# Supplementary material
Source: PubMed Central journal article supplement (PMC4340604)
Supplement: NIHMS61919-supplement-Supplementary_appendix.pdf [file NIHMS61919-supplement-Supplementary_appendix.pdf]

# THE LANCET

## **Supplementary appendix**

This appendix formed part of the original submission and has been peer reviewed. We post it as supplied by the authors.

Supplement to: GBD 2013 Mortality and Causes of Death Collaborators. Global, regional, and national age–sex specific all-cause and cause-specific mortality for 240 causes of death, 1990–2013: a systematic analysis for the Global Burden of Disease Study 2013. *Lancet* 2015; published online Dec 18. [http://dx.doi.org/10.1016/S0140-6736\(14\)61682-2](http://dx.doi.org/10.1016/S0140-6736(14)61682-2).

# Appendix to Global, regional, and national levels of age-sex specific all-cause mortality and cause-specific mortality for 240 causes of death, 1990-2013: a systematic analysis for the Global Burden of Disease Study 2013

This appendix provides further methodological detail, supplemental figures and more detailed results for all-cause mortality, causes of death, and years of life lost. The appendix is organized in ten broad sections following the structure of the main paper.

---

## Table of Contents

|                                                                                        |  |
|----------------------------------------------------------------------------------------|--|
| Section 1. All-cause mortality database.....                                           |  |
| Section 2. Modelling all-cause mortality.....                                          |  |
| Section 3. Supplemental and detailed results for all-cause mortality.....              |  |
| Section 4. Causes of death database.....                                               |  |
| Section 5. Assessing and enhancing causes of death data quality and comparability..... |  |
| Section 6. Modelling individual causes of death.....                                   |  |
| Section 7. CoDCorrect algorithm.....                                                   |  |
| Section 8. Measures of inequality.....                                                 |  |
| Section 9. Supplemental and detailed results for causes of death.....                  |  |
| Section 10. Data citation list by country.....                                         |  |
| Section 11. GBD 2013 covariates list.....                                              |  |
| Section 12. References.....                                                            |  |



## **Section 1. All-cause mortality database**

### **A. Country years of all-cause mortality data**

**Web Figure 1: Number of all-cause mortality data sources by country, 1950 - 2013**

**Web Figure 1: Number of all-cause mortality data sources by country, 1950-2013**

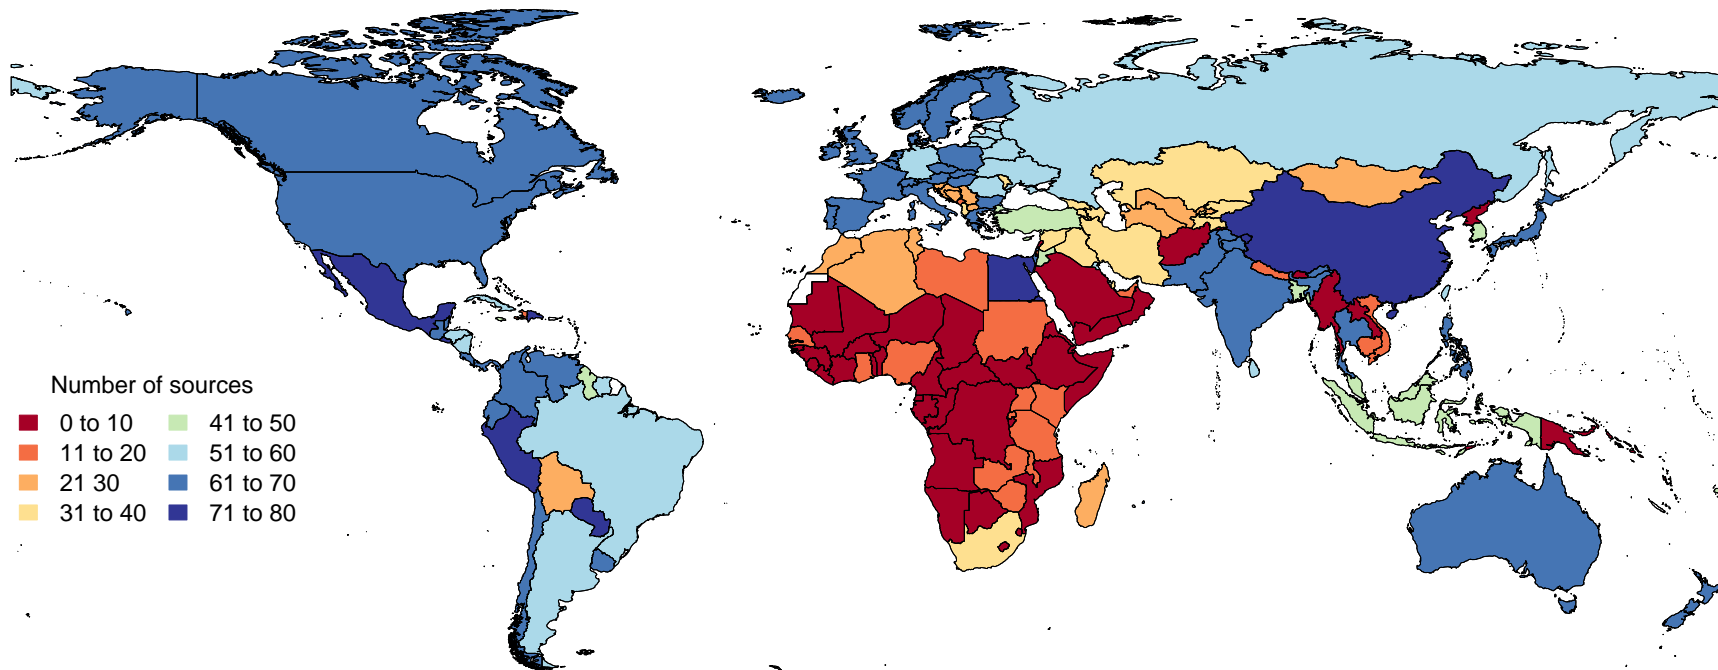

Number of sources

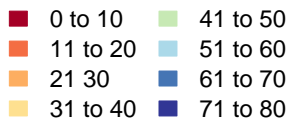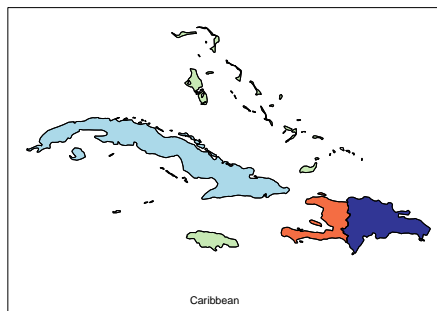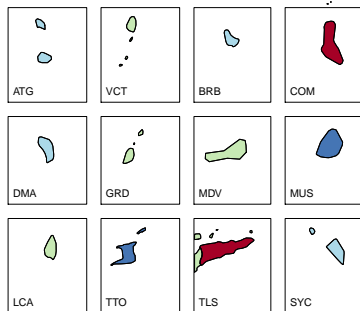

4

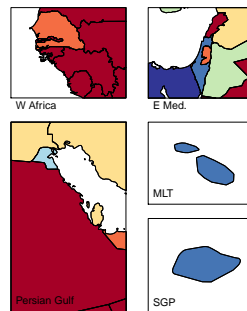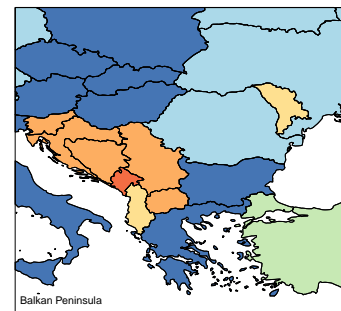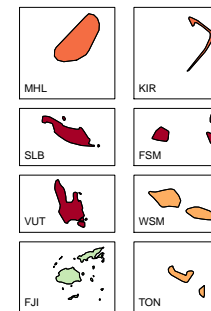

**Web Table 1: Number of years with data points by country and decade**

**Web Table 1 – Number of years with data points by country and decade**

|                                  | 1950s | 1960s | 1970s | 1980s | 1990s | 2000s |
|----------------------------------|-------|-------|-------|-------|-------|-------|
| <b>Asia Pacific, High-income</b> |       |       |       |       |       |       |
| Brunei                           | 10    | 6     | 9     | 8     | 8     | 12    |
| Japan                            | 10    | 10    | 10    | 10    | 10    | 12    |
| Singapore                        | 10    | 10    | 10    | 10    | 10    | 12    |
| South Korea                      | 10    | 10    | 8     | 10    | 10    | 12    |
| <b>Asia, Central</b>             |       |       |       |       |       |       |
| Armenia                          | 0     | 0     | 5     | 10    | 10    | 13    |
| Azerbaijan                       | 0     | 0     | 4     | 10    | 10    | 11    |
| Georgia                          | 0     | 0     | 5     | 10    | 10    | 12    |
| Kazakhstan                       | 0     | 1     | 9     | 10    | 10    | 11    |
| Kyrgyzstan                       | 0     | 2     | 10    | 10    | 10    | 13    |
| Mongolia                         | 0     | 6     | 10    | 10    | 10    | 11    |
| Tajikistan                       | 0     | 0     | 7     | 10    | 10    | 13    |
| Turkmenistan                     | 0     | 0     | 1     | 8     | 10    | 7     |
| Uzbekistan                       | 0     | 0     | 8     | 10    | 10    | 7     |
| <b>Asia, East</b>                |       |       |       |       |       |       |
| China                            | 3     | 10    | 10    | 10    | 10    | 14    |
| North Korea                      | 0     | 0     | 0     | 0     | 1     | 1     |
| Taiwan (province of China)       | 5     | 10    | 10    | 10    | 10    | 13    |
| <b>Asia, South</b>               |       |       |       |       |       |       |
| Afghanistan                      | 1     | 4     | 2     | 9     | 10    | 11    |
| Bangladesh                       | 10    | 10    | 10    | 10    | 10    | 12    |
| Bhutan                           | 0     | 0     | 4     | 10    | 10    | 10    |
| India                            | 10    | 10    | 10    | 10    | 10    | 13    |
| Nepal                            | 10    | 10    | 10    | 10    | 10    | 11    |
| Pakistan                         | 10    | 10    | 10    | 10    | 10    | 13    |
| <b>Asia, Southeast</b>           |       |       |       |       |       |       |
| Cambodia                         | 1     | 0     | 9     | 10    | 10    | 11    |
| Indonesia                        | 10    | 10    | 10    | 10    | 10    | 13    |
| Laos                             | 0     | 0     | 2     | 9     | 10    | 12    |
| Malaysia                         | 10    | 10    | 10    | 3     | 10    | 10    |
| Maldives                         | 1     | 4     | 7     | 10    | 10    | 12    |
| Myanmar                          | 0     | 2     | 5     | 8     | 8     | 7     |
| Philippines                      | 10    | 10    | 10    | 10    | 10    | 12    |
| Sri Lanka                        | 10    | 10    | 10    | 10    | 9     | 8     |
| Thailand                         | 10    | 10    | 10    | 10    | 10    | 10    |
| Timor-Leste                      | 0     | 3     | 10    | 10    | 10    | 10    |
| Vietnam                          | 0     | 6     | 10    | 10    | 10    | 11    |
| <b>Australasia</b>               |       |       |       |       |       |       |
| Australia                        | 10    | 10    | 10    | 10    | 10    | 12    |
| New Zealand                      | 10    | 10    | 10    | 10    | 10    | 12    |
| <b>Caribbean</b>                 |       |       |       |       |       |       |
| Antigua and Barbuda              | 10    | 8     | 9     | 6     | 10    | 10    |
| Barbados                         | 10    | 10    | 10    | 10    | 6     | 9     |
| Belize                           | 10    | 10    | 10    | 10    | 10    | 12    |

**Web Table 1 – Number of years with data points by country and decade**

|                                  | 1950s | 1960s | 1970s | 1980s | 1990s | 2000s |
|----------------------------------|-------|-------|-------|-------|-------|-------|
| Cuba                             | 1     | 10    | 10    | 10    | 10    | 11    |
| Dominica                         | 10    | 8     | 10    | 10    | 10    | 11    |
| Dominican Republic               | 10    | 10    | 10    | 10    | 10    | 12    |
| Grenada                          | 10    | 10    | 5     | 4     | 10    | 11    |
| Guyana                           | 10    | 10    | 10    | 10    | 10    | 10    |
| Haiti                            | 7     | 10    | 10    | 10    | 10    | 12    |
| Jamaica                          | 10    | 10    | 10    | 10    | 10    | 7     |
| Saint Lucia                      | 10    | 4     | 8     | 10    | 10    | 8     |
| Saint Vincent and the Grenadines | 7     | 5     | 7     | 8     | 7     | 11    |
| Suriname                         | 8     | 6     | 8     | 10    | 10    | 10    |
| The Bahamas                      | 0     | 4     | 9     | 10    | 10    | 9     |
| Trinidad and Tobago              | 10    | 10    | 10    | 10    | 10    | 9     |
| Europe, Central                  |       |       |       |       |       |       |
| Albania                          | 5     | 5     | 2     | 10    | 10    | 10    |
| Bosnia and Herzegovina           | 0     | 0     | 0     | 5     | 5     | 12    |
| Bulgaria                         | 10    | 10    | 10    | 10    | 10    | 13    |
| Croatia                          | 0     | 0     | 0     | 5     | 10    | 13    |
| Czech Republic                   | 10    | 10    | 10    | 10    | 10    | 13    |
| Hungary                          | 10    | 10    | 10    | 10    | 10    | 13    |
| Macedonia                        | 0     | 0     | 0     | 8     | 10    | 12    |
| Montenegro                       | 0     | 1     | 1     | 1     | 6     | 11    |
| Poland                           | 10    | 10    | 10    | 10    | 10    | 12    |
| Romania                          | 10    | 10    | 10    | 10    | 10    | 12    |
| Serbia                           | 1     | 1     | 1     | 9     | 10    | 13    |
| Slovakia                         | 10    | 10    | 10    | 10    | 10    | 12    |
| Slovenia                         | 0     | 0     | 0     | 8     | 10    | 12    |
| Europe, Eastern                  |       |       |       |       |       |       |
| Belarus                          | 1     | 10    | 10    | 10    | 10    | 12    |
| Estonia                          | 1     | 10    | 10    | 10    | 10    | 13    |
| Latvia                           | 1     | 10    | 10    | 10    | 10    | 13    |
| Lithuania                        | 1     | 10    | 10    | 10    | 10    | 13    |
| Moldova                          | 0     | 1     | 3     | 10    | 10    | 13    |
| Russia                           | 1     | 10    | 10    | 10    | 10    | 13    |
| Ukraine                          | 1     | 10    | 10    | 10    | 10    | 13    |
| Europe, Western                  |       |       |       |       |       |       |
| Andorra                          | 5     | 0     | 0     | 0     | 2     | 8     |
| Austria                          | 10    | 10    | 10    | 10    | 10    | 12    |
| Belgium                          | 10    | 10    | 10    | 10    | 10    | 11    |
| Cyprus                           | 6     | 4     | 7     | 10    | 10    | 12    |
| Denmark                          | 10    | 10    | 10    | 10    | 10    | 12    |
| Finland                          | 10    | 10    | 10    | 10    | 10    | 12    |
| France                           | 10    | 10    | 10    | 10    | 10    | 12    |
| Germany                          | 4     | 10    | 10    | 10    | 10    | 13    |
| Greece                           | 9     | 10    | 10    | 10    | 10    | 12    |
| Iceland                          | 10    | 10    | 10    | 10    | 10    | 12    |

**Web Table 1 – Number of years with data points by country and decade**

|                          | 1950s | 1960s | 1970s | 1980s | 1990s | 2000s |
|--------------------------|-------|-------|-------|-------|-------|-------|
| Ireland                  | 10    | 10    | 10    | 10    | 10    | 12    |
| Israel                   | 10    | 10    | 10    | 10    | 10    | 13    |
| Italy                    | 10    | 10    | 10    | 10    | 10    | 11    |
| Luxembourg               | 10    | 10    | 10    | 10    | 10    | 12    |
| Malta                    | 10    | 10    | 10    | 10    | 10    | 12    |
| Netherlands              | 10    | 10    | 10    | 10    | 10    | 12    |
| Norway                   | 10    | 10    | 10    | 10    | 10    | 13    |
| Portugal                 | 10    | 10    | 10    | 10    | 10    | 12    |
| Spain                    | 10    | 10    | 10    | 10    | 10    | 12    |
| Sweden                   | 10    | 10    | 10    | 10    | 10    | 12    |
| Switzerland              | 10    | 10    | 10    | 10    | 10    | 12    |
| United Kingdom           | 10    | 10    | 10    | 10    | 10    | 12    |
| Latin America, Andean    |       |       |       |       |       |       |
| Bolivia                  | 9     | 10    | 10    | 10    | 10    | 8     |
| Ecuador                  | 10    | 10    | 10    | 10    | 10    | 11    |
| Peru                     | 10    | 10    | 10    | 10    | 10    | 13    |
| Latin America, Central   |       |       |       |       |       |       |
| Colombia                 | 10    | 10    | 10    | 10    | 10    | 12    |
| Costa Rica               | 10    | 10    | 10    | 10    | 10    | 12    |
| El Salvador              | 10    | 10    | 10    | 10    | 10    | 11    |
| Guatemala                | 10    | 10    | 10    | 10    | 10    | 11    |
| Honduras                 | 10    | 10    | 10    | 10    | 10    | 12    |
| Mexico                   | 10    | 10    | 10    | 10    | 10    | 13    |
| Nicaragua                | 10    | 10    | 10    | 10    | 10    | 12    |
| Panama                   | 10    | 10    | 10    | 10    | 10    | 11    |
| Venezuela                | 10    | 10    | 10    | 10    | 10    | 12    |
| Latin America, Southern  |       |       |       |       |       |       |
| Argentina                | 10    | 10    | 10    | 10    | 10    | 12    |
| Chile                    | 10    | 10    | 10    | 10    | 10    | 12    |
| Uruguay                  | 10    | 10    | 10    | 10    | 10    | 12    |
| Latin America, Tropical  |       |       |       |       |       |       |
| Brazil                   | 10    | 10    | 10    | 10    | 10    | 12    |
| Paraguay                 | 10    | 10    | 10    | 10    | 10    | 11    |
| North Africa/Middle East |       |       |       |       |       |       |
| Algeria                  | 8     | 9     | 10    | 10    | 10    | 8     |
| Bahrain                  | 3     | 4     | 6     | 9     | 9     | 11    |
| Egypt                    | 10    | 10    | 10    | 10    | 10    | 12    |
| Iran                     | 1     | 5     | 10    | 10    | 10    | 11    |
| Iraq                     | 3     | 10    | 10    | 10    | 10    | 11    |
| Jordan                   | 6     | 10    | 10    | 10    | 10    | 13    |
| Kuwait                   | 1     | 10    | 10    | 10    | 9     | 12    |
| Lebanon                  | 1     | 6     | 10    | 10    | 10    | 5     |
| Libya                    | 2     | 7     | 10    | 10    | 7     | 5     |
| Morocco                  | 7     | 10    | 10    | 10    | 10    | 9     |
| Oman                     | 0     | 6     | 8     | 8     | 3     | 4     |

**Web Table 1 – Number of years with data points by country and decade**

|                                  | 1950s | 1960s | 1970s | 1980s | 1990s | 2000s |
|----------------------------------|-------|-------|-------|-------|-------|-------|
| Palestine                        | 0     | 0     | 1     | 3     | 5     | 10    |
| Qatar                            | 0     | 0     | 4     | 10    | 8     | 12    |
| Saudi Arabia                     | 0     | 0     | 5     | 7     | 2     | 13    |
| Sudan                            | 5     | 10    | 10    | 10    | 10    | 9     |
| Syria                            | 7     | 10    | 10    | 10    | 10    | 8     |
| Tunisia                          | 7     | 10    | 10    | 10    | 10    | 12    |
| Turkey                           | 8     | 10    | 10    | 10    | 10    | 12    |
| United Arab Emirates             | 2     | 5     | 7     | 4     | 6     | 6     |
| Yemen                            | 5     | 10    | 10    | 10    | 10    | 7     |
| North America, High-income       |       |       |       |       |       |       |
| Canada                           | 10    | 10    | 10    | 10    | 10    | 12    |
| United States                    | 10    | 10    | 10    | 10    | 10    | 12    |
| Oceania                          |       |       |       |       |       |       |
| Federated States of Micronesia   | 1     | 4     | 5     | 4     | 7     | 1     |
| Fiji                             | 10    | 10    | 10    | 9     | 6     | 8     |
| Kiribati                         | 5     | 8     | 4     | 1     | 10    | 6     |
| Marshall Islands                 | 0     | 0     | 0     | 6     | 8     | 3     |
| Papua New Guinea                 | 2     | 5     | 6     | 8     | 8     | 1     |
| Samoa                            | 9     | 10    | 9     | 1     | 1     | 4     |
| Solomon Islands                  | 4     | 6     | 2     | 2     | 6     | 2     |
| Tonga                            | 5     | 8     | 5     | 4     | 5     | 4     |
| Vanuatu                          | 3     | 3     | 2     | 7     | 10    | 8     |
| Sub-Saharan Africa, Central      |       |       |       |       |       |       |
| Angola                           | 0     | 0     | 4     | 10    | 10    | 11    |
| Central African Republic         | 2     | 5     | 10    | 10    | 10    | 11    |
| Congo                            | 2     | 3     | 4     | 10    | 10    | 12    |
| Democratic Republic of the Congo | 0     | 0     | 10    | 10    | 10    | 10    |
| Equatorial Guinea                | 0     | 0     | 4     | 10    | 10    | 3     |
| Gabon                            | 0     | 0     | 8     | 10    | 10    | 12    |
| Sub-Saharan Africa, Eastern      |       |       |       |       |       |       |
| Burundi                          | 1     | 9     | 10    | 10    | 10    | 12    |
| Comoros                          | 1     | 2     | 9     | 10    | 10    | 3     |
| Djibouti                         | 0     | 0     | 3     | 10    | 10    | 7     |
| Eritrea                          | 0     | 0     | 10    | 10    | 10    | 2     |
| Ethiopia                         | 0     | 2     | 10    | 10    | 10    | 11    |
| Kenya                            | 10    | 10    | 10    | 10    | 10    | 10    |
| Madagascar                       | 7     | 8     | 10    | 10    | 10    | 13    |
| Malawi                           | 3     | 9     | 10    | 10    | 10    | 12    |
| Mauritius                        | 10    | 10    | 10    | 10    | 10    | 12    |
| Mozambique                       | 2     | 5     | 10    | 10    | 10    | 12    |
| Rwanda                           | 4     | 10    | 10    | 10    | 10    | 11    |
| Seychelles                       | 9     | 10    | 10    | 10    | 9     | 13    |
| Somalia                          | 0     | 0     | 0     | 8     | 10    | 7     |
| South Sudan                      | 0     | 0     | 0     | 7     | 10    | 10    |
| Tanzania                         | 3     | 9     | 10    | 10    | 10    | 12    |



**Web Table 1 – Number of years with data points by country and decade**

|                              | 1950s | 1960s | 1970s | 1980s | 1990s | 2000s |
|------------------------------|-------|-------|-------|-------|-------|-------|
| Uganda                       | 3     | 8     | 10    | 10    | 10    | 12    |
| Zambia                       | 3     | 9     | 10    | 10    | 10    | 12    |
| Sub-Saharan Africa, Southern |       |       |       |       |       |       |
| Botswana                     | 2     | 7     | 10    | 10    | 10    | 8     |
| Lesotho                      | 7     | 10    | 10    | 10    | 10    | 10    |
| Namibia                      | 0     | 3     | 10    | 10    | 10    | 7     |
| South Africa                 | 0     | 2     | 10    | 10    | 10    | 13    |
| Swaziland                    | 4     | 5     | 7     | 10    | 10    | 11    |
| Zimbabwe                     | 2     | 9     | 10    | 10    | 10    | 11    |
| Sub-Saharan Africa, Western  |       |       |       |       |       |       |
| Benin                        | 3     | 10    | 10    | 10    | 10    | 12    |
| Burkina Faso                 | 0     | 7     | 10    | 10    | 10    | 11    |
| Cameroon                     | 9     | 10    | 10    | 10    | 10    | 12    |
| Cape Verde                   | 4     | 5     | 10    | 10    | 10    | 3     |
| Chad                         | 0     | 1     | 10    | 10    | 10    | 10    |
| Cote d'Ivoire                | 5     | 10    | 10    | 10    | 10    | 12    |
| Ghana                        | 6     | 10    | 10    | 10    | 10    | 12    |
| Guinea                       | 0     | 0     | 9     | 10    | 10    | 13    |
| Guinea-Bissau                | 0     | 0     | 5     | 10    | 10    | 7     |
| Liberia                      | 5     | 9     | 10    | 10    | 10    | 12    |
| Mali                         | 0     | 8     | 10    | 10    | 10    | 8     |
| Mauritania                   | 4     | 10    | 10    | 10    | 10    | 8     |
| Niger                        | 0     | 6     | 10    | 10    | 10    | 12    |
| Nigeria                      | 0     | 7     | 10    | 10    | 10    | 12    |
| Sao Tome and Principe        | 4     | 8     | 7     | 10    | 10    | 9     |
| Senegal                      | 7     | 10    | 10    | 10    | 10    | 13    |
| Sierra Leone                 | 2     | 7     | 8     | 10    | 10    | 11    |
| The Gambia                   | 2     | 5     | 7     | 10    | 10    | 9     |
| Togo                         | 4     | 9     | 10    | 10    | 10    | 11    |

**Web Table 2: Data source list of child and adult mortality data sources used in the GBD 2013**

**Web Table 2 - Data source list of child and adult mortality data sources used in the GBD 2013**

VR/SRS/DSP = Vital registration, sample registration system, and disease surveillance points. HH = Household deaths. CBH = Complete birth history. SBH = Summary birth history. SIBS = Sibling survival.

| Country     | Source number                                                                             | VR/<br>SRS/<br>DSP | HH | CBH | SBH | SIBS |
|-------------|-------------------------------------------------------------------------------------------|--------------------|----|-----|-----|------|
| Afghanistan | (AFG-01) 1972 National Demographic and Family Guidance Survey                             |                    |    |     | x   |      |
|             | (AFG-02) 1979 Census                                                                      |                    | x  |     |     |      |
|             | (AFG-03) 2000 Multiple Indicator Cluster Survey                                           |                    |    |     | x   |      |
|             | (AFG-04) 2003 Multiple Indicator Cluster Survey                                           |                    |    |     | x   |      |
|             | (AFG-05) 2006 Afghanistan Health Survey                                                   |                    |    |     | x   |      |
|             | (AFG-06) 2008 National Risk and Vulnerability Assessment                                  |                    |    |     | x   |      |
|             | (AFG-07) 2010 Multiple Indicator Cluster Survey                                           |                    |    |     | x   |      |
|             | (AFG-08) 2010 Special Demographic and Health Survey                                       |                    |    | x   | x   | x    |
| Albania     | (ALB-01) 1950, 1955, 1957-64, 1987-07 Vital Registration                                  | x                  |    |     |     |      |
|             | (ALB-02) 2000 Multiple Indicator Cluster Survey                                           |                    |    |     | x   |      |
|             | (ALB-03) 2002 Reproductive Health Survey                                                  |                    |    | x   | x   |      |
|             | (ALB-04) 2005 Multiple Indicator Cluster Survey                                           |                    |    |     | x   |      |
|             | (ALB-05) 2008-09 Standard Demographic and Health Survey                                   |                    |    | x   | x   |      |
|             | (ALB-06) 2011 Census                                                                      |                    |    |     | x   |      |
| Algeria     | (DZA-01) 1950-56, 1964-65, 1980-82, 1985-86, 1990, 1998, 2000, 2007-09 Vital Registration | x                  |    |     |     |      |
|             | (DZA-02) 1970 Fertility Survey                                                            |                    |    |     | x   |      |
|             | (DZA-03) 1986 National Fertility Survey                                                   |                    |    | x   |     |      |
|             | (DZA-04) 1992 Pan Arab Project for Child Development                                      |                    |    | x   | x   |      |
|             | (DZA-05) 1998 Census                                                                      |                    |    |     | x   |      |
|             | (DZA-06) 2000 Multiple Indicator Cluster Survey                                           |                    |    |     | x   |      |
|             | (DZA-07) 2002-03 Pan Arab Project for Family Health                                       |                    |    | x   | x   |      |
|             | (DZA-08) 2010-11 Vital Registration (Report)                                              | x                  |    |     |     |      |
| Andorra     |                                                                                           |                    |    |     |     |      |

**Web Table 2 - Data source list of child and adult mortality data sources used in the GBD 2013**

VR/SRS/DSP = Vital registration, sample registration system, and disease surveillance points. HH = Household deaths. CBH = Complete birth history. SBH = Summary birth history. SIBS = Sibling survival.

| Country             | Source number                                                     | VR/<br>SRS/<br>DSP | HH | CBH | SBH | SIBS |
|---------------------|-------------------------------------------------------------------|--------------------|----|-----|-----|------|
| Angola              | (AND-01) 1950-54, 1992, 1994, 2002-05, 2007-10 Vital Registration | x                  |    |     |     |      |
|                     | (AGO-01) 1996 Multiple Indicator Cluster Survey (Report)          |                    |    |     | x   |      |
|                     | (AGO-02) 2001 Multiple Indicator Cluster Survey                   |                    |    |     | x   |      |
|                     | (AGO-03) 2006-07 Malaria Indicator Survey                         |                    |    | x   | x   |      |
|                     | (AGO-04) 2008 Integrated Inquiry into People's Well-Being         |                    | x  |     |     |      |
| Antigua and Barbuda | (AGO-05) 2011 Malaria Indicator Survey                            |                    |    | x   | x   |      |
|                     | (ATG-01) 1950-66, 1969-78, 1983, 1985-09 Vital Registration       | x                  |    |     |     |      |
| Argentina           | (ARG-01) 1950-70, 1976-11 Vital Registration                      | x                  |    |     |     |      |
|                     | (ARG-02) 1970 Census                                              |                    |    |     | x   |      |
|                     | (ARG-03) 1980 Census                                              |                    |    |     | x   |      |
|                     | (ARG-04) 1991 Census                                              |                    |    |     | x   |      |
| Armenia             | (ARM-01) 1981-12 Vital Registration                               | x                  |    |     |     |      |
|                     | (ARM-02) 2000 Standard Demographic and Health Survey              |                    |    | x   | x   |      |
|                     | (ARM-03) 2001 Census                                              |                    |    |     | x   |      |
|                     | (ARM-04) 2005 Standard Demographic and Health Survey              |                    |    | x   | x   |      |
|                     | (ARM-05) 2010 Standard Demographic and Health Survey              |                    |    | x   | x   |      |
| Australia           | (AUS-01) 1950-11 Vital Registration                               | x                  |    |     |     |      |
| Austria             | (AUT-01) 1950-11 Vital Registration                               | x                  |    |     |     |      |
| Azerbaijan          | (AZE-01) 1981-10 Vital Registration                               | x                  |    |     |     |      |

**Web Table 2 - Data source list of child and adult mortality data sources used in the GBD 2013**

VR/SRS/DSP = Vital registration, sample registration system, and disease surveillance points. HH = Household deaths. CBH = Complete birth history. SBH = Summary birth history. SIBS = Sibling survival.

| Country                                                          | Source number                                                 | VR/<br>SRS/<br>DSP | HH | CBH | SBH | SIBS |
|------------------------------------------------------------------|---------------------------------------------------------------|--------------------|----|-----|-----|------|
| Bahrain                                                          | (AZE-02) 2000 Multiple Indicator Cluster Survey               |                    |    |     | x   |      |
|                                                                  | (AZE-03) 2001 Reproductive Health Survey                      |                    |    | x   |     |      |
|                                                                  | (AZE-04) 2006 Standard Demographic and Health Survey          |                    |    | x   | x   |      |
|                                                                  | (BHR-01) 1971 Census                                          |                    |    |     | x   |      |
|                                                                  | (BHR-02) 1980-82, 1984-93, 1995-09, 2012 Vital Registration   | x                  |    |     |     |      |
|                                                                  | (BHR-03) 1981 Census                                          |                    |    |     | x   |      |
|                                                                  | (BHR-04) 1989 Child Health Survey                             |                    |    | x   |     |      |
| Bangladesh                                                       | (BGD-05) 1991 Census                                          |                    |    |     | x   |      |
|                                                                  | (BHR-06) 1995 Gulf Family Health Survey                       |                    |    | x   |     |      |
|                                                                  | (BHR-07) 2001 Census                                          |                    |    |     | x   |      |
|                                                                  | (BGD-01) 1962-65 Population Growth Estimation Experiment      | x                  |    |     |     |      |
|                                                                  | (BGD-02) 1974 Retrospective Survey of Fertility and Mortality |                    |    |     | x   |      |
|                                                                  | (BGD-03) 1975-76 World Fertility Survey                       |                    |    | x   | x   |      |
|                                                                  | (BGD-04) 1980-02, 2004, 2006 Sample Registration System       | x                  |    |     |     |      |
|                                                                  | (BGD-05) 1981 Contraceptive Prevalence Survey                 |                    |    |     | x   |      |
|                                                                  | (BGD-06) 1985-86 Contraceptive Prevalence Survey              |                    |    |     | x   |      |
|                                                                  | (BGD-07) 1988-89 Fertility Survey                             |                    |    | x   |     |      |
|                                                                  | (BGD-08) 1993-94 Standard Demographic and Health Survey       |                    |    | x   | x   |      |
|                                                                  | (BGD-09) 1996-97 Standard Demographic and Health Survey       |                    |    | x   | x   |      |
|                                                                  | (BGD-10) 1999-00 Standard Demographic and Health Survey       |                    |    | x   | x   |      |
|                                                                  | (BGD-11) 2001 Special Demographic and Health Survey           |                    |    | x   | x   | x    |
| (BGD-12) 2003, 2005, 2007-10 Sample Registration System (Report) | x                                                             |                    |    |     |     |      |
| (BGD-13) 2004 Standard Demographic and Health Survey             |                                                               |                    |    | x   | x   |      |
| (BGD-14) 2007 Standard Demographic and Health Survey             |                                                               |                    |    | x   | x   |      |

**Web Table 2 - Data source list of child and adult mortality data sources used in the GBD 2013**

VR/SRS/DSP = Vital registration, sample registration system, and disease surveillance points. HH = Household deaths. CBH = Complete birth history. SBH = Summary birth history. SIBS = Sibling survival.

| Country  | Source number                                              | VR/<br>SRS/<br>DSP | HH | CBH | SBH | SIBS |
|----------|------------------------------------------------------------|--------------------|----|-----|-----|------|
|          | (BGD-15) 2008 Maternal Mortality and Health Service Survey |                    | x  |     |     |      |
|          | (BGD-16) 2011-12 Standard Demographic and Health Survey    |                    |    | x   | x   |      |
| Barbados | (BRB-01) 1950-95, 2000-08 Vital Registration               | x                  |    |     |     |      |
| Belarus  | (BLR-01) 1959-11 Vital Registration                        | x                  |    |     |     |      |
|          | (BLR-02) 1989 Census                                       |                    |    |     | x   |      |
|          | (BLR-03) 1999 Census                                       |                    |    |     | x   |      |
|          | (BLR-04) 2005 Multiple Indicator Cluster Survey            |                    |    |     | x   |      |
| Belgium  | (BEL-01) 1950-10 Vital Registration                        | x                  |    |     |     |      |
|          | (BEL-02) 1961 Census                                       |                    |    |     | x   |      |
|          | (BEL-03) 1970 Census                                       |                    |    |     | x   |      |
| Belize   | (BLZ-01) 1950-09 Vital Registration                        | x                  |    |     |     |      |
|          | (BLZ-02) 1991 Census                                       |                    |    |     | x   |      |
|          | (BLZ-03) 1991 Reproductive Health Survey                   |                    |    | x   | x   |      |
|          | (BLZ-04) 1999 Reproductive Health Survey                   |                    |    | x   | x   |      |
|          | (BLZ-05) 2000 Census                                       |                    |    |     | x   |      |
|          | (BLZ-06) 2006 Multiple Indicator Cluster Survey            |                    |    |     | x   |      |
|          | (BLZ-07) 2011 Multiple Indicator Cluster Survey            |                    |    |     | x   |      |
| Benin    | (BEN-01) 1981-82 World Fertility Survey                    |                    |    | x   | x   |      |
|          | (BEN-02) 1981-83 Multi-Round Survey                        |                    |    | x   |     |      |
|          | (BEN-03) 1992 Census                                       |                    | x  |     | x   |      |
|          | (BEN-04) 1996 Standard Demographic and Health Survey       |                    |    | x   | x   | x    |

**Web Table 2 - Data source list of child and adult mortality data sources used in the GBD 2013**

VR/SRS/DSP = Vital registration, sample registration system, and disease surveillance points. HH = Household deaths. CBH = Complete birth history. SBH = Summary birth history. SIBS = Sibling survival.

| Country                                                        | Source number                                           | VR/<br>SRS/<br>DSP | HH | CBH | SBH | SIBS |
|----------------------------------------------------------------|---------------------------------------------------------|--------------------|----|-----|-----|------|
|                                                                | (BEN-05) 2001 Standard Demographic and Health Survey    |                    |    | x   | x   |      |
|                                                                | (BEN-06) 2002 Census                                    |                    | x  |     |     |      |
|                                                                | (BEN-07) 2006 Standard Demographic and Health Survey    |                    |    | x   | x   | x    |
|                                                                | (BEN-08) 2011-12 Standard Demographic and Health Survey |                    |    | x   | x   |      |
| <b>Bhutan</b>                                                  |                                                         |                    |    |     |     |      |
| (BTN-01) 1984 Demographic Sample Survey                        |                                                         |                    |    | x   | x   |      |
| (BTN-02) 1994 National Health Survey                           |                                                         |                    |    | x   |     |      |
| (BTN-03) 2000 National Health Survey                           |                                                         |                    |    | x   |     |      |
| (BTN-04) 2005 Census                                           |                                                         |                    | x  |     | x   |      |
| (BTN-05) 2010 Multiple Indicator Cluster Survey                |                                                         |                    |    |     | x   |      |
| <b>Bolivia</b>                                                 |                                                         |                    |    |     |     |      |
| (BOL-01) 1951-58, 1965-66, 1976-77, 2000-03 Vital Registration |                                                         | x                  |    |     |     |      |
| (BOL-02) 1976 Census                                           |                                                         |                    |    |     | x   |      |
| (BOL-03) 1980 National Demographic Survey                      |                                                         |                    |    |     | x   |      |
| (BOL-04) 1988 Sample Survey                                    |                                                         |                    |    |     | x   |      |
| (BOL-05) 1989 Standard Demographic and Health Survey           |                                                         |                    |    | x   | x   |      |
| (BOL-06) 1992 Census                                           |                                                         |                    |    |     | x   |      |
| (BOL-07) 1993-94 Standard Demographic and Health Survey        |                                                         |                    |    | x   | x   | x    |
| (BOL-08) 1998 Standard Demographic and Health Survey           |                                                         |                    |    | x   | x   |      |
| (BOL-09) 2000 Household Survey                                 |                                                         |                    |    |     | x   |      |
| (BOL-10) 2000 Multiple Indicator Cluster Survey                |                                                         |                    |    |     | x   |      |
| (BOL-11) 2001 Census                                           |                                                         |                    |    |     | x   |      |
| (BOL-12) 2003-04 Standard Demographic and Health Survey        |                                                         |                    |    | x   | x   | x    |
| (BOL-13) 2008 Standard Demographic and Health Survey           |                                                         |                    |    | x   | x   | x    |
| <b>Bosnia and Herzegovina</b>                                  |                                                         |                    |    |     |     |      |
| (BIH-01) 1985-91, 1998-11 Vital Registration                   |                                                         | x                  |    |     |     |      |

**Web Table 2 - Data source list of child and adult mortality data sources used in the GBD 2013**

VR/SRS/DSP = Vital registration, sample registration system, and disease surveillance points. HH = Household deaths. CBH = Complete birth history. SBH = Summary birth history. SIBS = Sibling survival.

| Country                            | Source number                                        | VR/<br>SRS/<br>DSP | HH | CBH | SBH | SIBS |
|------------------------------------|------------------------------------------------------|--------------------|----|-----|-----|------|
| Botswana                           | (BIH-02) 2011 Multiple Indicator Cluster Survey      |                    |    |     | x   |      |
|                                    | (BWA-01) 1971 Census                                 |                    |    |     | x   |      |
|                                    | (BWA-02) 1981 Census                                 |                    |    |     | x   |      |
|                                    | (BWA-03) 1984 Family Health Survey                   |                    |    |     | x   |      |
|                                    | (BWA-04) 1988 Standard Demographic and Health Survey |                    |    | x   | x   |      |
|                                    | (BWA-05) 1991 Census                                 |                    |    |     | x   |      |
|                                    | (BWA-06) 1996 Family Health Survey                   |                    |    |     | x   |      |
|                                    | (BWA-07) 2000 Multiple Indicator Cluster Survey      |                    |    |     | x   |      |
|                                    | (BWA-08) 2001 Census                                 |                    | x  |     | x   |      |
|                                    | (BWA-09) 2007 Demographic Survey                     |                    | x  |     | x   |      |
| (BWA-10) 2007 Family Health Survey |                                                      | x                  | x  | x   |     |      |
| Brazil                             | (BRA-01) 1960 Census                                 |                    |    |     | x   |      |
|                                    | (BRA-02) 1970 Census                                 |                    |    |     | x   |      |
|                                    | (BRA-03) 1974-11 Vital Registration                  | x                  |    |     |     |      |
|                                    | (BRA-04) 1980 Census                                 |                    |    |     | x   |      |
|                                    | (BRA-05) 1984 National Health Survey                 |                    |    |     | x   |      |
|                                    | (BRA-06) 1986 National Health Survey                 |                    |    |     | x   |      |
|                                    | (BRA-07) 1986 Standard Demographic and Health Survey |                    |    | x   | x   |      |
|                                    | (BRA-08) 1991 Census                                 |                    |    |     | x   |      |
|                                    | (BRA-09) 1996-97 Living Standards Measurement Study  |                    |    |     | x   |      |
|                                    | (BRA-10) 1996 Standard Demographic and Health Survey |                    |    | x   | x   | x    |
|                                    | (BRA-11) 2000 Census                                 |                    |    |     | x   |      |
|                                    | (BRA-12) 2004 National Household Sample Survey       |                    |    |     | x   |      |
|                                    | (BRA-13) 2005 National Household Sample Survey       |                    |    |     | x   |      |



**Web Table 2 - Data source list of child and adult mortality data sources used in the GBD 2013**

VR/SRS/DSP = Vital registration, sample registration system, and disease surveillance points. HH = Household deaths. CBH = Complete birth history. SBH = Summary birth history. SIBS = Sibling survival.

| Country      | Source number                                                             | VR/<br>SRS/<br>DSP | HH | CBH | SBH | SIBS |
|--------------|---------------------------------------------------------------------------|--------------------|----|-----|-----|------|
|              | (BRA-14) 2006 National Household Sample Survey                            |                    |    |     | x   |      |
|              | (BRA-15) 2007 National Household Sample Survey                            |                    |    |     | x   |      |
|              | (BRA-16) 2008 National Household Sample Survey                            |                    |    |     | x   |      |
|              | (BRA-17) 2009 National Household Sample Survey                            |                    |    |     | x   |      |
|              | (BRA-18) 2010 Census                                                      |                    | x  |     | x   |      |
| Brunei       |                                                                           |                    |    |     |     |      |
|              | (BRN-01) 1950-59, 1964-78, 1982-92, 1995-11 Vital Registration            | x                  |    |     |     |      |
|              | (BRN-02) 1960 Census                                                      |                    |    |     | x   |      |
| Bulgaria     |                                                                           |                    |    |     |     |      |
|              | (BGR-01) 1950-12 Vital Registration                                       | x                  |    |     |     |      |
|              | (BGR-02) 1965 Census                                                      |                    |    |     | x   |      |
|              | (BGR-03) 1975 Census                                                      |                    |    |     | x   |      |
|              | (BGR-04) 1995 Living Standards Measurement Study                          |                    |    |     | x   |      |
|              | (BGR-05) 1997 Living Standards Measurement Study                          |                    |    |     | x   |      |
| Burkina Faso |                                                                           |                    |    |     |     |      |
|              | (BFA-01) 1960-61 Sample Demographic Survey in the Republic of Upper Volta |                    | x  |     |     |      |
|              | (BFA-02) 1976 Post-enumeration Survey                                     |                    |    |     | x   |      |
|              | (BFA-03) 1985 Census                                                      |                    | x  |     | x   |      |
|              | (BFA-04) 1992-93 Standard Demographic and Health Survey                   |                    |    | x   | x   |      |
|              | (BFA-05) 1996 Census                                                      |                    | x  |     |     |      |
|              | (BFA-06) 1998-99 Standard Demographic and Health Survey                   |                    |    | x   | x   | x    |
|              | (BFA-07) 2003 Standard Demographic and Health Survey                      |                    |    | x   | x   | x    |
|              | (BFA-08) 2006 Census                                                      |                    | x  |     | x   |      |
|              | (BFA-09) 2006 Multiple Indicator Cluster Survey                           |                    |    |     | x   |      |
|              | (BFA-10) 2010-11 Standard Demographic and Health Survey                   |                    |    | x   | x   | x    |
| Burundi      |                                                                           |                    |    |     |     |      |

**Web Table 2 - Data source list of child and adult mortality data sources used in the GBD 2013**

VR/SRS/DSP = Vital registration, sample registration system, and disease surveillance points. HH = Household deaths. CBH = Complete birth history. SBH = Summary birth history. SIBS = Sibling survival.

| Country  | Source number                                           | VR/<br>SRS/<br>DSP | HH | CBH | SBH | SIBS |
|----------|---------------------------------------------------------|--------------------|----|-----|-----|------|
|          | (BDI-01) 1970-71 Demographic Survey                     |                    |    | x   | x   |      |
|          | (BDI-02) 1979 Post-Census Survey                        |                    |    |     | x   |      |
|          | (BDI-03) 1987 Standard Demographic and Health Survey    |                    |    | x   | x   |      |
|          | (BDI-04) 1990 Census                                    |                    |    |     | x   |      |
|          | (BDI-05) 2000 Multiple Indicator Cluster Survey         |                    |    |     | x   |      |
|          | (BDI-06) 2005 Multiple Indicator Cluster Survey         |                    |    |     | x   |      |
|          | (BDI-07) 2010-11 Standard Demographic and Health Survey |                    |    | x   | x   | x    |
|          | (BDI-08) 2012 Malaria Indicator Survey                  |                    |    |     | x   |      |
| Cambodia |                                                         |                    |    |     |     |      |
|          | (KHM-01) 1959 Demographic Survey                        |                    | x  |     |     |      |
|          | (KHM-02) 1996 Socioeconomic Survey                      |                    | x  |     |     |      |
|          | (KHM-03) 1997 Socioeconomic Survey                      |                    | x  |     | x   |      |
|          | (KHM-04) 1998 Census                                    |                    |    |     | x   |      |
|          | (KHM-05) 1998 Special Demographic and Health Survey     |                    |    | x   | x   |      |
|          | (KHM-06) 1999 Socioeconomic Survey                      |                    |    |     | x   |      |
|          | (KHM-07) 2000 Standard Demographic and Health Survey    |                    |    | x   | x   | x    |
|          | (KHM-08) 2004 Socioeconomic Survey                      |                    |    |     | x   |      |
|          | (KHM-09) 2005-06 Standard Demographic and Health Survey |                    |    | x   | x   | x    |
|          | (KHM-10) 2008 Census                                    |                    | x  |     | x   |      |
|          | (KHM-11) 2010-11 Standard Demographic and Health Survey |                    |    | x   | x   | x    |
| Cameroon |                                                         |                    |    |     |     |      |
|          | (CMR-01) 1976 Census                                    |                    | x  |     |     |      |
|          | (CMR-02) 1978 World Fertility Survey                    |                    |    | x   | x   |      |
|          | (CMR-03) 1987 Census                                    |                    | x  |     |     |      |
|          | (CMR-04) 1991 Standard Demographic and Health Survey    |                    |    | x   | x   |      |
|          | (CMR-05) 1998 Standard Demographic and Health Survey    |                    |    | x   | x   | x    |

**Web Table 2 - Data source list of child and adult mortality data sources used in the GBD 2013**

VR/SRS/DSP = Vital registration, sample registration system, and disease surveillance points. HH = Household deaths. CBH = Complete birth history. SBH = Summary birth history. SIBS = Sibling survival.

| Country                  | Source number                                                                    | VR/<br>SRS/<br>DSP | HH | CBH | SBH | SIBS |
|--------------------------|----------------------------------------------------------------------------------|--------------------|----|-----|-----|------|
|                          | (CMR-06) 2000 Multiple Indicator Cluster Survey                                  |                    |    |     | x   |      |
|                          | (CMR-07) 2004 Standard Demographic and Health Survey                             |                    |    | x   | x   | x    |
|                          | (CMR-08) 2005 Census                                                             |                    |    |     | x   |      |
|                          | (CMR-09) 2011 Standard Demographic and Health Survey                             |                    |    | x   | x   | x    |
| Canada                   |                                                                                  |                    |    |     |     |      |
|                          | (CAN-01) 1950-09 Vital Registration                                              | x                  |    |     |     |      |
|                          | (CAN-02) 2010-11 Vital Registration (Report)                                     | x                  |    |     |     |      |
| Cape Verde               |                                                                                  |                    |    |     |     |      |
|                          | (CPV-01) 1955-57, 1959-60, 1966-75, 1979-80, 1983-85, 1990-91 Vital Registration | x                  |    |     |     |      |
|                          | (CPV-02) 1998 Reproductive Health Survey                                         |                    |    | x   | x   |      |
|                          | (CPV-03) 2000 Census                                                             |                    |    | x   | x   |      |
|                          | (CPV-04) 2005 Standard Demographic and Health Survey (Report)                    |                    |    | x   | x   |      |
| Central African Republic |                                                                                  |                    |    |     |     |      |
|                          | (CAF-01) 1975 Census                                                             |                    |    |     | x   |      |
|                          | (CAF-02) 1988 Census                                                             |                    | x  |     | x   |      |
|                          | (CAF-03) 1994-95 Standard Demographic and Health Survey                          |                    |    | x   | x   | x    |
|                          | (CAF-04) 2000 Multiple Indicator Cluster Survey                                  |                    |    |     | x   |      |
|                          | (CAF-05) 2006 Multiple Indicator Cluster Survey                                  |                    |    |     | x   |      |
|                          | (CAF-06) 2010 Multiple Indicator Cluster Survey                                  |                    |    |     | x   |      |
| Chad                     |                                                                                  |                    |    |     |     |      |
|                          | (TCD-01) 1993 Census                                                             |                    |    |     | x   |      |
|                          | (TCD-02) 1996-97 Standard Demographic and Health Survey                          |                    |    | x   | x   | x    |
|                          | (TCD-03) 2000 Multiple Indicator Cluster Survey                                  |                    |    |     | x   |      |
|                          | (TCD-04) 2004 Standard Demographic and Health Survey                             |                    |    | x   | x   | x    |
|                          | (TCD-05) 2010 Multiple Indicator Cluster Survey                                  |                    |    |     | x   |      |
| Chile                    |                                                                                  |                    |    |     |     |      |

**Web Table 2 - Data source list of child and adult mortality data sources used in the GBD 2013**

VR/SRS/DSP = Vital registration, sample registration system, and disease surveillance points. HH = Household deaths. CBH = Complete birth history. SBH = Summary birth history. SIBS = Sibling survival.

| Country | Source number                                                                          | VR/<br>SRS/<br>DSP | HH | CBH | SBH | SIBS |
|---------|----------------------------------------------------------------------------------------|--------------------|----|-----|-----|------|
|         | (CHL-01) 1950-11 Vital Registration                                                    | x                  |    |     |     |      |
|         | (CHL-02) 1970 Census                                                                   |                    |    |     | x   |      |
|         | (CHL-03) 1982 Census                                                                   |                    |    |     | x   |      |
|         | (CHL-04) 1992 Census                                                                   |                    |    |     | x   |      |
|         | (CHL-05) 2002 Census                                                                   |                    |    |     | x   |      |
| China   |                                                                                        |                    |    |     |     |      |
|         | (CHN-01) 1975 Survey of Cancer Epidemiology                                            |                    | x  |     |     |      |
|         | (CHN-02) 1982 Census                                                                   |                    | x  |     | x   |      |
|         | (CHN-03) 1982 National 1 per 1000 Fertility Survey                                     |                    |    |     | x   |      |
|         | (CHN-04) 1986-88, 1996-00, 2004-10 Disease Surveillance Points                         | x                  |    |     |     |      |
|         | (CHN-05) 1986 Sample Survey on Population Change                                       |                    | x  |     |     |      |
|         | (CHN-06) 1987 Fertility Sampling Survey in China                                       |                    | x  |     |     |      |
|         | (CHN-07) 1988 Fertility Sampling Survey in China                                       |                    | x  |     |     |      |
|         | (CHN-08) 1990 Census                                                                   |                    | x  |     | x   |      |
|         | (CHN-09) 1991 National Survey on Child Mortality                                       |                    | x  |     |     |      |
|         | (CHN-10) 1992-13 Maternal and Child Health Surveillance System                         | x                  |    |     |     |      |
|         | (CHN-11) 1992 Fertility Sampling Survey in China                                       |                    | x  |     |     |      |
|         | (CHN-12) 1994 Sample Survey on Population Change                                       |                    | x  |     |     |      |
|         | (CHN-13) 1995 1% Intra-Census Survey                                                   |                    | x  |     | x   |      |
|         | (CHN-14) 1996-12 Ministry of Health Routine Reporting for Maternal and Child Mortality |                    | x  |     |     |      |
|         | (CHN-15) 1996 Sample Survey on Population Change                                       |                    | x  |     |     |      |
|         | (CHN-16) 1997 Sample Survey on Population Change                                       |                    | x  |     |     |      |
|         | (CHN-17) 1998 Sample Survey on Population Change                                       |                    | x  |     |     |      |
|         | (CHN-18) 1999 Sample Survey on Population Change                                       |                    | x  |     |     |      |
|         | (CHN-19) 2000 Census                                                                   |                    | x  |     | x   |      |
|         | (CHN-20) 2001 Sample Survey on Population Change                                       |                    | x  |     |     |      |

**Web Table 2 - Data source list of child and adult mortality data sources used in the GBD 2013**

VR/SRS/DSP = Vital registration, sample registration system, and disease surveillance points. HH = Household deaths. CBH = Complete birth history. SBH = Summary birth history. SIBS = Sibling survival.

| Country  | Source number                                               | VR/<br>SRS/<br>DSP | HH | CBH | SBH | SIBS |
|----------|-------------------------------------------------------------|--------------------|----|-----|-----|------|
|          | (CHN-21) 2002 Sample Survey on Population Change            |                    | x  |     |     |      |
|          | (CHN-22) 2003 Sample Survey on Population Change            |                    | x  |     |     |      |
|          | (CHN-23) 2004 Sample Survey on Population Change            |                    | x  |     |     |      |
|          | (CHN-24) 2005 1% Intra-Census Survey                        |                    | x  |     |     |      |
|          | (CHN-25) 2006 Sample Survey on Population Change            |                    | x  |     |     |      |
|          | (CHN-26) 2007 Sample Survey on Population Change            |                    | x  |     |     |      |
|          | (CHN-27) 2008 Sample Survey on Population Change            |                    | x  |     |     |      |
|          | (CHN-28) 2009 Sample Survey on Population Change            |                    | x  |     |     |      |
|          | (CHN-29) 2010 Census                                        |                    | x  |     | x   |      |
| Colombia |                                                             |                    |    |     |     |      |
|          | (COL-01) 1950-77, 1979-80, 1982-09, 2011 Vital Registration | x                  |    |     |     |      |
|          | (COL-02) 1973 Census                                        |                    |    |     | x   |      |
|          | (COL-03) 1976 World Fertility Survey                        |                    |    | x   | x   |      |
|          | (COL-04) 1985 Census                                        |                    |    |     | x   |      |
|          | (COL-05) 1986 Standard Demographic and Health Survey        |                    |    | x   | x   |      |
|          | (COL-06) 1990 Standard Demographic and Health Survey        |                    |    | x   | x   |      |
|          | (COL-07) 1993 Census                                        |                    |    |     | x   |      |
|          | (COL-08) 1995 Standard Demographic and Health Survey        |                    |    | x   | x   |      |
|          | (COL-09) 2000 Standard Demographic and Health Survey        |                    |    | x   | x   |      |
|          | (COL-10) 2004-05 Standard Demographic and Health Survey     |                    |    | x   | x   |      |
|          | (COL-11) 2005 Census                                        |                    |    |     | x   |      |
|          | (COL-12) 2009-10 Standard Demographic and Health Survey     |                    |    | x   | x   |      |
| Comoros  |                                                             |                    |    |     |     |      |
|          | (COM-01) 1958 Census                                        |                    | x  |     |     |      |
|          | (COM-02) 1980 Census                                        |                    |    |     | x   |      |
|          | (COM-03) 1996 Standard Demographic and Health Survey        |                    |    | x   | x   |      |

**Web Table 2 - Data source list of child and adult mortality data sources used in the GBD 2013**

VR/SRS/DSP = Vital registration, sample registration system, and disease surveillance points. HH = Household deaths. CBH = Complete birth history. SBH = Summary birth history. SIBS = Sibling survival.

| Country       | Source number                                                 | VR/<br>SRS/<br>DSP | HH | CBH | SBH | SIBS |
|---------------|---------------------------------------------------------------|--------------------|----|-----|-----|------|
| Congo         | (COM-04) 2000 Multiple Indicator Cluster Survey               |                    |    |     | x   |      |
|               | (COM-05) 2012 Standard Demographic and Health Survey (Report) |                    |    | x   |     |      |
|               | (COG-01) 1974 Census                                          |                    |    |     | x   |      |
|               | (COG-02) 2005 Standard Demographic and Health Survey          |                    |    | x   | x   | x    |
| Congo         | (COG-03) 2009 AIDS Indicator Survey                           |                    |    |     | x   |      |
|               | (COG-04) 2011-12 Standard Demographic and Health Survey       |                    |    | x   | x   | x    |
|               | (CRI-01) 1950, 1952-11 Vital Registration                     | x                  |    |     |     |      |
|               | (CRI-02) 1973 Census                                          |                    |    |     | x   |      |
| Costa Rica    | (CRI-03) 1976 World Fertility Survey                          |                    |    | x   | x   |      |
|               | (CRI-04) 1981 Contraceptive Prevalence Survey                 |                    |    |     | x   |      |
|               | (CRI-05) 1984 Census                                          |                    |    |     | x   |      |
|               | (CRI-06) 1986 Reproductive Health Survey                      |                    |    | x   | x   |      |
|               | (CRI-07) 1992-93 Reproductive Health Survey                   |                    |    | x   | x   |      |
|               | (CRI-08) 2000 Census                                          |                    |    |     | x   |      |
|               | (CRI-09) 2011 Census                                          |                    |    |     | x   |      |
| Cote d'Ivoire | (CIV-01) 1978 Demographic Survey                              |                    |    | x   | x   |      |
|               | (CIV-02) 1980-81 World Fertility Survey                       |                    |    | x   | x   |      |
|               | (CIV-03) 1994 Standard Demographic and Health Survey          |                    |    | x   | x   | x    |
|               | (CIV-04) 1998-99 Standard Demographic and Health Survey       |                    |    | x   | x   |      |
|               | (CIV-05) 1998 Census                                          |                    | x  |     |     |      |
|               | (CIV-06) 2005 AIDS Indicator Survey                           |                    |    | x   | x   | x    |
|               | (CIV-07) 2011-12 Standard Demographic and Health Survey       |                    |    | x   | x   | x    |
| Croatia       |                                                               |                    |    |     |     |      |

**Web Table 2 - Data source list of child and adult mortality data sources used in the GBD 2013**

VR/SRS/DSP = Vital registration, sample registration system, and disease surveillance points. HH = Household deaths. CBH = Complete birth history. SBH = Summary birth history. SIBS = Sibling survival.

| Country                          | Source number                                        | VR/<br>SRS/<br>DSP | HH | CBH | SBH | SIBS |
|----------------------------------|------------------------------------------------------|--------------------|----|-----|-----|------|
| Cuba                             | (HRV-01) 1985-12 Vital Registration                  | x                  |    |     |     |      |
|                                  | (CUB-01) 1959-10 Vital Registration                  | x                  |    |     |     |      |
|                                  | (CUB-02) 1974 Income and Expenditure Survey          |                    |    |     | x   |      |
|                                  | (CUB-03) 1981 Census                                 |                    |    |     | x   |      |
|                                  | (CUB-04) 1987 National Fertility Survey              |                    |    |     | x   |      |
| Cyprus                           | (CUB-05) 2010 Multiple Indicator Cluster Survey      |                    |    |     | x   |      |
|                                  | (CYP-01) 1960 Census                                 |                    |    |     | x   |      |
|                                  | (CYP-02) 1973 Census                                 |                    |    |     | x   |      |
|                                  | (CYP-03) 1974-11 Vital Registration                  | x                  |    |     |     |      |
| Czech Republic                   | (CYP-04) 1992 Census                                 |                    |    |     | x   |      |
|                                  | (CZE-01) 1950-12 Vital Registration                  | x                  |    |     |     |      |
|                                  | (CZE-02) 1991 Census                                 |                    |    |     | x   |      |
| Democratic Republic of the Congo | (CZE-03) 1993 Reproductive Health Survey             |                    |    | x   | x   |      |
|                                  | (COD-01) 1984 Census                                 |                    |    |     | x   |      |
|                                  | (COD-02) 1995 Multiple Indicator Cluster Survey      |                    |    |     | x   |      |
|                                  | (COD-03) 2001 Multiple Indicator Cluster Survey      |                    |    |     | x   |      |
|                                  | (COD-04) 2007 Standard Demographic and Health Survey |                    |    | x   | x   | x    |
| Denmark                          | (COD-05) 2010 Multiple Indicator Cluster Survey      |                    |    |     | x   |      |
|                                  | (DNK-01) 1950-11 Vital Registration                  | x                  |    |     |     |      |
| Djibouti                         | (DJI-01) 2002 Pan Arab Project for Family Health     |                    |    | x   | x   |      |

**Web Table 2 - Data source list of child and adult mortality data sources used in the GBD 2013**

VR/SRS/DSP = Vital registration, sample registration system, and disease surveillance points. HH = Household deaths. CBH = Complete birth history. SBH = Summary birth history. SIBS = Sibling survival.

| Country            | Source number                                                 | VR/<br>SRS/<br>DSP | HH | CBH | SBH | SIBS |
|--------------------|---------------------------------------------------------------|--------------------|----|-----|-----|------|
| Dominica           | (DJI-02) 2006 Multiple Indicator Cluster Survey               |                    |    |     | x   |      |
|                    | (DMA-01) 1950-63, 1966-10 Vital Registration                  | x                  |    |     |     |      |
| Dominican Republic | (DOM-01) 1950-92, 1994-01, 2003-11 Vital Registration         | x                  |    |     |     |      |
|                    | (DOM-02) 1970 Census                                          |                    |    |     | x   |      |
|                    | (DOM-03) 1975 World Fertility Survey                          |                    |    |     | x   |      |
|                    | (DOM-04) 1980 World Fertility Survey                          |                    |    |     | x   |      |
|                    | (DOM-05) 1981 Census                                          |                    | x  |     |     |      |
|                    | (DOM-06) 1983 Contraceptive Prevalence Survey                 |                    |    |     | x   |      |
|                    | (DOM-07) 1986 Standard Demographic and Health Survey          |                    |    | x   | x   |      |
|                    | (DOM-08) 1991 Standard Demographic and Health Survey          |                    |    | x   | x   |      |
|                    | (DOM-09) 1996 Standard Demographic and Health Survey          |                    |    | x   | x   |      |
|                    | (DOM-10) 2000 Multiple Indicator Cluster Survey               |                    |    |     | x   |      |
|                    | (DOM-11) 2002 Standard Demographic and Health Survey          |                    |    | x   | x   | x    |
|                    | (DOM-12) 2006 National Multipurpose Household Survey          |                    |    | x   |     |      |
|                    | (DOM-13) 2007 Standard Demographic and Health Survey          |                    |    | x   | x   | x    |
|                    | (DOM-14) 2013 Standard Demographic and Health Survey (Report) |                    |    | x   |     |      |
| Ecuador            | (ECU-01) 1954-10 Vital Registration                           | x                  |    |     |     |      |
|                    | (ECU-02) 1974 Census                                          |                    |    |     | x   |      |
|                    | (ECU-03) 1979-80 World Fertility Survey                       |                    |    |     | x   |      |
|                    | (ECU-04) 1982 Census                                          |                    |    |     | x   |      |
|                    | (ECU-05) 1987 Standard Demographic and Health Survey          |                    |    | x   | x   |      |
|                    | (ECU-06) 1989 Reproductive Health Survey                      |                    |    | x   | x   |      |
|                    | (ECU-07) 1990 Census                                          |                    |    |     | x   |      |



**Web Table 2 - Data source list of child and adult mortality data sources used in the GBD 2013**

VR/SRS/DSP = Vital registration, sample registration system, and disease surveillance points. HH = Household deaths. CBH = Complete birth history. SBH = Summary birth history. SIBS = Sibling survival.

| Country     | Source number                                                    | VR/<br>SRS/<br>DSP | HH | CBH | SBH | SIBS |
|-------------|------------------------------------------------------------------|--------------------|----|-----|-----|------|
|             | (ECU-08) 1994 Reproductive Health Survey                         |                    |    | x   | x   | x    |
|             | (ECU-09) 1995 Living Standards Measurement Study                 |                    |    |     | x   |      |
|             | (ECU-10) 1998 Living Standards Measurement Study                 |                    |    |     | x   |      |
|             | (ECU-11) 1999 Reproductive Health Survey                         |                    |    | x   | x   |      |
|             | (ECU-12) 2001 Census                                             |                    |    |     | x   |      |
|             | (ECU-13) 2004 Reproductive Health Survey                         |                    |    | x   | x   | x    |
|             | (ECU-14) 2010 Census                                             |                    |    |     | x   |      |
| Egypt       |                                                                  |                    |    |     |     |      |
|             | (EGY-01) 1950-81, 1983-11 Vital Registration                     | x                  |    |     |     |      |
|             | (EGY-02) 1976 Census                                             |                    |    |     | x   |      |
|             | (EGY-03) 1980 World Fertility Survey                             |                    |    | x   | x   |      |
|             | (EGY-04) 1984 Contraceptive Prevalence Survey                    |                    |    |     | x   |      |
|             | (EGY-05) 1986 Census                                             |                    |    |     | x   |      |
|             | (EGY-06) 1988-89 Standard Demographic and Health Survey          |                    |    | x   | x   |      |
|             | (EGY-07) 1991 Pan Arab Project for Child Development             |                    |    | x   | x   |      |
|             | (EGY-08) 1992-93 Standard Demographic and Health Survey          |                    |    | x   | x   |      |
|             | (EGY-09) 1995-96 Standard Demographic and Health Survey          |                    |    | x   | x   |      |
|             | (EGY-10) 1997-98 Standard Demographic and Health Survey (Report) |                    |    | x   |     |      |
|             | (EGY-11) 2000 Standard Demographic and Health Survey             |                    |    | x   | x   |      |
|             | (EGY-12) 2003 Interim Demographic and Health Survey              |                    |    | x   | x   |      |
|             | (EGY-13) 2005 Standard Demographic and Health Survey             |                    |    | x   | x   |      |
|             | (EGY-14) 2008 Standard Demographic and Health Survey             |                    |    | x   | x   |      |
| El Salvador |                                                                  |                    |    |     |     |      |
|             | (SLV-01) 1950-09, 2011 Vital Registration                        | x                  |    |     |     |      |
|             | (SLV-02) 1971 Census                                             |                    |    |     | x   |      |
|             | (SLV-03) 1985 Standard Demographic and Health Survey             |                    |    | x   | x   |      |

**Web Table 2 - Data source list of child and adult mortality data sources used in the GBD 2013**

VR/SRS/DSP = Vital registration, sample registration system, and disease surveillance points. HH = Household deaths. CBH = Complete birth history. SBH = Summary birth history. SIBS = Sibling survival.

| Country           | Source number                                                 | VR/<br>SRS/<br>DSP | HH | CBH | SBH | SIBS |
|-------------------|---------------------------------------------------------------|--------------------|----|-----|-----|------|
|                   | (SLV-04) 1988 Reproductive Health Survey                      |                    |    |     | x   |      |
|                   | (SLV-05) 1992 Census                                          |                    |    |     | x   |      |
|                   | (SLV-06) 1992 Household Survey                                |                    |    |     | x   |      |
|                   | (SLV-07) 1993 Household Survey                                |                    |    |     | x   |      |
|                   | (SLV-08) 1993 Reproductive Health Survey                      |                    |    | x   | x   | x    |
|                   | (SLV-09) 1998 Reproductive Health Survey                      |                    |    | x   | x   | x    |
|                   | (SLV-10) 2002-03 Reproductive Health Survey                   |                    |    | x   | x   | x    |
|                   | (SLV-11) 2007 Census                                          |                    | x  |     | x   |      |
|                   | (SLV-12) 2008 Reproductive Health Survey                      |                    |    | x   | x   |      |
| Equatorial Guinea |                                                               |                    |    |     |     |      |
|                   | (GNQ-01) 2000 Multiple Indicator Cluster Survey               |                    |    |     | x   |      |
|                   | (GNQ-02) 2011 Standard Demographic and Health Survey (Report) |                    |    | x   |     |      |
| Eritrea           |                                                               |                    |    |     |     |      |
|                   | (ERI-01) 1995-96 Standard Demographic and Health Survey       |                    |    | x   | x   | x    |
|                   | (ERI-02) 2002 Standard Demographic and Health Survey          |                    |    | x   | x   |      |
| Estonia           |                                                               |                    |    |     |     |      |
|                   | (EST-01) 1959-12 Vital Registration                           | x                  |    |     |     |      |
|                   | (EST-02) 1989 Census                                          |                    |    |     | x   |      |
| Ethiopia          |                                                               |                    |    |     |     |      |
|                   | (ETH-01) 1984 Census                                          |                    |    |     | x   |      |
|                   | (ETH-02) 1990 National Family and Fertility Survey            |                    |    | x   | x   |      |
|                   | (ETH-03) 1994 Census                                          |                    |    |     | x   |      |
|                   | (ETH-04) 2000 Standard Demographic and Health Survey          |                    |    | x   | x   | x    |
|                   | (ETH-05) 2005 Standard Demographic and Health Survey          |                    |    | x   | x   | x    |
|                   | (ETH-06) 2007 Census                                          |                    | x  |     | x   |      |
|                   | (ETH-07) 2010-11 Standard Demographic and Health Survey       |                    |    | x   | x   | x    |

**Web Table 2 - Data source list of child and adult mortality data sources used in the GBD 2013**

VR/SRS/DSP = Vital registration, sample registration system, and disease surveillance points. HH = Household deaths. CBH = Complete birth history. SBH = Summary birth history. SIBS = Sibling survival.

| Country                 | Source number                                           | VR/<br>SRS/<br>DSP | HH | CBH | SBH | SIBS |
|-------------------------|---------------------------------------------------------|--------------------|----|-----|-----|------|
| States of<br>Micronesia |                                                         |                    |    |     |     |      |
|                         | (FSM-01) 1973 Census                                    |                    |    |     | x   |      |
|                         | (FSM-02) 1994 Census                                    |                    |    |     | x   |      |
|                         | (FSM-03) 2000 Census                                    |                    |    |     | x   |      |
|                         | (FSM-04) 2003 Vital Registration                        | x                  |    |     |     |      |
| Fiji                    |                                                         |                    |    |     |     |      |
|                         | (FJI-01) 1950-87, 2009, 2011 Vital Registration         | x                  |    |     |     |      |
|                         | (FJI-02) 1956 Census                                    |                    |    |     | x   |      |
|                         | (FJI-03) 1966 Census                                    |                    |    |     | x   |      |
|                         | (FJI-04) 1974 World Fertility Survey                    |                    |    | x   | x   |      |
|                         | (FJI-05) 1976 Census                                    |                    |    |     | x   |      |
|                         | (FJI-06) 1986 Census                                    |                    |    |     | x   |      |
|                         | (FJI-07) 2007 Census                                    |                    |    |     | x   |      |
| Finland                 |                                                         |                    |    |     |     |      |
|                         | (FIN-01) 1950-11 Vital Registration                     | x                  |    |     |     |      |
| France                  |                                                         |                    |    |     |     |      |
|                         | (FRA-01) 1950-11 Vital Registration                     | x                  |    |     |     |      |
| Gabon                   |                                                         |                    |    |     |     |      |
|                         | (GAB-01) 2000-01 Standard Demographic and Health Survey |                    |    | x   | x   | x    |
|                         | (GAB-02) 2012 Standard Demographic and Health Survey    |                    |    | x   | x   | x    |
| Georgia                 |                                                         |                    |    |     |     |      |
|                         | (GEO-01) 1981-83, 1985-10, 2012 Vital Registration      | x                  |    |     |     |      |
|                         | (GEO-02) 1999-00 Reproductive Health Survey             |                    |    | x   | x   |      |
|                         | (GEO-03) 2005 Multiple Indicator Cluster Survey         |                    |    |     | x   |      |
|                         | (GEO-04) 2005 Reproductive Health Survey                |                    |    | x   | x   |      |
|                         | (GEO-05) 2010 Reproductive Health Survey (Report)       |                    |    | x   |     |      |

**Web Table 2 - Data source list of child and adult mortality data sources used in the GBD 2013**

VR/SRS/DSP = Vital registration, sample registration system, and disease surveillance points. HH = Household deaths. CBH = Complete birth history. SBH = Summary birth history. SIBS = Sibling survival.

| Country   | Source number                                                  | VR/<br>SRS/<br>DSP | HH | CBH | SBH | SIBS |
|-----------|----------------------------------------------------------------|--------------------|----|-----|-----|------|
| Germany   | (DEU-01) 1956-12 Vital Registration                            | x                  |    |     |     |      |
|           |                                                                |                    |    |     |     |      |
| Ghana     | (GHA-01) 1970 Census                                           |                    |    |     | x   |      |
|           | (GHA-02) 1979-80 World Fertility Survey                        |                    |    | x   | x   |      |
|           | (GHA-03) 1988 Standard Demographic and Health Survey           |                    |    | x   | x   |      |
|           | (GHA-04) 1993-94 Standard Demographic and Health Survey        |                    |    | x   | x   |      |
|           | (GHA-05) 1998-99 Living Standards Measurement Study            |                    |    |     | x   |      |
|           | (GHA-06) 1998-99 Standard Demographic and Health Survey        |                    |    | x   | x   |      |
|           | (GHA-07) 2000 Census                                           |                    |    |     | x   |      |
|           | (GHA-08) 2003 Standard Demographic and Health Survey           |                    |    | x   | x   |      |
|           | (GHA-09) 2005 Living Standards Measurement Study               |                    |    |     | x   |      |
|           | (GHA-10) 2006 Multiple Indicator Cluster Survey                |                    |    |     | x   |      |
|           | (GHA-11) 2007-08 Special Demographic and Health Survey         |                    |    | x   | x   | x    |
|           | (GHA-12) 2008 Standard Demographic and Health Survey           |                    |    | x   | x   |      |
|           | (GHA-13) 2011 Multiple Indicator Cluster Survey                |                    |    | x   | x   |      |
| Greece    | (GRC-01) 1951-11 Vital Registration                            | x                  |    |     |     |      |
|           | (GRC-02) 1991 Census                                           |                    |    |     | x   |      |
| Grenada   | (GRD-01) 1950-69, 1974-78, 1984-85, 1988-10 Vital Registration | x                  |    |     |     |      |
|           |                                                                |                    |    |     |     |      |
| Guatemala | (GTM-01) 1950-72, 1974-81, 1983-09, 2011 Vital Registration    | x                  |    |     |     |      |
|           | (GTM-02) 1978-79 Reproductive Health Survey                    |                    |    |     | x   |      |
|           | (GTM-03) 1981 Census                                           |                    |    |     | x   |      |
|           | (GTM-04) 1987 Standard Demographic and Health Survey           |                    |    | x   | x   |      |

**Web Table 2 - Data source list of child and adult mortality data sources used in the GBD 2013**

VR/SRS/DSP = Vital registration, sample registration system, and disease surveillance points. HH = Household deaths. CBH = Complete birth history. SBH = Summary birth history. SIBS = Sibling survival.

| Country       | Source number                                                                          | VR/<br>SRS/<br>DSP | HH | CBH | SBH | SIBS |
|---------------|----------------------------------------------------------------------------------------|--------------------|----|-----|-----|------|
|               | (GTM-05) 1995 Standard Demographic and Health Survey                                   |                    |    | x   | x   | x    |
|               | (GTM-06) 1998-99 Interim Demographic and Health Survey                                 |                    |    | x   | x   |      |
|               | (GTM-07) 2000 Living Standards Measurement Study                                       |                    |    |     | x   |      |
|               | (GTM-08) 2002 Reproductive Health Survey                                               |                    |    | x   | x   |      |
|               | (GTM-09) 2008-09 Reproductive Health Survey                                            |                    |    | x   | x   |      |
| Guinea        |                                                                                        |                    |    |     |     |      |
|               | (GIN-01) 1983 Census                                                                   |                    | x  |     |     |      |
|               | (GIN-02) 1992 Standard Demographic and Health Survey (Report)                          |                    |    | x   |     |      |
|               | (GIN-03) 1996 Census                                                                   |                    |    |     | x   |      |
|               | (GIN-04) 1999 Standard Demographic and Health Survey                                   |                    |    | x   | x   | x    |
|               | (GIN-05) 2005 Standard Demographic and Health Survey                                   |                    |    | x   | x   | x    |
|               | (GIN-06) 2012 Standard Demographic and Health Survey                                   |                    |    | x   | x   |      |
| Guinea-Bissau |                                                                                        |                    |    |     |     |      |
|               | (GNB-01) 2000 Multiple Indicator Cluster Survey                                        |                    |    |     | x   |      |
|               | (GNB-02) 2006 Multiple Indicator Cluster Survey                                        |                    |    |     | x   |      |
|               | (GNB-03) 2010 Multiple Indicator Cluster Survey                                        |                    |    |     | x   |      |
| Guyana        |                                                                                        |                    |    |     |     |      |
|               | (GUY-01) 1950-61, 1969-71, 1974, 1977, 1979, 1984, 1988-99, 2001-09 Vital Registration | x                  |    |     |     |      |
|               | (GUY-02) 1975 World Fertility Survey                                                   |                    |    | x   | x   |      |
|               | (GUY-03) 1993 Living Standards Measurement Study                                       |                    |    |     | x   |      |
|               | (GUY-04) 2000 Multiple Indicator Cluster Survey                                        |                    |    |     | x   |      |
|               | (GUY-05) 2005 AIDS Indicator Survey                                                    |                    |    | x   | x   |      |
|               | (GUY-06) 2006-07 Multiple Indicator Cluster Survey                                     |                    |    |     | x   |      |
|               | (GUY-07) 2009 Standard Demographic and Health Survey                                   |                    |    | x   | x   |      |
| Haiti         |                                                                                        |                    |    |     |     |      |
|               | (HTI-01) 1971-73 Multi-Round Demographic Survey                                        |                    |    | x   |     |      |

**Web Table 2 - Data source list of child and adult mortality data sources used in the GBD 2013**

VR/SRS/DSP = Vital registration, sample registration system, and disease surveillance points. HH = Household deaths. CBH = Complete birth history. SBH = Summary birth history. SIBS = Sibling survival.

| Country  | Source number                                                         | VR/<br>SRS/<br>DSP | HH | CBH | SBH | SIBS |
|----------|-----------------------------------------------------------------------|--------------------|----|-----|-----|------|
|          | (HTI-02) 1971 Census                                                  |                    |    | x   |     |      |
|          | (HTI-03) 1972 Sample Survey                                           |                    | x  |     |     |      |
|          | (HTI-04) 1977 World Fertility Survey                                  |                    |    | x   | x   |      |
|          | (HTI-05) 1980, 1997, 1999, 2001-04 Vital Registration                 | x                  |    |     |     |      |
|          | (HTI-06) 1987 Mortality, Morbidity and Utilization of Services Survey |                    |    | x   | x   |      |
|          | (HTI-07) 1994-95 Standard Demographic and Health Survey               |                    |    | x   | x   |      |
|          | (HTI-08) 2000 Standard Demographic and Health Survey                  |                    |    | x   | x   | x    |
|          | (HTI-09) 2005-06 Standard Demographic and Health Survey               |                    |    | x   | x   | x    |
|          | (HTI-10) 2008 Global Fund Facility Survey                             |                    |    | x   |     |      |
|          | (HTI-11) 2012 Standard Demographic and Health Survey                  |                    |    | x   | x   |      |
| Honduras |                                                                       |                    |    |     |     |      |
|          | (HND-01) 1950-83, 1987-90 Vital Registration                          | x                  |    |     |     |      |
|          | (HND-02) 1970-72 National Demographic Survey                          |                    |    | x   | x   |      |
|          | (HND-03) 1974 Census                                                  |                    |    |     | x   |      |
|          | (HND-04) 1983-84 National Demographic Survey                          |                    |    |     | x   |      |
|          | (HND-05) 1985 National Maternal and Infant Health Survey              |                    |    |     | x   |      |
|          | (HND-06) 1987 Reproductive Health Survey                              |                    |    |     | x   |      |
|          | (HND-07) 1988 Census                                                  |                    |    |     | x   |      |
|          | (HND-08) 1991-92 Reproductive Health Survey                           |                    |    | x   | x   |      |
|          | (HND-09) 1996 Reproductive Health Survey                              |                    |    | x   | x   | x    |
|          | (HND-10) 2001 Census                                                  |                    | x  |     |     |      |
|          | (HND-11) 2001 Reproductive Health Survey                              |                    |    | x   | x   |      |
|          | (HND-12) 2004 Survey of Living Conditions                             |                    |    |     | x   |      |
|          | (HND-13) 2005-06 Standard Demographic and Health Survey               |                    |    | x   | x   |      |
|          | (HND-14) 2011-12 Standard Demographic and Health Survey               |                    |    | x   | x   |      |
| Hungary  |                                                                       |                    |    |     |     |      |

**Web Table 2 - Data source list of child and adult mortality data sources used in the GBD 2013**

VR/SRS/DSP = Vital registration, sample registration system, and disease surveillance points. HH = Household deaths. CBH = Complete birth history. SBH = Summary birth history. SIBS = Sibling survival.

| Country   | Source number                                                   | VR/<br>SRS/<br>DSP | HH | CBH | SBH | SIBS |
|-----------|-----------------------------------------------------------------|--------------------|----|-----|-----|------|
|           | (HUN-01) 1950-12 Vital Registration                             | x                  |    |     |     |      |
|           | (HUN-02) 1960 Census                                            |                    |    |     | x   |      |
| Iceland   |                                                                 |                    |    |     |     |      |
|           | (ISL-01) 1950-11 Vital Registration                             | x                  |    |     |     |      |
| India     |                                                                 |                    |    |     |     |      |
|           | (IND-01) 1950-64 Vital Registration                             | x                  |    |     |     |      |
|           | (IND-02) 1970-09 Sample Registration System                     | x                  |    |     |     |      |
|           | (IND-03) 1970 All-India Family Planning Survey                  |                    |    |     | x   |      |
|           | (IND-04) 1981 Census                                            |                    |    |     | x   |      |
|           | (IND-05) 1991 Census                                            |                    |    |     | x   |      |
|           | (IND-06) 1992-93 Standard Demographic and Health Survey         |                    |    | x   | x   |      |
|           | (IND-07) 1998-00 Standard Demographic and Health Survey         |                    |    | x   | x   |      |
|           | (IND-08) 1998-99 District Level Household and Facility Survey 1 |                    |    |     | x   |      |
|           | (IND-09) 2001 Census                                            |                    |    |     | x   |      |
|           | (IND-10) 2002-04 District Level Household and Facility Survey 2 |                    |    |     | x   |      |
|           | (IND-11) 2004-05 Human Development Survey                       |                    |    | x   | x   |      |
|           | (IND-12) 2005-06 Standard Demographic and Health Survey         |                    |    | x   | x   |      |
|           | (IND-13) 2007-08 District Level Household and Facility Survey 3 |                    |    |     | x   |      |
|           | (IND-14) 2010-12 Sample Registration System (Report)            | x                  |    |     |     |      |
| Indonesia |                                                                 |                    |    |     |     |      |
|           | (IDN-01) 1964-65 Socioeconomic National Sample Survey           |                    | x  |     | x   |      |
|           | (IDN-02) 1964 Socioeconomic National Sample Survey              |                    | x  |     |     |      |
|           | (IDN-03) 1971 Census                                            |                    |    |     | x   |      |
|           | (IDN-04) 1976 Intercensal Population Survey                     |                    |    |     | x   |      |
|           | (IDN-05) 1976 World Fertility Survey                            |                    |    | x   | x   |      |
|           | (IDN-06) 1980 Census                                            |                    |    |     | x   |      |

**Web Table 2 - Data source list of child and adult mortality data sources used in the GBD 2013**

VR/SRS/DSP = Vital registration, sample registration system, and disease surveillance points. HH = Household deaths. CBH = Complete birth history. SBH = Summary birth history. SIBS = Sibling survival.

| Country | Source number                                           | VR/<br>SRS/<br>DSP | HH | CBH | SBH | SIBS |
|---------|---------------------------------------------------------|--------------------|----|-----|-----|------|
|         | (IDN-07) 1985 Intercensal Population Survey             |                    | x  |     | x   |      |
|         | (IDN-08) 1987 Standard Demographic and Health Survey    |                    |    | x   | x   |      |
|         | (IDN-09) 1990 Census                                    |                    |    |     | x   |      |
|         | (IDN-10) 1991 Standard Demographic and Health Survey    |                    |    | x   | x   |      |
|         | (IDN-11) 1992 National Socioeconomic Survey             |                    |    |     | x   |      |
|         | (IDN-12) 1993 Indonesia Family Life Survey              |                    | x  | x   | x   |      |
|         | (IDN-13) 1993 National Socioeconomic Survey             |                    |    |     | x   |      |
|         | (IDN-14) 1994 National Socioeconomic Survey             |                    |    |     | x   |      |
|         | (IDN-15) 1994 Standard Demographic and Health Survey    |                    |    | x   | x   | x    |
|         | (IDN-16) 1995 Intercensal Population Survey             |                    |    | x   | x   |      |
|         | (IDN-17) 1995 National Socioeconomic Survey             |                    |    |     | x   |      |
|         | (IDN-18) 1996 National Socioeconomic Survey             |                    | x  |     | x   |      |
|         | (IDN-19) 1997 Indonesia Family Life Survey              |                    |    | x   | x   |      |
|         | (IDN-20) 1997 National Socioeconomic Survey             |                    |    |     | x   |      |
|         | (IDN-21) 1997 Standard Demographic and Health Survey    |                    |    | x   | x   | x    |
|         | (IDN-22) 1998 Indonesian Family Life Survey             |                    | x  |     |     |      |
|         | (IDN-23) 1998 National Socioeconomic Survey             |                    | x  |     | x   |      |
|         | (IDN-24) 1999 Census                                    |                    | x  |     |     |      |
|         | (IDN-25) 1999 National Socioeconomic Survey             |                    | x  |     | x   |      |
|         | (IDN-26) 2000 Census                                    |                    |    | x   | x   |      |
|         | (IDN-27) 2000 Indonesia Family Life Survey              |                    |    | x   | x   |      |
|         | (IDN-28) 2000 National Socioeconomic Survey             |                    |    |     | x   |      |
|         | (IDN-29) 2001 National Socioeconomic Survey             |                    |    |     | x   |      |
|         | (IDN-30) 2002-03 Standard Demographic and Health Survey |                    |    | x   | x   | x    |
|         | (IDN-31) 2002 National Socioeconomic Survey             |                    |    |     | x   |      |
|         | (IDN-32) 2003 National Socioeconomic Survey             |                    | x  |     | x   |      |



**Web Table 2 - Data source list of child and adult mortality data sources used in the GBD 2013**

VR/SRS/DSP = Vital registration, sample registration system, and disease surveillance points. HH = Household deaths. CBH = Complete birth history. SBH = Summary birth history. SIBS = Sibling survival.

| Country | Source number                                               | VR/<br>SRS/<br>DSP | HH | CBH | SBH | SIBS |
|---------|-------------------------------------------------------------|--------------------|----|-----|-----|------|
|         | (IDN-33) 2004 National Socioeconomic Survey                 |                    |    |     | x   |      |
|         | (IDN-34) 2005 Intercensal Population Survey                 |                    |    | x   |     |      |
|         | (IDN-35) 2005 National Socioeconomic Survey                 |                    |    |     | x   |      |
|         | (IDN-36) 2006 National Socioeconomic Survey                 |                    | x  |     | x   |      |
|         | (IDN-37) 2007 Indonesia Family Life Survey                  |                    | x  | x   |     |      |
|         | (IDN-38) 2007 National Socioeconomic Survey                 |                    |    |     | x   |      |
|         | (IDN-39) 2007 Standard Demographic and Health Survey        |                    |    | x   | x   | x    |
|         | (IDN-40) 2008 Indonesia Family Life Survey                  |                    |    |     | x   |      |
|         | (IDN-41) 2008 National Socioeconomic Survey                 |                    |    |     | x   |      |
|         | (IDN-42) 2009 National Socioeconomic Survey                 |                    |    |     | x   |      |
|         | (IDN-43) 2010 Census                                        |                    |    |     | x   |      |
|         | (IDN-44) 2010 National Socioeconomic Survey                 |                    |    |     | x   |      |
|         | (IDN-45) 2011 National Socioeconomic Survey                 |                    |    |     | x   |      |
|         | (IDN-46) 2012 Standard Demographic and Health Survey        |                    |    | x   | x   | x    |
| Iran    | (IRN-01) 1973-76 Baseline Population Growth Survey          |                    |    | x   | x   |      |
|         | (IRN-02) 1974-75, 1978-87, 1991, 1996-10 Vital Registration | x                  |    |     |     |      |
|         | (IRN-03) 1974 Sample Survey on Population and Health        |                    |    | x   |     |      |
|         | (IRN-04) 1984 Mortality and Fertility Survey                |                    |    | x   |     |      |
|         | (IRN-05) 1986 Census                                        |                    |    |     | x   |      |
|         | (IRN-06) 1991-94 Intercensal Population Survey              |                    |    |     | x   |      |
|         | (IRN-07) 1994 Mortality and Fertility Survey                |                    |    | x   |     |      |
|         | (IRN-08) 1996 Census                                        |                    |    |     | x   |      |
|         | (IRN-09) 1998 Measuring Population Growth Survey            |                    |    |     | x   |      |
|         | (IRN-10) 2000 Iran Demographic and Health Survey            |                    |    | x   | x   |      |
|         | (IRN-11) 2006 Census                                        |                    |    |     | x   |      |

**Web Table 2 - Data source list of child and adult mortality data sources used in the GBD 2013**

VR/SRS/DSP = Vital registration, sample registration system, and disease surveillance points. HH = Household deaths. CBH = Complete birth history. SBH = Summary birth history. SIBS = Sibling survival.

| Country | Source number                                                                                | VR/<br>SRS/<br>DSP | HH | CBH | SBH | SIBS |
|---------|----------------------------------------------------------------------------------------------|--------------------|----|-----|-----|------|
| Iraq    | (IRN-12) 2010 Standard Demographic and Health Survey                                         |                    |    | x   |     |      |
|         | (IRQ-01) 1955, 1958-69, 1976-77, 1987-89, 2008 Vital Registration                            | x                  |    |     |     |      |
|         | (IRQ-02) 1973-75 Demographic Sample Survey and Sample Registration System                    | x                  |    |     |     |      |
|         | (IRQ-03) 1974 Fertility Survey                                                               |                    |    |     | x   |      |
|         | (IRQ-04) 1987 Census                                                                         |                    |    |     | x   |      |
|         | (IRQ-05) 1989 Child Health Survey                                                            |                    |    | x   | x   |      |
|         | (IRQ-06) 1990 Iraq Immunization, Diarrhoeal Disease, Maternal and Childhood Mortality Survey |                    |    |     | x   |      |
|         | (IRQ-07) 1991 Epidemiological Study of Child Mortality in Post-War Iraq                      |                    |    | x   |     |      |
|         | (IRQ-08) 1997 Census                                                                         |                    |    |     | x   |      |
|         | (IRQ-09) 1999 Iraq Child and Maternal Mortality Survey                                       |                    |    | x   |     |      |
|         | (IRQ-10) 2004 Multiple Indicator Rapid Assessment                                            |                    | x  | x   | x   |      |
|         | (IRQ-11) 2006-07 Iraq Family Health Survey                                                   |                    |    | x   | x   |      |
|         | (IRQ-12) 2006 Multiple Indicator Cluster Survey                                              |                    |    | x   | x   |      |
|         | (IRQ-13) 2007 Iraq Family Health Survey                                                      |                    |    |     |     | x    |
|         | (IRQ-14) 2011 Iraq Mortality Study                                                           |                    |    |     |     | x    |
|         | (IRQ-15) 2011 Multiple Indicator Cluster Survey                                              |                    |    | x   | x   |      |
| Ireland | (IRL-01) 1950-10 Vital Registration                                                          | x                  |    |     |     |      |
|         | (IRL-02) 2011 Census                                                                         |                    | x  |     |     |      |
| Israel  | (ISR-01) 1950-12 Vital Registration                                                          | x                  |    |     |     |      |
| Italy   | (ITA-01) 1950-10 Vital Registration                                                          | x                  |    |     |     |      |
| Jamaica | (JAM-01) 1950-65, 1967, 1970-71, 1975, 1977, 1980-91, 1999-06 Vital Registration             | x                  |    |     |     |      |

**Web Table 2 - Data source list of child and adult mortality data sources used in the GBD 2013**

VR/SRS/DSP = Vital registration, sample registration system, and disease surveillance points. HH = Household deaths. CBH = Complete birth history. SBH = Summary birth history. SIBS = Sibling survival.

| Country | Source number                                                    | VR/<br>SRS/<br>DSP | HH | CBH | SBH | SIBS |
|---------|------------------------------------------------------------------|--------------------|----|-----|-----|------|
|         | (JAM-02) 1975-76 World Fertility Survey                          |                    |    | x   | x   |      |
|         | (JAM-03) 1982 Census                                             |                    |    |     | x   |      |
|         | (JAM-04) 1999 Multiple Indicator Cluster Survey                  |                    |    |     | x   |      |
|         | (JAM-05) 2001 Census                                             |                    |    |     | x   |      |
|         | (JAM-06) 2005 Multiple Indicator Cluster Survey                  |                    |    |     | x   |      |
|         | (JAM-07) 2008-09 Reproductive Health Survey                      |                    |    | x   |     |      |
| Japan   | (JPN-01) 1950-11 Vital Registration                              | x                  |    |     |     |      |
| Jordan  | (JOR-01) 1953-57, 1959-80, 2004-06, 2008 Vital Registration      | x                  |    |     |     |      |
|         | (JOR-02) 1972 National Fertility Survey                          |                    |    |     | x   |      |
|         | (JOR-03) 1976 World Fertility Survey                             |                    |    |     | x   |      |
|         | (JOR-04) 1979 Census                                             |                    |    |     | x   |      |
|         | (JOR-05) 1981 Demographic Survey                                 |                    |    |     | x   |      |
|         | (JOR-06) 1983 Reproductive Health Survey (Report)                |                    |    | x   |     |      |
|         | (JOR-07) 1988 Child Mortality Survey                             |                    |    |     | x   |      |
|         | (JOR-08) 1990 Child Mortality Survey                             |                    |    |     | x   |      |
|         | (JOR-09) 1990 Standard Demographic and Health Survey             |                    |    | x   | x   |      |
|         | (JOR-10) 1994 Population and Housing Census Accompanying Survey  |                    |    | x   |     |      |
|         | (JOR-11) 1995-96 Assessment of Causes of Death by Verbal Autopsy |                    |    | x   |     |      |
|         | (JOR-12) 1997 Standard Demographic and Health Survey             |                    |    | x   | x   | x    |
|         | (JOR-13) 1999 Annual Fertility Survey                            |                    |    |     | x   |      |
|         | (JOR-14) 2002 Standard Demographic and Health Survey             |                    |    | x   | x   |      |
|         | (JOR-15) 2007 Standard Demographic and Health Survey             |                    |    | x   | x   |      |
|         | (JOR-16) 2009 Interim Demographic and Health Survey              |                    |    | x   | x   |      |
|         | (JOR-17) 2012 Standard Demographic and Health Survey             |                    |    | x   | x   |      |

**Web Table 2 - Data source list of child and adult mortality data sources used in the GBD 2013**

VR/SRS/DSP = Vital registration, sample registration system, and disease surveillance points. HH = Household deaths. CBH = Complete birth history. SBH = Summary birth history. SIBS = Sibling survival.

| Country    | Source number                                           | VR/<br>SRS/<br>DSP | HH | CBH | SBH | SIBS |
|------------|---------------------------------------------------------|--------------------|----|-----|-----|------|
| Kazakhstan | (KAZ-01) 1981-82, 1985-10 Vital Registration            | x                  |    |     |     |      |
|            | (KAZ-02) 1989 Census                                    |                    |    |     | x   |      |
|            | (KAZ-03) 1995 Standard Demographic and Health Survey    |                    |    | x   | x   |      |
|            | (KAZ-04) 1996 Living Standards Measurement Study        |                    |    |     | x   |      |
|            | (KAZ-05) 1999 Census                                    |                    |    |     | x   |      |
|            | (KAZ-06) 1999 Standard Demographic and Health Survey    |                    |    | x   | x   |      |
|            | (KAZ-07) 2006 Multiple Indicator Cluster Survey         |                    |    |     | x   |      |
|            | (KAZ-08) 2009 Census                                    |                    |    |     | x   |      |
|            | (KAZ-09) 2010 Multiple Indicator Cluster Survey         |                    |    |     | x   |      |
| Kenya      | (KEN-01) 1969 Census                                    |                    |    |     | x   |      |
|            | (KEN-02) 1977-78 World Fertility Survey                 |                    |    | x   | x   |      |
|            | (KEN-03) 1977 National Demographic Survey               |                    |    |     | x   |      |
|            | (KEN-04) 1979 Census                                    |                    |    |     | x   |      |
|            | (KEN-05) 1988-89 Standard Demographic and Health Survey |                    |    | x   | x   |      |
|            | (KEN-06) 1989 Census                                    |                    |    |     | x   |      |
|            | (KEN-07) 1993 Standard Demographic and Health Survey    |                    |    | x   | x   |      |
|            | (KEN-08) 1998 Standard Demographic and Health Survey    |                    |    | x   | x   | x    |
|            | (KEN-09) 1999 Census                                    |                    |    |     | x   |      |
|            | (KEN-10) 2000 Multiple Indicator Cluster Survey         |                    |    |     | x   |      |
|            | (KEN-11) 2003 Standard Demographic and Health Survey    |                    |    | x   | x   | x    |
|            | (KEN-12) 2008-09 Standard Demographic and Health Survey |                    |    | x   | x   | x    |
|            | (KEN-13) 2009 Census                                    |                    | x  |     | x   |      |
| Kiribati   | (KIR-01) 1963 Census                                    |                    |    |     | x   |      |

**Web Table 2 - Data source list of child and adult mortality data sources used in the GBD 2013**

VR/SRS/DSP = Vital registration, sample registration system, and disease surveillance points. HH = Household deaths. CBH = Complete birth history. SBH = Summary birth history. SIBS = Sibling survival.

| Country    | Source number                                        | VR/<br>SRS/<br>DSP | HH | CBH | SBH | SIBS |
|------------|------------------------------------------------------|--------------------|----|-----|-----|------|
|            | (KIR-02) 1968 Census                                 |                    |    |     | x   |      |
|            | (KIR-03) 1973 Census                                 |                    |    |     | x   |      |
|            | (KIR-04) 1978 Census                                 |                    |    |     | x   |      |
|            | (KIR-05) 1991-01 Vital Registration                  | x                  |    |     |     |      |
|            | (KIR-06) 2005 Census                                 |                    |    |     | x   |      |
|            | (KIR-07) 2009 Demographic Health Survey              |                    |    | x   | x   |      |
| Kuwait     |                                                      |                    |    |     |     |      |
|            | (KWT-01) 1962-89, 1991-11 Vital Registration         | x                  |    |     |     |      |
|            | (KWT-02) 1975 Census                                 |                    |    |     | x   |      |
|            | (KWT-03) 1980 Census                                 |                    |    |     | x   |      |
|            | (KWT-04) 1987 Child Health Survey                    |                    |    |     | x   |      |
|            | (KWT-05) 1996 Gulf Family Health Survey              |                    |    | x   |     |      |
| Kyrgyzstan |                                                      |                    |    |     |     |      |
|            | (KGZ-01) 1981-11 Vital Registration                  | x                  |    |     |     |      |
|            | (KGZ-02) 1993 Living Standards Measurement Study     |                    |    |     | x   |      |
|            | (KGZ-03) 1997 Standard Demographic and Health Survey |                    |    | x   | x   |      |
|            | (KGZ-04) 1999 Census                                 |                    |    |     | x   |      |
|            | (KGZ-05) 2005-06 Multiple Indicator Cluster Survey   |                    |    |     | x   |      |
|            | (KGZ-06) 2009 Census                                 |                    |    |     | x   |      |
|            | (KGZ-07) 2012 Standard Demographic and Health Survey |                    |    | x   | x   |      |
| Laos       |                                                      |                    |    |     |     |      |
|            | (LAO-01) 1992-93 Living Conditions Survey            |                    |    |     | x   |      |
|            | (LAO-02) 1994-95 Fertility and Birth Spacing Survey  |                    |    | x   |     |      |
|            | (LAO-03) 1995 Census                                 |                    |    |     | x   |      |
|            | (LAO-04) 2000 Lao Reproductive Health Survey         |                    |    | x   |     |      |
|            | (LAO-05) 2011 Multiple Indicator Cluster Survey      |                    |    | x   | x   |      |

**Web Table 2 - Data source list of child and adult mortality data sources used in the GBD 2013**

VR/SRS/DSP = Vital registration, sample registration system, and disease surveillance points. HH = Household deaths. CBH = Complete birth history. SBH = Summary birth history. SIBS = Sibling survival.

| Country | Source number                                               | VR/<br>SRS/<br>DSP | HH | CBH | SBH | SIBS |
|---------|-------------------------------------------------------------|--------------------|----|-----|-----|------|
| Latvia  | (LVA-01) 1959-12 Vital Registration                         | x                  |    |     |     |      |
|         | (LVA-02) 1989 Census                                        |                    |    |     | x   |      |
| Lebanon | (LBN-01) 1971 National Fertility and Family Planning Survey |                    |    |     | x   |      |
|         | (LBN-02) 1996 Pan Arab Project for Child Development        |                    |    | x   | x   |      |
|         | (LBN-03) 2000 Multiple Indicator Cluster Survey             |                    |    |     | x   |      |
|         | (LBN-04) 2004 Pan Arab Project for Family Health            |                    |    | x   | x   | x    |
| Lesotho | (LSO-01) 1971 Demographic Survey                            |                    |    |     | x   |      |
|         | (LSO-02) 1976 Census                                        |                    |    |     | x   |      |
|         | (LSO-03) 1977 World Fertility Survey                        |                    |    | x   | x   |      |
|         | (LSO-04) 1986 Census                                        |                    |    |     | x   |      |
|         | (LSO-05) 1996 Census                                        |                    |    |     | x   |      |
|         | (LSO-06) 2000 Multiple Indicator Cluster Survey             |                    |    |     | x   |      |
|         | (LSO-07) 2001 Demographic Survey                            |                    |    |     | x   |      |
|         | (LSO-08) 2004-05 Standard Demographic and Health Survey     |                    |    | x   | x   | x    |
|         | (LSO-09) 2006 Census                                        |                    | x  |     |     |      |
|         | (LSO-10) 2009-10 Standard Demographic and Health Survey     |                    |    |     | x   | x    |
| Liberia | (LBR-01) 1969-71 Population Growth Survey                   |                    | x  | x   | x   |      |
|         | (LBR-02) 1974 Census                                        |                    |    |     | x   |      |
|         | (LBR-03) 1986 Standard Demographic and Health Survey        |                    |    | x   | x   |      |
|         | (LBR-04) 2006-07 Standard Demographic and Health Survey     |                    |    | x   | x   | x    |
|         | (LBR-05) 2008-09 Malaria Indicator Survey                   |                    |    | x   | x   |      |
|         | (LBR-06) 2011 Malaria Indicator Survey                      |                    |    |     | x   |      |

**Web Table 2 - Data source list of child and adult mortality data sources used in the GBD 2013**

VR/SRS/DSP = Vital registration, sample registration system, and disease surveillance points. HH = Household deaths. CBH = Complete birth history. SBH = Summary birth history. SIBS = Sibling survival.

| Country    | Source number                                                        | VR/<br>SRS/<br>DSP | HH | CBH | SBH | SIBS |
|------------|----------------------------------------------------------------------|--------------------|----|-----|-----|------|
| Libya      | (LBR-07) 2013 Standard Demographic and Health Survey (Report)        |                    |    | x   |     |      |
|            |                                                                      |                    |    |     |     |      |
| Lithuania  | (LBY-01) 1972-76, 1981, 1996, 2000, 2002, 2006-08 Vital Registration | x                  |    |     |     |      |
|            | (LBY-02) 1973 Census                                                 |                    |    |     | x   |      |
|            | (LBY-03) 1995 Pan Arab Project for Child Development                 |                    |    | x   | x   |      |
| Lithuania  |                                                                      |                    |    |     |     |      |
|            |                                                                      |                    |    |     |     |      |
| Luxembourg | (LTU-01) 1959-12 Vital Registration                                  | x                  |    |     |     |      |
|            | (LTU-02) 2011-12 Vital Registration (Report)                         | x                  |    |     |     |      |
| Luxembourg |                                                                      |                    |    |     |     |      |
|            |                                                                      |                    |    |     |     |      |
| Macedonia  | (LUX-01) 1950-11 Vital Registration                                  | x                  |    |     |     |      |
|            |                                                                      |                    |    |     |     |      |
| Macedonia  | (MKD-01) 1982, 1989-11 Vital Registration                            | x                  |    |     |     |      |
|            | (MKD-02) 2005 Multiple Indicator Cluster Survey                      |                    |    |     | x   |      |
|            | (MKD-03) 2011 Multiple Indicator Cluster Survey (Report)             |                    |    |     | x   |      |
| Madagascar |                                                                      |                    |    |     |     |      |
|            | (MDG-01) 1955, 1957-61, 1964-68, 1970-72 Vital Registration          | x                  |    |     |     |      |
|            | (MDG-02) 1966 Demographic Survey                                     |                    |    |     | x   |      |
|            | (MDG-03) 1992 Standard Demographic and Health Survey                 |                    |    | x   | x   | x    |
|            | (MDG-04) 1993 Census                                                 |                    | x  |     |     |      |
|            | (MDG-05) 1997 Standard Demographic and Health Survey                 |                    |    | x   | x   | x    |
|            | (MDG-06) 2000 Multiple Indicator Cluster Survey                      |                    |    |     | x   |      |
|            | (MDG-07) 2003-04 Standard Demographic and Health Survey              |                    |    | x   | x   | x    |
|            | (MDG-08) 2008-09 Standard Demographic and Health Survey              |                    |    | x   | x   | x    |
|            | (MDG-09) 2011 Malaria Indicator Survey                               |                    |    |     | x   |      |
| Malawi     | (MDG-10) 2013 Malaria Indicator Survey                               |                    |    |     | x   |      |
|            |                                                                      |                    |    |     |     |      |

**Web Table 2 - Data source list of child and adult mortality data sources used in the GBD 2013**

VR/SRS/DSP = Vital registration, sample registration system, and disease surveillance points. HH = Household deaths. CBH = Complete birth history. SBH = Summary birth history. SIBS = Sibling survival.

| Country  | Source number                                                  | VR/<br>SRS/<br>DSP | HH | CBH | SBH | SIBS |
|----------|----------------------------------------------------------------|--------------------|----|-----|-----|------|
|          | (MWI-01) 1970-72 Population Change Survey                      |                    | x  | x   | x   |      |
|          | (MWI-02) 1977 Census                                           |                    | x  |     | x   |      |
|          | (MWI-03) 1982 Demographic Survey                               |                    |    |     | x   |      |
|          | (MWI-04) 1987 Census                                           |                    | x  |     | x   |      |
|          | (MWI-05) 1992 Standard Demographic and Health Survey           |                    |    | x   | x   | x    |
|          | (MWI-06) 1995 Multiple Indicator Cluster Survey (Report)       |                    |    |     | x   |      |
|          | (MWI-07) 1998 Census                                           |                    | x  |     | x   |      |
|          | (MWI-08) 2000 Standard Demographic and Health Survey           |                    |    | x   | x   | x    |
|          | (MWI-09) 2004-05 Standard Demographic and Health Survey        |                    |    | x   | x   | x    |
|          | (MWI-10) 2006 Multiple Indicator Cluster Survey                |                    |    |     | x   |      |
|          | (MWI-11) 2008 Census                                           |                    | x  |     | x   |      |
|          | (MWI-12) 2008 Global Fund Facility Survey                      |                    |    | x   |     |      |
|          | (MWI-13) 2010 Standard Demographic and Health Survey           |                    |    | x   | x   | x    |
|          | (MWI-14) 2012 Malaria Indicator Survey                         |                    |    |     | x   |      |
| Malaysia |                                                                |                    |    |     |     |      |
|          | (MYS-01) 1952-72, 1976-78, 1984-86, 1990-09 Vital Registration | x                  |    |     |     |      |
|          | (MYS-02) 1970 Census                                           |                    |    |     | x   |      |
|          | (MYS-03) 1974 World Fertility Survey                           |                    |    | x   | x   |      |
|          | (MYS-04) 1980 Census                                           |                    |    |     | x   |      |
| Maldives |                                                                |                    |    |     |     |      |
|          | (MDV-01) 1974-76, 1978-11 Vital Registration                   | x                  |    |     |     |      |
|          | (MDV-02) 1977 Census                                           |                    |    |     | x   |      |
|          | (MDV-03) 1985 Census                                           |                    |    |     | x   |      |
|          | (MDV-04) 1990 Census                                           |                    |    |     | x   |      |
|          | (MDV-05) 1995 Census                                           |                    |    |     | x   |      |
|          | (MDV-06) 2000 Census                                           |                    |    |     | x   |      |



**Web Table 2 - Data source list of child and adult mortality data sources used in the GBD 2013**

VR/SRS/DSP = Vital registration, sample registration system, and disease surveillance points. HH = Household deaths. CBH = Complete birth history. SBH = Summary birth history. SIBS = Sibling survival.

| Country          | Source number                                                    | VR/<br>SRS/<br>DSP | HH | CBH | SBH | SIBS |
|------------------|------------------------------------------------------------------|--------------------|----|-----|-----|------|
| Mali             | (MDV-07) 2009 Standard Demographic and Health Survey             |                    |    | x   | x   |      |
|                  |                                                                  |                    |    |     |     |      |
| Mali             | (MLI-01) 1976 Census                                             |                    | x  |     |     |      |
|                  | (MLI-02) 1987 Census                                             |                    | x  |     | x   |      |
|                  | (MLI-03) 1987 Standard Demographic and Health Survey             |                    |    | x   | x   |      |
|                  | (MLI-04) 1995-96 Standard Demographic and Health Survey          |                    |    | x   | x   | x    |
|                  | (MLI-05) 1998 Census                                             |                    | x  |     | x   |      |
|                  | (MLI-06) 2001 Standard Demographic and Health Survey             |                    |    |     | x   | x    |
|                  | (MLI-07) 2006 Standard Demographic and Health Survey             |                    |    |     | x   | x    |
|                  | (MLI-08) 2012 Standard Demographic and Health Survey (Report)    |                    |    |     | x   |      |
| Malta            |                                                                  |                    |    |     |     |      |
|                  | (MLT-01) 1950-11 Vital Registration                              | x                  |    |     |     |      |
| Marshall Islands |                                                                  |                    |    |     |     |      |
|                  | (MHL-01) 1986-97, 2005-06 Vital Registration                     | x                  |    |     |     |      |
|                  | (MHL-02) 1999 Census                                             |                    |    |     | x   |      |
| Mauritania       | (MHL-03) 2006-07 Standard Demographic and Health Survey (Report) |                    |    | x   |     |      |
|                  |                                                                  |                    |    |     |     |      |
|                  | (MRT-01) 1981 World Fertility Survey                             |                    |    | x   | x   |      |
|                  | (MRT-02) 1988 Census                                             |                    |    | x   |     |      |
|                  | (MRT-03) 1990-91 Pan Arab Project for Child Development          |                    |    | x   | x   |      |
|                  | (MRT-04) 2000-01 Standard Demographic and Health Survey          |                    |    | x   | x   | x    |
| Mauritania       | (MRT-05) 2003-04 Special Demographic and Health Survey           |                    |    | x   | x   |      |
|                  | (MRT-06) 2007 Multiple Indicator Cluster Survey                  |                    |    |     | x   |      |
|                  |                                                                  |                    |    |     |     |      |
| Mauritius        |                                                                  |                    |    |     |     |      |
|                  | (MUS-01) 1950-11 Vital Registration                              | x                  |    |     |     |      |
| Mexico           |                                                                  |                    |    |     |     |      |

**Web Table 2 - Data source list of child and adult mortality data sources used in the GBD 2013**

VR/SRS/DSP = Vital registration, sample registration system, and disease surveillance points. HH = Household deaths. CBH = Complete birth history. SBH = Summary birth history. SIBS = Sibling survival.

| Country  | Source number                                                              | VR/<br>SRS/<br>DSP | HH | CBH | SBH | SIBS |
|----------|----------------------------------------------------------------------------|--------------------|----|-----|-----|------|
|          | (MEX-01) 1950-12 Vital Registration                                        | x                  |    |     |     |      |
|          | (MEX-02) 1976-77 World Fertility Survey                                    |                    |    | x   | x   |      |
|          | (MEX-03) 1979 National Planning Survey on Contraceptive Use                |                    |    |     | x   |      |
|          | (MEX-04) 1980 Census                                                       |                    |    |     | x   |      |
|          | (MEX-05) 1987 Standard Demographic and Health Survey                       |                    |    | x   | x   |      |
|          | (MEX-06) 1990 Census                                                       |                    |    |     | x   |      |
|          | (MEX-07) 1992 National Survey of Demographic Dynamics                      |                    |    | x   | x   |      |
|          | (MEX-08) 2000 Census                                                       |                    |    |     | x   |      |
|          | (MEX-09) 2005 Conteo                                                       |                    |    |     | x   |      |
|          | (MEX-10) 2006 National Survey of Demographic Dynamics                      |                    |    |     | x   |      |
|          | (MEX-11) 2009 National Survey of Demographic Dynamics                      |                    |    |     | x   |      |
|          | (MEX-12) 2010 Census                                                       |                    |    |     | x   |      |
|          | (MEX-13) 2010 Household Income and Expenditure Survey                      |                    |    |     | x   |      |
| Moldova  |                                                                            |                    |    |     |     |      |
|          | (MDA-01) 1981-82, 1985-12 Vital Registration                               | x                  |    |     |     |      |
|          | (MDA-02) 1989 Census                                                       |                    |    |     | x   |      |
|          | (MDA-03) 1997 Reproductive Health Survey                                   |                    |    |     | x   |      |
|          | (MDA-04) 2005 Standard Demographic and Health Survey                       |                    |    | x   | x   |      |
| Mongolia |                                                                            |                    |    |     |     |      |
|          | (MNG-01) 1965, 1970, 1975, 1980, 1985, 1987-90, 1994-03 Vital Registration | x                  |    |     |     |      |
|          | (MNG-02) 1989 Census                                                       |                    |    |     | x   |      |
|          | (MNG-03) 1994 Demographic Survey                                           |                    |    |     | x   |      |
|          | (MNG-04) 1998 Reproductive Health Survey                                   |                    |    | x   | x   |      |
|          | (MNG-05) 2000 Multiple Indicator Cluster Survey                            |                    |    |     | x   |      |
|          | (MNG-06) 2003 Reproductive Health Survey                                   |                    |    | x   | x   |      |
|          | (MNG-07) 2005 Multiple Indicator Cluster Survey                            |                    |    |     | x   |      |

**Web Table 2 - Data source list of child and adult mortality data sources used in the GBD 2013**

VR/SRS/DSP = Vital registration, sample registration system, and disease surveillance points. HH = Household deaths. CBH = Complete birth history. SBH = Summary birth history. SIBS = Sibling survival.

| Country    | Source number                                                                       | VR/<br>SRS/<br>DSP | HH | CBH | SBH | SIBS |
|------------|-------------------------------------------------------------------------------------|--------------------|----|-----|-----|------|
|            | (MNG-08) 2008 Reproductive Health Survey                                            |                    |    |     | x   |      |
|            | (MNG-09) 2010 Multiple Indicator Cluster Survey                                     |                    |    |     | x   |      |
| Montenegro |                                                                                     |                    |    |     |     |      |
|            | (MNE-01) 1961 Census                                                                |                    | x  |     |     |      |
|            | (MNE-02) 1971 Census                                                                |                    | x  |     |     |      |
|            | (MNE-03) 1981 Census                                                                |                    | x  |     |     |      |
|            | (MNE-04) 1991 Census                                                                |                    | x  |     |     |      |
|            | (MNE-05) 1995-09, 2011 Vital Registration                                           | x                  |    |     |     |      |
| Morocco    |                                                                                     |                    |    |     |     |      |
|            | (MAR-01) 1980 World Fertility Survey                                                |                    |    | x   | x   |      |
|            | (MAR-02) 1982 Census                                                                |                    |    |     | x   |      |
|            | (MAR-03) 1983 Contraceptive Prevalence Survey                                       |                    |    |     | x   |      |
|            | (MAR-04) 1987 Standard Demographic and Health Survey                                |                    |    | x   | x   |      |
|            | (MAR-05) 1989-91, 1993, 1995-97, 1999, 2001, 2005, 2007-08, 2011 Vital Registration | x                  |    |     |     |      |
|            | (MAR-06) 1992 Standard Demographic and Health Survey                                |                    |    | x   | x   | x    |
|            | (MAR-07) 1994 Census                                                                |                    |    |     | x   |      |
|            | (MAR-08) 1995 Special Demographic and Health Survey                                 |                    |    | x   | x   |      |
|            | (MAR-09) 1996-97 Pan Arab Project for Child Development                             |                    |    | x   | x   |      |
|            | (MAR-10) 2003-04 Standard Demographic and Health Survey                             |                    |    | x   | x   | x    |
|            | (MAR-11) 2004 Census                                                                |                    |    |     | x   |      |
|            | (MAR-12) 2009 Multi-Round Demographic Survey                                        |                    | x  |     |     |      |
|            | (MAR-13) 2011 National Survey on Population and Family Health                       |                    |    | x   |     |      |
| Mozambique |                                                                                     |                    |    |     |     |      |
|            | (MOZ-01) 1970 Census                                                                |                    |    |     | x   |      |
|            | (MOZ-02) 1980 Census                                                                |                    |    |     | x   |      |
|            | (MOZ-03) 1995 Multiple Indicator Cluster Survey (Report)                            |                    |    |     | x   |      |

**Web Table 2 - Data source list of child and adult mortality data sources used in the GBD 2013**

VR/SRS/DSP = Vital registration, sample registration system, and disease surveillance points. HH = Household deaths. CBH = Complete birth history. SBH = Summary birth history. SIBS = Sibling survival.

| Country | Source number                                                        | VR/<br>SRS/<br>DSP | HH | CBH | SBH | SIBS |
|---------|----------------------------------------------------------------------|--------------------|----|-----|-----|------|
|         | (MOZ-04) 1997 Census                                                 |                    | x  |     | x   |      |
|         | (MOZ-05) 1997 Standard Demographic and Health Survey                 |                    |    | x   | x   | x    |
|         | (MOZ-06) 2003 Standard Demographic and Health Survey                 |                    |    | x   | x   | x    |
|         | (MOZ-07) 2007 Census                                                 |                    | x  |     | x   |      |
|         | (MOZ-08) 2008 Multiple Indicator Cluster Survey                      |                    |    | x   | x   |      |
|         | (MOZ-09) 2009 AIDS Indicator Survey                                  |                    |    |     | x   |      |
|         | (MOZ-10) 2011 Standard Demographic and Health Survey                 |                    |    | x   | x   | x    |
| Myanmar |                                                                      |                    |    |     |     |      |
|         | (MMR-01) 1983 Census                                                 |                    |    |     | x   |      |
|         | (MMR-02) 1991 Population Changes and Fertility Survey                |                    | x  | x   |     |      |
|         | (MMR-03) 1997 Fertility and Reproductive Health Survey               |                    |    | x   | x   |      |
|         | (MMR-04) 1999 National Mortality Survey                              |                    |    | x   |     |      |
|         | (MMR-05) 2001 Fertility and Reproductive Health Survey               |                    | x  |     | x   |      |
|         | (MMR-06) 2003 Overall and Cause-Specific Under-Five Mortality Survey |                    | x  |     |     |      |
|         | (MMR-07) 2005 Vital Registration                                     | x                  |    |     |     |      |
|         | (MMR-08) 2007 Fertility and Reproductive Health Survey               |                    |    |     | x   |      |
|         | (MMR-09) 2010 Multiple Indicator Cluster Survey                      |                    |    | x   |     |      |
| Namibia |                                                                      |                    |    |     |     |      |
|         | (NAM-01) 1991 Census                                                 |                    |    |     | x   |      |
|         | (NAM-02) 1992 Standard Demographic and Health Survey                 |                    |    | x   | x   | x    |
|         | (NAM-03) 2000 Standard Demographic and Health Survey                 |                    |    | x   | x   | x    |
|         | (NAM-04) 2001 Census                                                 |                    | x  |     |     |      |
|         | (NAM-05) 2006-07 Standard Demographic and Health Survey              |                    |    | x   | x   | x    |
| Nepal   |                                                                      |                    |    |     |     |      |
|         | (NPL-01) 1971 Census                                                 |                    |    |     | x   |      |
|         | (NPL-02) 1976 World Fertility Survey                                 |                    |    | x   | x   |      |

**Web Table 2 - Data source list of child and adult mortality data sources used in the GBD 2013**

VR/SRS/DSP = Vital registration, sample registration system, and disease surveillance points. HH = Household deaths. CBH = Complete birth history. SBH = Summary birth history. SIBS = Sibling survival.

| Country     | Source number                                                           | VR/<br>SRS/<br>DSP | HH | CBH | SBH | SIBS |
|-------------|-------------------------------------------------------------------------|--------------------|----|-----|-----|------|
|             | (NPL-03) 1981 Census                                                    |                    |    |     | x   |      |
|             | (NPL-04) 1985-86 Fertility and Family Planning Survey                   |                    |    |     | x   |      |
|             | (NPL-05) 1991 Census                                                    |                    |    |     | x   |      |
|             | (NPL-06) 1991 Fertility, Family Planning and Health Survey              |                    |    | x   | x   |      |
|             | (NPL-07) 1996 Standard Demographic and Health Survey                    |                    |    | x   | x   | x    |
|             | (NPL-08) 2001 Census                                                    |                    | x  |     | x   |      |
|             | (NPL-09) 2001 Standard Demographic and Health Survey                    |                    |    | x   | x   |      |
|             | (NPL-10) 2006 Standard Demographic and Health Survey                    |                    |    | x   | x   | x    |
|             | (NPL-11) 2011 Standard Demographic and Health Survey                    |                    |    | x   | x   |      |
| Netherlands |                                                                         |                    |    |     |     |      |
|             | (NLD-01) 1950-11 Vital Registration                                     | x                  |    |     |     |      |
| New Zealand |                                                                         |                    |    |     |     |      |
|             | (NZL-01) 1950-11 Vital Registration                                     | x                  |    |     |     |      |
| Nicaragua   |                                                                         |                    |    |     |     |      |
|             | (NIC-01) 1950-65, 1968-69, 1973-78, 1987-94, 1996-11 Vital Registration | x                  |    |     |     |      |
|             | (NIC-02) 1971 Census                                                    |                    |    |     | x   |      |
|             | (NIC-03) 1977-78 National Retrospective Demographic Survey              |                    |    |     | x   |      |
|             | (NIC-04) 1985-86 Socio-Demographic Survey                               |                    |    |     | x   |      |
|             | (NIC-05) 1992-93 Reproductive Health Survey                             |                    |    | x   | x   | x    |
|             | (NIC-06) 1993 Living Standards Measurement Study                        |                    |    |     | x   |      |
|             | (NIC-07) 1995 Census                                                    |                    |    |     | x   |      |
|             | (NIC-08) 1997-98 Standard Demographic and Health Survey                 |                    |    | x   | x   |      |
|             | (NIC-09) 2001 Living Standards Measurement Study                        |                    |    |     | x   |      |
|             | (NIC-10) 2001 Standard Demographic and Health Survey                    |                    |    | x   | x   |      |
|             | (NIC-11) 2005 Census                                                    |                    |    |     | x   |      |
|             | (NIC-12) 2005 Living Standards Measurement Study                        |                    |    |     | x   |      |

**Web Table 2 - Data source list of child and adult mortality data sources used in the GBD 2013**

VR/SRS/DSP = Vital registration, sample registration system, and disease surveillance points. HH = Household deaths. CBH = Complete birth history. SBH = Summary birth history. SIBS = Sibling survival.

| Country                                                       | Source number                                                 | VR/<br>SRS/<br>DSP | HH | CBH | SBH | SIBS |
|---------------------------------------------------------------|---------------------------------------------------------------|--------------------|----|-----|-----|------|
| Niger                                                         | (NIC-13) 2006-07 Reproductive Health Survey                   |                    |    | x   | x   |      |
|                                                               |                                                               |                    |    |     |     |      |
| Nigeria                                                       | (NER-01) 1992 Standard Demographic and Health Survey          |                    |    | x   | x   | x    |
|                                                               | (NER-02) 1996 Multiple Indicator Cluster Survey (Report)      |                    |    |     | x   |      |
|                                                               | (NER-03) 1998 Standard Demographic and Health Survey          |                    |    | x   | x   |      |
|                                                               | (NER-04) 2000 Multiple Indicator Cluster Survey               |                    |    |     | x   |      |
|                                                               | (NER-05) 2006 Standard Demographic and Health Survey          |                    |    | x   | x   | x    |
|                                                               | (NER-06) 2012 Standard Demographic and Health Survey          |                    |    | x   | x   | x    |
|                                                               | (NGA-01) 1981-82 World Fertility Survey                       |                    |    |     |     | x    |
|                                                               | (NGA-02) 1990 Standard Demographic and Health Survey          |                    |    |     | x   | x    |
|                                                               | (NGA-03) 1999 Standard Demographic and Health Survey (Report) |                    |    |     | x   |      |
|                                                               | (NGA-04) 2003 Standard Demographic and Health Survey          |                    |    |     | x   | x    |
|                                                               | (NGA-05) 2007 General Household Survey                        |                    |    | x   |     | x    |
| (NGA-06) 2007 Multiple Indicator Cluster Survey               |                                                               |                    |    |     | x   |      |
| (NGA-07) 2007 Vital Registration                              |                                                               | x                  |    |     |     |      |
| (NGA-08) 2008 Standard Demographic and Health Survey          |                                                               |                    |    | x   | x   | x    |
| (NGA-09) 2010 Malaria Indicator Survey                        |                                                               |                    |    | x   | x   |      |
| (NGA-10) 2011 Multiple Indicator Cluster Survey               |                                                               |                    |    |     | x   |      |
| (NGA-11) 2013 Standard Demographic and Health Survey (Report) |                                                               |                    |    | x   |     |      |
| North Korea                                                   |                                                               |                    |    |     |     |      |
|                                                               | (PRK-01) 1993 Census                                          |                    | x  |     |     |      |
|                                                               | (PRK-02) 2008 Census                                          |                    | x  |     |     |      |
| Norway                                                        |                                                               |                    |    |     |     |      |
|                                                               | (NOR-01) 1950-12 Vital Registration                           |                    | x  |     |     |      |
| Oman                                                          |                                                               |                    |    |     |     |      |

**Web Table 2 - Data source list of child and adult mortality data sources used in the GBD 2013**

VR/SRS/DSP = Vital registration, sample registration system, and disease surveillance points. HH = Household deaths. CBH = Complete birth history. SBH = Summary birth history. SIBS = Sibling survival.

| Country  | Source number                                                          | VR/<br>SRS/<br>DSP | HH | CBH | SBH | SIBS |
|----------|------------------------------------------------------------------------|--------------------|----|-----|-----|------|
|          | (OMN-01) 1975 Sociodemographic Survey in 5 Towns                       |                    |    |     | x   |      |
|          | (OMN-02) 1977-79 Sociodemographic Survey in 11 Towns                   |                    |    |     | x   |      |
|          | (OMN-03) 1988-89 Oman Child Health Survey                              |                    |    | x   | x   |      |
|          | (OMN-04) 1993 Census                                                   |                    |    |     | x   |      |
|          | (OMN-05) 1995 Gulf Family Health Survey                                |                    |    | x   |     |      |
|          | (OMN-06) 2001, 2003-04, 2007 Vital Registration                        | x                  |    |     |     |      |
| Pakistan | (PAK-01) 1962-65 Population Growth Estimation Experiment               | x                  |    |     |     |      |
|          | (PAK-02) 1968, 1976-79, 1984-93, 1997, 2001 Population Growth Survey   | x                  |    |     |     |      |
|          | (PAK-03) 1968, 1976-79, 1984-93, 1997, 2001 Sample Registration System | x                  |    |     |     |      |
|          | (PAK-04) 1973 Housing, Economic, Demographic Characteristics Survey    |                    |    |     | x   |      |
|          | (PAK-05) 1975 World Fertility Survey                                   |                    |    | x   | x   |      |
|          | (PAK-06) 1981 Census                                                   |                    |    |     | x   |      |
|          | (PAK-07) 1984-85 Contraceptive Prevalence Survey                       |                    |    |     | x   |      |
|          | (PAK-08) 1990-91 Standard Demographic and Health Survey                |                    |    | x   | x   |      |
|          | (PAK-09) 1991 Demographic Survey                                       |                    | x  |     |     |      |
|          | (PAK-10) 1991 Living Standards Measurement Study                       |                    |    | x   | x   |      |
|          | (PAK-11) 1992 Demographic Survey                                       |                    | x  |     |     |      |
|          | (PAK-12) 1995 Demographic Survey                                       |                    | x  |     |     |      |
|          | (PAK-13) 1995, 1999 Population Growth Survey (Report)                  | x                  |    |     |     |      |
|          | (PAK-14) 1996 Demographic Survey                                       |                    | x  |     |     |      |
|          | (PAK-15) 1996 Fertility and Planning Survey                            |                    |    | x   | x   |      |
|          | (PAK-16) 1997 Demographic Survey                                       |                    | x  |     |     |      |
|          | (PAK-17) 1998-99 Integrated Household Survey                           |                    |    |     | x   |      |
|          | (PAK-18) 1999 Demographic Survey                                       |                    | x  |     |     |      |
|          | (PAK-19) 2000 Reproductive Health and Family Planning Survey           |                    |    | x   |     |      |

**Web Table 2 - Data source list of child and adult mortality data sources used in the GBD 2013**

VR/SRS/DSP = Vital registration, sample registration system, and disease surveillance points. HH = Household deaths. CBH = Complete birth history. SBH = Summary birth history. SIBS = Sibling survival.

| Country   | Source number                                                   | VR/<br>SRS/<br>DSP | HH | CBH | SBH | SIBS |
|-----------|-----------------------------------------------------------------|--------------------|----|-----|-----|------|
|           | (PAK-20) 2001-02 Integrated Household Survey                    |                    |    |     | x   |      |
|           | (PAK-21) 2003, 2005, 2007 Demographic Survey                    | x                  |    |     |     |      |
|           | (PAK-22) 2005-06 Social and Living Standards Measurement Survey |                    |    |     | x   |      |
|           | (PAK-23) 2006-07 Standard Demographic and Health Survey         |                    |    | x   | x   |      |
|           | (PAK-24) 2006 Demographic Survey (Report)                       | x                  |    |     |     |      |
|           | (PAK-25) 2007-08 Social and Living Standards Measurement Survey |                    |    |     | x   |      |
|           | (PAK-26) 2012-13 Standard Demographic and Health Survey         |                    |    | x   | x   |      |
| Palestine |                                                                 |                    |    |     |     |      |
|           | (PSE-01) 1995 Demographic Survey                                |                    |    | x   |     |      |
|           | (PSE-02) 1997 Census                                            |                    |    |     | x   |      |
|           | (PSE-03) 1999-2003 Demographic and Health Survey                |                    |    | x   |     |      |
|           | (PSE-04) 2000 Palestine Health Survey                           |                    |    | x   |     |      |
|           | (PSE-05) 2000, 2002-04, 2006-09 Vital Registration              | x                  |    |     |     |      |
|           | (PSE-06) 2006 Pan Arab Project for Family Health                |                    |    | x   |     |      |
|           | (PSE-07) 2007 Census                                            |                    |    |     | x   |      |
|           | (PSE-08) 2010 Multiple Indicator Cluster Survey (Report)        |                    |    | x   |     |      |
| Panama    |                                                                 |                    |    |     |     |      |
|           | (PAN-01) 1950, 1952-10 Vital Registration                       | x                  |    |     |     |      |
|           | (PAN-02) 1960 Census                                            |                    |    |     | x   |      |
|           | (PAN-03) 1975-76 World Fertility Survey                         |                    |    | x   | x   |      |
|           | (PAN-04) 1975-77 National Demographic Survey                    |                    |    | x   | x   |      |
|           | (PAN-05) 1980 Census                                            |                    |    |     | x   |      |
|           | (PAN-06) 1990 Census                                            |                    |    |     | x   |      |
|           | (PAN-07) 1997 Living Standards Measurement Study                |                    |    |     | x   |      |
|           | (PAN-08) 2000 Census                                            |                    | x  |     | x   |      |
|           | (PAN-09) 2003 Living Standards Measurement Study                |                    |    |     | x   |      |



**Web Table 2 - Data source list of child and adult mortality data sources used in the GBD 2013**

VR/SRS/DSP = Vital registration, sample registration system, and disease surveillance points. HH = Household deaths. CBH = Complete birth history. SBH = Summary birth history. SIBS = Sibling survival.

| Country          | Source number                                                  | VR/<br>SRS/<br>DSP | HH | CBH | SBH | SIBS |
|------------------|----------------------------------------------------------------|--------------------|----|-----|-----|------|
| Papua New Guinea | (PNG-01) 1971 Census                                           |                    |    |     | x   |      |
|                  | (PNG-02) 1977, 1980 Vital Registration                         | x                  |    |     |     |      |
|                  | (PNG-03) 1980 Census                                           |                    |    |     | x   |      |
|                  | (PNG-04) 1991 Demographic and Health Survey (Report)           |                    |    |     | x   |      |
|                  | (PNG-05) 1996 Demographic and Health Survey (Report)           |                    |    | x   | x   |      |
|                  | (PNG-06) 2000 Census                                           |                    |    |     | x   |      |
|                  | (PNG-07) 2006 Demographic and Health Survey (Report)           |                    |    | x   |     |      |
| Paraguay         | (PRY-01) 1950-92, 1994-10 Vital Registration                   | x                  |    |     |     |      |
|                  | (PRY-02) 1972 Census                                           |                    |    |     | x   |      |
|                  | (PRY-03) 1977 National Demographic Survey                      |                    |    |     | x   |      |
|                  | (PRY-04) 1979 World Fertility Survey                           |                    |    |     | x   |      |
|                  | (PRY-05) 1982 Census                                           |                    |    |     | x   |      |
|                  | (PRY-06) 1990 Standard Demographic and Health Survey           |                    |    | x   | x   |      |
|                  | (PRY-07) 1992 Census                                           |                    |    |     | x   |      |
|                  | (PRY-08) 1995-96 Reproductive Health Survey                    |                    |    | x   | x   | x    |
|                  | (PRY-09) 1997 Integrated Household Survey                      |                    |    |     | x   |      |
|                  | (PRY-10) 1998 Reproductive Health Survey                       |                    |    | x   | x   |      |
|                  | (PRY-11) 2000 Integrated Household Survey                      |                    |    |     | x   |      |
|                  | (PRY-12) 2002 Census                                           |                    |    |     | x   |      |
|                  | (PRY-13) 2004 Reproductive Health Survey                       |                    |    |     | x   | x    |
|                  | (PRY-14) 2008 Reproductive Health Survey                       |                    |    |     | x   | x    |
| Peru             | (PER-01) 1950-64, 1966-73, 1975-92, 1994-10 Vital Registration | x                  |    |     |     |      |
|                  | (PER-02) 1972 Census                                           |                    |    |     | x   |      |

**Web Table 2 - Data source list of child and adult mortality data sources used in the GBD 2013**

VR/SRS/DSP = Vital registration, sample registration system, and disease surveillance points. HH = Household deaths. CBH = Complete birth history. SBH = Summary birth history. SIBS = Sibling survival.

| Country     | Source number                                                            | VR/<br>SRS/<br>DSP | HH | CBH | SBH | SIBS |
|-------------|--------------------------------------------------------------------------|--------------------|----|-----|-----|------|
|             | (PER-03) 1974-76 National Demographic Survey                             |                    |    | x   | x   |      |
|             | (PER-04) 1977-78 World Fertility Survey                                  |                    |    | x   | x   |      |
|             | (PER-05) 1981 Census                                                     |                    |    |     | x   |      |
|             | (PER-06) 1981 National Survey of Contraceptive Prevalence                |                    |    |     | x   |      |
|             | (PER-07) 1985 Living Standards Measurement Study                         |                    |    |     | x   |      |
|             | (PER-08) 1986 Standard Demographic and Health Survey                     |                    |    | x   | x   |      |
|             | (PER-09) 1991-92 Standard Demographic and Health Survey                  |                    |    | x   | x   | x    |
|             | (PER-10) 1993 Census                                                     |                    |    |     | x   |      |
|             | (PER-11) 1994 Living Standards Measurement Study                         |                    |    |     | x   |      |
|             | (PER-12) 1996 Standard Demographic and Health Survey                     |                    |    | x   | x   | x    |
|             | (PER-13) 2000 Standard Demographic and Health Survey                     |                    |    | x   | x   | x    |
|             | (PER-14) 2004 Continuous Demographic and Health Survey                   |                    |    | x   | x   | x    |
|             | (PER-15) 2005 Continuous Demographic and Health Survey                   |                    |    | x   | x   | x    |
|             | (PER-16) 2006 Continuous Demographic and Health Survey                   |                    |    | x   | x   | x    |
|             | (PER-17) 2007 Census                                                     |                    |    |     | x   |      |
|             | (PER-18) 2007 Continuous Demographic and Health Survey                   |                    |    | x   | x   | x    |
|             | (PER-19) 2008 Continuous Demographic and Health Survey                   |                    |    | x   | x   | x    |
|             | (PER-20) 2009 Continuous Demographic and Health Survey                   |                    |    | x   | x   | x    |
|             | (PER-21) 2010 Continuous Demographic and Health Survey                   |                    |    | x   | x   | x    |
|             | (PER-22) 2011 Continuous Demographic and Health Survey                   |                    |    | x   | x   | x    |
|             | (PER-23) 2012 Continuous Demographic and Health Survey                   |                    |    | x   | x   | x    |
| Philippines |                                                                          |                    |    |     |     |      |
|             | (PHL-01) 1950-53, 1956-98, 2004-05, 2008-09 Vital Registration           | x                  |    |     |     |      |
|             | (PHL-02) 1958 Philippine Statistical Sample Survey of Private Households |                    |    |     | x   |      |
|             | (PHL-03) 1970 Census                                                     |                    |    |     | x   |      |
|             | (PHL-04) 1978 World Fertility Survey                                     |                    |    | x   | x   |      |

**Web Table 2 - Data source list of child and adult mortality data sources used in the GBD 2013**

VR/SRS/DSP = Vital registration, sample registration system, and disease surveillance points. HH = Household deaths. CBH = Complete birth history. SBH = Summary birth history. SIBS = Sibling survival.

| Country  | Source number                                         | VR/<br>SRS/<br>DSP | HH | CBH | SBH | SIBS |
|----------|-------------------------------------------------------|--------------------|----|-----|-----|------|
|          | (PHL-05) 1980 Census                                  |                    |    |     | x   |      |
|          | (PHL-06) 1990 Census                                  |                    |    |     | x   |      |
|          | (PHL-07) 1993 Standard Demographic and Health Survey  |                    |    | x   | x   | x    |
|          | (PHL-08) 1998 Standard Demographic and Health Survey  |                    |    | x   | x   | x    |
|          | (PHL-09) 2003 Standard Demographic and Health Survey  |                    |    | x   | x   |      |
|          | (PHL-10) 2008 Standard Demographic and Health Survey  |                    |    | x   | x   |      |
|          | (PHL-11) 2011 Standard Demographic and Health Survey  |                    |    | x   | x   |      |
| Poland   |                                                       |                    |    |     |     |      |
|          | (POL-01) 1950-11 Vital Registration                   | x                  |    |     |     |      |
|          | (POL-02) 1970 Census                                  |                    |    |     | x   |      |
| Portugal |                                                       |                    |    |     |     |      |
|          | (PRT-01) 1950-11 Vital Registration                   | x                  |    |     |     |      |
|          | (PRT-02) 1979-80 World Fertility Survey               |                    |    | x   | x   |      |
| Qatar    |                                                       |                    |    |     |     |      |
|          | (QAT-01) 1981-90, 1992-97, 1999-11 Vital Registration | x                  |    |     |     |      |
|          | (QAT-02) 1987 Child Health Survey                     |                    |    | x   | x   |      |
|          | (QAT-03) 1998 Gulf Family Health Survey               |                    |    | x   |     |      |
| Romania  |                                                       |                    |    |     |     |      |
|          | (ROU-01) 1956-11 Vital Registration                   | x                  |    |     |     |      |
|          | (ROU-02) 1966 Census                                  |                    |    |     | x   |      |
|          | (ROU-03) 1977 Census                                  |                    |    |     | x   |      |
|          | (ROU-04) 1994 Living Standards Measurement Study      |                    |    | x   | x   |      |
|          | (ROU-05) 1999 Reproductive Health Survey              |                    |    | x   |     |      |
| Russia   |                                                       |                    |    |     |     |      |
|          | (RUS-01) 1959-12 Vital Registration                   | x                  |    |     |     |      |
|          | (RUS-02) 1989 Census                                  |                    |    |     | x   |      |

**Web Table 2 - Data source list of child and adult mortality data sources used in the GBD 2013**

VR/SRS/DSP = Vital registration, sample registration system, and disease surveillance points. HH = Household deaths. CBH = Complete birth history. SBH = Summary birth history. SIBS = Sibling survival.

| Country                    | Source number                                                                                      | VR/<br>SRS/<br>DSP | HH | CBH | SBH | SIBS |
|----------------------------|----------------------------------------------------------------------------------------------------|--------------------|----|-----|-----|------|
| Rwanda                     | (RWA-01) 1970 Sample Survey                                                                        |                    |    |     | x   |      |
|                            | (RWA-02) 1978 Census                                                                               |                    |    |     | x   |      |
|                            | (RWA-03) 1983 World Fertility Survey                                                               |                    |    | x   | x   |      |
|                            | (RWA-04) 1991 Census                                                                               |                    |    |     | x   |      |
|                            | (RWA-05) 1992 Standard Demographic and Health Survey                                               |                    |    | x   | x   |      |
|                            | (RWA-06) 1996 Socio-Demographic Survey                                                             |                    |    |     | x   |      |
|                            | (RWA-07) 2000 Standard Demographic and Health Survey                                               |                    |    | x   | x   | x    |
|                            | (RWA-08) 2002 Census                                                                               |                    | x  |     | x   |      |
|                            | (RWA-09) 2005 Standard Demographic and Health Survey                                               |                    |    | x   | x   | x    |
|                            | (RWA-10) 2006 Integrated Living Conditions Survey                                                  |                    |    |     | x   |      |
|                            | (RWA-11) 2007-08 Interim Demographic and Health Survey                                             |                    |    | x   | x   |      |
|                            | (RWA-12) 2010-11 Standard Demographic and Health Survey                                            |                    |    | x   | x   | x    |
| Saint Lucia                |                                                                                                    |                    |    |     |     |      |
|                            | (LCA-01) 1950-61, 1963, 1968, 1972-06, 2008 Vital Registration                                     | x                  |    |     |     |      |
| Vanuatu and the Grenadines |                                                                                                    |                    |    |     |     |      |
|                            | (VCT-01) 1950-56, 1960-64, 1970-72, 1974, 1977-80, 1982-88, 1990, 1992, 1995-10 Vital Registration | x                  |    |     |     |      |
| Samoa                      |                                                                                                    |                    |    |     |     |      |
|                            | (WSM-01) 1955-69, 1973-76, 1978, 1980 Vital Registration                                           | x                  |    |     |     |      |
|                            | (WSM-02) 1956 Census                                                                               |                    |    |     | x   |      |
|                            | (WSM-03) 1961 Census                                                                               |                    |    |     | x   |      |
|                            | (WSM-04) 1966 Census                                                                               |                    |    |     | x   |      |
|                            | (WSM-05) 1976 Census                                                                               |                    |    |     | x   |      |
|                            | (WSM-06) 1981 Census                                                                               |                    |    |     | x   |      |
|                            | (WSM-07) 1999 Secretariat of the Pacific Community Demographic and Health Survey                   |                    |    | x   |     |      |
|                            | (WSM-08) 2006 Census                                                                               |                    | x  |     |     |      |

**Web Table 2 - Data source list of child and adult mortality data sources used in the GBD 2013**

VR/SRS/DSP = Vital registration, sample registration system, and disease surveillance points. HH = Household deaths. CBH = Complete birth history. SBH = Summary birth history. SIBS = Sibling survival.

| Country               | Source number                                                                | VR/<br>SRS/<br>DSP | HH | CBH | SBH | SIBS |
|-----------------------|------------------------------------------------------------------------------|--------------------|----|-----|-----|------|
|                       | (WSM-09) 2009 Standard Demographic and Health Survey (Report)                |                    |    | x   |     |      |
|                       | (WSM-10) 2011 Census                                                         |                    | x  |     |     |      |
| Sao Tome and Principe |                                                                              |                    |    |     |     |      |
|                       | (STP-01) 1955-58, 1962-71, 1977-79, 1984-85, 1987 Vital Registration         | x                  |    |     |     |      |
|                       | (STP-02) 1981 Census                                                         |                    |    |     | x   |      |
|                       | (STP-03) 1991 Census                                                         |                    |    |     | x   |      |
|                       | (STP-04) 2000 Multiple Indicator Cluster Survey                              |                    |    |     | x   |      |
|                       | (STP-05) 2006 Multiple Indicator Cluster Survey                              |                    |    |     | x   |      |
|                       | (STP-06) 2008-09 Standard Demographic and Health Survey                      |                    |    | x   | x   | x    |
| Saudi Arabia          |                                                                              |                    |    |     |     |      |
|                       | (SAU-01) 1987-88 Child Health Survey                                         |                    |    |     | x   |      |
|                       | (SAU-02) 1990 Levels, Trends and Differentials of Infant and Child Mortality |                    |    |     | x   |      |
|                       | (SAU-03) 1996 Gulf Family Health Survey                                      |                    |    | x   |     |      |
|                       | (SAU-04) 2004 Census                                                         |                    | x  |     |     |      |
|                       | (SAU-05) 2007 Saudi Arabia Demographic Research Bulletin                     |                    | x  |     |     |      |
| Senegal               |                                                                              |                    |    |     |     |      |
|                       | (SEN-01) 1978 World Fertility Survey                                         |                    |    | x   | x   |      |
|                       | (SEN-02) 1986 Standard Demographic and Health Survey                         |                    |    | x   | x   |      |
|                       | (SEN-03) 1992-93 Standard Demographic and Health Survey                      |                    |    | x   | x   | x    |
|                       | (SEN-04) 1996 Multiple Indicator Cluster Survey                              |                    |    | x   |     |      |
|                       | (SEN-05) 1997 Standard Demographic and Health Survey                         |                    |    | x   | x   |      |
|                       | (SEN-06) 2000 Multiple Indicator Cluster Survey                              |                    | x  |     |     |      |
|                       | (SEN-07) 2002 Census                                                         |                    | x  |     |     |      |
|                       | (SEN-08) 2005 Standard Demographic and Health Survey                         |                    |    | x   | x   | x    |
|                       | (SEN-09) 2006 Malaria Indicator Survey                                       |                    |    | x   | x   |      |
|                       | (SEN-10) 2008-09 Malaria Indicator Survey                                    |                    |    | x   | x   |      |

**Web Table 2 - Data source list of child and adult mortality data sources used in the GBD 2013**

VR/SRS/DSP = Vital registration, sample registration system, and disease surveillance points. HH = Household deaths. CBH = Complete birth history. SBH = Summary birth history. SIBS = Sibling survival.

| Country      | Source number                                                 | VR/<br>SRS/<br>DSP | HH | CBH | SBH | SIBS |
|--------------|---------------------------------------------------------------|--------------------|----|-----|-----|------|
|              | (SEN-11) 2010-11 Standard Demographic and Health Survey       |                    |    | x   | x   | x    |
|              | (SEN-12) 2012-13 Standard Demographic and Health Survey       |                    |    | x   | x   |      |
| Serbia       |                                                               |                    |    |     |     |      |
|              | (SRB-01) 1953 Census                                          |                    | x  |     |     |      |
|              | (SRB-02) 1961 Census                                          |                    | x  |     |     |      |
|              | (SRB-03) 1971 Census                                          |                    | x  |     |     |      |
|              | (SRB-04) 1991 Census                                          |                    | x  |     |     |      |
|              | (SRB-05) 1995-12 Vital Registration                           | x                  |    |     |     |      |
|              | (SRB-06) 2005-06 Multiple Indicator Cluster Survey            |                    |    |     | x   |      |
|              | (SRB-07) 2010 Multiple Indicator Cluster Survey               |                    |    |     | x   |      |
| Seychelles   |                                                               |                    |    |     |     |      |
|              | (SYC-01) 1952-57, 1959, 1961-96, 1998-12 Vital Registration   | x                  |    |     |     |      |
|              | (SYC-02) 1960 Census                                          |                    | x  |     | x   |      |
|              | (SYC-03) 1971 Census                                          |                    |    |     | x   |      |
| Sierra Leone |                                                               |                    |    |     |     |      |
|              | (SLE-01) 1973 Pilot Census                                    |                    |    |     | x   |      |
|              | (SLE-02) 1974 Census                                          |                    |    |     | x   |      |
|              | (SLE-03) 1985 Census                                          |                    |    |     | x   |      |
|              | (SLE-04) 2000 Multiple Indicator Cluster Survey               |                    |    |     | x   |      |
|              | (SLE-05) 2004 Census                                          |                    | x  |     | x   |      |
|              | (SLE-06) 2005 Multiple Indicator Cluster Survey               |                    |    |     | x   |      |
|              | (SLE-07) 2008 Standard Demographic and Health Survey          |                    |    | x   | x   | x    |
|              | (SLE-08) 2010 Multiple Indicator Cluster Survey               |                    |    |     | x   |      |
|              | (SLE-09) 2013 Standard Demographic and Health Survey (Report) |                    |    | x   |     |      |
| Singapore    |                                                               |                    |    |     |     |      |
|              | (SGP-01) 1950-11 Vital Registration                           | x                  |    |     |     |      |

**Web Table 2 - Data source list of child and adult mortality data sources used in the GBD 2013**

VR/SRS/DSP = Vital registration, sample registration system, and disease surveillance points. HH = Household deaths. CBH = Complete birth history. SBH = Summary birth history. SIBS = Sibling survival.

| Country         | Source number                                                     | VR/<br>SRS/<br>DSP | HH | CBH | SBH | SIBS |
|-----------------|-------------------------------------------------------------------|--------------------|----|-----|-----|------|
| Slovakia        | (SVK-01) 1950-11 Vital Registration                               | x                  |    |     |     |      |
|                 |                                                                   |                    |    |     |     |      |
| Slovenia        | (SVN-01) 1982-11 Vital Registration                               | x                  |    |     |     |      |
|                 |                                                                   |                    |    |     |     |      |
| Solomon Islands | (SLB-01) 1970 Census                                              |                    |    |     | x   |      |
|                 | (SLB-02) 1976 Census                                              |                    |    |     | x   |      |
|                 | (SLB-03) 1999 Census                                              |                    |    | x   | x   |      |
|                 | (SLB-04) 2006-07 Standard Demographic and Health Survey (Report)  |                    |    | x   |     |      |
|                 |                                                                   |                    |    |     |     |      |
| Somalia         | (SOM-01) 1999 Multiple Indicator Cluster Survey                   |                    |    |     | x   |      |
|                 | (SOM-02) 2006 Multiple Indicator Cluster Survey                   |                    |    | x   | x   |      |
|                 |                                                                   |                    |    |     |     |      |
| South Africa    | (ZAF-01) 1980-82, 1993-10 Vital Registration                      | x                  |    |     |     |      |
|                 | (ZAF-02) 1990 Survey Conducted by Human Sciences Research Council |                    | x  |     |     |      |
|                 | (ZAF-03) 1993 Living Standards Measurement Study                  |                    |    |     | x   |      |
|                 | (ZAF-04) 1993 October Household Survey                            |                    | x  |     |     |      |
|                 | (ZAF-05) 1995 October Household Survey                            |                    | x  |     |     |      |
|                 | (ZAF-06) 1996 Census                                              |                    |    |     | x   |      |
|                 | (ZAF-07) 1996 October Household Survey                            |                    | x  |     |     |      |
|                 | (ZAF-08) 1997 October Household Survey                            |                    | x  |     |     |      |
|                 | (ZAF-09) 1998 October Household Survey                            |                    | x  |     |     |      |
|                 | (ZAF-10) 1998 Standard Demographic and Health Survey              |                    |    | x   | x   | x    |
|                 | (ZAF-11) 2001 Census                                              |                    | x  |     | x   |      |
|                 | (ZAF-12) 2003 Standard Demographic and Health Survey (Report)     |                    |    |     | x   |      |
|                 | (ZAF-13) 2006 Census                                              |                    |    |     |     |      |

**Web Table 2 - Data source list of child and adult mortality data sources used in the GBD 2013**

VR/SRS/DSP = Vital registration, sample registration system, and disease surveillance points. HH = Household deaths. CBH = Complete birth history. SBH = Summary birth history. SIBS = Sibling survival.

| Country     | Source number                                                     | VR/<br>SRS/<br>DSP | HH | CBH | SBH | SIBS |
|-------------|-------------------------------------------------------------------|--------------------|----|-----|-----|------|
|             | (ZAF-14) 2007 Community Survey                                    |                    | x  |     | x   |      |
|             | (ZAF-15) 2011 Census                                              |                    | x  |     |     |      |
| South Korea |                                                                   |                    |    |     |     |      |
|             | (KOR-01) 1957, 1960, 1962-64, 1966-67, 1977-11 Vital Registration | x                  |    |     |     |      |
|             | (KOR-02) 1970 Census                                              |                    |    |     | x   |      |
|             | (KOR-03) 1974 World Fertility Survey                              |                    |    | x   | x   |      |
|             | (KOR-04) 1975 Census                                              |                    |    |     | x   |      |
|             | (KOR-05) 1980 Census                                              |                    |    |     | x   |      |
|             | (KOR-06) 1985 Census                                              |                    |    |     | x   |      |
|             | (KOR-07) 1990 Census                                              |                    |    |     | x   |      |
| South Sudan |                                                                   |                    |    |     |     |      |
|             | (SSD-01) 2008 Census                                              |                    | x  |     | x   |      |
|             | (SSD-02) 2010 Household Health Survey                             |                    |    |     | x   |      |
| Spain       |                                                                   |                    |    |     |     |      |
|             | (ESP-01) 1950-11 Vital Registration                               | x                  |    |     |     |      |
| Sri Lanka   |                                                                   |                    |    |     |     |      |
|             | (LKA-01) 1950-89, 1991-95, 2004-07 Vital Registration             | x                  |    |     |     |      |
|             | (LKA-02) 1971 Census                                              |                    |    |     | x   |      |
|             | (LKA-03) 1975 World Fertility Survey                              |                    |    | x   | x   |      |
|             | (LKA-04) 1987 Standard Demographic and Health Survey              |                    |    | x   | x   |      |
|             | (LKA-05) 1993 Demographic and Health Survey (Report)              |                    |    | x   |     |      |
|             | (LKA-06) 2000 Demographic and Health Survey (Report)              |                    |    | x   |     |      |
|             | (LKA-07) 2001 Census                                              |                    |    |     | x   |      |
|             | (LKA-08) 2006-07 Standard Demographic and Health Survey (Report)  |                    |    | x   |     |      |
| Sudan       |                                                                   |                    |    |     |     |      |
|             | (SDN-01) 1973 Census                                              |                    |    |     | x   |      |



**Web Table 2 - Data source list of child and adult mortality data sources used in the GBD 2013**

VR/SRS/DSP = Vital registration, sample registration system, and disease surveillance points. HH = Household deaths. CBH = Complete birth history. SBH = Summary birth history. SIBS = Sibling survival.

| Country     | Source number                                                                    | VR/<br>SRS/<br>DSP | HH | CBH | SBH | SIBS |
|-------------|----------------------------------------------------------------------------------|--------------------|----|-----|-----|------|
|             | (SDN-02) 1978-79 World Fertility Survey                                          |                    |    | x   |     |      |
|             | (SDN-03) 1983 Census                                                             |                    |    |     | x   |      |
|             | (SDN-04) 1989-90 Standard Demographic and Health Survey                          |                    |    | x   | x   | x    |
|             | (SDN-05) 1992-93 Pan Arab Project for Child Development                          |                    |    | x   | x   |      |
|             | (SDN-06) 1993 Census                                                             |                    |    |     | x   |      |
|             | (SDN-07) 1999 Safe Motherhood Survey                                             |                    |    | x   |     |      |
|             | (SDN-08) 2000 Multiple Indicator Cluster Survey (Report)                         |                    |    |     | x   |      |
|             | (SDN-09) 2006 Pan Arab Project Family Health                                     |                    |    | x   |     |      |
|             | (SDN-10) 2008 Census                                                             |                    | x  |     | x   |      |
|             | (SDN-11) 2010 Multiple Indicator Cluster Survey (Report)                         |                    |    | x   |     |      |
| Suriname    |                                                                                  |                    |    |     |     |      |
|             | (SUR-01) 1950-57, 1961-66, 1971-73, 1975-82, 1984-06, 2008-09 Vital Registration | x                  |    |     |     |      |
|             | (SUR-02) 1999-00 Multiple Indicator Cluster Survey                               |                    |    |     | x   |      |
|             | (SUR-03) 2006 Multiple Indicator Cluster Survey                                  |                    |    |     | x   |      |
| Swaziland   |                                                                                  |                    |    |     |     |      |
|             | (SWZ-01) 1966 Census                                                             |                    |    |     | x   |      |
|             | (SWZ-02) 1976 Census                                                             |                    |    |     | x   |      |
|             | (SWZ-03) 1986 Census                                                             |                    |    |     | x   |      |
|             | (SWZ-04) 1997 Census                                                             |                    | x  |     |     |      |
|             | (SWZ-05) 2000 Multiple Indicator Cluster Survey                                  |                    |    |     | x   |      |
|             | (SWZ-06) 2006-07 Standard Demographic and Health Survey                          |                    |    | x   | x   | x    |
|             | (SWZ-07) 2007 Census                                                             |                    | x  |     |     |      |
|             | (SWZ-08) 2010 Multiple Indicator Cluster Survey                                  |                    |    | x   | x   |      |
| Sweden      |                                                                                  |                    |    |     |     |      |
|             | (SWE-01) 1950-11 Vital Registration                                              | x                  |    |     |     |      |
| Switzerland |                                                                                  |                    |    |     |     |      |

**Web Table 2 - Data source list of child and adult mortality data sources used in the GBD 2013**

VR/SRS/DSP = Vital registration, sample registration system, and disease surveillance points. HH = Household deaths. CBH = Complete birth history. SBH = Summary birth history. SIBS = Sibling survival.

| Country                          | Source number                                               | VR/<br>SRS/<br>DSP | HH | CBH | SBH | SIBS |
|----------------------------------|-------------------------------------------------------------|--------------------|----|-----|-----|------|
| Syria                            | (CHE-01) 1950-11 Vital Registration                         | x                  |    |     |     |      |
|                                  | (CHE-02) 1960 Census                                        |                    |    |     | x   |      |
| Syria                            | (SYR-01) 1964-78, 1983-85, 2005-07 Vital Registration       | x                  |    |     |     |      |
|                                  | (SYR-02) 1970 Census                                        |                    |    |     | x   |      |
|                                  | (SYR-03) 1976 Sample Population Census                      |                    |    |     | x   |      |
|                                  | (SYR-04) 1978 World Fertility Survey                        |                    |    | x   | x   |      |
|                                  | (SYR-05) 1981 Census                                        |                    |    |     | x   |      |
|                                  | (SYR-06) 1990 Syria EPI/CDD and Child Mortality Survey      |                    |    |     | x   |      |
|                                  | (SYR-07) 1993 Pan Arab Project for Child Development        |                    |    | x   | x   |      |
|                                  | (SYR-08) 1994 Census                                        |                    |    |     | x   |      |
|                                  | (SYR-09) 1999 Multipurpose Survey                           |                    | x  |     |     |      |
|                                  | (SYR-10) 2000 Multiple Indicator Cluster Survey (Report)    |                    | x  |     |     |      |
|                                  | (SYR-11) 2001 Pan Arab Project for Family Health            |                    |    |     | x   | x    |
|                                  | (SYR-12) 2006 Multiple Indicator Cluster Survey             |                    |    |     |     | x    |
| Taiwan<br>(province of<br>China) | (TWN-01) 1955-12 Vital Registration                         | x                  |    |     |     |      |
| Tajikistan                       | (TJK-01) 1981-82, 1985-05, 2007-08, 2011 Vital Registration | x                  |    |     |     |      |
|                                  | (TJK-02) 1989 Census                                        |                    |    |     | x   |      |
|                                  | (TJK-03) 1999 Living Standards Measurement Study            |                    |    |     | x   |      |
|                                  | (TJK-04) 2000 Multiple Indicator Cluster Survey             |                    |    |     | x   |      |
|                                  | (TJK-05) 2002 Demographic Survey                            |                    |    | x   | x   |      |
|                                  | (TJK-06) 2003 Living Standards Measurement Study            |                    |    |     | x   |      |
|                                  | (TJK-07) 2005 Multiple Indicator Cluster Survey             |                    |    |     | x   |      |
|                                  | (TJK-08) 2007 Living Standards Measurement Study            |                    |    | x   | x   |      |

**Web Table 2 - Data source list of child and adult mortality data sources used in the GBD 2013**

VR/SRS/DSP = Vital registration, sample registration system, and disease surveillance points. HH = Household deaths. CBH = Complete birth history. SBH = Summary birth history. SIBS = Sibling survival.

| Country  | Source number                                               | VR/<br>SRS/<br>DSP | HH | CBH | SBH | SIBS |   |
|----------|-------------------------------------------------------------|--------------------|----|-----|-----|------|---|
| Tanzania | (TJK-09) 2010 Survey on Infant Child and Maternal Mortality |                    |    | x   |     |      |   |
|          | (TJK-10) 2012 Standard Demographic and Health Survey        |                    |    | x   | x   |      |   |
| Tanzania | (TZA-01) 1967 Census                                        |                    | x  |     |     |      |   |
|          | (TZA-02) 1973 National Demographic Survey of Tanzania       |                    | x  |     |     |      |   |
|          | (TZA-03) 1978 Census                                        |                    |    |     | x   |      |   |
|          | (TZA-04) 1988 Census                                        |                    | x  |     | x   |      |   |
|          | (TZA-05) 1991-92 Standard Demographic and Health Survey     |                    |    | x   | x   |      |   |
|          | (TZA-06) 1993 Living Standards Measurement Study            |                    |    |     | x   |      |   |
|          | (TZA-07) 1996 Standard Demographic and Health Survey        |                    |    | x   | x   | x    |   |
|          | (TZA-08) 1999 Standard Demographic and Health Survey        |                    |    |     | x   | x    |   |
|          | (TZA-09) 2002 Census                                        |                    | x  |     | x   |      |   |
|          | (TZA-10) 2003-04 AIDS Indicator Survey                      |                    |    |     | x   | x    |   |
|          | (TZA-11) 2004-05 Standard Demographic and Health Survey     |                    |    |     | x   | x    | x |
|          | (TZA-12) 2007-08 AIDS Indicator Survey                      |                    |    |     | x   | x    |   |
|          | (TZA-13) 2009-10 Standard Demographic and Health Survey     |                    |    |     | x   | x    | x |
|          | (TZA-14) 2011-12 AIDS Indicator Survey                      |                    |    |     | x   | x    |   |
| Thailand | (THA-01) 1950-00, 2002-09 Vital Registration                | x                  |    |     |     |      |   |
|          | (THA-02) 1970 Census                                        |                    |    |     | x   |      |   |
|          | (THA-03) 1975 World Fertility Survey                        |                    |    | x   | x   |      |   |
|          | (THA-04) 1980 Census                                        |                    |    |     | x   |      |   |
|          | (THA-05) 1987 Standard Demographic and Health Survey        |                    |    | x   | x   |      |   |
|          | (THA-06) 1989 Survey of Population Change                   |                    |    |     | x   |      |   |
|          | (THA-07) 1990 Census                                        |                    |    |     | x   |      |   |
|          | (THA-08) 1995 Survey of Population Change                   |                    |    | x   |     |      |   |

**Web Table 2 - Data source list of child and adult mortality data sources used in the GBD 2013**

VR/SRS/DSP = Vital registration, sample registration system, and disease surveillance points. HH = Household deaths. CBH = Complete birth history. SBH = Summary birth history. SIBS = Sibling survival.

| Country     | Source number                                                            | VR/<br>SRS/<br>DSP | HH | CBH | SBH | SIBS |
|-------------|--------------------------------------------------------------------------|--------------------|----|-----|-----|------|
| The Bahamas | (THA-09) 2000 Census                                                     |                    |    |     | x   |      |
|             | (THA-10) 2005-06 Multiple Indicator Cluster Survey                       |                    |    |     | x   |      |
|             | (BHS-01) 1965, 1967-69, 1971-08 Vital Registration                       | x                  |    |     |     |      |
| The Gambia  | (GMB-01) 1973 Census                                                     |                    |    |     | x   |      |
|             | (GMB-02) 1983 Census                                                     |                    |    |     | x   |      |
|             | (GMB-03) 1990 Contraceptive Prevalence and Fertility Determinants Survey |                    |    | x   |     |      |
|             | (GMB-04) 1993 Census                                                     |                    |    |     | x   |      |
|             | (GMB-05) 2000 Multiple Indicator Cluster Survey                          |                    |    |     | x   |      |
|             | (GMB-06) 2005-06 Multiple Indicator Cluster Survey                       |                    |    |     | x   |      |
|             | (GMB-07) 2010 Multiple Indicator Cluster Survey (Report)                 |                    |    |     | x   |      |
|             | (GMB-08) 2013 Standard Demographic and Health Survey (Report)            |                    |    | x   |     |      |
| Timor-Leste | (TLS-01) 1991 Standard Demographic and Health Survey                     |                    |    | x   | x   |      |
|             | (TLS-02) 1994 Standard Demographic and Health Survey                     |                    |    | x   | x   |      |
|             | (TLS-03) 1997 Standard Demographic and Health Survey                     |                    |    | x   | x   |      |
|             | (TLS-04) 2001 Living Standards Measurement Study                         |                    |    |     | x   |      |
|             | (TLS-05) 2003 Standard Demographic and Health Survey                     |                    |    |     | x   |      |
|             | (TLS-06) 2004 Census                                                     |                    |    |     | x   |      |
|             | (TLS-07) 2009-10 Standard Demographic and Health Survey                  |                    |    | x   | x   | x    |
| Togo        | (TGO-01) 1961 Census                                                     |                    |    |     | x   |      |
|             | (TGO-02) 1961 Demographic Survey                                         |                    | x  |     |     |      |
|             | (TGO-03) 1971 Demographic Survey                                         |                    |    |     | x   |      |
|             | (TGO-04) 1988 Standard Demographic and Health Survey                     |                    |    | x   | x   |      |

**Web Table 2 - Data source list of child and adult mortality data sources used in the GBD 2013**

VR/SRS/DSP = Vital registration, sample registration system, and disease surveillance points. HH = Household deaths. CBH = Complete birth history. SBH = Summary birth history. SIBS = Sibling survival.

| Country                    | Source number                                                              | VR/<br>SRS/<br>DSP | HH | CBH | SBH | SIBS |
|----------------------------|----------------------------------------------------------------------------|--------------------|----|-----|-----|------|
|                            | (TGO-05) 1998 Standard Demographic and Health Survey                       |                    |    | x   | x   | x    |
|                            | (TGO-06) 2006 Multiple Indicator Cluster Survey                            |                    |    |     | x   |      |
|                            | (TGO-07) 2010 Census                                                       |                    | x  |     | x   |      |
|                            | (TGO-08) 2010 Multiple Indicator Cluster Survey                            |                    |    |     | x   |      |
| <b>Tonga</b>               |                                                                            |                    |    |     |     |      |
|                            | (TON-01) 1957-64, 1966, 1982-83, 1990, 1996-00, 2003-04 Vital Registration | x                  |    |     |     |      |
|                            | (TON-02) 1966 Census                                                       |                    |    |     | x   |      |
|                            | (TON-03) 1976 Census                                                       |                    |    |     | x   |      |
|                            | (TON-04) 1986 Census                                                       |                    |    |     | x   |      |
|                            | (TON-05) 2006 Census                                                       |                    | x  |     |     |      |
| <b>Trinidad and Tobago</b> |                                                                            |                    |    |     |     |      |
|                            | (TTO-01) 1950-02, 2005-08 Vital Registration                               | x                  |    |     |     |      |
|                            | (TTO-02) 1977 World Fertility Survey                                       |                    |    | x   | x   |      |
|                            | (TTO-03) 1987 Standard Demographic and Health Survey                       |                    |    | x   | x   |      |
|                            | (TTO-04) 2000 Multiple Indicator Cluster Survey                            |                    |    |     | x   |      |
|                            | (TTO-05) 2006 Multiple Indicator Cluster Survey                            |                    |    |     | x   |      |
| <b>Tunisia</b>             |                                                                            |                    |    |     |     |      |
|                            | (TUN-01) 1960, 1968-74, 1976-80, 1987-89, 1993-95, 1998 Vital Registration | x                  |    |     |     |      |
|                            | (TUN-02) 1968-69 National Demographic Survey                               |                    |    | x   |     |      |
|                            | (TUN-03) 1975 Census                                                       |                    |    |     | x   |      |
|                            | (TUN-04) 1978 World Fertility Survey                                       |                    |    | x   | x   |      |
|                            | (TUN-05) 1983 Contraceptive Prevalence Survey                              |                    |    |     | x   |      |
|                            | (TUN-06) 1984 Census                                                       |                    |    |     | x   |      |
|                            | (TUN-07) 1988 Standard Demographic and Health Survey                       |                    |    | x   | x   |      |
|                            | (TUN-08) 1994-95 Pan Arab Project for Child Development                    |                    |    | x   | x   |      |
|                            | (TUN-09) 2002 Pan Arab Project for Family Health                           |                    |    | x   | x   |      |

**Web Table 2 - Data source list of child and adult mortality data sources used in the GBD 2013**

VR/SRS/DSP = Vital registration, sample registration system, and disease surveillance points. HH = Household deaths. CBH = Complete birth history. SBH = Summary birth history. SIBS = Sibling survival.

| Country | Source number                                           | VR/<br>SRS/<br>DSP                                   | HH | CBH | SBH | SIBS |  |
|---------|---------------------------------------------------------|------------------------------------------------------|----|-----|-----|------|--|
| Turkey  | (TUR-10) 2011-12 Multiple Indicator Cluster Survey      |                                                      |    | x   | x   |      |  |
|         | (TUR-01) 1966-67 Demographic Survey                     |                                                      | x  | x   | x   |      |  |
|         | (TUR-02) 1967 Demographic Survey                        |                                                      | x  |     |     |      |  |
| Turkey  | (TUR-03) 1970 Census                                    |                                                      |    |     | x   |      |  |
|         | (TUR-04) 1975 Census                                    |                                                      |    |     | x   |      |  |
|         | (TUR-05) 1978-79, 1981-84, 1987-11 Vital Registration   | x                                                    |    |     |     |      |  |
|         | (TUR-06) 1978 World Fertility Survey                    |                                                      |    | x   | x   |      |  |
|         | (TUR-07) 1980 Census                                    |                                                      |    |     | x   |      |  |
|         | (TUR-08) 1983 Population and Health Survey              |                                                      |    |     | x   |      |  |
|         | (TUR-09) 1985 Census                                    |                                                      |    |     | x   |      |  |
|         | (TUR-10) 1988 Population and Health Survey              |                                                      |    | x   | x   |      |  |
|         | (TUR-11) 1989 Demographic Survey (Report)               |                                                      | x  |     | x   |      |  |
|         | (TUR-12) 1990 Census                                    |                                                      |    |     | x   |      |  |
|         | (TUR-13) 1993 Standard Demographic and Health Survey    |                                                      |    | x   | x   |      |  |
|         | (TUR-14) 1998 Standard Demographic and Health Survey    |                                                      |    | x   | x   |      |  |
|         | (TUR-15) 2000 Census                                    |                                                      |    |     | x   |      |  |
|         | (TUR-16) 2003-04 Standard Demographic and Health Survey |                                                      |    | x   | x   |      |  |
|         | (TUR-17) 2008 Demographic and Health Survey             |                                                      |    |     |     | x    |  |
|         | (TUR-18) 2011 Infant Mortality Survey                   |                                                      |    |     |     | x    |  |
|         | Turkmenistan                                            | (TKM-01) 1981-82, 1985-06 Vital Registration         | x  |     |     |      |  |
|         |                                                         | (TKM-02) 2000 Standard Demographic and Health Survey |    |     | x   | x    |  |
| Uganda  | (UGA-01) 1969 Census                                    |                                                      |    |     | x   |      |  |
|         | (UGA-02) 1988-89 Standard Demographic and Health Survey |                                                      |    | x   | x   |      |  |

**Web Table 2 - Data source list of child and adult mortality data sources used in the GBD 2013**

VR/SRS/DSP = Vital registration, sample registration system, and disease surveillance points. HH = Household deaths. CBH = Complete birth history. SBH = Summary birth history. SIBS = Sibling survival.

| Country              | Source number                                                  | VR/<br>SRS/<br>DSP | HH | CBH | SBH | SIBS |
|----------------------|----------------------------------------------------------------|--------------------|----|-----|-----|------|
|                      | (UGA-03) 1991 Census                                           |                    |    |     | x   |      |
|                      | (UGA-04) 1992 National Integrated Household Survey             |                    |    |     | x   |      |
|                      | (UGA-05) 1995 Standard Demographic and Health Survey           |                    |    | x   | x   | x    |
|                      | (UGA-06) 2000-01 Standard Demographic and Health Survey        |                    |    | x   | x   | x    |
|                      | (UGA-07) 2002 Census                                           |                    | x  |     | x   |      |
|                      | (UGA-08) 2004 AIDS Indicator Survey                            |                    |    |     | x   |      |
|                      | (UGA-09) 2006 Standard Demographic and Health Survey           |                    |    | x   | x   | x    |
|                      | (UGA-10) 2009-10 Malaria Indicator Survey                      |                    |    | x   | x   |      |
|                      | (UGA-11) 2011 AIDS Indicator Survey                            |                    |    |     | x   |      |
|                      | (UGA-12) 2011 Standard Demographic and Health Survey           |                    |    | x   | x   | x    |
| Ukraine              |                                                                |                    |    |     |     |      |
|                      | (UKR-01) 1959-12 Vital Registration                            | x                  |    |     |     |      |
|                      | (UKR-02) 1989 Census                                           |                    |    |     | x   |      |
|                      | (UKR-03) 1999 Reproductive Health Survey                       |                    |    | x   |     |      |
|                      | (UKR-04) 2001 Census                                           |                    |    |     | x   |      |
|                      | (UKR-05) 2005 Multiple Indicator Cluster Survey                |                    |    |     | x   |      |
|                      | (UKR-06) 2007 Standard Demographic and Health Survey           |                    |    | x   | x   |      |
|                      | (UKR-07) 2012 Multiple Indicator Cluster Survey                |                    |    |     | x   |      |
| United Arab Emirates |                                                                |                    |    |     |     |      |
|                      | (ARE-01) 1975 Census                                           |                    |    |     | x   |      |
|                      | (ARE-02) 1980 Census                                           |                    |    |     | x   |      |
|                      | (ARE-03) 1987-88 Child Health Survey                           |                    |    |     | x   |      |
|                      | (ARE-04) 1995-99, 2001-05 Vital Registration                   | x                  |    |     |     |      |
|                      | (ARE-05) 1995 Gulf Family Health Survey                        |                    |    | x   |     |      |
|                      | (ARE-06) 1998 United Arab Emirates Ministry of Planning Survey |                    | x  |     |     |      |
|                      | (ARE-07) 2004 United Arab Emirates Ministry of Planning Survey |                    | x  |     |     |      |

**Web Table 2 - Data source list of child and adult mortality data sources used in the GBD 2013**

VR/SRS/DSP = Vital registration, sample registration system, and disease surveillance points. HH = Household deaths. CBH = Complete birth history. SBH = Summary birth history. SIBS = Sibling survival.

| Country        | Source number                                                  | VR/<br>SRS/<br>DSP | HH | CBH | SBH | SIBS |
|----------------|----------------------------------------------------------------|--------------------|----|-----|-----|------|
| United Kingdom | (ARE-08) 2006 United Arab Emirates Ministry of Planning Survey |                    | x  |     |     |      |
|                | (GBR-01) 1950-11 Vital Registration                            | x                  |    |     |     |      |
| United States  | (USA-01) 1950-10 Vital Registration                            | x                  |    |     |     |      |
|                | (USA-02) 2011 Vital Registration (Report)                      | x                  |    |     |     |      |
| Uruguay        | (URY-01) 1950-04, 2007-09 Vital Registration                   | x                  |    |     |     |      |
|                | (URY-02) 1975 Census                                           |                    |    |     | x   |      |
|                | (URY-03) 1985 Census                                           |                    |    |     | x   |      |
|                | (URY-04) 1996 Census                                           |                    |    |     | x   |      |
|                | (URY-05) 2011 Census                                           |                    |    |     | x   |      |
| Uzbekistan     | (UZB-01) 1981-82, 1985-06 Vital Registration                   | x                  |    |     |     |      |
|                | (UZB-02) 1996 Standard Demographic and Health Survey           |                    |    | x   | x   |      |
|                | (UZB-03) 2000 Multiple Indicator Cluster Survey                |                    |    |     | x   |      |
|                | (UZB-04) 2002 Special Demographic and Health Survey            |                    |    | x   | x   |      |
|                | (UZB-05) 2006 Multiple Indicator Cluster Survey                |                    |    |     | x   |      |
| Vanuatu        | (VUT-01) 1967 Census                                           |                    |    |     | x   |      |
|                | (VUT-02) 1989 Census                                           |                    | x  |     | x   |      |
|                | (VUT-03) 1999 Census                                           |                    | x  |     |     |      |
|                | (VUT-04) 2007-08 Multiple Indicator Cluster Survey             |                    |    |     | x   |      |
|                | (VUT-05) 2009 Census                                           |                    |    |     | x   |      |
| Venezuela      | (VEN-01) 1950-94, 1996-11 Vital Registration                   | x                  |    |     |     |      |



**Web Table 2 - Data source list of child and adult mortality data sources used in the GBD 2013**

VR/SRS/DSP = Vital registration, sample registration system, and disease surveillance points. HH = Household deaths. CBH = Complete birth history. SBH = Summary birth history. SIBS = Sibling survival.

| Country | Source number                                                       | VR/<br>SRS/<br>DSP | HH | CBH | SBH | SIBS |
|---------|---------------------------------------------------------------------|--------------------|----|-----|-----|------|
|         | (VEN-02) 1977 World Fertility Survey                                |                    |    |     | x   |      |
|         | (VEN-03) 1981 Census                                                |                    |    |     | x   |      |
|         | (VEN-04) 1990 Census                                                |                    |    |     | x   |      |
|         | (VEN-05) 1998 National Population and Family Survey                 |                    | x  |     |     |      |
|         | (VEN-06) 2001 Census                                                |                    |    |     | x   |      |
| Vietnam |                                                                     |                    |    |     |     |      |
|         | (VNM-01) 1989 Census                                                |                    | x  |     | x   |      |
|         | (VNM-02) 1994 Intercensal Demographic Survey                        |                    |    |     | x   |      |
|         | (VNM-03) 1997 Standard Demographic and Health Survey                |                    |    | x   | x   |      |
|         | (VNM-04) 1999 Census                                                |                    | x  | x   | x   |      |
|         | (VNM-05) 2000 Multiple Indicator Cluster Survey                     |                    |    |     | x   |      |
|         | (VNM-06) 2002 Standard Demographic and Health Survey                |                    |    | x   | x   |      |
|         | (VNM-07) 2005 AIDS Indicator Survey                                 |                    |    |     | x   |      |
|         | (VNM-08) 2006 Multiple Indicator Cluster Survey                     |                    |    |     | x   |      |
|         | (VNM-09) 2006 Population Change and Family Planning Survey          |                    | x  |     |     |      |
|         | (VNM-10) 2007 Population Change and Family Planning Survey          |                    |    |     | x   |      |
|         | (VNM-11) 2008 Health Statistics Yearbook                            |                    | x  |     |     |      |
|         | (VNM-12) 2008 Population Change and Family Planning Survey          |                    |    |     | x   |      |
|         | (VNM-13) 2009 Census                                                |                    |    |     | x   |      |
|         | (VNM-14) 2010 Multiple Indicator Cluster Survey                     |                    |    |     | x   |      |
|         | (VNM-15) 2010 Population Change and Family Planning Survey (Report) |                    |    |     | x   |      |
|         | (VNM-16) 2011 Population Change and Family Planning Survey (Report) |                    |    |     | x   |      |
| Yemen   |                                                                     |                    |    |     |     |      |
|         | (YEM-01) 1979 World Fertility Survey                                |                    |    | x   | x   |      |
|         | (YEM-02) 1991-92 Standard Demographic and Health Survey             |                    |    | x   | x   |      |
|         | (YEM-03) 1994 Census                                                |                    |    |     | x   |      |

**Web Table 2 - Data source list of child and adult mortality data sources used in the GBD 2013**

VR/SRS/DSP = Vital registration, sample registration system, and disease surveillance points. HH = Household deaths. CBH = Complete birth history. SBH = Summary birth history. SIBS = Sibling survival.

| Country  | Source number                                                 | VR/<br>SRS/<br>DSP | HH | CBH | SBH | SIBS |
|----------|---------------------------------------------------------------|--------------------|----|-----|-----|------|
|          | (YEM-04) 1997 Standard Demographic and Health Survey (Report) |                    |    | x   |     |      |
|          | (YEM-05) 2003 Pan Arab Project for Family Health              |                    |    | x   | x   |      |
|          | (YEM-06) 2006 Multiple Indicator Cluster Survey               |                    |    | x   | x   |      |
|          | (YEM-07) 2006 Yemen Annual Statistical Report                 |                    | x  |     |     |      |
| Zambia   |                                                               |                    |    |     |     |      |
|          | (ZMB-01) 1969 Census                                          |                    |    |     | x   |      |
|          | (ZMB-02) 1974 Sample Census of Population                     |                    |    |     | x   |      |
|          | (ZMB-03) 1980 Census                                          |                    |    |     | x   |      |
|          | (ZMB-04) 1990 Census                                          |                    |    |     | x   |      |
|          | (ZMB-05) 1992 Standard Demographic and Health Survey          |                    |    | x   | x   |      |
|          | (ZMB-06) 1996-97 Standard Demographic and Health Survey       |                    |    | x   | x   | x    |
|          | (ZMB-07) 1998 Living Conditions Monitoring Survey             |                    | x  |     |     |      |
|          | (ZMB-08) 2000 Census                                          |                    |    |     | x   |      |
|          | (ZMB-09) 2000 Sexual Behavior Survey                          |                    |    |     |     | x    |
|          | (ZMB-10) 2001-02 Standard Demographic and Health Survey       |                    |    | x   | x   | x    |
|          | (ZMB-11) 2005 Sexual Behavior Survey                          |                    | x  |     |     |      |
|          | (ZMB-12) 2006 Living Conditions Monitoring Survey             |                    | x  |     |     |      |
|          | (ZMB-13) 2007 Household Health Coverage Survey                |                    | x  |     |     |      |
|          | (ZMB-14) 2007 Standard Demographic and Health Survey          |                    |    | x   | x   | x    |
|          | (ZMB-15) 2009 Sexual Behavior Survey                          |                    | x  |     |     |      |
|          | (ZMB-16) 2010 Living Conditions Monitoring Survey             |                    | x  |     |     |      |
|          | (ZMB-17) 2012 Malaria Indicator Survey                        |                    |    |     | x   |      |
| Zimbabwe |                                                               |                    |    |     |     |      |
|          | (ZWE-01) 1969 Census                                          |                    |    |     | x   |      |
|          | (ZWE-02) 1982 Census                                          |                    |    |     | x   |      |
|          | (ZWE-03) 1988-89 Standard Demographic and Health Survey       |                    |    | x   | x   |      |

**Web Table 2 - Data source list of child and adult mortality data sources used in the GBD 2013**

VR/SRS/DSP = Vital registration, sample registration system, and disease surveillance points. HH = Household deaths. CBH = Complete birth history. SBH = Summary birth history. SIBS = Sibling survival.

| Country | Source number                                           | VR/<br>SRS/<br>DSP | HH | CBH | SBH | SIBS |
|---------|---------------------------------------------------------|--------------------|----|-----|-----|------|
|         | (ZWE-04) 1990, 1995 Vital Registration                  | x                  |    |     |     |      |
|         | (ZWE-05) 1992 Census                                    |                    |    |     | x   |      |
|         | (ZWE-06) 1994 Standard Demographic and Health Survey    |                    |    | x   | x   | x    |
|         | (ZWE-07) 1997 Intercensal Demographic Survey            |                    | x  |     |     |      |
|         | (ZWE-08) 1999 Standard Demographic and Health Survey    |                    |    | x   | x   | x    |
|         | (ZWE-09) 2002 Census                                    |                    | x  |     | x   |      |
|         | (ZWE-10) 2005-06 Standard Demographic and Health Survey |                    |    | x   | x   | x    |
|         | (ZWE-11) 2009 Multiple Indicator Cluster Survey         |                    |    | x   | x   |      |
|         | (ZWE-12) 2010-11 Standard Demographic and Health Survey |                    |    | x   | x   | x    |
|         | (ZWE-13) 2012 Census                                    |                    |    |     | x   |      |

## Section 2. Modelling all-cause mortality

For GBD2010, we have systematically reviewed available formal demographic methods in all-cause mortality estimation. We have made significant improvement in Summary birth history method [a formal demographic tool used in estimating child mortality rate using birth histories module commonly found in censuses and household surveys such as the Demographic and Health Surveys], Sibling survival method [a method used to estimate probability of death from age 15 to age 60 using information on the survival and death of biological siblings], and Death distribution methods [a suite of methods used to assess completeness of vital registration systems]. We have also developed a new model life table system with much improved accuracy in estimation of age- and sex-specific mortality rate even in countries affected by HIV/AIDS. All these methods developments are published in peer-reviewed journals (Rajaratnam et al., 2010; Obermeyer et al., 2010; Murray et al., 2010; Wang et al., 2012).<sup>1-4</sup>

We are continuing improving demographic techniques in estimating all-cause mortality in the upcoming iteration of GBD. Significant improvements are being made in child mortality estimation and the model life table system used to estimate age specific mortality rates. Below are changes in details:

### 1. Changes in modeling child mortality rate.

Trends in under-five mortality are nontrivial to estimate, as most countries do not have a vital registration system that captures all deaths. Mortality data from different sources in the same country often differ. Thus, it is desirable for child mortality estimation method to deal with source specific biases. Based on the under-five mortality data synthesis model for the Global Burden of Disease Study 2010, we incorporate data bias adjustment into the modeling process. Specifically, we include a fixed effect for source type across all countries to detect systematic differences in the level of child mortality controlling for covariates for one source type versus another. In addition, we include a random effect for each country-source. By choosing country by country a reference source or using mean of a set of sources, we can adjust on a country by country basis for the problem of compositional bias created by substantial source specific non-sampling error. By removing the systematic difference in sources, we are able to avoid estimating false trends due to partial overlap of sources with different levels of non-sampling variance.

### 2. Changes in model life table system.

GBD2010 employed the first model life table system that has an integrated analytical module to accurately estimate age specific rate for populations affected by HIV/AIDS. A key analytical step in this process is to “attribute” mortality rate due to HIV/AIDS as estimated by UNAIDS to specific 5-year age groups. For GBD2013, We aim to advance the methodology applied in GBD2010 by using a nonlinear hierarchical mixed effects model, as shown in the equations below, that more accurately capture the functional form of child and adult mortality with respect to levels of education, income and death rate due to HIV/AIDS in the respective age groups of 0-4 and 15-59. In addition, we are employing a relative risk approach in re-distribute excess mortality due to HIV/AIDS into detailed age groups.

### A. Estimating the completeness of vital registration systems for deaths under age 5

The approach to estimating the completeness of vital registration systems for under-5 deaths is the same utilized in the Global Burden of Disease Study 2010.<sup>4</sup>

### B. Estimating the completeness of vital registration systems for adult deaths

VR systems may not capture all adult deaths. It is important to assess the quality, or in other words, the completeness, of available VR data. Demographers have long been applying a suite of death distribution methods (DDM) including generalized growth balance (GGB), synthetic extinct generation (SEG), and a combined approach (GGBSEG) to assess completeness.<sup>5-9</sup> These methods compare the age distribution of the population recorded in two censuses with the age distribution of deaths recorded between these two censuses and attempt to estimate completeness of VR. Recent modifications of these DDM methods provide estimates of completeness that, based on careful simulation studies, are more accurate and robust than traditional methods; nevertheless, these methods generate completeness estimates with substantial uncertainty intervals.<sup>1</sup>

For this study, the process for estimating completeness of death registration for adults is based on estimates of adult completeness from three death distribution methods updated by Murray and colleagues in 2010 and information about child completeness.<sup>1</sup> These two sources of information are combined to generate a series of estimates of source- and country-specific adult death registration completeness from 1970 to 2013. The underlying assumption of this process is that completeness of systems will change gradually, and consequently, assessments of completeness for a given year should be informed by DDM estimates for prior and future years in that country. Further, completeness is likely to be similar among countries within a region, and we can inform estimates of completeness with levels of completeness estimated for countries in the same region or super-region by borrowing strength over space as well as time. To do this, we use a two-stage model, whereby we first predict adult completeness based on child completeness and then use a spatial-temporal regression model to incorporate information about adult completeness from the application of DDM methods.

Child completeness is calculated as the ratio of observed child mortality to estimated child mortality for a given source, country, and year. For a particular country-source, estimates of child completeness are only available for years where that data source is present, but we produce a complete time series of child completeness estimates based on a smoothing process. For country-sources with no more than three years of data, we assume a constant level of child completeness at the level of the mean of those years that are available. For country-sources with more than three years of data, we use Loess regression to fill in the time series. In order to be conservative in our out-of-sample estimates of child completeness, instead of using the Loess predictions to forecast and backcast we simply hold child completeness constant before the first observation and after the last observation. Additionally, when there is a gap of more than five years we linearly interpolate between the observations on either side of this gap instead of using the Loess predictions to fill in these years.

Once we have obtained a full series of under-5 completeness estimates for each country-source we fit the model described in equation 1.

$$\log_{10}(c_{i,s,t}^{\text{adult}}) = \alpha + \beta_1 \cdot \log_{10}(c_{i,s,t}^{\text{child}}) + \gamma_1^{\text{SR}} + \gamma_2^{\text{SR}} \cdot \log_{10}(c_{i,s,t}^{\text{child}}) + \gamma_1^{\text{R}} + \gamma_2^{\text{R}} \cdot \log_{10}(c_{i,s,t}^{\text{child}}) + \eta_{i,s} + \xi_{i,s,t} \quad 1$$

Where:  $c_{i,s,t}^{\text{adult}}$  is completeness of adult deaths registration in country  $i$ , source  $s$ , at time  $t$ ;

$c_{i,s,t}^{\text{child}}$  is completeness of child deaths registration in country  $i$ , source  $s$ , at time  $t$ ;

$\gamma$  terms are random effects at the region (R) and super-region (SR) level;

$\eta_{i,s}$  is a random effect at the country and source level;

$\xi_{i,s,t}$  is an error term.

This model relates adult completeness to under-5 completeness and includes super-region and region-level random effects to allow for differences in both the average level of adult completeness and the relationship between child and adult completeness at these levels. The country-source random effect captures the fundamental difference in level of completeness between different data sources.

A  $\log_{10}$  transformation is employed to make over- and under-completeness symmetric (e.g., 50% complete and 200% complete are symmetric around 0 when  $\log_{10}$  transformed) and to simplify calculation of the variance of completeness estimates in  $\log_{10}$  space, which is needed for the adult mortality estimation process. Also, to avoid allowing outlying DDM-derived estimates of adult completeness from unduly influencing the predictions from the model in equation 1, for any given set of three DDM estimates (GGB, SEG, GGBSEG) calculated from a single pair of censuses, the estimate that is furthest from 1 (i.e., complete) is excluded.

For each country-source we predict  $\log_{10}(c_{i,s,t}^{\text{adult}})$  from coefficients estimated in the model above and child completeness. Not every country can be used to fit this model since DDM cannot be applied in some cases due to lack of appropriate census data. However, because the coefficients used for prediction are at the region and super-

region level, we can generate predictions from this model for all countries where estimates of child completeness are available. We do not believe that the same relationship between adult and child completeness exists for registration-based sources as for recall-based sources, so the above model is applied only to registration-based sources (primarily VR data but also sample registration systems). For sources that only include household death recall, we set an arbitrary value of 1 for the first stage values instead of making predictions from completeness from child age groups for the aforementioned reason. However, it should be noted that this set value by no means reflect the true completeness of adult age groups in the household death recall sources and it will change once we apply the spatial-temporal regression in the second stage estimation.

In the second stage, we calculate the residuals from the first stage and apply spatial-temporal smoothing to these residuals. The predicted residuals are then added back onto the first-stage predictions, generating the second-stage predictions. Spatial-temporal smoothing is carried out in the same way as in the adult mortality estimation process with three modifications: the  $\lambda$  and  $\zeta$  parameters are set to 2.0 and 0.95; only the fixed effect local regression variant is used; and the residuals are not held constant out of sample. The registration-based sources and the non-registration-based sources are handled separately in this step.

We also need to calculate the variance of the completeness estimates, as this information is utilized in the adult mortality estimation process. To do this, we approximate the variance based on the median absolute deviation (MAD) compared to the second-stage estimates. We calculate variances at the regional level and do so separately for registration-based sources and other sources. Then, for each country-source-year, we generate 10000 simulations from a normal distribution with mean equal to the second-stage prediction for that year and variance calculated as just described. For non-registration-based sources we believe that both under- and over-reporting are possible (over-reporting may occur due to telescoping of events outside of the recall period into the recall period), and so for these sources we now exponentiate the 10000 simulations and find the mean, which serves as the final prediction for completeness. For registration-based sources we believe that only underreporting is possible, so for these sources we first truncate any simulations above 1 to 1 and then exponentiate the 10000 simulations to find the truncated mean, which will serve as the final prediction for completeness. In both cases, before exponentiating the simulations, we calculate the variance of the simulations, which is used as the variance of the completeness estimates in the adult mortality estimation process.

The final completeness estimates are used to adjust, where appropriate, the corresponding country-source-years before these data are used in the adult mortality estimation process. For countries in which we believe males and females have differential completeness, we carry out the above process separately by sex. For a small number of data points, completeness cannot be estimated using the procedure described above due to a lack of appropriate census data, and the original growth balance method is the only viable option.<sup>7</sup> In previous papers, we have included a selected number of data points derived from household recall of deaths to which the Brass growth balance method had been applied. Our simulation studies suggest this method is extremely imprecise, so we have excluded these points from the analysis. This accounts for why the number of household recall of deaths data points has decreased in this analysis compared to Lozano et al.<sup>10</sup>

### **C. Correcting for survivor bias, zero-surviving sibships, and recall bias in the analysis of sibling histories**

In countries where sources including vital registration and household death recall are scarce, sibling histories provides important information on the level and trend of adult mortality rate. We have implemented changes to the previous method, referred to as the Corrected Sibling Survival (CSS) method that are known with different biases, such that it (1) uses appropriate survival weights that account for the study design, and (2) recovers the mortality experience of the families that are not represented because none of the siblings is alive and eligible to respond to the survey. We validate these methodological developments in a range of simulation environments. We also present new ways of adjusting for recall bias and handling sparse data in survey designs where the age range of the respondents is narrower than the age range desired for estimation..<sup>2,4</sup>

### **D. Child (5q0) and adult (45q15) mortality estimation: Gaussian process and spatial-temporal regressions**

*Overview of adult (5q0) mortality estimation:*

We apply the child mortality estimation methodology as reported by Wang et al.<sup>11</sup> Based on the under-five mortality data synthesis model for the Global Burden of Disease Study 2010, we incorporate data bias adjustment into the modeling process. Specifically, we include a fixed effect for source type across all countries to detect systematic differences in the level of child mortality controlling for covariates for one source type versus another. In addition, we include a random effect for each country-source. By choosing country by country a reference source or using mean of a set of sources, we can adjust on a country by country basis for the problem of compositional bias created by substantial source specific non-sampling error. Once the systematic difference in sources is removed, we are able to avoid estimating false trends due to partial overlap of sources with different levels of non-sampling variance. We then apply the combination of non-linear mixed effects model, spatial-temporal regression and Gaussian Process regression to synthesize raw child mortality data after data bias adjustment to obtain a consistent time series estimates of mortality with 95% uncertainty interval for every country.

*Overview of adult (45q15) mortality estimation:*

For each country, we generated a time series of  $_{45}q_{15}$  estimates. We modeled the underlying mortality risk separately from excess mortality due to conflict and natural disasters. To model the underlying mortality risk we relied on a three stage process that incorporates all data in our database for each country after excluding data identified as outliers or that refer to years identified to contain mortality shocks from conflict or natural disaster. In the first stage, we applied a nonlinear mixed effects model which used covariates to explain variation in  $_{45}m_{15}$ . In the second stage, we exploited spatial and temporal correlation in the residuals from the first stage regression by performing a smoothing process on these residuals. The smoothed residuals were then added back into the first stage regression predictions to produce an updated time-series of  $_{45}q_{15}$  for each country. In the third stage, we applied Gaussian process regression (GPR) which synthesizes information from the second stage predictions and the observed data. After applying this procedure to generate estimates of the underlying mortality risk, we modeled abrupt changes in mortality by estimating the excess risk of mortality in years identified as containing a conflict or natural disaster. This estimated excess mortality risk was then added to the underlying mortality risk to produce our final time series of  $_{45}q_{15}$  estimates. All analyses were carried out in Stata 13.1, R 3.0.2, and the PyMC package, version 2.0, in Python 2.5.4. A more complete description of the various stages of our modeling strategy is given below.

*First stage nonlinear mixed effects regression:*

The first stage nonlinear regression models country/year/sex specific adult mortality rate using key covariates: lag distributed GDP per capita, mean years of education in age group 15 to 59, and crude death rate due to HIV/AIDS in age group 15-59. We use the nonlinear mixed effects model specified in equation 2. This model was fit separately for males and females.

$$_{45}m_{15}^{\text{observed}} = \exp(\beta_1 + \beta_2 \cdot \text{Edu} + \beta_3 \cdot \ln(\text{LDI}) + \gamma_{\text{country}}) + \beta_4 \cdot \text{HIV} + \varepsilon \quad 2$$

Edu is the mean years of education for the age group 15-59; LDI is lagged distributed income;  $\gamma_{\text{country}}$  is a country-level random effect; and HIV is the crude mortality rate from HIV for ages 15-59. We initialized the model with starting values for each of the  $\beta$  coefficients equal to 0. We tested our model with different starting values, including values from a hierarchical linear mixed effects model, and found that this model was not sensitive to starting values.

The final stage 1 predictions were based on predictions from the model (equation 2 excluding the country random effect). We excluded the country random effect to facilitate modeling spatial trends in mortality in the second stage. The model predictions were then converted from  $_{45}m_{15}$  to  $_{45}q_{15}$  to be put into the second stage model described below.

*Second stage spatial-temporal smoothing of residuals:*

The first stage regression model reflects the explanatory power of the set of covariates but, as might be expected, fails to explain all of the variation in  $_{45}q_{15}$ . The residuals from the first stage regression are correlated in both time and space, indicating that  $_{45}q_{15}$  is correlated in time and space in ways that are not fully captured by the covariates

included in this regression. We exploited this remaining pattern of variation by applying a local regression to the residuals from the first stage regression, effectively smoothing across time and space.

The local regressions were fitted separately for each of the 21 regions which have been constructed such that countries within each region share similar epidemiological profiles.<sup>12</sup> We applied two variations of local regression to the first stage residuals, both of which utilized the same weighting scheme to incorporate temporal and spatial relatedness. In both variants, a set of weighted linear regressions, one for each country-year of interest, were undertaken. When carrying out the regression for a given country-year of interest, all residuals in the dataset were weighted with respect to this country and year. We first weighted residuals with respect to time using a weighting function similar to that utilized in Loess regression:

$$w_t = \left( 1 - \left( \frac{|r_t - r_{est}|}{1 + \operatorname{argmax}_t |r_t - r_{est}|} \right)^\lambda \right)^3 \quad 3$$

The  $r_t$  and  $r_{est}$  terms are, respectively, the year of interest and the year of the residual being weighted. The  $\operatorname{argmax}_t |r_t - r_{est}|$  term is the maximum distance between the year of interest and a residual within the region. The  $\lambda$  parameter in this weighting function dictates how quickly the weights fall off as the distance in time increases: a larger  $\lambda$  implies that the assigned weights will diminish slowly with time, while a smaller  $\lambda$  allows the weights to diminish more rapidly with time.

We then weighted residuals with respect to space by modifying the time weights described by equation 3. Weights for residuals within the country of interest were multiplied by a factor of

$$\frac{\zeta \sum_{i \notin c_{est}} w_i}{(1 - \zeta) \sum_{i \in c_{est}} w_i} \quad 4$$

where  $c_{est}$  is the country of interest and  $w_i$  are the time weights described above. As a result of this modification,  $100 \cdot \zeta$  % of the total weight was placed on residuals within the same country, and the remaining  $100 \cdot (1 - \zeta)$  % of the weight was placed on residuals from other countries in the region. For countries with no residuals (i.e. countries with no data) the above factor is 0 and there was no re-weighting: consequently all of the weight remains, by necessity, in other countries in the region. We set  $\lambda$  to 0.8 and  $\zeta$  to 0.8 based on an examination of country plots under various different settings of both parameters through iterative testing.

The first local regression variant, which we call linear local regression, is described in equation 5 and is a weighted linear regression of the residuals on year and an indicator of the residual from the country currently being estimated (if this indicator cannot be estimated, i.e. because there are no residuals in a given country, it is dropped).

$$r_{est} = \beta_0 + \beta_1 t + \beta_2 c_{est} + \varepsilon \quad 5$$

The second variant, which we call fixed effects local regression, used a weighted linear regression with no covariates. This is equivalent to a simple weighted average of the residuals.

Linear local regression incorporates information from covariates, in this case year, but extrapolation is heavily based on this covariate and in settings with sparse data this can result in implausible out-of-sample predictions. In contrast, fixed effects local regression does not incorporate an explicit time-trend and does not suffer from this problem in extrapolation, but also is less adequate at fitting the data in countries with many observations. We therefore chose to combine the estimates from both variants. As described in equation 6, we calculated the data density,  $d_c$  for each country we estimated,  $c_{est}$ , and then calculated a weighted average of the predictions from the linear local regression and fixed effects local regression where  $d_c$  % of the weight is assigned to the linear local regression and the rest to the fixed effects local regression. In this way, the final estimates for countries with more vital registration data are more heavily informed by the linear local regression and the final estimates for countries with less (or no) vital registration data are predominately informed by the fixed effects local regression, as is appropriate given the strengths and weaknesses of these two variants.



$$d_c = 100 * \left( \frac{\# \text{ VR points in } c_{\text{est}}}{\text{Maximum \# VR points in any country in the region}} \right) \quad 6$$

Residuals were logit-transformed before undergoing this smoothing; once the final estimates of the smoothed residuals were obtained for every country-year, these estimates were added back into the logit transform of the first stage regression predictions. This sum was then reverse-logit transformed; by carrying out the first two stages in logit-space we restricted the predictions to between 0 and 1. These predictions are called the second stage predictions.

**Web Table 3: Variance explained for child mortality and adult mortality rate models**

**Web Table 3 - Variance from the first and second stage models**

|                            | Variance explained: 5q0 models |         | Variance explained: 45q15 models |                |                  |                  |
|----------------------------|--------------------------------|---------|----------------------------------|----------------|------------------|------------------|
|                            | Stage 1                        | Stage 2 | Stage 1: males                   | Stage 2: males | Stage 1: females | Stage 2: females |
| Global                     | 0.96                           | 0.98    | 0.84                             | 0.93           | 0.91             | 0.95             |
| High-income Asia Pacific   | 0.94                           | 0.96    | 0.68                             | 0.95           | 0.84             | 0.95             |
| Brunei                     | 0.92                           | 0.94    | 0.22                             | 0.77           | 0.63             | 0.75             |
| Japan                      | 0.92                           | 0.98    | 0.73                             | 0.99           | 0.8              | 0.98             |
| Singapore                  | 0.97                           | 0.99    | 0.64                             | 0.94           | 0.93             | 0.97             |
| South Korea                | 0.94                           | 0.96    | 0.61                             | 0.96           | 0.85             | 0.98             |
| Central Asia               | 0.88                           | 0.94    | 0.74                             | 0.91           | 0.8              | 0.95             |
| Armenia                    | 0.82                           | 0.95    | -0.07                            | 0.61           | -2.88            | 0.53             |
| Azerbaijan                 | 0.54                           | 0.65    | 0                                | 0.47           | -0.59            | 0.47             |
| Georgia                    | 0.54                           | 0.61    | -1.24                            | -0.11          | -0.06            | 0.43             |
| Kazakhstan                 | -0.51                          | 0.66    | -0.18                            | 0.7            | -1.98            | 0.64             |
| Kyrgyzstan                 | 0.8                            | 0.94    | -0.01                            | 0.46           | -0.92            | 0.37             |
| Mongolia                   | 0.89                           | 0.9     | -0.47                            | 0.75           | 0.29             | 0.75             |
| Tajikistan                 | 0.86                           | 0.89    | -0.25                            | 0.36           | 0.07             | 0.48             |
| Turkmenistan               | 0.79                           | 0.78    | 0.01                             | 0.55           | -3.25            | -0.19            |
| Uzbekistan                 | 0.39                           | 0.58    | -0.06                            | 0.42           | -4.23            | 0.35             |
| East Asia                  | 0.79                           | 0.96    | 0.72                             | 0.89           | 0.84             | 0.89             |
| China                      | 0.42                           | 0.99    | 0.64                             | 0.59           | 0.86             | 0.84             |
| North Korea                | 0                              | 0       | 0                                | -0.01          | -0.05            | -0.01            |
| Taiwan (Province of China) | 0.95                           | 0.98    | 0.7                              | 0.9            | 0.83             | 0.98             |
| South Asia                 | 0.86                           | 0.97    | 0.74                             | 0.87           | 0.75             | 0.9              |
| Afghanistan                | 0.57                           | 0.94    | 0                                | -0.09          | 0                | -0.21            |
| Bangladesh                 | 0.96                           | 0.98    | 0.38                             | 0.72           | 0.59             | 0.85             |
| Bhutan                     | 0.96                           | 0.99    |                                  |                |                  |                  |
| India                      | 0.81                           | 0.95    | 0.75                             | 0.9            | 0.89             | 0.96             |
| Nepal                      | 0.7                            | 0.97    | 0.11                             | 0.38           | 0.5              | 0.65             |
| Pakistan                   | 0.82                           | 0.94    | 0.09                             | 0.37           | 0.39             | 0.72             |
| Southeast Asia             | 0.91                           | 0.97    | 0.66                             | 0.87           | 0.75             | 0.91             |
| Cambodia                   | 0.23                           | 0.83    | 0.09                             | 0.14           | 0.6              | 0.55             |
| Indonesia                  | 0.93                           | 0.98    | 0.05                             | 0.04           | 0.1              | 0.17             |
| Laos                       | 0.91                           | 0.95    |                                  |                |                  |                  |
| Malaysia                   | 0.97                           | 0.97    | 0.94                             | 0.98           | 0.98             | 0.99             |
| Maldives                   | 0.78                           | 0.97    | 0.45                             | 0.84           | 0.47             | 0.92             |
| Myanmar                    | 0.89                           | 0.92    |                                  |                |                  |                  |

**Web Table 3 - Variance from the first and second stage models**

|                                  | Variance explained: 5q0 models |         | Variance explained: 45q15 models |                |                  |                  |
|----------------------------------|--------------------------------|---------|----------------------------------|----------------|------------------|------------------|
|                                  | Stage 1                        | Stage 2 | Stage 1: males                   | Stage 2: males | Stage 1: females | Stage 2: females |
| Philippines                      | 0.92                           | 0.95    | -1.55                            | 0.39           | 0.64             | 0.87             |
| Sri Lanka                        | 0.92                           | 0.93    | -3.08                            | 0.18           | 0.9              | 0.96             |
| Thailand                         | 0.93                           | 0.97    | 0.49                             | 0.71           | 0.93             | 0.95             |
| Timor-Leste                      | 0.74                           | 0.94    | 0.02                             | 0.05           | 0.74             | 0.79             |
| Vietnam                          | 0.75                           | 0.94    | 0.36                             | 0.65           | 0.38             | 0.78             |
| Australasia                      | 0.92                           | 0.98    | 0.57                             | 0.98           | 0.79             | 0.97             |
| Australia                        | 0.9                            | 0.98    | 0.52                             | 0.98           | 0.86             | 0.98             |
| New Zealand                      | 0.95                           | 0.99    | 0.65                             | 0.97           | 0.68             | 0.96             |
| Caribbean                        | 0.93                           | 0.97    | 0.67                             | 0.82           | 0.79             | 0.89             |
| Antigua and Barbuda              | 0.83                           | 0.88    | 0.65                             | 0.74           | 0.89             | 0.91             |
| Barbados                         | 0.85                           | 0.93    | 0.53                             | 0.78           | 0.82             | 0.89             |
| Belize                           | 0.92                           | 0.96    | -0.13                            | 0.62           | 0.41             | 0.77             |
| Cuba                             | 0.96                           | 0.97    | -0.3                             | 0.62           | -1.55            | 0.8              |
| Dominica                         | 0.9                            | 0.93    | 0.34                             | 0.63           | 0.74             | 0.84             |
| Dominican Republic               | 0.97                           | 0.98    | -0.5                             | 0.52           | -0.03            | 0.6              |
| Grenada                          | 0.79                           | 0.92    | 0.23                             | 0.67           | 0.3              | 0.76             |
| Guyana                           | 0.61                           | 0.89    | 0.1                              | 0.59           | 0.17             | 0.78             |
| Haiti                            | 0.84                           | 0.98    | -0.42                            | -0.16          | -1.02            | -0.67            |
| Jamaica                          | 0.96                           | 0.96    | 0.58                             | 0.9            | 0.87             | 0.92             |
| Saint Lucia                      | 0.83                           | 0.91    | 0.71                             | 0.76           | 0.81             | 0.85             |
| Saint Vincent and the Grenadines | 0.85                           | 0.91    | 0.37                             | 0.63           | 0.51             | 0.77             |
| Suriname                         | 0.46                           | 0.62    | 0.28                             | 0.44           | 0.8              | 0.86             |
| The Bahamas                      | 0.73                           | 0.78    | 0.23                             | 0.58           | 0.82             | 0.81             |
| Trinidad and Tobago              | 0.89                           | 0.93    | 0.59                             | 0.75           | 0.82             | 0.93             |
| Central Europe                   | 0.82                           | 0.95    | -0.21                            | 0.86           | 0.43             | 0.91             |
| Albania                          | 0.88                           | 0.92    | 0.59                             | 0.77           | 0.76             | 0.87             |
| Bosnia and Herzegovina           | 0.68                           | 0.68    | 0.91                             | 0.71           | 0.09             | 0.22             |
| Bulgaria                         | 0.67                           | 0.95    | -2.69                            | 0.73           | -0.24            | 0.86             |
| Croatia                          | 0.92                           | 0.98    | 0.41                             | 0.89           | 0.95             | 0.95             |
| Czech Republic                   | 0.83                           | 0.89    | 0.25                             | 0.89           | 0.61             | 0.95             |
| Hungary                          | 0.97                           | 0.98    | -1.49                            | 0.79           | -1.65            | 0.76             |
| Macedonia                        | 0.6                            | 0.62    | 0.45                             | 0.51           | 0.7              | 0.76             |
| Montenegro                       | 0.48                           | 0.73    | -0.48                            | 0.69           | -1.18            | 0.51             |
| Poland                           | 0.9                            | 0.99    | -0.79                            | 0.64           | 0.78             | 0.92             |

**Web Table 3 - Variance from the first and second stage models**

|                | Variance explained: 5q0 models |         | Variance explained: 45q15 models |                |                  |                  |
|----------------|--------------------------------|---------|----------------------------------|----------------|------------------|------------------|
|                | Stage 1                        | Stage 2 | Stage 1: males                   | Stage 2: males | Stage 1: females | Stage 2: females |
| Romania        | 0.43                           | 0.93    | -2.59                            | 0.74           | -2.05            | 0.81             |
| Serbia         | 0.77                           | 0.81    | 0.63                             | 0.78           | 0.89             | 0.95             |
| Slovakia       | 0.79                           | 0.85    | -2.63                            | 0.69           | -0.04            | 0.84             |
| Slovenia       | 0.91                           | 0.97    | 0.4                              | 0.9            | 0.94             | 0.96             |
| Eastern Europe | 0.81                           | 0.88    | -0.5                             | 0.8            | -2.19            | 0.78             |
| Belarus        | 0.86                           | 0.92    | -1.03                            | 0.92           | -8.39            | 0.78             |
| Estonia        | 0.77                           | 0.94    | -0.77                            | 0.69           | -2.18            | 0.65             |
| Latvia         | 0.73                           | 0.9     | -0.78                            | 0.66           | -5.65            | 0.52             |
| Lithuania      | 0.86                           | 0.93    | -1.52                            | 0.73           | -10.62           | 0.32             |
| Moldova        | 0.77                           | 0.8     | -0.28                            | -0.15          | 0.4              | 0.56             |
| Russia         | 0.61                           | 0.93    | -0.75                            | 0.74           | -5.79            | 0.66             |
| Ukraine        | 0.72                           | 0.81    | -0.47                            | 0.85           | -4.82            | 0.66             |
| Western Europe | 0.95                           | 0.98    | 0.79                             | 0.97           | 0.81             | 0.97             |
| Andorra        | 0.8                            | 0.81    | 0.27                             | 0.93           | -0.63            | 0.38             |
| Austria        | 0.95                           | 0.98    | 0.71                             | 0.98           | 0.96             | 0.99             |
| Belgium        | 0.96                           | 0.99    | 0.85                             | 0.98           | 0.8              | 0.97             |
| Cyprus         | 0.95                           | 0.97    | 0.63                             | 0.71           | 0.8              | 0.83             |
| Denmark        | 0.97                           | 0.99    | 0.1                              | 0.93           | -0.83            | 0.92             |
| Finland        | 0.98                           | 0.99    | 0.78                             | 0.97           | 0.96             | 0.98             |
| France         | 0.96                           | 0.98    | 0.81                             | 0.98           | 0.97             | 0.98             |
| Germany        | 0.97                           | 0.99    | 0.71                             | 0.98           | 0.87             | 0.99             |
| Greece         | 0.92                           | 0.97    | 0.6                              | 0.86           | 0.92             | 0.96             |
| Iceland        | 0.92                           | 0.96    | 0.63                             | 0.91           | 0.72             | 0.84             |
| Ireland        | 0.98                           | 0.99    | 0.84                             | 0.95           | 0.94             | 0.96             |
| Israel         | 0.93                           | 0.97    | 0.71                             | 0.92           | 0.87             | 0.97             |
| Italy          | 0.96                           | 0.99    | 0.71                             | 0.98           | 0.97             | 0.99             |
| Luxembourg     | 0.96                           | 0.98    | 0.73                             | 0.97           | 0.94             | 0.96             |
| Malta          | 0.91                           | 0.93    | 0.73                             | 0.94           | 0.93             | 0.96             |
| Netherlands    | 0.97                           | 0.99    | 0.65                             | 0.96           | 0.41             | 0.95             |
| Norway         | 0.96                           | 0.98    | 0.5                              | 0.96           | -1.39            | 0.93             |
| Portugal       | 0.9                            | 0.98    | 0.83                             | 0.93           | 0.93             | 0.96             |
| Spain          | 0.98                           | 0.99    | 0.83                             | 0.92           | 0.91             | 0.97             |
| Sweden         | 0.96                           | 0.99    | 0.67                             | 0.96           | 0.82             | 0.98             |
| Switzerland    | 0.97                           | 0.99    | 0.64                             | 0.99           | 0.97             | 0.99             |

**Web Table 3 - Variance from the first and second stage models**

|                              | Variance explained: 5q0 models |         | Variance explained: 45q15 models |                |                  |                  |
|------------------------------|--------------------------------|---------|----------------------------------|----------------|------------------|------------------|
|                              | Stage 1                        | Stage 2 | Stage 1: males                   | Stage 2: males | Stage 1: females | Stage 2: females |
| United Kingdom               | 0.93                           | 0.98    | 0.78                             | 0.99           | 0.77             | 0.98             |
| Andean Latin America         | 0.97                           | 0.98    | 0.57                             | 0.87           | 0.8              | 0.88             |
| Bolivia                      | 0.96                           | 0.98    | 0.38                             | 0.81           | 0.78             | 0.88             |
| Ecuador                      | 0.97                           | 0.98    | 0.86                             | 0.94           | 0.78             | 0.82             |
| Peru                         | 0.97                           | 0.98    | 0.46                             | 0.84           | 0.73             | 0.85             |
| Central Latin America        | 0.97                           | 0.98    | 0.73                             | 0.94           | 0.85             | 0.96             |
| Colombia                     | 0.98                           | 0.98    | 0.63                             | 0.86           | 0.85             | 0.99             |
| Costa Rica                   | 0.88                           | 0.96    | 0.75                             | 0.85           | 0.94             | 0.96             |
| El Salvador                  | 0.97                           | 0.98    | 0.13                             | 0.56           | 0.64             | 0.81             |
| Guatemala                    | 0.98                           | 0.98    | 0.47                             | 0.83           | 0.58             | 0.97             |
| Honduras                     | 0.97                           | 0.98    | 0.36                             | 0.91           | 0.53             | 0.79             |
| Mexico                       | 0.98                           | 0.99    | 0.75                             | 0.96           | 0.92             | 0.99             |
| Nicaragua                    | 0.97                           | 0.99    | 0.3                              | 0.88           | 0.65             | 0.9              |
| Panama                       | 0.9                            | 0.97    | 0.76                             | 0.93           | 0.91             | 0.97             |
| Venezuela                    | 0.96                           | 0.97    | 0.67                             | 0.93           | 0.89             | 0.99             |
| Southern Latin America       | 0.88                           | 0.97    | 0.64                             | 0.97           | 0.88             | 0.99             |
| Argentina                    | 0.67                           | 0.96    | 0.75                             | 0.96           | 0.97             | 0.98             |
| Chile                        | 0.9                            | 0.98    | 0.58                             | 0.97           | 0.84             | 0.99             |
| Uruguay                      | 0.82                           | 0.91    | 0.86                             | 0.92           | 0.92             | 0.97             |
| Tropical Latin America       | 0.95                           | 0.96    | 0.85                             | 0.93           | 0.23             | 0.45             |
| Brazil                       | 0.98                           | 0.98    | 0.77                             | 0.75           | 0.94             | 0.94             |
| Paraguay                     | 0.84                           | 0.88    | 0.41                             | 0.79           | 0.03             | 0.32             |
| North Africa and Middle East | 0.95                           | 0.97    | 0.7                              | 0.89           | 0.8              | 0.89             |
| Algeria                      | 0.93                           | 0.95    | 0.41                             | 0.83           | 0.65             | 0.82             |
| Bahrain                      | 0.95                           | 0.97    | 0.45                             | 0.81           | 0.45             | 0.62             |
| Egypt                        | 0.95                           | 0.98    | 0.86                             | 0.89           | -0.59            | 0.8              |
| Iran                         | 0.87                           | 0.94    | 0.36                             | 0.69           | 0.55             | 0.65             |
| Iraq                         | 0.61                           | 0.69    | 0.26                             | 0.52           | -0.33            | 0.09             |
| Jordan                       | 0.85                           | 0.95    | 0.45                             | 0.89           | 0.68             | 0.87             |
| Kuwait                       | 0.88                           | 0.92    | -0.04                            | 0.89           | 0.49             | 0.84             |
| Lebanon                      | 0.8                            | 0.82    | 0.09                             | 0.43           | 0.46             | 0.53             |
| Libya                        | 0.88                           | 0.95    | 0.04                             | 0.35           | 0.15             | 0.47             |
| Morocco                      | 0.87                           | 0.88    | 0.26                             | 0.55           | 0.32             | 0.39             |
| Oman                         | 0.98                           | 0.97    | -0.03                            | -0.04          | -0.04            | -0.07            |

**Web Table 3 - Variance from the first and second stage models**

|                                  | Variance explained: 5q0 models |         | Variance explained: 45q15 models |                |                  |                  |
|----------------------------------|--------------------------------|---------|----------------------------------|----------------|------------------|------------------|
|                                  | Stage 1                        | Stage 2 | Stage 1: males                   | Stage 2: males | Stage 1: females | Stage 2: females |
| Palestine                        | 0.65                           | 0.61    | -0.25                            | 0.22           | -0.5             | 0.1              |
| Qatar                            | 0.82                           | 0.9     | 0.01                             | 0.63           | 0.53             | 0.62             |
| Saudi Arabia                     | 0.97                           | 0.98    | -0.08                            | 0.12           | 0.21             | 0.32             |
| Syria                            | 0.93                           | 0.97    | 0.56                             | 0.91           | 0.77             | 0.84             |
| Tunisia                          | 0.98                           | 0.98    | 0.55                             | 0.93           | 0.6              | 0.91             |
| Turkey                           | 0.97                           | 0.99    | 0.66                             | 0.9            | 0.86             | 0.93             |
| United Arab Emirates             | 0.97                           | 0.95    | 0.25                             | 0.38           | 0.33             | 0.09             |
| Yemen                            | 0.97                           | 0.98    |                                  |                |                  |                  |
| High-income North America        | 0.9                            | 0.98    | 0.75                             | 0.98           | 0.9              | 0.98             |
| Canada                           | 0.96                           | 0.99    | 0.73                             | 0.98           | 0.83             | 0.98             |
| United States                    | 0.78                           | 0.97    | 0.62                             | 0.97           | 0.95             | 0.97             |
| Oceania                          | 0.91                           | 0.94    | 0.41                             | 0.68           | -0.06            | 0.61             |
| Federated States of Micronesia   | -0.07                          | 0.44    |                                  |                |                  |                  |
| Fiji                             | 0.79                           | 0.87    | -1.36                            | 0.35           | -0.6             | 0.61             |
| Kiribati                         | 0.96                           | 0.97    | -0.06                            | -0.13          | 0.17             | 0.11             |
| Marshall Islands                 | 0.23                           | 0.17    | -0.03                            | 0.04           | -0.67            | 0.25             |
| Papua New Guinea                 | 0.66                           | 0.67    |                                  |                |                  |                  |
| Samoa                            | 0.82                           | 0.82    | -0.18                            | 0.41           | -0.76            | 0.13             |
| Solomon Islands                  | 0.98                           | 0.96    |                                  |                |                  |                  |
| Tonga                            | 0.21                           | 0.57    | 0.19                             | 0.41           | -0.87            | 0.4              |
| Vanuatu                          | 0.86                           | 0.95    |                                  |                |                  |                  |
| Central Sub-Saharan Africa       | 0.93                           | 0.95    | 0.82                             | 0.9            | 0.83             | 0.93             |
| Angola                           | 0.81                           | 0.86    |                                  |                |                  |                  |
| Central African Republic         | 0.56                           | 0.8     | 0.38                             | 0.6            | 0.63             | 0.81             |
| Congo                            | 0.71                           | 0.8     | 0.18                             | 0.58           | 0.2              | 0.59             |
| Democratic Republic of the Congo | 0.82                           | 0.83    | 0.57                             | 0.81           | -35.08           | -4.35            |
| Equatorial Guinea                | 0.21                           | -1.44   |                                  |                |                  |                  |
| Gabon                            | 0.8                            | 0.83    | 0.63                             | 0.87           | -0.01            | 0.84             |
| Eastern Sub-Saharan Africa       | 0.89                           | 0.95    | 0.54                             | 0.65           | 0.67             | 0.76             |
| Burundi                          | 0.81                           | 0.83    | 0.12                             | 0.44           | 0.17             | 0.49             |
| Comoros                          | 0.72                           | 0.93    | 0                                | -0.03          | 0                | -0.01            |
| Djibouti                         | 0.23                           | 0.27    |                                  |                |                  |                  |
| Eritrea                          | 0.95                           | 0.95    | -0.03                            | 0.18           | 0.14             | 0.27             |
| Ethiopia                         | 0.92                           | 0.96    | -0.36                            | 0.09           | -0.32            | 0.11             |

**Web Table 3 - Variance from the first and second stage models**

|                             | Variance explained: 5q0 models |         | Variance explained: 45q15 models |                |                  |                  |
|-----------------------------|--------------------------------|---------|----------------------------------|----------------|------------------|------------------|
|                             | Stage 1                        | Stage 2 | Stage 1: males                   | Stage 2: males | Stage 1: females | Stage 2: females |
| Kenya                       | 0.69                           | 0.88    | 0.7                              | 0.71           | 0.66             | 0.69             |
| Madagascar                  | 0.77                           | 0.88    | 0.02                             | 0.24           | 0.37             | 0.81             |
| Malawi                      | 0.86                           | 0.99    | 0.7                              | 0.76           | 0.75             | 0.76             |
| Mauritius                   | 0.93                           | 0.95    | 0.59                             | 0.93           | 0.7              | 0.96             |
| Mozambique                  | 0.81                           | 0.9     | 0.34                             | 0.45           | 0.21             | 0.27             |
| Rwanda                      | 0.77                           | 0.84    | 0.2                              | 0.43           | 0.19             | 0.47             |
| Seychelles                  | 0.86                           | 0.87    | -0.76                            | 0.25           | -0.39            | 0.43             |
| Somalia                     | 0.65                           | 0.67    |                                  |                |                  |                  |
| South Sudan                 | 0.36                           | 0.93    | 0                                | -0.08          | 0                | 0                |
| Sudan                       | 0.42                           | 0.83    | 0.39                             | 0.46           | 0.63             | 0.67             |
| Tanzania                    | 0.93                           | 0.94    | 0.52                             | 0.53           | 0.63             | 0.71             |
| Uganda                      | 0.82                           | 0.89    | 0.56                             | 0.61           | 0.56             | 0.57             |
| Zambia                      | 0.62                           | 0.83    | 0.29                             | 0.49           | 0.7              | 0.84             |
| Southern Sub-Saharan Africa | 0.61                           | 0.82    | 0.79                             | 0.87           | 0.86             | 0.89             |
| Botswana                    | 0.79                           | 0.81    | 0.56                             | 0.6            | 0.63             | 0.9              |
| Lesotho                     | -0.15                          | 0.54    | 0.75                             | 0.87           | 0.86             | 0.87             |
| Namibia                     | 0.8                            | 0.85    | 0.79                             | 0.87           | 0.79             | 0.82             |
| South Africa                | 0.49                           | 0.83    | 0.85                             | 0.89           | 0.9              | 0.93             |
| Swaziland                   | 0.5                            | 0.78    | 0.79                             | 0.91           | 0.87             | 0.89             |
| Zimbabwe                    | 0.47                           | 0.72    | 0.7                              | 0.8            | 0.81             | 0.86             |
| Western Sub-Saharan Africa  | 0.89                           | 0.96    | 0.57                             | 0.7            | 0.69             | 0.75             |
| Benin                       | 0.91                           | 0.97    | 0.17                             | 0.37           | 0.22             | 0.4              |
| Burkina Faso                | 0.77                           | 0.95    | 0.53                             | 0.52           | 0.62             | 0.6              |
| Cameroon                    | 0.9                            | 0.93    | 0.56                             | 0.64           | 0.68             | 0.66             |
| Cape Verde                  | 0.77                           | 0.79    | -0.61                            | 0.23           | -0.05            | 0.33             |
| Chad                        | 0.79                           | 0.82    | 0.22                             | 0.31           | 0.55             | 0.57             |
| Côte d'Ivoire               | 0.92                           | 0.93    | 0.56                             | 0.67           | 0.84             | 0.85             |
| Ghana                       | 0.89                           | 0.9     | 0.33                             | 0.55           | 0.32             | 0.15             |
| Guinea                      | 0.95                           | 0.97    | 0.07                             | 0.2            | 0.15             | 0.25             |
| Guinea-Bissau               | 0.83                           | 0.86    |                                  |                |                  |                  |
| Liberia                     | 0.9                            | 0.94    | 0.64                             | 0.53           | 0.15             | 0.23             |
| Mali                        | 0.88                           | 0.96    | -0.06                            | 0.18           | 0.05             | 0.05             |
| Mauritania                  | 0.59                           | 0.87    | 0.17                             | 0.5            | 0.57             | 0.46             |
| Niger                       | 0.93                           | 0.92    | -0.56                            | 0.53           | -0.33            | 0.33             |



**Web Table 3 - Variance from the first and second stage models**

|                       | Variance explained: 5q0 models |         | Variance explained: 45q15 models |                |                  |                  |
|-----------------------|--------------------------------|---------|----------------------------------|----------------|------------------|------------------|
|                       | Stage 1                        | Stage 2 | Stage 1: males                   | Stage 2: males | Stage 1: females | Stage 2: females |
| Nigeria               | -1.82                          | 0.86    | 0.54                             | 0.63           | 0.52             | 0.62             |
| Senegal               | 0.93                           | 0.97    | 0.1                              | 0.35           | 0.57             | 0.76             |
| Sierra Leone          | -0.61                          | 0.76    | -0.14                            | -0.25          | 0.27             | 0.38             |
| São Tomé and Príncipe | 0.85                           | 0.88    | 0.27                             | 0.86           | 0.29             | 0.78             |
| The Gambia            | 0.8                            | 0.94    |                                  |                |                  |                  |
| Togo                  | 0.95                           | 0.96    | -0.14                            | 0.18           | -3.43            | -1.2             |

### Model:

The third stage of our prediction method is a Gaussian process regression (GPR) based on the model given in equation 7 where  $\mu_t$  is the true  $\log_{10}(45q_{15})$  at time  $t$ ,  $f(t)$  is the baseline mortality risk, and  $S_t$  captures excess mortality due to war and disasters.  $S_t$  is estimated independently of  $f(t)$  as described in a later section.  $M$  and  $C$  describe the Gaussian process, giving the mean and covariance, respectively.

$$\begin{aligned}\mu_t &= f(t) + S_t \\ f(t) &\sim \text{GP}(M, C)\end{aligned}\tag{7}$$

For the Dominican Republic, Peru, and Madagascar, a slightly different model, described in equation 8 is used. For these countries, measurements from sibling histories and from vital registration are at different levels and the direction of the bias in each source is unknown. We therefore use a model which includes a bias term for each source ( $\beta_s$ ).

$$\begin{aligned}\mu_t &= f(t) + \beta_s + S_{t,s} \\ \beta_s &\sim \text{Normal}(0, 0.01^2) \\ f(t) &\sim \text{GP}(M, C)\end{aligned}\tag{8}$$

Gaussian process regression is a method of Bayesian inference. We specified a prior distribution for  $f(t)$ , and a likelihood function which describes the data generation process; the specified prior distributions and likelihood function are described in subsequent sections. We then used Markov Chain Monte Carlo (MCMC) to approximate the posterior distribution of  $f(t)$  which also incorporates information from the observed empirical estimates of adult mortality. An MCMC chain of length 5000 was produced; the first 3000 samples were discarded and the remaining 2000 were thinned by a factor of 2 for a total of 1000 simulations retained. The reported best estimates and confidence intervals were generated from the mean and the 2.5<sup>th</sup> and 97.5<sup>th</sup> percentiles of the 1000 samples, respectively.

### Priors:

The prior distribution of  $f(t)$  can be described in terms of the mean prior—the prior for  $M$ —and the covariance prior—the prior for  $C$ . We utilized the second stage predictions as the mean prior and used a Matern covariance function to describe the covariance prior. This covariance function incorporates three parameters: the amplitude, which controls the amount by which realizations of the Gaussian process distribution can deviate from the mean function, the scale, which controls the distance over which the function is correlated, and the degree of differentiability, which influences the smoothness of the samples from the Gaussian process.

We set the differentiability to 0.8 in countries with only complete VR data and to 2.0 in other countries. We used a lower differentiability in countries with complete VR data because in these countries we want the final estimates to follow the data closely even if the trend described is not smooth. In contrast, in countries where the data are less reliable we don't want the final estimates to be overly influenced by individual data points.

We selected prior values for the amplitude and scale based on model performance as assessed by out-of-sample predictive validity. We test five values of the scale—10, 15, 20, 25, 30—and five values of the squared amplitude—1, 2, 3, 4, and 5 times the mean squared error of the residuals from the second stage prediction model—for a total of 25 combinations of parameters. The out-of-sample predictive validity is assessed for each parameter combination by repeatedly dividing the data available into training and testing sets, fitting the model on the training sets and comparing the predictions to the corresponding data in the testing set.

We divided the data into testing and training sets 100 times. Data were divided as follows: for each region, a number  $X$  between 10 and 20 was sampled and the most recent  $X$  years of data in that region were assigned to the testing set. Then a number  $X$  between 5 and 10 was sampled, a country from within the region was sampled, and a year where there is data in that country was sampled. All data within  $X$  years of the selected year in the selected country were assigned to the testing set. This was repeated as many times as there are countries in the region; because iterations of

this procedure were independent, the data selected for the testing set may overlap. Any data that were not selected for the testing set were included in the training set.

For each testing and training division, the second stage model is fit on the training data. Then, the third stage model is also fit on the training data using each combination of scale and squared amplitude values tested for a total of 25 sets of predictions. The testing data are matched to the predictions in the corresponding country and year for each of the 25 sets of predictions. For each match we calculated the absolute relative error of the prediction compared to the empirical estimate in the testing set. We also classified each empirical estimate in the testing set as being covered or not covered by each corresponding prediction. The determination of coverage was made by calculating total variance—the sum of the variance of the empirical estimate (described below) and the variance of the GPR estimate—and then calculating a 95% confidence interval around the prediction based on this total variance and assuming a normal distribution. If the empirical estimate was within this confidence interval, it was classified as covered, and otherwise not.

Once this procedure has been carried out for all 100 testing and training divisions of the data we calculated the mean absolute relative error and the mean coverage for each combination of GPR parameters across all 100 sets of predictions. The ideal set of parameters would produce estimates with low mean absolute relative error and mean coverage close to 0.95. We used the function described in equation 9 to calculate a loss metric which incorporates both the coverage and the absolute relative error into a single measure to assess performance. Parameter combinations with lower values of this loss metric are considered preferable.

$$\text{Loss} = \begin{cases} \text{if coverage} \leq 0.95: (0.95 - \text{coverage})/5 + (\text{absolute relative error}) \\ \text{if coverage} > 0.95: (\text{coverage} - 0.95)/1 + (\text{absolute relative error}) \end{cases} \quad 9$$

The optimal parameters may differ from country to country. To allow for this, we calculated the loss function described in equation 9 separately for seven distinct groups of countries. These groups of countries are defined by the type of data which are available for estimating mortality: countries with complete VR only, countries with VR only (some or all of which is incomplete), countries with VR and other data, countries without VR data but with sibling histories, and the remaining countries. The first two groups listed are further subdivided into ‘small’ and ‘large’ population countries based on a population threshold of 50,000 15-49 year olds. For countries with no data, the highest of all selected scales and squared amplitudes from among all other countries is used.

#### *Likelihood:*

The likelihood describes the probability of observing the data given a particular set of parameters. As shown in equation 10, we used a normal model for describing the probability of observing a particular value of  $\log_{10}({}_{45}q_{15})$  where the mean is given by  $f(t)$  and the variance by  $V_t$ , the data variance.

$$\log_{10}({}_{45}q_{15}) \sim \text{Normal}(f(t), V_t) \quad 10$$

Data variance was calculated for each empirical observation of  ${}_{45}q_{15}$  and incorporated both sampling and non-sampling variation. The method for calculating the data variance depended on the type of data:

For estimates derived from complete vital registration data we assumed that there was no non-sampling variance and included only sampling variance as computed from a binomial model. We set  $N$  equal to the national population aged 15 to 59 years and  $p$  equal to the mortality rate,  ${}_{45}m_{15}$ . We calculated the variance of  ${}_{45}m_{15}$  from  $p(1-p)/N$  and then transformed this to the variance of  $\log_{10}({}_{45}q_{15})$  using the delta method.

For estimates derived from incomplete vital registration data, we wanted to include not only sampling variance but also the non-sampling variance that arises from uncertainty in the completeness estimate. For these data, the total data variance was given by the sum of the sampling variance (calculated as for complete vital registration data) and the variance of the completeness estimate (calculated as described in chapter [completeness]);

For estimates derived from sample registration systems or surveys where completeness has been assessed in the normal ways, the above procedures for complete and incomplete vital registration were followed but the national population size was replaced with the appropriate population size for the given system or survey;

For estimates derived from sources other than sibling histories where completeness could not be assessed or was assessed by the growth balance method, the highest data variance generated by the above three procedures within the same region was assigned;

Finally, for estimates derived from sibling history data, the mean absolute deviation (MAD) estimator of the variance was calculated with reference to the first stage predictions as described in equation 11.

$$\theta_{r,s}^2 = (1.4826 \cdot \text{MAD}_{r,s})^2 = 1.4826 \cdot \text{median}(|\log_{10}({}_{45}q_{15}^{\text{observed}}) - \log_{10}({}_{45}q_{15}^{\text{predicted}})|)^2 \quad 11$$

#### *War and natural disaster model:*

We excluded data from years with mortality shocks due to war and disaster to ensure that these sudden idiosyncratic increases in mortality would not affect long-term trends in mortality for a given country. These increases in mortality are, however, ultimately important to include so we implemented an additional modeling step to estimate excess mortality due to wars and natural disasters.

Information about the age and sex distribution of deaths from war and natural disaster was not available for most populations affected so we instead utilized information about the crude death rate due to war or natural disaster. For every country-year where we identified a war or disaster shock where empirical data were available we calculated the excess mortality due to that shock as described in equations 12 and 13 where  ${}_{45}q_{15}^{\text{GPR}}$  and  ${}_{45}M_{15}^{\text{GPR}}$  are the predicted mortality risk from GPR and the corresponding mortality rate, respectively,  ${}_{45}M_{15}^{\text{observed}}$  is the observed mortality rate, and  ${}_{45}M_{15}^{\text{shock}}$  is the mortality rate due to war and/or disaster.

$${}_{45}M_{15}^{\text{GPR}} = \frac{\ln(1 - {}_{45}q_{15}^{\text{GPR}})}{-45} \quad 12$$

$${}_{45}M_{15}^{\text{shock}} = {}_{45}M_{15}^{\text{observed}} - {}_{45}M_{15}^{\text{GPR}} \quad 13$$

We then related the war and disaster mortality rate,  ${}_{45}M_{15}^{\text{shock}}$  to the war and disaster crude death rate,  $\text{CDR}^{\text{shock}}$  using the model described in equation 14.

$${}_{45}M_{15}^{\text{shock}}_{t,c,s} = \beta * \text{CDR}^{\text{shock}}_{t,c,s} + \varepsilon \quad 14$$

Where  $t$  is time,  $c$  is country, and  $s$  is sex.

There is considerable uncertainty in the estimates of the crude death rate due to war and disaster. In order to incorporate that uncertainty into our final estimates we generated 1,000 simulations of the crude death rate based on the provided upper and lower bounds of these estimates and then paired these draws with the 1,000 simulations from the Gaussian process regression. These 1,000 pairs were then used to fit the model described in equation 14 1,000 times. As there is also uncertainty in the model described by equation 14, for each of these 1,000 sets of coefficients we re-sampled 100 sets of parameters based on the estimated mean and covariance. The estimated  $\beta$ s were then used to estimate the distribution of  ${}_{45}q_{15}$  with the mortality shock included from  ${}_{45}M_{15}^{\text{GPR}}$  as described in equation 15 and from this distribution to calculate the mean and 2.5<sup>th</sup> and 97.5<sup>th</sup> percentiles. As with previous models, this model was implemented separately for males and females.

$${}_{45}q_{15}^{\text{with shock}} = 1 - e^{-45 * ({}_{45}M_{15}^{\text{GPR}} + \hat{\beta} * \text{CDR}^{\text{shock}})} \quad 15$$

### *Model validation:*

We assessed both the in-sample and out-of-sample predictive validity of this model for estimating adult mortality. The in-sample predictive validity of the model was calculated by comparing the final estimates of  ${}_{45}q_{15}$  to the empirical estimates in our database (outliers excluded). Out-of-sample predictive validity was assessed by fitting the models to a subset of the data and comparing the resulting predictions to the remaining data. We assessed out-of-sample predictive validity in four different scenarios:

In the first scenario, we iterated through a process whereby we dropped 20% of all data at random and fit the model on the remaining 80% of data. This process was repeated 30 times with new sets of 20% of all data selected each time.

In the second scenario, we iterated through a process whereby we dropped the data from 20% of countries and fit the model on the data from the remaining 80% of countries. This process was also repeated 30 times with new sets of 20% of countries randomly selected each time.

In the third scenario, we fit the model withholding the most recent 20% of the data.

In the fourth scenario, we fit the model withholding the oldest 20% of data.

The first two scenarios were intended to assess the model's ability to predict in the absence of data, first broadly and then when missing data is concentrated in a given country, while the second two tests assessed the model's ability to forecast and backcast outside the range of available data. Across all scenarios and metrics the predictive validity generally increased from the first stage predictions to the second stage predictions and then again to the third stage predictions, confirming that at each stage of the modeling process the quality and accuracy of the predictions increases. In general, the increase in predictive validity between the first stage and the second stage was larger than between the second and third stage, suggesting that the largest gains from the multi-stage process are obtained by applying spatial-temporal smoothing. The distribution of individual error observations tends to have the widest distribution for first stage predictions, with the distributions tightening for the second stage and GPR results; indicating better overall fit to the data compared to the linear model (stage 1). As would be expected, predictive validity was higher in-sample than out-of-sample, however, the difference between the in-sample predictive validity and the out-of-sample predictive validity when 20% of the data is withheld at random is relatively small. The out-of-sample predictive validity suffers more noticeably compared to the in-sample predictive validity when 20% of countries are withheld or when the most recent and the most distant 20% of data are withheld, suggesting that the model had a harder time predicting when there were more countries without data or large spans of time without data than when there was just less data but this deficiency was not concentrated into particular countries or time periods. This decrease in the predictive validity out-of-sample is most noticeable in the second and third stage predictions; the more structured 1<sup>st</sup> stage predictions perform more consistently out-of-sample compared to in-sample, but also perform worse than the second and third stage predictions both in- and out-of-sample. The GPR model performed best in the forecasting out-of-sample scenario, an important finding since the most recent years rarely have data available.

### **E. New relational model life table system**

For many purposes, estimates of age-specific mortality rates are useful. In settings without complete VR systems, data are often available for some summary measures of mortality such as under-5 mortality from complete or summary birth histories and mortality from age 15 to 60 from sibling histories. Model life tables, which are structured relationships between levels of age-specific mortality at different ages, can be used to generate an estimate of age-specific mortality for detailed age-groups from summary measures of mortality on children and adults. Model life tables have many other applications as well, such as simplifying the task of mortality projection or updating life tables from the most recent empirically observed data. This is true even for countries with good VR systems due to the fact that compilation/publication of VR data takes years.

An ideal model life table system has several desirable attributes. First, a model life table system should be parsimonious and require only a few entry parameters to generate a full life table. Second, it should adequately capture the range of age patterns of mortality observed in real populations and yield high predictive validity, not just measured by summary indices such as life expectancy at birth, but more importantly by age-specific mortality rates.

Third, it should provide satisfactory estimates of age-specific mortality for countries with high levels of mortality, especially those with substantial HIV/AIDS epidemics. Finally, a model life table should generate age-specific mortality with a plausible time trend, and the partial derivative of age-specific mortality should be positive with respect to entry parameters such as  ${}_5q_0$  and  ${}_{45}q_{15}$ .

A simple and somewhat flexible model life table system was proposed by Brass.<sup>13</sup> He observed that in general the logit of the  $l_x$  column in a life table could be represented as a linear transformation of the logit of the  $l_x$  column of a reference standard. Murray et al. noted that as a population moved further away from the levels of mortality in the reference standard, the assumption of linearity in logit  $l_x$  space was violated.<sup>14</sup> A series of age-specific modification factors were proposed that allowed for the characteristic bending of the logit  $l_x$  function compared to the standard. Murray et al. also assessed the ability of this modified logit life table system to predict age-specific mortality rates. The modified logit life table system with its built-in mechanism of predicting adult mortality ( ${}_{45}q_{15}$ ) from child mortality ( ${}_5q_0$ ) has been extensively used by the World Health Organization since the early 2000s.

This system, however, suffers from two major limitations. First, when adult mortality is very high relative to child mortality, such as in the presence of an HIV epidemic, the age patterns of mortality generated do not fit well to the observed data. Second, when the modified logit life table system is applied to time series of  ${}_5q_0$  and  ${}_{45}q_{15}$ , paradoxical trends can be generated where adult and child mortality are declining, but predicted age-specific death rates in some age-groups are increasing. We have extended the modified logit life table system to deal with these two major limitations. Wang et al. provide a more complete discussion of the development of this approach.<sup>4,15</sup> We summarize these developments in brief here. There are five distinct steps.

#### *Database for developing the model life table system*

Relational model life table systems critically depend on the empirical database used to generate model life table standards and test the predictive validity of model life tables. Murray et al. used a database of 3604 life tables covering 63 countries.<sup>14</sup> We have expanded this database to include 10711 empirical life tables from national and subnational populations that are not affected by HIV/AIDS. Two major data sources provide about 97-99% of these life tables. The Human Mortality Database (HMD)<sup>16</sup> has over 8400 life tables from 37 countries or areas dating back to 1751. A total of 4445 life tables from this database dating between 1950 and 2011 are included in our database. We excluded life tables of poor quality as assessed by the HMD. The other major source of empirical life tables is the collection in which VR data have been evaluated using death distribution methods, as revised by Murray and colleagues (2010).<sup>1</sup> We include life tables only if they are evaluated as being 95% complete or higher. It's our view that accuracy of the age pattern of mortality in the raw data is to a certain degree correlated with the completeness of the data. We did make certain exceptions for the purpose of including age pattern of mortality from regions that otherwise won't be represented in our database with the strict completeness threshold. In these cases, rigorous assessment of the quality of these data is conducted. In total, we include 6036 life tables from various VR sources adjusted by the death distribution methods. We also include 14 life tables from Matlab, Bangladesh [HDSS site],<sup>17</sup> 120 life tables from censuses especially those from Chinese provinces, and 96 life table from sample registration systems.

In building the empirical life table database for the new model life table system used by GBD, we have examined more data sources that we decided to exclude from our database. These include VR sources that are deemed incomplete and life tables with implausible patterns or high levels of stochastic fluctuation among age groups. All those included in the empirical life table database have been adjusted for incompleteness. In addition, we have also applied five-year moving average to empirical life tables from countries with small population size to account for random fluctuation in age specific mortality rates in a single year. These include most of the life tables from the INDEPTH network which we have decided not to include in our database. The figure below shows two age patterns of mortality from INDEPTH network. To make such life tables useful, significant level of smoothing has to be done and one has to make strong assumption in such a process.

Age specific mortality rates from HDSS in 2011 [both sexes combined]

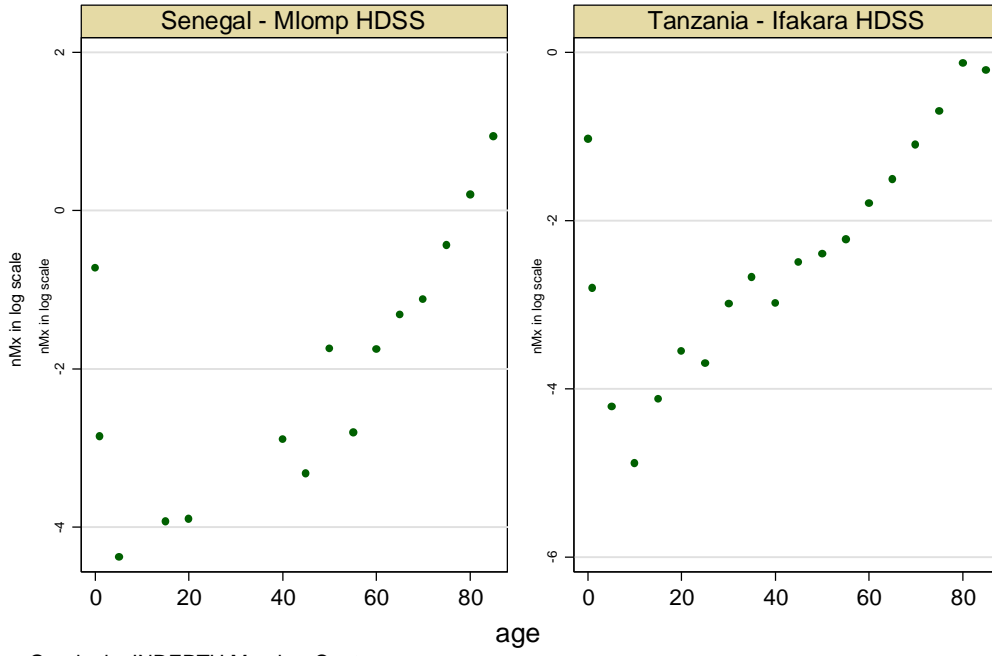

Graphs by INDEPTH Member Centres

**Web Figure 2: Age-specific mortality rates from HDSS in 2011, both sexes combined**

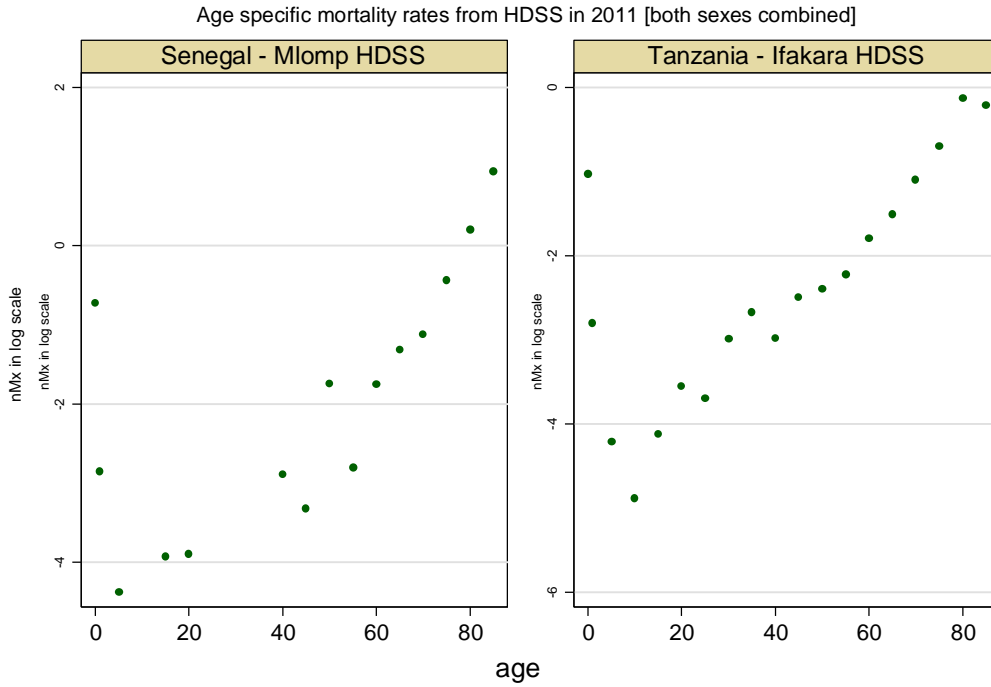

We have included in web table 4 the source the population, sex, and source of these empirical life tables.



**Web Table 4: Source for empirical life tables used in GBD2013**

**Web Table 4 - Source for empirical life tables used in GBD 2013**

|                        | GBD Region     | GBD Super Region                                 | Sex    | Years                                                                      | Source                   |
|------------------------|----------------|--------------------------------------------------|--------|----------------------------------------------------------------------------|--------------------------|
| Armenia                | Central Asia   | Central Europe, Eastern Europe, and Central Asia | Male   | 1981,1983,1985-1986,1990-1994,1996-1998,2000-2001,2003,2005-2006,2008-2011 | Vital Registration       |
| Armenia                | Central Asia   | Central Europe, Eastern Europe, and Central Asia | Female | 1985-1987,1989-2003,2005-2006,2009                                         | Vital Registration       |
| Azerbaijan             | Central Asia   | Central Europe, Eastern Europe, and Central Asia | Female | 1981-1989,1996-2004,2008-2010                                              | Vital Registration       |
| Azerbaijan             | Central Asia   | Central Europe, Eastern Europe, and Central Asia | Male   | 1981,1983-1988,1999-2003,2007-2010                                         | Vital Registration       |
| Georgia                | Central Asia   | Central Europe, Eastern Europe, and Central Asia | Male   | 1981-1983,1985-1992,1994-2001,2003-2006,2010,2012                          | Vital Registration       |
| Georgia                | Central Asia   | Central Europe, Eastern Europe, and Central Asia | Female | 1981,1985-1987,1989-1992,1994-2001,2004-2005                               | Vital Registration       |
| Kazakhstan             | Central Asia   | Central Europe, Eastern Europe, and Central Asia | Female | 1981-1982,1985-2010                                                        | Vital Registration       |
| Kazakhstan             | Central Asia   | Central Europe, Eastern Europe, and Central Asia | Male   | 1981-1982,1985-2010                                                        | Vital Registration       |
| Kyrgyzstan             | Central Asia   | Central Europe, Eastern Europe, and Central Asia | Male   | 1981-2011                                                                  | Vital Registration       |
| Kyrgyzstan             | Central Asia   | Central Europe, Eastern Europe, and Central Asia | Female | 1981-2011                                                                  | Vital Registration       |
| Mongolia               | Central Asia   | Central Europe, Eastern Europe, and Central Asia | Male   | 1990,1995-1999,2002-2004                                                   | Vital Registration       |
| Mongolia               | Central Asia   | Central Europe, Eastern Europe, and Central Asia | Female | 1996-1999,2002-2004                                                        | Vital Registration       |
| Tajikistan             | Central Asia   | Central Europe, Eastern Europe, and Central Asia | Male   | 1981-1982,1985-1996                                                        | Vital Registration       |
| Tajikistan             | Central Asia   | Central Europe, Eastern Europe, and Central Asia | Female | 1981-1982,1985-1996                                                        | Vital Registration       |
| Turkmenistan           | Central Asia   | Central Europe, Eastern Europe, and Central Asia | Male   | 1981-1982,1985-1998                                                        | Vital Registration       |
| Turkmenistan           | Central Asia   | Central Europe, Eastern Europe, and Central Asia | Female | 1981-1982,1985-1998                                                        | Vital Registration       |
| Uzbekistan             | Central Asia   | Central Europe, Eastern Europe, and Central Asia | Male   | 1981-1982,1985-2005                                                        | Vital Registration       |
| Uzbekistan             | Central Asia   | Central Europe, Eastern Europe, and Central Asia | Female | 1981-1982,1985-2005                                                        | Vital Registration       |
| Albania                | Central Europe | Central Europe, Eastern Europe, and Central Asia | Male   | 1955,1957-1963,1987-1992                                                   | Vital Registration       |
| Albania                | Central Europe | Central Europe, Eastern Europe, and Central Asia | Female | 1962-1963,1988-1993                                                        | Vital Registration       |
| Bosnia and Herzegovina | Central Europe | Central Europe, Eastern Europe, and Central Asia | Male   | 1985-1991,1998,2003-2004,2006-2007                                         | Vital Registration       |
| Bosnia and Herzegovina | Central Europe | Central Europe, Eastern Europe, and Central Asia | Female | 1985-1991,1998,2003-2004,2006-2007                                         | Vital Registration       |
| Bulgaria               | Central Europe | Central Europe, Eastern Europe, and Central Asia | Female | 1970-2010                                                                  | Human Mortality Database |
| Bulgaria               | Central Europe | Central Europe, Eastern Europe, and Central Asia | Male   | 1950-1969,2011                                                             | Vital Registration       |
| Bulgaria               | Central Europe | Central Europe, Eastern Europe, and Central Asia | Male   | 1970-2010                                                                  | Human Mortality Database |

**Web Table 4 - Source for empirical life tables used in GBD 2013**

|                | GBD Region     | GBD Super Region                                 | Sex    | Years                    | Source                   |
|----------------|----------------|--------------------------------------------------|--------|--------------------------|--------------------------|
| Bulgaria       | Central Europe | Central Europe, Eastern Europe, and Central Asia | Female | 1950-1969,2011           | Vital Registration       |
| Croatia        | Central Europe | Central Europe, Eastern Europe, and Central Asia | Female | 1985-2008,2010,2011      | Vital Registration       |
| Croatia        | Central Europe | Central Europe, Eastern Europe, and Central Asia | Male   | 1985-2011                | Vital Registration       |
| Czech Republic | Central Europe | Central Europe, Eastern Europe, and Central Asia | Male   | 1950-2011                | Human Mortality Database |
| Czech Republic | Central Europe | Central Europe, Eastern Europe, and Central Asia | Female | 1950-2011                | Human Mortality Database |
| Hungary        | Central Europe | Central Europe, Eastern Europe, and Central Asia | Female | 1950-2006,2008,2009      | Human Mortality Database |
| Hungary        | Central Europe | Central Europe, Eastern Europe, and Central Asia | Male   | 2007,2010-2011           | Vital Registration       |
| Hungary        | Central Europe | Central Europe, Eastern Europe, and Central Asia | Male   | 1950-2006,2008,2009      | Human Mortality Database |
| Hungary        | Central Europe | Central Europe, Eastern Europe, and Central Asia | Female | 2007,2010-2011           | Vital Registration       |
| Macedonia      | Central Europe | Central Europe, Eastern Europe, and Central Asia | Female | 1982,1990-2007,2009-2010 | Vital Registration       |
| Macedonia      | Central Europe | Central Europe, Eastern Europe, and Central Asia | Male   | 1982,1990-2009           | Vital Registration       |
| Montenegro     | Central Europe | Central Europe, Eastern Europe, and Central Asia | Male   | 2000-2009,2011           | Vital Registration       |
| Montenegro     | Central Europe | Central Europe, Eastern Europe, and Central Asia | Female | 1960,1970,1980,1990      | Census                   |
| Montenegro     | Central Europe | Central Europe, Eastern Europe, and Central Asia | Female | 1997-1998,2000,2008,2011 | Vital Registration       |
| Montenegro     | Central Europe | Central Europe, Eastern Europe, and Central Asia | Male   | 1960,1970,1980,1990      | Census                   |
| Poland         | Central Europe | Central Europe, Eastern Europe, and Central Asia | Male   | 1951-1957,2007,2010-2011 | Vital Registration       |
| Poland         | Central Europe | Central Europe, Eastern Europe, and Central Asia | Female | 1958-2006,2008,2009      | Human Mortality Database |
| Poland         | Central Europe | Central Europe, Eastern Europe, and Central Asia | Female | 1951-1957,2007,2010-2011 | Vital Registration       |
| Poland         | Central Europe | Central Europe, Eastern Europe, and Central Asia | Male   | 1958-2006,2008,2009      | Human Mortality Database |
| Romania        | Central Europe | Central Europe, Eastern Europe, and Central Asia | Female | 1956-2011                | Vital Registration       |
| Romania        | Central Europe | Central Europe, Eastern Europe, and Central Asia | Male   | 1956-2011                | Vital Registration       |
| Serbia         | Central Europe | Central Europe, Eastern Europe, and Central Asia | Male   | 1995-2011                | Vital Registration       |
| Serbia         | Central Europe | Central Europe, Eastern Europe, and Central Asia | Male   | 1953,1961,1971,1991      | Census                   |
| Serbia         | Central Europe | Central Europe, Eastern Europe, and Central Asia | Female | 1953,1961,1971,1991      | Census                   |
| Serbia         | Central Europe | Central Europe, Eastern Europe, and Central Asia | Female | 1995-2011                | Vital Registration       |
| Slovakia       | Central Europe | Central Europe, Eastern Europe, and Central Asia | Female | 1950-1961,2007,2010-2011 | Vital Registration       |
| Slovakia       | Central Europe | Central Europe, Eastern Europe, and Central Asia | Male   | 1962-2006,2008,2009      | Human Mortality Database |
| Slovakia       | Central Europe | Central Europe, Eastern Europe, and Central Asia | Female | 1962-2006,2008,2009      | Human Mortality Database |
| Slovakia       | Central Europe | Central Europe, Eastern Europe, and Central Asia | Male   | 1950-1961,2007,2010-2011 | Vital Registration       |

**Web Table 4 - Source for empirical life tables used in GBD 2013**

|           | GBD Region     | GBD Super Region                                 | Sex    | Years                    | Source                   |
|-----------|----------------|--------------------------------------------------|--------|--------------------------|--------------------------|
| Slovenia  | Central Europe | Central Europe, Eastern Europe, and Central Asia | Male   | 1982,2007-2008,2010-2011 | Vital Registration       |
| Slovenia  | Central Europe | Central Europe, Eastern Europe, and Central Asia | Female | 1983-2006,2008,2009      | Human Mortality Database |
| Slovenia  | Central Europe | Central Europe, Eastern Europe, and Central Asia | Male   | 1983-2006,2009           | Human Mortality Database |
| Slovenia  | Central Europe | Central Europe, Eastern Europe, and Central Asia | Female | 1982,2007,2010-2011      | Vital Registration       |
| Belarus   | Eastern Europe | Central Europe, Eastern Europe, and Central Asia | Male   | 1959-1969,2011           | Vital Registration       |
| Belarus   | Eastern Europe | Central Europe, Eastern Europe, and Central Asia | Female | 1959-1963,1965,1969,2011 | Vital Registration       |
| Belarus   | Eastern Europe | Central Europe, Eastern Europe, and Central Asia | Male   | 1970-2010                | Human Mortality Database |
| Belarus   | Eastern Europe | Central Europe, Eastern Europe, and Central Asia | Female | 1970-2010                | Human Mortality Database |
| Estonia   | Eastern Europe | Central Europe, Eastern Europe, and Central Asia | Female | 2001-2008                | Vital Registration       |
| Estonia   | Eastern Europe | Central Europe, Eastern Europe, and Central Asia | Female | 1959-2000,2009,2011      | Human Mortality Database |
| Estonia   | Eastern Europe | Central Europe, Eastern Europe, and Central Asia | Male   | 2001-2008                | Vital Registration       |
| Estonia   | Eastern Europe | Central Europe, Eastern Europe, and Central Asia | Male   | 1959-2000,2009,2011      | Human Mortality Database |
| Latvia    | Eastern Europe | Central Europe, Eastern Europe, and Central Asia | Male   | 1970-2011                | Human Mortality Database |
| Latvia    | Eastern Europe | Central Europe, Eastern Europe, and Central Asia | Female | 1970-2011                | Human Mortality Database |
| Latvia    | Eastern Europe | Central Europe, Eastern Europe, and Central Asia | Male   | 1959-1969                | Vital Registration       |
| Latvia    | Eastern Europe | Central Europe, Eastern Europe, and Central Asia | Female | 1959-1969                | Vital Registration       |
| Lithuania | Eastern Europe | Central Europe, Eastern Europe, and Central Asia | Female | 1959-2007,2009,2011      | Human Mortality Database |
| Lithuania | Eastern Europe | Central Europe, Eastern Europe, and Central Asia | Female | 2008                     | Vital Registration       |
| Lithuania | Eastern Europe | Central Europe, Eastern Europe, and Central Asia | Male   | 2008                     | Vital Registration       |
| Lithuania | Eastern Europe | Central Europe, Eastern Europe, and Central Asia | Male   | 1959-2007,2009,2011      | Human Mortality Database |
| Moldova   | Eastern Europe | Central Europe, Eastern Europe, and Central Asia | Female | 1981-1982,1985,2011      | Vital Registration       |
| Moldova   | Eastern Europe | Central Europe, Eastern Europe, and Central Asia | Male   | 1981-1982,1985,2011      | Vital Registration       |
| Russia    | Eastern Europe | Central Europe, Eastern Europe, and Central Asia | Female | 1970-2006,2008,2010      | Human Mortality Database |
| Russia    | Eastern Europe | Central Europe, Eastern Europe, and Central Asia | Male   | 1959-1969,2007,2011      | Vital Registration       |
| Russia    | Eastern Europe | Central Europe, Eastern Europe, and Central Asia | Female | 1959-1969,2007,2011      | Vital Registration       |
| Russia    | Eastern Europe | Central Europe, Eastern Europe, and Central Asia | Male   | 1970-2006,2008,2010      | Human Mortality Database |
| Ukraine   | Eastern Europe | Central Europe, Eastern Europe, and Central Asia | Female | 1970-2006,2008,2009      | Human Mortality Database |
| Ukraine   | Eastern Europe | Central Europe, Eastern Europe, and Central Asia | Male   | 1959-1969,2007,2010-2011 | Vital Registration       |
| Ukraine   | Eastern Europe | Central Europe, Eastern Europe, and Central Asia | Female | 1959-1969,2007,2010-2011 | Vital Registration       |
| Ukraine   | Eastern Europe | Central Europe, Eastern Europe, and Central Asia | Male   | 1970-2006,2008,2009      | Human Mortality Database |

**Web Table 4 - Source for empirical life tables used in GBD 2013**

|               | GBD Region                | GBD Super Region | Sex    | Years                  | Source                   |
|---------------|---------------------------|------------------|--------|------------------------|--------------------------|
| Australia     | Australasia               | High-income      | Male   | 2010-2011              | Vital Registration       |
| Australia     | Australasia               | High-income      | Female | 1950-2009              | Human Mortality Database |
| Australia     | Australasia               | High-income      | Male   | 1950-2009              | Human Mortality Database |
| Australia     | Australasia               | High-income      | Female | 2010-2011              | Vital Registration       |
| New Zealand   | Australasia               | High-income      | Male   | 2004-2007,2009<br>2011 | Vital Registration       |
| New Zealand   | Australasia               | High-income      | Male   | 1950-2003,2008         | Human Mortality Database |
| New Zealand   | Australasia               | High-income      | Female | 1950-2003,2008         | Human Mortality Database |
| New Zealand   | Australasia               | High-income      | Female | 2004-2007,2009<br>2011 | Vital Registration       |
| Japan         | High-income Asia Pacific  | High-income      | Female | 2008,2010-2011         | Vital Registration       |
| Japan         | High-income Asia Pacific  | High-income      | Male   | 2008,2010-2011         | Vital Registration       |
| Japan         | High-income Asia Pacific  | High-income      | Female | 1950-2007,2009         | Human Mortality Database |
| Japan         | High-income Asia Pacific  | High-income      | Male   | 1950-2007,2009         | Human Mortality Database |
| Singapore     | High-income Asia Pacific  | High-income      | Female | 1955-1958,1960<br>2011 | Vital Registration       |
| Singapore     | High-income Asia Pacific  | High-income      | Male   | 1955-1958,1960<br>2011 | Vital Registration       |
| South Korea   | High-income Asia Pacific  | High-income      | Male   | 1979-2011              | Vital Registration       |
| South Korea   | High-income Asia Pacific  | High-income      | Female | 1979-2011              | Vital Registration       |
| Canada        | High-income North America | High-income      | Male   | 2010-2011              | Vital Registration       |
| Canada        | High-income North America | High-income      | Female | 1950-2009              | Human Mortality Database |
| Canada        | High-income North America | High-income      | Male   | 1950-2009              | Human Mortality Database |
| Canada        | High-income North America | High-income      | Female | 2010-2011              | Vital Registration       |
| United States | High-income North America | High-income      | Female | 1950-2010              | Human Mortality Database |
| United States | High-income North America | High-income      | Male   | 2011                   | Vital Registration       |
| United States | High-income North America | High-income      | Male   | 1950-2010              | Human Mortality Database |
| United States | High-income North America | High-income      | Female | 2011                   | Vital Registration       |
| Argentina     | Southern Latin America    | High-income      | Male   | 1968-1970,1977<br>2011 | Vital Registration       |
| Argentina     | Southern Latin America    | High-income      | Female | 1968-1970,1977<br>2011 | Vital Registration       |
| Chile         | Southern Latin America    | High-income      | Female | 1950-1991,2006<br>2011 | Vital Registration       |
| Chile         | Southern Latin America    | High-income      | Male   | 1992-2005              | Human Mortality Database |
| Chile         | Southern Latin America    | High-income      | Female | 1992-2005              | Human Mortality Database |
| Chile         | Southern Latin America    | High-income      | Male   | 1950-1991,2006<br>2011 | Vital Registration       |
| Uruguay       | Southern Latin America    | High-income      | Male   | 1950-2004,2007<br>2009 | Vital Registration       |
| Uruguay       | Southern Latin America    | High-income      | Female | 1950-2004,2007<br>2009 | Vital Registration       |
| Austria       | Western Europe            | High-income      | Male   | 2006-2008,2011         | Vital Registration       |
| Austria       | Western Europe            | High-income      | Male   | 1950-2005,2009<br>2010 | Human Mortality Database |
| Austria       | Western Europe            | High-income      | Female | 2006-2008,2011         | Vital Registration       |
| Austria       | Western Europe            | High-income      | Female | 1950-2005,2009<br>2010 | Human Mortality Database |
| Belgium       | Western Europe            | High-income      | Female | 2007,2010              | Vital Registration       |
| Belgium       | Western Europe            | High-income      | Female | 1950-2006,2008<br>2009 | Human Mortality Database |
| Belgium       | Western Europe            | High-income      | Male   | 2007,2010              | Vital Registration       |

**Web Table 4 - Source for empirical life tables used in GBD 2013**

|                                 | GBD Region     | GBD Super Region | Sex    | Years                    | Source                   |
|---------------------------------|----------------|------------------|--------|--------------------------|--------------------------|
| Belgium                         | Western Europe | High-income      | Male   | 1950-2006,2008,2009      | Human Mortality Database |
| Cyprus                          | Western Europe | High-income      | Male   | 1998,2006                | Vital Registration       |
| Denmark                         | Western Europe | High-income      | Female | 1950-2011                | Human Mortality Database |
| Denmark                         | Western Europe | High-income      | Male   | 1950-2011                | Human Mortality Database |
| East Germany                    | Western Europe | High-income      | Male   | 1956-2006                | Human Mortality Database |
| East Germany                    | Western Europe | High-income      | Female | 1956-2006                | Human Mortality Database |
| East Midlands, United Kingdom   | Western Europe | High-income      | Female | 1981-2012                | Vital Registration       |
| East Midlands, United Kingdom   | Western Europe | High-income      | Male   | 1981-2012                | Vital Registration       |
| East of England, United Kingdom | Western Europe | High-income      | Male   | 1981-2012                | Vital Registration       |
| East of England, United Kingdom | Western Europe | High-income      | Female | 1981-2012                | Vital Registration       |
| England & Wales                 | Western Europe | High-income      | Female | 1950-2011                | Human Mortality Database |
| England & Wales                 | Western Europe | High-income      | Male   | 1950-2011                | Human Mortality Database |
| England & Wales [civilians]     | Western Europe | High-income      | Female | 1950-2011                | Human Mortality Database |
| England & Wales [civilians]     | Western Europe | High-income      | Male   | 1950-2011                | Human Mortality Database |
| Finland                         | Western Europe | High-income      | Female | 1950-2007,2009           | Human Mortality Database |
| Finland                         | Western Europe | High-income      | Male   | 2008,2010-2011           | Vital Registration       |
| Finland                         | Western Europe | High-income      | Female | 2008,2010-2011           | Vital Registration       |
| Finland                         | Western Europe | High-income      | Male   | 1950-2007,2009           | Human Mortality Database |
| France                          | Western Europe | High-income      | Male   | 2007,2011                | Vital Registration       |
| France                          | Western Europe | High-income      | Female | 2007,2011                | Vital Registration       |
| France                          | Western Europe | High-income      | Male   | 1950-2006,2008,2010      | Human Mortality Database |
| France                          | Western Europe | High-income      | Female | 1950-2006,2008,2010      | Human Mortality Database |
| French [civilians]              | Western Europe | High-income      | Male   | 1950-2010                | Human Mortality Database |
| French [civilians]              | Western Europe | High-income      | Female | 1950-2010                | Human Mortality Database |
| Germany                         | Western Europe | High-income      | Female | 1991-2006,2008,2011      | Human Mortality Database |
| Germany                         | Western Europe | High-income      | Male   | 1991-2006,2008,2011      | Human Mortality Database |
| Germany                         | Western Europe | High-income      | Female | 1956-1990,2007           | Vital Registration       |
| Germany                         | Western Europe | High-income      | Male   | 1956-1990,2007           | Vital Registration       |
| Greater London, United Kingdom  | Western Europe | High-income      | Male   | 1981-2012                | Vital Registration       |
| Greater London, United Kingdom  | Western Europe | High-income      | Female | 1981-2012                | Vital Registration       |
| Greece                          | Western Europe | High-income      | Male   | 1951-2011                | Vital Registration       |
| Greece                          | Western Europe | High-income      | Female | 1951-2011                | Vital Registration       |
| Iceland                         | Western Europe | High-income      | Female | 1950-2010                | Human Mortality Database |
| Iceland                         | Western Europe | High-income      | Male   | 1950-2010                | Human Mortality Database |
| Ireland                         | Western Europe | High-income      | Female | 1986-2006,2009           | Human Mortality Database |
| Ireland                         | Western Europe | High-income      | Male   | 1986-2006,2009           | Human Mortality Database |
| Ireland                         | Western Europe | High-income      | Male   | 2011                     | Census                   |
| Ireland                         | Western Europe | High-income      | Male   | 1950-1985,2007,2008,2010 | Vital Registration       |
| Ireland                         | Western Europe | High-income      | Female | 1950-1985,2007,2008,2010 | Vital Registration       |

**Web Table 4 - Source for empirical life tables used in GBD 2013**

|                                    | GBD Region     | GBD Super Region | Sex    | Years                                             | Source                   |
|------------------------------------|----------------|------------------|--------|---------------------------------------------------|--------------------------|
| Ireland                            | Western Europe | High-income      | Female | 2011                                              | Census                   |
| Israel                             | Western Europe | High-income      | Male   | 1983-2009                                         | Human Mortality Database |
| Israel                             | Western Europe | High-income      | Female | 1983-2009                                         | Human Mortality Database |
| Israel                             | Western Europe | High-income      | Male   | 1957-1982,2010,2012                               | Vital Registration       |
| Israel                             | Western Europe | High-income      | Female | 1953-1982,2010,2012                               | Vital Registration       |
| Italy                              | Western Europe | High-income      | Female | 2007,2010                                         | Vital Registration       |
| Italy                              | Western Europe | High-income      | Male   | 2007,2010                                         | Vital Registration       |
| Italy                              | Western Europe | High-income      | Female | 1950-2006,2008,2009                               | Human Mortality Database |
| Italy                              | Western Europe | High-income      | Male   | 1950-2006,2008,2009                               | Human Mortality Database |
| Luxembourg                         | Western Europe | High-income      | Male   | 1960-2009                                         | Human Mortality Database |
| Luxembourg                         | Western Europe | High-income      | Female | 1960-2009                                         | Human Mortality Database |
| Malta                              | Western Europe | High-income      | Male   | 1982,2003                                         | Vital Registration       |
| Netherlands                        | Western Europe | High-income      | Male   | 1950-2006,2009                                    | Human Mortality Database |
| Netherlands                        | Western Europe | High-income      | Female | 2007-2008,2010,2011                               | Vital Registration       |
| Netherlands                        | Western Europe | High-income      | Female | 1950-2006,2009                                    | Human Mortality Database |
| Netherlands                        | Western Europe | High-income      | Male   | 2007-2008,2010,2011                               | Vital Registration       |
| North East England, United Kingdom | Western Europe | High-income      | Female | 1981-1990,1992,1995-2012                          | Vital Registration       |
| North East England, United Kingdom | Western Europe | High-income      | Male   | 1981-2012                                         | Vital Registration       |
| North West England, United Kingdom | Western Europe | High-income      | Male   | 1981-2012                                         | Vital Registration       |
| North West England, United Kingdom | Western Europe | High-income      | Female | 1981-2012                                         | Vital Registration       |
| Northern Ireland                   | Western Europe | High-income      | Male   | 1950-2011                                         | Human Mortality Database |
| Northern Ireland                   | Western Europe | High-income      | Female | 1950-2011                                         | Human Mortality Database |
| Northern Ireland, United Kingdom   | Western Europe | High-income      | Female | 1977,1979,1981-1988,1990-1999,2002-2005,2007,2011 | Vital Registration       |
| Northern Ireland, United Kingdom   | Western Europe | High-income      | Male   | 1979-2012                                         | Vital Registration       |
| Norway                             | Western Europe | High-income      | Female | 2010-2011                                         | Vital Registration       |
| Norway                             | Western Europe | High-income      | Female | 1950-2009                                         | Human Mortality Database |
| Norway                             | Western Europe | High-income      | Male   | 1950-2009                                         | Human Mortality Database |
| Norway                             | Western Europe | High-income      | Male   | 2010-2011                                         | Vital Registration       |
| Portugal                           | Western Europe | High-income      | Male   | 1971-2009                                         | Human Mortality Database |
| Portugal                           | Western Europe | High-income      | Female | 1971-2009                                         | Human Mortality Database |
| Portugal                           | Western Europe | High-income      | Female | 1950-1970,2010,2011                               | Vital Registration       |
| Portugal                           | Western Europe | High-income      | Male   | 1950-1970,2010,2011                               | Vital Registration       |
| Scotland, United Kingdom           | Western Europe | High-income      | Male   | 1964-2012                                         | Vital Registration       |
| Scotland, United Kingdom           | Western Europe | High-income      | Female | 1960-2012                                         | Vital Registration       |
| Scotland                           | Western Europe | High-income      | Female | 1950-2011                                         | Human Mortality Database |



**Web Table 4 - Source for empirical life tables used in GBD 2013**

|                                          | GBD Region           | GBD Super Region            | Sex    | Years                                   | Source                   |
|------------------------------------------|----------------------|-----------------------------|--------|-----------------------------------------|--------------------------|
| Scotland                                 | Western Europe       | High-income                 | Male   | 1950-2011                               | Human Mortality Database |
| South East England, United Kingdom       | Western Europe       | High-income                 | Male   | 1981-2012                               | Vital Registration       |
| South East England, United Kingdom       | Western Europe       | High-income                 | Female | 1981-2012                               | Vital Registration       |
| South West England, United Kingdom       | Western Europe       | High-income                 | Female | 1981-2012                               | Vital Registration       |
| South West England, United Kingdom       | Western Europe       | High-income                 | Male   | 1981-2012                               | Vital Registration       |
| Spain                                    | Western Europe       | High-income                 | Male   | 1961-2006,2008-2009                     | Human Mortality Database |
| Spain                                    | Western Europe       | High-income                 | Female | 1961-2006,2008-2009                     | Human Mortality Database |
| Spain                                    | Western Europe       | High-income                 | Male   | 1950-1960,2007,2010-2011                | Vital Registration       |
| Spain                                    | Western Europe       | High-income                 | Female | 1950-1960,2007,2010-2011                | Vital Registration       |
| Sweden                                   | Western Europe       | High-income                 | Female | 1950-2011                               | Human Mortality Database |
| Sweden                                   | Western Europe       | High-income                 | Male   | 1950-2011                               | Human Mortality Database |
| Switzerland                              | Western Europe       | High-income                 | Male   | 1950-2011                               | Human Mortality Database |
| Switzerland                              | Western Europe       | High-income                 | Female | 1950-2011                               | Human Mortality Database |
| United Kingdom                           | Western Europe       | High-income                 | Female | 2007                                    | Vital Registration       |
| United Kingdom                           | Western Europe       | High-income                 | Female | 1950-2006,2008-2011                     | Human Mortality Database |
| United Kingdom                           | Western Europe       | High-income                 | Male   | 1950-2006,2008-2011                     | Human Mortality Database |
| United Kingdom                           | Western Europe       | High-income                 | Male   | 2007                                    | Vital Registration       |
| Wales, United Kingdom                    | Western Europe       | High-income                 | Male   | 1981-2009,2011-2012                     | Vital Registration       |
| Wales, United Kingdom                    | Western Europe       | High-income                 | Female | 1981-2012                               | Vital Registration       |
| West Germany                             | Western Europe       | High-income                 | Female | 1956-2006                               | Human Mortality Database |
| West Germany                             | Western Europe       | High-income                 | Male   | 1956-2006                               | Human Mortality Database |
| West Midlands, United Kingdom            | Western Europe       | High-income                 | Male   | 1981-2012                               | Vital Registration       |
| West Midlands, United Kingdom            | Western Europe       | High-income                 | Female | 1981-2012                               | Vital Registration       |
| Yorkshire and the Humber, United Kingdom | Western Europe       | High-income                 | Female | 1981-2012                               | Vital Registration       |
| Yorkshire and the Humber, United Kingdom | Western Europe       | High-income                 | Male   | 1981-2012                               | Vital Registration       |
| Ecuador                                  | Andean Latin America | Latin America and Caribbean | Male   | 1954-1970,1975-2007                     | Vital Registration       |
| Ecuador                                  | Andean Latin America | Latin America and Caribbean | Female | 1975-2007                               | Vital Registration       |
| Peru                                     | Andean Latin America | Latin America and Caribbean | Female | 1957-1961,1970-1973,1975-1980           | Vital Registration       |
| Peru                                     | Andean Latin America | Latin America and Caribbean | Male   | 1956-1961,1966-1968,1970-1973,1975-1980 | Vital Registration       |
| Barbados                                 | Caribbean            | Latin America and Caribbean | Male   | 1993                                    | Vital Registration       |
| Cuba                                     | Caribbean            | Latin America and Caribbean | Male   | 1959-1965,1968-2010                     | Vital Registration       |



**Web Table 4 - Source for empirical life tables used in GBD 2013**

|                             | GBD Region            | GBD Super Region            | Sex    | Years                                                  | Source             |
|-----------------------------|-----------------------|-----------------------------|--------|--------------------------------------------------------|--------------------|
| Cuba                        | Caribbean             | Latin America and Caribbean | Female | 1959-1965,1968-2010                                    | Vital Registration |
| Grenada                     | Caribbean             | Latin America and Caribbean | Female | 1974-1978,1984                                         | Vital Registration |
| Grenada                     | Caribbean             | Latin America and Caribbean | Male   | 1974-1978,1984                                         | Vital Registration |
| Guadeloupe                  | Caribbean             | Latin America and Caribbean | Female | 1979                                                   | Vital Registration |
| Guadeloupe                  | Caribbean             | Latin America and Caribbean | Male   | 1980                                                   | Vital Registration |
| Jamaica                     | Caribbean             | Latin America and Caribbean | Male   | 1957-1961,1967-1971,1975,1977,1980-1987,1999,2004-2006 | Vital Registration |
| Jamaica                     | Caribbean             | Latin America and Caribbean | Female | 1971,1975,1977,1999,2004-2006                          | Vital Registration |
| Puerto Rico                 | Caribbean             | Latin America and Caribbean | Male   | 1950-2003,2005-2010                                    | Vital Registration |
| Puerto Rico                 | Caribbean             | Latin America and Caribbean | Female | 1950-2003,2005-2010                                    | Vital Registration |
| Trinidad and Tobago         | Caribbean             | Latin America and Caribbean | Female | 1950-2008                                              | Vital Registration |
| Trinidad and Tobago         | Caribbean             | Latin America and Caribbean | Male   | 1950-2008                                              | Vital Registration |
| Aguascalientes, Mexico      | Central Latin America | Latin America and Caribbean | Female | 1995-2011                                              | Vital Registration |
| Aguascalientes, Mexico      | Central Latin America | Latin America and Caribbean | Male   | 2004-2005,2007-2011                                    | Vital Registration |
| Baja California Sur, Mexico | Central Latin America | Latin America and Caribbean | Male   | 2006-2010                                              | Vital Registration |
| Baja California, Mexico     | Central Latin America | Latin America and Caribbean | Female | 1980-1983,1985-2011                                    | Vital Registration |
| Baja California, Mexico     | Central Latin America | Latin America and Caribbean | Male   | 1979-2011                                              | Vital Registration |
| Campeche, Mexico            | Central Latin America | Latin America and Caribbean | Male   | 2003,2005-2006,2008-2010                               | Vital Registration |
| Campeche, Mexico            | Central Latin America | Latin America and Caribbean | Female | 1989                                                   | Vital Registration |
| Chiapas, Mexico             | Central Latin America | Latin America and Caribbean | Male   | 1990,1992-2011                                         | Vital Registration |
| Chiapas, Mexico             | Central Latin America | Latin America and Caribbean | Female | 1987-2005,2007-2011                                    | Vital Registration |
| Chihuahua, Mexico           | Central Latin America | Latin America and Caribbean | Male   | 1979-2011                                              | Vital Registration |
| Chihuahua, Mexico           | Central Latin America | Latin America and Caribbean | Female | 1982-1993,1996-2000,2002-2011                          | Vital Registration |
| Coahuila, Mexico            | Central Latin America | Latin America and Caribbean | Female | 1979-1990,1992,1994-1995,1997-2011                     | Vital Registration |
| Coahuila, Mexico            | Central Latin America | Latin America and Caribbean | Male   | 1979-2011                                              | Vital Registration |
| Colima, Mexico              | Central Latin America | Latin America and Caribbean | Male   | 1992-1996,1998-1999,2003-2004,2007-2011                | Vital Registration |
| Colombia                    | Central Latin America | Latin America and Caribbean | Female | 1965-1977,1979-2009,2011                               | Vital Registration |
| Colombia                    | Central Latin America | Latin America and Caribbean | Male   | 1956-1977,1979-2009,2011                               | Vital Registration |
| Costa Rica                  | Central Latin America | Latin America and Caribbean | Female | 1963-2011                                              | Vital Registration |
| Costa Rica                  | Central Latin America | Latin America and Caribbean | Male   | 1955-2011                                              | Vital Registration |
| Distrito Federal, Mexico    | Central Latin America | Latin America and Caribbean | Female | 1979-2011                                              | Vital Registration |
| Distrito Federal, Mexico    | Central Latin America | Latin America and Caribbean | Male   | 1979-2011                                              | Vital Registration |

**Web Table 4 - Source for empirical life tables used in GBD 2013**

|                             | GBD Region            | GBD Super Region            | Sex    | Years                                                  | Source             |
|-----------------------------|-----------------------|-----------------------------|--------|--------------------------------------------------------|--------------------|
| Durango, Mexico             | Central Latin America | Latin America and Caribbean | Male   | 2005-2011                                              | Vital Registration |
| El Salvador                 | Central Latin America | Latin America and Caribbean | Male   | 1950-2009                                              | Vital Registration |
| El Salvador                 | Central Latin America | Latin America and Caribbean | Female | 1950-2009                                              | Vital Registration |
| Guanajuato, Mexico          | Central Latin America | Latin America and Caribbean | Male   | 1979-2011                                              | Vital Registration |
| Guanajuato, Mexico          | Central Latin America | Latin America and Caribbean | Female | 1979-2011                                              | Vital Registration |
| Guatemala                   | Central Latin America | Latin America and Caribbean | Female | 1976-1981,1983-2008,2011                               | Vital Registration |
| Guatemala                   | Central Latin America | Latin America and Caribbean | Male   | 1950-1952,1966-1972,1974-1980,1983-2008,2011           | Vital Registration |
| Hidalgo, Mexico             | Central Latin America | Latin America and Caribbean | Female | 1992-1993,1995,1998-2002,2011                          | Vital Registration |
| Hidalgo, Mexico             | Central Latin America | Latin America and Caribbean | Male   | 1981-1982,1985-2011                                    | Vital Registration |
| Honduras                    | Central Latin America | Latin America and Caribbean | Male   | 1973-1983                                              | Vital Registration |
| Honduras                    | Central Latin America | Latin America and Caribbean | Female | 1970-1979,1981-1983                                    | Vital Registration |
| Jalisco, Mexico             | Central Latin America | Latin America and Caribbean | Male   | 1979-2011                                              | Vital Registration |
| Jalisco, Mexico             | Central Latin America | Latin America and Caribbean | Female | 1979-2011                                              | Vital Registration |
| Mexico                      | Central Latin America | Latin America and Caribbean | Male   | 1960-2010                                              | Vital Registration |
| Mexico                      | Central Latin America | Latin America and Caribbean | Female | 1960-2010                                              | Vital Registration |
| Michoacán de Ocampo, Mexico | Central Latin America | Latin America and Caribbean | Female | 1979-1980,1982-1991,1993,1995-1999,2001-2002,2004-2011 | Vital Registration |
| Michoacán de Ocampo, Mexico | Central Latin America | Latin America and Caribbean | Male   | 1979-1980,1984,1988-1995,1997-2011                     | Vital Registration |
| Morelos, Mexico             | Central Latin America | Latin America and Caribbean | Male   | 1984-1985,1987,1991,1993-2011                          | Vital Registration |
| Morelos, Mexico             | Central Latin America | Latin America and Caribbean | Female | 1984-1988,1991-1992,1995-1998,2000,2005-2011           | Vital Registration |
| México, Mexico              | Central Latin America | Latin America and Caribbean | Male   | 1979-2011                                              | Vital Registration |
| México, Mexico              | Central Latin America | Latin America and Caribbean | Female | 1979-2011                                              | Vital Registration |
| Nayarit, Mexico             | Central Latin America | Latin America and Caribbean | Male   | 2009-2011                                              | Vital Registration |
| Nicaragua                   | Central Latin America | Latin America and Caribbean | Female | 1992,1994,1997-1999,2002-2007,2009-2010                | Vital Registration |
| Nicaragua                   | Central Latin America | Latin America and Caribbean | Male   | 1994,1996-2010                                         | Vital Registration |
| Nuevo León, Mexico          | Central Latin America | Latin America and Caribbean | Female | 1979-1984,1986-1988,1990-1992,1996-2011                | Vital Registration |
| Nuevo León, Mexico          | Central Latin America | Latin America and Caribbean | Male   | 1981-2011                                              | Vital Registration |
| Oaxaca, Mexico              | Central Latin America | Latin America and Caribbean | Male   | 1988-1993,1995-2011                                    | Vital Registration |
| Oaxaca, Mexico              | Central Latin America | Latin America and Caribbean | Female | 1988-1989,1991-1995,1997-2011                          | Vital Registration |
| Panama                      | Central Latin America | Latin America and Caribbean | Male   | 1960-1961,1964-1967,1969-2010                          | Vital Registration |
| Panama                      | Central Latin America | Latin America and Caribbean | Female | 1970-2010                                              | Vital Registration |
| Puebla, Mexico              | Central Latin America | Latin America and Caribbean | Male   | 1979-2011                                              | Vital Registration |

**Web Table 4 - Source for empirical life tables used in GBD 2013**

|                                         | GBD Region                   | GBD Super Region             | Sex    | Years                                                  | Source             |
|-----------------------------------------|------------------------------|------------------------------|--------|--------------------------------------------------------|--------------------|
| Puebla, Mexico                          | Central Latin America        | Latin America and Caribbean  | Female | 1979-2011                                              | Vital Registration |
| Querétaro, Mexico                       | Central Latin America        | Latin America and Caribbean  | Male   | 1994-1998,2000-2002,2004-2011                          | Vital Registration |
| Quintana Roo, Mexico                    | Central Latin America        | Latin America and Caribbean  | Female | 20012003                                               | Vital Registration |
| Quintana Roo, Mexico                    | Central Latin America        | Latin America and Caribbean  | Male   | 2007-2011                                              | Vital Registration |
| San Luis Potosí, Mexico                 | Central Latin America        | Latin America and Caribbean  | Male   | 1979-1980,1985-2011                                    | Vital Registration |
| San Luis Potosí, Mexico                 | Central Latin America        | Latin America and Caribbean  | Female | 1988-1990,1993,1996-1997,1999,2001-2003,2005,2010      | Vital Registration |
| Sinaloa, Mexico                         | Central Latin America        | Latin America and Caribbean  | Male   | 1995-1999,2005-2011                                    | Vital Registration |
| Sonora, Mexico                          | Central Latin America        | Latin America and Caribbean  | Male   | 1979-2011                                              | Vital Registration |
| Sonora, Mexico                          | Central Latin America        | Latin America and Caribbean  | Female | 1979-1983,1985,1987-1995,1997-2011                     | Vital Registration |
| Tabasco, Mexico                         | Central Latin America        | Latin America and Caribbean  | Female | 1984-1985,1988-1989,1992-1994,2002-2011                | Vital Registration |
| Tabasco, Mexico                         | Central Latin America        | Latin America and Caribbean  | Male   | 1986,1988-1999,2001-2011                               | Vital Registration |
| Tamaulipas, Mexico                      | Central Latin America        | Latin America and Caribbean  | Male   | 1979-2011                                              | Vital Registration |
| Tamaulipas, Mexico                      | Central Latin America        | Latin America and Caribbean  | Female | 1982-1983,1987,1991-1995,1997,2002,2005-2006,2008-2011 | Vital Registration |
| Tlaxcala, Mexico                        | Central Latin America        | Latin America and Caribbean  | Female | 1988-1989,1992,2004-2005,2008-2009                     | Vital Registration |
| Tlaxcala, Mexico                        | Central Latin America        | Latin America and Caribbean  | Male   | 1986-2002,2004-2011                                    | Vital Registration |
| Venezuela                               | Central Latin America        | Latin America and Caribbean  | Male   | 1950,1955-1994,1996-2007                               | Vital Registration |
| Venezuela                               | Central Latin America        | Latin America and Caribbean  | Female | 1950,1955-1994,1996-2007                               | Vital Registration |
| Veracruz de Ignacio de la Llave, Mexico | Central Latin America        | Latin America and Caribbean  | Male   | 1979-2011                                              | Vital Registration |
| Veracruz de Ignacio de la Llave, Mexico | Central Latin America        | Latin America and Caribbean  | Female | 1979-2011                                              | Vital Registration |
| Yucatán, Mexico                         | Central Latin America        | Latin America and Caribbean  | Female | 1983-1985,1987-1990,1992-2002,2004,2006-2011           | Vital Registration |
| Yucatán, Mexico                         | Central Latin America        | Latin America and Caribbean  | Male   | 1983-1998,2000-2004,2006-2011                          | Vital Registration |
| Zacatecas, Mexico                       | Central Latin America        | Latin America and Caribbean  | Male   | 1985-1989                                              | Vital Registration |
| Zacatecas, Mexico                       | Central Latin America        | Latin America and Caribbean  | Female | 1980,1987-2008,2010-2011                               | Vital Registration |
| Brazil                                  | Tropical Latin America       | Latin America and Caribbean  | Female | 1974-2009,2011                                         | Vital Registration |
| Brazil                                  | Tropical Latin America       | Latin America and Caribbean  | Male   | 1974-2009,2011                                         | Vital Registration |
| Paraguay                                | Tropical Latin America       | Latin America and Caribbean  | Male   | 1971-1973,1975-1986,2001                               | Vital Registration |
| Paraguay                                | Tropical Latin America       | Latin America and Caribbean  | Female | 1984-1986,2001                                         | Vital Registration |
| Algeria                                 | North Africa and Middle East | North Africa and Middle East | Female | 1980-1982,1985-1986,1998                               | Vital Registration |

| Web Table 4 - Source for empirical life tables used in GBD 2013 |                              |                                           |        |                                                     |                            |
|-----------------------------------------------------------------|------------------------------|-------------------------------------------|--------|-----------------------------------------------------|----------------------------|
|                                                                 | GBD Region                   | GBD Super Region                          | Sex    | Years                                               | Source                     |
| Algeria                                                         | North Africa and Middle East | North Africa and Middle East              | Male   | 1980-1982,1985<br>1986,1998                         | Vital Registration         |
| Egypt                                                           | North Africa and Middle East | North Africa and Middle East              | Female | 1992-2011                                           | Vital Registration         |
| Egypt                                                           | North Africa and Middle East | North Africa and Middle East              | Male   | 1970-1981,1983<br>2011                              | Vital Registration         |
| Iran                                                            | North Africa and Middle East | North Africa and Middle East              | Male   | 2005-2006                                           | Vital Registration         |
| Iran                                                            | North Africa and Middle East | North Africa and Middle East              | Female | 2005-2006                                           | Vital Registration         |
| Jordan                                                          | North Africa and Middle East | North Africa and Middle East              | Female | 1954-1957,1959<br>1963,2004-<br>2006,2008-2009      | Vital Registration         |
| Jordan                                                          | North Africa and Middle East | North Africa and Middle East              | Male   | 1954-1957,1959<br>1966,2004-<br>2006,2008-2009      | Vital Registration         |
| Kuwait                                                          | North Africa and Middle East | North Africa and Middle East              | Male   | 1966-<br>1978,1987,1993<br>,1996,1998,200<br>0-2011 | Vital Registration         |
| Kuwait                                                          | North Africa and Middle East | North Africa and Middle East              | Female | 1966-<br>1978,1993,1996<br>,1998,2001               | Vital Registration         |
| Saudi Arabia                                                    | North Africa and Middle East | North Africa and Middle East              | Male   | 2005                                                | Vital Registration         |
| Saudi Arabia                                                    | North Africa and Middle East | North Africa and Middle East              | Female | 2005                                                | Vital Registration         |
| Syria                                                           | North Africa and Middle East | North Africa and Middle East              | Female | 2005-2007                                           | Vital Registration         |
| Syria                                                           | North Africa and Middle East | North Africa and Middle East              | Male   | 2005-2007                                           | Vital Registration         |
| Tunisia                                                         | North Africa and Middle East | North Africa and Middle East              | Male   | 1980,1987-<br>1989,1993-<br>1995,1998               | Vital Registration         |
| Tunisia                                                         | North Africa and Middle East | North Africa and Middle East              | Female | 1980,1987-<br>1989,1993-<br>1995,1998               | Vital Registration         |
| Turkey                                                          | North Africa and Middle East | North Africa and Middle East              | Male   | 1967,2009-2011                                      | Vital Registration         |
| Turkey                                                          | North Africa and Middle East | North Africa and Middle East              | Female | 2009-2011                                           | Vital Registration         |
| India                                                           | South Asia                   | South Asia                                | Female | 1970-1988,1991<br>1994,1996-<br>2008,2010,2012      | Sample Registration System |
| India                                                           | South Asia                   | South Asia                                | Male   | 1970-1988,1991<br>1994,1996-<br>2008,2010,2012      | Sample Registration System |
| India, Rural                                                    | South Asia                   | South Asia                                | Male   | 2007-2011                                           | Sample Registration System |
| India, Rural                                                    | South Asia                   | South Asia                                | Female | 2007-2011                                           | Sample Registration System |
| India, Urban                                                    | South Asia                   | South Asia                                | Female | 2007-2011                                           | Sample Registration System |
| India, Urban                                                    | South Asia                   | South Asia                                | Male   | 2007-2011                                           | Sample Registration System |
| Matlab, Bangladesh                                              | South Asia                   | South Asia                                | Male   | 1977,1981,1985<br>,1989,1993,199<br>7,2001          | MATLAB                     |
| Matlab, Bangladesh                                              | South Asia                   | South Asia                                | Female | 1977,1981,1985<br>,1989,1993,199<br>7,2001          | MATLAB                     |
| Anhui, China                                                    | East Asia                    | Southeast Asia, East Asia, and<br>Oceania | Female | 1.9822E+11                                          | Census                     |
| Anhui, China                                                    | East Asia                    | Southeast Asia, East Asia, and<br>Oceania | Male   | 1.9822E+11                                          | Census                     |
| Beijing, China                                                  | East Asia                    | Southeast Asia, East Asia, and<br>Oceania | Female | 1989                                                | Census                     |
| Chongqing, China                                                | East Asia                    | Southeast Asia, East Asia, and<br>Oceania | Female | 1989,2000,2010                                      | Census                     |
| Chongqing, China                                                | East Asia                    | Southeast Asia, East Asia, and<br>Oceania | Male   | 1989,2000,2010                                      | Census                     |

**Web Table 4 - Source for empirical life tables used in GBD 2013**

|                       | GBD Region | GBD Super Region                       | Sex    | Years               | Source |
|-----------------------|------------|----------------------------------------|--------|---------------------|--------|
| Fujian, China         | East Asia  | Southeast Asia, East Asia, and Oceania | Female | 1989,2000,2010      | Census |
| Gansu, China          | East Asia  | Southeast Asia, East Asia, and Oceania | Female | 1989,2000,2010      | Census |
| Gansu, China          | East Asia  | Southeast Asia, East Asia, and Oceania | Male   | 1989,2000,2010      | Census |
| Guangdong, China      | East Asia  | Southeast Asia, East Asia, and Oceania | Male   | 19892000            | Census |
| Guangdong, China      | East Asia  | Southeast Asia, East Asia, and Oceania | Female | 19892000            | Census |
| Guangxi, China        | East Asia  | Southeast Asia, East Asia, and Oceania | Female | 1982,1989,2000,2010 | Census |
| Guizhou, China        | East Asia  | Southeast Asia, East Asia, and Oceania | Female | 19892000            | Census |
| Hebei, China          | East Asia  | Southeast Asia, East Asia, and Oceania | Female | 1989,2000,2010      | Census |
| Heilongjiang, China   | East Asia  | Southeast Asia, East Asia, and Oceania | Male   | 1989                | Census |
| Heilongjiang, China   | East Asia  | Southeast Asia, East Asia, and Oceania | Female | 1989                | Census |
| Henan, China          | East Asia  | Southeast Asia, East Asia, and Oceania | Female | 1982,1989,2000,2010 | Census |
| Hunan, China          | East Asia  | Southeast Asia, East Asia, and Oceania | Female | 1989,2000,2010      | Census |
| Hunan, China          | East Asia  | Southeast Asia, East Asia, and Oceania | Male   | 1989,2000,2010      | Census |
| Inner Mongolia, China | East Asia  | Southeast Asia, East Asia, and Oceania | Female | 1989,2000,2010      | Census |
| Jiangsu, China        | East Asia  | Southeast Asia, East Asia, and Oceania | Female | 2000                | Census |
| Jiangsu, China        | East Asia  | Southeast Asia, East Asia, and Oceania | Male   | 2000                | Census |
| Jiangxi, China        | East Asia  | Southeast Asia, East Asia, and Oceania | Female | 1989,2000,2010      | Census |
| Jiangxi, China        | East Asia  | Southeast Asia, East Asia, and Oceania | Male   | 1989,2000,2010      | Census |
| Jilin, China          | East Asia  | Southeast Asia, East Asia, and Oceania | Female | 1982,1989,2000      | Census |
| Jilin, China          | East Asia  | Southeast Asia, East Asia, and Oceania | Male   | 1982,1989,2000      | Census |
| Liaoning, China       | East Asia  | Southeast Asia, East Asia, and Oceania | Female | 1989,2000,2010      | Census |
| Liaoning, China       | East Asia  | Southeast Asia, East Asia, and Oceania | Male   | 20002010            | Census |
| Ningxia, China        | East Asia  | Southeast Asia, East Asia, and Oceania | Female | 1989,2000,2010      | Census |
| Qinghai, China        | East Asia  | Southeast Asia, East Asia, and Oceania | Female | 19821989            | Census |
| Qinghai, China        | East Asia  | Southeast Asia, East Asia, and Oceania | Male   | 19821989            | Census |
| Shaanxi, China        | East Asia  | Southeast Asia, East Asia, and Oceania | Male   | 19892000            | Census |
| Shaanxi, China        | East Asia  | Southeast Asia, East Asia, and Oceania | Female | 19892000            | Census |
| Shandong, China       | East Asia  | Southeast Asia, East Asia, and Oceania | Female | 19892000            | Census |
| Shandong, China       | East Asia  | Southeast Asia, East Asia, and Oceania | Male   | 19892000            | Census |
| Shanxi, China         | East Asia  | Southeast Asia, East Asia, and Oceania | Male   | 1989,2000,2010      | Census |
| Shanxi, China         | East Asia  | Southeast Asia, East Asia, and Oceania | Female | 1989,2000,2010      | Census |

**Web Table 4 - Source for empirical life tables used in GBD 2013**

|                 | GBD Region                  | GBD Super Region                       | Sex    | Years                                                  | Source                   |
|-----------------|-----------------------------|----------------------------------------|--------|--------------------------------------------------------|--------------------------|
| Sichuan, China  | East Asia                   | Southeast Asia, East Asia, and Oceania | Female | 1989,2000,2010                                         | Census                   |
| Taiwan          | East Asia                   | Southeast Asia, East Asia, and Oceania | Male   | 1970-1979                                              | Vital Registration       |
| Taiwan          | East Asia                   | Southeast Asia, East Asia, and Oceania | Female | 1980-2010                                              | Human Mortality Database |
| Taiwan          | East Asia                   | Southeast Asia, East Asia, and Oceania | Female | 1970-1979                                              | Vital Registration       |
| Taiwan          | East Asia                   | Southeast Asia, East Asia, and Oceania | Male   | 1980-2010                                              | Human Mortality Database |
| Yunnan, China   | East Asia                   | Southeast Asia, East Asia, and Oceania | Female | 1989,2000,2010                                         | Census                   |
| Zhejiang, China | East Asia                   | Southeast Asia, East Asia, and Oceania | Female | 1989,2000,2010                                         | Census                   |
| Zhejiang, China | East Asia                   | Southeast Asia, East Asia, and Oceania | Male   | 1989,2000,2010                                         | Census                   |
| Fiji            | Oceania                     | Southeast Asia, East Asia, and Oceania | Male   | 2003-2004,2009                                         | Vital Registration       |
| Fiji            | Oceania                     | Southeast Asia, East Asia, and Oceania | Female | 2003-2004,2009                                         | Vital Registration       |
| Malaysia        | Southeast Asia              | Southeast Asia, East Asia, and Oceania | Male   | 1965,1967-1969,1976-1977,1984-1986,1990-1998,2000-2009 | Vital Registration       |
| Malaysia        | Southeast Asia              | Southeast Asia, East Asia, and Oceania | Female | 1965,1967-1969,1976-1977,1984-1986,1990-1998,2000-2009 | Vital Registration       |
| Philippines     | Southeast Asia              | Southeast Asia, East Asia, and Oceania | Female | 1956-2005,2008-2009                                    | Vital Registration       |
| Philippines     | Southeast Asia              | Southeast Asia, East Asia, and Oceania | Male   | 1956-2005,2008-2009                                    | Vital Registration       |
| Reunion         | Southeast Asia              | Southeast Asia, East Asia, and Oceania | Male   | 1956,1960,1969-1970,1980,1982-1987,2000-2007           | Vital Registration       |
| Reunion         | Southeast Asia              | Southeast Asia, East Asia, and Oceania | Female | 1966,2003                                              | Vital Registration       |
| Sri Lanka       | Southeast Asia              | Southeast Asia, East Asia, and Oceania | Male   | 1950-1970,1972-1989,1991-2007                          | Vital Registration       |
| Sri Lanka       | Southeast Asia              | Southeast Asia, East Asia, and Oceania | Female | 1975-1989,1991-2007                                    | Vital Registration       |
| Thailand        | Southeast Asia              | Southeast Asia, East Asia, and Oceania | Female | 1950-2000,2002-2009                                    | Vital Registration       |
| Thailand        | Southeast Asia              | Southeast Asia, East Asia, and Oceania | Male   | 1950-2000,2002-2009                                    | Vital Registration       |
| Mauritius       | Eastern Sub-Saharan Africa  | Sub-Saharan Africa                     | Female | 1957-1958,1965-2011                                    | Vital Registration       |
| Mauritius       | Eastern Sub-Saharan Africa  | Sub-Saharan Africa                     | Male   | 1960-1961,1963-2011                                    | Vital Registration       |
| South Africa    | Southern Sub-Saharan Africa | Sub-Saharan Africa                     | Male   | 1993-2009                                              | Vital Registration       |
| South Africa    | Southern Sub-Saharan Africa | Sub-Saharan Africa                     | Female | 1993-2009                                              | Vital Registration       |
| Cape Verde      | Western Sub-Saharan Africa  | Sub-Saharan Africa                     | Female | 1980                                                   | Vital Registration       |
| Cape Verde      | Western Sub-Saharan Africa  | Sub-Saharan Africa                     | Male   | 1980                                                   | Vital Registration       |



### Model

The new relational model life table system is based on the logic that to capture the very high levels of younger adult mortality seen in populations with high HIV prevalence, we need to develop a model life table for a counterfactual population without HIV and then add on the effects of HIV by age and sex. This system is captured in three components. We first estimate counterfactual levels of  ${}_5q_0$  and  ${}_{45}q_{15}$  in the absence of HIV. The empirical approach taken for this step is explained below. Then a full set of age-specific death rates are generated using the model life table system from the counterfactual levels of child and adult mortality. Finally, the increase in mortality, specific to each age-group, associated with HIV is estimated.

### Model for populations free of HIV/AIDS

In terms of estimating a set of age-specific death rates from  ${}_5q_0$  and  ${}_{45}q_{15}$  using a relational model life table, we have undertaken several innovations. A key change from previous relational model life table systems is the shift to modeling  $q_x$  in logit space rather than the  $l_x$  in the same space. Modeling  $q_x$  enables us to more precisely capture the different impacts of changes from the two entry parameters ( ${}_5q_0$  and  ${}_{45}q_{15}$ ) on different age-groups. The following equation provides the life table for populations not affected by HIV/AIDS.

$$\begin{aligned} \text{logit}({}_nq_x^c) = & \text{logit}({}_nq_x^s) + \beta_x^1 \cdot (\text{logit}({}_5q_0^c) - \text{logit}({}_5q_0^s)) \\ & + \beta_x^2 \cdot (\text{logit}({}_{45}q_{15}^c) - \text{logit}({}_{45}q_{15}^s)) + \xi_x \end{aligned} \quad 16$$

Where:  $\text{logit}({}_{45}q_{15}^s)$  is the logit transformation of the  ${}_{45}q_{15}$  in the standard life table (development of the standard life table is presented below);

$\text{logit}({}_{45}q_{15}^c)$  is the logit transformation of the  ${}_{45}q_{15}$  value for a country without HIV or the counterfactual level of  ${}_{45}q_{15}$  in the absence of HIV in a country affected by HIV/AIDS;

$\text{logit}({}_5q_0^s)$  is the logit transformation of the  ${}_5q_0$  in the standard population;

$\text{logit}({}_5q_0^c)$  is the logit transformation of  ${}_5q_0$  for a country without HIV or the counterfactual level of  ${}_5q_0$  in the absence of HIV in a country affected by HIV/AIDS;

$\text{logit}({}_nq_x^s)$  is the logit of the probability of death in the standard population from age  $x$  to  $x + n$ ;

$\text{logit}({}_nq_x^c)$  is the logit transformation of the probability of death from age  $x$  to  $x + n$  in a country without HIV or the counterfactual level of  ${}_nq_x$  in the absence of HIV in a country affected by HIV/AIDS;

$\beta_x^1$  and  $\beta_x^2$  are coefficients that vary by age  $x$  and which measure the impact of differences in child and adult mortality rates between a target life table and the standard life table on the estimated age pattern of mortality. In other words, both coefficients determine how much the estimated age pattern of mortality deviates from the standard by age and from linearity.

This equation proposes that the logit transformed age specific probability of dying in a target life table ( $c$ ) can be represented as a function of the corresponding logit transformed age specific probability of dying in a standard life table ( $s$ ) and the differences in probability of dying from age 0 to 5 in logit scale and the difference in probability of dying from age 15 to 60 in logit scale between a pairs of life tables:  $c$  and  $s$ . Life table  $c$  is the estimated HIV-free life table either for a country affected by the epidemic or not. The model is based on an empirical observation where the differences in age specific probabilities of dying in logit scale between two life tables are highly correlated with differences in  ${}_5q_0$  or  ${}_{45}q_{15}$  in logit scale when HIV/AIDS epidemic is not present.

Coefficients  $\beta_x^1$  and  $\beta_x^2$  are estimated using equation 17 with zero-HIV life tables in our database.

$$\text{logit}({}_nq_x^c) - \text{logit}({}_nq_x^s) = \beta_x^1 \cdot (\text{logit}({}_5q_0^c) - \text{logit}({}_5q_0^s)) + \beta_x^2 \cdot (\text{logit}({}_{45}q_{15}^c) - \text{logit}({}_{45}q_{15}^s)) + \xi_x \quad 17$$

In estimating the parameters, we use country-time specific and region (i.e. global burden of disease region) specific standard for each life table not affected by HIV/AIDS in our database (other aggregated standard life tables by

different geographical or epidemiological clustering criteria are also possible). Country-time specific standard life tables are used whenever an empirical life table from the same country within a 15-year time frame is available in our database. 69,265 unique pairs of life tables are matched using our life table database with time lags between 1 and 15 years. Region specific standard life tables are generated by collapsing all zero-HIV life tables in our database from the same global burden of disease region by sex. We then pair up all zero-HIV life tables in our database with the generated region specific life tables. This gives us an additional 5,976 pairs of life tables.

The estimated  $\hat{\beta}_x^1$  and  $\hat{\beta}_x^2$  are shown in **Web Table 5**. We limit the effects of  ${}_5q_0$  and  ${}_{45}q_{15}$  to certain age groups to avoid implausible outputs when  ${}_5q_0$  and  ${}_{45}q_{15}$  from a population change in opposite directions. With the results in **Web Table 5**, we can generate full life tables for populations not affected by HIV/AIDS. (The procedure discussed so far will generate age specific mortality up to age group 80-84 only. Age specific mortality after age 85 is generated using a separate model that will be discussed later in this article.) The values of  ${}_5q_0$  and  ${}_{45}q_{15}$  serve as points of entry (or entry parameters) for this new model life table system.

For GBD2013, we have updated our procedure of standard life table computation to take into account empirical relationship between differences in age pattern of mortality and geography, and time. To generate a standard, we first calculate the Mahalanobis distance between the target life table and all zero-HIV empirical life tables of the same sex in our database based on  ${}_5q_0$  and  ${}_{45}q_{15}$  (in logit scale). The Mahalanobis distance between two sets of  ${}_5q_0$  and  ${}_{45}q_{15}$  are defined as:

$$D_M^i(Q^i) = \sqrt{(Q^i - O)^T S^{-1} (Q^i - O)} \quad 18$$

where  $O$  is a multivariate vector representing entry parameters  ${}_5q_0$  and  ${}_{45}q_{15}$  in logit scale.

$Q^i = (\log it({}_5q_0^i), \log it({}_{45}q_{15}^i))$  is a multivariate vector that corresponds to an empirical life table  $i$  in our life table database. We choose Mahalanobis distance over Euclidean distance due to the fact that  ${}_5q_0$  and  ${}_{45}q_{15}$  are highly correlated in logit space (the correlation coefficients are 0.58 and 0.87 for males and females, respectively), and Mahalanobis distance takes the covariance matrix of  ${}_5q_0$  and  ${}_{45}q_{15}$  in logit scale into consideration when calculating the distance between any pair of life tables. We then keep the potentially most similar life tables as measured by the Mahalanobis distance. The number of life tables retained is based on the numbers of empirical life tables from the same country included in our database. For example, for developed countries with empirical life table for every year, only 10 most similar life tables and all life tables from the same country are kept for additional analysis.

In the second step, instead of obtaining a simple arithmetic mean of all selected life tables, we apply empirical weights to each selected life table and compute the weighted average. We have examined all possible pairs of life tables of the same sex in our empirical database by country, GBD region, and GBD super region. For each pair of life tables, we compute the sum of difference in  ${}_nq_x$  in logit space. We then get the mean of such values by sex, time difference in years of observation, and whether the pair of life tables are from the same country, same GBD region, or same GBD super region. The reciprocal of the squared means are used as empirical weights. The figure below shows the empirical weights by lag in time and geographic region for males. This process gives more weights to life tables closer in terms of time and geographic location.

The counterfactual life table,  $c$ , or the final life table,  $p$ , when HIV/AIDS is non-existent in the population, is estimated using a standard life table,  $s$ , which is generated using the aforementioned procedure and coefficients

$\hat{\beta}_x^{1,g}$  and  $\hat{\beta}_x^{2,g}$  as shown in **Web Table 5**.



**Web Figure 3: Empirical weights by region**

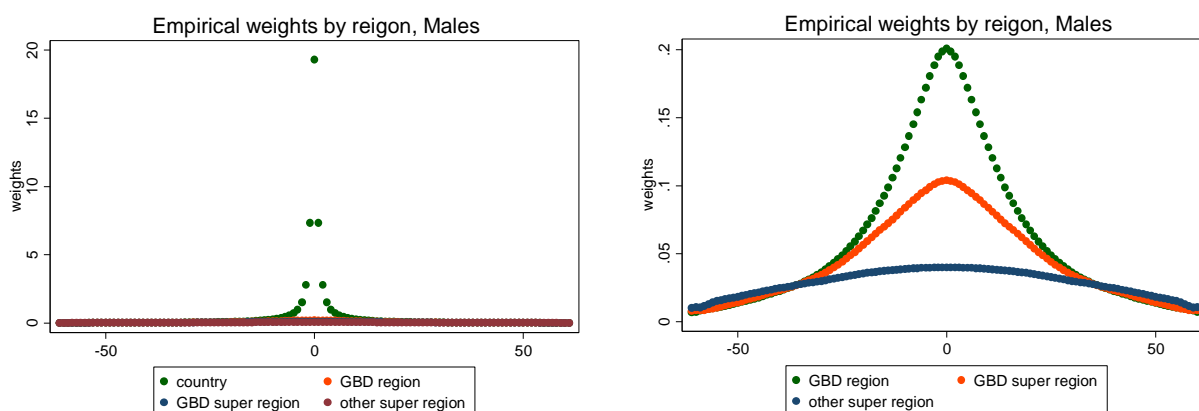

**Web Table 5: Model estimates by age and sex**

| age   | Diff. in 5q0(logit scale) |        | Diff. in 45q15 (logit scale) |        |
|-------|---------------------------|--------|------------------------------|--------|
|       | Male                      | Female | Male                         | Female |
| 0     | 0.9826                    | 0.9726 | --                           | --     |
| 1-4   | 1.0098                    | 1.0532 | --                           | --     |
| 5-9   | 0.7971                    | 0.7709 | --                           | --     |
| 10-14 | 0.4760                    | 0.3022 | 0.3898                       | 0.7101 |
| 15-19 | 0.1079                    | 0.1444 | 0.8100                       | 0.7964 |
| 20-24 | 0.0593                    | 0.1856 | 0.8212                       | 0.8577 |
| 25-29 | 0.0541                    | 0.1803 | 0.7964                       | 0.9382 |
| 30-34 | 0.0443                    | 0.1636 | 0.8189                       | 0.9148 |
| 35-39 | --                        | --     | 0.9184                       | 1.1703 |
| 40-44 | --                        | --     | 0.9263                       | 1.0269 |
| 45-49 | --                        | --     | 0.9221                       | 0.9176 |
| 50-54 | --                        | --     | 0.9041                       | 0.8641 |
| 55-59 | --                        | --     | 0.8583                       | 0.8085 |
| 60-64 | --                        | --     | 0.7999                       | 0.7807 |
| 65-69 | --                        | --     | 0.7411                       | 0.7608 |
| 70-74 | --                        | --     | 0.7110                       | 0.7780 |
| 75-79 | --                        | --     | 0.6616                       | 0.7415 |
| 80-84 | --                        | --     | 0.5954                       | 0.6385 |

*Introducing AIDS*

Currently, perhaps the most challenging issue for all existing model life table systems is providing plausible age specific mortality estimates given an HIV/AIDS epidemic. Both widely used model life table systems, the Coale-Demeny model life tables and the Modified Logit Life Table system, are largely based on empirical life tables from the pre-HIV era. In addition, they do not provide an integrated solution to the problem of incorporating HIV/AIDS. For GBD2013, we apply an innovative way of adding excess mortality due to HIV to specific age groups by the type of the HIV/AIDS epidemic: concentrated or generalized. In this step, we take all available vital registration data with

ICD10 coded causes of death. Then by sex, and type of epidemic, we run Seemingly Unrelated Regression (SUR) on the relative mortality risk due to HIV using constant only as shown in equation 19. The relative risks here are defined as the ratio HIV specific mortality in a specific age group and age group 40-44.

$$R_i = \alpha_i + \xi_i \quad 19$$

where  $i$  indicates different age groups, 0, 1-4, 5-9, 10-14, etc.

$$R_i = \frac{{}_n M_x^{HIV}}{{}_5 M_{40}^{HIV}}$$

We then repeatedly re-sample from the variance and covariance matrix of the estimated constants and residuals to get the mean and 95% uncertainty intervals of estimated relative risks by sex, age and types of epidemic. The figure below shows the relative risks for generalized epidemic.

**Web Figure 4: Relative risks for generalized epidemic**

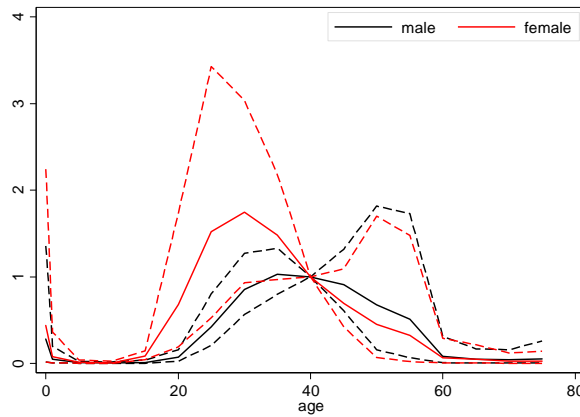

When crude death rates or age/sex specific death rates from HIV/AIDS are available, we use the equations described below to model the impact of HIV/AIDS. Here, we express child or adult mortality as functions of education, income, and crude death rate due to HIV/AIDS as described in the following equations:

$$\left({}_5 m_0\right)_{i,t} = e^{(\alpha^c + \beta_1^c \cdot \text{Edu}_{i,t}^c + \beta_2^c \cdot \text{LDI}_{i,t} + \gamma_i^c)} + \kappa_c \cdot (\text{CDR}_c^{\text{HIV}})_{i,t} + \xi_{i,t}^c \quad 20$$

$$\left({}_{45} m_{15}\right)_{i,t} = e^{(\alpha^a + \beta_1^a \cdot \text{Edu}_{i,t}^a + \beta_2^a \cdot \text{LDI}_{i,t} + \gamma_i^a)} + \kappa_a \cdot (\text{CDR}_a^{\text{HIV}})_{i,t} + \xi_{i,t}^a \quad 21$$

Where: a indicates parameters and variables specific to adult age-groups (15-59);

c indicates parameters and variables specific to child age-groups (0-4);

$\text{Edu}_{i,t}^c$  is maternal education in country  $i$  at time  $t$ ;

$\text{Edu}_{i,t}^a$  is population-weighted education for adult age-groups in country  $I$  at time  $t$ ;

$\text{LDI}_{i,t}$  is lagged distributed income in country  $i$  at time  $t$ ;

$\gamma_i$  terms are country-level random effects;

$(\text{CDR}_c^{\text{HIV}})_{i,t}$  and  $(\text{CDR}_a^{\text{HIV}})_{i,t}$  are the crude death rate from HIV for the child and adult age-groups, respectively, in country  $i$  at time  $t$ ;

$\kappa_c$  and  $\kappa_a$  are the coefficients giving the relationship between the crude death rate from HIV and the change in the survival probability;

$\xi$ ,  $\xi_{i,t}^c$  and  $\xi_{i,t}^a$  are error terms.

Essentially we model the difference between observed child/adult mortality rates and their HIV-free counterparts as a function of crude death rates due to HIV/AIDS in the respective age groups. Both equations 20 and 21 are

indirectly based on the mathematical relationship between probability of survival and mortality rates in the same age group as described by the following equations,

$${}_5n p_x^{\text{obs.}} = e^{-\int_x^{x+5n} \mu(a) da} = \exp\left(-\sum_x^{x+5*(n-1)} 5 \cdot {}_5 M_a\right) = \exp\left(-\sum_x^{x+5*(n-1)} 5 \cdot ({}_5 M_a^{\text{HIV}} + {}_5 M_a^{\text{non-HIV}})\right) \quad 22$$

From equation 22 we can see that probability of surviving,  ${}_5n p_x^{\text{obs.}}$ , in natural log space can be expressed as the sum of all age specific mortality rates from HIV and other non-HIV diseases. This enables us to model the difference of probability of survival between the observed values and the HIV-free scenario in log space on the crude death rates of HIV/AIDS, which is viewed as a proxy for the unobserved true mortality rates due to HIV/AIDS.

Using equation 20 and 21, we can estimate what the child mortality and adult mortality rates ( ${}_5q_0$  and  ${}_{45}q_{15}$ ) would be if HIV/AIDS are removed from the population. This can be done by the product of estimated HIV coefficients and crude death rates due to HIV/AIDS from the estimated all-cause child and adult mortality rates. These HIV-counterfactual child and adult mortality rates are then used the selected standard life table and generate HIV-free life table using the procedure described by equation 16. Through an iteration process, we then estimate age specific mortality rates due to HIV/AIDS and add them to the HIV-free age pattern of mortality just estimated so that  ${}_5q_0$  and  ${}_{45}q_{15}$  from the end of the iteration process match the all-cause child and adult mortality rates.

#### *Extending to oldest ages*

To extrapolate age-specific mortality beyond age 85, the Gompertz law of mortality and other functional model age pattern of mortality methods are generally used.<sup>18,19</sup> Here, we have developed a new model with better predictive validity than existing methods. Age-group dummies and probability of dying from age 80 to 84 in logarithmic scales are used to estimate the difference in age-specific probability of dying in logarithmic scale between two consecutive age-groups, as described in the following equation:

$$\ln\left({}_5 q_x^{j,t,g}\right) - \ln\left({}_5 q_{x+5}^{j,t,g}\right) = \alpha^g + \beta_x^g \cdot \text{age} + \gamma^g \cdot \ln\left({}_5 q_{80}^{j,t,g}\right) + \eta_j^g + \xi_x^{j,t,g} \quad 23$$

Here,  $j$  refers to country,  $g$  refers to sex, and  $t$  refers to time. Parameters are estimated using data from the HMD.<sup>16</sup> The parameters estimated from the above model are then used to generate age-specific probability of death from age 85 to 109. The validation process is done using a 20% out-of-sample procedure, and we repeat this process 100 times and compare the performance of our model with a modified Gompertz model.<sup>20</sup> The results of the validation, as shown in **Web Figure 5**, suggest that our model outperforms the modified Gompertz model in terms of relative error in predicted age-specific mortality rates.

**Web Figure 5: Relative error in estimated probability of death**

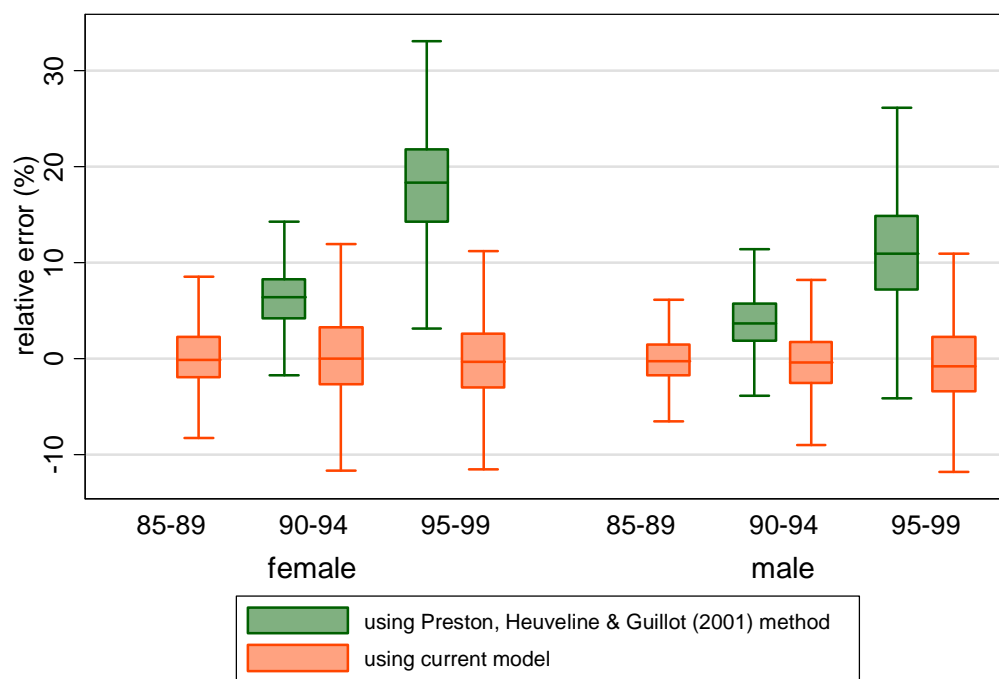

#### *Uncertainty in the estimated life tables*

One important attribute of this current study is the inclusion of uncertainty in every single step of the GBD mortality estimation process. We have integrated uncertainty from the entry parameters ( ${}_5q_0$  and  ${}_{45}q_{15}$ ) and the coefficients of each model we have discussed in this section based on the method illustrated by King et al.<sup>21</sup> Essentially, the model life table process just described is repeated 1,000 times based on randomly paired entry parameters (thus different standard life tables) and model coefficients. As a result of this process, in countries where uncertainties in estimated entry parameters are high, we can have wide uncertainty intervals in the estimated deaths, which is the final product of the GBD mortality process.

#### **F. New Population Structure for Standardization**

The WHO last released a global age standard in 2001. The world has experienced substantial change in global demography since then, inciting the need for a new standard population for computing age-standardized rates.

The old WHO standard used population data from the United Nations Population Division's World Population Prospects (WPP) 1998 revision. It was calculated using the non-weighted average across all countries of each age-specific population percentage in each 5-year age group up to the terminal group of 100+, using estimates from the years 2000-2025. We mirrored this technique with three key adaptations: (1) we used population data from the WPP 2012 revision for years 2010-2035; (2) we used the interpolated population in age group 0-1 provided in the WPP 2012 revision to separate ages 0-1 and 1-4; (3) we applied the non-weighted mean proportion across countries of populations in the early neonatal (0-6 days), late neonatal (7-27 days), and post neonatal (28-364 days) age groups from the GBD2013 study in years 2010-2013 to the new age 0-1 standard to get standard populations in these age groups. This new standard reflects an up-to-date age structure that facilitates more relevant comparisons between countries when computing age-standardized rates.

**Web Table 6: New world population age-standard**

**Web Table 6 — New world population age-standard**

| <b>Age</b>  | <b>Percent of Population</b> | <b>Rounded</b> |
|-------------|------------------------------|----------------|
| 0-6 days    | 0.0367429                    | 0.04           |
| 7-27 days   | 0.1079651                    | 0.11           |
| 28-364 days | 1.6850246                    | 1.68*          |
| 0-1 years   | 1.8297326                    | 1.83           |
| 1-5 years   | 7.1822788                    | 7.18           |
| 5-9 years   | 8.6928104                    | 8.69           |
| 10-14 years | 8.3952037                    | 8.4            |
| 15-19 years | 8.098376                     | 8.1            |
| 20-24 years | 7.8144767                    | 7.81           |
| 25-29 years | 7.559828                     | 7.56           |
| 30-34 years | 7.2485193                    | 7.25           |
| 35-39 years | 6.8558773                    | 6.86           |
| 40-44 years | 6.3842306                    | 6.38           |
| 45-49 years | 5.8490788                    | 5.85           |
| 50-54 years | 5.2709755                    | 5.27           |
| 55-59 years | 4.6780164                    | 4.68           |
| 60-64 years | 4.05754                      | 4.06           |
| 65-69 years | 3.3590683                    | 3.36           |
| 70-74 years | 2.6292656                    | 2.63           |
| 75-79 years | 1.8966813                    | 1.9            |
| 80-84 years | 1.2134801                    | 1.21           |
| 85-89 years | 0.644468                     | 0.64           |
| 90-94 years | 0.2576025                    | 0.26           |
| 95-99 years | 0.0700765                    | 0.07           |
| 100+ years  | 0.0124135                    | 0.01           |

\* rounded down in order for rounded numbers to sum to 100 percent

**Web Figure 6: Comparison of old and new population age standard**

Web Figure 6: Comparison of old and new population age standard

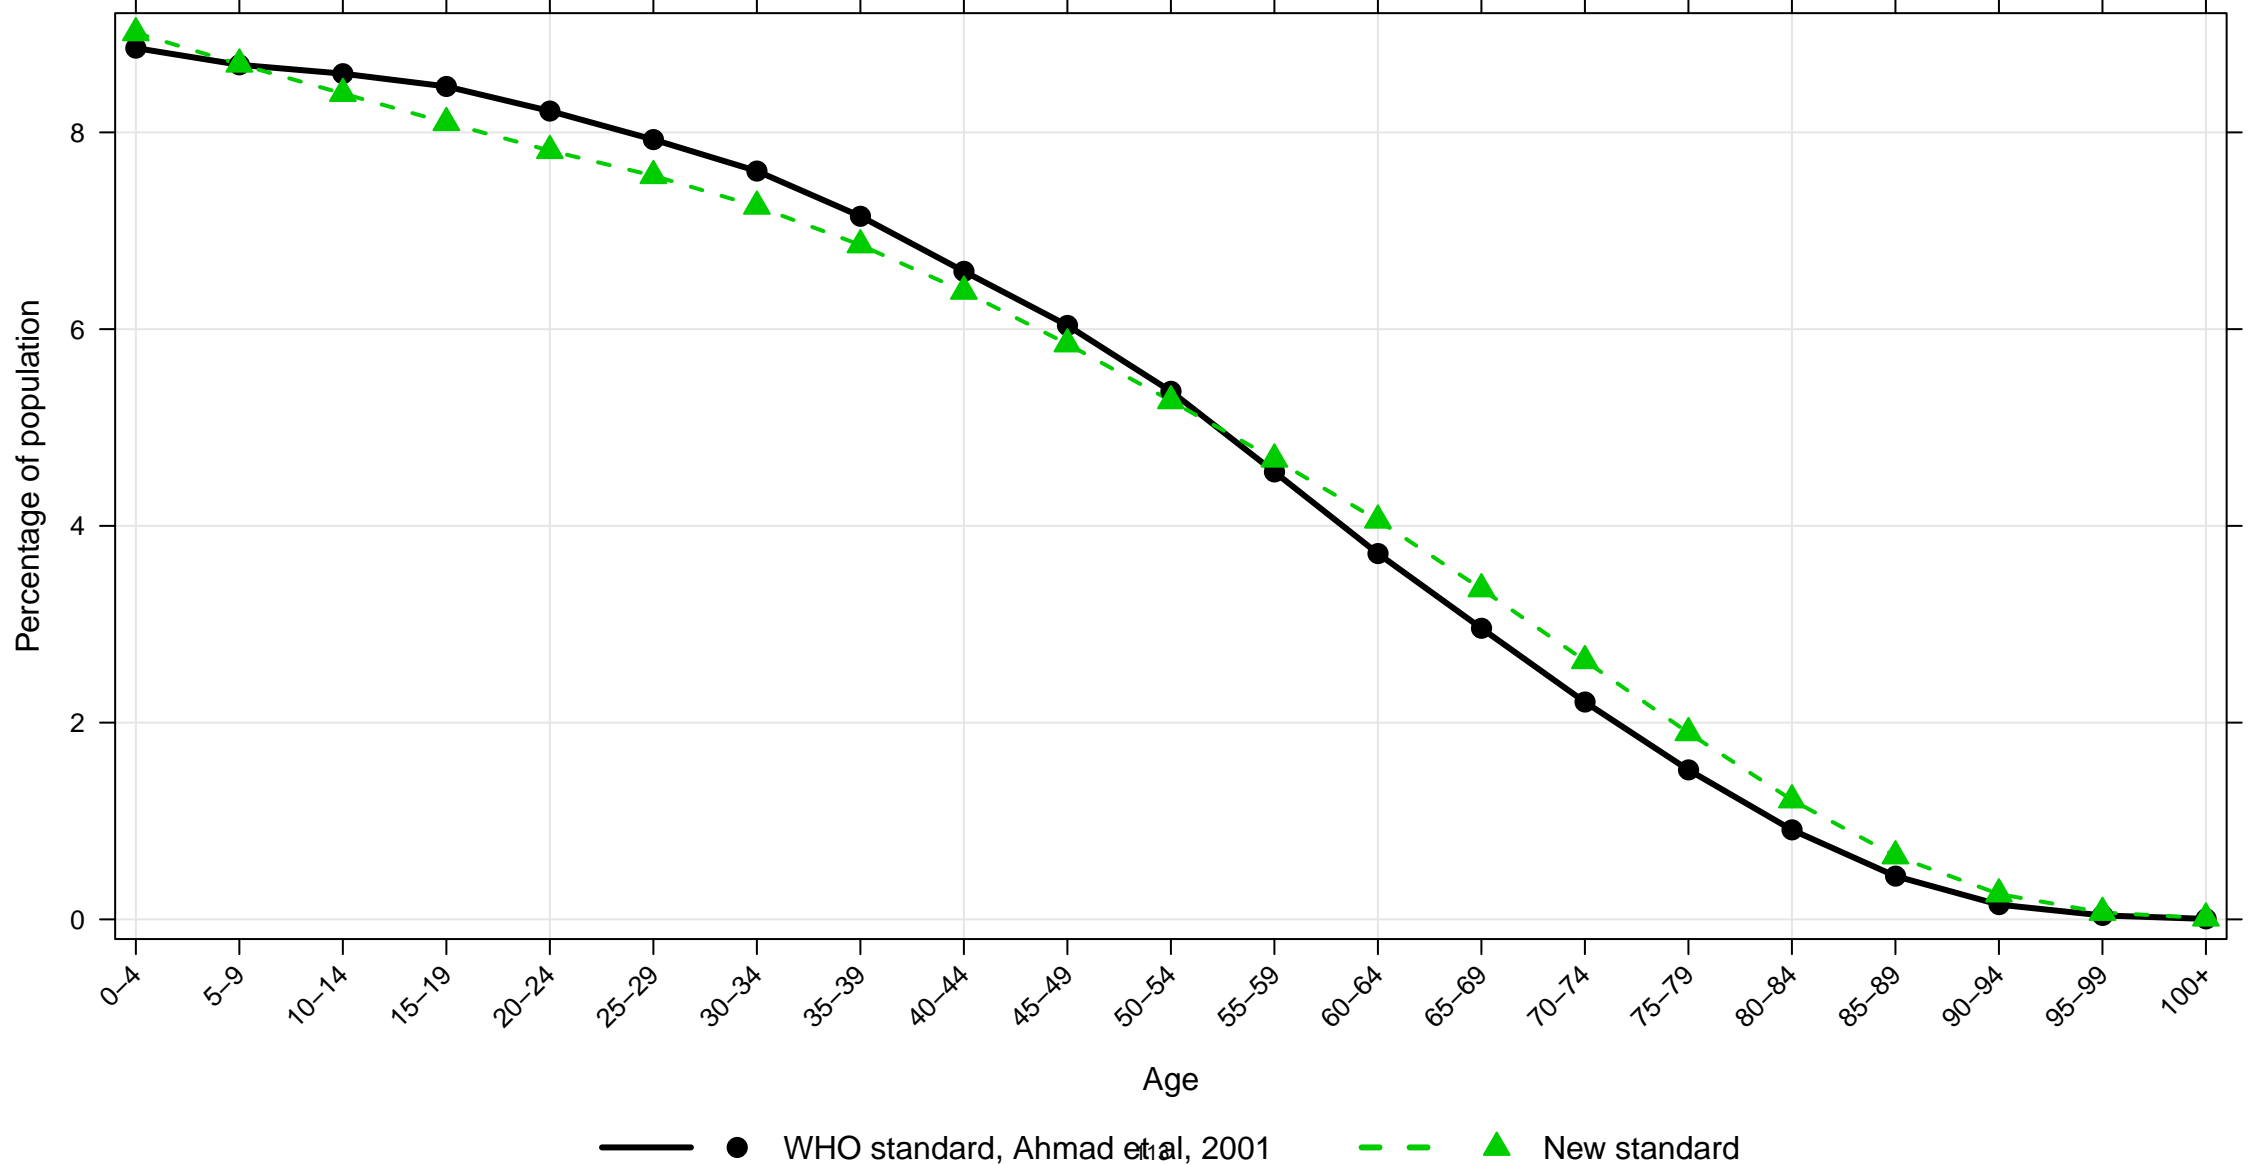



### **Section 3. Supplemental and detailed results for all-cause mortality**

This section presents detailed results on death numbers, mean age at death, life expectancy, and population age standard.

**Web Table 7. Regional deaths in thousands with 95% UI by age and sex in 1990, 2000, 2013**

**Web Table 7 – Regional deaths in thousands with 95% uncertainty by age and sex in 1990, 2000, 2013**

| Age (years)              | 1990                        |                             |                                | 2000                        |                             |                                | 2013                        |                             |                                |
|--------------------------|-----------------------------|-----------------------------|--------------------------------|-----------------------------|-----------------------------|--------------------------------|-----------------------------|-----------------------------|--------------------------------|
|                          | Male                        | Female                      | Total                          | Male                        | Female                      | Total                          | Male                        | Female                      | Total                          |
| High-income Asia Pacific |                             |                             |                                |                             |                             |                                |                             |                             |                                |
| Early neonatal           | 2.88<br>(2.56 – 3.43)       | 2.12<br>(1.79 – 2.56)       | 4.99<br>(4.35 – 5.95)          | 1.75<br>(1.69 – 1.80)       | 1.34<br>(1.19 – 1.51)       | 3.09<br>(2.90 – 3.28)          | 0.87<br>(0.74 – 1.05)       | 0.71<br>(0.58 – 0.88)       | 1.58<br>(1.33 – 1.92)          |
| Late neonatal            | 0.93<br>(0.85 – 1.03)       | 0.73<br>(0.67 – 0.80)       | 1.66<br>(1.53 – 1.83)          | 0.63<br>(0.60 – 0.66)       | 0.51<br>(0.48 – 0.53)       | 1.14<br>(1.10 – 1.17)          | 0.37<br>(0.31 – 0.43)       | 0.30<br>(0.26 – 0.35)       | 0.67<br>(0.58 – 0.78)          |
| Postneonatal             | 2.41<br>(2.14 – 2.68)       | 1.91<br>(1.60 – 2.24)       | 4.32<br>(3.77 – 4.91)          | 1.52<br>(1.44 – 1.59)       | 1.22<br>(1.04 – 1.40)       | 2.74<br>(2.48 – 2.99)          | 0.82<br>(0.70 – 0.97)       | 0.66<br>(0.54 – 0.81)       | 1.48<br>(1.25 – 1.77)          |
| 1-4                      | 2.18<br>(1.73 – 2.74)       | 1.63<br>(1.42 – 1.88)       | 3.81<br>(3.17 – 4.64)          | 1.42<br>(1.14 – 1.74)       | 1.10<br>(0.98 – 1.24)       | 2.53<br>(2.12 – 2.97)          | 0.73<br>(0.56 – 0.97)       | 0.60<br>(0.49 – 0.72)       | 1.33<br>(1.05 – 1.68)          |
| 5-9                      | 2.37<br>(2.08 – 2.76)       | 1.54<br>(1.34 – 1.78)       | 3.91<br>(3.43 – 4.49)          | 0.93<br>(0.89 – 0.97)       | 0.60<br>(0.57 – 0.63)       | 1.53<br>(1.49 – 1.56)          | 0.44<br>(0.38 – 0.50)       | 0.32<br>(0.28 – 0.36)       | 0.75<br>(0.66 – 0.86)          |
| 10-14                    | 1.94<br>(1.80 – 2.10)       | 1.27<br>(1.20 – 1.34)       | 3.21<br>(3.01 – 3.43)          | 0.85<br>(0.82 – 0.87)       | 0.53<br>(0.52 – 0.55)       | 1.38<br>(1.35 – 1.41)          | 0.50<br>(0.46 – 0.55)       | 0.33<br>(0.31 – 0.35)       | 0.83<br>(0.78 – 0.90)          |
| 15-19                    | 6.06<br>(5.97 – 6.15)       | 2.34<br>(2.29 – 2.40)       | 8.41<br>(8.29 – 8.53)          | 3.10<br>(3.04 – 3.17)       | 1.32<br>(1.30 – 1.34)       | 4.42<br>(4.35 – 4.49)          | 1.56<br>(1.45 – 1.65)       | 0.76<br>(0.71 – 0.82)       | 2.32<br>(2.20 – 2.44)          |
| 20-24                    | 6.79<br>(6.71 – 6.88)       | 2.82<br>(2.74 – 2.90)       | 9.62<br>(9.50 – 9.75)          | 4.66<br>(4.61 – 4.70)       | 1.91<br>(1.88 – 1.95)       | 6.57<br>(6.52 – 6.62)          | 2.56<br>(2.38 – 2.72)       | 1.20<br>(1.10 – 1.30)       | 3.76<br>(3.56 – 3.96)          |
| 25-29                    | 7.30<br>(7.21 – 7.38)       | 3.15<br>(3.06 – 3.23)       | 10.44<br>(10.30 – 10.58)       | 5.85<br>(5.78 – 5.92)       | 2.54<br>(2.50 – 2.58)       | 8.39<br>(8.31 – 8.46)          | 3.30<br>(3.08 – 3.49)       | 1.57<br>(1.44 – 1.70)       | 4.87<br>(4.61 – 5.12)          |
| 30-34                    | 8.63<br>(8.53 – 8.74)       | 3.88<br>(3.79 – 3.96)       | 12.51<br>(12.36 – 12.66)       | 6.83<br>(6.76 – 6.91)       | 3.20<br>(3.16 – 3.25)       | 10.03<br>(9.95 – 10.11)        | 4.21<br>(3.93 – 4.47)       | 2.16<br>(1.99 – 2.35)       | 6.38<br>(6.05 – 6.71)          |
| 35-39                    | 11.30<br>(11.18 – 11.42)    | 5.26<br>(5.21 – 5.32)       | 16.57<br>(16.42 – 16.70)       | 9.77<br>(9.66 – 9.87)       | 4.40<br>(4.33 – 4.47)       | 14.17<br>(14.04 – 14.30)       | 7.60<br>(7.02 – 8.18)       | 3.91<br>(3.51 – 4.33)       | 11.51<br>(10.76 – 12.18)       |
| 40-44                    | 17.42<br>(17.27 – 17.58)    | 8.22<br>(8.14 – 8.29)       | 25.64<br>(25.47 – 25.81)       | 14.78<br>(14.63 – 14.92)    | 6.26<br>(6.19 – 6.33)       | 21.04<br>(20.87 – 21.20)       | 11.69<br>(10.82 – 12.53)    | 5.51<br>(5.03 – 6.02)       | 17.20<br>(16.14 – 18.17)       |
| 45-49                    | 23.89<br>(23.69 – 24.09)    | 11.05<br>(10.96 – 11.14)    | 34.94<br>(34.72 – 35.16)       | 21.88<br>(21.70 – 22.07)    | 9.53<br>(9.45 – 9.61)       | 31.41<br>(31.21 – 31.62)       | 17.11<br>(15.86 – 18.34)    | 7.68<br>(7.08 – 8.33)       | 24.79<br>(23.35 – 26.13)       |
| 50-54                    | 33.78<br>(33.47 – 34.06)    | 15.37<br>(15.24 – 15.48)    | 49.15<br>(48.80 – 49.45)       | 34.59<br>(34.38 – 34.80)    | 15.24<br>(15.13 – 15.36)    | 49.83<br>(49.60 – 50.08)       | 24.37<br>(22.62 – 26.09)    | 10.58<br>(9.80 – 11.41)     | 34.95<br>(32.94 – 36.80)       |
| 55-59                    | 45.62<br>(45.34 – 45.89)    | 20.86<br>(20.71 – 21.00)    | 66.48<br>(66.11 – 66.77)       | 44.07<br>(43.81 – 44.32)    | 18.99<br>(18.86 – 19.13)    | 63.06<br>(62.78 – 63.34)       | 33.68<br>(31.34 – 35.98)    | 14.41<br>(13.36 – 15.48)    | 48.09<br>(45.40 – 50.62)       |
| 60-64                    | 55.86<br>(55.31 – 56.44)    | 27.86<br>(27.64 – 28.06)    | 83.72<br>(83.08 – 84.34)       | 59.19<br>(58.62 – 59.78)    | 26.20<br>(25.96 – 26.46)    | 85.39<br>(84.72 – 86.05)       | 66.13<br>(61.31 – 70.90)    | 28.54<br>(26.26 – 30.73)    | 94.67<br>(89.42 – 99.94)       |
| 65-69                    | 59.57<br>(59.17 – 59.97)    | 37.67<br>(37.30 – 38.01)    | 97.24<br>(96.57 – 97.78)       | 78.24<br>(77.47 – 79.02)    | 38.50<br>(38.10 – 38.92)    | 116.73<br>(115.80 – 117.67)    | 78.68<br>(73.44 – 83.88)    | 36.53<br>(33.74 – 39.21)    | 115.21<br>(109.21 – 121.10)    |
| 70-74                    | 67.22<br>(66.92 – 67.51)    | 50.26<br>(49.73 – 50.77)    | 117.48<br>(116.80 – 118.07)    | 94.02<br>(93.27 – 94.75)    | 54.93<br>(54.32 – 55.60)    | 148.95<br>(147.88 – 150.04)    | 95.62<br>(89.56 – 101.59)   | 50.23<br>(46.48 – 53.84)    | 145.85<br>(138.54 – 152.92)    |
| 75-79                    | 82.73<br>(82.30 – 83.16)    | 73.60<br>(72.69 – 74.48)    | 156.34<br>(155.31 – 157.34)    | 93.92<br>(93.13 – 94.72)    | 77.06<br>(76.06 – 78.13)    | 170.98<br>(169.49 – 172.53)    | 133.87<br>(125.80 – 141.59) | 85.72<br>(79.61 – 91.44)    | 219.58<br>(209.23 – 229.31)    |
| 80+                      | 149.04<br>(148.56 – 149.49) | 213.85<br>(211.69 – 215.95) | 362.89<br>(360.66 – 365.04)    | 204.07<br>(202.21 – 205.97) | 304.06<br>(300.13 – 308.17) | 508.14<br>(503.04 – 513.42)    | 384.75<br>(367.39 – 401.91) | 563.17<br>(535.98 – 589.95) | 947.92<br>(914.02 – 980.16)    |
| All ages                 | 587.93<br>(585.22 – 590.84) | 485.38<br>(480.87 – 489.52) | 1073.31<br>(1067.39 – 1078.70) | 682.06<br>(676.69 – 687.47) | 569.45<br>(563.13 – 576.14) | 1251.50<br>(1241.69 – 1261.36) | 868.86<br>(819.31 – 916.87) | 814.87<br>(768.49 – 858.92) | 1683.73<br>(1613.46 – 1747.84) |
| Central Asia             |                             |                             |                                |                             |                             |                                |                             |                             |                                |
| Early neonatal           | 22.03<br>(21.42 – 22.69)    | 15.83<br>(14.96 – 16.85)    | 37.86<br>(36.41 – 39.49)       | 15.36<br>(14.91 – 15.81)    | 10.81<br>(10.18 – 11.50)    | 26.17<br>(25.12 – 27.20)       | 14.30<br>(13.53 – 15.07)    | 9.98<br>(9.21 – 10.77)      | 24.29<br>(22.79 – 25.74)       |
| Late neonatal            | 5.90<br>(5.56 – 6.19)       | 5.44<br>(5.21 – 5.70)       | 11.34<br>(10.95 – 11.72)       | 3.74<br>(3.52 – 3.98)       | 3.50<br>(3.31 – 3.68)       | 7.24<br>(6.94 – 7.56)          | 2.80<br>(2.60 – 3.03)       | 2.64<br>(2.45 – 2.87)       | 5.44<br>(5.08 – 5.85)          |
| Postneonatal             | 25.51<br>(24.56 – 26.46)    | 21.04<br>(19.24 – 23.00)    | 46.55<br>(44.16 – 49.11)       | 16.31<br>(15.56 – 17.13)    | 13.07<br>(11.86 – 14.30)    | 29.39<br>(27.49 – 31.05)       | 11.17<br>(10.25 – 12.29)    | 8.74<br>(7.65 – 10.00)      | 19.91<br>(17.96 – 22.09)       |
| 1-4                      | 16.14<br>(13.95 – 18.38)    | 13.83<br>(12.84 – 14.77)    | 29.97<br>(26.91 – 33.09)       | 10.51<br>(8.89 – 12.45)     | 8.77<br>(8.06 – 9.55)       | 19.28<br>(16.99 – 21.86)       | 6.85<br>(5.75 – 8.13)       | 5.40<br>(4.86 – 6.04)       | 12.25<br>(10.67 – 14.17)       |
| 5-9                      | 4.40<br>(4.20 – 4.60)       | 3.15<br>(3.02 – 3.29)       | 7.54<br>(7.31 – 7.80)          | 4.19<br>(4.02 – 4.38)       | 3.01<br>(2.85 – 3.16)       | 7.20<br>(6.98 – 7.46)          | 2.57<br>(2.41 – 2.76)       | 1.70<br>(1.58 – 1.85)       | 4.27<br>(4.01 – 4.56)          |
| 10-14                    | 3.17<br>(3.09 – 3.26)       | 2.04<br>(1.97 – 2.11)       | 5.21<br>(5.11 – 5.32)          | 3.80<br>(3.69 – 3.92)       | 2.44<br>(2.36 – 2.52)       | 6.24<br>(6.11 – 6.39)          | 2.25<br>(2.11 – 2.38)       | 1.35<br>(1.25 – 1.46)       | 3.60<br>(3.42 – 3.79)          |
| 15-19                    | 4.35<br>(4.23 – 4.50)       | 2.25<br>(2.19 – 2.32)       | 6.60<br>(6.44 – 6.76)          | 5.25<br>(5.05 – 5.47)       | 2.60<br>(2.53 – 2.69)       | 7.86<br>(7.63 – 8.08)          | 4.48<br>(4.07 – 4.90)       | 2.01<br>(1.81 – 2.19)       | 6.49<br>(6.03 – 6.95)          |
| 20-24                    | 6.32<br>(6.11 – 6.55)       | 3.01<br>(2.92 – 3.10)       | 9.32<br>(9.09 – 9.57)          | 7.67<br>(7.35 – 7.99)       | 3.35<br>(3.24 – 3.48)       | 11.02<br>(10.69 – 11.37)       | 8.30<br>(7.41 – 9.21)       | 3.14<br>(2.82 – 3.46)       | 11.44<br>(10.48 – 12.43)       |
| 25-29                    | 8.17<br>(7.88 – 8.48)       | 3.72<br>(3.61 – 3.84)       | 11.89<br>(11.56 – 12.22)       | 8.89<br>(8.52 – 9.27)       | 3.77<br>(3.65 – 3.91)       | 12.66<br>(12.28 – 13.05)       | 9.99<br>(8.95 – 11.05)      | 3.69<br>(3.30 – 4.10)       | 13.69<br>(12.61 – 14.83)       |
| 30-34                    | 9.10<br>(8.77 – 9.45)       | 4.07<br>(3.95 – 4.20)       | 13.17<br>(12.82 – 13.54)       | 10.03<br>(9.62 – 10.42)     | 4.41<br>(4.27 – 4.57)       | 14.45<br>(13.98 – 14.85)       | 10.60<br>(9.55 – 11.76)     | 4.02<br>(3.59 – 4.48)       | 14.62<br>(13.48 – 15.91)       |
| 35-39                    | 9.36<br>(9.00 – 9.73)       | 4.30<br>(4.16 – 4.45)       | 13.66<br>(13.27 – 14.05)       | 13.61<br>(13.06 – 14.11)    | 6.19<br>(5.95 – 6.43)       | 19.80<br>(19.17 – 20.35)       | 12.11<br>(10.90 – 13.51)    | 4.88<br>(4.26 – 5.47)       | 17.00<br>(15.64 – 18.58)       |
| 40-44                    | 8.91<br>(8.55 – 9.26)       | 4.11<br>(3.98 – 4.25)       | 13.02<br>(12.63 – 13.41)       | 16.46<br>(15.82 – 17.05)    | 7.35<br>(7.08 – 7.61)       | 23.81<br>(23.08 – 24.45)       | 14.97<br>(13.50 – 16.69)    | 6.38<br>(5.61 – 7.15)       | 21.34<br>(19.74 – 23.26)       |
| 45-49                    | 9.54<br>(9.19 – 9.88)       | 4.48<br>(4.32 – 4.63)       | 14.01<br>(13.62 – 14.40)       | 18.07<br>(17.37 – 18.74)    | 8.51<br>(8.20 – 8.80)       | 26.58<br>(25.77 – 27.33)       | 20.13<br>(18.22 – 22.28)    | 9.27<br>(8.18 – 10.36)      | 29.41<br>(27.26 – 31.93)       |
| 50-54                    | 19.64<br>(18.98 – 20.33)    | 9.97<br>(9.64 – 10.30)      | 29.62<br>(28.87 – 30.44)       | 16.80<br>(16.14 – 17.44)    | 8.53<br>(8.21 – 8.82)       | 25.33<br>(24.58 – 26.05)       | 27.59<br>(25.03 – 30.46)    | 13.68<br>(12.11 – 15.25)    | 41.27<br>(38.25 – 44.72)       |
| 55-59                    | 19.96<br>(19.43 – 20.50)    | 11.18<br>(10.78 – 11.56)    | 31.15<br>(30.51 – 31.81)       | 16.30<br>(15.77 – 16.81)    | 9.19<br>(8.87 – 9.47)       | 25.48<br>(24.86 – 26.09)       | 30.33<br>(27.79 – 33.41)    | 16.41<br>(14.62 – 18.29)    | 46.73<br>(43.66 – 50.46)       |

**Web Table 7 – Regional deaths in thousands with 95% uncertainty by age and sex in 1990, 2000, 2013**

| Age (years)       | 1990                           |                                |                                | 2000                           |                                |                                | 2013                           |                                |                                 |
|-------------------|--------------------------------|--------------------------------|--------------------------------|--------------------------------|--------------------------------|--------------------------------|--------------------------------|--------------------------------|---------------------------------|
|                   | Male                           | Female                         | Total                          | Male                           | Female                         | Total                          | Male                           | Female                         | Total                           |
| 60-64             | 27.93<br>(27.30 – 28.61)       | 18.54<br>(17.93 – 19.07)       | 46.47<br>(45.62 – 47.34)       | 33.20<br>(32.20 – 34.19)       | 21.02<br>(20.35 – 21.60)       | 54.22<br>(53.05 – 55.38)       | 28.69<br>(26.64 – 31.25)       | 17.83<br>(16.07 – 19.53)       | 46.52<br>(43.86 – 49.77)        |
| 65-69             | 19.46<br>(19.08 – 19.87)       | 19.31<br>(18.71 – 19.86)       | 38.77<br>(38.02 – 39.41)       | 29.73<br>(29.03 – 30.36)       | 21.80<br>(21.19 – 22.40)       | 51.53<br>(50.59 – 52.46)       | 23.98<br>(22.48 – 25.77)       | 16.91<br>(15.40 – 18.38)       | 40.88<br>(38.87 – 43.28)        |
| 70-74             | 15.58<br>(15.31 – 15.86)       | 20.08<br>(19.51 – 20.63)       | 35.66<br>(34.97 – 36.24)       | 36.23<br>(35.50 – 36.93)       | 33.31<br>(32.40 – 34.17)       | 69.55<br>(68.44 – 70.70)       | 29.70<br>(28.02 – 31.80)       | 24.35<br>(22.31 – 26.22)       | 54.05<br>(51.51 – 57.06)        |
| 75-79             | 19.72<br>(19.43 – 20.02)       | 29.15<br>(28.32 – 29.88)       | 48.87<br>(47.93 – 49.65)       | 20.24<br>(19.92 – 20.56)       | 29.81<br>(28.99 – 30.57)       | 50.06<br>(49.25 – 50.89)       | 35.90<br>(34.14 – 38.19)       | 37.48<br>(34.57 – 40.03)       | 73.38<br>(70.18 – 77.05)        |
| 80+               | 34.74<br>(34.45 – 35.02)       | 65.77<br>(64.91 – 66.63)       | 100.51<br>(99.55 – 101.37)     | 25.16<br>(24.96 – 25.38)       | 61.01<br>(60.21 – 61.76)       | 86.18<br>(85.41 – 86.96)       | 50.29<br>(48.84 – 51.83)       | 84.66<br>(81.25 – 87.58)       | 134.95<br>(131.34 – 138.60)     |
| All ages          | 289.92<br>(284.22 – 295.46)    | 261.29<br>(256.09 – 266.97)    | 551.20<br>(543.41 – 559.44)    | 311.57<br>(304.28 – 318.55)    | 262.46<br>(256.96 – 267.86)    | 574.03<br>(564.84 – 582.91)    | 347.01<br>(326.47 – 371.51)    | 274.53<br>(255.60 – 292.20)    | 621.54<br>(594.10 – 651.94)     |
| <b>East Asia</b>  |                                |                                |                                |                                |                                |                                |                                |                                |                                 |
| Early neonatal    | 270.90<br>(250.71 – 289.15)    | 193.35<br>(166.44 – 220.53)    | 464.26<br>(416.21 – 508.39)    | 134.05<br>(126.53 – 140.66)    | 91.95<br>(81.11 – 104.10)      | 226.00<br>(208.38 – 243.67)    | 54.28<br>(48.45 – 59.69)       | 39.51<br>(32.06 – 48.39)       | 93.80<br>(82.26 – 105.63)       |
| Late neonatal     | 74.16<br>(64.33 – 83.68)       | 61.57<br>(54.44 – 69.07)       | 135.73<br>(123.29 – 148.85)    | 28.47<br>(25.29 – 31.77)       | 22.88<br>(20.36 – 25.44)       | 51.34<br>(46.97 – 56.14)       | 15.52<br>(13.69 – 17.54)       | 11.67<br>(10.32 – 13.03)       | 27.19<br>(24.52 – 29.89)        |
| Postneonatal      | 298.14<br>(264.51 – 330.91)    | 256.31<br>(196.03 – 331.37)    | 554.45<br>(466.23 – 654.13)    | 104.95<br>(93.88 – 115.79)     | 87.07<br>(65.76 – 112.12)      | 192.03<br>(160.57 – 224.77)    | 37.37<br>(32.66 – 42.04)       | 28.52<br>(22.76 – 35.83)       | 65.89<br>(55.62 – 78.14)        |
| 1-4               | 239.93<br>(157.10 – 333.75)    | 217.17<br>(179.54 – 262.73)    | 457.10<br>(336.91 – 590.26)    | 89.50<br>(59.11 – 122.75)      | 69.50<br>(57.35 – 83.00)       | 159.00<br>(118.01 – 204.95)    | 35.51<br>(24.52 – 48.58)       | 25.17<br>(20.07 – 31.04)       | 60.68<br>(44.94 – 79.56)        |
| 5-9               | 57.43<br>(51.65 – 63.34)       | 46.04<br>(39.00 – 53.33)       | 103.47<br>(94.16 – 112.33)     | 38.70<br>(36.53 – 41.41)       | 25.12<br>(23.07 – 27.38)       | 63.82<br>(60.81 – 66.92)       | 14.68<br>(13.11 – 16.48)       | 10.37<br>(9.48 – 11.27)        | 25.05<br>(23.08 – 27.13)        |
| 10-14             | 41.17<br>(37.41 – 44.80)       | 30.13<br>(26.02 – 34.15)       | 71.31<br>(66.07 – 76.51)       | 43.71<br>(41.26 – 47.02)       | 26.21<br>(24.47 – 28.16)       | 69.92<br>(66.79 – 73.87)       | 14.94<br>(13.56 – 16.58)       | 9.52<br>(8.62 – 10.32)         | 24.46<br>(22.82 – 26.39)        |
| 15-19             | 81.52<br>(74.48 – 91.20)       | 53.18<br>(45.40 – 61.80)       | 134.69<br>(123.64 – 147.09)    | 63.82<br>(60.25 – 68.22)       | 32.26<br>(30.56 – 34.49)       | 96.08<br>(92.16 – 101.87)      | 38.48<br>(34.03 – 46.82)       | 13.76<br>(11.72 – 16.32)       | 52.24<br>(47.33 – 60.52)        |
| 20-24             | 124.05<br>(111.38 – 145.75)    | 75.44<br>(63.52 – 88.22)       | 199.49<br>(181.02 – 224.26)    | 83.94<br>(78.98 – 89.40)       | 38.43<br>(35.84 – 41.11)       | 122.38<br>(116.83 – 128.89)    | 69.41<br>(61.64 – 85.25)       | 21.98<br>(18.92 – 25.73)       | 91.39<br>(83.03 – 108.10)       |
| 25-29             | 119.09<br>(107.26 – 141.86)    | 74.74<br>(64.97 – 85.06)       | 193.82<br>(177.64 – 218.84)    | 118.86<br>(111.17 – 126.92)    | 56.74<br>(52.41 – 61.36)       | 175.60<br>(166.33 – 185.55)    | 75.71<br>(67.57 – 90.83)       | 26.85<br>(23.15 – 30.70)       | 102.56<br>(93.94 – 118.15)      |
| 30-34             | 113.98<br>(103.11 – 133.22)    | 73.93<br>(64.00 – 83.92)       | 187.91<br>(172.59 – 210.93)    | 146.22<br>(136.29 – 155.59)    | 72.46<br>(67.50 – 78.53)       | 218.68<br>(206.90 – 229.98)    | 68.72<br>(60.63 – 80.56)       | 27.34<br>(23.77 – 30.71)       | 96.06<br>(87.57 – 108.90)       |
| 35-39             | 150.67<br>(133.46 – 177.42)    | 101.56<br>(89.17 – 113.22)     | 252.23<br>(230.29 – 281.01)    | 156.46<br>(146.13 – 166.11)    | 84.75<br>(78.50 – 91.89)       | 241.21<br>(228.67 – 252.64)    | 94.59<br>(81.80 – 110.88)      | 40.24<br>(33.96 – 45.53)       | 134.83<br>(120.46 – 151.29)     |
| 40-44             | 145.88<br>(128.03 – 171.49)    | 98.02<br>(86.98 – 109.41)      | 243.90<br>(222.94 – 273.04)    | 173.03<br>(162.44 – 183.76)    | 94.86<br>(87.86 – 103.12)      | 267.89<br>(254.37 – 281.52)    | 166.83<br>(141.13 – 195.41)    | 74.32<br>(62.30 – 85.45)       | 241.15<br>(212.14 – 270.44)     |
| 45-49             | 167.42<br>(145.60 – 193.20)    | 105.53<br>(94.18 – 118.01)     | 272.95<br>(247.80 – 302.56)    | 247.78<br>(231.79 – 266.88)    | 139.05<br>(128.33 – 150.01)    | 386.83<br>(367.12 – 409.60)    | 238.11<br>(196.96 – 281.31)    | 106.97<br>(89.81 – 128.29)     | 345.09<br>(299.11 – 391.74)     |
| 50-54             | 235.07<br>(201.01 – 266.89)    | 143.26<br>(129.59 – 162.79)    | 378.33<br>(341.96 – 415.07)    | 266.47<br>(248.91 – 290.02)    | 154.53<br>(143.47 – 165.92)    | 421.00<br>(399.65 – 447.30)    | 302.19<br>(250.85 – 350.20)    | 137.67<br>(114.83 – 165.74)    | 439.85<br>(381.93 – 496.34)     |
| 55-59             | 317.40<br>(272.23 – 346.85)    | 192.07<br>(170.60 – 222.77)    | 509.47<br>(460.58 – 550.86)    | 312.42<br>(290.05 – 340.87)    | 173.95<br>(160.87 – 186.32)    | 486.36<br>(461.00 – 518.67)    | 423.45<br>(348.63 – 483.63)    | 184.76<br>(155.01 – 223.28)    | 608.20<br>(527.13 – 688.03)     |
| 60-64             | 396.78<br>(342.08 – 427.17)    | 254.14<br>(228.06 – 300.55)    | 650.92<br>(591.97 – 705.99)    | 434.60<br>(401.70 – 470.81)    | 248.85<br>(228.32 – 265.64)    | 683.45<br>(647.55 – 723.05)    | 596.47<br>(497.34 – 668.67)    | 274.50<br>(229.68 – 327.94)    | 870.97<br>(758.47 – 972.04)     |
| 65-69             | 439.09<br>(383.95 – 461.09)    | 312.36<br>(283.98 – 360.65)    | 751.45<br>(692.38 – 806.27)    | 546.28<br>(506.23 – 587.58)    | 345.87<br>(312.97 – 369.98)    | 892.15<br>(846.72 – 939.58)    | 602.69<br>(503.73 – 665.10)    | 299.75<br>(257.17 – 347.88)    | 902.44<br>(795.12 – 994.48)     |
| 70-74             | 508.59<br>(445.14 – 534.12)    | 407.58<br>(372.42 – 469.98)    | 916.17<br>(846.64 – 985.73)    | 592.91<br>(551.96 – 630.25)    | 428.19<br>(384.87 – 458.54)    | 1021.10<br>(970.83 – 1070.51)  | 695.85<br>(579.99 – 765.78)    | 383.67<br>(333.21 – 430.51)    | 1079.52<br>(953.88 – 1173.13)   |
| 75-79             | 445.50<br>(399.47 – 465.34)    | 429.75<br>(403.67 – 485.46)    | 875.25<br>(824.92 – 935.63)    | 532.55<br>(500.22 – 563.19)    | 473.17<br>(427.69 – 510.43)    | 1005.72<br>(956.30 – 1053.51)  | 777.45<br>(661.28 – 844.80)    | 505.85<br>(452.85 – 541.82)    | 1283.30<br>(1159.27 – 1370.50)  |
| 80+               | 573.99<br>(545.79 – 588.96)    | 897.53<br>(877.38 – 942.83)    | 1471.52<br>(1436.51 – 1521.25) | 843.31<br>(816.98 – 864.30)    | 1139.42<br>(1080.86 – 1180.97) | 1982.72<br>(1925.34 – 2032.39) | 1410.28<br>(1304.95 – 1470.30) | 1565.32<br>(1504.11 – 1613.63) | 2975.60<br>(2858.40 – 3064.50)  |
| All ages          | 4800.77<br>(4383.01 – 5092.19) | 4023.67<br>(3745.76 – 4415.45) | 8824.44<br>(8314.97 – 9295.52) | 4958.02<br>(4686.52 – 5222.53) | 3805.26<br>(3549.26 – 4003.46) | 8763.29<br>(8414.28 – 9094.41) | 5732.53<br>(4964.56 – 6221.31) | 3787.74<br>(3437.35 – 4126.09) | 9520.27<br>(8681.41 – 10202.63) |
| <b>South Asia</b> |                                |                                |                                |                                |                                |                                |                                |                                |                                 |
| Early neonatal    | 763.70<br>(739.74 – 784.22)    | 598.56<br>(531.49 – 679.98)    | 1362.26<br>(1271.07 – 1453.03) | 642.57<br>(625.06 – 657.04)    | 497.17<br>(444.91 – 557.19)    | 1139.73<br>(1069.11 – 1203.52) | 446.65<br>(422.21 – 475.80)    | 340.57<br>(306.87 – 380.10)    | 787.23<br>(735.38 – 844.02)     |
| Late neonatal     | 294.92<br>(265.03 – 317.81)    | 264.54<br>(243.32 – 290.28)    | 559.46<br>(544.27 – 573.95)    | 215.64<br>(190.85 – 233.96)    | 189.69<br>(177.21 – 203.18)    | 405.33<br>(390.56 – 419.39)    | 113.98<br>(98.64 – 132.15)     | 104.11<br>(93.72 – 117.30)     | 218.09<br>(196.73 – 246.34)     |
| Postneonatal      | 570.77<br>(546.01 – 592.20)    | 624.09<br>(531.83 – 738.02)    | 1194.85<br>(1089.96 – 1301.95) | 435.81<br>(414.51 – 453.80)    | 467.73<br>(401.09 – 544.88)    | 903.54<br>(832.52 – 978.60)    | 235.22<br>(208.75 – 268.21)    | 250.32<br>(209.56 – 300.48)    | 485.54<br>(432.49 – 552.84)     |
| 1-4               | 494.03<br>(365.13 – 629.27)    | 635.91<br>(591.94 – 681.75)    | 1129.95<br>(956.13 – 1312.11)  | 340.34<br>(250.78 – 434.92)    | 420.58<br>(389.98 – 453.04)    | 760.92<br>(639.87 – 888.89)    | 165.21<br>(121.13 – 217.16)    | 187.93<br>(160.59 – 222.87)    | 353.14<br>(291.83 – 431.85)     |
| 5-9               | 163.35<br>(150.69 – 174.12)    | 187.65<br>(175.27 – 204.23)    | 351.00<br>(343.63 – 357.83)    | 132.01<br>(121.87 – 140.12)    | 138.58<br>(129.14 – 149.41)    | 270.59<br>(263.57 – 277.36)    | 83.54<br>(76.05 – 92.58)       | 76.45<br>(69.30 – 85.02)       | 159.98<br>(148.31 – 174.08)     |
| 10-14             | 91.21<br>(85.31 – 97.49)       | 101.42<br>(91.73 – 111.49)     | 192.63<br>(181.41 – 204.65)    | 91.89<br>(86.56 – 97.96)       | 97.06<br>(88.34 – 107.09)      | 188.95<br>(178.36 – 198.21)    | 70.33<br>(64.31 – 77.12)       | 61.02<br>(53.72 – 68.17)       | 131.35<br>(121.51 – 141.43)     |
| 15-19             | 116.95<br>(103.60 – 131.09)    | 144.53<br>(131.66 – 158.19)    | 261.48<br>(241.74 – 281.26)    | 127.74<br>(115.23 – 142.23)    | 146.86<br>(133.58 – 161.63)    | 274.60<br>(254.50 – 294.84)    | 119.73<br>(102.08 – 140.29)    | 109.36<br>(94.59 – 124.19)     | 229.09<br>(207.11 – 256.02)     |
| 20-24             | 143.26<br>(127.55 – 159.29)    | 172.11<br>(157.06 – 188.83)    | 315.38<br>(292.09 – 338.69)    | 161.57<br>(145.65 – 179.84)    | 175.52<br>(160.86 – 192.77)    | 337.09<br>(313.29 – 363.48)    | 172.24<br>(146.40 – 201.43)    | 137.73<br>(119.20 – 156.11)    | 309.97<br>(280.03 – 347.84)     |
| 25-29             | 140.30<br>(126.36 – 154.61)    | 152.58<br>(138.10 – 167.58)    | 292.88<br>(271.97 – 312.90)    | 173.04<br>(157.79 – 189.76)    | 159.90<br>(146.38 – 175.47)    | 332.94<br>(310.56 – 355.35)    | 193.68<br>(165.21 – 225.05)    | 132.61<br>(114.33 – 152.32)    | 326.28<br>(295.19 – 366.47)     |

**Web Table 7 – Regional deaths in thousands with 95% uncertainty by age and sex in 1990, 2000, 2013**

| Age (years)           | 1990                           |                                |                                   | 2000                           |                                |                                   | 2013                           |                                |                                   |
|-----------------------|--------------------------------|--------------------------------|-----------------------------------|--------------------------------|--------------------------------|-----------------------------------|--------------------------------|--------------------------------|-----------------------------------|
|                       | Male                           | Female                         | Total                             | Male                           | Female                         | Total                             | Male                           | Female                         | Total                             |
| 30-34                 | 152.20<br>(136.12 – 167.89)    | 136.59<br>(124.49 – 149.57)    | 288.78<br>(267.86 – 308.69)       | 194.90<br>(177.94 – 212.87)    | 149.39<br>(137.74 – 162.60)    | 344.29<br>(321.13 – 366.96)       | 212.89<br>(181.26 – 246.93)    | 128.84<br>(112.60 – 145.90)    | 341.73<br>(307.83 – 381.22)       |
| 35-39                 | 175.27<br>(154.94 – 195.62)    | 140.07<br>(123.91 – 157.50)    | 315.35<br>(287.64 – 340.90)       | 228.02<br>(206.91 – 253.23)    | 160.14<br>(144.16 – 177.42)    | 388.16<br>(359.04 – 417.83)       | 258.59<br>(216.04 – 304.18)    | 143.44<br>(121.00 – 168.49)    | 402.04<br>(357.43 – 459.76)       |
| 40-44                 | 183.66<br>(161.59 – 205.32)    | 135.14<br>(120.03 – 150.48)    | 318.80<br>(291.43 – 344.09)       | 260.25<br>(235.62 – 289.94)    | 164.49<br>(148.26 – 182.86)    | 424.74<br>(391.50 – 458.35)       | 295.15<br>(245.17 – 349.15)    | 157.58<br>(133.34 – 182.45)    | 452.73<br>(401.24 – 518.14)       |
| 45-49                 | 235.49<br>(207.48 – 263.12)    | 156.36<br>(139.48 – 173.83)    | 391.85<br>(359.43 – 424.15)       | 310.54<br>(279.09 – 347.94)    | 187.50<br>(168.52 – 208.42)    | 498.04<br>(457.79 – 540.26)       | 370.20<br>(306.19 – 438.91)    | 204.53<br>(173.31 – 236.78)    | 574.74<br>(510.76 – 655.58)       |
| 50-54                 | 312.03<br>(274.34 – 349.70)    | 217.56<br>(193.27 – 242.24)    | 529.59<br>(484.52 – 574.14)       | 338.65<br>(303.16 – 380.01)    | 221.76<br>(198.68 – 247.28)    | 560.41<br>(515.11 – 607.85)       | 456.63<br>(378.10 – 543.04)    | 256.51<br>(217.53 – 296.52)    | 713.14<br>(634.06 – 812.96)       |
| 55-59                 | 376.27<br>(332.71 – 419.65)    | 265.15<br>(237.71 – 292.17)    | 641.42<br>(589.45 – 690.73)       | 412.98<br>(371.47 – 460.41)    | 293.15<br>(264.23 – 323.76)    | 706.13<br>(651.90 – 762.85)       | 570.29<br>(472.82 – 672.82)    | 342.30<br>(291.04 – 394.78)    | 912.59<br>(816.91 – 1034.80)      |
| 60-64                 | 469.11<br>(420.49 – 517.88)    | 344.51<br>(309.58 – 378.65)    | 813.62<br>(753.66 – 871.54)       | 506.85<br>(458.54 – 561.11)    | 389.87<br>(351.99 – 429.98)    | 896.72<br>(832.45 – 962.21)       | 645.73<br>(542.27 – 752.03)    | 437.99<br>(373.32 – 502.48)    | 1083.71<br>(979.09 – 1218.73)     |
| 65-69                 | 478.14<br>(432.19 – 523.22)    | 367.39<br>(332.81 – 403.10)    | 845.53<br>(788.07 – 901.82)       | 560.60<br>(512.58 – 614.30)    | 456.55<br>(413.90 – 502.81)    | 1017.15<br>(948.61 – 1085.05)     | 665.96<br>(571.42 – 764.36)    | 513.82<br>(440.61 – 584.50)    | 1179.78<br>(1075.07 – 1314.35)    |
| 70-74                 | 444.67<br>(405.32 – 481.75)    | 369.48<br>(334.58 – 403.68)    | 814.15<br>(761.68 – 863.97)       | 533.21<br>(492.29 – 578.77)    | 476.05<br>(432.98 – 521.84)    | 1009.26<br>(945.79 – 1071.06)     | 684.13<br>(594.98 – 773.88)    | 602.63<br>(519.08 – 684.69)    | 1286.76<br>(1172.92 – 1419.52)    |
| 75-79                 | 356.43<br>(329.90 – 381.94)    | 311.54<br>(285.12 – 338.01)    | 667.97<br>(629.91 – 703.90)       | 450.16<br>(419.64 – 482.32)    | 405.58<br>(372.16 – 440.60)    | 855.73<br>(807.87 – 901.66)       | 609.99<br>(541.54 – 678.81)    | 570.80<br>(496.95 – 642.18)    | 1180.79<br>(1082.93 – 1286.20)    |
| 80+                   | 446.41<br>(428.64 – 463.39)    | 433.26<br>(414.19 – 451.54)    | 879.67<br>(852.85 – 903.82)       | 576.72<br>(556.41 – 597.22)    | 591.47<br>(566.95 – 615.42)    | 1168.19<br>(1135.09 – 1199.77)    | 885.77<br>(833.08 – 936.89)    | 988.39<br>(923.66 – 1049.43)   | 1874.16<br>(1796.04 – 1958.83)    |
| All ages              | 6408.21<br>(6009.71 – 6814.54) | 5758.43<br>(5413.33 – 6104.55) | 12166.63<br>(11673.62 – 12683.73) | 6693.49<br>(6309.87 – 7197.19) | 5789.04<br>(5432.66 – 6199.28) | 12482.53<br>(11913.89 – 13069.10) | 7255.93<br>(6396.37 – 8190.93) | 5746.93<br>(5147.48 – 6337.67) | 13002.83<br>(12070.25 – 14181.00) |
| <b>Southeast Asia</b> |                                |                                |                                   |                                |                                |                                   |                                |                                |                                   |
| Early neonatal        | 122.62<br>(117.71 – 126.46)    | 90.61<br>(83.88 – 97.66)       | 213.23<br>(201.48 – 223.84)       | 90.50<br>(87.13 – 93.87)       | 65.99<br>(61.28 – 71.18)       | 156.48<br>(148.64 – 164.45)       | 66.78<br>(61.55 – 72.03)       | 47.60<br>(42.57 – 52.87)       | 114.39<br>(104.39 – 124.55)       |
| Late neonatal         | 56.30<br>(53.30 – 58.90)       | 43.25<br>(41.13 – 45.61)       | 99.55<br>(96.39 – 103.03)         | 34.42<br>(32.42 – 36.44)       | 26.93<br>(25.63 – 28.42)       | 61.35<br>(59.11 – 63.76)          | 20.70<br>(18.66 – 22.93)       | 16.14<br>(14.68 – 17.86)       | 36.84<br>(33.52 – 40.70)          |
| Postneonatal          | 158.39<br>(151.14 – 165.57)    | 129.02<br>(113.89 – 145.93)    | 287.41<br>(265.73 – 309.53)       | 97.34<br>(93.01 – 102.31)      | 77.73<br>(68.54 – 88.56)       | 175.07<br>(162.36 – 189.70)       | 51.74<br>(44.92 – 59.52)       | 39.78<br>(32.89 – 47.71)       | 91.52<br>(78.31 – 106.83)         |
| 1-4                   | 134.93<br>(112.56 – 160.95)    | 122.90<br>(114.59 – 131.84)    | 257.83<br>(227.17 – 291.69)       | 75.61<br>(64.11 – 89.16)       | 66.15<br>(61.16 – 72.00)       | 141.76<br>(126.28 – 161.19)       | 42.11<br>(34.15 – 51.72)       | 33.98<br>(29.03 – 39.25)       | 76.08<br>(63.83 – 91.18)          |
| 5-9                   | 38.75<br>(36.91 – 40.64)       | 32.88<br>(30.92 – 35.07)       | 71.63<br>(68.98 – 74.23)          | 25.19<br>(23.92 – 26.55)       | 20.15<br>(18.94 – 21.74)       | 45.34<br>(43.53 – 47.59)          | 17.23<br>(15.56 – 18.93)       | 12.81<br>(11.63 – 14.26)       | 30.04<br>(27.49 – 32.74)          |
| 10-14                 | 25.81<br>(24.77 – 26.86)       | 20.44<br>(19.21 – 21.83)       | 46.24<br>(44.46 – 48.30)          | 21.15<br>(20.20 – 22.50)       | 15.76<br>(14.79 – 17.18)       | 36.91<br>(35.25 – 39.35)          | 16.48<br>(15.18 – 17.87)       | 11.37<br>(10.34 – 12.57)       | 27.86<br>(25.88 – 30.13)          |
| 15-19                 | 38.21<br>(36.40 – 40.12)       | 26.67<br>(24.72 – 28.74)       | 64.88<br>(61.62 – 68.36)          | 38.63<br>(36.71 – 40.60)       | 22.35<br>(20.77 – 24.00)       | 60.98<br>(57.73 – 64.52)          | 32.78<br>(30.51 – 35.37)       | 14.63<br>(13.56 – 16.09)       | 47.42<br>(44.68 – 50.57)          |
| 20-24                 | 53.86<br>(50.71 – 57.15)       | 33.33<br>(30.61 – 36.49)       | 87.19<br>(81.88 – 92.93)          | 55.24<br>(51.48 – 59.35)       | 28.90<br>(26.59 – 31.76)       | 84.14<br>(78.61 – 90.76)          | 49.68<br>(45.45 – 54.44)       | 19.26<br>(17.53 – 21.76)       | 68.94<br>(63.67 – 75.00)          |
| 25-29                 | 54.93<br>(51.44 – 58.86)       | 34.05<br>(31.21 – 37.81)       | 88.97<br>(83.35 – 96.31)          | 65.13<br>(59.91 – 70.98)       | 34.07<br>(31.11 – 38.04)       | 99.20<br>(91.59 – 108.50)         | 59.61<br>(53.84 – 66.86)       | 25.13<br>(22.51 – 29.04)       | 84.74<br>(77.29 – 94.37)          |
| 30-34                 | 54.34<br>(50.75 – 58.74)       | 35.73<br>(32.95 – 39.71)       | 90.07<br>(84.17 – 98.23)          | 72.54<br>(66.64 – 79.65)       | 38.95<br>(35.79 – 43.34)       | 111.49<br>(102.86 – 122.03)       | 71.44<br>(64.52 – 80.27)       | 32.11<br>(28.91 – 36.77)       | 103.55<br>(95.03 – 115.75)        |
| 35-39                 | 56.44<br>(52.48 – 61.38)       | 38.37<br>(35.12 – 44.32)       | 94.80<br>(88.01 – 105.55)         | 79.46<br>(73.34 – 86.65)       | 45.00<br>(41.34 – 51.46)       | 124.45<br>(115.21 – 138.13)       | 82.53<br>(74.75 – 93.09)       | 39.75<br>(35.33 – 47.41)       | 122.28<br>(111.91 – 138.72)       |
| 40-44                 | 53.50<br>(49.68 – 58.72)       | 37.15<br>(34.24 – 41.99)       | 90.65<br>(84.14 – 100.65)         | 86.53<br>(79.70 – 96.02)       | 51.40<br>(47.23 – 58.35)       | 137.93<br>(127.37 – 153.40)       | 100.55<br>(90.97 – 113.38)     | 52.49<br>(46.94 – 61.14)       | 153.03<br>(140.27 – 174.34)       |
| 45-49                 | 64.15<br>(59.72 – 70.30)       | 44.34<br>(40.96 – 49.17)       | 108.49<br>(101.03 – 119.48)       | 94.96<br>(87.66 – 105.19)      | 58.19<br>(53.23 – 65.79)       | 153.15<br>(141.51 – 170.29)       | 124.88<br>(112.40 – 141.00)    | 69.75<br>(62.22 – 80.44)       | 194.63<br>(178.28 – 219.07)       |
| 50-54                 | 81.93<br>(76.60 – 90.02)       | 58.30<br>(53.37 – 64.88)       | 140.23<br>(130.48 – 154.43)       | 96.05<br>(88.83 – 105.30)      | 63.82<br>(58.30 – 71.17)       | 159.87<br>(148.53 – 176.09)       | 154.50<br>(138.73 – 170.65)    | 92.05<br>(82.03 – 106.39)      | 246.54<br>(225.54 – 273.42)       |
| 55-59                 | 99.24<br>(92.82 – 108.16)      | 70.99<br>(64.78 – 78.89)       | 170.23<br>(158.27 – 186.54)       | 111.80<br>(103.94 – 121.59)    | 78.47<br>(71.94 – 86.52)       | 190.27<br>(177.56 – 207.16)       | 182.27<br>(163.90 – 199.64)    | 112.92<br>(100.05 – 130.43)    | 295.20<br>(270.88 – 323.74)       |
| 60-64                 | 116.71<br>(109.44 – 126.50)    | 89.26<br>(81.35 – 98.34)       | 205.97<br>(191.86 – 224.20)       | 141.77<br>(132.34 – 152.43)    | 108.20<br>(99.57 – 117.51)     | 249.97<br>(234.90 – 269.09)       | 194.93<br>(177.49 – 211.69)    | 131.46<br>(118.41 – 148.40)    | 326.40<br>(301.81 – 353.18)       |
| 65-69                 | 122.79<br>(115.95 – 131.17)    | 100.41<br>(92.05 – 110.37)     | 223.19<br>(208.98 – 241.20)       | 162.82<br>(152.14 – 173.47)    | 132.38<br>(121.68 – 143.93)    | 295.20<br>(277.69 – 316.42)       | 189.05<br>(172.81 – 204.54)    | 144.74<br>(131.53 – 160.96)    | 333.79<br>(311.17 – 359.07)       |
| 70-74                 | 124.55<br>(118.83 – 131.71)    | 115.80<br>(107.31 – 125.49)    | 240.35<br>(227.07 – 256.99)       | 169.54<br>(159.64 – 179.64)    | 154.17<br>(142.45 – 167.02)    | 323.71<br>(306.04 – 345.85)       | 205.38<br>(189.54 – 220.88)    | 179.04<br>(163.81 – 196.62)    | 384.42<br>(361.61 – 409.99)       |
| 75-79                 | 112.98<br>(109.02 – 117.83)    | 119.50<br>(112.28 – 128.08)    | 232.48<br>(222.42 – 244.17)       | 149.77<br>(142.39 – 157.31)    | 153.24<br>(142.23 – 166.13)    | 303.01<br>(287.99 – 321.20)       | 202.27<br>(188.48 – 216.40)    | 210.32<br>(195.13 – 226.02)    | 412.59<br>(390.15 – 435.45)       |
| 80+                   | 154.17<br>(151.48 – 157.06)    | 229.51<br>(223.24 – 236.46)    | 383.68<br>(376.16 – 392.30)       | 227.23<br>(222.11 – 232.81)    | 329.35<br>(318.89 – 346.01)    | 556.57<br>(543.77 – 574.70)       | 378.98<br>(364.58 – 393.03)    | 540.37<br>(521.75 – 557.37)    | 919.35<br>(894.48 – 941.76)       |
| All ages              | 1724.57<br>(1655.42 – 1809.34) | 1472.52<br>(1401.81 – 1559.96) | 3197.09<br>(3074.58 – 3355.40)    | 1895.66<br>(1811.31 – 1998.25) | 1571.20<br>(1483.63 – 1677.83) | 3466.86<br>(3314.90 – 3670.87)    | 2243.90<br>(2092.78 – 2404.54) | 1825.71<br>(1706.30 – 1977.36) | 4069.61<br>(3862.85 – 4332.93)    |
| <b>Australasia</b>    |                                |                                |                                   |                                |                                |                                   |                                |                                |                                   |
| Early neonatal        | 0.72<br>(0.69 – 0.75)          | 0.54<br>(0.47 – 0.63)          | 1.26<br>(1.17 – 1.35)             | 0.46<br>(0.44 – 0.48)          | 0.36<br>(0.31 – 0.41)          | 0.81<br>(0.75 – 0.87)             | 0.37<br>(0.31 – 0.45)          | 0.30<br>(0.25 – 0.38)          | 0.68<br>(0.56 – 0.82)             |
| Late neonatal         | 0.15<br>(0.14 – 0.16)          | 0.12<br>(0.11 – 0.12)          | 0.27<br>(0.26 – 0.28)             | 0.11<br>(0.10 – 0.12)          | 0.09<br>(0.08 – 0.09)          | 0.20<br>(0.19 – 0.20)             | 0.10<br>(0.09 – 0.12)          | 0.08<br>(0.07 – 0.09)          | 0.18<br>(0.16 – 0.21)             |
| Postneonatal          | 0.55<br>(0.52 – 0.58)          | 0.40<br>(0.35 – 0.46)          | 0.95<br>(0.88 – 1.02)             | 0.34<br>(0.33 – 0.37)          | 0.26<br>(0.22 – 0.30)          | 0.60<br>(0.55 – 0.65)             | 0.29<br>(0.25 – 0.34)          | 0.21<br>(0.17 – 0.26)          | 0.50<br>(0.42 – 0.60)             |

Web Table 7 – Regional deaths in thousands with 95% uncertainty by age and sex in 1990, 2000, 2013

| Age (years)    | 1990                     |                          |                             | 2000                     |                          |                             | 2013                       |                           |                             |
|----------------|--------------------------|--------------------------|-----------------------------|--------------------------|--------------------------|-----------------------------|----------------------------|---------------------------|-----------------------------|
|                | Male                     | Female                   | Total                       | Male                     | Female                   | Total                       | Male                       | Female                    | Total                       |
| 1-4            | 0.33<br>(0.24 – 0.42)    | 0.24<br>(0.20 – 0.28)    | 0.57<br>(0.45 – 0.70)       | 0.22<br>(0.16 – 0.28)    | 0.17<br>(0.14 – 0.19)    | 0.39<br>(0.31 – 0.47)       | 0.18<br>(0.13 – 0.24)      | 0.14<br>(0.11 – 0.17)     | 0.32<br>(0.24 – 0.41)       |
| 5-9            | 0.18<br>(0.17 – 0.18)    | 0.13<br>(0.12 – 0.13)    | 0.30<br>(0.30 – 0.31)       | 0.13<br>(0.12 – 0.13)    | 0.09<br>(0.09 – 0.10)    | 0.22<br>(0.21 – 0.22)       | 0.09<br>(0.08 – 0.10)      | 0.07<br>(0.06 – 0.08)     | 0.15<br>(0.13 – 0.17)       |
| 10-14          | 0.20<br>(0.19 – 0.21)    | 0.12<br>(0.11 – 0.12)    | 0.32<br>(0.31 – 0.33)       | 0.15<br>(0.15 – 0.16)    | 0.11<br>(0.10 – 0.11)    | 0.26<br>(0.25 – 0.27)       | 0.10<br>(0.09 – 0.11)      | 0.07<br>(0.07 – 0.08)     | 0.18<br>(0.16 – 0.19)       |
| 15-19          | 0.87<br>(0.86 – 0.88)    | 0.33<br>(0.32 – 0.33)    | 1.19<br>(1.18 – 1.20)       | 0.61<br>(0.60 – 0.62)    | 0.26<br>(0.26 – 0.27)    | 0.87<br>(0.86 – 0.88)       | 0.50<br>(0.47 – 0.53)      | 0.23<br>(0.22 – 0.24)     | 0.73<br>(0.70 – 0.76)       |
| 20-24          | 1.18<br>(1.17 – 1.19)    | 0.39<br>(0.38 – 0.39)    | 1.57<br>(1.55 – 1.58)       | 0.86<br>(0.85 – 0.87)    | 0.28<br>(0.28 – 0.29)    | 1.14<br>(1.13 – 1.16)       | 0.81<br>(0.76 – 0.86)      | 0.29<br>(0.27 – 0.31)     | 1.10<br>(1.05 – 1.15)       |
| 25-29          | 1.14<br>(1.12 – 1.16)    | 0.40<br>(0.39 – 0.41)    | 1.54<br>(1.52 – 1.56)       | 1.00<br>(0.99 – 1.01)    | 0.35<br>(0.34 – 0.36)    | 1.35<br>(1.34 – 1.36)       | 0.91<br>(0.86 – 0.97)      | 0.35<br>(0.32 – 0.37)     | 1.26<br>(1.20 – 1.32)       |
| 30-34          | 1.12<br>(1.09 – 1.14)    | 0.48<br>(0.46 – 0.49)    | 1.59<br>(1.56 – 1.62)       | 1.08<br>(1.07 – 1.09)    | 0.46<br>(0.45 – 0.47)    | 1.54<br>(1.52 – 1.55)       | 0.87<br>(0.82 – 0.93)      | 0.38<br>(0.35 – 0.40)     | 1.25<br>(1.19 – 1.32)       |
| 35-39          | 1.19<br>(1.16 – 1.21)    | 0.62<br>(0.61 – 0.63)    | 1.81<br>(1.77 – 1.84)       | 1.25<br>(1.24 – 1.27)    | 0.65<br>(0.64 – 0.66)    | 1.90<br>(1.88 – 1.92)       | 1.11<br>(1.04 – 1.18)      | 0.62<br>(0.57 – 0.68)     | 1.73<br>(1.64 – 1.82)       |
| 40-44          | 1.56<br>(1.54 – 1.58)    | 0.90<br>(0.89 – 0.92)    | 2.47<br>(2.44 – 2.49)       | 1.56<br>(1.54 – 1.59)    | 0.93<br>(0.91 – 0.95)    | 2.49<br>(2.46 – 2.52)       | 1.41<br>(1.33 – 1.51)      | 0.88<br>(0.81 – 0.95)     | 2.29<br>(2.19 – 2.41)       |
| 45-49          | 1.93<br>(1.91 – 1.95)    | 1.16<br>(1.15 – 1.18)    | 3.09<br>(3.07 – 3.12)       | 2.04<br>(2.01 – 2.07)    | 1.32<br>(1.30 – 1.34)    | 3.36<br>(3.33 – 3.40)       | 2.20<br>(2.06 – 2.34)      | 1.47<br>(1.37 – 1.57)     | 3.66<br>(3.50 – 3.84)       |
| 50-54          | 2.78<br>(2.75 – 2.82)    | 1.61<br>(1.59 – 1.63)    | 4.39<br>(4.36 – 4.43)       | 2.99<br>(2.95 – 3.02)    | 1.90<br>(1.87 – 1.92)    | 4.89<br>(4.85 – 4.92)       | 3.08<br>(2.88 – 3.27)      | 2.09<br>(1.96 – 2.23)     | 5.17<br>(4.94 – 5.41)       |
| 55-59          | 4.19<br>(4.13 – 4.25)    | 2.28<br>(2.25 – 2.31)    | 6.46<br>(6.41 – 6.52)       | 3.83<br>(3.79 – 3.88)    | 2.31<br>(2.28 – 2.34)    | 6.14<br>(6.09 – 6.20)       | 4.16<br>(3.92 – 4.42)      | 2.74<br>(2.58 – 2.92)     | 6.91<br>(6.62 – 7.21)       |
| 60-64          | 7.05<br>(6.97 – 7.14)    | 3.71<br>(3.67 – 3.76)    | 10.77<br>(10.69 – 10.85)    | 5.29<br>(5.21 – 5.37)    | 3.06<br>(3.02 – 3.10)    | 8.35<br>(8.26 – 8.45)       | 6.90<br>(6.52 – 7.29)      | 4.41<br>(4.16 – 4.68)     | 11.31<br>(10.86 – 11.77)    |
| 65-69          | 9.85<br>(9.76 – 9.94)    | 5.66<br>(5.60 – 5.73)    | 15.51<br>(15.41 – 15.61)    | 7.41<br>(7.30 – 7.53)    | 4.31<br>(4.25 – 4.37)    | 11.72<br>(11.59 – 11.86)    | 8.37<br>(7.94 – 8.81)      | 5.16<br>(4.88 – 5.47)     | 13.53<br>(13.03 – 14.06)    |
| 70-74          | 11.11<br>(11.01 – 11.21) | 7.55<br>(7.47 – 7.64)    | 18.66<br>(18.54 – 18.78)    | 11.18<br>(11.01 – 11.36) | 6.96<br>(6.86 – 7.06)    | 18.14<br>(17.94 – 18.36)    | 10.41<br>(9.91 – 10.94)    | 6.77<br>(6.39 – 7.17)     | 17.18<br>(16.57 – 17.85)    |
| 75-79          | 12.77<br>(12.66 – 12.88) | 10.50<br>(10.39 – 10.61) | 23.27<br>(23.13 – 23.41)    | 13.55<br>(13.38 – 13.71) | 10.48<br>(10.34 – 10.62) | 24.03<br>(23.80 – 24.27)    | 12.38<br>(11.84 – 12.95)   | 8.72<br>(8.25 – 9.21)     | 21.10<br>(20.39 – 21.88)    |
| 80+            | 20.03<br>(19.90 – 20.16) | 31.02<br>(30.75 – 31.29) | 51.05<br>(50.79 – 51.33)    | 27.90<br>(27.63 – 28.16) | 41.68<br>(41.32 – 42.03) | 69.58<br>(69.15 – 70.00)    | 48.40<br>(46.82 – 50.01)   | 60.69<br>(58.42 – 63.11)  | 109.09<br>(106.51 – 112.17) |
| All ages       | 78.88<br>(78.30 – 79.59) | 68.16<br>(67.46 – 68.83) | 147.04<br>(146.25 – 147.90) | 81.97<br>(81.03 – 82.88) | 76.01<br>(75.28 – 76.79) | 157.98<br>(156.79 – 159.25) | 102.64<br>(98.22 – 107.18) | 95.67<br>(91.48 – 100.11) | 198.31<br>(192.33 – 204.94) |
| Caribbean      |                          |                          |                             |                          |                          |                             |                            |                           |                             |
| Early neonatal | 9.19<br>(8.72 – 9.62)    | 6.78<br>(6.20 – 7.45)    | 15.98<br>(14.96 – 17.01)    | 6.98<br>(6.62 – 7.27)    | 5.10<br>(4.66 – 5.52)    | 12.08<br>(11.30 – 12.78)    | 5.56<br>(4.90 – 6.35)      | 4.07<br>(3.51 – 4.72)     | 9.63<br>(8.45 – 11.06)      |
| Late neonatal  | 4.42<br>(4.09 – 4.71)    | 3.70<br>(3.41 – 4.04)    | 8.12<br>(7.72 – 8.54)       | 2.83<br>(2.60 – 3.03)    | 2.37<br>(2.20 – 2.54)    | 5.20<br>(4.97 – 5.44)       | 2.02<br>(1.73 – 2.33)      | 1.71<br>(1.49 – 1.96)     | 3.73<br>(3.28 – 4.25)       |
| Postneonatal   | 12.52<br>(11.66 – 13.33) | 10.68<br>(9.07 – 12.54)  | 23.20<br>(20.84 – 25.82)    | 8.09<br>(7.54 – 8.62)    | 6.92<br>(5.83 – 8.08)    | 15.01<br>(13.46 – 16.55)    | 5.47<br>(4.74 – 6.38)      | 4.51<br>(3.59 – 5.55)     | 9.97<br>(8.36 – 11.88)      |
| 1-4            | 9.95<br>(7.52 – 12.76)   | 8.24<br>(7.30 – 9.19)    | 18.19<br>(14.85 – 21.88)    | 5.85<br>(4.24 – 7.60)    | 4.64<br>(4.11 – 5.20)    | 10.49<br>(8.36 – 12.85)     | 3.63<br>(2.60 – 4.86)      | 2.79<br>(2.25 – 3.44)     | 6.42<br>(4.99 – 8.25)       |
| 5-9            | 2.70<br>(2.46 – 3.07)    | 2.00<br>(1.78 – 2.36)    | 4.70<br>(4.36 – 5.32)       | 1.95<br>(1.76 – 2.31)    | 1.48<br>(1.30 – 1.90)    | 3.42<br>(3.14 – 4.17)       | 1.33<br>(1.15 – 1.53)      | 0.99<br>(0.84 – 1.15)     | 2.32<br>(2.03 – 2.66)       |
| 10-14          | 1.69<br>(1.57 – 1.94)    | 1.26<br>(1.16 – 1.42)    | 2.95<br>(2.80 – 3.33)       | 1.49<br>(1.37 – 1.83)    | 1.09<br>(0.99 – 1.34)    | 2.57<br>(2.39 – 3.14)       | 1.15<br>(1.05 – 1.25)      | 0.80<br>(0.73 – 0.89)     | 1.95<br>(1.79 – 2.13)       |
| 15-19          | 2.43<br>(2.35 – 2.52)    | 1.75<br>(1.68 – 1.83)    | 4.18<br>(4.07 – 4.31)       | 2.24<br>(2.15 – 2.37)    | 1.54<br>(1.44 – 1.65)    | 3.78<br>(3.64 – 3.97)       | 2.06<br>(1.86 – 2.27)      | 1.20<br>(1.11 – 1.31)     | 3.26<br>(3.03 – 3.50)       |
| 20-24          | 3.34<br>(3.23 – 3.47)    | 2.48<br>(2.29 – 2.70)    | 5.82<br>(5.57 – 6.13)       | 3.08<br>(2.89 – 3.40)    | 2.50<br>(2.01 – 3.12)    | 5.58<br>(4.95 – 6.45)       | 3.06<br>(2.68 – 3.48)      | 1.89<br>(1.62 – 2.24)     | 4.95<br>(4.42 – 5.54)       |
| 25-29          | 3.74<br>(3.53 – 4.06)    | 2.94<br>(2.64 – 3.26)    | 6.68<br>(6.23 – 7.23)       | 4.03<br>(3.61 – 4.56)    | 3.46<br>(2.80 – 4.11)    | 7.48<br>(6.51 – 8.58)       | 3.63<br>(3.17 – 4.19)      | 2.52<br>(2.09 – 2.98)     | 6.15<br>(5.39 – 6.97)       |
| 30-34          | 3.73<br>(3.50 – 4.00)    | 2.92<br>(2.70 – 3.13)    | 6.65<br>(6.28 – 7.08)       | 5.02<br>(4.54 – 5.48)    | 4.13<br>(3.68 – 4.63)    | 9.15<br>(8.28 – 10.00)      | 4.04<br>(3.56 – 4.61)      | 2.83<br>(2.50 – 3.16)     | 6.87<br>(6.22 – 7.54)       |
| 35-39          | 3.98<br>(3.78 – 4.21)    | 3.18<br>(3.03 – 3.34)    | 7.15<br>(6.90 – 7.49)       | 5.80<br>(5.38 – 6.28)    | 4.48<br>(4.11 – 4.96)    | 10.29<br>(9.56 – 11.16)     | 4.43<br>(3.97 – 4.91)      | 3.05<br>(2.78 – 3.39)     | 7.49<br>(6.91 – 8.08)       |
| 40-44          | 4.05<br>(3.91 – 4.20)    | 3.23<br>(3.09 – 3.37)    | 7.28<br>(7.07 – 7.50)       | 5.86<br>(5.59 – 6.13)    | 4.35<br>(4.07 – 4.64)    | 10.22<br>(9.73 – 10.72)     | 5.53<br>(5.06 – 6.03)      | 3.76<br>(3.44 – 4.13)     | 9.29<br>(8.70 – 9.92)       |
| 45-49          | 4.85<br>(4.67 – 5.05)    | 3.86<br>(3.66 – 4.04)    | 8.71<br>(8.45 – 9.02)       | 6.71<br>(6.40 – 7.06)    | 4.96<br>(4.69 – 5.25)    | 11.67<br>(11.18 – 12.18)    | 7.47<br>(6.82 – 8.17)      | 5.16<br>(4.70 – 5.70)     | 12.63<br>(11.84 – 13.50)    |
| 50-54          | 5.89<br>(5.67 – 6.15)    | 5.03<br>(4.72 – 5.34)    | 10.92<br>(10.52 – 11.30)    | 7.17<br>(6.87 – 7.54)    | 5.58<br>(5.28 – 6.03)    | 12.75<br>(12.28 – 13.38)    | 9.41<br>(8.61 – 10.38)     | 6.71<br>(6.03 – 7.53)     | 16.13<br>(15.08 – 17.47)    |
| 55-59          | 6.96<br>(6.73 – 7.22)    | 6.08<br>(5.70 – 6.42)    | 13.04<br>(12.58 – 13.55)    | 8.65<br>(8.31 – 9.07)    | 6.83<br>(6.42 – 7.29)    | 15.47<br>(14.93 – 16.14)    | 10.86<br>(9.89 – 12.01)    | 8.05<br>(7.22 – 9.00)     | 18.91<br>(17.64 – 20.49)    |
| 60-64          | 8.83<br>(8.61 – 9.06)    | 7.83<br>(7.47 – 8.14)    | 16.66<br>(16.23 – 17.05)    | 10.72<br>(10.46 – 10.99) | 8.95<br>(8.58 – 9.30)    | 19.67<br>(19.21 – 20.12)    | 13.39<br>(12.37 – 14.69)   | 10.34<br>(9.39 – 11.34)   | 23.73<br>(22.32 – 25.54)    |
| 65-69          | 10.65<br>(10.39 – 10.94) | 9.87<br>(9.39 – 10.25)   | 20.52<br>(19.98 – 21.01)    | 12.51<br>(12.23 – 12.80) | 11.04<br>(10.59 – 11.47) | 23.55<br>(23.03 – 24.09)    | 14.98<br>(13.95 – 16.41)   | 12.21<br>(11.05 – 13.44)  | 27.19<br>(25.63 – 29.23)    |
| 70-74          | 12.34<br>(12.08 – 12.61) | 11.66<br>(11.20 – 12.09) | 24.00<br>(23.48 – 24.53)    | 14.68<br>(14.36 – 14.96) | 13.32<br>(12.94 – 13.78) | 28.00<br>(27.51 – 28.52)    | 17.88<br>(16.71 – 19.46)   | 15.55<br>(14.21 – 17.07)  | 33.43<br>(31.66 – 35.68)    |
| 75-79          | 13.54<br>(13.32 – 13.75) | 13.41<br>(13.02 – 13.81) | 26.95<br>(26.49 – 27.43)    | 15.45<br>(15.18 – 15.69) | 15.23<br>(14.91 – 15.65) | 30.68<br>(30.28 – 31.18)    | 19.48<br>(18.29 – 21.07)   | 18.55<br>(17.09 – 20.45)  | 38.03<br>(36.20 – 40.77)    |

**Web Table 7 – Regional deaths in thousands with 95% uncertainty by age and sex in 1990, 2000, 2013**

| Age (years)    | 1990                        |                             |                                | 2000                        |                             |                                | 2013                        |                             |                                |
|----------------|-----------------------------|-----------------------------|--------------------------------|-----------------------------|-----------------------------|--------------------------------|-----------------------------|-----------------------------|--------------------------------|
|                | Male                        | Female                      | Total                          | Male                        | Female                      | Total                          | Male                        | Female                      | Total                          |
| 80+            | 28.17<br>(27.93 – 28.36)    | 32.88<br>(32.45 – 33.37)    | 61.05<br>(60.55 – 61.62)       | 37.77<br>(37.42 – 38.05)    | 46.83<br>(46.50 – 47.24)    | 84.60<br>(84.13 – 85.10)       | 48.93<br>(47.38 – 50.89)    | 63.23<br>(61.13 – 66.31)    | 112.15<br>(109.37 – 116.31)    |
| All ages       | 152.97<br>(149.64 – 156.26) | 139.80<br>(136.55 – 143.39) | 292.77<br>(287.87 – 297.45)    | 166.87<br>(163.86 – 170.18) | 154.80<br>(151.61 – 158.49) | 321.67<br>(317.09 – 326.64)    | 184.30<br>(174.40 – 195.83) | 169.92<br>(160.18 – 181.91) | 354.23<br>(339.46 – 372.03)    |
| Central Europe |                             |                             |                                |                             |                             |                                |                             |                             |                                |
| Early neonatal | 8.89<br>(8.36 – 9.50)       | 6.15<br>(5.71 – 6.69)       | 15.04<br>(14.18 – 16.03)       | 3.51<br>(3.42 – 3.60)       | 2.47<br>(2.32 – 2.61)       | 5.98<br>(5.77 – 6.17)          | 1.70<br>(1.21 – 2.52)       | 1.26<br>(0.91 – 1.82)       | 2.96<br>(2.11 – 4.36)          |
| Late neonatal  | 2.37<br>(2.27 – 2.47)       | 1.84<br>(1.78 – 1.90)       | 4.21<br>(4.07 – 4.36)          | 1.13<br>(1.09 – 1.17)       | 0.88<br>(0.87 – 0.90)       | 2.01<br>(1.96 – 2.06)          | 0.71<br>(0.54 – 0.94)       | 0.56<br>(0.43 – 0.73)       | 1.27<br>(0.99 – 1.67)          |
| Postneonatal   | 6.73<br>(6.46 – 7.08)       | 5.48<br>(4.98 – 6.05)       | 12.21<br>(11.57 – 12.95)       | 2.96<br>(2.85 – 3.09)       | 2.37<br>(2.15 – 2.61)       | 5.33<br>(5.04 – 5.65)          | 1.52<br>(1.09 – 2.12)       | 1.21<br>(0.86 – 1.67)       | 2.73<br>(1.94 – 3.78)          |
| 1-4            | 3.37<br>(2.93 – 3.88)       | 2.66<br>(2.45 – 2.88)       | 6.04<br>(5.39 – 6.76)          | 1.51<br>(1.34 – 1.72)       | 1.18<br>(1.10 – 1.27)       | 2.69<br>(2.43 – 2.98)          | 0.76<br>(0.55 – 1.02)       | 0.59<br>(0.44 – 0.78)       | 1.35<br>(0.98 – 1.78)          |
| 5-9            | 2.10<br>(2.02 – 2.20)       | 1.38<br>(1.33 – 1.45)       | 3.49<br>(3.39 – 3.62)          | 1.18<br>(1.15 – 1.22)       | 0.78<br>(0.75 – 0.81)       | 1.96<br>(1.92 – 2.01)          | 0.49<br>(0.38 – 0.65)       | 0.34<br>(0.27 – 0.44)       | 0.83<br>(0.65 – 1.09)          |
| 10-14          | 2.13<br>(2.07 – 2.19)       | 1.20<br>(1.17 – 1.24)       | 3.33<br>(3.25 – 3.41)          | 1.50<br>(1.48 – 1.53)       | 0.92<br>(0.91 – 0.94)       | 2.42<br>(2.40 – 2.45)          | 0.59<br>(0.50 – 0.69)       | 0.37<br>(0.34 – 0.41)       | 0.96<br>(0.85 – 1.10)          |
| 15-19          | 4.60<br>(4.53 – 4.69)       | 1.81<br>(1.78 – 1.84)       | 6.41<br>(6.33 – 6.50)          | 3.57<br>(3.54 – 3.59)       | 1.47<br>(1.46 – 1.49)       | 5.04<br>(5.01 – 5.07)          | 1.87<br>(1.78 – 1.94)       | 0.76<br>(0.72 – 0.80)       | 2.63<br>(2.52 – 2.73)          |
| 20-24          | 6.42<br>(6.32 – 6.53)       | 2.09<br>(2.05 – 2.13)       | 8.51<br>(8.40 – 8.63)          | 5.64<br>(5.61 – 5.67)       | 1.73<br>(1.71 – 1.75)       | 7.38<br>(7.34 – 7.41)          | 3.43<br>(3.31 – 3.54)       | 0.94<br>(0.89 – 1.00)       | 4.38<br>(4.22 – 4.51)          |
| 25-29          | 6.71<br>(6.61 – 6.81)       | 2.21<br>(2.17 – 2.26)       | 8.92<br>(8.79 – 9.04)          | 5.86<br>(5.83 – 5.90)       | 1.89<br>(1.87 – 1.91)       | 7.76<br>(7.71 – 7.79)          | 4.40<br>(4.25 – 4.54)       | 1.24<br>(1.17 – 1.31)       | 5.64<br>(5.45 – 5.82)          |
| 30-34          | 11.30<br>(11.17 – 11.43)    | 4.11<br>(4.05 – 4.19)       | 15.41<br>(15.24 – 15.57)       | 7.86<br>(7.79 – 7.93)       | 2.79<br>(2.76 – 2.81)       | 10.65<br>(10.58 – 10.71)       | 5.89<br>(5.70 – 6.07)       | 1.90<br>(1.80 – 2.00)       | 7.79<br>(7.55 – 8.01)          |
| 35-39          | 16.80<br>(16.59 – 17.01)    | 6.47<br>(6.37 – 6.59)       | 23.27<br>(23.01 – 23.51)       | 10.55<br>(10.47 – 10.63)    | 4.04<br>(4.00 – 4.07)       | 14.58<br>(14.49 – 14.67)       | 8.77<br>(8.52 – 9.05)       | 3.16<br>(3.05 – 3.28)       | 11.94<br>(11.66 – 12.23)       |
| 40-44          | 22.52<br>(22.26 – 22.82)    | 8.93<br>(8.80 – 9.09)       | 31.45<br>(31.14 – 31.80)       | 21.86<br>(21.74 – 21.97)    | 8.68<br>(8.62 – 8.74)       | 30.54<br>(30.40 – 30.66)       | 12.83<br>(12.50 – 13.20)    | 5.01<br>(4.87 – 5.17)       | 17.85<br>(17.46 – 18.28)       |
| 45-49          | 25.94<br>(25.65 – 26.27)    | 10.59<br>(10.44 – 10.77)    | 36.53<br>(36.19 – 36.94)       | 34.20<br>(34.05 – 34.35)    | 14.15<br>(14.07 – 14.22)    | 48.35<br>(48.18 – 48.52)       | 20.17<br>(19.64 – 20.73)    | 8.22<br>(7.99 – 8.47)       | 28.39<br>(27.81 – 29.04)       |
| 50-54          | 42.02<br>(41.51 – 42.60)    | 17.86<br>(17.61 – 18.15)    | 59.88<br>(59.30 – 60.61)       | 43.58<br>(43.40 – 43.76)    | 18.62<br>(18.53 – 18.71)    | 62.20<br>(62.00 – 62.40)       | 34.12<br>(33.17 – 35.17)    | 14.31<br>(13.90 – 14.76)    | 48.43<br>(47.37 – 49.52)       |
| 55-59          | 60.21<br>(59.37 – 61.10)    | 27.52<br>(27.11 – 27.97)    | 87.74<br>(86.79 – 88.87)       | 45.71<br>(45.54 – 45.88)    | 21.22<br>(21.12 – 21.32)    | 66.93<br>(66.73 – 67.12)       | 54.56<br>(53.19 – 56.03)    | 24.55<br>(23.90 – 25.26)    | 79.11<br>(77.57 – 80.73)       |
| 60-64          | 79.28<br>(78.09 – 80.42)    | 42.69<br>(42.08 – 43.29)    | 121.96<br>(120.65 – 123.39)    | 68.26<br>(68.00 – 68.55)    | 35.61<br>(35.42 – 35.79)    | 103.87<br>(103.54 – 104.22)    | 73.28<br>(71.53 – 75.15)    | 35.75<br>(34.82 – 36.76)    | 109.03<br>(107.02 – 111.11)    |
| 65-69          | 88.61<br>(87.41 – 89.70)    | 62.53<br>(61.72 – 63.38)    | 151.13<br>(149.64 – 152.64)    | 88.32<br>(88.03 – 88.64)    | 55.54<br>(55.19 – 55.88)    | 143.86<br>(143.35 – 144.33)    | 64.50<br>(63.30 – 65.72)    | 37.65<br>(36.86 – 38.59)    | 102.14<br>(100.57 – 103.64)    |
| 70-74          | 64.02<br>(63.16 – 64.79)    | 57.45<br>(56.76 – 58.17)    | 121.47<br>(120.31 – 122.63)    | 101.88<br>(101.57 – 102.23) | 84.38<br>(83.86 – 84.89)    | 186.26<br>(185.59 – 186.88)    | 76.42<br>(74.95 – 77.86)    | 57.53<br>(56.18 – 58.98)    | 133.95<br>(131.83 – 135.95)    |
| 75-79          | 96.35<br>(95.22 – 97.41)    | 107.14<br>(105.99 – 108.49) | 203.49<br>(201.63 – 205.37)    | 96.45<br>(96.18 – 96.75)    | 112.96<br>(112.32 – 113.58) | 209.41<br>(208.69 – 210.11)    | 94.92<br>(93.32 – 96.50)    | 94.20<br>(92.21 – 96.33)    | 189.12<br>(186.29 – 191.87)    |
| 80+            | 143.78<br>(142.53 – 144.91) | 237.17<br>(235.39 – 239.17) | 380.95<br>(378.50 – 383.34)    | 123.65<br>(123.29 – 124.00) | 229.92<br>(228.94 – 230.84) | 353.57<br>(352.45 – 354.57)    | 199.52<br>(197.38 – 201.84) | 342.35<br>(336.59 – 347.73) | 541.87<br>(535.18 – 548.00)    |
| All ages       | 694.16<br>(686.72 – 701.61) | 607.28<br>(601.41 – 613.85) | 1301.44<br>(1291.28 – 1312.52) | 669.20<br>(667.25 – 671.27) | 601.60<br>(598.65 – 604.33) | 1270.80<br>(1266.97 – 1274.26) | 660.44<br>(647.79 – 672.13) | 631.92<br>(620.59 – 644.16) | 1292.36<br>(1275.69 – 1309.79) |
| Eastern Europe |                             |                             |                                |                             |                             |                                |                             |                             |                                |
| Early neonatal | 17.16<br>(14.50 – 19.68)    | 11.95<br>(10.00 – 13.99)    | 29.10<br>(24.69 – 33.75)       | 9.70<br>(9.25 – 10.14)      | 6.76<br>(6.02 – 7.45)       | 16.45<br>(15.45 – 17.43)       | 4.88<br>(3.63 – 6.54)       | 3.53<br>(2.64 – 4.73)       | 8.41<br>(6.31 – 11.12)         |
| Late neonatal  | 4.21<br>(3.82 – 4.78)       | 3.09<br>(2.82 – 3.50)       | 7.30<br>(6.65 – 8.28)          | 2.50<br>(2.39 – 2.63)       | 1.83<br>(1.77 – 1.89)       | 4.33<br>(4.17 – 4.49)          | 1.86<br>(1.52 – 2.31)       | 1.33<br>(1.14 – 1.61)       | 3.20<br>(2.66 – 3.88)          |
| Postneonatal   | 11.00<br>(8.97 – 13.65)     | 8.40<br>(6.51 – 10.88)      | 19.40<br>(15.83 – 24.28)       | 5.87<br>(5.45 – 6.31)       | 4.46<br>(3.76 – 5.16)       | 10.33<br>(9.31 – 11.40)        | 4.00<br>(3.15 – 4.81)       | 3.07<br>(2.30 – 3.86)       | 7.06<br>(5.49 – 8.68)          |
| 1-4            | 8.01<br>(6.15 – 10.45)      | 6.22<br>(5.06 – 7.74)       | 14.24<br>(11.29 – 17.91)       | 4.18<br>(3.38 – 5.11)       | 3.19<br>(2.84 – 3.59)       | 7.37<br>(6.22 – 8.70)          | 2.63<br>(1.87 – 3.61)       | 2.02<br>(1.56 – 2.56)       | 4.65<br>(3.46 – 6.16)          |
| 5-9            | 6.15<br>(5.33 – 7.08)       | 3.49<br>(3.08 – 4.00)       | 9.64<br>(8.46 – 11.02)         | 3.63<br>(3.45 – 3.81)       | 2.21<br>(2.08 – 2.32)       | 5.83<br>(5.64 – 6.04)          | 1.77<br>(1.44 – 2.15)       | 1.14<br>(0.95 – 1.36)       | 2.91<br>(2.41 – 3.49)          |
| 10-14          | 4.65<br>(4.28 – 5.05)       | 2.40<br>(2.28 – 2.53)       | 7.05<br>(6.59 – 7.58)          | 4.91<br>(4.77 – 5.05)       | 2.58<br>(2.52 – 2.64)       | 7.49<br>(7.36 – 7.63)          | 1.47<br>(1.30 – 1.65)       | 0.84<br>(0.78 – 0.90)       | 2.31<br>(2.09 – 2.54)          |
| 15-19          | 10.65<br>(10.44 – 10.83)    | 4.39<br>(4.28 – 4.50)       | 15.03<br>(14.75 – 15.30)       | 15.64<br>(15.32 – 15.98)    | 5.93<br>(5.84 – 6.02)       | 21.57<br>(21.24 – 21.92)       | 4.58<br>(4.44 – 4.72)       | 1.93<br>(1.87 – 2.01)       | 6.51<br>(6.33 – 6.69)          |
| 20-24          | 17.30<br>(17.10 – 17.50)    | 4.75<br>(4.62 – 4.90)       | 22.05<br>(21.74 – 22.35)       | 30.12<br>(29.85 – 30.40)    | 7.54<br>(7.44 – 7.64)       | 37.66<br>(37.37 – 37.94)       | 16.55<br>(16.16 – 16.90)    | 4.50<br>(4.32 – 4.72)       | 21.06<br>(20.58 – 21.52)       |
| 25-29          | 26.36<br>(26.08 – 26.64)    | 6.73<br>(6.53 – 6.92)       | 33.08<br>(32.65 – 33.51)       | 38.21<br>(37.76 – 38.64)    | 9.36<br>(9.18 – 9.55)       | 47.57<br>(47.05 – 48.05)       | 32.48<br>(31.74 – 33.14)    | 8.48<br>(8.13 – 8.88)       | 40.96<br>(40.05 – 41.83)       |
| 30-34          | 37.16<br>(36.78 – 37.56)    | 9.98<br>(9.72 – 10.25)      | 47.14<br>(46.57 – 47.70)       | 45.13<br>(44.64 – 45.56)    | 11.72<br>(11.49 – 11.95)    | 56.85<br>(56.28 – 57.38)       | 38.48<br>(37.61 – 39.22)    | 10.85<br>(10.45 – 11.32)    | 49.33<br>(48.29 – 50.30)       |
| 35-39          | 44.90<br>(44.46 – 45.37)    | 13.43<br>(13.30 – 13.57)    | 58.33<br>(57.83 – 58.85)       | 70.76<br>(70.20 – 71.27)    | 19.04<br>(18.85 – 19.25)    | 89.81<br>(89.20 – 90.35)       | 43.49<br>(42.54 – 44.42)    | 13.26<br>(12.89 – 13.67)    | 56.75<br>(55.78 – 57.73)       |
| 40-44          | 51.66<br>(51.21 – 52.12)    | 17.36<br>(17.22 – 17.54)    | 69.02<br>(68.49 – 69.53)       | 104.93<br>(104.08 – 105.57) | 29.94<br>(29.72 – 30.16)    | 134.86<br>(133.93 – 135.53)    | 49.40<br>(48.32 – 50.38)    | 15.81<br>(15.41 – 16.25)    | 65.22<br>(64.13 – 66.28)       |
| 45-49          | 50.42<br>(49.98 – 50.87)    | 19.28<br>(19.09 – 19.50)    | 69.71<br>(69.18 – 70.24)       | 130.44<br>(129.54 – 131.26) | 41.67<br>(41.31 – 42.05)    | 172.11<br>(171.17 – 173.03)    | 71.23<br>(69.57 – 72.72)    | 25.14<br>(24.57 – 25.76)    | 96.37<br>(94.76 – 97.85)       |

**Web Table 7 – Regional deaths in thousands with 95% uncertainty by age and sex in 1990, 2000, 2013**

| Age (years)          | 1990                           |                                |                                | 2000                           |                                |                                | 2013                           |                                |                                |
|----------------------|--------------------------------|--------------------------------|--------------------------------|--------------------------------|--------------------------------|--------------------------------|--------------------------------|--------------------------------|--------------------------------|
|                      | Male                           | Female                         | Total                          | Male                           | Female                         | Total                          | Male                           | Female                         | Total                          |
| 50-54                | 112-12<br>(111-20 – 113-06)    | 46-58<br>(46-22 – 46-97)       | 158-70<br>(157-65 – 159-70)    | 140-19<br>(139-44 – 140-99)    | 50-83<br>(50-48 – 51-21)       | 191-02<br>(190-20 – 191-82)    | 119-58<br>(116-94 – 121-99)    | 46-80<br>(45-76 – 47-88)       | 166-38<br>(163-75 – 169-01)    |
| 55-59                | 111-85<br>(110-76 – 112-88)    | 54-21<br>(53-76 – 54-70)       | 166-06<br>(164-75 – 167-26)    | 116-62<br>(115-92 – 117-30)    | 51-69<br>(51-37 – 52-05)       | 168-31<br>(167-57 – 169-06)    | 135-60<br>(132-70 – 138-23)    | 65-34<br>(63-96 – 66-78)       | 200-94<br>(198-02 – 203-80)    |
| 60-64                | 169-32<br>(167-53 – 171-12)    | 103-16<br>(102-04 – 104-26)    | 272-48<br>(270-06 – 274-72)    | 236-95<br>(235-66 – 238-20)    | 120-64<br>(119-67 – 121-72)    | 357-59<br>(356-12 – 359-12)    | 200-73<br>(196-76 – 204-37)    | 104-44<br>(102-28 – 106-67)    | 305-17<br>(301-06 – 309-28)    |
| 65-69                | 118-28<br>(116-91 – 119-64)    | 123-15<br>(121-72 – 124-59)    | 241-43<br>(239-05 – 243-48)    | 198-88<br>(197-91 – 199-89)    | 133-36<br>(132-25 – 134-55)    | 332-24<br>(330-82 – 333-82)    | 65-70<br>(64-37 – 66-86)       | 45-59<br>(44-63 – 46-57)       | 111-29<br>(109-76 – 112-72)    |
| 70-74                | 93-46<br>(92-09 – 94-79)       | 128-74<br>(127-06 – 130-41)    | 222-20<br>(219-57 – 224-55)    | 244-37<br>(243-18 – 245-38)    | 242-28<br>(240-26 – 244-49)    | 486-65<br>(484-33 – 489-00)    | 216-64<br>(212-43 – 220-53)    | 214-78<br>(210-36 – 219-66)    | 431-42<br>(425-54 – 437-04)    |
| 75-79                | 126-87<br>(125-02 – 128-65)    | 236-80<br>(233-56 – 239-96)    | 363-67<br>(359-27 – 367-72)    | 134-82<br>(134-19 – 135-39)    | 252-54<br>(250-75 – 254-47)    | 387-36<br>(385-53 – 389-35)    | 118-23<br>(116-53 – 119-76)    | 157-30<br>(154-37 – 160-19)    | 275-54<br>(272-28 – 278-79)    |
| 80+                  | 164-63<br>(163-16 – 166-01)    | 488-26<br>(482-77 – 493-49)    | 652-89<br>(647-07 – 658-33)    | 161-60<br>(160-65 – 162-59)    | 537-96<br>(534-65 – 541-70)    | 699-56<br>(696-02 – 703-55)    | 272-77<br>(269-57 – 275-75)    | 666-03<br>(655-75 – 675-90)    | 938-80<br>(928-35 – 948-86)    |
| All ages             | 1186-15<br>(1174-25 – 1199-89) | 1292-38<br>(1279-63 – 1304-46) | 2478-53<br>(2458-80 – 2495-99) | 1699-44<br>(1691-52 – 1707-47) | 1535-53<br>(1525-54 – 1546-07) | 3234-97<br>(3222-17 – 3248-18) | 1402-10<br>(1377-62 – 1427-65) | 1392-18<br>(1369-42 – 1416-55) | 2794-28<br>(2763-58 – 2826-08) |
| Western Europe       |                                |                                |                                |                                |                                |                                |                                |                                |                                |
| Early neonatal       | 10-46<br>(10-25 – 10-67)       | 7-67<br>(7-25 – 8-08)          | 18-13<br>(17-61 – 18-66)       | 5-88<br>(5-78 – 5-99)          | 4-49<br>(4-27 – 4-71)          | 10-37<br>(10-11 – 10-62)       | 4-06<br>(3-32 – 5-02)          | 3-20<br>(2-63 – 3-88)          | 7-26<br>(5-98 – 8-96)          |
| Late neonatal        | 2-93<br>(2-84 – 3-01)          | 2-25<br>(2-22 – 2-28)          | 5-17<br>(5-08 – 5-27)          | 1-92<br>(1-87 – 1-98)          | 1-51<br>(1-49 – 1-54)          | 3-44<br>(3-39 – 3-50)          | 1-51<br>(1-28 – 1-75)          | 1-19<br>(1-01 – 1-40)          | 2-69<br>(2-29 – 3-14)          |
| Postneonatal         | 6-93<br>(6-77 – 7-09)          | 5-34<br>(5-06 – 5-66)          | 12-26<br>(11-87 – 12-71)       | 3-77<br>(3-70 – 3-86)          | 2-95<br>(2-78 – 3-14)          | 6-72<br>(6-50 – 6-95)          | 2-75<br>(2-31 – 3-29)          | 2-13<br>(1-77 – 2-59)          | 4-88<br>(4-11 – 5-86)          |
| 1-4                  | 4-05<br>(3-68 – 4-43)          | 3-07<br>(2-91 – 3-24)          | 7-12<br>(6-59 – 7-67)          | 2-33<br>(2-11 – 2-55)          | 1-83<br>(1-73 – 1-93)          | 4-16<br>(3-85 – 4-48)          | 1-67<br>(1-37 – 2-07)          | 1-35<br>(1-14 – 1-60)          | 3-03<br>(2-50 – 3-66)          |
| 5-9                  | 2-75<br>(2-70 – 2-80)          | 1-92<br>(1-88 – 1-97)          | 4-67<br>(4-62 – 4-73)          | 1-63<br>(1-59 – 1-66)          | 1-19<br>(1-17 – 1-22)          | 2-82<br>(2-79 – 2-85)          | 1-10<br>(0-95 – 1-27)          | 0-84<br>(0-73 – 0-97)          | 1-94<br>(1-68 – 2-26)          |
| 10-14                | 3-07<br>(3-03 – 3-10)          | 1-92<br>(1-90 – 1-94)          | 4-99<br>(4-95 – 5-03)          | 2-09<br>(2-06 – 2-12)          | 1-39<br>(1-38 – 1-41)          | 3-49<br>(3-46 – 3-51)          | 1-31<br>(1-19 – 1-43)          | 0-92<br>(0-87 – 0-97)          | 2-22<br>(2-06 – 2-41)          |
| 15-19                | 11-03<br>(10-97 – 11-08)       | 4-08<br>(4-05 – 4-10)          | 15-10<br>(15-05 – 15-16)       | 7-58<br>(7-54 – 7-62)          | 3-02<br>(3-00 – 3-04)          | 10-60<br>(10-55 – 10-64)       | 4-63<br>(4-50 – 4-78)          | 1-98<br>(1-92 – 2-05)          | 6-62<br>(6-44 – 6-80)          |
| 20-24                | 17-83<br>(17-73 – 17-92)       | 5-58<br>(5-54 – 5-62)          | 23-41<br>(23-31 – 23-50)       | 11-93<br>(11-87 – 11-98)       | 3-76<br>(3-73 – 3-78)          | 15-68<br>(15-63 – 15-74)       | 7-96<br>(7-76 – 8-17)          | 2-66<br>(2-57 – 2-76)          | 10-63<br>(10-38 – 10-88)       |
| 25-29                | 19-01<br>(18-84 – 19-17)       | 6-77<br>(6-70 – 6-83)          | 25-78<br>(25-60 – 25-94)       | 13-74<br>(13-61 – 13-85)       | 4-80<br>(4-75 – 4-85)          | 18-54<br>(18-41 – 18-67)       | 8-72<br>(8-51 – 8-93)          | 3-20<br>(3-09 – 3-33)          | 11-92<br>(11-65 – 12-21)       |
| 30-34                | 20-57<br>(20-30 – 20-84)       | 8-52<br>(8-44 – 8-60)          | 29-09<br>(28-81 – 29-35)       | 17-88<br>(17-65 – 18-09)       | 7-39<br>(7-32 – 7-47)          | 25-27<br>(25-03 – 25-49)       | 10-89<br>(10-62 – 11-16)       | 4-71<br>(4-55 – 4-89)          | 15-60<br>(15-26 – 15-95)       |
| 35-39                | 24-49<br>(24-25 – 24-71)       | 11-66<br>(11-60 – 11-74)       | 36-15<br>(35-92 – 36-39)       | 24-05<br>(23-85 – 24-22)       | 11-60<br>(11-53 – 11-67)       | 35-65<br>(35-44 – 35-84)       | 15-12<br>(14-72 – 15-53)       | 7-55<br>(7-28 – 7-82)          | 22-66<br>(22-15 – 23-15)       |
| 40-44                | 34-73<br>(34-54 – 34-90)       | 17-64<br>(17-55 – 17-73)       | 52-36<br>(52-18 – 52-56)       | 32-99<br>(32-86 – 33-12)       | 17-11<br>(17-03 – 17-19)       | 50-10<br>(49-95 – 50-25)       | 25-41<br>(24-77 – 26-09)       | 13-91<br>(13-47 – 14-34)       | 39-32<br>(38-53 – 40-10)       |
| 45-49                | 48-01<br>(47-88 – 48-14)       | 24-55<br>(24-46 – 24-64)       | 72-56<br>(72-40 – 72-72)       | 47-69<br>(47-48 – 47-88)       | 25-30<br>(25-19 – 25-40)       | 72-99<br>(72-76 – 73-20)       | 44-04<br>(42-99 – 45-16)       | 25-00<br>(24-32 – 25-69)       | 69-04<br>(67-75 – 70-32)       |
| 50-54                | 76-09<br>(75-80 – 76-39)       | 37-41<br>(37-29 – 37-53)       | 113-51<br>(113-17 – 113-84)    | 71-08<br>(70-73 – 71-39)       | 37-06<br>(36-91 – 37-20)       | 108-13<br>(107-77 – 108-48)    | 64-44<br>(62-95 – 66-05)       | 36-03<br>(35-09 – 36-94)       | 100-47<br>(98-68 – 102-33)     |
| 55-59                | 114-06<br>(113-61 – 114-51)    | 54-64<br>(54-41 – 54-88)       | 168-71<br>(168-14 – 169-25)    | 93-62<br>(93-30 – 93-91)       | 47-40<br>(47-22 – 47-58)       | 141-02<br>(140-67 – 141-36)    | 85-50<br>(83-62 – 87-56)       | 46-72<br>(45-61 – 47-83)       | 132-22<br>(129-94 – 134-56)    |
| 60-64                | 167-71<br>(167-15 – 168-25)    | 86-58<br>(86-23 – 86-96)       | 254-30<br>(253-56 – 255-02)    | 141-67<br>(141-12 – 142-18)    | 71-89<br>(71-60 – 72-21)       | 213-56<br>(212-96 – 214-14)    | 135-27<br>(132-28 – 138-45)    | 73-19<br>(71-42 – 74-99)       | 208-45<br>(204-70 – 212-04)    |
| 65-69                | 226-38<br>(225-79 – 226-95)    | 141-32<br>(140-80 – 141-87)    | 367-70<br>(366-85 – 368-55)    | 195-46<br>(194-52 – 196-35)    | 107-00<br>(106-45 – 107-60)    | 302-45<br>(301-37 – 303-53)    | 153-36<br>(150-24 – 156-60)    | 85-98<br>(83-88 – 88-00)       | 239-34<br>(235-41 – 243-33)    |
| 70-74                | 221-30<br>(220-53 – 222-02)    | 166-76<br>(166-06 – 167-53)    | 388-06<br>(386-92 – 389-16)    | 263-40<br>(262-33 – 264-38)    | 174-89<br>(174-03 – 175-81)    | 438-29<br>(436-93 – 439-57)    | 234-28<br>(229-65 – 239-02)    | 144-20<br>(140-79 – 147-55)    | 378-48<br>(372-49 – 384-40)    |
| 75-79                | 321-89<br>(320-40 – 323-33)    | 311-29<br>(309-76 – 312-98)    | 633-18<br>(630-87 – 635-53)    | 311-44<br>(310-39 – 312-47)    | 282-92<br>(281-81 – 284-08)    | 594-36<br>(592-74 – 595-87)    | 308-95<br>(303-33 – 314-71)    | 230-60<br>(225-35 – 235-56)    | 539-56<br>(531-76 – 547-26)    |
| 80+                  | 597-25<br>(595-18 – 599-25)    | 1031-44<br>(1027-56 – 1035-77) | 1628-70<br>(1623-74 – 1633-53) | 641-36<br>(639-88 – 642-89)    | 1156-95<br>(1153-81 – 1160-45) | 1798-31<br>(1794-87 – 1801-69) | 937-58<br>(924-03 – 951-30)    | 1427-40<br>(1403-91 – 1449-77) | 2364-98<br>(2335-96 – 2392-16) |
| All ages             | 1930-54<br>(1925-05 – 1936-00) | 1930-40<br>(1923-20 – 1937-89) | 3860-94<br>(3850-93 – 3870-50) | 1891-51<br>(1885-96 – 1896-57) | 1964-45<br>(1958-73 – 1970-43) | 3855-96<br>(3847-94 – 3863-88) | 2048-56<br>(2013-72 – 2085-04) | 2112-76<br>(2073-60 – 2150-57) | 4161-32<br>(4105-45 – 4214-53) |
| Andean Latin America |                                |                                |                                |                                |                                |                                |                                |                                |                                |
| Early neonatal       | 10-26<br>(9-71 – 10-73)        | 7-59<br>(6-79 – 8-35)          | 17-85<br>(16-50 – 19-02)       | 8-09<br>(7-77 – 8-40)          | 5-90<br>(5-43 – 6-38)          | 13-99<br>(13-20 – 14-74)       | 5-92<br>(5-65 – 6-22)          | 4-30<br>(3-88 – 4-69)          | 10-22<br>(9-58 – 10-83)        |
| Late neonatal        | 5-42<br>(5-10 – 5-69)          | 4-49<br>(4-24 – 4-75)          | 9-91<br>(9-65 – 10-17)         | 3-25<br>(3-06 – 3-44)          | 2-77<br>(2-64 – 2-91)          | 6-02<br>(5-85 – 6-22)          | 2-10<br>(1-99 – 2-20)          | 1-77<br>(1-68 – 1-87)          | 3-86<br>(3-71 – 4-03)          |
| Postneonatal         | 19-44<br>(18-64 – 20-21)       | 17-15<br>(14-83 – 19-57)       | 36-59<br>(33-55 – 39-53)       | 11-64<br>(11-15 – 12-13)       | 10-18<br>(8-89 – 11-46)        | 21-83<br>(20-25 – 23-42)       | 6-42<br>(5-98 – 6-90)          | 5-51<br>(4-74 – 6-30)          | 11-93<br>(10-80 – 13-03)       |
| 1-4                  | 13-84<br>(11-06 – 17-10)       | 13-46<br>(12-42 – 14-55)       | 27-31<br>(23-53 – 31-70)       | 7-46<br>(6-07 – 9-29)          | 6-72<br>(6-16 – 7-38)          | 14-18<br>(12-32 – 16-73)       | 4-36<br>(3-58 – 5-25)          | 3-66<br>(3-26 – 4-05)          | 8-02<br>(6-87 – 9-32)          |
| 5-9                  | 3-27<br>(3-09 – 3-45)          | 2-58<br>(2-41 – 2-74)          | 5-85<br>(5-66 – 6-03)          | 2-24<br>(2-12 – 2-38)          | 1-69<br>(1-57 – 1-85)          | 3-94<br>(3-78 – 4-13)          | 1-48<br>(1-39 – 1-58)          | 1-09<br>(1-00 – 1-19)          | 2-57<br>(2-43 – 2-71)          |
| 10-14                | 2-24<br>(2-15 – 2-33)          | 1-61<br>(1-53 – 1-69)          | 3-85<br>(3-73 – 3-97)          | 1-80<br>(1-72 – 1-91)          | 1-32<br>(1-25 – 1-43)          | 3-12<br>(3-02 – 3-34)          | 1-42<br>(1-33 – 1-51)          | 1-02<br>(0-93 – 1-12)          | 2-44<br>(2-32 – 2-58)          |
| 15-19                | 2-76<br>(2-64 – 2-89)          | 1-94<br>(1-81 – 2-06)          | 4-69<br>(4-51 – 4-89)          | 2-69<br>(2-57 – 2-80)          | 1-67<br>(1-58 – 1-77)          | 4-36<br>(4-20 – 4-51)          | 2-70<br>(2-32 – 3-12)          | 1-49<br>(1-30 – 1-67)          | 4-20<br>(3-82 – 4-62)          |



**Web Table 7 – Regional deaths in thousands with 95% uncertainty by age and sex in 1990, 2000, 2013**

| Age (years)            | 1990                        |                             |                             | 2000                        |                             |                             | 2013                        |                             |                                |
|------------------------|-----------------------------|-----------------------------|-----------------------------|-----------------------------|-----------------------------|-----------------------------|-----------------------------|-----------------------------|--------------------------------|
|                        | Male                        | Female                      | Total                       | Male                        | Female                      | Total                       | Male                        | Female                      | Total                          |
| 20-24                  | 3.61<br>(3.46 – 3.78)       | 2.28<br>(2.14 – 2.42)       | 5.90<br>(5.66 – 6.12)       | 3.85<br>(3.67 – 4.05)       | 1.96<br>(1.85 – 2.08)       | 5.81<br>(5.58 – 6.04)       | 4.18<br>(3.56 – 4.83)       | 1.74<br>(1.51 – 1.95)       | 5.91<br>(5.32 – 6.58)          |
| 25-29                  | 3.54<br>(3.37 – 3.71)       | 2.27<br>(2.14 – 2.40)       | 5.81<br>(5.59 – 6.04)       | 3.91<br>(3.70 – 4.18)       | 2.05<br>(1.94 – 2.19)       | 5.96<br>(5.70 – 6.28)       | 4.24<br>(3.61 – 4.91)       | 1.80<br>(1.56 – 2.04)       | 6.04<br>(5.43 – 6.76)          |
| 30-34                  | 3.38<br>(3.23 – 3.55)       | 2.32<br>(2.20 – 2.45)       | 5.70<br>(5.49 – 5.93)       | 3.89<br>(3.68 – 4.13)       | 2.21<br>(2.10 – 2.35)       | 6.10<br>(5.84 – 6.36)       | 4.24<br>(3.60 – 4.95)       | 2.00<br>(1.74 – 2.27)       | 6.24<br>(5.61 – 7.02)          |
| 35-39                  | 3.53<br>(3.36 – 3.73)       | 2.60<br>(2.46 – 2.76)       | 6.13<br>(5.88 – 6.39)       | 4.05<br>(3.84 – 4.26)       | 2.58<br>(2.44 – 2.75)       | 6.63<br>(6.39 – 6.90)       | 4.55<br>(3.86 – 5.36)       | 2.53<br>(2.11 – 2.95)       | 7.08<br>(6.34 – 7.94)          |
| 40-44                  | 3.60<br>(3.44 – 3.78)       | 2.66<br>(2.52 – 2.82)       | 6.26<br>(6.01 – 6.51)       | 4.28<br>(4.06 – 4.51)       | 2.90<br>(2.74 – 3.06)       | 7.18<br>(6.89 – 7.46)       | 5.09<br>(4.31 – 5.95)       | 3.15<br>(2.61 – 3.65)       | 8.24<br>(7.36 – 9.24)          |
| 45-49                  | 4.02<br>(3.84 – 4.22)       | 2.92<br>(2.78 – 3.08)       | 6.94<br>(6.68 – 7.20)       | 4.79<br>(4.54 – 5.03)       | 3.38<br>(3.22 – 3.58)       | 8.17<br>(7.84 – 8.49)       | 5.86<br>(4.94 – 6.82)       | 3.99<br>(3.30 – 4.72)       | 9.84<br>(8.79 – 11.00)         |
| 50-54                  | 4.75<br>(4.55 – 4.97)       | 3.52<br>(3.34 – 3.73)       | 8.27<br>(7.97 – 8.57)       | 5.36<br>(5.08 – 5.65)       | 3.88<br>(3.69 – 4.10)       | 9.24<br>(8.88 – 9.59)       | 7.10<br>(6.02 – 8.23)       | 5.09<br>(4.19 – 6.10)       | 12.19<br>(10.92 – 13.62)       |
| 55-59                  | 5.56<br>(5.33 – 5.79)       | 4.15<br>(3.97 – 4.37)       | 9.71<br>(9.40 – 10.04)      | 6.13<br>(5.82 – 6.46)       | 4.56<br>(4.36 – 4.81)       | 10.70<br>(10.30 – 11.08)    | 8.49<br>(7.21 – 9.84)       | 6.41<br>(5.31 – 7.71)       | 14.90<br>(13.37 – 16.61)       |
| 60-64                  | 6.70<br>(6.45 – 6.94)       | 5.30<br>(5.06 – 5.59)       | 12.00<br>(11.64 – 12.39)    | 7.67<br>(7.31 – 8.05)       | 5.91<br>(5.69 – 6.19)       | 13.57<br>(13.13 – 14.02)    | 10.18<br>(8.84 – 11.53)     | 7.98<br>(6.69 – 9.50)       | 18.16<br>(16.49 – 20.01)       |
| 65-69                  | 7.16<br>(6.94 – 7.37)       | 5.93<br>(5.73 – 6.20)       | 13.10<br>(12.77 – 13.43)    | 9.00<br>(8.60 – 9.41)       | 7.20<br>(6.98 – 7.52)       | 16.20<br>(15.73 – 16.68)    | 11.37<br>(10.07 – 12.69)    | 9.36<br>(7.97 – 11.09)      | 20.73<br>(18.99 – 22.79)       |
| 70-74                  | 7.71<br>(7.47 – 7.94)       | 7.00<br>(6.77 – 7.30)       | 14.71<br>(14.35 – 15.08)    | 10.02<br>(9.58 – 10.45)     | 8.55<br>(8.28 – 8.89)       | 18.57<br>(18.02 – 19.09)    | 13.12<br>(11.61 – 14.61)    | 11.53<br>(10.01 – 13.54)    | 24.65<br>(22.64 – 26.96)       |
| 75-79                  | 7.85<br>(7.64 – 8.05)       | 7.71<br>(7.51 – 7.99)       | 15.56<br>(15.25 – 15.89)    | 9.84<br>(9.48 – 10.20)      | 9.03<br>(8.78 – 9.40)       | 18.88<br>(18.37 – 19.36)    | 14.46<br>(13.03 – 15.92)    | 13.82<br>(12.37 – 16.00)    | 28.27<br>(26.31 – 30.53)       |
| 80+                    | 12.94<br>(12.78 – 13.07)    | 16.28<br>(16.10 – 16.50)    | 29.22<br>(28.98 – 29.48)    | 20.38<br>(20.02 – 20.74)    | 25.17<br>(24.85 – 25.56)    | 45.55<br>(45.04 – 46.08)    | 35.78<br>(34.10 – 37.49)    | 45.14<br>(43.09 – 47.98)    | 80.92<br>(78.39 – 84.10)       |
| All ages               | 131.57<br>(127.78 – 135.44) | 113.78<br>(109.97 – 117.85) | 245.35<br>(240.74 – 249.95) | 130.36<br>(126.03 – 134.51) | 109.65<br>(106.92 – 113.12) | 240.00<br>(235.11 – 245.06) | 153.05<br>(138.67 – 168.20) | 133.37<br>(121.42 – 148.41) | 286.42<br>(269.47 – 305.50)    |
| Central Latin America  |                             |                             |                             |                             |                             |                             |                             |                             |                                |
| Early neonatal         | 33.05<br>(31.80 – 34.23)    | 23.31<br>(21.86 – 24.95)    | 56.35<br>(53.80 – 58.98)    | 26.82<br>(25.76 – 27.89)    | 18.74<br>(17.41 – 20.17)    | 45.56<br>(43.36 – 47.59)    | 16.40<br>(14.78 – 18.19)    | 11.83<br>(10.39 – 13.46)    | 28.23<br>(25.34 – 31.16)       |
| Late neonatal          | 12.32<br>(11.38 – 13.26)    | 9.82<br>(9.28 – 10.43)      | 22.14<br>(20.85 – 23.48)    | 8.77<br>(8.22 – 9.36)       | 6.96<br>(6.66 – 7.27)       | 15.73<br>(15.00 – 16.51)    | 6.34<br>(5.90 – 6.71)       | 4.85<br>(4.55 – 5.14)       | 11.19<br>(10.53 – 11.84)       |
| Postneonatal           | 46.51<br>(43.60 – 49.75)    | 37.85<br>(33.67 – 43.30)    | 84.36<br>(78.36 – 91.66)    | 29.02<br>(27.16 – 31.07)    | 23.19<br>(20.52 – 26.48)    | 52.20<br>(48.15 – 56.89)    | 16.15<br>(14.73 – 17.95)    | 12.73<br>(11.15 – 14.67)    | 28.88<br>(25.97 – 32.60)       |
| 1-4                    | 23.99<br>(20.37 – 28.05)    | 23.08<br>(21.51 – 24.72)    | 47.07<br>(42.06 – 52.50)    | 16.49<br>(14.10 – 18.93)    | 15.07<br>(13.95 – 16.24)    | 31.57<br>(28.04 – 35.04)    | 10.40<br>(8.79 – 11.92)     | 9.03<br>(8.06 – 9.97)       | 19.43<br>(16.86 – 21.85)       |
| 5-9                    | 7.19<br>(6.88 – 7.48)       | 5.47<br>(5.21 – 5.79)       | 12.66<br>(12.23 – 13.13)    | 5.25<br>(5.01 – 5.55)       | 3.95<br>(3.74 – 4.35)       | 9.20<br>(8.85 – 9.81)       | 3.96<br>(3.67 – 4.27)       | 2.98<br>(2.76 – 3.23)       | 6.94<br>(6.48 – 7.47)          |
| 10-14                  | 6.41<br>(6.20 – 6.67)       | 4.06<br>(3.95 – 4.31)       | 10.46<br>(10.21 – 11.00)    | 5.56<br>(5.36 – 5.94)       | 3.59<br>(3.47 – 4.00)       | 9.15<br>(8.89 – 9.88)       | 5.13<br>(4.87 – 5.40)       | 3.41<br>(3.24 – 3.61)       | 8.54<br>(8.16 – 8.97)          |
| 15-19                  | 15.03<br>(14.74 – 15.32)    | 5.81<br>(5.73 – 5.90)       | 20.85<br>(20.53 – 21.16)    | 16.62<br>(16.26 – 17.01)    | 5.81<br>(5.70 – 5.94)       | 22.43<br>(22.05 – 22.85)    | 17.13<br>(16.27 – 18.20)    | 5.81<br>(5.55 – 6.14)       | 22.94<br>(21.99 – 24.14)       |
| 20-24                  | 22.30<br>(21.82 – 22.79)    | 6.73<br>(6.59 – 6.87)       | 29.04<br>(28.54 – 29.54)    | 24.45<br>(23.92 – 25.09)    | 6.45<br>(6.26 – 6.68)       | 30.90<br>(30.29 – 31.58)    | 26.19<br>(24.71 – 27.94)    | 6.56<br>(6.26 – 6.95)       | 32.75<br>(31.25 – 34.58)       |
| 25-29                  | 21.70<br>(21.30 – 22.10)    | 6.90<br>(6.75 – 7.05)       | 28.59<br>(28.16 – 29.03)    | 23.40<br>(22.92 – 24.04)    | 6.88<br>(6.62 – 7.41)       | 30.28<br>(29.63 – 31.26)    | 26.22<br>(24.86 – 27.85)    | 6.93<br>(6.57 – 7.34)       | 33.15<br>(31.72 – 34.85)       |
| 30-34                  | 19.58<br>(19.24 – 19.90)    | 7.32<br>(7.20 – 7.45)       | 26.90<br>(26.52 – 27.25)    | 22.30<br>(21.77 – 22.97)    | 7.83<br>(7.54 – 8.59)       | 30.13<br>(29.43 – 31.42)    | 25.02<br>(23.82 – 26.44)    | 7.74<br>(7.35 – 8.18)       | 32.76<br>(31.47 – 34.35)       |
| 35-39                  | 19.28<br>(18.97 – 19.61)    | 8.64<br>(8.49 – 8.80)       | 27.93<br>(27.56 – 28.30)    | 22.38<br>(21.83 – 23.07)    | 9.30<br>(8.99 – 9.96)       | 31.68<br>(30.98 – 33.09)    | 26.49<br>(25.33 – 27.93)    | 10.11<br>(9.55 – 10.84)     | 36.60<br>(35.20 – 38.28)       |
| 40-44                  | 17.39<br>(17.16 – 17.64)    | 8.99<br>(8.86 – 9.12)       | 26.38<br>(26.10 – 26.68)    | 22.38<br>(21.90 – 22.93)    | 10.97<br>(10.67 – 11.37)    | 33.34<br>(32.69 – 34.32)    | 29.12<br>(27.94 – 30.59)    | 14.12<br>(13.43 – 15.00)    | 43.24<br>(41.76 – 45.07)       |
| 45-49                  | 18.82<br>(18.59 – 19.07)    | 10.89<br>(10.75 – 11.02)    | 29.71<br>(29.45 – 30.01)    | 24.12<br>(23.68 – 24.64)    | 13.94<br>(13.65 – 14.29)    | 38.06<br>(37.44 – 38.71)    | 32.57<br>(31.12 – 34.32)    | 18.98<br>(18.08 – 20.12)    | 51.55<br>(49.75 – 53.73)       |
| 50-54                  | 20.71<br>(20.47 – 20.98)    | 13.28<br>(13.12 – 13.46)    | 33.99<br>(33.69 – 34.30)    | 25.08<br>(24.67 – 25.56)    | 16.15<br>(15.85 – 16.52)    | 41.23<br>(40.64 – 41.80)    | 36.98<br>(35.34 – 38.95)    | 24.06<br>(23.01 – 25.33)    | 61.04<br>(59.04 – 63.46)       |
| 55-59                  | 24.28<br>(24.01 – 24.60)    | 17.09<br>(16.87 – 17.33)    | 41.37<br>(41.02 – 41.74)    | 28.48<br>(28.07 – 28.98)    | 20.28<br>(19.95 – 20.67)    | 48.77<br>(48.17 – 49.37)    | 43.97<br>(42.11 – 46.13)    | 30.76<br>(29.55 – 32.25)    | 74.72<br>(72.44 – 77.48)       |
| 60-64                  | 28.84<br>(28.53 – 29.19)    | 21.60<br>(21.34 – 21.87)    | 50.44<br>(50.04 – 50.85)    | 33.14<br>(32.68 – 33.65)    | 24.43<br>(24.01 – 24.90)    | 57.57<br>(56.90 – 58.26)    | 52.40<br>(50.13 – 54.92)    | 39.72<br>(38.13 – 41.64)    | 92.11<br>(89.33 – 95.51)       |
| 65-69                  | 31.64<br>(31.35 – 31.97)    | 25.03<br>(24.77 – 25.32)    | 56.67<br>(56.27 – 57.12)    | 39.01<br>(38.43 – 39.65)    | 30.45<br>(29.86 – 31.02)    | 69.46<br>(68.58 – 70.35)    | 57.59<br>(55.14 – 60.26)    | 44.14<br>(42.32 – 46.35)    | 101.73<br>(98.60 – 105.55)     |
| 70-74                  | 32.20<br>(31.87 – 32.56)    | 26.94<br>(26.65 – 27.27)    | 59.14<br>(58.70 – 59.61)    | 43.39<br>(42.74 – 44.04)    | 34.93<br>(34.27 – 35.57)    | 78.31<br>(77.41 – 79.27)    | 63.67<br>(61.15 – 66.37)    | 51.45<br>(49.29 – 54.11)    | 115.11<br>(111.70 – 119.09)    |
| 75-79                  | 33.49<br>(33.23 – 33.78)    | 30.56<br>(30.24 – 30.91)    | 64.05<br>(63.60 – 64.56)    | 43.76<br>(43.19 – 44.35)    | 38.79<br>(38.11 – 39.45)    | 82.55<br>(81.66 – 83.47)    | 64.44<br>(62.08 – 66.98)    | 55.10<br>(52.75 – 57.84)    | 119.54<br>(115.99 – 123.57)    |
| 80+                    | 68.35<br>(68.13 – 68.61)    | 82.90<br>(82.56 – 83.27)    | 151.25<br>(150.84 – 151.72) | 93.78<br>(93.28 – 94.31)    | 113.21<br>(112.49 – 113.92) | 206.99<br>(206.05 – 207.95) | 163.70<br>(161.04 – 166.49) | 204.98<br>(201.59 – 208.86) | 368.68<br>(364.05 – 373.52)    |
| All ages               | 503.07<br>(494.95 – 511.22) | 376.28<br>(370.16 – 383.49) | 879.35<br>(869.48 – 891.22) | 554.20<br>(545.83 – 562.30) | 410.93<br>(404.54 – 418.27) | 965.13<br>(954.20 – 975.80) | 723.87<br>(700.55 – 753.26) | 565.27<br>(548.12 – 586.11) | 1289.14<br>(1258.31 – 1328.36) |
| Southern Latin America |                             |                             |                             |                             |                             |                             |                             |                             |                                |
| Early neonatal         | 6.59<br>(6.43 – 6.74)       | 4.85<br>(4.40 – 5.24)       | 11.44<br>(10.88 – 11.87)    | 4.07<br>(3.94 – 4.19)       | 3.06<br>(2.69 – 3.39)       | 7.13<br>(6.77 – 7.45)       | 2.71<br>(1.84 – 3.90)       | 2.06<br>(1.41 – 2.92)       | 4.78<br>(3.29 – 6.81)          |

**Web Table 7 – Regional deaths in thousands with 95% uncertainty by age and sex in 1990, 2000, 2013**

| Age (years)                   | 1990                        |                             |                             | 2000                        |                             |                             | 2013                        |                             |                             |
|-------------------------------|-----------------------------|-----------------------------|-----------------------------|-----------------------------|-----------------------------|-----------------------------|-----------------------------|-----------------------------|-----------------------------|
|                               | Male                        | Female                      | Total                       | Male                        | Female                      | Total                       | Male                        | Female                      | Total                       |
| Late neonatal                 | 1.65<br>(1.53 – 1.78)       | 1.33<br>(1.29 – 1.36)       | 2.98<br>(2.88 – 3.10)       | 1.19<br>(1.14 – 1.25)       | 0.94<br>(0.91 – 0.96)       | 2.13<br>(2.06 – 2.20)       | 0.95<br>(0.73 – 1.18)       | 0.74<br>(0.58 – 0.91)       | 1.70<br>(1.33 – 2.09)       |
| Postneonatal                  | 5.00<br>(4.79 – 5.22)       | 4.08<br>(3.48 – 4.72)       | 9.08<br>(8.43 – 9.68)       | 2.98<br>(2.86 – 3.09)       | 2.38<br>(2.07 – 2.71)       | 5.36<br>(4.97 – 5.72)       | 2.18<br>(1.73 – 2.85)       | 1.76<br>(1.32 – 2.31)       | 3.93<br>(3.03 – 5.17)       |
| 1-4                           | 2.07<br>(1.56 – 2.70)       | 1.68<br>(1.43 – 1.97)       | 3.74<br>(2.99 – 4.67)       | 1.40<br>(1.05 – 1.83)       | 1.10<br>(0.92 – 1.30)       | 2.50<br>(1.98 – 3.13)       | 1.00<br>(0.66 – 1.45)       | 0.79<br>(0.57 – 1.09)       | 1.79<br>(1.22 – 2.52)       |
| 5-9                           | 0.96<br>(0.92 – 0.99)       | 0.65<br>(0.62 – 0.68)       | 1.61<br>(1.59 – 1.62)       | 0.75<br>(0.72 – 0.78)       | 0.53<br>(0.50 – 0.56)       | 1.28<br>(1.26 – 1.29)       | 0.54<br>(0.43 – 0.71)       | 0.41<br>(0.32 – 0.51)       | 0.95<br>(0.75 – 1.21)       |
| 10-14                         | 1.05<br>(1.03 – 1.08)       | 0.64<br>(0.62 – 0.65)       | 1.69<br>(1.67 – 1.70)       | 0.86<br>(0.84 – 0.89)       | 0.57<br>(0.56 – 0.58)       | 1.43<br>(1.42 – 1.45)       | 0.71<br>(0.61 – 0.83)       | 0.48<br>(0.43 – 0.53)       | 1.19<br>(1.06 – 1.35)       |
| 15-19                         | 2.17<br>(2.14 – 2.20)       | 1.01<br>(1.00 – 1.02)       | 3.18<br>(3.15 – 3.21)       | 2.42<br>(2.39 – 2.45)       | 0.96<br>(0.95 – 0.98)       | 3.38<br>(3.35 – 3.41)       | 2.36<br>(2.21 – 2.50)       | 0.92<br>(0.87 – 0.98)       | 3.28<br>(3.10 – 3.44)       |
| 20-24                         | 2.92<br>(2.88 – 2.97)       | 1.14<br>(1.12 – 1.16)       | 4.07<br>(4.02 – 4.12)       | 3.45<br>(3.42 – 3.48)       | 1.13<br>(1.12 – 1.15)       | 4.59<br>(4.55 – 4.62)       | 3.38<br>(3.20 – 3.57)       | 1.05<br>(0.97 – 1.12)       | 4.43<br>(4.22 – 4.64)       |
| 25-29                         | 3.04<br>(2.99 – 3.09)       | 1.36<br>(1.34 – 1.38)       | 4.40<br>(4.35 – 4.46)       | 3.37<br>(3.34 – 3.40)       | 1.24<br>(1.22 – 1.26)       | 4.61<br>(4.57 – 4.65)       | 3.31<br>(3.14 – 3.49)       | 1.18<br>(1.09 – 1.26)       | 4.49<br>(4.29 – 4.70)       |
| 30-34                         | 3.29<br>(3.25 – 3.33)       | 1.73<br>(1.70 – 1.75)       | 5.01<br>(4.97 – 5.06)       | 3.49<br>(3.46 – 3.52)       | 1.51<br>(1.49 – 1.53)       | 5.00<br>(4.97 – 5.04)       | 3.51<br>(3.34 – 3.70)       | 1.53<br>(1.43 – 1.64)       | 5.04<br>(4.82 – 5.25)       |
| 35-39                         | 3.97<br>(3.95 – 4.00)       | 2.36<br>(2.34 – 2.39)       | 6.34<br>(6.30 – 6.38)       | 4.08<br>(4.05 – 4.11)       | 2.09<br>(2.06 – 2.11)       | 6.17<br>(6.13 – 6.22)       | 4.20<br>(3.98 – 4.44)       | 2.14<br>(2.00 – 2.30)       | 6.33<br>(6.05 – 6.64)       |
| 40-44                         | 5.42<br>(5.38 – 5.46)       | 3.10<br>(3.07 – 3.12)       | 8.52<br>(8.47 – 8.57)       | 5.31<br>(5.27 – 5.34)       | 3.03<br>(3.00 – 3.06)       | 8.34<br>(8.29 – 8.39)       | 5.19<br>(4.93 – 5.51)       | 2.87<br>(2.70 – 3.06)       | 8.05<br>(7.69 – 8.43)       |
| 45-49                         | 7.45<br>(7.40 – 7.51)       | 4.02<br>(3.99 – 4.05)       | 11.47<br>(11.41 – 11.53)    | 7.56<br>(7.51 – 7.60)       | 4.25<br>(4.21 – 4.28)       | 11.80<br>(11.74 – 11.87)    | 7.46<br>(7.07 – 7.92)       | 4.22<br>(3.99 – 4.49)       | 11.68<br>(11.17 – 12.21)    |
| 50-54                         | 10.38<br>(10.31 – 10.46)    | 5.24<br>(5.20 – 5.27)       | 15.62<br>(15.54 – 15.70)    | 10.54<br>(10.48 – 10.60)    | 5.77<br>(5.72 – 5.82)       | 16.31<br>(16.22 – 16.39)    | 11.35<br>(10.78 – 12.04)    | 6.35<br>(6.02 – 6.74)       | 17.71<br>(16.95 – 18.48)    |
| 55-59                         | 14.65<br>(14.57 – 14.73)    | 7.30<br>(7.25 – 7.35)       | 21.95<br>(21.85 – 22.04)    | 14.09<br>(14.00 – 14.16)    | 7.32<br>(7.26 – 7.39)       | 21.41<br>(21.30 – 21.51)    | 15.04<br>(15.04 – 16.70)    | 8.76<br>(8.32 – 9.26)       | 23.55<br>(23.56 – 25.57)    |
| 60-64                         | 19.59<br>(19.48 – 19.70)    | 10.27<br>(10.19 – 10.35)    | 29.86<br>(29.72 – 30.00)    | 18.00<br>(17.90 – 18.09)    | 9.42<br>(9.34 – 9.50)       | 27.42<br>(27.29 – 27.54)    | 21.04<br>(20.11 – 22.16)    | 11.62<br>(11.06 – 12.25)    | 32.66<br>(31.44 – 33.94)    |
| 65-69                         | 22.18<br>(22.04 – 22.33)    | 13.24<br>(13.15 – 13.33)    | 35.42<br>(35.25 – 35.59)    | 23.31<br>(23.19 – 23.43)    | 13.27<br>(13.17 – 13.35)    | 36.57<br>(36.42 – 36.72)    | 25.46<br>(24.42 – 26.69)    | 14.62<br>(13.93 – 15.38)    | 40.07<br>(38.68 – 41.53)    |
| 70-74                         | 24.01<br>(23.90 – 24.12)    | 17.36<br>(17.22 – 17.50)    | 41.37<br>(41.19 – 41.55)    | 28.17<br>(28.00 – 28.33)    | 18.80<br>(18.66 – 18.94)    | 46.98<br>(46.76 – 47.18)    | 29.12<br>(28.00 – 30.43)    | 18.81<br>(17.92 – 19.80)    | 47.94<br>(46.29 – 49.59)    |
| 75-79                         | 24.32<br>(24.20 – 24.44)    | 22.39<br>(22.19 – 22.59)    | 46.71<br>(46.47 – 46.96)    | 28.06<br>(27.88 – 28.24)    | 23.99<br>(23.83 – 24.15)    | 52.05<br>(51.78 – 52.29)    | 31.58<br>(30.49 – 32.85)    | 25.85<br>(24.69 – 27.08)    | 57.43<br>(55.63 – 59.19)    |
| 80+                           | 40.11<br>(40.01 – 40.21)    | 59.62<br>(59.42 – 59.81)    | 99.73<br>(99.52 – 99.94)    | 50.82<br>(50.68 – 50.96)    | 82.03<br>(81.75 – 82.28)    | 132.85<br>(132.54 – 133.14) | 76.25<br>(74.84 – 77.82)    | 123.44<br>(121.10 – 125.84) | 199.69<br>(196.77 – 202.57) |
| All ages                      | 200.83<br>(199.72 – 201.94) | 163.36<br>(162.35 – 164.41) | 364.19<br>(363.05 – 365.44) | 213.92<br>(212.89 – 215.01) | 183.38<br>(182.52 – 184.38) | 397.30<br>(395.92 – 398.67) | 248.09<br>(239.00 – 258.13) | 229.59<br>(222.29 – 237.26) | 477.68<br>(464.98 – 489.20) |
| <b>Tropical Latin America</b> |                             |                             |                             |                             |                             |                             |                             |                             |                             |
| Early neonatal                | 35.43<br>(33.93 – 36.88)    | 24.97<br>(22.64 – 27.65)    | 60.40<br>(56.71 – 64.00)    | 27.65<br>(26.39 – 28.94)    | 18.91<br>(16.98 – 20.94)    | 46.56<br>(43.55 – 49.41)    | 14.26<br>(12.80 – 15.88)    | 9.59<br>(7.95 – 11.49)      | 23.85<br>(21.08 – 26.68)    |
| Late neonatal                 | 11.70<br>(10.01 – 13.31)    | 11.64<br>(10.94 – 12.40)    | 23.35<br>(21.55 – 25.14)    | 7.12<br>(6.18 – 8.06)       | 6.98<br>(6.54 – 7.46)       | 14.10<br>(12.99 – 15.24)    | 4.16<br>(3.83 – 4.45)       | 3.97<br>(3.77 – 4.18)       | 8.13<br>(7.66 – 8.62)       |
| Postneonatal                  | 50.10<br>(46.24 – 54.15)    | 38.21<br>(31.78 – 46.34)    | 88.31<br>(80.11 – 96.57)    | 26.45<br>(23.73 – 29.42)    | 19.42<br>(15.43 – 24.01)    | 45.87<br>(40.78 – 51.46)    | 11.08<br>(10.08 – 12.27)    | 7.98<br>(6.70 – 9.65)       | 19.06<br>(16.93 – 21.47)    |
| 1-4                           | 13.44<br>(8.57 – 19.62)     | 10.74<br>(8.86 – 12.93)     | 24.18<br>(17.40 – 32.27)    | 7.16<br>(4.76 – 10.21)      | 5.41<br>(4.28 – 6.80)       | 12.57<br>(8.99 – 16.91)     | 3.70<br>(2.50 – 5.23)       | 2.69<br>(2.10 – 3.37)       | 6.40<br>(4.63 – 8.55)       |
| 5-9                           | 4.72<br>(4.39 – 5.06)       | 3.11<br>(2.88 – 3.37)       | 7.84<br>(7.50 – 8.21)       | 3.41<br>(3.15 – 3.67)       | 2.27<br>(2.08 – 2.47)       | 5.67<br>(5.36 – 5.99)       | 2.51<br>(2.30 – 2.74)       | 1.74<br>(1.58 – 1.93)       | 4.25<br>(3.98 – 4.56)       |
| 10-14                         | 4.80<br>(4.58 – 5.00)       | 2.82<br>(2.73 – 2.91)       | 7.62<br>(7.43 – 7.83)       | 4.26<br>(4.04 – 4.46)       | 2.56<br>(2.47 – 2.67)       | 6.82<br>(6.60 – 7.05)       | 3.70<br>(3.47 – 3.95)       | 2.32<br>(2.14 – 2.50)       | 6.02<br>(5.73 – 6.35)       |
| 15-19                         | 12.10<br>(11.88 – 12.32)    | 4.28<br>(4.21 – 4.36)       | 16.39<br>(16.17 – 16.61)    | 15.67<br>(15.38 – 15.96)    | 4.65<br>(4.57 – 4.73)       | 20.32<br>(20.01 – 20.62)    | 13.52<br>(12.36 – 14.76)    | 3.69<br>(3.39 – 3.98)       | 17.21<br>(15.99 – 18.43)    |
| 20-24                         | 17.87<br>(17.57 – 18.18)    | 5.23<br>(5.12 – 5.35)       | 23.11<br>(22.77 – 23.44)    | 21.94<br>(21.75 – 22.11)    | 5.35<br>(5.24 – 5.46)       | 27.29<br>(27.07 – 27.50)    | 19.41<br>(17.73 – 21.20)    | 4.26<br>(3.92 – 4.63)       | 23.67<br>(21.98 – 25.40)    |
| 25-29                         | 19.56<br>(19.24 – 19.91)    | 6.27<br>(6.13 – 6.41)       | 25.83<br>(25.45 – 26.22)    | 20.90<br>(20.68 – 21.07)    | 6.05<br>(5.93 – 6.18)       | 26.94<br>(26.71 – 27.17)    | 20.94<br>(19.22 – 22.75)    | 5.62<br>(5.13 – 6.11)       | 26.55<br>(24.75 – 28.33)    |
| 30-34                         | 19.91<br>(19.70 – 20.17)    | 7.33<br>(7.19 – 7.46)       | 27.24<br>(26.97 – 27.53)    | 21.82<br>(21.54 – 22.02)    | 7.62<br>(7.48 – 7.77)       | 29.44<br>(29.14 – 29.70)    | 22.41<br>(20.61 – 24.30)    | 7.42<br>(6.77 – 8.08)       | 29.83<br>(27.82 – 31.72)    |
| 35-39                         | 20.98<br>(20.82 – 21.19)    | 8.90<br>(8.80 – 9.00)       | 29.88<br>(29.69 – 30.12)    | 24.83<br>(24.58 – 25.07)    | 10.30<br>(10.21 – 10.42)    | 35.13<br>(34.88 – 35.39)    | 23.22<br>(21.15 – 25.37)    | 9.71<br>(8.65 – 10.84)      | 32.94<br>(30.57 – 35.20)    |
| 40-44                         | 22.16<br>(22.01 – 22.29)    | 10.53<br>(10.43 – 10.63)    | 32.69<br>(32.51 – 32.84)    | 27.22<br>(27.00 – 27.42)    | 13.07<br>(12.98 – 13.17)    | 40.30<br>(40.09 – 40.53)    | 26.57<br>(24.20 – 29.07)    | 13.11<br>(11.77 – 14.47)    | 39.68<br>(36.85 – 42.32)    |
| 45-49                         | 23.64<br>(23.49 – 23.78)    | 12.27<br>(12.18 – 12.36)    | 35.91<br>(35.73 – 36.07)    | 30.73<br>(30.59 – 30.90)    | 16.47<br>(16.36 – 16.57)    | 47.20<br>(47.03 – 47.38)    | 34.56<br>(31.42 – 37.85)    | 19.00<br>(17.22 – 20.81)    | 53.56<br>(49.85 – 57.13)    |
| 50-54                         | 28.83<br>(28.62 – 29.02)    | 15.84<br>(15.75 – 15.93)    | 44.67<br>(44.43 – 44.88)    | 33.79<br>(33.66 – 33.93)    | 19.45<br>(19.33 – 19.56)    | 53.24<br>(53.06 – 53.43)    | 44.41<br>(40.45 – 48.51)    | 25.88<br>(23.56 – 28.22)    | 70.29<br>(65.53 – 74.74)    |
| 55-59                         | 31.61<br>(31.45 – 31.76)    | 18.64<br>(18.53 – 18.74)    | 50.25<br>(50.06 – 50.43)    | 36.41<br>(36.27 – 36.58)    | 22.40<br>(22.28 – 22.52)    | 58.81<br>(58.62 – 59.02)    | 51.03<br>(46.64 – 55.67)    | 31.75<br>(29.04 – 34.47)    | 82.78<br>(77.44 – 87.79)    |
| 60-64                         | 38.19<br>(38.07 – 38.33)    | 24.17<br>(24.00 – 24.33)    | 62.36<br>(62.16 – 62.56)    | 44.25<br>(44.08 – 44.41)    | 29.45<br>(29.26 – 29.63)    | 73.70<br>(73.45 – 73.94)    | 58.59<br>(53.90 – 63.54)    | 39.15<br>(35.93 – 42.37)    | 97.74<br>(91.84 – 103.31)   |
| 65-69                         | 40.01<br>(39.84 – 40.16)    | 27.47<br>(27.33 – 27.61)    | 67.48<br>(67.27 – 67.68)    | 47.90<br>(47.76 – 48.06)    | 34.60<br>(34.42 – 34.78)    | 82.50<br>(82.28 – 82.75)    | 62.30<br>(57.70 – 67.12)    | 44.97<br>(41.35 – 48.53)    | 107.27<br>(101.37 – 112.88) |

**Web Table 7 – Regional deaths in thousands with 95% uncertainty by age and sex in 1990, 2000, 2013**

| Age (years)                  | 1990                           |                              |                                | 2000                           |                             |                                | 2013                           |                                |                                |
|------------------------------|--------------------------------|------------------------------|--------------------------------|--------------------------------|-----------------------------|--------------------------------|--------------------------------|--------------------------------|--------------------------------|
|                              | Male                           | Female                       | Total                          | Male                           | Female                      | Total                          | Male                           | Female                         | Total                          |
| 70-74                        | 41.05<br>(40.82 – 41.26)       | 31.85<br>(31.63 – 32.08)     | 72.90<br>(72.56 – 73.23)       | 54.23<br>(54.05 – 54.45)       | 42.80<br>(42.55 – 43.07)    | 97.03<br>(96.71 – 97.37)       | 66.66<br>(62.01 – 71.47)       | 53.17<br>(48.85 – 57.38)       | 119.83<br>(113.73 – 126.12)    |
| 75-79                        | 40.08<br>(39.81 – 40.33)       | 35.67<br>(35.40 – 35.93)     | 75.74<br>(75.32 – 76.17)       | 49.46<br>(49.33 – 49.61)       | 44.74<br>(44.46 – 45.03)    | 94.20<br>(93.89 – 94.53)       | 68.82<br>(64.46 – 73.25)       | 63.60<br>(58.74 – 68.25)       | 132.42<br>(126.34 – 138.90)    |
| 80+                          | 67.73<br>(67.46 – 67.98)       | 81.61<br>(81.26 – 81.96)     | 149.34<br>(148.87 – 149.82)    | 101.94<br>(101.65 – 102.23)    | 128.02<br>(127.39 – 128.65) | 229.96<br>(229.25 – 230.72)    | 167.11<br>(162.04 – 172.12)    | 223.03<br>(215.76 – 229.68)    | 390.14<br>(381.82 – 398.87)    |
| All ages                     | 543.92<br>(533.67 – 553.48)    | 381.56<br>(373.01 – 390.11)  | 925.48<br>(915.10 – 936.79)    | 607.15<br>(600.36 – 613.96)    | 440.50<br>(435.27 – 445.82) | 1047.65<br>(1039.61 – 1056.02) | 718.97<br>(673.12 – 767.89)    | 572.67<br>(537.94 – 604.97)    | 1291.63<br>(1235.19 – 1346.80) |
| North Africa and Middle East |                                |                              |                                |                                |                             |                                |                                |                                |                                |
| Early neonatal               | 109.44<br>(106.72 – 112.17)    | 80.15<br>(76.37 – 84.03)     | 189.59<br>(183.48 – 195.75)    | 80.80<br>(78.29 – 83.37)       | 59.36<br>(56.42 – 62.49)    | 140.17<br>(135.01 – 145.56)    | 60.56<br>(56.75 – 64.85)       | 45.33<br>(42.14 – 48.93)       | 105.89<br>(99.08 – 113.20)     |
| Late neonatal                | 52.84<br>(50.08 – 55.38)       | 41.18<br>(39.65 – 42.73)     | 94.02<br>(91.34 – 97.00)       | 30.65<br>(28.94 – 32.41)       | 24.08<br>(23.08 – 25.17)    | 54.74<br>(52.56 – 57.08)       | 20.85<br>(19.59 – 22.33)       | 16.04<br>(15.13 – 17.07)       | 36.89<br>(34.87 – 39.33)       |
| Postneonatal                 | 147.79<br>(142.59 – 153.95)    | 142.77<br>(131.86 – 154.89)  | 290.56<br>(275.51 – 305.96)    | 83.06<br>(78.74 – 87.36)       | 79.18<br>(72.44 – 86.54)    | 162.24<br>(151.78 – 173.07)    | 46.05<br>(42.18 – 50.45)       | 42.56<br>(37.44 – 47.70)       | 88.61<br>(79.62 – 97.65)       |
| 1-4                          | 96.77<br>(83.04 – 109.40)      | 96.78<br>(91.96 – 101.89)    | 193.55<br>(174.86 – 211.10)    | 53.09<br>(45.72 – 61.21)       | 49.20<br>(45.71 – 52.86)    | 102.30<br>(91.58 – 114.24)     | 31.86<br>(27.35 – 37.04)       | 27.16<br>(24.31 – 30.26)       | 59.02<br>(52.22 – 66.81)       |
| 5-9                          | 31.33<br>(29.93 – 32.62)       | 23.53<br>(22.49 – 24.51)     | 54.85<br>(53.28 – 56.42)       | 19.76<br>(18.85 – 20.73)       | 15.30<br>(14.26 – 16.26)    | 35.05<br>(33.29 – 36.45)       | 12.88<br>(12.03 – 13.83)       | 9.69<br>(9.02 – 10.49)         | 22.56<br>(21.15 – 24.18)       |
| 10-14                        | 21.53<br>(20.36 – 23.98)       | 14.84<br>(14.11 – 15.96)     | 36.37<br>(34.91 – 38.77)       | 16.92<br>(16.22 – 17.68)       | 11.89<br>(11.29 – 12.56)    | 28.81<br>(27.65 – 30.03)       | 11.84<br>(11.08 – 12.99)       | 8.00<br>(7.36 – 8.86)          | 19.84<br>(18.56 – 21.64)       |
| 15-19                        | 22.67<br>(21.21 – 25.36)       | 14.34<br>(13.48 – 15.47)     | 37.01<br>(35.19 – 39.66)       | 24.59<br>(23.54 – 25.78)       | 14.32<br>(13.58 – 15.04)    | 38.91<br>(37.45 – 40.45)       | 22.07<br>(20.55 – 24.27)       | 10.73<br>(9.88 – 11.80)        | 32.80<br>(30.74 – 35.31)       |
| 20-24                        | 26.84<br>(24.88 – 30.09)       | 15.98<br>(14.92 – 17.23)     | 42.81<br>(40.41 – 46.21)       | 29.62<br>(28.17 – 31.34)       | 15.75<br>(14.82 – 16.71)    | 45.37<br>(43.41 – 47.56)       | 31.00<br>(28.62 – 33.95)       | 13.52<br>(12.35 – 14.98)       | 44.52<br>(41.46 – 48.36)       |
| 25-29                        | 26.66<br>(24.70 – 29.72)       | 16.37<br>(15.35 – 17.69)     | 43.02<br>(40.59 – 46.23)       | 28.16<br>(26.79 – 29.83)       | 15.55<br>(14.66 – 16.55)    | 43.71<br>(41.77 – 45.81)       | 34.05<br>(31.48 – 37.18)       | 15.73<br>(14.27 – 17.58)       | 49.78<br>(46.30 – 54.31)       |
| 30-34                        | 26.72<br>(24.79 – 29.65)       | 16.88<br>(15.86 – 18.25)     | 43.60<br>(41.21 – 46.68)       | 28.46<br>(27.09 – 30.15)       | 17.05<br>(16.12 – 18.17)    | 45.51<br>(43.57 – 47.80)       | 35.85<br>(33.07 – 39.04)       | 18.09<br>(16.48 – 20.05)       | 53.94<br>(50.26 – 58.52)       |
| 35-39                        | 29.15<br>(26.97 – 32.09)       | 18.94<br>(17.64 – 20.48)     | 48.09<br>(45.36 – 51.49)       | 31.84<br>(30.12 – 33.80)       | 20.51<br>(19.23 – 22.03)    | 52.35<br>(49.86 – 55.28)       | 37.96<br>(34.80 – 41.35)       | 20.72<br>(18.77 – 23.05)       | 58.68<br>(54.74 – 63.72)       |
| 40-44                        | 29.32<br>(27.19 – 32.03)       | 19.14<br>(17.89 – 20.58)     | 48.46<br>(45.71 – 51.53)       | 38.29<br>(36.11 – 40.60)       | 23.79<br>(22.37 – 25.42)    | 62.08<br>(59.14 – 65.30)       | 44.49<br>(40.83 – 48.59)       | 25.32<br>(23.09 – 27.74)       | 69.80<br>(65.23 – 74.98)       |
| 45-49                        | 34.78<br>(32.40 – 37.67)       | 22.76<br>(21.36 – 24.36)     | 57.55<br>(54.52 – 60.84)       | 47.47<br>(44.71 – 50.33)       | 29.65<br>(27.90 – 31.64)    | 77.12<br>(73.65 – 81.04)       | 58.90<br>(54.30 – 64.10)       | 34.51<br>(31.59 – 37.73)       | 93.42<br>(87.45 – 99.98)       |
| 50-54                        | 47.85<br>(44.80 – 51.17)       | 31.06<br>(29.16 – 33.28)     | 78.90<br>(75.04 – 82.95)       | 54.08<br>(50.99 – 57.39)       | 35.29<br>(33.27 – 37.64)    | 89.37<br>(85.38 – 93.77)       | 78.67<br>(72.73 – 85.22)       | 48.40<br>(44.22 – 52.55)       | 127.07<br>(119.30 – 135.59)    |
| 55-59                        | 63.05<br>(59.61 – 66.86)       | 39.26<br>(37.18 – 41.65)     | 102.30<br>(98.04 – 107.00)     | 62.42<br>(59.07 – 65.71)       | 41.59<br>(39.42 – 44.01)    | 104.00<br>(99.61 – 108.60)     | 96.74<br>(90.04 – 104.61)      | 61.74<br>(56.69 – 66.49)       | 158.47<br>(149.33 – 168.49)    |
| 60-64                        | 76.34<br>(72.65 – 80.49)       | 53.96<br>(51.38 – 56.77)     | 130.29<br>(125.41 – 135.57)    | 83.84<br>(79.75 – 87.83)       | 58.49<br>(56.10 – 61.11)    | 142.33<br>(136.94 – 147.28)    | 111.34<br>(104.11 – 119.70)    | 76.09<br>(70.23 – 81.52)       | 187.44<br>(177.94 – 197.90)    |
| 65-69                        | 82.42<br>(78.70 – 86.49)       | 61.95<br>(59.42 – 64.97)     | 144.37<br>(139.50 – 149.56)    | 106.58<br>(101.73 – 111.24)    | 76.17<br>(73.07 – 79.57)    | 182.75<br>(176.61 – 188.86)    | 114.01<br>(107.10 – 121.90)    | 85.30<br>(79.15 – 91.07)       | 199.31<br>(189.81 – 209.96)    |
| 70-74                        | 77.29<br>(74.02 – 80.52)       | 69.39<br>(66.58 – 72.46)     | 146.67<br>(142.35 – 151.37)    | 112.19<br>(107.71 – 116.54)    | 92.49<br>(89.06 – 96.24)    | 204.68<br>(198.16 – 210.65)    | 124.21<br>(116.53 – 133.34)    | 105.36<br>(98.15 – 111.78)     | 229.57<br>(218.97 – 241.16)    |
| 75-79                        | 74.02<br>(71.58 – 76.46)       | 72.31<br>(70.14 – 74.75)     | 146.33<br>(143.05 – 149.87)    | 98.91<br>(95.41 – 102.18)      | 92.66<br>(89.60 – 95.88)    | 191.56<br>(186.45 – 196.62)    | 131.54<br>(123.84 – 140.61)    | 119.67<br>(112.40 – 126.18)    | 251.21<br>(240.88 – 262.97)    |
| 80+                          | 100.13<br>(98.26 – 101.83)     | 136.95<br>(134.92 – 139.01)  | 237.08<br>(234.49 – 239.85)    | 134.86<br>(132.58 – 136.92)    | 181.47<br>(178.90 – 184.16) | 316.33<br>(312.65 – 320.05)    | 235.06<br>(228.42 – 243.01)    | 306.03<br>(298.12 – 313.06)    | 541.09<br>(530.93 – 551.73)    |
| All ages                     | 1176.93<br>(1140.34 – 1218.85) | 988.52<br>(959.76 – 1017.81) | 2165.45<br>(2115.50 – 2216.40) | 1165.60<br>(1123.46 – 1208.05) | 953.78<br>(923.58 – 989.33) | 2119.38<br>(2063.31 – 2183.65) | 1339.98<br>(1270.58 – 1470.45) | 1089.98<br>(1033.39 – 1140.27) | 2429.91<br>(2332.82 – 2534.90) |
| High-income North America    |                                |                              |                                |                                |                             |                                |                                |                                |                                |
| Early neonatal               | 12.61<br>(12.17 – 12.98)       | 9.80<br>(8.45 – 11.38)       | 22.40<br>(21.09 – 23.68)       | 8.59<br>(8.37 – 8.79)          | 6.79<br>(5.98 – 7.76)       | 15.38<br>(14.40 – 16.36)       | 7.39<br>(6.03 – 9.04)          | 5.92<br>(4.82 – 7.23)          | 13.31<br>(10.99 – 16.06)       |
| Late neonatal                | 2.67<br>(2.40 – 2.88)          | 2.02<br>(1.93 – 2.10)        | 4.69<br>(4.46 – 4.92)          | 2.02<br>(1.84 – 2.18)          | 1.63<br>(1.56 – 1.68)       | 3.65<br>(3.48 – 3.81)          | 1.85<br>(1.54 – 2.17)          | 1.48<br>(1.28 – 1.70)          | 3.33<br>(2.87 – 3.84)          |
| Postneonatal                 | 8.01<br>(7.45 – 8.43)          | 5.96<br>(5.00 – 6.88)        | 13.97<br>(12.50 – 15.17)       | 5.89<br>(5.60 – 6.20)          | 4.46<br>(3.61 – 5.35)       | 10.35<br>(9.31 – 11.24)        | 4.88<br>(3.91 – 6.22)          | 3.70<br>(2.78 – 4.82)          | 8.58<br>(6.78 – 10.90)         |
| 1-4                          | 4.35<br>(3.00 – 5.99)          | 3.28<br>(2.62 – 4.02)        | 7.62<br>(5.62 – 10.01)         | 3.24<br>(2.21 – 4.49)          | 2.49<br>(2.01 – 3.02)       | 5.72<br>(4.22 – 7.50)          | 2.76<br>(1.81 – 4.03)          | 2.15<br>(1.59 – 2.85)          | 4.92<br>(3.40 – 6.86)          |
| 5-9                          | 2.60<br>(2.46 – 2.72)          | 1.84<br>(1.73 – 1.97)        | 4.44<br>(4.41 – 4.48)          | 2.00<br>(1.89 – 2.11)          | 1.51<br>(1.42 – 1.62)       | 3.51<br>(3.46 – 3.56)          | 1.49<br>(1.24 – 1.77)          | 1.15<br>(0.99 – 1.34)          | 2.64<br>(2.26 – 3.09)          |
| 10-14                        | 3.17<br>(3.08 – 3.26)          | 1.78<br>(1.73 – 1.83)        | 4.95<br>(4.89 – 5.01)          | 2.71<br>(2.62 – 2.81)          | 1.72<br>(1.68 – 1.78)       | 4.44<br>(4.36 – 4.50)          | 1.93<br>(1.72 – 2.16)          | 1.27<br>(1.16 – 1.39)          | 3.20<br>(2.92 – 3.52)          |
| 15-19                        | 11.95<br>(11.82 – 12.07)       | 4.30<br>(4.25 – 4.35)        | 16.25<br>(16.13 – 16.36)       | 10.59<br>(10.50 – 10.68)       | 4.23<br>(4.17 – 4.28)       | 14.82<br>(14.74 – 14.89)       | 9.09<br>(8.34 – 9.86)          | 3.52<br>(3.25 – 3.85)          | 12.61<br>(11.77 – 13.51)       |
| 20-24                        | 17.16<br>(17.03 – 17.28)       | 5.28<br>(5.19 – 5.36)        | 22.44<br>(22.29 – 22.55)       | 14.36<br>(14.26 – 14.47)       | 4.68<br>(4.61 – 4.75)       | 19.04<br>(18.94 – 19.15)       | 15.01<br>(13.83 – 16.20)       | 4.81<br>(4.42 – 5.28)          | 19.82<br>(18.50 – 21.19)       |
| 25-29                        | 20.37<br>(20.07 – 20.71)       | 7.18<br>(7.03 – 7.33)        | 27.56<br>(27.15 – 27.95)       | 13.81<br>(13.73 – 13.89)       | 5.51<br>(5.44 – 5.59)       | 19.31<br>(19.23 – 19.41)       | 14.92<br>(13.81 – 16.06)       | 5.68<br>(5.20 – 6.29)          | 20.61<br>(19.27 – 21.95)       |
| 30-34                        | 25.57<br>(25.07 – 26.10)       | 9.91<br>(9.72 – 10.11)       | 35.48<br>(34.90 – 36.02)       | 17.16<br>(16.87 – 17.49)       | 8.11<br>(8.00 – 8.23)       | 25.28<br>(24.95 – 25.62)       | 15.65<br>(14.43 – 16.88)       | 7.29<br>(6.69 – 8.03)          | 22.95<br>(21.50 – 24.47)       |
| 35-39                        | 28.74<br>(28.22 – 29.30)       | 12.54<br>(12.37 – 12.74)     | 41.29<br>(40.69 – 41.91)       | 25.38<br>(25.00 – 25.78)       | 13.79<br>(13.71 – 13.88)    | 39.17<br>(38.75 – 39.58)       | 17.86<br>(16.39 – 19.45)       | 9.96<br>(8.91 – 11.21)         | 27.81<br>(25.79 – 29.83)       |

**Web Table 7 – Regional deaths in thousands with 95% uncertainty by age and sex in 1990, 2000, 2013**

| Age (years)                | 1990                           |                                |                                | 2000                           |                                |                                | 2013                           |                                |                                |
|----------------------------|--------------------------------|--------------------------------|--------------------------------|--------------------------------|--------------------------------|--------------------------------|--------------------------------|--------------------------------|--------------------------------|
|                            | Male                           | Female                         | Total                          | Male                           | Female                         | Total                          | Male                           | Female                         | Total                          |
| 40-44                      | 32.92<br>(32.49 – 33.35)       | 16.43<br>(16.30 – 16.57)       | 49.36<br>(48.89 – 49.82)       | 36.30<br>(36.06 – 36.55)       | 20.95<br>(20.79 – 21.13)       | 57.25<br>(56.95 – 57.58)       | 27.33<br>(25.03 – 29.78)       | 16.20<br>(14.64 – 18.05)       | 43.53<br>(40.40 – 46.61)       |
| 45-49                      | 36.27<br>(36.11 – 36.45)       | 20.43<br>(20.32 – 20.55)       | 56.70<br>(56.50 – 56.93)       | 47.42<br>(47.10 – 47.75)       | 27.98<br>(27.74 – 28.24)       | 75.40<br>(74.95 – 75.88)       | 47.38<br>(43.52 – 51.63)       | 29.11<br>(26.60 – 32.02)       | 76.49<br>(71.17 – 81.61)       |
| 50-54                      | 45.95<br>(45.66 – 46.25)       | 27.41<br>(27.25 – 27.57)       | 73.36<br>(73.01 – 73.72)       | 60.23<br>(59.79 – 60.69)       | 37.41<br>(37.26 – 37.58)       | 97.64<br>(97.17 – 98.15)       | 71.94<br>(66.05 – 78.29)       | 43.49<br>(39.92 – 47.66)       | 115.43<br>(107.60 – 123.08)    |
| 55-59                      | 66.46<br>(65.90 – 67.04)       | 40.44<br>(40.24 – 40.65)       | 106.91<br>(106.27 – 107.56)    | 69.44<br>(69.21 – 69.68)       | 45.67<br>(45.39 – 45.95)       | 115.11<br>(114.73 – 115.47)    | 97.06<br>(89.49 – 105.21)      | 60.98<br>(56.20 – 66.47)       | 158.04<br>(147.69 – 167.92)    |
| 60-64                      | 103.29<br>(102.55 – 104.07)    | 65.47<br>(65.18 – 65.76)       | 168.76<br>(167.91 – 169.62)    | 86.21<br>(85.84 – 86.57)       | 59.23<br>(58.89 – 59.56)       | 145.44<br>(144.85 – 145.97)    | 128.99<br>(119.69 – 138.96)    | 85.78<br>(79.30 – 93.18)       | 214.76<br>(201.90 – 227.25)    |
| 65-69                      | 141.53<br>(140.55 – 142.54)    | 96.59<br>(96.21 – 96.99)       | 238.12<br>(237.01 – 239.24)    | 113.28<br>(112.66 – 113.90)    | 82.44<br>(82.02 – 82.85)       | 195.72<br>(194.87 – 196.51)    | 136.71<br>(127.77 – 146.28)    | 97.47<br>(90.38 – 105.54)      | 234.18<br>(221.04 – 246.84)    |
| 70-74                      | 164.16<br>(162.89 – 165.47)    | 123.76<br>(123.28 – 124.27)    | 287.91<br>(286.46 – 289.37)    | 155.22<br>(154.48 – 155.96)    | 124.02<br>(123.45 – 124.56)    | 279.24<br>(278.18 – 280.22)    | 146.56<br>(137.52 – 156.21)    | 111.34<br>(103.21 – 120.61)    | 257.90<br>(243.91 – 271.30)    |
| 75-79                      | 174.70<br>(173.48 – 175.95)    | 156.69<br>(156.05 – 157.35)    | 331.39<br>(329.90 – 332.90)    | 187.81<br>(187.08 – 188.53)    | 174.84<br>(174.20 – 175.48)    | 362.65<br>(361.61 – 363.59)    | 168.45<br>(159.23 – 178.26)    | 143.58<br>(133.86 – 154.61)    | 312.03<br>(296.61 – 327.09)    |
| 80+                        | 322.03<br>(320.88 – 323.23)    | 522.40<br>(520.60 – 524.36)    | 844.43<br>(842.24 – 846.60)    | 406.60<br>(405.58 – 407.62)    | 677.62<br>(674.77 – 680.37)    | 1084.22<br>(1081.82 – 1086.88) | 583.73<br>(561.06 – 607.46)    | 823.78<br>(786.18 – 865.18)    | 1407.52<br>(1358.94 – 1453.97) |
| All ages                   | 1224.51<br>(1218.89 – 1230.42) | 1133.51<br>(1130.18 – 1136.78) | 2358.02<br>(2350.66 – 2365.14) | 1268.27<br>(1263.95 – 1272.40) | 1305.06<br>(1301.46 – 1308.99) | 2573.33<br>(2567.02 – 2579.24) | 1501.00<br>(1414.93 – 1591.83) | 1458.67<br>(1375.76 – 1553.34) | 2959.66<br>(2824.06 – 3090.50) |
| Oceania                    |                                |                                |                                |                                |                                |                                |                                |                                |                                |
| Early neonatal             | 2.52<br>(2.24 – 2.76)          | 1.89<br>(1.62 – 2.17)          | 4.41<br>(3.87 – 4.91)          | 2.83<br>(2.44 – 3.22)          | 2.12<br>(1.75 – 2.49)          | 4.95<br>(4.18 – 5.68)          | 2.57<br>(2.03 – 3.20)          | 1.91<br>(1.47 – 2.45)          | 4.48<br>(3.51 – 5.69)          |
| Late neonatal              | 0.88<br>(0.74 – 1.04)          | 0.72<br>(0.61 – 0.85)          | 1.60<br>(1.40 – 1.84)          | 0.94<br>(0.71 – 1.19)          | 0.77<br>(0.61 – 0.96)          | 1.71<br>(1.34 – 2.12)          | 0.72<br>(0.45 – 1.14)          | 0.61<br>(0.39 – 0.89)          | 1.33<br>(0.86 – 2.05)          |
| Postneonatal               | 3.11<br>(2.64 – 3.61)          | 2.78<br>(2.07 – 3.65)          | 5.89<br>(4.74 – 7.23)          | 3.34<br>(2.57 – 4.17)          | 2.96<br>(2.06 – 4.09)          | 6.30<br>(4.63 – 8.10)          | 2.58<br>(1.50 – 3.95)          | 2.25<br>(1.25 – 3.57)          | 4.82<br>(2.83 – 7.47)          |
| 1-4                        | 2.73<br>(1.79 – 3.95)          | 2.35<br>(1.84 – 2.92)          | 5.08<br>(3.68 – 6.90)          | 2.81<br>(1.61 – 4.50)          | 2.39<br>(1.63 – 3.31)          | 5.20<br>(3.26 – 7.82)          | 2.05<br>(1.03 – 3.98)          | 1.67<br>(0.84 – 3.07)          | 3.72<br>(1.88 – 6.93)          |
| 5-9                        | 0.63<br>(0.52 – 0.77)          | 0.53<br>(0.44 – 0.63)          | 1.17<br>(1.01 – 1.32)          | 0.68<br>(0.53 – 0.87)          | 0.55<br>(0.43 – 0.69)          | 1.22<br>(0.99 – 1.52)          | 0.66<br>(0.49 – 0.88)          | 0.49<br>(0.34 – 0.73)          | 1.15<br>(0.85 – 1.62)          |
| 10-14                      | 0.49<br>(0.41 – 0.60)          | 0.49<br>(0.36 – 0.70)          | 0.98<br>(0.78 – 1.29)          | 0.52<br>(0.42 – 0.67)          | 0.52<br>(0.35 – 0.78)          | 1.05<br>(0.77 – 1.45)          | 0.55<br>(0.42 – 0.71)          | 0.53<br>(0.36 – 0.81)          | 1.08<br>(0.79 – 1.53)          |
| 15-19                      | 0.83<br>(0.67 – 1.09)          | 0.68<br>(0.50 – 0.95)          | 1.51<br>(1.17 – 2.04)          | 0.90<br>(0.73 – 1.19)          | 0.72<br>(0.49 – 1.03)          | 1.62<br>(1.22 – 2.22)          | 0.99<br>(0.77 – 1.34)          | 0.71<br>(0.49 – 1.06)          | 1.70<br>(1.29 – 2.40)          |
| 20-24                      | 1.13<br>(0.89 – 1.55)          | 0.86<br>(0.60 – 1.25)          | 1.99<br>(1.48 – 2.81)          | 1.38<br>(1.08 – 1.91)          | 1.02<br>(0.67 – 1.54)          | 2.40<br>(1.75 – 3.43)          | 1.48<br>(1.11 – 2.12)          | 0.95<br>(0.63 – 1.45)          | 2.43<br>(1.74 – 3.54)          |
| 25-29                      | 1.19<br>(0.90 – 1.67)          | 0.98<br>(0.64 – 1.48)          | 2.17<br>(1.54 – 3.18)          | 1.61<br>(1.22 – 2.26)          | 1.30<br>(0.82 – 2.01)          | 2.92<br>(2.06 – 4.25)          | 1.73<br>(1.27 – 2.51)          | 1.21<br>(0.76 – 1.92)          | 2.93<br>(2.00 – 4.40)          |
| 30-34                      | 1.31<br>(0.93 – 1.92)          | 1.04<br>(0.66 – 1.58)          | 2.34<br>(1.60 – 3.48)          | 1.71<br>(1.25 – 2.45)          | 1.31<br>(0.84 – 1.99)          | 3.02<br>(2.09 – 4.45)          | 2.11<br>(1.46 – 3.07)          | 1.42<br>(0.89 – 2.24)          | 3.53<br>(2.32 – 5.30)          |
| 35-39                      | 1.50<br>(1.04 – 2.24)          | 1.34<br>(0.77 – 2.29)          | 2.84<br>(1.80 – 4.55)          | 1.95<br>(1.39 – 2.89)          | 1.68<br>(0.96 – 2.90)          | 3.63<br>(2.35 – 5.78)          | 2.58<br>(1.75 – 3.84)          | 2.03<br>(1.10 – 3.73)          | 4.61<br>(2.85 – 7.56)          |
| 40-44                      | 1.68<br>(1.12 – 2.55)          | 1.29<br>(0.79 – 2.08)          | 2.97<br>(1.91 – 4.64)          | 2.24<br>(1.54 – 3.38)          | 1.77<br>(1.09 – 2.86)          | 4.01<br>(2.63 – 6.26)          | 3.05<br>(1.99 – 4.72)          | 2.29<br>(1.31 – 3.92)          | 5.34<br>(3.30 – 8.65)          |
| 45-49                      | 1.95<br>(1.29 – 2.95)          | 1.39<br>(0.88 – 2.10)          | 3.33<br>(2.17 – 5.02)          | 2.56<br>(1.73 – 3.87)          | 1.97<br>(1.27 – 3.00)          | 4.53<br>(2.99 – 6.87)          | 3.35<br>(2.16 – 5.15)          | 2.49<br>(1.52 – 3.94)          | 5.84<br>(3.67 – 9.10)          |
| 50-54                      | 2.19<br>(1.44 – 3.20)          | 1.64<br>(1.09 – 2.40)          | 3.83<br>(2.53 – 5.59)          | 2.78<br>(1.84 – 4.14)          | 2.31<br>(1.54 – 3.37)          | 5.08<br>(3.37 – 7.51)          | 3.86<br>(2.51 – 5.79)          | 3.16<br>(1.98 – 4.80)          | 7.01<br>(4.52 – 10.63)         |
| 55-59                      | 2.34<br>(1.59 – 3.28)          | 1.80<br>(1.23 – 2.52)          | 4.13<br>(2.81 – 5.79)          | 2.95<br>(1.98 – 4.19)          | 2.45<br>(1.70 – 3.44)          | 5.39<br>(3.67 – 7.63)          | 4.19<br>(2.73 – 6.06)          | 3.57<br>(2.35 – 5.20)          | 7.76<br>(5.15 – 11.31)         |
| 60-64                      | 2.44<br>(1.70 – 3.21)          | 1.98<br>(1.42 – 2.68)          | 4.41<br>(3.12 – 5.88)          | 3.09<br>(2.13 – 4.13)          | 2.67<br>(1.93 – 3.63)          | 5.76<br>(4.06 – 7.75)          | 4.39<br>(2.98 – 5.99)          | 3.94<br>(2.71 – 5.58)          | 8.34<br>(5.75 – 11.61)         |
| 65-69                      | 2.25<br>(1.66 – 2.81)          | 2.16<br>(1.59 – 2.83)          | 4.40<br>(3.26 – 5.64)          | 2.89<br>(2.09 – 3.66)          | 2.86<br>(2.13 – 3.76)          | 5.74<br>(4.22 – 7.42)          | 4.07<br>(2.93 – 5.22)          | 4.05<br>(2.93 – 5.53)          | 8.13<br>(5.87 – 10.78)         |
| 70-74                      | 1.87<br>(1.45 – 2.21)          | 2.10<br>(1.57 – 2.67)          | 3.97<br>(3.03 – 4.87)          | 2.43<br>(1.85 – 2.90)          | 2.82<br>(2.14 – 3.61)          | 5.25<br>(3.97 – 6.50)          | 3.70<br>(2.82 – 4.45)          | 4.18<br>(3.06 – 5.57)          | 7.88<br>(5.86 – 10.02)         |
| 75-79                      | 1.39<br>(1.13 – 1.58)          | 1.82<br>(1.41 – 2.20)          | 3.21<br>(2.55 – 3.77)          | 1.83<br>(1.46 – 2.10)          | 2.53<br>(1.99 – 3.09)          | 4.36<br>(3.44 – 5.19)          | 2.90<br>(2.32 – 3.33)          | 3.84<br>(2.92 – 4.87)          | 6.73<br>(5.25 – 8.20)          |
| 80+                        | 1.40<br>(1.26 – 1.46)          | 2.13<br>(1.89 – 2.28)          | 3.53<br>(3.16 – 3.73)          | 1.95<br>(1.75 – 2.05)          | 3.31<br>(2.97 – 3.55)          | 5.26<br>(4.72 – 5.60)          | 3.33<br>(3.00 – 3.51)          | 5.55<br>(4.89 – 6.11)          | 8.88<br>(7.90 – 9.61)          |
| All ages                   | 33.82<br>(27.02 – 42.65)       | 29.95<br>(23.34 – 38.55)       | 63.77<br>(50.31 – 81.18)       | 41.38<br>(31.58 – 53.16)       | 38.02<br>(28.53 – 49.95)       | 79.40<br>(60.29 – 102.84)      | 50.87<br>(39.07 – 66.75)       | 46.81<br>(35.17 – 63.21)       | 97.68<br>(74.27 – 129.76)      |
| Central Sub-Saharan Africa |                                |                                |                                |                                |                                |                                |                                |                                |                                |
| Early neonatal             | 42.81<br>(39.32 – 45.80)       | 31.30<br>(27.28 – 36.18)       | 74.11<br>(66.67 – 81.80)       | 53.98<br>(49.62 – 57.91)       | 38.96<br>(34.05 – 44.91)       | 92.94<br>(83.60 – 102.67)      | 56.06<br>(49.80 – 62.67)       | 40.31<br>(34.85 – 46.75)       | 96.38<br>(84.75 – 109.18)      |
| Late neonatal              | 15.82<br>(15.05 – 16.57)       | 15.36<br>(13.92 – 16.96)       | 31.18<br>(29.52 – 32.80)       | 18.70<br>(17.69 – 19.65)       | 18.20<br>(16.48 – 19.99)       | 36.90<br>(34.89 – 38.77)       | 16.26<br>(13.80 – 19.29)       | 15.68<br>(13.07 – 18.71)       | 31.94<br>(27.13 – 37.51)       |
| Postneonatal               | 74.28<br>(68.45 – 79.64)       | 70.65<br>(58.86 – 84.34)       | 144.93<br>(128.09 – 162.66)    | 92.41<br>(84.63 – 98.55)       | 88.56<br>(73.79 – 105.69)      | 180.97<br>(157.99 – 202.95)    | 82.43<br>(68.96 – 98.26)       | 79.97<br>(63.14 – 100.81)      | 162.40<br>(132.59 – 196.86)    |
| 1-4                        | 93.23<br>(74.40 – 113.00)      | 81.35<br>(75.38 – 87.85)       | 174.58<br>(150.19 – 200.46)    | 114.15<br>(89.33 – 138.69)     | 99.21<br>(91.54 – 107.18)      | 213.36<br>(182.27 – 245.70)    | 92.41<br>(66.13 – 128.29)      | 78.25<br>(60.69 – 100.94)      | 170.66<br>(129.22 – 227.61)    |
| 5-9                        | 12.16<br>(11.08 – 13.37)       | 11.36<br>(10.27 – 12.56)       | 23.52<br>(21.99 – 25.11)       | 15.66<br>(14.27 – 17.16)       | 14.75<br>(13.32 – 16.36)       | 30.41<br>(28.61 – 32.78)       | 14.36<br>(11.26 – 17.92)       | 14.11<br>(11.25 – 17.37)       | 28.47<br>(22.90 – 34.92)       |

**Web Table 7 – Regional deaths in thousands with 95% uncertainty by age and sex in 1990, 2000, 2013**

| Age (years)                | 1990                           |                                |                                | 2000                           |                                |                                | 2013                           |                                |                                |
|----------------------------|--------------------------------|--------------------------------|--------------------------------|--------------------------------|--------------------------------|--------------------------------|--------------------------------|--------------------------------|--------------------------------|
|                            | Male                           | Female                         | Total                          | Male                           | Female                         | Total                          | Male                           | Female                         | Total                          |
| 10-14                      | 6.24<br>(5.73 – 6.80)          | 5.60<br>(5.13 – 6.10)          | 11.84<br>(11.13 – 12.70)       | 8.46<br>(7.82 – 9.46)          | 7.44<br>(6.93 – 8.13)          | 15.90<br>(15.11 – 17.42)       | 8.81<br>(7.61 – 10.23)         | 7.67<br>(6.64 – 8.77)          | 16.47<br>(14.52 – 18.77)       |
| 15-19                      | 6.42<br>(5.85 – 6.99)          | 6.36<br>(5.89 – 6.83)          | 12.78<br>(11.98 – 13.61)       | 9.00<br>(8.35 – 9.70)          | 8.46<br>(7.91 – 9.01)          | 17.45<br>(16.61 – 18.43)       | 10.85<br>(9.72 – 11.86)        | 9.14<br>(7.95 – 10.33)         | 19.99<br>(18.11 – 21.87)       |
| 20-24                      | 8.41<br>(7.58 – 9.23)          | 8.67<br>(7.84 – 9.45)          | 17.08<br>(15.71 – 18.51)       | 11.67<br>(10.74 – 12.75)       | 12.66<br>(11.08 – 14.30)       | 24.33<br>(22.14 – 26.64)       | 14.93<br>(13.07 – 16.51)       | 13.58<br>(11.41 – 15.83)       | 28.50<br>(25.34 – 31.73)       |
| 25-29                      | 9.95<br>(8.65 – 11.52)         | 9.31<br>(8.37 – 10.33)         | 19.26<br>(17.32 – 21.56)       | 13.90<br>(12.39 – 15.62)       | 15.27<br>(13.10 – 17.35)       | 29.17<br>(25.89 – 32.52)       | 16.50<br>(14.47 – 18.45)       | 16.16<br>(13.48 – 18.58)       | 32.66<br>(28.95 – 36.31)       |
| 30-34                      | 11.08<br>(9.62 – 12.64)        | 9.04<br>(8.21 – 9.97)          | 20.12<br>(18.21 – 22.22)       | 16.34<br>(14.64 – 18.11)       | 15.28<br>(13.70 – 16.85)       | 31.62<br>(28.84 – 34.55)       | 18.17<br>(16.02 – 20.23)       | 16.13<br>(14.43 – 17.80)       | 34.30<br>(31.31 – 37.39)       |
| 35-39                      | 11.54<br>(10.10 – 12.94)       | 9.07<br>(8.16 – 10.18)         | 20.61<br>(18.61 – 22.86)       | 17.53<br>(15.83 – 19.30)       | 14.47<br>(13.20 – 16.09)       | 31.99<br>(29.28 – 35.03)       | 19.32<br>(17.31 – 21.44)       | 15.40<br>(14.00 – 17.04)       | 34.72<br>(31.89 – 37.70)       |
| 40-44                      | 11.59<br>(10.28 – 12.98)       | 8.66<br>(7.72 – 9.79)          | 20.25<br>(18.38 – 22.40)       | 17.38<br>(15.99 – 19.01)       | 12.74<br>(11.49 – 14.15)       | 30.12<br>(27.90 – 32.92)       | 19.92<br>(17.52 – 22.21)       | 14.18<br>(12.81 – 15.89)       | 34.10<br>(31.06 – 37.37)       |
| 45-49                      | 12.15<br>(10.58 – 13.84)       | 9.06<br>(8.04 – 10.22)         | 21.20<br>(18.99 – 23.75)       | 17.40<br>(15.77 – 19.31)       | 12.16<br>(10.99 – 13.57)       | 29.56<br>(27.14 – 32.61)       | 20.93<br>(18.22 – 24.07)       | 14.16<br>(12.51 – 16.31)       | 35.08<br>(31.35 – 39.03)       |
| 50-54                      | 12.78<br>(11.01 – 14.74)       | 10.58<br>(9.19 – 12.34)        | 23.36<br>(20.69 – 26.44)       | 17.76<br>(15.94 – 19.89)       | 13.63<br>(11.94 – 15.65)       | 31.40<br>(28.49 – 34.71)       | 21.86<br>(18.94 – 25.53)       | 15.92<br>(13.25 – 19.17)       | 37.78<br>(33.49 – 42.97)       |
| 55-59                      | 13.45<br>(11.61 – 15.54)       | 11.90<br>(10.33 – 13.87)       | 25.35<br>(22.55 – 28.67)       | 18.68<br>(16.70 – 21.04)       | 15.26<br>(13.41 – 17.34)       | 33.94<br>(30.63 – 37.64)       | 23.17<br>(19.98 – 27.22)       | 17.92<br>(14.86 – 21.61)       | 41.10<br>(35.88 – 47.40)       |
| 60-64                      | 14.53<br>(12.72 – 16.56)       | 14.38<br>(12.68 – 16.54)       | 28.91<br>(25.91 – 32.21)       | 20.04<br>(18.19 – 22.06)       | 18.27<br>(16.29 – 20.39)       | 38.30<br>(35.09 – 41.77)       | 25.42<br>(22.20 – 29.91)       | 21.64<br>(18.17 – 25.30)       | 47.06<br>(41.83 – 53.51)       |
| 65-69                      | 14.14<br>(12.41 – 16.09)       | 15.75<br>(13.77 – 18.19)       | 29.89<br>(26.77 – 33.41)       | 19.93<br>(17.90 – 21.92)       | 20.26<br>(17.91 – 22.68)       | 40.20<br>(36.60 – 43.81)       | 26.18<br>(22.83 – 30.36)       | 24.75<br>(20.67 – 29.13)       | 50.93<br>(45.15 – 57.88)       |
| 70-74                      | 13.14<br>(11.67 – 14.84)       | 16.10<br>(14.37 – 18.31)       | 29.24<br>(26.53 – 32.19)       | 18.58<br>(16.96 – 20.19)       | 20.81<br>(18.83 – 22.97)       | 39.40<br>(36.39 – 42.46)       | 25.09<br>(22.34 – 28.61)       | 26.30<br>(22.53 – 30.41)       | 51.39<br>(46.36 – 57.65)       |
| 75-79                      | 9.81<br>(8.85 – 10.94)         | 13.59<br>(12.24 – 15.24)       | 23.40<br>(21.45 – 25.63)       | 13.92<br>(12.86 – 14.94)       | 17.72<br>(16.17 – 19.44)       | 31.64<br>(29.44 – 33.96)       | 19.74<br>(17.99 – 22.13)       | 23.43<br>(20.22 – 26.89)       | 43.17<br>(39.08 – 48.04)       |
| 80+                        | 9.79<br>(9.28 – 10.43)         | 16.12<br>(15.25 – 17.13)       | 25.91<br>(24.80 – 27.16)       | 13.99<br>(13.32 – 14.53)       | 21.49<br>(20.46 – 22.51)       | 35.49<br>(34.13 – 36.82)       | 21.46<br>(20.45 – 22.77)       | 31.20<br>(28.86 – 33.58)       | 52.66<br>(49.85 – 55.79)       |
| All ages                   | 403.32<br>(380.23 – 425.71)    | 374.20<br>(352.00 – 398.35)    | 777.52<br>(744.35 – 811.38)    | 529.47<br>(501.96 – 555.07)    | 485.60<br>(461.30 – 512.81)    | 1015.08<br>(978.75 – 1051.41)  | 553.86<br>(497.48 – 617.36)    | 495.92<br>(444.23 – 551.79)    | 1049.78<br>(953.97 – 1152.79)  |
| Eastern Sub-Saharan Africa |                                |                                |                                |                                |                                |                                |                                |                                |                                |
| Early neonatal             | 158.77<br>(152.70 – 164.45)    | 112.55<br>(103.87 – 122.14)    | 271.32<br>(256.50 – 286.18)    | 168.75<br>(162.45 – 174.07)    | 117.39<br>(109.49 – 125.69)    | 286.14<br>(271.83 – 299.39)    | 152.82<br>(145.01 – 160.54)    | 109.53<br>(102.45 – 117.13)    | 262.34<br>(247.39 – 277.36)    |
| Late neonatal              | 71.00<br>(68.61 – 73.12)       | 54.08<br>(50.91 – 57.37)       | 125.08<br>(121.45 – 128.90)    | 63.51<br>(61.29 – 65.56)       | 48.55<br>(46.06 – 50.97)       | 112.06<br>(109.11 – 115.08)    | 46.16<br>(42.28 – 50.60)       | 35.92<br>(32.87 – 39.00)       | 82.08<br>(75.68 – 89.26)       |
| Postneonatal               | 249.13<br>(239.70 – 258.68)    | 228.02<br>(208.42 – 248.33)    | 477.15<br>(448.61 – 505.68)    | 250.35<br>(241.39 – 258.76)    | 234.82<br>(216.12 – 254.13)    | 485.18<br>(457.81 – 511.18)    | 178.85<br>(165.50 – 193.07)    | 166.51<br>(149.85 – 184.34)    | 345.36<br>(315.61 – 376.86)    |
| 1-4                        | 299.93<br>(270.43 – 333.76)    | 276.77<br>(266.00 – 287.45)    | 576.70<br>(536.97 – 621.16)    | 270.67<br>(242.57 – 301.13)    | 247.39<br>(237.61 – 257.24)    | 518.06<br>(479.34 – 558.12)    | 168.78<br>(145.46 – 195.85)    | 146.95<br>(131.45 – 164.45)    | 315.74<br>(278.46 – 359.02)    |
| 5-9                        | 43.90<br>(41.34 – 46.95)       | 40.48<br>(38.04 – 43.37)       | 84.38<br>(80.54 – 89.38)       | 48.21<br>(44.27 – 53.91)       | 44.91<br>(41.53 – 50.23)       | 93.13<br>(86.16 – 103.38)      | 36.64<br>(33.56 – 40.51)       | 33.12<br>(29.91 – 37.15)       | 69.75<br>(64.01 – 77.03)       |
| 10-14                      | 23.71<br>(22.17 – 26.60)       | 21.55<br>(20.40 – 23.02)       | 45.26<br>(43.10 – 49.11)       | 28.00<br>(25.33 – 34.48)       | 24.75<br>(23.06 – 27.68)       | 52.75<br>(48.73 – 61.65)       | 26.42<br>(24.90 – 29.28)       | 22.10<br>(20.69 – 24.06)       | 48.52<br>(45.68 – 53.15)       |
| 15-19                      | 23.38<br>(22.29 – 25.25)       | 23.29<br>(22.31 – 24.72)       | 46.67<br>(45.06 – 49.01)       | 28.60<br>(27.29 – 30.60)       | 30.22<br>(29.01 – 31.73)       | 58.82<br>(56.78 – 61.53)       | 32.52<br>(30.98 – 34.08)       | 26.10<br>(24.79 – 27.58)       | 58.61<br>(56.17 – 61.08)       |
| 20-24                      | 29.24<br>(27.90 – 31.31)       | 32.08<br>(30.43 – 34.18)       | 61.32<br>(58.75 – 64.45)       | 40.13<br>(37.65 – 42.88)       | 60.57<br>(53.69 – 67.59)       | 100.70<br>(92.06 – 109.54)     | 45.29<br>(42.15 – 48.17)       | 48.42<br>(43.31 – 53.94)       | 93.71<br>(86.95 – 100.91)      |
| 25-29                      | 35.59<br>(33.55 – 38.19)       | 35.60<br>(33.47 – 37.69)       | 71.19<br>(67.66 – 74.73)       | 63.40<br>(58.45 – 69.09)       | 84.54<br>(75.82 – 92.63)       | 147.95<br>(135.90 – 160.02)    | 60.55<br>(56.24 – 65.05)       | 68.77<br>(62.10 – 75.47)       | 129.32<br>(120.13 – 138.98)    |
| 30-34                      | 40.31<br>(38.02 – 42.94)       | 35.12<br>(33.42 – 36.78)       | 75.42<br>(72.50 – 78.57)       | 81.69<br>(76.48 – 87.39)       | 81.65<br>(76.68 – 86.67)       | 163.35<br>(154.66 – 172.35)    | 72.42<br>(68.22 – 76.70)       | 70.61<br>(67.04 – 74.41)       | 143.02<br>(137.10 – 149.26)    |
| 35-39                      | 41.42<br>(39.35 – 43.66)       | 35.24<br>(33.65 – 37.05)       | 76.66<br>(73.78 – 79.65)       | 80.72<br>(76.14 – 85.82)       | 67.97<br>(64.79 – 71.98)       | 148.70<br>(141.69 – 156.81)    | 73.91<br>(70.43 – 77.58)       | 63.84<br>(60.96 – 67.04)       | 137.75<br>(132.55 – 143.46)    |
| 40-44                      | 41.43<br>(39.46 – 44.04)       | 32.59<br>(31.06 – 34.24)       | 74.02<br>(71.23 – 77.28)       | 74.19<br>(70.82 – 78.01)       | 54.96<br>(52.22 – 57.96)       | 129.14<br>(124.03 – 134.95)    | 70.13<br>(67.02 – 73.49)       | 54.75<br>(52.14 – 57.84)       | 124.87<br>(120.37 – 129.59)    |
| 45-49                      | 41.64<br>(39.38 – 44.25)       | 31.70<br>(30.27 – 33.40)       | 73.34<br>(70.43 – 76.54)       | 68.34<br>(64.85 – 72.40)       | 47.61<br>(45.17 – 50.24)       | 115.95<br>(110.77 – 121.38)    | 66.87<br>(63.45 – 70.82)       | 49.42<br>(46.44 – 52.59)       | 116.29<br>(110.97 – 121.69)    |
| 50-54                      | 42.39<br>(39.88 – 45.25)       | 35.83<br>(34.15 – 37.76)       | 78.23<br>(74.92 – 81.71)       | 59.90<br>(56.68 – 63.82)       | 48.08<br>(45.53 – 51.41)       | 107.98<br>(103.37 – 113.22)    | 63.57<br>(59.87 – 67.81)       | 51.18<br>(47.27 – 55.11)       | 114.75<br>(109.28 – 120.32)    |
| 55-59                      | 46.76<br>(44.16 – 49.67)       | 41.44<br>(39.64 – 43.40)       | 88.19<br>(84.70 – 91.93)       | 54.88<br>(52.04 – 58.38)       | 47.70<br>(45.42 – 50.45)       | 102.58<br>(98.41 – 107.74)     | 65.59<br>(61.52 – 70.05)       | 55.99<br>(51.48 – 60.10)       | 121.58<br>(115.42 – 128.00)    |
| 60-64                      | 50.34<br>(47.63 – 53.16)       | 47.43<br>(45.58 – 49.43)       | 97.77<br>(94.10 – 101.56)      | 57.06<br>(55.08 – 59.53)       | 55.01<br>(52.95 – 57.20)       | 112.07<br>(108.95 – 115.64)    | 74.52<br>(70.42 – 79.42)       | 66.98<br>(62.38 – 71.35)       | 141.51<br>(135.19 – 148.29)    |
| 65-69                      | 51.00<br>(48.47 – 53.54)       | 52.38<br>(50.38 – 54.47)       | 103.38<br>(99.69 – 107.12)     | 62.63<br>(60.48 – 65.06)       | 64.01<br>(61.46 – 66.59)       | 126.64<br>(123.08 – 130.31)    | 79.53<br>(75.53 – 84.54)       | 77.15<br>(71.33 – 82.59)       | 156.68<br>(149.45 – 163.85)    |
| 70-74                      | 48.94<br>(46.65 – 51.18)       | 51.33<br>(49.54 – 53.27)       | 100.27<br>(97.02 – 103.55)     | 57.84<br>(55.95 – 59.86)       | 64.56<br>(62.24 – 67.06)       | 122.40<br>(119.29 – 125.63)    | 79.17<br>(75.47 – 83.75)       | 82.00<br>(76.54 – 87.20)       | 161.16<br>(154.69 – 167.85)    |
| 75-79                      | 39.04<br>(37.36 – 40.59)       | 44.15<br>(42.66 – 45.74)       | 83.19<br>(80.76 – 85.57)       | 50.96<br>(49.57 – 52.48)       | 59.54<br>(57.58 – 61.56)       | 110.50<br>(107.99 – 113.08)    | 71.65<br>(68.84 – 74.89)       | 79.72<br>(74.81 – 84.64)       | 151.37<br>(145.67 – 157.05)    |
| 80+                        | 39.83<br>(38.84 – 40.75)       | 53.41<br>(52.33 – 54.56)       | 93.24<br>(91.70 – 94.68)       | 61.59<br>(60.60 – 62.73)       | 73.96<br>(72.43 – 75.51)       | 135.55<br>(133.66 – 137.33)    | 101.17<br>(99.07 – 103.71)     | 127.24<br>(123.36 – 131.25)    | 228.41<br>(224.15 – 233.09)    |
| All ages                   | 1417.74<br>(1381.69 – 1457.17) | 1285.03<br>(1254.12 – 1318.06) | 2702.77<br>(2659.95 – 2747.89) | 1671.43<br>(1634.71 – 1708.81) | 1558.21<br>(1523.80 – 1597.13) | 3229.64<br>(3177.25 – 3287.06) | 1566.53<br>(1505.28 – 1630.93) | 1436.29<br>(1380.13 – 1497.06) | 3002.82<br>(2899.46 – 3109.31) |

**Web Table 7 – Regional deaths in thousands with 95% uncertainty by age and sex in 1990, 2000, 2013**

| Age (years)                 | 1990                      |                           |                           | 2000                      |                           |                           | 2013                      |                           |                           |
|-----------------------------|---------------------------|---------------------------|---------------------------|---------------------------|---------------------------|---------------------------|---------------------------|---------------------------|---------------------------|
|                             | Male                      | Female                    | Total                     | Male                      | Female                    | Total                     | Male                      | Female                    | Total                     |
| Southern Sub-Saharan Africa |                           |                           |                           |                           |                           |                           |                           |                           |                           |
| Early neonatal              | 15.36<br>(14.52–16.11)    | 12.59<br>(11.45–13.88)    | 27.95<br>(25.98–30.01)    | 16.95<br>(15.83–18.15)    | 12.60<br>(11.34–14.11)    | 29.55<br>(27.22–32.24)    | 13.58<br>(12.39–14.76)    | 10.72<br>(9.39–11.98)     | 24.30<br>(21.85–26.74)    |
| Late neonatal               | 5.47<br>(5.04–5.95)       | 4.81<br>(4.42–5.22)       | 10.28<br>(9.67–11.01)     | 4.73<br>(4.04–5.46)       | 4.26<br>(3.68–4.86)       | 8.99<br>(7.79–10.16)      | 3.88<br>(3.31–4.51)       | 3.35<br>(2.84–3.94)       | 7.22<br>(6.15–8.39)       |
| Postneonatal                | 25.51<br>(23.54–27.34)    | 20.28<br>(17.12–23.99)    | 45.79<br>(40.74–50.93)    | 32.29<br>(28.04–36.32)    | 27.38<br>(22.20–33.55)    | 59.66<br>(50.44–69.40)    | 16.99<br>(13.71–20.49)    | 13.12<br>(10.02–16.64)    | 30.11<br>(23.70–36.84)    |
| 1-4                         | 17.14<br>(13.24–21.69)    | 14.66<br>(12.99–16.49)    | 31.80<br>(26.27–37.94)    | 18.76<br>(13.66–25.27)    | 16.25<br>(13.04–19.89)    | 35.01<br>(27.08–45.12)    | 11.13<br>(8.28–14.48)     | 9.52<br>(7.67–11.64)      | 20.65<br>(16.18–25.95)    |
| 5-9                         | 3.87<br>(3.50–4.64)       | 3.19<br>(2.85–3.87)       | 7.06<br>(6.44–8.48)       | 6.49<br>(4.96–10.21)      | 5.63<br>(4.23–8.73)       | 12.11<br>(9.21–18.88)     | 4.35<br>(3.89–4.93)       | 3.85<br>(3.40–4.38)       | 8.20<br>(7.32–9.26)       |
| 10-14                       | 2.94<br>(2.68–3.51)       | 2.16<br>(1.95–2.51)       | 5.11<br>(4.73–5.99)       | 5.14<br>(3.77–9.60)       | 4.20<br>(3.27–6.56)       | 9.34<br>(7.10–16.15)      | 4.73<br>(4.25–5.33)       | 4.28<br>(3.84–4.78)       | 9.01<br>(8.12–10.05)      |
| 15-19                       | 4.92<br>(4.40–5.50)       | 2.85<br>(2.64–3.08)       | 7.77<br>(7.20–8.40)       | 7.67<br>(6.85–8.71)       | 6.02<br>(5.51–6.52)       | 13.69<br>(12.56–14.96)    | 7.12<br>(6.41–7.95)       | 5.51<br>(4.97–6.11)       | 12.63<br>(11.62–13.97)    |
| 20-24                       | 8.24<br>(7.32–9.30)       | 3.99<br>(3.60–4.38)       | 12.23<br>(11.23–13.38)    | 14.66<br>(13.12–16.24)    | 18.00<br>(14.68–21.93)    | 32.66<br>(28.56–37.83)    | 14.44<br>(12.60–16.57)    | 15.80<br>(13.18–18.99)    | 30.23<br>(26.63–34.79)    |
| 25-29                       | 10.03<br>(8.92–11.26)     | 4.83<br>(4.31–5.34)       | 14.86<br>(13.62–16.23)    | 26.04<br>(22.84–29.16)    | 29.09<br>(24.91–33.08)    | 55.12<br>(48.85–61.21)    | 27.46<br>(23.82–31.62)    | 30.06<br>(25.89–34.82)    | 57.52<br>(51.17–64.37)    |
| 30-34                       | 10.21<br>(9.14–11.44)     | 4.94<br>(4.51–5.41)       | 15.14<br>(13.96–16.45)    | 31.71<br>(28.36–34.72)    | 27.64<br>(25.43–29.98)    | 59.34<br>(54.85–63.95)    | 37.09<br>(33.34–41.58)    | 34.89<br>(30.98–39.50)    | 71.98<br>(66.34–78.37)    |
| 35-39                       | 10.01<br>(8.96–11.21)     | 4.98<br>(4.46–5.58)       | 14.99<br>(13.80–16.37)    | 31.34<br>(28.41–33.83)    | 23.75<br>(22.01–25.40)    | 55.09<br>(51.27–58.70)    | 38.08<br>(33.18–43.03)    | 31.16<br>(26.76–36.11)    | 69.25<br>(61.00–76.15)    |
| 40-44                       | 9.70<br>(8.72–10.89)      | 4.88<br>(4.38–5.48)       | 14.58<br>(13.45–15.86)    | 28.78<br>(26.74–31.05)    | 18.73<br>(16.94–20.55)    | 47.51<br>(44.44–50.99)    | 36.03<br>(32.64–39.91)    | 26.14<br>(22.07–30.01)    | 62.17<br>(58.15–67.23)    |
| 45-49                       | 10.41<br>(9.28–11.69)     | 5.39<br>(4.87–6.00)       | 15.80<br>(14.54–17.19)    | 26.45<br>(23.90–28.97)    | 16.12<br>(14.46–17.98)    | 42.57<br>(38.88–46.07)    | 31.15<br>(27.36–34.82)    | 22.68<br>(18.32–27.43)    | 53.83<br>(47.96–60.01)    |
| 50-54                       | 11.42<br>(10.19–12.77)    | 6.64<br>(5.99–7.38)       | 18.06<br>(16.66–19.59)    | 22.64<br>(20.10–25.54)    | 14.04<br>(12.40–15.99)    | 36.68<br>(33.56–40.17)    | 26.71<br>(23.77–30.01)    | 20.21<br>(16.86–23.86)    | 46.92<br>(42.17–51.91)    |
| 55-59                       | 12.76<br>(11.51–14.19)    | 8.11<br>(7.36–8.99)       | 20.88<br>(19.40–22.52)    | 20.77<br>(18.62–23.33)    | 13.85<br>(12.39–15.49)    | 34.62<br>(31.96–38.04)    | 24.68<br>(21.89–28.06)    | 17.83<br>(15.55–20.52)    | 42.51<br>(38.68–47.18)    |
| 60-64                       | 14.28<br>(12.98–15.76)    | 10.39<br>(9.46–11.44)     | 24.67<br>(23.04–26.46)    | 23.20<br>(21.12–25.55)    | 18.60<br>(16.83–20.32)    | 41.80<br>(38.87–45.07)    | 27.41<br>(24.52–30.77)    | 21.06<br>(18.64–23.49)    | 48.47<br>(44.77–52.56)    |
| 65-69                       | 14.92<br>(13.71–16.32)    | 11.67<br>(10.65–12.81)    | 26.59<br>(24.97–28.38)    | 21.38<br>(19.70–23.28)    | 20.88<br>(18.92–22.86)    | 42.26<br>(39.56–45.23)    | 26.27<br>(23.55–29.15)    | 21.63<br>(18.90–24.20)    | 47.89<br>(44.11–51.70)    |
| 70-74                       | 14.90<br>(13.76–16.20)    | 13.36<br>(12.29–14.61)    | 28.26<br>(26.62–30.12)    | 21.98<br>(20.39–23.78)    | 24.17<br>(21.82–26.33)    | 46.15<br>(43.33–49.39)    | 24.72<br>(22.24–27.25)    | 24.22<br>(21.05–27.38)    | 48.95<br>(44.99–52.91)    |
| 75-79                       | 11.74<br>(10.93–12.61)    | 12.07<br>(11.18–13.09)    | 23.81<br>(22.56–25.16)    | 18.17<br>(17.03–19.41)    | 21.41<br>(19.55–23.10)    | 39.59<br>(37.36–42.01)    | 21.09<br>(19.15–23.08)    | 25.64<br>(22.37–28.65)    | 46.73<br>(42.97–50.43)    |
| 80+                         | 19.27<br>(18.52–20.00)    | 30.50<br>(29.33–31.80)    | 49.77<br>(48.35–51.29)    | 29.04<br>(28.12–29.99)    | 50.50<br>(48.29–52.48)    | 79.54<br>(77.25–82.06)    | 40.39<br>(38.37–42.35)    | 79.74<br>(74.87–84.32)    | 120.13<br>(114.81–125.06) |
| All ages                    | 233.11<br>(218.62–249.91) | 182.30<br>(172.34–194.20) | 415.41<br>(396.79–437.81) | 408.18<br>(383.02–434.38) | 373.12<br>(353.24–393.53) | 781.30<br>(745.83–819.87) | 437.31<br>(408.19–465.95) | 421.40<br>(391.82–451.16) | 858.71<br>(819.22–897.04) |
| Western Sub-Saharan Africa  |                           |                           |                           |                           |                           |                           |                           |                           |                           |
| Early neonatal              | 184.23<br>(174.31–193.32) | 132.81<br>(118.97–148.58) | 317.03<br>(293.08–341.12) | 211.32<br>(199.32–220.98) | 150.15<br>(134.02–167.65) | 361.47<br>(333.53–388.49) | 221.42<br>(206.72–234.12) | 157.53<br>(141.64–174.21) | 378.95<br>(348.50–407.98) |
| Late neonatal               | 71.78<br>(69.80–73.66)    | 61.46<br>(56.73–66.51)    | 133.24<br>(127.91–138.19) | 75.43<br>(73.43–77.53)    | 64.82<br>(59.74–70.20)    | 140.25<br>(134.77–145.29) | 66.80<br>(62.11–71.80)    | 57.49<br>(52.21–62.90)    | 124.29<br>(115.83–133.41) |
| Postneonatal                | 240.12<br>(227.08–251.65) | 212.38<br>(187.24–240.55) | 452.49<br>(415.17–491.22) | 267.08<br>(252.69–279.97) | 239.69<br>(210.84–272.45) | 506.76<br>(463.32–550.82) | 238.49<br>(220.96–256.84) | 217.73<br>(190.12–248.39) | 456.22<br>(411.81–503.27) |
| 1-4                         | 404.94<br>(353.61–458.50) | 381.40<br>(367.34–393.66) | 786.34<br>(723.06–849.33) | 427.43<br>(371.23–484.59) | 402.37<br>(386.54–416.71) | 829.80<br>(760.64–900.31) | 356.24<br>(293.29–425.50) | 330.24<br>(297.85–365.16) | 686.48<br>(598.50–785.72) |
| 5-9                         | 51.49<br>(48.52–54.68)    | 45.93<br>(41.63–50.08)    | 97.42<br>(92.16–102.25)   | 57.78<br>(53.75–63.01)    | 52.99<br>(48.34–58.40)    | 110.77<br>(103.95–120.24) | 53.53<br>(48.00–60.25)    | 47.48<br>(41.93–54.97)    | 101.01<br>(91.97–112.29)  |
| 10-14                       | 23.52<br>(22.15–25.30)    | 19.60<br>(17.90–21.36)    | 43.12<br>(40.99–45.47)    | 28.46<br>(26.08–32.69)    | 24.20<br>(22.18–27.16)    | 52.66<br>(49.19–59.71)    | 29.16<br>(26.51–32.78)    | 24.29<br>(21.95–27.76)    | 53.45<br>(49.04–59.65)    |
| 15-19                       | 19.69<br>(18.38–21.42)    | 20.19<br>(18.32–21.92)    | 39.88<br>(37.59–42.30)    | 25.82<br>(24.39–27.72)    | 27.41<br>(25.56–29.39)    | 53.23<br>(50.74–55.97)    | 29.24<br>(26.79–32.19)    | 28.13<br>(25.39–31.99)    | 57.37<br>(53.29–62.00)    |
| 20-24                       | 23.08<br>(21.37–25.02)    | 24.65<br>(22.40–26.67)    | 47.73<br>(45.04–50.56)    | 32.97<br>(30.89–35.45)    | 42.51<br>(37.95–47.16)    | 75.47<br>(70.10–81.47)    | 39.58<br>(35.66–43.86)    | 47.38<br>(40.19–55.82)    | 86.96<br>(77.67–96.82)    |
| 25-29                       | 23.84<br>(22.11–25.82)    | 24.49<br>(22.49–26.39)    | 48.33<br>(45.67–51.15)    | 40.67<br>(37.23–44.40)    | 51.45<br>(46.10–56.73)    | 92.12<br>(84.18–100.28)   | 50.94<br>(44.78–57.17)    | 63.62<br>(53.35–73.58)    | 114.57<br>(100.95–126.95) |
| 30-34                       | 23.96<br>(22.17–25.82)    | 23.81<br>(22.02–25.54)    | 47.76<br>(45.22–50.26)    | 46.70<br>(43.13–50.57)    | 50.03<br>(46.35–53.33)    | 96.72<br>(90.76–102.73)   | 61.20<br>(54.72–67.07)    | 67.31<br>(61.30–73.11)    | 128.51<br>(118.67–137.59) |
| 35-39                       | 24.91<br>(23.12–26.94)    | 24.30<br>(22.49–25.91)    | 49.21<br>(46.74–51.87)    | 47.99<br>(44.88–51.33)    | 44.69<br>(42.32–47.18)    | 92.68<br>(88.56–97.55)    | 63.64<br>(58.21–68.57)    | 61.58<br>(57.39–66.13)    | 125.22<br>(117.57–132.95) |
| 40-44                       | 26.24<br>(24.35–28.56)    | 23.63<br>(22.13–25.15)    | 49.87<br>(47.51–52.59)    | 45.90<br>(43.55–48.58)    | 37.35<br>(35.36–39.28)    | 83.24<br>(79.94–86.52)    | 61.18<br>(57.03–65.68)    | 51.47<br>(48.28–55.19)    | 112.65<br>(107.16–118.61) |
| 45-49                       | 29.72<br>(27.58–32.28)    | 25.13<br>(23.70–26.64)    | 54.85<br>(52.48–57.78)    | 45.34<br>(42.60–48.60)    | 34.50<br>(32.70–36.50)    | 79.84<br>(76.56–83.94)    | 60.06<br>(55.37–65.53)    | 45.89<br>(42.67–49.52)    | 105.95<br>(99.55–112.90)  |
| 50-54                       | 32.44<br>(30.19–35.24)    | 28.70<br>(27.07–30.60)    | 61.15<br>(58.31–64.44)    | 45.54<br>(42.35–49.68)    | 36.73<br>(34.70–39.82)    | 82.27<br>(78.10–87.58)    | 58.40<br>(53.40–64.75)    | 46.37<br>(42.70–52.39)    | 104.77<br>(97.91–113.66)  |
| 55-59                       | 35.62<br>(33.36–38.36)    | 32.49<br>(30.68–34.68)    | 68.11<br>(65.11–71.43)    | 48.76<br>(46.01–52.28)    | 41.52<br>(39.23–44.43)    | 90.29<br>(86.35–95.60)    | 60.47<br>(55.25–67.18)    | 50.36<br>(46.14–56.80)    | 110.83<br>(103.46–120.93) |

**Web Table 7 – Regional deaths in thousands with 95% uncertainty by age and sex in 1990, 2000, 2013**

| Age (years) | 1990                           |                                |                                | 2000                           |                                |                                | 2013                           |                                |                                |
|-------------|--------------------------------|--------------------------------|--------------------------------|--------------------------------|--------------------------------|--------------------------------|--------------------------------|--------------------------------|--------------------------------|
|             | Male                           | Female                         | Total                          | Male                           | Female                         | Total                          | Male                           | Female                         | Total                          |
| 60-64       | 40.84<br>(38.62 – 43.90)       | 40.56<br>(38.54 – 43.36)       | 81.39<br>(78.14 – 85.48)       | 52.76<br>(50.31 – 55.92)       | 50.52<br>(48.08 – 53.42)       | 103.28<br>(99.63 – 107.15)     | 67.79<br>(62.68 – 75.83)       | 61.61<br>(56.96 – 69.51)       | 129.40<br>(121.97 – 139.27)    |
| 65-69       | 41.02<br>(38.97 – 43.64)       | 44.24<br>(42.38 – 47.03)       | 85.26<br>(82.28 – 88.92)       | 52.69<br>(50.51 – 55.40)       | 54.61<br>(52.24 – 57.34)       | 107.30<br>(103.91 – 110.90)    | 72.49<br>(67.69 – 80.62)       | 69.29<br>(64.19 – 77.93)       | 141.78<br>(134.17 – 152.17)    |
| 70-74       | 38.82<br>(37.11 – 41.00)       | 45.85<br>(44.23 – 48.43)       | 84.66<br>(82.31 – 87.84)       | 51.30<br>(49.41 – 53.58)       | 57.34<br>(55.44 – 60.15)       | 108.64<br>(105.81 – 111.95)    | 71.55<br>(67.31 – 78.81)       | 74.82<br>(70.17 – 82.42)       | 146.38<br>(139.67 – 155.02)    |
| 75-79       | 28.47<br>(27.56 – 29.60)       | 35.64<br>(34.51 – 37.60)       | 64.11<br>(62.57 – 66.32)       | 39.89<br>(38.91 – 41.22)       | 46.66<br>(45.19 – 49.00)       | 86.55<br>(84.58 – 89.02)       | 56.25<br>(53.79 – 60.91)       | 63.13<br>(59.88 – 69.06)       | 119.38<br>(114.95 – 126.02)    |
| 80+         | 27.43<br>(26.94 – 27.88)       | 37.06<br>(36.36 – 38.10)       | 64.50<br>(63.62 – 65.58)       | 40.83<br>(40.28 – 41.39)       | 51.56<br>(50.70 – 52.81)       | 92.39<br>(91.33 – 93.61)       | 60.52<br>(59.42 – 62.41)       | 76.93<br>(74.92 – 80.15)       | 137.45<br>(134.96 – 140.93)    |
| All ages    | 1392.15<br>(1344.59 – 1442.04) | 1284.30<br>(1236.78 – 1333.27) | 2676.45<br>(2631.29 – 2725.02) | 1684.65<br>(1632.34 – 1736.37) | 1561.10<br>(1512.74 – 1617.59) | 3245.75<br>(3193.84 – 3306.07) | 1778.96<br>(1680.59 – 1878.96) | 1642.66<br>(1560.03 – 1738.13) | 3421.62<br>(3266.77 – 3562.62) |

**Web Table 8. Mean age at death by country and decade for both sexes combined**



**Web Table 8 – Mean age at death by country and year for both sexes combined**

|                            | Mean age at death (years) |       |       |       |       |
|----------------------------|---------------------------|-------|-------|-------|-------|
|                            | 1990                      | 1995  | 2000  | 2005  | 2013  |
| High-income Asia Pacific   | 70.17                     | 72.19 | 74.02 | 76.35 | 79.72 |
| Brunei                     | 56.64                     | 56.63 | 57.06 | 58.79 | 63.17 |
| Japan                      | 73.01                     | 74.4  | 75.89 | 77.86 | 81.08 |
| Singapore                  | 66.66                     | 70.01 | 71.89 | 73.96 | 77.18 |
| South Korea                | 60.71                     | 64.2  | 66.79 | 70.1  | 74.29 |
| Central Asia               | 48.98                     | 50.94 | 53.1  | 55.67 | 58.2  |
| Armenia                    | 56.34                     | 60.51 | 64.43 | 67.5  | 70.64 |
| Azerbaijan                 | 42.54                     | 45.25 | 49.97 | 54.36 | 59.62 |
| Georgia                    | 63.6                      | 65.18 | 66.79 | 68.65 | 71.5  |
| Kazakhstan                 | 56.99                     | 58.28 | 58.69 | 59.22 | 60.37 |
| Kyrgyzstan                 | 47.47                     | 50.86 | 53.03 | 56.37 | 55.8  |
| Mongolia                   | 37.95                     | 44.18 | 47.93 | 48.89 | 50.78 |
| Tajikistan                 | 34.62                     | 35.58 | 37.39 | 42.39 | 45.7  |
| Turkmenistan               | 35.67                     | 40.07 | 44.33 | 47.22 | 50.95 |
| Uzbekistan                 | 46.11                     | 46.77 | 49.29 | 52.38 | 55.83 |
| East Asia                  | 51.81                     | 57.04 | 61.09 | 64.43 | 68.74 |
| China                      | 51.71                     | 57.11 | 61.22 | 64.45 | 68.78 |
| North Korea                | 49.15                     | 50.42 | 53.35 | 60.24 | 63.83 |
| Taiwan (Province of China) | 62.76                     | 64.43 | 66.61 | 69.11 | 73.01 |
| South Asia                 | 36.28                     | 39.25 | 42.58 | 46.25 | 52.43 |
| Afghanistan                | 19.58                     | 24.22 | 24.93 | 28.04 | 35.19 |
| Bangladesh                 | 30.83                     | 35.08 | 40.25 | 46.2  | 54.62 |
| Bhutan                     | 26.72                     | 31.02 | 37.87 | 44.32 | 53.28 |
| India                      | 38.13                     | 40.91 | 44.13 | 47.77 | 53.81 |
| Nepal                      | 27.01                     | 31.47 | 36.3  | 43.24 | 53.88 |
| Pakistan                   | 29.99                     | 33.56 | 37.03 | 39.57 | 43.84 |
| Southeast Asia             | 42.84                     | 47.73 | 51.56 | 54.97 | 59.55 |
| Cambodia                   | 28.67                     | 32.81 | 37.83 | 46.94 | 55.5  |
| Indonesia                  | 39.23                     | 45.27 | 49.56 | 52.99 | 57.47 |
| Laos                       | 25.45                     | 28.24 | 32.38 | 37.98 | 44.66 |
| Malaysia                   | 55.67                     | 57.37 | 59.43 | 61.57 | 63.89 |
| Maldives                   | 31.57                     | 40.04 | 45.16 | 53.13 | 60.97 |
| Myanmar                    | 40.54                     | 44.46 | 48.01 | 51.06 | 56.48 |
| Philippines                | 38.58                     | 43.13 | 46.15 | 49.01 | 53.09 |
| Sri Lanka                  | 52.05                     | 58.02 | 60.4  | 62.7  | 66.16 |
| Thailand                   | 52.29                     | 53.91 | 56.4  | 60.95 | 66.55 |
| Timor-Leste                | 18.19                     | 21.21 | 21.88 | 30.57 | 40.75 |
| Vietnam                    | 52.71                     | 57.66 | 62.35 | 64.76 | 67.56 |
| Australasia                | 71.1                      | 72.91 | 74.38 | 75.93 | 77.53 |
| Australia                  | 71.26                     | 73.11 | 74.55 | 76.18 | 77.74 |
| New Zealand                | 70.37                     | 72.0  | 73.53 | 74.76 | 76.44 |
| Caribbean                  | 48.5                      | 51.97 | 55.48 | 57.22 | 61.97 |
| Antigua and Barbuda        | 65.97                     | 65.71 | 66.39 | 67.58 | 66.77 |
| Barbados                   | 67.93                     | 69.32 | 70.35 | 70.05 | 70.3  |
| Belize                     | 46.8                      | 54.16 | 55.18 | 56.31 | 58.01 |
| Cuba                       | 68.02                     | 69.77 | 71.33 | 72.73 | 74.44 |
| Dominica                   | 60.02                     | 62.26 | 64.08 | 65.24 | 67.0  |
| Dominican Republic         | 40.39                     | 46.96 | 53.14 | 55.99 | 61.64 |
| Grenada                    | 60.76                     | 63.78 | 65.68 | 65.77 | 66.69 |
| Guyana                     | 53.42                     | 55.17 | 54.45 | 51.68 | 50.8  |

**Web Table 8 – Mean age at death by country and year for both sexes combined**

|                                  | Mean age at death (years) |       |       |       |       |
|----------------------------------|---------------------------|-------|-------|-------|-------|
|                                  | 1990                      | 1995  | 2000  | 2005  | 2013  |
| Haiti                            | 31.08                     | 33.78 | 37.62 | 39.45 | 46.26 |
| Jamaica                          | 62.3                      | 64.59 | 64.68 | 66.76 | 68.34 |
| Saint Lucia                      | 59.48                     | 64.43 | 67.13 | 66.61 | 68.91 |
| Saint Vincent and the Grenadines | 57.18                     | 60.1  | 62.05 | 62.63 | 63.85 |
| Suriname                         | 50.75                     | 52.03 | 53.26 | 55.26 | 59.11 |
| The Bahamas                      | 53.14                     | 56.45 | 59.81 | 61.88 | 64.55 |
| Trinidad and Tobago              | 59.99                     | 61.74 | 61.95 | 63.3  | 64.85 |
| Central Europe                   | 68.09                     | 68.83 | 69.91 | 71.52 | 74.22 |
| Albania                          | 52.75                     | 55.53 | 61.85 | 65.55 | 69.91 |
| Bosnia and Herzegovina           | 64.27                     | 61.35 | 68.58 | 70.34 | 73.57 |
| Bulgaria                         | 69.83                     | 70.57 | 71.15 | 72.37 | 74.58 |
| Croatia                          | 69.95                     | 70.94 | 71.29 | 73.36 | 76.28 |
| Czech Republic                   | 71.11                     | 72.0  | 72.6  | 73.57 | 75.87 |
| Hungary                          | 69.1                      | 69.58 | 70.5  | 71.77 | 74.47 |
| Macedonia                        | 61.59                     | 64.63 | 67.5  | 69.59 | 72.34 |
| Montenegro                       | 68.22                     | 68.97 | 66.9  | 69.84 | 72.15 |
| Poland                           | 68.03                     | 68.93 | 69.98 | 71.13 | 73.72 |
| Romania                          | 66.56                     | 67.89 | 68.35 | 70.84 | 74.04 |
| Serbia                           | 67.79                     | 67.91 | 69.8  | 72.13 | 74.73 |
| Slovakia                         | 68.66                     | 69.73 | 70.2  | 71.28 | 73.0  |
| Slovenia                         | 70.53                     | 71.8  | 71.84 | 74.12 | 77.57 |
| Eastern Europe                   | 66.18                     | 65.24 | 65.57 | 65.84 | 69.56 |
| Belarus                          | 67.4                      | 67.04 | 67.16 | 68.04 | 70.07 |
| Estonia                          | 68.27                     | 68.06 | 69.47 | 70.99 | 74.81 |
| Latvia                           | 68.22                     | 67.15 | 68.96 | 70.17 | 74.12 |
| Lithuania                        | 68.19                     | 67.22 | 68.78 | 69.76 | 73.79 |
| Moldova                          | 62.18                     | 62.33 | 64.97 | 66.67 | 68.64 |
| Russia                           | 65.37                     | 64.37 | 64.73 | 64.89 | 68.81 |
| Ukraine                          | 67.99                     | 67.33 | 67.4  | 67.83 | 71.0  |
| Western Europe                   | 74.05                     | 75.19 | 76.01 | 77.16 | 79.11 |
| Andorra                          | 76.81                     | 78.02 | 78.6  | 79.73 | 81.21 |
| Austria                          | 74.24                     | 75.13 | 75.77 | 76.91 | 78.71 |
| Belgium                          | 74.08                     | 74.9  | 75.5  | 76.67 | 78.46 |
| Cyprus                           | 73.27                     | 75.06 | 76.03 | 76.81 | 78.41 |
| Denmark                          | 73.99                     | 74.79 | 75.54 | 76.17 | 77.14 |
| Finland                          | 72.33                     | 73.79 | 74.65 | 75.41 | 77.78 |
| France                           | 73.93                     | 75.13 | 75.67 | 76.85 | 79.22 |
| Germany                          | 74.24                     | 75.04 | 75.62 | 76.78 | 78.87 |
| Greece                           | 74.74                     | 75.47 | 76.03 | 77.11 | 79.45 |
| Iceland                          | 73.47                     | 74.49 | 75.52 | 76.82 | 78.42 |
| Ireland                          | 72.64                     | 73.63 | 73.68 | 74.59 | 76.11 |
| Israel                           | 70.37                     | 72.34 | 73.25 | 74.9  | 77.46 |
| Italy                            | 74.11                     | 75.62 | 76.97 | 78.66 | 80.47 |
| Luxembourg                       | 72.62                     | 73.62 | 74.34 | 75.51 | 77.42 |
| Malta                            | 71.46                     | 72.67 | 73.27 | 75.37 | 76.03 |
| Netherlands                      | 74.03                     | 74.88 | 75.36 | 76.33 | 77.82 |
| Norway                           | 75.13                     | 76.6  | 77.28 | 78.32 | 78.89 |
| Portugal                         | 71.51                     | 73.0  | 74.12 | 75.71 | 77.65 |
| Spain                            | 73.11                     | 74.58 | 76.12 | 77.33 | 79.51 |
| Sweden                           | 76.26                     | 77.75 | 78.71 | 79.37 | 80.08 |

**Web Table 8 – Mean age at death by country and year for both sexes combined**

|                                | Mean age at death (years) |       |       |       |       |
|--------------------------------|---------------------------|-------|-------|-------|-------|
|                                | 1990                      | 1995  | 2000  | 2005  | 2013  |
| Switzerland                    | 74.7                      | 75.97 | 77.15 | 78.19 | 79.7  |
| United Kingdom                 | 74.53                     | 75.68 | 76.33 | 77.01 | 78.7  |
| Andean Latin America           | 36.81                     | 42.64 | 47.92 | 52.41 | 59.06 |
| Bolivia                        | 30.6                      | 34.53 | 39.43 | 43.45 | 50.77 |
| Ecuador                        | 42.39                     | 46.83 | 50.14 | 53.55 | 58.84 |
| Peru                           | 37.3                      | 44.42 | 50.69 | 55.81 | 62.6  |
| Central Latin America          | 45.92                     | 49.47 | 53.13 | 56.83 | 61.61 |
| Colombia                       | 48.17                     | 50.14 | 53.18 | 56.55 | 61.35 |
| Costa Rica                     | 57.97                     | 60.98 | 63.77 | 65.77 | 68.72 |
| El Salvador                    | 42.7                      | 48.08 | 53.74 | 58.21 | 62.2  |
| Guatemala                      | 33.54                     | 36.65 | 39.65 | 43.86 | 50.64 |
| Honduras                       | 37.89                     | 42.32 | 47.39 | 52.22 | 57.49 |
| Mexico                         | 47.27                     | 51.35 | 55.15 | 59.08 | 63.29 |
| Nicaragua                      | 30.74                     | 37.56 | 44.69 | 50.65 | 57.98 |
| Panama                         | 54.09                     | 55.61 | 57.47 | 60.16 | 64.48 |
| Venezuela                      | 49.16                     | 51.3  | 54.32 | 56.4  | 60.86 |
| Southern Latin America         | 64.0                      | 66.03 | 68.08 | 70.0  | 71.78 |
| Argentina                      | 63.92                     | 65.81 | 67.81 | 69.74 | 71.32 |
| Chile                          | 62.5                      | 65.24 | 67.69 | 69.83 | 72.28 |
| Uruguay                        | 68.65                     | 69.77 | 71.46 | 72.82 | 74.83 |
| Tropical Latin America         | 48.4                      | 52.89 | 56.37 | 59.94 | 64.64 |
| Brazil                         | 48.47                     | 52.96 | 56.46 | 60.03 | 64.77 |
| Paraguay                       | 44.76                     | 49.58 | 52.65 | 56.41 | 60.31 |
| North Africa and Middle East   | 38.25                     | 43.73 | 48.52 | 52.38 | 57.44 |
| Algeria                        | 36.81                     | 43.37 | 49.29 | 52.31 | 56.12 |
| Bahrain                        | 47.85                     | 51.27 | 54.79 | 55.13 | 57.04 |
| Egypt                          | 42.6                      | 48.6  | 54.04 | 57.53 | 60.7  |
| Iran                           | 33.86                     | 42.42 | 50.03 | 56.03 | 61.98 |
| Iraq                           | 41.13                     | 42.82 | 45.15 | 45.56 | 49.09 |
| Jordan                         | 46.69                     | 46.33 | 47.79 | 48.91 | 51.44 |
| Kuwait                         | 45.05                     | 47.63 | 50.28 | 53.07 | 55.26 |
| Lebanon                        | 53.44                     | 58.96 | 61.58 | 65.13 | 69.42 |
| Libya                          | 41.88                     | 47.9  | 52.61 | 55.93 | 61.61 |
| Morocco                        | 36.71                     | 42.4  | 48.12 | 53.1  | 57.7  |
| Oman                           | 36.24                     | 43.7  | 49.47 | 55.65 | 58.15 |
| Palestine                      | 31.29                     | 33.31 | 37.31 | 41.68 | 48.87 |
| Qatar                          | 41.77                     | 44.85 | 48.23 | 48.27 | 46.51 |
| Saudi Arabia                   | 38.8                      | 44.82 | 50.68 | 53.06 | 59.29 |
| Sudan                          | 27.57                     | 29.89 | 32.3  | 35.84 | 41.75 |
| Syria                          | 40.67                     | 45.5  | 50.38 | 54.35 | 55.69 |
| Tunisia                        | 44.98                     | 53.06 | 59.11 | 62.58 | 67.03 |
| Turkey                         | 45.62                     | 50.55 | 54.76 | 59.18 | 65.9  |
| United Arab Emirates           | 40.99                     | 43.71 | 46.55 | 45.58 | 40.56 |
| Yemen                          | 21.47                     | 29.38 | 31.68 | 35.21 | 40.74 |
| High-income North America      | 70.86                     | 72.03 | 73.13 | 73.44 | 74.88 |
| Canada                         | 71.56                     | 72.99 | 74.49 | 75.45 | 77.39 |
| United States                  | 70.79                     | 71.94 | 73.0  | 73.25 | 74.62 |
| Oceania                        | 37.98                     | 39.18 | 40.44 | 42.26 | 46.68 |
| Federated States of Micronesia | 46.01                     | 49.34 | 52.67 | 57.09 | 58.27 |
| Fiji                           | 48.09                     | 49.22 | 51.28 | 52.9  | 55.89 |

**Web Table 8 – Mean age at death by country and year for both sexes combined**

|                                  | Mean age at death (years) |       |       |       |       |
|----------------------------------|---------------------------|-------|-------|-------|-------|
|                                  | 1990                      | 1995  | 2000  | 2005  | 2013  |
| Kiribati                         | 39.43                     | 41.9  | 44.0  | 46.33 | 50.13 |
| Marshall Islands                 | 39.59                     | 43.44 | 44.45 | 47.11 | 51.12 |
| Papua New Guinea                 | 35.4                      | 36.54 | 37.82 | 39.76 | 44.45 |
| Samoa                            | 51.83                     | 54.75 | 57.24 | 59.67 | 62.96 |
| Solomon Islands                  | 44.24                     | 45.85 | 46.99 | 48.81 | 52.28 |
| Tonga                            | 54.1                      | 55.9  | 57.17 | 58.79 | 61.86 |
| Vanuatu                          | 49.62                     | 50.36 | 49.5  | 48.81 | 51.77 |
| Central Sub-Saharan Africa       | 23.09                     | 23.6  | 24.33 | 26.15 | 29.24 |
| Angola                           | 21.34                     | 22.71 | 23.33 | 24.67 | 28.75 |
| Central African Republic         | 31.29                     | 31.85 | 32.0  | 32.57 | 34.11 |
| Congo                            | 39.34                     | 38.46 | 36.01 | 37.57 | 41.2  |
| Democratic Republic of the Congo | 21.31                     | 21.66 | 22.62 | 24.73 | 27.8  |
| Equatorial Guinea                | 30.58                     | 29.23 | 28.26 | 28.57 | 32.16 |
| Gabon                            | 45.29                     | 46.91 | 48.06 | 48.65 | 48.68 |
| Eastern Sub-Saharan Africa       | 23.33                     | 25.1  | 27.39 | 30.87 | 35.0  |
| Burundi                          | 26.14                     | 26.14 | 26.38 | 29.36 | 31.25 |
| Comoros                          | 30.95                     | 33.97 | 35.91 | 38.88 | 43.59 |
| Djibouti                         | 27.54                     | 29.55 | 34.5  | 38.67 | 44.57 |
| Eritrea                          | 22.79                     | 26.37 | 29.03 | 31.72 | 36.78 |
| Ethiopia                         | 25.11                     | 26.63 | 28.2  | 32.53 | 39.04 |
| Kenya                            | 27.67                     | 28.79 | 29.68 | 32.57 | 36.15 |
| Madagascar                       | 25.25                     | 26.42 | 30.72 | 35.35 | 39.86 |
| Malawi                           | 16.8                      | 21.28 | 25.13 | 29.45 | 31.94 |
| Mauritius                        | 58.85                     | 60.81 | 63.31 | 65.26 | 67.21 |
| Mozambique                       | 18.89                     | 21.68 | 24.91 | 28.54 | 33.42 |
| Rwanda                           | 25.1                      | 23.79 | 28.39 | 31.3  | 35.39 |
| Seychelles                       | 64.53                     | 64.59 | 66.96 | 66.28 | 67.79 |
| Somalia                          | 21.91                     | 21.23 | 24.04 | 26.97 | 29.02 |
| South Sudan                      | 19.55                     | 21.37 | 26.26 | 29.55 | 33.96 |
| Tanzania                         | 21.51                     | 24.08 | 27.3  | 30.94 | 33.26 |
| Uganda                           | 22.35                     | 24.38 | 25.1  | 26.95 | 30.24 |
| Zambia                           | 21.84                     | 24.61 | 26.87 | 29.7  | 32.56 |
| Southern Sub-Saharan Africa      | 41.34                     | 42.31 | 42.92 | 43.22 | 48.53 |
| Botswana                         | 34.98                     | 34.64 | 35.52 | 38.02 | 41.86 |
| Lesotho                          | 37.79                     | 38.9  | 38.21 | 38.31 | 39.71 |
| Namibia                          | 38.8                      | 41.41 | 40.64 | 40.57 | 46.62 |
| South Africa                     | 43.42                     | 45.63 | 45.9  | 45.65 | 51.49 |
| Swaziland                        | 32.96                     | 35.1  | 35.13 | 35.18 | 39.08 |
| Zimbabwe                         | 35.78                     | 34.34 | 35.89 | 36.81 | 40.36 |
| Western Sub-Saharan Africa       | 18.46                     | 19.46 | 21.2  | 23.36 | 26.18 |
| Benin                            | 19.98                     | 22.51 | 24.77 | 29.31 | 36.67 |
| Burkina Faso                     | 18.26                     | 18.61 | 19.45 | 20.7  | 25.34 |
| Cameroon                         | 26.25                     | 26.57 | 28.07 | 29.36 | 32.07 |
| Cape Verde                       | 43.98                     | 46.94 | 49.15 | 53.93 | 62.31 |
| Chad                             | 17.85                     | 17.97 | 18.7  | 19.4  | 20.61 |
| Cote d'Ivoire                    | 23.99                     | 25.92 | 28.35 | 30.46 | 33.09 |
| Ghana                            | 25.71                     | 28.89 | 31.39 | 35.64 | 39.19 |
| Guinea                           | 17.55                     | 20.66 | 22.72 | 25.36 | 30.54 |
| Guinea-Bissau                    | 19.86                     | 21.23 | 23.07 | 24.91 | 28.51 |
| Liberia                          | 16.89                     | 18.42 | 23.48 | 28.78 | 34.72 |

**Web Table 8 – Mean age at death by country and year for both sexes combined**

|                       | Mean age at death (years) |       |       |       |       |
|-----------------------|---------------------------|-------|-------|-------|-------|
|                       | 1990                      | 1995  | 2000  | 2005  | 2013  |
| Mali                  | 18.22                     | 18.78 | 19.14 | 20.75 | 21.55 |
| Mauritania            | 29.85                     | 30.63 | 31.14 | 32.69 | 37.38 |
| Niger                 | 11.66                     | 12.74 | 14.37 | 17.61 | 22.17 |
| Nigeria               | 16.59                     | 17.0  | 18.74 | 20.48 | 22.76 |
| Sao Tome and Principe | 35.43                     | 36.13 | 38.71 | 41.3  | 45.65 |
| Senegal               | 22.97                     | 24.56 | 26.11 | 30.99 | 37.02 |
| Sierra Leone          | 17.9                      | 18.47 | 18.66 | 22.35 | 26.46 |
| The Gambia            | 18.98                     | 20.68 | 23.07 | 25.52 | 29.71 |
| Togo                  | 22.43                     | 24.01 | 25.56 | 26.22 | 28.81 |

**Web Figure 7a. Change in Mean Age at Death for Both Sexes Combined, 1990 to 2013**

# Web Figure 6a: Change in Mean Age at Death for Both Sexes Combined, 1990 to 2013

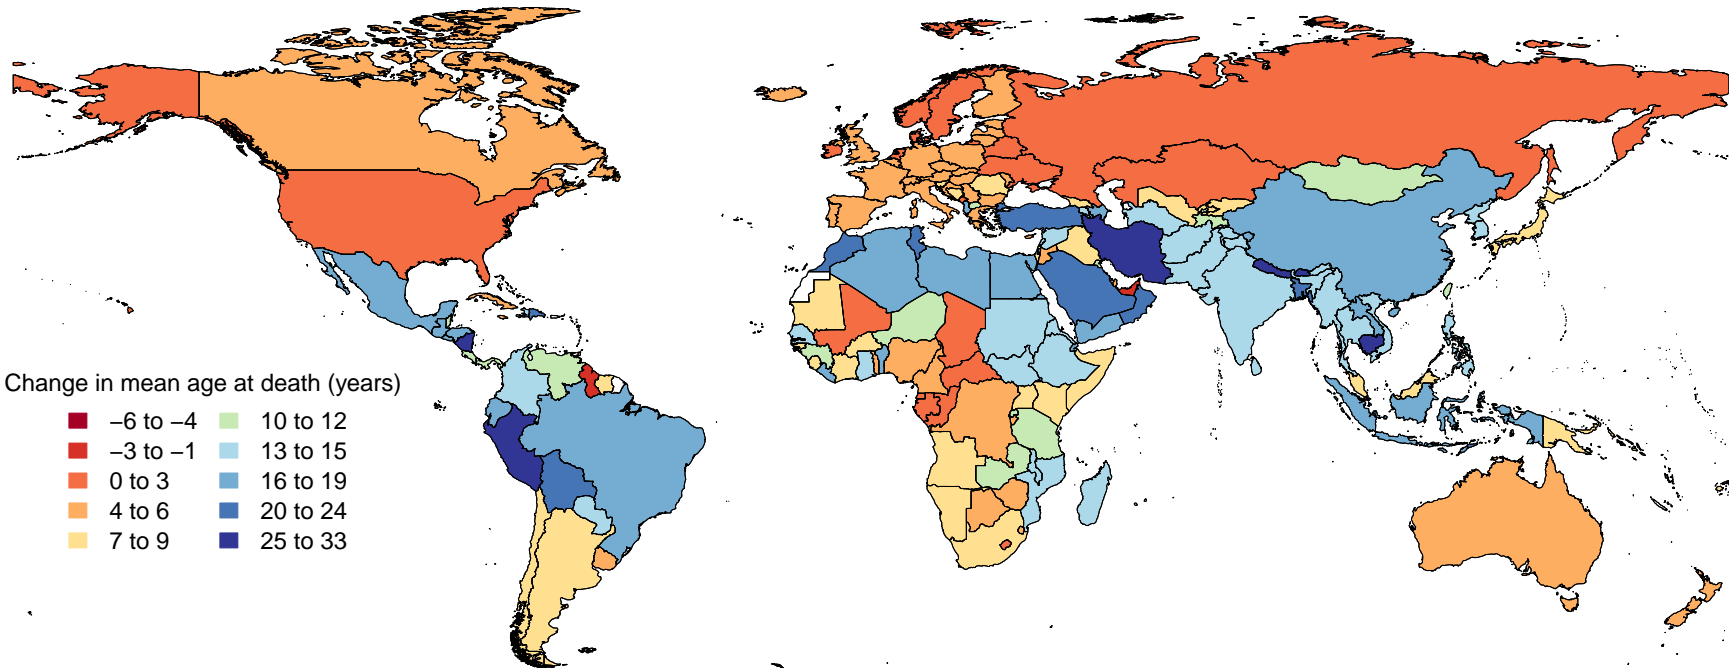

Change in mean age at death (years)

- 6 to -4
- 3 to -1
- 0 to 3
- 4 to 6
- 10 to 12
- 13 to 15
- 16 to 19
- 20 to 24
- 25 to 33

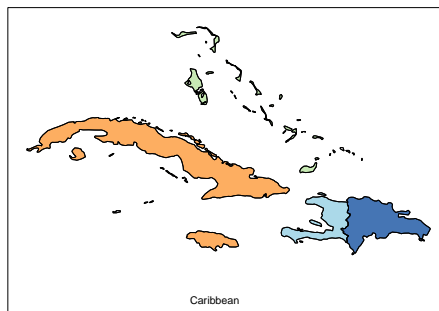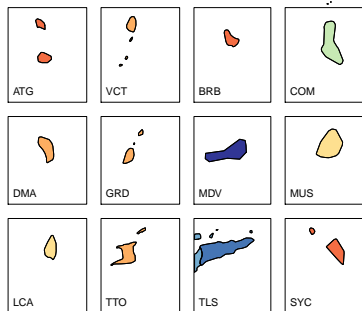

136

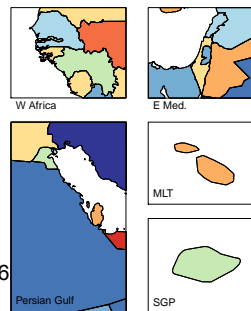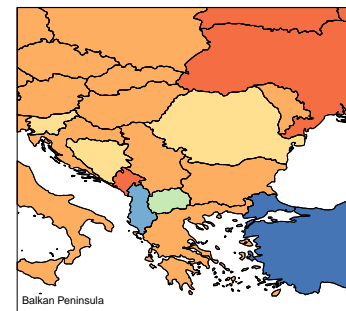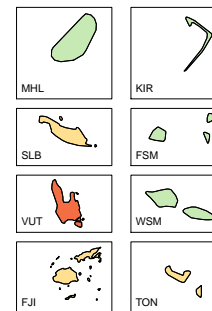

**Web Figure 7b: Change in Mean Age at Death for Females, 1990 to 2013**



# Web Figure 6b: Change in Mean Age at Death for Females, 1990 to 2013

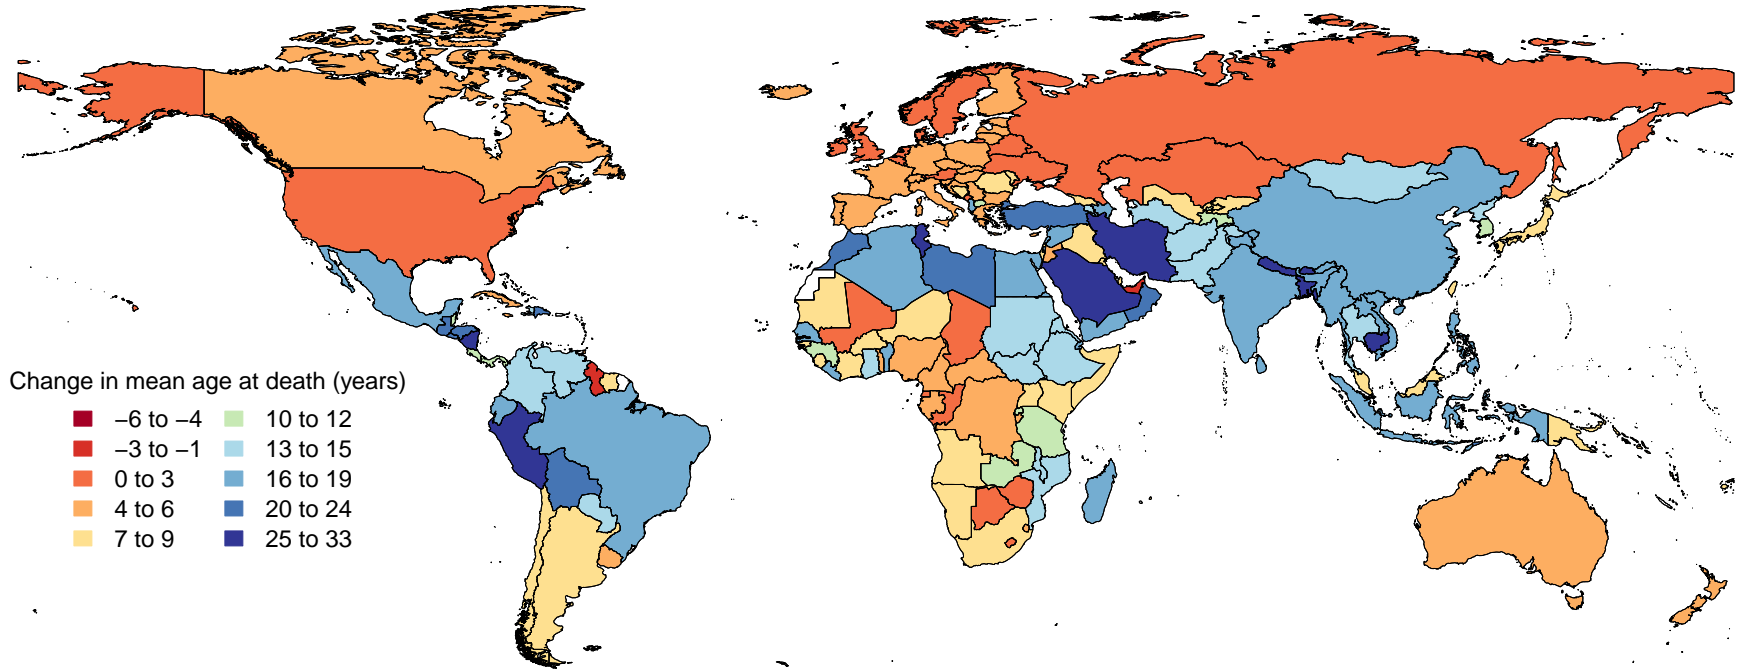

Change in mean age at death (years)

- 6 to -4
- 3 to -1
- 0 to 3
- 4 to 6
- 7 to 9
- 10 to 12
- 13 to 15
- 16 to 19
- 20 to 24
- 25 to 33

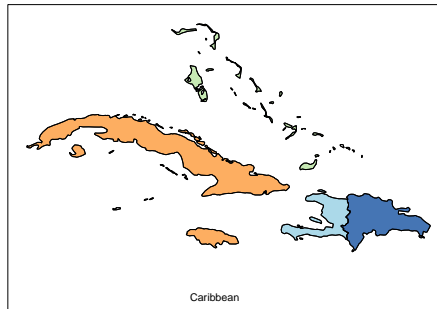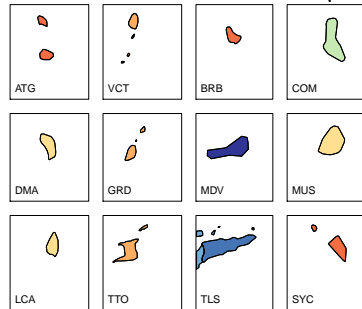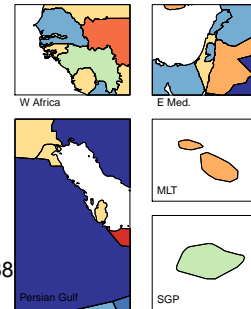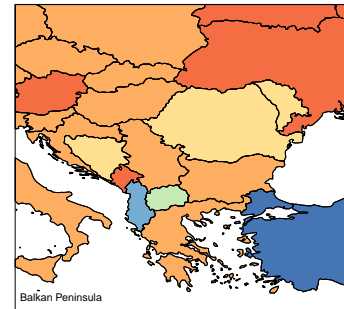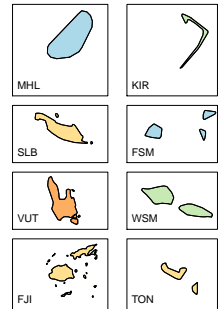

**Web Figure 7c: Change in Mean Age at Death for Males, 1990 to 2013**

# Web Figure 6c: Change in Mean Age at Death for Males, 1990 to 2013

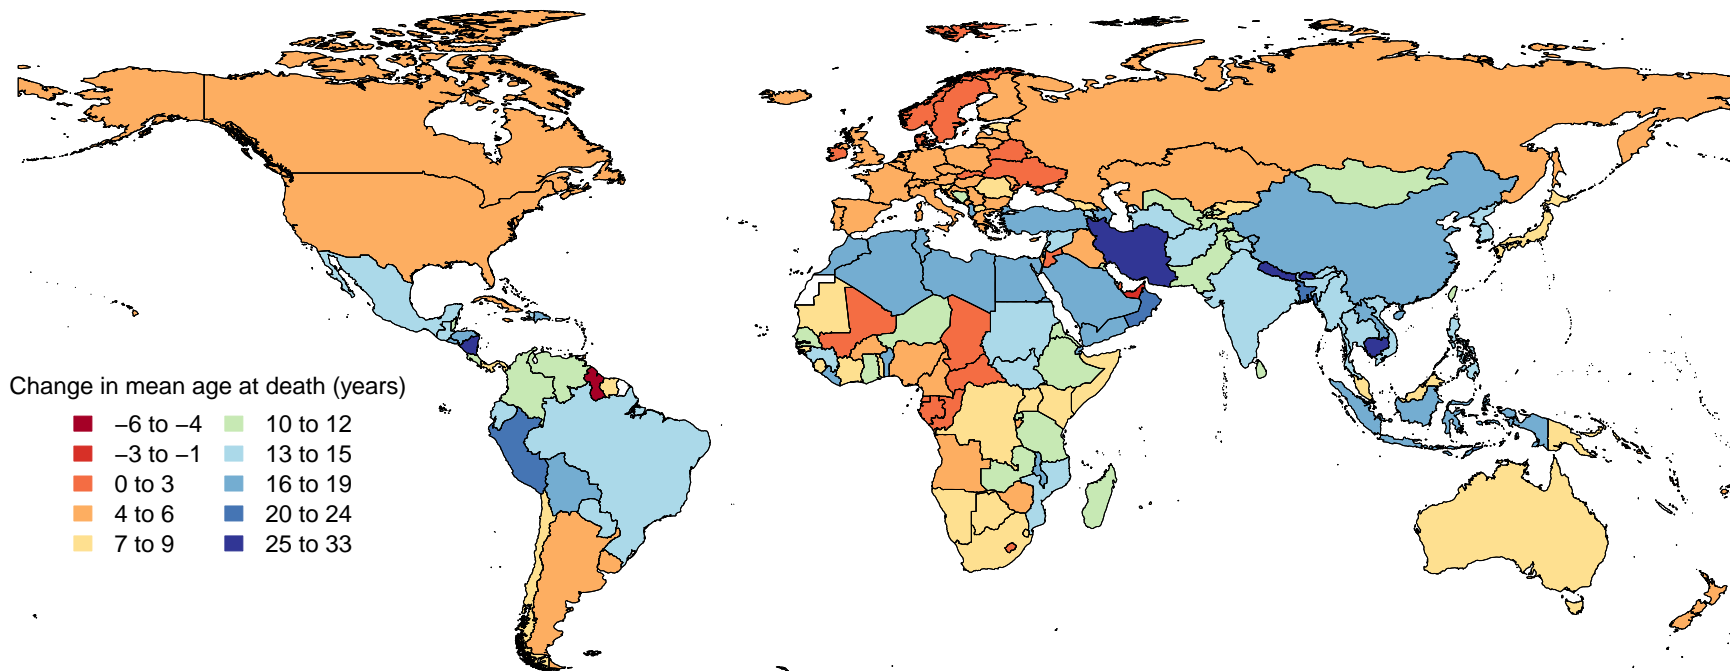

Change in mean age at death (years)

- 6 to -4
- 3 to -1
- 0 to 3
- 4 to 6
- 7 to 9
- 10 to 12
- 13 to 15
- 16 to 19
- 20 to 24
- 25 to 33

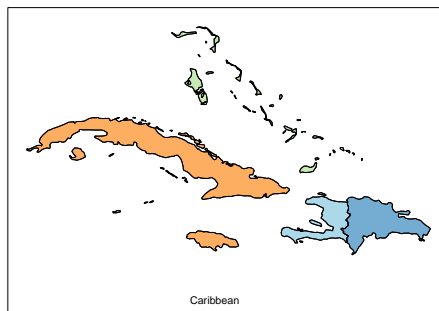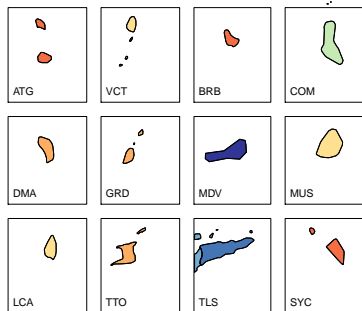

140

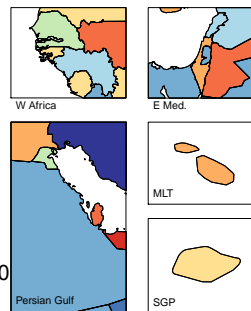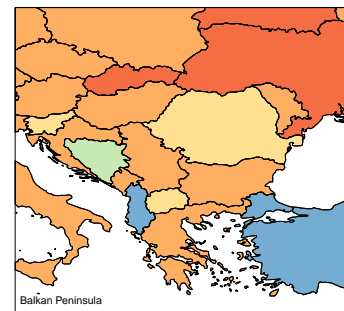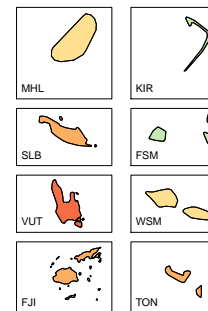

**Web Table 9. Under-five mortality (5q0), adult mortality (45q15), life expectancy at birth by country and sex in 1990 and 2013**

**Web Table 9 - Under-five mortality (5q0) per 1,000 live births, adult mortality (45q15), and life expectancy at birth by country and sex in 1990 and 2013**

|                     | 1990                        |                       |                       |                                  |                          | 2013                      |                       |                       |                                  |                          |
|---------------------|-----------------------------|-----------------------|-----------------------|----------------------------------|--------------------------|---------------------------|-----------------------|-----------------------|----------------------------------|--------------------------|
|                     | 5q0 per 1,000 live births   | 45q15                 |                       | Life expectancy at birth (years) |                          | 5q0 per 1,000 live births | 45q15                 |                       | Life expectancy at birth (years) |                          |
|                     | Both sexes                  | Male                  | Female                | Male                             | Female                   | Both sexes                | Male                  | Female                | Male                             | Female                   |
| Afghanistan         | 169.37<br>(159.21 – 181.32) | 0.39<br>(0.29 – 0.51) | 0.41<br>(0.33 – 0.50) | 50.71<br>(46.90 – 54.80)         | 49.98<br>(46.73 – 53.18) | 90.15<br>(81.57 – 99.98)  | 0.38<br>(0.26 – 0.51) | 0.40<br>(0.30 – 0.51) | 56.45<br>(52.17 – 61.38)         | 55.99<br>(52.21 – 60.36) |
| Albania             | 40.16<br>(35.09 – 45.13)    | 0.14<br>(0.14 – 0.15) | 0.08<br>(0.07 – 0.08) | 71.02<br>(70.35 – 71.64)         | 76.24<br>(75.66 – 76.77) | 17.86<br>(8.57 – 35.05)   | 0.14<br>(0.10 – 0.19) | 0.07<br>(0.05 – 0.09) | 72.68<br>(69.64 – 75.97)         | 79.32<br>(76.65 – 81.80) |
| Algeria             | 58.46<br>(54.59 – 62.39)    | 0.15<br>(0.12 – 0.18) | 0.12<br>(0.10 – 0.14) | 69.03<br>(67.05 – 71.17)         | 71.94<br>(70.28 – 73.44) | 24.30<br>(21.25 – 28.01)  | 0.11<br>(0.09 – 0.13) | 0.09<br>(0.07 – 0.10) | 75.13<br>(73.63 – 76.83)         | 77.42<br>(75.34 – 78.51) |
| Andorra             | 7.24<br>(4.38 – 11.29)      | 0.09<br>(0.07 – 0.12) | 0.04<br>(0.03 – 0.05) | 77.26<br>(74.31 – 79.57)         | 83.69<br>(81.63 – 85.87) | 2.61<br>(1.52 – 4.42)     | 0.07<br>(0.05 – 0.09) | 0.03<br>(0.02 – 0.04) | 80.88<br>(78.82 – 83.59)         | 86.62<br>(84.68 – 88.75) |
| Angola              | 184.94<br>(173.99 – 195.74) | 0.43<br>(0.31 – 0.56) | 0.33<br>(0.23 – 0.45) | 48.22<br>(44.51 – 52.35)         | 52.50<br>(48.30 – 57.48) | 89.57<br>(72.18 – 109.09) | 0.32<br>(0.26 – 0.43) | 0.26<br>(0.20 – 0.35) | 58.79<br>(54.20 – 62.20)         | 62.05<br>(57.55 – 65.92) |
| Antigua and Barbuda | 19.50<br>(10.81 – 32.66)    | 0.20<br>(0.18 – 0.22) | 0.11<br>(0.10 – 0.13) | 69.48<br>(68.01 – 70.85)         | 75.16<br>(73.78 – 76.47) | 15.33<br>(6.90 – 30.88)   | 0.16<br>(0.12 – 0.21) | 0.09<br>(0.06 – 0.12) | 72.45<br>(69.25 – 75.27)         | 77.84<br>(74.41 – 80.89) |
| Argentina           | 28.53<br>(28.14 – 28.91)    | 0.20<br>(0.20 – 0.20) | 0.10<br>(0.10 – 0.10) | 69.00<br>(68.84 – 69.16)         | 76.21<br>(76.02 – 76.39) | 14.15<br>(10.84 – 18.49)  | 0.16<br>(0.15 – 0.17) | 0.08<br>(0.08 – 0.09) | 72.29<br>(71.60 – 72.96)         | 79.58<br>(79.03 – 80.21) |
| Armenia             | 48.31<br>(45.52 – 51.61)    | 0.21<br>(0.20 – 0.23) | 0.10<br>(0.09 – 0.11) | 66.32<br>(65.52 – 66.98)         | 73.60<br>(72.91 – 74.40) | 16.80<br>(15.19 – 18.65)  | 0.19<br>(0.17 – 0.21) | 0.08<br>(0.08 – 0.09) | 70.22<br>(68.97 – 71.45)         | 77.55<br>(76.24 – 78.50) |
| Australia           | 9.54<br>(9.21 – 9.88)       | 0.12<br>(0.12 – 0.13) | 0.07<br>(0.07 – 0.07) | 73.93<br>(73.80 – 74.05)         | 80.15<br>(80.01 – 80.28) | 4.35<br>(3.71 – 5.14)     | 0.08<br>(0.07 – 0.08) | 0.05<br>(0.04 – 0.05) | 79.71<br>(79.13 – 80.30)         | 83.99<br>(83.48 – 84.52) |
| Austria             | 9.68<br>(9.16 – 10.17)      | 0.16<br>(0.15 – 0.16) | 0.07<br>(0.07 – 0.07) | 72.18<br>(72.05 – 72.31)         | 78.81<br>(78.65 – 78.99) | 4.08<br>(3.24 – 5.16)     | 0.09<br>(0.09 – 0.10) | 0.05<br>(0.05 – 0.05) | 78.30<br>(77.65 – 78.98)         | 83.10<br>(82.49 – 83.72) |
| Azerbaijan          | 78.04<br>(73.49 – 83.13)    | 0.25<br>(0.24 – 0.27) | 0.12<br>(0.11 – 0.13) | 62.31<br>(61.45 – 63.17)         | 70.03<br>(69.25 – 70.76) | 35.15<br>(31.79 – 39.01)  | 0.18<br>(0.15 – 0.22) | 0.09<br>(0.07 – 0.11) | 68.75<br>(66.87 – 71.05)         | 75.82<br>(74.11 – 77.11) |
| Bahrain             | 20.85<br>(19.88 – 21.80)    | 0.17<br>(0.15 – 0.20) | 0.15<br>(0.13 – 0.17) | 70.70<br>(69.03 – 72.34)         | 72.41<br>(71.18 – 73.62) | 6.88<br>(6.21 – 7.49)     | 0.08<br>(0.06 – 0.11) | 0.07<br>(0.05 – 0.09) | 78.26<br>(75.71 – 80.67)         | 79.87<br>(77.82 – 82.01) |
| Bangladesh          | 135.07<br>(132.20 – 138.29) | 0.26<br>(0.22 – 0.30) | 0.24<br>(0.20 – 0.28) | 58.12<br>(56.13 – 60.26)         | 58.98<br>(56.73 – 61.32) | 40.82<br>(36.93 – 45.40)  | 0.19<br>(0.15 – 0.24) | 0.15<br>(0.11 – 0.19) | 68.29<br>(66.02 – 71.23)         | 70.92<br>(68.78 – 73.75) |
| Barbados            | 27.15<br>(14.16 – 43.24)    | 0.18<br>(0.17 – 0.18) | 0.10<br>(0.10 – 0.11) | 70.52<br>(69.05 – 71.52)         | 75.45<br>(74.63 – 76.33) | 16.45<br>(7.29 – 33.49)   | 0.14<br>(0.11 – 0.17) | 0.09<br>(0.07 – 0.12) | 73.78<br>(71.67 – 76.13)         | 77.34<br>(74.82 – 79.82) |
| Belarus             | 20.18<br>(15.23 – 26.10)    | 0.28<br>(0.28 – 0.29) | 0.11<br>(0.10 – 0.11) | 65.77<br>(65.19 – 66.30)         | 75.48<br>(74.99 – 75.87) | 7.61<br>(5.53 – 10.41)    | 0.34<br>(0.31 – 0.36) | 0.11<br>(0.10 – 0.13) | 64.32<br>(63.22 – 65.64)         | 76.18<br>(75.26 – 77.16) |
| Belgium             | 10.27<br>(9.95 – 10.56)     | 0.14<br>(0.14 – 0.14) | 0.07<br>(0.07 – 0.08) | 72.68<br>(72.54 – 72.81)         | 79.22<br>(79.06 – 79.38) | 4.24<br>(3.61 – 4.99)     | 0.10<br>(0.09 – 0.11) | 0.06<br>(0.05 – 0.06) | 77.62<br>(76.62 – 78.57)         | 82.66<br>(81.75 – 83.53) |
| Belize              | 41.03<br>(33.96 – 48.36)    | 0.17<br>(0.15 – 0.18) | 0.11<br>(0.10 – 0.12) | 69.85<br>(68.59 – 71.05)         | 74.42<br>(73.27 – 75.58) | 18.60<br>(9.01 – 35.50)   | 0.24<br>(0.19 – 0.30) | 0.15<br>(0.12 – 0.20) | 67.48<br>(64.62 – 70.39)         | 72.66<br>(69.93 – 75.24) |
| Benin               | 175.43<br>(168.77 – 181.26) | 0.28<br>(0.25 – 0.30) | 0.20<br>(0.19 – 0.21) | 54.91<br>(53.42 – 56.36)         | 59.15<br>(57.75 – 60.48) | 60.12<br>(54.08 – 67.08)  | 0.29<br>(0.24 – 0.33) | 0.19<br>(0.16 – 0.22) | 62.39<br>(59.93 – 64.60)         | 67.44<br>(65.29 – 69.58) |
| Bhutan              | 134.97<br>(124.32 – 145.03) | 0.25<br>(0.15 – 0.37) | 0.22<br>(0.13 – 0.34) | 59.02<br>(53.93 – 64.25)         | 59.72<br>(54.45 – 64.96) | 47.54<br>(39.93 – 57.03)  | 0.19<br>(0.11 – 0.30) | 0.14<br>(0.08 – 0.22) | 68.03<br>(61.82 – 73.67)         | 71.36<br>(65.49 – 76.31) |

**Web Table 9 - Under-five mortality (5q0) per 1,000 live births, adult mortality (45q15), and life expectancy at birth by country and sex in 1990 and 2013**

|                          | 1990                        |                       |                       |                                  |                          | 2013                        |                       |                       |                                  |                          |
|--------------------------|-----------------------------|-----------------------|-----------------------|----------------------------------|--------------------------|-----------------------------|-----------------------|-----------------------|----------------------------------|--------------------------|
|                          | 5q0 per 1,000 live births   | 45q15                 |                       | Life expectancy at birth (years) |                          | 5q0 per 1,000 live births   | 45q15                 |                       | Life expectancy at birth (years) |                          |
|                          |                             | Both sexes            | Male                  | Female                           | Male                     |                             | Female                | Both sexes            | Male                             | Female                   |
| Bolivia                  | 109.42<br>(105.72 – 113.09) | 0.23<br>(0.21 – 0.25) | 0.20<br>(0.18 – 0.22) | 61.31<br>(60.09 – 62.70)         | 63.80<br>(62.05 – 65.35) | 41.91<br>(39.02 – 45.18)    | 0.16<br>(0.11 – 0.21) | 0.12<br>(0.09 – 0.17) | 70.53<br>(67.12 – 73.50)         | 73.19<br>(70.12 – 76.11) |
| Bosnia and Herzegovina   | 17.87<br>(16.96 – 18.70)    | 0.19<br>(0.19 – 0.20) | 0.09<br>(0.09 – 0.09) | 69.36<br>(69.14 – 69.56)         | 76.71<br>(76.39 – 77.06) | 5.43<br>(3.63 – 7.89)       | 0.13<br>(0.12 – 0.15) | 0.06<br>(0.06 – 0.07) | 74.36<br>(73.42 – 75.24)         | 80.63<br>(79.73 – 81.58) |
| Botswana                 | 54.92<br>(49.66 – 60.44)    | 0.25<br>(0.20 – 0.33) | 0.14<br>(0.10 – 0.18) | 64.14<br>(60.49 – 67.24)         | 71.43<br>(68.02 – 74.56) | 30.91<br>(22.35 – 41.94)    | 0.40<br>(0.35 – 0.45) | 0.30<br>(0.26 – 0.35) | 61.60<br>(58.41 – 65.00)         | 70.61<br>(63.80 – 75.86) |
| Brazil                   | 52.40<br>(49.76 – 55.42)    | 0.24<br>(0.24 – 0.24) | 0.12<br>(0.12 – 0.12) | 65.47<br>(65.13 – 65.83)         | 72.97<br>(72.60 – 73.32) | 18.02<br>(16.57 – 19.67)    | 0.18<br>(0.17 – 0.20) | 0.09<br>(0.08 – 0.10) | 71.63<br>(70.63 – 72.65)         | 78.43<br>(77.64 – 79.28) |
| Brunei                   | 10.20<br>(9.29 – 11.08)     | 0.15<br>(0.14 – 0.16) | 0.11<br>(0.11 – 0.12) | 72.41<br>(71.88 – 72.90)         | 75.67<br>(75.09 – 76.25) | 8.21<br>(6.76 – 10.01)      | 0.10<br>(0.08 – 0.12) | 0.06<br>(0.05 – 0.08) | 76.88<br>(74.71 – 78.99)         | 80.65<br>(78.76 – 82.42) |
| Bulgaria                 | 17.99<br>(17.24 – 18.79)    | 0.22<br>(0.21 – 0.22) | 0.10<br>(0.10 – 0.10) | 68.31<br>(68.13 – 68.49)         | 74.78<br>(74.60 – 74.96) | 9.71<br>(6.78 – 13.82)      | 0.18<br>(0.18 – 0.19) | 0.08<br>(0.08 – 0.08) | 71.23<br>(70.72 – 71.70)         | 77.81<br>(77.39 – 78.25) |
| Burkina Faso             | 207.50<br>(200.79 – 214.70) | 0.32<br>(0.30 – 0.35) | 0.26<br>(0.24 – 0.27) | 51.16<br>(49.57 – 52.72)         | 54.11<br>(52.54 – 55.56) | 103.97<br>(92.98 – 116.63)  | 0.25<br>(0.22 – 0.28) | 0.21<br>(0.19 – 0.24) | 60.81<br>(58.98 – 62.51)         | 63.08<br>(61.26 – 65.00) |
| Burundi                  | 175.53<br>(165.51 – 185.65) | 0.44<br>(0.39 – 0.49) | 0.43<br>(0.39 – 0.47) | 48.67<br>(46.78 – 50.53)         | 49.38<br>(47.59 – 51.19) | 88.75<br>(75.30 – 104.80)   | 0.33<br>(0.30 – 0.37) | 0.28<br>(0.24 – 0.31) | 58.51<br>(56.36 – 60.40)         | 61.08<br>(59.31 – 63.03) |
| Cambodia                 | 115.83<br>(110.50 – 121.68) | 0.32<br>(0.30 – 0.33) | 0.24<br>(0.22 – 0.25) | 56.87<br>(55.77 – 57.92)         | 61.16<br>(59.88 – 62.44) | 43.20<br>(37.37 – 49.47)    | 0.26<br>(0.23 – 0.30) | 0.16<br>(0.13 – 0.18) | 64.82<br>(62.86 – 66.47)         | 70.56<br>(68.95 – 72.26) |
| Cameroon                 | 135.19<br>(130.09 – 140.42) | 0.27<br>(0.25 – 0.29) | 0.23<br>(0.22 – 0.25) | 57.43<br>(56.28 – 58.49)         | 60.01<br>(58.83 – 61.15) | 100.93<br>(91.85 – 113.90)  | 0.36<br>(0.32 – 0.39) | 0.29<br>(0.27 – 0.31) | 56.99<br>(54.99 – 58.81)         | 60.53<br>(58.57 – 62.40) |
| Canada                   | 8.62<br>(8.35 – 8.90)       | 0.13<br>(0.13 – 0.13) | 0.07<br>(0.07 – 0.07) | 74.20<br>(74.10 – 74.31)         | 80.59<br>(80.48 – 80.69) | 5.40<br>(4.44 – 6.60)       | 0.08<br>(0.07 – 0.09) | 0.05<br>(0.05 – 0.06) | 79.44<br>(78.85 – 80.01)         | 83.43<br>(82.85 – 83.95) |
| Cape Verde               | 56.97<br>(54.47 – 59.50)    | 0.23<br>(0.22 – 0.25) | 0.11<br>(0.11 – 0.12) | 64.99<br>(64.35 – 65.68)         | 72.38<br>(71.69 – 73.13) | 24.13<br>(19.99 – 29.24)    | 0.19<br>(0.13 – 0.26) | 0.07<br>(0.05 – 0.11) | 69.83<br>(66.03 – 74.09)         | 78.50<br>(74.70 – 81.11) |
| Central African Republic | 177.12<br>(169.05 – 184.75) | 0.59<br>(0.55 – 0.65) | 0.39<br>(0.36 – 0.41) | 43.68<br>(41.23 – 45.59)         | 50.67<br>(49.11 – 52.30) | 137.69<br>(107.45 – 176.49) | 0.42<br>(0.37 – 0.48) | 0.38<br>(0.34 – 0.42) | 51.79<br>(48.56 – 55.27)         | 53.81<br>(50.46 – 56.82) |
| Chad                     | 203.11<br>(195.76 – 210.92) | 0.30<br>(0.27 – 0.33) | 0.25<br>(0.23 – 0.26) | 52.00<br>(50.38 – 53.80)         | 55.22<br>(53.64 – 56.81) | 146.53<br>(128.18 – 170.32) | 0.31<br>(0.26 – 0.35) | 0.26<br>(0.23 – 0.30) | 55.74<br>(53.11 – 58.51)         | 58.49<br>(55.53 – 61.10) |
| Chile                    | 19.02<br>(18.57 – 19.47)    | 0.19<br>(0.19 – 0.20) | 0.10<br>(0.10 – 0.10) | 69.51<br>(69.36 – 69.67)         | 76.54<br>(76.39 – 76.69) | 7.45<br>(5.10 – 10.77)      | 0.12<br>(0.10 – 0.13) | 0.06<br>(0.05 – 0.07) | 76.31<br>(75.33 – 77.32)         | 81.72<br>(80.79 – 82.63) |
| China                    | 59.06<br>(55.37 – 63.05)    | 0.20<br>(0.18 – 0.23) | 0.14<br>(0.13 – 0.16) | 66.01<br>(64.94 – 67.45)         | 70.21<br>(68.67 – 71.46) | 12.96<br>(12.02 – 13.82)    | 0.13<br>(0.11 – 0.15) | 0.06<br>(0.05 – 0.07) | 73.53<br>(72.44 – 75.35)         | 79.99<br>(78.92 – 81.17) |
| Colombia                 | 34.09<br>(32.21 – 35.81)    | 0.24<br>(0.23 – 0.25) | 0.12<br>(0.11 – 0.12) | 66.96<br>(66.36 – 67.62)         | 75.01<br>(74.50 – 75.54) | 17.94<br>(16.35 – 19.79)    | 0.16<br>(0.13 – 0.19) | 0.07<br>(0.06 – 0.09) | 72.28<br>(69.99 – 74.50)         | 78.94<br>(77.10 – 80.67) |
| Comoros                  | 121.79<br>(114.51 – 129.48) | 0.33<br>(0.24 – 0.44) | 0.30<br>(0.22 – 0.38) | 55.93<br>(51.67 – 60.09)         | 57.87<br>(54.17 – 62.12) | 45.79<br>(33.24 – 63.12)    | 0.32<br>(0.22 – 0.42) | 0.25<br>(0.17 – 0.34) | 61.90<br>(57.89 – 66.15)         | 65.53<br>(61.76 – 70.22) |
| Congo                    | 92.11<br>(87.11 – 97.90)    | 0.46<br>(0.42 – 0.50) | 0.33<br>(0.31 – 0.36) | 53.14<br>(51.55 – 54.73)         | 58.30<br>(56.91 – 59.57) | 61.08<br>(51.82 – 69.94)    | 0.36<br>(0.32 – 0.41) | 0.26<br>(0.23 – 0.29) | 59.12<br>(57.13 – 61.41)         | 64.05<br>(62.27 – 65.89) |

**Web Table 9 - Under-five mortality (5q0) per 1,000 live births, adult mortality (45q15), and life expectancy at birth by country and sex in 1990 and 2013**

|                                  | 1990                        |                       |                       |                                  |                          | 2013                       |                       |                       |                                  |                          |
|----------------------------------|-----------------------------|-----------------------|-----------------------|----------------------------------|--------------------------|----------------------------|-----------------------|-----------------------|----------------------------------|--------------------------|
|                                  | 5q0 per 1,000 live births   | 45q15                 |                       | Life expectancy at birth (years) |                          | 5q0 per 1,000 live births  | 45q15                 |                       | Life expectancy at birth (years) |                          |
|                                  |                             | Male                  | Female                | Male                             | Female                   |                            | Male                  | Female                | Male                             | Female                   |
|                                  | Both sexes                  | Male                  | Female                | Male                             | Female                   | Both sexes                 | Male                  | Female                | Male                             | Female                   |
| Costa Rica                       | 21.20<br>(19.44 – 23.01)    | 0.13<br>(0.13 – 0.13) | 0.08<br>(0.08 – 0.08) | 74.59<br>(74.26 – 74.86)         | 78.72<br>(78.44 – 79.01) | 10.43<br>(9.48 – 11.52)    | 0.10<br>(0.10 – 0.11) | 0.06<br>(0.05 – 0.06) | 77.58<br>(76.86 – 78.34)         | 82.11<br>(81.47 – 82.84) |
| Croatia                          | 11.76<br>(10.85 – 12.61)    | 0.22<br>(0.22 – 0.23) | 0.09<br>(0.09 – 0.09) | 68.71<br>(68.52 – 68.90)         | 76.69<br>(76.44 – 76.96) | 4.58<br>(3.10 – 6.61)      | 0.14<br>(0.13 – 0.15) | 0.06<br>(0.06 – 0.06) | 74.18<br>(73.61 – 74.67)         | 81.29<br>(80.71 – 81.86) |
| Cuba                             | 13.73<br>(13.33 – 14.10)    | 0.16<br>(0.15 – 0.16) | 0.11<br>(0.11 – 0.11) | 72.80<br>(72.66 – 72.95)         | 76.62<br>(76.46 – 76.78) | 5.65<br>(4.88 – 6.57)      | 0.12<br>(0.11 – 0.13) | 0.07<br>(0.06 – 0.08) | 76.29<br>(75.31 – 77.19)         | 80.43<br>(79.55 – 81.35) |
| Cyprus                           | 11.16<br>(10.47 – 11.99)    | 0.10<br>(0.10 – 0.11) | 0.05<br>(0.05 – 0.06) | 75.59<br>(75.07 – 76.05)         | 81.06<br>(80.65 – 81.43) | 4.11<br>(3.29 – 5.14)      | 0.07<br>(0.06 – 0.08) | 0.04<br>(0.03 – 0.04) | 79.59<br>(78.51 – 80.61)         | 84.73<br>(83.83 – 85.56) |
| Czech Republic                   | 12.48<br>(11.91 – 13.08)    | 0.22<br>(0.22 – 0.23) | 0.10<br>(0.09 – 0.10) | 67.82<br>(67.69 – 67.94)         | 75.45<br>(75.29 – 75.61) | 3.00<br>(2.08 – 4.31)      | 0.12<br>(0.12 – 0.13) | 0.06<br>(0.05 – 0.06) | 75.33<br>(74.98 – 75.71)         | 80.93<br>(80.56 – 81.30) |
| Côte d'Ivoire                    | 152.33<br>(146.98 – 158.50) | 0.33<br>(0.31 – 0.35) | 0.24<br>(0.22 – 0.25) | 53.95<br>(52.66 – 55.22)         | 58.88<br>(57.65 – 60.21) | 96.05<br>(86.68 – 108.92)  | 0.36<br>(0.33 – 0.40) | 0.28<br>(0.25 – 0.30) | 57.07<br>(54.84 – 58.89)         | 61.03<br>(59.51 – 62.65) |
| Democratic Republic of the Congo | 178.09<br>(169.47 – 186.77) | 0.33<br>(0.30 – 0.37) | 0.30<br>(0.27 – 0.33) | 52.29<br>(50.55 – 54.30)         | 54.37<br>(52.53 – 56.23) | 120.35<br>(96.12 – 150.16) | 0.34<br>(0.30 – 0.39) | 0.27<br>(0.23 – 0.30) | 55.70<br>(52.82 – 58.53)         | 59.35<br>(56.70 – 62.08) |
| Denmark                          | 9.29<br>(8.69 – 9.90)       | 0.15<br>(0.15 – 0.15) | 0.10<br>(0.10 – 0.10) | 72.31<br>(72.15 – 72.47)         | 77.81<br>(77.62 – 78.02) | 3.81<br>(3.01 – 4.84)      | 0.09<br>(0.09 – 0.10) | 0.06<br>(0.05 – 0.06) | 77.82<br>(77.05 – 78.54)         | 82.02<br>(81.29 – 82.77) |
| Djibouti                         | 111.56<br>(100.25 – 120.61) | 0.24<br>(0.16 – 0.34) | 0.25<br>(0.17 – 0.36) | 60.48<br>(55.96 – 64.54)         | 60.63<br>(56.40 – 65.12) | 62.89<br>(47.27 – 82.10)   | 0.27<br>(0.21 – 0.39) | 0.26<br>(0.20 – 0.36) | 62.69<br>(57.82 – 66.02)         | 64.07<br>(59.41 – 67.56) |
| Dominica                         | 31.10<br>(16.60 – 54.02)    | 0.18<br>(0.16 – 0.20) | 0.13<br>(0.12 – 0.15) | 69.67<br>(67.59 – 71.42)         | 72.82<br>(71.22 – 74.39) | 21.85<br>(10.19 – 42.79)   | 0.18<br>(0.14 – 0.23) | 0.08<br>(0.06 – 0.11) | 70.71<br>(67.52 – 73.84)         | 78.45<br>(75.51 – 81.11) |
| Dominican Republic               | 58.51<br>(54.75 – 61.91)    | 0.15<br>(0.14 – 0.16) | 0.10<br>(0.10 – 0.11) | 69.34<br>(68.52 – 70.17)         | 73.56<br>(72.77 – 74.28) | 28.77<br>(24.09 – 34.52)   | 0.17<br>(0.13 – 0.22) | 0.10<br>(0.07 – 0.12) | 70.99<br>(67.80 – 73.66)         | 76.53<br>(73.66 – 78.84) |
| Ecuador                          | 54.92<br>(52.10 – 57.91)    | 0.18<br>(0.18 – 0.19) | 0.11<br>(0.11 – 0.12) | 68.77<br>(68.10 – 69.41)         | 74.09<br>(73.48 – 74.68) | 28.63<br>(26.63 – 30.91)   | 0.18<br>(0.14 – 0.21) | 0.10<br>(0.07 – 0.12) | 71.75<br>(69.49 – 74.26)         | 78.09<br>(75.58 – 80.35) |
| Egypt                            | 83.41<br>(80.54 – 86.17)    | 0.23<br>(0.21 – 0.25) | 0.15<br>(0.14 – 0.17) | 62.42<br>(61.41 – 63.48)         | 66.69<br>(65.52 – 67.69) | 21.76<br>(19.60 – 24.29)   | 0.22<br>(0.19 – 0.25) | 0.13<br>(0.11 – 0.15) | 68.31<br>(66.78 – 69.83)         | 73.62<br>(72.17 – 75.05) |
| El Salvador                      | 54.50<br>(50.92 – 58.53)    | 0.26<br>(0.26 – 0.26) | 0.11<br>(0.11 – 0.11) | 65.26<br>(64.81 – 65.68)         | 74.35<br>(73.86 – 74.77) | 13.42<br>(12.20 – 14.83)   | 0.26<br>(0.22 – 0.31) | 0.11<br>(0.08 – 0.13) | 69.29<br>(66.60 – 71.68)         | 78.10<br>(75.93 – 80.12) |
| Equatorial Guinea                | 167.08<br>(148.14 – 186.29) | 0.43<br>(0.32 – 0.56) | 0.32<br>(0.22 – 0.44) | 49.16<br>(45.45 – 53.24)         | 53.88<br>(49.46 – 58.56) | 109.42<br>(82.51 – 142.58) | 0.33<br>(0.26 – 0.44) | 0.28<br>(0.22 – 0.36) | 57.29<br>(52.57 – 61.02)         | 60.54<br>(55.38 – 64.60) |
| Eritrea                          | 151.46<br>(144.66 – 158.90) | 0.41<br>(0.37 – 0.44) | 0.35<br>(0.32 – 0.38) | 50.96<br>(49.45 – 52.44)         | 54.01<br>(52.63 – 55.51) | 58.25<br>(41.89 – 79.86)   | 0.33<br>(0.27 – 0.38) | 0.27<br>(0.23 – 0.32) | 60.50<br>(57.99 – 63.41)         | 63.59<br>(61.16 – 65.96) |
| Estonia                          | 17.86<br>(16.80 – 19.07)    | 0.29<br>(0.29 – 0.30) | 0.11<br>(0.11 – 0.11) | 65.23<br>(65.01 – 65.47)         | 75.36<br>(75.06 – 75.61) | 4.20<br>(3.41 – 5.19)      | 0.20<br>(0.19 – 0.21) | 0.07<br>(0.06 – 0.07) | 71.54<br>(70.98 – 72.14)         | 81.10<br>(80.56 – 81.89) |
| Ethiopia                         | 203.93<br>(195.54 – 212.05) | 0.46<br>(0.43 – 0.51) | 0.41<br>(0.38 – 0.43) | 45.51<br>(43.86 – 47.20)         | 48.89<br>(47.31 – 50.34) | 74.38<br>(62.69 – 88.41)   | 0.28<br>(0.25 – 0.32) | 0.25<br>(0.22 – 0.27) | 61.43<br>(59.61 – 63.21)         | 63.70<br>(62.06 – 65.43) |
| Federated States of Micronesia   | 47.39<br>(38.33 – 57.48)    | 0.36<br>(0.24 – 0.51) | 0.26<br>(0.16 – 0.39) | 59.95<br>(54.43 – 65.55)         | 64.81<br>(59.21 – 70.08) | 14.69<br>(8.92 – 23.52)    | 0.32<br>(0.20 – 0.47) | 0.21<br>(0.13 – 0.33) | 64.41<br>(58.75 – 69.51)         | 69.49<br>(63.79 – 74.55) |

**Web Table 9 - Under-five mortality (5q0) per 1,000 live births, adult mortality (45q15), and life expectancy at birth by country and sex in 1990 and 2013**

|               | 1990                        |                       |                       |                                  |                          | 2013                        |                       |                       |                                  |                          |
|---------------|-----------------------------|-----------------------|-----------------------|----------------------------------|--------------------------|-----------------------------|-----------------------|-----------------------|----------------------------------|--------------------------|
|               | 5q0 per 1,000 live births   | 45q15                 |                       | Life expectancy at birth (years) |                          | 5q0 per 1,000 live births   | 45q15                 |                       | Life expectancy at birth (years) |                          |
|               |                             | Both sexes            | Male                  | Female                           | Male                     |                             | Female                | Both sexes            | Male                             | Female                   |
| Fiji          | 33.34<br>(24.94 – 44.89)    | 0.35<br>(0.26 – 0.43) | 0.23<br>(0.17 – 0.29) | 61.58<br>(58.49 – 65.13)         | 67.05<br>(64.20 – 70.16) | 32.72<br>(21.49 – 48.93)    | 0.29<br>(0.22 – 0.36) | 0.21<br>(0.17 – 0.27) | 64.02<br>(60.96 – 67.18)         | 68.28<br>(64.85 – 71.18) |
| Finland       | 6.97<br>(6.49 – 7.40)       | 0.18<br>(0.18 – 0.18) | 0.07<br>(0.07 – 0.07) | 70.94<br>(70.78 – 71.10)         | 79.00<br>(78.79 – 79.18) | 2.98<br>(2.33 – 3.81)       | 0.11<br>(0.10 – 0.12) | 0.05<br>(0.04 – 0.05) | 77.37<br>(76.69 – 78.13)         | 83.79<br>(83.11 – 84.47) |
| France        | 8.86<br>(8.65 – 9.05)       | 0.16<br>(0.16 – 0.16) | 0.07<br>(0.07 – 0.07) | 73.04<br>(72.96 – 73.13)         | 81.21<br>(81.09 – 81.32) | 3.75<br>(3.05 – 4.61)       | 0.11<br>(0.10 – 0.12) | 0.05<br>(0.05 – 0.05) | 78.38<br>(77.81 – 78.98)         | 84.91<br>(84.43 – 85.40) |
| Gabon         | 85.80<br>(80.97 – 91.08)    | 0.36<br>(0.33 – 0.39) | 0.22<br>(0.20 – 0.24) | 57.20<br>(55.86 – 58.70)         | 63.85<br>(62.74 – 65.04) | 60.37<br>(50.53 – 71.21)    | 0.49<br>(0.45 – 0.54) | 0.24<br>(0.19 – 0.28) | 54.37<br>(52.36 – 56.50)         | 65.18<br>(62.74 – 68.05) |
| Georgia       | 40.27<br>(37.03 – 43.97)    | 0.24<br>(0.22 – 0.26) | 0.10<br>(0.09 – 0.11) | 65.82<br>(64.82 – 66.57)         | 74.23<br>(73.45 – 75.01) | 21.06<br>(19.03 – 23.40)    | 0.23<br>(0.20 – 0.26) | 0.08<br>(0.07 – 0.09) | 67.69<br>(66.45 – 69.02)         | 78.16<br>(76.86 – 79.18) |
| Germany       | 9.23<br>(9.04 – 9.44)       | 0.16<br>(0.16 – 0.16) | 0.08<br>(0.08 – 0.08) | 71.96<br>(71.88 – 72.04)         | 78.52<br>(78.42 – 78.60) | 3.63<br>(3.20 – 4.13)       | 0.09<br>(0.09 – 0.10) | 0.05<br>(0.05 – 0.05) | 78.18<br>(77.94 – 78.42)         | 83.14<br>(82.91 – 83.37) |
| Ghana         | 121.69<br>(117.66 – 126.59) | 0.25<br>(0.22 – 0.28) | 0.23<br>(0.20 – 0.26) | 59.34<br>(57.79 – 61.12)         | 61.23<br>(59.50 – 63.06) | 71.40<br>(62.37 – 82.30)    | 0.25<br>(0.22 – 0.29) | 0.19<br>(0.17 – 0.22) | 62.99<br>(61.10 – 64.91)         | 66.85<br>(64.77 – 68.97) |
| Greece        | 10.44<br>(10.14 – 10.75)    | 0.12<br>(0.12 – 0.12) | 0.06<br>(0.06 – 0.06) | 74.53<br>(74.38 – 74.68)         | 79.44<br>(79.29 – 79.59) | 4.05<br>(3.57 – 4.61)       | 0.10<br>(0.09 – 0.11) | 0.04<br>(0.04 – 0.05) | 77.41<br>(76.77 – 78.07)         | 82.24<br>(81.67 – 82.75) |
| Grenada       | 28.09<br>(16.03 – 47.07)    | 0.21<br>(0.20 – 0.23) | 0.15<br>(0.14 – 0.16) | 67.94<br>(66.69 – 69.15)         | 72.25<br>(70.67 – 73.61) | 13.15<br>(6.10 – 25.94)     | 0.22<br>(0.19 – 0.26) | 0.14<br>(0.11 – 0.17) | 69.00<br>(66.95 – 71.22)         | 73.96<br>(72.07 – 75.68) |
| Guatemala     | 76.13<br>(72.44 – 79.48)    | 0.26<br>(0.26 – 0.27) | 0.18<br>(0.17 – 0.18) | 62.56<br>(62.09 – 63.14)         | 67.16<br>(66.50 – 67.70) | 28.05<br>(25.54 – 30.95)    | 0.23<br>(0.21 – 0.25) | 0.13<br>(0.12 – 0.14) | 69.34<br>(68.20 – 70.46)         | 75.21<br>(74.20 – 76.29) |
| Guinea        | 229.61<br>(221.46 – 237.97) | 0.24<br>(0.22 – 0.26) | 0.26<br>(0.24 – 0.28) | 52.52<br>(50.79 – 54.41)         | 52.22<br>(50.46 – 53.86) | 108.56<br>(99.64 – 117.74)  | 0.27<br>(0.23 – 0.32) | 0.26<br>(0.22 – 0.29) | 59.66<br>(57.53 – 61.86)         | 60.67<br>(58.43 – 63.06) |
| Guinea-Bissau | 220.69<br>(204.68 – 238.16) | 0.30<br>(0.20 – 0.42) | 0.28<br>(0.19 – 0.39) | 50.25<br>(45.91 – 54.83)         | 52.34<br>(47.31 – 57.34) | 152.49<br>(130.61 – 177.38) | 0.38<br>(0.32 – 0.48) | 0.36<br>(0.30 – 0.45) | 52.21<br>(48.32 – 55.56)         | 53.48<br>(49.56 – 57.13) |
| Guyana        | 50.90<br>(44.29 – 58.26)    | 0.31<br>(0.29 – 0.33) | 0.19<br>(0.18 – 0.20) | 61.93<br>(60.90 – 63.03)         | 68.21<br>(67.31 – 69.14) | 36.19<br>(17.23 – 69.54)    | 0.36<br>(0.29 – 0.43) | 0.23<br>(0.17 – 0.30) | 61.03<br>(57.29 – 64.50)         | 67.15<br>(63.61 – 71.21) |
| Haiti         | 146.61<br>(139.58 – 154.74) | 0.34<br>(0.32 – 0.36) | 0.33<br>(0.30 – 0.35) | 54.00<br>(52.74 – 55.32)         | 55.42<br>(54.15 – 56.73) | 66.15<br>(56.76 – 77.62)    | 0.26<br>(0.22 – 0.30) | 0.23<br>(0.19 – 0.27) | 63.35<br>(61.51 – 65.34)         | 65.31<br>(63.15 – 67.52) |
| Honduras      | 54.32<br>(51.49 – 57.02)    | 0.21<br>(0.19 – 0.24) | 0.16<br>(0.14 – 0.18) | 66.49<br>(65.24 – 67.77)         | 70.15<br>(68.65 – 71.45) | 23.10<br>(21.22 – 25.24)    | 0.19<br>(0.14 – 0.25) | 0.13<br>(0.08 – 0.19) | 70.11<br>(66.66 – 73.88)         | 74.00<br>(70.36 – 78.37) |
| Hungary       | 16.83<br>(16.20 – 17.51)    | 0.30<br>(0.30 – 0.31) | 0.13<br>(0.13 – 0.13) | 65.27<br>(65.13 – 65.42)         | 73.90<br>(73.73 – 74.06) | 5.13<br>(4.10 – 6.44)       | 0.19<br>(0.19 – 0.20) | 0.09<br>(0.08 – 0.09) | 72.18<br>(71.77 – 72.58)         | 79.26<br>(78.89 – 79.62) |
| Iceland       | 6.92<br>(5.86 – 8.13)       | 0.11<br>(0.11 – 0.12) | 0.07<br>(0.06 – 0.07) | 75.98<br>(75.51 – 76.51)         | 80.23<br>(79.63 – 80.81) | 2.42<br>(1.68 – 3.46)       | 0.06<br>(0.05 – 0.08) | 0.04<br>(0.03 – 0.05) | 80.81<br>(79.45 – 82.21)         | 84.82<br>(83.61 – 86.05) |
| India         | 114.54<br>(111.44 – 117.24) | 0.32<br>(0.28 – 0.35) | 0.26<br>(0.23 – 0.29) | 57.25<br>(55.79 – 58.77)         | 58.19<br>(56.64 – 59.77) | 48.83<br>(43.14 – 56.40)    | 0.26<br>(0.21 – 0.31) | 0.16<br>(0.14 – 0.19) | 64.16<br>(61.97 – 66.70)         | 68.48<br>(66.60 – 70.62) |
| Indonesia     | 85.80<br>(82.66 – 89.50)    | 0.22<br>(0.21 – 0.22) | 0.17<br>(0.16 – 0.18) | 63.18<br>(62.52 – 63.85)         | 66.84<br>(66.03 – 67.60) | 31.55<br>(28.05 – 35.64)    | 0.20<br>(0.18 – 0.23) | 0.13<br>(0.11 – 0.15) | 68.34<br>(67.17 – 69.90)         | 72.66<br>(71.50 – 74.11) |



**Web Table 9 - Under-five mortality (5q0) per 1,000 live births, adult mortality (45q15), and life expectancy at birth by country and sex in 1990 and 2013**

|            | 1990                        |                       |                       |                                  |                          | 2013                      |                       |                       |                                  |                          |
|------------|-----------------------------|-----------------------|-----------------------|----------------------------------|--------------------------|---------------------------|-----------------------|-----------------------|----------------------------------|--------------------------|
|            | 5q0 per 1,000 live births   | 45q15                 |                       | Life expectancy at birth (years) |                          | 5q0 per 1,000 live births | 45q15                 |                       | Life expectancy at birth (years) |                          |
|            |                             | Both sexes            | Male                  | Female                           | Male                     |                           | Female                | Both sexes            | Male                             | Female                   |
|            |                             |                       |                       |                                  |                          |                           |                       |                       |                                  |                          |
| Iran       | 77.79<br>(75.63 – 80.09)    | 0.23<br>(0.19 – 0.28) | 0.13<br>(0.11 – 0.17) | 63.48<br>(60.90 – 65.50)         | 69.46<br>(67.74 – 70.95) | 18.88<br>(16.38 – 21.94)  | 0.10<br>(0.08 – 0.13) | 0.05<br>(0.04 – 0.07) | 76.12<br>(73.81 – 78.08)         | 80.58<br>(79.10 – 82.21) |
| Iraq       | 52.96<br>(50.38 – 55.58)    | 0.17<br>(0.12 – 0.22) | 0.15<br>(0.11 – 0.21) | 68.59<br>(65.82 – 71.61)         | 69.86<br>(66.82 – 72.60) | 28.75<br>(26.17 – 31.71)  | 0.17<br>(0.11 – 0.24) | 0.15<br>(0.10 – 0.20) | 70.57<br>(66.63 – 74.38)         | 72.02<br>(69.01 – 75.48) |
| Ireland    | 9.75<br>(9.14 – 10.32)      | 0.13<br>(0.13 – 0.14) | 0.08<br>(0.08 – 0.08) | 72.13<br>(71.94 – 72.33)         | 77.64<br>(77.39 – 77.89) | 4.57<br>(3.43 – 6.09)     | 0.08<br>(0.07 – 0.10) | 0.05<br>(0.04 – 0.06) | 78.20<br>(76.70 – 79.55)         | 82.67<br>(81.36 – 83.81) |
| Israel     | 12.25<br>(11.70 – 12.83)    | 0.11<br>(0.11 – 0.12) | 0.07<br>(0.07 – 0.07) | 74.72<br>(74.50 – 74.93)         | 78.08<br>(77.89 – 78.28) | 4.33<br>(3.74 – 5.04)     | 0.07<br>(0.07 – 0.08) | 0.04<br>(0.04 – 0.04) | 80.25<br>(79.82 – 80.68)         | 84.02<br>(83.59 – 84.42) |
| Italy      | 9.51<br>(9.26 – 9.74)       | 0.13<br>(0.13 – 0.13) | 0.06<br>(0.06 – 0.06) | 73.60<br>(73.53 – 73.67)         | 80.23<br>(80.11 – 80.35) | 3.67<br>(2.81 – 4.80)     | 0.07<br>(0.07 – 0.08) | 0.04<br>(0.04 – 0.04) | 79.45<br>(78.63 – 80.20)         | 84.60<br>(83.80 – 85.28) |
| Jamaica    | 30.21<br>(22.67 – 39.59)    | 0.12<br>(0.12 – 0.13) | 0.11<br>(0.10 – 0.12) | 73.68<br>(72.72 – 74.67)         | 75.08<br>(74.16 – 76.03) | 18.31<br>(8.01 – 37.58)   | 0.13<br>(0.10 – 0.16) | 0.10<br>(0.07 – 0.13) | 74.29<br>(71.66 – 77.14)         | 76.72<br>(74.10 – 79.62) |
| Japan      | 6.05<br>(5.92 – 6.17)       | 0.11<br>(0.11 – 0.11) | 0.05<br>(0.05 – 0.05) | 76.04<br>(75.98 – 76.10)         | 81.96<br>(81.86 – 82.05) | 2.95<br>(2.31 – 3.78)     | 0.08<br>(0.07 – 0.09) | 0.04<br>(0.04 – 0.04) | 80.05<br>(79.26 – 80.84)         | 86.39<br>(85.74 – 87.12) |
| Jordan     | 33.44<br>(32.00 – 34.86)    | 0.16<br>(0.12 – 0.20) | 0.12<br>(0.10 – 0.14) | 70.83<br>(67.92 – 73.19)         | 73.20<br>(71.64 – 75.02) | 18.34<br>(16.74 – 20.22)  | 0.10<br>(0.07 – 0.12) | 0.06<br>(0.05 – 0.08) | 76.77<br>(74.45 – 78.97)         | 79.56<br>(78.23 – 81.39) |
| Kazakhstan | 39.97<br>(37.49 – 42.47)    | 0.33<br>(0.31 – 0.35) | 0.14<br>(0.14 – 0.15) | 61.99<br>(61.16 – 62.82)         | 71.29<br>(70.56 – 72.00) | 22.81<br>(20.63 – 25.32)  | 0.35<br>(0.31 – 0.40) | 0.14<br>(0.12 – 0.17) | 62.60<br>(60.59 – 64.29)         | 73.07<br>(71.44 – 74.50) |
| Kenya      | 94.94<br>(90.49 – 99.54)    | 0.24<br>(0.22 – 0.26) | 0.21<br>(0.19 – 0.22) | 61.77<br>(60.74 – 62.73)         | 64.17<br>(63.21 – 65.25) | 58.29<br>(46.55 – 73.40)  | 0.29<br>(0.26 – 0.32) | 0.22<br>(0.20 – 0.24) | 62.98<br>(61.28 – 64.80)         | 67.52<br>(65.36 – 69.25) |
| Kiribati   | 88.84<br>(73.17 – 106.91)   | 0.42<br>(0.34 – 0.51) | 0.29<br>(0.23 – 0.36) | 55.06<br>(52.12 – 58.25)         | 60.17<br>(57.20 – 63.33) | 52.16<br>(35.57 – 75.36)  | 0.41<br>(0.29 – 0.53) | 0.22<br>(0.14 – 0.31) | 58.08<br>(53.42 – 63.29)         | 66.48<br>(62.29 – 71.41) |
| Kuwait     | 18.02<br>(17.24 – 18.72)    | 0.09<br>(0.09 – 0.10) | 0.07<br>(0.07 – 0.07) | 76.74<br>(76.32 – 77.11)         | 79.09<br>(78.78 – 79.35) | 8.87<br>(8.23 – 9.60)     | 0.07<br>(0.07 – 0.08) | 0.05<br>(0.05 – 0.06) | 79.39<br>(78.72 – 80.09)         | 81.69<br>(81.10 – 82.28) |
| Kyrgyzstan | 71.94<br>(68.17 – 76.54)    | 0.28<br>(0.27 – 0.30) | 0.15<br>(0.14 – 0.16) | 61.42<br>(60.60 – 62.29)         | 69.11<br>(68.30 – 69.89) | 29.57<br>(27.01 – 32.22)  | 0.29<br>(0.26 – 0.33) | 0.13<br>(0.11 – 0.15) | 64.48<br>(62.94 – 66.14)         | 72.87<br>(71.45 – 74.28) |
| Laos       | 157.82<br>(145.92 – 171.50) | 0.30<br>(0.20 – 0.45) | 0.26<br>(0.16 – 0.39) | 54.51<br>(49.52 – 59.71)         | 57.15<br>(52.12 – 62.32) | 61.26<br>(52.81 – 69.43)  | 0.25<br>(0.15 – 0.38) | 0.18<br>(0.11 – 0.29) | 63.82<br>(58.29 – 68.96)         | 67.81<br>(62.47 – 72.87) |
| Latvia     | 17.88<br>(17.01 – 18.72)    | 0.30<br>(0.30 – 0.31) | 0.12<br>(0.11 – 0.12) | 64.79<br>(64.55 – 65.02)         | 75.03<br>(74.76 – 75.30) | 6.36<br>(5.32 – 7.63)     | 0.22<br>(0.21 – 0.23) | 0.08<br>(0.08 – 0.09) | 70.17<br>(69.64 – 70.64)         | 79.83<br>(79.35 – 80.36) |
| Lebanon    | 40.22<br>(37.83 – 42.98)    | 0.26<br>(0.18 – 0.40) | 0.17<br>(0.12 – 0.24) | 65.28<br>(58.68 – 69.57)         | 70.63<br>(66.68 – 73.72) | 13.30<br>(11.69 – 15.21)  | 0.10<br>(0.07 – 0.13) | 0.06<br>(0.05 – 0.08) | 76.83<br>(73.57 – 79.42)         | 80.01<br>(78.36 – 81.87) |
| Lesotho    | 91.81<br>(86.53 – 98.53)    | 0.36<br>(0.33 – 0.39) | 0.18<br>(0.17 – 0.20) | 56.73<br>(55.23 – 58.27)         | 65.84<br>(64.33 – 67.15) | 89.65<br>(71.33 – 113.76) | 0.67<br>(0.64 – 0.71) | 0.54<br>(0.50 – 0.57) | 45.55<br>(43.86 – 47.30)         | 51.16<br>(48.33 – 53.87) |
| Liberia    | 224.68<br>(214.50 – 234.48) | 0.30<br>(0.25 – 0.38) | 0.27<br>(0.24 – 0.33) | 50.23<br>(46.87 – 52.55)         | 52.56<br>(50.04 – 54.61) | 77.54<br>(66.24 – 91.38)  | 0.25<br>(0.22 – 0.29) | 0.24<br>(0.21 – 0.28) | 62.71<br>(60.71 – 64.91)         | 63.57<br>(61.45 – 65.72) |
| Libya      | 39.98<br>(36.65 – 43.72)    | 0.13<br>(0.10 – 0.18) | 0.10<br>(0.08 – 0.13) | 71.75<br>(68.94 – 74.40)         | 74.36<br>(71.94 – 76.30) | 14.33<br>(12.46 – 16.62)  | 0.13<br>(0.10 – 0.17) | 0.09<br>(0.07 – 0.11) | 73.82<br>(71.42 – 76.63)         | 77.34<br>(75.17 – 79.61) |

**Web Table 9 - Under-five mortality (5q0) per 1,000 live births, adult mortality (45q15), and life expectancy at birth by country and sex in 1990 and 2013**

|                  | 1990                        |                       |                       |                                  |                          | 2013                        |                       |                       |                                  |                          |
|------------------|-----------------------------|-----------------------|-----------------------|----------------------------------|--------------------------|-----------------------------|-----------------------|-----------------------|----------------------------------|--------------------------|
|                  | 5q0 per 1,000 live births   | 45q15                 |                       | Life expectancy at birth (years) |                          | 5q0 per 1,000 live births   | 45q15                 |                       | Life expectancy at birth (years) |                          |
|                  |                             | Both sexes            | Male                  | Female                           | Male                     |                             | Female                | Both sexes            | Male                             | Female                   |
| Lithuania        | 14.22<br>(13.38 – 15.15)    | 0.29<br>(0.29 – 0.29) | 0.11<br>(0.11 – 0.11) | 66.46<br>(66.25 – 66.66)         | 76.35<br>(76.10 – 76.57) | 4.55<br>(3.56 – 5.56)       | 0.25<br>(0.24 – 0.26) | 0.09<br>(0.08 – 0.09) | 69.67<br>(69.15 – 70.23)         | 80.01<br>(79.54 – 80.50) |
| Luxembourg       | 9.35<br>(8.23 – 10.67)      | 0.16<br>(0.15 – 0.17) | 0.08<br>(0.07 – 0.08) | 71.64<br>(71.19 – 72.08)         | 78.43<br>(77.94 – 78.93) | 2.78<br>(1.99 – 3.88)       | 0.08<br>(0.07 – 0.09) | 0.05<br>(0.04 – 0.06) | 79.05<br>(78.15 – 80.13)         | 83.10<br>(81.79 – 84.36) |
| Macedonia        | 34.42<br>(32.86 – 36.16)    | 0.16<br>(0.15 – 0.16) | 0.09<br>(0.09 – 0.09) | 70.40<br>(69.91 – 70.79)         | 75.46<br>(75.06 – 75.90) | 7.98<br>(5.25 – 11.92)      | 0.13<br>(0.12 – 0.14) | 0.07<br>(0.06 – 0.07) | 73.91<br>(73.00 – 74.90)         | 79.42<br>(78.42 – 80.38) |
| Madagascar       | 145.83<br>(140.05 – 151.93) | 0.31<br>(0.28 – 0.34) | 0.26<br>(0.24 – 0.28) | 55.11<br>(53.62 – 56.74)         | 57.84<br>(56.29 – 59.21) | 58.51<br>(46.45 – 73.75)    | 0.28<br>(0.22 – 0.36) | 0.22<br>(0.17 – 0.29) | 62.73<br>(59.02 – 65.92)         | 65.82<br>(62.70 – 69.32) |
| Malawi           | 227.08<br>(219.72 – 235.55) | 0.38<br>(0.36 – 0.41) | 0.33<br>(0.31 – 0.34) | 48.69<br>(47.28 – 50.16)         | 50.36<br>(48.77 – 51.84) | 89.88<br>(76.49 – 103.41)   | 0.43<br>(0.40 – 0.46) | 0.35<br>(0.32 – 0.38) | 55.66<br>(53.94 – 57.46)         | 58.88<br>(57.20 – 60.76) |
| Malaysia         | 16.82<br>(16.49 – 17.18)    | 0.19<br>(0.18 – 0.19) | 0.12<br>(0.12 – 0.12) | 69.88<br>(69.76 – 70.00)         | 74.53<br>(74.35 – 74.72) | 6.47<br>(5.51 – 7.63)       | 0.18<br>(0.16 – 0.20) | 0.08<br>(0.07 – 0.09) | 71.75<br>(70.67 – 72.89)         | 78.04<br>(77.19 – 79.19) |
| Maldives         | 71.49<br>(65.60 – 77.83)    | 0.19<br>(0.18 – 0.20) | 0.21<br>(0.20 – 0.22) | 66.02<br>(65.16 – 66.81)         | 65.42<br>(64.62 – 66.13) | 16.25<br>(13.53 – 19.68)    | 0.09<br>(0.08 – 0.10) | 0.05<br>(0.04 – 0.06) | 77.62<br>(76.30 – 78.84)         | 81.21<br>(79.85 – 82.41) |
| Mali             | 255.60<br>(246.93 – 264.49) | 0.29<br>(0.27 – 0.31) | 0.30<br>(0.28 – 0.32) | 48.75<br>(46.91 – 50.59)         | 48.86<br>(47.15 – 50.61) | 148.79<br>(126.36 – 176.03) | 0.26<br>(0.22 – 0.30) | 0.27<br>(0.24 – 0.32) | 57.58<br>(54.82 – 60.19)         | 56.97<br>(54.33 – 59.91) |
| Malta            | 9.70<br>(8.56 – 11.06)      | 0.11<br>(0.10 – 0.11) | 0.06<br>(0.06 – 0.07) | 74.99<br>(74.46 – 75.60)         | 80.04<br>(79.54 – 80.55) | 6.97<br>(5.10 – 9.49)       | 0.07<br>(0.06 – 0.08) | 0.04<br>(0.03 – 0.04) | 79.81<br>(78.49 – 81.02)         | 84.35<br>(83.19 – 85.46) |
| Marshall Islands | 47.82<br>(37.34 – 58.94)    | 0.32<br>(0.27 – 0.38) | 0.20<br>(0.16 – 0.24) | 61.52<br>(59.56 – 63.93)         | 67.57<br>(65.38 – 69.58) | 31.83<br>(19.19 – 51.78)    | 0.34<br>(0.23 – 0.45) | 0.23<br>(0.15 – 0.31) | 62.24<br>(57.49 – 67.14)         | 67.35<br>(63.30 – 71.76) |
| Mauritania       | 104.78<br>(99.57 – 110.31)  | 0.27<br>(0.24 – 0.30) | 0.26<br>(0.23 – 0.28) | 59.87<br>(58.47 – 61.30)         | 60.89<br>(59.66 – 62.12) | 69.32<br>(58.45 – 82.48)    | 0.23<br>(0.18 – 0.29) | 0.20<br>(0.16 – 0.25) | 64.02<br>(61.54 – 66.77)         | 66.13<br>(63.43 – 68.94) |
| Mauritius        | 22.03<br>(20.93 – 23.15)    | 0.25<br>(0.25 – 0.26) | 0.12<br>(0.11 – 0.12) | 65.57<br>(65.33 – 65.81)         | 73.70<br>(73.39 – 74.04) | 13.96<br>(12.23 – 16.01)    | 0.20<br>(0.18 – 0.22) | 0.09<br>(0.08 – 0.10) | 69.64<br>(68.72 – 70.58)         | 77.19<br>(76.19 – 78.25) |
| Mexico           | 42.65<br>(39.47 – 46.43)    | 0.20<br>(0.20 – 0.21) | 0.11<br>(0.11 – 0.11) | 68.88<br>(68.54 – 69.23)         | 75.34<br>(74.95 – 75.66) | 16.84<br>(15.32 – 18.59)    | 0.18<br>(0.18 – 0.18) | 0.09<br>(0.09 – 0.09) | 72.21<br>(71.91 – 72.53)         | 78.72<br>(78.41 – 78.99) |
| Moldova          | 30.43<br>(26.28 – 34.92)    | 0.28<br>(0.28 – 0.29) | 0.16<br>(0.15 – 0.16) | 64.45<br>(64.01 – 64.92)         | 71.41<br>(70.90 – 71.85) | 12.65<br>(9.15 – 16.44)     | 0.26<br>(0.25 – 0.27) | 0.10<br>(0.10 – 0.11) | 67.37<br>(66.79 – 67.99)         | 76.32<br>(75.70 – 76.95) |
| Mongolia         | 96.50<br>(90.74 – 102.78)   | 0.29<br>(0.27 – 0.32) | 0.20<br>(0.18 – 0.22) | 59.39<br>(58.19 – 60.67)         | 64.37<br>(63.27 – 65.64) | 42.86<br>(38.84 – 47.48)    | 0.36<br>(0.31 – 0.41) | 0.18<br>(0.15 – 0.21) | 60.54<br>(58.40 – 62.54)         | 69.38<br>(67.53 – 71.26) |
| Montenegro       | 20.94<br>(10.63 – 36.44)    | 0.18<br>(0.14 – 0.22) | 0.08<br>(0.06 – 0.10) | 70.21<br>(67.86 – 72.65)         | 77.34<br>(75.08 – 79.25) | 6.29<br>(3.62 – 10.48)      | 0.16<br>(0.13 – 0.19) | 0.08<br>(0.07 – 0.10) | 72.59<br>(71.17 – 74.26)         | 78.61<br>(77.19 – 80.17) |
| Morocco          | 70.47<br>(67.73 – 73.30)    | 0.18<br>(0.15 – 0.20) | 0.13<br>(0.12 – 0.15) | 66.56<br>(65.04 – 67.91)         | 69.97<br>(69.10 – 70.87) | 26.26<br>(23.24 – 29.83)    | 0.14<br>(0.11 – 0.18) | 0.10<br>(0.07 – 0.13) | 72.60<br>(69.68 – 75.11)         | 75.95<br>(73.34 – 78.10) |
| Mozambique       | 220.63<br>(213.50 – 228.58) | 0.32<br>(0.30 – 0.35) | 0.25<br>(0.23 – 0.27) | 49.53<br>(48.08 – 51.00)         | 53.77<br>(51.95 – 55.29) | 88.40<br>(76.87 – 101.54)   | 0.45<br>(0.42 – 0.49) | 0.37<br>(0.34 – 0.39) | 53.98<br>(52.24 – 55.69)         | 58.43<br>(56.76 – 60.25) |
| Myanmar          | 106.87<br>(94.01 – 121.48)  | 0.34<br>(0.23 – 0.49) | 0.28<br>(0.17 – 0.41) | 56.43<br>(51.30 – 61.44)         | 59.74<br>(54.61 – 65.47) | 37.11<br>(31.60 – 43.72)    | 0.28<br>(0.17 – 0.42) | 0.17<br>(0.10 – 0.28) | 64.21<br>(58.79 – 69.78)         | 69.98<br>(64.65 – 75.33) |

**Web Table 9 - Under-five mortality (5q0) per 1,000 live births, adult mortality (45q15), and life expectancy at birth by country and sex in 1990 and 2013**

|                  | 1990                        |                       |                       |                                  |                          | 2013                        |                       |                       |                                  |                          |
|------------------|-----------------------------|-----------------------|-----------------------|----------------------------------|--------------------------|-----------------------------|-----------------------|-----------------------|----------------------------------|--------------------------|
|                  | 5q0 per 1,000 live births   | 45q15                 |                       | Life expectancy at birth (years) |                          | 5q0 per 1,000 live births   | 45q15                 |                       | Life expectancy at birth (years) |                          |
|                  |                             | Both sexes            | Male                  | Female                           | Male                     |                             | Female                | Both sexes            | Male                             | Female                   |
|                  |                             |                       |                       |                                  |                          |                             |                       |                       |                                  |                          |
| Namibia          | 70.36<br>(66.45 – 73.99)    | 0.34<br>(0.32 – 0.36) | 0.21<br>(0.19 – 0.22) | 59.02<br>(58.10 – 60.05)         | 65.68<br>(64.92 – 66.52) | 34.73<br>(24.21 – 49.04)    | 0.49<br>(0.45 – 0.54) | 0.28<br>(0.26 – 0.31) | 56.22<br>(54.31 – 58.13)         | 65.35<br>(63.13 – 67.14) |
| Nepal            | 143.72<br>(139.72 – 148.09) | 0.26<br>(0.22 – 0.29) | 0.22<br>(0.19 – 0.26) | 58.00<br>(56.21 – 59.84)         | 58.93<br>(56.88 – 61.21) | 37.70<br>(33.88 – 42.15)    | 0.18<br>(0.15 – 0.22) | 0.14<br>(0.11 – 0.17) | 69.10<br>(66.94 – 71.40)         | 72.14<br>(69.93 – 74.68) |
| Netherlands      | 8.89<br>(8.54 – 9.30)       | 0.12<br>(0.11 – 0.12) | 0.07<br>(0.07 – 0.07) | 73.85<br>(73.74 – 73.96)         | 80.09<br>(79.97 – 80.22) | 4.08<br>(3.28 – 5.08)       | 0.07<br>(0.07 – 0.08) | 0.06<br>(0.05 – 0.06) | 78.69<br>(78.07 – 79.30)         | 82.42<br>(81.79 – 83.02) |
| New Zealand      | 11.24<br>(10.65 – 11.84)    | 0.14<br>(0.14 – 0.14) | 0.09<br>(0.09 – 0.09) | 72.49<br>(72.26 – 72.69)         | 78.21<br>(77.98 – 78.43) | 5.57<br>(4.68 – 6.66)       | 0.09<br>(0.08 – 0.09) | 0.06<br>(0.05 – 0.06) | 78.61<br>(77.82 – 79.36)         | 82.66<br>(82.02 – 83.32) |
| Nicaragua        | 66.48<br>(63.26 – 69.30)    | 0.16<br>(0.15 – 0.17) | 0.10<br>(0.10 – 0.11) | 68.63<br>(67.90 – 69.41)         | 73.23<br>(72.50 – 73.94) | 24.14<br>(21.96 – 26.66)    | 0.14<br>(0.12 – 0.16) | 0.07<br>(0.06 – 0.09) | 73.74<br>(72.53 – 74.82)         | 79.07<br>(78.00 – 80.06) |
| Niger            | 299.10<br>(289.95 – 308.32) | 0.28<br>(0.26 – 0.31) | 0.26<br>(0.24 – 0.27) | 45.96<br>(44.12 – 47.99)         | 48.03<br>(45.94 – 49.79) | 115.42<br>(104.91 – 127.39) | 0.24<br>(0.21 – 0.27) | 0.20<br>(0.18 – 0.22) | 60.45<br>(58.80 – 62.23)         | 62.89<br>(61.17 – 64.61) |
| Nigeria          | 207.12<br>(200.49 – 213.75) | 0.22<br>(0.19 – 0.26) | 0.23<br>(0.20 – 0.25) | 54.94<br>(52.82 – 56.68)         | 55.84<br>(53.79 – 57.57) | 127.95<br>(114.26 – 142.02) | 0.25<br>(0.22 – 0.29) | 0.25<br>(0.23 – 0.29) | 59.78<br>(57.48 – 62.01)         | 60.42<br>(58.01 – 62.31) |
| North Korea      | 54.53<br>(43.74 – 66.72)    | 0.21<br>(0.14 – 0.30) | 0.16<br>(0.11 – 0.24) | 66.04<br>(62.08 – 70.34)         | 69.39<br>(65.43 – 73.16) | 21.22<br>(17.18 – 26.33)    | 0.22<br>(0.17 – 0.27) | 0.13<br>(0.10 – 0.16) | 68.30<br>(66.07 – 71.15)         | 73.83<br>(72.00 – 76.53) |
| Norway           | 8.98<br>(8.44 – 9.59)       | 0.13<br>(0.13 – 0.13) | 0.07<br>(0.06 – 0.07) | 73.62<br>(73.43 – 73.80)         | 80.04<br>(79.83 – 80.25) | 2.97<br>(2.48 – 3.57)       | 0.08<br>(0.07 – 0.08) | 0.05<br>(0.04 – 0.05) | 79.09<br>(78.66 – 79.48)         | 83.71<br>(83.32 – 84.16) |
| Oman             | 40.98<br>(36.62 – 45.38)    | 0.16<br>(0.10 – 0.22) | 0.14<br>(0.10 – 0.20) | 69.98<br>(66.53 – 73.97)         | 71.59<br>(68.04 – 75.01) | 8.54<br>(7.39 – 9.96)       | 0.13<br>(0.09 – 0.18) | 0.08<br>(0.06 – 0.12) | 73.83<br>(71.48 – 77.29)         | 78.13<br>(75.96 – 81.26) |
| Pakistan         | 111.34<br>(108.08 – 114.95) | 0.21<br>(0.18 – 0.25) | 0.20<br>(0.18 – 0.23) | 62.20<br>(60.46 – 64.05)         | 62.54<br>(60.56 – 64.43) | 75.82<br>(70.05 – 82.50)    | 0.22<br>(0.16 – 0.29) | 0.17<br>(0.12 – 0.22) | 64.33<br>(61.38 – 67.72)         | 67.20<br>(63.95 – 70.05) |
| Palestine        | 46.19<br>(40.69 – 51.48)    | 0.18<br>(0.12 – 0.24) | 0.13<br>(0.09 – 0.18) | 68.56<br>(65.44 – 72.23)         | 72.08<br>(68.47 – 74.99) | 19.59<br>(16.95 – 22.82)    | 0.16<br>(0.12 – 0.22) | 0.08<br>(0.06 – 0.11) | 71.57<br>(68.06 – 75.19)         | 77.95<br>(74.69 – 80.32) |
| Panama           | 27.66<br>(25.41 – 30.02)    | 0.14<br>(0.13 – 0.15) | 0.08<br>(0.08 – 0.09) | 72.78<br>(72.14 – 73.47)         | 77.80<br>(77.19 – 78.41) | 18.67<br>(16.98 – 20.62)    | 0.13<br>(0.11 – 0.16) | 0.07<br>(0.06 – 0.08) | 74.99<br>(73.10 – 76.78)         | 80.89<br>(79.43 – 82.18) |
| Papua New Guinea | 92.63<br>(80.00 – 104.44)   | 0.41<br>(0.28 – 0.57) | 0.37<br>(0.25 – 0.52) | 54.87<br>(49.90 – 60.47)         | 56.69<br>(51.38 – 62.11) | 57.00<br>(36.70 – 86.39)    | 0.38<br>(0.26 – 0.53) | 0.33<br>(0.21 – 0.47) | 58.59<br>(53.01 – 63.81)         | 61.08<br>(55.08 – 66.49) |
| Paraguay         | 37.83<br>(35.34 – 40.25)    | 0.13<br>(0.12 – 0.14) | 0.10<br>(0.09 – 0.10) | 72.58<br>(72.00 – 73.18)         | 75.78<br>(75.16 – 76.45) | 20.97<br>(19.29 – 22.90)    | 0.17<br>(0.14 – 0.20) | 0.10<br>(0.08 – 0.12) | 71.42<br>(69.03 – 73.49)         | 76.21<br>(74.30 – 78.87) |
| Peru             | 74.59<br>(71.97 – 77.33)    | 0.16<br>(0.15 – 0.17) | 0.12<br>(0.11 – 0.13) | 67.63<br>(66.77 – 68.44)         | 71.27<br>(70.49 – 72.04) | 22.02<br>(20.47 – 23.82)    | 0.11<br>(0.09 – 0.14) | 0.08<br>(0.06 – 0.10) | 75.47<br>(73.45 – 77.69)         | 78.71<br>(76.69 – 80.31) |
| Philippines      | 53.87<br>(50.68 – 57.28)    | 0.24<br>(0.23 – 0.25) | 0.13<br>(0.12 – 0.14) | 64.70<br>(64.00 – 65.35)         | 72.20<br>(71.57 – 72.78) | 27.27<br>(23.19 – 32.23)    | 0.24<br>(0.19 – 0.29) | 0.12<br>(0.10 – 0.15) | 66.41<br>(63.92 – 68.85)         | 73.75<br>(71.51 – 75.85) |
| Poland           | 17.75<br>(17.42 – 18.06)    | 0.27<br>(0.26 – 0.27) | 0.10<br>(0.10 – 0.10) | 66.43<br>(66.32 – 66.54)         | 75.40<br>(75.28 – 75.51) | 5.04<br>(3.49 – 7.23)       | 0.18<br>(0.17 – 0.19) | 0.07<br>(0.06 – 0.07) | 72.64<br>(71.98 – 73.25)         | 81.02<br>(80.50 – 81.58) |
| Portugal         | 14.48<br>(14.11 – 14.85)    | 0.18<br>(0.18 – 0.18) | 0.08<br>(0.08 – 0.08) | 70.65<br>(70.52 – 70.79)         | 77.84<br>(77.67 – 77.98) | 3.45<br>(3.03 – 3.96)       | 0.12<br>(0.11 – 0.13) | 0.05<br>(0.04 – 0.05) | 76.65<br>(76.00 – 77.31)         | 82.95<br>(82.36 – 83.62) |

**Web Table 9 - Under-five mortality (5q0) per 1,000 live births, adult mortality (45q15), and life expectancy at birth by country and sex in 1990 and 2013**

|                                  | 1990                        |                       |                       |                                  |                          | 2013                        |                       |                       |                                  |                          |
|----------------------------------|-----------------------------|-----------------------|-----------------------|----------------------------------|--------------------------|-----------------------------|-----------------------|-----------------------|----------------------------------|--------------------------|
|                                  | 5q0 per 1,000 live births   | 45q15                 |                       | Life expectancy at birth (years) |                          | 5q0 per 1,000 live births   | 45q15                 |                       | Life expectancy at birth (years) |                          |
|                                  |                             | Both sexes            | Male                  | Female                           | Male                     |                             | Female                | Both sexes            | Male                             | Female                   |
|                                  |                             |                       |                       |                                  |                          |                             |                       |                       |                                  |                          |
| Qatar                            | 22.01<br>(19.35 – 24.65)    | 0.09<br>(0.08 – 0.10) | 0.09<br>(0.07 – 0.10) | 76.75<br>(75.83 – 77.79)         | 77.41<br>(76.04 – 78.53) | 10.35<br>(8.99 – 12.01)     | 0.06<br>(0.05 – 0.07) | 0.04<br>(0.03 – 0.05) | 81.20<br>(79.81 – 82.60)         | 83.08<br>(81.39 – 84.87) |
| Romania                          | 33.01<br>(32.38 – 33.60)    | 0.24<br>(0.24 – 0.24) | 0.11<br>(0.11 – 0.12) | 66.64<br>(66.44 – 66.85)         | 73.11<br>(72.89 – 73.32) | 10.97<br>(6.60 – 17.70)     | 0.16<br>(0.16 – 0.18) | 0.07<br>(0.07 – 0.07) | 72.77<br>(71.99 – 73.46)         | 79.17<br>(78.50 – 79.82) |
| Russia                           | 23.15<br>(18.24 – 29.35)    | 0.30<br>(0.30 – 0.30) | 0.12<br>(0.12 – 0.12) | 64.34<br>(63.80 – 64.80)         | 74.42<br>(73.96 – 74.78) | 9.64<br>(7.50 – 12.13)      | 0.31<br>(0.30 – 0.31) | 0.11<br>(0.11 – 0.12) | 65.74<br>(65.40 – 66.06)         | 76.65<br>(76.35 – 76.92) |
| Rwanda                           | 163.34<br>(156.93 – 170.36) | 0.48<br>(0.45 – 0.51) | 0.41<br>(0.38 – 0.43) | 47.90<br>(46.41 – 49.60)         | 51.03<br>(49.73 – 52.31) | 62.64<br>(50.69 – 78.21)    | 0.27<br>(0.24 – 0.30) | 0.19<br>(0.17 – 0.21) | 62.94<br>(61.07 – 64.62)         | 67.53<br>(65.86 – 69.30) |
| Saint Lucia                      | 32.04<br>(18.33 – 52.64)    | 0.20<br>(0.19 – 0.21) | 0.14<br>(0.14 – 0.15) | 68.20<br>(66.59 – 69.36)         | 72.27<br>(70.97 – 73.50) | 18.22<br>(8.07 – 37.07)     | 0.16<br>(0.13 – 0.20) | 0.10<br>(0.07 – 0.13) | 72.11<br>(69.47 – 74.71)         | 76.89<br>(74.31 – 79.65) |
| Saint Vincent and the Grenadines | 40.06<br>(21.48 – 69.88)    | 0.20<br>(0.19 – 0.22) | 0.15<br>(0.13 – 0.16) | 67.79<br>(65.18 – 69.50)         | 71.63<br>(69.57 – 73.42) | 23.57<br>(11.02 – 46.05)    | 0.18<br>(0.15 – 0.22) | 0.11<br>(0.09 – 0.14) | 70.53<br>(67.79 – 72.68)         | 74.99<br>(72.73 – 77.70) |
| Samoa                            | 23.22<br>(14.06 – 37.20)    | 0.27<br>(0.20 – 0.36) | 0.16<br>(0.11 – 0.22) | 65.49<br>(61.83 – 69.06)         | 71.68<br>(68.46 – 74.72) | 12.08<br>(6.86 – 20.43)     | 0.19<br>(0.14 – 0.23) | 0.16<br>(0.12 – 0.20) | 70.77<br>(68.26 – 73.15)         | 72.82<br>(70.20 – 75.13) |
| Saudi Arabia                     | 44.41<br>(39.20 – 50.04)    | 0.13<br>(0.09 – 0.19) | 0.09<br>(0.06 – 0.13) | 71.66<br>(67.89 – 75.35)         | 74.66<br>(72.03 – 77.44) | 12.04<br>(10.40 – 14.05)    | 0.11<br>(0.09 – 0.13) | 0.06<br>(0.05 – 0.07) | 75.79<br>(73.26 – 78.16)         | 80.76<br>(79.40 – 82.14) |
| Senegal                          | 145.15<br>(140.30 – 150.33) | 0.28<br>(0.26 – 0.31) | 0.23<br>(0.21 – 0.24) | 56.50<br>(55.16 – 57.85)         | 59.63<br>(58.22 – 60.92) | 59.54<br>(53.43 – 66.77)    | 0.24<br>(0.20 – 0.29) | 0.20<br>(0.17 – 0.24) | 64.25<br>(62.09 – 66.24)         | 66.99<br>(64.90 – 69.18) |
| Serbia                           | 18.78<br>(10.13 – 30.15)    | 0.17<br>(0.14 – 0.21) | 0.09<br>(0.07 – 0.11) | 70.58<br>(68.51 – 72.80)         | 76.73<br>(74.70 – 78.70) | 4.90<br>(3.92 – 6.02)       | 0.13<br>(0.12 – 0.13) | 0.07<br>(0.06 – 0.07) | 75.02<br>(74.44 – 75.54)         | 80.18<br>(79.68 – 80.73) |
| Seychelles                       | 17.26<br>(15.30 – 19.31)    | 0.30<br>(0.28 – 0.32) | 0.13<br>(0.11 – 0.14) | 65.06<br>(64.31 – 65.80)         | 74.24<br>(73.45 – 75.12) | 11.74<br>(10.09 – 13.71)    | 0.20<br>(0.18 – 0.23) | 0.09<br>(0.08 – 0.11) | 69.92<br>(68.61 – 71.00)         | 76.89<br>(75.90 – 78.69) |
| Sierra Leone                     | 230.37<br>(220.07 – 240.69) | 0.33<br>(0.29 – 0.37) | 0.23<br>(0.21 – 0.26) | 48.80<br>(46.71 – 50.95)         | 53.68<br>(51.90 – 55.58) | 126.75<br>(111.62 – 144.31) | 0.33<br>(0.29 – 0.38) | 0.25<br>(0.22 – 0.28) | 55.83<br>(53.47 – 57.85)         | 59.73<br>(57.45 – 61.87) |
| Singapore                        | 7.74<br>(7.21 – 8.28)       | 0.15<br>(0.15 – 0.15) | 0.09<br>(0.09 – 0.09) | 72.60<br>(72.39 – 72.79)         | 77.61<br>(77.39 – 77.83) | 2.29<br>(1.79 – 2.94)       | 0.07<br>(0.06 – 0.08) | 0.04<br>(0.04 – 0.04) | 79.71<br>(79.01 – 80.39)         | 84.03<br>(83.33 – 84.76) |
| Slovakia                         | 13.87<br>(13.11 – 14.69)    | 0.27<br>(0.26 – 0.27) | 0.10<br>(0.10 – 0.10) | 66.63<br>(66.46 – 66.79)         | 75.38<br>(75.21 – 75.57) | 6.65<br>(3.97 – 10.82)      | 0.16<br>(0.15 – 0.18) | 0.07<br>(0.06 – 0.07) | 72.61<br>(71.77 – 73.36)         | 79.70<br>(79.00 – 80.39) |
| Slovenia                         | 9.76<br>(8.74 – 10.91)      | 0.21<br>(0.21 – 0.21) | 0.09<br>(0.08 – 0.09) | 69.62<br>(69.39 – 69.85)         | 77.39<br>(77.10 – 77.67) | 3.62<br>(2.12 – 5.98)       | 0.11<br>(0.10 – 0.12) | 0.05<br>(0.05 – 0.06) | 76.86<br>(75.83 – 77.82)         | 82.95<br>(82.02 – 83.74) |
| Solomon Islands                  | 41.70<br>(30.67 – 54.27)    | 0.40<br>(0.27 – 0.55) | 0.33<br>(0.22 – 0.48) | 59.08<br>(53.34 – 64.73)         | 61.79<br>(55.62 – 67.96) | 21.82<br>(13.15 – 35.11)    | 0.36<br>(0.23 – 0.51) | 0.28<br>(0.18 – 0.43) | 62.19<br>(56.61 – 67.44)         | 65.35<br>(59.63 – 70.85) |
| Somalia                          | 188.78<br>(175.17 – 202.60) | 0.31<br>(0.20 – 0.44) | 0.32<br>(0.21 – 0.46) | 52.17<br>(47.32 – 57.01)         | 52.77<br>(47.96 – 58.01) | 113.65<br>(88.93 – 144.51)  | 0.31<br>(0.21 – 0.46) | 0.30<br>(0.19 – 0.44) | 57.15<br>(51.39 – 62.48)         | 58.37<br>(53.02 – 64.50) |
| South Africa                     | 70.01<br>(63.71 – 77.15)    | 0.32<br>(0.28 – 0.36) | 0.17<br>(0.15 – 0.19) | 60.46<br>(58.65 – 62.17)         | 68.87<br>(67.31 – 70.28) | 37.00<br>(27.83 – 47.77)    | 0.45<br>(0.42 – 0.48) | 0.35<br>(0.32 – 0.39) | 57.67<br>(55.98 – 59.45)         | 63.01<br>(61.30 – 64.91) |
| South Korea                      | 9.58<br>(7.46 – 12.35)      | 0.24<br>(0.23 – 0.24) | 0.10<br>(0.10 – 0.10) | 67.74<br>(67.42 – 68.02)         | 76.26<br>(76.00 – 76.49) | 3.75<br>(3.41 – 4.11)       | 0.11<br>(0.10 – 0.12) | 0.04<br>(0.04 – 0.05) | 77.20<br>(76.37 – 78.07)         | 83.66<br>(82.95 – 84.33) |

**Web Table 9 - Under-five mortality (5q0) per 1,000 live births, adult mortality (45q15), and life expectancy at birth by country and sex in 1990 and 2013**

|                            | 1990                        |                       |                       |                                  |                          | 2013                       |                       |                       |                                  |                          |
|----------------------------|-----------------------------|-----------------------|-----------------------|----------------------------------|--------------------------|----------------------------|-----------------------|-----------------------|----------------------------------|--------------------------|
|                            | 5q0 per 1,000 live births   | 45q15                 |                       | Life expectancy at birth (years) |                          | 5q0 per 1,000 live births  | 45q15                 |                       | Life expectancy at birth (years) |                          |
|                            | Both sexes                  | Male                  | Female                | Male                             | Female                   | Both sexes                 | Male                  | Female                | Male                             | Female                   |
| South Sudan                | 200.71<br>(173.87 – 231.46) | 0.36<br>(0.27 – 0.45) | 0.24<br>(0.19 – 0.31) | 49.50<br>(45.59 – 53.83)         | 55.39<br>(51.53 – 58.75) | 105.91<br>(83.79 – 135.11) | 0.40<br>(0.34 – 0.44) | 0.28<br>(0.25 – 0.32) | 54.57<br>(51.92 – 57.63)         | 60.17<br>(57.64 – 62.84) |
| Spain                      | 9.38<br>(9.10 – 9.64)       | 0.15<br>(0.15 – 0.15) | 0.06<br>(0.06 – 0.06) | 73.33<br>(73.22 – 73.45)         | 80.57<br>(80.44 – 80.70) | 3.58<br>(2.91 – 4.42)      | 0.09<br>(0.08 – 0.09) | 0.04<br>(0.04 – 0.05) | 78.97<br>(78.41 – 79.57)         | 84.43<br>(83.98 – 84.90) |
| Sri Lanka                  | 36.55<br>(35.62 – 37.38)    | 0.24<br>(0.23 – 0.25) | 0.11<br>(0.11 – 0.12) | 67.35<br>(66.72 – 67.76)         | 75.39<br>(74.83 – 75.75) | 8.81<br>(7.45 – 10.46)     | 0.18<br>(0.16 – 0.21) | 0.06<br>(0.05 – 0.08) | 72.09<br>(70.17 – 73.90)         | 80.23<br>(78.57 – 81.72) |
| Sudan                      | 108.55<br>(102.62 – 114.15) | 0.25<br>(0.21 – 0.30) | 0.22<br>(0.19 – 0.25) | 60.25<br>(58.23 – 62.34)         | 62.30<br>(60.40 – 64.27) | 47.06<br>(41.64 – 53.43)   | 0.21<br>(0.16 – 0.26) | 0.15<br>(0.11 – 0.20) | 67.01<br>(64.35 – 69.73)         | 70.81<br>(67.86 – 73.77) |
| Suriname                   | 50.62<br>(44.50 – 57.31)    | 0.22<br>(0.20 – 0.24) | 0.14<br>(0.13 – 0.16) | 66.27<br>(65.15 – 67.16)         | 71.32<br>(70.30 – 72.27) | 38.05<br>(31.82 – 45.68)   | 0.22<br>(0.17 – 0.29) | 0.13<br>(0.09 – 0.16) | 66.99<br>(63.70 – 70.28)         | 73.33<br>(70.35 – 76.36) |
| Swaziland                  | 75.12<br>(69.87 – 81.34)    | 0.33<br>(0.29 – 0.37) | 0.21<br>(0.18 – 0.23) | 59.13<br>(57.42 – 60.99)         | 65.18<br>(63.83 – 66.69) | 74.40<br>(58.08 – 95.98)   | 0.65<br>(0.61 – 0.68) | 0.48<br>(0.44 – 0.51) | 47.69<br>(46.06 – 49.41)         | 54.14<br>(51.86 – 56.53) |
| Sweden                     | 7.39<br>(7.02 – 7.80)       | 0.11<br>(0.11 – 0.12) | 0.07<br>(0.06 – 0.07) | 74.78<br>(74.63 – 74.91)         | 80.39<br>(80.21 – 80.55) | 2.70<br>(2.14 – 3.42)      | 0.07<br>(0.06 – 0.08) | 0.04<br>(0.04 – 0.05) | 79.64<br>(79.01 – 80.28)         | 83.87<br>(83.26 – 84.54) |
| Switzerland                | 8.46<br>(8.16 – 8.76)       | 0.13<br>(0.13 – 0.13) | 0.06<br>(0.06 – 0.06) | 74.07<br>(73.91 – 74.22)         | 80.94<br>(80.76 – 81.12) | 4.33<br>(3.79 – 4.98)      | 0.07<br>(0.06 – 0.07) | 0.04<br>(0.04 – 0.04) | 80.46<br>(79.81 – 81.09)         | 84.77<br>(84.17 – 85.35) |
| Syria                      | 42.70<br>(39.31 – 46.20)    | 0.19<br>(0.15 – 0.25) | 0.14<br>(0.10 – 0.17) | 67.88<br>(65.36 – 70.59)         | 71.73<br>(69.38 – 74.44) | 16.96<br>(15.81 – 18.34)   | 0.20<br>(0.15 – 0.31) | 0.12<br>(0.08 – 0.18) | 69.42<br>(64.52 – 72.67)         | 75.90<br>(72.16 – 78.35) |
| São Tomé and Príncipe      | 96.36<br>(90.42 – 103.13)   | 0.20<br>(0.17 – 0.24) | 0.18<br>(0.15 – 0.21) | 63.38<br>(61.38 – 65.51)         | 65.31<br>(63.04 – 67.11) | 40.70<br>(34.50 – 48.20)   | 0.23<br>(0.16 – 0.32) | 0.17<br>(0.12 – 0.23) | 66.88<br>(62.57 – 70.65)         | 69.95<br>(66.64 – 73.27) |
| Taiwan (Province of China) | 8.65<br>(8.41 – 8.89)       | 0.18<br>(0.18 – 0.18) | 0.09<br>(0.09 – 0.09) | 71.31<br>(71.18 – 71.45)         | 76.74<br>(76.61 – 76.87) | 6.68<br>(6.14 – 7.31)      | 0.13<br>(0.13 – 0.13) | 0.05<br>(0.05 – 0.06) | 76.42<br>(76.10 – 76.75)         | 82.36<br>(82.05 – 82.66) |
| Tajikistan                 | 94.51<br>(89.32 – 99.90)    | 0.22<br>(0.21 – 0.24) | 0.15<br>(0.14 – 0.16) | 62.39<br>(61.39 – 63.34)         | 67.50<br>(66.57 – 68.38) | 41.67<br>(37.92 – 45.18)   | 0.19<br>(0.16 – 0.22) | 0.12<br>(0.10 – 0.14) | 68.09<br>(66.48 – 70.16)         | 73.19<br>(71.34 – 74.70) |
| Tanzania                   | 150.58<br>(145.16 – 156.71) | 0.29<br>(0.28 – 0.31) | 0.25<br>(0.24 – 0.27) | 56.43<br>(55.13 – 57.77)         | 58.08<br>(56.71 – 59.36) | 76.52<br>(63.80 – 90.45)   | 0.30<br>(0.27 – 0.32) | 0.28<br>(0.25 – 0.30) | 61.52<br>(59.93 – 63.45)         | 62.89<br>(60.88 – 64.84) |
| Thailand                   | 31.11<br>(26.80 – 35.07)    | 0.22<br>(0.21 – 0.24) | 0.12<br>(0.11 – 0.12) | 68.44<br>(67.58 – 69.32)         | 75.10<br>(74.38 – 75.84) | 11.03<br>(9.29 – 13.15)    | 0.20<br>(0.17 – 0.25) | 0.09<br>(0.07 – 0.11) | 71.51<br>(68.75 – 74.21)         | 78.49<br>(76.79 – 80.37) |
| The Bahamas                | 33.84<br>(18.75 – 52.47)    | 0.26<br>(0.24 – 0.28) | 0.15<br>(0.13 – 0.16) | 65.29<br>(63.90 – 66.81)         | 71.86<br>(70.42 – 73.21) | 16.45<br>(7.47 – 32.55)    | 0.21<br>(0.15 – 0.27) | 0.11<br>(0.08 – 0.16) | 69.54<br>(66.41 – 72.85)         | 75.47<br>(72.78 – 78.90) |
| The Gambia                 | 161.73<br>(148.76 – 174.35) | 0.26<br>(0.16 – 0.39) | 0.22<br>(0.14 – 0.34) | 56.39<br>(51.14 – 61.18)         | 58.71<br>(53.52 – 63.42) | 74.56<br>(62.20 – 89.97)   | 0.25<br>(0.17 – 0.38) | 0.20<br>(0.12 – 0.31) | 62.69<br>(56.39 – 68.33)         | 66.03<br>(59.56 – 71.65) |
| Timor-Leste                | 151.64<br>(142.93 – 159.44) | 0.22<br>(0.19 – 0.25) | 0.23<br>(0.20 – 0.26) | 58.98<br>(57.32 – 60.86)         | 58.98<br>(57.01 – 60.83) | 38.76<br>(33.26 – 45.32)   | 0.16<br>(0.14 – 0.19) | 0.13<br>(0.11 – 0.15) | 70.20<br>(68.10 – 71.96)         | 72.70<br>(70.86 – 74.59) |
| Togo                       | 146.17<br>(140.04 – 152.45) | 0.26<br>(0.24 – 0.29) | 0.22<br>(0.21 – 0.24) | 57.42<br>(55.98 – 58.93)         | 59.72<br>(58.22 – 61.25) | 92.76<br>(77.51 – 111.85)  | 0.27<br>(0.24 – 0.31) | 0.21<br>(0.19 – 0.24) | 61.12<br>(58.52 – 63.71)         | 64.76<br>(62.61 – 66.67) |
| Tonga                      | 28.08<br>(17.53 – 42.80)    | 0.23<br>(0.17 – 0.30) | 0.18<br>(0.13 – 0.24) | 67.00<br>(63.85 – 70.56)         | 70.38<br>(67.05 – 73.09) | 23.51<br>(13.51 – 39.31)   | 0.23<br>(0.17 – 0.31) | 0.14<br>(0.09 – 0.19) | 67.37<br>(63.82 – 71.10)         | 73.23<br>(69.93 – 76.78) |

**Web Table 9 - Under-five mortality (5q0) per 1,000 live births, adult mortality (45q15), and life expectancy at birth by country and sex in 1990 and 2013**

|                      | 1990                        |                       |                       |                                  |                          | 2013                      |                       |                       |                                  |                          |
|----------------------|-----------------------------|-----------------------|-----------------------|----------------------------------|--------------------------|---------------------------|-----------------------|-----------------------|----------------------------------|--------------------------|
|                      | 5q0 per 1,000 live births   | 45q15                 |                       | Life expectancy at birth (years) |                          | 5q0 per 1,000 live births | 45q15                 |                       | Life expectancy at birth (years) |                          |
|                      | Both sexes                  | Male                  | Female                | Male                             | Female                   | Both sexes                | Male                  | Female                | Male                             | Female                   |
| Trinidad and Tobago  | 27.82<br>(20.10 – 37.15)    | 0.22<br>(0.22 – 0.23) | 0.16<br>(0.15 – 0.16) | 66.98<br>(66.19 – 67.62)         | 72.47<br>(71.67 – 73.04) | 22.25<br>(9.92 – 45.02)   | 0.23<br>(0.20 – 0.26) | 0.12<br>(0.10 – 0.14) | 67.39<br>(65.08 – 69.56)         | 75.47<br>(73.48 – 77.28) |
| Tunisia              | 48.96<br>(46.31 – 51.74)    | 0.15<br>(0.13 – 0.17) | 0.09<br>(0.08 – 0.11) | 69.86<br>(68.63 – 71.18)         | 74.12<br>(73.18 – 75.11) | 14.12<br>(12.62 – 15.88)  | 0.12<br>(0.09 – 0.16) | 0.06<br>(0.05 – 0.09) | 74.53<br>(71.84 – 77.89)         | 79.78<br>(77.76 – 81.94) |
| Turkey               | 69.77<br>(67.07 – 72.61)    | 0.23<br>(0.20 – 0.26) | 0.12<br>(0.10 – 0.13) | 64.01<br>(62.86 – 65.07)         | 70.73<br>(69.79 – 71.63) | 17.41<br>(15.52 – 19.63)  | 0.15<br>(0.12 – 0.18) | 0.06<br>(0.05 – 0.08) | 72.92<br>(70.79 – 74.93)         | 79.65<br>(78.46 – 81.04) |
| Turkmenistan         | 98.43<br>(90.11 – 107.50)   | 0.28<br>(0.26 – 0.29) | 0.16<br>(0.15 – 0.17) | 59.89<br>(58.84 – 60.89)         | 66.63<br>(65.60 – 67.59) | 52.30<br>(46.74 – 58.91)  | 0.27<br>(0.21 – 0.34) | 0.13<br>(0.09 – 0.17) | 63.47<br>(60.49 – 66.53)         | 71.73<br>(68.65 – 73.93) |
| Uganda               | 163.20<br>(157.09 – 170.25) | 0.43<br>(0.41 – 0.45) | 0.34<br>(0.33 – 0.36) | 49.86<br>(48.59 – 51.23)         | 53.55<br>(52.35 – 54.69) | 80.12<br>(69.42 – 93.07)  | 0.36<br>(0.33 – 0.40) | 0.30<br>(0.28 – 0.32) | 58.17<br>(56.12 – 59.85)         | 61.62<br>(59.96 – 63.12) |
| Ukraine              | 21.36<br>(18.21 – 24.42)    | 0.29<br>(0.28 – 0.30) | 0.11<br>(0.11 – 0.12) | 65.09<br>(64.60 – 65.51)         | 74.39<br>(74.05 – 74.73) | 10.89<br>(8.29 – 13.95)   | 0.29<br>(0.28 – 0.30) | 0.11<br>(0.10 – 0.11) | 66.55<br>(65.81 – 67.26)         | 76.52<br>(75.98 – 77.07) |
| United Arab Emirates | 21.40<br>(18.70 – 24.78)    | 0.16<br>(0.11 – 0.22) | 0.13<br>(0.09 – 0.17) | 71.67<br>(67.95 – 75.06)         | 73.52<br>(71.15 – 76.82) | 6.75<br>(6.00 – 7.64)     | 0.12<br>(0.08 – 0.16) | 0.08<br>(0.05 – 0.11) | 75.14<br>(72.46 – 78.80)         | 79.25<br>(76.61 – 82.18) |
| United Kingdom       | 9.56<br>(9.34 – 9.75)       | 0.13<br>(0.13 – 0.13) | 0.08<br>(0.08 – 0.08) | 72.87<br>(72.79 – 72.95)         | 78.44<br>(78.35 – 78.52) | 4.91<br>(4.01 – 6.04)     | 0.08<br>(0.07 – 0.08) | 0.05<br>(0.05 – 0.06) | 79.09<br>(78.57 – 79.67)         | 82.84<br>(82.25 – 83.35) |
| United States        | 11.30<br>(11.19 – 11.40)    | 0.17<br>(0.17 – 0.17) | 0.09<br>(0.09 – 0.09) | 71.87<br>(71.79 – 71.96)         | 78.84<br>(78.77 – 78.90) | 6.62<br>(5.46 – 8.07)     | 0.13<br>(0.12 – 0.14) | 0.07<br>(0.07 – 0.08) | 76.33<br>(75.50 – 77.18)         | 81.42<br>(80.58 – 82.16) |
| Uruguay              | 23.28<br>(22.33 – 24.31)    | 0.19<br>(0.19 – 0.20) | 0.10<br>(0.10 – 0.10) | 69.20<br>(68.98 – 69.43)         | 76.68<br>(76.40 – 76.94) | 10.94<br>(7.02 – 16.75)   | 0.15<br>(0.13 – 0.17) | 0.07<br>(0.06 – 0.09) | 73.03<br>(71.67 – 74.49)         | 80.62<br>(79.28 – 81.86) |
| Uzbekistan           | 55.61<br>(52.60 – 59.07)    | 0.24<br>(0.22 – 0.25) | 0.14<br>(0.13 – 0.15) | 64.58<br>(63.81 – 65.34)         | 70.64<br>(69.96 – 71.43) | 35.92<br>(32.49 – 39.87)  | 0.23<br>(0.17 – 0.29) | 0.13<br>(0.09 – 0.16) | 66.64<br>(63.73 – 69.56)         | 72.95<br>(70.38 – 75.91) |
| Vanuatu              | 36.25<br>(28.65 – 44.25)    | 0.36<br>(0.24 – 0.51) | 0.28<br>(0.17 – 0.41) | 60.79<br>(55.27 – 66.22)         | 64.71<br>(58.84 – 70.27) | 34.47<br>(23.47 – 49.97)  | 0.32<br>(0.21 – 0.47) | 0.23<br>(0.14 – 0.36) | 62.49<br>(57.16 – 67.84)         | 66.91<br>(61.17 – 72.08) |
| Venezuela            | 29.75<br>(29.41 – 30.11)    | 0.18<br>(0.18 – 0.18) | 0.11<br>(0.11 – 0.11) | 69.93<br>(69.76 – 70.12)         | 75.52<br>(75.33 – 75.71) | 13.27<br>(12.50 – 14.13)  | 0.19<br>(0.17 – 0.21) | 0.08<br>(0.07 – 0.10) | 71.84<br>(70.56 – 73.29)         | 79.32<br>(78.08 – 80.48) |
| Vietnam              | 47.54<br>(44.53 – 50.86)    | 0.22<br>(0.19 – 0.26) | 0.13<br>(0.11 – 0.15) | 65.94<br>(64.06 – 67.54)         | 72.14<br>(70.50 – 73.79) | 18.57<br>(15.77 – 21.94)  | 0.16<br>(0.11 – 0.20) | 0.06<br>(0.04 – 0.08) | 72.26<br>(69.13 – 75.51)         | 80.07<br>(77.85 – 82.37) |
| Yemen                | 122.10<br>(117.63 – 126.61) | 0.24<br>(0.15 – 0.36) | 0.24<br>(0.15 – 0.36) | 59.70<br>(54.52 – 64.20)         | 60.46<br>(55.14 – 65.43) | 50.42<br>(44.48 – 57.55)  | 0.20<br>(0.12 – 0.32) | 0.21<br>(0.12 – 0.33) | 66.95<br>(61.03 – 72.36)         | 67.08<br>(60.97 – 72.69) |
| Zambia               | 174.78<br>(168.68 – 182.41) | 0.47<br>(0.43 – 0.51) | 0.37<br>(0.35 – 0.39) | 50.92<br>(48.50 – 52.81)         | 51.83<br>(50.43 – 53.08) | 80.52<br>(63.35 – 101.17) | 0.37<br>(0.34 – 0.40) | 0.42<br>(0.39 – 0.45) | 58.02<br>(56.15 – 59.97)         | 55.61<br>(53.39 – 57.63) |
| Zimbabwe             | 67.13<br>(64.38 – 70.20)    | 0.30<br>(0.28 – 0.32) | 0.23<br>(0.21 – 0.25) | 61.70<br>(60.68 – 62.77)         | 65.00<br>(63.81 – 66.06) | 68.96<br>(56.28 – 84.67)  | 0.50<br>(0.45 – 0.54) | 0.41<br>(0.37 – 0.45) | 54.09<br>(52.15 – 56.34)         | 57.87<br>(55.11 – 60.92) |

**Web Table 10. Ages 15-49 mortality (35q15) and ages 50-74 mortality (25q50) by country and sex in 1990 and 2013**

**Web Table 10 — Ages 15-49 mortality (35q15) and ages 50-74 mortality (25q50) by country and sex in 1990 and 2013**

|                     | 1990                   |                        |                        |                        | 2013                   |                        |                        |                        |
|---------------------|------------------------|------------------------|------------------------|------------------------|------------------------|------------------------|------------------------|------------------------|
|                     | 35q15                  |                        | 25q50                  |                        | 35q15                  |                        | 25q50                  |                        |
|                     | Male                   | Female                 | Male                   | Female                 | Male                   | Female                 | Male                   | Female                 |
| Afghanistan         | 0.224<br>(0.163-0.300) | 0.248<br>(0.201-0.309) | 0.677<br>(0.557-0.778) | 0.691<br>(0.591-0.770) | 0.213<br>(0.140-0.298) | 0.227<br>(0.166-0.307) | 0.670<br>(0.533-0.773) | 0.692<br>(0.579-0.790) |
| Albania             | 0.068<br>(0.066-0.071) | 0.034<br>(0.032-0.035) | 0.386<br>(0.376-0.399) | 0.257<br>(0.249-0.266) | 0.068<br>(0.049-0.091) | 0.029<br>(0.020-0.038) | 0.395<br>(0.307-0.483) | 0.228<br>(0.175-0.292) |
| Algeria             | 0.075<br>(0.060-0.092) | 0.058<br>(0.048-0.072) | 0.388<br>(0.329-0.452) | 0.324<br>(0.286-0.364) | 0.052<br>(0.044-0.064) | 0.038<br>(0.032-0.045) | 0.308<br>(0.269-0.341) | 0.264<br>(0.237-0.317) |
| Andorra             | 0.044<br>(0.035-0.055) | 0.017<br>(0.011-0.023) | 0.295<br>(0.235-0.387) | 0.143<br>(0.107-0.183) | 0.032<br>(0.023-0.041) | 0.012<br>(0.008-0.017) | 0.214<br>(0.158-0.263) | 0.103<br>(0.074-0.136) |
| Angola              | 0.252<br>(0.186-0.337) | 0.197<br>(0.137-0.275) | 0.703<br>(0.542-0.814) | 0.584<br>(0.436-0.724) | 0.190<br>(0.149-0.248) | 0.159<br>(0.130-0.206) | 0.576<br>(0.504-0.723) | 0.487<br>(0.380-0.644) |
| Antigua and Barbuda | 0.098<br>(0.089-0.111) | 0.049<br>(0.042-0.056) | 0.475<br>(0.432-0.513) | 0.334<br>(0.295-0.360) | 0.080<br>(0.059-0.107) | 0.039<br>(0.028-0.055) | 0.393<br>(0.312-0.488) | 0.270<br>(0.194-0.352) |
| Argentina           | 0.087<br>(0.086-0.088) | 0.049<br>(0.049-0.050) | 0.484<br>(0.482-0.487) | 0.273<br>(0.271-0.275) | 0.070<br>(0.066-0.075) | 0.036<br>(0.033-0.038) | 0.422<br>(0.405-0.440) | 0.227<br>(0.216-0.240) |
| Armenia             | 0.105<br>(0.096-0.114) | 0.045<br>(0.040-0.049) | 0.501<br>(0.489-0.516) | 0.318<br>(0.305-0.330) | 0.087<br>(0.078-0.096) | 0.035<br>(0.031-0.039) | 0.473<br>(0.437-0.512) | 0.284<br>(0.259-0.316) |
| Australia           | 0.057<br>(0.056-0.057) | 0.028<br>(0.027-0.028) | 0.389<br>(0.386-0.393) | 0.229<br>(0.226-0.231) | 0.038<br>(0.035-0.041) | 0.020<br>(0.019-0.022) | 0.234<br>(0.221-0.248) | 0.149<br>(0.140-0.159) |
| Austria             | 0.071<br>(0.070-0.072) | 0.032<br>(0.032-0.033) | 0.431<br>(0.428-0.435) | 0.243<br>(0.239-0.247) | 0.038<br>(0.035-0.041) | 0.019<br>(0.017-0.021) | 0.279<br>(0.262-0.295) | 0.159<br>(0.148-0.171) |
| Azerbaijan          | 0.129<br>(0.119-0.138) | 0.057<br>(0.052-0.062) | 0.544<br>(0.530-0.565) | 0.348<br>(0.336-0.357) | 0.090<br>(0.074-0.108) | 0.039<br>(0.031-0.047) | 0.462<br>(0.396-0.515) | 0.285<br>(0.253-0.327) |
| Bahrain             | 0.083<br>(0.074-0.093) | 0.067<br>(0.056-0.078) | 0.446<br>(0.394-0.507) | 0.406<br>(0.376-0.438) | 0.038<br>(0.029-0.047) | 0.029<br>(0.023-0.035) | 0.275<br>(0.220-0.347) | 0.236<br>(0.180-0.295) |
| Bangladesh          | 0.140<br>(0.118-0.165) | 0.134<br>(0.115-0.156) | 0.538<br>(0.472-0.591) | 0.503<br>(0.441-0.579) | 0.098<br>(0.074-0.124) | 0.070<br>(0.056-0.087) | 0.453<br>(0.375-0.506) | 0.401<br>(0.312-0.472) |
| Barbados            | 0.090<br>(0.084-0.095) | 0.046<br>(0.043-0.051) | 0.415<br>(0.397-0.447) | 0.308<br>(0.274-0.338) | 0.068<br>(0.054-0.087) | 0.040<br>(0.031-0.052) | 0.357<br>(0.290-0.423) | 0.282<br>(0.218-0.342) |
| Belarus             | 0.144<br>(0.141-0.147) | 0.047<br>(0.046-0.048) | 0.563<br>(0.556-0.570) | 0.327<br>(0.321-0.333) | 0.172<br>(0.155-0.187) | 0.049<br>(0.043-0.055) | 0.646<br>(0.612-0.674) | 0.322<br>(0.296-0.346) |
| Belgium             | 0.063<br>(0.062-0.064) | 0.034<br>(0.033-0.035) | 0.425<br>(0.420-0.430) | 0.233<br>(0.230-0.237) | 0.042<br>(0.038-0.048) | 0.023<br>(0.020-0.026) | 0.290<br>(0.267-0.317) | 0.170<br>(0.154-0.188) |
| Belize              | 0.087<br>(0.079-0.095) | 0.053<br>(0.048-0.058) | 0.398<br>(0.374-0.427) | 0.302<br>(0.274-0.340) | 0.129<br>(0.104-0.159) | 0.071<br>(0.054-0.094) | 0.514<br>(0.431-0.582) | 0.398<br>(0.332-0.477) |
| Benin               | 0.157<br>(0.144-0.170) | 0.115<br>(0.106-0.124) | 0.511<br>(0.480-0.551) | 0.414<br>(0.402-0.430) | 0.162<br>(0.134-0.184) | 0.104<br>(0.093-0.116) | 0.551<br>(0.499-0.635) | 0.435<br>(0.362-0.507) |



**Web Table 10 — Ages 15-49 mortality (35q15) and ages 50-74 mortality (25q50) by country and sex in 1990 and 2013**

|                          | 1990                   |                        |                        |                        | 2013                   |                        |                        |                        |
|--------------------------|------------------------|------------------------|------------------------|------------------------|------------------------|------------------------|------------------------|------------------------|
|                          | 35q15                  |                        | 25q50                  |                        | 35q15                  |                        | 25q50                  |                        |
|                          | Male                   | Female                 | Male                   | Female                 | Male                   | Female                 | Male                   | Female                 |
| Bhutan                   | 0.133<br>(0.079-0.209) | 0.122<br>(0.069-0.190) | 0.514<br>(0.380-0.669) | 0.475<br>(0.357-0.638) | 0.098<br>(0.056-0.163) | 0.067<br>(0.036-0.109) | 0.441<br>(0.308-0.601) | 0.360<br>(0.251-0.523) |
| Bolivia                  | 0.128<br>(0.115-0.140) | 0.114<br>(0.101-0.128) | 0.479<br>(0.440-0.511) | 0.414<br>(0.379-0.458) | 0.083<br>(0.059-0.114) | 0.060<br>(0.042-0.078) | 0.375<br>(0.303-0.469) | 0.329<br>(0.256-0.425) |
| Bosnia and Herzegovina   | 0.088<br>(0.087-0.089) | 0.037<br>(0.036-0.038) | 0.503<br>(0.495-0.512) | 0.302<br>(0.295-0.309) | 0.058<br>(0.053-0.063) | 0.025<br>(0.023-0.027) | 0.391<br>(0.367-0.417) | 0.221<br>(0.200-0.244) |
| Botswana                 | 0.144<br>(0.115-0.187) | 0.074<br>(0.058-0.092) | 0.505<br>(0.409-0.641) | 0.333<br>(0.243-0.447) | 0.294<br>(0.248-0.332) | 0.254<br>(0.217-0.287) | 0.458<br>(0.364-0.593) | 0.166<br>(0.096-0.359) |
| Brazil                   | 0.133<br>(0.132-0.134) | 0.057<br>(0.057-0.058) | 0.479<br>(0.477-0.480) | 0.324<br>(0.322-0.325) | 0.101<br>(0.092-0.110) | 0.041<br>(0.037-0.045) | 0.393<br>(0.369-0.417) | 0.259<br>(0.240-0.277) |
| Brunei                   | 0.063<br>(0.057-0.069) | 0.049<br>(0.044-0.055) | 0.443<br>(0.431-0.456) | 0.340<br>(0.331-0.350) | 0.046<br>(0.038-0.054) | 0.027<br>(0.022-0.032) | 0.303<br>(0.246-0.369) | 0.213<br>(0.169-0.265) |
| Bulgaria                 | 0.099<br>(0.098-0.100) | 0.041<br>(0.041-0.042) | 0.527<br>(0.522-0.531) | 0.346<br>(0.342-0.351) | 0.073<br>(0.070-0.076) | 0.033<br>(0.031-0.035) | 0.475<br>(0.464-0.487) | 0.268<br>(0.257-0.278) |
| Burkina Faso             | 0.205<br>(0.186-0.227) | 0.163<br>(0.153-0.175) | 0.511<br>(0.483-0.544) | 0.465<br>(0.439-0.496) | 0.139<br>(0.121-0.160) | 0.123<br>(0.110-0.135) | 0.509<br>(0.458-0.554) | 0.450<br>(0.399-0.515) |
| Burundi                  | 0.252<br>(0.225-0.284) | 0.262<br>(0.233-0.288) | 0.727<br>(0.663-0.786) | 0.708<br>(0.663-0.746) | 0.192<br>(0.171-0.211) | 0.149<br>(0.132-0.167) | 0.598<br>(0.546-0.655) | 0.566<br>(0.512-0.611) |
| Cambodia                 | 0.182<br>(0.171-0.192) | 0.134<br>(0.125-0.142) | 0.581<br>(0.557-0.605) | 0.492<br>(0.457-0.529) | 0.142<br>(0.120-0.161) | 0.074<br>(0.064-0.084) | 0.521<br>(0.487-0.583) | 0.410<br>(0.349-0.463) |
| Cameroon                 | 0.152<br>(0.142-0.165) | 0.136<br>(0.128-0.144) | 0.531<br>(0.496-0.557) | 0.476<br>(0.448-0.510) | 0.231<br>(0.203-0.255) | 0.202<br>(0.187-0.216) | 0.559<br>(0.518-0.615) | 0.451<br>(0.399-0.527) |
| Canada                   | 0.057<br>(0.056-0.058) | 0.029<br>(0.028-0.029) | 0.387<br>(0.384-0.390) | 0.227<br>(0.225-0.229) | 0.036<br>(0.033-0.038) | 0.021<br>(0.020-0.023) | 0.251<br>(0.238-0.265) | 0.172<br>(0.163-0.184) |
| Cape Verde               | 0.122<br>(0.112-0.132) | 0.056<br>(0.052-0.061) | 0.504<br>(0.493-0.515) | 0.319<br>(0.305-0.334) | 0.093<br>(0.064-0.129) | 0.033<br>(0.023-0.046) | 0.448<br>(0.330-0.563) | 0.235<br>(0.175-0.336) |
| Central African Republic | 0.426<br>(0.372-0.507) | 0.261<br>(0.240-0.287) | 0.742<br>(0.706-0.776) | 0.606<br>(0.558-0.647) | 0.269<br>(0.236-0.302) | 0.262<br>(0.231-0.290) | 0.653<br>(0.583-0.733) | 0.568<br>(0.481-0.651) |
| Chad                     | 0.186<br>(0.167-0.205) | 0.154<br>(0.143-0.166) | 0.502<br>(0.469-0.533) | 0.449<br>(0.429-0.480) | 0.190<br>(0.163-0.218) | 0.177<br>(0.156-0.198) | 0.520<br>(0.439-0.605) | 0.436<br>(0.387-0.521) |
| Chile                    | 0.093<br>(0.092-0.094) | 0.042<br>(0.041-0.042) | 0.482<br>(0.479-0.485) | 0.301<br>(0.298-0.304) | 0.057<br>(0.051-0.063) | 0.025<br>(0.022-0.028) | 0.322<br>(0.299-0.347) | 0.203<br>(0.186-0.222) |
| China                    | 0.102<br>(0.090-0.118) | 0.073<br>(0.064-0.082) | 0.485<br>(0.437-0.504) | 0.369<br>(0.340-0.416) | 0.060<br>(0.051-0.071) | 0.027<br>(0.022-0.031) | 0.393<br>(0.338-0.426) | 0.222<br>(0.191-0.253) |
| Colombia                 | 0.150<br>(0.143-0.157) | 0.053<br>(0.050-0.056) | 0.433<br>(0.420-0.449) | 0.314<br>(0.303-0.325) | 0.100<br>(0.082-0.122) | 0.035<br>(0.028-0.043) | 0.351<br>(0.301-0.405) | 0.243<br>(0.204-0.288) |

**Web Table 10 — Ages 15-49 mortality (35q15) and ages 50-74 mortality (25q50) by country and sex in 1990 and 2013**

|                                  | 1990                   |                        |                        |                        | 2013                   |                        |                        |                        |
|----------------------------------|------------------------|------------------------|------------------------|------------------------|------------------------|------------------------|------------------------|------------------------|
|                                  | 35q15                  |                        | 25q50                  |                        | 35q15                  |                        | 25q50                  |                        |
|                                  | Male                   | Female                 | Male                   | Female                 | Male                   | Female                 | Male                   | Female                 |
| Comoros                          | 0.182<br>(0.131-0.247) | 0.167<br>(0.129-0.215) | 0.611<br>(0.478-0.755) | 0.578<br>(0.431-0.698) | 0.171<br>(0.113-0.236) | 0.122<br>(0.084-0.173) | 0.607<br>(0.486-0.711) | 0.542<br>(0.404-0.661) |
| Congo                            | 0.290<br>(0.259-0.326) | 0.197<br>(0.179-0.216) | 0.718<br>(0.672-0.751) | 0.616<br>(0.579-0.657) | 0.214<br>(0.191-0.241) | 0.149<br>(0.132-0.168) | 0.626<br>(0.541-0.689) | 0.512<br>(0.453-0.568) |
| Costa Rica                       | 0.063<br>(0.062-0.065) | 0.034<br>(0.033-0.035) | 0.320<br>(0.315-0.325) | 0.238<br>(0.233-0.243) | 0.053<br>(0.049-0.057) | 0.025<br>(0.023-0.028) | 0.272<br>(0.255-0.288) | 0.188<br>(0.174-0.201) |
| Croatia                          | 0.101<br>(0.099-0.103) | 0.036<br>(0.035-0.037) | 0.534<br>(0.531-0.538) | 0.310<br>(0.301-0.317) | 0.060<br>(0.057-0.063) | 0.023<br>(0.022-0.025) | 0.399<br>(0.383-0.414) | 0.203<br>(0.190-0.218) |
| Cuba                             | 0.081<br>(0.080-0.082) | 0.054<br>(0.053-0.055) | 0.382<br>(0.379-0.385) | 0.300<br>(0.296-0.302) | 0.052<br>(0.046-0.057) | 0.029<br>(0.026-0.033) | 0.328<br>(0.304-0.354) | 0.230<br>(0.209-0.249) |
| Cyprus                           | 0.044<br>(0.042-0.045) | 0.023<br>(0.022-0.024) | 0.344<br>(0.328-0.361) | 0.191<br>(0.183-0.201) | 0.033<br>(0.029-0.037) | 0.015<br>(0.013-0.018) | 0.245<br>(0.222-0.270) | 0.132<br>(0.117-0.150) |
| Czech Republic                   | 0.093<br>(0.092-0.094) | 0.037<br>(0.037-0.038) | 0.590<br>(0.586-0.593) | 0.349<br>(0.345-0.353) | 0.047<br>(0.045-0.049) | 0.021<br>(0.020-0.023) | 0.377<br>(0.366-0.386) | 0.211<br>(0.203-0.220) |
| Côte d'Ivoire                    | 0.197<br>(0.183-0.211) | 0.143<br>(0.134-0.153) | 0.573<br>(0.536-0.611) | 0.462<br>(0.431-0.500) | 0.228<br>(0.203-0.249) | 0.181<br>(0.166-0.195) | 0.579<br>(0.532-0.643) | 0.486<br>(0.431-0.544) |
| Democratic Republic of the Congo | 0.207<br>(0.185-0.226) | 0.180<br>(0.165-0.196) | 0.547<br>(0.496-0.612) | 0.541<br>(0.485-0.604) | 0.200<br>(0.171-0.227) | 0.157<br>(0.140-0.173) | 0.606<br>(0.543-0.676) | 0.526<br>(0.451-0.597) |
| Denmark                          | 0.065<br>(0.064-0.066) | 0.038<br>(0.037-0.038) | 0.450<br>(0.446-0.455) | 0.298<br>(0.292-0.303) | 0.038<br>(0.034-0.041) | 0.021<br>(0.018-0.023) | 0.297<br>(0.279-0.318) | 0.207<br>(0.191-0.224) |
| Djibouti                         | 0.131<br>(0.086-0.189) | 0.138<br>(0.093-0.197) | 0.498<br>(0.390-0.636) | 0.522<br>(0.393-0.660) | 0.157<br>(0.121-0.209) | 0.145<br>(0.116-0.197) | 0.526<br>(0.426-0.692) | 0.512<br>(0.385-0.668) |
| Dominica                         | 0.094<br>(0.084-0.105) | 0.061<br>(0.055-0.071) | 0.430<br>(0.388-0.484) | 0.374<br>(0.334-0.407) | 0.092<br>(0.070-0.118) | 0.035<br>(0.025-0.046) | 0.420<br>(0.334-0.519) | 0.244<br>(0.184-0.327) |
| Dominican Republic               | 0.078<br>(0.073-0.085) | 0.051<br>(0.047-0.055) | 0.372<br>(0.354-0.388) | 0.285<br>(0.273-0.294) | 0.088<br>(0.069-0.112) | 0.044<br>(0.034-0.056) | 0.391<br>(0.325-0.491) | 0.275<br>(0.221-0.357) |
| Ecuador                          | 0.107<br>(0.102-0.112) | 0.062<br>(0.059-0.065) | 0.368<br>(0.357-0.380) | 0.263<br>(0.254-0.273) | 0.107<br>(0.085-0.129) | 0.048<br>(0.037-0.063) | 0.334<br>(0.280-0.386) | 0.227<br>(0.183-0.280) |
| Egypt                            | 0.103<br>(0.094-0.112) | 0.070<br>(0.065-0.077) | 0.573<br>(0.546-0.600) | 0.428<br>(0.406-0.453) | 0.087<br>(0.075-0.100) | 0.045<br>(0.038-0.054) | 0.540<br>(0.497-0.586) | 0.397<br>(0.357-0.440) |
| El Salvador                      | 0.174<br>(0.171-0.176) | 0.059<br>(0.058-0.061) | 0.388<br>(0.383-0.393) | 0.273<br>(0.269-0.278) | 0.174<br>(0.147-0.208) | 0.053<br>(0.042-0.068) | 0.366<br>(0.321-0.417) | 0.256<br>(0.214-0.304) |
| Equatorial Guinea                | 0.253<br>(0.189-0.333) | 0.189<br>(0.134-0.265) | 0.714<br>(0.576-0.813) | 0.592<br>(0.441-0.720) | 0.213<br>(0.166-0.270) | 0.195<br>(0.154-0.238) | 0.532<br>(0.429-0.697) | 0.422<br>(0.332-0.610) |
| Eritrea                          | 0.234<br>(0.216-0.253) | 0.205<br>(0.187-0.223) | 0.697<br>(0.647-0.739) | 0.644<br>(0.608-0.675) | 0.181<br>(0.153-0.211) | 0.144<br>(0.122-0.168) | 0.616<br>(0.525-0.688) | 0.564<br>(0.500-0.632) |

**Web Table 10 — Ages 15-49 mortality (35q15) and ages 50-74 mortality (25q50) by country and sex in 1990 and 2013**

|                                | 1990                   |                        |                        |                        | 2013                   |                        |                        |                        |
|--------------------------------|------------------------|------------------------|------------------------|------------------------|------------------------|------------------------|------------------------|------------------------|
|                                | 35q15                  |                        | 25q50                  |                        | 35q15                  |                        | 25q50                  |                        |
|                                | Male                   | Female                 | Male                   | Female                 | Male                   | Female                 | Male                   | Female                 |
| Estonia                        | 0.152<br>(0.149-0.155) | 0.048<br>(0.047-0.050) | 0.583<br>(0.577-0.588) | 0.325<br>(0.319-0.333) | 0.092<br>(0.087-0.098) | 0.026<br>(0.024-0.028) | 0.464<br>(0.450-0.478) | 0.210<br>(0.192-0.224) |
| Ethiopia                       | 0.277<br>(0.257-0.314) | 0.247<br>(0.230-0.269) | 0.732<br>(0.696-0.767) | 0.680<br>(0.654-0.705) | 0.161<br>(0.140-0.179) | 0.132<br>(0.119-0.146) | 0.540<br>(0.508-0.594) | 0.525<br>(0.471-0.569) |
| Federated States of Micronesia | 0.197<br>(0.126-0.298) | 0.129<br>(0.076-0.214) | 0.659<br>(0.513-0.774) | 0.556<br>(0.424-0.698) | 0.169<br>(0.097-0.266) | 0.100<br>(0.056-0.172) | 0.606<br>(0.493-0.746) | 0.492<br>(0.357-0.656) |
| Fiji                           | 0.187<br>(0.138-0.240) | 0.113<br>(0.080-0.149) | 0.649<br>(0.573-0.713) | 0.528<br>(0.451-0.608) | 0.150<br>(0.110-0.195) | 0.099<br>(0.075-0.133) | 0.591<br>(0.501-0.662) | 0.497<br>(0.429-0.576) |
| Finland                        | 0.087<br>(0.085-0.088) | 0.031<br>(0.031-0.032) | 0.479<br>(0.474-0.485) | 0.246<br>(0.240-0.251) | 0.050<br>(0.046-0.054) | 0.020<br>(0.018-0.023) | 0.298<br>(0.279-0.314) | 0.147<br>(0.136-0.160) |
| France                         | 0.078<br>(0.077-0.079) | 0.032<br>(0.031-0.032) | 0.392<br>(0.390-0.394) | 0.185<br>(0.182-0.186) | 0.047<br>(0.044-0.050) | 0.022<br>(0.020-0.023) | 0.274<br>(0.261-0.287) | 0.134<br>(0.126-0.142) |
| Gabon                          | 0.201<br>(0.184-0.219) | 0.120<br>(0.111-0.130) | 0.666<br>(0.616-0.710) | 0.489<br>(0.447-0.527) | 0.337<br>(0.304-0.371) | 0.134<br>(0.117-0.155) | 0.686<br>(0.613-0.740) | 0.487<br>(0.377-0.565) |
| Georgia                        | 0.122<br>(0.112-0.134) | 0.046<br>(0.043-0.050) | 0.523<br>(0.509-0.546) | 0.315<br>(0.298-0.334) | 0.110<br>(0.096-0.128) | 0.034<br>(0.029-0.038) | 0.530<br>(0.497-0.556) | 0.256<br>(0.229-0.290) |
| Germany                        | 0.068<br>(0.067-0.068) | 0.033<br>(0.033-0.033) | 0.451<br>(0.449-0.453) | 0.259<br>(0.257-0.261) | 0.037<br>(0.035-0.038) | 0.019<br>(0.018-0.020) | 0.289<br>(0.283-0.296) | 0.162<br>(0.158-0.167) |
| Ghana                          | 0.140<br>(0.122-0.160) | 0.128<br>(0.114-0.143) | 0.505<br>(0.459-0.546) | 0.476<br>(0.421-0.540) | 0.144<br>(0.122-0.169) | 0.111<br>(0.096-0.122) | 0.507<br>(0.454-0.548) | 0.416<br>(0.354-0.494) |
| Greece                         | 0.054<br>(0.053-0.055) | 0.024<br>(0.024-0.025) | 0.363<br>(0.359-0.367) | 0.222<br>(0.218-0.225) | 0.046<br>(0.043-0.050) | 0.019<br>(0.018-0.021) | 0.286<br>(0.270-0.303) | 0.147<br>(0.137-0.158) |
| Grenada                        | 0.109<br>(0.101-0.118) | 0.067<br>(0.061-0.075) | 0.492<br>(0.458-0.528) | 0.400<br>(0.369-0.425) | 0.114<br>(0.095-0.135) | 0.065<br>(0.053-0.078) | 0.492<br>(0.435-0.537) | 0.371<br>(0.331-0.420) |
| Guatemala                      | 0.170<br>(0.167-0.172) | 0.104<br>(0.103-0.106) | 0.458<br>(0.451-0.464) | 0.374<br>(0.369-0.378) | 0.154<br>(0.142-0.169) | 0.067<br>(0.060-0.075) | 0.341<br>(0.319-0.366) | 0.288<br>(0.264-0.311) |
| Guinea                         | 0.138<br>(0.124-0.151) | 0.161<br>(0.149-0.172) | 0.457<br>(0.426-0.487) | 0.488<br>(0.454-0.517) | 0.157<br>(0.133-0.186) | 0.152<br>(0.137-0.168) | 0.519<br>(0.452-0.584) | 0.499<br>(0.424-0.579) |
| Guinea-Bissau                  | 0.174<br>(0.114-0.241) | 0.167<br>(0.105-0.237) | 0.543<br>(0.412-0.712) | 0.519<br>(0.413-0.676) | 0.242<br>(0.205-0.293) | 0.244<br>(0.209-0.298) | 0.604<br>(0.493-0.749) | 0.566<br>(0.449-0.712) |
| Guyana                         | 0.170<br>(0.161-0.181) | 0.090<br>(0.084-0.096) | 0.590<br>(0.553-0.627) | 0.470<br>(0.444-0.489) | 0.207<br>(0.168-0.252) | 0.117<br>(0.087-0.153) | 0.626<br>(0.519-0.705) | 0.508<br>(0.404-0.606) |
| Haiti                          | 0.211<br>(0.195-0.227) | 0.196<br>(0.183-0.208) | 0.560<br>(0.530-0.592) | 0.590<br>(0.540-0.627) | 0.147<br>(0.125-0.176) | 0.128<br>(0.113-0.147) | 0.499<br>(0.443-0.539) | 0.479<br>(0.403-0.545) |
| Honduras                       | 0.120<br>(0.106-0.138) | 0.085<br>(0.076-0.094) | 0.439<br>(0.410-0.464) | 0.362<br>(0.333-0.401) | 0.101<br>(0.073-0.137) | 0.061<br>(0.041-0.092) | 0.428<br>(0.327-0.526) | 0.347<br>(0.234-0.444) |

**Web Table 10 — Ages 15-49 mortality (35q15) and ages 50-74 mortality (25q50) by country and sex in 1990 and 2013**

|            | 1990                   |                        |                        |                        | 2013                   |                        |                        |                        |
|------------|------------------------|------------------------|------------------------|------------------------|------------------------|------------------------|------------------------|------------------------|
|            | 35q15                  |                        | 25q50                  |                        | 35q15                  |                        | 25q50                  |                        |
|            | Male                   | Female                 | Male                   | Female                 | Male                   | Female                 | Male                   | Female                 |
| Hungary    | 0.144<br>(0.143-0.146) | 0.059<br>(0.058-0.060) | 0.609<br>(0.606-0.613) | 0.370<br>(0.367-0.374) | 0.074<br>(0.071-0.077) | 0.033<br>(0.031-0.034) | 0.469<br>(0.458-0.481) | 0.257<br>(0.249-0.267) |
| Iceland    | 0.051<br>(0.048-0.053) | 0.027<br>(0.025-0.030) | 0.332<br>(0.319-0.345) | 0.231<br>(0.219-0.244) | 0.027<br>(0.023-0.033) | 0.015<br>(0.012-0.018) | 0.221<br>(0.191-0.253) | 0.138<br>(0.116-0.162) |
| India      | 0.161<br>(0.141-0.180) | 0.145<br>(0.128-0.161) | 0.656<br>(0.611-0.695) | 0.566<br>(0.522-0.605) | 0.135<br>(0.109-0.161) | 0.085<br>(0.071-0.100) | 0.572<br>(0.504-0.632) | 0.445<br>(0.385-0.497) |
| Indonesia  | 0.112<br>(0.107-0.118) | 0.094<br>(0.089-0.099) | 0.492<br>(0.476-0.503) | 0.402<br>(0.383-0.424) | 0.100<br>(0.090-0.117) | 0.060<br>(0.053-0.068) | 0.475<br>(0.426-0.506) | 0.377<br>(0.332-0.418) |
| Iran       | 0.121<br>(0.097-0.158) | 0.068<br>(0.054-0.088) | 0.492<br>(0.432-0.558) | 0.348<br>(0.312-0.392) | 0.050<br>(0.039-0.065) | 0.023<br>(0.018-0.030) | 0.297<br>(0.249-0.353) | 0.195<br>(0.160-0.231) |
| Iraq       | 0.082<br>(0.060-0.110) | 0.076<br>(0.057-0.099) | 0.419<br>(0.335-0.503) | 0.397<br>(0.318-0.498) | 0.083<br>(0.055-0.117) | 0.065<br>(0.047-0.093) | 0.417<br>(0.318-0.537) | 0.402<br>(0.300-0.483) |
| Ireland    | 0.053<br>(0.052-0.054) | 0.029<br>(0.028-0.030) | 0.472<br>(0.466-0.479) | 0.300<br>(0.293-0.307) | 0.038<br>(0.032-0.046) | 0.020<br>(0.017-0.024) | 0.273<br>(0.239-0.310) | 0.175<br>(0.154-0.202) |
| Israel     | 0.046<br>(0.045-0.047) | 0.028<br>(0.027-0.029) | 0.380<br>(0.375-0.385) | 0.290<br>(0.285-0.295) | 0.032<br>(0.030-0.034) | 0.015<br>(0.014-0.016) | 0.241<br>(0.232-0.251) | 0.152<br>(0.144-0.159) |
| Italy      | 0.057<br>(0.056-0.058) | 0.026<br>(0.026-0.026) | 0.404<br>(0.402-0.407) | 0.215<br>(0.213-0.218) | 0.032<br>(0.029-0.036) | 0.016<br>(0.014-0.018) | 0.250<br>(0.232-0.270) | 0.136<br>(0.124-0.150) |
| Jamaica    | 0.062<br>(0.058-0.067) | 0.049<br>(0.045-0.053) | 0.326<br>(0.310-0.342) | 0.311<br>(0.283-0.340) | 0.066<br>(0.050-0.084) | 0.044<br>(0.033-0.057) | 0.336<br>(0.273-0.408) | 0.293<br>(0.224-0.352) |
| Japan      | 0.045<br>(0.045-0.045) | 0.023<br>(0.023-0.024) | 0.332<br>(0.331-0.334) | 0.176<br>(0.174-0.177) | 0.033<br>(0.030-0.037) | 0.018<br>(0.016-0.020) | 0.241<br>(0.224-0.259) | 0.114<br>(0.103-0.124) |
| Jordan     | 0.079<br>(0.060-0.095) | 0.056<br>(0.048-0.064) | 0.407<br>(0.340-0.505) | 0.350<br>(0.301-0.401) | 0.046<br>(0.035-0.059) | 0.027<br>(0.020-0.033) | 0.287<br>(0.236-0.345) | 0.219<br>(0.178-0.256) |
| Kazakhstan | 0.172<br>(0.161-0.184) | 0.066<br>(0.062-0.070) | 0.630<br>(0.611-0.650) | 0.400<br>(0.377-0.418) | 0.188<br>(0.162-0.221) | 0.063<br>(0.052-0.077) | 0.636<br>(0.594-0.684) | 0.383<br>(0.342-0.426) |
| Kenya      | 0.132<br>(0.122-0.145) | 0.115<br>(0.108-0.123) | 0.495<br>(0.463-0.516) | 0.451<br>(0.417-0.486) | 0.183<br>(0.165-0.203) | 0.149<br>(0.134-0.165) | 0.488<br>(0.434-0.534) | 0.360<br>(0.319-0.441) |
| Kiribati   | 0.234<br>(0.188-0.297) | 0.157<br>(0.123-0.198) | 0.716<br>(0.639-0.775) | 0.597<br>(0.509-0.676) | 0.224<br>(0.154-0.310) | 0.105<br>(0.068-0.158) | 0.695<br>(0.574-0.783) | 0.502<br>(0.355-0.629) |
| Kuwait     | 0.044<br>(0.042-0.047) | 0.031<br>(0.030-0.033) | 0.287<br>(0.279-0.295) | 0.237<br>(0.231-0.244) | 0.033<br>(0.030-0.036) | 0.022<br>(0.020-0.025) | 0.246<br>(0.229-0.262) | 0.184<br>(0.172-0.198) |
| Kyrgyzstan | 0.145<br>(0.136-0.155) | 0.067<br>(0.062-0.072) | 0.582<br>(0.561-0.603) | 0.382<br>(0.363-0.401) | 0.147<br>(0.127-0.166) | 0.056<br>(0.047-0.065) | 0.607<br>(0.560-0.650) | 0.384<br>(0.344-0.425) |
| Laos       | 0.173<br>(0.108-0.256) | 0.152<br>(0.089-0.228) | 0.557<br>(0.414-0.734) | 0.507<br>(0.388-0.686) | 0.134<br>(0.078-0.209) | 0.090<br>(0.050-0.150) | 0.516<br>(0.379-0.684) | 0.438<br>(0.306-0.604) |

**Web Table 10 — Ages 15-49 mortality (35q15) and ages 50-74 mortality (25q50) by country and sex in 1990 and 2013**

|                  | 1990                   |                        |                        |                        | 2013                   |                        |                        |                        |
|------------------|------------------------|------------------------|------------------------|------------------------|------------------------|------------------------|------------------------|------------------------|
|                  | 35q15                  |                        | 25q50                  |                        | 35q15                  |                        | 25q50                  |                        |
|                  | Male                   | Female                 | Male                   | Female                 | Male                   | Female                 | Male                   | Female                 |
| Latvia           | 0.160<br>(0.158-0.162) | 0.053<br>(0.051-0.054) | 0.587<br>(0.581-0.593) | 0.332<br>(0.325-0.339) | 0.103<br>(0.099-0.108) | 0.033<br>(0.031-0.036) | 0.494<br>(0.482-0.507) | 0.231<br>(0.218-0.242) |
| Lebanon          | 0.146<br>(0.090-0.254) | 0.086<br>(0.056-0.138) | 0.495<br>(0.410-0.613) | 0.391<br>(0.318-0.473) | 0.045<br>(0.034-0.058) | 0.027<br>(0.020-0.035) | 0.297<br>(0.233-0.399) | 0.219<br>(0.174-0.262) |
| Lesotho          | 0.198<br>(0.181-0.217) | 0.103<br>(0.092-0.114) | 0.663<br>(0.617-0.712) | 0.414<br>(0.381-0.456) | 0.519<br>(0.474-0.553) | 0.452<br>(0.409-0.484) | 0.762<br>(0.715-0.802) | 0.465<br>(0.392-0.561) |
| Liberia          | 0.183<br>(0.149-0.244) | 0.170<br>(0.149-0.210) | 0.503<br>(0.454-0.562) | 0.483<br>(0.449-0.535) | 0.141<br>(0.119-0.166) | 0.138<br>(0.124-0.153) | 0.505<br>(0.447-0.552) | 0.500<br>(0.422-0.567) |
| Libya            | 0.065<br>(0.048-0.087) | 0.048<br>(0.035-0.063) | 0.360<br>(0.289-0.445) | 0.303<br>(0.252-0.374) | 0.061<br>(0.047-0.078) | 0.038<br>(0.030-0.049) | 0.376<br>(0.300-0.444) | 0.286<br>(0.229-0.344) |
| Lithuania        | 0.154<br>(0.152-0.156) | 0.050<br>(0.049-0.051) | 0.541<br>(0.536-0.546) | 0.302<br>(0.296-0.307) | 0.122<br>(0.117-0.127) | 0.036<br>(0.034-0.038) | 0.494<br>(0.482-0.507) | 0.226<br>(0.216-0.237) |
| Luxembourg       | 0.071<br>(0.068-0.074) | 0.034<br>(0.032-0.037) | 0.459<br>(0.447-0.471) | 0.257<br>(0.245-0.269) | 0.034<br>(0.030-0.039) | 0.020<br>(0.017-0.024) | 0.263<br>(0.237-0.286) | 0.168<br>(0.143-0.199) |
| Macedonia        | 0.075<br>(0.073-0.077) | 0.040<br>(0.038-0.042) | 0.418<br>(0.409-0.433) | 0.293<br>(0.287-0.302) | 0.054<br>(0.050-0.060) | 0.027<br>(0.024-0.030) | 0.403<br>(0.374-0.427) | 0.247<br>(0.223-0.272) |
| Madagascar       | 0.174<br>(0.158-0.191) | 0.151<br>(0.142-0.162) | 0.578<br>(0.535-0.625) | 0.519<br>(0.481-0.565) | 0.154<br>(0.113-0.198) | 0.113<br>(0.089-0.147) | 0.547<br>(0.484-0.659) | 0.502<br>(0.389-0.590) |
| Malawi           | 0.286<br>(0.253-0.311) | 0.230<br>(0.216-0.242) | 0.418<br>(0.396-0.443) | 0.490<br>(0.461-0.517) | 0.300<br>(0.273-0.325) | 0.263<br>(0.237-0.288) | 0.547<br>(0.482-0.609) | 0.455<br>(0.406-0.521) |
| Malaysia         | 0.087<br>(0.085-0.088) | 0.051<br>(0.050-0.052) | 0.488<br>(0.482-0.496) | 0.365<br>(0.361-0.369) | 0.082<br>(0.074-0.092) | 0.034<br>(0.029-0.039) | 0.455<br>(0.421-0.484) | 0.289<br>(0.258-0.307) |
| Maldives         | 0.096<br>(0.091-0.100) | 0.104<br>(0.099-0.111) | 0.447<br>(0.424-0.471) | 0.490<br>(0.471-0.509) | 0.042<br>(0.035-0.049) | 0.022<br>(0.018-0.027) | 0.266<br>(0.234-0.299) | 0.186<br>(0.161-0.219) |
| Mali             | 0.169<br>(0.156-0.182) | 0.188<br>(0.177-0.198) | 0.515<br>(0.492-0.542) | 0.535<br>(0.511-0.562) | 0.148<br>(0.126-0.172) | 0.161<br>(0.143-0.179) | 0.490<br>(0.431-0.560) | 0.529<br>(0.458-0.610) |
| Malta            | 0.045<br>(0.044-0.047) | 0.027<br>(0.026-0.029) | 0.368<br>(0.347-0.386) | 0.224<br>(0.213-0.236) | 0.031<br>(0.027-0.036) | 0.016<br>(0.013-0.019) | 0.234<br>(0.207-0.265) | 0.133<br>(0.114-0.154) |
| Marshall Islands | 0.171<br>(0.147-0.203) | 0.096<br>(0.080-0.117) | 0.628<br>(0.544-0.679) | 0.487<br>(0.421-0.540) | 0.179<br>(0.118-0.256) | 0.110<br>(0.067-0.159) | 0.631<br>(0.508-0.729) | 0.521<br>(0.395-0.633) |
| Mauritania       | 0.147<br>(0.128-0.166) | 0.140<br>(0.129-0.150) | 0.532<br>(0.502-0.575) | 0.537<br>(0.492-0.577) | 0.123<br>(0.097-0.159) | 0.104<br>(0.088-0.126) | 0.498<br>(0.429-0.551) | 0.467<br>(0.374-0.551) |
| Mauritius        | 0.108<br>(0.106-0.111) | 0.050<br>(0.048-0.052) | 0.649<br>(0.643-0.656) | 0.383<br>(0.375-0.391) | 0.094<br>(0.085-0.103) | 0.038<br>(0.034-0.042) | 0.502<br>(0.475-0.529) | 0.298<br>(0.271-0.325) |
| Mexico           | 0.116<br>(0.115-0.117) | 0.054<br>(0.053-0.055) | 0.393<br>(0.391-0.395) | 0.280<br>(0.278-0.281) | 0.097<br>(0.095-0.099) | 0.037<br>(0.036-0.039) | 0.382<br>(0.376-0.389) | 0.268<br>(0.262-0.274) |

**Web Table 10 — Ages 15-49 mortality (35q15) and ages 50-74 mortality (25q50) by country and sex in 1990 and 2013**

|             | 1990                   |                        |                        |                        | 2013                   |                        |                        |                        |
|-------------|------------------------|------------------------|------------------------|------------------------|------------------------|------------------------|------------------------|------------------------|
|             | 35q15                  |                        | 25q50                  |                        | 35q15                  |                        | 25q50                  |                        |
|             | Male                   | Female                 | Male                   | Female                 | Male                   | Female                 | Male                   | Female                 |
| Moldova     | 0.145<br>(0.143-0.147) | 0.070<br>(0.068-0.072) | 0.587<br>(0.581-0.592) | 0.420<br>(0.414-0.428) | 0.128<br>(0.121-0.134) | 0.042<br>(0.039-0.045) | 0.549<br>(0.540-0.557) | 0.323<br>(0.308-0.335) |
| Mongolia    | 0.156<br>(0.141-0.171) | 0.103<br>(0.095-0.111) | 0.581<br>(0.550-0.611) | 0.458<br>(0.422-0.493) | 0.191<br>(0.161-0.227) | 0.081<br>(0.066-0.100) | 0.663<br>(0.617-0.704) | 0.450<br>(0.401-0.497) |
| Montenegro  | 0.082<br>(0.066-0.098) | 0.036<br>(0.028-0.044) | 0.462<br>(0.387-0.535) | 0.274<br>(0.225-0.335) | 0.069<br>(0.058-0.080) | 0.032<br>(0.026-0.039) | 0.441<br>(0.390-0.483) | 0.270<br>(0.229-0.304) |
| Morocco     | 0.089<br>(0.078-0.100) | 0.067<br>(0.061-0.075) | 0.434<br>(0.395-0.488) | 0.354<br>(0.332-0.374) | 0.070<br>(0.052-0.088) | 0.044<br>(0.033-0.055) | 0.364<br>(0.307-0.465) | 0.297<br>(0.241-0.374) |
| Mozambique  | 0.190<br>(0.176-0.204) | 0.152<br>(0.143-0.162) | 0.558<br>(0.530-0.592) | 0.470<br>(0.445-0.497) | 0.320<br>(0.292-0.343) | 0.285<br>(0.260-0.310) | 0.610<br>(0.556-0.673) | 0.428<br>(0.390-0.485) |
| Myanmar     | 0.194<br>(0.121-0.287) | 0.152<br>(0.096-0.237) | 0.622<br>(0.490-0.769) | 0.556<br>(0.394-0.715) | 0.150<br>(0.091-0.243) | 0.080<br>(0.047-0.139) | 0.558<br>(0.408-0.697) | 0.438<br>(0.290-0.589) |
| Namibia     | 0.186<br>(0.175-0.197) | 0.106<br>(0.099-0.113) | 0.649<br>(0.616-0.680) | 0.483<br>(0.451-0.505) | 0.338<br>(0.301-0.370) | 0.201<br>(0.180-0.221) | 0.664<br>(0.614-0.716) | 0.436<br>(0.385-0.506) |
| Nepal       | 0.138<br>(0.121-0.160) | 0.129<br>(0.111-0.146) | 0.525<br>(0.470-0.581) | 0.475<br>(0.422-0.533) | 0.095<br>(0.077-0.119) | 0.064<br>(0.052-0.077) | 0.435<br>(0.370-0.496) | 0.370<br>(0.294-0.446) |
| Netherlands | 0.045<br>(0.044-0.046) | 0.028<br>(0.028-0.029) | 0.417<br>(0.414-0.421) | 0.223<br>(0.221-0.226) | 0.028<br>(0.026-0.031) | 0.022<br>(0.020-0.024) | 0.272<br>(0.256-0.289) | 0.182<br>(0.170-0.195) |
| New Zealand | 0.065<br>(0.064-0.067) | 0.037<br>(0.036-0.038) | 0.424<br>(0.419-0.431) | 0.275<br>(0.270-0.280) | 0.042<br>(0.038-0.046) | 0.024<br>(0.022-0.027) | 0.258<br>(0.241-0.277) | 0.179<br>(0.167-0.193) |
| Nicaragua   | 0.083<br>(0.078-0.090) | 0.052<br>(0.049-0.056) | 0.365<br>(0.351-0.379) | 0.277<br>(0.265-0.288) | 0.072<br>(0.063-0.082) | 0.034<br>(0.029-0.039) | 0.327<br>(0.304-0.356) | 0.226<br>(0.200-0.257) |
| Niger       | 0.164<br>(0.149-0.181) | 0.158<br>(0.147-0.171) | 0.511<br>(0.477-0.543) | 0.468<br>(0.447-0.491) | 0.134<br>(0.118-0.153) | 0.116<br>(0.105-0.126) | 0.495<br>(0.446-0.536) | 0.433<br>(0.395-0.480) |
| Nigeria     | 0.128<br>(0.110-0.150) | 0.136<br>(0.119-0.152) | 0.423<br>(0.385-0.473) | 0.438<br>(0.414-0.478) | 0.164<br>(0.141-0.186) | 0.178<br>(0.160-0.198) | 0.424<br>(0.377-0.503) | 0.406<br>(0.367-0.486) |
| North Korea | 0.110<br>(0.071-0.160) | 0.079<br>(0.052-0.117) | 0.484<br>(0.371-0.608) | 0.406<br>(0.308-0.542) | 0.105<br>(0.083-0.137) | 0.056<br>(0.042-0.071) | 0.510<br>(0.430-0.559) | 0.367<br>(0.292-0.412) |
| Norway      | 0.055<br>(0.054-0.056) | 0.027<br>(0.026-0.028) | 0.409<br>(0.404-0.414) | 0.226<br>(0.221-0.230) | 0.035<br>(0.033-0.037) | 0.018<br>(0.017-0.020) | 0.253<br>(0.244-0.264) | 0.157<br>(0.149-0.165) |
| Oman        | 0.078<br>(0.050-0.112) | 0.065<br>(0.045-0.095) | 0.407<br>(0.299-0.508) | 0.380<br>(0.281-0.489) | 0.058<br>(0.042-0.083) | 0.035<br>(0.025-0.050) | 0.398<br>(0.297-0.455) | 0.278<br>(0.197-0.331) |
| Pakistan    | 0.113<br>(0.095-0.132) | 0.114<br>(0.100-0.129) | 0.470<br>(0.414-0.520) | 0.446<br>(0.398-0.504) | 0.115<br>(0.081-0.159) | 0.088<br>(0.065-0.112) | 0.486<br>(0.389-0.564) | 0.409<br>(0.334-0.522) |
| Palestine   | 0.088<br>(0.060-0.127) | 0.062<br>(0.041-0.085) | 0.434<br>(0.333-0.517) | 0.350<br>(0.272-0.464) | 0.079<br>(0.056-0.105) | 0.035<br>(0.024-0.049) | 0.416<br>(0.318-0.528) | 0.259<br>(0.200-0.350) |

**Web Table 10 — Ages 15-49 mortality (35q15) and ages 50-74 mortality (25q50) by country and sex in 1990 and 2013**

|                                  | 1990                   |                        |                        |                        | 2013                   |                        |                        |                        |
|----------------------------------|------------------------|------------------------|------------------------|------------------------|------------------------|------------------------|------------------------|------------------------|
|                                  | 35q15                  |                        | 25q50                  |                        | 35q15                  |                        | 25q50                  |                        |
|                                  | Male                   | Female                 | Male                   | Female                 | Male                   | Female                 | Male                   | Female                 |
| Panama                           | 0.078<br>(0.073-0.083) | 0.042<br>(0.040-0.045) | 0.335<br>(0.320-0.352) | 0.240<br>(0.228-0.253) | 0.079<br>(0.066-0.092) | 0.034<br>(0.028-0.041) | 0.290<br>(0.252-0.333) | 0.184<br>(0.158-0.212) |
| Papua New Guinea                 | 0.235<br>(0.159-0.345) | 0.210<br>(0.131-0.322) | 0.702<br>(0.550-0.810) | 0.673<br>(0.536-0.792) | 0.214<br>(0.146-0.311) | 0.172<br>(0.102-0.274) | 0.666<br>(0.514-0.785) | 0.635<br>(0.496-0.773) |
| Paraguay                         | 0.065<br>(0.061-0.068) | 0.047<br>(0.045-0.050) | 0.333<br>(0.320-0.345) | 0.275<br>(0.259-0.291) | 0.088<br>(0.074-0.103) | 0.044<br>(0.035-0.054) | 0.401<br>(0.342-0.475) | 0.304<br>(0.239-0.357) |
| Peru                             | 0.088<br>(0.082-0.095) | 0.062<br>(0.057-0.067) | 0.376<br>(0.363-0.389) | 0.301<br>(0.290-0.313) | 0.057<br>(0.043-0.073) | 0.035<br>(0.027-0.042) | 0.297<br>(0.244-0.344) | 0.238<br>(0.197-0.290) |
| Philippines                      | 0.133<br>(0.127-0.140) | 0.067<br>(0.064-0.071) | 0.496<br>(0.481-0.510) | 0.315<br>(0.303-0.326) | 0.122<br>(0.096-0.151) | 0.059<br>(0.046-0.076) | 0.532<br>(0.462-0.603) | 0.334<br>(0.279-0.396) |
| Poland                           | 0.123<br>(0.122-0.123) | 0.043<br>(0.043-0.043) | 0.582<br>(0.580-0.585) | 0.334<br>(0.332-0.337) | 0.076<br>(0.072-0.081) | 0.024<br>(0.022-0.026) | 0.441<br>(0.426-0.459) | 0.212<br>(0.201-0.224) |
| Portugal                         | 0.090<br>(0.089-0.092) | 0.038<br>(0.037-0.038) | 0.439<br>(0.436-0.443) | 0.253<br>(0.249-0.256) | 0.056<br>(0.053-0.061) | 0.022<br>(0.020-0.024) | 0.304<br>(0.286-0.321) | 0.153<br>(0.141-0.164) |
| Qatar                            | 0.043<br>(0.038-0.047) | 0.037<br>(0.033-0.042) | 0.271<br>(0.247-0.293) | 0.270<br>(0.240-0.304) | 0.026<br>(0.021-0.031) | 0.017<br>(0.013-0.022) | 0.202<br>(0.173-0.234) | 0.155<br>(0.124-0.189) |
| Romania                          | 0.112<br>(0.111-0.113) | 0.052<br>(0.051-0.052) | 0.526<br>(0.522-0.529) | 0.357<br>(0.355-0.361) | 0.068<br>(0.064-0.072) | 0.027<br>(0.025-0.029) | 0.422<br>(0.407-0.441) | 0.240<br>(0.227-0.252) |
| Russia                           | 0.161<br>(0.160-0.162) | 0.053<br>(0.052-0.053) | 0.587<br>(0.583-0.591) | 0.342<br>(0.338-0.346) | 0.169<br>(0.166-0.172) | 0.054<br>(0.053-0.056) | 0.568<br>(0.561-0.574) | 0.293<br>(0.287-0.299) |
| Rwanda                           | 0.305<br>(0.281-0.330) | 0.249<br>(0.233-0.267) | 0.731<br>(0.690-0.769) | 0.683<br>(0.651-0.710) | 0.157<br>(0.135-0.176) | 0.105<br>(0.095-0.115) | 0.518<br>(0.491-0.573) | 0.424<br>(0.365-0.484) |
| Saint Lucia                      | 0.103<br>(0.097-0.111) | 0.065<br>(0.060-0.073) | 0.475<br>(0.445-0.503) | 0.390<br>(0.353-0.409) | 0.083<br>(0.063-0.105) | 0.043<br>(0.033-0.057) | 0.392<br>(0.320-0.473) | 0.288<br>(0.221-0.352) |
| Saint Vincent and the Grenadines | 0.104<br>(0.095-0.114) | 0.069<br>(0.061-0.080) | 0.462<br>(0.429-0.496) | 0.385<br>(0.344-0.420) | 0.097<br>(0.081-0.111) | 0.053<br>(0.042-0.065) | 0.415<br>(0.353-0.492) | 0.325<br>(0.261-0.379) |
| Samoa                            | 0.141<br>(0.095-0.195) | 0.073<br>(0.051-0.105) | 0.570<br>(0.495-0.649) | 0.421<br>(0.333-0.513) | 0.088<br>(0.065-0.116) | 0.071<br>(0.055-0.092) | 0.463<br>(0.397-0.521) | 0.408<br>(0.347-0.482) |
| Saudi Arabia                     | 0.063<br>(0.041-0.091) | 0.044<br>(0.028-0.062) | 0.351<br>(0.258-0.470) | 0.285<br>(0.215-0.358) | 0.048<br>(0.038-0.058) | 0.024<br>(0.020-0.029) | 0.331<br>(0.268-0.413) | 0.204<br>(0.172-0.243) |
| Senegal                          | 0.157<br>(0.144-0.172) | 0.132<br>(0.123-0.141) | 0.540<br>(0.498-0.577) | 0.461<br>(0.426-0.493) | 0.133<br>(0.107-0.159) | 0.103<br>(0.093-0.118) | 0.509<br>(0.459-0.570) | 0.461<br>(0.387-0.534) |
| Serbia                           | 0.078<br>(0.063-0.094) | 0.036<br>(0.029-0.045) | 0.462<br>(0.392-0.528) | 0.298<br>(0.248-0.347) | 0.054<br>(0.051-0.057) | 0.025<br>(0.024-0.027) | 0.374<br>(0.360-0.391) | 0.233<br>(0.219-0.246) |
| Seychelles                       | 0.156<br>(0.145-0.167) | 0.055<br>(0.048-0.062) | 0.590<br>(0.573-0.608) | 0.366<br>(0.345-0.385) | 0.096<br>(0.083-0.111) | 0.039<br>(0.034-0.048) | 0.487<br>(0.462-0.520) | 0.306<br>(0.256-0.330) |

**Web Table 10 — Ages 15-49 mortality (35q15) and ages 50-74 mortality (25q50) by country and sex in 1990 and 2013**

|                       | 1990                   |                        |                        |                        | 2013                   |                        |                        |                        |
|-----------------------|------------------------|------------------------|------------------------|------------------------|------------------------|------------------------|------------------------|------------------------|
|                       | 35q15                  |                        | 25q50                  |                        | 35q15                  |                        | 25q50                  |                        |
|                       | Male                   | Female                 | Male                   | Female                 | Male                   | Female                 | Male                   | Female                 |
| Sierra Leone          | 0.192<br>(0.167-0.215) | 0.139<br>(0.121-0.157) | 0.572<br>(0.514-0.645) | 0.448<br>(0.419-0.496) | 0.196<br>(0.170-0.222) | 0.155<br>(0.138-0.170) | 0.589<br>(0.536-0.662) | 0.474<br>(0.409-0.554) |
| Singapore             | 0.057<br>(0.056-0.058) | 0.033<br>(0.032-0.034) | 0.467<br>(0.461-0.472) | 0.316<br>(0.310-0.321) | 0.028<br>(0.025-0.030) | 0.015<br>(0.013-0.017) | 0.265<br>(0.248-0.283) | 0.159<br>(0.145-0.173) |
| Slovakia              | 0.116<br>(0.115-0.118) | 0.040<br>(0.040-0.041) | 0.602<br>(0.598-0.606) | 0.347<br>(0.342-0.352) | 0.064<br>(0.060-0.070) | 0.024<br>(0.022-0.026) | 0.452<br>(0.431-0.477) | 0.237<br>(0.220-0.253) |
| Slovenia              | 0.093<br>(0.091-0.095) | 0.035<br>(0.034-0.036) | 0.515<br>(0.510-0.520) | 0.295<br>(0.285-0.302) | 0.046<br>(0.042-0.051) | 0.020<br>(0.018-0.022) | 0.322<br>(0.296-0.347) | 0.169<br>(0.154-0.189) |
| Solomon Islands       | 0.218<br>(0.137-0.328) | 0.178<br>(0.105-0.283) | 0.688<br>(0.581-0.797) | 0.642<br>(0.508-0.769) | 0.194<br>(0.117-0.298) | 0.143<br>(0.082-0.238) | 0.645<br>(0.533-0.776) | 0.590<br>(0.444-0.739) |
| Somalia               | 0.179<br>(0.117-0.252) | 0.189<br>(0.125-0.280) | 0.548<br>(0.412-0.739) | 0.575<br>(0.427-0.731) | 0.177<br>(0.115-0.258) | 0.167<br>(0.113-0.255) | 0.583<br>(0.438-0.749) | 0.583<br>(0.416-0.735) |
| South Africa          | 0.186<br>(0.164-0.212) | 0.090<br>(0.079-0.103) | 0.560<br>(0.518-0.604) | 0.378<br>(0.346-0.417) | 0.325<br>(0.296-0.355) | 0.267<br>(0.236-0.295) | 0.588<br>(0.542-0.634) | 0.422<br>(0.380-0.461) |
| South Korea           | 0.117<br>(0.115-0.119) | 0.047<br>(0.046-0.047) | 0.553<br>(0.547-0.558) | 0.308<br>(0.303-0.312) | 0.047<br>(0.042-0.051) | 0.020<br>(0.018-0.023) | 0.309<br>(0.287-0.331) | 0.142<br>(0.130-0.154) |
| South Sudan           | 0.206<br>(0.159-0.260) | 0.145<br>(0.110-0.180) | 0.617<br>(0.496-0.756) | 0.469<br>(0.396-0.593) | 0.243<br>(0.212-0.269) | 0.185<br>(0.163-0.205) | 0.646<br>(0.568-0.717) | 0.479<br>(0.405-0.573) |
| Spain                 | 0.073<br>(0.072-0.074) | 0.028<br>(0.028-0.028) | 0.387<br>(0.383-0.390) | 0.196<br>(0.193-0.199) | 0.038<br>(0.035-0.040) | 0.018<br>(0.017-0.020) | 0.264<br>(0.250-0.277) | 0.129<br>(0.121-0.136) |
| Sri Lanka             | 0.134<br>(0.130-0.143) | 0.060<br>(0.058-0.066) | 0.456<br>(0.450-0.468) | 0.278<br>(0.272-0.291) | 0.097<br>(0.082-0.116) | 0.031<br>(0.025-0.038) | 0.414<br>(0.369-0.464) | 0.223<br>(0.191-0.262) |
| Sudan                 | 0.136<br>(0.115-0.164) | 0.124<br>(0.109-0.138) | 0.522<br>(0.454-0.568) | 0.466<br>(0.411-0.541) | 0.111<br>(0.087-0.146) | 0.072<br>(0.056-0.090) | 0.462<br>(0.386-0.519) | 0.386<br>(0.299-0.485) |
| Suriname              | 0.116<br>(0.104-0.130) | 0.071<br>(0.065-0.077) | 0.472<br>(0.457-0.490) | 0.361<br>(0.334-0.394) | 0.123<br>(0.095-0.159) | 0.061<br>(0.046-0.078) | 0.472<br>(0.373-0.572) | 0.335<br>(0.257-0.422) |
| Swaziland             | 0.179<br>(0.162-0.199) | 0.108<br>(0.098-0.120) | 0.639<br>(0.570-0.694) | 0.483<br>(0.430-0.529) | 0.496<br>(0.458-0.529) | 0.390<br>(0.356-0.419) | 0.738<br>(0.688-0.778) | 0.495<br>(0.422-0.585) |
| Sweden                | 0.050<br>(0.049-0.051) | 0.028<br>(0.027-0.028) | 0.370<br>(0.367-0.374) | 0.216<br>(0.212-0.219) | 0.030<br>(0.027-0.032) | 0.016<br>(0.014-0.018) | 0.244<br>(0.228-0.259) | 0.156<br>(0.143-0.168) |
| Switzerland           | 0.062<br>(0.061-0.063) | 0.029<br>(0.028-0.030) | 0.375<br>(0.370-0.380) | 0.194<br>(0.190-0.197) | 0.029<br>(0.026-0.031) | 0.016<br>(0.015-0.018) | 0.220<br>(0.206-0.236) | 0.131<br>(0.121-0.142) |
| Syria                 | 0.096<br>(0.072-0.132) | 0.064<br>(0.049-0.078) | 0.465<br>(0.386-0.513) | 0.374<br>(0.295-0.451) | 0.103<br>(0.076-0.172) | 0.055<br>(0.040-0.092) | 0.475<br>(0.386-0.568) | 0.311<br>(0.249-0.397) |
| São Tomé and Príncipe | 0.108<br>(0.089-0.130) | 0.100<br>(0.083-0.115) | 0.458<br>(0.402-0.511) | 0.417<br>(0.370-0.484) | 0.127<br>(0.090-0.202) | 0.084<br>(0.062-0.123) | 0.460<br>(0.364-0.561) | 0.422<br>(0.323-0.514) |



**Web Table 10 — Ages 15-49 mortality (35q15) and ages 50-74 mortality (25q50) by country and sex in 1990 and 2013**

|                            | 1990                   |                        |                        |                        | 2013                   |                        |                        |                        |
|----------------------------|------------------------|------------------------|------------------------|------------------------|------------------------|------------------------|------------------------|------------------------|
|                            | 35q15                  |                        | 25q50                  |                        | 35q15                  |                        | 25q50                  |                        |
|                            | Male                   | Female                 | Male                   | Female                 | Male                   | Female                 | Male                   | Female                 |
| Taiwan (Province of China) | 0.092<br>(0.092-0.093) | 0.040<br>(0.040-0.041) | 0.431<br>(0.427-0.434) | 0.307<br>(0.304-0.310) | 0.065<br>(0.062-0.067) | 0.024<br>(0.023-0.025) | 0.318<br>(0.311-0.325) | 0.184<br>(0.178-0.190) |
| Tajikistan                 | 0.115<br>(0.107-0.124) | 0.077<br>(0.071-0.083) | 0.500<br>(0.470-0.524) | 0.377<br>(0.363-0.396) | 0.096<br>(0.083-0.114) | 0.058<br>(0.048-0.066) | 0.454<br>(0.388-0.502) | 0.334<br>(0.298-0.393) |
| Tanzania                   | 0.189<br>(0.174-0.201) | 0.158<br>(0.149-0.167) | 0.475<br>(0.449-0.512) | 0.465<br>(0.435-0.493) | 0.197<br>(0.178-0.214) | 0.194<br>(0.174-0.211) | 0.475<br>(0.421-0.515) | 0.425<br>(0.372-0.502) |
| Thailand                   | 0.129<br>(0.121-0.139) | 0.058<br>(0.055-0.063) | 0.423<br>(0.403-0.442) | 0.305<br>(0.291-0.320) | 0.129<br>(0.103-0.159) | 0.048<br>(0.038-0.058) | 0.353<br>(0.297-0.413) | 0.240<br>(0.200-0.280) |
| The Bahamas                | 0.141<br>(0.129-0.154) | 0.069<br>(0.062-0.077) | 0.538<br>(0.491-0.581) | 0.392<br>(0.353-0.424) | 0.110<br>(0.080-0.145) | 0.052<br>(0.037-0.071) | 0.462<br>(0.362-0.546) | 0.326<br>(0.241-0.402) |
| The Gambia                 | 0.144<br>(0.086-0.219) | 0.129<br>(0.073-0.197) | 0.494<br>(0.374-0.678) | 0.456<br>(0.355-0.635) | 0.141<br>(0.093-0.210) | 0.105<br>(0.067-0.161) | 0.512<br>(0.377-0.681) | 0.447<br>(0.315-0.615) |
| Timor-Leste                | 0.122<br>(0.104-0.140) | 0.137<br>(0.121-0.151) | 0.445<br>(0.408-0.484) | 0.460<br>(0.412-0.521) | 0.082<br>(0.069-0.095) | 0.060<br>(0.052-0.070) | 0.400<br>(0.359-0.460) | 0.355<br>(0.299-0.414) |
| Togo                       | 0.150<br>(0.134-0.165) | 0.133<br>(0.122-0.144) | 0.502<br>(0.460-0.550) | 0.449<br>(0.415-0.486) | 0.166<br>(0.145-0.192) | 0.142<br>(0.122-0.159) | 0.488<br>(0.426-0.549) | 0.382<br>(0.345-0.455) |
| Tonga                      | 0.115<br>(0.082-0.156) | 0.081<br>(0.060-0.115) | 0.526<br>(0.422-0.605) | 0.450<br>(0.376-0.547) | 0.117<br>(0.083-0.160) | 0.060<br>(0.042-0.084) | 0.522<br>(0.421-0.612) | 0.377<br>(0.279-0.462) |
| Trinidad and Tobago        | 0.106<br>(0.103-0.108) | 0.066<br>(0.065-0.069) | 0.549<br>(0.542-0.556) | 0.413<br>(0.405-0.422) | 0.117<br>(0.100-0.137) | 0.052<br>(0.043-0.061) | 0.523<br>(0.472-0.575) | 0.327<br>(0.280-0.369) |
| Tunisia                    | 0.073<br>(0.064-0.082) | 0.043<br>(0.038-0.050) | 0.391<br>(0.355-0.423) | 0.289<br>(0.265-0.311) | 0.056<br>(0.040-0.075) | 0.028<br>(0.020-0.037) | 0.355<br>(0.266-0.429) | 0.224<br>(0.172-0.274) |
| Turkey                     | 0.118<br>(0.101-0.142) | 0.058<br>(0.050-0.066) | 0.517<br>(0.498-0.529) | 0.332<br>(0.310-0.355) | 0.069<br>(0.056-0.084) | 0.028<br>(0.022-0.033) | 0.385<br>(0.327-0.448) | 0.219<br>(0.186-0.255) |
| Turkmenistan               | 0.146<br>(0.137-0.154) | 0.081<br>(0.076-0.087) | 0.562<br>(0.548-0.579) | 0.395<br>(0.381-0.410) | 0.143<br>(0.102-0.178) | 0.061<br>(0.042-0.081) | 0.556<br>(0.488-0.654) | 0.355<br>(0.297-0.449) |
| Uganda                     | 0.303<br>(0.276-0.326) | 0.226<br>(0.211-0.239) | 0.575<br>(0.539-0.623) | 0.565<br>(0.531-0.599) | 0.239<br>(0.214-0.259) | 0.204<br>(0.186-0.220) | 0.555<br>(0.517-0.634) | 0.467<br>(0.420-0.523) |
| Ukraine                    | 0.147<br>(0.143-0.152) | 0.050<br>(0.048-0.051) | 0.583<br>(0.572-0.592) | 0.349<br>(0.342-0.356) | 0.153<br>(0.145-0.161) | 0.050<br>(0.047-0.053) | 0.555<br>(0.537-0.573) | 0.299<br>(0.286-0.312) |
| United Arab Emirates       | 0.076<br>(0.054-0.101) | 0.058<br>(0.040-0.078) | 0.409<br>(0.318-0.537) | 0.375<br>(0.286-0.439) | 0.053<br>(0.037-0.075) | 0.031<br>(0.022-0.046) | 0.361<br>(0.262-0.436) | 0.252<br>(0.176-0.316) |
| United Kingdom             | 0.051<br>(0.051-0.052) | 0.030<br>(0.030-0.030) | 0.447<br>(0.444-0.450) | 0.285<br>(0.283-0.286) | 0.036<br>(0.033-0.038) | 0.021<br>(0.019-0.023) | 0.257<br>(0.243-0.270) | 0.178<br>(0.168-0.190) |
| United States              | 0.086<br>(0.085-0.087) | 0.039<br>(0.039-0.039) | 0.427<br>(0.425-0.430) | 0.269<br>(0.268-0.270) | 0.063<br>(0.058-0.069) | 0.033<br>(0.030-0.037) | 0.313<br>(0.294-0.334) | 0.211<br>(0.195-0.227) |

**Web Table 10 — Ages 15-49 mortality (35q15) and ages 50-74 mortality (25q50) by country and sex in 1990 and 2013**

|            | 1990                   |                        |                        |                        | 2013                   |                        |                        |                        |
|------------|------------------------|------------------------|------------------------|------------------------|------------------------|------------------------|------------------------|------------------------|
|            | 35q15                  |                        | 25q50                  |                        | 35q15                  |                        | 25q50                  |                        |
|            | Male                   | Female                 | Male                   | Female                 | Male                   | Female                 | Male                   | Female                 |
| Uruguay    | 0.083<br>(0.081-0.084) | 0.045<br>(0.044-0.046) | 0.504<br>(0.499-0.510) | 0.281<br>(0.275-0.286) | 0.065<br>(0.056-0.074) | 0.032<br>(0.027-0.038) | 0.417<br>(0.375-0.456) | 0.209<br>(0.184-0.238) |
| Uzbekistan | 0.122<br>(0.112-0.133) | 0.068<br>(0.064-0.072) | 0.526<br>(0.513-0.539) | 0.382<br>(0.364-0.402) | 0.114<br>(0.085-0.145) | 0.056<br>(0.041-0.073) | 0.514<br>(0.434-0.604) | 0.365<br>(0.287-0.440) |
| Vanuatu    | 0.196<br>(0.122-0.298) | 0.141<br>(0.079-0.230) | 0.658<br>(0.541-0.771) | 0.579<br>(0.447-0.718) | 0.172<br>(0.102-0.270) | 0.113<br>(0.065-0.192) | 0.619<br>(0.488-0.745) | 0.526<br>(0.392-0.683) |
| Venezuela  | 0.093<br>(0.092-0.094) | 0.048<br>(0.048-0.049) | 0.427<br>(0.424-0.429) | 0.304<br>(0.301-0.306) | 0.114<br>(0.101-0.127) | 0.040<br>(0.034-0.046) | 0.366<br>(0.335-0.394) | 0.236<br>(0.212-0.263) |
| Vietnam    | 0.116<br>(0.093-0.144) | 0.064<br>(0.054-0.073) | 0.496<br>(0.460-0.530) | 0.350<br>(0.305-0.402) | 0.078<br>(0.057-0.099) | 0.026<br>(0.019-0.036) | 0.391<br>(0.302-0.492) | 0.210<br>(0.158-0.271) |
| Yemen      | 0.130<br>(0.076-0.205) | 0.134<br>(0.078-0.208) | 0.499<br>(0.376-0.655) | 0.492<br>(0.371-0.664) | 0.105<br>(0.061-0.174) | 0.100<br>(0.060-0.173) | 0.458<br>(0.327-0.620) | 0.489<br>(0.338-0.641) |
| Zambia     | 0.381<br>(0.340-0.428) | 0.264<br>(0.246-0.284) | 0.336<br>(0.298-0.380) | 0.527<br>(0.500-0.556) | 0.254<br>(0.229-0.277) | 0.299<br>(0.274-0.323) | 0.532<br>(0.469-0.609) | 0.598<br>(0.536-0.668) |
| Zimbabwe   | 0.189<br>(0.171-0.207) | 0.132<br>(0.124-0.143) | 0.502<br>(0.472-0.521) | 0.475<br>(0.428-0.509) | 0.359<br>(0.324-0.394) | 0.317<br>(0.281-0.351) | 0.609<br>(0.532-0.686) | 0.471<br>(0.374-0.576) |

**Web Figure 8. Change in country-specific life expectancy at birth for male/female pairs from 1990 - 2013**

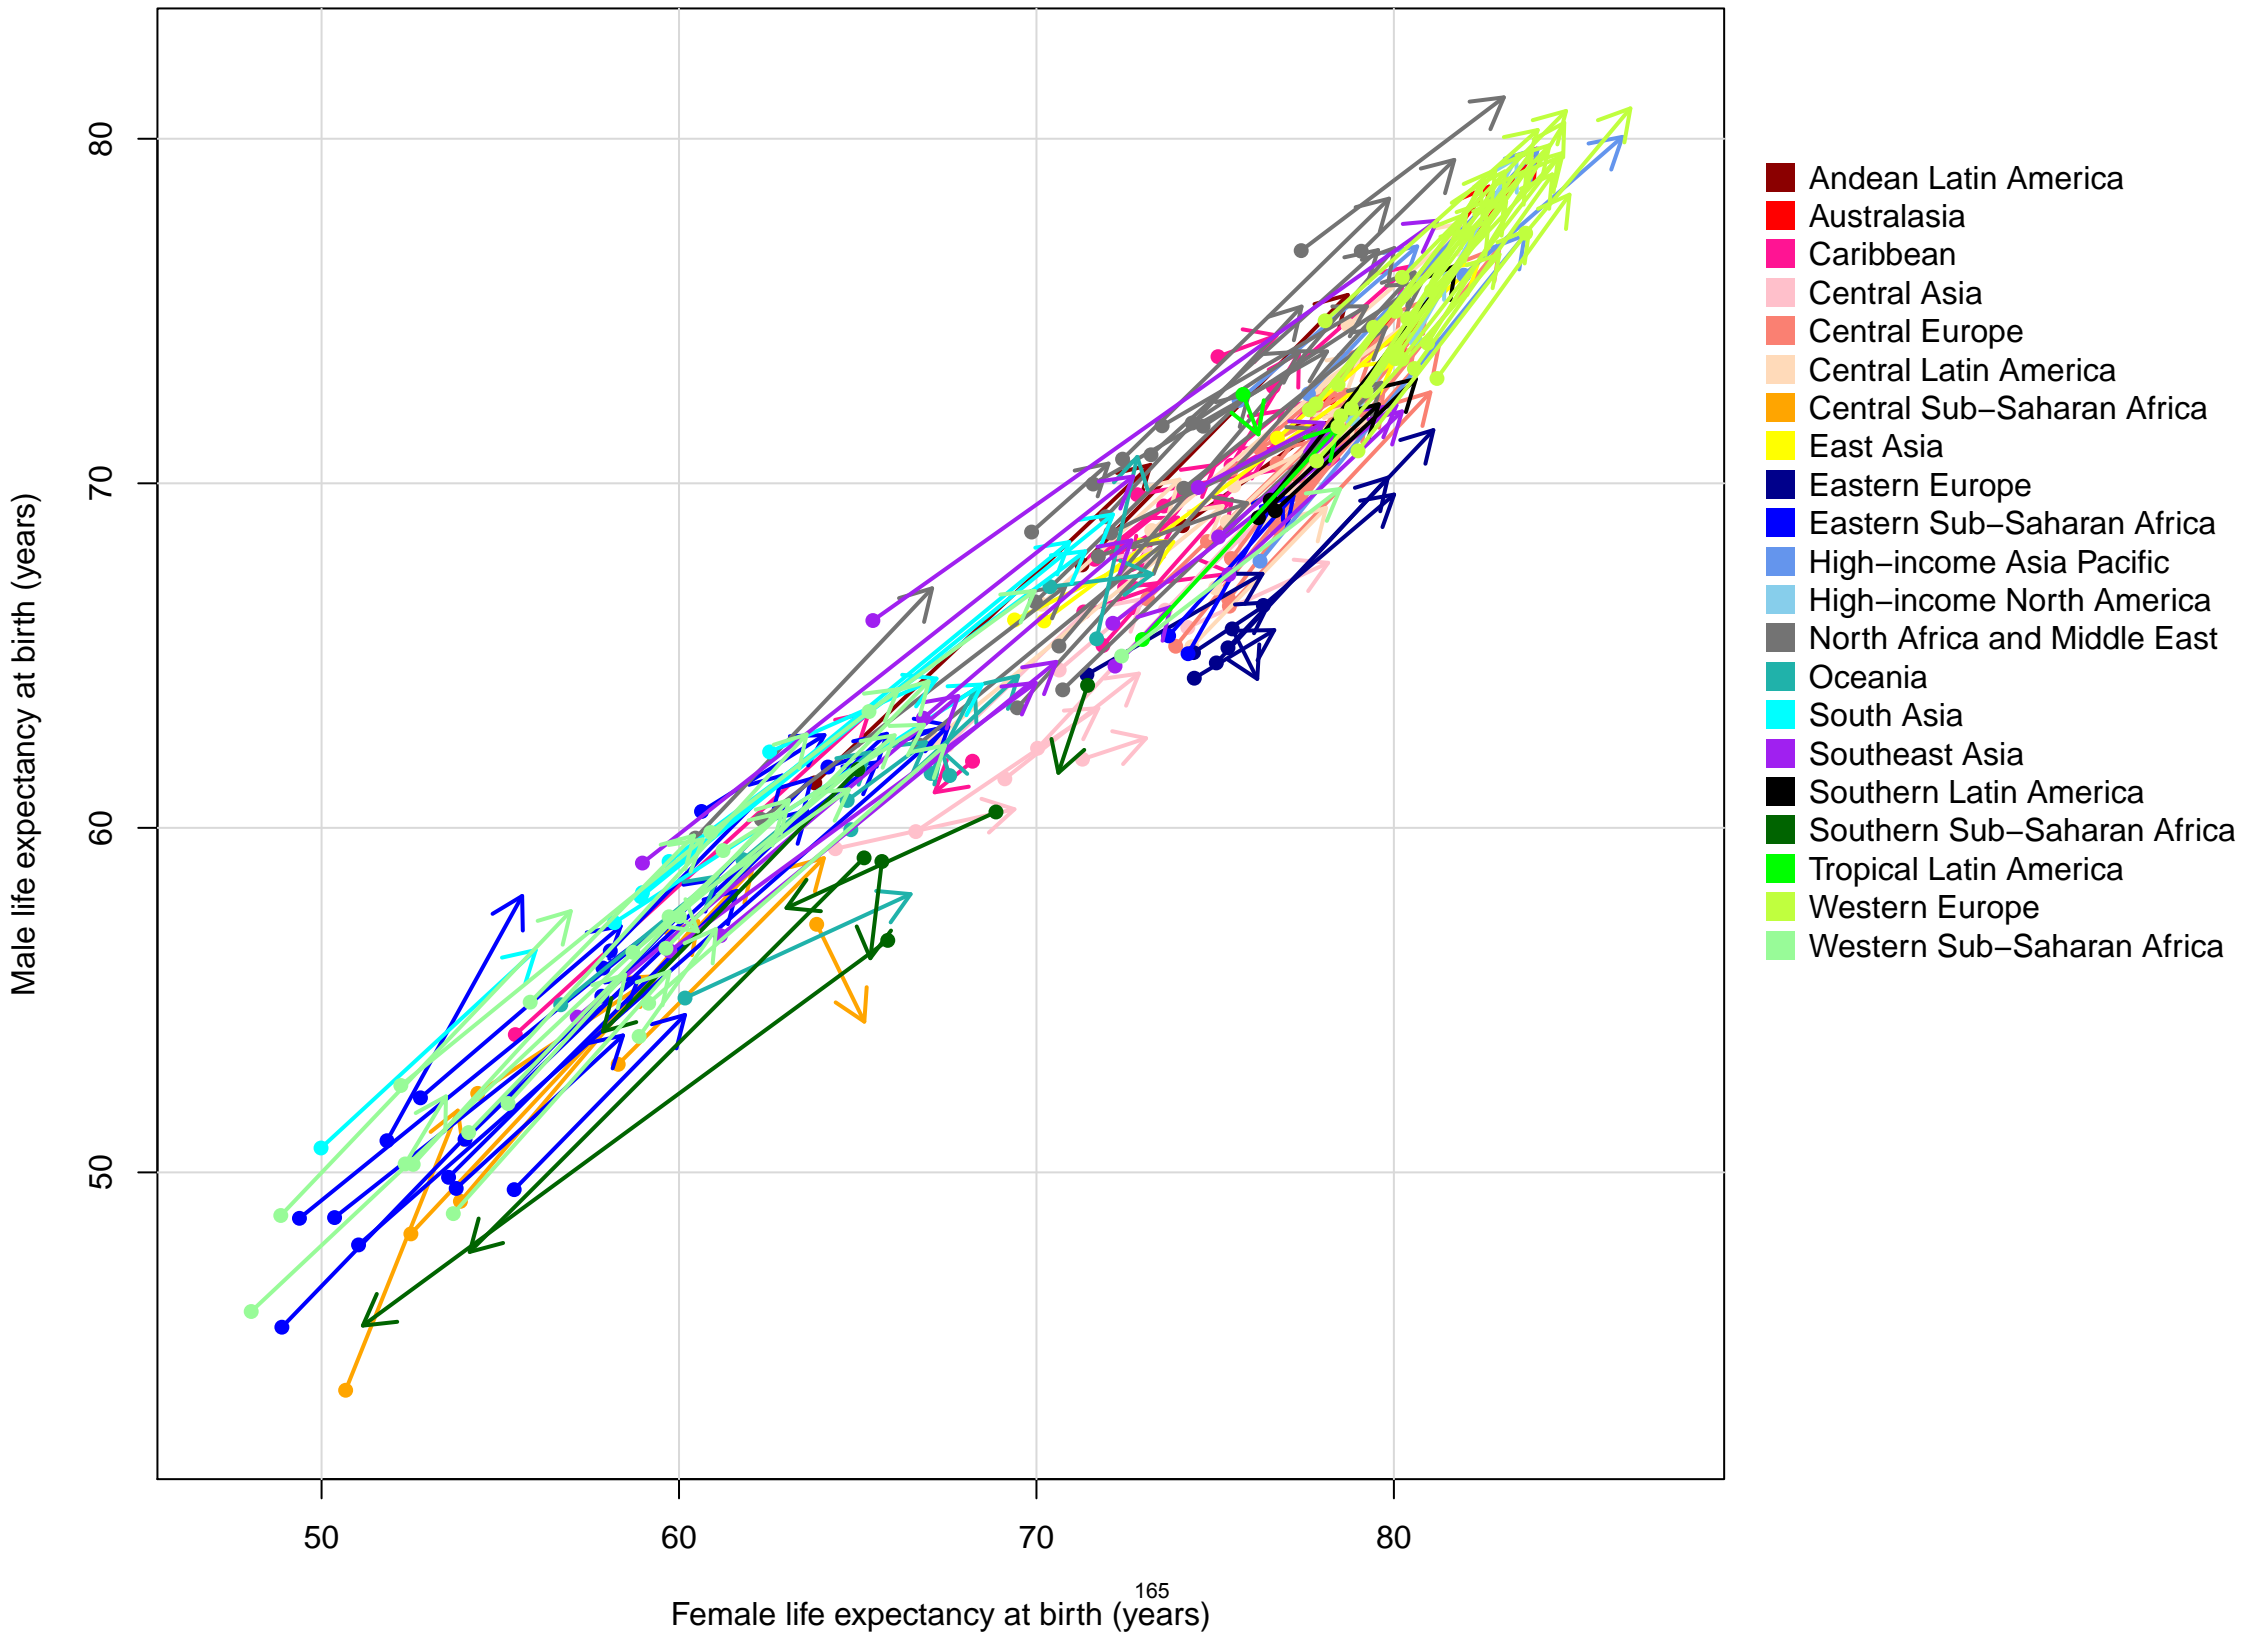

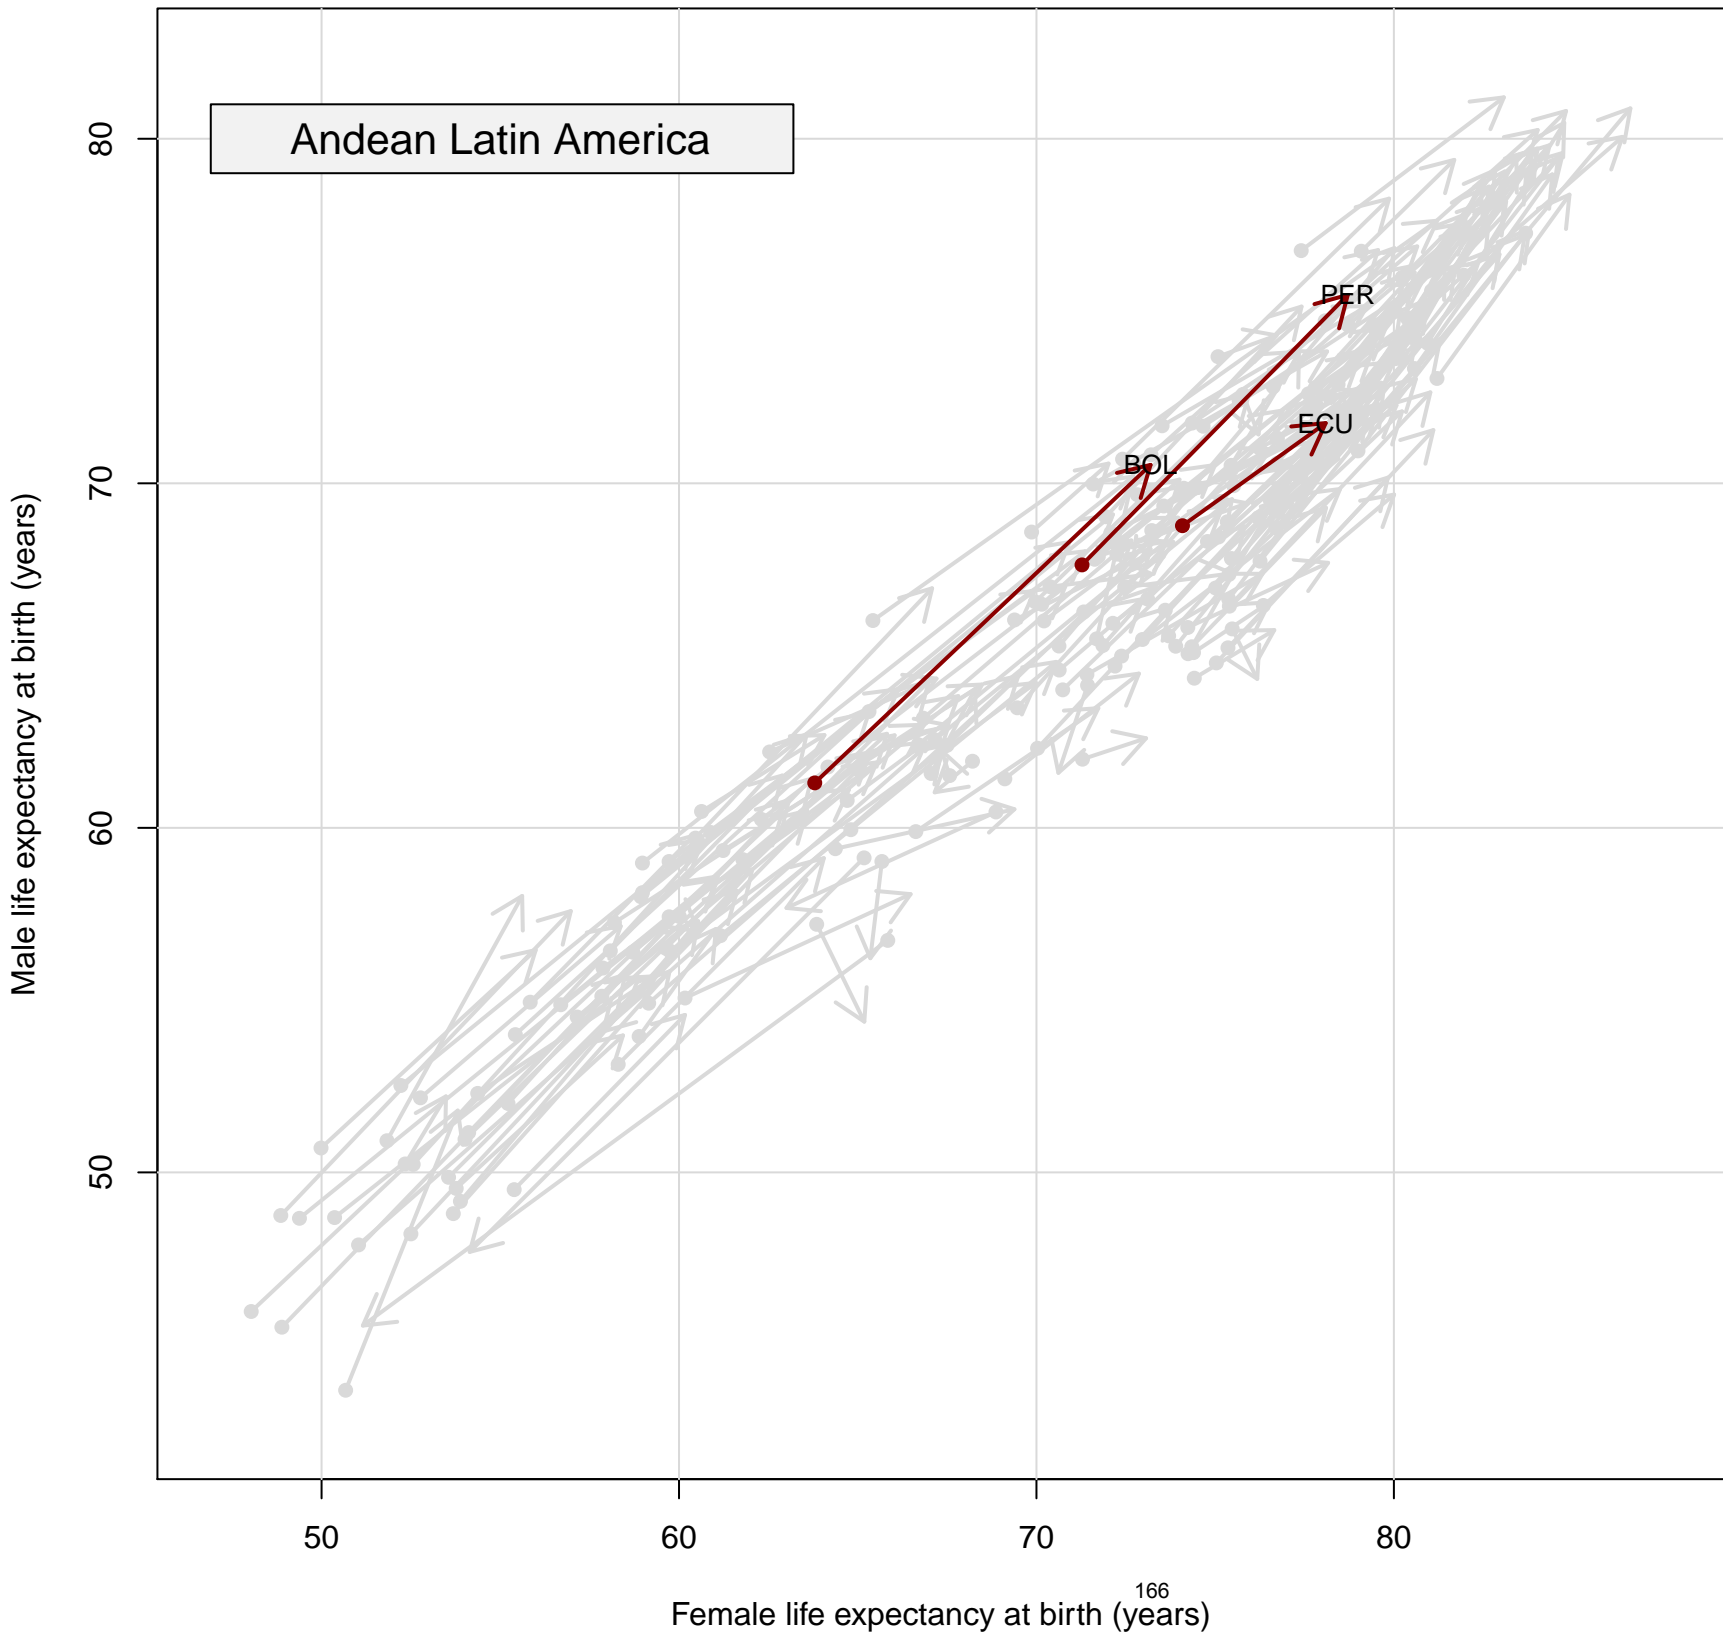

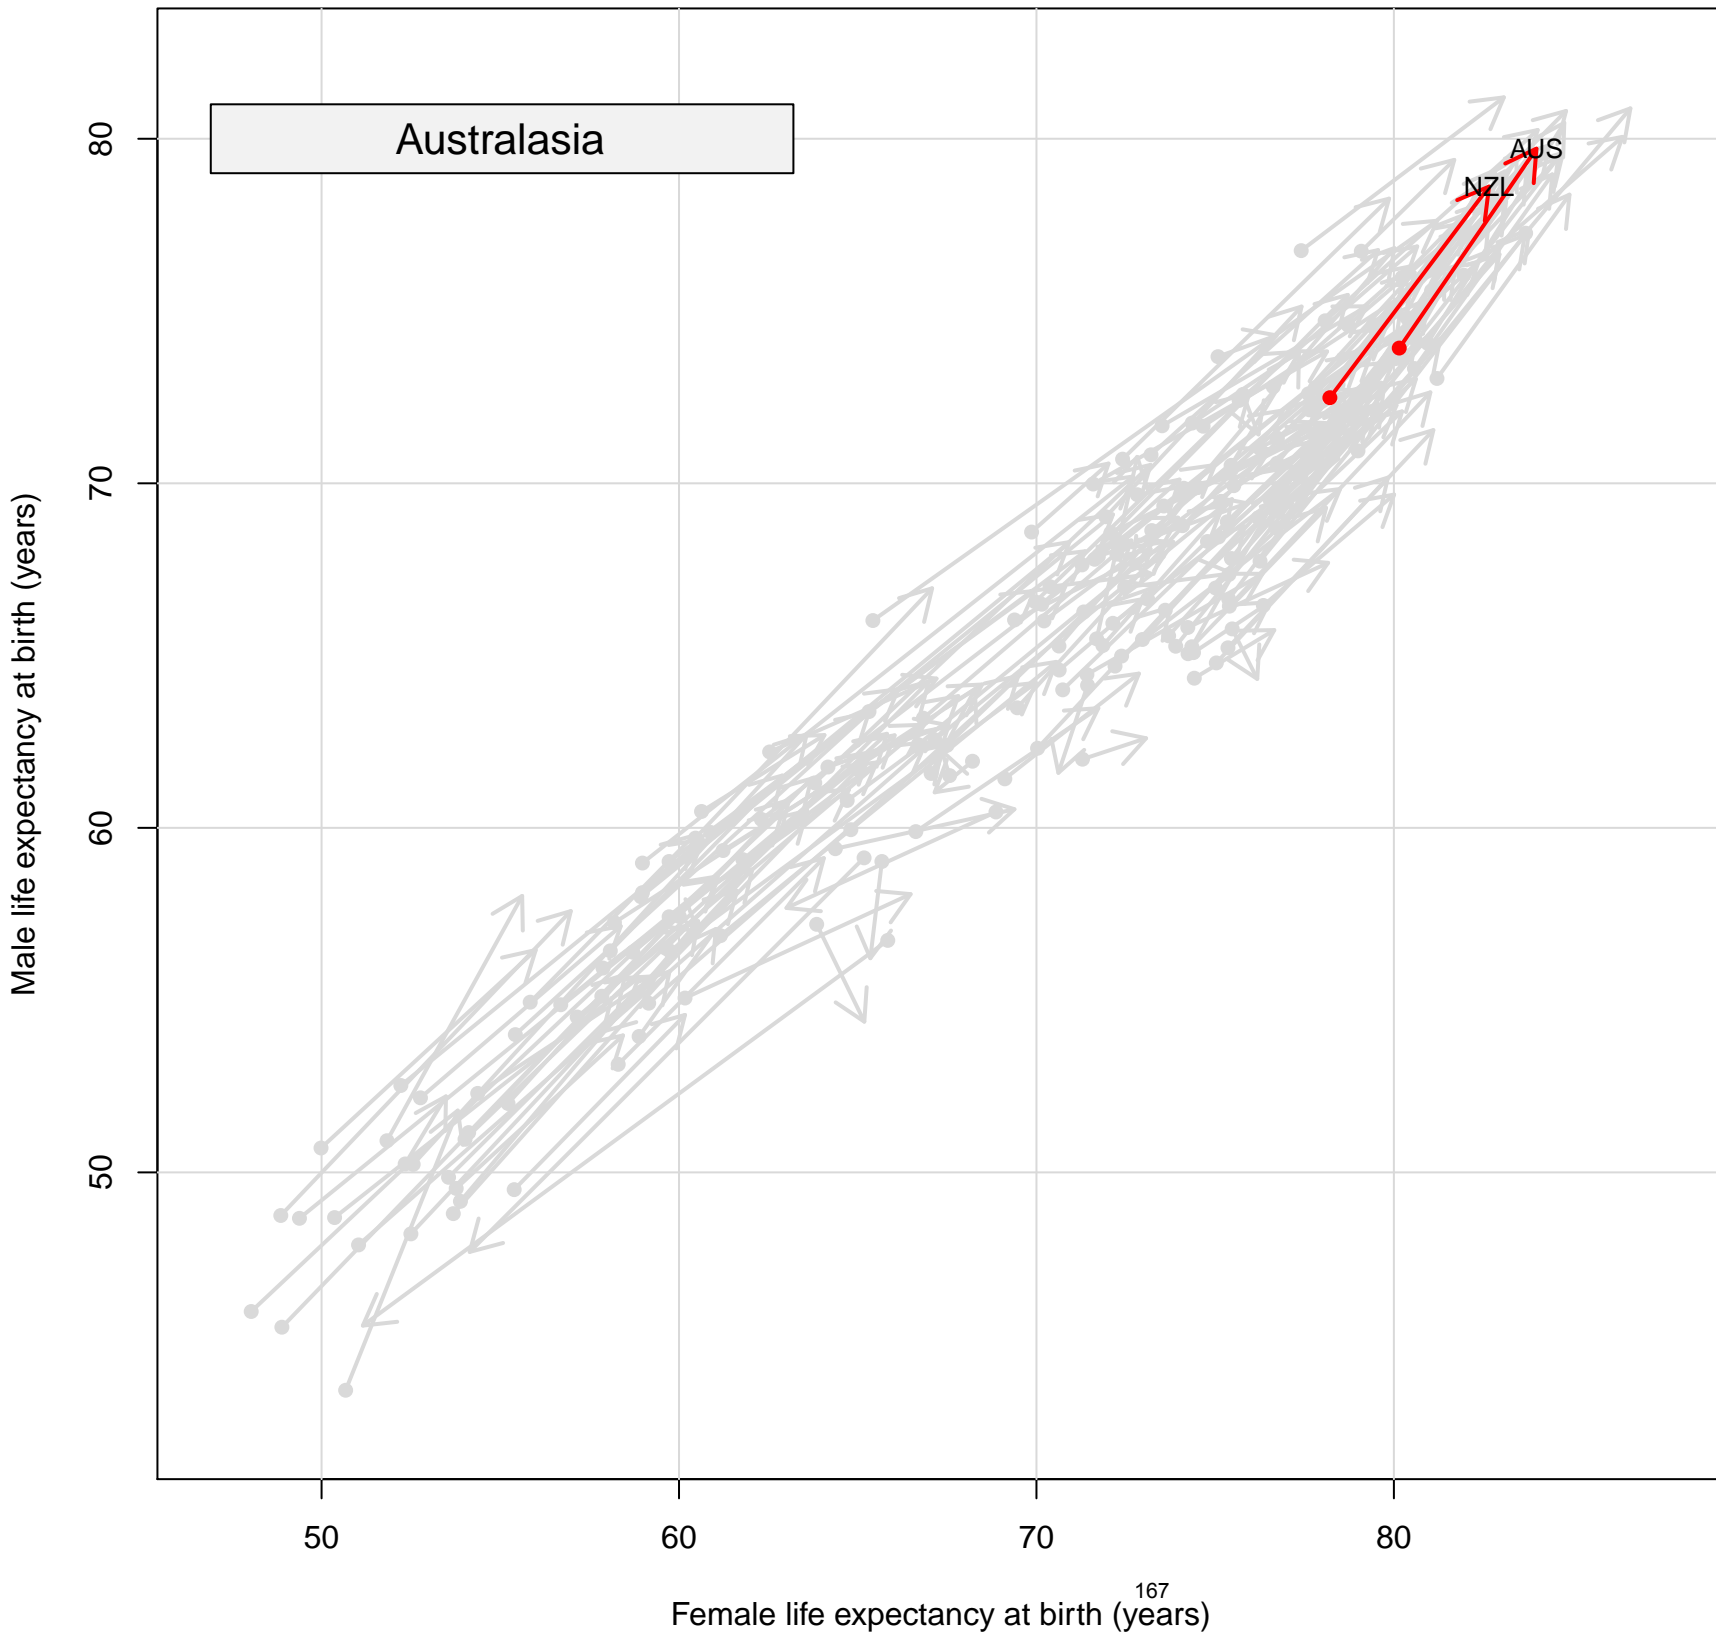

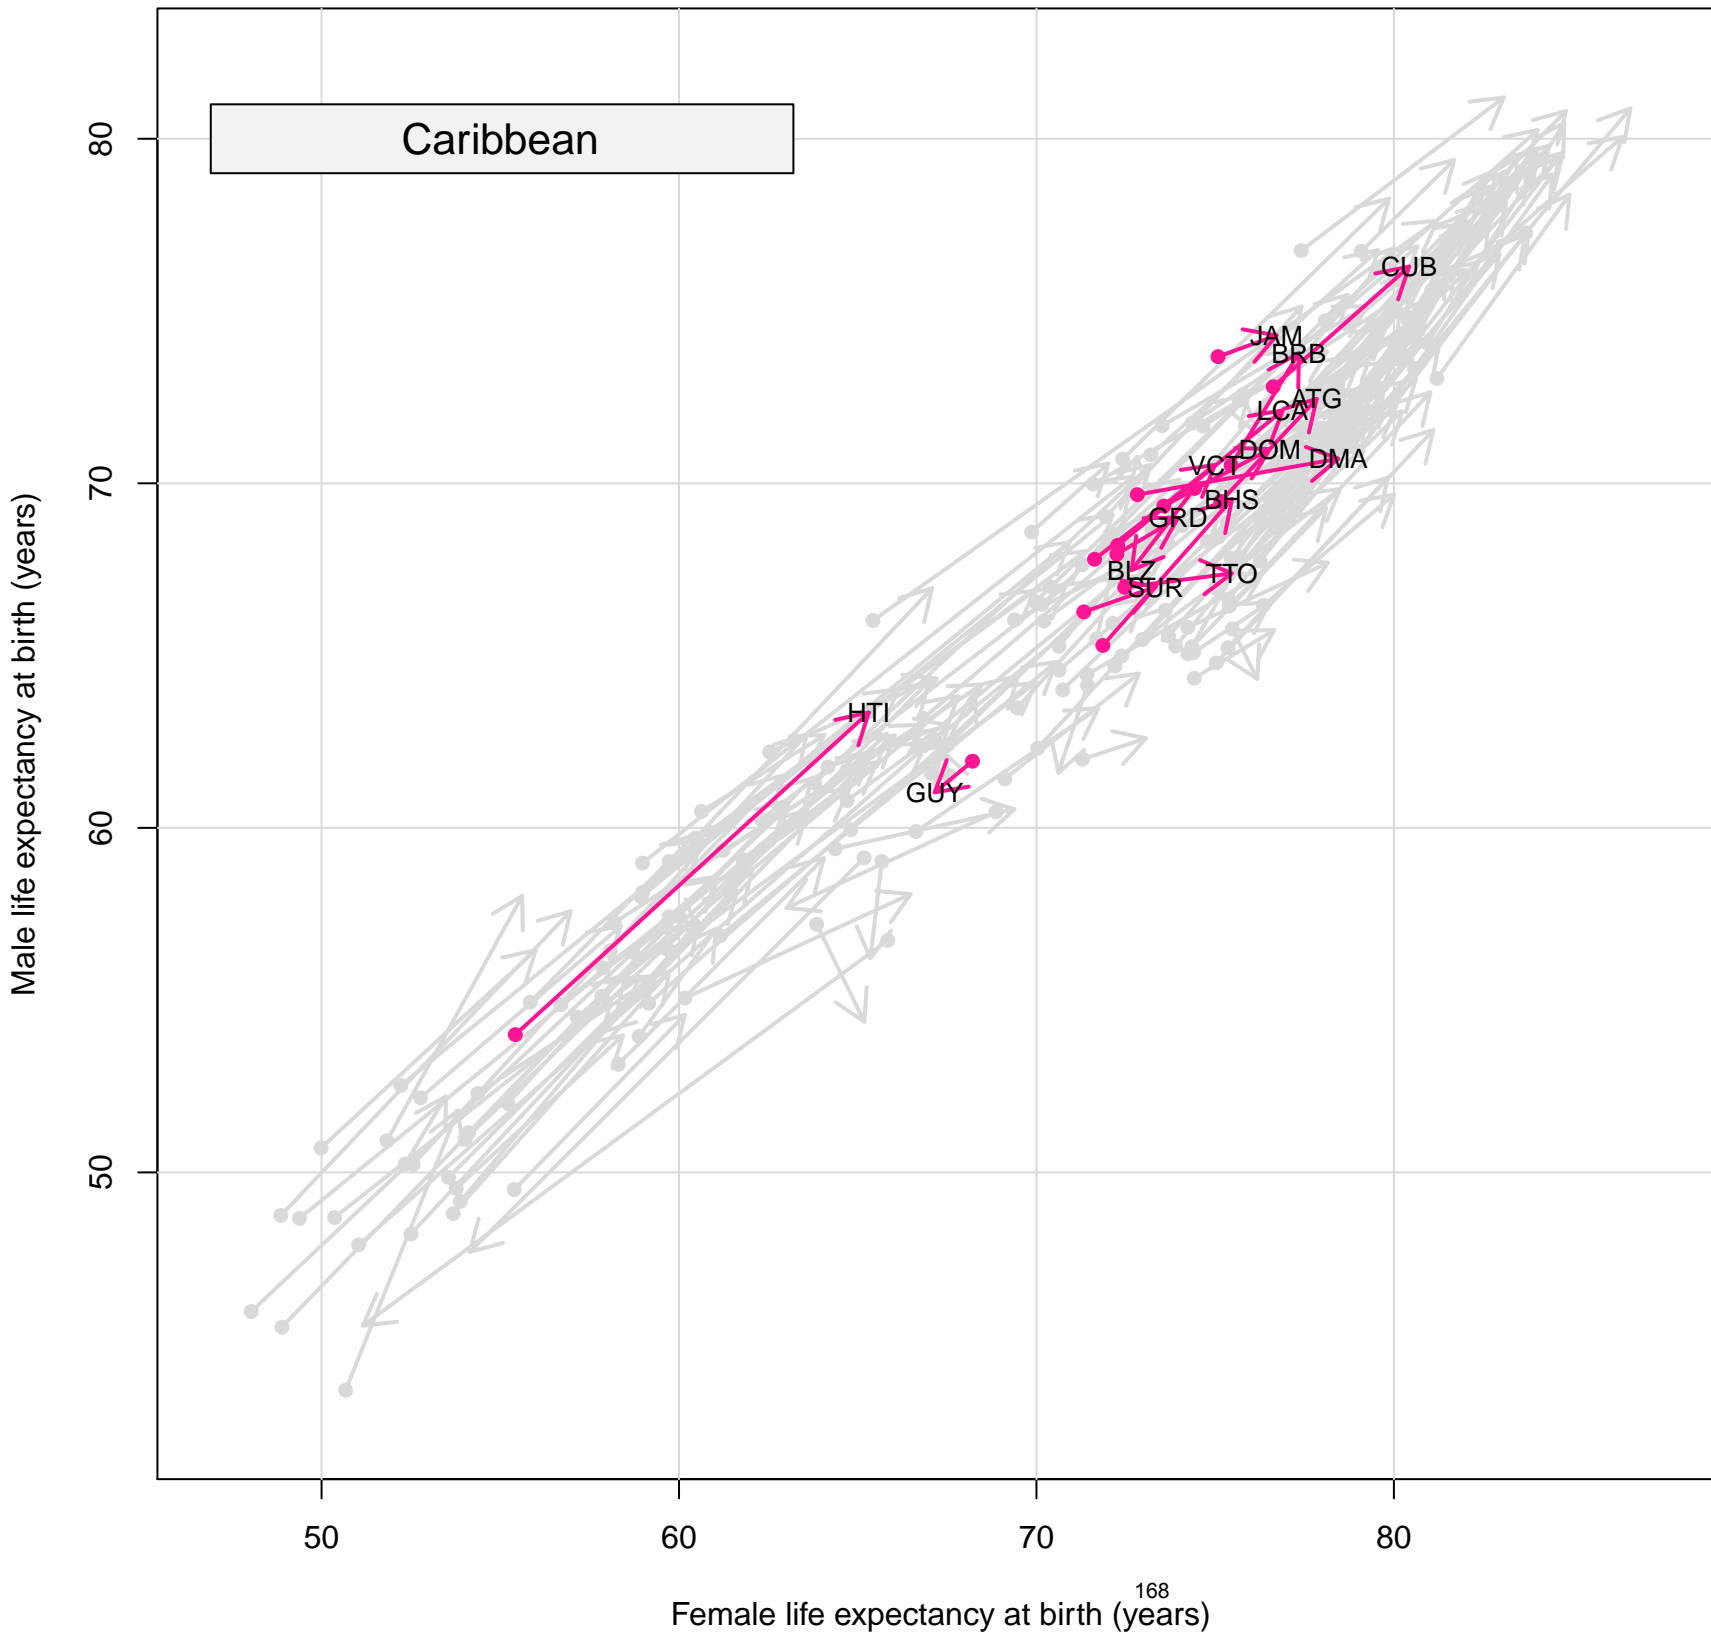

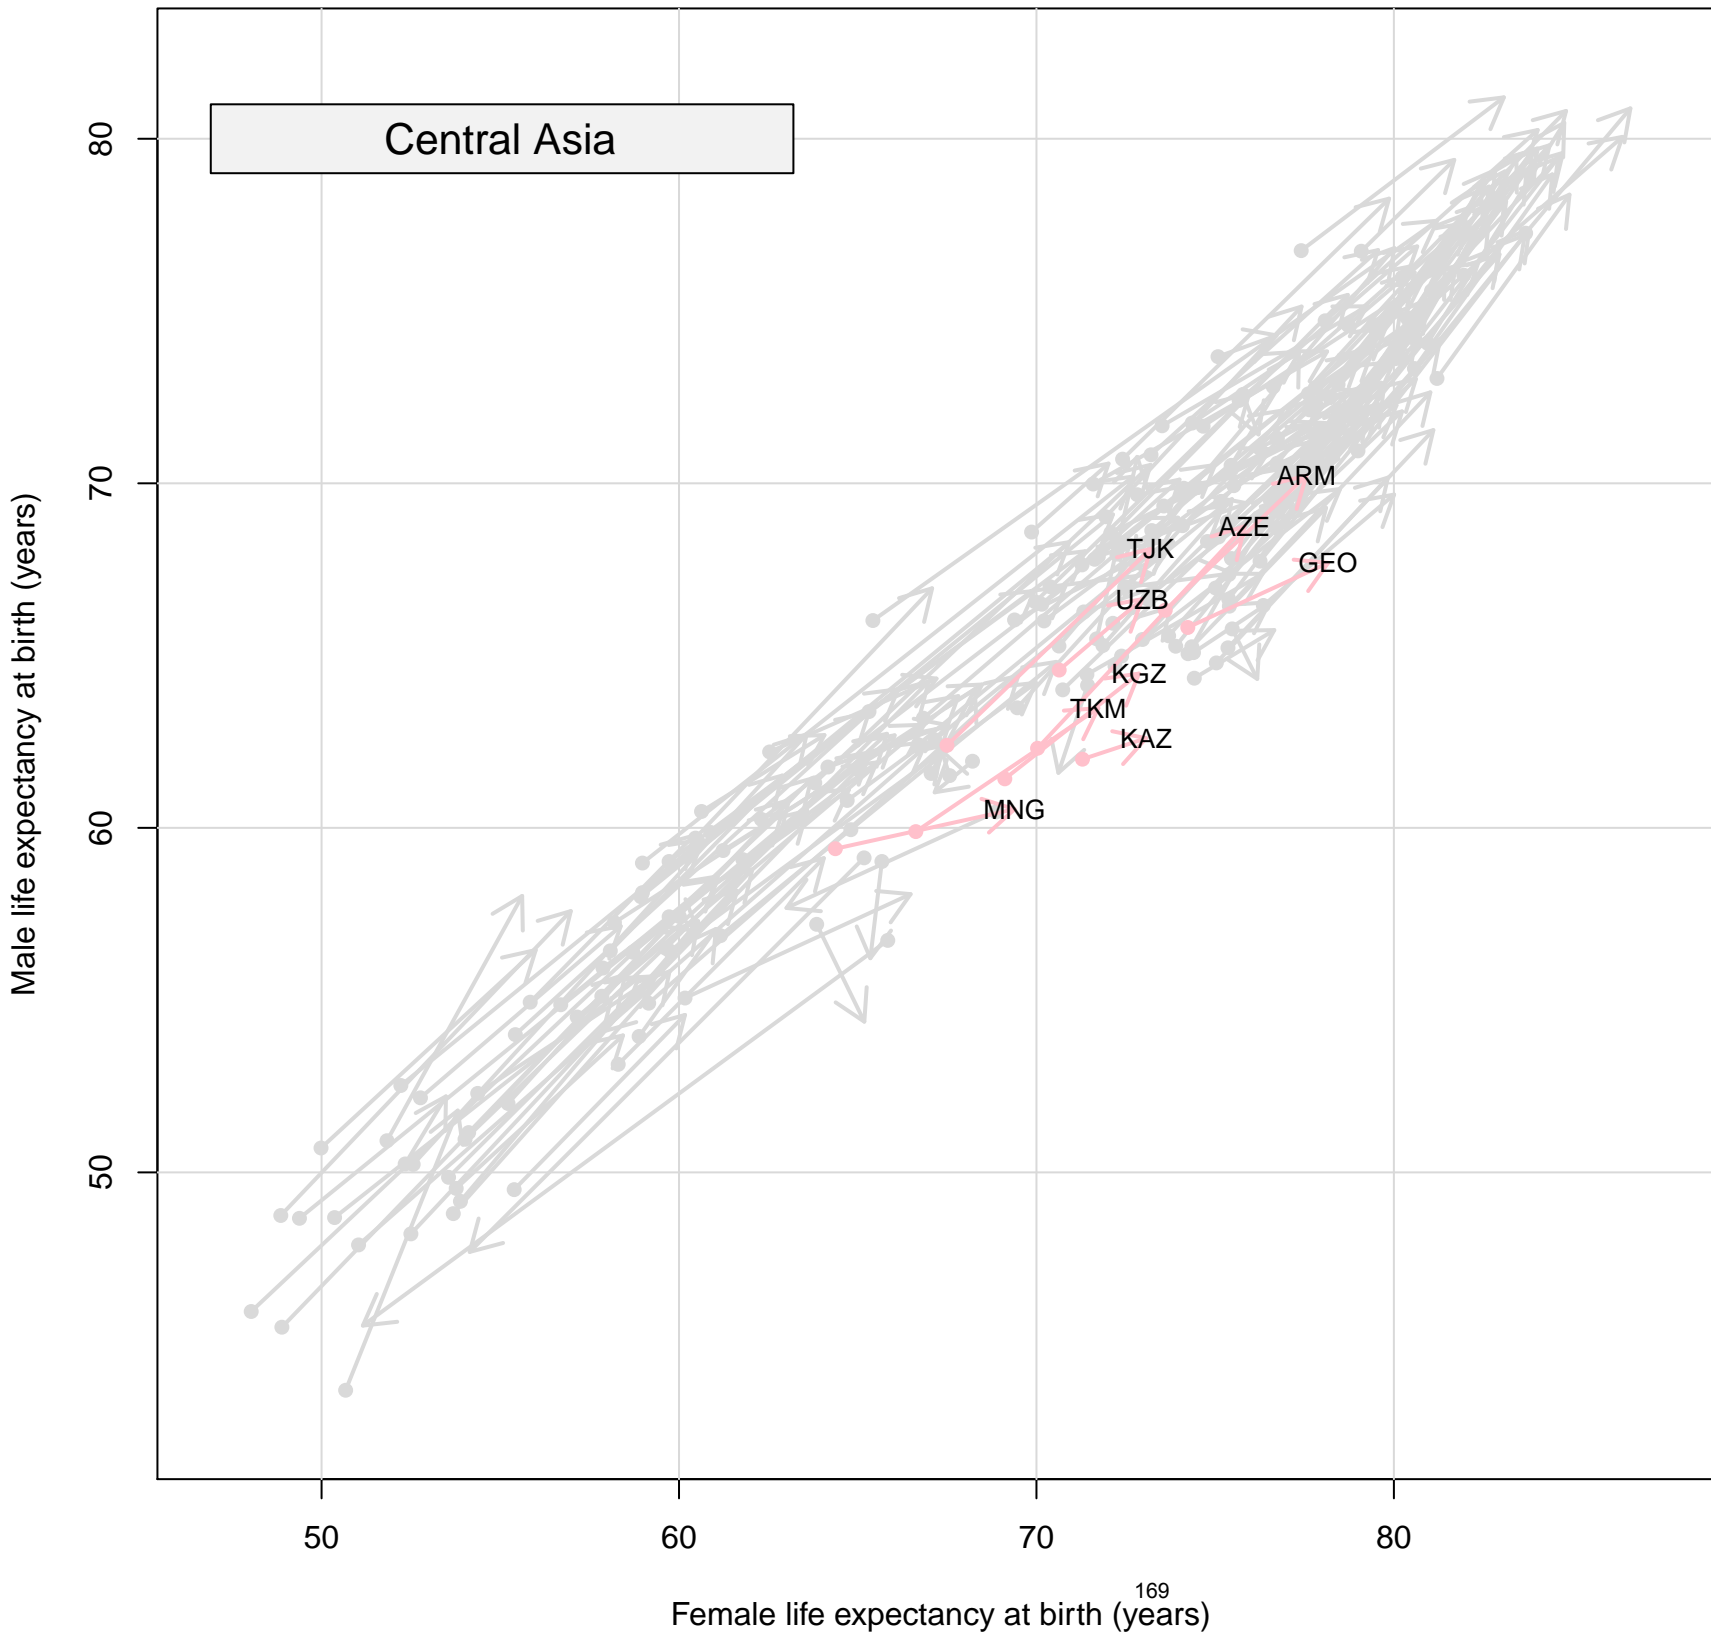



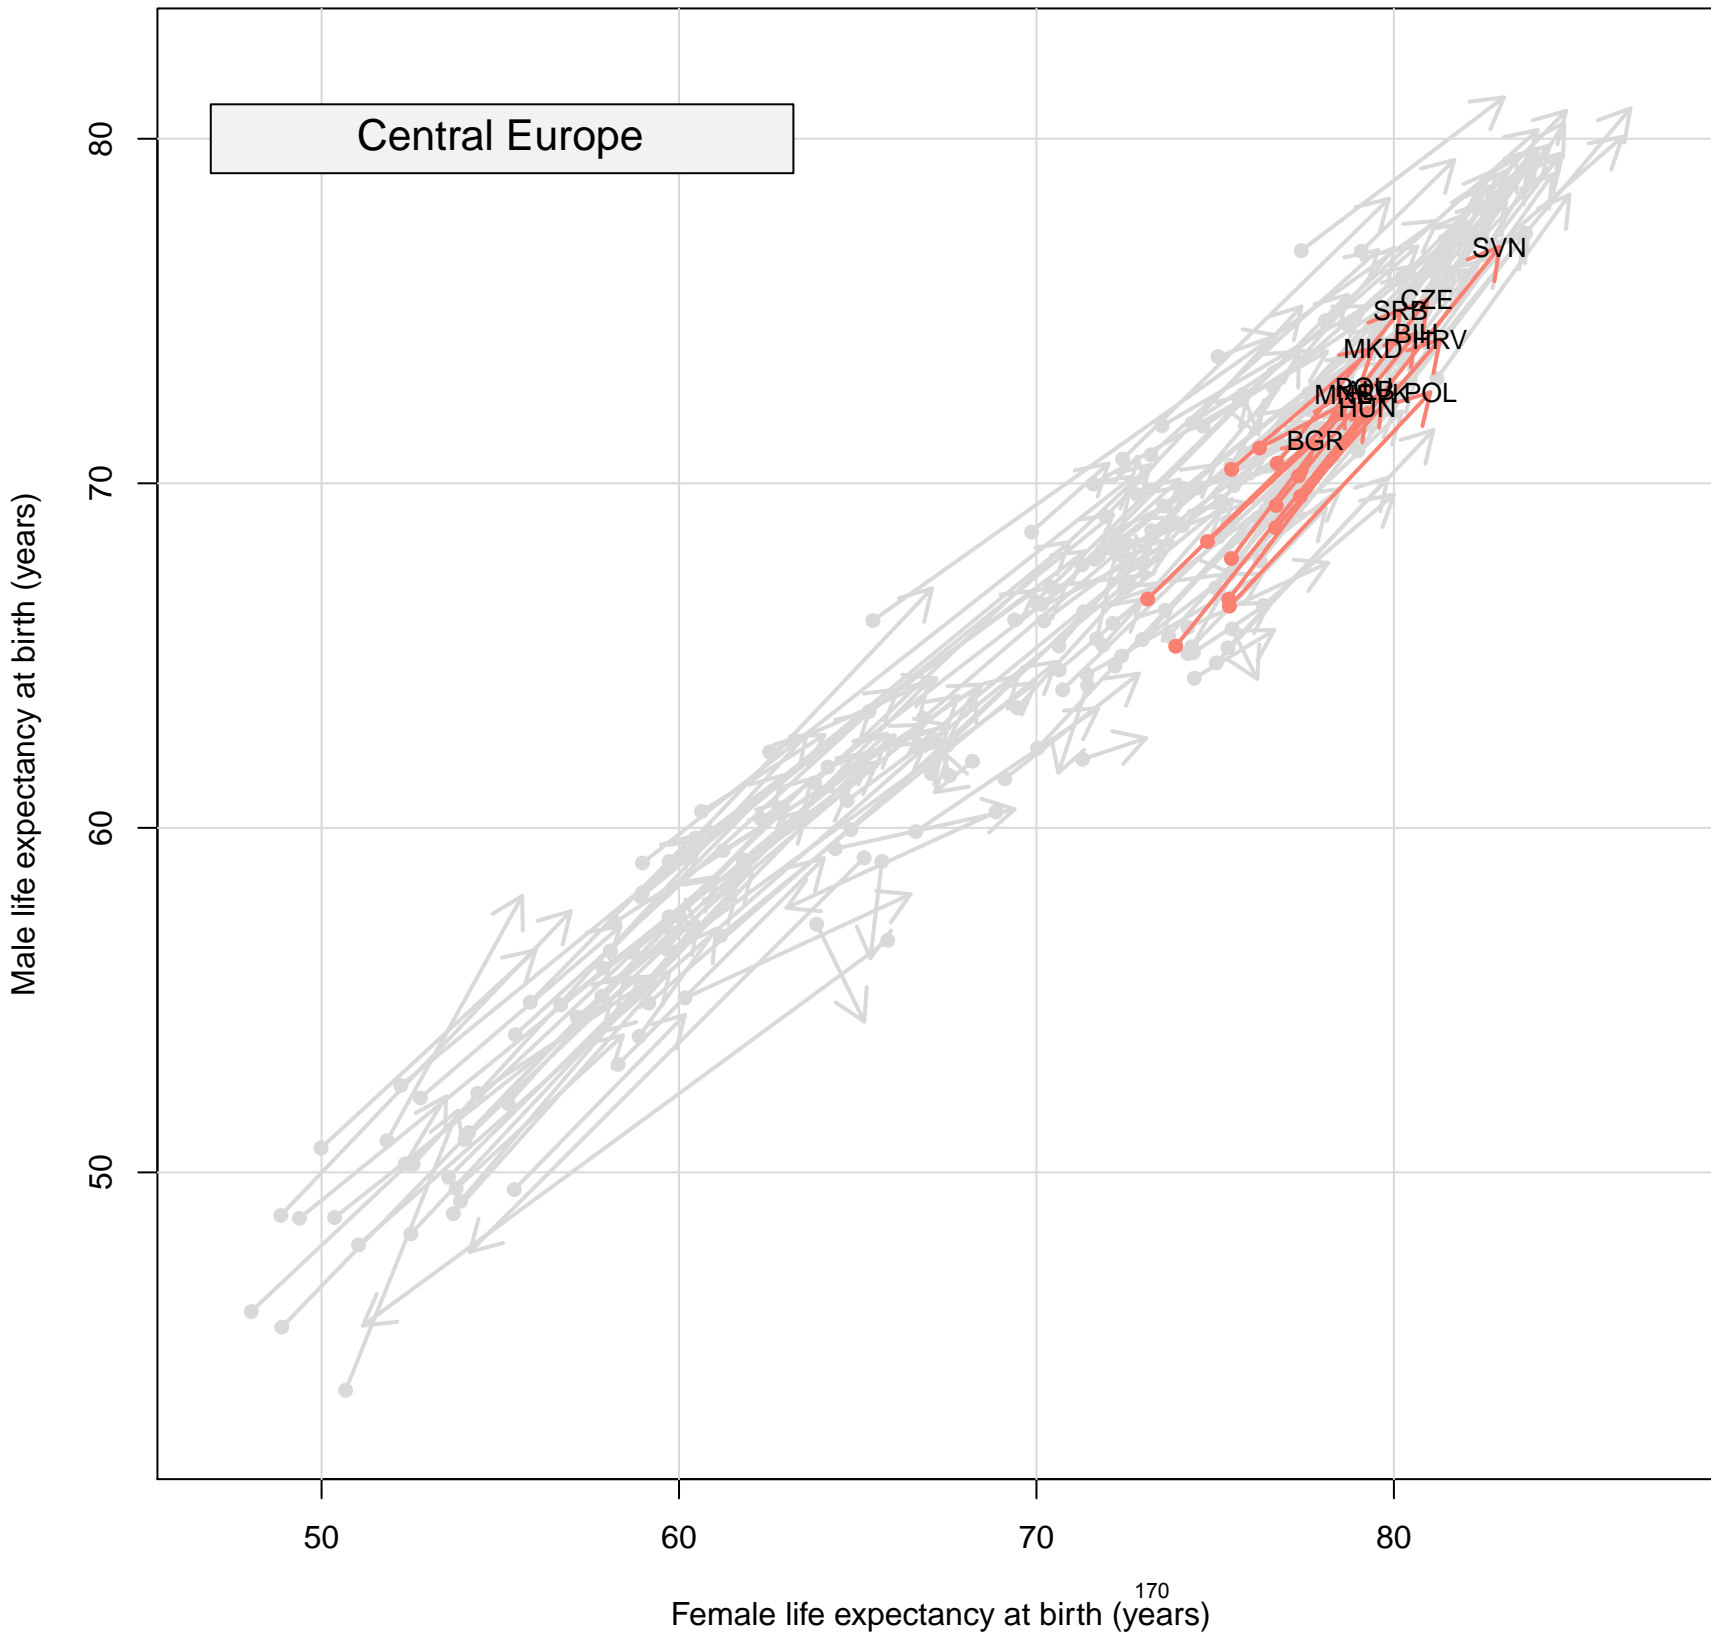

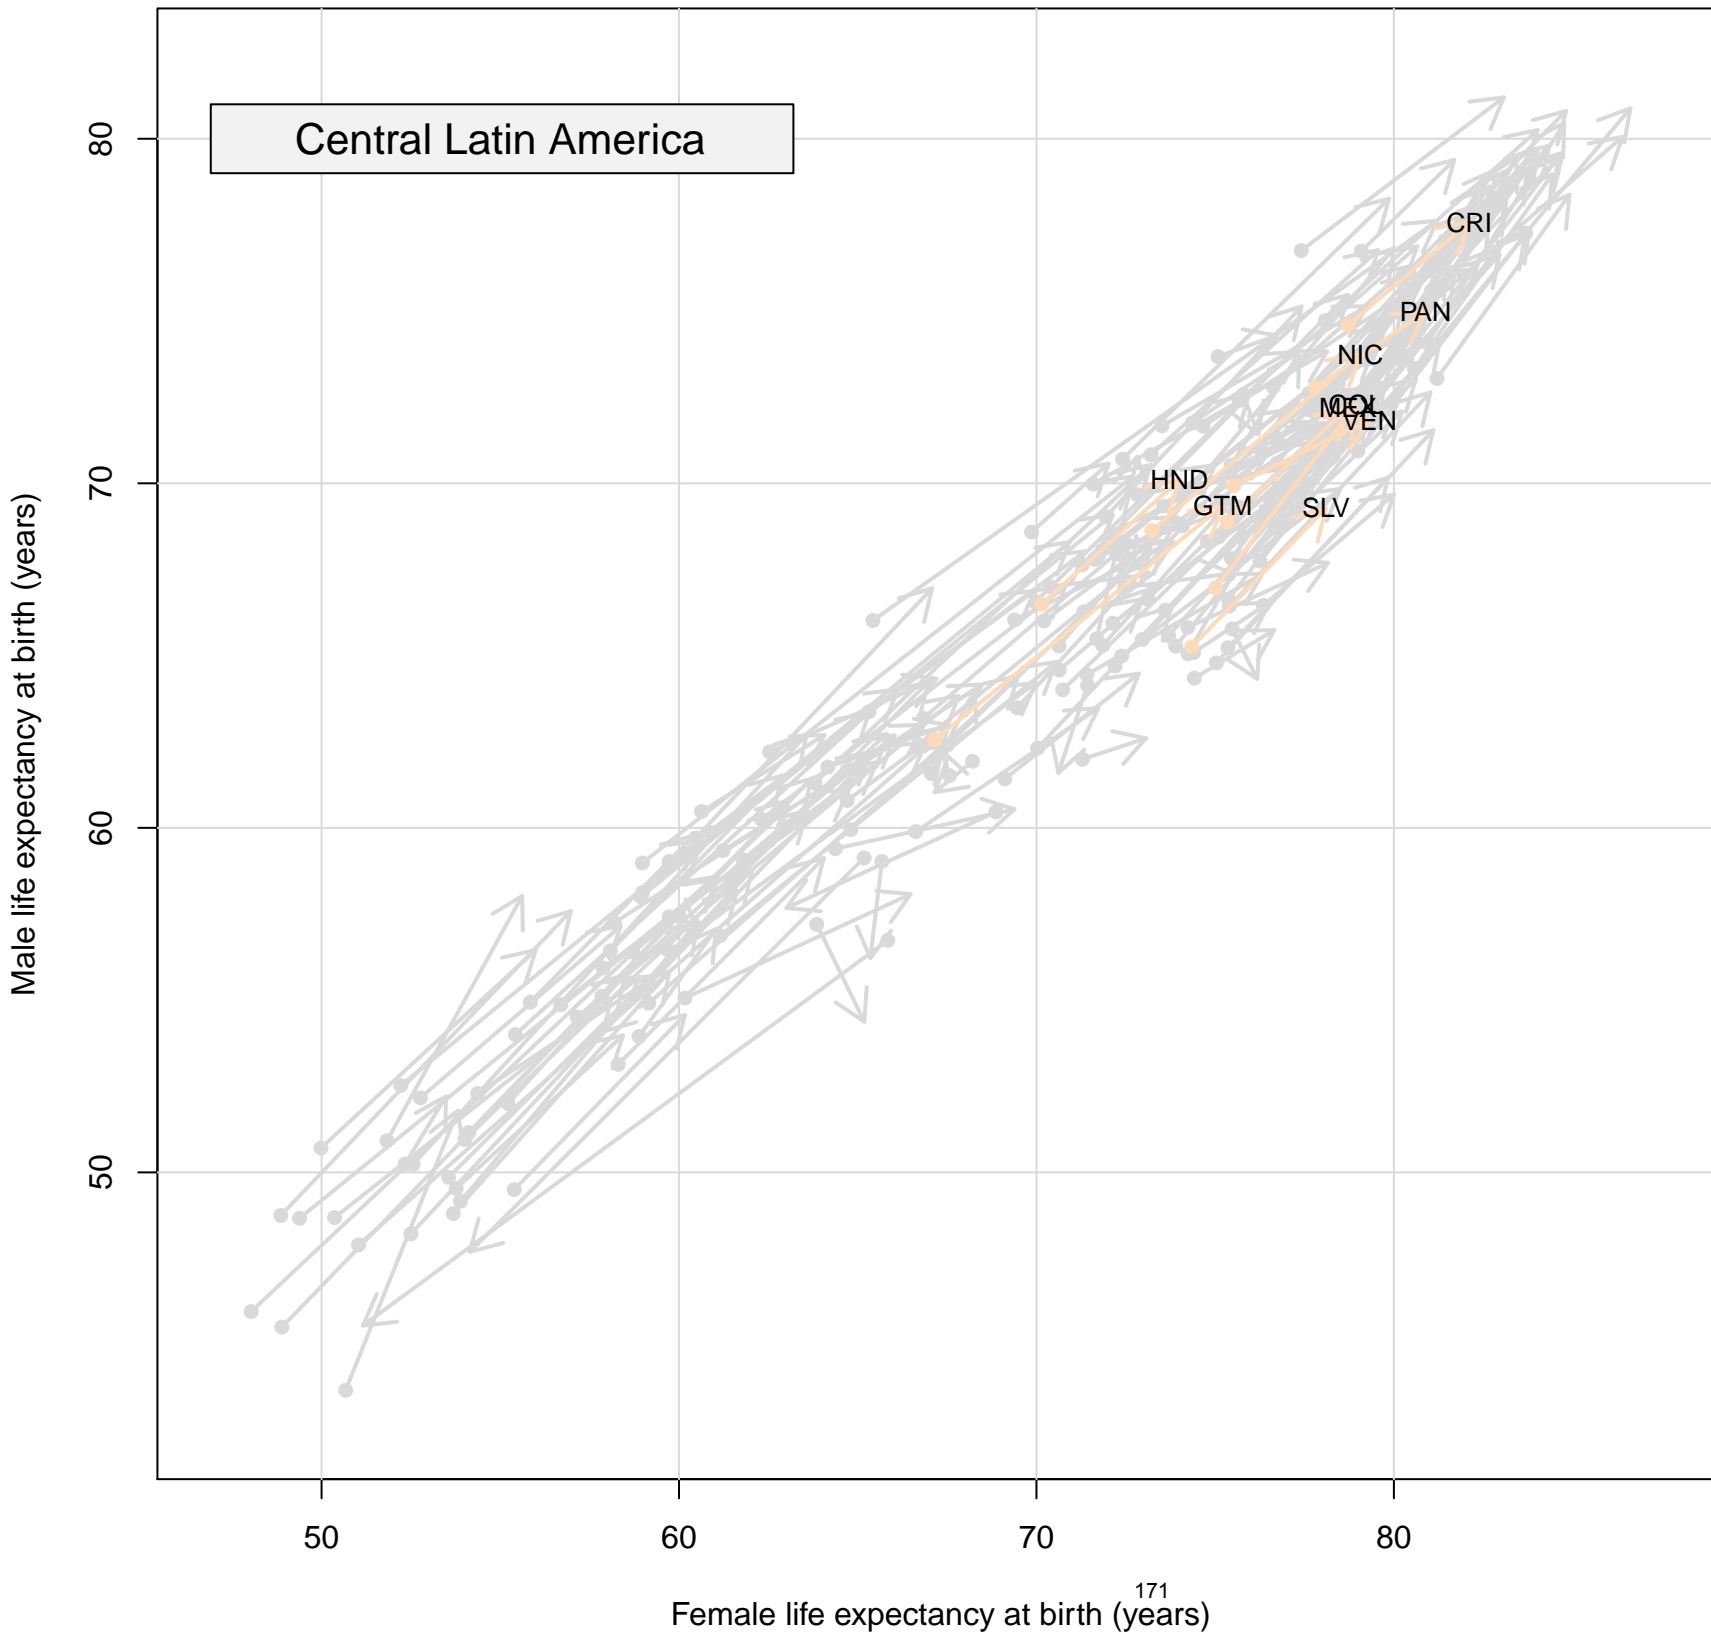

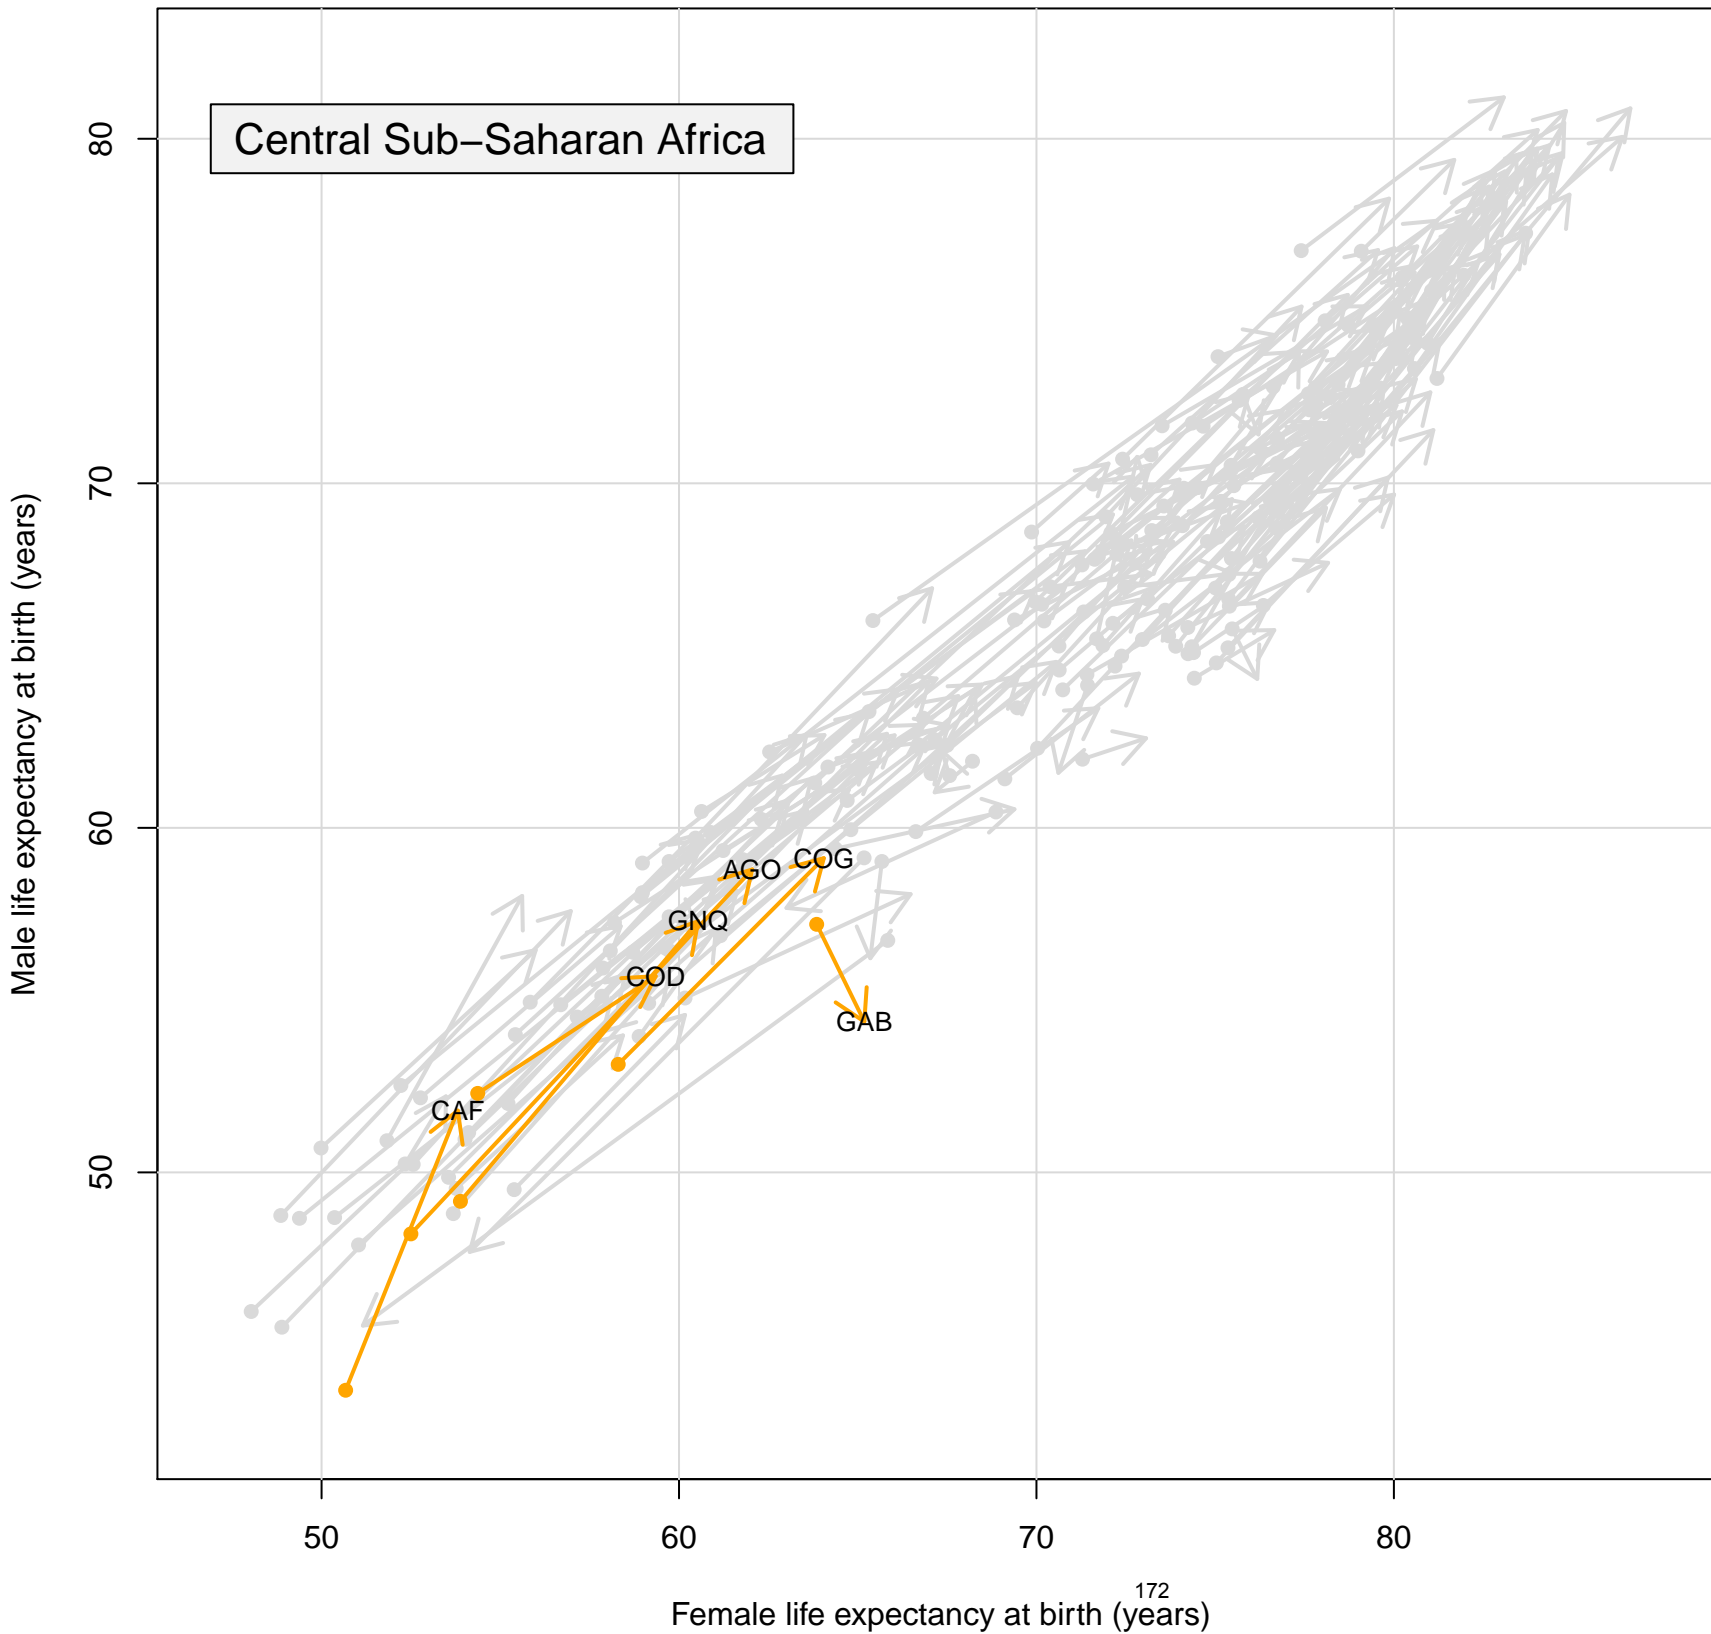

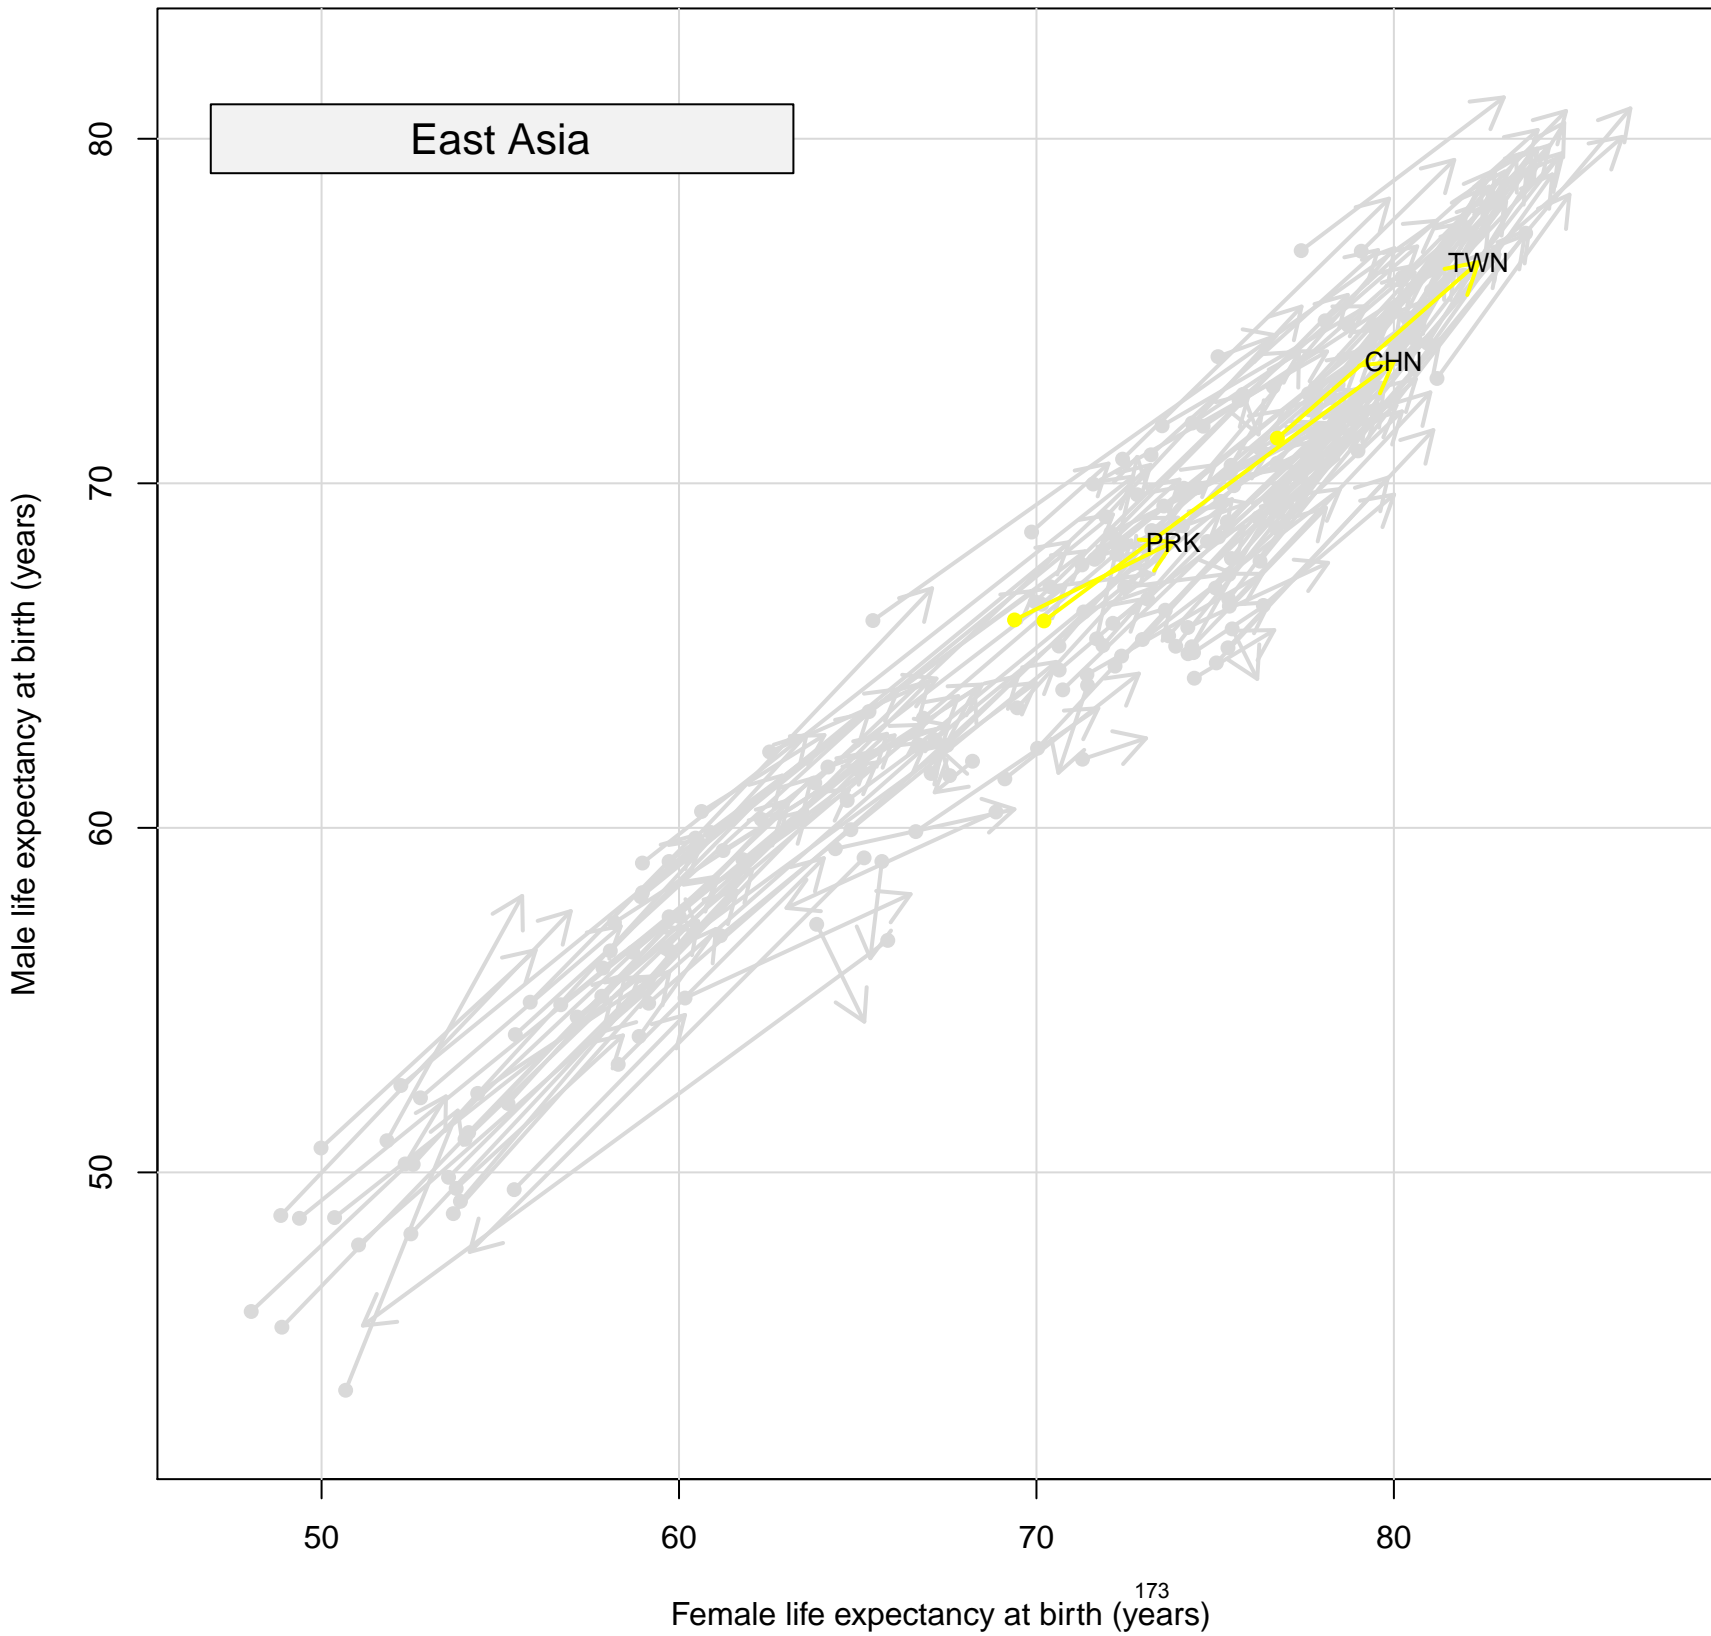

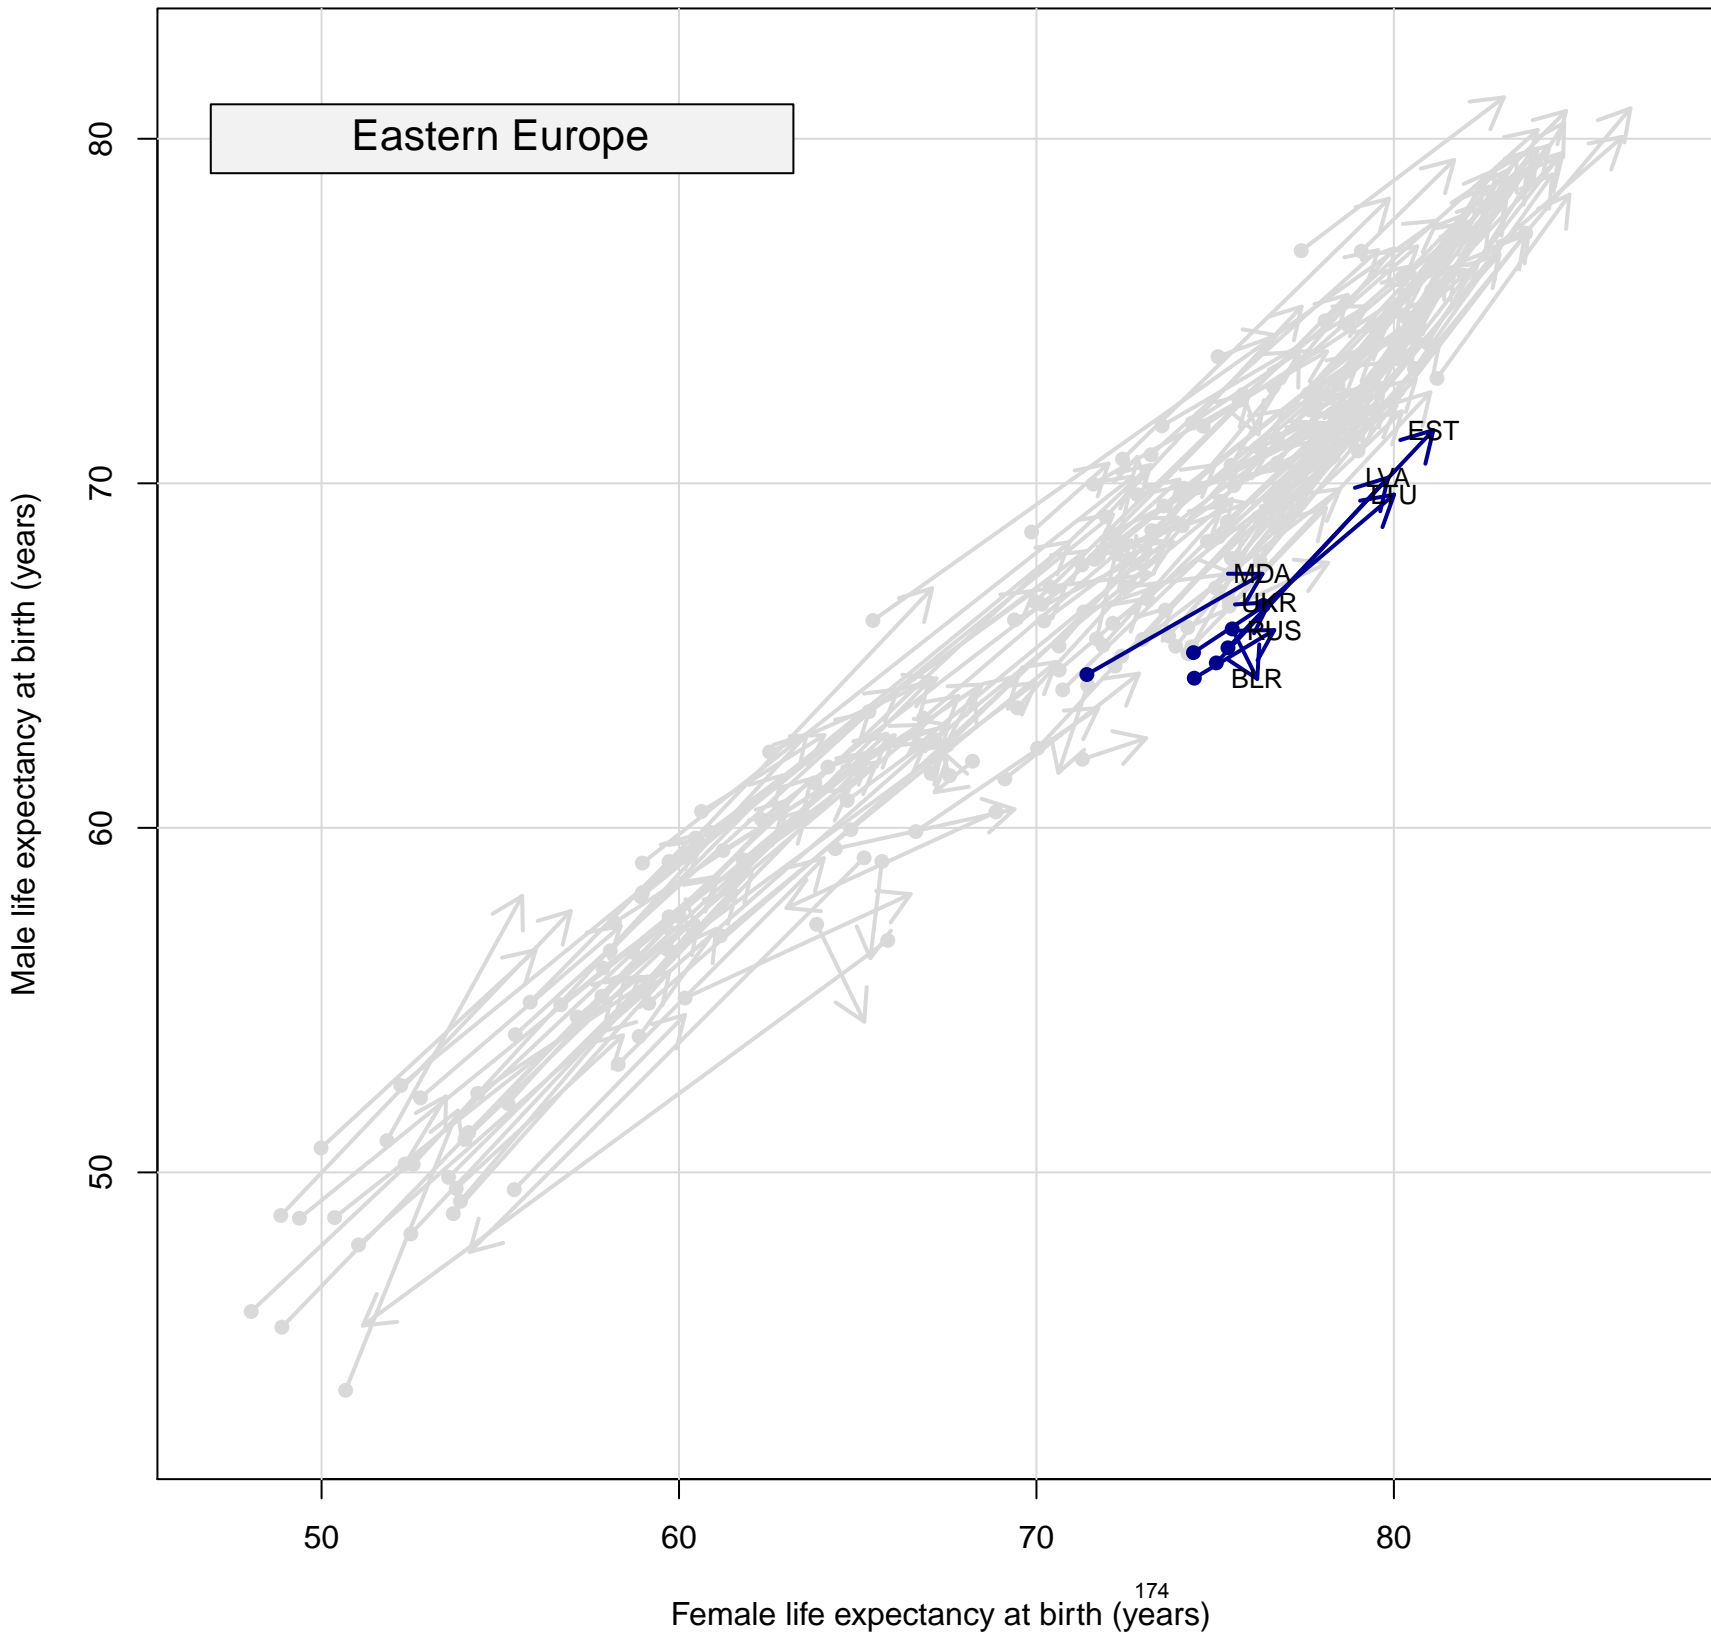

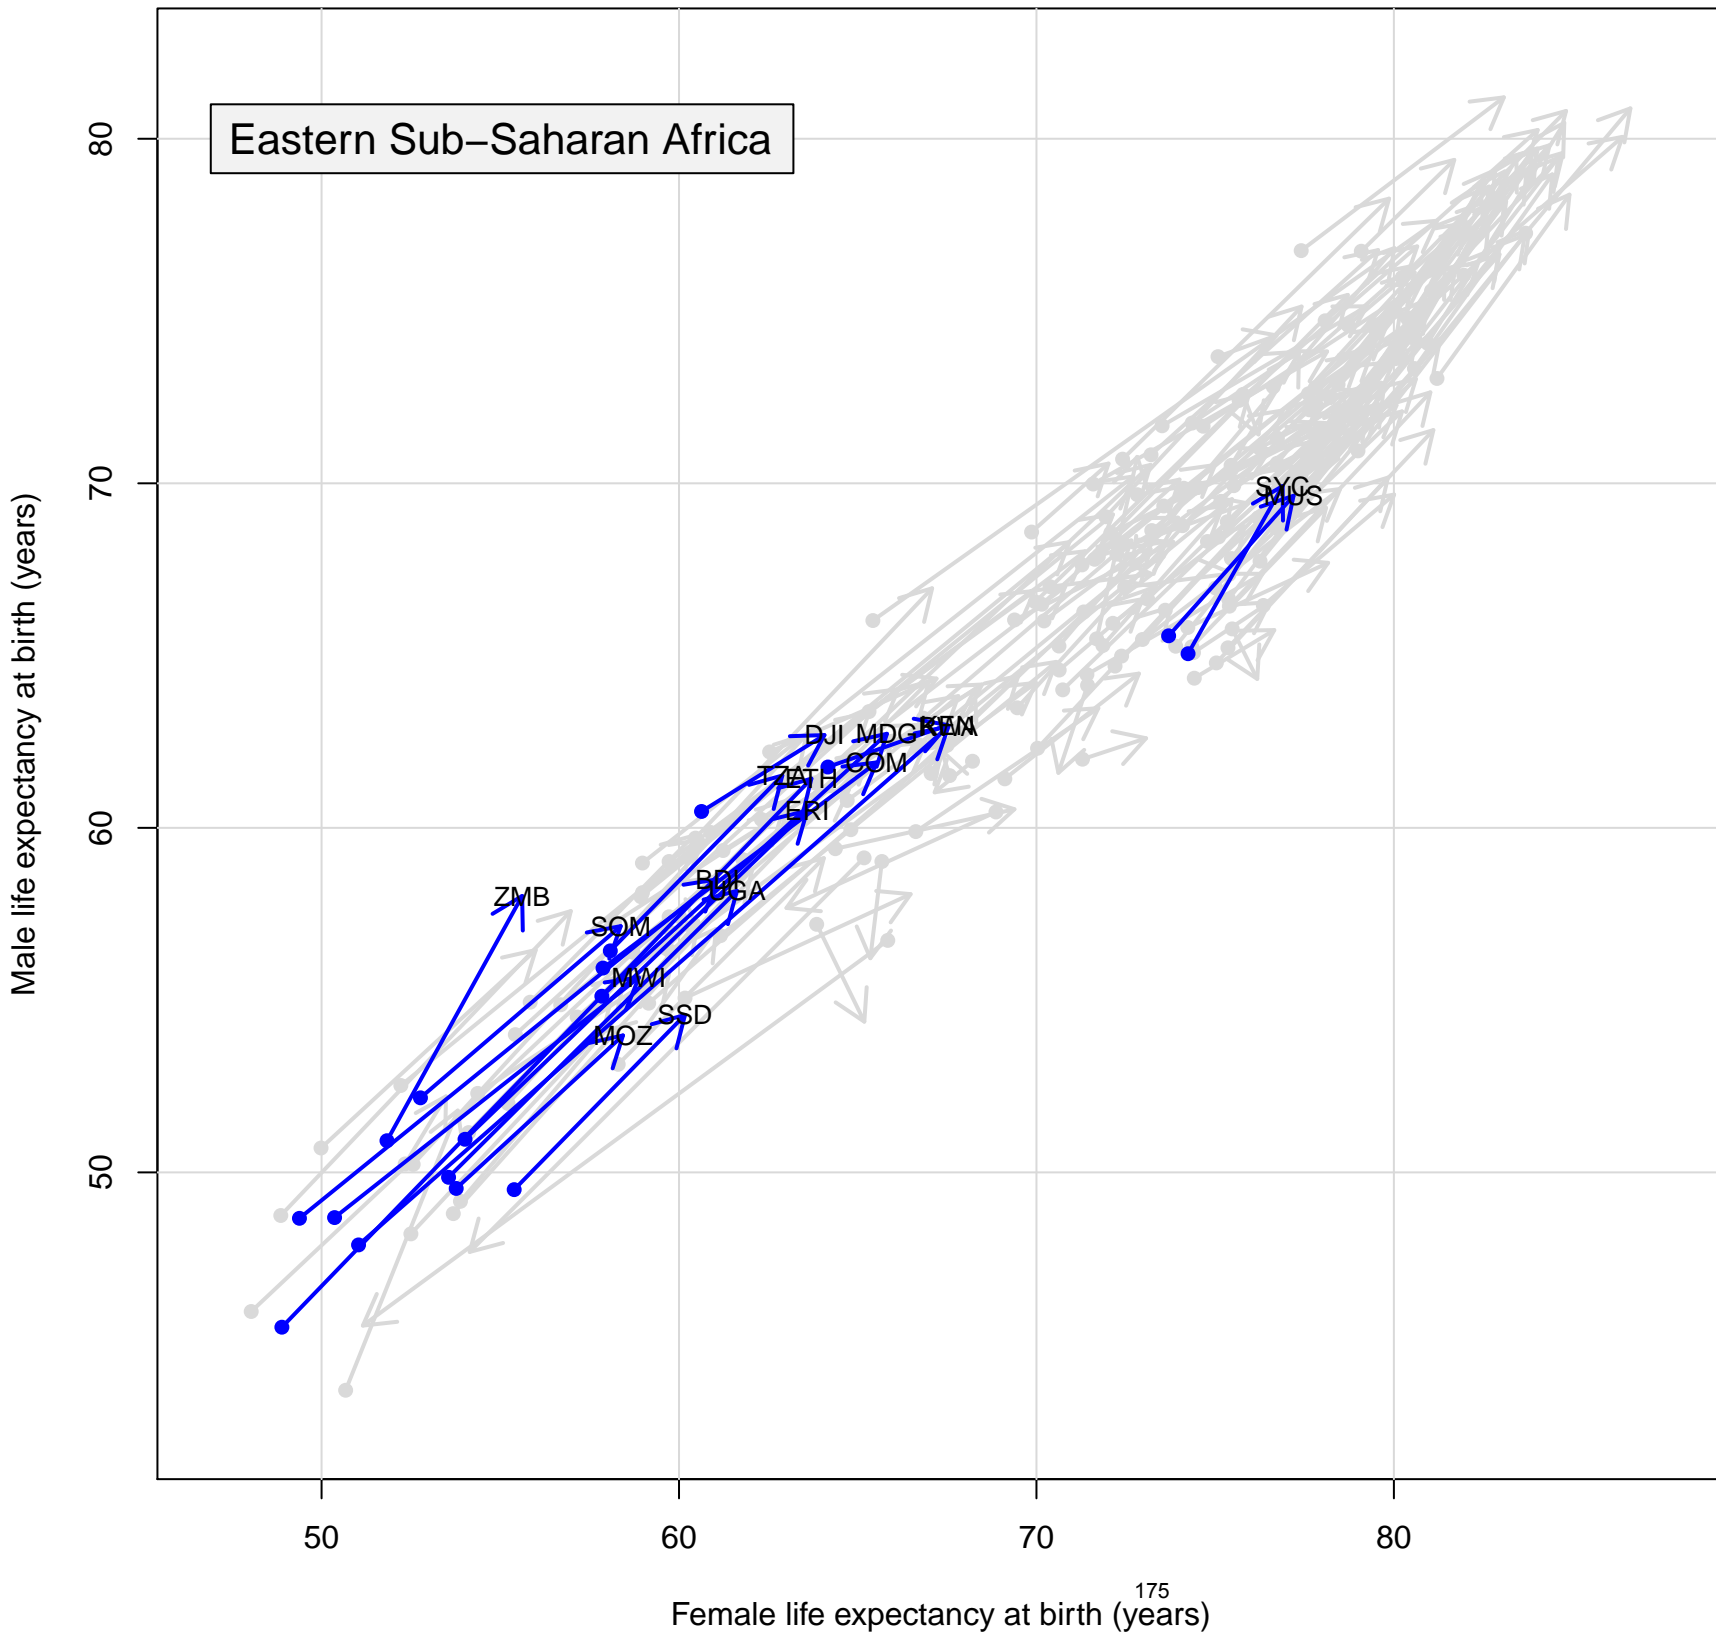

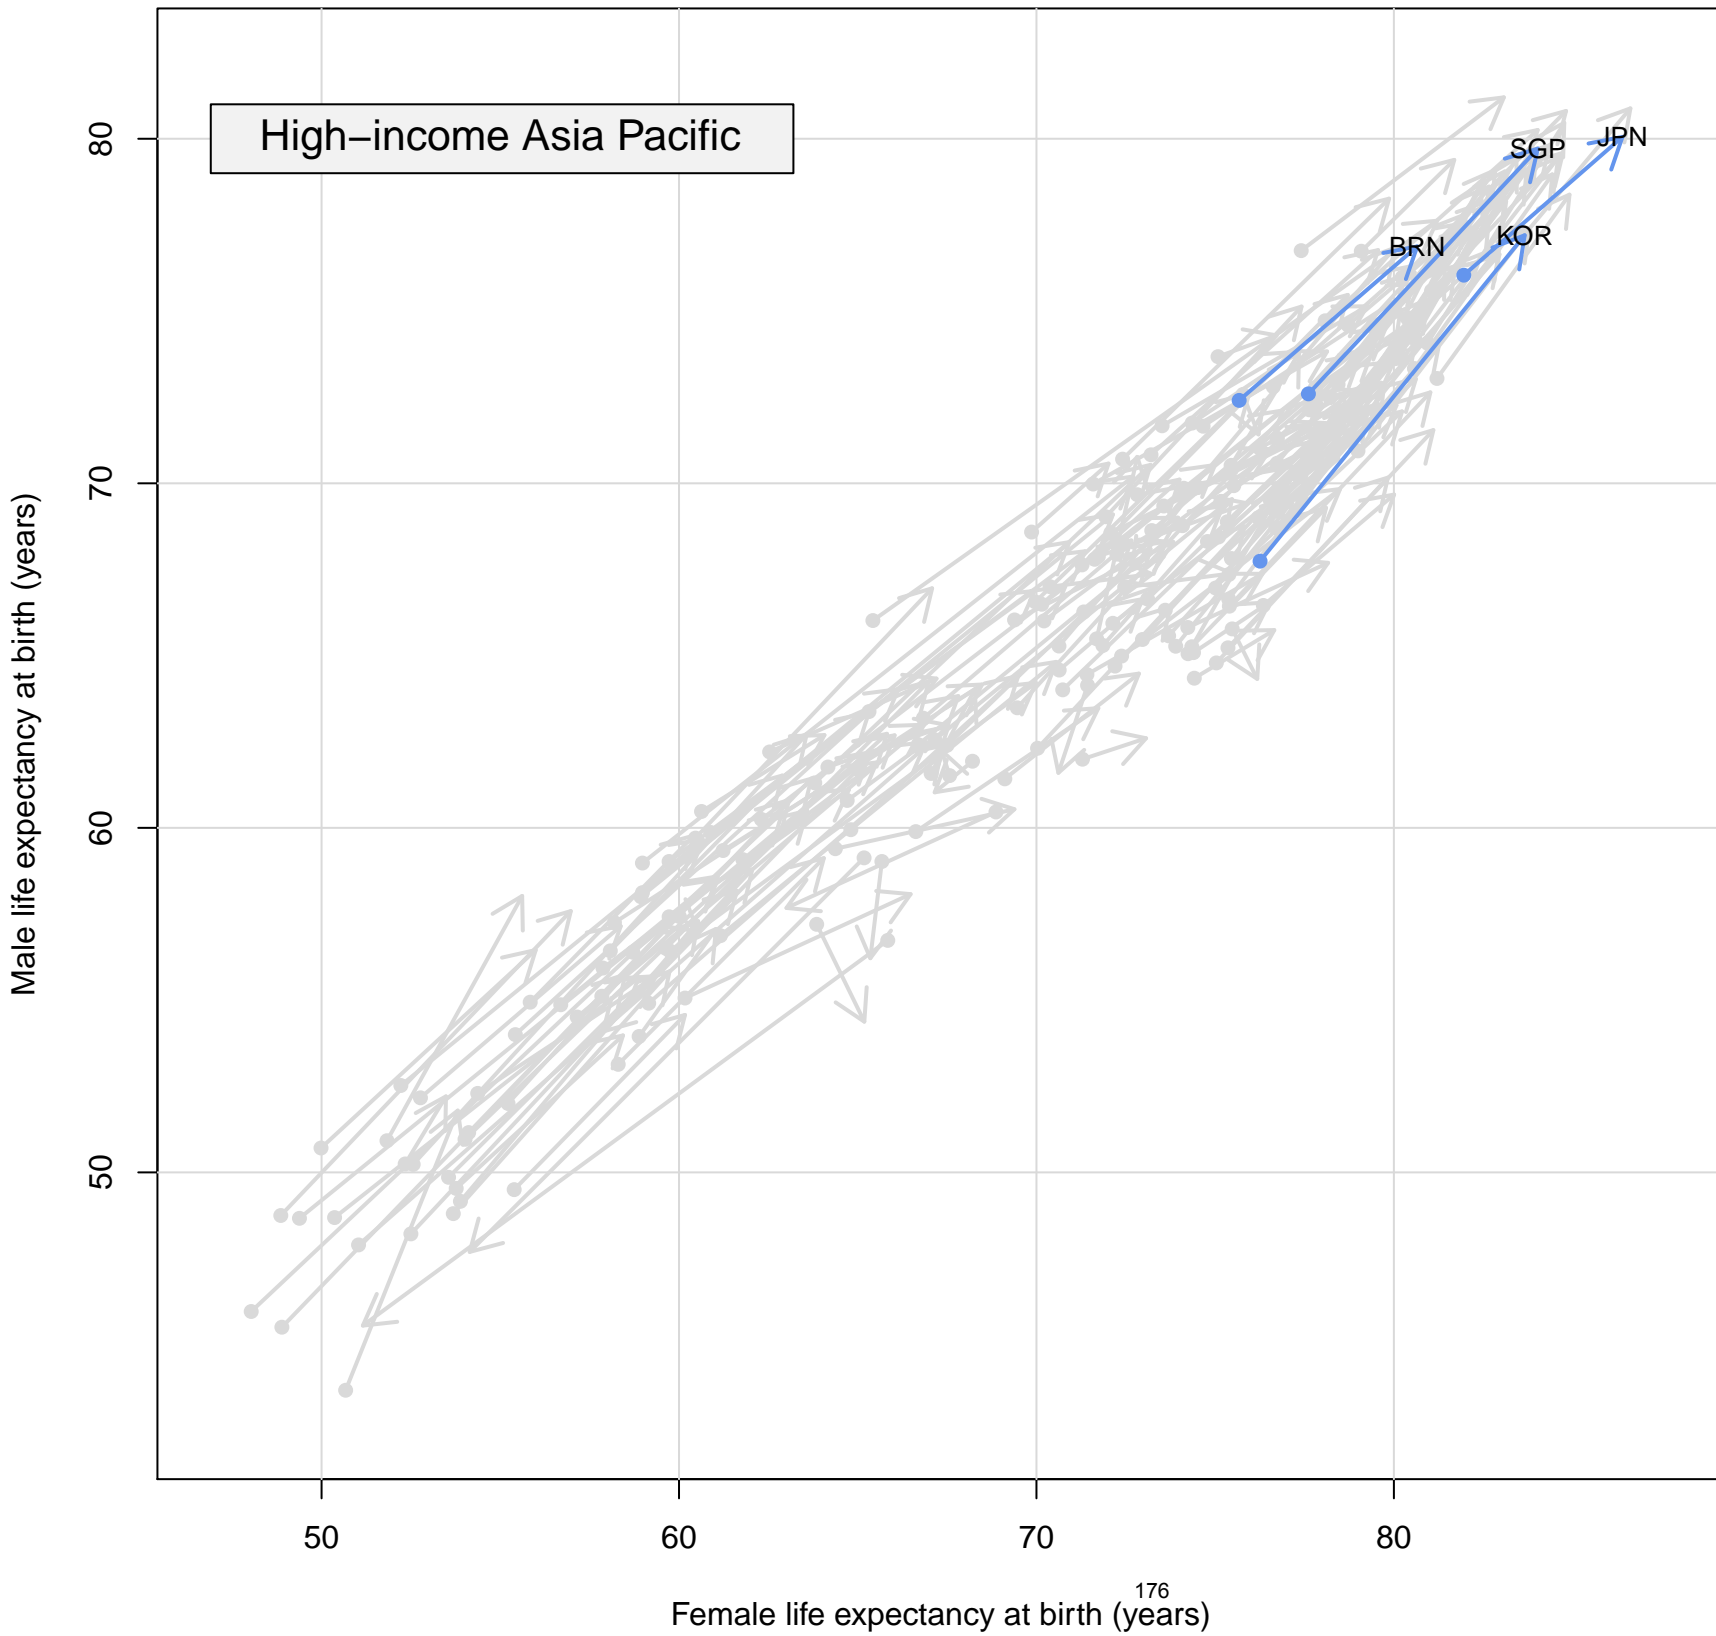

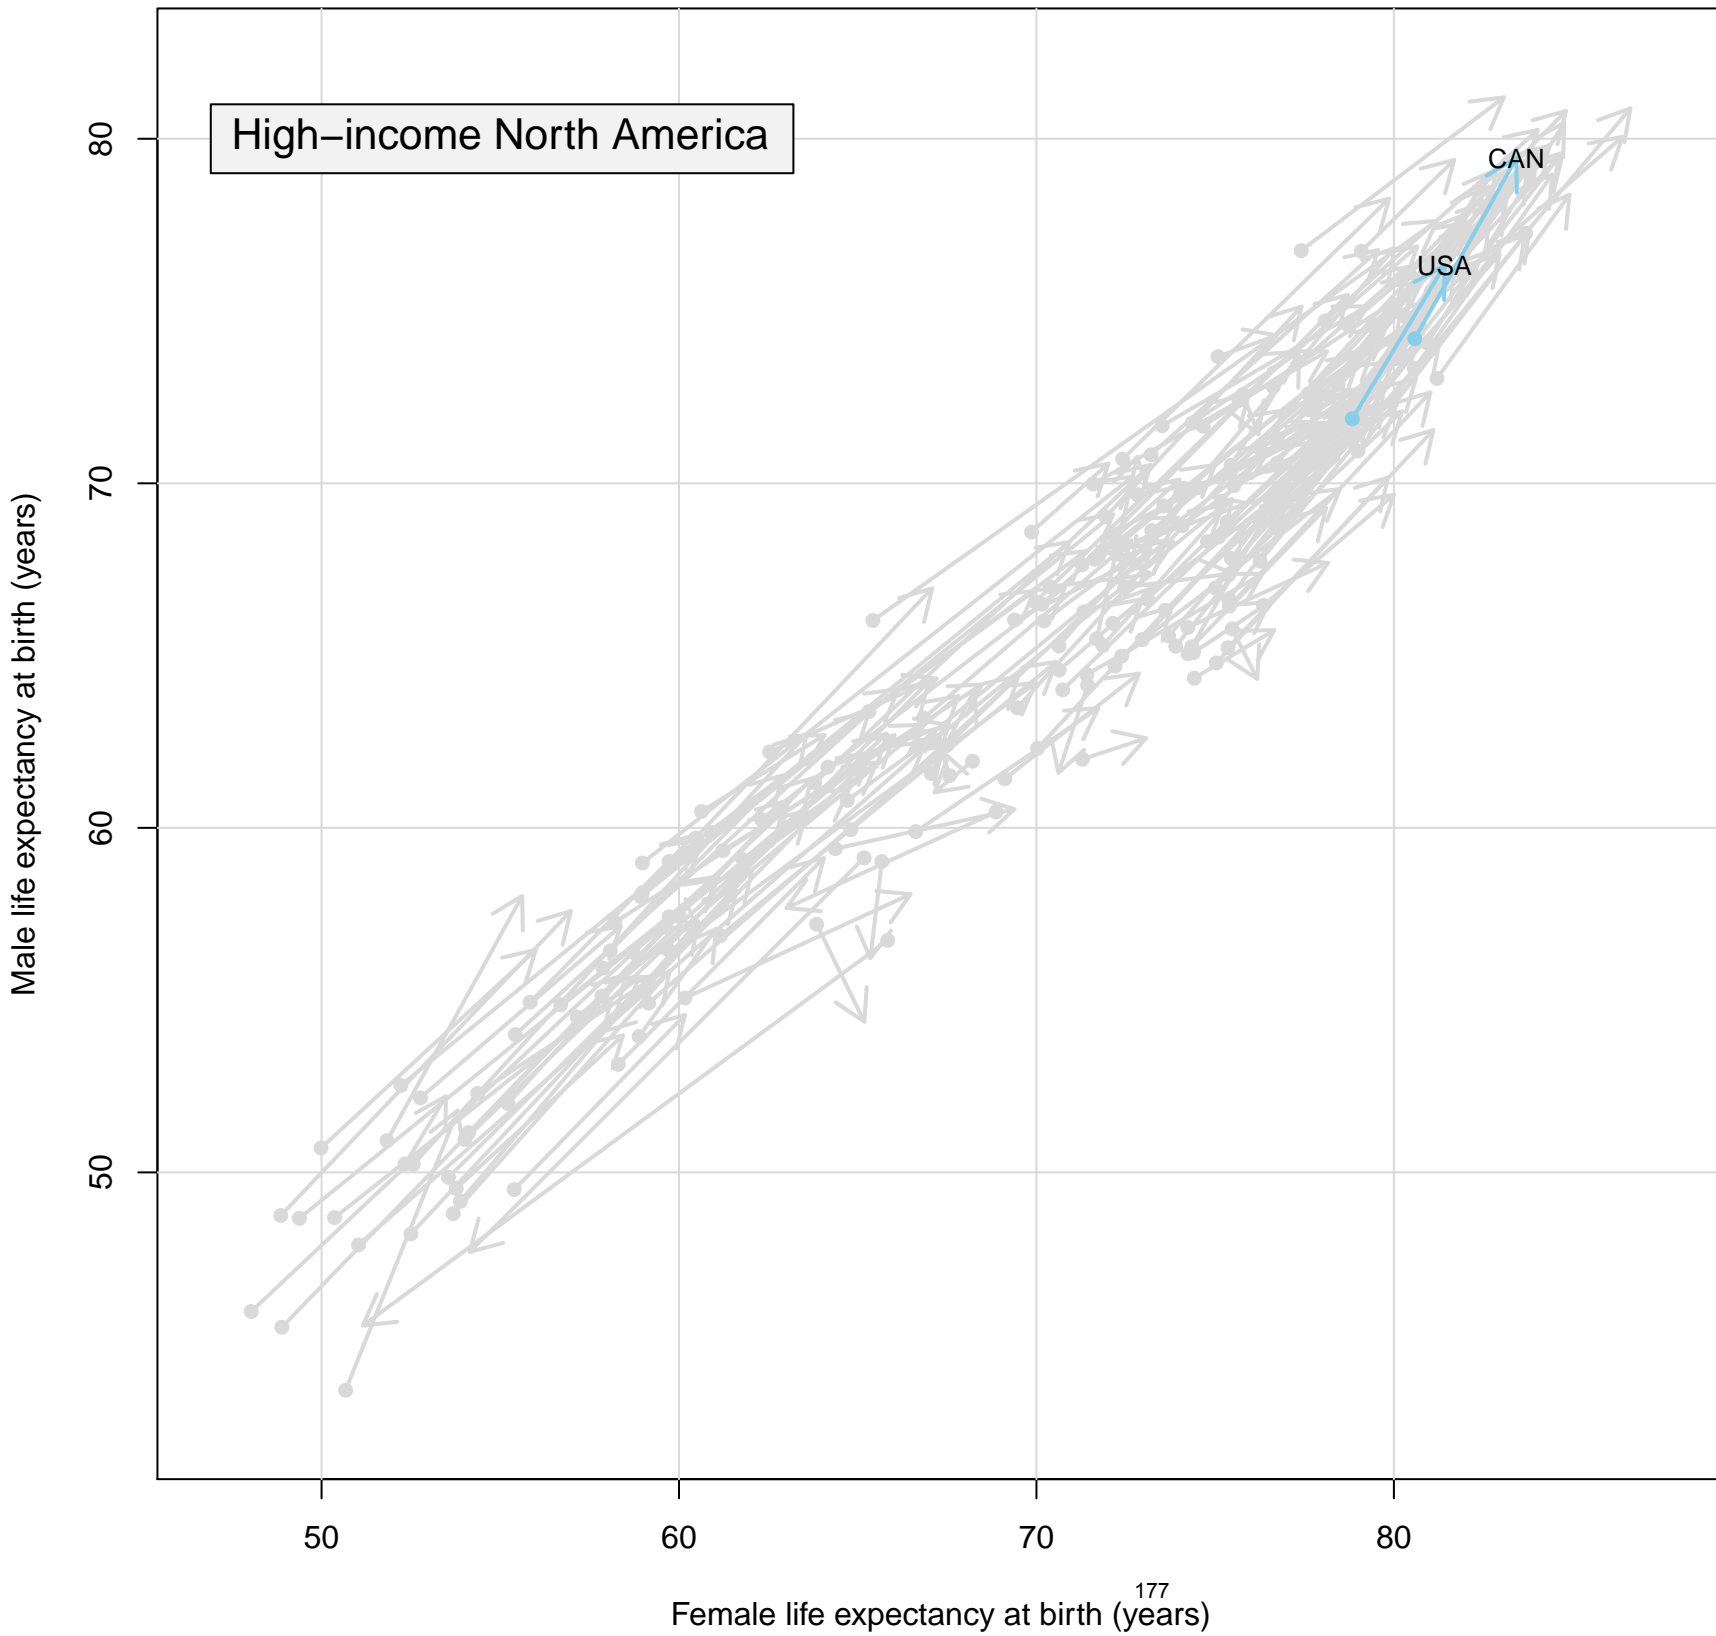



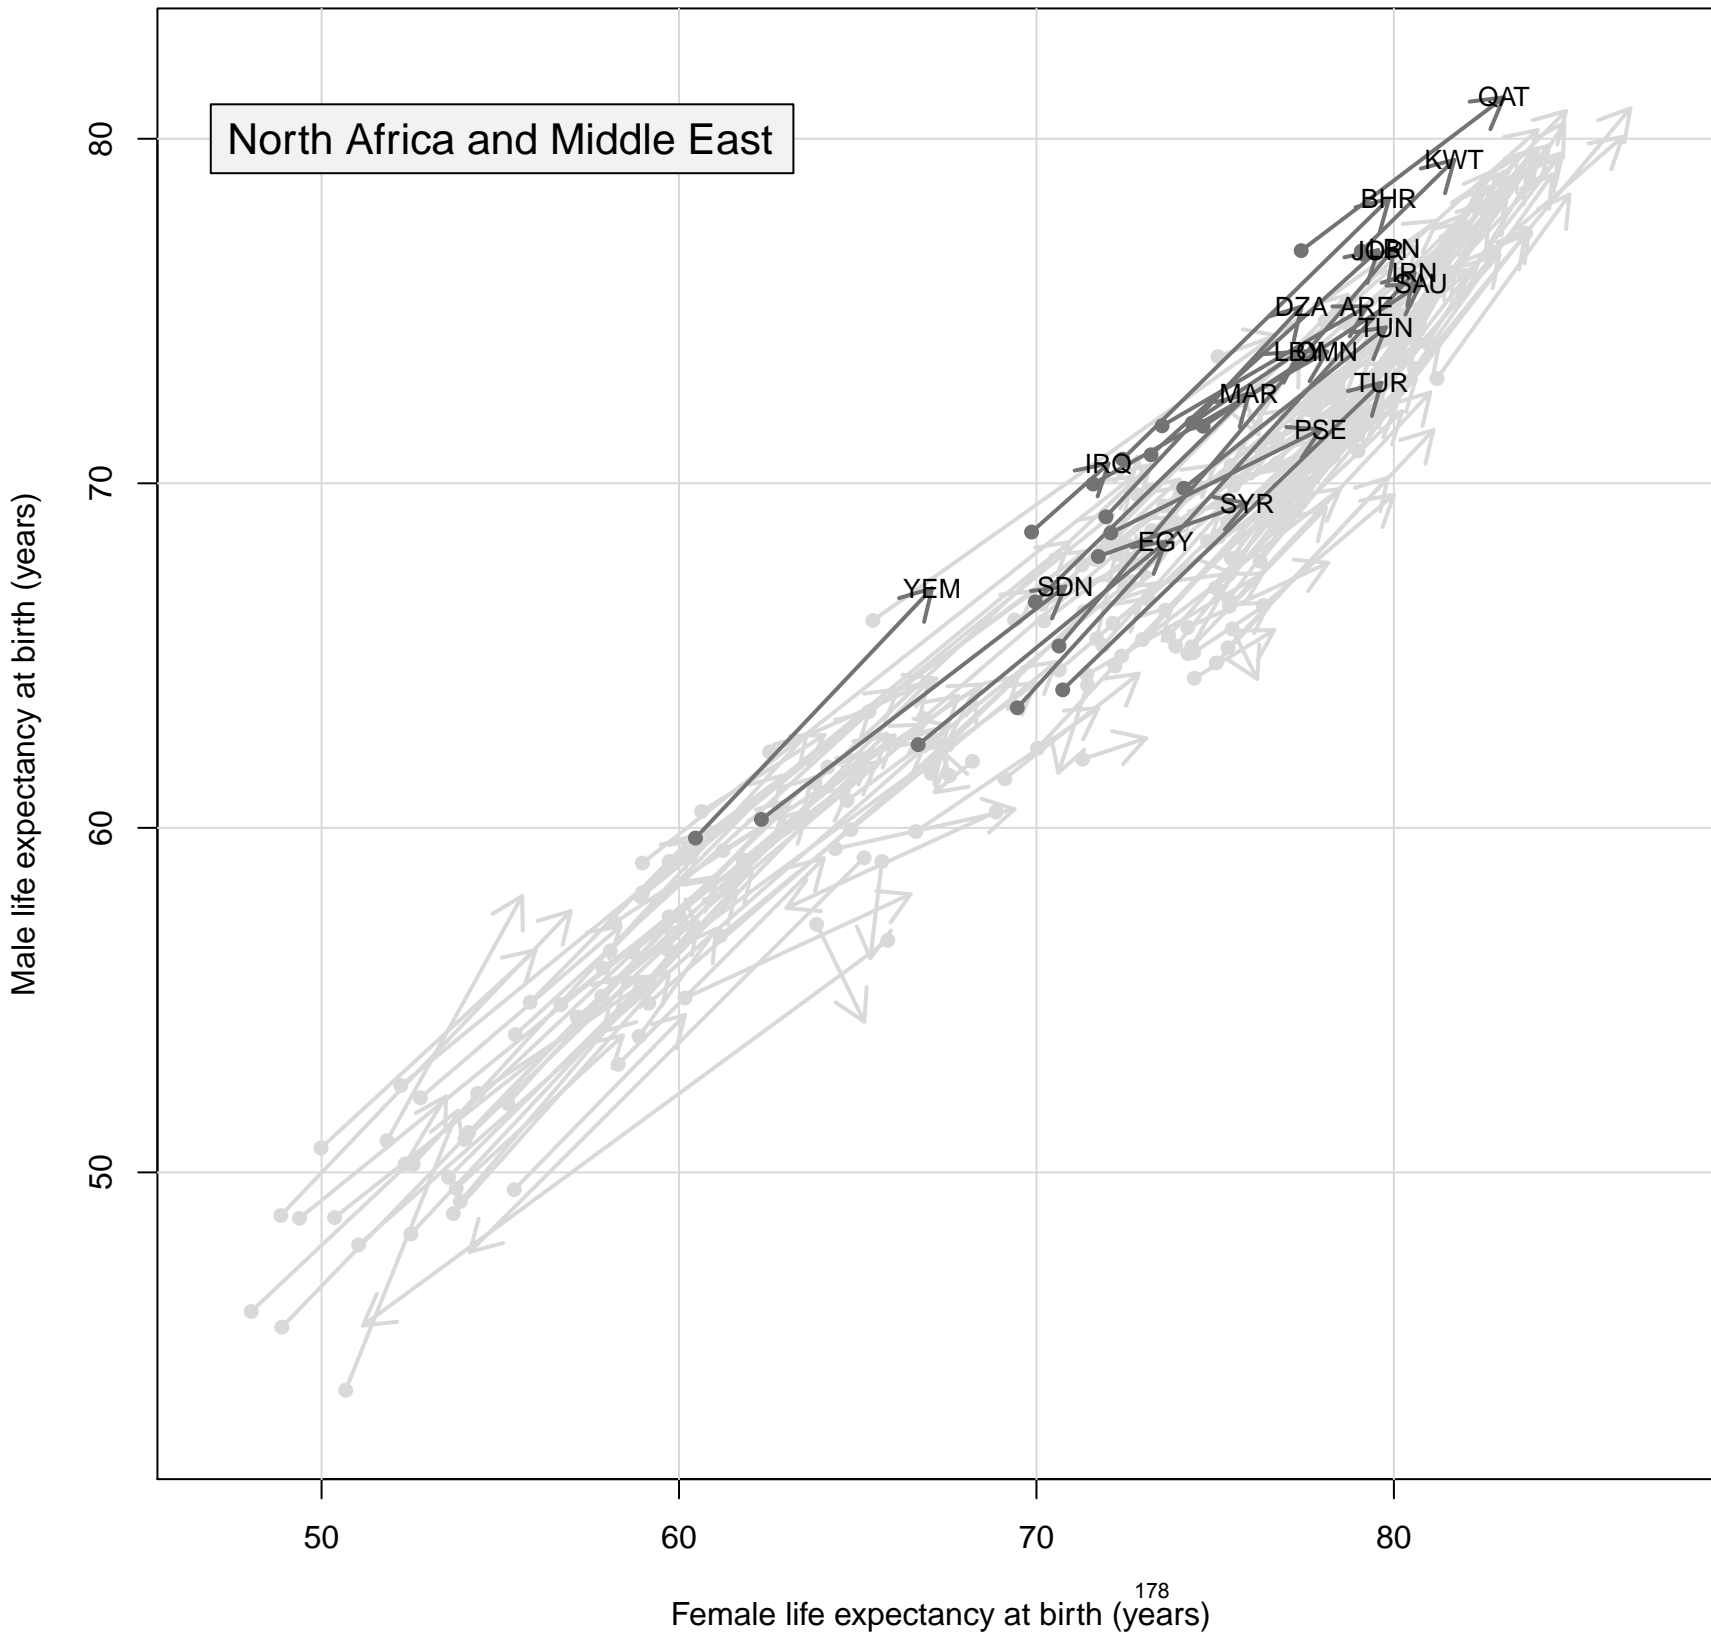

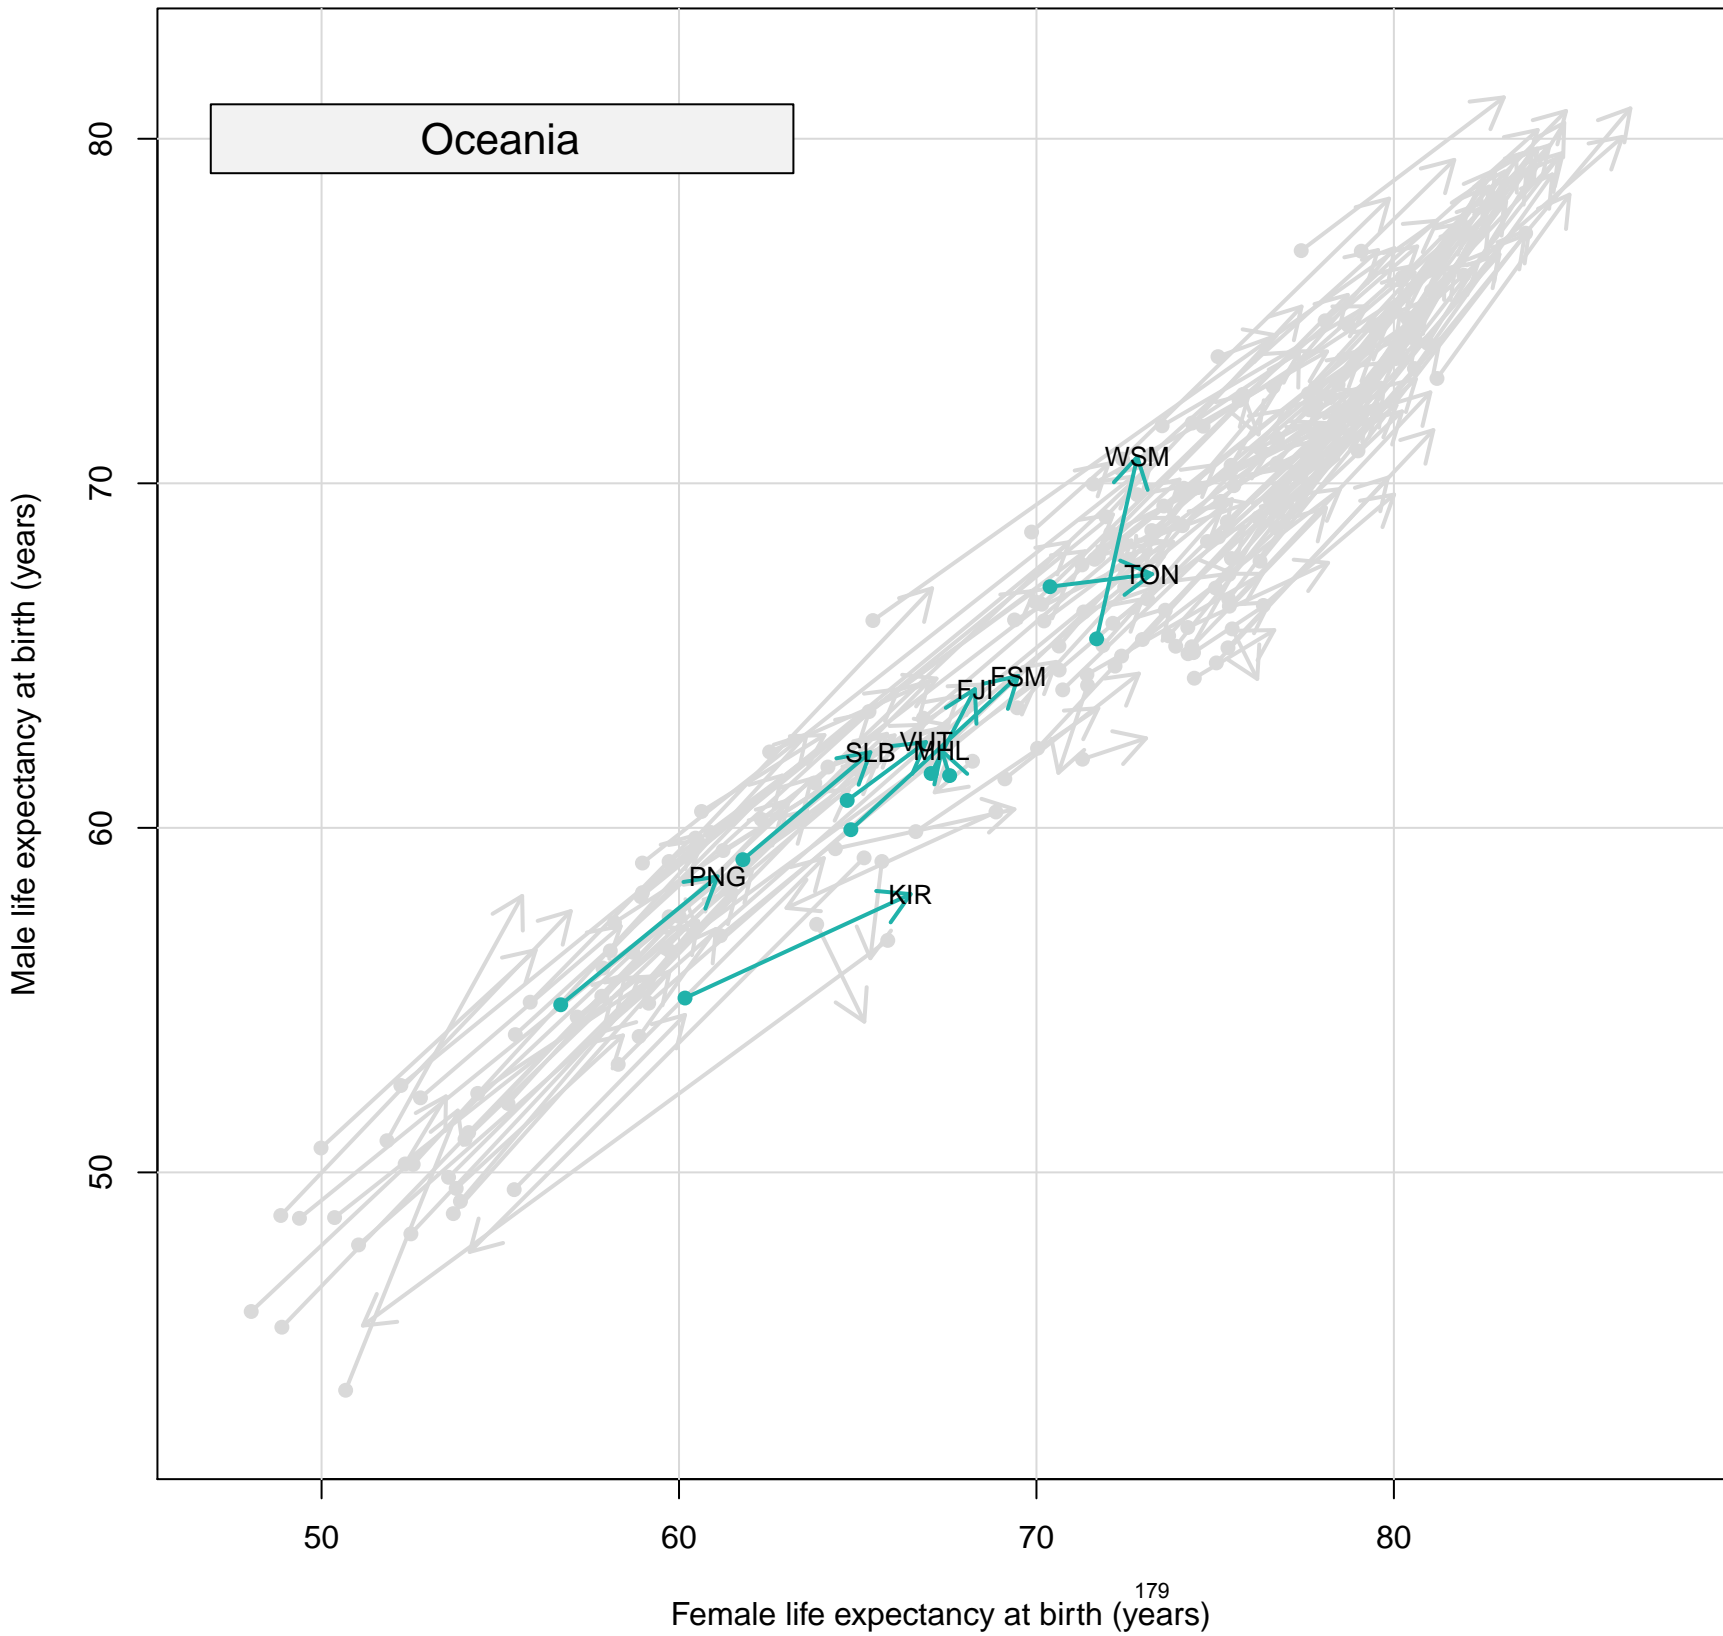

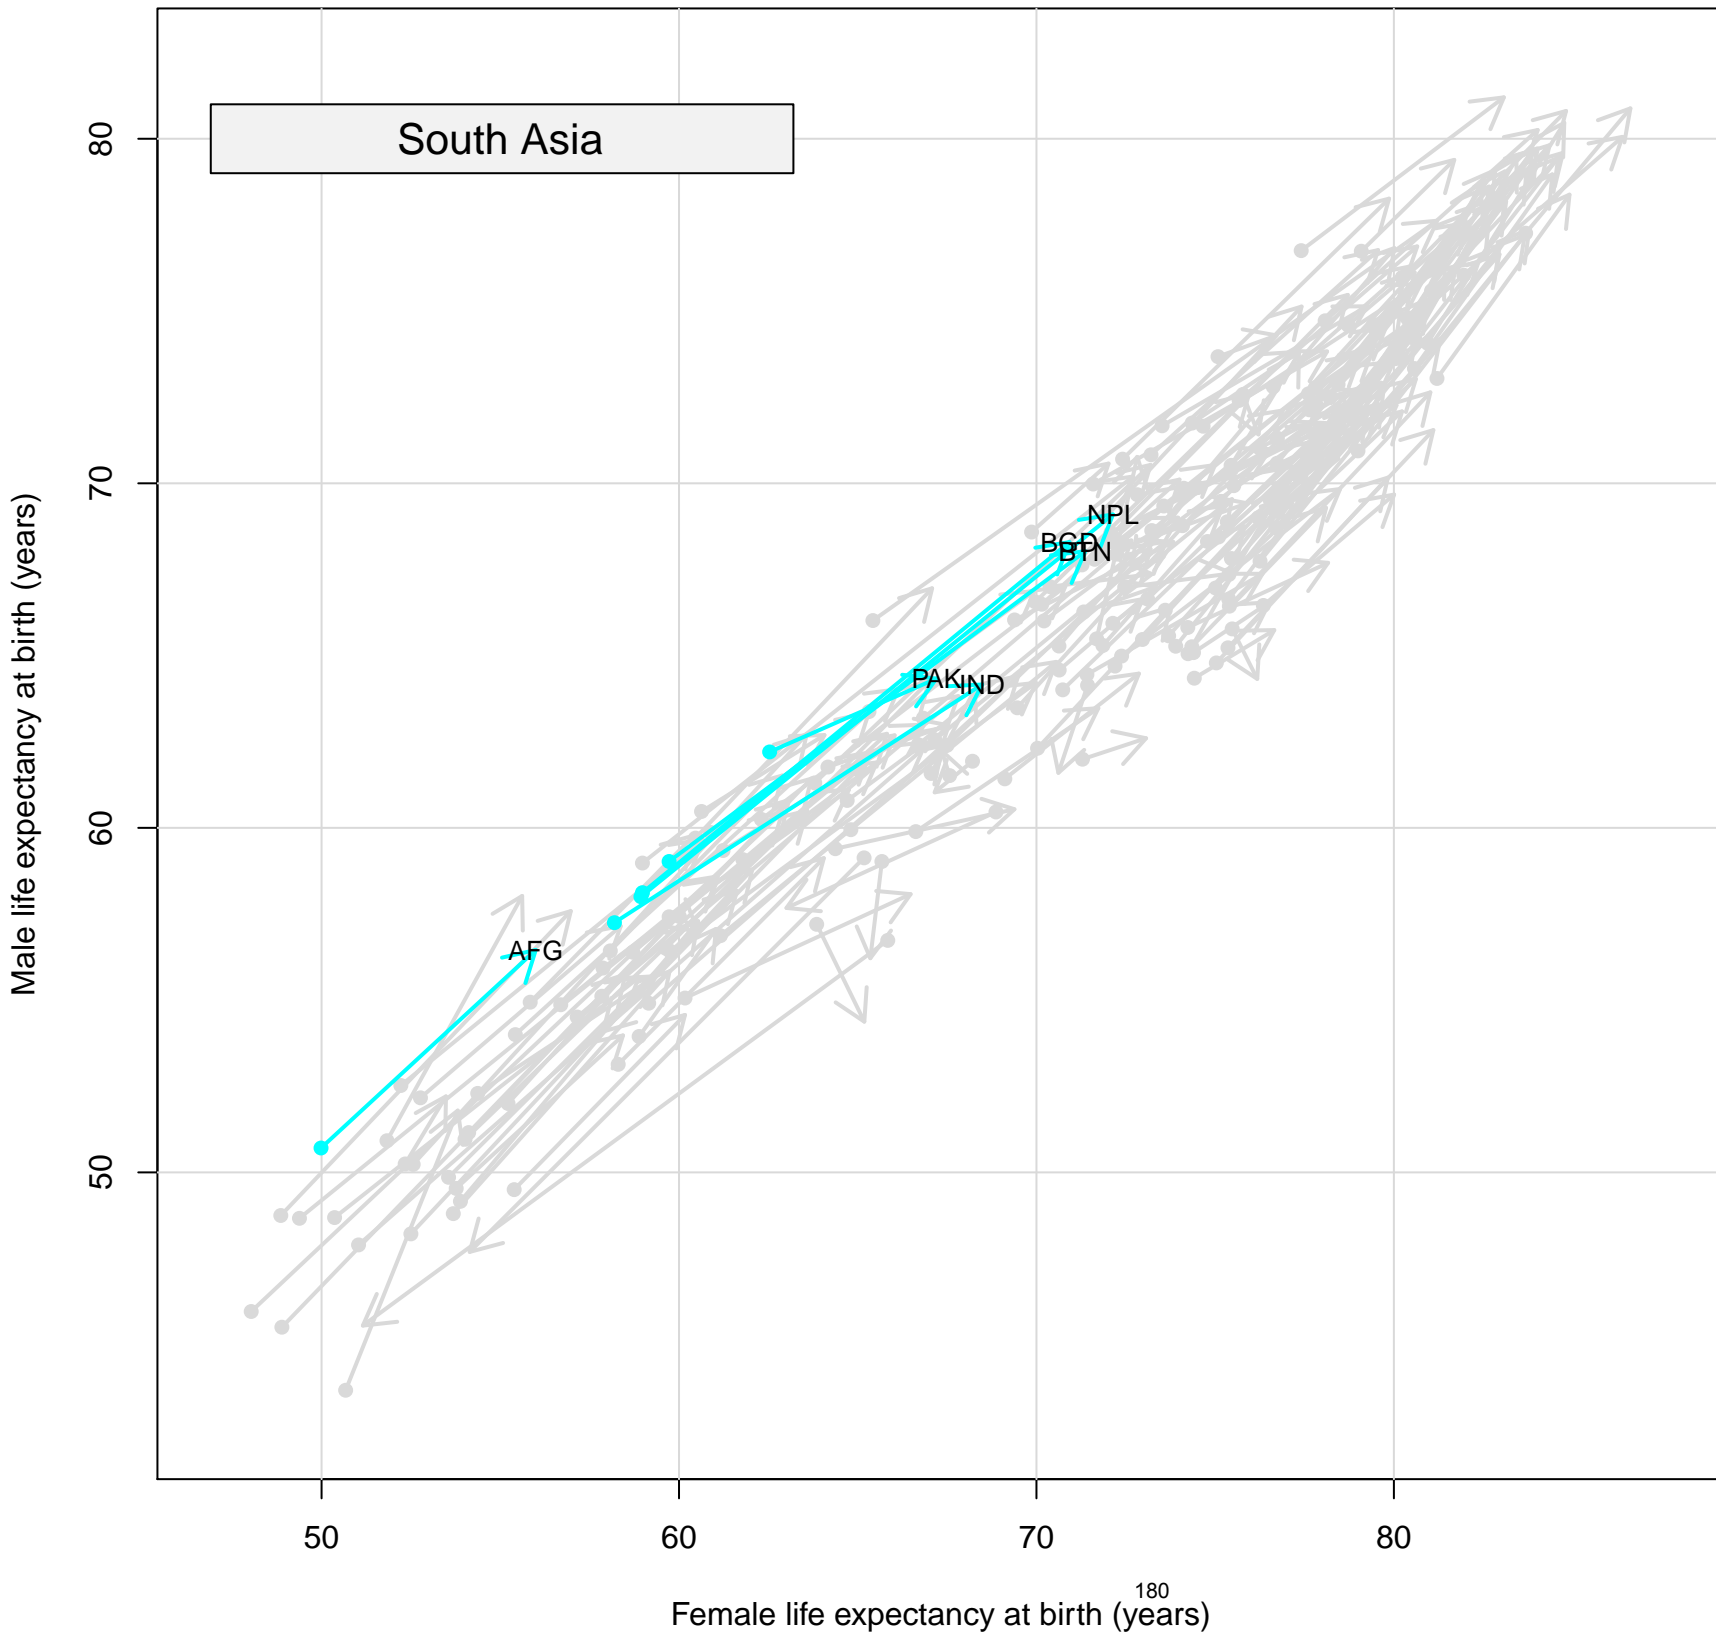

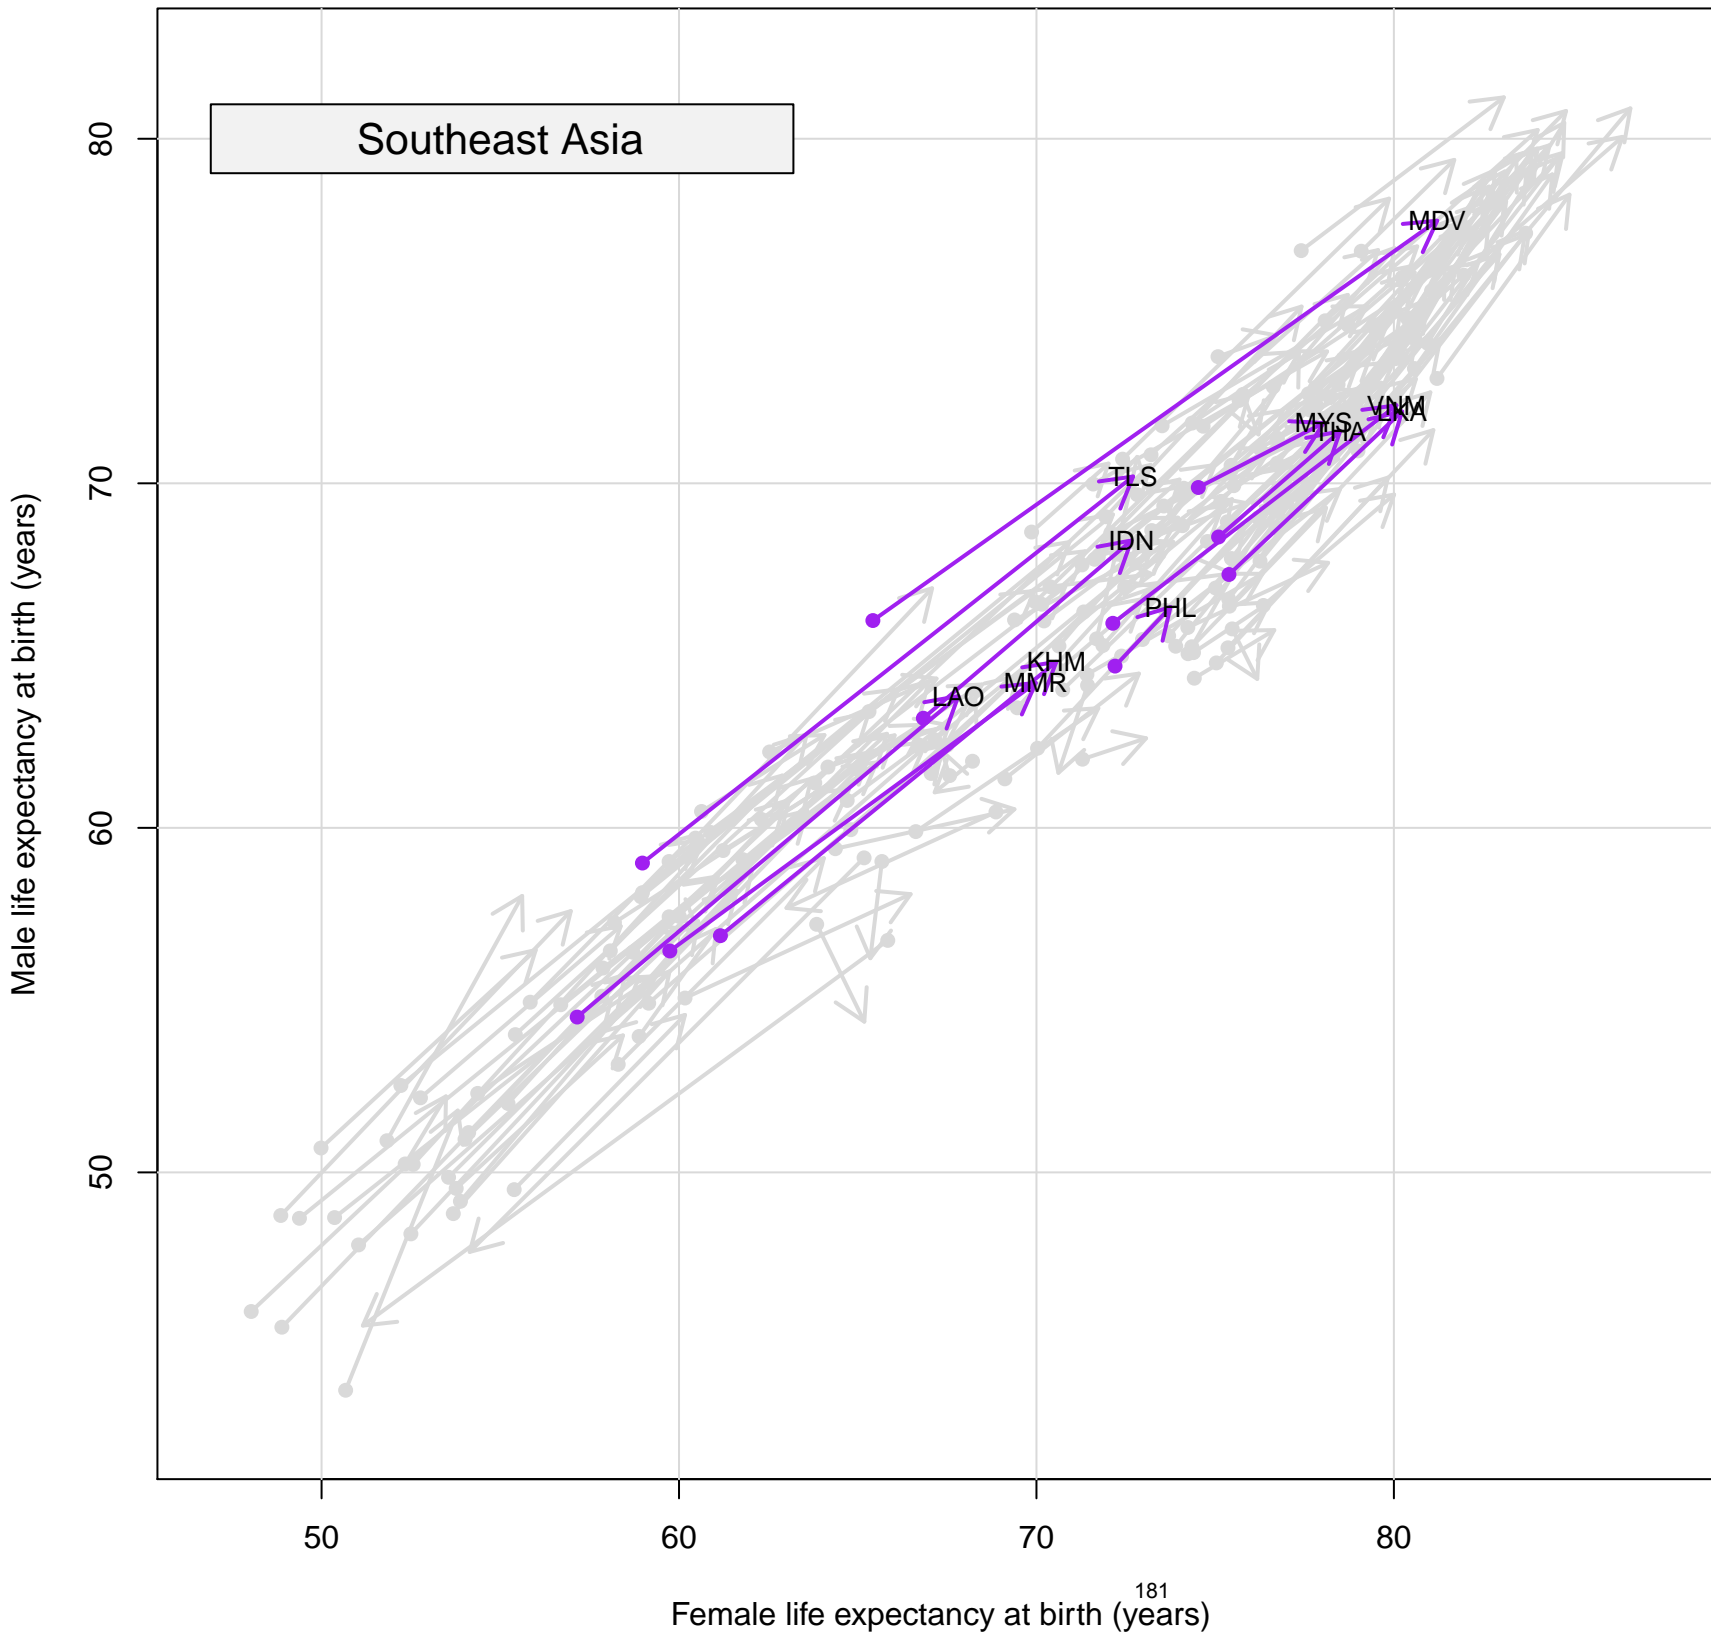

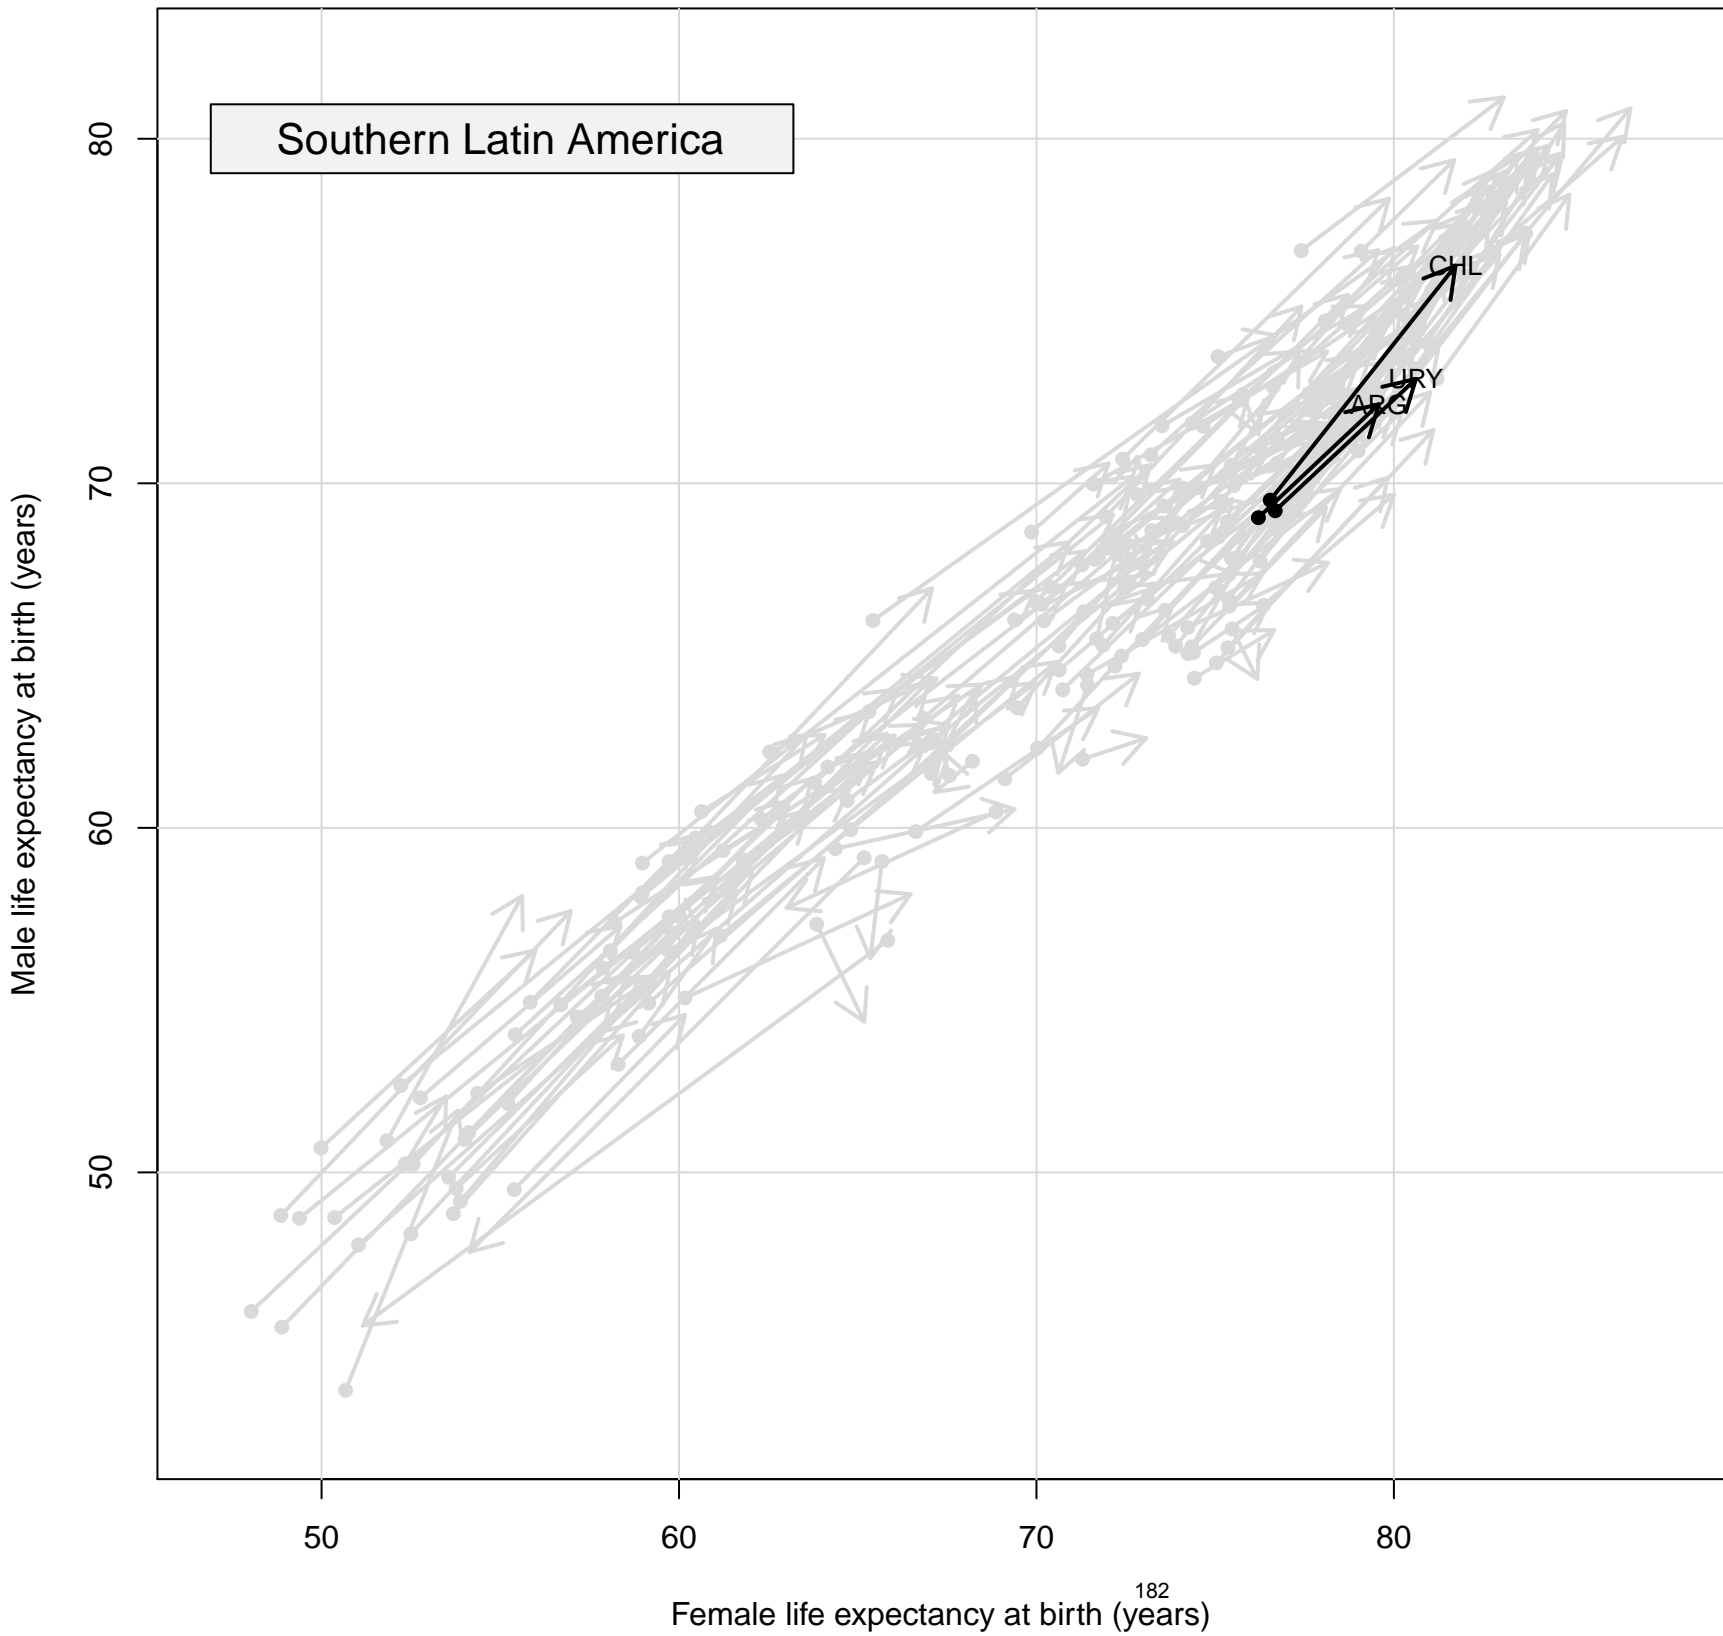

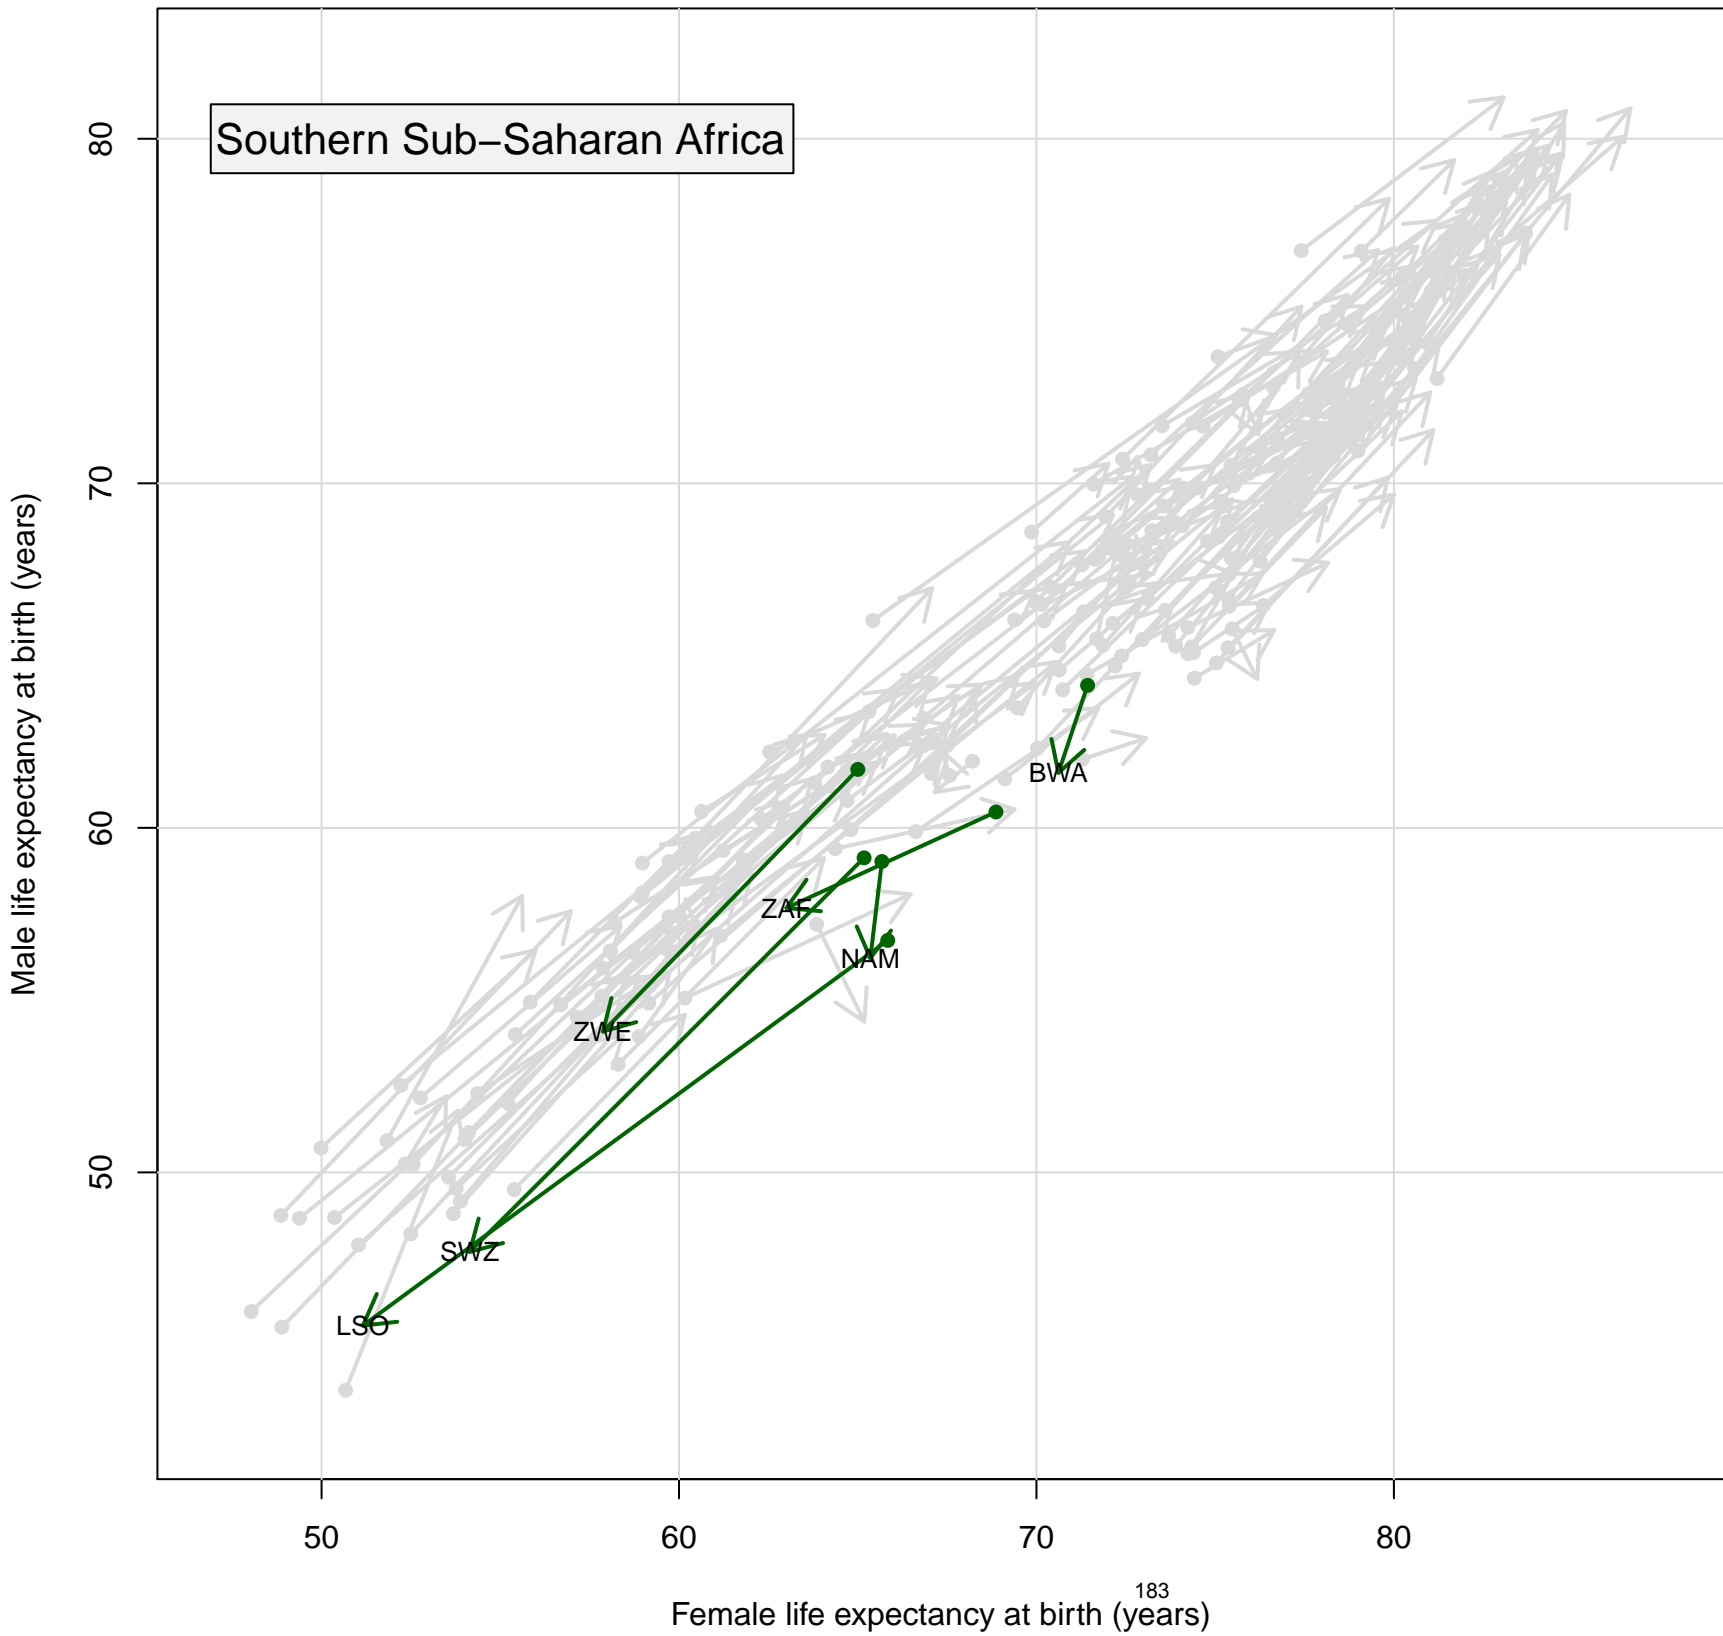

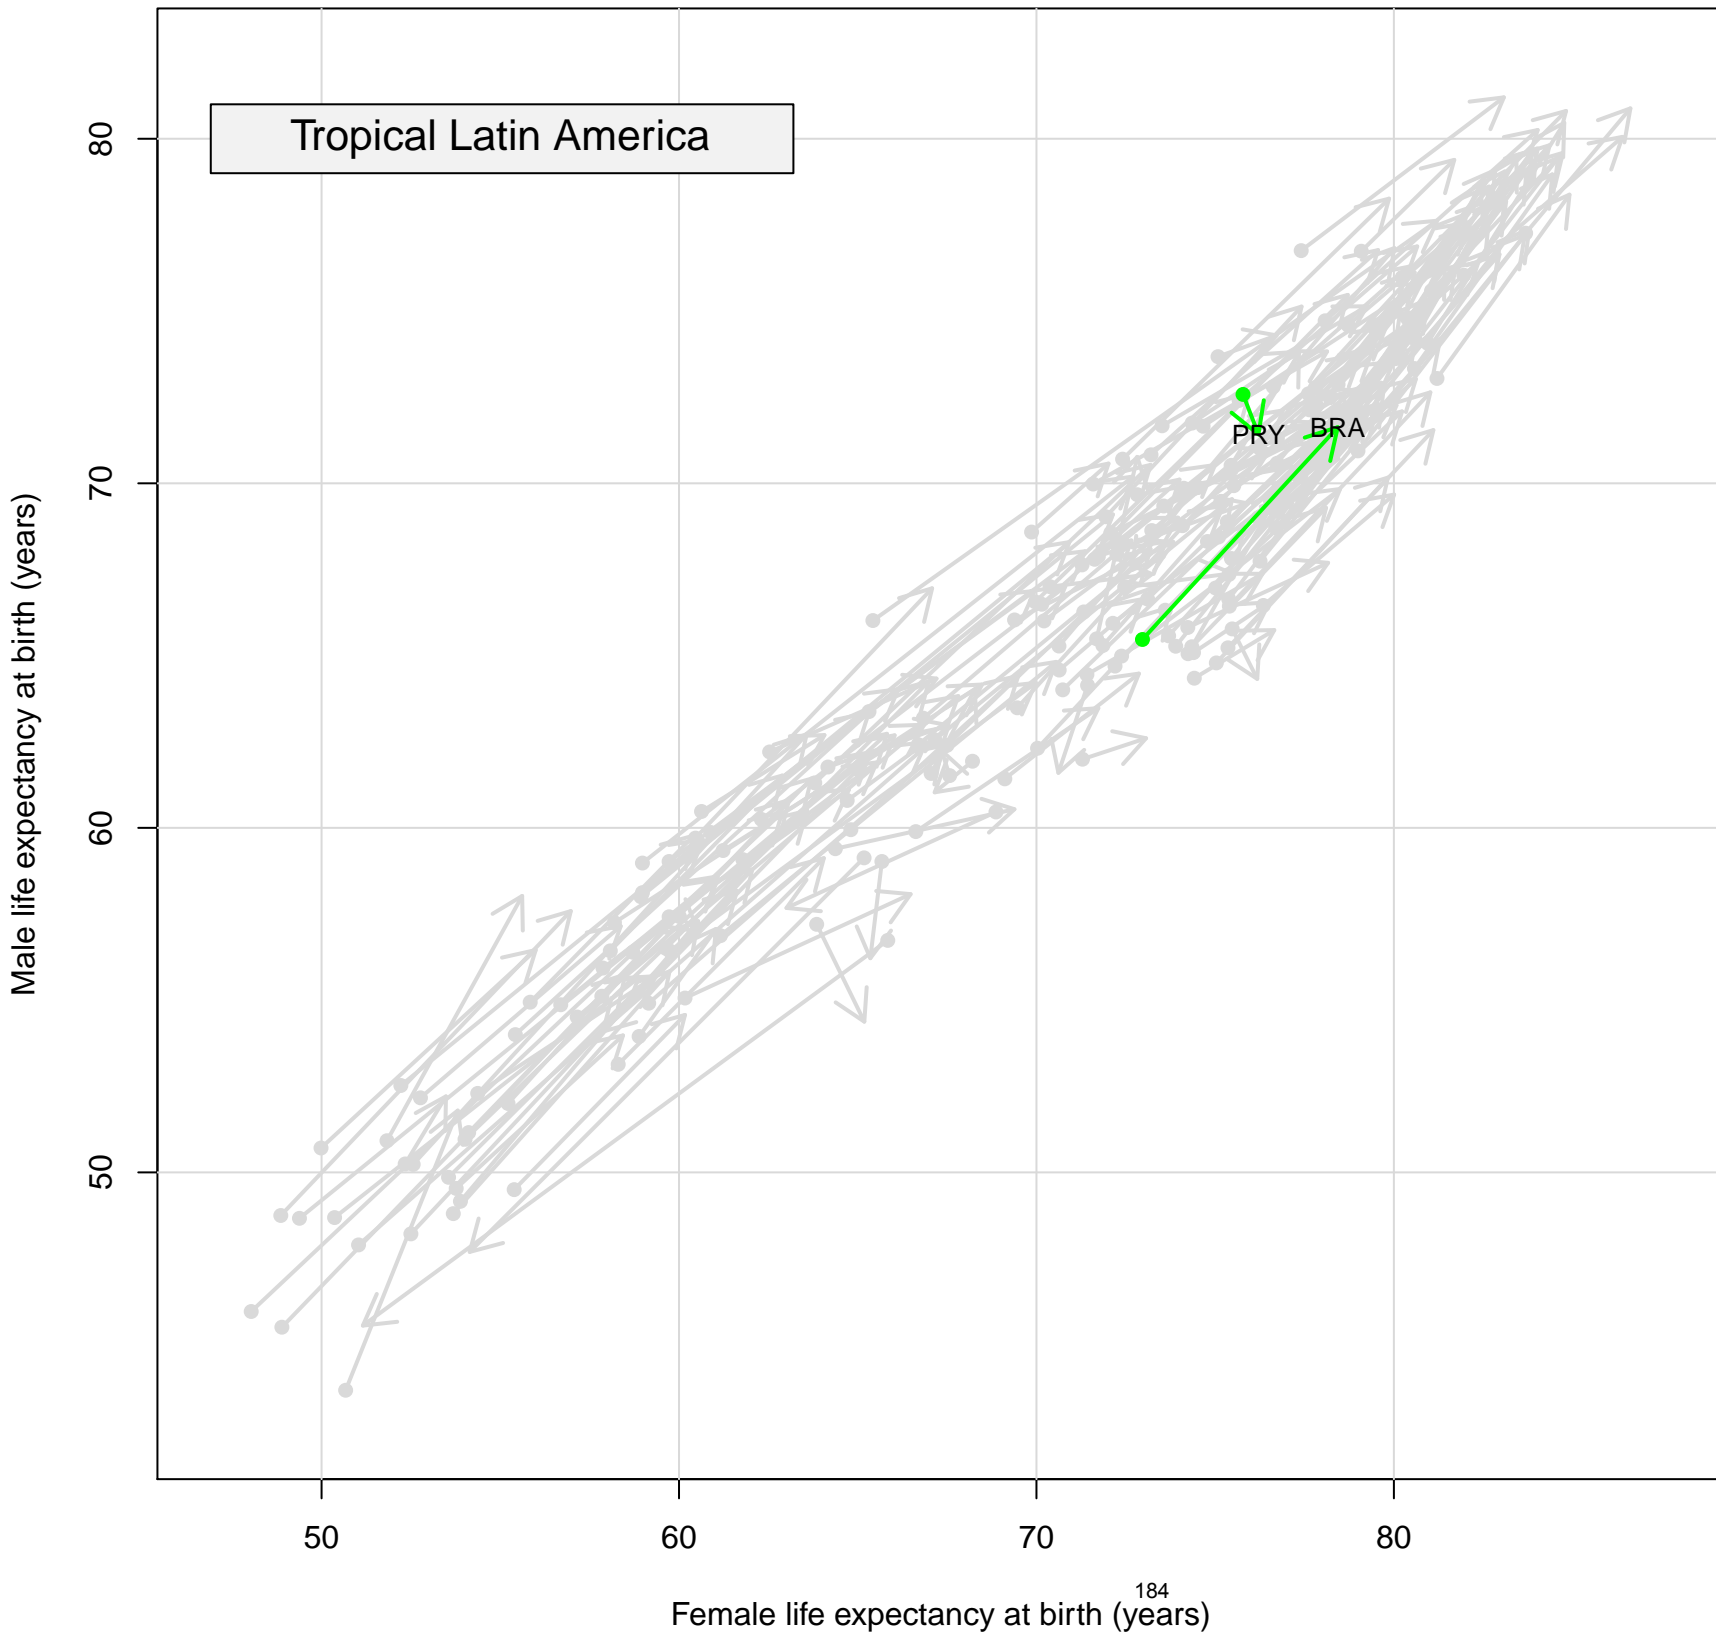

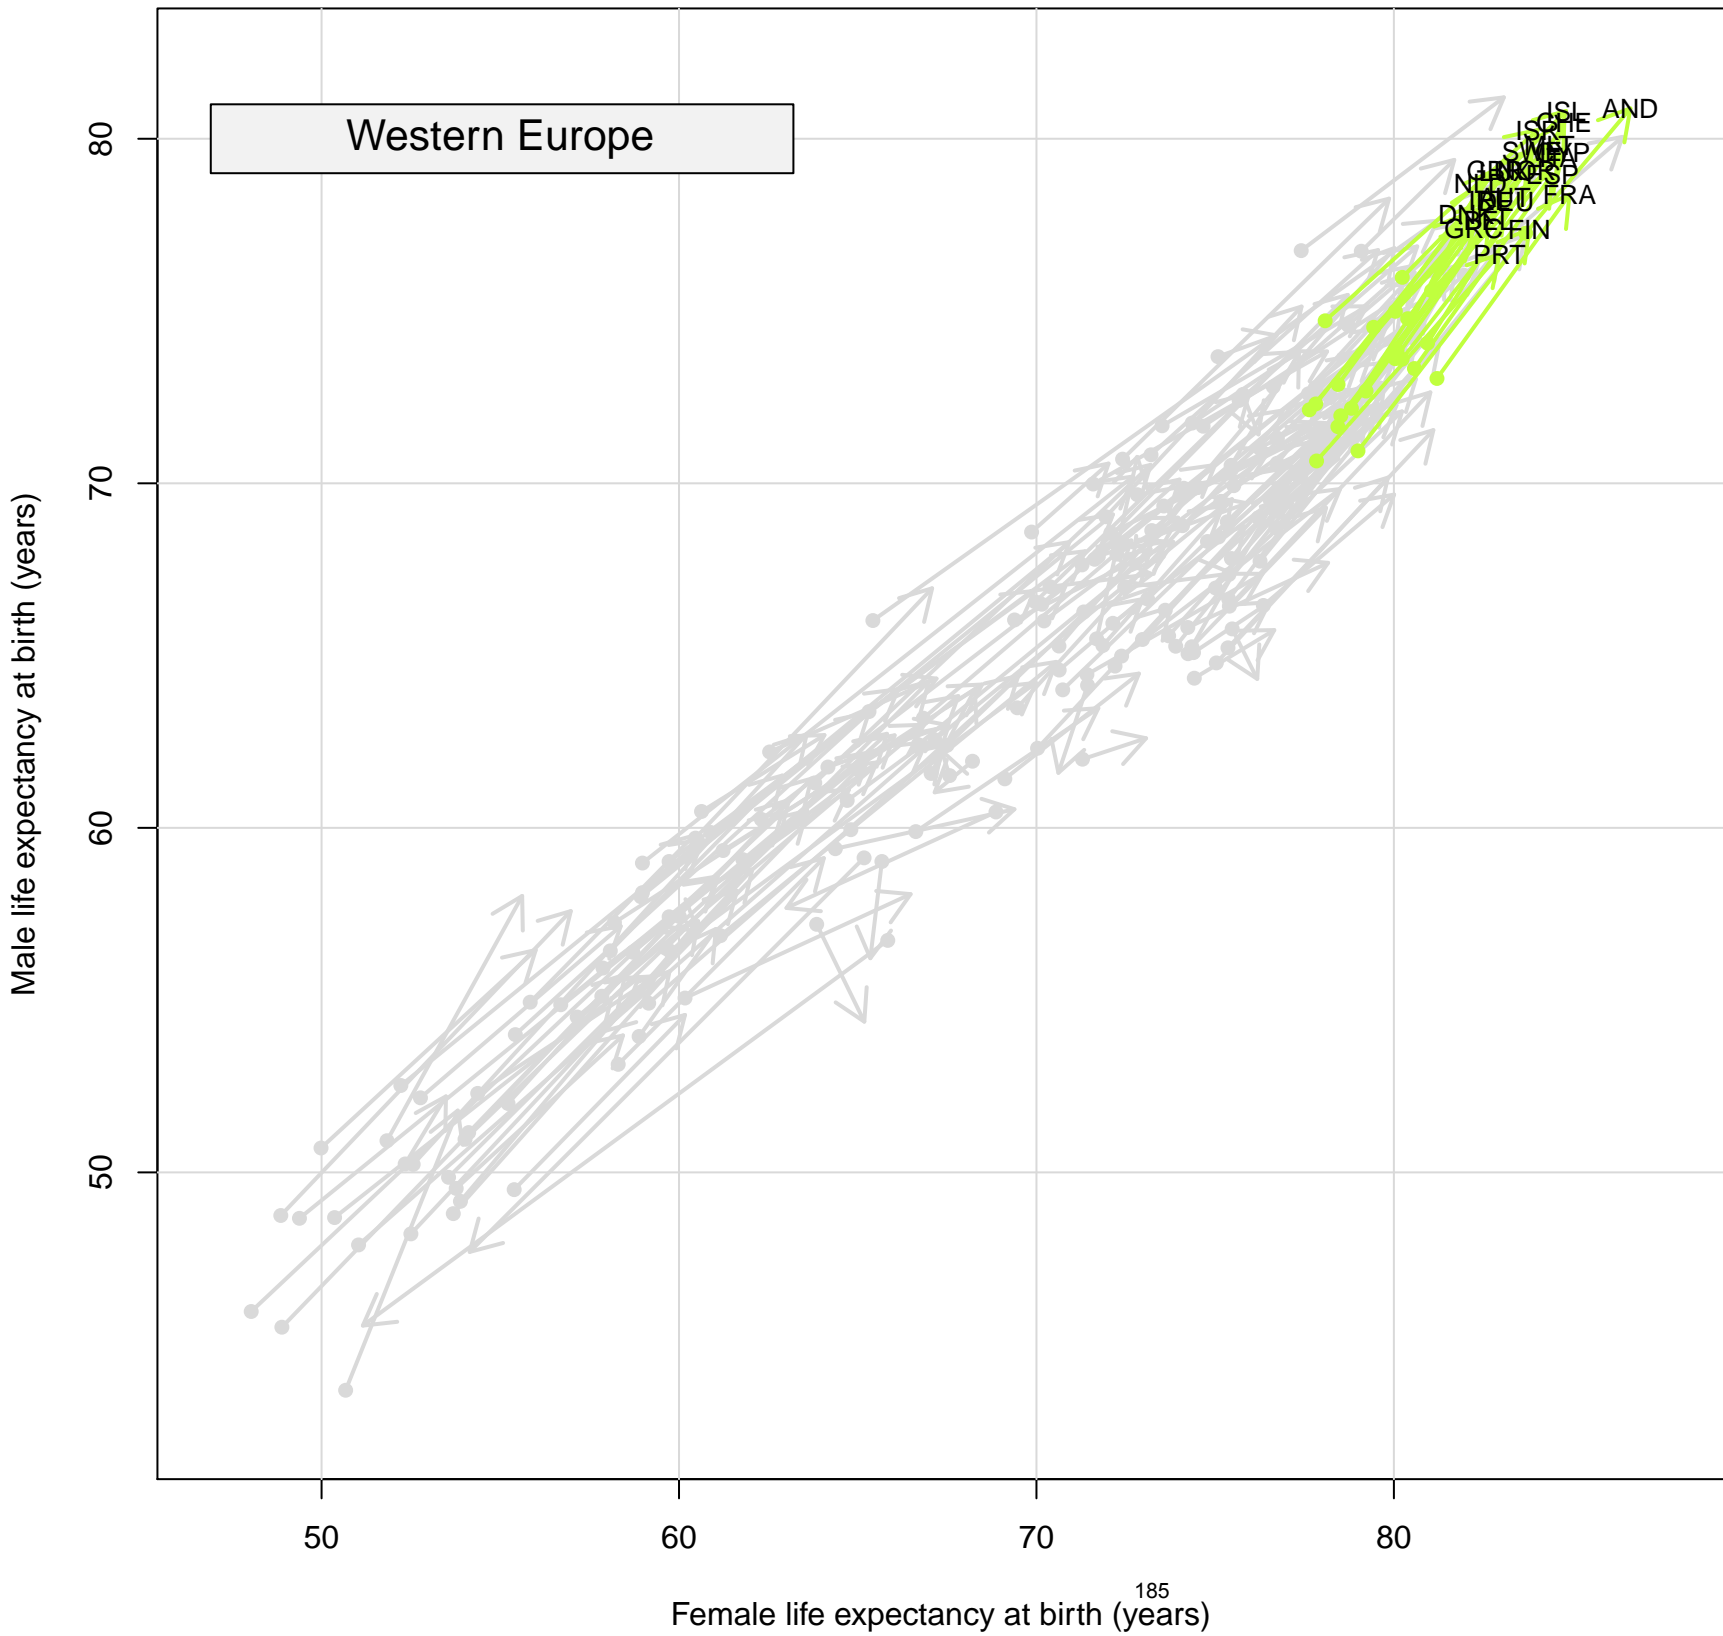



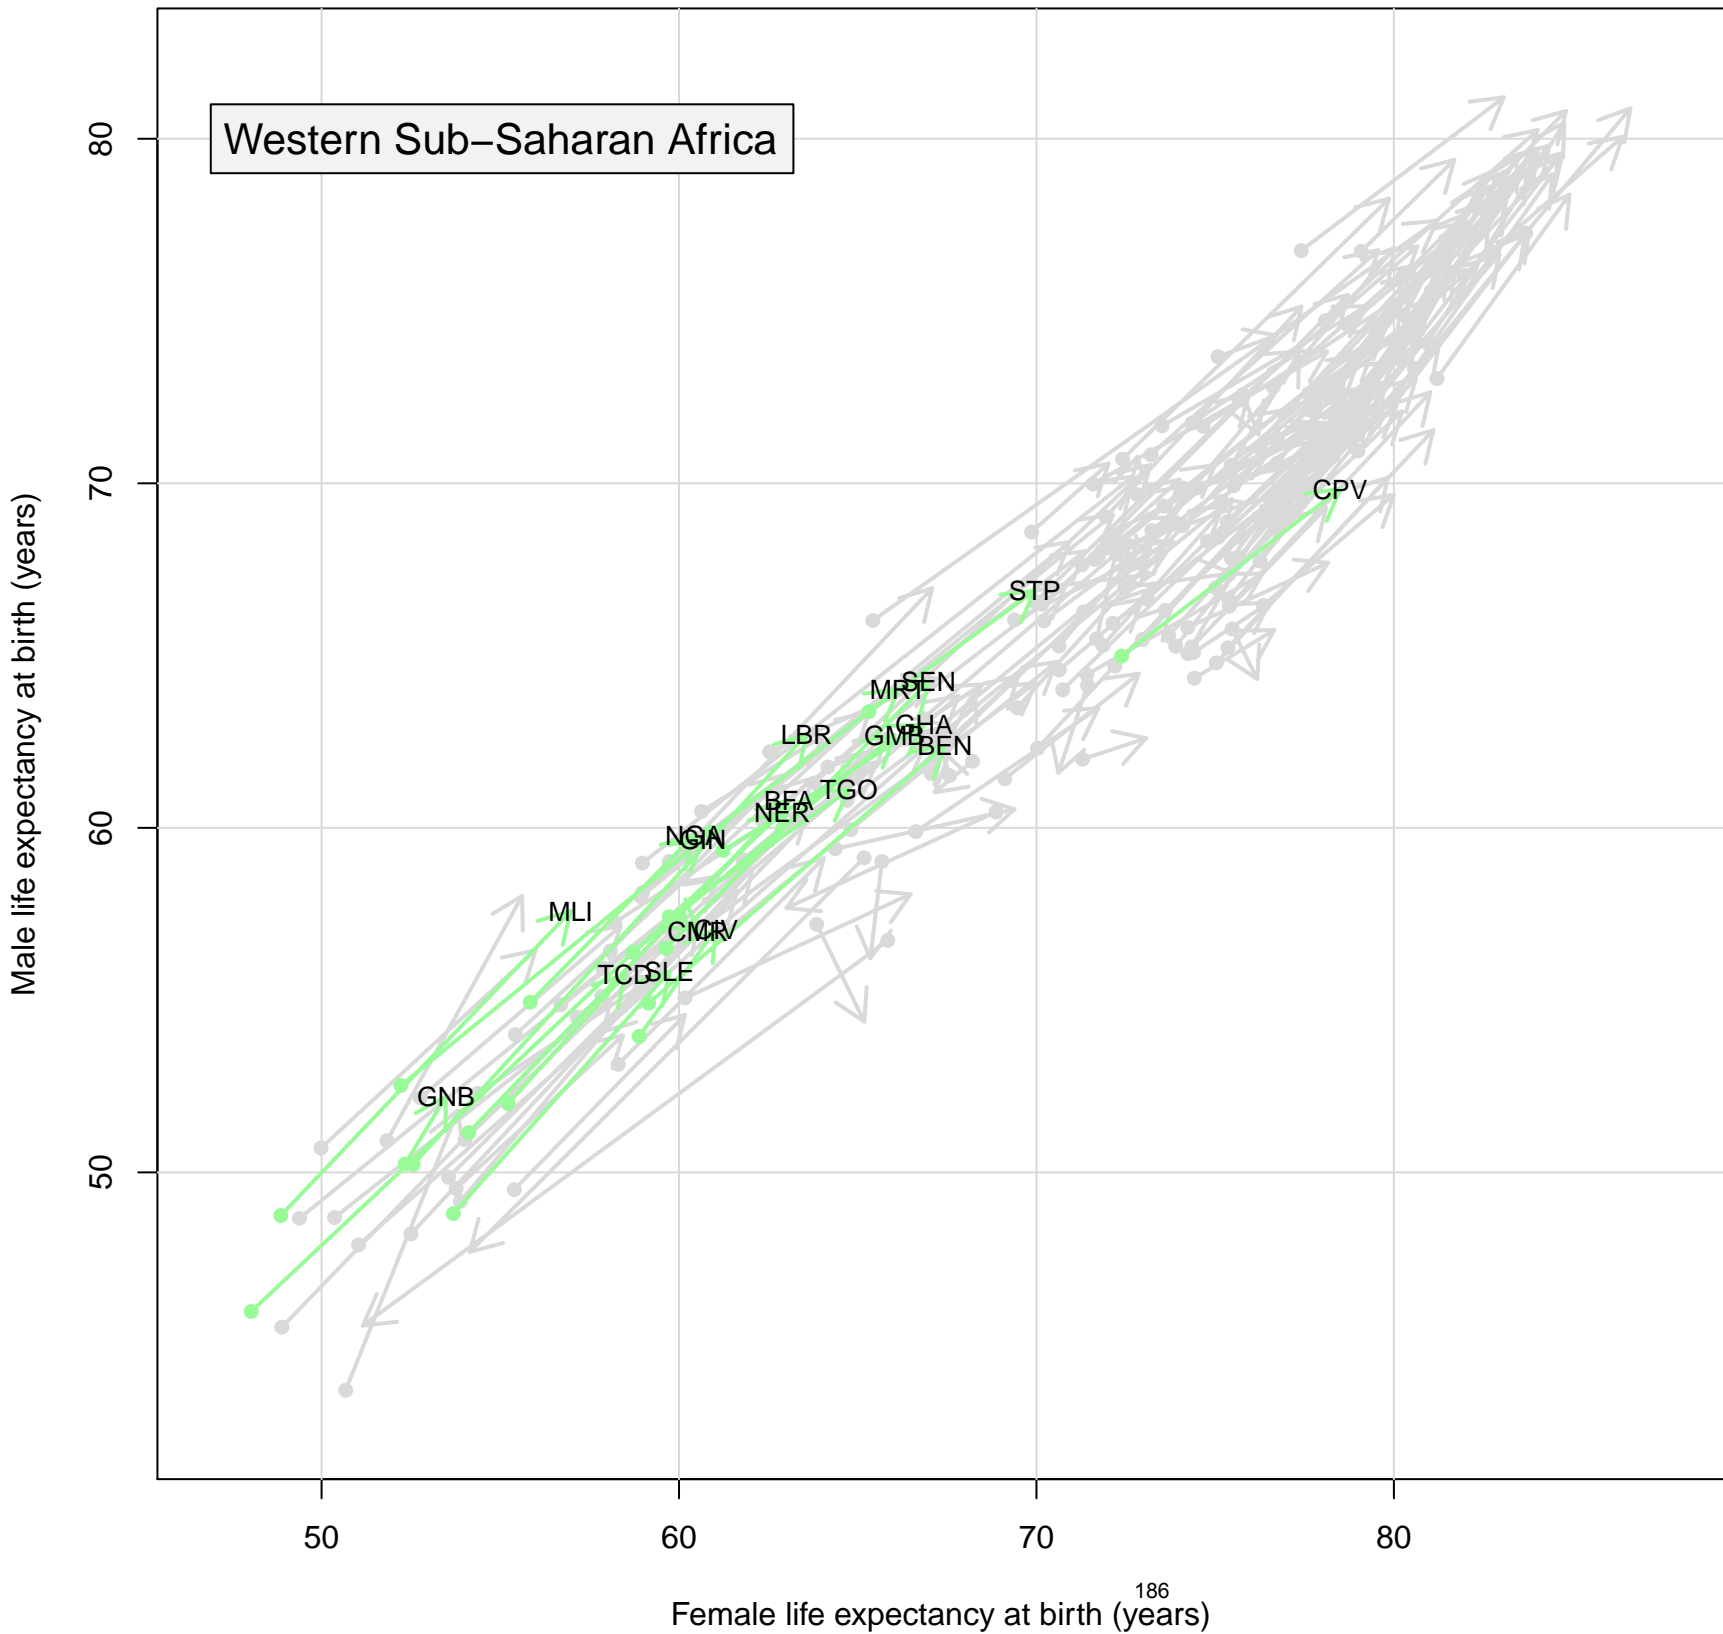

## **Section 4. Causes of death database**

This section provides a summary of site-years of data by main data type, GBD region, ICD type, and number of deaths.

**Web Table 11: Total number of site years by source type and cause for 2013 excluding studies on LRI and diarrhea etiologies**

**Web Table 11 - Total number of site years by source type and cause for 2013 excluding studies on LRI and diarrhea etiologies**

| Cause                                                             | Vital Registration | Verbal Autopsy | Surveillance | Survey/ Census | Cancer Registry | Sibling History | Burial/ Mortuary | Hospital | Police Records |
|-------------------------------------------------------------------|--------------------|----------------|--------------|----------------|-----------------|-----------------|------------------|----------|----------------|
| Communicable, maternal, neonatal, and nutritional diseases        | 4954               | 476            | 1428         | 73             |                 | 1213            | 9                |          |                |
| HIV/AIDS and tuberculosis                                         | 4917               | 173            | 324          |                |                 |                 |                  |          |                |
| Tuberculosis                                                      | 4898               | 161            | 50           |                |                 |                 |                  |          |                |
| HIV/AIDS                                                          | 4665               | 124            | 275          |                |                 |                 |                  |          |                |
| HIV/AIDS resulting in mycobacterial infection                     | 2138               |                | 1            |                |                 |                 |                  |          |                |
| HIV disease resulting in other specified or unspecified diseases  | 3431               |                | 1            |                |                 |                 |                  |          |                |
| Diarrhea, lower respiratory, and other common infectious diseases | 4926               | 319            | 519          |                |                 |                 |                  |          |                |
| Diarrhoea                                                         | 4817               | 293            | 339          |                |                 |                 |                  |          |                |
| Other diarrheal diseases                                          | 3662               |                |              |                |                 |                 |                  |          |                |
| Intestinal infectious diseases                                    | 4814               | 75             |              |                |                 |                 |                  |          |                |
| Typhoid fever                                                     | 4252               |                |              |                |                 |                 |                  |          |                |
| Paratyphoid fever                                                 | 3441               |                |              |                |                 |                 |                  |          |                |
| Other intestinal infectious diseases                              | 3983               |                |              |                |                 |                 |                  |          |                |
| Lower respiratory infections                                      | 4924               | 300            | 510          |                |                 |                 |                  |          |                |
| Upper respiratory infections                                      | 4429               | 54             |              |                |                 |                 |                  |          |                |
| Otitis media                                                      | 4235               | 45             |              |                |                 |                 |                  |          |                |
| Meningitis                                                        | 4868               | 196            | 214          |                |                 |                 |                  |          |                |
| Pneumococcal meningitis                                           | 3400               |                |              |                |                 |                 |                  |          |                |
| H influenzae type B meningitis                                    | 3402               |                |              |                |                 |                 |                  |          |                |
| Meningococcal meningitis                                          | 4568               |                |              |                |                 |                 |                  |          |                |
| Other meningitis                                                  | 3427               |                |              |                |                 |                 |                  |          |                |
| Encephalitis                                                      | 4429               | 51             |              |                |                 |                 |                  |          |                |
| Diphtheria                                                        | 4055               | 47             | 1            |                |                 |                 |                  |          |                |
| Whooping cough                                                    | 4373               | 76             | 1            |                |                 |                 |                  |          |                |
| Tetanus                                                           | 4667               | 169            | 98           |                |                 |                 |                  |          |                |
| Measles                                                           | 4751               | 182            | 209          |                |                 |                 |                  |          |                |
| Varicella                                                         | 3421               |                |              |                |                 |                 |                  |          |                |
| Neglected tropical diseases and malaria                           | 4663               | 222            | 216          |                |                 |                 |                  |          |                |
| Malaria                                                           | 4291               | 207            | 2            |                |                 |                 |                  |          |                |
| Chagas disease                                                    | 1983               |                |              |                |                 |                 |                  |          |                |
| Leishmaniasis                                                     | 3825               | 42             |              |                |                 |                 |                  |          |                |
| Visceral leishmaniasis                                            | 3748               | 42             |              |                |                 |                 |                  |          |                |
| Cutaneous and mucocutaneous leishmaniasis                         | 3399               | 42             |              |                |                 |                 |                  |          |                |
| African trypanosomiasis                                           | 3400               | 42             |              |                |                 |                 |                  |          |                |

**Web Table 11 - Total number of site years by source type and cause for 2013 excluding studies on LRI and diarrhea etiologies**

| Cause                                                              | Vital Registration | Verbal Autopsy | Surveillance | Survey/ Census | Cancer Registry | Sibling History | Burial/ Mortuary | Hospital | Police Records |
|--------------------------------------------------------------------|--------------------|----------------|--------------|----------------|-----------------|-----------------|------------------|----------|----------------|
| Schistosomiasis                                                    | 3958               | 42             |              |                |                 |                 |                  |          |                |
| Cysticercosis                                                      | 3400               | 42             |              |                |                 |                 |                  |          |                |
| Cystic echinococcosis                                              | 3954               | 42             |              |                |                 |                 |                  |          |                |
| Lymphatic filariasis                                               | 3499               |                |              |                |                 |                 |                  |          |                |
| Onchocerciasis                                                     | 3400               |                |              |                |                 |                 |                  |          |                |
| Dengue                                                             | 4046               | 42             |              |                |                 |                 |                  |          |                |
| Yellow fever                                                       | 4226               | 42             |              |                |                 |                 |                  |          |                |
| Rabies                                                             | 3966               | 94             |              |                |                 |                 |                  |          |                |
| Intestinal nematode infections                                     | 3849               | 43             |              |                |                 |                 |                  |          |                |
| Ascariasis                                                         | 3400               |                |              |                |                 |                 |                  |          |                |
| Trichuriasis                                                       | 3400               |                |              |                |                 |                 |                  |          |                |
| Hookworm disease                                                   | 3865               |                |              |                |                 |                 |                  |          |                |
| Food-borne trematodiasis                                           | 3880               | 42             |              |                |                 |                 |                  |          |                |
| Other neglected tropical diseases                                  | 4251               | 44             |              |                |                 |                 |                  |          |                |
| Maternal disorders                                                 | 4797               | 267            | 626          | 73             |                 | 1213            | 9                |          |                |
| Maternal haemorrhage                                               | 4394               | 124            | 406          | 1              |                 | 1               |                  |          |                |
| Maternal sepsis and other pregnancy related infection              | 4104               | 106            | 103          |                |                 | 1               |                  |          |                |
| Hypertensive diseases of pregnancy                                 | 4289               | 115            | 307          | 1              |                 | 1               |                  |          |                |
| Obstructed labor                                                   | 4114               | 103            | 162          |                |                 | 1               |                  |          |                |
| Pregnancy with abortive outcome                                    | 4657               | 113            | 151          | 2              |                 | 1               |                  |          |                |
| Indirect maternal deaths                                           | 3903               | 109            | 430          | 1              |                 | 1               |                  |          |                |
| Late maternal death (after 42 days)                                | 1992               | 38             |              |                |                 |                 |                  |          |                |
| Other maternal disorders                                           | 3764               | 3              | 306          |                |                 | 1               |                  |          |                |
| Neonatal disorders                                                 | 4935               | 225            | 525          |                |                 |                 |                  |          |                |
| Preterm birth complications                                        | 3845               | 193            | 516          |                |                 |                 |                  |          |                |
| Neonatal encephalopathy*                                           | 3652               | 178            | 517          |                |                 |                 |                  |          |                |
| Sepsis and other infectious disorders of the newborn baby          | 3598               | 128            | 272          |                |                 |                 |                  |          |                |
| Hemolytic disease in fetus and newborn and other neonatal jaundice | 3870               | 115            |              |                |                 |                 |                  |          |                |
| Other neonatal disorders                                           | 3526               | 82             | 400          |                |                 |                 |                  |          |                |
| Nutritional deficiencies                                           | 4922               | 134            | 209          |                |                 |                 |                  |          |                |
| Protein energy malnutrition                                        | 4392               | 163            |              |                |                 |                 |                  |          |                |
| Iodine deficiency                                                  | 3489               |                |              |                |                 |                 |                  |          |                |
| Iron-deficiency anaemia                                            | 3841               | 117            | 1            |                |                 |                 |                  |          |                |
| Other nutritional deficiencies                                     | 3420               | 42             |              |                |                 |                 |                  |          |                |

**Web Table 11 - Total number of site years by source type and cause for 2013 excluding studies on LRI and diarrhea etiologies**

| Cause                                                            | Vital Registration | Verbal Autopsy | Surveillance | Survey/ Census | Cancer Registry | Sibling History | Burial/ Mortuary | Hospital | Police Records |
|------------------------------------------------------------------|--------------------|----------------|--------------|----------------|-----------------|-----------------|------------------|----------|----------------|
| Other communicable, maternal, neonatal, and nutritional diseases | 4880               | 123            | 514          |                |                 |                 |                  |          |                |
| Sexually transmitted diseases excluding HIV                      | 4563               | 66             | 182          |                |                 |                 |                  |          |                |
| Syphilis                                                         | 4200               | 43             |              |                |                 |                 |                  |          |                |
| Chlamydial infection                                             | 3400               |                |              |                |                 |                 |                  |          |                |
| Gonococcal infection                                             | 3928               |                |              |                |                 |                 |                  |          |                |
| Anogenital herpes                                                | 3400               |                |              |                |                 |                 |                  |          |                |
| Other sexually transmitted diseases                              | 3822               |                |              |                |                 |                 |                  |          |                |
| Hepatitis                                                        | 4791               | 116            |              |                |                 |                 |                  |          |                |
| Acute hepatitis A                                                | 3420               |                |              |                |                 |                 |                  |          |                |
| Acute hepatitis B                                                | 3436               |                |              |                |                 |                 |                  |          |                |
| Acute hepatitis C                                                | 3414               |                |              |                |                 |                 |                  |          |                |
| Acute hepatitis E                                                | 3400               |                |              |                |                 |                 |                  |          |                |
| Leprosy                                                          | 4203               |                |              |                |                 |                 |                  |          |                |
| Other infectious diseases                                        | 4614               | 78             | 479          |                |                 |                 |                  |          |                |
| Non-communicable diseases                                        | 4946               | 275            | 527          |                | 3030            |                 |                  |          |                |
| Neoplasms                                                        | 4946               | 175            | 403          |                | 3030            |                 |                  |          |                |
| Oesophageal cancer                                               | 4896               | 51             |              |                | 3014            |                 |                  |          |                |
| Stomach cancer                                                   | 4913               | 58             |              |                | 3025            |                 |                  |          |                |
| Liver cancer                                                     | 4587               | 53             |              |                | 2997            |                 |                  |          |                |
| Larynx cancer                                                    | 4850               | 46             |              |                | 3022            |                 |                  |          |                |
| Tracheal, bronchus and lung cancer                               | 4906               | 53             |              |                | 3025            |                 |                  |          |                |
| Breast cancer                                                    | 4880               | 76             |              |                | 3030            |                 |                  |          |                |
| Cervical cancer                                                  | 4839               | 50             |              |                | 3025            |                 |                  |          |                |
| Uterine cancer                                                   | 4825               | 47             |              |                | 3014            |                 |                  |          |                |
| Prostate cancer                                                  | 4739               | 44             |              |                | 3025            |                 |                  |          |                |
| Colon and rectum cancer                                          | 4896               | 54             |              |                | 3025            |                 |                  |          |                |
| Lip and oral cavity cancer                                       | 4431               | 48             |              |                | 3008            |                 |                  |          |                |
| Nasopharynx cancer                                               | 4515               | 43             |              |                | 2953            |                 |                  |          |                |
| Cancer of other part of pharynx and oropharynx                   | 4202               | 46             |              |                | 2959            |                 |                  |          |                |
| Gallbladder and biliary tract cancer                             | 4176               | 42             |              |                | 2977            |                 |                  |          |                |
| Pancreatic cancer                                                | 4548               | 44             |              |                | 3023            |                 |                  |          |                |
| Malignant skin melanoma                                          | 4565               | 41             |              |                | 3016            |                 |                  |          |                |
| Non-melanoma skin cancer                                         | 4486               | 42             |              |                |                 |                 |                  |          |                |
| Ovarian cancer                                                   | 4449               | 45             |              |                | 3025            |                 |                  |          |                |

**Web Table 11 - Total number of site years by source type and cause for 2013 excluding studies on LRI and diarrhea etiologies**

| Cause                                               | Vital Registration | Verbal Autopsy | Surveillance | Survey/ Census | Cancer Registry | Sibling History | Burial/ Mortuary | Hospital | Police Records |
|-----------------------------------------------------|--------------------|----------------|--------------|----------------|-----------------|-----------------|------------------|----------|----------------|
| Testicular cancer                                   | 4366               | 41             |              |                | 3006            |                 |                  |          |                |
| Kidney and other urinary organ cancers              | 4180               | 43             |              |                | 3025            |                 |                  |          |                |
| Bladder cancer                                      | 4533               | 42             |              |                | 3023            |                 |                  |          |                |
| Brain and nervous system cancer                     | 4521               | 51             |              |                | 3016            |                 |                  |          |                |
| Thyroid cancer                                      | 4415               | 41             |              |                | 3024            |                 |                  |          |                |
| Mesothelioma                                        | 4091               | 41             |              |                | 1945            |                 |                  |          |                |
| Hodgkin lymphoma                                    | 4495               | 42             |              |                | 3013            |                 |                  |          |                |
| Non-Hodgkin's lymphoma                              | 4203               | 44             |              |                | 3024            |                 |                  |          |                |
| Multiple myeloma                                    | 4184               | 41             |              |                | 3009            |                 |                  |          |                |
| Leukaemia                                           | 4872               | 64             | 329          |                | 3013            |                 |                  |          |                |
| Other neoplasms                                     | 4914               | 78             |              |                |                 |                 |                  |          |                |
| Cardiovascular and circulatory diseases             | 4946               | 164            | 1            |                |                 |                 |                  |          |                |
| Rheumatic heart disease                             | 4911               |                |              |                |                 |                 |                  |          |                |
| Ischaemic heart disease                             | 4926               | 103            |              |                |                 |                 |                  |          |                |
| Cerebrovascular disease                             | 4928               | 127            | 1            |                |                 |                 |                  |          |                |
| Ischaemic stroke                                    | 4447               |                |              |                |                 |                 |                  |          |                |
| Hemorrhagic and other non-ischaemic stroke          | 4457               |                |              |                |                 |                 |                  |          |                |
| Hypertensive heart disease                          | 4524               |                |              |                |                 |                 |                  |          |                |
| Cardiomyopathy and myocarditis                      | 3786               |                |              |                |                 |                 |                  |          |                |
| Atrial fibrillation and flutter                     | 3415               |                |              |                |                 |                 |                  |          |                |
| Aortic aneurysm                                     | 3429               |                |              |                |                 |                 |                  |          |                |
| Peripheral vascular disease                         | 3414               |                |              |                |                 |                 |                  |          |                |
| Endocarditis                                        | 3432               |                |              |                |                 |                 |                  |          |                |
| Other cardiovascular and circulatory diseases       | 4832               |                |              |                |                 |                 |                  |          |                |
| Chronic respiratory diseases                        | 4555               | 142            | 110          |                |                 |                 |                  |          |                |
| COPD                                                | 3811               | 58             |              |                |                 |                 |                  |          |                |
| Pneumoconiosis                                      | 3630               |                |              |                |                 |                 |                  |          |                |
| Silicosis                                           | 3408               |                |              |                |                 |                 |                  |          |                |
| Asbestosis                                          | 3408               |                |              |                |                 |                 |                  |          |                |
| Coal workers pneumoconiosis                         | 3408               |                |              |                |                 |                 |                  |          |                |
| Other pneumoconiosis                                | 3401               |                |              |                |                 |                 |                  |          |                |
| Asthma                                              | 3443               | 55             |              |                |                 |                 |                  |          |                |
| Interstitial lung disease and pulmonary sarcoidosis | 3438               |                |              |                |                 |                 |                  |          |                |
| Other chronic respiratory diseases                  | 3472               |                |              |                |                 |                 |                  |          |                |

**Web Table 11 - Total number of site years by source type and cause for 2013 excluding studies on LRI and diarrhea etiologies**

| Cause                                               | Vital Registration | Verbal Autopsy | Surveillance | Survey/ Census | Cancer Registry | Sibling History | Burial/ Mortuary | Hospital | Police Records |
|-----------------------------------------------------|--------------------|----------------|--------------|----------------|-----------------|-----------------|------------------|----------|----------------|
| Cirrhosis of the liver                              | 4914               | 135            | 1            |                |                 |                 |                  |          |                |
| Cirrhosis due to alcohol use                        | 2060               |                |              |                |                 |                 |                  |          |                |
| Digestive diseases (except cirrhosis)               | 4889               | 128            | 242          |                |                 |                 |                  |          |                |
| Peptic ulcer disease                                | 4867               |                |              |                |                 |                 |                  |          |                |
| Gastritis and duodenitis                            | 3540               |                |              |                |                 |                 |                  |          |                |
| Appendicitis                                        | 4822               | 57             |              |                |                 |                 |                  |          |                |
| Paralytic ileus and intestinal obstruction          | 4516               | 67             |              |                |                 |                 |                  |          |                |
| Inguinal, femoral, and abdominal hernia             | 4203               | 65             |              |                |                 |                 |                  |          |                |
| Non-infective inflammatory bowel disease            | 3429               |                |              |                |                 |                 |                  |          |                |
| Vascular intestinal disorders                       | 3414               |                |              |                |                 |                 |                  |          |                |
| Gall bladder and bile duct disease                  | 4796               |                |              |                |                 |                 |                  |          |                |
| Pancreatitis                                        | 3448               |                |              |                |                 |                 |                  |          |                |
| Other digestive diseases                            | 4386               |                |              |                |                 |                 |                  |          |                |
| Neurological disorders                              | 4881               | 123            | 304          |                |                 |                 |                  |          |                |
| Alzheimer's disease and other dementias             | 4412               |                |              |                |                 |                 |                  |          |                |
| Parkinson's disease                                 | 4210               | 41             |              |                |                 |                 |                  |          |                |
| Epilepsy                                            | 4731               | 97             |              |                |                 |                 |                  |          |                |
| Multiple sclerosis                                  | 4398               |                |              |                |                 |                 |                  |          |                |
| Other neurological disorders                        | 3412               |                |              |                |                 |                 |                  |          |                |
| Mental and behavioural disorders                    | 4680               | 58             |              |                |                 |                 |                  |          |                |
| Schizophrenia                                       | 4152               |                |              |                |                 |                 |                  |          |                |
| Alcohol use disorders                               | 4391               | 52             |              |                |                 |                 |                  |          |                |
| Drug use disorders                                  | 4334               | 46             |              |                |                 |                 |                  |          |                |
| Opioid use disorders                                | 3403               |                |              |                |                 |                 |                  |          |                |
| Cocaine use disorders                               | 3400               |                |              |                |                 |                 |                  |          |                |
| Amphetamine use disorders                           | 3400               |                |              |                |                 |                 |                  |          |                |
| Cannabis use disorders                              | 3400               |                |              |                |                 |                 |                  |          |                |
| Other drug use disorders                            | 3409               |                |              |                |                 |                 |                  |          |                |
| Eating disorders                                    | 3389               |                |              |                |                 |                 |                  |          |                |
| Anorexia nervosa                                    | 3389               |                |              |                |                 |                 |                  |          |                |
| Bulimia nervosa                                     | 3382               |                |              |                |                 |                 |                  |          |                |
| Other mental and substance use disorders            | 3416               |                |              |                |                 |                 |                  |          |                |
| Diabetes, urogenital, blood, and endocrine diseases | 4906               | 164            | 1            |                |                 |                 |                  |          |                |
| Diabetes mellitus                                   | 4886               | 133            | 1            |                |                 |                 |                  |          |                |



**Web Table 11 - Total number of site years by source type and cause for 2013 excluding studies on LRI and diarrhea etiologies**

| Cause                                                                      | Vital Registration | Verbal Autopsy | Surveillance | Survey/ Census | Cancer Registry | Sibling History | Burial/ Mortuary | Hospital | Police Records |
|----------------------------------------------------------------------------|--------------------|----------------|--------------|----------------|-----------------|-----------------|------------------|----------|----------------|
| Acute glomerulonephritis                                                   | 3940               | 53             |              |                |                 |                 |                  |          |                |
| Chronic kidney disease                                                     | 4714               | 94             |              |                |                 |                 |                  |          |                |
| Chronic kidney disease due to diabetes mellitus                            | 3400               |                |              |                |                 |                 |                  |          |                |
| Chronic kidney disease due to hypertension                                 | 3424               |                |              |                |                 |                 |                  |          |                |
| Chronic kidney disease due to glomerulonephritis                           | 3424               |                |              |                |                 |                 |                  |          |                |
| Chronic kidney disease due to other causes                                 | 3410               |                |              |                |                 |                 |                  |          |                |
| Urinary diseases and male infertility                                      | 4833               | 48             |              |                |                 |                 |                  |          |                |
| Tubulointerstitial nephritis, pyelonephritis, and urinary tract infections | 4820               |                |              |                |                 |                 |                  |          |                |
| Urolithiasis                                                               | 4289               |                |              |                |                 |                 |                  |          |                |
| Other urinary diseases                                                     | 3438               |                |              |                |                 |                 |                  |          |                |
| Gynecological diseases                                                     | 4030               | 44             |              |                |                 |                 |                  |          |                |
| Uterine fibroids                                                           | 6                  |                |              |                |                 |                 |                  |          |                |
| Polycystic ovarian syndrome                                                | 3333               |                |              |                |                 |                 |                  |          |                |
| Endometriosis                                                              | 3333               |                |              |                |                 |                 |                  |          |                |
| Genital prolapse                                                           | 2074               |                |              |                |                 |                 |                  |          |                |
| Other gynecological diseases                                               | 3398               |                |              |                |                 |                 |                  |          |                |
| Hemoglobinopathies and hemolytic anaemias                                  | 4162               | 117            |              |                |                 |                 |                  |          |                |
| Thalassemias                                                               | 3424               | 44             |              |                |                 |                 |                  |          |                |
| Sickle cell disorders                                                      | 3410               | 48             |              |                |                 |                 |                  |          |                |
| G6PD deficiency                                                            | 3409               |                |              |                |                 |                 |                  |          |                |
| Other hemoglobinopathies and hemolytic anemias                             | 3414               |                |              |                |                 |                 |                  |          |                |
| Endocrine, metabolic, blood, and immune disorders                          | 4653               | 57             |              |                |                 |                 |                  |          |                |
| Musculoskeletal disorders                                                  | 4348               | 44             |              |                |                 |                 |                  |          |                |
| Rheumatoid arthritis                                                       | 4046               |                |              |                |                 |                 |                  |          |                |
| Other musculoskeletal disorders                                            | 4104               |                |              |                |                 |                 |                  |          |                |
| Other non-communicable diseases                                            | 4942               | 205            | 521          |                |                 |                 |                  |          |                |
| Congenital anomalies                                                       | 4942               | 204            | 521          |                |                 |                 |                  |          |                |
| Neural tube defects                                                        | 3991               |                | 272          |                |                 |                 |                  |          |                |
| Congenital heart anomalies                                                 | 4822               |                | 503          |                |                 |                 |                  |          |                |
| Cleft lip and cleft palate                                                 | 3949               |                |              |                |                 |                 |                  |          |                |
| Down's syndrome                                                            | 3414               |                | 193          |                |                 |                 |                  |          |                |
| Turner syndrome                                                            | 2059               |                |              |                |                 |                 |                  |          |                |
| Klinefelter syndrome                                                       | 3399               |                |              |                |                 |                 |                  |          |                |
| Chromosomal unbalanced rearrangements                                      | 3404               |                |              |                |                 |                 |                  |          |                |

**Web Table 11 - Total number of site years by source type and cause for 2013 excluding studies on LRI and diarrhea etiologies**

| Cause                                                | Vital Registration | Verbal Autopsy | Surveillance | Survey/ Census | Cancer Registry | Sibling History | Burial/ Mortuary | Hospital | Police Records |
|------------------------------------------------------|--------------------|----------------|--------------|----------------|-----------------|-----------------|------------------|----------|----------------|
| Other congenital anomalies                           | 4456               |                | 66           |                |                 |                 |                  |          |                |
| Skin and subcutaneous diseases                       | 4653               | 69             |              |                |                 |                 |                  |          |                |
| Cellulitis                                           | 3401               |                |              |                |                 |                 |                  |          |                |
| Abscess, impetigo, and other bacterial skin diseases | 4351               |                |              |                |                 |                 |                  |          |                |
| Scabies                                              | 3400               |                |              |                |                 |                 |                  |          |                |
| Decubitus ulcer                                      | 3400               |                |              |                |                 |                 |                  |          |                |
| Other skin and subcutaneous diseases                 | 3492               |                |              |                |                 |                 |                  |          |                |
| Sense organ diseases                                 | 3401               | 42             |              |                |                 |                 |                  |          |                |
| Other sense organ diseases                           | 3401               |                |              |                |                 |                 |                  |          |                |
| Sudden infant death syndrome                         | 3793               | 35             |              |                |                 |                 |                  |          |                |
| Injuries                                             | 4947               | 265            | 499          | 33             |                 |                 | 27               | 18       |                |
| Transport injuries                                   | 4913               | 119            | 365          | 15             |                 |                 | 24               | 11       | 73             |
| Road injuries                                        | 4386               | 82             |              | 4              |                 |                 | 10               | 3        | 73             |
| Pedestrian road injuries                             | 3422               | 43             |              |                |                 |                 | 5                |          | 68             |
| Cyclist road injuries                                | 3402               | 42             |              |                |                 |                 | 2                |          | 43             |
| Motorcyclist road injuries                           | 3408               | 42             |              | 2              |                 |                 | 2                |          | 50             |
| Motor vehicle road injuries                          | 3409               | 43             |              | 8              |                 |                 | 5                |          | 61             |
| Other road injuries                                  | 3401               | 42             |              |                |                 |                 | 1                |          | 29             |
| Other transport injuries                             | 4119               | 44             |              | 1              |                 |                 |                  |          | 2              |
| Unintentional injuries                               | 4909               | 140            | 457          | 8              |                 |                 | 25               | 11       |                |
| Falls                                                | 4878               | 89             | 341          | 4              |                 |                 | 9                | 1        |                |
| Drowning                                             | 4853               | 126            | 368          | 2              |                 |                 | 18               | 1        |                |
| Fire, heat, and hot substances                       | 4844               | 109            |              | 2              |                 |                 | 16               | 9        |                |
| Poisonings                                           | 4753               | 78             | 210          | 1              |                 |                 | 16               | 9        |                |
| Exposure to mechanical forces                        | 4615               | 53             |              | 4              |                 |                 | 9                | 6        |                |
| Unintentional firearm injuries                       | 4508               | 44             |              | 1              |                 |                 | 4                |          |                |
| Unintentional suffocation                            | 3409               | 44             | 445          |                |                 |                 | 9                |          |                |
| Other exposure to mechanical forces                  | 4475               | 46             |              | 4              |                 |                 | 1                |          |                |
| Adverse effects of medical treatment                 | 4591               | 67             |              | 1              |                 |                 | 4                | 7        |                |
| Animal contact                                       | 3971               | 96             |              | 2              |                 |                 | 3                | 7        |                |
| Venomous animal contact                              | 3433               | 91             |              |                |                 |                 | 1                |          |                |
| Non-venomous animal contact                          | 3432               | 48             |              |                |                 |                 |                  |          |                |
| Foreign body                                         | 4312               | 54             |              | 1              |                 |                 | 3                |          |                |
| Pulmonary aspiration and foreign body in airway      | 3413               | 54             |              |                |                 |                 | 3                |          |                |

**Web Table 11 - Total number of site years by source type and cause for 2013 excluding studies on LRI and diarrhea etiologies**

| Cause                                           | Vital Registration | Verbal Autopsy | Surveillance | Survey/ Census | Cancer Registry | Sibling History | Burial/ Mortuary | Hospital | Police Records |
|-------------------------------------------------|--------------------|----------------|--------------|----------------|-----------------|-----------------|------------------|----------|----------------|
| Foreign body in other body part                 | 3415               | 42             |              |                |                 |                 |                  |          |                |
| Unintentional injuries not classified elsewhere | 4069               | 72             |              | 1              |                 |                 | 16               |          |                |
| Self-harm and interpersonal violence            | 4884               | 164            |              | 8              |                 |                 | 25               | 3        |                |
| Self-harm                                       | 4865               | 136            |              | 1              |                 |                 | 19               | 3        |                |
| Interpersonal violence                          | 4848               | 122            |              | 8              |                 |                 | 25               | 1        | 1330           |
| Assault by firearm                              | 3402               | 50             |              | 5              |                 |                 | 8                |          |                |
| Assault by sharp object                         | 3402               | 49             |              | 1              |                 |                 | 7                |          |                |
| Assault by other means                          | 3402               | 51             |              |                |                 |                 | 6                |          |                |
| Forces of nature, war, and legal intervention   | 4686               | 59             |              | 9              |                 |                 | 7                |          |                |
| Exposure to forces of nature                    | 3458               | 48             |              | 5              |                 |                 | 5                |          |                |
| Collective violence and legal intervention      | 4383               | 54             |              | 5              |                 |                 | 5                |          |                |

COPD = chronic obstructive pulmonary disease. \*Includes birth asphyxia and birth trauma

**Web Table 12: Total number of site years by cause by region for 2013 excluding studies on LRI and diarrhea etiologies**

Web Table 12 - Total number of site years by cause by region for 2013 excluding studies on LRI and diarrhea etiologies excluding studies on LRI and diarrhea etiologies

| Cause                                                              | High-income Asia Pacific | Central Asia | East Asia | South Asia | Southeast Asia | Australasia | Caribbean | Central Europe | Eastern Europe | Western Europe | Andean Latin America |
|--------------------------------------------------------------------|--------------------------|--------------|-----------|------------|----------------|-------------|-----------|----------------|----------------|----------------|----------------------|
| Communicable, maternal, neonatal, and nutritional diseases         | 100                      | 200          | 2036      | 305        | 252            | 62          | 481       | 296            | 205            | 984            | 149                  |
| HIV/AIDS and tuberculosis                                          | 100                      | 193          | 990       | 102        | 108            | 62          | 416       | 290            | 205            | 982            | 63                   |
| Tuberculosis                                                       | 100                      | 193          | 713       | 102        | 108            | 62          | 408       | 290            | 205            | 982            | 63                   |
| HIV/AIDS                                                           | 100                      | 193          | 828       | 49         | 98             | 62          | 413       | 290            | 205            | 929            | 63                   |
| HIV/AIDS resulting in mycobacterial infection                      | 35                       | 26           | 295       | 0          | 43             | 24          | 182       | 174            | 91             | 361            | 30                   |
| HIV disease resulting in other specified or unspecified diseases   | 63                       | 26           | 304       | 0          | 45             | 62          | 193       | 235            | 94             | 844            | 31                   |
| Diarrhea, lower respiratory, and other common infectious diseases  | 100                      | 195          | 1191      | 171        | 124            | 62          | 421       | 290            | 205            | 982            | 63                   |
| Diarrhoea                                                          | 100                      | 195          | 922       | 163        | 106            | 62          | 421       | 290            | 205            | 982            | 63                   |
| Other diarrheal diseases                                           | 71                       | 41           | 456       | 6          | 47             | 62          | 193       | 235            | 105            | 862            | 31                   |
| Intestinal infectious diseases                                     | 97                       | 193          | 602       | 74         | 97             | 62          | 418       | 290            | 205            | 982            | 63                   |
| Typhoid fever                                                      | 92                       | 43           | 365       | 17         | 72             | 62          | 418       | 290            | 100            | 964            | 63                   |
| Paratyphoid fever                                                  | 63                       | 26           | 304       | 17         | 45             | 62          | 193       | 235            | 94             | 844            | 31                   |
| Other intestinal infectious diseases                               | 83                       | 43           | 313       | 0          | 66             | 62          | 392       | 287            | 75             | 887            | 63                   |
| Lower respiratory infections                                       | 100                      | 195          | 1188      | 166        | 114            | 62          | 421       | 290            | 205            | 982            | 63                   |
| Upper respiratory infections                                       | 97                       | 58           | 539       | 47         | 84             | 62          | 359       | 290            | 111            | 975            | 63                   |
| Otitis media                                                       | 92                       | 43           | 340       | 44         | 76             | 62          | 409       | 290            | 100            | 963            | 63                   |
| Meningitis                                                         | 100                      | 195          | 854       | 114        | 103            | 62          | 414       | 290            | 205            | 982            | 63                   |
| Pneumococcal meningitis                                            | 63                       | 26           | 304       | 0          | 45             | 62          | 193       | 235            | 70             | 844            | 31                   |
| H influenzae type B meningitis                                     | 63                       | 26           | 304       | 0          | 45             | 62          | 193       | 235            | 70             | 844            | 31                   |
| Meningococcal meningitis                                           | 100                      | 58           | 615       | 9          | 72             | 62          | 412       | 290            | 111            | 982            | 63                   |
| Other meningitis                                                   | 63                       | 26           | 304       | 0          | 45             | 62          | 193       | 235            | 94             | 844            | 31                   |
| Encephalitis                                                       | 100                      | 58           | 449       | 49         | 88             | 62          | 417       | 290            | 111            | 982            | 63                   |
| Diphtheria                                                         | 84                       | 57           | 315       | 52         | 92             | 62          | 280       | 274            | 106            | 956            | 63                   |
| Whooping cough                                                     | 91                       | 191          | 322       | 71         | 94             | 62          | 292       | 287            | 202            | 960            | 63                   |
| Tetanus                                                            | 89                       | 193          | 552       | 134        | 105            | 62          | 404       | 290            | 203            | 982            | 63                   |
| Measles                                                            | 93                       | 194          | 777       | 120        | 100            | 62          | 396       | 290            | 205            | 975            | 63                   |
| Varicella and herpes zoster                                        | 63                       | 26           | 304       | 0          | 62             | 62          | 193       | 235            | 70             | 844            | 31                   |
| Neglected tropical diseases and malaria                            | 100                      | 195          | 642       | 102        | 104            | 62          | 412       | 290            | 205            | 982            | 63                   |
| Malaria                                                            | 91                       | 188          | 324       | 89         | 99             | 62          | 302       | 263            | 184            | 945            | 63                   |
| Chagas disease                                                     | 16                       | 24           | 58        | 0          | 28             | 6           | 89        | 21             | 13             | 109            | 63                   |
| Leishmaniasis                                                      | 75                       | 50           | 315       | 38         | 72             | 62          | 276       | 255            | 84             | 886            | 55                   |
| Visceral leishmaniasis                                             | 71                       | 35           | 315       | 21         | 70             | 62          | 276       | 255            | 73             | 868            | 55                   |
| Cutaneous and mucocutaneous leishmaniasis                          | 63                       | 26           | 304       | 21         | 50             | 62          | 193       | 235            | 70             | 844            | 31                   |
| African trypanosomiasis                                            | 63                       | 26           | 304       | 21         | 50             | 62          | 193       | 235            | 70             | 844            | 31                   |
| Schistosomiasis                                                    | 75                       | 51           | 350       | 21         | 86             | 62          | 294       | 255            | 84             | 930            | 57                   |
| Cysticercosis                                                      | 63                       | 26           | 304       | 21         | 50             | 62          | 193       | 235            | 70             | 844            | 31                   |
| Cystic echinococcosis                                              | 71                       | 43           | 319       | 21         | 71             | 62          | 278       | 289            | 100            | 940            | 57                   |
| Lymphatic filariasis                                               | 63                       | 26           | 304       | 9          | 46             | 62          | 193       | 235            | 70             | 894            | 31                   |
| Onchocerciasis                                                     | 63                       | 26           | 304       | 0          | 45             | 62          | 193       | 235            | 70             | 844            | 31                   |
| Dengue                                                             | 92                       | 43           | 318       | 47         | 89             | 62          | 361       | 290            | 74             | 910            | 63                   |
| Yellow fever                                                       | 96                       | 58           | 326       | 21         | 87             | 62          | 409       | 285            | 87             | 981            | 63                   |
| Rabies                                                             | 81                       | 56           | 360       | 90         | 91             | 62          | 287       | 275            | 98             | 875            | 63                   |
| Intestinal nematode infections                                     | 72                       | 35           | 312       | 24         | 76             | 62          | 279       | 256            | 83             | 907            | 60                   |
| Ascariasis                                                         | 63                       | 26           | 304       | 0          | 45             | 62          | 193       | 235            | 70             | 844            | 31                   |
| Trichuriasis                                                       | 63                       | 26           | 304       | 0          | 45             | 62          | 193       | 235            | 70             | 844            | 31                   |
| Hookworm disease                                                   | 72                       | 35           | 326       | 17         | 71             | 62          | 279       | 256            | 71             | 907            | 60                   |
| Food-borne trematodiasis                                           | 80                       | 39           | 314       | 21         | 88             | 62          | 317       | 269            | 73             | 869            | 63                   |
| Other neglected tropical diseases                                  | 92                       | 43           | 343       | 48         | 97             | 62          | 412       | 290            | 92             | 964            | 63                   |
| Maternal disorders                                                 | 100                      | 200          | 1123      | 230        | 236            | 62          | 459       | 295            | 205            | 973            | 149                  |
| Maternal haemorrhage                                               | 92                       | 178          | 717       | 95         | 98             | 62          | 380       | 290            | 194            | 945            | 63                   |
| Maternal sepsis and other pregnancy related infection              | 92                       | 43           | 475       | 68         | 78             | 62          | 382       | 290            | 100            | 895            | 63                   |
| Hypertensive diseases of pregnancy                                 | 81                       | 175          | 653       | 99         | 89             | 62          | 294       | 285            | 194            | 922            | 63                   |
| Obstructed labor                                                   | 92                       | 43           | 540       | 94         | 84             | 62          | 387       | 290            | 77             | 894            | 63                   |
| Pregnancy with abortive outcome                                    | 99                       | 193          | 618       | 96         | 101            | 62          | 395       | 290            | 205            | 967            | 63                   |
| Indirect maternal deaths                                           | 80                       | 45           | 786       | 96         | 81             | 62          | 255       | 266            | 101            | 887            | 63                   |
| Late maternal death (after 42 days)                                | 35                       | 26           | 286       | 19         | 44             | 24          | 150       | 143            | 64             | 347            | 30                   |
| Other maternal disorders                                           | 65                       | 32           | 645       | 18         | 85             | 62          | 242       | 239            | 85             | 881            | 53                   |
| Neonatal disorders                                                 | 100                      | 198          | 1210      | 141        | 103            | 62          | 420       | 296            | 205            | 982            | 63                   |
| Preterm birth complications                                        | 63                       | 26           | 1187      | 117        | 69             | 62          | 195       | 235            | 94             | 844            | 31                   |
| Neonatal encephalopathy*                                           | 63                       | 28           | 1003      | 126        | 72             | 62          | 184       | 235            | 94             | 840            | 31                   |
| Sepsis and other infectious disorders of the newborn baby          | 63                       | 26           | 692       | 77         | 52             | 62          | 176       | 234            | 94             | 864            | 31                   |
| Hemolytic disease in fetus and newborn and other neonatal jaundice | 63                       | 26           | 586       | 103        | 70             | 62          | 193       | 235            | 94             | 894            | 31                   |
| Other neonatal disorders                                           | 63                       | 28           | 822       | 52         | 59             | 62          | 178       | 235            | 94             | 827            | 31                   |
| Nutritional deficiencies                                           | 100                      | 195          | 887       | 87         | 101            | 62          | 419       | 290            | 205            | 982            | 63                   |
| Protein energy malnutrition                                        | 94                       | 60           | 511       | 116        | 97             | 62          | 410       | 290            | 101            | 932            | 63                   |
| Iodine deficiency                                                  | 63                       | 26           | 304       | 0          | 46             | 62          | 193       | 235            | 70             | 894            | 31                   |
| Iron-deficiency anaemia                                            | 63                       | 28           | 663       | 77         | 60             | 62          | 193       | 235            | 94             | 844            | 31                   |
| Other nutritional deficiencies                                     | 63                       | 26           | 304       | 38         | 50             | 62          | 193       | 235            | 70             | 844            | 31                   |
| Other communicable, maternal, neonatal, and nutritional diseases   | 100                      | 193          | 1153      | 104        | 100            | 62          | 417       | 290            | 205            | 982            | 63                   |
| Sexually transmitted diseases excluding HIV                        | 96                       | 193          | 533       | 69         | 98             | 62          | 411       | 290            | 205            | 982            | 63                   |
| Syphilis                                                           | 87                       | 43           | 328       | 47         | 78             | 62          | 402       | 285            | 100            | 964            | 63                   |
| Chlamydial infection                                               | 63                       | 26           | 304       | 0          | 45             | 62          | 193       | 235            | 70             | 844            | 31                   |

Web Table 12 - Total number of site years by cause by region for 2013 excluding studies on LRI and diarrhea etiologies excluding studies on LRI and diarrhea etiologies

| Cause                                               | High-income Asia Pacific | Central Asia | East Asia | South Asia | Southeast Asia | Australasia | Caribbean | Central Europe | Eastern Europe | Western Europe | Andean Latin America |
|-----------------------------------------------------|--------------------------|--------------|-----------|------------|----------------|-------------|-----------|----------------|----------------|----------------|----------------------|
| Gonococcal infection                                | 85                       | 35           | 321       | 17         | 71             | 62          | 280       | 268            | 71             | 939            | 57                   |
| Anogenital herpes                                   | 63                       | 26           | 304       | 0          | 45             | 62          | 193       | 235            | 70             | 844            | 31                   |
| Other sexually transmitted diseases                 | 85                       | 40           | 312       | 0          | 70             | 62          | 280       | 274            | 71             | 889            | 58                   |
| Hepatitis                                           | 100                      | 193          | 578       | 101        | 92             | 62          | 405       | 290            | 205            | 982            | 63                   |
| Acute hepatitis A                                   | 63                       | 26           | 304       | 0          | 45             | 62          | 193       | 235            | 80             | 844            | 31                   |
| Acute hepatitis B                                   | 63                       | 26           | 304       | 9          | 45             | 62          | 193       | 235            | 84             | 844            | 31                   |
| Acute hepatitis C                                   | 63                       | 26           | 304       | 0          | 45             | 62          | 193       | 235            | 84             | 844            | 31                   |
| Acute hepatitis E                                   | 63                       | 26           | 304       | 0          | 45             | 62          | 193       | 235            | 70             | 844            | 31                   |
| Leprosy                                             | 87                       | 43           | 337       | 26         | 84             | 62          | 402       | 271            | 95             | 964            | 63                   |
| Other infectious diseases                           | 100                      | 58           | 1083      | 78         | 97             | 62          | 417       | 290            | 111            | 982            | 63                   |
| Non-communicable diseases                           | 234                      | 202          | 1720      | 258        | 199            | 122         | 444       | 472            | 293            | 2053           | 87                   |
| Neoplasms                                           | 234                      | 200          | 1596      | 213        | 197            | 122         | 442       | 472            | 293            | 2053           | 87                   |
| Oesophageal cancer                                  | 234                      | 195          | 1181      | 153        | 181            | 122         | 441       | 466            | 293            | 2037           | 87                   |
| Stomach cancer                                      | 234                      | 195          | 1194      | 154        | 182            | 122         | 442       | 466            | 293            | 2048           | 87                   |
| Liver cancer                                        | 234                      | 60           | 1191      | 154        | 182            | 122         | 440       | 466            | 197            | 1972           | 87                   |
| Larynx cancer                                       | 234                      | 195          | 1135      | 149        | 180            | 122         | 441       | 466            | 293            | 2048           | 87                   |
| Tracheal, bronchus and lung cancer                  | 234                      | 195          | 1186      | 153        | 183            | 122         | 442       | 466            | 293            | 2048           | 87                   |
| Breast cancer                                       | 234                      | 195          | 1161      | 169        | 183            | 122         | 442       | 466            | 293            | 2053           | 87                   |
| Cervical cancer                                     | 234                      | 195          | 1125      | 152        | 181            | 122         | 442       | 466            | 293            | 2048           | 87                   |
| Uterine cancer                                      | 234                      | 195          | 1126      | 148        | 168            | 122         | 441       | 466            | 293            | 2037           | 87                   |
| Prostate cancer                                     | 234                      | 195          | 1021      | 146        | 180            | 122         | 441       | 466            | 293            | 2048           | 87                   |
| Colon and rectum cancer                             | 234                      | 195          | 1176      | 154        | 182            | 122         | 442       | 466            | 293            | 2048           | 87                   |
| Lip and oral cavity cancer                          | 234                      | 60           | 1049      | 152        | 167            | 122         | 442       | 466            | 199            | 1981           | 87                   |
| Nasopharynx cancer                                  | 234                      | 60           | 1142      | 148        | 163            | 94          | 442       | 466            | 199            | 1965           | 87                   |
| Cancer of other part of pharynx and oropharynx      | 234                      | 60           | 826       | 148        | 163            | 94          | 442       | 466            | 199            | 1965           | 87                   |
| Gallbladder and biliary tract cancer                | 234                      | 60           | 826       | 124        | 161            | 94          | 441       | 466            | 199            | 1986           | 87                   |
| Pancreatic cancer                                   | 234                      | 60           | 1162      | 147        | 166            | 122         | 441       | 466            | 197            | 1998           | 87                   |
| Malignant skin melanoma                             | 234                      | 60           | 1083      | 146        | 179            | 122         | 441       | 466            | 199            | 2047           | 87                   |
| Non-melanoma skin cancer                            | 100                      | 58           | 602       | 47         | 78             | 62          | 417       | 290            | 111            | 932            | 63                   |
| Ovarian cancer                                      | 234                      | 60           | 1076      | 148        | 162            | 122         | 441       | 466            | 199            | 1998           | 87                   |
| Testicular cancer                                   | 234                      | 60           | 1015      | 123        | 165            | 122         | 441       | 466            | 197            | 1987           | 87                   |
| Kidney and other urinary organ cancers              | 234                      | 60           | 826       | 123        | 161            | 122         | 441       | 466            | 199            | 1998           | 87                   |
| Bladder cancer                                      | 234                      | 60           | 1148      | 146        | 166            | 122         | 441       | 466            | 199            | 1998           | 87                   |
| Brain and nervous system cancer                     | 234                      | 60           | 1152      | 136        | 165            | 122         | 441       | 466            | 199            | 1991           | 87                   |
| Thyroid cancer                                      | 234                      | 60           | 1063      | 120        | 165            | 122         | 441       | 466            | 199            | 1997           | 87                   |
| Mesothelioma                                        | 199                      | 44           | 820       | 104        | 145            | 122         | 434       | 434            | 171            | 1265           | 66                   |
| Hodgkin lymphoma                                    | 234                      | 60           | 1116      | 146        | 165            | 122         | 438       | 466            | 199            | 1996           | 87                   |
| Non-Hodgkin's lymphoma                              | 234                      | 60           | 826       | 147        | 165            | 122         | 437       | 466            | 199            | 1997           | 87                   |
| Multiple myeloma                                    | 234                      | 60           | 826       | 129        | 161            | 122         | 437       | 466            | 197            | 1990           | 87                   |
| Leukaemia                                           | 234                      | 195          | 1499      | 145        | 182            | 122         | 441       | 466            | 293            | 2036           | 87                   |
| Other neoplasms                                     | 100                      | 193          | 686       | 69         | 101            | 62          | 418       | 290            | 205            | 982            | 63                   |
| Cardiovascular and circulatory diseases             | 100                      | 198          | 686       | 112        | 113            | 62          | 418       | 296            | 205            | 982            | 63                   |
| Rheumatic heart disease                             | 100                      | 193          | 681       | 26         | 94             | 62          | 418       | 290            | 205            | 982            | 63                   |
| Ischaemic heart disease                             | 100                      | 193          | 684       | 96         | 104            | 62          | 418       | 290            | 205            | 982            | 63                   |
| Cerebrovascular disease                             | 100                      | 193          | 686       | 97         | 107            | 62          | 418       | 290            | 205            | 982            | 63                   |
| Ischaemic stroke                                    | 92                       | 43           | 675       | 0          | 71             | 62          | 418       | 290            | 90             | 914            | 63                   |
| Hemorrhagic and other non-ischaemic stroke          | 92                       | 43           | 686       | 0          | 71             | 62          | 418       | 290            | 90             | 914            | 63                   |
| Hypertensive heart disease                          | 92                       | 43           | 682       | 26         | 88             | 62          | 416       | 290            | 100            | 914            | 63                   |
| Cardiomyopathy and myocarditis                      | 63                       | 26           | 647       | 0          | 45             | 62          | 193       | 235            | 94             | 844            | 31                   |
| Atrial fibrillation and flutter                     | 63                       | 26           | 304       | 0          | 45             | 62          | 193       | 235            | 84             | 844            | 31                   |
| Aortic aneurysm                                     | 63                       | 26           | 304       | 0          | 47             | 62          | 193       | 235            | 84             | 844            | 31                   |
| Peripheral vascular disease                         | 63                       | 26           | 304       | 0          | 45             | 62          | 193       | 235            | 84             | 844            | 31                   |
| Endocarditis                                        | 63                       | 26           | 304       | 0          | 45             | 62          | 193       | 235            | 94             | 844            | 31                   |
| Other cardiovascular and circulatory diseases       | 92                       | 178          | 682       | 17         | 85             | 62          | 418       | 290            | 194            | 964            | 63                   |
| Chronic respiratory diseases                        | 100                      | 193          | 428       | 106        | 104            | 62          | 418       | 290            | 205            | 982            | 63                   |
| COPD                                                | 63                       | 26           | 665       | 37         | 52             | 62          | 193       | 235            | 94             | 844            | 31                   |
| Pneumoconiosis                                      | 63                       | 26           | 502       | 6          | 45             | 62          | 193       | 235            | 81             | 844            | 31                   |
| Silicosis                                           | 63                       | 26           | 304       | 0          | 45             | 62          | 193       | 235            | 70             | 844            | 31                   |
| Asbestosis                                          | 63                       | 26           | 304       | 0          | 45             | 62          | 193       | 235            | 70             | 844            | 31                   |
| Coal workers pneumoconiosis                         | 63                       | 26           | 304       | 0          | 45             | 62          | 193       | 235            | 70             | 844            | 31                   |
| Other pneumoconiosis                                | 63                       | 26           | 304       | 0          | 45             | 62          | 193       | 235            | 70             | 844            | 31                   |
| Asthma                                              | 63                       | 26           | 304       | 34         | 50             | 62          | 193       | 235            | 94             | 844            | 31                   |
| Interstitial lung disease and pulmonary sarcoidosis | 63                       | 26           | 304       | 6          | 45             | 62          | 193       | 235            | 94             | 844            | 31                   |
| Other chronic respiratory diseases                  | 63                       | 26           | 329       | 23         | 45             | 62          | 193       | 235            | 84             | 844            | 31                   |
| Cirrhosis of the liver                              | 100                      | 193          | 684       | 103        | 107            | 62          | 418       | 290            | 205            | 982            | 63                   |
| Cirrhosis due to alcohol use                        | 35                       | 26           | 295       | 0          | 39             | 24          | 182       | 143            | 63             | 361            | 30                   |
| Digestive diseases (except cirrhosis)               | 100                      | 193          | 916       | 98         | 99             | 62          | 418       | 290            | 205            | 982            | 63                   |
| Peptic ulcer disease                                | 100                      | 193          | 655       | 26         | 81             | 62          | 418       | 290            | 205            | 982            | 63                   |
| Gastritis and duodenitis                            | 63                       | 26           | 304       | 26         | 46             | 62          | 193       | 235            | 94             | 894            | 31                   |
| Appendicitis                                        | 100                      | 193          | 602       | 61         | 99             | 62          | 417       | 290            | 205            | 982            | 63                   |
| Paralytic ileus and intestinal obstruction          | 100                      | 58           | 637       | 64         | 80             | 62          | 417       | 290            | 111            | 932            | 63                   |
| Inguinal, femoral, and abdominal hernia             | 92                       | 43           | 383       | 66         | 93             | 62          | 415       | 290            | 100            | 914            | 63                   |

Web Table 12 - Total number of site years by cause by region for 2013 excluding studies on LRI and diarrhea etiologies excluding studies on LRI and diarrhea etiologies

| Cause                                                                      | High-income Asia Pacific | Central Asia | East Asia | South Asia | Southeast Asia | Australasia | Caribbean | Central Europe | Eastern Europe | Western Europe | Andean Latin America |
|----------------------------------------------------------------------------|--------------------------|--------------|-----------|------------|----------------|-------------|-----------|----------------|----------------|----------------|----------------------|
| Non-infective inflammatory bowel disease                                   | 63                       | 26           | 304       | 0          | 45             | 62          | 193       | 235            | 94             | 844            | 31                   |
| Vascular intestinal disorders                                              | 63                       | 26           | 304       | 0          | 45             | 62          | 193       | 235            | 84             | 844            | 31                   |
| Gall bladder and bile duct disease                                         | 92                       | 178          | 641       | 26         | 89             | 62          | 414       | 290            | 194            | 964            | 63                   |
| Pancreatitis                                                               | 63                       | 26           | 304       | 9          | 47             | 62          | 193       | 235            | 94             | 844            | 31                   |
| Other digestive diseases                                                   | 92                       | 43           | 583       | 20         | 71             | 62          | 414       | 290            | 100            | 914            | 63                   |
| Neurological disorders                                                     | 100                      | 193          | 949       | 95         | 103            | 62          | 415       | 290            | 205            | 982            | 63                   |
| Alzheimer's disease and other dementias                                    | 100                      | 51           | 591       | 26         | 73             | 62          | 380       | 290            | 101            | 932            | 62                   |
| Parkinson's disease                                                        | 92                       | 43           | 444       | 21         | 78             | 62          | 412       | 290            | 90             | 914            | 63                   |
| Epilepsy                                                                   | 92                       | 178          | 596       | 89         | 90             | 62          | 404       | 290            | 194            | 962            | 63                   |
| Multiple sclerosis                                                         | 83                       | 178          | 380       | 17         | 70             | 62          | 340       | 290            | 194            | 964            | 63                   |
| Other neurological disorders                                               | 63                       | 26           | 304       | 0          | 45             | 62          | 193       | 235            | 70             | 844            | 31                   |
| Mental and behavioural disorders                                           | 100                      | 193          | 591       | 51         | 84             | 62          | 397       | 290            | 205            | 931            | 63                   |
| Schizophrenia                                                              | 84                       | 43           | 571       | 26         | 69             | 62          | 276       | 290            | 90             | 902            | 55                   |
| Alcohol use disorders                                                      | 91                       | 178          | 419       | 30         | 76             | 62          | 377       | 290            | 194            | 913            | 63                   |
| Drug use disorders                                                         | 92                       | 178          | 361       | 27         | 81             | 62          | 370       | 290            | 194            | 913            | 63                   |
| Opioid use disorders                                                       | 63                       | 26           | 304       | 0          | 45             | 62          | 193       | 235            | 70             | 844            | 31                   |
| Cocaine use disorders                                                      | 63                       | 26           | 304       | 0          | 45             | 62          | 193       | 235            | 70             | 844            | 31                   |
| Amphetamine use disorders                                                  | 63                       | 26           | 304       | 0          | 45             | 62          | 193       | 235            | 70             | 844            | 31                   |
| Cannabis use disorders                                                     | 63                       | 26           | 304       | 0          | 45             | 62          | 193       | 235            | 70             | 844            | 31                   |
| Other drug use disorders                                                   | 63                       | 26           | 304       | 0          | 45             | 62          | 193       | 235            | 71             | 844            | 31                   |
| Eating disorders                                                           | 63                       | 26           | 304       | 0          | 45             | 62          | 186       | 235            | 70             | 841            | 31                   |
| Anorexia nervosa                                                           | 63                       | 26           | 304       | 0          | 45             | 62          | 186       | 235            | 70             | 841            | 31                   |
| Bulimia nervosa                                                            | 63                       | 26           | 303       | 0          | 45             | 62          | 183       | 235            | 70             | 840            | 31                   |
| Other mental and substance use disorders                                   | 63                       | 26           | 304       | 0          | 45             | 62          | 193       | 235            | 84             | 844            | 31                   |
| Diabetes, urogenital, blood, and endocrine diseases                        | 100                      | 195          | 676       | 105        | 108            | 62          | 418       | 290            | 205            | 982            | 63                   |
| Diabetes mellitus                                                          | 100                      | 193          | 663       | 102        | 101            | 62          | 418       | 290            | 205            | 982            | 63                   |
| Acute glomerulonephritis                                                   | 78                       | 50           | 312       | 31         | 88             | 62          | 276       | 255            | 106            | 922            | 55                   |
| Chronic kidney disease                                                     | 100                      | 193          | 487       | 76         | 104            | 62          | 418       | 290            | 205            | 982            | 63                   |
| Chronic kidney disease due to diabetes mellitus                            | 63                       | 26           | 304       | 0          | 45             | 62          | 193       | 235            | 70             | 844            | 31                   |
| Chronic kidney disease due to hypertension                                 | 63                       | 26           | 304       | 0          | 45             | 62          | 193       | 235            | 94             | 844            | 31                   |
| Chronic kidney disease due to glomerulonephritis                           | 63                       | 26           | 304       | 0          | 45             | 62          | 193       | 235            | 94             | 844            | 31                   |
| Chronic kidney disease due to other causes                                 | 63                       | 26           | 304       | 0          | 45             | 62          | 193       | 235            | 80             | 844            | 31                   |
| Urinary diseases and male infertility                                      | 100                      | 193          | 620       | 52         | 96             | 62          | 418       | 290            | 205            | 982            | 63                   |
| Tubulointerstitial nephritis, pyelonephritis, and urinary tract infections | 100                      | 193          | 609       | 26         | 86             | 62          | 413       | 290            | 205            | 982            | 63                   |
| Urolithiasis                                                               | 91                       | 43           | 599       | 26         | 83             | 62          | 276       | 289            | 100            | 953            | 55                   |
| Other urinary diseases                                                     | 63                       | 26           | 304       | 9          | 49             | 62          | 193       | 235            | 94             | 844            | 31                   |
| Gynecological diseases                                                     | 87                       | 57           | 312       | 41         | 82             | 62          | 343       | 283            | 97             | 913            | 63                   |
| Uterine fibroids                                                           | 0                        | 0            | 0         | 6          | 0              | 0           | 0         | 0              | 0              | 0              | 0                    |
| Polycystic ovarian syndrome                                                | 63                       | 26           | 295       | 0          | 45             | 62          | 164       | 235            | 70             | 829            | 31                   |
| Endometriosis                                                              | 63                       | 26           | 295       | 0          | 45             | 62          | 164       | 235            | 70             | 829            | 31                   |
| Genital prolapse                                                           | 35                       | 26           | 295       | 17         | 39             | 24          | 182       | 143            | 63             | 361            | 30                   |
| Other gynecological diseases                                               | 63                       | 26           | 304       | 0          | 45             | 62          | 193       | 235            | 70             | 844            | 31                   |
| Hemoglobinopathies and hemolytic anaemias                                  | 100                      | 60           | 318       | 60         | 79             | 62          | 418       | 290            | 101            | 932            | 63                   |
| Thalassemias                                                               | 63                       | 26           | 304       | 32         | 50             | 62          | 193       | 235            | 70             | 844            | 31                   |
| Sickle cell disorders                                                      | 63                       | 26           | 304       | 27         | 50             | 62          | 193       | 235            | 70             | 844            | 31                   |
| G6PD deficiency                                                            | 63                       | 26           | 304       | 0          | 45             | 62          | 193       | 235            | 70             | 844            | 31                   |
| Other hemoglobinopathies and hemolytic anaemias                            | 63                       | 26           | 304       | 6          | 45             | 62          | 193       | 235            | 70             | 844            | 31                   |
| Endocrine, metabolic, blood, and immune disorders                          | 100                      | 193          | 465       | 38         | 84             | 62          | 416       | 290            | 205            | 982            | 63                   |
| Musculoskeletal disorders                                                  | 100                      | 58           | 538       | 25         | 73             | 62          | 409       | 290            | 87             | 932            | 63                   |
| Rheumatoid arthritis                                                       | 89                       | 36           | 485       | 23         | 65             | 62          | 276       | 279            | 90             | 911            | 55                   |
| Other musculoskeletal disorders                                            | 92                       | 43           | 318       | 9          | 66             | 62          | 409       | 290            | 100            | 913            | 63                   |
| Other non-communicable diseases                                            | 100                      | 200          | 1203      | 140        | 108            | 62          | 420       | 296            | 205            | 982            | 63                   |
| Congenital anomalies                                                       | 100                      | 200          | 1203      | 140        | 108            | 62          | 420       | 296            | 205            | 982            | 63                   |
| Neural tube defects                                                        | 63                       | 161          | 799       | 26         | 50             | 62          | 193       | 235            | 174            | 894            | 31                   |
| Congenital heart anomalies                                                 | 92                       | 178          | 1182      | 26         | 76             | 62          | 415       | 290            | 194            | 964            | 63                   |
| Cleft lip and cleft palate                                                 | 87                       | 42           | 307       | 26         | 70             | 62          | 318       | 281            | 69             | 889            | 63                   |
| Down's syndrome                                                            | 63                       | 26           | 497       | 0          | 45             | 62          | 193       | 235            | 70             | 844            | 31                   |
| Turner syndrome                                                            | 35                       | 26           | 295       | 0          | 39             | 24          | 182       | 143            | 63             | 361            | 30                   |
| Klinefelter syndrome                                                       | 63                       | 26           | 304       | 0          | 45             | 62          | 193       | 235            | 70             | 844            | 31                   |
| Chromosomal unbalanced rearrangements                                      | 63                       | 26           | 304       | 0          | 45             | 62          | 193       | 235            | 71             | 844            | 31                   |
| Other congenital anomalies                                                 | 92                       | 43           | 634       | 26         | 92             | 62          | 379       | 290            | 100            | 960            | 63                   |
| Skin and subcutaneous diseases                                             | 100                      | 194          | 465       | 70         | 79             | 62          | 409       | 290            | 205            | 981            | 63                   |
| Cellulitis                                                                 | 63                       | 26           | 304       | 0          | 45             | 62          | 193       | 235            | 70             | 844            | 31                   |
| Abscess, impetigo, and other bacterial skin diseases                       | 92                       | 43           | 465       | 26         | 71             | 62          | 409       | 290            | 100            | 963            | 63                   |
| Scabies                                                                    | 63                       | 26           | 304       | 0          | 45             | 62          | 193       | 235            | 70             | 844            | 31                   |
| Decubitus ulcer                                                            | 63                       | 26           | 304       | 0          | 45             | 62          | 193       | 235            | 70             | 844            | 31                   |
| Other skin and subcutaneous diseases                                       | 63                       | 26           | 304       | 0          | 46             | 62          | 193       | 235            | 70             | 894            | 31                   |
| Sense organ diseases                                                       | 63                       | 26           | 304       | 21         | 50             | 62          | 193       | 235            | 70             | 844            | 31                   |
| Other sense organ diseases                                                 | 63                       | 26           | 304       | 0          | 45             | 62          | 193       | 235            | 70             | 844            | 31                   |
| Sudden infant death syndrome                                               | 80                       | 35           | 281       | 20         | 68             | 62          | 296       | 271            | 76             | 884            | 63                   |
| Injuries                                                                   | 100                      | 199          | 1182      | 178        | 130            | 62          | 420       | 297            | 205            | 982            | 63                   |
| Transport injuries                                                         | 103                      | 194          | 1048      | 118        | 119            | 62          | 420       | 300            | 211            | 986            | 65                   |

Web Table 12 - Total number of site years by cause by region for 2013 excluding studies on LRI and diarrhea etiologies excluding studies on LRI and diarrhea etiologies

| Cause                                           | High-income Asia Pacific | Central Asia | East Asia | South Asia | Southeast Asia | Australasia | Caribbean | Central Europe | Eastern Europe | Western Europe | Andean Latin America |
|-------------------------------------------------|--------------------------|--------------|-----------|------------|----------------|-------------|-----------|----------------|----------------|----------------|----------------------|
| Road injuries                                   | 95                       | 179          | 318       | 80         | 103            | 62          | 420       | 300            | 200            | 918            | 65                   |
| Pedestrian road injuries                        | 66                       | 27           | 304       | 26         | 52             | 62          | 195       | 245            | 90             | 848            | 33                   |
| Cyclist road injuries                           | 66                       | 27           | 304       | 23         | 53             | 62          | 194       | 244            | 77             | 847            | 33                   |
| Motorcyclist road injuries                      | 66                       | 26           | 304       | 26         | 54             | 62          | 196       | 244            | 76             | 848            | 32                   |
| Motor vehicle road injuries                     | 66                       | 27           | 304       | 26         | 54             | 62          | 196       | 245            | 77             | 848            | 33                   |
| Other road injuries                             | 65                       | 26           | 304       | 24         | 52             | 62          | 194       | 242            | 71             | 844            | 33                   |
| Other transport injuries                        | 92                       | 43           | 318       | 51         | 87             | 62          | 417       | 290            | 77             | 914            | 63                   |
| Unintentional injuries                          | 100                      | 193          | 1138      | 133        | 103            | 62          | 418       | 290            | 205            | 982            | 63                   |
| Falls                                           | 100                      | 193          | 991       | 84         | 99             | 62          | 418       | 290            | 205            | 982            | 63                   |
| Drowning                                        | 100                      | 192          | 1011      | 115        | 89             | 62          | 417       | 290            | 205            | 982            | 63                   |
| Fire, heat, and hot substances                  | 100                      | 193          | 617       | 109        | 98             | 62          | 418       | 290            | 205            | 982            | 63                   |
| Poisonings                                      | 100                      | 192          | 747       | 85         | 98             | 62          | 414       | 290            | 205            | 982            | 63                   |
| Exposure to mechanical forces                   | 100                      | 58           | 621       | 61         | 99             | 62          | 417       | 290            | 111            | 982            | 63                   |
| Unintentional firearm injuries                  | 92                       | 43           | 609       | 48         | 81             | 62          | 416       | 290            | 100            | 964            | 63                   |
| Unintentional suffocation                       | 63                       | 26           | 749       | 21         | 50             | 62          | 193       | 235            | 71             | 844            | 31                   |
| Other exposure to mechanical forces             | 92                       | 43           | 615       | 28         | 77             | 62          | 415       | 290            | 91             | 964            | 63                   |
| Adverse effects of medical treatment            | 100                      | 58           | 611       | 74         | 83             | 62          | 417       | 290            | 111            | 982            | 63                   |
| Animal contact                                  | 96                       | 50           | 318       | 87         | 76             | 62          | 276       | 287            | 111            | 932            | 55                   |
| Venomous animal contact                         | 63                       | 26           | 304       | 76         | 50             | 62          | 193       | 235            | 80             | 844            | 31                   |
| Non-venomous animal contact                     | 63                       | 26           | 304       | 25         | 50             | 62          | 193       | 235            | 94             | 844            | 31                   |
| Foreign body                                    | 100                      | 58           | 449       | 28         | 82             | 62          | 417       | 290            | 111            | 932            | 63                   |
| Pulmonary aspiration and foreign body in airway | 63                       | 26           | 304       | 27         | 54             | 62          | 193       | 235            | 70             | 844            | 31                   |
| Foreign body in other body part                 | 63                       | 26           | 304       | 21         | 50             | 62          | 193       | 235            | 84             | 844            | 31                   |
| Unintentional injuries not classified elsewhere | 96                       | 50           | 318       | 45         | 90             | 62          | 276       | 287            | 111            | 982            | 55                   |
| Self-harm and interpersonal violence            | 100                      | 193          | 654       | 128        | 108            | 62          | 419       | 290            | 205            | 982            | 63                   |
| Self-harm                                       | 100                      | 193          | 647       | 125        | 103            | 62          | 406       | 290            | 205            | 982            | 63                   |
| Interpersonal violence                          | 110                      | 300          | 635       | 185        | 181            | 62          | 685       | 290            | 205            | 982            | 97                   |
| Assault by firearm                              | 63                       | 26           | 304       | 22         | 51             | 62          | 194       | 235            | 71             | 844            | 31                   |
| Assault by sharp object                         | 63                       | 26           | 304       | 21         | 51             | 62          | 193       | 235            | 71             | 844            | 31                   |
| Assault by other means                          | 63                       | 26           | 304       | 21         | 50             | 62          | 193       | 235            | 71             | 844            | 31                   |
| Forces of nature, war, and legal intervention   | 100                      | 193          | 460       | 58         | 97             | 62          | 418       | 291            | 205            | 982            | 63                   |
| Exposure to forces of nature                    | 63                       | 26           | 304       | 37         | 68             | 62          | 194       | 235            | 81             | 844            | 31                   |
| Collective violence and legal intervention      | 92                       | 43           | 460       | 52         | 95             | 62          | 416       | 291            | 100            | 964            | 63                   |

COPD = chronic obstructive pulmonary disease. \*Includes birth asphyxia and birth trauma



**Web Figure 9: Site years of vital registration by ICD type for 1980-2013**

Web Figure 8: Site Years of Vital Registration by ICD Type 1980–2013

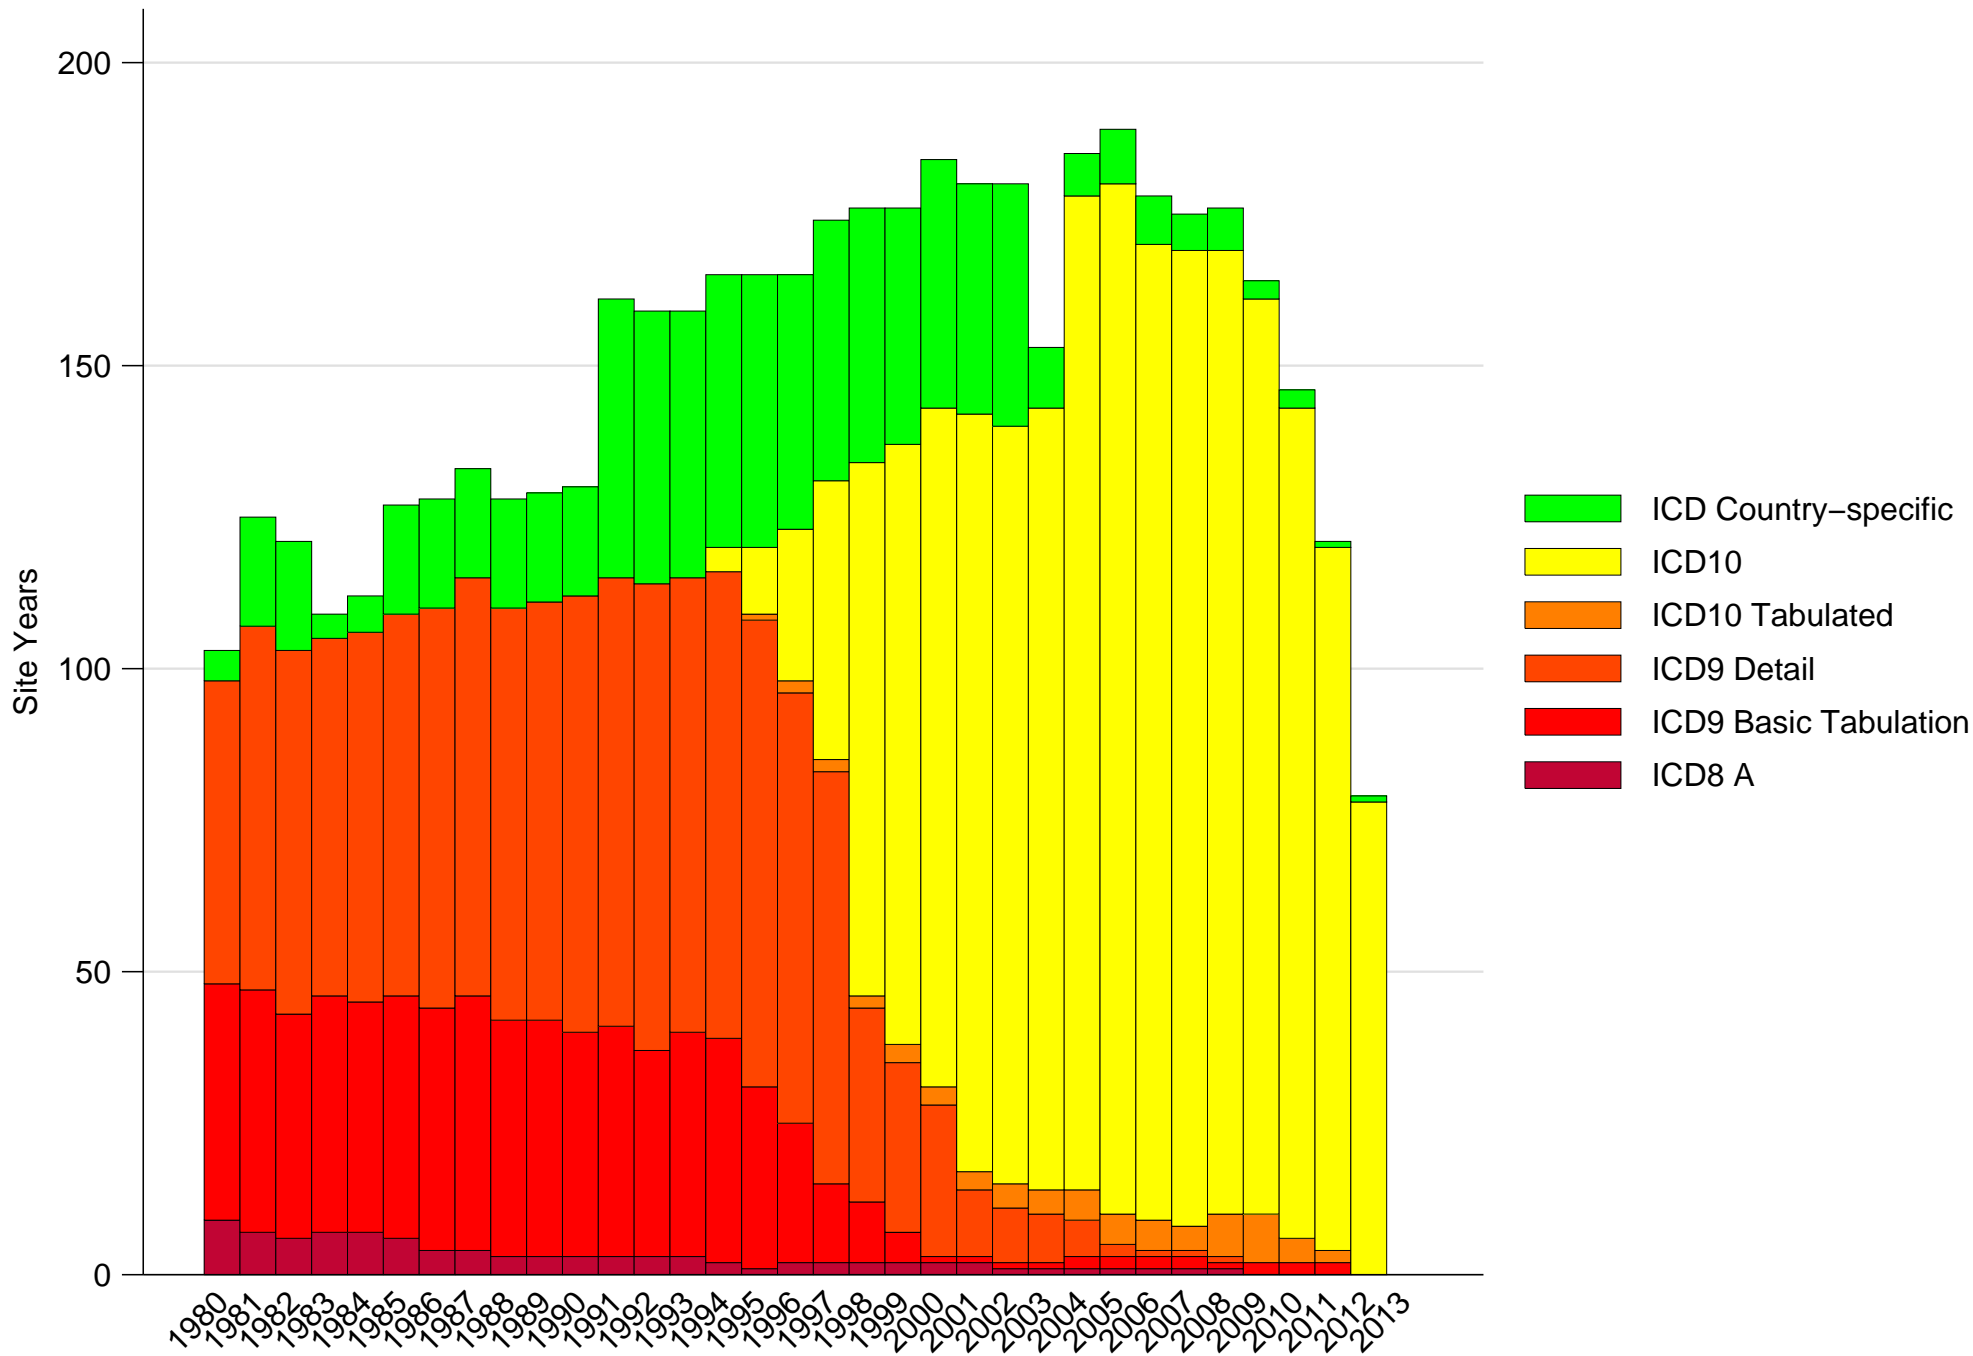

**Web Table 13: Source list by country and site, source type, study site, time period, age range, and deaths excluding sources on LRI and diarrhea etiologies**

**Web Table 13 - Source list by country and site, source type, study site, time period, age range, and deaths excluding sources on LRI and diarrhea etiologies**

| Geography           | Source Type        | Study Site                                      | Time Period*                           | Age Range       | Deaths used in analysis** |
|---------------------|--------------------|-------------------------------------------------|----------------------------------------|-----------------|---------------------------|
| Afghanistan         | Verbal Autopsy     | Alishang District, Laghman Province (periurban) | 2000                                   | 15 - 49 years   | 52                        |
| Afghanistan         | Verbal Autopsy     | Kabul City, Kabul province (urban)              | 2000                                   | 15 - 49 years   | 122                       |
| Afghanistan         | Verbal Autopsy     | Maywand, Kandahar province (rural)              | 2000                                   | 15 - 49 years   | 62                        |
| Afghanistan         | Verbal Autopsy     | Ragh, Badakshan Province (rural)                | 2000                                   | 15 - 49 years   | 121                       |
| Afghanistan         | Verbal Autopsy     | Badghis Province (rural)                        | 2001                                   | All Ages        | 79                        |
| Afghanistan         | Verbal Autopsy     | 49 villages                                     | 2002                                   | birth - 5 years | 1039                      |
| Afghanistan         | Verbal Autopsy     | National                                        | 2008                                   | All Ages        | 3140                      |
| Afghanistan         | Sibling History    | National                                        | 1996-2010                              | 15 - 54 years   | 184                       |
| Albania             | Vital Registration | National                                        | 1987-1989, 1992-2004                   | All Ages        | 265908                    |
| Albania             | Vital Registration | National                                        | 2005-2010                              | All Ages        | 2932                      |
| Albania             | Police Records     | National                                        | 2007                                   | All Ages        | Death Rate                |
| Algeria             | Surveillance       | National                                        | 2002                                   | 10 - 54 years   | 68                        |
| Algeria             | Police Records     | National                                        | 2003-2007                              | All Ages        | Death Rate                |
| Algeria             | Hospital           | National                                        | 2007                                   | All Ages        | 49383                     |
| Algeria             | Cancer Registry    | Algiers Province                                | 1995                                   | All Ages        | 805                       |
| Algeria             | Cancer Registry    | Setif Province                                  | 2000                                   | All Ages        | 423                       |
| Algeria             | Cancer Registry    | Setif Province                                  | 2005                                   | All Ages        | 548                       |
| Algeria             | Cancer Registry    | Setif Province                                  | 1987, 1991                             | All Ages        | 564                       |
| Algeria             | Cancer Registry    | Batna Province                                  | 2000-2006                              | All Ages        | 1766                      |
| Algeria             | Cancer Registry    | Oran Province                                   | 2005-2006                              | All Ages        | 779                       |
| Angola              | Police Records     | National                                        | 2004                                   | All Ages        | Death Rate                |
| Antigua and Barbuda | Vital Registration | National                                        | 1983, 1985-1995                        | All Ages        | 4845                      |
| Antigua and Barbuda | Vital Registration | National                                        | 2000-2009                              | All Ages        | 4617                      |
| Antigua and Barbuda | Police Records     | National                                        | 1985-1986                              | All Ages        | Death Rate                |
| Antigua and Barbuda | Police Records     | National                                        | 1995, 2001-2002, 2004, 2007, 2009-2010 | All Ages        | Death Rate                |
| Argentina           | Vital Registration | National                                        | 1980-1996                              | All Ages        | 4272680                   |
| Argentina           | Vital Registration | National                                        | 1997-2010                              | All Ages        | 4107326                   |
| Argentina           | Verbal Autopsy     | Chaco, Formosa, Mendoza, San Luis, and Tucuman  | 2002                                   | 10 - 49 years   | 20                        |
| Argentina           | Police Records     | National                                        | 1980                                   | All Ages        | Death Rate                |
| Argentina           | Police Records     | National                                        | 1997-1999, 2001-2005, 2007             | All Ages        | Death Rate                |
| Argentina           | Cancer Registry    | Bahia Blanca                                    | 1995                                   | All Ages        | 663                       |

**Web Table 13 - Source list by country and site, source type, study site, time period, age range, and deaths excluding sources on LRI and diarrhea etiologies**

| <b>Geography</b> | <b>Source Type</b> | <b>Study Site</b> | <b>Time Period*</b>  | <b>Age Range</b> | <b>Deaths used in analysis**</b> |
|------------------|--------------------|-------------------|----------------------|------------------|----------------------------------|
| Argentina        | Cancer Registry    | Bahia Blanca      | 2000                 | All Ages         | 529                              |
| Argentina        | Cancer Registry    | Bahia Blanca      | 2005                 | All Ages         | 519                              |
| Argentina        | Cancer Registry    | Cordoba           | 2005                 | All Ages         | 1854                             |
| Argentina        | Cancer Registry    | Mendoza           | 2005                 | All Ages         | 2182                             |
| Argentina        | Cancer Registry    | Tierra del Fuego  | 2005                 | All Ages         | 82                               |
| Argentina        | Cancer Registry    | Concordia         | 1992, 1995           | All Ages         | 332                              |
| Armenia          | Vital Registration | National          | 2012                 | All Ages         | 27598                            |
| Armenia          | Vital Registration | National          | 1981-1982, 1985-2003 | All Ages         | 493194                           |
| Armenia          | Vital Registration | National          | 2006, 2008-2011      | All Ages         | 138050                           |
| Armenia          | Police Records     | National          | 2007                 | All Ages         | Death Rate                       |
| Armenia          | Police Records     | National          | 1986-1988            | All Ages         | Death Rate                       |
| Australia        | Vital Registration | National          | 2005                 | All Ages         | 131323                           |
| Australia        | Vital Registration | National          | 1980-1997            | All Ages         | 2138890                          |
| Australia        | Vital Registration | National          | 1998-2004, 2006-2011 | All Ages         | 1750620                          |
| Australia        | Cancer Registry    | South Australia   | 1980-1981            | All Ages         | 4527                             |
| Australia        | Cancer Registry    | Tasmania          | 1980-1981            | All Ages         | 1411                             |
| Australia        | Cancer Registry    | National          | 1982-2009            | All Ages         | 835970                           |
| Austria          | Vital Registration | National          | 1983                 | All Ages         | 93039                            |
| Austria          | Vital Registration | National          | 1980-1982, 1984-2001 | All Ages         | 1755384                          |
| Austria          | Vital Registration | National          | 2002-2011            | All Ages         | 757879                           |
| Azerbaijan       | Vital Registration | National          | 2007                 | All Ages         | 50439                            |
| Azerbaijan       | Vital Registration | National          | 1981-1982, 1985-2000 | All Ages         | 844622                           |
| Azerbaijan       | Vital Registration | National          | 2001-2004            | All Ages         | 190672                           |
| Azerbaijan       | Police Records     | National          | 2007                 | All Ages         | Death Rate                       |
| Bahrain          | Vital Registration | National          | 1986                 | All Ages         | 4189                             |
| Bahrain          | Vital Registration | National          | 1998, 2000-2009      | All Ages         | 27672                            |
| Bahrain          | Police Records     | National          | 1980                 | All Ages         | Death Rate                       |
| Bahrain          | Police Records     | National          | 1997                 | All Ages         | Death Rate                       |
| Bahrain          | Police Records     | National          | 2007                 | All Ages         | Death Rate                       |
| Bahrain          | Cancer Registry    | National          | 2000                 | All Ages         | 180                              |
| Bahrain          | Cancer Registry    | National          | 2005                 | All Ages         | 188                              |

**Web Table 13 - Source list by country and site, source type, study site, time period, age range, and deaths excluding sources on LRI and diarrhea etiologies**

| Geography  | Source Type        | Study Site                                                                            | Time Period*               | Age Range        | Deaths used in analysis** |
|------------|--------------------|---------------------------------------------------------------------------------------|----------------------------|------------------|---------------------------|
| Bangladesh | Verbal Autopsy     | Jamalpur District, Dhaka                                                              | 1982                       | 15 - 44 years    | 58                        |
| Bangladesh | Verbal Autopsy     | Ghatail Upazila, Tangail District (rural)                                             | 1985                       | birth - 27 days  | 69                        |
| Bangladesh | Verbal Autopsy     | Matlab thana and Chittagong                                                           | 1986                       | 15 - 44 years    | 64                        |
| Bangladesh | Verbal Autopsy     | Matlab thana                                                                          | 1988                       | birth - 5 years  | 1567                      |
| Bangladesh | Verbal Autopsy     | Dhaka, Khulna, Rajshahi, and Chittagong                                               | 1990                       | birth - 5 years  | 806                       |
| Bangladesh | Verbal Autopsy     | Matlab thana and Chittagong                                                           | 1991                       | 15 - 49 years    | 358                       |
| Bangladesh | Verbal Autopsy     | Dhaka City (urban)                                                                    | 1992                       | birth - 9 years  | 402                       |
| Bangladesh | Verbal Autopsy     | Dhaka, Chittagong, Rajshahi, and Khulna                                               | 1992                       | birth - 27 days  | 48                        |
| Bangladesh | Verbal Autopsy     | National                                                                              | 1993                       | birth - 5 years  | 828                       |
| Bangladesh | Verbal Autopsy     | Dhaka slums (urban)                                                                   | 1994                       | birth - 364 days | 179                       |
| Bangladesh | Verbal Autopsy     | Chittagong, Dhaka, Khulna                                                             | 2000                       | All Ages         | 694                       |
| Bangladesh | Verbal Autopsy     | Dhaka (urban)                                                                         | 2004                       | birth - 5 years  | 914                       |
| Bangladesh | Verbal Autopsy     | National                                                                              | 2004                       | birth - 5 years  | 604                       |
| Bangladesh | Verbal Autopsy     | Rangpur                                                                               | 2004                       | birth - 27 days  | 951                       |
| Bangladesh | Verbal Autopsy     | Mallickbari and Hobirbari, two rural unions, in Valuaka upazilla, Mymensingh District | 2007                       | birth - 27 days  | 54                        |
| Bangladesh | Verbal Autopsy     | Dhaka slums (urban)                                                                   | 2008                       | birth - 27 days  | 260                       |
| Bangladesh | Verbal Autopsy     | Matlab thana                                                                          | 1980-1981                  | 20 - 69 years    | 1146                      |
| Bangladesh | Verbal Autopsy     | Matlab thana                                                                          | 1982-1986                  | All Ages         | 10731                     |
| Bangladesh | Verbal Autopsy     | Matlab thana                                                                          | 1987-2002                  | All Ages         | 25628                     |
| Bangladesh | Verbal Autopsy     | National                                                                              | 1991, 1994                 | birth - 5 years  | 1506                      |
| Bangladesh | Verbal Autopsy     | Matlab thana                                                                          | 2003-2006                  | All Ages         | 5807                      |
| Bangladesh | Verbal Autopsy     | Dhaka slums (urban)                                                                   | 2006, 2008                 | birth - 5 years  | 376                       |
| Bangladesh | Verbal Autopsy     | Matlab thana                                                                          | 2007-2012                  | All Ages         | 8944                      |
| Bangladesh | Survey/Census      | Gopalpur Upazila and Bhuapur Upazila (rural)                                          | 1982                       | 15 - 49 years    | 48                        |
| Bangladesh | Survey/Census      | National                                                                              | 2009                       | 15 - 49 years    | 80                        |
| Bangladesh | Sibling History    | National                                                                              | 1987-2001                  | 15 - 54 years    | 1555                      |
| Bangladesh | Police Records     | National                                                                              | 2006                       | All Ages         | Death Rate                |
| Bangladesh | Police Records     | National                                                                              | 1980-1986                  | All Ages         | Death Rate                |
| Bangladesh | Police Records     | National                                                                              | 2000, 2004-2007, 2009-2010 | All Ages         | Death Rate                |
| Bangladesh | Hospital           | National                                                                              | 1996                       | 10 - 49 years    | 28998                     |
| Barbados   | Vital Registration | National                                                                              | 1980-1995                  | All Ages         | 34848                     |

**Web Table 13 - Source list by country and site, source type, study site, time period, age range, and deaths excluding sources on LRI and diarrhea etiologies**

| Geography | Source Type        | Study Site                 | Time Period*                               | Age Range        | Deaths used in analysis** |
|-----------|--------------------|----------------------------|--------------------------------------------|------------------|---------------------------|
| Barbados  | Vital Registration | National                   | 2000-2008                                  | All Ages         | 20935                     |
| Barbados  | Police Records     | National                   | 1986                                       | All Ages         | Death Rate                |
| Barbados  | Police Records     | National                   | 2007                                       | All Ages         | Death Rate                |
| Barbados  | Police Records     | National                   | 1998-1999, 2009-2010                       | All Ages         | Death Rate                |
| Belarus   | Vital Registration | National                   | 1981-1982, 1985-1995, 1997-2001            | All Ages         | 2120188                   |
| Belarus   | Vital Registration | National                   | 2002-2003, 2007-2009                       | All Ages         | 691812                    |
| Belarus   | Cancer Registry    | National                   | 2000                                       | All Ages         | 21121                     |
| Belarus   | Cancer Registry    | National                   | 2005                                       | All Ages         | 20680                     |
| Belarus   | Cancer Registry    | National                   | 1985, 1990, 1995                           | All Ages         | 52762                     |
| Belgium   | Vital Registration | National                   | 1980-1984, 1986-1987, 1992-1997            | All Ages         | 1412576                   |
| Belgium   | Vital Registration | National                   | 1985, 1988-1991                            | All Ages         | 531803                    |
| Belgium   | Vital Registration | National                   | 1998-1999, 2003-2010                       | All Ages         | 1033650                   |
| Belgium   | Cancer Registry    | Flanders                   | 1997                                       | All Ages         | 10287                     |
| Belgium   | Cancer Registry    | Limburg                    | 1997                                       | All Ages         | 1420                      |
| Belgium   | Cancer Registry    | Flanders                   | 1999                                       | All Ages         | 12720                     |
| Belgium   | Cancer Registry    | Antwerp                    | 2000                                       | All Ages         | 3139                      |
| Belgium   | Cancer Registry    | National                   | 2003-2010                                  | All Ages         | 182118                    |
| Belize    | Vital Registration | National                   | 1980-1984, 1986-1987, 1989-1991, 1993-1996 | All Ages         | 10831                     |
| Belize    | Vital Registration | National                   | 1997-2009                                  | All Ages         | 17262                     |
| Belize    | Police Records     | National                   | 1980                                       | All Ages         | Death Rate                |
| Belize    | Police Records     | National                   | 1998-2004, 2006-2007, 2009-201             | All Ages         | Death Rate                |
| Benin     | Verbal Autopsy     | Pahou and Avlekete (rural) | 1989                                       | birth - 364 days | 25                        |
| Benin     | Sibling History    | National                   | 1982-2006                                  | 15 - 54 years    | 379                       |
| Benin     | Hospital           | Benin City                 | 1996-2000                                  | 15 - 39 years    | 32                        |
| Bhutan    | Survey/Census      | National                   | 1984                                       | 15 - 49 years    | MMR                       |
| Bhutan    | Survey/Census      | National                   | 1994                                       | 15 - 49 years    | MMR                       |
| Bhutan    | Survey/Census      | National                   | 2000                                       | 15 - 49 years    | MMR                       |
| Bhutan    | Survey/Census      | National                   | 2004                                       | All Ages         | 4498                      |
| Bhutan    | Police Records     | National                   | 2000-2007                                  | All Ages         | Death Rate                |
| Bhutan    | Hospital           | Hospital                   | 2000                                       | All Ages         | 591                       |
| Bhutan    | Hospital           | National                   | 2000                                       | All Ages         | 897                       |

**Web Table 13 - Source list by country and site, source type, study site, time period, age range, and deaths excluding sources on LRI and diarrhea etiologies**

| Geography              | Source Type        | Study Site                                                                     | Time Period*         | Age Range        | Deaths used in analysis** |
|------------------------|--------------------|--------------------------------------------------------------------------------|----------------------|------------------|---------------------------|
| Bhutan                 | Hospital           | National                                                                       | 2001                 | All Ages         | 1075                      |
| Bhutan                 | Hospital           | National                                                                       | 2002                 | All Ages         | 942                       |
| Bhutan                 | Hospital           | National                                                                       | 2003-2004            | All Ages         | 1465                      |
| Bhutan                 | Hospital           | National                                                                       | 2005-2009            | All Ages         | 3995                      |
| Bolivia                | Vital Registration | National                                                                       | 2000-2003            | All Ages         | 88639                     |
| Bolivia                | Survey/Census      | National                                                                       | 2000-2001            | 15 - 49 years    | 3110                      |
| Bolivia                | Sibling History    | National                                                                       | 1980, 1982-2008      | 15 - 54 years    | 322                       |
| Bolivia                | Police Records     | National                                                                       | 2007                 | All Ages         | Death Rate                |
| Bolivia                | Police Records     | National                                                                       | 2005-2007, 2009-2010 | All Ages         | Death Rate                |
| Bolivia                | Hospital           | La Paz and El Alto, La Paz District                                            | 2006                 | 15 - 49 years    | 18                        |
| Bosnia and Herzegovina | Vital Registration | National                                                                       | 2011                 | All Ages         | 35028                     |
| Bosnia and Herzegovina | Vital Registration | National                                                                       | 1985-1991            | All Ages         | 207124                    |
| Bosnia and Herzegovina | Survey/Census      | National                                                                       | 1997                 | All Ages         | 51                        |
| Botswana               | Survey/Census      | National                                                                       | 2003                 | All Ages         | 31577                     |
| Botswana               | Survey/Census      | National                                                                       | 2007                 | All Ages         | 20254                     |
| Botswana               | Police Records     | National                                                                       | 1982, 1984-1990      | All Ages         | Death Rate                |
| Botswana               | Police Records     | National                                                                       | 2005-2006, 2009      | All Ages         | Death Rate                |
| Botswana               | Hospital           | National                                                                       | 2005-2008            | 28 days +        | 42080                     |
| Brazil                 | Vital Registration | National                                                                       | 1996-2007, 2010      | All Ages         | 12816217                  |
| Brazil                 | Verbal Autopsy     | Pelotas (urban)                                                                | 1984                 | 1 - 5 years      | 29                        |
| Brazil                 | Verbal Autopsy     | Porto Alegre and Pelotas (urban)                                               | 1984                 | birth - 364 days | 357                       |
| Brazil                 | Verbal Autopsy     | Porto Alegre and Pelotas, Rio Grande do Sul                                    | 1985                 | birth - 5 years  | 1892                      |
| Brazil                 | Verbal Autopsy     | Trairi County, Ceara                                                           | 1985                 | birth - 364 days | 266                       |
| Brazil                 | Verbal Autopsy     | Pelotas (urban)                                                                | 1993                 | birth - 364 days | 111                       |
| Brazil                 | Verbal Autopsy     | Quixada, Icapui, and Jucas, three municipalities in the state of Ceara (urban) | 1993                 | birth - 364 days | 215                       |
| Brazil                 | Verbal Autopsy     | Recife                                                                         | 2003                 | 15 - 49 years    | 111                       |
| Brazil                 | Verbal Autopsy     | Sao Jose de Ribamar                                                            | 1986, 1989           | birth - 5 years  | 124                       |
| Brazil                 | Verbal Autopsy     | Parana                                                                         | 1998, 2001, 2004     | 15 - 49 years    | MMR                       |
| Brazil                 | Sibling History    | National                                                                       | 1982-1996            | 15 - 54 years    | 55                        |
| Brazil                 | Hospital           | Sao Paulo                                                                      | 2000                 | 15 - 49 years    | MMR                       |
| Brazil                 | Cancer Registry    | Fortaleza                                                                      | 1980                 | All Ages         | 1078                      |



**Web Table 13 - Source list by country and site, source type, study site, time period, age range, and deaths excluding sources on LRI and diarrhea etiologies**

| <b>Geography</b> | <b>Source Type</b> | <b>Study Site</b>      | <b>Time Period*</b>        | <b>Age Range</b> | <b>Deaths used in analysis**</b> |
|------------------|--------------------|------------------------|----------------------------|------------------|----------------------------------|
| Brazil           | Cancer Registry    | Recife                 | 1980                       | All Ages         | 1403                             |
| Brazil           | Cancer Registry    | Belem                  | 1990                       | All Ages         | 941                              |
| Brazil           | Cancer Registry    | Campinas               | 1993                       | All Ages         | 718                              |
| Brazil           | Cancer Registry    | Brasilia               | 1999                       | All Ages         | 1930                             |
| Brazil           | Cancer Registry    | Sao Paulo              | 2000                       | All Ages         | 15930                            |
| Brazil           | Cancer Registry    | Cuiaba                 | 2001                       | All Ages         | 570                              |
| Brazil           | Cancer Registry    | Aracaju                | 2004                       | All Ages         | 506                              |
| Brazil           | Cancer Registry    | Belo Horizonte         | 2004                       | All Ages         | 2799                             |
| Brazil           | Cancer Registry    | Cuiaba                 | 2004                       | All Ages         | 604                              |
| Brazil           | Cancer Registry    | Fortaleza              | 2004                       | All Ages         | 1766                             |
| Brazil           | Cancer Registry    | Goiania                | 2005                       | All Ages         | 1570                             |
| Brazil           | Cancer Registry    | Sao Paulo              | 2005                       | All Ages         | 13456                            |
| Brazil           | Cancer Registry    | Porto Alegre           | 1980, 1987, 1991           | All Ages         | 5957                             |
| Brazil           | Cancer Registry    | Goiania                | 1988-2002                  | All Ages         | 12141                            |
| Brunei           | Vital Registration | National               | 2011                       | All Ages         | 1235                             |
| Brunei           | Vital Registration | National               | 1996-2000, 2007-2009       | All Ages         | 8119                             |
| Brunei           | Police Records     | National               | 2007                       | All Ages         | Death Rate                       |
| Brunei           | Police Records     | National               | 1996-1998, 2003-2004, 2006 | All Ages         | Death Rate                       |
| Bulgaria         | Vital Registration | National               | 1980-1989                  | All Ages         | 1030304                          |
| Bulgaria         | Vital Registration | National               | 1990-2004                  | All Ages         | 1694027                          |
| Bulgaria         | Vital Registration | National               | 2005-2012                  | All Ages         | 886111                           |
| Bulgaria         | Police Records     | National               | 2007                       | All Ages         | Death Rate                       |
| Bulgaria         | Cancer Registry    | National               | 2000                       | All Ages         | 17477                            |
| Bulgaria         | Cancer Registry    | National               | 2006                       | All Ages         | 17369                            |
| Burkina Faso     | Verbal Autopsy     | Kongodjan area (rural) | 1984                       | birth - 5 years  | 43                               |
| Burkina Faso     | Verbal Autopsy     | Nouna                  | 1998                       | All Ages         | 1400                             |
| Burkina Faso     | Verbal Autopsy     | Nouna                  | 2000                       | All Ages         | 2086                             |
| Burkina Faso     | Verbal Autopsy     | Kourweogo (rural)      | 2002                       | birth - 14 years | 1013                             |
| Burkina Faso     | Verbal Autopsy     | Nouna (rural)          | 2002                       | All Ages         | 5649                             |
| Burkina Faso     | Verbal Autopsy     | Oubritenga (rural)     | 2002                       | birth - 14 years | 1491                             |
| Burkina Faso     | Verbal Autopsy     | Banfora                | 2007                       | birth - 364 days | 75                               |

**Web Table 13 - Source list by country and site, source type, study site, time period, age range, and deaths excluding sources on LRI and diarrhea etiologies**

| Geography    | Source Type        | Study Site                                                           | Time Period*         | Age Range       | Deaths used in analysis** |
|--------------|--------------------|----------------------------------------------------------------------|----------------------|-----------------|---------------------------|
| Burkina Faso | Verbal Autopsy     | Kossi Province                                                       | 2009                 | All Ages        | 1256                      |
| Burkina Faso | Survey/Census      | National                                                             | 2006                 | 15 - 49 years   | MMR                       |
| Burkina Faso | Survey/Census      | National                                                             | 2006                 | 15 - 49 years   | MMR                       |
| Burkina Faso | Sibling History    | Ouargaye and Diapaga                                                 | 2004                 | 15 - 49 years   | 318                       |
| Burkina Faso | Sibling History    | National                                                             | 1984-2010            | 15 - 54 years   | 341                       |
| Burkina Faso | Police Records     | National                                                             | 2007                 | All Ages        | Death Rate                |
| Burkina Faso | Police Records     | National                                                             | 2002-2007            | All Ages        | Death Rate                |
| Burundi      | Verbal Autopsy     | Nyanza-Lac, Imbo South (rural)                                       | 1990                 | birth - 5 years | 160                       |
| Burundi      | Sibling History    | National                                                             | 1996-2010            | 15 - 54 years   | 223                       |
| Burundi      | Police Records     | National                                                             | 1981-1982, 1984-1986 | All Ages        | Death Rate                |
| Cambodia     | Verbal Autopsy     | Trang, Ta Saen, Boeng Reang, Preah Rumkel, Chan Mul, Choam, Pir Thnu | 2001                 | All Ages        | 445                       |
| Cambodia     | Survey/Census      | National                                                             | 2008                 | 15 - 49 years   | 804                       |
| Cambodia     | Survey/Census      | National                                                             | 2008                 | 10 - 54 years   | 59                        |
| Cambodia     | Sibling History    | Pailin and Battambang                                                | 2004                 | 15 - 49 years   | MMR                       |
| Cambodia     | Sibling History    | National                                                             | 1986-2010            | 15 - 54 years   | 455                       |
| Cambodia     | Police Records     | National                                                             | 1995-2005            | All Ages        | Death Rate                |
| Cameroon     | Sibling History    | National                                                             | 1984-2010            | 15 - 54 years   | 745                       |
| Cameroon     | Police Records     | National                                                             | 2007                 | All Ages        | Death Rate                |
| Cameroon     | Police Records     | National                                                             | 2006-2007            | All Ages        | Death Rate                |
| Canada       | Vital Registration | National                                                             | 1980-1985            | All Ages        | 1048203                   |
| Canada       | Vital Registration | National                                                             | 1986-1999            | All Ages        | 2823098                   |
| Canada       | Vital Registration | National                                                             | 2000-2009            | All Ages        | 2284256                   |
| Canada       | Police Records     | National                                                             | 2006                 | All Ages        | Death Rate                |
| Canada       | Police Records     | National                                                             | 1995-2007, 2009      | All Ages        | Death Rate                |
| Canada       | Cancer Registry    | National                                                             | 2000                 | All Ages        | 44381                     |
| Canada       | Cancer Registry    | Alberta                                                              | 2005                 | All Ages        | 5294                      |
| Canada       | Cancer Registry    | British Columbia                                                     | 2005                 | All Ages        | 8109                      |
| Canada       | Cancer Registry    | Manitoba                                                             | 2005                 | All Ages        | 2454                      |
| Canada       | Cancer Registry    | New Brunswick                                                        | 2005                 | All Ages        | 1770                      |
| Canada       | Cancer Registry    | Newfoundland and Labrador                                            | 2005                 | All Ages        | 923                       |
| Canada       | Cancer Registry    | Northwest Territories                                                | 2005                 | All Ages        | 44                        |

**Web Table 13 - Source list by country and site, source type, study site, time period, age range, and deaths excluding sources on LRI and diarrhea etiologies**

| <b>Geography</b>         | <b>Source Type</b> | <b>Study Site</b>                      | <b>Time Period*</b>                                   | <b>Age Range</b> | <b>Deaths used in analysis**</b> |
|--------------------------|--------------------|----------------------------------------|-------------------------------------------------------|------------------|----------------------------------|
| Canada                   | Cancer Registry    | Nova Scotia                            | 2005                                                  | All Ages         | 2263                             |
| Canada                   | Cancer Registry    | Ontario                                | 2005                                                  | All Ages         | 23041                            |
| Canada                   | Cancer Registry    | Prince Edward Island                   | 2005                                                  | All Ages         | 319                              |
| Canada                   | Cancer Registry    | Quebec                                 | 2005                                                  | All Ages         | 17552                            |
| Canada                   | Cancer Registry    | Saskatchewan                           | 2005                                                  | All Ages         | 2064                             |
| Canada                   | Cancer Registry    | Yukon                                  | 2005                                                  | All Ages         | 38                               |
| Canada                   | Cancer Registry    | National                               | 1980, 1985, 1990, 1995                                | All Ages         | 197475                           |
| Canada                   | Cancer Registry    | Alberta                                | 1981-1984, 1986-1989, 1991-1994, 1996-1999, 2001-2002 | All Ages         | 68286                            |
| Canada                   | Cancer Registry    | British Columbia                       | 1981-1984, 1986-1989, 1991-1994, 1996-1999, 2001-2002 | All Ages         | 120815                           |
| Canada                   | Cancer Registry    | Manitoba                               | 1981-1984, 1986-1989, 1991-1994, 1996-1999, 2001-2002 | All Ages         | 43331                            |
| Canada                   | Cancer Registry    | Newfoundland                           | 1981-1984, 1986-1989, 1991-1994, 1996-1999, 2001-2002 | All Ages         | 14359                            |
| Canada                   | Cancer Registry    | Nova Scotia                            | 1981-1984, 1986-1989, 1991-1994, 1996-1999, 2001-2002 | All Ages         | 34616                            |
| Canada                   | Cancer Registry    | Ontario                                | 1981-1984, 1986-1989, 1991-1994, 1996-1999, 2001-2002 | All Ages         | 349875                           |
| Canada                   | Cancer Registry    | Saskatchewan                           | 1981-1984, 1986-1989, 1991-1994, 1996-1999, 2001-2002 | All Ages         | 31352                            |
| Canada                   | Cancer Registry    | New Brunswick                          | 1981-1984, 1987-1989, 1991-1994, 1996-1999, 2001-2002 | All Ages         | 25001                            |
| Canada                   | Cancer Registry    | Prince Edward Island                   | 1983-1984, 1986-1989, 1991-1994, 1996-1999, 2001-2002 | All Ages         | 4412                             |
| Canada                   | Cancer Registry    | Saskatchewan                           | 2003-2004                                             | All Ages         | 3889                             |
| Cape Verde               | Vital Registration | National                               | 1980                                                  | All Ages         | 2281                             |
| Cape Verde               | Verbal Autopsy     | Santiago, Santo Antao, and Sao Vicente | 1992                                                  | 15 - 49 years    | 89                               |
| Cape Verde               | Police Records     | National                               | 2007                                                  | All Ages         | Death Rate                       |
| Central African Republic | Sibling History    | National                               | 1980-1994                                             | 15 - 54 years    | 223                              |
| Chad                     | Sibling History    | National                               | 1982-2004                                             | 15 - 54 years    | 522                              |
| Chile                    | Vital Registration | National                               | 1985                                                  | All Ages         | 73488                            |
| Chile                    | Vital Registration | National                               | 1980-1984, 1986-1996                                  | All Ages         | 1191880                          |
| Chile                    | Vital Registration | National                               | 1997-2009                                             | All Ages         | 1092333                          |
| Chile                    | Police Records     | National                               | 2000-2004, 2007, 2009                                 | All Ages         | Death Rate                       |
| Chile                    | Cancer Registry    | Valdivia                               | 2000                                                  | All Ages         | 489                              |
| Chile                    | Cancer Registry    | Antofogasta                            | 2005                                                  | All Ages         | 546                              |

**Web Table 13 - Source list by country and site, source type, study site, time period, age range, and deaths excluding sources on LRI and diarrhea etiologies**

| Geography        | Source Type        | Study Site                    | Time Period*         | Age Range       | Deaths used in analysis** |
|------------------|--------------------|-------------------------------|----------------------|-----------------|---------------------------|
| Chile            | Cancer Registry    | Biobio                        | 2005                 | All Ages        | 458                       |
| Chile            | Cancer Registry    | Los Rios                      | 2005                 | All Ages        | 472                       |
| Chile            | Cancer Registry    | Valdivia                      | 2005                 | All Ages        | 498                       |
| China            | Verbal Autopsy     | Huai River Basin (rural)      | 2003                 | 5 years +       | 1362                      |
| China            | Police Records     | National                      | 2006                 | All Ages        | Death Rate                |
| China: Anhui     | Vital Registration | Anhui                         | 1991-2000, 2002      | All Ages        | 4707525                   |
| China: Anhui     | Vital Registration | Anhui                         | 2004-2012            | All Ages        | 3835108                   |
| China: Anhui     | Surveillance       | Anhui                         | 1996-2005            | 15 - 49 years   | 103                       |
| China: Anhui     | Surveillance       | Anhui                         | 1996-2012            | birth - 5 years | 1715                      |
| China: Anhui     | Surveillance       | Anhui                         | 2004-2012            | All Ages        | 2072                      |
| China: Anhui     | Surveillance       | Anhui                         | 2006-2012            | 15 - 49 years   | 172                       |
| China: Anhui     | Cancer Registry    | Feixi County, Anhui           | 2009                 | All Ages        | 1691                      |
| China: Anhui     | Cancer Registry    | Maanshan City, Anhui          | 2003-2009            | All Ages        | 6332                      |
| China: Anhui     | Cancer Registry    | Tongling City, Anhui          | 2008-2009            | All Ages        | 1604                      |
| China: Beijing   | Vital Registration | Beijing                       | 1991-2002            | All Ages        | 802518                    |
| China: Beijing   | Vital Registration | Beijing                       | 2004-2012            | All Ages        | 783757                    |
| China: Beijing   | Surveillance       | Beijing                       | 1996-1999, 2005      | 15 - 49 years   | 7                         |
| China: Beijing   | Surveillance       | Beijing                       | 1996-2012            | birth - 5 years | 504                       |
| China: Beijing   | Surveillance       | Beijing                       | 2004-2012            | All Ages        | 249                       |
| China: Beijing   | Surveillance       | Beijing                       | 2006-2012            | 15 - 49 years   | 18                        |
| China: Beijing   | Cancer Registry    | Beijing City, Beijing         | 1990-2004, 2006-2009 | All Ages        | 123849                    |
| China: Chongqing | Vital Registration | Chongqing                     | 1991-1998, 2000-2002 | All Ages        | 1655075                   |
| China: Chongqing | Vital Registration | Chongqing                     | 2004-2012            | All Ages        | 2050398                   |
| China: Chongqing | Surveillance       | Chongqing                     | 1996-2005            | 15 - 49 years   | 68                        |
| China: Chongqing | Surveillance       | Chongqing                     | 1996-2012            | 15 - 49 years   | 2608                      |
| China: Chongqing | Surveillance       | Chongqing                     | 1996-2012            | birth - 5 years | 745                       |
| China: Chongqing | Surveillance       | Chongqing                     | 2004-2012            | All Ages        | 3246                      |
| China: Chongqing | Surveillance       | Chongqing                     | 2006-2012            | 15 - 49 years   | 82                        |
| China: Chongqing | Cancer Registry    | Jiulongpo District, Chongqing | 2004, 2007, 2009     | All Ages        | 4404                      |
| China: Fujian    | Vital Registration | Fujian                        | 1991-2002            | All Ages        | 2338318                   |
| China: Fujian    | Vital Registration | Fujian                        | 2004-2012            | All Ages        | 2052048                   |

**Web Table 13 - Source list by country and site, source type, study site, time period, age range, and deaths excluding sources on LRI and diarrhea etiologies**

| Geography        | Source Type        | Study Site                | Time Period*         | Age Range       | Deaths used in analysis** |
|------------------|--------------------|---------------------------|----------------------|-----------------|---------------------------|
| China: Fujian    | Surveillance       | Fujian                    | 1996-2005            | 15 - 49 years   | 49                        |
| China: Fujian    | Surveillance       | Fujian                    | 1996-2012            | birth - 5 years | 1532                      |
| China: Fujian    | Surveillance       | Fujian                    | 2004-2012            | All Ages        | 1028                      |
| China: Fujian    | Surveillance       | Fujian                    | 2006-2012            | 15 - 49 years   | 78                        |
| China: Fujian    | Cancer Registry    | Xiamen City, Fujian       | 2009                 | All Ages        | 2653                      |
| China: Fujian    | Cancer Registry    | Changle City, Fujian      | 1990-2009            | All Ages        | 20276                     |
| China: Gansu     | Vital Registration | Gansu                     | 1991-2002            | All Ages        | 1806804                   |
| China: Gansu     | Vital Registration | Gansu                     | 2004-2012            | All Ages        | 1404778                   |
| China: Gansu     | Surveillance       | Gansu                     | 1996-2005            | 15 - 49 years   | 119                       |
| China: Gansu     | Surveillance       | Gansu                     | 1996-2012            | birth - 5 years | 1525                      |
| China: Gansu     | Surveillance       | Gansu                     | 2004-2012            | All Ages        | 275                       |
| China: Gansu     | Surveillance       | Gansu                     | 2006-2012            | 15 - 49 years   | 93                        |
| China: Gansu     | Cancer Registry    | Jingtai County, Gansu     | 2009                 | All Ages        | 322                       |
| China: Gansu     | Cancer Registry    | Liangzhou District, Gansu | 2008-2009            | All Ages        | 4701                      |
| China: Guangdong | Vital Registration | Guangdong                 | 1991-2002            | All Ages        | 5206214                   |
| China: Guangdong | Vital Registration | Guangdong                 | 2004-2012            | All Ages        | 4572720                   |
| China: Guangdong | Surveillance       | Guangdong                 | 1996-2002, 2004-2005 | 15 - 49 years   | 63                        |
| China: Guangdong | Surveillance       | Guangdong                 | 1996-2012            | birth - 5 years | 1409                      |
| China: Guangdong | Surveillance       | Guangdong                 | 2004-2012            | All Ages        | 9307                      |
| China: Guangdong | Surveillance       | Guangdong                 | 2006-2012            | 15 - 49 years   | 191                       |
| China: Guangdong | Cancer Registry    | Zhongshan City, Guangdong | 1998-2004, 2006-2009 | All Ages        | 19209                     |
| China: Guangdong | Cancer Registry    | Sihui City, Guangdong     | 1998-2009            | All Ages        | 5475                      |
| China: Guangdong | Cancer Registry    | Guangzhou City, Guangdong | 2000, 2002-2009      | All Ages        | 69022                     |
| China: Guangxi   | Vital Registration | Guangxi                   | 1991-2002            | All Ages        | 3544408                   |
| China: Guangxi   | Vital Registration | Guangxi                   | 2004-2012            | All Ages        | 2890302                   |
| China: Guangxi   | Surveillance       | Guangxi                   | 1996-2005            | 15 - 49 years   | 133                       |
| China: Guangxi   | Surveillance       | Guangxi                   | 1996-2012            | birth - 5 years | 2218                      |
| China: Guangxi   | Surveillance       | Guangxi                   | 2004-2012            | All Ages        | 21420                     |
| China: Guangxi   | Surveillance       | Guangxi                   | 2006-2012            | 15 - 49 years   | 166                       |
| China: Guangxi   | Cancer Registry    | Liuzhou City, Guangxi     | 2009                 | All Ages        | 1904                      |
| China: Guangxi   | Cancer Registry    | Fusui County, Guangxi     | 1990-1997, 2003-2009 | All Ages        | 6827                      |

**Web Table 13 - Source list by country and site, source type, study site, time period, age range, and deaths excluding sources on LRI and diarrhea etiologies**

| <b>Geography</b>    | <b>Source Type</b> | <b>Study Site</b>                      | <b>Time Period*</b>  | <b>Age Range</b> | <b>Deaths used in analysis**</b> |
|---------------------|--------------------|----------------------------------------|----------------------|------------------|----------------------------------|
| China: Guizhou      | Vital Registration | Guizhou                                | 1991-2002            | All Ages         | 431444                           |
| China: Guizhou      | Vital Registration | Guizhou                                | 2004-2012            | All Ages         | 2421457                          |
| China: Guizhou      | Verbal Autopsy     | Qingzhen, Zhenning, and Ziyun Counties | 1986                 | birth - 364 days | 3075                             |
| China: Guizhou      | Surveillance       | Guizhou                                | 1996-2005            | 15 - 49 years    | 259                              |
| China: Guizhou      | Surveillance       | Guizhou                                | 1996-2012            | birth - 5 years  | 3368                             |
| China: Guizhou      | Surveillance       | Guizhou                                | 2004-2012            | All Ages         | 6212                             |
| China: Guizhou      | Surveillance       | Guizhou                                | 2006-2012            | 15 - 49 years    | 162                              |
| China: Hainan       | Vital Registration | Hainan                                 | 1991-2002            | All Ages         | 395656                           |
| China: Hainan       | Vital Registration | Hainan                                 | 2004-2012            | All Ages         | 410163                           |
| China: Hainan       | Surveillance       | Hainan                                 | 1996-2005            | 15 - 49 years    | 37                               |
| China: Hainan       | Surveillance       | Hainan                                 | 1996-2012            | birth - 5 years  | 1653                             |
| China: Hainan       | Surveillance       | Hainan                                 | 2004-2012            | All Ages         | 805                              |
| China: Hainan       | Surveillance       | Hainan                                 | 2006-2012            | 15 - 49 years    | 41                               |
| China: Hebei        | Vital Registration | Hebei                                  | 1991-2002            | All Ages         | 4708602                          |
| China: Hebei        | Vital Registration | Hebei                                  | 2004-2012            | All Ages         | 4289209                          |
| China: Hebei        | Surveillance       | Hebei                                  | 1996-2005            | 15 - 49 years    | 69                               |
| China: Hebei        | Surveillance       | Hebei                                  | 1996-2012            | birth - 5 years  | 1143                             |
| China: Hebei        | Surveillance       | Hebei                                  | 2004-2012            | All Ages         | 1258                             |
| China: Hebei        | Surveillance       | Hebei                                  | 2006-2012            | 15 - 49 years    | 69                               |
| China: Hebei        | Cancer Registry    | Bading City, Hebei                     | 2009                 | All Ages         | 1625                             |
| China: Hebei        | Cancer Registry    | Qianxi County, Hebei                   | 2009                 | All Ages         | 617                              |
| China: Hebei        | Cancer Registry    | Cixian County, Hebei                   | 1990-2004, 2006-2009 | All Ages         | 27471                            |
| China: Hebei        | Cancer Registry    | Shexian County, Hebei                  | 2003-2009            | All Ages         | 6940                             |
| China: Heilongjiang | Vital Registration | Heilongjiag                            | 1991-2002            | All Ages         | 2740824                          |
| China: Heilongjiang | Vital Registration | Heilongjiag                            | 2004-2012            | All Ages         | 2115633                          |
| China: Heilongjiang | Surveillance       | Heilongjiag                            | 1996-2012            | birth - 5 years  | 873                              |
| China: Heilongjiang | Surveillance       | Heilongjiag                            | 1997-2002, 2004-2005 | 15 - 49 years    | 17                               |
| China: Heilongjiang | Surveillance       | Heilongjiag                            | 2004-2012            | All Ages         | 692                              |
| China: Heilongjiang | Surveillance       | Heilongjiag                            | 2006-2012            | 15 - 49 years    | 42                               |
| China: Heilongjiang | Cancer Registry    | Shangzhi City, Heilongjiang            | 2009                 | All Ages         | 1015                             |
| China: Heilongjiang | Cancer Registry    | Nangang District, Heilongjiang         | 1992-2009            | All Ages         | 26126                            |

**Web Table 13 - Source list by country and site, source type, study site, time period, age range, and deaths excluding sources on LRI and diarrhea etiologies**

| <b>Geography</b>      | <b>Source Type</b> | <b>Study Site</b>            | <b>Time Period*</b>  | <b>Age Range</b> | <b>Deaths used in analysis**</b> |
|-----------------------|--------------------|------------------------------|----------------------|------------------|----------------------------------|
| China: Heilongjiang   | Cancer Registry    | Daoli District, Heilongjiang | 2005-2009            | All Ages         | 6985                             |
| China: Henan          | Vital Registration | Henan                        | 1991-2002            | All Ages         | 7935369                          |
| China: Henan          | Vital Registration | Henan                        | 2004-2012            | All Ages         | 5820175                          |
| China: Henan          | Surveillance       | Henan                        | 1996-2005            | 15 - 49 years    | 199                              |
| China: Henan          | Surveillance       | Henan                        | 1996-2012            | birth - 5 years  | 1999                             |
| China: Henan          | Surveillance       | Henan                        | 2004-2012            | All Ages         | 12988                            |
| China: Henan          | Surveillance       | Henan                        | 2006-2012            | 15 - 49 years    | 224                              |
| China: Henan          | Cancer Registry    | Xiping County, Henan         | 2009                 | All Ages         | 1418                             |
| China: Henan          | Cancer Registry    | Yanshi City, Henan           | 2009                 | All Ages         | 927                              |
| China: Henan          | Cancer Registry    | Linzhou City, Henan          | 1990-2009            | All Ages         | 37000                            |
| China: Hubei          | Vital Registration | Hubei                        | 1991-2002            | All Ages         | 4006652                          |
| China: Hubei          | Vital Registration | Hubei                        | 2004-2012            | All Ages         | 3129347                          |
| China: Hubei          | Surveillance       | Hubei                        | 1996-2005            | 15 - 49 years    | 74                               |
| China: Hubei          | Surveillance       | Hubei                        | 1996-2012            | birth - 5 years  | 1359                             |
| China: Hubei          | Surveillance       | Hubei                        | 2004-2012            | All Ages         | 3314                             |
| China: Hubei          | Surveillance       | Hubei                        | 2006-2012            | 15 - 49 years    | 106                              |
| China: Hubei          | Cancer Registry    | Yunmeng County, Hubei        | 2009                 | All Ages         | 670                              |
| China: Hubei          | Cancer Registry    | Wuhan City, Hubei            | 1990-2004, 2006-2009 | All Ages         | 125194                           |
| China: Hunan          | Vital Registration | Hunan                        | 1991-2002            | All Ages         | 5783601                          |
| China: Hunan          | Vital Registration | Hunan                        | 2004-2012            | All Ages         | 4181125                          |
| China: Hunan          | Surveillance       | Hunan                        | 1996-2005            | 15 - 49 years    | 112                              |
| China: Hunan          | Surveillance       | Hunan                        | 1996-2012            | 15 - 49 years    | 4466                             |
| China: Hunan          | Surveillance       | Hunan                        | 1996-2012            | birth - 5 years  | 1736                             |
| China: Hunan          | Surveillance       | Hunan                        | 2004-2012            | All Ages         | 6799                             |
| China: Hunan          | Surveillance       | Hunan                        | 2006-2012            | 15 - 49 years    | 149                              |
| China: Hunan          | Cancer Registry    | Hengdong County, Hunan       | 2009                 | All Ages         | 1009                             |
| China: Inner Mongolia | Vital Registration | Inner Mongolia               | 1991-2002            | All Ages         | 1465806                          |
| China: Inner Mongolia | Vital Registration | Inner Mongolia               | 2004-2012            | All Ages         | 1353670                          |
| China: Inner Mongolia | Surveillance       | Inner Mongolia               | 1996-2004            | 15 - 49 years    | 37                               |
| China: Inner Mongolia | Surveillance       | Inner Mongolia               | 1996-2012            | birth - 5 years  | 1973                             |
| China: Inner Mongolia | Surveillance       | Inner Mongolia               | 2004-2012            | All Ages         | 208                              |

**Web Table 13 - Source list by country and site, source type, study site, time period, age range, and deaths excluding sources on LRI and diarrhea etiologies**

| <b>Geography</b>      | <b>Source Type</b> | <b>Study Site</b>            | <b>Time Period*</b>  | <b>Age Range</b> | <b>Deaths used in analysis**</b> |
|-----------------------|--------------------|------------------------------|----------------------|------------------|----------------------------------|
| China: Inner Mongolia | Surveillance       | Inner Mongolia               | 2006-2012            | 15 - 49 years    | 54                               |
| China: Inner Mongolia | Cancer Registry    | Chifeng City, Inner Mongolia | 2009                 | All Ages         | 1664                             |
| China: Jiangsu        | Vital Registration | Jiangsu                      | 1991-2002            | All Ages         | 5489533                          |
| China: Jiangsu        | Vital Registration | Jiangsu                      | 2004-2012            | All Ages         | 4576772                          |
| China: Jiangsu        | Surveillance       | Jiangsu                      | 1996-2005            | 15 - 49 years    | 72                               |
| China: Jiangsu        | Surveillance       | Jiangsu                      | 1996-2012            | birth - 5 years  | 1242                             |
| China: Jiangsu        | Surveillance       | Jiangsu                      | 2004-2012            | All Ages         | 2098                             |
| China: Jiangsu        | Surveillance       | Jiangsu                      | 2006-2012            | 15 - 49 years    | 42                               |
| China: Jiangsu        | Cancer Registry    | Qidong County                | 1985                 | All Ages         | 1905                             |
| China: Jiangsu        | Cancer Registry    | Wuxi, Jiangsu                | 2006                 | All Ages         | 3295                             |
| China: Jiangsu        | Cancer Registry    | Donghai County, Jiangsu      | 2009                 | All Ages         | 1588                             |
| China: Jiangsu        | Cancer Registry    | Haian County, Jiangsu        | 2009                 | All Ages         | 2200                             |
| China: Jiangsu        | Cancer Registry    | Huaiyin District, Jiangsu    | 2009                 | All Ages         | 1678                             |
| China: Jiangsu        | Cancer Registry    | Xuyi County, Jiangsu         | 2009                 | All Ages         | 1475                             |
| China: Jiangsu        | Cancer Registry    | Qidong City, Jiangsu         | 1990-2009            | All Ages         | 48521                            |
| China: Jiangsu        | Cancer Registry    | Huaian District, Jiangsu     | 1998-2009            | All Ages         | 29327                            |
| China: Jiangsu        | Cancer Registry    | Yangzhong City, Jiangsu      | 1998-2009            | All Ages         | 10402                            |
| China: Jiangsu        | Cancer Registry    | Jintan City, Jiangsu         | 2003-2007, 2009      | All Ages         | 5864                             |
| China: Jiangsu        | Cancer Registry    | Dafeng City, Jiangsu         | 2003-2009            | All Ages         | 10799                            |
| China: Jiangsu        | Cancer Registry    | Haimen City, Jiangsu         | 2003-2009            | All Ages         | 18354                            |
| China: Jiangsu        | Cancer Registry    | Jianhu County, Jiangsu       | 2003-2009            | All Ages         | 12270                            |
| China: Jiangsu        | Cancer Registry    | Taixing City, Jiangsu        | 2004-2005, 2007-2009 | All Ages         | 11459                            |
| China: Jiangsu        | Cancer Registry    | Suzhou City, Jiangsu         | 2006-2009            | All Ages         | 37668                            |
| China: Jiangsu        | Cancer Registry    | Guanyun County, Jiangsu      | 2007, 2009           | All Ages         | 3245                             |
| China: Jiangsu        | Cancer Registry    | Jinhu County, Jiangsu        | 2007-2009            | All Ages         | 2265                             |
| China: Jiangsu        | Cancer Registry    | Lianyungang, Jiangsu         | 2007-2009            | All Ages         | 3475                             |
| China: Jiangsu        | Cancer Registry    | Sheyang County, Jiangsu      | 2008-2009            | All Ages         | 4450                             |
| China: Jiangxi        | Vital Registration | Jiangxi                      | 1991-2002            | All Ages         | 3369154                          |
| China: Jiangxi        | Vital Registration | Jiangxi                      | 2004-2012            | All Ages         | 2263374                          |
| China: Jiangxi        | Surveillance       | Jiangxi                      | 1996-2005            | 15 - 49 years    | 74                               |
| China: Jiangxi        | Surveillance       | Jiangxi                      | 1996-2012            | birth - 5 years  | 2422                             |



**Web Table 13 - Source list by country and site, source type, study site, time period, age range, and deaths excluding sources on LRI and diarrhea etiologies**

| <b>Geography</b> | <b>Source Type</b> | <b>Study Site</b>           | <b>Time Period*</b>   | <b>Age Range</b> | <b>Deaths used in analysis**</b> |
|------------------|--------------------|-----------------------------|-----------------------|------------------|----------------------------------|
| China: Jiangxi   | Surveillance       | Jiangxi                     | 2004-2012             | All Ages         | 2104                             |
| China: Jiangxi   | Surveillance       | Jiangxi                     | 2006-2012             | 15 - 49 years    | 96                               |
| China: Jiangxi   | Cancer Registry    | Zhanggong District, Jiangxi | 2009                  | All Ages         | 715                              |
| China: Jilin     | Vital Registration | Jilin                       | 1991-2002             | All Ages         | 2097528                          |
| China: Jilin     | Vital Registration | Jilin                       | 2004-2012             | All Ages         | 1529921                          |
| China: Jilin     | Surveillance       | Jilin                       | 1996-2001, 2003, 2005 | 15 - 49 years    | 15                               |
| China: Jilin     | Surveillance       | Jilin                       | 1996-2012             | birth - 5 years  | 912                              |
| China: Jilin     | Surveillance       | Jilin                       | 2004-2012             | All Ages         | 569                              |
| China: Jilin     | Surveillance       | Jilin                       | 2006-2012             | 15 - 49 years    | 75                               |
| China: Jilin     | Cancer Registry    | Dehui City, Jilin           | 2009                  | All Ages         | 1407                             |
| China: Jilin     | Cancer Registry    | Yanji City, Jilin           | 2009                  | All Ages         | 542                              |
| China: Liaoning  | Vital Registration | Liaoning                    | 1991-2002             | All Ages         | 3112343                          |
| China: Liaoning  | Vital Registration | Liaoning                    | 2004-2012             | All Ages         | 2847872                          |
| China: Liaoning  | Surveillance       | Liaoning                    | 1996-2000, 2002, 2005 | 15 - 49 years    | 16                               |
| China: Liaoning  | Surveillance       | Liaoning                    | 1996-2012             | birth - 5 years  | 1187                             |
| China: Liaoning  | Surveillance       | Liaoning                    | 2004-2012             | All Ages         | 754                              |
| China: Liaoning  | Surveillance       | Liaoning                    | 2006-2012             | 15 - 49 years    | 47                               |
| China: Liaoning  | Cancer Registry    | Donggang City, Liaoning     | 2009                  | All Ages         | 1255                             |
| China: Liaoning  | Cancer Registry    | Zhuanghe City, Liaoning     | 2009                  | All Ages         | 1693                             |
| China: Liaoning  | Cancer Registry    | Anshan City, Liaoning       | 1998-2009             | All Ages         | 30536                            |
| China: Liaoning  | Cancer Registry    | Dalian City, Liaoning       | 1998-2009             | All Ages         | 57129                            |
| China: Liaoning  | Cancer Registry    | Benxi City, Liaoning        | 2003-2009             | All Ages         | 11440                            |
| China: Liaoning  | Cancer Registry    | Shenyang City, Liaoning     | 2003-2009             | All Ages         | 45390                            |
| China: Liaoning  | Cancer Registry    | Dandong City, Liaoning      | 2008-2009             | All Ages         | 3455                             |
| China: Ningxia   | Vital Registration | Ningxia                     | 1991-2002             | All Ages         | 259265                           |
| China: Ningxia   | Vital Registration | Ningxia                     | 2004-2012             | All Ages         | 245505                           |
| China: Ningxia   | Surveillance       | Ningxia                     | 1996-2005             | 15 - 49 years    | 97                               |
| China: Ningxia   | Surveillance       | Ningxia                     | 1996-2012             | birth - 5 years  | 2131                             |
| China: Ningxia   | Surveillance       | Ningxia                     | 2004-2012             | All Ages         | 92                               |
| China: Ningxia   | Surveillance       | Ningxia                     | 2006-2012             | 15 - 49 years    | 61                               |
| China: Qinghai   | Vital Registration | Qinghai                     | 1991-2002             | All Ages         | 392834                           |

**Web Table 13 - Source list by country and site, source type, study site, time period, age range, and deaths excluding sources on LRI and diarrhea etiologies**

| <b>Geography</b> | <b>Source Type</b> | <b>Study Site</b>         | <b>Time Period*</b>  | <b>Age Range</b> | <b>Deaths used in analysis**</b> |
|------------------|--------------------|---------------------------|----------------------|------------------|----------------------------------|
| China: Qinghai   | Vital Registration | Qinghai                   | 2004-2012            | All Ages         | 331180                           |
| China: Qinghai   | Surveillance       | Qinghai                   | 1996-2005            | 15 - 49 years    | 155                              |
| China: Qinghai   | Surveillance       | Qinghai                   | 1996-2012            | birth - 5 years  | 2125                             |
| China: Qinghai   | Surveillance       | Qinghai                   | 2004, 2006-2012      | All Ages         | 90                               |
| China: Qinghai   | Surveillance       | Qinghai                   | 2006-2012            | 15 - 49 years    | 73                               |
| China: Qinghai   | Cancer Registry    | Xining City, Qinghai      | 2009                 | All Ages         | 1231                             |
| China: Shaanxi   | Vital Registration | Shaanxi                   | 1991-2002            | All Ages         | 3067970                          |
| China: Shaanxi   | Vital Registration | Shaanxi                   | 2004-2012            | All Ages         | 1969641                          |
| China: Shaanxi   | Surveillance       | Shaanxi                   | 1996-2005            | 15 - 49 years    | 70                               |
| China: Shaanxi   | Surveillance       | Shaanxi                   | 1996-2012            | birth - 5 years  | 1217                             |
| China: Shaanxi   | Surveillance       | Shaanxi                   | 2004-2012            | All Ages         | 801                              |
| China: Shaanxi   | Surveillance       | Shaanxi                   | 2006-2012            | 15 - 49 years    | 69                               |
| China: Shandong  | Vital Registration | Shandong                  | 1991-2002            | All Ages         | 6855702                          |
| China: Shandong  | Vital Registration | Shandong                  | 2004-2012            | All Ages         | 5956074                          |
| China: Shandong  | Surveillance       | Shandong                  | 1996-2005            | 15 - 49 years    | 84                               |
| China: Shandong  | Surveillance       | Shandong                  | 1996-2012            | birth - 5 years  | 2156                             |
| China: Shandong  | Surveillance       | Shandong                  | 2004-2012            | All Ages         | 1638                             |
| China: Shandong  | Surveillance       | Shandong                  | 2006-2012            | 15 - 49 years    | 133                              |
| China: Shandong  | Cancer Registry    | Wenshang County, Shandong | 2009                 | All Ages         | 1182                             |
| China: Shandong  | Cancer Registry    | Feicheng City, Shandong   | 1998-2009            | All Ages         | 18907                            |
| China: Shandong  | Cancer Registry    | Linqu County, Shandong    | 1998-2009            | All Ages         | 14963                            |
| China: Shanghai  | Vital Registration | Shanghai                  | 1991-2002            | All Ages         | 1302933                          |
| China: Shanghai  | Vital Registration | Shanghai                  | 2004-2012            | All Ages         | 1009486                          |
| China: Shanghai  | Surveillance       | Shanghai                  | 1996-2012            | birth - 5 years  | 212                              |
| China: Shanghai  | Surveillance       | Shanghai                  | 1998, 2002           | 15 - 49 years    | 2                                |
| China: Shanghai  | Surveillance       | Shanghai                  | 2004-2012            | All Ages         | 377                              |
| China: Shanghai  | Surveillance       | Shanghai                  | 2007-2012            | 15 - 49 years    | 18                               |
| China: Shanghai  | Cancer Registry    | Shanghai                  | 1980, 1985           | All Ages         | 25089                            |
| China: Shanghai  | Cancer Registry    | Shanghai City, Shanghai   | 1990-2004, 2006-2009 | All Ages         | 274971                           |
| China: Shanxi    | Vital Registration | Shanxi                    | 1991-2002            | All Ages         | 2484023                          |
| China: Shanxi    | Vital Registration | Shanxi                    | 2004-2012            | All Ages         | 1717487                          |

**Web Table 13 - Source list by country and site, source type, study site, time period, age range, and deaths excluding sources on LRI and diarrhea etiologies**

| <b>Geography</b> | <b>Source Type</b> | <b>Study Site</b>           | <b>Time Period*</b>        | <b>Age Range</b> | <b>Deaths used in analysis**</b> |
|------------------|--------------------|-----------------------------|----------------------------|------------------|----------------------------------|
| China: Shanxi    | Surveillance       | Shanxi                      | 1996-2005                  | 15 - 49 years    | 121                              |
| China: Shanxi    | Surveillance       | Shanxi                      | 1996-2012                  | birth - 5 years  | 1542                             |
| China: Shanxi    | Surveillance       | Shanxi                      | 2004-2012                  | All Ages         | 1028                             |
| China: Shanxi    | Surveillance       | Shanxi                      | 2006-2012                  | 15 - 49 years    | 70                               |
| China: Shanxi    | Cancer Registry    | Yangquan City, Shanxi       | 2009                       | All Ages         | 1118                             |
| China: Shanxi    | Cancer Registry    | Yangcheng County, Shanxi    | 2003-2004, 2006-2009       | All Ages         | 6557                             |
| China: Sichuan   | Vital Registration | Sichuan                     | 1991-2002                  | All Ages         | 8442621                          |
| China: Sichuan   | Vital Registration | Sichuan                     | 2004-2012                  | All Ages         | 5883508                          |
| China: Sichuan   | Surveillance       | Sichuan                     | 1996-2005                  | 15 - 49 years    | 199                              |
| China: Sichuan   | Surveillance       | Sichuan                     | 1996-2012                  | birth - 5 years  | 2020                             |
| China: Sichuan   | Surveillance       | Sichuan                     | 2004-2012                  | All Ages         | 11476                            |
| China: Sichuan   | Surveillance       | Sichuan                     | 2006-2012                  | 15 - 49 years    | 179                              |
| China: Sichuan   | Cancer Registry    | Qingyang District, Sichuan  | 2009                       | All Ages         | 1078                             |
| China: Sichuan   | Cancer Registry    | Ziliujing District, Sichuan | 2009                       | All Ages         | 786                              |
| China: Sichuan   | Cancer Registry    | Yanting County, Sichuan     | 1998-2004, 2006-2009       | All Ages         | 20306                            |
| China: Tianjin   | Vital Registration | Tianjin                     | 1991-1998, 2000-2002       | All Ages         | 555174                           |
| China: Tianjin   | Vital Registration | Tianjin                     | 2004-2012                  | All Ages         | 529736                           |
| China: Tianjin   | Surveillance       | Tianjin                     | 1996-1997, 1999, 2003-2005 | 15 - 49 years    | 14                               |
| China: Tianjin   | Surveillance       | Tianjin                     | 1996-2012                  | birth - 5 years  | 584                              |
| China: Tianjin   | Surveillance       | Tianjin                     | 2004-2012                  | All Ages         | 247                              |
| China: Tianjin   | Surveillance       | Tianjin                     | 2006-2012                  | 15 - 49 years    | 24                               |
| China: Tianjin   | Cancer Registry    | Tianjin                     | 1981, 1985                 | All Ages         | 9438                             |
| China: Tianjin   | Cancer Registry    | Tianjin City, Tianjin       | 1990-2004                  | All Ages         | 101335                           |
| China: Tibet     | Vital Registration | Tibet                       | 1991-2002                  | All Ages         | 231134                           |
| China: Tibet     | Vital Registration | Tibet                       | 2004-2012                  | All Ages         | 180845                           |
| China: Tibet     | Surveillance       | Tibet                       | 1996-2012                  | 15 - 49 years    | 1654                             |
| China: Tibet     | Surveillance       | Tibet                       | 1996-2012                  | birth - 5 years  | 1674                             |
| China: Tibet     | Surveillance       | Tibet                       | 1997-2001, 2003-2005       | 15 - 49 years    | 30                               |
| China: Tibet     | Surveillance       | Tibet                       | 2006-2012                  | All Ages         | 22                               |
| China: Tibet     | Surveillance       | Tibet                       | 2006-2012                  | 15 - 49 years    | 42                               |
| China: Xinjiang  | Vital Registration | Xinjiang                    | 1991-2000, 2002            | All Ages         | 1531904                          |

**Web Table 13 - Source list by country and site, source type, study site, time period, age range, and deaths excluding sources on LRI and diarrhea etiologies**

| <b>Geography</b> | <b>Source Type</b> | <b>Study Site</b>        | <b>Time Period*</b>  | <b>Age Range</b> | <b>Deaths used in analysis**</b> |
|------------------|--------------------|--------------------------|----------------------|------------------|----------------------------------|
| China: Xinjiang  | Vital Registration | Xinjiang                 | 2004-2012            | All Ages         | 1284488                          |
| China: Xinjiang  | Surveillance       | Xinjiang                 | 1996-2005            | 15 - 49 years    | 128                              |
| China: Xinjiang  | Surveillance       | Xinjiang                 | 1996-2012            | birth - 5 years  | 4730                             |
| China: Xinjiang  | Surveillance       | Xinjiang                 | 2004-2012            | All Ages         | 4093                             |
| China: Xinjiang  | Surveillance       | Xinjiang                 | 2006-2012            | 15 - 49 years    | 150                              |
| China: Xinjiang  | Cancer Registry    | Kunes County, Xinjiang   | 2009                 | All Ages         | 448                              |
| China: Yunnan    | Vital Registration | Yunnan                   | 1991-2002            | All Ages         | 3726692                          |
| China: Yunnan    | Vital Registration | Yunnan                   | 2004-2012            | All Ages         | 2651089                          |
| China: Yunnan    | Surveillance       | Yunnan                   | 1996-2005            | 15 - 49 years    | 40                               |
| China: Yunnan    | Surveillance       | Yunnan                   | 1996-2012            | birth - 5 years  | 3411                             |
| China: Yunnan    | Surveillance       | Yunnan                   | 2004-2012            | All Ages         | 15621                            |
| China: Yunnan    | Surveillance       | Yunnan                   | 2006-2012            | 15 - 49 years    | 180                              |
| China: Yunnan    | Cancer Registry    | Gejiu City, Yunnan       | 2008                 | All Ages         | 418                              |
| China: Zhejiang  | Vital Registration | Zhejiang                 | 1991-2002            | All Ages         | 3333762                          |
| China: Zhejiang  | Vital Registration | Zhejiang                 | 2004-2012            | All Ages         | 2574012                          |
| China: Zhejiang  | Surveillance       | Zhejiang                 | 1996-1997, 1999-2005 | 15 - 49 years    | 23                               |
| China: Zhejiang  | Surveillance       | Zhejiang                 | 1996-2012            | birth - 5 years  | 768                              |
| China: Zhejiang  | Surveillance       | Zhejiang                 | 2004-2012            | All Ages         | 1184                             |
| China: Zhejiang  | Surveillance       | Zhejiang                 | 2007-2012            | 15 - 49 years    | 50                               |
| China: Zhejiang  | Cancer Registry    | Shangyu City, Zhejiang   | 2009                 | All Ages         | 1552                             |
| China: Zhejiang  | Cancer Registry    | Xianju County, Zhejiang  | 2009                 | All Ages         | 1014                             |
| China: Zhejiang  | Cancer Registry    | Jiashan County, Zhejiang | 1990-2004, 2006-2009 | All Ages         | 13728                            |
| China: Zhejiang  | Cancer Registry    | Haining City, Zhejiang   | 1998-2009            | All Ages         | 11132                            |
| China: Zhejiang  | Cancer Registry    | Jiaxing City, Zhejiang   | 2000-2005, 2007-2009 | All Ages         | 7564                             |
| China: Zhejiang  | Cancer Registry    | Hangzhou City, Zhejiang  | 2000-2009            | All Ages         | 78017                            |
| Colombia         | Vital Registration | National                 | 1980-1996            | All Ages         | 2595452                          |
| Colombia         | Vital Registration | National                 | 1997-2002, 2004-2007 | All Ages         | 1861247                          |
| Colombia         | Vital Registration | National                 | 2003, 2008           | All Ages         | 387703                           |
| Colombia         | Police Records     | National                 | 1990-1991            | All Ages         | Death Rate                       |
| Colombia         | Police Records     | National                 | 1995-2007, 2009-2010 | All Ages         | Death Rate                       |
| Colombia         | Cancer Registry    | Cali                     | 1983-2002            | All Ages         | 37191                            |

**Web Table 13 - Source list by country and site, source type, study site, time period, age range, and deaths excluding sources on LRI and diarrhea etiologies**

| Geography     | Source Type        | Study Site                                                    | Time Period*         | Age Range       | Deaths used in analysis** |
|---------------|--------------------|---------------------------------------------------------------|----------------------|-----------------|---------------------------|
| Comoros       | Police Records     | National                                                      | 2007                 | All Ages        | Death Rate                |
| Congo         | Sibling History    | National                                                      | 1991-2011            | 15 - 54 years   | 369                       |
| Congo         | Burial/Mortuary    | Brazzaville (urban)                                           | 1996                 | All Ages        | 756                       |
| Costa Rica    | Vital Registration | National                                                      | 1980-1996            | All Ages        | 189962                    |
| Costa Rica    | Vital Registration | National                                                      | 1997-2011            | All Ages        | 240465                    |
| Costa Rica    | Police Records     | National                                                      | 1980, 1983-1985      | All Ages        | Death Rate                |
| Costa Rica    | Police Records     | National                                                      | 1997-2007, 2009-2010 | All Ages        | Death Rate                |
| Costa Rica    | Cancer Registry    | National                                                      | 2005                 | All Ages        | 4160                      |
| Costa Rica    | Cancer Registry    | National                                                      | 1980-2002            | All Ages        | 63451                     |
| Cote d'Ivoire | Verbal Autopsy     | Grand-Alepe, Ahoutoue, Brofodoume, and Ahoue villages (rural) | 1988, 1990, 1992     | birth - 5 years | 113                       |
| Cote d'Ivoire | Sibling History    | National                                                      | 1980-1994, 1997-2011 | 15 - 54 years   | 387                       |
| Cote d'Ivoire | Police Records     | National                                                      | 2007                 | All Ages        | Death Rate                |
| Cote d'Ivoire | Cancer Registry    | National                                                      | 1996                 | All Ages        | 390                       |
| Croatia       | Vital Registration | National                                                      | 1985-1994            | All Ages        | 521294                    |
| Croatia       | Vital Registration | National                                                      | 1995-2012            | All Ages        | 924022                    |
| Croatia       | Police Records     | National                                                      | 2007                 | All Ages        | Death Rate                |
| Croatia       | Cancer Registry    | National                                                      | 2000                 | All Ages        | 12984                     |
| Croatia       | Cancer Registry    | National                                                      | 2005                 | All Ages        | 12750                     |
| Croatia       | Cancer Registry    | National                                                      | 1989, 1995           | All Ages        | 20357                     |
| Cuba          | Vital Registration | National                                                      | 1980-1996            | All Ages        | 1123243                   |
| Cuba          | Vital Registration | National                                                      | 1997-2000            | All Ages        | 310843                    |
| Cuba          | Vital Registration | National                                                      | 2001-2010            | All Ages        | 824832                    |
| Cuba          | Police Records     | National                                                      | 1995-2007            | All Ages        | Death Rate                |
| Cuba          | Cancer Registry    | National                                                      | 1986                 | All Ages        | 14015                     |
| Cuba          | Cancer Registry    | Villa Clara                                                   | 1996                 | All Ages        | 1256                      |
| Cuba          | Cancer Registry    | Villa Clara                                                   | 2005                 | All Ages        | 1449                      |
| Cyprus        | Vital Registration | National                                                      | 1999-2000            | All Ages        | 10431                     |
| Cyprus        | Vital Registration | National                                                      | 2004-2011            | All Ages        | 42032                     |
| Cyprus        | Police Records     | National                                                      | 2007                 | All Ages        | Death Rate                |
| Cyprus        | Cancer Registry    | National                                                      | 2000                 | All Ages        | 715                       |
| Cyprus        | Cancer Registry    | National                                                      | 2005                 | All Ages        | 921                       |

**Web Table 13 - Source list by country and site, source type, study site, time period, age range, and deaths excluding sources on LRI and diarrhea etiologies**

| <b>Geography</b>                 | <b>Source Type</b> | <b>Study Site</b>            | <b>Time Period*</b>  | <b>Age Range</b>  | <b>Deaths used in analysis**</b> |
|----------------------------------|--------------------|------------------------------|----------------------|-------------------|----------------------------------|
| Czech Republic                   | Vital Registration | National                     | 1986-1993            | All Ages          | 1004720                          |
| Czech Republic                   | Vital Registration | National                     | 1994-2012            | All Ages          | 2074833                          |
| Czech Republic                   | Police Records     | National                     | 2007                 | All Ages          | Death Rate                       |
| Czech Republic                   | Cancer Registry    | National                     | 2003                 | All Ages          | 28320                            |
| Czech Republic                   | Cancer Registry    | National                     | 2004                 | All Ages          | 28240                            |
| Czech Republic                   | Cancer Registry    | National                     | 2005                 | All Ages          | 28116                            |
| Czech Republic                   | Cancer Registry    | National                     | 2006                 | All Ages          | 27704                            |
| Czech Republic                   | Cancer Registry    | National                     | 2007                 | All Ages          | 27909                            |
| Czech Republic                   | Cancer Registry    | National                     | 2008                 | All Ages          | 28228                            |
| Czech Republic                   | Cancer Registry    | National                     | 2009                 | All Ages          | 27915                            |
| Czech Republic                   | Cancer Registry    | National                     | 1983-2002            | All Ages          | 525876                           |
| Democratic Republic of the Congo | Verbal Autopsy     | Katana (Kivu Zaire) (rural)  | 1986                 | All Ages          | 1248                             |
| Democratic Republic of the Congo | Verbal Autopsy     | Bwamanda Health Zone (rural) | 1990                 | birth - 5 years   | 246                              |
| Democratic Republic of the Congo | Verbal Autopsy     | Dwamanda (rural)             | 1990                 | 28 days - 5 years | 215                              |
| Democratic Republic of the Congo | Survey/Census      | East                         | 2003                 | All Ages          | 235                              |
| Democratic Republic of the Congo | Survey/Census      | West                         | 2003                 | All Ages          | 43                               |
| Democratic Republic of the Congo | Sibling History    | National                     | 1993-2007            | 15 - 54 years     | 228                              |
| Democratic Republic of the Congo | Police Records     | National                     | 2007                 | All Ages          | Death Rate                       |
| Democratic Republic of the Congo | Police Records     | National                     | 2004-2007, 2009-2010 | All Ages          | Death Rate                       |
| Denmark                          | Vital Registration | National                     | 1980-1993            | All Ages          | 815237                           |
| Denmark                          | Vital Registration | National                     | 1994-2011            | All Ages          | 1027337                          |
| Denmark                          | Cancer Registry    | National                     | 1980-2002            | All Ages          | 301134                           |
| Denmark                          | Cancer Registry    | National                     | 2003-2006            | All Ages          | 54988                            |
| Denmark                          | Cancer Registry    | National                     | 2007-2011            | All Ages          | 29712                            |
| Djibouti                         | Surveillance       | National                     | 2003                 | 15 - 49 years     | MMR                              |
| Dominica                         | Vital Registration | National                     | 2000                 | All Ages          | 426                              |
| Dominica                         | Vital Registration | National                     | 1980-1999            | All Ages          | 9834                             |

**Web Table 13 - Source list by country and site, source type, study site, time period, age range, and deaths excluding sources on LRI and diarrhea etiologies**

| Geography          | Source Type        | Study Site                                          | Time Period*                          | Age Range       | Deaths used in analysis** |
|--------------------|--------------------|-----------------------------------------------------|---------------------------------------|-----------------|---------------------------|
| Dominica           | Vital Registration | National                                            | 2001-2010                             | All Ages        | 5505                      |
| Dominica           | Police Records     | National                                            | 1982-1983, 1985-1986                  | All Ages        | Death Rate                |
| Dominica           | Police Records     | National                                            | 1999-2000, 2002-2004, 2007, 2009-2010 | All Ages        | Death Rate                |
| Dominican Republic | Vital Registration | National                                            | 1990                                  | All Ages        | 24289                     |
| Dominican Republic | Vital Registration | National                                            | 1980-1989, 1991-1992, 1994-1995       | All Ages        | 342010                    |
| Dominican Republic | Vital Registration | National                                            | 1996-2001, 2003-2005, 2010            | All Ages        | 271258                    |
| Dominican Republic | Survey/Census      | National                                            | 1997                                  | All Ages        | 51                        |
| Dominican Republic | Surveillance       | National                                            | 1999-2008                             | 15 - 49 years   | 1580                      |
| Dominican Republic | Sibling History    | Monsenor Nouel Province                             | 1986                                  | 15 - 49 years   | MMR                       |
| Dominican Republic | Sibling History    | National                                            | 1988-2007                             | 15 - 54 years   | 156                       |
| Dominican Republic | Police Records     | National                                            | 1996-2000, 2002, 2007, 2009-2010      | All Ages        | Death Rate                |
| Ecuador            | Vital Registration | National                                            | 1996                                  | All Ages        | 52300                     |
| Ecuador            | Vital Registration | National                                            | 1980-1995                             | All Ages        | 842079                    |
| Ecuador            | Vital Registration | National                                            | 1997-2010                             | All Ages        | 791276                    |
| Ecuador            | Sibling History    | National                                            | 1980-2000, 2002-2003                  | 15 - 54 years   | CF                        |
| Ecuador            | Police Records     | National                                            | 1991                                  | All Ages        | Death Rate                |
| Ecuador            | Police Records     | National                                            | 1996, 1999, 2006-2007, 2009           | All Ages        | Death Rate                |
| Ecuador            | Cancer Registry    | Cuenca                                              | 2005                                  | All Ages        | 381                       |
| Ecuador            | Cancer Registry    | Quito                                               | 2005                                  | All Ages        | 1638                      |
| Ecuador            | Cancer Registry    | Quito                                               | 1985-2002                             | All Ages        | 19390                     |
| Egypt              | Vital Registration | National                                            | 1980, 1987, 1991-1992                 | All Ages        | 1605098                   |
| Egypt              | Vital Registration | National                                            | 2000-2011                             | All Ages        | 5329585                   |
| Egypt              | Verbal Autopsy     | Menoufia                                            | 1981                                  | 15 - 49 years   | 2005                      |
| Egypt              | Verbal Autopsy     | Giza Governorate                                    | 1985                                  | 15 - 49 years   | 841                       |
| Egypt              | Verbal Autopsy     | 12 villages in Menoufia Governorate (rural)         | 1990                                  | birth - 5 years | 95                        |
| Egypt              | Verbal Autopsy     | Six sites in Upper Egypt, Beni Suef (rural)         | 1994                                  | birth - 5 years | 199                       |
| Egypt              | Verbal Autopsy     | 21 governorates in 1992 and 27 governorates in 2000 | 1992, 2000                            | 15 - 49 years   | 1152                      |
| Egypt              | Surveillance       | National                                            | 2004, 2006                            | 15 - 49 years   | 2394                      |
| Egypt              | Police Records     | National                                            | 2009                                  | All Ages        | Death Rate                |
| Egypt              | Police Records     | National                                            | 1982-1994                             | All Ages        | Death Rate                |
| Egypt              | Hospital           | Cairo                                               | 2008-2009                             | 15 - 49 years   | MMR                       |

**Web Table 13 - Source list by country and site, source type, study site, time period, age range, and deaths excluding sources on LRI and diarrhea etiologies**

| Geography   | Source Type        | Study Site                                                     | Time Period*                    | Age Range       | Deaths used in analysis** |
|-------------|--------------------|----------------------------------------------------------------|---------------------------------|-----------------|---------------------------|
| Egypt       | Cancer Registry    | Gharbiah                                                       | 2000                            | All Ages        | 2039                      |
| Egypt       | Cancer Registry    | Gharbiah                                                       | 2005                            | All Ages        | 2255                      |
| Egypt       | Cancer Registry    | Aswan                                                          | 2008                            | All Ages        | 597                       |
| Egypt       | Cancer Registry    | Damietta                                                       | 2009                            | All Ages        | 943                       |
| Egypt       | Cancer Registry    | Minia                                                          | 2009                            | All Ages        | 2715                      |
| El Salvador | Vital Registration | National                                                       | 1981-1984, 1990-1993, 1995-1996 | All Ages        | 302082                    |
| El Salvador | Vital Registration | National                                                       | 1997-2009                       | All Ages        | 390004                    |
| El Salvador | Survey/Census      | National                                                       | 2007                            | 10 - 54 years   | 6                         |
| El Salvador | Surveillance       | National                                                       | 2006-2010                       | 15 - 49 years   | 373                       |
| El Salvador | Sibling History    | National                                                       | 1980-2000, 2002                 | 15 - 54 years   | CF                        |
| El Salvador | Police Records     | National                                                       | 1995-2007, 2009-2010            | All Ages        | Death Rate                |
| Eritrea     | Sibling History    | National                                                       | 1981-1995                       | 15 - 54 years   | 196                       |
| Estonia     | Vital Registration | National                                                       | 1981-1982, 1985-1993            | All Ages        | 208214                    |
| Estonia     | Vital Registration | National                                                       | 1994-1996                       | All Ages        | 62060                     |
| Estonia     | Vital Registration | National                                                       | 1997-2012                       | All Ages        | 278849                    |
| Estonia     | Survey/Census      | National                                                       | 1997                            | All Ages        | 6                         |
| Estonia     | Cancer Registry    | National                                                       | 2005                            | All Ages        | 3371                      |
| Estonia     | Cancer Registry    | National                                                       | 1980-2002                       | All Ages        | 75520                     |
| Estonia     | Cancer Registry    | National                                                       | 2003-2004, 2006-2008            | All Ages        | 18973                     |
| Ethiopia    | Verbal Autopsy     | Southern Shoa Administrative Region, Butajira District (rural) | 1987                            | birth - 5 years | 646                       |
| Ethiopia    | Verbal Autopsy     | Jimma Town                                                     | 1990                            | 15 - 49 years   | 15                        |
| Ethiopia    | Verbal Autopsy     | Three Woredas of North Gondar (mixed)                          | 1992                            | birth - 5 years | 380                       |
| Ethiopia    | Verbal Autopsy     | Meskan and Mareko Butajira (BRPH-DSS) (rural)                  | 1997                            | 15 - 49 years   | 515                       |
| Ethiopia    | Verbal Autopsy     | Butajira                                                       | 2000                            | All Ages        | 200                       |
| Ethiopia    | Verbal Autopsy     | Butajira Rural Health Program (BRPH-DSS)                       | 2003                            | All Ages        | 289                       |
| Ethiopia    | Verbal Autopsy     | Gilgel Gibe Field Research Center, Southwest Ethiopia          | 2004                            | birth - 5 years | 168                       |
| Ethiopia    | Verbal Autopsy     | Alamata                                                        | 2006                            | All Ages        | 991                       |
| Ethiopia    | Verbal Autopsy     | Rata Azebo                                                     | 2006                            | All Ages        | 1106                      |
| Ethiopia    | Verbal Autopsy     | Addis Ababa (urban)                                            | 2008                            | 15 years +      | 4776                      |
| Ethiopia    | Verbal Autopsy     | Kilite Awlaelo Surveillance Site (rural)                       | 2010                            | All Ages        | 403                       |
| Ethiopia    | Verbal Autopsy     | Addis Ababa (urban)                                            | 2002, 2007                      | 10 years +      | 4239                      |



**Web Table 13 - Source list by country and site, source type, study site, time period, age range, and deaths excluding sources on LRI and diarrhea etiologies**

| Geography                      | Source Type        | Study Site                           | Time Period*         | Age Range     | Deaths used in analysis** |
|--------------------------------|--------------------|--------------------------------------|----------------------|---------------|---------------------------|
| Ethiopia                       | Survey/Census      | Addis Ababa (urban)                  | 1982                 | 15 - 49 years | MMR                       |
| Ethiopia                       | Survey/Census      | National                             | 1997                 | All Ages      | 5                         |
| Ethiopia                       | Survey/Census      | National                             | 2007                 | 10 - 49 years | 37226                     |
| Ethiopia                       | Sibling History    | Rural villages of Bonke in Gamo Gofa | 2011                 | 15 - 49 years | 819                       |
| Ethiopia                       | Sibling History    | National                             | 1986-2010            | 15 - 54 years | 1272                      |
| Ethiopia                       | Police Records     | National                             | 2004                 | All Ages      | Death Rate                |
| Ethiopia                       | Police Records     | National                             | 2006                 | All Ages      | Death Rate                |
| Ethiopia                       | Burial/Mortuary    | Addis Ababa (urban)                  | 2001-2006            | All Ages      | 115734                    |
| Ethiopia                       | Burial/Mortuary    | Addis Ababa (urban)                  | 2006-2007            | 5 years +     | 2006                      |
| Federated States of Micronesia | Police Records     | National                             | 2007                 | All Ages      | Death Rate                |
| Fiji                           | Vital Registration | National                             | 1999                 | All Ages      | 3395                      |
| Fiji                           | Vital Registration | National                             | 2009, 2011           | All Ages      | 13067                     |
| Fiji                           | Police Records     | National                             | 2007                 | All Ages      | Death Rate                |
| Fiji                           | Police Records     | National                             | 1980-1986, 1990-1994 | All Ages      | Death Rate                |
| Fiji                           | Police Records     | National                             | 2003-2004            | All Ages      | Death Rate                |
| Finland                        | Vital Registration | National                             | 1980-1986            | All Ages      | 318926                    |
| Finland                        | Vital Registration | National                             | 1987-1995            | All Ages      | 443739                    |
| Finland                        | Vital Registration | National                             | 1996-2011            | All Ages      | 786329                    |
| Finland                        | Cancer Registry    | National                             | 2005                 | All Ages      | 10170                     |
| Finland                        | Cancer Registry    | National                             | 1980-2002            | All Ages      | 209738                    |
| Finland                        | Cancer Registry    | National                             | 2003-2004, 2006-2011 | All Ages      | 87036                     |
| France                         | Vital Registration | National                             | 1980-1999            | All Ages      | 10721754                  |
| France                         | Vital Registration | National                             | 2000-2010            | All Ages      | 5834066                   |
| France                         | Cancer Registry    | Manche                               | 1995                 | All Ages      | 984                       |
| France                         | Cancer Registry    | La Martinique                        | 2000                 | All Ages      | 457                       |
| France                         | Cancer Registry    | Loire Atlantique                     | 2000                 | All Ages      | 2104                      |
| France                         | Cancer Registry    | Manche                               | 2000                 | All Ages      | 1005                      |
| France                         | Cancer Registry    | Bas Rhin                             | 2005                 | All Ages      | 2174                      |
| France                         | Cancer Registry    | Calvados                             | 2005                 | All Ages      | 1447                      |
| France                         | Cancer Registry    | Doubs                                | 2005                 | All Ages      | 1050                      |
| France                         | Cancer Registry    | Haut Rhin                            | 2005                 | All Ages      | 1426                      |

**Web Table 13 - Source list by country and site, source type, study site, time period, age range, and deaths excluding sources on LRI and diarrhea etiologies**

| <b>Geography</b> | <b>Source Type</b> | <b>Study Site</b>          | <b>Time Period*</b>             | <b>Age Range</b> | <b>Deaths used in analysis**</b> |
|------------------|--------------------|----------------------------|---------------------------------|------------------|----------------------------------|
| France           | Cancer Registry    | Herault                    | 2005                            | All Ages         | 2224                             |
| France           | Cancer Registry    | Iserre                     | 2005                            | All Ages         | 2265                             |
| France           | Cancer Registry    | Loire Atlantique           | 2005                            | All Ages         | 2528                             |
| France           | Cancer Registry    | Manche                     | 2005                            | All Ages         | 1116                             |
| France           | Cancer Registry    | Martinique                 | 2005                            | All Ages         | 492                              |
| France           | Cancer Registry    | Somme                      | 2005                            | All Ages         | 1216                             |
| France           | Cancer Registry    | Tarn                       | 2005                            | All Ages         | 915                              |
| France           | Cancer Registry    | Vendee                     | 2005                            | All Ages         | 1234                             |
| France           | Cancer Registry    | Bas Rhin                   | 1980-2002                       | All Ages         | 42782                            |
| France           | Cancer Registry    | Calvados                   | 1980-2002                       | All Ages         | 24843                            |
| France           | Cancer Registry    | Doubs                      | 1980-2002                       | All Ages         | 18296                            |
| France           | Cancer Registry    | Iserre                     | 1980-2002                       | All Ages         | 38664                            |
| France           | Cancer Registry    | Martinique                 | 1981, 1985, 1995                | All Ages         | 955                              |
| France           | Cancer Registry    | Somme                      | 1983-2002                       | All Ages         | 19673                            |
| France           | Cancer Registry    | Tarn                       | 1983-2002                       | All Ages         | 14248                            |
| France           | Cancer Registry    | Haut Rhin                  | 1988-2002                       | All Ages         | 20549                            |
| France           | Cancer Registry    | Herault                    | 1988-2002                       | All Ages         | 23449                            |
| France           | Cancer Registry    | La Reunion                 | 1990, 1993                      | All Ages         | 836                              |
| Gabon            | Sibling History    | National                   | 1986-2012                       | 15 - 54 years    | 197                              |
| Gabon            | Hospital           | Libreville                 | 2001-2006                       | 15 - 44 years    | 136                              |
| Georgia          | Vital Registration | National                   | 1981-1982, 1985-1992, 1994-1997 | All Ages         | 610661                           |
| Georgia          | Vital Registration | National                   | 1998-2001, 2004-2007, 2009-2010 | All Ages         | 427794                           |
| Georgia          | Police Records     | National                   | 1990-1994                       | All Ages         | Death Rate                       |
| Georgia          | Police Records     | National                   | 1995-2007, 2009-2010            | All Ages         | Death Rate                       |
| Germany          | Vital Registration | National                   | 1980-1994                       | All Ages         | 13769280                         |
| Germany          | Vital Registration | National                   | 1995-1997                       | All Ages         | 2627809                          |
| Germany          | Vital Registration | National                   | 1998-2012                       | All Ages         | 12638618                         |
| Germany          | Cancer Registry    | Brandenburg                | 2000                            | All Ages         | 6029                             |
| Germany          | Cancer Registry    | Free State of Saxony       | 2000                            | All Ages         | 11238                            |
| Germany          | Cancer Registry    | Hamburg                    | 2000                            | All Ages         | 4203                             |
| Germany          | Cancer Registry    | Mecklenburg-West Pomerania | 2000                            | All Ages         | 4216                             |

**Web Table 13 - Source list by country and site, source type, study site, time period, age range, and deaths excluding sources on LRI and diarrhea etiologies**

| <b>Geography</b> | <b>Source Type</b> | <b>Study Site</b>                  | <b>Time Period*</b>  | <b>Age Range</b>  | <b>Deaths used in analysis**</b> |
|------------------|--------------------|------------------------------------|----------------------|-------------------|----------------------------------|
| Germany          | Cancer Registry    | Munich                             | 2000                 | All Ages          | 5426                             |
| Germany          | Cancer Registry    | Munster, North Rhine-Westphalia    | 2000                 | All Ages          | 6371                             |
| Germany          | Cancer Registry    | Saarland                           | 2000                 | All Ages          | 2935                             |
| Germany          | Cancer Registry    | Munster, North Rhine-Westphalia    | 2003                 | All Ages          | 6227                             |
| Germany          | Cancer Registry    | Bavaria                            | 2004                 | All Ages          | 20739                            |
| Germany          | Cancer Registry    | Saarland                           | 2004                 | All Ages          | 2833                             |
| Germany          | Cancer Registry    | Brandenburg                        | 2005                 | All Ages          | 6564                             |
| Germany          | Cancer Registry    | Bremen                             | 2005                 | All Ages          | 2013                             |
| Germany          | Cancer Registry    | Free State of Saxony               | 2005                 | All Ages          | 11698                            |
| Germany          | Cancer Registry    | Hamburg                            | 2005                 | All Ages          | 4456                             |
| Germany          | Cancer Registry    | Mecklenburg-West Pomerania         | 2005                 | All Ages          | 4331                             |
| Germany          | Cancer Registry    | Munich                             | 2005                 | All Ages          | 9168                             |
| Germany          | Cancer Registry    | Munster, North Rhine-Westphalia    | 2005                 | All Ages          | 6413                             |
| Germany          | Cancer Registry    | Saarland                           | 2005                 | All Ages          | 3054                             |
| Germany          | Cancer Registry    | Schleswig-Holstein                 | 2005                 | All Ages          | 7989                             |
| Germany          | Cancer Registry    | Brandenburg Common Cancer Registry | 2006                 | All Ages          | 41009                            |
| Germany          | Cancer Registry    | Eastern States (ex GDR)            | 1980, 1985, 1988     | All Ages          | 95934                            |
| Germany          | Cancer Registry    | Saarland                           | 1980-1999, 2001-2002 | All Ages          | 60877                            |
| Germany          | Cancer Registry    | Brandenburg                        | 2003-2004            | All Ages          | 83081                            |
| Germany          | Cancer Registry    | Hamburg                            | 2003-2004, 2006-2007 | All Ages          | 17020                            |
| Germany          | Cancer Registry    | Berlin                             | 2007-2008            | All Ages          | 15667                            |
| Germany          | Cancer Registry    | Brandenburg                        | 2007-2008            | All Ages          | 13136                            |
| Germany          | Cancer Registry    | Mecklenburg Vorpommern             | 2007-2008            | All Ages          | 8662                             |
| Germany          | Cancer Registry    | National                           | 2007-2008            | All Ages          | 86778                            |
| Germany          | Cancer Registry    | Sachsen                            | 2007-2008            | All Ages          | 23889                            |
| Germany          | Cancer Registry    | Sachsen-Anhalt                     | 2007-2008            | All Ages          | 13574                            |
| Germany          | Cancer Registry    | Thuringen                          | 2007-2008            | All Ages          | 11850                            |
| Ghana            | Vital Registration | Accra                              | 2000, 2007           | All Ages          | 29436                            |
| Ghana            | Verbal Autopsy     | Kassena-Nankana                    | 1989                 | 15 - 49 years     | 155                              |
| Ghana            | Verbal Autopsy     | Kassena-Nankana                    | 1990                 | 28 days - 9 years | 495                              |
| Ghana            | Verbal Autopsy     | Kassena-Nankana                    | 1994                 | 28 days - 5 years | 857                              |

**Web Table 13 - Source list by country and site, source type, study site, time period, age range, and deaths excluding sources on LRI and diarrhea etiologies**

| Geography     | Source Type        | Study Site                                                                        | Time Period*               | Age Range         | Deaths used in analysis** |
|---------------|--------------------|-----------------------------------------------------------------------------------|----------------------------|-------------------|---------------------------|
| Ghana         | Verbal Autopsy     | Navrongo Health Research Center, Kasena-Nankana                                   | 1995                       | All Ages          | 3308                      |
| Ghana         | Verbal Autopsy     | Kassena-Nankana                                                                   | 1998                       | birth - 27 days   | 1068                      |
| Ghana         | Verbal Autopsy     | Navrongo                                                                          | 2000                       | All Ages          | 8483                      |
| Ghana         | Verbal Autopsy     | Kassena-Nankana                                                                   | 2003                       | 10 - 49 years     | 516                       |
| Ghana         | Verbal Autopsy     | Kintampo                                                                          | 2003                       | birth - 27 days   | 590                       |
| Ghana         | Verbal Autopsy     | Kintampo, Wenchi, Techiman, Nkoranza districts, Brong-Ahafo Region (rural)        | 2003                       | birth - 27 days   | 140                       |
| Ghana         | Verbal Autopsy     | Seven districts of the Brong Ahafo-region (rural)                                 | 2004                       | 15 - 44 years     | 1298                      |
| Ghana         | Verbal Autopsy     | Kassena-Nankana District (rural)                                                  | 2006                       | birth - 27 days   | 424                       |
| Ghana         | Verbal Autopsy     | Barekese, a sub-district in the Atwima Nwabiagya District, Ashanti Region (rural) | 2007                       | birth - 5 years   | 118                       |
| Ghana         | Verbal Autopsy     | Urban areas                                                                       | 2007                       | 10 - 49 years     | 4203                      |
| Ghana         | Sibling History    | Urban areas                                                                       | 1993-2007                  | 15 - 54 years     | 122                       |
| Ghana         | Police Records     | National                                                                          | 2007                       | All Ages          | Death Rate                |
| Ghana         | Police Records     | National                                                                          | 2009                       | All Ages          | Death Rate                |
| Ghana         | Burial/Mortuary    | Kumasi, Ashanti Region                                                            | 2005                       | All Ages          | 1545                      |
| Greece        | Vital Registration | National                                                                          | 1980-1986, 2007, 2009-2011 | All Ages          | 1061928                   |
| Greece        | Vital Registration | National                                                                          | 1987-2006, 2008            | All Ages          | 2110499                   |
| Greece        | Cancer Registry    | National                                                                          | 1990                       | All Ages          | 5245                      |
| Grenada       | Vital Registration | National                                                                          | 1984-1985, 1988-1996       | All Ages          | 8016                      |
| Grenada       | Vital Registration | National                                                                          | 2001-2010                  | All Ages          | 8010                      |
| Grenada       | Police Records     | National                                                                          | 2000, 2002-2003, 2010      | All Ages          | Death Rate                |
| Guatemala     | Vital Registration | National                                                                          | 1980-1981, 1984, 1986-1999 | All Ages          | 1164102                   |
| Guatemala     | Vital Registration | National                                                                          | 2000-2004                  | All Ages          | 334730                    |
| Guatemala     | Vital Registration | National                                                                          | 2005-2009                  | All Ages          | 348108                    |
| Guatemala     | Survey/Census      | National                                                                          | 1997                       | All Ages          | 15                        |
| Guatemala     | Sibling History    | National                                                                          | 1981-1995                  | 15 - 54 years     | 75                        |
| Guatemala     | Police Records     | National                                                                          | 1993-1994                  | All Ages          | Death Rate                |
| Guatemala     | Police Records     | National                                                                          | 2001-2004, 2007, 2009-2010 | All Ages          | Death Rate                |
| Guinea        | Verbal Autopsy     | Mandiana                                                                          | 1998                       | birth - 5 years   | 330                       |
| Guinea        | Sibling History    | National                                                                          | 1985-2012                  | 15 - 54 years     | 627                       |
| Guinea        | Cancer Registry    | Conakry                                                                           | 1993                       | All Ages          | 372                       |
| Guinea-Bissau | Verbal Autopsy     | Bandim II                                                                         | 1989                       | 28 days - 5 years | 135                       |

**Web Table 13 - Source list by country and site, source type, study site, time period, age range, and deaths excluding sources on LRI and diarrhea etiologies**

| Geography     | Source Type        | Study Site                                                           | Time Period*               | Age Range         | Deaths used in analysis** |
|---------------|--------------------|----------------------------------------------------------------------|----------------------------|-------------------|---------------------------|
| Guinea-Bissau | Verbal Autopsy     | Five northern regions of Guinea-Bissau                               | 1992                       | 15 - 49 years     | 339                       |
| Guinea-Bissau | Verbal Autopsy     | Bandim I, Bandim II, Belem, and Mindara districts of Bissau          | 1995                       | 28 days - 5 years | 114                       |
| Guinea-Bissau | Police Records     | National                                                             | 2007                       | All Ages          | Death Rate                |
| Guyana        | Vital Registration | National                                                             | 1984, 1988-1990, 1993-1997 | All Ages          | 43009                     |
| Guyana        | Vital Registration | National                                                             | 1991-1992, 1998-1999       | All Ages          | 17773                     |
| Guyana        | Vital Registration | National                                                             | 2001-2009                  | All Ages          | 44665                     |
| Guyana        | Police Records     | National                                                             | 1991-1993                  | All Ages          | Death Rate                |
| Guyana        | Police Records     | National                                                             | 2002-2003, 2009-2010       | All Ages          | Death Rate                |
| Haiti         | Vital Registration | National                                                             | 1981                       | All Ages          | 41048                     |
| Haiti         | Vital Registration | National                                                             | 1999, 2002-2004            | All Ages          | 40821                     |
| Haiti         | Verbal Autopsy     | Cite Soleil, low-income community on northern edge of Port-au-Prince | 1989                       | birth - 364 days  | 244                       |
| Haiti         | Verbal Autopsy     | Mirebalais (urban)                                                   | 1994                       | birth - 364 days  | 148                       |
| Haiti         | Verbal Autopsy     | Artibonite Valley                                                    | 1997                       | birth - 5 years   | 97                        |
| Haiti         | Sibling History    | National                                                             | 1986-2005                  | 15 - 54 years     | 366                       |
| Haiti         | Police Records     | National                                                             | 2001, 2007, 2009-2010      | All Ages          | Death Rate                |
| Honduras      | Vital Registration | National                                                             | 1980-1983, 1987-1990       | All Ages          | 134495                    |
| Honduras      | Verbal Autopsy     | National                                                             | 1990, 1997, 2010           | 15 - 49 years     | MMR                       |
| Honduras      | Survey/Census      | National                                                             | 2000-2001                  | 15 - 49 years     | 424                       |
| Honduras      | Sibling History    | National                                                             | 1981-1995                  | 15 - 54 years     | CF                        |
| Honduras      | Police Records     | National                                                             | 1980-1986                  | All Ages          | Death Rate                |
| Honduras      | Police Records     | National                                                             | 1999-2007, 2009-2010       | All Ages          | Death Rate                |
| Hungary       | Vital Registration | National                                                             | 1980-1995                  | All Ages          | 2333574                   |
| Hungary       | Vital Registration | National                                                             | 1996-2012                  | All Ages          | 2284977                   |
| Hungary       | Police Records     | National                                                             | 2007                       | All Ages          | Death Rate                |
| Hungary       | Cancer Registry    | County Szabolcs Szatmar (rural)                                      | 1980                       | All Ages          | 623                       |
| Hungary       | Cancer Registry    | County Szabolcs Szatmar (urban)                                      | 1980                       | All Ages          | 213                       |
| Hungary       | Cancer Registry    | National                                                             | 2001                       | All Ages          | 41450                     |
| Hungary       | Cancer Registry    | National                                                             | 2002                       | All Ages          | 41743                     |
| Hungary       | Cancer Registry    | National                                                             | 2003                       | All Ages          | 44453                     |
| Hungary       | Cancer Registry    | National                                                             | 2004                       | All Ages          | 42028                     |
| Hungary       | Cancer Registry    | National                                                             | 2005                       | All Ages          | 42047                     |

**Web Table 13 - Source list by country and site, source type, study site, time period, age range, and deaths excluding sources on LRI and diarrhea etiologies**

| <b>Geography</b> | <b>Source Type</b> | <b>Study Site</b>       | <b>Time Period*</b> | <b>Age Range</b> | <b>Deaths used in analysis**</b> |
|------------------|--------------------|-------------------------|---------------------|------------------|----------------------------------|
| Hungary          | Cancer Registry    | National                | 2006                | All Ages         | 41154                            |
| Hungary          | Cancer Registry    | National                | 2007                | All Ages         | 40363                            |
| Hungary          | Cancer Registry    | National                | 2008                | All Ages         | 40244                            |
| Hungary          | Cancer Registry    | National                | 2009                | All Ages         | 35627                            |
| Hungary          | Cancer Registry    | National                | 2010                | All Ages         | 36239                            |
| Hungary          | Cancer Registry    | National                | 2011                | All Ages         | 41026                            |
| Hungary          | Cancer Registry    | County Szabolcs Szatmar | 1980, 1985          | All Ages         | 1794                             |
| Hungary          | Cancer Registry    | County Vas              | 1980, 1985          | All Ages         | 1298                             |
| Iceland          | Vital Registration | National                | 1980                | All Ages         | 1538                             |
| Iceland          | Vital Registration | National                | 1981-1988           | All Ages         | 13270                            |
| Iceland          | Vital Registration | National                | 1989-1995           | All Ages         | 12336                            |
| Iceland          | Vital Registration | National                | 1996-2009           | All Ages         | 26141                            |
| Iceland          | Survey/Census      | National                | 1990, 2001          | 25 - 49 years    | 2                                |
| Iceland          | Cancer Registry    | National                | 1980-2002           | All Ages         | 11331                            |
| Iceland          | Cancer Registry    | National                | 2003-2011           | All Ages         | 5459                             |
| India            | Vital Registration | National                | 1980                | All Ages         | 172796                           |
| India            | Vital Registration | National                | 1981                | All Ages         | 230238                           |
| India            | Vital Registration | National                | 1982                | All Ages         | 194229                           |
| India            | Vital Registration | National                | 1983                | All Ages         | 192899                           |
| India            | Vital Registration | National                | 1986                | All Ages         | 256889                           |
| India            | Vital Registration | National                | 1987                | All Ages         | 317611                           |
| India            | Vital Registration | National                | 1988                | All Ages         | 330963                           |
| India            | Vital Registration | National                | 1989                | All Ages         | 331221                           |
| India            | Vital Registration | Urban Subnational       | 2002                | All Ages         | 591089                           |
| India            | Vital Registration | Urban Subnational       | 2003                | All Ages         | 637130                           |
| India            | Vital Registration | Urban Subnational       | 2004                | All Ages         | 650781                           |
| India            | Vital Registration | Urban Subnational       | 2005                | All Ages         | 700447                           |
| India            | Vital Registration | Urban Subnational       | 2006                | All Ages         | 773742                           |
| India            | Vital Registration | Urban National          | 2008                | All Ages         | 918036                           |
| India            | Vital Registration | Urban Subnational       | 1990-1998           | All Ages         | 3838044                          |
| India            | Vital Registration | Urban Subnational       | 1999-2001           | All Ages         | 1719356                          |

**Web Table 13 - Source list by country and site, source type, study site, time period, age range, and deaths excluding sources on LRI and diarrhea etiologies**

| Geography | Source Type    | Study Site                                                          | Time Period* | Age Range         | Deaths used in analysis** |
|-----------|----------------|---------------------------------------------------------------------|--------------|-------------------|---------------------------|
| India     | Verbal Autopsy | 69 rural villages in Haryana                                        | 1983         | birth - 5 years   | 117                       |
| India     | Verbal Autopsy | Gorakhpur slums                                                     | 1983         | birth - 27 days   | 50                        |
| India     | Verbal Autopsy | Gorakhpur slums                                                     | 1983         | birth - 5 years   | 296                       |
| India     | Verbal Autopsy | Anantapur district, Andhra Pradesh (periurban)                      | 1984         | 15 - 49 years     | 206                       |
| India     | Verbal Autopsy | Anantapur district, Andhra Pradesh (rural)                          | 1984         | 15 - 49 years     | 867                       |
| India     | Verbal Autopsy | National                                                            | 1984         | 15 - 49 years     | MMR                       |
| India     | Verbal Autopsy | 20 villages in Ballabgarh block                                     | 1985         | birth - 5 years   | 281                       |
| India     | Verbal Autopsy | Rural area of Ambala                                                | 1985         | 15 - 44 years     | 257                       |
| India     | Verbal Autopsy | Anantapur District, Andhra Pradesh (rural)                          | 1986         | 15 - 49 years     | 262                       |
| India     | Verbal Autopsy | Anantapur District, Andhra Pradesh (urban)                          | 1986         | 15 - 49 years     | 22                        |
| India     | Verbal Autopsy | Ballabgarh, Haryana state (rural)                                   | 1988         | birth - 5 years   | 811                       |
| India     | Verbal Autopsy | Gadchiroli district                                                 | 1988         | birth - 5 years   | 161                       |
| India     | Verbal Autopsy | Tricity district of Tamil Nadu                                      | 1988         | 28 days - 5 years | 88                        |
| India     | Verbal Autopsy | Agra (rural), Uttar Pradesh                                         | 1989         | 15 - 49 years     | 35                        |
| India     | Verbal Autopsy | Badaun (rural), Uttar Pradesh                                       | 1989         | 15 - 49 years     | 28                        |
| India     | Verbal Autopsy | Basti (rural), Uttar Pradesh                                        | 1989         | 15 - 49 years     | 20                        |
| India     | Verbal Autopsy | Farrukhabad (rural), Uttar Pradesh                                  | 1989         | 15 - 49 years     | 29                        |
| India     | Verbal Autopsy | Ghaziabad (rural), Uttar Pradesh                                    | 1989         | 15 - 49 years     | 7                         |
| India     | Verbal Autopsy | Gorakhpur (rural), Uttar Pradesh                                    | 1989         | 15 - 49 years     | 22                        |
| India     | Verbal Autopsy | Singhbhum, Keonjhar/Jawan, and Aligarh                              | 1989         | birth - 5 years   | 64                        |
| India     | Verbal Autopsy | Varanasi (rural), Uttar Pradesh                                     | 1989         | 15 - 49 years     | 23                        |
| India     | Verbal Autopsy | 45 contiguous villages in Shirur Development Block in Pune District | 1990         | birth - 5 years   | 286                       |
| India     | Verbal Autopsy | Kunjirwadi, Kawatha, and Tisgaon                                    | 1991         | All Ages          | 73                        |
| India     | Verbal Autopsy | Anganwadi centres of Lucknow                                        | 1992         | birth - 6 days    | 57                        |
| India     | Verbal Autopsy | Cuttack and Koraput Districts, Orissa State                         | 1992         | birth - 364 days  | 179                       |
| India     | Verbal Autopsy | Rural Subnational                                                   | 1992         | All Ages          | 8271                      |
| India     | Verbal Autopsy | Urban Subnational                                                   | 1992         | All Ages          | 2780                      |
| India     | Verbal Autopsy | Anganwadi centres of Lucknow                                        | 1994         | birth - 5 years   | 1211                      |
| India     | Verbal Autopsy | Patna                                                               | 1995         | birth - 27 days   | 1000                      |
| India     | Verbal Autopsy | Two urban slums in Delhi                                            | 1995         | birth - 364 days  | 162                       |
| India     | Verbal Autopsy | Vellore                                                             | 1996         | 10 - 19 years     | 427                       |

**Web Table 13 - Source list by country and site, source type, study site, time period, age range, and deaths excluding sources on LRI and diarrhea etiologies**

| <b>Geography</b> | <b>Source Type</b> | <b>Study Site</b>                                                              | <b>Time Period*</b> | <b>Age Range</b> | <b>Deaths used in analysis**</b> |
|------------------|--------------------|--------------------------------------------------------------------------------|---------------------|------------------|----------------------------------|
| India            | Verbal Autopsy     | Villupuram district in Tamil Nadu                                              | 1996                | 25 years +       | 47217                            |
| India            | Verbal Autopsy     | National                                                                       | 1997                | 15 - 49 years    | MMR                              |
| India            | Verbal Autopsy     | Ballabgarh, Haryana                                                            | 1998                | birth - 364 days | 102                              |
| India            | Verbal Autopsy     | Rural Subnational                                                              | 1998                | All Ages         | 8898                             |
| India            | Verbal Autopsy     | Urban Subnational                                                              | 1998                | All Ages         | 3044                             |
| India            | Verbal Autopsy     | Delhi- Sunder Nagri, Tahirpur and Amar Colony                                  | 1999                | birth - 364 days | 442                              |
| India            | Verbal Autopsy     | East Delhi (Gokulpuri) resettlement colony                                     | 1999                | All Ages         | 515                              |
| India            | Verbal Autopsy     | Vellore (urban)                                                                | 1999                | birth - 364 days | 219                              |
| India            | Verbal Autopsy     | Moradabad (urban)                                                              | 2000                | 25 - 64 years    | 2222                             |
| India            | Verbal Autopsy     | National                                                                       | 2000                | 15 - 49 years    | MMR                              |
| India            | Verbal Autopsy     | 1.1 million homes nationwide                                                   | 2002                | All Ages         | 121344                           |
| India            | Verbal Autopsy     | Five sites in Uttar Pradesh                                                    | 2002                | birth - 27 days  | 161                              |
| India            | Verbal Autopsy     | India (1.1 million homes)                                                      | 2002                | 5 - 14 years     | 3852                             |
| India            | Verbal Autopsy     | National                                                                       | 2002                | 5 years +        | 90325                            |
| India            | Verbal Autopsy     | National                                                                       | 2002                | 30 - 69 years    | 3947                             |
| India            | Verbal Autopsy     | National                                                                       | 2002                | 15 - 49 years    | 1397                             |
| India            | Verbal Autopsy     | National                                                                       | 2002                | birth - 5 years  | 23152                            |
| India            | Verbal Autopsy     | National                                                                       | 2002                | All Ages         | 122429                           |
| India            | Verbal Autopsy     | National                                                                       | 2002                | All Ages         | 122291                           |
| India            | Verbal Autopsy     | Rural Subnational                                                              | 2002                | 15 years +       | 77720                            |
| India            | Verbal Autopsy     | Southern Rajasthan                                                             | 2002                | 15 - 49 years    | 156                              |
| India            | Verbal Autopsy     | Urban National                                                                 | 2002                | 15 years +       | 17615                            |
| India            | Verbal Autopsy     | 411 villages in Rajasthan districts of Bikaner, Barmer, Jaisalmer, and Jodhpur | 2003                | 15 - 49 years    | 40                               |
| India            | Verbal Autopsy     | Assam (rural)                                                                  | 2003                | All Ages         | 1382                             |
| India            | Verbal Autopsy     | Assam (urban)                                                                  | 2003                | All Ages         | 499                              |
| India            | Verbal Autopsy     | Bihar (rural)                                                                  | 2003                | All Ages         | 3088                             |
| India            | Verbal Autopsy     | Bihar (urban)                                                                  | 2003                | All Ages         | 224                              |
| India            | Verbal Autopsy     | Kolkata ward 29 and 30 (urban)                                                 | 2003                | All Ages         | 88465                            |
| India            | Verbal Autopsy     | Maharashtra (rural)                                                            | 2003                | All Ages         | 899                              |
| India            | Verbal Autopsy     | Maharashtra (urban)                                                            | 2003                | All Ages         | 626                              |
| India            | Verbal Autopsy     | Rajasthan (rural)                                                              | 2003                | All Ages         | 2480                             |



**Web Table 13 - Source list by country and site, source type, study site, time period, age range, and deaths excluding sources on LRI and diarrhea etiologies**

| Geography | Source Type    | Study Site                                                                     | Time Period*         | Age Range        | Deaths used in analysis** |
|-----------|----------------|--------------------------------------------------------------------------------|----------------------|------------------|---------------------------|
| India     | Verbal Autopsy | Rajasthan (urban)                                                              | 2003                 | All Ages         | 660                       |
| India     | Verbal Autopsy | Rural Andhra Pradesh                                                           | 2003                 | birth - 79 years | 1339                      |
| India     | Verbal Autopsy | Tamil Nadu (rural)                                                             | 2003                 | All Ages         | 1703                      |
| India     | Verbal Autopsy | Tamil Nadu (urban)                                                             | 2003                 | All Ages         | 645                       |
| India     | Verbal Autopsy | 28 villages Ballabgarh block Haryana (rural)                                   | 2004                 | 15 years +       | 1859                      |
| India     | Verbal Autopsy | Kerala (rural)                                                                 | 2004                 | 25 years +       | 4248                      |
| India     | Verbal Autopsy | Aligarh (rural)                                                                | 2005                 | birth - 5 years  | 56                        |
| India     | Verbal Autopsy | Aligarh (urban)                                                                | 2005                 | birth - 5 years  | 26                        |
| India     | Verbal Autopsy | Jharkhand, Jharkland (rural) and Orissa                                        | 2005                 | 15 - 49 years    | 99                        |
| India     | Verbal Autopsy | National                                                                       | 2005                 | 15 - 49 years    | MMR                       |
| India     | Verbal Autopsy | Wardha district, Maharashtra                                                   | 2005                 | 15 years +       | 209                       |
| India     | Verbal Autopsy | West Singhbhum and Saraikela-Kharswan in Jharkhand and Keonjhar in Orissa      | 2005                 | 15 - 49 years    | 323                       |
| India     | Verbal Autopsy | 17 sectors in two districts of Uttar Pradesh, Barabanki and Unnao              | 2006                 | birth - 27 days  | 618                       |
| India     | Verbal Autopsy | 45 villages East and West Godavari Andhra Pradesh (rural)                      | 2006                 | All Ages         | 1407                      |
| India     | Verbal Autopsy | 45 villages East and West Godavari Andhra Pradesh (rural)                      | 2006                 | All Ages         | 2814                      |
| India     | Verbal Autopsy | 48 slum areas in Mumbai (urban)                                                | 2006                 | birth - 27 days  | 116                       |
| India     | Verbal Autopsy | Saraikela Kharswan, West Singhbhum, Keonjhar districts in Jharkhand and Orissa | 2006                 | birth - 6 days   | 367                       |
| India     | Verbal Autopsy | 28 villages in Ballabgarh (rural)                                              | 2008                 | 10 years +       | 510                       |
| India     | Verbal Autopsy | 28 villages in Ballabgarh (rural)                                              | 2008                 | birth - 5 years  | 143                       |
| India     | Verbal Autopsy | Ameliha, Jaguwapurwa, Dewpalpur, Maharajpur and Tatiyanganj                    | 2008                 | birth - 27 days  | 109                       |
| India     | Verbal Autopsy | Jhagadia block in Gujarat (Sewa Rural registry)                                | 2008                 | birth - 27 days  | 105                       |
| India     | Verbal Autopsy | National                                                                       | 2008                 | 15 - 49 years    | 926                       |
| India     | Verbal Autopsy | Dakshina Kannada district, Karnataka (urban)                                   | 2011                 | birth - 364 days | 119                       |
| India     | Verbal Autopsy | Raichur district, Karnataka (rural)                                            | 2011                 | birth - 364 days | 447                       |
| India     | Verbal Autopsy | 13 rural states                                                                | 1980-1998            | All Ages         | 482440                    |
| India     | Verbal Autopsy | Ballabgarh (rural)                                                             | 1983, 1993           | birth - 364 days | 606                       |
| India     | Verbal Autopsy | National                                                                       | 1997-2004, 2006-2012 | 15 - 49 years    | 6585                      |
| India     | Verbal Autopsy | Twenty eight villages Ballabgarh block Haryana (rural)                         | 2002-2007, 2009      | 10 years +       | 3914                      |
| India     | Verbal Autopsy | Godavari                                                                       | 2004-2007            | All Ages         | 5786                      |
| India     | Survey/Census  | Nine ICDS project areas nationally (rural)                                     | 1984                 | birth - 364 days | 215                       |

**Web Table 13 - Source list by country and site, source type, study site, time period, age range, and deaths excluding sources on LRI and diarrhea etiologies**

| Geography | Source Type     | Study Site                                 | Time Period*    | Age Range        | Deaths used in analysis** |
|-----------|-----------------|--------------------------------------------|-----------------|------------------|---------------------------|
| India     | Survey/Census   | Nine ICDS project areas nationally (urban) | 1984            | birth - 364 days | 26                        |
| India     | Survey/Census   | National                                   | 1997            | All Ages         | 5                         |
| India     | Survey/Census   | National                                   | 1999-2004       | 15 - 44 years    | 520                       |
| India     | Survey/Census   | National                                   | 2004-2008       | 15 - 49 years    | 2141                      |
| India     | Police Records  | Mumbai                                     | 1996            | All Ages         | Death Rate                |
| India     | Police Records  | Delhi                                      | 2003            | All Ages         | Death Rate                |
| India     | Police Records  | National                                   | 2006            | All Ages         | Death Rate                |
| India     | Police Records  | Kota                                       | 2007            | All Ages         | Death Rate                |
| India     | Police Records  | National                                   | 1980, 1985-1994 | All Ages         | Death Rate                |
| India     | Police Records  | National                                   | 1995-2007, 2009 | All Ages         | Death Rate                |
| India     | Cancer Registry | Chennai                                    | 1982            | All Ages         | 1443                      |
| India     | Cancer Registry | Barshi                                     | 1990            | All Ages         | 140                       |
| India     | Cancer Registry | Delhi                                      | 1994            | All Ages         | 4249                      |
| India     | Cancer Registry | Karunagappally                             | 2000            | All Ages         | 217                       |
| India     | Cancer Registry | Nagpur                                     | 2000            | All Ages         | 903                       |
| India     | Cancer Registry | New Delhi                                  | 2000            | All Ages         | 5359                      |
| India     | Cancer Registry | Poona                                      | 2000            | All Ages         | 1400                      |
| India     | Cancer Registry | Trivandrum                                 | 2000            | All Ages         | 583                       |
| India     | Cancer Registry | Aizawl                                     | 2005            | All Ages         | 361                       |
| India     | Cancer Registry | Imphal                                     | 2005            | All Ages         | 272                       |
| India     | Cancer Registry | Kolkata                                    | 2005            | All Ages         | 1925                      |
| India     | Cancer Registry | Mizoram (excl. Aizawl)                     | 2005            | All Ages         | 500                       |
| India     | Cancer Registry | Silchar                                    | 2005            | All Ages         | 71                        |
| India     | Cancer Registry | Aurangabad                                 | 2006            | All Ages         | 245                       |
| India     | Cancer Registry | Barshi                                     | 2006            | All Ages         | 163                       |
| India     | Cancer Registry | Bhopal                                     | 2006            | All Ages         | 518                       |
| India     | Cancer Registry | Chennai                                    | 2006            | All Ages         | 2087                      |
| India     | Cancer Registry | Delhi                                      | 2006            | All Ages         | 3431                      |
| India     | Cancer Registry | Kamrup Urban                               | 2006            | All Ages         | 476                       |
| India     | Cancer Registry | Kolkata                                    | 2006            | All Ages         | 1210                      |
| India     | Cancer Registry | Kollam                                     | 2006            | All Ages         | 1254                      |

**Web Table 13 - Source list by country and site, source type, study site, time period, age range, and deaths excluding sources on LRI and diarrhea etiologies**

| Geography | Source Type     | Study Site            | Time Period*           | Age Range        | Deaths used in analysis** |
|-----------|-----------------|-----------------------|------------------------|------------------|---------------------------|
| India     | Cancer Registry | Mumbai                | 2006                   | All Ages         | 4462                      |
| India     | Cancer Registry | Nagpur                | 2006                   | All Ages         | 673                       |
| India     | Cancer Registry | Pune                  | 2006                   | All Ages         | 1169                      |
| India     | Cancer Registry | Thiruvananthapuram    | 2006                   | All Ages         | 756                       |
| India     | Cancer Registry | Bangalore             | 2008                   | All Ages         | 3501                      |
| India     | Cancer Registry | Delhi                 | 2008                   | All Ages         | 7279                      |
| India     | Cancer Registry | Kolkata               | 2008                   | All Ages         | 2657                      |
| India     | Cancer Registry | Nagpur                | 2008                   | All Ages         | 1022                      |
| India     | Cancer Registry | Ahmedabad (rural)     | 2009                   | All Ages         | 427                       |
| India     | Cancer Registry | Ahmedabad (urban)     | 2009                   | All Ages         | 419                       |
| India     | Cancer Registry | Aurangabad            | 2009                   | All Ages         | 1969                      |
| India     | Cancer Registry | Barshi (rural)        | 2009                   | All Ages         | 230                       |
| India     | Cancer Registry | Bhopal                | 2009                   | All Ages         | 727                       |
| India     | Cancer Registry | Chennai               | 2009                   | All Ages         | 2842                      |
| India     | Cancer Registry | Kollam                | 2009                   | All Ages         | 1741                      |
| India     | Cancer Registry | Mumbai                | 2009                   | All Ages         | 5886                      |
| India     | Cancer Registry | Pune                  | 2009                   | All Ages         | 1521                      |
| India     | Cancer Registry | Kamrup Urban District | 2010                   | All Ages         | 838                       |
| India     | Cancer Registry | Meghalaya             | 2010                   | All Ages         | 660                       |
| India     | Cancer Registry | Thiruvananthapuram    | 2010                   | All Ages         | 839                       |
| India     | Cancer Registry | Wardha                | 2010                   | All Ages         | 625                       |
| India     | Cancer Registry | Poona                 | 1980, 1995             | All Ages         | 1872                      |
| India     | Cancer Registry | Mumbai                | 1980-2002              | All Ages         | 110888                    |
| India     | Cancer Registry | Nagpur                | 1981, 1995             | All Ages         | 1012                      |
| India     | Cancer Registry | Bangalore             | 1982, 1985, 1990, 1995 | All Ages         | 6099                      |
| India     | Cancer Registry | Chennai               | 1983-2002              | All Ages         | 43354                     |
| India     | Cancer Registry | Karunagappally        | 1991, 1995             | All Ages         | 393                       |
| India     | Cancer Registry | Trivandrum            | 1991, 1995             | All Ages         | 864                       |
| Indonesia | Verbal Autopsy  | Rural Bali            | 1981                   | 15 - 49 years    | 756                       |
| Indonesia | Verbal Autopsy  | South Sumatra (rural) | 1983                   | All Ages         | 68                        |
| Indonesia | Verbal Autopsy  | South Sumatra (rural) | 1984                   | birth - 364 days | 29                        |

**Web Table 13 - Source list by country and site, source type, study site, time period, age range, and deaths excluding sources on LRI and diarrhea etiologies**

| Geography | Source Type        | Study Site                                                                                             | Time Period*    | Age Range        | Deaths used in analysis** |
|-----------|--------------------|--------------------------------------------------------------------------------------------------------|-----------------|------------------|---------------------------|
| Indonesia | Verbal Autopsy     | Indramayu                                                                                              | 1991            | birth - 5 years  | 141                       |
| Indonesia | Verbal Autopsy     | Banjar, Barito Kuala, and Hulu Sungai Seletan in Rural South Kalimantan                                | 1997            | 15 - 49 years    | 130                       |
| Indonesia | Verbal Autopsy     | Lombok                                                                                                 | 1997            | birth - 27 days  | 60                        |
| Indonesia | Verbal Autopsy     | Jawa, Nusa Tenggara, South Sulawesi, and Sumatra                                                       | 2011            | All Ages         | 13474                     |
| Indonesia | Verbal Autopsy     | Ten provinces                                                                                          | 2012            | 15 years +       | 1232                      |
| Indonesia | Verbal Autopsy     | Subnational Rural and Subnational Urban                                                                | 2006-2007       | 5 years +        | 1427                      |
| Indonesia | Verbal Autopsy     | Gorontalo, Jakarta, Jawa Barat, Jawa Tengah, Kalimantan Barat, Lampung, Nusa Tenggara Timur, and Papua | 2009-2011       | 5 years +        | 7233                      |
| Indonesia | Verbal Autopsy     | Subnational                                                                                            | 2012-2013       | birth - 14 years | 333                       |
| Indonesia | Survey/Census      | National                                                                                               | 2001, 2004-2007 | All Ages         | 16931                     |
| Indonesia | Survey/Census      | National                                                                                               | 2001-2004       | All Ages         | 8093                      |
| Indonesia | Sibling History    | National                                                                                               | 1980-2012       | 15 - 54 years    | 993                       |
| Indonesia | Police Records     | National                                                                                               | 2007            | All Ages         | Death Rate                |
| Indonesia | Police Records     | National                                                                                               | 1981-1984, 1986 | All Ages         | Death Rate                |
| Indonesia | Police Records     | National                                                                                               | 2003-2004       | All Ages         | Death Rate                |
| Iran      | Vital Registration | National                                                                                               | 2007            | All Ages         | 217808                    |
| Iran      | Vital Registration | National                                                                                               | 2008            | All Ages         | 215243                    |
| Iran      | Vital Registration | National                                                                                               | 2009            | All Ages         | 214115                    |
| Iran      | Vital Registration | National                                                                                               | 2010            | All Ages         | 234673                    |
| Iran      | Vital Registration | National                                                                                               | 1980-1985, 1987 | All Ages         | 519180                    |
| Iran      | Vital Registration | National                                                                                               | 1996-2001       | All Ages         | 1265994                   |
| Iran      | Vital Registration | National                                                                                               | 2002-2003       | All Ages         | 591614                    |
| Iran      | Vital Registration | National                                                                                               | 2004-2006       | All Ages         | 698998                    |
| Iran      | Verbal Autopsy     | National                                                                                               | 1996            | 15 - 49 years    | 382                       |
| Iran      | Verbal Autopsy     | Birjand                                                                                                | 2004            | birth - 364 days | 156                       |
| Iran      | Surveillance       | National                                                                                               | 2002-2012       | 15 - 49 years    | 3293                      |
| Iran      | Police Records     | National                                                                                               | 2009            | All Ages         | Death Rate                |
| Iran      | Cancer Registry    | Golestan                                                                                               | 1998            | All Ages         | 631                       |
| Iran      | Cancer Registry    | National                                                                                               | 2003            | All Ages         | 8728                      |
| Iran      | Cancer Registry    | National                                                                                               | 2004            | All Ages         | 10569                     |
| Iran      | Cancer Registry    | National                                                                                               | 2005            | All Ages         | 12246                     |
| Iran      | Cancer Registry    | Golestan                                                                                               | 2006            | All Ages         | 1029                      |

**Web Table 13 - Source list by country and site, source type, study site, time period, age range, and deaths excluding sources on LRI and diarrhea etiologies**

| <b>Geography</b> | <b>Source Type</b> | <b>Study Site</b> | <b>Time Period*</b>    | <b>Age Range</b> | <b>Deaths used in analysis**</b> |
|------------------|--------------------|-------------------|------------------------|------------------|----------------------------------|
| Iran             | Cancer Registry    | National          | 2006                   | All Ages         | 13003                            |
| Iran             | Cancer Registry    | Ardabil           | 1985, 1997, 2006-2008  | All Ages         | 4678                             |
| Iraq             | Vital Registration | National          | 2008                   | All Ages         | 106245                           |
| Iraq             | Survey/Census      | National          | 1992, 1997             | 15 - 49 years    | 411                              |
| Iraq             | Police Records     | National          | 1990-1994              | All Ages         | Death Rate                       |
| Ireland          | Vital Registration | National          | 2006                   | All Ages         | 28482                            |
| Ireland          | Vital Registration | National          | 1980-2005              | All Ages         | 818268                           |
| Ireland          | Vital Registration | National          | 2007-2010              | All Ages         | 112411                           |
| Ireland          | Cancer Registry    | Southern          | 1981, 1984, 1990       | All Ages         | 2422                             |
| Ireland          | Cancer Registry    | National          | 1994-2010              | All Ages         | 107560                           |
| Israel           | Vital Registration | National          | 1980-1994              | All Ages         | 439567                           |
| Israel           | Vital Registration | National          | 1995-1997              | All Ages         | 106112                           |
| Israel           | Vital Registration | National          | 1998-2011              | All Ages         | 538867                           |
| Israel           | Police Records     | National          | 2007                   | All Ages         | Death Rate                       |
| Israel           | Cancer Registry    | National          | 2000                   | All Ages         | 8621                             |
| Israel           | Cancer Registry    | National          | 2005                   | All Ages         | 9248                             |
| Israel           | Cancer Registry    | National          | 2008                   | All Ages         | 9915                             |
| Israel           | Cancer Registry    | National          | 2009                   | All Ages         | 8953                             |
| Israel           | Cancer Registry    | National          | 2010                   | All Ages         | 9009                             |
| Israel           | Cancer Registry    | National          | 1980, 1985, 1990, 1995 | All Ages         | 22134                            |
| Italy            | Vital Registration | National          | 1980-2002              | All Ages         | 12674463                         |
| Italy            | Vital Registration | National          | 2003, 2006-2010        | All Ages         | 3474915                          |
| Italy            | Cancer Registry    | Ragusa            | 1981                   | All Ages         | 388                              |
| Italy            | Cancer Registry    | Romagna           | 1986                   | All Ages         | 1250                             |
| Italy            | Cancer Registry    | Sassari           | 1995                   | All Ages         | 876                              |
| Italy            | Cancer Registry    | Umbria            | 1995                   | All Ages         | 2370                             |
| Italy            | Cancer Registry    | Biella            | 1996                   | All Ages         | 626                              |
| Italy            | Cancer Registry    | North East        | 1996                   | All Ages         | 6588                             |
| Italy            | Cancer Registry    | Genoa             | 1999                   | All Ages         | 3330                             |
| Italy            | Cancer Registry    | Macerata          | 1999                   | All Ages         | 880                              |
| Italy            | Cancer Registry    | Salerno           | 1999                   | All Ages         | 1966                             |

**Web Table 13 - Source list by country and site, source type, study site, time period, age range, and deaths excluding sources on LRI and diarrhea etiologies**

| Geography | Source Type        | Study Site         | Time Period*          | Age Range | Deaths used in analysis** |
|-----------|--------------------|--------------------|-----------------------|-----------|---------------------------|
| Italy     | Cancer Registry    | Veneto             | 1999                  | All Ages  | 6146                      |
| Italy     | Cancer Registry    | Biella             | 2000                  | All Ages  | 611                       |
| Italy     | Cancer Registry    | Brescia            | 2000                  | All Ages  | 2984                      |
| Italy     | Cancer Registry    | Ferrara            | 2000                  | All Ages  | 1287                      |
| Italy     | Cancer Registry    | Florence and Prato | 2000                  | All Ages  | 3634                      |
| Italy     | Cancer Registry    | Milan              | 2000                  | All Ages  | 4334                      |
| Italy     | Cancer Registry    | Naples             | 2000                  | All Ages  | 830                       |
| Italy     | Cancer Registry    | North East         | 2000                  | All Ages  | 6353                      |
| Italy     | Cancer Registry    | Reggio Emilia      | 2000                  | All Ages  | 1320                      |
| Italy     | Cancer Registry    | Sassari            | 2000                  | All Ages  | 974                       |
| Italy     | Cancer Registry    | Sondrio            | 2000                  | All Ages  | 513                       |
| Italy     | Cancer Registry    | Syracuse           | 2000                  | All Ages  | 713                       |
| Italy     | Cancer Registry    | Modena             | 2003                  | All Ages  | 1825                      |
| Italy     | Cancer Registry    | Sondrio            | 2003                  | All Ages  | 524                       |
| Italy     | Cancer Registry    | Varese             | 1980-2000             | All Ages  | 41903                     |
| Italy     | Cancer Registry    | Parma              | 1980-2002             | All Ages  | 29823                     |
| Italy     | Cancer Registry    | Ragusa             | 1983-2002             | All Ages  | 9502                      |
| Italy     | Cancer Registry    | Latina             | 1984, 1989            | All Ages  | 1233                      |
| Italy     | Cancer Registry    | Trieste            | 1984, 1990            | All Ages  | 2306                      |
| Italy     | Cancer Registry    | Florence           | 1985-2002             | All Ages  | 63566                     |
| Italy     | Cancer Registry    | Torino             | 1985-2002             | All Ages  | 45100                     |
| Italy     | Cancer Registry    | Florence and Prato | 1986, 1989-1990, 1995 | All Ages  | 14033                     |
| Italy     | Cancer Registry    | Genoa              | 1986, 1990, 1994      | All Ages  | 7446                      |
| Italy     | Cancer Registry    | Modena             | 1988-2002             | All Ages  | 25385                     |
| Italy     | Cancer Registry    | Romagna            | 1988-2002             | All Ages  | 40996                     |
| Italy     | Cancer Registry    | Veneto             | 1990, 1994            | All Ages  | 8632                      |
| Italy     | Cancer Registry    | Ferrara            | 1991, 1995            | All Ages  | 2283                      |
| Italy     | Cancer Registry    | Macerata           | 1991, 1995            | All Ages  | 1506                      |
| Italy     | Cancer Registry    | National           | 2004-2008             | All Ages  | 247403                    |
| Jamaica   | Vital Registration | National           | 1980-1991             | All Ages  | 147610                    |
| Jamaica   | Vital Registration | National           | 2000-2006             | All Ages  | 106688                    |

**Web Table 13 - Source list by country and site, source type, study site, time period, age range, and deaths excluding sources on LRI and diarrhea etiologies**

| <b>Geography</b> | <b>Source Type</b> | <b>Study Site</b>       | <b>Time Period*</b>    | <b>Age Range</b> | <b>Deaths used in analysis**</b> |
|------------------|--------------------|-------------------------|------------------------|------------------|----------------------------------|
| Jamaica          | Verbal Autopsy     | National                | 1987                   | birth - 6 days   | 792                              |
| Jamaica          | Surveillance       | National                | 1998-2003, 2005, 2008  | 15 - 49 years    | 321                              |
| Jamaica          | Police Records     | National                | 1981-1986, 1990-1994   | All Ages         | Death Rate                       |
| Jamaica          | Police Records     | National                | 1995-2007, 2009-2010   | All Ages         | Death Rate                       |
| Jamaica          | Cancer Registry    | National                | 1980                   | All Ages         | 572                              |
| Jamaica          | Cancer Registry    | National                | 1990                   | All Ages         | 543                              |
| Jamaica          | Cancer Registry    | National                | 1995                   | All Ages         | 579                              |
| Jamaica          | Cancer Registry    | Kingston and St. Andrew | 2005                   | All Ages         | 553                              |
| Japan            | Vital Registration | National                | 1980-1994              | All Ages         | 11732123                         |
| Japan            | Vital Registration | National                | 1995-2011              | All Ages         | 17619112                         |
| Japan            | Police Records     | National                | 2007                   | All Ages         | Death Rate                       |
| Japan            | Cancer Registry    | Hiroshima               | 1998                   | All Ages         | 2869                             |
| Japan            | Cancer Registry    | Aichi Prefecture        | 2000                   | All Ages         | 1884                             |
| Japan            | Cancer Registry    | Fukui Prefecture        | 2000                   | All Ages         | 2309                             |
| Japan            | Cancer Registry    | Nagasaki Prefecture     | 2000                   | All Ages         | 4759                             |
| Japan            | Cancer Registry    | Aichi Prefecture        | 2005                   | All Ages         | 2978                             |
| Japan            | Cancer Registry    | Fukui Prefecture        | 2005                   | All Ages         | 2714                             |
| Japan            | Cancer Registry    | Hiroshima               | 2005                   | All Ages         | 3891                             |
| Japan            | Cancer Registry    | Miyagi Prefecture       | 2005                   | All Ages         | 7505                             |
| Japan            | Cancer Registry    | Nagasaki Prefecture     | 2005                   | All Ages         | 5364                             |
| Japan            | Cancer Registry    | Niigata Prefecture      | 2005                   | All Ages         | 8450                             |
| Japan            | Cancer Registry    | Osaka Prefecture        | 2005                   | All Ages         | 22532                            |
| Japan            | Cancer Registry    | Saga Prefecture         | 2005                   | All Ages         | 2795                             |
| Japan            | Cancer Registry    | Aichi Prefecture        | 2006                   | All Ages         | 17108                            |
| Japan            | Cancer Registry    | Nagasaki Prefecture     | 1980, 1985, 1990, 1995 | All Ages         | 4415                             |
| Japan            | Cancer Registry    | Miyagi Prefecture       | 1980-2002              | All Ages         | 117129                           |
| Japan            | Cancer Registry    | Osaka Prefecture        | 1980-2002              | All Ages         | 398483                           |
| Japan            | Cancer Registry    | Hiroshima               | 1983, 1988, 1993       | All Ages         | 6448                             |
| Japan            | Cancer Registry    | Yamagata Prefecture     | 1983-2002              | All Ages         | 72671                            |
| Japan            | Cancer Registry    | Saga                    | 1985, 1990, 1995       | All Ages         | 6613                             |
| Jordan           | Vital Registration | National                | 2010                   | All Ages         | 14800                            |

**Web Table 13 - Source list by country and site, source type, study site, time period, age range, and deaths excluding sources on LRI and diarrhea etiologies**

| Geography  | Source Type        | Study Site                                       | Time Period*                    | Age Range         | Deaths used in analysis** |
|------------|--------------------|--------------------------------------------------|---------------------------------|-------------------|---------------------------|
| Jordan     | Vital Registration | National                                         | 2004-2006                       | All Ages          | 53075                     |
| Jordan     | Vital Registration | National                                         | 2008-2009                       | All Ages          | 29138                     |
| Jordan     | Verbal Autopsy     | National                                         | 1995                            | birth - 79 years  | 947                       |
| Jordan     | Verbal Autopsy     | National                                         | 2007                            | 15 - 49 years     | 112                       |
| Jordan     | Sibling History    | National                                         | 1983-1984, 1987-1990, 1993-1997 | 15 - 54 years     | 21                        |
| Jordan     | Police Records     | National                                         | 1980-1986, 1990-1994            | All Ages          | Death Rate                |
| Jordan     | Cancer Registry    | National                                         | 2001                            | All Ages          | 1850                      |
| Jordan     | Cancer Registry    | National                                         | 2002                            | All Ages          | 1846                      |
| Jordan     | Cancer Registry    | National                                         | 2003                            | All Ages          | 1798                      |
| Jordan     | Cancer Registry    | National                                         | 2004                            | All Ages          | 1828                      |
| Jordan     | Cancer Registry    | National                                         | 2005                            | All Ages          | 1875                      |
| Jordan     | Cancer Registry    | National                                         | 2006                            | All Ages          | 2182                      |
| Jordan     | Cancer Registry    | National                                         | 2007                            | All Ages          | 2175                      |
| Jordan     | Cancer Registry    | National                                         | 2008                            | All Ages          | 2306                      |
| Kazakhstan | Vital Registration | National                                         | 1981-1982, 1985-1990            | All Ages          | 991792                    |
| Kazakhstan | Vital Registration | National                                         | 1991-2003                       | All Ages          | 1984179                   |
| Kazakhstan | Vital Registration | National                                         | 2004-2006, 2008-2010            | All Ages          | 907741                    |
| Kazakhstan | Police Records     | National                                         | 1995-1999                       | All Ages          | Death Rate                |
| Kenya      | Verbal Autopsy     | Nginda, Mathithi, and Kamahuha. Muranga district | 1986                            | birth - 5 years   | 216                       |
| Kenya      | Verbal Autopsy     | Brookebond Tea Estate                            | 1997                            | birth - 5 years   | 325                       |
| Kenya      | Verbal Autopsy     | Kisumu                                           | 2002                            | birth - 5 years   | 935                       |
| Kenya      | Verbal Autopsy     | Asembo and Gem, Nyanza Province                  | 2003                            | 28 days - 5 years | 1234                      |
| Kenya      | Verbal Autopsy     | Asembo and Gem, Nyanza Province                  | 2003                            | 10 - 79 years     | 1816                      |
| Kenya      | Verbal Autopsy     | Asembo and Gem, Nyanza Province                  | 2004                            | 28 days - 5 years | 1203                      |
| Kenya      | Verbal Autopsy     | Asembo and Gem, Nyanza Province                  | 2005                            | 28 days - 5 years | 1045                      |
| Kenya      | Verbal Autopsy     | Nairobi                                          | 2005                            | All Ages          | 572                       |
| Kenya      | Verbal Autopsy     | Asembo and Gem, Nyanza Province                  | 2006                            | 28 days - 5 years | 873                       |
| Kenya      | Verbal Autopsy     | Asembo and Gem, Nyanza Province                  | 2007                            | 28 days - 5 years | 865                       |
| Kenya      | Verbal Autopsy     | Asembo and Gem, Nyanza Province                  | 2008                            | 28 days - 5 years | 1702                      |
| Kenya      | Verbal Autopsy     | Nairobi                                          | 2002-2009                       | All Ages          | 2850                      |
| Kenya      | Verbal Autopsy     | Nyanza Province (rural)                          | 2005, 2007                      | 15 - 64 years     | 4414                      |



**Web Table 13 - Source list by country and site, source type, study site, time period, age range, and deaths excluding sources on LRI and diarrhea etiologies**

| <b>Geography</b> | <b>Source Type</b> | <b>Study Site</b>              | <b>Time Period*</b>             | <b>Age Range</b> | <b>Deaths used in analysis**</b> |
|------------------|--------------------|--------------------------------|---------------------------------|------------------|----------------------------------|
| Kenya            | Survey/Census      | Kwale District, Coast Province | 1985                            | 15 - 44 years    | 35                               |
| Kenya            | Survey/Census      | National                       | 1997                            | All Ages         | 5                                |
| Kenya            | Survey/Census      | National                       | 2009                            | 10 - 54 years    | 431                              |
| Kenya            | Sibling History    | National                       | 1984-2008                       | 15 - 54 years    | 477                              |
| Kenya            | Police Records     | National                       | 2004-2007, 2009-2010            | All Ages         | Death Rate                       |
| Kenya            | Hospital           | PCEA Kikuyu Hospital           | 2005                            | 20 - 29 years    | MMR                              |
| Kenya            | Cancer Registry    | Nairobi                        | 2000-2002                       | All Ages         | 2188                             |
| Kiribati         | Vital Registration | National                       | 1995                            | All Ages         | 3687                             |
| Kiribati         | Vital Registration | National                       | 1991-1994, 1996-1998            | All Ages         | 3231                             |
| Kiribati         | Vital Registration | National                       | 1999-2001                       | All Ages         | 1406                             |
| Kiribati         | Police Records     | National                       | 1986                            | All Ages         | Death Rate                       |
| Kiribati         | Police Records     | National                       | 2007                            | All Ages         | Death Rate                       |
| Kuwait           | Vital Registration | National                       | 1980-1987, 1993-1994            | All Ages         | 44021                            |
| Kuwait           | Vital Registration | National                       | 1995-2011                       | All Ages         | 79890                            |
| Kuwait           | Police Records     | National                       | 1980-1983, 1986-1989, 1992-1994 | All Ages         | Death Rate                       |
| Kuwait           | Police Records     | National                       | 1995-2002, 2004-2007, 2009      | All Ages         | Death Rate                       |
| Kuwait           | Cancer Registry    | National                       | 2000                            | All Ages         | 455                              |
| Kuwait           | Cancer Registry    | National                       | 2005                            | All Ages         | 529                              |
| Kuwait           | Cancer Registry    | National                       | 1980, 1985                      | All Ages         | 671                              |
| Kyrgyzstan       | Vital Registration | National                       | 1981-1982, 1985-1999            | All Ages         | 552392                           |
| Kyrgyzstan       | Vital Registration | National                       | 2000-2010                       | All Ages         | 396554                           |
| Kyrgyzstan       | Police Records     | National                       | 1995, 1997, 2000-2007, 2009     | All Ages         | Death Rate                       |
| Kyrgyzstan       | Cancer Registry    | National                       | 1986                            | All Ages         | 3655                             |
| Laos             | Verbal Autopsy     | 16 of 17 provinces             | 1989                            | 15 - 49 years    | 127                              |
| Laos             | Police Records     | National                       | 2010                            | All Ages         | Death Rate                       |
| Latvia           | Vital Registration | National                       | 1980-1995                       | All Ages         | 546414                           |
| Latvia           | Vital Registration | National                       | 1996-2012                       | All Ages         | 544651                           |
| Latvia           | Cancer Registry    | National                       | 2005                            | All Ages         | 5902                             |
| Latvia           | Cancer Registry    | National                       | 1988-2002                       | All Ages         | 78444                            |
| Lebanon          | Verbal Autopsy     | Beirut                         | 1988                            | 50 years +       | 416                              |
| Lebanon          | Verbal Autopsy     | Beirut                         | 2000                            | 15 - 49 years    | 15                               |

**Web Table 13 - Source list by country and site, source type, study site, time period, age range, and deaths excluding sources on LRI and diarrhea etiologies**

| <b>Geography</b> | <b>Source Type</b> | <b>Study Site</b>                               | <b>Time Period*</b>   | <b>Age Range</b> | <b>Deaths used in analysis**</b> |
|------------------|--------------------|-------------------------------------------------|-----------------------|------------------|----------------------------------|
| Lebanon          | Surveillance       | National                                        | 2008                  | 15 - 49 years    | 13                               |
| Lebanon          | Police Records     | National                                        | 1986-1988, 1993-1994  | All Ages         | Death Rate                       |
| Lebanon          | Police Records     | National                                        | 2004-2007, 2009-2010  | All Ages         | Death Rate                       |
| Lebanon          | Cancer Registry    | National                                        | 1998                  | All Ages         | 2188                             |
| Lebanon          | Cancer Registry    | National                                        | 2005                  | All Ages         | 3789                             |
| Lebanon          | Cancer Registry    | National                                        | 2006                  | All Ages         | 3931                             |
| Lebanon          | Cancer Registry    | National                                        | 2007                  | All Ages         | 4029                             |
| Lesotho          | Survey/Census      | National                                        | 2006                  | All Ages         | 44580                            |
| Lesotho          | Survey/Census      | National                                        | 1995-1996             | 15 - 39 years    | 480                              |
| Lesotho          | Sibling History    | National                                        | 1991-2009             | 15 - 54 years    | 265                              |
| Lesotho          | Police Records     | National                                        | 2009                  | All Ages         | Death Rate                       |
| Lesotho          | Police Records     | National                                        | 1986, 1988, 1990-1994 | All Ages         | Death Rate                       |
| Liberia          | Verbal Autopsy     | Liberian Agricultural Company rubber plantation | 1990                  | birth - 49 years | 24                               |
| Liberia          | Verbal Autopsy     | Bomi and Grand Cape Mount counties              | 1984, 1987            | birth - 5 years  | 949                              |
| Liberia          | Sibling History    | National                                        | 1992-2006             | 15 - 54 years    | 192                              |
| Liberia          | Police Records     | National                                        | 1982-1985             | All Ages         | Death Rate                       |
| Liberia          | Police Records     | National                                        | 2007, 2009-2010       | All Ages         | Death Rate                       |
| Libya            | Vital Registration | National                                        | 2006                  | All Ages         | 19163                            |
| Libya            | Vital Registration | National                                        | 2007                  | All Ages         | 20679                            |
| Libya            | Vital Registration | National                                        | 2008                  | All Ages         | 22451                            |
| Libya            | Police Records     | National                                        | 2003                  | All Ages         | Death Rate                       |
| Libya            | Cancer Registry    | Benghazi                                        | 2004                  | All Ages         | 560                              |
| Lithuania        | Vital Registration | National                                        | 1993                  | All Ages         | 46107                            |
| Lithuania        | Vital Registration | National                                        | 1981-1982, 1985-1992  | All Ages         | 378850                           |
| Lithuania        | Vital Registration | National                                        | 1994-1997             | All Ages         | 175831                           |
| Lithuania        | Vital Registration | National                                        | 1998-2010             | All Ages         | 545695                           |
| Lithuania        | Police Records     | National                                        | 2006                  | All Ages         | Death Rate                       |
| Lithuania        | Cancer Registry    | National                                        | 2005                  | All Ages         | 8894                             |
| Lithuania        | Cancer Registry    | National                                        | 1980-2002             | All Ages         | 155279                           |
| Luxembourg       | Vital Registration | National                                        | 1991                  | All Ages         | 3830                             |
| Luxembourg       | Vital Registration | National                                        | 1980-1990, 1992-1997  | All Ages         | 67444                            |

**Web Table 13 - Source list by country and site, source type, study site, time period, age range, and deaths excluding sources on LRI and diarrhea etiologies**

| <b>Geography</b> | <b>Source Type</b> | <b>Study Site</b>                                                            | <b>Time Period*</b>        | <b>Age Range</b> | <b>Deaths used in analysis**</b> |
|------------------|--------------------|------------------------------------------------------------------------------|----------------------------|------------------|----------------------------------|
| Luxembourg       | Vital Registration | National                                                                     | 1998-2011                  | All Ages         | 50624                            |
| Macedonia        | Vital Registration | National                                                                     | 1991-2003                  | All Ages         | 214958                           |
| Macedonia        | Vital Registration | National                                                                     | 2004-2005                  | All Ages         | 36349                            |
| Macedonia        | Vital Registration | National                                                                     | 2006-2010                  | All Ages         | 95379                            |
| Madagascar       | Vital Registration | Antananarivo                                                                 | 1984-1995                  | All Ages         | 79862                            |
| Madagascar       | Sibling History    | National                                                                     | 1980-2008                  | 15 - 54 years    | 727                              |
| Madagascar       | Police Records     | National                                                                     | 2000                       | All Ages         | Death Rate                       |
| Madagascar       | Police Records     | National                                                                     | 1980, 1985-1994            | All Ages         | Death Rate                       |
| Malawi           | Verbal Autopsy     | Mangochi                                                                     | 1988                       | birth - 5 years  | 688                              |
| Malawi           | Verbal Autopsy     | Three rural areas                                                            | 1999                       | 15 - 44 years    | 100                              |
| Malawi           | Verbal Autopsy     | Karonga District                                                             | 2004                       | birth - 14 years | 342                              |
| Malawi           | Verbal Autopsy     | Chiradzulu District (rural)                                                  | 2008                       | All Ages         | 50                               |
| Malawi           | Verbal Autopsy     | Karonga District                                                             | 2004-2008                  | 15 years +       | 877                              |
| Malawi           | Survey/Census      | National                                                                     | 2008                       | 10 - 54 years    | 324                              |
| Malawi           | Sibling History    | National                                                                     | 1980-2010                  | 15 - 54 years    | 1514                             |
| Malawi           | Police Records     | National                                                                     | 1981-1985                  | All Ages         | Death Rate                       |
| Malawi           | Hospital           | Nine hospitals in Salima (one), Kasungu (one), and Liongwe (seven) districts | 2007                       | 15 - 44 years    | 43                               |
| Malawi           | Cancer Registry    | Blantyre                                                                     | 1996                       | All Ages         | 218                              |
| Malawi           | Cancer Registry    | Blantyre                                                                     | 2005                       | All Ages         | 495                              |
| Malaysia         | Vital Registration | National                                                                     | 1997                       | All Ages         | 44012                            |
| Malaysia         | Vital Registration | National                                                                     | 1998                       | All Ages         | 43585                            |
| Malaysia         | Vital Registration | Peninsular Malaysia                                                          | 1980-1982                  | All Ages         | 71086                            |
| Malaysia         | Vital Registration | National                                                                     | 2000-2008                  | All Ages         | 573558                           |
| Malaysia         | Survey/Census      | National                                                                     | 1997                       | All Ages         | 20                               |
| Malaysia         | Police Records     | National                                                                     | 1981-1984, 1986, 1990-1994 | All Ages         | Death Rate                       |
| Malaysia         | Police Records     | National                                                                     | 1995-1996                  | All Ages         | Death Rate                       |
| Malaysia         | Cancer Registry    | Penang                                                                       | 2000                       | All Ages         | 902                              |
| Malaysia         | Cancer Registry    | Sarawak                                                                      | 2000                       | All Ages         | 1163                             |
| Malaysia         | Cancer Registry    | National                                                                     | 2003                       | All Ages         | 13860                            |
| Malaysia         | Cancer Registry    | Penang                                                                       | 2005                       | All Ages         | 1038                             |
| Malaysia         | Cancer Registry    | Penang, Chinese                                                              | 2005                       | All Ages         | 716                              |

**Web Table 13 - Source list by country and site, source type, study site, time period, age range, and deaths excluding sources on LRI and diarrhea etiologies**

| Geography              | Source Type        | Study Site                             | Time Period*                    | Age Range     | Deaths used in analysis** |
|------------------------|--------------------|----------------------------------------|---------------------------------|---------------|---------------------------|
| Malaysia               | Cancer Registry    | Penang, Indian                         | 2005                            | All Ages      | 92                        |
| Malaysia               | Cancer Registry    | Penang, Malay                          | 2005                            | All Ages      | 224                       |
| Maldives               | Vital Registration | National                               | 2000-2005, 2007-2008, 2010-2011 | All Ages      | 10597                     |
| Maldives               | Police Records     | National                               | 1986-1990                       | All Ages      | Death Rate                |
| Maldives               | Police Records     | National                               | 1995, 1997, 2001-2002, 2007     | All Ages      | Death Rate                |
| Mali                   | Vital Registration | Bamako                                 | 1981, 1984                      | All Ages      | 24895                     |
| Mali                   | Verbal Autopsy     | Bankoni district in the city of Bamako | 1990                            | 15 - 49 years | 20                        |
| Mali                   | Survey/Census      | National                               | 2009                            | 15 - 49 years | MMR                       |
| Mali                   | Sibling History    | 20 villages in Kita                    | 2007                            | 15 - 49 years | 429                       |
| Mali                   | Sibling History    | National                               | 1981-2006                       | 15 - 54 years | 858                       |
| Mali                   | Hospital           | Bamako                                 | 1994                            | 15 - 49 years | 271                       |
| Mali                   | Cancer Registry    | Bamako                                 | 1988, 1990, 1995                | All Ages      | 972                       |
| Malta                  | Vital Registration | National                               | 1980-1994                       | All Ages      | 43634                     |
| Malta                  | Vital Registration | National                               | 1995-2011                       | All Ages      | 51803                     |
| Malta                  | Police Records     | National                               | 2007                            | All Ages      | Death Rate                |
| Malta                  | Cancer Registry    | National                               | 2005                            | All Ages      | 751                       |
| Malta                  | Cancer Registry    | National                               | 1992, 1995                      | All Ages      | 1334                      |
| Malta                  | Cancer Registry    | National                               | 1999-2004, 2006-2010            | All Ages      | 7191                      |
| Marshall Islands       | Police Records     | National                               | 2007                            | All Ages      | Death Rate                |
| Marshall Islands       | Police Records     | National                               | 1991-1992, 1994                 | All Ages      | Death Rate                |
| Mauritania             | Sibling History    | National                               | 1986-2000                       | 15 - 54 years | 184                       |
| Mauritania             | Police Records     | National                               | 2007                            | All Ages      | Death Rate                |
| Mauritius              | Vital Registration | National                               | 1980                            | All Ages      | 6685                      |
| Mauritius              | Vital Registration | National                               | 1981-1990                       | All Ages      | 65920                     |
| Mauritius              | Vital Registration | National                               | 1991-2004                       | All Ages      | 106448                    |
| Mauritius              | Vital Registration | National                               | 2005-2011                       | All Ages      | 61289                     |
| Mauritius              | Police Records     | National                               | 1987, 1989-1994                 | All Ages      | Death Rate                |
| Mauritius              | Police Records     | National                               | 1995-2003, 2007, 2009           | All Ages      | Death Rate                |
| Mexico                 | Survey/Census      | National                               | 1997                            | All Ages      | 148                       |
| Mexico                 | Police Records     | National                               | 1995-2007, 2009-2010            | All Ages      | Death Rate                |
| Mexico: Aguascalientes | Vital Registration | Aguascalientes                         | 1980-2012                       | All Ages      | 121282                    |

**Web Table 13 - Source list by country and site, source type, study site, time period, age range, and deaths excluding sources on LRI and diarrhea etiologies**

| <b>Geography</b>                        | <b>Source Type</b> | <b>Study Site</b>               | <b>Time Period*</b> | <b>Age Range</b> | <b>Deaths used in analysis**</b> |
|-----------------------------------------|--------------------|---------------------------------|---------------------|------------------|----------------------------------|
| Mexico: Baja California                 | Vital Registration | Baja California                 | 1980-2012           | All Ages         | 321890                           |
| Mexico: Baja California Sur             | Vital Registration | Baja California Sur             | 1980-2012           | All Ages         | 51488                            |
| Mexico: Campeche                        | Vital Registration | Campeche                        | 1980-2012           | All Ages         | 83824                            |
| Mexico: Chiapas                         | Vital Registration | Chiapas                         | 1980-2012           | All Ages         | 502198                           |
| Mexico: Chihuahua                       | Vital Registration | Chihuahua                       | 1980-2012           | All Ages         | 495876                           |
| Mexico: Coahuila                        | Vital Registration | Coahuila                        | 1980-2012           | All Ages         | 331223                           |
| Mexico: Colima                          | Vital Registration | Colima                          | 1980-2012           | All Ages         | 79073                            |
| Mexico: Distrito Federal                | Vital Registration | Distrito Federal                | 1980-2012           | All Ages         | 1494836                          |
| Mexico: Durango                         | Vital Registration | Durango                         | 1980-2012           | All Ages         | 202488                           |
| Mexico: Guanajuato                      | Vital Registration | Guanajuato                      | 1980-2012           | All Ages         | 712451                           |
| Mexico: Guerrero                        | Vital Registration | Guerrero                        | 1980-2012           | All Ages         | 358632                           |
| Mexico: Guerrero                        | Verbal Autopsy     | Rural Guerrero                  | 1993                | birth - 5 years  | 366                              |
| Mexico: Hidalgo                         | Vital Registration | Hidalgo                         | 1980-2012           | All Ages         | 339184                           |
| Mexico: Jalisco                         | Vital Registration | Jalisco                         | 1980-2012           | All Ages         | 985981                           |
| Mexico: México                          | Vital Registration | México                          | 1980-2012           | All Ages         | 1684191                          |
| Mexico: Michoacán de Ocampo             | Vital Registration | Michoacán de Ocampo             | 1980-2012           | All Ages         | 605847                           |
| Mexico: Morelos                         | Vital Registration | Morelos                         | 1980-2012           | All Ages         | 216679                           |
| Mexico: Nayarit                         | Vital Registration | Nayarit                         | 1980-2012           | All Ages         | 133367                           |
| Mexico: Nuevo León                      | Vital Registration | Nuevo León                      | 1980-2012           | All Ages         | 493535                           |
| Mexico: Oaxaca                          | Vital Registration | Oaxaca                          | 1980-2012           | All Ages         | 604647                           |
| Mexico: Puebla                          | Vital Registration | Puebla                          | 1980-2012           | All Ages         | 867261                           |
| Mexico: Querétaro                       | Vital Registration | Querétaro                       | 1980-2012           | All Ages         | 189153                           |
| Mexico: Quintana Roo                    | Vital Registration | Quintana Roo                    | 1980-2012           | All Ages         | 70623                            |
| Mexico: San Luis Potosí                 | Vital Registration | San Luis Potosí                 | 1980-2012           | All Ages         | 337033                           |
| Mexico: Sinaloa                         | Vital Registration | Sinaloa                         | 1980-2012           | All Ages         | 321687                           |
| Mexico: Sonora                          | Vital Registration | Sonora                          | 1980-2012           | All Ages         | 334843                           |
| Mexico: Tabasco                         | Vital Registration | Tabasco                         | 1980-2012           | All Ages         | 241567                           |
| Mexico: Tamaulipas                      | Vital Registration | Tamaulipas                      | 1980-2012           | All Ages         | 379197                           |
| Mexico: Tlaxcala                        | Vital Registration | Tlaxcala                        | 1980-2012           | All Ages         | 144255                           |
| Mexico: Veracruz de Ignacio de la Llave | Vital Registration | Veracruz de Ignacio de la Llave | 1980-2012           | All Ages         | 1058133                          |
| Mexico: Yucatán                         | Vital Registration | Yucatán                         | 1980-2012           | All Ages         | 263148                           |

**Web Table 13 - Source list by country and site, source type, study site, time period, age range, and deaths excluding sources on LRI and diarrhea etiologies**

| Geography         | Source Type        | Study Site                                                  | Time Period*                    | Age Range       | Deaths used in analysis** |
|-------------------|--------------------|-------------------------------------------------------------|---------------------------------|-----------------|---------------------------|
| Mexico: Zacatecas | Vital Registration | Zacatecas                                                   | 1980-2012                       | All Ages        | 206766                    |
| Moldova           | Vital Registration | National                                                    | 1981-1982, 1985-1990            | All Ages        | 332660                    |
| Moldova           | Vital Registration | National                                                    | 1991-1995                       | All Ages        | 242169                    |
| Moldova           | Vital Registration | National                                                    | 1996-2012                       | All Ages        | 718838                    |
| Mongolia          | Vital Registration | National                                                    | 1994                            | All Ages        | 14984                     |
| Mongolia          | Vital Registration | National                                                    | 1992-1993, 1995-2007            | 15 - 49 years   | MMR                       |
| Mongolia          | Police Records     | National                                                    | 2004-2007, 2009                 | All Ages        | Death Rate                |
| Mongolia          | Cancer Registry    | National                                                    | 2005                            | All Ages        | 613                       |
| Montenegro        | Vital Registration | National                                                    | 2000, 2006, 2009                | All Ages        | 34772                     |
| Montenegro        | Police Records     | National                                                    | 2007                            | All Ages        | Death Rate                |
| Morocco           | Vital Registration | National                                                    | 2005                            | All Ages        | 135974                    |
| Morocco           | Vital Registration | National                                                    | 2008, 2011                      | All Ages        | 96088                     |
| Morocco           | Verbal Autopsy     | National                                                    | 1988                            | birth - 5 years | 382                       |
| Morocco           | Survey/Census      | National                                                    | 1997                            | All Ages        | 11                        |
| Morocco           | Surveillance       | National                                                    | 2001                            | 15 - 49 years   | 103                       |
| Morocco           | Surveillance       | National                                                    | 2002                            | 15 - 49 years   | 106                       |
| Morocco           | Surveillance       | National                                                    | 2003                            | 15 - 49 years   | 81                        |
| Morocco           | Surveillance       | National                                                    | 2004                            | 15 - 49 years   | 83                        |
| Morocco           | Surveillance       | National                                                    | 2008                            | 15 - 49 years   | 79                        |
| Morocco           | Surveillance       | National                                                    | 2009                            | 15 - 49 years   | 303                       |
| Morocco           | Sibling History    | National                                                    | 1980-2003                       | 15 - 54 years   | 226                       |
| Morocco           | Police Records     | National                                                    | 1980, 1990-1994                 | All Ages        | Death Rate                |
| Morocco           | Police Records     | National                                                    | 1999-2004, 2006-2007, 2009-2010 | All Ages        | Death Rate                |
| Morocco           | Cancer Registry    | Greater Casablanca                                          | 2004                            | All Ages        | 1959                      |
| Mozambique        | Verbal Autopsy     | Chingussura sub-center, Beira, Sofala Province (periurban)  | 1996                            | 15 - 49 years   | 22                        |
| Mozambique        | Verbal Autopsy     | Dondo sub-center, Dondo District, Sofala Province           | 1996                            | 15 - 49 years   | 54                        |
| Mozambique        | Verbal Autopsy     | Mafambisse sub-center, Dondo District, Sofala Province      | 1996                            | 15 - 49 years   | 38                        |
| Mozambique        | Verbal Autopsy     | Manga sub-center, Beira, Sofala Province (periurban)        | 1996                            | 15 - 49 years   | 17                        |
| Mozambique        | Verbal Autopsy     | Metuchira sub-center, Nhamatanda District, Sofala province  | 1996                            | 15 - 49 years   | 21                        |
| Mozambique        | Verbal Autopsy     | Nhamatanda, sub-center Nhamatanda District, Sofala province | 1996                            | 15 - 49 years   | 32                        |
| Mozambique        | Verbal Autopsy     | Ponta-Gea and Baxia (urban)                                 | 1996                            | 15 - 49 years   | 18                        |

**Web Table 13 - Source list by country and site, source type, study site, time period, age range, and deaths excluding sources on LRI and diarrhea etiologies**

| Geography  | Source Type     | Study Site                                                                  | Time Period*               | Age Range         | Deaths used in analysis** |
|------------|-----------------|-----------------------------------------------------------------------------|----------------------------|-------------------|---------------------------|
| Mozambique | Verbal Autopsy  | Siluvo sub-center, Nhamatanda District, Sofala province                     | 1996                       | 15 - 49 years     | 12                        |
| Mozambique | Verbal Autopsy  | Manhiça, Maputo Province                                                    | 2001                       | birth - 14 years  | 3696                      |
| Mozambique | Verbal Autopsy  | Manhiça, Maputo Province                                                    | 2002                       | All Ages          | 1248                      |
| Mozambique | Verbal Autopsy  | Mozambique                                                                  | 2007                       | All Ages          | 10080                     |
| Mozambique | Survey/Census   | National                                                                    | 2002                       | 10 - 49 years     | 6663                      |
| Mozambique | Survey/Census   | Cahora-Bassa and Changara Districts, Tete Province (rural)                  | 2003                       | All Ages          | 214                       |
| Mozambique | Sibling History | National                                                                    | 1983-2011                  | 15 - 54 years     | 447                       |
| Mozambique | Police Records  | National                                                                    | 2007                       | All Ages          | Death Rate                |
| Mozambique | Police Records  | National                                                                    | 1999-2003, 2007            | All Ages          | Death Rate                |
| Mozambique | Hospital        | Maputo                                                                      | 2003                       | 15 - 49 years     | 139                       |
| Mozambique | Burial/Mortuary | Maputo                                                                      | 1996, 2001                 | All Ages          | 11969                     |
| Myanmar    | Verbal Autopsy  | Pyinmana Township                                                           | 2007                       | All Ages          | 1775                      |
| Myanmar    | Verbal Autopsy  | Bago, Daik-U, Kyauk TaGar, Oktwin, Taungoo, and Yedarshay townships         | 2009                       | All Ages          | 61                        |
| Myanmar    | Police Records  | National                                                                    | 1995, 2000-2007            | All Ages          | Death Rate                |
| Namibia    | Sibling History | National                                                                    | 1980, 1982-1983, 1985-2006 | 15 - 54 years     | 209                       |
| Namibia    | Police Records  | National                                                                    | 2004                       | All Ages          | Death Rate                |
| Namibia    | Cancer Registry | National                                                                    | 2002                       | All Ages          | 384                       |
| Nepal      | Verbal Autopsy  | Talku Duncchaur Chhaimale in Kathmandu Valley (rural)                       | 1984                       | birth - 5 years   | 64                        |
| Nepal      | Verbal Autopsy  | Jumla district (rural)                                                      | 1987                       | birth - 5 years   | 2101                      |
| Nepal      | Verbal Autopsy  | Jumla district (rural)                                                      | 1989                       | birth - 27 days   | 123                       |
| Nepal      | Verbal Autopsy  | Lalitpur district (rural)                                                   | 1989                       | birth - 27 days   | 25                        |
| Nepal      | Verbal Autopsy  | Sarlahi District (rural)                                                    | 1999                       | birth - 27 days   | 182                       |
| Nepal      | Verbal Autopsy  | Sarlahi district (rural)                                                    | 2003                       | 28 days - 5 years | 333                       |
| Nepal      | Verbal Autopsy  | Morang district (rural)                                                     | 2005                       | birth - 27 days   | 183                       |
| Nepal      | Verbal Autopsy  | National                                                                    | 2006                       | birth - 5 years   | 474                       |
| Nepal      | Verbal Autopsy  | Mahottari District                                                          | 2007                       | 15 - 49 years     | 14                        |
| Nepal      | Verbal Autopsy  | Kailali Rupandehi Okhaldhunga Surkhet Jumloa Baglung Rasuwa Sunsari (rural) | 1998, 2008                 | 15 - 49 years     | 2137                      |
| Nepal      | Sibling History | Bara District                                                               | 2004                       | 15 - 49 years     | MMR                       |
| Nepal      | Sibling History | National                                                                    | 1992-2005                  | 15 - 44 years     | 90                        |
| Nepal      | Police Records  | National                                                                    | 1980-1986                  | All Ages          | Death Rate                |
| Nepal      | Police Records  | Nepal NSO                                                                   | 1997-2007, 2009            | All Ages          | Death Rate                |

**Web Table 13 - Source list by country and site, source type, study site, time period, age range, and deaths excluding sources on LRI and diarrhea etiologies**

| Geography   | Source Type        | Study Site                                                          | Time Period*               | Age Range       | Deaths used in analysis** |
|-------------|--------------------|---------------------------------------------------------------------|----------------------------|-----------------|---------------------------|
| Nepal       | Burial/Mortuary    | Kathmandu                                                           | 2002                       | All Ages        | 4372                      |
| Netherlands | Vital Registration | National                                                            | 1980-1995                  | All Ages        | 2003477                   |
| Netherlands | Vital Registration | National                                                            | 1996-2011                  | All Ages        | 2199016                   |
| Netherlands | Cancer Registry    | Antilles less Aruba                                                 | 1980                       | All Ages        | 138                       |
| Netherlands | Cancer Registry    | Maastricht                                                          | 2000                       | All Ages        | 1741                      |
| Netherlands | Cancer Registry    | National                                                            | 2000                       | All Ages        | 29419                     |
| Netherlands | Cancer Registry    | Eindhoven                                                           | 1980-2002                  | All Ages        | 37362                     |
| Netherlands | Cancer Registry    | Maastricht                                                          | 1987, 1990, 1995           | All Ages        | 4863                      |
| Netherlands | Cancer Registry    | national                                                            | 1990, 1995                 | All Ages        | 58700                     |
| Netherlands | Cancer Registry    | National                                                            | 2003-2007                  | All Ages        | 20977                     |
| New Zealand | Vital Registration | National                                                            | 1980-1999                  | All Ages        | 538373                    |
| New Zealand | Vital Registration | National                                                            | 2000-2009                  | All Ages        | 282556                    |
| New Zealand | Cancer Registry    | National                                                            | 2003                       | All Ages        | 8125                      |
| New Zealand | Cancer Registry    | National                                                            | 2004                       | All Ages        | 8391                      |
| New Zealand | Cancer Registry    | National                                                            | 2005                       | All Ages        | 248                       |
| New Zealand | Cancer Registry    | National                                                            | 2005                       | All Ages        | 715                       |
| New Zealand | Cancer Registry    | National                                                            | 2005                       | All Ages        | 7849                      |
| New Zealand | Cancer Registry    | National                                                            | 2005                       | All Ages        | 6887                      |
| New Zealand | Cancer Registry    | National                                                            | 2006                       | All Ages        | 7930                      |
| New Zealand | Cancer Registry    | National                                                            | 2007                       | All Ages        | 8077                      |
| New Zealand | Cancer Registry    | National                                                            | 1983-2002                  | All Ages        | 143861                    |
| Nicaragua   | Vital Registration | National                                                            | 1988-1994, 1996            | All Ages        | 104292                    |
| Nicaragua   | Vital Registration | National                                                            | 1997-2011                  | All Ages        | 240476                    |
| Nicaragua   | Survey/Census      | National                                                            | 2004-2005                  | 15 - 49 years   | 434                       |
| Nicaragua   | Sibling History    | National                                                            | 1980, 1983-1991            | 15 - 54 years   | CF                        |
| Nicaragua   | Police Records     | National                                                            | 2007                       | All Ages        | Death Rate                |
| Nicaragua   | Police Records     | National                                                            | 1990-1994                  | All Ages        | Death Rate                |
| Nicaragua   | Police Records     | National                                                            | 1995, 1997-2007, 2009-2010 | All Ages        | Death Rate                |
| Niger       | Verbal Autopsy     | Agadez, Diffa, Dosso, Maradi, Tahoua, Tillaberi, Zinder, and Niamey | 2005                       | birth - 5 years | 5737                      |
| Niger       | Sibling History    | National                                                            | 1980-2012                  | 15 - 54 years   | 776                       |
| Niger       | Police Records     | National                                                            | 2007                       | All Ages        | Death Rate                |



**Web Table 13 - Source list by country and site, source type, study site, time period, age range, and deaths excluding sources on LRI and diarrhea etiologies**

| Geography   | Source Type        | Study Site                           | Time Period*         | Age Range        | Deaths used in analysis** |
|-------------|--------------------|--------------------------------------|----------------------|------------------|---------------------------|
| Nigeria     | Vital Registration | Nko, Cross River State               | 2007                 | All Ages         | 23882                     |
| Nigeria     | Verbal Autopsy     | Nko Cross River State (rural)        | 1991                 | birth - 14 years | 475                       |
| Nigeria     | Verbal Autopsy     | Ibadan (urban)                       | 1994                 | 15 years +       | 60                        |
| Nigeria     | Survey/Census      | Akoko North Ondo State (rural)       | 1987                 | birth - 5 years  | 120                       |
| Nigeria     | Survey/Census      | Lagun (rural)                        | 1995                 | birth - 44 years | 23                        |
| Nigeria     | Sibling History    | Ibadan North                         | 2005                 | 15 - 49 years    | 1003                      |
| Nigeria     | Sibling History    | Ido                                  | 2005                 | 15 - 49 years    | 136                       |
| Nigeria     | Sibling History    | Lagos State                          | 2008                 | 15 - 49 years    | 111                       |
| Nigeria     | Sibling History    | National                             | 1994-2008            | 15 - 54 years    | 693                       |
| Nigeria     | Police Records     | National                             | 1990-1994            | All Ages         | Death Rate                |
| Nigeria     | Police Records     | National                             | 1995-2007            | All Ages         | Death Rate                |
| Nigeria     | Hospital           | Ebonyi state                         | 2004                 | 15 - 49 years    | 97                        |
| Nigeria     | Burial/Mortuary    | Ring Road State Hospital, Ibadan     | 1997                 | All Ages         | 1993                      |
| Nigeria     | Burial/Mortuary    | Aminu Kano Teaching Hospital (urban) | 2000                 | All Ages         | 386                       |
| Nigeria     | Burial/Mortuary    | Ibadan, Nigeria                      | 2008                 | All Ages         | 2625                      |
| North Korea | Survey/Census      | National                             | 2008                 | 15 - 49 years    | 267                       |
| Norway      | Vital Registration | National                             | 1980-1985            | All Ages         | 253864                    |
| Norway      | Vital Registration | National                             | 1986-1995            | All Ages         | 450778                    |
| Norway      | Vital Registration | National                             | 1996-2012            | All Ages         | 726225                    |
| Norway      | Cancer Registry    | National                             | 2005                 | All Ages         | 9868                      |
| Norway      | Cancer Registry    | National                             | 1980-2002            | All Ages         | 203762                    |
| Norway      | Cancer Registry    | National                             | 2003-2004, 2006-2010 | All Ages         | 73010                     |
| Oman        | Vital Registration | National                             | 2009                 | All Ages         | 7093                      |
| Oman        | Vital Registration | National                             | 2010                 | All Ages         | 7005                      |
| Oman        | Police Records     | National                             | 2001-2002            | All Ages         | Death Rate                |
| Oman        | Cancer Registry    | National                             | 1995                 | All Ages         | 343                       |
| Oman        | Cancer Registry    | National                             | 1999                 | All Ages         | 436                       |
| Oman        | Cancer Registry    | National                             | 2002                 | All Ages         | 345                       |
| Oman        | Cancer Registry    | National                             | 2003-2008            | All Ages         | 2174                      |
| Pakistan    | Verbal Autopsy     | Lahore (periurban)                   | 1985                 | birth - 364 days | 58                        |
| Pakistan    | Verbal Autopsy     | Lahore (rural)                       | 1985                 | birth - 364 days | 61                        |

**Web Table 13 - Source list by country and site, source type, study site, time period, age range, and deaths excluding sources on LRI and diarrhea etiologies**

| Geography | Source Type        | Study Site                                                                    | Time Period*         | Age Range        | Deaths used in analysis** |
|-----------|--------------------|-------------------------------------------------------------------------------|----------------------|------------------|---------------------------|
| Pakistan  | Verbal Autopsy     | Lahore (urban)                                                                | 1985                 | birth - 364 days | 76                        |
| Pakistan  | Verbal Autopsy     | Oshikhandass (rural)                                                          | 1989                 | birth - 5 years  | 54                        |
| Pakistan  | Verbal Autopsy     | Balochistan (Pishin, Loralai, Lasbela, and Khuzdar)                           | 1990                 | 15 - 49 years    | 124                       |
| Pakistan  | Verbal Autopsy     | Balochistan (Pishin, Loralai, Lasbela, and Khuzdar) (rural)                   | 1990                 | birth - 364 days | 522                       |
| Pakistan  | Verbal Autopsy     | Karachi (urban)                                                               | 1990                 | 15 - 49 years    | 34                        |
| Pakistan  | Verbal Autopsy     | North-West Frontier Province (Abottabad and Mansehra) (rural)                 | 1990                 | 15 - 49 years    | 38                        |
| Pakistan  | Verbal Autopsy     | North-West Frontier Province (Dera Ismail Khan, Peshawar, and Hazara) (rural) | 1992                 | birth - 364 days | 398                       |
| Pakistan  | Verbal Autopsy     | Federally Administered Tribal Areas (rural)                                   | 1994                 | birth - 364 days | 221                       |
| Pakistan  | Verbal Autopsy     | National                                                                      | 2006                 | birth - 5 years  | 3100                      |
| Pakistan  | Verbal Autopsy     | National                                                                      | 2006                 | 10 - 49 years    | 1062                      |
| Pakistan  | Verbal Autopsy     | Sindh                                                                         | 2007                 | birth - 5 years  | 54                        |
| Pakistan  | Verbal Autopsy     | Nurpur Shahan, Islamabad (urban)                                              | 2010                 | 15 years +       | 300                       |
| Pakistan  | Verbal Autopsy     | Abbottabad District (rural)                                                   | 1985-1986            | birth - 5 years  | 93                        |
| Pakistan  | Survey/Census      | National                                                                      | 1997                 | All Ages         | 20                        |
| Pakistan  | Survey/Census      | National                                                                      | 1993-1994            | All Ages         | 3394                      |
| Pakistan  | Surveillance       | Matiary, Sindh Province                                                       | 2007                 | 15 - 49 years    | 72                        |
| Pakistan  | Police Records     | National                                                                      | 1980                 | All Ages         | Death Rate                |
| Pakistan  | Police Records     | National                                                                      | 1996-2007, 2009      | All Ages         | Death Rate                |
| Pakistan  | Hospital           | National                                                                      | 2009                 | All Ages         | 98966                     |
| Pakistan  | Cancer Registry    | South Karachi                                                                 | 1996                 | All Ages         | 850                       |
| Pakistan  | Cancer Registry    | South Karachi                                                                 | 2000                 | All Ages         | 1116                      |
| Palestine | Vital Registration | West Bank                                                                     | 1997-2007            | All Ages         | 54578                     |
| Palestine | Vital Registration | National                                                                      | 2008-2009            | All Ages         | 12895                     |
| Palestine | Verbal Autopsy     | Ten West Bank districts                                                       | 2000                 | 15 - 49 years    | 36                        |
| Palestine | Surveillance       | West Bank                                                                     | 2009                 | 15 - 49 years    | 23                        |
| Palestine | Surveillance       | Gaza Strip                                                                    | 2008-2009            | 15 - 49 years    | 3862                      |
| Palestine | Police Records     | National                                                                      | 1997-1999, 2003-2005 | All Ages         | Death Rate                |
| Palestine | Cancer Registry    | West Bank                                                                     | 2010                 | All Ages         | 777                       |
| Palestine | Cancer Registry    | West Bank                                                                     | 2011                 | All Ages         | 879                       |
| Panama    | Vital Registration | National                                                                      | 1980-1989, 1996-1997 | All Ages         | 110218                    |
| Panama    | Vital Registration | National                                                                      | 1998-2009            | All Ages         | 161224                    |

**Web Table 13 - Source list by country and site, source type, study site, time period, age range, and deaths excluding sources on LRI and diarrhea etiologies**

| <b>Geography</b> | <b>Source Type</b> | <b>Study Site</b>                        | <b>Time Period*</b>             | <b>Age Range</b> | <b>Deaths used in analysis**</b> |
|------------------|--------------------|------------------------------------------|---------------------------------|------------------|----------------------------------|
| Panama           | Police Records     | National                                 | 1980                            | All Ages         | Death Rate                       |
| Panama           | Police Records     | National                                 | 1995-2007, 2009-2010            | All Ages         | Death Rate                       |
| Panama           | Police Records     | National                                 | 1996-2007                       | All Ages         | Death Rate                       |
| Papua New Guinea | Vital Registration | National                                 | 1980                            | All Ages         | 3559                             |
| Papua New Guinea | Verbal Autopsy     | Tari Basin                               | 1980                            | All Ages         | 2193                             |
| Papua New Guinea | Verbal Autopsy     | Tari Basin (rural)                       | 1980                            | All Ages         | 2312                             |
| Papua New Guinea | Verbal Autopsy     | Madang (rural)                           | 1983                            | All Ages         | 407                              |
| Papua New Guinea | Verbal Autopsy     | Asaro Valley, Eastern Highlands Province | 1985                            | All Ages         | 582                              |
| Papua New Guinea | Verbal Autopsy     | Wosera area, East Sepik Province         | 1992                            | All Ages         | 164                              |
| Papua New Guinea | Police Records     | National                                 | 2007                            | All Ages         | Death Rate                       |
| Papua New Guinea | Police Records     | National                                 | 2006-2007                       | All Ages         | Death Rate                       |
| Paraguay         | Vital Registration | National                                 | 1980-1991                       | All Ages         | 158118                           |
| Paraguay         | Vital Registration | National                                 | 1994-1995                       | All Ages         | 31736                            |
| Paraguay         | Vital Registration | National                                 | 1996-2010                       | All Ages         | 309427                           |
| Paraguay         | Survey/Census      | National                                 | 1997                            | All Ages         | 94                               |
| Paraguay         | Survey/Census      | Rural Subnational                        | 2002                            | 10 - 54 years    | 165                              |
| Paraguay         | Survey/Census      | Urban Subnational                        | 2002                            | 10 - 54 years    | 231                              |
| Paraguay         | Sibling History    | National                                 | 1980-1981, 1985, 1987-1994      | 15 - 54 years    | CF                               |
| Paraguay         | Police Records     | National                                 | 2007                            | All Ages         | Death Rate                       |
| Paraguay         | Police Records     | National                                 | 1992-1993                       | All Ages         | Death Rate                       |
| Paraguay         | Police Records     | National                                 | 1995-2007, 2009-2010            | All Ages         | Death Rate                       |
| Paraguay         | Cancer Registry    | Asuncion                                 | 1988                            | All Ages         | 1433                             |
| Peru             | Vital Registration | National                                 | 1980-1983, 1986-1992, 1994-1998 | All Ages         | 1396575                          |
| Peru             | Vital Registration | National                                 | 1999-2000, 2007-2010            | All Ages         | 544672                           |
| Peru             | Sibling History    | National                                 | 1980-2012                       | 15 - 54 years    | 1015                             |
| Peru             | Police Records     | National                                 | 2007                            | All Ages         | Death Rate                       |
| Peru             | Police Records     | National                                 | 1981-1982, 1984-1985            | All Ages         | Death Rate                       |
| Peru             | Police Records     | National                                 | 1999-2007, 2009                 | All Ages         | Death Rate                       |
| Peru             | Cancer Registry    | Lima                                     | 1990                            | All Ages         | 4600                             |
| Peru             | Cancer Registry    | Trujillo                                 | 2000                            | All Ages         | 457                              |
| Peru             | Cancer Registry    | Trujillo                                 | 1985, 1989                      | All Ages         | 732                              |

**Web Table 13 - Source list by country and site, source type, study site, time period, age range, and deaths excluding sources on LRI and diarrhea etiologies**

| Geography   | Source Type        | Study Site         | Time Period*     | Age Range        | Deaths used in analysis** |
|-------------|--------------------|--------------------|------------------|------------------|---------------------------|
| Philippines | Vital Registration | National           | 1981             | All Ages         | 296506                    |
| Philippines | Vital Registration | National           | 1980, 1982-1991  | All Ages         | 3505997                   |
| Philippines | Vital Registration | National           | 1992-1996        | All Ages         | 1628613                   |
| Philippines | Vital Registration | National           | 1997-1998        | All Ages         | 692392                    |
| Philippines | Vital Registration | National           | 1999-2003, 2008  | All Ages         | 2349817                   |
| Philippines | Vital Registration | National           | 2004-2005        | All Ages         | 829184                    |
| Philippines | Verbal Autopsy     | Cebu (urban)       | 1989             | birth - 364 days | 425                       |
| Philippines | Verbal Autopsy     | Bukidnon           | 2008             | 15 - 49 years    | 402                       |
| Philippines | Survey/Census      | National           | 1997             | All Ages         | 51                        |
| Philippines | Surveillance       | National           | 1993             | All Ages         | 218504                    |
| Philippines | Surveillance       | National           | 1994             | All Ages         | 69987                     |
| Philippines | Surveillance       | National           | 1996             | All Ages         | 114398                    |
| Philippines | Surveillance       | National           | 1997             | All Ages         | 47199                     |
| Philippines | Surveillance       | Capitol Region     | 1998             | All Ages         | 48333                     |
| Philippines | Surveillance       | National           | 2000             | All Ages         | 308634                    |
| Philippines | Surveillance       | National           | 2001             | All Ages         | 323616                    |
| Philippines | Surveillance       | National           | 2002             | All Ages         | 331230                    |
| Philippines | Surveillance       | National           | 2003             | All Ages         | 325768                    |
| Philippines | Surveillance       | National           | 2006             | All Ages         | 372489                    |
| Philippines | Surveillance       | National           | 2007             | All Ages         | 373414                    |
| Philippines | Sibling History    | National           | 1980-1998        | 15 - 54 years    | 330                       |
| Philippines | Police Records     | National           | 2009             | All Ages         | Death Rate                |
| Philippines | Cancer Registry    | Manila             | 2005             | All Ages         | 5165                      |
| Philippines | Cancer Registry    | Rizal              | 2005             | All Ages         | 5010                      |
| Philippines | Cancer Registry    | Rizal              | 1980, 1985, 1995 | All Ages         | 6617                      |
| Philippines | Cancer Registry    | Manila             | 1983-2002        | All Ages         | 83713                     |
| Poland      | Vital Registration | National           | 1980-1996        | All Ages         | 6350737                   |
| Poland      | Vital Registration | National           | 1999-2011        | All Ages         | 4834412                   |
| Poland      | Police Records     | National           | 2007             | All Ages         | Death Rate                |
| Poland      | Cancer Registry    | Nowy Sacz          | 1984             | All Ages         | 561                       |
| Poland      | Cancer Registry    | Warsaw Rural Areas | 1985             | All Ages         | 803                       |

**Web Table 13 - Source list by country and site, source type, study site, time period, age range, and deaths excluding sources on LRI and diarrhea etiologies**

| <b>Geography</b> | <b>Source Type</b> | <b>Study Site</b> | <b>Time Period*</b>                                   | <b>Age Range</b> | <b>Deaths used in analysis**</b> |
|------------------|--------------------|-------------------|-------------------------------------------------------|------------------|----------------------------------|
| Poland           | Cancer Registry    | Opole             | 1986                                                  | All Ages         | 1510                             |
| Poland           | Cancer Registry    | Cracow            | 2000                                                  | All Ages         | 1800                             |
| Poland           | Cancer Registry    | Kielce            | 2000                                                  | All Ages         | 2980                             |
| Poland           | Cancer Registry    | Warsaw City       | 2000                                                  | All Ages         | 3618                             |
| Poland           | Cancer Registry    | Cracow            | 1980, 1984-1985, 1990, 1995                           | All Ages         | 6562                             |
| Poland           | Cancer Registry    | Warsaw City       | 1981, 1985, 1990, 1995                                | All Ages         | 13906                            |
| Poland           | Cancer Registry    | Cracow City       | 1982-1983, 1987-1989, 1991-1993, 1996-1999, 2001-2002 | All Ages         | 22335                            |
| Poland           | Cancer Registry    | Lower Silesia     | 1985, 1990, 1995                                      | All Ages         | 14010                            |
| Poland           | Cancer Registry    | Kielce            | 1988-1989, 1991-1993, 1996-1999, 2001-2002            | All Ages         | 23567                            |
| Poland           | Cancer Registry    | Warsaw city       | 1988-1989, 1991-1993, 1996-1999, 2001-2002            | All Ages         | 43573                            |
| Poland           | Cancer Registry    | Kielce            | 1990, 1994                                            | All Ages         | 3784                             |
| Poland           | Cancer Registry    | National          | 2003-2010                                             | All Ages         | 553302                           |
| Portugal         | Vital Registration | National          | 1980-1983                                             | All Ages         | 379778                           |
| Portugal         | Vital Registration | National          | 1984-2001                                             | All Ages         | 1837408                          |
| Portugal         | Vital Registration | National          | 2002-2003, 2007-2011                                  | All Ages         | 738880                           |
| Portugal         | Cancer Registry    | Porto             | 2000                                                  | All Ages         | 4451                             |
| Portugal         | Cancer Registry    | South Regional    | 2000                                                  | All Ages         | 8794                             |
| Portugal         | Cancer Registry    | Azores            | 2005                                                  | All Ages         | 410                              |
| Portugal         | Cancer Registry    | Vila Nova De Gaia | 1985, 1995                                            | All Ages         | 700                              |
| Qatar            | Vital Registration | National          | 1984                                                  | All Ages         | 642                              |
| Qatar            | Vital Registration | National          | 1985                                                  | All Ages         | 794                              |
| Qatar            | Vital Registration | National          | 2000                                                  | All Ages         | 1173                             |
| Qatar            | Vital Registration | National          | 2001                                                  | All Ages         | 1210                             |
| Qatar            | Vital Registration | National          | 2002                                                  | All Ages         | 1218                             |
| Qatar            | Vital Registration | National          | 2003                                                  | All Ages         | 1311                             |
| Qatar            | Vital Registration | National          | 2004                                                  | All Ages         | 1340                             |
| Qatar            | Vital Registration | National          | 2005                                                  | All Ages         | 1537                             |
| Qatar            | Vital Registration | National          | 2006                                                  | All Ages         | 1750                             |
| Qatar            | Vital Registration | National          | 2007                                                  | All Ages         | 1681                             |
| Qatar            | Vital Registration | National          | 2008                                                  | All Ages         | 1942                             |

**Web Table 13 - Source list by country and site, source type, study site, time period, age range, and deaths excluding sources on LRI and diarrhea etiologies**

| Geography                        | Source Type        | Study Site                            | Time Period*                          | Age Range     | Deaths used in analysis** |
|----------------------------------|--------------------|---------------------------------------|---------------------------------------|---------------|---------------------------|
| Qatar                            | Vital Registration | National                              | 1995, 2004-2011                       | All Ages      | 15300                     |
| Qatar                            | Police Records     | National                              | 1980-1994                             | All Ages      | Death Rate                |
| Qatar                            | Police Records     | National                              | 1998-2000, 2003, 2007                 | All Ages      | Death Rate                |
| Qatar                            | Cancer Registry    | National                              | 2005                                  | All Ages      | 65                        |
| Romania                          | Vital Registration | National                              | 1980-1998                             | All Ages      | 4790606                   |
| Romania                          | Vital Registration | National                              | 1999-2011                             | All Ages      | 3369484                   |
| Romania                          | Cancer Registry    | Cluj (Rural)                          | 1980                                  | All Ages      | 378                       |
| Romania                          | Cancer Registry    | Cluj (Urban)                          | 1980                                  | All Ages      | 531                       |
| Romania                          | Cancer Registry    | Cluj                                  | 1980, 1985                            | All Ages      | 1844                      |
| Russia                           | Vital Registration | National                              | 2012                                  | All Ages      | 1899930                   |
| Russia                           | Vital Registration | National                              | 1980-1988                             | All Ages      | 13992472                  |
| Russia                           | Vital Registration | National                              | 1989-1998                             | All Ages      | 19283181                  |
| Russia                           | Vital Registration | National                              | 1999-2011                             | All Ages      | 28233740                  |
| Russia                           | Police Records     | National                              | 2004-2008                             | All Ages      | Death Rate                |
| Russia                           | Cancer Registry    | St. Petersburg                        | 2000                                  | All Ages      | 11173                     |
| Russia                           | Cancer Registry    | St. Petersburg                        | 2005                                  | All Ages      | 10707                     |
| Russia                           | Cancer Registry    | St. Petersburg                        | 1985, 1995                            | All Ages      | 20785                     |
| Rwanda                           | Sibling History    | National                              | 1986-2010                             | 15 - 54 years | 1212                      |
| Rwanda                           | Police Records     | National                              | 2007                                  | All Ages      | Death Rate                |
| Rwanda                           | Police Records     | National                              | 1986-1990                             | All Ages      | Death Rate                |
| Rwanda                           | Police Records     | National                              | 2003-2007                             | All Ages      | Death Rate                |
| Saint Lucia                      | Vital Registration | National                              | 1980-1981, 1983, 1986-1995            | All Ages      | 11741                     |
| Saint Lucia                      | Vital Registration | National                              | 1996-2006, 2008                       | All Ages      | 11793                     |
| Saint Lucia                      | Police Records     | National                              | 1995-1997, 1999-2007, 2009-2010       | All Ages      | Death Rate                |
| Saint Vincent and the Grenadines | Vital Registration | National                              | 1990                                  | All Ages      | 671                       |
| Saint Vincent and the Grenadines | Vital Registration | National                              | 1982-1987, 1995-1999                  | All Ages      | 8001                      |
| Saint Vincent and the Grenadines | Vital Registration | National                              | 2000-2010                             | All Ages      | 8516                      |
| Saint Vincent and the Grenadines | Police Records     | National                              | 1981-1985                             | All Ages      | Death Rate                |
| Saint Vincent and the Grenadines | Police Records     | Saint Vincent and the Grenadines PAHO | 1995-1996, 1998-2004, 2007, 2009-2010 | All Ages      | Death Rate                |
| Samoa                            | Cancer Registry    | National                              | 1984                                  | All Ages      | 53                        |
| Samoa                            | Burial/Mortuary    | Apia, Western Samoa                   | 1984                                  | All Ages      | 284                       |

**Web Table 13 - Source list by country and site, source type, study site, time period, age range, and deaths excluding sources on LRI and diarrhea etiologies**

| Geography             | Source Type        | Study Site                     | Time Period*                    | Age Range         | Deaths used in analysis** |
|-----------------------|--------------------|--------------------------------|---------------------------------|-------------------|---------------------------|
| Sao Tome and Principe | Vital Registration | National                       | 1985                            | All Ages          | 3292                      |
| Sao Tome and Principe | Sibling History    | National                       | 1994-1996, 1998-2000, 2002-2006 | 15 - 54 years     | 19                        |
| Sao Tome and Principe | Police Records     | National                       | 1990-1994                       | All Ages          | Death Rate                |
| Saudi Arabia          | Vital Registration | National                       | 2012                            | All Ages          | 45875                     |
| Saudi Arabia          | Vital Registration | National                       | 1999-2007                       | All Ages          | 304247                    |
| Saudi Arabia          | Vital Registration | National                       | 2008-2011                       | All Ages          | 182651                    |
| Saudi Arabia          | Police Records     | National                       | 1999-2007                       | All Ages          | Death Rate                |
| Saudi Arabia          | Hospital           | National                       | 2005                            | All Ages          | 49950                     |
| Saudi Arabia          | Hospital           | National                       | 2006                            | 15 - 49 years     | MMR                       |
| Saudi Arabia          | Hospital           | National                       | 2008                            | 15 - 49 years     | MMR                       |
| Saudi Arabia          | Hospital           | National                       | 2009                            | 15 - 49 years     | MMR                       |
| Saudi Arabia          | Cancer Registry    | National                       | 1994-1996                       | All Ages          | 7456                      |
| Saudi Arabia          | Cancer Registry    | Subnational                    | 1997-2000, 2002-2005            | All Ages          | 5431                      |
| Saudi Arabia          | Cancer Registry    | Subnational                    | 1997-2005                       | All Ages          | 25399                     |
| Senegal               | Verbal Autopsy     | Niakhar (rural)                | 1984                            | 28 days - 5 years | 356                       |
| Senegal               | Verbal Autopsy     | Niakhar (rural)                | 1984                            | 28 days - 5 years | 830                       |
| Senegal               | Verbal Autopsy     | Niakhar (rural)                | 1986                            | birth - 5 years   | 1517                      |
| Senegal               | Verbal Autopsy     | Mlomp (rural)                  | 1994                            | 15 - 59 years     | 363                       |
| Senegal               | Verbal Autopsy     | Bandafassi, Niakhar, and Mlomp | 1986, 1992                      | birth - 5 years   | 1167                      |
| Senegal               | Verbal Autopsy     | Niakhar (rural)                | 1990, 1993, 1996, 1999          | birth - 14 years  | 3424                      |
| Senegal               | Survey/Census      | National                       | 2002                            | 10 - 54 years     | 261                       |
| Senegal               | Surveillance       | Bandafassi                     | 2006                            | 10 - 49 years     | 29                        |
| Senegal               | Sibling History    | National                       | 1980-2010                       | 15 - 54 years     | 546                       |
| Senegal               | Police Records     | National                       | 1980                            | All Ages          | Death Rate                |
| Senegal               | Police Records     | National                       | 2003-2004                       | All Ages          | Death Rate                |
| Serbia                | Vital Registration | National                       | 1998-2012                       | All Ages          | 1542638                   |
| Serbia                | Police Records     | National                       | 2007                            | All Ages          | Death Rate                |
| Serbia                | Cancer Registry    | National                       | 2000                            | All Ages          | 13973                     |
| Serbia                | Cancer Registry    | National                       | 2005                            | All Ages          | 13574                     |
| Serbia                | Cancer Registry    | Vojvodina                      | 1990, 1995                      | All Ages          | 8856                      |
| Seychelles            | Vital Registration | National                       | 1981-1982, 1985-1987            | All Ages          | 2395                      |

**Web Table 13 - Source list by country and site, source type, study site, time period, age range, and deaths excluding sources on LRI and diarrhea etiologies**

| <b>Geography</b> | <b>Source Type</b> | <b>Study Site</b>                          | <b>Time Period*</b>    | <b>Age Range</b> | <b>Deaths used in analysis**</b> |
|------------------|--------------------|--------------------------------------------|------------------------|------------------|----------------------------------|
| Seychelles       | Vital Registration | National                                   | 2001-2009              | All Ages         | 5790                             |
| Seychelles       | Police Records     | National                                   | 1980, 1988-1990        | All Ages         | Death Rate                       |
| Sierra Leone     | Verbal Autopsy     | 15 villages north of Bo, Southern Province | 1990                   | birth - 9 years  | 37                               |
| Sierra Leone     | Verbal Autopsy     | Western Area and Porto Loko                | 1993                   | birth - 5 years  | 559                              |
| Sierra Leone     | Survey/Census      | National                                   | 2004                   | 10 - 54 years    | 280                              |
| Sierra Leone     | Survey/Census      | National                                   | 2004                   | All Ages         | 99278                            |
| Sierra Leone     | Survey/Census      | National                                   | 2012                   | 10 - 49 years    | 53                               |
| Sierra Leone     | Sibling History    | National                                   | 1994-2007              | 15 - 54 years    | 164                              |
| Sierra Leone     | Police Records     | National                                   | 2007                   | All Ages         | Death Rate                       |
| Sierra Leone     | Police Records     | National                                   | 2004-2007              | All Ages         | Death Rate                       |
| Singapore        | Vital Registration | National                                   | 1980-1990, 2004-2011   | All Ages         | 272908                           |
| Singapore        | Vital Registration | National                                   | 1991-2003              | All Ages         | 185584                           |
| Singapore        | Police Records     | National                                   | 2007                   | All Ages         | Death Rate                       |
| Singapore        | Cancer Registry    | National                                   | 2000                   | All Ages         | 3754                             |
| Singapore        | Cancer Registry    | National                                   | 2005                   | All Ages         | 4126                             |
| Singapore        | Cancer Registry    | National                                   | 1980, 1985, 1990, 1995 | All Ages         | 11221                            |
| Singapore        | Cancer Registry    | National                                   | 2004, 2006-2008        | All Ages         | 17251                            |
| Slovakia         | Vital Registration | National                                   | 1992-1993              | All Ages         | 106107                           |
| Slovakia         | Vital Registration | National                                   | 1994-2010              | All Ages         | 893432                           |
| Slovakia         | Police Records     | National                                   | 2007                   | All Ages         | Death Rate                       |
| Slovakia         | Cancer Registry    | National                                   | 2005                   | All Ages         | 12249                            |
| Slovakia         | Cancer Registry    | National                                   | 1980-2002              | All Ages         | 250165                           |
| Slovenia         | Vital Registration | National                                   | 1985-1996              | All Ages         | 231149                           |
| Slovenia         | Vital Registration | National                                   | 1997-2010              | All Ages         | 261878                           |
| Slovenia         | Police Records     | National                                   | 2007                   | All Ages         | Death Rate                       |
| Slovenia         | Cancer Registry    | National                                   | 2003                   | All Ages         | 5046                             |
| Slovenia         | Cancer Registry    | National                                   | 2004                   | All Ages         | 5309                             |
| Slovenia         | Cancer Registry    | National                                   | 2005                   | All Ages         | 5430                             |
| Slovenia         | Cancer Registry    | National                                   | 2006                   | All Ages         | 5334                             |
| Slovenia         | Cancer Registry    | National                                   | 2007                   | All Ages         | 5517                             |
| Slovenia         | Cancer Registry    | National                                   | 2008                   | All Ages         | 5581                             |



**Web Table 13 - Source list by country and site, source type, study site, time period, age range, and deaths excluding sources on LRI and diarrhea etiologies**

| Geography       | Source Type        | Study Site                                  | Time Period*    | Age Range        | Deaths used in analysis** |
|-----------------|--------------------|---------------------------------------------|-----------------|------------------|---------------------------|
| Slovenia        | Cancer Registry    | National                                    | 2009            | All Ages         | 5589                      |
| Slovenia        | Cancer Registry    | National                                    | 1980-2002       | All Ages         | 95757                     |
| Solomon Islands | Police Records     | National                                    | 2004-2007       | All Ages         | Death Rate                |
| South Africa    | Vital Registration | National                                    | 1993-1995       | All Ages         | 673915                    |
| South Africa    | Vital Registration | National                                    | 1996-2009       | All Ages         | 6871604                   |
| South Africa    | Verbal Autopsy     | Cape Town                                   | 1991            | birth - 364 days | 63                        |
| South Africa    | Verbal Autopsy     | Agincourt                                   | 1993            | All Ages         | 1001                      |
| South Africa    | Verbal Autopsy     | Agincourt                                   | 2001            | All Ages         | 1231                      |
| South Africa    | Verbal Autopsy     | Northern KwaZulu-Natal (rural)              | 2001            | birth - 14 years | 788                       |
| South Africa    | Verbal Autopsy     | Somkhele, KwaZulu-Natal                     | 2001            | All Ages         | 4094                      |
| South Africa    | Verbal Autopsy     | Western Cape Province (rural)               | 2002            | birth - 5 years  | 162                       |
| South Africa    | Verbal Autopsy     | Rural KwaZulu-Natal                         | 2003            | All Ages         | 11470                     |
| South Africa    | Survey/Census      | National                                    | 2001            | All Ages         | 91059                     |
| South Africa    | Survey/Census      | National                                    | 2007            | All Ages         | 739518                    |
| South Africa    | Survey/Census      | National                                    | 1997, 2008      | 15 - 49 years    | 4827                      |
| South Africa    | Survey/Census      | National                                    | 2000-2001       | 15 - 49 years    | 1002                      |
| South Africa    | Survey/Census      | National                                    | 2006-2007       | 10 - 54 years    | 140                       |
| South Africa    | Sibling History    | National                                    | 1984-1998       | 15 - 54 years    | 35                        |
| South Africa    | Police Records     | National                                    | 1980            | All Ages         | Death Rate                |
| South Africa    | Police Records     | National                                    | 1995-2007, 2009 | All Ages         | Death Rate                |
| South Africa    | Cancer Registry    | National                                    | 2000            | All Ages         | 338                       |
| South Africa    | Cancer Registry    | National                                    | 2003            | All Ages         | 18222                     |
| South Africa    | Cancer Registry    | National                                    | 2004            | All Ages         | 18577                     |
| South Africa    | Cancer Registry    | Butterworth, Centane, Bizana and Lusikisiki | 2005            | All Ages         | 363                       |
| South Africa    | Cancer Registry    | National                                    | 2005            | All Ages         | 17410                     |
| South Korea     | Vital Registration | National                                    | 1985-1994       | All Ages         | 2011242                   |
| South Korea     | Vital Registration | National                                    | 1995-2011       | All Ages         | 4158304                   |
| South Korea     | Police Records     | National                                    | 2009            | All Ages         | Death Rate                |
| South Korea     | Police Records     | National                                    | 1995-1997       | All Ages         | Death Rate                |
| South Korea     | Cancer Registry    | Seoul                                       | 1995            | All Ages         | 11690                     |
| South Korea     | Cancer Registry    | Busan                                       | 1996            | All Ages         | 4811                      |

**Web Table 13 - Source list by country and site, source type, study site, time period, age range, and deaths excluding sources on LRI and diarrhea etiologies**

| Geography   | Source Type        | Study Site     | Time Period*         | Age Range     | Deaths used in analysis** |
|-------------|--------------------|----------------|----------------------|---------------|---------------------------|
| South Korea | Cancer Registry    | Daegu          | 1997                 | All Ages      | 2810                      |
| South Korea | Cancer Registry    | Busan          | 2000                 | All Ages      | 4866                      |
| South Korea | Cancer Registry    | Daegu          | 2000                 | All Ages      | 3326                      |
| South Korea | Cancer Registry    | Daejeon        | 2000                 | All Ages      | 1555                      |
| South Korea | Cancer Registry    | Gwangju        | 2000                 | All Ages      | 1679                      |
| South Korea | Cancer Registry    | Incheon        | 2000                 | All Ages      | 2809                      |
| South Korea | Cancer Registry    | National       | 2000                 | All Ages      | 66241                     |
| South Korea | Cancer Registry    | Seoul          | 2000                 | All Ages      | 13197                     |
| South Korea | Cancer Registry    | Ulsan          | 2000                 | All Ages      | 1025                      |
| South Korea | Cancer Registry    | Jejudo         | 2001                 | All Ages      | 711                       |
| South Korea | Cancer Registry    | National       | 2005                 | All Ages      | 78649                     |
| South Korea | Cancer Registry    | National       | 2008                 | All Ages      | 87377                     |
| South Korea | Cancer Registry    | Naitional      | 2010                 | All Ages      | 94324                     |
| South Korea | Cancer Registry    | Kangwha County | 1989, 1995           | All Ages      | 233                       |
| South Korea | Cancer Registry    | National       | 2003-2004, 2006-2007 | All Ages      | 311920                    |
| South Sudan | Survey/Census      | National       | 2008                 | All Ages      | 11755                     |
| South Sudan | Survey/Census      | National       | 2008                 | 15 - 54 years | 3707                      |
| Spain       | Vital Registration | National       | 1980-1998            | All Ages      | 6136572                   |
| Spain       | Vital Registration | National       | 1999-2011            | All Ages      | 4902412                   |
| Spain       | Cancer Registry    | Tarragona      | 1981                 | All Ages      | 592                       |
| Spain       | Cancer Registry    | Canary Islands | 1994                 | All Ages      | 1620                      |
| Spain       | Cancer Registry    | Cuenca         | 1995                 | All Ages      | 349                       |
| Spain       | Cancer Registry    | Girona         | 1996                 | All Ages      | 920                       |
| Spain       | Cancer Registry    | Asturias       | 1998                 | All Ages      | 2164                      |
| Spain       | Cancer Registry    | Albacete       | 1999                 | All Ages      | 507                       |
| Spain       | Cancer Registry    | Basque Country | 1999                 | All Ages      | 3946                      |
| Spain       | Cancer Registry    | Canary Islands | 1999                 | All Ages      | 1822                      |
| Spain       | Cancer Registry    | Cuenca         | 2000                 | All Ages      | 350                       |
| Spain       | Cancer Registry    | Girona         | 2000                 | All Ages      | 1010                      |
| Spain       | Cancer Registry    | Canary Islands | 2003                 | All Ages      | 2435                      |
| Spain       | Cancer Registry    | Canary Islands | 2004                 | All Ages      | 2013                      |

**Web Table 13 - Source list by country and site, source type, study site, time period, age range, and deaths excluding sources on LRI and diarrhea etiologies**

| Geography | Source Type        | Study Site     | Time Period*               | Age Range     | Deaths used in analysis** |
|-----------|--------------------|----------------|----------------------------|---------------|---------------------------|
| Spain     | Cancer Registry    | Albacete       | 2005                       | All Ages      | 587                       |
| Spain     | Cancer Registry    | Asturias       | 2005                       | All Ages      | 2218                      |
| Spain     | Cancer Registry    | Basque Country | 2005                       | All Ages      | 4156                      |
| Spain     | Cancer Registry    | Ciudad Real    | 2005                       | All Ages      | 831                       |
| Spain     | Cancer Registry    | Cuenca         | 2005                       | All Ages      | 385                       |
| Spain     | Cancer Registry    | Girona         | 2005                       | All Ages      | 1150                      |
| Spain     | Cancer Registry    | Granada        | 2005                       | All Ages      | 1132                      |
| Spain     | Cancer Registry    | La Rioja       | 2005                       | All Ages      | 519                       |
| Spain     | Cancer Registry    | Mallorca       | 2005                       | All Ages      | 1192                      |
| Spain     | Cancer Registry    | Murcia         | 2005                       | All Ages      | 1872                      |
| Spain     | Cancer Registry    | Navarra        | 2005                       | All Ages      | 1061                      |
| Spain     | Cancer Registry    | Tarragona      | 2005                       | All Ages      | 1177                      |
| Spain     | Cancer Registry    | Zaragoza       | 1980-2000                  | All Ages      | 25357                     |
| Spain     | Cancer Registry    | Navarra        | 1980-2002                  | All Ages      | 19749                     |
| Spain     | Cancer Registry    | Murcia         | 1983-1996, 1998-2001       | All Ages      | 22866                     |
| Spain     | Cancer Registry    | Tarragona      | 1983-2001                  | All Ages      | 16136                     |
| Spain     | Cancer Registry    | Granada        | 1985-2002                  | All Ages      | 17350                     |
| Spain     | Cancer Registry    | Basque Country | 1986, 1989                 | All Ages      | 5769                      |
| Spain     | Cancer Registry    | Asturias       | 1989, 1993                 | All Ages      | 3955                      |
| Spain     | Cancer Registry    | Mallorca       | 1990, 1994                 | All Ages      | 1894                      |
| Spain     | Cancer Registry    | Albacete       | 1991, 1995                 | All Ages      | 887                       |
| Sri Lanka | Vital Registration | National       | 2006                       | All Ages      | 117467                    |
| Sri Lanka | Vital Registration | National       | 1980-1989, 1991-1992       | All Ages      | 1154025                   |
| Sri Lanka | Vital Registration | National       | 1993-1996                  | All Ages      | 423483                    |
| Sri Lanka | Vital Registration | National       | 2004-2005                  | All Ages      | 247040                    |
| Sri Lanka | Survey/Census      | National       | 1997                       | All Ages      | 151                       |
| Sri Lanka | Surveillance       | National       | 1995-2008                  | 15 - 49 years | MMR                       |
| Sri Lanka | Police Records     | National       | 1980-1986, 1990, 1997-2003 | All Ages      | Death Rate                |
| Sri Lanka | Police Records     | National       |                            | All Ages      | Death Rate                |
| Sri Lanka | Cancer Registry    | National       | 2003, 2005                 | All Ages      | 15007                     |
| Sudan     | Survey/Census      | Khartoum       | 2008                       | All Ages      | 63032                     |

**Web Table 13 - Source list by country and site, source type, study site, time period, age range, and deaths excluding sources on LRI and diarrhea etiologies**

| <b>Geography</b> | <b>Source Type</b> | <b>Study Site</b>                   | <b>Time Period*</b>             | <b>Age Range</b> | <b>Deaths used in analysis**</b> |
|------------------|--------------------|-------------------------------------|---------------------------------|------------------|----------------------------------|
| Sudan            | Survey/Census      | National                            | 2008                            | 10 - 54 years    | 2822                             |
| Sudan            | Survey/Census      | National                            | 2008                            | 10 - 54 years    | 2635                             |
| Sudan            | Survey/Census      | North Sudan                         | 2008                            | All Ages         | 446449                           |
| Sudan            | Surveillance       | National                            | 2005                            | 15 - 49 years    | MMR                              |
| Sudan            | Sibling History    | National                            | 1980-1989                       | 15 - 54 years    | 95                               |
| Sudan            | Police Records     | National                            | 2007                            | All Ages         | Death Rate                       |
| Sudan            | Police Records     | National                            | 2007                            | All Ages         | Death Rate                       |
| Sudan            | Police Records     | National                            | 1990-1994                       | All Ages         | Death Rate                       |
| Sudan            | Burial/Mortuary    | Omdurman Teaching Hospital Mortuary | 2010                            | All Ages         | 318                              |
| Sudan            | Burial/Mortuary    | Khartoum                            | 2004-2009                       | All Ages         | 15360                            |
| Suriname         | Vital Registration | National                            | 1980-1982, 1984-1992            | All Ages         | 25948                            |
| Suriname         | Vital Registration | National                            | 1995-2006, 2008-2009            | All Ages         | 34737                            |
| Suriname         | Police Records     | National                            | 1984-1986                       | All Ages         | Death Rate                       |
| Suriname         | Police Records     | National                            | 2001, 2006-2007                 | All Ages         | Death Rate                       |
| Swaziland        | Sibling History    | National                            | 1992, 1994-1996, 1998-2006      | 15 - 54 years    | 55                               |
| Swaziland        | Police Records     | National                            | 1986-1994                       | All Ages         | Death Rate                       |
| Swaziland        | Police Records     | Swaziland CTS                       | 1995, 2003-2004                 | All Ages         | Death Rate                       |
| Sweden           | Vital Registration | National                            | 1980-1986                       | All Ages         | 643022                           |
| Sweden           | Vital Registration | National                            | 1987-1996                       | All Ages         | 942034                           |
| Sweden           | Vital Registration | National                            | 1997-2010                       | All Ages         | 1295633                          |
| Sweden           | Cancer Registry    | National                            | 2005                            | All Ages         | 18284                            |
| Sweden           | Cancer Registry    | National                            | 1980-2002                       | All Ages         | 415468                           |
| Sweden           | Cancer Registry    | National                            | 2003-2004, 2006-2007, 2009-2010 | All Ages         | 113375                           |
| Switzerland      | Vital Registration | National                            | 1980-1994                       | All Ages         | 911324                           |
| Switzerland      | Vital Registration | National                            | 1995-2010                       | All Ages         | 991633                           |
| Switzerland      | Police Records     | National                            | 2006                            | All Ages         | Death Rate                       |
| Switzerland      | Cancer Registry    | Vaud, Rural                         | 1980                            | All Ages         | 711                              |
| Switzerland      | Cancer Registry    | Vaud, Urban                         | 1980                            | All Ages         | 463                              |
| Switzerland      | Cancer Registry    | Ticino                              | 1996                            | All Ages         | 665                              |
| Switzerland      | Cancer Registry    | Graubunden and Glarus               | 2000                            | All Ages         | 449                              |
| Switzerland      | Cancer Registry    | Neuchatel                           | 2000                            | All Ages         | 359                              |

**Web Table 13 - Source list by country and site, source type, study site, time period, age range, and deaths excluding sources on LRI and diarrhea etiologies**

| <b>Geography</b>          | <b>Source Type</b> | <b>Study Site</b>                                         | <b>Time Period*</b>    | <b>Age Range</b> | <b>Deaths used in analysis**</b> |
|---------------------------|--------------------|-----------------------------------------------------------|------------------------|------------------|----------------------------------|
| Switzerland               | Cancer Registry    | Ticino                                                    | 2000                   | All Ages         | 746                              |
| Switzerland               | Cancer Registry    | Valais                                                    | 2000                   | All Ages         | 545                              |
| Switzerland               | Cancer Registry    | Vaud                                                      | 2000                   | All Ages         | 1305                             |
| Switzerland               | Cancer Registry    | National                                                  | 2005                   | All Ages         | 14426                            |
| Switzerland               | Cancer Registry    | Neuchatel                                                 | 1980, 1985, 1990, 1994 | All Ages         | 1408                             |
| Switzerland               | Cancer Registry    | Vaud                                                      | 1980, 1985, 1990, 1994 | All Ages         | 4913                             |
| Switzerland               | Cancer Registry    | Geneva                                                    | 1980-2002              | All Ages         | 19708                            |
| Switzerland               | Cancer Registry    | Zurich                                                    | 1981, 1985, 1990, 1994 | All Ages         | 9409                             |
| Switzerland               | Cancer Registry    | Basel                                                     | 1981, 1985, 1990, 1995 | All Ages         | 4048                             |
| Switzerland               | Cancer Registry    | St Gall Appenzell                                         | 1983-2002              | All Ages         | 18298                            |
| Switzerland               | Cancer Registry    | Valais                                                    | 1990, 1995             | All Ages         | 919                              |
| Syria                     | Vital Registration | National                                                  | 1980, 1984-1985        | All Ages         | 137679                           |
| Syria                     | Vital Registration | National                                                  | 2005-2007              | All Ages         | 170570                           |
| Syria                     | Verbal Autopsy     | National                                                  | 1995                   | birth - 5 years  | 330                              |
| Syria                     | Verbal Autopsy     | National                                                  | 2003                   | 15 - 49 years    | 127                              |
| Syria                     | Surveillance       | National                                                  | 1993, 1998             | 15 - 49 years    | MMR                              |
| Syria                     | Police Records     | National                                                  | 2007                   | All Ages         | Death Rate                       |
| Syria                     | Police Records     | National                                                  | 1980-1994              | All Ages         | Death Rate                       |
| Taiwan, province of China | Vital Registration | National                                                  | 2007                   | All Ages         | 138964                           |
| Taiwan, province of China | Vital Registration | National                                                  | 2008                   | All Ages         | 142065                           |
| Taiwan, province of China | Vital Registration | National                                                  | 2009                   | All Ages         | 141990                           |
| Taiwan, province of China | Vital Registration | National                                                  | 2010                   | All Ages         | 144701                           |
| Taiwan, province of China | Vital Registration | National                                                  | 2011                   | All Ages         | 152025                           |
| Taiwan, province of China | Vital Registration | National                                                  | 2012                   | All Ages         | 153815                           |
| Taiwan, province of China | Police Records     | National                                                  | 1995-2007, 2009        | All Ages         | Death Rate                       |
| Taiwan, province of China | Cancer Registry    | National                                                  | 1980-2007              | All Ages         | 673928                           |
| Tajikistan                | Vital Registration | National                                                  | 1981-1982, 1985-2005   | All Ages         | 731888                           |
| Tajikistan                | Verbal Autopsy     | Sugd and the Region of Republican Subordination provinces | 2001                   | birth - 364 days | 96                               |
| Tajikistan                | Verbal Autopsy     | Dushanbe, Khatlon                                         | 2003                   | birth - 364 days | 217                              |
| Tajikistan                | Police Records     | National                                                  | 2000-2001              | All Ages         | Death Rate                       |
| Tajikistan                | Police Records     | National                                                  | 2006-2007, 2009        | All Ages         | Death Rate                       |

**Web Table 13 - Source list by country and site, source type, study site, time period, age range, and deaths excluding sources on LRI and diarrhea etiologies**

| Geography | Source Type        | Study Site                                                             | Time Period*         | Age Range        | Deaths used in analysis** |
|-----------|--------------------|------------------------------------------------------------------------|----------------------|------------------|---------------------------|
| Tanzania  | Verbal Autopsy     | Bagamoyo District (rural)                                              | 1986                 | birth - 5 years  | 610                       |
| Tanzania  | Verbal Autopsy     | Mkusi, Kilulu, Enzi, Tingeni, and Lunguza villages in Muheza District  | 1992                 | 7 days - 5 years | 83                        |
| Tanzania  | Verbal Autopsy     | 13 villages, Yombo division of Bagamoyo District                       | 1993                 | birth - 5 years  | 118                       |
| Tanzania  | Verbal Autopsy     | Bagamoyo District (rural)                                              | 1993                 | 15 - 49 years    | 76                        |
| Tanzania  | Verbal Autopsy     | Basotu (Hanang) and Dongobesh (Mbulu) divisions; Arusha                | 1995                 | birth - 27 days  | 76                        |
| Tanzania  | Verbal Autopsy     | Hai Northern Sentinel (rural)                                          | 1996                 | birth - 6 days   | 31                        |
| Tanzania  | Verbal Autopsy     | Mwanza                                                                 | 1999                 | birth - 59 years | 741                       |
| Tanzania  | Verbal Autopsy     | Rufiji                                                                 | 2000                 | All Ages         | 3931                      |
| Tanzania  | Verbal Autopsy     | Ifakara (rural)                                                        | 2001                 | All Ages         | 1713                      |
| Tanzania  | Verbal Autopsy     | Ijumbi, Nshambya, Ikondo, Bushemba, and Bunywambele villages in Muleba | 2001                 | birth - 69 years | 423                       |
| Tanzania  | Verbal Autopsy     | Pemba, Zanzibar                                                        | 2004                 | birth - 5 years  | 389                       |
| Tanzania  | Verbal Autopsy     | Rufiji (rural)                                                         | 2004                 | 1 year +         | 4471                      |
| Tanzania  | Verbal Autopsy     | Kilombero and Ulanga districts (rural)                                 | 2005                 | 15 - 59 years    | 1139                      |
| Tanzania  | Verbal Autopsy     | Kilombero and Ulanga districts rural                                   | 2005                 | 15 - 29 years    | 1130                      |
| Tanzania  | Verbal Autopsy     | Lindi and Mtwara regions (rural)                                       | 2007                 | birth - 27 days  | 219                       |
| Tanzania  | Verbal Autopsy     | Dar es Salaam (urban)                                                  | 1995, 1998, 2001     | All Ages         | 7219                      |
| Tanzania  | Verbal Autopsy     | Hai Northern Sentinel (rural)                                          | 1995, 1998, 2001     | All Ages         | 13560                     |
| Tanzania  | Verbal Autopsy     | Morogoro District (rural)                                              | 1995, 1998, 2001     | All Ages         | 15216                     |
| Tanzania  | Verbal Autopsy     | Ifakara (rural)                                                        | 2002-2005            | birth - 5 years  | 643                       |
| Tanzania  | Verbal Autopsy     | 25 villages of Kilombero and Ulanga districts (rural)                  | 2005-2007            | birth - 364 days | 1295                      |
| Tanzania  | Surveillance       | Rufiji                                                                 | 2004                 | 15 - 49 years    | 598                       |
| Tanzania  | Sibling History    | National                                                               | 1982-2009            | 15 - 54 years    | 552                       |
| Tanzania  | Police Records     | National                                                               | 2003-2004            | All Ages         | Death Rate                |
| Tanzania  | Hospital           | Northern Rural Tanzania                                                | 2010                 | 15 - 49 years    | 248                       |
| Thailand  | Vital Registration | National                                                               | 1980-1987            | All Ages         | 1888717                   |
| Thailand  | Vital Registration | National                                                               | 1990-1992            | All Ages         | 791800                    |
| Thailand  | Vital Registration | National                                                               | 1994-2000, 2002-2006 | All Ages         | 4253300                   |
| Thailand  | Verbal Autopsy     | Songkhla province                                                      | 2000                 | 35 - 64 years    | 50                        |
| Thailand  | Verbal Autopsy     | Songkhla province                                                      | 2001                 | birth - 6 days   | 14                        |
| Thailand  | Verbal Autopsy     | Panomtuan, Thepa, Kranuan, Muang districts                             | 2005                 | All Ages         | 12270                     |

**Web Table 13 - Source list by country and site, source type, study site, time period, age range, and deaths excluding sources on LRI and diarrhea etiologies**

| <b>Geography</b> | <b>Source Type</b> | <b>Study Site</b> | <b>Time Period*</b>                   | <b>Age Range</b> | <b>Deaths used in analysis**</b> |
|------------------|--------------------|-------------------|---------------------------------------|------------------|----------------------------------|
| Thailand         | Verbal Autopsy     | National          | 1997-1998                             | All Ages         | 18991                            |
| Thailand         | Police Records     | National          | 2007                                  | All Ages         | Death Rate                       |
| Thailand         | Police Records     | National          | 2009-2010                             | All Ages         | Death Rate                       |
| Thailand         | Cancer Registry    | Songkhla          | 1994                                  | All Ages         | 567                              |
| Thailand         | Cancer Registry    | Lampang           | 1995                                  | All Ages         | 932                              |
| Thailand         | Cancer Registry    | Bangkok           | 1996                                  | All Ages         | 3922                             |
| Thailand         | Cancer Registry    | Chiang Mai        | 2000                                  | All Ages         | 1744                             |
| Thailand         | Cancer Registry    | Lampang           | 2000                                  | All Ages         | 1112                             |
| Thailand         | Cancer Registry    | Songkhla          | 2000                                  | All Ages         | 769                              |
| Thailand         | Cancer Registry    | Bangkok           | 2002                                  | All Ages         | 5499                             |
| Thailand         | Cancer Registry    | Chiang Mai        | 2002                                  | All Ages         | 1880                             |
| Thailand         | Cancer Registry    | Chon Buri         | 2002                                  | All Ages         | 1022                             |
| Thailand         | Cancer Registry    | Khon Kaen         | 2002                                  | All Ages         | 1930                             |
| Thailand         | Cancer Registry    | Lampang           | 2002                                  | All Ages         | 1209                             |
| Thailand         | Cancer Registry    | Lop Buri          | 2002                                  | All Ages         | 713                              |
| Thailand         | Cancer Registry    | Nakhon Phanom     | 2002                                  | All Ages         | 696                              |
| Thailand         | Cancer Registry    | Prachuap Khiri    | 2002                                  | All Ages         | 366                              |
| Thailand         | Cancer Registry    | Rayong            | 2002                                  | All Ages         | 569                              |
| Thailand         | Cancer Registry    | Songkhla          | 2002                                  | All Ages         | 821                              |
| Thailand         | Cancer Registry    | Surat Thani       | 2002                                  | All Ages         | 716                              |
| Thailand         | Cancer Registry    | Ubon Ratchathani  | 2002                                  | All Ages         | 2136                             |
| Thailand         | Cancer Registry    | Udon Thani        | 2002                                  | All Ages         | 1868                             |
| Thailand         | Cancer Registry    | Bangkok           | 2005                                  | All Ages         | 6378                             |
| Thailand         | Cancer Registry    | Chiang Mai        | 2005                                  | All Ages         | 1990                             |
| Thailand         | Cancer Registry    | Chon Buri         | 2005                                  | All Ages         | 1152                             |
| Thailand         | Cancer Registry    | Khon Kaen         | 2005                                  | All Ages         | 1759                             |
| Thailand         | Cancer Registry    | Lampang           | 2005                                  | All Ages         | 1237                             |
| Thailand         | Cancer Registry    | Songkhla          | 2005                                  | All Ages         | 1116                             |
| Thailand         | Cancer Registry    | Chiang Mai        | 1983-1989, 1991-1994, 1996-1999, 2001 | All Ages         | 24922                            |
| Thailand         | Cancer Registry    | Khon Kaen         | 1988, 1991, 1995                      | All Ages         | 4331                             |
| Thailand         | Cancer Registry    | Chiang Mai        | 1990, 1995                            | All Ages         | 2814                             |

**Web Table 13 - Source list by country and site, source type, study site, time period, age range, and deaths excluding sources on LRI and diarrhea etiologies**

| Geography           | Source Type        | Study Site                                                                   | Time Period*                               | Age Range         | Deaths used in analysis** |
|---------------------|--------------------|------------------------------------------------------------------------------|--------------------------------------------|-------------------|---------------------------|
| The Bahamas         | Vital Registration | National                                                                     | 1980-1981, 1984-1985, 1987, 1993-1998      | All Ages          | 15841                     |
| The Bahamas         | Vital Registration | National                                                                     | 1999-2008                                  | All Ages          | 17290                     |
| The Bahamas         | Police Records     | National                                                                     | 1981-1986, 1990-1994                       | All Ages          | Death Rate                |
| The Bahamas         | Police Records     | National                                                                     | 1995-2004, 2006-2007, 2009-2010            | All Ages          | Death Rate                |
| The Gambia          | Verbal Autopsy     | 41 villages and hamlets near Farafenni in North Bank Division                | 1982                                       | birth - 27 days   | 38                        |
| The Gambia          | Verbal Autopsy     | 41 villages and hamlets near Farafenni on the north bank of the River Gambia | 1982                                       | birth - 5 years   | 171                       |
| The Gambia          | Verbal Autopsy     | Villages and hamlets north of Farafenni                                      | 1982                                       | birth - 9 years   | 184                       |
| The Gambia          | Verbal Autopsy     | Upper River Division (rural)                                                 | 1989                                       | birth - 5 years   | 273                       |
| The Gambia          | Verbal Autopsy     | Primary Health Care (PHC) Program villages                                   | 1992                                       | 1 - 9 years       | 306                       |
| The Gambia          | Verbal Autopsy     | Rural areas near Farafenni North Bank Division                               | 1995                                       | 15 - 49 years     | 18                        |
| The Gambia          | Verbal Autopsy     | Farafenni villages and urban areas                                           | 2006                                       | birth - 5 years   | 141                       |
| The Gambia          | Verbal Autopsy     | 41 villages and hamlets west of Farafenni North Bank                         | 1982, 1986                                 | 28 days - 5 years | 151                       |
| The Gambia          | Verbal Autopsy     | 73 villages in South Bank, east of Soma                                      | 1988-1989                                  | birth - 5 years   | 353                       |
| The Gambia          | Verbal Autopsy     | Upper River Division, eastern Gambia (rural)                                 | 1989-1993                                  | birth - 5 years   | 3776                      |
| The Gambia          | Verbal Autopsy     | 42 villages around the town of Farafenni                                     | 1999, 2002, 2006                           | birth - 5 years   | 738                       |
| The Gambia          | Police Records     | National                                                                     | 2004                                       | All Ages          | Death Rate                |
| The Gambia          | Cancer Registry    | National                                                                     | 1992                                       | All Ages          | 300                       |
| The Gambia          | Cancer Registry    | National                                                                     | 1988, 1997                                 | All Ages          | 600                       |
| Timor-Leste         | Sibling History    | National                                                                     | 1995-2009                                  | 15 - 54 years     | 227                       |
| Timor-Leste         | Police Records     | National                                                                     | 2004-2007, 2009-2010                       | All Ages          | Death Rate                |
| Togo                | Sibling History    | National                                                                     | 1984-1998                                  | 15 - 54 years     | 111                       |
| Togo                | Police Records     | National                                                                     | 2007                                       | All Ages          | Death Rate                |
| Tonga               | Vital Registration |                                                                              | 2003                                       | All Ages          | 1682                      |
| Tonga               | Police Records     | National                                                                     | 1980, 1986-1990                            | All Ages          | Death Rate                |
| Trinidad and Tobago | Vital Registration | National                                                                     | 1980-1998                                  | All Ages          | 158006                    |
| Trinidad and Tobago | Vital Registration | National                                                                     | 1999-2002, 2004-2008                       | All Ages          | 88402                     |
| Trinidad and Tobago | Police Records     | National                                                                     | 1981-1986                                  | All Ages          | Death Rate                |
| Trinidad and Tobago | Police Records     | National                                                                     | 1995-1997, 2000-2002, 2004-2007, 2009-2010 | All Ages          | Death Rate                |
| Trinidad and Tobago | Cancer Registry    | National                                                                     | 1995-2006                                  | All Ages          | 13584                     |
| Tunisia             | Survey/Census      | National                                                                     | 1997                                       | All Ages          | 32                        |



**Web Table 13 - Source list by country and site, source type, study site, time period, age range, and deaths excluding sources on LRI and diarrhea etiologies**

| Geography    | Source Type        | Study Site                                                                     | Time Period*                    | Age Range        | Deaths used in analysis** |
|--------------|--------------------|--------------------------------------------------------------------------------|---------------------------------|------------------|---------------------------|
| Tunisia      | Police Records     | National                                                                       | 2007                            | All Ages         | Death Rate                |
| Tunisia      | Police Records     | National                                                                       | 1998-2002                       | All Ages         | Death Rate                |
| Tunisia      | Cancer Registry    | Centre Sousse                                                                  | 2000                            | All Ages         | 285                       |
| Tunisia      | Cancer Registry    | North                                                                          | 2004                            | All Ages         | 2844                      |
| Turkey       | Vital Registration | Urban Subnational                                                              | 1983-1984, 1987-2008            | All Ages         | 4061047                   |
| Turkey       | Vital Registration | National                                                                       | 2010-2012                       | All Ages         | 920669                    |
| Turkey       | Verbal Autopsy     | Narlidere District, Izmir                                                      | 2000                            | birth - 364 days | 69                        |
| Turkey       | Verbal Autopsy     | Hasançelebi                                                                    | 2001                            | 20 years +       | 173                       |
| Turkey       | Verbal Autopsy     | Hasancelebi- Hekimhan, Malatya (rural)                                         | 2002                            | All Ages         | 1084                      |
| Turkey       | Verbal Autopsy     | 12,000 households                                                              | 2003                            | All Ages         | 1056                      |
| Turkey       | Verbal Autopsy     | National                                                                       | 2005                            | 15 - 49 years    | 226                       |
| Turkey       | Police Records     | National                                                                       | 2001-2010                       | All Ages         | Death Rate                |
| Turkey       | Cancer Registry    | Antalya                                                                        | 2000                            | All Ages         | 893                       |
| Turkey       | Cancer Registry    | Izmir                                                                          | 2000                            | All Ages         | 3015                      |
| Turkey       | Cancer Registry    | Izmir                                                                          | 2006                            | All Ages         | 4700                      |
| Turkey       | Cancer Registry    | Trabzon                                                                        | 2006                            | All Ages         | 771                       |
| Turkey       | Cancer Registry    | Antalya, Bursa, Edirne, Erzurum, Eskişehir, Samsun, Trabzon, and Izmir         | 2007                            | All Ages         | 13328                     |
| Turkey       | Cancer Registry    | Ankara, Antalya, Bursa, Edirne, Erzurum, Eskişehir, Samsun, Trabzon, and İzmir | 2008                            | All Ages         | 18221                     |
| Turkmenistan | Vital Registration | National                                                                       | 1981-1982, 1985-1990, 1994-1998 | All Ages         | 365754                    |
| Turkmenistan | Vital Registration | National                                                                       | 1991-1993                       | All Ages         | 85938                     |
| Turkmenistan | Police Records     | National                                                                       | 1995-1997, 1999-2006            | All Ages         | Death Rate                |
| Uganda       | Verbal Autopsy     | Iganga and Mayuge Districts (rural)                                            | 2006                            | birth - 27 days  | 64                        |
| Uganda       | Verbal Autopsy     | National                                                                       | 2006                            | birth - 5 years  | 530                       |
| Uganda       | Verbal Autopsy     | Southwest Uganda (rural)                                                       | 2007                            | 10 years +       | 264                       |
| Uganda       | Sibling History    | National                                                                       | 1981-2011                       | 15 - 54 years    | 808                       |
| Uganda       | Police Records     | National                                                                       | 2006                            | All Ages         | Death Rate                |
| Uganda       | Police Records     | National                                                                       | 2003-2004                       | All Ages         | Death Rate                |
| Uganda       | Cancer Registry    | Kyadondo County                                                                | 2000                            | All Ages         | 499                       |
| Uganda       | Cancer Registry    | Kyadondo County                                                                | 2005                            | All Ages         | 712                       |
| Uganda       | Cancer Registry    | Kyadondo County                                                                | 1992, 1995                      | All Ages         | 729                       |
| Uganda       | Burial/Mortuary    | Kampala                                                                        | 2007                            | All Ages         | 4941                      |

**Web Table 13 - Source list by country and site, source type, study site, time period, age range, and deaths excluding sources on LRI and diarrhea etiologies**

| <b>Geography</b>                                  | <b>Source Type</b> | <b>Study Site</b>        | <b>Time Period*</b>  | <b>Age Range</b> | <b>Deaths used in analysis**</b> |
|---------------------------------------------------|--------------------|--------------------------|----------------------|------------------|----------------------------------|
| Ukraine                                           | Vital Registration | National                 | 1981-1982, 1985-2004 | All Ages         | 15170429                         |
| Ukraine                                           | Vital Registration | National                 | 2005-2006, 2008-2011 | All Ages         | 4363866                          |
| Ukraine                                           | Cancer Registry    | National                 | 2002                 | All Ages         | 106609                           |
| Ukraine                                           | Cancer Registry    | National                 | 2003                 | All Ages         | 105750                           |
| Ukraine                                           | Cancer Registry    | National                 | 2004                 | All Ages         | 103744                           |
| Ukraine                                           | Cancer Registry    | National                 | 2005                 | All Ages         | 100393                           |
| Ukraine                                           | Cancer Registry    | National                 | 2006                 | All Ages         | 99102                            |
| Ukraine                                           | Cancer Registry    | National                 | 2007                 | All Ages         | 97108                            |
| Ukraine                                           | Cancer Registry    | National                 | 2009                 | All Ages         | 92707                            |
| Ukraine                                           | Cancer Registry    | National                 | 2010                 | All Ages         | 92996                            |
| Ukraine                                           | Cancer Registry    | National                 | 2000-2001            | All Ages         | 187121                           |
| United Arab Emirates                              | Police Records     | National                 | 1980                 | All Ages         | Death Rate                       |
| United Arab Emirates                              | Police Records     | National                 | 2003-2006            | All Ages         | Death Rate                       |
| United Kingdom: East Midlands                     | Cancer Registry    | East Midlands            | 1990-2010            | All Ages         | 229382                           |
| United Kingdom: East of England                   | Cancer Registry    | East of England          | 1990-2010            | All Ages         | 283358                           |
| United Kingdom: England: East Midlands            | Vital Registration | East Midlands            | 1981-2011            | All Ages         | 1332632                          |
| United Kingdom: England: East of England          | Vital Registration | East of England          | 1981-2011            | All Ages         | 1631104                          |
| United Kingdom: England: Greater London           | Vital Registration | London                   | 1981-2011            | All Ages         | 1963039                          |
| United Kingdom: England: North East England       | Vital Registration | North East               | 1981-2011            | All Ages         | 922447                           |
| United Kingdom: England: North West England       | Vital Registration | North West               | 1981-2011            | All Ages         | 2429589                          |
| United Kingdom: England: South East England       | Vital Registration | South East               | 1981-2011            | All Ages         | 2497676                          |
| United Kingdom: England: South West England       | Vital Registration | South West               | 1981-2011            | All Ages         | 1695675                          |
| United Kingdom: England: West Midlands            | Vital Registration | West Midlands            | 1981-2011            | All Ages         | 1709185                          |
| United Kingdom: England: Yorkshire and the Humber | Vital Registration | Yorkshire and The Humber | 1981-2011            | All Ages         | 1694100                          |
| United Kingdom: Greater London                    | Cancer Registry    | Greater London           | 1990-2010            | All Ages         | 314103                           |
| United Kingdom: North East England                | Cancer Registry    | North East England       | 1990-2010            | All Ages         | 165868                           |

**Web Table 13 - Source list by country and site, source type, study site, time period, age range, and deaths excluding sources on LRI and diarrhea etiologies**

| <b>Geography</b>                         | <b>Source Type</b> | <b>Study Site</b>                   | <b>Time Period*</b>  | <b>Age Range</b> | <b>Deaths used in analysis**</b> |
|------------------------------------------|--------------------|-------------------------------------|----------------------|------------------|----------------------------------|
| United Kingdom: North West England       | Cancer Registry    | North West England                  | 1990-2010            | All Ages         | 400052                           |
| United Kingdom: Northern Ireland         | Vital Registration | Northern Ireland                    | 1980-2011            | All Ages         | 487134                           |
| United Kingdom: Scotland                 | Vital Registration | Scotland                            | 1980-2012            | All Ages         | 2021918                          |
| United Kingdom: South East England       | Cancer Registry    | South East England                  | 1990-2010            | All Ages         | 417015                           |
| United Kingdom: South West England       | Cancer Registry    | South West England                  | 1990-2010            | All Ages         | 292283                           |
| United Kingdom: Wales                    | Vital Registration | Wales                               | 1981-2011            | All Ages         | 1043859                          |
| United Kingdom: Wales                    | Cancer Registry    | Wales                               | 2006-2011            | All Ages         | 47167                            |
| United Kingdom: West Midlands            | Cancer Registry    | West Midlands                       | 1990-2010            | All Ages         | 286811                           |
| United Kingdom: Yorkshire and the Humber | Cancer Registry    | Yorkshire and the Humber            | 1990-2010            | All Ages         | 285811                           |
| United States                            | Vital Registration | National                            | 1980-1998            | All Ages         | 40954241                         |
| United States                            | Vital Registration | National                            | 1999-2007            | All Ages         | 21797331                         |
| United States                            | Vital Registration | National                            | 2008-2010            | All Ages         | 7396410                          |
| United States                            | Police Records     | National                            | 1995-2007            | All Ages         | Death Rate                       |
| United States                            | Cancer Registry    | Atlanta, Georgia                    | 1980-2008            | All Ages         | 81387                            |
| United States                            | Cancer Registry    | Connecticut                         | 1980-2008            | All Ages         | 181668                           |
| United States                            | Cancer Registry    | Detroit, Michigan                   | 1980-2008            | All Ages         | 212180                           |
| United States                            | Cancer Registry    | Hawaii                              | 1980-2008            | All Ages         | 48392                            |
| United States                            | Cancer Registry    | Iowa                                | 1980-2008            | All Ages         | 159590                           |
| United States                            | Cancer Registry    | New Mexico                          | 1980-2008            | All Ages         | 60227                            |
| United States                            | Cancer Registry    | San Francisco - Oakland, California | 1980-2008            | All Ages         | 179179                           |
| United States                            | Cancer Registry    | Seattle, Washington                 | 1980-2008            | All Ages         | 169328                           |
| United States                            | Cancer Registry    | Utah                                | 1980-2008            | All Ages         | 50162                            |
| United States                            | Cancer Registry    | Alaska                              | 1992-2008            | All Ages         | 1909                             |
| United States                            | Cancer Registry    | Los Angeles, California             | 1992-2008            | All Ages         | 196353                           |
| United States                            | Cancer Registry    | Rural Georgia, Georgia              | 1992-2008            | All Ages         | 3441                             |
| United States                            | Cancer Registry    | San Jose - Monterey, California     | 1992-2008            | All Ages         | 48818                            |
| United States                            | Cancer Registry    | Louisiana                           | 2000-2004, 2006-2008 | All Ages         | 58304                            |
| United States                            | Cancer Registry    | California excluding SFO/SJM/LA     | 2000-2008            | All Ages         | 228843                           |
| United States                            | Cancer Registry    | Kentucky                            | 2000-2008            | All Ages         | 70394                            |

**Web Table 13 - Source list by country and site, source type, study site, time period, age range, and deaths excluding sources on LRI and diarrhea etiologies**

| <b>Geography</b> | <b>Source Type</b> | <b>Study Site</b>             | <b>Time Period*</b>             | <b>Age Range</b> | <b>Deaths used in analysis**</b> |
|------------------|--------------------|-------------------------------|---------------------------------|------------------|----------------------------------|
| United States    | Cancer Registry    | New Jersey                    | 2000-2008                       | All Ages         | 135845                           |
| Uruguay          | Vital Registration | National                      | 1991                            | All Ages         | 29784                            |
| Uruguay          | Vital Registration | National                      | 1980-1990, 1993-1996            | All Ages         | 445470                           |
| Uruguay          | Vital Registration | National                      | 1997-2001, 2003-2004, 2007-2009 | All Ages         | 316999                           |
| Uruguay          | Police Records     | National                      | 1980-1986                       | All Ages         | Death Rate                       |
| Uruguay          | Police Records     | National                      | 1995-2007, 2009-2010            | All Ages         | Death Rate                       |
| Uruguay          | Cancer Registry    | National                      | 2004                            | All Ages         | 7353                             |
| Uruguay          | Cancer Registry    | National                      | 2006                            | All Ages         | 7152                             |
| Uruguay          | Cancer Registry    | Montevideo                    | 1991, 1994                      | All Ages         | 7255                             |
| Uzbekistan       | Vital Registration | National                      | 1981-1982, 1985-2003            | All Ages         | 2828812                          |
| Uzbekistan       | Vital Registration | National                      | 2004-2005                       | All Ages         | 271804                           |
| Uzbekistan       | Police Records     | National                      | 1995-2007                       | All Ages         | Death Rate                       |
| Vanuatu          | Police Records     | National                      | 1987-1990                       | All Ages         | Death Rate                       |
| Venezuela        | Vital Registration | National                      | 1980-1983, 1985-1990, 1992-1994 | All Ages         | 1090886                          |
| Venezuela        | Vital Registration | National                      | 1996-2009                       | All Ages         | 1604646                          |
| Venezuela        | Police Records     | National                      | 1995-2007, 2009                 | All Ages         | Death Rate                       |
| Vietnam          | Verbal Autopsy     | Thai Binh (rural)             | 1987                            | birth - 5 years  | 124                              |
| Vietnam          | Verbal Autopsy     | Quang Ngai (urban)            | 1994                            | 15 - 49 years    | 812                              |
| Vietnam          | Verbal Autopsy     | Song Be (rural)               | 1994                            | 15 - 49 years    | 794                              |
| Vietnam          | Verbal Autopsy     | Vinh Phu (rural)              | 1994                            | 15 - 49 years    | 1236                             |
| Vietnam          | Verbal Autopsy     | Ba Vi District                | 1999                            | All Ages         | 189                              |
| Vietnam          | Verbal Autopsy     | Bavi District, Hatay Province | 2001                            | 20 years +       | 1067                             |
| Vietnam          | Verbal Autopsy     | National                      | 2006                            | All Ages         | 6804                             |
| Vietnam          | Verbal Autopsy     | National                      | 2008                            | All Ages         | 9290                             |
| Vietnam          | Verbal Autopsy     | National                      | 2008                            | All Ages         | 904654                           |
| Vietnam          | Verbal Autopsy     | National                      | 2009                            | All Ages         | 9920                             |
| Vietnam          | Verbal Autopsy     | Quang Ninh (rural)            | 2009                            | birth - 27 days  | 233                              |
| Vietnam          | Verbal Autopsy     | Chi Linh District             | 2008-2010                       | All Ages         | 896                              |
| Vietnam          | Survey/Census      | Quang Ninh (urban)            | 1987                            | birth - 364 days | 103                              |
| Vietnam          | Survey/Census      | National                      | 2006-2007                       | All Ages         | 8449495                          |
| Vietnam          | Police Records     | National                      | 2005-2006                       | All Ages         | Death Rate                       |

**Web Table 13 - Source list by country and site, source type, study site, time period, age range, and deaths excluding sources on LRI and diarrhea etiologies**

| <b>Geography</b> | <b>Source Type</b> | <b>Study Site</b>                                           | <b>Time Period*</b>  | <b>Age Range</b> | <b>Deaths used in analysis**</b> |
|------------------|--------------------|-------------------------------------------------------------|----------------------|------------------|----------------------------------|
| Vietnam          | Cancer Registry    | Ho Chi Minh City                                            | 1996                 | All Ages         | 3713                             |
| Vietnam          | Cancer Registry    | Hanoi                                                       | 1992, 1995           | All Ages         | 3625                             |
| Yemen            | Surveillance       | National                                                    | 2002                 | 15 - 49 years    | MMR                              |
| Yemen            | Sibling History    | National                                                    | 1992                 | 15 - 49 years    | 170                              |
| Yemen            | Police Records     | National                                                    | 2003-2007, 2009      | All Ages         | Death Rate                       |
| Zambia           | Verbal Autopsy     | Lufwanyama District, Copperbelt Province (rural)            | 2007                 | birth - 27 days  | 58                               |
| Zambia           | Verbal Autopsy     | Kafue District (rural)                                      | 2008                 | birth - 5 years  | 98                               |
| Zambia           | Verbal Autopsy     | Central, Luapula, Lusaka, and Southern; provinces in Zambia | 2009                 | All Ages         | 1133                             |
| Zambia           | Survey/Census      | National                                                    | 2010                 | 15 - 49 years    | 3697                             |
| Zambia           | Sibling History    | National                                                    | 1982-2007            | 15 - 54 years    | 563                              |
| Zambia           | Police Records     | National                                                    | 2007                 | All Ages         | Death Rate                       |
| Zambia           | Police Records     | National                                                    | 1980, 1990-1994      | All Ages         | Death Rate                       |
| Zambia           | Police Records     | National                                                    | 1998-1999            | All Ages         | Death Rate                       |
| Zambia           | Burial/Mortuary    | National                                                    | 2007-2008            | All Ages         | 18783                            |
| Zimbabwe         | Vital Registration | National                                                    | 1990                 | All Ages         | 34796                            |
| Zimbabwe         | Vital Registration | National                                                    | 2007                 | All Ages         | 62232                            |
| Zimbabwe         | Survey/Census      | National                                                    | 1997                 | All Ages         | 10                               |
| Zimbabwe         | Survey/Census      | National                                                    | 2002                 | 15 - 49 years    | MMR                              |
| Zimbabwe         | Survey/Census      | National                                                    | 2012                 | 15 - 49 years    | MMR                              |
| Zimbabwe         | Survey/Census      | National                                                    | 1991-1992            | 15 - 49 years    | 2838                             |
| Zimbabwe         | Survey/Census      | National                                                    | 2001-2002            | 15 - 49 years    | MMR                              |
| Zimbabwe         | Sibling History    | National                                                    | 1980-2010            | 15 - 54 years    | 479                              |
| Zimbabwe         | Police Records     | National                                                    | 1986                 | All Ages         | Death Rate                       |
| Zimbabwe         | Police Records     | National                                                    | 2006                 | All Ages         | Death Rate                       |
| Zimbabwe         | Police Records     | National                                                    | 1995-2000, 2003-2007 | All Ages         | Death Rate                       |
| Zimbabwe         | Cancer Registry    | Harare                                                      | 1991                 | All Ages         | 190                              |
| Zimbabwe         | Cancer Registry    | Harare                                                      | 2000                 | All Ages         | 806                              |
| Zimbabwe         | Cancer Registry    | Harare                                                      | 2004                 | All Ages         | 829                              |
| Zimbabwe         | Cancer Registry    | National                                                    | 2005                 | All Ages         | 2109                             |
| Zimbabwe         | Cancer Registry    | National                                                    | 2006                 | All Ages         | 2237                             |
| Zimbabwe         | Cancer Registry    | Harare                                                      | 1991, 1995           | All Ages         | 1260                             |

**Web Table 13 - Source list by country and site, source type, study site, time period, age range, and deaths excluding sources on LRI and diarrhea etiologies**

| Geography | Source Type | Study Site | Time Period* | Age Range | Deaths used in analysis** |
|-----------|-------------|------------|--------------|-----------|---------------------------|
|-----------|-------------|------------|--------------|-----------|---------------------------|

\* When data observations are reported in a range of years, the midpoint was used for analysis.

\*\* Deaths recorded in counts, death rates, maternal mortality rates (MMR), and cause-specific mortality fractions (CSMF) were used in analysis.

|  |  |  |  |  |  |
|--|--|--|--|--|--|
|  |  |  |  |  |  |
|--|--|--|--|--|--|

## **Section 5. Assessing and enhancing causes of death data quality and comparability**

### **A. Completeness sensitivity testing**

We conducted completeness sensitivity testing as part of the GBD 2010 Study. The approach and results of that testing can be found in Lozano et al.<sup>22</sup>

### **B. Mapping revisions and variants of the ICD**

**Web Table 14: List of International Classification of Diseases (ICD) codes mapped to the Global Burden of Disease cause list for causes of death**



**Web Table 14 - List of International Classification of Diseases codes mapped to the Global Burden of Disease cause list for Causes of Death**

| Cause Name                                                        | ICD10 Code                                                                                                                                                                                                                                                                                                                                                                                                                                                                                                                                                                                                                                                                                                                                                                                                                                                                                                                                                                                                         | ICD9 Code                                                                                                                                                                                                                                                                                                                                                                                                                                                                                                                                                                                                                                                                                                    |
|-------------------------------------------------------------------|--------------------------------------------------------------------------------------------------------------------------------------------------------------------------------------------------------------------------------------------------------------------------------------------------------------------------------------------------------------------------------------------------------------------------------------------------------------------------------------------------------------------------------------------------------------------------------------------------------------------------------------------------------------------------------------------------------------------------------------------------------------------------------------------------------------------------------------------------------------------------------------------------------------------------------------------------------------------------------------------------------------------|--------------------------------------------------------------------------------------------------------------------------------------------------------------------------------------------------------------------------------------------------------------------------------------------------------------------------------------------------------------------------------------------------------------------------------------------------------------------------------------------------------------------------------------------------------------------------------------------------------------------------------------------------------------------------------------------------------------|
| Communicable, maternal, neonatal, and nutritional diseases        | A00-A00.9,A01.0-A14,A15-A28.9,A31,A31.0,A31.8-A39.9,A42-A44.9,A48.1,A48.2,A48.4-A48.52,A49.1,A50-A58,A63-A63.8,A65-A70,A74,A74.8-A75.9,A77-A96.9,A98-A98.8,B00-B06.9,B10-B10.89,B15-B17.2,B19.1-B19.21,B20-B27.99,B29.4,B33-B33.8,B37-B37.2,B37.5-B37.89,B38-B54.0,B55.0,B56-B60.8,B63,B65-B65.9,B67-B72.0,B74.3-B75,B77-B78.9,B80-B81.8,B83-B83.8,B90-B91,B94.1,B94.2,B95-B95.5,D50-D52.0,D52.8-D53.9,D62-D63.8,D64.1-D64.3,D64.8-D64.9,D69.9,E00-E02,E40-E46.9,E51-E61.9,E63-E64.0,E64.2-E64.9,F07.1,G00.0-G00.8,G03-G03.8,G04-G05.8,G14,G14.6,H70-H70.93,I00,I02,I02.9,J01-J01.91,J02.0,J03.0-J03.01,J05-J05.11,J09-J15.8,J16-J16.9,J20-J21.9,J36,J36.0,K67.0-K67.8,K74.7,K74.8,K93.0,M03.1,M12.1-M12.19,M49.0,M49.1,M73.0,M73.1,M89.6-M89.69,N70-N71.9,N73-N74.8,N96,N98-N98.9,O00-O07.9,O09-O16.9,O20-O26.93,O28-O36.93,O40-O48.1,O60-O77.9,O80-O92.79,O96-P03.1,P03.6-P05.9,P07-P15.9,P19-P29.9,P35-P39.9,P50-P61.9,P70,P70.3-P72.9,P74-P78.9,P80-P81.9,P83-P84,P90-P94.9,P96,P96.3,P96.4,P96.8-P96.89,R19.7 | 001-001.9,002.0-029,031-034.9,036-036.40,036.5,036.8-037.9,039-039.4,039.8-040,040.1-041.89,042-054.0,054.10-066.9,070.0-070.21,070.3-070.31,070.41-070.43,070.51-070.53,070.7-070.71,071-075.9,076.5,076.8,078.4-084.9,085.0,086-088.9,090-104.9,117.3,117.7,120-120.9,122-125,125.4-125.9,127-127.2,127.4-129.0,136-136.29,137-139.0,139.9,244.2,260-263.9,265-269.9,280-281.9,285-285.9,320.0-320.89,321,321.1-323.9,357.0,381-383.9,390-390.9,391.4,392,392.9,461-461.9,466-469,470.0,475-475.9,476.9,480-482.89,483.0-483.9,484.0-484.7,487-489,614-614.9,630-636.92,638-638.92,640-679.14,716.0-716.09,730.4-730.6,730.8-730.99,760-768,768.2-770,770.1-775,775.4-779.34,779.6-779.89,787.91,V30-V39.2 |
| HIV/AIDS and tuberculosis                                         | A10-A14,A15-A19.9,B20-B24.9,B45-B45.9,B90-B90.9,K67.3,K93.0,M49.0,P37.0                                                                                                                                                                                                                                                                                                                                                                                                                                                                                                                                                                                                                                                                                                                                                                                                                                                                                                                                            | 010-019.9,042-044.9,137-137.9,138.0,138.9,139.9,730.4-730.6                                                                                                                                                                                                                                                                                                                                                                                                                                                                                                                                                                                                                                                  |
| Tuberculosis                                                      | A10-A14,A15-A19.9,B90-B90.9,K67.3,K93.0,M49.0,P37.0                                                                                                                                                                                                                                                                                                                                                                                                                                                                                                                                                                                                                                                                                                                                                                                                                                                                                                                                                                | 010-019.9,137-137.9,138.0,138.9,139.9,730.4-730.6                                                                                                                                                                                                                                                                                                                                                                                                                                                                                                                                                                                                                                                            |
| HIV/AIDS                                                          | B20-B24.9,B45-B45.9                                                                                                                                                                                                                                                                                                                                                                                                                                                                                                                                                                                                                                                                                                                                                                                                                                                                                                                                                                                                | 042-044.9                                                                                                                                                                                                                                                                                                                                                                                                                                                                                                                                                                                                                                                                                                    |
| HIV/AIDS resulting in mycobacterial infection                     | B20.0                                                                                                                                                                                                                                                                                                                                                                                                                                                                                                                                                                                                                                                                                                                                                                                                                                                                                                                                                                                                              |                                                                                                                                                                                                                                                                                                                                                                                                                                                                                                                                                                                                                                                                                                              |
| HIV/AIDS resulting in other diseases                              | B20.1-B23.9,B24.0,B45-B45.9                                                                                                                                                                                                                                                                                                                                                                                                                                                                                                                                                                                                                                                                                                                                                                                                                                                                                                                                                                                        | 042.0-042.9,043.0-043.9,044.1-044.9                                                                                                                                                                                                                                                                                                                                                                                                                                                                                                                                                                                                                                                                          |
| Diarrhea, lower respiratory, and other common infectious diseases | A00-A00.9,A01.0-A09.9,A33-A37.91,A39-A39.9,A83-A87.9,B01-B02.9,B05-B05.9,B94.1,F07.1,G00.0-G00.8,G03-G03.8,G04-G05.8,H70-H70.93,J01-J01.91,J05-J05.11,J09-J15.8,J16-J16.9,J20-J21.9,J36,J36.0,P23-P23.9,P35.8,R19.7                                                                                                                                                                                                                                                                                                                                                                                                                                                                                                                                                                                                                                                                                                                                                                                                | 001-001.9,002.0-009.9,032-033.9,036-036.40,036.5,036.8-037.9,047-049.9,052-053.9,055-055.9,062-064.9,139.0,320.0-320.89,321,321.1-323,323.1,323.4-323.9,381-383.9,461-461.9,466-469,470.0,475-475.9,476.9,480-482.89,483.0-483.9,484.0-484.4,484.6,484.7,487-001-001.9,003-006.9,007.4-007.8,008.01,008.02,008.04,008.2-009.9,787.91                                                                                                                                                                                                                                                                                                                                                                         |
| Diarrheal diseases                                                | A00-A00.9,A02-A04.1,A04.3,A04.5-A07,A07.2-A07.4,A08-A09.9,R19.7                                                                                                                                                                                                                                                                                                                                                                                                                                                                                                                                                                                                                                                                                                                                                                                                                                                                                                                                                    |                                                                                                                                                                                                                                                                                                                                                                                                                                                                                                                                                                                                                                                                                                              |
| Cholera                                                           | A00-A00.9                                                                                                                                                                                                                                                                                                                                                                                                                                                                                                                                                                                                                                                                                                                                                                                                                                                                                                                                                                                                          | 001-001.9                                                                                                                                                                                                                                                                                                                                                                                                                                                                                                                                                                                                                                                                                                    |
| Other salmonella infections                                       | A02-A02.9                                                                                                                                                                                                                                                                                                                                                                                                                                                                                                                                                                                                                                                                                                                                                                                                                                                                                                                                                                                                          | 003-003.9                                                                                                                                                                                                                                                                                                                                                                                                                                                                                                                                                                                                                                                                                                    |
| Shigellosis                                                       | A03-A03.9                                                                                                                                                                                                                                                                                                                                                                                                                                                                                                                                                                                                                                                                                                                                                                                                                                                                                                                                                                                                          | 004-004.9                                                                                                                                                                                                                                                                                                                                                                                                                                                                                                                                                                                                                                                                                                    |
| Enteropathogenic E coli infection                                 | A04.0                                                                                                                                                                                                                                                                                                                                                                                                                                                                                                                                                                                                                                                                                                                                                                                                                                                                                                                                                                                                              | 008.01                                                                                                                                                                                                                                                                                                                                                                                                                                                                                                                                                                                                                                                                                                       |
| Enterotoxigenic E coli infection                                  | A04.1                                                                                                                                                                                                                                                                                                                                                                                                                                                                                                                                                                                                                                                                                                                                                                                                                                                                                                                                                                                                              | 008.02,008.04                                                                                                                                                                                                                                                                                                                                                                                                                                                                                                                                                                                                                                                                                                |
| Campylobacter enteritis                                           | A04.5                                                                                                                                                                                                                                                                                                                                                                                                                                                                                                                                                                                                                                                                                                                                                                                                                                                                                                                                                                                                              | 008.43                                                                                                                                                                                                                                                                                                                                                                                                                                                                                                                                                                                                                                                                                                       |
| Amoebiasis                                                        | A06-A06.9                                                                                                                                                                                                                                                                                                                                                                                                                                                                                                                                                                                                                                                                                                                                                                                                                                                                                                                                                                                                          | 006-006.9                                                                                                                                                                                                                                                                                                                                                                                                                                                                                                                                                                                                                                                                                                    |
| Cryptosporidiosis                                                 | A07.2                                                                                                                                                                                                                                                                                                                                                                                                                                                                                                                                                                                                                                                                                                                                                                                                                                                                                                                                                                                                              | 007.4-007.7                                                                                                                                                                                                                                                                                                                                                                                                                                                                                                                                                                                                                                                                                                  |
| Rotaviral enteritis                                               | A08.0                                                                                                                                                                                                                                                                                                                                                                                                                                                                                                                                                                                                                                                                                                                                                                                                                                                                                                                                                                                                              | 008.61                                                                                                                                                                                                                                                                                                                                                                                                                                                                                                                                                                                                                                                                                                       |
| Aeromonas                                                         |                                                                                                                                                                                                                                                                                                                                                                                                                                                                                                                                                                                                                                                                                                                                                                                                                                                                                                                                                                                                                    | 008.2                                                                                                                                                                                                                                                                                                                                                                                                                                                                                                                                                                                                                                                                                                        |
| Clostridium difficile                                             | A04.7                                                                                                                                                                                                                                                                                                                                                                                                                                                                                                                                                                                                                                                                                                                                                                                                                                                                                                                                                                                                              | 008.45                                                                                                                                                                                                                                                                                                                                                                                                                                                                                                                                                                                                                                                                                                       |

**Web Table 14 - List of International Classification of Diseases codes mapped to the Global Burden of Disease cause list for Causes of Death**

| Cause Name                              | ICD10 Code                                                                                                                                                                              | ICD9 Code                                                                                                         |
|-----------------------------------------|-----------------------------------------------------------------------------------------------------------------------------------------------------------------------------------------|-------------------------------------------------------------------------------------------------------------------|
| Norovirus                               | A08.1-A08.19                                                                                                                                                                            | 008.63                                                                                                            |
| Adenovirus                              | A08.2                                                                                                                                                                                   | 008.62                                                                                                            |
| Other bacterial foodborne diarrhea      | A05-A05.9                                                                                                                                                                               | 005-005.9                                                                                                         |
| Other diarrheal diseases                | A04,A04.3,A04.6,A04.8,A04.9,A07,A07.3,A07.4,A08,A08.3-A09.9,R19.7                                                                                                                       | 007.8,008.3-008.42,008.44,008.46-008.6,008.64-009.9,787.91                                                        |
| Intestinal infectious diseases          | A01.0-A01.4,A04.2,A04.4,A07.0,A07.1,A07.8,A07.9                                                                                                                                         | 002.0-002.9,007-007.3,007.9-008.00,008.03,008.09,008.1                                                            |
| Typhoid fever                           | A01.0-A01.09                                                                                                                                                                            | 002.0                                                                                                             |
| Paratyphoid fever                       | A01.1-A01.4                                                                                                                                                                             | 002.1-002.9                                                                                                       |
| Other intestinal infectious diseases    | A04.2,A04.4,A07.0,A07.1,A07.8,A07.9                                                                                                                                                     | 007-007.3,007.9-008.00,008.03,008.09,008.1                                                                        |
| Lower respiratory infections            | J09-J15.8,J16-J16.9,J20-J21.9,P23-P23.9                                                                                                                                                 | 466-469,470.0,480-482.89,483.0-483.9,484.1,484.2,484.6,484.7,487-489                                              |
| Influenza                               | J09-J11.89                                                                                                                                                                              | 487-489                                                                                                           |
| Pneumococcal pneumonia                  | J13,J13.0,J15.3,J15.4,J15.6                                                                                                                                                             | 481-481.9                                                                                                         |
| H influenzae type B pneumonia           | J14,J14.0                                                                                                                                                                               | 482.2                                                                                                             |
| Respiratory syncytial virus pneumonia   | J12.1                                                                                                                                                                                   | 480.1                                                                                                             |
| Other lower respiratory infections      | J12,J12.0,J12.2-J12.9,J15-J15.29,J15.5,J15.7,J15.8,J16-J16.9,J20-J21.9,P23-P23.9                                                                                                        | 466-469,470.0,480,480.0,480.2-480.9,482-482.1,482.3-482.89,483.0-483.9,484.1,484.2,484.6,484.7                    |
| Upper respiratory infections            | J01-J01.91,J05-J05.11,J36,J36.0                                                                                                                                                         | 461-461.9,475-475.9,476.9                                                                                         |
| Otitis media                            | H70-H70.93                                                                                                                                                                              | 381-383.9                                                                                                         |
| Meningitis                              | A39-A39.9,A87-A87.9,G00.0-G00.8,G03-G03.8                                                                                                                                               | 036-036.40,036.5,036.8-036.9,047-049.9,320.0-320.89,321,321.1-322.9                                               |
| Pneumococcal meningitis                 | G00.1                                                                                                                                                                                   | 320.1                                                                                                             |
| H influenzae type B meningitis          | G00.0                                                                                                                                                                                   | 320.0                                                                                                             |
| Meningococcal meningitis                | A39-A39.9                                                                                                                                                                               | 036-036.40,036.5,036.8-036.9                                                                                      |
| Other meningitis                        | A87-A87.9,G00.2-G00.8,G03-G03.8                                                                                                                                                         | 047-049.9,320.2-320.89,321,321.1-322.9                                                                            |
| Encephalitis                            | A83-A86.4,B94.1,F07.1,G04-G05.8                                                                                                                                                         | 062-064.9,139.0,323,323.4-323.9                                                                                   |
| Diphtheria                              | A36-A36.9                                                                                                                                                                               | 032-032.9                                                                                                         |
| Whooping cough                          | A37-A37.91                                                                                                                                                                              | 033-033.9,484.3,484.4                                                                                             |
| Tetanus                                 | A33-A35.0                                                                                                                                                                               | 037-037.9,771.3                                                                                                   |
| Measles                                 | B05-B05.9                                                                                                                                                                               | 055-055.9,323.1,484.0                                                                                             |
| Varicella                               | B01-B02.9,P35.8                                                                                                                                                                         | 052-053.9                                                                                                         |
| Neglected tropical diseases and malaria | A68-A68.9,A69.2-A69.5,A75-A75.9,A77-A79.9,A82-A82.9,A90-A96.9,A98-A98.8,B50-B54.0,B55.0,B56-B58,B59-B60.8,B65-B65.9,B67-B72.0,B74.3-B75,B77-B78.9,B80-B81.8,B83-B83.8,P37.1,P37.3,P37.4 | 060-061.8,065-066.9,071-071.9,080,080.2-084.9,085.0,086-088.9,120-120.9,122-125,125.4-125.9,127-127.2,127.4-129.0 |
| Malaria                                 | B50-B54.0,P37.3,P37.4                                                                                                                                                                   | 084-084.9                                                                                                         |
| Chagas disease                          | B57-B57.5                                                                                                                                                                               | 086-086.2,086.9                                                                                                   |
| Leishmaniasis                           | B55.0                                                                                                                                                                                   | 085.0                                                                                                             |
| Visceral leishmaniasis                  | B55.0                                                                                                                                                                                   | 085.0                                                                                                             |
| African trypanosomiasis                 | B56-B56.9                                                                                                                                                                               | 086.3-086.5                                                                                                       |
| Schistosomiasis                         | B65-B65.9                                                                                                                                                                               | 120-120.9                                                                                                         |
| Cysticercosis                           | B69-B69.9                                                                                                                                                                               | 123.1                                                                                                             |

**Web Table 14 - List of International Classification of Diseases codes mapped to the Global Burden of Disease cause list for Causes of Death**

| Cause Name                                               | ICD10 Code                                                                                                                                                                             | ICD9 Code                                                                                                                  |
|----------------------------------------------------------|----------------------------------------------------------------------------------------------------------------------------------------------------------------------------------------|----------------------------------------------------------------------------------------------------------------------------|
| Cystic echinococcosis                                    | B67-B67.99                                                                                                                                                                             | 122-122.9                                                                                                                  |
| Dengue                                                   | A90-A91.9                                                                                                                                                                              | 061-061.8                                                                                                                  |
| Yellow fever                                             | A95-A95.9                                                                                                                                                                              | 060-060.9                                                                                                                  |
| Rabies                                                   | A82-A82.9                                                                                                                                                                              | 071-071.9                                                                                                                  |
| Intestinal nematode infections                           | B77-B77.9                                                                                                                                                                              | 127.0                                                                                                                      |
| Ascariasis                                               | B77-B77.9                                                                                                                                                                              | 127.0                                                                                                                      |
| Other neglected tropical diseases                        | A68-A68.9,A69.2-A69.5,A75-A75.9,A77-A79.9,A92-A94.0,A96-A96.9,A98-A98.8,B58,B59-B60.8,B68-B68.9,B70-B72.0,B74.3-B75,B78-B78.9,B80-B81.8,B83-B83.8,P37.1                                | 065-066.9,080,080.2-083.9,087-088.9,123,123.0,123.2-125,125.4-125.9,127,127.1,127.2,127.4-129.0                            |
| Maternal disorders                                       | N96,N98-N98.9,O00-O07.9,O09-O16.9,O20-O26.93,O28-O36.93,O40-O48.1,O60-O77.9,O80-O92.79,O96-O99.91                                                                                      | 630-636.92,638-638.92,640-679.14,V30-V39.2                                                                                 |
| Maternal hemorrhage                                      | O20-O20.9,O43.2-O43.239,O44-O46.93,O67-O67.9,O70,O72-O72.3                                                                                                                             | 640-641.93,665,666-666.9                                                                                                   |
| Maternal sepsis and other maternal infections            | O23-O23.93,O85-O86.89,O91-O91.23                                                                                                                                                       | 659.3-659.33,670-670.9                                                                                                     |
| Maternal hypertensive disorders                          | O10-O16.9                                                                                                                                                                              | 642-642.94                                                                                                                 |
| Maternal obstructed labor                                | O32-O33.9,O64-O66.9,O71-O71.9                                                                                                                                                          | 652-653.93,660-660.93,665.0-665.34                                                                                         |
| Maternal abortive outcome                                | N96,O00-O07.9                                                                                                                                                                          | 630-636.92,638-638.92,646.3-646.33                                                                                         |
| Indirect maternal deaths                                 | O24-O25.3,O98-O99.91                                                                                                                                                                   | 646-646.24,646.4-649.9,674-674.94                                                                                          |
| Late maternal deaths                                     | O96-O97.9                                                                                                                                                                              |                                                                                                                            |
| Other maternal disorders                                 | N98-N98.9,O09-O09.93,O21-O22.93,O26-O26.93,O28-O31.8,O34-O36.93,O40-O43.199,O43.8-O43.93,O47-O48.1,O60-O63.9,O68-O69.9,O70.0-O70.9,O73-O77.9,O80-O84.9,O87-O90.9,O92-O92.79            | 643-645.23,650-651.93,654-659.23,659.4-659.93,661-664.94,665.4-665.94,667-669.94,671-673.9,675-679.14                      |
| Neonatal disorders                                       | P00-P03.1,P03.6-P05.9,P07-P15.9,P19-P22.9,P24-P29.9,P36-P36.9,P38-P39.9,P50-P61.9,P70,P70.3-P72.9,P74-P78.9,P80-P81.9,P83-P84,P90-P94.9,P96,P96.3,P96.4,P96.8-P96.89                   | 760-768,768.2-770,770.1-771,771.4-775,775.4-779.34,779.6-779.89                                                            |
| Neonatal preterm birth complications                     | P01.0,P01.1,P07-P07.39,P22-P22.9,P25-P28.9,P61.2,P77-P77.9                                                                                                                             | 761.0,761.1,765-765.9,769-769.9,770.2-770.9,776.6,777.5-777.6                                                              |
| Neonatal encephalopathy due to birth asphyxia and trauma | P01.7-P03.1,P03.6-P03.9,P10-P15.9,P20-P21.9,P24-P24.9,P90-P91.9                                                                                                                        | 761.7-763.9,767-768,768.2-768.9,770.1-770.18,772.1-772.9,779.0-779.2                                                       |
| Neonatal sepsis and other neonatal infections            | P36-P36.9,P38-P39.9                                                                                                                                                                    | 771.4-771.9                                                                                                                |
| Hemolytic disease and other neonatal jaundice            | P55-P59.9                                                                                                                                                                              | 773-774.9                                                                                                                  |
| Other neonatal disorders                                 | P00-P01,P01.2-P01.6,P04-P05.9,P08-P09,P19-P19.9,P29-P29.9,P50-P54.9,P60-P61.1,P61.3-P61.9,P70,P70.3-P72.9,P74-P76.9,P78-P78.9,P80-P81.9,P83-P84,P92-P94.9,P96,P96.3,P96.4,P96.8-P96.89 | 760-761,761.2-761.6,764-764.99,766-766.9,770,771,772,772.0,775,775.4-776.5,776.7-777.4,777.7-779,779.3-779.34,779.6-779.89 |
| Nutritional deficiencies                                 | D50-D52.0,D52.8-D53.9,D62-D63.8,D64.1-D64.3,D64.8-D64.9,D69.9,E00-E02,E40-E46.9,E51-E61.9,E63-E64.0,E64.2-E64.9,M12.1-M12.19                                                           | 244.2,260-263.9,265-269.9,280-281.9,285-285.9,716.0-716.09                                                                 |
| Protein-energy malnutrition                              | E40-E46.9,E64.0                                                                                                                                                                        | 260-263.9                                                                                                                  |
| Iodine deficiency                                        | E00-E02                                                                                                                                                                                | 244.2                                                                                                                      |
| Iron-deficiency anemia                                   | D50-D50.9,D62-D63.8,D64.1-D64.3,D64.8-D64.9,D69.9                                                                                                                                      | 280-281,285-285.9                                                                                                          |
| Other nutritional deficiencies                           | D51-D52.0,D52.8-D53.9,E51-E61.9,E63-E64,E64.2,E64.3,M12.1-M12.19                                                                                                                       | 265-269.9,281.0-281.9,716.0-716.09                                                                                         |

**Web Table 14 - List of International Classification of Diseases codes mapped to the Global Burden of Disease cause list for Causes of Death**

| Cause Name                                                       | ICD10 Code                                                                                                                                                                                                                                                                                                                                                                                                                                                                                                             | ICD9 Code                                                                                                                                                                                                                                                                                                                                                                |
|------------------------------------------------------------------|------------------------------------------------------------------------------------------------------------------------------------------------------------------------------------------------------------------------------------------------------------------------------------------------------------------------------------------------------------------------------------------------------------------------------------------------------------------------------------------------------------------------|--------------------------------------------------------------------------------------------------------------------------------------------------------------------------------------------------------------------------------------------------------------------------------------------------------------------------------------------------------------------------|
| Other communicable, maternal, neonatal, and nutritional diseases | A20-A28.9,A31,A31.0,A31.8-A32.9,A38-A38.9,A42-A44.9,A48.1,A48.2,A48.4-A48.52,A49.1,A50-A58,A63-A63.8,A65-A67.9,A69-A69.1,A69.8-A70,A74,A74.8-A74.9,A80-A81.9,A88-A89.9,B00-B00.9,B03,B04,B06-B06.9,B10-B10.89,B15-B17.2,B19.1-B19.21,B25-B27.99,B29.4,B33-B33.8,B37-B37.2,B37.5-B37.89,B38-B44.9,B46-B49.9,B58.0-B58.9,B63,B91,B94.2,B95-B95.5,G14,G14.6,I00,I02,I02.9,J02.0,J03.0-J03.01,K67.0-K67.2,K67.8,K74.7,K74.8,M03.1,M49.1,M73.0,M73.1,M89.6-M89.69,N70-N71.9,N73-N74.8,P35-P35.3,P35.9,P37.P37.2.P37.5-P37.9 | 020-029,031-031.9,034-034.9,039-039.4,039.8-040,040.1-041.89,045-046.9,050-051.9,054,054.0,054.10-054.9,056-059.9,070.0-070.21,070.3-070.31,070.41-070.43,070.51-070.53,070.7-070.71,072-075.9,076.5,076.8,078.4-079.99,080.0,090-104.9,117.3,117.7,136-136.29,138,139,323.0-323.02,323.2,323.3,357.0,390-390.9,391.4,392,392.9,484.5,614-614.9,730.8-730.99,771.0-771.2 |
| Sexually transmitted diseases excluding HIV                      | A50-A58,A63-A63.8,B63,K67.0-K67.2,M03.1,M73.0,M73.1,N70-N71.9,N73-N74.8                                                                                                                                                                                                                                                                                                                                                                                                                                                | 090-099.9,614-614.9                                                                                                                                                                                                                                                                                                                                                      |
| Syphilis                                                         | A50-A53.9,K67.2,M03.1,M73.1                                                                                                                                                                                                                                                                                                                                                                                                                                                                                            | 090-097.9                                                                                                                                                                                                                                                                                                                                                                |
| Chlamydial infection                                             | A55-A56.8,K67.0                                                                                                                                                                                                                                                                                                                                                                                                                                                                                                        | 099,099.1,099.3-099.6                                                                                                                                                                                                                                                                                                                                                    |
| Gonococcal infection                                             | A54-A54.9,K67.1,M73.0                                                                                                                                                                                                                                                                                                                                                                                                                                                                                                  | 098-098.9                                                                                                                                                                                                                                                                                                                                                                |
| Other sexually transmitted diseases                              | A57-A58,A63-A63.8                                                                                                                                                                                                                                                                                                                                                                                                                                                                                                      | 099.0,099.2,099.8,099.9                                                                                                                                                                                                                                                                                                                                                  |
| Hepatitis                                                        | B15-B17.2,B19.1-B19.21,B94.2,P35.3                                                                                                                                                                                                                                                                                                                                                                                                                                                                                     | 070.0-070.21,070.3-070.31,070.41-070.43,070.51-070.53,070.7-070.71                                                                                                                                                                                                                                                                                                       |
| Acute hepatitis A                                                | B15-B15.9                                                                                                                                                                                                                                                                                                                                                                                                                                                                                                              | 070.0,070.1                                                                                                                                                                                                                                                                                                                                                              |
| Acute hepatitis B                                                | B16-B17.0,B19.1-B19.11,P35.3                                                                                                                                                                                                                                                                                                                                                                                                                                                                                           | 070.2-070.21,070.3-070.31,070.42,070.52                                                                                                                                                                                                                                                                                                                                  |
| Acute hepatitis C                                                | B17.1-B17.11,B19.2-B19.21                                                                                                                                                                                                                                                                                                                                                                                                                                                                                              | 070.41,070.51,070.7-070.71                                                                                                                                                                                                                                                                                                                                               |
| Acute hepatitis E                                                | B17.2                                                                                                                                                                                                                                                                                                                                                                                                                                                                                                                  | 070.43,070.53                                                                                                                                                                                                                                                                                                                                                            |
| Other infectious diseases                                        | A20-A28.9,A31,A31.0,A31.8-A32.9,A38-A38.9,A42-A44.9,A48.1,A48.2,A48.4-A48.52,A49.1,A65-A67.9,A69-A69.1,A69.8-A70,A74,A74.8-A74.9,A80-A81.9,A88-A89.9,B00-B00.9,B03,B04,B06-B06.9,B10-B10.89,B25-B27.99,B29.4,B33-B33.8,B37-B37.2,B37.5-B37.89,B38-B44.9,B46-B49.9,B58.0-B58.9,B91,B95-B95.5,G14,G14.6,I00,I02,I02.9,J02.0,J03.0-J03.01,K67.8,K74.7,K74.8,M49.1,M89.6-M89.69,P35-P35.2,P35.9,P37.P37.2.P37.5-P37.9                                                                                                      | 020-029,031-031.9,034-034.9,039-039.4,039.8-040,040.1-041.89,045-046.9,050-051.9,054,054.0,054.10-054.9,056-059.9,072-075.9,076.5,076.8,078.4-079.99,080.0,100-104.9,117.3,117.7,136-136.29,138,139,323.0-323.02,323.2,323.3,357.0,390-390.9,391.4,392,392.9,484.5,730.8-730.99,771.0-771.2                                                                              |

**Web Table 14 - List of International Classification of Diseases codes mapped to the Global Burden of Disease cause list for Causes of Death**

| Cause Name                | ICD10 Code                                                                                                                                                                                                                                                                                                                                                                                                                                                                                                                                                                                                                                                                                                                                                                                                                                                                                                                                                                                                                                                                                                                                                                                                                                                                                                                                                                                                                                                                                                                                                                                                                                                                                                                                                                                                                                                                                                                                                                                                                                                                             | ICD9 Code                                                                                                                                                                                                                                                                                                                                                                                                                                                                                                                                                                                                                                                                                                                                                                                                                                                                                                                                                                                                                                                                                                                                                                                                                                                                                                                                                                                                                                                                                                                                                                                                                                                                                                                                                                                                                                                                                                                                                                                |
|---------------------------|----------------------------------------------------------------------------------------------------------------------------------------------------------------------------------------------------------------------------------------------------------------------------------------------------------------------------------------------------------------------------------------------------------------------------------------------------------------------------------------------------------------------------------------------------------------------------------------------------------------------------------------------------------------------------------------------------------------------------------------------------------------------------------------------------------------------------------------------------------------------------------------------------------------------------------------------------------------------------------------------------------------------------------------------------------------------------------------------------------------------------------------------------------------------------------------------------------------------------------------------------------------------------------------------------------------------------------------------------------------------------------------------------------------------------------------------------------------------------------------------------------------------------------------------------------------------------------------------------------------------------------------------------------------------------------------------------------------------------------------------------------------------------------------------------------------------------------------------------------------------------------------------------------------------------------------------------------------------------------------------------------------------------------------------------------------------------------------|------------------------------------------------------------------------------------------------------------------------------------------------------------------------------------------------------------------------------------------------------------------------------------------------------------------------------------------------------------------------------------------------------------------------------------------------------------------------------------------------------------------------------------------------------------------------------------------------------------------------------------------------------------------------------------------------------------------------------------------------------------------------------------------------------------------------------------------------------------------------------------------------------------------------------------------------------------------------------------------------------------------------------------------------------------------------------------------------------------------------------------------------------------------------------------------------------------------------------------------------------------------------------------------------------------------------------------------------------------------------------------------------------------------------------------------------------------------------------------------------------------------------------------------------------------------------------------------------------------------------------------------------------------------------------------------------------------------------------------------------------------------------------------------------------------------------------------------------------------------------------------------------------------------------------------------------------------------------------------------|
| Non-communicable diseases | A31.1,A31.2,A46,A46.0,B18-B18.9,B37.3-B37.49,B37.9,C00-C13.9,C15-C25.9,C30-C34.92,C37-C38.8,C40-C41.9,C43-C45.9,C47-C54.9,C56-C57.8,C58,C58.0,C60-C63.8,C64-C67.9,C68.0-C68.8,C69-C75.8,C81-C86.6,C88-C97.9,D00.00-D00.2,D01.0-D01.3,D02.0-D02.3,D03-D06.9,D07.0-D07.2,D07.4,D07.5,D09.0,D09.2-D09.8,D10.0-D10.7,D11-D12.9,D13.0-D13.7,D14.0-D14.32,D15-D16.9,D22-D25.9,D26.0,D26.1,D27-D27.9,D28.0-D28.7,D29.0-D29.8,D30.0-D30.8,D31-D36,D36.1-D36.7,D37.01-D37.5,D38.0-D38.5,D39.1-D39.8,D40.0-D40.8,D41.0-D41.8,D42-D43.9,D44.0-D44.8,D45-D47.9,D48.0-D48.62,D49.2-D49.4,D49.6,D49.81,D52.1,D55-D58.9,D59.0-D59.3,D59.5,D59.6,D60-D61.9,D64.0,D64.4,D66-D69.8,D70-D75.89,D76-D78.89,D80-D83.9,D84.0-D84.8,D86-D86.9,D89-D89.3,E03-E07.1,E09-E16.9,E20-E34.8,E36-E36.8,E65-E68,E70-E85.29,E87.71,E88-E89.9,F00-F03.91,F06.2,F10-F11.99,F13-F16.99,F18-F23.9,F25-F29.9,F50.0-F50.1,G10-G13.8,G20-G26.0,G30-G31.9,G35-G37.9,G40-G41.9,G45-G46.8,G47.3-G47.39,G61-G61.9,G70-G73.7,G90-G90.9,G93.7,G95-G95.9,G97-G97.9,I01-I01.9,I02.0,I05-I09.9,I11-I13.9,I20-I25.9,I27.1,I28-I28.8,I30-I31.1,I31.8,I31.9,I33-I42.9,I47-I48.92,I51.0-I51.6,I60-I61.9,I62.0-I62.03,I63-I63.9,I65-I66.9,I67.0-I67.3,I67.5-I67.7,I69.0-I69.198,I69.20-I69.398,I70.2-I70.8,I71-I78.9,I80-I89.9,I91.9,I95.2,I95.3,I97-I98.2,I98.9,J30-J35.9,J37-J47.9,J60-J63.8,J65-J68.9,J70-J70.9,J82,J84-J84.9,J91-J92.9,J95-J95.9,K20-K22.9,K25-K29.91,K31-K31.89,K35-K38.9,K40-K46.9,K50-K52.9,K55-K57.93,K58.0-K62.9,K63.5,K64-K64.9,K66.8,K67,K68-K68.9,K70-K70.9,K71.3-K71.51,K71.7,K72.1-K74.69,K74.9,K75.2-K77.8,K80-K83.9,K85-K86.9,K90-K92,K92.8-K92.89,K94-K95.89,L00-L05.92,L08-L08.9,L10-L14.0,L51-L51.9,L88-L89.95,L93-L93.2,L97-L98.499,M00-M03.0,M03.2,M03.6,M05-M09.8,M30-M36.8,M40-M43.19,M65-M65.08,M71.0-M71.19,M86-M87.19,M88-M89.09,M89.5-M89.59,M89.7-M89.9,N00-N08.8,N10-N12.9,N14-N16.8,N18-N18.9,N20-N23.0,N25-N32.0,N32.3,N32.4,N34-N34.3,N36-N36.9,N39-N39.2,N41-N41.9,N44-N45.9,N49-N51.8,N65-N65.1,N72,N72.0,N75-N77.8,N80-N81.9,N83-N83.0,N84.0,N84.1,N87,N87.0,N90,N90.0,D02.2,D02.5,D70.0 | 035-035.9,036.41-036.43,036.6,070.22,070.23,070.32,070.33,070.44,070.54,112,112.1,112.2,135-135.9,136.6,140-148.9,150-158.9,160-164.9,170-175.9,180-183.8,184.0-184.4,184.8,185-186.9,187.1-187.8,188-188.9,189.0-189.8,190-194.8,200-208.92,209.0-209.17,209.21-209.27,209.31-209.57,209.61,209.63-209.67,210.0-210.9,211.0-211.8,212.0-212.8,213-213.9,217-218.9,219.0,219.1,220-220.9,221.0-221.8,222.0-222.8,223.0-223.89,224-228.9,229.0,229.8,230.1-230.8,231.0-231.2,232-232.9,233.0-233.2,233.31,233.32,233.4,233.5,233.7,234.0-234.8,235.0,235.4,235.6-235.8,236.1,236.2,236.4,236.5,236.7,236.91-237.9,238.0-238.8,239.2-239.4,239.6,240-243.9,244.0,244.1,244.3,244.8,245-246.9,250-259.9,270-273.9,275-276,277-277.2,277.30-277.9,278.0-279,279.6,282-284.9,286-286.5,286.7-292.9,294.1-295.95,303-303.93,304.0-304.23,304.4-304.83,305-305.13,305.3-305.93,307.1,307.54,327.2-327.8,330-331.2,331.5-337.9,340-341.9,345-345.91,349-349.8,353.6-353.9,356-356.9,357.1-357.7,358-359.9,391-391.2,391.8,391.9,392.0,393-398.99,402-404.93,410-414.9,416.1,416.2,417-417.9,420-423,423.1-425.9,427-427.32,427.6-427.89,429.0,429.1,430-435.9,437.0-437.2,437.5-437.8,441-457.9,459,459.1-459.39,470,470.9-474.9,476-476.1,477-479,490-504.9,506-506.9,508-509,515,516-517.8,518.6,518.7,518.9,519.0-519.8,530-536.1,536.4-536.49,537-537.6,537.8-537.84,538-543.9,550-553.6,555-558.9,560-560.39,560.8-560.9,562-562.13,564-564.7,565-566.9,569.0-569.44,569.5-569.71,569.84,569.85,571-571.9,572.3-572.9,573.0-573.4,573.8-577.9,579-583.9,585-585.9,588-590.9,592-593.89,594-599.6,599.8-599.89,601-602.9,604-604.99,610-610.9,617-617.9,620-620.9,621.4-621.9,622.3-622.7,629-629.81,680-686.9,694-695.59,707-707.9,710-711.99,714-714.33,714.8-714.9,728.86,728.88,730-730.29,732-732.9,740-749.04,749.2-758.6,758.8-758.9,759.0-759.89,775.0-775.3,779.4,779.5,780.57,780.62,780.63,786.03,787.1,788.0,790.2-790.22,790.3,798.0,E85.0-E85.029,E85.09-E85.439,E86.0-E86.019 |

**Web Table 14 - List of International Classification of Diseases codes mapped to the Global Burden of Disease cause list for Causes of Death**

| Cause Name                           | ICD10 Code                                                                                                                                                                                                                                                                                                                                                                                                                                                                                                          | ICD9 Code                                                                                                                                                                                                                                                                                                                                                                                                                                                                                                                                                                          |
|--------------------------------------|---------------------------------------------------------------------------------------------------------------------------------------------------------------------------------------------------------------------------------------------------------------------------------------------------------------------------------------------------------------------------------------------------------------------------------------------------------------------------------------------------------------------|------------------------------------------------------------------------------------------------------------------------------------------------------------------------------------------------------------------------------------------------------------------------------------------------------------------------------------------------------------------------------------------------------------------------------------------------------------------------------------------------------------------------------------------------------------------------------------|
|                                      | C00-C13.9,C15-C25.9,C30-C34.92,C37-C38.8,C40-C41.9,C43-C45.9,C47-C54.9,C56-C57.8,C58,C58.0,C60-C63.8,C64-C67.9,C68.0-C68.8,C69-C75.8,C81-C86.6,C88-C97.9,D00.00-D00.2,D01.0-D01.3,D02.0-D02.3,D03-D06.9,D07.0-D07.2,D07.4,D07.5,D09.0,D09.3-D09.8,D10.0-D10.7,D11-D12.9,D13.0-D13.7,D14.0-D14.32,D15-D16.9,D22-D25.9,D26.0,D26.1,D27-D27.9,D28.0-D28.7,D29.0-D29.8,D30.0-D30.8,D31-D36,D36.1-D36.7,D37.01-D37.5,D38.0-D38.5,D39.1-D39.8,D40.0-D40.8,D41.0-D41.8,D42-D43.9,D44.0-D44.8,D45-D47.9,D48.0-D48.62,D49.2- | 140-148.9,150-158.9,160-164.9,170-175.9,180-183.8,184.0-184.4,184.8,185-186.9,187.1-187.8,188-188.9,189.0-189.8,190-194.8,200-208.92,209.0-209.17,209.21-209.27,209.31-209.57,209.61,209.63-209.67,210.0-210.9,211.0-211.8,212.0-212.8,213-213.9,217-218.9,219.0,219.1,220-220.9,221.0-221.8,222.0-222.8,223.0-223.89,224-228.9,229.0,229.8,230.1-230.8,231.0-231.2,232-232.9,233.0-233.2,233.31,233.32,233.4,233.5,233.7,234.0-234.8,235.0,235.4,235.6-235.8,236.1,236.2,236.4,236.5,236.7,236.91-237.9,238.0-238.8,239.2-239.4,239.6,569.0,569.43,569.44,569.84,569.85,610-610.9 |
| Neoplasms                            | D49.4,D49.6,D49.81,K31.7,K62.0,K62.1,K63.5,N84.0,N84.1,N                                                                                                                                                                                                                                                                                                                                                                                                                                                            |                                                                                                                                                                                                                                                                                                                                                                                                                                                                                                                                                                                    |
| Esophageal cancer                    | C15-C15.9,D00.1,D13.0                                                                                                                                                                                                                                                                                                                                                                                                                                                                                               | 150-150.9,211.0,230.1                                                                                                                                                                                                                                                                                                                                                                                                                                                                                                                                                              |
| Stomach cancer                       | C16-C16.9,D00.2,D13.1,D37.1                                                                                                                                                                                                                                                                                                                                                                                                                                                                                         | 151-151.9,209.23,209.63,211.1,230.2                                                                                                                                                                                                                                                                                                                                                                                                                                                                                                                                                |
| Liver cancer                         | C22-C22.9,D13.4                                                                                                                                                                                                                                                                                                                                                                                                                                                                                                     | 155-155.3,211.5                                                                                                                                                                                                                                                                                                                                                                                                                                                                                                                                                                    |
| Larynx cancer                        | C32-C32.9,D02.0,D14.1,D38.0                                                                                                                                                                                                                                                                                                                                                                                                                                                                                         | 161-161.9,162.1,212.1,231.0,235.6                                                                                                                                                                                                                                                                                                                                                                                                                                                                                                                                                  |
| Lung, bronchus, and trachea cancer   | C33-C34.92,D02.1-D02.3,D14.2-D14.32,D38.1                                                                                                                                                                                                                                                                                                                                                                                                                                                                           | 162,162.0,162.2-162.9,209.21,209.61,212.2,212.3,231.1,231.2,235.7                                                                                                                                                                                                                                                                                                                                                                                                                                                                                                                  |
| Breast cancer                        | C50-C50.929,D05-D05.92,D24-D24.9,D48.6-D48.62,D49.3                                                                                                                                                                                                                                                                                                                                                                                                                                                                 | 174-175.9,217-217.8,233.0,238.3,239.3,610-610.9                                                                                                                                                                                                                                                                                                                                                                                                                                                                                                                                    |
| Cervical cancer                      | C53-C53.9,D06-D06.9,D26.0,D26.1,N84.1                                                                                                                                                                                                                                                                                                                                                                                                                                                                               | 180-180.9,219.0,219.1,233.1                                                                                                                                                                                                                                                                                                                                                                                                                                                                                                                                                        |
| Uterine cancer                       | C54-C54.9,D25-D25.9,N84.0,N87-N87.9                                                                                                                                                                                                                                                                                                                                                                                                                                                                                 | 182-182.8,218-218.9,233.2                                                                                                                                                                                                                                                                                                                                                                                                                                                                                                                                                          |
| Prostate cancer                      | C61-C61.9,D29.1,D40.0                                                                                                                                                                                                                                                                                                                                                                                                                                                                                               | 185-185.9,222.2,236.5                                                                                                                                                                                                                                                                                                                                                                                                                                                                                                                                                              |
| Colon and rectum cancer              | C18-C20.0,C20.9-C21.8,D01.0-D01.3,D12-D12.9,D37.3-D37.5,K62.0,K62.1,K63.5                                                                                                                                                                                                                                                                                                                                                                                                                                           | 153-154.9,155.5,155.9,209.1-209.17,209.5-209.57,211.3,211.4,230.3-230.6                                                                                                                                                                                                                                                                                                                                                                                                                                                                                                            |
| Mouth cancer                         | C00-C08.9,D00.00-D00.07,D10.0-D10.5,D11-D11.9,D37.01-D37.04,D37.09                                                                                                                                                                                                                                                                                                                                                                                                                                                  | 140-145.9,210.0-210.6,235.0                                                                                                                                                                                                                                                                                                                                                                                                                                                                                                                                                        |
| Nasopharynx cancer                   | C11-C11.9,D00.08,D10.6,D37.05                                                                                                                                                                                                                                                                                                                                                                                                                                                                                       | 147-147.9,210.7-210.9                                                                                                                                                                                                                                                                                                                                                                                                                                                                                                                                                              |
| Other pharynx cancer                 | C09-C10.9,C12-C13.9,D10.7                                                                                                                                                                                                                                                                                                                                                                                                                                                                                           | 146-146.9,148-148.9                                                                                                                                                                                                                                                                                                                                                                                                                                                                                                                                                                |
| Gallbladder and biliary tract cancer | C20.8,C23-C24.9,D13.5                                                                                                                                                                                                                                                                                                                                                                                                                                                                                               | 156-156.9,209.25-209.27,209.65-209.67                                                                                                                                                                                                                                                                                                                                                                                                                                                                                                                                              |
| Pancreatic cancer                    | C25-C25.9,D13.6,D13.7                                                                                                                                                                                                                                                                                                                                                                                                                                                                                               | 157-157.9,211.6,211.7                                                                                                                                                                                                                                                                                                                                                                                                                                                                                                                                                              |
| Malignant skin melanoma              | C43-C43.9,C44A,D03-D03.9,D22-D23.9,D48.5                                                                                                                                                                                                                                                                                                                                                                                                                                                                            | 172-172.9                                                                                                                                                                                                                                                                                                                                                                                                                                                                                                                                                                          |
| Non-melanoma skin cancer             | C44-C44.99,D04-D04.9,D49.2                                                                                                                                                                                                                                                                                                                                                                                                                                                                                          | 173-173.99,209.31-209.36,222.4,232-232.9,238.2                                                                                                                                                                                                                                                                                                                                                                                                                                                                                                                                     |
| Ovarian cancer                       | C56-C56.9,D27-D27.9,D39.1-D39.12                                                                                                                                                                                                                                                                                                                                                                                                                                                                                    | 183,183.0,220-220.9,236.2                                                                                                                                                                                                                                                                                                                                                                                                                                                                                                                                                          |
| Testicular cancer                    | C62-C62.92,D29.2-D29.8,D40.1-D40.8                                                                                                                                                                                                                                                                                                                                                                                                                                                                                  | 186-186.9,222.0,222.3,236.4                                                                                                                                                                                                                                                                                                                                                                                                                                                                                                                                                        |
| Kidney cancer                        | C64-C65.9,D30.0-D30.12,D41.0-D41.12                                                                                                                                                                                                                                                                                                                                                                                                                                                                                 | 189.0,189.1,209.24,209.64,223.0,223.1,236.91                                                                                                                                                                                                                                                                                                                                                                                                                                                                                                                                       |
| Bladder cancer                       | C67-C67.9,D09.0,D30.3,D41.4-D41.8,D49.4                                                                                                                                                                                                                                                                                                                                                                                                                                                                             | 188-188.9,223.3,233.7,236.7,239.4                                                                                                                                                                                                                                                                                                                                                                                                                                                                                                                                                  |
| Brain and nervous system cancer      | C70-C72.9                                                                                                                                                                                                                                                                                                                                                                                                                                                                                                           | 191-192.9                                                                                                                                                                                                                                                                                                                                                                                                                                                                                                                                                                          |
| Thyroid cancer                       | C73-C73.9,D09.3-D09.8,D34-D34.9,D44.0                                                                                                                                                                                                                                                                                                                                                                                                                                                                               | 193-193.9,226-226.9                                                                                                                                                                                                                                                                                                                                                                                                                                                                                                                                                                |
| Mesothelioma                         | C45-C45.9                                                                                                                                                                                                                                                                                                                                                                                                                                                                                                           | 158-158.9,163-163.9,212.4                                                                                                                                                                                                                                                                                                                                                                                                                                                                                                                                                          |
| Hodgkin disease                      | C81-C81.99                                                                                                                                                                                                                                                                                                                                                                                                                                                                                                          | 201-201.98                                                                                                                                                                                                                                                                                                                                                                                                                                                                                                                                                                         |
| Non-Hodgkin lymphoma                 | C82-C86.6,C96-C97.9                                                                                                                                                                                                                                                                                                                                                                                                                                                                                                 | 200-200.9,202-202.98                                                                                                                                                                                                                                                                                                                                                                                                                                                                                                                                                               |
| Multiple myeloma                     | C88-C90.32                                                                                                                                                                                                                                                                                                                                                                                                                                                                                                          | 203-203.9                                                                                                                                                                                                                                                                                                                                                                                                                                                                                                                                                                          |
| Leukemia                             | C91-C95.92                                                                                                                                                                                                                                                                                                                                                                                                                                                                                                          | 204-208.92                                                                                                                                                                                                                                                                                                                                                                                                                                                                                                                                                                         |

**Web Table 14 - List of International Classification of Diseases codes mapped to the Global Burden of Disease cause list for Causes of Death**

| Cause Name                                          | ICD10 Code                                                                                                                                                                                                                                                                                                                                                                            | ICD9 Code                                                                                                                                                                                                                                                                                                                                                                                                                                    |
|-----------------------------------------------------|---------------------------------------------------------------------------------------------------------------------------------------------------------------------------------------------------------------------------------------------------------------------------------------------------------------------------------------------------------------------------------------|----------------------------------------------------------------------------------------------------------------------------------------------------------------------------------------------------------------------------------------------------------------------------------------------------------------------------------------------------------------------------------------------------------------------------------------------|
| Other neoplasms                                     | C17-C17.9,C30-C31.9,C37-C38.8,C40-C41.9,C47-C49.9,C51-C52.9,C57-C57.8,C58,C58.0,C60-C60.9,C63-C63.8,C66-C66.9,C68.0-C68.8,C69-C69.92,C74-C75.8,D07.0-D07.2,D07.4,D07.5,D13.2-D13.39,D14.0,D15-D16.9,D28.0-D28.7,D29.0,D30.2-D30.22,D30.4-D30.8,D31-D33.9,D35-D36,D36.1-D36.7,D37.2,D38.2-D38.5,D39.2-D39.8,D41.2-D41.3,D42-D43.9,D44.1-D44.8,D45-D47.9,D48.0-D48.4,D49.6,D49.81,K31.7 | 152-152.9,160-160.9,164-164.9,170-171.9,181-181.9,182.9,183.2-183.8,184.0-184.4,184.8,187.1-187.8,189.2-189.8,190-190.9,194-194.8,209.0-209.03,209.22,209.4-209.43,211.2,211.8,212.0,212.5-212.8,213-213.9,221.0-221.8,222.1,222.8,223.2,223.8-223.89,224-225.9,227-228.9,229.0,229.8,230.7,230.8,233.31,233.32,233.4,233.5,234.0-234.8,235.4,235.8,236.1,236.99-237.9,238.0,238.1,238.4-238.8,239.2,239.6,569.0,569.43,569.44,569.84,569.85 |
| Cardiovascular diseases                             | G45-G46.8,I01-I01.9,I02.0,I05-I09.9,I11-I11.9,I20-I25.9,I28-I28.8,I30-I31.1,I31.8,I31.9,I33-I42.9,I47-I48.92,I51.0-I51.6,I60-I61.9,I62.0-I62.03,I63-I63.9,I65-I66.9,I67.0-I67.3,I67.5-I67.7,I69.0-I69.198,I69.20-I69.398,I70.2-I70.8,I71-I78.9,I80-I83.93,I86-I89.9,I91.9                                                                                                             | 036.41-036.43,036.6,391-391.2,391.8,391.9,392.0,393-398.99,402-402.91,410-414.9,417-417.9,420-423,423.1-425.9,427-427.32,427.6-427.89,429.0,429.1,430-435.9,437.0-437.2,437.5-437.8,441-454.9,456,456.3-457.9,459,459.1-459.39                                                                                                                                                                                                               |
| Rheumatic heart disease                             | I01-I01.9,I02.0,I05-I09.9                                                                                                                                                                                                                                                                                                                                                             | 391-391.2,391.8,391.9,392.0,393-398.99                                                                                                                                                                                                                                                                                                                                                                                                       |
| Ischemic heart disease                              | I20-I25.9                                                                                                                                                                                                                                                                                                                                                                             | 410-414.9                                                                                                                                                                                                                                                                                                                                                                                                                                    |
| Cerebrovascular disease                             | G45-G46.8,I60-I61.9,I62.0-I62.03,I63-I63.9,I65-I66.9,I67.0-I67.3,I67.5-I67.7,I69.0-I69.198,I69.20-I69.398                                                                                                                                                                                                                                                                             | 430-435.9,437.0-437.2,437.5-437.8                                                                                                                                                                                                                                                                                                                                                                                                            |
| Ischemic stroke                                     | G45-G46.8,I63-I63.9,I65-I66.9,I67.2,I67.3,I67.5,I67.6,I69.3-I69.398                                                                                                                                                                                                                                                                                                                   | 433-435.9,437.0,437.1,437.5-437.8                                                                                                                                                                                                                                                                                                                                                                                                            |
| Hemorrhagic stroke                                  | I60-I61.9,I62.0-I62.03,I67.0,I67.1,I67.7,I69.0-I69.198,I69.20-I69.298                                                                                                                                                                                                                                                                                                                 | 430-432.9,437.2                                                                                                                                                                                                                                                                                                                                                                                                                              |
| Hypertensive heart disease                          | I11-I11.9                                                                                                                                                                                                                                                                                                                                                                             | 402-402.91                                                                                                                                                                                                                                                                                                                                                                                                                                   |
| Cardiomyopathy and myocarditis                      | I40-I42.9,I51.4-I51.6                                                                                                                                                                                                                                                                                                                                                                 | 036.43,036.6,422-422.99,425-425.9,429.0,429.1                                                                                                                                                                                                                                                                                                                                                                                                |
| Atrial fibrillation and flutter                     | I48-I48.92                                                                                                                                                                                                                                                                                                                                                                            | 427.3-427.32                                                                                                                                                                                                                                                                                                                                                                                                                                 |
| Aortic aneurysm                                     | I71-I71.9                                                                                                                                                                                                                                                                                                                                                                             | 441-441.9                                                                                                                                                                                                                                                                                                                                                                                                                                    |
| Peripheral vascular disease                         | I70.2-I70.799,I73-I73.9                                                                                                                                                                                                                                                                                                                                                               | 443.0-443.9                                                                                                                                                                                                                                                                                                                                                                                                                                  |
| Endocarditis                                        | I33-I33.9,I39-I39.9                                                                                                                                                                                                                                                                                                                                                                   | 036.42,421-421.9,424.9-424.91                                                                                                                                                                                                                                                                                                                                                                                                                |
| Other cardiovascular and circulatory diseases       | I28-I28.8,I30-I31.1,I31.8,I31.9,I34-I38.9,I47-I47.9,I51.0-I51.3,I70.8,I72-I72.9,I74-I78.9,I80-I83.93,I86-I89.9,I91.9                                                                                                                                                                                                                                                                  | 036.41,417-417.9,420-420.99,423,423.1-424.8,424.99,427-427.2,427.6-427.89,442-443,444-454.9,456,456.3-457.9,459,459.1-459.39                                                                                                                                                                                                                                                                                                                 |
| Chronic respiratory diseases                        | D86-D86.2,D86.89,D86.9,G47.3-G47.39,J30-J35.9,J37-J47.9,J60-J63.8,J65-J68.9,J70-J70.1,J70.8,J70.9,J82,J84-J40-J44.9,J47-J47.9                                                                                                                                                                                                                                                         | 135-135.9,136.6,327.2-327.8,470,470.9-474.9,476-476.1,477-479,490-504.9,506-506.9,508-509,515,516-517.8,518.6,518.9,519.1-490-492.9,494-494.9,496-499                                                                                                                                                                                                                                                                                        |
| Chronic obstructive pulmonary disease               | J40-J44.9,J47-J47.9                                                                                                                                                                                                                                                                                                                                                                   | 490-492.9,494-494.9,496-499                                                                                                                                                                                                                                                                                                                                                                                                                  |
| Pneumoconiosis                                      | J60-J63.8,J65,J65.0,J92.0                                                                                                                                                                                                                                                                                                                                                             | 500-504.9                                                                                                                                                                                                                                                                                                                                                                                                                                    |
| Silicosis                                           | J62-J62.9                                                                                                                                                                                                                                                                                                                                                                             | 502-502.9,503.0,503.9                                                                                                                                                                                                                                                                                                                                                                                                                        |
| Asbestosis                                          | J61,J61.0,J92.0                                                                                                                                                                                                                                                                                                                                                                       | 501                                                                                                                                                                                                                                                                                                                                                                                                                                          |
| Coal workers pneumoconiosis                         | J60,J60.0                                                                                                                                                                                                                                                                                                                                                                             | 500-500.9,501.0,501.9                                                                                                                                                                                                                                                                                                                                                                                                                        |
| Other pneumoconiosis                                | J63-J63.8,J65,J65.0                                                                                                                                                                                                                                                                                                                                                                   | 503,503.1,504-504.9                                                                                                                                                                                                                                                                                                                                                                                                                          |
| Asthma                                              | J45-J46.9                                                                                                                                                                                                                                                                                                                                                                             | 493-493.92                                                                                                                                                                                                                                                                                                                                                                                                                                   |
| Interstitial lung disease and pulmonary sarcoidosis | D86-D86.2,D86.89,D86.9,J84-J84.9                                                                                                                                                                                                                                                                                                                                                      | 135-135.9,136.6,515,516-516.9                                                                                                                                                                                                                                                                                                                                                                                                                |
| Other chronic respiratory diseases                  | G47.3-G47.39,J30-J35.9,J37-J39.9,J66-J68.9,J70-J70.1,J70.8,J70.9,J82,J91-J92,J92.9                                                                                                                                                                                                                                                                                                    | 327.2-327.8,470,470.9-474.9,476-476.1,477-479,495-495.9,506-506.9,508-509,517-517.8,518.6,518.9,519.1-519.8,780.57,786.03                                                                                                                                                                                                                                                                                                                    |

**Web Table 14 - List of International Classification of Diseases codes mapped to the Global Burden of Disease cause list for Causes of Death**

| Cause Name                                 | ICD10 Code                                                                                                                                                                                                                                                         | ICD9 Code                                                                                                                                                                                                                                          |
|--------------------------------------------|--------------------------------------------------------------------------------------------------------------------------------------------------------------------------------------------------------------------------------------------------------------------|----------------------------------------------------------------------------------------------------------------------------------------------------------------------------------------------------------------------------------------------------|
| Cirrhosis                                  | B18-B18.9,D09.2-D09.22,I85-I85.9,K70-K70.9,K71.3-K71.51,K71.7,K72.1-K74.69,K74.9,K75.8-K76.0,K76.6,K76.7,K76.9                                                                                                                                                     | 070.22,070.23,070.32,070.33,070.44,070.54,456.0-456.21,571-571.9,572.3-572.9,573.0-573.3,573.8,573.9                                                                                                                                               |
| Cirrhosis due to alcohol use               | D09.2-D09.22                                                                                                                                                                                                                                                       |                                                                                                                                                                                                                                                    |
| Digestive diseases                         | I84-I84.9,K20-K22.9,K25-K29.91,K31-K31.6,K31.8-K31.89,K35-K38.9,K40-K42.9,K44-K46.9,K50-K52.9,K55-K57.93,K58.0-K62,K62.2-K62.6,K62.8-K62.9,K64-K64.9,K66.8,K67,K68-K68.9,K75.2-K75.4,K76.1-K76.5,K76.8-K76.89,K77-K77.8,K80-K83.9,K85-K86.9,K90-K90.9,K92.8-K92.89 | 455-455.9,530-536.1,537-537.6,537.8-537.84,538,540-543.9,550-551.1,551.3-552.1,552.3-553.6,555-558.9,560-560.39,560.8-560.9,562-562.13,564-564.1,564.5-564.7,565-566.9,569.1-569.42,569.5,569.7,569.71,573.4,574-577.9,579-579.2,579.4-579.9,787.1 |
| Peptic ulcer disease                       | K25-K28.9,K31,K31.1-K31.6,K31.8,K31.82-K31.89                                                                                                                                                                                                                      | 531-534.91                                                                                                                                                                                                                                         |
| Gastritis and duodenitis                   | K29-K29.91                                                                                                                                                                                                                                                         | 535-535.9                                                                                                                                                                                                                                          |
| Appendicitis                               | K35-K37.9,K38.3-K38.9                                                                                                                                                                                                                                              | 540-542.9                                                                                                                                                                                                                                          |
| Paralytic ileus and intestinal obstruction | K56-K56.9                                                                                                                                                                                                                                                          | 560-560.39,560.8-560.9                                                                                                                                                                                                                             |
| Inguinal, femoral, and abdominal hernia    | K40-K42.9,K44-K46.9                                                                                                                                                                                                                                                | 550-551.1,551.3-552.1,552.3-553.03,553.6,555.3                                                                                                                                                                                                     |
| Inflammatory bowel disease                 | K50-K52.9,K58.0,M09.1                                                                                                                                                                                                                                              | 555-555.2,555.9-556.9,558-558.9,569.5                                                                                                                                                                                                              |
| Vascular intestinal disorders              | K55-K55.9                                                                                                                                                                                                                                                          | 557-557.9                                                                                                                                                                                                                                          |
| Gallbladder and biliary diseases           | K80-K83.9                                                                                                                                                                                                                                                          | 574-576.9                                                                                                                                                                                                                                          |
| Pancreatitis                               | K85-K86.9                                                                                                                                                                                                                                                          | 577-577.9,579.4                                                                                                                                                                                                                                    |
| Other digestive diseases                   | I84-I84.9,K20-K22.9,K31.0,K31.81-K31.819,K38-K38.2,K57-K57.93,K58.9-K62,K62.2-K62.6,K62.8-K62.9,K64-K64.9,K66.8,K67,K68-K68.9,K75.2-K75.4,K76.1-K76.5,K76.8-K76.89,K77-K77.8,K90-K90.9,K92.8-K92.89                                                                | 455-455.9,530-530.9,536-536.1,537-537.6,537.8-537.84,538,543-543.9,553.1-553.3,562-562.13,564-564.1,564.5-564.7,565-566.9,569.1-569.42,569.7,569.71,573.4,579-579.2,579.8,579.9,787.1                                                              |
| Neurological disorders                     | F00-F03.91,G10-G13.8,G20-G21.0,G21.2-G24,G24.1-G25.0,G25.2,G25.3,G25.5,G25.8-G26.0,G30-G31.9,G35-G37.9,G40-G41.9,G61-G61.9,G70-G72,G72.2-G73.7,G90-G90.9,G95-G95.9,M33-M33.99                                                                                      | 290-290.9,294.1-294.9,330-331.2,331.5-337.9,340-341.9,345-345.91,349,349.2-349.8,353.6-353.9,356-356.9,357.1,357.3,357.4,357.7,358-359.9,728.86,728.88,775.2                                                                                       |
| Alzheimer disease and other dementias      | F00-F03.91,G30-G31.9                                                                                                                                                                                                                                               | 290-290.9,294.1-294.9,331-331.2                                                                                                                                                                                                                    |
| Parkinson disease                          | G20-G21.0,G21.2-G22.0                                                                                                                                                                                                                                              | 332-332.9                                                                                                                                                                                                                                          |
| Epilepsy                                   | G40-G41.9                                                                                                                                                                                                                                                          | 345-345.91                                                                                                                                                                                                                                         |
| Multiple sclerosis                         | G35-G35.9                                                                                                                                                                                                                                                          | 340-340.9                                                                                                                                                                                                                                          |
| Other neurological disorders               | G10-G13.8,G23-G24,G24.1-G25.0,G25.2,G25.3,G25.5,G25.8-G26.0,G36-G37.9,G61-G61.9,G70-G72,G72.2-G73.7,G90-G90.9,G95-G95.9,M33-M33.99                                                                                                                                 | 330-330.9,331.5-331.9,333-337.9,341-341.9,349,349.2-349.8,353.6-353.9,356-356.9,357.1,357.3,357.4,357.7,358-359.9,728.86,728.88,775.2                                                                                                              |
| Mental and substance use disorders         | F06.2,F10-F11.99,F13-F16.99,F18-F23.9,F25-F29.9,F50.0-F50.1,G72.1,P96.1,Q86.0,R78.0-R78.5,X45-X45.9,X49-X49.9                                                                                                                                                      | 291-292.9,295-295.95,303-303.93,304.0-304.23,304.4-304.83,305-305.13,305.3-305.93,307.1,307.54,357.5,790.3,E85.0-E85.029,E85.09-295-295.95                                                                                                         |
| Schizophrenia                              | F06.2,F20-F23.9,F25-F29.9                                                                                                                                                                                                                                          | 295-295.95                                                                                                                                                                                                                                         |
| Alcohol use disorders                      | F10-F10.99,G72.1,Q86.0,R78.0,X45-X45.9                                                                                                                                                                                                                             | 291-291.9,303-303.93,305.0-305.03,357.5,790.3,E86.0-E86.019                                                                                                                                                                                        |
| Drug use disorders                         | F11-F11.99,F13-F16.99,F18-F19.99,P96.1,R78.1-R78.5,X49-X49.9                                                                                                                                                                                                       | 292-292.9,304.0-304.23,304.4-304.83,305,305.1-305.13,305.3-305.93,E85.0-E85.029,E85.09-E85.439                                                                                                                                                     |
| Opioid use disorders                       | F11-F11.99,P96.1,R78.1                                                                                                                                                                                                                                             | 304.0-304.03,305.5-305.53,E85.00-E85.029                                                                                                                                                                                                           |
| Cocaine use disorders                      | F14-F14.99,R78.2                                                                                                                                                                                                                                                   | 304.2-304.23,305.6-305.63                                                                                                                                                                                                                          |
| Amphetamine use disorders                  | F15-F15.99                                                                                                                                                                                                                                                         | 304.4-304.43,305.7-305.73                                                                                                                                                                                                                          |



| Web Table 14 - List of International Classification of Diseases codes mapped to the Global Burden of Disease cause list for Causes of Death |                                                                                                                                                                                                                                                                                                                                                                                                                                                                                                                                                                                                                                                                                                                                                |                                                                                                                                                                                                                                                                                                                                                                                                                                                                                                                 |
|---------------------------------------------------------------------------------------------------------------------------------------------|------------------------------------------------------------------------------------------------------------------------------------------------------------------------------------------------------------------------------------------------------------------------------------------------------------------------------------------------------------------------------------------------------------------------------------------------------------------------------------------------------------------------------------------------------------------------------------------------------------------------------------------------------------------------------------------------------------------------------------------------|-----------------------------------------------------------------------------------------------------------------------------------------------------------------------------------------------------------------------------------------------------------------------------------------------------------------------------------------------------------------------------------------------------------------------------------------------------------------------------------------------------------------|
| Cause Name                                                                                                                                  | ICD10 Code                                                                                                                                                                                                                                                                                                                                                                                                                                                                                                                                                                                                                                                                                                                                     | ICD9 Code                                                                                                                                                                                                                                                                                                                                                                                                                                                                                                       |
| Other drug use disorders                                                                                                                    | F13-F13.99,F16-F16.99,F18-F19.99,R78.3-R78.5,X49-X49.9                                                                                                                                                                                                                                                                                                                                                                                                                                                                                                                                                                                                                                                                                         | 292-292.9,304.1-304.13,304.5-304.83,305,305.1-305.13,305.3-305.43,305.8-305.93                                                                                                                                                                                                                                                                                                                                                                                                                                  |
| Eating disorders                                                                                                                            | F50.0-F50.1                                                                                                                                                                                                                                                                                                                                                                                                                                                                                                                                                                                                                                                                                                                                    | 307.1,307.54                                                                                                                                                                                                                                                                                                                                                                                                                                                                                                    |
| Anorexia nervosa                                                                                                                            | F50.0-F50.1                                                                                                                                                                                                                                                                                                                                                                                                                                                                                                                                                                                                                                                                                                                                    | 307.1,307.54                                                                                                                                                                                                                                                                                                                                                                                                                                                                                                    |
| Diabetes, urogenital, blood, and endocrine diseases                                                                                         | B37.3-B37.49,B37.9,D52.1,D55-D58.9,D59.0-D59.3,D59.5,D59.6,D60-D61.9,D64.0,D64.4,D66-D69.8,D70-D75.89,D76-D78.89,D80-D83.9,D84.0-D84.8,D86.3-D86.87,D89-D89.3,E03-E07.1,E09-E16.9,E20-E34.8,E36-E36.8,E65-E68,E70-E85.29,E87.71,E88-E89.9,G21.1-G21.19,G24.0-G24.09,G25.1,G25.4,G25.6-G25.79,G72.0,G93.7,G97-G97.9,I12-I13.9,I95.2,I95.3,I97-I98.2,I98.9,I70.2-J70.5,J95-J95.9,K43-K43.9,K62.7,K91-K92,K94-K95.89,M87.1-M87.19,N00-N08.8,N10-N12.9,N14-N16.8,N18-N18.9,N20-N23.0,N25-N32.0,N32.3,N32.4,N34-N34.3,N36-N36.9,N39-N39.2,N41-N41.9,N44-N45.9,N49-N51.8,N65-N65.1,N72,N72.0,N75-N77.8,N80-N81.9,N83-N83.9,N99-N99.9,P03.2-P03.5,P70.0-E10-E10.11,E10.3-E11.1,E11.3-E12.1,E12.3-E13.11,E13.3-E14.1,E14.3-E14.9,P70.0-P70.2,R73-R73.9 | 112,112.1,112.2,240-243.9,244.0,244.1,244.3,244.8,245-246.9,250-259.9,270-273.9,275-276,277-277.2,277.30-277.9,278.0-279,279.6,282-284.9,286-286.5,286.7-289.9,349.0,349.1,357.2,357.6,403-404.93,518.7,519.0-519.09,536.4-536.49,539-539.9,551.2-551.29,552.2-552.29,564.2-564.4,569.6-569.69,579.3,580-583.9,585-585.9,588-590.9,592-593.89,594-599.6,599.8-599.89,601-602.9,604-604.99,617-617.9,620-620.9,621.4-621.9,622.3-622.7,629-629.81,775.0,775.1,775.3,779.4,779.5,780.62,780.63,788.0,790.2-790.22 |
| Diabetes mellitus                                                                                                                           | E10-E10.11,E10.3-E11.1,E11.3-E12.1,E12.3-E13.11,E13.3-E14.1,E14.3-E14.9,P70.0-P70.2,R73-R73.9                                                                                                                                                                                                                                                                                                                                                                                                                                                                                                                                                                                                                                                  | 250-250.39,250.5-250.99,357.2,775.0,775.1,790.2-790.22                                                                                                                                                                                                                                                                                                                                                                                                                                                          |
| Acute glomerulonephritis                                                                                                                    | N00-N01.9                                                                                                                                                                                                                                                                                                                                                                                                                                                                                                                                                                                                                                                                                                                                      | 580-580.9                                                                                                                                                                                                                                                                                                                                                                                                                                                                                                       |
| Chronic kidney disease                                                                                                                      | E10.2-E10.29,E11.2-E11.29,E12.2,E13.2-E13.29,E14.2,I12-I13.9,N02-N08.8,N15.0,N18-N18.9                                                                                                                                                                                                                                                                                                                                                                                                                                                                                                                                                                                                                                                         | 250.4-250.49,403-404.93,581-583.9,585-585.9,589-589.9                                                                                                                                                                                                                                                                                                                                                                                                                                                           |
| Chronic kidney disease due to diabetes mellitus                                                                                             | E10.2-E10.29,E11.2-E11.29,E12.2,E13.2-E13.29,E14.2                                                                                                                                                                                                                                                                                                                                                                                                                                                                                                                                                                                                                                                                                             | 250.4-250.49                                                                                                                                                                                                                                                                                                                                                                                                                                                                                                    |
| Chronic kidney disease due to hypertension                                                                                                  | I12-I13.9                                                                                                                                                                                                                                                                                                                                                                                                                                                                                                                                                                                                                                                                                                                                      | 403-404.93                                                                                                                                                                                                                                                                                                                                                                                                                                                                                                      |
| Chronic kidney disease due to glomerulonephritis                                                                                            | N03-N06.9                                                                                                                                                                                                                                                                                                                                                                                                                                                                                                                                                                                                                                                                                                                                      | 581-583.9                                                                                                                                                                                                                                                                                                                                                                                                                                                                                                       |
| Chronic kidney disease due to other causes                                                                                                  | N02-N02.9,N07-N08.8,N15.0                                                                                                                                                                                                                                                                                                                                                                                                                                                                                                                                                                                                                                                                                                                      | 589-589.9                                                                                                                                                                                                                                                                                                                                                                                                                                                                                                       |
| Urinary diseases and male infertility                                                                                                       | N10-N12.9,N15,N15.1-N16.8,N20-N23.0,N25-N32.0,N32.3,N32.4,N34-N34.3,N36-N36.9,N39-N39.2,N41-N41.9,N44-N45.9,N49-N51.8                                                                                                                                                                                                                                                                                                                                                                                                                                                                                                                                                                                                                          | 588-588.9,590-590.9,592-593.89,594-596.81,596.89-598.1,598.8-599.6,599.8-599.89,601-602.9,604-604.99,788.0                                                                                                                                                                                                                                                                                                                                                                                                      |
| Interstitial nephritis and urinary tract infections                                                                                         | N10-N12.9,N15,N15.1-N16.8,N30-N30.91,N34-N34.3,N39.0-N39.2                                                                                                                                                                                                                                                                                                                                                                                                                                                                                                                                                                                                                                                                                     | 590-590.9,595-595.9,597-597.9,599.0                                                                                                                                                                                                                                                                                                                                                                                                                                                                             |
| Urolithiasis                                                                                                                                | N20-N23.0                                                                                                                                                                                                                                                                                                                                                                                                                                                                                                                                                                                                                                                                                                                                      | 592-592.9,594-594.9,788.0                                                                                                                                                                                                                                                                                                                                                                                                                                                                                       |
| Other urinary diseases                                                                                                                      | N25-N29.8,N31-N32.0,N32.3,N32.4,N36-N36.9,N39,N41-N41.9,N44-N45.9,N49-N51.8                                                                                                                                                                                                                                                                                                                                                                                                                                                                                                                                                                                                                                                                    | 588-588.9,593-593.89,596-596.81,596.89,596.9,598-598.1,598.8-599,599.1-599.6,599.8-599.89,601-602.9,604-604.99                                                                                                                                                                                                                                                                                                                                                                                                  |
| Gynecological diseases                                                                                                                      | B37.3-B37.49,B37.9,E28.2,N72,N72.0,N75-N77.8,N80-N81.9,N83-N83.9                                                                                                                                                                                                                                                                                                                                                                                                                                                                                                                                                                                                                                                                               | 112,112.1,112.2,256.4,617-617.9,620-620.9,621.4-621.9,622.3-622.7,629-629.81                                                                                                                                                                                                                                                                                                                                                                                                                                    |
| Polycystic ovarian syndrome                                                                                                                 | E28.2                                                                                                                                                                                                                                                                                                                                                                                                                                                                                                                                                                                                                                                                                                                                          | 256.4                                                                                                                                                                                                                                                                                                                                                                                                                                                                                                           |
| Endometriosis                                                                                                                               | N80-N80.9                                                                                                                                                                                                                                                                                                                                                                                                                                                                                                                                                                                                                                                                                                                                      | 617-617.9                                                                                                                                                                                                                                                                                                                                                                                                                                                                                                       |
| Genital prolapse                                                                                                                            | N81-N81.9                                                                                                                                                                                                                                                                                                                                                                                                                                                                                                                                                                                                                                                                                                                                      |                                                                                                                                                                                                                                                                                                                                                                                                                                                                                                                 |
| Other gynecological diseases                                                                                                                | B37.3-B37.49,B37.9,N72,N72.0,N75-N77.8,N83-N83.9                                                                                                                                                                                                                                                                                                                                                                                                                                                                                                                                                                                                                                                                                               | 112,112.1,112.2,620-620.9,621.4-621.9,622.3-622.7,629-629.81                                                                                                                                                                                                                                                                                                                                                                                                                                                    |
| Hemoglobinopathies and hemolytic anemias                                                                                                    | D55-D58.9,D59.1,D59.3,D59.5,D60-D61.09,D61.2-D61.9,D64.0,D64.4                                                                                                                                                                                                                                                                                                                                                                                                                                                                                                                                                                                                                                                                                 | 282-284.9                                                                                                                                                                                                                                                                                                                                                                                                                                                                                                       |
| Thalassemias                                                                                                                                | D56-D56.9                                                                                                                                                                                                                                                                                                                                                                                                                                                                                                                                                                                                                                                                                                                                      | 282.4-282.49                                                                                                                                                                                                                                                                                                                                                                                                                                                                                                    |
| Sickle cell disorders                                                                                                                       | D57-D57.819                                                                                                                                                                                                                                                                                                                                                                                                                                                                                                                                                                                                                                                                                                                                    | 282.5-282.68                                                                                                                                                                                                                                                                                                                                                                                                                                                                                                    |

**Web Table 14 - List of International Classification of Diseases codes mapped to the Global Burden of Disease cause list for Causes of Death**

| Cause Name                                           | ICD10 Code                                                                                                                                                                                                                                                                                                                                                                                                                                                        | ICD9 Code                                                                                                                                                                                                                                                                                                                  |
|------------------------------------------------------|-------------------------------------------------------------------------------------------------------------------------------------------------------------------------------------------------------------------------------------------------------------------------------------------------------------------------------------------------------------------------------------------------------------------------------------------------------------------|----------------------------------------------------------------------------------------------------------------------------------------------------------------------------------------------------------------------------------------------------------------------------------------------------------------------------|
| G6PD deficiency                                      | D55-D55.9                                                                                                                                                                                                                                                                                                                                                                                                                                                         | 282.2,282.3                                                                                                                                                                                                                                                                                                                |
| Other hemoglobinopathies and hemolytic anemias       | D58-D58.9,D59.1,D59.3,D59.5,D60-D61.09,D61.2-D61.9,D64.0,D64.4                                                                                                                                                                                                                                                                                                                                                                                                    | 282-282.1,282.69-284.9                                                                                                                                                                                                                                                                                                     |
|                                                      | D52.1,D59.0,D59.2,D59.6,D61.1,D66-D69.8,D70-D75.89,D76-D78.89,D80-D83.9,D84.0-D84.8,D86.3-D86.87,D89-D89.3,E03-E07.1,E09-E09.9,E15-E16.9,E20-E28.1,E28.3-E34.8,E36-E36.8,E65-E68,E70-E85.29,E87.71,E88-E89.9,G21.1-G21.19,G24.0-G24.09,G25.1,G25.4,G25.6-G25.79,G72.0,G93.7,G97-G97.9,I95.2,I95.3,I97-I98.2,I98.9,J70.2-J70.5,J95-J95.9,K43-K43.9,K62.7,K91-K92,K94-K95.89,M87.1-M87.19,N14-N14.4,N65-N65.1,N99-N99.9,P03.2-P03.5,P96.2,P96.5,R50.2,R50.82,R50.83 | 240-243.9,244.0,244.1,244.3,244.8,245-246.9,251-256.39,256.8-259.9,270-273.9,275-276,277-277.2,277.30-277.9,278.0-279,279.6,286-286.5,286.7-289.9,349.0,349.1,357.6,518.7,519.0-519.09,536.4-536.49,539-539.9,551.2-551.29,552.2-552.29,564.2-564.4,569.6-569.69,579.3,596.82,596.83,598.2,775.3,779.4,779.5,780.62,780.63 |
| Endocrine, metabolic, blood, and immune disorders    | I27.1,L93-L93.2,M00-M03.0,M03.2,M03.6,M05-M09.0,M09.2,M09.8,M30-M32.9,M34-M36.8,M40-M43.19,M65-M65.08,M71.0-M71.19,M86-M87.09,M88-M89.09,M89.5-M89.59,M89.7-M89.9                                                                                                                                                                                                                                                                                                 | 416.1,416.2,695.4-695.59,710-711.99,714-714.33,714.8-714.9,730-730.29,732-732.9                                                                                                                                                                                                                                            |
| Musculoskeletal disorders                            | M05-M06.9,M08.0-M08.89                                                                                                                                                                                                                                                                                                                                                                                                                                            | 714-714.33,714.8-714.9                                                                                                                                                                                                                                                                                                     |
| Rheumatoid arthritis                                 | I27.1,L93-L93.2,M00-M03.0,M03.2,M03.6,M07-M08,M08.9-M09.0,M09.2,M09.8,M30-M32.9,M34-M36.8,M40-M43.19,M65-M65.08,M71.0-M71.19,M86-M87.09,M88-M89.09,M89.5-M89.59,M89.7-M89.9                                                                                                                                                                                                                                                                                       | 416.1,416.2,695.4-695.59,710-711.99,730-730.29,732-732.9                                                                                                                                                                                                                                                                   |
| Other musculoskeletal disorders                      | A31.1,A31.2,A46,A46.0,L00-L05.92,L08-L08.9,L10-L14.0,L51-L51.9,L88-L89.95,L97-L98.499,P96.0,Q00-Q07.9,Q10.4-Q18.9,Q20-Q28.9,Q30-Q36,Q37-Q45.9,Q50-Q86,Q86.1-Q87.89,Q89-Q89.8,Q90-Q93.9,Q95-Q95.9,Q97-Q97.9,Q99-Q99.8,R95                                                                                                                                                                                                                                          | 035-035.9,680-686.9,694-695.3,707-707.9,740-749.04,749.2-758.6,758.8-758.9,759.0-759.89,798.0                                                                                                                                                                                                                              |
| Other non-communicable diseases                      | P96.0,Q00-Q07.9,Q10.4-Q18.9,Q20-Q28.9,Q30-Q36,Q37-Q45.9,Q50-Q86,Q86.1-Q87.89,Q89-Q89.8,Q90-Q93.9,Q95-Q95.9,Q97-Q97.9,Q99-Q99.8                                                                                                                                                                                                                                                                                                                                    | 740-749.04,749.2-758.6,758.8-758.9,759.0-759.89                                                                                                                                                                                                                                                                            |
| Congenital anomalies                                 | Q00-Q01.9,Q05-Q05.9                                                                                                                                                                                                                                                                                                                                                                                                                                               | 740-741.93,742.0                                                                                                                                                                                                                                                                                                           |
| Neural tube defects                                  | Q20-Q28.9                                                                                                                                                                                                                                                                                                                                                                                                                                                         | 745-747.9                                                                                                                                                                                                                                                                                                                  |
| Congenital heart anomalies                           | Q35-Q36,Q37-Q37.9                                                                                                                                                                                                                                                                                                                                                                                                                                                 | 749-749.04,749.2-749.25                                                                                                                                                                                                                                                                                                    |
| Cleft lip and cleft palate                           | Q90-Q90.9                                                                                                                                                                                                                                                                                                                                                                                                                                                         | 758.0                                                                                                                                                                                                                                                                                                                      |
| Down syndrome                                        | Q91-Q93.9,Q95-Q95.9,Q97-Q97.9,Q99-Q99.8                                                                                                                                                                                                                                                                                                                                                                                                                           | 758,758.1-758.6,758.8-758.9                                                                                                                                                                                                                                                                                                |
| Chromosomal unbalanced rearrangements                | P96.0,Q02-Q04.9,Q06-Q07.9,Q10.4-Q18.9,Q30-Q34.9,Q38-Q45.9,Q50-Q86,Q86.1-Q87.89,Q89-Q89.8                                                                                                                                                                                                                                                                                                                                                                          | 742,742.1-744.9,748-748.9,749.6-757.9,759.0-759.89                                                                                                                                                                                                                                                                         |
| Other congenital anomalies                           | A31.1,A31.2,A46,A46.0,L00-L05.92,L08-L08.9,L10-L14.0,L51-L51.9,L88-L89.95,L97-L98.499                                                                                                                                                                                                                                                                                                                                                                             | 035-035.9,680-686.9,694-695.3,707-707.9                                                                                                                                                                                                                                                                                    |
| Skin and subcutaneous diseases                       | L03-L04                                                                                                                                                                                                                                                                                                                                                                                                                                                           | 681-682.9                                                                                                                                                                                                                                                                                                                  |
| Cellulitis                                           | A31.1,A31.2,A46,A46.0,L00-L02.93,L04.0-L05.92,L08-L08.9,L88,L97-L98.499                                                                                                                                                                                                                                                                                                                                                                                           | 035-035.9,680-680.9,683-686.9                                                                                                                                                                                                                                                                                              |
| Abscess, impetigo, and other bacterial skin diseases | L89-L89.95                                                                                                                                                                                                                                                                                                                                                                                                                                                        | 707-707.9                                                                                                                                                                                                                                                                                                                  |
| Decubitus ulcer                                      | L10-L14.0,L51-L51.9                                                                                                                                                                                                                                                                                                                                                                                                                                               | 694-695.3                                                                                                                                                                                                                                                                                                                  |
| Other skin and subcutaneous diseases                 | R95                                                                                                                                                                                                                                                                                                                                                                                                                                                               | 798.0                                                                                                                                                                                                                                                                                                                      |
| Sudden infant death syndrome                         |                                                                                                                                                                                                                                                                                                                                                                                                                                                                   |                                                                                                                                                                                                                                                                                                                            |

**Web Table 14 - List of International Classification of Diseases codes mapped to the Global Burden of Disease cause list for Causes of Death**

| Cause Name                  | ICD10 Code                                                                                                                                                                                                                    | ICD9 Code                                                                                                                                                                                                                                                                                                                                                                                                                                                                                                                                                                                                                               |
|-----------------------------|-------------------------------------------------------------------------------------------------------------------------------------------------------------------------------------------------------------------------------|-----------------------------------------------------------------------------------------------------------------------------------------------------------------------------------------------------------------------------------------------------------------------------------------------------------------------------------------------------------------------------------------------------------------------------------------------------------------------------------------------------------------------------------------------------------------------------------------------------------------------------------------|
| Injuries                    | V00-V86.99,V87.2,V87.3,V88.2,V88.3,V90,V90.0,V90.01-V98.8,W00-W46.2,W49-W62.9,W64-W70.9,W73-W81.9,W83-W94.9,W97.9,W99-X06.9,X08-X40.9,X43-X43.9,X46-X48.9,X50-X54.9,X57-X58.9,X60-Y08.9,Y35-Y84.9,Y87.1,Y88-Y88.3,Y89.0,Y89.1 | E00.0-E03.0,E80.0-E80.03,E80.1-E80.13,E80.2-E80.23,E80.3-E80.33,E80.4-E80.43,E80.5-E80.53,E80.6-E80.63,E80.7-E80.73,E81.00-E81.07,E81.10-E81.17,E81.20-E81.27,E81.30-E81.37,E81.40-E81.47,E81.50-E81.57,E81.60-E81.67,E81.70-E81.77,E81.80-E81.87,E81.90-E81.97,E82.00-E82.07,E82.10-E82.17,E82.20-E82.27,E82.30-E82.37,E82.40-E82.47,E82.50-E82.57,E82.60-E82.64,E82.70-E82.74,E82.80-E82.84,E82.90,E82.94,E83.0-E83.89,E84.0-E84.99,E85.03-E85.089,E85.48-E85.569,E85.6-E85.899,E86.02-E86.999,E87.0-E87.69,E87.8-E88.699,E88.8-E91.399,E91.5-E92.889,E92.91-E92.94,E93.0-E97.99,E99.0-E99.91                                         |
| Transport injuries          | V00-V86.99,V87.2,V87.3,V88.2,V88.3,V91-V91.9,V93-V98.8                                                                                                                                                                        | E80.0-E80.03,E80.1-E80.13,E80.2-E80.23,E80.3-E80.33,E80.4-E80.43,E80.5-E80.53,E80.6-E80.63,E80.7-E80.73,E81.00-E81.07,E81.10-E81.17,E81.20-E81.27,E81.30-E81.37,E81.40-E81.47,E81.50-E81.57,E81.60-E81.67,E81.70-E81.77,E81.80-E81.87,E81.90-E81.97,E82.00-E82.07,E82.10-E82.17,E82.20-E82.27,E82.30-E82.37,E82.40-E82.47,E82.50-E82.57,E82.60-E82.64,E82.70-E82.74,E82.80-E82.84,E82.90,E82.94,E83.1-E83.19,E83.3-E83.89,E84.0-E84.99,E92.91                                                                                                                                                                                           |
| Road injuries               | V01-V04.99,V06-V80.929,V82-V82.9,V87.2,V87.3                                                                                                                                                                                  | E80.03,E80.13,E80.23,E80.33,E80.43,E80.53,E80.63,E80.73,E81.00-E81.06,E81.10-E81.17,E81.20-E81.27,E81.30-E81.37,E81.40-E81.47,E81.50-E81.57,E81.60-E81.67,E81.70-E81.77,E81.80-E81.87,E81.90-E81.97,E82.00-E82.06,E82.10-E82.16,E82.20-E82.27,E82.30-E82.37,E82.40-E82.47,E82.50-E82.57,E82.60,E82.61,E82.63,E82.64,E82.70,E82.73,E82.74,E82.80,E82.84,E82.90,E82.94                                                                                                                                                                                                                                                                    |
| Pedestrian road injuries    | V01-V04.99,V06-V09.9                                                                                                                                                                                                          | E81.17,E81.27,E81.37,E81.47,E81.57,E81.67,E81.77,E81.87,E81.97,E82.27,E82.37,E82.47,E82.57,E82.60,E82.70,E82.80,E82.90                                                                                                                                                                                                                                                                                                                                                                                                                                                                                                                  |
| Cyclist road injuries       | V10-V19.9                                                                                                                                                                                                                     | E80.03,E80.13,E80.23,E80.33,E80.43,E80.53,E80.63,E80.73,E81.06,E81.16,E81.26,E81.36,E81.46,E81.56,E81.66,E81.76,E81.86,E81.96,E82.06,E82.16,E82.26,E82.36,E82.46,E82.56,E82.61                                                                                                                                                                                                                                                                                                                                                                                                                                                          |
| Motorcyclist road injuries  | V20-V29.9                                                                                                                                                                                                                     | E81.02,E81.03,E81.12,E81.13,E81.22,E81.23,E81.32,E81.33,E81.42,E81.43,E81.52,E81.53,E81.62,E81.63,E81.72,E81.73,E81.82,E81.83,E81.92,E81.93,E82.02,E82.03,E82.12,E82.13,E82.22,E82.23,E82.32,E82.33,E82.42,E82.43,E82.44,E82.45,E82.46,E82.47,E82.48,E82.49,E82.50,E82.51,E82.52,E82.53,E82.54,E82.55,E82.56,E82.57,E82.58,E82.59,E82.60,E82.61,E82.62,E82.63,E82.64,E82.65,E82.66,E82.67,E82.68,E82.69,E82.70,E82.71,E82.72,E82.73,E82.74,E82.75,E82.76,E82.77,E82.78,E82.79,E82.80,E82.81,E82.82,E82.83,E82.84,E82.85,E82.86,E82.87,E82.88,E82.89,E82.90,E82.91,E82.92,E82.93,E82.94,E82.95,E82.96,E82.97,E82.98,E82.99               |
| Motor vehicle road injuries | V30-V79.9,V87.2,V87.3                                                                                                                                                                                                         | E81.00,E81.01,E81.10,E81.11,E81.20,E81.21,E81.30,E81.31,E81.40,E81.41,E81.50,E81.51,E81.60,E81.61,E81.70,E81.71,E81.80,E81.81,E81.90,E81.91,E82.00,E82.01,E82.10,E82.11,E82.20,E82.21,E82.30,E82.31,E82.40,E82.41,E82.42,E82.43,E82.44,E82.45,E82.46,E82.47,E82.48,E82.49,E82.50,E82.51,E82.52,E82.53,E82.54,E82.55,E82.56,E82.57,E82.58,E82.59,E82.60,E82.61,E82.62,E82.63,E82.64,E82.65,E82.66,E82.67,E82.68,E82.69,E82.70,E82.71,E82.72,E82.73,E82.74,E82.75,E82.76,E82.77,E82.78,E82.79,E82.80,E82.81,E82.82,E82.83,E82.84,E82.85,E82.86,E82.87,E82.88,E82.89,E82.90,E82.91,E82.92,E82.93,E82.94,E82.95,E82.96,E82.97,E82.98,E82.99 |
| Other road injuries         | V80-V80.929,V82-V82.9                                                                                                                                                                                                         | E81.04,E81.05,E81.14,E81.15,E81.24,E81.25,E81.34,E81.35,E81.44,E81.45,E81.54,E81.55,E81.64,E81.65,E81.74,E81.75,E81.84,E81.85,E81.94,E81.95,E82.04,E82.05,E82.14,E82.15,E82.24,E82.25,E82.34,E82.35,E82.44,E82.45,E82.46,E82.47,E82.48,E82.49,E82.50,E82.51,E82.52,E82.53,E82.54,E82.55,E82.56,E82.57,E82.58,E82.59,E82.60,E82.61,E82.62,E82.63,E82.64,E82.65,E82.66,E82.67,E82.68,E82.69,E82.70,E82.71,E82.72,E82.73,E82.74,E82.75,E82.76,E82.77,E82.78,E82.79,E82.80,E82.81,E82.82,E82.83,E82.84,E82.85,E82.86,E82.87,E82.88,E82.89,E82.90,E82.91,E82.92,E82.93,E82.94,E82.95,E82.96,E82.97,E82.98,E82.99                             |
| Other transport injuries    | V00-V00.898,V05-V05.99,V81-V81.9,V83-V86.99,V88.2,V88.3,V91-V91.9,V93-V98.8                                                                                                                                                   | E80.0-E80.02,E80.1-E80.12,E80.2-E80.22,E80.3-E80.32,E80.4-E80.42,E80.5-E80.52,E80.6-E80.62,E80.7-E80.72,E81.07,E82.07,E82.17,E82.62,E82.72,E82.82,E83.1-E83.19,E83.3-E83.89,E84.0-E84.99,E92.91                                                                                                                                                                                                                                                                                                                                                                                                                                         |
| Unintentional injuries      | V90,V90.0,V90.01-V90.9,V92-V92.9,W00-W46.2,W49-W62.9,W64-W70.9,W73-W81.9,W83-W94.9,W97.9,W99-X06.9,X08-X29.9,X40-X40.9,X43-X43.9,X46-X48.9,X50-X54.9,X57-X58.9,Y38.9-Y84.9,Y88-Y88.3                                          | E00.0-E03.0,E83.0-E83.09,E83.2-E83.29,E85.03-E85.089,E85.48-E85.569,E85.6-E85.899,E86.02-E86.999,E87.0-E87.69,E87.8-E88.699,E88.8-E89.909,E90.01-E90.019,E90.11-E90.119,E90.2-E90.4,E90.41-E90.699,E91.0-E91.399,E91.5-E92.889,E92.92-E92.94,E93.0-E94.99                                                                                                                                                                                                                                                                                                                                                                               |
| Falls                       | W00-W19.9                                                                                                                                                                                                                     | E88.0-E88.699,E88.8-E88.89,E92.93                                                                                                                                                                                                                                                                                                                                                                                                                                                                                                                                                                                                       |

| Web Table 14 - List of International Classification of Diseases codes mapped to the Global Burden of Disease cause list for Causes of Death |                                                                             |                                                                                                                                |
|---------------------------------------------------------------------------------------------------------------------------------------------|-----------------------------------------------------------------------------|--------------------------------------------------------------------------------------------------------------------------------|
| Cause Name                                                                                                                                  | ICD10 Code                                                                  | ICD9 Code                                                                                                                      |
| Drowning                                                                                                                                    | V90,V90.0,V90.01-V90.9,V92-V92.9,W65-W70.9,W73-W74.9                        | E83.0-E83.09,E83.2-E83.29,E91.0-E91.099                                                                                        |
| Fire, heat, and hot substances                                                                                                              | X00-X06.9,X08-X19.9,X20.5                                                   | E89.0-E89.909,E92.4-E92.499,E92.94                                                                                             |
| Poisonings                                                                                                                                  | X40-X40.9,X43-X43.9,X46-X48.9                                               | E85.03-E85.089,E85.48-E85.519,E85.53-E85.569,E85.6-E85.899,E86.02-E86.999,E92.92                                               |
| Exposure to mechanical forces                                                                                                               | W20-W38.9,W40-W43.9,W45.0-W45.2,W46-W46.2,W49-W52,W52.3,W75-W76.9           | E91.3-E91.319,E91.6-E92.299,E92.81-E92.87                                                                                      |
| Unintentional firearm injuries                                                                                                              | W32-W34.9                                                                   | E92.2-E92.299,E92.87                                                                                                           |
| Unintentional suffocation                                                                                                                   | W75-W76.9                                                                   | E91.3-E91.319                                                                                                                  |
| Other exposure to mechanical forces                                                                                                         | W20-W31.9,W35-W38.9,W40-W43.9,W45.0-W45.2,W46-W46.2,W49-W52,W52.3           | E91.6-E92.199,E92.81-E92.86                                                                                                    |
| Adverse effects of medical treatment                                                                                                        | Y38.9-Y84.9,Y88-Y88.3                                                       | E85.52-E85.529,E87.0-E87.69,E87.8-E87.99,E93.0-E94.99                                                                          |
| Animal contact                                                                                                                              | W52.0-W52.2,W52.4-W62.9,W64-W64.9,X20-X20.4,X20.6-X29.9                     | E90.5-E90.699                                                                                                                  |
| Venomous animal contact                                                                                                                     | X20-X20.4,X20.6-X29.9                                                       | E90.5-E90.599                                                                                                                  |
| Non-venomous animal contact                                                                                                                 | W52.0-W52.2,W52.4-W62.9,W64-W64.9                                           | E90.6-E90.699                                                                                                                  |
| Foreign body                                                                                                                                | W44-W45,W45.3-W45.9,W78-W80.9,W83-W84.9                                     | E91.1-E91.209,E91.38-E91.399,E91.5-E91.509                                                                                     |
| Pulmonary aspiration and foreign body in airway                                                                                             | W78-W80.9,W83-W84.9                                                         | E91.1-E91.209,E91.38-E91.399                                                                                                   |
| Foreign body in other body part                                                                                                             | W44-W45,W45.3-W45.9                                                         | E91.5-E91.509                                                                                                                  |
| Other unintentional injuries                                                                                                                | W39-W39.9,W77-W77.9,W81-W81.9,W85-W94.9,W97.9,W99-W99.9,X50-X54.9,X57-X58.9 | E00.0-E03.0,E90.01-E90.019,E90.11-E90.119,E90.2-E90.4,E90.41-E90.499,E91.32-E91.339,E92.3-E92.399,E92.5-E92.809,E92.88-E92.889 |
| Self-harm and interpersonal violence                                                                                                        | X60-Y08.9,Y87.1                                                             | E90.40-E90.409,E95.0-E96.9                                                                                                     |
| Self-harm                                                                                                                                   | X60-X84.9                                                                   | E95.0-E95.9                                                                                                                    |
| Interpersonal violence                                                                                                                      | X85-Y08.9,Y87.1                                                             | E90.40-E90.409,E96.0-E96.9                                                                                                     |
| Assault by firearm                                                                                                                          | X93-X94.0,X94.3-X94.7,X94.9-X95.9,X96.5                                     | E96.5-E96.54                                                                                                                   |
| Assault by sharp object                                                                                                                     | X99-X99.9                                                                   | E96.6                                                                                                                          |
| Assault by other means                                                                                                                      | X85-X92.9,X94.1,X94.2,X94.8,X96-X96.4,X96.6-X98.9,Y00-Y08.9,Y87.1           | E90.40-E90.409,E96.0-E96.4,E96.55-E96.59,E96.7-E96.9                                                                           |
| Forces of nature, war, and legal intervention                                                                                               | X30-X39.9,Y35-Y38.893,Y89.0,Y89.1                                           | E90.0-E90.009,E90.09-E90.109,E90.18-E90.199,E90.7-E90.99,E97.0-E97.99,E99.0-E99.91                                             |
| Exposure to forces of nature                                                                                                                | X30-X39.9                                                                   | E90.0-E90.009,E90.09-E90.109,E90.18-E90.199,E90.7-E90.99                                                                       |
| Collective violence and legal intervention                                                                                                  | Y35-Y38.893,Y89.0,Y89.1                                                     | E97.0-E97.99,E99.0-E99.91                                                                                                      |
| Still born                                                                                                                                  | P95-P95.9                                                                   | 768.0,768.1                                                                                                                    |

**Web Table 14 - List of International Classification of Diseases codes mapped to the Global Burden of Disease cause list for Causes of Death**

| Cause Name   | ICD10 Code                                                                                                                                                                                                                                                                                                                                                                                                                                                                                                                                                                                                                                                                                                                                                                                                                                                                                                                                                                                                                                                                                                                                                                                                                                                                                                                                                                                                                                                                                                                                                                                                                                                                                                                                                                                                                                                                                                                                                                                | ICD9 Code                                                                                                                                                                                                                                                                                                                                                                                                                                                                                                                                                                                                                                                                                                                                                                                                                                                                                                                                                                                                                                                                                                                                                                                                                                                                                                                                                                                                                                                                                                                                                                                                                                                                                                                                                                                                                                                                                                                                                                                                                                                                                                                                                                                                                                                                                                                                                                                                                                                                                                                                           |
|--------------|-------------------------------------------------------------------------------------------------------------------------------------------------------------------------------------------------------------------------------------------------------------------------------------------------------------------------------------------------------------------------------------------------------------------------------------------------------------------------------------------------------------------------------------------------------------------------------------------------------------------------------------------------------------------------------------------------------------------------------------------------------------------------------------------------------------------------------------------------------------------------------------------------------------------------------------------------------------------------------------------------------------------------------------------------------------------------------------------------------------------------------------------------------------------------------------------------------------------------------------------------------------------------------------------------------------------------------------------------------------------------------------------------------------------------------------------------------------------------------------------------------------------------------------------------------------------------------------------------------------------------------------------------------------------------------------------------------------------------------------------------------------------------------------------------------------------------------------------------------------------------------------------------------------------------------------------------------------------------------------------|-----------------------------------------------------------------------------------------------------------------------------------------------------------------------------------------------------------------------------------------------------------------------------------------------------------------------------------------------------------------------------------------------------------------------------------------------------------------------------------------------------------------------------------------------------------------------------------------------------------------------------------------------------------------------------------------------------------------------------------------------------------------------------------------------------------------------------------------------------------------------------------------------------------------------------------------------------------------------------------------------------------------------------------------------------------------------------------------------------------------------------------------------------------------------------------------------------------------------------------------------------------------------------------------------------------------------------------------------------------------------------------------------------------------------------------------------------------------------------------------------------------------------------------------------------------------------------------------------------------------------------------------------------------------------------------------------------------------------------------------------------------------------------------------------------------------------------------------------------------------------------------------------------------------------------------------------------------------------------------------------------------------------------------------------------------------------------------------------------------------------------------------------------------------------------------------------------------------------------------------------------------------------------------------------------------------------------------------------------------------------------------------------------------------------------------------------------------------------------------------------------------------------------------------------------|
|              | A01,A14.9,A29-A30.9,A40-A41.9,A45,A45.9,A47-A48.0,A48.3,A48.8-A49.02,A49.2-A49.9,A59-A62,A64,A64.0,A71-A73,A74.0,A76,A97,A99,A99.0,B07-B09,B11-B14,B17.8,B17.9,B19,B19.0,B19.9,B28,B29,B30-B32.4,B34-B36.9,B55,B55.1-B55.9,B61,B62,B64,B66-B66.9,B73-B74.2,B76-B76.9,B79,B82-B82.9,B83.9-B89,B92-B94.0,B94.8,B94.9,B95.6-B99.9,C14-C14.9,C26-C29,C35,C36,C39-C39.9,C42,C46-C46.9,C55-C55.9,C57.9,C59,C63.9,C68,C68.9,C75.9-C80.9,C87,C98-D00.0,D01,D01.4-D02,D02.4,D02.9,D07,D07.3-D07.39,D07.6-D09,D09.1-D09.19,D09.9,D10,D10.9,D13,D13.9,D14,D14.4,D17-D21.9,D26,D26.7,D26.9,D28,D28.9,D29,D29.9,D30,D30.9,D36.0,D36.9-D37.0,D37.6-D38,D38.6-D39.0,D39.9,D40,D40.9,D41,D41.9,D44,D44.9,D48,D48.7-D49.1,D49.5,D49.7,D49.8,D49.89,D49.9,D54,D59,D59.4,D59.8,D59.9,D64,D65-D65.9,D75.9,D79,D84,D84.9,D85,D87,D88,D89.8-D99,E07.8-E08.9,E17-E19,E34.9-E35.8,E37-E39,E47-E50.9,E62,E64.1,E69,E85.3-E87.70,E87.79-E87.99,E90-E99.9,F04-F06.1,F06.3-F07.0,F07.2-F09.9,F12-F12.99,F17-F17.9,F24,F30-F50,F50.2-G00,G00.9-G02.8,G03.9,G06-G09.0,G15-G19,G27-G29,G32-G34,G38,G39,G42-G44.89,G47-G47.29,G47.4-G60.9,G62-G69,G74-G89.4,G91-G93.6,G93.8-G94.8,G96-G96.9,G98-H69.93,H71-H99,I00.0,I03,I04,I10-I10.9,I14-I19,I26-I27.0,I27.2-I27.9,I28.9-I29.9,I31.2-I31.4,I32-I32.8,I43-I46.9,I49-I51,I51.7-I59,I62,I62.1,I62.9,I64-I64.9,I67,I67.4,I67.8-I69,I69.2,I69.4-I70.1,I70.9-I70.92,I79-I79.8,I90,I92-I95.1,I95.8-I96.9,I98.4,I98.8,I99-J00.0,J02,J02.8-J03,J03.8-J04.31,J06-J08,J15.9,J17-J19.6,J22-J29,J48-J59,J64-J64.9,J69-J69.9,J71-J81.9,J83,J85-J90.9,J93-J94.9,J96-K19,K23-K24,K30,K31.9-K34,K39,K47-K49,K53,K54,K58,K63-K63.4,K63.8-K63.9,K65-K66.1,K66.9,K69,K71-K71.2,K71.6,K71.8-K72.01,K75-K75.1,K78,K79,K84,K87-K89,K92.0-K92.2,K92.9,K93,K93.1,K93.8,K96-K99,L06,L07,L09,L15-L50.9,L52-L87.9,L90-L92.9,L94-L96,L98.5-L99.8,M04,M10-M12.09,M12.2-M29,M37-M39,M43.2-M49,M49.2-M64,M65.1-M71,M71.2-M73,M73.8-M85.9,M87.2-M87.9,M89.1-M89.49,M90,M90.9,N00,N12,N12.9,N17,N17.9,N19 | 000,000.9,002,030-030.9,038-038.9,039.6,040.0,041.9,054.1,067-070,070.4,070.49,070.5,070.59,070.6,070.9,076-076.1,076.6,076.9-078.3,085,085.1-085.9,089-089.9,108-111.9,112.0,112.3-117.2,117.4-117.6,117.8-119,121-121.9,125.0-125.3,126-126.9,127.3,130-134.9,136.3-136.5,136.8,136.9,139.1,139.8,149-149.9,159-159.9,165-169,176-179.9,183.9,184,184.5,184.9,187,187.9,189,189.9,194.9-199.9,209,209.2,209.20,209.29-209.30,209.6,209.60,209.62,209.69-210,211,211.9,212,212.9,214-216.9,219,219.8,219.9,221,221.9,222,222.9,223,223.9,229,229.1,229.9-230.0,230.9,231,231.8,231.9,233,233.3,233.30,233.39,233.6,233.9,234,234.9,235,235.1-235.3,235.5,235.9-236.0,236.3,236.6,236.9,236.90,238,238.9-239.1,239.5,239.7-239.9,244,244.9,247-249.91,264-264.9,274-274.9,276.0-276.9,277.3,278,279.0-279.53,279.8,279.9,286.6,293-294.0,296-302.9,304,304.3-304.33,304.9-304.93,305.2-305.23,306-307.0,307.2-307.53,307.59-320,320.9,321.0,324-327.19,328,329,331.3,331.4,338-339.89,342-344.9,346-348.9,349.81-353.5,354-355.9,357,357.8-357.9,360-380.9,384-389.9,399-401.9,405-409.4,415-416.0,416.3-416.9,418-419.9,423.0,426-426.9,427.4-427.5,427.9-429,429.2-429.9,436-437,437.3,437.4,437.9-440.9,458-458.9,459.0,459.5-460.9,462-465.9,482.9,483,484,484.8-486.9,505-505.9,507-507.9,510-514.9,515.0,515.9,518-518.53,518.8-518.89,519,519.9-529.9,536.2,536.3,536.8,536.9,537.7,537.89,537.9,544-549,553.8,553.9,559,559.0,560.4-560.7,561,562.2-563,564.8-564.9,567-569,569.49,569.79-569.83,569.86-570.9,572-572.2,573,573.5,578-578.9,584-584.9,586-587.9,591-591.9,593.9,599.60-599.72,599.9-600.91,603-603.9,605-609,611-612.1,615-616.9,618-619.9,621-621.35,622-622.2,622.8-628.9,629.89,629.9,637-637.92,639-639.9,690-693.9,695.8-706.9,708-709.9,712-713.8,714.4,715-716,716.1-728.85,728.87,728.89-729.99,730.3-730.39,730.7-730.79,731-731.9,733-739.9,749.1-749.14,758.7,759,759.9,770.0,779.9-780.56,780.58-780.61,780.64-786.02,786.04-787.04,787.2-787.9,787.99,788,788.1-790.1,790.29,790.4-798,798.1-999.9,E80,E80.08,E80.09,E80.18,E80.19,E80.28,E80.29,E80.38,E80.39,E80.48,E80.49,E80.58,E80.59,E80.68,E80.69,E80.78-E81.0,E81.08-E81.1,E81.18-E81.2,E81.28-E81.3,E81.38-E81.4,E81.48-E81.5,E81.58-E81.6,E81.68-E81.7,E81.78-E81.8,E81.88-E81.9,E81.98-E82.0,E82.08-E82.1,E82.18-E82.2,E82.28-E82.3,E82.38-E82.4,E82.48-E82.5,E82.58-E82.6,E82.68-E82.7,E82.78-E82.8,E82.88-E82.9,E82.98-E83,E83.9,E85,E85.58-E85.599,E85.9,E87,E87.7,E88.7-E88.709,E91.4-E91.409,E92.89-E92.90,E92.95,E92.99,E98.0,E98.9,V01,V20.0 |
| Garbage Code |                                                                                                                                                                                                                                                                                                                                                                                                                                                                                                                                                                                                                                                                                                                                                                                                                                                                                                                                                                                                                                                                                                                                                                                                                                                                                                                                                                                                                                                                                                                                                                                                                                                                                                                                                                                                                                                                                                                                                                                           |                                                                                                                                                                                                                                                                                                                                                                                                                                                                                                                                                                                                                                                                                                                                                                                                                                                                                                                                                                                                                                                                                                                                                                                                                                                                                                                                                                                                                                                                                                                                                                                                                                                                                                                                                                                                                                                                                                                                                                                                                                                                                                                                                                                                                                                                                                                                                                                                                                                                                                                                                     |

**Web Table 15. Disaggregation of ICD9 Basic Tabulation: Example B14.9 "Remainder of B14: Malignant neoplasm of lymphatic and haemopoietic tissue" in females**

| <b>Web Table 15 - Disaggregation of ICD9 basic tabulation: Example B14.9 "Remainder of B14: Malignant neoplasm of lymphatic and haemopoietic tissue" in females</b> |                                                                                            |                      |                 |                 |                 |                 |                 |                 |                 |                 |                 |
|---------------------------------------------------------------------------------------------------------------------------------------------------------------------|--------------------------------------------------------------------------------------------|----------------------|-----------------|-----------------|-----------------|-----------------|-----------------|-----------------|-----------------|-----------------|-----------------|
| <b>ICD9</b>                                                                                                                                                         | <b>Target Name</b>                                                                         | <b>GBD Cause</b>     | <b>Infants</b>  | <b>1 to 4</b>   | <b>5 to 9</b>   | <b>10 to 14</b> | <b>15 to 19</b> | <b>20 to 24</b> | <b>25 to 29</b> | <b>30 to 34</b> | <b>35 to 39</b> |
| 200                                                                                                                                                                 | Lymphosarcoma and reticulosarcoma and other specified malignant tumors of lymphatic tissue | Non-Hodgkin lymphoma | 0.6             | 0.293           | 0.378           | 0.41            | 0.281           | 0.418           | 0.329           | 0.341           | 0.286           |
| 202                                                                                                                                                                 | Other malignant neoplasms of lymphoid and histiocytic tissue                               | Non-Hodgkin lymphoma | 0.4             | 0.659           | 0.622           | 0.564           | 0.702           | 0.567           | 0.646           | 0.624           | 0.613           |
| 203                                                                                                                                                                 | Multiple myeloma and immunoproliferative neoplasms                                         | Multiple myeloma     | 0               | 0.049           | 0               | 0.026           | 0.018           | 0.015           | 0.025           | 0.035           | 0.101           |
| <b>ICD9</b>                                                                                                                                                         | <b>Target Name</b>                                                                         | <b>GBD Cause</b>     | <b>40 to 44</b> | <b>45 to 49</b> | <b>50 to 54</b> | <b>55 to 59</b> | <b>60 to 64</b> | <b>65 to 69</b> | <b>70 to 74</b> | <b>75 to 79</b> | <b>80 plus</b>  |
| 200                                                                                                                                                                 | Lymphosarcoma and reticulosarcoma and other specified malignant tumors of lymphatic tissue | Non-Hodgkin lymphoma | 0.167           | 0.184           | 0.148           | 0.175           | 0.145           | 0.177           | 0.154           | 0.144           | 0.15            |
| 202                                                                                                                                                                 | Other malignant neoplasms of lymphoid and histiocytic tissue                               | Non-Hodgkin lymphoma | 0.626           | 0.576           | 0.548           | 0.487           | 0.462           | 0.476           | 0.483           | 0.493           | 0.544           |
| 203                                                                                                                                                                 | Multiple myeloma and immunoproliferative neoplasms                                         | Multiple myeloma     | 0.207           | 0.24            | 0.303           | 0.338           | 0.393           | 0.347           | 0.363           | 0.363           | 0.306           |

### C. Garbage code redistribution

The underlying algorithm used for garbage code redistribution in the GBD 2013 is the same as the algorithm used in the GBD 2010.<sup>22</sup> We have, however, changed how we generate some of the proportions we use to redistribute deaths to certain causes.

The statistical analysis used to determine proportions for garbage code redistribution for ill-defined cancer sites, ill-defined external causes of injury, unspecified stroke, heart failure, hypertension, and atherosclerosis was built off of the approach outlined by Ahern et al.<sup>23</sup> For each redistribution package, we defined the “universe” of data as all deaths coded to either the packages’ garbage codes or the packages’ redistribution targets for each country, year, age, and sex. We then ran the following regression:

$$TG_{crt} = \alpha + \beta Gar_{crt} + \gamma_r + \theta_r Gar_{crt} + \varepsilon_{ct} \quad 24$$

Where  $TG_{crt}$  is the percentage of deaths within the given garbage code’s “universe” which were coded to a given target group, by country (c), year (t) and with countries categorized into regions (r).  $Gar_{crt}$  in this formula is the percentage of deaths within the given garbage code’s “universe” that were coded to that garbage code (by country-year, with countries grouped by region). The parameter  $\alpha$  is a fixed constant,  $\beta$  is a slope coefficient describing the association between  $Gar$  and  $TG$ ,  $\gamma_r$  is a region-specific random intercept,  $\theta_r$  is a region-specific random slope and  $\varepsilon_{ct}$  is normally-distributed error. This regression was fit separately for all groups  $TG$ .

Redistribution of ICD10 code C14 and ICD9 code 149 is an example where this method was applied. The garbage codes here for malignant neoplasms of other and ill-defined sites in the lip, oral cavity and pharynx were redistributed onto mouth cancer, nasopharynx cancer, and other pharynx cancer. We combined our ICD10 and ICD9 data sources together as input data for the regression and then estimated the fraction of deaths from the garbage codes to be redistributed onto mouth, nasopharynx, and other pharynx cancers by region, sex, and age.

Figures 10 through 14 illustrated the differences of the proportional and regression-based proportions for this and other redistribution packages.

**Web Figure 10: Comparisons of proportionality redistribution of C14 (or 149) on three related cancers by age in Global level**

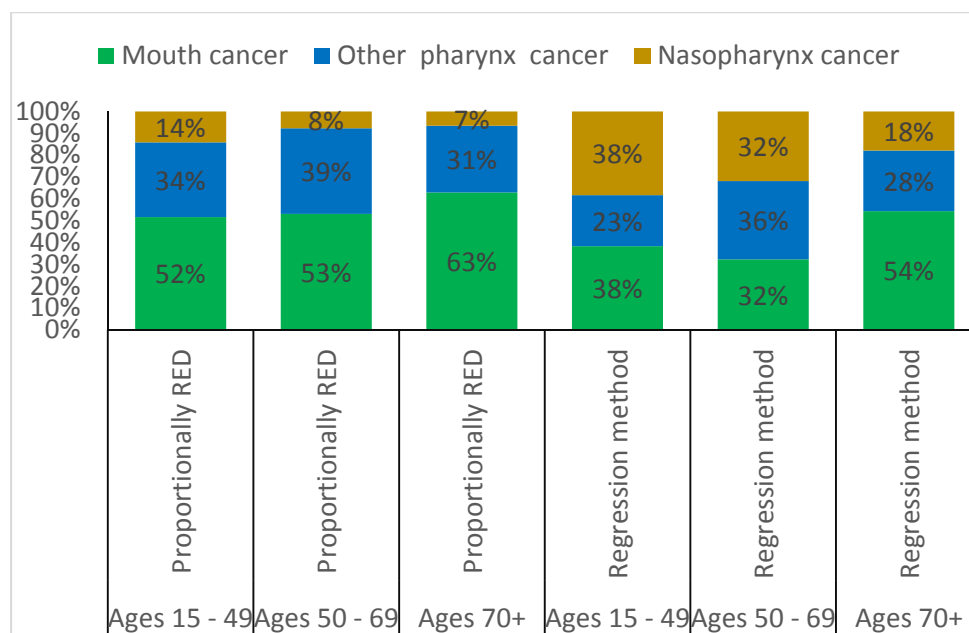



**Web Figure 11: Comparisons of assigned fraction of C14 (or 149) on nasopharynx cancer by regions for all ages**

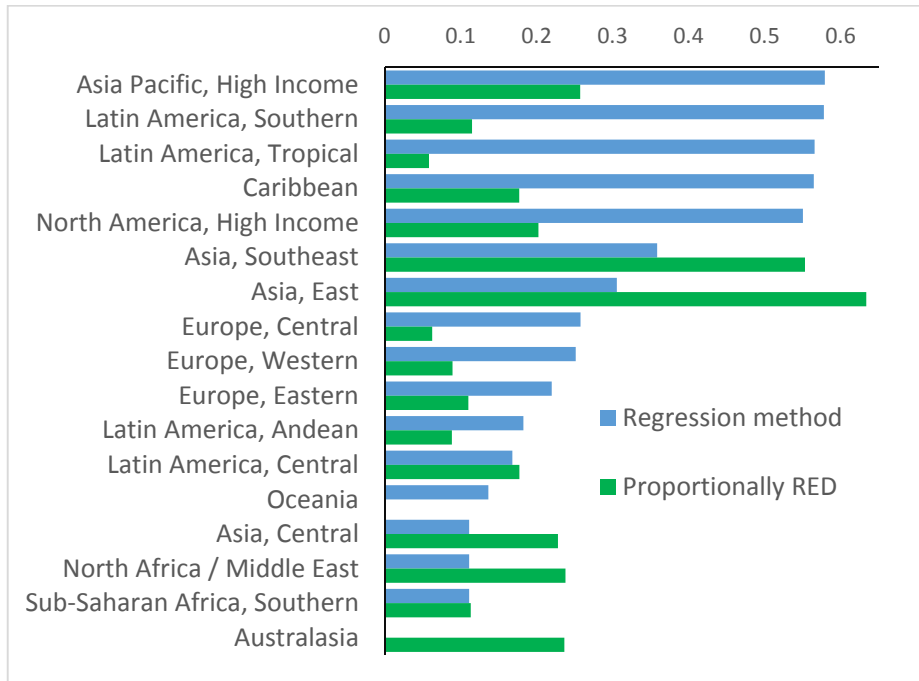

**Web Figure 12: Comparisons of assigned fraction of C14 (or 149) on oral cavity and lip cancer by regions for all ages**

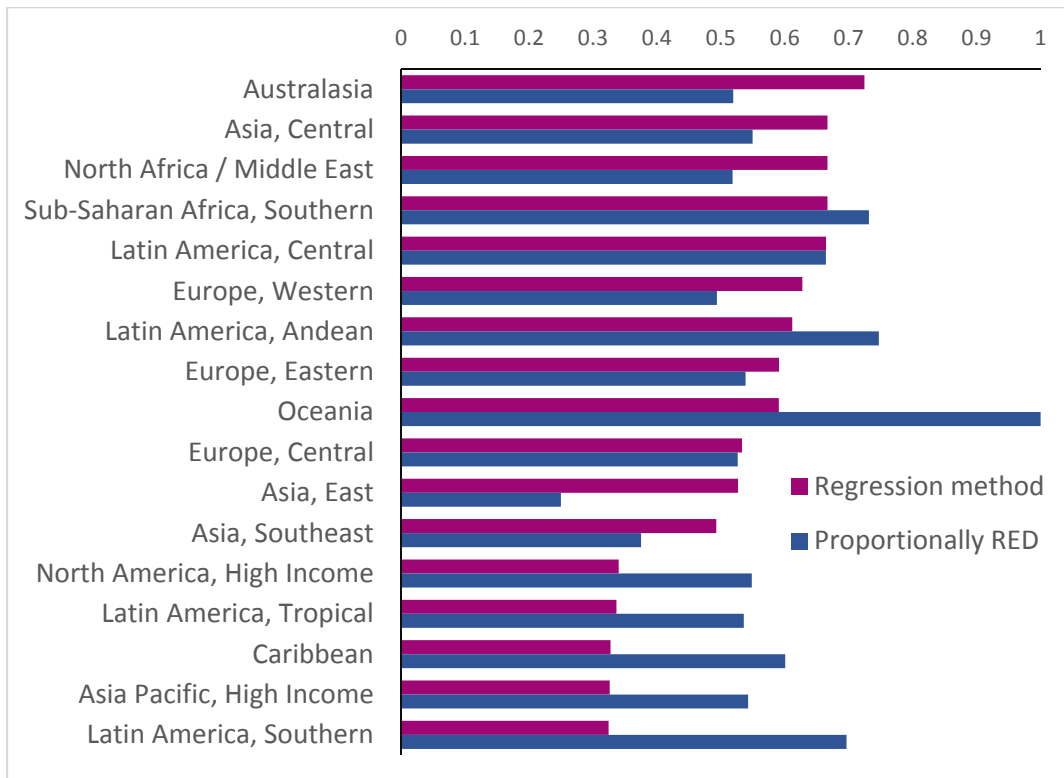

**Web Figure 13: Comparisons of assigned fraction of Y20 “Hanging, strangulation and suffocation, undetermined intent” on related injuries by ages in global level**

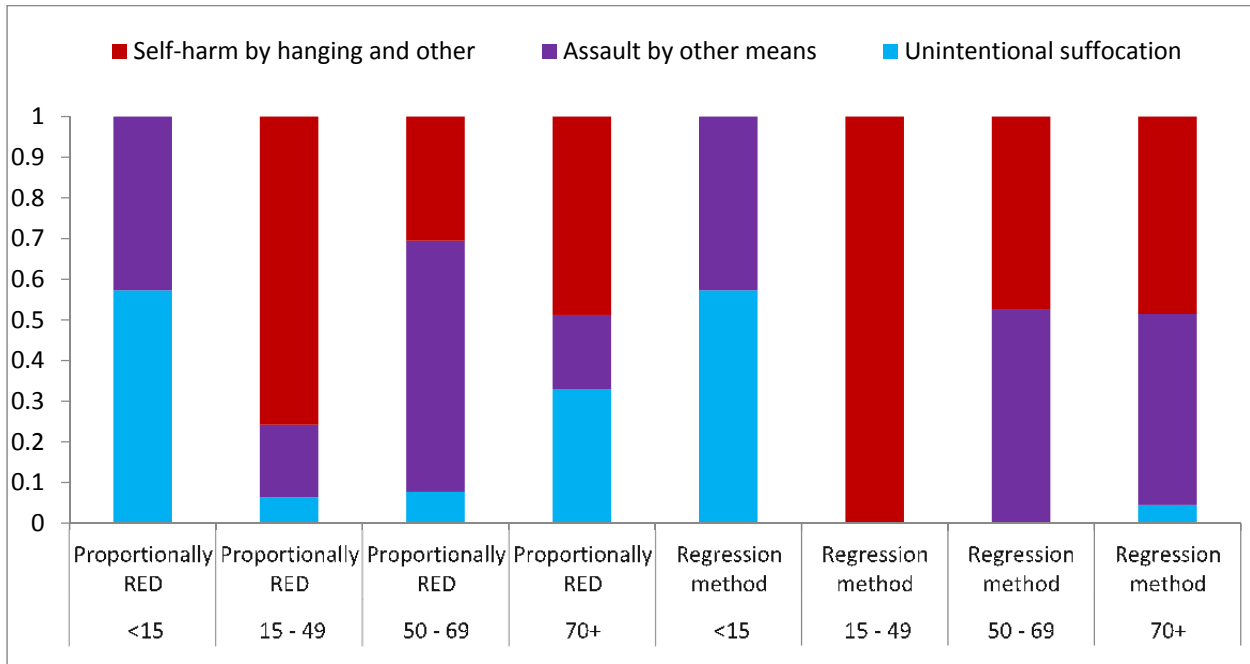

**Web Figure 14: Comparisons of assigned fraction of I64 “Stroke, not specified as hemorrhage or infarction” on related injuries by ages in global level**

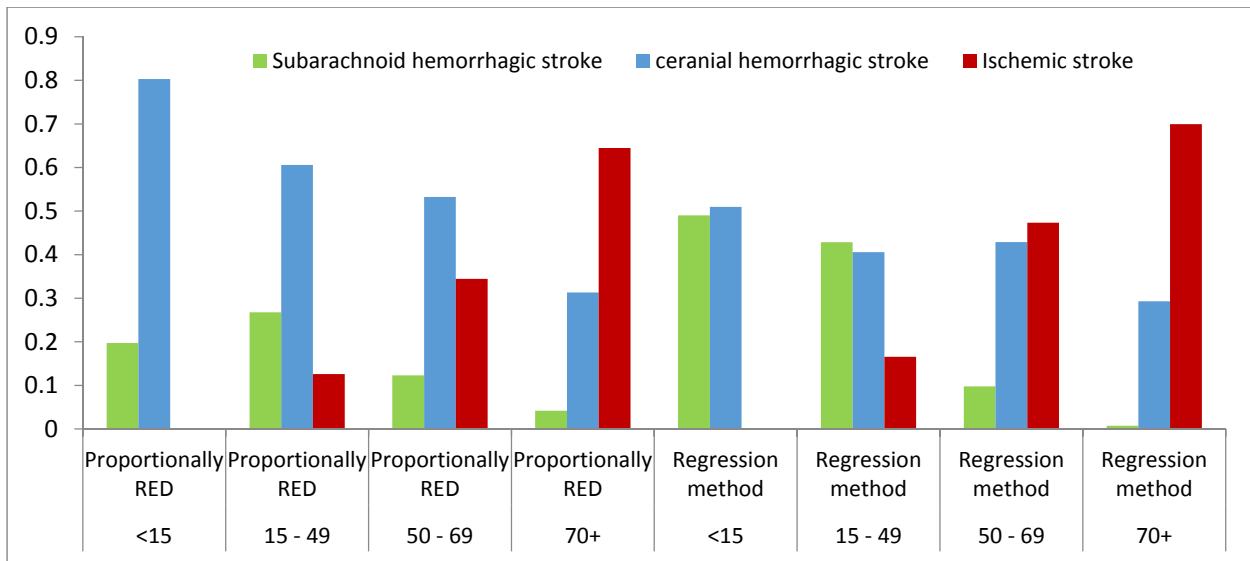

**Web Table 16: Cause fractions before and after redistribution at the global and super-region level for 2008  
excluding studies on LRI and diarrhea etiologies**

**Web Table 16a - Cause fractions before and after redistribution for global and super-region for 2008 ICD10 and ICD9 vital registration excluding studies on LRI and diarrhea etiologies**

| Cause                                                                         | Global                                                     |       | Central Europe, Eastern Europe, and Central Asia |       | High-Income |       | Latin America and Caribbean |       |
|-------------------------------------------------------------------------------|------------------------------------------------------------|-------|--------------------------------------------------|-------|-------------|-------|-----------------------------|-------|
|                                                                               | Before                                                     | After | Before                                           | After | Before      | After | Before                      | After |
|                                                                               | Communicable, maternal, neonatal, and nutritional diseases | 5.07  | 10.5                                             | 1.22  | 3.45        | 1.64  | 6.54                        | 7.08  |
| HIV/AIDS and tuberculosis                                                     | 2.08                                                       | 2.62  | 0.4                                              | 0.45  | 0.35        | 0.42  | 1.58                        | 1.77  |
| Tuberculosis                                                                  | 0.95                                                       | 0.71  | 0.36                                             | 0.38  | 0.14        | 0.17  | 0.53                        | 0.58  |
| HIV/AIDS                                                                      | 1.12                                                       | 1.91  | 0.04                                             | 0.08  | 0.22        | 0.24  | 1.06                        | 1.19  |
| HIV/AIDS resulting in mycobacterial infection                                 | 0.03                                                       | 0.36  | 0.01                                             | 0.03  | <0.05       | <0.05 | 0.12                        | 0.13  |
| HIV disease resulting in other specified or unspecified diseases              | 0.3                                                        | 0.71  | 0.02                                             | 0.04  | 0.16        | 0.17  | 0.72                        | 0.8   |
| Diarrhoea, lower respiratory infections, and other common infectious diseases | 1.05                                                       | 5.74  | 0.29                                             | 2.38  | 0.49        | 5.14  | 1.06                        | 6.32  |
| Diarrhoea                                                                     | 0.62                                                       | 0.65  | 0.04                                             | 0.04  | 0.23        | 0.33  | 0.63                        | 0.75  |
| Other diarrheal diseases                                                      | 0.53                                                       | 0.53  | 0.03                                             | 0.03  | 0.09        | 0.15  | 0.6                         | 0.7   |
| Intestinal infectious diseases                                                | <0.05                                                      | <0.05 | <0.05                                            | <0.05 | <0.05       | <0.05 | 0.01                        | 0.01  |
| Typhoid fever                                                                 | <0.05                                                      | <0.05 | 0                                                | <0.05 | <0.05       | <0.05 | 0.01                        | 0.01  |
| Paratyphoid fever                                                             | <0.05                                                      | <0.05 | 0                                                | <0.05 | <0.05       | <0.05 | <0.05                       | <0.05 |
| Other intestinal infectious diseases                                          | <0.05                                                      | <0.05 | <0.05                                            | <0.05 | <0.05       | <0.05 | <0.05                       | <0.05 |
| Lower respiratory infections                                                  | 0.26                                                       | 4.82  | 0.19                                             | 2.22  | 0.2         | 4.68  | 0.25                        | 5.19  |
| Upper respiratory infections                                                  | <0.05                                                      | <0.05 | <0.05                                            | <0.05 | <0.05       | <0.05 | <0.05                       | <0.05 |
| Otitis media                                                                  | <0.05                                                      | <0.05 | <0.05                                            | <0.05 | <0.05       | <0.05 | <0.05                       | <0.05 |
| Meningitis                                                                    | 0.08                                                       | 0.14  | 0.02                                             | 0.05  | 0.02        | 0.06  | 0.03                        | 0.2   |
| Pneumococcal meningitis                                                       | <0.05                                                      | <0.05 | <0.05                                            | <0.05 | 0.01        | 0.01  | 0.01                        | 0.03  |
| H influenzae type B meningitis                                                | <0.05                                                      | <0.05 | <0.05                                            | <0.05 | <0.05       | <0.05 | <0.05                       | <0.05 |
| Meningococcal meningitis                                                      | 0.01                                                       | 0.02  | 0.01                                             | 0.01  | <0.05       | <0.05 | 0.02                        | 0.04  |
| Other meningitis                                                              | 0.07                                                       | 0.1   | 0.01                                             | 0.03  | 0.01        | 0.04  | 0.01                        | 0.13  |
| Encephalitis                                                                  | 0.06                                                       | 0.08  | 0.04                                             | 0.05  | 0.03        | 0.04  | 0.09                        | 0.12  |
| Diphtheria                                                                    | <0.05                                                      | <0.05 | <0.05                                            | <0.05 | 0           | <0.05 | <0.05                       | <0.05 |
| Whooping cough                                                                | <0.05                                                      | <0.05 | <0.05                                            | <0.05 | <0.05       | <0.05 | <0.05                       | <0.05 |
| Tetanus                                                                       | 0.01                                                       | 0.01  | <0.05                                            | <0.05 | <0.05       | <0.05 | 0.01                        | 0.01  |
| Measles                                                                       | <0.05                                                      | <0.05 | 0                                                | <0.05 | <0.05       | <0.05 | <0.05                       | <0.05 |
| Varicella and herpes zoster                                                   | 0.01                                                       | 0.02  | <0.05                                            | <0.05 | 0.01        | 0.01  | 0.03                        | 0.03  |
| Neglected tropical diseases and malaria                                       | 0.13                                                       | 0.13  | 0.01                                             | 0.01  | 0.02        | 0.02  | 0.31                        | 0.36  |
| Malaria                                                                       | <0.05                                                      | <0.05 | <0.05                                            | <0.05 | <0.05       | <0.05 | 0.01                        | 0.01  |
| Chagas disease                                                                | 0.11                                                       | 0.12  |                                                  |       | 0.02        | 0.02  | 0.22                        | 0.24  |
| Leishmaniasis                                                                 | <0.05                                                      | <0.05 | 0                                                | <0.05 | <0.05       | <0.05 | 0.01                        | 0.03  |
| Visceral leishmaniasis                                                        | <0.05                                                      | <0.05 | 0                                                | <0.05 | <0.05       | <0.05 | 0.01                        | 0.03  |
| Cutaneous and mucocutaneous leishmaniasis                                     | <0.05                                                      | <0.05 | 0                                                | <0.05 | <0.05       | <0.05 | <0.05                       | <0.05 |
| African trypanosomiasis                                                       | <0.05                                                      | <0.05 | 0                                                | <0.05 | 0           | <0.05 | <0.05                       | <0.05 |
| Schistosomiasis                                                               | 0.01                                                       | 0.02  | 0                                                | <0.05 | <0.05       | <0.05 | 0.02                        | 0.02  |
| Cysticercosis                                                                 | <0.05                                                      | <0.05 | <0.05                                            | <0.05 | <0.05       | <0.05 | 0.01                        | 0.01  |
| Cystic echinococcosis                                                         | <0.05                                                      | <0.05 | <0.05                                            | <0.05 | <0.05       | <0.05 | <0.05                       | <0.05 |
| Lymphatic filariasis                                                          | <0.05                                                      | <0.05 | 0                                                | <0.05 | 0           | <0.05 | 0                           | <0.05 |
| Onchocerciasis                                                                | <0.05                                                      | <0.05 | 0                                                | <0.05 | <0.05       | <0.05 | 0                           | <0.05 |
| Dengue                                                                        | 0.01                                                       | 0.02  | <0.05                                            | <0.05 | <0.05       | <0.05 | 0.03                        | 0.03  |
| Yellow fever                                                                  | <0.05                                                      | <0.05 | 0                                                | <0.05 | 0           | <0.05 | <0.05                       | <0.05 |
| Rabies                                                                        | <0.05                                                      | <0.05 | <0.05                                            | <0.05 | <0.05       | <0.05 | <0.05                       | <0.05 |
| Intestinal nematode infections                                                | <0.05                                                      | <0.05 | 0                                                | <0.05 | <0.05       | <0.05 | <0.05                       | <0.05 |
| Ascariasis                                                                    | <0.05                                                      | <0.05 | 0                                                | <0.05 | <0.05       | <0.05 | <0.05                       | <0.05 |
| Trichuriasis                                                                  | 0                                                          | <0.05 | 0                                                | <0.05 | 0           | <0.05 | 0                           | <0.05 |
| Hookworm disease                                                              | <0.05                                                      | <0.05 | 0                                                | <0.05 | 0           | <0.05 | <0.05                       | <0.05 |
| Food-borne trematodiasis                                                      | <0.05                                                      | <0.05 | 0                                                | <0.05 | <0.05       | <0.05 | <0.05                       | <0.05 |
| Other neglected tropical diseases                                             | 0.04                                                       | 0.01  | <0.05                                            | <0.05 | 0.01        | 0.01  | 0.01                        | 0.01  |
| Maternal disorders                                                            | 1.38                                                       | 1.67  | 0.35                                             | 0.47  | 0.48        | 0.67  | 2.34                        | 2.84  |
| Maternal haemorrhage                                                          | 0.26                                                       | 0.28  | 0.08                                             | 0.09  | 0.04        | 0.05  | 0.46                        | 0.5   |
| Maternal sepsis and other pregnancy related infection                         | 0.07                                                       | 0.17  | 0.04                                             | 0.05  | 0.02        | 0.06  | 0.12                        | 0.3   |
| Hypertensive diseases of pregnancy                                            | 0.32                                                       | 0.34  | 0.05                                             | 0.06  | 0.06        | 0.07  | 0.6                         | 0.64  |
| Obstructed labor                                                              | 0.04                                                       | 0.05  | <0.05                                            | <0.05 | 0.01        | 0.01  | 0.08                        | 0.1   |
| Pregnancy with abortive outcome                                               | 0.11                                                       | 0.21  | 0.04                                             | 0.1   | 0.05        | 0.12  | 0.19                        | 0.34  |
| Indirect maternal deaths                                                      | 0.29                                                       | 0.31  | 0.06                                             | 0.07  | 0.1         | 0.12  | 0.46                        | 0.49  |
| Late maternal death (after 42 days)                                           | 0.04                                                       | 0.04  | <0.05                                            | <0.05 | 0.06        | 0.06  | 0.05                        | 0.06  |
| Other maternal disorders                                                      | 0.25                                                       | 0.28  | 0.07                                             | 0.09  | 0.15        | 0.18  | 0.4                         | 0.45  |
| Neonatal disorders                                                            | 1.01                                                       | 1.08  | 0.42                                             | 0.43  | 0.36        | 0.38  | 2.4                         | 2.49  |
| Preterm birth complications                                                   | 0.49                                                       | 0.52  | 0.21                                             | 0.22  | 0.2         | 0.21  | 1.1                         | 1.13  |
| Neonatal encephalopathy*                                                      | 0.2                                                        | 0.21  | 0.11                                             | 0.11  | 0.06        | 0.06  | 0.5                         | 0.53  |
| Sepsis and other infectious disorders of the newborn baby                     | 0.17                                                       | 0.19  | 0.03                                             | 0.03  | 0.03        | 0.03  | 0.49                        | 0.5   |
| Hemolytic disease in fetus and newborn and other neonatal jaundice            | 0.01                                                       | 0.01  | <0.05                                            | <0.05 | <0.05       | <0.05 | 0.02                        | 0.02  |
| Other neonatal disorders                                                      | 0.15                                                       | 0.16  | 0.07                                             | 0.07  | 0.07        | 0.08  | 0.29                        | 0.31  |
| Nutritional deficiencies                                                      | 0.48                                                       | 0.62  | 0.05                                             | 0.11  | 0.26        | 0.36  | 1.36                        | 1.54  |
| Protein energy malnutrition                                                   | 0.32                                                       | 0.36  | 0.02                                             | 0.02  | 0.13        | 0.16  | 1                           | 1.09  |
| Iodine deficiency                                                             | <0.05                                                      | <0.05 | <0.05                                            | <0.05 | <0.05       | <0.05 | <0.05                       | <0.05 |
| Iron-deficiency anaemia                                                       | 0.13                                                       | 0.21  | 0.02                                             | 0.08  | 0.11        | 0.18  | 0.28                        | 0.35  |
| Other nutritional deficiencies                                                | 0.04                                                       | 0.04  | 0.01                                             | 0.01  | 0.02        | 0.03  | 0.09                        | 0.1   |
| Other communicable, maternal, neonatal, and nutritional diseases              | 0.23                                                       | 0.21  | 0.04                                             | 0.06  | 0.14        | 0.19  | 0.17                        | 0.23  |
| Sexually transmitted diseases excluding HIV                                   | 0.01                                                       | 0.01  | <0.05                                            | <0.05 | 0.01        | 0.01  | 0.02                        | 0.02  |
| Syphilis                                                                      | <0.05                                                      | <0.05 | <0.05                                            | <0.05 | <0.05       | <0.05 | 0.01                        | 0.01  |
| Chlamydial infection                                                          | <0.05                                                      | <0.05 | 0                                                | <0.05 | <0.05       | <0.05 | <0.05                       | <0.05 |
| Gonococcal infection                                                          | <0.05                                                      | <0.05 | <0.05                                            | <0.05 | <0.05       | <0.05 | <0.05                       | <0.05 |
| Anogenital herpes                                                             | <0.05                                                      | <0.05 | 0                                                | <0.05 | <0.05       | <0.05 | <0.05                       | <0.05 |
| Other sexually transmitted diseases                                           | <0.05                                                      | <0.05 | <0.05                                            | <0.05 | <0.05       | <0.05 | <0.05                       | <0.05 |
| Hepatitis                                                                     | 0.04                                                       | 0.05  | 0.01                                             | 0.01  | 0.03        | 0.03  | 0.06                        | 0.07  |
| Acute hepatitis A                                                             | 0.01                                                       | 0.01  | <0.05                                            | <0.05 | <0.05       | <0.05 | 0.01                        | 0.01  |
| Acute hepatitis B                                                             | 0.02                                                       | 0.03  | 0.01                                             | 0.01  | 0.01        | 0.02  | 0.03                        | 0.03  |
| Acute hepatitis C                                                             | 0.01                                                       | 0.01  | <0.05                                            | <0.05 | 0.01        | 0.01  | 0.02                        | 0.03  |
| Acute hepatitis E                                                             | <0.05                                                      | <0.05 | <0.05                                            | <0.05 | <0.05       | <0.05 | <0.05                       | <0.05 |
| Leprosy                                                                       | <0.05                                                      | <0.05 | 0                                                | <0.05 | <0.05       | <0.05 | 0.01                        | 0.01  |
| Other infectious diseases                                                     | 0.18                                                       | 0.15  | 0.03                                             | 0.04  | 0.1         | 0.16  | 0.09                        | 0.13  |
| Non-communicable diseases                                                     | 59.8                                                       | 81.09 | 65.38                                            | 90.42 | 66.63       | 86.64 | 55.04                       | 73.25 |
| Neoplasms                                                                     | 19.71                                                      | 22.72 | 20.31                                            | 22.89 | 24.68       | 28.08 | 13.64                       | 16.27 |

Web Table 16a - Cause fractions before and after redistribution for global and super-region for 2008 ICD10 and ICD9 vital registration excluding studies on LRI and diarrhea etiologies

| Cause                                               | Global |        | Central Europe, Eastern Europe, and Central Asia |        | High-Income |        | Latin America and Caribbean |        |
|-----------------------------------------------------|--------|--------|--------------------------------------------------|--------|-------------|--------|-----------------------------|--------|
|                                                     | Before | After  | Before                                           | After  | Before      | After  | Before                      | After  |
| Oesophageal cancer                                  | 0.53   | 0.58   | 0.34                                             | 0.41   | 0.65        | 0.69   | 0.42                        | 0.5    |
| Stomach cancer                                      | 1.39   | 1.8    | 1.44                                             | 1.82   | 1.57        | 2.03   | 1.45                        | 1.87   |
| Liver cancer                                        | 1.1    | 1.2    | 0.71                                             | 0.82   | 1.32        | 1.41   | 0.83                        | 0.91   |
| Larynx cancer                                       | 0.21   | 0.23   | 0.38                                             | 0.41   | 0.19        | 0.2    | 0.27                        | 0.29   |
| Tracheal, bronchus and lung cancers                 | 4.41   | 4.9    | 4.76                                             | 5.15   | 5.83        | 6.41   | 1.91                        | 2.24   |
| Breast cancer                                       | 1.47   | 1.6    | 1.43                                             | 1.53   | 1.73        | 1.87   | 1.1                         | 1.2    |
| Cervical cancer                                     | 0.69   | 1.01   | 0.96                                             | 1.28   | 0.38        | 0.66   | 1.57                        | 2.06   |
| Uterine cancer                                      | 0.29   | 0.46   | 0.45                                             | 0.55   | 0.31        | 0.5    | 0.23                        | 0.42   |
| Prostate cancer                                     | 2.21   | 2.47   | 1.79                                             | 1.99   | 2.62        | 2.91   | 2.25                        | 2.46   |
| Colon and rectum cancer                             | 2.29   | 2.77   | 2.7                                              | 3.02   | 2.95        | 3.53   | 1.12                        | 1.55   |
| Lip and oral cavity cancer                          | 0.22   | 0.28   | 0.33                                             | 0.39   | 0.24        | 0.29   | 0.2                         | 0.27   |
| Nasopharynx cancer                                  | 0.04   | 0.06   | 0.04                                             | 0.08   | 0.03        | 0.05   | 0.02                        | 0.04   |
| Cancer of other part of pharynx and oropharynx      | 0.13   | 0.18   | 0.24                                             | 0.28   | 0.14        | 0.19   | 0.1                         | 0.15   |
| Gallbladder and biliary tract cancer                | 0.4    | 0.5    | 0.38                                             | 0.51   | 0.5         | 0.62   | 0.3                         | 0.37   |
| Pancreatic cancer                                   | 1.25   | 1.42   | 1.17                                             | 1.3    | 1.65        | 1.86   | 0.69                        | 0.82   |
| Malignant skin melanoma                             | 0.22   | 0.26   | 0.25                                             | 0.27   | 0.29        | 0.33   | 0.11                        | 0.15   |
| Non-melanoma skin cancer                            | 0.11   | 0.12   | 0.13                                             | 0.14   | 0.1         | 0.12   | 0.16                        | 0.18   |
| Ovarian cancer                                      | 0.98   | 1.12   | 1.1                                              | 1.22   | 1.14        | 1.3    | 0.74                        | 0.87   |
| Testicular cancer                                   | 0.04   | 0.05   | 0.06                                             | 0.07   | 0.03        | 0.04   | 0.08                        | 0.09   |
| Kidney and other urinary organ cancers              | 0.43   | 0.53   | 0.55                                             | 0.61   | 0.55        | 0.68   | 0.26                        | 0.32   |
| Bladder cancer                                      | 0.55   | 0.61   | 0.63                                             | 0.67   | 0.71        | 0.79   | 0.25                        | 0.28   |
| Brain and nervous system cancer                     | 0.51   | 0.55   | 0.64                                             | 0.68   | 0.54        | 0.57   | 0.49                        | 0.54   |
| Thyroid cancer                                      | 0.08   | 0.09   | 0.07                                             | 0.08   | 0.09        | 0.1    | 0.08                        | 0.09   |
| Mesothelioma                                        | 0.09   | 0.1    | 0.03                                             | 0.04   | 0.13        | 0.15   | 0.02                        | 0.04   |
| Hodgkin lymphoma                                    | 0.05   | 0.05   | 0.06                                             | 0.07   | 0.05        | 0.05   | 0.07                        | 0.08   |
| Non-Hodgkin lymphoma                                | 0.75   | 0.81   | 0.46                                             | 0.52   | 1.02        | 1.09   | 0.47                        | 0.53   |
| Multiple myeloma                                    | 0.32   | 0.34   | 0.21                                             | 0.23   | 0.44        | 0.47   | 0.19                        | 0.21   |
| Leukaemia                                           | 0.73   | 0.79   | 0.6                                              | 0.64   | 0.86        | 0.9    | 0.64                        | 0.69   |
| Other neoplasms                                     | 0.91   | 1.05   | 0.81                                             | 0.93   | 1.07        | 1.21   | 0.81                        | 0.98   |
| Cardiovascular and circulatory diseases             | 20.43  | 32.98  | 32.92                                            | 51.55  | 21.57       | 32.92  | 16.53                       | 27.26  |
| Rheumatic heart disease                             | 0.2    | 0.29   | 0.2                                              | 0.31   | 0.2         | 0.27   | 0.18                        | 0.23   |
| Ischaemic heart disease                             | 11.9   | 16.59  | 19.53                                            | 23.97  | 12.47       | 17.26  | 10.44                       | 14.27  |
| Cerebrovascular disease                             | 3.74   | 9.79   | 6.64                                             | 17.88  | 3.7         | 8.81   | 2.68                        | 8.41   |
| Ischaemic stroke                                    | 1.75   | 5.61   | 4.49                                             | 13.91  | 1.81        | 5.07   | 0.77                        | 3.53   |
| Hemorrhagic and other non-ischaemic stroke          | 1.99   | 4.18   | 2.15                                             | 3.98   | 1.89        | 3.74   | 1.9                         | 4.88   |
| Hypertensive heart disease                          | 1.31   | 1.95   | 2.38                                             | 4.03   | 1.17        | 1.55   | 1.31                        | 1.59   |
| Cardiomyopathy and myocarditis                      | 1.02   | 1.21   | 2.63                                             | 2.88   | 0.97        | 1.09   | 0.67                        | 0.8    |
| Atrial fibrillation and flutter                     | 0.53   | 0.59   | 0.23                                             | 0.24   | 0.83        | 0.92   | 0.15                        | 0.18   |
| Aortic aneurysm                                     | 0.47   | 0.55   | 0.35                                             | 0.41   | 0.62        | 0.7    | 0.33                        | 0.41   |
| Peripheral vascular disease                         | 0.2    | 0.21   | 0.2                                              | 0.22   | 0.28        | 0.29   | 0.1                         | 0.11   |
| Endocarditis                                        | 0.04   | 0.14   | 0.03                                             | 0.08   | 0.05        | 0.16   | 0.04                        | 0.14   |
| Other cardiovascular and circulatory diseases       | 1.02   | 1.66   | 0.72                                             | 1.54   | 1.28        | 1.87   | 0.64                        | 1.11   |
| Chronic respiratory diseases                        | 3.94   | 6.23   | 2.51                                             | 4.94   | 4.44        | 6.56   | 4.03                        | 5.75   |
| COPD                                                | 3.21   | 5.05   | 2.27                                             | 4.32   | 3.63        | 5.32   | 3.48                        | 4.97   |
| Pneumoconiosis                                      | 0.03   | 0.12   | 0.01                                             | 0.11   | 0.04        | 0.13   | 0.01                        | 0.08   |
| Silicosis                                           | 0.01   | 0.03   | 0.01                                             | 0.04   | 0.02        | 0.03   | 0.01                        | 0.02   |
| Asbestosis                                          | 0.01   | 0.03   | <0.005                                           | <0.005 | 0.02        | 0.05   | <0.005                      | <0.005 |
| Coal workers pneumoconiosis                         | <0.005 | <0.005 | <0.005                                           | <0.005 | <0.005      | <0.005 | <0.005                      | <0.005 |
| Other pneumoconiosis                                | <0.005 | <0.005 | <0.005                                           | <0.005 | <0.005      | <0.005 | <0.005                      | <0.005 |
| Asthma                                              | 0.31   | 0.37   | 0.15                                             | 0.16   | 0.18        | 0.21   | 0.28                        | 0.36   |
| Interstitial lung disease and pulmonary sarcoidosis | 0.41   | 0.68   | 0.08                                             | 0.32   | 0.57        | 0.85   | 0.33                        | 0.41   |
| Other chronic respiratory diseases                  | 0.04   | 0.09   | 0.01                                             | 0.06   | 0.04        | 0.07   | 0.05                        | 0.1    |
| Cirrhosis of the liver                              | 2.33   | 2.87   | 2.93                                             | 3.18   | 1.84        | 2.17   | 3.61                        | 4.1    |
| Cirrhosis due to alcohol use                        | <0.005 | <0.005 | 0                                                | <0.005 | <0.005      | <0.005 | 0                           | <0.005 |
| Digestive diseases (except cirrhosis)               | 1.84   | 2.21   | 1.74                                             | 1.99   | 1.86        | 2.26   | 2.21                        | 2.78   |
| Peptic ulcer disease                                | 0.32   | 0.38   | 0.42                                             | 0.47   | 0.22        | 0.29   | 0.43                        | 0.54   |
| Gastritis and duodenitis                            | 0.04   | 0.05   | 0.03                                             | 0.03   | 0.02        | 0.02   | 0.11                        | 0.13   |
| Appendicitis                                        | 0.03   | 0.05   | 0.02                                             | 0.03   | 0.02        | 0.03   | 0.09                        | 0.12   |
| Paralytic ileus and intestinal obstruction          | 0.31   | 0.4    | 0.21                                             | 0.27   | 0.37        | 0.46   | 0.3                         | 0.43   |
| Inguinal, femoral, and abdominal hernia             | 0.07   | 0.08   | 0.06                                             | 0.07   | 0.06        | 0.08   | 0.13                        | 0.15   |
| Non-infective inflammatory bowel disease            | 0.11   | 0.12   | 0.05                                             | 0.07   | 0.13        | 0.16   | 0.04                        | 0.06   |
| Vascular intestinal disorders                       | 0.3    | 0.34   | 0.32                                             | 0.35   | 0.36        | 0.42   | 0.27                        | 0.32   |
| Gall bladder and bile duct disease                  | 0.24   | 0.29   | 0.15                                             | 0.17   | 0.26        | 0.3    | 0.35                        | 0.4    |
| Pancreatitis                                        | 0.22   | 0.22   | 0.38                                             | 0.42   | 0.18        | 0.19   | 0.29                        | 0.31   |
| Other digestive diseases                            | 0.2    | 0.27   | 0.1                                              | 0.13   | 0.24        | 0.31   | 0.21                        | 0.31   |
| Neurological disorders                              | 3.83   | 4.19   | 1.14                                             | 1.24   | 5.89        | 6.4    | 1.46                        | 1.65   |
| Alzheimer's disease and other dementias             | 2.82   | 3.02   | 0.57                                             | 0.61   | 4.56        | 4.86   | 0.75                        | 0.81   |
| Parkinson's disease                                 | 0.46   | 0.54   | 0.21                                             | 0.23   | 0.69        | 0.8    | 0.2                         | 0.25   |
| Epilepsy                                            | 0.18   | 0.21   | 0.16                                             | 0.18   | 0.12        | 0.15   | 0.26                        | 0.28   |
| Multiple sclerosis                                  | 0.07   | 0.1    | 0.07                                             | 0.08   | 0.1         | 0.15   | 0.03                        | 0.05   |
| Other neurological disorders                        | 0.3    | 0.32   | 0.12                                             | 0.13   | 0.41        | 0.44   | 0.22                        | 0.25   |
| Mental and behavioural disorders                    | 0.43   | 0.94   | 0.57                                             | 0.81   | 0.41        | 0.93   | 0.62                        | 0.83   |
| Schizophrenia                                       | 0.03   | 0.03   | 0.02                                             | 0.02   | 0.03        | 0.03   | 0.02                        | 0.02   |
| Alcohol use disorders                               | 0.35   | 0.47   | 0.52                                             | 0.61   | 0.31        | 0.34   | 0.55                        | 0.68   |
| Drug use disorders                                  | 0.06   | 0.44   | 0.03                                             | 0.17   | 0.07        | 0.55   | 0.05                        | 0.12   |
| Opioid use disorders                                | 0.01   | 0.27   | <0.005                                           | <0.005 | 0.01        | 0.34   | <0.005                      | <0.005 |
| Cocaine use disorders                               | <0.005 | <0.005 | <0.005                                           | <0.005 | 0.01        | 0.04   | <0.005                      | <0.005 |
| Amphetamine use disorders                           | <0.005 | <0.005 | 0                                                | <0.005 | <0.005      | <0.005 | <0.005                      | <0.005 |
| Cannabis use disorders                              | <0.005 | <0.005 | 0                                                | <0.005 | <0.005      | <0.005 | <0.005                      | <0.005 |
| Other drug use disorders                            | 0.04   | 0.12   | 0.02                                             | 0.04   | 0.04        | 0.13   | 0.04                        | 0.07   |
| Eating disorders                                    | <0.005 | <0.005 | <0.005                                           | <0.005 | <0.005      | <0.005 | <0.005                      | <0.005 |
| Anorexia nervosa                                    | <0.005 | <0.005 | <0.005                                           | <0.005 | <0.005      | <0.005 | <0.005                      | <0.005 |
| Bulimia nervosa                                     | <0.005 | <0.005 | <0.005                                           | <0.005 | <0.005      | <0.005 | <0.005                      | <0.005 |
| Other mental and substance use disorders            | <0.005 | <0.005 | 0                                                | <0.005 | 0           | <0.005 | <0.005                      | <0.005 |

**Web Table 16a - Cause fractions before and after redistribution for global and super-region for 2008 ICD10 and ICD9 vital registration excluding studies on LRI and diarrhea etiologies**

| Cause                                                                      | Global                                              |       | Central Europe, Eastern Europe, and Central Asia |       | High-Income |       | Latin America and Caribbean |       |
|----------------------------------------------------------------------------|-----------------------------------------------------|-------|--------------------------------------------------|-------|-------------|-------|-----------------------------|-------|
|                                                                            | Before                                              | After | Before                                           | After | Before      | After | Before                      | After |
|                                                                            | Diabetes, urogenital, blood, and endocrine diseases | 6.21  | 7.62                                             | 2.83  | 3.32        | 5.1   | 6.3                         | 11.09 |
| Diabetes mellitus                                                          | 3.02                                                | 3.31  | 1.57                                             | 1.68  | 2.33        | 2.5   | 5.31                        | 5.67  |
| Acute glomerulonephritis                                                   | <0.05                                               | <0.05 | <0.05                                            | <0.05 | <0.05       | <0.05 | <0.05                       | <0.05 |
| Chronic kidney disease                                                     | 2.07                                                | 2.86  | 0.89                                             | 1.17  | 1.58        | 2.36  | 4.45                        | 5.2   |
| Chronic kidney disease due to diabetes mellitus                            | 0.73                                                | 0.96  | 0.11                                             | 0.18  | 0.27        | 0.51  | 2.76                        | 3.17  |
| Chronic kidney disease due to hypertension                                 | 0.39                                                | 0.84  | 0.1                                              | 0.27  | 0.39        | 0.85  | 0.67                        | 0.92  |
| Chronic kidney disease due to glomerulonephritis                           | 0.08                                                | 0.13  | 0.05                                             | 0.07  | 0.08        | 0.09  | 0.08                        | 0.1   |
| Chronic kidney disease due to other causes                                 | <0.05                                               | <0.05 | <0.05                                            | <0.05 | <0.05       | <0.05 | <0.05                       | <0.05 |
| Urinary diseases and male infertility                                      | 0.49                                                | 0.65  | 0.22                                             | 0.27  | 0.54        | 0.7   | 0.62                        | 0.79  |
| Tubulointerstitial nephritis, pyelonephritis, and urinary tract infections | 0.41                                                | 0.53  | 0.18                                             | 0.21  | 0.47        | 0.6   | 0.53                        | 0.67  |
| Urolithiasis                                                               | 0.02                                                | 0.02  | 0.01                                             | 0.02  | 0.02        | 0.02  | 0.03                        | 0.03  |
| Other urinary diseases                                                     | 0.07                                                | 0.1   | 0.03                                             | 0.04  | 0.05        | 0.07  | 0.07                        | 0.09  |
| Gynecological diseases                                                     | 0.01                                                | 0.01  | <0.05                                            | <0.05 | <0.05       | <0.05 | 0.01                        | 0.01  |
| Uterine fibroids                                                           |                                                     |       |                                                  |       |             |       |                             |       |
| Polycystic ovarian syndrome                                                | <0.05                                               | <0.05 | 0                                                | <0.05 | <0.05       | <0.05 | <0.05                       | <0.05 |
| Endometriosis                                                              | <0.05                                               | <0.05 | 0                                                | <0.05 | <0.05       | <0.05 | <0.05                       | <0.05 |
| Genital prolapse                                                           | <0.05                                               | <0.05 | <0.05                                            | <0.05 | <0.05       | <0.05 | 0.01                        | 0.01  |
| Other gynecological diseases                                               | 0.01                                                | 0.01  | <0.05                                            | <0.05 | <0.05       | <0.05 | 0.01                        | 0.01  |
| Hemoglobinopathies and hemolytic anaemias                                  | 0.07                                                | 0.12  | 0.02                                             | 0.06  | 0.07        | 0.09  | 0.11                        | 0.14  |
| Thalassemias                                                               | <0.05                                               | <0.05 | <0.05                                            | <0.05 | <0.05       | <0.05 | <0.05                       | <0.05 |
| Sickle cell disorders                                                      | 0.01                                                | 0.01  | 0                                                | 0.01  | 0.01        | 0.01  | 0.02                        | 0.02  |
| G6PD deficiency                                                            | <0.05                                               | <0.05 | <0.05                                            | <0.05 | <0.05       | <0.05 | <0.05                       | <0.05 |
| Other hemoglobinopathies and hemolytic anemias                             | 0.06                                                | 0.09  | 0.02                                             | 0.04  | 0.06        | 0.08  | 0.09                        | 0.11  |
| Endocrine, metabolic, blood, and immune disorders                          | 0.54                                                | 0.67  | 0.11                                             | 0.14  | 0.58        | 0.65  | 0.58                        | 0.64  |
| Musculoskeletal disorders                                                  | 0.26                                                | 0.33  | 0.11                                             | 0.13  | 0.3         | 0.37  | 0.34                        | 0.42  |
| Rheumatoid arthritis                                                       | 0.09                                                | 0.1   | 0.05                                             | 0.05  | 0.1         | 0.1   | 0.12                        | 0.13  |
| Other musculoskeletal disorders                                            | 0.18                                                | 0.24  | 0.06                                             | 0.07  | 0.2         | 0.27  | 0.22                        | 0.29  |
| Other non-communicable diseases                                            | 0.81                                                | 1     | 0.33                                             | 0.37  | 0.55        | 0.66  | 1.51                        | 1.75  |
| Congenital anomalies                                                       | 0.58                                                | 0.72  | 0.27                                             | 0.3   | 0.32        | 0.38  | 1.21                        | 1.4   |
| Neural tube defects                                                        | 0.03                                                | 0.03  | 0.01                                             | 0.01  | 0.01        | 0.02  | 0.07                        | 0.08  |
| Congenital heart anomalies                                                 | 0.27                                                | 0.34  | 0.13                                             | 0.14  | 0.12        | 0.13  | 0.59                        | 0.67  |
| Cleft lip and cleft palate                                                 | <0.05                                               | <0.05 | <0.05                                            | <0.05 | <0.05       | <0.05 | <0.05                       | <0.05 |
| Down's syndrome                                                            | 0.03                                                | 0.04  | 0.01                                             | 0.01  | 0.03        | 0.04  | 0.05                        | 0.06  |
| Turner syndrome                                                            | <0.05                                               | <0.05 | <0.05                                            | <0.05 | <0.05       | <0.05 | <0.05                       | <0.05 |
| Klinefelter syndrome                                                       | <0.05                                               | <0.05 | <0.05                                            | <0.05 | <0.05       | <0.05 | <0.05                       | <0.05 |
| Chromosomal unbalanced rearrangements                                      | 0.02                                                | 0.03  | 0.01                                             | 0.01  | 0.03        | 0.03  | 0.02                        | 0.02  |
| Other congenital anomalies                                                 | 0.23                                                | 0.28  | 0.11                                             | 0.13  | 0.13        | 0.16  | 0.48                        | 0.56  |
| Skin and subcutaneous diseases                                             | 0.19                                                | 0.23  | 0.05                                             | 0.06  | 0.18        | 0.22  | 0.27                        | 0.31  |
| Cellulitis                                                                 | 0.03                                                | 0.04  | 0.01                                             | 0.01  | 0.03        | 0.04  | 0.03                        | 0.04  |
| Abscess, impetigo, and other bacterial skin diseases                       | 0.06                                                | 0.08  | 0.02                                             | 0.03  | 0.05        | 0.07  | 0.11                        | 0.14  |
| Scabies                                                                    | <0.05                                               | <0.05 | 0                                                | <0.05 | <0.05       | <0.05 | <0.05                       | <0.05 |
| Decubitus ulcer                                                            | 0.09                                                | 0.1   | 0.01                                             | 0.02  | 0.09        | 0.1   | 0.11                        | 0.12  |
| Other skin and subcutaneous diseases                                       | 0.01                                                | 0.01  | <0.05                                            | <0.05 | 0.01        | 0.01  | 0.01                        | 0.01  |
| Sense organ diseases                                                       | <0.05                                               | <0.05 | <0.05                                            | <0.05 | <0.05       | <0.05 | <0.05                       | <0.05 |
| Other sense organ diseases                                                 | <0.05                                               | <0.05 | <0.05                                            | <0.05 | <0.05       | <0.05 | <0.05                       | <0.05 |
| Sudden infant death syndrome                                               | 0.04                                                | 0.04  | 0.01                                             | 0.01  | 0.05        | 0.05  | 0.03                        | 0.03  |
| Injuries                                                                   | 5.47                                                | 8.39  | 4.63                                             | 6.12  | 4.57        | 6.82  | 9.1                         | 13.73 |
| Transport injuries                                                         | 1.05                                                | 2.15  | 0.98                                             | 1.59  | 0.82        | 1.47  | 2.1                         | 4.33  |
| Road injuries                                                              | 0.98                                                | 2.04  | 0.88                                             | 1.45  | 0.75        | 1.36  | 2.06                        | 4.22  |
| Pedestrian road injuries                                                   | 0.32                                                | 0.61  | 0.28                                             | 0.44  | 0.19        | 0.34  | 0.82                        | 1.46  |
| Cyclist road injuries                                                      | 0.06                                                | 0.14  | 0.08                                             | 0.13  | 0.05        | 0.11  | 0.1                         | 0.24  |
| Motorcyclist road injuries                                                 | 0.19                                                | 0.32  | 0.07                                             | 0.12  | 0.15        | 0.23  | 0.46                        | 0.73  |
| Motor vehicle road injuries                                                | 0.41                                                | 0.94  | 0.44                                             | 0.73  | 0.36        | 0.66  | 0.65                        | 1.73  |
| Other road injuries                                                        | 0.01                                                | 0.02  | 0.01                                             | 0.03  | <0.05       | <0.05 | 0.03                        | 0.06  |
| Other transport injuries                                                   | 0.06                                                | 0.11  | 0.1                                              | 0.14  | 0.07        | 0.11  | 0.04                        | 0.11  |
| Unintentional injuries                                                     | 1.89                                                | 3.09  | 1.93                                             | 2.44  | 1.77        | 3.01  | 2.08                        | 3.29  |
| Falls                                                                      | 0.72                                                | 1.22  | 0.88                                             | 1.07  | 0.84        | 1.46  | 0.63                        | 1.12  |
| Drowning                                                                   | 0.31                                                | 0.37  | 0.27                                             | 0.33  | 0.21        | 0.23  | 0.51                        | 0.61  |
| Fire, heat, and hot substances                                             | 0.12                                                | 0.18  | 0.16                                             | 0.18  | 0.1         | 0.16  | 0.1                         | 0.18  |
| Poisonings                                                                 | 0.04                                                | 0.09  | 0.11                                             | 0.14  | 0.03        | 0.08  | 0.04                        | 0.08  |
| Exposure to mechanical forces                                              | 0.18                                                | 0.26  | 0.1                                              | 0.14  | 0.1         | 0.15  | 0.21                        | 0.31  |
| Unintentional firearm injuries                                             | 0.06                                                | 0.09  | 0.01                                             | 0.02  | 0.01        | 0.03  | 0.07                        | 0.12  |
| Unintentional suffocation                                                  | 0.04                                                | 0.06  | 0.01                                             | 0.01  | 0.02        | 0.03  | 0.03                        | 0.04  |
| Other exposure to mechanical forces                                        | 0.08                                                | 0.11  | 0.09                                             | 0.11  | 0.07        | 0.09  | 0.1                         | 0.14  |
| Adverse effects of medical treatment                                       | 0.17                                                | 0.33  | 0.11                                             | 0.18  | 0.14        | 0.29  | 0.11                        | 0.28  |
| Animal contact                                                             | 0.02                                                | 0.03  | 0.02                                             | 0.02  | 0.01        | 0.01  | 0.05                        | 0.06  |
| Venomous animal contact                                                    | 0.01                                                | 0.01  | 0.01                                             | 0.01  | <0.05       | <0.05 | 0.03                        | 0.04  |
| Non-venomous animal contact                                                | 0.01                                                | 0.01  | 0.01                                             | 0.01  | <0.05       | <0.05 | 0.02                        | 0.02  |
| Foreign body                                                               | 0.26                                                | 0.52  | 0.21                                             | 0.24  | 0.3         | 0.6   | 0.29                        | 0.48  |
| Pulmonary aspiration and foreign body in airway                            | 0.26                                                | 0.51  | 0.21                                             | 0.24  | 0.3         | 0.6   | 0.28                        | 0.47  |
| Foreign body in other body part                                            | <0.05                                               | <0.05 | <0.05                                            | <0.05 | <0.05       | <0.05 | <0.05                       | <0.05 |
| Unintentional injuries not classified elsewhere                            | 0.07                                                | 0.1   | 0.06                                             | 0.15  | 0.03        | 0.04  | 0.15                        | 0.18  |
| Self-harm and interpersonal violence                                       | 2.4                                                 | 3     | 1.55                                             | 1.9   | 1.92        | 2.27  | 4.83                        | 6     |
| Self-harm                                                                  | 1.27                                                | 1.61  | 1.37                                             | 1.64  | 1.63        | 1.89  | 0.93                        | 1.39  |
| Interpersonal violence                                                     | 1.13                                                | 1.39  | 0.17                                             | 0.27  | 0.29        | 0.38  | 3.91                        | 4.61  |
| Assault by firearm                                                         | 0.78                                                | 0.91  | 0.02                                             | 0.04  | 0.18        | 0.22  | 2.96                        | 3.45  |
| Assault by sharp object                                                    | 0.24                                                | 0.28  | 0.07                                             | 0.09  | 0.06        | 0.08  | 0.6                         | 0.7   |
| Assault by other means                                                     | 0.12                                                | 0.19  | 0.09                                             | 0.13  | 0.05        | 0.09  | 0.35                        | 0.46  |
| Forces of nature, war, and legal intervention                              | 0.12                                                | 0.15  | 0.17                                             | 0.19  | 0.06        | 0.07  | 0.08                        | 0.11  |
| Exposure to forces of nature                                               | 0.06                                                | 0.08  | 0.17                                             | 0.18  | 0.05        | 0.06  | 0.04                        | 0.06  |
| Collective violence and legal intervention                                 | 0.06                                                | 0.07  | <0.05                                            | <0.05 | 0.01        | 0.01  | 0.04                        | 0.05  |

COPD = chronic obstructive pulmonary disease. \*Includes birth asphyxia and birth trauma

**Web Table 17: GBD 2010 and GBD 2013 comparison of cause fractions before and after redistribution for 1995 ICD9 vital registration excluding studies on LRI and diarrhea etiologies**

**Web Table 17 - GBD 2010 and GBD 2013 comparison of cause fractions before and after redistribution for 1995 ICD9 vital registration excluding studies on LRI and diarrhea etiologies**

| Cause                                                                         | GBD 2010 |        | GBD 2013 |        |
|-------------------------------------------------------------------------------|----------|--------|----------|--------|
|                                                                               | Before   | After  | Before   | After  |
| Communicable, maternal, neonatal, and nutritional diseases                    | 7.174    | 8.29   | 2.932    | 8.398  |
| HIV/AIDS and tuberculosis                                                     | 1.439    | 1.51   | 0.275    | 1.502  |
| Tuberculosis                                                                  | 0.273    | 0.318  | 0.275    | 0.345  |
| HIV/AIDS**                                                                    | 1.165    | 1.191  | <0.005   | <0.005 |
| HIV/AIDS resulting in mycobacterial infection                                 |          |        | 0.000    | 0.161  |
| HIV disease resulting in other specified or unspecified diseases              |          |        | 0.000    | 1.135  |
| Diarrhoea, lower respiratory infections, and other common infectious diseases | 3.774    | 4.551  | 0.787    | 4.658  |
| Diarrhoea                                                                     | 0.343    | 0.452  | 0.332    | 0.437  |
| Other diarrheal diseases                                                      | 0.324    | 0.408  | 0.311    | 0.379  |
| Intestinal infectious diseases                                                |          |        | <0.005   | <0.005 |
| Typhoid fever                                                                 | <0.005   | <0.005 | <0.005   | <0.005 |
| Paratyphoid fever                                                             |          |        | <0.005   | <0.005 |
| Other intestinal infectious diseases                                          |          |        | <0.005   | <0.005 |
| Lower respiratory infections**                                                | 3.223    | 3.812  | 0.321    | 3.96   |
| Upper respiratory infections**                                                | 0.035    | 0.041  | <0.005   | <0.005 |
| Otitis media                                                                  | <0.005   | <0.005 | <0.005   | <0.005 |
| Meningitis                                                                    | 0.115    | 0.157  | 0.075    | 0.178  |
| Pneumococcal meningitis                                                       | 0.008    | 0.01   | 0.008    | 0.017  |
| H influenzae type B meningitis                                                | <0.005   | <0.005 | <0.005   | <0.005 |
| Meningococcal meningitis                                                      | 0.023    | 0.032  | 0.023    | 0.051  |
| Other meningitis**                                                            | 0.083    | 0.114  | 0.043    | 0.103  |
| Encephalitis                                                                  | 0.027    | 0.036  | 0.027    | 0.041  |
| Diphtheria                                                                    | <0.005   | <0.005 | <0.005   | <0.005 |
| Whooping cough                                                                | <0.005   | <0.005 | <0.005   | <0.005 |
| Tetanus                                                                       | 0.01     | 0.013  | 0.01     | 0.012  |
| Measles                                                                       | <0.005   | <0.005 | <0.005   | <0.005 |
| Varicella and herpes zoster                                                   | 0.01     | 0.018  | 0.01     | 0.014  |
| Neglected tropical diseases and malaria                                       | 0.104    | 0.138  | 0.103    | 0.125  |
| Malaria                                                                       | 0.007    | 0.01   | 0.007    | 0.009  |
| Chagas disease                                                                | 0.072    | 0.094  | 0.362    | 0.431  |
| Leishmaniasis                                                                 | <0.005   | <0.005 | <0.005   | <0.005 |
| Visceral leishmaniasis                                                        |          |        | <0.005   | <0.005 |
| Cutaneous and mucocutaneous leishmaniasis                                     |          |        | <0.005   | <0.005 |
| African trypanosomiasis                                                       | <0.005   | <0.005 | <0.005   | <0.005 |
| Schistosomiasis                                                               | 0.008    | 0.01   | 0.008    | 0.009  |
| Cysticercosis                                                                 | 0.005    | 0.006  | 0.005    | 0.006  |
| Cystic echinococcosis                                                         | <0.005   | <0.005 | <0.005   | <0.005 |
| Lymphatic filariasis                                                          | 0.000    | 0.000  | <0.005   | <0.005 |
| Onchocerciasis                                                                | 0.000    | 0.000  | 0.000    | <0.005 |
| Dengue                                                                        | <0.005   | <0.005 | <0.005   | <0.005 |
| Yellow fever                                                                  | 0.000    | 0.000  | <0.005   | <0.005 |
| Rabies                                                                        | <0.005   | <0.005 | <0.005   | <0.005 |
| Intestinal nematode infections                                                | <0.005   | <0.005 | <0.005   | <0.005 |
| Ascariasis                                                                    | <0.005   | <0.005 | <0.005   | <0.005 |
| Trichuriasis                                                                  | 0.000    | 0.000  | <0.005   | <0.005 |
| Hookworm disease                                                              | 0.000    | 0.000  | <0.005   | <0.005 |
| Food-borne trematodiasis                                                      | 0.000    | 0.000  | <0.005   | <0.005 |
| Other neglected tropical diseases                                             | <0.005   | <0.005 | <0.005   | <0.005 |
| Maternal disorders**                                                          | 0.053    | 0.073  | 1.038    | 1.465  |
| Maternal haemorrhage**                                                        | 0.01     | 0.012  | 0.21     | 0.234  |
| Maternal sepsis and other pregnancy related infection**                       | <0.005   | <0.005 | 0.052    | 0.163  |
| Hypertensive diseases of pregnancy**                                          | 0.015    | 0.018  | 0.3      | 0.327  |
| Obstructed labor**                                                            | <0.005   | <0.005 | 0.027    | 0.031  |
| Pregnancy with abortive outcome**                                             | 0.006    | 0.012  | 0.072    | 0.285  |
| Indirect maternal deaths                                                      |          |        | 0.17     | 0.187  |
| Late maternal death (after 42 days)                                           |          |        |          |        |
| Other maternal disorders                                                      | 0.019    | 0.023  | 0.207    | 0.238  |



**Web Table 17 - GBD 2010 and GBD 2013 comparison of cause fractions before and after redistribution for 1995 ICD9 vital registration excluding studies on LRI and diarrhea etiologies**

| Cause                                                              | GBD 2010 |        | GBD 2013 |        |
|--------------------------------------------------------------------|----------|--------|----------|--------|
|                                                                    | Before   | After  | Before   | After  |
| Neonatal disorders                                                 | 1.198    | 1.293  | 1.108    | 1.231  |
| Preterm birth complications                                        | 0.648    | 0.696  | 0.629    | 0.709  |
| Neonatal encephalopathy*                                           | 0.252    | 0.269  | 0.255    | 0.268  |
| Sepsis and other infectious disorders of the newborn baby          | 0.122    | 0.135  | 0.119    | 0.136  |
| Hemolytic disease in fetus and newborn and other neonatal jaundice |          |        | 0.01     | 0.011  |
| Other neonatal disorders                                           | 0.095    | 0.103  | 0.097    | 0.107  |
| Nutritional deficiencies                                           | 0.478    | 0.5    | 0.463    | 0.62   |
| Protein energy malnutrition                                        | 0.314    | 0.333  | 0.302    | 0.373  |
| Iodine deficiency                                                  | 0.005    | 0.006  | <0.005   | <0.005 |
| Iron-deficiency anaemia**                                          | 0.114    | 0.116  | 0.116    | 0.198  |
| Other nutritional deficiencies                                     | 0.045    | 0.045  | 0.045    | 0.049  |
| Other communicable, maternal, neonatal, and nutritional diseases   | 0.175    | 0.275  | 0.146    | 0.191  |
| Sexually transmitted diseases excluding HIV                        | 0.011    | 0.015  | 0.01     | 0.013  |
| Syphilis                                                           | 0.006    | 0.007  | 0.006    | 0.007  |
| Chlamydial infection                                               | <0.005   | <0.005 | <0.005   | <0.005 |
| Gonococcal infection                                               | <0.005   | <0.005 | <0.005   | <0.005 |
| Anogenital herpes                                                  |          |        | <0.005   | <0.005 |
| Other sexually transmitted diseases                                | 0.000    | 0.000  | <0.005   | <0.005 |
| Hepatitis                                                          | 0.037    | 0.11   | 0.036    | 0.042  |
| Acute hepatitis A                                                  | 0.006    | 0.021  | <0.005   | <0.005 |
| Acute hepatitis B                                                  | 0.031    | 0.089  | 0.031    | 0.036  |
| Acute hepatitis C                                                  | 0.000    | <0.005 | <0.005   | <0.005 |
| Acute hepatitis E                                                  | 0.000    | <0.005 | 0.000    | <0.005 |
| Leprosy                                                            | 0.000    | 0.000  | <0.005   | <0.005 |
| Other infectious diseases                                          | 0.127    | 0.149  | 0.097    | 0.131  |
| Non-communicable diseases                                          | 71.601   | 84.674 | 60.447   | 83.078 |
| Neoplasms                                                          | 21.578   | 23.958 | 20.076   | 23.543 |
| Oesophageal cancer                                                 | 0.479    | 0.482  | 0.508    | 0.546  |
| Stomach cancer                                                     | 1.25     | 1.381  | 1.296    | 1.788  |
| Liver cancer                                                       | 0.725    | 0.759  | 0.733    | 0.787  |
| Larynx cancer                                                      | 0.255    | 0.265  | 0.265    | 0.294  |
| Tracheal, bronchus and lung cancer                                 | 4.633    | 4.676  | 4.859    | 5.401  |
| Breast cancer                                                      | 1.705    | 1.732  | 1.789    | 2.004  |
| Cervical cancer                                                    | 0.278    | 0.399  | 0.596    | 0.955  |
| Uterine cancer                                                     | 0.122    | 0.206  | 0.267    | 0.46   |
| Prostate cancer                                                    | 1.308    | 1.334  | 2.61     | 2.875  |
| Colon and rectum cancer                                            | 2.365    | 2.608  | 2.475    | 3.064  |
| Lip and oral cavity cancer                                         | 0.226    | 0.273  | 0.236    | 0.312  |
| Nasopharynx cancer                                                 | 0.03     | 0.036  | 0.035    | 0.065  |
| Cancer of other part of pharynx and oropharynx                     | 0.133    | 0.16   | 0.138    | 0.199  |
| Gallbladder and biliary tract cancer                               | 0.316    | 0.374  | 0.326    | 0.466  |
| Pancreatic cancer                                                  | 1.023    | 1.116  | 1.062    | 1.244  |
| Malignant skin melanoma                                            | 0.229    | 0.237  | 0.237    | 0.301  |
| Non-melanoma skin cancer                                           | 0.092    | 0.097  | 0.095    | 0.109  |
| Ovarian cancer                                                     | 0.487    | 0.52   | 1.082    | 1.241  |
| Testicular cancer                                                  | 0.022    | 0.022  | 0.044    | 0.049  |
| Kidney and other urinary organ cancers                             | 0.45     | 0.503  | 0.431    | 0.549  |
| Bladder cancer                                                     | 0.572    | 0.629  | 0.598    | 0.7    |
| Brain and nervous system cancer                                    | 0.645    | 0.659  | 0.489    | 0.539  |
| Thyroid cancer                                                     | 0.07     | 0.072  | 0.07     | 0.091  |
| Mesothelioma                                                       |          |        | 0.13     | 0.155  |
| Hodgkin lymphoma                                                   | 0.069    | 0.077  | 0.069    | 0.074  |
| Non-Hodgkin's lymphoma                                             | 0.666    | 0.703  | 0.673    | 0.715  |
| Multiple myeloma                                                   | 0.336    | 0.371  | 0.35     | 0.371  |
| Leukaemia                                                          | 0.762    | 0.803  | 0.76     | 0.812  |
| Other neoplasms                                                    | 0.709    | 1.656  | 0.754    | 0.89   |
| Cardiovascular and circulatory diseases                            | 33.044   | 40.792 | 24.308   | 39.389 |

**Web Table 17 - GBD 2010 and GBD 2013 comparison of cause fractions before and after redistribution for 1995 ICD9 vital registration excluding studies on LRI and diarrhea etiologies**

| Cause                                               | GBD 2010 |        | GBD 2013 |        |
|-----------------------------------------------------|----------|--------|----------|--------|
|                                                     | Before   | After  | Before   | After  |
| Rheumatic heart disease                             | 0.645    | 0.783  | 0.259    | 0.329  |
| Ischaemic heart disease                             | 18.006   | 22.376 | 16.372   | 23.088 |
| Cerebrovascular disease**                           | 9.386    | 11.155 | 3.357    | 10.506 |
| Ischaemic stroke                                    | 5.967    | 7.16   | 1.687    | 6.246  |
| Hemorrhagic and other non-ischaemic stroke**        | 3.417    | 3.991  | 1.67     | 4.26   |
| Hypertensive heart disease                          | 1.263    | 1.961  | 1.018    | 1.303  |
| Cardiomyopathy and myocarditis                      | 1.017    | 1.262  | 1.126    | 1.468  |
| Atrial fibrillation and flutter                     | 0.283    | 0.312  | 0.281    | 0.334  |
| Aortic aneurysm                                     | 0.561    | 0.686  | 0.569    | 0.628  |
| Peripheral vascular disease                         | 0.155    | 0.167  | 0.158    | 0.17   |
| Endocarditis**                                      | 0.046    | 0.087  | 0.142    | 0.194  |
| Other cardiovascular and circulatory diseases       | 1.678    | 1.994  | 1.025    | 1.368  |
| Chronic respiratory diseases                        | 5.314    | 6.009  | 4.217    | 5.59   |
| COPD                                                | 3.713    | 4.189  | 3.497    | 4.622  |
| Pneumoconiosis**                                    | 0.263    | 0.297  | 0.056    | 0.147  |
| Silicosis                                           |          |        | 0.031    | 0.045  |
| Asbestosis                                          |          |        | 0.008    | 0.031  |
| Coal workers pneumoconiosis                         |          |        | 0.016    | 0.027  |
| Other pneumoconiosis                                |          |        | <0.005   | <0.005 |
| Asthma                                              | 0.339    | 0.374  | 0.346    | 0.378  |
| Interstitial lung disease and pulmonary sarcoidosis | 0.391    | 0.436  | 0.203    | 0.31   |
| Other chronic respiratory diseases                  | 0.596    | 0.7    | 0.177    | 0.212  |
| Cirrhosis of the liver                              | 1.914    | 2.27   | 1.964    | 2.376  |
| Cirrhosis due to alcohol use                        |          |        |          |        |
| Digestive diseases (except cirrhosis)               | 1.881    | 2.319  | 1.759    | 2.236  |
| Peptic ulcer disease                                | 0.357    | 0.444  | 0.362    | 0.482  |
| Gastritis and duodenitis                            | 0.034    | 0.051  | 0.033    | 0.036  |
| Appendicitis                                        | 0.028    | 0.048  | 0.028    | 0.057  |
| Paralytic ileus and intestinal obstruction          | 0.265    | 0.298  | 0.264    | 0.302  |
| Inguinal, femoral, and abdominal hernia             | 0.033    | 0.071  | 0.048    | 0.094  |
| Non-infective inflammatory bowel disease            | 0.082    | 0.095  | 0.084    | 0.166  |
| Vascular intestinal disorders                       | 0.336    | 0.366  | 0.334    | 0.364  |
| Gall bladder and bile duct disease                  | 0.212    | 0.241  | 0.212    | 0.237  |
| Pancreatitis                                        | 0.185    | 0.207  | 0.185    | 0.212  |
| Other digestive diseases                            | 0.349    | 0.498  | 0.208    | 0.285  |
| Neurological disorders                              | 1.912    | 2.022  | 2.179    | 2.378  |
| Alzheimer's disease and other dementias             | 1.342    | 1.362  | 1.299    | 1.398  |
| Parkinson's disease                                 | 0.374    | 0.42   | 0.374    | 0.379  |
| Epilepsy                                            | 0.123    | 0.158  | 0.125    | 0.152  |
| Multiple sclerosis                                  | 0.073    | 0.082  | 0.074    | 0.089  |
| Other neurological disorders                        | 0.000    | 0.000  | 0.308    | 0.361  |
| Mental and behavioural disorders                    | 0.599    | 0.658  | 0.548    | 0.663  |
| Schizophrenia                                       | 0.016    | 0.017  | 0.015    | 0.016  |
| Alcohol use disorders                               | 0.406    | 0.444  | 0.404    | 0.449  |
| Drug use disorders**                                | 0.14     | 0.158  | 0.127    | 0.196  |
| Opioid use disorders**                              | 0.024    | 0.027  | 0.07     | 0.089  |
| Cocaine use disorders                               | <0.005   | <0.005 | <0.005   | <0.005 |
| Amphetamine use disorders                           | <0.005   | <0.005 | <0.005   | <0.005 |
| Cannabis use disorders                              | 0.000    | 0.000  | <0.005   | <0.005 |
| Other drug use disorders                            | 0.049    | 0.054  | 0.034    | 0.075  |
| Eating disorders                                    | 0.007    | 0.008  | <0.005   | <0.005 |
| Anorexia nervosa                                    |          |        | <0.005   | <0.005 |
| Bulimia nervosa                                     |          |        | 0.000    | <0.005 |
| Other mental and substance use disorders            | 0.03     | 0.031  | 0.000    | <0.005 |
| Diabetes, urogenital, blood, and endocrine diseases | 4.235    | 5.394  | 4.343    | 5.672  |
| Diabetes mellitus                                   | 2.69     | 2.719  | 2.649    | 2.951  |
| Acute glomerulonephritis                            | <0.005   | <0.005 | <0.005   | <0.005 |

**Web Table 17 - GBD 2010 and GBD 2013 comparison of cause fractions before and after redistribution for 1995 ICD9 vital registration excluding studies on LRI and diarrhea etiologies**

| Cause                                                                      | GBD 2010 |        | GBD 2013 |        |
|----------------------------------------------------------------------------|----------|--------|----------|--------|
|                                                                            | Before   | After  | Before   | After  |
| Chronic kidney disease                                                     | 0.362    | 1.373  | 0.767    | 1.604  |
| Chronic kidney disease due to diabetes mellitus                            | 0.012    | 0.041  | 0.012    | 0.232  |
| Chronic kidney disease due to hypertension                                 | 0.281    | 0.988  | 0.282    | 0.719  |
| Chronic kidney disease due to glomerulonephritis                           |          |        | 0.07     | 0.085  |
| Chronic kidney disease due to other causes                                 | 0.069    | 0.344  | <0.005   | <0.005 |
| Urinary diseases and male infertility                                      | 0.523    | 0.629  | 0.426    | 0.5    |
| Tubulointerstitial nephritis, pyelonephritis, and urinary tract infections | 0.372    | 0.41   | 0.368    | 0.425  |
| Urolithiasis                                                               | 0.017    | 0.019  | 0.017    | 0.021  |
| Other urinary diseases                                                     | 0.134    | 0.198  | 0.04     | 0.054  |
| Gynecological diseases                                                     | 0.011    | 0.012  | 0.005    | 0.006  |
| Uterine fibroids                                                           | <0.005   | <0.005 |          |        |
| Polycystic ovarian syndrome                                                | 0.000    | 0.000  | 0.000    | <0.005 |
| Endometriosis                                                              | <0.005   | <0.005 | <0.005   | <0.005 |
| Genital prolapse                                                           | <0.005   | <0.005 |          |        |
| Other gynecological diseases                                               | 0.008    | 0.01   | 0.005    | 0.005  |
| Hemoglobinopathies and hemolytic anaemias                                  | 0.142    | 0.144  | 0.093    | 0.112  |
| Thalassemias                                                               | 0.011    | 0.011  | <0.005   | <0.005 |
| Sickle cell disorders                                                      | 0.018    | 0.018  | 0.009    | 0.011  |
| G6PD deficiency                                                            | <0.005   | <0.005 | <0.005   | <0.005 |
| Other hemoglobinopathies and hemolytic anaemias                            | 0.11     | 0.11   | 0.081    | 0.095  |
| Endocrine, metabolic, blood, and immune disorders                          | 0.502    | 0.511  | 0.4      | 0.494  |
| Musculoskeletal disorders                                                  | 0.281    | 0.312  | 0.232    | 0.254  |
| Rheumatoid arthritis                                                       | 0.088    | 0.093  | 0.088    | 0.092  |
| Other musculoskeletal disorders                                            | 0.19     | 0.215  | 0.144    | 0.162  |
| Other non-communicable diseases                                            | 0.848    | 0.945  | 0.822    | 0.978  |
| Congenital anomalies                                                       | 0.612    | 0.649  | 0.58     | 0.666  |
| Neural tube defects                                                        | 0.065    | 0.068  | 0.047    | 0.053  |
| Congenital heart anomalies                                                 | 0.285    | 0.298  | 0.251    | 0.288  |
| Cleft lip and cleft palate                                                 | <0.005   | <0.005 | <0.005   | <0.005 |
| Down's syndrome                                                            | 0.026    | 0.027  | 0.026    | 0.03   |
| Turner syndrome                                                            |          |        |          |        |
| Klinefelter syndrome                                                       |          |        | <0.005   | <0.005 |
| Chromosomal unbalanced rearrangements                                      | 0.024    | 0.025  | 0.024    | 0.027  |
| Other congenital anomalies                                                 | 0.212    | 0.229  | 0.23     | 0.265  |
| Skin and subcutaneous diseases                                             | 0.159    | 0.212  | 0.162    | 0.226  |
| Cellulitis                                                                 | 0.023    | 0.038  | 0.023    | 0.041  |
| Abscess, impetigo, and other bacterial skin diseases                       | 0.019    | 0.046  | 0.014    | 0.051  |
| Scabies                                                                    | 0.000    | 0.000  | <0.005   | <0.005 |
| Decubitus ulcer                                                            | 0.101    | 0.109  | 0.113    | 0.122  |
| Other skin and subcutaneous diseases                                       | 0.017    | 0.018  | 0.011    | 0.012  |
| Sense organ diseases                                                       | 0.000    | 0.000  | <0.005   | <0.005 |
| Other sense organ diseases                                                 | 0.000    | 0.000  | <0.005   | <0.005 |
| Sudden infant death syndrome                                               | 0.076    | 0.084  | 0.079    | 0.086  |
| Injuries                                                                   | 5.851    | 8.3    | 5.543    | 8.509  |
| Transport injuries                                                         | 1.132    | 2.301  | 1.121    | 2.464  |
| Road injuries                                                              | 1.078    | 2.225  | 1.068    | 2.389  |
| Pedestrian road injuries                                                   | 0.415    | 0.588  | 0.408    | 0.563  |
| Cyclist road injuries                                                      | 0.047    | 0.085  | 0.046    | 0.098  |
| Motorcyclist road injuries                                                 | 0.088    | 0.315  | 0.087    | 0.391  |
| Motor vehicle road injuries**                                              | 0.528    | 1.192  | 0.525    | 1.286  |
| Other road injuries**                                                      | <0.005   | <0.005 | <0.005   | <0.005 |
| Other transport injuries                                                   | 0.054    | 0.076  | 0.053    | 0.074  |
| Unintentional injuries                                                     | 2.039    | 2.767  | 1.703    | 2.807  |
| Falls                                                                      | 0.581    | 0.926  | 0.594    | 1.167  |
| Drowning                                                                   | 0.286    | 0.332  | 0.281    | 0.317  |
| Fire, heat, and hot substances                                             | 0.134    | 0.194  | 0.134    | 0.19   |
| Poisonings                                                                 | 0.143    | 0.16   | 0.125    | 0.143  |

**Web Table 17 - GBD 2010 and GBD 2013 comparison of cause fractions before and after redistribution for 1995 ICD9 vital registration excluding studies on LRI and diarrhea etiologies**

| Cause                                           | GBD 2010 |       | GBD 2013 |        |
|-------------------------------------------------|----------|-------|----------|--------|
|                                                 | Before   | After | Before   | After  |
| Exposure to mechanical forces                   | 0.127    | 0.155 | 0.13     | 0.158  |
| Unintentional firearm injuries                  | 0.042    | 0.05  | 0.041    | 0.046  |
| Unintentional suffocation                       |          |       | 0.006    | 0.013  |
| Other exposure to mechanical forces             | 0.085    | 0.105 | 0.083    | 0.099  |
| Adverse effects of medical treatment            | 0.122    | 0.154 | 0.148    | 0.29   |
| Animal contact                                  | 0.026    | 0.032 | 0.018    | 0.02   |
| Venomous animal contact                         | 0.014    | 0.017 | 0.013    | 0.015  |
| Non-venomous animal contact                     | 0.012    | 0.014 | 0.005    | 0.006  |
| Foreign body                                    |          |       | 0.193    | 0.424  |
| Pulmonary aspiration and foreign body in airway |          |       | 0.192    | 0.423  |
| Foreign body in other body part                 |          |       | <0.005   | <0.005 |
| Unintentional injuries not classified elsewhere | 0.619    | 0.815 | 0.081    | 0.096  |
| Self-harm and interpersonal violence            | 2.68     | 3.232 | 2.661    | 3.142  |
| Self-harm                                       | 1.296    | 1.557 | 1.299    | 1.62   |
| Interpersonal violence                          | 1.384    | 1.675 | 1.362    | 1.522  |
| Assault by firearm                              | 0.896    | 1.069 | 0.88     | 0.969  |
| Assault by sharp object                         | 0.201    | 0.245 | 0.199    | 0.221  |
| Assault by other means                          | 0.287    | 0.361 | 0.284    | 0.333  |
| Forces of nature, war, and legal intervention   | 0.000    | 0.000 | 0.058    | 0.097  |
| Exposure to forces of nature                    | 0.000    | 0.000 | 0.051    | 0.089  |
| Collective violence and legal intervention      | 0.000    | 0.000 | 0.007    | 0.008  |

COPD = chronic obstructive pulmonary disease. \*Includes birth asphyxia and birth trauma

\*\*The differences in before redistribution between 2010 and 2013 are from change both changes in raw data numbers provided by WHO, as well as changes in mapping

**Web Table 18: GBD 2010 and GBD 2013 comparison of cause fractions before and after redistribution for 2008 ICD10 vital registration excluding studies on LRI and diarrhea etiologies**

**Web Table 18 - GBD 2010 and GBD 2013 comparison of cause fractions before and after redistribution for 2008 ICD10 vital registration excluding studies on LRI and diarrhea etiologies**

| Cause                                                                         | GBD 2010 |        | GBD 2013 |        |
|-------------------------------------------------------------------------------|----------|--------|----------|--------|
|                                                                               | Before   | After  | Before   | After  |
| Communicable, maternal, neonatal, and nutritional diseases                    | 8.766    | 10.221 | 5.01     | 10.489 |
| HIV/AIDS and tuberculosis                                                     | 2.476    | 2.706  | 2.116    | 2.679  |
| Tuberculosis                                                                  | 0.549    | 0.623  | 0.977    | 0.727  |
| HIV/AIDS                                                                      | 1.927    | 2.083  | 1.139    | 1.952  |
| HIV/AIDS resulting in mycobacterial infection                                 | 0.025    | 0.027  | 0.026    | 0.372  |
| HIV disease resulting in other specified or unspecified diseases**            | 1.085    | 1.183  | 0.285    | 0.707  |
| Diarrhoea, lower respiratory infections, and other common infectious diseases | 4.552    | 5.459  | 1.057    | 5.779  |
| Diarrhoea                                                                     | 0.515    | 0.661  | 0.628    | 0.652  |
| Other diarrheal diseases                                                      | 0.506    | 0.649  | 0.532    | 0.529  |
| Intestinal infectious diseases                                                |          |        | <0.005   | <0.005 |
| Typhoid fever                                                                 | 0.007    | 0.022  | <0.005   | <0.005 |
| Paratyphoid fever                                                             | 0.007    | 0.022  | <0.005   | <0.005 |
| Other intestinal infectious diseases                                          |          |        | <0.005   | <0.005 |
| Lower respiratory infections**                                                | 3.869    | 4.545  | 0.263    | 4.861  |
| Upper respiratory infections**                                                | 0.011    | 0.014  | <0.005   | <0.005 |
| Otitis media                                                                  | <0.005   | <0.005 | <0.005   | <0.005 |
| Meningitis                                                                    | 0.078    | 0.117  | 0.081    | 0.14   |
| Pneumococcal meningitis                                                       | <0.005   | <0.005 | <0.005   | <0.005 |
| H influenzae type B meningitis                                                | <0.005   | <0.005 | <0.005   | <0.005 |
| Meningococcal meningitis                                                      | 0.009    | 0.028  | 0.009    | 0.023  |
| Other meningitis                                                              | 0.064    | 0.082  | 0.068    | 0.099  |
| Encephalitis                                                                  | 0.049    | 0.07   | 0.056    | 0.078  |
| Diphtheria                                                                    | <0.005   | <0.005 | <0.005   | <0.005 |
| Whooping cough                                                                | <0.005   | <0.005 | <0.005   | <0.005 |
| Tetanus                                                                       | 0.008    | 0.009  | 0.008    | 0.009  |
| Measles                                                                       | <0.005   | <0.005 | <0.005   | <0.005 |
| Varicella and herpes zoster                                                   | 0.011    | 0.013  | 0.013    | 0.017  |
| Neglected tropical diseases and malaria                                       | 0.115    | 0.15   | 0.134    | 0.136  |
| Malaria                                                                       | <0.005   | <0.005 | <0.005   | <0.005 |
| Chagas disease**                                                              | 0.062    | 0.075  | 0.117    | 0.128  |
| Leishmaniasis                                                                 | <0.005   | <0.005 | <0.005   | <0.005 |
| Visceral leishmaniasis                                                        |          |        | <0.005   | <0.005 |
| Cutaneous and mucocutaneous leishmaniasis                                     |          |        | <0.005   | <0.005 |
| African trypanosomiasis                                                       | <0.005   | <0.005 | <0.005   | <0.005 |
| Schistosomiasis                                                               | 0.014    | 0.017  | 0.014    | 0.016  |
| Cysticercosis                                                                 | <0.005   | <0.005 | <0.005   | <0.005 |
| Cystic echinococcosis                                                         | <0.005   | <0.005 | <0.005   | <0.005 |
| Lymphatic filariasis                                                          | 0        | 0      | <0.005   | <0.005 |
| Onchocerciasis                                                                | 0        | 0      | <0.005   | <0.005 |
| Dengue                                                                        | 0.013    | 0.014  | 0.015    | 0.017  |
| Yellow fever                                                                  | 0        | 0      | <0.005   | <0.005 |
| Rabies                                                                        | <0.005   | <0.005 | <0.005   | <0.005 |
| Intestinal nematode infections                                                | <0.005   | <0.005 | <0.005   | <0.005 |
| Ascariasis                                                                    | <0.005   | <0.005 | <0.005   | <0.005 |
| Trichuriasis                                                                  | 0        | 0      | 0        | <0.005 |
| Hookworm disease                                                              | 0        | 0      | <0.005   | <0.005 |

**Web Table 18 - GBD 2010 and GBD 2013 comparison of cause fractions before and after redistribution for 2008 ICD10 vital registration excluding studies on LRI and diarrhea etiologies**

| Cause                                                              | GBD 2010 |        | GBD 2013 |        |
|--------------------------------------------------------------------|----------|--------|----------|--------|
|                                                                    | Before   | After  | Before   | After  |
| Food-borne trematodiasis                                           | 0        | 0      | <0.005   | <0.005 |
| Other neglected tropical diseases                                  | 0.012    | 0.015  | 0.041    | 0.014  |
| Maternal disorders**                                               | 0.071    | 0.086  | 1.313    | 1.607  |
| Maternal haemorrhage**                                             | 0.013    | 0.015  | 0.236    | 0.26   |
| Maternal sepsis and other pregnancy related infection**            | <0.005   | <0.005 | 0.073    | 0.17   |
| Hypertensive diseases of pregnancy**                               | 0.016    | 0.017  | 0.305    | 0.324  |
| Obstructed labor**                                                 | <0.005   | <0.005 | 0.035    | 0.045  |
| Pregnancy with abortive outcome**                                  | 0.005    | 0.01   | 0.106    | 0.199  |
| Indirect maternal deaths                                           |          |        | 0.28     | 0.297  |
| Late maternal death (after 42 days)                                |          |        | 0.034    | 0.037  |
| Other maternal disorders**                                         | 0.033    | 0.036  | 0.25     | 0.279  |
| Neonatal disorders                                                 | 0.97     | 1.043  | 0.964    | 1.031  |
| Preterm birth complications                                        | 0.479    | 0.503  | 0.469    | 0.491  |
| Neonatal encephalopathy*                                           | 0.193    | 0.207  | 0.187    | 0.2    |
| Sepsis and other infectious disorders of the newborn baby          | 0.14     | 0.162  | 0.155    | 0.176  |
| Hemolytic disease in fetus and newborn and other neonatal jaundice |          |        | 0.009    | 0.009  |
| Other neonatal disorders                                           | 0.115    | 0.123  | 0.147    | 0.156  |
| Nutritional deficiencies                                           | 0.416    | 0.477  | 0.426    | 0.559  |
| Protein energy malnutrition                                        | 0.25     | 0.29   | 0.273    | 0.318  |
| Iodine deficiency**                                                | 0.012    | 0.016  | <0.005   | <0.005 |
| Iron-deficiency anaemia**                                          | 0.124    | 0.135  | 0.119    | 0.201  |
| Other nutritional deficiencies                                     | 0.03     | 0.036  | 0.032    | 0.039  |
| Other communicable, maternal, neonatal, and nutritional diseases   | 0.179    | 0.319  | 0.237    | 0.212  |
| Sexually transmitted diseases excluding HIV                        | 0.009    | 0.014  | 0.01     | 0.011  |
| Syphilis                                                           | <0.005   | <0.005 | <0.005   | <0.005 |
| Chlamydial infection                                               | <0.005   | <0.005 | <0.005   | <0.005 |
| Gonococcal infection                                               | <0.005   | <0.005 | <0.005   | <0.005 |
| Anogenital herpes                                                  |          |        | <0.005   | <0.005 |
| Other sexually transmitted diseases                                | <0.005   | <0.005 | <0.005   | <0.005 |
| Hepatitis                                                          | 0.036    | 0.12   | 0.042    | 0.051  |
| Acute hepatitis A                                                  | <0.005   | <0.005 | 0.005    | 0.006  |
| Acute hepatitis B                                                  | 0.021    | 0.062  | 0.023    | 0.029  |
| Acute hepatitis C                                                  | 0.01     | 0.015  | 0.009    | 0.011  |
| Acute hepatitis E                                                  | <0.005   | <0.005 | <0.005   | <0.005 |
| Leprosy                                                            | 0        | 0      | <0.005   | <0.005 |
| Other infectious diseases                                          | 0.134    | 0.184  | 0.183    | 0.148  |
| Non-communicable diseases                                          | 69.9     | 82.874 | 59.756   | 81.205 |
| Neoplasms                                                          | 21.9     | 24.755 | 19.974   | 22.996 |
| Oesophageal cancer                                                 | 0.551    | 0.594  | 0.54     | 0.598  |
| Stomach cancer                                                     | 1.328    | 1.43   | 1.397    | 1.812  |
| Liver cancer                                                       | 1.101    | 1.199  | 1.101    | 1.202  |
| Larynx cancer                                                      | 0.206    | 0.231  | 0.215    | 0.233  |
| Tracheal, bronchus and lung cancer                                 | 4.397    | 4.652  | 4.507    | 4.998  |
| Breast cancer                                                      | 1.433    | 1.521  | 1.484    | 1.617  |
| Cervical cancer**                                                  | 0.288    | 0.408  | 0.653    | 0.979  |
| Uterine cancer**                                                   | 0.14     | 0.224  | 0.297    | 0.471  |

**Web Table 18 - GBD 2010 and GBD 2013 comparison of cause fractions before and after redistribution for 2008 ICD10 vital registration excluding studies on LRI and diarrhea etiologies**

| Cause                                               | GBD 2010 |        | GBD 2013 |        |
|-----------------------------------------------------|----------|--------|----------|--------|
|                                                     | Before   | After  | Before   | After  |
| Prostate cancer**                                   | 1.129    | 1.202  | 2.221    | 2.478  |
| Colon and rectum cancer                             | 2.276    | 2.624  | 2.341    | 2.826  |
| Lip and oral cavity cancer                          | 0.223    | 0.287  | 0.228    | 0.287  |
| Nasopharynx cancer                                  | 0.031    | 0.05   | 0.037    | 0.056  |
| Cancer of other part of pharynx and oropharynx      | 0.13     | 0.196  | 0.135    | 0.183  |
| Gallbladder and biliary tract cancer                | 0.381    | 0.468  | 0.4      | 0.501  |
| Pancreatic cancer                                   | 1.23     | 1.304  | 1.265    | 1.436  |
| Malignant skin melanoma                             | 0.216    | 0.229  | 0.226    | 0.261  |
| Non-melanoma skin cancer                            | 0.1      | 0.112  | 0.107    | 0.122  |
| Ovarian cancer**                                    | 0.458    | 0.502  | 0.982    | 1.131  |
| Testicular cancer**                                 | 0.021    | 0.022  | 0.042    | 0.048  |
| Kidney and other urinary organ cancers              | 0.459    | 0.55   | 0.432    | 0.531  |
| Bladder cancer                                      | 0.556    | 0.602  | 0.561    | 0.623  |
| Brain and nervous system cancer                     | 0.639    | 0.683  | 0.512    | 0.554  |
| Thyroid cancer                                      | 0.078    | 0.096  | 0.08     | 0.089  |
| Mesothelioma                                        |          |        | 0.088    | 0.106  |
| Hodgkin lymphoma                                    | 0.045    | 0.048  | 0.045    | 0.052  |
| Non-Hodgkin's lymphoma                              | 0.586    | 0.695  | 0.762    | 0.822  |
| Multiple myeloma                                    | 0.32     | 0.337  | 0.327    | 0.349  |
| Leukaemia                                           | 0.725    | 0.791  | 0.731    | 0.784  |
| Other neoplasms                                     | 1.251    | 1.867  | 0.913    | 1.056  |
| Cardiovascular and circulatory diseases             | 28.244   | 34.522 | 20.641   | 33.289 |
| Rheumatic heart disease**                           | 0.457    | 0.561  | 0.198    | 0.292  |
| Ischaemic heart disease                             | 13.815   | 16.648 | 11.937   | 16.66  |
| Cerebrovascular disease**                           | 8.397    | 9.853  | 3.804    | 9.873  |
| Ischaemic stroke**                                  | 4.983    | 5.899  | 1.794    | 5.722  |
| Hemorrhagic and other non-ischaemic stroke**        | 3.412    | 3.951  | 2.009    | 4.15   |
| Hypertensive heart disease                          | 1.816    | 2.517  | 1.335    | 1.988  |
| Cardiomyopathy and myocarditis                      | 1.001    | 1.28   | 1.056    | 1.249  |
| Atrial fibrillation and flutter                     | 0.546    | 0.594  | 0.544    | 0.604  |
| Aortic aneurysm                                     | 0.515    | 0.555  | 0.481    | 0.562  |
| Peripheral vascular disease                         | 0.218    | 0.231  | 0.209    | 0.221  |
| Endocarditis**                                      | 0.054    | 0.115  | 0.04     | 0.145  |
| Other cardiovascular and circulatory diseases       | 1.418    | 2.146  | 1.038    | 1.695  |
| Chronic respiratory diseases                        | 4.966    | 5.521  | 3.93     | 6.25   |
| COPD                                                | 3.531    | 3.926  | 3.193    | 5.048  |
| Pneumoconiosis**                                    | 0.32     | 0.368  | 0.029    | 0.127  |
| Silicosis                                           |          |        | 0.013    | 0.034  |
| Asbestosis                                          |          |        | 0.01     | 0.034  |
| Coal workers pneumoconiosis                         |          |        | <0.005   | <0.005 |
| Other pneumoconiosis                                |          |        | <0.005   | <0.005 |
| Asthma                                              | 0.281    | 0.315  | 0.307    | 0.376  |
| Interstitial lung disease and pulmonary sarcoidosis | 0.479    | 0.524  | 0.412    | 0.686  |
| Other chronic respiratory diseases**                | 0.35     | 0.38   | 0.038    | 0.09   |
| Cirrhosis of the liver                              | 2.205    | 2.613  | 2.209    | 2.743  |
| Cirrhosis due to alcohol use                        |          |        | <0.005   | <0.005 |



**Web Table 18 - GBD 2010 and GBD 2013 comparison of cause fractions before and after redistribution for 2008 ICD10 vital registration excluding studies on LRI and diarrhea etiologies**

| Cause                                                                      | GBD 2010 |        | GBD 2013 |        |
|----------------------------------------------------------------------------|----------|--------|----------|--------|
|                                                                            | Before   | After  | Before   | After  |
| Digestive diseases (except cirrhosis)                                      | 1.995    | 2.491  | 1.819    | 2.18   |
| Peptic ulcer disease                                                       | 0.295    | 0.334  | 0.31     | 0.374  |
| Gastritis and duodenitis                                                   | 0.032    | 0.035  | 0.036    | 0.04   |
| Appendicitis                                                               | 0.027    | 0.067  | 0.029    | 0.052  |
| Paralytic ileus and intestinal obstruction                                 | 0.307    | 0.354  | 0.31     | 0.402  |
| Inguinal, femoral, and abdominal hernia                                    | 0.029    | 0.036  | 0.068    | 0.081  |
| Non-infective inflammatory bowel disease                                   | 0.106    | 0.124  | 0.116    | 0.122  |
| Vascular intestinal disorders                                              | 0.304    | 0.322  | 0.297    | 0.342  |
| Gall bladder and bile duct disease                                         | 0.24     | 0.28   | 0.239    | 0.281  |
| Pancreatitis                                                               | 0.218    | 0.238  | 0.217    | 0.219  |
| Other digestive diseases**                                                 | 0.437    | 0.701  | 0.197    | 0.267  |
| Neurological disorders                                                     | 3.735    | 3.923  | 3.947    | 4.317  |
| Alzheimer's disease and other dementias                                    | 2.995    | 3.027  | 2.926    | 3.136  |
| Parkinson's disease                                                        | 0.488    | 0.604  | 0.47     | 0.548  |
| Epilepsy                                                                   | 0.173    | 0.212  | 0.177    | 0.203  |
| Multiple sclerosis                                                         | 0.078    | 0.081  | 0.073    | 0.105  |
| Other neurological disorders                                               | 0        | 0      | 0.301    | 0.325  |
| Mental and behavioural disorders                                           | 0.617    | 0.765  | 0.423    | 0.949  |
| Schizophrenia                                                              | 0.026    | 0.028  | 0.027    | 0.028  |
| Alcohol use disorders                                                      | 0.335    | 0.381  | 0.34     | 0.469  |
| Drug use disorders**                                                       | 0.199    | 0.281  | 0.055    | 0.449  |
| Opioid use disorders**                                                     | 0.01     | 0.02   | 0.007    | 0.274  |
| Cocaine use disorders                                                      | <0.005   | <0.005 | <0.005   | <0.005 |
| Amphetamine use disorders                                                  | <0.005   | <0.005 | <0.005   | <0.005 |
| Cannabis use disorders                                                     | 0        | 0      | <0.005   | <0.005 |
| Other drug use disorders**                                                 | 0.024    | 0.027  | 0.043    | 0.126  |
| Eating disorders                                                           | 0.006    | 0.022  | <0.005   | <0.005 |
| Anorexia nervosa                                                           |          |        | <0.005   | <0.005 |
| Bulimia nervosa                                                            |          |        | <0.005   | <0.005 |
| Other mental and substance use disorders                                   | 0.05     | 0.053  | <0.005   | <0.005 |
| Diabetes, urogenital, blood, and endocrine diseases                        | 5.055    | 6.918  | 5.781    | 7.188  |
| Diabetes mellitus                                                          | 2.811    | 3.076  | 2.853    | 3.136  |
| Acute glomerulonephritis                                                   | <0.005   | <0.005 | <0.005   | <0.005 |
| Chronic kidney disease                                                     | 0.954    | 2.211  | 1.818    | 2.607  |
| Chronic kidney disease due to diabetes mellitus                            | 0.518    | 0.988  | 0.527    | 0.75   |
| Chronic kidney disease due to hypertension                                 | 0.356    | 1.038  | 0.364    | 0.818  |
| Chronic kidney disease due to glomerulonephritis                           |          |        | 0.085    | 0.129  |
| Chronic kidney disease due to other causes                                 | 0.08     | 0.183  | <0.005   | <0.005 |
| Urinary diseases and male infertility                                      | 0.562    | 0.766  | 0.493    | 0.651  |
| Tubulointerstitial nephritis, pyelonephritis, and urinary tract infections | 0.444    | 0.605  | 0.406    | 0.529  |
| Urolithiasis                                                               | 0.018    | 0.023  | 0.018    | 0.022  |
| Other urinary diseases                                                     | 0.1      | 0.135  | 0.068    | 0.1    |
| Gynecological diseases                                                     | 0.013    | 0.014  | 0.006    | 0.007  |
| Uterine fibroids                                                           | <0.005   | <0.005 |          |        |
| Polycystic ovarian syndrome                                                | 0        | 0      | <0.005   | <0.005 |
| Endometriosis                                                              | <0.005   | <0.005 | <0.005   | <0.005 |

**Web Table 18 - GBD 2010 and GBD 2013 comparison of cause fractions before and after redistribution for 2008 ICD10 vital registration excluding studies on LRI and diarrhea etiologies**

| Cause                                                | GBD 2010 |        | GBD 2013 |        |
|------------------------------------------------------|----------|--------|----------|--------|
|                                                      | Before   | After  | Before   | After  |
| Genital prolapse                                     | <0.005   | <0.005 | <0.005   | <0.005 |
| Other gynecological diseases                         | 0.009    | 0.01   | <0.005   | <0.005 |
| Hemoglobinopathies and hemolytic anaemias            | 0.114    | 0.128  | 0.073    | 0.116  |
| Thalassemias                                         | 0.012    | 0.014  | <0.005   | <0.005 |
| Sickle cell disorders                                | 0.009    | 0.01   | 0.009    | 0.013  |
| G6PD deficiency                                      | 0.007    | 0.009  | <0.005   | <0.005 |
| Other hemoglobinopathies and hemolytic anaemias      | 0.086    | 0.095  | 0.062    | 0.09   |
| Endocrine, metabolic, blood, and immune disorders    | 0.597    | 0.712  | 0.534    | 0.666  |
| Musculoskeletal disorders                            | 0.37     | 0.434  | 0.258    | 0.327  |
| Rheumatoid arthritis                                 | 0.085    | 0.09   | 0.083    | 0.09   |
| Other musculoskeletal disorders                      | 0.284    | 0.343  | 0.175    | 0.237  |
| Other non-communicable diseases                      | 0.818    | 0.935  | 0.774    | 0.967  |
| Congenital anomalies                                 | 0.604    | 0.685  | 0.547    | 0.688  |
| Neural tube defects                                  | 0.025    | 0.027  | 0.026    | 0.029  |
| Congenital heart anomalies                           | 0.323    | 0.337  | 0.252    | 0.319  |
| Cleft lip and cleft palate                           | <0.005   | <0.005 | <0.005   | <0.005 |
| Down's syndrome                                      | 0.032    | 0.033  | 0.032    | 0.043  |
| Turner syndrome                                      |          |        | <0.005   | <0.005 |
| Klinefelter syndrome                                 |          |        | <0.005   | <0.005 |
| Chromosomal unbalanced rearrangements                | 0.021    | 0.023  | 0.022    | 0.027  |
| Other congenital anomalies                           | 0.2      | 0.263  | 0.212    | 0.267  |
| Skin and subcutaneous diseases                       | 0.179    | 0.211  | 0.188    | 0.232  |
| Cellulitis                                           | 0.032    | 0.037  | 0.028    | 0.039  |
| Abscess, impetigo, and other bacterial skin diseases | 0.044    | 0.059  | 0.058    | 0.081  |
| Scabies                                              | 0        | 0      | <0.005   | <0.005 |
| Decubitus ulcer                                      | 0.088    | 0.094  | 0.09     | 0.1    |
| Other skin and subcutaneous diseases                 | 0.015    | 0.022  | 0.011    | 0.012  |
| Sense organ diseases                                 | 0        | 0      | <0.005   | <0.005 |
| Other sense organ diseases                           | 0        | 0      | <0.005   | <0.005 |
| Sudden infant death syndrome                         | 0.035    | 0.039  | 0.039    | 0.043  |
| Injuries                                             | 5.267    | 7.945  | 5.437    | 8.296  |
| Transport injuries                                   | 1.017    | 1.838  | 1.024    | 2.063  |
| Road injuries                                        | 0.952    | 1.715  | 0.958    | 1.95   |
| Pedestrian road injuries                             | 0.289    | 0.44   | 0.296    | 0.567  |
| Cyclist road injuries                                | 0.057    | 0.106  | 0.057    | 0.144  |
| Motorcyclist road injuries                           | 0.197    | 0.29   | 0.192    | 0.316  |
| Motor vehicle road injuries**                        | 0.4      | 0.833  | 0.404    | 0.904  |
| Other road injuries**                                | 0.008    | 0.019  | 0.008    | 0.019  |
| Other transport injuries                             | 0.064    | 0.123  | 0.066    | 0.113  |
| Unintentional injuries                               | 1.966    | 3.24   | 1.894    | 3.09   |
| Falls                                                | 0.732    | 1.144  | 0.731    | 1.226  |
| Drowning                                             | 0.292    | 0.397  | 0.301    | 0.36   |
| Fire, heat, and hot substances                       | 0.119    | 0.222  | 0.12     | 0.183  |
| Poisonings**                                         | 0.162    | 0.226  | 0.038    | 0.093  |
| Exposure to mechanical forces                        | 0.177    | 0.32   | 0.181    | 0.258  |
| Unintentional firearm injuries**                     | 0.099    | 0.161  | 0.062    | 0.093  |

**Web Table 18 - GBD 2010 and GBD 2013 comparison of cause fractions before and after redistribution for 2008 ICD10 vital registration excluding studies on LRI and diarrhea etiologies**

| Cause                                             | GBD 2010 |       | GBD 2013 |        |
|---------------------------------------------------|----------|-------|----------|--------|
|                                                   | Before   | After | Before   | After  |
| Unintentional suffocation                         |          |       | 0.044    | 0.055  |
| Other exposure to mechanical forces               | 0.078    | 0.159 | 0.075    | 0.11   |
| Adverse effects of medical treatment              | 0.098    | 0.21  | 0.172    | 0.327  |
| Animal contact                                    | 0.017    | 0.029 | 0.018    | 0.024  |
| Venomous animal contact                           | 0.01     | 0.014 | 0.011    | 0.014  |
| Non-venomous animal contact                       | 0.007    | 0.014 | 0.007    | 0.01   |
| Foreign body                                      |          |       | 0.262    | 0.519  |
| Pulmonary aspiration and foreign body in airway   |          |       | 0.26     | 0.517  |
| Foreign body in other body part                   |          |       | <0.005   | <0.005 |
| Unintentional injuries not classified elsewhere** | 0.369    | 0.692 | 0.072    | 0.099  |
| Self-harm and interpersonal violence              | 2.284    | 2.867 | 2.39     | 2.989  |
| Self-harm                                         | 1.262    | 1.506 | 1.296    | 1.645  |
| Interpersonal violence                            | 1.021    | 1.361 | 1.094    | 1.344  |
| Assault by firearm                                | 0.687    | 0.831 | 0.749    | 0.882  |
| Assault by sharp object                           | 0.228    | 0.317 | 0.234    | 0.279  |
| Assault by other means                            | 0.106    | 0.212 | 0.112    | 0.184  |
| Forces of nature, war, and legal intervention     | 0        | 0     | 0.128    | 0.154  |
| Exposure to forces of nature                      | 0        | 0     | 0.063    | 0.077  |
| Collective violence and legal intervention        | 0        | 0     | 0.065    | 0.077  |

COPD = chronic obstructive pulmonary disease. \*Includes birth asphyxia and birth trauma

\*\*The differences in before redistribution between 2010 and 2013 are from change both changes in raw data numbers provided by WHO, as well as changes in mapping.

#### D. Age and sex splitting for the causes of death database

Different sources particularly verbal autopsy studies report deaths for a wide range of age-groups with varying intervals. For the analysis of causes of death, we map these different age intervals in the GBD standard set of age-groups. The approach taken to undertake this mapping is the same as used in the GBD 2010 Study and is explained in detail elsewhere.<sup>22</sup>

#### E. Noise reduction for the causes of death database

To deal with problems of zero counts in vital registration or sibling histories for a given age-group in a given year, we use a Bayesian noise reduction algorithm. For this algorithm, we assume a normal prior and a normal data likelihood. We estimate the normal prior for a given country series of data such as vital registration, verbal autopsy, or a sequence of DHS surveys in a country by estimating a negative binomial for the fraction of deaths in each age-group due to each respective cause with dummy variables for age and year. With notable exceptions for small-island nations in Oceania and the Caribbean, these regressions are country specific so borrowing strength over age is only within a data type in a country. The variance of the prior,  $\tau^2$ , is estimated from the negative binomial regression taking into account the variance-covariance matrix of the regression coefficients. For the data variance, we use the Wilson approximation which provides an estimate of  $\sigma^2$  even in cases with a zero count of cause-specific deaths. The posterior estimate for each data points is

$$\begin{aligned}\text{Mean} &= \left( \frac{\tau^2}{\tau^2 + \sigma^2} X + \frac{\sigma^2}{\tau^2 + \sigma^2} \mu \right) \\ \text{Variance} &= \left( \frac{\tau^2 \sigma^2}{\tau^2 + \sigma^2} \right)\end{aligned}\tag{25}$$

Where  $X$  is the mean of the data and  $\mu$  is the mean of the prior. This approach to noise reduction avoids the problem that zero counts in an ln rates model or a logit cause fraction model will be dropped from the regression and lead to upward bias in the estimates. This is particularly important in two settings: high-income countries with small numbers of cause-specific deaths and in the analysis of sibling history data where for any given age-group in any given year the number of deaths reported in the survey that are pregnancy-related or the number of deaths from all causes in that age group may be small.

## Section 6. Modelling individual causes of death

### A. Strategy by cause

As noted in the main body of the paper, due to variations in data density and data quality, different strategies have been used for different causes. Web Table 19 summarizes the modeling strategy for different causes. In nearly all causes, the strategy used is similar to the GBD 2010 Study. Wherever possible, we use CODEm as the primary modeling strategy for all causes of death. Doing so enhances the comparability of results and the ensemble modeling approach has merits that are well-documented.<sup>24</sup> In conducting the GBD 2013 we identified several causes for which we have switched strategies from that used in the GBD 2010 Study. The causes for which we have used different strategies in the GBD 2013 are: HIV/AIDS; lower respiratory infections; upper respiratory infections; otitis media; meningitis; encephalitis; malaria; iron-deficiency anemia; other nutritional deficiencies; acute hepatitis A, B, and C; inguinal, femoral, and abdominal hernia; Alzheimer disease and other dementias; eating disorders; chronic kidney disease due to diabetes mellitus; chronic kidney disease due to hypertension; cellulitis; decubitus ulcer; and other skin and subcutaneous diseases. Driven by an increase in data for the specific causes themselves, we are able to attain reasonable results using CODEm for the following causes: decubitus ulcer; cellulitis; other skin disease and subcutaneous diseases; and inguinal, femoral, and abdominal hernia; otitis media; iron-deficiency anemia and other nutritional deficiencies; eating disorders; and lower respiratory infections (LRI).

In GBD 2010, otitis media, iron-deficiency anemia, and other nutritional deficiencies were estimated using negative binomial models. The GBD 2013 CODEm results for otitis media provide a better fit to the available data than the previously used negative binomial model. For deaths due to iron-deficiency anemia, CODEm produces estimates more suitable to the biological pattern of this cause; while using CODEm for other nutritional deficiencies in GBD 2013 provided more precise uncertainty intervals. Finally, using CODEm to model eating disorders in GBD 2013 resulted in estimates closer to the expected sex pattern than a negative binomial model.

In GBD 2010, we first generated the joint mortality estimates for meningitis and encephalitis in CODEm, which were then split into each cause by a fixed proportion. This approach was chosen because substantially more data points, particularly in highly endemic areas, did not distinguish between these two. In GBD 2013, we had more data that were specific to each cause that allowed us to estimate the mortality separately in CODEm (data points that did not distinguish between these two were split at the redistribution stage).

While many causes of death were shifted away from a negative binomial modeling approach, one important exception is upper respiratory infections (URI). In GBD 2010, URI deaths were modeled within an aggregate of this cause and LRI, grouped as acute respiratory infections (ARI). Deaths due to ARI were modeled using CODEm in GBD 2010, and divided into URI and LRI using a fixed proportion. In GBD 2013, grouped ARI was removed, and URI and LRI deaths were modeled separately due to better quality data, mapping, and more precise definitions. LRI deaths were modeled using CODEm in GBD 2013, however a negative binomial model was used to estimate deaths due to URI as this strategy is well suited to model low number of global deaths.

We apply the modeling strategies for malaria, tuberculosis, and HIV as described in Murray et al.<sup>25</sup>

GBD 2010 analysis of deaths due to chronic kidney disease (CKD) assumed the same risk of mortality across etiologies of end-stage renal disease and applied prevalence-based etiological proportions obtained from renal replacement therapy registries to the CKD mortality estimates in order to obtain etiology-specific mortality estimates. However, literature confirms that the risk of mortality differs among renal replacement therapy patients of different etiologies.<sup>26–28</sup> GBD 2013 relaxes this assumption by directly modeling etiology-specific CKD mortality data from vital registration systems for CKD due to diabetes, hypertension, and glomerulonephritis using CODEm. Because of poor data quality for CKD due to other causes, this residual etiological proportion was modeled using data from renal replacement therapy registries.

Unlike the causes of death detailed above, where CODEm was determined to provide more reasonable results, deaths due to acute viral hepatitis (including hepatitis A, B, C and E) were transitioned from CODEm to natural history models in GBD 2013. Many acute hepatitis death reports are coded nonspecifically (e.g. ICD-10 code B17.9, acute viral hepatitis, unspecified), and type-specific mortality data for acute hepatitis are therefore limited and unreliable. We, therefore, developed four natural history models – one each for hepatitis A, B, C and E – to estimate type-specific acute hepatitis mortality. The deaths estimated from these four models were then fit within the larger acute viral hepatitis mortality envelope via CodCorrect.

For cholera, we compared the expected number of cholera cases for each country-year from epidemiological studies that reported proportion of cholera in patients with diarrhoea using the total number of diarrhoea episodes from a separate analysis. We assigned cholera population attributable fractions to adjust the cholera cases. We modelled under-reporting of cholera case notification and imputed for all countries to predict the total number of cholera cases for all countries present in WHO cholera notification. Furthermore, we modelled proportion of cholera in all diarrhoea cases in these countries to impute for all country-years from 1990 onward, giving us a final estimate of the proportion of cholera and ultimately the number of cholera cases by country and year. Up until this step, country estimates were for all ages combined. To split into age-specific estimates of cholera cases, we used a common age curve derived from a random effect meta-regression analysis (DisMod-MR); the age curve was derived from studies that reported the proportion of cholera in cases for multiple age groups.

**Web Table 19. Modeling strategy by cause and CoDCorrect level**

**Web Table 19 - Modeling strategy and CodCorrect level by cause of death**

| Cause                                                      | Level     | Modeling Strategy                                                                                                    |
|------------------------------------------------------------|-----------|----------------------------------------------------------------------------------------------------------------------|
| Communicable, maternal, neonatal, and nutritional diseases | Aggregate |                                                                                                                      |
| HIV/AIDS and tuberculosis                                  | Aggregate |                                                                                                                      |
| Tuberculosis                                               | 1         | CODEm                                                                                                                |
| HIV/AIDS                                                   | 1         | Spectrum                                                                                                             |
| HIV/AIDS resulting in mycobacterial infection              | 2         | Spectrum                                                                                                             |
| HIV/AIDS resulting in other diseases                       | 2         | Spectrum                                                                                                             |
| Diarrhea, lower respiratory, and other common infectious   | Aggregate |                                                                                                                      |
| Diarrheal diseases                                         | 1         | CODEm                                                                                                                |
| Intestinal infectious diseases                             | Aggregate |                                                                                                                      |
| Typhoid fever                                              | 1         | Natural history model                                                                                                |
| Paratyphoid fever                                          | 1         | Natural history model                                                                                                |
| Other intestinal infectious diseases                       | 1         | Negative binomial regression                                                                                         |
| Lower respiratory infections                               | 1         | CODEm                                                                                                                |
| Upper respiratory infections                               | 1         | Negative binomial regression                                                                                         |
| Otitis media                                               | 1         | CODEm                                                                                                                |
| Meningitis                                                 | 1         | CODEm                                                                                                                |
| Pneumococcal meningitis                                    | 2         | DisMod MR-2.0 proportion (country/year/age/sex-specific)                                                             |
| H influenzae type B meningitis                             | 2         | DisMod MR-2.0 proportion (country/year/age/sex-specific)                                                             |
| Meningococcal meningitis                                   | 2         | DisMod MR-2.0 proportion (country/year/age/sex-specific)                                                             |
| Other meningitis                                           | 2         | DisMod MR-2.0 proportion (country/year/age/sex-specific)                                                             |
| Encephalitis                                               | 1         | CODEm                                                                                                                |
| Diphtheria                                                 | 1         | Negative binomial regression                                                                                         |
| Whooping cough                                             | 1         | CODEm (VR countries); natural history model (non-VR countries)                                                       |
| Tetanus                                                    | 1         | CODEm                                                                                                                |
| Measles                                                    | 1         | Natural history model                                                                                                |
| Varicella and herpes zoster                                | 1         | Negative binomial regression                                                                                         |
| Neglected tropical diseases and malaria                    | Aggregate |                                                                                                                      |
| Malaria                                                    | 1         | CODEm ( <i>P. falciparum</i> / <i>P. vivax</i> countries); negative binomial regression ( <i>P. vivax</i> countries) |
| Chagas disease                                             | 1         | CODEm                                                                                                                |
| Leishmaniasis                                              | Aggregate |                                                                                                                      |
| Visceral leishmaniasis                                     | 1         | Natural history model                                                                                                |
| African trypanosomiasis                                    | 1         | Natural history model                                                                                                |
| Schistosomiasis                                            | 1         | Negative binomial regression                                                                                         |

**Web Table 19 - Modeling strategy and CodCorrect level by cause of death**

| Cause                                                   | Level     | Modeling Strategy                                                                  |
|---------------------------------------------------------|-----------|------------------------------------------------------------------------------------|
| Cysticercosis                                           | 1         | Negative binomial regression                                                       |
| Cystic echinococcosis                                   | 1         | Negative binomial regression                                                       |
| Dengue                                                  | 1         | CODEm                                                                              |
| Yellow fever                                            | 1         | Natural history model                                                              |
| Rabies                                                  | 1         | CODEm                                                                              |
| Intestinal nematode infections                          | Aggregate |                                                                                    |
| Ascariasis                                              | 1         | Negative binomial regression                                                       |
| Other neglected tropical diseases                       | 1         | CODEm                                                                              |
| Maternal disorders                                      | 1         | CODEm; post-CODEm HIV correction                                                   |
| Maternal hemorrhage                                     | 2         | DisMod MR-2.0 proportion (country/year/age/sex-specific)                           |
| Maternal sepsis and other maternal infections           | 2         | DisMod MR-2.0 proportion (country/year/age/sex-specific)                           |
| Maternal hypertensive disorders                         | 2         | DisMod MR-2.0 proportion (country/year/age/sex-specific)                           |
| Maternal obstructed labor                               | 2         | DisMod MR-2.0 proportion (country/year/age/sex-specific)                           |
| Maternal abortive outcome                               | 2         | DisMod MR-2.0 proportion (country/year/age/sex-specific)                           |
| Indirect maternal deaths                                | 2         | DisMod MR-2.0 proportion (country/year/age/sex-specific)                           |
| Late maternal deaths                                    | 2         | DisMod MR-2.0 proportion (country/year/age/sex-specific)                           |
| Maternal deaths aggravated by HIV/AIDS                  | 2         | Spectrum                                                                           |
| Other maternal disorders                                | 2         | DisMod MR-2.0 proportion (country/year/age/sex-specific)                           |
| Neonatal disorders                                      | 1         | CODEm                                                                              |
| Neonatal preterm birth complications                    | 2         | CODEm                                                                              |
| Neonatal encephalopathy due to birth asphyxia/trauma    | 2         | CODEm                                                                              |
| Neonatal sepsis and other neonatal infections           | 2         | CODEm                                                                              |
| Hemolytic disease and other neonatal jaundice           | 2         | CODEm                                                                              |
| Other neonatal disorders                                | 2         | CODEm                                                                              |
| Nutritional deficiencies                                | 1         | CODEm                                                                              |
| Protein-energy malnutrition                             | 2         | CODEm; mortality shock regression for famine (appended post-CodCorrect)            |
| Iodine deficiency                                       | 2         | Negative binomial regression                                                       |
| Iron-deficiency anemia                                  | 2         | CODEm                                                                              |
| Other nutritional deficiencies                          | 2         | CODEm                                                                              |
| Other communicable, maternal, neonatal, and nutritional | Aggregate |                                                                                    |
| Sexually transmitted diseases excluding HIV             | 1         | CODEm; natural history model (congenital syphilis)                                 |
| Syphilis                                                | 2         | Data proportion (age/sex-specific VR); natural history model (congenital syphilis) |
| Chlamydial infection                                    | 2         | Data proportion (age/sex-specific VR)                                              |



**Web Table 19 - Modeling strategy and CodCorrect level by cause of death**

| Cause                                | Level     | Modeling Strategy                                        |
|--------------------------------------|-----------|----------------------------------------------------------|
| Gonococcal infection                 | 2         | Data proportion (age/sex-specific VR)                    |
| Other sexually transmitted diseases  | 2         | Data proportion (age/sex-specific VR)                    |
| Hepatitis                            | 1         | CODEm                                                    |
| Acute hepatitis A                    | 2         | Natural history model                                    |
| Acute hepatitis B                    | 2         | Natural history model                                    |
| Acute hepatitis C                    | 2         | Natural history model                                    |
| Acute hepatitis E                    | 2         | Natural history model                                    |
| Other infectious diseases            | 1         | CODEm                                                    |
| Non-communicable diseases            | Aggregate |                                                          |
| Neoplasms                            | Aggregate |                                                          |
| Esophageal cancer                    | 1         | CODEm                                                    |
| Stomach cancer                       | 1         | CODEm                                                    |
| Liver cancer                         | 1         | CODEm                                                    |
| Liver cancer due to hepatitis B      | 2         | DisMod MR-2.0 proportion (country/year/age/sex-specific) |
| Liver cancer due to hepatitis C      | 2         | DisMod MR-2.0 proportion (country/year/age/sex-specific) |
| Liver cancer due to alcohol use      | 2         | DisMod MR-2.0 proportion (country/year/age/sex-specific) |
| Liver cancer due to other causes     | 2         | DisMod MR-2.0 proportion (country/year/age/sex-specific) |
| Larynx cancer                        | 1         | CODEm                                                    |
| Tracheal, bronchus, and lung cancers | 1         | CODEm                                                    |
| Breast cancer                        | 1         | CODEm                                                    |
| Cervical cancer                      | 1         | CODEm                                                    |
| Uterine cancer                       | 1         | CODEm                                                    |
| Prostate cancer                      | 1         | CODEm                                                    |
| Colon and rectum cancer              | 1         | CODEm                                                    |
| Lip and oral cavity cancer           | 1         | CODEm                                                    |
| Nasopharynx cancer                   | 1         | CODEm                                                    |
| Other pharynx cancer                 | 1         | CODEm                                                    |
| Gallbladder and biliary tract cancer | 1         | CODEm                                                    |
| Pancreatic cancer                    | 1         | CODEm                                                    |
| Malignant skin melanoma              | 1         | CODEm                                                    |
| Non-melanoma skin cancer             | 1         | CODEm                                                    |
| Ovarian cancer                       | 1         | CODEm                                                    |
| Testicular cancer                    | 1         | CODEm                                                    |

**Web Table 19 - Modeling strategy and CodCorrect level by cause of death**

| Cause                                               | Level | Modeling Strategy |
|-----------------------------------------------------|-------|-------------------|
| Kidney cancer                                       | 1     | CODEm             |
| Bladder cancer                                      | 1     | CODEm             |
| Brain and nervous system cancer                     | 1     | CODEm             |
| Thyroid cancer                                      | 1     | CODEm             |
| Mesothelioma                                        | 1     | CODEm             |
| Hodgkin lymphoma                                    | 1     | CODEm             |
| Non-Hodgkin lymphoma                                | 1     | CODEm             |
| Multiple myeloma                                    | 1     | CODEm             |
| Leukemia                                            | 1     | CODEm             |
| Other neoplasms                                     | 1     | CODEm             |
| Cardiovascular diseases                             | 1     | CODEm             |
| Rheumatic heart disease                             | 2     | CODEm             |
| Ischemic heart disease                              | 2     | CODEm             |
| Cerebrovascular disease                             | 2     | CODEm             |
| Ischemic stroke                                     | 3     | CODEm             |
| Hemorrhagic stroke                                  | 3     | CODEm             |
| Hypertensive heart disease                          | 2     | CODEm             |
| Cardiomyopathy and myocarditis                      | 2     | CODEm             |
| Atrial fibrillation and flutter                     | 2     | CODEm             |
| Aortic aneurysm                                     | 2     | CODEm             |
| Peripheral vascular disease                         | 2     | CODEm             |
| Endocarditis                                        | 2     | CODEm             |
| Other cardiovascular and circulatory diseases       | 2     | CODEm             |
| Chronic respiratory diseases                        | 1     | CODEm             |
| Chronic obstructive pulmonary disease               | 2     | CODEm             |
| Pneumoconiosis                                      | 2     | CODEm             |
| Silicosis                                           | 3     | CODEm             |
| Asbestosis                                          | 3     | CODEm             |
| Coal workers pneumoconiosis                         | 3     | CODEm             |
| Other pneumoconiosis                                | 3     | CODEm             |
| Asthma                                              | 2     | CODEm             |
| Interstitial lung disease and pulmonary sarcoidosis | 2     | CODEm             |
| Other chronic respiratory diseases                  | 2     | CODEm             |

**Web Table 19 - Modeling strategy and CodCorrect level by cause of death**

| Cause                                               | Level     | Modeling Strategy                                        |
|-----------------------------------------------------|-----------|----------------------------------------------------------|
| Cirrhosis                                           | 1         | CODEm                                                    |
| Cirrhosis due to hepatitis B                        | 2         | DisMod MR-2.0 proportion (country/year/age/sex-specific) |
| Cirrhosis due to hepatitis C                        | 2         | DisMod MR-2.0 proportion (country/year/age/sex-specific) |
| Cirrhosis due to alcohol use                        | 2         | DisMod MR-2.0 proportion (country/year/age/sex-specific) |
| Cirrhosis due to other causes                       | 2         | DisMod MR-2.0 proportion (country/year/age/sex-specific) |
| Digestive diseases                                  | 1         | CODEm                                                    |
| Peptic ulcer disease                                | 2         | CODEm                                                    |
| Gastritis and duodenitis                            | 2         | CODEm                                                    |
| Appendicitis                                        | 2         | CODEm                                                    |
| Paralytic ileus and intestinal obstruction          | 2         | CODEm                                                    |
| Inguinal, femoral, and abdominal hernia             | 2         | CODEm                                                    |
| Inflammatory bowel disease                          | 2         | CODEm                                                    |
| Vascular intestinal disorders                       | 2         | CODEm                                                    |
| Gallbladder and biliary diseases                    | 2         | CODEm                                                    |
| Pancreatitis                                        | 2         | CODEm                                                    |
| Other digestive diseases                            | 2         | CODEm                                                    |
| Neurological disorders                              | Aggregate |                                                          |
| Alzheimer disease and other dementias               | 1         | Natural history model                                    |
| Parkinson disease                                   | 1         | CODEm                                                    |
| Epilepsy                                            | 1         | CODEm                                                    |
| Multiple sclerosis                                  | 1         | CODEm                                                    |
| Other neurological disorders                        | 1         | CODEm                                                    |
| Mental and substance use disorders                  | Aggregate |                                                          |
| Schizophrenia                                       | 1         | CODEm                                                    |
| Alcohol use disorders                               | 1         | CODEm                                                    |
| Drug use disorders                                  | 1         | CODEm                                                    |
| Opioid use disorders                                | 2         | Data proportion (region/year/age/sex-specific VR)        |
| Cocaine use disorders                               | 2         | Data proportion (region/year/age/sex-specific VR)        |
| Amphetamine use disorders                           | 2         | Data proportion (region/year/age/sex-specific VR)        |
| Other drug use disorders                            | 2         | Data proportion (region/year/age/sex-specific VR)        |
| Eating disorders                                    | Aggregate |                                                          |
| Anorexia nervosa                                    | 1         | Negative binomial regression                             |
| Diabetes, urogenital, blood, and endocrine diseases | Aggregate |                                                          |

**Web Table 19 - Modeling strategy and CodCorrect level by cause of death**

| Cause                                               | Level     | Modeling Strategy                                                      |
|-----------------------------------------------------|-----------|------------------------------------------------------------------------|
| Diabetes mellitus                                   | 1         | CODEm                                                                  |
| Acute glomerulonephritis                            | 1         | CODEm                                                                  |
| Chronic kidney disease                              | 1         | CODEm                                                                  |
| Chronic kidney disease due to diabetes mellitus     | 2         | CODEm                                                                  |
| Chronic kidney disease due to hypertension          | 2         | CODEm                                                                  |
| Chronic kidney disease due to glomerulonephritis    | 2         | CODEm                                                                  |
| Chronic kidney disease due to other causes          | 2         | DisMod MR-2.0 proportion (country/year/age/sex-specific)               |
| Urinary diseases and male infertility               | 1         | CODEm                                                                  |
| Interstitial nephritis and urinary tract infections | 2         | CODEm                                                                  |
| Urolithiasis                                        | 2         | CODEm                                                                  |
| Other urinary diseases                              | 2         | CODEm                                                                  |
| Gynecological diseases                              | 1         | CODEm                                                                  |
| Uterine fibroids                                    | 2         | Data proportion (age-specific VR)                                      |
| Polycystic ovarian syndrome                         | 2         | Data proportion (age-specific VR)                                      |
| Endometriosis                                       | 2         | Data proportion (age-specific VR)                                      |
| Genital prolapse                                    | 2         | Data proportion (age-specific VR)                                      |
| Other gynecological diseases                        | 2         | Data proportion (age-specific VR)                                      |
| Hemoglobinopathies and hemolytic anemias            | 1         | CODEm                                                                  |
| Thalassemias                                        | 2         | DisMod MR-2.0 cause-specific mortality (country/year/age/sex-specific) |
| Sickle cell disorders                               | 2         | DisMod MR-2.0 cause-specific mortality (country/year/age/sex-specific) |
| G6PD deficiency                                     | 2         | DisMod MR-2.0 cause-specific mortality (country/year/age/sex-specific) |
| Other hemoglobinopathies and hemolytic anemias      | 2         | Data proportion (age-specific high-income VR)                          |
| Endocrine, metabolic, blood, and immune disorders   | 1         | CODEm                                                                  |
| Musculoskeletal disorders                           | 1         | CODEm                                                                  |
| Rheumatoid arthritis                                | 2         | CODEm                                                                  |
| Other musculoskeletal disorders                     | 2         | CODEm                                                                  |
| Other non-communicable diseases                     | Aggregate |                                                                        |
| Congenital anomalies                                | 1         | CODEm                                                                  |
| Neural tube defects                                 | 2         | CODEm                                                                  |
| Congenital heart anomalies                          | 2         | CODEm                                                                  |
| Cleft lip and cleft palate                          | 2         | CODEm                                                                  |
| Down syndrome                                       | 2         | CODEm                                                                  |
| Chromosomal unbalanced rearrangements               | 2         | CODEm                                                                  |

**Web Table 19 - Modeling strategy and CodCorrect level by cause of death**

| Cause                                                | Level     | Modeling Strategy |
|------------------------------------------------------|-----------|-------------------|
| Other congenital anomalies                           | 2         | CODEm             |
| Skin and subcutaneous diseases                       | 1         | CODEm             |
| Cellulitis                                           | 2         | CODEm             |
| Abscess, impetigo, and other bacterial skin diseases | 2         | CODEm             |
| Decubitus ulcer                                      | 2         | CODEm             |
| Other skin and subcutaneous diseases                 | 2         | CODEm             |
| Sudden infant death syndrome                         | 1         | CODEm             |
| Injuries                                             | Aggregate |                   |
| Transport injuries                                   | 1         | CODEm             |
| Road injuries                                        | 2         | CODEm             |
| Pedestrian road injuries                             | 3         | CODEm             |
| Cyclist road injuries                                | 3         | CODEm             |
| Motorcyclist road injuries                           | 3         | CODEm             |
| Motor vehicle road injuries                          | 3         | CODEm             |
| Other road injuries                                  | 3         | CODEm             |
| Other transport injuries                             | 2         | CODEm             |
| Unintentional injuries                               | Aggregate |                   |
| Falls                                                | 1         | CODEm             |
| Drowning                                             | 1         | CODEm             |
| Fire, heat, and hot substances                       | 1         | CODEm             |
| Poisonings                                           | 1         | CODEm             |
| Exposure to mechanical forces                        | Aggregate |                   |
| Unintentional firearm injuries                       | 1         | CODEm             |
| Unintentional suffocation                            | 1         | CODEm             |
| Other exposure to mechanical forces                  | 1         | CODEm             |
| Adverse effects of medical treatment                 | 1         | CODEm             |
| Animal contact                                       | 1         | CODEm             |
| Venomous animal contact                              | 2         | CODEm             |
| Non-venomous animal contact                          | 2         | CODEm             |
| Foreign body                                         | Aggregate |                   |
| Pulmonary aspiration and foreign body in airway      | 1         | CODEm             |
| Foreign body in other body part                      | 1         | CODEm             |
| Other unintentional injuries                         | 1         | CODEm             |

**Web Table 19 - Modeling strategy and CodCorrect level by cause of death**

| <b>Cause</b>                                  | <b>Level</b> | <b>Modeling Strategy</b>                                           |
|-----------------------------------------------|--------------|--------------------------------------------------------------------|
| Self-harm and interpersonal violence          | Aggregate    |                                                                    |
| Self-harm                                     | 1            | CODEm                                                              |
| Interpersonal violence                        | 1            | CODEm                                                              |
| Assault by firearm                            | 2            | CODEm                                                              |
| Assault by sharp object                       | 2            | CODEm                                                              |
| Assault by other means                        | 2            | CODEm                                                              |
| Forces of nature, war, and legal intervention | Aggregate    |                                                                    |
| Exposure to forces of nature                  | 1            | Mortality shock regression for disaster (appended post-CodCorrect) |
| Collective violence and legal intervention    | 1            | Mortality shock regression for war (appended post-CodCorrect)      |

**Web Table 20: Modelling strategy for individual cause of death models in GBD 2010 and GBD 2013**

**Web Table 20- Causes of death for which the modelling strategy changed from GBD 2010 to GBD 2013**

| Cause                                           | GBD 2010 Modelling Strategy      | GBD 2013 Modelling Strategy                                                                       |
|-------------------------------------------------|----------------------------------|---------------------------------------------------------------------------------------------------|
| HIV/AIDS                                        | CODEm plus natural history model | Spectrum                                                                                          |
| Lower respiratory infections                    | Fixed proportion                 | CODEm                                                                                             |
| Upper respiratory infections                    | Fixed proportion                 | Negative binomial model                                                                           |
| Otitis media                                    | Negative binomial model          | CODEm                                                                                             |
| Meningitis                                      | Fixed proportion                 | CODEm                                                                                             |
| Encephalitis                                    | Fixed proportion                 | CODEm                                                                                             |
| Malaria                                         | CODEm                            | CODEm (P. falciparum/P. vivax countries);<br>negative binomial regression (P. vivax<br>countries) |
| Iron-deficiency anemia                          | Negative binomial model          | CODEm                                                                                             |
| Other nutritional deficiencies                  | Negative binomial model          | CODEm                                                                                             |
| Acute hepatitis A                               | CODEm                            | Natural history model                                                                             |
| Acute hepatitis B                               | CODEm                            | Natural history model                                                                             |
| Acute hepatitis C                               | CODEm                            | Natural history model                                                                             |
| Inguinal, femoral, and abdominal hernia         | Negative binomial                | CODEm                                                                                             |
| Alzheimer disease and other dementias           | CODEm                            | Natural history model                                                                             |
| Chronic kidney disease due to diabetes mellitus | Aetiology modeling               | CODEm                                                                                             |
| Chronic kidney disease due to hypertension      | Aetiology modeling               | CODEm                                                                                             |
| Cellulitis                                      | Fixed proportion                 | CODEm                                                                                             |
| Decubitus ulcer                                 | Fixed proportion                 | CODEm                                                                                             |
| Other skin and subcutaneous diseases            | Fixed proportion                 | CODEm                                                                                             |



## **B. CODEm model performance**

The majority of the causes of death, including most major causes except HIV, were modeled using cause of death ensemble modelling (CODEm). Web Table 19 provides a summary of the performance of these CODEm models in terms of the standard out-of-sample predictive validity metrics. Three metrics are reported: a) the average root-mean-squared error of the prediction compared to the data held out from the analysis across the set of different hold-outs used for a cause; b) the root-mean-squared error of the data and model prediction trend across hold-outs; and c) the data coverage of the 95% uncertainty intervals for the predicted values of the data across hold-outs. More detail on the CODEm approach to modeling is available<sup>22,24</sup> Web Table 21 provides more detail for each CODEm analysis including the covariates tested and the prior belief based on the literature for the direction of the relationship between covariates and the cause-specific outcome.

**Web Table 21: CODEm predictive validity results by cause, sex, age, and location**

**Web Table 21 - CODEm predictive validity results by cause, sex, age, and location**

| Cause                        | Sex     | Age Start   | Age End     | Predictive Validity |          |          |           |             |              |
|------------------------------|---------|-------------|-------------|---------------------|----------|----------|-----------|-------------|--------------|
|                              |         |             |             | RMSE In             | RMSE Out | Trend In | Trend Out | Coverage In | Coverage Out |
| Tuberculosis                 | Females | 28-364 days | 80+ years   | 0.699               | 1.049    | 1.024    | 1.157     | 0.967       | 0.907        |
| Tuberculosis                 | Males   | 28-364 days | 80+ years   | 0.291               | 0.633    | 0.147    | 0.174     | 0.997       | 0.930        |
| Diarrheal diseases           | Females | 0-6 days    | 1-4 years   | 0.493               | 0.878    | 0.300    | 0.320     | 0.996       | 0.977        |
| Diarrheal diseases           | Females | 5-9 years   | 80+ years   | 0.387               | 0.789    | 0.245    | 0.288     | 0.997       | 0.967        |
| Diarrheal diseases           | Males   | 0-6 days    | 1-4 years   | 0.486               | 0.840    | 0.324    | 0.360     | 0.996       | 0.977        |
| Diarrheal diseases           | Males   | 5-9 years   | 80+ years   | 0.392               | 0.777    | 0.264    | 0.292     | 0.997       | 0.971        |
| Lower respiratory infections | Females | 0-6 days    | 1-4 years   | 0.404               | 0.607    | 0.258    | 0.278     | 0.992       | 0.976        |
| Lower respiratory infections | Females | 5-9 years   | 80+ years   | 0.309               | 0.531    | 0.148    | 0.175     | 0.996       | 0.955        |
| Lower respiratory infections | Males   | 0-6 days    | 1-4 years   | 0.523               | 0.730    | 0.527    | 0.575     | 0.988       | 0.968        |
| Lower respiratory infections | Males   | 5-9 years   | 80+ years   | 0.604               | 0.794    | 0.732    | 0.761     | 0.976       | 0.925        |
| Otitis media                 | Females | 0-6 days    | 80+ years   | 0.414               | 0.873    | 0.326    | 0.455     | 0.996       | 0.968        |
| Otitis media                 | Males   | 0-6 days    | 80+ years   | 0.422               | 0.929    | 0.344    | 0.502     | 0.996       | 0.966        |
| Meningitis                   | Females | 0-6 days    | 1-4 years   | 0.394               | 0.646    | 0.240    | 0.283     | 0.995       | 0.975        |
| Meningitis                   | Females | 5-9 years   | 80+ years   | 0.344               | 0.560    | 0.205    | 0.189     | 0.997       | 0.979        |
| Meningitis                   | Males   | 0-6 days    | 1-4 years   | 0.455               | 0.697    | 0.284    | 0.270     | 0.993       | 0.972        |
| Meningitis                   | Males   | 5-9 years   | 80+ years   | 0.338               | 0.545    | 0.205    | 0.206     | 0.996       | 0.979        |
| Encephalitis                 | Females | 0-6 days    | 1-4 years   | 0.487               | 1.061    | 0.393    | 0.450     | 0.995       | 0.948        |
| Encephalitis                 | Females | 5-9 years   | 80+ years   | 0.397               | 0.668    | 0.275    | 0.305     | 0.998       | 0.980        |
| Encephalitis                 | Males   | 0-6 days    | 1-4 years   | 0.500               | 0.974    | 0.423    | 0.463     | 0.993       | 0.956        |
| Encephalitis                 | Males   | 5-9 years   | 80+ years   | 0.399               | 0.737    | 0.281    | 0.386     | 0.997       | 0.971        |
| Whooping cough               | Females | 28-364 days | 1-4 years   | 1.332               | 1.865    | 3.671    | 4.365     | 0.978       | 0.939        |
| Whooping cough               | Females | 5-9 years   | 55-59 years | 0.439               | 0.616    | 0.322    | 0.379     | 0.992       | 0.982        |
| Whooping cough               | Males   | 28-364 days | 1-4 years   | 1.248               | 1.842    | 3.244    | 4.070     | 0.977       | 0.932        |
| Whooping cough               | Males   | 5-9 years   | 55-59 years | 0.405               | 0.573    | 0.268    | 0.331     | 0.993       | 0.983        |
| Tetanus                      | Females | 0-6 days    | 28-364 days | 0.811               | 1.513    | 1.161    | 1.393     | 0.981       | 0.936        |
| Tetanus                      | Females | 1-4 years   | 80+ years   | 0.535               | 0.998    | 0.514    | 0.637     | 0.992       | 0.961        |
| Tetanus                      | Males   | 0-6 days    | 28-364 days | 0.869               | 1.637    | 1.310    | 1.558     | 0.977       | 0.906        |
| Tetanus                      | Males   | 1-4 years   | 80+ years   | 0.610               | 1.055    | 0.680    | 0.771     | 0.988       | 0.954        |
| Malaria [Africa]             | Females | 7-27 days   | 1-4 years   | 0.452               | 0.506    | 0.521    | 0.485     | 0.991       | 0.994        |
| Malaria [Africa]             | Females | 5-9 years   | 80+ years   | 0.884               | 1.179    | 2.259    | 4.105     | 0.987       | 0.947        |
| Malaria [Africa]             | Males   | 7-27 days   | 1-4 years   | 0.411               | 0.494    | 0.434    | 0.426     | 0.994       | 0.996        |
| Malaria [Africa]             | Males   | 5-9 years   | 80+ years   | 0.596               | 0.702    | 1.009    | 1.556     | 0.994       | 0.984        |
| Malaria [non-Africa]         | Females | 7-27 days   | 1-4 years   | 0.804               | 1.118    | 1.174    | 1.596     | 0.992       | 0.983        |

**Web Table 21 - CODEm predictive validity results by cause, sex, age, and location**

| Cause                                                    | Sex     | Age Start   | Age End     | Predictive Validity |          |          |           |             |              |
|----------------------------------------------------------|---------|-------------|-------------|---------------------|----------|----------|-----------|-------------|--------------|
|                                                          |         |             |             | RMSE In             | RMSE Out | Trend In | Trend Out | Coverage In | Coverage Out |
| Malaria [non-Africa]                                     | Females | 5-9 years   | 80+ years   | 0.520               | 0.677    | 0.498    | 0.616     | 0.991       | 0.976        |
| Malaria [non-Africa]                                     | Males   | 7-27 days   | 1-4 years   | 0.814               | 1.069    | 1.181    | 1.636     | 0.990       | 0.980        |
| Malaria [non-Africa]                                     | Males   | 5-9 years   | 80+ years   | 0.564               | 0.725    | 0.598    | 0.770     | 0.992       | 0.982        |
| Chagas disease                                           | Females | 28-364 days | 80+ years   | 0.626               | 1.250    | 0.821    | 0.724     | 0.993       | 0.945        |
| Chagas disease                                           | Males   | 28-364 days | 80+ years   | 0.697               | 1.131    | 0.966    | 0.718     | 0.991       | 0.963        |
| Dengue                                                   | Females | 28-364 days | 80+ years   | 0.464               | 0.853    | 0.370    | 0.469     | 0.996       | 0.960        |
| Dengue                                                   | Males   | 28-364 days | 80+ years   | 0.458               | 0.915    | 0.366    | 0.536     | 0.995       | 0.948        |
| Rabies                                                   | Females | Rabies      | Females     | Rabies              | 0.748    | 0.172    | 0.204     | 0.997       | 0.969        |
| Rabies                                                   | Males   | 28-364 days | 80+ years   | 0.406               | 0.840    | 0.239    | 0.267     | 0.995       | 0.958        |
| Other neglected tropical diseases                        | Females | 0-6 days    | 80+ years   | 0.467               | 1.049    | 0.409    | 0.572     | 0.996       | 0.953        |
| Other neglected tropical diseases                        | Males   | 0-6 days    | 80+ years   | 0.474               | 1.041    | 0.425    | 0.548     | 0.996       | 0.952        |
| Maternal disorders                                       | Females | 10-14 years | 45-49 years | 0.473               | 0.845    | 0.308    | 0.445     | 0.993       | 0.979        |
| Neonatal disorders                                       | Females | 0-6 days    | 1-4 years   | 0.427               | 0.658    | 0.142    | 0.175     | 0.997       | 0.976        |
| Neonatal disorders                                       | Males   | 0-6 days    | 1-4 years   | 0.423               | 0.652    | 0.149    | 0.198     | 0.996       | 0.975        |
| Neonatal preterm birth complications                     | Females | 0-6 days    | 1-4 years   | 0.424               | 0.624    | 0.231    | 0.212     | 0.997       | 0.980        |
| Neonatal preterm birth complications                     | Males   | 0-6 days    | 1-4 years   | 0.520               | 0.694    | 0.220    | 0.213     | 0.997       | 0.980        |
| Neonatal encephalopathy due to birth asphyxia and trauma | Females | 0-6 days    | 1-4 years   | 0.503               | 0.803    | 0.294    | 0.392     | 0.995       | 0.967        |
| Neonatal encephalopathy due to birth asphyxia and trauma | Males   | 0-6 days    | 1-4 years   | 0.508               | 0.753    | 0.284    | 0.303     | 0.995       | 0.966        |
| Neonatal sepsis and other neonatal infections            | Females | 0-6 days    | 1-4 years   | 1.015               | 1.536    | 1.635    | 1.817     | 0.964       | 0.924        |
| Neonatal sepsis and other neonatal infections            | Males   | 0-6 days    | 1-4 years   | 0.992               | 1.496    | 1.567    | 1.838     | 0.970       | 0.924        |
| Hemolytic disease and other neonatal jaundice            | Females | 0-6 days    | 1-4 years   | 1.796               | 2.253    | 6.585    | 6.968     | 0.925       | 0.892        |
| Hemolytic disease and other neonatal jaundice            | Males   | 0-6 days    | 1-4 years   | 1.843               | 2.154    | 6.605    | 6.640     | 0.897       | 0.872        |
| Other neonatal disorders                                 | Females | 0-6 days    | 1-4 years   | 0.544               | 0.876    | 0.571    | 0.615     | 0.992       | 0.950        |
| Other neonatal disorders                                 | Males   | 0-6 days    | 1-4 years   | 0.560               | 0.898    | 0.457    | 0.593     | 0.994       | 0.952        |
| Nutritional deficiencies                                 | Females | 28-364 days | 80+ years   | 0.287               | 0.617    | 0.130    | 0.177     | 0.998       | 0.960        |
| Nutritional deficiencies                                 | Males   | 28-364 days | 80+ years   | 0.323               | 0.639    | 0.169    | 0.213     | 0.998       | 0.963        |
| Protein-energy malnutrition                              | Females | 28-364 days | 1-4 years   | 0.565               | 1.044    | 0.468    | 0.563     | 0.994       | 0.946        |
| Protein-energy malnutrition                              | Females | 5-9 years   | 80+ years   | 0.423               | 0.888    | 0.299    | 0.385     | 0.995       | 0.946        |
| Protein-energy malnutrition                              | Males   | 28-364 days | 1-4 years   | 0.528               | 1.030    | 0.440    | 0.552     | 0.993       | 0.945        |
| Protein-energy malnutrition                              | Males   | 5-9 years   | 80+ years   | 0.454               | 0.957    | 0.349    | 0.454     | 0.994       | 0.937        |
| Iron-deficiency anemia                                   | Females | 28-364 days | 80+ years   | 0.307               | 0.628    | 0.127    | 0.135     | 0.998       | 0.977        |
| Iron-deficiency anemia                                   | Males   | 28-364 days | 80+ years   | 0.322               | 0.729    | 0.165    | 0.162     | 0.999       | 0.971        |
| Other nutritional deficiencies                           | Females | 28-364 days | 80+ years   | 0.411               | 0.870    | 0.284    | 0.316     | 0.997       | 0.960        |

**Web Table 21 - CODEm predictive validity results by cause, sex, age, and location**

| Cause                                             | Sex     | Age Start   | Age End   | Predictive Validity |          |          |           |             |              |
|---------------------------------------------------|---------|-------------|-----------|---------------------|----------|----------|-----------|-------------|--------------|
|                                                   |         |             |           | RMSE In             | RMSE Out | Trend In | Trend Out | Coverage In | Coverage Out |
| Other nutritional deficiencies                    | Males   | 28-364 days | 80+ years | 0.450               | 0.874    | 0.336    | 0.375     | 0.996       | 0.963        |
| Sexually transmitted diseases excluding HIV       | Females | 10-14 years | 80+ years | 0.589               | 0.831    | 0.462    | 0.480     | 0.994       | 0.973        |
| Sexually transmitted diseases excluding HIV       | Males   | 10-14 years | 80+ years | 0.696               | 1.028    | 0.895    | 0.967     | 0.989       | 0.966        |
| Hepatitis                                         | Females | 28-364 days | 80+ years | 0.502               | 1.027    | 0.521    | 0.719     | 0.996       | 0.953        |
| Hepatitis                                         | Males   | 28-364 days | 80+ years | 0.471               | 0.985    | 0.451    | 0.597     | 0.995       | 0.943        |
| Other infectious diseases                         | Females | 0-6 days    | 80+ years | 0.579               | 0.804    | 0.250    | 0.300     | 0.992       | 0.967        |
| Other infectious diseases                         | Males   | 0-6 days    | 80+ years | 0.604               | 0.864    | 0.271    | 0.338     | 0.992       | 0.966        |
| Esophageal cancer [Developed]                     | Females | 15-19 years | 80+ years | 0.328               | 0.505    | 0.140    | 0.204     | 0.996       | 0.971        |
| Esophageal cancer [Developed]                     | Males   | 15-19 years | 80+ years | 0.292               | 0.448    | 0.076    | 0.102     | 0.995       | 0.975        |
| Esophageal cancer [Developing]                    | Females | 15-19 years | 80+ years | 0.362               | 0.672    | 0.152    | 0.196     | 0.994       | 0.951        |
| Esophageal cancer [Developing]                    | Males   | 15-19 years | 80+ years | 0.314               | 0.540    | 0.092    | 0.107     | 0.993       | 0.951        |
| Stomach cancer [Developed]                        | Females | 15-19 years | 80+ years | 0.275               | 0.364    | 0.059    | 0.062     | 0.993       | 0.968        |
| Stomach cancer [Developed]                        | Males   | 15-19 years | 80+ years | 0.243               | 0.319    | 0.045    | 0.054     | 0.991       | 0.977        |
| Stomach cancer [Developing]                       | Females | 15-19 years | 80+ years | 0.289               | 0.441    | 0.075    | 0.090     | 0.994       | 0.967        |
| Stomach cancer [Developing]                       | Males   | 15-19 years | 80+ years | 0.287               | 0.445    | 0.085    | 0.118     | 0.990       | 0.956        |
| Liver cancer [Developed]                          | Females | 5-9 years   | 80+ years | 0.421               | 0.706    | 0.227    | 0.283     | 0.994       | 0.963        |
| Liver cancer [Developed]                          | Males   | 5-9 years   | 80+ years | 0.424               | 0.695    | 0.234    | 0.263     | 0.994       | 0.956        |
| Liver cancer [Developing]                         | Females | 5-9 years   | 80+ years | 0.510               | 0.923    | 0.293    | 0.464     | 0.987       | 0.945        |
| Liver cancer [Developing]                         | Males   | 5-9 years   | 80+ years | 0.505               | 0.811    | 0.322    | 0.363     | 0.985       | 0.940        |
| Larynx cancer [Developed]                         | Females | 15-19 years | 80+ years | 0.536               | 0.597    | 0.429    | 0.410     | 0.985       | 0.980        |
| Larynx cancer [Developed]                         | Males   | 15-19 years | 80+ years | 0.334               | 0.400    | 0.087    | 0.081     | 0.997       | 0.986        |
| Larynx cancer [Developing]                        | Females | 15-19 years | 80+ years | 0.534               | 0.753    | 0.408    | 0.403     | 0.989       | 0.973        |
| Larynx cancer [Developing]                        | Males   | 15-19 years | 80+ years | 0.354               | 0.538    | 0.116    | 0.126     | 0.996       | 0.975        |
| Tracheal, bronchus, and lung cancers [Developed]  | Females | 15-19 years | 80+ years | 0.271               | 0.403    | 0.062    | 0.070     | 0.992       | 0.952        |
| Tracheal, bronchus, and lung cancers [Developed]  | Males   | 15-19 years | 80+ years | 0.251               | 0.340    | 0.047    | 0.060     | 0.988       | 0.954        |
| Tracheal, bronchus, and lung cancers [Developing] | Females | 15-19 years | 80+ years | 0.298               | 0.466    | 0.076    | 0.084     | 0.990       | 0.948        |
| Tracheal, bronchus, and lung cancers [Developing] | Males   | 15-19 years | 80+ years | 0.276               | 0.457    | 0.068    | 0.084     | 0.987       | 0.941        |
| Breast cancer [Developed]                         | Females | 15-19 years | 80+ years | 0.258               | 0.320    | 0.045    | 0.057     | 0.988       | 0.975        |
| Breast cancer [Developed]                         | Males   | 15-19 years | 80+ years | 0.678               | 0.952    | 0.749    | 0.857     | 0.985       | 0.954        |
| Breast cancer [Developing]                        | Females | 15-19 years | 80+ years | 0.291               | 0.402    | 0.067    | 0.075     | 0.992       | 0.964        |
| Breast cancer [Developing]                        | Males   | 15-19 years | 80+ years | 0.647               | 1.016    | 0.624    | 0.821     | 0.985       | 0.945        |
| Cervical cancer [Developed]                       | Females | 15-19 years | 80+ years | 0.297               | 0.378    | 0.070    | 0.076     | 0.994       | 0.983        |
| Cervical cancer [Developing]                      | Females | 15-19 years | 80+ years | 0.319               | 0.474    | 0.089    | 0.098     | 0.995       | 0.975        |

**Web Table 21 - CODEm predictive validity results by cause, sex, age, and location**

| Cause                                             | Sex     | Age Start   | Age End   | Predictive Validity |          |          |           |             |              |
|---------------------------------------------------|---------|-------------|-----------|---------------------|----------|----------|-----------|-------------|--------------|
|                                                   |         |             |           | RMSE In             | RMSE Out | Trend In | Trend Out | Coverage In | Coverage Out |
| Uterine cancer [Developed]                        | Females | 15-19 years | 80+ years | 0.523               | 0.721    | 0.156    | 0.231     | 0.987       | 0.972        |
| Uterine cancer [Developing]                       | Females | 15-19 years | 80+ years | 0.468               | 0.641    | 0.148    | 0.179     | 0.993       | 0.977        |
| Prostate cancer [Developed]                       | Males   | 15-19 years | 80+ years | 0.297               | 0.401    | 0.058    | 0.068     | 0.994       | 0.984        |
| Prostate cancer [Developing]                      | Males   | 15-19 years | 80+ years | 0.339               | 0.510    | 0.094    | 0.110     | 0.995       | 0.981        |
| Colon and rectum cancer [Developed]               | Females | 15-19 years | 80+ years | 0.256               | 0.341    | 0.051    | 0.065     | 0.989       | 0.961        |
| Colon and rectum cancer [Developed]               | Males   | 15-19 years | 80+ years | 0.225               | 0.297    | 0.050    | 0.058     | 0.989       | 0.967        |
| Colon and rectum cancer [Developing]              | Females | 15-19 years | 80+ years | 0.270               | 0.390    | 0.070    | 0.072     | 0.992       | 0.968        |
| Colon and rectum cancer [Developing]              | Males   | 15-19 years | 80+ years | 0.246               | 0.369    | 0.061    | 0.070     | 0.992       | 0.969        |
| Lip and oral cavity cancer [Developed]            | Females | 15-19 years | 80+ years | 0.409               | 0.501    | 0.182    | 0.179     | 0.994       | 0.988        |
| Lip and oral cavity cancer [Developed]            | Males   | 15-19 years | 80+ years | 0.301               | 0.431    | 0.073    | 0.091     | 0.995       | 0.984        |
| Lip and oral cavity cancer [Developing]           | Females | 15-19 years | 80+ years | 0.389               | 0.573    | 0.151    | 0.171     | 0.996       | 0.984        |
| Lip and oral cavity cancer [Developing]           | Males   | 15-19 years | 80+ years | 0.295               | 0.471    | 0.076    | 0.087     | 0.997       | 0.979        |
| Nasopharynx cancer [Developed]                    | Females | 5-9 years   | 80+ years | 0.562               | 0.689    | 0.241    | 0.262     | 0.995       | 0.989        |
| Nasopharynx cancer [Developed]                    | Males   | 5-9 years   | 80+ years | 0.472               | 0.604    | 0.121    | 0.141     | 0.997       | 0.989        |
| Nasopharynx cancer [Developing]                   | Females | 5-9 years   | 80+ years | 0.498               | 0.770    | 0.217    | 0.256     | 0.995       | 0.976        |
| Nasopharynx cancer [Developing]                   | Males   | 5-9 years   | 80+ years | 0.425               | 0.683    | 0.109    | 0.141     | 0.996       | 0.974        |
| Other pharynx cancer [Developed]                  | Females | 15-19 years | 80+ years | 0.484               | 0.572    | 0.212    | 0.173     | 0.992       | 0.986        |
| Other pharynx cancer [Developed]                  | Males   | 15-19 years | 80+ years | 0.330               | 0.496    | 0.083    | 0.105     | 0.999       | 0.982        |
| Other pharynx cancer [Developing]                 | Females | 15-19 years | 80+ years | 0.454               | 0.677    | 0.174    | 0.216     | 0.994       | 0.979        |
| Other pharynx cancer [Developing]                 | Males   | 15-19 years | 80+ years | 0.345               | 0.587    | 0.088    | 0.104     | 0.996       | 0.968        |
| Gallbladder and biliary tract cancer [Developed]  | Females | 15-19 years | 80+ years | 0.327               | 0.494    | 0.062    | 0.080     | 0.997       | 0.977        |
| Gallbladder and biliary tract cancer [Developed]  | Males   | 15-19 years | 80+ years | 0.315               | 0.469    | 0.099    | 0.097     | 0.998       | 0.978        |
| Gallbladder and biliary tract cancer [Developing] | Females | 15-19 years | 80+ years | 0.403               | 0.635    | 0.110    | 0.132     | 0.992       | 0.965        |
| Gallbladder and biliary tract cancer [Developing] | Males   | 15-19 years | 80+ years | 0.374               | 0.609    | 0.130    | 0.172     | 0.995       | 0.966        |
| Pancreatic cancer [Developed]                     | Females | 15-19 years | 80+ years | 0.264               | 0.400    | 0.071    | 0.102     | 0.988       | 0.971        |
| Pancreatic cancer [Developed]                     | Males   | 15-19 years | 80+ years | 0.277               | 0.392    | 0.068    | 0.089     | 0.988       | 0.974        |
| Pancreatic cancer [Developing]                    | Females | 15-19 years | 80+ years | 0.316               | 0.535    | 0.095    | 0.132     | 0.993       | 0.973        |
| Pancreatic cancer [Developing]                    | Males   | 15-19 years | 80+ years | 0.313               | 0.525    | 0.089    | 0.115     | 0.994       | 0.977        |
| Malignant skin melanoma [Developed]               | Females | 15-19 years | 80+ years | 0.354               | 0.430    | 0.098    | 0.116     | 0.994       | 0.991        |
| Malignant skin melanoma [Developed]               | Males   | 15-19 years | 80+ years | 0.327               | 0.439    | 0.116    | 0.125     | 0.998       | 0.993        |
| Malignant skin melanoma [Developing]              | Females | 15-19 years | 80+ years | 0.392               | 0.575    | 0.151    | 0.193     | 0.994       | 0.980        |
| Malignant skin melanoma [Developing]              | Males   | 15-19 years | 80+ years | 0.372               | 0.530    | 0.155    | 0.161     | 0.997       | 0.986        |
| Non-melanoma skin cancer [Developed]              | Females | 15-19 years | 80+ years | 0.321               | 0.486    | 0.171    | 0.169     | 0.998       | 0.985        |

**Web Table 21 - CODEm predictive validity results by cause, sex, age, and location**

| Cause                                        | Sex     | Age Start   | Age End   | Predictive Validity |          |          |           |             |              |
|----------------------------------------------|---------|-------------|-----------|---------------------|----------|----------|-----------|-------------|--------------|
|                                              |         |             |           | RMSE In             | RMSE Out | Trend In | Trend Out | Coverage In | Coverage Out |
| Non-melanoma skin cancer [Developed]         | Males   | 15-19 years | 80+ years | 0.371               | 0.575    | 0.267    | 0.282     | 0.995       | 0.971        |
| Non-melanoma skin cancer [Developing]        | Females | 15-19 years | 80+ years | 0.313               | 0.527    | 0.155    | 0.158     | 0.998       | 0.988        |
| Non-melanoma skin cancer [Developing]        | Males   | 15-19 years | 80+ years | 0.331               | 0.547    | 0.190    | 0.188     | 0.998       | 0.981        |
| Ovarian cancer [Developed]                   | Females | 15-19 years | 80+ years | 0.290               | 0.385    | 0.066    | 0.090     | 0.990       | 0.973        |
| Ovarian cancer [Developing]                  | Females | 15-19 years | 80+ years | 0.314               | 0.484    | 0.092    | 0.120     | 0.993       | 0.978        |
| Testicular cancer [Developed]                | Males   | 15-19 years | 80+ years | 0.606               | 0.737    | 0.440    | 0.483     | 0.981       | 0.964        |
| Testicular cancer [Developing]               | Males   | 15-19 years | 80+ years | 0.575               | 0.829    | 0.346    | 0.420     | 0.990       | 0.964        |
| Kidney cancer [Developed]                    | Females | 28-364 days | 80+ years | 0.448               | 0.576    | 0.126    | 0.146     | 0.997       | 0.990        |
| Kidney cancer [Developed]                    | Males   | 28-364 days | 80+ years | 0.368               | 0.515    | 0.079    | 0.092     | 0.995       | 0.988        |
| Kidney cancer [Developing]                   | Females | 28-364 days | 80+ years | 0.406               | 0.627    | 0.107    | 0.146     | 0.996       | 0.984        |
| Kidney cancer [Developing]                   | Males   | 28-364 days | 80+ years | 0.362               | 0.550    | 0.085    | 0.108     | 0.995       | 0.983        |
| Bladder cancer [Developed]                   | Females | 15-19 years | 80+ years | 0.341               | 0.468    | 0.091    | 0.100     | 0.996       | 0.988        |
| Bladder cancer [Developed]                   | Males   | 15-19 years | 80+ years | 0.307               | 0.406    | 0.058    | 0.069     | 0.993       | 0.985        |
| Bladder cancer [Developing]                  | Females | 15-19 years | 80+ years | 0.407               | 0.621    | 0.149    | 0.179     | 0.995       | 0.979        |
| Bladder cancer [Developing]                  | Males   | 15-19 years | 80+ years | 0.341               | 0.550    | 0.084    | 0.107     | 0.993       | 0.970        |
| Brain and nervous system cancer [Developed]  | Females | 1-4 years   | 80+ years | 0.301               | 0.458    | 0.120    | 0.159     | 0.996       | 0.978        |
| Brain and nervous system cancer [Developed]  | Males   | 1-4 years   | 80+ years | 0.291               | 0.372    | 0.105    | 0.116     | 0.997       | 0.987        |
| Brain and nervous system cancer [Developing] | Females | 1-4 years   | 80+ years | 0.366               | 0.600    | 0.145    | 0.195     | 0.996       | 0.973        |
| Brain and nervous system cancer [Developing] | Males   | 1-4 years   | 80+ years | 0.356               | 0.558    | 0.130    | 0.144     | 0.997       | 0.980        |
| Thyroid cancer [Developed]                   | Females | 10-14 years | 80+ years | 0.437               | 0.553    | 0.174    | 0.211     | 0.997       | 0.988        |
| Thyroid cancer [Developed]                   | Males   | 10-14 years | 80+ years | 0.463               | 0.572    | 0.247    | 0.330     | 0.993       | 0.986        |
| Thyroid cancer [Developing]                  | Females | 10-14 years | 80+ years | 0.415               | 0.583    | 0.165    | 0.207     | 0.996       | 0.985        |
| Thyroid cancer [Developing]                  | Males   | 10-14 years | 80+ years | 0.435               | 0.629    | 0.204    | 0.287     | 0.995       | 0.983        |
| Mesothelioma [Developed]                     | Females | 15-19 years | 80+ years | 0.521               | 0.815    | 0.336    | 0.464     | 0.994       | 0.966        |
| Mesothelioma [Developed]                     | Males   | 15-19 years | 80+ years | 0.548               | 0.809    | 0.300    | 0.358     | 0.992       | 0.973        |
| Mesothelioma [Developing]                    | Females | 15-19 years | 80+ years | 0.470               | 0.777    | 0.261    | 0.317     | 0.995       | 0.971        |
| Mesothelioma [Developing]                    | Males   | 15-19 years | 80+ years | 0.465               | 0.803    | 0.219    | 0.303     | 0.995       | 0.963        |
| Hodgkin lymphoma [Developed]                 | Females | 0-6 days    | 80+ years | 0.520               | 0.731    | 0.339    | 0.432     | 0.992       | 0.976        |
| Hodgkin lymphoma [Developed]                 | Males   | 0-6 days    | 80+ years | 0.564               | 0.751    | 0.375    | 0.458     | 0.988       | 0.975        |
| Hodgkin lymphoma [Developing]                | Females | 0-6 days    | 80+ years | 0.564               | 0.903    | 0.369    | 0.463     | 0.992       | 0.962        |
| Hodgkin lymphoma [Developing]                | Males   | 0-6 days    | 80+ years | 0.604               | 0.950    | 0.380    | 0.438     | 0.989       | 0.953        |
| Non-Hodgkin lymphoma [Developed]             | Females | 28-364 days | 80+ years | 0.342               | 0.476    | 0.096    | 0.105     | 0.998       | 0.987        |
| Non-Hodgkin lymphoma [Developed]             | Males   | 28-364 days | 80+ years | 0.292               | 0.415    | 0.080    | 0.092     | 0.998       | 0.989        |

**Web Table 21 - CODEm predictive validity results by cause, sex, age, and location**

| Cause                             | Sex     | Age Start   | Age End   | Predictive Validity |          |          |           |             |              |
|-----------------------------------|---------|-------------|-----------|---------------------|----------|----------|-----------|-------------|--------------|
|                                   |         |             |           | RMSE In             | RMSE Out | Trend In | Trend Out | Coverage In | Coverage Out |
| Non-Hodgkin lymphoma [Developing] | Females | 28-364 days | 80+ years | 0.367               | 0.564    | 0.131    | 0.158     | 0.996       | 0.979        |
| Non-Hodgkin lymphoma [Developing] | Males   | 28-364 days | 80+ years | 0.330               | 0.505    | 0.110    | 0.130     | 0.996       | 0.978        |
| Multiple myeloma [Developed]      | Females | 15-19 years | 80+ years | 0.358               | 0.503    | 0.138    | 0.158     | 0.997       | 0.981        |
| Multiple myeloma [Developed]      | Males   | 15-19 years | 80+ years | 0.333               | 0.452    | 0.113    | 0.121     | 0.998       | 0.990        |
| Multiple myeloma [Developing]     | Females | 15-19 years | 80+ years | 0.393               | 0.578    | 0.169    | 0.183     | 0.996       | 0.977        |
| Multiple myeloma [Developing]     | Males   | 15-19 years | 80+ years | 0.370               | 0.548    | 0.149    | 0.148     | 0.997       | 0.983        |
| Leukemia [Developed]              | Females | 28-364 days | 80+ years | 0.279               | 0.355    | 0.098    | 0.113     | 0.995       | 0.989        |
| Leukemia [Developed]              | Males   | 28-364 days | 80+ years | 0.273               | 0.344    | 0.093    | 0.114     | 0.995       | 0.988        |
| Leukemia [Developing]             | Females | 28-364 days | 80+ years | 0.379               | 0.543    | 0.203    | 0.297     | 0.992       | 0.977        |
| Leukemia [Developing]             | Males   | 28-364 days | 80+ years | 0.369               | 0.518    | 0.189    | 0.266     | 0.992       | 0.979        |
| Other neoplasms [Developed]       | Females | 0-6 days    | 80+ years | 0.235               | 0.398    | 0.091    | 0.101     | 0.998       | 0.973        |
| Other neoplasms [Developed]       | Males   | 0-6 days    | 80+ years | 0.240               | 0.413    | 0.096    | 0.099     | 0.999       | 0.979        |
| Other neoplasms [Developing]      | Females | 0-6 days    | 80+ years | 0.267               | 0.476    | 0.105    | 0.124     | 0.997       | 0.977        |
| Other neoplasms [Developing]      | Males   | 0-6 days    | 80+ years | 0.262               | 0.469    | 0.107    | 0.138     | 0.998       | 0.974        |
| Cardiovascular diseases           | Females | 0-6 days    | 80+ years | 0.185               | 0.359    | 0.050    | 0.060     | 0.997       | 0.960        |
| Cardiovascular diseases           | Males   | 0-6 days    | 80+ years | 0.177               | 0.362    | 0.046    | 0.054     | 0.996       | 0.917        |
| Rheumatic heart disease           | Females | 1-4 years   | 80+ years | 0.278               | 0.634    | 0.126    | 0.150     | 0.998       | 0.942        |
| Rheumatic heart disease           | Males   | 1-4 years   | 80+ years | 0.836               | 1.137    | 1.504    | 1.612     | 0.952       | 0.891        |
| Ischemic heart disease            | Females | 28-364 days | 80+ years | 0.213               | 0.448    | 0.068    | 0.088     | 0.997       | 0.944        |
| Ischemic heart disease            | Males   | 28-364 days | 80+ years | 0.216               | 0.448    | 0.068    | 0.082     | 0.996       | 0.915        |
| Cerebrovascular disease           | Females | 0-6 days    | 80+ years | 0.203               | 0.444    | 0.056    | 0.065     | 0.998       | 0.956        |
| Cerebrovascular disease           | Males   | 0-6 days    | 80+ years | 0.236               | 0.458    | 0.075    | 0.072     | 0.989       | 0.944        |
| Ischemic stroke                   | Females | 28-364 days | 80+ years | 0.201               | 0.494    | 0.045    | 0.056     | 0.999       | 0.956        |
| Ischemic stroke                   | Males   | 28-364 days | 80+ years | 0.192               | 0.461    | 0.048    | 0.056     | 0.999       | 0.955        |
| Hemorrhagic stroke                | Females | 0-6 days    | 80+ years | 0.213               | 0.561    | 0.064    | 0.075     | 0.998       | 0.954        |
| Hemorrhagic stroke                | Males   | 0-6 days    | 80+ years | 0.227               | 0.562    | 0.076    | 0.088     | 0.998       | 0.953        |
| Hypertensive heart disease        | Females | 28-364 days | 80+ years | 0.357               | 0.708    | 0.174    | 0.248     | 0.995       | 0.942        |
| Hypertensive heart disease        | Males   | 28-364 days | 80+ years | 0.450               | 0.782    | 0.261    | 0.300     | 0.992       | 0.931        |
| Cardiomyopathy and myocarditis    | Females | 0-6 days    | 80+ years | 0.311               | 0.796    | 0.127    | 0.224     | 0.997       | 0.934        |
| Cardiomyopathy and myocarditis    | Males   | 0-6 days    | 80+ years | 0.505               | 0.770    | 0.453    | 0.461     | 0.969       | 0.896        |
| Atrial fibrillation and flutter   | Females | 30-34 years | 80+ years | 0.504               | 1.118    | 0.412    | 0.595     | 0.986       | 0.921        |
| Atrial fibrillation and flutter   | Males   | 30-34 years | 80+ years | 0.551               | 1.131    | 0.526    | 0.671     | 0.984       | 0.907        |
| Aortic aneurysm                   | Females | 15-19 years | 80+ years | 0.265               | 0.603    | 0.106    | 0.101     | 0.999       | 0.953        |



**Web Table 21 - CODEm predictive validity results by cause, sex, age, and location**

| Cause                                               | Sex     | Age Start   | Age End   | Predictive Validity |          |          |           |             |              |
|-----------------------------------------------------|---------|-------------|-----------|---------------------|----------|----------|-----------|-------------|--------------|
|                                                     |         |             |           | RMSE In             | RMSE Out | Trend In | Trend Out | Coverage In | Coverage Out |
| Aortic aneurysm                                     | Males   | 15-19 years | 80+ years | 0.219               | 0.551    | 0.069    | 0.079     | 0.999       | 0.952        |
| Peripheral vascular disease                         | Females | 40-44 years | 80+ years | 0.514               | 1.119    | 0.485    | 0.685     | 0.986       | 0.907        |
| Peripheral vascular disease                         | Males   | 40-44 years | 80+ years | 0.540               | 1.193    | 0.553    | 0.788     | 0.982       | 0.884        |
| Endocarditis                                        | Females | 0-6 days    | 80+ years | 0.323               | 0.694    | 0.147    | 0.180     | 0.998       | 0.966        |
| Endocarditis                                        | Males   | 0-6 days    | 80+ years | 0.342               | 0.711    | 0.143    | 0.170     | 0.998       | 0.960        |
| Other cardiovascular and circulatory diseases       | Females | 0-6 days    | 80+ years | 0.618               | 0.930    | 0.790    | 0.959     | 0.976       | 0.933        |
| Other cardiovascular and circulatory diseases       | Males   | 0-6 days    | 80+ years | 0.330               | 0.683    | 0.174    | 0.232     | 0.994       | 0.949        |
| Chronic respiratory diseases                        | Females | 0-6 days    | 80+ years | 0.239               | 0.547    | 0.077    | 0.096     | 0.997       | 0.930        |
| Chronic respiratory diseases                        | Males   | 0-6 days    | 80+ years | 0.229               | 0.506    | 0.077    | 0.092     | 0.997       | 0.930        |
| Chronic obstructive pulmonary disease               | Females | 28-364 days | 80+ years | 0.286               | 0.556    | 0.100    | 0.093     | 0.992       | 0.935        |
| Chronic obstructive pulmonary disease               | Males   | 28-364 days | 80+ years | 0.249               | 0.491    | 0.091    | 0.104     | 0.996       | 0.944        |
| Pneumoconiosis                                      | Females | 1-4 years   | 80+ years | 0.394               | 0.795    | 0.302    | 0.417     | 0.996       | 0.968        |
| Pneumoconiosis                                      | Males   | 1-4 years   | 80+ years | 0.296               | 0.557    | 0.122    | 0.114     | 0.996       | 0.965        |
| Silicosis                                           | Females | 0-6 days    | 80+ years | 0.343               | 0.600    | 0.231    | 0.275     | 0.998       | 0.987        |
| Silicosis                                           | Males   | 0-6 days    | 80+ years | 0.332               | 0.833    | 0.208    | 0.223     | 0.996       | 0.951        |
| Asbestosis                                          | Females | 0-6 days    | 80+ years | 0.342               | 0.641    | 0.233    | 0.339     | 0.996       | 0.977        |
| Asbestosis                                          | Males   | 0-6 days    | 80+ years | 0.239               | 0.528    | 0.090    | 0.115     | 0.999       | 0.981        |
| Coal workers pneumoconiosis                         | Females | 0-6 days    | 80+ years | 0.318               | 0.614    | 0.202    | 0.258     | 0.998       | 0.985        |
| Coal workers pneumoconiosis                         | Males   | 0-6 days    | 80+ years | 0.223               | 0.666    | 0.074    | 0.100     | 0.998       | 0.955        |
| Other pneumoconiosis                                | Females | 0-6 days    | 80+ years | 0.200               | 0.464    | 0.054    | 0.067     | 0.999       | 0.986        |
| Other pneumoconiosis                                | Males   | 0-6 days    | 80+ years | 0.228               | 0.545    | 0.085    | 0.096     | 0.998       | 0.967        |
| Asthma                                              | Females | 1-4 years   | 80+ years | 0.291               | 0.659    | 0.121    | 0.136     | 0.998       | 0.960        |
| Asthma                                              | Males   | 1-4 years   | 80+ years | 0.334               | 0.735    | 0.146    | 0.163     | 0.997       | 0.931        |
| Interstitial lung disease and pulmonary sarcoidosis | Females | 1-4 years   | 80+ years | 0.346               | 0.781    | 0.160    | 0.202     | 0.998       | 0.960        |
| Interstitial lung disease and pulmonary sarcoidosis | Males   | 1-4 years   | 80+ years | 0.290               | 0.706    | 0.101    | 0.114     | 0.999       | 0.959        |
| Other chronic respiratory diseases                  | Females | 0-6 days    | 80+ years | 0.409               | 1.012    | 0.310    | 0.468     | 0.995       | 0.925        |
| Other chronic respiratory diseases                  | Males   | 0-6 days    | 80+ years | 0.381               | 0.940    | 0.276    | 0.377     | 0.997       | 0.937        |
| Cirrhosis                                           | Females | 1-4 years   | 80+ years | 0.230               | 0.549    | 0.082    | 0.115     | 0.999       | 0.918        |
| Cirrhosis                                           | Males   | 1-4 years   | 80+ years | 0.213               | 0.519    | 0.066    | 0.085     | 0.998       | 0.884        |
| Digestive diseases                                  | Females | 1-4 years   | 80+ years | 0.197               | 0.346    | 0.065    | 0.077     | 0.999       | 0.973        |
| Digestive diseases                                  | Males   | 1-4 years   | 80+ years | 0.191               | 0.358    | 0.064    | 0.076     | 0.999       | 0.963        |
| Peptic ulcer disease                                | Females | 1-4 years   | 80+ years | 0.306               | 0.545    | 0.134    | 0.145     | 0.997       | 0.979        |
| Peptic ulcer disease                                | Males   | 1-4 years   | 80+ years | 0.289               | 0.505    | 0.117    | 0.123     | 0.998       | 0.977        |

**Web Table 21 - CODEm predictive validity results by cause, sex, age, and location**

| Cause                                      | Sex     | Age Start   | Age End     | Predictive Validity |          |          |           |             |              |
|--------------------------------------------|---------|-------------|-------------|---------------------|----------|----------|-----------|-------------|--------------|
|                                            |         |             |             | RMSE In             | RMSE Out | Trend In | Trend Out | Coverage In | Coverage Out |
| Gastritis and duodenitis                   | Females | 1-4 years   | 80+ years   | 0.413               | 0.779    | 0.298    | 0.354     | 0.995       | 0.964        |
| Gastritis and duodenitis                   | Males   | 1-4 years   | 80+ years   | 0.423               | 0.813    | 0.321    | 0.403     | 0.994       | 0.960        |
| Appendicitis                               | Females | 1-4 years   | 80+ years   | 0.820               | 1.043    | 1.441    | 1.568     | 0.963       | 0.934        |
| Appendicitis                               | Males   | 1-4 years   | 80+ years   | 0.400               | 0.645    | 0.278    | 0.314     | 0.996       | 0.974        |
| Paralytic ileus and intestinal obstruction | Females | 0-6 days    | 80+ years   | 0.487               | 0.933    | 0.288    | 0.334     | 0.993       | 0.948        |
| Paralytic ileus and intestinal obstruction | Males   | 0-6 days    | 80+ years   | 0.463               | 0.941    | 0.279    | 0.349     | 0.993       | 0.940        |
| Inguinal, femoral, and abdominal hernia    | Females | 1-4 years   | 80+ years   | 0.418               | 0.745    | 0.245    | 0.321     | 0.996       | 0.963        |
| Inguinal, femoral, and abdominal hernia    | Males   | 1-4 years   | 80+ years   | 0.411               | 0.752    | 0.261    | 0.307     | 0.996       | 0.960        |
| Inflammatory bowel disease                 | Females | 1-4 years   | 80+ years   | 0.381               | 0.716    | 0.251    | 0.291     | 0.997       | 0.969        |
| Inflammatory bowel disease                 | Males   | 1-4 years   | 80+ years   | 0.390               | 0.762    | 0.262    | 0.348     | 0.996       | 0.958        |
| Vascular intestinal disorders              | Females | 1-4 years   | 80+ years   | 0.328               | 0.650    | 0.154    | 0.142     | 0.997       | 0.974        |
| Vascular intestinal disorders              | Males   | 1-4 years   | 80+ years   | 0.392               | 0.682    | 0.246    | 0.259     | 0.994       | 0.976        |
| Gallbladder and biliary diseases           | Females | 1-4 years   | 80+ years   | 0.299               | 0.558    | 0.149    | 0.192     | 0.998       | 0.975        |
| Gallbladder and biliary diseases           | Males   | 1-4 years   | 80+ years   | 0.293               | 0.555    | 0.146    | 0.184     | 0.998       | 0.976        |
| Pancreatitis                               | Females | 1-4 years   | 80+ years   | 0.340               | 0.567    | 0.202    | 0.204     | 0.996       | 0.977        |
| Pancreatitis                               | Males   | 1-4 years   | 80+ years   | 0.333               | 0.604    | 0.187    | 0.208     | 0.996       | 0.973        |
| Other digestive diseases                   | Females | 1-4 years   | 80+ years   | 0.272               | 0.664    | 0.111    | 0.170     | 0.998       | 0.968        |
| Other digestive diseases                   | Males   | 1-4 years   | 80+ years   | 0.281               | 0.596    | 0.118    | 0.158     | 0.998       | 0.983        |
| Parkinson disease                          | Females | 20-24 years | 80+ years   | 0.356               | 0.664    | 0.200    | 0.236     | 0.996       | 0.969        |
| Parkinson disease                          | Males   | 20-24 years | 80+ years   | 0.352               | 0.690    | 0.185    | 0.230     | 0.996       | 0.966        |
| Epilepsy                                   | Females | 28-364 days | 80+ years   | 0.379               | 0.645    | 0.238    | 0.271     | 0.997       | 0.978        |
| Epilepsy                                   | Males   | 28-364 days | 80+ years   | 0.350               | 0.582    | 0.208    | 0.246     | 0.997       | 0.978        |
| Multiple sclerosis                         | Females | 20-24 years | 80+ years   | 0.484               | 0.801    | 0.407    | 0.432     | 0.992       | 0.977        |
| Multiple sclerosis                         | Males   | 20-24 years | 80+ years   | 0.564               | 0.828    | 0.541    | 0.566     | 0.989       | 0.973        |
| Other neurological disorders               | Females | 28-364 days | 80+ years   | 0.308               | 0.544    | 0.145    | 0.159     | 0.996       | 0.973        |
| Other neurological disorders               | Males   | 28-364 days | 80+ years   | 0.280               | 0.516    | 0.124    | 0.140     | 0.998       | 0.980        |
| Schizophrenia                              | Females | 25-29 years | 80+ years   | 0.566               | 1.065    | 0.582    | 0.711     | 0.991       | 0.928        |
| Schizophrenia                              | Males   | 25-29 years | 80+ years   | 0.589               | 1.137    | 0.596    | 0.740     | 0.992       | 0.920        |
| Alcohol use disorders                      | Females | 15-19 years | 80+ years   | 0.401               | 0.861    | 0.262    | 0.317     | 0.997       | 0.950        |
| Alcohol use disorders                      | Males   | 15-19 years | 80+ years   | 0.360               | 0.873    | 0.227    | 0.327     | 0.995       | 0.902        |
| Drug use disorders                         | Females | 0-6 days    | 28-364 days | 0.473               | 1.217    | 0.373    | 0.612     | 0.993       | 0.922        |
| Drug use disorders                         | Females | 15-19 years | 80+ years   | 0.430               | 1.042    | 0.338    | 0.540     | 0.993       | 0.920        |
| Drug use disorders                         | Males   | 0-6 days    | 28-364 days | 0.430               | 1.146    | 0.297    | 0.490     | 0.996       | 0.938        |

**Web Table 21 - CODEm predictive validity results by cause, sex, age, and location**

| Cause                                               | Sex     | Age Start   | Age End     | Predictive Validity |          |          |           |             |              |
|-----------------------------------------------------|---------|-------------|-------------|---------------------|----------|----------|-----------|-------------|--------------|
|                                                     |         |             |             | RMSE In             | RMSE Out | Trend In | Trend Out | Coverage In | Coverage Out |
| Drug use disorders                                  | Males   | 15-19 years | 80+ years   | 0.444               | 1.026    | 0.334    | 0.533     | 0.990       | 0.904        |
| Diabetes mellitus                                   | Females | 0-6 days    | 20-24 years | 0.295               | 0.733    | 0.090    | 0.095     | 0.998       | 0.974        |
| Diabetes mellitus                                   | Females | 25-29 years | 80+ years   | 0.219               | 0.453    | 0.084    | 0.110     | 0.998       | 0.932        |
| Diabetes mellitus                                   | Males   | 0-6 days    | 20-24 years | 0.284               | 0.687    | 0.065    | 0.084     | 0.999       | 0.976        |
| Diabetes mellitus                                   | Males   | 25-29 years | 80+ years   | 0.236               | 0.475    | 0.098    | 0.126     | 0.997       | 0.918        |
| Acute glomerulonephritis                            | Females | 28-364 days | 80+ years   | 0.475               | 0.792    | 0.405    | 0.444     | 0.997       | 0.975        |
| Acute glomerulonephritis                            | Males   | 28-364 days | 80+ years   | 0.478               | 0.857    | 0.417    | 0.506     | 0.997       | 0.965        |
| Chronic kidney disease                              | Females | 28-364 days | 80+ years   | 0.275               | 0.593    | 0.114    | 0.162     | 0.996       | 0.952        |
| Chronic kidney disease                              | Males   | 28-364 days | 80+ years   | 0.275               | 0.595    | 0.109    | 0.169     | 0.996       | 0.947        |
| Chronic kidney disease due to diabetes mellitus     | Females | 28-364 days | 80+ years   | 0.417               | 1.137    | 0.295    | 0.473     | 0.992       | 0.916        |
| Chronic kidney disease due to diabetes mellitus     | Males   | 28-364 days | 80+ years   | 0.433               | 1.107    | 0.316    | 0.419     | 0.994       | 0.933        |
| Chronic kidney disease due to hypertension          | Females | 28-364 days | 80+ years   | 0.308               | 0.645    | 0.135    | 0.139     | 0.998       | 0.962        |
| Chronic kidney disease due to hypertension          | Males   | 28-364 days | 80+ years   | 0.292               | 0.648    | 0.128    | 0.139     | 0.998       | 0.959        |
| Chronic kidney disease due to glomerulonephritis    | Females | 28-364 days | 80+ years   | 0.429               | 0.771    | 0.266    | 0.287     | 0.995       | 0.951        |
| Chronic kidney disease due to glomerulonephritis    | Males   | 28-364 days | 80+ years   | 0.406               | 0.745    | 0.264    | 0.278     | 0.995       | 0.949        |
| Urinary diseases and male infertility               | Females | 0-6 days    | 80+ years   | 0.329               | 0.764    | 0.154    | 0.205     | 0.998       | 0.948        |
| Urinary diseases and male infertility               | Males   | 0-6 days    | 80+ years   | 0.333               | 0.699    | 0.172    | 0.227     | 0.997       | 0.954        |
| Interstitial nephritis and urinary tract infections | Females | 0-6 days    | 80+ years   | 0.391               | 0.827    | 0.213    | 0.266     | 0.997       | 0.948        |
| Interstitial nephritis and urinary tract infections | Males   | 0-6 days    | 80+ years   | 0.400               | 0.818    | 0.226    | 0.264     | 0.996       | 0.953        |
| Urolithiasis                                        | Females | 5-9 years   | 80+ years   | 0.417               | 0.793    | 0.294    | 0.327     | 0.995       | 0.960        |
| Urolithiasis                                        | Males   | 5-9 years   | 80+ years   | 0.419               | 0.838    | 0.308    | 0.363     | 0.994       | 0.958        |
| Other urinary diseases                              | Females | 0-6 days    | 80+ years   | 0.428               | 0.812    | 0.299    | 0.341     | 0.995       | 0.961        |
| Other urinary diseases                              | Males   | 0-6 days    | 80+ years   | 0.330               | 0.683    | 0.162    | 0.180     | 0.997       | 0.968        |
| Gynecological diseases                              | Females | 15-19 years | 80+ years   | 0.512               | 0.899    | 0.524    | 0.592     | 0.993       | 0.954        |
| Hemoglobinopathies and hemolytic anemias            | Females | 0-6 days    | 80+ years   | 0.350               | 0.679    | 0.196    | 0.213     | 0.997       | 0.972        |
| Hemoglobinopathies and hemolytic anemias            | Males   | 0-6 days    | 80+ years   | 0.329               | 0.609    | 0.184    | 0.176     | 0.998       | 0.974        |
| Endocrine, metabolic, blood, and immune disorders   | Females | 0-6 days    | 80+ years   | 0.338               | 0.688    | 0.186    | 0.249     | 0.998       | 0.958        |
| Endocrine, metabolic, blood, and immune disorders   | Males   | 0-6 days    | 80+ years   | 0.374               | 0.788    | 0.232    | 0.332     | 0.996       | 0.941        |
| Musculoskeletal disorders                           | Females | 5-9 years   | 80+ years   | 0.300               | 0.805    | 0.145    | 0.213     | 0.998       | 0.945        |
| Musculoskeletal disorders                           | Males   | 5-9 years   | 80+ years   | 0.303               | 0.666    | 0.149    | 0.196     | 0.998       | 0.974        |
| Rheumatoid arthritis                                | Females | 5-9 years   | 80+ years   | 0.403               | 0.802    | 0.265    | 0.308     | 0.995       | 0.955        |
| Rheumatoid arthritis                                | Males   | 5-9 years   | 80+ years   | 0.957               | 1.276    | 1.882    | 2.048     | 0.957       | 0.915        |
| Other musculoskeletal disorders                     | Females | 5-9 years   | 80+ years   | 0.315               | 0.741    | 0.165    | 0.216     | 0.998       | 0.951        |

**Web Table 21 - CODEm predictive validity results by cause, sex, age, and location**

| Cause                                 | Sex     | Age Start   | Age End     | Predictive Validity |          |          |           |             |              |
|---------------------------------------|---------|-------------|-------------|---------------------|----------|----------|-----------|-------------|--------------|
|                                       |         |             |             | RMSE In             | RMSE Out | Trend In | Trend Out | Coverage In | Coverage Out |
| Other musculoskeletal disorders       | Males   | 5-9 years   | 80+ years   | 0.287               | 0.593    | 0.144    | 0.212     | 0.999       | 0.976        |
| Congenital anomalies                  | Females | 0-6 days    | 80+ years   | 0.236               | 0.454    | 0.086    | 0.095     | 0.999       | 0.984        |
| Congenital anomalies                  | Males   | 0-6 days    | 80+ years   | 0.233               | 0.459    | 0.087    | 0.093     | 0.998       | 0.981        |
| Neural tube defects                   | Females | 0-6 days    | 80+ years   | 0.522               | 0.892    | 0.472    | 0.519     | 0.993       | 0.973        |
| Neural tube defects                   | Males   | 0-6 days    | 80+ years   | 0.498               | 0.931    | 0.430    | 0.442     | 0.993       | 0.969        |
| Congenital heart anomalies            | Females | 0-6 days    | 80+ years   | 0.311               | 0.651    | 0.161    | 0.172     | 0.997       | 0.967        |
| Congenital heart anomalies            | Males   | 0-6 days    | 80+ years   | 0.279               | 0.603    | 0.129    | 0.159     | 0.998       | 0.976        |
| Cleft lip and cleft palate            | Females | 0-6 days    | 1-4 years   | 1.455               | 2.089    | 4.791    | 5.735     | 0.971       | 0.941        |
| Cleft lip and cleft palate            | Males   | 0-6 days    | 1-4 years   | 1.686               | 2.115    | 5.634    | 6.180     | 0.972       | 0.953        |
| Down syndrome                         | Females | 0-6 days    | 80+ years   | 0.500               | 0.873    | 0.402    | 0.442     | 0.991       | 0.968        |
| Down syndrome                         | Males   | 0-6 days    | 80+ years   | 0.494               | 0.893    | 0.372    | 0.461     | 0.994       | 0.971        |
| Chromosomal unbalanced rearrangements | Females | 0-6 days    | 80+ years   | 0.407               | 0.722    | 0.293    | 0.267     | 0.996       | 0.977        |
| Chromosomal unbalanced rearrangements | Males   | 0-6 days    | 80+ years   | 0.391               | 0.763    | 0.275    | 0.300     | 0.996       | 0.975        |
| Other congenital anomalies            | Females | 0-6 days    | 80+ years   | 0.649               | 1.115    | 0.800    | 0.916     | 0.971       | 0.911        |
| Other congenital anomalies            | Males   | 0-6 days    | 80+ years   | 0.907               | 1.431    | 1.841    | 2.216     | 0.955       | 0.887        |
| Skin and subcutaneous diseases        | Females | 28-364 days | 80+ years   | 0.344               | 0.863    | 0.195    | 0.294     | 0.998       | 0.948        |
| Skin and subcutaneous diseases        | Males   | 28-364 days | 80+ years   | 0.344               | 0.850    | 0.193    | 0.281     | 0.998       | 0.951        |
| Cellulitis                            | Females | 28-364 days | 80+ years   | 0.417               | 0.801    | 0.263    | 0.328     | 0.999       | 0.984        |
| Cellulitis                            | Males   | 28-364 days | 80+ years   | 0.459               | 0.839    | 0.323    | 0.368     | 0.999       | 0.985        |
| Pyoderma                              | Females | 0-6 days    | 80+ years   | 0.325               | 0.767    | 0.182    | 0.263     | 0.999       | 0.971        |
| Pyoderma                              | Males   | 0-6 days    | 80+ years   | 0.342               | 0.785    | 0.214    | 0.306     | 0.998       | 0.969        |
| Decubitus ulcer                       | Females | 1-4 years   | 80+ years   | 0.362               | 0.827    | 0.218    | 0.303     | 0.996       | 0.950        |
| Decubitus ulcer                       | Males   | 1-4 years   | 80+ years   | 0.384               | 0.823    | 0.245    | 0.301     | 0.995       | 0.949        |
| Other skin and subcutaneous diseases  | Females | 28-364 days | 80+ years   | 0.623               | 1.115    | 0.826    | 1.115     | 0.989       | 0.947        |
| Other skin and subcutaneous diseases  | Males   | 28-364 days | 80+ years   | 0.711               | 0.983    | 1.115    | 1.310     | 0.982       | 0.962        |
| Sudden infant death syndrome          | Females | 7-27 days   | 28-364 days | 1.042               | 1.668    | 1.588    | 1.809     | 0.971       | 0.899        |
| Sudden infant death syndrome          | Males   | 7-27 days   | 28-364 days | 0.945               | 1.672    | 1.354    | 1.797     | 0.974       | 0.894        |
| Transport injuries [Developed]        | Females | 0-6 days    | 80+ years   | 0.245               | 0.423    | 0.114    | 0.130     | 0.999       | 0.979        |
| Transport injuries [Developed]        | Males   | 0-6 days    | 80+ years   | 0.205               | 0.376    | 0.077    | 0.093     | 0.996       | 0.958        |
| Transport injuries [Developing]       | Females | 0-6 days    | 80+ years   | 0.295               | 0.522    | 0.129    | 0.158     | 0.996       | 0.964        |
| Transport injuries [Developing]       | Males   | 0-6 days    | 80+ years   | 0.277               | 0.487    | 0.104    | 0.131     | 0.995       | 0.950        |
| Road injuries [Developed]             | Females | 0-6 days    | 80+ years   | 0.256               | 0.458    | 0.120    | 0.148     | 0.998       | 0.977        |
| Road injuries [Developed]             | Males   | 0-6 days    | 80+ years   | 0.214               | 0.363    | 0.087    | 0.104     | 0.997       | 0.966        |

**Web Table 21 - CODEm predictive validity results by cause, sex, age, and location**

| Cause                                    | Sex     | Age Start | Age End   | Predictive Validity |          |          |           |             |              |
|------------------------------------------|---------|-----------|-----------|---------------------|----------|----------|-----------|-------------|--------------|
|                                          |         |           |           | RMSE In             | RMSE Out | Trend In | Trend Out | Coverage In | Coverage Out |
| Road injuries [Developing]               | Females | 0-6 days  | 80+ years | 0.302               | 0.565    | 0.145    | 0.179     | 0.996       | 0.955        |
| Road injuries [Developing]               | Males   | 0-6 days  | 80+ years | 0.270               | 0.502    | 0.118    | 0.147     | 0.994       | 0.938        |
| Pedestrian road injuries [Developed]     | Females | 0-6 days  | 80+ years | 0.412               | 0.686    | 0.328    | 0.430     | 0.995       | 0.968        |
| Pedestrian road injuries [Developed]     | Males   | 0-6 days  | 80+ years | 0.376               | 0.561    | 0.218    | 0.220     | 0.996       | 0.971        |
| Pedestrian road injuries [Developing]    | Females | 0-6 days  | 80+ years | 0.342               | 0.601    | 0.198    | 0.211     | 0.996       | 0.963        |
| Pedestrian road injuries [Developing]    | Males   | 0-6 days  | 80+ years | 0.331               | 0.550    | 0.153    | 0.152     | 0.994       | 0.956        |
| Cyclist road injuries [Developed]        | Females | 1-4 years | 80+ years | 0.379               | 0.847    | 0.259    | 0.404     | 0.996       | 0.951        |
| Cyclist road injuries [Developed]        | Males   | 1-4 years | 80+ years | 0.408               | 0.774    | 0.294    | 0.370     | 0.994       | 0.938        |
| Cyclist road injuries [Developing]       | Females | 1-4 years | 80+ years | 0.324               | 0.709    | 0.170    | 0.243     | 0.997       | 0.959        |
| Cyclist road injuries [Developing]       | Males   | 1-4 years | 80+ years | 0.362               | 0.680    | 0.194    | 0.240     | 0.993       | 0.931        |
| Motorcyclist road injuries [Developed]   | Females | 0-6 days  | 80+ years | 0.574               | 0.939    | 0.546    | 0.629     | 0.992       | 0.948        |
| Motorcyclist road injuries [Developed]   | Males   | 0-6 days  | 80+ years | 0.415               | 0.738    | 0.285    | 0.311     | 0.991       | 0.943        |
| Motorcyclist road injuries [Developing]  | Females | 0-6 days  | 80+ years | 0.449               | 0.848    | 0.330    | 0.417     | 0.993       | 0.954        |
| Motorcyclist road injuries [Developing]  | Males   | 0-6 days  | 80+ years | 0.395               | 0.699    | 0.233    | 0.269     | 0.993       | 0.946        |
| Motor vehicle road injuries [Developed]  | Females | 0-6 days  | 80+ years | 0.325               | 0.571    | 0.186    | 0.242     | 0.997       | 0.965        |
| Motor vehicle road injuries [Developed]  | Males   | 0-6 days  | 80+ years | 0.305               | 0.532    | 0.147    | 0.181     | 0.995       | 0.955        |
| Motor vehicle road injuries [Developing] | Females | 0-6 days  | 80+ years | 0.302               | 0.527    | 0.139    | 0.169     | 0.996       | 0.965        |
| Motor vehicle road injuries [Developing] | Males   | 0-6 days  | 80+ years | 0.270               | 0.520    | 0.115    | 0.146     | 0.995       | 0.954        |
| Other road injuries [Developed]          | Females | 0-6 days  | 80+ years | 0.720               | 1.280    | 0.858    | 1.149     | 0.991       | 0.927        |
| Other road injuries [Developed]          | Males   | 0-6 days  | 80+ years | 0.699               | 1.365    | 0.951    | 1.366     | 0.991       | 0.906        |
| Other road injuries [Developing]         | Females | 0-6 days  | 80+ years | 0.589               | 1.095    | 0.570    | 0.759     | 0.993       | 0.948        |
| Other road injuries [Developing]         | Males   | 0-6 days  | 80+ years | 0.574               | 1.184    | 0.573    | 0.849     | 0.991       | 0.919        |
| Other transport injuries [Developed]     | Females | 0-6 days  | 80+ years | 0.573               | 0.905    | 0.595    | 0.744     | 0.990       | 0.952        |
| Other transport injuries [Developed]     | Males   | 0-6 days  | 80+ years | 0.449               | 0.782    | 0.374    | 0.393     | 0.993       | 0.951        |
| Other transport injuries [Developing]    | Females | 0-6 days  | 80+ years | 0.481               | 0.870    | 0.437    | 0.602     | 0.990       | 0.951        |
| Other transport injuries [Developing]    | Males   | 0-6 days  | 80+ years | 0.418               | 0.796    | 0.300    | 0.380     | 0.993       | 0.943        |
| Falls                                    | Females | 0-6 days  | 80+ years | 0.360               | 0.667    | 0.182    | 0.257     | 0.996       | 0.965        |
| Falls                                    | Males   | 0-6 days  | 80+ years | 0.338               | 0.676    | 0.174    | 0.201     | 0.996       | 0.945        |
| Drowning                                 | Females | 0-6 days  | 80+ years | 0.421               | 0.719    | 0.276    | 0.349     | 0.993       | 0.969        |
| Drowning                                 | Males   | 0-6 days  | 80+ years | 0.432               | 0.706    | 0.253    | 0.291     | 0.993       | 0.955        |
| Fire, heat, and hot substances           | Females | 0-6 days  | 80+ years | 0.354               | 0.640    | 0.208    | 0.229     | 0.997       | 0.969        |
| Fire, heat, and hot substances           | Males   | 0-6 days  | 80+ years | 0.711               | 0.948    | 1.074    | 1.250     | 0.967       | 0.927        |
| Poisonings                               | Females | 0-6 days  | 80+ years | 0.438               | 0.829    | 0.305    | 0.362     | 0.995       | 0.952        |

**Web Table 21 - CODEm predictive validity results by cause, sex, age, and location**

| Cause                                           | Sex     | Age Start   | Age End   | Predictive Validity |          |          |           |             |              |
|-------------------------------------------------|---------|-------------|-----------|---------------------|----------|----------|-----------|-------------|--------------|
|                                                 |         |             |           | RMSE In             | RMSE Out | Trend In | Trend Out | Coverage In | Coverage Out |
| Poisonings                                      | Males   | 0-6 days    | 80+ years | 0.442               | 0.847    | 0.324    | 0.417     | 0.994       | 0.949        |
| Unintentional firearm injuries                  | Females | 0-6 days    | 80+ years | 0.498               | 0.998    | 0.475    | 0.677     | 0.995       | 0.957        |
| Unintentional firearm injuries                  | Males   | 0-6 days    | 80+ years | 0.547               | 1.154    | 0.576    | 0.818     | 0.991       | 0.929        |
| Unintentional suffocation                       | Females | 0-6 days    | 80+ years | 0.469               | 0.978    | 0.376    | 0.438     | 0.997       | 0.976        |
| Unintentional suffocation                       | Males   | 0-6 days    | 80+ years | 0.494               | 1.130    | 0.445    | 0.569     | 0.997       | 0.961        |
| Other exposure to mechanical forces             | Females | 0-6 days    | 80+ years | 0.372               | 0.729    | 0.246    | 0.313     | 0.998       | 0.973        |
| Other exposure to mechanical forces             | Males   | 0-6 days    | 80+ years | 0.361               | 0.756    | 0.214    | 0.277     | 0.994       | 0.940        |
| Adverse effects of medical treatment            | Females | 0-6 days    | 80+ years | 0.440               | 0.969    | 0.230    | 0.338     | 0.995       | 0.941        |
| Adverse effects of medical treatment            | Males   | 0-6 days    | 80+ years | 0.456               | 0.937    | 0.249    | 0.349     | 0.994       | 0.943        |
| Animal contact                                  | Females | 0-6 days    | 80+ years | 0.492               | 1.063    | 0.373    | 0.473     | 0.997       | 0.951        |
| Animal contact                                  | Males   | 0-6 days    | 80+ years | 0.466               | 1.058    | 0.349    | 0.466     | 0.995       | 0.946        |
| Venomous animal contact                         | Females | 0-6 days    | 80+ years | 0.437               | 0.877    | 0.361    | 0.401     | 0.998       | 0.970        |
| Venomous animal contact                         | Males   | 0-6 days    | 80+ years | 0.440               | 0.935    | 0.364    | 0.447     | 0.997       | 0.962        |
| Non-venomous animal contact                     | Females | 0-6 days    | 80+ years | 0.433               | 0.758    | 0.359    | 0.408     | 0.998       | 0.983        |
| Non-venomous animal contact                     | Males   | 0-6 days    | 80+ years | 0.402               | 0.798    | 0.306    | 0.347     | 0.998       | 0.976        |
| Pulmonary aspiration and foreign body in airway | Females | 0-6 days    | 80+ years | 0.346               | 0.717    | 0.176    | 0.174     | 0.998       | 0.964        |
| Pulmonary aspiration and foreign body in airway | Males   | 0-6 days    | 80+ years | 0.341               | 0.755    | 0.169    | 0.190     | 0.997       | 0.956        |
| Foreign body in other body part                 | Females | 0-6 days    | 80+ years | 0.442               | 0.650    | 0.390    | 0.426     | 0.997       | 0.991        |
| Foreign body in other body part                 | Males   | 0-6 days    | 80+ years | 0.496               | 0.735    | 0.481    | 0.513     | 0.996       | 0.984        |
| Other unintentional injuries                    | Females | 0-6 days    | 80+ years | 0.737               | 1.459    | 1.108    | 1.523     | 0.982       | 0.888        |
| Other unintentional injuries                    | Males   | 0-6 days    | 80+ years | 0.891               | 1.785    | 1.719    | 2.386     | 0.960       | 0.829        |
| Self-harm                                       | Females | 10-14 years | 80+ years | 0.350               | 0.685    | 0.199    | 0.294     | 0.993       | 0.937        |
| Self-harm                                       | Males   | 10-14 years | 80+ years | 0.333               | 0.646    | 0.189    | 0.277     | 0.994       | 0.918        |
| Interpersonal violence                          | Females | 0-6 days    | 80+ years | 0.483               | 0.788    | 0.298    | 0.452     | 0.992       | 0.958        |
| Interpersonal violence                          | Males   | 0-6 days    | 80+ years | 0.461               | 0.786    | 0.263    | 0.464     | 0.992       | 0.936        |
| Assault by firearm                              | Females | 0-6 days    | 80+ years | 0.496               | 0.883    | 0.441    | 0.420     | 0.992       | 0.955        |
| Assault by firearm                              | Males   | 0-6 days    | 80+ years | 0.442               | 0.911    | 0.338    | 0.393     | 0.994       | 0.934        |
| Assault by sharp object                         | Females | 0-6 days    | 80+ years | 0.455               | 0.744    | 0.388    | 0.384     | 0.993       | 0.972        |
| Assault by sharp object                         | Males   | 0-6 days    | 80+ years | 0.425               | 0.819    | 0.304    | 0.333     | 0.994       | 0.956        |
| Assault by other means                          | Females | 0-6 days    | 80+ years | 0.348               | 0.597    | 0.225    | 0.231     | 0.997       | 0.975        |
| Assault by other means                          | Males   | 0-6 days    | 80+ years | 0.330               | 0.657    | 0.198    | 0.258     | 0.997       | 0.957        |

**Web Table 22: CODEm covariates used, level of covariate, and expected direction of covariate by cause, sex, age, and location**

**Web Table 22 – CODEm covariates used, level of covariate, and expected direction of covariate by cause, sex, and age**

| Cause                                | Sex     | Age Start   | Age End   | Covariate                                      | Level | Direction |
|--------------------------------------|---------|-------------|-----------|------------------------------------------------|-------|-----------|
| Acute glomerulonephritis             | Females | 28-364 days | 80+ years | Health System Access (unitless)                | 1     | Negative  |
| Acute glomerulonephritis             | Females | 28-364 days | 80+ years | Systolic Blood Pressure (mmHg)                 | 2     | Positive  |
| Acute glomerulonephritis             | Females | 28-364 days | 80+ years | Improved Water Source (proportion with access) | 2     | Negative  |
| Acute glomerulonephritis             | Females | 28-364 days | 80+ years | Sanitation (proportion with access)            | 2     | Negative  |
| Acute glomerulonephritis             | Females | 28-364 days | 80+ years | Education (years per capita)                   | 3     | Negative  |
| Acute glomerulonephritis             | Females | 28-364 days | 80+ years | LDI (I\$ per capita)                           | 3     | Negative  |
| Acute glomerulonephritis             | Males   | 28-364 days | 80+ years | Health System Access (unitless)                | 1     | Negative  |
| Acute glomerulonephritis             | Males   | 28-364 days | 80+ years | Sanitation (proportion with access)            | 2     | Negative  |
| Acute glomerulonephritis             | Males   | 28-364 days | 80+ years | Systolic Blood Pressure (mmHg)                 | 2     | Positive  |
| Acute glomerulonephritis             | Males   | 28-364 days | 80+ years | Improved Water Source (proportion with access) | 2     | Negative  |
| Acute glomerulonephritis             | Males   | 28-364 days | 80+ years | LDI (I\$ per capita)                           | 3     | Negative  |
| Acute glomerulonephritis             | Males   | 28-364 days | 80+ years | Education (years per capita)                   | 3     | Negative  |
| Adverse effects of medical treatment | Females | 0-6 days    | 80+ years | Health System Access 2 (unitless)              | 2     | None      |
| Adverse effects of medical treatment | Females | 0-6 days    | 80+ years | LDI (I\$ per capita)                           | 3     | None      |
| Adverse effects of medical treatment | Males   | 0-6 days    | 80+ years | Health System Access 2 (unitless)              | 2     | None      |
| Adverse effects of medical treatment | Males   | 0-6 days    | 80+ years | LDI (I\$ per capita)                           | 3     | None      |
| Alcohol use disorders                | Females | 15-19 years | 80+ years | Alcohol (liters per capita)                    | 1     | Positive  |
| Alcohol use disorders                | Females | 15-19 years | 80+ years | Health System Access 2 (unitless)              | 2     | Negative  |
| Alcohol use disorders                | Females | 15-19 years | 80+ years | Systolic Blood Pressure (mmHg)                 | 2     | None      |
| Alcohol use disorders                | Females | 15-19 years | 80+ years | Cumulative Cigarettes (10 Years)               | 2     | None      |
| Alcohol use disorders                | Females | 15-19 years | 80+ years | Mean BMI                                       | 2     | None      |
| Alcohol use disorders                | Females | 15-19 years | 80+ years | Smoking Prevalence                             | 2     | None      |
| Alcohol use disorders                | Females | 15-19 years | 80+ years | Red Meat (kcal per capita)                     | 2     | None      |
| Alcohol use disorders                | Females | 15-19 years | 80+ years | Cholesterol (total, mean per capita)           | 2     | None      |
| Alcohol use disorders                | Females | 15-19 years | 80+ years | Religion (binary, >50% Muslim)                 | 2     | Negative  |
| Alcohol use disorders                | Females | 15-19 years | 80+ years | LDI (I\$ per capita)                           | 3     | Negative  |
| Alcohol use disorders                | Females | 15-19 years | 80+ years | Education (years per capita)                   | 3     | Negative  |
| Alcohol use disorders                | Males   | 15-19 years | 80+ years | Cumulative Cigarettes (10 Years)               | 2     | None      |
| Alcohol use disorders                | Males   | 15-19 years | 80+ years | Systolic Blood Pressure (mmHg)                 | 2     | None      |
| Alcohol use disorders                | Males   | 15-19 years | 80+ years | Religion (binary, >50% Muslim)                 | 2     | Negative  |
| Alcohol use disorders                | Males   | 15-19 years | 80+ years | Red Meat (kcal per capita)                     | 2     | None      |
| Alcohol use disorders                | Males   | 15-19 years | 80+ years | Health System Access 2 (unitless)              | 2     | Negative  |
| Alcohol use disorders                | Males   | 15-19 years | 80+ years | Smoking Prevalence                             | 2     | None      |
| Alcohol use disorders                | Males   | 15-19 years | 80+ years | Mean BMI                                       | 2     | None      |
| Alcohol use disorders                | Males   | 15-19 years | 80+ years | Cholesterol (total, mean per capita)           | 2     | None      |



**Web Table 22 – CODEm covariates used, level of covariate, and expected direction of covariate by cause, sex, and age**

| Cause                 | Sex     | Age Start   | Age End   | Covariate                                           | Level | Direction |
|-----------------------|---------|-------------|-----------|-----------------------------------------------------|-------|-----------|
| Alcohol use disorders | Males   | 15-19 years | 80+ years | Education (years per capita)                        | 3     | Negative  |
| Alcohol use disorders | Males   | 15-19 years | 80+ years | LDI (I\$ per capita)                                | 3     | Negative  |
| Animal contact        | Females | 0-6 days    | 80+ years | Vehicles - 4 wheels (per capita)                    | 1     | None      |
| Animal contact        | Females | 0-6 days    | 80+ years | Health System Access 2 (unitless)                   | 2     | Negative  |
| Animal contact        | Females | 0-6 days    | 80+ years | LDI (I\$ per capita)                                | 3     | None      |
| Animal contact        | Females | 0-6 days    | 80+ years | Elevation Over 1500m (proportion)                   | 3     | None      |
| Animal contact        | Females | 0-6 days    | 80+ years | Elevation Under 100m (proportion)                   | 3     | None      |
| Animal contact        | Females | 0-6 days    | 80+ years | Population Density (under 150 ppl/sqkm, proportion) | 3     | None      |
| Animal contact        | Females | 0-6 days    | 80+ years | Population Density (over 1000 ppl/sqkm, proportion) | 3     | None      |
| Animal contact        | Females | 0-6 days    | 80+ years | Education (years per capita)                        | 3     | Negative  |
| Animal contact        | Males   | 0-6 days    | 80+ years | Vehicles - 4 wheels (per capita)                    | 1     | None      |
| Animal contact        | Males   | 0-6 days    | 80+ years | Population 15 to 30 (proportion)                    | 2     | Positive  |
| Animal contact        | Males   | 0-6 days    | 80+ years | Elevation Over 1500m (proportion)                   | 3     | None      |
| Animal contact        | Males   | 0-6 days    | 80+ years | Population Density (under 150 ppl/sqkm, proportion) | 3     | None      |
| Animal contact        | Males   | 0-6 days    | 80+ years | LDI (I\$ per capita)                                | 3     | None      |
| Animal contact        | Males   | 0-6 days    | 80+ years | Elevation Under 100m (proportion)                   | 3     | None      |
| Animal contact        | Males   | 0-6 days    | 80+ years | Education (years per capita)                        | 3     | Negative  |
| Animal contact        | Males   | 0-6 days    | 80+ years | Population Density (over 1000 ppl/sqkm, proportion) | 3     | None      |
| Aortic aneurysm       | Females | 15-19 years | 80+ years | Diabetes Age-Standardized Prevalence (proportion)   | 1     | Positive  |
| Aortic aneurysm       | Females | 15-19 years | 80+ years | Cholesterol (total, mean per capita)                | 1     | Positive  |
| Aortic aneurysm       | Females | 15-19 years | 80+ years | Mean BMI                                            | 1     | Positive  |
| Aortic aneurysm       | Females | 15-19 years | 80+ years | Pulses & Legumes (kcal per capita)                  | 2     | Negative  |
| Aortic aneurysm       | Females | 15-19 years | 80+ years | Alcohol (liters per capita)                         | 2     | None      |
| Aortic aneurysm       | Females | 15-19 years | 80+ years | Animal Fats (kcal per capita)                       | 2     | Positive  |
| Aortic aneurysm       | Females | 15-19 years | 80+ years | Smoking Prevalence                                  | 2     | Positive  |
| Aortic aneurysm       | Females | 15-19 years | 80+ years | Nuts & Seeds (kcal per capita)                      | 2     | Negative  |
| Aortic aneurysm       | Females | 15-19 years | 80+ years | Red Meat (kcal per capita)                          | 2     | Positive  |
| Aortic aneurysm       | Females | 15-19 years | 80+ years | Elevation 100 to 500m (proportion)                  | 3     | Negative  |
| Aortic aneurysm       | Females | 15-19 years | 80+ years | Elevation 500 to 1500m (proportion)                 | 3     | Negative  |
| Aortic aneurysm       | Females | 15-19 years | 80+ years | Elevation Over 1500m (proportion)                   | 3     | Negative  |
| Aortic aneurysm       | Males   | 15-19 years | 80+ years | Tobacco (cigarettes per capita) [lagged 10 years]   | 1     | Positive  |
| Aortic aneurysm       | Males   | 15-19 years | 80+ years | Mean BMI                                            | 1     | Positive  |
| Aortic aneurysm       | Males   | 15-19 years | 80+ years | Diabetes Age-Standardized Prevalence (proportion)   | 1     | Positive  |
| Aortic aneurysm       | Males   | 15-19 years | 80+ years | Cholesterol (total, mean per capita)                | 1     | Positive  |
| Aortic aneurysm       | Males   | 15-19 years | 80+ years | Systolic Blood Pressure (mmHg)                      | 1     | Positive  |

**Web Table 22 – CODEm covariates used, level of covariate, and expected direction of covariate by cause, sex, and age**

| Cause           | Sex     | Age Start   | Age End   | Covariate                                           | Level | Direction |
|-----------------|---------|-------------|-----------|-----------------------------------------------------|-------|-----------|
| Aortic aneurysm | Males   | 15-19 years | 80+ years | Smoking Prevalence                                  | 2     | Positive  |
| Aortic aneurysm | Males   | 15-19 years | 80+ years | Nuts & Seeds (kcal per capita)                      | 2     | Negative  |
| Aortic aneurysm | Males   | 15-19 years | 80+ years | Animal Fats (kcal per capita)                       | 2     | Positive  |
| Aortic aneurysm | Males   | 15-19 years | 80+ years | Cumulative Cigarettes (10 Years)                    | 2     | Positive  |
| Aortic aneurysm | Males   | 15-19 years | 80+ years | Pulses & Legumes (kcal per capita)                  | 2     | Negative  |
| Aortic aneurysm | Males   | 15-19 years | 80+ years | Total Calories (kcal per capita)                    | 2     | Positive  |
| Aortic aneurysm | Males   | 15-19 years | 80+ years | Alcohol (liters per capita)                         | 2     | None      |
| Aortic aneurysm | Males   | 15-19 years | 80+ years | Red Meat (kcal per capita)                          | 2     | Positive  |
| Aortic aneurysm | Males   | 15-19 years | 80+ years | Elevation 500 to 1500m (proportion)                 | 3     | Negative  |
| Aortic aneurysm | Males   | 15-19 years | 80+ years | Elevation Over 1500m (proportion)                   | 3     | Negative  |
| Aortic aneurysm | Males   | 15-19 years | 80+ years | LDI (I\$ per capita)                                | 3     | Negative  |
| Aortic aneurysm | Males   | 15-19 years | 80+ years | Elevation 100 to 500m (proportion)                  | 3     | Negative  |
| Appendicitis    | Females | 1-4 years   | 80+ years | Health System Access (capped)                       | 2     | Negative  |
| Appendicitis    | Females | 1-4 years   | 80+ years | Fruits (kcal per capita)                            | 2     | Negative  |
| Appendicitis    | Females | 1-4 years   | 80+ years | Vegetables (kcal per capita)                        | 2     | Negative  |
| Appendicitis    | Females | 1-4 years   | 80+ years | LDI (I\$ per capita)                                | 3     | Negative  |
| Appendicitis    | Females | 1-4 years   | 80+ years | Education (years per capita)                        | 3     | Negative  |
| Appendicitis    | Males   | 1-4 years   | 80+ years | Health System Access (capped)                       | 2     | Negative  |
| Appendicitis    | Males   | 1-4 years   | 80+ years | Fruits (kcal per capita)                            | 2     | Negative  |
| Appendicitis    | Males   | 1-4 years   | 80+ years | Vegetables (kcal per capita)                        | 2     | Negative  |
| Appendicitis    | Males   | 1-4 years   | 80+ years | Education (years per capita)                        | 3     | Negative  |
| Appendicitis    | Males   | 1-4 years   | 80+ years | LDI (I\$ per capita)                                | 3     | Negative  |
| Asbestosis      | Females | 0-6 days    | 80+ years | Smoking Prevalence                                  | 1     | Positive  |
| Asbestosis      | Females | 0-6 days    | 80+ years | Asbestos production (binary)                        | 1     | Positive  |
| Asbestosis      | Females | 0-6 days    | 80+ years | Health System Access 2 (unitless)                   | 1     | Negative  |
| Asbestosis      | Females | 0-6 days    | 80+ years | Indoor Air Pollution (Coal Cooking)                 | 1     | Positive  |
| Asbestosis      | Females | 0-6 days    | 80+ years | Population Density (over 1000 ppl/sqkm, proportion) | 2     | Positive  |
| Asbestosis      | Females | 0-6 days    | 80+ years | Gold production (kg) per capita                     | 2     | Positive  |
| Asbestosis      | Females | 0-6 days    | 80+ years | LDI (I\$ per capita)                                | 3     | Negative  |
| Asbestosis      | Females | 0-6 days    | 80+ years | Education (years per capita)                        | 3     | Negative  |
| Asbestosis      | Males   | 0-6 days    | 80+ years | Asbestos production (binary)                        | 1     | Positive  |
| Asbestosis      | Males   | 0-6 days    | 80+ years | Health System Access 2 (unitless)                   | 1     | Negative  |
| Asbestosis      | Males   | 0-6 days    | 80+ years | Smoking Prevalence                                  | 1     | Positive  |
| Asbestosis      | Males   | 0-6 days    | 80+ years | Cumulative Cigarettes (5 Years)                     | 1     | Positive  |
| Asbestosis      | Males   | 0-6 days    | 80+ years | Gold production (binary)                            | 2     | Positive  |

**Web Table 22 – CODEm covariates used, level of covariate, and expected direction of covariate by cause, sex, and age**

| Cause                   | Sex     | Age Start | Age End   | Covariate                                           | Level | Direction |
|-------------------------|---------|-----------|-----------|-----------------------------------------------------|-------|-----------|
| Asbestosis              | Males   | 0-6 days  | 80+ years | Population Density (over 1000 ppl/sqkm, proportion) | 2     | Positive  |
| Asbestosis              | Males   | 0-6 days  | 80+ years | Elevation Over 1500m (proportion)                   | 2     | Positive  |
| Asbestosis              | Males   | 0-6 days  | 80+ years | Asbestos production (kg) per capita                 | 2     | Positive  |
| Asbestosis              | Males   | 0-6 days  | 80+ years | Gold production (kg) per capita                     | 2     | Positive  |
| Asbestosis              | Males   | 0-6 days  | 80+ years | LDI (I\$ per capita)                                | 3     | Negative  |
| Asbestosis              | Males   | 0-6 days  | 80+ years | Education (years per capita)                        | 3     | Negative  |
| Assault by firearm      | Females | 0-6 days  | 80+ years | Health System Access 2 (unitless)                   | 1     | Negative  |
| Assault by firearm      | Females | 0-6 days  | 80+ years | Opium Cultivation (binary)                          | 2     | Positive  |
| Assault by firearm      | Females | 0-6 days  | 80+ years | LDI (I\$ per capita)                                | 3     | None      |
| Assault by firearm      | Females | 0-6 days  | 80+ years | Education (years per capita)                        | 3     | None      |
| Assault by firearm      | Males   | 0-6 days  | 80+ years | Health System Access 2 (unitless)                   | 1     | Negative  |
| Assault by firearm      | Males   | 0-6 days  | 80+ years | Opium Cultivation (binary)                          | 2     | Positive  |
| Assault by firearm      | Males   | 0-6 days  | 80+ years | LDI (I\$ per capita)                                | 3     | None      |
| Assault by firearm      | Males   | 0-6 days  | 80+ years | Education (years per capita)                        | 3     | None      |
| Assault by other means  | Females | 0-6 days  | 80+ years | Health System Access 2 (unitless)                   | 1     | Negative  |
| Assault by other means  | Females | 0-6 days  | 80+ years | Alcohol (liters per capita)                         | 1     | Positive  |
| Assault by other means  | Females | 0-6 days  | 80+ years | Opium Cultivation (binary)                          | 2     | Positive  |
| Assault by other means  | Females | 0-6 days  | 80+ years | Education (years per capita)                        | 3     | None      |
| Assault by other means  | Females | 0-6 days  | 80+ years | LDI (I\$ per capita)                                | 3     | None      |
| Assault by other means  | Males   | 0-6 days  | 80+ years | Health System Access 2 (unitless)                   | 1     | Negative  |
| Assault by other means  | Males   | 0-6 days  | 80+ years | Alcohol (liters per capita)                         | 1     | Positive  |
| Assault by other means  | Males   | 0-6 days  | 80+ years | Opium Cultivation (binary)                          | 2     | Positive  |
| Assault by other means  | Males   | 0-6 days  | 80+ years | Education (years per capita)                        | 3     | None      |
| Assault by other means  | Males   | 0-6 days  | 80+ years | LDI (I\$ per capita)                                | 3     | None      |
| Assault by sharp object | Females | 0-6 days  | 80+ years | Alcohol (liters per capita)                         | 1     | Positive  |
| Assault by sharp object | Females | 0-6 days  | 80+ years | Health System Access 2 (unitless)                   | 1     | Negative  |
| Assault by sharp object | Females | 0-6 days  | 80+ years | Opium Cultivation (binary)                          | 2     | Positive  |
| Assault by sharp object | Females | 0-6 days  | 80+ years | Education (years per capita)                        | 3     | None      |
| Assault by sharp object | Females | 0-6 days  | 80+ years | LDI (I\$ per capita)                                | 3     | None      |
| Assault by sharp object | Males   | 0-6 days  | 80+ years | Health System Access 2 (unitless)                   | 1     | Negative  |
| Assault by sharp object | Males   | 0-6 days  | 80+ years | Opium Cultivation (binary)                          | 2     | Positive  |
| Assault by sharp object | Males   | 0-6 days  | 80+ years | LDI (I\$ per capita)                                | 3     | None      |
| Assault by sharp object | Males   | 0-6 days  | 80+ years | Education (years per capita)                        | 3     | None      |
| Asthma                  | Females | 1-4 years | 80+ years | Indoor Air Pollution (Biomass Cooking)              | 1     | Positive  |
| Asthma                  | Females | 1-4 years | 80+ years | Smoking Prevalence                                  | 1     | Positive  |

**Web Table 22 — CODEm covariates used, level of covariate, and expected direction of covariate by cause, sex, and age**

| Cause                           | Sex     | Age Start   | Age End   | Covariate                                           | Level | Direction |
|---------------------------------|---------|-------------|-----------|-----------------------------------------------------|-------|-----------|
| Asthma                          | Females | 1-4 years   | 80+ years | Cumulative Cigarettes (5 Years)                     | 1     | Positive  |
| Asthma                          | Females | 1-4 years   | 80+ years | Indoor Air Pollution (Coal Cooking)                 | 1     | Positive  |
| Asthma                          | Females | 1-4 years   | 80+ years | Outdoor Air Pollution (PM2.5)                       | 1     | Positive  |
| Asthma                          | Females | 1-4 years   | 80+ years | Health System Access 2 (unitless)                   | 1     | Negative  |
| Asthma                          | Females | 1-4 years   | 80+ years | Population Density (over 1000 ppl/sqkm, proportion) | 2     | Positive  |
| Asthma                          | Females | 1-4 years   | 80+ years | LDI (I\$ per capita)                                | 3     | Negative  |
| Asthma                          | Females | 1-4 years   | 80+ years | Education (years per capita)                        | 3     | Negative  |
| Asthma                          | Males   | 1-4 years   | 80+ years | Outdoor Air Pollution (PM2.5)                       | 1     | Positive  |
| Asthma                          | Males   | 1-4 years   | 80+ years | Cumulative Cigarettes (5 Years)                     | 1     | Positive  |
| Asthma                          | Males   | 1-4 years   | 80+ years | Indoor Air Pollution (Biomass Cooking)              | 1     | Positive  |
| Asthma                          | Males   | 1-4 years   | 80+ years | Health System Access 2 (unitless)                   | 1     | Negative  |
| Asthma                          | Males   | 1-4 years   | 80+ years | Smoking Prevalence                                  | 1     | Positive  |
| Asthma                          | Males   | 1-4 years   | 80+ years | Population Density (over 1000 ppl/sqkm, proportion) | 2     | Positive  |
| Asthma                          | Males   | 1-4 years   | 80+ years | LDI (I\$ per capita)                                | 3     | Negative  |
| Asthma                          | Males   | 1-4 years   | 80+ years | Education (years per capita)                        | 3     | Negative  |
| Atrial fibrillation and flutter | Females | 30-34 years | 80+ years | Cholesterol (total, mean per capita)                | 1     | Positive  |
| Atrial fibrillation and flutter | Females | 30-34 years | 80+ years | Mean BMI                                            | 1     | Positive  |
| Atrial fibrillation and flutter | Females | 30-34 years | 80+ years | Diabetes Age-Standardized Prevalence (proportion)   | 1     | Positive  |
| Atrial fibrillation and flutter | Females | 30-34 years | 80+ years | Cumulative Cigarettes (10 Years)                    | 2     | Positive  |
| Atrial fibrillation and flutter | Females | 30-34 years | 80+ years | Pulses & Legumes (kcal per capita)                  | 2     | Negative  |
| Atrial fibrillation and flutter | Females | 30-34 years | 80+ years | Total Calories (kcal per capita)                    | 2     | Positive  |
| Atrial fibrillation and flutter | Females | 30-34 years | 80+ years | In-Milk (kcal per capita)                           | 2     | Negative  |
| Atrial fibrillation and flutter | Females | 30-34 years | 80+ years | Fruits (kcal per capita)                            | 2     | Negative  |
| Atrial fibrillation and flutter | Females | 30-34 years | 80+ years | Alcohol (liters per capita)                         | 2     | None      |
| Atrial fibrillation and flutter | Females | 30-34 years | 80+ years | Animal Fats (kcal per capita)                       | 2     | Positive  |
| Atrial fibrillation and flutter | Females | 30-34 years | 80+ years | Smoking Prevalence                                  | 2     | Positive  |
| Atrial fibrillation and flutter | Females | 30-34 years | 80+ years | Elevation Over 1500m (proportion)                   | 3     | Negative  |
| Atrial fibrillation and flutter | Females | 30-34 years | 80+ years | Elevation 100 to 500m (proportion)                  | 3     | Negative  |
| Atrial fibrillation and flutter | Females | 30-34 years | 80+ years | Elevation 500 to 1500m (proportion)                 | 3     | Negative  |
| Atrial fibrillation and flutter | Males   | 30-34 years | 80+ years | Mean BMI                                            | 1     | Positive  |
| Atrial fibrillation and flutter | Males   | 30-34 years | 80+ years | Systolic Blood Pressure (mmHg)                      | 1     | Positive  |
| Atrial fibrillation and flutter | Males   | 30-34 years | 80+ years | Cholesterol (total, mean per capita)                | 1     | Positive  |
| Atrial fibrillation and flutter | Males   | 30-34 years | 80+ years | Diabetes Age-Standardized Prevalence (proportion)   | 1     | Positive  |
| Atrial fibrillation and flutter | Males   | 30-34 years | 80+ years | In-Milk (kcal per capita)                           | 2     | Negative  |
| Atrial fibrillation and flutter | Males   | 30-34 years | 80+ years | Alcohol (liters per capita)                         | 2     | None      |

**Web Table 22 – CODEm covariates used, level of covariate, and expected direction of covariate by cause, sex, and age**

| Cause                           | Sex     | Age Start   | Age End   | Covariate                                           | Level | Direction |
|---------------------------------|---------|-------------|-----------|-----------------------------------------------------|-------|-----------|
| Atrial fibrillation and flutter | Males   | 30-34 years | 80+ years | Pulses & Legumes (kcal per capita)                  | 2     | Negative  |
| Atrial fibrillation and flutter | Males   | 30-34 years | 80+ years | Total Calories (kcal per capita)                    | 2     | Positive  |
| Atrial fibrillation and flutter | Males   | 30-34 years | 80+ years | Fruits (kcal per capita)                            | 2     | Negative  |
| Atrial fibrillation and flutter | Males   | 30-34 years | 80+ years | Smoking Prevalence                                  | 2     | Positive  |
| Atrial fibrillation and flutter | Males   | 30-34 years | 80+ years | Animal Fats (kcal per capita)                       | 2     | Positive  |
| Atrial fibrillation and flutter | Males   | 30-34 years | 80+ years | Elevation Over 1500m (proportion)                   | 3     | Negative  |
| Atrial fibrillation and flutter | Males   | 30-34 years | 80+ years | Elevation 500 to 1500m (proportion)                 | 3     | Negative  |
| Atrial fibrillation and flutter | Males   | 30-34 years | 80+ years | Elevation 100 to 500m (proportion)                  | 3     | Negative  |
| Bladder cancer [Developed]      | Females | 15-19 years | 80+ years | Cumulative Cigarettes (5 Years)                     | 1     | Positive  |
| Bladder cancer [Developed]      | Females | 15-19 years | 80+ years | Cumulative Cigarettes (10 Years)                    | 1     | Positive  |
| Bladder cancer [Developed]      | Females | 15-19 years | 80+ years | Cumulative Cigarettes (15 Years)                    | 1     | Positive  |
| Bladder cancer [Developed]      | Females | 15-19 years | 80+ years | Smoking Prevalence [lagged 10 years]                | 1     | Positive  |
| Bladder cancer [Developed]      | Females | 15-19 years | 80+ years | Alcohol (liters per capita)                         | 2     | Positive  |
| Bladder cancer [Developed]      | Females | 15-19 years | 80+ years | Health System Access 2 (unitless)                   | 2     | Negative  |
| Bladder cancer [Developed]      | Females | 15-19 years | 80+ years | Fruits (kcal per capita)                            | 2     | Negative  |
| Bladder cancer [Developed]      | Females | 15-19 years | 80+ years | Vegetables (kcal per capita)                        | 2     | Negative  |
| Bladder cancer [Developed]      | Females | 15-19 years | 80+ years | Population Density (over 1000 ppl/sqkm, proportion) | 2     | Positive  |
| Bladder cancer [Developed]      | Females | 15-19 years | 80+ years | LDI (I\$ per capita)                                | 3     | Negative  |
| Bladder cancer [Developed]      | Females | 15-19 years | 80+ years | Education (years per capita)                        | 3     | Negative  |
| Bladder cancer [Developed]      | Males   | 15-19 years | 80+ years | Cumulative Cigarettes (10 Years)                    | 1     | Positive  |
| Bladder cancer [Developed]      | Males   | 15-19 years | 80+ years | Smoking Prevalence [lagged 10 years]                | 1     | Positive  |
| Bladder cancer [Developed]      | Males   | 15-19 years | 80+ years | Cumulative Cigarettes (5 Years)                     | 1     | Positive  |
| Bladder cancer [Developed]      | Males   | 15-19 years | 80+ years | Cumulative Cigarettes (15 Years)                    | 1     | Positive  |
| Bladder cancer [Developed]      | Males   | 15-19 years | 80+ years | Alcohol (liters per capita)                         | 2     | Positive  |
| Bladder cancer [Developed]      | Males   | 15-19 years | 80+ years | Population Density (over 1000 ppl/sqkm, proportion) | 2     | Positive  |
| Bladder cancer [Developed]      | Males   | 15-19 years | 80+ years | Health System Access 2 (unitless)                   | 2     | Negative  |
| Bladder cancer [Developed]      | Males   | 15-19 years | 80+ years | Education (years per capita)                        | 3     | Negative  |
| Bladder cancer [Developed]      | Males   | 15-19 years | 80+ years | LDI (I\$ per capita)                                | 3     | Negative  |
| Bladder cancer [Developing]     | Females | 15-19 years | 80+ years | Cumulative Cigarettes (5 Years)                     | 1     | Positive  |
| Bladder cancer [Developing]     | Females | 15-19 years | 80+ years | Smoking Prevalence [lagged 10 years]                | 1     | Positive  |
| Bladder cancer [Developing]     | Females | 15-19 years | 80+ years | Cumulative Cigarettes (10 Years)                    | 1     | Positive  |
| Bladder cancer [Developing]     | Females | 15-19 years | 80+ years | Cumulative Cigarettes (15 Years)                    | 1     | Positive  |
| Bladder cancer [Developing]     | Females | 15-19 years | 80+ years | Population Density (under 150 ppl/sqkm, proportion) | 2     | Positive  |
| Bladder cancer [Developing]     | Females | 15-19 years | 80+ years | Vegetables (kcal per capita)                        | 2     | Negative  |
| Bladder cancer [Developing]     | Females | 15-19 years | 80+ years | Health System Access 2 (unitless)                   | 2     | Negative  |

**Web Table 22 – CODEm covariates used, level of covariate, and expected direction of covariate by cause, sex, and age**

| Cause                                        | Sex     | Age Start   | Age End   | Covariate                                           | Level | Direction |
|----------------------------------------------|---------|-------------|-----------|-----------------------------------------------------|-------|-----------|
| Bladder cancer [Developing]                  | Females | 15-19 years | 80+ years | Alcohol (liters per capita)                         | 2     | Positive  |
| Bladder cancer [Developing]                  | Females | 15-19 years | 80+ years | Education (years per capita)                        | 3     | Negative  |
| Bladder cancer [Developing]                  | Females | 15-19 years | 80+ years | LDI (I\$ per capita)                                | 3     | Negative  |
| Bladder cancer [Developing]                  | Males   | 15-19 years | 80+ years | Smoking Prevalence [lagged 10 years]                | 1     | Positive  |
| Bladder cancer [Developing]                  | Males   | 15-19 years | 80+ years | Cumulative Cigarettes (5 Years)                     | 1     | Positive  |
| Bladder cancer [Developing]                  | Males   | 15-19 years | 80+ years | Cumulative Cigarettes (10 Years)                    | 1     | Positive  |
| Bladder cancer [Developing]                  | Males   | 15-19 years | 80+ years | Cumulative Cigarettes (15 Years)                    | 1     | Positive  |
| Bladder cancer [Developing]                  | Males   | 15-19 years | 80+ years | Alcohol (liters per capita)                         | 2     | Positive  |
| Bladder cancer [Developing]                  | Males   | 15-19 years | 80+ years | Population Density (over 1000 ppl/sqkm, proportion) | 2     | Positive  |
| Bladder cancer [Developing]                  | Males   | 15-19 years | 80+ years | Health System Access 2 (unitless)                   | 2     | Negative  |
| Bladder cancer [Developing]                  | Males   | 15-19 years | 80+ years | Education (years per capita)                        | 3     | Negative  |
| Bladder cancer [Developing]                  | Males   | 15-19 years | 80+ years | LDI (I\$ per capita)                                | 3     | Negative  |
| Brain and nervous system cancer [Developed]  | Females | 1-4 years   | 80+ years | Cumulative Cigarettes (10 Years)                    | 1     | Positive  |
| Brain and nervous system cancer [Developed]  | Females | 1-4 years   | 80+ years | Cumulative Cigarettes (15 Years)                    | 1     | Positive  |
| Brain and nervous system cancer [Developed]  | Females | 1-4 years   | 80+ years | Animal Fats (kcal per capita)                       | 2     | Positive  |
| Brain and nervous system cancer [Developed]  | Females | 1-4 years   | 80+ years | LDI (I\$ per capita)                                | 3     | Negative  |
| Brain and nervous system cancer [Developed]  | Males   | 1-4 years   | 80+ years | Cumulative Cigarettes (15 Years)                    | 1     | Positive  |
| Brain and nervous system cancer [Developed]  | Males   | 1-4 years   | 80+ years | Cumulative Cigarettes (10 Years)                    | 1     | Positive  |
| Brain and nervous system cancer [Developed]  | Males   | 1-4 years   | 80+ years | Smoking Prevalence [lagged 20 years]                | 1     | Positive  |
| Brain and nervous system cancer [Developed]  | Males   | 1-4 years   | 80+ years | Animal Fats (kcal per capita)                       | 2     | Positive  |
| Brain and nervous system cancer [Developing] | Females | 1-4 years   | 80+ years | Cumulative Cigarettes (15 Years)                    | 1     | Positive  |
| Brain and nervous system cancer [Developing] | Females | 1-4 years   | 80+ years | Smoking Prevalence [lagged 20 years]                | 1     | Positive  |
| Brain and nervous system cancer [Developing] | Females | 1-4 years   | 80+ years | Cumulative Cigarettes (10 Years)                    | 1     | Positive  |
| Brain and nervous system cancer [Developing] | Females | 1-4 years   | 80+ years | Cholesterol (total, mean per capita)                | 2     | Positive  |
| Brain and nervous system cancer [Developing] | Females | 1-4 years   | 80+ years | LDI (I\$ per capita)                                | 3     | Negative  |
| Brain and nervous system cancer [Developing] | Males   | 1-4 years   | 80+ years | Smoking Prevalence [lagged 20 years]                | 1     | Positive  |
| Brain and nervous system cancer [Developing] | Males   | 1-4 years   | 80+ years | Systolic Blood Pressure (mmHg)                      | 2     | Positive  |
| Brain and nervous system cancer [Developing] | Males   | 1-4 years   | 80+ years | Cholesterol (total, mean per capita)                | 2     | Positive  |
| Brain and nervous system cancer [Developing] | Males   | 1-4 years   | 80+ years | LDI (I\$ per capita)                                | 3     | Negative  |
| Breast cancer [Developed]                    | Females | 15-19 years | 80+ years | Alcohol (liters per capita)                         | 1     | Positive  |
| Breast cancer [Developed]                    | Females | 15-19 years | 80+ years | Mean BMI                                            | 1     | Positive  |
| Breast cancer [Developed]                    | Females | 15-19 years | 80+ years | Latitude 15 to 30 (proportion)                      | 2     | None      |
| Breast cancer [Developed]                    | Females | 15-19 years | 80+ years | Latitude 30 to 45 (proportion)                      | 2     | Negative  |
| Breast cancer [Developed]                    | Females | 15-19 years | 80+ years | Fertility (15-19 year olds)                         | 2     | Negative  |
| Breast cancer [Developed]                    | Females | 15-19 years | 80+ years | Animal Fats (kcal per capita)                       | 2     | Positive  |

**Web Table 22 – CODEm covariates used, level of covariate, and expected direction of covariate by cause, sex, and age**

| Cause                      | Sex     | Age Start   | Age End   | Covariate                         | Level | Direction |
|----------------------------|---------|-------------|-----------|-----------------------------------|-------|-----------|
| Breast cancer [Developed]  | Females | 15-19 years | 80+ years | Cumulative Cigarettes (10 Years)  | 2     | Positive  |
| Breast cancer [Developed]  | Females | 15-19 years | 80+ years | Total Fertility Rate              | 2     | Negative  |
| Breast cancer [Developed]  | Females | 15-19 years | 80+ years | Vegetables (kcal per capita)      | 2     | Negative  |
| Breast cancer [Developed]  | Females | 15-19 years | 80+ years | Health System Access 2 (unitless) | 2     | Negative  |
| Breast cancer [Developed]  | Females | 15-19 years | 80+ years | Education (years per capita)      | 3     | Negative  |
| Breast cancer [Developed]  | Females | 15-19 years | 80+ years | LDI (I\$ per capita)              | 3     | Negative  |
| Breast cancer [Developed]  | Males   | 15-19 years | 80+ years | Mean BMI                          | 1     | Positive  |
| Breast cancer [Developed]  | Males   | 15-19 years | 80+ years | Alcohol (liters per capita)       | 1     | Positive  |
| Breast cancer [Developed]  | Males   | 15-19 years | 80+ years | Cumulative Cigarettes (10 Years)  | 2     | Positive  |
| Breast cancer [Developed]  | Males   | 15-19 years | 80+ years | Fertility (15-19 year olds)       | 2     | Negative  |
| Breast cancer [Developed]  | Males   | 15-19 years | 80+ years | Latitude Over 45 (proportion)     | 2     | Negative  |
| Breast cancer [Developed]  | Males   | 15-19 years | 80+ years | Total Fertility Rate              | 2     | Negative  |
| Breast cancer [Developed]  | Males   | 15-19 years | 80+ years | LDI (I\$ per capita)              | 3     | Negative  |
| Breast cancer [Developing] | Females | 15-19 years | 80+ years | Alcohol (liters per capita)       | 1     | Positive  |
| Breast cancer [Developing] | Females | 15-19 years | 80+ years | Mean BMI                          | 1     | Positive  |
| Breast cancer [Developing] | Females | 15-19 years | 80+ years | Fruits (kcal per capita)          | 2     | Negative  |
| Breast cancer [Developing] | Females | 15-19 years | 80+ years | Health System Access 2 (unitless) | 2     | Negative  |
| Breast cancer [Developing] | Females | 15-19 years | 80+ years | Total Fertility Rate              | 2     | Negative  |
| Breast cancer [Developing] | Females | 15-19 years | 80+ years | Latitude 15 to 30 (proportion)    | 2     | None      |
| Breast cancer [Developing] | Females | 15-19 years | 80+ years | Latitude Over 45 (proportion)     | 2     | Negative  |
| Breast cancer [Developing] | Females | 15-19 years | 80+ years | Latitude 30 to 45 (proportion)    | 2     | Negative  |
| Breast cancer [Developing] | Females | 15-19 years | 80+ years | Cumulative Cigarettes (10 Years)  | 2     | Positive  |
| Breast cancer [Developing] | Females | 15-19 years | 80+ years | Animal Fats (kcal per capita)     | 2     | Positive  |
| Breast cancer [Developing] | Females | 15-19 years | 80+ years | Fertility (15-19 year olds)       | 2     | Negative  |
| Breast cancer [Developing] | Females | 15-19 years | 80+ years | LDI (I\$ per capita)              | 3     | Negative  |
| Breast cancer [Developing] | Males   | 15-19 years | 80+ years | Alcohol (liters per capita)       | 1     | Positive  |
| Breast cancer [Developing] | Males   | 15-19 years | 80+ years | Health System Access 2 (unitless) | 2     | Negative  |
| Breast cancer [Developing] | Males   | 15-19 years | 80+ years | Latitude Over 45 (proportion)     | 2     | Negative  |
| Breast cancer [Developing] | Males   | 15-19 years | 80+ years | Total Fertility Rate              | 2     | Negative  |
| Breast cancer [Developing] | Males   | 15-19 years | 80+ years | Latitude 15 to 30 (proportion)    | 2     | None      |
| Breast cancer [Developing] | Males   | 15-19 years | 80+ years | Fertility (15-19 year olds)       | 2     | Negative  |
| Breast cancer [Developing] | Males   | 15-19 years | 80+ years | Cumulative Cigarettes (10 Years)  | 2     | Positive  |
| Breast cancer [Developing] | Males   | 15-19 years | 80+ years | Animal Fats (kcal per capita)     | 2     | Positive  |
| Breast cancer [Developing] | Males   | 15-19 years | 80+ years | Education (years per capita)      | 3     | Negative  |
| Breast cancer [Developing] | Males   | 15-19 years | 80+ years | LDI (I\$ per capita)              | 3     | Negative  |



**Web Table 22 – CODEm covariates used, level of covariate, and expected direction of covariate by cause, sex, and age**

| Cause                          | Sex     | Age Start   | Age End   | Covariate                                         | Level | Direction |
|--------------------------------|---------|-------------|-----------|---------------------------------------------------|-------|-----------|
| Cardiomyopathy and myocarditis | Females | 0-6 days    | 80+ years | Systolic Blood Pressure (mmHg)                    | 1     | Positive  |
| Cardiomyopathy and myocarditis | Females | 0-6 days    | 80+ years | Diabetes Age-Standardized Prevalence (proportion) | 1     | Positive  |
| Cardiomyopathy and myocarditis | Females | 0-6 days    | 80+ years | Alcohol (liters per capita)                       | 2     | None      |
| Cardiomyopathy and myocarditis | Females | 0-6 days    | 80+ years | Health System Access 2 (unitless)                 | 3     | Negative  |
| Cardiomyopathy and myocarditis | Females | 0-6 days    | 80+ years | LDI (I\$ per capita)                              | 3     | Negative  |
| Cardiomyopathy and myocarditis | Females | 0-6 days    | 80+ years | Education (years per capita)                      | 3     | Negative  |
| Cardiomyopathy and myocarditis | Males   | 0-6 days    | 80+ years | Systolic Blood Pressure (mmHg)                    | 1     | Positive  |
| Cardiomyopathy and myocarditis | Males   | 0-6 days    | 80+ years | Diabetes Age-Standardized Prevalence (proportion) | 1     | Positive  |
| Cardiomyopathy and myocarditis | Males   | 0-6 days    | 80+ years | Alcohol (liters per capita)                       | 2     | None      |
| Cardiomyopathy and myocarditis | Males   | 0-6 days    | 80+ years | Education (years per capita)                      | 3     | Negative  |
| Cardiomyopathy and myocarditis | Males   | 0-6 days    | 80+ years | Health System Access 2 (unitless)                 | 3     | Negative  |
| Cardiomyopathy and myocarditis | Males   | 0-6 days    | 80+ years | LDI (I\$ per capita)                              | 3     | Negative  |
| Cardiovascular diseases        | Females | 0-6 days    | 80+ years | Smoking Prevalence                                | 1     | Positive  |
| Cardiovascular diseases        | Females | 0-6 days    | 80+ years | Vegetables (kcal per capita)                      | 2     | Negative  |
| Cardiovascular diseases        | Females | 0-6 days    | 80+ years | PUFA Omega 3 - Seafood (kcal per capita)          | 2     | Negative  |
| Cardiovascular diseases        | Females | 0-6 days    | 80+ years | Animal Fats (kcal per capita)                     | 2     | Positive  |
| Cardiovascular diseases        | Females | 0-6 days    | 80+ years | Alcohol (liters per capita)                       | 2     | None      |
| Cardiovascular diseases        | Females | 0-6 days    | 80+ years | LDI (I\$ per capita)                              | 3     | Negative  |
| Cardiovascular diseases        | Males   | 0-6 days    | 80+ years | Cholesterol (total, mean per capita)              | 1     | Positive  |
| Cardiovascular diseases        | Males   | 0-6 days    | 80+ years | Smoking Prevalence                                | 1     | Positive  |
| Cardiovascular diseases        | Males   | 0-6 days    | 80+ years | Elevation Under 100m (proportion)                 | 1     | Positive  |
| Cardiovascular diseases        | Males   | 0-6 days    | 80+ years | Red Meat (kcal per capita)                        | 2     | Positive  |
| Cardiovascular diseases        | Males   | 0-6 days    | 80+ years | PUFA Omega 3 - Seafood (kcal per capita)          | 2     | Negative  |
| Cardiovascular diseases        | Males   | 0-6 days    | 80+ years | Animal Fats (kcal per capita)                     | 2     | Positive  |
| Cardiovascular diseases        | Males   | 0-6 days    | 80+ years | Vegetables (kcal per capita)                      | 2     | Negative  |
| Cardiovascular diseases        | Males   | 0-6 days    | 80+ years | Alcohol (liters per capita)                       | 2     | None      |
| Cardiovascular diseases        | Males   | 0-6 days    | 80+ years | LDI (I\$ per capita)                              | 3     | Negative  |
| Cellulitis                     | Females | 28-364 days | 80+ years | Malnutrition (proportion <2SD weight for age)     | 1     | Positive  |
| Cellulitis                     | Females | 28-364 days | 80+ years | Health System Access 2 (unitless)                 | 1     | Negative  |
| Cellulitis                     | Females | 28-364 days | 80+ years | Sanitation (proportion with access)               | 1     | Negative  |
| Cellulitis                     | Females | 28-364 days | 80+ years | Improved Water Source (proportion with access)    | 1     | Negative  |
| Cellulitis                     | Females | 28-364 days | 80+ years | Alcohol (liters per capita)                       | 2     | Positive  |
| Cellulitis                     | Females | 28-364 days | 80+ years | Smoking Prevalence                                | 2     | Positive  |
| Cellulitis                     | Females | 28-364 days | 80+ years | Latitude Under 15 (proportion)                    | 3     | None      |
| Cellulitis                     | Females | 28-364 days | 80+ years | LDI (I\$ per capita)                              | 3     | Negative  |



**Web Table 22 – CODEm covariates used, level of covariate, and expected direction of covariate by cause, sex, and age**

| Cause                   | Sex     | Age Start   | Age End   | Covariate                                       | Level | Direction |
|-------------------------|---------|-------------|-----------|-------------------------------------------------|-------|-----------|
| Cellulitis              | Females | 28-364 days | 80+ years | Population 15 to 30 (proportion)                | 3     | None      |
| Cellulitis              | Females | 28-364 days | 80+ years | Education (years per capita)                    | 3     | Negative  |
| Cellulitis              | Females | 28-364 days | 80+ years | Latitude Over 45 (proportion)                   | 3     | None      |
| Cellulitis              | Females | 28-364 days | 80+ years | Latitude 30 to 45 (proportion)                  | 3     | None      |
| Cellulitis              | Males   | 28-364 days | 80+ years | Health System Access 2 (unitless)               | 1     | Negative  |
| Cellulitis              | Males   | 28-364 days | 80+ years | Improved Water Source (proportion with access)  | 1     | Negative  |
| Cellulitis              | Males   | 28-364 days | 80+ years | Sanitation (proportion with access)             | 1     | Negative  |
| Cellulitis              | Males   | 28-364 days | 80+ years | Malnutrition (proportion <2SD weight for age)   | 1     | Positive  |
| Cellulitis              | Males   | 28-364 days | 80+ years | Alcohol (liters per capita)                     | 2     | Positive  |
| Cellulitis              | Males   | 28-364 days | 80+ years | Smoking Prevalence                              | 2     | Positive  |
| Cellulitis              | Males   | 28-364 days | 80+ years | Latitude 30 to 45 (proportion)                  | 3     | None      |
| Cellulitis              | Males   | 28-364 days | 80+ years | LDI (I\$ per capita)                            | 3     | Negative  |
| Cellulitis              | Males   | 28-364 days | 80+ years | Education (years per capita)                    | 3     | Negative  |
| Cellulitis              | Males   | 28-364 days | 80+ years | Population 15 to 30 (proportion)                | 3     | None      |
| Cellulitis              | Males   | 28-364 days | 80+ years | Latitude Under 15 (proportion)                  | 3     | None      |
| Cellulitis              | Males   | 28-364 days | 80+ years | Latitude Over 45 (proportion)                   | 3     | None      |
| Cerebrovascular disease | Females | 0-6 days    | 80+ years | Cumulative Cigarettes (5 Years)                 | 1     | Positive  |
| Cerebrovascular disease | Females | 0-6 days    | 80+ years | Smoking Prevalence                              | 1     | Positive  |
| Cerebrovascular disease | Females | 0-6 days    | 80+ years | Systolic Blood Pressure (mmHg)                  | 1     | Positive  |
| Cerebrovascular disease | Females | 0-6 days    | 80+ years | Fruits (kcal per capita)                        | 2     | Negative  |
| Cerebrovascular disease | Females | 0-6 days    | 80+ years | Nuts & Seeds (kcal per capita)                  | 2     | Negative  |
| Cerebrovascular disease | Females | 0-6 days    | 80+ years | In-Milk (kcal per capita)                       | 2     | Negative  |
| Cerebrovascular disease | Females | 0-6 days    | 80+ years | Alcohol (liters per capita)                     | 2     | None      |
| Cerebrovascular disease | Females | 0-6 days    | 80+ years | PUFA Omega 3 - Seafood (kcal per capita)        | 2     | Negative  |
| Cerebrovascular disease | Females | 0-6 days    | 80+ years | Vegetables (kcal per capita)                    | 2     | Negative  |
| Cerebrovascular disease | Females | 0-6 days    | 80+ years | PUFA Omega 6 - Vegetable Oils (kcal per capita) | 2     | Negative  |
| Cerebrovascular disease | Females | 0-6 days    | 80+ years | LDI (I\$ per capita)                            | 3     | Negative  |
| Cerebrovascular disease | Females | 0-6 days    | 80+ years | Health System Access 2 (unitless)               | 3     | Negative  |
| Cerebrovascular disease | Females | 0-6 days    | 80+ years | Whole Grains (kcal per capita)                  | 3     | Negative  |
| Cerebrovascular disease | Females | 0-6 days    | 80+ years | Red Meat (kcal per capita)                      | 3     | Positive  |
| Cerebrovascular disease | Females | 0-6 days    | 80+ years | Education (years per capita)                    | 3     | Negative  |
| Cerebrovascular disease | Females | 0-6 days    | 80+ years | Animal Fats (kcal per capita)                   | 3     | Positive  |
| Cerebrovascular disease | Females | 0-6 days    | 80+ years | Pulses & Legumes (kcal per capita)              | 3     | Negative  |
| Cerebrovascular disease | Males   | 0-6 days    | 80+ years | Mean BMI                                        | 1     | Positive  |
| Cerebrovascular disease | Males   | 0-6 days    | 80+ years | Smoking Prevalence                              | 1     | Positive  |

**Web Table 22 – CODEm covariates used, level of covariate, and expected direction of covariate by cause, sex, and age**

| Cause                        | Sex     | Age Start   | Age End   | Covariate                                       | Level | Direction |
|------------------------------|---------|-------------|-----------|-------------------------------------------------|-------|-----------|
| Cerebrovascular disease      | Males   | 0-6 days    | 80+ years | Systolic Blood Pressure (mmHg)                  | 1     | Positive  |
| Cerebrovascular disease      | Males   | 0-6 days    | 80+ years | Cumulative Cigarettes (5 Years)                 | 1     | Positive  |
| Cerebrovascular disease      | Males   | 0-6 days    | 80+ years | Alcohol (liters per capita)                     | 2     | None      |
| Cerebrovascular disease      | Males   | 0-6 days    | 80+ years | Fruits (kcal per capita)                        | 2     | Negative  |
| Cerebrovascular disease      | Males   | 0-6 days    | 80+ years | Nuts & Seeds (kcal per capita)                  | 2     | Negative  |
| Cerebrovascular disease      | Males   | 0-6 days    | 80+ years | Vegetables (kcal per capita)                    | 2     | Negative  |
| Cerebrovascular disease      | Males   | 0-6 days    | 80+ years | PUFA Omega 3 - Seafood (kcal per capita)        | 2     | Negative  |
| Cerebrovascular disease      | Males   | 0-6 days    | 80+ years | PUFA Omega 6 - Vegetable Oils (kcal per capita) | 2     | Negative  |
| Cerebrovascular disease      | Males   | 0-6 days    | 80+ years | Red Meat (kcal per capita)                      | 3     | Positive  |
| Cerebrovascular disease      | Males   | 0-6 days    | 80+ years | LDI (I\$ per capita)                            | 3     | Negative  |
| Cerebrovascular disease      | Males   | 0-6 days    | 80+ years | Pulses & Legumes (kcal per capita)              | 3     | Negative  |
| Cerebrovascular disease      | Males   | 0-6 days    | 80+ years | Health System Access 2 (unitless)               | 3     | Negative  |
| Cerebrovascular disease      | Males   | 0-6 days    | 80+ years | Whole Grains (kcal per capita)                  | 3     | Negative  |
| Cerebrovascular disease      | Males   | 0-6 days    | 80+ years | Education (years per capita)                    | 3     | Negative  |
| Cerebrovascular disease      | Males   | 0-6 days    | 80+ years | Animal Fats (kcal per capita)                   | 3     | Positive  |
| Cervical cancer [Developed]  | Females | 15-19 years | 80+ years | Smoking Prevalence                              | 1     | Positive  |
| Cervical cancer [Developed]  | Females | 15-19 years | 80+ years | Abortion On-Demand Illegal (binary)             | 1     | Positive  |
| Cervical cancer [Developed]  | Females | 15-19 years | 80+ years | Health System Access 2 (unitless)               | 2     | Negative  |
| Cervical cancer [Developed]  | Females | 15-19 years | 80+ years | Fruits (kcal per capita)                        | 2     | Negative  |
| Cervical cancer [Developed]  | Females | 15-19 years | 80+ years | Vegetables (kcal per capita)                    | 2     | Negative  |
| Cervical cancer [Developed]  | Females | 15-19 years | 80+ years | Total Fertility Rate                            | 2     | Positive  |
| Cervical cancer [Developed]  | Females | 15-19 years | 80+ years | Fertility (15-19 year olds)                     | 2     | Positive  |
| Cervical cancer [Developed]  | Females | 15-19 years | 80+ years | Education (years per capita)                    | 3     | Negative  |
| Cervical cancer [Developed]  | Females | 15-19 years | 80+ years | LDI (I\$ per capita)                            | 3     | Negative  |
| Cervical cancer [Developing] | Females | 15-19 years | 80+ years | Abortion On-Demand Illegal (binary)             | 1     | Positive  |
| Cervical cancer [Developing] | Females | 15-19 years | 80+ years | Smoking Prevalence                              | 1     | Positive  |
| Cervical cancer [Developing] | Females | 15-19 years | 80+ years | Health System Access 2 (unitless)               | 2     | Negative  |
| Cervical cancer [Developing] | Females | 15-19 years | 80+ years | Fruits (kcal per capita)                        | 2     | Negative  |
| Cervical cancer [Developing] | Females | 15-19 years | 80+ years | Fertility (15-19 year olds)                     | 2     | Positive  |
| Cervical cancer [Developing] | Females | 15-19 years | 80+ years | Education (years per capita)                    | 3     | Negative  |
| Chagas disease               | Females | 28-364 days | 80+ years | Chagas Population-at-Risk 2 (proportion)        | 1     | Positive  |
| Chagas disease               | Females | 28-364 days | 80+ years | Health System Access (unitless)                 | 1     | Negative  |
| Chagas disease               | Females | 28-364 days | 80+ years | LDI (I\$ per capita)                            | 3     | Negative  |
| Chagas disease               | Females | 28-364 days | 80+ years | Education (years per capita)                    | 3     | None      |
| Chagas disease               | Males   | 28-364 days | 80+ years | Chagas Population-at-Risk 2 (proportion)        | 1     | Positive  |

**Web Table 22 – CODEm covariates used, level of covariate, and expected direction of covariate by cause, sex, and age**

| Cause                                 | Sex     | Age Start   | Age End   | Covariate                                                           | Level | Direction |
|---------------------------------------|---------|-------------|-----------|---------------------------------------------------------------------|-------|-----------|
| Chagas disease                        | Males   | 28-364 days | 80+ years | Health System Access (unitless)                                     | 1     | Negative  |
| Chagas disease                        | Males   | 28-364 days | 80+ years | Education (years per capita)                                        | 3     | None      |
| Chagas disease                        | Males   | 28-364 days | 80+ years | LDI (I\$ per capita)                                                | 3     | Negative  |
| Chromosomal unbalanced rearrangements | Females | 0-6 days    | 80+ years | Rate of congenital chromosomal abnormalities (per 1000 live births) | 1     | Positive  |
| Chromosomal unbalanced rearrangements | Females | 0-6 days    | 80+ years | Live Births 40+ (proportion)                                        | 1     | Positive  |
| Chromosomal unbalanced rearrangements | Females | 0-6 days    | 80+ years | Live Births 35+ (proportion)                                        | 1     | Positive  |
| Chromosomal unbalanced rearrangements | Females | 0-6 days    | 80+ years | Alcohol (liters per capita)                                         | 3     | Positive  |
| Chromosomal unbalanced rearrangements | Females | 0-6 days    | 80+ years | Indoor Air Pollution (All Cooking Fuels)                            | 3     | Positive  |
| Chromosomal unbalanced rearrangements | Males   | 0-6 days    | 80+ years | Live Births 40+ (proportion)                                        | 1     | Positive  |
| Chromosomal unbalanced rearrangements | Males   | 0-6 days    | 80+ years | Rate of congenital chromosomal abnormalities (per 1000 live births) | 1     | Positive  |
| Chromosomal unbalanced rearrangements | Males   | 0-6 days    | 80+ years | Live Births 35+ (proportion)                                        | 1     | Positive  |
| Chromosomal unbalanced rearrangements | Males   | 0-6 days    | 80+ years | Indoor Air Pollution (All Cooking Fuels)                            | 3     | Positive  |
| Chronic kidney disease                | Females | 28-364 days | 80+ years | Systolic Blood Pressure (mmHg)                                      | 1     | Positive  |
| Chronic kidney disease                | Females | 28-364 days | 80+ years | Mean BMI                                                            | 1     | Positive  |
| Chronic kidney disease                | Females | 28-364 days | 80+ years | Diabetes Age-Standardized Prevalence (proportion)                   | 1     | Positive  |
| Chronic kidney disease                | Females | 28-364 days | 80+ years | Health System Access (unitless)                                     | 1     | Negative  |
| Chronic kidney disease                | Females | 28-364 days | 80+ years | Diabetes Fasting Plasma Glucose (mmol/L)                            | 1     | Positive  |
| Chronic kidney disease                | Females | 28-364 days | 80+ years | Red Meat (kcal per capita)                                          | 2     | None      |
| Chronic kidney disease                | Females | 28-364 days | 80+ years | Total Calories (kcal per capita)                                    | 2     | Positive  |
| Chronic kidney disease                | Females | 28-364 days | 80+ years | Whole Grains (kcal per capita)                                      | 2     | None      |
| Chronic kidney disease                | Females | 28-364 days | 80+ years | Animal Fats (kcal per capita)                                       | 2     | None      |
| Chronic kidney disease                | Females | 28-364 days | 80+ years | Cholesterol (total, mean per capita)                                | 2     | Positive  |
| Chronic kidney disease                | Females | 28-364 days | 80+ years | LDI (I\$ per capita)                                                | 3     | Negative  |
| Chronic kidney disease                | Females | 28-364 days | 80+ years | Education (years per capita)                                        | 3     | Negative  |
| Chronic kidney disease                | Males   | 28-364 days | 80+ years | Mean BMI                                                            | 1     | Positive  |
| Chronic kidney disease                | Males   | 28-364 days | 80+ years | Diabetes Age-Standardized Prevalence (proportion)                   | 1     | Positive  |
| Chronic kidney disease                | Males   | 28-364 days | 80+ years | Systolic Blood Pressure (mmHg)                                      | 1     | Positive  |
| Chronic kidney disease                | Males   | 28-364 days | 80+ years | Health System Access (unitless)                                     | 1     | Negative  |
| Chronic kidney disease                | Males   | 28-364 days | 80+ years | Diabetes Fasting Plasma Glucose (mmol/L)                            | 1     | Positive  |
| Chronic kidney disease                | Males   | 28-364 days | 80+ years | Animal Fats (kcal per capita)                                       | 2     | None      |
| Chronic kidney disease                | Males   | 28-364 days | 80+ years | Total Calories (kcal per capita)                                    | 2     | Positive  |
| Chronic kidney disease                | Males   | 28-364 days | 80+ years | Red Meat (kcal per capita)                                          | 2     | None      |
| Chronic kidney disease                | Males   | 28-364 days | 80+ years | Whole Grains (kcal per capita)                                      | 2     | None      |
| Chronic kidney disease                | Males   | 28-364 days | 80+ years | LDI (I\$ per capita)                                                | 3     | Negative  |
| Chronic kidney disease                | Males   | 28-364 days | 80+ years | Education (years per capita)                                        | 3     | Negative  |

**Web Table 22 – CODEm covariates used, level of covariate, and expected direction of covariate by cause, sex, and age**

| Cause                                            | Sex     | Age Start   | Age End   | Covariate                                     | Level | Direction |
|--------------------------------------------------|---------|-------------|-----------|-----------------------------------------------|-------|-----------|
| Chronic kidney disease due to diabetes mellitus  | Females | 28-364 days | 80+ years | Diabetes Fasting Plasma Glucose (mmol/L)      | 1     | Positive  |
| Chronic kidney disease due to diabetes mellitus  | Females | 28-364 days | 80+ years | Diabetes Age-Specific Prevalence (proportion) | 1     | Positive  |
| Chronic kidney disease due to diabetes mellitus  | Females | 28-364 days | 80+ years | Whole Grains (kcal per capita)                | 2     | None      |
| Chronic kidney disease due to diabetes mellitus  | Females | 28-364 days | 80+ years | Red Meat (kcal per capita)                    | 2     | None      |
| Chronic kidney disease due to diabetes mellitus  | Females | 28-364 days | 80+ years | Cholesterol (total, mean per capita)          | 2     | Positive  |
| Chronic kidney disease due to diabetes mellitus  | Females | 28-364 days | 80+ years | Total Calories (kcal per capita)              | 2     | Positive  |
| Chronic kidney disease due to diabetes mellitus  | Females | 28-364 days | 80+ years | Mean BMI                                      | 2     | Positive  |
| Chronic kidney disease due to diabetes mellitus  | Females | 28-364 days | 80+ years | Animal Fats (kcal per capita)                 | 2     | None      |
| Chronic kidney disease due to diabetes mellitus  | Females | 28-364 days | 80+ years | LDI (I\$ per capita)                          | 3     | Negative  |
| Chronic kidney disease due to diabetes mellitus  | Males   | 28-364 days | 80+ years | Diabetes Age-Specific Prevalence (proportion) | 1     | Positive  |
| Chronic kidney disease due to diabetes mellitus  | Males   | 28-364 days | 80+ years | Diabetes Fasting Plasma Glucose (mmol/L)      | 1     | Positive  |
| Chronic kidney disease due to diabetes mellitus  | Males   | 28-364 days | 80+ years | Mean BMI                                      | 2     | Positive  |
| Chronic kidney disease due to diabetes mellitus  | Males   | 28-364 days | 80+ years | Cholesterol (total, mean per capita)          | 2     | Positive  |
| Chronic kidney disease due to diabetes mellitus  | Males   | 28-364 days | 80+ years | Red Meat (kcal per capita)                    | 2     | None      |
| Chronic kidney disease due to diabetes mellitus  | Males   | 28-364 days | 80+ years | Whole Grains (kcal per capita)                | 2     | None      |
| Chronic kidney disease due to diabetes mellitus  | Males   | 28-364 days | 80+ years | Animal Fats (kcal per capita)                 | 2     | None      |
| Chronic kidney disease due to diabetes mellitus  | Males   | 28-364 days | 80+ years | Total Calories (kcal per capita)              | 2     | Positive  |
| Chronic kidney disease due to diabetes mellitus  | Males   | 28-364 days | 80+ years | Education (years per capita)                  | 3     | Negative  |
| Chronic kidney disease due to diabetes mellitus  | Males   | 28-364 days | 80+ years | LDI (I\$ per capita)                          | 3     | Negative  |
| Chronic kidney disease due to glomerulonephritis | Females | 28-364 days | 80+ years | Health System Access (unitless)               | 1     | Negative  |
| Chronic kidney disease due to glomerulonephritis | Females | 28-364 days | 80+ years | Systolic Blood Pressure (mmHg)                | 1     | Positive  |
| Chronic kidney disease due to glomerulonephritis | Females | 28-364 days | 80+ years | Animal Fats (kcal per capita)                 | 2     | Positive  |
| Chronic kidney disease due to glomerulonephritis | Females | 28-364 days | 80+ years | Whole Grains (kcal per capita)                | 2     | None      |
| Chronic kidney disease due to glomerulonephritis | Females | 28-364 days | 80+ years | Cholesterol (total, mean per capita)          | 2     | Positive  |
| Chronic kidney disease due to glomerulonephritis | Females | 28-364 days | 80+ years | Education (years per capita)                  | 3     | Negative  |
| Chronic kidney disease due to glomerulonephritis | Males   | 28-364 days | 80+ years | Health System Access (unitless)               | 1     | Negative  |
| Chronic kidney disease due to glomerulonephritis | Males   | 28-364 days | 80+ years | Systolic Blood Pressure (mmHg)                | 1     | Positive  |
| Chronic kidney disease due to glomerulonephritis | Males   | 28-364 days | 80+ years | Animal Fats (kcal per capita)                 | 2     | Positive  |
| Chronic kidney disease due to glomerulonephritis | Males   | 28-364 days | 80+ years | Whole Grains (kcal per capita)                | 2     | None      |
| Chronic kidney disease due to glomerulonephritis | Males   | 28-364 days | 80+ years | Education (years per capita)                  | 3     | Negative  |
| Chronic kidney disease due to hypertension       | Females | 28-364 days | 80+ years | Systolic Blood Pressure (mmHg)                | 1     | Positive  |
| Chronic kidney disease due to hypertension       | Females | 28-364 days | 80+ years | Health System Access (unitless)               | 1     | Negative  |
| Chronic kidney disease due to hypertension       | Females | 28-364 days | 80+ years | Whole Grains (kcal per capita)                | 2     | None      |
| Chronic kidney disease due to hypertension       | Females | 28-364 days | 80+ years | Mean BMI                                      | 2     | Positive  |
| Chronic kidney disease due to hypertension       | Females | 28-364 days | 80+ years | Red Meat (kcal per capita)                    | 2     | None      |

**Web Table 22 – CODEm covariates used, level of covariate, and expected direction of covariate by cause, sex, and age**

| Cause                                      | Sex     | Age Start   | Age End   | Covariate                                           | Level | Direction |
|--------------------------------------------|---------|-------------|-----------|-----------------------------------------------------|-------|-----------|
| Chronic kidney disease due to hypertension | Females | 28-364 days | 80+ years | Total Calories (kcal per capita)                    | 2     | Positive  |
| Chronic kidney disease due to hypertension | Females | 28-364 days | 80+ years | Cholesterol (total, mean per capita)                | 2     | Positive  |
| Chronic kidney disease due to hypertension | Females | 28-364 days | 80+ years | Animal Fats (kcal per capita)                       | 2     | None      |
| Chronic kidney disease due to hypertension | Females | 28-364 days | 80+ years | LDI (I\$ per capita)                                | 3     | Negative  |
| Chronic kidney disease due to hypertension | Females | 28-364 days | 80+ years | Education (years per capita)                        | 3     | Negative  |
| Chronic kidney disease due to hypertension | Males   | 28-364 days | 80+ years | Health System Access (unitless)                     | 1     | Negative  |
| Chronic kidney disease due to hypertension | Males   | 28-364 days | 80+ years | Systolic Blood Pressure (mmHg)                      | 1     | Positive  |
| Chronic kidney disease due to hypertension | Males   | 28-364 days | 80+ years | Animal Fats (kcal per capita)                       | 2     | None      |
| Chronic kidney disease due to hypertension | Males   | 28-364 days | 80+ years | Red Meat (kcal per capita)                          | 2     | None      |
| Chronic kidney disease due to hypertension | Males   | 28-364 days | 80+ years | Whole Grains (kcal per capita)                      | 2     | None      |
| Chronic kidney disease due to hypertension | Males   | 28-364 days | 80+ years | Mean BMI                                            | 2     | Positive  |
| Chronic kidney disease due to hypertension | Males   | 28-364 days | 80+ years | Total Calories (kcal per capita)                    | 2     | Positive  |
| Chronic kidney disease due to hypertension | Males   | 28-364 days | 80+ years | Cholesterol (total, mean per capita)                | 2     | Positive  |
| Chronic kidney disease due to hypertension | Males   | 28-364 days | 80+ years | Education (years per capita)                        | 3     | Negative  |
| Chronic kidney disease due to hypertension | Males   | 28-364 days | 80+ years | LDI (I\$ per capita)                                | 3     | Negative  |
| Chronic obstructive pulmonary disease      | Females | 28-364 days | 80+ years | Cumulative Cigarettes (5 Years)                     | 1     | Positive  |
| Chronic obstructive pulmonary disease      | Females | 28-364 days | 80+ years | Indoor Air Pollution (Biomass Cooking)              | 1     | Positive  |
| Chronic obstructive pulmonary disease      | Females | 28-364 days | 80+ years | Smoking Prevalence                                  | 1     | Positive  |
| Chronic obstructive pulmonary disease      | Females | 28-364 days | 80+ years | Indoor Air Pollution (Coal Cooking)                 | 1     | Positive  |
| Chronic obstructive pulmonary disease      | Females | 28-364 days | 80+ years | Outdoor Air Pollution (PM2.5)                       | 1     | Positive  |
| Chronic obstructive pulmonary disease      | Females | 28-364 days | 80+ years | Health System Access 2 (unitless)                   | 1     | Negative  |
| Chronic obstructive pulmonary disease      | Females | 28-364 days | 80+ years | Elevation Over 1500m (proportion)                   | 2     | Positive  |
| Chronic obstructive pulmonary disease      | Females | 28-364 days | 80+ years | Population Density (over 1000 ppl/sqkm, proportion) | 2     | Positive  |
| Chronic obstructive pulmonary disease      | Females | 28-364 days | 80+ years | LDI (I\$ per capita)                                | 3     | Negative  |
| Chronic obstructive pulmonary disease      | Females | 28-364 days | 80+ years | Education (years per capita)                        | 3     | Negative  |
| Chronic obstructive pulmonary disease      | Males   | 28-364 days | 80+ years | Health System Access 2 (unitless)                   | 1     | Negative  |
| Chronic obstructive pulmonary disease      | Males   | 28-364 days | 80+ years | Indoor Air Pollution (Biomass Cooking)              | 1     | Positive  |
| Chronic obstructive pulmonary disease      | Males   | 28-364 days | 80+ years | Smoking Prevalence                                  | 1     | Positive  |
| Chronic obstructive pulmonary disease      | Males   | 28-364 days | 80+ years | Cumulative Cigarettes (5 Years)                     | 1     | Positive  |
| Chronic obstructive pulmonary disease      | Males   | 28-364 days | 80+ years | Outdoor Air Pollution (PM2.5)                       | 1     | Positive  |
| Chronic obstructive pulmonary disease      | Males   | 28-364 days | 80+ years | Indoor Air Pollution (Coal Cooking)                 | 1     | Positive  |
| Chronic obstructive pulmonary disease      | Males   | 28-364 days | 80+ years | Elevation Over 1500m (proportion)                   | 2     | Positive  |
| Chronic obstructive pulmonary disease      | Males   | 28-364 days | 80+ years | Population Density (over 1000 ppl/sqkm, proportion) | 2     | Positive  |
| Chronic obstructive pulmonary disease      | Males   | 28-364 days | 80+ years | Education (years per capita)                        | 3     | Negative  |
| Chronic obstructive pulmonary disease      | Males   | 28-364 days | 80+ years | LDI (I\$ per capita)                                | 3     | Negative  |

**Web Table 22 – CODEm covariates used, level of covariate, and expected direction of covariate by cause, sex, and age**

| Cause                        | Sex     | Age Start | Age End   | Covariate                                           | Level | Direction |
|------------------------------|---------|-----------|-----------|-----------------------------------------------------|-------|-----------|
| Chronic respiratory diseases | Females | 0-6 days  | 80+ years | Health System Access 2 (unitless)                   | 1     | Negative  |
| Chronic respiratory diseases | Females | 0-6 days  | 80+ years | Indoor Air Pollution (Coal Cooking)                 | 1     | Positive  |
| Chronic respiratory diseases | Females | 0-6 days  | 80+ years | Cumulative Cigarettes (5 Years)                     | 1     | Positive  |
| Chronic respiratory diseases | Females | 0-6 days  | 80+ years | Outdoor Air Pollution (PM2.5)                       | 1     | Positive  |
| Chronic respiratory diseases | Females | 0-6 days  | 80+ years | Indoor Air Pollution (Biomass Cooking)              | 1     | Positive  |
| Chronic respiratory diseases | Females | 0-6 days  | 80+ years | Smoking Prevalence                                  | 1     | Positive  |
| Chronic respiratory diseases | Females | 0-6 days  | 80+ years | LDI (I\$ per capita)                                | 3     | Negative  |
| Chronic respiratory diseases | Females | 0-6 days  | 80+ years | Population Density (over 1000 ppl/sqkm, proportion) | 3     | Positive  |
| Chronic respiratory diseases | Females | 0-6 days  | 80+ years | Education (years per capita)                        | 3     | Negative  |
| Chronic respiratory diseases | Males   | 0-6 days  | 80+ years | Indoor Air Pollution (Biomass Cooking)              | 1     | Positive  |
| Chronic respiratory diseases | Males   | 0-6 days  | 80+ years | Smoking Prevalence                                  | 1     | Positive  |
| Chronic respiratory diseases | Males   | 0-6 days  | 80+ years | Outdoor Air Pollution (PM2.5)                       | 1     | Positive  |
| Chronic respiratory diseases | Males   | 0-6 days  | 80+ years | Cumulative Cigarettes (5 Years)                     | 1     | Positive  |
| Chronic respiratory diseases | Males   | 0-6 days  | 80+ years | Health System Access 2 (unitless)                   | 1     | Negative  |
| Chronic respiratory diseases | Males   | 0-6 days  | 80+ years | Indoor Air Pollution (Coal Cooking)                 | 1     | Positive  |
| Chronic respiratory diseases | Males   | 0-6 days  | 80+ years | Population Density (over 1000 ppl/sqkm, proportion) | 3     | Positive  |
| Chronic respiratory diseases | Males   | 0-6 days  | 80+ years | LDI (I\$ per capita)                                | 3     | Negative  |
| Chronic respiratory diseases | Males   | 0-6 days  | 80+ years | Education (years per capita)                        | 3     | Negative  |
| Cirrhosis                    | Females | 1-4 years | 80+ years | Schistosomiasis Prevalence (proportion)             | 1     | Positive  |
| Cirrhosis                    | Females | 1-4 years | 80+ years | Hepatitis C Prevalence (proportion)                 | 1     | Positive  |
| Cirrhosis                    | Females | 1-4 years | 80+ years | Alcohol (liters per capita)                         | 1     | Positive  |
| Cirrhosis                    | Females | 1-4 years | 80+ years | Health System Access 2 (unitless)                   | 1     | Negative  |
| Cirrhosis                    | Females | 1-4 years | 80+ years | Hepatitis B Prevalence (proportion)                 | 1     | Positive  |
| Cirrhosis                    | Females | 1-4 years | 80+ years | Mean BMI                                            | 2     | Positive  |
| Cirrhosis                    | Females | 1-4 years | 80+ years | Diabetes Age-Standardized Prevalence (proportion)   | 2     | Positive  |
| Cirrhosis                    | Females | 1-4 years | 80+ years | LDI (I\$ per capita)                                | 3     | Negative  |
| Cirrhosis                    | Females | 1-4 years | 80+ years | Education (years per capita)                        | 3     | Negative  |
| Cirrhosis                    | Males   | 1-4 years | 80+ years | Alcohol (liters per capita)                         | 1     | Positive  |
| Cirrhosis                    | Males   | 1-4 years | 80+ years | Hepatitis C Prevalence (proportion)                 | 1     | Positive  |
| Cirrhosis                    | Males   | 1-4 years | 80+ years | Schistosomiasis Prevalence (proportion)             | 1     | Positive  |
| Cirrhosis                    | Males   | 1-4 years | 80+ years | Health System Access 2 (unitless)                   | 1     | Negative  |
| Cirrhosis                    | Males   | 1-4 years | 80+ years | Hepatitis B Prevalence (proportion)                 | 1     | Positive  |
| Cirrhosis                    | Males   | 1-4 years | 80+ years | Diabetes Age-Standardized Prevalence (proportion)   | 2     | Positive  |
| Cirrhosis                    | Males   | 1-4 years | 80+ years | Mean BMI                                            | 2     | Positive  |
| Cirrhosis                    | Males   | 1-4 years | 80+ years | LDI (I\$ per capita)                                | 3     | Negative  |

**Web Table 22 – CODEm covariates used, level of covariate, and expected direction of covariate by cause, sex, and age**

| Cause                       | Sex     | Age Start | Age End   | Covariate                                           | Level | Direction |
|-----------------------------|---------|-----------|-----------|-----------------------------------------------------|-------|-----------|
| Cirrhosis                   | Males   | 1-4 years | 80+ years | Education (years per capita)                        | 3     | Negative  |
| Cleft lip and cleft palate  | Females | 0-6 days  | 1-4 years | Indoor Air Pollution (All Cooking Fuels)            | 1     | Positive  |
| Cleft lip and cleft palate  | Females | 0-6 days  | 1-4 years | Smoking Prevalence (Reproductive Age Standardized)  | 1     | Positive  |
| Cleft lip and cleft palate  | Females | 0-6 days  | 1-4 years | Alcohol (liters per capita)                         | 1     | Positive  |
| Cleft lip and cleft palate  | Females | 0-6 days  | 1-4 years | Education (years per capita)                        | 2     | Negative  |
| Cleft lip and cleft palate  | Females | 0-6 days  | 1-4 years | LDI (I\$ per capita)                                | 3     | Negative  |
| Cleft lip and cleft palate  | Females | 0-6 days  | 1-4 years | Health System Access (capped)                       | 3     | Negative  |
| Cleft lip and cleft palate  | Females | 0-6 days  | 1-4 years | Measles Vaccine Coverage (proportion)               | 3     | Negative  |
| Cleft lip and cleft palate  | Males   | 0-6 days  | 1-4 years | Alcohol (liters per capita)                         | 1     | Positive  |
| Cleft lip and cleft palate  | Males   | 0-6 days  | 1-4 years | Smoking Prevalence (Reproductive Age Standardized)  | 1     | Positive  |
| Cleft lip and cleft palate  | Males   | 0-6 days  | 1-4 years | Indoor Air Pollution (All Cooking Fuels)            | 1     | Positive  |
| Cleft lip and cleft palate  | Males   | 0-6 days  | 1-4 years | Legality of Abortion                                | 1     | Negative  |
| Cleft lip and cleft palate  | Males   | 0-6 days  | 1-4 years | Education (years per capita)                        | 2     | Negative  |
| Cleft lip and cleft palate  | Males   | 0-6 days  | 1-4 years | Vegetables (kcal per capita)                        | 2     | Negative  |
| Cleft lip and cleft palate  | Males   | 0-6 days  | 1-4 years | Measles Vaccine Coverage (proportion)               | 3     | Negative  |
| Cleft lip and cleft palate  | Males   | 0-6 days  | 1-4 years | LDI (I\$ per capita)                                | 3     | Negative  |
| Cleft lip and cleft palate  | Males   | 0-6 days  | 1-4 years | Health System Access (capped)                       | 3     | Negative  |
| Coal workers pneumoconiosis | Females | 0-6 days  | 80+ years | Cumulative Cigarettes (5 Years)                     | 1     | Positive  |
| Coal workers pneumoconiosis | Females | 0-6 days  | 80+ years | Indoor Air Pollution (Coal Cooking)                 | 1     | Positive  |
| Coal workers pneumoconiosis | Females | 0-6 days  | 80+ years | Health System Access 2 (unitless)                   | 1     | Negative  |
| Coal workers pneumoconiosis | Females | 0-6 days  | 80+ years | Smoking Prevalence                                  | 1     | Positive  |
| Coal workers pneumoconiosis | Females | 0-6 days  | 80+ years | Asbestos production (binary)                        | 1     | Positive  |
| Coal workers pneumoconiosis | Females | 0-6 days  | 80+ years | Population Density (over 1000 ppl/sqkm, proportion) | 2     | Positive  |
| Coal workers pneumoconiosis | Females | 0-6 days  | 80+ years | Gold production (kg) per capita                     | 2     | Positive  |
| Coal workers pneumoconiosis | Females | 0-6 days  | 80+ years | Asbestos production (kg) per capita                 | 2     | Positive  |
| Coal workers pneumoconiosis | Females | 0-6 days  | 80+ years | Education (years per capita)                        | 3     | Negative  |
| Coal workers pneumoconiosis | Females | 0-6 days  | 80+ years | LDI (I\$ per capita)                                | 3     | Negative  |
| Coal workers pneumoconiosis | Males   | 0-6 days  | 80+ years | Health System Access 2 (unitless)                   | 1     | Negative  |
| Coal workers pneumoconiosis | Males   | 0-6 days  | 80+ years | Cumulative Cigarettes (5 Years)                     | 1     | Positive  |
| Coal workers pneumoconiosis | Males   | 0-6 days  | 80+ years | Indoor Air Pollution (Coal Cooking)                 | 1     | Positive  |
| Coal workers pneumoconiosis | Males   | 0-6 days  | 80+ years | Asbestos production (binary)                        | 1     | Positive  |
| Coal workers pneumoconiosis | Males   | 0-6 days  | 80+ years | Smoking Prevalence                                  | 1     | Positive  |
| Coal workers pneumoconiosis | Males   | 0-6 days  | 80+ years | Elevation Over 1500m (proportion)                   | 2     | Positive  |
| Coal workers pneumoconiosis | Males   | 0-6 days  | 80+ years | Population Density (over 1000 ppl/sqkm, proportion) | 2     | Positive  |
| Coal workers pneumoconiosis | Males   | 0-6 days  | 80+ years | Gold production (kg) per capita                     | 2     | Positive  |



**Web Table 22 – CODEm covariates used, level of covariate, and expected direction of covariate by cause, sex, and age**

| Cause                                | Sex     | Age Start   | Age End   | Covariate                                         | Level | Direction |
|--------------------------------------|---------|-------------|-----------|---------------------------------------------------|-------|-----------|
| Coal workers pneumoconiosis          | Males   | 0-6 days    | 80+ years | LDI (I\$ per capita)                              | 3     | Negative  |
| Coal workers pneumoconiosis          | Males   | 0-6 days    | 80+ years | Education (years per capita)                      | 3     | Negative  |
| Colon and rectum cancer [Developed]  | Females | 15-19 years | 80+ years | Alcohol (liters per capita)                       | 1     | Positive  |
| Colon and rectum cancer [Developed]  | Females | 15-19 years | 80+ years | Tobacco (cigarettes per capita) [lagged 10 years] | 1     | Positive  |
| Colon and rectum cancer [Developed]  | Females | 15-19 years | 80+ years | Fruits (kcal per capita)                          | 1     | Negative  |
| Colon and rectum cancer [Developed]  | Females | 15-19 years | 80+ years | Whole Grains (kcal per capita)                    | 1     | Negative  |
| Colon and rectum cancer [Developed]  | Females | 15-19 years | 80+ years | Vegetables (kcal per capita)                      | 1     | Negative  |
| Colon and rectum cancer [Developed]  | Females | 15-19 years | 80+ years | Smoking Prevalence                                | 1     | Positive  |
| Colon and rectum cancer [Developed]  | Females | 15-19 years | 80+ years | Mean BMI                                          | 1     | Positive  |
| Colon and rectum cancer [Developed]  | Females | 15-19 years | 80+ years | In-Milk (kcal per capita)                         | 1     | Negative  |
| Colon and rectum cancer [Developed]  | Females | 15-19 years | 80+ years | Diabetes Age-Standardized Prevalence (proportion) | 2     | Positive  |
| Colon and rectum cancer [Developed]  | Females | 15-19 years | 80+ years | Red Meat (kcal per capita)                        | 2     | Positive  |
| Colon and rectum cancer [Developed]  | Females | 15-19 years | 80+ years | Health System Access 2 (unitless)                 | 2     | Negative  |
| Colon and rectum cancer [Developed]  | Females | 15-19 years | 80+ years | PUFA Omega 3 - Seafood (kcal per capita)          | 2     | Negative  |
| Colon and rectum cancer [Developed]  | Females | 15-19 years | 80+ years | Nuts & Seeds (kcal per capita)                    | 2     | Negative  |
| Colon and rectum cancer [Developed]  | Females | 15-19 years | 80+ years | LDI (I\$ per capita)                              | 3     | Negative  |
| Colon and rectum cancer [Developed]  | Females | 15-19 years | 80+ years | Education (years per capita)                      | 3     | Negative  |
| Colon and rectum cancer [Developed]  | Males   | 15-19 years | 80+ years | Smoking Prevalence                                | 1     | Positive  |
| Colon and rectum cancer [Developed]  | Males   | 15-19 years | 80+ years | In-Milk (kcal per capita)                         | 1     | Negative  |
| Colon and rectum cancer [Developed]  | Males   | 15-19 years | 80+ years | Tobacco (cigarettes per capita) [lagged 10 years] | 1     | Positive  |
| Colon and rectum cancer [Developed]  | Males   | 15-19 years | 80+ years | Alcohol (liters per capita)                       | 1     | Positive  |
| Colon and rectum cancer [Developed]  | Males   | 15-19 years | 80+ years | Fruits (kcal per capita)                          | 1     | Negative  |
| Colon and rectum cancer [Developed]  | Males   | 15-19 years | 80+ years | Whole Grains (kcal per capita)                    | 1     | Negative  |
| Colon and rectum cancer [Developed]  | Males   | 15-19 years | 80+ years | Vegetables (kcal per capita)                      | 1     | Negative  |
| Colon and rectum cancer [Developed]  | Males   | 15-19 years | 80+ years | Mean BMI                                          | 1     | Positive  |
| Colon and rectum cancer [Developed]  | Males   | 15-19 years | 80+ years | Diabetes Age-Standardized Prevalence (proportion) | 2     | Positive  |
| Colon and rectum cancer [Developed]  | Males   | 15-19 years | 80+ years | Red Meat (kcal per capita)                        | 2     | Positive  |
| Colon and rectum cancer [Developed]  | Males   | 15-19 years | 80+ years | PUFA Omega 3 - Seafood (kcal per capita)          | 2     | Negative  |
| Colon and rectum cancer [Developed]  | Males   | 15-19 years | 80+ years | Nuts & Seeds (kcal per capita)                    | 2     | Negative  |
| Colon and rectum cancer [Developed]  | Males   | 15-19 years | 80+ years | Health System Access 2 (unitless)                 | 2     | Negative  |
| Colon and rectum cancer [Developed]  | Males   | 15-19 years | 80+ years | LDI (I\$ per capita)                              | 3     | Negative  |
| Colon and rectum cancer [Developing] | Females | 15-19 years | 80+ years | Smoking Prevalence                                | 1     | Positive  |
| Colon and rectum cancer [Developing] | Females | 15-19 years | 80+ years | Fruits (kcal per capita)                          | 1     | Negative  |
| Colon and rectum cancer [Developing] | Females | 15-19 years | 80+ years | Alcohol (liters per capita)                       | 1     | Positive  |
| Colon and rectum cancer [Developing] | Females | 15-19 years | 80+ years | Tobacco (cigarettes per capita) [lagged 10 years] | 1     | Positive  |



**Web Table 22 – CODEm covariates used, level of covariate, and expected direction of covariate by cause, sex, and age**

| Cause                                | Sex     | Age Start   | Age End   | Covariate                                                           | Level | Direction |
|--------------------------------------|---------|-------------|-----------|---------------------------------------------------------------------|-------|-----------|
| Colon and rectum cancer [Developing] | Females | 15-19 years | 80+ years | Vegetables (kcal per capita)                                        | 1     | Negative  |
| Colon and rectum cancer [Developing] | Females | 15-19 years | 80+ years | Mean BMI                                                            | 1     | Positive  |
| Colon and rectum cancer [Developing] | Females | 15-19 years | 80+ years | In-Milk (kcal per capita)                                           | 1     | Negative  |
| Colon and rectum cancer [Developing] | Females | 15-19 years | 80+ years | Diabetes Age-Standardized Prevalence (proportion)                   | 2     | Positive  |
| Colon and rectum cancer [Developing] | Females | 15-19 years | 80+ years | PUFA Omega 3 - Seafood (kcal per capita)                            | 2     | Negative  |
| Colon and rectum cancer [Developing] | Females | 15-19 years | 80+ years | Red Meat (kcal per capita)                                          | 2     | Positive  |
| Colon and rectum cancer [Developing] | Females | 15-19 years | 80+ years | Health System Access 2 (unitless)                                   | 2     | Negative  |
| Colon and rectum cancer [Developing] | Females | 15-19 years | 80+ years | Nuts & Seeds (kcal per capita)                                      | 2     | Negative  |
| Colon and rectum cancer [Developing] | Females | 15-19 years | 80+ years | LDI (I\$ per capita)                                                | 3     | Negative  |
| Colon and rectum cancer [Developing] | Males   | 15-19 years | 80+ years | Alcohol (liters per capita)                                         | 1     | Positive  |
| Colon and rectum cancer [Developing] | Males   | 15-19 years | 80+ years | Fruits (kcal per capita)                                            | 1     | Negative  |
| Colon and rectum cancer [Developing] | Males   | 15-19 years | 80+ years | Smoking Prevalence                                                  | 1     | Positive  |
| Colon and rectum cancer [Developing] | Males   | 15-19 years | 80+ years | Mean BMI                                                            | 1     | Positive  |
| Colon and rectum cancer [Developing] | Males   | 15-19 years | 80+ years | In-Milk (kcal per capita)                                           | 1     | Negative  |
| Colon and rectum cancer [Developing] | Males   | 15-19 years | 80+ years | Tobacco (cigarettes per capita) [lagged 10 years]                   | 1     | Positive  |
| Colon and rectum cancer [Developing] | Males   | 15-19 years | 80+ years | PUFA Omega 3 - Seafood (kcal per capita)                            | 2     | Negative  |
| Colon and rectum cancer [Developing] | Males   | 15-19 years | 80+ years | Nuts & Seeds (kcal per capita)                                      | 2     | Negative  |
| Colon and rectum cancer [Developing] | Males   | 15-19 years | 80+ years | Red Meat (kcal per capita)                                          | 2     | Positive  |
| Colon and rectum cancer [Developing] | Males   | 15-19 years | 80+ years | Diabetes Age-Standardized Prevalence (proportion)                   | 2     | Positive  |
| Congenital anomalies                 | Females | 0-6 days    | 80+ years | Rate of congenital chromosomal abnormalities (per 1000 live births) | 1     | Positive  |
| Congenital anomalies                 | Females | 0-6 days    | 80+ years | Rate of congenital heart disease (per 1000 live births)             | 1     | Positive  |
| Congenital anomalies                 | Females | 0-6 days    | 80+ years | Live Births 35+ (proportion)                                        | 1     | Positive  |
| Congenital anomalies                 | Females | 0-6 days    | 80+ years | Alcohol (liters per capita)                                         | 1     | Positive  |
| Congenital anomalies                 | Females | 0-6 days    | 80+ years | Health System Access (capped)                                       | 2     | None      |
| Congenital anomalies                 | Females | 0-6 days    | 80+ years | Legality of Abortion                                                | 2     | Negative  |
| Congenital anomalies                 | Females | 0-6 days    | 80+ years | Smoking Prevalence (Reproductive Age Standardized)                  | 3     | Positive  |
| Congenital anomalies                 | Females | 0-6 days    | 80+ years | LDI (I\$ per capita)                                                | 3     | Negative  |
| Congenital anomalies                 | Females | 0-6 days    | 80+ years | Fruits (kcal per capita)                                            | 3     | Negative  |
| Congenital anomalies                 | Females | 0-6 days    | 80+ years | Vegetables (kcal per capita)                                        | 3     | Negative  |
| Congenital anomalies                 | Males   | 0-6 days    | 80+ years | Rate of congenital heart disease (per 1000 live births)             | 1     | Positive  |
| Congenital anomalies                 | Males   | 0-6 days    | 80+ years | Live Births 35+ (proportion)                                        | 1     | Positive  |
| Congenital anomalies                 | Males   | 0-6 days    | 80+ years | Rate of congenital chromosomal abnormalities (per 1000 live births) | 1     | Positive  |
| Congenital anomalies                 | Males   | 0-6 days    | 80+ years | Alcohol (liters per capita)                                         | 1     | Positive  |
| Congenital anomalies                 | Males   | 0-6 days    | 80+ years | Health System Access (capped)                                       | 2     | None      |
| Congenital anomalies                 | Males   | 0-6 days    | 80+ years | Legality of Abortion                                                | 2     | Negative  |

**Web Table 22 – CODEm covariates used, level of covariate, and expected direction of covariate by cause, sex, and age**

| Cause                             | Sex     | Age Start | Age End   | Covariate                                               | Level | Direction |
|-----------------------------------|---------|-----------|-----------|---------------------------------------------------------|-------|-----------|
| Congenital anomalies              | Males   | 0-6 days  | 80+ years | Smoking Prevalence (Reproductive Age Standardized)      | 3     | Positive  |
| Congenital anomalies              | Males   | 0-6 days  | 80+ years | Fruits (kcal per capita)                                | 3     | Negative  |
| Congenital anomalies              | Males   | 0-6 days  | 80+ years | LDI (I\$ per capita)                                    | 3     | Negative  |
| Congenital anomalies              | Males   | 0-6 days  | 80+ years | Vegetables (kcal per capita)                            | 3     | Negative  |
| Congenital heart anomalies        | Females | 0-6 days  | 80+ years | Rate of congenital heart disease (per 1000 live births) | 1     | Positive  |
| Congenital heart anomalies        | Females | 0-6 days  | 80+ years | Alcohol (liters per capita)                             | 1     | Positive  |
| Congenital heart anomalies        | Females | 0-6 days  | 80+ years | Measles Vaccine Coverage (proportion)                   | 1     | Negative  |
| Congenital heart anomalies        | Females | 0-6 days  | 80+ years | Live Births 35+ (proportion)                            | 1     | Positive  |
| Congenital heart anomalies        | Females | 0-6 days  | 80+ years | LDI (I\$ per capita)                                    | 2     | None      |
| Congenital heart anomalies        | Females | 0-6 days  | 80+ years | Legality of Abortion                                    | 2     | Negative  |
| Congenital heart anomalies        | Females | 0-6 days  | 80+ years | Diabetes Age-Standardized Prevalence (proportion)       | 2     | Positive  |
| Congenital heart anomalies        | Females | 0-6 days  | 80+ years | Smoking Prevalence (Reproductive Age Standardized)      | 3     | Positive  |
| Congenital heart anomalies        | Males   | 0-6 days  | 80+ years | Live Births 35+ (proportion)                            | 1     | Positive  |
| Congenital heart anomalies        | Males   | 0-6 days  | 80+ years | Measles Vaccine Coverage (proportion)                   | 1     | Negative  |
| Congenital heart anomalies        | Males   | 0-6 days  | 80+ years | Alcohol (liters per capita)                             | 1     | Positive  |
| Congenital heart anomalies        | Males   | 0-6 days  | 80+ years | Rate of congenital heart disease (per 1000 live births) | 1     | Positive  |
| Congenital heart anomalies        | Males   | 0-6 days  | 80+ years | Legality of Abortion                                    | 2     | Negative  |
| Congenital heart anomalies        | Males   | 0-6 days  | 80+ years | LDI (I\$ per capita)                                    | 2     | None      |
| Congenital heart anomalies        | Males   | 0-6 days  | 80+ years | Diabetes Age-Standardized Prevalence (proportion)       | 2     | Positive  |
| Congenital heart anomalies        | Males   | 0-6 days  | 80+ years | Smoking Prevalence (Reproductive Age Standardized)      | 3     | Positive  |
| Cyclist road injuries [Developed] | Females | 1-4 years | 80+ years | Vehicles - 2 wheels fraction (proportion)               | 1     | Positive  |
| Cyclist road injuries [Developed] | Females | 1-4 years | 80+ years | Alcohol (liters per capita)                             | 1     | Positive  |
| Cyclist road injuries [Developed] | Females | 1-4 years | 80+ years | Health System Access 2 (unitless)                       | 1     | Negative  |
| Cyclist road injuries [Developed] | Females | 1-4 years | 80+ years | Vehicles - 2+4 wheels (per capita)                      | 1     | Positive  |
| Cyclist road injuries [Developed] | Females | 1-4 years | 80+ years | Population Density (500-1000 ppl/sqkm, proportion)      | 2     | None      |
| Cyclist road injuries [Developed] | Females | 1-4 years | 80+ years | Population Density (300-500 ppl/sqkm, proportion)       | 2     | None      |
| Cyclist road injuries [Developed] | Females | 1-4 years | 80+ years | LDI (I\$ per capita)                                    | 2     | None      |
| Cyclist road injuries [Developed] | Females | 1-4 years | 80+ years | Education (years per capita)                            | 3     | Negative  |
| Cyclist road injuries [Developed] | Males   | 1-4 years | 80+ years | Alcohol (liters per capita)                             | 1     | Positive  |
| Cyclist road injuries [Developed] | Males   | 1-4 years | 80+ years | Vehicles - 2 wheels fraction (proportion)               | 1     | Positive  |
| Cyclist road injuries [Developed] | Males   | 1-4 years | 80+ years | Health System Access 2 (unitless)                       | 1     | Negative  |
| Cyclist road injuries [Developed] | Males   | 1-4 years | 80+ years | Population Density (500-1000 ppl/sqkm, proportion)      | 2     | None      |
| Cyclist road injuries [Developed] | Males   | 1-4 years | 80+ years | Population Density (300-500 ppl/sqkm, proportion)       | 2     | None      |
| Cyclist road injuries [Developed] | Males   | 1-4 years | 80+ years | LDI (I\$ per capita)                                    | 2     | None      |
| Cyclist road injuries [Developed] | Males   | 1-4 years | 80+ years | Education (years per capita)                            | 3     | Negative  |

**Web Table 22 – CODEm covariates used, level of covariate, and expected direction of covariate by cause, sex, and age**

| Cause                              | Sex     | Age Start | Age End   | Covariate                                          | Level | Direction |
|------------------------------------|---------|-----------|-----------|----------------------------------------------------|-------|-----------|
| Cyclist road injuries [Developing] | Females | 1-4 years | 80+ years | Health System Access 2 (unitless)                  | 1     | Negative  |
| Cyclist road injuries [Developing] | Females | 1-4 years | 80+ years | Vehicles - 2+4 wheels (per capita)                 | 1     | Positive  |
| Cyclist road injuries [Developing] | Females | 1-4 years | 80+ years | Alcohol (liters per capita)                        | 1     | Positive  |
| Cyclist road injuries [Developing] | Females | 1-4 years | 80+ years | Vehicles - 2 wheels fraction (proportion)          | 1     | Positive  |
| Cyclist road injuries [Developing] | Females | 1-4 years | 80+ years | Population Density (500-1000 ppl/sqkm, proportion) | 2     | None      |
| Cyclist road injuries [Developing] | Females | 1-4 years | 80+ years | LDI (I\$ per capita)                               | 2     | None      |
| Cyclist road injuries [Developing] | Females | 1-4 years | 80+ years | Population Density (300-500 ppl/sqkm, proportion)  | 2     | None      |
| Cyclist road injuries [Developing] | Females | 1-4 years | 80+ years | Education (years per capita)                       | 3     | Negative  |
| Cyclist road injuries [Developing] | Males   | 1-4 years | 80+ years | Health System Access 2 (unitless)                  | 1     | Negative  |
| Cyclist road injuries [Developing] | Males   | 1-4 years | 80+ years | Vehicles - 2 wheels fraction (proportion)          | 1     | Positive  |
| Cyclist road injuries [Developing] | Males   | 1-4 years | 80+ years | Alcohol (liters per capita)                        | 1     | Positive  |
| Cyclist road injuries [Developing] | Males   | 1-4 years | 80+ years | Vehicles - 2+4 wheels (per capita)                 | 1     | Positive  |
| Cyclist road injuries [Developing] | Males   | 1-4 years | 80+ years | LDI (I\$ per capita)                               | 2     | None      |
| Cyclist road injuries [Developing] | Males   | 1-4 years | 80+ years | Population Density (300-500 ppl/sqkm, proportion)  | 2     | None      |
| Cyclist road injuries [Developing] | Males   | 1-4 years | 80+ years | Population Density (500-1000 ppl/sqkm, proportion) | 2     | None      |
| Cyclist road injuries [Developing] | Males   | 1-4 years | 80+ years | Education (years per capita)                       | 3     | Negative  |
| Decubitus ulcer                    | Females | 1-4 years | 80+ years | Malnutrition (proportion <2SD weight for age)      | 1     | Positive  |
| Decubitus ulcer                    | Females | 1-4 years | 80+ years | Sanitation (proportion with access)                | 1     | Negative  |
| Decubitus ulcer                    | Females | 1-4 years | 80+ years | Health System Access 2 (unitless)                  | 2     | Negative  |
| Decubitus ulcer                    | Females | 1-4 years | 80+ years | Cumulative Cigarettes (5 Years)                    | 2     | Positive  |
| Decubitus ulcer                    | Females | 1-4 years | 80+ years | Cumulative Cigarettes (10 Years)                   | 2     | Positive  |
| Decubitus ulcer                    | Females | 1-4 years | 80+ years | Smoking Prevalence                                 | 2     | Positive  |
| Decubitus ulcer                    | Females | 1-4 years | 80+ years | Alcohol (liters per capita)                        | 2     | Positive  |
| Decubitus ulcer                    | Females | 1-4 years | 80+ years | Latitude 15 to 30 (proportion)                     | 3     | None      |
| Decubitus ulcer                    | Females | 1-4 years | 80+ years | Education (years per capita)                       | 3     | Negative  |
| Decubitus ulcer                    | Females | 1-4 years | 80+ years | Latitude Over 45 (proportion)                      | 3     | None      |
| Decubitus ulcer                    | Females | 1-4 years | 80+ years | Latitude Under 15 (proportion)                     | 3     | None      |
| Decubitus ulcer                    | Females | 1-4 years | 80+ years | Latitude 30 to 45 (proportion)                     | 3     | None      |
| Decubitus ulcer                    | Males   | 1-4 years | 80+ years | Sanitation (proportion with access)                | 1     | Negative  |
| Decubitus ulcer                    | Males   | 1-4 years | 80+ years | Malnutrition (proportion <2SD weight for age)      | 1     | Positive  |
| Decubitus ulcer                    | Males   | 1-4 years | 80+ years | Cumulative Cigarettes (5 Years)                    | 2     | Positive  |
| Decubitus ulcer                    | Males   | 1-4 years | 80+ years | Health System Access 2 (unitless)                  | 2     | Negative  |
| Decubitus ulcer                    | Males   | 1-4 years | 80+ years | Cumulative Cigarettes (10 Years)                   | 2     | Positive  |
| Decubitus ulcer                    | Males   | 1-4 years | 80+ years | Alcohol (liters per capita)                        | 2     | Positive  |
| Decubitus ulcer                    | Males   | 1-4 years | 80+ years | Smoking Prevalence                                 | 2     | Positive  |

**Web Table 22 – CODEm covariates used, level of covariate, and expected direction of covariate by cause, sex, and age**

| Cause             | Sex     | Age Start   | Age End     | Covariate                                                    | Level | Direction |
|-------------------|---------|-------------|-------------|--------------------------------------------------------------|-------|-----------|
| Decubitus ulcer   | Males   | 1-4 years   | 80+ years   | Latitude Under 15 (proportion)                               | 3     | None      |
| Decubitus ulcer   | Males   | 1-4 years   | 80+ years   | Latitude 30 to 45 (proportion)                               | 3     | None      |
| Decubitus ulcer   | Males   | 1-4 years   | 80+ years   | Education (years per capita)                                 | 3     | Negative  |
| Decubitus ulcer   | Males   | 1-4 years   | 80+ years   | Latitude 15 to 30 (proportion)                               | 3     | None      |
| Decubitus ulcer   | Males   | 1-4 years   | 80+ years   | Latitude Over 45 (proportion)                                | 3     | None      |
| Dengue            | Females | 28-364 days | 80+ years   | Population weighted probability of dengue transmission       | 1     | Positive  |
| Dengue            | Females | 28-364 days | 80+ years   | Dengue outbreaks (binary)                                    | 2     | Positive  |
| Dengue            | Females | 28-364 days | 80+ years   | Rainfall Quintile 5 (proportion)                             | 2     | Positive  |
| Dengue            | Females | 28-364 days | 80+ years   | Dengue anomalies (deviation from mean dengue incidence rate) | 2     | Positive  |
| Dengue            | Females | 28-364 days | 80+ years   | Health System Access (unitless)                              | 2     | None      |
| Dengue            | Females | 28-364 days | 80+ years   | Latitude Under 15 (proportion)                               | 2     | Positive  |
| Dengue            | Females | 28-364 days | 80+ years   | Education (years per capita)                                 | 3     | None      |
| Dengue            | Females | 28-364 days | 80+ years   | LDI (I\$ per capita)                                         | 3     | None      |
| Dengue            | Males   | 28-364 days | 80+ years   | Population weighted probability of dengue transmission       | 1     | Positive  |
| Dengue            | Males   | 28-364 days | 80+ years   | Dengue outbreaks (binary)                                    | 2     | Positive  |
| Dengue            | Males   | 28-364 days | 80+ years   | Elevation Under 100m (proportion)                            | 2     | Positive  |
| Dengue            | Males   | 28-364 days | 80+ years   | Rainfall Quintile 5 (proportion)                             | 2     | Positive  |
| Dengue            | Males   | 28-364 days | 80+ years   | Latitude Under 15 (proportion)                               | 2     | Positive  |
| Dengue            | Males   | 28-364 days | 80+ years   | Health System Access (unitless)                              | 2     | None      |
| Dengue            | Males   | 28-364 days | 80+ years   | Dengue anomalies (deviation from mean dengue incidence rate) | 2     | Positive  |
| Dengue            | Males   | 28-364 days | 80+ years   | Education (years per capita)                                 | 3     | None      |
| Dengue            | Males   | 28-364 days | 80+ years   | LDI (I\$ per capita)                                         | 3     | None      |
| Diabetes mellitus | Females | 0-6 days    | 20-24 years | Cholesterol (total, mean per capita)                         | 1     | Positive  |
| Diabetes mellitus | Females | 0-6 days    | 20-24 years | Diabetes Fasting Plasma Glucose (mmol/L)                     | 1     | Positive  |
| Diabetes mellitus | Females | 0-6 days    | 20-24 years | Systolic Blood Pressure (mmHg)                               | 1     | Positive  |
| Diabetes mellitus | Females | 0-6 days    | 20-24 years | Diabetes Age-Standardized Prevalence (proportion)            | 1     | Positive  |
| Diabetes mellitus | Females | 0-6 days    | 20-24 years | Mean BMI                                                     | 1     | Positive  |
| Diabetes mellitus | Females | 0-6 days    | 20-24 years | Animal Fats (kcal per capita)                                | 2     | Positive  |
| Diabetes mellitus | Females | 0-6 days    | 20-24 years | Health System Access (unitless)                              | 2     | Negative  |
| Diabetes mellitus | Females | 0-6 days    | 20-24 years | Total Calories (kcal per capita)                             | 2     | Positive  |
| Diabetes mellitus | Females | 0-6 days    | 20-24 years | Vegetables (kcal per capita)                                 | 2     | Negative  |
| Diabetes mellitus | Females | 0-6 days    | 20-24 years | Education (years per capita)                                 | 3     | Negative  |
| Diabetes mellitus | Females | 0-6 days    | 20-24 years | LDI (I\$ per capita)                                         | 3     | Negative  |
| Diabetes mellitus | Females | 25-29 years | 80+ years   | Systolic Blood Pressure (mmHg)                               | 1     | Positive  |
| Diabetes mellitus | Females | 25-29 years | 80+ years   | Diabetes Fasting Plasma Glucose (mmol/L)                     | 1     | Positive  |

**Web Table 22 – CODEm covariates used, level of covariate, and expected direction of covariate by cause, sex, and age**

| Cause              | Sex     | Age Start   | Age End     | Covariate                                           | Level | Direction |
|--------------------|---------|-------------|-------------|-----------------------------------------------------|-------|-----------|
| Diabetes mellitus  | Females | 25-29 years | 80+ years   | Mean BMI                                            | 1     | Positive  |
| Diabetes mellitus  | Females | 25-29 years | 80+ years   | Diabetes Age-Standardized Prevalence (proportion)   | 1     | Positive  |
| Diabetes mellitus  | Females | 25-29 years | 80+ years   | Cholesterol (total, mean per capita)                | 1     | Positive  |
| Diabetes mellitus  | Females | 25-29 years | 80+ years   | Animal Fats (kcal per capita)                       | 2     | Positive  |
| Diabetes mellitus  | Females | 25-29 years | 80+ years   | Total Calories (kcal per capita)                    | 2     | Positive  |
| Diabetes mellitus  | Females | 25-29 years | 80+ years   | Health System Access (unitless)                     | 2     | Negative  |
| Diabetes mellitus  | Females | 25-29 years | 80+ years   | Education (years per capita)                        | 3     | Negative  |
| Diabetes mellitus  | Females | 25-29 years | 80+ years   | LDI (I\$ per capita)                                | 3     | Negative  |
| Diabetes mellitus  | Males   | 0-6 days    | 20-24 years | Diabetes Age-Standardized Prevalence (proportion)   | 1     | Positive  |
| Diabetes mellitus  | Males   | 0-6 days    | 20-24 years | Systolic Blood Pressure (mmHg)                      | 1     | Positive  |
| Diabetes mellitus  | Males   | 0-6 days    | 20-24 years | Mean BMI                                            | 1     | Positive  |
| Diabetes mellitus  | Males   | 0-6 days    | 20-24 years | Cholesterol (total, mean per capita)                | 1     | Positive  |
| Diabetes mellitus  | Males   | 0-6 days    | 20-24 years | Diabetes Fasting Plasma Glucose (mmol/L)            | 1     | Positive  |
| Diabetes mellitus  | Males   | 0-6 days    | 20-24 years | Health System Access (unitless)                     | 2     | Negative  |
| Diabetes mellitus  | Males   | 0-6 days    | 20-24 years | Animal Fats (kcal per capita)                       | 2     | Positive  |
| Diabetes mellitus  | Males   | 0-6 days    | 20-24 years | Fruits (kcal per capita)                            | 2     | Negative  |
| Diabetes mellitus  | Males   | 0-6 days    | 20-24 years | Vegetables (kcal per capita)                        | 2     | Negative  |
| Diabetes mellitus  | Males   | 0-6 days    | 20-24 years | Total Calories (kcal per capita)                    | 2     | Positive  |
| Diabetes mellitus  | Males   | 0-6 days    | 20-24 years | LDI (I\$ per capita)                                | 3     | Negative  |
| Diabetes mellitus  | Males   | 0-6 days    | 20-24 years | Education (years per capita)                        | 3     | Negative  |
| Diabetes mellitus  | Males   | 25-29 years | 80+ years   | Cholesterol (total, mean per capita)                | 1     | Positive  |
| Diabetes mellitus  | Males   | 25-29 years | 80+ years   | Diabetes Fasting Plasma Glucose (mmol/L)            | 1     | Positive  |
| Diabetes mellitus  | Males   | 25-29 years | 80+ years   | Systolic Blood Pressure (mmHg)                      | 1     | Positive  |
| Diabetes mellitus  | Males   | 25-29 years | 80+ years   | Diabetes Age-Standardized Prevalence (proportion)   | 1     | Positive  |
| Diabetes mellitus  | Males   | 25-29 years | 80+ years   | Mean BMI                                            | 1     | Positive  |
| Diabetes mellitus  | Males   | 25-29 years | 80+ years   | Animal Fats (kcal per capita)                       | 2     | Positive  |
| Diabetes mellitus  | Males   | 25-29 years | 80+ years   | Total Calories (kcal per capita)                    | 2     | Positive  |
| Diabetes mellitus  | Males   | 25-29 years | 80+ years   | LDI (I\$ per capita)                                | 3     | Negative  |
| Diabetes mellitus  | Males   | 25-29 years | 80+ years   | Education (years per capita)                        | 3     | Negative  |
| Diarrheal diseases | Females | 0-6 days    | 1-4 years   | Rotavirus Vaccine Introduced (binary)               | 1     | Negative  |
| Diarrheal diseases | Females | 0-6 days    | 1-4 years   | Improved Water Source (proportion with access)      | 1     | Negative  |
| Diarrheal diseases | Females | 0-6 days    | 1-4 years   | Sanitation (proportion with access)                 | 1     | Negative  |
| Diarrheal diseases | Females | 0-6 days    | 1-4 years   | Malnutrition (proportion <2SD weight for age)       | 2     | Positive  |
| Diarrheal diseases | Females | 0-6 days    | 1-4 years   | Education (years per capita)                        | 3     | Negative  |
| Diarrheal diseases | Females | 0-6 days    | 1-4 years   | Population Density (over 1000 ppl/sqkm, proportion) | 3     | None      |

**Web Table 22 – CODEm covariates used, level of covariate, and expected direction of covariate by cause, sex, and age**

| Cause              | Sex     | Age Start | Age End   | Covariate                                           | Level | Direction |
|--------------------|---------|-----------|-----------|-----------------------------------------------------|-------|-----------|
| Diarrheal diseases | Females | 0-6 days  | 1-4 years | Latitude Under 15 (proportion)                      | 3     | Positive  |
| Diarrheal diseases | Females | 0-6 days  | 1-4 years | Population Density (under 150 ppl/sqkm, proportion) | 3     | None      |
| Diarrheal diseases | Females | 0-6 days  | 1-4 years | LDI (\$ per capita)                                 | 3     | Negative  |
| Diarrheal diseases | Females | 5-9 years | 80+ years | Rotavirus Vaccine Introduced (binary)               | 1     | Negative  |
| Diarrheal diseases | Females | 5-9 years | 80+ years | Sanitation (proportion with access)                 | 1     | Negative  |
| Diarrheal diseases | Females | 5-9 years | 80+ years | Health System Access 2 (unitless)                   | 1     | Negative  |
| Diarrheal diseases | Females | 5-9 years | 80+ years | Improved Water Source (proportion with access)      | 1     | Negative  |
| Diarrheal diseases | Females | 5-9 years | 80+ years | Malnutrition (proportion <2SD weight for age)       | 2     | Positive  |
| Diarrheal diseases | Females | 5-9 years | 80+ years | Education (years per capita)                        | 3     | Negative  |
| Diarrheal diseases | Females | 5-9 years | 80+ years | Population Density (under 150 ppl/sqkm, proportion) | 3     | None      |
| Diarrheal diseases | Females | 5-9 years | 80+ years | Population Density (over 1000 ppl/sqkm, proportion) | 3     | None      |
| Diarrheal diseases | Females | 5-9 years | 80+ years | Latitude Under 15 (proportion)                      | 3     | Positive  |
| Diarrheal diseases | Females | 5-9 years | 80+ years | LDI (\$ per capita)                                 | 3     | Negative  |
| Diarrheal diseases | Males   | 0-6 days  | 1-4 years | Improved Water Source (proportion with access)      | 1     | Negative  |
| Diarrheal diseases | Males   | 0-6 days  | 1-4 years | Rotavirus Vaccine Introduced (binary)               | 1     | Negative  |
| Diarrheal diseases | Males   | 0-6 days  | 1-4 years | Sanitation (proportion with access)                 | 1     | Negative  |
| Diarrheal diseases | Males   | 0-6 days  | 1-4 years | Malnutrition (proportion <2SD weight for age)       | 2     | Positive  |
| Diarrheal diseases | Males   | 0-6 days  | 1-4 years | Education (years per capita)                        | 3     | Negative  |
| Diarrheal diseases | Males   | 0-6 days  | 1-4 years | Latitude Under 15 (proportion)                      | 3     | Positive  |
| Diarrheal diseases | Males   | 0-6 days  | 1-4 years | LDI (\$ per capita)                                 | 3     | Negative  |
| Diarrheal diseases | Males   | 0-6 days  | 1-4 years | Population Density (over 1000 ppl/sqkm, proportion) | 3     | None      |
| Diarrheal diseases | Males   | 0-6 days  | 1-4 years | Population Density (under 150 ppl/sqkm, proportion) | 3     | None      |
| Diarrheal diseases | Males   | 5-9 years | 80+ years | Rotavirus Vaccine Introduced (binary)               | 1     | Negative  |
| Diarrheal diseases | Males   | 5-9 years | 80+ years | Health System Access 2 (unitless)                   | 1     | Negative  |
| Diarrheal diseases | Males   | 5-9 years | 80+ years | Improved Water Source (proportion with access)      | 1     | Negative  |
| Diarrheal diseases | Males   | 5-9 years | 80+ years | Sanitation (proportion with access)                 | 1     | Negative  |
| Diarrheal diseases | Males   | 5-9 years | 80+ years | Malnutrition (proportion <2SD weight for age)       | 2     | Positive  |
| Diarrheal diseases | Males   | 5-9 years | 80+ years | Population Density (under 150 ppl/sqkm, proportion) | 3     | None      |
| Diarrheal diseases | Males   | 5-9 years | 80+ years | Population Density (over 1000 ppl/sqkm, proportion) | 3     | None      |
| Diarrheal diseases | Males   | 5-9 years | 80+ years | LDI (\$ per capita)                                 | 3     | Negative  |
| Diarrheal diseases | Males   | 5-9 years | 80+ years | Latitude Under 15 (proportion)                      | 3     | Positive  |
| Diarrheal diseases | Males   | 5-9 years | 80+ years | Education (years per capita)                        | 3     | Negative  |
| Digestive diseases | Females | 1-4 years | 80+ years | Cumulative Cigarettes (5 Years)                     | 1     | Positive  |
| Digestive diseases | Females | 1-4 years | 80+ years | Alcohol (liters per capita)                         | 1     | Positive  |
| Digestive diseases | Females | 1-4 years | 80+ years | Health System Access (capped)                       | 1     | Negative  |

**Web Table 22 – CODEm covariates used, level of covariate, and expected direction of covariate by cause, sex, and age**

| Cause              | Sex     | Age Start   | Age End     | Covariate                                     | Level | Direction |
|--------------------|---------|-------------|-------------|-----------------------------------------------|-------|-----------|
| Digestive diseases | Females | 1-4 years   | 80+ years   | Sanitation (proportion with access)           | 1     | Negative  |
| Digestive diseases | Females | 1-4 years   | 80+ years   | Fruits (kcal per capita)                      | 2     | Negative  |
| Digestive diseases | Females | 1-4 years   | 80+ years   | Red Meat (kcal per capita)                    | 2     | Positive  |
| Digestive diseases | Females | 1-4 years   | 80+ years   | Malnutrition (proportion <2SD weight for age) | 2     | Positive  |
| Digestive diseases | Females | 1-4 years   | 80+ years   | Education (years per capita)                  | 3     | Negative  |
| Digestive diseases | Males   | 1-4 years   | 80+ years   | Sanitation (proportion with access)           | 1     | Negative  |
| Digestive diseases | Males   | 1-4 years   | 80+ years   | Cumulative Cigarettes (5 Years)               | 1     | Positive  |
| Digestive diseases | Males   | 1-4 years   | 80+ years   | Health System Access (capped)                 | 1     | Negative  |
| Digestive diseases | Males   | 1-4 years   | 80+ years   | Alcohol (liters per capita)                   | 1     | Positive  |
| Digestive diseases | Males   | 1-4 years   | 80+ years   | Malnutrition (proportion <2SD weight for age) | 2     | Positive  |
| Digestive diseases | Males   | 1-4 years   | 80+ years   | Red Meat (kcal per capita)                    | 2     | Positive  |
| Digestive diseases | Males   | 1-4 years   | 80+ years   | Fruits (kcal per capita)                      | 2     | Negative  |
| Digestive diseases | Males   | 1-4 years   | 80+ years   | Education (years per capita)                  | 3     | Negative  |
| Down syndrome      | Females | 0-6 days    | 80+ years   | Live Births 35+ (proportion)                  | 1     | Positive  |
| Down syndrome      | Females | 0-6 days    | 80+ years   | Live Births 40+ (proportion)                  | 1     | Positive  |
| Down syndrome      | Males   | 0-6 days    | 80+ years   | Live Births 40+ (proportion)                  | 1     | Positive  |
| Down syndrome      | Males   | 0-6 days    | 80+ years   | Live Births 35+ (proportion)                  | 1     | Positive  |
| Drowning           | Females | 0-6 days    | 80+ years   | Alcohol (liters per capita)                   | 1     | Positive  |
| Drowning           | Females | 0-6 days    | 80+ years   | LDI (I\$ per capita)                          | 3     | None      |
| Drowning           | Females | 0-6 days    | 80+ years   | Education (years per capita)                  | 3     | Negative  |
| Drowning           | Males   | 0-6 days    | 80+ years   | Alcohol (liters per capita)                   | 1     | Positive  |
| Drowning           | Males   | 0-6 days    | 80+ years   | Coastal Population within 10km (proportion)   | 1     | Positive  |
| Drowning           | Males   | 0-6 days    | 80+ years   | Education (years per capita)                  | 3     | Negative  |
| Drowning           | Males   | 0-6 days    | 80+ years   | LDI (I\$ per capita)                          | 3     | None      |
| Drug use disorders | Females | 0-6 days    | 28-364 days | Opium Cultivation (binary)                    | 1     | Positive  |
| Drug use disorders | Females | 0-6 days    | 28-364 days | Alcohol (liters per capita)                   | 1     | Positive  |
| Drug use disorders | Females | 0-6 days    | 28-364 days | Health System Access 2 (unitless)             | 1     | None      |
| Drug use disorders | Females | 0-6 days    | 28-364 days | Education (years per capita)                  | 3     | None      |
| Drug use disorders | Females | 0-6 days    | 28-364 days | LDI (I\$ per capita)                          | 3     | None      |
| Drug use disorders | Females | 15-19 years | 80+ years   | Alcohol (liters per capita)                   | 1     | Positive  |
| Drug use disorders | Females | 15-19 years | 80+ years   | Opium Cultivation (binary)                    | 1     | Positive  |
| Drug use disorders | Females | 15-19 years | 80+ years   | Smoking Prevalence                            | 1     | Positive  |
| Drug use disorders | Females | 15-19 years | 80+ years   | Health System Access 2 (unitless)             | 1     | None      |
| Drug use disorders | Females | 15-19 years | 80+ years   | Education (years per capita)                  | 3     | None      |
| Drug use disorders | Females | 15-19 years | 80+ years   | LDI (I\$ per capita)                          | 3     | None      |



**Web Table 22 – CODEm covariates used, level of covariate, and expected direction of covariate by cause, sex, and age**

| Cause              | Sex     | Age Start   | Age End     | Covariate                                           | Level | Direction |
|--------------------|---------|-------------|-------------|-----------------------------------------------------|-------|-----------|
| Drug use disorders | Males   | 0-6 days    | 28-364 days | Health System Access 2 (unitless)                   | 1     | None      |
| Drug use disorders | Males   | 0-6 days    | 28-364 days | Opium Cultivation (binary)                          | 1     | Positive  |
| Drug use disorders | Males   | 0-6 days    | 28-364 days | Alcohol (liters per capita)                         | 1     | Positive  |
| Drug use disorders | Males   | 0-6 days    | 28-364 days | Education (years per capita)                        | 3     | None      |
| Drug use disorders | Males   | 0-6 days    | 28-364 days | LDI (I\$ per capita)                                | 3     | None      |
| Drug use disorders | Males   | 15-19 years | 80+ years   | Alcohol (liters per capita)                         | 1     | Positive  |
| Drug use disorders | Males   | 15-19 years | 80+ years   | Health System Access 2 (unitless)                   | 1     | None      |
| Drug use disorders | Males   | 15-19 years | 80+ years   | Opium Cultivation (binary)                          | 1     | Positive  |
| Drug use disorders | Males   | 15-19 years | 80+ years   | Education (years per capita)                        | 3     | None      |
| Drug use disorders | Males   | 15-19 years | 80+ years   | LDI (I\$ per capita)                                | 3     | None      |
| Encephalitis       | Females | 0-6 days    | 1-4 years   | Health System Access 2 (unitless)                   | 1     | Negative  |
| Encephalitis       | Females | 0-6 days    | 1-4 years   | Malnutrition (proportion <2SD weight for age)       | 1     | Positive  |
| Encephalitis       | Females | 0-6 days    | 1-4 years   | Population Density (over 1000 ppl/sqkm, proportion) | 2     | Positive  |
| Encephalitis       | Females | 0-6 days    | 1-4 years   | Sanitation (proportion with access)                 | 3     | Negative  |
| Encephalitis       | Females | 0-6 days    | 1-4 years   | Education (years per capita)                        | 3     | Negative  |
| Encephalitis       | Females | 0-6 days    | 1-4 years   | LDI (I\$ per capita)                                | 3     | Negative  |
| Encephalitis       | Females | 0-6 days    | 1-4 years   | Improved Water Source (proportion with access)      | 3     | Negative  |
| Encephalitis       | Females | 5-9 years   | 80+ years   | Malnutrition (proportion <2SD weight for age)       | 1     | Positive  |
| Encephalitis       | Females | 5-9 years   | 80+ years   | Population Density (over 1000 ppl/sqkm, proportion) | 2     | Positive  |
| Encephalitis       | Females | 5-9 years   | 80+ years   | LDI (I\$ per capita)                                | 3     | Negative  |
| Encephalitis       | Females | 5-9 years   | 80+ years   | Education (years per capita)                        | 3     | Negative  |
| Encephalitis       | Males   | 0-6 days    | 1-4 years   | Health System Access 2 (unitless)                   | 1     | Negative  |
| Encephalitis       | Males   | 0-6 days    | 1-4 years   | Malnutrition (proportion <2SD weight for age)       | 1     | Positive  |
| Encephalitis       | Males   | 0-6 days    | 1-4 years   | Population Density (over 1000 ppl/sqkm, proportion) | 2     | Positive  |
| Encephalitis       | Males   | 0-6 days    | 1-4 years   | LDI (I\$ per capita)                                | 3     | Negative  |
| Encephalitis       | Males   | 0-6 days    | 1-4 years   | Improved Water Source (proportion with access)      | 3     | Negative  |
| Encephalitis       | Males   | 0-6 days    | 1-4 years   | Education (years per capita)                        | 3     | Negative  |
| Encephalitis       | Males   | 0-6 days    | 1-4 years   | Sanitation (proportion with access)                 | 3     | Negative  |
| Encephalitis       | Males   | 5-9 years   | 80+ years   | Malnutrition (proportion <2SD weight for age)       | 1     | Positive  |
| Encephalitis       | Males   | 5-9 years   | 80+ years   | Population Density (over 1000 ppl/sqkm, proportion) | 2     | Positive  |
| Encephalitis       | Males   | 5-9 years   | 80+ years   | LDI (I\$ per capita)                                | 3     | Negative  |
| Encephalitis       | Males   | 5-9 years   | 80+ years   | Education (years per capita)                        | 3     | Negative  |
| Endocarditis       | Females | 0-6 days    | 80+ years   | Sanitation (proportion with access)                 | 1     | Negative  |
| Endocarditis       | Females | 0-6 days    | 80+ years   | Improved Water Source (proportion with access)      | 1     | Negative  |
| Endocarditis       | Females | 0-6 days    | 80+ years   | Health System Access (capped)                       | 3     | Negative  |



**Web Table 22 – CODEm covariates used, level of covariate, and expected direction of covariate by cause, sex, and age**

| Cause                                             | Sex     | Age Start   | Age End   | Covariate                                      | Level | Direction |
|---------------------------------------------------|---------|-------------|-----------|------------------------------------------------|-------|-----------|
| Endocarditis                                      | Females | 0-6 days    | 80+ years | Education (years per capita)                   | 3     | Negative  |
| Endocarditis                                      | Females | 0-6 days    | 80+ years | LDI (I\$ per capita)                           | 3     | Negative  |
| Endocarditis                                      | Males   | 0-6 days    | 80+ years | Sanitation (proportion with access)            | 1     | Negative  |
| Endocarditis                                      | Males   | 0-6 days    | 80+ years | Improved Water Source (proportion with access) | 1     | Negative  |
| Endocarditis                                      | Males   | 0-6 days    | 80+ years | Health System Access (capped)                  | 3     | Negative  |
| Endocarditis                                      | Males   | 0-6 days    | 80+ years | Education (years per capita)                   | 3     | Negative  |
| Endocarditis                                      | Males   | 0-6 days    | 80+ years | LDI (I\$ per capita)                           | 3     | Negative  |
| Endocrine, metabolic, blood, and immune disorders | Females | 0-6 days    | 80+ years | Health System Access 2 (unitless)              | 1     | Negative  |
| Endocrine, metabolic, blood, and immune disorders | Females | 0-6 days    | 80+ years | Mean BMI                                       | 1     | Positive  |
| Endocrine, metabolic, blood, and immune disorders | Females | 0-6 days    | 80+ years | Animal Fats (kcal per capita)                  | 2     | Positive  |
| Endocrine, metabolic, blood, and immune disorders | Females | 0-6 days    | 80+ years | Alcohol (liters per capita)                    | 2     | Positive  |
| Endocrine, metabolic, blood, and immune disorders | Females | 0-6 days    | 80+ years | Cholesterol (total, mean per capita)           | 2     | Positive  |
| Endocrine, metabolic, blood, and immune disorders | Females | 0-6 days    | 80+ years | Total Calories (kcal per capita)               | 2     | Positive  |
| Endocrine, metabolic, blood, and immune disorders | Females | 0-6 days    | 80+ years | Education (years per capita)                   | 3     | Negative  |
| Endocrine, metabolic, blood, and immune disorders | Females | 0-6 days    | 80+ years | LDI (I\$ per capita)                           | 3     | Negative  |
| Endocrine, metabolic, blood, and immune disorders | Males   | 0-6 days    | 80+ years | Mean BMI                                       | 1     | Positive  |
| Endocrine, metabolic, blood, and immune disorders | Males   | 0-6 days    | 80+ years | Total Calories (kcal per capita)               | 2     | Positive  |
| Endocrine, metabolic, blood, and immune disorders | Males   | 0-6 days    | 80+ years | Alcohol (liters per capita)                    | 2     | Positive  |
| Endocrine, metabolic, blood, and immune disorders | Males   | 0-6 days    | 80+ years | Animal Fats (kcal per capita)                  | 2     | Positive  |
| Endocrine, metabolic, blood, and immune disorders | Males   | 0-6 days    | 80+ years | Cholesterol (total, mean per capita)           | 2     | Positive  |
| Endocrine, metabolic, blood, and immune disorders | Males   | 0-6 days    | 80+ years | LDI (I\$ per capita)                           | 3     | Negative  |
| Endocrine, metabolic, blood, and immune disorders | Males   | 0-6 days    | 80+ years | Education (years per capita)                   | 3     | Negative  |
| Epilepsy                                          | Females | 28-364 days | 80+ years | Pig Meat (kg per capita)                       | 1     | Positive  |
| Epilepsy                                          | Females | 28-364 days | 80+ years | Health System Access (capped)                  | 1     | Negative  |
| Epilepsy                                          | Females | 28-364 days | 80+ years | Mean BMI                                       | 2     | Positive  |
| Epilepsy                                          | Females | 28-364 days | 80+ years | Education (years per capita)                   | 3     | Negative  |
| Epilepsy                                          | Females | 28-364 days | 80+ years | LDI (I\$ per capita)                           | 3     | Negative  |
| Epilepsy                                          | Males   | 28-364 days | 80+ years | Health System Access (capped)                  | 1     | Negative  |
| Epilepsy                                          | Males   | 28-364 days | 80+ years | Pig Meat (kg per capita)                       | 1     | Positive  |
| Epilepsy                                          | Males   | 28-364 days | 80+ years | Mean BMI                                       | 2     | Positive  |
| Epilepsy                                          | Males   | 28-364 days | 80+ years | Education (years per capita)                   | 3     | Negative  |
| Epilepsy                                          | Males   | 28-364 days | 80+ years | LDI (I\$ per capita)                           | 3     | Negative  |
| Esophageal cancer [Developed]                     | Females | 15-19 years | 80+ years | Alcohol (liters per capita)                    | 1     | Positive  |
| Esophageal cancer [Developed]                     | Females | 15-19 years | 80+ years | Fruits (kcal per capita)                       | 1     | Negative  |
| Esophageal cancer [Developed]                     | Females | 15-19 years | 80+ years | Mean BMI                                       | 1     | Positive  |

**Web Table 22 – CODEm covariates used, level of covariate, and expected direction of covariate by cause, sex, and age**

| Cause                          | Sex     | Age Start   | Age End   | Covariate                                         | Level | Direction |
|--------------------------------|---------|-------------|-----------|---------------------------------------------------|-------|-----------|
| Esophageal cancer [Developed]  | Females | 15-19 years | 80+ years | Smoking Prevalence [lagged 10 years]              | 1     | Positive  |
| Esophageal cancer [Developed]  | Females | 15-19 years | 80+ years | Total Calories (kcal per capita)                  | 2     | Positive  |
| Esophageal cancer [Developed]  | Females | 15-19 years | 80+ years | Improved Water Source (proportion with access)    | 2     | Negative  |
| Esophageal cancer [Developed]  | Females | 15-19 years | 80+ years | Sanitation (proportion with access)               | 2     | Negative  |
| Esophageal cancer [Developed]  | Females | 15-19 years | 80+ years | Vegetables (kcal per capita)                      | 2     | Negative  |
| Esophageal cancer [Developed]  | Females | 15-19 years | 80+ years | Indoor Air Pollution (Coal Cooking)               | 2     | Positive  |
| Esophageal cancer [Developed]  | Females | 15-19 years | 80+ years | Outdoor Air Pollution (PM2.5)                     | 2     | Positive  |
| Esophageal cancer [Developed]  | Females | 15-19 years | 80+ years | Education (years per capita)                      | 3     | Negative  |
| Esophageal cancer [Developed]  | Females | 15-19 years | 80+ years | LDI (\$ per capita)                               | 3     | Negative  |
| Esophageal cancer [Developed]  | Males   | 15-19 years | 80+ years | Cumulative Cigarettes (20 Years)                  | 1     | Positive  |
| Esophageal cancer [Developed]  | Males   | 15-19 years | 80+ years | Fruits (kcal per capita)                          | 1     | Negative  |
| Esophageal cancer [Developed]  | Males   | 15-19 years | 80+ years | Alcohol (liters per capita)                       | 1     | Positive  |
| Esophageal cancer [Developed]  | Males   | 15-19 years | 80+ years | Mean BMI                                          | 1     | Positive  |
| Esophageal cancer [Developed]  | Males   | 15-19 years | 80+ years | Cumulative Cigarettes (15 Years)                  | 1     | Positive  |
| Esophageal cancer [Developed]  | Males   | 15-19 years | 80+ years | Tobacco (cigarettes per capita) [lagged 10 years] | 1     | Positive  |
| Esophageal cancer [Developed]  | Males   | 15-19 years | 80+ years | Outdoor Air Pollution (PM2.5)                     | 2     | Positive  |
| Esophageal cancer [Developed]  | Males   | 15-19 years | 80+ years | Improved Water Source (proportion with access)    | 2     | Negative  |
| Esophageal cancer [Developed]  | Males   | 15-19 years | 80+ years | Indoor Air Pollution (Coal Cooking)               | 2     | Positive  |
| Esophageal cancer [Developed]  | Males   | 15-19 years | 80+ years | Total Calories (kcal per capita)                  | 2     | Positive  |
| Esophageal cancer [Developed]  | Males   | 15-19 years | 80+ years | Vegetables (kcal per capita)                      | 2     | Negative  |
| Esophageal cancer [Developed]  | Males   | 15-19 years | 80+ years | LDI (\$ per capita)                               | 3     | Negative  |
| Esophageal cancer [Developed]  | Males   | 15-19 years | 80+ years | Education (years per capita)                      | 3     | Negative  |
| Esophageal cancer [Developing] | Females | 15-19 years | 80+ years | Alcohol (liters per capita)                       | 1     | Positive  |
| Esophageal cancer [Developing] | Females | 15-19 years | 80+ years | Cumulative Cigarettes (15 Years)                  | 1     | Positive  |
| Esophageal cancer [Developing] | Females | 15-19 years | 80+ years | Smoking Prevalence [lagged 10 years]              | 1     | Positive  |
| Esophageal cancer [Developing] | Females | 15-19 years | 80+ years | Fruits (kcal per capita)                          | 1     | Negative  |
| Esophageal cancer [Developing] | Females | 15-19 years | 80+ years | Cumulative Cigarettes (20 Years)                  | 1     | Positive  |
| Esophageal cancer [Developing] | Females | 15-19 years | 80+ years | Sanitation (proportion with access)               | 2     | Negative  |
| Esophageal cancer [Developing] | Females | 15-19 years | 80+ years | Improved Water Source (proportion with access)    | 2     | Negative  |
| Esophageal cancer [Developing] | Females | 15-19 years | 80+ years | Vegetables (kcal per capita)                      | 2     | Negative  |
| Esophageal cancer [Developing] | Females | 15-19 years | 80+ years | Outdoor Air Pollution (PM2.5)                     | 2     | Positive  |
| Esophageal cancer [Developing] | Females | 15-19 years | 80+ years | Indoor Air Pollution (Coal Cooking)               | 2     | Positive  |
| Esophageal cancer [Developing] | Females | 15-19 years | 80+ years | Indoor Air Pollution (All Cooking Fuels)          | 2     | Positive  |
| Esophageal cancer [Developing] | Females | 15-19 years | 80+ years | Indoor Air Pollution (Biomass Cooking)            | 2     | Positive  |
| Esophageal cancer [Developing] | Females | 15-19 years | 80+ years | Total Calories (kcal per capita)                  | 2     | Positive  |

**Web Table 22 – CODEm covariates used, level of covariate, and expected direction of covariate by cause, sex, and age**

| Cause                           | Sex     | Age Start   | Age End   | Covariate                                           | Level | Direction |
|---------------------------------|---------|-------------|-----------|-----------------------------------------------------|-------|-----------|
| Esophageal cancer [Developing]  | Females | 15-19 years | 80+ years | Education (years per capita)                        | 3     | Negative  |
| Esophageal cancer [Developing]  | Females | 15-19 years | 80+ years | LDI (I\$ per capita)                                | 3     | Negative  |
| Esophageal cancer [Developing]  | Males   | 15-19 years | 80+ years | Mean BMI                                            | 1     | Positive  |
| Esophageal cancer [Developing]  | Males   | 15-19 years | 80+ years | Alcohol (liters per capita)                         | 1     | Positive  |
| Esophageal cancer [Developing]  | Males   | 15-19 years | 80+ years | Fruits (kcal per capita)                            | 1     | Negative  |
| Esophageal cancer [Developing]  | Males   | 15-19 years | 80+ years | Vegetables (kcal per capita)                        | 2     | Negative  |
| Esophageal cancer [Developing]  | Males   | 15-19 years | 80+ years | Total Calories (kcal per capita)                    | 2     | Positive  |
| Esophageal cancer [Developing]  | Males   | 15-19 years | 80+ years | Indoor Air Pollution (Coal Cooking)                 | 2     | Positive  |
| Esophageal cancer [Developing]  | Males   | 15-19 years | 80+ years | Education (years per capita)                        | 3     | Negative  |
| Esophageal cancer [Developing]  | Males   | 15-19 years | 80+ years | LDI (I\$ per capita)                                | 3     | Negative  |
| Falls                           | Females | 0-6 days    | 80+ years | Health System Access 2 (unitless)                   | 1     | Negative  |
| Falls                           | Females | 0-6 days    | 80+ years | Alcohol (liters per capita)                         | 1     | Positive  |
| Falls                           | Females | 0-6 days    | 80+ years | In-Milk (kcal per capita)                           | 2     | Negative  |
| Falls                           | Females | 0-6 days    | 80+ years | LDI (I\$ per capita)                                | 3     | None      |
| Falls                           | Males   | 0-6 days    | 80+ years | Health System Access 2 (unitless)                   | 1     | Negative  |
| Falls                           | Males   | 0-6 days    | 80+ years | Alcohol (liters per capita)                         | 1     | Positive  |
| Falls                           | Males   | 0-6 days    | 80+ years | In-Milk (kcal per capita)                           | 2     | Negative  |
| Falls                           | Males   | 0-6 days    | 80+ years | LDI (I\$ per capita)                                | 3     | None      |
| Fire, heat, and hot substances  | Females | 0-6 days    | 80+ years | Health System Access 2 (unitless)                   | 1     | Negative  |
| Fire, heat, and hot substances  | Females | 0-6 days    | 80+ years | Indoor Air Pollution (Biomass Cooking)              | 2     | Positive  |
| Fire, heat, and hot substances  | Females | 0-6 days    | 80+ years | Population Density (over 1000 ppl/sqkm, proportion) | 2     | None      |
| Fire, heat, and hot substances  | Females | 0-6 days    | 80+ years | Alcohol (liters per capita)                         | 2     | Positive  |
| Fire, heat, and hot substances  | Females | 0-6 days    | 80+ years | Education (years per capita)                        | 3     | Negative  |
| Fire, heat, and hot substances  | Females | 0-6 days    | 80+ years | LDI (I\$ per capita)                                | 3     | None      |
| Fire, heat, and hot substances  | Males   | 0-6 days    | 80+ years | Health System Access 2 (unitless)                   | 1     | Negative  |
| Fire, heat, and hot substances  | Males   | 0-6 days    | 80+ years | Alcohol (liters per capita)                         | 2     | Positive  |
| Fire, heat, and hot substances  | Males   | 0-6 days    | 80+ years | Population Density (over 1000 ppl/sqkm, proportion) | 2     | None      |
| Fire, heat, and hot substances  | Males   | 0-6 days    | 80+ years | Indoor Air Pollution (Biomass Cooking)              | 2     | Positive  |
| Fire, heat, and hot substances  | Males   | 0-6 days    | 80+ years | Education (years per capita)                        | 3     | Negative  |
| Fire, heat, and hot substances  | Males   | 0-6 days    | 80+ years | LDI (I\$ per capita)                                | 3     | None      |
| Foreign body in other body part | Females | 0-6 days    | 80+ years | Alcohol (liters per capita)                         | 1     | Positive  |
| Foreign body in other body part | Females | 0-6 days    | 80+ years | LDI (I\$ per capita)                                | 3     | None      |
| Foreign body in other body part | Females | 0-6 days    | 80+ years | Elevation Under 100m (proportion)                   | 3     | None      |
| Foreign body in other body part | Females | 0-6 days    | 80+ years | Population Density (under 150 ppl/sqkm, proportion) | 3     | None      |
| Foreign body in other body part | Females | 0-6 days    | 80+ years | Population Density (over 1000 ppl/sqkm, proportion) | 3     | None      |

**Web Table 22 – CODEm covariates used, level of covariate, and expected direction of covariate by cause, sex, and age**

| Cause                                            | Sex     | Age Start   | Age End   | Covariate                                           | Level | Direction |
|--------------------------------------------------|---------|-------------|-----------|-----------------------------------------------------|-------|-----------|
| Foreign body in other body part                  | Females | 0-6 days    | 80+ years | Elevation Over 1500m (proportion)                   | 3     | None      |
| Foreign body in other body part                  | Males   | 0-6 days    | 80+ years | Alcohol (liters per capita)                         | 1     | Positive  |
| Foreign body in other body part                  | Males   | 0-6 days    | 80+ years | Population Density (over 1000 ppl/sqkm, proportion) | 3     | None      |
| Foreign body in other body part                  | Males   | 0-6 days    | 80+ years | Elevation Over 1500m (proportion)                   | 3     | None      |
| Foreign body in other body part                  | Males   | 0-6 days    | 80+ years | Population Density (under 150 ppl/sqkm, proportion) | 3     | None      |
| Foreign body in other body part                  | Males   | 0-6 days    | 80+ years | LDI (I\$ per capita)                                | 3     | None      |
| Foreign body in other body part                  | Males   | 0-6 days    | 80+ years | Elevation Under 100m (proportion)                   | 3     | None      |
| Gallbladder and biliary diseases                 | Females | 1-4 years   | 80+ years | Health System Access (capped)                       | 1     | Negative  |
| Gallbladder and biliary diseases                 | Females | 1-4 years   | 80+ years | Animal Fats (kcal per capita)                       | 1     | Positive  |
| Gallbladder and biliary diseases                 | Females | 1-4 years   | 80+ years | Mean BMI                                            | 1     | Positive  |
| Gallbladder and biliary diseases                 | Females | 1-4 years   | 80+ years | Population Over 65 (proportion)                     | 2     | Positive  |
| Gallbladder and biliary diseases                 | Females | 1-4 years   | 80+ years | Alcohol (liters per capita)                         | 2     | Positive  |
| Gallbladder and biliary diseases                 | Females | 1-4 years   | 80+ years | Red Meat (kcal per capita)                          | 2     | Positive  |
| Gallbladder and biliary diseases                 | Females | 1-4 years   | 80+ years | LDI (I\$ per capita)                                | 3     | None      |
| Gallbladder and biliary diseases                 | Females | 1-4 years   | 80+ years | Education (years per capita)                        | 3     | None      |
| Gallbladder and biliary diseases                 | Males   | 1-4 years   | 80+ years | Mean BMI                                            | 1     | Positive  |
| Gallbladder and biliary diseases                 | Males   | 1-4 years   | 80+ years | Animal Fats (kcal per capita)                       | 1     | Positive  |
| Gallbladder and biliary diseases                 | Males   | 1-4 years   | 80+ years | Health System Access (capped)                       | 1     | Negative  |
| Gallbladder and biliary diseases                 | Males   | 1-4 years   | 80+ years | Population Over 65 (proportion)                     | 2     | Positive  |
| Gallbladder and biliary diseases                 | Males   | 1-4 years   | 80+ years | Alcohol (liters per capita)                         | 2     | Positive  |
| Gallbladder and biliary diseases                 | Males   | 1-4 years   | 80+ years | LDI (I\$ per capita)                                | 3     | None      |
| Gallbladder and biliary diseases                 | Males   | 1-4 years   | 80+ years | Education (years per capita)                        | 3     | None      |
| Gallbladder and biliary tract cancer [Developed] | Females | 15-19 years | 80+ years | Cumulative Cigarettes (5 Years)                     | 2     | Positive  |
| Gallbladder and biliary tract cancer [Developed] | Females | 15-19 years | 80+ years | Alcohol (liters per capita)                         | 2     | Positive  |
| Gallbladder and biliary tract cancer [Developed] | Females | 15-19 years | 80+ years | Cumulative Cigarettes (10 Years)                    | 2     | Positive  |
| Gallbladder and biliary tract cancer [Developed] | Females | 15-19 years | 80+ years | Tobacco (cigarettes per capita)                     | 2     | Positive  |
| Gallbladder and biliary tract cancer [Developed] | Females | 15-19 years | 80+ years | Fruits (kcal per capita)                            | 2     | Negative  |
| Gallbladder and biliary tract cancer [Developed] | Females | 15-19 years | 80+ years | Health System Access (capped)                       | 2     | Negative  |
| Gallbladder and biliary tract cancer [Developed] | Females | 15-19 years | 80+ years | Vegetables (kcal per capita)                        | 2     | Negative  |
| Gallbladder and biliary tract cancer [Developed] | Females | 15-19 years | 80+ years | Education (years per capita)                        | 3     | Negative  |
| Gallbladder and biliary tract cancer [Developed] | Females | 15-19 years | 80+ years | LDI (I\$ per capita)                                | 3     | Negative  |
| Gallbladder and biliary tract cancer [Developed] | Males   | 15-19 years | 80+ years | Cumulative Cigarettes (5 Years)                     | 2     | Positive  |
| Gallbladder and biliary tract cancer [Developed] | Males   | 15-19 years | 80+ years | Cumulative Cigarettes (10 Years)                    | 2     | Positive  |
| Gallbladder and biliary tract cancer [Developed] | Males   | 15-19 years | 80+ years | Health System Access (capped)                       | 2     | Negative  |
| Gallbladder and biliary tract cancer [Developed] | Males   | 15-19 years | 80+ years | Alcohol (liters per capita)                         | 2     | Positive  |

**Web Table 22 – CODEm covariates used, level of covariate, and expected direction of covariate by cause, sex, and age**

| Cause                                             | Sex     | Age Start   | Age End   | Covariate                                      | Level | Direction |
|---------------------------------------------------|---------|-------------|-----------|------------------------------------------------|-------|-----------|
| Gallbladder and biliary tract cancer [Developed]  | Males   | 15-19 years | 80+ years | Tobacco (cigarettes per capita)                | 2     | Positive  |
| Gallbladder and biliary tract cancer [Developed]  | Males   | 15-19 years | 80+ years | Smoking Prevalence [lagged 20 years]           | 2     | Positive  |
| Gallbladder and biliary tract cancer [Developed]  | Males   | 15-19 years | 80+ years | Fruits (kcal per capita)                       | 2     | Negative  |
| Gallbladder and biliary tract cancer [Developed]  | Males   | 15-19 years | 80+ years | Vegetables (kcal per capita)                   | 2     | Negative  |
| Gallbladder and biliary tract cancer [Developed]  | Males   | 15-19 years | 80+ years | Education (years per capita)                   | 3     | Negative  |
| Gallbladder and biliary tract cancer [Developed]  | Males   | 15-19 years | 80+ years | LDI (I\$ per capita)                           | 3     | Negative  |
| Gallbladder and biliary tract cancer [Developing] | Females | 15-19 years | 80+ years | Cumulative Cigarettes (5 Years)                | 2     | Positive  |
| Gallbladder and biliary tract cancer [Developing] | Females | 15-19 years | 80+ years | Health System Access (capped)                  | 2     | Negative  |
| Gallbladder and biliary tract cancer [Developing] | Females | 15-19 years | 80+ years | Vegetables (kcal per capita)                   | 2     | Negative  |
| Gallbladder and biliary tract cancer [Developing] | Females | 15-19 years | 80+ years | Alcohol (liters per capita)                    | 2     | Positive  |
| Gallbladder and biliary tract cancer [Developing] | Females | 15-19 years | 80+ years | Tobacco (cigarettes per capita)                | 2     | Positive  |
| Gallbladder and biliary tract cancer [Developing] | Females | 15-19 years | 80+ years | Cumulative Cigarettes (10 Years)               | 2     | Positive  |
| Gallbladder and biliary tract cancer [Developing] | Females | 15-19 years | 80+ years | LDI (I\$ per capita)                           | 3     | Negative  |
| Gallbladder and biliary tract cancer [Developing] | Females | 15-19 years | 80+ years | Education (years per capita)                   | 3     | Negative  |
| Gallbladder and biliary tract cancer [Developing] | Males   | 15-19 years | 80+ years | Health System Access (capped)                  | 2     | Negative  |
| Gallbladder and biliary tract cancer [Developing] | Males   | 15-19 years | 80+ years | Vegetables (kcal per capita)                   | 2     | Negative  |
| Gallbladder and biliary tract cancer [Developing] | Males   | 15-19 years | 80+ years | Cumulative Cigarettes (10 Years)               | 2     | Positive  |
| Gallbladder and biliary tract cancer [Developing] | Males   | 15-19 years | 80+ years | Cumulative Cigarettes (5 Years)                | 2     | Positive  |
| Gallbladder and biliary tract cancer [Developing] | Males   | 15-19 years | 80+ years | Fruits (kcal per capita)                       | 2     | Negative  |
| Gallbladder and biliary tract cancer [Developing] | Males   | 15-19 years | 80+ years | Alcohol (liters per capita)                    | 2     | Positive  |
| Gallbladder and biliary tract cancer [Developing] | Males   | 15-19 years | 80+ years | Smoking Prevalence [lagged 20 years]           | 2     | Positive  |
| Gallbladder and biliary tract cancer [Developing] | Males   | 15-19 years | 80+ years | Tobacco (cigarettes per capita)                | 2     | Positive  |
| Gallbladder and biliary tract cancer [Developing] | Males   | 15-19 years | 80+ years | Education (years per capita)                   | 3     | Negative  |
| Gallbladder and biliary tract cancer [Developing] | Males   | 15-19 years | 80+ years | LDI (I\$ per capita)                           | 3     | Negative  |
| Gastritis and duodenitis                          | Females | 1-4 years   | 80+ years | Alcohol (liters per capita)                    | 1     | Positive  |
| Gastritis and duodenitis                          | Females | 1-4 years   | 80+ years | Smoking Prevalence                             | 1     | Positive  |
| Gastritis and duodenitis                          | Females | 1-4 years   | 80+ years | Health System Access (capped)                  | 2     | Negative  |
| Gastritis and duodenitis                          | Females | 1-4 years   | 80+ years | Sanitation (proportion with access)            | 2     | Negative  |
| Gastritis and duodenitis                          | Females | 1-4 years   | 80+ years | Improved Water Source (proportion with access) | 2     | Negative  |
| Gastritis and duodenitis                          | Females | 1-4 years   | 80+ years | Vegetables (kcal per capita)                   | 2     | None      |
| Gastritis and duodenitis                          | Females | 1-4 years   | 80+ years | LDI (I\$ per capita)                           | 3     | Negative  |
| Gastritis and duodenitis                          | Females | 1-4 years   | 80+ years | Education (years per capita)                   | 3     | Negative  |
| Gastritis and duodenitis                          | Males   | 1-4 years   | 80+ years | Alcohol (liters per capita)                    | 1     | Positive  |
| Gastritis and duodenitis                          | Males   | 1-4 years   | 80+ years | Smoking Prevalence                             | 1     | Positive  |
| Gastritis and duodenitis                          | Males   | 1-4 years   | 80+ years | Health System Access (capped)                  | 2     | Negative  |

**Web Table 22 – CODEm covariates used, level of covariate, and expected direction of covariate by cause, sex, and age**

| Cause                                         | Sex     | Age Start   | Age End   | Covariate                                                                    | Level | Direction |
|-----------------------------------------------|---------|-------------|-----------|------------------------------------------------------------------------------|-------|-----------|
| Gastritis and duodenitis                      | Males   | 1-4 years   | 80+ years | Improved Water Source (proportion with access)                               | 2     | Negative  |
| Gastritis and duodenitis                      | Males   | 1-4 years   | 80+ years | Vegetables (kcal per capita)                                                 | 2     | None      |
| Gastritis and duodenitis                      | Males   | 1-4 years   | 80+ years | Sanitation (proportion with access)                                          | 2     | Negative  |
| Gastritis and duodenitis                      | Males   | 1-4 years   | 80+ years | Education (years per capita)                                                 | 3     | Negative  |
| Gastritis and duodenitis                      | Males   | 1-4 years   | 80+ years | LDI (I\$ per capita)                                                         | 3     | Negative  |
| Gynecological diseases                        | Females | 15-19 years | 80+ years | Health System Access (unitless)                                              | 1     | Negative  |
| Gynecological diseases                        | Females | 15-19 years | 80+ years | Indoor Air Pollution (All Cooking Fuels)                                     | 1     | None      |
| Gynecological diseases                        | Females | 15-19 years | 80+ years | Smoking Prevalence                                                           | 1     | None      |
| Gynecological diseases                        | Females | 15-19 years | 80+ years | Live Births 35+ (proportion)                                                 | 2     | Positive  |
| Gynecological diseases                        | Females | 15-19 years | 80+ years | Vegetables (kcal per capita)                                                 | 2     | Negative  |
| Gynecological diseases                        | Females | 15-19 years | 80+ years | Mean BMI                                                                     | 2     | Positive  |
| Gynecological diseases                        | Females | 15-19 years | 80+ years | Fruits (kcal per capita)                                                     | 2     | Negative  |
| Gynecological diseases                        | Females | 15-19 years | 80+ years | Skilled Birth Attendance (proportion)                                        | 2     | Negative  |
| Gynecological diseases                        | Females | 15-19 years | 80+ years | Total Fertility Rate                                                         | 2     | Positive  |
| Gynecological diseases                        | Females | 15-19 years | 80+ years | LDI (I\$ per capita)                                                         | 3     | Negative  |
| Gynecological diseases                        | Females | 15-19 years | 80+ years | Education (years per capita)                                                 | 3     | Negative  |
| Hemoglobinopathies and hemolytic anemias      | Females | 0-6 days    | 80+ years | Hemoglobinopathies Prevalence x Excess Mortality (excluding G6PD deficiency) | 1     | Positive  |
| Hemoglobinopathies and hemolytic anemias      | Females | 0-6 days    | 80+ years | Latitude Over 45 (proportion)                                                | 2     | Negative  |
| Hemoglobinopathies and hemolytic anemias      | Females | 0-6 days    | 80+ years | Health System Access (capped)                                                | 2     | Negative  |
| Hemoglobinopathies and hemolytic anemias      | Females | 0-6 days    | 80+ years | Latitude Under 15 (proportion)                                               | 2     | Positive  |
| Hemoglobinopathies and hemolytic anemias      | Females | 0-6 days    | 80+ years | Latitude 30 to 45 (proportion)                                               | 2     | None      |
| Hemoglobinopathies and hemolytic anemias      | Females | 0-6 days    | 80+ years | LDI (I\$ per capita)                                                         | 3     | Negative  |
| Hemoglobinopathies and hemolytic anemias      | Females | 0-6 days    | 80+ years | Education (years per capita)                                                 | 3     | Negative  |
| Hemoglobinopathies and hemolytic anemias      | Males   | 0-6 days    | 80+ years | Hemoglobinopathies Prevalence x Excess Mortality (excluding G6PD deficiency) | 1     | Positive  |
| Hemoglobinopathies and hemolytic anemias      | Males   | 0-6 days    | 80+ years | Latitude 30 to 45 (proportion)                                               | 2     | None      |
| Hemoglobinopathies and hemolytic anemias      | Males   | 0-6 days    | 80+ years | Latitude Over 45 (proportion)                                                | 2     | Negative  |
| Hemoglobinopathies and hemolytic anemias      | Males   | 0-6 days    | 80+ years | Latitude Under 15 (proportion)                                               | 2     | Positive  |
| Hemoglobinopathies and hemolytic anemias      | Males   | 0-6 days    | 80+ years | Health System Access (capped)                                                | 2     | Negative  |
| Hemoglobinopathies and hemolytic anemias      | Males   | 0-6 days    | 80+ years | Education (years per capita)                                                 | 3     | Negative  |
| Hemoglobinopathies and hemolytic anemias      | Males   | 0-6 days    | 80+ years | LDI (I\$ per capita)                                                         | 3     | Negative  |
| Hemolytic disease and other neonatal jaundice | Females | 0-6 days    | 1-4 years | Health System Access 2 (unitless)                                            | 2     | Negative  |
| Hemolytic disease and other neonatal jaundice | Females | 0-6 days    | 1-4 years | Skilled Birth Attendance (proportion)                                        | 2     | Negative  |
| Hemolytic disease and other neonatal jaundice | Females | 0-6 days    | 1-4 years | In-Facility Delivery (proportion)                                            | 2     | Negative  |
| Hemolytic disease and other neonatal jaundice | Females | 0-6 days    | 1-4 years | Antenatal Care (4 visits) Coverage (proportion)                              | 2     | Negative  |
| Hemolytic disease and other neonatal jaundice | Females | 0-6 days    | 1-4 years | Total Fertility Rate                                                         | 2     | Positive  |

**Web Table 22 – CODEm covariates used, level of covariate, and expected direction of covariate by cause, sex, and age**

| Cause                                         | Sex     | Age Start   | Age End   | Covariate                                       | Level | Direction |
|-----------------------------------------------|---------|-------------|-----------|-------------------------------------------------|-------|-----------|
| Hemolytic disease and other neonatal jaundice | Females | 0-6 days    | 1-4 years | LDI (I\$ per capita)                            | 3     | None      |
| Hemolytic disease and other neonatal jaundice | Females | 0-6 days    | 1-4 years | Education (years per capita)                    | 3     | None      |
| Hemolytic disease and other neonatal jaundice | Males   | 0-6 days    | 1-4 years | Health System Access 2 (unitless)               | 2     | Negative  |
| Hemolytic disease and other neonatal jaundice | Males   | 0-6 days    | 1-4 years | Skilled Birth Attendance (proportion)           | 2     | Negative  |
| Hemolytic disease and other neonatal jaundice | Males   | 0-6 days    | 1-4 years | Total Fertility Rate                            | 2     | Positive  |
| Hemolytic disease and other neonatal jaundice | Males   | 0-6 days    | 1-4 years | In-Facility Delivery (proportion)               | 2     | Negative  |
| Hemolytic disease and other neonatal jaundice | Males   | 0-6 days    | 1-4 years | Antenatal Care (4 visits) Coverage (proportion) | 2     | Negative  |
| Hemolytic disease and other neonatal jaundice | Males   | 0-6 days    | 1-4 years | Education (years per capita)                    | 3     | None      |
| Hemolytic disease and other neonatal jaundice | Males   | 0-6 days    | 1-4 years | LDI (I\$ per capita)                            | 3     | None      |
| Hemorrhagic stroke                            | Females | 0-6 days    | 80+ years | Smoking Prevalence                              | 1     | Positive  |
| Hemorrhagic stroke                            | Females | 0-6 days    | 80+ years | Alcohol (liters per capita)                     | 2     | None      |
| Hemorrhagic stroke                            | Females | 0-6 days    | 80+ years | PUFA Omega 3 - Seafood (kcal per capita)        | 2     | Negative  |
| Hemorrhagic stroke                            | Females | 0-6 days    | 80+ years | Vegetables (kcal per capita)                    | 2     | Negative  |
| Hemorrhagic stroke                            | Females | 0-6 days    | 80+ years | PUFA Omega 6 - Vegetable Oils (kcal per capita) | 2     | Negative  |
| Hemorrhagic stroke                            | Females | 0-6 days    | 80+ years | Nuts & Seeds (kcal per capita)                  | 2     | Negative  |
| Hemorrhagic stroke                            | Females | 0-6 days    | 80+ years | In-Milk (kcal per capita)                       | 2     | Negative  |
| Hemorrhagic stroke                            | Females | 0-6 days    | 80+ years | LDI (I\$ per capita)                            | 3     | Negative  |
| Hemorrhagic stroke                            | Females | 0-6 days    | 80+ years | Education (years per capita)                    | 3     | Negative  |
| Hemorrhagic stroke                            | Males   | 0-6 days    | 80+ years | Smoking Prevalence                              | 1     | Positive  |
| Hemorrhagic stroke                            | Males   | 0-6 days    | 80+ years | Vegetables (kcal per capita)                    | 2     | Negative  |
| Hemorrhagic stroke                            | Males   | 0-6 days    | 80+ years | Nuts & Seeds (kcal per capita)                  | 2     | Negative  |
| Hemorrhagic stroke                            | Males   | 0-6 days    | 80+ years | In-Milk (kcal per capita)                       | 2     | Negative  |
| Hemorrhagic stroke                            | Males   | 0-6 days    | 80+ years | PUFA Omega 6 - Vegetable Oils (kcal per capita) | 2     | Negative  |
| Hemorrhagic stroke                            | Males   | 0-6 days    | 80+ years | Alcohol (liters per capita)                     | 2     | None      |
| Hemorrhagic stroke                            | Males   | 0-6 days    | 80+ years | PUFA Omega 3 - Seafood (kcal per capita)        | 2     | Negative  |
| Hemorrhagic stroke                            | Males   | 0-6 days    | 80+ years | LDI (I\$ per capita)                            | 3     | Negative  |
| Hemorrhagic stroke                            | Males   | 0-6 days    | 80+ years | Education (years per capita)                    | 3     | Negative  |
| Hepatitis                                     | Females | 28-364 days | 80+ years | Hepatitis B Prevalence (proportion)             | 1     | Positive  |
| Hepatitis                                     | Females | 28-364 days | 80+ years | Hepatitis E Prevalence (proportion)             | 1     | Positive  |
| Hepatitis                                     | Females | 28-364 days | 80+ years | Hepatitis A Prevalence (proportion)             | 1     | Positive  |
| Hepatitis                                     | Females | 28-364 days | 80+ years | Hepatitis C Prevalence (proportion)             | 1     | Positive  |
| Hepatitis                                     | Females | 28-364 days | 80+ years | Improved Water Source (proportion with access)  | 2     | Negative  |
| Hepatitis                                     | Females | 28-364 days | 80+ years | Health System Access 2 (unitless)               | 2     | Negative  |
| Hepatitis                                     | Females | 28-364 days | 80+ years | Sanitation (proportion with access)             | 2     | Negative  |
| Hepatitis                                     | Females | 28-364 days | 80+ years | LDI (I\$ per capita)                            | 2     | Negative  |



**Web Table 22 – CODEm covariates used, level of covariate, and expected direction of covariate by cause, sex, and age**

| Cause                         | Sex     | Age Start   | Age End   | Covariate                                      | Level | Direction |
|-------------------------------|---------|-------------|-----------|------------------------------------------------|-------|-----------|
| Hepatitis                     | Females | 28-364 days | 80+ years | Education (years per capita)                   | 3     | Negative  |
| Hepatitis                     | Males   | 28-364 days | 80+ years | Hepatitis B Prevalence (proportion)            | 1     | Positive  |
| Hepatitis                     | Males   | 28-364 days | 80+ years | Hepatitis A Prevalence (proportion)            | 1     | Positive  |
| Hepatitis                     | Males   | 28-364 days | 80+ years | Hepatitis E Prevalence (proportion)            | 1     | Positive  |
| Hepatitis                     | Males   | 28-364 days | 80+ years | Hepatitis C Prevalence (proportion)            | 1     | Positive  |
| Hepatitis                     | Males   | 28-364 days | 80+ years | Sanitation (proportion with access)            | 2     | Negative  |
| Hepatitis                     | Males   | 28-364 days | 80+ years | Improved Water Source (proportion with access) | 2     | Negative  |
| Hepatitis                     | Males   | 28-364 days | 80+ years | LDI (I\$ per capita)                           | 2     | Negative  |
| Hepatitis                     | Males   | 28-364 days | 80+ years | Health System Access 2 (unitless)              | 2     | Negative  |
| Hepatitis                     | Males   | 28-364 days | 80+ years | Education (years per capita)                   | 3     | Negative  |
| Hodgkin lymphoma [Developed]  | Females | 0-6 days    | 80+ years | Health System Access 2 (unitless)              | 1     | Negative  |
| Hodgkin lymphoma [Developed]  | Females | 0-6 days    | 80+ years | LDI (I\$ per capita)                           | 2     | None      |
| Hodgkin lymphoma [Developed]  | Females | 0-6 days    | 80+ years | Education (years per capita)                   | 2     | None      |
| Hodgkin lymphoma [Developed]  | Females | 0-6 days    | 80+ years | Latitude 30 to 45 (proportion)                 | 3     | None      |
| Hodgkin lymphoma [Developed]  | Females | 0-6 days    | 80+ years | Latitude 15 to 30 (proportion)                 | 3     | None      |
| Hodgkin lymphoma [Developed]  | Females | 0-6 days    | 80+ years | Latitude Over 45 (proportion)                  | 3     | Positive  |
| Hodgkin lymphoma [Developed]  | Males   | 0-6 days    | 80+ years | Health System Access 2 (unitless)              | 1     | Negative  |
| Hodgkin lymphoma [Developed]  | Males   | 0-6 days    | 80+ years | Education (years per capita)                   | 2     | None      |
| Hodgkin lymphoma [Developed]  | Males   | 0-6 days    | 80+ years | LDI (I\$ per capita)                           | 2     | None      |
| Hodgkin lymphoma [Developed]  | Males   | 0-6 days    | 80+ years | Latitude 30 to 45 (proportion)                 | 3     | None      |
| Hodgkin lymphoma [Developed]  | Males   | 0-6 days    | 80+ years | Latitude Under 15 (proportion)                 | 3     | Negative  |
| Hodgkin lymphoma [Developed]  | Males   | 0-6 days    | 80+ years | Latitude 15 to 30 (proportion)                 | 3     | None      |
| Hodgkin lymphoma [Developing] | Females | 0-6 days    | 80+ years | Health System Access 2 (unitless)              | 1     | Negative  |
| Hodgkin lymphoma [Developing] | Females | 0-6 days    | 80+ years | LDI (I\$ per capita)                           | 2     | None      |
| Hodgkin lymphoma [Developing] | Females | 0-6 days    | 80+ years | Education (years per capita)                   | 2     | None      |
| Hodgkin lymphoma [Developing] | Females | 0-6 days    | 80+ years | Latitude Under 15 (proportion)                 | 3     | Negative  |
| Hodgkin lymphoma [Developing] | Females | 0-6 days    | 80+ years | Latitude 30 to 45 (proportion)                 | 3     | None      |
| Hodgkin lymphoma [Developing] | Females | 0-6 days    | 80+ years | Latitude 15 to 30 (proportion)                 | 3     | None      |
| Hodgkin lymphoma [Developing] | Males   | 0-6 days    | 80+ years | Health System Access 2 (unitless)              | 1     | Negative  |
| Hodgkin lymphoma [Developing] | Males   | 0-6 days    | 80+ years | LDI (I\$ per capita)                           | 2     | None      |
| Hodgkin lymphoma [Developing] | Males   | 0-6 days    | 80+ years | Education (years per capita)                   | 2     | None      |
| Hodgkin lymphoma [Developing] | Males   | 0-6 days    | 80+ years | Latitude 30 to 45 (proportion)                 | 3     | None      |
| Hodgkin lymphoma [Developing] | Males   | 0-6 days    | 80+ years | Latitude 15 to 30 (proportion)                 | 3     | None      |
| Hodgkin lymphoma [Developing] | Males   | 0-6 days    | 80+ years | Latitude Under 15 (proportion)                 | 3     | Negative  |
| Hypertensive heart disease    | Females | 28-364 days | 80+ years | Systolic Blood Pressure (mmHg)                 | 1     | Positive  |



**Web Table 22 – CODEm covariates used, level of covariate, and expected direction of covariate by cause, sex, and age**

| Cause                      | Sex     | Age Start   | Age End   | Covariate                                | Level | Direction |
|----------------------------|---------|-------------|-----------|------------------------------------------|-------|-----------|
| Hypertensive heart disease | Females | 28-364 days | 80+ years | Indoor Air Pollution (All Cooking Fuels) | 2     | Positive  |
| Hypertensive heart disease | Females | 28-364 days | 80+ years | PUFA Omega 3 - Seafood (kcal per capita) | 2     | Negative  |
| Hypertensive heart disease | Females | 28-364 days | 80+ years | Vegetables (kcal per capita)             | 2     | Negative  |
| Hypertensive heart disease | Females | 28-364 days | 80+ years | Alcohol (liters per capita)              | 2     | None      |
| Hypertensive heart disease | Females | 28-364 days | 80+ years | Outdoor Air Pollution (PM2.5)            | 2     | Positive  |
| Hypertensive heart disease | Females | 28-364 days | 80+ years | Cumulative Cigarettes (10 Years)         | 2     | Positive  |
| Hypertensive heart disease | Females | 28-364 days | 80+ years | Nuts & Seeds (kcal per capita)           | 2     | Negative  |
| Hypertensive heart disease | Females | 28-364 days | 80+ years | Total Calories (kcal per capita)         | 2     | Positive  |
| Hypertensive heart disease | Females | 28-364 days | 80+ years | LDI (I\$ per capita)                     | 3     | Negative  |
| Hypertensive heart disease | Females | 28-364 days | 80+ years | Elevation Under 100m (proportion)        | 3     | Negative  |
| Hypertensive heart disease | Females | 28-364 days | 80+ years | Education (years per capita)             | 3     | Negative  |
| Hypertensive heart disease | Males   | 28-364 days | 80+ years | Alcohol (liters per capita)              | 2     | None      |
| Hypertensive heart disease | Males   | 28-364 days | 80+ years | Indoor Air Pollution (All Cooking Fuels) | 2     | Positive  |
| Hypertensive heart disease | Males   | 28-364 days | 80+ years | Nuts & Seeds (kcal per capita)           | 2     | Negative  |
| Hypertensive heart disease | Males   | 28-364 days | 80+ years | PUFA Omega 3 - Seafood (kcal per capita) | 2     | Negative  |
| Hypertensive heart disease | Males   | 28-364 days | 80+ years | Total Calories (kcal per capita)         | 2     | Positive  |
| Hypertensive heart disease | Males   | 28-364 days | 80+ years | Vegetables (kcal per capita)             | 2     | Negative  |
| Hypertensive heart disease | Males   | 28-364 days | 80+ years | Elevation Under 100m (proportion)        | 3     | Negative  |
| Hypertensive heart disease | Males   | 28-364 days | 80+ years | Education (years per capita)             | 3     | Negative  |
| Hypertensive heart disease | Males   | 28-364 days | 80+ years | LDI (I\$ per capita)                     | 3     | Negative  |
| Inflammatory bowel disease | Females | 1-4 years   | 80+ years | Vegetables (kcal per capita)             | 1     | Negative  |
| Inflammatory bowel disease | Females | 1-4 years   | 80+ years | Fruits (kcal per capita)                 | 1     | Negative  |
| Inflammatory bowel disease | Females | 1-4 years   | 80+ years | Red Meat (kcal per capita)               | 1     | Positive  |
| Inflammatory bowel disease | Females | 1-4 years   | 80+ years | Animal Fats (kcal per capita)            | 1     | Positive  |
| Inflammatory bowel disease | Females | 1-4 years   | 80+ years | Health System Access (capped)            | 2     | Negative  |
| Inflammatory bowel disease | Females | 1-4 years   | 80+ years | Latitude Over 45 (proportion)            | 3     | Positive  |
| Inflammatory bowel disease | Females | 1-4 years   | 80+ years | LDI (I\$ per capita)                     | 3     | None      |
| Inflammatory bowel disease | Females | 1-4 years   | 80+ years | Education (years per capita)             | 3     | Negative  |
| Inflammatory bowel disease | Males   | 1-4 years   | 80+ years | Fruits (kcal per capita)                 | 1     | Negative  |
| Inflammatory bowel disease | Males   | 1-4 years   | 80+ years | Animal Fats (kcal per capita)            | 1     | Positive  |
| Inflammatory bowel disease | Males   | 1-4 years   | 80+ years | Red Meat (kcal per capita)               | 1     | Positive  |
| Inflammatory bowel disease | Males   | 1-4 years   | 80+ years | Vegetables (kcal per capita)             | 1     | Negative  |
| Inflammatory bowel disease | Males   | 1-4 years   | 80+ years | Health System Access (capped)            | 2     | Negative  |
| Inflammatory bowel disease | Males   | 1-4 years   | 80+ years | LDI (I\$ per capita)                     | 3     | None      |
| Inflammatory bowel disease | Males   | 1-4 years   | 80+ years | Education (years per capita)             | 3     | Negative  |

**Web Table 22 – CODEm covariates used, level of covariate, and expected direction of covariate by cause, sex, and age**

| Cause                                               | Sex     | Age Start   | Age End   | Covariate                                           | Level | Direction |
|-----------------------------------------------------|---------|-------------|-----------|-----------------------------------------------------|-------|-----------|
| Inflammatory bowel disease                          | Males   | 1-4 years   | 80+ years | Latitude Over 45 (proportion)                       | 3     | Positive  |
| Inguinal, femoral, and abdominal hernia             | Females | 1-4 years   | 80+ years | Health System Access (capped)                       | 2     | Negative  |
| Inguinal, femoral, and abdominal hernia             | Females | 1-4 years   | 80+ years | LDI (I\$ per capita)                                | 3     | Negative  |
| Inguinal, femoral, and abdominal hernia             | Females | 1-4 years   | 80+ years | Education (years per capita)                        | 3     | Negative  |
| Inguinal, femoral, and abdominal hernia             | Males   | 1-4 years   | 80+ years | Health System Access (capped)                       | 2     | Negative  |
| Inguinal, femoral, and abdominal hernia             | Males   | 1-4 years   | 80+ years | LDI (I\$ per capita)                                | 3     | Negative  |
| Inguinal, femoral, and abdominal hernia             | Males   | 1-4 years   | 80+ years | Education (years per capita)                        | 3     | Negative  |
| Interpersonal violence                              | Females | 0-6 days    | 80+ years | Alcohol (liters per capita)                         | 1     | Positive  |
| Interpersonal violence                              | Females | 0-6 days    | 80+ years | Health System Access 2 (unitless)                   | 1     | Negative  |
| Interpersonal violence                              | Females | 0-6 days    | 80+ years | Population Density (over 1000 ppl/sqkm, proportion) | 2     | Positive  |
| Interpersonal violence                              | Females | 0-6 days    | 80+ years | LDI (I\$ per capita)                                | 3     | None      |
| Interpersonal violence                              | Females | 0-6 days    | 80+ years | Education (years per capita)                        | 3     | None      |
| Interpersonal violence                              | Males   | 0-6 days    | 80+ years | Health System Access 2 (unitless)                   | 1     | Negative  |
| Interpersonal violence                              | Males   | 0-6 days    | 80+ years | Opium Cultivation (binary)                          | 2     | Positive  |
| Interpersonal violence                              | Males   | 0-6 days    | 80+ years | Population Density (over 1000 ppl/sqkm, proportion) | 2     | Positive  |
| Interpersonal violence                              | Males   | 0-6 days    | 80+ years | LDI (I\$ per capita)                                | 3     | None      |
| Interpersonal violence                              | Males   | 0-6 days    | 80+ years | Education (years per capita)                        | 3     | None      |
| Interstitial lung disease and pulmonary sarcoidosis | Females | 1-4 years   | 80+ years | Elevation Over 1500m (proportion)                   | 2     | Positive  |
| Interstitial lung disease and pulmonary sarcoidosis | Females | 1-4 years   | 80+ years | Population Density (over 1000 ppl/sqkm, proportion) | 2     | Positive  |
| Interstitial lung disease and pulmonary sarcoidosis | Males   | 1-4 years   | 80+ years | Population Density (over 1000 ppl/sqkm, proportion) | 2     | Positive  |
| Interstitial nephritis and urinary tract infections | Females | 0-6 days    | 80+ years | Health System Access 2 (unitless)                   | 1     | Negative  |
| Interstitial nephritis and urinary tract infections | Females | 0-6 days    | 80+ years | LDI (I\$ per capita)                                | 2     | Negative  |
| Interstitial nephritis and urinary tract infections | Males   | 0-6 days    | 80+ years | Health System Access 2 (unitless)                   | 1     | Negative  |
| Interstitial nephritis and urinary tract infections | Males   | 0-6 days    | 80+ years | Education (years per capita)                        | 2     | Negative  |
| Interstitial nephritis and urinary tract infections | Males   | 0-6 days    | 80+ years | LDI (I\$ per capita)                                | 2     | Negative  |
| Iron-deficiency anemia                              | Females | 28-364 days | 80+ years | Malnutrition (proportion <2SD weight for age)       | 1     | Positive  |
| Iron-deficiency anemia                              | Females | 28-364 days | 80+ years | Health System Access 2 (unitless)                   | 1     | Negative  |
| Iron-deficiency anemia                              | Females | 28-364 days | 80+ years | Age-Standardize Prevalence of Severe Anemia         | 1     | Positive  |
| Iron-deficiency anemia                              | Females | 28-364 days | 80+ years | Mortality Rate Due to War Shocks (per 1 person)     | 2     | Positive  |
| Iron-deficiency anemia                              | Females | 28-364 days | 80+ years | Rainfall Quintile 2 (proportion)                    | 2     | None      |
| Iron-deficiency anemia                              | Females | 28-364 days | 80+ years | Sanitation (proportion with access)                 | 2     | Negative  |
| Iron-deficiency anemia                              | Females | 28-364 days | 80+ years | Total Calories (kcal per capita)                    | 2     | Negative  |
| Iron-deficiency anemia                              | Females | 28-364 days | 80+ years | Rainfall Quintile 1 (proportion)                    | 2     | None      |
| Iron-deficiency anemia                              | Females | 28-364 days | 80+ years | Improved Water Source (proportion with access)      | 2     | Negative  |
| Iron-deficiency anemia                              | Females | 28-364 days | 80+ years | LDI (I\$ per capita)                                | 3     | Negative  |

**Web Table 22 – CODEm covariates used, level of covariate, and expected direction of covariate by cause, sex, and age**

| Cause                  | Sex     | Age Start   | Age End   | Covariate                                       | Level | Direction |
|------------------------|---------|-------------|-----------|-------------------------------------------------|-------|-----------|
| Iron-deficiency anemia | Females | 28-364 days | 80+ years | Education (years per capita)                    | 3     | Negative  |
| Iron-deficiency anemia | Males   | 28-364 days | 80+ years | Health System Access 2 (unitless)               | 1     | Negative  |
| Iron-deficiency anemia | Males   | 28-364 days | 80+ years | Malnutrition (proportion <2SD weight for age)   | 1     | Positive  |
| Iron-deficiency anemia | Males   | 28-364 days | 80+ years | Rainfall Quintile 1 (proportion)                | 2     | None      |
| Iron-deficiency anemia | Males   | 28-364 days | 80+ years | Sanitation (proportion with access)             | 2     | Negative  |
| Iron-deficiency anemia | Males   | 28-364 days | 80+ years | Total Calories (kcal per capita)                | 2     | Negative  |
| Iron-deficiency anemia | Males   | 28-364 days | 80+ years | Mortality Rate Due to War Shocks (per 1 person) | 2     | Positive  |
| Iron-deficiency anemia | Males   | 28-364 days | 80+ years | Improved Water Source (proportion with access)  | 2     | Negative  |
| Iron-deficiency anemia | Males   | 28-364 days | 80+ years | Rainfall Quintile 2 (proportion)                | 2     | None      |
| Iron-deficiency anemia | Males   | 28-364 days | 80+ years | Education (years per capita)                    | 3     | Negative  |
| Iron-deficiency anemia | Males   | 28-364 days | 80+ years | LDI (I\$ per capita)                            | 3     | Negative  |
| Ischemic heart disease | Females | 28-364 days | 80+ years | Smoking Prevalence                              | 1     | Positive  |
| Ischemic heart disease | Females | 28-364 days | 80+ years | Alcohol (liters per capita)                     | 2     | None      |
| Ischemic heart disease | Females | 28-364 days | 80+ years | PUFA Omega 3 - Seafood (kcal per capita)        | 2     | Negative  |
| Ischemic heart disease | Females | 28-364 days | 80+ years | Vegetables (kcal per capita)                    | 2     | Negative  |
| Ischemic heart disease | Females | 28-364 days | 80+ years | Animal Fats (kcal per capita)                   | 2     | Positive  |
| Ischemic heart disease | Females | 28-364 days | 80+ years | Red Meat (kcal per capita)                      | 3     | Positive  |
| Ischemic heart disease | Females | 28-364 days | 80+ years | LDI (I\$ per capita)                            | 3     | Negative  |
| Ischemic heart disease | Females | 28-364 days | 80+ years | Pulses & Legumes (kcal per capita)              | 3     | Negative  |
| Ischemic heart disease | Males   | 28-364 days | 80+ years | Cholesterol (total, mean per capita)            | 1     | Positive  |
| Ischemic heart disease | Males   | 28-364 days | 80+ years | Elevation Under 100m (proportion)               | 1     | Positive  |
| Ischemic heart disease | Males   | 28-364 days | 80+ years | Smoking Prevalence                              | 1     | Positive  |
| Ischemic heart disease | Males   | 28-364 days | 80+ years | Animal Fats (kcal per capita)                   | 2     | Positive  |
| Ischemic heart disease | Males   | 28-364 days | 80+ years | Vegetables (kcal per capita)                    | 2     | Negative  |
| Ischemic heart disease | Males   | 28-364 days | 80+ years | PUFA Omega 3 - Seafood (kcal per capita)        | 2     | Negative  |
| Ischemic heart disease | Males   | 28-364 days | 80+ years | Alcohol (liters per capita)                     | 2     | None      |
| Ischemic heart disease | Males   | 28-364 days | 80+ years | LDI (I\$ per capita)                            | 3     | Negative  |
| Ischemic heart disease | Males   | 28-364 days | 80+ years | Red Meat (kcal per capita)                      | 3     | Positive  |
| Ischemic stroke        | Females | 28-364 days | 80+ years | Smoking Prevalence                              | 1     | Positive  |
| Ischemic stroke        | Females | 28-364 days | 80+ years | Alcohol (liters per capita)                     | 2     | None      |
| Ischemic stroke        | Females | 28-364 days | 80+ years | Nuts & Seeds (kcal per capita)                  | 2     | Negative  |
| Ischemic stroke        | Females | 28-364 days | 80+ years | Fruits (kcal per capita)                        | 2     | Negative  |
| Ischemic stroke        | Females | 28-364 days | 80+ years | Vegetables (kcal per capita)                    | 2     | Negative  |
| Ischemic stroke        | Females | 28-364 days | 80+ years | Pulses & Legumes (kcal per capita)              | 2     | Negative  |
| Ischemic stroke        | Females | 28-364 days | 80+ years | Education (years per capita)                    | 3     | Negative  |

**Web Table 22 – CODEm covariates used, level of covariate, and expected direction of covariate by cause, sex, and age**

| Cause                      | Sex     | Age Start   | Age End   | Covariate                                         | Level | Direction |
|----------------------------|---------|-------------|-----------|---------------------------------------------------|-------|-----------|
| Ischemic stroke            | Females | 28-364 days | 80+ years | LDI (I\$ per capita)                              | 3     | Negative  |
| Ischemic stroke            | Females | 28-364 days | 80+ years | Animal Fats (kcal per capita)                     | 3     | Positive  |
| Ischemic stroke            | Females | 28-364 days | 80+ years | PUFA Omega 3 - Seafood (kcal per capita)          | 3     | Negative  |
| Ischemic stroke            | Males   | 28-364 days | 80+ years | Smoking Prevalence                                | 1     | Positive  |
| Ischemic stroke            | Males   | 28-364 days | 80+ years | Alcohol (liters per capita)                       | 2     | None      |
| Ischemic stroke            | Males   | 28-364 days | 80+ years | Health System Access 2 (unitless)                 | 2     | Negative  |
| Ischemic stroke            | Males   | 28-364 days | 80+ years | Fruits (kcal per capita)                          | 2     | Negative  |
| Ischemic stroke            | Males   | 28-364 days | 80+ years | Pulses & Legumes (kcal per capita)                | 2     | Negative  |
| Ischemic stroke            | Males   | 28-364 days | 80+ years | Vegetables (kcal per capita)                      | 2     | Negative  |
| Ischemic stroke            | Males   | 28-364 days | 80+ years | Nuts & Seeds (kcal per capita)                    | 2     | Negative  |
| Ischemic stroke            | Males   | 28-364 days | 80+ years | Animal Fats (kcal per capita)                     | 3     | Positive  |
| Ischemic stroke            | Males   | 28-364 days | 80+ years | Education (years per capita)                      | 3     | Negative  |
| Ischemic stroke            | Males   | 28-364 days | 80+ years | LDI (I\$ per capita)                              | 3     | Negative  |
| Ischemic stroke            | Males   | 28-364 days | 80+ years | PUFA Omega 3 - Seafood (kcal per capita)          | 3     | Negative  |
| Kidney cancer [Developed]  | Females | 28-364 days | 80+ years | Smoking Prevalence                                | 1     | Positive  |
| Kidney cancer [Developed]  | Females | 28-364 days | 80+ years | Mean BMI                                          | 1     | Positive  |
| Kidney cancer [Developed]  | Females | 28-364 days | 80+ years | Total Calories (kcal per capita)                  | 1     | Positive  |
| Kidney cancer [Developed]  | Females | 28-364 days | 80+ years | Diabetes Age-Standardized Prevalence (proportion) | 2     | Positive  |
| Kidney cancer [Developed]  | Females | 28-364 days | 80+ years | Systolic Blood Pressure (mmHg)                    | 2     | Positive  |
| Kidney cancer [Developed]  | Females | 28-364 days | 80+ years | Alcohol (liters per capita)                       | 2     | Positive  |
| Kidney cancer [Developed]  | Females | 28-364 days | 80+ years | Total Fertility Rate                              | 3     | None      |
| Kidney cancer [Developed]  | Females | 28-364 days | 80+ years | LDI (I\$ per capita)                              | 3     | Negative  |
| Kidney cancer [Developed]  | Males   | 28-364 days | 80+ years | Smoking Prevalence                                | 1     | Positive  |
| Kidney cancer [Developed]  | Males   | 28-364 days | 80+ years | Cumulative Cigarettes (10 Years)                  | 1     | Positive  |
| Kidney cancer [Developed]  | Males   | 28-364 days | 80+ years | Cumulative Cigarettes (15 Years)                  | 1     | Positive  |
| Kidney cancer [Developed]  | Males   | 28-364 days | 80+ years | Total Calories (kcal per capita)                  | 1     | Positive  |
| Kidney cancer [Developed]  | Males   | 28-364 days | 80+ years | Cumulative Cigarettes (5 Years)                   | 1     | Positive  |
| Kidney cancer [Developed]  | Males   | 28-364 days | 80+ years | Mean BMI                                          | 1     | Positive  |
| Kidney cancer [Developed]  | Males   | 28-364 days | 80+ years | Diabetes Age-Standardized Prevalence (proportion) | 2     | Positive  |
| Kidney cancer [Developed]  | Males   | 28-364 days | 80+ years | Systolic Blood Pressure (mmHg)                    | 2     | Positive  |
| Kidney cancer [Developed]  | Males   | 28-364 days | 80+ years | Alcohol (liters per capita)                       | 2     | Positive  |
| Kidney cancer [Developed]  | Males   | 28-364 days | 80+ years | LDI (I\$ per capita)                              | 3     | Negative  |
| Kidney cancer [Developed]  | Males   | 28-364 days | 80+ years | Total Fertility Rate                              | 3     | None      |
| Kidney cancer [Developing] | Females | 28-364 days | 80+ years | Cumulative Cigarettes (10 Years)                  | 1     | Positive  |
| Kidney cancer [Developing] | Females | 28-364 days | 80+ years | Mean BMI                                          | 1     | Positive  |

**Web Table 22 – CODEm covariates used, level of covariate, and expected direction of covariate by cause, sex, and age**

| Cause                      | Sex     | Age Start   | Age End   | Covariate                                           | Level | Direction |
|----------------------------|---------|-------------|-----------|-----------------------------------------------------|-------|-----------|
| Kidney cancer [Developing] | Females | 28-364 days | 80+ years | Total Calories (kcal per capita)                    | 1     | Positive  |
| Kidney cancer [Developing] | Females | 28-364 days | 80+ years | Smoking Prevalence                                  | 1     | Positive  |
| Kidney cancer [Developing] | Females | 28-364 days | 80+ years | Cumulative Cigarettes (15 Years)                    | 1     | Positive  |
| Kidney cancer [Developing] | Females | 28-364 days | 80+ years | Systolic Blood Pressure (mmHg)                      | 2     | Positive  |
| Kidney cancer [Developing] | Females | 28-364 days | 80+ years | Health System Access 2 (unitless)                   | 2     | Negative  |
| Kidney cancer [Developing] | Females | 28-364 days | 80+ years | Diabetes Age-Standardized Prevalence (proportion)   | 2     | Positive  |
| Kidney cancer [Developing] | Females | 28-364 days | 80+ years | Alcohol (liters per capita)                         | 2     | Positive  |
| Kidney cancer [Developing] | Females | 28-364 days | 80+ years | Total Fertility Rate                                | 3     | None      |
| Kidney cancer [Developing] | Females | 28-364 days | 80+ years | LDI (I\$ per capita)                                | 3     | Negative  |
| Kidney cancer [Developing] | Males   | 28-364 days | 80+ years | Smoking Prevalence                                  | 1     | Positive  |
| Kidney cancer [Developing] | Males   | 28-364 days | 80+ years | Total Calories (kcal per capita)                    | 1     | Positive  |
| Kidney cancer [Developing] | Males   | 28-364 days | 80+ years | Mean BMI                                            | 1     | Positive  |
| Kidney cancer [Developing] | Males   | 28-364 days | 80+ years | Alcohol (liters per capita)                         | 2     | Positive  |
| Kidney cancer [Developing] | Males   | 28-364 days | 80+ years | Health System Access 2 (unitless)                   | 2     | Negative  |
| Kidney cancer [Developing] | Males   | 28-364 days | 80+ years | Systolic Blood Pressure (mmHg)                      | 2     | Positive  |
| Kidney cancer [Developing] | Males   | 28-364 days | 80+ years | Diabetes Age-Standardized Prevalence (proportion)   | 2     | Positive  |
| Kidney cancer [Developing] | Males   | 28-364 days | 80+ years | Total Fertility Rate                                | 3     | None      |
| Kidney cancer [Developing] | Males   | 28-364 days | 80+ years | LDI (I\$ per capita)                                | 3     | Negative  |
| Larynx cancer [Developed]  | Females | 15-19 years | 80+ years | Alcohol (liters per capita)                         | 1     | Positive  |
| Larynx cancer [Developed]  | Females | 15-19 years | 80+ years | Population Density (over 1000 ppl/sqkm, proportion) | 2     | Positive  |
| Larynx cancer [Developed]  | Females | 15-19 years | 80+ years | Cumulative Cigarettes (5 Years)                     | 2     | Positive  |
| Larynx cancer [Developed]  | Females | 15-19 years | 80+ years | Smoking Prevalence                                  | 2     | Positive  |
| Larynx cancer [Developed]  | Females | 15-19 years | 80+ years | Cumulative Cigarettes (10 Years)                    | 2     | Positive  |
| Larynx cancer [Developed]  | Females | 15-19 years | 80+ years | Cumulative Cigarettes (15 Years)                    | 2     | Positive  |
| Larynx cancer [Developed]  | Females | 15-19 years | 80+ years | Outdoor Air Pollution (PM2.5)                       | 2     | Positive  |
| Larynx cancer [Developed]  | Females | 15-19 years | 80+ years | Cumulative Cigarettes (20 Years)                    | 2     | Positive  |
| Larynx cancer [Developed]  | Females | 15-19 years | 80+ years | LDI (I\$ per capita)                                | 3     | Negative  |
| Larynx cancer [Developed]  | Females | 15-19 years | 80+ years | Education (years per capita)                        | 3     | Negative  |
| Larynx cancer [Developed]  | Males   | 15-19 years | 80+ years | Alcohol (liters per capita)                         | 1     | Positive  |
| Larynx cancer [Developed]  | Males   | 15-19 years | 80+ years | Smoking Prevalence                                  | 2     | Positive  |
| Larynx cancer [Developed]  | Males   | 15-19 years | 80+ years | Tobacco (cigarettes per capita)                     | 2     | Positive  |
| Larynx cancer [Developed]  | Males   | 15-19 years | 80+ years | Population Density (over 1000 ppl/sqkm, proportion) | 2     | Positive  |
| Larynx cancer [Developed]  | Males   | 15-19 years | 80+ years | Cumulative Cigarettes (10 Years)                    | 2     | Positive  |
| Larynx cancer [Developed]  | Males   | 15-19 years | 80+ years | Outdoor Air Pollution (PM2.5)                       | 2     | Positive  |
| Larynx cancer [Developed]  | Males   | 15-19 years | 80+ years | Cumulative Cigarettes (20 Years)                    | 2     | Positive  |

**Web Table 22 – CODEm covariates used, level of covariate, and expected direction of covariate by cause, sex, and age**

| Cause                      | Sex     | Age Start   | Age End   | Covariate                                           | Level | Direction |
|----------------------------|---------|-------------|-----------|-----------------------------------------------------|-------|-----------|
| Larynx cancer [Developed]  | Males   | 15-19 years | 80+ years | Cumulative Cigarettes (5 Years)                     | 2     | Positive  |
| Larynx cancer [Developed]  | Males   | 15-19 years | 80+ years | Cumulative Cigarettes (15 Years)                    | 2     | Positive  |
| Larynx cancer [Developed]  | Males   | 15-19 years | 80+ years | LDI (\$ per capita)                                 | 3     | Negative  |
| Larynx cancer [Developed]  | Males   | 15-19 years | 80+ years | Education (years per capita)                        | 3     | Negative  |
| Larynx cancer [Developing] | Females | 15-19 years | 80+ years | Alcohol (liters per capita)                         | 1     | Positive  |
| Larynx cancer [Developing] | Females | 15-19 years | 80+ years | Vegetables (kcal per capita)                        | 1     | Negative  |
| Larynx cancer [Developing] | Females | 15-19 years | 80+ years | Cumulative Cigarettes (15 Years)                    | 2     | Positive  |
| Larynx cancer [Developing] | Females | 15-19 years | 80+ years | Indoor Air Pollution (All Cooking Fuels)            | 2     | Positive  |
| Larynx cancer [Developing] | Females | 15-19 years | 80+ years | Population Density (under 150 ppl/sqkm, proportion) | 2     | Positive  |
| Larynx cancer [Developing] | Females | 15-19 years | 80+ years | Population Density (over 1000 ppl/sqkm, proportion) | 2     | Positive  |
| Larynx cancer [Developing] | Females | 15-19 years | 80+ years | Outdoor Air Pollution (PM2.5)                       | 2     | Positive  |
| Larynx cancer [Developing] | Females | 15-19 years | 80+ years | Cumulative Cigarettes (10 Years)                    | 2     | Positive  |
| Larynx cancer [Developing] | Females | 15-19 years | 80+ years | Cumulative Cigarettes (5 Years)                     | 2     | Positive  |
| Larynx cancer [Developing] | Females | 15-19 years | 80+ years | Smoking Prevalence                                  | 2     | Positive  |
| Larynx cancer [Developing] | Females | 15-19 years | 80+ years | Cumulative Cigarettes (20 Years)                    | 2     | Positive  |
| Larynx cancer [Developing] | Females | 15-19 years | 80+ years | Tobacco (cigarettes per capita)                     | 2     | Positive  |
| Larynx cancer [Developing] | Females | 15-19 years | 80+ years | LDI (\$ per capita)                                 | 3     | Negative  |
| Larynx cancer [Developing] | Females | 15-19 years | 80+ years | Education (years per capita)                        | 3     | Negative  |
| Larynx cancer [Developing] | Males   | 15-19 years | 80+ years | Fruits (kcal per capita)                            | 1     | Negative  |
| Larynx cancer [Developing] | Males   | 15-19 years | 80+ years | Alcohol (liters per capita)                         | 1     | Positive  |
| Larynx cancer [Developing] | Males   | 15-19 years | 80+ years | Cumulative Cigarettes (15 Years)                    | 2     | Positive  |
| Larynx cancer [Developing] | Males   | 15-19 years | 80+ years | Tobacco (cigarettes per capita)                     | 2     | Positive  |
| Larynx cancer [Developing] | Males   | 15-19 years | 80+ years | Outdoor Air Pollution (PM2.5)                       | 2     | Positive  |
| Larynx cancer [Developing] | Males   | 15-19 years | 80+ years | Smoking Prevalence                                  | 2     | Positive  |
| Larynx cancer [Developing] | Males   | 15-19 years | 80+ years | Cumulative Cigarettes (5 Years)                     | 2     | Positive  |
| Larynx cancer [Developing] | Males   | 15-19 years | 80+ years | Population Density (under 150 ppl/sqkm, proportion) | 2     | Positive  |
| Larynx cancer [Developing] | Males   | 15-19 years | 80+ years | Indoor Air Pollution (All Cooking Fuels)            | 2     | Positive  |
| Larynx cancer [Developing] | Males   | 15-19 years | 80+ years | Population Density (over 1000 ppl/sqkm, proportion) | 2     | Positive  |
| Larynx cancer [Developing] | Males   | 15-19 years | 80+ years | Cumulative Cigarettes (20 Years)                    | 2     | Positive  |
| Larynx cancer [Developing] | Males   | 15-19 years | 80+ years | Cumulative Cigarettes (10 Years)                    | 2     | Positive  |
| Larynx cancer [Developing] | Males   | 15-19 years | 80+ years | Education (years per capita)                        | 3     | Negative  |
| Larynx cancer [Developing] | Males   | 15-19 years | 80+ years | LDI (\$ per capita)                                 | 3     | Negative  |
| Leukemia [Developed]       | Females | 28-364 days | 80+ years | Cumulative Cigarettes (5 Years)                     | 1     | Positive  |
| Leukemia [Developed]       | Females | 28-364 days | 80+ years | Health System Access 2 (unitless)                   | 1     | Negative  |
| Leukemia [Developed]       | Females | 28-364 days | 80+ years | Smoking Prevalence                                  | 1     | Positive  |

**Web Table 22 — CODEm covariates used, level of covariate, and expected direction of covariate by cause, sex, and age**

| Cause                    | Sex     | Age Start   | Age End   | Covariate                           | Level | Direction |
|--------------------------|---------|-------------|-----------|-------------------------------------|-------|-----------|
| Leukemia [Developed]     | Females | 28-364 days | 80+ years | Cumulative Cigarettes (15 Years)    | 1     | Positive  |
| Leukemia [Developed]     | Females | 28-364 days | 80+ years | Cumulative Cigarettes (10 Years)    | 1     | Positive  |
| Leukemia [Developed]     | Females | 28-364 days | 80+ years | Total Fertility Rate                | 2     | None      |
| Leukemia [Developed]     | Females | 28-364 days | 80+ years | Alcohol (liters per capita)         | 2     | Positive  |
| Leukemia [Developed]     | Females | 28-364 days | 80+ years | Education (years per capita)        | 3     | Negative  |
| Leukemia [Developed]     | Females | 28-364 days | 80+ years | LDI (I\$ per capita)                | 3     | Negative  |
| Leukemia [Developed]     | Males   | 28-364 days | 80+ years | Smoking Prevalence                  | 1     | Positive  |
| Leukemia [Developed]     | Males   | 28-364 days | 80+ years | Health System Access 2 (unitless)   | 1     | Negative  |
| Leukemia [Developed]     | Males   | 28-364 days | 80+ years | Cumulative Cigarettes (15 Years)    | 1     | Positive  |
| Leukemia [Developed]     | Males   | 28-364 days | 80+ years | Cumulative Cigarettes (10 Years)    | 1     | Positive  |
| Leukemia [Developed]     | Males   | 28-364 days | 80+ years | Cumulative Cigarettes (5 Years)     | 1     | Positive  |
| Leukemia [Developed]     | Males   | 28-364 days | 80+ years | Total Fertility Rate                | 2     | None      |
| Leukemia [Developed]     | Males   | 28-364 days | 80+ years | Alcohol (liters per capita)         | 2     | Positive  |
| Leukemia [Developed]     | Males   | 28-364 days | 80+ years | LDI (I\$ per capita)                | 3     | Negative  |
| Leukemia [Developed]     | Males   | 28-364 days | 80+ years | Education (years per capita)        | 3     | Negative  |
| Leukemia [Developing]    | Females | 28-364 days | 80+ years | Health System Access 2 (unitless)   | 1     | Negative  |
| Leukemia [Developing]    | Females | 28-364 days | 80+ years | Smoking Prevalence                  | 1     | Positive  |
| Leukemia [Developing]    | Females | 28-364 days | 80+ years | Cumulative Cigarettes (10 Years)    | 1     | Positive  |
| Leukemia [Developing]    | Females | 28-364 days | 80+ years | Cumulative Cigarettes (5 Years)     | 1     | Positive  |
| Leukemia [Developing]    | Females | 28-364 days | 80+ years | Cumulative Cigarettes (15 Years)    | 1     | Positive  |
| Leukemia [Developing]    | Females | 28-364 days | 80+ years | Total Fertility Rate                | 2     | None      |
| Leukemia [Developing]    | Females | 28-364 days | 80+ years | Alcohol (liters per capita)         | 2     | Positive  |
| Leukemia [Developing]    | Females | 28-364 days | 80+ years | Education (years per capita)        | 3     | Negative  |
| Leukemia [Developing]    | Females | 28-364 days | 80+ years | LDI (I\$ per capita)                | 3     | Negative  |
| Leukemia [Developing]    | Males   | 28-364 days | 80+ years | Health System Access 2 (unitless)   | 1     | Negative  |
| Leukemia [Developing]    | Males   | 28-364 days | 80+ years | Cumulative Cigarettes (10 Years)    | 1     | Positive  |
| Leukemia [Developing]    | Males   | 28-364 days | 80+ years | Cumulative Cigarettes (5 Years)     | 1     | Positive  |
| Leukemia [Developing]    | Males   | 28-364 days | 80+ years | Smoking Prevalence                  | 1     | Positive  |
| Leukemia [Developing]    | Males   | 28-364 days | 80+ years | Cumulative Cigarettes (15 Years)    | 1     | Positive  |
| Leukemia [Developing]    | Males   | 28-364 days | 80+ years | Alcohol (liters per capita)         | 2     | Positive  |
| Leukemia [Developing]    | Males   | 28-364 days | 80+ years | Total Fertility Rate                | 2     | None      |
| Leukemia [Developing]    | Males   | 28-364 days | 80+ years | LDI (I\$ per capita)                | 3     | Negative  |
| Leukemia [Developing]    | Males   | 28-364 days | 80+ years | Education (years per capita)        | 3     | Negative  |
| Liver cancer [Developed] | Females | 5-9 years   | 80+ years | Hepatitis B Prevalence (proportion) | 1     | Positive  |
| Liver cancer [Developed] | Females | 5-9 years   | 80+ years | Hepatitis C Prevalence (proportion) | 1     | Positive  |



**Web Table 22 – CODEm covariates used, level of covariate, and expected direction of covariate by cause, sex, and age**

| Cause                        | Sex     | Age Start | Age End   | Covariate                                         | Level | Direction |
|------------------------------|---------|-----------|-----------|---------------------------------------------------|-------|-----------|
| Liver cancer [Developed]     | Females | 5-9 years | 80+ years | Alcohol (liters per capita)                       | 1     | Positive  |
| Liver cancer [Developed]     | Females | 5-9 years | 80+ years | Diabetes Age-Standardized Prevalence (proportion) | 2     | Positive  |
| Liver cancer [Developed]     | Females | 5-9 years | 80+ years | Mean BMI                                          | 2     | Positive  |
| Liver cancer [Developed]     | Females | 5-9 years | 80+ years | Education (years per capita)                      | 3     | Negative  |
| Liver cancer [Developed]     | Males   | 5-9 years | 80+ years | Hepatitis B Prevalence (proportion)               | 1     | Positive  |
| Liver cancer [Developed]     | Males   | 5-9 years | 80+ years | Alcohol (liters per capita)                       | 1     | Positive  |
| Liver cancer [Developed]     | Males   | 5-9 years | 80+ years | Hepatitis C Prevalence (proportion)               | 1     | Positive  |
| Liver cancer [Developed]     | Males   | 5-9 years | 80+ years | Mean BMI                                          | 2     | Positive  |
| Liver cancer [Developed]     | Males   | 5-9 years | 80+ years | Diabetes Age-Standardized Prevalence (proportion) | 2     | Positive  |
| Liver cancer [Developed]     | Males   | 5-9 years | 80+ years | Education (years per capita)                      | 3     | Negative  |
| Liver cancer [Developing]    | Females | 5-9 years | 80+ years | Alcohol (liters per capita)                       | 1     | Positive  |
| Liver cancer [Developing]    | Females | 5-9 years | 80+ years | Hepatitis B Prevalence (proportion)               | 1     | Positive  |
| Liver cancer [Developing]    | Females | 5-9 years | 80+ years | Hepatitis C Prevalence (proportion)               | 1     | Positive  |
| Liver cancer [Developing]    | Females | 5-9 years | 80+ years | Mean BMI                                          | 2     | Positive  |
| Liver cancer [Developing]    | Females | 5-9 years | 80+ years | Diabetes Age-Standardized Prevalence (proportion) | 2     | Positive  |
| Liver cancer [Developing]    | Females | 5-9 years | 80+ years | Education (years per capita)                      | 3     | Negative  |
| Liver cancer [Developing]    | Females | 5-9 years | 80+ years | LDI (I\$ per capita)                              | 3     | Negative  |
| Liver cancer [Developing]    | Males   | 5-9 years | 80+ years | Alcohol (liters per capita)                       | 1     | Positive  |
| Liver cancer [Developing]    | Males   | 5-9 years | 80+ years | Hepatitis B Prevalence (proportion)               | 1     | Positive  |
| Liver cancer [Developing]    | Males   | 5-9 years | 80+ years | Hepatitis C Prevalence (proportion)               | 1     | Positive  |
| Liver cancer [Developing]    | Males   | 5-9 years | 80+ years | Diabetes Age-Standardized Prevalence (proportion) | 2     | Positive  |
| Liver cancer [Developing]    | Males   | 5-9 years | 80+ years | Mean BMI                                          | 2     | Positive  |
| Liver cancer [Developing]    | Males   | 5-9 years | 80+ years | LDI (I\$ per capita)                              | 3     | Negative  |
| Liver cancer [Developing]    | Males   | 5-9 years | 80+ years | Education (years per capita)                      | 3     | Negative  |
| Lower respiratory infections | Females | 0-6 days  | 1-4 years | PCV3 Coverage (proportion)                        | 1     | Negative  |
| Lower respiratory infections | Females | 0-6 days  | 1-4 years | Indoor Air Pollution (All Cooking Fuels)          | 1     | Positive  |
| Lower respiratory infections | Females | 0-6 days  | 1-4 years | Hib3 Vaccine Coverage (proportion)                | 1     | Negative  |
| Lower respiratory infections | Females | 0-6 days  | 1-4 years | Malnutrition (proportion <2SD weight for age)     | 1     | Negative  |
| Lower respiratory infections | Females | 0-6 days  | 1-4 years | Outdoor Air Pollution (PM2.5)                     | 1     | Positive  |
| Lower respiratory infections | Females | 0-6 days  | 1-4 years | Health System Access 2 (unitless)                 | 1     | Negative  |
| Lower respiratory infections | Females | 0-6 days  | 1-4 years | Improved Water Source (proportion with access)    | 2     | Negative  |
| Lower respiratory infections | Females | 0-6 days  | 1-4 years | Sanitation (proportion with access)               | 2     | Negative  |
| Lower respiratory infections | Females | 0-6 days  | 1-4 years | DTP3 Coverage (proportion)                        | 2     | Negative  |
| Lower respiratory infections | Females | 0-6 days  | 1-4 years | Elevation Over 1500m (proportion)                 | 2     | Positive  |
| Lower respiratory infections | Females | 0-6 days  | 1-4 years | LDI (I\$ per capita)                              | 3     | Negative  |



**Web Table 22 – CODEm covariates used, level of covariate, and expected direction of covariate by cause, sex, and age**

| Cause                        | Sex     | Age Start | Age End   | Covariate                                           | Level | Direction |
|------------------------------|---------|-----------|-----------|-----------------------------------------------------|-------|-----------|
| Lower respiratory infections | Females | 0-6 days  | 1-4 years | Population Density (over 1000 ppl/sqkm, proportion) | 3     | Positive  |
| Lower respiratory infections | Females | 0-6 days  | 1-4 years | Education (years per capita)                        | 3     | Negative  |
| Lower respiratory infections | Females | 5-9 years | 80+ years | Smoking Prevalence                                  | 1     | Positive  |
| Lower respiratory infections | Females | 5-9 years | 80+ years | Indoor Air Pollution (All Cooking Fuels)            | 1     | Positive  |
| Lower respiratory infections | Females | 5-9 years | 80+ years | Health System Access 2 (unitless)                   | 1     | Negative  |
| Lower respiratory infections | Females | 5-9 years | 80+ years | Hib3 Vaccine Coverage (proportion)                  | 1     | Negative  |
| Lower respiratory infections | Females | 5-9 years | 80+ years | PCV3 Coverage (proportion)                          | 1     | Negative  |
| Lower respiratory infections | Females | 5-9 years | 80+ years | DTP3 Coverage (proportion)                          | 2     | Negative  |
| Lower respiratory infections | Females | 5-9 years | 80+ years | Improved Water Source (proportion with access)      | 2     | Negative  |
| Lower respiratory infections | Females | 5-9 years | 80+ years | Sanitation (proportion with access)                 | 2     | Negative  |
| Lower respiratory infections | Females | 5-9 years | 80+ years | Rainfall (Quintiles 4-5)                            | 2     | Positive  |
| Lower respiratory infections | Females | 5-9 years | 80+ years | Population Density (over 1000 ppl/sqkm, proportion) | 3     | Positive  |
| Lower respiratory infections | Females | 5-9 years | 80+ years | LDI (I\$ per capita)                                | 3     | Negative  |
| Lower respiratory infections | Females | 5-9 years | 80+ years | Education (years per capita)                        | 3     | Negative  |
| Lower respiratory infections | Males   | 0-6 days  | 1-4 years | Outdoor Air Pollution (PM2.5)                       | 1     | Positive  |
| Lower respiratory infections | Males   | 0-6 days  | 1-4 years | Health System Access 2 (unitless)                   | 1     | Negative  |
| Lower respiratory infections | Males   | 0-6 days  | 1-4 years | Hib3 Vaccine Coverage (proportion)                  | 1     | Negative  |
| Lower respiratory infections | Males   | 0-6 days  | 1-4 years | Indoor Air Pollution (All Cooking Fuels)            | 1     | Positive  |
| Lower respiratory infections | Males   | 0-6 days  | 1-4 years | PCV3 Coverage (proportion)                          | 1     | Negative  |
| Lower respiratory infections | Males   | 0-6 days  | 1-4 years | Malnutrition (proportion <2SD weight for age)       | 1     | Negative  |
| Lower respiratory infections | Males   | 0-6 days  | 1-4 years | Sanitation (proportion with access)                 | 2     | Negative  |
| Lower respiratory infections | Males   | 0-6 days  | 1-4 years | Improved Water Source (proportion with access)      | 2     | Negative  |
| Lower respiratory infections | Males   | 0-6 days  | 1-4 years | DTP3 Coverage (proportion)                          | 2     | Negative  |
| Lower respiratory infections | Males   | 0-6 days  | 1-4 years | Elevation Over 1500m (proportion)                   | 2     | Positive  |
| Lower respiratory infections | Males   | 0-6 days  | 1-4 years | Education (years per capita)                        | 3     | Negative  |
| Lower respiratory infections | Males   | 0-6 days  | 1-4 years | Population Density (over 1000 ppl/sqkm, proportion) | 3     | Positive  |
| Lower respiratory infections | Males   | 0-6 days  | 1-4 years | LDI (I\$ per capita)                                | 3     | Negative  |
| Lower respiratory infections | Males   | 5-9 years | 80+ years | Smoking Prevalence                                  | 1     | Positive  |
| Lower respiratory infections | Males   | 5-9 years | 80+ years | Indoor Air Pollution (All Cooking Fuels)            | 1     | Positive  |
| Lower respiratory infections | Males   | 5-9 years | 80+ years | Health System Access 2 (unitless)                   | 1     | Negative  |
| Lower respiratory infections | Males   | 5-9 years | 80+ years | PCV3 Coverage (proportion)                          | 1     | Negative  |
| Lower respiratory infections | Males   | 5-9 years | 80+ years | Hib3 Vaccine Coverage (proportion)                  | 1     | Negative  |
| Lower respiratory infections | Males   | 5-9 years | 80+ years | Rainfall (Quintiles 4-5)                            | 2     | Positive  |
| Lower respiratory infections | Males   | 5-9 years | 80+ years | DTP3 Coverage (proportion)                          | 2     | Negative  |
| Lower respiratory infections | Males   | 5-9 years | 80+ years | Sanitation (proportion with access)                 | 2     | Negative  |

**Web Table 22 – CODEm covariates used, level of covariate, and expected direction of covariate by cause, sex, and age**

| Cause                                             | Sex     | Age Start   | Age End   | Covariate                                           | Level | Direction |
|---------------------------------------------------|---------|-------------|-----------|-----------------------------------------------------|-------|-----------|
| Lower respiratory infections                      | Males   | 5-9 years   | 80+ years | Improved Water Source (proportion with access)      | 2     | Negative  |
| Lower respiratory infections                      | Males   | 5-9 years   | 80+ years | LDI (I\$ per capita)                                | 3     | Negative  |
| Lower respiratory infections                      | Males   | 5-9 years   | 80+ years | Population Density (over 1000 ppl/sqkm, proportion) | 3     | Positive  |
| Lower respiratory infections                      | Males   | 5-9 years   | 80+ years | Education (years per capita)                        | 3     | Negative  |
| Tracheal, bronchus and lung cancers [Developed]   | Females | 15-19 years | 80+ years | Cumulative Cigarettes (20 Years)                    | 1     | Positive  |
| Tracheal, bronchus and lung cancers [Developed]   | Females | 15-19 years | 80+ years | Cumulative Cigarettes (5 Years)                     | 1     | Positive  |
| Tracheal, bronchus and lung cancers [Developed]   | Females | 15-19 years | 80+ years | Cumulative Cigarettes (10 Years)                    | 1     | Positive  |
| Tracheal, bronchus and lung cancers [Developed]   | Females | 15-19 years | 80+ years | Smoking Prevalence                                  | 1     | Positive  |
| Tracheal, bronchus, and lung cancers [Developed]  | Females | 15-19 years | 80+ years | Cumulative Cigarettes (15 Years)                    | 1     | Positive  |
| Tracheal, bronchus, and lung cancers [Developed]  | Females | 15-19 years | 80+ years | Population Density (over 1000 ppl/sqkm, proportion) | 2     | Positive  |
| Tracheal, bronchus, and lung cancers [Developed]  | Males   | 15-19 years | 80+ years | Cumulative Cigarettes (10 Years)                    | 1     | Positive  |
| Tracheal, bronchus, and lung cancers [Developed]  | Males   | 15-19 years | 80+ years | Cumulative Cigarettes (20 Years)                    | 1     | Positive  |
| Tracheal, bronchus, and lung cancers [Developed]  | Males   | 15-19 years | 80+ years | Cumulative Cigarettes (5 Years)                     | 1     | Positive  |
| Tracheal, bronchus, and lung cancers [Developed]  | Males   | 15-19 years | 80+ years | Indoor Air Pollution (All Cooking Fuels)            | 1     | Positive  |
| Tracheal, bronchus, and lung cancers [Developed]  | Males   | 15-19 years | 80+ years | Smoking Prevalence                                  | 1     | Positive  |
| Tracheal, bronchus, and lung cancers [Developed]  | Males   | 15-19 years | 80+ years | Tobacco (cigarettes per capita)                     | 1     | Positive  |
| Tracheal, bronchus, and lung cancers [Developed]  | Males   | 15-19 years | 80+ years | Cumulative Cigarettes (15 Years)                    | 1     | Positive  |
| Tracheal, bronchus, and lung cancers [Developed]  | Males   | 15-19 years | 80+ years | Fruits (kcal per capita)                            | 1     | Negative  |
| Tracheal, bronchus, and lung cancers [Developed]  | Males   | 15-19 years | 80+ years | Outdoor Air Pollution (PM2.5)                       | 1     | Positive  |
| Tracheal, bronchus, and lung cancers [Developed]  | Males   | 15-19 years | 80+ years | Population Density (over 1000 ppl/sqkm, proportion) | 2     | Positive  |
| Tracheal, bronchus, and lung cancers [Developed]  | Males   | 15-19 years | 80+ years | Education (years per capita)                        | 3     | Negative  |
| Tracheal, bronchus, and lung cancers [Developed]  | Males   | 15-19 years | 80+ years | LDI (I\$ per capita)                                | 3     | Negative  |
| Tracheal, bronchus, and lung cancers [Developing] | Females | 15-19 years | 80+ years | Cumulative Cigarettes (15 Years)                    | 1     | Positive  |
| Tracheal, bronchus, and lung cancers [Developing] | Females | 15-19 years | 80+ years | Cumulative Cigarettes (10 Years)                    | 1     | Positive  |
| Tracheal, bronchus, and lung cancers [Developing] | Females | 15-19 years | 80+ years | Cumulative Cigarettes (5 Years)                     | 1     | Positive  |
| Tracheal, bronchus, and lung cancers [Developing] | Females | 15-19 years | 80+ years | Cumulative Cigarettes (20 Years)                    | 1     | Positive  |
| Tracheal, bronchus, and lung cancers [Developing] | Females | 15-19 years | 80+ years | Smoking Prevalence                                  | 1     | Positive  |
| Tracheal, bronchus, and lung cancers [Developing] | Females | 15-19 years | 80+ years | Indoor Air Pollution (All Cooking Fuels)            | 1     | Positive  |
| Tracheal, bronchus, and lung cancers [Developing] | Females | 15-19 years | 80+ years | Population Density (over 1000 ppl/sqkm, proportion) | 2     | Positive  |
| Tracheal, bronchus, and lung cancers [Developing] | Females | 15-19 years | 80+ years | Population Density (under 150 ppl/sqkm, proportion) | 2     | Positive  |
| Tracheal, bronchus, and lung cancers [Developing] | Females | 15-19 years | 80+ years | LDI (I\$ per capita)                                | 3     | Negative  |
| Tracheal, bronchus, and lung cancers [Developing] | Males   | 15-19 years | 80+ years | Tobacco (cigarettes per capita)                     | 1     | Positive  |
| Tracheal, bronchus, and lung cancers [Developing] | Males   | 15-19 years | 80+ years | Cumulative Cigarettes (15 Years)                    | 1     | Positive  |
| Tracheal, bronchus, and lung cancers [Developing] | Males   | 15-19 years | 80+ years | Cumulative Cigarettes (20 Years)                    | 1     | Positive  |
| Tracheal, bronchus, and lung cancers [Developing] | Males   | 15-19 years | 80+ years | Smoking Prevalence                                  | 1     | Positive  |

**Web Table 22 – CODEm covariates used, level of covariate, and expected direction of covariate by cause, sex, and age**

| Cause                                             | Sex     | Age Start   | Age End   | Covariate                                           | Level | Direction |
|---------------------------------------------------|---------|-------------|-----------|-----------------------------------------------------|-------|-----------|
| Tracheal, bronchus, and lung cancers [Developing] | Males   | 15-19 years | 80+ years | Cumulative Cigarettes (10 Years)                    | 1     | Positive  |
| Tracheal, bronchus, and lung cancers [Developing] | Males   | 15-19 years | 80+ years | Outdoor Air Pollution (PM2.5)                       | 1     | Positive  |
| Tracheal, bronchus, and lung cancers [Developing] | Males   | 15-19 years | 80+ years | Indoor Air Pollution (All Cooking Fuels)            | 1     | Positive  |
| Tracheal, bronchus, and lung cancers [Developing] | Males   | 15-19 years | 80+ years | Cumulative Cigarettes (5 Years)                     | 1     | Positive  |
| Tracheal, bronchus, and lung cancers [Developing] | Males   | 15-19 years | 80+ years | Population Density (over 1000 ppl/sqkm, proportion) | 2     | Positive  |
| Tracheal, bronchus, and lung cancers [Developing] | Males   | 15-19 years | 80+ years | LDI (I\$ per capita)                                | 3     | Negative  |
| Tracheal, bronchus, and lung cancers [Developing] | Males   | 15-19 years | 80+ years | Education (years per capita)                        | 3     | Negative  |
| Malaria [Africa]                                  | Females | 7-27 days   | 1-4 years | Interaction of malaria ITN and log PFPR covariates  | 1     | None      |
| Malaria [Africa]                                  | Females | 7-27 days   | 1-4 years | Malaria Population-At-Risk (proportion)             | 1     | Positive  |
| Malaria [Africa]                                  | Females | 7-27 days   | 1-4 years | Rainfall (Quintiles 2-5)                            | 1     | Positive  |
| Malaria [Africa]                                  | Females | 7-27 days   | 1-4 years | Malaria PFPR (rate)                                 | 1     | Positive  |
| Malaria [Africa]                                  | Females | 7-27 days   | 1-4 years | Malaria Prevalence-Weighted Resistance              | 1     | Positive  |
| Malaria [Africa]                                  | Females | 7-27 days   | 1-4 years | Malaria Lysenko PFPR (2 Highest Endemicity)         | 1     | Positive  |
| Malaria [Africa]                                  | Females | 7-27 days   | 1-4 years | Malaria Endemicity (5-100%)                         | 1     | Positive  |
| Malaria [Africa]                                  | Females | 7-27 days   | 1-4 years | ITN Coverage (proportion)                           | 1     | Negative  |
| Malaria [Africa]                                  | Females | 7-27 days   | 1-4 years | LDI (I\$ per capita)                                | 3     | Negative  |
| Malaria [Africa]                                  | Females | 7-27 days   | 1-4 years | Education (years per capita)                        | 3     | Negative  |
| Malaria [Africa]                                  | Females | 5-9 years   | 80+ years | Malaria PFPR (rate)                                 | 1     | Positive  |
| Malaria [Africa]                                  | Females | 5-9 years   | 80+ years | Malaria Population-At-Risk (proportion)             | 1     | Positive  |
| Malaria [Africa]                                  | Females | 5-9 years   | 80+ years | Malaria Endemicity (40-100%)                        | 1     | Positive  |
| Malaria [Africa]                                  | Females | 5-9 years   | 80+ years | ITN Coverage (proportion)                           | 1     | Negative  |
| Malaria [Africa]                                  | Females | 5-9 years   | 80+ years | Health System Access (capped)                       | 1     | Negative  |
| Malaria [Africa]                                  | Females | 5-9 years   | 80+ years | Malaria Endemicity (5-100%)                         | 1     | Positive  |
| Malaria [Africa]                                  | Females | 5-9 years   | 80+ years | Malaria Lysenko PFPR (2 Highest Endemicity)         | 1     | Positive  |
| Malaria [Africa]                                  | Females | 5-9 years   | 80+ years | Malaria Prevalence-Weighted Resistance              | 1     | Positive  |
| Malaria [Africa]                                  | Females | 5-9 years   | 80+ years | Malaria Lysenko PFPR (3 Highest Endemicity)         | 1     | Positive  |
| Malaria [Africa]                                  | Females | 5-9 years   | 80+ years | Interaction of malaria ITN and log PFPR covariates  | 1     | None      |
| Malaria [Africa]                                  | Females | 5-9 years   | 80+ years | Education (years per capita)                        | 3     | Negative  |
| Malaria [Africa]                                  | Females | 5-9 years   | 80+ years | LDI (I\$ per capita)                                | 3     | Negative  |
| Malaria [Africa]                                  | Males   | 7-27 days   | 1-4 years | Malaria Endemicity (5-100%)                         | 1     | Positive  |
| Malaria [Africa]                                  | Males   | 7-27 days   | 1-4 years | Rainfall (Quintiles 2-5)                            | 1     | Positive  |
| Malaria [Africa]                                  | Males   | 7-27 days   | 1-4 years | Interaction of malaria ITN and log PFPR covariates  | 1     | None      |
| Malaria [Africa]                                  | Males   | 7-27 days   | 1-4 years | Malaria Lysenko PFPR (2 Highest Endemicity)         | 1     | Positive  |
| Malaria [Africa]                                  | Males   | 7-27 days   | 1-4 years | Malaria Prevalence-Weighted Resistance              | 1     | Positive  |
| Malaria [Africa]                                  | Males   | 7-27 days   | 1-4 years | Malaria PFPR (rate)                                 | 1     | Positive  |

**Web Table 22 – CODEm covariates used, level of covariate, and expected direction of covariate by cause, sex, and age**

| Cause                | Sex     | Age Start | Age End   | Covariate                                          | Level | Direction |
|----------------------|---------|-----------|-----------|----------------------------------------------------|-------|-----------|
| Malaria [Africa]     | Males   | 7-27 days | 1-4 years | Malaria Population-At-Risk (proportion)            | 1     | Positive  |
| Malaria [Africa]     | Males   | 7-27 days | 1-4 years | Education (years per capita)                       | 3     | Negative  |
| Malaria [Africa]     | Males   | 7-27 days | 1-4 years | LDI (I\$ per capita)                               | 3     | Negative  |
| Malaria [Africa]     | Males   | 5-9 years | 80+ years | Interaction of malaria ITN and log PFPR covariates | 1     | None      |
| Malaria [Africa]     | Males   | 5-9 years | 80+ years | Malaria Population-At-Risk (proportion)            | 1     | Positive  |
| Malaria [Africa]     | Males   | 5-9 years | 80+ years | Malaria PFPR (rate)                                | 1     | Positive  |
| Malaria [Africa]     | Males   | 5-9 years | 80+ years | Malaria Endemicity (40-100%)                       | 1     | Positive  |
| Malaria [Africa]     | Males   | 5-9 years | 80+ years | Malaria Lysenko PFPR (3 Highest Endemicity)        | 1     | Positive  |
| Malaria [Africa]     | Males   | 5-9 years | 80+ years | Rainfall (Quintiles 4-5)                           | 1     | Positive  |
| Malaria [Africa]     | Males   | 5-9 years | 80+ years | Malaria Endemicity (5-100%)                        | 1     | Positive  |
| Malaria [Africa]     | Males   | 5-9 years | 80+ years | Health System Access (capped)                      | 1     | Negative  |
| Malaria [Africa]     | Males   | 5-9 years | 80+ years | Malaria Prevalence-Weighted Resistance             | 1     | Positive  |
| Malaria [Africa]     | Males   | 5-9 years | 80+ years | Malaria Lysenko PFPR (2 Highest Endemicity)        | 1     | Positive  |
| Malaria [Africa]     | Males   | 5-9 years | 80+ years | ITN Coverage (proportion)                          | 1     | Negative  |
| Malaria [Africa]     | Males   | 5-9 years | 80+ years | LDI (I\$ per capita)                               | 3     | Negative  |
| Malaria [Africa]     | Males   | 5-9 years | 80+ years | Education (years per capita)                       | 3     | Negative  |
| Malaria [non-Africa] | Females | 7-27 days | 1-4 years | Rainfall (Quintiles 3-5)                           | 1     | Positive  |
| Malaria [non-Africa] | Females | 7-27 days | 1-4 years | Rainfall (Quintiles 4-5)                           | 1     | Positive  |
| Malaria [non-Africa] | Females | 7-27 days | 1-4 years | Health System Access (capped)                      | 1     | Negative  |
| Malaria [non-Africa] | Females | 7-27 days | 1-4 years | Malaria Population-At-Risk (proportion)            | 1     | Positive  |
| Malaria [non-Africa] | Females | 7-27 days | 1-4 years | Malaria Indoor Residual Spraying Coverage          | 1     | Negative  |
| Malaria [non-Africa] | Females | 7-27 days | 1-4 years | Rainfall (Quintiles 2-5)                           | 1     | Positive  |
| Malaria [non-Africa] | Females | 7-27 days | 1-4 years | ITN Coverage (proportion)                          | 1     | Negative  |
| Malaria [non-Africa] | Females | 7-27 days | 1-4 years | Interaction of malaria ITN and log PFPR covariates | 1     | None      |
| Malaria [non-Africa] | Females | 7-27 days | 1-4 years | Malaria PFPR (rate)                                | 1     | Positive  |
| Malaria [non-Africa] | Females | 7-27 days | 1-4 years | Malaria Endemicity (40-100%)                       | 1     | Positive  |
| Malaria [non-Africa] | Females | 7-27 days | 1-4 years | Malaria Lysenko PFPR (3 Highest Endemicity)        | 1     | Positive  |
| Malaria [non-Africa] | Females | 7-27 days | 1-4 years | Malaria Lysenko PFPR (2 Highest Endemicity)        | 1     | Positive  |
| Malaria [non-Africa] | Females | 7-27 days | 1-4 years | Malaria Endemicity (5-100%)                        | 1     | Positive  |
| Malaria [non-Africa] | Females | 7-27 days | 1-4 years | Education (years per capita)                       | 3     | Negative  |
| Malaria [non-Africa] | Females | 7-27 days | 1-4 years | LDI (I\$ per capita)                               | 3     | Negative  |
| Malaria [non-Africa] | Females | 5-9 years | 80+ years | Malaria Lysenko PFPR (2 Highest Endemicity)        | 1     | Positive  |
| Malaria [non-Africa] | Females | 5-9 years | 80+ years | Malaria Prevalence-Weighted Resistance             | 1     | Positive  |
| Malaria [non-Africa] | Females | 5-9 years | 80+ years | Malaria Lysenko PFPR (3 Highest Endemicity)        | 1     | Positive  |
| Malaria [non-Africa] | Females | 5-9 years | 80+ years | Interaction of malaria ITN and log PFPR covariates | 1     | None      |

**Web Table 22 – CODEm covariates used, level of covariate, and expected direction of covariate by cause, sex, and age**

| Cause                               | Sex     | Age Start   | Age End   | Covariate                                          | Level | Direction |
|-------------------------------------|---------|-------------|-----------|----------------------------------------------------|-------|-----------|
| Malaria [non-Africa]                | Females | 5-9 years   | 80+ years | Malaria Population-At-Risk (proportion)            | 1     | Positive  |
| Malaria [non-Africa]                | Females | 5-9 years   | 80+ years | Health System Access (capped)                      | 1     | Negative  |
| Malaria [non-Africa]                | Females | 5-9 years   | 80+ years | ITN Coverage (proportion)                          | 1     | Negative  |
| Malaria [non-Africa]                | Females | 5-9 years   | 80+ years | Rainfall (Quintiles 4-5)                           | 1     | Positive  |
| Malaria [non-Africa]                | Females | 5-9 years   | 80+ years | Malaria Indoor Residual Spraying Coverage          | 1     | Negative  |
| Malaria [non-Africa]                | Females | 5-9 years   | 80+ years | Rainfall (Quintiles 3-5)                           | 1     | Positive  |
| Malaria [non-Africa]                | Females | 5-9 years   | 80+ years | Malaria PFPR (rate)                                | 1     | Positive  |
| Malaria [non-Africa]                | Males   | 7-27 days   | 1-4 years | Malaria Endemicity (5-100%)                        | 1     | Positive  |
| Malaria [non-Africa]                | Males   | 7-27 days   | 1-4 years | Malaria Lysenko PFPR (2 Highest Endemicity)        | 1     | Positive  |
| Malaria [non-Africa]                | Males   | 7-27 days   | 1-4 years | Rainfall (Quintiles 3-5)                           | 1     | Positive  |
| Malaria [non-Africa]                | Males   | 7-27 days   | 1-4 years | Malaria PFPR (rate)                                | 1     | Positive  |
| Malaria [non-Africa]                | Males   | 7-27 days   | 1-4 years | ITN Coverage (proportion)                          | 1     | Negative  |
| Malaria [non-Africa]                | Males   | 7-27 days   | 1-4 years | Rainfall (Quintiles 2-5)                           | 1     | Positive  |
| Malaria [non-Africa]                | Males   | 7-27 days   | 1-4 years | Malaria Endemicity (40-100%)                       | 1     | Positive  |
| Malaria [non-Africa]                | Males   | 7-27 days   | 1-4 years | Interaction of malaria ITN and log PFPR covariates | 1     | None      |
| Malaria [non-Africa]                | Males   | 7-27 days   | 1-4 years | Malaria Population-At-Risk (proportion)            | 1     | Positive  |
| Malaria [non-Africa]                | Males   | 7-27 days   | 1-4 years | Malaria Lysenko PFPR (3 Highest Endemicity)        | 1     | Positive  |
| Malaria [non-Africa]                | Males   | 7-27 days   | 1-4 years | Malaria Indoor Residual Spraying Coverage          | 1     | Negative  |
| Malaria [non-Africa]                | Males   | 7-27 days   | 1-4 years | Health System Access (capped)                      | 1     | Negative  |
| Malaria [non-Africa]                | Males   | 7-27 days   | 1-4 years | Rainfall (Quintiles 4-5)                           | 1     | Positive  |
| Malaria [non-Africa]                | Males   | 7-27 days   | 1-4 years | LDI (\$ per capita)                                | 3     | Negative  |
| Malaria [non-Africa]                | Males   | 7-27 days   | 1-4 years | Education (years per capita)                       | 3     | Negative  |
| Malaria [non-Africa]                | Males   | 5-9 years   | 80+ years | Malaria Lysenko PFPR (3 Highest Endemicity)        | 1     | Positive  |
| Malaria [non-Africa]                | Males   | 5-9 years   | 80+ years | ITN Coverage (proportion)                          | 1     | Negative  |
| Malaria [non-Africa]                | Males   | 5-9 years   | 80+ years | Interaction of malaria ITN and log PFPR covariates | 1     | None      |
| Malaria [non-Africa]                | Males   | 5-9 years   | 80+ years | Health System Access (capped)                      | 1     | Negative  |
| Malaria [non-Africa]                | Males   | 5-9 years   | 80+ years | Malaria PFPR (rate)                                | 1     | Positive  |
| Malaria [non-Africa]                | Males   | 5-9 years   | 80+ years | Malaria Population-At-Risk (proportion)            | 1     | Positive  |
| Malaria [non-Africa]                | Males   | 5-9 years   | 80+ years | Rainfall (Quintiles 4-5)                           | 1     | Positive  |
| Malaria [non-Africa]                | Males   | 5-9 years   | 80+ years | Malaria Indoor Residual Spraying Coverage          | 1     | Negative  |
| Malaria [non-Africa]                | Males   | 5-9 years   | 80+ years | Malaria Lysenko PFPR (2 Highest Endemicity)        | 1     | Positive  |
| Malaria [non-Africa]                | Males   | 5-9 years   | 80+ years | Rainfall (Quintiles 3-5)                           | 1     | Positive  |
| Malaria [non-Africa]                | Males   | 5-9 years   | 80+ years | Malaria Prevalence-Weighted Resistance             | 1     | Positive  |
| Malignant skin melanoma [Developed] | Females | 15-19 years | 80+ years | Vegetables (kcal per capita)                       | 1     | Negative  |
| Malignant skin melanoma [Developed] | Females | 15-19 years | 80+ years | Alcohol (liters per capita)                        | 1     | Positive  |

**Web Table 22 – CODEm covariates used, level of covariate, and expected direction of covariate by cause, sex, and age**

| Cause                                | Sex     | Age Start   | Age End     | Covariate                                         | Level | Direction |
|--------------------------------------|---------|-------------|-------------|---------------------------------------------------|-------|-----------|
| Malignant skin melanoma [Developed]  | Females | 15-19 years | 80+ years   | Smoking Prevalence [lagged 10 years]              | 1     | Positive  |
| Malignant skin melanoma [Developed]  | Females | 15-19 years | 80+ years   | Diabetes Age-Standardized Prevalence (proportion) | 2     | Positive  |
| Malignant skin melanoma [Developed]  | Females | 15-19 years | 80+ years   | Latitude 30 to 45 (proportion)                    | 2     | Negative  |
| Malignant skin melanoma [Developed]  | Females | 15-19 years | 80+ years   | Mean BMI                                          | 2     | Positive  |
| Malignant skin melanoma [Developed]  | Females | 15-19 years | 80+ years   | Latitude 15 to 30 (proportion)                    | 2     | None      |
| Malignant skin melanoma [Developed]  | Females | 15-19 years | 80+ years   | Animal Fats (kcal per capita)                     | 2     | Positive  |
| Malignant skin melanoma [Developed]  | Males   | 15-19 years | 80+ years   | Alcohol (liters per capita)                       | 1     | Positive  |
| Malignant skin melanoma [Developed]  | Males   | 15-19 years | 80+ years   | Vegetables (kcal per capita)                      | 1     | Negative  |
| Malignant skin melanoma [Developed]  | Males   | 15-19 years | 80+ years   | Diabetes Age-Standardized Prevalence (proportion) | 2     | Positive  |
| Malignant skin melanoma [Developed]  | Males   | 15-19 years | 80+ years   | Mean BMI                                          | 2     | Positive  |
| Malignant skin melanoma [Developed]  | Males   | 15-19 years | 80+ years   | Animal Fats (kcal per capita)                     | 2     | Positive  |
| Malignant skin melanoma [Developed]  | Males   | 15-19 years | 80+ years   | Latitude 15 to 30 (proportion)                    | 2     | None      |
| Malignant skin melanoma [Developing] | Females | 15-19 years | 80+ years   | Smoking Prevalence [lagged 10 years]              | 1     | Positive  |
| Malignant skin melanoma [Developing] | Females | 15-19 years | 80+ years   | Vegetables (kcal per capita)                      | 1     | Negative  |
| Malignant skin melanoma [Developing] | Females | 15-19 years | 80+ years   | Alcohol (liters per capita)                       | 1     | Positive  |
| Malignant skin melanoma [Developing] | Females | 15-19 years | 80+ years   | Fruits (kcal per capita)                          | 1     | Negative  |
| Malignant skin melanoma [Developing] | Females | 15-19 years | 80+ years   | Mean BMI                                          | 2     | Positive  |
| Malignant skin melanoma [Developing] | Females | 15-19 years | 80+ years   | Animal Fats (kcal per capita)                     | 2     | Positive  |
| Malignant skin melanoma [Developing] | Females | 15-19 years | 80+ years   | Latitude 15 to 30 (proportion)                    | 2     | None      |
| Malignant skin melanoma [Developing] | Females | 15-19 years | 80+ years   | Latitude 30 to 45 (proportion)                    | 2     | Negative  |
| Malignant skin melanoma [Developing] | Females | 15-19 years | 80+ years   | Diabetes Age-Standardized Prevalence (proportion) | 2     | Positive  |
| Malignant skin melanoma [Developing] | Females | 15-19 years | 80+ years   | LDI (I\$ per capita)                              | 3     | Negative  |
| Malignant skin melanoma [Developing] | Females | 15-19 years | 80+ years   | Education (years per capita)                      | 3     | Negative  |
| Malignant skin melanoma [Developing] | Males   | 15-19 years | 80+ years   | Vegetables (kcal per capita)                      | 1     | Negative  |
| Malignant skin melanoma [Developing] | Males   | 15-19 years | 80+ years   | Alcohol (liters per capita)                       | 1     | Positive  |
| Malignant skin melanoma [Developing] | Males   | 15-19 years | 80+ years   | Latitude 15 to 30 (proportion)                    | 2     | None      |
| Malignant skin melanoma [Developing] | Males   | 15-19 years | 80+ years   | Diabetes Age-Standardized Prevalence (proportion) | 2     | Positive  |
| Malignant skin melanoma [Developing] | Males   | 15-19 years | 80+ years   | Latitude 30 to 45 (proportion)                    | 2     | Negative  |
| Malignant skin melanoma [Developing] | Males   | 15-19 years | 80+ years   | Mean BMI                                          | 2     | Positive  |
| Malignant skin melanoma [Developing] | Males   | 15-19 years | 80+ years   | Animal Fats (kcal per capita)                     | 2     | Positive  |
| Maternal disorders                   | Females | 10-14 years | 45-49 years | Education (years per capita)                      | 1     | Negative  |
| Maternal disorders                   | Females | 10-14 years | 45-49 years | Female HIV death rate per 1 for ages 15-49        | 1     | Positive  |
| Maternal disorders                   | Females | 10-14 years | 45-49 years | Total Fertility Rate                              | 1     | Positive  |
| Maternal disorders                   | Females | 10-14 years | 45-49 years | Age-Specific Fertility Rate                       | 1     | Positive  |
| Maternal disorders                   | Females | 10-14 years | 45-49 years | In-Facility Delivery (proportion)                 | 1     | Negative  |

**Web Table 22 – CODEm covariates used, level of covariate, and expected direction of covariate by cause, sex, and age**

| Cause                    | Sex     | Age Start   | Age End     | Covariate                                       | Level | Direction |
|--------------------------|---------|-------------|-------------|-------------------------------------------------|-------|-----------|
| Maternal disorders       | Females | 10-14 years | 45-49 years | Skilled Birth Attendance (proportion)           | 1     | Negative  |
| Maternal disorders       | Females | 10-14 years | 45-49 years | Health System Access (capped)                   | 2     | Negative  |
| Maternal disorders       | Females | 10-14 years | 45-49 years | Antenatal Care (4 visits) Coverage (proportion) | 2     | Negative  |
| Maternal disorders       | Females | 10-14 years | 45-49 years | Malnutrition (proportion <2SD weight for age)   | 2     | Positive  |
| Maternal disorders       | Females | 10-14 years | 45-49 years | LDI (I\$ per capita)                            | 3     | Negative  |
| Meningitis               | Females | 0-6 days    | 1-4 years   | Malnutrition (proportion <2SD weight for age)   | 1     | Positive  |
| Meningitis               | Females | 0-6 days    | 1-4 years   | Meningitis Belt (binary)                        | 1     | Positive  |
| Meningitis               | Females | 0-6 days    | 1-4 years   | Health System Access 2 (unitless)               | 1     | Negative  |
| Meningitis               | Females | 0-6 days    | 1-4 years   | LDI (I\$ per capita)                            | 3     | Negative  |
| Meningitis               | Females | 0-6 days    | 1-4 years   | Education (years per capita)                    | 3     | Negative  |
| Meningitis               | Females | 0-6 days    | 1-4 years   | Sanitation (proportion with access)             | 3     | Negative  |
| Meningitis               | Females | 0-6 days    | 1-4 years   | Improved Water Source (proportion with access)  | 3     | Negative  |
| Meningitis               | Females | 5-9 years   | 80+ years   | Malnutrition (proportion <2SD weight for age)   | 1     | Positive  |
| Meningitis               | Females | 5-9 years   | 80+ years   | Meningitis Belt (binary)                        | 1     | Positive  |
| Meningitis               | Females | 5-9 years   | 80+ years   | Health System Access 2 (unitless)               | 1     | Negative  |
| Meningitis               | Females | 5-9 years   | 80+ years   | Education (years per capita)                    | 3     | Negative  |
| Meningitis               | Females | 5-9 years   | 80+ years   | Sanitation (proportion with access)             | 3     | Negative  |
| Meningitis               | Females | 5-9 years   | 80+ years   | Improved Water Source (proportion with access)  | 3     | Negative  |
| Meningitis               | Females | 5-9 years   | 80+ years   | LDI (I\$ per capita)                            | 3     | Negative  |
| Meningitis               | Males   | 0-6 days    | 1-4 years   | Meningitis Belt (binary)                        | 1     | Positive  |
| Meningitis               | Males   | 0-6 days    | 1-4 years   | Health System Access 2 (unitless)               | 1     | Negative  |
| Meningitis               | Males   | 0-6 days    | 1-4 years   | Malnutrition (proportion <2SD weight for age)   | 1     | Positive  |
| Meningitis               | Males   | 0-6 days    | 1-4 years   | LDI (I\$ per capita)                            | 3     | Negative  |
| Meningitis               | Males   | 0-6 days    | 1-4 years   | Education (years per capita)                    | 3     | Negative  |
| Meningitis               | Males   | 0-6 days    | 1-4 years   | Improved Water Source (proportion with access)  | 3     | Negative  |
| Meningitis               | Males   | 0-6 days    | 1-4 years   | Sanitation (proportion with access)             | 3     | Negative  |
| Meningitis               | Males   | 5-9 years   | 80+ years   | Health System Access 2 (unitless)               | 1     | Negative  |
| Meningitis               | Males   | 5-9 years   | 80+ years   | Malnutrition (proportion <2SD weight for age)   | 1     | Positive  |
| Meningitis               | Males   | 5-9 years   | 80+ years   | Meningitis Belt (binary)                        | 1     | Positive  |
| Meningitis               | Males   | 5-9 years   | 80+ years   | Education (years per capita)                    | 3     | Negative  |
| Meningitis               | Males   | 5-9 years   | 80+ years   | Sanitation (proportion with access)             | 3     | Negative  |
| Meningitis               | Males   | 5-9 years   | 80+ years   | LDI (I\$ per capita)                            | 3     | Negative  |
| Meningitis               | Males   | 5-9 years   | 80+ years   | Improved Water Source (proportion with access)  | 3     | Negative  |
| Mesothelioma [Developed] | Females | 15-19 years | 80+ years   | Smoking Prevalence                              | 1     | Positive  |
| Mesothelioma [Developed] | Females | 15-19 years | 80+ years   | Health System Access 2 (unitless)               | 1     | Negative  |



**Web Table 22 – CODEm covariates used, level of covariate, and expected direction of covariate by cause, sex, and age**

| Cause                     | Sex     | Age Start   | Age End   | Covariate                                           | Level | Direction |
|---------------------------|---------|-------------|-----------|-----------------------------------------------------|-------|-----------|
| Mesothelioma [Developed]  | Females | 15-19 years | 80+ years | Population Over 65 (proportion)                     | 2     | Positive  |
| Mesothelioma [Developed]  | Females | 15-19 years | 80+ years | Elevation Over 1500m (proportion)                   | 2     | Positive  |
| Mesothelioma [Developed]  | Females | 15-19 years | 80+ years | Elevation 500 to 1500m (proportion)                 | 2     | Positive  |
| Mesothelioma [Developed]  | Females | 15-19 years | 80+ years | Asbestos production (kg) per capita                 | 2     | Positive  |
| Mesothelioma [Developed]  | Females | 15-19 years | 80+ years | Population Density (over 1000 ppl/sqkm, proportion) | 2     | Positive  |
| Mesothelioma [Developed]  | Females | 15-19 years | 80+ years | Gold production (kg) per capita                     | 2     | Positive  |
| Mesothelioma [Developed]  | Females | 15-19 years | 80+ years | LDI (I\$ per capita)                                | 3     | Negative  |
| Mesothelioma [Developed]  | Females | 15-19 years | 80+ years | Education (years per capita)                        | 3     | Negative  |
| Mesothelioma [Developed]  | Males   | 15-19 years | 80+ years | Asbestos production (kg) per capita                 | 2     | Positive  |
| Mesothelioma [Developed]  | Males   | 15-19 years | 80+ years | Elevation Over 1500m (proportion)                   | 2     | Positive  |
| Mesothelioma [Developed]  | Males   | 15-19 years | 80+ years | Population Over 65 (proportion)                     | 2     | Positive  |
| Mesothelioma [Developed]  | Males   | 15-19 years | 80+ years | Population Density (over 1000 ppl/sqkm, proportion) | 2     | Positive  |
| Mesothelioma [Developed]  | Males   | 15-19 years | 80+ years | Gold production (kg) per capita                     | 2     | Positive  |
| Mesothelioma [Developed]  | Males   | 15-19 years | 80+ years | Education (years per capita)                        | 3     | Negative  |
| Mesothelioma [Developing] | Females | 15-19 years | 80+ years | Asbestos production (binary)                        | 1     | Positive  |
| Mesothelioma [Developing] | Females | 15-19 years | 80+ years | Health System Access 2 (unitless)                   | 1     | Negative  |
| Mesothelioma [Developing] | Females | 15-19 years | 80+ years | Cumulative Cigarettes (5 Years)                     | 1     | Positive  |
| Mesothelioma [Developing] | Females | 15-19 years | 80+ years | Smoking Prevalence                                  | 1     | Positive  |
| Mesothelioma [Developing] | Females | 15-19 years | 80+ years | Gold production (binary)                            | 2     | Positive  |
| Mesothelioma [Developing] | Females | 15-19 years | 80+ years | Population Density (over 1000 ppl/sqkm, proportion) | 2     | Positive  |
| Mesothelioma [Developing] | Females | 15-19 years | 80+ years | Elevation Over 1500m (proportion)                   | 2     | Positive  |
| Mesothelioma [Developing] | Females | 15-19 years | 80+ years | Population Over 65 (proportion)                     | 2     | Positive  |
| Mesothelioma [Developing] | Females | 15-19 years | 80+ years | Asbestos production (kg) per capita                 | 2     | Positive  |
| Mesothelioma [Developing] | Females | 15-19 years | 80+ years | Gold production (kg) per capita                     | 2     | Positive  |
| Mesothelioma [Developing] | Females | 15-19 years | 80+ years | LDI (I\$ per capita)                                | 3     | Negative  |
| Mesothelioma [Developing] | Females | 15-19 years | 80+ years | Education (years per capita)                        | 3     | Negative  |
| Mesothelioma [Developing] | Males   | 15-19 years | 80+ years | Health System Access 2 (unitless)                   | 1     | Negative  |
| Mesothelioma [Developing] | Males   | 15-19 years | 80+ years | Asbestos production (binary)                        | 1     | Positive  |
| Mesothelioma [Developing] | Males   | 15-19 years | 80+ years | Smoking Prevalence                                  | 1     | Positive  |
| Mesothelioma [Developing] | Males   | 15-19 years | 80+ years | Population Density (over 1000 ppl/sqkm, proportion) | 2     | Positive  |
| Mesothelioma [Developing] | Males   | 15-19 years | 80+ years | Gold production (kg) per capita                     | 2     | Positive  |
| Mesothelioma [Developing] | Males   | 15-19 years | 80+ years | Elevation Over 1500m (proportion)                   | 2     | Positive  |
| Mesothelioma [Developing] | Males   | 15-19 years | 80+ years | Gold production (binary)                            | 2     | Positive  |
| Mesothelioma [Developing] | Males   | 15-19 years | 80+ years | Asbestos production (kg) per capita                 | 2     | Positive  |
| Mesothelioma [Developing] | Males   | 15-19 years | 80+ years | Population Over 65 (proportion)                     | 2     | Positive  |



**Web Table 22 – CODEm covariates used, level of covariate, and expected direction of covariate by cause, sex, and age**

| Cause                                    | Sex     | Age Start   | Age End   | Covariate                                          | Level | Direction |
|------------------------------------------|---------|-------------|-----------|----------------------------------------------------|-------|-----------|
| Mesothelioma [Developing]                | Males   | 15-19 years | 80+ years | Education (years per capita)                       | 3     | Negative  |
| Motor vehicle road injuries [Developed]  | Females | 0-6 days    | 80+ years | Alcohol (liters per capita)                        | 1     | Positive  |
| Motor vehicle road injuries [Developed]  | Females | 0-6 days    | 80+ years | Vehicles - 4 wheels (per capita)                   | 1     | Positive  |
| Motor vehicle road injuries [Developed]  | Females | 0-6 days    | 80+ years | Health System Access 2 (unitless)                  | 1     | Negative  |
| Motor vehicle road injuries [Developed]  | Females | 0-6 days    | 80+ years | LDI (I\$ per capita)                               | 2     | None      |
| Motor vehicle road injuries [Developed]  | Females | 0-6 days    | 80+ years | Population Density (300-500 ppl/sqkm, proportion)  | 2     | None      |
| Motor vehicle road injuries [Developed]  | Females | 0-6 days    | 80+ years | Population Density (500-1000 ppl/sqkm, proportion) | 2     | None      |
| Motor vehicle road injuries [Developed]  | Females | 0-6 days    | 80+ years | Education (years per capita)                       | 3     | Negative  |
| Motor vehicle road injuries [Developed]  | Males   | 0-6 days    | 80+ years | Alcohol (liters per capita)                        | 1     | Positive  |
| Motor vehicle road injuries [Developed]  | Males   | 0-6 days    | 80+ years | Vehicles - 4 wheels (per capita)                   | 1     | Positive  |
| Motor vehicle road injuries [Developed]  | Males   | 0-6 days    | 80+ years | Health System Access 2 (unitless)                  | 1     | Negative  |
| Motor vehicle road injuries [Developed]  | Males   | 0-6 days    | 80+ years | Population Density (300-500 ppl/sqkm, proportion)  | 2     | None      |
| Motor vehicle road injuries [Developed]  | Males   | 0-6 days    | 80+ years | Population Density (500-1000 ppl/sqkm, proportion) | 2     | None      |
| Motor vehicle road injuries [Developed]  | Males   | 0-6 days    | 80+ years | LDI (I\$ per capita)                               | 2     | None      |
| Motor vehicle road injuries [Developed]  | Males   | 0-6 days    | 80+ years | Education (years per capita)                       | 3     | Negative  |
| Motor vehicle road injuries [Developing] | Females | 0-6 days    | 80+ years | Alcohol (liters per capita)                        | 1     | Positive  |
| Motor vehicle road injuries [Developing] | Females | 0-6 days    | 80+ years | Vehicles - 4 wheels (per capita)                   | 1     | Positive  |
| Motor vehicle road injuries [Developing] | Females | 0-6 days    | 80+ years | Health System Access 2 (unitless)                  | 1     | Negative  |
| Motor vehicle road injuries [Developing] | Females | 0-6 days    | 80+ years | LDI (I\$ per capita)                               | 2     | None      |
| Motor vehicle road injuries [Developing] | Females | 0-6 days    | 80+ years | Population Density (300-500 ppl/sqkm, proportion)  | 2     | None      |
| Motor vehicle road injuries [Developing] | Females | 0-6 days    | 80+ years | Population Density (500-1000 ppl/sqkm, proportion) | 2     | None      |
| Motor vehicle road injuries [Developing] | Females | 0-6 days    | 80+ years | Education (years per capita)                       | 3     | Negative  |
| Motor vehicle road injuries [Developing] | Males   | 0-6 days    | 80+ years | Vehicles - 4 wheels (per capita)                   | 1     | Positive  |
| Motor vehicle road injuries [Developing] | Males   | 0-6 days    | 80+ years | Health System Access 2 (unitless)                  | 1     | Negative  |
| Motor vehicle road injuries [Developing] | Males   | 0-6 days    | 80+ years | Alcohol (liters per capita)                        | 1     | Positive  |
| Motor vehicle road injuries [Developing] | Males   | 0-6 days    | 80+ years | Population Density (300-500 ppl/sqkm, proportion)  | 2     | None      |
| Motor vehicle road injuries [Developing] | Males   | 0-6 days    | 80+ years | LDI (I\$ per capita)                               | 2     | None      |
| Motor vehicle road injuries [Developing] | Males   | 0-6 days    | 80+ years | Population Density (500-1000 ppl/sqkm, proportion) | 2     | None      |
| Motor vehicle road injuries [Developing] | Males   | 0-6 days    | 80+ years | Education (years per capita)                       | 3     | Negative  |
| Motorcyclist road injuries [Developed]   | Females | 0-6 days    | 80+ years | Vehicles - 2 wheels (per capita)                   | 1     | Positive  |
| Motorcyclist road injuries [Developed]   | Females | 0-6 days    | 80+ years | Health System Access 2 (unitless)                  | 1     | Negative  |
| Motorcyclist road injuries [Developed]   | Females | 0-6 days    | 80+ years | Alcohol (liters per capita)                        | 1     | Positive  |
| Motorcyclist road injuries [Developed]   | Females | 0-6 days    | 80+ years | Population Density (500-1000 ppl/sqkm, proportion) | 2     | None      |
| Motorcyclist road injuries [Developed]   | Females | 0-6 days    | 80+ years | Population Density (300-500 ppl/sqkm, proportion)  | 2     | None      |
| Motorcyclist road injuries [Developed]   | Females | 0-6 days    | 80+ years | LDI (I\$ per capita)                               | 2     | None      |

**Web Table 22 – CODEm covariates used, level of covariate, and expected direction of covariate by cause, sex, and age**

| Cause                                   | Sex     | Age Start   | Age End   | Covariate                                          | Level | Direction |
|-----------------------------------------|---------|-------------|-----------|----------------------------------------------------|-------|-----------|
| Motorcyclist road injuries [Developed]  | Females | 0-6 days    | 80+ years | Education (years per capita)                       | 3     | Negative  |
| Motorcyclist road injuries [Developed]  | Males   | 0-6 days    | 80+ years | Health System Access 2 (unitless)                  | 1     | Negative  |
| Motorcyclist road injuries [Developed]  | Males   | 0-6 days    | 80+ years | Alcohol (liters per capita)                        | 1     | Positive  |
| Motorcyclist road injuries [Developed]  | Males   | 0-6 days    | 80+ years | Vehicles - 2 wheels (per capita)                   | 1     | Positive  |
| Motorcyclist road injuries [Developed]  | Males   | 0-6 days    | 80+ years | Population Density (500-1000 ppl/sqkm, proportion) | 2     | None      |
| Motorcyclist road injuries [Developed]  | Males   | 0-6 days    | 80+ years | LDI (I\$ per capita)                               | 2     | None      |
| Motorcyclist road injuries [Developed]  | Males   | 0-6 days    | 80+ years | Population Density (300-500 ppl/sqkm, proportion)  | 2     | None      |
| Motorcyclist road injuries [Developed]  | Males   | 0-6 days    | 80+ years | Education (years per capita)                       | 3     | Negative  |
| Motorcyclist road injuries [Developing] | Females | 0-6 days    | 80+ years | Health System Access 2 (unitless)                  | 1     | Negative  |
| Motorcyclist road injuries [Developing] | Females | 0-6 days    | 80+ years | Vehicles - 2 wheels (per capita)                   | 1     | Positive  |
| Motorcyclist road injuries [Developing] | Females | 0-6 days    | 80+ years | Alcohol (liters per capita)                        | 1     | Positive  |
| Motorcyclist road injuries [Developing] | Females | 0-6 days    | 80+ years | LDI (I\$ per capita)                               | 2     | None      |
| Motorcyclist road injuries [Developing] | Females | 0-6 days    | 80+ years | Population Density (300-500 ppl/sqkm, proportion)  | 2     | None      |
| Motorcyclist road injuries [Developing] | Females | 0-6 days    | 80+ years | Population Density (500-1000 ppl/sqkm, proportion) | 2     | None      |
| Motorcyclist road injuries [Developing] | Females | 0-6 days    | 80+ years | Education (years per capita)                       | 3     | Negative  |
| Motorcyclist road injuries [Developing] | Males   | 0-6 days    | 80+ years | Alcohol (liters per capita)                        | 1     | Positive  |
| Motorcyclist road injuries [Developing] | Males   | 0-6 days    | 80+ years | Health System Access 2 (unitless)                  | 1     | Negative  |
| Motorcyclist road injuries [Developing] | Males   | 0-6 days    | 80+ years | Vehicles - 2 wheels (per capita)                   | 1     | Positive  |
| Motorcyclist road injuries [Developing] | Males   | 0-6 days    | 80+ years | Population Density (500-1000 ppl/sqkm, proportion) | 2     | None      |
| Motorcyclist road injuries [Developing] | Males   | 0-6 days    | 80+ years | Population Density (300-500 ppl/sqkm, proportion)  | 2     | None      |
| Motorcyclist road injuries [Developing] | Males   | 0-6 days    | 80+ years | LDI (I\$ per capita)                               | 2     | None      |
| Motorcyclist road injuries [Developing] | Males   | 0-6 days    | 80+ years | Education (years per capita)                       | 3     | Negative  |
| Lip and oral cavity cancer [Developed]  | Females | 15-19 years | 80+ years | Smoking Prevalence [lagged 10 years]               | 1     | Positive  |
| Lip and oral cavity cancer [Developed]  | Females | 15-19 years | 80+ years | Fruits (kcal per capita)                           | 1     | Negative  |
| Lip and oral cavity cancer [Developed]  | Females | 15-19 years | 80+ years | Alcohol (liters per capita)                        | 1     | Positive  |
| Lip and oral cavity cancer [Developed]  | Females | 15-19 years | 80+ years | Vegetables (kcal per capita)                       | 1     | Negative  |
| Lip and oral cavity cancer [Developed]  | Females | 15-19 years | 80+ years | Red Meat (kcal per capita)                         | 2     | Positive  |
| Lip and oral cavity cancer [Developed]  | Females | 15-19 years | 80+ years | LDI (I\$ per capita)                               | 3     | Negative  |
| Lip and oral cavity cancer [Developed]  | Males   | 15-19 years | 80+ years | Vegetables (kcal per capita)                       | 1     | Negative  |
| Lip and oral cavity cancer [Developed]  | Males   | 15-19 years | 80+ years | Fruits (kcal per capita)                           | 1     | Negative  |
| Lip and oral cavity cancer [Developed]  | Males   | 15-19 years | 80+ years | Alcohol (liters per capita)                        | 1     | Positive  |
| Lip and oral cavity cancer [Developed]  | Males   | 15-19 years | 80+ years | Cumulative Cigarettes (10 Years)                   | 1     | Positive  |
| Lip and oral cavity cancer [Developed]  | Males   | 15-19 years | 80+ years | Cumulative Cigarettes (20 Years)                   | 1     | Positive  |
| Lip and oral cavity cancer [Developed]  | Males   | 15-19 years | 80+ years | Cumulative Cigarettes (5 Years)                    | 1     | Positive  |
| Lip and oral cavity cancer [Developed]  | Males   | 15-19 years | 80+ years | Health System Access 2 (unitless)                  | 2     | Negative  |

**Web Table 22 – CODEm covariates used, level of covariate, and expected direction of covariate by cause, sex, and age**

| Cause                                   | Sex     | Age Start   | Age End   | Covariate                                         | Level | Direction |
|-----------------------------------------|---------|-------------|-----------|---------------------------------------------------|-------|-----------|
| Lip and oral cavity cancer [Developed]  | Males   | 15-19 years | 80+ years | Red Meat (kcal per capita)                        | 2     | Positive  |
| Lip and oral cavity cancer [Developed]  | Males   | 15-19 years | 80+ years | Education (years per capita)                      | 3     | Negative  |
| Lip and oral cavity cancer [Developed]  | Males   | 15-19 years | 80+ years | LDI (\$ per capita)                               | 3     | Negative  |
| Lip and oral cavity cancer [Developing] | Females | 15-19 years | 80+ years | Vegetables (kcal per capita)                      | 1     | Negative  |
| Lip and oral cavity cancer [Developing] | Females | 15-19 years | 80+ years | Smoking Prevalence [lagged 10 years]              | 1     | Positive  |
| Lip and oral cavity cancer [Developing] | Females | 15-19 years | 80+ years | Alcohol (liters per capita)                       | 1     | Positive  |
| Lip and oral cavity cancer [Developing] | Females | 15-19 years | 80+ years | Health System Access 2 (unitless)                 | 2     | Negative  |
| Lip and oral cavity cancer [Developing] | Females | 15-19 years | 80+ years | Red Meat (kcal per capita)                        | 2     | Positive  |
| Lip and oral cavity cancer [Developing] | Males   | 15-19 years | 80+ years | Cumulative Cigarettes (10 Years)                  | 1     | Positive  |
| Lip and oral cavity cancer [Developing] | Males   | 15-19 years | 80+ years | Alcohol (liters per capita)                       | 1     | Positive  |
| Lip and oral cavity cancer [Developing] | Males   | 15-19 years | 80+ years | Cumulative Cigarettes (5 Years)                   | 1     | Positive  |
| Lip and oral cavity cancer [Developing] | Males   | 15-19 years | 80+ years | Cumulative Cigarettes (20 Years)                  | 1     | Positive  |
| Lip and oral cavity cancer [Developing] | Males   | 15-19 years | 80+ years | Fruits (kcal per capita)                          | 1     | Negative  |
| Lip and oral cavity cancer [Developing] | Males   | 15-19 years | 80+ years | Red Meat (kcal per capita)                        | 2     | Positive  |
| Lip and oral cavity cancer [Developing] | Males   | 15-19 years | 80+ years | Health System Access 2 (unitless)                 | 2     | Negative  |
| Lip and oral cavity cancer [Developing] | Males   | 15-19 years | 80+ years | Education (years per capita)                      | 3     | Negative  |
| Multiple myeloma [Developed]            | Females | 15-19 years | 80+ years | Alcohol (liters per capita)                       | 1     | Positive  |
| Multiple myeloma [Developed]            | Females | 15-19 years | 80+ years | Smoking Prevalence                                | 1     | Positive  |
| Multiple myeloma [Developed]            | Females | 15-19 years | 80+ years | Red Meat (kcal per capita)                        | 1     | Positive  |
| Multiple myeloma [Developed]            | Females | 15-19 years | 80+ years | Mean BMI                                          | 2     | Positive  |
| Multiple myeloma [Developed]            | Females | 15-19 years | 80+ years | Fruits (kcal per capita)                          | 2     | Negative  |
| Multiple myeloma [Developed]            | Females | 15-19 years | 80+ years | Vegetables (kcal per capita)                      | 2     | Negative  |
| Multiple myeloma [Developed]            | Males   | 15-19 years | 80+ years | Red Meat (kcal per capita)                        | 1     | Positive  |
| Multiple myeloma [Developed]            | Males   | 15-19 years | 80+ years | Alcohol (liters per capita)                       | 1     | Positive  |
| Multiple myeloma [Developed]            | Males   | 15-19 years | 80+ years | Mean BMI                                          | 2     | Positive  |
| Multiple myeloma [Developed]            | Males   | 15-19 years | 80+ years | Vegetables (kcal per capita)                      | 2     | Negative  |
| Multiple myeloma [Developed]            | Males   | 15-19 years | 80+ years | Fruits (kcal per capita)                          | 2     | Negative  |
| Multiple myeloma [Developing]           | Females | 15-19 years | 80+ years | Smoking Prevalence                                | 1     | Positive  |
| Multiple myeloma [Developing]           | Females | 15-19 years | 80+ years | Tobacco (cigarettes per capita) [lagged 10 years] | 1     | Positive  |
| Multiple myeloma [Developing]           | Females | 15-19 years | 80+ years | Red Meat (kcal per capita)                        | 1     | Positive  |
| Multiple myeloma [Developing]           | Females | 15-19 years | 80+ years | Alcohol (liters per capita)                       | 1     | Positive  |
| Multiple myeloma [Developing]           | Females | 15-19 years | 80+ years | Vegetables (kcal per capita)                      | 2     | Negative  |
| Multiple myeloma [Developing]           | Females | 15-19 years | 80+ years | Mean BMI                                          | 2     | Positive  |
| Multiple myeloma [Developing]           | Males   | 15-19 years | 80+ years | Alcohol (liters per capita)                       | 1     | Positive  |
| Multiple myeloma [Developing]           | Males   | 15-19 years | 80+ years | Red Meat (kcal per capita)                        | 1     | Positive  |

**Web Table 22 – CODEm covariates used, level of covariate, and expected direction of covariate by cause, sex, and age**

| Cause                          | Sex     | Age Start   | Age End   | Covariate                                           | Level | Direction |
|--------------------------------|---------|-------------|-----------|-----------------------------------------------------|-------|-----------|
| Multiple myeloma [Developing]  | Males   | 15-19 years | 80+ years | Vegetables (kcal per capita)                        | 2     | Negative  |
| Multiple myeloma [Developing]  | Males   | 15-19 years | 80+ years | Mean BMI                                            | 2     | Positive  |
| Multiple sclerosis             | Females | 20-24 years | 80+ years | Absolute value of average latitude                  | 1     | Positive  |
| Multiple sclerosis             | Females | 20-24 years | 80+ years | Animal Fats (kcal per capita)                       | 2     | Positive  |
| Multiple sclerosis             | Females | 20-24 years | 80+ years | Cholesterol (total, mean per capita)                | 2     | Positive  |
| Multiple sclerosis             | Females | 20-24 years | 80+ years | Smoking Prevalence                                  | 3     | Positive  |
| Multiple sclerosis             | Males   | 20-24 years | 80+ years | Absolute value of average latitude                  | 1     | Positive  |
| Multiple sclerosis             | Males   | 20-24 years | 80+ years | Animal Fats (kcal per capita)                       | 2     | Positive  |
| Multiple sclerosis             | Males   | 20-24 years | 80+ years | Cholesterol (total, mean per capita)                | 2     | Positive  |
| Musculoskeletal disorders      | Females | 5-9 years   | 80+ years | Mean BMI                                            | 1     | Positive  |
| Musculoskeletal disorders      | Females | 5-9 years   | 80+ years | Alcohol (liters per capita)                         | 2     | Positive  |
| Musculoskeletal disorders      | Females | 5-9 years   | 80+ years | Education (years per capita)                        | 2     | None      |
| Musculoskeletal disorders      | Females | 5-9 years   | 80+ years | Vegetables (kcal per capita)                        | 2     | Positive  |
| Musculoskeletal disorders      | Females | 5-9 years   | 80+ years | Smoking Prevalence                                  | 2     | Positive  |
| Musculoskeletal disorders      | Females | 5-9 years   | 80+ years | Cholesterol (total, mean per capita)                | 2     | Positive  |
| Musculoskeletal disorders      | Females | 5-9 years   | 80+ years | LDI (I\$ per capita)                                | 2     | None      |
| Musculoskeletal disorders      | Females | 5-9 years   | 80+ years | Latitude Over 45 (proportion)                       | 3     | None      |
| Musculoskeletal disorders      | Females | 5-9 years   | 80+ years | Latitude 30 to 45 (proportion)                      | 3     | None      |
| Musculoskeletal disorders      | Females | 5-9 years   | 80+ years | Latitude 15 to 30 (proportion)                      | 3     | None      |
| Musculoskeletal disorders      | Females | 5-9 years   | 80+ years | Latitude Under 15 (proportion)                      | 3     | None      |
| Musculoskeletal disorders      | Males   | 5-9 years   | 80+ years | Mean BMI                                            | 1     | Positive  |
| Musculoskeletal disorders      | Males   | 5-9 years   | 80+ years | Cholesterol (total, mean per capita)                | 2     | Positive  |
| Musculoskeletal disorders      | Males   | 5-9 years   | 80+ years | LDI (I\$ per capita)                                | 2     | None      |
| Musculoskeletal disorders      | Males   | 5-9 years   | 80+ years | Vegetables (kcal per capita)                        | 2     | Positive  |
| Musculoskeletal disorders      | Males   | 5-9 years   | 80+ years | Education (years per capita)                        | 2     | None      |
| Musculoskeletal disorders      | Males   | 5-9 years   | 80+ years | Smoking Prevalence                                  | 2     | Positive  |
| Musculoskeletal disorders      | Males   | 5-9 years   | 80+ years | Alcohol (liters per capita)                         | 2     | Positive  |
| Musculoskeletal disorders      | Males   | 5-9 years   | 80+ years | Latitude 15 to 30 (proportion)                      | 3     | None      |
| Musculoskeletal disorders      | Males   | 5-9 years   | 80+ years | Latitude Over 45 (proportion)                       | 3     | None      |
| Musculoskeletal disorders      | Males   | 5-9 years   | 80+ years | Latitude 30 to 45 (proportion)                      | 3     | None      |
| Musculoskeletal disorders      | Males   | 5-9 years   | 80+ years | Latitude Under 15 (proportion)                      | 3     | None      |
| Nasopharynx cancer [Developed] | Females | 5-9 years   | 80+ years | Alcohol (liters per capita)                         | 1     | Positive  |
| Nasopharynx cancer [Developed] | Females | 5-9 years   | 80+ years | Vegetables (kcal per capita)                        | 1     | Negative  |
| Nasopharynx cancer [Developed] | Females | 5-9 years   | 80+ years | Malnutrition (proportion <2SD weight for age)       | 2     | Positive  |
| Nasopharynx cancer [Developed] | Females | 5-9 years   | 80+ years | Population Density (over 1000 ppl/sqkm, proportion) | 2     | Positive  |

**Web Table 22 – CODEm covariates used, level of covariate, and expected direction of covariate by cause, sex, and age**

| Cause                           | Sex     | Age Start | Age End   | Covariate                                           | Level | Direction |
|---------------------------------|---------|-----------|-----------|-----------------------------------------------------|-------|-----------|
| Nasopharynx cancer [Developed]  | Females | 5-9 years | 80+ years | Fruits (kcal per capita)                            | 2     | Negative  |
| Nasopharynx cancer [Developed]  | Females | 5-9 years | 80+ years | Health System Access 2 (unitless)                   | 2     | Negative  |
| Nasopharynx cancer [Developed]  | Females | 5-9 years | 80+ years | Education (years per capita)                        | 3     | Negative  |
| Nasopharynx cancer [Developed]  | Females | 5-9 years | 80+ years | LDI (I\$ per capita)                                | 3     | Negative  |
| Nasopharynx cancer [Developed]  | Males   | 5-9 years | 80+ years | Alcohol (liters per capita)                         | 1     | Positive  |
| Nasopharynx cancer [Developed]  | Males   | 5-9 years | 80+ years | Vegetables (kcal per capita)                        | 1     | Negative  |
| Nasopharynx cancer [Developed]  | Males   | 5-9 years | 80+ years | Fruits (kcal per capita)                            | 2     | Negative  |
| Nasopharynx cancer [Developed]  | Males   | 5-9 years | 80+ years | Malnutrition (proportion <2SD weight for age)       | 2     | Positive  |
| Nasopharynx cancer [Developed]  | Males   | 5-9 years | 80+ years | Health System Access 2 (unitless)                   | 2     | Negative  |
| Nasopharynx cancer [Developed]  | Males   | 5-9 years | 80+ years | Whole Grains (kcal per capita)                      | 2     | Negative  |
| Nasopharynx cancer [Developed]  | Males   | 5-9 years | 80+ years | Population Density (over 1000 ppl/sqkm, proportion) | 2     | Positive  |
| Nasopharynx cancer [Developed]  | Males   | 5-9 years | 80+ years | Education (years per capita)                        | 3     | Negative  |
| Nasopharynx cancer [Developed]  | Males   | 5-9 years | 80+ years | LDI (I\$ per capita)                                | 3     | Negative  |
| Nasopharynx cancer [Developing] | Females | 5-9 years | 80+ years | Alcohol (liters per capita)                         | 1     | Positive  |
| Nasopharynx cancer [Developing] | Females | 5-9 years | 80+ years | Vegetables (kcal per capita)                        | 1     | Negative  |
| Nasopharynx cancer [Developing] | Females | 5-9 years | 80+ years | Whole Grains (kcal per capita)                      | 2     | Negative  |
| Nasopharynx cancer [Developing] | Females | 5-9 years | 80+ years | Malnutrition (proportion <2SD weight for age)       | 2     | Positive  |
| Nasopharynx cancer [Developing] | Females | 5-9 years | 80+ years | Population Density (under 150 ppl/sqkm, proportion) | 2     | Positive  |
| Nasopharynx cancer [Developing] | Females | 5-9 years | 80+ years | Health System Access 2 (unitless)                   | 2     | Negative  |
| Nasopharynx cancer [Developing] | Females | 5-9 years | 80+ years | Fruits (kcal per capita)                            | 2     | Negative  |
| Nasopharynx cancer [Developing] | Females | 5-9 years | 80+ years | Education (years per capita)                        | 3     | Negative  |
| Nasopharynx cancer [Developing] | Females | 5-9 years | 80+ years | LDI (I\$ per capita)                                | 3     | Negative  |
| Nasopharynx cancer [Developing] | Males   | 5-9 years | 80+ years | Alcohol (liters per capita)                         | 1     | Positive  |
| Nasopharynx cancer [Developing] | Males   | 5-9 years | 80+ years | Vegetables (kcal per capita)                        | 1     | Negative  |
| Nasopharynx cancer [Developing] | Males   | 5-9 years | 80+ years | Malnutrition (proportion <2SD weight for age)       | 2     | Positive  |
| Nasopharynx cancer [Developing] | Males   | 5-9 years | 80+ years | Health System Access 2 (unitless)                   | 2     | Negative  |
| Nasopharynx cancer [Developing] | Males   | 5-9 years | 80+ years | Whole Grains (kcal per capita)                      | 2     | Negative  |
| Nasopharynx cancer [Developing] | Males   | 5-9 years | 80+ years | Fruits (kcal per capita)                            | 2     | Negative  |
| Nasopharynx cancer [Developing] | Males   | 5-9 years | 80+ years | Population Density (under 150 ppl/sqkm, proportion) | 2     | Positive  |
| Nasopharynx cancer [Developing] | Males   | 5-9 years | 80+ years | Population Density (over 1000 ppl/sqkm, proportion) | 2     | Positive  |
| Nasopharynx cancer [Developing] | Males   | 5-9 years | 80+ years | LDI (I\$ per capita)                                | 3     | Negative  |
| Nasopharynx cancer [Developing] | Males   | 5-9 years | 80+ years | Education (years per capita)                        | 3     | Negative  |
| Neonatal disorders              | Females | 0-6 days  | 1-4 years | Smoking Prevalence (Reproductive Age Standardized)  | 1     | Positive  |
| Neonatal disorders              | Females | 0-6 days  | 1-4 years | Health System Access 2 (unitless)                   | 1     | Negative  |
| Neonatal disorders              | Females | 0-6 days  | 1-4 years | Indoor Air Pollution (All Cooking Fuels)            | 1     | None      |

**Web Table 22 – CODEm covariates used, level of covariate, and expected direction of covariate by cause, sex, and age**

| Cause                                                    | Sex     | Age Start | Age End   | Covariate                                          | Level | Direction |
|----------------------------------------------------------|---------|-----------|-----------|----------------------------------------------------|-------|-----------|
| Neonatal disorders                                       | Females | 0-6 days  | 1-4 years | LDI (I\$ per capita)                               | 2     | None      |
| Neonatal disorders                                       | Females | 0-6 days  | 1-4 years | Education (years per capita)                       | 2     | None      |
| Neonatal disorders                                       | Females | 0-6 days  | 1-4 years | Malnutrition (proportion <2SD weight for age)      | 2     | None      |
| Neonatal disorders                                       | Females | 0-6 days  | 1-4 years | Skilled Birth Attendance (proportion)              | 2     | Negative  |
| Neonatal disorders                                       | Females | 0-6 days  | 1-4 years | Total Fertility Rate                               | 3     | Positive  |
| Neonatal disorders                                       | Males   | 0-6 days  | 1-4 years | Indoor Air Pollution (All Cooking Fuels)           | 1     | None      |
| Neonatal disorders                                       | Males   | 0-6 days  | 1-4 years | Health System Access 2 (unitless)                  | 1     | Negative  |
| Neonatal disorders                                       | Males   | 0-6 days  | 1-4 years | Smoking Prevalence (Reproductive Age Standardized) | 1     | Positive  |
| Neonatal disorders                                       | Males   | 0-6 days  | 1-4 years | Malnutrition (proportion <2SD weight for age)      | 2     | None      |
| Neonatal disorders                                       | Males   | 0-6 days  | 1-4 years | Skilled Birth Attendance (proportion)              | 2     | Negative  |
| Neonatal disorders                                       | Males   | 0-6 days  | 1-4 years | Education (years per capita)                       | 2     | None      |
| Neonatal disorders                                       | Males   | 0-6 days  | 1-4 years | LDI (I\$ per capita)                               | 2     | None      |
| Neonatal disorders                                       | Males   | 0-6 days  | 1-4 years | Total Fertility Rate                               | 3     | Positive  |
| Neonatal encephalopathy due to birth asphyxia and trauma | Females | 0-6 days  | 1-4 years | Smoking Prevalence (Reproductive Age Standardized) | 1     | Positive  |
| Neonatal encephalopathy due to birth asphyxia and trauma | Females | 0-6 days  | 1-4 years | Health System Access 2 (unitless)                  | 1     | Negative  |
| Neonatal encephalopathy due to birth asphyxia and trauma | Females | 0-6 days  | 1-4 years | Indoor Air Pollution (All Cooking Fuels)           | 1     | Positive  |
| Neonatal encephalopathy due to birth asphyxia and trauma | Females | 0-6 days  | 1-4 years | Skilled Birth Attendance (proportion)              | 2     | Negative  |
| Neonatal encephalopathy due to birth asphyxia and trauma | Females | 0-6 days  | 1-4 years | Malnutrition (proportion <2SD weight for age)      | 2     | Positive  |
| Neonatal encephalopathy due to birth asphyxia and trauma | Females | 0-6 days  | 1-4 years | LDI (I\$ per capita)                               | 3     | None      |
| Neonatal encephalopathy due to birth asphyxia and trauma | Females | 0-6 days  | 1-4 years | Total Fertility Rate                               | 3     | Positive  |
| Neonatal encephalopathy due to birth asphyxia and trauma | Females | 0-6 days  | 1-4 years | Education (years per capita)                       | 3     | Negative  |
| Neonatal encephalopathy due to birth asphyxia and trauma | Males   | 0-6 days  | 1-4 years | Health System Access 2 (unitless)                  | 1     | Negative  |
| Neonatal encephalopathy due to birth asphyxia and trauma | Males   | 0-6 days  | 1-4 years | Smoking Prevalence (Reproductive Age Standardized) | 1     | Positive  |
| Neonatal encephalopathy due to birth asphyxia and trauma | Males   | 0-6 days  | 1-4 years | Indoor Air Pollution (All Cooking Fuels)           | 1     | Positive  |
| Neonatal encephalopathy due to birth asphyxia and trauma | Males   | 0-6 days  | 1-4 years | Malnutrition (proportion <2SD weight for age)      | 2     | Positive  |
| Neonatal encephalopathy due to birth asphyxia and trauma | Males   | 0-6 days  | 1-4 years | Skilled Birth Attendance (proportion)              | 2     | Negative  |
| Neonatal encephalopathy due to birth asphyxia and trauma | Males   | 0-6 days  | 1-4 years | LDI (I\$ per capita)                               | 3     | None      |
| Neonatal encephalopathy due to birth asphyxia and trauma | Males   | 0-6 days  | 1-4 years | Education (years per capita)                       | 3     | Negative  |
| Neonatal encephalopathy due to birth asphyxia and trauma | Males   | 0-6 days  | 1-4 years | Total Fertility Rate                               | 3     | Positive  |
| Neonatal preterm birth complications                     | Females | 0-6 days  | 1-4 years | Health System Access 2 (unitless)                  | 1     | Negative  |
| Neonatal preterm birth complications                     | Females | 0-6 days  | 1-4 years | Smoking Prevalence (Reproductive Age Standardized) | 1     | Positive  |
| Neonatal preterm birth complications                     | Females | 0-6 days  | 1-4 years | Indoor Air Pollution (All Cooking Fuels)           | 1     | Positive  |
| Neonatal preterm birth complications                     | Females | 0-6 days  | 1-4 years | Skilled Birth Attendance (proportion)              | 2     | Negative  |
| Neonatal preterm birth complications                     | Females | 0-6 days  | 1-4 years | Malnutrition (proportion <2SD weight for age)      | 2     | Positive  |
| Neonatal preterm birth complications                     | Females | 0-6 days  | 1-4 years | Total Fertility Rate                               | 3     | Positive  |

**Web Table 22 – CODEm covariates used, level of covariate, and expected direction of covariate by cause, sex, and age**

| Cause                                         | Sex     | Age Start | Age End   | Covariate                                          | Level | Direction |
|-----------------------------------------------|---------|-----------|-----------|----------------------------------------------------|-------|-----------|
| Neonatal preterm birth complications          | Females | 0-6 days  | 1-4 years | LDI (I\$ per capita)                               | 3     | None      |
| Neonatal preterm birth complications          | Females | 0-6 days  | 1-4 years | Education (years per capita)                       | 3     | None      |
| Neonatal preterm birth complications          | Males   | 0-6 days  | 1-4 years | Indoor Air Pollution (All Cooking Fuels)           | 1     | Positive  |
| Neonatal preterm birth complications          | Males   | 0-6 days  | 1-4 years | Health System Access 2 (unitless)                  | 1     | Negative  |
| Neonatal preterm birth complications          | Males   | 0-6 days  | 1-4 years | Smoking Prevalence (Reproductive Age Standardized) | 1     | Positive  |
| Neonatal preterm birth complications          | Males   | 0-6 days  | 1-4 years | Skilled Birth Attendance (proportion)              | 2     | Negative  |
| Neonatal preterm birth complications          | Males   | 0-6 days  | 1-4 years | Malnutrition (proportion <2SD weight for age)      | 2     | Positive  |
| Neonatal preterm birth complications          | Males   | 0-6 days  | 1-4 years | LDI (I\$ per capita)                               | 3     | None      |
| Neonatal preterm birth complications          | Males   | 0-6 days  | 1-4 years | Education (years per capita)                       | 3     | None      |
| Neonatal preterm birth complications          | Males   | 0-6 days  | 1-4 years | Total Fertility Rate                               | 3     | Positive  |
| Neonatal sepsis and other neonatal infections | Females | 0-6 days  | 1-4 years | Indoor Air Pollution (All Cooking Fuels)           | 1     | Positive  |
| Neonatal sepsis and other neonatal infections | Females | 0-6 days  | 1-4 years | Smoking Prevalence (Reproductive Age Standardized) | 1     | Positive  |
| Neonatal sepsis and other neonatal infections | Females | 0-6 days  | 1-4 years | Skilled Birth Attendance (proportion)              | 2     | Negative  |
| Neonatal sepsis and other neonatal infections | Females | 0-6 days  | 1-4 years | LDI (I\$ per capita)                               | 3     | None      |
| Neonatal sepsis and other neonatal infections | Males   | 0-6 days  | 1-4 years | Smoking Prevalence (Reproductive Age Standardized) | 1     | Positive  |
| Neonatal sepsis and other neonatal infections | Males   | 0-6 days  | 1-4 years | Indoor Air Pollution (All Cooking Fuels)           | 1     | Positive  |
| Neonatal sepsis and other neonatal infections | Males   | 0-6 days  | 1-4 years | Education (years per capita)                       | 3     | Negative  |
| Neonatal sepsis and other neonatal infections | Males   | 0-6 days  | 1-4 years | LDI (I\$ per capita)                               | 3     | None      |
| Neural tube defects                           | Females | 0-6 days  | 80+ years | Smoking Prevalence (Reproductive Age Standardized) | 1     | Positive  |
| Neural tube defects                           | Females | 0-6 days  | 80+ years | Diabetes Age-Standardized Prevalence (proportion)  | 1     | Positive  |
| Neural tube defects                           | Females | 0-6 days  | 80+ years | Indoor Air Pollution (All Cooking Fuels)           | 1     | Positive  |
| Neural tube defects                           | Females | 0-6 days  | 80+ years | Fruits (kcal per capita)                           | 2     | Negative  |
| Neural tube defects                           | Females | 0-6 days  | 80+ years | Vegetables (kcal per capita)                       | 2     | Negative  |
| Neural tube defects                           | Females | 0-6 days  | 80+ years | LDI (I\$ per capita)                               | 2     | Negative  |
| Neural tube defects                           | Females | 0-6 days  | 80+ years | Alcohol (liters per capita)                        | 2     | Positive  |
| Neural tube defects                           | Females | 0-6 days  | 80+ years | Health System Access 2 (unitless)                  | 3     | Negative  |
| Neural tube defects                           | Females | 0-6 days  | 80+ years | Education (years per capita)                       | 3     | Negative  |
| Neural tube defects                           | Males   | 0-6 days  | 80+ years | Indoor Air Pollution (All Cooking Fuels)           | 1     | Positive  |
| Neural tube defects                           | Males   | 0-6 days  | 80+ years | Smoking Prevalence (Reproductive Age Standardized) | 1     | Positive  |
| Neural tube defects                           | Males   | 0-6 days  | 80+ years | Alcohol (liters per capita)                        | 2     | Positive  |
| Neural tube defects                           | Males   | 0-6 days  | 80+ years | Fruits (kcal per capita)                           | 2     | Negative  |
| Neural tube defects                           | Males   | 0-6 days  | 80+ years | LDI (I\$ per capita)                               | 2     | Negative  |
| Neural tube defects                           | Males   | 0-6 days  | 80+ years | Vegetables (kcal per capita)                       | 2     | Negative  |
| Neural tube defects                           | Males   | 0-6 days  | 80+ years | Health System Access 2 (unitless)                  | 3     | Negative  |
| Neural tube defects                           | Males   | 0-6 days  | 80+ years | Education (years per capita)                       | 3     | Negative  |



**Web Table 22 – CODEm covariates used, level of covariate, and expected direction of covariate by cause, sex, and age**

| Cause                                 | Sex     | Age Start   | Age End   | Covariate                                           | Level | Direction |
|---------------------------------------|---------|-------------|-----------|-----------------------------------------------------|-------|-----------|
| Non-Hodgkin lymphoma [Developed]      | Females | 28-364 days | 80+ years | Smoking Prevalence                                  | 2     | Positive  |
| Non-Hodgkin lymphoma [Developed]      | Females | 28-364 days | 80+ years | Alcohol (liters per capita)                         | 2     | Positive  |
| Non-Hodgkin lymphoma [Developed]      | Females | 28-364 days | 80+ years | Total Fertility Rate                                | 3     | None      |
| Non-Hodgkin lymphoma [Developed]      | Males   | 28-364 days | 80+ years | Alcohol (liters per capita)                         | 2     | Positive  |
| Non-Hodgkin lymphoma [Developed]      | Males   | 28-364 days | 80+ years | Total Fertility Rate                                | 3     | None      |
| Non-Hodgkin lymphoma [Developing]     | Females | 28-364 days | 80+ years | Alcohol (liters per capita)                         | 2     | Positive  |
| Non-Hodgkin lymphoma [Developing]     | Females | 28-364 days | 80+ years | Total Fertility Rate                                | 3     | None      |
| Non-Hodgkin lymphoma [Developing]     | Males   | 28-364 days | 80+ years | Alcohol (liters per capita)                         | 2     | Positive  |
| Non-Hodgkin lymphoma [Developing]     | Males   | 28-364 days | 80+ years | Total Fertility Rate                                | 3     | None      |
| Non-melanoma skin cancer [Developed]  | Females | 15-19 years | 80+ years | Health System Access (capped)                       | 1     | Positive  |
| Non-melanoma skin cancer [Developed]  | Females | 15-19 years | 80+ years | Average latitude                                    | 2     | None      |
| Non-melanoma skin cancer [Developed]  | Females | 15-19 years | 80+ years | Education (years per capita)                        | 3     | Negative  |
| Non-melanoma skin cancer [Developed]  | Females | 15-19 years | 80+ years | LDI (I\$ per capita)                                | 3     | Negative  |
| Non-melanoma skin cancer [Developed]  | Males   | 15-19 years | 80+ years | Smoking Prevalence [lagged 20 years]                | 1     | Positive  |
| Non-melanoma skin cancer [Developed]  | Males   | 15-19 years | 80+ years | Health System Access (capped)                       | 1     | Positive  |
| Non-melanoma skin cancer [Developed]  | Males   | 15-19 years | 80+ years | Average latitude                                    | 2     | None      |
| Non-melanoma skin cancer [Developed]  | Males   | 15-19 years | 80+ years | LDI (I\$ per capita)                                | 3     | Negative  |
| Non-melanoma skin cancer [Developing] | Females | 15-19 years | 80+ years | Health System Access (capped)                       | 1     | Positive  |
| Non-melanoma skin cancer [Developing] | Females | 15-19 years | 80+ years | Cumulative Cigarettes (10 Years)                    | 1     | Positive  |
| Non-melanoma skin cancer [Developing] | Females | 15-19 years | 80+ years | Cumulative Cigarettes (5 Years)                     | 1     | Positive  |
| Non-melanoma skin cancer [Developing] | Females | 15-19 years | 80+ years | Cumulative Cigarettes (15 Years)                    | 1     | Positive  |
| Non-melanoma skin cancer [Developing] | Females | 15-19 years | 80+ years | Average latitude                                    | 2     | None      |
| Non-melanoma skin cancer [Developing] | Females | 15-19 years | 80+ years | LDI (I\$ per capita)                                | 3     | Negative  |
| Non-melanoma skin cancer [Developing] | Females | 15-19 years | 80+ years | Education (years per capita)                        | 3     | Negative  |
| Non-melanoma skin cancer [Developing] | Males   | 15-19 years | 80+ years | Smoking Prevalence [lagged 20 years]                | 1     | Positive  |
| Non-melanoma skin cancer [Developing] | Males   | 15-19 years | 80+ years | Health System Access (capped)                       | 1     | Positive  |
| Non-melanoma skin cancer [Developing] | Males   | 15-19 years | 80+ years | Average latitude                                    | 2     | None      |
| Non-melanoma skin cancer [Developing] | Males   | 15-19 years | 80+ years | Education (years per capita)                        | 3     | Negative  |
| Non-melanoma skin cancer [Developing] | Males   | 15-19 years | 80+ years | LDI (I\$ per capita)                                | 3     | Negative  |
| Non-venomous animal contact           | Females | 0-6 days    | 80+ years | Vehicles - 4 wheels (per capita)                    | 1     | None      |
| Non-venomous animal contact           | Females | 0-6 days    | 80+ years | Health System Access 2 (unitless)                   | 2     | Negative  |
| Non-venomous animal contact           | Females | 0-6 days    | 80+ years | Population Density (under 150 ppl/sqkm, proportion) | 3     | None      |
| Non-venomous animal contact           | Females | 0-6 days    | 80+ years | LDI (I\$ per capita)                                | 3     | None      |
| Non-venomous animal contact           | Females | 0-6 days    | 80+ years | Population Density (over 1000 ppl/sqkm, proportion) | 3     | None      |
| Non-venomous animal contact           | Females | 0-6 days    | 80+ years | Elevation Over 1500m (proportion)                   | 3     | None      |



**Web Table 22 – CODEm covariates used, level of covariate, and expected direction of covariate by cause, sex, and age**

| Cause                                         | Sex     | Age Start   | Age End   | Covariate                                           | Level | Direction |
|-----------------------------------------------|---------|-------------|-----------|-----------------------------------------------------|-------|-----------|
| Non-venomous animal contact                   | Females | 0-6 days    | 80+ years | Education (years per capita)                        | 3     | Negative  |
| Non-venomous animal contact                   | Females | 0-6 days    | 80+ years | Elevation Under 100m (proportion)                   | 3     | None      |
| Non-venomous animal contact                   | Males   | 0-6 days    | 80+ years | Vehicles - 4 wheels (per capita)                    | 1     | None      |
| Non-venomous animal contact                   | Males   | 0-6 days    | 80+ years | Health System Access 2 (unitless)                   | 2     | Negative  |
| Non-venomous animal contact                   | Males   | 0-6 days    | 80+ years | Education (years per capita)                        | 3     | Negative  |
| Non-venomous animal contact                   | Males   | 0-6 days    | 80+ years | Elevation Under 100m (proportion)                   | 3     | None      |
| Non-venomous animal contact                   | Males   | 0-6 days    | 80+ years | Elevation Over 1500m (proportion)                   | 3     | None      |
| Non-venomous animal contact                   | Males   | 0-6 days    | 80+ years | Population Density (under 150 ppl/sqkm, proportion) | 3     | None      |
| Non-venomous animal contact                   | Males   | 0-6 days    | 80+ years | LDI (I\$ per capita)                                | 3     | None      |
| Non-venomous animal contact                   | Males   | 0-6 days    | 80+ years | Population Density (over 1000 ppl/sqkm, proportion) | 3     | None      |
| Nutritional deficiencies                      | Females | 28-364 days | 80+ years | Malnutrition Shock (binary)                         | 1     | Positive  |
| Nutritional deficiencies                      | Females | 28-364 days | 80+ years | Health System Access 2 (unitless)                   | 1     | Negative  |
| Nutritional deficiencies                      | Females | 28-364 days | 80+ years | Malnutrition (proportion <2SD weight for age)       | 1     | Positive  |
| Nutritional deficiencies                      | Females | 28-364 days | 80+ years | Age-Standardize Prevalence of Severe Anemia         | 1     | Positive  |
| Nutritional deficiencies                      | Females | 28-364 days | 80+ years | Total Calories (kcal per capita)                    | 2     | Negative  |
| Nutritional deficiencies                      | Females | 28-364 days | 80+ years | Rainfall Quintile 1 (proportion)                    | 2     | None      |
| Nutritional deficiencies                      | Females | 28-364 days | 80+ years | Sanitation (proportion with access)                 | 2     | Negative  |
| Nutritional deficiencies                      | Females | 28-364 days | 80+ years | Rainfall Quintile 2 (proportion)                    | 2     | None      |
| Nutritional deficiencies                      | Females | 28-364 days | 80+ years | Mortality Rate Due to War Shocks (per 1 person)     | 2     | Positive  |
| Nutritional deficiencies                      | Females | 28-364 days | 80+ years | Improved Water Source (proportion with access)      | 2     | Negative  |
| Nutritional deficiencies                      | Females | 28-364 days | 80+ years | LDI (I\$ per capita)                                | 3     | Negative  |
| Nutritional deficiencies                      | Females | 28-364 days | 80+ years | Education (years per capita)                        | 3     | Negative  |
| Nutritional deficiencies                      | Males   | 28-364 days | 80+ years | Health System Access 2 (unitless)                   | 1     | Negative  |
| Nutritional deficiencies                      | Males   | 28-364 days | 80+ years | Malnutrition (proportion <2SD weight for age)       | 1     | Positive  |
| Nutritional deficiencies                      | Males   | 28-364 days | 80+ years | Age-Standardize Prevalence of Severe Anemia         | 1     | Positive  |
| Nutritional deficiencies                      | Males   | 28-364 days | 80+ years | Malnutrition Shock (binary)                         | 1     | Positive  |
| Nutritional deficiencies                      | Males   | 28-364 days | 80+ years | Improved Water Source (proportion with access)      | 2     | Negative  |
| Nutritional deficiencies                      | Males   | 28-364 days | 80+ years | Rainfall Quintile 2 (proportion)                    | 2     | None      |
| Nutritional deficiencies                      | Males   | 28-364 days | 80+ years | Rainfall Quintile 1 (proportion)                    | 2     | None      |
| Nutritional deficiencies                      | Males   | 28-364 days | 80+ years | Total Calories (kcal per capita)                    | 2     | Negative  |
| Nutritional deficiencies                      | Males   | 28-364 days | 80+ years | Sanitation (proportion with access)                 | 2     | Negative  |
| Nutritional deficiencies                      | Males   | 28-364 days | 80+ years | Mortality Rate Due to War Shocks (per 1 person)     | 2     | Positive  |
| Nutritional deficiencies                      | Males   | 28-364 days | 80+ years | Education (years per capita)                        | 3     | Negative  |
| Nutritional deficiencies                      | Males   | 28-364 days | 80+ years | LDI (I\$ per capita)                                | 3     | Negative  |
| Other cardiovascular and circulatory diseases | Females | 0-6 days    | 80+ years | Cholesterol (total, mean per capita)                | 1     | Positive  |

**Web Table 22 – CODEm covariates used, level of covariate, and expected direction of covariate by cause, sex, and age**

| Cause                                         | Sex     | Age Start | Age End   | Covariate                                       | Level | Direction |
|-----------------------------------------------|---------|-----------|-----------|-------------------------------------------------|-------|-----------|
| Other cardiovascular and circulatory diseases | Females | 0-6 days  | 80+ years | PUFA Omega 6 - Vegetable Oils (kcal per capita) | 2     | Negative  |
| Other cardiovascular and circulatory diseases | Females | 0-6 days  | 80+ years | Whole Grains (kcal per capita)                  | 2     | Negative  |
| Other cardiovascular and circulatory diseases | Females | 0-6 days  | 80+ years | Fruits (kcal per capita)                        | 2     | Negative  |
| Other cardiovascular and circulatory diseases | Females | 0-6 days  | 80+ years | Alcohol (liters per capita)                     | 2     | None      |
| Other cardiovascular and circulatory diseases | Females | 0-6 days  | 80+ years | Animal Fats (kcal per capita)                   | 2     | Positive  |
| Other cardiovascular and circulatory diseases | Females | 0-6 days  | 80+ years | PUFA Omega 3 - Seafood (kcal per capita)        | 2     | Negative  |
| Other cardiovascular and circulatory diseases | Females | 0-6 days  | 80+ years | Red Meat (kcal per capita)                      | 2     | Positive  |
| Other cardiovascular and circulatory diseases | Females | 0-6 days  | 80+ years | Smoking Prevalence                              | 2     | Positive  |
| Other cardiovascular and circulatory diseases | Females | 0-6 days  | 80+ years | Indoor Air Pollution (All Cooking Fuels)        | 2     | Positive  |
| Other cardiovascular and circulatory diseases | Females | 0-6 days  | 80+ years | Nuts & Seeds (kcal per capita)                  | 2     | Negative  |
| Other cardiovascular and circulatory diseases | Females | 0-6 days  | 80+ years | Vegetables (kcal per capita)                    | 2     | Negative  |
| Other cardiovascular and circulatory diseases | Females | 0-6 days  | 80+ years | Total Calories (kcal per capita)                | 2     | Positive  |
| Other cardiovascular and circulatory diseases | Females | 0-6 days  | 80+ years | Elevation 100 to 500m (proportion)              | 3     | Negative  |
| Other cardiovascular and circulatory diseases | Females | 0-6 days  | 80+ years | LDI (I\$ per capita)                            | 3     | Negative  |
| Other cardiovascular and circulatory diseases | Females | 0-6 days  | 80+ years | Health System Access 2 (unitless)               | 3     | Negative  |
| Other cardiovascular and circulatory diseases | Females | 0-6 days  | 80+ years | Education (years per capita)                    | 3     | Negative  |
| Other cardiovascular and circulatory diseases | Males   | 0-6 days  | 80+ years | Cholesterol (total, mean per capita)            | 1     | Positive  |
| Other cardiovascular and circulatory diseases | Males   | 0-6 days  | 80+ years | Cumulative Cigarettes (10 Years)                | 2     | Positive  |
| Other cardiovascular and circulatory diseases | Males   | 0-6 days  | 80+ years | Indoor Air Pollution (All Cooking Fuels)        | 2     | Positive  |
| Other cardiovascular and circulatory diseases | Males   | 0-6 days  | 80+ years | Fruits (kcal per capita)                        | 2     | Negative  |
| Other cardiovascular and circulatory diseases | Males   | 0-6 days  | 80+ years | Vegetables (kcal per capita)                    | 2     | Negative  |
| Other cardiovascular and circulatory diseases | Males   | 0-6 days  | 80+ years | Alcohol (liters per capita)                     | 2     | None      |
| Other cardiovascular and circulatory diseases | Males   | 0-6 days  | 80+ years | Smoking Prevalence                              | 2     | Positive  |
| Other cardiovascular and circulatory diseases | Males   | 0-6 days  | 80+ years | PUFA Omega 6 - Vegetable Oils (kcal per capita) | 2     | Negative  |
| Other cardiovascular and circulatory diseases | Males   | 0-6 days  | 80+ years | Red Meat (kcal per capita)                      | 2     | Positive  |
| Other cardiovascular and circulatory diseases | Males   | 0-6 days  | 80+ years | Whole Grains (kcal per capita)                  | 2     | Negative  |
| Other cardiovascular and circulatory diseases | Males   | 0-6 days  | 80+ years | Animal Fats (kcal per capita)                   | 2     | Positive  |
| Other cardiovascular and circulatory diseases | Males   | 0-6 days  | 80+ years | Total Calories (kcal per capita)                | 2     | Positive  |
| Other cardiovascular and circulatory diseases | Males   | 0-6 days  | 80+ years | PUFA Omega 3 - Seafood (kcal per capita)        | 2     | Negative  |
| Other cardiovascular and circulatory diseases | Males   | 0-6 days  | 80+ years | Nuts & Seeds (kcal per capita)                  | 2     | Negative  |
| Other cardiovascular and circulatory diseases | Males   | 0-6 days  | 80+ years | LDI (I\$ per capita)                            | 3     | Negative  |
| Other cardiovascular and circulatory diseases | Males   | 0-6 days  | 80+ years | Health System Access 2 (unitless)               | 3     | Negative  |
| Other cardiovascular and circulatory diseases | Males   | 0-6 days  | 80+ years | Education (years per capita)                    | 3     | Negative  |
| Other cardiovascular and circulatory diseases | Males   | 0-6 days  | 80+ years | Elevation 100 to 500m (proportion)              | 3     | Negative  |
| Other chronic respiratory diseases            | Females | 0-6 days  | 80+ years | Cumulative Cigarettes (5 Years)                 | 1     | Positive  |

**Web Table 22 – CODEm covariates used, level of covariate, and expected direction of covariate by cause, sex, and age**

| Cause                              | Sex     | Age Start | Age End   | Covariate                                                           | Level | Direction |
|------------------------------------|---------|-----------|-----------|---------------------------------------------------------------------|-------|-----------|
| Other chronic respiratory diseases | Females | 0-6 days  | 80+ years | Health System Access 2 (unitless)                                   | 1     | Negative  |
| Other chronic respiratory diseases | Females | 0-6 days  | 80+ years | Outdoor Air Pollution (PM2.5)                                       | 1     | Positive  |
| Other chronic respiratory diseases | Females | 0-6 days  | 80+ years | Indoor Air Pollution (Biomass Cooking)                              | 1     | Positive  |
| Other chronic respiratory diseases | Females | 0-6 days  | 80+ years | Smoking Prevalence                                                  | 1     | Positive  |
| Other chronic respiratory diseases | Females | 0-6 days  | 80+ years | Population Density (over 1000 ppl/sqkm, proportion)                 | 2     | Positive  |
| Other chronic respiratory diseases | Females | 0-6 days  | 80+ years | Elevation Over 1500m (proportion)                                   | 2     | Positive  |
| Other chronic respiratory diseases | Females | 0-6 days  | 80+ years | LDI (I\$ per capita)                                                | 3     | Negative  |
| Other chronic respiratory diseases | Females | 0-6 days  | 80+ years | Education (years per capita)                                        | 3     | Negative  |
| Other chronic respiratory diseases | Males   | 0-6 days  | 80+ years | Smoking Prevalence                                                  | 1     | Positive  |
| Other chronic respiratory diseases | Males   | 0-6 days  | 80+ years | Health System Access 2 (unitless)                                   | 1     | Negative  |
| Other chronic respiratory diseases | Males   | 0-6 days  | 80+ years | Indoor Air Pollution (Biomass Cooking)                              | 1     | Positive  |
| Other chronic respiratory diseases | Males   | 0-6 days  | 80+ years | Cumulative Cigarettes (5 Years)                                     | 1     | Positive  |
| Other chronic respiratory diseases | Males   | 0-6 days  | 80+ years | Outdoor Air Pollution (PM2.5)                                       | 1     | Positive  |
| Other chronic respiratory diseases | Males   | 0-6 days  | 80+ years | Population Density (over 1000 ppl/sqkm, proportion)                 | 2     | Positive  |
| Other chronic respiratory diseases | Males   | 0-6 days  | 80+ years | Elevation Over 1500m (proportion)                                   | 2     | Positive  |
| Other chronic respiratory diseases | Males   | 0-6 days  | 80+ years | Education (years per capita)                                        | 3     | Negative  |
| Other chronic respiratory diseases | Males   | 0-6 days  | 80+ years | LDI (I\$ per capita)                                                | 3     | Negative  |
| Other congenital anomalies         | Females | 0-6 days  | 80+ years | Live Births 35+ (proportion)                                        | 1     | Positive  |
| Other congenital anomalies         | Females | 0-6 days  | 80+ years | Diabetes Age-Standardized Prevalence (proportion)                   | 1     | Positive  |
| Other congenital anomalies         | Females | 0-6 days  | 80+ years | Alcohol (liters per capita)                                         | 1     | Positive  |
| Other congenital anomalies         | Females | 0-6 days  | 80+ years | Legality of Abortion                                                | 2     | Negative  |
| Other congenital anomalies         | Females | 0-6 days  | 80+ years | Smoking Prevalence (Reproductive Age Standardized)                  | 2     | Positive  |
| Other congenital anomalies         | Females | 0-6 days  | 80+ years | Rate of congenital chromosomal abnormalities (per 1000 live births) | 2     | Positive  |
| Other congenital anomalies         | Females | 0-6 days  | 80+ years | LDI (I\$ per capita)                                                | 3     | None      |
| Other congenital anomalies         | Males   | 0-6 days  | 80+ years | Diabetes Age-Standardized Prevalence (proportion)                   | 1     | Positive  |
| Other congenital anomalies         | Males   | 0-6 days  | 80+ years | Alcohol (liters per capita)                                         | 1     | Positive  |
| Other congenital anomalies         | Males   | 0-6 days  | 80+ years | Live Births 35+ (proportion)                                        | 1     | Positive  |
| Other congenital anomalies         | Males   | 0-6 days  | 80+ years | Rate of congenital chromosomal abnormalities (per 1000 live births) | 2     | Positive  |
| Other congenital anomalies         | Males   | 0-6 days  | 80+ years | LDI (I\$ per capita)                                                | 3     | None      |
| Other digestive diseases           | Females | 1-4 years | 80+ years | Smoking Prevalence                                                  | 1     | Positive  |
| Other digestive diseases           | Females | 1-4 years | 80+ years | Alcohol (liters per capita)                                         | 1     | Positive  |
| Other digestive diseases           | Females | 1-4 years | 80+ years | Diabetes Age-Standardized Prevalence (proportion)                   | 2     | Positive  |
| Other digestive diseases           | Females | 1-4 years | 80+ years | Vegetables (kcal per capita)                                        | 2     | None      |
| Other digestive diseases           | Females | 1-4 years | 80+ years | Red Meat (kcal per capita)                                          | 2     | Positive  |
| Other digestive diseases           | Females | 1-4 years | 80+ years | Fruits (kcal per capita)                                            | 2     | Negative  |

**Web Table 22 – CODEm covariates used, level of covariate, and expected direction of covariate by cause, sex, and age**

| Cause                               | Sex     | Age Start | Age End   | Covariate                                           | Level | Direction |
|-------------------------------------|---------|-----------|-----------|-----------------------------------------------------|-------|-----------|
| Other digestive diseases            | Females | 1-4 years | 80+ years | Mean BMI                                            | 2     | Positive  |
| Other digestive diseases            | Females | 1-4 years | 80+ years | Improved Water Source (proportion with access)      | 2     | Negative  |
| Other digestive diseases            | Females | 1-4 years | 80+ years | Sanitation (proportion with access)                 | 2     | Negative  |
| Other digestive diseases            | Females | 1-4 years | 80+ years | Malnutrition (proportion <2SD weight for age)       | 2     | Positive  |
| Other digestive diseases            | Females | 1-4 years | 80+ years | Health System Access 2 (unitless)                   | 2     | Negative  |
| Other digestive diseases            | Females | 1-4 years | 80+ years | Animal Fats (kcal per capita)                       | 2     | Positive  |
| Other digestive diseases            | Females | 1-4 years | 80+ years | LDI (I\$ per capita)                                | 3     | Negative  |
| Other digestive diseases            | Females | 1-4 years | 80+ years | Education (years per capita)                        | 3     | Negative  |
| Other digestive diseases            | Males   | 1-4 years | 80+ years | Alcohol (liters per capita)                         | 1     | Positive  |
| Other digestive diseases            | Males   | 1-4 years | 80+ years | Smoking Prevalence                                  | 1     | Positive  |
| Other digestive diseases            | Males   | 1-4 years | 80+ years | Diabetes Age-Standardized Prevalence (proportion)   | 2     | Positive  |
| Other digestive diseases            | Males   | 1-4 years | 80+ years | Improved Water Source (proportion with access)      | 2     | Negative  |
| Other digestive diseases            | Males   | 1-4 years | 80+ years | Malnutrition (proportion <2SD weight for age)       | 2     | Positive  |
| Other digestive diseases            | Males   | 1-4 years | 80+ years | Sanitation (proportion with access)                 | 2     | Negative  |
| Other digestive diseases            | Males   | 1-4 years | 80+ years | Animal Fats (kcal per capita)                       | 2     | Positive  |
| Other digestive diseases            | Males   | 1-4 years | 80+ years | Red Meat (kcal per capita)                          | 2     | Positive  |
| Other digestive diseases            | Males   | 1-4 years | 80+ years | Fruits (kcal per capita)                            | 2     | Negative  |
| Other digestive diseases            | Males   | 1-4 years | 80+ years | Health System Access 2 (unitless)                   | 2     | Negative  |
| Other digestive diseases            | Males   | 1-4 years | 80+ years | Vegetables (kcal per capita)                        | 2     | None      |
| Other digestive diseases            | Males   | 1-4 years | 80+ years | Mean BMI                                            | 2     | Positive  |
| Other digestive diseases            | Males   | 1-4 years | 80+ years | Education (years per capita)                        | 3     | Negative  |
| Other digestive diseases            | Males   | 1-4 years | 80+ years | LDI (I\$ per capita)                                | 3     | Negative  |
| Other exposure to mechanical forces | Females | 0-6 days  | 80+ years | Population Density (over 1000 ppl/sqkm, proportion) | 2     | None      |
| Other exposure to mechanical forces | Females | 0-6 days  | 80+ years | Population Density (under 150 ppl/sqkm, proportion) | 2     | None      |
| Other exposure to mechanical forces | Females | 0-6 days  | 80+ years | Alcohol (liters per capita)                         | 2     | Positive  |
| Other exposure to mechanical forces | Females | 0-6 days  | 80+ years | Health System Access (unitless)                     | 2     | Negative  |
| Other exposure to mechanical forces | Females | 0-6 days  | 80+ years | Education (years per capita)                        | 3     | Negative  |
| Other exposure to mechanical forces | Females | 0-6 days  | 80+ years | LDI (I\$ per capita)                                | 3     | None      |
| Other exposure to mechanical forces | Males   | 0-6 days  | 80+ years | Health System Access (unitless)                     | 2     | Negative  |
| Other exposure to mechanical forces | Males   | 0-6 days  | 80+ years | Alcohol (liters per capita)                         | 2     | Positive  |
| Other exposure to mechanical forces | Males   | 0-6 days  | 80+ years | Population Density (under 150 ppl/sqkm, proportion) | 2     | None      |
| Other exposure to mechanical forces | Males   | 0-6 days  | 80+ years | Population Density (over 1000 ppl/sqkm, proportion) | 2     | None      |
| Other exposure to mechanical forces | Males   | 0-6 days  | 80+ years | Education (years per capita)                        | 3     | Negative  |
| Other exposure to mechanical forces | Males   | 0-6 days  | 80+ years | LDI (I\$ per capita)                                | 3     | None      |
| Other infectious diseases           | Females | 0-6 days  | 80+ years | Measles Vaccine Coverage (proportion)               | 1     | Negative  |

**Web Table 22 — CODEm covariates used, level of covariate, and expected direction of covariate by cause, sex, and age**

| Cause                           | Sex     | Age Start | Age End   | Covariate                                      | Level | Direction |
|---------------------------------|---------|-----------|-----------|------------------------------------------------|-------|-----------|
| Other infectious diseases       | Females | 0-6 days  | 80+ years | DTP3 Coverage (proportion)                     | 1     | Negative  |
| Other infectious diseases       | Females | 0-6 days  | 80+ years | Health System Access (unitless)                | 1     | Negative  |
| Other infectious diseases       | Females | 0-6 days  | 80+ years | Latitude 15 to 30 (proportion)                 | 2     | None      |
| Other infectious diseases       | Females | 0-6 days  | 80+ years | Rainfall Quintile 2 (proportion)               | 2     | None      |
| Other infectious diseases       | Females | 0-6 days  | 80+ years | Antenatal Care (1 visit) Coverage (proportion) | 2     | Negative  |
| Other infectious diseases       | Females | 0-6 days  | 80+ years | Latitude 30 to 45 (proportion)                 | 2     | None      |
| Other infectious diseases       | Females | 0-6 days  | 80+ years | Latitude Under 15 (proportion)                 | 2     | Positive  |
| Other infectious diseases       | Females | 0-6 days  | 80+ years | Improved Water Source (proportion with access) | 2     | Negative  |
| Other infectious diseases       | Females | 0-6 days  | 80+ years | Rainfall Quintile 5 (proportion)               | 2     | Positive  |
| Other infectious diseases       | Females | 0-6 days  | 80+ years | Malnutrition (proportion <2SD weight for age)  | 2     | Positive  |
| Other infectious diseases       | Females | 0-6 days  | 80+ years | Rainfall Quintile 1 (proportion)               | 2     | Negative  |
| Other infectious diseases       | Females | 0-6 days  | 80+ years | Rainfall Quintile 3 (proportion)               | 2     | None      |
| Other infectious diseases       | Females | 0-6 days  | 80+ years | Rainfall Quintile 4 (proportion)               | 2     | None      |
| Other infectious diseases       | Females | 0-6 days  | 80+ years | Sanitation (proportion with access)            | 2     | Negative  |
| Other infectious diseases       | Females | 0-6 days  | 80+ years | LDI (I\$ per capita)                           | 3     | Negative  |
| Other infectious diseases       | Females | 0-6 days  | 80+ years | Education (years per capita)                   | 3     | Negative  |
| Other infectious diseases       | Males   | 0-6 days  | 80+ years | Measles Vaccine Coverage (proportion)          | 1     | Negative  |
| Other infectious diseases       | Males   | 0-6 days  | 80+ years | DTP3 Coverage (proportion)                     | 1     | Negative  |
| Other infectious diseases       | Males   | 0-6 days  | 80+ years | Health System Access (unitless)                | 1     | Negative  |
| Other infectious diseases       | Males   | 0-6 days  | 80+ years | Rainfall Quintile 4 (proportion)               | 2     | None      |
| Other infectious diseases       | Males   | 0-6 days  | 80+ years | Rainfall Quintile 1 (proportion)               | 2     | Negative  |
| Other infectious diseases       | Males   | 0-6 days  | 80+ years | Improved Water Source (proportion with access) | 2     | Negative  |
| Other infectious diseases       | Males   | 0-6 days  | 80+ years | Sanitation (proportion with access)            | 2     | Negative  |
| Other infectious diseases       | Males   | 0-6 days  | 80+ years | Latitude 15 to 30 (proportion)                 | 2     | None      |
| Other infectious diseases       | Males   | 0-6 days  | 80+ years | Malnutrition (proportion <2SD weight for age)  | 2     | Positive  |
| Other infectious diseases       | Males   | 0-6 days  | 80+ years | Rainfall Quintile 5 (proportion)               | 2     | Positive  |
| Other infectious diseases       | Males   | 0-6 days  | 80+ years | Latitude Under 15 (proportion)                 | 2     | Positive  |
| Other infectious diseases       | Males   | 0-6 days  | 80+ years | Antenatal Care (1 visit) Coverage (proportion) | 2     | Negative  |
| Other infectious diseases       | Males   | 0-6 days  | 80+ years | Latitude 30 to 45 (proportion)                 | 2     | None      |
| Other infectious diseases       | Males   | 0-6 days  | 80+ years | Rainfall Quintile 3 (proportion)               | 2     | None      |
| Other infectious diseases       | Males   | 0-6 days  | 80+ years | Rainfall Quintile 2 (proportion)               | 2     | None      |
| Other infectious diseases       | Males   | 0-6 days  | 80+ years | LDI (I\$ per capita)                           | 3     | Negative  |
| Other infectious diseases       | Males   | 0-6 days  | 80+ years | Education (years per capita)                   | 3     | Negative  |
| Other musculoskeletal disorders | Females | 5-9 years | 80+ years | Mean BMI                                       | 1     | Positive  |
| Other musculoskeletal disorders | Females | 5-9 years | 80+ years | LDI (I\$ per capita)                           | 2     | None      |

**Web Table 22 – CODEm covariates used, level of covariate, and expected direction of covariate by cause, sex, and age**

| Cause                             | Sex     | Age Start | Age End   | Covariate                                          | Level | Direction |
|-----------------------------------|---------|-----------|-----------|----------------------------------------------------|-------|-----------|
| Other musculoskeletal disorders   | Females | 5-9 years | 80+ years | Cholesterol (total, mean per capita)               | 2     | Positive  |
| Other musculoskeletal disorders   | Females | 5-9 years | 80+ years | Alcohol (liters per capita)                        | 2     | Positive  |
| Other musculoskeletal disorders   | Females | 5-9 years | 80+ years | Education (years per capita)                       | 2     | None      |
| Other musculoskeletal disorders   | Females | 5-9 years | 80+ years | Vegetables (kcal per capita)                       | 2     | Positive  |
| Other musculoskeletal disorders   | Females | 5-9 years | 80+ years | Smoking Prevalence                                 | 2     | Positive  |
| Other musculoskeletal disorders   | Females | 5-9 years | 80+ years | Latitude Under 15 (proportion)                     | 3     | None      |
| Other musculoskeletal disorders   | Females | 5-9 years | 80+ years | Latitude 15 to 30 (proportion)                     | 3     | None      |
| Other musculoskeletal disorders   | Females | 5-9 years | 80+ years | Latitude Over 45 (proportion)                      | 3     | None      |
| Other musculoskeletal disorders   | Females | 5-9 years | 80+ years | Latitude 30 to 45 (proportion)                     | 3     | None      |
| Other musculoskeletal disorders   | Males   | 5-9 years | 80+ years | Mean BMI                                           | 1     | Positive  |
| Other musculoskeletal disorders   | Males   | 5-9 years | 80+ years | Alcohol (liters per capita)                        | 2     | Positive  |
| Other musculoskeletal disorders   | Males   | 5-9 years | 80+ years | Cholesterol (total, mean per capita)               | 2     | Positive  |
| Other musculoskeletal disorders   | Males   | 5-9 years | 80+ years | Education (years per capita)                       | 2     | None      |
| Other musculoskeletal disorders   | Males   | 5-9 years | 80+ years | Vegetables (kcal per capita)                       | 2     | Positive  |
| Other musculoskeletal disorders   | Males   | 5-9 years | 80+ years | LDI (I\$ per capita)                               | 2     | None      |
| Other musculoskeletal disorders   | Males   | 5-9 years | 80+ years | Latitude Under 15 (proportion)                     | 3     | None      |
| Other musculoskeletal disorders   | Males   | 5-9 years | 80+ years | Latitude 15 to 30 (proportion)                     | 3     | None      |
| Other musculoskeletal disorders   | Males   | 5-9 years | 80+ years | Latitude Over 45 (proportion)                      | 3     | None      |
| Other musculoskeletal disorders   | Males   | 5-9 years | 80+ years | Latitude 30 to 45 (proportion)                     | 3     | None      |
| Other neglected tropical diseases | Females | 0-6 days  | 80+ years | Health System Access 2 (unitless)                  | 1     | Negative  |
| Other neglected tropical diseases | Females | 0-6 days  | 80+ years | Latitude Under 15 (proportion)                     | 1     | Positive  |
| Other neglected tropical diseases | Females | 0-6 days  | 80+ years | Rainfall Quintile 5 (proportion)                   | 2     | Positive  |
| Other neglected tropical diseases | Females | 0-6 days  | 80+ years | Sanitation (proportion with access)                | 2     | Negative  |
| Other neglected tropical diseases | Females | 0-6 days  | 80+ years | Education (years per capita)                       | 3     | Negative  |
| Other neglected tropical diseases | Females | 0-6 days  | 80+ years | LDI (I\$ per capita)                               | 3     | Negative  |
| Other neglected tropical diseases | Males   | 0-6 days  | 80+ years | Health System Access 2 (unitless)                  | 1     | Negative  |
| Other neglected tropical diseases | Males   | 0-6 days  | 80+ years | Latitude Under 15 (proportion)                     | 1     | Positive  |
| Other neglected tropical diseases | Males   | 0-6 days  | 80+ years | Sanitation (proportion with access)                | 2     | Negative  |
| Other neglected tropical diseases | Males   | 0-6 days  | 80+ years | Rainfall Quintile 5 (proportion)                   | 2     | Positive  |
| Other neglected tropical diseases | Males   | 0-6 days  | 80+ years | Education (years per capita)                       | 3     | Negative  |
| Other neglected tropical diseases | Males   | 0-6 days  | 80+ years | LDI (I\$ per capita)                               | 3     | Negative  |
| Other neonatal disorders          | Females | 0-6 days  | 1-4 years | Smoking Prevalence (Reproductive Age Standardized) | 1     | Positive  |
| Other neonatal disorders          | Females | 0-6 days  | 1-4 years | Indoor Air Pollution (All Cooking Fuels)           | 1     | Positive  |
| Other neonatal disorders          | Females | 0-6 days  | 1-4 years | Health System Access 2 (unitless)                  | 1     | Negative  |
| Other neonatal disorders          | Females | 0-6 days  | 1-4 years | Skilled Birth Attendance (proportion)              | 2     | Negative  |

**Web Table 22 – CODEm covariates used, level of covariate, and expected direction of covariate by cause, sex, and age**

| Cause                        | Sex     | Age Start | Age End   | Covariate                                          | Level | Direction |
|------------------------------|---------|-----------|-----------|----------------------------------------------------|-------|-----------|
| Other neonatal disorders     | Females | 0-6 days  | 1-4 years | Malnutrition (proportion <2SD weight for age)      | 2     | Positive  |
| Other neonatal disorders     | Females | 0-6 days  | 1-4 years | Total Fertility Rate                               | 3     | Positive  |
| Other neonatal disorders     | Females | 0-6 days  | 1-4 years | Education (years per capita)                       | 3     | Negative  |
| Other neonatal disorders     | Females | 0-6 days  | 1-4 years | LDI (I\$ per capita)                               | 3     | None      |
| Other neonatal disorders     | Males   | 0-6 days  | 1-4 years | Smoking Prevalence (Reproductive Age Standardized) | 1     | Positive  |
| Other neonatal disorders     | Males   | 0-6 days  | 1-4 years | Health System Access 2 (unitless)                  | 1     | Negative  |
| Other neonatal disorders     | Males   | 0-6 days  | 1-4 years | Indoor Air Pollution (All Cooking Fuels)           | 1     | Positive  |
| Other neonatal disorders     | Males   | 0-6 days  | 1-4 years | Malnutrition (proportion <2SD weight for age)      | 2     | Positive  |
| Other neonatal disorders     | Males   | 0-6 days  | 1-4 years | Skilled Birth Attendance (proportion)              | 2     | Negative  |
| Other neonatal disorders     | Males   | 0-6 days  | 1-4 years | LDI (I\$ per capita)                               | 3     | None      |
| Other neonatal disorders     | Males   | 0-6 days  | 1-4 years | Education (years per capita)                       | 3     | Negative  |
| Other neonatal disorders     | Males   | 0-6 days  | 1-4 years | Total Fertility Rate                               | 3     | Positive  |
| Other neoplasms [Developed]  | Females | 0-6 days  | 80+ years | PUFA Omega 3 - Seafood (kcal per capita)           | 2     | Negative  |
| Other neoplasms [Developed]  | Females | 0-6 days  | 80+ years | Nuts & Seeds (kcal per capita)                     | 2     | Negative  |
| Other neoplasms [Developed]  | Females | 0-6 days  | 80+ years | Health System Access 2 (unitless)                  | 2     | Negative  |
| Other neoplasms [Developed]  | Females | 0-6 days  | 80+ years | Fruits (kcal per capita)                           | 2     | Negative  |
| Other neoplasms [Developed]  | Females | 0-6 days  | 80+ years | LDI (I\$ per capita)                               | 3     | Negative  |
| Other neoplasms [Developed]  | Females | 0-6 days  | 80+ years | Education (years per capita)                       | 3     | Negative  |
| Other neoplasms [Developed]  | Males   | 0-6 days  | 80+ years | Smoking Prevalence [lagged 20 years]               | 1     | Positive  |
| Other neoplasms [Developed]  | Males   | 0-6 days  | 80+ years | Health System Access 2 (unitless)                  | 2     | Negative  |
| Other neoplasms [Developed]  | Males   | 0-6 days  | 80+ years | Nuts & Seeds (kcal per capita)                     | 2     | Negative  |
| Other neoplasms [Developed]  | Males   | 0-6 days  | 80+ years | Fruits (kcal per capita)                           | 2     | Negative  |
| Other neoplasms [Developed]  | Males   | 0-6 days  | 80+ years | LDI (I\$ per capita)                               | 3     | Negative  |
| Other neoplasms [Developed]  | Males   | 0-6 days  | 80+ years | Education (years per capita)                       | 3     | Negative  |
| Other neoplasms [Developing] | Females | 0-6 days  | 80+ years | Smoking Prevalence [lagged 20 years]               | 1     | Positive  |
| Other neoplasms [Developing] | Females | 0-6 days  | 80+ years | Tobacco (cigarettes per capita) [lagged 20 years]  | 1     | Positive  |
| Other neoplasms [Developing] | Females | 0-6 days  | 80+ years | Health System Access 2 (unitless)                  | 2     | Negative  |
| Other neoplasms [Developing] | Females | 0-6 days  | 80+ years | Vegetables (kcal per capita)                       | 2     | Negative  |
| Other neoplasms [Developing] | Females | 0-6 days  | 80+ years | PUFA Omega 3 - Seafood (kcal per capita)           | 2     | Negative  |
| Other neoplasms [Developing] | Females | 0-6 days  | 80+ years | Fruits (kcal per capita)                           | 2     | Negative  |
| Other neoplasms [Developing] | Females | 0-6 days  | 80+ years | Education (years per capita)                       | 3     | Negative  |
| Other neoplasms [Developing] | Females | 0-6 days  | 80+ years | LDI (I\$ per capita)                               | 3     | Negative  |
| Other neoplasms [Developing] | Males   | 0-6 days  | 80+ years | Smoking Prevalence [lagged 20 years]               | 1     | Positive  |
| Other neoplasms [Developing] | Males   | 0-6 days  | 80+ years | Fruits (kcal per capita)                           | 2     | Negative  |
| Other neoplasms [Developing] | Males   | 0-6 days  | 80+ years | Nuts & Seeds (kcal per capita)                     | 2     | Negative  |



**Web Table 22 – CODEm covariates used, level of covariate, and expected direction of covariate by cause, sex, and age**

| Cause                          | Sex     | Age Start   | Age End   | Covariate                                           | Level | Direction |
|--------------------------------|---------|-------------|-----------|-----------------------------------------------------|-------|-----------|
| Other neoplasms [Developing]   | Males   | 0-6 days    | 80+ years | Education (years per capita)                        | 3     | Negative  |
| Other neoplasms [Developing]   | Males   | 0-6 days    | 80+ years | LDI (I\$ per capita)                                | 3     | Negative  |
| Other neurological disorders   | Females | 28-364 days | 80+ years | Health System Access 2 (unitless)                   | 1     | Negative  |
| Other neurological disorders   | Females | 28-364 days | 80+ years | Malnutrition (proportion <2SD weight for age)       | 1     | Positive  |
| Other neurological disorders   | Females | 28-364 days | 80+ years | Systolic Blood Pressure (mmHg)                      | 1     | Positive  |
| Other neurological disorders   | Females | 28-364 days | 80+ years | Mean BMI                                            | 1     | Positive  |
| Other neurological disorders   | Females | 28-364 days | 80+ years | Cholesterol (total, mean per capita)                | 1     | Positive  |
| Other neurological disorders   | Females | 28-364 days | 80+ years | Pig Meat (kg per capita)                            | 1     | Positive  |
| Other neurological disorders   | Females | 28-364 days | 80+ years | Fruits (kcal per capita)                            | 2     | Negative  |
| Other neurological disorders   | Females | 28-364 days | 80+ years | Red Meat (kcal per capita)                          | 2     | Positive  |
| Other neurological disorders   | Females | 28-364 days | 80+ years | Population Density (over 1000 ppl/sqkm, proportion) | 2     | Positive  |
| Other neurological disorders   | Females | 28-364 days | 80+ years | Animal Fats (kcal per capita)                       | 2     | Positive  |
| Other neurological disorders   | Females | 28-364 days | 80+ years | Alcohol (liters per capita)                         | 2     | Positive  |
| Other neurological disorders   | Females | 28-364 days | 80+ years | Smoking Prevalence                                  | 3     | Positive  |
| Other neurological disorders   | Males   | 28-364 days | 80+ years | Cholesterol (total, mean per capita)                | 1     | Positive  |
| Other neurological disorders   | Males   | 28-364 days | 80+ years | Pig Meat (kg per capita)                            | 1     | Positive  |
| Other neurological disorders   | Males   | 28-364 days | 80+ years | Mean BMI                                            | 1     | Positive  |
| Other neurological disorders   | Males   | 28-364 days | 80+ years | Systolic Blood Pressure (mmHg)                      | 1     | Positive  |
| Other neurological disorders   | Males   | 28-364 days | 80+ years | Fruits (kcal per capita)                            | 2     | Negative  |
| Other neurological disorders   | Males   | 28-364 days | 80+ years | Population Density (over 1000 ppl/sqkm, proportion) | 2     | Positive  |
| Other neurological disorders   | Males   | 28-364 days | 80+ years | Alcohol (liters per capita)                         | 2     | Positive  |
| Other neurological disorders   | Males   | 28-364 days | 80+ years | Animal Fats (kcal per capita)                       | 2     | Positive  |
| Other neurological disorders   | Males   | 28-364 days | 80+ years | Red Meat (kcal per capita)                          | 2     | Positive  |
| Other nutritional deficiencies | Females | 28-364 days | 80+ years | Age-Standardize Prevalence of Severe Anemia         | 1     | Positive  |
| Other nutritional deficiencies | Females | 28-364 days | 80+ years | Malnutrition (proportion <2SD weight for age)       | 1     | Positive  |
| Other nutritional deficiencies | Females | 28-364 days | 80+ years | Health System Access 2 (unitless)                   | 1     | Negative  |
| Other nutritional deficiencies | Females | 28-364 days | 80+ years | Improved Water Source (proportion with access)      | 2     | Negative  |
| Other nutritional deficiencies | Females | 28-364 days | 80+ years | Rainfall Quintile 2 (proportion)                    | 2     | None      |
| Other nutritional deficiencies | Females | 28-364 days | 80+ years | Sanitation (proportion with access)                 | 2     | Negative  |
| Other nutritional deficiencies | Females | 28-364 days | 80+ years | Total Calories (kcal per capita)                    | 2     | Negative  |
| Other nutritional deficiencies | Females | 28-364 days | 80+ years | Rainfall Quintile 1 (proportion)                    | 2     | None      |
| Other nutritional deficiencies | Females | 28-364 days | 80+ years | Education (years per capita)                        | 3     | Negative  |
| Other nutritional deficiencies | Females | 28-364 days | 80+ years | LDI (I\$ per capita)                                | 3     | Negative  |
| Other nutritional deficiencies | Males   | 28-364 days | 80+ years | Health System Access 2 (unitless)                   | 1     | Negative  |
| Other nutritional deficiencies | Males   | 28-364 days | 80+ years | Malnutrition (proportion <2SD weight for age)       | 1     | Positive  |



**Web Table 22 – CODEm covariates used, level of covariate, and expected direction of covariate by cause, sex, and age**

| Cause                             | Sex     | Age Start   | Age End   | Covariate                                           | Level | Direction |
|-----------------------------------|---------|-------------|-----------|-----------------------------------------------------|-------|-----------|
| Other nutritional deficiencies    | Males   | 28-364 days | 80+ years | Rainfall Quintile 1 (proportion)                    | 2     | None      |
| Other nutritional deficiencies    | Males   | 28-364 days | 80+ years | Rainfall Quintile 2 (proportion)                    | 2     | None      |
| Other nutritional deficiencies    | Males   | 28-364 days | 80+ years | Improved Water Source (proportion with access)      | 2     | Negative  |
| Other nutritional deficiencies    | Males   | 28-364 days | 80+ years | Sanitation (proportion with access)                 | 2     | Negative  |
| Other nutritional deficiencies    | Males   | 28-364 days | 80+ years | Total Calories (kcal per capita)                    | 2     | Negative  |
| Other nutritional deficiencies    | Males   | 28-364 days | 80+ years | Education (years per capita)                        | 3     | Negative  |
| Other nutritional deficiencies    | Males   | 28-364 days | 80+ years | LDI (I\$ per capita)                                | 3     | Negative  |
| Other pharynx cancer [Developed]  | Females | 15-19 years | 80+ years | Fruits (kcal per capita)                            | 1     | Negative  |
| Other pharynx cancer [Developed]  | Females | 15-19 years | 80+ years | Vegetables (kcal per capita)                        | 1     | Negative  |
| Other pharynx cancer [Developed]  | Females | 15-19 years | 80+ years | Smoking Prevalence                                  | 1     | Positive  |
| Other pharynx cancer [Developed]  | Females | 15-19 years | 80+ years | Alcohol (liters per capita)                         | 1     | Positive  |
| Other pharynx cancer [Developed]  | Females | 15-19 years | 80+ years | Whole Grains (kcal per capita)                      | 2     | Negative  |
| Other pharynx cancer [Developed]  | Females | 15-19 years | 80+ years | Population Density (over 1000 ppl/sqkm, proportion) | 2     | Positive  |
| Other pharynx cancer [Developed]  | Females | 15-19 years | 80+ years | Malnutrition (proportion <2SD weight for age)       | 2     | Positive  |
| Other pharynx cancer [Developed]  | Females | 15-19 years | 80+ years | Health System Access (capped)                       | 2     | Negative  |
| Other pharynx cancer [Developed]  | Males   | 15-19 years | 80+ years | Smoking Prevalence                                  | 1     | Positive  |
| Other pharynx cancer [Developed]  | Males   | 15-19 years | 80+ years | Alcohol (liters per capita)                         | 1     | Positive  |
| Other pharynx cancer [Developed]  | Males   | 15-19 years | 80+ years | Fruits (kcal per capita)                            | 1     | Negative  |
| Other pharynx cancer [Developed]  | Males   | 15-19 years | 80+ years | Vegetables (kcal per capita)                        | 1     | Negative  |
| Other pharynx cancer [Developed]  | Males   | 15-19 years | 80+ years | Population Density (over 1000 ppl/sqkm, proportion) | 2     | Positive  |
| Other pharynx cancer [Developed]  | Males   | 15-19 years | 80+ years | Whole Grains (kcal per capita)                      | 2     | Negative  |
| Other pharynx cancer [Developed]  | Males   | 15-19 years | 80+ years | Health System Access (capped)                       | 2     | Negative  |
| Other pharynx cancer [Developed]  | Males   | 15-19 years | 80+ years | Cumulative Cigarettes (5 Years)                     | 2     | Positive  |
| Other pharynx cancer [Developed]  | Males   | 15-19 years | 80+ years | Malnutrition (proportion <2SD weight for age)       | 2     | Positive  |
| Other pharynx cancer [Developed]  | Males   | 15-19 years | 80+ years | Education (years per capita)                        | 3     | Negative  |
| Other pharynx cancer [Developing] | Females | 15-19 years | 80+ years | Smoking Prevalence                                  | 1     | Positive  |
| Other pharynx cancer [Developing] | Females | 15-19 years | 80+ years | Vegetables (kcal per capita)                        | 1     | Negative  |
| Other pharynx cancer [Developing] | Females | 15-19 years | 80+ years | Alcohol (liters per capita)                         | 1     | Positive  |
| Other pharynx cancer [Developing] | Females | 15-19 years | 80+ years | Cumulative Cigarettes (5 Years)                     | 2     | Positive  |
| Other pharynx cancer [Developing] | Females | 15-19 years | 80+ years | Population Density (under 150 ppl/sqkm, proportion) | 2     | Positive  |
| Other pharynx cancer [Developing] | Females | 15-19 years | 80+ years | Health System Access (capped)                       | 2     | Negative  |
| Other pharynx cancer [Developing] | Females | 15-19 years | 80+ years | Malnutrition (proportion <2SD weight for age)       | 2     | Positive  |
| Other pharynx cancer [Developing] | Females | 15-19 years | 80+ years | Whole Grains (kcal per capita)                      | 2     | Negative  |
| Other pharynx cancer [Developing] | Females | 15-19 years | 80+ years | Education (years per capita)                        | 3     | Negative  |
| Other pharynx cancer [Developing] | Females | 15-19 years | 80+ years | LDI (I\$ per capita)                                | 3     | Negative  |

**Web Table 22 – CODEm covariates used, level of covariate, and expected direction of covariate by cause, sex, and age**

| Cause                             | Sex     | Age Start   | Age End   | Covariate                                           | Level | Direction |
|-----------------------------------|---------|-------------|-----------|-----------------------------------------------------|-------|-----------|
| Other pharynx cancer [Developing] | Males   | 15-19 years | 80+ years | Vegetables (kcal per capita)                        | 1     | Negative  |
| Other pharynx cancer [Developing] | Males   | 15-19 years | 80+ years | Alcohol (liters per capita)                         | 1     | Positive  |
| Other pharynx cancer [Developing] | Males   | 15-19 years | 80+ years | Fruits (kcal per capita)                            | 1     | Negative  |
| Other pharynx cancer [Developing] | Males   | 15-19 years | 80+ years | Population Density (under 150 ppl/sqkm, proportion) | 2     | Positive  |
| Other pharynx cancer [Developing] | Males   | 15-19 years | 80+ years | Whole Grains (kcal per capita)                      | 2     | Negative  |
| Other pharynx cancer [Developing] | Males   | 15-19 years | 80+ years | Population Density (over 1000 ppl/sqkm, proportion) | 2     | Positive  |
| Other pharynx cancer [Developing] | Males   | 15-19 years | 80+ years | Health System Access (capped)                       | 2     | Negative  |
| Other pharynx cancer [Developing] | Males   | 15-19 years | 80+ years | Cumulative Cigarettes (5 Years)                     | 2     | Positive  |
| Other pharynx cancer [Developing] | Males   | 15-19 years | 80+ years | Malnutrition (proportion <2SD weight for age)       | 2     | Positive  |
| Other pharynx cancer [Developing] | Males   | 15-19 years | 80+ years | Education (years per capita)                        | 3     | Negative  |
| Other pneumoconiosis              | Females | 0-6 days    | 80+ years | Cumulative Cigarettes (5 Years)                     | 1     | Positive  |
| Other pneumoconiosis              | Females | 0-6 days    | 80+ years | Asbestos production (binary)                        | 1     | Positive  |
| Other pneumoconiosis              | Females | 0-6 days    | 80+ years | Smoking Prevalence                                  | 1     | Positive  |
| Other pneumoconiosis              | Females | 0-6 days    | 80+ years | Health System Access 2 (unitless)                   | 1     | Negative  |
| Other pneumoconiosis              | Females | 0-6 days    | 80+ years | Gold production (kg) per capita                     | 2     | Positive  |
| Other pneumoconiosis              | Females | 0-6 days    | 80+ years | Elevation Over 1500m (proportion)                   | 2     | Positive  |
| Other pneumoconiosis              | Females | 0-6 days    | 80+ years | Elevation 500 to 1500m (proportion)                 | 2     | Positive  |
| Other pneumoconiosis              | Females | 0-6 days    | 80+ years | Asbestos production (kg) per capita                 | 2     | Positive  |
| Other pneumoconiosis              | Females | 0-6 days    | 80+ years | Gold production (binary)                            | 2     | Positive  |
| Other pneumoconiosis              | Females | 0-6 days    | 80+ years | LDI (I\$ per capita)                                | 3     | Negative  |
| Other pneumoconiosis              | Females | 0-6 days    | 80+ years | Education (years per capita)                        | 3     | Negative  |
| Other pneumoconiosis              | Males   | 0-6 days    | 80+ years | Indoor Air Pollution (Coal Cooking)                 | 1     | Positive  |
| Other pneumoconiosis              | Males   | 0-6 days    | 80+ years | Cumulative Cigarettes (5 Years)                     | 1     | Positive  |
| Other pneumoconiosis              | Males   | 0-6 days    | 80+ years | Smoking Prevalence                                  | 1     | Positive  |
| Other pneumoconiosis              | Males   | 0-6 days    | 80+ years | Health System Access 2 (unitless)                   | 1     | Negative  |
| Other pneumoconiosis              | Males   | 0-6 days    | 80+ years | Asbestos production (binary)                        | 1     | Positive  |
| Other pneumoconiosis              | Males   | 0-6 days    | 80+ years | Elevation 500 to 1500m (proportion)                 | 2     | Positive  |
| Other pneumoconiosis              | Males   | 0-6 days    | 80+ years | Asbestos production (kg) per capita                 | 2     | Positive  |
| Other pneumoconiosis              | Males   | 0-6 days    | 80+ years | Population Density (over 1000 ppl/sqkm, proportion) | 2     | Positive  |
| Other pneumoconiosis              | Males   | 0-6 days    | 80+ years | Gold production (kg) per capita                     | 2     | Positive  |
| Other pneumoconiosis              | Males   | 0-6 days    | 80+ years | Gold production (binary)                            | 2     | Positive  |
| Other pneumoconiosis              | Males   | 0-6 days    | 80+ years | Elevation Over 1500m (proportion)                   | 2     | Positive  |
| Other pneumoconiosis              | Males   | 0-6 days    | 80+ years | Education (years per capita)                        | 3     | Negative  |
| Other pneumoconiosis              | Males   | 0-6 days    | 80+ years | LDI (I\$ per capita)                                | 3     | Negative  |
| Other road injuries [Developed]   | Females | 0-6 days    | 80+ years | Vehicles - 2 wheels fraction (proportion)           | 1     | Positive  |

**Web Table 22 – CODEm covariates used, level of covariate, and expected direction of covariate by cause, sex, and age**

| Cause                                | Sex     | Age Start   | Age End   | Covariate                                          | Level | Direction |
|--------------------------------------|---------|-------------|-----------|----------------------------------------------------|-------|-----------|
| Other road injuries [Developed]      | Females | 0-6 days    | 80+ years | Health System Access 2 (unitless)                  | 1     | Negative  |
| Other road injuries [Developed]      | Females | 0-6 days    | 80+ years | LDI (I\$ per capita)                               | 2     | None      |
| Other road injuries [Developed]      | Males   | 0-6 days    | 80+ years | Health System Access 2 (unitless)                  | 1     | Negative  |
| Other road injuries [Developed]      | Males   | 0-6 days    | 80+ years | Vehicles - 2 wheels fraction (proportion)          | 1     | Positive  |
| Other road injuries [Developed]      | Males   | 0-6 days    | 80+ years | LDI (I\$ per capita)                               | 2     | None      |
| Other road injuries [Developed]      | Males   | 0-6 days    | 80+ years | Rainfall Quintile 5 (proportion)                   | 3     | Positive  |
| Other road injuries [Developing]     | Females | 0-6 days    | 80+ years | Vehicles - 2 wheels fraction (proportion)          | 1     | Positive  |
| Other road injuries [Developing]     | Females | 0-6 days    | 80+ years | Health System Access 2 (unitless)                  | 1     | Negative  |
| Other road injuries [Developing]     | Females | 0-6 days    | 80+ years | LDI (I\$ per capita)                               | 2     | None      |
| Other road injuries [Developing]     | Males   | 0-6 days    | 80+ years | Health System Access 2 (unitless)                  | 1     | Negative  |
| Other road injuries [Developing]     | Males   | 0-6 days    | 80+ years | Vehicles - 2 wheels fraction (proportion)          | 1     | Positive  |
| Other road injuries [Developing]     | Males   | 0-6 days    | 80+ years | LDI (I\$ per capita)                               | 2     | None      |
| Other skin and subcutaneous diseases | Females | 28-364 days | 80+ years | Alcohol (liters per capita)                        | 2     | Positive  |
| Other skin and subcutaneous diseases | Females | 28-364 days | 80+ years | Latitude Under 15 (proportion)                     | 3     | None      |
| Other skin and subcutaneous diseases | Females | 28-364 days | 80+ years | Latitude 30 to 45 (proportion)                     | 3     | None      |
| Other skin and subcutaneous diseases | Females | 28-364 days | 80+ years | Latitude Over 45 (proportion)                      | 3     | None      |
| Other skin and subcutaneous diseases | Females | 28-364 days | 80+ years | Latitude 15 to 30 (proportion)                     | 3     | None      |
| Other skin and subcutaneous diseases | Males   | 28-364 days | 80+ years | Malnutrition (proportion <2SD weight for age)      | 1     | Positive  |
| Other skin and subcutaneous diseases | Males   | 28-364 days | 80+ years | Alcohol (liters per capita)                        | 2     | Positive  |
| Other skin and subcutaneous diseases | Males   | 28-364 days | 80+ years | Latitude 30 to 45 (proportion)                     | 3     | None      |
| Other skin and subcutaneous diseases | Males   | 28-364 days | 80+ years | Latitude Over 45 (proportion)                      | 3     | None      |
| Other skin and subcutaneous diseases | Males   | 28-364 days | 80+ years | Latitude 15 to 30 (proportion)                     | 3     | None      |
| Other skin and subcutaneous diseases | Males   | 28-364 days | 80+ years | Latitude Under 15 (proportion)                     | 3     | None      |
| Other transport injuries [Developed] | Females | 0-6 days    | 80+ years | Alcohol (liters per capita)                        | 1     | Positive  |
| Other transport injuries [Developed] | Females | 0-6 days    | 80+ years | Vehicles - 2 wheels fraction (proportion)          | 1     | Positive  |
| Other transport injuries [Developed] | Females | 0-6 days    | 80+ years | Vehicles - 2+4 wheels (per capita)                 | 1     | Positive  |
| Other transport injuries [Developed] | Females | 0-6 days    | 80+ years | Health System Access 2 (unitless)                  | 1     | Negative  |
| Other transport injuries [Developed] | Females | 0-6 days    | 80+ years | Population Density (300-500 ppl/sqkm, proportion)  | 2     | None      |
| Other transport injuries [Developed] | Females | 0-6 days    | 80+ years | Population Density (500-1000 ppl/sqkm, proportion) | 2     | None      |
| Other transport injuries [Developed] | Females | 0-6 days    | 80+ years | Education (years per capita)                       | 3     | Negative  |
| Other transport injuries [Developed] | Females | 0-6 days    | 80+ years | LDI (I\$ per capita)                               | 3     | None      |
| Other transport injuries [Developed] | Males   | 0-6 days    | 80+ years | Vehicles - 2+4 wheels (per capita)                 | 1     | Positive  |
| Other transport injuries [Developed] | Males   | 0-6 days    | 80+ years | Alcohol (liters per capita)                        | 1     | Positive  |
| Other transport injuries [Developed] | Males   | 0-6 days    | 80+ years | Vehicles - 2 wheels fraction (proportion)          | 1     | Positive  |
| Other transport injuries [Developed] | Males   | 0-6 days    | 80+ years | Health System Access 2 (unitless)                  | 1     | Negative  |

**Web Table 22 – CODEm covariates used, level of covariate, and expected direction of covariate by cause, sex, and age**

| Cause                                 | Sex     | Age Start | Age End   | Covariate                                           | Level | Direction |
|---------------------------------------|---------|-----------|-----------|-----------------------------------------------------|-------|-----------|
| Other transport injuries [Developed]  | Males   | 0-6 days  | 80+ years | Population Density (500-1000 ppl/sqkm, proportion)  | 2     | None      |
| Other transport injuries [Developed]  | Males   | 0-6 days  | 80+ years | Population Density (300-500 ppl/sqkm, proportion)   | 2     | None      |
| Other transport injuries [Developed]  | Males   | 0-6 days  | 80+ years | LDI (\$ per capita)                                 | 3     | None      |
| Other transport injuries [Developed]  | Males   | 0-6 days  | 80+ years | Education (years per capita)                        | 3     | Negative  |
| Other transport injuries [Developing] | Females | 0-6 days  | 80+ years | Alcohol (liters per capita)                         | 1     | Positive  |
| Other transport injuries [Developing] | Females | 0-6 days  | 80+ years | Vehicles - 2+4 wheels (per capita)                  | 1     | Positive  |
| Other transport injuries [Developing] | Females | 0-6 days  | 80+ years | Health System Access 2 (unitless)                   | 1     | Negative  |
| Other transport injuries [Developing] | Females | 0-6 days  | 80+ years | Vehicles - 2 wheels fraction (proportion)           | 1     | Positive  |
| Other transport injuries [Developing] | Females | 0-6 days  | 80+ years | Population Density (300-500 ppl/sqkm, proportion)   | 2     | None      |
| Other transport injuries [Developing] | Females | 0-6 days  | 80+ years | Population Density (500-1000 ppl/sqkm, proportion)  | 2     | None      |
| Other transport injuries [Developing] | Females | 0-6 days  | 80+ years | Education (years per capita)                        | 3     | Negative  |
| Other transport injuries [Developing] | Females | 0-6 days  | 80+ years | LDI (\$ per capita)                                 | 3     | None      |
| Other transport injuries [Developing] | Males   | 0-6 days  | 80+ years | Alcohol (liters per capita)                         | 1     | Positive  |
| Other transport injuries [Developing] | Males   | 0-6 days  | 80+ years | Vehicles - 2 wheels fraction (proportion)           | 1     | Positive  |
| Other transport injuries [Developing] | Males   | 0-6 days  | 80+ years | Vehicles - 2+4 wheels (per capita)                  | 1     | Positive  |
| Other transport injuries [Developing] | Males   | 0-6 days  | 80+ years | Health System Access 2 (unitless)                   | 1     | Negative  |
| Other transport injuries [Developing] | Males   | 0-6 days  | 80+ years | Population Density (300-500 ppl/sqkm, proportion)   | 2     | None      |
| Other transport injuries [Developing] | Males   | 0-6 days  | 80+ years | Population Density (500-1000 ppl/sqkm, proportion)  | 2     | None      |
| Other transport injuries [Developing] | Males   | 0-6 days  | 80+ years | Education (years per capita)                        | 3     | Negative  |
| Other transport injuries [Developing] | Males   | 0-6 days  | 80+ years | LDI (\$ per capita)                                 | 3     | None      |
| Other unintentional injuries          | Females | 0-6 days  | 80+ years | Alcohol (liters per capita)                         | 1     | Positive  |
| Other unintentional injuries          | Females | 0-6 days  | 80+ years | Vehicles - 2 wheels (per capita)                    | 1     | Positive  |
| Other unintentional injuries          | Females | 0-6 days  | 80+ years | Vehicles - 4 wheels (per capita)                    | 1     | None      |
| Other unintentional injuries          | Females | 0-6 days  | 80+ years | Health System Access 2 (unitless)                   | 2     | Negative  |
| Other unintentional injuries          | Females | 0-6 days  | 80+ years | Population Density (under 150 ppl/sqkm, proportion) | 3     | None      |
| Other unintentional injuries          | Females | 0-6 days  | 80+ years | Education (years per capita)                        | 3     | Negative  |
| Other unintentional injuries          | Females | 0-6 days  | 80+ years | LDI (\$ per capita)                                 | 3     | None      |
| Other unintentional injuries          | Females | 0-6 days  | 80+ years | Elevation Over 1500m (proportion)                   | 3     | None      |
| Other unintentional injuries          | Females | 0-6 days  | 80+ years | Population Density (over 1000 ppl/sqkm, proportion) | 3     | None      |
| Other unintentional injuries          | Females | 0-6 days  | 80+ years | Elevation Under 100m (proportion)                   | 3     | None      |
| Other unintentional injuries          | Males   | 0-6 days  | 80+ years | Vehicles - 2 wheels (per capita)                    | 1     | Positive  |
| Other unintentional injuries          | Males   | 0-6 days  | 80+ years | Vehicles - 4 wheels (per capita)                    | 1     | None      |
| Other unintentional injuries          | Males   | 0-6 days  | 80+ years | Alcohol (liters per capita)                         | 1     | Positive  |
| Other unintentional injuries          | Males   | 0-6 days  | 80+ years | Education (years per capita)                        | 3     | Negative  |
| Other unintentional injuries          | Males   | 0-6 days  | 80+ years | Population Density (over 1000 ppl/sqkm, proportion) | 3     | None      |

**Web Table 22 – CODEm covariates used, level of covariate, and expected direction of covariate by cause, sex, and age**

| Cause                        | Sex     | Age Start | Age End   | Covariate                                           | Level | Direction |
|------------------------------|---------|-----------|-----------|-----------------------------------------------------|-------|-----------|
| Other unintentional injuries | Males   | 0-6 days  | 80+ years | LDI (I\$ per capita)                                | 3     | None      |
| Other unintentional injuries | Males   | 0-6 days  | 80+ years | Elevation Over 1500m (proportion)                   | 3     | None      |
| Other unintentional injuries | Males   | 0-6 days  | 80+ years | Population Density (under 150 ppl/sqkm, proportion) | 3     | None      |
| Other unintentional injuries | Males   | 0-6 days  | 80+ years | Elevation Under 100m (proportion)                   | 3     | None      |
| Other urinary diseases       | Females | 0-6 days  | 80+ years | Mean BMI                                            | 1     | Positive  |
| Other urinary diseases       | Females | 0-6 days  | 80+ years | Health System Access 2 (unitless)                   | 1     | Positive  |
| Other urinary diseases       | Females | 0-6 days  | 80+ years | Education (years per capita)                        | 1     | Positive  |
| Other urinary diseases       | Females | 0-6 days  | 80+ years | LDI (I\$ per capita)                                | 1     | Positive  |
| Other urinary diseases       | Males   | 0-6 days  | 80+ years | Education (years per capita)                        | 1     | Positive  |
| Other urinary diseases       | Males   | 0-6 days  | 80+ years | Mean BMI                                            | 1     | Positive  |
| Other urinary diseases       | Males   | 0-6 days  | 80+ years | LDI (I\$ per capita)                                | 1     | Positive  |
| Otitis media                 | Females | 0-6 days  | 80+ years | Health System Access 2 (unitless)                   | 1     | Negative  |
| Otitis media                 | Females | 0-6 days  | 80+ years | Malnutrition (proportion <2SD weight for age)       | 1     | Positive  |
| Otitis media                 | Females | 0-6 days  | 80+ years | Smoking Prevalence                                  | 1     | Positive  |
| Otitis media                 | Females | 0-6 days  | 80+ years | Outdoor Air Pollution (PM2.5)                       | 1     | Positive  |
| Otitis media                 | Females | 0-6 days  | 80+ years | Indoor Air Pollution (All Cooking Fuels)            | 1     | Positive  |
| Otitis media                 | Females | 0-6 days  | 80+ years | Elevation Over 1500m (proportion)                   | 2     | Positive  |
| Otitis media                 | Females | 0-6 days  | 80+ years | DTP3 Coverage (proportion)                          | 2     | Negative  |
| Otitis media                 | Females | 0-6 days  | 80+ years | Sanitation (proportion with access)                 | 2     | Negative  |
| Otitis media                 | Females | 0-6 days  | 80+ years | Improved Water Source (proportion with access)      | 2     | Negative  |
| Otitis media                 | Females | 0-6 days  | 80+ years | Population Density (over 1000 ppl/sqkm, proportion) | 3     | Positive  |
| Otitis media                 | Females | 0-6 days  | 80+ years | Education (years per capita)                        | 3     | Negative  |
| Otitis media                 | Females | 0-6 days  | 80+ years | LDI (I\$ per capita)                                | 3     | Negative  |
| Otitis media                 | Males   | 0-6 days  | 80+ years | Malnutrition (proportion <2SD weight for age)       | 1     | Positive  |
| Otitis media                 | Males   | 0-6 days  | 80+ years | Indoor Air Pollution (All Cooking Fuels)            | 1     | Positive  |
| Otitis media                 | Males   | 0-6 days  | 80+ years | Outdoor Air Pollution (PM2.5)                       | 1     | Positive  |
| Otitis media                 | Males   | 0-6 days  | 80+ years | Smoking Prevalence                                  | 1     | Positive  |
| Otitis media                 | Males   | 0-6 days  | 80+ years | Health System Access 2 (unitless)                   | 1     | Negative  |
| Otitis media                 | Males   | 0-6 days  | 80+ years | Elevation Over 1500m (proportion)                   | 2     | Positive  |
| Otitis media                 | Males   | 0-6 days  | 80+ years | DTP3 Coverage (proportion)                          | 2     | Negative  |
| Otitis media                 | Males   | 0-6 days  | 80+ years | Improved Water Source (proportion with access)      | 2     | Negative  |
| Otitis media                 | Males   | 0-6 days  | 80+ years | Sanitation (proportion with access)                 | 2     | Negative  |
| Otitis media                 | Males   | 0-6 days  | 80+ years | LDI (I\$ per capita)                                | 3     | Negative  |
| Otitis media                 | Males   | 0-6 days  | 80+ years | Population Density (over 1000 ppl/sqkm, proportion) | 3     | Positive  |
| Otitis media                 | Males   | 0-6 days  | 80+ years | Education (years per capita)                        | 3     | Negative  |

**Web Table 22 — CODEm covariates used, level of covariate, and expected direction of covariate by cause, sex, and age**

| Cause                         | Sex     | Age Start   | Age End   | Covariate                                         | Level | Direction |
|-------------------------------|---------|-------------|-----------|---------------------------------------------------|-------|-----------|
| Ovarian cancer [Developed]    | Females | 15-19 years | 80+ years | Tobacco (cigarettes per capita) [lagged 10 years] | 1     | Positive  |
| Ovarian cancer [Developed]    | Females | 15-19 years | 80+ years | Alcohol (liters per capita)                       | 1     | Positive  |
| Ovarian cancer [Developed]    | Females | 15-19 years | 80+ years | Cumulative Cigarettes (20 Years)                  | 1     | Positive  |
| Ovarian cancer [Developed]    | Females | 15-19 years | 80+ years | Latitude 15 to 30 (proportion)                    | 2     | None      |
| Ovarian cancer [Developed]    | Females | 15-19 years | 80+ years | Smoking Prevalence [lagged 20 years]              | 2     | Positive  |
| Ovarian cancer [Developed]    | Females | 15-19 years | 80+ years | Mean BMI                                          | 2     | Positive  |
| Ovarian cancer [Developed]    | Females | 15-19 years | 80+ years | Fruits (kcal per capita)                          | 2     | Negative  |
| Ovarian cancer [Developed]    | Females | 15-19 years | 80+ years | Total Fertility Rate                              | 2     | None      |
| Ovarian cancer [Developed]    | Females | 15-19 years | 80+ years | Latitude 30 to 45 (proportion)                    | 2     | Negative  |
| Ovarian cancer [Developed]    | Females | 15-19 years | 80+ years | Animal Fats (kcal per capita)                     | 2     | Positive  |
| Ovarian cancer [Developed]    | Females | 15-19 years | 80+ years | Diabetes Age-Standardized Prevalence (proportion) | 2     | Positive  |
| Ovarian cancer [Developed]    | Females | 15-19 years | 80+ years | Total Calories (kcal per capita)                  | 2     | Positive  |
| Ovarian cancer [Developed]    | Females | 15-19 years | 80+ years | LDI (I\$ per capita)                              | 3     | Negative  |
| Ovarian cancer [Developing]   | Females | 15-19 years | 80+ years | Cumulative Cigarettes (20 Years)                  | 1     | Positive  |
| Ovarian cancer [Developing]   | Females | 15-19 years | 80+ years | Tobacco (cigarettes per capita) [lagged 10 years] | 1     | Positive  |
| Ovarian cancer [Developing]   | Females | 15-19 years | 80+ years | Alcohol (liters per capita)                       | 1     | Positive  |
| Ovarian cancer [Developing]   | Females | 15-19 years | 80+ years | Latitude 30 to 45 (proportion)                    | 2     | Negative  |
| Ovarian cancer [Developing]   | Females | 15-19 years | 80+ years | Total Calories (kcal per capita)                  | 2     | Positive  |
| Ovarian cancer [Developing]   | Females | 15-19 years | 80+ years | Diabetes Age-Standardized Prevalence (proportion) | 2     | Positive  |
| Ovarian cancer [Developing]   | Females | 15-19 years | 80+ years | Total Fertility Rate                              | 2     | None      |
| Ovarian cancer [Developing]   | Females | 15-19 years | 80+ years | Mean BMI                                          | 2     | Positive  |
| Ovarian cancer [Developing]   | Females | 15-19 years | 80+ years | Latitude 15 to 30 (proportion)                    | 2     | None      |
| Ovarian cancer [Developing]   | Females | 15-19 years | 80+ years | Animal Fats (kcal per capita)                     | 2     | Positive  |
| Ovarian cancer [Developing]   | Females | 15-19 years | 80+ years | Smoking Prevalence [lagged 20 years]              | 2     | Positive  |
| Pancreatic cancer [Developed] | Females | 15-19 years | 80+ years | Cumulative Cigarettes (5 Years)                   | 1     | Positive  |
| Pancreatic cancer [Developed] | Females | 15-19 years | 80+ years | Cumulative Cigarettes (20 Years)                  | 1     | Positive  |
| Pancreatic cancer [Developed] | Females | 15-19 years | 80+ years | Mean BMI                                          | 1     | Positive  |
| Pancreatic cancer [Developed] | Females | 15-19 years | 80+ years | Total Calories (kcal per capita)                  | 1     | Positive  |
| Pancreatic cancer [Developed] | Females | 15-19 years | 80+ years | Smoking Prevalence                                | 1     | Positive  |
| Pancreatic cancer [Developed] | Females | 15-19 years | 80+ years | Cumulative Cigarettes (10 Years)                  | 1     | Positive  |
| Pancreatic cancer [Developed] | Females | 15-19 years | 80+ years | Alcohol (liters per capita)                       | 2     | Positive  |
| Pancreatic cancer [Developed] | Females | 15-19 years | 80+ years | Diabetes Age-Standardized Prevalence (proportion) | 2     | Positive  |
| Pancreatic cancer [Developed] | Females | 15-19 years | 80+ years | Animal Fats (kcal per capita)                     | 2     | Positive  |
| Pancreatic cancer [Developed] | Females | 15-19 years | 80+ years | LDI (I\$ per capita)                              | 3     | Negative  |
| Pancreatic cancer [Developed] | Males   | 15-19 years | 80+ years | Mean BMI                                          | 1     | Positive  |

**Web Table 22 – CODEm covariates used, level of covariate, and expected direction of covariate by cause, sex, and age**

| Cause                          | Sex     | Age Start   | Age End   | Covariate                                         | Level | Direction |
|--------------------------------|---------|-------------|-----------|---------------------------------------------------|-------|-----------|
| Pancreatic cancer [Developed]  | Males   | 15-19 years | 80+ years | Cumulative Cigarettes (5 Years)                   | 1     | Positive  |
| Pancreatic cancer [Developed]  | Males   | 15-19 years | 80+ years | Total Calories (kcal per capita)                  | 1     | Positive  |
| Pancreatic cancer [Developed]  | Males   | 15-19 years | 80+ years | Cumulative Cigarettes (20 Years)                  | 1     | Positive  |
| Pancreatic cancer [Developed]  | Males   | 15-19 years | 80+ years | Cumulative Cigarettes (10 Years)                  | 1     | Positive  |
| Pancreatic cancer [Developed]  | Males   | 15-19 years | 80+ years | Smoking Prevalence                                | 1     | Positive  |
| Pancreatic cancer [Developed]  | Males   | 15-19 years | 80+ years | Tobacco (cigarettes per capita)                   | 1     | Positive  |
| Pancreatic cancer [Developed]  | Males   | 15-19 years | 80+ years | Animal Fats (kcal per capita)                     | 2     | Positive  |
| Pancreatic cancer [Developed]  | Males   | 15-19 years | 80+ years | Diabetes Age-Standardized Prevalence (proportion) | 2     | Positive  |
| Pancreatic cancer [Developed]  | Males   | 15-19 years | 80+ years | Alcohol (liters per capita)                       | 2     | Positive  |
| Pancreatic cancer [Developed]  | Males   | 15-19 years | 80+ years | Education (years per capita)                      | 3     | Negative  |
| Pancreatic cancer [Developed]  | Males   | 15-19 years | 80+ years | LDI (I\$ per capita)                              | 3     | Negative  |
| Pancreatic cancer [Developing] | Females | 15-19 years | 80+ years | Cumulative Cigarettes (5 Years)                   | 1     | Positive  |
| Pancreatic cancer [Developing] | Females | 15-19 years | 80+ years | Cumulative Cigarettes (10 Years)                  | 1     | Positive  |
| Pancreatic cancer [Developing] | Females | 15-19 years | 80+ years | Total Calories (kcal per capita)                  | 1     | Positive  |
| Pancreatic cancer [Developing] | Females | 15-19 years | 80+ years | Smoking Prevalence                                | 1     | Positive  |
| Pancreatic cancer [Developing] | Females | 15-19 years | 80+ years | Tobacco (cigarettes per capita)                   | 1     | Positive  |
| Pancreatic cancer [Developing] | Females | 15-19 years | 80+ years | Cumulative Cigarettes (20 Years)                  | 1     | Positive  |
| Pancreatic cancer [Developing] | Females | 15-19 years | 80+ years | Mean BMI                                          | 1     | Positive  |
| Pancreatic cancer [Developing] | Females | 15-19 years | 80+ years | Alcohol (liters per capita)                       | 2     | Positive  |
| Pancreatic cancer [Developing] | Females | 15-19 years | 80+ years | Animal Fats (kcal per capita)                     | 2     | Positive  |
| Pancreatic cancer [Developing] | Females | 15-19 years | 80+ years | Diabetes Age-Standardized Prevalence (proportion) | 2     | Positive  |
| Pancreatic cancer [Developing] | Females | 15-19 years | 80+ years | Red Meat (kcal per capita)                        | 2     | Positive  |
| Pancreatic cancer [Developing] | Males   | 15-19 years | 80+ years | Total Calories (kcal per capita)                  | 1     | Positive  |
| Pancreatic cancer [Developing] | Males   | 15-19 years | 80+ years | Cumulative Cigarettes (20 Years)                  | 1     | Positive  |
| Pancreatic cancer [Developing] | Males   | 15-19 years | 80+ years | Tobacco (cigarettes per capita)                   | 1     | Positive  |
| Pancreatic cancer [Developing] | Males   | 15-19 years | 80+ years | Mean BMI                                          | 1     | Positive  |
| Pancreatic cancer [Developing] | Males   | 15-19 years | 80+ years | Smoking Prevalence                                | 1     | Positive  |
| Pancreatic cancer [Developing] | Males   | 15-19 years | 80+ years | Cumulative Cigarettes (10 Years)                  | 1     | Positive  |
| Pancreatic cancer [Developing] | Males   | 15-19 years | 80+ years | Cumulative Cigarettes (5 Years)                   | 1     | Positive  |
| Pancreatic cancer [Developing] | Males   | 15-19 years | 80+ years | Diabetes Age-Standardized Prevalence (proportion) | 2     | Positive  |
| Pancreatic cancer [Developing] | Males   | 15-19 years | 80+ years | Red Meat (kcal per capita)                        | 2     | Positive  |
| Pancreatic cancer [Developing] | Males   | 15-19 years | 80+ years | Animal Fats (kcal per capita)                     | 2     | Positive  |
| Pancreatic cancer [Developing] | Males   | 15-19 years | 80+ years | Alcohol (liters per capita)                       | 2     | Positive  |
| Pancreatitis                   | Females | 1-4 years   | 80+ years | Alcohol (liters per capita)                       | 1     | Positive  |
| Pancreatitis                   | Females | 1-4 years   | 80+ years | Mean BMI                                          | 2     | Positive  |



**Web Table 22 – CODEm covariates used, level of covariate, and expected direction of covariate by cause, sex, and age**

| Cause                                      | Sex     | Age Start   | Age End   | Covariate                                          | Level | Direction |
|--------------------------------------------|---------|-------------|-----------|----------------------------------------------------|-------|-----------|
| Pancreatitis                               | Females | 1-4 years   | 80+ years | Health System Access (capped)                      | 2     | Negative  |
| Pancreatitis                               | Females | 1-4 years   | 80+ years | LDI (I\$ per capita)                               | 3     | None      |
| Pancreatitis                               | Females | 1-4 years   | 80+ years | Education (years per capita)                       | 3     | Negative  |
| Pancreatitis                               | Males   | 1-4 years   | 80+ years | Alcohol (liters per capita)                        | 1     | Positive  |
| Pancreatitis                               | Males   | 1-4 years   | 80+ years | Health System Access (capped)                      | 2     | Negative  |
| Pancreatitis                               | Males   | 1-4 years   | 80+ years | Mean BMI                                           | 2     | Positive  |
| Pancreatitis                               | Males   | 1-4 years   | 80+ years | LDI (I\$ per capita)                               | 3     | None      |
| Pancreatitis                               | Males   | 1-4 years   | 80+ years | Education (years per capita)                       | 3     | Negative  |
| Paralytic ileus and intestinal obstruction | Females | 0-6 days    | 80+ years | Health System Access (capped)                      | 1     | Negative  |
| Paralytic ileus and intestinal obstruction | Males   | 0-6 days    | 80+ years | Fruits (kcal per capita)                           | 2     | Negative  |
| Paralytic ileus and intestinal obstruction | Males   | 0-6 days    | 80+ years | LDI (I\$ per capita)                               | 3     | Negative  |
| Paralytic ileus and intestinal obstruction | Males   | 0-6 days    | 80+ years | Education (years per capita)                       | 3     | Negative  |
| Parkinson disease                          | Females | 20-24 years | 80+ years | Cumulative Cigarettes (5 Years)                    | 1     | None      |
| Parkinson disease                          | Females | 20-24 years | 80+ years | Cumulative Cigarettes (10 Years)                   | 1     | None      |
| Parkinson disease                          | Females | 20-24 years | 80+ years | Sanitation (proportion with access)                | 2     | None      |
| Parkinson disease                          | Females | 20-24 years | 80+ years | Fruits (kcal per capita)                           | 2     | Negative  |
| Parkinson disease                          | Females | 20-24 years | 80+ years | Cholesterol (total, mean per capita)               | 2     | Positive  |
| Parkinson disease                          | Females | 20-24 years | 80+ years | Improved Water Source (proportion with access)     | 2     | None      |
| Parkinson disease                          | Females | 20-24 years | 80+ years | Absolute value of average latitude                 | 2     | Positive  |
| Parkinson disease                          | Females | 20-24 years | 80+ years | LDI (I\$ per capita)                               | 3     | None      |
| Parkinson disease                          | Males   | 20-24 years | 80+ years | Cumulative Cigarettes (10 Years)                   | 1     | None      |
| Parkinson disease                          | Males   | 20-24 years | 80+ years | Cumulative Cigarettes (5 Years)                    | 1     | None      |
| Parkinson disease                          | Males   | 20-24 years | 80+ years | Improved Water Source (proportion with access)     | 2     | None      |
| Parkinson disease                          | Males   | 20-24 years | 80+ years | Sanitation (proportion with access)                | 2     | None      |
| Parkinson disease                          | Males   | 20-24 years | 80+ years | Cholesterol (total, mean per capita)               | 2     | Positive  |
| Parkinson disease                          | Males   | 20-24 years | 80+ years | Absolute value of average latitude                 | 2     | Positive  |
| Parkinson disease                          | Males   | 20-24 years | 80+ years | Fruits (kcal per capita)                           | 2     | Negative  |
| Parkinson disease                          | Males   | 20-24 years | 80+ years | LDI (I\$ per capita)                               | 3     | None      |
| Pedestrian road injuries [Developed]       | Females | 0-6 days    | 80+ years | Vehicles - 2 wheels fraction (proportion)          | 1     | Positive  |
| Pedestrian road injuries [Developed]       | Females | 0-6 days    | 80+ years | Alcohol (liters per capita)                        | 1     | Positive  |
| Pedestrian road injuries [Developed]       | Females | 0-6 days    | 80+ years | Health System Access 2 (unitless)                  | 1     | Negative  |
| Pedestrian road injuries [Developed]       | Females | 0-6 days    | 80+ years | LDI (I\$ per capita)                               | 2     | None      |
| Pedestrian road injuries [Developed]       | Females | 0-6 days    | 80+ years | Population Density (500-1000 ppl/sqkm, proportion) | 2     | None      |
| Pedestrian road injuries [Developed]       | Females | 0-6 days    | 80+ years | Population Density (300-500 ppl/sqkm, proportion)  | 2     | None      |
| Pedestrian road injuries [Developed]       | Females | 0-6 days    | 80+ years | Education (years per capita)                       | 3     | Negative  |



**Web Table 22 – CODEm covariates used, level of covariate, and expected direction of covariate by cause, sex, and age**

| Cause                                 | Sex     | Age Start | Age End   | Covariate                                          | Level | Direction |
|---------------------------------------|---------|-----------|-----------|----------------------------------------------------|-------|-----------|
| Pedestrian road injuries [Developed]  | Males   | 0-6 days  | 80+ years | Vehicles - 2 wheels fraction (proportion)          | 1     | Positive  |
| Pedestrian road injuries [Developed]  | Males   | 0-6 days  | 80+ years | Alcohol (liters per capita)                        | 1     | Positive  |
| Pedestrian road injuries [Developed]  | Males   | 0-6 days  | 80+ years | Health System Access 2 (unitless)                  | 1     | Negative  |
| Pedestrian road injuries [Developed]  | Males   | 0-6 days  | 80+ years | Population Density (500-1000 ppl/sqkm, proportion) | 2     | None      |
| Pedestrian road injuries [Developed]  | Males   | 0-6 days  | 80+ years | Population Density (300-500 ppl/sqkm, proportion)  | 2     | None      |
| Pedestrian road injuries [Developed]  | Males   | 0-6 days  | 80+ years | LDI (I\$ per capita)                               | 2     | None      |
| Pedestrian road injuries [Developed]  | Males   | 0-6 days  | 80+ years | Education (years per capita)                       | 3     | Negative  |
| Pedestrian road injuries [Developing] | Females | 0-6 days  | 80+ years | Health System Access 2 (unitless)                  | 1     | Negative  |
| Pedestrian road injuries [Developing] | Females | 0-6 days  | 80+ years | Vehicles - 2 wheels fraction (proportion)          | 1     | Positive  |
| Pedestrian road injuries [Developing] | Females | 0-6 days  | 80+ years | Alcohol (liters per capita)                        | 1     | Positive  |
| Pedestrian road injuries [Developing] | Females | 0-6 days  | 80+ years | Vehicles - 2+4 wheels (per capita)                 | 1     | Positive  |
| Pedestrian road injuries [Developing] | Females | 0-6 days  | 80+ years | Population Density (500-1000 ppl/sqkm, proportion) | 2     | None      |
| Pedestrian road injuries [Developing] | Females | 0-6 days  | 80+ years | LDI (I\$ per capita)                               | 2     | None      |
| Pedestrian road injuries [Developing] | Females | 0-6 days  | 80+ years | Population Density (300-500 ppl/sqkm, proportion)  | 2     | None      |
| Pedestrian road injuries [Developing] | Females | 0-6 days  | 80+ years | Education (years per capita)                       | 3     | Negative  |
| Pedestrian road injuries [Developing] | Males   | 0-6 days  | 80+ years | Health System Access 2 (unitless)                  | 1     | Negative  |
| Pedestrian road injuries [Developing] | Males   | 0-6 days  | 80+ years | Vehicles - 2 wheels fraction (proportion)          | 1     | Positive  |
| Pedestrian road injuries [Developing] | Males   | 0-6 days  | 80+ years | Alcohol (liters per capita)                        | 1     | Positive  |
| Pedestrian road injuries [Developing] | Males   | 0-6 days  | 80+ years | LDI (I\$ per capita)                               | 2     | None      |
| Pedestrian road injuries [Developing] | Males   | 0-6 days  | 80+ years | Population Density (500-1000 ppl/sqkm, proportion) | 2     | None      |
| Pedestrian road injuries [Developing] | Males   | 0-6 days  | 80+ years | Population Density (300-500 ppl/sqkm, proportion)  | 2     | None      |
| Pedestrian road injuries [Developing] | Males   | 0-6 days  | 80+ years | Education (years per capita)                       | 3     | Negative  |
| Peptic ulcer disease                  | Females | 1-4 years | 80+ years | Cumulative Cigarettes (10 Years)                   | 1     | Positive  |
| Peptic ulcer disease                  | Females | 1-4 years | 80+ years | Smoking Prevalence                                 | 1     | Positive  |
| Peptic ulcer disease                  | Females | 1-4 years | 80+ years | Alcohol (liters per capita)                        | 1     | Positive  |
| Peptic ulcer disease                  | Females | 1-4 years | 80+ years | Cumulative Cigarettes (5 Years)                    | 1     | Positive  |
| Peptic ulcer disease                  | Females | 1-4 years | 80+ years | Health System Access (capped)                      | 2     | Negative  |
| Peptic ulcer disease                  | Females | 1-4 years | 80+ years | Sanitation (proportion with access)                | 2     | Negative  |
| Peptic ulcer disease                  | Females | 1-4 years | 80+ years | Vegetables (kcal per capita)                       | 2     | Negative  |
| Peptic ulcer disease                  | Females | 1-4 years | 80+ years | LDI (I\$ per capita)                               | 3     | Negative  |
| Peptic ulcer disease                  | Females | 1-4 years | 80+ years | Education (years per capita)                       | 3     | Negative  |
| Peptic ulcer disease                  | Males   | 1-4 years | 80+ years | Cumulative Cigarettes (5 Years)                    | 1     | Positive  |
| Peptic ulcer disease                  | Males   | 1-4 years | 80+ years | Alcohol (liters per capita)                        | 1     | Positive  |
| Peptic ulcer disease                  | Males   | 1-4 years | 80+ years | Smoking Prevalence                                 | 1     | Positive  |
| Peptic ulcer disease                  | Males   | 1-4 years | 80+ years | Cumulative Cigarettes (10 Years)                   | 1     | Positive  |

**Web Table 22 – CODEm covariates used, level of covariate, and expected direction of covariate by cause, sex, and age**

| Cause                       | Sex     | Age Start   | Age End   | Covariate                                         | Level | Direction |
|-----------------------------|---------|-------------|-----------|---------------------------------------------------|-------|-----------|
| Peptic ulcer disease        | Males   | 1-4 years   | 80+ years | Vegetables (kcal per capita)                      | 2     | Negative  |
| Peptic ulcer disease        | Males   | 1-4 years   | 80+ years | Health System Access (capped)                     | 2     | Negative  |
| Peptic ulcer disease        | Males   | 1-4 years   | 80+ years | Sanitation (proportion with access)               | 2     | Negative  |
| Peptic ulcer disease        | Males   | 1-4 years   | 80+ years | LDI (I\$ per capita)                              | 3     | Negative  |
| Peptic ulcer disease        | Males   | 1-4 years   | 80+ years | Education (years per capita)                      | 3     | Negative  |
| Peripheral vascular disease | Females | 40-44 years | 80+ years | Mean BMI                                          | 1     | Positive  |
| Peripheral vascular disease | Females | 40-44 years | 80+ years | Cholesterol (total, mean per capita)              | 1     | Positive  |
| Peripheral vascular disease | Females | 40-44 years | 80+ years | Diabetes Age-Standardized Prevalence (proportion) | 1     | Positive  |
| Peripheral vascular disease | Females | 40-44 years | 80+ years | Systolic Blood Pressure (mmHg)                    | 1     | Positive  |
| Peripheral vascular disease | Females | 40-44 years | 80+ years | Red Meat (kcal per capita)                        | 2     | Positive  |
| Peripheral vascular disease | Females | 40-44 years | 80+ years | Total Calories (kcal per capita)                  | 2     | Positive  |
| Peripheral vascular disease | Females | 40-44 years | 80+ years | Smoking Prevalence                                | 2     | Positive  |
| Peripheral vascular disease | Females | 40-44 years | 80+ years | Pulses & Legumes (kcal per capita)                | 2     | Negative  |
| Peripheral vascular disease | Females | 40-44 years | 80+ years | Alcohol (liters per capita)                       | 2     | None      |
| Peripheral vascular disease | Females | 40-44 years | 80+ years | Health System Access 2 (unitless)                 | 3     | Negative  |
| Peripheral vascular disease | Males   | 40-44 years | 80+ years | Diabetes Age-Standardized Prevalence (proportion) | 1     | Positive  |
| Peripheral vascular disease | Males   | 40-44 years | 80+ years | Systolic Blood Pressure (mmHg)                    | 1     | Positive  |
| Peripheral vascular disease | Males   | 40-44 years | 80+ years | Mean BMI                                          | 1     | Positive  |
| Peripheral vascular disease | Males   | 40-44 years | 80+ years | Cholesterol (total, mean per capita)              | 1     | Positive  |
| Peripheral vascular disease | Males   | 40-44 years | 80+ years | Alcohol (liters per capita)                       | 2     | None      |
| Peripheral vascular disease | Males   | 40-44 years | 80+ years | Pulses & Legumes (kcal per capita)                | 2     | Negative  |
| Peripheral vascular disease | Males   | 40-44 years | 80+ years | Outdoor Air Pollution (PM2.5)                     | 2     | Positive  |
| Peripheral vascular disease | Males   | 40-44 years | 80+ years | Red Meat (kcal per capita)                        | 2     | Positive  |
| Peripheral vascular disease | Males   | 40-44 years | 80+ years | Total Calories (kcal per capita)                  | 2     | Positive  |
| Peripheral vascular disease | Males   | 40-44 years | 80+ years | Health System Access 2 (unitless)                 | 3     | Negative  |
| Peripheral vascular disease | Males   | 40-44 years | 80+ years | LDI (I\$ per capita)                              | 3     | Negative  |
| Pneumoconiosis              | Females | 1-4 years   | 80+ years | Gold production (kg) per capita                   | 1     | Positive  |
| Pneumoconiosis              | Females | 1-4 years   | 80+ years | Coal Production (per capita)                      | 1     | Positive  |
| Pneumoconiosis              | Females | 1-4 years   | 80+ years | Asbestos production (kg) per capita               | 1     | Positive  |
| Pneumoconiosis              | Females | 1-4 years   | 80+ years | Coal Reserves (teragrams per capita)              | 2     | Positive  |
| Pneumoconiosis              | Females | 1-4 years   | 80+ years | Elevation Over 1500m (proportion)                 | 2     | Positive  |
| Pneumoconiosis              | Females | 1-4 years   | 80+ years | Smoking Prevalence                                | 2     | Positive  |
| Pneumoconiosis              | Females | 1-4 years   | 80+ years | Cumulative Cigarettes (5 Years)                   | 2     | Positive  |
| Pneumoconiosis              | Females | 1-4 years   | 80+ years | Education (years per capita)                      | 3     | Negative  |
| Pneumoconiosis              | Females | 1-4 years   | 80+ years | Health System Access 2 (unitless)                 | 3     | Negative  |

**Web Table 22 – CODEm covariates used, level of covariate, and expected direction of covariate by cause, sex, and age**

| Cause                        | Sex     | Age Start   | Age End   | Covariate                                           | Level | Direction |
|------------------------------|---------|-------------|-----------|-----------------------------------------------------|-------|-----------|
| Pneumoconiosis               | Females | 1-4 years   | 80+ years | LDI (I\$ per capita)                                | 3     | Negative  |
| Pneumoconiosis               | Males   | 1-4 years   | 80+ years | Gold production (kg) per capita                     | 1     | Positive  |
| Pneumoconiosis               | Males   | 1-4 years   | 80+ years | Asbestos production (kg) per capita                 | 1     | Positive  |
| Pneumoconiosis               | Males   | 1-4 years   | 80+ years | Coal Production (per capita)                        | 1     | Positive  |
| Pneumoconiosis               | Males   | 1-4 years   | 80+ years | Smoking Prevalence                                  | 2     | Positive  |
| Pneumoconiosis               | Males   | 1-4 years   | 80+ years | Coal Reserves (teragrams per capita)                | 2     | Positive  |
| Pneumoconiosis               | Males   | 1-4 years   | 80+ years | Elevation Over 1500m (proportion)                   | 2     | Positive  |
| Pneumoconiosis               | Males   | 1-4 years   | 80+ years | Cumulative Cigarettes (5 Years)                     | 2     | Positive  |
| Pneumoconiosis               | Males   | 1-4 years   | 80+ years | Elevation 500 to 1500m (proportion)                 | 2     | Positive  |
| Pneumoconiosis               | Males   | 1-4 years   | 80+ years | LDI (I\$ per capita)                                | 3     | Negative  |
| Pneumoconiosis               | Males   | 1-4 years   | 80+ years | Health System Access 2 (unitless)                   | 3     | Negative  |
| Pneumoconiosis               | Males   | 1-4 years   | 80+ years | Education (years per capita)                        | 3     | Negative  |
| Poisonings                   | Females | 0-6 days    | 80+ years | Opium Cultivation (binary)                          | 1     | Positive  |
| Poisonings                   | Females | 0-6 days    | 80+ years | Health System Access 2 (unitless)                   | 1     | Negative  |
| Poisonings                   | Females | 0-6 days    | 80+ years | Population Density (over 1000 ppl/sqkm, proportion) | 2     | None      |
| Poisonings                   | Females | 0-6 days    | 80+ years | Population Density (under 150 ppl/sqkm, proportion) | 2     | None      |
| Poisonings                   | Females | 0-6 days    | 80+ years | Education (years per capita)                        | 3     | Negative  |
| Poisonings                   | Females | 0-6 days    | 80+ years | LDI (I\$ per capita)                                | 3     | None      |
| Poisonings                   | Males   | 0-6 days    | 80+ years | Opium Cultivation (binary)                          | 1     | Positive  |
| Poisonings                   | Males   | 0-6 days    | 80+ years | Health System Access 2 (unitless)                   | 1     | Negative  |
| Poisonings                   | Males   | 0-6 days    | 80+ years | Population Density (over 1000 ppl/sqkm, proportion) | 2     | None      |
| Poisonings                   | Males   | 0-6 days    | 80+ years | Population Density (under 150 ppl/sqkm, proportion) | 2     | None      |
| Poisonings                   | Males   | 0-6 days    | 80+ years | Education (years per capita)                        | 3     | Negative  |
| Poisonings                   | Males   | 0-6 days    | 80+ years | LDI (I\$ per capita)                                | 3     | None      |
| Prostate cancer [Developed]  | Males   | 15-19 years | 80+ years | Animal Fats (kcal per capita)                       | 2     | Positive  |
| Prostate cancer [Developed]  | Males   | 15-19 years | 80+ years | LDI (I\$ per capita)                                | 3     | None      |
| Prostate cancer [Developed]  | Males   | 15-19 years | 80+ years | Education (years per capita)                        | 3     | None      |
| Prostate cancer [Developing] | Males   | 15-19 years | 80+ years | Animal Fats (kcal per capita)                       | 2     | Positive  |
| Prostate cancer [Developing] | Males   | 15-19 years | 80+ years | Education (years per capita)                        | 3     | None      |
| Prostate cancer [Developing] | Males   | 15-19 years | 80+ years | LDI (I\$ per capita)                                | 3     | None      |
| Protein-energy malnutrition  | Females | 28-364 days | 1-4 years | Age-Standardize Prevalence of Severe Anemia         | 1     | Positive  |
| Protein-energy malnutrition  | Females | 28-364 days | 1-4 years | Malnutrition (proportion <2SD weight for age)       | 1     | Positive  |
| Protein-energy malnutrition  | Females | 28-364 days | 1-4 years | Health System Access 2 (unitless)                   | 1     | Negative  |
| Protein-energy malnutrition  | Females | 28-364 days | 1-4 years | Total Calories (kcal per capita)                    | 2     | Negative  |
| Protein-energy malnutrition  | Females | 28-364 days | 1-4 years | Sanitation (proportion with access)                 | 2     | Negative  |

**Web Table 22 – CODEm covariates used, level of covariate, and expected direction of covariate by cause, sex, and age**

| Cause                       | Sex     | Age Start   | Age End   | Covariate                                      | Level | Direction |
|-----------------------------|---------|-------------|-----------|------------------------------------------------|-------|-----------|
| Protein-energy malnutrition | Females | 28-364 days | 1-4 years | Rainfall Quintile 2 (proportion)               | 2     | None      |
| Protein-energy malnutrition | Females | 28-364 days | 1-4 years | Rainfall Quintile 1 (proportion)               | 2     | None      |
| Protein-energy malnutrition | Females | 28-364 days | 1-4 years | Improved Water Source (proportion with access) | 2     | Negative  |
| Protein-energy malnutrition | Females | 28-364 days | 1-4 years | Education (years per capita)                   | 3     | Negative  |
| Protein-energy malnutrition | Females | 28-364 days | 1-4 years | LDI (I\$ per capita)                           | 3     | Negative  |
| Protein-energy malnutrition | Females | 5-9 years   | 80+ years | Health System Access 2 (unitless)              | 1     | Negative  |
| Protein-energy malnutrition | Females | 5-9 years   | 80+ years | Age-Standardize Prevalence of Severe Anemia    | 1     | Positive  |
| Protein-energy malnutrition | Females | 5-9 years   | 80+ years | Malnutrition (proportion <2SD weight for age)  | 1     | Positive  |
| Protein-energy malnutrition | Females | 5-9 years   | 80+ years | Sanitation (proportion with access)            | 2     | Negative  |
| Protein-energy malnutrition | Females | 5-9 years   | 80+ years | Rainfall Quintile 2 (proportion)               | 2     | None      |
| Protein-energy malnutrition | Females | 5-9 years   | 80+ years | Improved Water Source (proportion with access) | 2     | Negative  |
| Protein-energy malnutrition | Females | 5-9 years   | 80+ years | Total Calories (kcal per capita)               | 2     | Negative  |
| Protein-energy malnutrition | Females | 5-9 years   | 80+ years | Rainfall Quintile 1 (proportion)               | 2     | None      |
| Protein-energy malnutrition | Females | 5-9 years   | 80+ years | Education (years per capita)                   | 3     | Negative  |
| Protein-energy malnutrition | Females | 5-9 years   | 80+ years | LDI (I\$ per capita)                           | 3     | Negative  |
| Protein-energy malnutrition | Males   | 28-364 days | 1-4 years | Malnutrition (proportion <2SD weight for age)  | 1     | Positive  |
| Protein-energy malnutrition | Males   | 28-364 days | 1-4 years | Health System Access 2 (unitless)              | 1     | Negative  |
| Protein-energy malnutrition | Males   | 28-364 days | 1-4 years | Age-Standardize Prevalence of Severe Anemia    | 1     | Positive  |
| Protein-energy malnutrition | Males   | 28-364 days | 1-4 years | Improved Water Source (proportion with access) | 2     | Negative  |
| Protein-energy malnutrition | Males   | 28-364 days | 1-4 years | Rainfall Quintile 2 (proportion)               | 2     | None      |
| Protein-energy malnutrition | Males   | 28-364 days | 1-4 years | Sanitation (proportion with access)            | 2     | Negative  |
| Protein-energy malnutrition | Males   | 28-364 days | 1-4 years | Total Calories (kcal per capita)               | 2     | Negative  |
| Protein-energy malnutrition | Males   | 28-364 days | 1-4 years | Rainfall Quintile 1 (proportion)               | 2     | None      |
| Protein-energy malnutrition | Males   | 28-364 days | 1-4 years | LDI (I\$ per capita)                           | 3     | Negative  |
| Protein-energy malnutrition | Males   | 28-364 days | 1-4 years | Education (years per capita)                   | 3     | Negative  |
| Protein-energy malnutrition | Males   | 5-9 years   | 80+ years | Health System Access 2 (unitless)              | 1     | Negative  |
| Protein-energy malnutrition | Males   | 5-9 years   | 80+ years | Malnutrition (proportion <2SD weight for age)  | 1     | Positive  |
| Protein-energy malnutrition | Males   | 5-9 years   | 80+ years | Age-Standardize Prevalence of Severe Anemia    | 1     | Positive  |
| Protein-energy malnutrition | Males   | 5-9 years   | 80+ years | Improved Water Source (proportion with access) | 2     | Negative  |
| Protein-energy malnutrition | Males   | 5-9 years   | 80+ years | Total Calories (kcal per capita)               | 2     | Negative  |
| Protein-energy malnutrition | Males   | 5-9 years   | 80+ years | Rainfall Quintile 2 (proportion)               | 2     | None      |
| Protein-energy malnutrition | Males   | 5-9 years   | 80+ years | Rainfall Quintile 1 (proportion)               | 2     | None      |
| Protein-energy malnutrition | Males   | 5-9 years   | 80+ years | Sanitation (proportion with access)            | 2     | Negative  |
| Protein-energy malnutrition | Males   | 5-9 years   | 80+ years | Education (years per capita)                   | 3     | Negative  |
| Protein-energy malnutrition | Males   | 5-9 years   | 80+ years | LDI (I\$ per capita)                           | 3     | Negative  |

**Web Table 22 – CODEm covariates used, level of covariate, and expected direction of covariate by cause, sex, and age**

| Cause                                           | Sex     | Age Start   | Age End   | Covariate                                           | Level | Direction |
|-------------------------------------------------|---------|-------------|-----------|-----------------------------------------------------|-------|-----------|
| Pulmonary aspiration and foreign body in airway | Females | 0-6 days    | 80+ years | Alcohol (liters per capita)                         | 1     | Positive  |
| Pulmonary aspiration and foreign body in airway | Females | 0-6 days    | 80+ years | Mean BMI                                            | 1     | Positive  |
| Pulmonary aspiration and foreign body in airway | Females | 0-6 days    | 80+ years | LDI (I\$ per capita)                                | 3     | None      |
| Pulmonary aspiration and foreign body in airway | Males   | 0-6 days    | 80+ years | Mean BMI                                            | 1     | Positive  |
| Pulmonary aspiration and foreign body in airway | Males   | 0-6 days    | 80+ years | Alcohol (liters per capita)                         | 1     | Positive  |
| Pulmonary aspiration and foreign body in airway | Males   | 0-6 days    | 80+ years | Health System Access (capped)                       | 1     | Negative  |
| Pulmonary aspiration and foreign body in airway | Males   | 0-6 days    | 80+ years | LDI (I\$ per capita)                                | 3     | None      |
| Pyoderma                                        | Females | 0-6 days    | 80+ years | Improved Water Source (proportion with access)      | 1     | Negative  |
| Pyoderma                                        | Females | 0-6 days    | 80+ years | Sanitation (proportion with access)                 | 1     | Negative  |
| Pyoderma                                        | Females | 0-6 days    | 80+ years | Health System Access 2 (unitless)                   | 1     | Positive  |
| Pyoderma                                        | Females | 0-6 days    | 80+ years | Malnutrition (proportion <2SD weight for age)       | 1     | Positive  |
| Pyoderma                                        | Females | 0-6 days    | 80+ years | Latitude 15 to 30 (proportion)                      | 3     | None      |
| Pyoderma                                        | Females | 0-6 days    | 80+ years | Latitude Under 15 (proportion)                      | 3     | None      |
| Pyoderma                                        | Females | 0-6 days    | 80+ years | Education (years per capita)                        | 3     | Negative  |
| Pyoderma                                        | Females | 0-6 days    | 80+ years | Latitude Over 45 (proportion)                       | 3     | None      |
| Pyoderma                                        | Females | 0-6 days    | 80+ years | LDI (I\$ per capita)                                | 3     | Negative  |
| Pyoderma                                        | Females | 0-6 days    | 80+ years | Latitude 30 to 45 (proportion)                      | 3     | None      |
| Pyoderma                                        | Males   | 0-6 days    | 80+ years | Improved Water Source (proportion with access)      | 1     | Negative  |
| Pyoderma                                        | Males   | 0-6 days    | 80+ years | Malnutrition (proportion <2SD weight for age)       | 1     | Positive  |
| Pyoderma                                        | Males   | 0-6 days    | 80+ years | Sanitation (proportion with access)                 | 1     | Negative  |
| Pyoderma                                        | Males   | 0-6 days    | 80+ years | Health System Access 2 (unitless)                   | 1     | Positive  |
| Pyoderma                                        | Males   | 0-6 days    | 80+ years | Latitude Over 45 (proportion)                       | 3     | None      |
| Pyoderma                                        | Males   | 0-6 days    | 80+ years | Latitude 30 to 45 (proportion)                      | 3     | None      |
| Pyoderma                                        | Males   | 0-6 days    | 80+ years | Education (years per capita)                        | 3     | Negative  |
| Pyoderma                                        | Males   | 0-6 days    | 80+ years | Latitude Under 15 (proportion)                      | 3     | None      |
| Pyoderma                                        | Males   | 0-6 days    | 80+ years | Latitude 15 to 30 (proportion)                      | 3     | None      |
| Pyoderma                                        | Males   | 0-6 days    | 80+ years | LDI (I\$ per capita)                                | 3     | Negative  |
| Rabies                                          | Females | 28-364 days | 80+ years | Health System Access (unitless)                     | 1     | Negative  |
| Rabies                                          | Females | 28-364 days | 80+ years | Population Density (500-1000 ppl/sqkm, proportion)  | 2     | None      |
| Rabies                                          | Females | 28-364 days | 80+ years | Population Density (over 1000 ppl/sqkm, proportion) | 2     | None      |
| Rabies                                          | Females | 28-364 days | 80+ years | Population Density (300-500 ppl/sqkm, proportion)   | 2     | None      |
| Rabies                                          | Males   | 28-364 days | 80+ years | Health System Access (unitless)                     | 1     | Negative  |
| Rabies                                          | Males   | 28-364 days | 80+ years | Population Density (300-500 ppl/sqkm, proportion)   | 2     | None      |
| Rabies                                          | Males   | 28-364 days | 80+ years | Population Density (over 1000 ppl/sqkm, proportion) | 2     | None      |
| Rheumatic heart disease                         | Females | 1-4 years   | 80+ years | Sanitation (proportion with access)                 | 1     | Negative  |

**Web Table 22 – CODEm covariates used, level of covariate, and expected direction of covariate by cause, sex, and age**

| Cause                     | Sex     | Age Start | Age End   | Covariate                                      | Level | Direction |
|---------------------------|---------|-----------|-----------|------------------------------------------------|-------|-----------|
| Rheumatic heart disease   | Females | 1-4 years | 80+ years | Malnutrition (proportion <2SD weight for age)  | 1     | Positive  |
| Rheumatic heart disease   | Females | 1-4 years | 80+ years | Population Under 30 (proportion)               | 1     | Positive  |
| Rheumatic heart disease   | Females | 1-4 years | 80+ years | Improved Water Source (proportion with access) | 1     | Negative  |
| Rheumatic heart disease   | Females | 1-4 years | 80+ years | Education (years per capita)                   | 3     | Negative  |
| Rheumatic heart disease   | Females | 1-4 years | 80+ years | Health System Access 2 (unitless)              | 3     | Negative  |
| Rheumatic heart disease   | Females | 1-4 years | 80+ years | LDI (I\$ per capita)                           | 3     | Negative  |
| Rheumatic heart disease   | Males   | 1-4 years | 80+ years | Malnutrition (proportion <2SD weight for age)  | 1     | Positive  |
| Rheumatic heart disease   | Males   | 1-4 years | 80+ years | Improved Water Source (proportion with access) | 1     | Negative  |
| Rheumatic heart disease   | Males   | 1-4 years | 80+ years | Sanitation (proportion with access)            | 1     | Negative  |
| Rheumatic heart disease   | Males   | 1-4 years | 80+ years | Population Under 30 (proportion)               | 1     | Positive  |
| Rheumatic heart disease   | Males   | 1-4 years | 80+ years | Health System Access 2 (unitless)              | 3     | Negative  |
| Rheumatic heart disease   | Males   | 1-4 years | 80+ years | LDI (I\$ per capita)                           | 3     | Negative  |
| Rheumatic heart disease   | Males   | 1-4 years | 80+ years | Education (years per capita)                   | 3     | Negative  |
| Rheumatoid arthritis      | Females | 5-9 years | 80+ years | Smoking Prevalence                             | 1     | Positive  |
| Rheumatoid arthritis      | Females | 5-9 years | 80+ years | Health System Access 2 (unitless)              | 1     | Negative  |
| Rheumatoid arthritis      | Females | 5-9 years | 80+ years | Alcohol (liters per capita)                    | 1     | Positive  |
| Rheumatoid arthritis      | Females | 5-9 years | 80+ years | Cholesterol (total, mean per capita)           | 2     | Positive  |
| Rheumatoid arthritis      | Females | 5-9 years | 80+ years | Vegetables (kcal per capita)                   | 2     | Positive  |
| Rheumatoid arthritis      | Females | 5-9 years | 80+ years | Latitude 15 to 30 (proportion)                 | 3     | None      |
| Rheumatoid arthritis      | Females | 5-9 years | 80+ years | LDI (I\$ per capita)                           | 3     | Negative  |
| Rheumatoid arthritis      | Females | 5-9 years | 80+ years | Latitude Over 45 (proportion)                  | 3     | None      |
| Rheumatoid arthritis      | Females | 5-9 years | 80+ years | Latitude Under 15 (proportion)                 | 3     | None      |
| Rheumatoid arthritis      | Females | 5-9 years | 80+ years | Latitude 30 to 45 (proportion)                 | 3     | None      |
| Rheumatoid arthritis      | Males   | 5-9 years | 80+ years | Alcohol (liters per capita)                    | 1     | Positive  |
| Rheumatoid arthritis      | Males   | 5-9 years | 80+ years | Latitude 15 to 30 (proportion)                 | 3     | None      |
| Rheumatoid arthritis      | Males   | 5-9 years | 80+ years | Latitude 30 to 45 (proportion)                 | 3     | None      |
| Rheumatoid arthritis      | Males   | 5-9 years | 80+ years | LDI (I\$ per capita)                           | 3     | Negative  |
| Rheumatoid arthritis      | Males   | 5-9 years | 80+ years | Latitude Under 15 (proportion)                 | 3     | None      |
| Rheumatoid arthritis      | Males   | 5-9 years | 80+ years | Latitude Over 45 (proportion)                  | 3     | None      |
| Road injuries [Developed] | Females | 0-6 days  | 80+ years | Vehicles - 2 wheels fraction (proportion)      | 1     | Positive  |
| Road injuries [Developed] | Females | 0-6 days  | 80+ years | Vehicles - 4 wheels (per capita)               | 1     | Positive  |
| Road injuries [Developed] | Females | 0-6 days  | 80+ years | Vehicles - 2+4 wheels (per capita)             | 1     | Positive  |
| Road injuries [Developed] | Females | 0-6 days  | 80+ years | Alcohol (liters per capita)                    | 1     | Positive  |
| Road injuries [Developed] | Females | 0-6 days  | 80+ years | Vehicles - 2 wheels (per capita)               | 1     | Positive  |
| Road injuries [Developed] | Females | 0-6 days  | 80+ years | Health System Access 2 (unitless)              | 1     | Negative  |

**Web Table 22 – CODEm covariates used, level of covariate, and expected direction of covariate by cause, sex, and age**

| Cause                      | Sex     | Age Start | Age End   | Covariate                                          | Level | Direction |
|----------------------------|---------|-----------|-----------|----------------------------------------------------|-------|-----------|
| Road injuries [Developed]  | Females | 0-6 days  | 80+ years | Population Density (500-1000 ppl/sqkm, proportion) | 2     | None      |
| Road injuries [Developed]  | Females | 0-6 days  | 80+ years | Population 15 to 30 (proportion)                   | 2     | Positive  |
| Road injuries [Developed]  | Females | 0-6 days  | 80+ years | LDI (I\$ per capita)                               | 2     | None      |
| Road injuries [Developed]  | Females | 0-6 days  | 80+ years | Population Density (300-500 ppl/sqkm, proportion)  | 2     | None      |
| Road injuries [Developed]  | Females | 0-6 days  | 80+ years | Education (years per capita)                       | 3     | Negative  |
| Road injuries [Developed]  | Males   | 0-6 days  | 80+ years | Vehicles - 2+4 wheels (per capita)                 | 1     | Positive  |
| Road injuries [Developed]  | Males   | 0-6 days  | 80+ years | Alcohol (liters per capita)                        | 1     | Positive  |
| Road injuries [Developed]  | Males   | 0-6 days  | 80+ years | Health System Access 2 (unitless)                  | 1     | Negative  |
| Road injuries [Developed]  | Males   | 0-6 days  | 80+ years | Vehicles - 4 wheels (per capita)                   | 1     | Positive  |
| Road injuries [Developed]  | Males   | 0-6 days  | 80+ years | Vehicles - 2 wheels (per capita)                   | 1     | Positive  |
| Road injuries [Developed]  | Males   | 0-6 days  | 80+ years | Vehicles - 2 wheels fraction (proportion)          | 1     | Positive  |
| Road injuries [Developed]  | Males   | 0-6 days  | 80+ years | Population Density (500-1000 ppl/sqkm, proportion) | 2     | None      |
| Road injuries [Developed]  | Males   | 0-6 days  | 80+ years | LDI (I\$ per capita)                               | 2     | None      |
| Road injuries [Developed]  | Males   | 0-6 days  | 80+ years | Population Density (300-500 ppl/sqkm, proportion)  | 2     | None      |
| Road injuries [Developed]  | Males   | 0-6 days  | 80+ years | Population 15 to 30 (proportion)                   | 2     | Positive  |
| Road injuries [Developed]  | Males   | 0-6 days  | 80+ years | Education (years per capita)                       | 3     | Negative  |
| Road injuries [Developing] | Females | 0-6 days  | 80+ years | Vehicles - 2 wheels (per capita)                   | 1     | Positive  |
| Road injuries [Developing] | Females | 0-6 days  | 80+ years | Vehicles - 2 wheels fraction (proportion)          | 1     | Positive  |
| Road injuries [Developing] | Females | 0-6 days  | 80+ years | Vehicles - 2+4 wheels (per capita)                 | 1     | Positive  |
| Road injuries [Developing] | Females | 0-6 days  | 80+ years | Alcohol (liters per capita)                        | 1     | Positive  |
| Road injuries [Developing] | Females | 0-6 days  | 80+ years | Health System Access 2 (unitless)                  | 1     | Negative  |
| Road injuries [Developing] | Females | 0-6 days  | 80+ years | Vehicles - 4 wheels (per capita)                   | 1     | Positive  |
| Road injuries [Developing] | Females | 0-6 days  | 80+ years | Population Density (300-500 ppl/sqkm, proportion)  | 2     | None      |
| Road injuries [Developing] | Females | 0-6 days  | 80+ years | Population Density (500-1000 ppl/sqkm, proportion) | 2     | None      |
| Road injuries [Developing] | Females | 0-6 days  | 80+ years | Population 15 to 30 (proportion)                   | 2     | Positive  |
| Road injuries [Developing] | Females | 0-6 days  | 80+ years | LDI (I\$ per capita)                               | 2     | None      |
| Road injuries [Developing] | Females | 0-6 days  | 80+ years | Education (years per capita)                       | 3     | Negative  |
| Road injuries [Developing] | Males   | 0-6 days  | 80+ years | Health System Access 2 (unitless)                  | 1     | Negative  |
| Road injuries [Developing] | Males   | 0-6 days  | 80+ years | Vehicles - 2 wheels (per capita)                   | 1     | Positive  |
| Road injuries [Developing] | Males   | 0-6 days  | 80+ years | Alcohol (liters per capita)                        | 1     | Positive  |
| Road injuries [Developing] | Males   | 0-6 days  | 80+ years | Vehicles - 2+4 wheels (per capita)                 | 1     | Positive  |
| Road injuries [Developing] | Males   | 0-6 days  | 80+ years | Vehicles - 2 wheels fraction (proportion)          | 1     | Positive  |
| Road injuries [Developing] | Males   | 0-6 days  | 80+ years | Vehicles - 4 wheels (per capita)                   | 1     | Positive  |
| Road injuries [Developing] | Males   | 0-6 days  | 80+ years | Population Density (300-500 ppl/sqkm, proportion)  | 2     | None      |
| Road injuries [Developing] | Males   | 0-6 days  | 80+ years | Population Density (500-1000 ppl/sqkm, proportion) | 2     | None      |



**Web Table 22 – CODEm covariates used, level of covariate, and expected direction of covariate by cause, sex, and age**

| Cause                                       | Sex     | Age Start   | Age End   | Covariate                                           | Level | Direction |
|---------------------------------------------|---------|-------------|-----------|-----------------------------------------------------|-------|-----------|
| Road injuries [Developing]                  | Males   | 0-6 days    | 80+ years | Population 15 to 30 (proportion)                    | 2     | Positive  |
| Road injuries [Developing]                  | Males   | 0-6 days    | 80+ years | LDI (I\$ per capita)                                | 2     | None      |
| Road injuries [Developing]                  | Males   | 0-6 days    | 80+ years | Education (years per capita)                        | 3     | Negative  |
| Schizophrenia                               | Females | 25-29 years | 80+ years | Malnutrition (proportion <2SD weight for age)       | 1     | Positive  |
| Schizophrenia                               | Females | 25-29 years | 80+ years | Health System Access 2 (unitless)                   | 1     | None      |
| Schizophrenia                               | Females | 25-29 years | 80+ years | Alcohol (liters per capita)                         | 2     | None      |
| Schizophrenia                               | Females | 25-29 years | 80+ years | Cumulative Cigarettes (20 Years)                    | 2     | None      |
| Schizophrenia                               | Females | 25-29 years | 80+ years | Smoking Prevalence                                  | 2     | None      |
| Schizophrenia                               | Females | 25-29 years | 80+ years | Education (years per capita)                        | 3     | None      |
| Schizophrenia                               | Females | 25-29 years | 80+ years | LDI (I\$ per capita)                                | 3     | None      |
| Schizophrenia                               | Males   | 25-29 years | 80+ years | Health System Access 2 (unitless)                   | 1     | None      |
| Schizophrenia                               | Males   | 25-29 years | 80+ years | Malnutrition (proportion <2SD weight for age)       | 1     | Positive  |
| Schizophrenia                               | Males   | 25-29 years | 80+ years | Alcohol (liters per capita)                         | 2     | None      |
| Schizophrenia                               | Males   | 25-29 years | 80+ years | Smoking Prevalence                                  | 2     | None      |
| Schizophrenia                               | Males   | 25-29 years | 80+ years | Cumulative Cigarettes (20 Years)                    | 2     | None      |
| Schizophrenia                               | Males   | 25-29 years | 80+ years | LDI (I\$ per capita)                                | 3     | None      |
| Schizophrenia                               | Males   | 25-29 years | 80+ years | Education (years per capita)                        | 3     | None      |
| Self-harm                                   | Females | 10-14 years | 80+ years | Alcohol (liters per capita)                         | 1     | Positive  |
| Self-harm                                   | Females | 10-14 years | 80+ years | Population Density (under 150 ppl/sqkm, proportion) | 2     | None      |
| Self-harm                                   | Females | 10-14 years | 80+ years | Population Density (150-300 ppl/sqkm, proportion)   | 2     | None      |
| Self-harm                                   | Females | 10-14 years | 80+ years | Population Density (300-500 ppl/sqkm, proportion)   | 2     | None      |
| Self-harm                                   | Females | 10-14 years | 80+ years | Religion (binary, >50% Muslim)                      | 2     | Negative  |
| Self-harm                                   | Females | 10-14 years | 80+ years | Population Density (over 1000 ppl/sqkm, proportion) | 2     | None      |
| Self-harm                                   | Females | 10-14 years | 80+ years | Population Density (500-1000 ppl/sqkm, proportion)  | 2     | None      |
| Self-harm                                   | Females | 10-14 years | 80+ years | Education (years per capita)                        | 3     | None      |
| Self-harm                                   | Females | 10-14 years | 80+ years | LDI (I\$ per capita)                                | 3     | None      |
| Self-harm                                   | Males   | 10-14 years | 80+ years | Alcohol (liters per capita)                         | 1     | Positive  |
| Self-harm                                   | Males   | 10-14 years | 80+ years | Population Density (under 150 ppl/sqkm, proportion) | 2     | None      |
| Self-harm                                   | Males   | 10-14 years | 80+ years | Population Density (150-300 ppl/sqkm, proportion)   | 2     | None      |
| Self-harm                                   | Males   | 10-14 years | 80+ years | Population Density (over 1000 ppl/sqkm, proportion) | 2     | None      |
| Self-harm                                   | Males   | 10-14 years | 80+ years | Population Density (300-500 ppl/sqkm, proportion)   | 2     | None      |
| Self-harm                                   | Males   | 10-14 years | 80+ years | Religion (binary, >50% Muslim)                      | 2     | Negative  |
| Self-harm                                   | Males   | 10-14 years | 80+ years | LDI (I\$ per capita)                                | 3     | None      |
| Sexually transmitted diseases excluding HIV | Females | 10-14 years | 80+ years | Syphilis prevalence (proportion)                    | 1     | Positive  |
| Sexually transmitted diseases excluding HIV | Females | 10-14 years | 80+ years | Education (years per capita)                        | 2     | Negative  |



**Web Table 22 – CODEm covariates used, level of covariate, and expected direction of covariate by cause, sex, and age**

| Cause                                       | Sex     | Age Start   | Age End   | Covariate                                           | Level | Direction |
|---------------------------------------------|---------|-------------|-----------|-----------------------------------------------------|-------|-----------|
| Sexually transmitted diseases excluding HIV | Females | 10-14 years | 80+ years | Legality of Abortion                                | 2     | Negative  |
| Sexually transmitted diseases excluding HIV | Females | 10-14 years | 80+ years | Health System Access (capped)                       | 2     | Negative  |
| Sexually transmitted diseases excluding HIV | Females | 10-14 years | 80+ years | Total Fertility Rate                                | 2     | Positive  |
| Sexually transmitted diseases excluding HIV | Females | 10-14 years | 80+ years | Antenatal Care (4 visits) Coverage (proportion)     | 3     | Negative  |
| Sexually transmitted diseases excluding HIV | Females | 10-14 years | 80+ years | Antenatal Care (1 visit) Coverage (proportion)      | 3     | Negative  |
| Sexually transmitted diseases excluding HIV | Males   | 10-14 years | 80+ years | Syphilis prevalence (proportion)                    | 1     | Positive  |
| Sexually transmitted diseases excluding HIV | Males   | 10-14 years | 80+ years | Health System Access (capped)                       | 2     | Negative  |
| Sexually transmitted diseases excluding HIV | Males   | 10-14 years | 80+ years | Education (years per capita)                        | 2     | Negative  |
| Sexually transmitted diseases excluding HIV | Males   | 10-14 years | 80+ years | Total Fertility Rate                                | 2     | Positive  |
| Sexually transmitted diseases excluding HIV | Males   | 10-14 years | 80+ years | Antenatal Care (1 visit) Coverage (proportion)      | 3     | Negative  |
| Sexually transmitted diseases excluding HIV | Males   | 10-14 years | 80+ years | Antenatal Care (4 visits) Coverage (proportion)     | 3     | Negative  |
| Silicosis                                   | Females | 0-6 days    | 80+ years | Asbestos production (binary)                        | 1     | Positive  |
| Silicosis                                   | Females | 0-6 days    | 80+ years | Population Density (over 1000 ppl/sqkm, proportion) | 1     | Positive  |
| Silicosis                                   | Females | 0-6 days    | 80+ years | Indoor Air Pollution (Coal Cooking)                 | 1     | Positive  |
| Silicosis                                   | Females | 0-6 days    | 80+ years | Cumulative Cigarettes (5 Years)                     | 1     | Positive  |
| Silicosis                                   | Females | 0-6 days    | 80+ years | Health System Access 2 (unitless)                   | 1     | Negative  |
| Silicosis                                   | Females | 0-6 days    | 80+ years | Asbestos production (kg) per capita                 | 2     | Positive  |
| Silicosis                                   | Females | 0-6 days    | 80+ years | Elevation Over 1500m (proportion)                   | 2     | Positive  |
| Silicosis                                   | Females | 0-6 days    | 80+ years | Gold production (kg) per capita                     | 2     | Positive  |
| Silicosis                                   | Females | 0-6 days    | 80+ years | Education (years per capita)                        | 3     | Negative  |
| Silicosis                                   | Females | 0-6 days    | 80+ years | LDI (I\$ per capita)                                | 3     | Negative  |
| Silicosis                                   | Males   | 0-6 days    | 80+ years | Cumulative Cigarettes (5 Years)                     | 1     | Positive  |
| Silicosis                                   | Males   | 0-6 days    | 80+ years | Indoor Air Pollution (Coal Cooking)                 | 1     | Positive  |
| Silicosis                                   | Males   | 0-6 days    | 80+ years | Asbestos production (binary)                        | 1     | Positive  |
| Silicosis                                   | Males   | 0-6 days    | 80+ years | Smoking Prevalence                                  | 1     | Positive  |
| Silicosis                                   | Males   | 0-6 days    | 80+ years | Health System Access 2 (unitless)                   | 1     | Negative  |
| Silicosis                                   | Males   | 0-6 days    | 80+ years | Asbestos production (kg) per capita                 | 2     | Positive  |
| Silicosis                                   | Males   | 0-6 days    | 80+ years | Elevation 500 to 1500m (proportion)                 | 2     | Positive  |
| Silicosis                                   | Males   | 0-6 days    | 80+ years | Gold production (kg) per capita                     | 2     | Positive  |
| Silicosis                                   | Males   | 0-6 days    | 80+ years | Elevation Over 1500m (proportion)                   | 2     | Positive  |
| Silicosis                                   | Males   | 0-6 days    | 80+ years | Gold production (binary)                            | 2     | Positive  |
| Silicosis                                   | Males   | 0-6 days    | 80+ years | LDI (I\$ per capita)                                | 3     | Negative  |
| Silicosis                                   | Males   | 0-6 days    | 80+ years | Education (years per capita)                        | 3     | Negative  |
| Skin and subcutaneous diseases              | Females | 28-364 days | 80+ years | Malnutrition (proportion <2SD weight for age)       | 1     | Positive  |
| Skin and subcutaneous diseases              | Females | 28-364 days | 80+ years | Alcohol (liters per capita)                         | 2     | Positive  |

**Web Table 22 – CODEm covariates used, level of covariate, and expected direction of covariate by cause, sex, and age**

| Cause                          | Sex     | Age Start   | Age End   | Covariate                                      | Level | Direction |
|--------------------------------|---------|-------------|-----------|------------------------------------------------|-------|-----------|
| Skin and subcutaneous diseases | Females | 28-364 days | 80+ years | Smoking Prevalence                             | 2     | Positive  |
| Skin and subcutaneous diseases | Females | 28-364 days | 80+ years | Latitude 15 to 30 (proportion)                 | 3     | None      |
| Skin and subcutaneous diseases | Females | 28-364 days | 80+ years | Latitude 30 to 45 (proportion)                 | 3     | None      |
| Skin and subcutaneous diseases | Females | 28-364 days | 80+ years | Latitude Over 45 (proportion)                  | 3     | None      |
| Skin and subcutaneous diseases | Females | 28-364 days | 80+ years | Latitude Under 15 (proportion)                 | 3     | None      |
| Skin and subcutaneous diseases | Males   | 28-364 days | 80+ years | Improved Water Source (proportion with access) | 1     | Negative  |
| Skin and subcutaneous diseases | Males   | 28-364 days | 80+ years | Sanitation (proportion with access)            | 1     | Negative  |
| Skin and subcutaneous diseases | Males   | 28-364 days | 80+ years | Malnutrition (proportion <2SD weight for age)  | 1     | Positive  |
| Skin and subcutaneous diseases | Males   | 28-364 days | 80+ years | Alcohol (liters per capita)                    | 2     | Positive  |
| Skin and subcutaneous diseases | Males   | 28-364 days | 80+ years | Latitude 15 to 30 (proportion)                 | 3     | None      |
| Skin and subcutaneous diseases | Males   | 28-364 days | 80+ years | Latitude 30 to 45 (proportion)                 | 3     | None      |
| Skin and subcutaneous diseases | Males   | 28-364 days | 80+ years | Latitude Over 45 (proportion)                  | 3     | None      |
| Skin and subcutaneous diseases | Males   | 28-364 days | 80+ years | Latitude Under 15 (proportion)                 | 3     | None      |
| Stomach cancer [Developed]     | Females | 15-19 years | 80+ years | Cumulative Cigarettes (20 Years)               | 1     | Positive  |
| Stomach cancer [Developed]     | Females | 15-19 years | 80+ years | Cumulative Cigarettes (10 Years)               | 1     | Positive  |
| Stomach cancer [Developed]     | Females | 15-19 years | 80+ years | Tobacco (cigarettes per capita)                | 1     | Positive  |
| Stomach cancer [Developed]     | Females | 15-19 years | 80+ years | Cumulative Cigarettes (15 Years)               | 1     | Positive  |
| Stomach cancer [Developed]     | Females | 15-19 years | 80+ years | Indoor Air Pollution (Coal Cooking)            | 2     | Positive  |
| Stomach cancer [Developed]     | Females | 15-19 years | 80+ years | Outdoor Air Pollution (PM2.5)                  | 2     | Positive  |
| Stomach cancer [Developed]     | Females | 15-19 years | 80+ years | Indoor Air Pollution (Biomass Cooking)         | 2     | Positive  |
| Stomach cancer [Developed]     | Females | 15-19 years | 80+ years | Indoor Air Pollution (All Cooking Fuels)       | 2     | Positive  |
| Stomach cancer [Developed]     | Females | 15-19 years | 80+ years | Improved Water Source (proportion with access) | 2     | Negative  |
| Stomach cancer [Developed]     | Females | 15-19 years | 80+ years | Fruits (kcal per capita)                       | 2     | Negative  |
| Stomach cancer [Developed]     | Females | 15-19 years | 80+ years | Alcohol (liters per capita)                    | 2     | Positive  |
| Stomach cancer [Developed]     | Females | 15-19 years | 80+ years | Sanitation (proportion with access)            | 2     | Negative  |
| Stomach cancer [Developed]     | Females | 15-19 years | 80+ years | Vegetables (kcal per capita)                   | 2     | Negative  |
| Stomach cancer [Developed]     | Females | 15-19 years | 80+ years | Education (years per capita)                   | 3     | Negative  |
| Stomach cancer [Developed]     | Females | 15-19 years | 80+ years | LDI (I\$ per capita)                           | 3     | Negative  |
| Stomach cancer [Developed]     | Males   | 15-19 years | 80+ years | Cumulative Cigarettes (20 Years)               | 1     | Positive  |
| Stomach cancer [Developed]     | Males   | 15-19 years | 80+ years | Cumulative Cigarettes (15 Years)               | 1     | Positive  |
| Stomach cancer [Developed]     | Males   | 15-19 years | 80+ years | Cumulative Cigarettes (10 Years)               | 1     | Positive  |
| Stomach cancer [Developed]     | Males   | 15-19 years | 80+ years | Tobacco (cigarettes per capita)                | 1     | Positive  |
| Stomach cancer [Developed]     | Males   | 15-19 years | 80+ years | Smoking Prevalence [lagged 10 years]           | 1     | Positive  |
| Stomach cancer [Developed]     | Males   | 15-19 years | 80+ years | Indoor Air Pollution (All Cooking Fuels)       | 2     | Positive  |
| Stomach cancer [Developed]     | Males   | 15-19 years | 80+ years | Indoor Air Pollution (Biomass Cooking)         | 2     | Positive  |

**Web Table 22 – CODEm covariates used, level of covariate, and expected direction of covariate by cause, sex, and age**

| Cause                       | Sex     | Age Start   | Age End   | Covariate                                      | Level | Direction |
|-----------------------------|---------|-------------|-----------|------------------------------------------------|-------|-----------|
| Stomach cancer [Developed]  | Males   | 15-19 years | 80+ years | Alcohol (liters per capita)                    | 2     | Positive  |
| Stomach cancer [Developed]  | Males   | 15-19 years | 80+ years | Outdoor Air Pollution (PM2.5)                  | 2     | Positive  |
| Stomach cancer [Developed]  | Males   | 15-19 years | 80+ years | Vegetables (kcal per capita)                   | 2     | Negative  |
| Stomach cancer [Developed]  | Males   | 15-19 years | 80+ years | Fruits (kcal per capita)                       | 2     | Negative  |
| Stomach cancer [Developed]  | Males   | 15-19 years | 80+ years | Indoor Air Pollution (Coal Cooking)            | 2     | Positive  |
| Stomach cancer [Developed]  | Males   | 15-19 years | 80+ years | Sanitation (proportion with access)            | 2     | Negative  |
| Stomach cancer [Developed]  | Males   | 15-19 years | 80+ years | Improved Water Source (proportion with access) | 2     | Negative  |
| Stomach cancer [Developed]  | Males   | 15-19 years | 80+ years | LDI (\$ per capita)                            | 3     | Negative  |
| Stomach cancer [Developed]  | Males   | 15-19 years | 80+ years | Education (years per capita)                   | 3     | Negative  |
| Stomach cancer [Developing] | Females | 15-19 years | 80+ years | Tobacco (cigarettes per capita)                | 1     | Positive  |
| Stomach cancer [Developing] | Females | 15-19 years | 80+ years | Cumulative Cigarettes (20 Years)               | 1     | Positive  |
| Stomach cancer [Developing] | Females | 15-19 years | 80+ years | Cumulative Cigarettes (10 Years)               | 1     | Positive  |
| Stomach cancer [Developing] | Females | 15-19 years | 80+ years | Cumulative Cigarettes (15 Years)               | 1     | Positive  |
| Stomach cancer [Developing] | Females | 15-19 years | 80+ years | Indoor Air Pollution (All Cooking Fuels)       | 2     | Positive  |
| Stomach cancer [Developing] | Females | 15-19 years | 80+ years | Indoor Air Pollution (Biomass Cooking)         | 2     | Positive  |
| Stomach cancer [Developing] | Females | 15-19 years | 80+ years | Vegetables (kcal per capita)                   | 2     | Negative  |
| Stomach cancer [Developing] | Females | 15-19 years | 80+ years | Indoor Air Pollution (Coal Cooking)            | 2     | Positive  |
| Stomach cancer [Developing] | Females | 15-19 years | 80+ years | Improved Water Source (proportion with access) | 2     | Negative  |
| Stomach cancer [Developing] | Females | 15-19 years | 80+ years | Sanitation (proportion with access)            | 2     | Negative  |
| Stomach cancer [Developing] | Females | 15-19 years | 80+ years | Outdoor Air Pollution (PM2.5)                  | 2     | Positive  |
| Stomach cancer [Developing] | Females | 15-19 years | 80+ years | Alcohol (liters per capita)                    | 2     | Positive  |
| Stomach cancer [Developing] | Females | 15-19 years | 80+ years | Fruits (kcal per capita)                       | 2     | Negative  |
| Stomach cancer [Developing] | Females | 15-19 years | 80+ years | LDI (\$ per capita)                            | 3     | Negative  |
| Stomach cancer [Developing] | Females | 15-19 years | 80+ years | Education (years per capita)                   | 3     | Negative  |
| Stomach cancer [Developing] | Males   | 15-19 years | 80+ years | Smoking Prevalence [lagged 10 years]           | 1     | Positive  |
| Stomach cancer [Developing] | Males   | 15-19 years | 80+ years | Cumulative Cigarettes (15 Years)               | 1     | Positive  |
| Stomach cancer [Developing] | Males   | 15-19 years | 80+ years | Cumulative Cigarettes (20 Years)               | 1     | Positive  |
| Stomach cancer [Developing] | Males   | 15-19 years | 80+ years | Cumulative Cigarettes (10 Years)               | 1     | Positive  |
| Stomach cancer [Developing] | Males   | 15-19 years | 80+ years | Tobacco (cigarettes per capita)                | 1     | Positive  |
| Stomach cancer [Developing] | Males   | 15-19 years | 80+ years | Indoor Air Pollution (All Cooking Fuels)       | 2     | Positive  |
| Stomach cancer [Developing] | Males   | 15-19 years | 80+ years | Improved Water Source (proportion with access) | 2     | Negative  |
| Stomach cancer [Developing] | Males   | 15-19 years | 80+ years | Vegetables (kcal per capita)                   | 2     | Negative  |
| Stomach cancer [Developing] | Males   | 15-19 years | 80+ years | Sanitation (proportion with access)            | 2     | Negative  |
| Stomach cancer [Developing] | Males   | 15-19 years | 80+ years | Indoor Air Pollution (Coal Cooking)            | 2     | Positive  |
| Stomach cancer [Developing] | Males   | 15-19 years | 80+ years | Alcohol (liters per capita)                    | 2     | Positive  |

**Web Table 22 – CODEm covariates used, level of covariate, and expected direction of covariate by cause, sex, and age**

| Cause                          | Sex     | Age Start   | Age End     | Covariate                                          | Level | Direction |
|--------------------------------|---------|-------------|-------------|----------------------------------------------------|-------|-----------|
| Stomach cancer [Developing]    | Males   | 15-19 years | 80+ years   | Fruits (kcal per capita)                           | 2     | Negative  |
| Stomach cancer [Developing]    | Males   | 15-19 years | 80+ years   | Indoor Air Pollution (Biomass Cooking)             | 2     | Positive  |
| Stomach cancer [Developing]    | Males   | 15-19 years | 80+ years   | Outdoor Air Pollution (PM2.5)                      | 2     | Positive  |
| Stomach cancer [Developing]    | Males   | 15-19 years | 80+ years   | LDI (I\$ per capita)                               | 3     | Negative  |
| Stomach cancer [Developing]    | Males   | 15-19 years | 80+ years   | Education (years per capita)                       | 3     | Negative  |
| Sudden infant death syndrome   | Females | 7-27 days   | 28-364 days | Smoking Prevalence (Reproductive Age Standardized) | 1     | Positive  |
| Sudden infant death syndrome   | Females | 7-27 days   | 28-364 days | In-Facility Delivery (proportion)                  | 1     | Negative  |
| Sudden infant death syndrome   | Females | 7-27 days   | 28-364 days | Total Fertility Rate                               | 3     | Positive  |
| Sudden infant death syndrome   | Females | 7-27 days   | 28-364 days | LDI (I\$ per capita)                               | 3     | None      |
| Sudden infant death syndrome   | Males   | 7-27 days   | 28-364 days | Smoking Prevalence (Reproductive Age Standardized) | 1     | Positive  |
| Sudden infant death syndrome   | Males   | 7-27 days   | 28-364 days | In-Facility Delivery (proportion)                  | 1     | Negative  |
| Sudden infant death syndrome   | Males   | 7-27 days   | 28-364 days | LDI (I\$ per capita)                               | 3     | None      |
| Testicular cancer [Developed]  | Males   | 15-19 years | 80+ years   | Vegetables (kcal per capita)                       | 2     | Negative  |
| Testicular cancer [Developed]  | Males   | 15-19 years | 80+ years   | Fruits (kcal per capita)                           | 2     | Negative  |
| Testicular cancer [Developed]  | Males   | 15-19 years | 80+ years   | Health System Access 2 (unitless)                  | 2     | Negative  |
| Testicular cancer [Developed]  | Males   | 15-19 years | 80+ years   | LDI (I\$ per capita)                               | 3     | Negative  |
| Testicular cancer [Developing] | Males   | 15-19 years | 80+ years   | Vegetables (kcal per capita)                       | 2     | Negative  |
| Tetanus                        | Females | 0-6 days    | 28-364 days | Health System Access 2 (unitless)                  | 1     | Negative  |
| Tetanus                        | Females | 0-6 days    | 28-364 days | Tetanus Toxoid Coverage Smooth (proportion)        | 1     | Negative  |
| Tetanus                        | Females | 0-6 days    | 28-364 days | DTP3 Coverage (proportion)                         | 1     | Negative  |
| Tetanus                        | Females | 0-6 days    | 28-364 days | In-Facility Delivery (proportion)                  | 2     | Negative  |
| Tetanus                        | Females | 0-6 days    | 28-364 days | Skilled Birth Attendance (proportion)              | 2     | Negative  |
| Tetanus                        | Females | 0-6 days    | 28-364 days | LDI (I\$ per capita)                               | 3     | Negative  |
| Tetanus                        | Females | 0-6 days    | 28-364 days | Education (years per capita)                       | 3     | Negative  |
| Tetanus                        | Females | 1-4 years   | 80+ years   | Health System Access 2 (unitless)                  | 1     | Negative  |
| Tetanus                        | Females | 1-4 years   | 80+ years   | DTP3 Coverage (proportion)                         | 1     | Negative  |
| Tetanus                        | Females | 1-4 years   | 80+ years   | Sanitation (proportion with access)                | 3     | Negative  |
| Tetanus                        | Females | 1-4 years   | 80+ years   | LDI (I\$ per capita)                               | 3     | Negative  |
| Tetanus                        | Females | 1-4 years   | 80+ years   | Education (years per capita)                       | 3     | Negative  |
| Tetanus                        | Males   | 0-6 days    | 28-364 days | Tetanus Toxoid Coverage Smooth (proportion)        | 1     | Negative  |
| Tetanus                        | Males   | 0-6 days    | 28-364 days | Health System Access 2 (unitless)                  | 1     | Negative  |
| Tetanus                        | Males   | 0-6 days    | 28-364 days | DTP3 Coverage (proportion)                         | 1     | Negative  |
| Tetanus                        | Males   | 0-6 days    | 28-364 days | In-Facility Delivery (proportion)                  | 2     | Negative  |
| Tetanus                        | Males   | 0-6 days    | 28-364 days | Skilled Birth Attendance (proportion)              | 2     | Negative  |
| Tetanus                        | Males   | 0-6 days    | 28-364 days | LDI (I\$ per capita)                               | 3     | Negative  |

**Web Table 22 – CODEm covariates used, level of covariate, and expected direction of covariate by cause, sex, and age**

| Cause                          | Sex     | Age Start   | Age End     | Covariate                                          | Level | Direction |
|--------------------------------|---------|-------------|-------------|----------------------------------------------------|-------|-----------|
| Tetanus                        | Males   | 0-6 days    | 28-364 days | Education (years per capita)                       | 3     | Negative  |
| Tetanus                        | Males   | 1-4 years   | 80+ years   | DTP3 Coverage (proportion)                         | 1     | Negative  |
| Tetanus                        | Males   | 1-4 years   | 80+ years   | Health System Access 2 (unitless)                  | 1     | Negative  |
| Tetanus                        | Males   | 1-4 years   | 80+ years   | Education (years per capita)                       | 3     | Negative  |
| Tetanus                        | Males   | 1-4 years   | 80+ years   | Sanitation (proportion with access)                | 3     | Negative  |
| Tetanus                        | Males   | 1-4 years   | 80+ years   | LDI (I\$ per capita)                               | 3     | Negative  |
| Thyroid cancer [Developed]     | Females | 10-14 years | 80+ years   | Tobacco (cigarettes per capita) [lagged 10 years]  | 1     | Positive  |
| Thyroid cancer [Developed]     | Females | 10-14 years | 80+ years   | Vegetables (kcal per capita)                       | 2     | Negative  |
| Thyroid cancer [Developed]     | Females | 10-14 years | 80+ years   | Fruits (kcal per capita)                           | 2     | Negative  |
| Thyroid cancer [Developed]     | Females | 10-14 years | 80+ years   | Education (years per capita)                       | 3     | Negative  |
| Thyroid cancer [Developed]     | Females | 10-14 years | 80+ years   | LDI (I\$ per capita)                               | 3     | Negative  |
| Thyroid cancer [Developed]     | Males   | 10-14 years | 80+ years   | Smoking Prevalence [lagged 10 years]               | 1     | Positive  |
| Thyroid cancer [Developed]     | Males   | 10-14 years | 80+ years   | Vegetables (kcal per capita)                       | 2     | Negative  |
| Thyroid cancer [Developed]     | Males   | 10-14 years | 80+ years   | Fruits (kcal per capita)                           | 2     | Negative  |
| Thyroid cancer [Developed]     | Males   | 10-14 years | 80+ years   | Education (years per capita)                       | 3     | Negative  |
| Thyroid cancer [Developing]    | Females | 10-14 years | 80+ years   | Tobacco (cigarettes per capita) [lagged 10 years]  | 1     | Positive  |
| Thyroid cancer [Developing]    | Females | 10-14 years | 80+ years   | Improved Water Source (proportion with access)     | 2     | Negative  |
| Thyroid cancer [Developing]    | Females | 10-14 years | 80+ years   | Fruits (kcal per capita)                           | 2     | Negative  |
| Thyroid cancer [Developing]    | Females | 10-14 years | 80+ years   | Vegetables (kcal per capita)                       | 2     | Negative  |
| Thyroid cancer [Developing]    | Females | 10-14 years | 80+ years   | Sanitation (proportion with access)                | 2     | Negative  |
| Thyroid cancer [Developing]    | Females | 10-14 years | 80+ years   | Education (years per capita)                       | 3     | Negative  |
| Thyroid cancer [Developing]    | Females | 10-14 years | 80+ years   | LDI (I\$ per capita)                               | 3     | Negative  |
| Thyroid cancer [Developing]    | Males   | 10-14 years | 80+ years   | Tobacco (cigarettes per capita) [lagged 10 years]  | 1     | Positive  |
| Thyroid cancer [Developing]    | Males   | 10-14 years | 80+ years   | Smoking Prevalence [lagged 10 years]               | 1     | Positive  |
| Thyroid cancer [Developing]    | Males   | 10-14 years | 80+ years   | Red Meat (kcal per capita)                         | 2     | Positive  |
| Thyroid cancer [Developing]    | Males   | 10-14 years | 80+ years   | Mean BMI                                           | 2     | Positive  |
| Thyroid cancer [Developing]    | Males   | 10-14 years | 80+ years   | Vegetables (kcal per capita)                       | 2     | Negative  |
| Thyroid cancer [Developing]    | Males   | 10-14 years | 80+ years   | Improved Water Source (proportion with access)     | 2     | Negative  |
| Transport injuries [Developed] | Females | 0-6 days    | 80+ years   | Vehicles - 2+4 wheels (per capita)                 | 1     | Positive  |
| Transport injuries [Developed] | Females | 0-6 days    | 80+ years   | Health System Access 2 (unitless)                  | 1     | Negative  |
| Transport injuries [Developed] | Females | 0-6 days    | 80+ years   | Vehicles - 2 wheels fraction (proportion)          | 1     | Positive  |
| Transport injuries [Developed] | Females | 0-6 days    | 80+ years   | Alcohol (liters per capita)                        | 1     | Positive  |
| Transport injuries [Developed] | Females | 0-6 days    | 80+ years   | LDI (I\$ per capita)                               | 2     | None      |
| Transport injuries [Developed] | Females | 0-6 days    | 80+ years   | Population Density (500-1000 ppl/sqkm, proportion) | 2     | None      |
| Transport injuries [Developed] | Females | 0-6 days    | 80+ years   | Population Density (300-500 ppl/sqkm, proportion)  | 2     | None      |

**Web Table 22 – CODEm covariates used, level of covariate, and expected direction of covariate by cause, sex, and age**

| Cause                           | Sex     | Age Start   | Age End   | Covariate                                          | Level | Direction |
|---------------------------------|---------|-------------|-----------|----------------------------------------------------|-------|-----------|
| Transport injuries [Developed]  | Females | 0-6 days    | 80+ years | Education (years per capita)                       | 3     | Negative  |
| Transport injuries [Developed]  | Males   | 0-6 days    | 80+ years | Health System Access 2 (unitless)                  | 1     | Negative  |
| Transport injuries [Developed]  | Males   | 0-6 days    | 80+ years | Vehicles - 2+4 wheels (per capita)                 | 1     | Positive  |
| Transport injuries [Developed]  | Males   | 0-6 days    | 80+ years | Vehicles - 2 wheels fraction (proportion)          | 1     | Positive  |
| Transport injuries [Developed]  | Males   | 0-6 days    | 80+ years | Alcohol (liters per capita)                        | 1     | Positive  |
| Transport injuries [Developed]  | Males   | 0-6 days    | 80+ years | Population Density (300-500 ppl/sqkm, proportion)  | 2     | None      |
| Transport injuries [Developed]  | Males   | 0-6 days    | 80+ years | LDI (I\$ per capita)                               | 2     | None      |
| Transport injuries [Developed]  | Males   | 0-6 days    | 80+ years | Population Density (500-1000 ppl/sqkm, proportion) | 2     | None      |
| Transport injuries [Developed]  | Males   | 0-6 days    | 80+ years | Education (years per capita)                       | 3     | Negative  |
| Transport injuries [Developing] | Females | 0-6 days    | 80+ years | Vehicles - 2 wheels fraction (proportion)          | 1     | Positive  |
| Transport injuries [Developing] | Females | 0-6 days    | 80+ years | Alcohol (liters per capita)                        | 1     | Positive  |
| Transport injuries [Developing] | Females | 0-6 days    | 80+ years | Health System Access 2 (unitless)                  | 1     | Negative  |
| Transport injuries [Developing] | Females | 0-6 days    | 80+ years | Vehicles - 2+4 wheels (per capita)                 | 1     | Positive  |
| Transport injuries [Developing] | Females | 0-6 days    | 80+ years | Population Density (500-1000 ppl/sqkm, proportion) | 2     | None      |
| Transport injuries [Developing] | Females | 0-6 days    | 80+ years | Population Density (300-500 ppl/sqkm, proportion)  | 2     | None      |
| Transport injuries [Developing] | Females | 0-6 days    | 80+ years | LDI (I\$ per capita)                               | 2     | None      |
| Transport injuries [Developing] | Females | 0-6 days    | 80+ years | Education (years per capita)                       | 3     | Negative  |
| Transport injuries [Developing] | Males   | 0-6 days    | 80+ years | Alcohol (liters per capita)                        | 1     | Positive  |
| Transport injuries [Developing] | Males   | 0-6 days    | 80+ years | Vehicles - 2 wheels fraction (proportion)          | 1     | Positive  |
| Transport injuries [Developing] | Males   | 0-6 days    | 80+ years | Health System Access 2 (unitless)                  | 1     | Negative  |
| Transport injuries [Developing] | Males   | 0-6 days    | 80+ years | Vehicles - 2+4 wheels (per capita)                 | 1     | Positive  |
| Transport injuries [Developing] | Males   | 0-6 days    | 80+ years | Population Density (300-500 ppl/sqkm, proportion)  | 2     | None      |
| Transport injuries [Developing] | Males   | 0-6 days    | 80+ years | Population Density (500-1000 ppl/sqkm, proportion) | 2     | None      |
| Transport injuries [Developing] | Males   | 0-6 days    | 80+ years | LDI (I\$ per capita)                               | 2     | None      |
| Transport injuries [Developing] | Males   | 0-6 days    | 80+ years | Education (years per capita)                       | 3     | Negative  |
| Tuberculosis                    | Females | 28-364 days | 80+ years | Malnutrition (proportion <2SD weight for age)      | 1     | Positive  |
| Tuberculosis                    | Females | 28-364 days | 80+ years | Smoking Prevalence                                 | 1     | Positive  |
| Tuberculosis                    | Females | 28-364 days | 80+ years | Cumulative Cigarettes (5 Years)                    | 1     | Positive  |
| Tuberculosis                    | Females | 28-364 days | 80+ years | Health System Access 2 (unitless)                  | 1     | Negative  |
| Tuberculosis                    | Females | 28-364 days | 80+ years | Indoor Air Pollution (All Cooking Fuels)           | 1     | Positive  |
| Tuberculosis                    | Females | 28-364 days | 80+ years | Alcohol (liters per capita)                        | 2     | Positive  |
| Tuberculosis                    | Females | 28-364 days | 80+ years | Education (years per capita)                       | 3     | Negative  |
| Tuberculosis                    | Females | 28-364 days | 80+ years | LDI (I\$ per capita)                               | 3     | Negative  |
| Tuberculosis                    | Males   | 28-364 days | 80+ years | Health System Access 2 (unitless)                  | 1     | Negative  |
| Tuberculosis                    | Males   | 28-364 days | 80+ years | Cumulative Cigarettes (5 Years)                    | 1     | Positive  |

**Web Table 22 – CODEm covariates used, level of covariate, and expected direction of covariate by cause, sex, and age**

| Cause                                 | Sex     | Age Start   | Age End   | Covariate                                           | Level | Direction |
|---------------------------------------|---------|-------------|-----------|-----------------------------------------------------|-------|-----------|
| Tuberculosis                          | Males   | 28-364 days | 80+ years | Smoking Prevalence                                  | 1     | Positive  |
| Tuberculosis                          | Males   | 28-364 days | 80+ years | Indoor Air Pollution (All Cooking Fuels)            | 1     | Positive  |
| Tuberculosis                          | Males   | 28-364 days | 80+ years | Malnutrition (proportion <2SD weight for age)       | 1     | Positive  |
| Tuberculosis                          | Males   | 28-364 days | 80+ years | Alcohol (liters per capita)                         | 2     | Positive  |
| Tuberculosis                          | Males   | 28-364 days | 80+ years | Education (years per capita)                        | 3     | Negative  |
| Tuberculosis                          | Males   | 28-364 days | 80+ years | LDI (I\$ per capita)                                | 3     | Negative  |
| Unintentional firearm injuries        | Females | 0-6 days    | 80+ years | Population Density (over 1000 ppl/sqkm, proportion) | 2     | None      |
| Unintentional firearm injuries        | Females | 0-6 days    | 80+ years | Health System Access (unitless)                     | 2     | Negative  |
| Unintentional firearm injuries        | Females | 0-6 days    | 80+ years | Population Density (under 150 ppl/sqkm, proportion) | 2     | None      |
| Unintentional firearm injuries        | Females | 0-6 days    | 80+ years | LDI (I\$ per capita)                                | 3     | None      |
| Unintentional firearm injuries        | Females | 0-6 days    | 80+ years | Education (years per capita)                        | 3     | Negative  |
| Unintentional firearm injuries        | Males   | 0-6 days    | 80+ years | Alcohol (liters per capita)                         | 2     | Positive  |
| Unintentional firearm injuries        | Males   | 0-6 days    | 80+ years | Health System Access (unitless)                     | 2     | Negative  |
| Unintentional firearm injuries        | Males   | 0-6 days    | 80+ years | Population Density (under 150 ppl/sqkm, proportion) | 2     | None      |
| Unintentional firearm injuries        | Males   | 0-6 days    | 80+ years | Population Density (over 1000 ppl/sqkm, proportion) | 2     | None      |
| Unintentional firearm injuries        | Males   | 0-6 days    | 80+ years | LDI (I\$ per capita)                                | 3     | None      |
| Unintentional firearm injuries        | Males   | 0-6 days    | 80+ years | Education (years per capita)                        | 3     | Negative  |
| Unintentional suffocation             | Females | 0-6 days    | 80+ years | Alcohol (liters per capita)                         | 2     | Positive  |
| Unintentional suffocation             | Females | 0-6 days    | 80+ years | Population Density (under 150 ppl/sqkm, proportion) | 2     | None      |
| Unintentional suffocation             | Females | 0-6 days    | 80+ years | Population Density (over 1000 ppl/sqkm, proportion) | 2     | None      |
| Unintentional suffocation             | Females | 0-6 days    | 80+ years | LDI (I\$ per capita)                                | 3     | None      |
| Unintentional suffocation             | Males   | 0-6 days    | 80+ years | Population Density (over 1000 ppl/sqkm, proportion) | 2     | None      |
| Unintentional suffocation             | Males   | 0-6 days    | 80+ years | Population Density (under 150 ppl/sqkm, proportion) | 2     | None      |
| Unintentional suffocation             | Males   | 0-6 days    | 80+ years | Alcohol (liters per capita)                         | 2     | Positive  |
| Unintentional suffocation             | Males   | 0-6 days    | 80+ years | LDI (I\$ per capita)                                | 3     | None      |
| Urinary diseases and male infertility | Females | 0-6 days    | 80+ years | Health System Access 2 (unitless)                   | 1     | Negative  |
| Urinary diseases and male infertility | Females | 0-6 days    | 80+ years | Latitude Over 45 (proportion)                       | 2     | None      |
| Urinary diseases and male infertility | Females | 0-6 days    | 80+ years | Latitude Under 15 (proportion)                      | 2     | None      |
| Urinary diseases and male infertility | Females | 0-6 days    | 80+ years | Latitude 15 to 30 (proportion)                      | 2     | None      |
| Urinary diseases and male infertility | Females | 0-6 days    | 80+ years | Mean BMI                                            | 2     | Positive  |
| Urinary diseases and male infertility | Females | 0-6 days    | 80+ years | Latitude 30 to 45 (proportion)                      | 2     | None      |
| Urinary diseases and male infertility | Females | 0-6 days    | 80+ years | LDI (I\$ per capita)                                | 3     | Negative  |
| Urinary diseases and male infertility | Females | 0-6 days    | 80+ years | Education (years per capita)                        | 3     | Negative  |
| Urinary diseases and male infertility | Males   | 0-6 days    | 80+ years | Health System Access 2 (unitless)                   | 1     | Negative  |
| Urinary diseases and male infertility | Males   | 0-6 days    | 80+ years | Latitude 30 to 45 (proportion)                      | 2     | None      |



**Web Table 22 – CODEm covariates used, level of covariate, and expected direction of covariate by cause, sex, and age**

| Cause                                 | Sex     | Age Start   | Age End   | Covariate                                         | Level | Direction |
|---------------------------------------|---------|-------------|-----------|---------------------------------------------------|-------|-----------|
| Urinary diseases and male infertility | Males   | 0-6 days    | 80+ years | Latitude Over 45 (proportion)                     | 2     | None      |
| Urinary diseases and male infertility | Males   | 0-6 days    | 80+ years | Latitude Under 15 (proportion)                    | 2     | None      |
| Urinary diseases and male infertility | Males   | 0-6 days    | 80+ years | Mean BMI                                          | 2     | Positive  |
| Urinary diseases and male infertility | Males   | 0-6 days    | 80+ years | Latitude 15 to 30 (proportion)                    | 2     | None      |
| Urinary diseases and male infertility | Males   | 0-6 days    | 80+ years | LDI (I\$ per capita)                              | 3     | Negative  |
| Urinary diseases and male infertility | Males   | 0-6 days    | 80+ years | Education (years per capita)                      | 3     | Negative  |
| Urolithiasis                          | Females | 5-9 years   | 80+ years | Health System Access (unitless)                   | 1     | Negative  |
| Urolithiasis                          | Females | 5-9 years   | 80+ years | Animal Fats (kcal per capita)                     | 2     | Positive  |
| Urolithiasis                          | Females | 5-9 years   | 80+ years | Red Meat (kcal per capita)                        | 2     | Positive  |
| Urolithiasis                          | Females | 5-9 years   | 80+ years | Vegetables (kcal per capita)                      | 2     | Negative  |
| Urolithiasis                          | Females | 5-9 years   | 80+ years | Fruits (kcal per capita)                          | 2     | Negative  |
| Urolithiasis                          | Females | 5-9 years   | 80+ years | LDI (I\$ per capita)                              | 3     | Negative  |
| Urolithiasis                          | Females | 5-9 years   | 80+ years | Education (years per capita)                      | 3     | Negative  |
| Urolithiasis                          | Males   | 5-9 years   | 80+ years | Health System Access (unitless)                   | 1     | Negative  |
| Urolithiasis                          | Males   | 5-9 years   | 80+ years | Animal Fats (kcal per capita)                     | 2     | Positive  |
| Urolithiasis                          | Males   | 5-9 years   | 80+ years | Red Meat (kcal per capita)                        | 2     | Positive  |
| Urolithiasis                          | Males   | 5-9 years   | 80+ years | Vegetables (kcal per capita)                      | 2     | Negative  |
| Urolithiasis                          | Males   | 5-9 years   | 80+ years | Fruits (kcal per capita)                          | 2     | Negative  |
| Urolithiasis                          | Males   | 5-9 years   | 80+ years | Education (years per capita)                      | 3     | Negative  |
| Urolithiasis                          | Males   | 5-9 years   | 80+ years | LDI (I\$ per capita)                              | 3     | Negative  |
| Uterine cancer [Developed]            | Females | 15-19 years | 80+ years | Mean BMI                                          | 1     | Positive  |
| Uterine cancer [Developed]            | Females | 15-19 years | 80+ years | Cumulative Cigarettes (5 Years)                   | 2     | Positive  |
| Uterine cancer [Developed]            | Females | 15-19 years | 80+ years | Cumulative Cigarettes (10 Years)                  | 2     | Positive  |
| Uterine cancer [Developed]            | Females | 15-19 years | 80+ years | Diabetes Age-Standardized Prevalence (proportion) | 2     | Positive  |
| Uterine cancer [Developed]            | Females | 15-19 years | 80+ years | Total Fertility Rate                              | 2     | None      |
| Uterine cancer [Developed]            | Females | 15-19 years | 80+ years | Vegetables (kcal per capita)                      | 2     | Negative  |
| Uterine cancer [Developed]            | Females | 15-19 years | 80+ years | Education (years per capita)                      | 3     | Negative  |
| Uterine cancer [Developed]            | Females | 15-19 years | 80+ years | LDI (I\$ per capita)                              | 3     | Negative  |
| Uterine cancer [Developing]           | Females | 15-19 years | 80+ years | Mean BMI                                          | 1     | Positive  |
| Uterine cancer [Developing]           | Females | 15-19 years | 80+ years | Smoking Prevalence                                | 2     | Positive  |
| Uterine cancer [Developing]           | Females | 15-19 years | 80+ years | Health System Access (unitless)                   | 2     | Negative  |
| Uterine cancer [Developing]           | Females | 15-19 years | 80+ years | Cumulative Cigarettes (10 Years)                  | 2     | Positive  |
| Uterine cancer [Developing]           | Females | 15-19 years | 80+ years | Diabetes Age-Standardized Prevalence (proportion) | 2     | Positive  |
| Uterine cancer [Developing]           | Females | 15-19 years | 80+ years | Vegetables (kcal per capita)                      | 2     | Negative  |
| Uterine cancer [Developing]           | Females | 15-19 years | 80+ years | Fruits (kcal per capita)                          | 2     | Negative  |



**Web Table 22 – CODEm covariates used, level of covariate, and expected direction of covariate by cause, sex, and age**

| Cause                         | Sex     | Age Start   | Age End   | Covariate                                           | Level | Direction |
|-------------------------------|---------|-------------|-----------|-----------------------------------------------------|-------|-----------|
| Uterine cancer [Developing]   | Females | 15-19 years | 80+ years | Tobacco (cigarettes per capita) [lagged 20 years]   | 2     | Positive  |
| Uterine cancer [Developing]   | Females | 15-19 years | 80+ years | Cumulative Cigarettes (5 Years)                     | 2     | Positive  |
| Uterine cancer [Developing]   | Females | 15-19 years | 80+ years | Total Fertility Rate                                | 2     | None      |
| Uterine cancer [Developing]   | Females | 15-19 years | 80+ years | LDI (I\$ per capita)                                | 3     | Negative  |
| Uterine cancer [Developing]   | Females | 15-19 years | 80+ years | Education (years per capita)                        | 3     | Negative  |
| Vascular intestinal disorders | Females | 1-4 years   | 80+ years | Diabetes Fasting Plasma Glucose (mmol/L)            | 1     | Positive  |
| Vascular intestinal disorders | Females | 1-4 years   | 80+ years | Diabetes Age-Specific Prevalence (proportion)       | 1     | Positive  |
| Vascular intestinal disorders | Females | 1-4 years   | 80+ years | Diabetes Age-Standardized Prevalence (proportion)   | 1     | Positive  |
| Vascular intestinal disorders | Females | 1-4 years   | 80+ years | Cholesterol (total, mean per capita)                | 1     | Positive  |
| Vascular intestinal disorders | Females | 1-4 years   | 80+ years | Health System Access (capped)                       | 2     | Negative  |
| Vascular intestinal disorders | Females | 1-4 years   | 80+ years | Alcohol (liters per capita)                         | 2     | Positive  |
| Vascular intestinal disorders | Females | 1-4 years   | 80+ years | Animal Fats (kcal per capita)                       | 2     | Positive  |
| Vascular intestinal disorders | Females | 1-4 years   | 80+ years | Fruits (kcal per capita)                            | 2     | Negative  |
| Vascular intestinal disorders | Females | 1-4 years   | 80+ years | Latitude Over 45 (proportion)                       | 3     | Positive  |
| Vascular intestinal disorders | Males   | 1-4 years   | 80+ years | Diabetes Age-Standardized Prevalence (proportion)   | 1     | Positive  |
| Vascular intestinal disorders | Males   | 1-4 years   | 80+ years | Diabetes Fasting Plasma Glucose (mmol/L)            | 1     | Positive  |
| Vascular intestinal disorders | Males   | 1-4 years   | 80+ years | Diabetes Age-Specific Prevalence (proportion)       | 1     | Positive  |
| Vascular intestinal disorders | Males   | 1-4 years   | 80+ years | Cholesterol (total, mean per capita)                | 1     | Positive  |
| Vascular intestinal disorders | Males   | 1-4 years   | 80+ years | Animal Fats (kcal per capita)                       | 2     | Positive  |
| Vascular intestinal disorders | Males   | 1-4 years   | 80+ years | Health System Access (capped)                       | 2     | Negative  |
| Vascular intestinal disorders | Males   | 1-4 years   | 80+ years | Alcohol (liters per capita)                         | 2     | Positive  |
| Vascular intestinal disorders | Males   | 1-4 years   | 80+ years | Education (years per capita)                        | 3     | Negative  |
| Vascular intestinal disorders | Males   | 1-4 years   | 80+ years | Latitude Over 45 (proportion)                       | 3     | Positive  |
| Venomous animal contact       | Females | 0-6 days    | 80+ years | Vehicles - 4 wheels (per capita)                    | 1     | None      |
| Venomous animal contact       | Females | 0-6 days    | 80+ years | Health System Access 2 (unitless)                   | 2     | Negative  |
| Venomous animal contact       | Females | 0-6 days    | 80+ years | Population Density (under 150 ppl/sqkm, proportion) | 3     | None      |
| Venomous animal contact       | Females | 0-6 days    | 80+ years | Education (years per capita)                        | 3     | Negative  |
| Venomous animal contact       | Females | 0-6 days    | 80+ years | Population Density (over 1000 ppl/sqkm, proportion) | 3     | None      |
| Venomous animal contact       | Females | 0-6 days    | 80+ years | Elevation Under 100m (proportion)                   | 3     | None      |
| Venomous animal contact       | Females | 0-6 days    | 80+ years | Elevation Over 1500m (proportion)                   | 3     | None      |
| Venomous animal contact       | Females | 0-6 days    | 80+ years | LDI (I\$ per capita)                                | 3     | None      |
| Venomous animal contact       | Males   | 0-6 days    | 80+ years | Vehicles - 4 wheels (per capita)                    | 1     | None      |
| Venomous animal contact       | Males   | 0-6 days    | 80+ years | Vehicles - 2 wheels (per capita)                    | 1     | Positive  |
| Venomous animal contact       | Males   | 0-6 days    | 80+ years | Health System Access 2 (unitless)                   | 2     | Negative  |
| Venomous animal contact       | Males   | 0-6 days    | 80+ years | Education (years per capita)                        | 3     | Negative  |

**Web Table 22 – CODEm covariates used, level of covariate, and expected direction of covariate by cause, sex, and age**

| Cause                   | Sex     | Age Start   | Age End     | Covariate                                           | Level | Direction |
|-------------------------|---------|-------------|-------------|-----------------------------------------------------|-------|-----------|
| Venomous animal contact | Males   | 0-6 days    | 80+ years   | LDI (I\$ per capita)                                | 3     | None      |
| Venomous animal contact | Males   | 0-6 days    | 80+ years   | Population Density (over 1000 ppl/sqkm, proportion) | 3     | None      |
| Venomous animal contact | Males   | 0-6 days    | 80+ years   | Population Density (under 150 ppl/sqkm, proportion) | 3     | None      |
| Venomous animal contact | Males   | 0-6 days    | 80+ years   | Elevation Under 100m (proportion)                   | 3     | None      |
| Venomous animal contact | Males   | 0-6 days    | 80+ years   | Elevation Over 1500m (proportion)                   | 3     | None      |
| Whooping cough          | Females | 28-364 days | 1-4 years   | DTP3 Coverage (proportion)                          | 1     | Negative  |
| Whooping cough          | Females | 28-364 days | 1-4 years   | Education (years per capita)                        | 3     | Negative  |
| Whooping cough          | Females | 28-364 days | 1-4 years   | LDI (I\$ per capita)                                | 3     | Negative  |
| Whooping cough          | Females | 5-9 years   | 55-59 years | DTP3 Coverage (proportion)                          | 1     | Negative  |
| Whooping cough          | Females | 5-9 years   | 55-59 years | Education (years per capita)                        | 3     | Negative  |
| Whooping cough          | Females | 5-9 years   | 55-59 years | LDI (I\$ per capita)                                | 3     | Negative  |
| Whooping cough          | Males   | 28-364 days | 1-4 years   | DTP3 Coverage (proportion)                          | 1     | Negative  |
| Whooping cough          | Males   | 28-364 days | 1-4 years   | Education (years per capita)                        | 3     | Negative  |
| Whooping cough          | Males   | 28-364 days | 1-4 years   | LDI (I\$ per capita)                                | 3     | Negative  |
| Whooping cough          | Males   | 5-9 years   | 55-59 years | DTP3 Coverage (proportion)                          | 1     | Negative  |
| Whooping cough          | Males   | 5-9 years   | 55-59 years | LDI (I\$ per capita)                                | 3     | Negative  |
| Whooping cough          | Males   | 5-9 years   | 55-59 years | Education (years per capita)                        | 3     | Negative  |

**Web Table 23: Comparison of GBD 2010 and GBD 2013 covariates used in causes of death modeling**

**Web Table 23 - Comparison of covariates used in CoD models for GBD 2010 and GBD 2013**

| Cause Name         | Sex | Covariate name                                      | GBD 2010 |         |         | GBD 2013 |         |         |
|--------------------|-----|-----------------------------------------------------|----------|---------|---------|----------|---------|---------|
|                    |     |                                                     | Level 1  | Level 2 | Level 3 | Level 1  | Level 2 | Level 3 |
| Tuberculosis       | 1   | Cumulative Cigarettes (5 Years)                     | X        |         |         | X        |         |         |
| Tuberculosis       | 1   | Diabetes Fasting Plasma Glucose (mmol/L)            | X        |         |         | X        |         |         |
| Tuberculosis       | 1   | Health System Access 2 (unitless)                   | X        |         |         | X        |         |         |
| Tuberculosis       | 1   | Malnutrition (proportion <2SD weight for age)       | X        |         |         | X        |         |         |
| Tuberculosis       | 1   | Indoor Air Pollution (All Cooking Fuels)            | X        |         |         | X        |         |         |
| Tuberculosis       | 1   | Smoking Prevalence                                  | X        |         |         | X        |         |         |
| Tuberculosis       | 1   | Alcohol (liters per capita)                         |          | X       |         |          | X       |         |
| Tuberculosis       | 1   | Population Density (500-1000 ppl/sqkm, proportion)  |          | X       |         |          | X       |         |
| Tuberculosis       | 1   | Population Density (over 1000 ppl/sqkm, proportion) |          | X       |         |          | X       |         |
| Tuberculosis       | 1   | LDI (I\$ per capita)                                |          |         | X       |          |         | X       |
| Tuberculosis       | 1   | Education (years per capita)                        |          |         | X       |          |         | X       |
| Tuberculosis       | 2   | Cumulative Cigarettes (5 Years)                     | X        |         |         | X        |         |         |
| Tuberculosis       | 2   | Diabetes Fasting Plasma Glucose (mmol/L)            | X        |         |         | X        |         |         |
| Tuberculosis       | 2   | Health System Access 2 (unitless)                   | X        |         |         | X        |         |         |
| Tuberculosis       | 2   | Malnutrition (proportion <2SD weight for age)       | X        |         |         | X        |         |         |
| Tuberculosis       | 2   | Indoor Air Pollution (All Cooking Fuels)            | X        |         |         | X        |         |         |
| Tuberculosis       | 2   | Smoking Prevalence                                  | X        |         |         | X        |         |         |
| Tuberculosis       | 2   | Alcohol (liters per capita)                         |          | X       |         |          | X       |         |
| Tuberculosis       | 2   | Population Density (500-1000 ppl/sqkm, proportion)  |          | X       |         |          | X       |         |
| Tuberculosis       | 2   | Population Density (over 1000 ppl/sqkm, proportion) |          | X       |         |          | X       |         |
| Tuberculosis       | 2   | LDI (I\$ per capita)                                |          |         | X       |          |         | X       |
| Tuberculosis       | 2   | Education (years per capita)                        |          |         | X       |          |         | X       |
| Diarrheal diseases | 1   | Health System Access 2 (unitless)                   | X        |         |         | X        |         |         |
| Diarrheal diseases | 1   | Rotavirus Vaccine Introduced (binary)               | X        |         |         | X        |         |         |
| Diarrheal diseases | 1   | Sanitation (proportion with access)                 | X        |         |         | X        |         |         |
| Diarrheal diseases | 1   | Improved Water Source (proportion with access)      | X        |         |         | X        |         |         |
| Diarrheal diseases | 1   | Malnutrition (proportion <2SD weight for age)       |          | X       |         |          | X       |         |
| Diarrheal diseases | 1   | LDI (I\$ per capita)                                |          |         | X       |          |         | X       |
| Diarrheal diseases | 1   | Education (years per capita)                        |          |         | X       |          |         | X       |
| Diarrheal diseases | 1   | Latitude Under 15 (proportion)                      |          |         | X       |          |         | X       |
| Diarrheal diseases | 1   | Population Density (over 1000 ppl/sqkm, proportion) |          |         | X       |          |         | X       |
| Diarrheal diseases | 1   | Population Density (under 150 ppl/sqkm, proportion) |          |         | X       |          |         | X       |
| Diarrheal diseases | 2   | Health System Access 2 (unitless)                   | X        |         |         | X        |         |         |
| Diarrheal diseases | 2   | Rotavirus Vaccine Introduced (binary)               | X        |         |         | X        |         |         |
| Diarrheal diseases | 2   | Sanitation (proportion with access)                 | X        |         |         | X        |         |         |
| Diarrheal diseases | 2   | Improved Water Source (proportion with access)      | X        |         |         | X        |         |         |
| Diarrheal diseases | 2   | Malnutrition (proportion <2SD weight for age)       |          | X       |         |          | X       |         |
| Diarrheal diseases | 2   | LDI (I\$ per capita)                                |          |         | X       |          |         | X       |

**Web Table 23 - Comparison of covariates used in CoD models for GBD 2010 and GBD 2013**

| Cause Name                           | Sex | Covariate name                                      | GBD 2010 |         |         | GBD 2013 |         |         |
|--------------------------------------|-----|-----------------------------------------------------|----------|---------|---------|----------|---------|---------|
|                                      |     |                                                     | Level 1  | Level 2 | Level 3 | Level 1  | Level 2 | Level 3 |
| Diarrheal diseases                   | 2   | Education (years per capita)                        |          |         | X       |          |         | X       |
| Diarrheal diseases                   | 2   | Latitude Under 15 (proportion)                      |          |         | X       |          |         | X       |
| Diarrheal diseases                   | 2   | Population Density (over 1000 ppl/sqkm, proportion) |          |         | X       |          |         | X       |
| Diarrheal diseases                   | 2   | Population Density (under 150 ppl/sqkm, proportion) |          |         | X       |          |         | X       |
| Typhoid fever                        | 1   | Improved Water Source (proportion with access)      | X*       |         |         | X*       |         |         |
| Typhoid fever                        | 2   | Improved Water Source (proportion with access)      | X*       |         |         | X*       |         |         |
| Paratyphoid fever                    | 1   | Improved Water Source (proportion with access)      | X*       |         |         | X*       |         |         |
| Paratyphoid fever                    | 2   | Improved Water Source (proportion with access)      | X*       |         |         | X*       |         |         |
| Other intestinal infectious diseases | 1   | Improved Water Source (proportion with access)      | X*       |         |         | X*       |         |         |
| Other intestinal infectious diseases | 2   | Improved Water Source (proportion with access)      | X*       |         |         | X*       |         |         |
| Lower respiratory infections         | 1   | Hib3 Vaccine Coverage (proportion)                  |          |         |         | X        |         |         |
| Lower respiratory infections         | 1   | PCV3 Coverage (proportion)                          |          |         |         | X        |         |         |
| Lower respiratory infections         | 1   | Health System Access 2 (unitless)                   | X        |         |         | X        |         |         |
| Lower respiratory infections         | 1   | Malnutrition (proportion <2SD weight for age)       | X        |         |         | X        |         |         |
| Lower respiratory infections         | 1   | Indoor Air Pollution (All Cooking Fuels)            | X        |         |         | X        |         |         |
| Lower respiratory infections         | 1   | Outdoor Air Pollution (PM2.5)                       | X        |         |         | X        |         |         |
| Lower respiratory infections         | 1   | Smoking Prevalence                                  | X        |         |         | X        |         |         |
| Lower respiratory infections         | 1   | DTP3 Coverage (proportion)                          |          | X       |         |          | X       |         |
| Lower respiratory infections         | 1   | Elevation Over 1500m (proportion)                   |          | X       |         |          | X       |         |
| Lower respiratory infections         | 1   | Rainfall (Quintiles 4-5)                            |          | X       |         |          | X       |         |
| Lower respiratory infections         | 1   | Sanitation (proportion with access)                 |          | X       |         |          | X       |         |
| Lower respiratory infections         | 1   | Improved Water Source (proportion with access)      |          | X       |         |          | X       |         |
| Lower respiratory infections         | 1   | LDI (I\$ per capita)                                |          |         | X       |          |         | X       |
| Lower respiratory infections         | 1   | Education (years per capita)                        |          |         | X       |          |         | X       |
| Lower respiratory infections         | 1   | Population Density (over 1000 ppl/sqkm, proportion) |          |         | X       |          |         | X       |
| Lower respiratory infections         | 2   | PCV3 Coverage (proportion)                          |          |         |         | X        |         |         |
| Lower respiratory infections         | 2   | Smoking Prevalence                                  |          |         |         | X        |         |         |
| Lower respiratory infections         | 2   | Smoking Prevalence (Reproductive Age Standardized)  | X        |         |         |          |         |         |
| Lower respiratory infections         | 2   | Hib3 Vaccine Coverage (proportion)                  | X        |         |         | X        |         |         |
| Lower respiratory infections         | 2   | Health System Access 2 (unitless)                   | X        |         |         | X        |         |         |
| Lower respiratory infections         | 2   | Malnutrition (proportion <2SD weight for age)       | X        |         |         | X        |         |         |
| Lower respiratory infections         | 2   | Indoor Air Pollution (All Cooking Fuels)            | X        |         |         | X        |         |         |
| Lower respiratory infections         | 2   | Outdoor Air Pollution (PM2.5)                       | X        |         |         | X        |         |         |
| Lower respiratory infections         | 2   | DTP3 Coverage (proportion)                          |          | X       |         |          | X       |         |
| Lower respiratory infections         | 2   | Elevation Over 1500m (proportion)                   |          | X       |         |          | X       |         |
| Lower respiratory infections         | 2   | Rainfall (Quintiles 4-5)                            |          | X       |         |          | X       |         |
| Lower respiratory infections         | 2   | Sanitation (proportion with access)                 |          | X       |         |          | X       |         |
| Lower respiratory infections         | 2   | Improved Water Source (proportion with access)      |          | X       |         |          | X       |         |

**Web Table 23 - Comparison of covariates used in CoD models for GBD 2010 and GBD 2013**

| Cause Name                   | Sex | Covariate name                                      | GBD 2010 |         |         | GBD 2013 |         |         |
|------------------------------|-----|-----------------------------------------------------|----------|---------|---------|----------|---------|---------|
|                              |     |                                                     | Level 1  | Level 2 | Level 3 | Level 1  | Level 2 | Level 3 |
| Lower respiratory infections | 2   | LDI (I\$ per capita)                                |          |         | X       |          |         | X       |
| Lower respiratory infections | 2   | Education (years per capita)                        |          |         | X       |          |         | X       |
| Lower respiratory infections | 2   | Population Density (over 1000 ppl/sqkm, proportion) |          |         | X       |          |         | X       |
| Upper respiratory infections | 1   | Hib3 Vaccine Coverage (proportion)                  | X        |         |         |          |         |         |
| Upper respiratory infections | 1   | Health System Access 2 (unitless)                   | X        |         |         |          |         |         |
| Upper respiratory infections | 1   | Malnutrition (proportion <2SD weight for age)       | X        |         |         |          |         |         |
| Upper respiratory infections | 1   | Indoor Air Pollution (All Cooking Fuels)            | X        |         |         |          |         |         |
| Upper respiratory infections | 1   | Outdoor Air Pollution (PM2.5)                       | X        |         |         |          |         |         |
| Upper respiratory infections | 1   | Smoking Prevalence (Reproductive Age Standardized)  | X        |         |         |          |         |         |
| Upper respiratory infections | 1   | DTP3 Coverage (proportion)                          |          | X       |         |          |         |         |
| Upper respiratory infections | 1   | Elevation Over 1500m (proportion)                   |          | X       |         |          |         |         |
| Upper respiratory infections | 1   | Rainfall (Quintiles 4-5)                            |          | X       |         |          |         |         |
| Upper respiratory infections | 1   | Sanitation (proportion with access)                 |          | X       |         |          |         |         |
| Upper respiratory infections | 1   | Improved Water Source (proportion with access)      |          | X       |         |          |         |         |
| Upper respiratory infections | 1   | LDI (I\$ per capita)                                |          |         | X       | X*       |         |         |
| Upper respiratory infections | 1   | Education (years per capita)                        |          |         | X       |          |         |         |
| Upper respiratory infections | 1   | Population Density (over 1000 ppl/sqkm, proportion) |          |         | X       |          |         |         |
| Upper respiratory infections | 2   | Health System Access 2 (unitless)                   | X        |         |         |          |         |         |
| Upper respiratory infections | 2   | Malnutrition (proportion <2SD weight for age)       | X        |         |         |          |         |         |
| Upper respiratory infections | 2   | Indoor Air Pollution (All Cooking Fuels)            | X        |         |         |          |         |         |
| Upper respiratory infections | 2   | Outdoor Air Pollution (PM2.5)                       | X        |         |         |          |         |         |
| Upper respiratory infections | 2   | Smoking Prevalence                                  | X        |         |         |          |         |         |
| Upper respiratory infections | 2   | DTP3 Coverage (proportion)                          |          | X       |         |          |         |         |
| Upper respiratory infections | 2   | Elevation Over 1500m (proportion)                   |          | X       |         |          |         |         |
| Upper respiratory infections | 2   | Rainfall (Quintiles 4-5)                            |          | X       |         |          |         |         |
| Upper respiratory infections | 2   | Sanitation (proportion with access)                 |          | X       |         |          |         |         |
| Upper respiratory infections | 2   | Improved Water Source (proportion with access)      |          | X       |         |          |         |         |
| Upper respiratory infections | 2   | LDI (I\$ per capita)                                |          |         | X       | X*       |         |         |
| Upper respiratory infections | 2   | Education (years per capita)                        |          |         | X       |          |         |         |
| Upper respiratory infections | 2   | Population Density (over 1000 ppl/sqkm, proportion) |          |         | X       |          |         |         |
| Otitis media                 | 1   | Health System Access 2 (unitless)                   |          |         |         | X        |         |         |
| Otitis media                 | 1   | Malnutrition (proportion <2SD weight for age)       | X*       |         |         | X        |         |         |
| Otitis media                 | 1   | Indoor Air Pollution (All Cooking Fuels)            |          |         |         | X        |         |         |
| Otitis media                 | 1   | Outdoor Air Pollution (PM2.5)                       |          |         |         | X        |         |         |
| Otitis media                 | 1   | Smoking Prevalence                                  |          |         |         | X        |         |         |
| Otitis media                 | 1   | DTP3 Coverage (proportion)                          |          |         |         |          | X       |         |
| Otitis media                 | 1   | Elevation Over 1500m (proportion)                   |          |         |         |          | X       |         |
| Otitis media                 | 1   | Rainfall (Quintiles 4-5)                            |          |         |         |          | X       |         |

**Web Table 23 - Comparison of covariates used in CoD models for GBD 2010 and GBD 2013**

| Cause Name              | Sex | Covariate name                                      | GBD 2010 |         |         | GBD 2013 |         |         |
|-------------------------|-----|-----------------------------------------------------|----------|---------|---------|----------|---------|---------|
|                         |     |                                                     | Level 1  | Level 2 | Level 3 | Level 1  | Level 2 | Level 3 |
| Otitis media            | 1   | Sanitation (proportion with access)                 |          |         |         |          | X       |         |
| Otitis media            | 1   | Improved Water Source (proportion with access)      |          |         |         |          | X       |         |
| Otitis media            | 1   | LDI (I\$ per capita)                                | X*       |         |         |          |         | X       |
| Otitis media            | 1   | Education (years per capita)                        | X*       |         |         |          |         | X       |
| Otitis media            | 1   | Population Density (over 1000 ppl/sqkm, proportion) |          |         |         |          |         | X       |
| Otitis media            | 2   | Health System Access 2 (unitless)                   |          |         |         | X        |         |         |
| Otitis media            | 2   | Malnutrition (proportion <2SD weight for age)       | X*       |         |         | X        |         |         |
| Otitis media            | 2   | Indoor Air Pollution (All Cooking Fuels)            |          |         |         | X        |         |         |
| Otitis media            | 2   | Outdoor Air Pollution (PM2.5)                       |          |         |         | X        |         |         |
| Otitis media            | 2   | Smoking Prevalence                                  |          |         |         | X        |         |         |
| Otitis media            | 2   | DTP3 Coverage (proportion)                          |          |         |         |          | X       |         |
| Otitis media            | 2   | Elevation Over 1500m (proportion)                   |          |         |         |          | X       |         |
| Otitis media            | 2   | Rainfall (Quintiles 4-5)                            |          |         |         |          | X       |         |
| Otitis media            | 2   | Sanitation (proportion with access)                 |          |         |         |          | X       |         |
| Otitis media            | 2   | Improved Water Source (proportion with access)      |          |         |         |          | X       |         |
| Otitis media            | 2   | LDI (I\$ per capita)                                | X*       |         |         |          |         | X       |
| Otitis media            | 2   | Education (years per capita)                        | X*       |         |         |          |         | X       |
| Otitis media            | 2   | Population Density (over 1000 ppl/sqkm, proportion) |          |         |         |          |         | X       |
| Meningitis              | 1   | Health System Access 2 (unitless)                   | X        |         |         | X        |         |         |
| Meningitis              | 1   | Malnutrition (proportion <2SD weight for age)       | X        |         |         | X        |         |         |
| Meningitis              | 1   | Meningitis Belt (binary)                            | X        |         |         | X        |         |         |
| Meningitis              | 1   | Population Density (over 1000 ppl/sqkm, proportion) |          | X       |         |          | X       |         |
| Meningitis              | 1   | LDI (I\$ per capita)                                |          |         |         |          |         | X       |
| Meningitis              | 1   | Education (years per capita)                        |          |         |         |          |         | X       |
| Meningitis              | 1   | Sanitation (proportion with access)                 |          |         |         |          |         | X       |
| Meningitis              | 1   | Improved Water Source (proportion with access)      |          |         |         |          |         | X       |
| Meningitis              | 2   | Health System Access 2 (unitless)                   | X        |         |         | X        |         |         |
| Meningitis              | 2   | Malnutrition (proportion <2SD weight for age)       | X        |         |         | X        |         |         |
| Meningitis              | 2   | Meningitis Belt (binary)                            | X        |         |         | X        |         |         |
| Meningitis              | 2   | Population Density (over 1000 ppl/sqkm, proportion) |          | X       |         |          | X       |         |
| Meningitis              | 2   | LDI (I\$ per capita)                                |          |         |         |          |         | X       |
| Meningitis              | 2   | Education (years per capita)                        |          |         |         |          |         | X       |
| Meningitis              | 2   | Sanitation (proportion with access)                 |          |         |         |          |         | X       |
| Meningitis              | 2   | Improved Water Source (proportion with access)      |          |         |         |          |         | X       |
| Pneumococcal meningitis | 1   | LDI (I\$ per capita)                                |          |         |         |          |         | X*      |
| Pneumococcal meningitis | 1   | None                                                |          |         |         |          | X*      |         |
| Pneumococcal meningitis | 1   | Education (years per capita)                        |          |         |         |          |         | X*      |
| Pneumococcal meningitis | 1   | Health System Access 2 (unitless)                   | X*       |         |         |          |         |         |

**Web Table 23 - Comparison of covariates used in CoD models for GBD 2010 and GBD 2013**

| Cause Name                     | Sex | Covariate name                                      | GBD 2010 |         |         | GBD 2013 |         |         |
|--------------------------------|-----|-----------------------------------------------------|----------|---------|---------|----------|---------|---------|
|                                |     |                                                     | Level 1  | Level 2 | Level 3 | Level 1  | Level 2 | Level 3 |
| Pneumococcal meningitis        | 1   | Malnutrition (proportion <2SD weight for age)       | X*       |         |         |          |         |         |
| Pneumococcal meningitis        | 1   | Meningitis Belt (binary)                            | X*       |         |         |          |         |         |
| Pneumococcal meningitis        | 1   | Population Density (over 1000 ppl/sqkm, proportion) |          | X*      |         |          |         |         |
| Pneumococcal meningitis        | 1   | Sanitation (proportion with access)                 |          |         | X*      |          |         |         |
| Pneumococcal meningitis        | 1   | Improved Water Source (proportion with access)      |          |         | X*      |          |         |         |
| Pneumococcal meningitis        | 2   | LDI (I\$ per capita)                                |          |         | X*      |          |         |         |
| Pneumococcal meningitis        | 2   | None                                                |          |         |         | X*       |         |         |
| Pneumococcal meningitis        | 2   | Education (years per capita)                        |          |         | X*      |          |         |         |
| Pneumococcal meningitis        | 2   | Health System Access 2 (unitless)                   | X*       |         |         |          |         |         |
| Pneumococcal meningitis        | 2   | Malnutrition (proportion <2SD weight for age)       | X*       |         |         |          |         |         |
| Pneumococcal meningitis        | 2   | Meningitis Belt (binary)                            | X*       |         |         |          |         |         |
| Pneumococcal meningitis        | 2   | Population Density (over 1000 ppl/sqkm, proportion) |          | X*      |         |          |         |         |
| Pneumococcal meningitis        | 2   | Sanitation (proportion with access)                 |          |         | X*      |          |         |         |
| Pneumococcal meningitis        | 2   | Improved Water Source (proportion with access)      |          |         | X*      |          |         |         |
| H influenzae type B meningitis | 1   | LDI (I\$ per capita)                                |          |         | X*      |          |         |         |
| H influenzae type B meningitis | 1   | None                                                |          |         |         | X*       |         |         |
| H influenzae type B meningitis | 1   | Education (years per capita)                        |          |         | X*      |          |         |         |
| H influenzae type B meningitis | 1   | Health System Access 2 (unitless)                   | X*       |         |         |          |         |         |
| H influenzae type B meningitis | 1   | Malnutrition (proportion <2SD weight for age)       | X*       |         |         |          |         |         |
| H influenzae type B meningitis | 1   | Meningitis Belt (binary)                            | X*       |         |         |          |         |         |
| H influenzae type B meningitis | 1   | Population Density (over 1000 ppl/sqkm, proportion) |          | X*      |         |          |         |         |
| H influenzae type B meningitis | 1   | Sanitation (proportion with access)                 |          |         | X*      |          |         |         |
| H influenzae type B meningitis | 1   | Improved Water Source (proportion with access)      |          |         | X*      |          |         |         |
| H influenzae type B meningitis | 2   | LDI (I\$ per capita)                                |          |         | X*      |          |         |         |
| H influenzae type B meningitis | 2   | None                                                |          |         |         | X*       |         |         |
| H influenzae type B meningitis | 2   | Education (years per capita)                        |          |         | X*      |          |         |         |
| H influenzae type B meningitis | 2   | Health System Access 2 (unitless)                   | X*       |         |         |          |         |         |
| H influenzae type B meningitis | 2   | Malnutrition (proportion <2SD weight for age)       | X*       |         |         |          |         |         |
| H influenzae type B meningitis | 2   | Meningitis Belt (binary)                            | X*       |         |         |          |         |         |
| H influenzae type B meningitis | 2   | Population Density (over 1000 ppl/sqkm, proportion) |          | X*      |         |          |         |         |
| H influenzae type B meningitis | 2   | Sanitation (proportion with access)                 |          |         | X*      |          |         |         |
| H influenzae type B meningitis | 2   | Improved Water Source (proportion with access)      |          |         | X*      |          |         |         |
| Meningococcal meningitis       | 1   | LDI (I\$ per capita)                                |          |         | X*      |          |         |         |
| Meningococcal meningitis       | 1   | None                                                |          |         |         | X*       |         |         |
| Meningococcal meningitis       | 1   | Education (years per capita)                        |          |         | X*      |          |         |         |
| Meningococcal meningitis       | 1   | Health System Access 2 (unitless)                   | X*       |         |         |          |         |         |
| Meningococcal meningitis       | 1   | Malnutrition (proportion <2SD weight for age)       | X*       |         |         |          |         |         |
| Meningococcal meningitis       | 1   | Meningitis Belt (binary)                            | X*       |         |         |          |         |         |



**Web Table 23 - Comparison of covariates used in CoD models for GBD 2010 and GBD 2013**

| Cause Name               | Sex | Covariate name                                      | GBD 2010 |         |         | GBD 2013 |         |         |
|--------------------------|-----|-----------------------------------------------------|----------|---------|---------|----------|---------|---------|
|                          |     |                                                     | Level 1  | Level 2 | Level 3 | Level 1  | Level 2 | Level 3 |
| Meningococcal meningitis | 1   | Population Density (over 1000 ppl/sqkm, proportion) |          | X*      |         |          |         |         |
| Meningococcal meningitis | 1   | Sanitation (proportion with access)                 |          |         | X*      |          |         |         |
| Meningococcal meningitis | 1   | Improved Water Source (proportion with access)      |          |         | X*      |          |         |         |
| Meningococcal meningitis | 2   | LDI (I\$ per capita)                                |          |         | X*      |          |         |         |
| Meningococcal meningitis | 2   | None                                                |          |         |         | X*       |         |         |
| Meningococcal meningitis | 2   | Education (years per capita)                        |          |         | X*      |          |         |         |
| Meningococcal meningitis | 2   | Health System Access 2 (unitless)                   | X*       |         |         |          |         |         |
| Meningococcal meningitis | 2   | Malnutrition (proportion <2SD weight for age)       | X*       |         |         |          |         |         |
| Meningococcal meningitis | 2   | Meningitis Belt (binary)                            | X*       |         |         |          |         |         |
| Meningococcal meningitis | 2   | Population Density (over 1000 ppl/sqkm, proportion) |          | X*      |         |          |         |         |
| Meningococcal meningitis | 2   | Sanitation (proportion with access)                 |          |         | X*      |          |         |         |
| Meningococcal meningitis | 2   | Improved Water Source (proportion with access)      |          |         | X*      |          |         |         |
| Other meningitis         | 1   | LDI (I\$ per capita)                                |          |         | X*      |          |         |         |
| Other meningitis         | 1   | None                                                |          |         |         | X*       |         |         |
| Other meningitis         | 1   | Education (years per capita)                        |          |         | X*      |          |         |         |
| Other meningitis         | 1   | Health System Access 2 (unitless)                   | X*       |         |         |          |         |         |
| Other meningitis         | 1   | Malnutrition (proportion <2SD weight for age)       | X*       |         |         |          |         |         |
| Other meningitis         | 1   | Meningitis Belt (binary)                            | X*       |         |         |          |         |         |
| Other meningitis         | 1   | Population Density (over 1000 ppl/sqkm, proportion) |          | X*      |         |          |         |         |
| Other meningitis         | 1   | Sanitation (proportion with access)                 |          |         | X*      |          |         |         |
| Other meningitis         | 1   | Improved Water Source (proportion with access)      |          |         | X*      |          |         |         |
| Other meningitis         | 2   | LDI (I\$ per capita)                                |          |         | X*      |          |         |         |
| Other meningitis         | 2   | None                                                |          |         |         | X*       |         |         |
| Other meningitis         | 2   | Education (years per capita)                        |          |         | X*      |          |         |         |
| Other meningitis         | 2   | Health System Access 2 (unitless)                   | X*       |         |         |          |         |         |
| Other meningitis         | 2   | Malnutrition (proportion <2SD weight for age)       | X*       |         |         |          |         |         |
| Other meningitis         | 2   | Meningitis Belt (binary)                            | X*       |         |         |          |         |         |
| Other meningitis         | 2   | Population Density (over 1000 ppl/sqkm, proportion) |          | X*      |         |          |         |         |
| Other meningitis         | 2   | Sanitation (proportion with access)                 |          |         | X*      |          |         |         |
| Other meningitis         | 2   | Improved Water Source (proportion with access)      |          |         | X*      |          |         |         |
| Encephalitis             | 1   | Health System Access 2 (unitless)                   | X        |         |         | X        |         |         |
| Encephalitis             | 1   | Malnutrition (proportion <2SD weight for age)       | X        |         |         | X        |         |         |
| Encephalitis             | 1   | Meningitis Belt (binary)                            | X        |         |         | X        |         |         |
| Encephalitis             | 1   | Population Density (over 1000 ppl/sqkm, proportion) |          | X       |         |          | X       |         |
| Encephalitis             | 1   | LDI (I\$ per capita)                                |          |         | X       |          |         | X       |
| Encephalitis             | 1   | Education (years per capita)                        |          |         | X       |          |         | X       |
| Encephalitis             | 1   | Sanitation (proportion with access)                 |          |         | X       |          |         | X       |
| Encephalitis             | 1   | Improved Water Source (proportion with access)      |          |         | X       |          |         | X       |

**Web Table 23 - Comparison of covariates used in CoD models for GBD 2010 and GBD 2013**

| Cause Name     | Sex | Covariate name                                      | GBD 2010 |         |         | GBD 2013 |         |         |
|----------------|-----|-----------------------------------------------------|----------|---------|---------|----------|---------|---------|
|                |     |                                                     | Level 1  | Level 2 | Level 3 | Level 1  | Level 2 | Level 3 |
| Encephalitis   | 2   | Health System Access 2 (unitless)                   | X        |         |         | X        |         |         |
| Encephalitis   | 2   | Malnutrition (proportion <2SD weight for age)       | X        |         |         | X        |         |         |
| Encephalitis   | 2   | Meningitis Belt (binary)                            | X        |         |         | X        |         |         |
| Encephalitis   | 2   | Population Density (over 1000 ppl/sqkm, proportion) |          | X       |         |          | X       |         |
| Encephalitis   | 2   | LDI (I\$ per capita)                                |          |         | X       |          |         | X       |
| Encephalitis   | 2   | Education (years per capita)                        |          |         | X       |          |         | X       |
| Encephalitis   | 2   | Sanitation (proportion with access)                 |          |         | X       |          |         | X       |
| Encephalitis   | 2   | Improved Water Source (proportion with access)      |          |         | X       |          |         | X       |
| Diphtheria     | 1   | DTP3 Coverage (proportion)                          | X*       |         |         | X*       |         |         |
| Diphtheria     | 1   | LDI (I\$ per capita)                                | X*       |         |         |          |         |         |
| Diphtheria     | 1   | Health System Access 2 (unitless)                   | X*       |         |         |          |         |         |
| Diphtheria     | 1   | Population Over 65 (proportion)                     | X*       |         |         |          |         |         |
| Diphtheria     | 2   | DTP3 Coverage (proportion)                          | X*       |         |         | X*       |         |         |
| Diphtheria     | 2   | LDI (I\$ per capita)                                | X*       |         |         |          |         |         |
| Diphtheria     | 2   | Health System Access 2 (unitless)                   | X*       |         |         |          |         |         |
| Diphtheria     | 2   | Population Over 65 (proportion)                     | X*       |         |         |          |         |         |
| Whooping cough | 1   | DTP3 Coverage (proportion)                          | X*       |         |         | X*       |         |         |
| Whooping cough | 1   | Health System Access (unitless)                     | X*       |         |         |          |         |         |
| Whooping cough | 1   | Health System Access 2 (unitless)                   |          |         |         | X*       |         |         |
| Whooping cough | 2   | DTP3 Coverage (proportion)                          | X*       |         |         | X*       |         |         |
| Whooping cough | 2   | Health System Access (unitless)                     | X*       |         |         |          |         |         |
| Whooping cough | 2   | Health System Access 2 (unitless)                   |          |         |         | X*       |         |         |
| Tetanus        | 1   | Sanitation (proportion with access)                 |          |         |         |          |         | X       |
| Tetanus        | 1   | DTP3 Coverage (proportion)                          | X        |         |         | X        |         |         |
| Tetanus        | 1   | Health System Access 2 (unitless)                   | X        |         |         | X        |         |         |
| Tetanus        | 1   | Tetanus Toxoid Coverage Smooth (proportion)         | X        |         |         | X        |         |         |
| Tetanus        | 1   | In-Facility Delivery (proportion)                   |          | X       |         |          | X       |         |
| Tetanus        | 1   | Skilled Birth Attendance (proportion)               |          | X       |         |          | X       |         |
| Tetanus        | 1   | LDI (I\$ per capita)                                |          |         | X       |          |         | X       |
| Tetanus        | 1   | Education (years per capita)                        |          |         | X       |          |         | X       |
| Tetanus        | 2   | Sanitation (proportion with access)                 |          |         |         |          |         | X       |
| Tetanus        | 2   | DTP3 Coverage (proportion)                          | X        |         |         | X        |         |         |
| Tetanus        | 2   | Health System Access 2 (unitless)                   | X        |         |         | X        |         |         |
| Tetanus        | 2   | Tetanus Toxoid Coverage Smooth (proportion)         | X        |         |         | X        |         |         |
| Tetanus        | 2   | In-Facility Delivery (proportion)                   |          | X       |         |          | X       |         |
| Tetanus        | 2   | Skilled Birth Attendance (proportion)               |          | X       |         |          | X       |         |
| Tetanus        | 2   | LDI (I\$ per capita)                                |          |         | X       |          |         | X       |
| Tetanus        | 2   | Education (years per capita)                        |          |         | X       |          |         | X       |

**Web Table 23 - Comparison of covariates used in CoD models for GBD 2010 and GBD 2013**

| Cause Name | Sex | Covariate name                                     | GBD 2010 |         |         | GBD 2013 |         |         |
|------------|-----|----------------------------------------------------|----------|---------|---------|----------|---------|---------|
|            |     |                                                    | Level 1  | Level 2 | Level 3 | Level 1  | Level 2 | Level 3 |
| Measles    | 1   | LDI (I\$ per capita)                               |          |         |         | X*       |         |         |
| Measles    | 1   | Measles Natural History Death Rate                 | X*       |         |         |          |         |         |
| Measles    | 1   | Measles Vaccine Coverage (proportion)              |          |         |         | X*       |         |         |
| Measles    | 2   | LDI (I\$ per capita)                               |          |         |         | X*       |         |         |
| Measles    | 2   | Measles Natural History Death Rate                 | X*       |         |         |          |         |         |
| Measles    | 2   | Measles Vaccine Coverage (proportion)              |          |         |         | X*       |         |         |
| Varicella  | 1   | Health System Access (unitless)                    | X*       |         |         |          |         |         |
| Varicella  | 1   | Health System Access 2 (unitless)                  |          |         |         | X*       |         |         |
| Varicella  | 2   | Health System Access (unitless)                    | X*       |         |         |          |         |         |
| Varicella  | 2   | Health System Access 2 (unitless)                  |          |         |         | X*       |         |         |
| Malaria    | 1   | Health System Access (capped)                      |          |         |         | X        |         |         |
| Malaria    | 1   | Interaction of malaria ITN and log PFPR covariates |          |         |         | X        |         |         |
| Malaria    | 1   | Health System Access 2 (unitless)                  | X        |         |         |          |         |         |
| Malaria    | 1   | Malaria Lysenko PFPR 1 (Holoendemic)               | X        |         |         |          |         |         |
| Malaria    | 1   | Malaria Lysenko PFPR (4 Highest Endemicity)        | X        |         |         |          |         |         |
| Malaria    | 1   | Rainfall Quintile 5 (proportion)                   | X        |         |         |          |         |         |
| Malaria    | 1   | ITN Coverage (proportion)                          | X        |         |         | X        |         |         |
| Malaria    | 1   | Malaria Endemicity (40-100%)                       | X        |         |         | X        |         |         |
| Malaria    | 1   | Malaria Endemicity (5-100%)                        | X        |         |         | X        |         |         |
| Malaria    | 1   | Malaria Indoor Residual Spraying Coverage          | X        |         |         | X        |         |         |
| Malaria    | 1   | Malaria Lysenko PFPR (2 Highest Endemicity)        | X        |         |         | X        |         |         |
| Malaria    | 1   | Malaria Lysenko PFPR (3 Highest Endemicity)        | X        |         |         | X        |         |         |
| Malaria    | 1   | Malaria Population-At-Risk (proportion)            | X        |         |         | X        |         |         |
| Malaria    | 1   | Malaria PFPR (rate)                                | X        |         |         | X        |         |         |
| Malaria    | 1   | Malaria Prevalence-Weighted Resistance             | X        |         |         | X        |         |         |
| Malaria    | 1   | Rainfall (Quintiles 2-5)                           | X        |         |         | X        |         |         |
| Malaria    | 1   | Rainfall (Quintiles 3-5)                           | X        |         |         | X        |         |         |
| Malaria    | 1   | Rainfall (Quintiles 4-5)                           | X        |         |         | X        |         |         |
| Malaria    | 1   | Malaria vivax (binary)                             |          | X       |         |          |         |         |
| Malaria    | 1   | LDI (I\$ per capita)                               |          |         | X       |          |         | X       |
| Malaria    | 1   | Education (years per capita)                       |          |         | X       |          |         | X       |
| Malaria    | 2   | Health System Access (capped)                      |          |         |         | X        |         |         |
| Malaria    | 2   | Interaction of malaria ITN and log PFPR covariates |          |         |         | X        |         |         |
| Malaria    | 2   | Health System Access 2 (unitless)                  | X        |         |         |          |         |         |
| Malaria    | 2   | Malaria Lysenko PFPR 1 (Holoendemic)               | X        |         |         |          |         |         |
| Malaria    | 2   | Malaria Lysenko PFPR (4 Highest Endemicity)        | X        |         |         |          |         |         |
| Malaria    | 2   | Rainfall Quintile 5 (proportion)                   | X        |         |         |          |         |         |
| Malaria    | 2   | ITN Coverage (proportion)                          | X        |         |         | X        |         |         |

**Web Table 23 - Comparison of covariates used in CoD models for GBD 2010 and GBD 2013**

| Cause Name              | Sex | Covariate name                                         | GBD 2010 |         |         | GBD 2013 |         |         |
|-------------------------|-----|--------------------------------------------------------|----------|---------|---------|----------|---------|---------|
|                         |     |                                                        | Level 1  | Level 2 | Level 3 | Level 1  | Level 2 | Level 3 |
| Malaria                 | 2   | Malaria Endemicity (40-100%)                           | X        |         |         | X        |         |         |
| Malaria                 | 2   | Malaria Endemicity (5-100%)                            | X        |         |         | X        |         |         |
| Malaria                 | 2   | Malaria Indoor Residual Spraying Coverage              | X        |         |         | X        |         |         |
| Malaria                 | 2   | Malaria Lysenko PFPR (2 Highest Endemicity)            | X        |         |         | X        |         |         |
| Malaria                 | 2   | Malaria Lysenko PFPR (3 Highest Endemicity)            | X        |         |         | X        |         |         |
| Malaria                 | 2   | Malaria Population-At-Risk (proportion)                | X        |         |         | X        |         |         |
| Malaria                 | 2   | Malaria PFPR (rate)                                    | X        |         |         | X        |         |         |
| Malaria                 | 2   | Malaria Prevalence-Weighted Resistance                 | X        |         |         | X        |         |         |
| Malaria                 | 2   | Rainfall (Quintiles 2-5)                               | X        |         |         | X        |         |         |
| Malaria                 | 2   | Rainfall (Quintiles 3-5)                               | X        |         |         | X        |         |         |
| Malaria                 | 2   | Rainfall (Quintiles 4-5)                               | X        |         |         | X        |         |         |
| Malaria                 | 2   | Malaria vivax (binary)                                 |          | X       |         |          |         |         |
| Malaria                 | 2   | LDI (I\$ per capita)                                   |          |         |         | X        |         | X       |
| Malaria                 | 2   | Education (years per capita)                           |          |         |         | X        |         | X       |
| Chagas disease          | 1   | Chagas Population-at-Risk 2 (proportion)               | X        |         |         | X        |         |         |
| Chagas disease          | 1   | Health System Access (unitless)                        | X        |         |         | X        |         |         |
| Chagas disease          | 1   | Sanitation (proportion with access)                    |          | X       |         |          | X       |         |
| Chagas disease          | 1   | LDI (I\$ per capita)                                   |          |         |         | X        |         | X       |
| Chagas disease          | 1   | Education (years per capita)                           |          |         |         | X        |         | X       |
| Chagas disease          | 2   | Chagas Population-at-Risk 2 (proportion)               | X        |         |         | X        |         |         |
| Chagas disease          | 2   | Health System Access (unitless)                        | X        |         |         | X        |         |         |
| Chagas disease          | 2   | Sanitation (proportion with access)                    |          | X       |         |          | X       |         |
| Chagas disease          | 2   | LDI (I\$ per capita)                                   |          |         |         | X        |         | X       |
| Chagas disease          | 2   | Education (years per capita)                           |          |         |         | X        |         | X       |
| Visceral leishmaniasis  | 1   | High leishmaniasis endemicity (binary)                 | X*       |         |         | X*       |         |         |
| Visceral leishmaniasis  | 2   | High leishmaniasis endemicity (binary)                 | X*       |         |         | X*       |         |         |
| African trypanosomiasis | 1   | Number of Reported Cases of African trypanosomiasis    | X*       |         |         | X*       |         |         |
| African trypanosomiasis | 2   | Number of Reported Cases of African trypanosomiasis    | X*       |         |         | X*       |         |         |
| Schistosomiasis         | 1   | Schistosomiasis Prevalence (proportion)                | X*       |         |         | X*       |         |         |
| Schistosomiasis         | 2   | Schistosomiasis Prevalence (proportion)                | X*       |         |         | X*       |         |         |
| Cysticercosis           | 1   | Health System Access (capped)                          | X*       |         |         | X*       |         |         |
| Cysticercosis           | 1   | Religion (binary, >50% Muslim)                         | X*       |         |         | X*       |         |         |
| Cysticercosis           | 2   | Health System Access (capped)                          | X*       |         |         | X*       |         |         |
| Cysticercosis           | 2   | Religion (binary, >50% Muslim)                         | X*       |         |         | X*       |         |         |
| Cystic echinococcosis   | 1   | Endemicity                                             | X*       |         |         | X*       |         |         |
| Cystic echinococcosis   | 2   | Endemicity                                             | X*       |         |         | X*       |         |         |
| Dengue                  | 1   | Population weighted probability of dengue transmission |          |         |         | X        |         |         |
| Dengue                  | 1   | Population Density (over 1000 ppl/sqkm, proportion)    |          |         |         | X        |         |         |

**Web Table 23 - Comparison of covariates used in CoD models for GBD 2010 and GBD 2013**

| Cause Name                     | Sex | Covariate name                                               | GBD 2010 |         |         | GBD 2013 |         |         |
|--------------------------------|-----|--------------------------------------------------------------|----------|---------|---------|----------|---------|---------|
|                                |     |                                                              | Level 1  | Level 2 | Level 3 | Level 1  | Level 2 | Level 3 |
| Dengue                         | 1   | Dengue anomalies (deviation from mean dengue incidence rate) |          |         |         |          | X       |         |
| Dengue                         | 1   | Dengue outbreaks (binary)                                    |          |         |         |          | X       |         |
| Dengue                         | 1   | Dengue Incidence (per 1000) v7                               | X        |         |         |          |         |         |
| Dengue                         | 1   | Health System Access (unitless)                              |          | X       |         |          | X       |         |
| Dengue                         | 1   | Latitude Under 15 (proportion)                               |          | X       |         |          | X       |         |
| Dengue                         | 1   | Elevation Under 100m (proportion)                            |          | X       |         |          | X       |         |
| Dengue                         | 1   | Rainfall Quintile 4 (proportion)                             |          | X       |         |          | X       |         |
| Dengue                         | 1   | Rainfall Quintile 5 (proportion)                             |          | X       |         |          | X       |         |
| Dengue                         | 1   | LDI (I\$ per capita)                                         |          |         |         | X        |         | X       |
| Dengue                         | 1   | Education (years per capita)                                 |          |         |         | X        |         | X       |
| Dengue                         | 2   | Population weighted probability of dengue transmission       |          |         |         | X        |         |         |
| Dengue                         | 2   | Population Density (over 1000 ppl/sqkm, proportion)          |          |         |         | X        |         |         |
| Dengue                         | 2   | Dengue anomalies (deviation from mean dengue incidence rate) |          |         |         |          | X       |         |
| Dengue                         | 2   | Dengue outbreaks (binary)                                    |          |         |         |          | X       |         |
| Dengue                         | 2   | Dengue Incidence (per 1000) v7                               | X        |         |         |          |         |         |
| Dengue                         | 2   | Health System Access (unitless)                              |          | X       |         |          | X       |         |
| Dengue                         | 2   | Latitude Under 15 (proportion)                               |          | X       |         |          | X       |         |
| Dengue                         | 2   | Elevation Under 100m (proportion)                            |          | X       |         |          | X       |         |
| Dengue                         | 2   | Rainfall Quintile 4 (proportion)                             |          | X       |         |          | X       |         |
| Dengue                         | 2   | Rainfall Quintile 5 (proportion)                             |          | X       |         |          | X       |         |
| Dengue                         | 2   | LDI (I\$ per capita)                                         |          |         |         | X        |         | X       |
| Dengue                         | 2   | Education (years per capita)                                 |          |         |         | X        |         | X       |
| Yellow fever                   | 1   | None                                                         |          |         |         | X*       |         |         |
| Yellow fever                   | 1   | Yellow fever endemicity (binary)                             | X*       |         |         |          |         |         |
| Yellow fever                   | 2   | None                                                         |          |         |         | X*       |         |         |
| Yellow fever                   | 2   | Yellow fever endemicity (binary)                             | X*       |         |         |          |         |         |
| Rabies                         | 1   | Health System Access (unitless)                              | X        |         |         | X        |         |         |
| Rabies                         | 1   | Population Density (150-300 ppl/sqkm, proportion)            |          | X       |         |          |         |         |
| Rabies                         | 1   | Population Density (300-500 ppl/sqkm, proportion)            |          | X       |         |          | X       |         |
| Rabies                         | 1   | Population Density (500-1000 ppl/sqkm, proportion)           |          | X       |         |          | X       |         |
| Rabies                         | 1   | Population Density (over 1000 ppl/sqkm, proportion)          |          | X       |         |          | X       |         |
| Rabies                         | 2   | Health System Access (unitless)                              | X        |         |         | X        |         |         |
| Rabies                         | 2   | Population Density (150-300 ppl/sqkm, proportion)            |          | X       |         |          |         |         |
| Rabies                         | 2   | Population Density (300-500 ppl/sqkm, proportion)            |          | X       |         |          | X       |         |
| Rabies                         | 2   | Population Density (500-1000 ppl/sqkm, proportion)           |          | X       |         |          | X       |         |
| Rabies                         | 2   | Population Density (over 1000 ppl/sqkm, proportion)          |          | X       |         |          | X       |         |
| Intestinal nematode infections | 1   | Population Density (over 1000 ppl/sqkm, proportion)          | X*       |         |         | X*       |         |         |
| Intestinal nematode infections | 2   | Population Density (over 1000 ppl/sqkm, proportion)          | X*       |         |         | X*       |         |         |

**Web Table 23 - Comparison of covariates used in CoD models for GBD 2010 and GBD 2013**

| Cause Name                                    | Sex | Covariate name                                      | GBD 2010 |         |         | GBD 2013 |         |         |
|-----------------------------------------------|-----|-----------------------------------------------------|----------|---------|---------|----------|---------|---------|
|                                               |     |                                                     | Level 1  | Level 2 | Level 3 | Level 1  | Level 2 | Level 3 |
| Ascariasis                                    | 1   | Population Density (over 1000 ppl/sqkm, proportion) | X*       |         |         | X*       |         |         |
| Ascariasis                                    | 2   | Population Density (over 1000 ppl/sqkm, proportion) | X*       |         |         | X*       |         |         |
| Other neglected tropical diseases             | 1   | Health System Access 2 (unitless)                   | X        |         |         | X        |         |         |
| Other neglected tropical diseases             | 1   | Latitude Under 15 (proportion)                      | X        |         |         | X        |         |         |
| Other neglected tropical diseases             | 1   | Rainfall Quintile 5 (proportion)                    |          | X       |         |          | X       |         |
| Other neglected tropical diseases             | 1   | Sanitation (proportion with access)                 |          | X       |         |          | X       |         |
| Other neglected tropical diseases             | 1   | LDI (I\$ per capita)                                |          |         | X       |          |         | X       |
| Other neglected tropical diseases             | 1   | Education (years per capita)                        |          |         | X       |          |         | X       |
| Other neglected tropical diseases             | 2   | Health System Access 2 (unitless)                   | X        |         |         | X        |         |         |
| Other neglected tropical diseases             | 2   | Latitude Under 15 (proportion)                      | X        |         |         | X        |         |         |
| Other neglected tropical diseases             | 2   | Rainfall Quintile 5 (proportion)                    |          | X       |         |          | X       |         |
| Other neglected tropical diseases             | 2   | Sanitation (proportion with access)                 |          | X       |         |          | X       |         |
| Other neglected tropical diseases             | 2   | LDI (I\$ per capita)                                |          |         | X       |          |         | X       |
| Other neglected tropical diseases             | 2   | Education (years per capita)                        |          |         | X       |          |         | X       |
| Maternal disorders                            | 2   | Antenatal Care (4 visits) Coverage (proportion)     |          | X*      |         | X*       |         |         |
| Maternal disorders                            | 2   | Age-Specific Fertility Rate                         | X*       |         |         | X*       |         |         |
| Maternal disorders                            | 2   | HIV Prevalence, ARV-Adjusted (Custom Lag, %)        |          | X*      |         |          |         |         |
| Maternal disorders                            | 2   | In-Facility Delivery (proportion)                   | X*       |         |         | X*       |         |         |
| Maternal disorders                            | 2   | LDI (I\$ per capita)                                |          |         | X*      | X*       |         |         |
| Maternal disorders                            | 2   | Skilled Birth Attendance (proportion)               | X*       |         |         | X*       |         |         |
| Maternal disorders                            | 2   | Total Fertility Rate                                | X*       |         |         | X*       |         |         |
| Maternal disorders                            | 2   | Education (years per capita)                        |          | X*      |         |          |         |         |
| Maternal disorders                            | 2   | Female HIV death rate per 1 for ages 15-49          |          |         |         | X*       |         |         |
| Maternal disorders                            | 2   | Health System Access 2 (unitless)                   |          | X*      |         |          |         |         |
| Maternal disorders                            | 2   | Malnutrition (proportion <2SD weight for age)       |          | X*      |         | X*       |         |         |
| Maternal disorders                            | 2   | Neonatal Death Rate Modeled 2 (per 1000)            |          | X*      |         | X*       |         |         |
| Maternal hemorrhage                           | 2   | Antenatal Care (4 visits) Coverage (proportion)     |          | X*      |         |          |         |         |
| Maternal hemorrhage                           | 2   | Age-Specific Fertility Rate                         | X*       |         |         |          |         |         |
| Maternal hemorrhage                           | 2   | HIV Prevalence, ARV-Adjusted (Custom Lag, %)        |          | X*      |         |          |         |         |
| Maternal hemorrhage                           | 2   | In-Facility Delivery (proportion)                   | X*       |         |         | X*       |         |         |
| Maternal hemorrhage                           | 2   | LDI (I\$ per capita)                                |          |         | X*      |          |         |         |
| Maternal hemorrhage                           | 2   | Skilled Birth Attendance (proportion)               | X*       |         |         |          |         |         |
| Maternal hemorrhage                           | 2   | Total Fertility Rate                                | X*       |         |         |          |         |         |
| Maternal hemorrhage                           | 2   | Education (years per capita)                        |          | X*      |         |          |         |         |
| Maternal hemorrhage                           | 2   | Health System Access 2 (unitless)                   |          | X*      |         |          |         |         |
| Maternal hemorrhage                           | 2   | Malnutrition (proportion <2SD weight for age)       |          | X*      |         |          |         |         |
| Maternal hemorrhage                           | 2   | Neonatal Death Rate Modeled 2 (per 1000)            |          | X*      |         |          |         |         |
| Maternal sepsis and other maternal infections | 2   | Antenatal Care (4 visits) Coverage (proportion)     |          | X*      |         |          |         |         |

**Web Table 23 - Comparison of covariates used in CoD models for GBD 2010 and GBD 2013**

| Cause Name                                    | Sex | Covariate name                                  | GBD 2010 |         |         | GBD 2013 |         |         |
|-----------------------------------------------|-----|-------------------------------------------------|----------|---------|---------|----------|---------|---------|
|                                               |     |                                                 | Level 1  | Level 2 | Level 3 | Level 1  | Level 2 | Level 3 |
| Maternal sepsis and other maternal infections | 2   | Age-Specific Fertility Rate                     | X*       |         |         |          |         |         |
| Maternal sepsis and other maternal infections | 2   | HIV Prevalence, ARV-Adjusted (Custom Lag, %)    |          | X*      |         |          |         |         |
| Maternal sepsis and other maternal infections | 2   | In-Facility Delivery (proportion)               | X*       |         |         |          |         |         |
| Maternal sepsis and other maternal infections | 2   | LDI (I\$ per capita)                            |          |         | X*      | X*       |         |         |
| Maternal sepsis and other maternal infections | 2   | Skilled Birth Attendance (proportion)           | X*       |         |         |          |         |         |
| Maternal sepsis and other maternal infections | 2   | Total Fertility Rate                            | X*       |         |         |          |         |         |
| Maternal sepsis and other maternal infections | 2   | Education (years per capita)                    |          | X*      |         |          |         |         |
| Maternal sepsis and other maternal infections | 2   | Health System Access 2 (unitless)               |          | X*      |         |          |         |         |
| Maternal sepsis and other maternal infections | 2   | Malnutrition (proportion <2SD weight for age)   |          | X*      |         |          |         |         |
| Maternal sepsis and other maternal infections | 2   | Neonatal Death Rate Modeled 2 (per 1000)        |          | X*      |         |          |         |         |
| Maternal hypertensive disorders               | 2   | Antenatal Care (4 visits) Coverage (proportion) |          | X*      |         |          |         |         |
| Maternal hypertensive disorders               | 2   | Age-Specific Fertility Rate                     | X*       |         |         |          |         |         |
| Maternal hypertensive disorders               | 2   | HIV Prevalence, ARV-Adjusted (Custom Lag, %)    |          | X*      |         |          |         |         |
| Maternal hypertensive disorders               | 2   | In-Facility Delivery (proportion)               | X*       |         |         |          |         |         |
| Maternal hypertensive disorders               | 2   | LDI (I\$ per capita)                            |          |         | X*      |          |         |         |
| Maternal hypertensive disorders               | 2   | Skilled Birth Attendance (proportion)           | X*       |         |         |          |         |         |
| Maternal hypertensive disorders               | 2   | Total Fertility Rate                            | X*       |         |         |          |         |         |
| Maternal hypertensive disorders               | 2   | None                                            |          |         |         | X*       |         |         |
| Maternal hypertensive disorders               | 2   | Education (years per capita)                    |          | X*      |         |          |         |         |
| Maternal hypertensive disorders               | 2   | Health System Access 2 (unitless)               |          | X*      |         |          |         |         |
| Maternal hypertensive disorders               | 2   | Malnutrition (proportion <2SD weight for age)   |          | X*      |         |          |         |         |
| Maternal hypertensive disorders               | 2   | Neonatal Death Rate Modeled 2 (per 1000)        |          | X*      |         |          |         |         |
| Maternal obstructed labor                     | 2   | Antenatal Care (4 visits) Coverage (proportion) |          | X*      |         |          |         |         |
| Maternal obstructed labor                     | 2   | Age-Specific Fertility Rate                     | X*       |         |         |          |         |         |
| Maternal obstructed labor                     | 2   | HIV Prevalence, ARV-Adjusted (Custom Lag, %)    |          | X*      |         |          |         |         |
| Maternal obstructed labor                     | 2   | In-Facility Delivery (proportion)               | X*       |         |         |          | X*      |         |
| Maternal obstructed labor                     | 2   | LDI (I\$ per capita)                            |          |         | X*      |          |         |         |
| Maternal obstructed labor                     | 2   | Skilled Birth Attendance (proportion)           | X*       |         |         |          |         |         |
| Maternal obstructed labor                     | 2   | Total Fertility Rate                            | X*       |         |         |          |         |         |
| Maternal obstructed labor                     | 2   | Education (years per capita)                    |          | X*      |         |          |         |         |
| Maternal obstructed labor                     | 2   | Health System Access 2 (unitless)               |          | X*      |         |          |         |         |

**Web Table 23 - Comparison of covariates used in CoD models for GBD 2010 and GBD 2013**

| Cause Name                             | Sex | Covariate name                                  | GBD 2010 |         |         | GBD 2013 |         |         |
|----------------------------------------|-----|-------------------------------------------------|----------|---------|---------|----------|---------|---------|
|                                        |     |                                                 | Level 1  | Level 2 | Level 3 | Level 1  | Level 2 | Level 3 |
| Maternal obstructed labor              | 2   | Malnutrition (proportion <2SD weight for age)   |          | X*      |         |          |         |         |
| Maternal obstructed labor              | 2   | Neonatal Death Rate Modeled 2 (per 1000)        |          | X*      |         |          |         |         |
| Maternal abortive outcome              | 2   | Antenatal Care (4 visits) Coverage (proportion) |          | X*      |         |          |         |         |
| Maternal abortive outcome              | 2   | Age-Specific Fertility Rate                     | X*       |         |         |          |         |         |
| Maternal abortive outcome              | 2   | HIV Prevalence, ARV-Adjusted (Custom Lag, %)    |          | X*      |         |          |         |         |
| Maternal abortive outcome              | 2   | In-Facility Delivery (proportion)               | X*       |         |         |          |         |         |
| Maternal abortive outcome              | 2   | LDI (I\$ per capita)                            |          |         | X*      |          |         |         |
| Maternal abortive outcome              | 2   | Skilled Birth Attendance (proportion)           | X*       |         |         |          |         |         |
| Maternal abortive outcome              | 2   | Total Fertility Rate                            | X*       |         |         |          |         |         |
| Maternal abortive outcome              | 2   | Legality of Abortion                            |          |         |         | X*       |         |         |
| Maternal abortive outcome              | 2   | Education (years per capita)                    |          | X*      |         |          |         |         |
| Maternal abortive outcome              | 2   | Health System Access 2 (unitless)               |          | X*      |         |          |         |         |
| Maternal abortive outcome              | 2   | Malnutrition (proportion <2SD weight for age)   |          | X*      |         |          |         |         |
| Maternal abortive outcome              | 2   | Neonatal Death Rate Modeled 2 (per 1000)        |          | X*      |         |          |         |         |
| Indirect maternal deaths               | 2   | Antenatal Care (4 visits) Coverage (proportion) |          | X*      |         |          |         |         |
| Indirect maternal deaths               | 2   | Age-Specific Fertility Rate                     | X*       |         |         |          |         |         |
| Indirect maternal deaths               | 2   | HIV Prevalence, ARV-Adjusted (Custom Lag, %)    |          | X*      |         |          |         |         |
| Indirect maternal deaths               | 2   | In-Facility Delivery (proportion)               | X*       |         |         |          |         |         |
| Indirect maternal deaths               | 2   | LDI (I\$ per capita)                            |          |         | X*      |          |         |         |
| Indirect maternal deaths               | 2   | Skilled Birth Attendance (proportion)           | X*       |         |         |          |         |         |
| Indirect maternal deaths               | 2   | Total Fertility Rate                            | X*       |         |         |          |         |         |
| Indirect maternal deaths               | 2   | None                                            |          |         |         | X*       |         |         |
| Indirect maternal deaths               | 2   | Education (years per capita)                    |          | X*      |         |          |         |         |
| Indirect maternal deaths               | 2   | Health System Access 2 (unitless)               |          | X*      |         |          |         |         |
| Indirect maternal deaths               | 2   | Malnutrition (proportion <2SD weight for age)   |          | X*      |         |          |         |         |
| Indirect maternal deaths               | 2   | Neonatal Death Rate Modeled 2 (per 1000)        |          | X*      |         |          |         |         |
| Late maternal deaths                   | 2   | Antenatal Care (4 visits) Coverage (proportion) |          | X*      |         |          |         |         |
| Late maternal deaths                   | 2   | Age-Specific Fertility Rate                     | X*       |         |         |          |         |         |
| Late maternal deaths                   | 2   | HIV Prevalence, ARV-Adjusted (Custom Lag, %)    |          | X*      |         |          |         |         |
| Late maternal deaths                   | 2   | In-Facility Delivery (proportion)               | X*       |         |         | X*       |         |         |
| Late maternal deaths                   | 2   | LDI (I\$ per capita)                            |          |         | X*      | X*       |         |         |
| Late maternal deaths                   | 2   | Skilled Birth Attendance (proportion)           | X*       |         |         |          |         |         |
| Late maternal deaths                   | 2   | Total Fertility Rate                            | X*       |         |         |          |         |         |
| Late maternal deaths                   | 2   | Education (years per capita)                    |          | X*      |         |          |         |         |
| Late maternal deaths                   | 2   | Health System Access 2 (unitless)               |          | X*      |         |          |         |         |
| Late maternal deaths                   | 2   | Malnutrition (proportion <2SD weight for age)   |          | X*      |         |          |         |         |
| Late maternal deaths                   | 2   | Neonatal Death Rate Modeled 2 (per 1000)        |          | X*      |         |          |         |         |
| Maternal deaths aggravated by HIV/AIDS | 2   | Antenatal Care (4 visits) Coverage (proportion) |          | X*      |         |          |         |         |



**Web Table 23 - Comparison of covariates used in CoD models for GBD 2010 and GBD 2013**

| Cause Name                             | Sex | Covariate name                                     | GBD 2010 |         |         | GBD 2013 |         |         |
|----------------------------------------|-----|----------------------------------------------------|----------|---------|---------|----------|---------|---------|
|                                        |     |                                                    | Level 1  | Level 2 | Level 3 | Level 1  | Level 2 | Level 3 |
| Maternal deaths aggravated by HIV/AIDS | 2   | Age-Specific Fertility Rate                        | X*       |         |         |          |         |         |
| Maternal deaths aggravated by HIV/AIDS | 2   | HIV Prevalence, ARV-Adjusted (Custom Lag, %)       |          | X*      |         |          |         |         |
| Maternal deaths aggravated by HIV/AIDS | 2   | In-Facility Delivery (proportion)                  | X*       |         |         |          |         |         |
| Maternal deaths aggravated by HIV/AIDS | 2   | LDI (I\$ per capita)                               |          |         | X*      |          |         |         |
| Maternal deaths aggravated by HIV/AIDS | 2   | Skilled Birth Attendance (proportion)              | X*       |         |         |          |         |         |
| Maternal deaths aggravated by HIV/AIDS | 2   | Total Fertility Rate                               | X*       |         |         |          |         |         |
| Maternal deaths aggravated by HIV/AIDS | 2   | None                                               |          |         |         | X*       |         |         |
| Maternal deaths aggravated by HIV/AIDS | 2   | Education (years per capita)                       |          | X*      |         |          |         |         |
| Maternal deaths aggravated by HIV/AIDS | 2   | Health System Access 2 (unitless)                  |          | X*      |         |          |         |         |
| Maternal deaths aggravated by HIV/AIDS | 2   | Malnutrition (proportion <2SD weight for age)      |          | X*      |         |          |         |         |
| Maternal deaths aggravated by HIV/AIDS | 2   | Neonatal Death Rate Modeled 2 (per 1000)           |          | X*      |         |          |         |         |
| Other maternal disorders               | 2   | Antenatal Care (4 visits) Coverage (proportion)    |          | X*      |         |          |         |         |
| Other maternal disorders               | 2   | Age-Specific Fertility Rate                        | X*       |         |         |          |         |         |
| Other maternal disorders               | 2   | HIV Prevalence, ARV-Adjusted (Custom Lag, %)       |          | X*      |         |          |         |         |
| Other maternal disorders               | 2   | In-Facility Delivery (proportion)                  | X*       |         |         |          |         |         |
| Other maternal disorders               | 2   | LDI (I\$ per capita)                               |          |         | X*      | X*       |         |         |
| Other maternal disorders               | 2   | Skilled Birth Attendance (proportion)              | X*       |         |         |          |         |         |
| Other maternal disorders               | 2   | Total Fertility Rate                               | X*       |         |         |          |         |         |
| Other maternal disorders               | 2   | Education (years per capita)                       |          | X*      |         |          |         |         |
| Other maternal disorders               | 2   | Health System Access 2 (unitless)                  |          | X*      |         |          |         |         |
| Other maternal disorders               | 2   | Malnutrition (proportion <2SD weight for age)      |          | X*      |         |          |         |         |
| Other maternal disorders               | 2   | Neonatal Death Rate Modeled 2 (per 1000)           |          | X*      |         |          |         |         |
| Neonatal disorders                     | 1   | In-Facility Delivery (proportion)                  | X        |         |         |          |         |         |
| Neonatal disorders                     | 1   | Health System Access 2 (unitless)                  | X        |         |         | X        |         |         |
| Neonatal disorders                     | 1   | Indoor Air Pollution (All Cooking Fuels)           | X        |         |         | X        |         |         |
| Neonatal disorders                     | 1   | Smoking Prevalence (Reproductive Age Standardized) | X        |         |         | X        |         |         |
| Neonatal disorders                     | 1   | HIV Prevalence, ARV-Adjusted (Custom Lag, %)       |          | X       |         |          |         |         |
| Neonatal disorders                     | 1   | LDI (I\$ per capita)                               |          | X       |         |          | X       |         |
| Neonatal disorders                     | 1   | Skilled Birth Attendance (proportion)              |          | X       |         |          | X       |         |
| Neonatal disorders                     | 1   | Education (years per capita)                       |          | X       |         |          | X       |         |
| Neonatal disorders                     | 1   | Malnutrition (proportion <2SD weight for age)      |          | X       |         |          | X       |         |
| Neonatal disorders                     | 1   | Completeness of Vital Registration                 |          |         | X       |          |         |         |
| Neonatal disorders                     | 1   | Total Fertility Rate                               |          |         | X       |          |         | X       |
| Neonatal disorders                     | 2   | In-Facility Delivery (proportion)                  | X        |         |         |          |         |         |
| Neonatal disorders                     | 2   | Health System Access 2 (unitless)                  | X        |         |         | X        |         |         |
| Neonatal disorders                     | 2   | Indoor Air Pollution (All Cooking Fuels)           | X        |         |         | X        |         |         |
| Neonatal disorders                     | 2   | Smoking Prevalence (Reproductive Age Standardized) | X        |         |         | X        |         |         |
| Neonatal disorders                     | 2   | HIV Prevalence, ARV-Adjusted (Custom Lag, %)       |          | X       |         |          |         |         |

**Web Table 23 - Comparison of covariates used in CoD models for GBD 2010 and GBD 2013**

| Cause Name                                               | Sex | Covariate name                                     | GBD 2010 |         |         | GBD 2013 |         |         |
|----------------------------------------------------------|-----|----------------------------------------------------|----------|---------|---------|----------|---------|---------|
|                                                          |     |                                                    | Level 1  | Level 2 | Level 3 | Level 1  | Level 2 | Level 3 |
| Neonatal disorders                                       | 2   | LDI (I\$ per capita)                               |          | X       |         |          | X       |         |
| Neonatal disorders                                       | 2   | Skilled Birth Attendance (proportion)              |          | X       |         |          | X       |         |
| Neonatal disorders                                       | 2   | Education (years per capita)                       |          | X       |         |          | X       |         |
| Neonatal disorders                                       | 2   | Malnutrition (proportion <2SD weight for age)      |          | X       |         |          | X       |         |
| Neonatal disorders                                       | 2   | Completeness of Vital Registration                 |          |         |         | X        |         |         |
| Neonatal disorders                                       | 2   | Total Fertility Rate                               |          |         |         | X        |         | X       |
| Neonatal preterm birth complications                     | 1   | In-Facility Delivery (proportion)                  | X        |         |         |          |         |         |
| Neonatal preterm birth complications                     | 1   | Health System Access 2 (unitless)                  | X        |         |         | X        |         |         |
| Neonatal preterm birth complications                     | 1   | Indoor Air Pollution (All Cooking Fuels)           | X        |         |         | X        |         |         |
| Neonatal preterm birth complications                     | 1   | Smoking Prevalence (Reproductive Age Standardized) | X        |         |         | X        |         |         |
| Neonatal preterm birth complications                     | 1   | HIV Prevalence, ARV-Adjusted (Custom Lag, %)       |          | X       |         |          |         |         |
| Neonatal preterm birth complications                     | 1   | Skilled Birth Attendance (proportion)              |          | X       |         |          | X       |         |
| Neonatal preterm birth complications                     | 1   | Malnutrition (proportion <2SD weight for age)      |          | X       |         |          | X       |         |
| Neonatal preterm birth complications                     | 1   | LDI (I\$ per capita)                               |          |         |         | X        |         | X       |
| Neonatal preterm birth complications                     | 1   | Total Fertility Rate                               |          |         |         | X        |         | X       |
| Neonatal preterm birth complications                     | 1   | Education (years per capita)                       |          |         |         | X        |         | X       |
| Neonatal preterm birth complications                     | 2   | In-Facility Delivery (proportion)                  | X        |         |         |          |         |         |
| Neonatal preterm birth complications                     | 2   | Health System Access 2 (unitless)                  | X        |         |         | X        |         |         |
| Neonatal preterm birth complications                     | 2   | Indoor Air Pollution (All Cooking Fuels)           | X        |         |         | X        |         |         |
| Neonatal preterm birth complications                     | 2   | Smoking Prevalence (Reproductive Age Standardized) | X        |         |         | X        |         |         |
| Neonatal preterm birth complications                     | 2   | HIV Prevalence, ARV-Adjusted (Custom Lag, %)       |          | X       |         |          |         |         |
| Neonatal preterm birth complications                     | 2   | Skilled Birth Attendance (proportion)              |          | X       |         |          | X       |         |
| Neonatal preterm birth complications                     | 2   | Malnutrition (proportion <2SD weight for age)      |          | X       |         |          | X       |         |
| Neonatal preterm birth complications                     | 2   | LDI (I\$ per capita)                               |          |         |         | X        |         | X       |
| Neonatal preterm birth complications                     | 2   | Total Fertility Rate                               |          |         |         | X        |         | X       |
| Neonatal preterm birth complications                     | 2   | Education (years per capita)                       |          |         |         | X        |         | X       |
| Neonatal encephalopathy due to birth asphyxia and trauma | 1   | In-Facility Delivery (proportion)                  | X        |         |         |          |         |         |
| Neonatal encephalopathy due to birth asphyxia and trauma | 1   | Health System Access 2 (unitless)                  | X        |         |         | X        |         |         |
| Neonatal encephalopathy due to birth asphyxia and trauma | 1   | Indoor Air Pollution (All Cooking Fuels)           | X        |         |         | X        |         |         |
| Neonatal encephalopathy due to birth asphyxia and trauma | 1   | Smoking Prevalence (Reproductive Age Standardized) | X        |         |         | X        |         |         |
| Neonatal encephalopathy due to birth asphyxia and trauma | 1   | HIV Prevalence, ARV-Adjusted (Custom Lag, %)       |          | X       |         |          |         |         |
| Neonatal encephalopathy due to birth asphyxia and trauma | 1   | Skilled Birth Attendance (proportion)              |          | X       |         |          | X       |         |
| Neonatal encephalopathy due to birth asphyxia and trauma | 1   | Malnutrition (proportion <2SD weight for age)      |          | X       |         |          | X       |         |

**Web Table 23 - Comparison of covariates used in CoD models for GBD 2010 and GBD 2013**

| Cause Name                                               | Sex | Covariate name                                     | GBD 2010 |         |         | GBD 2013 |         |         |
|----------------------------------------------------------|-----|----------------------------------------------------|----------|---------|---------|----------|---------|---------|
|                                                          |     |                                                    | Level 1  | Level 2 | Level 3 | Level 1  | Level 2 | Level 3 |
| Neonatal encephalopathy due to birth asphyxia and trauma | 1   | LDI (I\$ per capita)                               |          |         | X       |          |         | X       |
| Neonatal encephalopathy due to birth asphyxia and trauma | 1   | Total Fertility Rate                               |          |         | X       |          |         | X       |
| Neonatal encephalopathy due to birth asphyxia and trauma | 1   | Education (years per capita)                       |          |         | X       |          |         | X       |
| Neonatal encephalopathy due to birth asphyxia and trauma | 2   | In-Facility Delivery (proportion)                  | X        |         |         |          |         |         |
| Neonatal encephalopathy due to birth asphyxia and trauma | 2   | Health System Access 2 (unitless)                  | X        |         |         | X        |         |         |
| Neonatal encephalopathy due to birth asphyxia and trauma | 2   | Indoor Air Pollution (All Cooking Fuels)           | X        |         |         | X        |         |         |
| Neonatal encephalopathy due to birth asphyxia and trauma | 2   | Smoking Prevalence (Reproductive Age Standardized) | X        |         |         | X        |         |         |
| Neonatal encephalopathy due to birth asphyxia and trauma | 2   | HIV Prevalence, ARV-Adjusted (Custom Lag, %)       |          | X       |         |          |         |         |
| Neonatal encephalopathy due to birth asphyxia and trauma | 2   | Skilled Birth Attendance (proportion)              |          | X       |         |          | X       |         |
| Neonatal encephalopathy due to birth asphyxia and trauma | 2   | Malnutrition (proportion <2SD weight for age)      |          | X       |         |          | X       |         |
| Neonatal encephalopathy due to birth asphyxia and trauma | 2   | LDI (I\$ per capita)                               |          |         | X       |          |         | X       |
| Neonatal encephalopathy due to birth asphyxia and trauma | 2   | Total Fertility Rate                               |          |         | X       |          |         | X       |
| Neonatal encephalopathy due to birth asphyxia and trauma | 2   | Education (years per capita)                       |          |         | X       |          |         | X       |
| Neonatal sepsis and other neonatal infections            | 1   | In-Facility Delivery (proportion)                  | X        |         |         |          |         |         |
| Neonatal sepsis and other neonatal infections            | 1   | Health System Access 2 (unitless)                  | X        |         |         | X        |         |         |
| Neonatal sepsis and other neonatal infections            | 1   | Indoor Air Pollution (All Cooking Fuels)           | X        |         |         | X        |         |         |
| Neonatal sepsis and other neonatal infections            | 1   | Smoking Prevalence (Reproductive Age Standardized) | X        |         |         | X        |         |         |
| Neonatal sepsis and other neonatal infections            | 1   | HIV Prevalence, ARV-Adjusted (Custom Lag, %)       |          | X       |         |          |         |         |
| Neonatal sepsis and other neonatal infections            | 1   | Skilled Birth Attendance (proportion)              |          | X       |         |          | X       |         |
| Neonatal sepsis and other neonatal infections            | 1   | Malnutrition (proportion <2SD weight for age)      |          | X       |         |          | X       |         |
| Neonatal sepsis and other neonatal infections            | 1   | LDI (I\$ per capita)                               |          |         | X       |          |         | X       |
| Neonatal sepsis and other neonatal infections            | 1   | Total Fertility Rate                               |          |         | X       |          |         | X       |

**Web Table 23 - Comparison of covariates used in CoD models for GBD 2010 and GBD 2013**

| Cause Name                                    | Sex | Covariate name                                     | GBD 2010 |         |         | GBD 2013 |         |         |
|-----------------------------------------------|-----|----------------------------------------------------|----------|---------|---------|----------|---------|---------|
|                                               |     |                                                    | Level 1  | Level 2 | Level 3 | Level 1  | Level 2 | Level 3 |
| Neonatal sepsis and other neonatal infections | 1   | Education (years per capita)                       |          |         | X       |          |         | X       |
| Neonatal sepsis and other neonatal infections | 2   | In-Facility Delivery (proportion)                  | X        |         |         |          |         |         |
| Neonatal sepsis and other neonatal infections | 2   | Health System Access 2 (unitless)                  | X        |         |         | X        |         |         |
| Neonatal sepsis and other neonatal infections | 2   | Indoor Air Pollution (All Cooking Fuels)           | X        |         |         | X        |         |         |
| Neonatal sepsis and other neonatal infections | 2   | Smoking Prevalence (Reproductive Age Standardized) | X        |         |         | X        |         |         |
| Neonatal sepsis and other neonatal infections | 2   | HIV Prevalence, ARV-Adjusted (Custom Lag, %)       |          | X       |         |          |         |         |
| Neonatal sepsis and other neonatal infections | 2   | Skilled Birth Attendance (proportion)              |          | X       |         |          | X       |         |
| Neonatal sepsis and other neonatal infections | 2   | Malnutrition (proportion <2SD weight for age)      |          | X       |         |          | X       |         |
| Neonatal sepsis and other neonatal infections | 2   | LDI (I\$ per capita)                               |          |         | X       |          |         | X       |
| Neonatal sepsis and other neonatal infections | 2   | Total Fertility Rate                               |          |         | X       |          |         | X       |
| Neonatal sepsis and other neonatal infections | 2   | Education (years per capita)                       |          |         | X       |          |         | X       |
| Hemolytic disease and other neonatal jaundice | 1   | HIV Prevalence, ARV-Adjusted (Custom Lag, %)       |          | X*      |         |          |         |         |
| Hemolytic disease and other neonatal jaundice | 1   | Completeness of Vital Registration                 |          |         | X*      |          |         |         |
| Hemolytic disease and other neonatal jaundice | 1   | Malnutrition (proportion <2SD weight for age)      |          | X*      |         |          |         |         |
| Hemolytic disease and other neonatal jaundice | 1   | Indoor Air Pollution (All Cooking Fuels)           | X*       |         |         |          |         |         |
| Hemolytic disease and other neonatal jaundice | 1   | Smoking Prevalence (Reproductive Age Standardized) | X*       |         |         |          |         |         |
| Hemolytic disease and other neonatal jaundice | 1   | Antenatal Care (4 visits) Coverage (proportion)    |          |         |         |          | X       |         |
| Hemolytic disease and other neonatal jaundice | 1   | In-Facility Delivery (proportion)                  | X*       |         |         |          | X       |         |
| Hemolytic disease and other neonatal jaundice | 1   | Skilled Birth Attendance (proportion)              |          | X*      |         |          | X       |         |
| Hemolytic disease and other neonatal jaundice | 1   | Total Fertility Rate                               |          |         | X*      |          | X       |         |
| Hemolytic disease and other neonatal jaundice | 1   | Health System Access 2 (unitless)                  | X*       |         |         |          | X       |         |
| Hemolytic disease and other neonatal jaundice | 1   | LDI (I\$ per capita)                               |          | X*      |         |          |         | X       |

**Web Table 23 - Comparison of covariates used in CoD models for GBD 2010 and GBD 2013**

| Cause Name                                    | Sex | Covariate name                                     | GBD 2010 |         |         | GBD 2013 |         |         |
|-----------------------------------------------|-----|----------------------------------------------------|----------|---------|---------|----------|---------|---------|
|                                               |     |                                                    | Level 1  | Level 2 | Level 3 | Level 1  | Level 2 | Level 3 |
| Hemolytic disease and other neonatal jaundice | 1   | Education (years per capita)                       |          | X*      |         |          |         | X       |
| Hemolytic disease and other neonatal jaundice | 2   | HIV Prevalence, ARV-Adjusted (Custom Lag, %)       |          | X*      |         |          |         |         |
| Hemolytic disease and other neonatal jaundice | 2   | Completeness of Vital Registration                 |          |         | X*      |          |         |         |
| Hemolytic disease and other neonatal jaundice | 2   | Malnutrition (proportion <2SD weight for age)      |          | X*      |         |          |         |         |
| Hemolytic disease and other neonatal jaundice | 2   | Indoor Air Pollution (All Cooking Fuels)           | X*       |         |         |          |         |         |
| Hemolytic disease and other neonatal jaundice | 2   | Smoking Prevalence (Reproductive Age Standardized) | X*       |         |         |          |         |         |
| Hemolytic disease and other neonatal jaundice | 2   | Antenatal Care (4 visits) Coverage (proportion)    |          |         |         |          | X       |         |
| Hemolytic disease and other neonatal jaundice | 2   | In-Facility Delivery (proportion)                  | X*       |         |         |          | X       |         |
| Hemolytic disease and other neonatal jaundice | 2   | Skilled Birth Attendance (proportion)              |          | X*      |         |          | X       |         |
| Hemolytic disease and other neonatal jaundice | 2   | Total Fertility Rate                               |          |         | X*      |          | X       |         |
| Hemolytic disease and other neonatal jaundice | 2   | Health System Access 2 (unitless)                  | X*       |         |         |          | X       |         |
| Hemolytic disease and other neonatal jaundice | 2   | LDI (I\$ per capita)                               |          | X*      |         |          |         | X       |
| Hemolytic disease and other neonatal jaundice | 2   | Education (years per capita)                       |          | X*      |         |          |         | X       |
| Other neonatal disorders                      | 1   | In-Facility Delivery (proportion)                  | X        |         |         |          |         |         |
| Other neonatal disorders                      | 1   | Health System Access 2 (unitless)                  | X        |         |         |          | X       |         |
| Other neonatal disorders                      | 1   | Indoor Air Pollution (All Cooking Fuels)           | X        |         |         |          | X       |         |
| Other neonatal disorders                      | 1   | Smoking Prevalence (Reproductive Age Standardized) | X        |         |         |          | X       |         |
| Other neonatal disorders                      | 1   | HIV Prevalence, ARV-Adjusted (Custom Lag, %)       |          | X       |         |          |         |         |
| Other neonatal disorders                      | 1   | Skilled Birth Attendance (proportion)              |          | X       |         |          | X       |         |
| Other neonatal disorders                      | 1   | Malnutrition (proportion <2SD weight for age)      |          | X       |         |          | X       |         |
| Other neonatal disorders                      | 1   | LDI (I\$ per capita)                               |          |         | X       |          |         | X       |
| Other neonatal disorders                      | 1   | Total Fertility Rate                               |          |         | X       |          |         | X       |
| Other neonatal disorders                      | 1   | Education (years per capita)                       |          |         | X       |          |         | X       |
| Other neonatal disorders                      | 2   | In-Facility Delivery (proportion)                  | X        |         |         |          |         |         |
| Other neonatal disorders                      | 2   | Health System Access 2 (unitless)                  | X        |         |         |          | X       |         |
| Other neonatal disorders                      | 2   | Indoor Air Pollution (All Cooking Fuels)           | X        |         |         |          | X       |         |
| Other neonatal disorders                      | 2   | Smoking Prevalence (Reproductive Age Standardized) | X        |         |         |          | X       |         |
| Other neonatal disorders                      | 2   | HIV Prevalence, ARV-Adjusted (Custom Lag, %)       |          | X       |         |          |         |         |
| Other neonatal disorders                      | 2   | Skilled Birth Attendance (proportion)              |          | X       |         |          | X       |         |

**Web Table 23 - Comparison of covariates used in CoD models for GBD 2010 and GBD 2013**

| Cause Name                  | Sex | Covariate name                                                               | GBD 2010 |         |         | GBD 2013 |         |         |
|-----------------------------|-----|------------------------------------------------------------------------------|----------|---------|---------|----------|---------|---------|
|                             |     |                                                                              | Level 1  | Level 2 | Level 3 | Level 1  | Level 2 | Level 3 |
| Other neonatal disorders    | 2   | Malnutrition (proportion <2SD weight for age)                                |          | X       |         |          | X       |         |
| Other neonatal disorders    | 2   | LDI (I\$ per capita)                                                         |          |         | X       |          |         | X       |
| Other neonatal disorders    | 2   | Total Fertility Rate                                                         |          |         | X       |          |         | X       |
| Other neonatal disorders    | 2   | Education (years per capita)                                                 |          |         | X       |          |         | X       |
| Nutritional deficiencies    | 1   | Health System Access 2 (unitless)                                            | X        |         |         | X        |         |         |
| Nutritional deficiencies    | 1   | Malnutrition (proportion <2SD weight for age)                                | X        |         |         | X        |         |         |
| Nutritional deficiencies    | 1   | Malnutrition Shock (binary)                                                  | X        |         |         | X        |         |         |
| Nutritional deficiencies    | 1   | Age-Standardize Prevalence of Severe Anemia                                  | X        |         |         | X        |         |         |
| Nutritional deficiencies    | 1   | Rainfall Quintile 1 (proportion)                                             |          | X       |         |          | X       |         |
| Nutritional deficiencies    | 1   | Rainfall Quintile 2 (proportion)                                             |          | X       |         |          | X       |         |
| Nutritional deficiencies    | 1   | Sanitation (proportion with access)                                          |          | X       |         |          | X       |         |
| Nutritional deficiencies    | 1   | Total Calories (kcal per capita)                                             |          | X       |         |          | X       |         |
| Nutritional deficiencies    | 1   | Mortality Rate Due to War Shocks (per 1 person)                              |          | X       |         |          | X       |         |
| Nutritional deficiencies    | 1   | Improved Water Source (proportion with access)                               |          | X       |         |          | X       |         |
| Nutritional deficiencies    | 1   | LDI (I\$ per capita)                                                         |          |         | X       |          |         | X       |
| Nutritional deficiencies    | 1   | Education (years per capita)                                                 |          |         | X       |          |         | X       |
| Nutritional deficiencies    | 2   | Health System Access 2 (unitless)                                            | X        |         |         | X        |         |         |
| Nutritional deficiencies    | 2   | Malnutrition (proportion <2SD weight for age)                                | X        |         |         | X        |         |         |
| Nutritional deficiencies    | 2   | Malnutrition Shock (binary)                                                  | X        |         |         | X        |         |         |
| Nutritional deficiencies    | 2   | Age-Standardize Prevalence of Severe Anemia                                  | X        |         |         | X        |         |         |
| Nutritional deficiencies    | 2   | Rainfall Quintile 1 (proportion)                                             |          | X       |         |          | X       |         |
| Nutritional deficiencies    | 2   | Rainfall Quintile 2 (proportion)                                             |          | X       |         |          | X       |         |
| Nutritional deficiencies    | 2   | Sanitation (proportion with access)                                          |          | X       |         |          | X       |         |
| Nutritional deficiencies    | 2   | Total Calories (kcal per capita)                                             |          | X       |         |          | X       |         |
| Nutritional deficiencies    | 2   | Mortality Rate Due to War Shocks (per 1 person)                              |          | X       |         |          | X       |         |
| Nutritional deficiencies    | 2   | Improved Water Source (proportion with access)                               |          | X       |         |          | X       |         |
| Nutritional deficiencies    | 2   | LDI (I\$ per capita)                                                         |          |         | X       |          |         | X       |
| Nutritional deficiencies    | 2   | Education (years per capita)                                                 |          |         | X       |          |         | X       |
|                             |     | Improved Water Source (proportion with access, based on GBD 2010 definition) |          |         |         |          |         |         |
| Protein-energy malnutrition | 1   |                                                                              |          | X*      |         |          |         |         |
| Protein-energy malnutrition | 1   | Health System Access 2 (unitless)                                            | X*       |         |         | X        |         |         |
| Protein-energy malnutrition | 1   | Malnutrition (proportion <2SD weight for age)                                | X*       |         |         | X        |         |         |
| Protein-energy malnutrition | 1   | Malnutrition Shock (binary)                                                  | X*       |         |         | X        |         |         |
| Protein-energy malnutrition | 1   | Age-Standardize Prevalence of Severe Anemia                                  |          |         |         | X        |         |         |
| Protein-energy malnutrition | 1   | Rainfall Quintile 1 (proportion)                                             |          | X*      |         |          | X       |         |
| Protein-energy malnutrition | 1   | Rainfall Quintile 2 (proportion)                                             |          | X*      |         |          | X       |         |
| Protein-energy malnutrition | 1   | Sanitation (proportion with access)                                          |          | X*      |         |          | X       |         |
| Protein-energy malnutrition | 1   | Total Calories (kcal per capita)                                             | X*       |         |         |          | X       |         |
| Protein-energy malnutrition | 1   | Mortality Rate Due to War Shocks (per 1 person)                              |          | X*      |         |          | X       |         |

**Web Table 23 - Comparison of covariates used in CoD models for GBD 2010 and GBD 2013**

| Cause Name                  | Sex | Covariate name                                                               | GBD 2010 |         |         | GBD 2013 |         |         |
|-----------------------------|-----|------------------------------------------------------------------------------|----------|---------|---------|----------|---------|---------|
|                             |     |                                                                              | Level 1  | Level 2 | Level 3 | Level 1  | Level 2 | Level 3 |
| Protein-energy malnutrition | 1   | Improved Water Source (proportion with access)                               |          |         |         | X        |         |         |
| Protein-energy malnutrition | 1   | LDI (I\$ per capita)                                                         |          |         | X*      |          |         | X       |
| Protein-energy malnutrition | 1   | Education (years per capita)                                                 |          |         | X*      |          |         | X       |
| Protein-energy malnutrition | 2   | Improved Water Source (proportion with access, based on GBD 2010 definition) |          | X*      |         |          |         |         |
| Protein-energy malnutrition | 2   | Health System Access 2 (unitless)                                            | X*       |         |         | X        |         |         |
| Protein-energy malnutrition | 2   | Malnutrition (proportion <2SD weight for age)                                | X*       |         |         | X        |         |         |
| Protein-energy malnutrition | 2   | Malnutrition Shock (binary)                                                  | X*       |         |         | X        |         |         |
| Protein-energy malnutrition | 2   | Age-Standardize Prevalence of Severe Anemia                                  |          |         |         | X        |         |         |
| Protein-energy malnutrition | 2   | Rainfall Quintile 1 (proportion)                                             |          | X*      |         |          | X       |         |
| Protein-energy malnutrition | 2   | Rainfall Quintile 2 (proportion)                                             |          | X*      |         |          | X       |         |
| Protein-energy malnutrition | 2   | Sanitation (proportion with access)                                          |          | X*      |         |          | X       |         |
| Protein-energy malnutrition | 2   | Total Calories (kcal per capita)                                             | X*       |         |         |          | X       |         |
| Protein-energy malnutrition | 2   | Mortality Rate Due to War Shocks (per 1 person)                              |          | X*      |         |          | X       |         |
| Protein-energy malnutrition | 2   | Improved Water Source (proportion with access)                               |          |         |         |          | X       |         |
| Protein-energy malnutrition | 2   | LDI (I\$ per capita)                                                         |          |         | X*      |          |         | X       |
| Protein-energy malnutrition | 2   | Education (years per capita)                                                 |          |         | X*      |          |         | X       |
| Iodine deficiency           | 1   | LDI (I\$ per capita)                                                         |          | X*      | X*      |          |         |         |
| Iodine deficiency           | 1   | Health System Access 2 (unitless)                                            | X*       |         |         |          |         |         |
| Iodine deficiency           | 1   | Proportion of households using iodized salt (adjusted)                       |          |         |         | X*       |         |         |
| Iodine deficiency           | 1   | Malnutrition (proportion <2SD weight for age)                                | X*       | X*      |         |          |         |         |
| Iodine deficiency           | 1   | Mortality Rate Due to Conflict in Last 10 Years (per 1 person)               |          | X*      |         |          |         |         |
| Iodine deficiency           | 2   | LDI (I\$ per capita)                                                         |          | X*      | X*      |          |         |         |
| Iodine deficiency           | 2   | Health System Access 2 (unitless)                                            | X*       |         |         |          |         |         |
| Iodine deficiency           | 2   | Proportion of households using iodized salt (adjusted)                       |          |         |         | X*       |         |         |
| Iodine deficiency           | 2   | Malnutrition (proportion <2SD weight for age)                                | X*       | X*      |         |          |         |         |
| Iodine deficiency           | 2   | Mortality Rate Due to Conflict in Last 10 Years (per 1 person)               |          | X*      |         |          |         |         |
| Iron-deficiency anemia      | 1   | Year                                                                         |          |         |         | X*       |         |         |
| Iron-deficiency anemia      | 1   | Health System Access 2 (unitless)                                            | X*       |         |         | X        |         |         |
| Iron-deficiency anemia      | 1   | Malnutrition (proportion <2SD weight for age)                                | X*       |         |         | X        |         |         |
| Iron-deficiency anemia      | 1   | Malnutrition Shock (binary)                                                  | X*       |         |         | X        |         |         |
| Iron-deficiency anemia      | 1   | Age-Standardize Prevalence of Severe Anemia                                  | X*       |         |         | X        |         |         |
| Iron-deficiency anemia      | 1   | Rainfall Quintile 1 (proportion)                                             |          | X*      |         |          | X       |         |
| Iron-deficiency anemia      | 1   | Rainfall Quintile 2 (proportion)                                             |          | X*      |         |          | X       |         |
| Iron-deficiency anemia      | 1   | Sanitation (proportion with access)                                          |          | X*      |         |          | X       |         |
| Iron-deficiency anemia      | 1   | Total Calories (kcal per capita)                                             |          | X*      |         |          | X       |         |
| Iron-deficiency anemia      | 1   | Mortality Rate Due to War Shocks (per 1 person)                              |          | X*      |         |          | X       |         |
| Iron-deficiency anemia      | 1   | Improved Water Source (proportion with access)                               |          | X*      |         |          | X       |         |
| Iron-deficiency anemia      | 1   | LDI (I\$ per capita)                                                         |          |         | X*      |          |         | X       |

**Web Table 23 - Comparison of covariates used in CoD models for GBD 2010 and GBD 2013**

| Cause Name                     | Sex | Covariate name                                  | GBD 2010 |         |         | GBD 2013 |         |         |
|--------------------------------|-----|-------------------------------------------------|----------|---------|---------|----------|---------|---------|
|                                |     |                                                 | Level 1  | Level 2 | Level 3 | Level 1  | Level 2 | Level 3 |
| Iron-deficiency anemia         | 1   | Education (years per capita)                    |          |         | X*      |          |         | X       |
| Iron-deficiency anemia         | 2   | Year                                            |          |         |         | X*       |         |         |
| Iron-deficiency anemia         | 2   | Health System Access 2 (unitless)               | X*       |         |         | X        |         |         |
| Iron-deficiency anemia         | 2   | Malnutrition (proportion <2SD weight for age)   | X*       |         |         | X        |         |         |
| Iron-deficiency anemia         | 2   | Malnutrition Shock (binary)                     | X*       |         |         | X        |         |         |
| Iron-deficiency anemia         | 2   | Age-Standardize Prevalence of Severe Anemia     | X*       |         |         | X        |         |         |
| Iron-deficiency anemia         | 2   | Rainfall Quintile 1 (proportion)                |          | X*      |         |          | X       |         |
| Iron-deficiency anemia         | 2   | Rainfall Quintile 2 (proportion)                |          | X*      |         |          | X       |         |
| Iron-deficiency anemia         | 2   | Sanitation (proportion with access)             |          | X*      |         |          | X       |         |
| Iron-deficiency anemia         | 2   | Total Calories (kcal per capita)                |          | X*      |         |          | X       |         |
| Iron-deficiency anemia         | 2   | Mortality Rate Due to War Shocks (per 1 person) |          | X*      |         |          | X       |         |
| Iron-deficiency anemia         | 2   | Improved Water Source (proportion with access)  |          | X*      |         |          | X       |         |
| Iron-deficiency anemia         | 2   | LDI (I\$ per capita)                            |          |         | X*      |          |         | X       |
| Iron-deficiency anemia         | 2   | Education (years per capita)                    |          |         | X*      |          |         | X       |
| Other nutritional deficiencies | 1   | Health System Access 2 (unitless)               | X*       |         |         | X        |         |         |
| Other nutritional deficiencies | 1   | Malnutrition (proportion <2SD weight for age)   | X*       |         |         | X        |         |         |
| Other nutritional deficiencies | 1   | Malnutrition Shock (binary)                     | X*       |         |         | X        |         |         |
| Other nutritional deficiencies | 1   | Age-Standardize Prevalence of Severe Anemia     | X*       |         |         | X        |         |         |
| Other nutritional deficiencies | 1   | Rainfall Quintile 1 (proportion)                |          | X*      |         |          | X       |         |
| Other nutritional deficiencies | 1   | Rainfall Quintile 2 (proportion)                |          | X*      |         |          | X       |         |
| Other nutritional deficiencies | 1   | Sanitation (proportion with access)             |          | X*      |         |          | X       |         |
| Other nutritional deficiencies | 1   | Total Calories (kcal per capita)                |          | X*      |         |          | X       |         |
| Other nutritional deficiencies | 1   | Mortality Rate Due to War Shocks (per 1 person) |          | X*      |         |          | X       |         |
| Other nutritional deficiencies | 1   | Improved Water Source (proportion with access)  |          | X*      |         | X*       | X       |         |
| Other nutritional deficiencies | 1   | LDI (I\$ per capita)                            |          |         | X*      |          |         | X       |
| Other nutritional deficiencies | 1   | Education (years per capita)                    |          |         | X*      |          |         | X       |
| Other nutritional deficiencies | 2   | Health System Access 2 (unitless)               | X*       |         |         | X        |         |         |
| Other nutritional deficiencies | 2   | Malnutrition (proportion <2SD weight for age)   | X*       |         |         | X        |         |         |
| Other nutritional deficiencies | 2   | Malnutrition Shock (binary)                     | X*       |         |         | X        |         |         |
| Other nutritional deficiencies | 2   | Age-Standardize Prevalence of Severe Anemia     | X*       |         |         | X        |         |         |
| Other nutritional deficiencies | 2   | Rainfall Quintile 1 (proportion)                |          | X*      |         |          | X       |         |
| Other nutritional deficiencies | 2   | Rainfall Quintile 2 (proportion)                |          | X*      |         |          | X       |         |
| Other nutritional deficiencies | 2   | Sanitation (proportion with access)             |          | X*      |         |          | X       |         |
| Other nutritional deficiencies | 2   | Total Calories (kcal per capita)                |          | X*      |         |          | X       |         |
| Other nutritional deficiencies | 2   | Mortality Rate Due to War Shocks (per 1 person) |          | X*      |         |          | X       |         |
| Other nutritional deficiencies | 2   | Improved Water Source (proportion with access)  |          | X*      |         | X*       | X       |         |
| Other nutritional deficiencies | 2   | LDI (I\$ per capita)                            |          |         | X*      |          |         | X       |
| Other nutritional deficiencies | 2   | Education (years per capita)                    |          |         | X*      |          |         | X       |



**Web Table 23 - Comparison of covariates used in CoD models for GBD 2010 and GBD 2013**

| Cause Name                                  | Sex | Covariate name                                  | GBD 2010 |         |         | GBD 2013 |         |         |
|---------------------------------------------|-----|-------------------------------------------------|----------|---------|---------|----------|---------|---------|
|                                             |     |                                                 | Level 1  | Level 2 | Level 3 | Level 1  | Level 2 | Level 3 |
| Sexually transmitted diseases excluding HIV | 1   | LDI (I\$ per capita)                            | X*       |         |         |          |         |         |
| Sexually transmitted diseases excluding HIV | 1   | Improved Water Source (proportion with access)  |          |         |         | X*       |         |         |
| Sexually transmitted diseases excluding HIV | 1   | Syphilis prevalence (proportion)                | X*       |         |         | X        |         |         |
| Sexually transmitted diseases excluding HIV | 1   | Total Fertility Rate                            |          |         |         |          | X       |         |
| Sexually transmitted diseases excluding HIV | 1   | Legality of Abortion                            |          |         |         |          | X       |         |
| Sexually transmitted diseases excluding HIV | 1   | Education (years per capita)                    |          |         |         |          | X       |         |
| Sexually transmitted diseases excluding HIV | 1   | Health System Access (capped)                   |          |         |         |          | X       |         |
| Sexually transmitted diseases excluding HIV | 1   | Antenatal Care (1 visit) Coverage (proportion)  |          |         |         |          |         | X       |
| Sexually transmitted diseases excluding HIV | 1   | Antenatal Care (4 visits) Coverage (proportion) |          |         |         |          |         | X       |
| Sexually transmitted diseases excluding HIV | 2   | LDI (I\$ per capita)                            | X*       |         |         |          |         |         |
| Sexually transmitted diseases excluding HIV | 2   | Improved Water Source (proportion with access)  |          |         |         | X*       |         |         |
| Sexually transmitted diseases excluding HIV | 2   | Syphilis prevalence (proportion)                | X*       |         |         | X        |         |         |
| Sexually transmitted diseases excluding HIV | 2   | Total Fertility Rate                            |          |         |         |          | X       |         |
| Sexually transmitted diseases excluding HIV | 2   | Legality of Abortion                            |          |         |         |          | X       |         |
| Sexually transmitted diseases excluding HIV | 2   | Education (years per capita)                    |          |         |         |          | X       |         |
| Sexually transmitted diseases excluding HIV | 2   | Health System Access (capped)                   |          |         |         |          | X       |         |
| Sexually transmitted diseases excluding HIV | 2   | Antenatal Care (1 visit) Coverage (proportion)  |          |         |         |          |         | X       |
| Sexually transmitted diseases excluding HIV | 2   | Antenatal Care (4 visits) Coverage (proportion) |          |         |         |          |         | X       |
| Syphilis                                    | 1   | Antenatal Care (1 visit) Coverage (proportion)  | X*       |         |         |          |         |         |
| Syphilis                                    | 1   | Antenatal Care (4 visits) Coverage (proportion) | X*       |         |         |          |         |         |
| Syphilis                                    | 1   | LDI (I\$ per capita)                            | X*       |         |         |          |         |         |
| Syphilis                                    | 1   | None                                            |          |         |         | X*       |         |         |
| Syphilis                                    | 1   | Health System Access 2 (unitless)               | X*       |         |         |          |         |         |
| Syphilis                                    | 2   | Antenatal Care (1 visit) Coverage (proportion)  | X*       |         |         |          |         |         |
| Syphilis                                    | 2   | Antenatal Care (4 visits) Coverage (proportion) | X*       |         |         |          |         |         |
| Syphilis                                    | 2   | LDI (I\$ per capita)                            | X*       |         |         |          |         |         |
| Syphilis                                    | 2   | None                                            |          |         |         | X*       |         |         |
| Syphilis                                    | 2   | Health System Access 2 (unitless)               | X*       |         |         |          |         |         |
| Chlamydial infection                        | 1   | LDI (I\$ per capita)                            | X*       |         |         |          |         |         |
| Chlamydial infection                        | 1   | None                                            |          |         |         | X*       |         |         |
| Chlamydial infection                        | 1   | Syphilis prevalence (proportion)                | X*       |         |         |          |         |         |
| Chlamydial infection                        | 2   | LDI (I\$ per capita)                            | X*       |         |         |          |         |         |
| Chlamydial infection                        | 2   | None                                            |          |         |         | X*       |         |         |
| Chlamydial infection                        | 2   | Syphilis prevalence (proportion)                | X*       |         |         |          |         |         |
| Gonococcal infection                        | 1   | LDI (I\$ per capita)                            | X*       |         |         |          |         |         |
| Gonococcal infection                        | 1   | None                                            |          |         |         | X*       |         |         |
| Gonococcal infection                        | 1   | Syphilis prevalence (proportion)                | X*       |         |         |          |         |         |
| Gonococcal infection                        | 2   | LDI (I\$ per capita)                            | X*       |         |         |          |         |         |

**Web Table 23 - Comparison of covariates used in CoD models for GBD 2010 and GBD 2013**

| Cause Name                          | Sex | Covariate name                                      | GBD 2010 |         |         | GBD 2013 |         |         |
|-------------------------------------|-----|-----------------------------------------------------|----------|---------|---------|----------|---------|---------|
|                                     |     |                                                     | Level 1  | Level 2 | Level 3 | Level 1  | Level 2 | Level 3 |
| Gonococcal infection                | 2   | None                                                |          |         |         | X*       |         |         |
| Gonococcal infection                | 2   | Syphilis prevalence (proportion)                    | X*       |         |         |          |         |         |
| Other sexually transmitted diseases | 1   | LDI (I\$ per capita)                                | X*       |         |         |          |         |         |
| Other sexually transmitted diseases | 1   | None                                                |          |         |         | X*       |         |         |
| Other sexually transmitted diseases | 1   | Syphilis prevalence (proportion)                    | X*       |         |         |          |         |         |
| Other sexually transmitted diseases | 2   | LDI (I\$ per capita)                                | X*       |         |         |          |         |         |
| Other sexually transmitted diseases | 2   | None                                                |          |         |         | X*       |         |         |
| Other sexually transmitted diseases | 2   | Syphilis prevalence (proportion)                    | X*       |         |         |          |         |         |
| Hepatitis                           | 1   | Sanitation (proportion with access)                 |          |         |         |          | X       |         |
| Hepatitis                           | 1   | Improved Water Source (proportion with access)      |          |         |         |          | X       |         |
| Hepatitis                           | 1   | HIV Prevalence, ARV-Adjusted (Custom Lag, %)        | X        |         |         |          |         |         |
| Hepatitis                           | 1   | Hepatitis A Prevalence (proportion)                 | X        |         |         | X        |         |         |
| Hepatitis                           | 1   | Hepatitis B Prevalence (proportion)                 | X        |         |         | X        |         |         |
| Hepatitis                           | 1   | Hepatitis C Prevalence (proportion)                 | X        |         |         | X        |         |         |
| Hepatitis                           | 1   | Hepatitis E Prevalence (proportion)                 | X        |         |         | X        |         |         |
| Hepatitis                           | 1   | Alcohol (liters per capita)                         |          | X       |         |          |         |         |
| Hepatitis                           | 1   | Population Density (over 1000 ppl/sqkm, proportion) |          | X       |         |          |         |         |
| Hepatitis                           | 1   | Population Density (under 150 ppl/sqkm, proportion) |          | X       |         |          |         |         |
| Hepatitis                           | 1   | Health System Access 2 (unitless)                   |          | X       |         |          | X       |         |
| Hepatitis                           | 1   | LDI (I\$ per capita)                                |          |         | X       |          | X       |         |
| Hepatitis                           | 1   | Education (years per capita)                        |          |         | X       |          |         | X       |
| Hepatitis                           | 2   | Sanitation (proportion with access)                 |          |         |         |          | X       |         |
| Hepatitis                           | 2   | Improved Water Source (proportion with access)      |          |         |         |          | X       |         |
| Hepatitis                           | 2   | HIV Prevalence, ARV-Adjusted (Custom Lag, %)        | X        |         |         |          |         |         |
| Hepatitis                           | 2   | Hepatitis A Prevalence (proportion)                 | X        |         |         | X        |         |         |
| Hepatitis                           | 2   | Hepatitis B Prevalence (proportion)                 | X        |         |         | X        |         |         |
| Hepatitis                           | 2   | Hepatitis C Prevalence (proportion)                 | X        |         |         | X        |         |         |
| Hepatitis                           | 2   | Hepatitis E Prevalence (proportion)                 | X        |         |         | X        |         |         |
| Hepatitis                           | 2   | Alcohol (liters per capita)                         |          | X       |         |          |         |         |
| Hepatitis                           | 2   | Population Density (over 1000 ppl/sqkm, proportion) |          | X       |         |          |         |         |
| Hepatitis                           | 2   | Population Density (under 150 ppl/sqkm, proportion) |          | X       |         |          |         |         |
| Hepatitis                           | 2   | Health System Access 2 (unitless)                   |          | X       |         |          | X       |         |
| Hepatitis                           | 2   | LDI (I\$ per capita)                                |          |         | X       |          | X       |         |
| Hepatitis                           | 2   | Education (years per capita)                        |          |         | X       |          |         | X       |
| Acute hepatitis A                   | 1   | Improved Water Source (proportion with access)      |          |         |         | X*       |         |         |
| Acute hepatitis A                   | 1   | HIV Prevalence, ARV-Adjusted (Custom Lag, %)        | X        |         |         |          |         |         |
| Acute hepatitis A                   | 1   | Hepatitis A Prevalence (proportion)                 | X        |         |         |          |         |         |
| Acute hepatitis A                   | 1   | Alcohol (liters per capita)                         |          | X       |         |          |         |         |

**Web Table 23 - Comparison of covariates used in CoD models for GBD 2010 and GBD 2013**

| Cause Name        | Sex | Covariate name                                      | GBD 2010 |         |         | GBD 2013 |         |         |
|-------------------|-----|-----------------------------------------------------|----------|---------|---------|----------|---------|---------|
|                   |     |                                                     | Level 1  | Level 2 | Level 3 | Level 1  | Level 2 | Level 3 |
| Acute hepatitis A | 1   | Health System Access 2 (unitless)                   |          | X       |         |          |         |         |
| Acute hepatitis A | 1   | Population Density (over 1000 ppl/sqkm, proportion) |          | X       |         |          |         |         |
| Acute hepatitis A | 1   | Population Density (under 150 ppl/sqkm, proportion) |          | X       |         |          |         |         |
| Acute hepatitis A | 1   | LDI (I\$ per capita)                                |          |         | X       | X*       |         |         |
| Acute hepatitis A | 1   | Education (years per capita)                        |          |         | X       |          |         |         |
| Acute hepatitis A | 2   | Improved Water Source (proportion with access)      |          |         |         | X*       |         |         |
| Acute hepatitis A | 2   | HIV Prevalence, ARV-Adjusted (Custom Lag, %)        | X        |         |         |          |         |         |
| Acute hepatitis A | 2   | Hepatitis A Prevalence (proportion)                 | X        |         |         |          |         |         |
| Acute hepatitis A | 2   | Alcohol (liters per capita)                         |          | X       |         |          |         |         |
| Acute hepatitis A | 2   | Health System Access 2 (unitless)                   |          | X       |         |          |         |         |
| Acute hepatitis A | 2   | Population Density (over 1000 ppl/sqkm, proportion) |          | X       |         |          |         |         |
| Acute hepatitis A | 2   | Population Density (under 150 ppl/sqkm, proportion) |          | X       |         |          |         |         |
| Acute hepatitis A | 2   | LDI (I\$ per capita)                                |          |         | X       | X*       |         |         |
| Acute hepatitis A | 2   | Education (years per capita)                        |          |         | X       |          |         |         |
| Acute hepatitis B | 1   | None                                                |          |         |         | X*       |         |         |
| Acute hepatitis B | 1   | HIV Prevalence, ARV-Adjusted (Custom Lag, %)        | X        |         |         |          |         |         |
| Acute hepatitis B | 1   | Hepatitis B Prevalence (proportion)                 | X        |         |         |          |         |         |
| Acute hepatitis B | 1   | Alcohol (liters per capita)                         |          | X       |         |          |         |         |
| Acute hepatitis B | 1   | Health System Access 2 (unitless)                   |          | X       |         |          |         |         |
| Acute hepatitis B | 1   | Population Density (over 1000 ppl/sqkm, proportion) |          | X       |         |          |         |         |
| Acute hepatitis B | 1   | Population Density (under 150 ppl/sqkm, proportion) |          | X       |         |          |         |         |
| Acute hepatitis B | 1   | LDI (I\$ per capita)                                |          |         | X       |          |         |         |
| Acute hepatitis B | 1   | Education (years per capita)                        |          |         | X       |          |         |         |
| Acute hepatitis B | 2   | None                                                |          |         |         | X*       |         |         |
| Acute hepatitis B | 2   | HIV Prevalence, ARV-Adjusted (Custom Lag, %)        | X        |         |         |          |         |         |
| Acute hepatitis B | 2   | Hepatitis B Prevalence (proportion)                 | X        |         |         |          |         |         |
| Acute hepatitis B | 2   | Alcohol (liters per capita)                         |          | X       |         |          |         |         |
| Acute hepatitis B | 2   | Health System Access 2 (unitless)                   |          | X       |         |          |         |         |
| Acute hepatitis B | 2   | Population Density (over 1000 ppl/sqkm, proportion) |          | X       |         |          |         |         |
| Acute hepatitis B | 2   | Population Density (under 150 ppl/sqkm, proportion) |          | X       |         |          |         |         |
| Acute hepatitis B | 2   | LDI (I\$ per capita)                                |          |         | X       |          |         |         |
| Acute hepatitis B | 2   | Education (years per capita)                        |          |         | X       |          |         |         |
| Acute hepatitis C | 1   | None                                                |          |         |         | X*       |         |         |
| Acute hepatitis C | 1   | HIV Prevalence, ARV-Adjusted (Custom Lag, %)        | X        |         |         |          |         |         |
| Acute hepatitis C | 1   | Hepatitis C Prevalence (proportion)                 | X        |         |         |          |         |         |
| Acute hepatitis C | 1   | Alcohol (liters per capita)                         |          | X       |         |          |         |         |
| Acute hepatitis C | 1   | Health System Access 2 (unitless)                   |          | X       |         |          |         |         |
| Acute hepatitis C | 1   | Population Density (over 1000 ppl/sqkm, proportion) |          | X       |         |          |         |         |

**Web Table 23 - Comparison of covariates used in CoD models for GBD 2010 and GBD 2013**

| Cause Name        | Sex | Covariate name                                                                           | GBD 2010 |         |         | GBD 2013 |         |         |
|-------------------|-----|------------------------------------------------------------------------------------------|----------|---------|---------|----------|---------|---------|
|                   |     |                                                                                          | Level 1  | Level 2 | Level 3 | Level 1  | Level 2 | Level 3 |
| Acute hepatitis C | 1   | Population Density (under 150 ppl/sqkm, proportion)                                      |          | X       |         |          |         |         |
| Acute hepatitis C | 1   | LDI (I\$ per capita)                                                                     |          |         | X       |          |         |         |
| Acute hepatitis C | 1   | Education (years per capita)                                                             |          |         | X       |          |         |         |
| Acute hepatitis C | 2   | None                                                                                     |          |         |         | X*       |         |         |
| Acute hepatitis C | 2   | HIV Prevalence, ARV-Adjusted (Custom Lag, %)                                             | X        |         |         |          |         |         |
| Acute hepatitis C | 2   | Hepatitis C Prevalence (proportion)                                                      | X        |         |         |          |         |         |
| Acute hepatitis C | 2   | Alcohol (liters per capita)                                                              |          | X       |         |          |         |         |
| Acute hepatitis C | 2   | Health System Access 2 (unitless)                                                        |          | X       |         |          |         |         |
| Acute hepatitis C | 2   | Population Density (over 1000 ppl/sqkm, proportion)                                      |          | X       |         |          |         |         |
| Acute hepatitis C | 2   | Population Density (under 150 ppl/sqkm, proportion)                                      |          | X       |         |          |         |         |
| Acute hepatitis C | 2   | LDI (I\$ per capita)                                                                     |          |         | X       |          |         |         |
| Acute hepatitis C | 2   | Education (years per capita)                                                             |          |         | X       |          |         |         |
| Acute hepatitis E | 1   | HIV Prevalence, ARV-Adjusted (Custom Lag, %)                                             | X*       |         |         |          |         |         |
| Acute hepatitis E | 1   | LDI (I\$ per capita)                                                                     |          |         | X*      |          |         |         |
| Acute hepatitis E | 1   | Alcohol (liters per capita)                                                              |          | X*      |         |          |         |         |
| Acute hepatitis E | 1   | Education (years per capita)                                                             |          |         | X*      |          |         |         |
| Acute hepatitis E | 1   | Health System Access 2 (unitless)                                                        |          | X*      |         |          |         |         |
| Acute hepatitis E | 1   | Proportion of the population living in the classic monsoon region (low-income countries) |          |         |         | X*       |         |         |
| Acute hepatitis E | 1   | Population Density (over 1000 ppl/sqkm, proportion)                                      |          | X*      |         |          |         |         |
| Acute hepatitis E | 1   | Population Density (under 150 ppl/sqkm, proportion)                                      |          | X*      |         |          |         |         |
| Acute hepatitis E | 1   | Hepatitis A Prevalence (proportion)                                                      | X*       |         |         |          |         |         |
| Acute hepatitis E | 1   | Hepatitis B Prevalence (proportion)                                                      | X*       |         |         |          |         |         |
| Acute hepatitis E | 1   | Hepatitis C Prevalence (proportion)                                                      | X*       |         |         |          |         |         |
| Acute hepatitis E | 1   | Hepatitis E Prevalence (proportion)                                                      | X*       |         |         |          |         |         |
| Acute hepatitis E | 1   | Sanitation (proportion with access)                                                      |          |         |         | X*       |         |         |
| Acute hepatitis E | 2   | HIV Prevalence, ARV-Adjusted (Custom Lag, %)                                             | X*       |         |         |          |         |         |
| Acute hepatitis E | 2   | LDI (I\$ per capita)                                                                     |          |         | X*      |          |         |         |
| Acute hepatitis E | 2   | Alcohol (liters per capita)                                                              |          | X*      |         |          |         |         |
| Acute hepatitis E | 2   | Education (years per capita)                                                             |          |         | X*      |          |         |         |
| Acute hepatitis E | 2   | Health System Access 2 (unitless)                                                        |          | X*      |         |          |         |         |
| Acute hepatitis E | 2   | Proportion of the population living in the classic monsoon region (low-income countries) |          |         |         | X*       |         |         |
| Acute hepatitis E | 2   | Population Density (over 1000 ppl/sqkm, proportion)                                      |          | X*      |         |          |         |         |
| Acute hepatitis E | 2   | Population Density (under 150 ppl/sqkm, proportion)                                      |          | X*      |         |          |         |         |
| Acute hepatitis E | 2   | Hepatitis A Prevalence (proportion)                                                      | X*       |         |         |          |         |         |
| Acute hepatitis E | 2   | Hepatitis B Prevalence (proportion)                                                      | X*       |         |         |          |         |         |
| Acute hepatitis E | 2   | Hepatitis C Prevalence (proportion)                                                      | X*       |         |         |          |         |         |
| Acute hepatitis E | 2   | Hepatitis E Prevalence (proportion)                                                      | X*       |         |         |          |         |         |

**Web Table 23 - Comparison of covariates used in CoD models for GBD 2010 and GBD 2013**

| Cause Name                | Sex | Covariate name                                 | GBD 2010 |         |         | GBD 2013 |         |         |
|---------------------------|-----|------------------------------------------------|----------|---------|---------|----------|---------|---------|
|                           |     |                                                | Level 1  | Level 2 | Level 3 | Level 1  | Level 2 | Level 3 |
| Acute hepatitis E         | 2   | Sanitation (proportion with access)            |          |         |         | X*       |         |         |
| Other infectious diseases | 1   | DTP3 Coverage (proportion)                     | X        |         |         | X        |         |         |
| Other infectious diseases | 1   | Health System Access (unitless)                | X        |         |         | X        |         |         |
| Other infectious diseases | 1   | Measles Vaccine Coverage (proportion)          | X        |         |         | X        |         |         |
| Other infectious diseases | 1   | Antenatal Care (1 visit) Coverage (proportion) |          | X       |         |          | X       |         |
| Other infectious diseases | 1   | Malnutrition (proportion <2SD weight for age)  |          | X       |         |          | X       |         |
| Other infectious diseases | 1   | Latitude Under 15 (proportion)                 |          | X       |         |          | X       |         |
| Other infectious diseases | 1   | Latitude 15 to 30 (proportion)                 |          | X       |         |          | X       |         |
| Other infectious diseases | 1   | Latitude 30 to 45 (proportion)                 |          | X       |         |          | X       |         |
| Other infectious diseases | 1   | Latitude Over 45 (proportion)                  |          | X       |         |          | X       |         |
| Other infectious diseases | 1   | Rainfall Quintile 1 (proportion)               |          | X       |         |          | X       |         |
| Other infectious diseases | 1   | Rainfall Quintile 2 (proportion)               |          | X       |         |          | X       |         |
| Other infectious diseases | 1   | Rainfall Quintile 3 (proportion)               |          | X       |         |          | X       |         |
| Other infectious diseases | 1   | Rainfall Quintile 4 (proportion)               |          | X       |         |          | X       |         |
| Other infectious diseases | 1   | Rainfall Quintile 5 (proportion)               |          | X       |         |          | X       |         |
| Other infectious diseases | 1   | Sanitation (proportion with access)            |          | X       |         |          | X       |         |
| Other infectious diseases | 1   | Improved Water Source (proportion with access) |          | X       |         |          | X       |         |
| Other infectious diseases | 1   | LDI (I\$ per capita)                           |          |         | X       |          |         | X       |
| Other infectious diseases | 1   | Education (years per capita)                   |          |         | X       |          |         | X       |
| Other infectious diseases | 2   | DTP3 Coverage (proportion)                     | X        |         |         | X        |         |         |
| Other infectious diseases | 2   | Health System Access (unitless)                | X        |         |         | X        |         |         |
| Other infectious diseases | 2   | Measles Vaccine Coverage (proportion)          | X        |         |         | X        |         |         |
| Other infectious diseases | 2   | Antenatal Care (1 visit) Coverage (proportion) |          | X       |         |          | X       |         |
| Other infectious diseases | 2   | Malnutrition (proportion <2SD weight for age)  |          | X       |         |          | X       |         |
| Other infectious diseases | 2   | Latitude Under 15 (proportion)                 |          | X       |         |          | X       |         |
| Other infectious diseases | 2   | Latitude 15 to 30 (proportion)                 |          | X       |         |          | X       |         |
| Other infectious diseases | 2   | Latitude 30 to 45 (proportion)                 |          | X       |         |          | X       |         |
| Other infectious diseases | 2   | Latitude Over 45 (proportion)                  |          | X       |         |          | X       |         |
| Other infectious diseases | 2   | Rainfall Quintile 1 (proportion)               |          | X       |         |          | X       |         |
| Other infectious diseases | 2   | Rainfall Quintile 2 (proportion)               |          | X       |         |          | X       |         |
| Other infectious diseases | 2   | Rainfall Quintile 3 (proportion)               |          | X       |         |          | X       |         |
| Other infectious diseases | 2   | Rainfall Quintile 4 (proportion)               |          | X       |         |          | X       |         |
| Other infectious diseases | 2   | Rainfall Quintile 5 (proportion)               |          | X       |         |          | X       |         |
| Other infectious diseases | 2   | Sanitation (proportion with access)            |          | X       |         |          | X       |         |
| Other infectious diseases | 2   | Improved Water Source (proportion with access) |          | X       |         |          | X       |         |
| Other infectious diseases | 2   | LDI (I\$ per capita)                           |          |         | X       |          |         | X       |
| Other infectious diseases | 2   | Education (years per capita)                   |          |         | X       |          |         | X       |
| Esophageal cancer         | 1   | Total Calories (kcal per capita)               |          |         |         |          | X       |         |

**Web Table 23 - Comparison of covariates used in CoD models for GBD 2010 and GBD 2013**

| Cause Name        | Sex | Covariate name                                 | GBD 2010 |         |         | GBD 2013 |         |         |
|-------------------|-----|------------------------------------------------|----------|---------|---------|----------|---------|---------|
|                   |     |                                                | Level 1  | Level 2 | Level 3 | Level 1  | Level 2 | Level 3 |
| Esophageal cancer | 1   | Red Meat (kcal per capita)                     | X        |         |         |          |         |         |
| Esophageal cancer | 1   | Alcohol (liters per capita)                    | X        |         |         | X        |         |         |
| Esophageal cancer | 1   | Cumulative Cigarettes (15 Years)               | X        |         |         | X        |         |         |
| Esophageal cancer | 1   | Cumulative Cigarettes (20 Years)               | X        |         |         | X        |         |         |
| Esophageal cancer | 1   | Indoor Air Pollution (All Cooking Fuels)       | X        |         |         |          | X       |         |
| Esophageal cancer | 1   | Cumulative Cigarettes (10 Years)               |          | X       |         |          |         |         |
| Esophageal cancer | 1   | Tobacco (cigarettes per capita)                | X        | X       |         | X        |         |         |
| Esophageal cancer | 1   | Fruits (kcal per capita)                       |          | X       |         | X        |         |         |
| Esophageal cancer | 1   | Mean BMI                                       |          | X       |         | X        |         |         |
| Esophageal cancer | 1   | Smoking Prevalence                             | X        | X       |         | X        |         |         |
| Esophageal cancer | 1   | Indoor Air Pollution (Biomass Cooking)         |          | X       |         |          | X       |         |
| Esophageal cancer | 1   | Indoor Air Pollution (Coal Cooking)            |          | X       |         |          | X       |         |
| Esophageal cancer | 1   | Outdoor Air Pollution (PM2.5)                  |          | X       |         |          | X       |         |
| Esophageal cancer | 1   | Sanitation (proportion with access)            |          | X       |         |          | X       |         |
| Esophageal cancer | 1   | Vegetables (kcal per capita)                   |          | X       |         |          | X       |         |
| Esophageal cancer | 1   | Improved Water Source (proportion with access) |          | X       |         |          | X       |         |
| Esophageal cancer | 1   | LDI (I\$ per capita)                           |          |         | X       |          |         | X       |
| Esophageal cancer | 1   | Education (years per capita)                   |          |         | X       |          |         | X       |
| Esophageal cancer | 2   | Total Calories (kcal per capita)               |          |         |         |          | X       |         |
| Esophageal cancer | 2   | Red Meat (kcal per capita)                     | X        |         |         |          |         |         |
| Esophageal cancer | 2   | Alcohol (liters per capita)                    | X        |         |         | X        |         |         |
| Esophageal cancer | 2   | Cumulative Cigarettes (15 Years)               | X        |         |         | X        |         |         |
| Esophageal cancer | 2   | Cumulative Cigarettes (20 Years)               | X        |         |         | X        |         |         |
| Esophageal cancer | 2   | Indoor Air Pollution (All Cooking Fuels)       | X        |         |         |          | X       |         |
| Esophageal cancer | 2   | Cumulative Cigarettes (10 Years)               |          | X       |         |          |         |         |
| Esophageal cancer | 2   | Tobacco (cigarettes per capita)                | X        | X       |         | X        |         |         |
| Esophageal cancer | 2   | Fruits (kcal per capita)                       |          | X       |         | X        |         |         |
| Esophageal cancer | 2   | Mean BMI                                       |          | X       |         | X        |         |         |
| Esophageal cancer | 2   | Smoking Prevalence                             | X        | X       |         | X        |         |         |
| Esophageal cancer | 2   | Indoor Air Pollution (Biomass Cooking)         |          | X       |         |          | X       |         |
| Esophageal cancer | 2   | Indoor Air Pollution (Coal Cooking)            |          | X       |         |          | X       |         |
| Esophageal cancer | 2   | Outdoor Air Pollution (PM2.5)                  |          | X       |         |          | X       |         |
| Esophageal cancer | 2   | Sanitation (proportion with access)            |          | X       |         |          | X       |         |
| Esophageal cancer | 2   | Vegetables (kcal per capita)                   |          | X       |         |          | X       |         |
| Esophageal cancer | 2   | Improved Water Source (proportion with access) |          | X       |         |          | X       |         |
| Esophageal cancer | 2   | LDI (I\$ per capita)                           |          |         | X       |          |         | X       |
| Esophageal cancer | 2   | Education (years per capita)                   |          |         | X       |          |         | X       |
| Stomach cancer    | 1   | Red Meat (kcal per capita)                     | X        |         |         |          |         |         |

**Web Table 23 - Comparison of covariates used in CoD models for GBD 2010 and GBD 2013**

| Cause Name     | Sex | Covariate name                                 | GBD 2010 |         |         | GBD 2013 |         |         |
|----------------|-----|------------------------------------------------|----------|---------|---------|----------|---------|---------|
|                |     |                                                | Level 1  | Level 2 | Level 3 | Level 1  | Level 2 | Level 3 |
| Stomach cancer | 1   | Cumulative Cigarettes (15 Years)               | X        |         |         | X        |         |         |
| Stomach cancer | 1   | Cumulative Cigarettes (20 Years)               | X        |         |         | X        |         |         |
| Stomach cancer | 1   | Alcohol (liters per capita)                    | X        |         |         |          | X       |         |
| Stomach cancer | 1   | Tobacco (cigarettes per capita)                | X        | X       |         | X        |         |         |
| Stomach cancer | 1   | Cumulative Cigarettes (10 Years)               |          | X       |         | X        |         |         |
| Stomach cancer | 1   | Smoking Prevalence                             | X        | X       |         | X        |         |         |
| Stomach cancer | 1   | Fruits (kcal per capita)                       |          | X       |         |          | X       |         |
| Stomach cancer | 1   | Mean BMI                                       |          | X       |         |          | X       |         |
| Stomach cancer | 1   | Indoor Air Pollution (All Cooking Fuels)       |          | X       |         |          | X       |         |
| Stomach cancer | 1   | Outdoor Air Pollution (PM2.5)                  |          | X       |         |          | X       |         |
| Stomach cancer | 1   | Sanitation (proportion with access)            |          | X       |         |          | X       |         |
| Stomach cancer | 1   | Vegetables (kcal per capita)                   |          | X       |         |          | X       |         |
| Stomach cancer | 1   | Improved Water Source (proportion with access) |          | X       |         |          | X       |         |
| Stomach cancer | 1   | Indoor Air Pollution (Biomass Cooking)         |          |         | X       |          | X       |         |
| Stomach cancer | 1   | Indoor Air Pollution (Coal Cooking)            |          |         | X       |          | X       |         |
| Stomach cancer | 1   | LDI (I\$ per capita)                           |          |         | X       |          |         | X       |
| Stomach cancer | 1   | Education (years per capita)                   |          |         | X       |          |         | X       |
| Stomach cancer | 2   | Red Meat (kcal per capita)                     | X        |         |         |          |         |         |
| Stomach cancer | 2   | Cumulative Cigarettes (15 Years)               | X        |         |         | X        |         |         |
| Stomach cancer | 2   | Cumulative Cigarettes (20 Years)               | X        |         |         | X        |         |         |
| Stomach cancer | 2   | Alcohol (liters per capita)                    | X        |         |         |          | X       |         |
| Stomach cancer | 2   | Tobacco (cigarettes per capita)                | X        | X       |         | X        |         |         |
| Stomach cancer | 2   | Cumulative Cigarettes (10 Years)               |          | X       |         | X        |         |         |
| Stomach cancer | 2   | Smoking Prevalence                             | X        | X       |         | X        |         |         |
| Stomach cancer | 2   | Fruits (kcal per capita)                       |          | X       |         |          | X       |         |
| Stomach cancer | 2   | Mean BMI                                       |          | X       |         |          | X       |         |
| Stomach cancer | 2   | Indoor Air Pollution (All Cooking Fuels)       |          | X       |         |          | X       |         |
| Stomach cancer | 2   | Outdoor Air Pollution (PM2.5)                  |          | X       |         |          | X       |         |
| Stomach cancer | 2   | Sanitation (proportion with access)            |          | X       |         |          | X       |         |
| Stomach cancer | 2   | Vegetables (kcal per capita)                   |          | X       |         |          | X       |         |
| Stomach cancer | 2   | Improved Water Source (proportion with access) |          | X       |         |          | X       |         |
| Stomach cancer | 2   | Indoor Air Pollution (Biomass Cooking)         |          |         | X       |          | X       |         |
| Stomach cancer | 2   | Indoor Air Pollution (Coal Cooking)            |          |         | X       |          | X       |         |
| Stomach cancer | 2   | LDI (I\$ per capita)                           |          |         | X       |          |         | X       |
| Stomach cancer | 2   | Education (years per capita)                   |          |         | X       |          |         | X       |
| Liver cancer   | 1   | Cumulative Cigarettes (15 Years)               |          |         |         | X        |         |         |
| Liver cancer   | 1   | Cumulative Cigarettes (20 Years)               |          |         |         | X        |         |         |
| Liver cancer   | 1   | Alcohol (liters per capita)                    | X        |         |         | X        |         |         |

**Web Table 23 - Comparison of covariates used in CoD models for GBD 2010 and GBD 2013**

| Cause Name                      | Sex | Covariate name                                    | GBD 2010 |         |         | GBD 2013 |         |         |
|---------------------------------|-----|---------------------------------------------------|----------|---------|---------|----------|---------|---------|
|                                 |     |                                                   | Level 1  | Level 2 | Level 3 | Level 1  | Level 2 | Level 3 |
| Liver cancer                    | 1   | Hepatitis B Prevalence (proportion)               | X        |         |         | X        |         |         |
| Liver cancer                    | 1   | Hepatitis C Prevalence (proportion)               | X        |         |         | X        |         |         |
| Liver cancer                    | 1   | Animal Fats (kcal per capita)                     |          | X       |         |          | X       |         |
| Liver cancer                    | 1   | Diabetes Age-Standardized Prevalence (proportion) |          | X       |         |          | X       |         |
| Liver cancer                    | 1   | Health System Access 2 (unitless)                 |          | X       |         |          | X       |         |
| Liver cancer                    | 1   | Mean BMI                                          |          | X       |         |          | X       |         |
| Liver cancer                    | 1   | Red Meat (kcal per capita)                        |          | X       |         |          | X       |         |
| Liver cancer                    | 1   | Tobacco (cigarettes per capita)                   |          |         | X       | X        |         |         |
| Liver cancer                    | 1   | LDI (I\$ per capita)                              |          |         | X       |          |         | X       |
| Liver cancer                    | 1   | Education (years per capita)                      |          |         | X       |          |         | X       |
| Liver cancer                    | 2   | Cumulative Cigarettes (15 Years)                  |          |         |         | X        |         |         |
| Liver cancer                    | 2   | Cumulative Cigarettes (20 Years)                  |          |         |         | X        |         |         |
| Liver cancer                    | 2   | Alcohol (liters per capita)                       | X        |         |         | X        |         |         |
| Liver cancer                    | 2   | Hepatitis B Prevalence (proportion)               | X        |         |         | X        |         |         |
| Liver cancer                    | 2   | Hepatitis C Prevalence (proportion)               | X        |         |         | X        |         |         |
| Liver cancer                    | 2   | Animal Fats (kcal per capita)                     |          | X       |         |          | X       |         |
| Liver cancer                    | 2   | Diabetes Age-Standardized Prevalence (proportion) |          | X       |         |          | X       |         |
| Liver cancer                    | 2   | Health System Access 2 (unitless)                 |          | X       |         |          | X       |         |
| Liver cancer                    | 2   | Mean BMI                                          |          | X       |         |          | X       |         |
| Liver cancer                    | 2   | Red Meat (kcal per capita)                        |          | X       |         |          | X       |         |
| Liver cancer                    | 2   | Tobacco (cigarettes per capita)                   |          |         | X       | X        |         |         |
| Liver cancer                    | 2   | LDI (I\$ per capita)                              |          |         | X       |          |         | X       |
| Liver cancer                    | 2   | Education (years per capita)                      |          |         | X       |          |         | X       |
| Liver cancer due to hepatitis B | 1   | LDI (I\$ per capita)                              |          |         | X*      |          |         |         |
| Liver cancer due to hepatitis B | 1   | Alcohol (liters per capita)                       | X*       |         |         |          |         |         |
| Liver cancer due to hepatitis B | 1   | Animal Fats (kcal per capita)                     |          | X*      |         |          |         |         |
| Liver cancer due to hepatitis B | 1   | Tobacco (cigarettes per capita)                   |          |         | X*      |          |         |         |
| Liver cancer due to hepatitis B | 1   | Diabetes Age-Standardized Prevalence (proportion) |          | X*      |         |          |         |         |
| Liver cancer due to hepatitis B | 1   | Education (years per capita)                      |          |         | X*      |          |         |         |
| Liver cancer due to hepatitis B | 1   | Health System Access 2 (unitless)                 |          | X*      |         |          |         |         |
| Liver cancer due to hepatitis B | 1   | Mean BMI                                          |          | X*      |         |          |         |         |
| Liver cancer due to hepatitis B | 1   | Hepatitis B Prevalence (proportion)               | X*       |         |         |          |         |         |
| Liver cancer due to hepatitis B | 1   | Hepatitis C Prevalence (proportion)               | X*       |         |         | X*       |         |         |
| Liver cancer due to hepatitis B | 1   | Red Meat (kcal per capita)                        |          | X*      |         |          |         |         |
| Liver cancer due to hepatitis B | 1   | Year                                              |          |         |         | X*       |         |         |
| Liver cancer due to hepatitis B | 2   | LDI (I\$ per capita)                              |          |         | X*      |          |         |         |
| Liver cancer due to hepatitis B | 2   | Alcohol (liters per capita)                       | X*       |         |         |          |         |         |
| Liver cancer due to hepatitis B | 2   | Animal Fats (kcal per capita)                     |          | X*      |         |          |         |         |



**Web Table 23 - Comparison of covariates used in CoD models for GBD 2010 and GBD 2013**

| Cause Name                      | Sex | Covariate name                                    | GBD 2010 |         |         | GBD 2013 |         |         |
|---------------------------------|-----|---------------------------------------------------|----------|---------|---------|----------|---------|---------|
|                                 |     |                                                   | Level 1  | Level 2 | Level 3 | Level 1  | Level 2 | Level 3 |
| Liver cancer due to hepatitis B | 2   | Tobacco (cigarettes per capita)                   |          |         | X*      |          |         |         |
| Liver cancer due to hepatitis B | 2   | Diabetes Age-Standardized Prevalence (proportion) |          | X*      |         |          |         |         |
| Liver cancer due to hepatitis B | 2   | Education (years per capita)                      |          |         | X*      |          |         |         |
| Liver cancer due to hepatitis B | 2   | Health System Access 2 (unitless)                 |          | X*      |         |          |         |         |
| Liver cancer due to hepatitis B | 2   | Mean BMI                                          |          | X*      |         |          |         |         |
| Liver cancer due to hepatitis B | 2   | Hepatitis B Prevalence (proportion)               | X*       |         |         |          |         |         |
| Liver cancer due to hepatitis B | 2   | Hepatitis C Prevalence (proportion)               | X*       |         |         | X*       |         |         |
| Liver cancer due to hepatitis B | 2   | Red Meat (kcal per capita)                        |          | X*      |         |          |         |         |
| Liver cancer due to hepatitis B | 2   | Year                                              |          |         |         | X*       |         |         |
| Liver cancer due to hepatitis C | 1   | LDI (I\$ per capita)                              |          |         | X*      |          |         |         |
| Liver cancer due to hepatitis C | 1   | Alcohol (liters per capita)                       | X*       |         |         |          |         |         |
| Liver cancer due to hepatitis C | 1   | Animal Fats (kcal per capita)                     |          | X*      |         |          |         |         |
| Liver cancer due to hepatitis C | 1   | Tobacco (cigarettes per capita)                   |          |         | X*      |          |         |         |
| Liver cancer due to hepatitis C | 1   | Diabetes Age-Standardized Prevalence (proportion) |          | X*      |         |          |         |         |
| Liver cancer due to hepatitis C | 1   | Education (years per capita)                      |          |         | X*      |          |         |         |
| Liver cancer due to hepatitis C | 1   | Health System Access 2 (unitless)                 |          | X*      |         |          |         |         |
| Liver cancer due to hepatitis C | 1   | Mean BMI                                          |          | X*      |         |          |         |         |
| Liver cancer due to hepatitis C | 1   | Hepatitis B Prevalence (proportion)               | X*       |         |         |          |         |         |
| Liver cancer due to hepatitis C | 1   | Hepatitis C Prevalence (proportion)               | X*       |         |         | X*       |         |         |
| Liver cancer due to hepatitis C | 1   | Red Meat (kcal per capita)                        |          | X*      |         |          |         |         |
| Liver cancer due to hepatitis C | 1   | Year                                              |          |         |         | X*       |         |         |
| Liver cancer due to hepatitis C | 2   | LDI (I\$ per capita)                              |          |         | X*      |          |         |         |
| Liver cancer due to hepatitis C | 2   | Alcohol (liters per capita)                       | X*       |         |         |          |         |         |
| Liver cancer due to hepatitis C | 2   | Animal Fats (kcal per capita)                     |          | X*      |         |          |         |         |
| Liver cancer due to hepatitis C | 2   | Tobacco (cigarettes per capita)                   |          |         | X*      |          |         |         |
| Liver cancer due to hepatitis C | 2   | Diabetes Age-Standardized Prevalence (proportion) |          | X*      |         |          |         |         |
| Liver cancer due to hepatitis C | 2   | Education (years per capita)                      |          |         | X*      |          |         |         |
| Liver cancer due to hepatitis C | 2   | Health System Access 2 (unitless)                 |          | X*      |         |          |         |         |
| Liver cancer due to hepatitis C | 2   | Mean BMI                                          |          | X*      |         |          |         |         |
| Liver cancer due to hepatitis C | 2   | Hepatitis B Prevalence (proportion)               | X*       |         |         |          |         |         |
| Liver cancer due to hepatitis C | 2   | Hepatitis C Prevalence (proportion)               | X*       |         |         | X*       |         |         |
| Liver cancer due to hepatitis C | 2   | Red Meat (kcal per capita)                        |          | X*      |         |          |         |         |
| Liver cancer due to hepatitis C | 2   | Year                                              |          |         |         | X*       |         |         |
| Liver cancer due to alcohol use | 1   | LDI (I\$ per capita)                              |          |         | X*      |          |         |         |
| Liver cancer due to alcohol use | 1   | Alcohol (liters per capita)                       | X*       |         |         |          |         |         |
| Liver cancer due to alcohol use | 1   | Animal Fats (kcal per capita)                     |          | X*      |         |          |         |         |
| Liver cancer due to alcohol use | 1   | Tobacco (cigarettes per capita)                   |          |         | X*      |          |         |         |
| Liver cancer due to alcohol use | 1   | Diabetes Age-Standardized Prevalence (proportion) |          | X*      |         |          |         |         |

**Web Table 23 - Comparison of covariates used in CoD models for GBD 2010 and GBD 2013**

| Cause Name                       | Sex | Covariate name                                    | GBD 2010 |         |         | GBD 2013 |         |         |
|----------------------------------|-----|---------------------------------------------------|----------|---------|---------|----------|---------|---------|
|                                  |     |                                                   | Level 1  | Level 2 | Level 3 | Level 1  | Level 2 | Level 3 |
| Liver cancer due to alcohol use  | 1   | Education (years per capita)                      |          |         | X*      |          |         |         |
| Liver cancer due to alcohol use  | 1   | Health System Access 2 (unitless)                 |          | X*      |         |          |         |         |
| Liver cancer due to alcohol use  | 1   | Mean BMI                                          |          | X*      |         |          |         |         |
| Liver cancer due to alcohol use  | 1   | Hepatitis B Prevalence (proportion)               | X*       |         |         |          |         |         |
| Liver cancer due to alcohol use  | 1   | Hepatitis C Prevalence (proportion)               | X*       |         |         | X*       |         |         |
| Liver cancer due to alcohol use  | 1   | Red Meat (kcal per capita)                        |          | X*      |         |          |         |         |
| Liver cancer due to alcohol use  | 1   | Year                                              |          |         |         | X*       |         |         |
| Liver cancer due to alcohol use  | 2   | LDI (I\$ per capita)                              |          |         | X*      |          |         |         |
| Liver cancer due to alcohol use  | 2   | Alcohol (liters per capita)                       | X*       |         |         |          |         |         |
| Liver cancer due to alcohol use  | 2   | Animal Fats (kcal per capita)                     |          | X*      |         |          |         |         |
| Liver cancer due to alcohol use  | 2   | Tobacco (cigarettes per capita)                   |          |         | X*      |          |         |         |
| Liver cancer due to alcohol use  | 2   | Diabetes Age-Standardized Prevalence (proportion) |          | X*      |         |          |         |         |
| Liver cancer due to alcohol use  | 2   | Education (years per capita)                      |          |         | X*      |          |         |         |
| Liver cancer due to alcohol use  | 2   | Health System Access 2 (unitless)                 |          | X*      |         |          |         |         |
| Liver cancer due to alcohol use  | 2   | Mean BMI                                          |          | X*      |         |          |         |         |
| Liver cancer due to alcohol use  | 2   | Hepatitis B Prevalence (proportion)               | X*       |         |         |          |         |         |
| Liver cancer due to alcohol use  | 2   | Hepatitis C Prevalence (proportion)               | X*       |         |         | X*       |         |         |
| Liver cancer due to alcohol use  | 2   | Red Meat (kcal per capita)                        |          | X*      |         |          |         |         |
| Liver cancer due to alcohol use  | 2   | Year                                              |          |         |         | X*       |         |         |
| Liver cancer due to other causes | 1   | LDI (I\$ per capita)                              |          |         | X*      |          |         |         |
| Liver cancer due to other causes | 1   | Alcohol (liters per capita)                       | X*       |         |         |          |         |         |
| Liver cancer due to other causes | 1   | Animal Fats (kcal per capita)                     |          | X*      |         |          |         |         |
| Liver cancer due to other causes | 1   | Tobacco (cigarettes per capita)                   |          |         | X*      |          |         |         |
| Liver cancer due to other causes | 1   | Diabetes Age-Standardized Prevalence (proportion) |          | X*      |         |          |         |         |
| Liver cancer due to other causes | 1   | Education (years per capita)                      |          |         | X*      |          |         |         |
| Liver cancer due to other causes | 1   | Health System Access 2 (unitless)                 |          | X*      |         |          |         |         |
| Liver cancer due to other causes | 1   | Mean BMI                                          |          | X*      |         |          |         |         |
| Liver cancer due to other causes | 1   | Hepatitis B Prevalence (proportion)               | X*       |         |         |          |         |         |
| Liver cancer due to other causes | 1   | Hepatitis C Prevalence (proportion)               | X*       |         |         | X*       |         |         |
| Liver cancer due to other causes | 1   | Red Meat (kcal per capita)                        |          | X*      |         |          |         |         |
| Liver cancer due to other causes | 1   | Year                                              |          |         |         | X*       |         |         |
| Liver cancer due to other causes | 2   | LDI (I\$ per capita)                              |          |         | X*      |          |         |         |
| Liver cancer due to other causes | 2   | Alcohol (liters per capita)                       | X*       |         |         |          |         |         |
| Liver cancer due to other causes | 2   | Animal Fats (kcal per capita)                     |          | X*      |         |          |         |         |
| Liver cancer due to other causes | 2   | Tobacco (cigarettes per capita)                   |          |         | X*      |          |         |         |
| Liver cancer due to other causes | 2   | Diabetes Age-Standardized Prevalence (proportion) |          | X*      |         |          |         |         |
| Liver cancer due to other causes | 2   | Education (years per capita)                      |          |         | X*      |          |         |         |
| Liver cancer due to other causes | 2   | Health System Access 2 (unitless)                 |          | X*      |         |          |         |         |

**Web Table 23 - Comparison of covariates used in CoD models for GBD 2010 and GBD 2013**

| Cause Name                         | Sex | Covariate name                                      | GBD 2010 |         |         | GBD 2013 |         |         |
|------------------------------------|-----|-----------------------------------------------------|----------|---------|---------|----------|---------|---------|
|                                    |     |                                                     | Level 1  | Level 2 | Level 3 | Level 1  | Level 2 | Level 3 |
| Liver cancer due to other causes   | 2   | Mean BMI                                            |          | X*      |         |          |         |         |
| Liver cancer due to other causes   | 2   | Hepatitis B Prevalence (proportion)                 | X*       |         |         |          |         |         |
| Liver cancer due to other causes   | 2   | Hepatitis C Prevalence (proportion)                 | X*       |         |         | X*       |         |         |
| Liver cancer due to other causes   | 2   | Red Meat (kcal per capita)                          |          | X*      |         |          |         |         |
| Liver cancer due to other causes   | 2   | Year                                                |          |         |         | X*       |         |         |
| Larynx cancer                      | 1   | Alcohol (liters per capita)                         |          |         |         | X        |         |         |
| Larynx cancer                      | 1   | Tobacco (cigarettes per capita)                     | X        |         |         |          | X       |         |
| Larynx cancer                      | 1   | Cumulative Cigarettes (20 Years)                    | X        |         |         |          | X       |         |
| Larynx cancer                      | 1   | Cumulative Cigarettes (5 Years)                     | X        |         |         |          | X       |         |
| Larynx cancer                      | 1   | Smoking Prevalence                                  | X        |         |         |          | X       |         |
| Larynx cancer                      | 1   | Fruits (kcal per capita)                            |          | X       |         | X        |         |         |
| Larynx cancer                      | 1   | Vegetables (kcal per capita)                        |          | X       |         | X        |         |         |
| Larynx cancer                      | 1   | Cumulative Cigarettes (10 Years)                    |          | X       |         |          | X       |         |
| Larynx cancer                      | 1   | Cumulative Cigarettes (15 Years)                    |          | X       |         |          | X       |         |
| Larynx cancer                      | 1   | Indoor Air Pollution (All Cooking Fuels)            |          | X       |         |          | X       |         |
| Larynx cancer                      | 1   | Outdoor Air Pollution (PM2.5)                       |          | X       |         |          | X       |         |
| Larynx cancer                      | 1   | Population Density (over 1000 ppl/sqkm, proportion) |          | X       |         |          | X       |         |
| Larynx cancer                      | 1   | Population Density (under 150 ppl/sqkm, proportion) |          | X       |         |          | X       |         |
| Larynx cancer                      | 1   | LDI (I\$ per capita)                                |          |         |         | X        |         | X       |
| Larynx cancer                      | 1   | Education (years per capita)                        |          |         |         | X        |         | X       |
| Larynx cancer                      | 2   | Alcohol (liters per capita)                         |          |         |         | X        |         |         |
| Larynx cancer                      | 2   | Tobacco (cigarettes per capita)                     | X        |         |         |          | X       |         |
| Larynx cancer                      | 2   | Cumulative Cigarettes (20 Years)                    | X        |         |         |          | X       |         |
| Larynx cancer                      | 2   | Cumulative Cigarettes (5 Years)                     | X        |         |         |          | X       |         |
| Larynx cancer                      | 2   | Smoking Prevalence                                  | X        |         |         |          | X       |         |
| Larynx cancer                      | 2   | Fruits (kcal per capita)                            |          | X       |         | X        |         |         |
| Larynx cancer                      | 2   | Vegetables (kcal per capita)                        |          | X       |         | X        |         |         |
| Larynx cancer                      | 2   | Cumulative Cigarettes (10 Years)                    |          | X       |         |          | X       |         |
| Larynx cancer                      | 2   | Cumulative Cigarettes (15 Years)                    |          | X       |         |          | X       |         |
| Larynx cancer                      | 2   | Indoor Air Pollution (All Cooking Fuels)            |          | X       |         |          | X       |         |
| Larynx cancer                      | 2   | Outdoor Air Pollution (PM2.5)                       |          | X       |         |          | X       |         |
| Larynx cancer                      | 2   | Population Density (over 1000 ppl/sqkm, proportion) |          | X       |         |          | X       |         |
| Larynx cancer                      | 2   | Population Density (under 150 ppl/sqkm, proportion) |          | X       |         |          | X       |         |
| Larynx cancer                      | 2   | LDI (I\$ per capita)                                |          |         |         | X        |         | X       |
| Larynx cancer                      | 2   | Education (years per capita)                        |          |         |         | X        |         | X       |
| Lung, bronchus, and trachea cancer | 1   | Tobacco (cigarettes per capita)                     | X        |         |         |          | X       |         |
| Lung, bronchus, and trachea cancer | 1   | Cumulative Cigarettes (20 Years)                    | X        |         |         |          | X       |         |
| Lung, bronchus, and trachea cancer | 1   | Cumulative Cigarettes (5 Years)                     | X        |         |         |          | X       |         |

**Web Table 23 - Comparison of covariates used in CoD models for GBD 2010 and GBD 2013**

| Cause Name                         | Sex | Covariate name                                      | GBD 2010 |         |         | GBD 2013 |         |         |
|------------------------------------|-----|-----------------------------------------------------|----------|---------|---------|----------|---------|---------|
|                                    |     |                                                     | Level 1  | Level 2 | Level 3 | Level 1  | Level 2 | Level 3 |
| Lung, bronchus, and trachea cancer | 1   | Smoking Prevalence                                  | X        |         |         | X        |         |         |
| Lung, bronchus, and trachea cancer | 1   | Cumulative Cigarettes (10 Years)                    |          | X       |         | X        |         |         |
| Lung, bronchus, and trachea cancer | 1   | Cumulative Cigarettes (15 Years)                    |          | X       |         | X        |         |         |
| Lung, bronchus, and trachea cancer | 1   | Fruits (kcal per capita)                            |          | X       |         | X        |         |         |
| Lung, bronchus, and trachea cancer | 1   | Indoor Air Pollution (All Cooking Fuels)            |          | X       |         | X        |         |         |
| Lung, bronchus, and trachea cancer | 1   | Outdoor Air Pollution (PM2.5)                       |          | X       |         | X        |         |         |
| Lung, bronchus, and trachea cancer | 1   | Population Density (over 1000 ppl/sqkm, proportion) |          | X       |         |          | X       |         |
| Lung, bronchus, and trachea cancer | 1   | Population Density (under 150 ppl/sqkm, proportion) |          | X       |         |          | X       |         |
| Lung, bronchus, and trachea cancer | 1   | Vegetables (kcal per capita)                        |          | X       |         |          | X       |         |
| Lung, bronchus, and trachea cancer | 1   | LDI (I\$ per capita)                                |          |         | X       |          |         | X       |
| Lung, bronchus, and trachea cancer | 1   | Education (years per capita)                        |          |         | X       |          |         | X       |
| Lung, bronchus, and trachea cancer | 2   | Tobacco (cigarettes per capita)                     | X        |         |         | X        |         |         |
| Lung, bronchus, and trachea cancer | 2   | Cumulative Cigarettes (20 Years)                    | X        |         |         | X        |         |         |
| Lung, bronchus, and trachea cancer | 2   | Cumulative Cigarettes (5 Years)                     | X        |         |         | X        |         |         |
| Lung, bronchus, and trachea cancer | 2   | Smoking Prevalence                                  | X        |         |         | X        |         |         |
| Lung, bronchus, and trachea cancer | 2   | Cumulative Cigarettes (10 Years)                    |          | X       |         | X        |         |         |
| Lung, bronchus, and trachea cancer | 2   | Cumulative Cigarettes (15 Years)                    |          | X       |         | X        |         |         |
| Lung, bronchus, and trachea cancer | 2   | Fruits (kcal per capita)                            |          | X       |         | X        |         |         |
| Lung, bronchus, and trachea cancer | 2   | Indoor Air Pollution (All Cooking Fuels)            |          | X       |         | X        |         |         |
| Lung, bronchus, and trachea cancer | 2   | Outdoor Air Pollution (PM2.5)                       |          | X       |         | X        |         |         |
| Lung, bronchus, and trachea cancer | 2   | Population Density (over 1000 ppl/sqkm, proportion) |          | X       |         |          | X       |         |
| Lung, bronchus, and trachea cancer | 2   | Population Density (under 150 ppl/sqkm, proportion) |          | X       |         |          | X       |         |
| Lung, bronchus, and trachea cancer | 2   | Vegetables (kcal per capita)                        |          | X       |         |          | X       |         |
| Lung, bronchus, and trachea cancer | 2   | LDI (I\$ per capita)                                |          |         | X       |          |         | X       |
| Lung, bronchus, and trachea cancer | 2   | Education (years per capita)                        |          |         | X       |          |         | X       |
| Breast cancer                      | 1   | Alcohol (liters per capita)                         |          |         |         | X        |         |         |
| Breast cancer                      | 1   | Mean BMI                                            |          |         |         | X        |         |         |
| Breast cancer                      | 1   | Total Fertility Rate                                |          |         |         |          | X       |         |
| Breast cancer                      | 1   | Animal Fats (kcal per capita)                       |          |         |         |          | X       |         |
| Breast cancer                      | 1   | Cumulative Cigarettes (10 Years)                    |          |         |         |          | X       |         |
| Breast cancer                      | 1   | Fertility (15-19 year olds)                         |          |         |         |          | X       |         |
| Breast cancer                      | 1   | Fruits (kcal per capita)                            |          |         |         |          | X       |         |
| Breast cancer                      | 1   | Health System Access 2 (unitless)                   |          |         |         |          | X       |         |
| Breast cancer                      | 1   | Latitude 15 to 30 (proportion)                      |          |         |         |          | X       |         |
| Breast cancer                      | 1   | Latitude 30 to 45 (proportion)                      |          |         |         |          | X       |         |
| Breast cancer                      | 1   | Latitude Over 45 (proportion)                       |          |         |         |          | X       |         |
| Breast cancer                      | 1   | Vegetables (kcal per capita)                        |          |         |         |          | X       |         |
| Breast cancer                      | 1   | LDI (I\$ per capita)                                |          |         |         |          |         | X       |

**Web Table 23 - Comparison of covariates used in CoD models for GBD 2010 and GBD 2013**

| Cause Name      | Sex | Covariate name                                    | GBD 2010 |         |         | GBD 2013 |         |         |
|-----------------|-----|---------------------------------------------------|----------|---------|---------|----------|---------|---------|
|                 |     |                                                   | Level 1  | Level 2 | Level 3 | Level 1  | Level 2 | Level 3 |
| Breast cancer   | 1   | Education (years per capita)                      |          |         |         |          |         | X       |
| Breast cancer   | 2   | Alcohol (liters per capita)                       | X        |         |         | X        |         |         |
| Breast cancer   | 2   | Mean BMI                                          | X        |         |         | X        |         |         |
| Breast cancer   | 2   | Total Fertility Rate                              | X        |         |         |          | X       |         |
| Breast cancer   | 2   | Animal Fats (kcal per capita)                     | X        |         |         |          | X       |         |
| Breast cancer   | 2   | Cumulative Cigarettes (10 Years)                  | X        |         |         |          | X       |         |
| Breast cancer   | 2   | Fertility (15-19 year olds)                       | X        |         |         |          | X       |         |
| Breast cancer   | 2   | Fruits (kcal per capita)                          |          | X       |         |          | X       |         |
| Breast cancer   | 2   | Health System Access 2 (unitless)                 |          | X       |         |          | X       |         |
| Breast cancer   | 2   | Latitude 15 to 30 (proportion)                    |          | X       |         |          | X       |         |
| Breast cancer   | 2   | Latitude 30 to 45 (proportion)                    |          | X       |         |          | X       |         |
| Breast cancer   | 2   | Latitude Over 45 (proportion)                     |          | X       |         |          | X       |         |
| Breast cancer   | 2   | Vegetables (kcal per capita)                      |          | X       |         |          | X       |         |
| Breast cancer   | 2   | LDI (I\$ per capita)                              |          |         | X       |          |         | X       |
| Breast cancer   | 2   | Education (years per capita)                      |          |         | X       |          |         | X       |
| Cervical cancer | 2   | Abortion On-Demand Illegal (binary)               |          |         |         | X        |         |         |
| Cervical cancer | 2   | Cumulative Cigarettes (15 Years)                  |          |         |         | X        |         |         |
| Cervical cancer | 2   | Cumulative Cigarettes (5 Years)                   |          |         |         | X        |         |         |
| Cervical cancer | 2   | Smoking Prevalence                                |          |         |         | X        |         |         |
| Cervical cancer | 2   | HIV Prevalence, ARV-Adjusted (Custom Lag, %)      | X        |         |         | X        |         |         |
| Cervical cancer | 2   | Cumulative Cigarettes (10 Years)                  | X        |         |         | X        |         |         |
| Cervical cancer | 2   | Total Fertility Rate                              | X        |         |         |          | X       |         |
| Cervical cancer | 2   | Fertility (15-19 year olds)                       | X        |         |         |          | X       |         |
| Cervical cancer | 2   | Fruits (kcal per capita)                          |          | X       |         |          | X       |         |
| Cervical cancer | 2   | Health System Access 2 (unitless)                 |          | X       |         |          | X       |         |
| Cervical cancer | 2   | Vegetables (kcal per capita)                      |          | X       |         |          | X       |         |
| Cervical cancer | 2   | LDI (I\$ per capita)                              |          |         | X       |          |         | X       |
| Cervical cancer | 2   | Education (years per capita)                      |          |         | X       |          |         | X       |
| Uterine cancer  | 2   | Mean BMI                                          | X        |         |         | X        |         |         |
| Uterine cancer  | 2   | Diabetes Age-Standardized Prevalence (proportion) | X        |         |         |          | X       |         |
| Uterine cancer  | 2   | Health System Access (unitless)                   | X        |         |         |          | X       |         |
| Uterine cancer  | 2   | Cumulative Cigarettes (15 Years)                  |          | X       |         |          |         |         |
| Uterine cancer  | 2   | Cumulative Cigarettes (20 Years)                  |          | X       |         |          |         |         |
| Uterine cancer  | 2   | Total Fertility Rate                              |          | X       |         |          | X       |         |
| Uterine cancer  | 2   | Tobacco (cigarettes per capita)                   |          | X       |         |          | X       |         |
| Uterine cancer  | 2   | Cumulative Cigarettes (10 Years)                  |          | X       |         |          | X       |         |
| Uterine cancer  | 2   | Cumulative Cigarettes (5 Years)                   |          | X       |         |          | X       |         |
| Uterine cancer  | 2   | Fruits (kcal per capita)                          |          | X       |         |          | X       |         |

**Web Table 23 - Comparison of covariates used in CoD models for GBD 2010 and GBD 2013**

| Cause Name              | Sex | Covariate name                                    | GBD 2010 |         |         | GBD 2013 |         |         |
|-------------------------|-----|---------------------------------------------------|----------|---------|---------|----------|---------|---------|
|                         |     |                                                   | Level 1  | Level 2 | Level 3 | Level 1  | Level 2 | Level 3 |
| Uterine cancer          | 2   | Smoking Prevalence                                |          | X       |         |          | X       |         |
| Uterine cancer          | 2   | Vegetables (kcal per capita)                      |          | X       |         |          | X       |         |
| Uterine cancer          | 2   | LDI (I\$ per capita)                              |          |         |         |          |         | X       |
| Uterine cancer          | 2   | Education (years per capita)                      |          |         |         |          |         | X       |
| Prostate cancer         | 1   | Health System Access 2 (unitless)                 | X        |         |         | X        |         |         |
| Prostate cancer         | 1   | Tobacco (cigarettes per capita)                   |          | X       |         |          |         |         |
| Prostate cancer         | 1   | Mean BMI                                          |          | X       |         |          |         |         |
| Prostate cancer         | 1   | Red Meat (kcal per capita)                        |          | X       |         |          |         |         |
| Prostate cancer         | 1   | Smoking Prevalence                                |          | X       |         |          |         |         |
| Prostate cancer         | 1   | Vegetables (kcal per capita)                      |          | X       |         |          |         |         |
| Prostate cancer         | 1   | Animal Fats (kcal per capita)                     |          | X       |         |          | X       |         |
| Prostate cancer         | 1   | LDI (I\$ per capita)                              |          | X       |         |          |         | X       |
| Prostate cancer         | 1   | Education (years per capita)                      |          | X       |         |          |         | X       |
| Prostate cancer         | 1   | Alcohol (liters per capita)                       |          |         |         | X        |         |         |
| Colon and rectum cancer | 1   | In-Milk (kcal per capita)                         |          |         |         | X        |         |         |
| Colon and rectum cancer | 1   | Tobacco (cigarettes per capita)                   | X        |         |         | X        |         |         |
| Colon and rectum cancer | 1   | Smoking Prevalence                                | X        |         |         | X        |         |         |
| Colon and rectum cancer | 1   | Whole Grains (kcal per capita)                    | X        |         |         | X        |         |         |
| Colon and rectum cancer | 1   | Health System Access 2 (unitless)                 | X        |         |         |          | X       |         |
| Colon and rectum cancer | 1   | Nuts & Seeds (kcal per capita)                    | X        |         |         |          | X       |         |
| Colon and rectum cancer | 1   | Red Meat (kcal per capita)                        | X        |         |         |          | X       |         |
| Colon and rectum cancer | 1   | Alcohol (liters per capita)                       |          | X       |         | X        |         |         |
| Colon and rectum cancer | 1   | Fruits (kcal per capita)                          |          | X       |         | X        |         |         |
| Colon and rectum cancer | 1   | Mean BMI                                          |          | X       |         | X        |         |         |
| Colon and rectum cancer | 1   | Vegetables (kcal per capita)                      |          | X       |         | X        |         |         |
| Colon and rectum cancer | 1   | Diabetes Age-Standardized Prevalence (proportion) |          | X       |         |          | X       |         |
| Colon and rectum cancer | 1   | PUFA Omega 3 - Seafood (kcal per capita)          |          | X       |         |          | X       |         |
| Colon and rectum cancer | 1   | LDI (I\$ per capita)                              |          |         |         | X        |         | X       |
| Colon and rectum cancer | 1   | Education (years per capita)                      |          |         |         | X        |         | X       |
| Colon and rectum cancer | 2   | In-Milk (kcal per capita)                         |          |         |         | X        |         |         |
| Colon and rectum cancer | 2   | Tobacco (cigarettes per capita)                   | X        |         |         | X        |         |         |
| Colon and rectum cancer | 2   | Smoking Prevalence                                | X        |         |         | X        |         |         |
| Colon and rectum cancer | 2   | Whole Grains (kcal per capita)                    | X        |         |         | X        |         |         |
| Colon and rectum cancer | 2   | Health System Access 2 (unitless)                 | X        |         |         |          | X       |         |
| Colon and rectum cancer | 2   | Nuts & Seeds (kcal per capita)                    | X        |         |         |          | X       |         |
| Colon and rectum cancer | 2   | Red Meat (kcal per capita)                        | X        |         |         |          | X       |         |
| Colon and rectum cancer | 2   | Alcohol (liters per capita)                       |          | X       |         | X        |         |         |
| Colon and rectum cancer | 2   | Fruits (kcal per capita)                          |          | X       |         | X        |         |         |

**Web Table 23 - Comparison of covariates used in CoD models for GBD 2010 and GBD 2013**

| Cause Name              | Sex | Covariate name                                      | GBD 2010 |         |         | GBD 2013 |         |         |
|-------------------------|-----|-----------------------------------------------------|----------|---------|---------|----------|---------|---------|
|                         |     |                                                     | Level 1  | Level 2 | Level 3 | Level 1  | Level 2 | Level 3 |
| Colon and rectum cancer | 2   | Mean BMI                                            |          | X       |         | X        |         |         |
| Colon and rectum cancer | 2   | Vegetables (kcal per capita)                        |          | X       |         | X        |         |         |
| Colon and rectum cancer | 2   | Diabetes Age-Standardized Prevalence (proportion)   |          | X       |         |          | X       |         |
| Colon and rectum cancer | 2   | PUFA Omega 3 - Seafood (kcal per capita)            |          | X       |         |          | X       |         |
| Colon and rectum cancer | 2   | LDI (I\$ per capita)                                |          |         | X       |          |         | X       |
| Colon and rectum cancer | 2   | Education (years per capita)                        |          |         | X       |          |         | X       |
| Mouth cancer            | 1   | Cumulative Cigarettes (10 Years)                    |          |         |         | X        |         |         |
| Mouth cancer            | 1   | Cumulative Cigarettes (20 Years)                    |          |         |         | X        |         |         |
| Mouth cancer            | 1   | Fruits (kcal per capita)                            |          |         |         | X        |         |         |
| Mouth cancer            | 1   | Vegetables (kcal per capita)                        |          |         |         | X        |         |         |
| Mouth cancer            | 1   | Alcohol (liters per capita)                         | X        |         |         | X        |         |         |
| Mouth cancer            | 1   | Cumulative Cigarettes (5 Years)                     | X        |         |         | X        |         |         |
| Mouth cancer            | 1   | Smoking Prevalence                                  | X        |         |         | X        |         |         |
| Mouth cancer            | 1   | Health System Access 2 (unitless)                   | X        |         |         |          | X       |         |
| Mouth cancer            | 1   | Red Meat (kcal per capita)                          | X        |         |         |          | X       |         |
| Mouth cancer            | 1   | LDI (I\$ per capita)                                |          |         | X       |          |         | X       |
| Mouth cancer            | 1   | Education (years per capita)                        |          |         | X       |          |         | X       |
| Mouth cancer            | 2   | Cumulative Cigarettes (10 Years)                    |          |         |         | X        |         |         |
| Mouth cancer            | 2   | Cumulative Cigarettes (20 Years)                    |          |         |         | X        |         |         |
| Mouth cancer            | 2   | Fruits (kcal per capita)                            |          |         |         | X        |         |         |
| Mouth cancer            | 2   | Vegetables (kcal per capita)                        |          |         |         | X        |         |         |
| Mouth cancer            | 2   | Alcohol (liters per capita)                         | X        |         |         | X        |         |         |
| Mouth cancer            | 2   | Cumulative Cigarettes (5 Years)                     | X        |         |         | X        |         |         |
| Mouth cancer            | 2   | Smoking Prevalence                                  | X        |         |         | X        |         |         |
| Mouth cancer            | 2   | Health System Access 2 (unitless)                   | X        |         |         |          | X       |         |
| Mouth cancer            | 2   | Red Meat (kcal per capita)                          | X        |         |         |          | X       |         |
| Mouth cancer            | 2   | LDI (I\$ per capita)                                |          |         | X       |          |         | X       |
| Mouth cancer            | 2   | Education (years per capita)                        |          |         | X       |          |         | X       |
| Nasopharynx cancer      | 1   | Alcohol (liters per capita)                         |          |         |         | X        |         |         |
| Nasopharynx cancer      | 1   | Malnutrition (proportion <2SD weight for age)       | X        |         |         |          | X       |         |
| Nasopharynx cancer      | 1   | Vegetables (kcal per capita)                        |          | X       |         | X        |         |         |
| Nasopharynx cancer      | 1   | Fruits (kcal per capita)                            |          | X       |         |          | X       |         |
| Nasopharynx cancer      | 1   | Health System Access 2 (unitless)                   |          | X       |         |          | X       |         |
| Nasopharynx cancer      | 1   | Population Density (over 1000 ppl/sqkm, proportion) |          | X       |         |          | X       |         |
| Nasopharynx cancer      | 1   | Population Density (under 150 ppl/sqkm, proportion) |          | X       |         |          | X       |         |
| Nasopharynx cancer      | 1   | Whole Grains (kcal per capita)                      |          | X       |         |          | X       |         |
| Nasopharynx cancer      | 1   | LDI (I\$ per capita)                                |          |         | X       |          |         | X       |
| Nasopharynx cancer      | 1   | Education (years per capita)                        |          |         | X       |          |         | X       |

**Web Table 23 - Comparison of covariates used in CoD models for GBD 2010 and GBD 2013**

| Cause Name                           | Sex | Covariate name                                      | GBD 2010 |         |         | GBD 2013 |         |         |
|--------------------------------------|-----|-----------------------------------------------------|----------|---------|---------|----------|---------|---------|
|                                      |     |                                                     | Level 1  | Level 2 | Level 3 | Level 1  | Level 2 | Level 3 |
| Nasopharynx cancer                   | 2   | Alcohol (liters per capita)                         |          |         |         | X        |         |         |
| Nasopharynx cancer                   | 2   | Malnutrition (proportion <2SD weight for age)       | X        |         |         |          | X       |         |
| Nasopharynx cancer                   | 2   | Vegetables (kcal per capita)                        |          | X       |         | X        |         |         |
| Nasopharynx cancer                   | 2   | Fruits (kcal per capita)                            |          | X       |         |          | X       |         |
| Nasopharynx cancer                   | 2   | Health System Access 2 (unitless)                   |          | X       |         |          | X       |         |
| Nasopharynx cancer                   | 2   | Population Density (over 1000 ppl/sqkm, proportion) |          | X       |         |          | X       |         |
| Nasopharynx cancer                   | 2   | Population Density (under 150 ppl/sqkm, proportion) |          | X       |         |          | X       |         |
| Nasopharynx cancer                   | 2   | Whole Grains (kcal per capita)                      |          | X       |         |          | X       |         |
| Nasopharynx cancer                   | 2   | LDI (I\$ per capita)                                |          |         |         | X        |         | X       |
| Nasopharynx cancer                   | 2   | Education (years per capita)                        |          |         |         | X        |         | X       |
| Other pharynx cancer                 | 1   | Alcohol (liters per capita)                         |          |         |         | X        |         |         |
| Other pharynx cancer                 | 1   | Health System Access (capped)                       |          |         |         |          | X       |         |
| Other pharynx cancer                 | 1   | Smoking Prevalence                                  | X        |         |         | X        |         |         |
| Other pharynx cancer                 | 1   | Cumulative Cigarettes (5 Years)                     | X        |         |         |          | X       |         |
| Other pharynx cancer                 | 1   | Malnutrition (proportion <2SD weight for age)       | X        |         |         |          | X       |         |
| Other pharynx cancer                 | 1   | Health System Access 2 (unitless)                   |          | X       |         |          |         |         |
| Other pharynx cancer                 | 1   | Fruits (kcal per capita)                            |          | X       |         | X        |         |         |
| Other pharynx cancer                 | 1   | Vegetables (kcal per capita)                        |          | X       |         | X        |         |         |
| Other pharynx cancer                 | 1   | Population Density (over 1000 ppl/sqkm, proportion) |          | X       |         |          | X       |         |
| Other pharynx cancer                 | 1   | Population Density (under 150 ppl/sqkm, proportion) |          | X       |         |          | X       |         |
| Other pharynx cancer                 | 1   | Whole Grains (kcal per capita)                      |          | X       |         |          | X       |         |
| Other pharynx cancer                 | 1   | LDI (I\$ per capita)                                |          |         |         | X        |         | X       |
| Other pharynx cancer                 | 1   | Education (years per capita)                        |          |         |         | X        |         | X       |
| Other pharynx cancer                 | 2   | Alcohol (liters per capita)                         |          |         |         | X        |         |         |
| Other pharynx cancer                 | 2   | Health System Access (capped)                       |          |         |         |          | X       |         |
| Other pharynx cancer                 | 2   | Smoking Prevalence                                  | X        |         |         | X        |         |         |
| Other pharynx cancer                 | 2   | Cumulative Cigarettes (5 Years)                     | X        |         |         |          | X       |         |
| Other pharynx cancer                 | 2   | Malnutrition (proportion <2SD weight for age)       | X        |         |         |          | X       |         |
| Other pharynx cancer                 | 2   | Health System Access 2 (unitless)                   |          | X       |         |          |         |         |
| Other pharynx cancer                 | 2   | Fruits (kcal per capita)                            |          | X       |         | X        |         |         |
| Other pharynx cancer                 | 2   | Vegetables (kcal per capita)                        |          | X       |         | X        |         |         |
| Other pharynx cancer                 | 2   | Population Density (over 1000 ppl/sqkm, proportion) |          | X       |         |          | X       |         |
| Other pharynx cancer                 | 2   | Population Density (under 150 ppl/sqkm, proportion) |          | X       |         |          | X       |         |
| Other pharynx cancer                 | 2   | Whole Grains (kcal per capita)                      |          | X       |         |          | X       |         |
| Other pharynx cancer                 | 2   | LDI (I\$ per capita)                                |          |         |         | X        |         | X       |
| Other pharynx cancer                 | 2   | Education (years per capita)                        |          |         |         | X        |         | X       |
| Gallbladder and biliary tract cancer | 1   | Health System Access (capped)                       |          |         |         |          | X       |         |
| Gallbladder and biliary tract cancer | 1   | Total Calories (kcal per capita)                    | X        |         |         | X        |         |         |



**Web Table 23 - Comparison of covariates used in CoD models for GBD 2010 and GBD 2013**

| Cause Name                           | Sex | Covariate name                                    | GBD 2010 |         |         | GBD 2013 |         |         |
|--------------------------------------|-----|---------------------------------------------------|----------|---------|---------|----------|---------|---------|
|                                      |     |                                                   | Level 1  | Level 2 | Level 3 | Level 1  | Level 2 | Level 3 |
| Gallbladder and biliary tract cancer | 1   | Alcohol (liters per capita)                       | X        |         |         |          | X       |         |
| Gallbladder and biliary tract cancer | 1   | Tobacco (cigarettes per capita)                   | X        |         |         |          | X       |         |
| Gallbladder and biliary tract cancer | 1   | Smoking Prevalence                                | X        |         |         |          | X       |         |
| Gallbladder and biliary tract cancer | 1   | Cumulative Cigarettes (15 Years)                  |          | X       |         |          |         |         |
| Gallbladder and biliary tract cancer | 1   | Cumulative Cigarettes (20 Years)                  |          | X       |         |          |         |         |
| Gallbladder and biliary tract cancer | 1   | Mean BMI                                          |          | X       |         | X        |         |         |
| Gallbladder and biliary tract cancer | 1   | Cumulative Cigarettes (10 Years)                  |          | X       |         |          | X       |         |
| Gallbladder and biliary tract cancer | 1   | Cumulative Cigarettes (5 Years)                   |          | X       |         |          | X       |         |
| Gallbladder and biliary tract cancer | 1   | Diabetes Age-Standardized Prevalence (proportion) |          | X       |         |          | X       |         |
| Gallbladder and biliary tract cancer | 1   | Fruits (kcal per capita)                          |          | X       |         |          | X       |         |
| Gallbladder and biliary tract cancer | 1   | Vegetables (kcal per capita)                      |          | X       |         |          | X       |         |
| Gallbladder and biliary tract cancer | 1   | Health System Access (unitless)                   |          |         | X       |          |         |         |
| Gallbladder and biliary tract cancer | 1   | LDI (I\$ per capita)                              |          |         | X       |          |         | X       |
| Gallbladder and biliary tract cancer | 1   | Education (years per capita)                      |          |         | X       |          |         | X       |
| Gallbladder and biliary tract cancer | 2   | Health System Access (capped)                     |          |         |         |          | X       |         |
| Gallbladder and biliary tract cancer | 2   | Total Calories (kcal per capita)                  | X        |         |         | X        |         |         |
| Gallbladder and biliary tract cancer | 2   | Alcohol (liters per capita)                       | X        |         |         |          | X       |         |
| Gallbladder and biliary tract cancer | 2   | Tobacco (cigarettes per capita)                   | X        |         |         |          | X       |         |
| Gallbladder and biliary tract cancer | 2   | Smoking Prevalence                                | X        |         |         |          | X       |         |
| Gallbladder and biliary tract cancer | 2   | Cumulative Cigarettes (15 Years)                  |          | X       |         |          |         |         |
| Gallbladder and biliary tract cancer | 2   | Cumulative Cigarettes (20 Years)                  |          | X       |         |          |         |         |
| Gallbladder and biliary tract cancer | 2   | Mean BMI                                          |          | X       |         | X        |         |         |
| Gallbladder and biliary tract cancer | 2   | Cumulative Cigarettes (10 Years)                  |          | X       |         |          | X       |         |
| Gallbladder and biliary tract cancer | 2   | Cumulative Cigarettes (5 Years)                   |          | X       |         |          | X       |         |
| Gallbladder and biliary tract cancer | 2   | Diabetes Age-Standardized Prevalence (proportion) |          | X       |         |          | X       |         |
| Gallbladder and biliary tract cancer | 2   | Fruits (kcal per capita)                          |          | X       |         |          | X       |         |
| Gallbladder and biliary tract cancer | 2   | Vegetables (kcal per capita)                      |          | X       |         |          | X       |         |
| Gallbladder and biliary tract cancer | 2   | Health System Access 2 (unitless)                 |          |         | X       |          |         |         |
| Gallbladder and biliary tract cancer | 2   | LDI (I\$ per capita)                              |          |         | X       |          |         | X       |
| Gallbladder and biliary tract cancer | 2   | Education (years per capita)                      |          |         | X       |          |         | X       |
| Pancreatic cancer                    | 1   | Cumulative Cigarettes (10 Years)                  |          |         |         | X        |         |         |
| Pancreatic cancer                    | 1   | Cumulative Cigarettes (20 Years)                  |          |         |         | X        |         |         |
| Pancreatic cancer                    | 1   | Cumulative Cigarettes (5 Years)                   |          |         |         | X        |         |         |
| Pancreatic cancer                    | 1   | Total Calories (kcal per capita)                  |          |         |         | X        |         |         |
| Pancreatic cancer                    | 1   | Smoking Prevalence                                | X        |         |         | X        |         |         |
| Pancreatic cancer                    | 1   | Alcohol (liters per capita)                       | X        |         |         |          | X       |         |
| Pancreatic cancer                    | 1   | Red Meat (kcal per capita)                        | X        |         |         |          | X       |         |
| Pancreatic cancer                    | 1   | Vegetables (kcal per capita)                      | X        |         |         |          | X       |         |

**Web Table 23 - Comparison of covariates used in CoD models for GBD 2010 and GBD 2013**

| Cause Name              | Sex | Covariate name                                    | GBD 2010 |         |         | GBD 2013 |         |         |
|-------------------------|-----|---------------------------------------------------|----------|---------|---------|----------|---------|---------|
|                         |     |                                                   | Level 1  | Level 2 | Level 3 | Level 1  | Level 2 | Level 3 |
| Pancreatic cancer       | 1   | Tobacco (cigarettes per capita)                   | X        | X       |         | X        |         |         |
| Pancreatic cancer       | 1   | Mean BMI                                          |          | X       |         | X        |         |         |
| Pancreatic cancer       | 1   | Animal Fats (kcal per capita)                     |          | X       |         |          | X       |         |
| Pancreatic cancer       | 1   | Diabetes Age-Standardized Prevalence (proportion) |          | X       |         |          | X       |         |
| Pancreatic cancer       | 1   | Fruits (kcal per capita)                          | X        | X       |         |          | X       |         |
| Pancreatic cancer       | 1   | LDI (I\$ per capita)                              |          |         | X       |          |         | X       |
| Pancreatic cancer       | 1   | Education (years per capita)                      |          |         | X       |          |         | X       |
| Pancreatic cancer       | 1   | Health System Access (unitless)                   |          |         | X       |          |         | X       |
| Pancreatic cancer       | 2   | Cumulative Cigarettes (10 Years)                  |          |         |         | X        |         |         |
| Pancreatic cancer       | 2   | Cumulative Cigarettes (20 Years)                  |          |         |         | X        |         |         |
| Pancreatic cancer       | 2   | Cumulative Cigarettes (5 Years)                   |          |         |         | X        |         |         |
| Pancreatic cancer       | 2   | Total Calories (kcal per capita)                  |          |         |         | X        |         |         |
| Pancreatic cancer       | 2   | Smoking Prevalence                                | X        |         |         | X        |         |         |
| Pancreatic cancer       | 2   | Alcohol (liters per capita)                       | X        |         |         |          | X       |         |
| Pancreatic cancer       | 2   | Red Meat (kcal per capita)                        | X        |         |         |          | X       |         |
| Pancreatic cancer       | 2   | Vegetables (kcal per capita)                      | X        |         |         |          | X       |         |
| Pancreatic cancer       | 2   | Tobacco (cigarettes per capita)                   | X        | X       |         | X        |         |         |
| Pancreatic cancer       | 2   | Mean BMI                                          |          | X       |         | X        |         |         |
| Pancreatic cancer       | 2   | Animal Fats (kcal per capita)                     |          | X       |         |          | X       |         |
| Pancreatic cancer       | 2   | Diabetes Age-Standardized Prevalence (proportion) |          | X       |         |          | X       |         |
| Pancreatic cancer       | 2   | Fruits (kcal per capita)                          | X        | X       |         |          | X       |         |
| Pancreatic cancer       | 2   | LDI (I\$ per capita)                              |          |         | X       |          |         | X       |
| Pancreatic cancer       | 2   | Education (years per capita)                      |          |         | X       |          |         | X       |
| Pancreatic cancer       | 2   | Health System Access (unitless)                   |          |         | X       |          |         | X       |
| Malignant skin melanoma | 1   | Alcohol (liters per capita)                       | X        |         |         | X        |         |         |
| Malignant skin melanoma | 1   | Fruits (kcal per capita)                          | X        |         |         | X        |         |         |
| Malignant skin melanoma | 1   | Vegetables (kcal per capita)                      | X        |         |         | X        |         |         |
| Malignant skin melanoma | 1   | Diabetes Age-Standardized Prevalence (proportion) | X        |         |         |          | X       |         |
| Malignant skin melanoma | 1   | Tobacco (cigarettes per capita)                   | X        | X       |         | X        |         |         |
| Malignant skin melanoma | 1   | Cumulative Cigarettes (20 Years)                  |          | X       |         | X        |         |         |
| Malignant skin melanoma | 1   | Smoking Prevalence                                |          | X       |         | X        |         |         |
| Malignant skin melanoma | 1   | Animal Fats (kcal per capita)                     |          | X       |         |          | X       |         |
| Malignant skin melanoma | 1   | Mean BMI                                          |          | X       |         |          | X       |         |
| Malignant skin melanoma | 1   | Latitude 15 to 30 (proportion)                    |          | X       |         |          | X       |         |
| Malignant skin melanoma | 1   | Latitude 30 to 45 (proportion)                    |          | X       |         |          | X       |         |
| Malignant skin melanoma | 1   | Latitude Over 45 (proportion)                     |          | X       |         |          | X       |         |
| Malignant skin melanoma | 1   | LDI (I\$ per capita)                              |          |         | X       |          |         | X       |
| Malignant skin melanoma | 1   | Education (years per capita)                      |          |         | X       |          |         | X       |

**Web Table 23 - Comparison of covariates used in CoD models for GBD 2010 and GBD 2013**

| Cause Name               | Sex | Covariate name                                    | GBD 2010 |         |         | GBD 2013 |         |         |
|--------------------------|-----|---------------------------------------------------|----------|---------|---------|----------|---------|---------|
|                          |     |                                                   | Level 1  | Level 2 | Level 3 | Level 1  | Level 2 | Level 3 |
| Malignant skin melanoma  | 2   | Alcohol (liters per capita)                       | X        |         |         | X        |         |         |
| Malignant skin melanoma  | 2   | Fruits (kcal per capita)                          | X        |         |         | X        |         |         |
| Malignant skin melanoma  | 2   | Vegetables (kcal per capita)                      | X        |         |         | X        |         |         |
| Malignant skin melanoma  | 2   | Diabetes Age-Standardized Prevalence (proportion) | X        |         |         |          | X       |         |
| Malignant skin melanoma  | 2   | Tobacco (cigarettes per capita)                   | X        | X       |         | X        |         |         |
| Malignant skin melanoma  | 2   | Cumulative Cigarettes (20 Years)                  |          | X       |         | X        |         |         |
| Malignant skin melanoma  | 2   | Smoking Prevalence                                |          | X       |         | X        |         |         |
| Malignant skin melanoma  | 2   | Animal Fats (kcal per capita)                     |          | X       |         |          | X       |         |
| Malignant skin melanoma  | 2   | Mean BMI                                          |          | X       |         |          | X       |         |
| Malignant skin melanoma  | 2   | Latitude 15 to 30 (proportion)                    |          | X       |         |          | X       |         |
| Malignant skin melanoma  | 2   | Latitude 30 to 45 (proportion)                    |          | X       |         |          | X       |         |
| Malignant skin melanoma  | 2   | Latitude Over 45 (proportion)                     |          | X       |         |          | X       |         |
| Malignant skin melanoma  | 2   | LDI (I\$ per capita)                              |          |         | X       |          |         | X       |
| Malignant skin melanoma  | 2   | Education (years per capita)                      |          |         | X       |          |         | X       |
| Non-melanoma skin cancer | 1   | Cumulative Cigarettes (10 Years)                  |          |         |         | X        |         |         |
| Non-melanoma skin cancer | 1   | Cumulative Cigarettes (15 Years)                  |          |         |         | X        |         |         |
| Non-melanoma skin cancer | 1   | Cumulative Cigarettes (5 Years)                   |          |         |         | X        |         |         |
| Non-melanoma skin cancer | 1   | Health System Access (capped)                     |          |         |         | X        |         |         |
| Non-melanoma skin cancer | 1   | Average latitude                                  |          |         |         |          | X       |         |
| Non-melanoma skin cancer | 1   | Health System Access 2 (unitless)                 | X        |         |         |          |         |         |
| Non-melanoma skin cancer | 1   | Smoking Prevalence                                | X        |         |         | X        |         |         |
| Non-melanoma skin cancer | 1   | Latitude Under 15 (proportion)                    |          | X       |         |          |         |         |
| Non-melanoma skin cancer | 1   | Latitude 15 to 30 (proportion)                    |          | X       |         |          |         |         |
| Non-melanoma skin cancer | 1   | Latitude 30 to 45 (proportion)                    |          | X       |         |          |         |         |
| Non-melanoma skin cancer | 1   | Latitude Over 45 (proportion)                     |          | X       |         |          |         |         |
| Non-melanoma skin cancer | 1   | LDI (I\$ per capita)                              |          |         | X       |          |         | X       |
| Non-melanoma skin cancer | 1   | Education (years per capita)                      |          |         | X       |          |         | X       |
| Non-melanoma skin cancer | 2   | Cumulative Cigarettes (10 Years)                  |          |         |         | X        |         |         |
| Non-melanoma skin cancer | 2   | Cumulative Cigarettes (15 Years)                  |          |         |         | X        |         |         |
| Non-melanoma skin cancer | 2   | Cumulative Cigarettes (5 Years)                   |          |         |         | X        |         |         |
| Non-melanoma skin cancer | 2   | Health System Access (capped)                     |          |         |         | X        |         |         |
| Non-melanoma skin cancer | 2   | Average latitude                                  |          |         |         |          | X       |         |
| Non-melanoma skin cancer | 2   | Health System Access 2 (unitless)                 | X        |         |         |          |         |         |
| Non-melanoma skin cancer | 2   | Smoking Prevalence                                | X        |         |         | X        |         |         |
| Non-melanoma skin cancer | 2   | Latitude Under 15 (proportion)                    |          | X       |         |          |         |         |
| Non-melanoma skin cancer | 2   | Latitude 15 to 30 (proportion)                    |          | X       |         |          |         |         |
| Non-melanoma skin cancer | 2   | Latitude 30 to 45 (proportion)                    |          | X       |         |          |         |         |
| Non-melanoma skin cancer | 2   | Latitude Over 45 (proportion)                     |          | X       |         |          |         |         |

**Web Table 23 - Comparison of covariates used in CoD models for GBD 2010 and GBD 2013**

| Cause Name               | Sex | Covariate name                                    | GBD 2010 |         |         | GBD 2013 |         |         |
|--------------------------|-----|---------------------------------------------------|----------|---------|---------|----------|---------|---------|
|                          |     |                                                   | Level 1  | Level 2 | Level 3 | Level 1  | Level 2 | Level 3 |
| Non-melanoma skin cancer | 2   | LDI (I\$ per capita)                              |          |         | X       |          |         | X       |
| Non-melanoma skin cancer | 2   | Education (years per capita)                      |          |         | X       |          |         | X       |
| Ovarian cancer           | 2   | Alcohol (liters per capita)                       | X        |         |         | X        |         |         |
| Ovarian cancer           | 2   | Tobacco (cigarettes per capita)                   | X        |         |         | X        |         |         |
| Ovarian cancer           | 2   | Contraception (Modern) Prevalence (proportion)    | X        |         |         | X        |         |         |
| Ovarian cancer           | 2   | Diabetes Age-Standardized Prevalence (proportion) | X        |         |         |          | X       |         |
| Ovarian cancer           | 2   | Total Calories (kcal per capita)                  | X        |         |         |          | X       |         |
| Ovarian cancer           | 2   | Cumulative Cigarettes (20 Years)                  |          | X       |         | X        |         |         |
| Ovarian cancer           | 2   | Total Fertility Rate                              |          | X       |         |          | X       |         |
| Ovarian cancer           | 2   | Animal Fats (kcal per capita)                     |          | X       |         |          | X       |         |
| Ovarian cancer           | 2   | Fruits (kcal per capita)                          |          | X       |         |          | X       |         |
| Ovarian cancer           | 2   | Latitude 15 to 30 (proportion)                    |          | X       |         |          | X       |         |
| Ovarian cancer           | 2   | Latitude 30 to 45 (proportion)                    |          | X       |         |          | X       |         |
| Ovarian cancer           | 2   | Latitude Over 45 (proportion)                     |          | X       |         |          | X       |         |
| Ovarian cancer           | 2   | Smoking Prevalence                                |          | X       |         |          | X       |         |
| Ovarian cancer           | 2   | Vegetables (kcal per capita)                      |          | X       |         |          | X       |         |
| Ovarian cancer           | 2   | Mean BMI                                          |          |         | X       |          | X       |         |
| Ovarian cancer           | 2   | LDI (I\$ per capita)                              |          |         | X       |          |         | X       |
| Ovarian cancer           | 2   | Education (years per capita)                      |          |         | X       |          |         | X       |
| Testicular cancer        | 1   | Cumulative Cigarettes (15 Years)                  |          |         |         |          | X       |         |
| Testicular cancer        | 1   | Cumulative Cigarettes (5 Years)                   |          |         |         |          | X       |         |
| Testicular cancer        | 1   | Cumulative Cigarettes (10 Years)                  |          | X       |         |          | X       |         |
| Testicular cancer        | 1   | Fruits (kcal per capita)                          |          | X       |         |          | X       |         |
| Testicular cancer        | 1   | Health System Access 2 (unitless)                 |          | X       |         |          | X       |         |
| Testicular cancer        | 1   | Vegetables (kcal per capita)                      |          | X       |         |          | X       |         |
| Testicular cancer        | 1   | LDI (I\$ per capita)                              |          |         | X       |          |         | X       |
| Testicular cancer        | 1   | Education (years per capita)                      |          |         | X       |          |         | X       |
| Kidney cancer            | 1   | Cumulative Cigarettes (5 Years)                   |          |         |         | X        |         |         |
| Kidney cancer            | 1   | Mean BMI                                          |          |         |         | X        |         |         |
| Kidney cancer            | 1   | Total Calories (kcal per capita)                  |          |         |         | X        |         |         |
| Kidney cancer            | 1   | Total Fertility Rate                              |          |         |         |          |         | X       |
| Kidney cancer            | 1   | Cumulative Cigarettes (10 Years)                  | X        |         |         | X        |         |         |
| Kidney cancer            | 1   | Cumulative Cigarettes (15 Years)                  | X        |         |         | X        |         |         |
| Kidney cancer            | 1   | Smoking Prevalence                                | X        |         |         | X        |         |         |
| Kidney cancer            | 1   | Diabetes Age-Standardized Prevalence (proportion) | X        |         |         |          | X       |         |
| Kidney cancer            | 1   | Systolic Blood Pressure (mmHg)                    | X        |         |         |          | X       |         |
| Kidney cancer            | 1   | Alcohol (liters per capita)                       |          | X       |         |          | X       |         |
| Kidney cancer            | 1   | Health System Access 2 (unitless)                 |          | X       |         |          | X       |         |

**Web Table 23 - Comparison of covariates used in CoD models for GBD 2010 and GBD 2013**

| Cause Name     | Sex | Covariate name                                      | GBD 2010 |         |         | GBD 2013 |         |         |
|----------------|-----|-----------------------------------------------------|----------|---------|---------|----------|---------|---------|
|                |     |                                                     | Level 1  | Level 2 | Level 3 | Level 1  | Level 2 | Level 3 |
| Kidney cancer  | 1   | LDI (I\$ per capita)                                |          |         | X       |          |         | X       |
| Kidney cancer  | 1   | Education (years per capita)                        |          |         | X       |          |         | X       |
| Kidney cancer  | 2   | Cumulative Cigarettes (5 Years)                     |          |         |         | X        |         |         |
| Kidney cancer  | 2   | Mean BMI                                            |          |         |         | X        |         |         |
| Kidney cancer  | 2   | Total Calories (kcal per capita)                    |          |         |         | X        |         |         |
| Kidney cancer  | 2   | Cumulative Cigarettes (10 Years)                    | X        |         |         | X        |         |         |
| Kidney cancer  | 2   | Cumulative Cigarettes (15 Years)                    | X        |         |         | X        |         |         |
| Kidney cancer  | 2   | Smoking Prevalence                                  | X        |         |         | X        |         |         |
| Kidney cancer  | 2   | Diabetes Age-Standardized Prevalence (proportion)   | X        |         |         |          | X       |         |
| Kidney cancer  | 2   | Systolic Blood Pressure (mmHg)                      | X        |         |         |          | X       |         |
| Kidney cancer  | 2   | Alcohol (liters per capita)                         |          | X       |         |          | X       |         |
| Kidney cancer  | 2   | Health System Access 2 (unitless)                   |          | X       |         |          | X       |         |
| Kidney cancer  | 2   | LDI (I\$ per capita)                                |          |         | X       |          |         | X       |
| Kidney cancer  | 2   | Total Fertility Rate                                |          |         | X       |          |         | X       |
| Kidney cancer  | 2   | Education (years per capita)                        |          |         | X       |          |         | X       |
| Bladder cancer | 1   | Cumulative Cigarettes (5 Years)                     |          |         |         | X        |         |         |
| Bladder cancer | 1   | Cumulative Cigarettes (10 Years)                    | X        |         |         | X        |         |         |
| Bladder cancer | 1   | Cumulative Cigarettes (15 Years)                    | X        |         |         | X        |         |         |
| Bladder cancer | 1   | Smoking Prevalence                                  | X        |         |         | X        |         |         |
| Bladder cancer | 1   | Fruits (kcal per capita)                            | X        |         |         |          | X       |         |
| Bladder cancer | 1   | Health System Access 2 (unitless)                   | X        |         |         |          | X       |         |
| Bladder cancer | 1   | Vegetables (kcal per capita)                        | X        |         |         |          | X       |         |
| Bladder cancer | 1   | Alcohol (liters per capita)                         |          | X       |         |          | X       |         |
| Bladder cancer | 1   | Population Density (over 1000 ppl/sqkm, proportion) |          | X       |         |          | X       |         |
| Bladder cancer | 1   | Population Density (under 150 ppl/sqkm, proportion) |          | X       |         |          | X       |         |
| Bladder cancer | 1   | LDI (I\$ per capita)                                |          |         | X       |          |         | X       |
| Bladder cancer | 1   | Education (years per capita)                        |          |         | X       |          |         | X       |
| Bladder cancer | 2   | Cumulative Cigarettes (5 Years)                     |          |         |         | X        |         |         |
| Bladder cancer | 2   | Cumulative Cigarettes (10 Years)                    | X        |         |         | X        |         |         |
| Bladder cancer | 2   | Cumulative Cigarettes (15 Years)                    | X        |         |         | X        |         |         |
| Bladder cancer | 2   | Smoking Prevalence                                  | X        |         |         | X        |         |         |
| Bladder cancer | 2   | Fruits (kcal per capita)                            | X        |         |         |          | X       |         |
| Bladder cancer | 2   | Health System Access 2 (unitless)                   | X        |         |         |          | X       |         |
| Bladder cancer | 2   | Vegetables (kcal per capita)                        | X        |         |         |          | X       |         |
| Bladder cancer | 2   | Alcohol (liters per capita)                         |          | X       |         |          | X       |         |
| Bladder cancer | 2   | Population Density (over 1000 ppl/sqkm, proportion) |          | X       |         |          | X       |         |
| Bladder cancer | 2   | Population Density (under 150 ppl/sqkm, proportion) |          | X       |         |          | X       |         |
| Bladder cancer | 2   | LDI (I\$ per capita)                                |          |         | X       |          |         | X       |

**Web Table 23 - Comparison of covariates used in CoD models for GBD 2010 and GBD 2013**

| Cause Name                      | Sex | Covariate name                                 | GBD 2010 |         |         | GBD 2013 |         |         |
|---------------------------------|-----|------------------------------------------------|----------|---------|---------|----------|---------|---------|
|                                 |     |                                                | Level 1  | Level 2 | Level 3 | Level 1  | Level 2 | Level 3 |
| Bladder cancer                  | 2   | Education (years per capita)                   |          |         | X       |          |         | X       |
| Brain and nervous system cancer | 1   | Alcohol (liters per capita)                    | X        |         |         | X        |         |         |
| Brain and nervous system cancer | 1   | Cumulative Cigarettes (10 Years)               | X        |         |         | X        |         |         |
| Brain and nervous system cancer | 1   | Cumulative Cigarettes (15 Years)               | X        |         |         | X        |         |         |
| Brain and nervous system cancer | 1   | Smoking Prevalence                             | X        |         |         | X        |         |         |
| Brain and nervous system cancer | 1   | Animal Fats (kcal per capita)                  | X        |         |         |          | X       |         |
| Brain and nervous system cancer | 1   | Fruits (kcal per capita)                       | X        |         |         |          | X       |         |
| Brain and nervous system cancer | 1   | Health System Access 2 (unitless)              | X        |         |         |          | X       |         |
| Brain and nervous system cancer | 1   | Systolic Blood Pressure (mmHg)                 | X        |         |         |          | X       |         |
| Brain and nervous system cancer | 1   | Cholesterol (total, mean per capita)           | X        |         |         |          | X       |         |
| Brain and nervous system cancer | 1   | Red Meat (kcal per capita)                     | X        |         |         |          | X       |         |
| Brain and nervous system cancer | 1   | Vegetables (kcal per capita)                   | X        |         |         |          | X       |         |
| Brain and nervous system cancer | 1   | LDI (I\$ per capita)                           |          | X       |         |          |         | X       |
| Brain and nervous system cancer | 1   | Education (years per capita)                   |          | X       |         |          |         | X       |
| Brain and nervous system cancer | 2   | Alcohol (liters per capita)                    | X        |         |         | X        |         |         |
| Brain and nervous system cancer | 2   | Cumulative Cigarettes (10 Years)               | X        |         |         | X        |         |         |
| Brain and nervous system cancer | 2   | Cumulative Cigarettes (15 Years)               | X        |         |         | X        |         |         |
| Brain and nervous system cancer | 2   | Smoking Prevalence                             | X        |         |         | X        |         |         |
| Brain and nervous system cancer | 2   | Animal Fats (kcal per capita)                  | X        |         |         |          | X       |         |
| Brain and nervous system cancer | 2   | Fruits (kcal per capita)                       | X        |         |         |          | X       |         |
| Brain and nervous system cancer | 2   | Health System Access 2 (unitless)              | X        |         |         |          | X       |         |
| Brain and nervous system cancer | 2   | Systolic Blood Pressure (mmHg)                 | X        |         |         |          | X       |         |
| Brain and nervous system cancer | 2   | Cholesterol (total, mean per capita)           | X        |         |         |          | X       |         |
| Brain and nervous system cancer | 2   | Red Meat (kcal per capita)                     | X        |         |         |          | X       |         |
| Brain and nervous system cancer | 2   | Vegetables (kcal per capita)                   | X        |         |         |          | X       |         |
| Brain and nervous system cancer | 2   | LDI (I\$ per capita)                           |          | X       |         |          |         | X       |
| Brain and nervous system cancer | 2   | Education (years per capita)                   |          | X       |         |          |         | X       |
| Thyroid cancer                  | 1   | Alcohol (liters per capita)                    | X        |         |         | X        |         |         |
| Thyroid cancer                  | 1   | Tobacco (cigarettes per capita)                | X        |         |         | X        |         |         |
| Thyroid cancer                  | 1   | Smoking Prevalence                             | X        |         |         | X        |         |         |
| Thyroid cancer                  | 1   | Red Meat (kcal per capita)                     | X        |         |         |          | X       |         |
| Thyroid cancer                  | 1   | Fruits (kcal per capita)                       |          | X       |         |          | X       |         |
| Thyroid cancer                  | 1   | Mean BMI                                       |          | X       |         |          | X       |         |
| Thyroid cancer                  | 1   | Sanitation (proportion with access)            |          | X       |         |          | X       |         |
| Thyroid cancer                  | 1   | Vegetables (kcal per capita)                   |          | X       |         |          | X       |         |
| Thyroid cancer                  | 1   | Improved Water Source (proportion with access) |          | X       |         |          | X       |         |
| Thyroid cancer                  | 1   | LDI (I\$ per capita)                           |          |         | X       |          |         | X       |
| Thyroid cancer                  | 1   | Education (years per capita)                   |          |         | X       |          |         | X       |

**Web Table 23 - Comparison of covariates used in CoD models for GBD 2010 and GBD 2013**

| Cause Name     | Sex | Covariate name                                      | GBD 2010 |         |         | GBD 2013 |         |         |
|----------------|-----|-----------------------------------------------------|----------|---------|---------|----------|---------|---------|
|                |     |                                                     | Level 1  | Level 2 | Level 3 | Level 1  | Level 2 | Level 3 |
| Thyroid cancer | 2   | Alcohol (liters per capita)                         | X        |         |         | X        |         |         |
| Thyroid cancer | 2   | Tobacco (cigarettes per capita)                     | X        |         |         | X        |         |         |
| Thyroid cancer | 2   | Smoking Prevalence                                  | X        |         |         | X        |         |         |
| Thyroid cancer | 2   | Red Meat (kcal per capita)                          | X        |         |         |          | X       |         |
| Thyroid cancer | 2   | Fruits (kcal per capita)                            |          | X       |         |          | X       |         |
| Thyroid cancer | 2   | Mean BMI                                            |          | X       |         |          | X       |         |
| Thyroid cancer | 2   | Sanitation (proportion with access)                 |          | X       |         |          | X       |         |
| Thyroid cancer | 2   | Vegetables (kcal per capita)                        |          | X       |         |          | X       |         |
| Thyroid cancer | 2   | Improved Water Source (proportion with access)      |          | X       |         |          | X       |         |
| Thyroid cancer | 2   | LDI (I\$ per capita)                                |          |         |         |          |         | X       |
| Thyroid cancer | 2   | Education (years per capita)                        |          |         |         |          |         | X       |
| Mesothelioma   | 1   | Asbestos production (binary)                        |          |         |         | X        |         |         |
| Mesothelioma   | 1   | Cumulative Cigarettes (5 Years)                     |          |         |         | X        |         |         |
| Mesothelioma   | 1   | Health System Access 2 (unitless)                   |          |         |         | X        |         |         |
| Mesothelioma   | 1   | Indoor Air Pollution (Coal Cooking)                 |          |         |         | X        |         |         |
| Mesothelioma   | 1   | Smoking Prevalence                                  |          |         |         | X        |         |         |
| Mesothelioma   | 1   | Asbestos production (kg) per capita                 |          |         |         |          | X       |         |
| Mesothelioma   | 1   | Gold production (binary)                            |          |         |         |          | X       |         |
| Mesothelioma   | 1   | Gold production (kg) per capita                     |          |         |         |          | X       |         |
| Mesothelioma   | 1   | Elevation Over 1500m (proportion)                   |          |         |         |          | X       |         |
| Mesothelioma   | 1   | Elevation 500 to 1500m (proportion)                 |          |         |         |          | X       |         |
| Mesothelioma   | 1   | Population Density (over 1000 ppl/sqkm, proportion) |          |         |         |          | X       |         |
| Mesothelioma   | 1   | Population Over 65 (proportion)                     |          |         |         |          | X       |         |
| Mesothelioma   | 1   | LDI (I\$ per capita)                                |          |         |         |          |         | X       |
| Mesothelioma   | 1   | Education (years per capita)                        |          |         |         |          |         | X       |
| Mesothelioma   | 2   | Asbestos production (binary)                        |          |         |         | X        |         |         |
| Mesothelioma   | 2   | Cumulative Cigarettes (5 Years)                     |          |         |         | X        |         |         |
| Mesothelioma   | 2   | Health System Access 2 (unitless)                   |          |         |         | X        |         |         |
| Mesothelioma   | 2   | Indoor Air Pollution (Coal Cooking)                 |          |         |         | X        |         |         |
| Mesothelioma   | 2   | Smoking Prevalence                                  |          |         |         | X        |         |         |
| Mesothelioma   | 2   | Asbestos production (kg) per capita                 |          |         |         |          | X       |         |
| Mesothelioma   | 2   | Gold production (binary)                            |          |         |         |          | X       |         |
| Mesothelioma   | 2   | Gold production (kg) per capita                     |          |         |         |          | X       |         |
| Mesothelioma   | 2   | Elevation Over 1500m (proportion)                   |          |         |         |          | X       |         |
| Mesothelioma   | 2   | Elevation 500 to 1500m (proportion)                 |          |         |         |          | X       |         |
| Mesothelioma   | 2   | Population Density (over 1000 ppl/sqkm, proportion) |          |         |         |          | X       |         |
| Mesothelioma   | 2   | Population Over 65 (proportion)                     |          |         |         |          | X       |         |
| Mesothelioma   | 2   | LDI (I\$ per capita)                                |          |         |         |          |         | X       |

**Web Table 23 - Comparison of covariates used in CoD models for GBD 2010 and GBD 2013**

| Cause Name           | Sex | Covariate name                                 | GBD 2010 |         |         | GBD 2013 |         |         |
|----------------------|-----|------------------------------------------------|----------|---------|---------|----------|---------|---------|
|                      |     |                                                | Level 1  | Level 2 | Level 3 | Level 1  | Level 2 | Level 3 |
| Mesothelioma         | 2   | Education (years per capita)                   |          |         |         |          |         | X       |
| Hodgkin disease      | 1   | Health System Access 2 (unitless)              | X        |         |         | X        |         |         |
| Hodgkin disease      | 1   | LDI (I\$ per capita)                           |          | X       |         |          | X       |         |
| Hodgkin disease      | 1   | Education (years per capita)                   |          | X       |         |          | X       |         |
| Hodgkin disease      | 1   | Latitude Under 15 (proportion)                 |          |         | X       |          |         | X       |
| Hodgkin disease      | 1   | Latitude 15 to 30 (proportion)                 |          |         | X       |          |         | X       |
| Hodgkin disease      | 1   | Latitude 30 to 45 (proportion)                 |          |         | X       |          |         | X       |
| Hodgkin disease      | 1   | Latitude Over 45 (proportion)                  |          |         | X       |          |         | X       |
| Hodgkin disease      | 2   | Health System Access 2 (unitless)              | X        |         |         | X        |         |         |
| Hodgkin disease      | 2   | LDI (I\$ per capita)                           |          | X       |         |          | X       |         |
| Hodgkin disease      | 2   | Education (years per capita)                   |          | X       |         |          | X       |         |
| Hodgkin disease      | 2   | Latitude Under 15 (proportion)                 |          |         | X       |          |         | X       |
| Hodgkin disease      | 2   | Latitude 15 to 30 (proportion)                 |          |         | X       |          |         | X       |
| Hodgkin disease      | 2   | Latitude 30 to 45 (proportion)                 |          |         | X       |          |         | X       |
| Hodgkin disease      | 2   | Latitude Over 45 (proportion)                  |          |         | X       |          |         | X       |
| Non-Hodgkin lymphoma | 1   | Health System Access 2 (unitless)              | X        |         |         | X        |         |         |
| Non-Hodgkin lymphoma | 1   | Alcohol (liters per capita)                    |          | X       |         |          | X       |         |
| Non-Hodgkin lymphoma | 1   | Cumulative Cigarettes (10 Years)               |          | X       |         |          | X       |         |
| Non-Hodgkin lymphoma | 1   | Smoking Prevalence                             |          | X       |         |          | X       |         |
| Non-Hodgkin lymphoma | 1   | LDI (I\$ per capita)                           |          |         | X       |          |         | X       |
| Non-Hodgkin lymphoma | 1   | Total Fertility Rate                           |          |         | X       |          |         | X       |
| Non-Hodgkin lymphoma | 2   | Health System Access 2 (unitless)              | X        |         |         | X        |         |         |
| Non-Hodgkin lymphoma | 2   | Alcohol (liters per capita)                    |          | X       |         |          | X       |         |
| Non-Hodgkin lymphoma | 2   | Cumulative Cigarettes (10 Years)               |          | X       |         |          | X       |         |
| Non-Hodgkin lymphoma | 2   | Smoking Prevalence                             |          | X       |         |          | X       |         |
| Non-Hodgkin lymphoma | 2   | LDI (I\$ per capita)                           |          |         | X       |          |         | X       |
| Non-Hodgkin lymphoma | 2   | Total Fertility Rate                           |          |         | X       |          |         | X       |
| Multiple myeloma     | 1   | Alcohol (liters per capita)                    | X        |         |         | X        |         |         |
| Multiple myeloma     | 1   | Tobacco (cigarettes per capita)                | X        |         |         | X        |         |         |
| Multiple myeloma     | 1   | Red Meat (kcal per capita)                     | X        |         |         | X        |         |         |
| Multiple myeloma     | 1   | Smoking Prevalence                             | X        |         |         | X        |         |         |
| Multiple myeloma     | 1   | Fruits (kcal per capita)                       |          | X       |         |          | X       |         |
| Multiple myeloma     | 1   | Mean BMI                                       |          | X       |         |          | X       |         |
| Multiple myeloma     | 1   | Sanitation (proportion with access)            |          | X       |         |          | X       |         |
| Multiple myeloma     | 1   | Vegetables (kcal per capita)                   |          | X       |         |          | X       |         |
| Multiple myeloma     | 1   | Improved Water Source (proportion with access) |          | X       |         |          | X       |         |
| Multiple myeloma     | 1   | LDI (I\$ per capita)                           |          |         | X       |          |         | X       |
| Multiple myeloma     | 1   | Education (years per capita)                   |          |         | X       |          |         | X       |



**Web Table 23 - Comparison of covariates used in CoD models for GBD 2010 and GBD 2013**

| Cause Name       | Sex | Covariate name                                 | GBD 2010 |         |         | GBD 2013 |         |         |
|------------------|-----|------------------------------------------------|----------|---------|---------|----------|---------|---------|
|                  |     |                                                | Level 1  | Level 2 | Level 3 | Level 1  | Level 2 | Level 3 |
| Multiple myeloma | 2   | Alcohol (liters per capita)                    | X        |         |         | X        |         |         |
| Multiple myeloma | 2   | Tobacco (cigarettes per capita)                | X        |         |         | X        |         |         |
| Multiple myeloma | 2   | Red Meat (kcal per capita)                     | X        |         |         | X        |         |         |
| Multiple myeloma | 2   | Smoking Prevalence                             | X        |         |         | X        |         |         |
| Multiple myeloma | 2   | Fruits (kcal per capita)                       |          | X       |         |          | X       |         |
| Multiple myeloma | 2   | Mean BMI                                       |          | X       |         |          | X       |         |
| Multiple myeloma | 2   | Sanitation (proportion with access)            |          | X       |         |          | X       |         |
| Multiple myeloma | 2   | Vegetables (kcal per capita)                   |          | X       |         |          | X       |         |
| Multiple myeloma | 2   | Improved Water Source (proportion with access) |          | X       |         |          | X       |         |
| Multiple myeloma | 2   | LDI (I\$ per capita)                           |          |         |         |          |         | X       |
| Multiple myeloma | 2   | Education (years per capita)                   |          |         |         | X        |         | X       |
| Leukemia         | 1   | Cumulative Cigarettes (15 Years)               |          |         |         | X        |         |         |
| Leukemia         | 1   | Cumulative Cigarettes (5 Years)                |          |         |         | X        |         |         |
| Leukemia         | 1   | Cumulative Cigarettes (10 Years)               | X        |         |         | X        |         |         |
| Leukemia         | 1   | Health System Access 2 (unitless)              | X        |         |         | X        |         |         |
| Leukemia         | 1   | Smoking Prevalence                             | X        |         |         | X        |         |         |
| Leukemia         | 1   | Total Fertility Rate                           | X        |         |         |          | X       |         |
| Leukemia         | 1   | Alcohol (liters per capita)                    | X        |         |         |          | X       |         |
| Leukemia         | 1   | LDI (I\$ per capita)                           |          |         |         | X        |         | X       |
| Leukemia         | 1   | Education (years per capita)                   |          |         |         | X        |         | X       |
| Leukemia         | 2   | Cumulative Cigarettes (15 Years)               |          |         |         | X        |         |         |
| Leukemia         | 2   | Cumulative Cigarettes (5 Years)                |          |         |         | X        |         |         |
| Leukemia         | 2   | Cumulative Cigarettes (10 Years)               | X        |         |         | X        |         |         |
| Leukemia         | 2   | Health System Access 2 (unitless)              | X        |         |         | X        |         |         |
| Leukemia         | 2   | Smoking Prevalence                             | X        |         |         | X        |         |         |
| Leukemia         | 2   | Total Fertility Rate                           | X        |         |         |          | X       |         |
| Leukemia         | 2   | Alcohol (liters per capita)                    | X        |         |         |          | X       |         |
| Leukemia         | 2   | LDI (I\$ per capita)                           |          |         |         | X        |         | X       |
| Leukemia         | 2   | Education (years per capita)                   |          |         |         | X        |         | X       |
| Other neoplasms  | 1   | Health System Access 2 (unitless)              | X        |         |         |          | X       |         |
| Other neoplasms  | 1   | LDI (I\$ per capita)                           | X        |         |         |          |         | X       |
| Other neoplasms  | 1   | Tobacco (cigarettes per capita)                |          | X       |         | X        |         |         |
| Other neoplasms  | 1   | Smoking Prevalence                             |          | X       |         | X        |         |         |
| Other neoplasms  | 1   | Education (years per capita)                   |          | X       |         |          |         | X       |
| Other neoplasms  | 1   | Fruits (kcal per capita)                       |          |         |         | X        |         |         |
| Other neoplasms  | 1   | Nuts & Seeds (kcal per capita)                 |          |         |         | X        |         |         |
| Other neoplasms  | 1   | PUFA Omega 3 - Seafood (kcal per capita)       |          |         |         | X        |         |         |
| Other neoplasms  | 1   | Vegetables (kcal per capita)                   |          |         |         | X        |         |         |

**Web Table 23 - Comparison of covariates used in CoD models for GBD 2010 and GBD 2013**

| Cause Name              | Sex | Covariate name                                      | GBD 2010 |         |         | GBD 2013 |         |         |
|-------------------------|-----|-----------------------------------------------------|----------|---------|---------|----------|---------|---------|
|                         |     |                                                     | Level 1  | Level 2 | Level 3 | Level 1  | Level 2 | Level 3 |
| Other neoplasms         | 2   | Health System Access 2 (unitless)                   | X        |         |         |          | X       |         |
| Other neoplasms         | 2   | LDI (I\$ per capita)                                | X        |         |         |          |         | X       |
| Other neoplasms         | 2   | Tobacco (cigarettes per capita)                     |          | X       |         | X        |         |         |
| Other neoplasms         | 2   | Smoking Prevalence                                  |          | X       |         | X        |         |         |
| Other neoplasms         | 2   | Education (years per capita)                        |          | X       |         |          |         | X       |
| Other neoplasms         | 2   | Fruits (kcal per capita)                            |          |         | X       |          | X       |         |
| Other neoplasms         | 2   | Nuts & Seeds (kcal per capita)                      |          |         | X       |          | X       |         |
| Other neoplasms         | 2   | PUFA Omega 3 - Seafood (kcal per capita)            |          |         | X       |          | X       |         |
| Other neoplasms         | 2   | Vegetables (kcal per capita)                        |          |         | X       |          | X       |         |
| Cardiovascular diseases | 1   | Cumulative Cigarettes (5 Years)                     | X        |         |         |          |         |         |
| Cardiovascular diseases | 1   | Systolic Blood Pressure (mmHg)                      | X        |         |         |          |         |         |
| Cardiovascular diseases | 1   | Cholesterol (total, mean per capita)                | X        |         |         | X        |         |         |
| Cardiovascular diseases | 1   | Smoking Prevalence                                  | X        |         |         | X        |         |         |
| Cardiovascular diseases | 1   | Fruits (kcal per capita)                            |          | X       |         |          |         |         |
| Cardiovascular diseases | 1   | Health System Access 2 (unitless)                   |          | X       |         |          |         |         |
| Cardiovascular diseases | 1   | In-Milk (kcal per capita)                           |          | X       |         |          |         |         |
| Cardiovascular diseases | 1   | Nuts & Seeds (kcal per capita)                      |          | X       |         |          |         |         |
| Cardiovascular diseases | 1   | Elevation 100 to 500m (proportion)                  |          | X       |         |          |         |         |
| Cardiovascular diseases | 1   | Elevation Over 1500m (proportion)                   |          | X       |         |          |         |         |
| Cardiovascular diseases | 1   | Elevation 500 to 1500m (proportion)                 |          | X       |         |          |         |         |
| Cardiovascular diseases | 1   | PUFA Omega 6 - Vegetable Oils (kcal per capita)     |          | X       |         |          |         |         |
| Cardiovascular diseases | 1   | Pulses & Legumes (kcal per capita)                  |          | X       |         |          |         |         |
| Cardiovascular diseases | 1   | Total Calories (kcal per capita)                    |          | X       |         |          |         |         |
| Cardiovascular diseases | 1   | Whole Grains (kcal per capita)                      |          | X       |         |          |         |         |
| Cardiovascular diseases | 1   | Elevation Under 100m (proportion)                   |          | X       |         | X        |         |         |
| Cardiovascular diseases | 1   | Alcohol (liters per capita)                         |          | X       |         |          | X       |         |
| Cardiovascular diseases | 1   | Animal Fats (kcal per capita)                       |          | X       |         |          | X       |         |
| Cardiovascular diseases | 1   | PUFA Omega 3 - Seafood (kcal per capita)            |          | X       |         |          | X       |         |
| Cardiovascular diseases | 1   | Red Meat (kcal per capita)                          |          | X       |         |          | X       |         |
| Cardiovascular diseases | 1   | Vegetables (kcal per capita)                        |          | X       |         |          | X       |         |
| Cardiovascular diseases | 1   | Diabetes Age-Standardized Prevalence (proportion)   |          |         | X       |          |         |         |
| Cardiovascular diseases | 1   | Education (years per capita)                        |          |         | X       |          |         |         |
| Cardiovascular diseases | 1   | Mean BMI                                            |          |         | X       |          |         |         |
| Cardiovascular diseases | 1   | Population Density (over 1000 ppl/sqkm, proportion) |          |         | X       |          |         |         |
| Cardiovascular diseases | 1   | Population Density (under 150 ppl/sqkm, proportion) |          |         | X       |          |         |         |
| Cardiovascular diseases | 1   | Population Over 65 (proportion)                     |          |         | X       |          |         |         |
| Cardiovascular diseases | 1   | LDI (I\$ per capita)                                |          |         | X       |          |         | X       |
| Cardiovascular diseases | 2   | Cumulative Cigarettes (5 Years)                     | X        |         |         |          |         |         |

**Web Table 23 - Comparison of covariates used in CoD models for GBD 2010 and GBD 2013**

| Cause Name              | Sex | Covariate name                                      | GBD 2010 |         |         | GBD 2013 |         |         |
|-------------------------|-----|-----------------------------------------------------|----------|---------|---------|----------|---------|---------|
|                         |     |                                                     | Level 1  | Level 2 | Level 3 | Level 1  | Level 2 | Level 3 |
| Cardiovascular diseases | 2   | Systolic Blood Pressure (mmHg)                      | X        |         |         |          |         |         |
| Cardiovascular diseases | 2   | Cholesterol (total, mean per capita)                | X        |         |         | X        |         |         |
| Cardiovascular diseases | 2   | Smoking Prevalence                                  | X        |         |         | X        |         |         |
| Cardiovascular diseases | 2   | Fruits (kcal per capita)                            |          | X       |         |          |         |         |
| Cardiovascular diseases | 2   | Health System Access 2 (unitless)                   |          | X       |         |          |         |         |
| Cardiovascular diseases | 2   | In-Milk (kcal per capita)                           |          | X       |         |          |         |         |
| Cardiovascular diseases | 2   | Nuts & Seeds (kcal per capita)                      |          | X       |         |          |         |         |
| Cardiovascular diseases | 2   | Elevation 100 to 500m (proportion)                  |          | X       |         |          |         |         |
| Cardiovascular diseases | 2   | Elevation Over 1500m (proportion)                   |          | X       |         |          |         |         |
| Cardiovascular diseases | 2   | Elevation 500 to 1500m (proportion)                 |          | X       |         |          |         |         |
| Cardiovascular diseases | 2   | PUFA Omega 6 - Vegetable Oils (kcal per capita)     |          | X       |         |          |         |         |
| Cardiovascular diseases | 2   | Pulses & Legumes (kcal per capita)                  |          | X       |         |          |         |         |
| Cardiovascular diseases | 2   | Total Calories (kcal per capita)                    |          | X       |         |          |         |         |
| Cardiovascular diseases | 2   | Whole Grains (kcal per capita)                      |          | X       |         |          |         |         |
| Cardiovascular diseases | 2   | Elevation Under 100m (proportion)                   |          | X       |         | X        |         |         |
| Cardiovascular diseases | 2   | Alcohol (liters per capita)                         |          | X       |         |          | X       |         |
| Cardiovascular diseases | 2   | Animal Fats (kcal per capita)                       |          | X       |         |          | X       |         |
| Cardiovascular diseases | 2   | PUFA Omega 3 - Seafood (kcal per capita)            |          | X       |         |          | X       |         |
| Cardiovascular diseases | 2   | Red Meat (kcal per capita)                          |          | X       |         |          | X       |         |
| Cardiovascular diseases | 2   | Vegetables (kcal per capita)                        |          | X       |         |          | X       |         |
| Cardiovascular diseases | 2   | Diabetes Age-Standardized Prevalence (proportion)   |          |         | X       |          |         |         |
| Cardiovascular diseases | 2   | Education (years per capita)                        |          |         | X       |          |         |         |
| Cardiovascular diseases | 2   | Mean BMI                                            |          |         | X       |          |         |         |
| Cardiovascular diseases | 2   | Population Density (over 1000 ppl/sqkm, proportion) |          |         | X       |          |         |         |
| Cardiovascular diseases | 2   | Population Density (under 150 ppl/sqkm, proportion) |          |         | X       |          |         |         |
| Cardiovascular diseases | 2   | Population Over 65 (proportion)                     |          |         | X       |          |         |         |
| Cardiovascular diseases | 2   | LDI (I\$ per capita)                                |          |         | X       |          |         | X       |
| Rheumatic heart disease | 1   | Malnutrition (proportion <2SD weight for age)       | X        |         |         | X        |         |         |
| Rheumatic heart disease | 1   | Population Under 30 (proportion)                    | X        |         |         | X        |         |         |
| Rheumatic heart disease | 1   | Sanitation (proportion with access)                 | X        |         |         | X        |         |         |
| Rheumatic heart disease | 1   | Improved Water Source (proportion with access)      | X        |         |         | X        |         |         |
| Rheumatic heart disease | 1   | Health System Access 2 (unitless)                   | X        |         |         |          |         | X       |
| Rheumatic heart disease | 1   | Population Density (500-1000 ppl/sqkm, proportion)  |          | X       |         |          |         |         |
| Rheumatic heart disease | 1   | Population Density (over 1000 ppl/sqkm, proportion) |          | X       |         |          |         |         |
| Rheumatic heart disease | 1   | LDI (I\$ per capita)                                |          |         | X       |          |         | X       |
| Rheumatic heart disease | 1   | Education (years per capita)                        |          |         | X       |          |         | X       |
| Rheumatic heart disease | 2   | Malnutrition (proportion <2SD weight for age)       | X        |         |         | X        |         |         |
| Rheumatic heart disease | 2   | Population Under 30 (proportion)                    | X        |         |         | X        |         |         |

**Web Table 23 - Comparison of covariates used in CoD models for GBD 2010 and GBD 2013**

| Cause Name              | Sex | Covariate name                                      | GBD 2010 |         |         | GBD 2013 |         |         |
|-------------------------|-----|-----------------------------------------------------|----------|---------|---------|----------|---------|---------|
|                         |     |                                                     | Level 1  | Level 2 | Level 3 | Level 1  | Level 2 | Level 3 |
| Rheumatic heart disease | 2   | Sanitation (proportion with access)                 | X        |         |         | X        |         |         |
| Rheumatic heart disease | 2   | Improved Water Source (proportion with access)      | X        |         |         | X        |         |         |
| Rheumatic heart disease | 2   | Health System Access 2 (unitless)                   | X        |         |         |          |         | X       |
| Rheumatic heart disease | 2   | Population Density (500-1000 ppl/sqkm, proportion)  |          | X       |         |          |         |         |
| Rheumatic heart disease | 2   | Population Density (over 1000 ppl/sqkm, proportion) |          | X       |         |          |         |         |
| Rheumatic heart disease | 2   | LDI (I\$ per capita)                                |          |         | X       |          |         | X       |
| Rheumatic heart disease | 2   | Education (years per capita)                        |          |         | X       |          |         | X       |
| Ischemic heart disease  | 1   | Cumulative Cigarettes (5 Years)                     | X        |         |         |          |         |         |
| Ischemic heart disease  | 1   | Diabetes Age-Standardized Prevalence (proportion)   | X        |         |         |          |         |         |
| Ischemic heart disease  | 1   | Mean BMI                                            | X        |         |         |          |         |         |
| Ischemic heart disease  | 1   | Systolic Blood Pressure (mmHg)                      | X        |         |         |          |         |         |
| Ischemic heart disease  | 1   | Cholesterol (total, mean per capita)                | X        |         |         | X        |         |         |
| Ischemic heart disease  | 1   | Smoking Prevalence                                  | X        |         |         | X        |         |         |
| Ischemic heart disease  | 1   | Fruits (kcal per capita)                            |          | X       |         |          |         |         |
| Ischemic heart disease  | 1   | Health System Access 2 (unitless)                   |          | X       |         |          |         |         |
| Ischemic heart disease  | 1   | In-Milk (kcal per capita)                           |          | X       |         |          |         |         |
| Ischemic heart disease  | 1   | Nuts & Seeds (kcal per capita)                      |          | X       |         |          |         |         |
| Ischemic heart disease  | 1   | Alcohol (liters per capita)                         |          | X       |         |          | X       |         |
| Ischemic heart disease  | 1   | Animal Fats (kcal per capita)                       |          | X       |         |          | X       |         |
| Ischemic heart disease  | 1   | PUFA Omega 3 - Seafood (kcal per capita)            |          | X       |         |          | X       |         |
| Ischemic heart disease  | 1   | Vegetables (kcal per capita)                        |          | X       |         |          | X       |         |
| Ischemic heart disease  | 1   | Disaster Deaths (rate per 1000)                     |          |         | X       |          |         |         |
| Ischemic heart disease  | 1   | Education (years per capita)                        |          |         | X       |          |         |         |
| Ischemic heart disease  | 1   | Elevation 100 to 500m (proportion)                  |          |         | X       |          |         |         |
| Ischemic heart disease  | 1   | Elevation Over 1500m (proportion)                   |          |         | X       |          |         |         |
| Ischemic heart disease  | 1   | Elevation 500 to 1500m (proportion)                 |          |         | X       |          |         |         |
| Ischemic heart disease  | 1   | PUFA Omega 6 - Vegetable Oils (kcal per capita)     |          |         | X       |          |         |         |
| Ischemic heart disease  | 1   | Mortality Rate Due to War Shocks (per 1 person)     |          |         | X       |          |         |         |
| Ischemic heart disease  | 1   | Whole Grains (kcal per capita)                      |          |         | X       |          |         |         |
| Ischemic heart disease  | 1   | Elevation Under 100m (proportion)                   |          |         | X       | X        |         |         |
| Ischemic heart disease  | 1   | LDI (I\$ per capita)                                |          |         | X       |          |         | X       |
| Ischemic heart disease  | 1   | Pulses & Legumes (kcal per capita)                  |          |         | X       |          |         | X       |
| Ischemic heart disease  | 1   | Red Meat (kcal per capita)                          |          |         | X       |          |         | X       |
| Ischemic heart disease  | 2   | Cumulative Cigarettes (5 Years)                     | X        |         |         |          |         |         |
| Ischemic heart disease  | 2   | Diabetes Age-Standardized Prevalence (proportion)   | X        |         |         |          |         |         |
| Ischemic heart disease  | 2   | Mean BMI                                            | X        |         |         |          |         |         |
| Ischemic heart disease  | 2   | Systolic Blood Pressure (mmHg)                      | X        |         |         |          |         |         |
| Ischemic heart disease  | 2   | Cholesterol (total, mean per capita)                | X        |         |         | X        |         |         |

**Web Table 23 - Comparison of covariates used in CoD models for GBD 2010 and GBD 2013**

| Cause Name              | Sex | Covariate name                                  | GBD 2010 |         |         | GBD 2013 |         |         |
|-------------------------|-----|-------------------------------------------------|----------|---------|---------|----------|---------|---------|
|                         |     |                                                 | Level 1  | Level 2 | Level 3 | Level 1  | Level 2 | Level 3 |
| Ischemic heart disease  | 2   | Smoking Prevalence                              | X        |         |         | X        |         |         |
| Ischemic heart disease  | 2   | Fruits (kcal per capita)                        |          | X       |         |          |         |         |
| Ischemic heart disease  | 2   | Health System Access 2 (unitless)               |          | X       |         |          |         |         |
| Ischemic heart disease  | 2   | In-Milk (kcal per capita)                       |          | X       |         |          |         |         |
| Ischemic heart disease  | 2   | Nuts & Seeds (kcal per capita)                  |          | X       |         |          |         |         |
| Ischemic heart disease  | 2   | Alcohol (liters per capita)                     |          | X       |         |          | X       |         |
| Ischemic heart disease  | 2   | Animal Fats (kcal per capita)                   |          | X       |         |          | X       |         |
| Ischemic heart disease  | 2   | PUFA Omega 3 - Seafood (kcal per capita)        |          | X       |         |          | X       |         |
| Ischemic heart disease  | 2   | Vegetables (kcal per capita)                    |          | X       |         |          | X       |         |
| Ischemic heart disease  | 2   | Disaster Deaths (rate per 1000)                 |          |         | X       |          |         |         |
| Ischemic heart disease  | 2   | Education (years per capita)                    |          |         | X       |          |         |         |
| Ischemic heart disease  | 2   | Elevation 100 to 500m (proportion)              |          |         | X       |          |         |         |
| Ischemic heart disease  | 2   | Elevation Over 1500m (proportion)               |          |         | X       |          |         |         |
| Ischemic heart disease  | 2   | Elevation 500 to 1500m (proportion)             |          |         | X       |          |         |         |
| Ischemic heart disease  | 2   | PUFA Omega 6 - Vegetable Oils (kcal per capita) |          |         | X       |          |         |         |
| Ischemic heart disease  | 2   | Mortality Rate Due to War Shocks (per 1 person) |          |         | X       |          |         |         |
| Ischemic heart disease  | 2   | Whole Grains (kcal per capita)                  |          |         | X       |          |         |         |
| Ischemic heart disease  | 2   | Elevation Under 100m (proportion)               |          |         | X       | X        |         |         |
| Ischemic heart disease  | 2   | LDI (I\$ per capita)                            |          |         | X       |          |         | X       |
| Ischemic heart disease  | 2   | Pulses & Legumes (kcal per capita)              |          |         | X       |          |         | X       |
| Ischemic heart disease  | 2   | Red Meat (kcal per capita)                      |          |         | X       |          |         | X       |
| Cerebrovascular disease | 1   | Cumulative Cigarettes (5 Years)                 | X        |         |         | X        |         |         |
| Cerebrovascular disease | 1   | Mean BMI                                        | X        |         |         | X        |         |         |
| Cerebrovascular disease | 1   | Systolic Blood Pressure (mmHg)                  | X        |         |         | X        |         |         |
| Cerebrovascular disease | 1   | Cholesterol (total, mean per capita)            | X        |         |         | X        |         |         |
| Cerebrovascular disease | 1   | Smoking Prevalence                              | X        |         |         | X        |         |         |
| Cerebrovascular disease | 1   | Alcohol (liters per capita)                     |          | X       |         |          | X       |         |
| Cerebrovascular disease | 1   | Fruits (kcal per capita)                        |          | X       |         |          | X       |         |
| Cerebrovascular disease | 1   | In-Milk (kcal per capita)                       |          | X       |         |          | X       |         |
| Cerebrovascular disease | 1   | Nuts & Seeds (kcal per capita)                  |          | X       |         |          | X       |         |
| Cerebrovascular disease | 1   | PUFA Omega 3 - Seafood (kcal per capita)        |          | X       |         |          | X       |         |
| Cerebrovascular disease | 1   | PUFA Omega 6 - Vegetable Oils (kcal per capita) |          | X       |         |          | X       |         |
| Cerebrovascular disease | 1   | Vegetables (kcal per capita)                    |          | X       |         |          | X       |         |
| Cerebrovascular disease | 1   | Health System Access 2 (unitless)               |          | X       |         |          |         | X       |
| Cerebrovascular disease | 1   | Disaster Deaths (rate per 1000)                 |          |         | X       |          |         |         |
| Cerebrovascular disease | 1   | Elevation 100 to 500m (proportion)              |          |         | X       |          |         |         |
| Cerebrovascular disease | 1   | Elevation Over 1500m (proportion)               |          |         | X       |          |         |         |
| Cerebrovascular disease | 1   | Elevation 500 to 1500m (proportion)             |          |         | X       |          |         |         |

**Web Table 23 - Comparison of covariates used in CoD models for GBD 2010 and GBD 2013**

| Cause Name              | Sex | Covariate name                                    | GBD 2010 |         |         | GBD 2013 |         |         |
|-------------------------|-----|---------------------------------------------------|----------|---------|---------|----------|---------|---------|
|                         |     |                                                   | Level 1  | Level 2 | Level 3 | Level 1  | Level 2 | Level 3 |
| Cerebrovascular disease | 1   | Elevation Under 100m (proportion)                 |          |         | X       |          |         |         |
| Cerebrovascular disease | 1   | Mortality Rate Due to War Shocks (per 1 person)   |          |         | X       |          |         |         |
| Cerebrovascular disease | 1   | LDI (I\$ per capita)                              |          |         | X       |          |         | X       |
| Cerebrovascular disease | 1   | Animal Fats (kcal per capita)                     |          |         | X       |          |         | X       |
| Cerebrovascular disease | 1   | Diabetes Age-Standardized Prevalence (proportion) |          |         | X       |          |         | X       |
| Cerebrovascular disease | 1   | Education (years per capita)                      |          |         | X       |          |         | X       |
| Cerebrovascular disease | 1   | Pulses & Legumes (kcal per capita)                |          |         | X       |          |         | X       |
| Cerebrovascular disease | 1   | Red Meat (kcal per capita)                        |          |         | X       |          |         | X       |
| Cerebrovascular disease | 1   | Whole Grains (kcal per capita)                    |          |         | X       |          |         | X       |
| Cerebrovascular disease | 2   | Cumulative Cigarettes (5 Years)                   | X        |         |         | X        |         |         |
| Cerebrovascular disease | 2   | Mean BMI                                          | X        |         |         | X        |         |         |
| Cerebrovascular disease | 2   | Systolic Blood Pressure (mmHg)                    | X        |         |         | X        |         |         |
| Cerebrovascular disease | 2   | Cholesterol (total, mean per capita)              | X        |         |         | X        |         |         |
| Cerebrovascular disease | 2   | Smoking Prevalence                                | X        |         |         | X        |         |         |
| Cerebrovascular disease | 2   | Alcohol (liters per capita)                       |          | X       |         |          | X       |         |
| Cerebrovascular disease | 2   | Fruits (kcal per capita)                          |          | X       |         |          | X       |         |
| Cerebrovascular disease | 2   | In-Milk (kcal per capita)                         |          | X       |         |          | X       |         |
| Cerebrovascular disease | 2   | Nuts & Seeds (kcal per capita)                    |          | X       |         |          | X       |         |
| Cerebrovascular disease | 2   | PUFA Omega 3 - Seafood (kcal per capita)          |          | X       |         |          | X       |         |
| Cerebrovascular disease | 2   | PUFA Omega 6 - Vegetable Oils (kcal per capita)   |          | X       |         |          | X       |         |
| Cerebrovascular disease | 2   | Vegetables (kcal per capita)                      |          | X       |         |          | X       |         |
| Cerebrovascular disease | 2   | Health System Access 2 (unitless)                 |          | X       |         |          |         | X       |
| Cerebrovascular disease | 2   | Disaster Deaths (rate per 1000)                   |          |         | X       |          |         |         |
| Cerebrovascular disease | 2   | Elevation 100 to 500m (proportion)                |          |         | X       |          |         |         |
| Cerebrovascular disease | 2   | Elevation Over 1500m (proportion)                 |          |         | X       |          |         |         |
| Cerebrovascular disease | 2   | Elevation 500 to 1500m (proportion)               |          |         | X       |          |         |         |
| Cerebrovascular disease | 2   | Elevation Under 100m (proportion)                 |          |         | X       |          |         |         |
| Cerebrovascular disease | 2   | Mortality Rate Due to War Shocks (per 1 person)   |          |         | X       |          |         |         |
| Cerebrovascular disease | 2   | LDI (I\$ per capita)                              |          |         | X       |          |         | X       |
| Cerebrovascular disease | 2   | Animal Fats (kcal per capita)                     |          |         | X       |          |         | X       |
| Cerebrovascular disease | 2   | Diabetes Age-Standardized Prevalence (proportion) |          |         | X       |          |         | X       |
| Cerebrovascular disease | 2   | Education (years per capita)                      |          |         | X       |          |         | X       |
| Cerebrovascular disease | 2   | Pulses & Legumes (kcal per capita)                |          |         | X       |          |         | X       |
| Cerebrovascular disease | 2   | Red Meat (kcal per capita)                        |          |         | X       |          |         | X       |
| Cerebrovascular disease | 2   | Whole Grains (kcal per capita)                    |          |         | X       |          |         | X       |
| Ischemic stroke         | 1   | Cumulative Cigarettes (5 Years)                   | X        |         |         |          |         |         |
| Ischemic stroke         | 1   | Systolic Blood Pressure (mmHg)                    | X        |         |         |          |         |         |
| Ischemic stroke         | 1   | Cholesterol (total, mean per capita)              | X        |         |         | X        |         |         |

**Web Table 23 - Comparison of covariates used in CoD models for GBD 2010 and GBD 2013**

| Cause Name         | Sex | Covariate name                                    | GBD 2010 |         |         | GBD 2013 |         |         |
|--------------------|-----|---------------------------------------------------|----------|---------|---------|----------|---------|---------|
|                    |     |                                                   | Level 1  | Level 2 | Level 3 | Level 1  | Level 2 | Level 3 |
| Ischemic stroke    | 1   | Smoking Prevalence                                | X        |         |         | X        |         |         |
| Ischemic stroke    | 1   | PUFA Omega 6 - Vegetable Oils (kcal per capita)   |          | X       |         |          |         |         |
| Ischemic stroke    | 1   | Whole Grains (kcal per capita)                    |          | X       |         |          |         |         |
| Ischemic stroke    | 1   | Alcohol (liters per capita)                       |          | X       |         |          | X       |         |
| Ischemic stroke    | 1   | Fruits (kcal per capita)                          |          | X       |         |          | X       |         |
| Ischemic stroke    | 1   | Health System Access 2 (unitless)                 |          | X       |         |          | X       |         |
| Ischemic stroke    | 1   | In-Milk (kcal per capita)                         |          | X       |         |          | X       |         |
| Ischemic stroke    | 1   | Nuts & Seeds (kcal per capita)                    |          | X       |         |          | X       |         |
| Ischemic stroke    | 1   | Pulses & Legumes (kcal per capita)                |          | X       |         |          | X       |         |
| Ischemic stroke    | 1   | Vegetables (kcal per capita)                      |          | X       |         |          | X       |         |
| Ischemic stroke    | 1   | Diabetes Age-Standardized Prevalence (proportion) |          |         | X       |          |         |         |
| Ischemic stroke    | 1   | Mean BMI                                          |          |         | X       |          |         |         |
| Ischemic stroke    | 1   | Red Meat (kcal per capita)                        |          |         | X       |          |         |         |
| Ischemic stroke    | 1   | LDI (I\$ per capita)                              |          |         | X       |          |         | X       |
| Ischemic stroke    | 1   | Animal Fats (kcal per capita)                     |          |         | X       |          |         | X       |
| Ischemic stroke    | 1   | Education (years per capita)                      |          |         | X       |          |         | X       |
| Ischemic stroke    | 1   | PUFA Omega 3 - Seafood (kcal per capita)          |          |         | X       |          |         | X       |
| Ischemic stroke    | 2   | Cumulative Cigarettes (5 Years)                   | X        |         |         |          |         |         |
| Ischemic stroke    | 2   | Systolic Blood Pressure (mmHg)                    | X        |         |         |          |         |         |
| Ischemic stroke    | 2   | Cholesterol (total, mean per capita)              | X        |         |         | X        |         |         |
| Ischemic stroke    | 2   | Smoking Prevalence                                | X        |         |         | X        |         |         |
| Ischemic stroke    | 2   | PUFA Omega 6 - Vegetable Oils (kcal per capita)   |          | X       |         |          |         |         |
| Ischemic stroke    | 2   | Whole Grains (kcal per capita)                    |          | X       |         |          |         |         |
| Ischemic stroke    | 2   | Alcohol (liters per capita)                       |          | X       |         |          | X       |         |
| Ischemic stroke    | 2   | Fruits (kcal per capita)                          |          | X       |         |          | X       |         |
| Ischemic stroke    | 2   | Health System Access 2 (unitless)                 |          | X       |         |          | X       |         |
| Ischemic stroke    | 2   | In-Milk (kcal per capita)                         |          | X       |         |          | X       |         |
| Ischemic stroke    | 2   | Nuts & Seeds (kcal per capita)                    |          | X       |         |          | X       |         |
| Ischemic stroke    | 2   | Pulses & Legumes (kcal per capita)                |          | X       |         |          | X       |         |
| Ischemic stroke    | 2   | Vegetables (kcal per capita)                      |          | X       |         |          | X       |         |
| Ischemic stroke    | 2   | Diabetes Age-Standardized Prevalence (proportion) |          |         | X       |          |         |         |
| Ischemic stroke    | 2   | Mean BMI                                          |          |         | X       |          |         |         |
| Ischemic stroke    | 2   | Red Meat (kcal per capita)                        |          |         | X       |          |         |         |
| Ischemic stroke    | 2   | LDI (I\$ per capita)                              |          |         | X       |          |         | X       |
| Ischemic stroke    | 2   | Animal Fats (kcal per capita)                     |          |         | X       |          |         | X       |
| Ischemic stroke    | 2   | Education (years per capita)                      |          |         | X       |          |         | X       |
| Ischemic stroke    | 2   | PUFA Omega 3 - Seafood (kcal per capita)          |          |         | X       |          |         | X       |
| Hemorrhagic stroke | 1   | Cumulative Cigarettes (5 Years)                   | X        |         |         |          |         |         |

**Web Table 23 - Comparison of covariates used in CoD models for GBD 2010 and GBD 2013**

| Cause Name         | Sex | Covariate name                                    | GBD 2010 |         |         | GBD 2013 |         |         |
|--------------------|-----|---------------------------------------------------|----------|---------|---------|----------|---------|---------|
|                    |     |                                                   | Level 1  | Level 2 | Level 3 | Level 1  | Level 2 | Level 3 |
| Hemorrhagic stroke | 1   | Systolic Blood Pressure (mmHg)                    | X        |         |         |          |         |         |
| Hemorrhagic stroke | 1   | Cholesterol (total, mean per capita)              | X        |         |         |          |         |         |
| Hemorrhagic stroke | 1   | Smoking Prevalence                                | X        |         |         | X        |         |         |
| Hemorrhagic stroke | 1   | Fruits (kcal per capita)                          |          | X       |         |          |         |         |
| Hemorrhagic stroke | 1   | Health System Access 2 (unitless)                 |          | X       |         |          |         |         |
| Hemorrhagic stroke | 1   | Alcohol (liters per capita)                       |          | X       |         |          | X       |         |
| Hemorrhagic stroke | 1   | In-Milk (kcal per capita)                         |          | X       |         |          | X       |         |
| Hemorrhagic stroke | 1   | Nuts & Seeds (kcal per capita)                    |          | X       |         |          | X       |         |
| Hemorrhagic stroke | 1   | PUFA Omega 3 - Seafood (kcal per capita)          |          | X       |         |          | X       |         |
| Hemorrhagic stroke | 1   | PUFA Omega 6 - Vegetable Oils (kcal per capita)   |          | X       |         |          | X       |         |
| Hemorrhagic stroke | 1   | Pulses & Legumes (kcal per capita)                |          | X       |         |          | X       |         |
| Hemorrhagic stroke | 1   | Vegetables (kcal per capita)                      |          | X       |         |          | X       |         |
| Hemorrhagic stroke | 1   | Animal Fats (kcal per capita)                     |          |         | X       |          |         |         |
| Hemorrhagic stroke | 1   | Diabetes Age-Standardized Prevalence (proportion) |          |         | X       |          |         |         |
| Hemorrhagic stroke | 1   | Mean BMI                                          |          |         | X       |          |         |         |
| Hemorrhagic stroke | 1   | Red Meat (kcal per capita)                        |          |         | X       |          |         |         |
| Hemorrhagic stroke | 1   | Whole Grains (kcal per capita)                    |          |         | X       |          |         |         |
| Hemorrhagic stroke | 1   | LDI (I\$ per capita)                              |          |         | X       |          |         | X       |
| Hemorrhagic stroke | 1   | Education (years per capita)                      |          |         | X       |          |         | X       |
| Hemorrhagic stroke | 2   | Cumulative Cigarettes (5 Years)                   | X        |         |         |          |         |         |
| Hemorrhagic stroke | 2   | Systolic Blood Pressure (mmHg)                    | X        |         |         |          |         |         |
| Hemorrhagic stroke | 2   | Cholesterol (total, mean per capita)              | X        |         |         |          |         |         |
| Hemorrhagic stroke | 2   | Smoking Prevalence                                | X        |         |         | X        |         |         |
| Hemorrhagic stroke | 2   | Fruits (kcal per capita)                          |          | X       |         |          |         |         |
| Hemorrhagic stroke | 2   | Health System Access 2 (unitless)                 |          | X       |         |          |         |         |
| Hemorrhagic stroke | 2   | Alcohol (liters per capita)                       |          | X       |         |          | X       |         |
| Hemorrhagic stroke | 2   | In-Milk (kcal per capita)                         |          | X       |         |          | X       |         |
| Hemorrhagic stroke | 2   | Nuts & Seeds (kcal per capita)                    |          | X       |         |          | X       |         |
| Hemorrhagic stroke | 2   | PUFA Omega 3 - Seafood (kcal per capita)          |          | X       |         |          | X       |         |
| Hemorrhagic stroke | 2   | PUFA Omega 6 - Vegetable Oils (kcal per capita)   |          | X       |         |          | X       |         |
| Hemorrhagic stroke | 2   | Pulses & Legumes (kcal per capita)                |          | X       |         |          | X       |         |
| Hemorrhagic stroke | 2   | Vegetables (kcal per capita)                      |          | X       |         |          | X       |         |
| Hemorrhagic stroke | 2   | Animal Fats (kcal per capita)                     |          |         | X       |          |         |         |
| Hemorrhagic stroke | 2   | Diabetes Age-Standardized Prevalence (proportion) |          |         | X       |          |         |         |
| Hemorrhagic stroke | 2   | Mean BMI                                          |          |         | X       |          |         |         |
| Hemorrhagic stroke | 2   | Red Meat (kcal per capita)                        |          |         | X       |          |         |         |
| Hemorrhagic stroke | 2   | Whole Grains (kcal per capita)                    |          |         | X       |          |         |         |
| Hemorrhagic stroke | 2   | LDI (I\$ per capita)                              |          |         | X       |          |         | X       |



**Web Table 23 - Comparison of covariates used in CoD models for GBD 2010 and GBD 2013**

| Cause Name                 | Sex | Covariate name                                    | GBD 2010 |         |         | GBD 2013 |         |         |
|----------------------------|-----|---------------------------------------------------|----------|---------|---------|----------|---------|---------|
|                            |     |                                                   | Level 1  | Level 2 | Level 3 | Level 1  | Level 2 | Level 3 |
| Hemorrhagic stroke         | 2   | Education (years per capita)                      |          |         | X       |          |         | X       |
| Hypertensive heart disease | 1   | Tobacco (cigarettes per capita)                   | X        |         |         |          |         |         |
| Hypertensive heart disease | 1   | Diabetes Age-Standardized Prevalence (proportion) | X        |         |         |          |         |         |
| Hypertensive heart disease | 1   | Health System Access 2 (unitless)                 | X        |         |         |          |         |         |
| Hypertensive heart disease | 1   | Mean BMI                                          | X        |         |         |          |         |         |
| Hypertensive heart disease | 1   | Cholesterol (total, mean per capita)              | X        |         |         |          |         |         |
| Hypertensive heart disease | 1   | Systolic Blood Pressure (mmHg)                    | X        |         |         | X        |         |         |
| Hypertensive heart disease | 1   | Animal Fats (kcal per capita)                     |          | X       |         |          |         |         |
| Hypertensive heart disease | 1   | Fruits (kcal per capita)                          |          | X       |         |          |         |         |
| Hypertensive heart disease | 1   | PUFA Omega 6 - Vegetable Oils (kcal per capita)   |          | X       |         |          |         |         |
| Hypertensive heart disease | 1   | Red Meat (kcal per capita)                        |          | X       |         |          |         |         |
| Hypertensive heart disease | 1   | Smoking Prevalence                                |          | X       |         |          |         |         |
| Hypertensive heart disease | 1   | Whole Grains (kcal per capita)                    |          | X       |         |          |         |         |
| Hypertensive heart disease | 1   | Alcohol (liters per capita)                       |          | X       |         |          | X       |         |
| Hypertensive heart disease | 1   | Cumulative Cigarettes (10 Years)                  |          | X       |         |          | X       |         |
| Hypertensive heart disease | 1   | In-Milk (kcal per capita)                         |          | X       |         |          | X       |         |
| Hypertensive heart disease | 1   | Nuts & Seeds (kcal per capita)                    |          | X       |         |          | X       |         |
| Hypertensive heart disease | 1   | Indoor Air Pollution (All Cooking Fuels)          |          | X       |         |          | X       |         |
| Hypertensive heart disease | 1   | Outdoor Air Pollution (PM2.5)                     |          | X       |         |          | X       |         |
| Hypertensive heart disease | 1   | PUFA Omega 3 - Seafood (kcal per capita)          |          | X       |         |          | X       |         |
| Hypertensive heart disease | 1   | Pulses & Legumes (kcal per capita)                |          | X       |         |          | X       |         |
| Hypertensive heart disease | 1   | Total Calories (kcal per capita)                  |          | X       |         |          | X       |         |
| Hypertensive heart disease | 1   | Vegetables (kcal per capita)                      |          | X       |         |          | X       |         |
| Hypertensive heart disease | 1   | Elevation 100 to 500m (proportion)                |          |         | X       |          |         |         |
| Hypertensive heart disease | 1   | Elevation Over 1500m (proportion)                 |          |         | X       |          |         |         |
| Hypertensive heart disease | 1   | Elevation 500 to 1500m (proportion)               |          |         | X       |          |         |         |
| Hypertensive heart disease | 1   | LDI (I\$ per capita)                              |          |         | X       |          |         | X       |
| Hypertensive heart disease | 1   | Education (years per capita)                      |          |         | X       |          |         | X       |
| Hypertensive heart disease | 1   | Elevation Under 100m (proportion)                 |          |         | X       |          |         | X       |
| Hypertensive heart disease | 2   | Tobacco (cigarettes per capita)                   | X        |         |         |          |         |         |
| Hypertensive heart disease | 2   | Diabetes Age-Standardized Prevalence (proportion) | X        |         |         |          |         |         |
| Hypertensive heart disease | 2   | Health System Access 2 (unitless)                 | X        |         |         |          |         |         |
| Hypertensive heart disease | 2   | Mean BMI                                          | X        |         |         |          |         |         |
| Hypertensive heart disease | 2   | Cholesterol (total, mean per capita)              | X        |         |         |          |         |         |
| Hypertensive heart disease | 2   | Systolic Blood Pressure (mmHg)                    | X        |         |         | X        |         |         |
| Hypertensive heart disease | 2   | Animal Fats (kcal per capita)                     |          | X       |         |          |         |         |
| Hypertensive heart disease | 2   | Fruits (kcal per capita)                          |          | X       |         |          |         |         |
| Hypertensive heart disease | 2   | PUFA Omega 6 - Vegetable Oils (kcal per capita)   |          | X       |         |          |         |         |

**Web Table 23 - Comparison of covariates used in CoD models for GBD 2010 and GBD 2013**

| Cause Name                     | Sex | Covariate name                                    | GBD 2010 |         |         | GBD 2013 |         |         |
|--------------------------------|-----|---------------------------------------------------|----------|---------|---------|----------|---------|---------|
|                                |     |                                                   | Level 1  | Level 2 | Level 3 | Level 1  | Level 2 | Level 3 |
| Hypertensive heart disease     | 2   | Red Meat (kcal per capita)                        |          | X       |         |          |         |         |
| Hypertensive heart disease     | 2   | Smoking Prevalence                                |          | X       |         |          |         |         |
| Hypertensive heart disease     | 2   | Whole Grains (kcal per capita)                    |          | X       |         |          |         |         |
| Hypertensive heart disease     | 2   | Alcohol (liters per capita)                       |          | X       |         |          | X       |         |
| Hypertensive heart disease     | 2   | Cumulative Cigarettes (10 Years)                  |          | X       |         |          | X       |         |
| Hypertensive heart disease     | 2   | In-Milk (kcal per capita)                         |          | X       |         |          | X       |         |
| Hypertensive heart disease     | 2   | Nuts & Seeds (kcal per capita)                    |          | X       |         |          | X       |         |
| Hypertensive heart disease     | 2   | Indoor Air Pollution (All Cooking Fuels)          |          | X       |         |          | X       |         |
| Hypertensive heart disease     | 2   | Outdoor Air Pollution (PM2.5)                     |          | X       |         |          | X       |         |
| Hypertensive heart disease     | 2   | PUFA Omega 3 - Seafood (kcal per capita)          |          | X       |         |          | X       |         |
| Hypertensive heart disease     | 2   | Pulses & Legumes (kcal per capita)                |          | X       |         |          | X       |         |
| Hypertensive heart disease     | 2   | Total Calories (kcal per capita)                  |          | X       |         |          | X       |         |
| Hypertensive heart disease     | 2   | Vegetables (kcal per capita)                      |          | X       |         |          | X       |         |
| Hypertensive heart disease     | 2   | Elevation 100 to 500m (proportion)                |          |         |         | X        |         |         |
| Hypertensive heart disease     | 2   | Elevation Over 1500m (proportion)                 |          |         |         | X        |         |         |
| Hypertensive heart disease     | 2   | Elevation 500 to 1500m (proportion)               |          |         |         | X        |         |         |
| Hypertensive heart disease     | 2   | LDI (I\$ per capita)                              |          |         |         | X        |         | X       |
| Hypertensive heart disease     | 2   | Education (years per capita)                      |          |         |         | X        |         | X       |
| Hypertensive heart disease     | 2   | Elevation Under 100m (proportion)                 |          |         |         | X        |         | X       |
| Cardiomyopathy and myocarditis | 1   | Tobacco (cigarettes per capita)                   | X        |         |         |          |         |         |
| Cardiomyopathy and myocarditis | 1   | Mean BMI                                          | X        |         |         |          |         |         |
| Cardiomyopathy and myocarditis | 1   | Cholesterol (total, mean per capita)              | X        |         |         |          |         |         |
| Cardiomyopathy and myocarditis | 1   | Diabetes Age-Standardized Prevalence (proportion) | X        |         |         | X        |         |         |
| Cardiomyopathy and myocarditis | 1   | Systolic Blood Pressure (mmHg)                    | X        |         |         | X        |         |         |
| Cardiomyopathy and myocarditis | 1   | Health System Access 2 (unitless)                 | X        |         |         |          |         | X       |
| Cardiomyopathy and myocarditis | 1   | Animal Fats (kcal per capita)                     |          | X       |         |          |         |         |
| Cardiomyopathy and myocarditis | 1   | Cumulative Cigarettes (10 Years)                  |          | X       |         |          |         |         |
| Cardiomyopathy and myocarditis | 1   | Fruits (kcal per capita)                          |          | X       |         |          |         |         |
| Cardiomyopathy and myocarditis | 1   | In-Milk (kcal per capita)                         |          | X       |         |          |         |         |
| Cardiomyopathy and myocarditis | 1   | Nuts & Seeds (kcal per capita)                    |          | X       |         |          |         |         |
| Cardiomyopathy and myocarditis | 1   | Indoor Air Pollution (All Cooking Fuels)          |          | X       |         |          |         |         |
| Cardiomyopathy and myocarditis | 1   | Outdoor Air Pollution (PM2.5)                     |          | X       |         |          |         |         |
| Cardiomyopathy and myocarditis | 1   | PUFA Omega 3 - Seafood (kcal per capita)          |          | X       |         |          |         |         |
| Cardiomyopathy and myocarditis | 1   | PUFA Omega 6 - Vegetable Oils (kcal per capita)   |          | X       |         |          |         |         |
| Cardiomyopathy and myocarditis | 1   | Pulses & Legumes (kcal per capita)                |          | X       |         |          |         |         |
| Cardiomyopathy and myocarditis | 1   | Red Meat (kcal per capita)                        |          | X       |         |          |         |         |
| Cardiomyopathy and myocarditis | 1   | Smoking Prevalence                                |          | X       |         |          |         |         |
| Cardiomyopathy and myocarditis | 1   | Total Calories (kcal per capita)                  |          | X       |         |          |         |         |

**Web Table 23 - Comparison of covariates used in CoD models for GBD 2010 and GBD 2013**

| Cause Name                      | Sex | Covariate name                                    | GBD 2010 |         |         | GBD 2013 |         |         |
|---------------------------------|-----|---------------------------------------------------|----------|---------|---------|----------|---------|---------|
|                                 |     |                                                   | Level 1  | Level 2 | Level 3 | Level 1  | Level 2 | Level 3 |
| Cardiomyopathy and myocarditis  | 1   | Vegetables (kcal per capita)                      |          | X       |         |          |         |         |
| Cardiomyopathy and myocarditis  | 1   | Whole Grains (kcal per capita)                    |          | X       |         |          |         |         |
| Cardiomyopathy and myocarditis  | 1   | Alcohol (liters per capita)                       |          | X       |         |          | X       |         |
| Cardiomyopathy and myocarditis  | 1   | Elevation 100 to 500m (proportion)                |          |         | X       |          |         |         |
| Cardiomyopathy and myocarditis  | 1   | Elevation Over 1500m (proportion)                 |          |         | X       |          |         |         |
| Cardiomyopathy and myocarditis  | 1   | Elevation 500 to 1500m (proportion)               |          |         | X       |          |         |         |
| Cardiomyopathy and myocarditis  | 1   | Elevation Under 100m (proportion)                 |          |         | X       |          |         |         |
| Cardiomyopathy and myocarditis  | 1   | LDI (I\$ per capita)                              |          |         | X       |          |         | X       |
| Cardiomyopathy and myocarditis  | 1   | Education (years per capita)                      |          |         | X       |          |         | X       |
| Cardiomyopathy and myocarditis  | 2   | Tobacco (cigarettes per capita)                   | X        |         |         |          |         |         |
| Cardiomyopathy and myocarditis  | 2   | Mean BMI                                          | X        |         |         |          |         |         |
| Cardiomyopathy and myocarditis  | 2   | Cholesterol (total, mean per capita)              | X        |         |         |          |         |         |
| Cardiomyopathy and myocarditis  | 2   | Diabetes Age-Standardized Prevalence (proportion) | X        |         |         | X        |         |         |
| Cardiomyopathy and myocarditis  | 2   | Systolic Blood Pressure (mmHg)                    | X        |         |         | X        |         |         |
| Cardiomyopathy and myocarditis  | 2   | Health System Access 2 (unitless)                 | X        |         |         |          |         | X       |
| Cardiomyopathy and myocarditis  | 2   | Animal Fats (kcal per capita)                     |          | X       |         |          |         |         |
| Cardiomyopathy and myocarditis  | 2   | Cumulative Cigarettes (10 Years)                  |          | X       |         |          |         |         |
| Cardiomyopathy and myocarditis  | 2   | Fruits (kcal per capita)                          |          | X       |         |          |         |         |
| Cardiomyopathy and myocarditis  | 2   | In-Milk (kcal per capita)                         |          | X       |         |          |         |         |
| Cardiomyopathy and myocarditis  | 2   | Nuts & Seeds (kcal per capita)                    |          | X       |         |          |         |         |
| Cardiomyopathy and myocarditis  | 2   | Indoor Air Pollution (All Cooking Fuels)          |          | X       |         |          |         |         |
| Cardiomyopathy and myocarditis  | 2   | Outdoor Air Pollution (PM2.5)                     |          | X       |         |          |         |         |
| Cardiomyopathy and myocarditis  | 2   | PUFA Omega 3 - Seafood (kcal per capita)          |          | X       |         |          |         |         |
| Cardiomyopathy and myocarditis  | 2   | PUFA Omega 6 - Vegetable Oils (kcal per capita)   |          | X       |         |          |         |         |
| Cardiomyopathy and myocarditis  | 2   | Pulses & Legumes (kcal per capita)                |          | X       |         |          |         |         |
| Cardiomyopathy and myocarditis  | 2   | Red Meat (kcal per capita)                        |          | X       |         |          |         |         |
| Cardiomyopathy and myocarditis  | 2   | Smoking Prevalence                                |          | X       |         |          |         |         |
| Cardiomyopathy and myocarditis  | 2   | Total Calories (kcal per capita)                  |          | X       |         |          |         |         |
| Cardiomyopathy and myocarditis  | 2   | Vegetables (kcal per capita)                      |          | X       |         |          |         |         |
| Cardiomyopathy and myocarditis  | 2   | Whole Grains (kcal per capita)                    |          | X       |         |          |         |         |
| Cardiomyopathy and myocarditis  | 2   | Alcohol (liters per capita)                       |          | X       |         |          | X       |         |
| Cardiomyopathy and myocarditis  | 2   | Elevation 100 to 500m (proportion)                |          |         | X       |          |         |         |
| Cardiomyopathy and myocarditis  | 2   | Elevation Over 1500m (proportion)                 |          |         | X       |          |         |         |
| Cardiomyopathy and myocarditis  | 2   | Elevation 500 to 1500m (proportion)               |          |         | X       |          |         |         |
| Cardiomyopathy and myocarditis  | 2   | Elevation Under 100m (proportion)                 |          |         | X       |          |         |         |
| Cardiomyopathy and myocarditis  | 2   | LDI (I\$ per capita)                              |          |         | X       |          |         | X       |
| Cardiomyopathy and myocarditis  | 2   | Education (years per capita)                      |          |         | X       |          |         | X       |
| Atrial fibrillation and flutter | 1   | Tobacco (cigarettes per capita)                   | X        |         |         | X        |         |         |

**Web Table 23 - Comparison of covariates used in CoD models for GBD 2010 and GBD 2013**

| Cause Name                      | Sex | Covariate name                                    | GBD 2010 |         |         | GBD 2013 |         |         |
|---------------------------------|-----|---------------------------------------------------|----------|---------|---------|----------|---------|---------|
|                                 |     |                                                   | Level 1  | Level 2 | Level 3 | Level 1  | Level 2 | Level 3 |
| Atrial fibrillation and flutter | 1   | Diabetes Age-Standardized Prevalence (proportion) | X        |         |         | X        |         |         |
| Atrial fibrillation and flutter | 1   | Health System Access 2 (unitless)                 | X        |         |         | X        |         |         |
| Atrial fibrillation and flutter | 1   | Mean BMI                                          | X        |         |         | X        |         |         |
| Atrial fibrillation and flutter | 1   | Systolic Blood Pressure (mmHg)                    | X        |         |         | X        |         |         |
| Atrial fibrillation and flutter | 1   | Cholesterol (total, mean per capita)              | X        |         |         | X        |         |         |
| Atrial fibrillation and flutter | 1   | Alcohol (liters per capita)                       |          | X       |         |          | X       |         |
| Atrial fibrillation and flutter | 1   | Animal Fats (kcal per capita)                     |          | X       |         |          | X       |         |
| Atrial fibrillation and flutter | 1   | Cumulative Cigarettes (10 Years)                  |          | X       |         |          | X       |         |
| Atrial fibrillation and flutter | 1   | Fruits (kcal per capita)                          |          | X       |         |          | X       |         |
| Atrial fibrillation and flutter | 1   | In-Milk (kcal per capita)                         |          | X       |         |          | X       |         |
| Atrial fibrillation and flutter | 1   | Nuts & Seeds (kcal per capita)                    |          | X       |         |          | X       |         |
| Atrial fibrillation and flutter | 1   | Indoor Air Pollution (All Cooking Fuels)          |          | X       |         |          | X       |         |
| Atrial fibrillation and flutter | 1   | Outdoor Air Pollution (PM2.5)                     |          | X       |         |          | X       |         |
| Atrial fibrillation and flutter | 1   | PUFA Omega 3 - Seafood (kcal per capita)          |          | X       |         |          | X       |         |
| Atrial fibrillation and flutter | 1   | PUFA Omega 6 - Vegetable Oils (kcal per capita)   |          | X       |         |          | X       |         |
| Atrial fibrillation and flutter | 1   | Pulses & Legumes (kcal per capita)                |          | X       |         |          | X       |         |
| Atrial fibrillation and flutter | 1   | Red Meat (kcal per capita)                        |          | X       |         |          | X       |         |
| Atrial fibrillation and flutter | 1   | Smoking Prevalence                                |          | X       |         |          | X       |         |
| Atrial fibrillation and flutter | 1   | Total Calories (kcal per capita)                  |          | X       |         |          | X       |         |
| Atrial fibrillation and flutter | 1   | Vegetables (kcal per capita)                      |          | X       |         |          | X       |         |
| Atrial fibrillation and flutter | 1   | Whole Grains (kcal per capita)                    |          | X       |         |          | X       |         |
| Atrial fibrillation and flutter | 1   | LDI (I\$ per capita)                              |          |         | X       |          |         | X       |
| Atrial fibrillation and flutter | 1   | Education (years per capita)                      |          |         | X       |          |         | X       |
| Atrial fibrillation and flutter | 1   | Elevation 100 to 500m (proportion)                |          |         | X       |          |         | X       |
| Atrial fibrillation and flutter | 1   | Elevation Over 1500m (proportion)                 |          |         | X       |          |         | X       |
| Atrial fibrillation and flutter | 1   | Elevation 500 to 1500m (proportion)               |          |         | X       |          |         | X       |
| Atrial fibrillation and flutter | 1   | Elevation Under 100m (proportion)                 |          |         | X       |          |         | X       |
| Atrial fibrillation and flutter | 2   | Tobacco (cigarettes per capita)                   | X        |         |         | X        |         |         |
| Atrial fibrillation and flutter | 2   | Diabetes Age-Standardized Prevalence (proportion) | X        |         |         | X        |         |         |
| Atrial fibrillation and flutter | 2   | Health System Access 2 (unitless)                 | X        |         |         | X        |         |         |
| Atrial fibrillation and flutter | 2   | Mean BMI                                          | X        |         |         | X        |         |         |
| Atrial fibrillation and flutter | 2   | Systolic Blood Pressure (mmHg)                    | X        |         |         | X        |         |         |
| Atrial fibrillation and flutter | 2   | Cholesterol (total, mean per capita)              | X        |         |         | X        |         |         |
| Atrial fibrillation and flutter | 2   | Alcohol (liters per capita)                       |          | X       |         |          | X       |         |
| Atrial fibrillation and flutter | 2   | Animal Fats (kcal per capita)                     |          | X       |         |          | X       |         |
| Atrial fibrillation and flutter | 2   | Cumulative Cigarettes (10 Years)                  |          | X       |         |          | X       |         |
| Atrial fibrillation and flutter | 2   | Fruits (kcal per capita)                          |          | X       |         |          | X       |         |
| Atrial fibrillation and flutter | 2   | In-Milk (kcal per capita)                         |          | X       |         |          | X       |         |

**Web Table 23 - Comparison of covariates used in CoD models for GBD 2010 and GBD 2013**

| Cause Name                      | Sex | Covariate name                                    | GBD 2010 |         |         | GBD 2013 |         |         |
|---------------------------------|-----|---------------------------------------------------|----------|---------|---------|----------|---------|---------|
|                                 |     |                                                   | Level 1  | Level 2 | Level 3 | Level 1  | Level 2 | Level 3 |
| Atrial fibrillation and flutter | 2   | Nuts & Seeds (kcal per capita)                    |          | X       |         |          | X       |         |
| Atrial fibrillation and flutter | 2   | Indoor Air Pollution (All Cooking Fuels)          |          | X       |         |          | X       |         |
| Atrial fibrillation and flutter | 2   | Outdoor Air Pollution (PM2.5)                     |          | X       |         |          | X       |         |
| Atrial fibrillation and flutter | 2   | PUFA Omega 3 - Seafood (kcal per capita)          |          | X       |         |          | X       |         |
| Atrial fibrillation and flutter | 2   | PUFA Omega 6 - Vegetable Oils (kcal per capita)   |          | X       |         |          | X       |         |
| Atrial fibrillation and flutter | 2   | Pulses & Legumes (kcal per capita)                |          | X       |         |          | X       |         |
| Atrial fibrillation and flutter | 2   | Red Meat (kcal per capita)                        |          | X       |         |          | X       |         |
| Atrial fibrillation and flutter | 2   | Smoking Prevalence                                |          | X       |         |          | X       |         |
| Atrial fibrillation and flutter | 2   | Total Calories (kcal per capita)                  |          | X       |         |          | X       |         |
| Atrial fibrillation and flutter | 2   | Vegetables (kcal per capita)                      |          | X       |         |          | X       |         |
| Atrial fibrillation and flutter | 2   | Whole Grains (kcal per capita)                    |          | X       |         |          | X       |         |
| Atrial fibrillation and flutter | 2   | LDI (I\$ per capita)                              |          |         |         | X        |         | X       |
| Atrial fibrillation and flutter | 2   | Education (years per capita)                      |          |         |         | X        |         | X       |
| Atrial fibrillation and flutter | 2   | Elevation 100 to 500m (proportion)                |          |         |         | X        |         | X       |
| Atrial fibrillation and flutter | 2   | Elevation Over 1500m (proportion)                 |          |         |         | X        |         | X       |
| Atrial fibrillation and flutter | 2   | Elevation 500 to 1500m (proportion)               |          |         |         | X        |         | X       |
| Atrial fibrillation and flutter | 2   | Elevation Under 100m (proportion)                 |          |         |         | X        |         | X       |
| Aortic aneurysm                 | 1   | Tobacco (cigarettes per capita)                   | X        |         |         | X        |         |         |
| Aortic aneurysm                 | 1   | Diabetes Age-Standardized Prevalence (proportion) | X        |         |         | X        |         |         |
| Aortic aneurysm                 | 1   | Health System Access 2 (unitless)                 | X        |         |         | X        |         |         |
| Aortic aneurysm                 | 1   | Mean BMI                                          | X        |         |         | X        |         |         |
| Aortic aneurysm                 | 1   | Systolic Blood Pressure (mmHg)                    | X        |         |         | X        |         |         |
| Aortic aneurysm                 | 1   | Cholesterol (total, mean per capita)              | X        |         |         | X        |         |         |
| Aortic aneurysm                 | 1   | Alcohol (liters per capita)                       |          | X       |         |          | X       |         |
| Aortic aneurysm                 | 1   | Animal Fats (kcal per capita)                     |          | X       |         |          | X       |         |
| Aortic aneurysm                 | 1   | Cumulative Cigarettes (10 Years)                  |          | X       |         |          | X       |         |
| Aortic aneurysm                 | 1   | Fruits (kcal per capita)                          |          | X       |         |          | X       |         |
| Aortic aneurysm                 | 1   | In-Milk (kcal per capita)                         |          | X       |         |          | X       |         |
| Aortic aneurysm                 | 1   | Nuts & Seeds (kcal per capita)                    |          | X       |         |          | X       |         |
| Aortic aneurysm                 | 1   | Indoor Air Pollution (All Cooking Fuels)          |          | X       |         |          | X       |         |
| Aortic aneurysm                 | 1   | Outdoor Air Pollution (PM2.5)                     |          | X       |         |          | X       |         |
| Aortic aneurysm                 | 1   | PUFA Omega 3 - Seafood (kcal per capita)          |          | X       |         |          | X       |         |
| Aortic aneurysm                 | 1   | PUFA Omega 6 - Vegetable Oils (kcal per capita)   |          | X       |         |          | X       |         |
| Aortic aneurysm                 | 1   | Pulses & Legumes (kcal per capita)                |          | X       |         |          | X       |         |
| Aortic aneurysm                 | 1   | Red Meat (kcal per capita)                        |          | X       |         |          | X       |         |
| Aortic aneurysm                 | 1   | Smoking Prevalence                                |          | X       |         |          | X       |         |
| Aortic aneurysm                 | 1   | Total Calories (kcal per capita)                  |          | X       |         |          | X       |         |
| Aortic aneurysm                 | 1   | Vegetables (kcal per capita)                      |          | X       |         |          | X       |         |

**Web Table 23 - Comparison of covariates used in CoD models for GBD 2010 and GBD 2013**

| Cause Name                  | Sex | Covariate name                                    | GBD 2010 |         |         | GBD 2013 |         |         |
|-----------------------------|-----|---------------------------------------------------|----------|---------|---------|----------|---------|---------|
|                             |     |                                                   | Level 1  | Level 2 | Level 3 | Level 1  | Level 2 | Level 3 |
| Aortic aneurysm             | 1   | Whole Grains (kcal per capita)                    |          | X       |         |          | X       |         |
| Aortic aneurysm             | 1   | LDI (I\$ per capita)                              |          |         | X       |          |         | X       |
| Aortic aneurysm             | 1   | Education (years per capita)                      |          |         | X       |          |         | X       |
| Aortic aneurysm             | 1   | Elevation 100 to 500m (proportion)                |          |         | X       |          |         | X       |
| Aortic aneurysm             | 1   | Elevation Over 1500m (proportion)                 |          |         | X       |          |         | X       |
| Aortic aneurysm             | 1   | Elevation 500 to 1500m (proportion)               |          |         | X       |          |         | X       |
| Aortic aneurysm             | 1   | Elevation Under 100m (proportion)                 |          |         | X       |          |         | X       |
| Aortic aneurysm             | 2   | Tobacco (cigarettes per capita)                   | X        |         |         | X        |         |         |
| Aortic aneurysm             | 2   | Diabetes Age-Standardized Prevalence (proportion) | X        |         |         | X        |         |         |
| Aortic aneurysm             | 2   | Health System Access 2 (unitless)                 | X        |         |         | X        |         |         |
| Aortic aneurysm             | 2   | Mean BMI                                          | X        |         |         | X        |         |         |
| Aortic aneurysm             | 2   | Systolic Blood Pressure (mmHg)                    | X        |         |         | X        |         |         |
| Aortic aneurysm             | 2   | Cholesterol (total, mean per capita)              | X        |         |         | X        |         |         |
| Aortic aneurysm             | 2   | Alcohol (liters per capita)                       |          | X       |         |          | X       |         |
| Aortic aneurysm             | 2   | Animal Fats (kcal per capita)                     |          | X       |         |          | X       |         |
| Aortic aneurysm             | 2   | Cumulative Cigarettes (10 Years)                  |          | X       |         |          | X       |         |
| Aortic aneurysm             | 2   | Fruits (kcal per capita)                          |          | X       |         |          | X       |         |
| Aortic aneurysm             | 2   | In-Milk (kcal per capita)                         |          | X       |         |          | X       |         |
| Aortic aneurysm             | 2   | Nuts & Seeds (kcal per capita)                    |          | X       |         |          | X       |         |
| Aortic aneurysm             | 2   | Indoor Air Pollution (All Cooking Fuels)          |          | X       |         |          | X       |         |
| Aortic aneurysm             | 2   | Outdoor Air Pollution (PM2.5)                     |          | X       |         |          | X       |         |
| Aortic aneurysm             | 2   | PUFA Omega 3 - Seafood (kcal per capita)          |          | X       |         |          | X       |         |
| Aortic aneurysm             | 2   | PUFA Omega 6 - Vegetable Oils (kcal per capita)   |          | X       |         |          | X       |         |
| Aortic aneurysm             | 2   | Pulses & Legumes (kcal per capita)                |          | X       |         |          | X       |         |
| Aortic aneurysm             | 2   | Red Meat (kcal per capita)                        |          | X       |         |          | X       |         |
| Aortic aneurysm             | 2   | Smoking Prevalence                                |          | X       |         |          | X       |         |
| Aortic aneurysm             | 2   | Total Calories (kcal per capita)                  |          | X       |         |          | X       |         |
| Aortic aneurysm             | 2   | Vegetables (kcal per capita)                      |          | X       |         |          | X       |         |
| Aortic aneurysm             | 2   | Whole Grains (kcal per capita)                    |          | X       |         |          | X       |         |
| Aortic aneurysm             | 2   | LDI (I\$ per capita)                              |          |         | X       |          |         | X       |
| Aortic aneurysm             | 2   | Education (years per capita)                      |          |         | X       |          |         | X       |
| Aortic aneurysm             | 2   | Elevation 100 to 500m (proportion)                |          |         | X       |          |         | X       |
| Aortic aneurysm             | 2   | Elevation Over 1500m (proportion)                 |          |         | X       |          |         | X       |
| Aortic aneurysm             | 2   | Elevation 500 to 1500m (proportion)               |          |         | X       |          |         | X       |
| Aortic aneurysm             | 2   | Elevation Under 100m (proportion)                 |          |         | X       |          |         | X       |
| Peripheral vascular disease | 1   | Tobacco (cigarettes per capita)                   | X        |         |         | X        |         |         |
| Peripheral vascular disease | 1   | Diabetes Age-Standardized Prevalence (proportion) | X        |         |         | X        |         |         |
| Peripheral vascular disease | 1   | Mean BMI                                          | X        |         |         | X        |         |         |

**Web Table 23 - Comparison of covariates used in CoD models for GBD 2010 and GBD 2013**

| Cause Name                  | Sex | Covariate name                                    | GBD 2010 |         |         | GBD 2013 |         |         |
|-----------------------------|-----|---------------------------------------------------|----------|---------|---------|----------|---------|---------|
|                             |     |                                                   | Level 1  | Level 2 | Level 3 | Level 1  | Level 2 | Level 3 |
| Peripheral vascular disease | 1   | Systolic Blood Pressure (mmHg)                    | X        |         |         | X        |         |         |
| Peripheral vascular disease | 1   | Cholesterol (total, mean per capita)              | X        |         |         | X        |         |         |
| Peripheral vascular disease | 1   | Health System Access 2 (unitless)                 | X        |         |         |          |         | X       |
| Peripheral vascular disease | 1   | Animal Fats (kcal per capita)                     |          | X       |         |          |         |         |
| Peripheral vascular disease | 1   | In-Milk (kcal per capita)                         |          | X       |         |          |         |         |
| Peripheral vascular disease | 1   | Alcohol (liters per capita)                       |          | X       |         |          | X       |         |
| Peripheral vascular disease | 1   | Cumulative Cigarettes (10 Years)                  |          | X       |         |          | X       |         |
| Peripheral vascular disease | 1   | Fruits (kcal per capita)                          |          | X       |         |          | X       |         |
| Peripheral vascular disease | 1   | Nuts & Seeds (kcal per capita)                    |          | X       |         |          | X       |         |
| Peripheral vascular disease | 1   | Indoor Air Pollution (All Cooking Fuels)          |          | X       |         |          | X       |         |
| Peripheral vascular disease | 1   | Outdoor Air Pollution (PM2.5)                     |          | X       |         |          | X       |         |
| Peripheral vascular disease | 1   | PUFA Omega 3 - Seafood (kcal per capita)          |          | X       |         |          | X       |         |
| Peripheral vascular disease | 1   | PUFA Omega 6 - Vegetable Oils (kcal per capita)   |          | X       |         |          | X       |         |
| Peripheral vascular disease | 1   | Pulses & Legumes (kcal per capita)                |          | X       |         |          | X       |         |
| Peripheral vascular disease | 1   | Red Meat (kcal per capita)                        |          | X       |         |          | X       |         |
| Peripheral vascular disease | 1   | Smoking Prevalence                                |          | X       |         |          | X       |         |
| Peripheral vascular disease | 1   | Total Calories (kcal per capita)                  |          | X       |         |          | X       |         |
| Peripheral vascular disease | 1   | Vegetables (kcal per capita)                      |          | X       |         |          | X       |         |
| Peripheral vascular disease | 1   | Whole Grains (kcal per capita)                    |          | X       |         |          | X       |         |
| Peripheral vascular disease | 1   | Elevation 100 to 500m (proportion)                |          |         | X       |          |         |         |
| Peripheral vascular disease | 1   | Elevation Over 1500m (proportion)                 |          |         | X       |          |         |         |
| Peripheral vascular disease | 1   | Elevation 500 to 1500m (proportion)               |          |         | X       |          |         |         |
| Peripheral vascular disease | 1   | Elevation Under 100m (proportion)                 |          |         | X       |          |         |         |
| Peripheral vascular disease | 1   | LDI (I\$ per capita)                              |          |         | X       |          |         | X       |
| Peripheral vascular disease | 1   | Education (years per capita)                      |          |         | X       |          |         | X       |
| Peripheral vascular disease | 2   | Tobacco (cigarettes per capita)                   | X        |         |         | X        |         |         |
| Peripheral vascular disease | 2   | Diabetes Age-Standardized Prevalence (proportion) | X        |         |         | X        |         |         |
| Peripheral vascular disease | 2   | Mean BMI                                          | X        |         |         | X        |         |         |
| Peripheral vascular disease | 2   | Systolic Blood Pressure (mmHg)                    | X        |         |         | X        |         |         |
| Peripheral vascular disease | 2   | Cholesterol (total, mean per capita)              | X        |         |         | X        |         |         |
| Peripheral vascular disease | 2   | Health System Access 2 (unitless)                 | X        |         |         |          |         | X       |
| Peripheral vascular disease | 2   | Animal Fats (kcal per capita)                     |          | X       |         |          |         |         |
| Peripheral vascular disease | 2   | In-Milk (kcal per capita)                         |          | X       |         |          |         |         |
| Peripheral vascular disease | 2   | Alcohol (liters per capita)                       |          | X       |         |          | X       |         |
| Peripheral vascular disease | 2   | Cumulative Cigarettes (10 Years)                  |          | X       |         |          | X       |         |
| Peripheral vascular disease | 2   | Fruits (kcal per capita)                          |          | X       |         |          | X       |         |
| Peripheral vascular disease | 2   | Nuts & Seeds (kcal per capita)                    |          | X       |         |          | X       |         |
| Peripheral vascular disease | 2   | Indoor Air Pollution (All Cooking Fuels)          |          | X       |         |          | X       |         |

**Web Table 23 - Comparison of covariates used in CoD models for GBD 2010 and GBD 2013**

| Cause Name                  | Sex | Covariate name                                    | GBD 2010 |         |         | GBD 2013 |         |         |
|-----------------------------|-----|---------------------------------------------------|----------|---------|---------|----------|---------|---------|
|                             |     |                                                   | Level 1  | Level 2 | Level 3 | Level 1  | Level 2 | Level 3 |
| Peripheral vascular disease | 2   | Outdoor Air Pollution (PM2.5)                     |          | X       |         |          | X       |         |
| Peripheral vascular disease | 2   | PUFA Omega 3 - Seafood (kcal per capita)          |          | X       |         |          | X       |         |
| Peripheral vascular disease | 2   | PUFA Omega 6 - Vegetable Oils (kcal per capita)   |          | X       |         |          | X       |         |
| Peripheral vascular disease | 2   | Pulses & Legumes (kcal per capita)                |          | X       |         |          | X       |         |
| Peripheral vascular disease | 2   | Red Meat (kcal per capita)                        |          | X       |         |          | X       |         |
| Peripheral vascular disease | 2   | Smoking Prevalence                                |          | X       |         |          | X       |         |
| Peripheral vascular disease | 2   | Total Calories (kcal per capita)                  |          | X       |         |          | X       |         |
| Peripheral vascular disease | 2   | Vegetables (kcal per capita)                      |          | X       |         |          | X       |         |
| Peripheral vascular disease | 2   | Whole Grains (kcal per capita)                    |          | X       |         |          | X       |         |
| Peripheral vascular disease | 2   | Elevation 100 to 500m (proportion)                |          |         |         | X        |         |         |
| Peripheral vascular disease | 2   | Elevation Over 1500m (proportion)                 |          |         |         | X        |         |         |
| Peripheral vascular disease | 2   | Elevation 500 to 1500m (proportion)               |          |         |         | X        |         |         |
| Peripheral vascular disease | 2   | Elevation Under 100m (proportion)                 |          |         |         | X        |         |         |
| Peripheral vascular disease | 2   | LDI (I\$ per capita)                              |          |         |         | X        |         | X       |
| Peripheral vascular disease | 2   | Education (years per capita)                      |          |         |         | X        |         | X       |
| Endocarditis                | 1   | Sanitation (proportion with access)               |          |         |         | X        |         |         |
| Endocarditis                | 1   | Improved Water Source (proportion with access)    |          |         |         | X        |         |         |
| Endocarditis                | 1   | Health System Access (capped)                     |          |         |         |          |         | X       |
| Endocarditis                | 1   | Tobacco (cigarettes per capita)                   | X        |         |         |          |         |         |
| Endocarditis                | 1   | Diabetes Age-Standardized Prevalence (proportion) | X        |         |         |          |         |         |
| Endocarditis                | 1   | Health System Access 2 (unitless)                 | X        |         |         |          |         |         |
| Endocarditis                | 1   | Mean BMI                                          | X        |         |         |          |         |         |
| Endocarditis                | 1   | Systolic Blood Pressure (mmHg)                    | X        |         |         |          |         |         |
| Endocarditis                | 1   | Cholesterol (total, mean per capita)              | X        |         |         |          |         |         |
| Endocarditis                | 1   | Alcohol (liters per capita)                       |          | X       |         |          |         |         |
| Endocarditis                | 1   | Animal Fats (kcal per capita)                     |          | X       |         |          |         |         |
| Endocarditis                | 1   | Cumulative Cigarettes (10 Years)                  |          | X       |         |          |         |         |
| Endocarditis                | 1   | Fruits (kcal per capita)                          |          | X       |         |          |         |         |
| Endocarditis                | 1   | In-Milk (kcal per capita)                         |          | X       |         |          |         |         |
| Endocarditis                | 1   | Nuts & Seeds (kcal per capita)                    |          | X       |         |          |         |         |
| Endocarditis                | 1   | Indoor Air Pollution (All Cooking Fuels)          |          | X       |         |          |         |         |
| Endocarditis                | 1   | Outdoor Air Pollution (PM2.5)                     |          | X       |         |          |         |         |
| Endocarditis                | 1   | PUFA Omega 3 - Seafood (kcal per capita)          |          | X       |         |          |         |         |
| Endocarditis                | 1   | PUFA Omega 6 - Vegetable Oils (kcal per capita)   |          | X       |         |          |         |         |
| Endocarditis                | 1   | Pulses & Legumes (kcal per capita)                |          | X       |         |          |         |         |
| Endocarditis                | 1   | Red Meat (kcal per capita)                        |          | X       |         |          |         |         |
| Endocarditis                | 1   | Smoking Prevalence                                |          | X       |         |          |         |         |
| Endocarditis                | 1   | Total Calories (kcal per capita)                  |          | X       |         |          |         |         |



**Web Table 23 - Comparison of covariates used in CoD models for GBD 2010 and GBD 2013**

| Cause Name   | Sex | Covariate name                                    | GBD 2010 |         |         | GBD 2013 |         |         |
|--------------|-----|---------------------------------------------------|----------|---------|---------|----------|---------|---------|
|              |     |                                                   | Level 1  | Level 2 | Level 3 | Level 1  | Level 2 | Level 3 |
| Endocarditis | 1   | Vegetables (kcal per capita)                      |          | X       |         |          |         |         |
| Endocarditis | 1   | Whole Grains (kcal per capita)                    |          | X       |         |          |         |         |
| Endocarditis | 1   | Elevation 100 to 500m (proportion)                |          |         |         |          | X       |         |
| Endocarditis | 1   | Elevation Over 1500m (proportion)                 |          |         |         |          | X       |         |
| Endocarditis | 1   | Elevation 500 to 1500m (proportion)               |          |         |         |          | X       |         |
| Endocarditis | 1   | Elevation Under 100m (proportion)                 |          |         |         |          | X       |         |
| Endocarditis | 1   | LDI (I\$ per capita)                              |          |         |         |          | X       | X       |
| Endocarditis | 1   | Education (years per capita)                      |          |         |         |          | X       | X       |
| Endocarditis | 2   | Sanitation (proportion with access)               |          |         |         |          | X       |         |
| Endocarditis | 2   | Improved Water Source (proportion with access)    |          |         |         |          | X       |         |
| Endocarditis | 2   | Health System Access (capped)                     |          |         |         |          |         | X       |
| Endocarditis | 2   | Tobacco (cigarettes per capita)                   | X        |         |         |          |         |         |
| Endocarditis | 2   | Diabetes Age-Standardized Prevalence (proportion) | X        |         |         |          |         |         |
| Endocarditis | 2   | Health System Access 2 (unitless)                 | X        |         |         |          |         |         |
| Endocarditis | 2   | Mean BMI                                          | X        |         |         |          |         |         |
| Endocarditis | 2   | Systolic Blood Pressure (mmHg)                    | X        |         |         |          |         |         |
| Endocarditis | 2   | Cholesterol (total, mean per capita)              | X        |         |         |          |         |         |
| Endocarditis | 2   | Alcohol (liters per capita)                       |          | X       |         |          |         |         |
| Endocarditis | 2   | Animal Fats (kcal per capita)                     |          | X       |         |          |         |         |
| Endocarditis | 2   | Cumulative Cigarettes (10 Years)                  |          | X       |         |          |         |         |
| Endocarditis | 2   | Fruits (kcal per capita)                          |          | X       |         |          |         |         |
| Endocarditis | 2   | In-Milk (kcal per capita)                         |          | X       |         |          |         |         |
| Endocarditis | 2   | Nuts & Seeds (kcal per capita)                    |          | X       |         |          |         |         |
| Endocarditis | 2   | Indoor Air Pollution (All Cooking Fuels)          |          | X       |         |          |         |         |
| Endocarditis | 2   | Outdoor Air Pollution (PM2.5)                     |          | X       |         |          |         |         |
| Endocarditis | 2   | PUFA Omega 3 - Seafood (kcal per capita)          |          | X       |         |          |         |         |
| Endocarditis | 2   | PUFA Omega 6 - Vegetable Oils (kcal per capita)   |          | X       |         |          |         |         |
| Endocarditis | 2   | Pulses & Legumes (kcal per capita)                |          | X       |         |          |         |         |
| Endocarditis | 2   | Red Meat (kcal per capita)                        |          | X       |         |          |         |         |
| Endocarditis | 2   | Smoking Prevalence                                |          | X       |         |          |         |         |
| Endocarditis | 2   | Total Calories (kcal per capita)                  |          | X       |         |          |         |         |
| Endocarditis | 2   | Vegetables (kcal per capita)                      |          | X       |         |          |         |         |
| Endocarditis | 2   | Whole Grains (kcal per capita)                    |          | X       |         |          |         |         |
| Endocarditis | 2   | Elevation 100 to 500m (proportion)                |          |         |         |          | X       |         |
| Endocarditis | 2   | Elevation Over 1500m (proportion)                 |          |         |         |          | X       |         |
| Endocarditis | 2   | Elevation 500 to 1500m (proportion)               |          |         |         |          | X       |         |
| Endocarditis | 2   | Elevation Under 100m (proportion)                 |          |         |         |          | X       |         |
| Endocarditis | 2   | LDI (I\$ per capita)                              |          |         |         |          | X       | X       |

**Web Table 23 - Comparison of covariates used in CoD models for GBD 2010 and GBD 2013**

| Cause Name                                    | Sex | Covariate name                                    | GBD 2010 |         |         | GBD 2013 |         |         |
|-----------------------------------------------|-----|---------------------------------------------------|----------|---------|---------|----------|---------|---------|
|                                               |     |                                                   | Level 1  | Level 2 | Level 3 | Level 1  | Level 2 | Level 3 |
| Endocarditis                                  | 2   | Education (years per capita)                      |          |         | X       |          |         | X       |
| Other cardiovascular and circulatory diseases | 1   | Tobacco (cigarettes per capita)                   | X        |         |         | X        |         |         |
| Other cardiovascular and circulatory diseases | 1   | Diabetes Age-Standardized Prevalence (proportion) | X        |         |         | X        |         |         |
| Other cardiovascular and circulatory diseases | 1   | Mean BMI                                          | X        |         |         | X        |         |         |
| Other cardiovascular and circulatory diseases | 1   | Systolic Blood Pressure (mmHg)                    | X        |         |         | X        |         |         |
| Other cardiovascular and circulatory diseases | 1   | Cholesterol (total, mean per capita)              | X        |         |         | X        |         |         |
| Other cardiovascular and circulatory diseases | 1   | Health System Access 2 (unitless)                 | X        |         |         |          |         | X       |
| Other cardiovascular and circulatory diseases | 1   | Alcohol (liters per capita)                       |          | X       |         |          | X       |         |
| Other cardiovascular and circulatory diseases | 1   | Animal Fats (kcal per capita)                     |          | X       |         |          | X       |         |
| Other cardiovascular and circulatory diseases | 1   | Cumulative Cigarettes (10 Years)                  |          | X       |         |          | X       |         |
| Other cardiovascular and circulatory diseases | 1   | Fruits (kcal per capita)                          |          | X       |         |          | X       |         |
| Other cardiovascular and circulatory diseases | 1   | ln-Milk (kcal per capita)                         |          | X       |         |          | X       |         |
| Other cardiovascular and circulatory diseases | 1   | Nuts & Seeds (kcal per capita)                    |          | X       |         |          | X       |         |
| Other cardiovascular and circulatory diseases | 1   | Indoor Air Pollution (All Cooking Fuels)          |          | X       |         |          | X       |         |
| Other cardiovascular and circulatory diseases | 1   | Outdoor Air Pollution (PM2.5)                     |          | X       |         |          | X       |         |
| Other cardiovascular and circulatory diseases | 1   | PUFA Omega 3 - Seafood (kcal per capita)          |          | X       |         |          | X       |         |
| Other cardiovascular and circulatory diseases | 1   | PUFA Omega 6 - Vegetable Oils (kcal per capita)   |          | X       |         |          | X       |         |
| Other cardiovascular and circulatory diseases | 1   | Pulses & Legumes (kcal per capita)                |          | X       |         |          | X       |         |
| Other cardiovascular and circulatory diseases | 1   | Red Meat (kcal per capita)                        |          | X       |         |          | X       |         |
| Other cardiovascular and circulatory diseases | 1   | Smoking Prevalence                                |          | X       |         |          | X       |         |
| Other cardiovascular and circulatory diseases | 1   | Total Calories (kcal per capita)                  |          | X       |         |          | X       |         |
| Other cardiovascular and circulatory diseases | 1   | Vegetables (kcal per capita)                      |          | X       |         |          | X       |         |

**Web Table 23 - Comparison of covariates used in CoD models for GBD 2010 and GBD 2013**

| Cause Name                                    | Sex | Covariate name                                    | GBD 2010 |         |         | GBD 2013 |         |         |
|-----------------------------------------------|-----|---------------------------------------------------|----------|---------|---------|----------|---------|---------|
|                                               |     |                                                   | Level 1  | Level 2 | Level 3 | Level 1  | Level 2 | Level 3 |
| Other cardiovascular and circulatory diseases | 1   | Whole Grains (kcal per capita)                    |          | X       |         |          | X       |         |
| Other cardiovascular and circulatory diseases | 1   | Elevation Over 1500m (proportion)                 |          |         | X       |          |         |         |
| Other cardiovascular and circulatory diseases | 1   | Elevation 500 to 1500m (proportion)               |          |         | X       |          |         |         |
| Other cardiovascular and circulatory diseases | 1   | Elevation Under 100m (proportion)                 |          |         | X       |          |         |         |
| Other cardiovascular and circulatory diseases | 1   | LDI (I\$ per capita)                              |          |         | X       |          |         | X       |
| Other cardiovascular and circulatory diseases | 1   | Education (years per capita)                      |          |         | X       |          |         | X       |
| Other cardiovascular and circulatory diseases | 1   | Elevation 100 to 500m (proportion)                |          |         | X       |          |         | X       |
| Other cardiovascular and circulatory diseases | 2   | Tobacco (cigarettes per capita)                   | X        |         |         | X        |         |         |
| Other cardiovascular and circulatory diseases | 2   | Diabetes Age-Standardized Prevalence (proportion) | X        |         |         | X        |         |         |
| Other cardiovascular and circulatory diseases | 2   | Mean BMI                                          | X        |         |         | X        |         |         |
| Other cardiovascular and circulatory diseases | 2   | Systolic Blood Pressure (mmHg)                    | X        |         |         | X        |         |         |
| Other cardiovascular and circulatory diseases | 2   | Cholesterol (total, mean per capita)              | X        |         |         | X        |         |         |
| Other cardiovascular and circulatory diseases | 2   | Health System Access 2 (unitless)                 | X        |         |         |          |         | X       |
| Other cardiovascular and circulatory diseases | 2   | Alcohol (liters per capita)                       |          | X       |         |          | X       |         |
| Other cardiovascular and circulatory diseases | 2   | Animal Fats (kcal per capita)                     |          | X       |         |          | X       |         |
| Other cardiovascular and circulatory diseases | 2   | Cumulative Cigarettes (10 Years)                  |          | X       |         |          | X       |         |
| Other cardiovascular and circulatory diseases | 2   | Fruits (kcal per capita)                          |          | X       |         |          | X       |         |
| Other cardiovascular and circulatory diseases | 2   | In-Milk (kcal per capita)                         |          | X       |         |          | X       |         |
| Other cardiovascular and circulatory diseases | 2   | Nuts & Seeds (kcal per capita)                    |          | X       |         |          | X       |         |
| Other cardiovascular and circulatory diseases | 2   | Indoor Air Pollution (All Cooking Fuels)          |          | X       |         |          | X       |         |
| Other cardiovascular and circulatory diseases | 2   | Outdoor Air Pollution (PM2.5)                     |          | X       |         |          | X       |         |
| Other cardiovascular and circulatory diseases | 2   | PUFA Omega 3 - Seafood (kcal per capita)          |          | X       |         |          | X       |         |

**Web Table 23 - Comparison of covariates used in CoD models for GBD 2010 and GBD 2013**

| Cause Name                                    | Sex | Covariate name                                      | GBD 2010 |         |         | GBD 2013 |         |         |
|-----------------------------------------------|-----|-----------------------------------------------------|----------|---------|---------|----------|---------|---------|
|                                               |     |                                                     | Level 1  | Level 2 | Level 3 | Level 1  | Level 2 | Level 3 |
| Other cardiovascular and circulatory diseases | 2   | PUFA Omega 6 - Vegetable Oils (kcal per capita)     |          | X       |         |          | X       |         |
| Other cardiovascular and circulatory diseases | 2   | Pulses & Legumes (kcal per capita)                  |          | X       |         |          | X       |         |
| Other cardiovascular and circulatory diseases | 2   | Red Meat (kcal per capita)                          |          | X       |         |          | X       |         |
| Other cardiovascular and circulatory diseases | 2   | Smoking Prevalence                                  |          | X       |         |          | X       |         |
| Other cardiovascular and circulatory diseases | 2   | Total Calories (kcal per capita)                    |          | X       |         |          | X       |         |
| Other cardiovascular and circulatory diseases | 2   | Vegetables (kcal per capita)                        |          | X       |         |          | X       |         |
| Other cardiovascular and circulatory diseases | 2   | Whole Grains (kcal per capita)                      |          | X       |         |          | X       |         |
| Other cardiovascular and circulatory diseases | 2   | Elevation Over 1500m (proportion)                   |          |         |         | X        |         |         |
| Other cardiovascular and circulatory diseases | 2   | Elevation 500 to 1500m (proportion)                 |          |         |         | X        |         |         |
| Other cardiovascular and circulatory diseases | 2   | Elevation Under 100m (proportion)                   |          |         |         | X        |         |         |
| Other cardiovascular and circulatory diseases | 2   | LDI (\$ per capita)                                 |          |         |         | X        |         | X       |
| Other cardiovascular and circulatory diseases | 2   | Education (years per capita)                        |          |         |         | X        |         | X       |
| Other cardiovascular and circulatory diseases | 2   | Elevation 100 to 500m (proportion)                  |          |         |         | X        |         | X       |
| Chronic respiratory diseases                  | 1   | Cumulative Cigarettes (5 Years)                     | X        |         |         |          | X       |         |
| Chronic respiratory diseases                  | 1   | Health System Access 2 (unitless)                   | X        |         |         |          | X       |         |
| Chronic respiratory diseases                  | 1   | Indoor Air Pollution (Biomass Cooking)              | X        |         |         |          | X       |         |
| Chronic respiratory diseases                  | 1   | Indoor Air Pollution (Coal Cooking)                 | X        |         |         |          | X       |         |
| Chronic respiratory diseases                  | 1   | Outdoor Air Pollution (PM2.5)                       | X        |         |         |          | X       |         |
| Chronic respiratory diseases                  | 1   | Smoking Prevalence                                  | X        |         |         |          | X       |         |
| Chronic respiratory diseases                  | 1   | Elevation Over 1500m (proportion)                   |          | X       |         |          |         | X       |
| Chronic respiratory diseases                  | 1   | Elevation 500 to 1500m (proportion)                 |          | X       |         |          |         | X       |
| Chronic respiratory diseases                  | 1   | LDI (\$ per capita)                                 |          |         |         | X        |         | X       |
| Chronic respiratory diseases                  | 1   | Education (years per capita)                        |          |         |         | X        |         | X       |
| Chronic respiratory diseases                  | 1   | Population Density (over 1000 ppl/sqkm, proportion) |          |         |         | X        |         | X       |
| Chronic respiratory diseases                  | 2   | Cumulative Cigarettes (5 Years)                     | X        |         |         |          | X       |         |
| Chronic respiratory diseases                  | 2   | Health System Access 2 (unitless)                   | X        |         |         |          | X       |         |
| Chronic respiratory diseases                  | 2   | Indoor Air Pollution (Biomass Cooking)              | X        |         |         |          | X       |         |
| Chronic respiratory diseases                  | 2   | Indoor Air Pollution (Coal Cooking)                 | X        |         |         |          | X       |         |
| Chronic respiratory diseases                  | 2   | Outdoor Air Pollution (PM2.5)                       | X        |         |         |          | X       |         |

**Web Table 23 - Comparison of covariates used in CoD models for GBD 2010 and GBD 2013**

| Cause Name                            | Sex | Covariate name                                      | GBD 2010 |         |         | GBD 2013 |         |         |
|---------------------------------------|-----|-----------------------------------------------------|----------|---------|---------|----------|---------|---------|
|                                       |     |                                                     | Level 1  | Level 2 | Level 3 | Level 1  | Level 2 | Level 3 |
| Chronic respiratory diseases          | 2   | Smoking Prevalence                                  | X        |         |         | X        |         |         |
| Chronic respiratory diseases          | 2   | Elevation Over 1500m (proportion)                   |          | X       |         |          | X       |         |
| Chronic respiratory diseases          | 2   | Elevation 500 to 1500m (proportion)                 |          | X       |         |          | X       |         |
| Chronic respiratory diseases          | 2   | LDI (I\$ per capita)                                |          |         | X       |          |         | X       |
| Chronic respiratory diseases          | 2   | Education (years per capita)                        |          |         | X       |          |         | X       |
| Chronic respiratory diseases          | 2   | Population Density (over 1000 ppl/sqkm, proportion) |          |         | X       |          |         | X       |
| Chronic obstructive pulmonary disease | 1   | Cumulative Cigarettes (5 Years)                     | X        |         |         | X        |         |         |
| Chronic obstructive pulmonary disease | 1   | Health System Access 2 (unitless)                   | X        |         |         | X        |         |         |
| Chronic obstructive pulmonary disease | 1   | Indoor Air Pollution (Biomass Cooking)              | X        |         |         | X        |         |         |
| Chronic obstructive pulmonary disease | 1   | Indoor Air Pollution (Coal Cooking)                 | X        |         |         | X        |         |         |
| Chronic obstructive pulmonary disease | 1   | Outdoor Air Pollution (PM2.5)                       | X        |         |         | X        |         |         |
| Chronic obstructive pulmonary disease | 1   | Smoking Prevalence                                  | X        |         |         | X        |         |         |
| Chronic obstructive pulmonary disease | 1   | Population Over 65 (proportion)                     |          | X       |         |          |         |         |
| Chronic obstructive pulmonary disease | 1   | Elevation Over 1500m (proportion)                   |          | X       |         |          | X       |         |
| Chronic obstructive pulmonary disease | 1   | Elevation 500 to 1500m (proportion)                 |          | X       |         |          | X       |         |
| Chronic obstructive pulmonary disease | 1   | Population Density (over 1000 ppl/sqkm, proportion) |          | X       |         |          | X       |         |
| Chronic obstructive pulmonary disease | 1   | LDI (I\$ per capita)                                |          |         | X       |          |         | X       |
| Chronic obstructive pulmonary disease | 1   | Education (years per capita)                        |          |         | X       |          |         | X       |
| Chronic obstructive pulmonary disease | 2   | Cumulative Cigarettes (5 Years)                     | X        |         |         | X        |         |         |
| Chronic obstructive pulmonary disease | 2   | Health System Access 2 (unitless)                   | X        |         |         | X        |         |         |
| Chronic obstructive pulmonary disease | 2   | Indoor Air Pollution (Biomass Cooking)              | X        |         |         | X        |         |         |
| Chronic obstructive pulmonary disease | 2   | Indoor Air Pollution (Coal Cooking)                 | X        |         |         | X        |         |         |
| Chronic obstructive pulmonary disease | 2   | Outdoor Air Pollution (PM2.5)                       | X        |         |         | X        |         |         |
| Chronic obstructive pulmonary disease | 2   | Smoking Prevalence                                  | X        |         |         | X        |         |         |
| Chronic obstructive pulmonary disease | 2   | Population Over 65 (proportion)                     |          | X       |         |          |         |         |
| Chronic obstructive pulmonary disease | 2   | Elevation Over 1500m (proportion)                   |          | X       |         |          | X       |         |
| Chronic obstructive pulmonary disease | 2   | Elevation 500 to 1500m (proportion)                 |          | X       |         |          | X       |         |
| Chronic obstructive pulmonary disease | 2   | Population Density (over 1000 ppl/sqkm, proportion) |          | X       |         |          | X       |         |
| Chronic obstructive pulmonary disease | 2   | LDI (I\$ per capita)                                |          |         | X       |          |         | X       |
| Chronic obstructive pulmonary disease | 2   | Education (years per capita)                        |          |         | X       |          |         | X       |
| Pneumoconiosis                        | 1   | Coal Production (per capita)                        |          |         |         | X        |         |         |
| Pneumoconiosis                        | 1   | Asbestos production (binary)                        | X        |         |         |          |         |         |
| Pneumoconiosis                        | 1   | Indoor Air Pollution (Coal Cooking)                 | X        |         |         |          |         |         |
| Pneumoconiosis                        | 1   | Cumulative Cigarettes (5 Years)                     | X        |         |         |          | X       |         |
| Pneumoconiosis                        | 1   | Smoking Prevalence                                  | X        |         |         |          | X       |         |
| Pneumoconiosis                        | 1   | Health System Access 2 (unitless)                   | X        |         |         |          |         | X       |
| Pneumoconiosis                        | 1   | Gold production (binary)                            |          | X       |         |          |         |         |
| Pneumoconiosis                        | 1   | Coal Reserves (binary)                              |          | X       |         |          |         |         |

**Web Table 23 - Comparison of covariates used in CoD models for GBD 2010 and GBD 2013**

| Cause Name     | Sex | Covariate name                                      | GBD 2010 |         |         | GBD 2013 |         |         |
|----------------|-----|-----------------------------------------------------|----------|---------|---------|----------|---------|---------|
|                |     |                                                     | Level 1  | Level 2 | Level 3 | Level 1  | Level 2 | Level 3 |
| Pneumoconiosis | 1   | Population Density (over 1000 ppl/sqkm, proportion) |          | X       |         |          |         |         |
| Pneumoconiosis | 1   | Population Over 65 (proportion)                     |          | X       |         |          |         |         |
| Pneumoconiosis | 1   | Asbestos production (kg) per capita                 |          | X       |         | X        |         |         |
| Pneumoconiosis | 1   | Gold production (kg) per capita                     |          | X       |         | X        |         |         |
| Pneumoconiosis | 1   | Coal Reserves (teragrams per capita)                |          | X       |         |          | X       |         |
| Pneumoconiosis | 1   | Elevation Over 1500m (proportion)                   |          | X       |         |          | X       |         |
| Pneumoconiosis | 1   | Elevation 500 to 1500m (proportion)                 |          | X       |         |          | X       |         |
| Pneumoconiosis | 1   | LDI (I\$ per capita)                                |          |         | X       |          |         | X       |
| Pneumoconiosis | 1   | Education (years per capita)                        |          |         | X       |          |         | X       |
| Pneumoconiosis | 2   | Coal Production (per capita)                        |          |         |         | X        |         |         |
| Pneumoconiosis | 2   | Asbestos production (binary)                        | X        |         |         |          |         |         |
| Pneumoconiosis | 2   | Indoor Air Pollution (Coal Cooking)                 | X        |         |         |          |         |         |
| Pneumoconiosis | 2   | Cumulative Cigarettes (5 Years)                     | X        |         |         |          | X       |         |
| Pneumoconiosis | 2   | Smoking Prevalence                                  | X        |         |         |          | X       |         |
| Pneumoconiosis | 2   | Health System Access 2 (unitless)                   | X        |         |         |          |         | X       |
| Pneumoconiosis | 2   | Gold production (binary)                            |          | X       |         |          |         |         |
| Pneumoconiosis | 2   | Coal Reserves (binary)                              |          | X       |         |          |         |         |
| Pneumoconiosis | 2   | Population Density (over 1000 ppl/sqkm, proportion) |          | X       |         |          |         |         |
| Pneumoconiosis | 2   | Population Over 65 (proportion)                     |          | X       |         |          |         |         |
| Pneumoconiosis | 2   | Asbestos production (kg) per capita                 |          | X       |         | X        |         |         |
| Pneumoconiosis | 2   | Gold production (kg) per capita                     |          | X       |         | X        |         |         |
| Pneumoconiosis | 2   | Coal Reserves (teragrams per capita)                |          | X       |         |          | X       |         |
| Pneumoconiosis | 2   | Elevation Over 1500m (proportion)                   |          | X       |         |          | X       |         |
| Pneumoconiosis | 2   | Elevation 500 to 1500m (proportion)                 |          | X       |         |          | X       |         |
| Pneumoconiosis | 2   | LDI (I\$ per capita)                                |          |         | X       |          |         | X       |
| Pneumoconiosis | 2   | Education (years per capita)                        |          |         | X       |          |         | X       |
| Silicosis      | 1   | Coal Reserves (binary)                              |          | X*      |         |          |         |         |
| Silicosis      | 1   | Coal Reserves (teragrams per capita)                |          | X*      |         |          |         |         |
| Silicosis      | 1   | Population Over 65 (proportion)                     |          | X*      |         |          |         |         |
| Silicosis      | 1   | Asbestos production (binary)                        | X*       |         |         | X        |         |         |
| Silicosis      | 1   | Cumulative Cigarettes (5 Years)                     | X*       |         |         | X        |         |         |
| Silicosis      | 1   | Health System Access 2 (unitless)                   | X*       |         |         | X        |         |         |
| Silicosis      | 1   | Indoor Air Pollution (Coal Cooking)                 | X*       |         |         | X        |         |         |
| Silicosis      | 1   | Population Density (over 1000 ppl/sqkm, proportion) |          | X*      |         | X        |         |         |
| Silicosis      | 1   | Smoking Prevalence                                  | X*       |         |         | X        |         |         |
| Silicosis      | 1   | Asbestos production (kg) per capita                 |          | X*      |         |          | X       |         |
| Silicosis      | 1   | Gold production (binary)                            |          | X*      |         |          | X       |         |
| Silicosis      | 1   | Gold production (kg) per capita                     |          | X*      |         |          | X       |         |

**Web Table 23 - Comparison of covariates used in CoD models for GBD 2010 and GBD 2013**

| Cause Name | Sex | Covariate name                                      | GBD 2010 |         |         | GBD 2013 |         |         |
|------------|-----|-----------------------------------------------------|----------|---------|---------|----------|---------|---------|
|            |     |                                                     | Level 1  | Level 2 | Level 3 | Level 1  | Level 2 | Level 3 |
| Silicosis  | 1   | Elevation Over 1500m (proportion)                   |          | X*      |         |          | X       |         |
| Silicosis  | 1   | Elevation 500 to 1500m (proportion)                 |          | X*      |         |          | X       |         |
| Silicosis  | 1   | LDI (I\$ per capita)                                |          |         | X*      |          |         | X       |
| Silicosis  | 1   | Education (years per capita)                        |          |         | X*      |          |         | X       |
| Silicosis  | 2   | Coal Reserves (binary)                              |          | X*      |         |          |         |         |
| Silicosis  | 2   | Coal Reserves (teragrams per capita)                |          | X*      |         |          |         |         |
| Silicosis  | 2   | Population Over 65 (proportion)                     |          | X*      |         |          |         |         |
| Silicosis  | 2   | Asbestos production (binary)                        | X*       |         |         | X        |         |         |
| Silicosis  | 2   | Cumulative Cigarettes (5 Years)                     | X*       |         |         | X        |         |         |
| Silicosis  | 2   | Health System Access 2 (unitless)                   | X*       |         |         | X        |         |         |
| Silicosis  | 2   | Indoor Air Pollution (Coal Cooking)                 | X*       |         |         | X        |         |         |
| Silicosis  | 2   | Population Density (over 1000 ppl/sqkm, proportion) |          | X*      |         | X        |         |         |
| Silicosis  | 2   | Smoking Prevalence                                  | X*       |         |         | X        |         |         |
| Silicosis  | 2   | Asbestos production (kg) per capita                 |          | X*      |         |          | X       |         |
| Silicosis  | 2   | Gold production (binary)                            |          | X*      |         |          | X       |         |
| Silicosis  | 2   | Gold production (kg) per capita                     |          | X*      |         |          | X       |         |
| Silicosis  | 2   | Elevation Over 1500m (proportion)                   |          | X*      |         |          | X       |         |
| Silicosis  | 2   | Elevation 500 to 1500m (proportion)                 |          | X*      |         |          | X       |         |
| Silicosis  | 2   | LDI (I\$ per capita)                                |          |         | X*      |          |         | X       |
| Silicosis  | 2   | Education (years per capita)                        |          |         | X*      |          |         | X       |
| Asbestosis | 1   | Coal Reserves (binary)                              |          | X*      |         |          |         |         |
| Asbestosis | 1   | Coal Reserves (teragrams per capita)                |          | X*      |         |          |         |         |
| Asbestosis | 1   | Population Over 65 (proportion)                     |          | X*      |         |          |         |         |
| Asbestosis | 1   | Asbestos production (binary)                        | X*       |         |         | X        |         |         |
| Asbestosis | 1   | Cumulative Cigarettes (5 Years)                     | X*       |         |         | X        |         |         |
| Asbestosis | 1   | Health System Access 2 (unitless)                   | X*       |         |         | X        |         |         |
| Asbestosis | 1   | Indoor Air Pollution (Coal Cooking)                 | X*       |         |         | X        |         |         |
| Asbestosis | 1   | Smoking Prevalence                                  | X*       |         |         | X        |         |         |
| Asbestosis | 1   | Asbestos production (kg) per capita                 |          | X*      |         |          | X       |         |
| Asbestosis | 1   | Gold production (binary)                            |          | X*      |         |          | X       |         |
| Asbestosis | 1   | Gold production (kg) per capita                     |          | X*      |         |          | X       |         |
| Asbestosis | 1   | Elevation Over 1500m (proportion)                   |          | X*      |         |          | X       |         |
| Asbestosis | 1   | Elevation 500 to 1500m (proportion)                 |          | X*      |         |          | X       |         |
| Asbestosis | 1   | Population Density (over 1000 ppl/sqkm, proportion) |          | X*      |         |          | X       |         |
| Asbestosis | 1   | LDI (I\$ per capita)                                |          |         | X*      |          |         | X       |
| Asbestosis | 1   | Education (years per capita)                        |          |         | X*      |          |         | X       |
| Asbestosis | 2   | Coal Reserves (binary)                              |          | X*      |         |          |         |         |
| Asbestosis | 2   | Coal Reserves (teragrams per capita)                |          | X*      |         |          |         |         |

**Web Table 23 - Comparison of covariates used in CoD models for GBD 2010 and GBD 2013**

| Cause Name                  | Sex | Covariate name                                      | GBD 2010 |         |         | GBD 2013 |         |         |
|-----------------------------|-----|-----------------------------------------------------|----------|---------|---------|----------|---------|---------|
|                             |     |                                                     | Level 1  | Level 2 | Level 3 | Level 1  | Level 2 | Level 3 |
| Asbestosis                  | 2   | Population Over 65 (proportion)                     |          | X*      |         |          |         |         |
| Asbestosis                  | 2   | Asbestos production (binary)                        | X*       |         |         | X        |         |         |
| Asbestosis                  | 2   | Cumulative Cigarettes (5 Years)                     | X*       |         |         | X        |         |         |
| Asbestosis                  | 2   | Health System Access 2 (unitless)                   | X*       |         |         | X        |         |         |
| Asbestosis                  | 2   | Indoor Air Pollution (Coal Cooking)                 | X*       |         |         | X        |         |         |
| Asbestosis                  | 2   | Smoking Prevalence                                  | X*       |         |         | X        |         |         |
| Asbestosis                  | 2   | Asbestos production (kg) per capita                 |          | X*      |         |          | X       |         |
| Asbestosis                  | 2   | Gold production (binary)                            |          | X*      |         |          | X       |         |
| Asbestosis                  | 2   | Gold production (kg) per capita                     |          | X*      |         |          | X       |         |
| Asbestosis                  | 2   | Elevation Over 1500m (proportion)                   |          | X*      |         |          | X       |         |
| Asbestosis                  | 2   | Elevation 500 to 1500m (proportion)                 |          | X*      |         |          | X       |         |
| Asbestosis                  | 2   | Population Density (over 1000 ppl/sqkm, proportion) |          | X*      |         |          | X       |         |
| Asbestosis                  | 2   | LDI (I\$ per capita)                                |          |         | X*      |          |         | X       |
| Asbestosis                  | 2   | Education (years per capita)                        |          |         | X*      |          |         | X       |
| Coal workers pneumoconiosis | 1   | Coal Reserves (binary)                              |          | X*      |         |          |         |         |
| Coal workers pneumoconiosis | 1   | Coal Reserves (teragrams per capita)                |          | X*      |         |          |         |         |
| Coal workers pneumoconiosis | 1   | Population Over 65 (proportion)                     |          | X*      |         |          |         |         |
| Coal workers pneumoconiosis | 1   | Asbestos production (binary)                        | X*       |         |         | X        |         |         |
| Coal workers pneumoconiosis | 1   | Cumulative Cigarettes (5 Years)                     | X*       |         |         | X        |         |         |
| Coal workers pneumoconiosis | 1   | Health System Access 2 (unitless)                   | X*       |         |         | X        |         |         |
| Coal workers pneumoconiosis | 1   | Indoor Air Pollution (Coal Cooking)                 | X*       |         |         | X        |         |         |
| Coal workers pneumoconiosis | 1   | Smoking Prevalence                                  | X*       |         |         | X        |         |         |
| Coal workers pneumoconiosis | 1   | Asbestos production (kg) per capita                 |          | X*      |         |          | X       |         |
| Coal workers pneumoconiosis | 1   | Gold production (binary)                            |          | X*      |         |          | X       |         |
| Coal workers pneumoconiosis | 1   | Gold production (kg) per capita                     |          | X*      |         |          | X       |         |
| Coal workers pneumoconiosis | 1   | Elevation Over 1500m (proportion)                   |          | X*      |         |          | X       |         |
| Coal workers pneumoconiosis | 1   | Elevation 500 to 1500m (proportion)                 |          | X*      |         |          | X       |         |
| Coal workers pneumoconiosis | 1   | Population Density (over 1000 ppl/sqkm, proportion) |          | X*      |         |          | X       |         |
| Coal workers pneumoconiosis | 1   | LDI (I\$ per capita)                                |          |         | X*      |          |         | X       |
| Coal workers pneumoconiosis | 1   | Education (years per capita)                        |          |         | X*      |          |         | X       |
| Coal workers pneumoconiosis | 2   | Coal Reserves (binary)                              |          | X*      |         |          |         |         |
| Coal workers pneumoconiosis | 2   | Coal Reserves (teragrams per capita)                |          | X*      |         |          |         |         |
| Coal workers pneumoconiosis | 2   | Population Over 65 (proportion)                     |          | X*      |         |          |         |         |
| Coal workers pneumoconiosis | 2   | Asbestos production (binary)                        | X*       |         |         | X        |         |         |
| Coal workers pneumoconiosis | 2   | Cumulative Cigarettes (5 Years)                     | X*       |         |         | X        |         |         |
| Coal workers pneumoconiosis | 2   | Health System Access 2 (unitless)                   | X*       |         |         | X        |         |         |
| Coal workers pneumoconiosis | 2   | Indoor Air Pollution (Coal Cooking)                 | X*       |         |         | X        |         |         |
| Coal workers pneumoconiosis | 2   | Smoking Prevalence                                  | X*       |         |         | X        |         |         |



**Web Table 23 - Comparison of covariates used in CoD models for GBD 2010 and GBD 2013**

| Cause Name                  | Sex | Covariate name                                      | GBD 2010 |         |         | GBD 2013 |         |         |
|-----------------------------|-----|-----------------------------------------------------|----------|---------|---------|----------|---------|---------|
|                             |     |                                                     | Level 1  | Level 2 | Level 3 | Level 1  | Level 2 | Level 3 |
| Coal workers pneumoconiosis | 2   | Asbestos production (kg) per capita                 |          | X*      |         |          | X       |         |
| Coal workers pneumoconiosis | 2   | Gold production (binary)                            |          | X*      |         |          | X       |         |
| Coal workers pneumoconiosis | 2   | Gold production (kg) per capita                     |          | X*      |         |          | X       |         |
| Coal workers pneumoconiosis | 2   | Elevation Over 1500m (proportion)                   |          | X*      |         |          | X       |         |
| Coal workers pneumoconiosis | 2   | Elevation 500 to 1500m (proportion)                 |          | X*      |         |          | X       |         |
| Coal workers pneumoconiosis | 2   | Population Density (over 1000 ppl/sqkm, proportion) |          | X*      |         |          | X       |         |
| Coal workers pneumoconiosis | 2   | LDI (I\$ per capita)                                |          |         |         | X*       |         | X       |
| Coal workers pneumoconiosis | 2   | Education (years per capita)                        |          |         |         | X*       |         | X       |
| Other pneumoconiosis        | 1   | Coal Reserves (binary)                              |          | X*      |         |          |         |         |
| Other pneumoconiosis        | 1   | Coal Reserves (teragrams per capita)                |          | X*      |         |          |         |         |
| Other pneumoconiosis        | 1   | Population Over 65 (proportion)                     |          | X*      |         |          |         |         |
| Other pneumoconiosis        | 1   | Asbestos production (binary)                        | X*       |         |         | X        |         |         |
| Other pneumoconiosis        | 1   | Cumulative Cigarettes (5 Years)                     | X*       |         |         | X        |         |         |
| Other pneumoconiosis        | 1   | Health System Access 2 (unitless)                   | X*       |         |         | X        |         |         |
| Other pneumoconiosis        | 1   | Indoor Air Pollution (Coal Cooking)                 | X*       |         |         | X        |         |         |
| Other pneumoconiosis        | 1   | Smoking Prevalence                                  | X*       |         |         | X        |         |         |
| Other pneumoconiosis        | 1   | Asbestos production (kg) per capita                 |          | X*      |         |          | X       |         |
| Other pneumoconiosis        | 1   | Gold production (binary)                            |          | X*      |         |          | X       |         |
| Other pneumoconiosis        | 1   | Gold production (kg) per capita                     |          | X*      |         |          | X       |         |
| Other pneumoconiosis        | 1   | Elevation Over 1500m (proportion)                   |          | X*      |         |          | X       |         |
| Other pneumoconiosis        | 1   | Elevation 500 to 1500m (proportion)                 |          | X*      |         |          | X       |         |
| Other pneumoconiosis        | 1   | Population Density (over 1000 ppl/sqkm, proportion) |          | X*      |         |          | X       |         |
| Other pneumoconiosis        | 1   | LDI (I\$ per capita)                                |          |         |         | X*       |         | X       |
| Other pneumoconiosis        | 1   | Education (years per capita)                        |          |         |         | X*       |         | X       |
| Other pneumoconiosis        | 2   | Coal Reserves (binary)                              |          | X*      |         |          |         |         |
| Other pneumoconiosis        | 2   | Coal Reserves (teragrams per capita)                |          | X*      |         |          |         |         |
| Other pneumoconiosis        | 2   | Population Over 65 (proportion)                     |          | X*      |         |          |         |         |
| Other pneumoconiosis        | 2   | Asbestos production (binary)                        | X*       |         |         | X        |         |         |
| Other pneumoconiosis        | 2   | Cumulative Cigarettes (5 Years)                     | X*       |         |         | X        |         |         |
| Other pneumoconiosis        | 2   | Health System Access 2 (unitless)                   | X*       |         |         | X        |         |         |
| Other pneumoconiosis        | 2   | Indoor Air Pollution (Coal Cooking)                 | X*       |         |         | X        |         |         |
| Other pneumoconiosis        | 2   | Smoking Prevalence                                  | X*       |         |         | X        |         |         |
| Other pneumoconiosis        | 2   | Asbestos production (kg) per capita                 |          | X*      |         |          | X       |         |
| Other pneumoconiosis        | 2   | Gold production (binary)                            |          | X*      |         |          | X       |         |
| Other pneumoconiosis        | 2   | Gold production (kg) per capita                     |          | X*      |         |          | X       |         |
| Other pneumoconiosis        | 2   | Elevation Over 1500m (proportion)                   |          | X*      |         |          | X       |         |
| Other pneumoconiosis        | 2   | Elevation 500 to 1500m (proportion)                 |          | X*      |         |          | X       |         |
| Other pneumoconiosis        | 2   | Population Density (over 1000 ppl/sqkm, proportion) |          | X*      |         |          | X       |         |

**Web Table 23 - Comparison of covariates used in CoD models for GBD 2010 and GBD 2013**

| Cause Name                                          | Sex | Covariate name                                      | GBD 2010 |         |         | GBD 2013 |         |         |
|-----------------------------------------------------|-----|-----------------------------------------------------|----------|---------|---------|----------|---------|---------|
|                                                     |     |                                                     | Level 1  | Level 2 | Level 3 | Level 1  | Level 2 | Level 3 |
| Other pneumoconiosis                                | 2   | LDI (I\$ per capita)                                |          |         | X*      |          |         | X       |
| Other pneumoconiosis                                | 2   | Education (years per capita)                        |          |         | X*      |          |         | X       |
| Asthma                                              | 1   | Cumulative Cigarettes (5 Years)                     | X        |         |         | X        |         |         |
| Asthma                                              | 1   | Health System Access 2 (unitless)                   | X        |         |         | X        |         |         |
| Asthma                                              | 1   | Indoor Air Pollution (Biomass Cooking)              | X        |         |         | X        |         |         |
| Asthma                                              | 1   | Indoor Air Pollution (Coal Cooking)                 | X        |         |         | X        |         |         |
| Asthma                                              | 1   | Outdoor Air Pollution (PM2.5)                       | X        |         |         | X        |         |         |
| Asthma                                              | 1   | Smoking Prevalence                                  | X        |         |         | X        |         |         |
| Asthma                                              | 1   | Population Over 65 (proportion)                     |          | X       |         |          |         |         |
| Asthma                                              | 1   | Elevation Over 1500m (proportion)                   |          | X       |         |          | X       |         |
| Asthma                                              | 1   | Elevation 500 to 1500m (proportion)                 |          | X       |         |          | X       |         |
| Asthma                                              | 1   | Population Density (over 1000 ppl/sqkm, proportion) |          | X       |         |          | X       |         |
| Asthma                                              | 1   | LDI (I\$ per capita)                                |          |         | X       |          |         | X       |
| Asthma                                              | 1   | Education (years per capita)                        |          |         | X       |          |         | X       |
| Asthma                                              | 2   | Cumulative Cigarettes (5 Years)                     | X        |         |         | X        |         |         |
| Asthma                                              | 2   | Health System Access 2 (unitless)                   | X        |         |         | X        |         |         |
| Asthma                                              | 2   | Indoor Air Pollution (Biomass Cooking)              | X        |         |         | X        |         |         |
| Asthma                                              | 2   | Indoor Air Pollution (Coal Cooking)                 | X        |         |         | X        |         |         |
| Asthma                                              | 2   | Outdoor Air Pollution (PM2.5)                       | X        |         |         | X        |         |         |
| Asthma                                              | 2   | Smoking Prevalence                                  | X        |         |         | X        |         |         |
| Asthma                                              | 2   | Population Over 65 (proportion)                     |          | X       |         |          |         |         |
| Asthma                                              | 2   | Elevation Over 1500m (proportion)                   |          | X       |         |          | X       |         |
| Asthma                                              | 2   | Elevation 500 to 1500m (proportion)                 |          | X       |         |          | X       |         |
| Asthma                                              | 2   | Population Density (over 1000 ppl/sqkm, proportion) |          | X       |         |          | X       |         |
| Asthma                                              | 2   | LDI (I\$ per capita)                                |          |         | X       |          |         | X       |
| Asthma                                              | 2   | Education (years per capita)                        |          |         | X       |          |         | X       |
| Interstitial lung disease and pulmonary sarcoidosis | 1   | Cumulative Cigarettes (5 Years)                     | X        |         |         | X        |         |         |
| Interstitial lung disease and pulmonary sarcoidosis | 1   | Health System Access 2 (unitless)                   | X        |         |         | X        |         |         |
| Interstitial lung disease and pulmonary sarcoidosis | 1   | Indoor Air Pollution (Biomass Cooking)              | X        |         |         | X        |         |         |
| Interstitial lung disease and pulmonary sarcoidosis | 1   | Indoor Air Pollution (Coal Cooking)                 | X        |         |         | X        |         |         |
| Interstitial lung disease and pulmonary sarcoidosis | 1   | Outdoor Air Pollution (PM2.5)                       | X        |         |         | X        |         |         |
| Interstitial lung disease and pulmonary sarcoidosis | 1   | Smoking Prevalence                                  | X        |         |         | X        |         |         |
| Interstitial lung disease and pulmonary sarcoidosis | 1   | Population Over 65 (proportion)                     |          | X       |         |          |         |         |

**Web Table 23 - Comparison of covariates used in CoD models for GBD 2010 and GBD 2013**

| Cause Name                                          | Sex | Covariate name                                      | GBD 2010 |         |         | GBD 2013 |         |         |
|-----------------------------------------------------|-----|-----------------------------------------------------|----------|---------|---------|----------|---------|---------|
|                                                     |     |                                                     | Level 1  | Level 2 | Level 3 | Level 1  | Level 2 | Level 3 |
| Interstitial lung disease and pulmonary sarcoidosis | 1   | Elevation Over 1500m (proportion)                   |          | X       |         |          | X       |         |
| Interstitial lung disease and pulmonary sarcoidosis | 1   | Elevation 500 to 1500m (proportion)                 |          | X       |         |          | X       |         |
| Interstitial lung disease and pulmonary sarcoidosis | 1   | Population Density (over 1000 ppl/sqkm, proportion) |          | X       |         |          | X       |         |
| Interstitial lung disease and pulmonary sarcoidosis | 1   | LDI (I\$ per capita)                                |          |         | X       |          |         | X       |
| Interstitial lung disease and pulmonary sarcoidosis | 1   | Education (years per capita)                        |          |         | X       |          |         | X       |
| Interstitial lung disease and pulmonary sarcoidosis | 2   | Cumulative Cigarettes (5 Years)                     | X        |         |         | X        |         |         |
| Interstitial lung disease and pulmonary sarcoidosis | 2   | Health System Access 2 (unitless)                   | X        |         |         | X        |         |         |
| Interstitial lung disease and pulmonary sarcoidosis | 2   | Indoor Air Pollution (Biomass Cooking)              | X        |         |         | X        |         |         |
| Interstitial lung disease and pulmonary sarcoidosis | 2   | Indoor Air Pollution (Coal Cooking)                 | X        |         |         | X        |         |         |
| Interstitial lung disease and pulmonary sarcoidosis | 2   | Outdoor Air Pollution (PM2.5)                       | X        |         |         | X        |         |         |
| Interstitial lung disease and pulmonary sarcoidosis | 2   | Smoking Prevalence                                  | X        |         |         | X        |         |         |
| Interstitial lung disease and pulmonary sarcoidosis | 2   | Population Over 65 (proportion)                     |          | X       |         |          |         |         |
| Interstitial lung disease and pulmonary sarcoidosis | 2   | Elevation Over 1500m (proportion)                   |          | X       |         |          | X       |         |
| Interstitial lung disease and pulmonary sarcoidosis | 2   | Elevation 500 to 1500m (proportion)                 |          | X       |         |          | X       |         |
| Interstitial lung disease and pulmonary sarcoidosis | 2   | Population Density (over 1000 ppl/sqkm, proportion) |          | X       |         |          | X       |         |
| Interstitial lung disease and pulmonary sarcoidosis | 2   | LDI (I\$ per capita)                                |          |         | X       |          |         | X       |
| Interstitial lung disease and pulmonary sarcoidosis | 2   | Education (years per capita)                        |          |         | X       |          |         | X       |
| Other chronic respiratory diseases                  | 1   | Cumulative Cigarettes (5 Years)                     | X        |         |         | X        |         |         |
| Other chronic respiratory diseases                  | 1   | Health System Access 2 (unitless)                   | X        |         |         | X        |         |         |
| Other chronic respiratory diseases                  | 1   | Indoor Air Pollution (Biomass Cooking)              | X        |         |         | X        |         |         |
| Other chronic respiratory diseases                  | 1   | Indoor Air Pollution (Coal Cooking)                 | X        |         |         | X        |         |         |
| Other chronic respiratory diseases                  | 1   | Outdoor Air Pollution (PM2.5)                       | X        |         |         | X        |         |         |
| Other chronic respiratory diseases                  | 1   | Smoking Prevalence                                  | X        |         |         | X        |         |         |
| Other chronic respiratory diseases                  | 1   | Population Over 65 (proportion)                     |          | X       |         |          |         |         |
| Other chronic respiratory diseases                  | 1   | Elevation Over 1500m (proportion)                   |          | X       |         |          | X       |         |

**Web Table 23 - Comparison of covariates used in CoD models for GBD 2010 and GBD 2013**

| Cause Name                         | Sex | Covariate name                                      | GBD 2010 |         |         | GBD 2013 |         |         |
|------------------------------------|-----|-----------------------------------------------------|----------|---------|---------|----------|---------|---------|
|                                    |     |                                                     | Level 1  | Level 2 | Level 3 | Level 1  | Level 2 | Level 3 |
| Other chronic respiratory diseases | 1   | Elevation 500 to 1500m (proportion)                 |          | X       |         |          | X       |         |
| Other chronic respiratory diseases | 1   | Population Density (over 1000 ppl/sqkm, proportion) |          | X       |         |          | X       |         |
| Other chronic respiratory diseases | 1   | LDI (I\$ per capita)                                |          |         |         |          |         | X       |
| Other chronic respiratory diseases | 1   | Education (years per capita)                        |          |         |         |          |         | X       |
| Other chronic respiratory diseases | 2   | Cumulative Cigarettes (5 Years)                     | X        |         |         | X        |         |         |
| Other chronic respiratory diseases | 2   | Health System Access 2 (unitless)                   | X        |         |         | X        |         |         |
| Other chronic respiratory diseases | 2   | Indoor Air Pollution (Biomass Cooking)              | X        |         |         | X        |         |         |
| Other chronic respiratory diseases | 2   | Indoor Air Pollution (Coal Cooking)                 | X        |         |         | X        |         |         |
| Other chronic respiratory diseases | 2   | Outdoor Air Pollution (PM2.5)                       | X        |         |         | X        |         |         |
| Other chronic respiratory diseases | 2   | Smoking Prevalence                                  | X        |         |         | X        |         |         |
| Other chronic respiratory diseases | 2   | Population Over 65 (proportion)                     |          | X       |         |          |         |         |
| Other chronic respiratory diseases | 2   | Elevation Over 1500m (proportion)                   |          | X       |         |          | X       |         |
| Other chronic respiratory diseases | 2   | Elevation 500 to 1500m (proportion)                 |          | X       |         |          | X       |         |
| Other chronic respiratory diseases | 2   | Population Density (over 1000 ppl/sqkm, proportion) |          | X       |         |          | X       |         |
| Other chronic respiratory diseases | 2   | LDI (I\$ per capita)                                |          |         |         |          |         | X       |
| Other chronic respiratory diseases | 2   | Education (years per capita)                        |          |         |         |          |         | X       |
| Cirrhosis                          | 1   | Alcohol (liters per capita)                         | X        |         |         | X        |         |         |
| Cirrhosis                          | 1   | Health System Access 2 (unitless)                   | X        |         |         | X        |         |         |
| Cirrhosis                          | 1   | Hepatitis B Prevalence (proportion)                 | X        |         |         | X        |         |         |
| Cirrhosis                          | 1   | Hepatitis C Prevalence (proportion)                 | X        |         |         | X        |         |         |
| Cirrhosis                          | 1   | Schistosomiasis Prevalence (proportion)             | X        |         |         | X        |         |         |
| Cirrhosis                          | 1   | Diabetes Age-Standardized Prevalence (proportion)   |          | X       |         |          | X       |         |
| Cirrhosis                          | 1   | Mean BMI                                            |          | X       |         |          | X       |         |
| Cirrhosis                          | 1   | LDI (I\$ per capita)                                |          |         |         |          |         | X       |
| Cirrhosis                          | 1   | Education (years per capita)                        |          |         |         |          |         | X       |
| Cirrhosis                          | 2   | Alcohol (liters per capita)                         | X        |         |         | X        |         |         |
| Cirrhosis                          | 2   | Health System Access 2 (unitless)                   | X        |         |         | X        |         |         |
| Cirrhosis                          | 2   | Hepatitis B Prevalence (proportion)                 | X        |         |         | X        |         |         |
| Cirrhosis                          | 2   | Hepatitis C Prevalence (proportion)                 | X        |         |         | X        |         |         |
| Cirrhosis                          | 2   | Schistosomiasis Prevalence (proportion)             | X        |         |         | X        |         |         |
| Cirrhosis                          | 2   | Diabetes Age-Standardized Prevalence (proportion)   |          | X       |         |          | X       |         |
| Cirrhosis                          | 2   | Mean BMI                                            |          | X       |         |          | X       |         |
| Cirrhosis                          | 2   | LDI (I\$ per capita)                                |          |         |         |          |         | X       |
| Cirrhosis                          | 2   | Education (years per capita)                        |          |         |         |          |         | X       |
| Cirrhosis due to hepatitis B       | 1   | LDI (I\$ per capita)                                |          |         |         |          |         | X*      |
| Cirrhosis due to hepatitis B       | 1   | Alcohol (liters per capita)                         | X*       |         |         |          |         |         |
| Cirrhosis due to hepatitis B       | 1   | Diabetes Age-Standardized Prevalence (proportion)   |          | X*      |         |          |         |         |
| Cirrhosis due to hepatitis B       | 1   | Education (years per capita)                        |          |         |         |          |         | X*      |

**Web Table 23 - Comparison of covariates used in CoD models for GBD 2010 and GBD 2013**

| Cause Name                   | Sex | Covariate name                                           | GBD 2010 |         |         | GBD 2013 |         |         |
|------------------------------|-----|----------------------------------------------------------|----------|---------|---------|----------|---------|---------|
|                              |     |                                                          | Level 1  | Level 2 | Level 3 | Level 1  | Level 2 | Level 3 |
| Cirrhosis due to hepatitis B | 1   | Health System Access 2 (unitless)                        | X*       |         |         |          |         |         |
| Cirrhosis due to hepatitis B | 1   | Mean BMI                                                 |          | X*      |         |          |         |         |
| Cirrhosis due to hepatitis B | 1   | Hepatitis B Prevalence (proportion)                      | X*       |         |         |          |         |         |
| Cirrhosis due to hepatitis B | 1   | Hepatitis B Prevalence (based on GBD 2013 Dismod models) |          |         |         | X*       |         |         |
| Cirrhosis due to hepatitis B | 1   | Hepatitis C Prevalence (proportion)                      | X*       |         |         |          |         |         |
| Cirrhosis due to hepatitis B | 1   | Schistosomiasis Prevalence (proportion)                  | X*       |         |         |          |         |         |
| Cirrhosis due to hepatitis B | 1   | Year                                                     |          |         |         | X*       |         |         |
| Cirrhosis due to hepatitis B | 2   | LDI (I\$ per capita)                                     |          |         |         | X*       |         |         |
| Cirrhosis due to hepatitis B | 2   | Alcohol (liters per capita)                              | X*       |         |         |          |         |         |
| Cirrhosis due to hepatitis B | 2   | Diabetes Age-Standardized Prevalence (proportion)        |          | X*      |         |          |         |         |
| Cirrhosis due to hepatitis B | 2   | Education (years per capita)                             |          |         |         | X*       |         |         |
| Cirrhosis due to hepatitis B | 2   | Health System Access 2 (unitless)                        | X*       |         |         |          |         |         |
| Cirrhosis due to hepatitis B | 2   | Mean BMI                                                 |          | X*      |         |          |         |         |
| Cirrhosis due to hepatitis B | 2   | Hepatitis B Prevalence (proportion)                      | X*       |         |         |          |         |         |
| Cirrhosis due to hepatitis B | 2   | Hepatitis B Prevalence (based on GBD 2013 Dismod models) |          |         |         | X*       |         |         |
| Cirrhosis due to hepatitis B | 2   | Hepatitis C Prevalence (proportion)                      | X*       |         |         |          |         |         |
| Cirrhosis due to hepatitis B | 2   | Schistosomiasis Prevalence (proportion)                  | X*       |         |         |          |         |         |
| Cirrhosis due to hepatitis B | 2   | Year                                                     |          |         |         | X*       |         |         |
| Cirrhosis due to hepatitis C | 1   | LDI (I\$ per capita)                                     |          |         |         | X*       |         |         |
| Cirrhosis due to hepatitis C | 1   | Alcohol (liters per capita)                              | X*       |         |         |          |         |         |
| Cirrhosis due to hepatitis C | 1   | Diabetes Age-Standardized Prevalence (proportion)        |          | X*      |         |          |         |         |
| Cirrhosis due to hepatitis C | 1   | Education (years per capita)                             |          |         |         | X*       |         |         |
| Cirrhosis due to hepatitis C | 1   | Health System Access 2 (unitless)                        | X*       |         |         |          |         |         |
| Cirrhosis due to hepatitis C | 1   | Mean BMI                                                 |          | X*      |         |          |         |         |
| Cirrhosis due to hepatitis C | 1   | Hepatitis B Prevalence (proportion)                      | X*       |         |         |          |         |         |
| Cirrhosis due to hepatitis C | 1   | Hepatitis B Prevalence (based on GBD 2013 Dismod models) |          |         |         | X*       |         |         |
| Cirrhosis due to hepatitis C | 1   | Hepatitis C Prevalence (proportion)                      | X*       |         |         |          |         |         |
| Cirrhosis due to hepatitis C | 1   | Schistosomiasis Prevalence (proportion)                  | X*       |         |         |          |         |         |
| Cirrhosis due to hepatitis C | 1   | Year                                                     |          |         |         | X*       |         |         |
| Cirrhosis due to hepatitis C | 2   | LDI (I\$ per capita)                                     |          |         |         | X*       |         |         |
| Cirrhosis due to hepatitis C | 2   | Alcohol (liters per capita)                              | X*       |         |         |          |         |         |
| Cirrhosis due to hepatitis C | 2   | Diabetes Age-Standardized Prevalence (proportion)        |          | X*      |         |          |         |         |
| Cirrhosis due to hepatitis C | 2   | Education (years per capita)                             |          |         |         | X*       |         |         |
| Cirrhosis due to hepatitis C | 2   | Health System Access 2 (unitless)                        | X*       |         |         |          |         |         |
| Cirrhosis due to hepatitis C | 2   | Mean BMI                                                 |          | X*      |         |          |         |         |
| Cirrhosis due to hepatitis C | 2   | Hepatitis B Prevalence (proportion)                      | X*       |         |         |          |         |         |
| Cirrhosis due to hepatitis C | 2   | Hepatitis B Prevalence (based on GBD 2013 Dismod models) |          |         |         | X*       |         |         |
| Cirrhosis due to hepatitis C | 2   | Hepatitis C Prevalence (proportion)                      | X*       |         |         |          |         |         |

**Web Table 23 - Comparison of covariates used in CoD models for GBD 2010 and GBD 2013**

| Cause Name                    | Sex | Covariate name                                    | GBD 2010 |         |         | GBD 2013 |         |         |
|-------------------------------|-----|---------------------------------------------------|----------|---------|---------|----------|---------|---------|
|                               |     |                                                   | Level 1  | Level 2 | Level 3 | Level 1  | Level 2 | Level 3 |
| Cirrhosis due to hepatitis C  | 2   | Schistosomiasis Prevalence (proportion)           | X*       |         |         |          |         |         |
| Cirrhosis due to hepatitis C  | 2   | Year                                              |          |         |         | X*       |         |         |
| Cirrhosis due to alcohol use  | 1   | LDI (I\$ per capita)                              |          |         | X*      |          |         |         |
| Cirrhosis due to alcohol use  | 1   | Alcohol (liters per capita)                       | X*       |         |         | X*       |         |         |
| Cirrhosis due to alcohol use  | 1   | Diabetes Age-Standardized Prevalence (proportion) |          | X*      |         |          |         |         |
| Cirrhosis due to alcohol use  | 1   | Education (years per capita)                      |          |         | X*      |          |         |         |
| Cirrhosis due to alcohol use  | 1   | Health System Access 2 (unitless)                 | X*       |         |         |          |         |         |
| Cirrhosis due to alcohol use  | 1   | Mean BMI                                          |          | X*      |         |          |         |         |
| Cirrhosis due to alcohol use  | 1   | Hepatitis B Prevalence (proportion)               | X*       |         |         |          |         |         |
| Cirrhosis due to alcohol use  | 1   | Hepatitis C Prevalence (proportion)               | X*       |         |         |          |         |         |
| Cirrhosis due to alcohol use  | 1   | Schistosomiasis Prevalence (proportion)           | X*       |         |         |          |         |         |
| Cirrhosis due to alcohol use  | 1   | Year                                              |          |         |         | X*       |         |         |
| Cirrhosis due to alcohol use  | 2   | LDI (I\$ per capita)                              |          |         | X*      |          |         |         |
| Cirrhosis due to alcohol use  | 2   | Alcohol (liters per capita)                       | X*       |         |         | X*       |         |         |
| Cirrhosis due to alcohol use  | 2   | Diabetes Age-Standardized Prevalence (proportion) |          | X*      |         |          |         |         |
| Cirrhosis due to alcohol use  | 2   | Education (years per capita)                      |          |         | X*      |          |         |         |
| Cirrhosis due to alcohol use  | 2   | Health System Access 2 (unitless)                 | X*       |         |         |          |         |         |
| Cirrhosis due to alcohol use  | 2   | Mean BMI                                          |          | X*      |         |          |         |         |
| Cirrhosis due to alcohol use  | 2   | Hepatitis B Prevalence (proportion)               | X*       |         |         |          |         |         |
| Cirrhosis due to alcohol use  | 2   | Hepatitis C Prevalence (proportion)               | X*       |         |         |          |         |         |
| Cirrhosis due to alcohol use  | 2   | Schistosomiasis Prevalence (proportion)           | X*       |         |         |          |         |         |
| Cirrhosis due to alcohol use  | 2   | Year                                              |          |         |         | X*       |         |         |
| Cirrhosis due to other causes | 1   | LDI (I\$ per capita)                              |          |         | X*      |          |         |         |
| Cirrhosis due to other causes | 1   | Alcohol (liters per capita)                       | X*       |         |         |          |         |         |
| Cirrhosis due to other causes | 1   | Diabetes Age-Standardized Prevalence (proportion) |          | X*      |         |          |         |         |
| Cirrhosis due to other causes | 1   | Education (years per capita)                      |          |         | X*      |          |         |         |
| Cirrhosis due to other causes | 1   | Health System Access 2 (unitless)                 | X*       |         |         |          |         |         |
| Cirrhosis due to other causes | 1   | Mean BMI                                          |          | X*      |         |          |         |         |
| Cirrhosis due to other causes | 1   | Hepatitis B Prevalence (proportion)               | X*       |         |         |          |         |         |
| Cirrhosis due to other causes | 1   | Hepatitis C Prevalence (proportion)               | X*       |         |         |          |         |         |
| Cirrhosis due to other causes | 1   | Schistosomiasis Prevalence (proportion)           | X*       |         |         |          |         |         |
| Cirrhosis due to other causes | 1   | Year                                              |          |         |         | X*       |         |         |
| Cirrhosis due to other causes | 2   | LDI (I\$ per capita)                              |          |         | X*      |          |         |         |
| Cirrhosis due to other causes | 2   | Alcohol (liters per capita)                       | X*       |         |         |          |         |         |
| Cirrhosis due to other causes | 2   | Diabetes Age-Standardized Prevalence (proportion) |          | X*      |         |          |         |         |
| Cirrhosis due to other causes | 2   | Education (years per capita)                      |          |         | X*      |          |         |         |
| Cirrhosis due to other causes | 2   | Health System Access 2 (unitless)                 | X*       |         |         |          |         |         |
| Cirrhosis due to other causes | 2   | Mean BMI                                          |          | X*      |         |          |         |         |

**Web Table 23 - Comparison of covariates used in CoD models for GBD 2010 and GBD 2013**

| Cause Name                    | Sex | Covariate name                                | GBD 2010 |         |         | GBD 2013 |         |         |
|-------------------------------|-----|-----------------------------------------------|----------|---------|---------|----------|---------|---------|
|                               |     |                                               | Level 1  | Level 2 | Level 3 | Level 1  | Level 2 | Level 3 |
| Cirrhosis due to other causes | 2   | Hepatitis B Prevalence (proportion)           | X*       |         |         |          |         |         |
| Cirrhosis due to other causes | 2   | Hepatitis C Prevalence (proportion)           | X*       |         |         |          |         |         |
| Cirrhosis due to other causes | 2   | Schistosomiasis Prevalence (proportion)       | X*       |         |         |          |         |         |
| Cirrhosis due to other causes | 2   | Year                                          |          |         |         | X*       |         |         |
| Digestive diseases            | 1   | Health System Access (capped)                 |          |         |         | X        |         |         |
| Digestive diseases            | 1   | Health System Access 2 (unitless)             | X        |         |         |          |         |         |
| Digestive diseases            | 1   | Alcohol (liters per capita)                   | X        |         |         | X        |         |         |
| Digestive diseases            | 1   | Cumulative Cigarettes (5 Years)               | X        |         |         | X        |         |         |
| Digestive diseases            | 1   | Sanitation (proportion with access)           | X        |         |         | X        |         |         |
| Digestive diseases            | 1   | HIV Prevalence, ARV-Adjusted (Custom Lag, %)  |          | X       |         |          |         |         |
| Digestive diseases            | 1   | Fruits (kcal per capita)                      |          | X       |         |          | X       |         |
| Digestive diseases            | 1   | Malnutrition (proportion <2SD weight for age) |          | X       |         |          | X       |         |
| Digestive diseases            | 1   | Red Meat (kcal per capita)                    |          | X       |         |          | X       |         |
| Digestive diseases            | 1   | Education (years per capita)                  |          |         | X       |          |         | X       |
| Digestive diseases            | 2   | Health System Access (capped)                 |          |         |         | X        |         |         |
| Digestive diseases            | 2   | Health System Access 2 (unitless)             | X        |         |         |          |         |         |
| Digestive diseases            | 2   | Alcohol (liters per capita)                   | X        |         |         | X        |         |         |
| Digestive diseases            | 2   | Cumulative Cigarettes (5 Years)               | X        |         |         | X        |         |         |
| Digestive diseases            | 2   | Sanitation (proportion with access)           | X        |         |         | X        |         |         |
| Digestive diseases            | 2   | HIV Prevalence, ARV-Adjusted (Custom Lag, %)  |          | X       |         |          |         |         |
| Digestive diseases            | 2   | Fruits (kcal per capita)                      |          | X       |         |          | X       |         |
| Digestive diseases            | 2   | Malnutrition (proportion <2SD weight for age) |          | X       |         |          | X       |         |
| Digestive diseases            | 2   | Red Meat (kcal per capita)                    |          | X       |         |          | X       |         |
| Digestive diseases            | 2   | Education (years per capita)                  |          |         | X       |          |         | X       |
| Peptic ulcer disease          | 1   | Health System Access (capped)                 |          |         |         |          | X       |         |
| Peptic ulcer disease          | 1   | Alcohol (liters per capita)                   | X        |         |         | X        |         |         |
| Peptic ulcer disease          | 1   | Cumulative Cigarettes (10 Years)              | X        |         |         | X        |         |         |
| Peptic ulcer disease          | 1   | Cumulative Cigarettes (5 Years)               | X        |         |         | X        |         |         |
| Peptic ulcer disease          | 1   | Smoking Prevalence                            | X        |         |         | X        |         |         |
| Peptic ulcer disease          | 1   | Health System Access 2 (unitless)             |          | X       |         |          |         |         |
| Peptic ulcer disease          | 1   | Sanitation (proportion with access)           |          | X       |         |          | X       |         |
| Peptic ulcer disease          | 1   | Vegetables (kcal per capita)                  |          | X       |         |          | X       |         |
| Peptic ulcer disease          | 1   | LDI (I\$ per capita)                          |          |         | X       |          |         | X       |
| Peptic ulcer disease          | 1   | Education (years per capita)                  |          |         | X       |          |         | X       |
| Peptic ulcer disease          | 2   | Health System Access (capped)                 |          |         |         |          | X       |         |
| Peptic ulcer disease          | 2   | Alcohol (liters per capita)                   | X        |         |         | X        |         |         |
| Peptic ulcer disease          | 2   | Cumulative Cigarettes (10 Years)              | X        |         |         | X        |         |         |
| Peptic ulcer disease          | 2   | Cumulative Cigarettes (5 Years)               | X        |         |         | X        |         |         |

**Web Table 23 - Comparison of covariates used in CoD models for GBD 2010 and GBD 2013**

| Cause Name               | Sex | Covariate name                                 | GBD 2010 |         |         | GBD 2013 |         |         |
|--------------------------|-----|------------------------------------------------|----------|---------|---------|----------|---------|---------|
|                          |     |                                                | Level 1  | Level 2 | Level 3 | Level 1  | Level 2 | Level 3 |
| Peptic ulcer disease     | 2   | Smoking Prevalence                             | X        |         |         | X        |         |         |
| Peptic ulcer disease     | 2   | Health System Access 2 (unitless)              |          | X       |         |          |         |         |
| Peptic ulcer disease     | 2   | Sanitation (proportion with access)            |          | X       |         |          | X       |         |
| Peptic ulcer disease     | 2   | Vegetables (kcal per capita)                   |          | X       |         |          | X       |         |
| Peptic ulcer disease     | 2   | LDI (I\$ per capita)                           |          |         | X       |          |         | X       |
| Peptic ulcer disease     | 2   | Education (years per capita)                   |          |         | X       |          |         | X       |
| Gastritis and duodenitis | 1   | Health System Access (capped)                  |          |         |         |          | X       |         |
| Gastritis and duodenitis | 1   | Alcohol (liters per capita)                    | X        |         |         | X        |         |         |
| Gastritis and duodenitis | 1   | Cumulative Cigarettes (10 Years)               | X        |         |         | X        |         |         |
| Gastritis and duodenitis | 1   | Cumulative Cigarettes (5 Years)                | X        |         |         | X        |         |         |
| Gastritis and duodenitis | 1   | Smoking Prevalence                             | X        |         |         | X        |         |         |
| Gastritis and duodenitis | 1   | Health System Access 2 (unitless)              |          | X       |         |          |         |         |
| Gastritis and duodenitis | 1   | Sanitation (proportion with access)            |          | X       |         |          | X       |         |
| Gastritis and duodenitis | 1   | Vegetables (kcal per capita)                   |          | X       |         |          | X       |         |
| Gastritis and duodenitis | 1   | Improved Water Source (proportion with access) |          | X       |         |          | X       |         |
| Gastritis and duodenitis | 1   | LDI (I\$ per capita)                           |          |         | X       |          |         | X       |
| Gastritis and duodenitis | 1   | Education (years per capita)                   |          |         | X       |          |         | X       |
| Gastritis and duodenitis | 2   | Health System Access (capped)                  |          |         |         |          | X       |         |
| Gastritis and duodenitis | 2   | Alcohol (liters per capita)                    | X        |         |         | X        |         |         |
| Gastritis and duodenitis | 2   | Cumulative Cigarettes (10 Years)               | X        |         |         | X        |         |         |
| Gastritis and duodenitis | 2   | Cumulative Cigarettes (5 Years)                | X        |         |         | X        |         |         |
| Gastritis and duodenitis | 2   | Smoking Prevalence                             | X        |         |         | X        |         |         |
| Gastritis and duodenitis | 2   | Health System Access 2 (unitless)              |          | X       |         |          |         |         |
| Gastritis and duodenitis | 2   | Sanitation (proportion with access)            |          | X       |         |          | X       |         |
| Gastritis and duodenitis | 2   | Vegetables (kcal per capita)                   |          | X       |         |          | X       |         |
| Gastritis and duodenitis | 2   | Improved Water Source (proportion with access) |          | X       |         |          | X       |         |
| Gastritis and duodenitis | 2   | LDI (I\$ per capita)                           |          |         | X       |          |         | X       |
| Gastritis and duodenitis | 2   | Education (years per capita)                   |          |         | X       |          |         | X       |
| Appendicitis             | 1   | Health System Access (capped)                  |          |         |         |          | X       |         |
| Appendicitis             | 1   | Health System Access 2 (unitless)              |          | X       |         |          |         |         |
| Appendicitis             | 1   | Fruits (kcal per capita)                       |          | X       |         |          | X       |         |
| Appendicitis             | 1   | Vegetables (kcal per capita)                   |          | X       |         |          | X       |         |
| Appendicitis             | 1   | LDI (I\$ per capita)                           |          |         | X       |          |         | X       |
| Appendicitis             | 1   | Education (years per capita)                   |          |         | X       |          |         | X       |
| Appendicitis             | 2   | Health System Access (capped)                  |          |         |         |          | X       |         |
| Appendicitis             | 2   | Health System Access 2 (unitless)              |          | X       |         |          |         |         |
| Appendicitis             | 2   | Fruits (kcal per capita)                       |          | X       |         |          | X       |         |
| Appendicitis             | 2   | Vegetables (kcal per capita)                   |          | X       |         |          | X       |         |



**Web Table 23 - Comparison of covariates used in CoD models for GBD 2010 and GBD 2013**

| Cause Name                                 | Sex | Covariate name                    | GBD 2010 |         |         | GBD 2013 |         |         |
|--------------------------------------------|-----|-----------------------------------|----------|---------|---------|----------|---------|---------|
|                                            |     |                                   | Level 1  | Level 2 | Level 3 | Level 1  | Level 2 | Level 3 |
| Appendicitis                               | 2   | LDI (I\$ per capita)              |          |         | X       |          |         | X       |
| Appendicitis                               | 2   | Education (years per capita)      |          |         | X       |          |         | X       |
| Paralytic ileus and intestinal obstruction | 1   | Health System Access (capped)     |          |         |         | X        |         |         |
| Paralytic ileus and intestinal obstruction | 1   | Health System Access 2 (unitless) | X        |         |         |          |         |         |
| Paralytic ileus and intestinal obstruction | 1   | Fruits (kcal per capita)          |          | X       |         |          | X       |         |
| Paralytic ileus and intestinal obstruction | 1   | Vegetables (kcal per capita)      |          | X       |         |          | X       |         |
| Paralytic ileus and intestinal obstruction | 1   | LDI (I\$ per capita)              |          |         | X       |          |         | X       |
| Paralytic ileus and intestinal obstruction | 1   | Education (years per capita)      |          |         | X       |          |         | X       |
| Paralytic ileus and intestinal obstruction | 2   | Health System Access (capped)     |          |         |         | X        |         |         |
| Paralytic ileus and intestinal obstruction | 2   | Health System Access 2 (unitless) | X        |         |         |          |         |         |
| Paralytic ileus and intestinal obstruction | 2   | Fruits (kcal per capita)          |          | X       |         |          | X       |         |
| Paralytic ileus and intestinal obstruction | 2   | Vegetables (kcal per capita)      |          | X       |         |          | X       |         |
| Paralytic ileus and intestinal obstruction | 2   | LDI (I\$ per capita)              |          |         | X       |          |         | X       |
| Paralytic ileus and intestinal obstruction | 2   | Education (years per capita)      |          |         | X       |          |         | X       |
| Inguinal, femoral, and abdominal hernia    | 1   | Health System Access (unitless)   |          |         | X*      |          |         |         |
| Inguinal, femoral, and abdominal hernia    | 1   | Health System Access (capped)     |          |         |         |          | X       |         |
| Inguinal, femoral, and abdominal hernia    | 1   | LDI (I\$ per capita)              |          |         |         |          |         | X       |
| Inguinal, femoral, and abdominal hernia    | 1   | Education (years per capita)      |          |         |         |          |         | X       |
| Inguinal, femoral, and abdominal hernia    | 2   | Health System Access (unitless)   |          |         | X*      |          |         |         |
| Inguinal, femoral, and abdominal hernia    | 2   | Health System Access (capped)     |          |         |         |          | X       |         |
| Inguinal, femoral, and abdominal hernia    | 2   | LDI (I\$ per capita)              |          |         |         |          |         | X       |
| Inguinal, femoral, and abdominal hernia    | 2   | Education (years per capita)      |          |         |         |          |         | X       |
| Inflammatory bowel disease                 | 1   | Health System Access (capped)     |          |         |         |          | X       |         |
| Inflammatory bowel disease                 | 1   | Latitude 15 to 30 (proportion)    |          |         |         |          |         | X       |
| Inflammatory bowel disease                 | 1   | Latitude 30 to 45 (proportion)    |          |         |         |          |         | X       |
| Inflammatory bowel disease                 | 1   | Latitude Over 45 (proportion)     |          |         |         |          |         | X       |
| Inflammatory bowel disease                 | 1   | Animal Fats (kcal per capita)     | X        |         |         | X        |         |         |
| Inflammatory bowel disease                 | 1   | Fruits (kcal per capita)          | X        |         |         | X        |         |         |
| Inflammatory bowel disease                 | 1   | Red Meat (kcal per capita)        | X        |         |         | X        |         |         |
| Inflammatory bowel disease                 | 1   | Vegetables (kcal per capita)      | X        |         |         | X        |         |         |
| Inflammatory bowel disease                 | 1   | Health System Access 2 (unitless) |          | X       |         |          |         |         |
| Inflammatory bowel disease                 | 1   | LDI (I\$ per capita)              |          |         | X       |          |         | X       |
| Inflammatory bowel disease                 | 1   | Education (years per capita)      |          |         | X       |          |         | X       |
| Inflammatory bowel disease                 | 2   | Health System Access (capped)     |          |         |         |          | X       |         |
| Inflammatory bowel disease                 | 2   | Latitude 15 to 30 (proportion)    |          |         |         |          |         | X       |
| Inflammatory bowel disease                 | 2   | Latitude 30 to 45 (proportion)    |          |         |         |          |         | X       |
| Inflammatory bowel disease                 | 2   | Latitude Over 45 (proportion)     |          |         |         |          |         | X       |
| Inflammatory bowel disease                 | 2   | Animal Fats (kcal per capita)     | X        |         |         | X        |         |         |

**Web Table 23 - Comparison of covariates used in CoD models for GBD 2010 and GBD 2013**

| Cause Name                       | Sex | Covariate name                                    | GBD 2010 |         |         | GBD 2013 |         |         |
|----------------------------------|-----|---------------------------------------------------|----------|---------|---------|----------|---------|---------|
|                                  |     |                                                   | Level 1  | Level 2 | Level 3 | Level 1  | Level 2 | Level 3 |
| Inflammatory bowel disease       | 2   | Fruits (kcal per capita)                          | X        |         |         | X        |         |         |
| Inflammatory bowel disease       | 2   | Red Meat (kcal per capita)                        | X        |         |         | X        |         |         |
| Inflammatory bowel disease       | 2   | Vegetables (kcal per capita)                      | X        |         |         | X        |         |         |
| Inflammatory bowel disease       | 2   | Health System Access 2 (unitless)                 |          | X       |         |          |         |         |
| Inflammatory bowel disease       | 2   | LDI (I\$ per capita)                              |          |         | X       |          |         | X       |
| Inflammatory bowel disease       | 2   | Education (years per capita)                      |          |         | X       |          |         | X       |
| Vascular intestinal disorders    | 1   | Health System Access (capped)                     |          |         |         |          | X       |         |
| Vascular intestinal disorders    | 1   | Latitude Over 45 (proportion)                     |          |         |         |          |         | X       |
| Vascular intestinal disorders    | 1   | Diabetes Fasting Plasma Glucose (mmol/L)          | X        |         |         | X        |         |         |
| Vascular intestinal disorders    | 1   | Diabetes Age-Standardized Prevalence (proportion) | X        |         |         | X        |         |         |
| Vascular intestinal disorders    | 1   | Diabetes Age-Specific Prevalence (proportion)     | X        |         |         | X        |         |         |
| Vascular intestinal disorders    | 1   | Systolic Blood Pressure (mmHg)                    | X        |         |         | X        |         |         |
| Vascular intestinal disorders    | 1   | Cholesterol (total, mean per capita)              | X        |         |         | X        |         |         |
| Vascular intestinal disorders    | 1   | Health System Access 2 (unitless)                 |          | X       |         |          |         |         |
| Vascular intestinal disorders    | 1   | Alcohol (liters per capita)                       |          | X       |         |          | X       |         |
| Vascular intestinal disorders    | 1   | Animal Fats (kcal per capita)                     |          | X       |         |          | X       |         |
| Vascular intestinal disorders    | 1   | Fruits (kcal per capita)                          |          | X       |         |          | X       |         |
| Vascular intestinal disorders    | 1   | Vegetables (kcal per capita)                      |          | X       |         |          | X       |         |
| Vascular intestinal disorders    | 1   | LDI (I\$ per capita)                              |          |         | X       |          |         | X       |
| Vascular intestinal disorders    | 1   | Education (years per capita)                      |          |         | X       |          |         | X       |
| Vascular intestinal disorders    | 2   | Health System Access (capped)                     |          |         |         |          | X       |         |
| Vascular intestinal disorders    | 2   | Latitude Over 45 (proportion)                     |          |         |         |          |         | X       |
| Vascular intestinal disorders    | 2   | Diabetes Fasting Plasma Glucose (mmol/L)          | X        |         |         | X        |         |         |
| Vascular intestinal disorders    | 2   | Diabetes Age-Standardized Prevalence (proportion) | X        |         |         | X        |         |         |
| Vascular intestinal disorders    | 2   | Diabetes Age-Specific Prevalence (proportion)     | X        |         |         | X        |         |         |
| Vascular intestinal disorders    | 2   | Systolic Blood Pressure (mmHg)                    | X        |         |         | X        |         |         |
| Vascular intestinal disorders    | 2   | Cholesterol (total, mean per capita)              | X        |         |         | X        |         |         |
| Vascular intestinal disorders    | 2   | Health System Access 2 (unitless)                 |          | X       |         |          |         |         |
| Vascular intestinal disorders    | 2   | Alcohol (liters per capita)                       |          | X       |         |          | X       |         |
| Vascular intestinal disorders    | 2   | Animal Fats (kcal per capita)                     |          | X       |         |          | X       |         |
| Vascular intestinal disorders    | 2   | Fruits (kcal per capita)                          |          | X       |         |          | X       |         |
| Vascular intestinal disorders    | 2   | Vegetables (kcal per capita)                      |          | X       |         |          | X       |         |
| Vascular intestinal disorders    | 2   | LDI (I\$ per capita)                              |          |         | X       |          |         | X       |
| Vascular intestinal disorders    | 2   | Education (years per capita)                      |          |         | X       |          |         | X       |
| Gallbladder and biliary diseases | 1   | Health System Access (capped)                     |          |         |         | X        |         |         |
| Gallbladder and biliary diseases | 1   | Health System Access 2 (unitless)                 | X        |         |         |          |         |         |
| Gallbladder and biliary diseases | 1   | Animal Fats (kcal per capita)                     | X        |         |         | X        |         |         |
| Gallbladder and biliary diseases | 1   | Mean BMI                                          | X        |         |         | X        |         |         |

**Web Table 23 - Comparison of covariates used in CoD models for GBD 2010 and GBD 2013**

| Cause Name                       | Sex | Covariate name                                    | GBD 2010 |         |         | GBD 2013 |         |         |
|----------------------------------|-----|---------------------------------------------------|----------|---------|---------|----------|---------|---------|
|                                  |     |                                                   | Level 1  | Level 2 | Level 3 | Level 1  | Level 2 | Level 3 |
| Gallbladder and biliary diseases | 1   | Alcohol (liters per capita)                       |          | X       |         |          | X       |         |
| Gallbladder and biliary diseases | 1   | Population Over 65 (proportion)                   |          | X       |         |          | X       |         |
| Gallbladder and biliary diseases | 1   | Red Meat (kcal per capita)                        |          | X       |         |          | X       |         |
| Gallbladder and biliary diseases | 1   | LDI (I\$ per capita)                              |          |         |         |          |         | X       |
| Gallbladder and biliary diseases | 1   | Education (years per capita)                      |          |         |         |          |         | X       |
| Gallbladder and biliary diseases | 2   | Health System Access (capped)                     |          |         |         | X        |         |         |
| Gallbladder and biliary diseases | 2   | Health System Access 2 (unitless)                 | X        |         |         |          |         |         |
| Gallbladder and biliary diseases | 2   | Animal Fats (kcal per capita)                     | X        |         |         | X        |         |         |
| Gallbladder and biliary diseases | 2   | Mean BMI                                          | X        |         |         | X        |         |         |
| Gallbladder and biliary diseases | 2   | Alcohol (liters per capita)                       |          | X       |         |          | X       |         |
| Gallbladder and biliary diseases | 2   | Population Over 65 (proportion)                   |          | X       |         |          | X       |         |
| Gallbladder and biliary diseases | 2   | Red Meat (kcal per capita)                        |          | X       |         |          | X       |         |
| Gallbladder and biliary diseases | 2   | LDI (I\$ per capita)                              |          |         |         |          |         | X       |
| Gallbladder and biliary diseases | 2   | Education (years per capita)                      |          |         |         |          |         | X       |
| Pancreatitis                     | 1   | Health System Access (capped)                     |          |         |         |          | X       |         |
| Pancreatitis                     | 1   | Alcohol (liters per capita)                       | X        |         |         | X        |         |         |
| Pancreatitis                     | 1   | Health System Access 2 (unitless)                 |          | X       |         |          |         |         |
| Pancreatitis                     | 1   | Mean BMI                                          |          | X       |         |          | X       |         |
| Pancreatitis                     | 1   | LDI (I\$ per capita)                              |          |         |         |          |         | X       |
| Pancreatitis                     | 1   | Education (years per capita)                      |          |         |         |          |         | X       |
| Pancreatitis                     | 2   | Health System Access (capped)                     |          |         |         |          | X       |         |
| Pancreatitis                     | 2   | Alcohol (liters per capita)                       | X        |         |         | X        |         |         |
| Pancreatitis                     | 2   | Health System Access 2 (unitless)                 |          | X       |         |          |         |         |
| Pancreatitis                     | 2   | Mean BMI                                          |          | X       |         |          | X       |         |
| Pancreatitis                     | 2   | LDI (I\$ per capita)                              |          |         |         |          |         | X       |
| Pancreatitis                     | 2   | Education (years per capita)                      |          |         |         |          |         | X       |
| Other digestive diseases         | 1   | Alcohol (liters per capita)                       | X        |         |         | X        |         |         |
| Other digestive diseases         | 1   | Cumulative Cigarettes (10 Years)                  | X        |         |         | X        |         |         |
| Other digestive diseases         | 1   | Cumulative Cigarettes (5 Years)                   | X        |         |         | X        |         |         |
| Other digestive diseases         | 1   | Smoking Prevalence                                | X        |         |         | X        |         |         |
| Other digestive diseases         | 1   | Animal Fats (kcal per capita)                     |          | X       |         |          | X       |         |
| Other digestive diseases         | 1   | Diabetes Age-Standardized Prevalence (proportion) |          | X       |         |          | X       |         |
| Other digestive diseases         | 1   | Fruits (kcal per capita)                          |          | X       |         |          | X       |         |
| Other digestive diseases         | 1   | Health System Access 2 (unitless)                 |          | X       |         |          | X       |         |
| Other digestive diseases         | 1   | Malnutrition (proportion <2SD weight for age)     |          | X       |         |          | X       |         |
| Other digestive diseases         | 1   | Mean BMI                                          |          | X       |         |          | X       |         |
| Other digestive diseases         | 1   | Red Meat (kcal per capita)                        |          | X       |         |          | X       |         |
| Other digestive diseases         | 1   | Sanitation (proportion with access)               |          | X       |         |          | X       |         |

**Web Table 23 - Comparison of covariates used in CoD models for GBD 2010 and GBD 2013**

| Cause Name                            | Sex | Covariate name                                    | GBD 2010 |         |         | GBD 2013 |         |         |
|---------------------------------------|-----|---------------------------------------------------|----------|---------|---------|----------|---------|---------|
|                                       |     |                                                   | Level 1  | Level 2 | Level 3 | Level 1  | Level 2 | Level 3 |
| Other digestive diseases              | 1   | Vegetables (kcal per capita)                      |          | X       |         |          | X       |         |
| Other digestive diseases              | 1   | Improved Water Source (proportion with access)    |          | X       |         |          | X       |         |
| Other digestive diseases              | 1   | LDI (I\$ per capita)                              |          |         |         |          |         | X       |
| Other digestive diseases              | 1   | Education (years per capita)                      |          |         |         |          |         | X       |
| Other digestive diseases              | 2   | Alcohol (liters per capita)                       | X        |         |         | X        |         |         |
| Other digestive diseases              | 2   | Cumulative Cigarettes (10 Years)                  | X        |         |         | X        |         |         |
| Other digestive diseases              | 2   | Cumulative Cigarettes (5 Years)                   | X        |         |         | X        |         |         |
| Other digestive diseases              | 2   | Smoking Prevalence                                | X        |         |         | X        |         |         |
| Other digestive diseases              | 2   | Animal Fats (kcal per capita)                     |          | X       |         |          | X       |         |
| Other digestive diseases              | 2   | Diabetes Age-Standardized Prevalence (proportion) |          | X       |         |          | X       |         |
| Other digestive diseases              | 2   | Fruits (kcal per capita)                          |          | X       |         |          | X       |         |
| Other digestive diseases              | 2   | Health System Access 2 (unitless)                 |          | X       |         |          | X       |         |
| Other digestive diseases              | 2   | Malnutrition (proportion <2SD weight for age)     |          | X       |         |          | X       |         |
| Other digestive diseases              | 2   | Mean BMI                                          |          | X       |         |          | X       |         |
| Other digestive diseases              | 2   | Red Meat (kcal per capita)                        |          | X       |         |          | X       |         |
| Other digestive diseases              | 2   | Sanitation (proportion with access)               |          | X       |         |          | X       |         |
| Other digestive diseases              | 2   | Vegetables (kcal per capita)                      |          | X       |         |          | X       |         |
| Other digestive diseases              | 2   | Improved Water Source (proportion with access)    |          | X       |         |          | X       |         |
| Other digestive diseases              | 2   | LDI (I\$ per capita)                              |          |         |         | X        |         | X       |
| Other digestive diseases              | 2   | Education (years per capita)                      |          |         |         | X        |         | X       |
| Alzheimer disease and other dementias | 1   | None                                              |          |         |         | X*       |         |         |
| Alzheimer disease and other dementias | 1   | Diabetes Age-Standardized Prevalence (proportion) | X        |         |         |          |         |         |
| Alzheimer disease and other dementias | 1   | Diabetes Age-Specific Prevalence (proportion)     | X        |         |         |          |         |         |
| Alzheimer disease and other dementias | 1   | Health System Access 2 (unitless)                 | X        |         |         |          |         |         |
| Alzheimer disease and other dementias | 1   | Mean BMI                                          | X        |         |         |          |         |         |
| Alzheimer disease and other dementias | 1   | Systolic Blood Pressure (mmHg)                    | X        |         |         |          |         |         |
| Alzheimer disease and other dementias | 1   | Cholesterol (total, mean per capita)              | X        |         |         |          |         |         |
| Alzheimer disease and other dementias | 1   | Animal Fats (kcal per capita)                     |          | X       |         |          |         |         |
| Alzheimer disease and other dementias | 1   | Latitude Over 45 (proportion)                     |          | X       |         |          |         |         |
| Alzheimer disease and other dementias | 1   | Red Meat (kcal per capita)                        |          | X       |         |          |         |         |
| Alzheimer disease and other dementias | 1   | LDI (I\$ per capita)                              |          |         |         | X        |         |         |
| Alzheimer disease and other dementias | 1   | Education (years per capita)                      |          |         |         | X        |         |         |
| Alzheimer disease and other dementias | 1   | Sanitation (proportion with access)               |          |         |         | X        |         |         |
| Alzheimer disease and other dementias | 1   | Improved Water Source (proportion with access)    |          |         |         | X        |         |         |
| Alzheimer disease and other dementias | 2   | None                                              |          |         |         | X*       |         |         |
| Alzheimer disease and other dementias | 2   | Diabetes Age-Standardized Prevalence (proportion) | X        |         |         |          |         |         |
| Alzheimer disease and other dementias | 2   | Diabetes Age-Specific Prevalence (proportion)     | X        |         |         |          |         |         |
| Alzheimer disease and other dementias | 2   | Health System Access 2 (unitless)                 | X        |         |         |          |         |         |

**Web Table 23 - Comparison of covariates used in CoD models for GBD 2010 and GBD 2013**

| Cause Name                            | Sex | Covariate name                                      | GBD 2010 |         |         | GBD 2013 |         |         |
|---------------------------------------|-----|-----------------------------------------------------|----------|---------|---------|----------|---------|---------|
|                                       |     |                                                     | Level 1  | Level 2 | Level 3 | Level 1  | Level 2 | Level 3 |
| Alzheimer disease and other dementias | 2   | Mean BMI                                            | X        |         |         |          |         |         |
| Alzheimer disease and other dementias | 2   | Systolic Blood Pressure (mmHg)                      | X        |         |         |          |         |         |
| Alzheimer disease and other dementias | 2   | Cholesterol (total, mean per capita)                | X        |         |         |          |         |         |
| Alzheimer disease and other dementias | 2   | Animal Fats (kcal per capita)                       |          | X       |         |          |         |         |
| Alzheimer disease and other dementias | 2   | Latitude Over 45 (proportion)                       |          | X       |         |          |         |         |
| Alzheimer disease and other dementias | 2   | Red Meat (kcal per capita)                          |          | X       |         |          |         |         |
| Alzheimer disease and other dementias | 2   | LDI (I\$ per capita)                                |          |         | X       |          |         |         |
| Alzheimer disease and other dementias | 2   | Education (years per capita)                        |          |         | X       |          |         |         |
| Alzheimer disease and other dementias | 2   | Sanitation (proportion with access)                 |          |         | X       |          |         |         |
| Alzheimer disease and other dementias | 2   | Improved Water Source (proportion with access)      |          |         | X       |          |         |         |
| Parkinson disease                     | 1   | Health System Access (capped)                       |          |         |         | X        |         |         |
| Parkinson disease                     | 1   | Absolute value of average latitude                  |          |         |         |          | X       |         |
| Parkinson disease                     | 1   | Health System Access 2 (unitless)                   | X        |         |         |          |         |         |
| Parkinson disease                     | 1   | Population Density (under 150 ppl/sqkm, proportion) | X        |         |         |          |         |         |
| Parkinson disease                     | 1   | Cholesterol (total, mean per capita)                | X        |         |         |          | X       |         |
| Parkinson disease                     | 1   | Latitude Over 45 (proportion)                       |          | X       |         |          |         |         |
| Parkinson disease                     | 1   | Vegetables (kcal per capita)                        |          | X       |         |          |         |         |
| Parkinson disease                     | 1   | Cumulative Cigarettes (10 Years)                    |          | X       |         | X        |         |         |
| Parkinson disease                     | 1   | Cumulative Cigarettes (5 Years)                     |          | X       |         | X        |         |         |
| Parkinson disease                     | 1   | Fruits (kcal per capita)                            |          | X       |         |          | X       |         |
| Parkinson disease                     | 1   | Smoking Prevalence                                  |          |         | X       |          |         |         |
| Parkinson disease                     | 1   | Sanitation (proportion with access)                 |          |         | X       |          | X       |         |
| Parkinson disease                     | 1   | Improved Water Source (proportion with access)      |          |         | X       |          | X       |         |
| Parkinson disease                     | 1   | LDI (I\$ per capita)                                |          |         | X       |          |         | X       |
| Parkinson disease                     | 1   | Education (years per capita)                        |          |         | X       |          |         | X       |
| Parkinson disease                     | 2   | Health System Access (capped)                       |          |         |         | X        |         |         |
| Parkinson disease                     | 2   | Absolute value of average latitude                  |          |         |         |          | X       |         |
| Parkinson disease                     | 2   | Health System Access 2 (unitless)                   | X        |         |         |          |         |         |
| Parkinson disease                     | 2   | Population Density (under 150 ppl/sqkm, proportion) | X        |         |         |          |         |         |
| Parkinson disease                     | 2   | Cholesterol (total, mean per capita)                | X        |         |         |          | X       |         |
| Parkinson disease                     | 2   | Latitude Over 45 (proportion)                       |          | X       |         |          |         |         |
| Parkinson disease                     | 2   | Vegetables (kcal per capita)                        |          | X       |         |          |         |         |
| Parkinson disease                     | 2   | Cumulative Cigarettes (10 Years)                    |          | X       |         | X        |         |         |
| Parkinson disease                     | 2   | Cumulative Cigarettes (5 Years)                     |          | X       |         | X        |         |         |
| Parkinson disease                     | 2   | Fruits (kcal per capita)                            |          | X       |         |          | X       |         |
| Parkinson disease                     | 2   | Smoking Prevalence                                  |          |         | X       |          |         |         |
| Parkinson disease                     | 2   | Sanitation (proportion with access)                 |          |         | X       |          | X       |         |
| Parkinson disease                     | 2   | Improved Water Source (proportion with access)      |          |         | X       |          | X       |         |

**Web Table 23 - Comparison of covariates used in CoD models for GBD 2010 and GBD 2013**

| Cause Name         | Sex | Covariate name                       | GBD 2010 |         |         | GBD 2013 |         |         |
|--------------------|-----|--------------------------------------|----------|---------|---------|----------|---------|---------|
|                    |     |                                      | Level 1  | Level 2 | Level 3 | Level 1  | Level 2 | Level 3 |
| Parkinson disease  | 2   | LDI (I\$ per capita)                 |          |         | X       |          |         | X       |
| Parkinson disease  | 2   | Education (years per capita)         |          |         | X       |          |         | X       |
| Epilepsy           | 1   | Health System Access (capped)        |          |         |         | X        |         |         |
| Epilepsy           | 1   | Pigs (per capita)                    |          |         |         | X        |         |         |
| Epilepsy           | 1   | Health System Access 2 (unitless)    | X        |         |         |          |         |         |
| Epilepsy           | 1   | Systolic Blood Pressure (mmHg)       | X        |         |         | X        |         |         |
| Epilepsy           | 1   | Pig Meat (kg per capita)             | X        |         |         | X        |         |         |
| Epilepsy           | 1   | Mean BMI                             | X        |         |         |          | X       |         |
| Epilepsy           | 1   | Cholesterol (total, mean per capita) | X        |         |         |          | X       |         |
| Epilepsy           | 1   | Animal Fats (kcal per capita)        |          | X       |         |          |         |         |
| Epilepsy           | 1   | Fruits (kcal per capita)             |          | X       |         |          |         |         |
| Epilepsy           | 1   | Red Meat (kcal per capita)           |          | X       |         |          |         |         |
| Epilepsy           | 1   | Smoking Prevalence                   |          |         | X       |          |         |         |
| Epilepsy           | 1   | LDI (I\$ per capita)                 |          |         | X       |          |         | X       |
| Epilepsy           | 1   | Cumulative Cigarettes (10 Years)     |          |         | X       |          |         | X       |
| Epilepsy           | 1   | Cumulative Cigarettes (5 Years)      |          |         | X       |          |         | X       |
| Epilepsy           | 1   | Education (years per capita)         |          |         | X       |          |         | X       |
| Epilepsy           | 2   | Health System Access (capped)        |          |         |         | X        |         |         |
| Epilepsy           | 2   | Pigs (per capita)                    |          |         |         | X        |         |         |
| Epilepsy           | 2   | Health System Access 2 (unitless)    | X        |         |         |          |         |         |
| Epilepsy           | 2   | Systolic Blood Pressure (mmHg)       | X        |         |         | X        |         |         |
| Epilepsy           | 2   | Pig Meat (kg per capita)             | X        |         |         | X        |         |         |
| Epilepsy           | 2   | Mean BMI                             | X        |         |         |          | X       |         |
| Epilepsy           | 2   | Cholesterol (total, mean per capita) | X        |         |         |          | X       |         |
| Epilepsy           | 2   | Animal Fats (kcal per capita)        |          | X       |         |          |         |         |
| Epilepsy           | 2   | Fruits (kcal per capita)             |          | X       |         |          |         |         |
| Epilepsy           | 2   | Red Meat (kcal per capita)           |          | X       |         |          |         |         |
| Epilepsy           | 2   | Smoking Prevalence                   |          |         | X       |          |         |         |
| Epilepsy           | 2   | LDI (I\$ per capita)                 |          |         | X       |          |         | X       |
| Epilepsy           | 2   | Cumulative Cigarettes (10 Years)     |          |         | X       |          |         | X       |
| Epilepsy           | 2   | Cumulative Cigarettes (5 Years)      |          |         | X       |          |         | X       |
| Epilepsy           | 2   | Education (years per capita)         |          |         | X       |          |         | X       |
| Multiple sclerosis | 1   | Absolute value of average latitude   |          |         |         | X        |         |         |
| Multiple sclerosis | 1   | Health System Access (capped)        |          |         |         | X        |         |         |
| Multiple sclerosis | 1   | Health System Access 2 (unitless)    | X        |         |         |          |         |         |
| Multiple sclerosis | 1   | Latitude 30 to 45 (proportion)       | X        |         |         |          |         |         |
| Multiple sclerosis | 1   | Latitude Over 45 (proportion)        | X        |         |         |          |         |         |
| Multiple sclerosis | 1   | Animal Fats (kcal per capita)        |          | X       |         |          | X       |         |

**Web Table 23 - Comparison of covariates used in CoD models for GBD 2010 and GBD 2013**

| Cause Name                   | Sex | Covariate name                                      | GBD 2010 |         |         | GBD 2013 |         |         |
|------------------------------|-----|-----------------------------------------------------|----------|---------|---------|----------|---------|---------|
|                              |     |                                                     | Level 1  | Level 2 | Level 3 | Level 1  | Level 2 | Level 3 |
| Multiple sclerosis           | 1   | Cholesterol (total, mean per capita)                |          | X       |         |          | X       |         |
| Multiple sclerosis           | 1   | Elevation Over 1500m (proportion)                   |          |         | X       |          |         |         |
| Multiple sclerosis           | 1   | LDI (I\$ per capita)                                |          |         | X       |          |         | X       |
| Multiple sclerosis           | 1   | Cumulative Cigarettes (10 Years)                    |          |         | X       |          |         | X       |
| Multiple sclerosis           | 1   | Cumulative Cigarettes (5 Years)                     |          |         | X       |          |         | X       |
| Multiple sclerosis           | 1   | Education (years per capita)                        |          |         | X       |          |         | X       |
| Multiple sclerosis           | 1   | Smoking Prevalence                                  |          |         | X       |          |         | X       |
| Multiple sclerosis           | 2   | Absolute value of average latitude                  |          |         |         | X        |         |         |
| Multiple sclerosis           | 2   | Health System Access (capped)                       |          |         |         | X        |         |         |
| Multiple sclerosis           | 2   | Health System Access 2 (unitless)                   | X        |         |         |          |         |         |
| Multiple sclerosis           | 2   | Latitude 30 to 45 (proportion)                      | X        |         |         |          |         |         |
| Multiple sclerosis           | 2   | Latitude Over 45 (proportion)                       | X        |         |         |          |         |         |
| Multiple sclerosis           | 2   | Animal Fats (kcal per capita)                       |          | X       |         |          | X       |         |
| Multiple sclerosis           | 2   | Cholesterol (total, mean per capita)                |          | X       |         |          | X       |         |
| Multiple sclerosis           | 2   | Elevation Over 1500m (proportion)                   |          |         | X       |          |         |         |
| Multiple sclerosis           | 2   | LDI (I\$ per capita)                                |          |         | X       |          |         | X       |
| Multiple sclerosis           | 2   | Cumulative Cigarettes (10 Years)                    |          |         | X       |          |         | X       |
| Multiple sclerosis           | 2   | Cumulative Cigarettes (5 Years)                     |          |         | X       |          |         | X       |
| Multiple sclerosis           | 2   | Education (years per capita)                        |          |         | X       |          |         | X       |
| Multiple sclerosis           | 2   | Smoking Prevalence                                  |          |         | X       |          |         | X       |
| Other neurological disorders | 1   | Health System Access 2 (unitless)                   | X        |         |         | X        |         |         |
| Other neurological disorders | 1   | Malnutrition (proportion <2SD weight for age)       | X        |         |         | X        |         |         |
| Other neurological disorders | 1   | Mean BMI                                            | X        |         |         | X        |         |         |
| Other neurological disorders | 1   | Systolic Blood Pressure (mmHg)                      | X        |         |         | X        |         |         |
| Other neurological disorders | 1   | Cholesterol (total, mean per capita)                | X        |         |         | X        |         |         |
| Other neurological disorders | 1   | Pig Meat (kg per capita)                            | X        |         |         | X        |         |         |
| Other neurological disorders | 1   | Alcohol (liters per capita)                         |          | X       |         |          | X       |         |
| Other neurological disorders | 1   | Animal Fats (kcal per capita)                       |          | X       |         |          | X       |         |
| Other neurological disorders | 1   | Fruits (kcal per capita)                            |          | X       |         |          | X       |         |
| Other neurological disorders | 1   | Population Density (over 1000 ppl/sqkm, proportion) |          | X       |         |          | X       |         |
| Other neurological disorders | 1   | Red Meat (kcal per capita)                          |          | X       |         |          | X       |         |
| Other neurological disorders | 1   | LDI (I\$ per capita)                                |          |         | X       |          |         | X       |
| Other neurological disorders | 1   | Cumulative Cigarettes (10 Years)                    |          |         | X       |          |         | X       |
| Other neurological disorders | 1   | Cumulative Cigarettes (5 Years)                     |          |         | X       |          |         | X       |
| Other neurological disorders | 1   | Education (years per capita)                        |          |         | X       |          |         | X       |
| Other neurological disorders | 1   | Smoking Prevalence                                  |          |         | X       |          |         | X       |
| Other neurological disorders | 2   | Health System Access 2 (unitless)                   | X        |         |         | X        |         |         |
| Other neurological disorders | 2   | Malnutrition (proportion <2SD weight for age)       | X        |         |         | X        |         |         |

**Web Table 23 - Comparison of covariates used in CoD models for GBD 2010 and GBD 2013**

| Cause Name                   | Sex | Covariate name                                      | GBD 2010 |         |         | GBD 2013 |         |         |
|------------------------------|-----|-----------------------------------------------------|----------|---------|---------|----------|---------|---------|
|                              |     |                                                     | Level 1  | Level 2 | Level 3 | Level 1  | Level 2 | Level 3 |
| Other neurological disorders | 2   | Mean BMI                                            | X        |         |         | X        |         |         |
| Other neurological disorders | 2   | Systolic Blood Pressure (mmHg)                      | X        |         |         | X        |         |         |
| Other neurological disorders | 2   | Cholesterol (total, mean per capita)                | X        |         |         | X        |         |         |
| Other neurological disorders | 2   | Pig Meat (kg per capita)                            | X        |         |         | X        |         |         |
| Other neurological disorders | 2   | Alcohol (liters per capita)                         |          | X       |         |          | X       |         |
| Other neurological disorders | 2   | Animal Fats (kcal per capita)                       |          | X       |         |          | X       |         |
| Other neurological disorders | 2   | Fruits (kcal per capita)                            |          | X       |         |          | X       |         |
| Other neurological disorders | 2   | Population Density (over 1000 ppl/sqkm, proportion) |          | X       |         |          | X       |         |
| Other neurological disorders | 2   | Red Meat (kcal per capita)                          |          | X       |         |          | X       |         |
| Other neurological disorders | 2   | LDI (I\$ per capita)                                |          |         |         | X        |         | X       |
| Other neurological disorders | 2   | Cumulative Cigarettes (10 Years)                    |          |         |         | X        |         | X       |
| Other neurological disorders | 2   | Cumulative Cigarettes (5 Years)                     |          |         |         | X        |         | X       |
| Other neurological disorders | 2   | Education (years per capita)                        |          |         |         | X        |         | X       |
| Other neurological disorders | 2   | Smoking Prevalence                                  |          |         |         | X        |         | X       |
| Schizophrenia                | 1   | Mean BMI                                            | X        |         |         |          |         |         |
| Schizophrenia                | 1   | Systolic Blood Pressure (mmHg)                      | X        |         |         |          |         |         |
| Schizophrenia                | 1   | Cholesterol (total, mean per capita)                | X        |         |         |          |         |         |
| Schizophrenia                | 1   | Pig Meat (kg per capita)                            | X        |         |         |          |         |         |
| Schizophrenia                | 1   | Population Density (over 1000 ppl/sqkm, proportion) | X        |         |         |          |         |         |
| Schizophrenia                | 1   | Health System Access 2 (unitless)                   | X        |         |         | X        |         |         |
| Schizophrenia                | 1   | Malnutrition (proportion <2SD weight for age)       | X        |         |         | X        |         |         |
| Schizophrenia                | 1   | Animal Fats (kcal per capita)                       |          | X       |         |          |         |         |
| Schizophrenia                | 1   | Fruits (kcal per capita)                            |          | X       |         |          |         |         |
| Schizophrenia                | 1   | Opium Cultivation (binary)                          |          | X       |         |          |         |         |
| Schizophrenia                | 1   | Red Meat (kcal per capita)                          |          | X       |         |          |         |         |
| Schizophrenia                | 1   | Alcohol (liters per capita)                         |          | X       |         |          | X       |         |
| Schizophrenia                | 1   | Cumulative Cigarettes (20 Years)                    |          | X       |         |          | X       |         |
| Schizophrenia                | 1   | Smoking Prevalence                                  |          | X       |         |          | X       |         |
| Schizophrenia                | 1   | LDI (I\$ per capita)                                |          |         |         | X        |         | X       |
| Schizophrenia                | 1   | Education (years per capita)                        |          |         |         | X        |         | X       |
| Schizophrenia                | 2   | Mean BMI                                            | X        |         |         |          |         |         |
| Schizophrenia                | 2   | Systolic Blood Pressure (mmHg)                      | X        |         |         |          |         |         |
| Schizophrenia                | 2   | Cholesterol (total, mean per capita)                | X        |         |         |          |         |         |
| Schizophrenia                | 2   | Pig Meat (kg per capita)                            | X        |         |         |          |         |         |
| Schizophrenia                | 2   | Population Density (over 1000 ppl/sqkm, proportion) | X        |         |         |          |         |         |
| Schizophrenia                | 2   | Health System Access 2 (unitless)                   | X        |         |         | X        |         |         |
| Schizophrenia                | 2   | Malnutrition (proportion <2SD weight for age)       | X        |         |         | X        |         |         |
| Schizophrenia                | 2   | Animal Fats (kcal per capita)                       |          | X       |         |          |         |         |



**Web Table 23 - Comparison of covariates used in CoD models for GBD 2010 and GBD 2013**

| Cause Name            | Sex | Covariate name                       | GBD 2010 |         |         | GBD 2013 |         |         |
|-----------------------|-----|--------------------------------------|----------|---------|---------|----------|---------|---------|
|                       |     |                                      | Level 1  | Level 2 | Level 3 | Level 1  | Level 2 | Level 3 |
| Schizophrenia         | 2   | Fruits (kcal per capita)             |          | X       |         |          |         |         |
| Schizophrenia         | 2   | Opium Cultivation (binary)           |          | X       |         |          |         |         |
| Schizophrenia         | 2   | Red Meat (kcal per capita)           |          | X       |         |          |         |         |
| Schizophrenia         | 2   | Alcohol (liters per capita)          |          | X       |         |          | X       |         |
| Schizophrenia         | 2   | Cumulative Cigarettes (20 Years)     |          | X       |         |          | X       |         |
| Schizophrenia         | 2   | Smoking Prevalence                   |          | X       |         |          | X       |         |
| Schizophrenia         | 2   | LDI (I\$ per capita)                 |          |         |         |          |         | X       |
| Schizophrenia         | 2   | Education (years per capita)         |          |         |         |          |         | X       |
| Alcohol use disorders | 1   | Alcohol (liters per capita)          | X        |         |         | X        |         |         |
| Alcohol use disorders | 1   | Cumulative Cigarettes (10 Years)     |          | X       |         |          | X       |         |
| Alcohol use disorders | 1   | Health System Access 2 (unitless)    |          | X       |         |          | X       |         |
| Alcohol use disorders | 1   | Mean BMI                             |          | X       |         |          | X       |         |
| Alcohol use disorders | 1   | Systolic Blood Pressure (mmHg)       |          | X       |         |          | X       |         |
| Alcohol use disorders | 1   | Cholesterol (total, mean per capita) |          | X       |         |          | X       |         |
| Alcohol use disorders | 1   | Red Meat (kcal per capita)           |          | X       |         |          | X       |         |
| Alcohol use disorders | 1   | Religion (binary, >50% Muslim)       |          | X       |         |          | X       |         |
| Alcohol use disorders | 1   | Smoking Prevalence                   |          | X       |         |          | X       |         |
| Alcohol use disorders | 1   | LDI (I\$ per capita)                 |          |         |         |          |         | X       |
| Alcohol use disorders | 1   | Education (years per capita)         |          |         |         |          |         | X       |
| Alcohol use disorders | 2   | Alcohol (liters per capita)          | X        |         |         | X        |         |         |
| Alcohol use disorders | 2   | Cumulative Cigarettes (10 Years)     |          | X       |         |          | X       |         |
| Alcohol use disorders | 2   | Health System Access 2 (unitless)    |          | X       |         |          | X       |         |
| Alcohol use disorders | 2   | Mean BMI                             |          | X       |         |          | X       |         |
| Alcohol use disorders | 2   | Systolic Blood Pressure (mmHg)       |          | X       |         |          | X       |         |
| Alcohol use disorders | 2   | Cholesterol (total, mean per capita) |          | X       |         |          | X       |         |
| Alcohol use disorders | 2   | Red Meat (kcal per capita)           |          | X       |         |          | X       |         |
| Alcohol use disorders | 2   | Religion (binary, >50% Muslim)       |          | X       |         |          | X       |         |
| Alcohol use disorders | 2   | Smoking Prevalence                   |          | X       |         |          | X       |         |
| Alcohol use disorders | 2   | LDI (I\$ per capita)                 |          |         |         |          |         | X       |
| Alcohol use disorders | 2   | Education (years per capita)         |          |         |         |          |         | X       |
| Drug use disorders    | 1   | Alcohol (liters per capita)          | X        |         |         | X        |         |         |
| Drug use disorders    | 1   | Cumulative Cigarettes (10 Years)     | X        |         |         | X        |         |         |
| Drug use disorders    | 1   | Cumulative Cigarettes (5 Years)      | X        |         |         | X        |         |         |
| Drug use disorders    | 1   | Health System Access 2 (unitless)    | X        |         |         | X        |         |         |
| Drug use disorders    | 1   | Opium Cultivation (binary)           | X        |         |         | X        |         |         |
| Drug use disorders    | 1   | Smoking Prevalence                   | X        |         |         | X        |         |         |
| Drug use disorders    | 1   | Mean BMI                             |          | X       |         |          |         |         |
| Drug use disorders    | 1   | Systolic Blood Pressure (mmHg)       |          | X       |         |          |         |         |

**Web Table 23 - Comparison of covariates used in CoD models for GBD 2010 and GBD 2013**

| Cause Name            | Sex | Covariate name                       | GBD 2010 |         |         | GBD 2013 |         |         |
|-----------------------|-----|--------------------------------------|----------|---------|---------|----------|---------|---------|
|                       |     |                                      | Level 1  | Level 2 | Level 3 | Level 1  | Level 2 | Level 3 |
| Drug use disorders    | 1   | Cholesterol (total, mean per capita) |          | X       |         |          |         |         |
| Drug use disorders    | 1   | LDI (I\$ per capita)                 |          |         | X       |          |         | X       |
| Drug use disorders    | 1   | Education (years per capita)         |          |         | X       |          |         | X       |
| Drug use disorders    | 2   | Alcohol (liters per capita)          | X        |         |         | X        |         |         |
| Drug use disorders    | 2   | Cumulative Cigarettes (10 Years)     | X        |         |         | X        |         |         |
| Drug use disorders    | 2   | Cumulative Cigarettes (5 Years)      | X        |         |         | X        |         |         |
| Drug use disorders    | 2   | Health System Access 2 (unitless)    | X        |         |         | X        |         |         |
| Drug use disorders    | 2   | Opium Cultivation (binary)           | X        |         |         | X        |         |         |
| Drug use disorders    | 2   | Smoking Prevalence                   | X        |         |         | X        |         |         |
| Drug use disorders    | 2   | Mean BMI                             |          | X       |         |          |         |         |
| Drug use disorders    | 2   | Systolic Blood Pressure (mmHg)       |          | X       |         |          |         |         |
| Drug use disorders    | 2   | Cholesterol (total, mean per capita) |          | X       |         |          |         |         |
| Drug use disorders    | 2   | LDI (I\$ per capita)                 |          |         | X       |          |         | X       |
| Drug use disorders    | 2   | Education (years per capita)         |          |         | X       |          |         | X       |
| Opioid use disorders  | 1   | LDI (I\$ per capita)                 |          |         | X*      |          |         |         |
| Opioid use disorders  | 1   | Alcohol (liters per capita)          | X*       |         |         | X*       |         |         |
| Opioid use disorders  | 1   | Cumulative Cigarettes (10 Years)     | X*       |         |         |          |         |         |
| Opioid use disorders  | 1   | Cumulative Cigarettes (5 Years)      | X*       |         |         |          |         |         |
| Opioid use disorders  | 1   | Education (years per capita)         |          |         | X*      |          |         |         |
| Opioid use disorders  | 1   | Health System Access 2 (unitless)    | X*       |         |         |          |         |         |
| Opioid use disorders  | 1   | Mean BMI                             |          | X*      |         |          |         |         |
| Opioid use disorders  | 1   | Systolic Blood Pressure (mmHg)       |          | X*      |         |          |         |         |
| Opioid use disorders  | 1   | Cholesterol (total, mean per capita) |          | X*      |         |          |         |         |
| Opioid use disorders  | 1   | Opium Cultivation (binary)           | X*       |         |         |          |         |         |
| Opioid use disorders  | 1   | Smoking Prevalence                   | X*       |         |         |          |         |         |
| Opioid use disorders  | 2   | LDI (I\$ per capita)                 |          |         | X*      |          |         |         |
| Opioid use disorders  | 2   | Alcohol (liters per capita)          | X*       |         |         | X*       |         |         |
| Opioid use disorders  | 2   | Cumulative Cigarettes (10 Years)     | X*       |         |         |          |         |         |
| Opioid use disorders  | 2   | Cumulative Cigarettes (5 Years)      | X*       |         |         |          |         |         |
| Opioid use disorders  | 2   | Education (years per capita)         |          |         | X*      |          |         |         |
| Opioid use disorders  | 2   | Health System Access 2 (unitless)    | X*       |         |         |          |         |         |
| Opioid use disorders  | 2   | Mean BMI                             |          | X*      |         |          |         |         |
| Opioid use disorders  | 2   | Systolic Blood Pressure (mmHg)       |          | X*      |         |          |         |         |
| Opioid use disorders  | 2   | Cholesterol (total, mean per capita) |          | X*      |         |          |         |         |
| Opioid use disorders  | 2   | Opium Cultivation (binary)           | X*       |         |         |          |         |         |
| Opioid use disorders  | 2   | Smoking Prevalence                   | X*       |         |         |          |         |         |
| Cocaine use disorders | 1   | LDI (I\$ per capita)                 |          |         | X*      |          |         |         |
| Cocaine use disorders | 1   | Alcohol (liters per capita)          | X*       |         |         |          |         |         |

**Web Table 23 - Comparison of covariates used in CoD models for GBD 2010 and GBD 2013**

| Cause Name                | Sex | Covariate name                       | GBD 2010 |         |         | GBD 2013 |         |         |
|---------------------------|-----|--------------------------------------|----------|---------|---------|----------|---------|---------|
|                           |     |                                      | Level 1  | Level 2 | Level 3 | Level 1  | Level 2 | Level 3 |
| Cocaine use disorders     | 1   | Cumulative Cigarettes (10 Years)     | X*       |         |         | X*       |         |         |
| Cocaine use disorders     | 1   | Cumulative Cigarettes (5 Years)      | X*       |         |         |          |         |         |
| Cocaine use disorders     | 1   | Education (years per capita)         |          |         | X*      |          |         |         |
| Cocaine use disorders     | 1   | Health System Access 2 (unitless)    | X*       |         |         |          |         |         |
| Cocaine use disorders     | 1   | Mean BMI                             |          | X*      |         |          |         |         |
| Cocaine use disorders     | 1   | Systolic Blood Pressure (mmHg)       |          | X*      |         |          |         |         |
| Cocaine use disorders     | 1   | Cholesterol (total, mean per capita) |          | X*      |         |          |         |         |
| Cocaine use disorders     | 1   | Opium Cultivation (binary)           | X*       |         |         |          |         |         |
| Cocaine use disorders     | 1   | Smoking Prevalence                   | X*       |         |         |          |         |         |
| Cocaine use disorders     | 2   | LDI (I\$ per capita)                 |          |         | X*      |          |         |         |
| Cocaine use disorders     | 2   | Alcohol (liters per capita)          | X*       |         |         |          |         |         |
| Cocaine use disorders     | 2   | Cumulative Cigarettes (10 Years)     | X*       |         |         | X*       |         |         |
| Cocaine use disorders     | 2   | Cumulative Cigarettes (5 Years)      | X*       |         |         |          |         |         |
| Cocaine use disorders     | 2   | Education (years per capita)         |          |         | X*      |          |         |         |
| Cocaine use disorders     | 2   | Health System Access 2 (unitless)    | X*       |         |         |          |         |         |
| Cocaine use disorders     | 2   | Mean BMI                             |          | X*      |         |          |         |         |
| Cocaine use disorders     | 2   | Systolic Blood Pressure (mmHg)       |          | X*      |         |          |         |         |
| Cocaine use disorders     | 2   | Cholesterol (total, mean per capita) |          | X*      |         |          |         |         |
| Cocaine use disorders     | 2   | Opium Cultivation (binary)           | X*       |         |         |          |         |         |
| Cocaine use disorders     | 2   | Smoking Prevalence                   | X*       |         |         |          |         |         |
| Amphetamine use disorders | 1   | LDI (I\$ per capita)                 |          |         | X*      |          |         |         |
| Amphetamine use disorders | 1   | Alcohol (liters per capita)          | X*       |         |         |          |         |         |
| Amphetamine use disorders | 1   | Cumulative Cigarettes (10 Years)     | X*       |         |         |          |         |         |
| Amphetamine use disorders | 1   | Cumulative Cigarettes (5 Years)      | X*       |         |         | X*       |         |         |
| Amphetamine use disorders | 1   | Education (years per capita)         |          |         | X*      |          |         |         |
| Amphetamine use disorders | 1   | Health System Access 2 (unitless)    | X*       |         |         |          |         |         |
| Amphetamine use disorders | 1   | Mean BMI                             |          | X*      |         |          |         |         |
| Amphetamine use disorders | 1   | Systolic Blood Pressure (mmHg)       |          | X*      |         |          |         |         |
| Amphetamine use disorders | 1   | Cholesterol (total, mean per capita) |          | X*      |         |          |         |         |
| Amphetamine use disorders | 1   | Opium Cultivation (binary)           | X*       |         |         |          |         |         |
| Amphetamine use disorders | 1   | Smoking Prevalence                   | X*       |         |         |          |         |         |
| Amphetamine use disorders | 2   | LDI (I\$ per capita)                 |          |         | X*      |          |         |         |
| Amphetamine use disorders | 2   | Alcohol (liters per capita)          | X*       |         |         |          |         |         |
| Amphetamine use disorders | 2   | Cumulative Cigarettes (10 Years)     | X*       |         |         |          |         |         |
| Amphetamine use disorders | 2   | Cumulative Cigarettes (5 Years)      | X*       |         |         | X*       |         |         |
| Amphetamine use disorders | 2   | Education (years per capita)         |          |         | X*      |          |         |         |
| Amphetamine use disorders | 2   | Health System Access 2 (unitless)    | X*       |         |         |          |         |         |
| Amphetamine use disorders | 2   | Mean BMI                             |          | X*      |         |          |         |         |

**Web Table 23 - Comparison of covariates used in CoD models for GBD 2010 and GBD 2013**

| Cause Name                | Sex | Covariate name                                    | GBD 2010 |         |         | GBD 2013 |         |         |
|---------------------------|-----|---------------------------------------------------|----------|---------|---------|----------|---------|---------|
|                           |     |                                                   | Level 1  | Level 2 | Level 3 | Level 1  | Level 2 | Level 3 |
| Amphetamine use disorders | 2   | Systolic Blood Pressure (mmHg)                    |          | X*      |         |          |         |         |
| Amphetamine use disorders | 2   | Cholesterol (total, mean per capita)              |          | X*      |         |          |         |         |
| Amphetamine use disorders | 2   | Opium Cultivation (binary)                        | X*       |         |         |          |         |         |
| Amphetamine use disorders | 2   | Smoking Prevalence                                | X*       |         |         |          |         |         |
| Other drug use disorders  | 1   | LDI (I\$ per capita)                              |          |         | X*      | X*       |         |         |
| Other drug use disorders  | 1   | Alcohol (liters per capita)                       | X*       |         |         |          |         |         |
| Other drug use disorders  | 1   | Cumulative Cigarettes (10 Years)                  | X*       |         |         |          |         |         |
| Other drug use disorders  | 1   | Cumulative Cigarettes (5 Years)                   | X*       |         |         |          |         |         |
| Other drug use disorders  | 1   | Education (years per capita)                      |          |         | X*      | X*       |         |         |
| Other drug use disorders  | 1   | Health System Access 2 (unitless)                 | X*       |         |         |          |         |         |
| Other drug use disorders  | 1   | Health System Access (capped)                     |          |         |         | X*       |         |         |
| Other drug use disorders  | 1   | Mean BMI                                          |          | X*      |         |          |         |         |
| Other drug use disorders  | 1   | Systolic Blood Pressure (mmHg)                    |          | X*      |         |          |         |         |
| Other drug use disorders  | 1   | Cholesterol (total, mean per capita)              |          | X*      |         |          |         |         |
| Other drug use disorders  | 1   | Opium Cultivation (binary)                        | X*       |         |         | X*       |         |         |
| Other drug use disorders  | 1   | Smoking Prevalence                                | X*       |         |         | X*       |         |         |
| Other drug use disorders  | 2   | LDI (I\$ per capita)                              |          |         | X*      | X*       |         |         |
| Other drug use disorders  | 2   | Alcohol (liters per capita)                       | X*       |         |         |          |         |         |
| Other drug use disorders  | 2   | Cumulative Cigarettes (10 Years)                  | X*       |         |         |          |         |         |
| Other drug use disorders  | 2   | Cumulative Cigarettes (5 Years)                   | X*       |         |         |          |         |         |
| Other drug use disorders  | 2   | Education (years per capita)                      |          |         | X*      | X*       |         |         |
| Other drug use disorders  | 2   | Health System Access 2 (unitless)                 | X*       |         |         |          |         |         |
| Other drug use disorders  | 2   | Health System Access (capped)                     |          |         |         | X*       |         |         |
| Other drug use disorders  | 2   | Mean BMI                                          |          | X*      |         |          |         |         |
| Other drug use disorders  | 2   | Systolic Blood Pressure (mmHg)                    |          | X*      |         |          |         |         |
| Other drug use disorders  | 2   | Cholesterol (total, mean per capita)              |          | X*      |         |          |         |         |
| Other drug use disorders  | 2   | Opium Cultivation (binary)                        | X*       |         |         | X*       |         |         |
| Other drug use disorders  | 2   | Smoking Prevalence                                | X*       |         |         | X*       |         |         |
| Eating disorders          | 1   | LDI (I\$ per capita)                              | X*       |         |         | X*       |         |         |
| Eating disorders          | 2   | LDI (I\$ per capita)                              | X*       |         |         | X*       |         |         |
| Diabetes mellitus         | 1   | Diabetes Age-Specific Prevalence (proportion)     | X        |         |         |          |         |         |
| Diabetes mellitus         | 1   | Diabetes Fasting Plasma Glucose (mmol/L)          | X        |         |         | X        |         |         |
| Diabetes mellitus         | 1   | Diabetes Age-Standardized Prevalence (proportion) | X        |         |         | X        |         |         |
| Diabetes mellitus         | 1   | Mean BMI                                          | X        |         |         | X        |         |         |
| Diabetes mellitus         | 1   | Systolic Blood Pressure (mmHg)                    | X        |         |         | X        |         |         |
| Diabetes mellitus         | 1   | Cholesterol (total, mean per capita)              | X        |         |         | X        |         |         |
| Diabetes mellitus         | 1   | Animal Fats (kcal per capita)                     |          | X       |         |          | X       |         |
| Diabetes mellitus         | 1   | Fruits (kcal per capita)                          |          | X       |         |          | X       |         |

**Web Table 23 - Comparison of covariates used in CoD models for GBD 2010 and GBD 2013**

| Cause Name               | Sex | Covariate name                                    | GBD 2010 |         |         | GBD 2013 |         |         |
|--------------------------|-----|---------------------------------------------------|----------|---------|---------|----------|---------|---------|
|                          |     |                                                   | Level 1  | Level 2 | Level 3 | Level 1  | Level 2 | Level 3 |
| Diabetes mellitus        | 1   | Health System Access (unitless)                   |          | X       |         |          | X       |         |
| Diabetes mellitus        | 1   | Total Calories (kcal per capita)                  |          | X       |         |          | X       |         |
| Diabetes mellitus        | 1   | Vegetables (kcal per capita)                      |          | X       |         |          | X       |         |
| Diabetes mellitus        | 1   | Whole Grains (kcal per capita)                    |          | X       |         |          | X       |         |
| Diabetes mellitus        | 1   | LDI (I\$ per capita)                              |          |         | X       |          |         | X       |
| Diabetes mellitus        | 1   | Education (years per capita)                      |          |         | X       |          |         | X       |
| Diabetes mellitus        | 2   | Education (years per capita)                      |          |         |         |          |         | X       |
| Diabetes mellitus        | 2   | Diabetes Fasting Plasma Glucose (mmol/L)          | X        |         |         | X        |         |         |
| Diabetes mellitus        | 2   | Diabetes Age-Standardized Prevalence (proportion) | X        |         |         | X        |         |         |
| Diabetes mellitus        | 2   | Mean BMI                                          |          | X       |         | X        |         |         |
| Diabetes mellitus        | 2   | Systolic Blood Pressure (mmHg)                    |          | X       |         | X        |         |         |
| Diabetes mellitus        | 2   | Cholesterol (total, mean per capita)              |          | X       |         | X        |         |         |
| Diabetes mellitus        | 2   | Animal Fats (kcal per capita)                     |          | X       |         |          | X       |         |
| Diabetes mellitus        | 2   | Fruits (kcal per capita)                          |          | X       |         |          | X       |         |
| Diabetes mellitus        | 2   | Health System Access (unitless)                   |          | X       |         |          | X       |         |
| Diabetes mellitus        | 2   | Total Calories (kcal per capita)                  |          | X       |         |          | X       |         |
| Diabetes mellitus        | 2   | Vegetables (kcal per capita)                      |          | X       |         |          | X       |         |
| Diabetes mellitus        | 2   | Whole Grains (kcal per capita)                    |          | X       |         |          | X       |         |
| Diabetes mellitus        | 2   | LDI (I\$ per capita)                              |          |         | X       |          |         | X       |
| Acute glomerulonephritis | 1   | Health System Access (unitless)                   | X        |         |         | X        |         |         |
| Acute glomerulonephritis | 1   | Diabetes Age-Standardized Prevalence (proportion) |          | X       |         |          | X       |         |
| Acute glomerulonephritis | 1   | Systolic Blood Pressure (mmHg)                    |          | X       |         |          | X       |         |
| Acute glomerulonephritis | 1   | Sanitation (proportion with access)               |          | X       |         |          | X       |         |
| Acute glomerulonephritis | 1   | Improved Water Source (proportion with access)    |          | X       |         |          | X       |         |
| Acute glomerulonephritis | 1   | LDI (I\$ per capita)                              |          |         | X       |          |         | X       |
| Acute glomerulonephritis | 1   | Education (years per capita)                      |          |         | X       |          |         | X       |
| Acute glomerulonephritis | 2   | Health System Access (unitless)                   | X        |         |         | X        |         |         |
| Acute glomerulonephritis | 2   | Diabetes Age-Standardized Prevalence (proportion) |          | X       |         |          | X       |         |
| Acute glomerulonephritis | 2   | Systolic Blood Pressure (mmHg)                    |          | X       |         |          | X       |         |
| Acute glomerulonephritis | 2   | Sanitation (proportion with access)               |          | X       |         |          | X       |         |
| Acute glomerulonephritis | 2   | Improved Water Source (proportion with access)    |          | X       |         |          | X       |         |
| Acute glomerulonephritis | 2   | LDI (I\$ per capita)                              |          |         | X       |          |         | X       |
| Acute glomerulonephritis | 2   | Education (years per capita)                      |          |         | X       |          |         | X       |
| Chronic kidney disease   | 1   | Diabetes Fasting Plasma Glucose (mmol/L)          | X        |         |         | X        |         |         |
| Chronic kidney disease   | 1   | Diabetes Age-Standardized Prevalence (proportion) | X        |         |         | X        |         |         |
| Chronic kidney disease   | 1   | Health System Access (unitless)                   | X        |         |         | X        |         |         |
| Chronic kidney disease   | 1   | Mean BMI                                          | X        |         |         | X        |         |         |
| Chronic kidney disease   | 1   | Systolic Blood Pressure (mmHg)                    | X        |         |         | X        |         |         |

**Web Table 23 - Comparison of covariates used in CoD models for GBD 2010 and GBD 2013**

| Cause Name                                      | Sex | Covariate name                                    | GBD 2010 |         |         | GBD 2013 |         |         |
|-------------------------------------------------|-----|---------------------------------------------------|----------|---------|---------|----------|---------|---------|
|                                                 |     |                                                   | Level 1  | Level 2 | Level 3 | Level 1  | Level 2 | Level 3 |
| Chronic kidney disease                          | 1   | Animal Fats (kcal per capita)                     |          | X       |         |          | X       |         |
| Chronic kidney disease                          | 1   | Cholesterol (total, mean per capita)              |          | X       |         |          | X       |         |
| Chronic kidney disease                          | 1   | Red Meat (kcal per capita)                        |          | X       |         |          | X       |         |
| Chronic kidney disease                          | 1   | Total Calories (kcal per capita)                  |          | X       |         |          | X       |         |
| Chronic kidney disease                          | 1   | Whole Grains (kcal per capita)                    |          | X       |         |          | X       |         |
| Chronic kidney disease                          | 1   | LDI (I\$ per capita)                              |          |         |         | X        |         | X       |
| Chronic kidney disease                          | 1   | Education (years per capita)                      |          |         |         | X        |         | X       |
| Chronic kidney disease                          | 2   | Diabetes Fasting Plasma Glucose (mmol/L)          | X        |         |         | X        |         |         |
| Chronic kidney disease                          | 2   | Diabetes Age-Standardized Prevalence (proportion) | X        |         |         | X        |         |         |
| Chronic kidney disease                          | 2   | Health System Access (unitless)                   | X        |         |         | X        |         |         |
| Chronic kidney disease                          | 2   | Mean BMI                                          | X        |         |         | X        |         |         |
| Chronic kidney disease                          | 2   | Systolic Blood Pressure (mmHg)                    | X        |         |         | X        |         |         |
| Chronic kidney disease                          | 2   | Animal Fats (kcal per capita)                     |          | X       |         |          | X       |         |
| Chronic kidney disease                          | 2   | Cholesterol (total, mean per capita)              |          | X       |         |          | X       |         |
| Chronic kidney disease                          | 2   | Red Meat (kcal per capita)                        |          | X       |         |          | X       |         |
| Chronic kidney disease                          | 2   | Total Calories (kcal per capita)                  |          | X       |         |          | X       |         |
| Chronic kidney disease                          | 2   | Whole Grains (kcal per capita)                    |          | X       |         |          | X       |         |
| Chronic kidney disease                          | 2   | LDI (I\$ per capita)                              |          |         |         | X        |         | X       |
| Chronic kidney disease                          | 2   | Education (years per capita)                      |          |         |         | X        |         | X       |
| Chronic kidney disease due to diabetes mellitus | 1   | Systolic Blood Pressure (mmHg)                    | X*       |         |         |          |         |         |
| Chronic kidney disease due to diabetes mellitus | 1   | Diabetes Fasting Plasma Glucose (mmol/L)          | X*       |         |         | X        |         |         |
| Chronic kidney disease due to diabetes mellitus | 1   | Diabetes Age-Standardized Prevalence (proportion) | X*       |         |         | X        |         |         |
| Chronic kidney disease due to diabetes mellitus | 1   | Animal Fats (kcal per capita)                     |          | X*      |         |          | X       |         |
| Chronic kidney disease due to diabetes mellitus | 1   | Health System Access (unitless)                   | X*       |         |         |          | X       |         |
| Chronic kidney disease due to diabetes mellitus | 1   | Mean BMI                                          | X*       |         |         |          | X       |         |
| Chronic kidney disease due to diabetes mellitus | 1   | Cholesterol (total, mean per capita)              |          | X*      |         |          | X       |         |
| Chronic kidney disease due to diabetes mellitus | 1   | Red Meat (kcal per capita)                        |          | X*      |         |          | X       |         |
| Chronic kidney disease due to diabetes mellitus | 1   | Total Calories (kcal per capita)                  |          | X*      |         |          | X       |         |
| Chronic kidney disease due to diabetes mellitus | 1   | Whole Grains (kcal per capita)                    |          | X*      |         |          | X       |         |
| Chronic kidney disease due to diabetes mellitus | 1   | LDI (I\$ per capita)                              |          |         |         | X*       |         | X       |

**Web Table 23 - Comparison of covariates used in CoD models for GBD 2010 and GBD 2013**

| Cause Name                                      | Sex | Covariate name                                    | GBD 2010 |         |         | GBD 2013 |         |         |
|-------------------------------------------------|-----|---------------------------------------------------|----------|---------|---------|----------|---------|---------|
|                                                 |     |                                                   | Level 1  | Level 2 | Level 3 | Level 1  | Level 2 | Level 3 |
| Chronic kidney disease due to diabetes mellitus | 1   | Education (years per capita)                      |          |         | X*      |          |         | X       |
| Chronic kidney disease due to diabetes mellitus | 2   | Systolic Blood Pressure (mmHg)                    | X*       |         |         |          |         |         |
| Chronic kidney disease due to diabetes mellitus | 2   | Diabetes Fasting Plasma Glucose (mmol/L)          | X*       |         |         | X        |         |         |
| Chronic kidney disease due to diabetes mellitus | 2   | Diabetes Age-Standardized Prevalence (proportion) | X*       |         |         | X        |         |         |
| Chronic kidney disease due to diabetes mellitus | 2   | Animal Fats (kcal per capita)                     |          | X*      |         |          | X       |         |
| Chronic kidney disease due to diabetes mellitus | 2   | Health System Access (unitless)                   | X*       |         |         |          | X       |         |
| Chronic kidney disease due to diabetes mellitus | 2   | Mean BMI                                          | X*       |         |         |          | X       |         |
| Chronic kidney disease due to diabetes mellitus | 2   | Cholesterol (total, mean per capita)              |          | X*      |         |          | X       |         |
| Chronic kidney disease due to diabetes mellitus | 2   | Red Meat (kcal per capita)                        |          | X*      |         |          | X       |         |
| Chronic kidney disease due to diabetes mellitus | 2   | Total Calories (kcal per capita)                  |          | X*      |         |          | X       |         |
| Chronic kidney disease due to diabetes mellitus | 2   | Whole Grains (kcal per capita)                    |          | X*      |         |          | X       |         |
| Chronic kidney disease due to diabetes mellitus | 2   | LDI (I\$ per capita)                              |          |         | X*      |          |         | X       |
| Chronic kidney disease due to diabetes mellitus | 2   | Education (years per capita)                      |          |         | X*      |          |         | X       |
| Chronic kidney disease due to hypertension      | 1   | Diabetes Fasting Plasma Glucose (mmol/L)          | X*       |         |         |          |         |         |
| Chronic kidney disease due to hypertension      | 1   | Diabetes Age-Standardized Prevalence (proportion) | X*       |         |         |          |         |         |
| Chronic kidney disease due to hypertension      | 1   | Health System Access (unitless)                   | X*       |         |         | X        |         |         |
| Chronic kidney disease due to hypertension      | 1   | Systolic Blood Pressure (mmHg)                    | X*       |         |         | X        |         |         |
| Chronic kidney disease due to hypertension      | 1   | Animal Fats (kcal per capita)                     |          | X*      |         |          | X       |         |
| Chronic kidney disease due to hypertension      | 1   | Mean BMI                                          | X*       |         |         |          | X       |         |
| Chronic kidney disease due to hypertension      | 1   | Cholesterol (total, mean per capita)              |          | X*      |         |          | X       |         |
| Chronic kidney disease due to hypertension      | 1   | Red Meat (kcal per capita)                        |          | X*      |         |          | X       |         |
| Chronic kidney disease due to hypertension      | 1   | Total Calories (kcal per capita)                  |          | X*      |         |          | X       |         |
| Chronic kidney disease due to hypertension      | 1   | Whole Grains (kcal per capita)                    |          | X*      |         |          | X       |         |
| Chronic kidney disease due to hypertension      | 1   | LDI (I\$ per capita)                              |          |         | X*      |          |         | X       |
| Chronic kidney disease due to hypertension      | 1   | Education (years per capita)                      |          |         | X*      |          |         | X       |
| Chronic kidney disease due to hypertension      | 2   | Diabetes Fasting Plasma Glucose (mmol/L)          | X*       |         |         |          |         |         |
| Chronic kidney disease due to hypertension      | 2   | Diabetes Age-Standardized Prevalence (proportion) | X*       |         |         |          |         |         |
| Chronic kidney disease due to hypertension      | 2   | Health System Access (unitless)                   | X*       |         |         | X        |         |         |
| Chronic kidney disease due to hypertension      | 2   | Systolic Blood Pressure (mmHg)                    | X*       |         |         | X        |         |         |

**Web Table 23 - Comparison of covariates used in CoD models for GBD 2010 and GBD 2013**

| Cause Name                                 | Sex | Covariate name                                    | GBD 2010 |         |         | GBD 2013 |         |         |
|--------------------------------------------|-----|---------------------------------------------------|----------|---------|---------|----------|---------|---------|
|                                            |     |                                                   | Level 1  | Level 2 | Level 3 | Level 1  | Level 2 | Level 3 |
| Chronic kidney disease due to hypertension | 2   | Animal Fats (kcal per capita)                     |          | X*      |         |          | X       |         |
| Chronic kidney disease due to hypertension | 2   | Mean BMI                                          | X*       |         |         |          | X       |         |
| Chronic kidney disease due to hypertension | 2   | Cholesterol (total, mean per capita)              |          | X*      |         |          | X       |         |
| Chronic kidney disease due to hypertension | 2   | Red Meat (kcal per capita)                        |          | X*      |         |          | X       |         |
| Chronic kidney disease due to hypertension | 2   | Total Calories (kcal per capita)                  |          | X*      |         |          | X       |         |
| Chronic kidney disease due to hypertension | 2   | Whole Grains (kcal per capita)                    |          | X*      |         |          | X       |         |
| Chronic kidney disease due to hypertension | 2   | LDI (I\$ per capita)                              |          |         |         | X*       |         | X       |
| Chronic kidney disease due to hypertension | 2   | Education (years per capita)                      |          |         |         | X*       |         | X       |
| Chronic kidney disease due to other causes | 1   | LDI (I\$ per capita)                              |          |         |         | X*       |         |         |
| Chronic kidney disease due to other causes | 1   | Animal Fats (kcal per capita)                     |          | X*      |         |          |         |         |
| Chronic kidney disease due to other causes | 1   | None                                              |          |         |         | X*       |         |         |
| Chronic kidney disease due to other causes | 1   | Diabetes Fasting Plasma Glucose (mmol/L)          | X*       |         |         |          |         |         |
| Chronic kidney disease due to other causes | 1   | Diabetes Age-Standardized Prevalence (proportion) | X*       |         |         |          |         |         |
| Chronic kidney disease due to other causes | 1   | Education (years per capita)                      |          |         |         | X*       |         |         |
| Chronic kidney disease due to other causes | 1   | Health System Access (unitless)                   | X*       |         |         |          |         |         |
| Chronic kidney disease due to other causes | 1   | Mean BMI                                          | X*       |         |         |          |         |         |
| Chronic kidney disease due to other causes | 1   | Systolic Blood Pressure (mmHg)                    | X*       |         |         |          |         |         |
| Chronic kidney disease due to other causes | 1   | Cholesterol (total, mean per capita)              |          | X*      |         |          |         |         |
| Chronic kidney disease due to other causes | 1   | Red Meat (kcal per capita)                        |          | X*      |         |          |         |         |
| Chronic kidney disease due to other causes | 1   | Total Calories (kcal per capita)                  |          | X*      |         |          |         |         |
| Chronic kidney disease due to other causes | 1   | Whole Grains (kcal per capita)                    |          | X*      |         |          |         |         |
| Chronic kidney disease due to other causes | 2   | LDI (I\$ per capita)                              |          |         |         | X*       |         |         |
| Chronic kidney disease due to other causes | 2   | Animal Fats (kcal per capita)                     |          | X*      |         |          |         |         |
| Chronic kidney disease due to other causes | 2   | None                                              |          |         |         | X*       |         |         |
| Chronic kidney disease due to other causes | 2   | Diabetes Fasting Plasma Glucose (mmol/L)          | X*       |         |         |          |         |         |
| Chronic kidney disease due to other causes | 2   | Diabetes Age-Standardized Prevalence (proportion) | X*       |         |         |          |         |         |
| Chronic kidney disease due to other causes | 2   | Education (years per capita)                      |          |         |         | X*       |         |         |
| Chronic kidney disease due to other causes | 2   | Health System Access (unitless)                   | X*       |         |         |          |         |         |
| Chronic kidney disease due to other causes | 2   | Mean BMI                                          | X*       |         |         |          |         |         |
| Chronic kidney disease due to other causes | 2   | Systolic Blood Pressure (mmHg)                    | X*       |         |         |          |         |         |
| Chronic kidney disease due to other causes | 2   | Cholesterol (total, mean per capita)              |          | X*      |         |          |         |         |
| Chronic kidney disease due to other causes | 2   | Red Meat (kcal per capita)                        |          | X*      |         |          |         |         |
| Chronic kidney disease due to other causes | 2   | Total Calories (kcal per capita)                  |          | X*      |         |          |         |         |
| Chronic kidney disease due to other causes | 2   | Whole Grains (kcal per capita)                    |          | X*      |         |          |         |         |
| Urinary diseases and male infertility      | 1   | Health System Access 2 (unitless)                 | X        |         |         | X        |         |         |
| Urinary diseases and male infertility      | 1   | Mean BMI                                          |          | X       |         |          | X       |         |
| Urinary diseases and male infertility      | 1   | Latitude Under 15 (proportion)                    |          | X       |         |          | X       |         |
| Urinary diseases and male infertility      | 1   | Latitude 15 to 30 (proportion)                    |          | X       |         |          | X       |         |



**Web Table 23 - Comparison of covariates used in CoD models for GBD 2010 and GBD 2013**

| Cause Name                                          | Sex | Covariate name                                                  | GBD 2010 |         |         | GBD 2013 |         |         |
|-----------------------------------------------------|-----|-----------------------------------------------------------------|----------|---------|---------|----------|---------|---------|
|                                                     |     |                                                                 | Level 1  | Level 2 | Level 3 | Level 1  | Level 2 | Level 3 |
| Urinary diseases and male infertility               | 1   | Latitude 30 to 45 (proportion)                                  |          | X       |         |          | X       |         |
| Urinary diseases and male infertility               | 1   | Latitude Over 45 (proportion)                                   |          | X       |         |          | X       |         |
| Urinary diseases and male infertility               | 1   | LDI (I\$ per capita)                                            |          |         |         |          |         | X       |
| Urinary diseases and male infertility               | 1   | Education (years per capita)                                    |          |         |         |          | X       | X       |
| Urinary diseases and male infertility               | 2   | Health System Access 2 (unitless)                               | X        |         |         | X        |         |         |
| Urinary diseases and male infertility               | 2   | Mean BMI                                                        |          | X       |         |          | X       |         |
| Urinary diseases and male infertility               | 2   | Latitude Under 15 (proportion)                                  |          | X       |         |          | X       |         |
| Urinary diseases and male infertility               | 2   | Latitude 15 to 30 (proportion)                                  |          | X       |         |          | X       |         |
| Urinary diseases and male infertility               | 2   | Latitude 30 to 45 (proportion)                                  |          | X       |         |          | X       |         |
| Urinary diseases and male infertility               | 2   | Latitude Over 45 (proportion)                                   |          | X       |         |          | X       |         |
| Urinary diseases and male infertility               | 2   | LDI (I\$ per capita)                                            |          |         |         |          |         | X       |
| Urinary diseases and male infertility               | 2   | Education (years per capita)                                    |          |         |         |          | X       | X       |
| Interstitial nephritis and urinary tract infections | 1   | Health System Access 2 (unitless)                               | X        |         |         | X        |         |         |
| Interstitial nephritis and urinary tract infections | 1   | LDI (I\$ per capita)                                            |          | X       |         |          | X       |         |
| Interstitial nephritis and urinary tract infections | 1   | Education (years per capita)                                    |          | X       |         |          | X       |         |
| Interstitial nephritis and urinary tract infections | 1   | Hospital Beds (per 1000)                                        |          | X       |         |          | X       |         |
| Interstitial nephritis and urinary tract infections | 2   | Health System Access 2 (unitless)                               | X        |         |         | X        |         |         |
| Interstitial nephritis and urinary tract infections | 2   | LDI (I\$ per capita)                                            |          | X       |         |          | X       |         |
| Interstitial nephritis and urinary tract infections | 2   | Education (years per capita)                                    |          | X       |         |          | X       |         |
| Interstitial nephritis and urinary tract infections | 2   | Hospital Beds (per 1000)                                        |          | X       |         |          | X       |         |
| Urolithiasis                                        | 1   | Health System Access (unitless)                                 | X        |         |         | X        |         |         |
| Urolithiasis                                        | 1   | 90th percentile climatic temperature in the given country-year. | X        |         |         | X        |         |         |
| Urolithiasis                                        | 1   | Animal Fats (kcal per capita)                                   |          | X       |         |          | X       |         |
| Urolithiasis                                        | 1   | Fruits (kcal per capita)                                        |          | X       |         |          | X       |         |
| Urolithiasis                                        | 1   | Red Meat (kcal per capita)                                      |          | X       |         |          | X       |         |
| Urolithiasis                                        | 1   | Vegetables (kcal per capita)                                    |          | X       |         |          | X       |         |
| Urolithiasis                                        | 1   | LDI (I\$ per capita)                                            |          |         |         |          |         | X       |
| Urolithiasis                                        | 1   | Education (years per capita)                                    |          |         |         |          |         | X       |
| Urolithiasis                                        | 2   | Health System Access (unitless)                                 | X        |         |         | X        |         |         |
| Urolithiasis                                        | 2   | 90th percentile climatic temperature in the given country-year. | X        |         |         | X        |         |         |
| Urolithiasis                                        | 2   | Animal Fats (kcal per capita)                                   |          | X       |         |          | X       |         |
| Urolithiasis                                        | 2   | Fruits (kcal per capita)                                        |          | X       |         |          | X       |         |

**Web Table 23 - Comparison of covariates used in CoD models for GBD 2010 and GBD 2013**

| Cause Name                               | Sex | Covariate name                                                               | GBD 2010 |         |         | GBD 2013 |         |         |
|------------------------------------------|-----|------------------------------------------------------------------------------|----------|---------|---------|----------|---------|---------|
|                                          |     |                                                                              | Level 1  | Level 2 | Level 3 | Level 1  | Level 2 | Level 3 |
| Urolithiasis                             | 2   | Red Meat (kcal per capita)                                                   |          | X       |         |          | X       |         |
| Urolithiasis                             | 2   | Vegetables (kcal per capita)                                                 |          | X       |         |          | X       |         |
| Urolithiasis                             | 2   | LDI (I\$ per capita)                                                         |          |         |         | X        |         | X       |
| Urolithiasis                             | 2   | Education (years per capita)                                                 |          |         | X       |          |         | X       |
| Other urinary diseases                   | 1   | Latitude Under 15 (proportion)                                               |          | X*      |         |          |         |         |
| Other urinary diseases                   | 1   | Latitude 15 to 30 (proportion)                                               |          | X*      |         |          |         |         |
| Other urinary diseases                   | 1   | Latitude 30 to 45 (proportion)                                               |          | X*      |         |          |         |         |
| Other urinary diseases                   | 1   | Latitude Over 45 (proportion)                                                |          | X*      |         |          |         |         |
| Other urinary diseases                   | 1   | LDI (I\$ per capita)                                                         |          |         |         | X*       | X       |         |
| Other urinary diseases                   | 1   | Education (years per capita)                                                 |          |         |         | X*       | X       |         |
| Other urinary diseases                   | 1   | Health System Access 2 (unitless)                                            | X*       |         |         |          | X       |         |
| Other urinary diseases                   | 1   | Mean BMI                                                                     |          | X*      |         |          | X       |         |
| Other urinary diseases                   | 2   | Latitude Under 15 (proportion)                                               |          | X*      |         |          |         |         |
| Other urinary diseases                   | 2   | Latitude 15 to 30 (proportion)                                               |          | X*      |         |          |         |         |
| Other urinary diseases                   | 2   | Latitude 30 to 45 (proportion)                                               |          | X*      |         |          |         |         |
| Other urinary diseases                   | 2   | Latitude Over 45 (proportion)                                                |          | X*      |         |          |         |         |
| Other urinary diseases                   | 2   | LDI (I\$ per capita)                                                         |          |         |         | X*       | X       |         |
| Other urinary diseases                   | 2   | Education (years per capita)                                                 |          |         |         | X*       | X       |         |
| Other urinary diseases                   | 2   | Health System Access 2 (unitless)                                            | X*       |         |         |          | X       |         |
| Other urinary diseases                   | 2   | Mean BMI                                                                     |          | X*      |         |          | X       |         |
| Gynecological diseases                   | 2   | Skilled Birth Attendance (proportion)                                        |          |         |         |          |         | X       |
| Gynecological diseases                   | 2   | Live Births 35+ (proportion)                                                 |          |         |         |          |         | X       |
| Gynecological diseases                   | 2   | Age-Specific Fertility Rate                                                  | X        |         |         |          |         |         |
| Gynecological diseases                   | 2   | HIV Prevalence, ARV-Adjusted (Custom Lag, %)                                 | X        |         |         |          |         |         |
| Gynecological diseases                   | 2   | Tobacco (cigarettes per capita)                                              | X        |         |         |          |         |         |
| Gynecological diseases                   | 2   | Cumulative Cigarettes (10 Years)                                             | X        |         |         |          |         |         |
| Gynecological diseases                   | 2   | Cumulative Cigarettes (5 Years)                                              | X        |         |         |          |         |         |
| Gynecological diseases                   | 2   | Health System Access (unitless)                                              | X        |         |         |          | X       |         |
| Gynecological diseases                   | 2   | Indoor Air Pollution (All Cooking Fuels)                                     | X        |         |         |          | X       |         |
| Gynecological diseases                   | 2   | Smoking Prevalence                                                           | X        |         |         |          | X       |         |
| Gynecological diseases                   | 2   | Total Fertility Rate                                                         | X        |         |         |          |         | X       |
| Gynecological diseases                   | 2   | Fruits (kcal per capita)                                                     |          | X       |         |          |         | X       |
| Gynecological diseases                   | 2   | Mean BMI                                                                     |          | X       |         |          |         | X       |
| Gynecological diseases                   | 2   | Vegetables (kcal per capita)                                                 |          | X       |         |          |         | X       |
| Gynecological diseases                   | 2   | LDI (I\$ per capita)                                                         |          |         |         | X        |         | X       |
| Gynecological diseases                   | 2   | Education (years per capita)                                                 |          |         |         | X        |         | X       |
| Hemoglobinopathies and hemolytic anemias | 1   | Hemoglobinopathies Prevalence x Excess Mortality (excluding G6PD deficiency) |          |         |         |          | X       |         |
| Hemoglobinopathies and hemolytic anemias | 1   | Health System Access (capped)                                                |          |         |         |          |         | X       |

**Web Table 23 - Comparison of covariates used in CoD models for GBD 2010 and GBD 2013**

| Cause Name                               | Sex | Covariate name                                                               | GBD 2010 |         |         | GBD 2013 |         |         |
|------------------------------------------|-----|------------------------------------------------------------------------------|----------|---------|---------|----------|---------|---------|
|                                          |     |                                                                              | Level 1  | Level 2 | Level 3 | Level 1  | Level 2 | Level 3 |
| Hemoglobinopathies and hemolytic anemias | 1   | Health System Access 2 (unitless)                                            | X        |         |         |          |         |         |
| Hemoglobinopathies and hemolytic anemias | 1   | Hemoglobinopathies Prevalence x Excess Mortality                             | X        |         |         |          |         |         |
| Hemoglobinopathies and hemolytic anemias | 1   | Latitude Under 15 (proportion)                                               |          | X       |         |          | X       |         |
| Hemoglobinopathies and hemolytic anemias | 1   | Latitude 15 to 30 (proportion)                                               |          | X       |         |          | X       |         |
| Hemoglobinopathies and hemolytic anemias | 1   | Latitude 30 to 45 (proportion)                                               |          | X       |         |          | X       |         |
| Hemoglobinopathies and hemolytic anemias | 1   | Latitude Over 45 (proportion)                                                |          | X       |         |          | X       |         |
| Hemoglobinopathies and hemolytic anemias | 1   | LDI (I\$ per capita)                                                         |          |         |         | X        |         | X       |
| Hemoglobinopathies and hemolytic anemias | 1   | Education (years per capita)                                                 |          |         |         | X        |         | X       |
| Hemoglobinopathies and hemolytic anemias | 2   | Hemoglobinopathies Prevalence x Excess Mortality (excluding G6PD deficiency) |          |         |         | X        |         |         |
| Hemoglobinopathies and hemolytic anemias | 2   | Health System Access (capped)                                                |          |         |         |          | X       |         |
| Hemoglobinopathies and hemolytic anemias | 2   | Health System Access 2 (unitless)                                            | X        |         |         |          |         |         |
| Hemoglobinopathies and hemolytic anemias | 2   | Hemoglobinopathies Prevalence x Excess Mortality                             | X        |         |         |          |         |         |
| Hemoglobinopathies and hemolytic anemias | 2   | Latitude Under 15 (proportion)                                               |          | X       |         |          | X       |         |
| Hemoglobinopathies and hemolytic anemias | 2   | Latitude 15 to 30 (proportion)                                               |          | X       |         |          | X       |         |
| Hemoglobinopathies and hemolytic anemias | 2   | Latitude 30 to 45 (proportion)                                               |          | X       |         |          | X       |         |
| Hemoglobinopathies and hemolytic anemias | 2   | Latitude Over 45 (proportion)                                                |          | X       |         |          | X       |         |
| Hemoglobinopathies and hemolytic anemias | 2   | LDI (I\$ per capita)                                                         |          |         |         | X        |         | X       |
| Hemoglobinopathies and hemolytic anemias | 2   | Education (years per capita)                                                 |          |         |         | X        |         | X       |
| Thalassemias                             | 1   | LDI (I\$ per capita)                                                         |          |         |         | X*       |         |         |
| Thalassemias                             | 1   | Education (years per capita)                                                 |          |         |         | X*       |         |         |
| Thalassemias                             | 1   | Health System Access 2 (unitless)                                            | X*       |         |         |          |         |         |
| Thalassemias                             | 1   | Hemoglobinopathies Prevalence x Excess Mortality                             | X*       |         |         |          |         |         |
| Thalassemias                             | 1   | Latitude Under 15 (proportion)                                               |          | X*      |         |          |         |         |
| Thalassemias                             | 1   | Latitude 15 to 30 (proportion)                                               |          | X*      |         |          |         |         |
| Thalassemias                             | 1   | Latitude 30 to 45 (proportion)                                               |          | X*      |         |          |         |         |
| Thalassemias                             | 1   | Latitude Over 45 (proportion)                                                |          | X*      |         |          |         |         |
| Thalassemias                             | 2   | LDI (I\$ per capita)                                                         |          |         |         | X*       | X*      |         |
| Thalassemias                             | 2   | Education (years per capita)                                                 |          |         |         | X*       |         |         |
| Thalassemias                             | 2   | Health System Access 2 (unitless)                                            | X*       |         |         |          |         |         |
| Thalassemias                             | 2   | Hemoglobinopathies Prevalence x Excess Mortality                             | X*       |         |         |          |         |         |
| Thalassemias                             | 2   | Latitude Under 15 (proportion)                                               |          | X*      |         |          |         |         |
| Thalassemias                             | 2   | Latitude 15 to 30 (proportion)                                               |          | X*      |         |          |         |         |
| Thalassemias                             | 2   | Latitude 30 to 45 (proportion)                                               |          | X*      |         |          |         |         |
| Thalassemias                             | 2   | Latitude Over 45 (proportion)                                                |          | X*      |         |          |         |         |
| Sickle cell disorders                    | 1   | LDI (I\$ per capita)                                                         |          |         |         | X*       | X*      |         |
| Sickle cell disorders                    | 1   | Education (years per capita)                                                 |          |         |         | X*       |         |         |
| Sickle cell disorders                    | 1   | Health System Access 2 (unitless)                                            | X*       |         |         |          |         |         |
| Sickle cell disorders                    | 1   | Hemoglobinopathies Prevalence x Excess Mortality                             | X*       |         |         |          |         |         |

**Web Table 23 - Comparison of covariates used in CoD models for GBD 2010 and GBD 2013**

| Cause Name                                     | Sex | Covariate name                                   | GBD 2010 |         |         | GBD 2013 |         |         |
|------------------------------------------------|-----|--------------------------------------------------|----------|---------|---------|----------|---------|---------|
|                                                |     |                                                  | Level 1  | Level 2 | Level 3 | Level 1  | Level 2 | Level 3 |
| Sickle cell disorders                          | 1   | Malaria Lysenko PFPR 1 (Holoendemic)             |          |         |         | X*       |         |         |
| Sickle cell disorders                          | 1   | Latitude Under 15 (proportion)                   |          | X*      |         |          |         |         |
| Sickle cell disorders                          | 1   | Latitude 15 to 30 (proportion)                   |          | X*      |         |          |         |         |
| Sickle cell disorders                          | 1   | Latitude 30 to 45 (proportion)                   |          | X*      |         |          |         |         |
| Sickle cell disorders                          | 1   | Latitude Over 45 (proportion)                    |          | X*      |         |          |         |         |
| Sickle cell disorders                          | 2   | LDI (I\$ per capita)                             |          |         | X*      |          | X*      |         |
| Sickle cell disorders                          | 2   | Education (years per capita)                     |          |         | X*      |          |         |         |
| Sickle cell disorders                          | 2   | Health System Access 2 (unitless)                | X*       |         |         |          |         |         |
| Sickle cell disorders                          | 2   | Hemoglobinopathies Prevalence x Excess Mortality | X*       |         |         |          |         |         |
| Sickle cell disorders                          | 2   | Malaria Lysenko PFPR 1 (Holoendemic)             |          |         |         |          | X*      |         |
| Sickle cell disorders                          | 2   | Latitude Under 15 (proportion)                   |          | X*      |         |          |         |         |
| Sickle cell disorders                          | 2   | Latitude 15 to 30 (proportion)                   |          | X*      |         |          |         |         |
| Sickle cell disorders                          | 2   | Latitude 30 to 45 (proportion)                   |          | X*      |         |          |         |         |
| Sickle cell disorders                          | 2   | Latitude Over 45 (proportion)                    |          | X*      |         |          |         |         |
| G6PD deficiency                                | 1   | LDI (I\$ per capita)                             |          |         | X*      |          |         |         |
| G6PD deficiency                                | 1   | Absolute value of average latitude               |          |         |         |          | X*      |         |
| G6PD deficiency                                | 1   | Education (years per capita)                     |          |         | X*      |          |         |         |
| G6PD deficiency                                | 1   | Health System Access 2 (unitless)                | X*       |         |         |          |         |         |
| G6PD deficiency                                | 1   | Hemoglobinopathies Prevalence x Excess Mortality | X*       |         |         |          |         |         |
| G6PD deficiency                                | 1   | Latitude Under 15 (proportion)                   |          | X*      |         |          |         |         |
| G6PD deficiency                                | 1   | Latitude 15 to 30 (proportion)                   |          | X*      |         |          |         |         |
| G6PD deficiency                                | 1   | Latitude 30 to 45 (proportion)                   |          | X*      |         |          |         |         |
| G6PD deficiency                                | 1   | Latitude Over 45 (proportion)                    |          | X*      |         |          |         |         |
| G6PD deficiency                                | 2   | LDI (I\$ per capita)                             |          |         | X*      |          |         |         |
| G6PD deficiency                                | 2   | Absolute value of average latitude               |          |         |         |          | X*      |         |
| G6PD deficiency                                | 2   | Education (years per capita)                     |          |         | X*      |          |         |         |
| G6PD deficiency                                | 2   | Health System Access 2 (unitless)                | X*       |         |         |          |         |         |
| G6PD deficiency                                | 2   | Hemoglobinopathies Prevalence x Excess Mortality | X*       |         |         |          |         |         |
| G6PD deficiency                                | 2   | Latitude Under 15 (proportion)                   |          | X*      |         |          |         |         |
| G6PD deficiency                                | 2   | Latitude 15 to 30 (proportion)                   |          | X*      |         |          |         |         |
| G6PD deficiency                                | 2   | Latitude 30 to 45 (proportion)                   |          | X*      |         |          |         |         |
| G6PD deficiency                                | 2   | Latitude Over 45 (proportion)                    |          | X*      |         |          |         |         |
| Other hemoglobinopathies and hemolytic anemias | 1   | LDI (I\$ per capita)                             |          |         | X*      |          |         |         |
| Other hemoglobinopathies and hemolytic anemias | 1   | None                                             |          |         |         |          | X*      |         |
| Other hemoglobinopathies and hemolytic anemias | 1   | Education (years per capita)                     |          |         | X*      |          |         |         |

**Web Table 23 - Comparison of covariates used in CoD models for GBD 2010 and GBD 2013**

| Cause Name                                        | Sex | Covariate name                                   | GBD 2010 |         |         | GBD 2013 |         |         |
|---------------------------------------------------|-----|--------------------------------------------------|----------|---------|---------|----------|---------|---------|
|                                                   |     |                                                  | Level 1  | Level 2 | Level 3 | Level 1  | Level 2 | Level 3 |
| Other hemoglobinopathies and hemolytic anemias    | 1   | Health System Access 2 (unitless)                | X*       |         |         |          |         |         |
| Other hemoglobinopathies and hemolytic anemias    | 1   | Hemoglobinopathies Prevalence x Excess Mortality | X*       |         |         |          |         |         |
| Other hemoglobinopathies and hemolytic anemias    | 1   | Latitude Under 15 (proportion)                   |          | X*      |         |          |         |         |
| Other hemoglobinopathies and hemolytic anemias    | 1   | Latitude 15 to 30 (proportion)                   |          | X*      |         |          |         |         |
| Other hemoglobinopathies and hemolytic anemias    | 1   | Latitude 30 to 45 (proportion)                   |          | X*      |         |          |         |         |
| Other hemoglobinopathies and hemolytic anemias    | 1   | Latitude Over 45 (proportion)                    |          | X*      |         |          |         |         |
| Other hemoglobinopathies and hemolytic anemias    | 2   | LDI (I\$ per capita)                             |          |         | X*      |          |         |         |
| Other hemoglobinopathies and hemolytic anemias    | 2   | None                                             |          |         |         | X*       |         |         |
| Other hemoglobinopathies and hemolytic anemias    | 2   | Education (years per capita)                     |          |         | X*      |          |         |         |
| Other hemoglobinopathies and hemolytic anemias    | 2   | Health System Access 2 (unitless)                | X*       |         |         |          |         |         |
| Other hemoglobinopathies and hemolytic anemias    | 2   | Hemoglobinopathies Prevalence x Excess Mortality | X*       |         |         |          |         |         |
| Other hemoglobinopathies and hemolytic anemias    | 2   | Latitude Under 15 (proportion)                   |          | X*      |         |          |         |         |
| Other hemoglobinopathies and hemolytic anemias    | 2   | Latitude 15 to 30 (proportion)                   |          | X*      |         |          |         |         |
| Other hemoglobinopathies and hemolytic anemias    | 2   | Latitude 30 to 45 (proportion)                   |          | X*      |         |          |         |         |
| Other hemoglobinopathies and hemolytic anemias    | 2   | Latitude Over 45 (proportion)                    |          | X*      |         |          |         |         |
| Endocrine, metabolic, blood, and immune disorders | 1   | Health System Access 2 (unitless)                | X        |         |         | X        |         |         |
| Endocrine, metabolic, blood, and immune disorders | 1   | Mean BMI                                         | X        |         |         | X        |         |         |
| Endocrine, metabolic, blood, and immune disorders | 1   | Alcohol (liters per capita)                      |          | X       |         |          | X       |         |
| Endocrine, metabolic, blood, and immune disorders | 1   | Animal Fats (kcal per capita)                    |          | X       |         |          | X       |         |
| Endocrine, metabolic, blood, and immune disorders | 1   | Cholesterol (total, mean per capita)             |          | X       |         |          | X       |         |
| Endocrine, metabolic, blood, and immune disorders | 1   | Total Calories (kcal per capita)                 |          | X       |         |          | X       |         |
| Endocrine, metabolic, blood, and immune disorders | 1   | LDI (I\$ per capita)                             |          |         | X       |          |         | X       |

**Web Table 23 - Comparison of covariates used in CoD models for GBD 2010 and GBD 2013**

| Cause Name                                        | Sex | Covariate name                       | GBD 2010 |         |         | GBD 2013 |         |         |
|---------------------------------------------------|-----|--------------------------------------|----------|---------|---------|----------|---------|---------|
|                                                   |     |                                      | Level 1  | Level 2 | Level 3 | Level 1  | Level 2 | Level 3 |
| Endocrine, metabolic, blood, and immune disorders | 1   | Education (years per capita)         |          |         | X       |          |         | X       |
| Endocrine, metabolic, blood, and immune disorders | 2   | Health System Access 2 (unitless)    | X        |         |         | X        |         |         |
| Endocrine, metabolic, blood, and immune disorders | 2   | Mean BMI                             | X        |         |         | X        |         |         |
| Endocrine, metabolic, blood, and immune disorders | 2   | Alcohol (liters per capita)          |          | X       |         |          | X       |         |
| Endocrine, metabolic, blood, and immune disorders | 2   | Animal Fats (kcal per capita)        |          | X       |         |          | X       |         |
| Endocrine, metabolic, blood, and immune disorders | 2   | Cholesterol (total, mean per capita) |          | X       |         |          | X       |         |
| Endocrine, metabolic, blood, and immune disorders | 2   | Total Calories (kcal per capita)     |          | X       |         |          | X       |         |
| Endocrine, metabolic, blood, and immune disorders | 2   | LDI (I\$ per capita)                 |          |         | X       |          |         | X       |
| Endocrine, metabolic, blood, and immune disorders | 2   | Education (years per capita)         |          |         | X       |          |         | X       |
| Musculoskeletal disorders                         | 1   | Mean BMI                             | X        |         |         | X        |         |         |
| Musculoskeletal disorders                         | 1   | LDI (I\$ per capita)                 |          | X       |         |          | X       |         |
| Musculoskeletal disorders                         | 1   | Alcohol (liters per capita)          |          | X       |         |          | X       |         |
| Musculoskeletal disorders                         | 1   | Cumulative Cigarettes (10 Years)     |          | X       |         |          | X       |         |
| Musculoskeletal disorders                         | 1   | Cumulative Cigarettes (5 Years)      |          | X       |         |          | X       |         |
| Musculoskeletal disorders                         | 1   | Education (years per capita)         |          | X       |         |          | X       |         |
| Musculoskeletal disorders                         | 1   | Health System Access 2 (unitless)    |          | X       |         |          | X       |         |
| Musculoskeletal disorders                         | 1   | Cholesterol (total, mean per capita) |          | X       |         |          | X       |         |
| Musculoskeletal disorders                         | 1   | Smoking Prevalence                   |          | X       |         |          | X       |         |
| Musculoskeletal disorders                         | 1   | Vegetables (kcal per capita)         |          | X       |         |          | X       |         |
| Musculoskeletal disorders                         | 1   | Latitude Under 15 (proportion)       |          |         | X       |          |         | X       |
| Musculoskeletal disorders                         | 1   | Latitude 15 to 30 (proportion)       |          |         | X       |          |         | X       |
| Musculoskeletal disorders                         | 1   | Latitude 30 to 45 (proportion)       |          |         | X       |          |         | X       |
| Musculoskeletal disorders                         | 1   | Latitude Over 45 (proportion)        |          |         | X       |          |         | X       |
| Musculoskeletal disorders                         | 2   | Mean BMI                             | X        |         |         | X        |         |         |
| Musculoskeletal disorders                         | 2   | LDI (I\$ per capita)                 |          | X       |         |          | X       |         |
| Musculoskeletal disorders                         | 2   | Alcohol (liters per capita)          |          | X       |         |          | X       |         |
| Musculoskeletal disorders                         | 2   | Cumulative Cigarettes (10 Years)     |          | X       |         |          | X       |         |
| Musculoskeletal disorders                         | 2   | Cumulative Cigarettes (5 Years)      |          | X       |         |          | X       |         |
| Musculoskeletal disorders                         | 2   | Education (years per capita)         |          | X       |         |          | X       |         |
| Musculoskeletal disorders                         | 2   | Health System Access 2 (unitless)    |          | X       |         |          | X       |         |
| Musculoskeletal disorders                         | 2   | Cholesterol (total, mean per capita) |          | X       |         |          | X       |         |
| Musculoskeletal disorders                         | 2   | Smoking Prevalence                   |          | X       |         |          | X       |         |

**Web Table 23 - Comparison of covariates used in CoD models for GBD 2010 and GBD 2013**

| Cause Name                      | Sex | Covariate name                       | GBD 2010 |         |         | GBD 2013 |         |         |
|---------------------------------|-----|--------------------------------------|----------|---------|---------|----------|---------|---------|
|                                 |     |                                      | Level 1  | Level 2 | Level 3 | Level 1  | Level 2 | Level 3 |
| Musculoskeletal disorders       | 2   | Vegetables (kcal per capita)         |          | X       |         |          | X       |         |
| Musculoskeletal disorders       | 2   | Latitude Under 15 (proportion)       |          |         | X       |          |         | X       |
| Musculoskeletal disorders       | 2   | Latitude 15 to 30 (proportion)       |          |         | X       |          |         | X       |
| Musculoskeletal disorders       | 2   | Latitude 30 to 45 (proportion)       |          |         | X       |          |         | X       |
| Musculoskeletal disorders       | 2   | Latitude Over 45 (proportion)        |          |         | X       |          |         | X       |
| Rheumatoid arthritis            | 1   | Alcohol (liters per capita)          | X        |         |         | X        |         |         |
| Rheumatoid arthritis            | 1   | Cumulative Cigarettes (10 Years)     | X        |         |         | X        |         |         |
| Rheumatoid arthritis            | 1   | Cumulative Cigarettes (5 Years)      | X        |         |         | X        |         |         |
| Rheumatoid arthritis            | 1   | Health System Access 2 (unitless)    | X        |         |         | X        |         |         |
| Rheumatoid arthritis            | 1   | Smoking Prevalence                   | X        |         |         | X        |         |         |
| Rheumatoid arthritis            | 1   | Cholesterol (total, mean per capita) |          | X       |         |          | X       |         |
| Rheumatoid arthritis            | 1   | Vegetables (kcal per capita)         |          | X       |         |          | X       |         |
| Rheumatoid arthritis            | 1   | LDI (I\$ per capita)                 |          |         | X       |          |         | X       |
| Rheumatoid arthritis            | 1   | Education (years per capita)         |          |         | X       |          |         | X       |
| Rheumatoid arthritis            | 1   | Mean BMI                             |          |         | X       |          |         | X       |
| Rheumatoid arthritis            | 1   | Latitude Under 15 (proportion)       |          |         | X       |          |         | X       |
| Rheumatoid arthritis            | 1   | Latitude 15 to 30 (proportion)       |          |         | X       |          |         | X       |
| Rheumatoid arthritis            | 1   | Latitude 30 to 45 (proportion)       |          |         | X       |          |         | X       |
| Rheumatoid arthritis            | 1   | Latitude Over 45 (proportion)        |          |         | X       |          |         | X       |
| Rheumatoid arthritis            | 2   | Alcohol (liters per capita)          | X        |         |         | X        |         |         |
| Rheumatoid arthritis            | 2   | Cumulative Cigarettes (10 Years)     | X        |         |         | X        |         |         |
| Rheumatoid arthritis            | 2   | Cumulative Cigarettes (5 Years)      | X        |         |         | X        |         |         |
| Rheumatoid arthritis            | 2   | Health System Access 2 (unitless)    | X        |         |         | X        |         |         |
| Rheumatoid arthritis            | 2   | Smoking Prevalence                   | X        |         |         | X        |         |         |
| Rheumatoid arthritis            | 2   | Cholesterol (total, mean per capita) |          | X       |         |          | X       |         |
| Rheumatoid arthritis            | 2   | Vegetables (kcal per capita)         |          | X       |         |          | X       |         |
| Rheumatoid arthritis            | 2   | LDI (I\$ per capita)                 |          |         | X       |          |         | X       |
| Rheumatoid arthritis            | 2   | Education (years per capita)         |          |         | X       |          |         | X       |
| Rheumatoid arthritis            | 2   | Mean BMI                             |          |         | X       |          |         | X       |
| Rheumatoid arthritis            | 2   | Latitude Under 15 (proportion)       |          |         | X       |          |         | X       |
| Rheumatoid arthritis            | 2   | Latitude 15 to 30 (proportion)       |          |         | X       |          |         | X       |
| Rheumatoid arthritis            | 2   | Latitude 30 to 45 (proportion)       |          |         | X       |          |         | X       |
| Rheumatoid arthritis            | 2   | Latitude Over 45 (proportion)        |          |         | X       |          |         | X       |
| Other musculoskeletal disorders | 1   | Mean BMI                             | X        |         |         | X        |         |         |
| Other musculoskeletal disorders | 1   | LDI (I\$ per capita)                 |          | X       |         |          | X       |         |
| Other musculoskeletal disorders | 1   | Alcohol (liters per capita)          |          | X       |         |          | X       |         |
| Other musculoskeletal disorders | 1   | Cumulative Cigarettes (10 Years)     |          | X       |         |          | X       |         |
| Other musculoskeletal disorders | 1   | Cumulative Cigarettes (5 Years)      |          | X       |         |          | X       |         |

**Web Table 23 - Comparison of covariates used in CoD models for GBD 2010 and GBD 2013**

| Cause Name                      | Sex | Covariate name                                                      | GBD 2010 |         |         | GBD 2013 |         |         |
|---------------------------------|-----|---------------------------------------------------------------------|----------|---------|---------|----------|---------|---------|
|                                 |     |                                                                     | Level 1  | Level 2 | Level 3 | Level 1  | Level 2 | Level 3 |
| Other musculoskeletal disorders | 1   | Education (years per capita)                                        |          | X       |         |          | X       |         |
| Other musculoskeletal disorders | 1   | Health System Access 2 (unitless)                                   |          | X       |         |          | X       |         |
| Other musculoskeletal disorders | 1   | Cholesterol (total, mean per capita)                                |          | X       |         |          | X       |         |
| Other musculoskeletal disorders | 1   | Smoking Prevalence                                                  |          | X       |         |          | X       |         |
| Other musculoskeletal disorders | 1   | Vegetables (kcal per capita)                                        |          | X       |         |          | X       |         |
| Other musculoskeletal disorders | 1   | Latitude Under 15 (proportion)                                      |          |         |         | X        |         | X       |
| Other musculoskeletal disorders | 1   | Latitude 15 to 30 (proportion)                                      |          |         |         | X        |         | X       |
| Other musculoskeletal disorders | 1   | Latitude 30 to 45 (proportion)                                      |          |         |         | X        |         | X       |
| Other musculoskeletal disorders | 1   | Latitude Over 45 (proportion)                                       |          |         |         | X        |         | X       |
| Other musculoskeletal disorders | 2   | Mean BMI                                                            | X        |         |         | X        |         |         |
| Other musculoskeletal disorders | 2   | LDI (I\$ per capita)                                                |          | X       |         |          | X       |         |
| Other musculoskeletal disorders | 2   | Alcohol (liters per capita)                                         |          | X       |         |          | X       |         |
| Other musculoskeletal disorders | 2   | Cumulative Cigarettes (10 Years)                                    |          | X       |         |          | X       |         |
| Other musculoskeletal disorders | 2   | Cumulative Cigarettes (5 Years)                                     |          | X       |         |          | X       |         |
| Other musculoskeletal disorders | 2   | Education (years per capita)                                        |          | X       |         |          | X       |         |
| Other musculoskeletal disorders | 2   | Health System Access 2 (unitless)                                   |          | X       |         |          | X       |         |
| Other musculoskeletal disorders | 2   | Cholesterol (total, mean per capita)                                |          | X       |         |          | X       |         |
| Other musculoskeletal disorders | 2   | Smoking Prevalence                                                  |          | X       |         |          | X       |         |
| Other musculoskeletal disorders | 2   | Vegetables (kcal per capita)                                        |          | X       |         |          | X       |         |
| Other musculoskeletal disorders | 2   | Latitude Under 15 (proportion)                                      |          |         |         | X        |         | X       |
| Other musculoskeletal disorders | 2   | Latitude 15 to 30 (proportion)                                      |          |         |         | X        |         | X       |
| Other musculoskeletal disorders | 2   | Latitude 30 to 45 (proportion)                                      |          |         |         | X        |         | X       |
| Other musculoskeletal disorders | 2   | Latitude Over 45 (proportion)                                       |          |         |         | X        |         | X       |
| Congenital anomalies            | 1   | Legality of Abortion                                                |          |         |         |          | X       |         |
| Congenital anomalies            | 1   | Health System Access (capped)                                       |          |         |         |          | X       |         |
| Congenital anomalies            | 1   | Health System Access 2 (unitless)                                   | X        |         |         |          |         |         |
| Congenital anomalies            | 1   | Alcohol (liters per capita)                                         | X        |         |         | X        |         |         |
| Congenital anomalies            | 1   | Rate of congenital heart disease (per 1000 live births)             | X        |         |         | X        |         |         |
| Congenital anomalies            | 1   | Rate of congenital chromosomal abnormalities (per 1000 live births) | X        |         |         | X        |         |         |
| Congenital anomalies            | 1   | Live Births 35+ (proportion)                                        | X        |         |         | X        |         |         |
| Congenital anomalies            | 1   | Indoor Air Pollution (All Cooking Fuels)                            | X        |         |         |          |         | X       |
| Congenital anomalies            | 1   | Smoking Prevalence (Reproductive Age Standardized)                  | X        |         |         |          |         | X       |
| Congenital anomalies            | 1   | Measles Vaccine Coverage (proportion)                               |          | X       |         |          |         |         |
| Congenital anomalies            | 1   | Total Fertility Rate                                                |          |         |         | X        |         |         |
| Congenital anomalies            | 1   | Education (years per capita)                                        |          |         |         | X        |         |         |
| Congenital anomalies            | 1   | LDI (I\$ per capita)                                                |          |         |         | X        |         | X       |
| Congenital anomalies            | 1   | Fruits (kcal per capita)                                            |          |         |         | X        |         | X       |
| Congenital anomalies            | 1   | Vegetables (kcal per capita)                                        |          |         |         | X        |         | X       |



**Web Table 23 - Comparison of covariates used in CoD models for GBD 2010 and GBD 2013**

| Cause Name           | Sex | Covariate name                                                      | GBD 2010 |         |         | GBD 2013 |         |         |
|----------------------|-----|---------------------------------------------------------------------|----------|---------|---------|----------|---------|---------|
|                      |     |                                                                     | Level 1  | Level 2 | Level 3 | Level 1  | Level 2 | Level 3 |
| Congenital anomalies | 2   | Legality of Abortion                                                |          |         |         |          | X       |         |
| Congenital anomalies | 2   | Health System Access (capped)                                       |          |         |         |          | X       |         |
| Congenital anomalies | 2   | Health System Access 2 (unitless)                                   | X        |         |         |          |         |         |
| Congenital anomalies | 2   | Alcohol (liters per capita)                                         | X        |         |         | X        |         |         |
| Congenital anomalies | 2   | Rate of congenital heart disease (per 1000 live births)             | X        |         |         | X        |         |         |
| Congenital anomalies | 2   | Rate of congenital chromosomal abnormalities (per 1000 live births) | X        |         |         | X        |         |         |
| Congenital anomalies | 2   | Live Births 35+ (proportion)                                        | X        |         |         | X        |         |         |
| Congenital anomalies | 2   | Indoor Air Pollution (All Cooking Fuels)                            | X        |         |         |          |         | X       |
| Congenital anomalies | 2   | Smoking Prevalence (Reproductive Age Standardized)                  | X        |         |         |          |         | X       |
| Congenital anomalies | 2   | Measles Vaccine Coverage (proportion)                               |          | X       |         |          |         |         |
| Congenital anomalies | 2   | Total Fertility Rate                                                |          |         | X       |          |         |         |
| Congenital anomalies | 2   | Education (years per capita)                                        |          |         | X       |          | X       |         |
| Congenital anomalies | 2   | LDI (I\$ per capita)                                                |          |         | X       |          |         | X       |
| Congenital anomalies | 2   | Fruits (kcal per capita)                                            |          |         | X       |          |         | X       |
| Congenital anomalies | 2   | Vegetables (kcal per capita)                                        |          |         | X       |          |         | X       |
| Neural tube defects  | 1   | Diabetes Age-Standardized Prevalence (proportion)                   |          |         |         | X        |         |         |
| Neural tube defects  | 1   | Live Births 35+ (proportion)                                        | X        |         |         |          |         |         |
| Neural tube defects  | 1   | Indoor Air Pollution (All Cooking Fuels)                            | X        |         |         | X        |         |         |
| Neural tube defects  | 1   | Smoking Prevalence (Reproductive Age Standardized)                  | X        |         |         | X        |         |         |
| Neural tube defects  | 1   | Alcohol (liters per capita)                                         | X        |         |         |          | X       |         |
| Neural tube defects  | 1   | Health System Access 2 (unitless)                                   | X        |         |         |          |         | X       |
| Neural tube defects  | 1   | Measles Vaccine Coverage (proportion)                               |          | X       |         |          |         |         |
| Neural tube defects  | 1   | Total Fertility Rate                                                |          |         | X       |          |         |         |
| Neural tube defects  | 1   | LDI (I\$ per capita)                                                |          |         | X       |          | X       |         |
| Neural tube defects  | 1   | Fruits (kcal per capita)                                            |          |         | X       |          | X       |         |
| Neural tube defects  | 1   | Vegetables (kcal per capita)                                        |          |         | X       |          | X       |         |
| Neural tube defects  | 1   | Education (years per capita)                                        |          |         | X       |          |         | X       |
| Neural tube defects  | 2   | Diabetes Age-Standardized Prevalence (proportion)                   |          |         |         | X        |         |         |
| Neural tube defects  | 2   | Live Births 35+ (proportion)                                        | X        |         |         |          |         |         |
| Neural tube defects  | 2   | Indoor Air Pollution (All Cooking Fuels)                            | X        |         |         | X        |         |         |
| Neural tube defects  | 2   | Smoking Prevalence (Reproductive Age Standardized)                  | X        |         |         | X        |         |         |
| Neural tube defects  | 2   | Alcohol (liters per capita)                                         | X        |         |         |          | X       |         |
| Neural tube defects  | 2   | Health System Access 2 (unitless)                                   | X        |         |         |          |         | X       |
| Neural tube defects  | 2   | Measles Vaccine Coverage (proportion)                               |          | X       |         |          |         |         |
| Neural tube defects  | 2   | Total Fertility Rate                                                |          |         | X       |          |         |         |
| Neural tube defects  | 2   | LDI (I\$ per capita)                                                |          |         | X       |          | X       |         |
| Neural tube defects  | 2   | Fruits (kcal per capita)                                            |          |         | X       |          | X       |         |
| Neural tube defects  | 2   | Vegetables (kcal per capita)                                        |          |         | X       |          | X       |         |

**Web Table 23 - Comparison of covariates used in CoD models for GBD 2010 and GBD 2013**

| Cause Name                 | Sex | Covariate name                                          | GBD 2010 |         |         | GBD 2013 |         |         |
|----------------------------|-----|---------------------------------------------------------|----------|---------|---------|----------|---------|---------|
|                            |     |                                                         | Level 1  | Level 2 | Level 3 | Level 1  | Level 2 | Level 3 |
| Neural tube defects        | 2   | Education (years per capita)                            |          |         | X       |          |         | X       |
| Congenital heart anomalies | 1   | Live Births 35+ (proportion)                            |          |         |         | X        |         |         |
| Congenital heart anomalies | 1   | Legality of Abortion                                    |          |         |         |          | X       |         |
| Congenital heart anomalies | 1   | Diabetes Age-Standardized Prevalence (proportion)       |          |         |         |          | X       |         |
| Congenital heart anomalies | 1   | Health System Access 2 (unitless)                       | X        |         |         |          |         |         |
| Congenital heart anomalies | 1   | Live Births 40+ (proportion)                            | X        |         |         |          |         |         |
| Congenital heart anomalies | 1   | Alcohol (liters per capita)                             | X        |         |         | X        |         |         |
| Congenital heart anomalies | 1   | Rate of congenital heart disease (per 1000 live births) | X        |         |         | X        |         |         |
| Congenital heart anomalies | 1   | Indoor Air Pollution (All Cooking Fuels)                | X        |         |         |          |         | X       |
| Congenital heart anomalies | 1   | Smoking Prevalence (Reproductive Age Standardized)      | X        |         |         |          |         | X       |
| Congenital heart anomalies | 1   | Measles Vaccine Coverage (proportion)                   |          | X       |         | X        |         |         |
| Congenital heart anomalies | 1   | Total Fertility Rate                                    |          |         | X       |          |         |         |
| Congenital heart anomalies | 1   | LDI (I\$ per capita)                                    |          |         | X       |          | X       |         |
| Congenital heart anomalies | 1   | Education (years per capita)                            |          |         | X       |          | X       |         |
| Congenital heart anomalies | 2   | Live Births 35+ (proportion)                            |          |         |         | X        |         |         |
| Congenital heart anomalies | 2   | Legality of Abortion                                    |          |         |         |          | X       |         |
| Congenital heart anomalies | 2   | Diabetes Age-Standardized Prevalence (proportion)       |          |         |         |          | X       |         |
| Congenital heart anomalies | 2   | Health System Access 2 (unitless)                       | X        |         |         |          |         |         |
| Congenital heart anomalies | 2   | Live Births 40+ (proportion)                            | X        |         |         |          |         |         |
| Congenital heart anomalies | 2   | Alcohol (liters per capita)                             | X        |         |         | X        |         |         |
| Congenital heart anomalies | 2   | Rate of congenital heart disease (per 1000 live births) | X        |         |         | X        |         |         |
| Congenital heart anomalies | 2   | Indoor Air Pollution (All Cooking Fuels)                | X        |         |         |          |         | X       |
| Congenital heart anomalies | 2   | Smoking Prevalence (Reproductive Age Standardized)      | X        |         |         |          |         | X       |
| Congenital heart anomalies | 2   | Measles Vaccine Coverage (proportion)                   |          | X       |         | X        |         |         |
| Congenital heart anomalies | 2   | Total Fertility Rate                                    |          |         | X       |          |         |         |
| Congenital heart anomalies | 2   | LDI (I\$ per capita)                                    |          |         | X       |          | X       |         |
| Congenital heart anomalies | 2   | Education (years per capita)                            |          |         | X       |          | X       |         |
| Cleft lip and cleft palate | 1   | Legality of Abortion                                    |          |         |         | X        |         |         |
| Cleft lip and cleft palate | 1   | Diabetes Age-Standardized Prevalence (proportion)       |          |         |         |          | X       |         |
| Cleft lip and cleft palate | 1   | Fruits (kcal per capita)                                |          |         |         |          | X       |         |
| Cleft lip and cleft palate | 1   | Vegetables (kcal per capita)                            |          |         |         |          | X       |         |
| Cleft lip and cleft palate | 1   | Health System Access (capped)                           |          |         |         |          |         | X       |
| Cleft lip and cleft palate | 1   | Health System Access 2 (unitless)                       | X        |         |         |          |         |         |
| Cleft lip and cleft palate | 1   | Live Births 35+ (proportion)                            | X        |         |         |          |         |         |
| Cleft lip and cleft palate | 1   | Alcohol (liters per capita)                             | X        |         |         | X        |         |         |
| Cleft lip and cleft palate | 1   | Indoor Air Pollution (All Cooking Fuels)                | X        |         |         | X        |         |         |
| Cleft lip and cleft palate | 1   | Smoking Prevalence (Reproductive Age Standardized)      | X        |         |         | X        |         |         |
| Cleft lip and cleft palate | 1   | Measles Vaccine Coverage (proportion)                   |          | X       |         |          |         | X       |

**Web Table 23 - Comparison of covariates used in CoD models for GBD 2010 and GBD 2013**

| Cause Name                 | Sex | Covariate name                                     | GBD 2010 |         |         | GBD 2013 |         |         |
|----------------------------|-----|----------------------------------------------------|----------|---------|---------|----------|---------|---------|
|                            |     |                                                    | Level 1  | Level 2 | Level 3 | Level 1  | Level 2 | Level 3 |
| Cleft lip and cleft palate | 1   | Total Fertility Rate                               |          |         | X       |          |         |         |
| Cleft lip and cleft palate | 1   | Education (years per capita)                       |          |         | X       |          | X       |         |
| Cleft lip and cleft palate | 1   | LDI (I\$ per capita)                               |          |         | X       |          |         | X       |
| Cleft lip and cleft palate | 2   | Legality of Abortion                               |          |         |         | X        |         |         |
| Cleft lip and cleft palate | 2   | Diabetes Age-Standardized Prevalence (proportion)  |          |         |         |          | X       |         |
| Cleft lip and cleft palate | 2   | Fruits (kcal per capita)                           |          |         |         |          | X       |         |
| Cleft lip and cleft palate | 2   | Vegetables (kcal per capita)                       |          |         |         |          | X       |         |
| Cleft lip and cleft palate | 2   | Health System Access (capped)                      |          |         |         |          |         | X       |
| Cleft lip and cleft palate | 2   | Health System Access 2 (unitless)                  | X        |         |         |          |         |         |
| Cleft lip and cleft palate | 2   | Live Births 35+ (proportion)                       | X        |         |         |          |         |         |
| Cleft lip and cleft palate | 2   | Alcohol (liters per capita)                        | X        |         |         | X        |         |         |
| Cleft lip and cleft palate | 2   | Indoor Air Pollution (All Cooking Fuels)           | X        |         |         | X        |         |         |
| Cleft lip and cleft palate | 2   | Smoking Prevalence (Reproductive Age Standardized) | X        |         |         | X        |         |         |
| Cleft lip and cleft palate | 2   | Measles Vaccine Coverage (proportion)              |          | X       |         |          |         | X       |
| Cleft lip and cleft palate | 2   | Total Fertility Rate                               |          |         | X       |          |         |         |
| Cleft lip and cleft palate | 2   | Education (years per capita)                       |          |         | X       |          | X       |         |
| Cleft lip and cleft palate | 2   | LDI (I\$ per capita)                               |          |         | X       |          |         | X       |
| Down syndrome              | 1   | Legality of Abortion                               |          |         |         | X        |         |         |
| Down syndrome              | 1   | Live Births 40+ (proportion)                       |          |         |         | X        |         |         |
| Down syndrome              | 1   | Live Births 35+ (proportion)                       | X        |         |         | X        |         |         |
| Down syndrome              | 1   | Health System Access 2 (unitless)                  | X        |         |         |          | X       |         |
| Down syndrome              | 1   | Alcohol (liters per capita)                        | X        |         |         |          |         | X       |
| Down syndrome              | 1   | Indoor Air Pollution (All Cooking Fuels)           | X        |         |         |          |         | X       |
| Down syndrome              | 1   | Smoking Prevalence (Reproductive Age Standardized) | X        |         |         |          |         | X       |
| Down syndrome              | 1   | Measles Vaccine Coverage (proportion)              |          | X       |         |          | X       |         |
| Down syndrome              | 1   | Total Fertility Rate                               |          |         | X       |          |         |         |
| Down syndrome              | 1   | LDI (I\$ per capita)                               |          |         | X       |          | X       |         |
| Down syndrome              | 1   | Education (years per capita)                       |          |         | X       |          |         | X       |
| Down syndrome              | 2   | Legality of Abortion                               |          |         |         | X        |         |         |
| Down syndrome              | 2   | Live Births 40+ (proportion)                       |          |         |         | X        |         |         |
| Down syndrome              | 2   | Live Births 35+ (proportion)                       | X        |         |         | X        |         |         |
| Down syndrome              | 2   | Health System Access 2 (unitless)                  | X        |         |         |          | X       |         |
| Down syndrome              | 2   | Alcohol (liters per capita)                        | X        |         |         |          |         | X       |
| Down syndrome              | 2   | Indoor Air Pollution (All Cooking Fuels)           | X        |         |         |          |         | X       |
| Down syndrome              | 2   | Smoking Prevalence (Reproductive Age Standardized) | X        |         |         |          |         | X       |
| Down syndrome              | 2   | Measles Vaccine Coverage (proportion)              |          | X       |         |          | X       |         |
| Down syndrome              | 2   | Total Fertility Rate                               |          |         | X       |          |         |         |
| Down syndrome              | 2   | LDI (I\$ per capita)                               |          |         | X       |          | X       |         |

**Web Table 23 - Comparison of covariates used in CoD models for GBD 2010 and GBD 2013**

| Cause Name                            | Sex | Covariate name                                                      | GBD 2010 |         |         | GBD 2013 |         |         |
|---------------------------------------|-----|---------------------------------------------------------------------|----------|---------|---------|----------|---------|---------|
|                                       |     |                                                                     | Level 1  | Level 2 | Level 3 | Level 1  | Level 2 | Level 3 |
| Down syndrome                         | 2   | Education (years per capita)                                        |          |         | X       |          |         | X       |
| Chromosomal unbalanced rearrangements | 1   | Legality of Abortion                                                |          |         |         | X        |         |         |
| Chromosomal unbalanced rearrangements | 1   | Live Births 40+ (proportion)                                        |          |         |         | X        |         |         |
| Chromosomal unbalanced rearrangements | 1   | Rate of congenital chromosomal abnormalities (per 1000 live births) | X        |         |         | X        |         |         |
| Chromosomal unbalanced rearrangements | 1   | Live Births 35+ (proportion)                                        | X        |         |         | X        |         |         |
| Chromosomal unbalanced rearrangements | 1   | Health System Access 2 (unitless)                                   | X        |         |         |          | X       |         |
| Chromosomal unbalanced rearrangements | 1   | Alcohol (liters per capita)                                         | X        |         |         |          |         | X       |
| Chromosomal unbalanced rearrangements | 1   | Indoor Air Pollution (All Cooking Fuels)                            | X        |         |         |          |         | X       |
| Chromosomal unbalanced rearrangements | 1   | Smoking Prevalence (Reproductive Age Standardized)                  | X        |         |         |          |         | X       |
| Chromosomal unbalanced rearrangements | 1   | Measles Vaccine Coverage (proportion)                               |          | X       |         |          | X       |         |
| Chromosomal unbalanced rearrangements | 1   | Total Fertility Rate                                                |          |         | X       |          |         |         |
| Chromosomal unbalanced rearrangements | 1   | LDI (I\$ per capita)                                                |          |         | X       |          | X       |         |
| Chromosomal unbalanced rearrangements | 1   | Education (years per capita)                                        |          |         | X       |          |         | X       |
| Chromosomal unbalanced rearrangements | 2   | Legality of Abortion                                                |          |         |         | X        |         |         |
| Chromosomal unbalanced rearrangements | 2   | Live Births 40+ (proportion)                                        |          |         |         | X        |         |         |
| Chromosomal unbalanced rearrangements | 2   | Rate of congenital chromosomal abnormalities (per 1000 live births) | X        |         |         | X        |         |         |
| Chromosomal unbalanced rearrangements | 2   | Live Births 35+ (proportion)                                        | X        |         |         | X        |         |         |
| Chromosomal unbalanced rearrangements | 2   | Health System Access 2 (unitless)                                   | X        |         |         |          | X       |         |
| Chromosomal unbalanced rearrangements | 2   | Alcohol (liters per capita)                                         | X        |         |         |          |         | X       |
| Chromosomal unbalanced rearrangements | 2   | Indoor Air Pollution (All Cooking Fuels)                            | X        |         |         |          |         | X       |
| Chromosomal unbalanced rearrangements | 2   | Smoking Prevalence (Reproductive Age Standardized)                  | X        |         |         |          |         | X       |
| Chromosomal unbalanced rearrangements | 2   | Measles Vaccine Coverage (proportion)                               |          | X       |         |          | X       |         |
| Chromosomal unbalanced rearrangements | 2   | Total Fertility Rate                                                |          |         | X       |          |         |         |
| Chromosomal unbalanced rearrangements | 2   | LDI (I\$ per capita)                                                |          |         | X       |          | X       |         |
| Chromosomal unbalanced rearrangements | 2   | Education (years per capita)                                        |          |         | X       |          |         | X       |
| Other congenital anomalies            | 1   | Diabetes Age-Standardized Prevalence (proportion)                   |          |         |         | X        |         |         |
| Other congenital anomalies            | 1   | Legality of Abortion                                                |          |         |         |          | X       |         |
| Other congenital anomalies            | 1   | Rate of congenital heart disease (per 1000 live births)             |          |         |         |          | X       |         |
| Other congenital anomalies            | 1   | Rate of congenital chromosomal abnormalities (per 1000 live births) |          |         |         |          | X       |         |
| Other congenital anomalies            | 1   | Alcohol (liters per capita)                                         | X        |         |         | X        |         |         |
| Other congenital anomalies            | 1   | Health System Access 2 (unitless)                                   | X        |         |         | X        |         |         |
| Other congenital anomalies            | 1   | Live Births 35+ (proportion)                                        | X        |         |         | X        |         |         |
| Other congenital anomalies            | 1   | Indoor Air Pollution (All Cooking Fuels)                            | X        |         |         |          | X       |         |
| Other congenital anomalies            | 1   | Smoking Prevalence (Reproductive Age Standardized)                  | X        |         |         |          | X       |         |
| Other congenital anomalies            | 1   | Measles Vaccine Coverage (proportion)                               |          | X       |         |          | X       |         |
| Other congenital anomalies            | 1   | Total Fertility Rate                                                |          |         | X       |          |         |         |
| Other congenital anomalies            | 1   | Education (years per capita)                                        |          |         | X       |          | X       |         |
| Other congenital anomalies            | 1   | LDI (I\$ per capita)                                                |          |         | X       |          |         | X       |

**Web Table 23 - Comparison of covariates used in CoD models for GBD 2010 and GBD 2013**

| Cause Name                     | Sex | Covariate name                                                      | GBD 2010 |         |         | GBD 2013 |         |         |
|--------------------------------|-----|---------------------------------------------------------------------|----------|---------|---------|----------|---------|---------|
|                                |     |                                                                     | Level 1  | Level 2 | Level 3 | Level 1  | Level 2 | Level 3 |
| Other congenital anomalies     | 2   | Diabetes Age-Standardized Prevalence (proportion)                   |          |         |         | X        |         |         |
| Other congenital anomalies     | 2   | Legality of Abortion                                                |          |         |         |          | X       |         |
| Other congenital anomalies     | 2   | Rate of congenital heart disease (per 1000 live births)             |          |         |         |          | X       |         |
| Other congenital anomalies     | 2   | Rate of congenital chromosomal abnormalities (per 1000 live births) |          |         |         |          | X       |         |
| Other congenital anomalies     | 2   | Alcohol (liters per capita)                                         | X        |         |         | X        |         |         |
| Other congenital anomalies     | 2   | Health System Access 2 (unitless)                                   | X        |         |         | X        |         |         |
| Other congenital anomalies     | 2   | Live Births 35+ (proportion)                                        | X        |         |         | X        |         |         |
| Other congenital anomalies     | 2   | Indoor Air Pollution (All Cooking Fuels)                            | X        |         |         |          | X       |         |
| Other congenital anomalies     | 2   | Smoking Prevalence (Reproductive Age Standardized)                  | X        |         |         |          | X       |         |
| Other congenital anomalies     | 2   | Measles Vaccine Coverage (proportion)                               |          | X       |         |          | X       |         |
| Other congenital anomalies     | 2   | Total Fertility Rate                                                |          |         | X       |          |         |         |
| Other congenital anomalies     | 2   | Education (years per capita)                                        |          |         | X       |          | X       |         |
| Other congenital anomalies     | 2   | LDI (I\$ per capita)                                                |          |         | X       |          |         | X       |
| Skin and subcutaneous diseases | 1   | Health System Access 2 (unitless)                                   | X        |         |         | X        |         |         |
| Skin and subcutaneous diseases | 1   | Malnutrition (proportion <2SD weight for age)                       | X        |         |         | X        |         |         |
| Skin and subcutaneous diseases | 1   | Sanitation (proportion with access)                                 | X        |         |         | X        |         |         |
| Skin and subcutaneous diseases | 1   | Improved Water Source (proportion with access)                      | X        |         |         | X        |         |         |
| Skin and subcutaneous diseases | 1   | Alcohol (liters per capita)                                         |          | X       |         |          | X       |         |
| Skin and subcutaneous diseases | 1   | Cumulative Cigarettes (10 Years)                                    |          | X       |         |          | X       |         |
| Skin and subcutaneous diseases | 1   | Cumulative Cigarettes (5 Years)                                     |          | X       |         |          | X       |         |
| Skin and subcutaneous diseases | 1   | Smoking Prevalence                                                  |          | X       |         |          | X       |         |
| Skin and subcutaneous diseases | 1   | LDI (I\$ per capita)                                                |          |         | X       |          |         | X       |
| Skin and subcutaneous diseases | 1   | Education (years per capita)                                        |          |         | X       |          |         | X       |
| Skin and subcutaneous diseases | 1   | Latitude Under 15 (proportion)                                      |          |         | X       |          |         | X       |
| Skin and subcutaneous diseases | 1   | Latitude 15 to 30 (proportion)                                      |          |         | X       |          |         | X       |
| Skin and subcutaneous diseases | 1   | Latitude 30 to 45 (proportion)                                      |          |         | X       |          |         | X       |
| Skin and subcutaneous diseases | 1   | Latitude Over 45 (proportion)                                       |          |         | X       |          |         | X       |
| Skin and subcutaneous diseases | 2   | Health System Access 2 (unitless)                                   | X        |         |         | X        |         |         |
| Skin and subcutaneous diseases | 2   | Malnutrition (proportion <2SD weight for age)                       | X        |         |         | X        |         |         |
| Skin and subcutaneous diseases | 2   | Sanitation (proportion with access)                                 | X        |         |         | X        |         |         |
| Skin and subcutaneous diseases | 2   | Improved Water Source (proportion with access)                      | X        |         |         | X        |         |         |
| Skin and subcutaneous diseases | 2   | Alcohol (liters per capita)                                         |          | X       |         |          | X       |         |
| Skin and subcutaneous diseases | 2   | Cumulative Cigarettes (10 Years)                                    |          | X       |         |          | X       |         |
| Skin and subcutaneous diseases | 2   | Cumulative Cigarettes (5 Years)                                     |          | X       |         |          | X       |         |
| Skin and subcutaneous diseases | 2   | Smoking Prevalence                                                  |          | X       |         |          | X       |         |
| Skin and subcutaneous diseases | 2   | LDI (I\$ per capita)                                                |          |         | X       |          |         | X       |
| Skin and subcutaneous diseases | 2   | Education (years per capita)                                        |          |         | X       |          |         | X       |
| Skin and subcutaneous diseases | 2   | Latitude Under 15 (proportion)                                      |          |         | X       |          |         | X       |

**Web Table 23 - Comparison of covariates used in CoD models for GBD 2010 and GBD 2013**

| Cause Name                     | Sex | Covariate name                                 | GBD 2010 |         |         | GBD 2013 |         |         |
|--------------------------------|-----|------------------------------------------------|----------|---------|---------|----------|---------|---------|
|                                |     |                                                | Level 1  | Level 2 | Level 3 | Level 1  | Level 2 | Level 3 |
| Skin and subcutaneous diseases | 2   | Latitude 15 to 30 (proportion)                 |          |         | X       |          |         | X       |
| Skin and subcutaneous diseases | 2   | Latitude 30 to 45 (proportion)                 |          |         | X       |          |         | X       |
| Skin and subcutaneous diseases | 2   | Latitude Over 45 (proportion)                  |          |         | X       |          |         | X       |
| Cellulitis                     | 1   | Latitude 15 to 30 (proportion)                 |          |         | X*      |          |         |         |
| Cellulitis                     | 1   | Health System Access 2 (unitless)              | X*       |         |         | X        |         |         |
| Cellulitis                     | 1   | Malnutrition (proportion <2SD weight for age)  | X*       |         |         | X        |         |         |
| Cellulitis                     | 1   | Sanitation (proportion with access)            | X*       |         |         | X        |         |         |
| Cellulitis                     | 1   | Improved Water Source (proportion with access) | X*       |         |         | X        |         |         |
| Cellulitis                     | 1   | Alcohol (liters per capita)                    |          | X*      |         |          | X       |         |
| Cellulitis                     | 1   | Cumulative Cigarettes (10 Years)               |          | X*      |         |          | X       |         |
| Cellulitis                     | 1   | Cumulative Cigarettes (5 Years)                |          | X*      |         |          | X       |         |
| Cellulitis                     | 1   | Smoking Prevalence                             |          | X*      |         |          | X       |         |
| Cellulitis                     | 1   | LDI (I\$ per capita)                           |          |         | X*      |          |         | X       |
| Cellulitis                     | 1   | Education (years per capita)                   |          |         | X*      |          |         | X       |
| Cellulitis                     | 1   | Latitude Under 15 (proportion)                 |          |         | X*      |          |         | X       |
| Cellulitis                     | 1   | Population 15 to 30 (proportion)               |          |         |         |          |         | X       |
| Cellulitis                     | 1   | Latitude 30 to 45 (proportion)                 |          |         | X*      |          |         | X       |
| Cellulitis                     | 1   | Latitude Over 45 (proportion)                  |          |         | X*      |          |         | X       |
| Cellulitis                     | 2   | Latitude 15 to 30 (proportion)                 |          |         | X*      |          |         |         |
| Cellulitis                     | 2   | Health System Access 2 (unitless)              | X*       |         |         | X        |         |         |
| Cellulitis                     | 2   | Malnutrition (proportion <2SD weight for age)  | X*       |         |         | X        |         |         |
| Cellulitis                     | 2   | Sanitation (proportion with access)            | X*       |         |         | X        |         |         |
| Cellulitis                     | 2   | Improved Water Source (proportion with access) | X*       |         |         | X        |         |         |
| Cellulitis                     | 2   | Alcohol (liters per capita)                    |          | X*      |         |          | X       |         |
| Cellulitis                     | 2   | Cumulative Cigarettes (10 Years)               |          | X*      |         |          | X       |         |
| Cellulitis                     | 2   | Cumulative Cigarettes (5 Years)                |          | X*      |         |          | X       |         |
| Cellulitis                     | 2   | Smoking Prevalence                             |          | X*      |         |          | X       |         |
| Cellulitis                     | 2   | LDI (I\$ per capita)                           |          |         | X*      |          |         | X       |
| Cellulitis                     | 2   | Education (years per capita)                   |          |         | X*      |          |         | X       |
| Cellulitis                     | 2   | Latitude Under 15 (proportion)                 |          |         | X*      |          |         | X       |
| Cellulitis                     | 2   | Population 15 to 30 (proportion)               |          |         |         |          |         | X       |
| Cellulitis                     | 2   | Latitude 30 to 45 (proportion)                 |          |         | X*      |          |         | X       |
| Cellulitis                     | 2   | Latitude Over 45 (proportion)                  |          |         | X*      |          |         | X       |
| Pyoderma                       | 1   | Health System Access 2 (unitless)              | X*       |         |         | X        |         |         |
| Pyoderma                       | 1   | Malnutrition (proportion <2SD weight for age)  | X*       |         |         | X        |         |         |
| Pyoderma                       | 1   | Sanitation (proportion with access)            | X*       |         |         | X        |         |         |
| Pyoderma                       | 1   | Improved Water Source (proportion with access) | X*       |         |         | X        |         |         |
| Pyoderma                       | 1   | Alcohol (liters per capita)                    |          | X*      |         |          | X       |         |

**Web Table 23 - Comparison of covariates used in CoD models for GBD 2010 and GBD 2013**

| Cause Name      | Sex | Covariate name                                 | GBD 2010 |         |         | GBD 2013 |         |         |
|-----------------|-----|------------------------------------------------|----------|---------|---------|----------|---------|---------|
|                 |     |                                                | Level 1  | Level 2 | Level 3 | Level 1  | Level 2 | Level 3 |
| Pyoderma        | 1   | Cumulative Cigarettes (10 Years)               |          | X*      |         |          | X       |         |
| Pyoderma        | 1   | Cumulative Cigarettes (5 Years)                |          | X*      |         |          | X       |         |
| Pyoderma        | 1   | Smoking Prevalence                             |          | X*      |         |          | X       |         |
| Pyoderma        | 1   | LDI (I\$ per capita)                           |          |         |         |          |         | X       |
| Pyoderma        | 1   | Education (years per capita)                   |          |         |         |          |         | X       |
| Pyoderma        | 1   | Latitude Under 15 (proportion)                 |          |         |         |          |         | X       |
| Pyoderma        | 1   | Latitude 15 to 30 (proportion)                 |          |         |         |          |         | X       |
| Pyoderma        | 1   | Latitude 30 to 45 (proportion)                 |          |         |         |          |         | X       |
| Pyoderma        | 1   | Latitude Over 45 (proportion)                  |          |         |         |          |         | X       |
| Pyoderma        | 2   | Health System Access 2 (unitless)              | X*       |         |         | X        |         |         |
| Pyoderma        | 2   | Malnutrition (proportion <2SD weight for age)  | X*       |         |         | X        |         |         |
| Pyoderma        | 2   | Sanitation (proportion with access)            | X*       |         |         | X        |         |         |
| Pyoderma        | 2   | Improved Water Source (proportion with access) | X*       |         |         | X        |         |         |
| Pyoderma        | 2   | Alcohol (liters per capita)                    |          | X*      |         |          | X       |         |
| Pyoderma        | 2   | Cumulative Cigarettes (10 Years)               |          | X*      |         |          | X       |         |
| Pyoderma        | 2   | Cumulative Cigarettes (5 Years)                |          | X*      |         |          | X       |         |
| Pyoderma        | 2   | Smoking Prevalence                             |          | X*      |         |          | X       |         |
| Pyoderma        | 2   | LDI (I\$ per capita)                           |          |         |         |          |         | X       |
| Pyoderma        | 2   | Education (years per capita)                   |          |         |         |          |         | X       |
| Pyoderma        | 2   | Latitude Under 15 (proportion)                 |          |         |         |          |         | X       |
| Pyoderma        | 2   | Latitude 15 to 30 (proportion)                 |          |         |         |          |         | X       |
| Pyoderma        | 2   | Latitude 30 to 45 (proportion)                 |          |         |         |          |         | X       |
| Pyoderma        | 2   | Latitude Over 45 (proportion)                  |          |         |         |          |         | X       |
| Decubitus ulcer | 1   | Malnutrition (proportion <2SD weight for age)  | X*       |         |         | X        |         |         |
| Decubitus ulcer | 1   | Sanitation (proportion with access)            | X*       |         |         | X        |         |         |
| Decubitus ulcer | 1   | Improved Water Source (proportion with access) | X*       |         |         | X        |         |         |
| Decubitus ulcer | 1   | Alcohol (liters per capita)                    |          | X*      |         |          | X       |         |
| Decubitus ulcer | 1   | Cumulative Cigarettes (10 Years)               |          | X*      |         |          | X       |         |
| Decubitus ulcer | 1   | Cumulative Cigarettes (5 Years)                |          | X*      |         |          | X       |         |
| Decubitus ulcer | 1   | Health System Access 2 (unitless)              | X*       |         |         |          | X       |         |
| Decubitus ulcer | 1   | Smoking Prevalence                             |          | X*      |         |          | X       |         |
| Decubitus ulcer | 1   | LDI (I\$ per capita)                           |          |         |         |          |         | X       |
| Decubitus ulcer | 1   | Education (years per capita)                   |          |         |         |          |         | X       |
| Decubitus ulcer | 1   | Latitude Under 15 (proportion)                 |          |         |         |          |         | X       |
| Decubitus ulcer | 1   | Latitude 15 to 30 (proportion)                 |          |         |         |          |         | X       |
| Decubitus ulcer | 1   | Latitude 30 to 45 (proportion)                 |          |         |         |          |         | X       |
| Decubitus ulcer | 1   | Latitude Over 45 (proportion)                  |          |         |         |          |         | X       |
| Decubitus ulcer | 2   | Malnutrition (proportion <2SD weight for age)  | X*       |         |         | X        |         |         |

**Web Table 23 - Comparison of covariates used in CoD models for GBD 2010 and GBD 2013**

| Cause Name                           | Sex | Covariate name                                 | GBD 2010 |         |         | GBD 2013 |         |         |
|--------------------------------------|-----|------------------------------------------------|----------|---------|---------|----------|---------|---------|
|                                      |     |                                                | Level 1  | Level 2 | Level 3 | Level 1  | Level 2 | Level 3 |
| Decubitus ulcer                      | 2   | Sanitation (proportion with access)            | X*       |         |         | X        |         |         |
| Decubitus ulcer                      | 2   | Improved Water Source (proportion with access) | X*       |         |         | X        |         |         |
| Decubitus ulcer                      | 2   | Alcohol (liters per capita)                    |          | X*      |         |          | X       |         |
| Decubitus ulcer                      | 2   | Cumulative Cigarettes (10 Years)               |          | X*      |         |          | X       |         |
| Decubitus ulcer                      | 2   | Cumulative Cigarettes (5 Years)                |          | X*      |         |          | X       |         |
| Decubitus ulcer                      | 2   | Health System Access 2 (unitless)              | X*       |         |         |          | X       |         |
| Decubitus ulcer                      | 2   | Smoking Prevalence                             |          | X*      |         |          | X       |         |
| Decubitus ulcer                      | 2   | LDI (I\$ per capita)                           |          |         | X*      |          |         | X       |
| Decubitus ulcer                      | 2   | Education (years per capita)                   |          |         | X*      |          |         | X       |
| Decubitus ulcer                      | 2   | Latitude Under 15 (proportion)                 |          |         | X*      |          |         | X       |
| Decubitus ulcer                      | 2   | Latitude 15 to 30 (proportion)                 |          |         | X*      |          |         | X       |
| Decubitus ulcer                      | 2   | Latitude 30 to 45 (proportion)                 |          |         | X*      |          |         | X       |
| Decubitus ulcer                      | 2   | Latitude Over 45 (proportion)                  |          |         | X*      |          |         | X       |
| Other skin and subcutaneous diseases | 1   | Malnutrition (proportion <2SD weight for age)  | X*       |         |         | X        |         |         |
| Other skin and subcutaneous diseases | 1   | Sanitation (proportion with access)            | X*       |         |         | X        |         |         |
| Other skin and subcutaneous diseases | 1   | Improved Water Source (proportion with access) | X*       |         |         | X        |         |         |
| Other skin and subcutaneous diseases | 1   | Alcohol (liters per capita)                    |          | X*      |         |          | X       |         |
| Other skin and subcutaneous diseases | 1   | Cumulative Cigarettes (10 Years)               |          | X*      |         |          | X       |         |
| Other skin and subcutaneous diseases | 1   | Cumulative Cigarettes (5 Years)                |          | X*      |         |          | X       |         |
| Other skin and subcutaneous diseases | 1   | Health System Access 2 (unitless)              | X*       |         |         |          | X       |         |
| Other skin and subcutaneous diseases | 1   | Smoking Prevalence                             |          | X*      |         |          | X       |         |
| Other skin and subcutaneous diseases | 1   | LDI (I\$ per capita)                           |          |         | X*      |          |         | X       |
| Other skin and subcutaneous diseases | 1   | Education (years per capita)                   |          |         | X*      |          |         | X       |
| Other skin and subcutaneous diseases | 1   | Latitude Under 15 (proportion)                 |          |         | X*      |          |         | X       |
| Other skin and subcutaneous diseases | 1   | Latitude 15 to 30 (proportion)                 |          |         | X*      |          |         | X       |
| Other skin and subcutaneous diseases | 1   | Latitude 30 to 45 (proportion)                 |          |         | X*      |          |         | X       |
| Other skin and subcutaneous diseases | 1   | Latitude Over 45 (proportion)                  |          |         | X*      |          |         | X       |
| Other skin and subcutaneous diseases | 2   | Malnutrition (proportion <2SD weight for age)  | X*       |         |         | X        |         |         |
| Other skin and subcutaneous diseases | 2   | Sanitation (proportion with access)            | X*       |         |         | X        |         |         |
| Other skin and subcutaneous diseases | 2   | Improved Water Source (proportion with access) | X*       |         |         | X        |         |         |
| Other skin and subcutaneous diseases | 2   | Alcohol (liters per capita)                    |          | X*      |         |          | X       |         |
| Other skin and subcutaneous diseases | 2   | Cumulative Cigarettes (10 Years)               |          | X*      |         |          | X       |         |
| Other skin and subcutaneous diseases | 2   | Cumulative Cigarettes (5 Years)                |          | X*      |         |          | X       |         |
| Other skin and subcutaneous diseases | 2   | Health System Access 2 (unitless)              | X*       |         |         |          | X       |         |
| Other skin and subcutaneous diseases | 2   | Smoking Prevalence                             |          | X*      |         |          | X       |         |
| Other skin and subcutaneous diseases | 2   | LDI (I\$ per capita)                           |          |         | X*      |          |         | X       |
| Other skin and subcutaneous diseases | 2   | Education (years per capita)                   |          |         | X*      |          |         | X       |
| Other skin and subcutaneous diseases | 2   | Latitude Under 15 (proportion)                 |          |         | X*      |          |         | X       |



**Web Table 23 - Comparison of covariates used in CoD models for GBD 2010 and GBD 2013**

| Cause Name                           | Sex | Covariate name                                     | GBD 2010 |         |         | GBD 2013 |         |         |
|--------------------------------------|-----|----------------------------------------------------|----------|---------|---------|----------|---------|---------|
|                                      |     |                                                    | Level 1  | Level 2 | Level 3 | Level 1  | Level 2 | Level 3 |
| Other skin and subcutaneous diseases | 2   | Latitude 15 to 30 (proportion)                     |          |         | X*      |          |         | X       |
| Other skin and subcutaneous diseases | 2   | Latitude 30 to 45 (proportion)                     |          |         | X*      |          |         | X       |
| Other skin and subcutaneous diseases | 2   | Latitude Over 45 (proportion)                      |          |         | X*      |          |         | X       |
| Sudden infant death syndrome         | 1   | In-Facility Delivery (proportion)                  | X        |         |         | X        |         |         |
| Sudden infant death syndrome         | 1   | Health System Access 2 (unitless)                  | X        |         |         | X        |         |         |
| Sudden infant death syndrome         | 1   | Indoor Air Pollution (All Cooking Fuels)           | X        |         |         | X        |         |         |
| Sudden infant death syndrome         | 1   | Smoking Prevalence (Reproductive Age Standardized) | X        |         |         | X        |         |         |
| Sudden infant death syndrome         | 1   | HIV Prevalence, ARV-Adjusted (Custom Lag, %)       |          | X       |         |          | X       |         |
| Sudden infant death syndrome         | 1   | Skilled Birth Attendance (proportion)              |          | X       |         |          | X       |         |
| Sudden infant death syndrome         | 1   | Malnutrition (proportion <2SD weight for age)      |          | X       |         |          | X       |         |
| Sudden infant death syndrome         | 1   | LDI (I\$ per capita)                               |          |         | X       |          |         | X       |
| Sudden infant death syndrome         | 1   | Total Fertility Rate                               |          |         | X       |          |         | X       |
| Sudden infant death syndrome         | 1   | Education (years per capita)                       |          |         | X       |          |         | X       |
| Sudden infant death syndrome         | 2   | In-Facility Delivery (proportion)                  | X        |         |         | X        |         |         |
| Sudden infant death syndrome         | 2   | Health System Access 2 (unitless)                  | X        |         |         | X        |         |         |
| Sudden infant death syndrome         | 2   | Indoor Air Pollution (All Cooking Fuels)           | X        |         |         | X        |         |         |
| Sudden infant death syndrome         | 2   | Smoking Prevalence (Reproductive Age Standardized) | X        |         |         | X        |         |         |
| Sudden infant death syndrome         | 2   | HIV Prevalence, ARV-Adjusted (Custom Lag, %)       |          | X       |         |          | X       |         |
| Sudden infant death syndrome         | 2   | Skilled Birth Attendance (proportion)              |          | X       |         |          | X       |         |
| Sudden infant death syndrome         | 2   | Malnutrition (proportion <2SD weight for age)      |          | X       |         |          | X       |         |
| Sudden infant death syndrome         | 2   | LDI (I\$ per capita)                               |          |         | X       |          |         | X       |
| Sudden infant death syndrome         | 2   | Total Fertility Rate                               |          |         | X       |          |         | X       |
| Sudden infant death syndrome         | 2   | Education (years per capita)                       |          |         | X       |          |         | X       |
| Transport injuries                   | 1   | Alcohol (liters per capita)                        | X        |         |         | X        |         |         |
| Transport injuries                   | 1   | Health System Access 2 (unitless)                  | X        |         |         | X        |         |         |
| Transport injuries                   | 1   | Vehicles - 2+4 wheels (per capita)                 | X        |         |         | X        |         |         |
| Transport injuries                   | 1   | Vehicles - 2 wheels fraction (proportion)          | X        |         |         | X        |         |         |
| Transport injuries                   | 1   | Population 15 to 30 (proportion)                   |          | X       |         |          |         |         |
| Transport injuries                   | 1   | LDI (I\$ per capita)                               |          | X       |         |          | X       |         |
| Transport injuries                   | 1   | Population Density (300-500 ppl/sqkm, proportion)  |          | X       |         |          | X       |         |
| Transport injuries                   | 1   | Population Density (500-1000 ppl/sqkm, proportion) |          | X       |         |          | X       |         |
| Transport injuries                   | 1   | Education (years per capita)                       |          |         | X       |          |         | X       |
| Transport injuries                   | 1   | Rainfall Quintile 5 (proportion)                   |          |         | X       |          |         | X       |
| Transport injuries                   | 2   | Alcohol (liters per capita)                        | X        |         |         | X        |         |         |
| Transport injuries                   | 2   | Health System Access 2 (unitless)                  | X        |         |         | X        |         |         |
| Transport injuries                   | 2   | Vehicles - 2+4 wheels (per capita)                 | X        |         |         | X        |         |         |
| Transport injuries                   | 2   | Vehicles - 2 wheels fraction (proportion)          | X        |         |         | X        |         |         |
| Transport injuries                   | 2   | Population 15 to 30 (proportion)                   |          | X       |         |          |         |         |

**Web Table 23 - Comparison of covariates used in CoD models for GBD 2010 and GBD 2013**

| Cause Name               | Sex | Covariate name                                     | GBD 2010 |         |         | GBD 2013 |         |         |
|--------------------------|-----|----------------------------------------------------|----------|---------|---------|----------|---------|---------|
|                          |     |                                                    | Level 1  | Level 2 | Level 3 | Level 1  | Level 2 | Level 3 |
| Transport injuries       | 2   | LDI (I\$ per capita)                               |          | X       |         |          | X       |         |
| Transport injuries       | 2   | Population Density (300-500 ppl/sqkm, proportion)  |          | X       |         |          | X       |         |
| Transport injuries       | 2   | Population Density (500-1000 ppl/sqkm, proportion) |          | X       |         |          | X       |         |
| Transport injuries       | 2   | Education (years per capita)                       |          |         | X       |          |         | X       |
| Transport injuries       | 2   | Rainfall Quintile 5 (proportion)                   |          |         | X       |          |         | X       |
| Road injuries            | 1   | Alcohol (liters per capita)                        | X        |         |         | X        |         |         |
| Road injuries            | 1   | Health System Access 2 (unitless)                  | X        |         |         | X        |         |         |
| Road injuries            | 1   | Vehicles - 2+4 wheels (per capita)                 | X        |         |         | X        |         |         |
| Road injuries            | 1   | Vehicles - 2 wheels (per capita)                   | X        |         |         | X        |         |         |
| Road injuries            | 1   | Vehicles - 4 wheels (per capita)                   | X        |         |         | X        |         |         |
| Road injuries            | 1   | Vehicles - 2 wheels fraction (proportion)          | X        |         |         | X        |         |         |
| Road injuries            | 1   | LDI (I\$ per capita)                               |          | X       |         |          | X       |         |
| Road injuries            | 1   | Population 15 to 30 (proportion)                   |          | X       |         |          | X       |         |
| Road injuries            | 1   | Population Density (300-500 ppl/sqkm, proportion)  |          | X       |         |          | X       |         |
| Road injuries            | 1   | Population Density (500-1000 ppl/sqkm, proportion) |          | X       |         |          | X       |         |
| Road injuries            | 1   | Rainfall Quintile 5 (proportion)                   |          |         | X       |          |         |         |
| Road injuries            | 1   | Education (years per capita)                       |          |         | X       |          |         | X       |
| Road injuries            | 2   | Alcohol (liters per capita)                        | X        |         |         | X        |         |         |
| Road injuries            | 2   | Health System Access 2 (unitless)                  | X        |         |         | X        |         |         |
| Road injuries            | 2   | Vehicles - 2+4 wheels (per capita)                 | X        |         |         | X        |         |         |
| Road injuries            | 2   | Vehicles - 2 wheels (per capita)                   | X        |         |         | X        |         |         |
| Road injuries            | 2   | Vehicles - 4 wheels (per capita)                   | X        |         |         | X        |         |         |
| Road injuries            | 2   | Vehicles - 2 wheels fraction (proportion)          | X        |         |         | X        |         |         |
| Road injuries            | 2   | LDI (I\$ per capita)                               |          | X       |         |          | X       |         |
| Road injuries            | 2   | Population 15 to 30 (proportion)                   |          | X       |         |          | X       |         |
| Road injuries            | 2   | Population Density (300-500 ppl/sqkm, proportion)  |          | X       |         |          | X       |         |
| Road injuries            | 2   | Population Density (500-1000 ppl/sqkm, proportion) |          | X       |         |          | X       |         |
| Road injuries            | 2   | Rainfall Quintile 5 (proportion)                   |          |         | X       |          |         |         |
| Road injuries            | 2   | Education (years per capita)                       |          |         | X       |          |         | X       |
| Pedestrian road injuries | 1   | Alcohol (liters per capita)                        | X        |         |         | X        |         |         |
| Pedestrian road injuries | 1   | Health System Access 2 (unitless)                  | X        |         |         | X        |         |         |
| Pedestrian road injuries | 1   | Vehicles - 2+4 wheels (per capita)                 | X        |         |         | X        |         |         |
| Pedestrian road injuries | 1   | Vehicles - 2 wheels fraction (proportion)          | X        |         |         | X        |         |         |
| Pedestrian road injuries | 1   | Population 15 to 30 (proportion)                   |          | X       |         |          |         |         |
| Pedestrian road injuries | 1   | LDI (I\$ per capita)                               |          | X       |         |          | X       |         |
| Pedestrian road injuries | 1   | Population Density (300-500 ppl/sqkm, proportion)  |          | X       |         |          | X       |         |
| Pedestrian road injuries | 1   | Population Density (500-1000 ppl/sqkm, proportion) |          | X       |         |          | X       |         |
| Pedestrian road injuries | 1   | Education (years per capita)                       |          |         | X       |          |         | X       |

**Web Table 23 - Comparison of covariates used in CoD models for GBD 2010 and GBD 2013**

| Cause Name                  | Sex | Covariate name                                     | GBD 2010 |         |         | GBD 2013 |         |         |
|-----------------------------|-----|----------------------------------------------------|----------|---------|---------|----------|---------|---------|
|                             |     |                                                    | Level 1  | Level 2 | Level 3 | Level 1  | Level 2 | Level 3 |
| Pedestrian road injuries    | 1   | Rainfall Quintile 5 (proportion)                   |          |         | X       |          |         | X       |
| Pedestrian road injuries    | 2   | Alcohol (liters per capita)                        | X        |         |         | X        |         |         |
| Pedestrian road injuries    | 2   | Health System Access 2 (unitless)                  | X        |         |         | X        |         |         |
| Pedestrian road injuries    | 2   | Vehicles - 2+4 wheels (per capita)                 | X        |         |         | X        |         |         |
| Pedestrian road injuries    | 2   | Vehicles - 2 wheels fraction (proportion)          | X        |         |         | X        |         |         |
| Pedestrian road injuries    | 2   | Population 15 to 30 (proportion)                   |          | X       |         |          |         |         |
| Pedestrian road injuries    | 2   | LDI (I\$ per capita)                               |          | X       |         |          | X       |         |
| Pedestrian road injuries    | 2   | Population Density (300-500 ppl/sqkm, proportion)  |          | X       |         |          | X       |         |
| Pedestrian road injuries    | 2   | Population Density (500-1000 ppl/sqkm, proportion) |          | X       |         |          | X       |         |
| Pedestrian road injuries    | 2   | Education (years per capita)                       |          |         | X       |          |         | X       |
| Pedestrian road injuries    | 2   | Rainfall Quintile 5 (proportion)                   |          |         | X       |          |         | X       |
| Cyclist road injuries       | 1   | Alcohol (liters per capita)                        | X        |         |         | X        |         |         |
| Cyclist road injuries       | 1   | Health System Access 2 (unitless)                  | X        |         |         | X        |         |         |
| Cyclist road injuries       | 1   | Vehicles - 2+4 wheels (per capita)                 | X        |         |         | X        |         |         |
| Cyclist road injuries       | 1   | Vehicles - 2 wheels fraction (proportion)          | X        |         |         | X        |         |         |
| Cyclist road injuries       | 1   | Population 15 to 30 (proportion)                   |          | X       |         |          |         |         |
| Cyclist road injuries       | 1   | LDI (I\$ per capita)                               |          | X       |         |          | X       |         |
| Cyclist road injuries       | 1   | Population Density (300-500 ppl/sqkm, proportion)  |          | X       |         |          | X       |         |
| Cyclist road injuries       | 1   | Population Density (500-1000 ppl/sqkm, proportion) |          | X       |         |          | X       |         |
| Cyclist road injuries       | 1   | Rainfall Quintile 5 (proportion)                   |          |         | X       |          |         |         |
| Cyclist road injuries       | 1   | Education (years per capita)                       |          |         | X       |          |         | X       |
| Cyclist road injuries       | 2   | Alcohol (liters per capita)                        | X        |         |         | X        |         |         |
| Cyclist road injuries       | 2   | Health System Access 2 (unitless)                  | X        |         |         | X        |         |         |
| Cyclist road injuries       | 2   | Vehicles - 2+4 wheels (per capita)                 | X        |         |         | X        |         |         |
| Cyclist road injuries       | 2   | Vehicles - 2 wheels fraction (proportion)          | X        |         |         | X        |         |         |
| Cyclist road injuries       | 2   | Population 15 to 30 (proportion)                   |          | X       |         |          |         |         |
| Cyclist road injuries       | 2   | LDI (I\$ per capita)                               |          | X       |         |          | X       |         |
| Cyclist road injuries       | 2   | Population Density (300-500 ppl/sqkm, proportion)  |          | X       |         |          | X       |         |
| Cyclist road injuries       | 2   | Population Density (500-1000 ppl/sqkm, proportion) |          | X       |         |          | X       |         |
| Cyclist road injuries       | 2   | Rainfall Quintile 5 (proportion)                   |          |         | X       |          |         |         |
| Cyclist road injuries       | 2   | Education (years per capita)                       |          |         | X       |          |         | X       |
| Motorecyclist road injuries | 1   | Alcohol (liters per capita)                        | X        |         |         | X        |         |         |
| Motorecyclist road injuries | 1   | Health System Access 2 (unitless)                  | X        |         |         | X        |         |         |
| Motorecyclist road injuries | 1   | Vehicles - 2 wheels (per capita)                   | X        |         |         | X        |         |         |
| Motorecyclist road injuries | 1   | Population 15 to 30 (proportion)                   |          | X       |         |          |         |         |
| Motorecyclist road injuries | 1   | LDI (I\$ per capita)                               |          | X       |         |          | X       |         |
| Motorecyclist road injuries | 1   | Population Density (300-500 ppl/sqkm, proportion)  |          | X       |         |          | X       |         |
| Motorecyclist road injuries | 1   | Population Density (500-1000 ppl/sqkm, proportion) |          | X       |         |          | X       |         |

**Web Table 23 - Comparison of covariates used in CoD models for GBD 2010 and GBD 2013**

| Cause Name                  | Sex | Covariate name                                     | GBD 2010 |         |         | GBD 2013 |         |         |
|-----------------------------|-----|----------------------------------------------------|----------|---------|---------|----------|---------|---------|
|                             |     |                                                    | Level 1  | Level 2 | Level 3 | Level 1  | Level 2 | Level 3 |
| Motorecyclist road injuries | 1   | Education (years per capita)                       |          |         | X       |          |         | X       |
| Motorecyclist road injuries | 1   | Rainfall Quintile 5 (proportion)                   |          |         | X       |          |         | X       |
| Motorecyclist road injuries | 2   | Alcohol (liters per capita)                        | X        |         |         | X        |         |         |
| Motorecyclist road injuries | 2   | Health System Access 2 (unitless)                  | X        |         |         | X        |         |         |
| Motorecyclist road injuries | 2   | Vehicles - 2 wheels (per capita)                   | X        |         |         | X        |         |         |
| Motorecyclist road injuries | 2   | Population 15 to 30 (proportion)                   |          | X       |         |          |         |         |
| Motorecyclist road injuries | 2   | LDI (I\$ per capita)                               |          | X       |         |          | X       |         |
| Motorecyclist road injuries | 2   | Population Density (300-500 ppl/sqkm, proportion)  |          | X       |         |          | X       |         |
| Motorecyclist road injuries | 2   | Population Density (500-1000 ppl/sqkm, proportion) |          | X       |         |          | X       |         |
| Motorecyclist road injuries | 2   | Education (years per capita)                       |          |         | X       |          |         | X       |
| Motorecyclist road injuries | 2   | Rainfall Quintile 5 (proportion)                   |          |         | X       |          |         | X       |
| Motor vehicle road injuries | 1   | Alcohol (liters per capita)                        | X        |         |         | X        |         |         |
| Motor vehicle road injuries | 1   | Health System Access 2 (unitless)                  | X        |         |         | X        |         |         |
| Motor vehicle road injuries | 1   | Vehicles - 4 wheels (per capita)                   | X        |         |         | X        |         |         |
| Motor vehicle road injuries | 1   | Population 15 to 30 (proportion)                   |          | X       |         |          |         |         |
| Motor vehicle road injuries | 1   | LDI (I\$ per capita)                               |          | X       |         |          | X       |         |
| Motor vehicle road injuries | 1   | Population Density (300-500 ppl/sqkm, proportion)  |          | X       |         |          | X       |         |
| Motor vehicle road injuries | 1   | Population Density (500-1000 ppl/sqkm, proportion) |          | X       |         |          | X       |         |
| Motor vehicle road injuries | 1   | Education (years per capita)                       |          |         | X       |          |         | X       |
| Motor vehicle road injuries | 1   | Rainfall Quintile 5 (proportion)                   |          |         | X       |          |         | X       |
| Motor vehicle road injuries | 2   | Alcohol (liters per capita)                        | X        |         |         | X        |         |         |
| Motor vehicle road injuries | 2   | Health System Access 2 (unitless)                  | X        |         |         | X        |         |         |
| Motor vehicle road injuries | 2   | Vehicles - 4 wheels (per capita)                   | X        |         |         | X        |         |         |
| Motor vehicle road injuries | 2   | Population 15 to 30 (proportion)                   |          | X       |         |          |         |         |
| Motor vehicle road injuries | 2   | LDI (I\$ per capita)                               |          | X       |         |          | X       |         |
| Motor vehicle road injuries | 2   | Population Density (300-500 ppl/sqkm, proportion)  |          | X       |         |          | X       |         |
| Motor vehicle road injuries | 2   | Population Density (500-1000 ppl/sqkm, proportion) |          | X       |         |          | X       |         |
| Motor vehicle road injuries | 2   | Education (years per capita)                       |          |         | X       |          |         | X       |
| Motor vehicle road injuries | 2   | Rainfall Quintile 5 (proportion)                   |          |         | X       |          |         | X       |
| Other road injuries         | 1   | Alcohol (liters per capita)                        | X        |         |         | X        |         |         |
| Other road injuries         | 1   | Health System Access 2 (unitless)                  | X        |         |         | X        |         |         |
| Other road injuries         | 1   | Vehicles - 2+4 wheels (per capita)                 | X        |         |         | X        |         |         |
| Other road injuries         | 1   | Vehicles - 2 wheels fraction (proportion)          | X        |         |         | X        |         |         |
| Other road injuries         | 1   | Population 15 to 30 (proportion)                   |          | X       |         |          |         |         |
| Other road injuries         | 1   | LDI (I\$ per capita)                               |          | X       |         |          | X       |         |
| Other road injuries         | 1   | Rainfall Quintile 5 (proportion)                   |          |         | X       |          |         | X       |
| Other road injuries         | 2   | Alcohol (liters per capita)                        | X        |         |         | X        |         |         |
| Other road injuries         | 2   | Health System Access 2 (unitless)                  | X        |         |         | X        |         |         |

**Web Table 23 - Comparison of covariates used in CoD models for GBD 2010 and GBD 2013**

| Cause Name               | Sex | Covariate name                                     | GBD 2010 |         |         | GBD 2013 |         |         |
|--------------------------|-----|----------------------------------------------------|----------|---------|---------|----------|---------|---------|
|                          |     |                                                    | Level 1  | Level 2 | Level 3 | Level 1  | Level 2 | Level 3 |
| Other road injuries      | 2   | Vehicles - 2+4 wheels (per capita)                 | X        |         |         | X        |         |         |
| Other road injuries      | 2   | Vehicles - 2 wheels fraction (proportion)          | X        |         |         | X        |         |         |
| Other road injuries      | 2   | Population 15 to 30 (proportion)                   |          | X       |         |          |         |         |
| Other road injuries      | 2   | LDI (I\$ per capita)                               |          | X       |         |          | X       |         |
| Other road injuries      | 2   | Rainfall Quintile 5 (proportion)                   |          |         | X       |          |         | X       |
| Other transport injuries | 1   | Alcohol (liters per capita)                        | X        |         |         | X        |         |         |
| Other transport injuries | 1   | Health System Access 2 (unitless)                  | X        |         |         | X        |         |         |
| Other transport injuries | 1   | Vehicles - 2+4 wheels (per capita)                 | X        |         |         | X        |         |         |
| Other transport injuries | 1   | Vehicles - 2 wheels fraction (proportion)          | X        |         |         | X        |         |         |
| Other transport injuries | 1   | Population 15 to 30 (proportion)                   |          | X       |         |          |         |         |
| Other transport injuries | 1   | Population Density (300-500 ppl/sqkm, proportion)  |          | X       |         |          | X       |         |
| Other transport injuries | 1   | Population Density (500-1000 ppl/sqkm, proportion) |          | X       |         |          | X       |         |
| Other transport injuries | 1   | LDI (I\$ per capita)                               |          | X       | X       |          |         | X       |
| Other transport injuries | 1   | Education (years per capita)                       |          |         | X       |          |         | X       |
| Other transport injuries | 1   | Rainfall Quintile 5 (proportion)                   |          |         | X       |          |         | X       |
| Other transport injuries | 2   | Alcohol (liters per capita)                        | X        |         |         | X        |         |         |
| Other transport injuries | 2   | Health System Access 2 (unitless)                  | X        |         |         | X        |         |         |
| Other transport injuries | 2   | Vehicles - 2+4 wheels (per capita)                 | X        |         |         | X        |         |         |
| Other transport injuries | 2   | Vehicles - 2 wheels fraction (proportion)          | X        |         |         | X        |         |         |
| Other transport injuries | 2   | Population 15 to 30 (proportion)                   |          | X       |         |          |         |         |
| Other transport injuries | 2   | Population Density (300-500 ppl/sqkm, proportion)  |          | X       |         |          | X       |         |
| Other transport injuries | 2   | Population Density (500-1000 ppl/sqkm, proportion) |          | X       |         |          | X       |         |
| Other transport injuries | 2   | LDI (I\$ per capita)                               |          | X       | X       |          |         | X       |
| Other transport injuries | 2   | Education (years per capita)                       |          |         | X       |          |         | X       |
| Other transport injuries | 2   | Rainfall Quintile 5 (proportion)                   |          |         | X       |          |         | X       |
| Falls                    | 1   | Alcohol (liters per capita)                        | X        |         |         | X        |         |         |
| Falls                    | 1   | Health System Access 2 (unitless)                  | X        |         |         | X        |         |         |
| Falls                    | 1   | In-Milk (kcal per capita)                          |          | X       |         |          | X       |         |
| Falls                    | 1   | Population Over 65 (proportion)                    |          |         | X       |          |         |         |
| Falls                    | 1   | LDI (I\$ per capita)                               |          |         | X       |          |         | X       |
| Falls                    | 1   | Elevation Over 1500m (proportion)                  |          |         | X       |          |         | X       |
| Falls                    | 2   | Alcohol (liters per capita)                        | X        |         |         | X        |         |         |
| Falls                    | 2   | Health System Access 2 (unitless)                  | X        |         |         | X        |         |         |
| Falls                    | 2   | In-Milk (kcal per capita)                          |          | X       |         |          | X       |         |
| Falls                    | 2   | Population Over 65 (proportion)                    |          |         | X       |          |         |         |
| Falls                    | 2   | LDI (I\$ per capita)                               |          |         | X       |          |         | X       |
| Falls                    | 2   | Elevation Over 1500m (proportion)                  |          |         | X       |          |         | X       |
| Drowning                 | 1   | Alcohol (liters per capita)                        | X        |         |         | X        |         |         |

**Web Table 23 - Comparison of covariates used in CoD models for GBD 2010 and GBD 2013**

| Cause Name                     | Sex | Covariate name                                      | GBD 2010 |         |         | GBD 2013 |         |         |
|--------------------------------|-----|-----------------------------------------------------|----------|---------|---------|----------|---------|---------|
|                                |     |                                                     | Level 1  | Level 2 | Level 3 | Level 1  | Level 2 | Level 3 |
| Drowning                       | 1   | Coastal Population within 10km (proportion)         | X        |         |         | X        |         |         |
| Drowning                       | 1   | Landlocked Nation (binary)                          | X        |         |         | X        |         |         |
| Drowning                       | 1   | Rainfall Quintile 1 (proportion)                    | X        |         |         | X        |         |         |
| Drowning                       | 1   | Rainfall Quintile 5 (proportion)                    | X        |         |         | X        |         |         |
| Drowning                       | 1   | Elevation Under 100m (proportion)                   |          | X       |         |          | X       |         |
| Drowning                       | 1   | Population Under 30 (proportion)                    |          |         | X       |          |         |         |
| Drowning                       | 1   | LDI (I\$ per capita)                                |          |         | X       |          |         | X       |
| Drowning                       | 1   | Education (years per capita)                        |          |         | X       |          |         | X       |
| Drowning                       | 2   | Alcohol (liters per capita)                         | X        |         |         | X        |         |         |
| Drowning                       | 2   | Coastal Population within 10km (proportion)         | X        |         |         | X        |         |         |
| Drowning                       | 2   | Landlocked Nation (binary)                          | X        |         |         | X        |         |         |
| Drowning                       | 2   | Rainfall Quintile 1 (proportion)                    | X        |         |         | X        |         |         |
| Drowning                       | 2   | Rainfall Quintile 5 (proportion)                    | X        |         |         | X        |         |         |
| Drowning                       | 2   | Elevation Under 100m (proportion)                   |          | X       |         |          | X       |         |
| Drowning                       | 2   | Population Under 30 (proportion)                    |          |         | X       |          |         |         |
| Drowning                       | 2   | LDI (I\$ per capita)                                |          |         | X       |          |         | X       |
| Drowning                       | 2   | Education (years per capita)                        |          |         | X       |          |         | X       |
| Fire, heat, and hot substances | 1   | Indoor Air Pollution (Biomass Cooking)              |          |         |         |          | X       |         |
| Fire, heat, and hot substances | 1   | Health System Access 2 (unitless)                   | X        |         |         | X        |         |         |
| Fire, heat, and hot substances | 1   | Alcohol (liters per capita)                         |          | X       |         |          | X       |         |
| Fire, heat, and hot substances | 1   | Tobacco (cigarettes per capita)                     |          | X       |         |          | X       |         |
| Fire, heat, and hot substances | 1   | Population Density (over 1000 ppl/sqkm, proportion) |          | X       |         |          | X       |         |
| Fire, heat, and hot substances | 1   | LDI (I\$ per capita)                                |          |         | X       |          |         | X       |
| Fire, heat, and hot substances | 1   | Education (years per capita)                        |          |         | X       |          |         | X       |
| Fire, heat, and hot substances | 2   | Indoor Air Pollution (Biomass Cooking)              |          |         |         |          | X       |         |
| Fire, heat, and hot substances | 2   | Health System Access 2 (unitless)                   | X        |         |         | X        |         |         |
| Fire, heat, and hot substances | 2   | Alcohol (liters per capita)                         |          | X       |         |          | X       |         |
| Fire, heat, and hot substances | 2   | Tobacco (cigarettes per capita)                     |          | X       |         |          | X       |         |
| Fire, heat, and hot substances | 2   | Population Density (over 1000 ppl/sqkm, proportion) |          | X       |         |          | X       |         |
| Fire, heat, and hot substances | 2   | LDI (I\$ per capita)                                |          |         | X       |          |         | X       |
| Fire, heat, and hot substances | 2   | Education (years per capita)                        |          |         | X       |          |         | X       |
| Poisonings                     | 1   | Health System Access 2 (unitless)                   | X        |         |         | X        |         |         |
| Poisonings                     | 1   | Opium Cultivation (binary)                          | X        |         |         | X        |         |         |
| Poisonings                     | 1   | Population Density (over 1000 ppl/sqkm, proportion) |          | X       |         |          | X       |         |
| Poisonings                     | 1   | Population Density (under 150 ppl/sqkm, proportion) |          | X       |         |          | X       |         |
| Poisonings                     | 1   | Improved Water Source (proportion with access)      |          |         | X       |          |         |         |
| Poisonings                     | 1   | LDI (I\$ per capita)                                |          |         | X       |          |         | X       |
| Poisonings                     | 1   | Education (years per capita)                        |          |         | X       |          |         | X       |

**Web Table 23 - Comparison of covariates used in CoD models for GBD 2010 and GBD 2013**

| Cause Name                          | Sex | Covariate name                                      | GBD 2010 |         |         | GBD 2013 |         |         |
|-------------------------------------|-----|-----------------------------------------------------|----------|---------|---------|----------|---------|---------|
|                                     |     |                                                     | Level 1  | Level 2 | Level 3 | Level 1  | Level 2 | Level 3 |
| Poisonings                          | 2   | Health System Access 2 (unitless)                   | X        |         |         | X        |         |         |
| Poisonings                          | 2   | Opium Cultivation (binary)                          | X        |         |         | X        |         |         |
| Poisonings                          | 2   | Population Density (over 1000 ppl/sqkm, proportion) |          | X       |         |          | X       |         |
| Poisonings                          | 2   | Population Density (under 150 ppl/sqkm, proportion) |          | X       |         |          | X       |         |
| Poisonings                          | 2   | Improved Water Source (proportion with access)      |          |         | X       |          |         |         |
| Poisonings                          | 2   | LDI (I\$ per capita)                                |          |         | X       |          |         | X       |
| Poisonings                          | 2   | Education (years per capita)                        |          |         | X       |          |         | X       |
| Unintentional firearm injuries      | 1   | Alcohol (liters per capita)                         |          | X       |         |          | X       |         |
| Unintentional firearm injuries      | 1   | Health System Access (unitless)                     |          | X       |         |          | X       |         |
| Unintentional firearm injuries      | 1   | Population Density (over 1000 ppl/sqkm, proportion) |          | X       |         |          | X       |         |
| Unintentional firearm injuries      | 1   | Population Density (under 150 ppl/sqkm, proportion) |          | X       |         |          | X       |         |
| Unintentional firearm injuries      | 1   | LDI (I\$ per capita)                                |          |         | X       |          |         | X       |
| Unintentional firearm injuries      | 1   | Education (years per capita)                        |          |         | X       |          |         | X       |
| Unintentional firearm injuries      | 2   | Alcohol (liters per capita)                         |          | X       |         |          | X       |         |
| Unintentional firearm injuries      | 2   | Health System Access (unitless)                     |          | X       |         |          | X       |         |
| Unintentional firearm injuries      | 2   | Population Density (over 1000 ppl/sqkm, proportion) |          | X       |         |          | X       |         |
| Unintentional firearm injuries      | 2   | Population Density (under 150 ppl/sqkm, proportion) |          | X       |         |          | X       |         |
| Unintentional firearm injuries      | 2   | LDI (I\$ per capita)                                |          |         | X       |          |         | X       |
| Unintentional firearm injuries      | 2   | Education (years per capita)                        |          |         | X       |          |         | X       |
| Unintentional suffocation           | 1   | Alcohol (liters per capita)                         |          | X*      |         |          | X       |         |
| Unintentional suffocation           | 1   | Health System Access 2 (unitless)                   |          | X*      |         |          | X       |         |
| Unintentional suffocation           | 1   | Population Density (over 1000 ppl/sqkm, proportion) |          | X*      |         |          | X       |         |
| Unintentional suffocation           | 1   | Population Density (under 150 ppl/sqkm, proportion) |          | X*      |         |          | X       |         |
| Unintentional suffocation           | 1   | LDI (I\$ per capita)                                |          |         | X*      |          |         | X       |
| Unintentional suffocation           | 1   | Education (years per capita)                        |          |         | X*      |          |         | X       |
| Unintentional suffocation           | 2   | Alcohol (liters per capita)                         |          | X*      |         |          | X       |         |
| Unintentional suffocation           | 2   | Health System Access 2 (unitless)                   |          | X*      |         |          | X       |         |
| Unintentional suffocation           | 2   | Population Density (over 1000 ppl/sqkm, proportion) |          | X*      |         |          | X       |         |
| Unintentional suffocation           | 2   | Population Density (under 150 ppl/sqkm, proportion) |          | X*      |         |          | X       |         |
| Unintentional suffocation           | 2   | LDI (I\$ per capita)                                |          |         | X*      |          |         | X       |
| Unintentional suffocation           | 2   | Education (years per capita)                        |          |         | X*      |          |         | X       |
| Other exposure to mechanical forces | 1   | Alcohol (liters per capita)                         |          | X       |         |          | X       |         |
| Other exposure to mechanical forces | 1   | Health System Access (unitless)                     |          | X       |         |          | X       |         |
| Other exposure to mechanical forces | 1   | Population Density (over 1000 ppl/sqkm, proportion) |          | X       |         |          | X       |         |
| Other exposure to mechanical forces | 1   | Population Density (under 150 ppl/sqkm, proportion) |          | X       |         |          | X       |         |
| Other exposure to mechanical forces | 1   | LDI (I\$ per capita)                                |          |         | X       |          |         | X       |
| Other exposure to mechanical forces | 1   | Education (years per capita)                        |          |         | X       |          |         | X       |
| Other exposure to mechanical forces | 2   | Alcohol (liters per capita)                         |          | X       |         |          | X       |         |

**Web Table 23 - Comparison of covariates used in CoD models for GBD 2010 and GBD 2013**

| Cause Name                           | Sex | Covariate name                                      | GBD 2010 |         |         | GBD 2013 |         |         |
|--------------------------------------|-----|-----------------------------------------------------|----------|---------|---------|----------|---------|---------|
|                                      |     |                                                     | Level 1  | Level 2 | Level 3 | Level 1  | Level 2 | Level 3 |
| Other exposure to mechanical forces  | 2   | Health System Access (unitless)                     |          | X       |         |          | X       |         |
| Other exposure to mechanical forces  | 2   | Population Density (over 1000 ppl/sqkm, proportion) |          | X       |         |          | X       |         |
| Other exposure to mechanical forces  | 2   | Population Density (under 150 ppl/sqkm, proportion) |          | X       |         |          | X       |         |
| Other exposure to mechanical forces  | 2   | LDI (I\$ per capita)                                |          |         | X       |          |         | X       |
| Other exposure to mechanical forces  | 2   | Education (years per capita)                        |          |         | X       |          |         | X       |
| Adverse effects of medical treatment | 1   | Alcohol (liters per capita)                         | X        |         |         |          |         |         |
| Adverse effects of medical treatment | 1   | Vehicles - 2 wheels (per capita)                    | X        |         |         |          |         |         |
| Adverse effects of medical treatment | 1   | Vehicles - 4 wheels (per capita)                    | X        |         |         |          |         |         |
| Adverse effects of medical treatment | 1   | Population 15 to 30 (proportion)                    |          | X       |         |          |         |         |
| Adverse effects of medical treatment | 1   | Health System Access 2 (unitless)                   |          | X       |         |          | X       |         |
| Adverse effects of medical treatment | 1   | Education (years per capita)                        |          |         | X       |          |         |         |
| Adverse effects of medical treatment | 1   | Elevation Over 1500m (proportion)                   |          |         | X       |          |         |         |
| Adverse effects of medical treatment | 1   | Population Density (over 1000 ppl/sqkm, proportion) |          |         | X       |          |         |         |
| Adverse effects of medical treatment | 1   | Population Density (under 150 ppl/sqkm, proportion) |          |         | X       |          |         |         |
| Adverse effects of medical treatment | 1   | Elevation Under 100m (proportion)                   |          |         | X       |          |         |         |
| Adverse effects of medical treatment | 1   | LDI (I\$ per capita)                                |          |         | X       |          |         | X       |
| Adverse effects of medical treatment | 2   | Alcohol (liters per capita)                         | X        |         |         |          |         |         |
| Adverse effects of medical treatment | 2   | Vehicles - 2 wheels (per capita)                    | X        |         |         |          |         |         |
| Adverse effects of medical treatment | 2   | Vehicles - 4 wheels (per capita)                    | X        |         |         |          |         |         |
| Adverse effects of medical treatment | 2   | Population 15 to 30 (proportion)                    |          | X       |         |          |         |         |
| Adverse effects of medical treatment | 2   | Health System Access 2 (unitless)                   |          | X       |         |          | X       |         |
| Adverse effects of medical treatment | 2   | Education (years per capita)                        |          |         | X       |          |         |         |
| Adverse effects of medical treatment | 2   | Elevation Over 1500m (proportion)                   |          |         | X       |          |         |         |
| Adverse effects of medical treatment | 2   | Population Density (over 1000 ppl/sqkm, proportion) |          |         | X       |          |         |         |
| Adverse effects of medical treatment | 2   | Population Density (under 150 ppl/sqkm, proportion) |          |         | X       |          |         |         |
| Adverse effects of medical treatment | 2   | Elevation Under 100m (proportion)                   |          |         | X       |          |         |         |
| Adverse effects of medical treatment | 2   | LDI (I\$ per capita)                                |          |         | X       |          |         | X       |
| Animal contact                       | 1   | Alcohol (liters per capita)                         | X        |         |         | X        |         |         |
| Animal contact                       | 1   | Vehicles - 2 wheels (per capita)                    | X        |         |         | X        |         |         |
| Animal contact                       | 1   | Vehicles - 4 wheels (per capita)                    | X        |         |         | X        |         |         |
| Animal contact                       | 1   | Health System Access 2 (unitless)                   |          | X       |         |          | X       |         |
| Animal contact                       | 1   | Population 15 to 30 (proportion)                    |          | X       |         |          | X       |         |
| Animal contact                       | 1   | LDI (I\$ per capita)                                |          |         | X       |          |         | X       |
| Animal contact                       | 1   | Education (years per capita)                        |          |         | X       |          |         | X       |
| Animal contact                       | 1   | Elevation Over 1500m (proportion)                   |          |         | X       |          |         | X       |
| Animal contact                       | 1   | Population Density (over 1000 ppl/sqkm, proportion) |          |         | X       |          |         | X       |
| Animal contact                       | 1   | Population Density (under 150 ppl/sqkm, proportion) |          |         | X       |          |         | X       |
| Animal contact                       | 1   | Elevation Under 100m (proportion)                   |          |         | X       |          |         | X       |



**Web Table 23 - Comparison of covariates used in CoD models for GBD 2010 and GBD 2013**

| Cause Name                  | Sex | Covariate name                                      | GBD 2010 |         |         | GBD 2013 |         |         |
|-----------------------------|-----|-----------------------------------------------------|----------|---------|---------|----------|---------|---------|
|                             |     |                                                     | Level 1  | Level 2 | Level 3 | Level 1  | Level 2 | Level 3 |
| Animal contact              | 2   | Alcohol (liters per capita)                         | X        |         |         | X        |         |         |
| Animal contact              | 2   | Vehicles - 2 wheels (per capita)                    | X        |         |         | X        |         |         |
| Animal contact              | 2   | Vehicles - 4 wheels (per capita)                    | X        |         |         | X        |         |         |
| Animal contact              | 2   | Health System Access 2 (unitless)                   |          | X       |         |          | X       |         |
| Animal contact              | 2   | Population 15 to 30 (proportion)                    |          | X       |         |          | X       |         |
| Animal contact              | 2   | LDI (I\$ per capita)                                |          |         | X       |          |         | X       |
| Animal contact              | 2   | Education (years per capita)                        |          |         | X       |          |         | X       |
| Animal contact              | 2   | Elevation Over 1500m (proportion)                   |          |         | X       |          |         | X       |
| Animal contact              | 2   | Population Density (over 1000 ppl/sqkm, proportion) |          |         | X       |          |         | X       |
| Animal contact              | 2   | Population Density (under 150 ppl/sqkm, proportion) |          |         | X       |          |         | X       |
| Animal contact              | 2   | Elevation Under 100m (proportion)                   |          |         | X       |          |         | X       |
| Venomous animal contact     | 1   | Alcohol (liters per capita)                         | X        |         |         | X        |         |         |
| Venomous animal contact     | 1   | Vehicles - 2 wheels (per capita)                    | X        |         |         | X        |         |         |
| Venomous animal contact     | 1   | Vehicles - 4 wheels (per capita)                    | X        |         |         | X        |         |         |
| Venomous animal contact     | 1   | Population 15 to 30 (proportion)                    |          | X       |         |          |         |         |
| Venomous animal contact     | 1   | Health System Access 2 (unitless)                   |          | X       |         |          | X       |         |
| Venomous animal contact     | 1   | LDI (I\$ per capita)                                |          |         | X       |          |         | X       |
| Venomous animal contact     | 1   | Education (years per capita)                        |          |         | X       |          |         | X       |
| Venomous animal contact     | 1   | Elevation Over 1500m (proportion)                   |          |         | X       |          |         | X       |
| Venomous animal contact     | 1   | Population Density (over 1000 ppl/sqkm, proportion) |          |         | X       |          |         | X       |
| Venomous animal contact     | 1   | Population Density (under 150 ppl/sqkm, proportion) |          |         | X       |          |         | X       |
| Venomous animal contact     | 1   | Elevation Under 100m (proportion)                   |          |         | X       |          |         | X       |
| Venomous animal contact     | 2   | Alcohol (liters per capita)                         | X        |         |         | X        |         |         |
| Venomous animal contact     | 2   | Vehicles - 2 wheels (per capita)                    | X        |         |         | X        |         |         |
| Venomous animal contact     | 2   | Vehicles - 4 wheels (per capita)                    | X        |         |         | X        |         |         |
| Venomous animal contact     | 2   | Population 15 to 30 (proportion)                    |          | X       |         |          |         |         |
| Venomous animal contact     | 2   | Health System Access 2 (unitless)                   |          | X       |         |          | X       |         |
| Venomous animal contact     | 2   | LDI (I\$ per capita)                                |          |         | X       |          |         | X       |
| Venomous animal contact     | 2   | Education (years per capita)                        |          |         | X       |          |         | X       |
| Venomous animal contact     | 2   | Elevation Over 1500m (proportion)                   |          |         | X       |          |         | X       |
| Venomous animal contact     | 2   | Population Density (over 1000 ppl/sqkm, proportion) |          |         | X       |          |         | X       |
| Venomous animal contact     | 2   | Population Density (under 150 ppl/sqkm, proportion) |          |         | X       |          |         | X       |
| Venomous animal contact     | 2   | Elevation Under 100m (proportion)                   |          |         | X       |          |         | X       |
| Non-venomous animal contact | 1   | Alcohol (liters per capita)                         | X        |         |         | X        |         |         |
| Non-venomous animal contact | 1   | Vehicles - 2 wheels (per capita)                    | X        |         |         | X        |         |         |
| Non-venomous animal contact | 1   | Vehicles - 4 wheels (per capita)                    | X        |         |         | X        |         |         |
| Non-venomous animal contact | 1   | Population 15 to 30 (proportion)                    |          | X       |         |          |         |         |
| Non-venomous animal contact | 1   | Health System Access 2 (unitless)                   |          | X       |         |          | X       |         |

**Web Table 23 - Comparison of covariates used in CoD models for GBD 2010 and GBD 2013**

| Cause Name                                      | Sex | Covariate name                                      | GBD 2010 |         |         | GBD 2013 |         |         |
|-------------------------------------------------|-----|-----------------------------------------------------|----------|---------|---------|----------|---------|---------|
|                                                 |     |                                                     | Level 1  | Level 2 | Level 3 | Level 1  | Level 2 | Level 3 |
| Non-venomous animal contact                     | 1   | LDI (I\$ per capita)                                |          |         | X       |          |         | X       |
| Non-venomous animal contact                     | 1   | Education (years per capita)                        |          |         | X       |          |         | X       |
| Non-venomous animal contact                     | 1   | Elevation Over 1500m (proportion)                   |          |         | X       |          |         | X       |
| Non-venomous animal contact                     | 1   | Population Density (over 1000 ppl/sqkm, proportion) |          |         | X       |          |         | X       |
| Non-venomous animal contact                     | 1   | Population Density (under 150 ppl/sqkm, proportion) |          |         | X       |          |         | X       |
| Non-venomous animal contact                     | 1   | Elevation Under 100m (proportion)                   |          |         | X       |          |         | X       |
| Non-venomous animal contact                     | 2   | Alcohol (liters per capita)                         | X        |         |         | X        |         |         |
| Non-venomous animal contact                     | 2   | Vehicles - 2 wheels (per capita)                    | X        |         |         | X        |         |         |
| Non-venomous animal contact                     | 2   | Vehicles - 4 wheels (per capita)                    | X        |         |         | X        |         |         |
| Non-venomous animal contact                     | 2   | Population 15 to 30 (proportion)                    |          | X       |         |          |         |         |
| Non-venomous animal contact                     | 2   | Health System Access 2 (unitless)                   |          | X       |         |          | X       |         |
| Non-venomous animal contact                     | 2   | LDI (I\$ per capita)                                |          |         | X       |          |         | X       |
| Non-venomous animal contact                     | 2   | Education (years per capita)                        |          |         | X       |          |         | X       |
| Non-venomous animal contact                     | 2   | Elevation Over 1500m (proportion)                   |          |         | X       |          |         | X       |
| Non-venomous animal contact                     | 2   | Population Density (over 1000 ppl/sqkm, proportion) |          |         | X       |          |         | X       |
| Non-venomous animal contact                     | 2   | Population Density (under 150 ppl/sqkm, proportion) |          |         | X       |          |         | X       |
| Non-venomous animal contact                     | 2   | Elevation Under 100m (proportion)                   |          |         | X       |          |         | X       |
| Pulmonary aspiration and foreign body in airway | 1   | Alcohol (liters per capita)                         | X*       |         |         | X        |         |         |
| Pulmonary aspiration and foreign body in airway | 1   | Health System Access (capped)                       | X*       |         |         | X        |         |         |
| Pulmonary aspiration and foreign body in airway | 1   | Mean BMI                                            | X*       |         |         | X        |         |         |
| Pulmonary aspiration and foreign body in airway | 1   | LDI (I\$ per capita)                                |          |         | X*      |          |         | X       |
| Pulmonary aspiration and foreign body in airway | 2   | Alcohol (liters per capita)                         | X*       |         |         | X        |         |         |
| Pulmonary aspiration and foreign body in airway | 2   | Health System Access (capped)                       | X*       |         |         | X        |         |         |
| Pulmonary aspiration and foreign body in airway | 2   | Mean BMI                                            | X*       |         |         | X        |         |         |
| Pulmonary aspiration and foreign body in airway | 2   | LDI (I\$ per capita)                                |          |         | X*      |          |         | X       |
| Foreign body in other body part                 | 1   | Alcohol (liters per capita)                         | X*       |         |         | X        |         |         |
| Foreign body in other body part                 | 1   | Health System Access 2 (unitless)                   |          | X*      |         |          | X       |         |
| Foreign body in other body part                 | 1   | LDI (I\$ per capita)                                |          |         | X*      |          |         | X       |
| Foreign body in other body part                 | 1   | Education (years per capita)                        |          |         | X*      |          |         | X       |
| Foreign body in other body part                 | 1   | Elevation Over 1500m (proportion)                   |          |         | X*      |          |         | X       |
| Foreign body in other body part                 | 1   | Population Density (over 1000 ppl/sqkm, proportion) |          |         | X*      |          |         | X       |
| Foreign body in other body part                 | 1   | Population Density (under 150 ppl/sqkm, proportion) |          |         | X*      |          |         | X       |

**Web Table 23 - Comparison of covariates used in CoD models for GBD 2010 and GBD 2013**

| Cause Name                      | Sex | Covariate name                                      | GBD 2010 |         |         | GBD 2013 |         |         |
|---------------------------------|-----|-----------------------------------------------------|----------|---------|---------|----------|---------|---------|
|                                 |     |                                                     | Level 1  | Level 2 | Level 3 | Level 1  | Level 2 | Level 3 |
| Foreign body in other body part | 1   | Elevation Under 100m (proportion)                   |          |         | X*      |          |         | X       |
| Foreign body in other body part | 2   | Alcohol (liters per capita)                         | X*       |         |         | X        |         |         |
| Foreign body in other body part | 2   | Health System Access 2 (unitless)                   |          | X*      |         |          | X       |         |
| Foreign body in other body part | 2   | LDI (I\$ per capita)                                |          |         | X*      |          |         | X       |
| Foreign body in other body part | 2   | Education (years per capita)                        |          |         | X*      |          |         | X       |
| Foreign body in other body part | 2   | Elevation Over 1500m (proportion)                   |          |         | X*      |          |         | X       |
| Foreign body in other body part | 2   | Population Density (over 1000 ppl/sqkm, proportion) |          |         | X*      |          |         | X       |
| Foreign body in other body part | 2   | Population Density (under 150 ppl/sqkm, proportion) |          |         | X*      |          |         | X       |
| Foreign body in other body part | 2   | Elevation Under 100m (proportion)                   |          |         | X*      |          |         | X       |
| Other unintentional injuries    | 1   | Alcohol (liters per capita)                         | X        |         |         | X        |         |         |
| Other unintentional injuries    | 1   | Vehicles - 2 wheels (per capita)                    | X        |         |         | X        |         |         |
| Other unintentional injuries    | 1   | Vehicles - 4 wheels (per capita)                    | X        |         |         | X        |         |         |
| Other unintentional injuries    | 1   | Population 15 to 30 (proportion)                    |          | X       |         |          |         |         |
| Other unintentional injuries    | 1   | Health System Access 2 (unitless)                   |          | X       |         |          | X       |         |
| Other unintentional injuries    | 1   | LDI (I\$ per capita)                                |          |         | X       |          |         | X       |
| Other unintentional injuries    | 1   | Education (years per capita)                        |          |         | X       |          |         | X       |
| Other unintentional injuries    | 1   | Elevation Over 1500m (proportion)                   |          |         | X       |          |         | X       |
| Other unintentional injuries    | 1   | Population Density (over 1000 ppl/sqkm, proportion) |          |         | X       |          |         | X       |
| Other unintentional injuries    | 1   | Population Density (under 150 ppl/sqkm, proportion) |          |         | X       |          |         | X       |
| Other unintentional injuries    | 1   | Elevation Under 100m (proportion)                   |          |         | X       |          |         | X       |
| Other unintentional injuries    | 2   | Alcohol (liters per capita)                         | X        |         |         | X        |         |         |
| Other unintentional injuries    | 2   | Vehicles - 2 wheels (per capita)                    | X        |         |         | X        |         |         |
| Other unintentional injuries    | 2   | Vehicles - 4 wheels (per capita)                    | X        |         |         | X        |         |         |
| Other unintentional injuries    | 2   | Population 15 to 30 (proportion)                    |          | X       |         |          |         |         |
| Other unintentional injuries    | 2   | Health System Access 2 (unitless)                   |          | X       |         |          | X       |         |
| Other unintentional injuries    | 2   | LDI (I\$ per capita)                                |          |         | X       |          |         | X       |
| Other unintentional injuries    | 2   | Education (years per capita)                        |          |         | X       |          |         | X       |
| Other unintentional injuries    | 2   | Elevation Over 1500m (proportion)                   |          |         | X       |          |         | X       |
| Other unintentional injuries    | 2   | Population Density (over 1000 ppl/sqkm, proportion) |          |         | X       |          |         | X       |
| Other unintentional injuries    | 2   | Population Density (under 150 ppl/sqkm, proportion) |          |         | X       |          |         | X       |
| Other unintentional injuries    | 2   | Elevation Under 100m (proportion)                   |          |         | X       |          |         | X       |
| Self-harm                       | 1   | Population Density (150-300 ppl/sqkm, proportion)   |          |         |         |          | X       |         |
| Self-harm                       | 1   | Population Density (300-500 ppl/sqkm, proportion)   |          |         |         |          | X       |         |
| Self-harm                       | 1   | Population Density (500-1000 ppl/sqkm, proportion)  |          |         |         |          | X       |         |
| Self-harm                       | 1   | Population Density (under 150 ppl/sqkm, proportion) |          |         |         |          | X       |         |
| Self-harm                       | 1   | Alcohol (liters per capita)                         | X        |         |         | X        |         |         |
| Self-harm                       | 1   | Opium Cultivation (binary)                          |          | X       |         |          | X       |         |
| Self-harm                       | 1   | Religion (binary, >50% Muslim)                      |          | X       |         |          | X       |         |

**Web Table 23 - Comparison of covariates used in CoD models for GBD 2010 and GBD 2013**

| Cause Name             | Sex | Covariate name                                      | GBD 2010 |         |         | GBD 2013 |         |         |
|------------------------|-----|-----------------------------------------------------|----------|---------|---------|----------|---------|---------|
|                        |     |                                                     | Level 1  | Level 2 | Level 3 | Level 1  | Level 2 | Level 3 |
| Self-harm              | 1   | Population Density (over 1000 ppl/sqkm, proportion) |          |         | X       |          | X       |         |
| Self-harm              | 1   | LDI (I\$ per capita)                                |          |         | X       |          |         | X       |
| Self-harm              | 1   | Education (years per capita)                        |          |         | X       |          |         | X       |
| Self-harm              | 2   | Population Density (150-300 ppl/sqkm, proportion)   |          |         |         |          | X       |         |
| Self-harm              | 2   | Population Density (300-500 ppl/sqkm, proportion)   |          |         |         |          | X       |         |
| Self-harm              | 2   | Population Density (500-1000 ppl/sqkm, proportion)  |          |         |         |          | X       |         |
| Self-harm              | 2   | Population Density (under 150 ppl/sqkm, proportion) |          |         |         |          | X       |         |
| Self-harm              | 2   | Alcohol (liters per capita)                         | X        |         |         | X        |         |         |
| Self-harm              | 2   | Opium Cultivation (binary)                          |          | X       |         |          | X       |         |
| Self-harm              | 2   | Religion (binary, >50% Muslim)                      |          | X       |         |          | X       |         |
| Self-harm              | 2   | Population Density (over 1000 ppl/sqkm, proportion) |          |         | X       |          | X       |         |
| Self-harm              | 2   | LDI (I\$ per capita)                                |          |         | X       |          |         | X       |
| Self-harm              | 2   | Education (years per capita)                        |          |         | X       |          |         | X       |
| Interpersonal violence | 1   | Population 15 to 30 (proportion)                    | X        |         |         |          |         |         |
| Interpersonal violence | 1   | Alcohol (liters per capita)                         | X        |         |         | X        |         |         |
| Interpersonal violence | 1   | Health System Access 2 (unitless)                   | X        |         |         | X        |         |         |
| Interpersonal violence | 1   | Opium Cultivation (binary)                          |          | X       |         |          | X       |         |
| Interpersonal violence | 1   | Population Density (over 1000 ppl/sqkm, proportion) |          | X       |         |          | X       |         |
| Interpersonal violence | 1   | LDI (I\$ per capita)                                |          |         | X       |          |         | X       |
| Interpersonal violence | 1   | Education (years per capita)                        |          |         | X       |          |         | X       |
| Interpersonal violence | 2   | Population 15 to 30 (proportion)                    | X        |         |         |          |         |         |
| Interpersonal violence | 2   | Alcohol (liters per capita)                         | X        |         |         | X        |         |         |
| Interpersonal violence | 2   | Health System Access 2 (unitless)                   | X        |         |         | X        |         |         |
| Interpersonal violence | 2   | Opium Cultivation (binary)                          |          | X       |         |          | X       |         |
| Interpersonal violence | 2   | Population Density (over 1000 ppl/sqkm, proportion) |          | X       |         |          | X       |         |
| Interpersonal violence | 2   | LDI (I\$ per capita)                                |          |         | X       |          |         | X       |
| Interpersonal violence | 2   | Education (years per capita)                        |          |         | X       |          |         | X       |
| Assault by firearm     | 1   | Population 15 to 30 (proportion)                    | X        |         |         |          |         |         |
| Assault by firearm     | 1   | Alcohol (liters per capita)                         | X        |         |         | X        |         |         |
| Assault by firearm     | 1   | Health System Access 2 (unitless)                   | X        |         |         | X        |         |         |
| Assault by firearm     | 1   | Opium Cultivation (binary)                          |          | X       |         |          | X       |         |
| Assault by firearm     | 1   | Population Density (over 1000 ppl/sqkm, proportion) |          | X       |         |          | X       |         |
| Assault by firearm     | 1   | LDI (I\$ per capita)                                |          |         | X       |          |         | X       |
| Assault by firearm     | 1   | Education (years per capita)                        |          |         | X       |          |         | X       |
| Assault by firearm     | 2   | Population 15 to 30 (proportion)                    | X        |         |         |          |         |         |
| Assault by firearm     | 2   | Alcohol (liters per capita)                         | X        |         |         | X        |         |         |
| Assault by firearm     | 2   | Health System Access 2 (unitless)                   | X        |         |         | X        |         |         |
| Assault by firearm     | 2   | Opium Cultivation (binary)                          |          | X       |         |          | X       |         |

**Web Table 23 - Comparison of covariates used in CoD models for GBD 2010 and GBD 2013**

| Cause Name              | Sex | Covariate name                                      | GBD 2010 |         |         | GBD 2013 |         |         |
|-------------------------|-----|-----------------------------------------------------|----------|---------|---------|----------|---------|---------|
|                         |     |                                                     | Level 1  | Level 2 | Level 3 | Level 1  | Level 2 | Level 3 |
| Assault by firearm      | 2   | Population Density (over 1000 ppl/sqkm, proportion) |          | X       |         |          | X       |         |
| Assault by firearm      | 2   | LDI (I\$ per capita)                                |          |         | X       |          |         | X       |
| Assault by firearm      | 2   | Education (years per capita)                        |          |         | X       |          |         | X       |
| Assault by sharp object | 1   | Population 15 to 30 (proportion)                    | X        |         |         |          |         |         |
| Assault by sharp object | 1   | Alcohol (liters per capita)                         | X        |         |         | X        |         |         |
| Assault by sharp object | 1   | Health System Access 2 (unitless)                   | X        |         |         | X        |         |         |
| Assault by sharp object | 1   | Opium Cultivation (binary)                          |          | X       |         |          | X       |         |
| Assault by sharp object | 1   | Population Density (over 1000 ppl/sqkm, proportion) |          | X       |         |          | X       |         |
| Assault by sharp object | 1   | LDI (I\$ per capita)                                |          |         | X       |          |         | X       |
| Assault by sharp object | 1   | Education (years per capita)                        |          |         | X       |          |         | X       |
| Assault by sharp object | 2   | Population 15 to 30 (proportion)                    | X        |         |         |          |         |         |
| Assault by sharp object | 2   | Alcohol (liters per capita)                         | X        |         |         | X        |         |         |
| Assault by sharp object | 2   | Health System Access 2 (unitless)                   | X        |         |         | X        |         |         |
| Assault by sharp object | 2   | Opium Cultivation (binary)                          |          | X       |         |          | X       |         |
| Assault by sharp object | 2   | Population Density (over 1000 ppl/sqkm, proportion) |          | X       |         |          | X       |         |
| Assault by sharp object | 2   | LDI (I\$ per capita)                                |          |         | X       |          |         | X       |
| Assault by sharp object | 2   | Education (years per capita)                        |          |         | X       |          |         | X       |
| Assault by other means  | 1   | Population 15 to 30 (proportion)                    | X        |         |         |          |         |         |
| Assault by other means  | 1   | Alcohol (liters per capita)                         | X        |         |         | X        |         |         |
| Assault by other means  | 1   | Health System Access 2 (unitless)                   | X        |         |         | X        |         |         |
| Assault by other means  | 1   | Opium Cultivation (binary)                          |          | X       |         |          | X       |         |
| Assault by other means  | 1   | Population Density (over 1000 ppl/sqkm, proportion) |          | X       |         |          | X       |         |
| Assault by other means  | 1   | LDI (I\$ per capita)                                |          |         | X       |          |         | X       |
| Assault by other means  | 1   | Education (years per capita)                        |          |         | X       |          |         | X       |
| Assault by other means  | 2   | Population 15 to 30 (proportion)                    | X        |         |         |          |         |         |
| Assault by other means  | 2   | Alcohol (liters per capita)                         | X        |         |         | X        |         |         |
| Assault by other means  | 2   | Health System Access 2 (unitless)                   | X        |         |         | X        |         |         |
| Assault by other means  | 2   | Opium Cultivation (binary)                          |          | X       |         |          | X       |         |
| Assault by other means  | 2   | Population Density (over 1000 ppl/sqkm, proportion) |          | X       |         |          | X       |         |
| Assault by other means  | 2   | LDI (I\$ per capita)                                |          |         | X       |          |         | X       |
| Assault by other means  | 2   | Education (years per capita)                        |          |         | X       |          |         | X       |

\* Denotes that this is a custom model

## **Section 7. CoDCorrect algorithm**

The CoDCorrect algorithm used in the GBD 2013 is the same as the algorithm used in the GBD 2010<sup>22</sup>, with some modifications described in the main text of the paper. Updated percentage changes before and after CoDCorrect for level 1 causes are below.

**Web Table 24: Percent change for level 1 CoDCorrect causes**

**Web Table 24 — Percent change for level 1 CoDCorrect causes in 2013**

| Cause                                       | % Change |
|---------------------------------------------|----------|
| Tuberculosis                                | 6.91     |
| HIV/AIDS                                    | -6.95    |
| Diarrheal diseases                          | 5.08     |
| Typhoid fever                               | 7.67     |
| Paratyphoid fever                           | 7.80     |
| Other intestinal infectious diseases        | 8.73     |
| Lower respiratory infections                | 2.91     |
| Upper respiratory infections                | 6.90     |
| Otitis media                                | 5.35     |
| Meningitis                                  | 8.54     |
| Encephalitis                                | 6.01     |
| Diphtheria                                  | 5.60     |
| Whooping cough                              | 0.04     |
| Tetanus                                     | 2.80     |
| Measles                                     | -5.66    |
| Varicella and herpes zoster                 | 3.78     |
| Malaria                                     | -1.25    |
| Chagas disease                              | -6.66    |
| Visceral leishmaniasis                      | 5.11     |
| African trypanosomiasis                     | 17.02    |
| Schistosomiasis                             | 6.24     |
| Cysticercosis                               | 5.16     |
| Cystic echinococcosis                       | 4.22     |
| Dengue                                      | 8.29     |
| Yellow fever                                | 11.40    |
| Rabies                                      | 7.12     |
| Intestinal nematode infections              | 7.37     |
| Other neglected tropical diseases           | 8.17     |
| Maternal disorders                          | 4.92     |
| Neonatal disorders                          | 1.96     |
| Nutritional deficiencies                    | 6.62     |
| Sexually transmitted diseases excluding HIV | 5.91     |
| Hepatitis                                   | 5.66     |
| Other infectious diseases                   | 6.10     |
| Esophageal cancer                           | -0.61    |
| Stomach cancer                              | -1.90    |
| Liver cancer                                | -0.62    |
| Larynx cancer                               | -0.50    |
| Tracheal, bronchus, and lung cancers        | -3.05    |
| Breast cancer                               | -1.83    |
| Cervical cancer                             | 3.13     |
| Uterine cancer                              | -2.72    |
| Prostate cancer                             | -5.15    |
| Colon and rectum cancer                     | -3.36    |
| Lip and oral cavity cancer                  | 1.49     |
| Nasopharynx cancer                          | 0.40     |
| Other pharynx cancer                        | 1.78     |
| Gallbladder and biliary tract cancer        | -2.06    |
| Pancreatic cancer                           | -4.08    |



**Web Table 24 — Percent change for level 1 CoDCorrect causes in 2013**

| Cause                                             | % Change |
|---------------------------------------------------|----------|
| Malignant skin melanoma                           | -3.84    |
| Non-melanoma skin cancer                          | -3.20    |
| Ovarian cancer                                    | -1.63    |
| Testicular cancer                                 | 2.59     |
| Kidney cancer                                     | -3.55    |
| Bladder cancer                                    | -3.06    |
| Brain and nervous system cancer                   | -1.59    |
| Thyroid cancer                                    | -1.12    |
| Mesothelioma                                      | -4.00    |
| Hodgkin lymphoma                                  | 1.06     |
| Non-Hodgkin lymphoma                              | -1.14    |
| Multiple myeloma                                  | -3.77    |
| Leukemia                                          | -0.94    |
| Other neoplasms                                   | -0.62    |
| Cardiovascular diseases                           | -1.27    |
| Chronic respiratory diseases                      | 0.81     |
| Cirrhosis                                         | 1.99     |
| Digestive diseases                                | 2.43     |
| Alzheimer disease and other dementias             | -5.54    |
| Parkinson disease                                 | -6.19    |
| Epilepsy                                          | 4.19     |
| Multiple sclerosis                                | -3.17    |
| Other neurological disorders                      | -1.77    |
| Schizophrenia                                     | -1.54    |
| Alcohol use disorders                             | -0.93    |
| Drug use disorders                                | 1.19     |
| Eating disorders                                  | 0.79     |
| Diabetes mellitus                                 | 0.95     |
| Acute glomerulonephritis                          | 3.28     |
| Chronic kidney disease                            | -0.29    |
| Urinary diseases and male infertility             | 0.63     |
| Gynecological diseases                            | 5.99     |
| Hemoglobinopathies and hemolytic anemias          | -2.71    |
| Endocrine, metabolic, blood, and immune disorders | 0.60     |
| Musculoskeletal disorders                         | -0.23    |
| Congenital anomalies                              | 2.47     |
| Skin and subcutaneous diseases                    | 3.24     |
| Sudden infant death syndrome                      | -2.11    |
| Transport injuries                                | 3.89     |
| Falls                                             | 0.20     |
| Drowning                                          | 3.04     |
| Fire, heat, and hot substances                    | 6.89     |
| Poisonings                                        | 4.16     |
| Unintentional firearm injuries                    | 7.54     |
| Unintentional suffocation                         | -1.75    |
| Other exposure to mechanical forces               | 3.17     |
| Adverse effects of medical treatment              | 2.64     |
| Animal contact                                    | 7.29     |
| Pulmonary aspiration and foreign body in airway   | -0.05    |

**Web Table 24 — Percent change for level 1 CoDCorrect causes in 2013**

| Cause                           | % Change |
|---------------------------------|----------|
| Foreign body in other body part | 5.33     |
| Other unintentional injuries    | 6.49     |
| Self-harm                       | 2.56     |
| Interpersonal violence          | 3.62     |

## Section 8. Measures of inequality and Multiple decrement life table

### 8.1. Gini coefficients

This section presents technical details on evaluating inequality of certain metrics such as Under-5 Mortality rate or cause specific mortality rate at the country level.

There are two types of gini coefficient in measuring inequality we have used in this study: population weighted gini coefficient, and population weighted mean absolute difference.

The population weighted gini coefficient is computed using the equation below:

$$Gini = \frac{\sum_{i=1}^N \sum_{j=1}^N (|x_i - x_j|) p_i p_j}{2(\sum_{j=1}^N p_j)^2 \mu}$$

Where  $x_i$  is the metric of interest for country  $i$ ,  $p_i$  is the population of country  $i$ ,  $N$  is the number of countries, and  $\mu$  is the mean across countries. Inspection of this equation shows that this can be interpreted as the average relative difference across all pairs of countries weighted for population size.<sup>29</sup>

and the population weighted mean absolute difference is computed using the following equation:

$$\text{mean absolute difference} = \frac{\sum_{i=1}^N \sum_{j=1}^N (|x_i - x_j|) p_i p_j}{2(\sum_{j=1}^N p_j)^2}$$

Where  $p_i$  and  $p_j$  represent national populations covered in the GBD2013 study.  $x_i$  and  $x_j$  indicate age-specific mortality rates for age groups 0, -14, 5-9, ..., and 80 plus.

### 8.2. Multiple decrement life-tables

Multiple decrement life tables are widely used by demographers to examine the impacts of cause specific mortality on summary mortality indicators such as probability of death and life expectancy. For our purposes, we calculated the proportion probability of death for a specific age group that is attributable to a specific cause of death. This metric can be obtained using the following equation:

$${}_n QF_x^i = \frac{\sum_{x=X}^{N+X-5} l_x \cdot {}_5q_x^i}{\sum_{i=1}^K \sum_{x=X}^{N+X-5} l_x \cdot {}_5q_x^i}$$

Where  ${}_n QF_x^i$  is the fraction of contribution to probability of death from cause  $i$  in age group  $x$  to  $x+n$ .  $l_x$  is the probability of survival from birth to age  $x$  and  ${}_5q_x^i$  is the probability of death from cause  $i$  in age group  $x$  to  $x+5$ .

## Section 9. Supplemental and detailed results for causes of death

This section presents detailed results on death numbers, death rates, and YLLs for 1990 and 2013. The tables are arranged as follows:

**Web Table 25: Global deaths by age, sex, and cause in 1990**

**Web Table 25 - Global deaths with 95% UI by age, sex, and cause in 1990**

| Cause                                                             | Both Sexes, All Ages                    | Both Sexes, 0-4 Years                   | Both Sexes, 5-14 Years               | Both Sexes, 15-49 Years              | Both Sexes, 50-69 Years                 | Both Sexes, 70-80 Years                 |
|-------------------------------------------------------------------|-----------------------------------------|-----------------------------------------|--------------------------------------|--------------------------------------|-----------------------------------------|-----------------------------------------|
| All causes                                                        | 47,468,690<br>(46,771,664 - 48,223,315) | 12,115,239<br>(11,935,353 - 12,293,205) | 1,369,657<br>(1,345,522 - 1,395,802) | 7,348,011<br>(7,135,193 - 7,590,054) | 11,038,553<br>(10,744,932 - 11,339,632) | 15,597,231<br>(15,405,476 - 15,811,822) |
| Communicable, maternal, neonatal, and nutritional diseases        | 16,149,409<br>(15,674,491 - 16,597,585) | 10,076,305<br>(9,698,809 - 10,366,453)  | 717,109<br>(679,553 - 757,949)       | 2,153,637<br>(2,061,121 - 2,263,635) | 1,547,827<br>(1,476,303 - 1,643,579)    | 1,654,532<br>(1,572,809 - 1,737,573)    |
| HIV/AIDS and tuberculosis                                         | 2,072,463<br>(1,938,187 - 2,246,131)    | 125,658<br>(111,654 - 166,599)          | 44,329<br>(40,045 - 50,744)          | 843,183<br>(772,069 - 922,707)       | 690,590<br>(638,124 - 753,722)          | 368,703<br>(334,836 - 397,546)          |
| Tuberculosis                                                      | 1,786,058<br>(1,666,444 - 1,945,446)    | 90,478<br>(77,451 - 130,275)            | 42,653<br>(38,299 - 49,234)          | 644,385<br>(591,046 - 707,804)       | 647,509<br>(595,160 - 708,287)          | 361,033<br>(326,581 - 389,352)          |
| HIV/AIDS                                                          | 286,405<br>(227,374 - 370,284)          | 35,181<br>(32,278 - 38,325)             | 1,676<br>(1,303 - 2,028)             | 198,797<br>(152,493 - 266,603)       | 43,081<br>(33,765 - 55,695)             | 7,670<br>(6,147 - 9,633)                |
| HIV/AIDS resulting in mycobacterial infection                     | 27,775<br>(20,460 - 37,441)             | 3,227<br>(2,599 - 3,998)                | 143<br>(103 - 189)                   | 19,249<br>(13,720 - 26,912)          | 4,357<br>(3,180 - 5,861)                | 799<br>(590 - 1,063)                    |
| HIV/AIDS resulting in other diseases                              | 258,629<br>(206,072 - 334,421)          | 31,953<br>(29,209 - 34,900)             | 1,533<br>(1,192 - 1,859)             | 179,549<br>(137,479 - 242,305)       | 38,723<br>(30,337 - 50,076)             | 6,871<br>(5,517 - 8,705)                |
| Diarrhea, lower respiratory, and other common infectious diseases | 7,880,508<br>(7,468,323 - 8,337,203)    | 5,103,883<br>(4,761,417 - 5,466,806)    | 473,240<br>(435,073 - 517,263)       | 619,575<br>(569,130 - 682,315)       | 616,188<br>(577,007 - 672,450)          | 1,067,622<br>(985,342 - 1,136,238)      |
| Diarrheal diseases                                                | 2,578,732<br>(2,412,202 - 2,748,856)    | 1,607,276<br>(1,463,403 - 1,756,665)    | 146,421<br>(130,036 - 164,932)       | 227,824<br>(210,309 - 244,312)       | 267,041<br>(242,138 - 290,315)          | 330,169<br>(301,530 - 355,973)          |
| Intestinal infectious diseases                                    | 259,132<br>(145,627 - 424,574)          | 82,001<br>(46,723 - 135,247)            | 76,722<br>(43,819 - 123,720)         | 83,802<br>(44,271 - 138,964)         | 11,810<br>(6,574 - 19,642)              | 4,797<br>(2,956 - 7,653)                |
| Typhoid fever                                                     | 180,470<br>(96,400 - 302,288)           | 52,543<br>(27,405 - 90,257)             | 55,503<br>(30,558 - 90,878)          | 61,004<br>(31,074 - 103,447)         | 8,239<br>(4,082 - 14,464)               | 3,181<br>(1,737 - 5,386)                |
| Paratyphoid fever                                                 | 63,377<br>(33,589 - 106,730)            | 21,223<br>(10,818 - 38,182)             | 19,657<br>(10,899 - 33,515)          | 19,205<br>(9,743 - 33,196)           | 2,389<br>(1,192 - 4,306)                | 903<br>(497 - 1,546)                    |
| Other intestinal infectious diseases                              | 15,284<br>(13,526 - 17,296)             | 8,234<br>(6,933 - 9,718)                | 1,562<br>(1,336 - 1,863)             | 3,593<br>(3,210 - 3,999)             | 1,182<br>(1,038 - 1,339)                | 713<br>(630 - 803)                      |
| Lower respiratory infections                                      | 3,420,650<br>(3,211,595 - 3,638,383)    | 2,168,125<br>(1,983,943 - 2,334,111)    | 115,440<br>(101,448 - 129,737)       | 184,044<br>(168,800 - 204,780)       | 263,859<br>(243,005 - 301,013)          | 689,182<br>(611,329 - 749,093)          |
| Upper respiratory infections                                      | 4,711<br>(3,982 - 5,620)                | 1,710<br>(1,211 - 2,518)                | 221<br>(136 - 379)                   | 962<br>(770 - 1,219)                 | 960<br>(705 - 1,343)                    | 857<br>(664 - 1,131)                    |
| Otitis media                                                      | 4,905<br>(4,521 - 5,274)                | 1,956<br>(1,684 - 2,241)                | 681<br>(604 - 763)                   | 1,088<br>(1,003 - 1,183)             | 659<br>(609 - 719)                      | 520<br>(471 - 573)                      |
| Meningitis                                                        | 464,368<br>(404,976 - 558,969)          | 298,178<br>(241,332 - 389,130)          | 43,703<br>(37,731 - 49,323)          | 67,459<br>(60,273 - 73,999)          | 35,559<br>(31,681 - 38,897)             | 19,468<br>(16,765 - 21,082)             |
| Pneumococcal meningitis                                           | 112,059<br>(97,677 - 132,604)           | 61,217<br>(48,994 - 80,064)             | 13,746<br>(11,475 - 15,916)          | 20,758<br>(18,148 - 23,414)          | 10,475<br>(8,438 - 12,415)              | 5,862<br>(5,052 - 6,693)                |
| H influenzae type B meningitis                                    | 118,037<br>(98,172 - 147,034)           | 93,733<br>(75,072 - 122,239)            | 10,398<br>(8,643 - 12,218)           | 8,591<br>(7,291 - 9,959)             | 3,467<br>(2,936 - 4,003)                | 1,848<br>(1,546 - 2,125)                |
| Meningococcal meningitis                                          | 88,144<br>(76,081 - 107,996)            | 54,381<br>(43,229 - 72,926)             | 7,916<br>(6,816 - 9,291)             | 13,930<br>(12,298 - 15,684)          | 7,489<br>(6,545 - 8,516)                | 4,427<br>(3,723 - 5,040)                |
| Other meningitis                                                  | 146,128<br>(128,027 - 174,909)          | 88,847<br>(71,693 - 115,846)            | 11,644<br>(9,757 - 13,625)           | 24,180<br>(21,095 - 27,173)          | 14,127<br>(11,901 - 16,422)             | 7,330<br>(6,027 - 8,304)                |
| Encephalitis                                                      | 92,191<br>(65,217 - 116,181)            | 50,893<br>(32,148 - 69,635)             | 12,507<br>(7,227 - 17,510)           | 16,705<br>(11,921 - 19,834)          | 8,219<br>(5,903 - 9,677)                | 3,868<br>(2,647 - 4,493)                |
| Diphtheria                                                        | 8,032<br>(3,864 - 18,841)               | 6,314<br>(2,636 - 16,867)               | 1,196<br>(465 - 3,427)               | 402<br>(252 - 694)                   | 120<br>(53 - 316)                       | --                                      |
| Whooping cough                                                    | 138,219<br>(52,875 - 300,219)           | 129,769<br>(49,894 - 280,709)           | 6,859<br>(2,561 - 15,400)            | 1,410<br>(573 - 3,275)               | 181<br>(77 - 418)                       | --                                      |
| Tetanus                                                           | 356,156<br>(292,914 - 578,607)          | 282,371<br>(228,714 - 472,401)          | 8,019<br>(5,226 - 15,638)            | 23,003<br>(16,957 - 40,721)          | 26,583<br>(18,322 - 47,744)             | 16,180<br>(10,537 - 26,852)             |
| Measles                                                           | 544,474<br>(303,985 - 867,791)          | 472,364<br>(265,263 - 749,924)          | 60,793<br>(33,080 - 98,897)          | 10,985<br>(4,950 - 25,396)           | 332<br>(144 - 805)                      | --                                      |
| Varicella and herpes zoster                                       | 8,938<br>(7,165 - 11,721)               | 2,924<br>(1,807 - 4,890)                | 677<br>(403 - 1,228)                 | 1,891<br>(1,417 - 2,541)             | 865<br>(599 - 1,240)                    | 2,581<br>(1,710 - 4,093)                |
| Neglected tropical diseases and malaria                           | 1,092,429<br>(994,078 - 1,196,684)      | 645,441<br>(548,264 - 743,405)          | 122,139<br>(109,601 - 134,714)       | 165,127<br>(142,121 - 190,351)       | 115,123<br>(102,625 - 131,027)          | 44,600<br>(38,112 - 56,490)             |
| Malaria                                                           | 888,127<br>(793,426 - 992,748)          | 584,409<br>(487,185 - 680,648)          | 85,896<br>(74,734 - 97,079)          | 104,657<br>(86,161 - 125,071)        | 83,833<br>(72,428 - 95,277)             | 29,332<br>(24,377 - 34,215)             |
| Chagas disease                                                    | 12,669<br>(5,171 - 39,411)              | 24<br>(9 - 82)                          | 30<br>(12 - 90)                      | 2,803<br>(999 - 7,930)               | 5,731<br>(2,260 - 18,269)               | 4,081<br>(1,657 - 13,638)               |
| Leishmaniasis                                                     | 52,159<br>(44,630 - 60,650)             | 20,433<br>(16,263 - 25,038)             | 13,137<br>(10,283 - 16,368)          | 14,953<br>(12,396 - 17,599)          | 2,833<br>(2,362 - 3,324)                | 803<br>(685 - 923)                      |
| Visceral leishmaniasis                                            | 52,159<br>(44,630 - 60,650)             | 20,433<br>(16,263 - 25,038)             | 13,137<br>(10,283 - 16,368)          | 14,953<br>(12,396 - 17,599)          | 2,833<br>(2,362 - 3,324)                | 803<br>(685 - 923)                      |
| African trypanosomiasis                                           | 22,963<br>(11,411 - 37,721)             | 1,632<br>(742 - 2,744)                  | 2,536<br>(1,227 - 4,324)             | 14,490<br>(7,221 - 23,602)           | 3,566<br>(1,694 - 5,947)                | 739<br>(349 - 1,260)                    |
| Schistosomiasis                                                   | 17,366<br>(14,775 - 20,552)             | 357<br>(272 - 460)                      | 632<br>(521 - 768)                   | 6,182<br>(5,280 - 7,216)             | 6,632<br>(5,477 - 8,056)                | 3,563<br>(2,853 - 4,468)                |
| Cysticercosis                                                     | 915<br>(809 - 1,130)                    | 54<br>(37 - 89)                         | 61<br>(49 - 82)                      | 517<br>(457 - 636)                   | 213<br>(190 - 254)                      | 71<br>(63 - 80)                         |
| Cystic echinococcosis                                             | 4,040<br>(3,825 - 4,271)                | 572<br>(486 - 665)                      | 742<br>(680 - 811)                   | 1,516<br>(1,424 - 1,613)             | 789<br>(746 - 834)                      | 421<br>(398 - 443)                      |
| Dengue                                                            | 8,765<br>(5,243 - 11,328)               | 4,063<br>(1,819 - 5,948)                | 2,486<br>(1,342 - 3,280)             | 1,595<br>(1,223 - 1,898)             | 378<br>(325 - 465)                      | 243<br>(196 - 287)                      |
| Yellow fever                                                      | 2,235<br>(1,904 - 2,548)                | 194<br>(121 - 302)                      | 408<br>(283 - 562)                   | 1,275<br>(1,022 - 1,519)             | 265<br>(176 - 375)                      | 93<br>(45 - 166)                        |
| Rabies                                                            | 38,449<br>(26,714 - 48,737)             | 5,854<br>(3,650 - 9,750)                | 12,226<br>(7,583 - 15,159)           | 11,082<br>(8,237 - 14,341)           | 7,432<br>(5,237 - 9,031)                | 1,855<br>(1,394 - 2,387)                |
| Intestinal nematode infections                                    | 9,135<br>(8,092 - 10,218)               | 7,001<br>(6,037 - 8,041)                | 1,269<br>(1,103 - 1,448)             | 445<br>(368 - 529)                   | 224<br>(177 - 277)                      | 196<br>(153 - 244)                      |

**Web Table 25 - Global deaths with 95% UI by age, sex, and cause in 1990**

| Cause                                                            | Both Sexes, All Ages                    | Both Sexes, 0-4 Years                | Both Sexes, 5-14 Years         | Both Sexes, 15-49 Years              | Both Sexes, 50-69 Years              | Both Sexes, 70-80 Years                 |
|------------------------------------------------------------------|-----------------------------------------|--------------------------------------|--------------------------------|--------------------------------------|--------------------------------------|-----------------------------------------|
| Ascariasis                                                       | 9,135<br>(8,092 - 10,218)               | 7,001<br>(6,037 - 8,041)             | 1,269<br>(1,103 - 1,448)       | 445<br>(368 - 529)                   | 224<br>(177 - 277)                   | 196<br>(153 - 244)                      |
| Other neglected tropical diseases                                | 35,606<br>(26,356 - 44,179)             | 20,849<br>(14,316 - 28,239)          | 2,715<br>(2,021 - 3,401)       | 5,610<br>(4,296 - 6,894)             | 3,229<br>(2,486 - 3,963)             | 3,203<br>(2,227 - 4,362)                |
| Maternal disorders                                               | 376,575<br>(343,975 - 408,222)          | --                                   | 2,021<br>(1,534 - 2,614)       | 374,554<br>(342,100 - 406,196)       | --                                   | --                                      |
| Maternal hemorrhage                                              | 71,390<br>(64,636 - 78,513)             | --                                   | 222<br>(169 - 289)             | 71,167<br>(64,419 - 78,282)          | --                                   | --                                      |
| Maternal sepsis and other maternal infections                    | 34,148<br>(30,509 - 38,035)             | --                                   | 221<br>(164 - 289)             | 33,927<br>(30,305 - 37,792)          | --                                   | --                                      |
| Maternal hypertensive disorders                                  | 36,594<br>(33,261 - 39,857)             | --                                   | 255<br>(194 - 329)             | 36,339<br>(32,998 - 39,567)          | --                                   | --                                      |
| Maternal obstructed labor                                        | 29,331<br>(26,332 - 32,749)             | --                                   | 116<br>(86 - 151)              | 29,215<br>(26,220 - 32,634)          | --                                   | --                                      |
| Maternal abortive outcome                                        | 50,045<br>(45,792 - 54,757)             | --                                   | 295<br>(221 - 397)             | 49,751<br>(45,474 - 54,498)          | --                                   | --                                      |
| Indirect maternal deaths                                         | 40,074<br>(35,459 - 44,364)             | --                                   | 178<br>(134 - 231)             | 39,897<br>(35,314 - 44,173)          | --                                   | --                                      |
| Late maternal deaths                                             | 44,859<br>(36,440 - 53,195)             | --                                   | 387<br>(281 - 528)             | 44,471<br>(36,072 - 52,844)          | --                                   | --                                      |
| Maternal deaths aggravated by HIV/AIDS                           | 791<br>(459 - 1,097)                    | --                                   | --                             | 791<br>(459 - 1,097)                 | --                                   | --                                      |
| Other maternal disorders                                         | 68,582<br>(58,429 - 80,402)             | --                                   | 343<br>(250 - 459)             | 68,239<br>(58,082 - 80,029)          | --                                   | --                                      |
| Neonatal disorders                                               | 3,433,257<br>(3,225,741 - 3,586,077)    | 3,433,257<br>(3,225,741 - 3,586,077) | --                             | --                                   | --                                   | --                                      |
| Neonatal preterm birth complications                             | 1,570,456<br>(1,285,020 - 1,803,518)    | 1,570,456<br>(1,285,020 - 1,803,518) | --                             | --                                   | --                                   | --                                      |
| Neonatal encephalopathy due to birth asphyxia and trauma         | 874,057<br>(688,524 - 1,055,385)        | 874,057<br>(688,524 - 1,055,385)     | --                             | --                                   | --                                   | --                                      |
| Neonatal sepsis and other neonatal infections                    | 346,373<br>(195,669 - 483,990)          | 346,373<br>(195,669 - 483,990)       | --                             | --                                   | --                                   | --                                      |
| Hemolytic disease and other neonatal jaundice                    | 64,760<br>(39,471 - 96,270)             | 64,760<br>(39,471 - 96,270)          | --                             | --                                   | --                                   | --                                      |
| Other neonatal disorders                                         | 577,611<br>(457,485 - 756,029)          | 577,611<br>(457,485 - 756,029)       | --                             | --                                   | --                                   | --                                      |
| Nutritional deficiencies                                         | 757,692<br>(641,537 - 934,412)          | 451,630<br>(376,506 - 560,547)       | 35,625<br>(29,724 - 43,205)    | 72,030<br>(57,856 - 88,632)          | 64,416<br>(52,604 - 83,547)          | 133,991<br>(113,280 - 166,565)          |
| Protein-energy malnutrition                                      | 507,933<br>(394,310 - 648,543)          | 355,935<br>(279,064 - 465,068)       | 21,644<br>(16,008 - 28,144)    | 26,950<br>(17,856 - 38,077)          | 30,546<br>(20,827 - 42,541)          | 72,858<br>(50,348 - 91,610)             |
| Iodine deficiency                                                | 2,117<br>(1,350 - 3,417)                | 912<br>(406 - 1,933)                 | 159<br>(79 - 332)              | 351<br>(205 - 629)                   | 346<br>(189 - 728)                   | 349<br>(183 - 651)                      |
| Iron-deficiency anemia                                           | 213,376<br>(143,541 - 309,311)          | 80,878<br>(37,638 - 141,640)         | 12,535<br>(8,490 - 17,774)     | 40,379<br>(29,699 - 51,641)          | 29,382<br>(21,217 - 42,646)          | 50,202<br>(35,936 - 74,975)             |
| Other nutritional deficiencies                                   | 34,267<br>(23,768 - 56,075)             | 13,906<br>(8,521 - 26,781)           | 1,287<br>(811 - 2,082)         | 4,350<br>(2,758 - 7,086)             | 4,142<br>(2,705 - 6,743)             | 10,582<br>(6,331 - 16,211)              |
| Other communicable, maternal, neonatal, and nutritional diseases | 536,486<br>(433,021 - 674,882)          | 316,437<br>(220,193 - 445,183)       | 39,754<br>(32,520 - 49,864)    | 79,169<br>(72,660 - 85,638)          | 61,510<br>(53,676 - 69,916)          | 39,616<br>(34,043 - 46,993)             |
| Sexually transmitted diseases excluding HIV                      | 257,648<br>(154,732 - 396,443)          | 223,453<br>(126,541 - 352,710)       | 17,098<br>(9,978 - 26,889)     | 6,469<br>(5,293 - 7,812)             | 5,333<br>(3,555 - 7,746)             | 5,295<br>(3,516 - 7,686)                |
| Syphilis                                                         | 250,613<br>(147,407 - 389,134)          | 223,453<br>(126,541 - 352,710)       | 16,772<br>(9,729 - 26,548)     | 2,965<br>(2,407 - 3,625)             | 3,321<br>(2,227 - 4,713)             | 4,102<br>(2,749 - 5,857)                |
| Chlamydial infection                                             | 1,491<br>(1,125 - 1,876)                | --                                   | 65<br>(38 - 98)                | 762<br>(605 - 911)                   | 430<br>(244 - 716)                   | 234<br>(136 - 421)                      |
| Gonococcal infection                                             | 3,171<br>(2,499 - 3,828)                | --                                   | 131<br>(96 - 208)              | 1,457<br>(1,191 - 1,770)             | 937<br>(624 - 1,359)                 | 646<br>(427 - 971)                      |
| Other sexually transmitted diseases                              | 2,372<br>(1,880 - 2,847)                | --                                   | 130<br>(95 - 206)              | 1,284<br>(1,053 - 1,545)             | 645<br>(425 - 951)                   | 313<br>(202 - 513)                      |
| Hepatitis                                                        | 161,984<br>(152,772 - 171,432)          | 43,825<br>(38,398 - 50,165)          | 14,540<br>(13,041 - 16,284)    | 55,510<br>(51,408 - 60,125)          | 32,596<br>(30,087 - 35,384)          | 15,513<br>(14,300 - 16,831)             |
| Acute hepatitis A                                                | 22,636<br>(7,900 - 40,226)              | 15,942<br>(5,859 - 27,152)           | 2,984<br>(997 - 5,555)         | 2,906<br>(833 - 5,992)               | 627<br>(172 - 1,420)                 | 175<br>(45 - 427)                       |
| Acute hepatitis B                                                | 84,991<br>(65,066 - 103,971)            | 22,716<br>(13,517 - 32,497)          | 2,999<br>(1,747 - 4,571)       | 20,166<br>(13,349 - 27,505)          | 25,411<br>(21,003 - 29,211)          | 13,698<br>(12,132 - 15,264)             |
| Acute hepatitis C                                                | 2,297<br>(459 - 5,324)                  | --                                   | 264<br>(49 - 655)              | 941<br>(188 - 2,241)                 | 732<br>(144 - 1,729)                 | 360<br>(73 - 832)                       |
| Acute hepatitis E                                                | 52,061<br>(39,014 - 67,176)             | 5,166<br>(2,633 - 9,051)             | 8,292<br>(6,176 - 10,526)      | 31,497<br>(24,733 - 38,653)          | 5,826<br>(3,231 - 9,543)             | 1,280<br>(600 - 2,321)                  |
| Other infectious diseases                                        | 116,854<br>(94,006 - 144,256)           | 49,159<br>(38,509 - 63,185)          | 8,116<br>(6,015 - 10,479)      | 17,190<br>(12,719 - 21,357)          | 23,582<br>(17,503 - 32,601)          | 18,808<br>(14,418 - 25,918)             |
| Non-communicable diseases                                        | 26,993,493<br>(26,298,089 - 27,639,062) | 1,272,788<br>(1,091,944 - 1,567,015) | 299,881<br>(273,717 - 329,694) | 3,160,363<br>(3,024,719 - 3,301,196) | 8,788,848<br>(8,532,384 - 9,039,887) | 13,471,612<br>(13,282,690 - 13,679,624) |
| Neoplasms                                                        | 5,659,706<br>(5,440,448 - 5,826,649)    | 74,381<br>(62,700 - 98,427)          | 63,662<br>(56,645 - 71,968)    | 888,277<br>(839,892 - 933,914)       | 2,524,357<br>(2,422,485 - 2,604,846) | 2,109,029<br>(2,036,183 - 2,191,580)    |
| Esophageal cancer                                                | 313,140<br>(274,958 - 351,513)          | --                                   | --                             | 30,389<br>(25,716 - 34,677)          | 164,550<br>(143,953 - 186,488)       | 118,202<br>(105,086 - 133,211)          |
| Stomach cancer                                                   | 763,387<br>(725,637 - 803,190)          | --                                   | --                             | 99,798<br>(93,701 - 106,919)         | 348,897<br>(329,480 - 367,272)       | 314,692<br>(295,013 - 335,590)          |
| Liver cancer                                                     | 510,058<br>(474,941 - 543,146)          | --                                   | 2,234<br>(1,827 - 2,870)       | 118,106<br>(107,942 - 132,520)       | 251,147<br>(231,324 - 270,136)       | 138,572<br>(129,027 - 149,543)          |

**Web Table 25 - Global deaths with 95% UI by age, sex, and cause in 1990**

| Cause                                | Both Sexes, All Ages                    | Both Sexes, 0-4 Years          | Both Sexes, 5-14 Years      | Both Sexes, 15-49 Years              | Both Sexes, 50-69 Years              | Both Sexes, 70-80 Years              |
|--------------------------------------|-----------------------------------------|--------------------------------|-----------------------------|--------------------------------------|--------------------------------------|--------------------------------------|
| Liver cancer due to hepatitis B      | 198,354<br>(181,653 - 213,391)          | --                             | 721<br>(589 - 939)          | 59,584<br>(53,481 - 67,771)          | 100,615<br>(91,544 - 109,882)        | 37,433<br>(34,410 - 40,539)          |
| Liver cancer due to hepatitis C      | 87,447<br>(79,503 - 94,701)             | --                             | 79<br>(61 - 108)            | 12,788<br>(11,437 - 14,544)          | 43,908<br>(39,285 - 48,036)          | 30,671<br>(27,880 - 34,074)          |
| Liver cancer due to alcohol use      | 122,797<br>(113,840 - 132,535)          | --                             | --                          | 16,235<br>(14,670 - 18,157)          | 60,065<br>(54,652 - 65,394)          | 46,497<br>(42,783 - 51,114)          |
| Liver cancer due to other causes     | 101,461<br>(92,823 - 109,961)           | --                             | 1,433<br>(1,153 - 1,877)    | 29,498<br>(26,920 - 32,930)          | 46,559<br>(42,115 - 51,053)          | 23,971<br>(21,516 - 26,146)          |
| Larynx cancer                        | 76,226<br>(62,660 - 88,135)             | --                             | --                          | 9,983<br>(7,683 - 11,596)            | 42,695<br>(34,989 - 49,279)          | 23,548<br>(19,674 - 28,123)          |
| Tracheal, bronchus and lung cancer   | 1,050,024<br>(1,010,593 - 1,078,197)    | --                             | --                          | 98,779<br>(91,682 - 104,480)         | 557,820<br>(531,640 - 575,204)       | 393,424<br>(381,214 - 407,069)       |
| Breast cancer                        | 327,282<br>(289,174 - 366,768)          | --                             | --                          | 76,940<br>(68,643 - 82,413)          | 150,042<br>(133,774 - 168,471)       | 100,300<br>(84,727 - 117,421)        |
| Cervical cancer                      | 196,311<br>(162,940 - 212,390)          | --                             | --                          | 56,689<br>(48,367 - 63,670)          | 93,739<br>(76,579 - 103,286)         | 45,883<br>(36,873 - 49,674)          |
| Uterine cancer                       | 45,636<br>(36,572 - 55,582)             | --                             | --                          | 5,962<br>(4,332 - 7,974)             | 21,376<br>(17,076 - 26,407)          | 18,299<br>(15,176 - 21,269)          |
| Prostate cancer                      | 157,054<br>(123,987 - 193,133)          | --                             | --                          | 1,176<br>(889 - 1,427)               | 35,428<br>(27,885 - 44,546)          | 120,450<br>(93,446 - 149,167)        |
| Colon and rectum cancer              | 490,204<br>(476,116 - 504,537)          | --                             | --                          | 51,987<br>(49,886 - 54,319)          | 193,726<br>(187,526 - 199,358)       | 244,491<br>(236,718 - 253,571)       |
| Lip and oral cavity cancer           | 83,939<br>(74,022 - 96,227)             | --                             | --                          | 15,598<br>(13,304 - 18,183)          | 41,628<br>(36,781 - 47,485)          | 26,713<br>(23,514 - 30,998)          |
| Nasopharynx cancer                   | 53,719<br>(47,677 - 63,523)             | --                             | 857<br>(650 - 1,256)        | 18,708<br>(16,446 - 22,412)          | 25,243<br>(22,410 - 29,674)          | 8,911<br>(7,605 - 10,406)            |
| Other pharynx cancer                 | 48,904<br>(43,690 - 53,491)             | --                             | --                          | 8,278<br>(7,188 - 9,033)             | 29,061<br>(26,123 - 32,135)          | 11,566<br>(10,316 - 12,619)          |
| Gallbladder and biliary tract cancer | 115,411<br>(100,613 - 130,435)          | --                             | --                          | 9,231<br>(7,856 - 10,156)            | 47,955<br>(41,774 - 53,940)          | 58,225<br>(50,267 - 67,912)          |
| Pancreatic cancer                    | 186,441<br>(181,295 - 191,773)          | --                             | --                          | 16,092<br>(15,474 - 16,732)          | 83,060<br>(80,663 - 85,585)          | 87,289<br>(84,480 - 90,713)          |
| Malignant skin melanoma              | 38,682<br>(30,110 - 50,875)             | --                             | --                          | 9,889<br>(7,764 - 12,408)            | 15,446<br>(11,904 - 20,941)          | 13,347<br>(10,355 - 17,319)          |
| Non-melanoma skin cancer             | 25,022<br>(20,234 - 29,994)             | --                             | --                          | 3,759<br>(2,949 - 4,981)             | 7,050<br>(5,527 - 8,551)             | 14,213<br>(11,487 - 17,209)          |
| Ovarian cancer                       | 98,912<br>(93,107 - 106,124)            | --                             | --                          | 17,870<br>(16,516 - 19,069)          | 50,595<br>(46,990 - 54,309)          | 30,447<br>(28,711 - 33,898)          |
| Testicular cancer                    | 6,961<br>(5,362 - 8,241)                | --                             | --                          | 4,759<br>(3,730 - 5,780)             | 1,348<br>(990 - 1,578)               | 854<br>(603 - 994)                   |
| Kidney cancer                        | 77,914<br>(73,836 - 83,038)             | 2,823<br>(1,750 - 3,802)       | 1,168<br>(945 - 1,400)      | 8,572<br>(8,046 - 9,107)             | 37,081<br>(35,246 - 39,187)          | 28,269<br>(26,370 - 31,290)          |
| Bladder cancer                       | 130,826<br>(116,598 - 140,878)          | --                             | --                          | 7,215<br>(6,053 - 7,893)             | 49,743<br>(43,838 - 52,963)          | 73,868<br>(65,507 - 80,971)          |
| Brain and nervous system cancer      | 136,011<br>(116,626 - 155,200)          | 5,545<br>(4,073 - 8,129)       | 9,578<br>(7,583 - 11,541)   | 41,755<br>(34,881 - 48,123)          | 53,422<br>(46,536 - 61,661)          | 25,711<br>(22,605 - 29,859)          |
| Thyroid cancer                       | 23,752<br>(20,256 - 26,104)             | --                             | 172<br>(85 - 331)           | 3,079<br>(2,468 - 3,641)             | 9,721<br>(8,384 - 10,874)            | 10,780<br>(9,059 - 11,910)           |
| Mesothelioma                         | 16,972<br>(15,192 - 20,319)             | --                             | --                          | 2,111<br>(1,854 - 2,285)             | 8,502<br>(7,602 - 10,122)            | 6,359<br>(5,583 - 8,136)             |
| Hodgkin lymphoma                     | 33,590<br>(24,056 - 38,034)             | 5,072<br>(3,107 - 7,520)       | 2,282<br>(1,357 - 3,034)    | 12,320<br>(8,880 - 13,916)           | 8,308<br>(5,909 - 9,219)             | 5,610<br>(3,994 - 6,184)             |
| Non-Hodgkin lymphoma                 | 133,597<br>(116,308 - 158,012)          | 5,921<br>(4,299 - 9,372)       | 6,178<br>(4,362 - 7,434)    | 29,434<br>(23,975 - 33,451)          | 47,225<br>(40,748 - 56,055)          | 44,838<br>(39,221 - 57,000)          |
| Multiple myeloma                     | 45,316<br>(37,361 - 57,360)             | --                             | --                          | 3,857<br>(3,264 - 4,555)             | 19,212<br>(15,727 - 23,878)          | 22,247<br>(17,785 - 29,667)          |
| Leukemia                             | 223,777<br>(215,144 - 234,189)          | 21,313<br>(17,873 - 26,409)    | 25,631<br>(23,590 - 28,513) | 72,743<br>(68,703 - 77,463)          | 53,458<br>(51,377 - 55,721)          | 50,631<br>(48,874 - 52,811)          |
| Other neoplasms                      | 250,636<br>(231,782 - 305,222)          | 33,707<br>(25,734 - 56,964)    | 15,562<br>(12,808 - 22,216) | 53,197<br>(48,684 - 63,776)          | 76,879<br>(70,700 - 85,755)          | 71,291<br>(66,519 - 84,274)          |
| Cardiovascular diseases              | 12,279,565<br>(11,776,561 - 12,764,086) | 134,689<br>(116,568 - 156,948) | 57,631<br>(51,120 - 67,263) | 1,079,475<br>(1,004,997 - 1,150,491) | 3,782,773<br>(3,602,435 - 3,953,424) | 7,224,997<br>(6,909,243 - 7,455,529) |
| Rheumatic heart disease              | 373,493<br>(302,540 - 464,629)          | 7,932<br>(5,784 - 11,893)      | 12,877<br>(10,254 - 16,321) | 102,686<br>(80,899 - 126,381)        | 134,101<br>(106,013 - 168,433)       | 115,898<br>(94,142 - 144,770)        |
| Ischemic heart disease               | 5,737,483<br>(5,254,862 - 6,148,625)    | 19,298<br>(15,820 - 24,630)    | 10,334<br>(8,710 - 12,804)  | 469,118<br>(420,359 - 518,082)       | 1,811,229<br>(1,641,388 - 1,931,569) | 3,427,505<br>(3,103,601 - 3,700,841) |
| Cerebrovascular disease              | 4,584,795<br>(4,162,107 - 4,968,097)    | 37,710<br>(31,261 - 46,770)    | 20,216<br>(17,425 - 24,223) | 334,459<br>(298,962 - 376,585)       | 1,365,337<br>(1,240,040 - 1,493,100) | 2,827,074<br>(2,550,944 - 3,054,926) |
| Ischemic stroke                      | 2,182,865<br>(1,923,290 - 2,430,872)    | 4,417<br>(2,030 - 7,414)       | 2,552<br>(1,384 - 4,308)    | 49,060<br>(38,307 - 60,934)          | 469,104<br>(385,916 - 539,421)       | 1,657,731<br>(1,462,583 - 1,829,761) |
| Hemorrhagic stroke                   | 2,401,930<br>(2,109,380 - 2,669,117)    | 33,292<br>(27,956 - 41,500)    | 17,664<br>(15,135 - 21,470) | 285,398<br>(253,030 - 323,530)       | 896,233<br>(786,323 - 1,003,238)     | 1,169,343<br>(997,762 - 1,317,615)   |
| Hypertensive heart disease           | 622,148<br>(525,748 - 783,943)          | 3,111<br>(1,822 - 4,431)       | 1,147<br>(807 - 1,418)      | 45,927<br>(36,739 - 59,351)          | 185,011<br>(153,195 - 237,323)       | 386,952<br>(327,488 - 496,295)       |
| Cardiomyopathy and myocarditis       | 293,896<br>(243,521 - 346,319)          | 26,874<br>(15,610 - 36,258)    | 5,872<br>(3,742 - 7,548)    | 50,323<br>(41,490 - 61,000)          | 82,558<br>(66,878 - 102,197)         | 128,269<br>(109,411 - 149,678)       |
| Atrial fibrillation and flutter      | 28,916<br>(26,004 - 32,367)             | --                             | --                          | 362<br>(320 - 401)                   | 3,315<br>(2,955 - 3,664)             | 25,240<br>(22,547 - 28,417)          |
| Aortic aneurysm                      | 99,644<br>(82,373 - 118,540)            | --                             | --                          | 7,541<br>(6,069 - 9,041)             | 32,736<br>(27,080 - 38,216)          | 59,367<br>(48,707 - 71,933)          |



**Web Table 25 - Global deaths with 95% UI by age, sex, and cause in 1990**

| Cause                                               | Both Sexes, All Ages                 | Both Sexes, 0-4 Years          | Both Sexes, 5-14 Years      | Both Sexes, 15-49 Years        | Both Sexes, 50-69 Years            | Both Sexes, 70-80 Years              |
|-----------------------------------------------------|--------------------------------------|--------------------------------|-----------------------------|--------------------------------|------------------------------------|--------------------------------------|
| Peripheral vascular disease                         | 15,875<br>(14,387 - 17,512)          | --                             | --                          | 289<br>(253 - 322)             | 3,126<br>(2,800 - 3,447)           | 12,461<br>(11,306 - 13,795)          |
| Endocarditis                                        | 45,053<br>(35,560 - 58,613)          | 4,352<br>(2,850 - 6,939)       | 962<br>(656 - 1,493)        | 9,580<br>(7,334 - 12,702)      | 12,506<br>(9,775 - 16,742)         | 17,652<br>(13,311 - 23,860)          |
| Other cardiovascular and circulatory diseases       | 478,261<br>(403,905 - 546,416)       | 35,413<br>(28,991 - 43,445)    | 6,222<br>(5,109 - 7,570)    | 59,190<br>(49,466 - 70,263)    | 152,855<br>(125,468 - 175,633)     | 224,581<br>(193,102 - 258,951)       |
| Chronic respiratory diseases                        | 3,490,198<br>(3,280,371 - 3,795,308) | 125,300<br>(108,338 - 139,417) | 25,135<br>(22,835 - 28,306) | 231,920<br>(209,376 - 254,005) | 1,088,935<br>(995,100 - 1,183,549) | 2,018,909<br>(1,890,116 - 2,189,222) |
| Chronic obstructive pulmonary disease               | 2,421,325<br>(2,151,275 - 2,632,407) | 60,583<br>(50,686 - 68,957)    | 7,383<br>(5,355 - 8,902)    | 100,122<br>(80,550 - 114,208)  | 687,060<br>(593,315 - 763,073)     | 1,566,177<br>(1,420,027 - 1,701,628) |
| Pneumoconiosis                                      | 251,178<br>(183,982 - 317,779)       | 1,062<br>(680 - 1,614)         | 723<br>(445 - 1,105)        | 27,169<br>(17,439 - 34,924)    | 120,139<br>(83,062 - 155,976)      | 102,085<br>(74,989 - 131,755)        |
| Silicosis                                           | 55,359<br>(36,721 - 77,065)          | 258<br>(123 - 521)             | 194<br>(90 - 378)           | 5,897<br>(3,732 - 8,669)       | 25,873<br>(16,201 - 36,681)        | 23,137<br>(15,194 - 33,829)          |
| Asbestosis                                          | 21,020<br>(13,886 - 30,360)          | 165<br>(88 - 286)              | 127<br>(76 - 209)           | 2,563<br>(1,673 - 3,690)       | 11,141<br>(7,020 - 16,330)         | 7,024<br>(4,599 - 10,739)            |
| Coal workers pneumoconiosis                         | 28,853<br>(18,181 - 43,865)          | 139<br>(87 - 222)              | 114<br>(69 - 184)           | 3,401<br>(2,027 - 5,172)       | 14,325<br>(8,656 - 21,850)         | 10,874<br>(6,816 - 17,364)           |
| Other pneumoconiosis                                | 145,946<br>(100,318 - 189,183)       | 500<br>(320 - 759)             | 288<br>(187 - 415)          | 15,308<br>(8,787 - 20,162)     | 68,800<br>(45,399 - 91,836)        | 61,049<br>(41,297 - 81,782)          |
| Asthma                                              | 504,343<br>(399,706 - 731,765)       | 27,569<br>(22,931 - 33,166)    | 13,551<br>(11,669 - 17,437) | 79,169<br>(65,698 - 108,886)   | 187,942<br>(142,597 - 281,135)     | 196,112<br>(149,249 - 307,140)       |
| Interstitial lung disease and pulmonary sarcoidosis | 217,577<br>(128,694 - 299,444)       | 1,005<br>(340 - 2,239)         | 587<br>(275 - 1,353)        | 14,247<br>(6,492 - 21,693)     | 79,264<br>(40,437 - 119,742)       | 122,475<br>(75,014 - 161,431)        |
| Other chronic respiratory diseases                  | 95,775<br>(78,319 - 113,809)         | 35,081<br>(28,932 - 41,375)    | 2,891<br>(1,962 - 3,685)    | 11,213<br>(8,134 - 13,752)     | 14,530<br>(10,724 - 18,875)        | 32,060<br>(25,943 - 39,893)          |
| Cirrhosis                                           | 837,996<br>(806,965 - 866,656)       | 18,394<br>(15,496 - 21,871)    | 11,953<br>(10,917 - 13,006) | 230,288<br>(219,618 - 241,635) | 379,019<br>(363,826 - 394,013)     | 198,342<br>(188,774 - 205,403)       |
| Cirrhosis due to hepatitis B                        | 233,897<br>(220,823 - 250,046)       | 1,235<br>(971 - 1,577)         | 2,364<br>(1,946 - 2,810)    | 70,300<br>(64,966 - 77,212)    | 107,263<br>(100,508 - 115,250)     | 52,734<br>(48,729 - 56,870)          |
| Cirrhosis due to hepatitis C                        | 213,069<br>(200,395 - 226,699)       | 1,200<br>(927 - 1,664)         | 1,864<br>(1,543 - 2,231)    | 51,609<br>(48,057 - 55,250)    | 99,400<br>(92,376 - 106,496)       | 58,995<br>(54,594 - 63,387)          |
| Cirrhosis due to alcohol use                        | 292,246<br>(276,488 - 307,068)       | --                             | --                          | 73,522<br>(67,454 - 79,053)    | 142,727<br>(134,450 - 150,148)     | 75,996<br>(72,268 - 79,909)          |
| Cirrhosis due to other causes                       | 98,785<br>(92,069 - 106,038)         | 15,958<br>(13,367 - 19,201)    | 7,725<br>(6,924 - 8,575)    | 34,856<br>(32,008 - 37,932)    | 29,629<br>(26,863 - 33,259)        | 10,617<br>(9,566 - 11,901)           |
| Digestive diseases                                  | 1,053,199<br>(958,556 - 1,131,225)   | 50,426<br>(42,148 - 64,129)    | 39,968<br>(35,759 - 44,879) | 233,556<br>(203,080 - 253,408) | 322,737<br>(287,928 - 347,964)     | 406,513<br>(369,799 - 440,467)       |
| Peptic ulcer disease                                | 326,924<br>(288,840 - 388,661)       | 4,962<br>(3,288 - 8,557)       | 6,147<br>(4,142 - 8,041)    | 67,147<br>(57,195 - 83,088)    | 120,369<br>(105,217 - 142,416)     | 128,793<br>(111,550 - 150,688)       |
| Gastritis and duodenitis                            | 54,236<br>(32,114 - 76,338)          | 2,917<br>(1,144 - 4,612)       | 2,942<br>(1,804 - 4,700)    | 12,431<br>(7,331 - 18,339)     | 17,062<br>(9,466 - 24,737)         | 18,884<br>(10,195 - 27,042)          |
| Appendicitis                                        | 87,486<br>(70,850 - 105,877)         | 6,937<br>(4,552 - 11,330)      | 7,198<br>(5,627 - 9,460)    | 34,902<br>(27,760 - 42,198)    | 20,536<br>(15,747 - 25,663)        | 17,913<br>(12,679 - 22,682)          |
| Paralytic ileus and intestinal obstruction          | 178,007<br>(116,322 - 228,512)       | 9,023<br>(5,978 - 12,197)      | 10,857<br>(6,931 - 13,533)  | 41,809<br>(24,818 - 52,266)    | 51,218<br>(31,418 - 65,568)        | 65,099<br>(43,428 - 89,741)          |
| Inguinal, femoral, and abdominal hernia             | 50,455<br>(33,193 - 61,178)          | 2,485<br>(1,278 - 3,835)       | 7,801<br>(2,031 - 4,341)    | 7,801<br>(4,527 - 10,053)      | 13,153<br>(8,014 - 16,156)         | 23,756<br>(16,105 - 30,096)          |
| Inflammatory bowel disease                          | 54,853<br>(40,433 - 67,179)          | 9,428<br>(5,900 - 15,040)      | 3,435<br>(2,457 - 4,731)    | 11,547<br>(7,846 - 14,964)     | 11,958<br>(8,122 - 14,836)         | 18,485<br>(12,219 - 22,739)          |
| Vascular intestinal disorders                       | 52,573<br>(34,663 - 78,383)          | 451<br>(131 - 1,106)           | 559<br>(160 - 1,430)        | 3,678<br>(2,105 - 6,325)       | 13,579<br>(8,392 - 21,501)         | 34,305<br>(22,280 - 50,227)          |
| Gallbladder and biliary diseases                    | 80,451<br>(68,896 - 94,126)          | 1,715<br>(1,303 - 2,804)       | 1,426<br>(1,165 - 1,779)    | 10,661<br>(8,723 - 12,503)     | 23,805<br>(19,526 - 27,852)        | 42,845<br>(36,509 - 50,845)          |
| Pancreatitis                                        | 82,977<br>(59,177 - 111,289)         | 831<br>(347 - 1,461)           | 1,608<br>(917 - 2,654)      | 29,538<br>(20,824 - 40,899)    | 28,850<br>(20,534 - 38,686)        | 22,151<br>(15,624 - 30,637)          |
| Other digestive diseases                            | 85,237<br>(73,253 - 99,480)          | 11,677<br>(8,856 - 15,996)     | 3,029<br>(2,527 - 3,755)    | 14,043<br>(11,187 - 16,958)    | 22,206<br>(18,668 - 26,354)        | 34,281<br>(29,268 - 39,614)          |
| Neurological disorders                              | 1,017,530<br>(964,974 - 1,072,329)   | 27,214<br>(19,593 - 36,804)    | 15,356<br>(12,474 - 18,486) | 71,923<br>(62,387 - 79,697)    | 92,091<br>(87,353 - 99,064)        | 810,945<br>(764,548 - 859,544)       |
| Alzheimer disease and other dementias               | 795,785<br>(747,870 - 844,318)       | --                             | --                          | 178<br>(153 - 207)             | 49,359<br>(46,478 - 52,219)        | 746,247<br>(698,654 - 794,135)       |
| Parkinson disease                                   | 43,684<br>(38,307 - 55,062)          | --                             | --                          | 510<br>(433 - 597)             | 6,411<br>(5,528 - 7,849)           | 36,763<br>(32,525 - 46,918)          |
| Epilepsy                                            | 111,050<br>(95,515 - 129,891)        | 21,616<br>(14,555 - 31,487)    | 13,004<br>(10,348 - 16,224) | 54,163<br>(45,170 - 61,513)    | 13,102<br>(11,079 - 15,557)        | 9,165<br>(7,977 - 11,735)            |
| Multiple sclerosis                                  | 12,366<br>(9,212 - 19,028)           | --                             | --                          | 4,568<br>(3,282 - 6,772)       | 5,431<br>(4,117 - 8,804)           | 2,367<br>(1,781 - 3,549)             |
| Other neurological disorders                        | 54,646<br>(47,097 - 60,830)          | 5,598<br>(4,520 - 9,813)       | 2,353<br>(1,936 - 3,196)    | 12,504<br>(10,342 - 14,069)    | 17,787<br>(15,560 - 19,583)        | 16,403<br>(14,495 - 17,846)          |
| Mental and substance use disorders                  | 188,346<br>(157,200 - 242,290)       | 2,095<br>(1,264 - 2,925)       | 41<br>(34 - 50)             | 108,871<br>(89,849 - 133,958)  | 61,341<br>(51,177 - 86,620)        | 15,998<br>(13,355 - 20,479)          |
| Schizophrenia                                       | 22,824<br>(14,694 - 28,265)          | --                             | --                          | 11,157<br>(7,009 - 14,222)     | 7,386<br>(4,757 - 9,082)           | 4,282<br>(2,850 - 5,161)             |
| Alcohol use disorders                               | 111,911<br>(83,963 - 165,250)        | --                             | --                          | 57,792<br>(41,391 - 81,771)    | 45,943<br>(36,607 - 69,791)        | 8,176<br>(6,215 - 11,868)            |
| Drug use disorders                                  | 53,231<br>(47,750 - 64,113)          | 2,095<br>(1,264 - 2,925)       | --                          | 39,585<br>(34,371 - 48,012)    | 8,012<br>(7,254 - 10,388)          | 3,539<br>(3,140 - 4,221)             |
| Opioid use disorders                                | 17,983<br>(16,476 - 22,241)          | 699<br>(475 - 1,077)           | --                          | 13,113<br>(11,953 - 16,279)    | 2,886<br>(2,546 - 3,840)           | 1,285<br>(1,113 - 1,564)             |

**Web Table 25 - Global deaths with 95% UI by age, sex, and cause in 1990**

| Cause                                               | Both Sexes, All Ages                 | Both Sexes, 0-4 Years          | Both Sexes, 5-14 Years      | Both Sexes, 15-49 Years        | Both Sexes, 50-69 Years        | Both Sexes, 70-80 Years        |
|-----------------------------------------------------|--------------------------------------|--------------------------------|-----------------------------|--------------------------------|--------------------------------|--------------------------------|
| Cocaine use disorders                               | 2,443<br>(2,164 - 2,867)             | 102<br>(64 - 164)              | --                          | 1,820<br>(1,589 - 2,153)       | 318<br>(275 - 373)             | 203<br>(170 - 248)             |
| Amphetamine use disorders                           | 2,112<br>(1,865 - 2,488)             | 113<br>(70 - 184)              | --                          | 1,439<br>(1,237 - 1,700)       | 347<br>(299 - 411)             | 214<br>(179 - 255)             |
| Other drug use disorders                            | 30,693<br>(26,112 - 37,331)          | 1,181<br>(689 - 1,774)         | --                          | 23,214<br>(19,037 - 28,182)    | 4,461<br>(4,028 - 5,679)       | 1,837<br>(1,620 - 2,187)       |
| Eating disorders                                    | 379<br>(343 - 419)                   | --                             | 41<br>(34 - 50)             | 338<br>(302 - 376)             | --                             | --                             |
| Anorexia nervosa                                    | 379<br>(343 - 419)                   | --                             | 41<br>(34 - 50)             | 338<br>(302 - 376)             | --                             | --                             |
| Diabetes, urogenital, blood, and endocrine diseases | 1,569,396<br>(1,456,687 - 1,709,164) | 161,018<br>(101,637 - 262,519) | 47,418<br>(32,185 - 63,987) | 240,610<br>(220,827 - 261,313) | 491,345<br>(460,230 - 514,390) | 629,005<br>(591,164 - 661,844) |
| Diabetes mellitus                                   | 684,267<br>(653,244 - 711,475)       | 8,125<br>(6,667 - 10,256)      | 3,026<br>(2,366 - 4,020)    | 73,131<br>(68,312 - 77,844)    | 278,445<br>(262,793 - 292,838) | 321,540<br>(306,842 - 335,934) |
| Acute glomerulonephritis                            | 23,615<br>(13,710 - 33,390)          | 4,471<br>(1,309 - 8,262)       | 2,351<br>(1,232 - 3,473)    | 6,975<br>(4,474 - 9,657)       | 5,527<br>(3,080 - 8,210)       | 4,290<br>(2,468 - 6,703)       |
| Chronic kidney disease                              | 408,568<br>(363,844 - 433,380)       | 12,649<br>(10,030 - 14,481)    | 6,616<br>(5,584 - 7,289)    | 76,298<br>(64,627 - 81,809)    | 126,172<br>(113,931 - 135,894) | 186,833<br>(167,755 - 202,042) |
| Chronic kidney disease due to diabetes mellitus     | 46,325<br>(34,790 - 54,808)          | 244<br>(125 - 341)             | 154<br>(95 - 208)           | 5,086<br>(3,402 - 6,230)       | 15,331<br>(11,707 - 18,673)    | 25,509<br>(19,534 - 30,265)    |
| Chronic kidney disease due to hypertension          | 119,964<br>(91,573 - 144,818)        | 1,233<br>(549 - 1,978)         | 535<br>(301 - 812)          | 16,206<br>(11,065 - 19,959)    | 37,258<br>(27,509 - 44,994)    | 64,732<br>(49,943 - 78,524)    |
| Chronic kidney disease due to glomerulonephritis    | 99,027<br>(84,505 - 114,665)         | 7,091<br>(5,486 - 8,895)       | 3,718<br>(3,096 - 4,361)    | 29,867<br>(26,079 - 34,118)    | 30,264<br>(25,336 - 36,068)    | 28,087<br>(23,093 - 33,942)    |
| Chronic kidney disease due to other causes          | 143,253<br>(115,271 - 167,983)       | 4,081<br>(2,677 - 5,291)       | 2,209<br>(1,560 - 2,641)    | 25,139<br>(18,918 - 28,894)    | 43,319<br>(36,126 - 51,911)    | 68,506<br>(55,628 - 81,930)    |
| Urinary diseases and male infertility               | 151,393<br>(129,129 - 161,094)       | 10,552<br>(8,371 - 12,582)     | 3,075<br>(2,453 - 3,590)    | 24,417<br>(19,889 - 26,679)    | 42,375<br>(34,225 - 46,034)    | 70,973<br>(62,083 - 79,277)    |
| Interstitial nephritis and urinary tract infections | 109,922<br>(92,863 - 118,140)        | 8,058<br>(5,738 - 9,764)       | 2,070<br>(1,407 - 2,586)    | 17,093<br>(13,149 - 19,178)    | 29,324<br>(23,136 - 32,794)    | 53,377<br>(46,632 - 60,890)    |
| Urolithiasis                                        | 15,142<br>(11,094 - 18,661)          | --                             | 367<br>(265 - 556)          | 2,917<br>(2,279 - 3,644)       | 5,582<br>(3,915 - 7,100)       | 6,276<br>(4,353 - 7,822)       |
| Other urinary diseases                              | 26,330<br>(21,906 - 34,973)          | 2,494<br>(1,700 - 3,993)       | 638<br>(478 - 973)          | 4,408<br>(3,502 - 6,125)       | 7,470<br>(5,775 - 10,416)      | 11,320<br>(8,773 - 15,093)     |
| Gynecological diseases                              | 5,302<br>(3,932 - 7,023)             | --                             | --                          | 2,845<br>(2,138 - 3,853)       | 1,005<br>(768 - 1,248)         | 1,451<br>(975 - 2,128)         |
| Uterine fibroids                                    | 1,238<br>(895 - 1,677)               | --                             | --                          | 509<br>(366 - 707)             | 279<br>(214 - 350)             | 450<br>(302 - 663)             |
| Polycystic ovarian syndrome                         | 193<br>(147 - 260)                   | --                             | --                          | 187<br>(142 - 250)             | 6<br>(5 - 9)                   | --                             |
| Endometriosis                                       | 475<br>(360 - 632)                   | --                             | --                          | 449<br>(341 - 599)             | 25<br>(18 - 36)                | --                             |
| Genital prolapse                                    | 920<br>(680 - 1,229)                 | --                             | --                          | 373<br>(283 - 498)             | 179<br>(137 - 224)             | 368<br>(246 - 540)             |
| Other gynecological diseases                        | 2,476<br>(1,845 - 3,249)             | --                             | --                          | 1,327<br>(1,001 - 1,774)       | 515<br>(393 - 638)             | 633<br>(426 - 936)             |
| Hemoglobinopathies and hemolytic anemias            | 182,729<br>(91,544 - 302,527)        | 98,650<br>(39,983 - 193,671)   | 27,182<br>(12,246 - 44,022) | 33,237<br>(17,730 - 58,819)    | 12,342<br>(7,419 - 20,028)     | 11,317<br>(7,063 - 15,030)     |
| Thalassemias                                        | 36,190<br>(21,165 - 49,386)          | 19,251<br>(9,141 - 28,542)     | 6,165<br>(3,633 - 8,495)    | 10,325<br>(6,511 - 13,346)     | 405<br>(250 - 549)             | 44<br>(26 - 61)                |
| Sickle cell disorders                               | 112,887<br>(39,442 - 222,595)        | 71,422<br>(21,297 - 159,402)   | 19,316<br>(6,341 - 37,297)  | 17,504<br>(6,983 - 42,841)     | 4,372<br>(1,987 - 9,978)       | 272<br>(159 - 401)             |
| G6PD deficiency                                     | 3,386<br>(2,007 - 4,618)             | 1,486<br>(644 - 2,315)         | 431<br>(255 - 577)          | 1,005<br>(614 - 1,311)         | 374<br>(233 - 502)             | 90<br>(51 - 129)               |
| Other hemoglobinopathies and hemolytic anemias      | 30,265<br>(19,842 - 38,584)          | 6,491<br>(3,473 - 9,318)       | 1,270<br>(801 - 1,713)      | 4,403<br>(2,885 - 5,744)       | 7,191<br>(4,700 - 9,552)       | 10,910<br>(6,826 - 14,477)     |
| Endocrine, metabolic, blood, and immune disorders   | 113,522<br>(90,594 - 134,447)        | 26,570<br>(18,263 - 35,139)    | 5,168<br>(3,844 - 6,639)    | 23,706<br>(18,966 - 27,880)    | 25,477<br>(21,187 - 30,740)    | 32,601<br>(25,401 - 38,119)    |
| Musculoskeletal disorders                           | 65,864<br>(55,041 - 73,448)          | --                             | 3,796<br>(2,635 - 4,555)    | 18,895<br>(14,981 - 21,988)    | 21,810<br>(17,602 - 24,616)    | 21,363<br>(19,412 - 25,255)    |
| Rheumatoid arthritis                                | 27,794<br>(23,838 - 31,711)          | --                             | 939<br>(597 - 1,355)        | 4,073<br>(3,073 - 5,052)       | 10,387<br>(8,487 - 12,035)     | 12,395<br>(10,895 - 14,224)    |
| Other musculoskeletal disorders                     | 38,070<br>(30,293 - 44,089)          | --                             | 2,857<br>(1,804 - 3,592)    | 14,821<br>(11,365 - 17,679)    | 11,423<br>(9,029 - 13,429)     | 8,968<br>(8,019 - 11,260)      |
| Other non-communicable diseases                     | 831,692<br>(690,650 - 1,060,993)     | 679,272<br>(547,847 - 899,817) | 34,921<br>(29,258 - 42,896) | 56,548<br>(51,932 - 62,175)    | 24,439<br>(21,420 - 26,323)    | 36,512<br>(32,510 - 39,473)    |
| Congenital anomalies                                | 750,605<br>(611,803 - 969,698)       | 647,234<br>(518,328 - 857,236) | 33,298<br>(27,815 - 41,137) | 47,735<br>(43,368 - 53,280)    | 12,853<br>(9,567 - 14,511)     | 9,485<br>(6,697 - 10,706)      |
| Neural tube defects                                 | 151,302<br>(109,085 - 256,344)       | 140,660<br>(100,397 - 242,783) | 4,163<br>(2,748 - 6,601)    | 5,036<br>(3,530 - 7,454)       | 912<br>(625 - 1,277)           | 530<br>(281 - 766)             |
| Congenital heart anomalies                          | 366,150<br>(292,991 - 485,164)       | 311,638<br>(242,560 - 425,029) | 18,706<br>(14,981 - 23,176) | 24,082<br>(21,018 - 27,992)    | 6,470<br>(4,696 - 7,677)       | 5,254<br>(3,401 - 6,172)       |
| Cleft lip and cleft palate                          | 7,648<br>(4,177 - 11,453)            | 7,648<br>(4,177 - 11,453)      | --                          | --                             | --                             | --                             |
| Down syndrome                                       | 42,478<br>(16,406 - 72,987)          | 31,240<br>(10,083 - 57,455)    | 3,225<br>(1,309 - 5,312)    | 6,230<br>(3,594 - 9,282)       | 1,613<br>(1,111 - 2,231)       | 171<br>(113 - 240)             |
| Chromosomal unbalanced rearrangements               | 19,114<br>(8,543 - 41,175)           | 16,349<br>(7,062 - 36,945)     | 700<br>(299 - 1,459)        | 1,692<br>(857 - 2,881)         | 252<br>(138 - 367)             | 120<br>(68 - 168)              |
| Other congenital anomalies                          | 163,913<br>(119,899 - 301,931)       | 139,699<br>(98,951 - 270,816)  | 6,504<br>(4,623 - 12,086)   | 10,695<br>(8,486 - 13,836)     | 3,606<br>(2,795 - 4,509)       | 3,410<br>(2,696 - 3,991)       |

**Web Table 25 - Global deaths with 95% UI by age, sex, and cause in 1990**

| Cause                                           | Both Sexes, All Ages                 | Both Sexes, 0-4 Years          | Both Sexes, 5-14 Years         | Both Sexes, 15-49 Years              | Both Sexes, 50-69 Years        | Both Sexes, 70-80 Years        |
|-------------------------------------------------|--------------------------------------|--------------------------------|--------------------------------|--------------------------------------|--------------------------------|--------------------------------|
| Skin and subcutaneous diseases                  | 59,052<br>(54,086 - 63,086)          | 10,003<br>(7,340 - 12,865)     | 1,623<br>(1,339 - 1,896)       | 8,812<br>(8,047 - 9,527)             | 11,585<br>(10,665 - 12,779)    | 27,028<br>(24,820 - 29,695)    |
| Cellulitis                                      | 27,018<br>(18,986 - 34,101)          | 5,900<br>(4,136 - 7,801)       | 999<br>(704 - 1,281)           | 4,885<br>(3,356 - 6,474)             | 6,419<br>(4,531 - 8,158)       | 8,815<br>(5,817 - 11,584)      |
| Pyoderma                                        | 16,723<br>(11,628 - 23,106)          | 3,787<br>(2,250 - 6,212)       | 453<br>(244 - 718)             | 2,818<br>(1,674 - 4,034)             | 3,360<br>(2,254 - 4,653)       | 6,304<br>(5,010 - 7,584)       |
| Decubitus ulcer                                 | 13,653<br>(11,541 - 16,942)          | 125<br>(33 - 265)              | 111<br>(52 - 201)              | 789<br>(523 - 1,186)                 | 1,517<br>(1,176 - 2,117)       | 11,111<br>(9,619 - 13,478)     |
| Other skin and subcutaneous diseases            | 1,658<br>(1,233 - 2,192)             | 191<br>(69 - 452)              | 60<br>(33 - 107)               | 320<br>(220 - 442)                   | 289<br>(221 - 352)             | 798<br>(647 - 1,257)           |
| Sudden infant death syndrome                    | 22,035<br>(12,665 - 40,152)          | 22,035<br>(12,665 - 40,152)    | --                             | --                                   | --                             | --                             |
| Injuries                                        | 4,325,788<br>(4,095,712 - 4,524,017) | 766,145<br>(627,952 - 863,663) | 352,667<br>(326,488 - 375,829) | 2,034,010<br>(1,942,595 - 2,137,601) | 701,879<br>(667,767 - 751,682) | 471,087<br>(446,563 - 511,887) |
| Transport injuries                              | 1,149,989<br>(1,092,930 - 1,253,892) | 122,617<br>(104,722 - 147,188) | 102,380<br>(94,483 - 113,862)  | 646,079<br>(614,080 - 699,407)       | 191,950<br>(180,173 - 208,891) | 86,965<br>(80,978 - 94,796)    |
| Road injuries                                   | 1,058,371<br>(1,004,954 - 1,167,159) | 109,234<br>(92,818 - 132,699)  | 94,499<br>(87,318 - 105,867)   | 600,613<br>(570,802 - 653,144)       | 174,546<br>(164,627 - 191,191) | 79,478<br>(74,845 - 87,607)    |
| Pedestrian road injuries                        | 389,652<br>(339,637 - 471,999)       | 56,173<br>(44,503 - 74,966)    | 48,336<br>(42,200 - 57,261)    | 169,651<br>(141,690 - 210,773)       | 74,059<br>(64,342 - 87,541)    | 41,432<br>(37,207 - 47,512)    |
| Cyclist road injuries                           | 68,586<br>(58,483 - 83,324)          | 6,061<br>(4,554 - 8,124)       | 8,657<br>(7,307 - 10,819)      | 32,385<br>(26,827 - 38,892)          | 14,663<br>(12,377 - 17,770)    | 6,820<br>(5,796 - 8,121)       |
| Motorcyclist road injuries                      | 201,959<br>(169,271 - 236,433)       | 10,770<br>(7,466 - 14,578)     | 8,408<br>(6,470 - 10,633)      | 154,828<br>(130,051 - 182,065)       | 21,886<br>(17,694 - 26,651)    | 6,067<br>(4,563 - 7,256)       |
| Motor vehicle road injuries                     | 364,394<br>(324,415 - 409,112)       | 31,634<br>(25,374 - 39,371)    | 25,040<br>(21,234 - 29,012)    | 227,385<br>(201,953 - 253,836)       | 57,511<br>(49,967 - 64,688)    | 22,824<br>(19,560 - 26,043)    |
| Other road injuries                             | 33,779<br>(21,865 - 44,081)          | 4,596<br>(2,386 - 7,134)       | 4,057<br>(2,450 - 5,702)       | 16,364<br>(9,624 - 23,591)           | 6,426<br>(4,065 - 9,056)       | 2,335<br>(1,652 - 3,130)       |
| Other transport injuries                        | 91,619<br>(77,406 - 102,027)         | 13,382<br>(10,645 - 16,338)    | 7,880<br>(6,638 - 9,262)       | 45,466<br>(38,943 - 51,636)          | 17,403<br>(13,992 - 19,863)    | 7,487<br>(5,725 - 8,512)       |
| Unintentional injuries                          | 2,017,196<br>(1,848,602 - 2,165,725) | 601,237<br>(458,177 - 694,594) | 217,112<br>(191,466 - 238,667) | 639,898<br>(593,442 - 697,800)       | 276,153<br>(259,078 - 307,675) | 282,795<br>(265,512 - 317,399) |
| Falls                                           | 340,535<br>(311,652 - 411,482)       | 39,567<br>(28,737 - 55,894)    | 17,369<br>(14,768 - 21,172)    | 84,641<br>(73,824 - 103,523)         | 64,286<br>(58,185 - 80,737)    | 134,672<br>(119,351 - 165,654) |
| Drowning                                        | 544,889<br>(409,195 - 635,767)       | 214,975<br>(134,286 - 277,645) | 111,765<br>(83,879 - 130,006)  | 155,300<br>(128,140 - 176,723)       | 41,890<br>(35,496 - 48,779)    | 20,959<br>(17,555 - 24,728)    |
| Fire, heat, and hot substances                  | 299,625<br>(262,704 - 352,910)       | 69,453<br>(50,901 - 90,771)    | 24,198<br>(20,828 - 30,286)    | 133,330<br>(111,205 - 159,362)       | 40,242<br>(35,186 - 49,526)    | 32,401<br>(27,391 - 38,090)    |
| Poisonings                                      | 120,163<br>(104,087 - 168,476)       | 28,301<br>(21,379 - 44,797)    | 7,846<br>(6,449 - 11,343)      | 54,938<br>(47,883 - 74,264)          | 18,833<br>(16,354 - 26,891)    | 10,245<br>(8,695 - 14,459)     |
| Exposure to mechanical forces                   | 232,688<br>(186,251 - 273,880)       | 101,942<br>(53,082 - 141,587)  | 17,051<br>(14,604 - 20,797)    | 78,855<br>(71,695 - 94,713)          | 26,387<br>(23,740 - 30,954)    | 8,454<br>(7,555 - 10,002)      |
| Unintentional firearm injuries                  | 51,447<br>(44,475 - 60,025)          | 7,656<br>(5,958 - 10,052)      | 4,255<br>(3,438 - 5,357)       | 29,418<br>(24,625 - 35,669)          | 7,411<br>(5,750 - 9,952)       | 2,707<br>(2,128 - 3,558)       |
| Unintentional suffocation                       | 84,034<br>(26,926 - 124,589)         | 75,165<br>(21,751 - 114,369)   | 2,476<br>(1,411 - 3,671)       | 3,914<br>(2,586 - 5,118)             | 1,529<br>(987 - 1,897)         | 950<br>(670 - 1,263)           |
| Other exposure to mechanical forces             | 97,207<br>(88,845 - 119,871)         | 19,121<br>(13,173 - 27,190)    | 10,319<br>(8,421 - 13,595)     | 45,523<br>(41,572 - 55,836)          | 17,447<br>(15,444 - 21,111)    | 4,797<br>(4,191 - 5,897)       |
| Adverse effects of medical treatment            | 93,488<br>(77,195 - 110,214)         | 26,927<br>(17,869 - 35,930)    | 3,429<br>(2,438 - 4,154)       | 20,284<br>(16,163 - 25,025)          | 20,044<br>(16,348 - 26,122)    | 22,804<br>(18,633 - 28,982)    |
| Animal contact                                  | 95,492<br>(59,822 - 126,576)         | 17,601<br>(10,428 - 26,909)    | 18,935<br>(11,872 - 26,292)    | 32,950<br>(20,150 - 41,449)          | 18,857<br>(11,807 - 25,182)    | 7,149<br>(4,569 - 9,483)       |
| Venomous animal contact                         | 76,267<br>(47,473 - 104,650)         | 11,997<br>(7,245 - 20,731)     | 15,574<br>(9,853 - 22,019)     | 28,618<br>(16,907 - 36,406)          | 15,346<br>(9,482 - 20,381)     | 4,732<br>(2,850 - 6,193)       |
| Non-venomous animal contact                     | 19,225<br>(11,516 - 26,256)          | 5,604<br>(2,680 - 8,084)       | 3,360<br>(1,851 - 5,053)       | 4,332<br>(2,351 - 5,730)             | 3,511<br>(2,248 - 5,275)       | 2,418<br>(1,504 - 3,651)       |
| Foreign body                                    | 142,245<br>(99,549 - 211,626)        | 76,302<br>(47,314 - 117,686)   | 3,749<br>(2,557 - 5,836)       | 16,393<br>(11,107 - 23,546)          | 15,261<br>(10,146 - 21,579)    | 30,539<br>(21,828 - 44,847)    |
| Pulmonary aspiration and foreign body in airway | 139,751<br>(97,174 - 209,748)        | 75,560<br>(46,534 - 117,259)   | 3,539<br>(2,398 - 5,653)       | 15,780<br>(10,578 - 23,032)          | 14,737<br>(9,753 - 21,067)     | 30,134<br>(21,422 - 44,478)    |
| Foreign body in other body part                 | 2,494<br>(1,595 - 3,489)             | 741<br>(382 - 1,427)           | 210<br>(137 - 308)             | 613<br>(406 - 819)                   | 524<br>(322 - 699)             | 406<br>(299 - 514)             |
| Other unintentional injuries                    | 148,072<br>(119,852 - 162,774)       | 26,170<br>(16,920 - 30,565)    | 12,771<br>(9,709 - 14,518)     | 63,207<br>(54,766 - 71,537)          | 30,353<br>(24,202 - 34,285)    | 15,571<br>(10,643 - 17,966)    |
| Self-harm and interpersonal violence            | 1,052,754<br>(929,268 - 1,152,048)   | 23,600<br>(17,161 - 29,554)    | 24,563<br>(20,647 - 28,286)    | 701,928<br>(622,052 - 767,752)       | 207,796<br>(185,586 - 229,469) | 94,866<br>(81,973 - 103,627)   |
| Self-harm                                       | 712,022<br>(630,586 - 784,666)       | --                             | 11,765<br>(10,028 - 13,737)    | 450,207<br>(394,877 - 493,437)       | 166,302<br>(147,299 - 188,398) | 83,748<br>(70,701 - 92,147)    |
| Interpersonal violence                          | 340,731<br>(253,939 - 415,058)       | 23,600<br>(17,161 - 29,554)    | 12,798<br>(9,687 - 15,958)     | 251,721<br>(188,356 - 303,458)       | 41,494<br>(29,435 - 52,614)    | 11,118<br>(8,124 - 13,901)     |
| Assault by firearm                              | 127,619<br>(89,908 - 165,148)        | 3,095<br>(1,851 - 4,397)       | 2,782<br>(1,850 - 3,655)       | 105,209<br>(75,133 - 133,683)        | 14,002<br>(8,510 - 20,050)     | 2,531<br>(1,595 - 3,705)       |
| Assault by sharp object                         | 93,977<br>(65,091 - 127,801)         | 3,021<br>(1,418 - 4,472)       | 2,369<br>(1,323 - 3,123)       | 74,111<br>(51,314 - 103,438)         | 12,012<br>(7,637 - 16,802)     | 2,464<br>(1,621 - 3,362)       |
| Assault by other means                          | 119,136<br>(84,439 - 142,946)        | 17,484<br>(12,825 - 22,893)    | 7,648<br>(5,774 - 10,061)      | 72,402<br>(48,917 - 89,021)          | 15,480<br>(10,750 - 19,590)    | 6,123<br>(4,316 - 7,471)       |
| Forces of nature, war, and legal intervention   | 105,849<br>(77,214 - 170,678)        | 18,690<br>(18,223 - 20,460)    | 8,612<br>(6,409 - 14,072)      | 46,105<br>(30,622 - 81,662)          | 25,980<br>(17,301 - 44,977)    | 6,461<br>(4,133 - 10,997)      |
| Exposure to forces of nature                    | 33,421<br>(19,432 - 63,524)          | 4,845<br>(4,655 - 4,971)       | 2,647<br>(1,605 - 5,035)       | 13,564<br>(6,849 - 28,813)           | 9,628<br>(4,938 - 19,425)      | 2,737<br>(1,425 - 5,555)       |
| Collective violence and legal intervention      | 72,427<br>(54,729 - 106,528)         | 13,845<br>(13,549 - 15,703)    | 5,964<br>(4,614 - 8,737)       | 32,541<br>(22,548 - 52,627)          | 16,352<br>(11,357 - 25,594)    | 3,725<br>(2,569 - 5,698)       |

**Web Table 25 - Global deaths with 95% UI by age, sex, and cause in 1990**

| Cause                                                             | Males, All Ages                         | Males, 0-4 Years                     | Males, 5-14 Years              | Males, 15-49 Years                   | Males, 50-69 Years                   | Males, 70-80 Years                   |
|-------------------------------------------------------------------|-----------------------------------------|--------------------------------------|--------------------------------|--------------------------------------|--------------------------------------|--------------------------------------|
| All causes                                                        | 25,115,840<br>(24,527,882 - 25,642,431) | 6,385,499<br>(6,168,734 - 6,561,693) | 713,451<br>(689,506 - 734,225) | 4,366,652<br>(4,196,087 - 4,577,148) | 6,568,405<br>(6,317,361 - 6,789,477) | 7,081,833<br>(6,929,410 - 7,189,751) |
| Communicable, maternal, neonatal, and nutritional diseases        | 8,320,755<br>(7,955,226 - 8,628,283)    | 5,291,806<br>(5,002,568 - 5,504,459) | 342,953<br>(318,922 - 368,657) | 1,019,616<br>(958,437 - 1,097,024)   | 889,937<br>(833,308 - 968,966)       | 776,443<br>(726,645 - 833,752)       |
| HIV/AIDS and tuberculosis                                         | 1,260,574<br>(1,155,017 - 1,403,525)    | 60,605<br>(51,671 - 81,297)          | 19,085<br>(16,398 - 22,443)    | 517,837<br>(465,892 - 580,928)       | 443,850<br>(399,563 - 498,610)       | 219,197<br>(195,405 - 241,354)       |
| Tuberculosis                                                      | 1,055,787<br>(957,458 - 1,189,961)      | 42,877<br>(34,610 - 63,352)          | 18,252<br>(15,572 - 21,618)    | 370,972<br>(328,218 - 419,691)       | 410,851<br>(366,676 - 465,546)       | 212,835<br>(188,814 - 234,796)       |
| HIV/AIDS                                                          | 204,787<br>(162,747 - 264,318)          | 17,728<br>(16,275 - 19,344)          | 833<br>(648 - 1,008)           | 146,865<br>(113,087 - 194,645)       | 33,000<br>(25,976 - 42,636)          | 6,362<br>(5,042 - 8,003)             |
| HIV/AIDS resulting in mycobacterial infection                     | 21,200<br>(15,632 - 28,715)             | 1,822<br>(1,477 - 2,263)             | 79<br>(58 - 105)               | 15,086<br>(10,789 - 21,054)          | 3,523<br>(2,603 - 4,736)             | 689<br>(510 - 926)                   |
| HIV/AIDS resulting in other diseases                              | 183,587<br>(145,566 - 236,322)          | 15,906<br>(14,531 - 17,424)          | 754<br>(586 - 914)             | 131,779<br>(101,990 - 174,988)       | 29,477<br>(23,242 - 38,076)          | 5,673<br>(4,505 - 7,111)             |
| Diarrhea, lower respiratory, and other common infectious diseases | 3,934,081<br>(3,666,019 - 4,208,108)    | 2,602,110<br>(2,374,304 - 2,810,014) | 225,587<br>(202,622 - 251,184) | 326,007<br>(294,316 - 366,483)       | 318,668<br>(293,404 - 356,632)       | 461,709<br>(414,470 - 501,584)       |
| Diarrheal diseases                                                | 1,243,709<br>(1,133,670 - 1,353,719)    | 818,375<br>(718,523 - 917,958)       | 66,117<br>(56,079 - 77,278)    | 108,588<br>(96,288 - 120,271)        | 120,164<br>(106,508 - 134,648)       | 130,465<br>(117,849 - 142,362)       |
| Intestinal infectious diseases                                    | 139,158<br>(79,594 - 228,824)           | 43,679<br>(24,781 - 72,626)          | 40,346<br>(22,883 - 65,259)    | 47,012<br>(25,284 - 78,578)          | 5,944<br>(3,263 - 9,996)             | 2,178<br>(1,323 - 3,412)             |
| Typhoid fever                                                     | 96,289<br>(50,654 - 163,082)            | 27,584<br>(14,192 - 48,171)          | 29,035<br>(15,808 - 48,801)    | 34,161<br>(17,693 - 59,117)          | 4,089<br>(2,020 - 7,185)             | 1,419<br>(758 - 2,423)               |
| Paratyphoid fever                                                 | 33,871<br>(17,878 - 57,629)             | 11,231<br>(5,471 - 20,596)           | 10,391<br>(5,530 - 18,088)     | 10,671<br>(5,284 - 18,806)           | 1,187<br>(566 - 2,238)               | 391<br>(199 - 673)                   |
| Other intestinal infectious diseases                              | 8,998<br>(7,867 - 10,240)               | 4,864<br>(4,000 - 5,818)             | 920<br>(773 - 1,100)           | 2,180<br>(1,922 - 2,467)             | 667<br>(579 - 761)                   | 368<br>(316 - 423)                   |
| Lower respiratory infections                                      | 1,712,651<br>(1,585,585 - 1,858,521)    | 1,099,551<br>(981,814 - 1,207,178)   | 52,714<br>(43,788 - 61,085)    | 102,611<br>(88,914 - 118,425)        | 151,005<br>(134,473 - 178,045)       | 306,770<br>(261,737 - 350,578)       |
| Upper respiratory infections                                      | 2,476<br>(2,031 - 3,062)                | 865<br>(568 - 1,356)                 | 112<br>(62 - 218)              | 555<br>(420 - 761)                   | 547<br>(375 - 850)                   | 397<br>(282 - 593)                   |
| Otitis media                                                      | 2,168<br>(1,866 - 2,371)                | 874<br>(719 - 1,038)                 | 311<br>(259 - 354)             | 525<br>(461 - 571)                   | 276<br>(243 - 304)                   | 183<br>(161 - 202)                   |
| Meningitis                                                        | 249,357<br>(195,439 - 333,456)          | 162,876<br>(107,785 - 243,902)       | 21,939<br>(18,379 - 25,873)    | 36,934<br>(31,990 - 41,287)          | 18,826<br>(16,360 - 21,279)          | 8,781<br>(7,644 - 9,855)             |
| Pneumococcal meningitis                                           | 59,687<br>(48,028 - 77,350)             | 33,285<br>(21,669 - 49,589)          | 6,863<br>(5,436 - 8,427)       | 11,319<br>(9,434 - 13,236)           | 5,555<br>(4,421 - 6,978)             | 2,665<br>(2,218 - 3,207)             |
| H influenzae type B meningitis                                    | 63,229<br>(45,613 - 88,806)             | 50,700<br>(32,931 - 75,971)          | 5,215<br>(4,155 - 6,471)       | 4,633<br>(3,758 - 5,626)             | 1,851<br>(1,423 - 2,279)             | 829<br>(667 - 1,006)                 |
| Meningococcal meningitis                                          | 48,441<br>(37,583 - 65,061)             | 30,680<br>(19,671 - 47,141)          | 4,124<br>(3,353 - 5,005)       | 7,549<br>(6,381 - 8,839)             | 4,089<br>(3,333 - 5,019)             | 1,998<br>(1,593 - 2,378)             |
| Other meningitis                                                  | 78,000<br>(62,611 - 103,626)            | 48,211<br>(33,082 - 73,421)          | 5,737<br>(4,539 - 6,992)       | 13,433<br>(11,403 - 15,638)          | 7,331<br>(5,829 - 8,853)             | 3,288<br>(2,623 - 3,918)             |
| Encephalitis                                                      | 46,583<br>(31,635 - 59,798)             | 25,301<br>(14,152 - 36,880)          | 6,028<br>(3,249 - 8,169)       | 8,933<br>(5,708 - 10,836)            | 4,312<br>(2,795 - 5,340)             | 2,009<br>(1,212 - 2,437)             |
| Diphtheria                                                        | 4,005<br>(1,613 - 10,601)               | 3,121<br>(971 - 9,480)               | 584<br>(188 - 1,771)           | 227<br>(128 - 435)                   | 72<br>(26 - 249)                     | --                                   |
| Whooping cough                                                    | 63,175<br>(24,391 - 140,931)            | 59,385<br>(22,937 - 132,688)         | 2,982<br>(1,097 - 6,827)       | 718<br>(290 - 1,702)                 | 89<br>(38 - 209)                     | --                                   |
| Tetanus                                                           | 194,374<br>(159,516 - 294,858)          | 149,052<br>(119,944 - 230,224)       | 4,699<br>(2,452 - 10,368)      | 13,953<br>(8,501 - 25,665)           | 16,831<br>(9,255 - 29,278)           | 9,838<br>(4,678 - 18,133)            |
| Measles                                                           | 272,110<br>(149,117 - 443,663)          | 237,554<br>(130,450 - 386,070)       | 29,413<br>(15,674 - 48,402)    | 4,957<br>(2,223 - 11,663)            | 186<br>(80 - 459)                    | --                                   |
| Varicella and herpes zoster                                       | 4,315<br>(3,232 - 6,148)                | 1,477<br>(847 - 2,860)               | 341<br>(177 - 718)             | 992<br>(664 - 1,504)                 | 417<br>(264 - 726)                   | 1,088<br>(626 - 2,261)               |
| Neglected tropical diseases and malaria                           | 561,846<br>(501,902 - 627,140)          | 324,513<br>(264,495 - 382,852)       | 63,996<br>(56,378 - 71,889)    | 93,506<br>(80,838 - 108,409)         | 58,796<br>(51,108 - 69,860)          | 21,035<br>(17,967 - 28,516)          |
| Malaria                                                           | 448,011<br>(390,379 - 507,292)          | 292,947<br>(234,503 - 351,688)       | 43,170<br>(36,058 - 50,594)    | 57,671<br>(47,364 - 70,718)          | 40,965<br>(34,196 - 49,176)          | 13,258<br>(10,979 - 16,076)          |
| Chagas disease                                                    | 7,447<br>(1,526 - 24,427)               | 13<br>(2 - 44)                       | 17<br>(3 - 52)                 | 1,802<br>(340 - 5,108)               | 3,495<br>(643 - 11,110)              | 2,121<br>(394 - 8,332)               |
| Leishmaniasis                                                     | 32,369<br>(27,091 - 38,298)             | 12,227<br>(8,992 - 15,883)           | 7,754<br>(5,817 - 9,875)       | 10,023<br>(7,927 - 12,320)           | 1,861<br>(1,468 - 2,300)             | 504<br>(404 - 602)                   |
| Visceral leishmaniasis                                            | 32,369<br>(27,091 - 38,298)             | 12,227<br>(8,992 - 15,883)           | 7,754<br>(5,817 - 9,875)       | 10,023<br>(7,927 - 12,320)           | 1,861<br>(1,468 - 2,300)             | 504<br>(404 - 602)                   |
| African trypanosomiasis                                           | 11,316<br>(5,666 - 18,926)              | 828<br>(377 - 1,474)                 | 1,277<br>(615 - 2,169)         | 7,305<br>(3,704 - 12,042)            | 1,603<br>(764 - 2,721)               | 305<br>(142 - 530)                   |
| Schistosomiasis                                                   | 10,075<br>(8,403 - 12,093)              | 194<br>(144 - 265)                   | 361<br>(291 - 449)             | 3,807<br>(3,147 - 4,568)             | 3,937<br>(3,170 - 4,887)             | 1,776<br>(1,398 - 2,254)             |
| Cysticercosis                                                     | 462<br>(413 - 555)                      | 23<br>(15 - 38)                      | 27<br>(22 - 37)                | 281<br>(251 - 336)                   | 103<br>(92 - 121)                    | 28<br>(25 - 32)                      |
| Cystic echinococcosis                                             | 1,831<br>(1,724 - 1,946)                | 227<br>(188 - 274)                   | 311<br>(284 - 343)             | 746<br>(691 - 808)                   | 386<br>(361 - 411)                   | 160<br>(151 - 169)                   |
| Dengue                                                            | 4,402<br>(2,400 - 5,949)                | 2,350<br>(937 - 3,604)               | 1,142<br>(618 - 1,464)         | 604<br>(437 - 728)                   | 195<br>(149 - 250)                   | 111<br>(77 - 132)                    |
| Yellow fever                                                      | 1,556<br>(1,264 - 1,875)                | 132<br>(75 - 224)                    | 281<br>(172 - 412)             | 907<br>(677 - 1,151)                 | 173<br>(104 - 268)                   | 62<br>(26 - 123)                     |
| Rabies                                                            | 23,544<br>(15,127 - 33,666)             | 3,285<br>(1,859 - 6,347)             | 7,716<br>(4,396 - 10,595)      | 7,182<br>(4,742 - 10,043)            | 4,336<br>(2,675 - 5,730)             | 1,026<br>(631 - 1,377)               |
| Intestinal nematode infections                                    | 4,252<br>(3,638 - 4,921)                | 3,199<br>(2,648 - 3,801)             | 598<br>(503 - 700)             | 247<br>(194 - 308)                   | 120<br>(87 - 156)                    | 88<br>(62 - 121)                     |



**Web Table 25 - Global deaths with 95% UI by age, sex, and cause in 1990**

| Cause                                                            | Males, All Ages                         | Males, 0-4 Years                     | Males, 5-14 Years              | Males, 15-49 Years                   | Males, 50-69 Years                   | Males, 70-80 Years                   |
|------------------------------------------------------------------|-----------------------------------------|--------------------------------------|--------------------------------|--------------------------------------|--------------------------------------|--------------------------------------|
| Ascariasis                                                       | 4,252<br>(3,638 - 4,921)                | 3,199<br>(2,648 - 3,801)             | 598<br>(503 - 700)             | 247<br>(194 - 308)                   | 120<br>(87 - 156)                    | 88<br>(62 - 121)                     |
| Other neglected tropical diseases                                | 16,581<br>(11,429 - 22,712)             | 9,087<br>(5,164 - 14,610)            | 1,341<br>(905 - 1,796)         | 2,932<br>(2,116 - 3,748)             | 1,624<br>(1,247 - 1,963)             | 1,596<br>(1,054 - 2,280)             |
| Maternal disorders                                               | --                                      | --                                   | --                             | --                                   | --                                   | --                                   |
| Maternal hemorrhage                                              | --                                      | --                                   | --                             | --                                   | --                                   | --                                   |
| Maternal sepsis and other maternal infections                    | --                                      | --                                   | --                             | --                                   | --                                   | --                                   |
| Maternal hypertensive disorders                                  | --                                      | --                                   | --                             | --                                   | --                                   | --                                   |
| Maternal obstructed labor                                        | --                                      | --                                   | --                             | --                                   | --                                   | --                                   |
| Maternal abortive outcome                                        | --                                      | --                                   | --                             | --                                   | --                                   | --                                   |
| Indirect maternal deaths                                         | --                                      | --                                   | --                             | --                                   | --                                   | --                                   |
| Late maternal deaths                                             | --                                      | --                                   | --                             | --                                   | --                                   | --                                   |
| Maternal deaths aggravated by HIV/AIDS                           | --                                      | --                                   | --                             | --                                   | --                                   | --                                   |
| Other maternal disorders                                         | --                                      | --                                   | --                             | --                                   | --                                   | --                                   |
| Neonatal disorders                                               | 1,931,217<br>(1,820,223 - 2,010,224)    | 1,931,217<br>(1,820,223 - 2,010,224) | --                             | --                                   | --                                   | --                                   |
| Neonatal preterm birth complications                             | 877,740<br>(645,338 - 1,090,426)        | 877,740<br>(645,338 - 1,090,426)     | --                             | --                                   | --                                   | --                                   |
| Neonatal encephalopathy due to birth asphyxia and trauma         | 489,234<br>(344,910 - 646,633)          | 489,234<br>(344,910 - 646,633)       | --                             | --                                   | --                                   | --                                   |
| Neonatal sepsis and other neonatal infections                    | 210,231<br>(89,437 - 346,136)           | 210,231<br>(89,437 - 346,136)        | --                             | --                                   | --                                   | --                                   |
| Hemolytic disease and other neonatal jaundice                    | 35,944<br>(19,254 - 58,890)             | 35,944<br>(19,254 - 58,890)          | --                             | --                                   | --                                   | --                                   |
| Other neonatal disorders                                         | 318,069<br>(226,573 - 487,706)          | 318,069<br>(226,573 - 487,706)       | --                             | --                                   | --                                   | --                                   |
| Nutritional deficiencies                                         | 356,783<br>(250,012 - 500,990)          | 216,053<br>(148,075 - 302,893)       | 15,882<br>(10,471 - 23,532)    | 35,689<br>(23,519 - 51,765)          | 33,894<br>(22,672 - 52,661)          | 55,265<br>(38,524 - 82,699)          |
| Protein-energy malnutrition                                      | 261,195<br>(180,261 - 381,132)          | 181,777<br>(126,842 - 265,778)       | 10,809<br>(6,622 - 16,326)     | 17,329<br>(9,450 - 27,834)           | 19,021<br>(11,398 - 31,184)          | 32,258<br>(18,538 - 50,468)          |
| Iodine deficiency                                                | 978<br>(509 - 1,921)                    | 399<br>(135 - 1,106)                 | 66<br>(27 - 161)               | 207<br>(92 - 462)                    | 186<br>(71 - 528)                    | 119<br>(49 - 287)                    |
| Iron-deficiency anemia                                           | 77,376<br>(39,461 - 139,681)            | 27,424<br>(8,219 - 64,867)           | 4,358<br>(1,875 - 7,580)       | 15,517<br>(7,808 - 24,307)           | 12,751<br>(7,234 - 22,756)           | 17,326<br>(9,367 - 32,479)           |
| Other nutritional deficiencies                                   | 17,234<br>(9,164 - 33,451)              | 6,453<br>(2,334 - 15,890)            | 648<br>(309 - 1,334)           | 2,635<br>(1,323 - 4,858)             | 1,936<br>(924 - 3,637)               | 5,562<br>(2,441 - 10,562)            |
| Other communicable, maternal, neonatal, and nutritional diseases | 276,253<br>(223,435 - 345,373)          | 157,308<br>(109,304 - 221,129)       | 18,403<br>(14,826 - 23,113)    | 46,577<br>(41,427 - 52,322)          | 34,728<br>(29,127 - 41,769)          | 19,238<br>(15,350 - 24,578)          |
| Sexually transmitted diseases excluding HIV                      | 124,707<br>(73,899 - 192,856)           | 110,405<br>(62,603 - 174,290)        | 7,795<br>(4,549 - 12,174)      | 2,646<br>(1,888 - 3,612)             | 2,153<br>(1,419 - 2,949)             | 1,708<br>(1,010 - 2,456)             |
| Syphilis                                                         | 122,472<br>(71,436 - 190,600)           | 110,405<br>(62,603 - 174,290)        | 7,646<br>(4,395 - 12,031)      | 1,426<br>(1,020 - 1,940)             | 1,570<br>(1,033 - 2,146)             | 1,425<br>(840 - 2,050)               |
| Chlamydial infection                                             | --                                      | --                                   | --                             | --                                   | --                                   | --                                   |
| Gonococcal infection                                             | 1,318<br>(927 - 1,753)                  | --                                   | 76<br>(48 - 142)               | 670<br>(477 - 918)                   | 369<br>(244 - 505)                   | 202<br>(120 - 290)                   |
| Other sexually transmitted diseases                              | 918<br>(660 - 1,241)                    | --                                   | 74<br>(47 - 138)               | 550<br>(392 - 754)                   | 214<br>(141 - 291)                   | 80<br>(48 - 114)                     |
| Hepatitis                                                        | 88,784<br>(81,724 - 96,293)             | 21,629<br>(17,260 - 26,427)          | 6,578<br>(5,672 - 7,586)       | 33,344<br>(29,878 - 37,446)          | 19,246<br>(17,172 - 21,466)          | 7,987<br>(7,209 - 8,849)             |
| Acute hepatitis A                                                | 10,535<br>(3,337 - 19,901)              | 6,984<br>(2,160 - 12,978)            | 1,320<br>(423 - 2,505)         | 1,812<br>(504 - 3,857)               | 347<br>(93 - 795)                    | 72<br>(19 - 174)                     |
| Acute hepatitis B                                                | 51,289<br>(39,198 - 63,149)             | 12,533<br>(7,543 - 17,803)           | 1,652<br>(954 - 2,508)         | 14,632<br>(9,743 - 20,213)           | 15,330<br>(12,518 - 17,790)          | 7,142<br>(6,234 - 8,018)             |
| Acute hepatitis C                                                | 1,368<br>(270 - 3,284)                  | --                                   | 148<br>(27 - 373)              | 640<br>(122 - 1,584)                 | 416<br>(80 - 1,006)                  | 163<br>(32 - 397)                    |
| Acute hepatitis E                                                | 25,592<br>(17,948 - 34,996)             | 2,111<br>(917 - 4,015)               | 3,458<br>(2,449 - 4,577)       | 16,260<br>(11,566 - 21,429)          | 3,153<br>(1,646 - 5,237)             | 609<br>(277 - 1,138)                 |
| Other infectious diseases                                        | 62,762<br>(43,509 - 83,574)             | 25,275<br>(16,974 - 36,134)          | 4,029<br>(2,551 - 5,734)       | 10,587<br>(6,889 - 13,933)           | 13,329<br>(8,415 - 20,572)           | 9,543<br>(6,240 - 15,144)            |
| Non-communicable diseases                                        | 13,997,004<br>(13,492,651 - 14,487,832) | 666,934<br>(561,100 - 880,234)       | 153,380<br>(136,920 - 173,370) | 1,885,070<br>(1,772,118 - 2,004,866) | 5,213,276<br>(4,985,295 - 5,404,242) | 6,078,344<br>(5,926,088 - 6,185,014) |
| Neoplasms                                                        | 3,154,963<br>(3,024,074 - 3,251,129)    | 38,551<br>(31,892 - 51,917)          | 34,228<br>(30,002 - 38,340)    | 462,450<br>(430,725 - 498,994)       | 1,493,250<br>(1,423,935 - 1,544,470) | 1,126,485<br>(1,085,364 - 1,162,518) |
| Esophageal cancer                                                | 198,563<br>(162,749 - 231,184)          | --                                   | --                             | 20,057<br>(15,553 - 23,860)          | 112,929<br>(91,761 - 132,219)        | 65,578<br>(53,059 - 77,659)          |
| Stomach cancer                                                   | 462,328<br>(435,511 - 481,039)          | --                                   | --                             | 54,614<br>(50,652 - 59,550)          | 231,890<br>(216,084 - 243,797)       | 175,824<br>(167,239 - 182,936)       |
| Liver cancer                                                     | 347,126<br>(316,854 - 374,702)          | --                                   | 1,186<br>(998 - 1,467)         | 89,206<br>(79,499 - 102,472)         | 177,082<br>(159,589 - 192,622)       | 79,652<br>(72,560 - 88,148)          |

**Web Table 25 - Global deaths with 95% UI by age, sex, and cause in 1990**

| Cause                                | Males, All Ages                      | Males, 0-4 Years            | Males, 5-14 Years           | Males, 15-49 Years             | Males, 50-69 Years                   | Males, 70-80 Years                   |
|--------------------------------------|--------------------------------------|-----------------------------|-----------------------------|--------------------------------|--------------------------------------|--------------------------------------|
| Liver cancer due to hepatitis B      | 150,569<br>(134,949 - 164,564)       | --                          | 446<br>(368 - 561)          | 48,050<br>(42,340 - 55,735)    | 77,259<br>(68,598 - 84,951)          | 24,814<br>(22,346 - 27,384)          |
| Liver cancer due to hepatitis C      | 55,842<br>(49,419 - 62,746)          | --                          | 42<br>(33 - 53)             | 9,402<br>(8,096 - 11,104)      | 30,014<br>(26,156 - 33,789)          | 16,384<br>(14,375 - 19,135)          |
| Liver cancer due to alcohol use      | 89,097<br>(80,938 - 98,252)          | --                          | --                          | 13,364<br>(11,872 - 15,238)    | 45,980<br>(41,035 - 50,770)          | 29,753<br>(26,582 - 33,783)          |
| Liver cancer due to other causes     | 51,619<br>(46,359 - 57,707)          | --                          | 698<br>(581 - 857)          | 18,390<br>(16,160 - 21,398)    | 23,829<br>(20,963 - 26,740)          | 8,701<br>(7,612 - 9,785)             |
| Larynx cancer                        | 64,615<br>(50,668 - 75,283)          | --                          | --                          | 8,178<br>(5,811 - 9,177)       | 37,281<br>(28,968 - 43,448)          | 19,156<br>(15,309 - 23,117)          |
| Tracheal, bronchus and lung cancer   | 764,452<br>(736,195 - 784,607)       | --                          | --                          | 67,406<br>(63,255 - 71,822)    | 423,692<br>(406,610 - 436,892)       | 273,353<br>(263,282 - 280,696)       |
| Breast cancer                        | 5,011<br>(3,426 - 6,326)             | --                          | --                          | 1,057<br>(714 - 1,216)         | 2,190<br>(1,489 - 2,689)             | 1,765<br>(1,147 - 2,418)             |
| Cervical cancer                      | --                                   | --                          | --                          | --                             | --                                   | --                                   |
| Uterine cancer                       | --                                   | --                          | --                          | --                             | --                                   | --                                   |
| Prostate cancer                      | 157,054<br>(123,987 - 193,133)       | --                          | --                          | 1,176<br>(889 - 1,427)         | 35,428<br>(27,885 - 44,546)          | 120,450<br>(93,446 - 149,167)        |
| Colon and rectum cancer              | 244,548<br>(236,665 - 250,368)       | --                          | --                          | 28,695<br>(27,043 - 30,621)    | 105,133<br>(101,508 - 108,379)       | 110,719<br>(107,028 - 113,635)       |
| Lip and oral cavity cancer           | 54,514<br>(48,064 - 66,258)          | --                          | --                          | 10,336<br>(8,925 - 13,080)     | 28,254<br>(25,116 - 33,906)          | 15,924<br>(13,844 - 19,946)          |
| Nasopharynx cancer                   | 34,263<br>(31,018 - 37,503)          | --                          | 468<br>(338 - 669)          | 11,843<br>(10,487 - 13,503)    | 16,923<br>(15,090 - 18,758)          | 5,028<br>(4,485 - 5,549)             |
| Other pharynx cancer                 | 38,621<br>(33,632 - 43,645)          | --                          | --                          | 6,204<br>(5,182 - 6,939)       | 23,731<br>(20,896 - 26,954)          | 8,686<br>(7,492 - 9,723)             |
| Gallbladder and biliary tract cancer | 41,373<br>(34,870 - 47,497)          | --                          | --                          | 3,586<br>(3,007 - 4,051)       | 18,340<br>(15,370 - 21,119)          | 19,447<br>(16,131 - 22,838)          |
| Pancreatic cancer                    | 98,457<br>(95,503 - 100,745)         | --                          | --                          | 10,650<br>(10,119 - 11,228)    | 49,139<br>(47,468 - 50,479)          | 38,668<br>(37,509 - 39,699)          |
| Malignant skin melanoma              | 19,984<br>(13,124 - 30,714)          | --                          | --                          | 5,252<br>(3,557 - 7,759)       | 8,196<br>(5,302 - 13,065)            | 6,536<br>(4,227 - 9,834)             |
| Non-melanoma skin cancer             | 13,253<br>(9,964 - 17,117)           | --                          | --                          | 2,151<br>(1,650 - 3,132)       | 4,421<br>(3,272 - 5,701)             | 6,681<br>(4,941 - 8,641)             |
| Ovarian cancer                       | --                                   | --                          | --                          | --                             | --                                   | --                                   |
| Testicular cancer                    | 6,961<br>(5,362 - 8,241)             | --                          | --                          | 4,759<br>(3,730 - 5,780)       | 1,348<br>(990 - 1,578)               | 854<br>(603 - 994)                   |
| Kidney cancer                        | 45,874<br>(44,339 - 47,420)          | 1,022<br>(670 - 1,494)      | 445<br>(375 - 523)          | 5,231<br>(4,914 - 5,578)       | 24,178<br>(23,126 - 25,265)          | 14,998<br>(14,379 - 15,733)          |
| Bladder cancer                       | 96,105<br>(85,040 - 102,024)         | --                          | --                          | 4,833<br>(4,001 - 5,265)       | 39,058<br>(34,331 - 41,468)          | 52,215<br>(45,895 - 55,844)          |
| Brain and nervous system cancer      | 75,958<br>(59,177 - 93,303)          | 3,020<br>(1,776 - 5,119)    | 5,278<br>(3,726 - 6,712)    | 24,147<br>(18,373 - 30,180)    | 30,668<br>(24,658 - 37,701)          | 12,845<br>(10,462 - 15,378)          |
| Thyroid cancer                       | 7,685<br>(6,728 - 8,495)             | --                          | 47<br>(34 - 58)             | 1,229<br>(1,042 - 1,362)       | 3,738<br>(3,237 - 4,133)             | 2,671<br>(2,340 - 2,992)             |
| Mesothelioma                         | 9,782<br>(8,579 - 12,669)            | --                          | --                          | 1,118<br>(927 - 1,246)         | 4,981<br>(4,234 - 6,225)             | 3,683<br>(3,152 - 5,374)             |
| Hodgkin lymphoma                     | 17,562<br>(12,557 - 19,995)          | 1,833<br>(1,096 - 3,096)    | 1,101<br>(720 - 1,438)      | 7,544<br>(5,409 - 8,813)       | 4,599<br>(3,247 - 5,163)             | 2,484<br>(1,862 - 2,817)             |
| Non-Hodgkin lymphoma                 | 76,260<br>(64,826 - 92,624)          | 2,879<br>(1,862 - 4,199)    | 3,717<br>(2,580 - 4,516)    | 19,037<br>(15,181 - 21,752)    | 28,289<br>(23,879 - 34,782)          | 22,339<br>(19,025 - 28,982)          |
| Multiple myeloma                     | 23,098<br>(17,786 - 31,368)          | --                          | --                          | 2,348<br>(1,871 - 3,012)       | 10,408<br>(7,912 - 13,943)           | 10,342<br>(7,592 - 14,784)           |
| Leukemia                             | 122,059<br>(116,214 - 128,838)       | 11,428<br>(9,024 - 14,859)  | 14,117<br>(12,697 - 15,870) | 41,321<br>(37,993 - 45,111)    | 29,342<br>(28,029 - 30,603)          | 25,850<br>(24,942 - 26,656)          |
| Other neoplasms                      | 129,457<br>(118,930 - 151,437)       | 18,369<br>(14,140 - 29,875) | 7,867<br>(6,554 - 11,012)   | 30,470<br>(27,559 - 34,155)    | 42,012<br>(37,712 - 46,914)          | 30,738<br>(28,251 - 37,377)          |
| Cardiovascular diseases              | 5,977,292<br>(5,753,060 - 6,145,982) | 73,607<br>(65,856 - 82,024) | 29,112<br>(26,484 - 31,867) | 678,042<br>(637,589 - 719,947) | 2,250,312<br>(2,143,299 - 2,334,341) | 2,946,219<br>(2,854,569 - 3,013,917) |
| Rheumatic heart disease              | 153,631<br>(112,841 - 208,567)       | 4,026<br>(2,676 - 5,992)    | 6,009<br>(4,237 - 7,859)    | 45,401<br>(31,210 - 58,098)    | 56,086<br>(41,433 - 80,252)          | 42,108<br>(30,958 - 58,996)          |
| Ischemic heart disease               | 2,944,688<br>(2,644,461 - 3,185,490) | 10,732<br>(8,713 - 13,497)  | 5,684<br>(4,716 - 7,150)    | 330,258<br>(289,615 - 365,039) | 1,178,932<br>(1,067,193 - 1,273,947) | 1,419,082<br>(1,289,870 - 1,543,566) |
| Cerebrovascular disease              | 2,111,134<br>(1,862,571 - 2,354,554) | 20,907<br>(17,102 - 26,874) | 10,511<br>(8,728 - 12,742)  | 195,258<br>(165,606 - 228,382) | 749,990<br>(654,702 - 847,394)       | 1,134,467<br>(998,733 - 1,266,010)   |
| Ischemic stroke                      | 930,916<br>(759,613 - 1,077,231)     | 2,268<br>(1,039 - 4,645)    | 1,242<br>(700 - 2,265)      | 29,017<br>(19,287 - 38,277)    | 263,150<br>(198,856 - 322,002)       | 635,239<br>(528,677 - 733,411)       |
| Hemorrhagic stroke                   | 1,180,217<br>(995,494 - 1,375,014)   | 18,639<br>(14,930 - 24,135) | 9,269<br>(7,684 - 11,342)   | 166,241<br>(140,967 - 196,202) | 486,840<br>(408,409 - 571,625)       | 499,228<br>(403,901 - 593,246)       |
| Hypertensive heart disease           | 271,835<br>(200,737 - 398,906)       | 1,509<br>(614 - 2,488)      | 553<br>(291 - 757)          | 27,541<br>(19,842 - 39,904)    | 100,269<br>(74,920 - 147,422)        | 141,964<br>(104,272 - 214,659)       |
| Cardiomyopathy and myocarditis       | 162,954<br>(126,011 - 204,040)       | 14,518<br>(6,253 - 20,325)  | 2,819<br>(1,454 - 3,823)    | 34,687<br>(27,198 - 44,884)    | 57,295<br>(43,334 - 74,835)          | 53,634<br>(38,808 - 66,050)          |
| Atrial fibrillation and flutter      | 10,641<br>(9,414 - 11,837)           | --                          | --                          | 217<br>(184 - 242)             | 1,899<br>(1,668 - 2,141)             | 8,525<br>(7,447 - 9,558)             |
| Aortic aneurysm                      | 64,962<br>(51,081 - 72,821)          | --                          | --                          | 5,116<br>(3,981 - 5,980)       | 24,055<br>(18,933 - 27,290)          | 35,791<br>(29,229 - 39,855)          |

**Web Table 25 - Global deaths with 95% UI by age, sex, and cause in 1990**

| Cause                                               | Males, All Ages                      | Males, 0-4 Years            | Males, 5-14 Years           | Males, 15-49 Years             | Males, 50-69 Years             | Males, 70-80 Years                 |
|-----------------------------------------------------|--------------------------------------|-----------------------------|-----------------------------|--------------------------------|--------------------------------|------------------------------------|
| Peripheral vascular disease                         | 8,083<br>(7,249 - 8,894)             | --                          | --                          | 188<br>(159 - 216)             | 2,141<br>(1,896 - 2,418)       | 5,754<br>(5,145 - 6,337)           |
| Endocarditis                                        | 22,882<br>(15,789 - 31,658)          | 2,024<br>(1,354 - 3,098)    | 408<br>(283 - 608)          | 5,763<br>(3,933 - 7,967)       | 7,350<br>(5,019 - 10,385)      | 7,338<br>(4,843 - 10,209)          |
| Other cardiovascular and circulatory diseases       | 226,483<br>(180,680 - 271,773)       | 19,891<br>(15,522 - 27,384) | 3,128<br>(2,403 - 3,991)    | 33,613<br>(26,970 - 41,699)    | 72,294<br>(55,574 - 90,327)    | 97,556<br>(76,264 - 113,918)       |
| Chronic respiratory diseases                        | 1,922,247<br>(1,714,662 - 2,146,761) | 64,994<br>(51,969 - 75,528) | 12,254<br>(10,331 - 14,622) | 127,726<br>(105,750 - 146,273) | 647,463<br>(555,193 - 734,884) | 1,069,810<br>(983,292 - 1,195,896) |
| Chronic obstructive pulmonary disease               | 1,321,712<br>(1,149,560 - 1,453,160) | 30,489<br>(24,328 - 37,070) | 3,555<br>(2,637 - 4,254)    | 53,536<br>(43,548 - 61,999)    | 401,296<br>(339,477 - 455,819) | 832,835<br>(735,324 - 925,415)     |
| Pneumoconiosis                                      | 166,694<br>(107,281 - 226,476)       | 697<br>(366 - 1,195)        | 509<br>(242 - 883)          | 20,008<br>(11,818 - 27,043)    | 82,253<br>(50,103 - 112,222)   | 63,227<br>(42,053 - 87,456)        |
| Silicosis                                           | 52,582<br>(34,171 - 74,819)          | 220<br>(80 - 483)           | 166<br>(62 - 350)           | 5,557<br>(3,456 - 8,289)       | 24,821<br>(15,368 - 35,327)    | 21,819<br>(13,924 - 32,253)        |
| Asbestosis                                          | 18,953<br>(11,887 - 28,048)          | 121<br>(45 - 242)           | 98<br>(49 - 180)            | 2,252<br>(1,331 - 3,326)       | 10,256<br>(6,096 - 15,222)     | 6,225<br>(3,907 - 9,867)           |
| Coal workers pneumoconiosis                         | 26,253<br>(15,330 - 41,292)          | 90<br>(42 - 158)            | 81<br>(36 - 146)            | 3,028<br>(1,667 - 4,810)       | 13,347<br>(7,679 - 20,879)     | 9,707<br>(5,690 - 16,278)          |
| Other pneumoconiosis                                | 68,906<br>(35,220 - 100,495)         | 266<br>(127 - 508)          | 164<br>(76 - 293)           | 9,171<br>(4,391 - 13,047)      | 33,829<br>(17,055 - 51,188)    | 25,477<br>(13,117 - 38,524)        |
| Asthma                                              | 264,831<br>(213,566 - 403,426)       | 12,837<br>(9,794 - 17,032)  | 6,218<br>(5,084 - 8,441)    | 40,088<br>(32,600 - 58,283)    | 107,232<br>(81,031 - 166,394)  | 98,457<br>(76,001 - 156,763)       |
| Interstitial lung disease and pulmonary sarcoidosis | 117,581<br>(65,624 - 157,959)        | 447<br>(142 - 1,107)        | 271<br>(111 - 621)          | 7,919<br>(3,409 - 12,234)      | 47,971<br>(23,636 - 71,815)    | 60,972<br>(36,228 - 79,402)        |
| Other chronic respiratory diseases                  | 51,428<br>(36,117 - 63,735)          | 20,524<br>(14,691 - 25,648) | 1,699<br>(981 - 2,346)      | 6,176<br>(3,729 - 8,239)       | 8,710<br>(5,480 - 12,302)      | 14,319<br>(10,869 - 17,744)        |
| Cirrhosis                                           | 545,548<br>(521,361 - 569,203)       | 8,905<br>(6,866 - 11,540)   | 5,675<br>(5,083 - 6,332)    | 168,688<br>(158,131 - 178,936) | 257,014<br>(244,102 - 268,941) | 105,268<br>(99,951 - 110,043)      |
| Cirrhosis due to hepatitis B                        | 142,306<br>(131,261 - 154,979)       | 619<br>(442 - 852)          | 1,170<br>(916 - 1,434)      | 48,790<br>(43,909 - 54,819)    | 66,469<br>(60,670 - 72,812)    | 25,259<br>(23,006 - 28,103)        |
| Cirrhosis due to hepatitis C                        | 120,544<br>(110,604 - 130,890)       | 679<br>(428 - 1,125)        | 942<br>(724 - 1,265)        | 33,471<br>(30,271 - 36,611)    | 59,082<br>(53,911 - 64,549)    | 26,369<br>(23,621 - 29,383)        |
| Cirrhosis due to alcohol use                        | 227,033<br>(211,237 - 241,689)       | --                          | --                          | 64,338<br>(58,298 - 69,763)    | 113,932<br>(105,506 - 121,413) | 48,764<br>(45,772 - 51,809)        |
| Cirrhosis due to other causes                       | 55,665<br>(50,482 - 61,369)          | 7,606<br>(5,797 - 9,982)    | 3,563<br>(3,056 - 4,103)    | 22,088<br>(19,831 - 24,762)    | 17,531<br>(15,279 - 20,123)    | 4,876<br>(4,293 - 5,715)           |
| Digestive diseases                                  | 576,403<br>(506,996 - 630,175)       | 26,785<br>(21,070 - 36,708) | 20,225<br>(17,296 - 23,217) | 147,058<br>(121,823 - 164,685) | 195,648<br>(170,527 - 215,742) | 186,688<br>(166,293 - 204,822)     |
| Peptic ulcer disease                                | 203,639<br>(172,751 - 249,793)       | 2,888<br>(1,726 - 5,651)    | 2,920<br>(2,032 - 4,454)    | 47,637<br>(39,045 - 60,815)    | 81,378<br>(68,407 - 99,133)    | 68,815<br>(58,674 - 82,538)        |
| Gastritis and duodenitis                            | 28,093<br>(14,003 - 44,753)          | 1,425<br>(426 - 2,589)      | 1,209<br>(542 - 2,045)      | 7,084<br>(3,436 - 11,539)      | 9,743<br>(4,773 - 16,204)      | 8,632<br>(4,130 - 14,105)          |
| Appendicitis                                        | 45,935<br>(34,950 - 61,827)          | 2,923<br>(1,685 - 5,554)    | 3,350<br>(2,379 - 4,823)    | 20,447<br>(15,133 - 27,254)    | 11,352<br>(8,188 - 15,844)     | 7,863<br>(5,357 - 10,736)          |
| Paralytic ileus and intestinal obstruction          | 96,062<br>(52,844 - 127,893)         | 4,931<br>(2,691 - 7,522)    | 6,980<br>(4,321 - 9,197)    | 24,454<br>(11,449 - 32,098)    | 30,731<br>(16,383 - 40,891)    | 28,965<br>(16,239 - 41,037)        |
| Inguinal, femoral, and abdominal hernia             | 30,844<br>(17,626 - 37,862)          | 1,793<br>(734 - 3,000)      | 1,380<br>(733 - 1,921)      | 5,699<br>(2,851 - 7,721)       | 8,588<br>(4,649 - 11,011)      | 13,383<br>(8,089 - 17,408)         |
| Inflammatory bowel disease                          | 24,839<br>(16,992 - 32,755)          | 4,738<br>(1,751 - 8,593)    | 1,300<br>(698 - 2,023)      | 5,476<br>(3,347 - 7,827)       | 6,158<br>(3,715 - 8,260)       | 7,167<br>(4,358 - 9,613)           |
| Vascular intestinal disorders                       | 23,376<br>(10,223 - 43,476)          | 385<br>(72 - 982)           | 426<br>(93 - 1,109)         | 2,216<br>(893 - 4,705)         | 7,811<br>(3,442 - 15,053)      | 12,538<br>(5,455 - 23,380)         |
| Gallbladder and biliary diseases                    | 31,924<br>(26,422 - 38,514)          | 717<br>(411 - 1,472)        | 551<br>(416 - 807)          | 4,927<br>(3,667 - 6,094)       | 10,188<br>(7,949 - 12,458)     | 15,541<br>(13,042 - 18,833)        |
| Pancreatitis                                        | 47,264<br>(28,783 - 71,970)          | 404<br>(134 - 829)          | 613<br>(305 - 1,142)        | 20,373<br>(12,534 - 30,690)    | 16,464<br>(10,060 - 25,410)    | 9,409<br>(5,468 - 13,809)          |
| Other digestive diseases                            | 44,428<br>(35,289 - 56,488)          | 6,579<br>(4,400 - 9,902)    | 1,496<br>(1,091 - 1,998)    | 8,744<br>(6,196 - 11,400)      | 13,234<br>(9,530 - 17,356)     | 14,375<br>(10,945 - 18,320)        |
| Neurological disorders                              | 455,118<br>(427,339 - 481,237)       | 14,750<br>(9,363 - 23,457)  | 8,584<br>(6,740 - 11,460)   | 43,351<br>(35,733 - 50,448)    | 50,096<br>(46,080 - 53,886)    | 338,336<br>(317,354 - 358,417)     |
| Alzheimer disease and other dementias               | 333,050<br>(311,189 - 352,914)       | --                          | --                          | 90<br>(70 - 115)               | 26,655<br>(24,569 - 28,675)    | 306,305<br>(285,427 - 326,183)     |
| Parkinson disease                                   | 22,793<br>(21,193 - 24,202)          | --                          | --                          | 301<br>(252 - 340)             | 3,709<br>(3,403 - 3,979)       | 18,782<br>(17,409 - 20,240)        |
| Epilepsy                                            | 64,020<br>(52,739 - 82,563)          | 11,720<br>(6,789 - 20,792)  | 7,211<br>(5,447 - 10,198)   | 32,220<br>(25,520 - 38,764)    | 7,918<br>(6,316 - 10,032)      | 4,951<br>(3,880 - 6,401)           |
| Multiple sclerosis                                  | 5,165<br>(2,923 - 9,805)             | --                          | --                          | 2,014<br>(1,112 - 3,616)       | 2,291<br>(1,336 - 4,517)       | 860<br>(476 - 1,608)               |
| Other neurological disorders                        | 30,088<br>(21,949 - 36,941)          | 3,029<br>(1,856 - 7,412)    | 1,373<br>(931 - 2,257)      | 8,725<br>(6,506 - 10,252)      | 9,524<br>(7,194 - 11,282)      | 7,437<br>(5,479 - 8,722)           |
| Mental and substance use disorders                  | 143,522<br>(113,111 - 187,686)       | 1,323<br>(707 - 2,114)      | 6<br>(5 - 7)                | 87,740<br>(68,712 - 110,572)   | 45,165<br>(35,604 - 66,042)    | 9,288<br>(7,217 - 12,782)          |
| Schizophrenia                                       | 10,817<br>(5,249 - 14,904)           | --                          | --                          | 5,752<br>(2,663 - 8,059)       | 3,569<br>(1,756 - 4,910)       | 1,497<br>(758 - 2,094)             |
| Alcohol use disorders                               | 90,651<br>(65,704 - 135,936)         | --                          | --                          | 48,502<br>(33,424 - 71,448)    | 36,087<br>(27,285 - 56,769)    | 6,061<br>(4,204 - 9,276)           |
| Drug use disorders                                  | 41,976<br>(34,918 - 52,501)          | 1,323<br>(707 - 2,114)      | --                          | 33,414<br>(27,696 - 41,732)    | 5,509<br>(4,786 - 7,689)       | 1,730<br>(1,444 - 2,335)           |
| Opioid use disorders                                | 14,081<br>(12,679 - 18,005)          | 406<br>(221 - 592)          | --                          | 10,961<br>(9,845 - 13,893)     | 2,074<br>(1,762 - 2,921)       | 640<br>(515 - 875)                 |

**Web Table 25 - Global deaths with 95% UI by age, sex, and cause in 1990**

| Cause                                               | Males, All Ages                | Males, 0-4 Years               | Males, 5-14 Years           | Males, 15-49 Years             | Males, 50-69 Years             | Males, 70-80 Years             |
|-----------------------------------------------------|--------------------------------|--------------------------------|-----------------------------|--------------------------------|--------------------------------|--------------------------------|
| Cocaine use disorders                               | 1,640<br>(1,415 - 1,970)       | 51<br>(27 - 81)                | --                          | 1,323<br>(1,125 - 1,600)       | 182<br>(149 - 225)             | 84<br>(64 - 113)               |
| Amphetamine use disorders                           | 1,355<br>(1,141 - 1,650)       | 54<br>(28 - 87)                | --                          | 1,020<br>(843 - 1,257)         | 195<br>(159 - 245)             | 86<br>(64 - 114)               |
| Other drug use disorders                            | 24,899<br>(19,473 - 31,297)    | 812<br>(435 - 1,381)           | --                          | 20,110<br>(15,407 - 25,142)    | 3,058<br>(2,645 - 4,190)       | 919<br>(768 - 1,233)           |
| Eating disorders                                    | 78<br>(67 - 90)                | --                             | 6<br>(5 - 7)                | 72<br>(62 - 85)                | --                             | --                             |
| Anorexia nervosa                                    | 78<br>(67 - 90)                | --                             | 6<br>(5 - 7)                | 72<br>(62 - 85)                | --                             | --                             |
| Diabetes, urogenital, blood, and endocrine diseases | 768,629<br>(695,592 - 882,771) | 85,187<br>(46,377 - 169,571)   | 23,908<br>(14,495 - 37,183) | 132,839<br>(120,073 - 152,181) | 251,718<br>(237,302 - 265,412) | 274,978<br>(255,106 - 285,153) |
| Diabetes mellitus                                   | 308,210<br>(295,237 - 321,350) | 4,441<br>(3,909 - 5,021)       | 1,404<br>(1,241 - 1,589)    | 39,728<br>(36,978 - 42,360)    | 134,119<br>(126,512 - 141,502) | 128,518<br>(122,974 - 133,911) |
| Acute glomerulonephritis                            | 11,991<br>(6,189 - 18,391)     | 2,173<br>(584 - 4,621)         | 1,016<br>(499 - 1,672)      | 3,503<br>(1,902 - 5,437)       | 3,050<br>(1,493 - 4,936)       | 2,249<br>(1,069 - 3,698)       |
| Chronic kidney disease                              | 220,536<br>(188,958 - 234,261) | 7,607<br>(5,743 - 9,003)       | 3,586<br>(2,937 - 4,003)    | 46,191<br>(37,248 - 50,379)    | 71,551<br>(61,928 - 77,738)    | 91,601<br>(76,929 - 97,616)    |
| Chronic kidney disease due to diabetes mellitus     | 23,308<br>(14,010 - 30,541)    | 158<br>(72 - 238)              | 86<br>(44 - 146)            | 3,003<br>(1,538 - 3,876)       | 8,098<br>(5,085 - 10,879)      | 11,963<br>(6,878 - 15,796)     |
| Chronic kidney disease due to hypertension          | 63,524<br>(40,085 - 78,693)    | 761<br>(250 - 1,233)           | 280<br>(112 - 408)          | 10,057<br>(5,756 - 12,514)     | 21,727<br>(13,519 - 27,016)    | 30,699<br>(20,530 - 38,364)    |
| Chronic kidney disease due to glomerulonephritis    | 53,189<br>(43,266 - 64,925)    | 4,058<br>(2,984 - 5,457)       | 1,974<br>(1,625 - 2,398)    | 16,633<br>(13,755 - 20,085)    | 16,244<br>(13,152 - 20,254)    | 14,281<br>(10,750 - 18,220)    |
| Chronic kidney disease due to other causes          | 80,516<br>(61,101 - 100,746)   | 2,631<br>(1,573 - 3,598)       | 1,246<br>(828 - 1,537)      | 16,499<br>(11,775 - 20,060)    | 25,483<br>(19,645 - 32,678)    | 34,658<br>(26,352 - 44,053)    |
| Urinary diseases and male infertility               | 79,282<br>(63,173 - 88,471)    | 6,229<br>(4,731 - 7,762)       | 1,508<br>(1,239 - 1,752)    | 13,789<br>(10,236 - 16,020)    | 23,600<br>(18,089 - 27,096)    | 34,155<br>(28,111 - 38,583)    |
| Interstitial nephritis and urinary tract infections | 52,052<br>(40,503 - 58,531)    | 4,666<br>(3,121 - 5,878)       | 957<br>(664 - 1,152)        | 9,043<br>(6,448 - 10,590)      | 14,764<br>(11,013 - 17,302)    | 22,622<br>(17,862 - 26,603)    |
| Urolithiasis                                        | 8,871<br>(5,641 - 11,704)      | --                             | 166<br>(121 - 272)          | 1,675<br>(1,113 - 2,284)       | 3,385<br>(2,024 - 4,562)       | 3,644<br>(2,106 - 4,853)       |
| Other urinary diseases                              | 18,359<br>(13,978 - 25,997)    | 1,564<br>(940 - 2,709)         | 385<br>(279 - 615)          | 3,071<br>(2,226 - 4,579)       | 5,451<br>(3,909 - 8,079)       | 7,889<br>(5,608 - 11,041)      |
| Gynecological diseases                              | --                             | --                             | --                          | --                             | --                             | --                             |
| Uterine fibroids                                    | --                             | --                             | --                          | --                             | --                             | --                             |
| Polycystic ovarian syndrome                         | --                             | --                             | --                          | --                             | --                             | --                             |
| Endometriosis                                       | --                             | --                             | --                          | --                             | --                             | --                             |
| Genital prolapse                                    | --                             | --                             | --                          | --                             | --                             | --                             |
| Other gynecological diseases                        | --                             | --                             | --                          | --                             | --                             | --                             |
| Hemoglobinopathies and hemolytic anemias            | 95,028<br>(33,221 - 195,821)   | 52,530<br>(14,224 - 134,204)   | 13,731<br>(4,526 - 27,010)  | 16,821<br>(6,873 - 38,278)     | 6,445<br>(3,236 - 13,622)      | 5,502<br>(3,043 - 8,500)       |
| Thalassemias                                        | 18,804<br>(10,471 - 28,731)    | 10,214<br>(4,502 - 16,603)     | 3,312<br>(1,851 - 5,122)    | 5,064<br>(2,833 - 7,597)       | 198<br>(111 - 323)             | 16<br>(9 - 27)                 |
| Sickle cell disorders                               | 57,611<br>(9,772 - 152,762)    | 37,464<br>(5,049 - 114,746)    | 9,381<br>(1,572 - 22,638)   | 8,597<br>(2,140 - 27,428)      | 2,084<br>(675 - 6,875)         | 85<br>(42 - 176)               |
| G6PD deficiency                                     | 1,921<br>(984 - 2,828)         | 867<br>(310 - 1,482)           | 255<br>(134 - 378)          | 547<br>(300 - 866)             | 211<br>(120 - 347)             | 41<br>(22 - 72)                |
| Other hemoglobinopathies and hemolytic anemias      | 16,691<br>(9,697 - 24,149)     | 3,985<br>(1,825 - 6,058)       | 782<br>(440 - 1,187)        | 2,613<br>(1,488 - 3,913)       | 3,952<br>(2,316 - 6,071)       | 5,359<br>(2,968 - 8,241)       |
| Endocrine, metabolic, blood, and immune disorders   | 53,582<br>(37,346 - 65,194)    | 12,207<br>(6,997 - 17,289)     | 2,663<br>(1,750 - 3,755)    | 12,806<br>(9,321 - 15,156)     | 12,953<br>(9,780 - 16,714)     | 12,953<br>(9,225 - 16,447)     |
| Musculoskeletal disorders                           | 26,784<br>(19,475 - 33,703)    | --                             | 2,000<br>(1,262 - 2,825)    | 7,404<br>(5,187 - 8,996)       | 10,093<br>(7,096 - 12,724)     | 7,287<br>(5,620 - 9,877)       |
| Rheumatoid arthritis                                | 9,338<br>(6,595 - 12,333)      | --                             | 459<br>(186 - 808)          | 1,573<br>(1,022 - 2,255)       | 4,028<br>(2,698 - 5,467)       | 3,278<br>(2,375 - 4,320)       |
| Other musculoskeletal disorders                     | 17,445<br>(12,746 - 21,736)    | --                             | 1,541<br>(929 - 2,132)      | 5,831<br>(3,959 - 6,964)       | 6,064<br>(4,140 - 7,743)       | 4,009<br>(3,015 - 5,691)       |
| Other non-communicable diseases                     | 426,499<br>(361,321 - 584,633) | 352,833<br>(289,011 - 505,952) | 17,390<br>(14,773 - 22,209) | 29,772<br>(26,877 - 33,227)    | 12,517<br>(10,929 - 13,774)    | 13,987<br>(12,515 - 15,256)    |
| Congenital anomalies                                | 389,118<br>(325,145 - 544,343) | 335,584<br>(273,723 - 486,040) | 16,607<br>(13,969 - 21,355) | 25,076<br>(22,364 - 28,475)    | 6,961<br>(4,919 - 8,098)       | 4,890<br>(3,081 - 5,748)       |
| Neural tube defects                                 | 72,393<br>(50,749 - 101,772)   | 67,080<br>(46,056 - 93,180)    | 1,963<br>(1,263 - 2,772)    | 2,562<br>(1,739 - 3,713)       | 474<br>(295 - 676)             | 313<br>(144 - 489)             |
| Congenital heart anomalies                          | 190,921<br>(156,252 - 277,370) | 162,268<br>(129,211 - 245,311) | 9,566<br>(7,954 - 12,367)   | 12,856<br>(10,914 - 15,119)    | 3,596<br>(2,377 - 4,398)       | 2,635<br>(1,397 - 3,284)       |
| Cleft lip and cleft palate                          | 4,208<br>(1,760 - 7,569)       | 4,208<br>(1,760 - 7,569)       | --                          | --                             | --                             | --                             |
| Down syndrome                                       | 18,518<br>(6,882 - 35,027)     | 13,646<br>(3,958 - 28,440)     | 1,173<br>(445 - 2,183)      | 2,871<br>(1,669 - 4,386)       | 743<br>(475 - 1,131)           | 85<br>(51 - 131)               |
| Chromosomal unbalanced rearrangements               | 7,779<br>(3,669 - 19,077)      | 6,627<br>(3,035 - 17,179)      | 327<br>(149 - 784)          | 640<br>(320 - 1,003)           | 128<br>(68 - 203)              | 56<br>(30 - 84)                |
| Other congenital anomalies                          | 95,299<br>(65,819 - 189,861)   | 81,755<br>(54,288 - 171,287)   | 3,579<br>(2,381 - 6,685)    | 6,146<br>(4,673 - 7,961)       | 2,019<br>(1,460 - 2,656)       | 1,801<br>(1,395 - 2,182)       |



**Web Table 25 - Global deaths with 95% UI by age, sex, and cause in 1990**

| Cause                                           | Males, All Ages                      | Males, 0-4 Years               | Males, 5-14 Years              | Males, 15-49 Years                   | Males, 50-69 Years             | Males, 70-80 Years             |
|-------------------------------------------------|--------------------------------------|--------------------------------|--------------------------------|--------------------------------------|--------------------------------|--------------------------------|
| Skin and subcutaneous diseases                  | 24,612<br>(22,244 - 26,634)          | 4,481<br>(2,950 - 5,744)       | 783<br>(623 - 903)             | 4,697<br>(4,194 - 5,233)             | 5,556<br>(5,038 - 6,187)       | 9,097<br>(8,333 - 10,157)      |
| Cellulitis                                      | 10,972<br>(6,970 - 15,819)           | 2,408<br>(1,394 - 3,986)       | 432<br>(251 - 653)             | 2,330<br>(1,364 - 3,517)             | 2,835<br>(1,854 - 3,997)       | 2,967<br>(1,905 - 4,327)       |
| Pyoderma                                        | 8,154<br>(4,952 - 11,295)            | 1,904<br>(1,007 - 2,867)       | 250<br>(119 - 387)             | 1,720<br>(882 - 2,561)               | 1,776<br>(1,012 - 2,596)       | 2,503<br>(1,717 - 3,318)       |
| Decubitus ulcer                                 | 4,848<br>(3,722 - 6,116)             | 85<br>(17 - 193)               | 69<br>(29 - 123)               | 500<br>(298 - 697)                   | 820<br>(586 - 1,101)           | 3,373<br>(2,733 - 4,062)       |
| Other skin and subcutaneous diseases            | 639<br>(394 - 886)                   | 83<br>(28 - 184)               | 32<br>(15 - 60)                | 146<br>(89 - 212)                    | 124<br>(78 - 161)              | 254<br>(163 - 319)             |
| Sudden infant death syndrome                    | 12,769<br>(6,352 - 21,949)           | 12,769<br>(6,352 - 21,949)     | --                             | --                                   | --                             | --                             |
| Injuries                                        | 2,798,081<br>(2,656,511 - 2,965,134) | 426,759<br>(345,416 - 494,247) | 217,118<br>(199,431 - 232,533) | 1,461,966<br>(1,383,618 - 1,553,311) | 465,193<br>(435,780 - 504,390) | 227,046<br>(215,292 - 248,818) |
| Transport injuries                              | 838,632<br>(788,893 - 919,364)       | 71,006<br>(57,890 - 90,279)    | 65,598<br>(59,565 - 73,568)    | 516,205<br>(484,305 - 562,490)       | 134,208<br>(123,474 - 146,740) | 51,613<br>(48,274 - 57,329)    |
| Road injuries                                   | 774,188<br>(727,207 - 858,399)       | 63,026<br>(50,990 - 80,336)    | 61,038<br>(55,498 - 68,570)    | 480,965<br>(452,693 - 527,025)       | 122,000<br>(112,449 - 135,850) | 47,159<br>(44,551 - 52,603)    |
| Pedestrian road injuries                        | 275,267<br>(225,916 - 347,156)       | 34,219<br>(25,159 - 47,793)    | 31,913<br>(26,492 - 39,494)    | 135,115<br>(107,153 - 173,893)       | 50,404<br>(41,381 - 62,246)    | 23,616<br>(20,190 - 29,219)    |
| Cyclist road injuries                           | 48,316<br>(39,556 - 59,089)          | 3,462<br>(2,389 - 4,853)       | 5,769<br>(4,652 - 7,425)       | 23,857<br>(18,965 - 29,276)          | 10,272<br>(8,124 - 12,723)     | 4,955<br>(3,986 - 6,038)       |
| Motorcyclist road injuries                      | 160,908<br>(132,231 - 194,871)       | 5,538<br>(3,590 - 8,320)       | 5,220<br>(3,726 - 7,104)       | 129,851<br>(106,274 - 156,562)       | 16,147<br>(12,287 - 20,560)    | 4,153<br>(3,104 - 5,169)       |
| Motor vehicle road injuries                     | 264,285<br>(229,811 - 304,445)       | 16,922<br>(11,848 - 22,826)    | 15,217<br>(12,169 - 18,808)    | 179,086<br>(157,184 - 205,460)       | 40,000<br>(33,393 - 46,120)    | 13,060<br>(10,813 - 15,402)    |
| Other road injuries                             | 25,411<br>(13,738 - 34,691)          | 2,885<br>(1,043 - 4,912)       | 2,919<br>(1,360 - 4,421)       | 13,056<br>(7,027 - 19,714)           | 5,178<br>(2,778 - 7,781)       | 1,375<br>(810 - 2,033)         |
| Other transport injuries                        | 64,444<br>(52,054 - 73,706)          | 7,980<br>(5,701 - 10,746)      | 4,561<br>(3,651 - 5,536)       | 35,240<br>(28,640 - 41,349)          | 12,209<br>(9,147 - 14,354)     | 4,454<br>(3,023 - 5,362)       |
| Unintentional injuries                          | 1,193,663<br>(1,088,741 - 1,295,838) | 333,364<br>(251,198 - 396,943) | 132,912<br>(114,570 - 146,458) | 432,180<br>(398,221 - 477,733)       | 176,547<br>(163,057 - 199,043) | 118,661<br>(109,878 - 137,783) |
| Falls                                           | 198,498<br>(174,962 - 252,735)       | 22,231<br>(15,394 - 31,960)    | 10,809<br>(8,948 - 13,760)     | 68,605<br>(58,069 - 86,696)          | 46,041<br>(40,582 - 59,084)    | 50,812<br>(45,177 - 64,345)    |
| Drowning                                        | 356,505<br>(269,403 - 424,027)       | 124,340<br>(74,735 - 166,471)  | 74,517<br>(54,475 - 88,051)    | 119,254<br>(96,750 - 142,165)        | 28,117<br>(23,086 - 34,916)    | 10,277<br>(8,447 - 12,955)     |
| Fire, heat, and hot substances                  | 116,066<br>(93,417 - 137,279)        | 32,129<br>(21,381 - 42,705)    | 8,535<br>(6,789 - 10,473)      | 45,342<br>(35,197 - 53,996)          | 18,051<br>(15,143 - 23,220)    | 12,008<br>(9,538 - 14,425)     |
| Poisonings                                      | 73,988<br>(61,165 - 108,722)         | 15,920<br>(10,870 - 27,843)    | 4,241<br>(3,363 - 6,592)       | 36,310<br>(27,870 - 49,227)          | 12,493<br>(10,255 - 18,421)    | 5,024<br>(4,343 - 7,984)       |
| Exposure to mechanical forces                   | 165,173<br>(142,164 - 193,198)       | 58,867<br>(31,152 - 83,013)    | 11,375<br>(9,663 - 14,258)     | 68,097<br>(61,134 - 84,114)          | 11,375<br>(18,775 - 25,955)    | 5,412<br>(4,712 - 6,527)       |
| Unintentional firearm injuries                  | 39,684<br>(33,273 - 46,446)          | 4,920<br>(3,629 - 6,812)       | 2,832<br>(2,192 - 3,634)       | 24,474<br>(19,968 - 30,045)          | 5,505<br>(4,109 - 7,734)       | 1,953<br>(1,385 - 2,681)       |
| Unintentional suffocation                       | 48,525<br>(14,291 - 72,721)          | 42,618<br>(10,160 - 66,016)    | 1,486<br>(775 - 2,266)         | 2,863<br>(1,689 - 3,628)             | 1,058<br>(624 - 1,331)         | 501<br>(297 - 650)             |
| Other exposure to mechanical forces             | 76,964<br>(70,219 - 96,772)          | 11,330<br>(7,412 - 16,624)     | 7,058<br>(5,762 - 9,462)       | 40,760<br>(36,934 - 49,379)          | 14,858<br>(13,010 - 18,102)    | 2,958<br>(2,616 - 3,703)       |
| Adverse effects of medical treatment            | 49,589<br>(35,361 - 63,110)          | 16,732<br>(9,474 - 25,127)     | 2,114<br>(1,336 - 2,765)       | 10,724<br>(7,522 - 13,894)           | 10,013<br>(7,402 - 12,966)     | 10,006<br>(7,416 - 13,244)     |
| Animal contact                                  | 50,936<br>(31,054 - 61,113)          | 7,836<br>(4,757 - 12,014)      | 10,445<br>(6,599 - 13,383)     | 18,842<br>(10,482 - 23,481)          | 10,128<br>(6,143 - 12,597)     | 3,684<br>(2,226 - 4,605)       |
| Venomous animal contact                         | 39,283<br>(23,410 - 48,275)          | 4,358<br>(2,678 - 7,633)       | 8,390<br>(5,101 - 10,729)      | 15,708<br>(8,471 - 19,772)           | 8,259<br>(5,013 - 10,578)      | 2,568<br>(1,485 - 3,277)       |
| Non-venomous animal contact                     | 11,653<br>(6,690 - 14,811)           | 3,478<br>(1,618 - 5,495)       | 2,055<br>(1,218 - 3,073)       | 3,134<br>(1,537 - 3,894)             | 1,870<br>(1,127 - 2,362)       | 1,116<br>(694 - 1,476)         |
| Foreign body                                    | 82,438<br>(50,626 - 140,338)         | 41,683<br>(23,667 - 77,366)    | 2,618<br>(1,617 - 4,627)       | 12,168<br>(7,093 - 18,635)           | 10,882<br>(6,157 - 17,006)     | 15,087<br>(8,984 - 25,859)     |
| Pulmonary aspiration and foreign body in airway | 80,829<br>(49,188 - 138,742)         | 41,190<br>(23,363 - 77,038)    | 2,488<br>(1,515 - 4,469)       | 11,741<br>(6,760 - 18,244)           | 10,446<br>(5,805 - 16,560)     | 14,963<br>(8,885 - 25,760)     |
| Foreign body in other body part                 | 1,609<br>(868 - 2,467)               | 492<br>(211 - 1,058)           | 130<br>(73 - 222)              | 427<br>(239 - 611)                   | 436<br>(236 - 619)             | 124<br>(67 - 176)              |
| Other unintentional injuries                    | 100,471<br>(89,991 - 112,114)        | 13,626<br>(10,115 - 16,441)    | 8,257<br>(6,602 - 9,450)       | 52,838<br>(46,991 - 60,741)          | 19,400<br>(17,249 - 22,173)    | 6,350<br>(5,557 - 7,265)       |
| Self-harm and interpersonal violence            | 701,076<br>(589,113 - 796,293)       | 12,432<br>(7,701 - 16,921)     | 13,271<br>(10,157 - 15,889)    | 483,879<br>(408,000 - 547,525)       | 138,191<br>(114,564 - 159,917) | 53,303<br>(42,335 - 60,248)    |
| Self-harm                                       | 433,377<br>(351,866 - 483,739)       | --                             | 5,694<br>(4,250 - 6,967)       | 274,921<br>(224,004 - 305,139)       | 106,044<br>(87,846 - 123,731)  | 46,718<br>(35,716 - 53,173)    |
| Interpersonal violence                          | 267,699<br>(182,762 - 343,595)       | 12,432<br>(7,701 - 16,921)     | 7,577<br>(4,814 - 10,069)      | 208,958<br>(145,232 - 261,073)       | 32,147<br>(20,468 - 44,203)    | 6,586<br>(4,076 - 9,240)       |
| Assault by firearm                              | 111,721<br>(76,133 - 148,789)        | 1,576<br>(706 - 2,550)         | 1,864<br>(1,046 - 2,607)       | 94,184<br>(65,786 - 122,976)         | 12,277<br>(6,997 - 18,202)     | 1,821<br>(978 - 2,884)         |
| Assault by sharp object                         | 73,748<br>(46,996 - 110,042)         | 1,418<br>(487 - 2,516)         | 1,351<br>(648 - 1,956)         | 60,084<br>(38,684 - 89,554)          | 9,471<br>(5,499 - 14,342)      | 1,424<br>(798 - 2,283)         |
| Assault by other means                          | 82,229<br>(49,778 - 104,887)         | 9,438<br>(5,920 - 13,441)      | 4,362<br>(2,714 - 6,022)       | 54,690<br>(31,429 - 69,588)          | 10,399<br>(6,127 - 14,707)     | 3,340<br>(1,945 - 4,696)       |
| Forces of nature, war, and legal intervention   | 64,710<br>(42,929 - 126,548)         | 9,957<br>(9,342 - 11,520)      | 5,337<br>(3,619 - 10,559)      | 29,701<br>(17,527 - 64,786)          | 16,246<br>(9,623 - 34,125)     | 3,468<br>(2,036 - 6,961)       |
| Exposure to forces of nature                    | 20,767<br>(10,581 - 46,514)          | 2,543<br>(2,273 - 2,717)       | 1,677<br>(893 - 3,748)         | 9,045<br>(3,919 - 22,268)            | 6,053<br>(2,708 - 14,137)      | 1,450<br>(627 - 3,135)         |
| Collective violence and legal intervention      | 43,943<br>(30,410 - 77,955)          | 7,414<br>(6,923 - 9,026)       | 3,661<br>(2,578 - 6,436)       | 20,656<br>(12,753 - 40,832)          | 10,193<br>(6,424 - 19,398)     | 2,019<br>(1,237 - 3,716)       |

**Web Table 25 - Global deaths with 95% UI by age, sex, and cause in 1990**

| Cause                                                             | Females, All Ages                       | Females, 0-4 Years                   | Females, 5-14 Years            | Females, 15-49 Years                 | Females, 50-69 Years                 | Females, 70-80 Years                 |
|-------------------------------------------------------------------|-----------------------------------------|--------------------------------------|--------------------------------|--------------------------------------|--------------------------------------|--------------------------------------|
| All causes                                                        | 22,352,850<br>(21,883,157 - 22,924,556) | 5,729,740<br>(5,538,313 - 5,938,918) | 656,205<br>(633,092 - 681,224) | 2,981,359<br>(2,851,101 - 3,120,562) | 4,470,148<br>(4,309,244 - 4,667,206) | 8,515,398<br>(8,381,927 - 8,697,565) |
| Communicable, maternal, neonatal, and nutritional diseases        | 7,828,654<br>(7,560,760 - 8,132,028)    | 4,784,499<br>(4,570,016 - 5,017,268) | 374,156<br>(353,891 - 396,442) | 1,134,022<br>(1,079,146 - 1,198,585) | 657,889<br>(616,394 - 700,344)       | 878,088<br>(809,102 - 941,296)       |
| HIV/AIDS and tuberculosis                                         | 811,889<br>(736,563 - 902,280)          | 65,053<br>(57,442 - 88,079)          | 25,244<br>(21,947 - 30,519)    | 325,346<br>(290,865 - 367,057)       | 246,740<br>(215,682 - 275,521)       | 149,505<br>(128,085 - 167,455)       |
| Tuberculosis                                                      | 730,271<br>(653,810 - 818,605)          | 47,601<br>(40,545 - 69,727)          | 24,401<br>(21,154 - 29,599)    | 273,414<br>(241,435 - 312,844)       | 236,658<br>(205,473 - 265,158)       | 148,197<br>(126,900 - 166,284)       |
| HIV/AIDS                                                          | 81,617<br>(64,392 - 105,855)            | 17,453<br>(15,976 - 18,993)          | 843<br>(651 - 1,020)           | 51,932<br>(38,793 - 72,755)          | 10,081<br>(7,491 - 13,612)           | 1,308<br>(958 - 1,751)               |
| HIV/AIDS resulting in mycobacterial infection                     | 6,575<br>(4,767 - 8,905)                | 1,405<br>(1,127 - 1,731)             | 63<br>(46 - 84)                | 4,162<br>(2,859 - 5,985)             | 835<br>(576 - 1,171)                 | 110<br>(75 - 154)                    |
| HIV/AIDS resulting in other diseases                              | 75,042<br>(59,044 - 97,633)             | 16,048<br>(14,695 - 17,489)          | 780<br>(604 - 943)             | 47,770<br>(35,530 - 66,871)          | 9,246<br>(6,859 - 12,497)            | 1,198<br>(880 - 1,602)               |
| Diarrhea, lower respiratory, and other common infectious diseases | 3,946,426<br>(3,738,043 - 4,224,381)    | 2,501,772<br>(2,332,835 - 2,731,202) | 247,653<br>(225,826 - 271,346) | 293,569<br>(264,678 - 325,424)       | 297,519<br>(271,455 - 329,546)       | 605,913<br>(543,005 - 660,288)       |
| Diarrheal diseases                                                | 1,335,023<br>(1,233,114 - 1,438,159)    | 788,901<br>(702,757 - 882,875)       | 80,304<br>(69,347 - 92,883)    | 119,236<br>(106,745 - 131,018)       | 146,877<br>(127,682 - 164,866)       | 199,704<br>(176,050 - 223,829)       |
| Intestinal infectious diseases                                    | 119,973<br>(66,456 - 197,906)           | 38,323<br>(21,536 - 64,130)          | 36,376<br>(20,353 - 59,572)    | 36,790<br>(19,218 - 62,719)          | 5,866<br>(3,205 - 9,968)             | 2,619<br>(1,589 - 4,199)             |
| Typhoid fever                                                     | 84,181<br>(43,942 - 143,456)            | 24,959<br>(12,732 - 43,124)          | 26,467<br>(14,272 - 43,952)    | 26,843<br>(13,434 - 46,692)          | 4,150<br>(2,054 - 7,284)             | 1,762<br>(953 - 2,947)               |
| Paratyphoid fever                                                 | 29,506<br>(15,515 - 50,841)             | 9,993<br>(4,991 - 18,005)            | 9,266<br>(4,803 - 16,578)      | 8,534<br>(4,249 - 15,339)            | 1,202<br>(598 - 2,196)               | 512<br>(277 - 913)                   |
| Other intestinal infectious diseases                              | 6,286<br>(5,568 - 7,101)                | 3,370<br>(2,861 - 3,962)             | 643<br>(537 - 776)             | 1,413<br>(1,241 - 1,592)             | 515<br>(431 - 605)                   | 345<br>(290 - 401)                   |
| Lower respiratory infections                                      | 1,707,999<br>(1,585,500 - 1,845,126)    | 1,068,574<br>(967,937 - 1,172,453)   | 62,726<br>(53,731 - 72,130)    | 81,433<br>(72,011 - 91,494)          | 112,854<br>(99,358 - 130,158)        | 382,412<br>(327,978 - 425,064)       |
| Upper respiratory infections                                      | 2,234<br>(1,760 - 3,006)                | 845<br>(527 - 1,546)                 | 109<br>(55 - 222)              | 407<br>(295 - 596)                   | 413<br>(279 - 649)                   | 460<br>(328 - 651)                   |
| Otitis media                                                      | 2,737<br>(2,487 - 3,007)                | 1,083<br>(916 - 1,290)               | 370<br>(324 - 431)             | 563<br>(500 - 634)                   | 383<br>(340 - 434)                   | 337<br>(293 - 387)                   |
| Meningitis                                                        | 215,011<br>(189,028 - 245,286)          | 135,303<br>(112,858 - 163,907)       | 21,764<br>(18,286 - 25,203)    | 30,525<br>(26,066 - 35,027)          | 16,733<br>(13,918 - 19,188)          | 10,687<br>(8,445 - 12,073)           |
| Pneumococcal meningitis                                           | 52,372<br>(45,645 - 60,042)             | 27,932<br>(22,807 - 35,116)          | 6,883<br>(5,382 - 8,405)       | 9,439<br>(7,815 - 11,412)            | 4,921<br>(3,760 - 6,481)             | 3,197<br>(2,465 - 3,893)             |
| H influenzae type B meningitis                                    | 54,808<br>(46,326 - 65,715)             | 43,033<br>(35,296 - 53,341)          | 5,183<br>(4,091 - 6,332)       | 3,958<br>(3,202 - 4,882)             | 1,616<br>(1,276 - 2,042)             | 1,019<br>(782 - 1,224)               |
| Meningococcal meningitis                                          | 39,703<br>(34,634 - 45,708)             | 23,701<br>(19,723 - 29,541)          | 3,792<br>(3,128 - 4,740)       | 6,381<br>(5,319 - 7,697)             | 3,400<br>(2,659 - 4,130)             | 2,429<br>(1,854 - 2,927)             |
| Other meningitis                                                  | 68,128<br>(59,215 - 78,486)             | 40,636<br>(33,401 - 48,981)          | 5,907<br>(4,706 - 7,279)       | 10,747<br>(8,895 - 12,870)           | 6,796<br>(5,161 - 8,379)             | 4,042<br>(3,132 - 4,897)             |
| Encephalitis                                                      | 45,608<br>(29,804 - 60,278)             | 25,591<br>(13,549 - 37,366)          | 6,479<br>(3,343 - 9,683)       | 7,772<br>(4,885 - 10,157)            | 3,907<br>(2,545 - 4,963)             | 1,859<br>(1,168 - 2,277)             |
| Diphtheria                                                        | 4,028<br>(1,550 - 11,471)               | 3,193<br>(911 - 10,574)              | 612<br>(162 - 2,258)           | 175<br>(84 - 386)                    | 48<br>(17 - 144)                     | --                                   |
| Whooping cough                                                    | 75,044<br>(29,193 - 158,952)            | 70,384<br>(27,448 - 148,808)         | 3,877<br>(1,453 - 8,617)       | 691<br>(281 - 1,642)                 | 92<br>(39 - 214)                     | --                                   |
| Tetanus                                                           | 161,783<br>(117,497 - 335,446)          | 133,319<br>(93,669 - 294,108)        | 3,320<br>(2,069 - 6,657)       | 9,050<br>(5,654 - 17,819)            | 9,753<br>(5,390 - 20,988)            | 6,341<br>(3,614 - 13,042)            |
| Measles                                                           | 272,363<br>(154,810 - 432,304)          | 234,810<br>(134,450 - 369,010)       | 31,379<br>(17,300 - 50,243)    | 6,028<br>(2,706 - 14,090)            | 146<br>(63 - 362)                    | --                                   |
| Varicella and herpes zoster                                       | 4,623<br>(3,461 - 6,584)                | 1,447<br>(773 - 2,935)               | 336<br>(173 - 767)             | 899<br>(612 - 1,319)                 | 448<br>(287 - 734)                   | 1,493<br>(911 - 2,571)               |
| Neglected tropical diseases and malaria                           | 530,584<br>(471,765 - 590,228)          | 320,928<br>(268,144 - 375,922)       | 58,143<br>(49,674 - 66,175)    | 71,621<br>(59,743 - 84,042)          | 56,326<br>(48,532 - 65,826)          | 23,565<br>(19,245 - 31,496)          |
| Malaria                                                           | 440,116<br>(383,378 - 501,825)          | 291,461<br>(239,142 - 344,988)       | 42,726<br>(35,048 - 50,022)    | 46,986<br>(36,418 - 57,666)          | 42,868<br>(35,781 - 50,927)          | 16,074<br>(12,452 - 19,740)          |
| Chagas disease                                                    | 5,223<br>(1,303 - 19,832)               | 14<br>(2 - 39)                       | 14<br>(3 - 50)                 | 1,001<br>(199 - 3,402)               | 2,236<br>(485 - 8,437)               | 1,960<br>(465 - 7,563)               |
| Leishmaniasis                                                     | 19,790<br>(16,296 - 23,699)             | 8,205<br>(6,011 - 10,535)            | 5,383<br>(3,919 - 6,943)       | 4,930<br>(3,977 - 6,074)             | 972<br>(776 - 1,220)                 | 299<br>(239 - 364)                   |
| Visceral leishmaniasis                                            | 19,790<br>(16,296 - 23,699)             | 8,205<br>(6,011 - 10,535)            | 5,383<br>(3,919 - 6,943)       | 4,930<br>(3,977 - 6,074)             | 972<br>(776 - 1,220)                 | 299<br>(239 - 364)                   |
| African trypanosomiasis                                           | 11,646<br>(5,810 - 18,967)              | 804<br>(363 - 1,391)                 | 1,260<br>(608 - 2,134)         | 7,185<br>(3,593 - 11,684)            | 1,963<br>(940 - 3,274)               | 434<br>(208 - 731)                   |
| Schistosomiasis                                                   | 7,292<br>(6,140 - 8,690)                | 164<br>(120 - 218)                   | 271<br>(214 - 334)             | 2,375<br>(1,967 - 2,831)             | 2,695<br>(2,184 - 3,322)             | 1,787<br>(1,392 - 2,281)             |
| Cysticercosis                                                     | 453<br>(392 - 577)                      | 31<br>(21 - 51)                      | 33<br>(26 - 45)                | 236<br>(204 - 304)                   | 110<br>(97 - 134)                    | 43<br>(38 - 49)                      |
| Cystic echinococcosis                                             | 2,210<br>(2,067 - 2,362)                | 345<br>(294 - 400)                   | 431<br>(390 - 473)             | 770<br>(709 - 835)                   | 403<br>(371 - 436)                   | 261<br>(243 - 279)                   |
| Dengue                                                            | 4,363<br>(2,500 - 5,876)                | 1,712<br>(733 - 2,681)               | 1,344<br>(603 - 1,934)         | 992<br>(681 - 1,250)                 | 183<br>(146 - 244)                   | 132<br>(94 - 167)                    |
| Yellow fever                                                      | 679<br>(527 - 858)                      | 62<br>(30 - 118)                     | 128<br>(74 - 205)              | 368<br>(260 - 508)                   | 91<br>(43 - 165)                     | 31<br>(9 - 80)                       |
| Rabies                                                            | 14,904<br>(9,145 - 19,716)              | 2,568<br>(1,430 - 4,109)             | 4,510<br>(2,382 - 5,906)       | 3,901<br>(2,558 - 5,388)             | 3,096<br>(1,865 - 3,916)             | 829<br>(565 - 1,164)                 |
| Intestinal nematode infections                                    | 4,883<br>(4,319 - 5,517)                | 3,801<br>(3,301 - 4,359)             | 671<br>(562 - 782)             | 199<br>(153 - 249)                   | 104<br>(72 - 140)                    | 108<br>(80 - 142)                    |

**Web Table 25 - Global deaths with 95% UI by age, sex, and cause in 1990**

| Cause                                                            | Females, All Ages                       | Females, 0-4 Years                   | Females, 5-14 Years            | Females, 15-49 Years                 | Females, 50-69 Years                 | Females, 70-80 Years                 |
|------------------------------------------------------------------|-----------------------------------------|--------------------------------------|--------------------------------|--------------------------------------|--------------------------------------|--------------------------------------|
| Ascariasis                                                       | 4,883<br>(4,319 - 5,517)                | 3,801<br>(3,301 - 4,359)             | 671<br>(562 - 782)             | 199<br>(153 - 249)                   | 104<br>(72 - 140)                    | 108<br>(80 - 142)                    |
| Other neglected tropical diseases                                | 19,025<br>(13,056 - 24,731)             | 11,761<br>(7,082 - 17,097)           | 1,374<br>(917 - 1,900)         | 2,678<br>(2,058 - 3,364)             | 1,605<br>(1,146 - 2,155)             | 1,607<br>(1,091 - 2,334)             |
| Maternal disorders                                               | 376,575<br>(343,975 - 408,222)          | --                                   | 2,021<br>(1,534 - 2,614)       | 374,554<br>(342,100 - 406,196)       | --                                   | --                                   |
| Maternal hemorrhage                                              | 71,390<br>(64,636 - 78,513)             | --                                   | 222<br>(169 - 289)             | 71,167<br>(64,419 - 78,282)          | --                                   | --                                   |
| Maternal sepsis and other maternal infections                    | 34,148<br>(30,509 - 38,035)             | --                                   | 221<br>(164 - 289)             | 33,927<br>(30,305 - 37,792)          | --                                   | --                                   |
| Maternal hypertensive disorders                                  | 36,594<br>(33,261 - 39,857)             | --                                   | 255<br>(194 - 329)             | 36,339<br>(32,998 - 39,567)          | --                                   | --                                   |
| Maternal obstructed labor                                        | 29,331<br>(26,332 - 32,749)             | --                                   | 116<br>(86 - 151)              | 29,215<br>(26,220 - 32,634)          | --                                   | --                                   |
| Maternal abortive outcome                                        | 50,045<br>(45,792 - 54,757)             | --                                   | 295<br>(221 - 397)             | 49,751<br>(45,474 - 54,498)          | --                                   | --                                   |
| Indirect maternal deaths                                         | 40,074<br>(35,459 - 44,364)             | --                                   | 178<br>(134 - 231)             | 39,897<br>(35,314 - 44,173)          | --                                   | --                                   |
| Late maternal deaths                                             | 44,859<br>(36,440 - 53,195)             | --                                   | 387<br>(281 - 528)             | 44,471<br>(36,072 - 52,844)          | --                                   | --                                   |
| Maternal deaths aggravated by HIV/AIDS                           | 791<br>(459 - 1,097)                    | --                                   | --                             | 791<br>(459 - 1,097)                 | --                                   | --                                   |
| Other maternal disorders                                         | 68,582<br>(58,429 - 80,402)             | --                                   | 343<br>(250 - 459)             | 68,239<br>(58,082 - 80,029)          | --                                   | --                                   |
| Neonatal disorders                                               | 1,502,039<br>(1,355,122 - 1,644,899)    | 1,502,039<br>(1,355,122 - 1,644,899) | --                             | --                                   | --                                   | --                                   |
| Neonatal preterm birth complications                             | 692,716<br>(535,662 - 842,861)          | 692,716<br>(535,662 - 842,861)       | --                             | --                                   | --                                   | --                                   |
| Neonatal encephalopathy due to birth asphyxia and trauma         | 384,822<br>(296,392 - 485,172)          | 384,822<br>(296,392 - 485,172)       | --                             | --                                   | --                                   | --                                   |
| Neonatal sepsis and other neonatal infections                    | 136,142<br>(70,174 - 206,087)           | 136,142<br>(70,174 - 206,087)        | --                             | --                                   | --                                   | --                                   |
| Hemolytic disease and other neonatal jaundice                    | 28,816<br>(13,887 - 50,555)             | 28,816<br>(13,887 - 50,555)          | --                             | --                                   | --                                   | --                                   |
| Other neonatal disorders                                         | 259,543<br>(168,659 - 351,063)          | 259,543<br>(168,659 - 351,063)       | --                             | --                                   | --                                   | --                                   |
| Nutritional deficiencies                                         | 400,909<br>(359,114 - 448,308)          | 235,577<br>(198,445 - 275,802)       | 19,743<br>(16,861 - 22,874)    | 36,341<br>(32,221 - 40,389)          | 30,522<br>(27,024 - 34,074)          | 78,727<br>(69,995 - 87,365)          |
| Protein-energy malnutrition                                      | 246,738<br>(173,943 - 312,228)          | 174,158<br>(120,110 - 226,986)       | 10,835<br>(7,104 - 14,124)     | 9,621<br>(5,148 - 14,994)            | 11,525<br>(6,723 - 17,058)           | 40,600<br>(23,967 - 52,165)          |
| Iodine deficiency                                                | 1,139<br>(620 - 1,974)                  | 513<br>(178 - 1,233)                 | 93<br>(34 - 241)               | 143<br>(74 - 268)                    | 160<br>(74 - 288)                    | 230<br>(95 - 481)                    |
| Iron-deficiency anemia                                           | 135,999<br>(82,990 - 210,262)           | 53,454<br>(21,835 - 104,237)         | 8,177<br>(5,167 - 12,214)      | 24,862<br>(18,104 - 30,594)          | 16,631<br>(10,997 - 21,968)          | 32,876<br>(21,032 - 50,387)          |
| Other nutritional deficiencies                                   | 17,033<br>(10,177 - 29,418)             | 7,453<br>(3,613 - 15,248)            | 639<br>(312 - 1,040)           | 1,715<br>(853 - 2,931)               | 2,206<br>(1,268 - 3,866)             | 5,021<br>(2,446 - 8,005)             |
| Other communicable, maternal, neonatal, and nutritional diseases | 260,232<br>(207,493 - 331,371)          | 159,129<br>(110,563 - 224,928)       | 21,351<br>(17,021 - 26,862)    | 32,592<br>(29,164 - 36,098)          | 26,783<br>(22,258 - 32,441)          | 20,378<br>(16,760 - 25,165)          |
| Sexually transmitted diseases excluding HIV                      | 132,940<br>(80,753 - 205,493)           | 113,048<br>(64,579 - 179,087)        | 9,303<br>(5,488 - 14,680)      | 3,822<br>(3,025 - 4,580)             | 3,180<br>(1,793 - 5,410)             | 3,587<br>(2,087 - 5,964)             |
| Syphilis                                                         | 128,141<br>(76,004 - 200,390)           | 113,048<br>(64,579 - 179,087)        | 9,126<br>(5,314 - 14,435)      | 1,539<br>(1,218 - 1,851)             | 1,751<br>(980 - 3,026)               | 2,676<br>(1,568 - 4,368)             |
| Chlamydial infection                                             | 1,491<br>(1,125 - 1,876)                | --                                   | 65<br>(38 - 98)                | 762<br>(605 - 911)                   | 430<br>(244 - 716)                   | 234<br>(136 - 421)                   |
| Gonococcal infection                                             | 1,853<br>(1,365 - 2,407)                | --                                   | 56<br>(32 - 84)                | 786<br>(622 - 944)                   | 568<br>(321 - 957)                   | 444<br>(257 - 766)                   |
| Other sexually transmitted diseases                              | 1,454<br>(1,094 - 1,835)                | --                                   | 56<br>(33 - 85)                | 734<br>(582 - 876)                   | 431<br>(244 - 721)                   | 233<br>(135 - 434)                   |
| Hepatitis                                                        | 73,200<br>(67,492 - 79,692)             | 22,197<br>(18,547 - 26,572)          | 7,961<br>(6,781 - 9,329)       | 22,166<br>(19,771 - 24,569)          | 13,350<br>(11,767 - 15,058)          | 7,526<br>(6,572 - 8,569)             |
| Acute hepatitis A                                                | 12,101<br>(4,592 - 20,666)              | 8,958<br>(3,572 - 14,931)            | 1,665<br>(553 - 3,170)         | 1,095<br>(318 - 2,222)               | 280<br>(73 - 631)                    | 103<br>(25 - 257)                    |
| Acute hepatitis B                                                | 33,702<br>(25,170 - 42,479)             | 10,183<br>(5,555 - 15,803)           | 1,347<br>(737 - 2,137)         | 5,535<br>(3,528 - 7,975)             | 10,081<br>(8,101 - 12,018)           | 6,556<br>(5,567 - 7,628)             |
| Acute hepatitis C                                                | 929<br>(191 - 2,139)                    | --                                   | 115<br>(22 - 279)              | 300<br>(60 - 721)                    | 317<br>(62 - 774)                    | 197<br>(40 - 469)                    |
| Acute hepatitis E                                                | 26,469<br>(20,272 - 33,500)             | 3,056<br>(1,449 - 5,394)             | 4,834<br>(3,456 - 6,289)       | 15,236<br>(12,339 - 18,140)          | 2,672<br>(1,453 - 4,350)             | 671<br>(324 - 1,214)                 |
| Other infectious diseases                                        | 54,092<br>(41,339 - 71,683)             | 23,884<br>(17,503 - 33,480)          | 4,087<br>(2,806 - 5,786)       | 6,603<br>(4,657 - 8,369)             | 10,253<br>(7,060 - 16,519)           | 9,265<br>(6,310 - 13,319)            |
| Non-communicable diseases                                        | 12,996,489<br>(12,621,678 - 13,423,793) | 605,854<br>(501,163 - 730,502)       | 146,501<br>(131,460 - 161,055) | 1,275,293<br>(1,198,879 - 1,351,372) | 3,575,572<br>(3,432,131 - 3,733,615) | 7,393,268<br>(7,260,268 - 7,567,704) |
| Neoplasms                                                        | 2,504,743<br>(2,326,375 - 2,656,854)    | 35,830<br>(28,762 - 48,656)          | 29,434<br>(25,734 - 34,073)    | 425,827<br>(393,401 - 453,284)       | 1,031,107<br>(952,069 - 1,096,272)   | 982,544<br>(923,202 - 1,064,333)     |
| Esophageal cancer                                                | 114,577<br>(102,422 - 131,896)          | --                                   | --                             | 8,685<br>(8,685 - 12,029)            | 51,621<br>(45,268 - 60,180)          | 52,624<br>(47,043 - 60,997)          |
| Stomach cancer                                                   | 301,059<br>(267,932 - 337,509)          | --                                   | --                             | 45,184<br>(40,502 - 50,194)          | 117,007<br>(103,818 - 130,736)       | 138,868<br>(120,029 - 159,604)       |
| Liver cancer                                                     | 162,932<br>(147,856 - 179,492)          | --                                   | 1,047<br>(755 - 1,551)         | 28,900<br>(25,417 - 33,189)          | 74,064<br>(66,188 - 83,051)          | 58,920<br>(53,245 - 65,833)          |

**Web Table 25 - Global deaths with 95% UI by age, sex, and cause in 1990**

| Cause                                | Females, All Ages                    | Females, 0-4 Years          | Females, 5-14 Years         | Females, 15-49 Years           | Females, 50-69 Years                 | Females, 70-80 Years                 |
|--------------------------------------|--------------------------------------|-----------------------------|-----------------------------|--------------------------------|--------------------------------------|--------------------------------------|
| Liver cancer due to hepatitis B      | 47,785<br>(41,519 - 54,941)          | --                          | 275<br>(195 - 423)          | 11,535<br>(9,843 - 13,579)     | 23,357<br>(19,786 - 27,348)          | 12,619<br>(10,915 - 14,456)          |
| Liver cancer due to hepatitis C      | 31,605<br>(27,937 - 36,199)          | --                          | 38<br>(24 - 68)             | 3,386<br>(2,871 - 4,067)       | 13,893<br>(12,145 - 16,020)          | 14,287<br>(12,565 - 16,727)          |
| Liver cancer due to alcohol use      | 33,700<br>(30,691 - 37,684)          | --                          | --                          | 2,871<br>(2,501 - 3,269)       | 14,084<br>(12,466 - 15,864)          | 16,744<br>(15,056 - 19,067)          |
| Liver cancer due to other causes     | 49,842<br>(44,069 - 55,275)          | --                          | 735<br>(523 - 1,112)        | 11,108<br>(9,713 - 12,827)     | 22,730<br>(19,887 - 25,718)          | 15,270<br>(13,411 - 17,229)          |
| Larynx cancer                        | 11,611<br>(7,311 - 17,871)           | --                          | --                          | 1,804<br>(1,072 - 2,950)       | 5,414<br>(3,424 - 8,335)             | 4,392<br>(2,790 - 6,420)             |
| Tracheal, bronchus and lung cancer   | 285,572<br>(258,570 - 308,286)       | --                          | --                          | 31,373<br>(26,686 - 34,608)    | 134,128<br>(119,535 - 145,185)       | 120,071<br>(112,371 - 134,952)       |
| Breast cancer                        | 322,271<br>(283,679 - 362,372)       | --                          | --                          | 75,883<br>(67,741 - 81,367)    | 147,852<br>(131,883 - 166,780)       | 98,535<br>(83,711 - 116,079)         |
| Cervical cancer                      | 196,311<br>(162,940 - 212,390)       | --                          | --                          | 56,689<br>(48,367 - 63,670)    | 93,739<br>(76,579 - 103,286)         | 45,883<br>(36,873 - 49,674)          |
| Uterine cancer                       | 45,636<br>(36,572 - 55,582)          | --                          | --                          | 5,962<br>(4,332 - 7,974)       | 21,376<br>(17,076 - 26,407)          | 18,299<br>(15,176 - 21,269)          |
| Prostate cancer                      | --                                   | --                          | --                          | --                             | --                                   | --                                   |
| Colon and rectum cancer              | 245,656<br>(234,520 - 262,370)       | --                          | --                          | 23,291<br>(21,895 - 24,948)    | 88,593<br>(84,444 - 94,553)          | 133,772<br>(126,927 - 143,804)       |
| Lip and oral cavity cancer           | 29,426<br>(22,326 - 35,015)          | --                          | --                          | 5,262<br>(3,707 - 6,672)       | 13,375<br>(9,913 - 16,386)           | 10,789<br>(8,564 - 12,694)           |
| Nasopharynx cancer                   | 19,456<br>(14,851 - 27,334)          | --                          | 389<br>(262 - 730)          | 6,865<br>(5,141 - 9,839)       | 8,320<br>(6,446 - 11,990)            | 3,883<br>(2,765 - 5,078)             |
| Other pharynx cancer                 | 10,283<br>(9,249 - 11,429)           | --                          | --                          | 2,074<br>(1,733 - 2,434)       | 5,329<br>(4,710 - 6,116)             | 2,880<br>(2,514 - 3,304)             |
| Gallbladder and biliary tract cancer | 74,038<br>(61,823 - 88,883)          | --                          | --                          | 5,645<br>(4,631 - 6,582)       | 29,615<br>(25,036 - 34,706)          | 38,778<br>(31,759 - 47,824)          |
| Pancreatic cancer                    | 87,984<br>(83,797 - 93,905)          | --                          | --                          | 5,442<br>(5,108 - 5,818)       | 33,921<br>(32,188 - 36,432)          | 48,621<br>(46,023 - 52,112)          |
| Malignant skin melanoma              | 18,699<br>(14,971 - 23,017)          | --                          | --                          | 4,637<br>(3,729 - 5,302)       | 7,250<br>(5,925 - 9,067)             | 6,812<br>(5,281 - 8,635)             |
| Non-melanoma skin cancer             | 11,769<br>(8,895 - 15,114)           | --                          | --                          | 1,608<br>(1,056 - 2,261)       | 2,629<br>(1,907 - 3,477)             | 7,533<br>(5,841 - 9,673)             |
| Ovarian cancer                       | 98,912<br>(93,107 - 106,124)         | --                          | --                          | 17,870<br>(16,516 - 19,069)    | 50,595<br>(46,990 - 54,309)          | 30,447<br>(28,711 - 33,898)          |
| Testicular cancer                    | --                                   | --                          | --                          | --                             | --                                   | --                                   |
| Kidney cancer                        | 32,040<br>(27,872 - 36,667)          | 1,801<br>(980 - 2,623)      | 723<br>(530 - 929)          | 3,341<br>(2,881 - 3,761)       | 12,903<br>(11,227 - 14,513)          | 13,271<br>(11,347 - 16,192)          |
| Bladder cancer                       | 34,721<br>(26,657 - 42,905)          | --                          | --                          | 2,383<br>(1,702 - 2,971)       | 10,685<br>(7,894 - 12,938)           | 21,654<br>(16,663 - 27,586)          |
| Brain and nervous system cancer      | 60,053<br>(52,961 - 68,239)          | 2,525<br>(1,848 - 3,350)    | 4,300<br>(3,526 - 5,082)    | 17,608<br>(14,847 - 19,553)    | 22,755<br>(20,255 - 26,105)          | 12,866<br>(11,390 - 15,500)          |
| Thyroid cancer                       | 16,066<br>(12,929 - 18,531)          | --                          | 126<br>(44 - 279)           | 1,849<br>(1,336 - 2,417)       | 5,982<br>(4,868 - 7,091)             | 8,108<br>(6,457 - 9,288)             |
| Mesothelioma                         | 7,190<br>(5,995 - 8,427)             | --                          | --                          | 992<br>(821 - 1,110)           | 3,521<br>(3,030 - 4,179)             | 2,676<br>(2,089 - 3,225)             |
| Hodgkin lymphoma                     | 16,029<br>(10,273 - 19,367)          | 3,239<br>(1,692 - 5,434)    | 1,180<br>(559 - 1,781)      | 4,776<br>(3,129 - 5,543)       | 3,708<br>(2,324 - 4,321)             | 3,125<br>(1,972 - 3,590)             |
| Non-Hodgkin lymphoma                 | 57,337<br>(46,786 - 77,116)          | 3,041<br>(1,822 - 7,048)    | 10,398<br>(1,516 - 3,715)   | 18,937<br>(7,648 - 13,595)     | 22,500<br>(15,131 - 24,809)          | 22,500<br>(18,000 - 31,519)          |
| Multiple myeloma                     | 22,219<br>(17,308 - 30,217)          | --                          | --                          | 1,509<br>(1,198 - 1,822)       | 8,804<br>(6,751 - 11,562)            | 11,905<br>(8,723 - 17,157)           |
| Leukemia                             | 101,717<br>(95,470 - 110,441)        | 9,885<br>(8,202 - 12,656)   | 11,514<br>(10,277 - 13,031) | 31,422<br>(28,767 - 34,487)    | 24,116<br>(22,393 - 26,039)          | 24,781<br>(23,303 - 27,045)          |
| Other neoplasms                      | 121,179<br>(104,595 - 159,776)       | 15,338<br>(10,034 - 28,634) | 7,695<br>(5,659 - 12,091)   | 22,726<br>(18,934 - 31,054)    | 34,867<br>(29,986 - 42,574)          | 40,552<br>(36,656 - 50,764)          |
| Cardiovascular diseases              | 6,302,274<br>(5,800,592 - 6,810,125) | 61,082<br>(42,911 - 79,455) | 28,519<br>(22,624 - 37,380) | 401,433<br>(345,638 - 469,029) | 1,532,461<br>(1,369,828 - 1,706,181) | 4,278,778<br>(3,986,209 - 4,523,514) |
| Rheumatic heart disease              | 219,863<br>(158,097 - 294,724)       | 3,905<br>(2,482 - 7,037)    | 6,868<br>(5,020 - 10,292)   | 57,285<br>(41,415 - 77,723)    | 78,014<br>(54,090 - 103,148)         | 73,790<br>(53,332 - 99,964)          |
| Ischemic heart disease               | 2,792,795<br>(2,401,873 - 3,160,549) | 8,566<br>(5,951 - 12,676)   | 4,650<br>(3,322 - 6,436)    | 138,860<br>(109,256 - 173,386) | 632,296<br>(519,961 - 737,542)       | 2,008,423<br>(1,738,326 - 2,241,817) |
| Cerebrovascular disease              | 2,473,662<br>(2,120,488 - 2,767,980) | 16,802<br>(11,906 - 24,290) | 9,705<br>(7,626 - 13,039)   | 139,201<br>(116,091 - 166,808) | 615,347<br>(524,727 - 711,334)       | 1,692,607<br>(1,449,005 - 1,889,641) |
| Ischemic stroke                      | 1,251,948<br>(1,011,250 - 1,429,167) | 2,149<br>(820 - 4,714)      | 1,310<br>(545 - 2,981)      | 20,043<br>(13,588 - 28,998)    | 205,955<br>(157,389 - 251,568)       | 1,022,491<br>(832,064 - 1,161,427)   |
| Hemorrhagic stroke                   | 1,221,713<br>(1,002,412 - 1,457,467) | 14,653<br>(10,217 - 21,230) | 8,395<br>(6,227 - 11,597)   | 119,157<br>(99,736 - 145,926)  | 409,393<br>(336,737 - 488,963)       | 670,116<br>(530,116 - 804,122)       |
| Hypertensive heart disease           | 350,313<br>(273,396 - 451,380)       | 1,602<br>(907 - 2,588)      | 595<br>(405 - 881)          | 18,385<br>(13,625 - 24,721)    | 84,742<br>(64,747 - 108,151)         | 244,989<br>(191,579 - 314,339)       |
| Cardiomyopathy and myocarditis       | 130,943<br>(104,638 - 162,071)       | 12,356<br>(4,918 - 20,173)  | 3,053<br>(1,376 - 4,502)    | 15,636<br>(10,740 - 19,655)    | 25,263<br>(19,551 - 33,892)          | 74,634<br>(61,436 - 91,536)          |
| Atrial fibrillation and flutter      | 18,276<br>(15,744 - 21,366)          | --                          | --                          | 145<br>(120 - 176)             | 1,416<br>(1,184 - 1,696)             | 16,715<br>(14,325 - 19,728)          |
| Aortic aneurysm                      | 34,682<br>(22,096 - 50,556)          | --                          | --                          | 2,425<br>(1,454 - 3,682)       | 8,681<br>(5,349 - 12,879)            | 23,576<br>(14,948 - 34,786)          |



**Web Table 25 - Global deaths with 95% UI by age, sex, and cause in 1990**

| Cause                                               | Females, All Ages                    | Females, 0-4 Years          | Females, 5-14 Years         | Females, 15-49 Years          | Females, 50-69 Years           | Females, 70-80 Years             |
|-----------------------------------------------------|--------------------------------------|-----------------------------|-----------------------------|-------------------------------|--------------------------------|----------------------------------|
| Peripheral vascular disease                         | 7,792<br>(6,624 - 9,142)             | --                          | --                          | 101<br>(78 - 125)             | 985<br>(786 - 1,170)           | 6,707<br>(5,708 - 7,895)         |
| Endocarditis                                        | 22,171<br>(15,313 - 35,560)          | 2,329<br>(1,168 - 4,309)    | 555<br>(304 - 1,040)        | 3,817<br>(2,619 - 6,625)      | 5,156<br>(3,400 - 9,144)       | 10,314<br>(6,347 - 16,332)       |
| Other cardiovascular and circulatory diseases       | 251,778<br>(201,657 - 305,662)       | 15,522<br>(10,272 - 21,675) | 3,093<br>(2,133 - 4,176)    | 25,578<br>(18,332 - 32,773)   | 80,560<br>(61,476 - 99,782)    | 127,024<br>(101,585 - 155,090)   |
| Chronic respiratory diseases                        | 1,567,952<br>(1,419,632 - 1,742,988) | 60,306<br>(49,325 - 69,976) | 12,881<br>(11,354 - 14,666) | 104,195<br>(91,494 - 118,127) | 441,472<br>(388,324 - 497,217) | 949,098<br>(864,501 - 1,064,187) |
| Chronic obstructive pulmonary disease               | 1,099,613<br>(930,039 - 1,259,843)   | 30,094<br>(22,726 - 36,246) | 3,827<br>(2,446 - 5,148)    | 46,586<br>(33,652 - 58,491)   | 285,764<br>(228,607 - 337,150) | 733,343<br>(630,502 - 836,674)   |
| Pneumoconiosis                                      | 84,484<br>(57,862 - 118,531)         | 366<br>(239 - 566)          | 214<br>(141 - 275)          | 7,161<br>(4,312 - 9,995)      | 37,886<br>(23,877 - 54,362)    | 38,857<br>(24,667 - 59,706)      |
| Silicosis                                           | 2,777<br>(1,560 - 5,211)             | 28<br>(22 - 88)             | 340<br>(19 - 49)            | 340<br>(180 - 718)            | 1,052<br>(500 - 2,269)         | 1,318<br>(743 - 2,423)           |
| Asbestosis                                          | 2,067<br>(1,117 - 3,728)             | 43<br>(26 - 92)             | 29<br>(20 - 44)             | 311<br>(172 - 568)            | 885<br>(421 - 1,709)           | 799<br>(412 - 1,478)             |
| Coal workers pneumoconiosis                         | 2,600<br>(1,501 - 4,596)             | 49<br>(30 - 97)             | 33<br>(23 - 47)             | 373<br>(220 - 678)            | 978<br>(486 - 2,045)           | 1,167<br>(646 - 2,061)           |
| Other pneumoconiosis                                | 77,040<br>(51,268 - 109,914)         | 235<br>(123 - 357)          | 123<br>(62 - 168)           | 6,138<br>(3,471 - 8,627)      | 34,971<br>(21,980 - 50,050)    | 35,573<br>(22,640 - 55,362)      |
| Asthma                                              | 239,511<br>(165,868 - 415,280)       | 14,732<br>(11,534 - 18,818) | 7,333<br>(5,887 - 9,841)    | 39,082<br>(28,861 - 57,010)   | 80,709<br>(52,015 - 146,339)   | 97,655<br>(63,799 - 188,206)     |
| Interstitial lung disease and pulmonary sarcoidosis | 99,996<br>(43,748 - 152,805)         | 557<br>(168 - 1,301)        | 316<br>(125 - 821)          | 6,328<br>(2,428 - 10,347)     | 31,292<br>(11,356 - 53,775)    | 61,502<br>(28,371 - 94,356)      |
| Other chronic respiratory diseases                  | 44,348<br>(33,992 - 57,250)          | 14,557<br>(11,522 - 18,688) | 1,192<br>(772 - 1,563)      | 5,038<br>(3,702 - 6,296)      | 5,820<br>(4,087 - 8,147)       | 17,741<br>(12,650 - 25,367)      |
| Cirrhosis                                           | 292,448<br>(276,990 - 309,506)       | 9,489<br>(7,703 - 11,803)   | 6,278<br>(5,542 - 7,108)    | 91,601<br>(57,744 - 65,601)   | 122,006<br>(114,404 - 130,386) | 93,075<br>(86,360 - 99,262)      |
| Cirrhosis due to hepatitis B                        | 91,591<br>(82,836 - 100,045)         | 616<br>(436 - 848)          | 1,195<br>(904 - 1,542)      | 21,510<br>(19,297 - 23,867)   | 40,795<br>(36,444 - 45,273)    | 27,475<br>(24,087 - 30,175)      |
| Cirrhosis due to hepatitis C                        | 92,525<br>(84,613 - 102,101)         | 521<br>(391 - 718)          | 921<br>(676 - 1,210)        | 18,138<br>(16,518 - 20,060)   | 40,319<br>(36,278 - 45,258)    | 32,626<br>(29,076 - 36,392)      |
| Cirrhosis due to alcohol use                        | 65,213<br>(59,541 - 70,680)          | --                          | --                          | 9,185<br>(8,177 - 10,317)     | 28,795<br>(26,110 - 31,541)    | 27,233<br>(24,619 - 29,579)      |
| Cirrhosis due to other causes                       | 43,120<br>(38,889 - 47,580)          | 8,352<br>(6,707 - 10,440)   | 4,162<br>(3,534 - 4,872)    | 12,768<br>(11,137 - 14,507)   | 12,097<br>(10,433 - 13,985)    | 5,741<br>(4,932 - 6,645)         |
| Digestive diseases                                  | 476,797<br>(416,551 - 525,036)       | 23,641<br>(19,734 - 30,477) | 19,744<br>(16,896 - 22,954) | 86,498<br>(72,771 - 97,518)   | 127,090<br>(107,164 - 140,543) | 219,825<br>(192,574 - 246,736)   |
| Peptic ulcer disease                                | 123,286<br>(97,689 - 156,152)        | 2,074<br>(1,340 - 3,507)    | 2,733<br>(1,725 - 4,173)    | 19,510<br>(14,738 - 26,231)   | 38,991<br>(30,598 - 49,927)    | 59,978<br>(46,409 - 75,068)      |
| Gastritis and duodenitis                            | 26,143<br>(11,420 - 43,519)          | 1,492<br>(502 - 2,652)      | 1,734<br>(897 - 3,307)      | 5,346<br>(2,399 - 8,910)      | 7,320<br>(2,939 - 11,601)      | 10,252<br>(4,206 - 17,996)       |
| Appendicitis                                        | 41,551<br>(30,158 - 52,864)          | 4,013<br>(2,491 - 6,892)    | 3,848<br>(2,795 - 5,426)    | 14,456<br>(10,280 - 18,525)   | 9,184<br>(6,022 - 12,371)      | 10,050<br>(6,166 - 13,950)       |
| Paralytic ileus and intestinal obstruction          | 81,945<br>(45,650 - 121,871)         | 4,091<br>(2,234 - 5,929)    | 3,877<br>(1,874 - 5,386)    | 17,355<br>(9,545 - 23,777)    | 20,488<br>(11,263 - 29,930)    | 36,134<br>(20,699 - 56,857)      |
| Inguinal, femoral, and abdominal hernia             | 19,611<br>(10,733 - 27,007)          | 692<br>(328 - 1,134)        | 1,881<br>(958 - 2,759)      | 2,101<br>(1,106 - 2,927)      | 4,564<br>(2,465 - 6,106)       | 10,373<br>(5,365 - 15,003)       |
| Inflammatory bowel disease                          | 30,014<br>(19,001 - 39,692)          | 4,690<br>(3,124 - 7,030)    | 2,135<br>(1,349 - 3,185)    | 6,070<br>(3,721 - 8,549)      | 5,800<br>(3,575 - 7,822)       | 11,319<br>(6,705 - 14,965)       |
| Vascular intestinal disorders                       | 29,197<br>(16,421 - 49,730)          | 66<br>(0 - 432)             | 133<br>(1 - 819)            | 1,462<br>(772 - 2,873)        | 5,767<br>(3,072 - 9,968)       | 21,768<br>(11,747 - 36,880)      |
| Gallbladder and biliary diseases                    | 48,527<br>(37,735 - 60,404)          | 998<br>(721 - 1,617)        | 875<br>(623 - 1,172)        | 5,734<br>(4,494 - 7,273)      | 13,617<br>(9,959 - 16,934)     | 27,304<br>(21,319 - 35,213)      |
| Pancreatitis                                        | 35,713<br>(22,598 - 53,692)          | 427<br>(121 - 837)          | 995<br>(470 - 1,854)        | 9,164<br>(5,836 - 14,751)     | 12,386<br>(7,476 - 18,701)     | 12,741<br>(7,840 - 18,993)       |
| Other digestive diseases                            | 40,809<br>(34,177 - 48,515)          | 5,098<br>(3,834 - 7,073)    | 1,533<br>(1,220 - 1,926)    | 5,299<br>(4,340 - 6,436)      | 8,972<br>(7,367 - 11,033)      | 19,906<br>(16,043 - 23,822)      |
| Neurological disorders                              | 562,412<br>(513,530 - 612,888)       | 12,464<br>(8,113 - 16,576)  | 6,772<br>(4,768 - 8,404)    | 28,572<br>(23,374 - 33,808)   | 41,995<br>(38,938 - 46,377)    | 472,609<br>(430,666 - 513,477)   |
| Alzheimer disease and other dementias               | 462,735<br>(421,062 - 501,508)       | --                          | --                          | 88<br>(75 - 109)              | 22,705<br>(20,651 - 25,043)    | 439,942<br>(398,568 - 478,936)   |
| Parkinson disease                                   | 20,891<br>(16,484 - 28,849)          | --                          | --                          | 209<br>(157 - 274)            | 2,702<br>(2,090 - 3,664)       | 17,980<br>(14,415 - 24,829)      |
| Epilepsy                                            | 47,030<br>(34,319 - 58,417)          | 9,895<br>(5,441 - 13,566)   | 5,792<br>(3,775 - 7,304)    | 21,943<br>(16,514 - 26,814)   | 5,185<br>(4,023 - 6,629)       | 4,215<br>(3,427 - 5,944)         |
| Multiple sclerosis                                  | 7,200<br>(5,044 - 11,587)            | --                          | --                          | 2,554<br>(1,654 - 4,035)      | 3,140<br>(2,269 - 5,266)       | 1,506<br>(1,045 - 2,500)         |
| Other neurological disorders                        | 24,557<br>(23,196 - 27,772)          | 2,569<br>(2,235 - 3,289)    | 980<br>(860 - 1,250)        | 3,779<br>(3,477 - 4,543)      | 8,264<br>(7,743 - 9,312)       | 8,966<br>(8,421 - 9,710)         |
| Mental and substance use disorders                  | 44,824<br>(33,412 - 64,033)          | 772<br>(464 - 1,657)        | 36<br>(29 - 44)             | 21,131<br>(15,893 - 29,476)   | 16,175<br>(11,129 - 25,638)    | 6,710<br>(5,190 - 8,889)         |
| Schizophrenia                                       | 12,007<br>(7,510 - 15,289)           | --                          | --                          | 5,405<br>(3,294 - 6,968)      | 3,817<br>(2,411 - 4,894)       | 2,785<br>(1,795 - 3,530)         |
| Alcohol use disorders                               | 21,260<br>(11,190 - 40,789)          | --                          | --                          | 9,289<br>(4,870 - 17,419)     | 9,856<br>(5,187 - 19,573)      | 2,115<br>(1,059 - 4,041)         |
| Drug use disorders                                  | 11,255<br>(9,749 - 13,382)           | 772<br>(464 - 1,657)        | --                          | 6,171<br>(5,378 - 7,614)      | 2,503<br>(2,081 - 2,996)       | 1,810<br>(1,493 - 2,202)         |
| Opioid use disorders                                | 3,902<br>(3,343 - 4,728)             | 294<br>(152 - 658)          | --                          | 2,151<br>(1,809 - 2,684)      | 812<br>(659 - 994)             | 645<br>(518 - 786)               |

**Web Table 25 - Global deaths with 95% UI by age, sex, and cause in 1990**

| Cause                                               | Females, All Ages              | Females, 0-4 Years             | Females, 5-14 Years         | Females, 15-49 Years          | Females, 50-69 Years           | Females, 70-80 Years           |
|-----------------------------------------------------|--------------------------------|--------------------------------|-----------------------------|-------------------------------|--------------------------------|--------------------------------|
| Cocaine use disorders                               | 803<br>(678 - 960)             | 52<br>(28 - 108)               | --                          | 496<br>(392 - 623)            | 136<br>(112 - 166)             | 119<br>(92 - 152)              |
| Amphetamine use disorders                           | 757<br>(634 - 915)             | 59<br>(33 - 125)               | --                          | 419<br>(325 - 539)            | 152<br>(125 - 184)             | 128<br>(99 - 166)              |
| Other drug use disorders                            | 5,793<br>(4,961 - 7,117)       | 368<br>(229 - 750)             | --                          | 3,104<br>(2,665 - 3,930)      | 1,402<br>(1,160 - 1,716)       | 918<br>(753 - 1,137)           |
| Eating disorders                                    | 302<br>(265 - 343)             | --                             | 36<br>(29 - 44)             | 266<br>(230 - 305)            | --                             | --                             |
| Anorexia nervosa                                    | 302<br>(265 - 343)             | --                             | 36<br>(29 - 44)             | 266<br>(230 - 305)            | --                             | --                             |
| Diabetes, urogenital, blood, and endocrine diseases | 800,766<br>(727,820 - 871,074) | 75,831<br>(48,799 - 108,773)   | 23,510<br>(16,096 - 31,374) | 107,771<br>(96,059 - 119,078) | 239,627<br>(216,851 - 257,604) | 354,028<br>(325,121 - 384,179) |
| Diabetes mellitus                                   | 376,058<br>(350,417 - 404,143) | 3,684<br>(2,265 - 5,842)       | 1,622<br>(953 - 2,591)      | 33,403<br>(30,179 - 37,145)   | 144,327<br>(131,431 - 155,925) | 193,023<br>(179,019 - 208,511) |
| Acute glomerulonephritis                            | 11,624<br>(6,027 - 16,784)     | 2,299<br>(660 - 4,426)         | 1,335<br>(634 - 2,120)      | 3,472<br>(2,017 - 4,828)      | 2,478<br>(1,242 - 3,690)       | 2,041<br>(999 - 3,172)         |
| Chronic kidney disease                              | 188,032<br>(159,247 - 212,218) | 5,043<br>(3,744 - 5,922)       | 3,030<br>(2,406 - 3,452)    | 30,107<br>(25,005 - 33,669)   | 54,621<br>(46,633 - 62,285)    | 95,232<br>(79,817 - 108,145)   |
| Chronic kidney disease due to diabetes mellitus     | 23,017<br>(17,730 - 27,822)    | 87<br>(44 - 142)               | 68<br>(40 - 102)            | 2,082<br>(1,423 - 2,609)      | 7,234<br>(5,670 - 8,896)       | 13,546<br>(10,396 - 16,864)    |
| Chronic kidney disease due to hypertension          | 56,440<br>(37,038 - 76,082)    | 473<br>(200 - 887)             | 254<br>(117 - 452)          | 6,150<br>(3,679 - 8,847)      | 15,531<br>(9,735 - 21,304)     | 34,032<br>(22,293 - 45,834)    |
| Chronic kidney disease due to glomerulonephritis    | 45,837<br>(34,355 - 56,536)    | 3,033<br>(2,075 - 3,805)       | 1,745<br>(1,289 - 2,139)    | 13,234<br>(10,158 - 16,181)   | 14,020<br>(10,126 - 17,980)    | 13,805<br>(9,794 - 18,015)     |
| Chronic kidney disease due to other causes          | 62,737<br>(45,871 - 79,878)    | 1,450<br>(888 - 2,170)         | 963<br>(627 - 1,305)        | 8,640<br>(5,928 - 11,001)     | 17,837<br>(13,213 - 22,647)    | 33,848<br>(23,701 - 44,050)    |
| Urinary diseases and male infertility               | 72,111<br>(57,933 - 80,506)    | 4,323<br>(2,851 - 5,674)       | 1,567<br>(1,060 - 2,008)    | 10,628<br>(8,344 - 11,972)    | 18,775<br>(13,984 - 21,085)    | 36,818<br>(30,249 - 44,451)    |
| Interstitial nephritis and urinary tract infections | 57,870<br>(45,197 - 65,087)    | 3,392<br>(2,087 - 4,654)       | 1,113<br>(631 - 1,528)      | 8,050<br>(6,018 - 9,253)      | 14,559<br>(10,704 - 16,566)    | 30,755<br>(25,265 - 37,251)    |
| Urolithiasis                                        | 6,271<br>(4,136 - 8,283)       | --                             | 201<br>(123 - 352)          | 1,242<br>(885 - 1,688)        | 2,197<br>(1,348 - 2,969)       | 2,632<br>(1,582 - 3,538)       |
| Other urinary diseases                              | 7,971<br>(6,077 - 11,557)      | 931<br>(395 - 1,512)           | 253<br>(157 - 452)          | 1,337<br>(1,015 - 2,050)      | 2,019<br>(1,454 - 3,074)       | 3,431<br>(2,494 - 4,995)       |
| Gynecological diseases                              | 5,302<br>(3,932 - 7,023)       | --                             | --                          | 2,845<br>(2,138 - 3,853)      | 1,005<br>(768 - 1,248)         | 1,451<br>(975 - 2,128)         |
| Uterine fibroids                                    | 1,238<br>(895 - 1,677)         | --                             | --                          | 509<br>(366 - 707)            | 279<br>(214 - 350)             | 450<br>(302 - 663)             |
| Polycystic ovarian syndrome                         | 193<br>(147 - 260)             | --                             | --                          | 187<br>(142 - 250)            | 6<br>(5 - 9)                   | --                             |
| Endometriosis                                       | 475<br>(360 - 632)             | --                             | --                          | 449<br>(341 - 599)            | 25<br>(18 - 36)                | --                             |
| Genital prolapse                                    | 920<br>(680 - 1,229)           | --                             | --                          | 373<br>(283 - 498)            | 179<br>(137 - 224)             | 368<br>(246 - 540)             |
| Other gynecological diseases                        | 2,476<br>(1,845 - 3,249)       | --                             | --                          | 1,327<br>(1,001 - 1,774)      | 515<br>(393 - 638)             | 633<br>(426 - 936)             |
| Hemoglobinopathies and hemolytic anemias            | 87,701<br>(46,725 - 135,182)   | 46,120<br>(17,746 - 79,999)    | 13,451<br>(6,290 - 22,049)  | 16,417<br>(8,442 - 24,864)    | 5,897<br>(3,060 - 8,511)       | 5,815<br>(3,142 - 7,979)       |
| Thalassemias                                        | 17,386<br>(8,258 - 26,963)     | 9,037<br>(3,413 - 15,355)      | 2,853<br>(1,372 - 4,408)    | 5,261<br>(2,777 - 7,432)      | 208<br>(102 - 305)             | 28<br>(13 - 43)                |
| Sickle cell disorders                               | 55,276<br>(24,833 - 95,243)    | 33,958<br>(11,450 - 62,139)    | 9,936<br>(3,973 - 18,702)   | 8,907<br>(3,972 - 15,876)     | 2,287<br>(1,055 - 3,954)       | 187<br>(101 - 282)             |
| G6PD deficiency                                     | 1,465<br>(717 - 2,198)         | 619<br>(240 - 1,074)           | 176<br>(86 - 266)           | 458<br>(229 - 650)            | 163<br>(79 - 233)              | 49<br>(22 - 78)                |
| Other hemoglobinopathies and hemolytic anemias      | 13,574<br>(7,691 - 18,563)     | 2,506<br>(1,205 - 4,073)       | 487<br>(256 - 742)          | 1,790<br>(964 - 2,512)        | 3,239<br>(1,737 - 4,469)       | 5,551<br>(2,998 - 7,638)       |
| Endocrine, metabolic, blood, and immune disorders   | 59,939<br>(43,410 - 79,946)    | 14,363<br>(9,615 - 20,735)     | 2,505<br>(1,797 - 3,365)    | 10,900<br>(7,697 - 14,331)    | 12,524<br>(9,130 - 16,613)     | 19,648<br>(13,755 - 25,342)    |
| Musculoskeletal disorders                           | 39,080<br>(33,574 - 44,161)    | --                             | 1,796<br>(1,246 - 2,369)    | 11,490<br>(9,140 - 14,155)    | 11,717<br>(9,392 - 13,116)     | 14,076<br>(12,800 - 16,095)    |
| Rheumatoid arthritis                                | 18,456<br>(15,692 - 20,774)    | --                             | 480<br>(304 - 673)          | 2,500<br>(1,792 - 3,299)      | 6,358<br>(4,845 - 7,211)       | 9,117<br>(7,996 - 10,314)      |
| Other musculoskeletal disorders                     | 20,625<br>(16,145 - 24,723)    | --                             | 1,316<br>(721 - 1,775)      | 8,990<br>(6,815 - 11,202)     | 5,359<br>(4,035 - 6,301)       | 4,960<br>(4,444 - 6,008)       |
| Other non-communicable diseases                     | 405,193<br>(321,773 - 516,567) | 326,439<br>(248,524 - 433,316) | 17,531<br>(13,683 - 22,574) | 26,776<br>(23,252 - 30,742)   | 11,922<br>(9,845 - 13,383)     | 22,526<br>(19,861 - 25,222)    |
| Congenital anomalies                                | 361,487<br>(282,345 - 468,615) | 311,650<br>(236,332 - 416,609) | 16,690<br>(12,972 - 21,670) | 22,660<br>(19,374 - 26,557)   | 5,892<br>(4,167 - 6,992)       | 4,595<br>(3,087 - 5,440)       |
| Neural tube defects                                 | 78,909<br>(49,883 - 140,726)   | 73,580<br>(46,040 - 132,456)   | 2,200<br>(1,350 - 4,120)    | 2,474<br>(1,597 - 4,194)      | 438<br>(259 - 665)             | 218<br>(113 - 335)             |
| Congenital heart anomalies                          | 175,229<br>(126,790 - 237,250) | 149,370<br>(104,650 - 208,105) | 9,140<br>(6,595 - 12,393)   | 11,226<br>(8,877 - 14,097)    | 2,874<br>(1,974 - 3,667)       | 2,619<br>(1,674 - 3,254)       |
| Cleft lip and cleft palate                          | 3,440<br>(1,176 - 5,903)       | 3,440<br>(1,176 - 5,903)       | --                          | --                            | --                             | --                             |
| Down syndrome                                       | 23,961<br>(7,989 - 42,310)     | 17,594<br>(4,851 - 33,189)     | 2,052<br>(738 - 3,571)      | 3,359<br>(1,582 - 5,737)      | 870<br>(546 - 1,315)           | 86<br>(51 - 139)               |
| Chromosomal unbalanced rearrangements               | 11,334<br>(3,984 - 26,091)     | 9,722<br>(3,338 - 22,962)      | 373<br>(117 - 917)          | 1,052<br>(379 - 2,218)        | 124<br>(52 - 212)              | 64<br>(27 - 102)               |
| Other congenital anomalies                          | 68,614<br>(49,333 - 148,139)   | 57,944<br>(40,944 - 129,900)   | 2,925<br>(1,977 - 5,973)    | 4,549<br>(3,097 - 7,268)      | 1,587<br>(1,146 - 2,125)       | 1,609<br>(1,174 - 1,997)       |

**Web Table 25 - Global deaths with 95% UI by age, sex, and cause in 1990**

| Cause                                           | Females, All Ages                    | Females, 0-4 Years             | Females, 5-14 Years            | Females, 15-49 Years           | Females, 50-69 Years           | Females, 70-80 Years           |
|-------------------------------------------------|--------------------------------------|--------------------------------|--------------------------------|--------------------------------|--------------------------------|--------------------------------|
| Skin and subcutaneous diseases                  | 34,439<br>(30,933 - 37,372)          | 5,523<br>(3,857 - 7,814)       | 840<br>(659 - 1,052)           | 4,116<br>(3,503 - 4,544)       | 6,030<br>(5,303 - 6,877)       | 17,931<br>(15,986 - 20,126)    |
| Cellulitis                                      | 16,046<br>(9,550 - 19,795)           | 3,492<br>(1,698 - 4,994)       | 567<br>(323 - 747)             | 2,554<br>(1,431 - 3,274)       | 3,584<br>(2,100 - 4,551)       | 5,848<br>(3,216 - 7,974)       |
| Pyoderma                                        | 8,569<br>(5,759 - 13,124)            | 1,883<br>(933 - 3,805)         | 203<br>(104 - 410)             | 1,099<br>(619 - 1,929)         | 1,584<br>(994 - 2,581)         | 3,800<br>(2,972 - 4,890)       |
| Decubitus ulcer                                 | 8,805<br>(7,343 - 11,823)            | 39<br>(12 - 157)               | 42<br>(19 - 127)               | 289<br>(177 - 626)             | 697<br>(506 - 1,222)           | 7,738<br>(6,479 - 9,873)       |
| Other skin and subcutaneous diseases            | 1,019<br>(723 - 1,485)               | 108<br>(31 - 283)              | 28<br>(14 - 52)                | 174<br>(111 - 243)             | 164<br>(115 - 210)             | 545<br>(403 - 1,000)           |
| Sudden infant death syndrome                    | 9,267<br>(4,388 - 19,893)            | 9,267<br>(4,388 - 19,893)      | --                             | --                             | --                             | --                             |
| Injuries                                        | 1,527,707<br>(1,391,781 - 1,652,904) | 339,386<br>(268,926 - 394,048) | 135,549<br>(122,328 - 150,230) | 572,044<br>(522,521 - 628,130) | 236,686<br>(215,563 - 263,831) | 244,041<br>(220,196 - 273,285) |
| Transport injuries                              | 311,357<br>(285,587 - 359,593)       | 51,610<br>(42,889 - 63,429)    | 36,781<br>(32,464 - 42,438)    | 129,873<br>(118,128 - 152,796) | 57,741<br>(51,356 - 67,347)    | 35,351<br>(30,459 - 40,544)    |
| Road injuries                                   | 284,183<br>(259,768 - 326,808)       | 46,208<br>(38,429 - 57,040)    | 33,462<br>(29,476 - 38,357)    | 119,648<br>(108,240 - 138,735) | 52,547<br>(46,628 - 61,086)    | 32,319<br>(27,970 - 36,790)    |
| Pedestrian road injuries                        | 114,385<br>(98,143 - 139,458)        | 21,955<br>(17,332 - 29,406)    | 16,423<br>(13,581 - 19,772)    | 34,536<br>(28,494 - 45,028)    | 23,656<br>(19,922 - 29,133)    | 17,815<br>(15,164 - 21,667)    |
| Cyclist road injuries                           | 20,270<br>(16,759 - 26,651)          | 2,599<br>(1,804 - 3,758)       | 2,888<br>(2,276 - 3,948)       | 8,528<br>(6,679 - 11,893)      | 4,391<br>(3,629 - 5,521)       | 1,864<br>(1,490 - 2,415)       |
| Motorcyclist road injuries                      | 41,051<br>(30,024 - 54,709)          | 5,232<br>(2,954 - 7,526)       | 3,189<br>(2,057 - 4,555)       | 24,977<br>(18,984 - 33,551)    | 5,740<br>(3,868 - 8,011)       | 1,914<br>(1,100 - 2,580)       |
| Motor vehicle road injuries                     | 100,109<br>(84,398 - 116,346)        | 14,711<br>(10,598 - 19,405)    | 9,823<br>(7,749 - 11,825)      | 48,299<br>(40,612 - 55,413)    | 17,511<br>(14,298 - 20,864)    | 9,765<br>(7,683 - 11,680)      |
| Other road injuries                             | 8,368<br>(3,368 - 11,200)            | 1,711<br>(430 - 3,187)         | 1,138<br>(417 - 1,772)         | 3,309<br>(1,321 - 4,797)       | 1,249<br>(574 - 1,792)         | 961<br>(530 - 1,421)           |
| Other transport injuries                        | 27,175<br>(23,253 - 34,444)          | 5,402<br>(4,194 - 7,097)       | 3,319<br>(2,510 - 4,231)       | 10,226<br>(8,470 - 13,633)     | 5,195<br>(4,172 - 6,489)       | 3,032<br>(2,443 - 3,807)       |
| Unintentional injuries                          | 823,533<br>(715,311 - 922,485)       | 267,874<br>(196,719 - 320,759) | 84,201<br>(72,430 - 96,991)    | 207,718<br>(178,384 - 239,759) | 99,606<br>(88,480 - 117,428)   | 164,135<br>(143,679 - 190,114) |
| Falls                                           | 142,037<br>(120,749 - 183,358)       | 17,336<br>(11,808 - 27,278)    | 6,560<br>(5,147 - 8,717)       | 16,036<br>(13,078 - 21,280)    | 18,245<br>(15,397 - 24,937)    | 83,860<br>(68,576 - 107,639)   |
| Drowning                                        | 188,384<br>(133,163 - 231,562)       | 90,635<br>(56,371 - 122,685)   | 37,248<br>(26,884 - 46,192)    | 36,046<br>(26,436 - 42,243)    | 13,773<br>(10,286 - 16,400)    | 10,682<br>(8,171 - 13,257)     |
| Fire, heat, and hot substances                  | 183,559<br>(156,028 - 231,513)       | 37,324<br>(26,204 - 52,154)    | 15,663<br>(12,812 - 21,038)    | 87,988<br>(70,103 - 112,407)   | 22,191<br>(18,172 - 29,987)    | 20,394<br>(16,222 - 26,161)    |
| Poisonings                                      | 46,175<br>(36,716 - 74,266)          | 12,381<br>(8,878 - 21,244)     | 3,605<br>(2,730 - 5,698)       | 18,628<br>(14,735 - 30,144)    | 6,340<br>(4,853 - 10,267)      | 5,221<br>(3,872 - 7,919)       |
| Exposure to mechanical forces                   | 67,515<br>(37,899 - 92,530)          | 43,075<br>(16,410 - 67,294)    | 5,675<br>(4,327 - 7,208)       | 10,758<br>(8,923 - 12,755)     | 4,966<br>(4,116 - 6,122)       | 3,042<br>(2,545 - 3,795)       |
| Unintentional firearm injuries                  | 11,763<br>(9,116 - 14,517)           | 2,737<br>(1,697 - 4,009)       | 1,424<br>(959 - 2,026)         | 4,944<br>(3,743 - 6,552)       | 1,906<br>(1,291 - 2,731)       | 754<br>(536 - 1,092)           |
| Unintentional suffocation                       | 35,509<br>(8,951 - 59,140)           | 32,548<br>(7,331 - 55,387)     | 990<br>(400 - 1,695)           | 1,051<br>(512 - 1,488)         | 471<br>(251 - 637)             | 449<br>(243 - 649)             |
| Other exposure to mechanical forces             | 20,243<br>(16,102 - 25,955)          | 7,790<br>(4,881 - 11,759)      | 3,261<br>(2,410 - 4,531)       | 4,763<br>(4,089 - 5,912)       | 2,589<br>(2,186 - 3,274)       | 1,839<br>(1,493 - 2,513)       |
| Adverse effects of medical treatment            | 43,899<br>(34,158 - 58,848)          | 10,194<br>(6,277 - 15,151)     | 1,314<br>(837 - 1,717)         | 9,560<br>(7,326 - 13,717)      | 10,031<br>(7,733 - 15,149)     | 12,798<br>(9,670 - 17,784)     |
| Animal contact                                  | 44,556<br>(17,218 - 72,441)          | 9,765<br>(4,342 - 18,581)      | 8,490<br>(3,355 - 15,584)      | 14,108<br>(4,847 - 21,203)     | 8,728<br>(3,044 - 14,702)      | 3,465<br>(1,258 - 5,446)       |
| Venomous animal contact                         | 36,984<br>(14,594 - 62,501)          | 7,639<br>(3,508 - 14,955)      | 7,184<br>(2,844 - 13,404)      | 12,910<br>(4,457 - 20,136)     | 7,087<br>(2,489 - 12,152)      | 2,164<br>(703 - 3,398)         |
| Non-venomous animal contact                     | 7,572<br>(2,581 - 14,133)            | 2,126<br>(645 - 3,912)         | 1,305<br>(385 - 2,790)         | 1,198<br>(368 - 2,297)         | 1,641<br>(540 - 3,210)         | 1,301<br>(465 - 2,486)         |
| Foreign body                                    | 59,807<br>(36,038 - 89,939)          | 34,619<br>(18,347 - 55,419)    | 1,131<br>(671 - 1,752)         | 4,225<br>(2,693 - 6,376)       | 4,379<br>(2,742 - 6,340)       | 15,452<br>(9,403 - 23,429)     |
| Pulmonary aspiration and foreign body in airway | 58,922<br>(35,168 - 89,101)          | 34,370<br>(17,998 - 55,173)    | 1,051<br>(595 - 1,680)         | 4,039<br>(2,515 - 6,151)       | 4,291<br>(2,664 - 6,260)       | 15,171<br>(9,138 - 23,182)     |
| Foreign body in other body part                 | 885<br>(590 - 1,385)                 | 249<br>(131 - 566)             | 80<br>(51 - 135)               | 186<br>(126 - 277)             | 88<br>(60 - 111)               | 282<br>(191 - 377)             |
| Other unintentional injuries                    | 47,601<br>(24,351 - 54,665)          | 12,544<br>(6,263 - 15,846)     | 4,515<br>(2,696 - 5,518)       | 10,370<br>(5,838 - 12,046)     | 10,952<br>(4,927 - 13,408)     | 9,221<br>(4,083 - 11,559)      |
| Self-harm and interpersonal violence            | 351,678<br>(304,733 - 389,599)       | 11,169<br>(7,952 - 15,437)     | 11,293<br>(9,336 - 13,401)     | 218,049<br>(189,642 - 244,382) | 69,605<br>(58,517 - 77,849)    | 41,563<br>(33,508 - 46,295)    |
| Self-harm                                       | 278,645<br>(238,894 - 312,409)       | --                             | 6,071<br>(4,896 - 7,455)       | 175,286<br>(152,411 - 198,549) | 60,258<br>(49,910 - 67,900)    | 37,030<br>(28,390 - 41,329)    |
| Interpersonal violence                          | 73,033<br>(53,432 - 92,239)          | 11,169<br>(7,952 - 15,437)     | 5,222<br>(3,909 - 7,022)       | 42,763<br>(30,626 - 53,214)    | 9,347<br>(6,572 - 11,882)      | 4,532<br>(3,168 - 5,675)       |
| Assault by firearm                              | 15,897<br>(10,011 - 21,886)          | 1,520<br>(755 - 2,307)         | 918<br>(552 - 1,341)           | 11,025<br>(7,131 - 14,837)     | 1,725<br>(986 - 2,497)         | 710<br>(401 - 1,105)           |
| Assault by sharp object                         | 20,229<br>(12,271 - 26,016)          | 1,604<br>(654 - 2,580)         | 1,017<br>(493 - 1,436)         | 14,027<br>(8,696 - 18,003)     | 2,541<br>(1,514 - 3,342)       | 1,039<br>(575 - 1,428)         |
| Assault by other means                          | 36,907<br>(27,314 - 51,198)          | 8,045<br>(5,832 - 11,690)      | 3,286<br>(2,529 - 4,793)       | 17,712<br>(12,933 - 24,663)    | 5,080<br>(3,540 - 6,830)       | 2,783<br>(1,901 - 3,645)       |
| Forces of nature, war, and legal intervention   | 41,139<br>(28,328 - 76,506)          | 8,733<br>(8,143 - 10,378)      | 3,274<br>(2,348 - 5,874)       | 16,404<br>(9,791 - 34,959)     | 9,734<br>(5,696 - 20,265)      | 2,993<br>(1,736 - 6,142)       |
| Exposure to forces of nature                    | 12,655<br>(7,042 - 26,344)           | 2,302<br>(2,059 - 2,473)       | 971<br>(564 - 2,040)           | 4,519<br>(1,982 - 10,762)      | 3,575<br>(1,628 - 8,351)       | 1,287<br>(581 - 2,847)         |
| Collective violence and legal intervention      | 28,484<br>(20,493 - 49,607)          | 6,431<br>(5,966 - 7,942)       | 2,304<br>(1,727 - 3,968)       | 11,885<br>(7,429 - 24,070)     | 6,159<br>(3,854 - 11,981)      | 1,706<br>(1,075 - 3,224)       |

**Web Table 26: Global deaths by age, sex, and cause in 2013**



Web Table 26 - Global deaths with 95% UI by age, sex, and cause in 2013

| Cause                                                             | Both Sexes, All Ages                    | Both Sexes, 0-4 Years                | Both Sexes, 5-14 Years         | Both Sexes, 15-49 Years              | Both Sexes, 50-69 Years                 | Both Sexes, 70-80 Years                 |
|-------------------------------------------------------------------|-----------------------------------------|--------------------------------------|--------------------------------|--------------------------------------|-----------------------------------------|-----------------------------------------|
| All causes                                                        | 54,863,765<br>(53,576,131 - 56,333,554) | 6,279,920<br>(5,984,416 - 6,608,273) | 842,217<br>(807,043 - 881,489) | 8,644,753<br>(8,310,903 - 9,047,821) | 13,985,351<br>(13,431,633 - 14,613,908) | 25,111,525<br>(24,649,089 - 25,556,462) |
| Communicable, maternal, neonatal, and nutritional diseases        | 11,809,640<br>(11,335,529 - 12,282,964) | 5,041,672<br>(4,727,671 - 5,364,619) | 425,388<br>(394,724 - 458,703) | 2,580,398<br>(2,467,374 - 2,715,489) | 1,567,943<br>(1,474,814 - 1,672,232)    | 2,194,239<br>(2,018,278 - 2,324,200)    |
| HIV/AIDS and tuberculosis                                         | 2,631,235<br>(2,497,349 - 2,863,173)    | 106,721<br>(95,461 - 117,867)        | 83,245<br>(78,588 - 88,298)    | 1,418,038<br>(1,335,837 - 1,544,424) | 689,363<br>(633,564 - 761,002)          | 333,867<br>(304,589 - 366,763)          |
| Tuberculosis                                                      | 1,290,261<br>(1,167,284 - 1,406,184)    | 42,886<br>(31,283 - 51,691)          | 16,944<br>(13,157 - 19,633)    | 483,659<br>(426,825 - 538,448)       | 440,876<br>(392,938 - 491,757)          | 305,896<br>(275,807 - 337,272)          |
| HIV/AIDS                                                          | 1,340,974<br>(1,257,838 - 1,482,611)    | 63,835<br>(58,494 - 71,634)          | 66,302<br>(62,189 - 71,162)    | 934,379<br>(862,473 - 1,041,389)     | 248,487<br>(227,153 - 286,742)          | 27,971<br>(24,975 - 32,982)             |
| HIV/AIDS resulting in mycobacterial infection                     | 84,012<br>(67,367 - 104,862)            | 3,773<br>(3,041 - 4,688)             | 3,643<br>(2,959 - 4,469)       | 58,334<br>(46,723 - 73,193)          | 16,341<br>(12,980 - 20,654)             | 1,921<br>(1,504 - 2,459)                |
| HIV/AIDS resulting in other diseases                              | 1,256,962<br>(1,178,071 - 1,391,067)    | 60,062<br>(54,737 - 67,324)          | 62,659<br>(58,600 - 67,383)    | 876,045<br>(806,494 - 977,480)       | 232,146<br>(212,444 - 265,996)          | 26,050<br>(23,237 - 30,782)             |
| Diarrhea, lower respiratory, and other common infectious diseases | 4,750,530<br>(4,388,833 - 5,029,893)    | 1,829,945<br>(1,657,159 - 2,018,020) | 221,807<br>(195,000 - 253,121) | 552,013<br>(499,272 - 620,281)       | 631,380<br>(554,741 - 691,731)          | 1,515,385<br>(1,343,902 - 1,628,160)    |
| Diarrheal diseases                                                | 1,264,079<br>(1,151,183 - 1,383,210)    | 519,666<br>(438,795 - 593,675)       | 55,512<br>(46,311 - 66,508)    | 151,081<br>(136,494 - 168,030)       | 200,842<br>(170,808 - 238,799)          | 336,979<br>(289,059 - 395,752)          |
| Intestinal infectious diseases                                    | 221,256<br>(122,575 - 362,580)          | 62,419<br>(32,994 - 103,607)         | 60,113<br>(34,559 - 93,822)    | 81,627<br>(42,990 - 138,783)         | 12,502<br>(6,428 - 21,997)              | 4,595<br>(2,638 - 7,511)                |
| Typhoid fever                                                     | 160,721<br>(85,914 - 268,021)           | 43,047<br>(21,680 - 73,256)          | 44,429<br>(25,168 - 70,399)    | 60,553<br>(31,727 - 105,676)         | 9,337<br>(4,520 - 16,688)               | 3,356<br>(1,789 - 5,708)                |
| Paratyphoid fever                                                 | 54,283<br>(29,257 - 92,018)             | 16,210<br>(8,255 - 27,920)           | 15,106<br>(8,284 - 24,834)     | 19,487<br>(9,969 - 34,963)           | 2,617<br>(1,222 - 5,005)                | 864<br>(434 - 1,568)                    |
| Other intestinal infectious diseases                              | 6,251<br>(5,541 - 6,997)                | 3,162<br>(2,663 - 3,718)             | 579<br>(471 - 711)             | 1,587<br>(1,392 - 1,801)             | 548<br>(474 - 634)                      | 375<br>(323 - 438)                      |
| Lower respiratory infections                                      | 2,652,629<br>(2,368,032 - 2,808,097)    | 905,059<br>(810,304 - 998,125)       | 55,971<br>(47,734 - 65,170)    | 211,934<br>(182,185 - 232,793)       | 351,515<br>(286,707 - 384,055)          | 1,128,150<br>(975,062 - 1,217,515)      |
| Upper respiratory infections                                      | 3,930<br>(3,336 - 4,706)                | 828<br>(666 - 1,230)                 | 116<br>(69 - 188)              | 944<br>(736 - 1,235)                 | 984<br>(691 - 1,450)                    | 1,058<br>(785 - 1,461)                  |
| Otitis media                                                      | 2,417<br>(2,273 - 2,562)                | 470<br>(402 - 545)                   | 203<br>(179 - 231)             | 611<br>(565 - 660)                   | 496<br>(458 - 537)                      | 637<br>(595 - 685)                      |
| Meningitis                                                        | 303,477<br>(261,412 - 346,349)          | 141,952<br>(105,060 - 182,518)       | 23,125<br>(18,922 - 27,350)    | 71,333<br>(59,735 - 80,130)          | 40,543<br>(32,440 - 46,531)             | 26,524<br>(21,943 - 30,029)             |
| Pneumococcal meningitis                                           | 79,079<br>(67,773 - 91,091)             | 30,488<br>(21,886 - 39,411)          | 7,384<br>(5,948 - 8,933)       | 21,647<br>(17,858 - 25,129)          | 11,886<br>(9,232 - 14,530)              | 7,673<br>(6,258 - 9,159)                |
| H influenzae type B meningitis                                    | 64,410<br>(53,043 - 76,437)             | 44,116<br>(32,887 - 56,130)          | 5,126<br>(4,178 - 6,103)       | 8,550<br>(6,997 - 9,916)             | 4,033<br>(3,031 - 5,084)                | 2,585<br>(2,031 - 3,068)                |
| Meningococcal meningitis                                          | 65,742<br>(55,894 - 75,828)             | 29,549<br>(21,753 - 38,571)          | 5,231<br>(4,218 - 6,418)       | 16,230<br>(13,455 - 18,303)          | 8,646<br>(6,541 - 10,190)               | 6,086<br>(4,817 - 7,026)                |
| Other meningitis                                                  | 94,246<br>(82,203 - 106,417)            | 37,800<br>(27,834 - 48,068)          | 5,383<br>(4,302 - 6,358)       | 24,906<br>(20,990 - 28,664)          | 15,977<br>(13,228 - 19,077)             | 10,179<br>(8,369 - 12,214)              |
| Encephalitis                                                      | 77,320<br>(65,438 - 97,016)             | 25,792<br>(18,995 - 35,540)          | 9,231<br>(6,979 - 12,374)      | 21,894<br>(17,576 - 28,555)          | 13,083<br>(10,563 - 17,510)             | 7,320<br>(5,590 - 9,081)                |
| Diphtheria                                                        | 3,276<br>(1,695 - 6,588)                | 2,120<br>(827 - 5,310)               | 587<br>(181 - 1,721)           | 431<br>(204 - 908)                   | 139<br>(44 - 441)                       | --                                      |
| Whooping cough                                                    | 60,635<br>(22,294 - 136,765)            | 56,420<br>(20,746 - 126,996)         | 3,266<br>(1,110 - 8,271)       | 829<br>(342 - 1,974)                 | 120<br>(56 - 275)                       | --                                      |
| Tetanus                                                           | 58,879<br>(39,802 - 77,349)             | 31,503<br>(16,746 - 45,010)          | 1,955<br>(1,511 - 2,725)       | 7,804<br>(6,040 - 10,784)            | 10,349<br>(6,631 - 16,034)              | 7,267<br>(4,460 - 11,612)               |
| Measles                                                           | 95,597<br>(48,499 - 172,868)            | 82,100<br>(41,723 - 144,973)         | 11,350<br>(5,502 - 21,878)     | 2,083<br>(922 - 4,998)               | 63<br>(28 - 150)                        | --                                      |
| Varicella and herpes zoster                                       | 7,036<br>(5,735 - 8,684)                | 1,616<br>(1,075 - 2,531)             | 379<br>(239 - 634)             | 1,441<br>(1,104 - 1,945)             | 743<br>(539 - 1,082)                    | 2,857<br>(1,969 - 4,204)                |
| Neglected tropical diseases and malaria                           | 996,985<br>(840,475 - 1,185,195)        | 622,695<br>(486,651 - 795,714)       | 75,088<br>(62,898 - 91,270)    | 155,079<br>(135,000 - 182,703)       | 86,609<br>(70,880 - 105,855)            | 57,513<br>(46,999 - 73,355)             |
| Malaria                                                           | 854,600<br>(702,924 - 1,032,497)        | 586,844<br>(451,969 - 756,864)       | 51,916<br>(40,475 - 67,441)    | 107,867<br>(88,267 - 135,794)        | 64,466<br>(50,731 - 82,218)             | 43,507<br>(33,682 - 55,867)             |
| Chagas disease                                                    | 10,611<br>(4,158 - 32,997)              | 9<br>(3 - 28)                        | 14<br>(4 - 38)                 | 1,358<br>(512 - 4,671)               | 4,571<br>(1,633 - 14,037)               | 4,659<br>(1,671 - 15,518)               |
| Leishmaniasis                                                     | 62,471<br>(52,291 - 73,297)             | 21,221<br>(16,529 - 26,896)          | 12,985<br>(9,791 - 16,357)     | 22,367<br>(18,526 - 26,663)          | 4,551<br>(3,700 - 5,493)                | 1,348<br>(1,122 - 1,560)                |
| Visceral leishmaniasis                                            | 62,471<br>(52,291 - 73,297)             | 21,221<br>(16,529 - 26,896)          | 12,985<br>(9,791 - 16,357)     | 22,367<br>(18,526 - 26,663)          | 4,551<br>(3,700 - 5,493)                | 1,348<br>(1,122 - 1,560)                |
| African trypanosomiasis                                           | 6,887<br>(3,669 - 10,873)               | 471<br>(226 - 797)                   | 789<br>(378 - 1,267)           | 4,463<br>(2,386 - 7,092)             | 965<br>(511 - 1,521)                    | 199<br>(106 - 311)                      |
| Schistosomiasis                                                   | 5,509<br>(4,907 - 6,179)                | 78<br>(56 - 107)                     | 143<br>(112 - 183)             | 2,195<br>(1,901 - 2,523)             | 1,991<br>(1,736 - 2,277)                | 1,103<br>(971 - 1,262)                  |
| Cysticercosis                                                     | 664<br>(536 - 951)                      | 26<br>(15 - 49)                      | 30<br>(20 - 50)                | 395<br>(317 - 573)                   | 157<br>(130 - 211)                      | 56<br>(48 - 71)                         |
| Cystic echinococcosis                                             | 2,225<br>(2,105 - 2,357)                | 161<br>(136 - 188)                   | 245<br>(220 - 274)             | 935<br>(871 - 1,002)                 | 530<br>(496 - 568)                      | 354<br>(336 - 374)                      |
| Dengue                                                            | 9,110<br>(5,630 - 10,842)               | 2,617<br>(1,368 - 3,488)             | 2,279<br>(1,106 - 2,930)       | 2,591<br>(1,827 - 3,039)             | 902<br>(682 - 1,013)                    | 722<br>(529 - 828)                      |
| Yellow fever                                                      | 513<br>(431 - 612)                      | 49<br>(32 - 75)                      | 105<br>(71 - 157)              | 283<br>(229 - 355)                   | 56<br>(40 - 79)                         | 21<br>(13 - 34)                         |
| Rabies                                                            | 23,542<br>(17,273 - 28,560)             | 2,538<br>(1,743 - 3,745)             | 5,029<br>(3,450 - 6,705)       | 8,403<br>(6,061 - 10,263)            | 5,714<br>(4,243 - 7,114)                | 1,858<br>(1,307 - 2,333)                |
| Intestinal nematode infections                                    | 4,508<br>(3,969 - 5,106)                | 3,087<br>(2,614 - 3,636)             | 601<br>(499 - 711)             | 381<br>(316 - 455)                   | 213<br>(168 - 269)                      | 226<br>(178 - 281)                      |

Web Table 26 - Global deaths with 95% UI by age, sex, and cause in 2013

| Cause                                                            | Both Sexes, All Ages                    | Both Sexes, 0-4 Years                | Both Sexes, 5-14 Years         | Both Sexes, 15-49 Years              | Both Sexes, 50-69 Years                 | Both Sexes, 70-80 Years                 |
|------------------------------------------------------------------|-----------------------------------------|--------------------------------------|--------------------------------|--------------------------------------|-----------------------------------------|-----------------------------------------|
| Ascariasis                                                       | 4,508<br>(3,969 - 5,106)                | 3,087<br>(2,614 - 3,636)             | 601<br>(499 - 711)             | 381<br>(316 - 455)                   | 213<br>(168 - 269)                      | 226<br>(178 - 281)                      |
| Other neglected tropical diseases                                | 16,344<br>(13,934 - 19,565)             | 5,595<br>(4,181 - 7,877)             | 953<br>(751 - 1,203)           | 3,841<br>(3,232 - 4,616)             | 2,493<br>(2,052 - 3,075)                | 3,462<br>(2,873 - 4,211)                |
| Maternal disorders                                               | 293,336<br>(261,322 - 328,200)          | --                                   | 1,125<br>(801 - 1,599)         | 292,211<br>(260,386 - 327,072)       | --                                      | --                                      |
| Maternal hemorrhage                                              | 44,245<br>(38,327 - 50,955)             | --                                   | 106<br>(75 - 148)              | 44,139<br>(38,229 - 50,836)          | --                                      | --                                      |
| Maternal sepsis and other maternal infections                    | 23,750<br>(20,058 - 28,025)             | --                                   | 96<br>(66 - 134)               | 23,654<br>(19,973 - 27,918)          | --                                      | --                                      |
| Maternal hypertensive disorders                                  | 29,335<br>(25,708 - 33,452)             | --                                   | 134<br>(95 - 184)              | 29,201<br>(25,571 - 33,310)          | --                                      | --                                      |
| Maternal obstructed labor                                        | 18,815<br>(16,297 - 21,786)             | --                                   | 53<br>(36 - 77)                | 18,762<br>(16,247 - 21,733)          | --                                      | --                                      |
| Maternal abortive outcome                                        | 43,736<br>(38,278 - 49,943)             | --                                   | 178<br>(122 - 262)             | 43,558<br>(38,154 - 49,754)          | --                                      | --                                      |
| Indirect maternal deaths                                         | 31,088<br>(26,822 - 35,753)             | --                                   | 93<br>(65 - 132)               | 30,995<br>(26,753 - 35,633)          | --                                      | --                                      |
| Late maternal deaths                                             | 43,546<br>(35,701 - 52,449)             | --                                   | 259<br>(177 - 375)             | 43,287<br>(35,474 - 52,150)          | --                                      | --                                      |
| Maternal deaths aggravated by HIV/AIDS                           | 2,071<br>(1,285 - 2,871)                | --                                   | --                             | 2,071<br>(1,285 - 2,871)             | --                                      | --                                      |
| Other maternal disorders                                         | 56,169<br>(48,673 - 64,352)             | --                                   | 205<br>(139 - 292)             | 55,964<br>(48,439 - 64,157)          | --                                      | --                                      |
| Neonatal disorders                                               | 2,048,038<br>(1,934,724 - 2,160,256)    | 2,048,038<br>(1,934,724 - 2,160,256) | --                             | --                                   | --                                      | --                                      |
| Neonatal preterm birth complications                             | 742,381<br>(591,348 - 910,767)          | 742,381<br>(591,348 - 910,767)       | --                             | --                                   | --                                      | --                                      |
| Neonatal encephalopathy due to birth asphyxia and trauma         | 643,765<br>(515,010 - 760,486)          | 643,765<br>(515,010 - 760,486)       | --                             | --                                   | --                                      | --                                      |
| Neonatal sepsis and other neonatal infections                    | 366,041<br>(233,155 - 510,770)          | 366,041<br>(233,155 - 510,770)       | --                             | --                                   | --                                      | --                                      |
| Hemolytic disease and other neonatal jaundice                    | 19,619<br>(13,030 - 29,666)             | 19,619<br>(13,030 - 29,666)          | --                             | --                                   | --                                      | --                                      |
| Other neonatal disorders                                         | 276,231<br>(219,603 - 350,681)          | 276,231<br>(219,603 - 350,681)       | --                             | --                                   | --                                      | --                                      |
| Nutritional deficiencies                                         | 681,088<br>(533,461 - 795,483)          | 260,702<br>(197,924 - 316,603)       | 22,563<br>(17,103 - 27,330)    | 82,565<br>(66,285 - 104,206)         | 89,892<br>(67,991 - 107,259)            | 225,366<br>(178,606 - 263,897)          |
| Protein-energy malnutrition                                      | 468,794<br>(349,995 - 560,932)          | 225,906<br>(168,497 - 280,129)       | 16,203<br>(11,229 - 20,551)    | 35,608<br>(24,387 - 51,226)          | 46,449<br>(30,537 - 57,554)             | 144,629<br>(95,533 - 174,125)           |
| Iodine deficiency                                                | 2,684<br>(1,530 - 4,706)                | 538<br>(188 - 1,277)                 | 108<br>(48 - 238)              | 613<br>(273 - 1,407)                 | 751<br>(260 - 2,137)                    | 675<br>(269 - 1,586)                    |
| Iron-deficiency anemia                                           | 183,361<br>(121,967 - 259,212)          | 31,681<br>(12,951 - 60,720)          | 5,850<br>(3,387 - 8,753)       | 42,809<br>(30,436 - 55,736)          | 36,811<br>(22,785 - 51,003)             | 66,210<br>(42,295 - 100,998)            |
| Other nutritional deficiencies                                   | 26,249<br>(16,983 - 41,229)             | 2,578<br>(1,452 - 5,466)             | 402<br>(265 - 747)             | 3,535<br>(2,211 - 5,986)             | 5,882<br>(3,798 - 9,862)                | 13,852<br>(8,025 - 21,531)              |
| Other communicable, maternal, neonatal, and nutritional diseases | 408,428<br>(342,062 - 488,350)          | 173,570<br>(117,110 - 245,984)       | 21,559<br>(16,912 - 27,508)    | 80,492<br>(71,223 - 91,371)          | 70,698<br>(60,292 - 86,795)             | 62,108<br>(51,286 - 76,042)             |
| Sexually transmitted diseases excluding HIV                      | 142,017<br>(87,589 - 213,920)           | 120,537<br>(69,259 - 187,735)        | 8,514<br>(4,897 - 13,610)      | 4,792<br>(4,017 - 5,952)             | 3,437<br>(2,678 - 4,439)                | 4,737<br>(3,419 - 7,388)                |
| Syphilis                                                         | 136,848<br>(82,391 - 208,900)           | 120,537<br>(69,259 - 187,735)        | 8,342<br>(4,727 - 13,455)      | 2,184<br>(1,831 - 2,759)             | 2,133<br>(1,669 - 2,755)                | 3,652<br>(2,681 - 5,555)                |
| Chlamydial infection                                             | 1,133<br>(927 - 1,411)                  | --                                   | 31<br>(24 - 43)                | 591<br>(476 - 714)                   | 281<br>(203 - 401)                      | 230<br>(141 - 430)                      |
| Gonococcal infection                                             | 2,321<br>(1,966 - 2,880)                | --                                   | 71<br>(53 - 109)               | 1,071<br>(894 - 1,355)               | 605<br>(472 - 784)                      | 575<br>(405 - 920)                      |
| Other sexually transmitted diseases                              | 1,715<br>(1,463 - 2,082)                | --                                   | 70<br>(53 - 107)               | 946<br>(791 - 1,185)                 | 418<br>(325 - 548)                      | 281<br>(187 - 479)                      |
| Hepatitis                                                        | 136,657<br>(123,673 - 163,236)          | 16,793<br>(11,721 - 28,400)          | 7,340<br>(5,865 - 9,854)       | 53,108<br>(46,876 - 62,017)          | 36,787<br>(32,739 - 41,941)             | 22,629<br>(20,194 - 25,264)             |
| Acute hepatitis A                                                | 14,912<br>(4,964 - 27,716)              | 7,337<br>(2,645 - 14,030)            | 1,561<br>(513 - 2,953)         | 4,058<br>(1,154 - 8,379)             | 1,444<br>(406 - 3,151)                  | 512<br>(128 - 1,151)                    |
| Acute hepatitis B                                                | 68,642<br>(52,007 - 86,603)             | 7,292<br>(3,614 - 13,478)            | 1,177<br>(654 - 1,912)         | 15,607<br>(9,540 - 23,029)           | 25,859<br>(20,516 - 31,374)             | 18,707<br>(15,704 - 21,591)             |
| Acute hepatitis C                                                | 3,451<br>(736 - 8,172)                  | --                                   | 203<br>(40 - 491)              | 1,249<br>(254 - 3,060)               | 1,176<br>(247 - 2,760)                  | 824<br>(182 - 1,841)                    |
| Acute hepatitis E                                                | 49,652<br>(36,134 - 67,456)             | 2,165<br>(904 - 5,144)               | 4,399<br>(3,029 - 6,353)       | 32,194<br>(24,649 - 40,707)          | 8,308<br>(4,621 - 13,488)               | 2,587<br>(1,253 - 4,621)                |
| Other infectious diseases                                        | 129,754<br>(89,566 - 164,859)           | 36,240<br>(18,661 - 64,022)          | 5,706<br>(3,550 - 8,909)       | 22,592<br>(16,167 - 28,765)          | 30,474<br>(22,123 - 44,372)             | 34,742<br>(24,390 - 48,422)             |
| Non-communicable diseases                                        | 38,267,197<br>(37,202,182 - 39,417,571) | 871,126<br>(730,511 - 1,067,740)     | 207,201<br>(183,267 - 242,468) | 3,802,486<br>(3,602,798 - 4,022,332) | 11,388,193<br>(10,925,503 - 11,910,543) | 21,998,190<br>(21,562,548 - 22,434,448) |
| Neoplasms                                                        | 8,235,660<br>(7,941,400 - 8,538,860)    | 48,554<br>(40,893 - 55,846)          | 47,533<br>(42,743 - 52,111)    | 1,023,431<br>(969,416 - 1,083,524)   | 3,384,608<br>(3,232,336 - 3,549,130)    | 3,731,534<br>(3,566,483 - 3,843,222)    |
| Esophageal cancer                                                | 440,202<br>(389,229 - 516,788)          | --                                   | --                             | 36,757<br>(31,776 - 44,029)          | 214,983<br>(187,670 - 256,773)          | 188,461<br>(166,991 - 220,750)          |
| Stomach cancer                                                   | 840,953<br>(791,586 - 894,089)          | --                                   | --                             | 80,053<br>(75,039 - 85,186)          | 341,121<br>(318,454 - 366,676)          | 419,779<br>(394,526 - 449,799)          |
| Liver cancer                                                     | 817,969<br>(763,704 - 878,980)          | --                                   | 1,630<br>(1,356 - 1,907)       | 138,563<br>(125,058 - 152,605)       | 387,459<br>(356,052 - 421,402)          | 290,318<br>(272,292 - 313,206)          |

Web Table 26 - Global deaths with 95% UI by age, sex, and cause in 2013

| Cause                                | Both Sexes, All Ages                    | Both Sexes, 0-4 Years       | Both Sexes, 5-14 Years      | Both Sexes, 15-49 Years              | Both Sexes, 50-69 Years              | Both Sexes, 70-80 Years                 |
|--------------------------------------|-----------------------------------------|-----------------------------|-----------------------------|--------------------------------------|--------------------------------------|-----------------------------------------|
| Liver cancer due to hepatitis B      | 300,003<br>(272,042 - 329,206)          | --                          | 626<br>(517 - 752)          | 68,580<br>(61,317 - 77,062)          | 153,267<br>(136,290 - 170,745)       | 77,530<br>(70,711 - 84,289)             |
| Liver cancer due to hepatitis C      | 342,530<br>(317,058 - 375,257)          | --                          | 199<br>(162 - 249)          | 42,839<br>(37,665 - 48,978)          | 156,854<br>(141,925 - 174,137)       | 142,637<br>(131,526 - 156,760)          |
| Liver cancer due to alcohol use      | 92,159<br>(84,834 - 100,319)            | --                          | --                          | 8,333<br>(7,395 - 9,491)             | 39,228<br>(35,454 - 43,770)          | 44,598<br>(40,741 - 48,919)             |
| Liver cancer due to other causes     | 83,278<br>(75,129 - 92,157)             | --                          | 804<br>(654 - 970)          | 18,811<br>(16,545 - 21,052)          | 38,109<br>(33,925 - 42,720)          | 25,553<br>(23,233 - 28,599)             |
| Larynx cancer                        | 87,587<br>(74,257 - 106,236)            | --                          | --                          | 9,180<br>(7,863 - 11,789)            | 44,585<br>(37,027 - 53,155)          | 33,822<br>(28,068 - 40,255)             |
| Tracheal, bronchus and lung cancer   | 1,639,645<br>(1,565,632 - 1,705,956)    | --                          | --                          | 110,356<br>(103,249 - 119,355)       | 750,946<br>(710,555 - 790,171)       | 778,343<br>(736,842 - 808,190)          |
| Breast cancer                        | 471,011<br>(411,986 - 514,219)          | --                          | --                          | 100,092<br>(92,432 - 109,707)        | 208,924<br>(189,939 - 230,952)       | 161,995<br>(130,421 - 176,407)          |
| Cervical cancer                      | 235,732<br>(201,945 - 257,940)          | --                          | --                          | 59,975<br>(49,517 - 66,629)          | 112,300<br>(92,060 - 124,562)        | 63,457<br>(56,909 - 72,165)             |
| Uterine cancer                       | 67,686<br>(53,572 - 79,047)             | --                          | --                          | 6,780<br>(4,813 - 8,366)             | 30,078<br>(23,124 - 35,529)          | 30,828<br>(25,262 - 36,391)             |
| Prostate cancer                      | 292,729<br>(242,244 - 373,884)          | --                          | --                          | 1,851<br>(1,417 - 2,372)             | 53,993<br>(44,132 - 68,469)          | 236,884<br>(194,694 - 309,909)          |
| Colon and rectum cancer              | 771,100<br>(741,475 - 799,180)          | --                          | --                          | 69,593<br>(66,016 - 73,186)          | 268,945<br>(257,415 - 280,503)       | 432,562<br>(414,635 - 452,021)          |
| Lip and oral cavity cancer           | 135,005<br>(115,272 - 154,286)          | --                          | --                          | 22,762<br>(18,496 - 26,714)          | 63,027<br>(53,501 - 72,408)          | 49,217<br>(42,844 - 57,233)             |
| Nasopharynx cancer                   | 60,491<br>(53,959 - 69,459)             | --                          | 541<br>(394 - 779)          | 17,911<br>(15,798 - 20,621)          | 29,899<br>(26,466 - 34,396)          | 12,140<br>(10,834 - 14,562)             |
| Other pharynx cancer                 | 78,568<br>(67,021 - 86,301)             | --                          | --                          | 11,816<br>(10,019 - 13,514)          | 45,343<br>(37,554 - 50,788)          | 21,408<br>(18,691 - 23,512)             |
| Gallbladder and biliary tract cancer | 139,537<br>(120,026 - 155,007)          | --                          | --                          | 10,550<br>(8,667 - 11,803)           | 50,425<br>(43,525 - 56,111)          | 78,562<br>(64,702 - 88,703)             |
| Pancreatic cancer                    | 352,435<br>(339,413 - 364,800)          | --                          | --                          | 24,874<br>(23,615 - 26,244)          | 141,019<br>(134,935 - 147,072)       | 186,542<br>(178,391 - 194,444)          |
| Malignant skin melanoma              | 56,934<br>(43,906 - 75,706)             | --                          | --                          | 11,372<br>(9,451 - 15,663)           | 21,998<br>(16,715 - 30,018)          | 23,565<br>(17,483 - 30,681)             |
| Non-melanoma skin cancer             | 39,168<br>(32,803 - 48,654)             | --                          | --                          | 3,826<br>(3,172 - 5,580)             | 9,306<br>(7,623 - 11,850)            | 26,036<br>(21,728 - 31,913)             |
| Ovarian cancer                       | 157,754<br>(147,454 - 169,536)          | --                          | --                          | 25,360<br>(23,164 - 28,134)          | 75,698<br>(69,830 - 82,520)          | 56,696<br>(51,511 - 61,513)             |
| Testicular cancer                    | 8,307<br>(6,313 - 10,373)               | --                          | --                          | 5,202<br>(3,904 - 6,474)             | 1,776<br>(1,355 - 2,227)             | 1,329<br>(1,001 - 1,651)                |
| Kidney cancer                        | 133,802<br>(125,956 - 141,101)          | 1,676<br>(1,397 - 2,047)    | 871<br>(749 - 1,012)        | 11,826<br>(11,032 - 12,710)          | 56,956<br>(53,570 - 60,723)          | 62,472<br>(56,283 - 68,435)             |
| Bladder cancer                       | 173,864<br>(156,797 - 192,451)          | --                          | --                          | 7,673<br>(6,814 - 8,815)             | 53,928<br>(49,604 - 60,977)          | 112,263<br>(98,479 - 123,659)           |
| Brain and nervous system cancer      | 203,900<br>(169,455 - 234,839)          | 3,235<br>(2,614 - 3,987)    | 7,341<br>(5,891 - 8,614)    | 53,654<br>(44,589 - 64,224)          | 85,806<br>(73,423 - 100,883)         | 53,865<br>(43,346 - 58,595)             |
| Thyroid cancer                       | 33,687<br>(29,627 - 38,186)             | --                          | 97<br>(75 - 121)            | 3,585<br>(3,125 - 4,314)             | 13,113<br>(11,337 - 14,884)          | 16,892<br>(14,787 - 19,557)             |
| Mesothelioma                         | 33,744<br>(29,404 - 38,654)             | --                          | --                          | 2,264<br>(2,069 - 2,603)             | 18,360<br>(16,384 - 20,705)          | 13,120<br>(10,118 - 15,444)             |
| Hodgkin lymphoma                     | 24,209<br>(22,005 - 31,608)             | 1,947<br>(1,243 - 3,237)    | 930<br>(736 - 1,213)        | 8,340<br>(7,512 - 10,934)            | 6,947<br>(6,242 - 9,306)             | 6,044<br>(5,561 - 7,686)                |
| Non-Hodgkin lymphoma                 | 225,504<br>(186,319 - 245,797)          | 5,725<br>(4,218 - 7,529)    | 5,892<br>(4,705 - 7,014)    | 40,895<br>(35,452 - 46,890)          | 77,502<br>(65,878 - 86,687)          | 95,490<br>(71,493 - 106,817)            |
| Multiple myeloma                     | 79,408<br>(65,272 - 94,199)             | --                          | --                          | 5,987<br>(5,052 - 6,930)             | 30,967<br>(26,069 - 37,219)          | 42,454<br>(33,046 - 51,278)             |
| Leukemia                             | 265,125<br>(253,943 - 275,826)          | 9,174<br>(7,941 - 10,570)   | 16,477<br>(14,843 - 18,080) | 73,772<br>(69,533 - 78,226)          | 72,972<br>(69,286 - 76,731)          | 92,730<br>(86,619 - 97,479)             |
| Other neoplasms                      | 369,605<br>(328,032 - 400,070)          | 26,797<br>(20,923 - 32,828) | 13,754<br>(11,262 - 15,906) | 68,561<br>(61,203 - 79,150)          | 116,233<br>(105,068 - 128,831)       | 144,261<br>(122,696 - 156,216)          |
| Cardiovascular diseases              | 17,297,480<br>(16,520,176 - 18,071,873) | 55,109<br>(48,618 - 65,998) | 29,394<br>(25,608 - 35,700) | 1,309,282<br>(1,202,221 - 1,406,619) | 4,765,051<br>(4,468,820 - 5,051,716) | 11,138,643<br>(10,722,980 - 11,642,102) |
| Rheumatic heart disease              | 275,054<br>(222,622 - 353,938)          | 1,961<br>(1,383 - 2,922)    | 4,968<br>(3,823 - 6,635)    | 67,260<br>(54,937 - 88,039)          | 90,817<br>(73,792 - 123,121)         | 110,048<br>(84,010 - 135,991)           |
| Ischemic heart disease               | 8,139,852<br>(7,322,942 - 8,758,490)    | 6,373<br>(4,779 - 10,000)   | 5,965<br>(4,684 - 8,362)    | 623,902<br>(551,069 - 693,850)       | 2,316,676<br>(2,073,253 - 2,519,089) | 5,186,935<br>(4,661,891 - 5,581,516)    |
| Cerebrovascular disease              | 6,446,874<br>(5,963,007 - 7,155,192)    | 13,832<br>(11,568 - 16,840) | 9,345<br>(7,900 - 11,526)   | 381,746<br>(337,502 - 430,523)       | 1,701,612<br>(1,545,907 - 1,890,996) | 4,340,339<br>(4,008,025 - 4,831,993)    |
| Ischemic stroke                      | 3,272,924<br>(2,812,654 - 3,592,562)    | 1,551<br>(1,125 - 2,209)    | 1,111<br>(846 - 1,518)      | 60,723<br>(47,299 - 74,070)          | 603,230<br>(494,117 - 691,636)       | 2,606,309<br>(2,269,254 - 2,854,636)    |
| Hemorrhagic stroke                   | 3,173,951<br>(2,885,717 - 3,719,684)    | 12,280<br>(10,279 - 15,073) | 8,234<br>(6,919 - 10,256)   | 321,024<br>(284,060 - 365,431)       | 1,098,382<br>(987,958 - 1,255,467)   | 1,734,030<br>(1,557,342 - 2,140,851)    |
| Hypertensive heart disease           | 1,068,585<br>(849,758 - 1,242,160)      | 1,409<br>(945 - 1,973)      | 754<br>(559 - 964)          | 66,923<br>(51,215 - 83,059)          | 285,589<br>(220,552 - 340,847)       | 713,910<br>(565,004 - 835,048)          |
| Cardiomyopathy and myocarditis       | 443,297<br>(370,111 - 511,997)          | 16,341<br>(12,833 - 20,239) | 4,433<br>(3,456 - 5,359)    | 83,585<br>(65,406 - 94,813)          | 135,078<br>(106,567 - 156,111)       | 203,860<br>(175,886 - 241,113)          |
| Atrial fibrillation and flutter      | 112,209<br>(97,716 - 126,677)           | --                          | --                          | 878<br>(773 - 978)                   | 7,787<br>(6,799 - 8,663)             | 103,545<br>(89,472 - 117,246)           |
| Aortic aneurysm                      | 151,493<br>(124,201 - 179,954)          | --                          | --                          | 10,913<br>(8,718 - 12,934)           | 43,161<br>(36,085 - 50,161)          | 97,418<br>(78,479 - 118,547)            |

Web Table 26 - Global deaths with 95% UI by age, sex, and cause in 2013

| Cause                                               | Both Sexes, All Ages                 | Both Sexes, 0-4 Years       | Both Sexes, 5-14 Years      | Both Sexes, 15-49 Years        | Both Sexes, 50-69 Years              | Both Sexes, 70-80 Years              |
|-----------------------------------------------------|--------------------------------------|-----------------------------|-----------------------------|--------------------------------|--------------------------------------|--------------------------------------|
| Peripheral vascular disease                         | 40,492<br>(35,487 - 44,883)          | --                          | --                          | 579<br>(510 - 6,699)           | 6,050<br>(5,408 - 6,699)             | 33,863<br>(29,532 - 37,928)          |
| Endocarditis                                        | 65,036<br>(48,593 - 79,435)          | 3,899<br>(2,677 - 5,165)    | 878<br>(661 - 1,211)        | 13,316<br>(9,600 - 16,514)     | 18,437<br>(13,559 - 22,940)          | 28,507<br>(21,297 - 35,712)          |
| Other cardiovascular and circulatory diseases       | 554,588<br>(499,143 - 654,152)       | 11,294<br>(8,576 - 16,003)  | 3,051<br>(2,415 - 4,159)    | 60,179<br>(50,787 - 79,286)    | 159,844<br>(142,076 - 202,125)       | 320,219<br>(281,721 - 373,318)       |
| Chronic respiratory diseases                        | 4,267,521<br>(3,996,330 - 4,694,190) | 36,421<br>(31,394 - 43,313) | 10,336<br>(9,055 - 11,871)  | 215,313<br>(191,073 - 247,883) | 1,133,227<br>(1,027,329 - 1,273,111) | 2,872,224<br>(2,694,692 - 3,153,197) |
| Chronic obstructive pulmonary disease               | 2,931,173<br>(2,626,295 - 3,215,811) | 13,667<br>(11,132 - 17,891) | 2,856<br>(2,239 - 3,415)    | 90,895<br>(75,623 - 105,493)   | 702,633<br>(614,964 - 797,839)       | 2,121,122<br>(1,907,137 - 2,310,541) |
| Pneumoconiosis                                      | 259,726<br>(201,731 - 331,167)       | 306<br>(209 - 453)          | 289<br>(209 - 418)          | 21,322<br>(16,067 - 27,492)    | 105,093<br>(78,649 - 136,463)        | 132,715<br>(99,357 - 174,267)        |
| Silicosis                                           | 46,326<br>(32,145 - 64,796)          | 78<br>(46 - 133)            | 75<br>(49 - 119)            | 3,947<br>(2,619 - 6,068)       | 17,759<br>(11,701 - 25,745)          | 24,468<br>(16,621 - 34,313)          |
| Asbestosis                                          | 24,087<br>(17,502 - 32,342)          | 57<br>(37 - 90)             | 60<br>(43 - 86)             | 2,500<br>(1,810 - 3,439)       | 11,171<br>(7,709 - 15,601)           | 10,300<br>(7,232 - 13,954)           |
| Coal workers pneumoconiosis                         | 25,209<br>(18,971 - 35,592)          | 48<br>(33 - 71)             | 58<br>(42 - 85)             | 2,825<br>(2,025 - 4,082)       | 12,010<br>(8,553 - 16,989)           | 10,268<br>(7,337 - 14,752)           |
| Other pneumoconiosis                                | 164,104<br>(123,090 - 213,607)       | 125<br>(85 - 193)           | 97<br>(70 - 135)            | 12,050<br>(8,941 - 15,662)     | 64,154<br>(46,532 - 86,099)          | 87,679<br>(61,429 - 120,260)         |
| Asthma                                              | 489,002<br>(397,747 - 676,840)       | 8,393<br>(6,535 - 10,373)   | 4,809<br>(3,955 - 6,050)    | 67,068<br>(55,767 - 88,216)    | 166,642<br>(132,916 - 231,533)       | 242,090<br>(190,339 - 341,126)       |
| Interstitial lung disease and pulmonary sarcoidosis | 471,491<br>(372,288 - 606,808)       | 689<br>(359 - 1,472)        | 532<br>(287 - 1,167)        | 22,737<br>(17,398 - 29,667)    | 137,072<br>(100,761 - 171,834)       | 310,462<br>(246,299 - 413,541)       |
| Other chronic respiratory diseases                  | 116,130<br>(99,225 - 136,918)        | 13,366<br>(11,263 - 15,934) | 1,850<br>(1,431 - 2,263)    | 13,291<br>(10,943 - 15,804)    | 21,787<br>(17,289 - 27,921)          | 65,835<br>(55,212 - 80,257)          |
| Cirrhosis                                           | 1,221,129<br>(1,170,315 - 1,284,297) | 9,651<br>(7,383 - 12,538)   | 8,928<br>(7,783 - 10,230)   | 319,921<br>(298,485 - 344,463) | 553,173<br>(525,100 - 586,100)       | 329,456<br>(316,137 - 346,498)       |
| Cirrhosis due to hepatitis B                        | 317,384<br>(292,283 - 344,593)       | 409<br>(290 - 590)          | 1,399<br>(1,117 - 1,766)    | 84,037<br>(74,276 - 94,223)    | 144,238<br>(131,463 - 157,733)       | 87,301<br>(80,512 - 95,201)          |
| Cirrhosis due to hepatitis C                        | 357,807<br>(334,264 - 386,087)       | 590<br>(435 - 835)          | 1,130<br>(892 - 1,419)      | 78,131<br>(70,220 - 87,216)    | 167,470<br>(155,176 - 181,507)       | 110,487<br>(101,113 - 119,446)       |
| Cirrhosis due to alcohol use                        | 383,797<br>(356,171 - 414,674)       | --                          | --                          | 91,950<br>(80,638 - 104,904)   | 183,463<br>(168,828 - 200,032)       | 108,385<br>(100,925 - 117,159)       |
| Cirrhosis due to other causes                       | 162,142<br>(145,492 - 182,934)       | 8,653<br>(6,623 - 11,332)   | 6,399<br>(5,482 - 7,406)    | 65,804<br>(58,259 - 75,234)    | 58,002<br>(49,844 - 67,277)          | 23,284<br>(20,231 - 26,777)          |
| Digestive diseases                                  | 1,168,304<br>(1,064,378 - 1,275,503) | 17,396<br>(13,966 - 22,109) | 16,736<br>(14,058 - 19,341) | 217,490<br>(189,310 - 249,855) | 336,197<br>(291,982 - 375,380)       | 580,486<br>(533,074 - 638,112)       |
| Peptic ulcer disease                                | 301,434<br>(249,777 - 350,519)       | 1,463<br>(964 - 2,287)      | 2,012<br>(1,374 - 2,723)    | 51,834<br>(41,404 - 64,637)    | 101,762<br>(80,958 - 120,747)        | 144,363<br>(119,831 - 169,134)       |
| Gastritis and duodenitis                            | 59,526<br>(42,237 - 90,069)          | 949<br>(500 - 1,487)        | 1,085<br>(697 - 1,820)      | 10,084<br>(7,188 - 16,343)     | 18,419<br>(12,501 - 26,948)          | 28,989<br>(20,158 - 47,739)          |
| Appendicitis                                        | 71,912<br>(51,398 - 89,467)          | 2,081<br>(1,441 - 3,218)    | 2,504<br>(1,918 - 3,204)    | 27,634<br>(19,390 - 36,498)    | 18,545<br>(12,787 - 24,083)          | 21,147<br>(14,435 - 27,449)          |
| Paralytic ileus and intestinal obstruction          | 235,739<br>(175,606 - 326,977)       | 4,669<br>(3,470 - 7,038)    | 5,680<br>(4,302 - 7,437)    | 43,094<br>(32,201 - 59,781)    | 65,542<br>(48,434 - 93,209)          | 116,755<br>(83,416 - 162,001)        |
| Inguinal, femoral, and abdominal hernia             | 32,463<br>(25,621 - 48,801)          | 525<br>(329 - 783)          | 697<br>(437 - 1,423)        | 3,687<br>(2,713 - 6,672)       | 7,426<br>(5,834 - 11,656)            | 20,128<br>(14,965 - 29,560)          |
| Inflammatory bowel disease                          | 51,246<br>(42,419 - 69,749)          | 3,238<br>(2,098 - 4,772)    | 1,238<br>(844 - 1,718)      | 10,914<br>(8,451 - 14,871)     | 12,074<br>(9,538 - 16,352)           | 23,781<br>(19,571 - 33,586)          |
| Vascular intestinal disorders                       | 79,475<br>(51,898 - 113,350)         | 167<br>(50 - 359)           | 257<br>(70 - 576)           | 4,306<br>(2,404 - 7,540)       | 16,608<br>(10,135 - 26,091)          | 58,137<br>(37,432 - 82,243)          |
| Gallbladder and biliary diseases                    | 105,877<br>(89,113 - 122,269)        | 631<br>(472 - 829)          | 697<br>(434 - 868)          | 10,365<br>(8,537 - 12,272)     | 25,434<br>(21,016 - 29,737)          | 68,749<br>(56,916 - 80,350)          |
| Pancreatitis                                        | 122,594<br>(85,870 - 152,345)        | 324<br>(176 - 479)          | 786<br>(454 - 1,148)        | 38,048<br>(25,554 - 49,085)    | 42,107<br>(28,673 - 53,806)          | 41,329<br>(29,030 - 51,780)          |
| Other digestive diseases                            | 108,038<br>(90,423 - 124,244)        | 3,348<br>(2,454 - 4,612)    | 1,780<br>(1,383 - 2,190)    | 17,523<br>(13,363 - 21,072)    | 28,280<br>(23,312 - 33,312)          | 57,107<br>(48,107 - 67,230)          |
| Neurological disorders                              | 1,976,827<br>(1,875,010 - 2,080,663) | 19,040<br>(15,544 - 24,034) | 12,066<br>(9,795 - 14,867)  | 81,061<br>(69,293 - 90,788)    | 152,160<br>(142,223 - 160,395)       | 1,712,500<br>(1,622,109 - 1,811,681) |
| Alzheimer disease and other dementias               | 1,655,052<br>(1,563,499 - 1,765,311) | --                          | --                          | 510<br>(450 - 580)             | 84,917<br>(80,071 - 90,059)          | 1,569,625<br>(1,480,291 - 1,677,545) |
| Parkinson disease                                   | 102,504<br>(79,287 - 112,590)        | --                          | --                          | 799<br>(693 - 942)             | 10,769<br>(8,958 - 12,134)           | 90,936<br>(69,261 - 100,679)         |
| Epilepsy                                            | 115,842<br>(93,742 - 131,988)        | 13,946<br>(10,445 - 18,841) | 9,795<br>(7,567 - 12,575)   | 56,961<br>(46,205 - 65,509)    | 17,702<br>(14,228 - 20,225)          | 17,438<br>(13,526 - 19,726)          |
| Multiple sclerosis                                  | 19,773<br>(12,828 - 25,461)          | --                          | --                          | 5,445<br>(3,849 - 7,925)       | 9,567<br>(5,720 - 11,737)            | 4,761<br>(2,755 - 5,835)             |
| Other neurological disorders                        | 83,656<br>(71,834 - 90,817)          | 5,095<br>(4,161 - 6,731)    | 2,271<br>(1,830 - 2,626)    | 17,345<br>(14,181 - 19,246)    | 29,205<br>(25,429 - 32,496)          | 29,741<br>(25,856 - 32,642)          |
| Mental and substance use disorders                  | 282,386<br>(233,900 - 329,282)       | 2,778<br>(1,462 - 4,185)    | 40<br>(32 - 50)             | 156,545<br>(133,042 - 178,573) | 92,733<br>(71,120 - 114,576)         | 30,291<br>(25,545 - 34,706)          |
| Schizophrenia                                       | 16,024<br>(13,743 - 22,804)          | --                          | --                          | 5,589<br>(4,615 - 8,330)       | 5,747<br>(4,802 - 8,385)             | 4,688<br>(3,818 - 6,195)             |
| Alcohol use disorders                               | 139,172<br>(90,150 - 178,509)        | --                          | --                          | 64,755<br>(42,812 - 83,301)    | 60,555<br>(37,836 - 76,901)          | 13,863<br>(8,708 - 17,131)           |
| Drug use disorders                                  | 126,581<br>(110,803 - 135,550)       | 2,778<br>(1,462 - 4,185)    | --                          | 85,633<br>(73,105 - 92,036)    | 26,431<br>(23,025 - 29,002)          | 11,740<br>(10,778 - 12,637)          |
| Opioid use disorders                                | 50,750<br>(43,398 - 54,365)          | 759<br>(468 - 1,075)        | --                          | 34,707<br>(28,826 - 37,668)    | 10,618<br>(8,870 - 11,755)           | 4,666<br>(4,262 - 5,092)             |

Web Table 26 - Global deaths with 95% UI by age, sex, and cause in 2013

| Cause                                               | Both Sexes, All Ages                 | Both Sexes, 0-4 Years          | Both Sexes, 5-14 Years      | Both Sexes, 15-49 Years        | Both Sexes, 50-69 Years        | Both Sexes, 70-80 Years              |
|-----------------------------------------------------|--------------------------------------|--------------------------------|-----------------------------|--------------------------------|--------------------------------|--------------------------------------|
| Cocaine use disorders                               | 4,305<br>(3,886 - 4,682)             | 57<br>(42 - 72)                | --                          | 2,894<br>(2,528 - 3,196)       | 814<br>(704 - 918)             | 540<br>(463 - 637)                   |
| Amphetamine use disorders                           | 3,788<br>(3,425 - 4,145)             | 65<br>(49 - 83)                | --                          | 2,212<br>(1,972 - 2,466)       | 886<br>(763 - 1,001)           | 625<br>(527 - 738)                   |
| Other drug use disorders                            | 67,739<br>(59,542 - 72,796)          | 1,897<br>(881 - 3,028)         | --                          | 45,820<br>(39,591 - 49,419)    | 14,113<br>(12,560 - 15,536)    | 5,909<br>(5,363 - 6,442)             |
| Eating disorders                                    | 608<br>(548 - 679)                   | --                             | 40<br>(32 - 50)             | 568<br>(508 - 640)             | --                             | --                                   |
| Anorexia nervosa                                    | 608<br>(548 - 679)                   | --                             | 40<br>(32 - 50)             | 568<br>(508 - 640)             | --                             | --                                   |
| Diabetes, urogenital, blood, and endocrine diseases | 2,954,999<br>(2,763,985 - 3,171,075) | 163,681<br>(85,736 - 285,893)  | 48,744<br>(27,717 - 82,141) | 376,680<br>(344,257 - 420,989) | 890,262<br>(825,830 - 943,991) | 1,475,633<br>(1,360,808 - 1,553,982) |
| Diabetes mellitus                                   | 1,299,376<br>(1,234,515 - 1,374,837) | 4,468<br>(3,602 - 5,622)       | 2,136<br>(1,650 - 2,842)    | 115,620<br>(106,492 - 124,340) | 468,486<br>(441,134 - 502,301) | 708,665<br>(672,289 - 755,255)       |
| Acute glomerulonephritis                            | 18,791<br>(14,348 - 22,789)          | 1,655<br>(809 - 2,779)         | 1,094<br>(740 - 1,558)      | 5,330<br>(4,141 - 6,623)       | 5,267<br>(4,065 - 6,308)       | 5,445<br>(4,326 - 6,345)             |
| Chronic kidney disease                              | 956,246<br>(812,896 - 1,034,491)     | 8,884<br>(7,274 - 10,746)      | 5,518<br>(4,467 - 6,339)    | 131,807<br>(106,902 - 145,705) | 288,450<br>(232,788 - 316,301) | 521,587<br>(445,011 - 566,732)       |
| Chronic kidney disease due to diabetes mellitus     | 173,061<br>(139,261 - 208,755)       | 244<br>(175 - 351)             | 210<br>(151 - 284)          | 15,359<br>(11,661 - 18,774)    | 63,308<br>(46,842 - 70,889)    | 93,939<br>(78,210 - 119,985)         |
| Chronic kidney disease due to hypertension          | 275,691<br>(196,895 - 336,532)       | 1,112<br>(711 - 1,609)         | 585<br>(406 - 800)          | 30,339<br>(21,654 - 37,859)    | 78,934<br>(54,471 - 96,078)    | 164,722<br>(118,729 - 201,535)       |
| Chronic kidney disease due to glomerulonephritis    | 116,328<br>(92,908 - 144,008)        | 4,124<br>(3,293 - 5,205)       | 2,445<br>(1,949 - 2,944)    | 30,960<br>(24,912 - 36,825)    | 35,692<br>(28,030 - 44,804)    | 43,105<br>(33,099 - 55,351)          |
| Chronic kidney disease due to other causes          | 391,168<br>(296,970 - 452,264)       | 3,404<br>(2,543 - 4,434)       | 2,278<br>(1,762 - 2,737)    | 55,149<br>(40,265 - 65,465)    | 110,515<br>(80,843 - 129,757)  | 219,821<br>(167,239 - 259,835)       |
| Urinary diseases and male infertility               | 245,766<br>(205,478 - 264,724)       | 7,141<br>(5,239 - 8,840)       | 2,100<br>(1,600 - 2,562)    | 32,882<br>(27,740 - 36,400)    | 59,677<br>(50,438 - 65,195)    | 143,966<br>(117,713 - 157,550)       |
| Interstitial nephritis and urinary tract infections | 175,490<br>(144,588 - 192,011)       | 5,656<br>(3,822 - 7,144)       | 1,393<br>(972 - 1,740)      | 22,122<br>(18,211 - 24,870)    | 38,792<br>(33,158 - 43,710)    | 107,526<br>(86,106 - 119,424)        |
| Urolithiasis                                        | 14,745<br>(12,366 - 20,070)          | --                             | 203<br>(153 - 292)          | 2,426<br>(1,897 - 3,530)       | 4,845<br>(3,925 - 6,811)       | 7,271<br>(5,830 - 9,895)             |
| Other urinary diseases                              | 55,531<br>(40,400 - 66,476)          | 1,485<br>(1,082 - 2,093)       | 504<br>(369 - 697)          | 8,334<br>(6,018 - 10,230)      | 16,039<br>(10,966 - 19,296)    | 29,169<br>(21,085 - 35,129)          |
| Gynecological diseases                              | 3,407<br>(2,889 - 4,829)             | --                             | --                          | 1,360<br>(1,121 - 2,365)       | 595<br>(502 - 819)             | 1,453<br>(1,077 - 1,958)             |
| Uterine fibroids                                    | 878<br>(728 - 1,184)                 | --                             | --                          | 266<br>(207 - 439)             | 164<br>(137 - 223)             | 448<br>(329 - 613)                   |
| Polycystic ovarian syndrome                         | 88<br>(74 - 156)                     | --                             | --                          | 84<br>(70 - 150)               | 4<br>(3 - 5)                   | --                                   |
| Endometriosis                                       | 223<br>(187 - 386)                   | --                             | --                          | 208<br>(173 - 365)             | 14<br>(11 - 20)                | --                                   |
| Genital prolapse                                    | 647<br>(537 - 875)                   | --                             | --                          | 172<br>(143 - 302)             | 107<br>(90 - 147)              | 369<br>(274 - 495)                   |
| Other gynecological diseases                        | 1,571<br>(1,340 - 2,237)             | --                             | --                          | 628<br>(520 - 1,101)           | 307<br>(258 - 424)             | 636<br>(470 - 858)                   |
| Hemoglobinopathies and hemolytic anemias            | 240,408<br>(106,039 - 456,056)       | 118,953<br>(39,632 - 241,800)  | 33,120<br>(11,276 - 67,540) | 52,366<br>(26,164 - 102,741)   | 17,249<br>(10,971 - 28,000)    | 18,721<br>(12,632 - 24,213)          |
| Thalassemias                                        | 24,773<br>(16,939 - 32,060)          | 9,156<br>(6,164 - 12,039)      | 4,281<br>(2,939 - 5,765)    | 10,368<br>(6,930 - 13,765)     | 822<br>(587 - 1,096)           | 145<br>(99 - 190)                    |
| Sickle cell disorders                               | 176,187<br>(56,338 - 385,692)        | 105,383<br>(28,771 - 226,196)  | 27,798<br>(7,181 - 61,480)  | 35,005<br>(13,224 - 83,751)    | 7,342<br>(3,660 - 16,471)      | 659<br>(398 - 974)                   |
| G6PD deficiency                                     | 4,095<br>(2,580 - 5,600)             | 1,201<br>(621 - 1,921)         | 368<br>(214 - 563)          | 1,382<br>(891 - 1,870)         | 824<br>(558 - 1,118)           | 320<br>(196 - 437)                   |
| Other hemoglobinopathies and hemolytic anemias      | 35,354<br>(24,265 - 44,900)          | 3,213<br>(1,875 - 5,599)       | 672<br>(445 - 930)          | 5,610<br>(3,870 - 7,253)       | 8,260<br>(5,851 - 10,806)      | 17,598<br>(11,928 - 22,896)          |
| Endocrine, metabolic, blood, and immune disorders   | 191,005<br>(150,486 - 218,519)       | 22,581<br>(18,992 - 27,706)    | 4,775<br>(3,986 - 5,990)    | 37,315<br>(31,208 - 44,621)    | 50,538<br>(39,962 - 56,494)    | 75,796<br>(57,140 - 85,303)          |
| Musculoskeletal disorders                           | 116,281<br>(100,350 - 137,674)       | --                             | 3,165<br>(2,702 - 3,941)    | 27,601<br>(23,886 - 32,739)    | 36,392<br>(31,304 - 45,014)    | 49,123<br>(42,646 - 56,531)          |
| Rheumatoid arthritis                                | 38,087<br>(33,029 - 46,891)          | --                             | 545<br>(387 - 865)          | 3,969<br>(3,170 - 5,306)       | 13,194<br>(10,925 - 17,047)    | 20,379<br>(18,017 - 24,251)          |
| Other musculoskeletal disorders                     | 78,195<br>(65,231 - 90,341)          | --                             | 2,619<br>(2,126 - 3,144)    | 23,632<br>(19,969 - 27,468)    | 23,199<br>(19,071 - 27,923)    | 28,745<br>(23,868 - 32,935)          |
| Other non-communicable diseases                     | 746,610<br>(674,098 - 846,209)       | 518,496<br>(447,708 - 614,863) | 30,259<br>(26,498 - 34,180) | 75,165<br>(65,921 - 86,580)    | 44,391<br>(35,000 - 49,712)    | 78,299<br>(66,197 - 84,427)          |
| Congenital anomalies                                | 632,143<br>(561,331 - 730,325)       | 495,319<br>(424,788 - 590,319) | 29,042<br>(25,335 - 32,968) | 61,815<br>(52,951 - 72,448)    | 23,903<br>(16,087 - 27,853)    | 22,064<br>(14,040 - 25,053)          |
| Neural tube defects                                 | 68,882<br>(40,892 - 124,396)         | 63,252<br>(36,277 - 115,241)   | 1,861<br>(1,030 - 3,318)    | 2,905<br>(2,114 - 4,665)       | 538<br>(399 - 858)             | 326<br>(233 - 516)                   |
| Congenital heart anomalies                          | 323,387<br>(288,346 - 372,585)       | 248,669<br>(214,204 - 296,024) | 17,140<br>(14,522 - 19,830) | 32,458<br>(26,483 - 39,064)    | 12,754<br>(7,646 - 16,035)     | 12,366<br>(6,580 - 15,044)           |
| Cleft lip and cleft palate                          | 3,290<br>(1,895 - 5,187)             | 3,290<br>(1,895 - 5,187)       | --                          | --                             | --                             | --                                   |
| Down syndrome                                       | 36,444<br>(20,443 - 52,379)          | 23,802<br>(11,363 - 37,389)    | 2,283<br>(1,371 - 3,308)    | 7,289<br>(4,895 - 10,221)      | 2,775<br>(1,790 - 3,454)       | 295<br>(200 - 383)                   |
| Chromosomal unbalanced rearrangements               | 17,301<br>(10,626 - 26,754)          | 14,065<br>(8,120 - 23,009)     | 587<br>(359 - 863)          | 2,089<br>(1,521 - 2,972)       | 370<br>(250 - 502)             | 190<br>(129 - 254)                   |
| Other congenital anomalies                          | 182,838<br>(150,154 - 261,870)       | 142,242<br>(112,860 - 218,781) | 7,171<br>(5,721 - 9,840)    | 17,073<br>(13,798 - 20,940)    | 7,466<br>(5,752 - 8,666)       | 8,886<br>(6,802 - 10,153)            |

Web Table 26 - Global deaths with 95% UI by age, sex, and cause in 2013

| Cause                                           | Both Sexes, All Ages                 | Both Sexes, 0-4 Years          | Both Sexes, 5-14 Years         | Both Sexes, 15-49 Years              | Both Sexes, 50-69 Years            | Both Sexes, 70-80 Years        |
|-------------------------------------------------|--------------------------------------|--------------------------------|--------------------------------|--------------------------------------|------------------------------------|--------------------------------|
| Skin and subcutaneous diseases                  | 99,414<br>(89,855 - 107,329)         | 8,123<br>(6,628 - 9,800)       | 1,218<br>(1,028 - 1,429)       | 13,350<br>(11,564 - 15,015)          | 20,488<br>(18,397 - 22,712)        | 56,235<br>(49,624 - 61,372)    |
| Cellulitis                                      | 29,499<br>(22,543 - 39,282)          | 3,549<br>(2,355 - 5,121)       | 579<br>(414 - 785)             | 5,036<br>(3,694 - 6,881)             | 7,558<br>(5,673 - 10,244)          | 12,778<br>(9,571 - 16,997)     |
| Pyoderma                                        | 37,669<br>(30,245 - 42,904)          | 4,116<br>(3,000 - 5,471)       | 424<br>(317 - 534)             | 5,911<br>(4,504 - 7,022)             | 9,057<br>(6,947 - 10,771)          | 18,161<br>(14,695 - 20,940)    |
| Decubitus ulcer                                 | 28,452<br>(24,440 - 32,993)          | 141<br>(78 - 240)              | 126<br>(85 - 180)              | 1,631<br>(1,239 - 2,067)             | 3,209<br>(2,607 - 3,959)           | 23,346<br>(20,351 - 27,036)    |
| Other skin and subcutaneous diseases            | 3,793<br>(3,023 - 4,869)             | 317<br>(183 - 503)             | 89<br>(65 - 114)               | 772<br>(589 - 911)                   | 664<br>(527 - 825)                 | 1,950<br>(1,509 - 2,824)       |
| Sudden infant death syndrome                    | 15,053<br>(9,599 - 21,425)           | 15,053<br>(9,599 - 21,425)     | --                             | --                                   | --                                 | --                             |
| Injuries                                        | 4,786,929<br>(4,507,907 - 5,072,815) | 367,122<br>(320,602 - 426,644) | 209,628<br>(191,203 - 231,125) | 2,261,868<br>(2,111,851 - 2,414,001) | 1,029,215<br>(955,110 - 1,103,965) | 919,096<br>(827,846 - 977,333) |
| Transport injuries                              | 1,482,723<br>(1,364,792 - 1,588,836) | 74,749<br>(59,638 - 90,404)    | 70,880<br>(61,940 - 78,595)    | 821,338<br>(757,011 - 888,299)       | 333,896<br>(302,220 - 362,793)     | 181,860<br>(162,869 - 195,005) |
| Road injuries                                   | 1,395,796<br>(1,286,139 - 1,492,717) | 68,302<br>(54,165 - 83,074)    | 66,259<br>(57,993 - 73,616)    | 775,423<br>(714,422 - 838,970)       | 313,988<br>(284,659 - 340,742)     | 171,826<br>(154,988 - 184,813) |
| Pedestrian road injuries                        | 543,815<br>(452,013 - 629,084)       | 34,287<br>(26,022 - 43,817)    | 33,543<br>(27,678 - 38,793)    | 229,937<br>(184,065 - 276,987)       | 145,054<br>(120,289 - 167,394)     | 100,994<br>(86,559 - 113,122)  |
| Cyclist road injuries                           | 90,595<br>(74,167 - 106,606)         | 3,466<br>(2,528 - 4,693)       | 5,610<br>(4,628 - 7,081)       | 41,137<br>(34,007 - 48,695)          | 25,832<br>(20,479 - 31,294)        | 14,550<br>(11,624 - 17,221)    |
| Motorcyclist road injuries                      | 248,508<br>(200,879 - 294,361)       | 4,409<br>(3,241 - 6,187)       | 5,048<br>(3,876 - 6,510)       | 189,155<br>(153,686 - 225,464)       | 38,567<br>(29,346 - 46,813)        | 11,329<br>(8,856 - 14,010)     |
| Motor vehicle road injuries                     | 492,675<br>(431,009 - 555,058)       | 24,240<br>(18,928 - 30,393)    | 20,203<br>(16,741 - 23,953)    | 305,949<br>(267,488 - 345,534)       | 99,423<br>(85,689 - 114,984)       | 42,860<br>(37,032 - 49,705)    |
| Other road injuries                             | 20,203<br>(14,409 - 25,537)          | 1,899<br>(1,124 - 2,580)       | 1,855<br>(1,256 - 2,623)       | 9,244<br>(6,232 - 11,734)            | 5,112<br>(3,746 - 7,413)           | 2,094<br>(1,642 - 2,913)       |
| Other transport injuries                        | 86,927<br>(71,986 - 97,165)          | 6,448<br>(4,913 - 7,831)       | 4,621<br>(3,519 - 5,433)       | 45,916<br>(38,389 - 52,299)          | 19,908<br>(16,295 - 22,974)        | 10,034<br>(7,960 - 11,394)     |
| Unintentional injuries                          | 2,006,666<br>(1,857,128 - 2,183,050) | 276,368<br>(238,764 - 328,076) | 119,540<br>(106,430 - 139,072) | 637,689<br>(583,147 - 714,165)       | 392,140<br>(355,685 - 428,356)     | 580,929<br>(499,078 - 627,908) |
| Falls                                           | 556,375<br>(448,548 - 610,669)       | 24,248<br>(18,827 - 30,828)    | 12,681<br>(10,171 - 15,953)    | 111,917<br>(93,140 - 129,802)        | 112,914<br>(90,199 - 126,881)      | 294,614<br>(227,387 - 328,099) |
| Drowning                                        | 368,111<br>(310,970 - 515,367)       | 81,857<br>(62,923 - 113,448)   | 55,952<br>(46,976 - 76,262)    | 143,071<br>(121,949 - 199,429)       | 52,035<br>(42,865 - 75,963)        | 35,195<br>(28,664 - 48,217)    |
| Fire, heat, and hot substances                  | 237,516<br>(199,251 - 282,860)       | 31,704<br>(25,088 - 40,113)    | 10,937<br>(8,891 - 14,007)     | 105,296<br>(86,029 - 132,668)        | 44,625<br>(36,912 - 53,323)        | 44,954<br>(36,829 - 51,485)    |
| Poisonings                                      | 98,047<br>(70,192 - 110,779)         | 10,617<br>(7,079 - 13,982)     | 3,751<br>(2,461 - 4,551)       | 44,631<br>(31,831 - 51,616)          | 22,537<br>(15,628 - 25,887)        | 16,511<br>(11,611 - 18,596)    |
| Exposure to mechanical forces                   | 196,826<br>(177,860 - 244,594)       | 36,771<br>(28,687 - 61,891)    | 11,404<br>(9,442 - 14,978)     | 89,391<br>(80,078 - 102,322)         | 39,960<br>(35,020 - 45,408)        | 19,301<br>(16,866 - 21,855)    |
| Unintentional firearm injuries                  | 47,349<br>(41,042 - 55,677)          | 3,180<br>(2,449 - 4,167)       | 1,940<br>(1,566 - 2,417)       | 29,241<br>(24,620 - 35,357)          | 8,673<br>(6,925 - 10,899)          | 4,316<br>(3,409 - 5,426)       |
| Unintentional suffocation                       | 37,563<br>(29,071 - 80,721)          | 21,121<br>(14,882 - 46,989)    | 2,359<br>(1,548 - 5,000)       | 7,343<br>(5,771 - 15,022)            | 3,621<br>(2,973 - 6,108)           | 3,120<br>(2,383 - 4,835)       |
| Other exposure to mechanical forces             | 111,914<br>(95,521 - 122,410)        | 12,469<br>(9,511 - 15,655)     | 7,106<br>(5,810 - 8,627)       | 52,807<br>(46,470 - 59,041)          | 27,667<br>(22,883 - 31,430)        | 11,865<br>(9,943 - 13,343)     |
| Adverse effects of medical treatment            | 141,690<br>(107,534 - 165,928)       | 21,536<br>(15,049 - 30,909)    | 3,037<br>(2,150 - 4,126)       | 30,533<br>(23,928 - 36,553)          | 36,516<br>(27,345 - 44,140)        | 50,069<br>(36,579 - 57,579)    |
| Animal contact                                  | 79,557<br>(62,346 - 138,692)         | 10,325<br>(6,959 - 16,944)     | 9,703<br>(7,121 - 15,464)      | 28,750<br>(21,848 - 51,685)          | 20,037<br>(14,850 - 37,572)        | 10,743<br>(7,977 - 19,215)     |
| Venomous animal contact                         | 57,185<br>(44,125 - 102,480)         | 6,746<br>(4,259 - 11,305)      | 7,120<br>(5,075 - 11,388)      | 22,957<br>(17,085 - 42,954)          | 14,575<br>(10,289 - 28,316)        | 5,788<br>(4,110 - 10,931)      |
| Non-venomous animal contact                     | 22,372<br>(16,422 - 36,824)          | 3,578<br>(2,343 - 6,106)       | 2,583<br>(1,816 - 4,404)       | 5,793<br>(4,260 - 8,895)             | 5,462<br>(3,781 - 9,772)           | 4,955<br>(3,346 - 8,766)       |
| Foreign body                                    | 165,704<br>(114,785 - 219,088)       | 48,271<br>(33,861 - 66,692)    | 3,007<br>(2,124 - 4,281)       | 20,699<br>(13,730 - 27,830)          | 22,357<br>(14,528 - 29,518)        | 71,370<br>(47,474 - 93,510)    |
| Pulmonary aspiration and foreign body in airway | 162,090<br>(109,827 - 214,718)       | 47,703<br>(33,226 - 66,039)    | 2,785<br>(1,908 - 4,009)       | 19,840<br>(12,802 - 26,767)          | 21,397<br>(13,541 - 28,576)        | 70,364<br>(46,187 - 92,453)    |
| Foreign body in other body part                 | 3,615<br>(2,671 - 5,359)             | 568<br>(393 - 939)             | 222<br>(166 - 374)             | 859<br>(637 - 1,346)                 | 961<br>(642 - 1,528)               | 1,006<br>(735 - 1,345)         |
| Other unintentional injuries                    | 162,840<br>(143,880 - 180,308)       | 11,041<br>(9,136 - 13,863)     | 9,068<br>(7,719 - 10,594)      | 63,401<br>(57,368 - 70,477)          | 41,159<br>(34,891 - 48,277)        | 38,171<br>(26,955 - 47,037)    |
| Self-harm and interpersonal violence            | 1,247,117<br>(1,067,199 - 1,390,855) | 10,985<br>(7,414 - 14,726)     | 17,166<br>(13,427 - 20,787)    | 783,587<br>(673,391 - 881,850)       | 286,461<br>(247,912 - 323,862)     | 148,917<br>(133,859 - 170,487) |
| Self-harm                                       | 842,419<br>(718,142 - 939,006)       | --                             | 8,752<br>(6,599 - 11,530)      | 481,299<br>(392,106 - 541,917)       | 225,699<br>(190,835 - 254,362)     | 126,669<br>(114,810 - 151,653) |
| Interpersonal violence                          | 404,698<br>(298,721 - 496,602)       | 10,985<br>(7,414 - 14,726)     | 8,414<br>(5,946 - 10,662)      | 302,289<br>(222,552 - 367,432)       | 60,763<br>(44,196 - 84,407)        | 22,247<br>(14,996 - 28,354)    |
| Assault by firearm                              | 180,371<br>(120,455 - 231,301)       | 2,095<br>(1,278 - 2,955)       | 2,663<br>(1,637 - 3,483)       | 145,889<br>(97,521 - 184,315)        | 23,623<br>(15,605 - 35,653)        | 6,102<br>(3,501 - 9,001)       |
| Assault by sharp object                         | 114,325<br>(77,079 - 163,230)        | 1,807<br>(1,151 - 2,818)       | 1,592<br>(1,079 - 2,396)       | 87,466<br>(58,425 - 123,248)         | 18,257<br>(11,585 - 27,197)        | 5,203<br>(3,262 - 7,221)       |
| Assault by other means                          | 110,001<br>(78,704 - 142,113)        | 7,083<br>(4,713 - 9,787)       | 4,159<br>(2,789 - 5,572)       | 68,934<br>(48,413 - 91,349)          | 18,883<br>(13,791 - 25,682)        | 10,942<br>(7,187 - 13,878)     |
| Forces of nature, war, and legal intervention   | 50,423<br>(34,386 - 88,784)          | 5,019<br>(3,954 - 12,519)      | 2,041<br>(1,462 - 3,445)       | 19,254<br>(12,081 - 36,698)          | 16,718<br>(11,285 - 28,366)        | 7,391<br>(5,304 - 10,785)      |
| Exposure to forces of nature                    | 19,195<br>(13,481 - 31,978)          | 1,501<br>(448 - 9,000)         | 527<br>(377 - 795)             | 7,012<br>(4,900 - 11,080)            | 6,849<br>(4,936 - 10,330)          | 3,305<br>(2,637 - 4,437)       |
| Collective violence and legal intervention      | 31,228<br>(20,330 - 56,973)          | 3,518<br>(3,504 - 3,539)       | 1,514<br>(1,056 - 2,708)       | 12,242<br>(6,925 - 26,092)           | 9,868<br>(6,065 - 18,181)          | 4,086<br>(2,534 - 6,394)       |

Web Table 26 - Global deaths with 95% UI by age, sex, and cause in 2013

| Cause                                                             | Males, All Ages                         | Males, 0-4 Years                     | Males, 5-14 Years              | Males, 15-49 Years                   | Males, 50-69 Years                   | Males, 70-80 Years                      |
|-------------------------------------------------------------------|-----------------------------------------|--------------------------------------|--------------------------------|--------------------------------------|--------------------------------------|-----------------------------------------|
| All causes                                                        | 29,918,793<br>(28,727,254 - 31,104,340) | 3,383,342<br>(3,202,127 - 3,573,200) | 459,136<br>(438,093 - 483,662) | 5,422,787<br>(5,119,361 - 5,767,143) | 8,669,517<br>(8,151,057 - 9,187,527) | 11,984,010<br>(11,564,351 - 12,314,481) |
| Communicable, maternal, neonatal, and nutritional diseases        | 6,226,550<br>(5,929,853 - 6,532,136)    | 2,723,272<br>(2,516,478 - 2,912,825) | 215,932<br>(196,091 - 237,128) | 1,295,247<br>(1,204,188 - 1,398,981) | 941,870<br>(866,138 - 1,021,788)     | 1,050,230<br>(933,382 - 1,132,886)      |
| HIV/AIDS and tuberculosis                                         | 1,558,726<br>(1,447,085 - 1,768,058)    | 56,015<br>(49,370 - 63,007)          | 41,846<br>(39,213 - 44,629)    | 803,952<br>(743,310 - 910,233)       | 451,712<br>(405,537 - 522,015)       | 205,201<br>(183,667 - 235,690)          |
| Tuberculosis                                                      | 835,602<br>(739,281 - 958,088)          | 23,249<br>(16,159 - 29,303)          | 8,187<br>(6,410 - 9,922)       | 312,575<br>(271,741 - 357,782)       | 303,721<br>(262,038 - 354,328)       | 187,669<br>(166,714 - 215,720)          |
| HIV/AIDS                                                          | 723,124<br>(670,708 - 831,754)          | 32,766<br>(30,103 - 36,807)          | 33,659<br>(31,571 - 36,067)    | 491,376<br>(448,911 - 563,085)       | 147,990<br>(133,660 - 176,719)       | 17,332<br>(15,244 - 21,018)             |
| HIV/AIDS resulting in mycobacterial infection                     | 50,780<br>(40,801 - 63,789)             | 2,175<br>(1,756 - 2,707)             | 2,074<br>(1,690 - 2,535)       | 34,448<br>(27,459 - 43,640)          | 10,775<br>(8,553 - 13,821)           | 1,307<br>(1,019 - 1,690)                |
| HIV/AIDS resulting in other diseases                              | 672,344<br>(623,472 - 777,275)          | 30,591<br>(27,923 - 34,395)          | 31,585<br>(29,548 - 33,940)    | 456,928<br>(415,558 - 526,838)       | 137,215<br>(124,002 - 162,858)       | 16,025<br>(14,079 - 19,446)             |
| Diarrhea, lower respiratory, and other common infectious diseases | 2,427,634<br>(2,203,550 - 2,611,622)    | 949,210<br>(838,354 - 1,064,027)     | 114,964<br>(98,347 - 134,710)  | 314,780<br>(276,099 - 361,435)       | 355,950<br>(302,315 - 400,657)       | 692,730<br>(592,432 - 762,685)          |
| Diarrheal diseases                                                | 607,696<br>(535,804 - 683,957)          | 271,385<br>(217,055 - 330,639)       | 27,857<br>(21,586 - 35,097)    | 78,180<br>(67,497 - 89,698)          | 97,150<br>(77,479 - 123,209)         | 133,123<br>(109,891 - 161,159)          |
| Intestinal infectious diseases                                    | 117,978<br>(63,879 - 195,741)           | 32,439<br>(17,159 - 55,485)          | 32,767<br>(18,298 - 52,105)    | 44,433<br>(22,052 - 79,506)          | 6,337<br>(2,989 - 11,992)            | 2,000<br>(1,104 - 3,555)                |
| Typhoid fever                                                     | 84,910<br>(44,412 - 143,185)            | 22,036<br>(11,027 - 38,407)          | 24,011<br>(13,010 - 38,932)    | 32,766<br>(15,840 - 58,976)          | 4,673<br>(2,060 - 9,062)             | 1,424<br>(706 - 2,650)                  |
| Paratyphoid fever                                                 | 29,397<br>(15,032 - 49,675)             | 8,531<br>(4,168 - 15,135)            | 8,414<br>(4,328 - 14,311)      | 10,710<br>(5,040 - 19,656)           | 1,355<br>(533 - 3,003)               | 386<br>(174 - 756)                      |
| Other intestinal infectious diseases                              | 3,670<br>(3,212 - 4,174)                | 1,872<br>(1,529 - 2,250)             | 342<br>(272 - 428)             | 957<br>(821 - 1,095)                 | 309<br>(259 - 366)                   | 190<br>(156 - 230)                      |
| Lower respiratory infections                                      | 1,380,227<br>(1,187,697 - 1,486,807)    | 470,154<br>(407,791 - 530,874)       | 28,736<br>(23,582 - 35,093)    | 130,371<br>(106,759 - 149,201)       | 215,140<br>(167,692 - 242,615)       | 535,826<br>(437,177 - 597,993)          |
| Upper respiratory infections                                      | 2,160<br>(1,747 - 2,800)                | 432<br>(267 - 709)                   | 61<br>(33 - 122)               | 580<br>(416 - 853)                   | 588<br>(386 - 976)                   | 499<br>(344 - 788)                      |
| Otitis media                                                      | 1,215<br>(1,121 - 1,318)                | 232<br>(192 - 280)                   | 106<br>(89 - 126)              | 357<br>(322 - 397)                   | 250<br>(225 - 278)                   | 271<br>(245 - 300)                      |
| Meningitis                                                        | 162,570<br>(129,112 - 198,636)          | 75,201<br>(44,676 - 106,548)         | 12,201<br>(9,645 - 15,360)     | 41,027<br>(34,040 - 47,977)          | 22,230<br>(17,781 - 27,047)          | 11,911<br>(9,736 - 14,322)              |
| Pneumococcal meningitis                                           | 42,235<br>(34,273 - 51,507)             | 16,023<br>(9,407 - 23,419)           | 3,913<br>(2,991 - 5,111)       | 12,514<br>(10,243 - 14,937)          | 6,417<br>(4,834 - 8,406)             | 3,368<br>(2,596 - 4,330)                |
| H influenzae type B meningitis                                    | 34,692<br>(24,472 - 44,813)             | 23,600<br>(13,966 - 33,401)          | 2,704<br>(2,129 - 3,443)       | 4,936<br>(3,912 - 5,930)             | 2,264<br>(1,675 - 3,094)             | 1,187<br>(908 - 1,544)                  |
| Meningococcal meningitis                                          | 34,638<br>(27,901 - 43,396)             | 15,635<br>(9,154 - 23,668)           | 2,833<br>(2,139 - 3,671)       | 8,908<br>(7,203 - 10,586)            | 4,603<br>(3,374 - 6,030)             | 2,660<br>(2,101 - 3,351)                |
| Other meningitis                                                  | 51,005<br>(41,041 - 61,194)             | 19,943<br>(11,913 - 28,243)          | 2,753<br>(2,174 - 3,401)       | 14,669<br>(11,824 - 17,932)          | 8,946<br>(7,022 - 11,509)            | 4,696<br>(3,409 - 5,975)                |
| Encephalitis                                                      | 39,683<br>(31,419 - 52,658)             | 12,149<br>(7,493 - 18,857)           | 4,737<br>(3,354 - 6,858)       | 12,283<br>(8,688 - 16,954)           | 6,848<br>(5,134 - 10,136)            | 3,667<br>(2,433 - 4,973)                |
| Diphtheria                                                        | 1,684<br>(714 - 4,051)                  | 1,035<br>(298 - 3,311)               | 302<br>(70 - 1,099)            | 265<br>(103 - 696)                   | 83<br>(22 - 345)                     | --                                      |
| Whooping cough                                                    | 28,036<br>(10,193 - 63,883)             | 26,139<br>(9,511 - 59,106)           | 1,421<br>(488 - 3,633)         | 417<br>(172 - 1,023)                 | 59<br>(28 - 137)                     | --                                      |
| Tetanus                                                           | 35,184<br>(21,667 - 49,230)             | 17,757<br>(8,806 - 26,639)           | 1,089<br>(785 - 1,812)         | 5,192<br>(3,515 - 7,914)             | 6,873<br>(3,523 - 12,245)            | 4,274<br>(2,021 - 8,376)                |
| Measles                                                           | 47,920<br>(24,075 - 88,366)             | 41,467<br>(20,979 - 75,178)          | 5,496<br>(2,639 - 11,103)      | 922<br>(401 - 2,218)                 | 36<br>(16 - 83)                      | --                                      |
| Varicella and herpes zoster                                       | 3,280<br>(2,519 - 4,317)                | 822<br>(482 - 1,459)                 | 190<br>(104 - 372)             | 752<br>(516 - 1,159)                 | 357<br>(230 - 612)                   | 1,159<br>(723 - 2,000)                  |
| Neglected tropical diseases and malaria                           | 518,487<br>(418,667 - 651,428)          | 328,598<br>(248,293 - 440,664)       | 36,719<br>(29,072 - 49,581)    | 84,497<br>(69,202 - 108,251)         | 43,790<br>(33,486 - 57,857)          | 24,883<br>(18,347 - 34,300)             |
| Malaria                                                           | 434,816<br>(337,340 - 564,670)          | 308,276<br>(228,861 - 419,140)       | 23,063<br>(16,024 - 36,081)    | 55,239<br>(39,773 - 78,196)          | 30,596<br>(21,021 - 42,239)          | 17,642<br>(11,709 - 25,323)             |
| Chagas disease                                                    | 6,427<br>(1,351 - 21,902)               | 5<br>(1 - 19)                        | 8<br>(1 - 22)                  | 957<br>(222 - 3,758)                 | 2,994<br>(575 - 10,619)              | 2,463<br>(464 - 8,764)                  |
| Leishmaniasis                                                     | 39,520<br>(32,640 - 47,431)             | 12,956<br>(9,283 - 17,319)           | 7,862<br>(5,814 - 10,174)      | 14,840<br>(11,672 - 18,678)          | 2,986<br>(2,314 - 3,764)             | 876<br>(700 - 1,057)                    |
| Visceral leishmaniasis                                            | 39,520<br>(32,640 - 47,431)             | 12,956<br>(9,283 - 17,319)           | 7,862<br>(5,814 - 10,174)      | 14,840<br>(11,672 - 18,678)          | 2,986<br>(2,314 - 3,764)             | 876<br>(700 - 1,057)                    |
| African trypanosomiasis                                           | 3,616<br>(1,898 - 5,712)                | 241<br>(108 - 433)                   | 402<br>(182 - 657)             | 2,441<br>(1,255 - 3,862)             | 448<br>(236 - 712)                   | 84<br>(45 - 133)                        |
| Schistosomiasis                                                   | 3,206<br>(2,825 - 3,624)                | 43<br>(29 - 64)                      | 82<br>(62 - 110)               | 1,349<br>(1,159 - 1,575)             | 1,176<br>(1,005 - 1,363)             | 556<br>(472 - 649)                      |
| Cysticercosis                                                     | 332<br>(272 - 458)                      | 11<br>(7 - 22)                       | 14<br>(9 - 23)                 | 207<br>(169 - 288)                   | 77<br>(65 - 100)                     | 22<br>(19 - 28)                         |
| Cystic echinococcosis                                             | 1,089<br>(1,018 - 1,172)                | 69<br>(57 - 84)                      | 109<br>(98 - 123)              | 494<br>(456 - 538)                   | 275<br>(255 - 300)                   | 142<br>(132 - 151)                      |
| Dengue                                                            | 4,433<br>(2,515 - 5,340)                | 1,442<br>(659 - 2,044)               | 1,033<br>(493 - 1,285)         | 1,136<br>(745 - 1,331)               | 483<br>(336 - 560)                   | 339<br>(201 - 388)                      |
| Yellow fever                                                      | 361<br>(288 - 454)                      | 34<br>(20 - 56)                      | 73<br>(44 - 122)               | 203<br>(155 - 274)                   | 38<br>(25 - 58)                      | 14<br>(8 - 26)                          |
| Rabies                                                            | 14,119<br>(8,603 - 18,327)              | 1,399<br>(815 - 2,290)               | 3,260<br>(1,843 - 4,722)       | 5,209<br>(3,214 - 6,892)             | 3,310<br>(1,982 - 4,447)             | 941<br>(523 - 1,300)                    |
| Intestinal nematode infections                                    | 2,235<br>(1,885 - 2,643)                | 1,489<br>(1,192 - 1,845)             | 300<br>(233 - 373)             | 225<br>(174 - 283)                   | 119<br>(85 - 159)                    | 102<br>(72 - 136)                       |

Web Table 26 - Global deaths with 95% UI by age, sex, and cause in 2013

| Cause                                                            | Males, All Ages                         | Males, 0-4 Years                     | Males, 5-14 Years             | Males, 15-49 Years                   | Males, 50-69 Years                   | Males, 70-80 Years                      |
|------------------------------------------------------------------|-----------------------------------------|--------------------------------------|-------------------------------|--------------------------------------|--------------------------------------|-----------------------------------------|
| Ascariasis                                                       | 2,235<br>(1,885 - 2,643)                | 1,489<br>(1,192 - 1,845)             | 300<br>(233 - 373)            | 225<br>(174 - 283)                   | 119<br>(85 - 159)                    | 102<br>(72 - 136)                       |
| Other neglected tropical diseases                                | 8,334<br>(6,842 - 10,727)               | 2,632<br>(1,787 - 4,178)             | 513<br>(386 - 719)            | 2,199<br>(1,770 - 2,881)             | 1,288<br>(1,021 - 1,622)             | 1,703<br>(1,351 - 2,188)                |
| Maternal disorders                                               | --                                      | --                                   | --                            | --                                   | --                                   | --                                      |
| Maternal hemorrhage                                              | --                                      | --                                   | --                            | --                                   | --                                   | --                                      |
| Maternal sepsis and other maternal infections                    | --                                      | --                                   | --                            | --                                   | --                                   | --                                      |
| Maternal hypertensive disorders                                  | --                                      | --                                   | --                            | --                                   | --                                   | --                                      |
| Maternal obstructed labor                                        | --                                      | --                                   | --                            | --                                   | --                                   | --                                      |
| Maternal abortive outcome                                        | --                                      | --                                   | --                            | --                                   | --                                   | --                                      |
| Indirect maternal deaths                                         | --                                      | --                                   | --                            | --                                   | --                                   | --                                      |
| Late maternal deaths                                             | --                                      | --                                   | --                            | --                                   | --                                   | --                                      |
| Maternal deaths aggravated by HIV/AIDS                           | --                                      | --                                   | --                            | --                                   | --                                   | --                                      |
| Other maternal disorders                                         | --                                      | --                                   | --                            | --                                   | --                                   | --                                      |
| Neonatal disorders                                               | 1,167,862<br>(1,098,212 - 1,242,636)    | 1,167,862<br>(1,098,212 - 1,242,636) | --                            | --                                   | --                                   | --                                      |
| Neonatal preterm birth complications                             | 416,414<br>(292,655 - 567,175)          | 416,414<br>(292,655 - 567,175)       | --                            | --                                   | --                                   | --                                      |
| Neonatal encephalopathy due to birth asphyxia and trauma         | 361,247<br>(257,255 - 459,807)          | 361,247<br>(257,255 - 459,807)       | --                            | --                                   | --                                   | --                                      |
| Neonatal sepsis and other neonatal infections                    | 225,155<br>(115,982 - 350,631)          | 225,155<br>(115,982 - 350,631)       | --                            | --                                   | --                                   | --                                      |
| Hemolytic disease and other neonatal jaundice                    | 12,378<br>(7,001 - 22,391)              | 12,378<br>(7,001 - 22,391)           | --                            | --                                   | --                                   | --                                      |
| Other neonatal disorders                                         | 152,668<br>(108,808 - 210,671)          | 152,668<br>(108,808 - 210,671)       | --                            | --                                   | --                                   | --                                      |
| Nutritional deficiencies                                         | 335,434<br>(207,536 - 437,724)          | 135,796<br>(89,476 - 181,386)        | 11,561<br>(7,067 - 15,722)    | 41,580<br>(27,156 - 60,960)          | 48,903<br>(27,780 - 63,999)          | 97,594<br>(53,637 - 126,084)            |
| Protein-energy malnutrition                                      | 241,789<br>(142,886 - 309,993)          | 119,107<br>(76,884 - 163,187)        | 8,591<br>(4,754 - 12,142)     | 21,455<br>(11,879 - 34,202)          | 28,171<br>(14,366 - 39,166)          | 64,644<br>(29,186 - 85,526)             |
| Iodine deficiency                                                | 1,263<br>(513 - 2,729)                  | 219<br>(52 - 585)                    | 44<br>(14 - 107)              | 321<br>(106 - 1,008)                 | 448<br>(81 - 1,673)                  | 231<br>(76 - 694)                       |
| Iron-deficiency anemia                                           | 78,399<br>(39,588 - 136,028)            | 15,257<br>(4,069 - 35,631)           | 2,707<br>(1,038 - 4,712)      | 17,513<br>(9,465 - 29,735)           | 17,758<br>(8,464 - 29,928)           | 25,164<br>(12,363 - 47,210)             |
| Other nutritional deficiencies                                   | 13,984<br>(5,726 - 23,600)              | 1,214<br>(466 - 3,164)               | 219<br>(109 - 468)            | 2,290<br>(1,039 - 4,050)             | 2,525<br>(963 - 3,990)               | 7,735<br>(2,824 - 13,431)               |
| Other communicable, maternal, neonatal, and nutritional diseases | 218,407<br>(179,583 - 260,237)          | 85,791<br>(57,580 - 120,700)         | 10,841<br>(8,351 - 13,771)    | 50,438<br>(43,088 - 59,641)          | 41,515<br>(33,564 - 55,434)          | 29,822<br>(22,914 - 39,920)             |
| Sexually transmitted diseases excluding HIV                      | 67,413<br>(40,532 - 103,814)            | 59,111<br>(34,174 - 93,309)          | 3,977<br>(2,279 - 6,360)      | 1,813<br>(1,368 - 2,698)             | 1,365<br>(966 - 2,059)               | 1,146<br>(828 - 1,712)                  |
| Syphilis                                                         | 65,931<br>(38,965 - 102,357)            | 59,111<br>(34,174 - 93,309)          | 3,890<br>(2,199 - 6,284)      | 978<br>(737 - 1,444)                 | 994<br>(703 - 1,505)                 | 958<br>(691 - 1,428)                    |
| Chlamydial infection                                             | --                                      | --                                   | --                            | --                                   | --                                   | --                                      |
| Gonococcal infection                                             | 873<br>(671 - 1,283)                    | --                                   | 44<br>(30 - 80)               | 459<br>(347 - 689)                   | 235<br>(166 - 352)                   | 136<br>(98 - 202)                       |
| Other sexually transmitted diseases                              | 609<br>(462 - 905)                      | --                                   | 43<br>(30 - 78)               | 376<br>(285 - 565)                   | 137<br>(97 - 204)                    | 53<br>(39 - 78)                         |
| Hepatitis                                                        | 81,480<br>(70,992 - 99,633)             | 8,602<br>(5,172 - 16,810)            | 3,910<br>(2,892 - 5,528)      | 34,100<br>(28,803 - 41,620)          | 23,088<br>(19,551 - 27,266)          | 11,781<br>(9,840 - 13,790)              |
| Acute hepatitis A                                                | 7,937<br>(2,387 - 15,945)               | 3,466<br>(1,045 - 7,863)             | 810<br>(245 - 1,595)          | 2,607<br>(741 - 5,446)               | 832<br>(230 - 1,839)                 | 223<br>(56 - 513)                       |
| Acute hepatitis B                                                | 43,020<br>(32,226 - 55,025)             | 4,181<br>(1,990 - 8,817)             | 756<br>(412 - 1,253)          | 11,512<br>(6,993 - 17,027)           | 16,638<br>(12,747 - 20,756)          | 9,932<br>(7,962 - 11,766)               |
| Acute hepatitis C                                                | 2,093<br>(440 - 5,027)                  | --                                   | 124<br>(23 - 327)             | 886<br>(172 - 2,268)                 | 716<br>(143 - 1,720)                 | 368<br>(77 - 848)                       |
| Acute hepatitis E                                                | 28,429<br>(19,697 - 40,126)             | 955<br>(313 - 2,547)                 | 2,220<br>(1,399 - 3,387)      | 19,095<br>(13,375 - 25,955)          | 4,902<br>(2,589 - 8,256)             | 1,258<br>(595 - 2,306)                  |
| Other infectious diseases                                        | 69,514<br>(43,182 - 93,415)             | 18,077<br>(8,327 - 34,860)           | 2,955<br>(1,632 - 4,907)      | 14,526<br>(9,604 - 19,417)           | 17,061<br>(10,782 - 29,318)          | 16,895<br>(10,170 - 26,480)             |
| Non-communicable diseases                                        | 20,451,622<br>(19,471,051 - 21,413,973) | 458,011<br>(377,097 - 602,866)       | 110,774<br>(93,523 - 133,721) | 2,392,452<br>(2,222,489 - 2,595,094) | 7,013,520<br>(6,580,602 - 7,451,386) | 10,476,864<br>(10,088,926 - 10,801,199) |
| Neoplasms                                                        | 4,745,206<br>(4,492,118 - 4,980,542)    | 27,303<br>(22,563 - 32,420)          | 27,103<br>(24,207 - 30,168)   | 544,919<br>(506,051 - 590,964)       | 2,042,130<br>(1,908,645 - 2,163,119) | 2,103,751<br>(2,014,180 - 2,191,929)    |
| Esophageal cancer                                                | 307,886<br>(260,435 - 383,256)          | --                                   | --                            | 25,082<br>(20,501 - 31,941)          | 160,659<br>(133,166 - 201,631)       | 122,145<br>(102,872 - 152,478)          |
| Stomach cancer                                                   | 530,318<br>(490,446 - 562,643)          | --                                   | --                            | 47,304<br>(43,685 - 51,357)          | 235,811<br>(214,767 - 255,060)       | 247,203<br>(230,304 - 261,783)          |
| Liver cancer                                                     | 564,201<br>(513,658 - 612,887)          | --                                   | 992<br>(799 - 1,195)          | 107,105<br>(94,919 - 119,866)        | 282,452<br>(253,992 - 309,099)       | 173,652<br>(158,032 - 191,370)          |



Web Table 26 - Global deaths with 95% UI by age, sex, and cause in 2013

| Cause                                | Males, All Ages                      | Males, 0-4 Years            | Males, 5-14 Years           | Males, 15-49 Years             | Males, 50-69 Years                   | Males, 70-80 Years                   |
|--------------------------------------|--------------------------------------|-----------------------------|-----------------------------|--------------------------------|--------------------------------------|--------------------------------------|
| Liver cancer due to hepatitis B      | 226,626<br>(199,046 - 252,607)       | --                          | 448<br>(355 - 551)          | 55,906<br>(49,010 - 63,871)    | 118,114<br>(101,540 - 133,987)       | 52,157<br>(45,601 - 58,094)          |
| Liver cancer due to hepatitis C      | 233,230<br>(210,272 - 264,070)       | --                          | 133<br>(102 - 177)          | 33,728<br>(28,745 - 39,552)    | 115,944<br>(102,037 - 132,742)       | 83,425<br>(73,904 - 94,718)          |
| Liver cancer due to alcohol use      | 67,466<br>(60,318 - 75,124)          | --                          | --                          | 6,975<br>(6,052 - 8,094)       | 30,866<br>(27,422 - 35,074)          | 29,624<br>(26,028 - 33,231)          |
| Liver cancer due to other causes     | 36,880<br>(32,509 - 41,793)          | --                          | 411<br>(321 - 506)          | 10,495<br>(8,987 - 12,138)     | 17,528<br>(14,968 - 20,393)          | 8,446<br>(7,386 - 9,630)             |
| Larynx cancer                        | 75,483<br>(61,534 - 92,428)          | --                          | --                          | 7,720<br>(6,553 - 10,353)      | 39,245<br>(32,003 - 48,085)          | 28,518<br>(22,715 - 34,536)          |
| Tracheal, bronchus and lung cancer   | 1,154,629<br>(1,087,240 - 1,215,549) | --                          | --                          | 74,128<br>(68,174 - 81,304)    | 551,341<br>(513,570 - 585,991)       | 529,160<br>(500,524 - 553,059)       |
| Breast cancer                        | 7,022<br>(5,483 - 9,383)             | --                          | --                          | 1,285<br>(1,036 - 1,530)       | 3,017<br>(2,343 - 3,887)             | 2,719<br>(1,946 - 4,014)             |
| Cervical cancer                      | --                                   | --                          | --                          | --                             | --                                   | --                                   |
| Uterine cancer                       | --                                   | --                          | --                          | --                             | --                                   | --                                   |
| Prostate cancer                      | 292,729<br>(242,244 - 373,884)       | --                          | --                          | 1,851<br>(1,417 - 2,372)       | 53,993<br>(44,132 - 68,469)          | 236,884<br>(194,694 - 309,909)       |
| Colon and rectum cancer              | 413,986<br>(396,017 - 431,192)       | --                          | --                          | 40,981<br>(38,255 - 43,909)    | 158,784<br>(149,800 - 166,773)       | 214,221<br>(204,806 - 223,529)       |
| Lip and oral cavity cancer           | 87,360<br>(68,321 - 98,171)          | --                          | --                          | 15,056<br>(10,964 - 18,105)    | 42,801<br>(33,071 - 48,718)          | 29,503<br>(24,065 - 34,903)          |
| Nasopharynx cancer                   | 43,269<br>(38,327 - 48,370)          | --                          | 373<br>(243 - 594)          | 13,016<br>(11,340 - 14,954)    | 22,110<br>(19,249 - 25,034)          | 7,769<br>(6,890 - 8,671)             |
| Other pharynx cancer                 | 62,501<br>(51,247 - 69,556)          | --                          | --                          | 8,913<br>(7,129 - 10,414)      | 37,278<br>(30,116 - 42,288)          | 16,309<br>(13,561 - 18,411)          |
| Gallbladder and biliary tract cancer | 53,810<br>(45,137 - 61,000)          | --                          | --                          | 4,167<br>(3,282 - 4,740)       | 20,431<br>(17,305 - 23,409)          | 29,211<br>(23,675 - 33,797)          |
| Pancreatic cancer                    | 185,133<br>(177,550 - 192,705)       | --                          | --                          | 16,350<br>(15,295 - 17,510)    | 84,275<br>(79,966 - 88,341)          | 84,508<br>(80,665 - 88,392)          |
| Malignant skin melanoma              | 32,210<br>(20,781 - 49,818)          | --                          | --                          | 6,524<br>(4,648 - 10,519)      | 12,833<br>(8,218 - 20,554)           | 12,853<br>(7,608 - 19,044)           |
| Non-melanoma skin cancer             | 21,900<br>(16,919 - 29,323)          | --                          | --                          | 2,473<br>(1,911 - 4,022)       | 6,255<br>(4,891 - 8,412)             | 13,173<br>(9,919 - 17,679)           |
| Ovarian cancer                       | --                                   | --                          | --                          | --                             | --                                   | --                                   |
| Testicular cancer                    | 8,307<br>(6,313 - 10,373)            | --                          | --                          | 5,202<br>(3,904 - 6,474)       | 1,776<br>(1,355 - 2,227)             | 1,329<br>(1,001 - 1,651)             |
| Kidney cancer                        | 86,729<br>(81,975 - 91,291)          | 843<br>(651 - 1,126)        | 426<br>(355 - 526)          | 7,919<br>(7,315 - 8,587)       | 39,886<br>(37,400 - 42,472)          | 37,656<br>(34,884 - 40,607)          |
| Bladder cancer                       | 130,016<br>(116,155 - 141,975)       | --                          | --                          | 5,215<br>(4,668 - 5,975)       | 42,702<br>(39,248 - 49,006)          | 82,099<br>(70,678 - 89,044)          |
| Brain and nervous system cancer      | 118,053<br>(90,512 - 145,690)        | 1,768<br>(1,199 - 2,437)    | 4,283<br>(2,924 - 5,516)    | 32,718<br>(23,722 - 41,858)    | 51,411<br>(39,948 - 63,757)          | 27,873<br>(20,341 - 32,626)          |
| Thyroid cancer                       | 12,496<br>(11,024 - 14,303)          | --                          | 45<br>(35 - 53)             | 1,682<br>(1,438 - 1,988)       | 5,647<br>(4,949 - 6,553)             | 5,122<br>(4,471 - 5,750)             |
| Mesothelioma                         | 24,043<br>(19,956 - 28,064)          | --                          | --                          | 1,428<br>(1,266 - 1,731)       | 12,608<br>(10,879 - 14,608)          | 10,007<br>(7,060 - 12,399)           |
| Hodgkin lymphoma                     | 14,218<br>(12,598 - 19,201)          | 895<br>(494 - 1,787)        | 583<br>(429 - 822)          | 5,445<br>(4,741 - 7,478)       | 4,264<br>(3,707 - 5,919)             | 3,031<br>(2,672 - 4,051)             |
| Non-Hodgkin lymphoma                 | 133,129<br>(107,776 - 148,696)       | 3,105<br>(2,186 - 4,105)    | 3,766<br>(2,885 - 4,653)    | 27,196<br>(23,080 - 32,681)    | 48,406<br>(39,243 - 55,978)          | 50,657<br>(36,526 - 57,695)          |
| Multiple myeloma                     | 42,303<br>(31,266 - 54,407)          | --                          | --                          | 3,591<br>(2,791 - 4,466)       | 17,302<br>(13,208 - 22,366)          | 21,410<br>(15,037 - 28,283)          |
| Leukemia                             | 148,931<br>(141,936 - 156,157)       | 5,072<br>(4,273 - 6,014)    | 9,324<br>(8,235 - 10,492)   | 42,624<br>(39,581 - 46,331)    | 41,360<br>(38,776 - 43,856)          | 50,552<br>(47,677 - 53,535)          |
| Other neoplasms                      | 194,544<br>(171,397 - 213,330)       | 15,620<br>(11,784 - 19,668) | 7,311<br>(5,990 - 8,698)    | 39,943<br>(35,448 - 46,548)    | 65,483<br>(58,635 - 73,619)          | 66,187<br>(55,019 - 72,313)          |
| Cardiovascular diseases              | 8,788,998<br>(8,343,508 - 9,256,932) | 29,838<br>(26,071 - 34,051) | 15,199<br>(13,266 - 17,216) | 876,182<br>(810,460 - 953,630) | 2,991,765<br>(2,789,759 - 3,207,233) | 4,876,014<br>(4,669,901 - 5,067,280) |
| Rheumatic heart disease              | 118,043<br>(85,905 - 166,051)        | 1,075<br>(700 - 1,694)      | 2,340<br>(1,616 - 3,277)    | 31,936<br>(22,955 - 46,833)    | 41,223<br>(29,721 - 61,274)          | 41,470<br>(27,814 - 55,677)          |
| Ischemic heart disease               | 4,320,343<br>(3,838,035 - 4,723,596) | 3,568<br>(2,625 - 4,915)    | 3,338<br>(2,542 - 4,206)    | 456,422<br>(399,683 - 515,624) | 1,562,648<br>(1,379,370 - 1,729,516) | 2,294,368<br>(2,034,179 - 2,522,785) |
| Cerebrovascular disease              | 3,183,168<br>(2,832,197 - 3,699,966) | 7,975<br>(6,281 - 9,919)    | 5,152<br>(4,198 - 6,370)    | 237,649<br>(200,651 - 285,057) | 1,008,443<br>(879,911 - 1,183,675)   | 1,923,951<br>(1,702,967 - 2,198,617) |
| Ischemic stroke                      | 1,527,528<br>(1,254,291 - 1,766,243) | 820<br>(533 - 1,293)        | 587<br>(403 - 835)          | 38,946<br>(27,676 - 50,456)    | 369,488<br>(286,253 - 443,855)       | 1,117,687<br>(922,386 - 1,285,164)   |
| Hemorrhagic stroke                   | 1,655,640<br>(1,428,570 - 2,030,394) | 7,154<br>(5,634 - 8,863)    | 4,565<br>(3,713 - 5,674)    | 198,703<br>(167,916 - 242,060) | 638,954<br>(545,863 - 775,876)       | 806,263<br>(683,990 - 1,027,462)     |
| Hypertensive heart disease           | 482,949<br>(346,342 - 630,173)       | 774<br>(453 - 1,227)        | 383<br>(245 - 535)          | 42,679<br>(28,952 - 56,913)    | 163,295<br>(113,374 - 215,707)       | 275,817<br>(195,229 - 370,420)       |
| Cardiomyopathy and myocarditis       | 249,444<br>(189,599 - 302,087)       | 8,239<br>(5,454 - 10,954)   | 2,075<br>(1,448 - 2,620)    | 56,917<br>(42,518 - 66,750)    | 91,319<br>(67,025 - 109,412)         | 90,893<br>(68,639 - 117,624)         |
| Atrial fibrillation and flutter      | 40,311<br>(33,303 - 46,213)          | --                          | --                          | 520<br>(440 - 587)             | 4,667<br>(3,860 - 5,243)             | 35,124<br>(28,921 - 40,721)          |
| Aortic aneurysm                      | 96,668<br>(78,874 - 109,783)         | --                          | --                          | 7,745<br>(6,094 - 8,992)       | 31,682<br>(26,162 - 36,032)          | 57,242<br>(47,900 - 65,305)          |

Web Table 26 - Global deaths with 95% UI by age, sex, and cause in 2013

| Cause                                               | Males, All Ages                      | Males, 0-4 Years            | Males, 5-14 Years         | Males, 15-49 Years             | Males, 50-69 Years             | Males, 70-80 Years                   |
|-----------------------------------------------------|--------------------------------------|-----------------------------|---------------------------|--------------------------------|--------------------------------|--------------------------------------|
| Peripheral vascular disease                         | 18,930<br>(16,277 - 21,302)          | --                          | --                        | 372<br>(317 - 425)             | 4,090<br>(3,524 - 4,534)       | 14,468<br>(12,386 - 16,541)          |
| Endocarditis                                        | 36,044<br>(23,722 - 47,560)          | 2,129<br>(1,372 - 2,854)    | 428<br>(291 - 607)        | 8,356<br>(5,401 - 11,209)      | 11,755<br>(7,701 - 15,733)     | 13,375<br>(8,855 - 18,246)           |
| Other cardiovascular and circulatory diseases       | 243,098<br>(212,641 - 320,311)       | 6,077<br>(4,483 - 8,697)    | 1,484<br>(1,162 - 2,000)  | 33,588<br>(28,048 - 47,216)    | 72,642<br>(63,231 - 99,390)    | 129,307<br>(111,841 - 161,876)       |
| Chronic respiratory diseases                        | 2,420,771<br>(2,122,895 - 2,712,539) | 19,769<br>(16,098 - 24,605) | 5,687<br>(4,746 - 6,750)  | 131,193<br>(110,837 - 156,916) | 698,756<br>(603,537 - 807,495) | 1,565,366<br>(1,379,125 - 1,739,412) |
| Chronic obstructive pulmonary disease               | 1,717,670<br>(1,451,896 - 1,929,579) | 7,102<br>(5,602 - 10,061)   | 1,579<br>(1,186 - 1,948)  | 59,232<br>(46,523 - 72,080)    | 450,525<br>(377,483 - 519,589) | 1,199,232<br>(1,020,571 - 1,343,062) |
| Pneumoconiosis                                      | 147,091<br>(100,508 - 198,664)       | 198<br>(112 - 338)          | 197<br>(120 - 323)        | 15,188<br>(10,469 - 21,217)    | 62,207<br>(41,769 - 85,148)    | 69,301<br>(46,525 - 94,196)          |
| Silicosis                                           | 42,274<br>(28,543 - 59,748)          | 59<br>(28 - 112)            | 57<br>(31 - 101)          | 3,495<br>(2,216 - 5,527)       | 15,929<br>(10,258 - 23,552)    | 22,734<br>(15,128 - 32,078)          |
| Asbestosis                                          | 20,569<br>(13,965 - 28,390)          | 38<br>(19 - 70)             | 42<br>(26 - 68)           | 2,098<br>(1,423 - 3,049)       | 9,584<br>(6,156 - 13,754)      | 8,807<br>(5,866 - 12,131)            |
| Coal workers pneumoconiosis                         | 22,079<br>(15,590 - 31,964)          | 29<br>(17 - 49)             | 40<br>(25 - 66)           | 2,414<br>(1,627 - 3,715)       | 10,570<br>(7,299 - 15,525)     | 9,026<br>(6,272 - 13,277)            |
| Other pneumoconiosis                                | 62,169<br>(41,199 - 87,366)          | 72<br>(38 - 143)            | 59<br>(35 - 98)           | 7,182<br>(4,754 - 10,013)      | 26,123<br>(16,780 - 36,964)    | 28,734<br>(18,539 - 40,653)          |
| Asthma                                              | 246,734<br>(199,872 - 351,196)       | 4,104<br>(2,908 - 5,569)    | 2,520<br>(1,994 - 3,254)  | 36,063<br>(28,521 - 51,683)    | 91,124<br>(69,613 - 136,440)   | 112,923<br>(90,317 - 151,947)        |
| Interstitial lung disease and pulmonary sarcoidosis | 249,172<br>(182,200 - 342,960)       | 326<br>(147 - 801)          | 268<br>(139 - 629)        | 13,021<br>(8,952 - 17,644)     | 82,193<br>(58,226 - 111,484)   | 153,365<br>(112,434 - 214,924)       |
| Other chronic respiratory diseases                  | 60,104<br>(47,190 - 70,958)          | 8,039<br>(5,978 - 10,110)   | 1,124<br>(793 - 1,503)    | 7,690<br>(5,690 - 9,990)       | 12,707<br>(9,337 - 16,970)     | 30,545<br>(24,115 - 35,338)          |
| Cirrhosis                                           | 822,812<br>(777,523 - 880,140)       | 4,975<br>(3,530 - 7,043)    | 4,837<br>(4,093 - 5,840)  | 244,653<br>(223,895 - 267,835) | 389,538<br>(364,951 - 418,061) | 178,809<br>(168,742 - 190,090)       |
| Cirrhosis due to hepatitis B                        | 200,099<br>(179,599 - 222,377)       | 226<br>(146 - 364)          | 817<br>(591 - 1,114)      | 62,817<br>(53,924 - 72,171)    | 95,327<br>(84,534 - 106,775)   | 40,913<br>(37,117 - 45,101)          |
| Cirrhosis due to hepatitis C                        | 206,911<br>(186,940 - 228,610)       | 301<br>(199 - 464)          | 611<br>(453 - 847)        | 52,626<br>(45,106 - 61,109)    | 102,682<br>(91,468 - 114,672)  | 50,690<br>(46,299 - 55,365)          |
| Cirrhosis due to alcohol use                        | 313,416<br>(287,110 - 341,552)       | --                          | --                        | 83,237<br>(72,398 - 95,980)    | 154,219<br>(140,768 - 169,600) | 75,959<br>(70,293 - 81,987)          |
| Cirrhosis due to other causes                       | 102,386<br>(88,753 - 118,670)        | 4,447<br>(3,126 - 6,314)    | 3,410<br>(2,807 - 4,173)  | 45,973<br>(38,842 - 54,459)    | 37,309<br>(30,098 - 44,798)    | 11,247<br>(9,344 - 13,307)           |
| Digestive diseases                                  | 623,856<br>(532,966 - 710,748)       | 9,550<br>(7,335 - 13,153)   | 8,923<br>(6,991 - 10,931) | 144,255<br>(121,014 - 174,725) | 204,268<br>(170,385 - 237,879) | 256,859<br>(222,199 - 283,918)       |
| Peptic ulcer disease                                | 182,172<br>(141,848 - 221,219)       | 884<br>(503 - 1,564)        | 1,077<br>(634 - 1,571)    | 38,322<br>(29,280 - 49,774)    | 68,164<br>(50,536 - 85,171)    | 73,725<br>(58,781 - 88,682)          |
| Gastritis and duodenitis                            | 31,185<br>(17,793 - 49,965)          | 476<br>(173 - 860)          | 445<br>(214 - 847)        | 6,125<br>(3,637 - 11,321)      | 11,007<br>(5,948 - 17,605)     | 13,132<br>(7,405 - 20,517)           |
| Appendicitis                                        | 40,019<br>(26,119 - 53,698)          | 868<br>(523 - 1,560)        | 1,116<br>(776 - 1,581)    | 18,444<br>(11,964 - 26,048)    | 10,659<br>(6,529 - 15,266)     | 8,933<br>(5,560 - 12,521)            |
| Paralytic ileus and intestinal obstruction          | 118,503<br>(76,792 - 182,963)        | 2,546<br>(1,727 - 4,391)    | 3,734<br>(2,532 - 5,372)  | 24,709<br>(16,470 - 39,194)    | 38,123<br>(24,765 - 61,155)    | 49,392<br>(30,500 - 74,287)          |
| Inguinal, femoral, and abdominal hernia             | 19,808<br>(13,935 - 32,759)          | 342<br>(175 - 580)          | 314<br>(207 - 561)        | 2,568<br>(1,782 - 5,039)       | 4,957<br>(3,365 - 8,278)       | 11,626<br>(7,776 - 18,854)           |
| Inflammatory bowel disease                          | 24,354<br>(18,242 - 33,877)          | 1,802<br>(900 - 2,883)      | 529<br>(300 - 776)        | 5,902<br>(4,126 - 8,470)       | 6,547<br>(4,594 - 8,959)       | 9,574<br>(7,342 - 13,253)            |
| Vascular intestinal disorders                       | 34,238<br>(15,327 - 63,791)          | 141<br>(39 - 344)           | 191<br>(56 - 459)         | 2,668<br>(1,051 - 5,604)       | 9,585<br>(4,238 - 18,277)      | 21,652<br>(9,626 - 39,326)           |
| Gallbladder and biliary diseases                    | 44,133<br>(35,526 - 53,667)          | 270<br>(152 - 436)          | 293<br>(185 - 377)        | 5,237<br>(4,032 - 6,578)       | 11,730<br>(9,263 - 14,953)     | 26,603<br>(21,247 - 32,010)          |
| Pancreatitis                                        | 75,083<br>(46,019 - 98,409)          | 169<br>(86 - 299)           | 341<br>(153 - 535)        | 28,890<br>(17,170 - 40,319)    | 26,601<br>(15,959 - 35,634)    | 19,082<br>(11,628 - 24,700)          |
| Other digestive diseases                            | 54,361<br>(40,481 - 67,749)          | 2,052<br>(1,335 - 3,142)    | 885<br>(554 - 1,222)      | 11,389<br>(7,153 - 14,972)     | 16,895<br>(12,261 - 21,356)    | 23,140<br>(17,942 - 28,553)          |
| Neurological disorders                              | 906,689<br>(858,971 - 954,039)       | 9,934<br>(7,538 - 13,810)   | 7,043<br>(5,572 - 9,049)  | 50,374<br>(40,879 - 58,005)    | 85,137<br>(78,463 - 91,354)    | 754,202<br>(707,979 - 794,975)       |
| Alzheimer disease and other dementias               | 726,449<br>(681,443 - 768,565)       | --                          | --                        | 262<br>(218 - 317)             | 47,290<br>(43,547 - 50,993)    | 678,897<br>(635,113 - 720,456)       |
| Parkinson disease                                   | 56,638<br>(42,721 - 63,557)          | --                          | --                        | 475<br>(421 - 521)             | 6,700<br>(5,715 - 7,354)       | 49,464<br>(37,228 - 55,948)          |
| Epilepsy                                            | 68,983<br>(54,117 - 82,261)          | 7,203<br>(4,961 - 11,035)   | 5,697<br>(4,315 - 7,665)  | 35,437<br>(26,914 - 41,791)    | 11,198<br>(8,705 - 13,502)     | 9,448<br>(6,941 - 11,297)            |
| Multiple sclerosis                                  | 8,040<br>(3,546 - 12,312)            | --                          | --                        | 2,415<br>(1,182 - 4,014)       | 3,894<br>(1,637 - 5,857)       | 1,731<br>(738 - 2,580)               |
| Other neurological disorders                        | 46,578<br>(35,258 - 54,817)          | 2,731<br>(1,916 - 4,288)    | 1,345<br>(967 - 1,677)    | 11,785<br>(8,796 - 13,768)     | 16,054<br>(12,427 - 19,383)    | 14,662<br>(10,990 - 17,752)          |
| Mental and substance use disorders                  | 219,359<br>(171,669 - 263,728)       | 1,830<br>(734 - 3,227)      | 5<br>(4 - 7)              | 127,241<br>(102,499 - 147,915) | 71,384<br>(49,688 - 89,679)    | 18,898<br>(14,046 - 22,419)          |
| Schizophrenia                                       | 8,693<br>(6,599 - 14,842)            | --                          | --                        | 3,484<br>(2,612 - 5,864)       | 3,305<br>(2,447 - 5,724)       | 1,904<br>(1,335 - 3,161)             |
| Alcohol use disorders                               | 116,855<br>(72,432 - 155,946)        | --                          | --                        | 55,754<br>(35,267 - 74,410)    | 50,070<br>(29,726 - 66,781)    | 11,030<br>(6,114 - 13,563)           |
| Drug use disorders                                  | 93,688<br>(75,880 - 101,665)         | 1,830<br>(734 - 3,227)      | --                        | 67,885<br>(53,631 - 73,870)    | 18,008<br>(14,256 - 20,523)    | 5,965<br>(5,258 - 6,702)             |
| Opioid use disorders                                | 38,139<br>(30,133 - 41,669)          | 437<br>(238 - 726)          | --                        | 27,783<br>(21,777 - 30,632)    | 7,514<br>(5,864 - 8,586)       | 2,405<br>(2,096 - 2,765)             |

Web Table 26 - Global deaths with 95% UI by age, sex, and cause in 2013

| Cause                                               | Males, All Ages                      | Males, 0-4 Years               | Males, 5-14 Years           | Males, 15-49 Years             | Males, 50-69 Years             | Males, 70-80 Years             |
|-----------------------------------------------------|--------------------------------------|--------------------------------|-----------------------------|--------------------------------|--------------------------------|--------------------------------|
| Cocaine use disorders                               | 2,678<br>(2,229 - 2,975)             | 26<br>(16 - 38)                | --                          | 1,980<br>(1,601 - 2,244)       | 449<br>(361 - 532)             | 223<br>(174 - 281)             |
| Amphetamine use disorders                           | 2,273<br>(1,955 - 2,544)             | 29<br>(19 - 41)                | --                          | 1,511<br>(1,273 - 1,726)       | 484<br>(403 - 571)             | 249<br>(189 - 317)             |
| Other drug use disorders                            | 50,597<br>(41,257 - 54,785)          | 1,338<br>(452 - 2,492)         | --                          | 36,611<br>(29,527 - 39,794)    | 9,561<br>(7,687 - 10,917)      | 3,088<br>(2,711 - 3,461)       |
| Eating disorders                                    | 123<br>(107 - 140)                   | --                             | 5<br>(4 - 7)                | 118<br>(102 - 134)             | --                             | --                             |
| Anorexia nervosa                                    | 123<br>(107 - 140)                   | --                             | 5<br>(4 - 7)                | 118<br>(102 - 134)             | --                             | --                             |
| Diabetes, urogenital, blood, and endocrine diseases | 1,488,656<br>(1,358,553 - 1,652,416) | 81,219<br>(33,271 - 179,689)   | 24,495<br>(11,821 - 47,017) | 220,234<br>(195,154 - 257,909) | 488,897<br>(446,196 - 530,482) | 673,811<br>(628,470 - 713,952) |
| Diabetes mellitus                                   | 619,681<br>(586,547 - 664,248)       | 2,681<br>(2,301 - 3,075)       | 1,025<br>(883 - 1,195)      | 66,403<br>(60,601 - 73,415)    | 245,055<br>(227,065 - 267,501) | 304,517<br>(286,233 - 326,186) |
| Acute glomerulonephritis                            | 10,386<br>(7,209 - 12,994)           | 928<br>(409 - 1,687)           | 542<br>(353 - 818)          | 2,866<br>(2,062 - 3,766)       | 3,104<br>(2,202 - 3,942)       | 2,946<br>(2,075 - 3,753)       |
| Chronic kidney disease                              | 524,795<br>(427,803 - 578,513)       | 5,209<br>(4,073 - 6,842)       | 2,975<br>(2,266 - 3,601)    | 85,831<br>(64,527 - 98,687)    | 169,962<br>(133,166 - 192,407) | 260,818<br>(223,600 - 288,380) |
| Chronic kidney disease due to diabetes mellitus     | 89,463<br>(67,028 - 128,542)         | 140<br>(84 - 250)              | 108<br>(63 - 176)           | 9,282<br>(5,996 - 12,592)      | 34,175<br>(22,719 - 40,642)    | 45,757<br>(36,785 - 73,741)    |
| Chronic kidney disease due to hypertension          | 149,980<br>(88,407 - 181,160)        | 658<br>(354 - 979)             | 287<br>(156 - 405)          | 19,260<br>(11,731 - 24,747)    | 48,190<br>(28,626 - 59,424)    | 81,586<br>(48,900 - 99,159)    |
| Chronic kidney disease due to glomerulonephritis    | 65,674<br>(48,548 - 84,115)          | 2,341<br>(1,720 - 3,195)       | 1,400<br>(1,077 - 1,749)    | 18,909<br>(14,193 - 23,195)    | 20,482<br>(14,435 - 26,356)    | 22,542<br>(15,818 - 30,354)    |
| Chronic kidney disease due to other causes          | 219,679<br>(153,576 - 266,934)       | 2,071<br>(1,380 - 2,932)       | 1,180<br>(834 - 1,558)      | 38,379<br>(24,269 - 48,096)    | 67,115<br>(45,303 - 86,205)    | 110,933<br>(79,064 - 136,107)  |
| Urinary diseases and male infertility               | 124,039<br>(98,468 - 134,919)        | 4,176<br>(3,038 - 5,514)       | 1,007<br>(777 - 1,190)      | 18,794<br>(14,930 - 21,154)    | 34,290<br>(27,195 - 38,544)    | 65,773<br>(51,894 - 72,770)    |
| Interstitial nephritis and urinary tract infections | 78,354<br>(60,529 - 91,575)          | 3,289<br>(2,153 - 4,447)       | 639<br>(461 - 805)          | 11,554<br>(9,000 - 13,762)     | 19,897<br>(15,526 - 24,004)    | 42,977<br>(32,780 - 49,922)    |
| Urolithiasis                                        | 8,239<br>(6,305 - 12,310)            | --                             | 88<br>(64 - 137)            | 1,376<br>(1,000 - 2,194)       | 2,920<br>(2,191 - 4,474)       | 3,855<br>(2,919 - 5,707)       |
| Other urinary diseases                              | 37,446<br>(26,229 - 46,590)          | 887<br>(550 - 1,458)           | 280<br>(188 - 395)          | 5,865<br>(3,931 - 7,432)       | 11,474<br>(7,452 - 14,336)     | 18,940<br>(13,199 - 24,007)    |
| Gynecological diseases                              | --                                   | --                             | --                          | --                             | --                             | --                             |
| Uterine fibroids                                    | --                                   | --                             | --                          | --                             | --                             | --                             |
| Polycystic ovarian syndrome                         | --                                   | --                             | --                          | --                             | --                             | --                             |
| Endometriosis                                       | --                                   | --                             | --                          | --                             | --                             | --                             |
| Genital prolapse                                    | --                                   | --                             | --                          | --                             | --                             | --                             |
| Other gynecological diseases                        | --                                   | --                             | --                          | --                             | --                             | --                             |
| Hemoglobinopathies and hemolytic anemias            | 118,751<br>(33,319 - 272,249)        | 57,530<br>(9,191 - 156,981)    | 16,353<br>(3,396 - 39,462)  | 26,026<br>(9,170 - 67,987)     | 9,483<br>(5,027 - 18,290)      | 9,360<br>(5,648 - 14,039)      |
| Thalassemias                                        | 13,797<br>(8,190 - 20,262)           | 5,185<br>(2,991 - 7,667)       | 2,455<br>(1,483 - 3,638)    | 5,598<br>(3,369 - 8,236)       | 482<br>(301 - 723)             | 77<br>(45 - 114)               |
| Sickle cell disorders                               | 83,973<br>(11,323 - 228,153)         | 50,251<br>(4,610 - 148,474)    | 13,302<br>(1,348 - 35,813)  | 16,410<br>(3,304 - 53,328)     | 3,732<br>(1,387 - 11,464)      | 279<br>(145 - 632)             |
| G6PD deficiency                                     | 2,430<br>(1,301 - 3,723)             | 664<br>(250 - 1,290)           | 224<br>(111 - 373)          | 803<br>(449 - 1,264)           | 554<br>(335 - 847)             | 186<br>(104 - 298)             |
| Other hemoglobinopathies and hemolytic anemias      | 18,551<br>(11,359 - 27,947)          | 1,430<br>(674 - 2,572)         | 372<br>(207 - 581)          | 3,215<br>(1,949 - 4,970)       | 4,715<br>(2,872 - 7,033)       | 8,818<br>(5,341 - 13,290)      |
| Endocrine, metabolic, blood, and immune disorders   | 91,003<br>(68,821 - 109,461)         | 10,696<br>(8,351 - 13,893)     | 2,594<br>(2,088 - 3,512)    | 20,314<br>(15,782 - 24,425)    | 27,002<br>(19,227 - 31,751)    | 30,398<br>(21,467 - 36,405)    |
| Musculoskeletal disorders                           | 47,678<br>(34,420 - 60,483)          | --                             | 1,592<br>(1,228 - 2,176)    | 11,686<br>(8,328 - 14,588)     | 17,556<br>(13,267 - 23,989)    | 16,845<br>(11,546 - 21,031)    |
| Rheumatoid arthritis                                | 13,227<br>(9,962 - 19,238)           | --                             | 300<br>(181 - 535)          | 1,887<br>(1,359 - 2,913)       | 5,625<br>(4,130 - 8,784)       | 5,415<br>(3,888 - 7,338)       |
| Other musculoskeletal disorders                     | 34,452<br>(23,698 - 42,724)          | --                             | 1,292<br>(937 - 1,700)      | 9,799<br>(6,655 - 11,979)      | 11,931<br>(8,188 - 15,820)     | 11,429<br>(7,555 - 14,001)     |
| Other non-communicable diseases                     | 387,596<br>(346,923 - 453,575)       | 273,592<br>(233,949 - 339,351) | 15,891<br>(13,429 - 18,246) | 41,716<br>(35,501 - 48,788)    | 24,090<br>(18,042 - 27,363)    | 32,308<br>(24,265 - 35,752)    |
| Congenital anomalies                                | 335,947<br>(295,977 - 401,295)       | 261,881<br>(222,633 - 327,770) | 15,309<br>(12,945 - 17,612) | 34,384<br>(28,807 - 40,971)    | 13,226<br>(8,489 - 15,856)     | 11,148<br>(6,286 - 13,132)     |
| Neural tube defects                                 | 33,620<br>(19,008 - 60,766)          | 30,753<br>(16,424 - 54,366)    | 909<br>(494 - 1,405)        | 1,510<br>(1,046 - 2,686)       | 266<br>(184 - 476)             | 183<br>(113 - 357)             |
| Congenital heart anomalies                          | 172,469<br>(150,613 - 201,729)       | 131,298<br>(111,138 - 163,391) | 9,207<br>(7,360 - 11,006)   | 18,295<br>(14,339 - 22,534)    | 7,293<br>(4,103 - 9,259)       | 6,376<br>(2,846 - 8,191)       |
| Cleft lip and cleft palate                          | 1,628<br>(696 - 3,039)               | 1,628<br>(696 - 3,039)         | --                          | --                             | --                             | --                             |
| Down syndrome                                       | 16,715<br>(8,609 - 27,212)           | 10,526<br>(4,514 - 19,622)     | 887<br>(468 - 1,456)        | 3,812<br>(2,265 - 5,804)       | 1,340<br>(761 - 1,766)         | 150<br>(85 - 209)              |
| Chromosomal unbalanced rearrangements               | 7,255<br>(4,606 - 12,273)            | 5,870<br>(3,577 - 10,710)      | 298<br>(179 - 511)          | 807<br>(559 - 1,169)           | 192<br>(127 - 283)             | 88<br>(57 - 124)               |
| Other congenital anomalies                          | 104,259<br>(81,879 - 159,435)        | 81,805<br>(61,199 - 135,574)   | 4,009<br>(3,050 - 5,582)    | 9,959<br>(7,418 - 12,700)      | 4,135<br>(3,015 - 5,090)       | 4,350<br>(3,237 - 5,158)       |

Web Table 26 - Global deaths with 95% UI by age, sex, and cause in 2013

| Cause                                           | Males, All Ages                      | Males, 0-4 Years               | Males, 5-14 Years              | Males, 15-49 Years                   | Males, 50-69 Years             | Males, 70-80 Years             |
|-------------------------------------------------|--------------------------------------|--------------------------------|--------------------------------|--------------------------------------|--------------------------------|--------------------------------|
| Skin and subcutaneous diseases                  | 43,200<br>(36,205 - 48,001)          | 3,262<br>(2,556 - 4,170)       | 582<br>(472 - 719)             | 7,332<br>(6,327 - 8,545)             | 10,864<br>(8,819 - 12,497)     | 21,160<br>(17,680 - 23,609)    |
| Cellulitis                                      | 12,950<br>(8,691 - 20,095)           | 1,435<br>(780 - 2,413)         | 267<br>(162 - 405)             | 2,601<br>(1,584 - 4,132)             | 3,771<br>(2,467 - 5,842)       | 4,876<br>(3,220 - 7,707)       |
| Pyoderma                                        | 18,284<br>(12,725 - 22,293)          | 1,649<br>(1,014 - 2,238)       | 207<br>(136 - 269)             | 3,423<br>(2,328 - 4,369)             | 5,025<br>(3,238 - 6,482)       | 7,981<br>(5,628 - 9,738)       |
| Decubitus ulcer                                 | 10,557<br>(8,163 - 12,501)           | 74<br>(35 - 120)               | 66<br>(37 - 95)                | 986<br>(652 - 1,286)                 | 1,776<br>(1,295 - 2,179)       | 7,655<br>(6,185 - 9,019)       |
| Other skin and subcutaneous diseases            | 1,410<br>(952 - 1,767)               | 104<br>(57 - 170)              | 41<br>(26 - 57)                | 323<br>(219 - 410)                   | 292<br>(192 - 363)             | 649<br>(410 - 864)             |
| Sudden infant death syndrome                    | 8,449<br>(4,843 - 12,506)            | 8,449<br>(4,843 - 12,506)      | --                             | --                                   | --                             | --                             |
| Injuries                                        | 3,240,621<br>(2,995,150 - 3,476,560) | 202,059<br>(172,293 - 242,734) | 132,430<br>(119,035 - 149,044) | 1,735,088<br>(1,598,276 - 1,871,968) | 714,126<br>(642,982 - 779,757) | 456,917<br>(404,557 - 488,650) |
| Transport injuries                              | 1,102,598<br>(991,431 - 1,206,245)   | 41,951<br>(33,212 - 53,705)    | 45,871<br>(39,610 - 52,097)    | 668,127<br>(605,197 - 731,933)       | 237,451<br>(207,587 - 265,373) | 109,198<br>(94,533 - 119,110)  |
| Road injuries                                   | 1,038,739<br>(929,465 - 1,131,794)   | 38,265<br>(30,068 - 49,656)    | 42,983<br>(37,343 - 48,854)    | 631,134<br>(573,555 - 690,861)       | 222,971<br>(195,213 - 249,178) | 103,386<br>(89,447 - 112,833)  |
| Pedestrian road injuries                        | 376,422<br>(295,955 - 460,302)       | 19,986<br>(14,517 - 28,563)    | 21,573<br>(16,895 - 26,155)    | 181,688<br>(139,454 - 229,147)       | 96,867<br>(74,947 - 117,618)   | 56,308<br>(45,663 - 66,284)    |
| Cyclist road injuries                           | 69,878<br>(54,797 - 84,861)          | 2,249<br>(1,499 - 3,367)       | 3,981<br>(3,096 - 5,362)       | 32,815<br>(25,609 - 40,038)          | 19,782<br>(14,815 - 24,948)    | 11,051<br>(8,446 - 13,611)     |
| Motorcyclist road injuries                      | 214,886<br>(167,263 - 259,730)       | 2,884<br>(1,844 - 4,383)       | 3,638<br>(2,552 - 5,029)       | 168,350<br>(133,126 - 203,177)       | 31,521<br>(22,792 - 40,244)    | 8,494<br>(6,199 - 11,068)      |
| Motor vehicle road injuries                     | 362,661<br>(307,078 - 422,517)       | 11,913<br>(8,642 - 15,681)     | 12,407<br>(9,689 - 15,587)     | 241,515<br>(205,765 - 277,774)       | 70,532<br>(58,062 - 84,293)    | 26,294<br>(21,216 - 31,952)    |
| Other road injuries                             | 14,894<br>(10,170 - 20,702)          | 1,234<br>(627 - 1,877)         | 1,385<br>(872 - 2,140)         | 6,766<br>(4,524 - 9,192)             | 4,270<br>(2,977 - 6,616)       | 1,239<br>(864 - 1,823)         |
| Other transport injuries                        | 63,859<br>(49,873 - 73,491)          | 3,686<br>(2,557 - 4,767)       | 2,888<br>(2,081 - 3,500)       | 36,994<br>(29,191 - 43,182)          | 14,480<br>(11,287 - 17,241)    | 5,812<br>(4,271 - 6,872)       |
| Unintentional injuries                          | 1,205,736<br>(1,088,237 - 1,329,009) | 151,687<br>(126,630 - 185,600) | 75,604<br>(66,142 - 90,631)    | 464,617<br>(421,633 - 524,051)       | 260,201<br>(228,853 - 287,566) | 253,627<br>(208,713 - 278,712) |
| Falls                                           | 322,329<br>(248,409 - 360,399)       | 14,545<br>(10,734 - 19,471)    | 8,626<br>(6,519 - 11,079)      | 94,249<br>(75,219 - 110,743)         | 82,952<br>(61,546 - 96,023)    | 121,957<br>(89,392 - 138,689)  |
| Drowning                                        | 254,288<br>(207,297 - 342,435)       | 47,112<br>(34,821 - 65,857)    | 37,614<br>(30,589 - 51,164)    | 115,823<br>(95,619 - 154,293)        | 36,219<br>(27,729 - 50,364)    | 17,520<br>(12,826 - 21,855)    |
| Fire, heat, and hot substances                  | 100,416<br>(80,914 - 119,634)        | 15,002<br>(11,120 - 20,308)    | 4,344<br>(3,391 - 5,662)       | 42,690<br>(34,070 - 53,220)          | 21,212<br>(16,901 - 25,631)    | 17,168<br>(13,273 - 20,102)    |
| Poisonings                                      | 62,537<br>(37,606 - 73,162)          | 6,032<br>(3,705 - 8,354)       | 2,117<br>(1,154 - 2,657)       | 31,251<br>(19,256 - 38,301)          | 14,701<br>(8,411 - 17,373)     | 8,436<br>(4,614 - 9,843)       |
| Exposure to mechanical forces                   | 145,772<br>(129,293 - 176,742)       | 20,656<br>(15,707 - 39,479)    | 7,225<br>(5,800 - 10,073)      | 75,701<br>(66,689 - 87,190)          | 31,138<br>(26,225 - 35,747)    | 11,052<br>(8,534 - 12,469)     |
| Unintentional firearm injuries                  | 35,989<br>(29,656 - 43,433)          | 1,804<br>(1,245 - 2,626)       | 1,211<br>(921 - 1,552)         | 24,140<br>(19,546 - 30,277)          | 6,010<br>(4,580 - 8,003)       | 2,825<br>(2,009 - 3,805)       |
| Unintentional suffocation                       | 24,126<br>(18,346 - 59,252)          | 12,499<br>(8,327 - 32,733)     | 1,529<br>(933 - 3,819)         | 5,722<br>(4,369 - 12,430)            | 2,635<br>(2,081 - 4,691)       | 1,742<br>(1,312 - 2,628)       |
| Other exposure to mechanical forces             | 85,656<br>(72,340 - 94,535)          | 6,353<br>(4,528 - 8,272)       | 4,486<br>(3,591 - 5,432)       | 45,839<br>(39,611 - 51,603)          | 22,493<br>(17,969 - 26,062)    | 6,485<br>(4,713 - 7,283)       |
| Adverse effects of medical treatment            | 72,127<br>(50,238 - 89,829)          | 13,418<br>(8,034 - 21,485)     | 1,889<br>(1,183 - 2,778)       | 16,113<br>(11,499 - 20,562)          | 18,267<br>(12,573 - 22,615)    | 22,441<br>(15,138 - 27,577)    |
| Animal contact                                  | 46,166<br>(36,543 - 73,955)          | 4,810<br>(2,825 - 7,501)       | 5,667<br>(3,927 - 8,678)       | 18,454<br>(13,699 - 31,583)          | 11,808<br>(8,698 - 18,993)     | 5,428<br>(4,177 - 8,431)       |
| Venomous animal contact                         | 33,256<br>(25,541 - 54,653)          | 2,645<br>(1,566 - 4,550)       | 4,048<br>(2,679 - 6,300)       | 14,392<br>(10,261 - 25,933)          | 8,887<br>(6,231 - 15,000)      | 3,285<br>(2,378 - 5,133)       |
| Non-venomous animal contact                     | 12,910<br>(9,243 - 17,878)           | 2,164<br>(1,148 - 3,604)       | 1,619<br>(1,082 - 2,548)       | 4,063<br>(2,785 - 5,611)             | 2,921<br>(2,136 - 4,239)       | 2,143<br>(1,542 - 3,026)       |
| Foreign body                                    | 90,296<br>(50,448 - 129,921)         | 24,105<br>(13,570 - 37,680)    | 1,866<br>(1,167 - 2,959)       | 14,859<br>(8,220 - 21,022)           | 15,600<br>(8,108 - 22,257)     | 33,866<br>(18,370 - 51,118)    |
| Pulmonary aspiration and foreign body in airway | 88,134<br>(48,247 - 127,318)         | 23,754<br>(13,193 - 37,157)    | 1,725<br>(1,008 - 2,794)       | 14,265<br>(7,478 - 20,344)           | 14,797<br>(7,377 - 21,249)     | 33,593<br>(18,117 - 50,819)    |
| Foreign body in other body part                 | 2,161<br>(1,372 - 3,671)             | 351<br>(207 - 640)             | 141<br>(93 - 263)              | 594<br>(388 - 1,011)                 | 803<br>(494 - 1,330)           | 272<br>(158 - 425)             |
| Other unintentional injuries                    | 111,806<br>(100,782 - 125,638)       | 6,008<br>(4,830 - 7,488)       | 6,256<br>(5,329 - 7,399)       | 55,477<br>(49,743 - 62,541)          | 28,304<br>(23,545 - 34,347)    | 15,761<br>(13,104 - 19,122)    |
| Self-harm and interpersonal violence            | 904,581<br>(726,056 - 1,029,664)     | 5,605<br>(3,425 - 7,809)       | 9,761<br>(6,964 - 12,407)      | 590,331<br>(465,599 - 678,369)       | 207,414<br>(159,419 - 242,250) | 91,470<br>(74,252 - 109,010)   |
| Self-harm                                       | 574,556<br>(433,414 - 656,150)       | --                             | 4,723<br>(3,071 - 6,609)       | 333,309<br>(247,657 - 384,410)       | 158,508<br>(117,614 - 184,013) | 78,015<br>(62,972 - 95,707)    |
| Interpersonal violence                          | 330,025<br>(226,148 - 422,217)       | 5,605<br>(3,425 - 7,809)       | 5,037<br>(3,118 - 6,732)       | 257,021<br>(178,866 - 320,168)       | 48,906<br>(32,598 - 71,780)    | 13,455<br>(7,602 - 18,683)     |
| Assault by firearm                              | 161,342<br>(103,551 - 211,854)       | 1,104<br>(562 - 1,756)         | 1,852<br>(988 - 2,638)         | 132,917<br>(86,328 - 169,544)        | 21,127<br>(13,273 - 33,183)    | 4,342<br>(2,054 - 6,947)       |
| Assault by sharp object                         | 90,649<br>(53,402 - 137,269)         | 797<br>(424 - 1,372)           | 884<br>(497 - 1,472)           | 71,270<br>(42,757 - 106,893)         | 14,717<br>(8,084 - 23,226)     | 2,981<br>(1,496 - 4,847)       |
| Assault by other means                          | 78,035<br>(49,093 - 109,283)         | 3,705<br>(2,189 - 5,236)       | 2,302<br>(1,363 - 3,311)       | 52,834<br>(33,623 - 75,039)          | 13,062<br>(7,992 - 19,579)     | 6,133<br>(3,250 - 8,576)       |
| Forces of nature, war, and legal intervention   | 27,706<br>(16,393 - 61,113)          | 2,816<br>(2,096 - 7,012)       | 1,195<br>(777 - 2,523)         | 12,013<br>(6,518 - 27,416)           | 9,060<br>(5,203 - 18,932)      | 2,621<br>(1,474 - 5,274)       |
| Exposure to forces of nature                    | 8,490<br>(4,739 - 16,974)            | 839<br>(214 - 4,971)           | 274<br>(171 - 504)             | 3,749<br>(2,185 - 7,485)             | 2,940<br>(1,671 - 5,967)       | 688<br>(369 - 1,425)           |
| Collective violence and legal intervention      | 19,215<br>(11,119 - 42,435)          | 1,977<br>(1,842 - 2,080)       | 921<br>(584 - 2,041)           | 8,264<br>(4,086 - 20,948)            | 6,120<br>(3,299 - 13,491)      | 1,933<br>(1,036 - 3,845)       |

Web Table 26 - Global deaths with 95% UI by age, sex, and cause in 2013

| Cause                                                             | Females, All Ages                       | Females, 0-4 Years                   | Females, 5-14 Years            | Females, 15-49 Years                 | Females, 50-69 Years                 | Females, 70-80 Years                    |
|-------------------------------------------------------------------|-----------------------------------------|--------------------------------------|--------------------------------|--------------------------------------|--------------------------------------|-----------------------------------------|
| All causes                                                        | 24,944,972<br>(24,188,666 - 25,682,795) | 2,896,578<br>(2,738,432 - 3,071,744) | 383,081<br>(362,372 - 403,445) | 3,221,965<br>(3,058,874 - 3,390,093) | 5,315,834<br>(5,022,440 - 5,598,757) | 13,127,515<br>(12,826,273 - 13,402,304) |
| Communicable, maternal, neonatal, and nutritional diseases        | 5,583,089<br>(5,329,236 - 5,834,185)    | 2,318,400<br>(2,163,129 - 2,473,840) | 209,456<br>(192,732 - 227,107) | 1,285,151<br>(1,216,706 - 1,359,111) | 626,073<br>(576,610 - 680,274)       | 1,144,009<br>(1,024,610 - 1,251,583)    |
| HIV/AIDS and tuberculosis                                         | 1,072,509<br>(985,546 - 1,159,303)      | 50,706<br>(44,538 - 57,255)          | 41,399<br>(38,855 - 44,310)    | 614,086<br>(570,444 - 667,741)       | 237,652<br>(210,946 - 264,327)       | 128,666<br>(105,140 - 146,624)          |
| Tuberculosis                                                      | 454,659<br>(356,953 - 511,449)          | 19,637<br>(13,149 - 24,602)          | 8,757<br>(6,434 - 10,753)      | 171,083<br>(136,160 - 200,693)       | 137,155<br>(112,151 - 158,194)       | 118,027<br>(92,660 - 135,613)           |
| HIV/AIDS                                                          | 617,850<br>(570,414 - 677,695)          | 31,069<br>(28,460 - 34,777)          | 32,642<br>(30,595 - 35,072)    | 443,003<br>(406,766 - 491,138)       | 100,497<br>(88,499 - 115,015)        | 10,639<br>(8,730 - 12,981)              |
| HIV/AIDS resulting in mycobacterial infection                     | 33,232<br>(26,745 - 41,826)             | 1,598<br>(1,281 - 1,986)             | 1,568<br>(1,280 - 1,921)       | 23,886<br>(19,201 - 30,080)          | 5,566<br>(4,293 - 7,128)             | 614<br>(457 - 798)                      |
| HIV/AIDS resulting in other diseases                              | 584,618<br>(539,186 - 641,034)          | 29,471<br>(26,851 - 32,944)          | 31,074<br>(29,062 - 33,444)    | 419,117<br>(383,757 - 466,593)       | 94,931<br>(84,049 - 109,490)         | 10,025<br>(8,211 - 12,297)              |
| Diarrhea, lower respiratory, and other common infectious diseases | 2,322,897<br>(2,135,458 - 2,483,165)    | 880,735<br>(791,785 - 971,477)       | 106,844<br>(93,521 - 121,865)  | 237,233<br>(207,359 - 271,520)       | 275,430<br>(237,880 - 315,560)       | 822,655<br>(715,191 - 914,589)          |
| Diarrheal diseases                                                | 656,384<br>(576,321 - 746,032)          | 248,281<br>(201,429 - 300,930)       | 27,655<br>(21,382 - 35,161)    | 72,900<br>(63,078 - 83,898)          | 103,692<br>(82,189 - 133,973)        | 203,855<br>(164,103 - 255,906)          |
| Intestinal infectious diseases                                    | 103,278<br>(55,773 - 170,765)           | 29,980<br>(16,047 - 50,306)          | 27,346<br>(15,651 - 43,493)    | 37,194<br>(19,176 - 64,138)          | 6,165<br>(3,038 - 11,056)            | 2,594<br>(1,402 - 4,353)                |
| Typhoid fever                                                     | 75,812<br>(40,055 - 126,410)            | 21,011<br>(10,638 - 35,631)          | 20,418<br>(11,338 - 32,861)    | 27,788<br>(13,807 - 48,706)          | 4,664<br>(2,203 - 6,634)             | 1,932<br>(960 - 3,348)                  |
| Paratyphoid fever                                                 | 24,886<br>(13,120 - 42,628)             | 7,679<br>(3,884 - 13,503)            | 6,692<br>(3,665 - 11,501)      | 8,777<br>(4,125 - 15,988)            | 1,261<br>(535 - 2,542)               | 477<br>(223 - 941)                      |
| Other intestinal infectious diseases                              | 2,581<br>(2,263 - 2,912)                | 1,290<br>(1,070 - 1,533)             | 236<br>(184 - 300)             | 629<br>(536 - 731)                   | 239<br>(197 - 291)                   | 185<br>(149 - 225)                      |
| Lower respiratory infections                                      | 1,272,401<br>(1,133,102 - 1,371,222)    | 434,905<br>(379,168 - 493,847)       | 27,235<br>(21,791 - 32,717)    | 81,562<br>(68,769 - 91,658)          | 136,375<br>(109,446 - 152,920)       | 592,324<br>(498,068 - 659,086)          |
| Upper respiratory infections                                      | 1,769<br>(1,403 - 2,247)                | 396<br>(228 - 671)                   | 54<br>(28 - 104)               | 364<br>(262 - 531)                   | 396<br>(250 - 680)                   | 558<br>(376 - 860)                      |
| Otitis media                                                      | 1,202<br>(1,119 - 1,289)                | 238<br>(198 - 285)                   | 97<br>(85 - 110)               | 255<br>(232 - 277)                   | 246<br>(222 - 272)                   | 366<br>(331 - 403)                      |
| Meningitis                                                        | 140,907<br>(118,820 - 160,652)          | 66,751<br>(52,474 - 82,590)          | 10,924<br>(8,461 - 13,408)     | 30,307<br>(24,449 - 35,382)          | 18,312<br>(13,678 - 22,284)          | 14,613<br>(11,601 - 17,352)             |
| Pneumococcal meningitis                                           | 36,844<br>(29,976 - 42,619)             | 14,465<br>(10,868 - 18,220)          | 3,472<br>(2,669 - 4,411)       | 9,133<br>(7,135 - 11,209)            | 5,469<br>(3,763 - 7,279)             | 4,305<br>(3,306 - 5,502)                |
| H influenzae type B meningitis                                    | 29,718<br>(24,783 - 35,381)             | 20,515<br>(15,938 - 25,568)          | 2,422<br>(1,869 - 2,987)       | 3,614<br>(2,869 - 4,477)             | 1,769<br>(1,202 - 2,422)             | 1,398<br>(1,028 - 1,806)                |
| Meningococcal meningitis                                          | 31,104<br>(25,407 - 35,579)             | 13,914<br>(10,816 - 17,537)          | 2,399<br>(1,835 - 3,057)       | 7,322<br>(5,869 - 8,844)             | 4,043<br>(2,769 - 5,255)             | 3,426<br>(2,486 - 4,217)                |
| Other meningitis                                                  | 43,241<br>(36,861 - 49,741)             | 17,857<br>(14,038 - 22,455)          | 2,631<br>(1,944 - 3,212)       | 10,238<br>(8,100 - 12,324)           | 7,031<br>(5,227 - 9,036)             | 5,484<br>(4,195 - 7,017)                |
| Encephalitis                                                      | 37,637<br>(29,482 - 50,237)             | 13,644<br>(9,070 - 20,647)           | 4,494<br>(2,996 - 6,164)       | 9,611<br>(7,034 - 14,209)            | 6,236<br>(4,595 - 9,074)             | 3,653<br>(2,510 - 4,903)                |
| Diphtheria                                                        | 1,592<br>(607 - 4,218)                  | 1,085<br>(265 - 3,679)               | 285<br>(57 - 1,044)            | 166<br>(61 - 420)                    | 56<br>(13 - 261)                     | --                                      |
| Whooping cough                                                    | 32,599<br>(12,023 - 75,487)             | 30,281<br>(11,168 - 69,602)          | 1,845<br>(618 - 4,522)         | 412<br>(167 - 983)                   | 60<br>(28 - 141)                     | --                                      |
| Tetanus                                                           | 23,695<br>(14,153 - 33,842)             | 13,746<br>(5,209 - 22,489)           | 867<br>(611 - 1,188)           | 2,612<br>(1,975 - 3,632)             | 3,477<br>(2,272 - 5,473)             | 2,994<br>(1,874 - 4,851)                |
| Measles                                                           | 47,677<br>(24,332 - 85,052)             | 40,633<br>(21,040 - 69,748)          | 5,854<br>(2,839 - 11,185)      | 1,161<br>(509 - 2,704)               | 28<br>(12 - 66)                      | --                                      |
| Varicella and herpes zoster                                       | 3,756<br>(2,845 - 5,149)                | 794<br>(449 - 1,450)                 | 189<br>(101 - 358)             | 689<br>(479 - 1,038)                 | 387<br>(250 - 643)                   | 1,698<br>(1,037 - 2,874)                |
| Neglected tropical diseases and malaria                           | 478,497<br>(401,395 - 574,637)          | 294,098<br>(220,061 - 386,076)       | 38,369<br>(26,639 - 47,517)    | 70,582<br>(52,288 - 85,688)          | 42,818<br>(31,719 - 55,070)          | 32,630<br>(24,218 - 42,353)             |
| Malaria                                                           | 419,784<br>(341,830 - 517,097)          | 278,568<br>(204,306 - 371,057)       | 28,853<br>(16,695 - 38,190)    | 52,628<br>(33,699 - 67,939)          | 33,870<br>(22,903 - 45,295)          | 25,866<br>(17,823 - 34,525)             |
| Chagas disease                                                    | 4,183<br>(1,003 - 14,255)               | 4<br>(1 - 12)                        | 6<br>(1 - 17)                  | 401<br>(91 - 1,545)                  | 1,576<br>(300 - 5,412)               | 2,196<br>(428 - 6,867)                  |
| Leishmaniasis                                                     | 22,952<br>(18,464 - 27,870)             | 8,264<br>(5,894 - 10,784)            | 5,123<br>(3,640 - 6,742)       | 7,527<br>(5,959 - 9,180)             | 1,565<br>(1,147 - 2,044)             | 472<br>(370 - 590)                      |
| Visceral leishmaniasis                                            | 22,952<br>(18,464 - 27,870)             | 8,264<br>(5,894 - 10,784)            | 5,123<br>(3,640 - 6,742)       | 7,527<br>(5,959 - 9,180)             | 1,565<br>(1,147 - 2,044)             | 472<br>(370 - 590)                      |
| African trypanosomiasis                                           | 3,271<br>(1,757 - 5,210)                | 230<br>(109 - 390)                   | 387<br>(192 - 626)             | 2,023<br>(1,066 - 3,282)             | 517<br>(265 - 832)                   | 115<br>(61 - 184)                       |
| Schistosomiasis                                                   | 2,302<br>(2,013 - 2,643)                | 35<br>(24 - 50)                      | 60<br>(46 - 77)                | 846<br>(714 - 994)                   | 814<br>(692 - 965)                   | 547<br>(459 - 652)                      |
| Cysticercosis                                                     | 333<br>(261 - 499)                      | 15<br>(9 - 28)                       | 16<br>(11 - 27)                | 188<br>(144 - 289)                   | 80<br>(65 - 111)                     | 34<br>(29 - 43)                         |
| Cystic echinococcosis                                             | 1,136<br>(1,060 - 1,217)                | 92<br>(76 - 109)                     | 136<br>(121 - 153)             | 441<br>(404 - 480)                   | 255<br>(234 - 279)                   | 212<br>(199 - 230)                      |
| Dengue                                                            | 4,677<br>(2,500 - 5,723)                | 1,174<br>(524 - 1,621)               | 1,246<br>(489 - 1,719)         | 1,455<br>(923 - 1,826)               | 419<br>(275 - 505)                   | 383<br>(265 - 479)                      |
| Yellow fever                                                      | 152<br>(122 - 191)                      | 15<br>(9 - 28)                       | 32<br>(20 - 53)                | 80<br>(59 - 112)                     | 18<br>(11 - 31)                      | 7<br>(3 - 14)                           |
| Rabies                                                            | 9,423<br>(6,202 - 12,693)               | 1,139<br>(700 - 1,776)               | 1,769<br>(1,135 - 2,490)       | 3,194<br>(2,045 - 4,167)             | 2,405<br>(1,652 - 3,532)             | 916<br>(629 - 1,330)                    |
| Intestinal nematode infections                                    | 2,273<br>(1,979 - 2,613)                | 1,598<br>(1,325 - 1,911)             | 301<br>(238 - 372)             | 156<br>(118 - 203)                   | 94<br>(64 - 130)                     | 124<br>(88 - 166)                       |

Web Table 26 - Global deaths with 95% UI by age, sex, and cause in 2013

| Cause                                                            | Females, All Ages                       | Females, 0-4 Years             | Females, 5-14 Years          | Females, 15-49 Years                 | Females, 50-69 Years                 | Females, 70-80 Years                    |
|------------------------------------------------------------------|-----------------------------------------|--------------------------------|------------------------------|--------------------------------------|--------------------------------------|-----------------------------------------|
| Ascariasis                                                       | 2,273<br>(1,979 - 2,613)                | 1,598<br>(1,325 - 1,911)       | 301<br>(238 - 372)           | 156<br>(118 - 203)                   | 94<br>(64 - 130)                     | 124<br>(88 - 166)                       |
| Other neglected tropical diseases                                | 8,011<br>(6,390 - 10,050)               | 2,964<br>(1,947 - 4,381)       | 440<br>(301 - 584)           | 1,642<br>(1,324 - 2,029)             | 1,205<br>(900 - 1,683)               | 1,759<br>(1,320 - 2,374)                |
| Maternal disorders                                               | 293,336<br>(261,322 - 328,200)          | --                             | 1,125<br>(801 - 1,599)       | 292,211<br>(260,386 - 327,072)       | --                                   | --                                      |
| Maternal hemorrhage                                              | 44,245<br>(38,327 - 50,955)             | --                             | 106<br>(75 - 148)            | 44,139<br>(38,229 - 50,836)          | --                                   | --                                      |
| Maternal sepsis and other maternal infections                    | 23,750<br>(20,058 - 28,025)             | --                             | 96<br>(66 - 134)             | 23,654<br>(19,973 - 27,918)          | --                                   | --                                      |
| Maternal hypertensive disorders                                  | 29,335<br>(25,708 - 33,452)             | --                             | 134<br>(95 - 184)            | 29,201<br>(25,571 - 33,310)          | --                                   | --                                      |
| Maternal obstructed labor                                        | 18,815<br>(16,297 - 21,786)             | --                             | 53<br>(36 - 77)              | 18,762<br>(16,247 - 21,733)          | --                                   | --                                      |
| Maternal abortive outcome                                        | 43,736<br>(38,278 - 49,943)             | --                             | 178<br>(122 - 262)           | 43,558<br>(38,154 - 49,754)          | --                                   | --                                      |
| Indirect maternal deaths                                         | 31,088<br>(26,822 - 35,753)             | --                             | 93<br>(65 - 132)             | 30,995<br>(26,753 - 35,633)          | --                                   | --                                      |
| Late maternal deaths                                             | 43,546<br>(35,701 - 52,449)             | --                             | 259<br>(177 - 375)           | 43,287<br>(35,474 - 52,150)          | --                                   | --                                      |
| Maternal deaths aggravated by HIV/AIDS                           | 2,071<br>(1,285 - 2,871)                | --                             | --                           | 2,071<br>(1,285 - 2,871)             | --                                   | --                                      |
| Other maternal disorders                                         | 56,169<br>(48,673 - 64,352)             | --                             | 205<br>(139 - 292)           | 55,964<br>(48,439 - 64,157)          | --                                   | --                                      |
| Neonatal disorders                                               | 880,176<br>(813,731 - 951,235)          | 880,176<br>(813,731 - 951,235) | --                           | --                                   | --                                   | --                                      |
| Neonatal preterm birth complications                             | 325,967<br>(237,803 - 411,305)          | 325,967<br>(237,803 - 411,305) | --                           | --                                   | --                                   | --                                      |
| Neonatal encephalopathy due to birth asphyxia and trauma         | 282,518<br>(222,218 - 346,543)          | 282,518<br>(222,218 - 346,543) | --                           | --                                   | --                                   | --                                      |
| Neonatal sepsis and other neonatal infections                    | 140,886<br>(82,158 - 202,950)           | 140,886<br>(82,158 - 202,950)  | --                           | --                                   | --                                   | --                                      |
| Hemolytic disease and other neonatal jaundice                    | 7,241<br>(4,073 - 12,555)               | 7,241<br>(4,073 - 12,555)      | --                           | --                                   | --                                   | --                                      |
| Other neonatal disorders                                         | 123,563<br>(94,730 - 161,873)           | 123,563<br>(94,730 - 161,873)  | --                           | --                                   | --                                   | --                                      |
| Nutritional deficiencies                                         | 345,654<br>(293,833 - 384,377)          | 124,906<br>(98,914 - 150,972)  | 11,002<br>(8,759 - 13,190)   | 40,985<br>(33,695 - 47,219)          | 40,990<br>(32,158 - 47,543)          | 127,772<br>(105,182 - 148,971)          |
| Protein-energy malnutrition                                      | 227,005<br>(168,082 - 274,126)          | 106,799<br>(75,964 - 134,792)  | 7,612<br>(5,008 - 9,958)     | 14,152<br>(8,813 - 21,421)           | 18,277<br>(12,344 - 26,354)          | 80,165<br>(51,634 - 105,166)            |
| Iodine deficiency                                                | 1,421<br>(732 - 2,879)                  | 319<br>(73 - 908)              | 65<br>(20 - 171)             | 291<br>(106 - 802)                   | 303<br>(101 - 921)                   | 444<br>(141 - 1,287)                    |
| Iron-deficiency anemia                                           | 104,962<br>(57,841 - 152,063)           | 16,424<br>(4,922 - 38,077)     | 3,143<br>(1,500 - 5,081)     | 25,296<br>(16,776 - 31,265)          | 19,052<br>(10,019 - 25,334)          | 41,046<br>(21,976 - 64,752)             |
| Other nutritional deficiencies                                   | 12,266<br>(8,028 - 23,574)              | 1,364<br>(554 - 3,418)         | 182<br>(100 - 370)           | 1,245<br>(742 - 2,717)               | 3,357<br>(1,746 - 6,780)             | 6,117<br>(3,517 - 11,091)               |
| Other communicable, maternal, neonatal, and nutritional diseases | 190,020<br>(152,702 - 235,460)          | 87,780<br>(59,026 - 127,449)   | 10,718<br>(8,045 - 14,188)   | 30,054<br>(25,732 - 35,079)          | 29,183<br>(23,383 - 37,764)          | 32,286<br>(24,757 - 42,124)             |
| Sexually transmitted diseases excluding HIV                      | 74,604<br>(46,613 - 112,097)            | 61,426<br>(35,066 - 96,372)    | 4,536<br>(2,605 - 7,311)     | 2,980<br>(2,390 - 3,600)             | 2,071<br>(1,491 - 2,969)             | 3,591<br>(2,315 - 6,194)                |
| Syphilis                                                         | 70,917<br>(42,969 - 108,472)            | 61,426<br>(35,066 - 96,372)    | 4,452<br>(2,529 - 7,230)     | 1,206<br>(967 - 1,457)               | 1,139<br>(818 - 1,617)               | 2,695<br>(1,754 - 4,519)                |
| Chlamydial infection                                             | 1,133<br>(927 - 1,411)                  | --                             | 31<br>(24 - 43)              | 591<br>(476 - 714)                   | 281<br>(203 - 401)                   | 230<br>(141 - 430)                      |
| Gonococcal infection                                             | 1,448<br>(1,155 - 1,858)                | --                             | 27<br>(20 - 37)              | 613<br>(492 - 740)                   | 370<br>(267 - 529)                   | 439<br>(276 - 792)                      |
| Other sexually transmitted diseases                              | 1,106<br>(900 - 1,382)                  | --                             | 27<br>(21 - 37)              | 570<br>(458 - 689)                   | 281<br>(203 - 402)                   | 228<br>(136 - 434)                      |
| Hepatitis                                                        | 55,177<br>(48,342 - 66,953)             | 8,191<br>(5,674 - 13,225)      | 3,431<br>(2,543 - 4,804)     | 19,008<br>(16,077 - 23,121)          | 13,699<br>(11,663 - 16,522)          | 10,848<br>(9,539 - 12,931)              |
| Acute hepatitis A                                                | 6,974<br>(2,435 - 12,396)               | 3,870<br>(1,431 - 7,188)       | 751<br>(250 - 1,465)         | 1,451<br>(405 - 2,958)               | 612<br>(171 - 1,286)                 | 289<br>(72 - 636)                       |
| Acute hepatitis B                                                | 25,622<br>(19,288 - 32,417)             | 3,110<br>(1,416 - 5,796)       | 421<br>(212 - 732)           | 4,095<br>(2,460 - 6,234)             | 9,221<br>(7,010 - 11,596)            | 8,774<br>(7,099 - 10,624)               |
| Acute hepatitis C                                                | 1,357<br>(289 - 3,011)                  | --                             | 79<br>(15 - 197)             | 363<br>(72 - 877)                    | 460<br>(99 - 1,042)                  | 455<br>(98 - 987)                       |
| Acute hepatitis E                                                | 21,223<br>(15,327 - 29,347)             | 1,210<br>(474 - 2,658)         | 2,179<br>(1,414 - 3,303)     | 13,099<br>(9,996 - 16,923)           | 3,406<br>(1,816 - 5,518)             | 1,329<br>(627 - 2,433)                  |
| Other infectious diseases                                        | 60,240<br>(37,364 - 86,693)             | 18,163<br>(8,213 - 37,810)     | 2,751<br>(1,427 - 5,247)     | 8,065<br>(5,022 - 11,350)            | 13,413<br>(8,636 - 21,055)           | 17,847<br>(10,884 - 27,686)             |
| Non-communicable diseases                                        | 17,815,575<br>(17,196,631 - 18,416,106) | 413,115<br>(342,848 - 506,853) | 96,427<br>(84,003 - 112,986) | 1,410,034<br>(1,312,396 - 1,510,410) | 4,374,673<br>(4,125,066 - 4,627,594) | 11,521,326<br>(11,253,335 - 11,780,994) |
| Neoplasms                                                        | 3,490,454<br>(3,249,536 - 3,666,327)    | 21,251<br>(17,546 - 25,769)    | 20,431<br>(17,946 - 22,737)  | 478,512<br>(445,300 - 511,078)       | 1,342,478<br>(1,249,909 - 1,432,122) | 1,627,783<br>(1,480,537 - 1,700,392)    |
| Esophageal cancer                                                | 132,315<br>(118,326 - 146,950)          | --                             | --                           | 11,675<br>(9,709 - 13,841)           | 54,325<br>(46,991 - 61,571)          | 66,316<br>(59,735 - 74,069)             |
| Stomach cancer                                                   | 310,635<br>(277,996 - 348,275)          | --                             | --                           | 32,749<br>(29,424 - 36,402)          | 105,310<br>(93,845 - 118,098)        | 172,576<br>(152,224 - 198,218)          |
| Liver cancer                                                     | 253,768<br>(233,080 - 278,664)          | --                             | 638<br>(518 - 778)           | 31,458<br>(27,786 - 35,297)          | 105,006<br>(93,685 - 118,068)        | 116,666<br>(106,232 - 128,497)          |

Web Table 26 - Global deaths with 95% UI by age, sex, and cause in 2013

| Cause                                | Females, All Ages                    | Females, 0-4 Years          | Females, 5-14 Years         | Females, 15-49 Years           | Females, 50-69 Years                 | Females, 70-80 Years                 |
|--------------------------------------|--------------------------------------|-----------------------------|-----------------------------|--------------------------------|--------------------------------------|--------------------------------------|
| Liver cancer due to hepatitis B      | 73,377<br>(65,377 - 82,274)          | --                          | 178<br>(136 - 225)          | 12,674<br>(11,095 - 14,397)    | 35,153<br>(30,364 - 40,611)          | 25,372<br>(22,654 - 28,707)          |
| Liver cancer due to hepatitis C      | 109,300<br>(99,751 - 121,272)        | --                          | 66<br>(50 - 88)             | 9,111<br>(7,966 - 10,494)      | 40,910<br>(36,237 - 47,114)          | 59,212<br>(53,104 - 65,463)          |
| Liver cancer due to alcohol use      | 24,693<br>(21,992 - 27,885)          | --                          | --                          | 1,357<br>(1,169 - 1,589)       | 8,362<br>(7,296 - 9,794)             | 14,974<br>(13,067 - 17,007)          |
| Liver cancer due to other causes     | 46,398<br>(40,655 - 52,936)          | --                          | 394<br>(315 - 496)          | 8,316<br>(7,177 - 9,532)       | 20,581<br>(17,587 - 24,113)          | 17,107<br>(15,121 - 19,765)          |
| Larynx cancer                        | 12,104<br>(7,709 - 19,002)           | --                          | --                          | 1,461<br>(855 - 2,366)         | 5,340<br>(3,360 - 8,404)             | 5,303<br>(3,456 - 8,222)             |
| Tracheal, bronchus and lung cancer   | 485,017<br>(430,531 - 517,363)       | --                          | --                          | 36,228<br>(32,925 - 40,751)    | 199,605<br>(180,674 - 216,473)       | 249,184<br>(208,887 - 267,781)       |
| Breast cancer                        | 463,990<br>(406,163 - 507,923)       | --                          | --                          | 98,807<br>(91,176 - 108,542)   | 205,907<br>(186,914 - 228,351)       | 159,276<br>(127,458 - 173,583)       |
| Cervical cancer                      | 235,732<br>(201,945 - 257,940)       | --                          | --                          | 59,975<br>(49,517 - 66,629)    | 112,300<br>(92,060 - 124,562)        | 63,457<br>(56,909 - 72,165)          |
| Uterine cancer                       | 67,686<br>(53,572 - 79,047)          | --                          | --                          | 6,780<br>(4,813 - 8,366)       | 30,078<br>(23,124 - 35,529)          | 30,828<br>(25,262 - 36,391)          |
| Prostate cancer                      | --                                   | --                          | --                          | --                             | --                                   | --                                   |
| Colon and rectum cancer              | 357,114<br>(333,818 - 377,763)       | --                          | --                          | 28,612<br>(26,589 - 30,540)    | 110,161<br>(102,465 - 117,197)       | 218,341<br>(202,787 - 234,616)       |
| Lip and oral cavity cancer           | 47,645<br>(37,014 - 59,967)          | --                          | --                          | 7,705<br>(5,520 - 9,853)       | 20,225<br>(15,529 - 26,547)          | 19,714<br>(15,731 - 24,312)          |
| Nasopharynx cancer                   | 17,222<br>(13,392 - 25,276)          | --                          | 168<br>(115 - 248)          | 4,894<br>(3,689 - 7,093)       | 7,789<br>(5,860 - 11,517)            | 4,371<br>(3,522 - 6,666)             |
| Other pharynx cancer                 | 16,067<br>(13,975 - 18,486)          | --                          | --                          | 2,903<br>(2,198 - 3,736)       | 8,065<br>(6,690 - 9,684)             | 5,099<br>(4,400 - 5,844)             |
| Gallbladder and biliary tract cancer | 85,728<br>(68,390 - 97,554)          | --                          | --                          | 6,383<br>(4,768 - 7,431)       | 29,993<br>(23,911 - 34,269)          | 49,351<br>(38,062 - 57,625)          |
| Pancreatic cancer                    | 167,302<br>(155,261 - 176,741)       | --                          | --                          | 8,524<br>(7,843 - 9,135)       | 56,744<br>(52,341 - 60,296)          | 102,034<br>(94,500 - 108,705)        |
| Malignant skin melanoma              | 24,724<br>(19,234 - 28,907)          | --                          | --                          | 4,848<br>(4,076 - 5,762)       | 9,164<br>(7,224 - 10,812)            | 10,712<br>(7,734 - 12,451)           |
| Non-melanoma skin cancer             | 17,268<br>(13,751 - 22,430)          | --                          | --                          | 1,353<br>(988 - 1,944)         | 3,051<br>(2,285 - 4,123)             | 12,863<br>(10,184 - 16,525)          |
| Ovarian cancer                       | 157,754<br>(147,454 - 169,536)       | --                          | --                          | 25,360<br>(23,164 - 28,134)    | 75,698<br>(69,830 - 82,520)          | 56,696<br>(51,511 - 61,513)          |
| Testicular cancer                    | --                                   | --                          | --                          | --                             | --                                   | --                                   |
| Kidney cancer                        | 47,072<br>(39,845 - 52,651)          | 833<br>(655 - 1,054)        | 445<br>(371 - 532)          | 3,907<br>(3,538 - 4,378)       | 17,070<br>(15,123 - 19,223)          | 24,817<br>(19,559 - 29,939)          |
| Bladder cancer                       | 43,848<br>(34,058 - 55,827)          | --                          | --                          | 2,458<br>(1,814 - 3,299)       | 11,226<br>(8,693 - 14,510)           | 30,164<br>(23,113 - 38,901)          |
| Brain and nervous system cancer      | 85,847<br>(75,045 - 93,108)          | 1,467<br>(1,219 - 1,746)    | 3,058<br>(2,663 - 3,426)    | 20,936<br>(18,897 - 22,974)    | 34,394<br>(30,615 - 38,746)          | 25,992<br>(20,868 - 28,448)          |
| Thyroid cancer                       | 21,191<br>(17,244 - 25,569)          | --                          | 53<br>(34 - 75)             | 1,902<br>(1,511 - 2,558)       | 7,465<br>(5,772 - 8,987)             | 11,771<br>(9,823 - 14,529)           |
| Mesothelioma                         | 9,701<br>(8,360 - 11,589)            | --                          | --                          | 836<br>(748 - 969)             | 5,752<br>(4,900 - 6,792)             | 3,113<br>(2,477 - 3,943)             |
| Hodgkin lymphoma                     | 9,991<br>(8,932 - 12,880)            | 1,052<br>(596 - 1,890)      | 347<br>(272 - 459)          | 2,895<br>(2,586 - 3,837)       | 2,683<br>(2,343 - 3,664)             | 3,013<br>(2,691 - 3,799)             |
| Non-Hodgkin lymphoma                 | 92,375<br>(64,939 - 105,361)         | 2,620<br>(1,774 - 4,099)    | 2,126<br>(1,344 - 2,752)    | 13,699<br>(9,732 - 16,002)     | 29,096<br>(21,250 - 34,343)          | 44,833<br>(29,133 - 52,181)          |
| Multiple myeloma                     | 37,105<br>(28,889 - 47,426)          | --                          | --                          | 2,396<br>(1,936 - 2,939)       | 13,665<br>(10,703 - 17,651)          | 21,044<br>(15,712 - 27,576)          |
| Leukemia                             | 116,194<br>(106,424 - 123,785)       | 4,102<br>(3,414 - 4,801)    | 7,153<br>(6,236 - 7,972)    | 31,149<br>(28,016 - 33,914)    | 31,613<br>(28,828 - 34,655)          | 42,178<br>(36,694 - 45,670)          |
| Other neoplasms                      | 175,061<br>(142,794 - 195,471)       | 11,177<br>(8,009 - 14,971)  | 6,443<br>(4,777 - 7,978)    | 28,618<br>(23,730 - 34,627)    | 50,750<br>(42,241 - 59,073)          | 78,074<br>(62,718 - 87,097)          |
| Cardiovascular diseases              | 8,508,481<br>(7,828,237 - 9,197,055) | 25,271<br>(20,212 - 34,574) | 14,196<br>(11,390 - 19,786) | 433,099<br>(352,116 - 505,874) | 1,773,286<br>(1,523,319 - 1,961,001) | 6,262,629<br>(5,811,151 - 6,723,376) |
| Rheumatic heart disease              | 157,011<br>(113,954 - 216,938)       | 886<br>(525 - 1,617)        | 2,628<br>(1,864 - 3,943)    | 35,325<br>(24,698 - 48,815)    | 49,594<br>(36,330 - 73,734)          | 68,578<br>(47,635 - 94,165)          |
| Ischemic heart disease               | 3,819,509<br>(3,249,853 - 4,323,342) | 2,805<br>(1,687 - 6,342)    | 2,627<br>(1,774 - 4,958)    | 167,480<br>(121,048 - 213,448) | 754,028<br>(586,039 - 885,605)       | 2,892,567<br>(2,495,705 - 3,248,897) |
| Cerebrovascular disease              | 3,263,706<br>(2,816,879 - 3,742,587) | 5,857<br>(4,569 - 8,387)    | 4,194<br>(3,258 - 5,948)    | 144,098<br>(113,107 - 169,183) | 693,169<br>(568,738 - 794,244)       | 2,416,388<br>(2,108,656 - 2,810,674) |
| Ischemic stroke                      | 1,745,396<br>(1,404,656 - 1,990,813) | 731<br>(482 - 1,215)        | 525<br>(352 - 850)          | 21,777<br>(14,247 - 28,000)    | 233,741<br>(173,152 - 278,017)       | 1,488,622<br>(1,215,326 - 1,707,302) |
| Hemorrhagic stroke                   | 1,518,310<br>(1,294,016 - 1,876,069) | 5,126<br>(4,038 - 7,275)    | 3,669<br>(2,845 - 5,294)    | 122,321<br>(96,506 - 145,231)  | 459,428<br>(377,264 - 547,021)       | 927,677<br>(799,578 - 1,201,130)     |
| Hypertensive heart disease           | 585,636<br>(427,102 - 683,431)       | 634<br>(381 - 1,048)        | 371<br>(254 - 522)          | 24,244<br>(16,545 - 30,604)    | 122,294<br>(85,944 - 153,020)        | 438,093<br>(321,007 - 520,772)       |
| Cardiomyopathy and myocarditis       | 193,853<br>(153,096 - 233,685)       | 8,102<br>(5,526 - 11,200)   | 2,358<br>(1,657 - 3,170)    | 26,668<br>(18,407 - 32,421)    | 43,758<br>(31,059 - 53,644)          | 112,967<br>(92,979 - 138,324)        |
| Atrial fibrillation and flutter      | 71,898<br>(58,256 - 85,485)          | --                          | --                          | 358<br>(292 - 426)             | 3,119<br>(2,513 - 3,791)             | 68,420<br>(55,353 - 81,742)          |
| Aortic aneurysm                      | 54,824<br>(33,337 - 79,355)          | --                          | --                          | 3,169<br>(1,872 - 4,843)       | 11,480<br>(6,916 - 16,887)           | 40,176<br>(24,481 - 58,540)          |

Web Table 26 - Global deaths with 95% UI by age, sex, and cause in 2013

| Cause                                               | Females, All Ages                    | Females, 0-4 Years          | Females, 5-14 Years      | Females, 15-49 Years         | Females, 50-69 Years           | Females, 70-80 Years                 |
|-----------------------------------------------------|--------------------------------------|-----------------------------|--------------------------|------------------------------|--------------------------------|--------------------------------------|
| Peripheral vascular disease                         | 21,562<br>(17,691 - 25,139)          | --                          | --                       | 207<br>(168 - 254)           | 1,960<br>(1,608 - 2,408)       | 19,395<br>(15,712 - 22,644)          |
| Endocarditis                                        | 28,992<br>(19,239 - 40,981)          | 1,770<br>(978 - 2,831)      | 450<br>(295 - 740)       | 4,959<br>(3,063 - 7,108)     | 6,681<br>(4,239 - 9,865)       | 15,131<br>(9,663 - 21,776)           |
| Other cardiovascular and circulatory diseases       | 311,491<br>(253,844 - 393,441)       | 5,217<br>(3,839 - 8,332)    | 1,568<br>(1,168 - 2,410) | 26,592<br>(20,964 - 35,750)  | 87,202<br>(71,028 - 114,068)   | 190,912<br>(150,848 - 235,003)       |
| Chronic respiratory diseases                        | 1,846,750<br>(1,681,507 - 2,116,304) | 16,652<br>(13,917 - 21,300) | 4,649<br>(3,965 - 5,652) | 84,119<br>(72,384 - 100,172) | 434,470<br>(374,025 - 522,743) | 1,306,859<br>(1,198,218 - 1,510,581) |
| Chronic obstructive pulmonary disease               | 1,213,503<br>(1,031,081 - 1,439,346) | 6,565<br>(4,891 - 8,819)    | 1,277<br>(848 - 1,745)   | 31,663<br>(23,422 - 41,752)  | 252,108<br>(198,767 - 314,496) | 921,890<br>(787,035 - 1,081,455)     |
| Pneumoconiosis                                      | 112,634<br>(72,117 - 163,699)        | 108<br>(75 - 157)           | 92<br>(70 - 117)         | 6,134<br>(4,069 - 8,843)     | 42,886<br>(26,168 - 65,051)    | 63,414<br>(37,578 - 98,180)          |
| Silicosis                                           | 4,052<br>(2,154 - 7,421)             | 18<br>(12 - 30)             | 18<br>(14 - 25)          | 452<br>(243 - 882)           | 1,830<br>(848 - 3,669)         | 1,734<br>(903 - 3,423)               |
| Asbestosis                                          | 3,517<br>(2,010 - 6,095)             | 19<br>(13 - 30)             | 18<br>(14 - 23)          | 402<br>(228 - 718)           | 1,586<br>(773 - 2,954)         | 1,493<br>(790 - 2,716)               |
| Coal workers pneumoconiosis                         | 3,130<br>(1,741 - 5,442)             | 18<br>(12 - 29)             | 18<br>(14 - 24)          | 412<br>(239 - 723)           | 1,440<br>(714 - 2,765)         | 1,242<br>(566 - 2,503)               |
| Other pneumoconiosis                                | 101,935<br>(65,211 - 149,398)        | 53<br>(34 - 78)             | 38<br>(27 - 50)          | 4,869<br>(3,067 - 7,177)     | 38,031<br>(23,361 - 58,243)    | 58,945<br>(34,664 - 91,632)          |
| Asthma                                              | 242,268<br>(164,331 - 391,652)       | 4,289<br>(3,163 - 5,734)    | 2,290<br>(1,797 - 2,996) | 31,005<br>(23,029 - 42,149)  | 75,518<br>(48,574 - 125,406)   | 129,167<br>(84,601 - 220,891)        |
| Interstitial lung disease and pulmonary sarcoidosis | 222,319<br>(139,619 - 317,318)       | 363<br>(171 - 825)          | 264<br>(134 - 632)       | 9,716<br>(6,438 - 14,383)    | 54,878<br>(32,282 - 80,033)    | 157,097<br>(99,827 - 227,095)        |
| Other chronic respiratory diseases                  | 56,026<br>(41,982 - 76,419)          | 5,327<br>(4,125 - 7,414)    | 726<br>(524 - 1,033)     | 5,602<br>(4,472 - 7,445)     | 9,080<br>(6,419 - 13,181)      | 35,291<br>(25,396 - 49,774)          |
| Cirrhosis                                           | 398,317<br>(374,662 - 426,360)       | 4,676<br>(3,360 - 6,746)    | 4,090<br>(3,334 - 4,947) | 75,268<br>(68,705 - 82,275)  | 163,635<br>(152,253 - 175,863) | 150,648<br>(140,182 - 164,604)       |
| Cirrhosis due to hepatitis B                        | 117,285<br>(102,823 - 130,723)       | 183<br>(116 - 318)          | 583<br>(393 - 867)       | 21,220<br>(18,004 - 24,698)  | 48,911<br>(42,720 - 55,305)    | 46,388<br>(41,050 - 53,116)          |
| Cirrhosis due to hepatitis C                        | 150,895<br>(134,475 - 164,409)       | 288<br>(151 - 514)          | 519<br>(372 - 686)       | 25,505<br>(22,867 - 28,463)  | 64,788<br>(56,815 - 71,576)    | 59,796<br>(51,632 - 66,301)          |
| Cirrhosis due to alcohol use                        | 70,381<br>(61,877 - 79,913)          | --                          | --                       | 8,712<br>(7,082 - 10,182)    | 29,243<br>(25,361 - 33,922)    | 32,426<br>(28,222 - 37,642)          |
| Cirrhosis due to other causes                       | 59,756<br>(49,654 - 69,956)          | 4,205<br>(3,000 - 6,110)    | 2,989<br>(2,385 - 3,686) | 19,831<br>(16,576 - 23,704)  | 20,693<br>(15,968 - 25,544)    | 12,037<br>(9,801 - 14,679)           |
| Digestive diseases                                  | 544,448<br>(483,041 - 623,752)       | 7,845<br>(6,232 - 10,084)   | 7,813<br>(6,163 - 9,527) | 73,235<br>(61,823 - 86,383)  | 131,928<br>(114,450 - 155,254) | 323,626<br>(285,017 - 370,261)       |
| Peptic ulcer disease                                | 119,261<br>(89,467 - 147,865)        | 579<br>(338 - 882)          | 935<br>(593 - 1,379)     | 13,512<br>(9,351 - 17,845)   | 33,598<br>(24,360 - 43,018)    | 70,638<br>(53,358 - 89,199)          |
| Gastritis and duodenitis                            | 28,340<br>(14,709 - 54,370)          | 473<br>(201 - 848)          | 640<br>(336 - 1,310)     | 3,959<br>(2,016 - 8,213)     | 7,412<br>(3,458 - 14,290)      | 15,857<br>(8,363 - 31,141)           |
| Appendicitis                                        | 31,893<br>(21,089 - 41,481)          | 1,212<br>(773 - 1,965)      | 1,389<br>(962 - 1,947)   | 9,191<br>(6,095 - 12,409)    | 7,887<br>(5,072 - 11,094)      | 12,215<br>(7,252 - 17,440)           |
| Paralytic ileus and intestinal obstruction          | 117,235<br>(73,113 - 177,284)        | 2,123<br>(1,362 - 3,244)    | 1,946<br>(1,092 - 2,735) | 18,385<br>(11,892 - 28,677)  | 27,419<br>(17,518 - 42,630)    | 67,363<br>(41,134 - 104,586)         |
| Inguinal, femoral, and abdominal hernia             | 12,654<br>(7,549 - 21,102)           | 183<br>(104 - 308)          | 383<br>(188 - 1,040)     | 1,118<br>(701 - 2,094)       | 2,468<br>(1,660 - 4,470)       | 8,502<br>(4,788 - 13,827)            |
| Inflammatory bowel disease                          | 26,892<br>(18,891 - 40,344)          | 1,436<br>(891 - 2,271)      | 710<br>(422 - 1,046)     | 5,012<br>(3,283 - 7,402)     | 5,527<br>(3,865 - 8,507)       | 14,207<br>(9,812 - 22,183)           |
| Vascular intestinal disorders                       | 45,237<br>(24,915 - 72,806)          | 26<br>(0 - 127)             | 65<br>(1 - 316)          | 1,638<br>(872 - 3,166)       | 7,023<br>(3,865 - 11,990)      | 36,485<br>(19,533 - 57,354)          |
| Gallbladder and biliary diseases                    | 61,745<br>(44,706 - 76,778)          | 362<br>(229 - 515)          | 405<br>(198 - 545)       | 5,128<br>(3,714 - 6,429)     | 13,704<br>(9,991 - 17,271)     | 42,146<br>(30,663 - 52,930)          |
| Pancreatitis                                        | 47,512<br>(29,748 - 65,388)          | 156<br>(74 - 259)           | 445<br>(229 - 729)       | 9,158<br>(5,869 - 13,138)    | 15,506<br>(9,420 - 22,137)     | 22,247<br>(13,752 - 30,915)          |
| Other digestive diseases                            | 53,677<br>(43,469 - 64,879)          | 1,296<br>(879 - 1,819)      | 896<br>(662 - 1,184)     | 6,134<br>(4,915 - 7,621)     | 11,385<br>(9,172 - 14,145)     | 33,968<br>(26,978 - 41,671)          |
| Neurological disorders                              | 1,070,138<br>(976,408 - 1,164,468)   | 9,106<br>(6,796 - 12,204)   | 5,023<br>(3,711 - 6,373) | 30,687<br>(25,484 - 35,909)  | 67,023<br>(61,092 - 71,874)    | 958,299<br>(873,257 - 1,055,280)     |
| Alzheimer disease and other dementias               | 928,603<br>(847,907 - 1,024,042)     | --                          | --                       | 248<br>(202 - 302)           | 37,627<br>(34,420 - 40,812)    | 890,728<br>(811,085 - 987,836)       |
| Parkinson disease                                   | 45,866<br>(27,791 - 53,305)          | --                          | --                       | 324<br>(245 - 420)           | 4,069<br>(2,876 - 5,192)       | 41,472<br>(24,445 - 48,467)          |
| Epilepsy                                            | 46,859<br>(34,711 - 56,648)          | 6,743<br>(4,400 - 9,829)    | 4,098<br>(2,807 - 5,450) | 21,524<br>(16,223 - 26,234)  | 6,504<br>(4,844 - 7,987)       | 7,990<br>(5,565 - 9,750)             |
| Multiple sclerosis                                  | 11,732<br>(6,367 - 15,346)           | --                          | --                       | 3,030<br>(1,943 - 4,658)     | 5,672<br>(2,948 - 7,196)       | 3,030<br>(1,407 - 3,810)             |
| Other neurological disorders                        | 37,078<br>(34,411 - 39,913)          | 2,363<br>(2,038 - 2,818)    | 925<br>(812 - 1,122)     | 5,560<br>(5,143 - 6,228)     | 13,151<br>(12,097 - 16,268)    | 15,078<br>(13,690 - 16,247)          |
| Mental and substance use disorders                  | 63,027<br>(50,810 - 80,823)          | 948<br>(538 - 1,348)        | 35<br>(27 - 44)          | 29,304<br>(24,428 - 36,510)  | 21,348<br>(15,653 - 29,325)    | 11,392<br>(9,399 - 13,838)           |
| Schizophrenia                                       | 7,331<br>(6,218 - 10,068)            | --                          | --                       | 2,105<br>(1,751 - 3,037)     | 2,442<br>(2,011 - 3,526)       | 2,784<br>(2,150 - 3,654)             |
| Alcohol use disorders                               | 22,318<br>(10,018 - 37,605)          | --                          | --                       | 9,000<br>(3,985 - 15,157)    | 10,484<br>(4,697 - 18,326)     | 2,833<br>(1,197 - 4,773)             |
| Drug use disorders                                  | 32,894<br>(29,378 - 36,720)          | 948<br>(538 - 1,348)        | --                       | 17,748<br>(15,532 - 20,065)  | 8,422<br>(7,250 - 9,745)       | 5,775<br>(5,255 - 6,503)             |
| Opioid use disorders                                | 12,610<br>(11,140 - 14,119)          | 322<br>(174 - 512)          | --                       | 6,924<br>(5,984 - 7,853)     | 3,104<br>(2,611 - 3,674)       | 2,261<br>(2,007 - 2,584)             |



Web Table 26 - Global deaths with 95% UI by age, sex, and cause in 2013

| Cause                                               | Females, All Ages                    | Females, 0-4 Years             | Females, 5-14 Years         | Females, 15-49 Years           | Females, 50-69 Years           | Females, 70-80 Years           |
|-----------------------------------------------------|--------------------------------------|--------------------------------|-----------------------------|--------------------------------|--------------------------------|--------------------------------|
| Cocaine use disorders                               | 1,627<br>(1,457 - 1,834)             | 30<br>(21 - 41)                | --                          | 914<br>(797 - 1,058)           | 365<br>(306 - 432)             | 317<br>(263 - 388)             |
| Amphetamine use disorders                           | 1,515<br>(1,346 - 1,693)             | 36<br>(25 - 51)                | --                          | 701<br>(611 - 795)             | 401<br>(337 - 474)             | 376<br>(307 - 460)             |
| Other drug use disorders                            | 17,142<br>(15,259 - 19,314)          | 559<br>(305 - 758)             | --                          | 9,209<br>(8,060 - 10,604)      | 4,552<br>(3,895 - 5,309)       | 2,821<br>(2,492 - 3,216)       |
| Eating disorders                                    | 485<br>(428 - 555)                   | --                             | 35<br>(27 - 44)             | 451<br>(394 - 519)             | --                             | --                             |
| Anorexia nervosa                                    | 485<br>(428 - 555)                   | --                             | 35<br>(27 - 44)             | 451<br>(394 - 519)             | --                             | --                             |
| Diabetes, urogenital, blood, and endocrine diseases | 1,466,343<br>(1,347,170 - 1,629,066) | 82,462<br>(47,800 - 157,673)   | 24,249<br>(14,594 - 39,769) | 156,446<br>(141,146 - 179,976) | 401,365<br>(361,564 - 439,773) | 801,821<br>(712,275 - 857,884) |
| Diabetes mellitus                                   | 679,695<br>(623,576 - 740,595)       | 1,787<br>(1,077 - 2,844)       | 1,112<br>(652 - 1,837)      | 49,217<br>(43,491 - 55,000)    | 223,431<br>(202,290 - 247,224) | 404,148<br>(368,447 - 446,800) |
| Acute glomerulonephritis                            | 8,405<br>(5,887 - 10,598)            | 727<br>(347 - 1,233)           | 552<br>(329 - 813)          | 2,464<br>(1,772 - 3,138)       | 2,163<br>(1,498 - 2,745)       | 2,499<br>(1,850 - 3,139)       |
| Chronic kidney disease                              | 431,451<br>(335,780 - 479,638)       | 3,675<br>(2,906 - 4,725)       | 2,543<br>(2,038 - 3,036)    | 45,976<br>(37,685 - 51,960)    | 118,487<br>(89,930 - 134,631)  | 260,769<br>(198,570 - 291,873) |
| Chronic kidney disease due to diabetes mellitus     | 83,598<br>(63,743 - 96,388)          | 103<br>(74 - 129)              | 102<br>(71 - 129)           | 6,077<br>(4,539 - 6,997)       | 29,133<br>(20,688 - 33,488)    | 48,182<br>(35,891 - 56,663)    |
| Chronic kidney disease due to hypertension          | 125,711<br>(79,698 - 172,722)        | 454<br>(240 - 766)             | 298<br>(163 - 472)          | 11,078<br>(6,970 - 15,646)     | 30,744<br>(19,291 - 43,058)    | 83,137<br>(51,694 - 113,337)   |
| Chronic kidney disease due to glomerulonephritis    | 50,654<br>(37,828 - 69,155)          | 1,784<br>(1,297 - 2,281)       | 1,046<br>(770 - 1,351)      | 12,051<br>(9,079 - 15,648)     | 15,210<br>(10,629 - 21,954)    | 20,563<br>(14,576 - 29,490)    |
| Chronic kidney disease due to other causes          | 171,489<br>(111,377 - 216,755)       | 1,333<br>(950 - 2,016)         | 1,098<br>(816 - 1,405)      | 16,770<br>(12,500 - 21,263)    | 43,400<br>(28,020 - 59,994)    | 108,888<br>(66,013 - 139,867)  |
| Urinary diseases and male infertility               | 121,727<br>(90,911 - 136,963)        | 2,965<br>(1,865 - 3,965)       | 1,093<br>(721 - 1,481)      | 14,088<br>(10,985 - 16,726)    | 25,387<br>(20,056 - 29,653)    | 78,194<br>(56,316 - 90,101)    |
| Interstitial nephritis and urinary tract infections | 97,135<br>(72,707 - 110,744)         | 2,367<br>(1,349 - 3,259)       | 754<br>(443 - 1,043)        | 10,568<br>(8,184 - 12,726)     | 18,896<br>(15,126 - 22,680)    | 64,550<br>(46,788 - 74,959)    |
| Urolithiasis                                        | 6,506<br>(4,655 - 9,549)             | --                             | 115<br>(77 - 182)           | 1,050<br>(786 - 1,612)         | 1,925<br>(1,406 - 2,897)       | 3,416<br>(2,201 - 5,316)       |
| Other urinary diseases                              | 18,085<br>(11,296 - 22,876)          | 598<br>(395 - 929)             | 224<br>(143 - 382)          | 2,469<br>(1,606 - 3,384)       | 4,566<br>(2,631 - 5,937)       | 10,228<br>(5,985 - 13,257)     |
| Gynecological diseases                              | 3,407<br>(2,889 - 4,829)             | --                             | --                          | 1,360<br>(1,121 - 2,365)       | 595<br>(502 - 819)             | 1,453<br>(1,077 - 1,958)       |
| Uterine fibroids                                    | 878<br>(728 - 1,184)                 | --                             | --                          | 266<br>(207 - 439)             | 164<br>(137 - 223)             | 448<br>(329 - 613)             |
| Polycystic ovarian syndrome                         | 88<br>(74 - 156)                     | --                             | --                          | 84<br>(70 - 150)               | 4<br>(3 - 5)                   | --                             |
| Endometriosis                                       | 223<br>(187 - 386)                   | --                             | --                          | 208<br>(173 - 365)             | 14<br>(11 - 20)                | --                             |
| Genital prolapse                                    | 647<br>(537 - 875)                   | --                             | --                          | 172<br>(143 - 302)             | 107<br>(90 - 147)              | 369<br>(274 - 495)             |
| Other gynecological diseases                        | 1,571<br>(1,340 - 2,237)             | --                             | --                          | 628<br>(520 - 1,101)           | 307<br>(258 - 424)             | 636<br>(470 - 858)             |
| Hemoglobinopathies and hemolytic anemias            | 121,657<br>(58,493 - 229,782)        | 61,423<br>(25,006 - 138,783)   | 16,767<br>(6,539 - 32,212)  | 26,340<br>(13,732 - 44,688)    | 7,766<br>(4,403 - 11,875)      | 9,362<br>(5,384 - 12,783)      |
| Thalassemias                                        | 10,976<br>(6,598 - 15,086)           | 3,971<br>(2,364 - 5,670)       | 1,826<br>(1,040 - 2,682)    | 4,770<br>(2,666 - 6,627)       | 340<br>(204 - 494)             | 68<br>(40 - 96)                |
| Sickle cell disorders                               | 92,214<br>(37,152 - 197,561)         | 55,131<br>(20,767 - 129,960)   | 14,996<br>(4,898 - 29,680)  | 18,595<br>(8,673 - 36,484)     | 3,611<br>(1,804 - 6,491)       | 380<br>(204 - 554)             |
| G6PD deficiency                                     | 1,664<br>(919 - 2,334)               | 537<br>(271 - 910)             | 144<br>(77 - 221)           | 579<br>(314 - 807)             | 270<br>(153 - 399)             | 134<br>(67 - 209)              |
| Other hemoglobinopathies and hemolytic anemias      | 16,803<br>(10,168 - 23,220)          | 1,783<br>(953 - 3,431)         | 300<br>(174 - 435)          | 2,395<br>(1,419 - 3,255)       | 3,545<br>(2,137 - 5,003)       | 8,780<br>(5,073 - 12,051)      |
| Endocrine, metabolic, blood, and immune disorders   | 100,002<br>(71,202 - 123,434)        | 11,885<br>(8,629 - 15,612)     | 2,181<br>(1,620 - 2,810)    | 17,002<br>(12,351 - 21,770)    | 23,536<br>(16,982 - 29,117)    | 45,398<br>(30,930 - 53,819)    |
| Musculoskeletal disorders                           | 68,603<br>(61,537 - 76,724)          | --                             | 1,573<br>(1,312 - 1,880)    | 15,915<br>(14,063 - 18,053)    | 18,836<br>(16,256 - 21,613)    | 32,278<br>(28,294 - 36,495)    |
| Rheumatoid arthritis                                | 24,860<br>(21,306 - 28,802)          | --                             | 246<br>(178 - 402)          | 2,082<br>(1,628 - 2,763)       | 7,569<br>(6,229 - 8,938)       | 14,963<br>(12,683 - 17,481)    |
| Other musculoskeletal disorders                     | 43,743<br>(38,977 - 49,413)          | --                             | 1,327<br>(1,065 - 1,565)    | 13,834<br>(12,289 - 15,661)    | 11,267<br>(9,882 - 13,527)     | 17,315<br>(14,853 - 20,146)    |
| Other non-communicable diseases                     | 359,013<br>(312,522 - 420,866)       | 244,903<br>(200,161 - 302,315) | 14,368<br>(11,924 - 17,176) | 33,449<br>(27,814 - 41,422)    | 20,302<br>(16,075 - 23,652)    | 45,991<br>(39,254 - 51,105)    |
| Congenital anomalies                                | 296,196<br>(252,658 - 352,355)       | 233,438<br>(189,859 - 290,459) | 13,732<br>(11,327 - 16,575) | 27,431<br>(22,062 - 35,027)    | 10,678<br>(7,157 - 13,449)     | 10,916<br>(6,909 - 12,971)     |
| Neural tube defects                                 | 35,262<br>(19,166 - 75,498)          | 32,499<br>(16,944 - 70,103)    | 952<br>(500 - 2,040)        | 1,396<br>(930 - 2,592)         | 272<br>(178 - 505)             | 143<br>(91 - 226)              |
| Congenital heart anomalies                          | 150,918<br>(125,433 - 181,975)       | 117,371<br>(94,614 - 147,899)  | 7,933<br>(6,318 - 9,666)    | 14,163<br>(10,992 - 18,571)    | 5,461<br>(3,158 - 7,699)       | 5,991<br>(3,334 - 7,752)       |
| Cleft lip and cleft palate                          | 1,661<br>(701 - 3,029)               | 1,661<br>(701 - 3,029)         | --                          | --                             | --                             | --                             |
| Down syndrome                                       | 19,729<br>(10,066 - 29,250)          | 13,276<br>(5,825 - 21,729)     | 1,396<br>(734 - 2,178)      | 3,477<br>(2,153 - 5,592)       | 1,435<br>(873 - 1,930)         | 145<br>(83 - 214)              |
| Chromosomal unbalanced rearrangements               | 10,046<br>(5,093 - 16,379)           | 8,194<br>(3,811 - 13,811)      | 290<br>(140 - 480)          | 1,282<br>(764 - 2,170)         | 178<br>(100 - 281)             | 102<br>(56 - 157)              |
| Other congenital anomalies                          | 78,579<br>(62,211 - 120,984)         | 60,437<br>(46,791 - 99,325)    | 3,162<br>(2,363 - 4,937)    | 7,113<br>(5,323 - 10,018)      | 3,331<br>(2,552 - 4,170)       | 4,536<br>(3,268 - 5,403)       |

Web Table 26 - Global deaths with 95% UI by age, sex, and cause in 2013

| Cause                                           | Females, All Ages                    | Females, 0-4 Years             | Females, 5-14 Years         | Females, 15-49 Years           | Females, 50-69 Years           | Females, 70-80 Years           |
|-------------------------------------------------|--------------------------------------|--------------------------------|-----------------------------|--------------------------------|--------------------------------|--------------------------------|
| Skin and subcutaneous diseases                  | 56,214<br>(50,090 - 62,058)          | 4,861<br>(3,829 - 6,219)       | 636<br>(532 - 750)          | 6,018<br>(4,936 - 6,816)       | 9,624<br>(8,532 - 11,038)      | 35,075<br>(30,698 - 39,364)    |
| Cellulitis                                      | 16,549<br>(11,192 - 22,609)          | 2,113<br>(1,273 - 3,206)       | 312<br>(198 - 437)          | 2,435<br>(1,617 - 3,326)       | 3,787<br>(2,421 - 5,290)       | 7,902<br>(5,102 - 11,180)      |
| Pyoderma                                        | 19,386<br>(15,227 - 23,069)          | 2,467<br>(1,606 - 3,601)       | 217<br>(152 - 297)          | 2,488<br>(1,830 - 3,115)       | 4,032<br>(3,031 - 5,368)       | 10,180<br>(8,140 - 12,161)     |
| Decubitus ulcer                                 | 17,896<br>(15,213 - 21,364)          | 67<br>(32 - 150)               | 59<br>(39 - 97)             | 645<br>(484 - 916)             | 1,433<br>(1,131 - 1,961)       | 15,691<br>(13,160 - 18,501)    |
| Other skin and subcutaneous diseases            | 2,383<br>(1,787 - 3,521)             | 214<br>(107 - 364)             | 48<br>(34 - 64)             | 449<br>(308 - 556)             | 371<br>(274 - 505)             | 1,301<br>(931 - 2,268)         |
| Sudden infant death syndrome                    | 6,604<br>(3,614 - 11,100)            | 6,604<br>(3,614 - 11,100)      | --                          | --                             | --                             | --                             |
| Injuries                                        | 1,546,308<br>(1,415,569 - 1,682,513) | 165,062<br>(141,035 - 192,063) | 77,197<br>(69,381 - 86,516) | 526,780<br>(469,976 - 592,285) | 315,088<br>(283,147 - 358,148) | 462,180<br>(397,280 - 509,164) |
| Transport injuries                              | 380,126<br>(330,348 - 419,212)       | 32,798<br>(25,067 - 41,280)    | 25,010<br>(20,369 - 28,784) | 153,211<br>(133,136 - 170,127) | 96,445<br>(81,103 - 109,168)   | 72,662<br>(61,581 - 83,689)    |
| Road injuries                                   | 357,057<br>(308,790 - 392,718)       | 30,037<br>(22,560 - 38,164)    | 23,276<br>(18,945 - 26,776) | 144,289<br>(125,552 - 159,870) | 91,016<br>(76,637 - 103,184)   | 68,440<br>(57,808 - 78,262)    |
| Pedestrian road injuries                        | 167,394<br>(134,713 - 190,152)       | 14,302<br>(10,064 - 18,974)    | 11,970<br>(9,285 - 14,163)  | 48,249<br>(38,040 - 56,080)    | 48,187<br>(38,423 - 56,308)    | 44,686<br>(36,232 - 52,128)    |
| Cyclist road injuries                           | 20,717<br>(16,372 - 24,110)          | 1,217<br>(759 - 1,769)         | 1,629<br>(1,193 - 2,072)    | 8,323<br>(6,515 - 9,830)       | 6,050<br>(4,691 - 7,350)       | 3,498<br>(2,675 - 4,281)       |
| Motorcyclist road injuries                      | 33,623<br>(23,403 - 45,197)          | 1,525<br>(995 - 2,329)         | 1,410<br>(920 - 2,044)      | 20,806<br>(14,760 - 27,470)    | 7,047<br>(4,637 - 9,593)       | 2,835<br>(1,828 - 4,130)       |
| Motor vehicle road injuries                     | 130,014<br>(110,890 - 151,929)       | 12,328<br>(8,816 - 16,714)     | 7,796<br>(5,945 - 9,515)    | 64,434<br>(55,185 - 74,851)    | 28,891<br>(23,480 - 34,732)    | 16,566<br>(13,594 - 20,326)    |
| Other road injuries                             | 5,310<br>(3,226 - 7,245)             | 665<br>(382 - 1,029)           | 470<br>(271 - 699)          | 2,477<br>(1,304 - 3,772)       | 842<br>(539 - 1,168)           | 854<br>(601 - 1,451)           |
| Other transport injuries                        | 23,068<br>(17,907 - 26,780)          | 2,762<br>(1,910 - 3,545)       | 1,734<br>(1,226 - 2,239)    | 8,922<br>(7,064 - 10,865)      | 5,428<br>(4,117 - 6,602)       | 4,222<br>(3,274 - 5,197)       |
| Unintentional injuries                          | 800,930<br>(707,590 - 905,200)       | 124,681<br>(104,704 - 150,106) | 43,936<br>(38,088 - 52,229) | 173,071<br>(145,451 - 213,309) | 131,939<br>(114,961 - 154,960) | 327,302<br>(266,332 - 364,134) |
| Falls                                           | 234,046<br>(170,244 - 276,834)       | 9,703<br>(6,635 - 13,199)      | 4,055<br>(2,930 - 5,484)    | 17,669<br>(13,523 - 22,248)    | 29,962<br>(21,421 - 36,345)    | 172,657<br>(122,625 - 208,393) |
| Drowning                                        | 113,822<br>(93,524 - 176,348)        | 34,745<br>(25,090 - 52,222)    | 18,339<br>(14,354 - 25,998) | 27,248<br>(21,480 - 45,846)    | 15,815<br>(12,771 - 26,019)    | 17,676<br>(13,949 - 26,452)    |
| Fire, heat, and hot substances                  | 137,100<br>(107,592 - 175,982)       | 16,702<br>(12,453 - 22,066)    | 6,593<br>(5,014 - 9,008)    | 62,606<br>(45,306 - 89,019)    | 23,413<br>(17,529 - 30,538)    | 27,786<br>(21,127 - 33,888)    |
| Poisonings                                      | 35,510<br>(20,156 - 41,992)          | 4,585<br>(2,254 - 6,693)       | 1,634<br>(881 - 2,074)      | 13,380<br>(7,794 - 16,458)     | 7,836<br>(4,290 - 9,626)       | 8,076<br>(4,773 - 9,880)       |
| Exposure to mechanical forces                   | 51,054<br>(44,435 - 71,148)          | 16,114<br>(12,476 - 28,062)    | 4,179<br>(3,414 - 5,838)    | 13,689<br>(11,731 - 18,008)    | 8,822<br>(7,354 - 11,306)      | 8,249<br>(7,089 - 10,244)      |
| Unintentional firearm injuries                  | 11,360<br>(9,399 - 14,172)           | 1,376<br>(981 - 1,936)         | 729<br>(544 - 998)          | 5,101<br>(3,947 - 6,722)       | 2,663<br>(1,847 - 3,962)       | 1,491<br>(1,088 - 2,114)       |
| Unintentional suffocation                       | 13,437<br>(9,957 - 31,446)           | 8,623<br>(5,954 - 20,427)      | 830<br>(533 - 2,306)        | 1,621<br>(1,025 - 4,411)       | 986<br>(713 - 1,981)           | 1,378<br>(843 - 2,425)         |
| Other exposure to mechanical forces             | 26,257<br>(22,404 - 30,482)          | 6,116<br>(4,571 - 7,985)       | 2,620<br>(2,080 - 3,388)    | 6,967<br>(5,895 - 8,515)       | 5,174<br>(4,256 - 6,427)       | 5,380<br>(4,518 - 6,713)       |
| Adverse effects of medical treatment            | 69,563<br>(48,242 - 88,949)          | 8,118<br>(5,358 - 12,043)      | 1,148<br>(754 - 1,504)      | 14,420<br>(10,161 - 19,523)    | 18,249<br>(12,459 - 25,210)    | 27,629<br>(18,010 - 32,897)    |
| Animal contact                                  | 33,391<br>(18,710 - 74,493)          | 5,515<br>(2,395 - 11,026)      | 4,036<br>(2,090 - 8,709)    | 10,295<br>(6,054 - 23,862)     | 8,229<br>(4,847 - 20,694)      | 5,315<br>(2,765 - 12,138)      |
| Venomous animal contact                         | 23,929<br>(13,734 - 53,905)          | 4,101<br>(1,660 - 7,726)       | 3,072<br>(1,554 - 6,565)    | 8,565<br>(5,161 - 20,355)      | 5,687<br>(3,147 - 14,842)      | 2,503<br>(1,264 - 6,356)       |
| Non-venomous animal contact                     | 9,462<br>(4,418 - 21,797)            | 1,414<br>(619 - 3,540)         | 964<br>(407 - 2,403)        | 1,730<br>(725 - 3,854)         | 2,542<br>(1,135 - 6,011)       | 2,812<br>(1,312 - 6,310)       |
| Foreign body                                    | 75,409<br>(44,950 - 108,837)         | 24,166<br>(14,710 - 36,413)    | 1,141<br>(705 - 1,708)      | 5,840<br>(3,604 - 8,608)       | 6,758<br>(4,055 - 9,888)       | 37,505<br>(21,775 - 54,132)    |
| Pulmonary aspiration and foreign body in airway | 73,955<br>(43,689 - 107,344)         | 23,948<br>(14,313 - 36,182)    | 1,060<br>(624 - 1,588)      | 5,576<br>(3,331 - 8,340)       | 6,600<br>(3,899 - 9,740)       | 36,771<br>(21,030 - 53,466)    |
| Foreign body in other body part                 | 1,453<br>(1,048 - 2,184)             | 217<br>(146 - 452)             | 81<br>(58 - 150)            | 264<br>(201 - 448)             | 157<br>(107 - 226)             | 734<br>(511 - 1,044)           |
| Other unintentional injuries                    | 51,034<br>(31,400 - 65,933)          | 5,033<br>(3,356 - 7,414)       | 2,812<br>(1,700 - 3,876)    | 7,924<br>(6,588 - 9,883)       | 12,856<br>(7,974 - 17,687)     | 22,410<br>(10,995 - 30,380)    |
| Self-harm and interpersonal violence            | 342,535<br>(299,471 - 401,239)       | 5,380<br>(3,361 - 7,904)       | 7,406<br>(5,623 - 9,555)    | 193,257<br>(165,251 - 228,425) | 79,047<br>(68,237 - 96,063)    | 57,446<br>(50,570 - 68,682)    |
| Self-harm                                       | 267,863<br>(230,178 - 320,185)       | --                             | 4,029<br>(2,723 - 6,110)    | 147,989<br>(120,710 - 183,479) | 67,190<br>(56,622 - 83,622)    | 48,654<br>(42,634 - 61,887)    |
| Interpersonal violence                          | 74,672<br>(54,296 - 93,656)          | 5,380<br>(3,361 - 7,904)       | 3,377<br>(2,244 - 4,483)    | 45,267<br>(33,414 - 57,498)    | 11,857<br>(9,180 - 16,113)     | 8,792<br>(5,844 - 11,746)      |
| Assault by firearm                              | 19,030<br>(11,597 - 26,927)          | 991<br>(493 - 1,509)           | 811<br>(458 - 1,221)        | 12,971<br>(7,974 - 18,317)     | 2,496<br>(1,557 - 3,744)       | 1,761<br>(893 - 3,030)         |
| Assault by sharp object                         | 23,676<br>(16,408 - 33,809)          | 1,011<br>(574 - 1,767)         | 708<br>(428 - 1,111)        | 16,196<br>(11,164 - 23,437)    | 3,540<br>(2,497 - 5,211)       | 2,222<br>(1,341 - 3,305)       |
| Assault by other means                          | 31,966<br>(21,688 - 42,996)          | 3,378<br>(2,064 - 5,197)       | 1,888<br>(1,167 - 2,615)    | 16,100<br>(10,949 - 22,348)    | 5,821<br>(4,269 - 8,174)       | 4,809<br>(3,007 - 6,580)       |
| Forces of nature, war, and legal intervention   | 22,717<br>(15,633 - 42,000)          | 2,203<br>(1,632 - 5,661)       | 846<br>(588 - 1,549)        | 7,241<br>(4,504 - 14,434)      | 7,657<br>(5,155 - 13,822)      | 4,770<br>(3,461 - 7,731)       |
| Exposure to forces of nature                    | 10,704<br>(7,980 - 16,683)           | 662<br>(177 - 4,060)           | 253<br>(181 - 394)          | 3,263<br>(2,388 - 4,927)       | 3,910<br>(2,992 - 5,655)       | 2,617<br>(2,188 - 3,574)       |
| Collective violence and legal intervention      | 12,013<br>(7,182 - 24,325)           | 1,541<br>(1,438 - 1,669)       | 594<br>(395 - 1,163)        | 3,978<br>(2,004 - 9,550)       | 3,748<br>(2,036 - 8,148)       | 2,153<br>(1,191 - 4,099)       |

**Web Table 27: Global death rates (per 100k) by age, sex, and cause in 1990**

Web Table 27 - Global death rates (per 100k) with 95% UI by age, sex, and cause in 1990

| Cause                                                             | Both Sexes, All Ages     | Both Sexes, 0-4 Years          | Both Sexes, 5-14 Years   | Both Sexes, 15-49 Years  | Both Sexes, 50-69 Years        | Both Sexes, 70-80 Years        |
|-------------------------------------------------------------------|--------------------------|--------------------------------|--------------------------|--------------------------|--------------------------------|--------------------------------|
| All causes                                                        | 895.0<br>(881.9 - 909.2) | 1,894.5<br>(1,866.4 - 1,922.3) | 124.1<br>(121.9 - 126.5) | 274.7<br>(266.8 - 283.8) | 1,623.1<br>(1,579.9 - 1,667.4) | 7,581.9<br>(7,488.7 - 7,686.2) |
| Communicable, maternal, neonatal, and nutritional diseases        | 304.5<br>(295.5 - 312.9) | 1,575.7<br>(1,516.6 - 1,621.0) | 65.0<br>(61.6 - 68.7)    | 80.5<br>(77.1 - 84.6)    | 227.6<br>(217.1 - 241.7)       | 804.3<br>(764.5 - 844.6)       |
| HIV/AIDS and tuberculosis                                         | 39.1<br>(36.5 - 42.4)    | 19.6<br>(17.5 - 26.1)          | 4.0<br>(3.6 - 4.6)       | 31.5<br>(28.9 - 34.5)    | 101.5<br>(93.8 - 110.8)        | 179.2<br>(162.8 - 193.2)       |
| Tuberculosis                                                      | 33.7<br>(31.4 - 36.7)    | 14.1<br>(12.1 - 20.4)          | 3.9<br>(3.5 - 4.5)       | 24.1<br>(22.1 - 26.5)    | 95.2<br>(87.5 - 104.1)         | 175.5<br>(158.8 - 189.3)       |
| HIV/AIDS                                                          | 5.4<br>(4.3 - 7.0)       | 5.5<br>(5.0 - 6.0)             | 0.2<br>(0.1 - 0.2)       | 7.4<br>(5.7 - 10.0)      | 6.3<br>(5.0 - 8.2)             | 3.7<br>(3.0 - 4.7)             |
| HIV/AIDS resulting in mycobacterial infection                     | 0.5<br>(0.4 - 0.7)       | 0.5<br>(0.4 - 0.6)             | 0.0<br>(0.0 - 0.0)       | 0.7<br>(0.5 - 1.0)       | 0.6<br>(0.5 - 0.9)             | 0.4<br>(0.3 - 0.5)             |
| HIV/AIDS resulting in other diseases                              | 4.9<br>(3.9 - 6.3)       | 5.0<br>(4.6 - 5.5)             | 0.1<br>(0.1 - 0.2)       | 6.7<br>(5.1 - 9.1)       | 5.7<br>(4.5 - 7.4)             | 3.3<br>(2.7 - 4.2)             |
| Diarrhea, lower respiratory, and other common infectious diseases | 148.6<br>(140.8 - 157.2) | 798.1<br>(744.6 - 854.9)       | 42.9<br>(39.4 - 46.9)    | 23.2<br>(21.3 - 25.5)    | 90.6<br>(84.8 - 98.9)          | 519.0<br>(479.0 - 552.3)       |
| Diarrheal diseases                                                | 48.6<br>(45.5 - 51.8)    | 251.3<br>(228.8 - 274.7)       | 13.3<br>(11.8 - 14.9)    | 8.5<br>(7.9 - 9.1)       | 39.3<br>(35.6 - 42.7)          | 160.5<br>(146.6 - 173.0)       |
| Intestinal infectious diseases                                    | 4.9<br>(2.7 - 8.0)       | 12.8<br>(7.3 - 21.1)           | 7.0<br>(4.0 - 11.2)      | 3.1<br>(1.7 - 5.2)       | 1.7<br>(1.0 - 2.9)             | 2.3<br>(1.4 - 3.7)             |
| Typhoid fever                                                     | 3.4<br>(1.8 - 5.7)       | 8.2<br>(4.3 - 14.1)            | 5.0<br>(2.8 - 8.2)       | 2.3<br>(1.2 - 3.9)       | 1.2<br>(0.6 - 2.1)             | 1.5<br>(0.8 - 2.6)             |
| Paratyphoid fever                                                 | 1.2<br>(0.6 - 2.0)       | 3.3<br>(1.7 - 6.0)             | 1.8<br>(1.0 - 3.0)       | 0.7<br>(0.4 - 1.2)       | 0.4<br>(0.2 - 0.6)             | 0.4<br>(0.2 - 0.8)             |
| Other intestinal infectious diseases                              | 0.3<br>(0.3 - 0.3)       | 1.3<br>(1.1 - 1.5)             | 0.1<br>(0.1 - 0.2)       | 0.1<br>(0.1 - 0.1)       | 0.2<br>(0.2 - 0.2)             | 0.3<br>(0.3 - 0.4)             |
| Lower respiratory infections                                      | 64.5<br>(60.6 - 68.6)    | 339.0<br>(310.2 - 365.0)       | 10.5<br>(9.2 - 11.8)     | 6.9<br>(6.3 - 7.7)       | 38.8<br>(35.7 - 44.3)          | 335.0<br>(297.2 - 364.1)       |
| Upper respiratory infections                                      | 0.1<br>(0.1 - 0.1)       | 0.3<br>(0.2 - 0.4)             | 0.0<br>(0.0 - 0.0)       | 0.0<br>(0.0 - 0.0)       | 0.1<br>(0.1 - 0.2)             | 0.4<br>(0.3 - 0.5)             |
| Otitis media                                                      | 0.1<br>(0.1 - 0.1)       | 0.3<br>(0.3 - 0.4)             | 0.1<br>(0.1 - 0.1)       | 0.0<br>(0.0 - 0.0)       | 0.1<br>(0.1 - 0.1)             | 0.3<br>(0.2 - 0.3)             |
| Meningitis                                                        | 8.8<br>(7.7 - 10.5)      | 46.6<br>(37.7 - 60.8)          | 4.0<br>(3.4 - 4.5)       | 2.5<br>(2.3 - 2.8)       | 5.2<br>(4.7 - 5.7)             | 9.5<br>(8.1 - 10.2)            |
| Pneumococcal meningitis                                           | 2.1<br>(1.8 - 2.5)       | 9.6<br>(7.7 - 12.5)            | 1.2<br>(1.0 - 1.4)       | 0.8<br>(0.7 - 0.9)       | 1.5<br>(1.2 - 1.8)             | 2.8<br>(2.5 - 3.3)             |
| H influenzae type B meningitis                                    | 2.2<br>(1.9 - 2.8)       | 14.7<br>(11.7 - 19.1)          | 0.9<br>(0.8 - 1.1)       | 0.3<br>(0.3 - 0.4)       | 0.5<br>(0.4 - 0.6)             | 0.9<br>(0.8 - 1.0)             |
| Meningococcal meningitis                                          | 1.7<br>(1.4 - 2.0)       | 8.5<br>(6.8 - 11.4)            | 0.7<br>(0.6 - 0.8)       | 0.5<br>(0.5 - 0.6)       | 1.1<br>(1.0 - 1.3)             | 2.2<br>(1.8 - 2.4)             |
| Other meningitis                                                  | 2.8<br>(2.4 - 3.3)       | 13.9<br>(11.2 - 18.1)          | 1.1<br>(0.9 - 1.2)       | 0.9<br>(0.8 - 1.0)       | 2.1<br>(1.7 - 2.4)             | 3.6<br>(2.9 - 4.0)             |
| Encephalitis                                                      | 1.7<br>(1.2 - 2.2)       | 8.0<br>(5.0 - 10.9)            | 1.1<br>(0.7 - 1.6)       | 0.6<br>(0.4 - 0.7)       | 1.2<br>(0.9 - 1.4)             | 1.9<br>(1.3 - 2.2)             |
| Diphtheria                                                        | 0.2<br>(0.1 - 0.4)       | 1.0<br>(0.4 - 2.6)             | 0.1<br>(0.0 - 0.3)       | 0.0<br>(0.0 - 0.0)       | 0.0<br>(0.0 - 0.0)             | --                             |
| Whooping cough                                                    | 2.6<br>(1.0 - 5.7)       | 20.3<br>(7.8 - 43.9)           | 0.6<br>(0.2 - 1.4)       | 0.1<br>(0.0 - 0.1)       | 0.0<br>(0.0 - 0.1)             | --                             |
| Tetanus                                                           | 6.7<br>(5.5 - 10.9)      | 44.2<br>(35.8 - 73.9)          | 0.7<br>(0.5 - 1.4)       | 0.9<br>(0.6 - 1.5)       | 3.9<br>(2.7 - 7.0)             | 7.9<br>(5.1 - 13.1)            |
| Measles                                                           | 10.3<br>(5.7 - 16.4)     | 73.9<br>(41.5 - 117.3)         | 5.5<br>(3.0 - 9.0)       | 0.4<br>(0.0 - 0.9)       | 0.0<br>(0.0 - 0.1)             | --                             |
| Varicella and herpes zoster                                       | 0.2<br>(0.1 - 0.2)       | 0.5<br>(0.3 - 0.8)             | 0.1<br>(0.0 - 0.1)       | 0.1<br>(0.1 - 0.1)       | 0.1<br>(0.1 - 0.2)             | 1.3<br>(0.8 - 2.0)             |
| Neglected tropical diseases and malaria                           | 20.6<br>(18.7 - 22.6)    | 100.9<br>(85.7 - 116.2)        | 11.1<br>(9.9 - 12.2)     | 6.2<br>(5.3 - 7.1)       | 16.9<br>(15.1 - 19.3)          | 21.7<br>(18.5 - 27.5)          |
| Malaria                                                           | 16.7<br>(15.0 - 18.7)    | 91.4<br>(76.2 - 106.4)         | 7.8<br>(6.8 - 8.8)       | 3.9<br>(3.2 - 4.7)       | 12.3<br>(10.6 - 14.0)          | 14.3<br>(11.8 - 16.6)          |
| Chagas disease                                                    | 0.2<br>(0.1 - 0.7)       | 0.0<br>(0.0 - 0.0)             | 0.0<br>(0.0 - 0.0)       | 0.1<br>(0.0 - 0.3)       | 0.8<br>(0.3 - 2.7)             | 2.0<br>(0.8 - 6.6)             |
| Leishmaniasis                                                     | 1.0<br>(0.8 - 1.1)       | 3.2<br>(2.5 - 3.9)             | 1.2<br>(0.9 - 1.5)       | 0.6<br>(0.5 - 0.7)       | 0.4<br>(0.3 - 0.5)             | 0.4<br>(0.3 - 0.4)             |
| Visceral leishmaniasis                                            | 1.0<br>(0.8 - 1.1)       | 3.2<br>(2.5 - 3.9)             | 1.2<br>(0.9 - 1.5)       | 0.6<br>(0.5 - 0.7)       | 0.4<br>(0.3 - 0.5)             | 0.4<br>(0.3 - 0.4)             |
| African trypanosomiasis                                           | 0.4<br>(0.2 - 0.7)       | 0.3<br>(0.1 - 0.4)             | 0.2<br>(0.1 - 0.4)       | 0.5<br>(0.3 - 0.9)       | 0.5<br>(0.2 - 0.9)             | 0.4<br>(0.2 - 0.6)             |
| Schistosomiasis                                                   | 0.3<br>(0.3 - 0.4)       | 0.1<br>(0.0 - 0.1)             | 0.1<br>(0.0 - 0.1)       | 0.2<br>(0.2 - 0.3)       | 1.0<br>(0.8 - 1.2)             | 1.7<br>(1.4 - 2.2)             |
| Cysticercosis                                                     | 0.0<br>(0.0 - 0.0)       | 0.0<br>(0.0 - 0.0)             | 0.0<br>(0.0 - 0.0)       | 0.0<br>(0.0 - 0.0)       | 0.0<br>(0.0 - 0.0)             | 0.0<br>(0.0 - 0.0)             |
| Cystic echinococcosis                                             | 0.1<br>(0.1 - 0.1)       | 0.1<br>(0.1 - 0.1)             | 0.1<br>(0.1 - 0.1)       | 0.1<br>(0.1 - 0.1)       | 0.1<br>(0.1 - 0.1)             | 0.2<br>(0.2 - 0.2)             |
| Dengue                                                            | 0.2<br>(0.1 - 0.2)       | 0.6<br>(0.3 - 0.9)             | 0.2<br>(0.1 - 0.3)       | 0.1<br>(0.0 - 0.1)       | 0.1<br>(0.0 - 0.1)             | 0.1<br>(0.1 - 0.1)             |
| Yellow fever                                                      | 0.0<br>(0.0 - 0.0)       | 0.0<br>(0.0 - 0.0)             | 0.0<br>(0.0 - 0.1)       | 0.0<br>(0.0 - 0.1)       | 0.0<br>(0.0 - 0.1)             | 0.0<br>(0.0 - 0.1)             |
| Rabies                                                            | 0.7<br>(0.5 - 0.9)       | 0.9<br>(0.6 - 1.5)             | 1.1<br>(0.7 - 1.4)       | 0.4<br>(0.3 - 0.5)       | 1.1<br>(0.8 - 1.3)             | 0.9<br>(0.7 - 1.2)             |
| Intestinal nematode infections                                    | 0.2<br>(0.2 - 0.2)       | 1.1<br>(0.9 - 1.3)             | 0.1<br>(0.1 - 0.1)       | 0.0<br>(0.0 - 0.0)       | 0.0<br>(0.0 - 0.0)             | 0.1<br>(0.1 - 0.1)             |

Web Table 27 - Global death rates (per 100k) with 95% UI by age, sex, and cause in 1990

| Cause                                                            | Both Sexes, All Ages     | Both Sexes, 0-4 Years    | Both Sexes, 5-14 Years | Both Sexes, 15-49 Years  | Both Sexes, 50-69 Years        | Both Sexes, 70-80 Years        |
|------------------------------------------------------------------|--------------------------|--------------------------|------------------------|--------------------------|--------------------------------|--------------------------------|
| Ascariasis                                                       | 0.2<br>(0.2 - 0.2)       | 1.1<br>(0.9 - 1.3)       | 0.1<br>(0.1 - 0.1)     | 0.0<br>(0.0 - 0.0)       | 0.0<br>(0.0 - 0.0)             | 0.1<br>(0.1 - 0.1)             |
| Other neglected tropical diseases                                | 0.7<br>(0.5 - 0.8)       | 3.3<br>(2.2 - 4.4)       | 0.2<br>(0.2 - 0.3)     | 0.2<br>(0.2 - 0.3)       | 0.5<br>(0.4 - 0.6)             | 1.6<br>(1.1 - 2.1)             |
| Maternal disorders                                               | 7.1<br>(6.5 - 7.7)       | --                       | 0.2<br>(0.1 - 0.2)     | 14.0<br>(12.8 - 15.2)    | --                             | --                             |
| Maternal hemorrhage                                              | 1.3<br>(1.2 - 1.5)       | --                       | 0.0<br>(0.0 - 0.0)     | 2.7<br>(2.4 - 2.9)       | --                             | --                             |
| Maternal sepsis and other maternal infections                    | 0.6<br>(0.6 - 0.7)       | --                       | 0.0<br>(0.0 - 0.0)     | 1.3<br>(1.1 - 1.4)       | --                             | --                             |
| Maternal hypertensive disorders                                  | 0.7<br>(0.6 - 0.8)       | --                       | 0.0<br>(0.0 - 0.0)     | 1.4<br>(1.2 - 1.5)       | --                             | --                             |
| Maternal obstructed labor                                        | 0.6<br>(0.5 - 0.6)       | --                       | 0.0<br>(0.0 - 0.0)     | 1.1<br>(1.0 - 1.2)       | --                             | --                             |
| Maternal abortive outcome                                        | 0.9<br>(0.9 - 1.0)       | --                       | 0.0<br>(0.0 - 0.0)     | 1.9<br>(1.7 - 2.0)       | --                             | --                             |
| Indirect maternal deaths                                         | 0.8<br>(0.7 - 0.8)       | --                       | 0.0<br>(0.0 - 0.0)     | 1.5<br>(1.3 - 1.7)       | --                             | --                             |
| Late maternal deaths                                             | 0.8<br>(0.7 - 1.0)       | --                       | 0.0<br>(0.0 - 0.0)     | 1.7<br>(1.3 - 2.0)       | --                             | --                             |
| Maternal deaths aggravated by HIV/AIDS                           | 0.0<br>(0.0 - 0.0)       | --                       | --                     | 0.0<br>(0.0 - 0.0)       | --                             | --                             |
| Other maternal disorders                                         | 1.3<br>(1.1 - 1.5)       | --                       | 0.0<br>(0.0 - 0.0)     | 2.6<br>(2.2 - 3.0)       | --                             | --                             |
| Neonatal disorders                                               | 64.7<br>(60.8 - 67.6)    | 536.9<br>(504.4 - 560.8) | --                     | --                       | --                             | --                             |
| Neonatal preterm birth complications                             | 29.6<br>(24.2 - 34.0)    | 245.6<br>(200.9 - 282.0) | --                     | --                       | --                             | --                             |
| Neonatal encephalopathy due to birth asphyxia and trauma         | 16.5<br>(13.0 - 19.9)    | 136.7<br>(107.7 - 165.0) | --                     | --                       | --                             | --                             |
| Neonatal sepsis and other neonatal infections                    | 6.5<br>(3.7 - 9.1)       | 54.2<br>(30.6 - 75.7)    | --                     | --                       | --                             | --                             |
| Hemolytic disease and other neonatal jaundice                    | 1.2<br>(0.7 - 1.8)       | 10.1<br>(6.2 - 15.1)     | --                     | --                       | --                             | --                             |
| Other neonatal disorders                                         | 10.9<br>(8.6 - 14.3)     | 90.3<br>(71.5 - 118.2)   | --                     | --                       | --                             | --                             |
| Nutritional deficiencies                                         | 14.3<br>(12.1 - 17.6)    | 70.6<br>(58.9 - 87.7)    | 3.2<br>(2.7 - 3.9)     | 2.7<br>(2.2 - 3.3)       | 9.5<br>(7.7 - 12.3)            | 65.1<br>(55.1 - 81.0)          |
| Protein-energy malnutrition                                      | 9.6<br>(7.4 - 12.2)      | 55.7<br>(43.6 - 72.7)    | 2.0<br>(1.5 - 2.6)     | 1.0<br>(0.7 - 1.4)       | 4.5<br>(3.1 - 6.3)             | 35.4<br>(24.5 - 44.5)          |
| Iodine deficiency                                                | 0.0<br>(0.0 - 0.1)       | 0.1<br>(0.1 - 0.3)       | 0.0<br>(0.0 - 0.0)     | 0.0<br>(0.0 - 0.0)       | 0.1<br>(0.0 - 0.1)             | 0.2<br>(0.1 - 0.3)             |
| Iron-deficiency anemia                                           | 4.0<br>(2.7 - 5.8)       | 12.6<br>(5.9 - 22.1)     | 1.1<br>(0.8 - 1.6)     | 1.5<br>(1.1 - 1.9)       | 4.3<br>(3.1 - 6.3)             | 24.4<br>(17.5 - 36.4)          |
| Other nutritional deficiencies                                   | 0.6<br>(0.4 - 1.1)       | 2.2<br>(1.3 - 4.2)       | 0.1<br>(0.1 - 0.2)     | 0.2<br>(0.1 - 0.3)       | 0.6<br>(0.4 - 1.0)             | 5.1<br>(3.1 - 7.9)             |
| Other communicable, maternal, neonatal, and nutritional diseases | 10.1<br>(8.2 - 12.7)     | 49.5<br>(34.4 - 69.6)    | 3.6<br>(2.9 - 4.5)     | 3.0<br>(2.7 - 3.2)       | 9.0<br>(7.9 - 10.3)            | 19.3<br>(16.5 - 22.8)          |
| Sexually transmitted diseases excluding HIV                      | 4.9<br>(2.9 - 7.5)       | 34.9<br>(19.8 - 55.2)    | 1.5<br>(0.9 - 2.4)     | 0.2<br>(0.2 - 0.3)       | 0.8<br>(0.5 - 1.1)             | 2.6<br>(1.7 - 3.7)             |
| Syphilis                                                         | 4.7<br>(2.8 - 7.3)       | 34.9<br>(19.8 - 55.2)    | 1.5<br>(0.9 - 2.4)     | 0.1<br>(0.1 - 0.1)       | 0.5<br>(0.3 - 0.7)             | 2.0<br>(1.3 - 2.8)             |
| Chlamydial infection                                             | 0.0<br>(0.0 - 0.0)       | --                       | 0.0<br>(0.0 - 0.0)     | 0.0<br>(0.0 - 0.0)       | 0.1<br>(0.0 - 0.1)             | 0.1<br>(0.1 - 0.2)             |
| Gonococcal infection                                             | 0.1<br>(0.0 - 0.1)       | --                       | 0.0<br>(0.0 - 0.0)     | 0.1<br>(0.0 - 0.1)       | 0.1<br>(0.1 - 0.2)             | 0.3<br>(0.2 - 0.5)             |
| Other sexually transmitted diseases                              | 0.0<br>(0.0 - 0.1)       | --                       | 0.0<br>(0.0 - 0.0)     | 0.0<br>(0.0 - 0.1)       | 0.1<br>(0.1 - 0.1)             | 0.2<br>(0.1 - 0.2)             |
| Hepatitis                                                        | 3.1<br>(2.9 - 3.2)       | 6.9<br>(6.0 - 7.8)       | 1.3<br>(1.2 - 1.5)     | 2.1<br>(1.9 - 2.2)       | 4.8<br>(4.4 - 5.2)             | 7.5<br>(7.0 - 8.2)             |
| Acute hepatitis A                                                | 0.4<br>(0.1 - 0.8)       | 2.5<br>(0.9 - 4.2)       | 0.3<br>(0.1 - 0.5)     | 0.1<br>(0.0 - 0.2)       | 0.1<br>(0.0 - 0.2)             | 0.1<br>(0.0 - 0.2)             |
| Acute hepatitis B                                                | 1.6<br>(1.2 - 2.0)       | 3.6<br>(2.1 - 5.1)       | 0.3<br>(0.2 - 0.4)     | 0.8<br>(0.5 - 1.0)       | 3.7<br>(3.1 - 4.3)             | 6.7<br>(5.9 - 7.4)             |
| Acute hepatitis C                                                | 0.0<br>(0.0 - 0.1)       | --                       | 0.0<br>(0.0 - 0.1)     | 0.0<br>(0.0 - 0.1)       | 0.1<br>(0.0 - 0.3)             | 0.2<br>(0.0 - 0.4)             |
| Acute hepatitis E                                                | 1.0<br>(0.7 - 1.3)       | 0.8<br>(0.4 - 1.4)       | 0.8<br>(0.6 - 1.0)     | 1.2<br>(0.9 - 1.4)       | 0.9<br>(0.5 - 1.4)             | 0.6<br>(0.3 - 1.1)             |
| Other infectious diseases                                        | 2.2<br>(1.8 - 2.7)       | 7.7<br>(6.0 - 9.9)       | 0.7<br>(0.5 - 0.9)     | 0.6<br>(0.5 - 0.8)       | 3.5<br>(2.6 - 4.8)             | 9.1<br>(7.0 - 12.6)            |
| Non-communicable diseases                                        | 509.0<br>(495.8 - 521.1) | 199.0<br>(170.8 - 245.0) | 27.2<br>(24.8 - 29.9)  | 118.2<br>(113.1 - 123.4) | 1,292.3<br>(1,254.6 - 1,329.2) | 6,548.6<br>(6,456.8 - 6,649.7) |
| Neoplasms                                                        | 106.7<br>(102.6 - 109.9) | 11.6<br>(9.8 - 15.4)     | 5.8<br>(5.1 - 6.5)     | 33.2<br>(31.4 - 34.9)    | 371.2<br>(356.2 - 383.0)       | 1,025.2<br>(989.8 - 1,065.3)   |
| Esophageal cancer                                                | 5.9<br>(5.2 - 6.6)       | --                       | --                     | 1.1<br>(1.0 - 1.3)       | 24.2<br>(21.2 - 27.4)          | 57.5<br>(51.1 - 64.8)          |
| Stomach cancer                                                   | 14.4<br>(13.7 - 15.1)    | --                       | --                     | 3.7<br>(3.5 - 4.0)       | 51.3<br>(48.4 - 54.0)          | 153.0<br>(143.4 - 163.1)       |
| Liver cancer                                                     | 9.6<br>(9.0 - 10.2)      | --                       | 0.2<br>(0.2 - 0.3)     | 4.4<br>(4.0 - 5.0)       | 36.9<br>(34.0 - 39.7)          | 67.4<br>(62.7 - 72.7)          |

Web Table 27 - Global death rates (per 100k) with 95% UI by age, sex, and cause in 1990

| Cause                                | Both Sexes, All Ages     | Both Sexes, 0-4 Years | Both Sexes, 5-14 Years | Both Sexes, 15-49 Years | Both Sexes, 50-69 Years  | Both Sexes, 70-80 Years        |
|--------------------------------------|--------------------------|-----------------------|------------------------|-------------------------|--------------------------|--------------------------------|
| Liver cancer due to hepatitis B      | 3.7<br>(3.4 - 4.1)       | --                    | 0.1<br>(0.1 - 0.1)     | 2.2<br>(2.0 - 2.5)      | 14.8<br>(13.5 - 16.2)    | 18.2<br>(16.7 - 19.7)          |
| Liver cancer due to hepatitis C      | 1.6<br>(1.5 - 1.8)       | --                    | 0.0<br>(0.0 - 0.0)     | 0.5<br>(0.4 - 0.5)      | 6.5<br>(5.8 - 7.1)       | 14.9<br>(13.6 - 16.6)          |
| Liver cancer due to alcohol use      | 2.3<br>(2.1 - 2.5)       | --                    | --                     | 0.6<br>(0.5 - 0.7)      | 8.8<br>(8.0 - 9.6)       | 22.6<br>(20.8 - 24.8)          |
| Liver cancer due to other causes     | 1.9<br>(1.8 - 2.1)       | --                    | 0.1<br>(0.1 - 0.2)     | 1.1<br>(1.0 - 1.2)      | 6.8<br>(6.2 - 7.5)       | 11.7<br>(10.5 - 12.7)          |
| Larynx cancer                        | 1.4<br>(1.2 - 1.7)       | --                    | --                     | 0.4<br>(0.3 - 0.4)      | 6.3<br>(5.1 - 7.2)       | 11.4<br>(9.6 - 13.7)           |
| Tracheal, bronchus and lung cancer   | 19.8<br>(19.1 - 20.3)    | --                    | --                     | 3.7<br>(3.4 - 3.9)      | 82.0<br>(78.2 - 84.6)    | 191.2<br>(185.3 - 197.9)       |
| Breast cancer                        | 6.2<br>(5.5 - 6.9)       | --                    | --                     | 2.9<br>(2.6 - 3.1)      | 22.1<br>(19.7 - 24.8)    | 48.8<br>(41.2 - 57.1)          |
| Cervical cancer                      | 3.7<br>(3.1 - 4.0)       | --                    | --                     | 2.1<br>(1.8 - 2.4)      | 13.8<br>(11.3 - 15.2)    | 22.3<br>(17.9 - 24.1)          |
| Uterine cancer                       | 0.9<br>(0.7 - 1.0)       | --                    | --                     | 0.2<br>(0.2 - 0.3)      | 3.1<br>(2.5 - 3.9)       | 8.9<br>(7.4 - 10.3)            |
| Prostate cancer                      | 3.0<br>(2.3 - 3.6)       | --                    | --                     | 0.0<br>(0.0 - 0.1)      | 5.2<br>(4.1 - 6.6)       | 58.6<br>(45.4 - 72.5)          |
| Colon and rectum cancer              | 9.2<br>(9.0 - 9.5)       | --                    | --                     | 1.9<br>(1.9 - 2.0)      | 28.5<br>(27.6 - 29.3)    | 118.8<br>(115.1 - 123.3)       |
| Lip and oral cavity cancer           | 1.6<br>(1.4 - 1.8)       | --                    | --                     | 0.6<br>(0.5 - 0.7)      | 6.1<br>(5.4 - 7.0)       | 13.0<br>(11.4 - 15.1)          |
| Nasopharynx cancer                   | 1.0<br>(0.9 - 1.2)       | --                    | 0.1<br>(0.1 - 0.1)     | 0.7<br>(0.6 - 0.8)      | 3.7<br>(3.3 - 4.4)       | 4.3<br>(3.7 - 5.1)             |
| Other pharynx cancer                 | 0.9<br>(0.8 - 1.0)       | --                    | --                     | 0.3<br>(0.3 - 0.3)      | 4.3<br>(3.8 - 4.7)       | 5.6<br>(5.0 - 6.1)             |
| Gallbladder and biliary tract cancer | 2.2<br>(1.9 - 2.5)       | --                    | --                     | 0.3<br>(0.3 - 0.4)      | 7.1<br>(6.1 - 7.9)       | 28.3<br>(24.4 - 33.0)          |
| Pancreatic cancer                    | 3.5<br>(3.4 - 3.6)       | --                    | --                     | 0.6<br>(0.6 - 0.6)      | 12.2<br>(11.9 - 12.6)    | 42.4<br>(41.1 - 44.1)          |
| Malignant skin melanoma              | 0.7<br>(0.6 - 1.0)       | --                    | --                     | 0.4<br>(0.3 - 0.5)      | 2.3<br>(1.8 - 3.1)       | 6.5<br>(5.0 - 8.4)             |
| Non-melanoma skin cancer             | 0.5<br>(0.4 - 0.6)       | --                    | --                     | 0.1<br>(0.1 - 0.2)      | 1.0<br>(0.8 - 1.3)       | 6.9<br>(5.6 - 8.4)             |
| Ovarian cancer                       | 1.9<br>(1.8 - 2.0)       | --                    | --                     | 0.7<br>(0.6 - 0.7)      | 7.4<br>(6.9 - 8.0)       | 14.8<br>(14.0 - 16.5)          |
| Testicular cancer                    | 0.1<br>(0.1 - 0.2)       | --                    | --                     | 0.2<br>(0.1 - 0.2)      | 0.2<br>(0.1 - 0.2)       | 0.4<br>(0.3 - 0.5)             |
| Kidney cancer                        | 1.5<br>(1.4 - 1.6)       | 0.4<br>(0.3 - 0.6)    | 0.1<br>(0.1 - 0.1)     | 0.3<br>(0.3 - 0.3)      | 5.5<br>(5.2 - 5.8)       | 13.7<br>(12.8 - 15.2)          |
| Bladder cancer                       | 2.5<br>(2.2 - 2.7)       | --                    | --                     | 0.3<br>(0.2 - 0.3)      | 7.3<br>(6.4 - 7.8)       | 35.9<br>(31.8 - 39.4)          |
| Brain and nervous system cancer      | 2.6<br>(2.2 - 2.9)       | 0.9<br>(0.6 - 1.3)    | 0.9<br>(0.7 - 1.0)     | 1.6<br>(1.3 - 1.8)      | 7.9<br>(6.8 - 9.1)       | 12.5<br>(11.0 - 14.5)          |
| Thyroid cancer                       | 0.4<br>(0.4 - 0.5)       | --                    | 0.0<br>(0.0 - 0.0)     | 0.1<br>(0.1 - 0.1)      | 1.4<br>(1.2 - 1.6)       | 5.2<br>(4.4 - 5.8)             |
| Mesothelioma                         | 0.3<br>(0.3 - 0.4)       | --                    | --                     | 0.1<br>(0.1 - 0.1)      | 1.3<br>(1.1 - 1.5)       | 3.1<br>(2.7 - 4.0)             |
| Hodgkin lymphoma                     | 0.6<br>(0.5 - 0.7)       | 0.8<br>(0.5 - 1.2)    | 0.2<br>(0.1 - 0.3)     | 0.5<br>(0.3 - 0.5)      | 1.2<br>(0.9 - 1.4)       | 2.7<br>(1.9 - 3.0)             |
| Non-Hodgkin lymphoma                 | 2.5<br>(2.2 - 3.0)       | 0.9<br>(0.7 - 1.5)    | 0.6<br>(0.4 - 0.7)     | 1.1<br>(0.9 - 1.3)      | 6.9<br>(6.0 - 8.2)       | 21.8<br>(19.1 - 27.7)          |
| Multiple myeloma                     | 0.9<br>(0.7 - 1.1)       | --                    | --                     | 0.1<br>(0.1 - 0.2)      | 2.8<br>(2.3 - 3.5)       | 10.8<br>(8.6 - 14.4)           |
| Leukemia                             | 4.2<br>(4.1 - 4.4)       | 3.3<br>(2.8 - 4.1)    | 2.3<br>(2.1 - 2.6)     | 2.7<br>(2.6 - 2.9)      | 7.9<br>(7.6 - 8.2)       | 24.6<br>(23.8 - 25.7)          |
| Other neoplasms                      | 4.7<br>(4.4 - 5.8)       | 5.3<br>(4.0 - 8.9)    | 1.4<br>(1.2 - 2.0)     | 2.0<br>(1.8 - 2.4)      | 11.3<br>(10.4 - 12.6)    | 34.7<br>(32.3 - 41.0)          |
| Cardiovascular diseases              | 231.5<br>(222.0 - 240.7) | 21.1<br>(18.2 - 24.5) | 5.2<br>(4.6 - 6.1)     | 40.4<br>(37.6 - 43.0)   | 556.2<br>(529.7 - 581.3) | 3,512.1<br>(3,358.6 - 3,624.2) |
| Rheumatic heart disease              | 7.0<br>(5.7 - 8.8)       | 1.2<br>(0.9 - 1.9)    | 1.2<br>(0.9 - 1.5)     | 3.8<br>(3.0 - 4.7)      | 19.7<br>(15.6 - 24.8)    | 56.3<br>(45.8 - 70.4)          |
| Ischemic heart disease               | 108.2<br>(99.1 - 115.9)  | 3.0<br>(2.5 - 3.9)    | 0.9<br>(0.8 - 1.2)     | 17.5<br>(15.7 - 19.4)   | 266.3<br>(241.3 - 284.0) | 1,666.1<br>(1,508.7 - 1,799.0) |
| Cerebrovascular disease              | 86.4<br>(78.5 - 93.7)    | 5.9<br>(4.9 - 7.3)    | 1.8<br>(1.6 - 2.2)     | 12.5<br>(11.2 - 14.1)   | 200.8<br>(182.3 - 219.5) | 1,374.3<br>(1,240.0 - 1,485.0) |
| Ischemic stroke                      | 41.2<br>(36.3 - 45.8)    | 0.7<br>(0.3 - 1.2)    | 0.2<br>(0.1 - 0.4)     | 1.8<br>(1.4 - 2.3)      | 69.0<br>(56.7 - 79.3)    | 805.8<br>(711.0 - 889.5)       |
| Hemorrhagic stroke                   | 45.3<br>(39.8 - 50.3)    | 5.2<br>(4.4 - 6.5)    | 1.6<br>(1.4 - 1.9)     | 10.7<br>(9.5 - 12.1)    | 131.8<br>(115.6 - 147.5) | 568.4<br>(485.0 - 640.5)       |
| Hypertensive heart disease           | 11.7<br>(9.9 - 14.8)     | 0.5<br>(0.3 - 0.7)    | 0.1<br>(0.1 - 0.1)     | 1.7<br>(1.4 - 2.2)      | 27.2<br>(22.5 - 34.9)    | 188.1<br>(159.2 - 241.3)       |
| Cardiomyopathy and myocarditis       | 5.5<br>(4.6 - 6.5)       | 4.2<br>(2.4 - 5.7)    | 0.5<br>(0.3 - 0.7)     | 1.9<br>(1.6 - 2.3)      | 12.1<br>(9.8 - 15.0)     | 62.4<br>(53.2 - 72.8)          |
| Atrial fibrillation and flutter      | 0.5<br>(0.5 - 0.6)       | --                    | --                     | 0.0<br>(0.0 - 0.0)      | 0.5<br>(0.4 - 0.5)       | 12.3<br>(11.0 - 13.8)          |
| Aortic aneurysm                      | 1.9<br>(1.6 - 2.2)       | --                    | --                     | 0.3<br>(0.2 - 0.3)      | 4.8<br>(4.0 - 5.6)       | 28.9<br>(23.7 - 35.0)          |

Web Table 27 - Global death rates (per 100k) with 95% UI by age, sex, and cause in 1990

| Cause                                               | Both Sexes, All Ages  | Both Sexes, 0-4 Years | Both Sexes, 5-14 Years | Both Sexes, 15-49 Years | Both Sexes, 50-69 Years  | Both Sexes, 70-80 Years    |
|-----------------------------------------------------|-----------------------|-----------------------|------------------------|-------------------------|--------------------------|----------------------------|
| Peripheral vascular disease                         | 0.3<br>(0.3 - 0.3)    | --                    | --                     | 0.0<br>(0.0 - 0.0)      | 0.5<br>(0.4 - 0.5)       | 6.1<br>(5.5 - 6.7)         |
| Endocarditis                                        | 0.8<br>(0.7 - 1.1)    | 0.7<br>(0.4 - 1.1)    | 0.1<br>(0.1 - 0.1)     | 0.4<br>(0.3 - 0.5)      | 1.8<br>(1.4 - 2.5)       | 8.6<br>(6.5 - 11.6)        |
| Other cardiovascular and circulatory diseases       | 9.0<br>(7.6 - 10.3)   | 5.5<br>(4.5 - 6.8)    | 0.6<br>(0.5 - 0.7)     | 2.2<br>(1.8 - 2.6)      | 22.5<br>(18.4 - 25.8)    | 109.2<br>(93.9 - 125.9)    |
| Chronic respiratory diseases                        | 65.8<br>(61.9 - 71.6) | 19.6<br>(16.9 - 21.8) | 2.3<br>(2.1 - 2.6)     | 8.7<br>(7.8 - 9.5)      | 160.1<br>(146.3 - 174.0) | 981.4<br>(918.8 - 1,064.2) |
| Chronic obstructive pulmonary disease               | 45.7<br>(40.6 - 49.6) | 9.5<br>(7.9 - 10.8)   | 0.7<br>(0.5 - 0.8)     | 3.7<br>(3.0 - 4.3)      | 101.0<br>(87.2 - 112.2)  | 761.3<br>(690.3 - 827.2)   |
| Pneumoconiosis                                      | 4.7<br>(3.5 - 6.0)    | 0.2<br>(0.1 - 0.3)    | 0.1<br>(0.0 - 0.1)     | 1.0<br>(0.7 - 1.3)      | 17.7<br>(12.2 - 22.9)    | 49.6<br>(36.5 - 64.0)      |
| Silicosis                                           | 1.0<br>(0.7 - 1.5)    | 0.0<br>(0.0 - 0.1)    | 0.0<br>(0.0 - 0.0)     | 0.2<br>(0.1 - 0.3)      | 3.8<br>(2.4 - 5.4)       | 11.2<br>(7.4 - 16.4)       |
| Asbestosis                                          | 0.4<br>(0.3 - 0.6)    | 0.0<br>(0.0 - 0.0)    | 0.0<br>(0.0 - 0.0)     | 0.1<br>(0.1 - 0.1)      | 1.6<br>(1.0 - 2.4)       | 3.4<br>(2.2 - 5.2)         |
| Coal workers pneumoconiosis                         | 0.5<br>(0.3 - 0.8)    | 0.0<br>(0.0 - 0.0)    | 0.0<br>(0.0 - 0.0)     | 0.1<br>(0.1 - 0.2)      | 2.1<br>(1.3 - 3.2)       | 5.3<br>(3.3 - 8.4)         |
| Other pneumoconiosis                                | 2.8<br>(1.9 - 3.6)    | 0.1<br>(0.0 - 0.1)    | 0.0<br>(0.0 - 0.0)     | 0.6<br>(0.3 - 0.8)      | 10.1<br>(6.7 - 13.5)     | 29.7<br>(20.1 - 39.8)      |
| Asthma                                              | 9.5<br>(7.5 - 13.8)   | 4.3<br>(3.6 - 5.2)    | 1.2<br>(1.1 - 1.6)     | 3.0<br>(2.5 - 4.1)      | 27.6<br>(21.0 - 41.3)    | 95.3<br>(72.6 - 149.3)     |
| Interstitial lung disease and pulmonary sarcoidosis | 4.1<br>(2.4 - 5.6)    | 0.2<br>(0.1 - 0.4)    | 0.1<br>(0.0 - 0.1)     | 0.5<br>(0.2 - 0.8)      | 11.7<br>(5.9 - 17.6)     | 59.5<br>(36.5 - 78.5)      |
| Other chronic respiratory diseases                  | 1.8<br>(1.5 - 2.1)    | 5.5<br>(4.5 - 6.5)    | 0.3<br>(0.2 - 0.3)     | 0.4<br>(0.3 - 0.5)      | 2.1<br>(1.6 - 2.8)       | 15.6<br>(12.6 - 19.4)      |
| Cirrhosis                                           | 15.8<br>(15.2 - 16.3) | 2.9<br>(2.4 - 3.4)    | 1.1<br>(1.0 - 1.2)     | 8.6<br>(8.2 - 9.0)      | 55.7<br>(53.5 - 57.9)    | 96.4<br>(91.8 - 99.8)      |
| Cirrhosis due to hepatitis B                        | 4.4<br>(4.2 - 4.7)    | 0.2<br>(0.2 - 0.2)    | 0.2<br>(0.2 - 0.3)     | 2.6<br>(2.4 - 2.9)      | 15.8<br>(14.8 - 16.9)    | 25.6<br>(23.7 - 27.6)      |
| Cirrhosis due to hepatitis C                        | 4.0<br>(3.8 - 4.3)    | 0.2<br>(0.1 - 0.3)    | 0.2<br>(0.1 - 0.2)     | 1.9<br>(1.8 - 2.1)      | 14.6<br>(13.6 - 15.7)    | 28.7<br>(26.5 - 30.8)      |
| Cirrhosis due to alcohol use                        | 5.5<br>(5.2 - 5.8)    | --                    | --                     | 2.7<br>(2.5 - 3.0)      | 21.0<br>(19.8 - 22.1)    | 36.9<br>(35.1 - 38.8)      |
| Cirrhosis due to other causes                       | 1.9<br>(1.7 - 2.0)    | 2.5<br>(2.1 - 3.0)    | 0.7<br>(0.6 - 0.8)     | 1.3<br>(1.2 - 1.4)      | 4.4<br>(3.9 - 4.9)       | 5.2<br>(4.7 - 5.8)         |
| Digestive diseases                                  | 19.9<br>(18.1 - 21.3) | 7.9<br>(6.6 - 10.0)   | 3.6<br>(3.2 - 4.1)     | 8.7<br>(7.6 - 9.5)      | 47.5<br>(42.3 - 51.2)    | 197.6<br>(179.8 - 214.1)   |
| Peptic ulcer disease                                | 6.2<br>(5.4 - 7.3)    | 0.8<br>(0.5 - 1.3)    | 0.5<br>(0.4 - 0.7)     | 2.5<br>(2.1 - 3.1)      | 17.7<br>(15.5 - 20.9)    | 62.6<br>(54.2 - 73.3)      |
| Gastritis and duodenitis                            | 1.0<br>(0.6 - 1.4)    | 0.5<br>(0.2 - 0.7)    | 0.3<br>(0.2 - 0.4)     | 0.5<br>(0.3 - 0.7)      | 2.5<br>(1.4 - 3.6)       | 9.2<br>(5.0 - 13.1)        |
| Appendicitis                                        | 1.6<br>(1.3 - 2.0)    | 1.1<br>(0.7 - 1.8)    | 0.7<br>(0.5 - 0.9)     | 1.3<br>(1.0 - 1.6)      | 3.0<br>(2.3 - 3.8)       | 8.7<br>(6.2 - 11.0)        |
| Paralytic ileus and intestinal obstruction          | 3.4<br>(2.2 - 4.3)    | 1.4<br>(0.9 - 1.9)    | 1.0<br>(0.6 - 1.2)     | 1.6<br>(0.9 - 2.0)      | 7.5<br>(4.6 - 9.6)       | 31.6<br>(21.1 - 43.6)      |
| Inguinal, femoral, and abdominal hernia             | 1.0<br>(0.6 - 1.2)    | 0.4<br>(0.2 - 0.6)    | 0.3<br>(0.2 - 0.4)     | 0.3<br>(0.2 - 0.4)      | 1.9<br>(1.2 - 2.4)       | 11.5<br>(7.8 - 14.6)       |
| Inflammatory bowel disease                          | 1.0<br>(0.8 - 1.3)    | 1.5<br>(0.9 - 2.4)    | 0.3<br>(0.2 - 0.4)     | 0.4<br>(0.3 - 0.6)      | 1.8<br>(1.2 - 2.2)       | 9.0<br>(5.9 - 11.1)        |
| Vascular intestinal disorders                       | 1.0<br>(0.7 - 1.5)    | 0.1<br>(0.0 - 0.2)    | 0.1<br>(0.0 - 0.1)     | 0.1<br>(0.1 - 0.2)      | 2.0<br>(1.2 - 3.2)       | 16.7<br>(10.8 - 24.4)      |
| Gallbladder and biliary diseases                    | 1.5<br>(1.3 - 1.8)    | 0.3<br>(0.2 - 0.4)    | 0.1<br>(0.1 - 0.2)     | 0.4<br>(0.3 - 0.5)      | 3.5<br>(2.9 - 4.1)       | 20.8<br>(17.7 - 24.7)      |
| Pancreatitis                                        | 1.6<br>(1.1 - 2.1)    | 0.1<br>(0.1 - 0.2)    | 0.1<br>(0.1 - 0.2)     | 1.1<br>(0.8 - 1.5)      | 4.2<br>(3.0 - 5.7)       | 10.8<br>(7.6 - 14.9)       |
| Other digestive diseases                            | 1.6<br>(1.4 - 1.9)    | 1.8<br>(1.4 - 2.5)    | 0.3<br>(0.2 - 0.3)     | 0.5<br>(0.4 - 0.6)      | 3.3<br>(2.7 - 3.9)       | 16.7<br>(14.2 - 19.3)      |
| Neurological disorders                              | 19.2<br>(18.2 - 20.2) | 4.3<br>(3.1 - 5.8)    | 1.4<br>(1.1 - 1.7)     | 2.7<br>(2.3 - 3.0)      | 13.5<br>(12.8 - 14.6)    | 394.2<br>(371.6 - 417.8)   |
| Alzheimer disease and other dementias               | 15.0<br>(14.1 - 15.9) | --                    | --                     | 0.0<br>(0.0 - 0.0)      | 7.3<br>(6.8 - 7.7)       | 362.8<br>(339.6 - 386.0)   |
| Parkinson disease                                   | 0.8<br>(0.7 - 1.0)    | --                    | --                     | 0.0<br>(0.0 - 0.0)      | 0.9<br>(0.8 - 1.2)       | 17.9<br>(15.8 - 22.8)      |
| Epilepsy                                            | 2.1<br>(1.8 - 2.4)    | 3.4<br>(2.3 - 4.9)    | 1.2<br>(0.9 - 1.5)     | 2.0<br>(1.7 - 2.3)      | 1.9<br>(1.6 - 2.3)       | 4.5<br>(3.9 - 5.7)         |
| Multiple sclerosis                                  | 0.2<br>(0.2 - 0.4)    | --                    | --                     | 0.2<br>(0.1 - 0.3)      | 0.8<br>(0.6 - 1.3)       | 1.2<br>(0.9 - 1.7)         |
| Other neurological disorders                        | 1.0<br>(0.9 - 1.1)    | 0.9<br>(0.7 - 1.5)    | 0.2<br>(0.2 - 0.3)     | 0.5<br>(0.4 - 0.5)      | 2.6<br>(2.3 - 2.9)       | 8.0<br>(7.0 - 8.7)         |
| Mental and substance use disorders                  | 3.6<br>(3.0 - 4.6)    | 0.3<br>(0.2 - 0.5)    | 0.0<br>(0.0 - 0.0)     | 4.1<br>(3.4 - 5.0)      | 9.0<br>(7.5 - 12.7)      | 7.8<br>(6.5 - 10.0)        |
| Schizophrenia                                       | 0.4<br>(0.3 - 0.5)    | --                    | --                     | 0.4<br>(0.3 - 0.5)      | 1.1<br>(0.7 - 1.3)       | 2.1<br>(1.4 - 2.5)         |
| Alcohol use disorders                               | 2.1<br>(1.6 - 3.1)    | --                    | --                     | 2.2<br>(1.5 - 3.1)      | 6.8<br>(5.4 - 10.3)      | 4.0<br>(3.0 - 5.8)         |
| Drug use disorders                                  | 1.0<br>(0.9 - 1.2)    | 0.3<br>(0.2 - 0.5)    | --                     | 1.5<br>(1.3 - 1.8)      | 1.2<br>(1.1 - 1.5)       | 1.7<br>(1.5 - 2.1)         |
| Opioid use disorders                                | 0.3<br>(0.3 - 0.4)    | 0.1<br>(0.1 - 0.2)    | --                     | 0.5<br>(0.4 - 0.6)      | 0.4<br>(0.4 - 0.6)       | 0.6<br>(0.5 - 0.8)         |

Web Table 27 - Global death rates (per 100k) with 95% UI by age, sex, and cause in 1990

| Cause                                               | Both Sexes, All Ages  | Both Sexes, 0-4 Years   | Both Sexes, 5-14 Years | Both Sexes, 15-49 Years | Both Sexes, 50-69 Years | Both Sexes, 70-80 Years  |
|-----------------------------------------------------|-----------------------|-------------------------|------------------------|-------------------------|-------------------------|--------------------------|
| Cocaine use disorders                               | 0.0<br>(0.0 - 0.1)    | 0.0<br>(0.0 - 0.0)      | --                     | 0.1<br>(0.1 - 0.1)      | 0.0<br>(0.0 - 0.1)      | 0.1<br>(0.1 - 0.1)       |
| Amphetamine use disorders                           | 0.0<br>(0.0 - 0.0)    | 0.0<br>(0.0 - 0.0)      | --                     | 0.1<br>(0.0 - 0.1)      | 0.1<br>(0.0 - 0.1)      | 0.1<br>(0.1 - 0.1)       |
| Other drug use disorders                            | 0.6<br>(0.5 - 0.7)    | 0.2<br>(0.1 - 0.3)      | --                     | 0.9<br>(0.7 - 1.1)      | 0.7<br>(0.6 - 0.8)      | 0.9<br>(0.8 - 1.1)       |
| Eating disorders                                    | 0.0<br>(0.0 - 0.0)    | --                      | 0.0<br>(0.0 - 0.0)     | 0.0<br>(0.0 - 0.0)      | --                      | --                       |
| Anorexia nervosa                                    | 0.0<br>(0.0 - 0.0)    | --                      | 0.0<br>(0.0 - 0.0)     | 0.0<br>(0.0 - 0.0)      | --                      | --                       |
| Diabetes, urogenital, blood, and endocrine diseases | 29.6<br>(27.5 - 32.2) | 25.2<br>(15.9 - 41.1)   | 4.3<br>(2.9 - 5.8)     | 9.0<br>(8.3 - 9.8)      | 72.2<br>(67.7 - 75.6)   | 305.8<br>(287.4 - 321.7) |
| Diabetes mellitus                                   | 12.9<br>(12.3 - 13.4) | 1.3<br>(1.0 - 1.6)      | 0.3<br>(0.2 - 0.4)     | 2.7<br>(2.6 - 2.9)      | 40.9<br>(38.6 - 43.1)   | 156.3<br>(149.2 - 163.3) |
| Acute glomerulonephritis                            | 0.4<br>(0.3 - 0.6)    | 0.7<br>(0.2 - 1.3)      | 0.2<br>(0.1 - 0.3)     | 0.3<br>(0.2 - 0.4)      | 0.8<br>(0.5 - 1.2)      | 2.1<br>(1.2 - 3.3)       |
| Chronic kidney disease                              | 7.7<br>(6.9 - 8.2)    | 2.0<br>(1.6 - 2.3)      | 0.6<br>(0.5 - 0.7)     | 2.9<br>(2.4 - 3.1)      | 18.6<br>(16.8 - 20.0)   | 90.8<br>(81.5 - 98.2)    |
| Chronic kidney disease due to diabetes mellitus     | 0.9<br>(0.7 - 1.0)    | 0.0<br>(0.0 - 0.1)      | 0.0<br>(0.0 - 0.0)     | 0.2<br>(0.1 - 0.2)      | 2.3<br>(1.7 - 2.7)      | 12.4<br>(9.5 - 14.7)     |
| Chronic kidney disease due to hypertension          | 2.3<br>(1.7 - 2.7)    | 0.2<br>(0.1 - 0.3)      | 0.0<br>(0.0 - 0.1)     | 0.6<br>(0.4 - 0.7)      | 5.5<br>(4.0 - 6.6)      | 31.5<br>(24.3 - 38.2)    |
| Chronic kidney disease due to glomerulonephritis    | 1.9<br>(1.6 - 2.2)    | 1.1<br>(0.9 - 1.4)      | 0.3<br>(0.3 - 0.4)     | 1.1<br>(1.0 - 1.3)      | 4.4<br>(3.7 - 5.3)      | 13.7<br>(11.2 - 16.5)    |
| Chronic kidney disease due to other causes          | 2.7<br>(2.2 - 3.2)    | 0.6<br>(0.4 - 0.8)      | 0.2<br>(0.1 - 0.2)     | 0.9<br>(0.7 - 1.1)      | 6.4<br>(5.3 - 7.6)      | 33.3<br>(27.0 - 39.8)    |
| Urinary diseases and male infertility               | 2.9<br>(2.4 - 3.0)    | 1.7<br>(1.3 - 2.0)      | 0.3<br>(0.2 - 0.3)     | 0.9<br>(0.7 - 1.0)      | 6.2<br>(5.0 - 6.8)      | 34.5<br>(30.2 - 38.5)    |
| Interstitial nephritis and urinary tract infections | 2.1<br>(1.8 - 2.2)    | 1.3<br>(0.9 - 1.5)      | 0.2<br>(0.1 - 0.2)     | 0.6<br>(0.5 - 0.7)      | 4.3<br>(3.4 - 4.8)      | 25.9<br>(22.7 - 29.6)    |
| Urolithiasis                                        | 0.3<br>(0.2 - 0.4)    | --                      | 0.0<br>(0.0 - 0.1)     | 0.1<br>(0.1 - 0.1)      | 0.8<br>(0.6 - 1.0)      | 3.1<br>(2.1 - 3.8)       |
| Other urinary diseases                              | 0.5<br>(0.4 - 0.7)    | 0.4<br>(0.3 - 0.6)      | 0.1<br>(0.0 - 0.1)     | 0.2<br>(0.1 - 0.2)      | 1.1<br>(0.8 - 1.5)      | 5.5<br>(4.3 - 7.3)       |
| Gynecological diseases                              | 0.1<br>(0.1 - 0.1)    | --                      | --                     | 0.1<br>(0.1 - 0.1)      | 0.1<br>(0.1 - 0.2)      | 0.7<br>(0.5 - 1.0)       |
| Uterine fibroids                                    | 0.0<br>(0.0 - 0.0)    | --                      | --                     | 0.0<br>(0.0 - 0.0)      | 0.0<br>(0.0 - 0.1)      | 0.2<br>(0.1 - 0.3)       |
| Polycystic ovarian syndrome                         | 0.0<br>(0.0 - 0.0)    | --                      | --                     | 0.0<br>(0.0 - 0.0)      | 0.0<br>(0.0 - 0.0)      | --                       |
| Endometriosis                                       | 0.0<br>(0.0 - 0.0)    | --                      | --                     | 0.0<br>(0.0 - 0.0)      | 0.0<br>(0.0 - 0.0)      | --                       |
| Genital prolapse                                    | 0.0<br>(0.0 - 0.0)    | --                      | --                     | 0.0<br>(0.0 - 0.0)      | 0.0<br>(0.0 - 0.0)      | 0.2<br>(0.1 - 0.3)       |
| Other gynecological diseases                        | 0.0<br>(0.0 - 0.1)    | --                      | --                     | 0.0<br>(0.0 - 0.1)      | 0.1<br>(0.1 - 0.1)      | 0.3<br>(0.2 - 0.5)       |
| Hemoglobinopathies and hemolytic anemias            | 3.4<br>(1.7 - 5.7)    | 15.4<br>(6.3 - 30.3)    | 2.5<br>(1.1 - 4.0)     | 1.2<br>(0.7 - 2.2)      | 1.8<br>(1.1 - 2.9)      | 5.5<br>(3.4 - 7.3)       |
| Thalassemias                                        | 0.7<br>(0.4 - 0.9)    | 3.0<br>(1.4 - 4.5)      | 0.6<br>(0.3 - 0.8)     | 0.4<br>(0.2 - 0.5)      | 0.1<br>(0.0 - 0.1)      | 0.0<br>(0.0 - 0.0)       |
| Sickle cell disorders                               | 2.1<br>(0.7 - 4.2)    | 11.2<br>(3.3 - 24.9)    | 1.8<br>(0.6 - 3.4)     | 0.7<br>(0.3 - 1.6)      | 0.6<br>(0.3 - 1.5)      | 0.1<br>(0.1 - 0.2)       |
| G6PD deficiency                                     | 0.1<br>(0.0 - 0.1)    | 0.2<br>(0.1 - 0.4)      | 0.0<br>(0.0 - 0.1)     | 0.0<br>(0.0 - 0.0)      | 0.1<br>(0.0 - 0.1)      | 0.0<br>(0.0 - 0.1)       |
| Other hemoglobinopathies and hemolytic anemias      | 0.6<br>(0.4 - 0.7)    | 1.0<br>(0.5 - 1.5)      | 0.1<br>(0.1 - 0.2)     | 0.2<br>(0.1 - 0.2)      | 1.1<br>(0.7 - 1.4)      | 5.3<br>(3.3 - 7.0)       |
| Endocrine, metabolic, blood, and immune disorders   | 2.1<br>(1.7 - 2.5)    | 4.2<br>(2.9 - 5.5)      | 0.5<br>(0.3 - 0.6)     | 0.9<br>(0.7 - 1.0)      | 3.7<br>(3.1 - 4.5)      | 15.8<br>(12.3 - 18.5)    |
| Musculoskeletal disorders                           | 1.2<br>(1.0 - 1.4)    | --                      | 0.3<br>(0.2 - 0.4)     | 0.7<br>(0.6 - 0.8)      | 3.2<br>(2.6 - 3.6)      | 10.4<br>(9.4 - 12.3)     |
| Rheumatoid arthritis                                | 0.5<br>(0.4 - 0.6)    | --                      | 0.1<br>(0.1 - 0.1)     | 0.2<br>(0.1 - 0.2)      | 1.5<br>(1.2 - 1.8)      | 6.0<br>(5.3 - 6.9)       |
| Other musculoskeletal disorders                     | 0.7<br>(0.6 - 0.8)    | --                      | 0.3<br>(0.2 - 0.3)     | 0.6<br>(0.4 - 0.7)      | 1.7<br>(1.3 - 2.0)      | 4.4<br>(3.9 - 5.5)       |
| Other non-communicable diseases                     | 15.7<br>(13.0 - 20.0) | 106.2<br>(85.7 - 140.7) | 3.2<br>(2.7 - 3.9)     | 2.1<br>(1.9 - 2.3)      | 3.6<br>(3.1 - 3.9)      | 17.7<br>(15.8 - 19.2)    |
| Congenital anomalies                                | 14.2<br>(11.5 - 18.3) | 101.2<br>(81.1 - 134.0) | 3.0<br>(2.5 - 3.7)     | 1.8<br>(1.6 - 2.0)      | 1.9<br>(1.4 - 2.1)      | 4.6<br>(3.3 - 5.2)       |
| Neural tube defects                                 | 2.9<br>(2.1 - 4.8)    | 22.0<br>(15.7 - 38.0)   | 0.4<br>(0.2 - 0.6)     | 0.2<br>(0.1 - 0.3)      | 0.1<br>(0.1 - 0.2)      | 0.3<br>(0.1 - 0.4)       |
| Congenital heart anomalies                          | 6.9<br>(5.5 - 9.1)    | 48.7<br>(37.9 - 66.5)   | 1.7<br>(1.4 - 2.1)     | 0.9<br>(0.8 - 1.0)      | 1.0<br>(0.7 - 1.1)      | 2.6<br>(1.7 - 3.0)       |
| Cleft lip and cleft palate                          | 0.1<br>(0.1 - 0.2)    | 1.2<br>(0.7 - 1.8)      | --                     | --                      | --                      | --                       |
| Down syndrome                                       | 0.8<br>(0.3 - 1.4)    | 4.9<br>(1.6 - 9.0)      | 0.3<br>(0.1 - 0.5)     | 0.2<br>(0.1 - 0.3)      | 0.2<br>(0.2 - 0.3)      | 0.1<br>(0.1 - 0.1)       |
| Chromosomal unbalanced rearrangements               | 0.4<br>(0.2 - 0.8)    | 2.6<br>(1.1 - 5.8)      | 0.1<br>(0.0 - 0.1)     | 0.1<br>(0.0 - 0.1)      | 0.0<br>(0.0 - 0.1)      | 0.1<br>(0.0 - 0.1)       |
| Other congenital anomalies                          | 3.1<br>(2.3 - 5.7)    | 21.8<br>(15.5 - 42.3)   | 0.6<br>(0.4 - 1.1)     | 0.4<br>(0.3 - 0.5)      | 0.5<br>(0.4 - 0.7)      | 1.7<br>(1.3 - 1.9)       |



Web Table 27 - Global death rates (per 100k) with 95% UI by age, sex, and cause in 1990

| Cause                                           | Both Sexes, All Ages  | Both Sexes, 0-4 Years   | Both Sexes, 5-14 Years | Both Sexes, 15-49 Years | Both Sexes, 50-69 Years | Both Sexes, 70-80 Years  |
|-------------------------------------------------|-----------------------|-------------------------|------------------------|-------------------------|-------------------------|--------------------------|
| Skin and subcutaneous diseases                  | 1.1<br>(1.0 - 1.2)    | 1.6<br>(1.1 - 2.0)      | 0.1<br>(0.1 - 0.2)     | 0.3<br>(0.3 - 0.4)      | 1.7<br>(1.6 - 1.9)      | 13.1<br>(12.1 - 14.4)    |
| Cellulitis                                      | 0.5<br>(0.4 - 0.6)    | 0.9<br>(0.6 - 1.2)      | 0.1<br>(0.1 - 0.1)     | 0.2<br>(0.1 - 0.2)      | 0.9<br>(0.7 - 1.2)      | 4.3<br>(2.8 - 5.6)       |
| Pyoderma                                        | 0.3<br>(0.2 - 0.4)    | 0.6<br>(0.4 - 1.0)      | 0.0<br>(0.0 - 0.1)     | 0.1<br>(0.1 - 0.2)      | 0.5<br>(0.3 - 0.7)      | 3.1<br>(2.4 - 3.7)       |
| Decubitus ulcer                                 | 0.3<br>(0.2 - 0.3)    | 0.0<br>(0.0 - 0.0)      | 0.0<br>(0.0 - 0.0)     | 0.0<br>(0.0 - 0.0)      | 0.2<br>(0.2 - 0.3)      | 5.4<br>(4.7 - 6.6)       |
| Other skin and subcutaneous diseases            | 0.0<br>(0.0 - 0.0)    | 0.0<br>(0.0 - 0.1)      | 0.0<br>(0.0 - 0.0)     | 0.0<br>(0.0 - 0.0)      | 0.0<br>(0.0 - 0.1)      | 0.4<br>(0.3 - 0.6)       |
| Sudden infant death syndrome                    | 0.4<br>(0.2 - 0.8)    | 3.4<br>(2.0 - 6.3)      | --                     | --                      | --                      | --                       |
| Injuries                                        | 81.6<br>(77.2 - 85.3) | 119.8<br>(98.2 - 135.1) | 32.0<br>(29.6 - 34.1)  | 76.0<br>(72.6 - 79.9)   | 103.2<br>(98.2 - 110.5) | 229.0<br>(217.1 - 248.8) |
| Transport injuries                              | 21.7<br>(20.6 - 23.6) | 19.2<br>(16.4 - 23.0)   | 9.3<br>(8.6 - 10.3)    | 24.2<br>(23.0 - 26.1)   | 28.2<br>(26.5 - 30.7)   | 42.3<br>(39.4 - 46.1)    |
| Road injuries                                   | 20.0<br>(18.9 - 22.0) | 17.1<br>(14.5 - 20.8)   | 8.6<br>(7.9 - 9.6)     | 22.5<br>(21.3 - 24.4)   | 25.7<br>(24.4 - 28.1)   | 38.6<br>(36.4 - 42.6)    |
| Pedestrian road injuries                        | 7.3<br>(6.4 - 8.9)    | 8.8<br>(7.0 - 11.7)     | 4.4<br>(3.8 - 5.2)     | 6.3<br>(5.3 - 7.9)      | 10.9<br>(9.5 - 12.9)    | 20.1<br>(18.1 - 23.1)    |
| Cyclist road injuries                           | 1.3<br>(1.1 - 1.6)    | 0.9<br>(0.7 - 1.3)      | 0.8<br>(0.7 - 1.0)     | 1.2<br>(1.0 - 1.5)      | 2.2<br>(1.8 - 2.6)      | 3.3<br>(2.8 - 3.9)       |
| Motorcyclist road injuries                      | 3.8<br>(3.2 - 4.5)    | 1.7<br>(1.2 - 2.3)      | 0.8<br>(0.6 - 1.0)     | 5.8<br>(4.9 - 6.8)      | 3.2<br>(2.6 - 3.9)      | 2.9<br>(2.2 - 3.5)       |
| Motor vehicle road injuries                     | 6.9<br>(6.1 - 7.7)    | 4.9<br>(4.0 - 6.2)      | 2.3<br>(1.9 - 2.6)     | 8.5<br>(7.6 - 9.5)      | 8.5<br>(7.3 - 9.5)      | 11.1<br>(9.5 - 12.7)     |
| Other road injuries                             | 0.6<br>(0.4 - 0.8)    | 0.7<br>(0.4 - 1.1)      | 0.4<br>(0.2 - 0.5)     | 0.6<br>(0.4 - 0.9)      | 0.9<br>(0.6 - 1.3)      | 1.1<br>(0.8 - 1.5)       |
| Other transport injuries                        | 1.7<br>(1.5 - 1.9)    | 2.1<br>(1.7 - 2.6)      | 0.7<br>(0.6 - 0.8)     | 1.7<br>(1.5 - 1.9)      | 2.6<br>(2.1 - 2.9)      | 3.6<br>(2.8 - 4.1)       |
| Unintentional injuries                          | 38.0<br>(34.9 - 40.8) | 94.0<br>(71.6 - 108.6)  | 19.7<br>(17.3 - 21.6)  | 23.9<br>(22.2 - 26.1)   | 40.6<br>(38.1 - 45.2)   | 137.5<br>(129.1 - 154.3) |
| Falls                                           | 6.4<br>(5.9 - 7.8)    | 6.2<br>(4.5 - 8.7)      | 1.6<br>(1.3 - 1.9)     | 3.2<br>(2.8 - 3.9)      | 9.5<br>(8.6 - 11.9)     | 65.5<br>(58.0 - 80.5)    |
| Drowning                                        | 10.3<br>(7.7 - 12.0)  | 33.6<br>(21.0 - 43.4)   | 10.1<br>(7.6 - 11.8)   | 5.8<br>(4.8 - 6.6)      | 6.2<br>(5.2 - 7.2)      | 10.2<br>(8.5 - 12.0)     |
| Fire, heat, and hot substances                  | 5.6<br>(5.0 - 6.7)    | 10.9<br>(8.0 - 14.2)    | 2.2<br>(1.9 - 2.7)     | 5.0<br>(4.2 - 6.0)      | 5.9<br>(5.2 - 7.3)      | 15.8<br>(13.3 - 18.5)    |
| Poisonings                                      | 2.3<br>(2.0 - 3.2)    | 4.4<br>(3.3 - 7.0)      | 0.7<br>(0.6 - 1.0)     | 2.1<br>(1.8 - 2.8)      | 2.8<br>(2.4 - 4.0)      | 5.0<br>(4.2 - 7.0)       |
| Exposure to mechanical forces                   | 4.4<br>(3.5 - 5.2)    | 15.9<br>(8.3 - 22.1)    | 1.5<br>(1.3 - 1.9)     | 2.9<br>(2.7 - 3.5)      | 3.9<br>(3.5 - 4.6)      | 4.1<br>(3.7 - 4.9)       |
| Unintentional firearm injuries                  | 1.0<br>(0.8 - 1.1)    | 1.2<br>(0.9 - 1.6)      | 0.4<br>(0.3 - 0.5)     | 1.1<br>(0.9 - 1.3)      | 1.1<br>(0.8 - 1.5)      | 1.3<br>(1.0 - 1.7)       |
| Unintentional suffocation                       | 1.6<br>(0.5 - 2.3)    | 11.8<br>(3.4 - 17.9)    | 0.2<br>(0.1 - 0.3)     | 0.1<br>(0.1 - 0.2)      | 0.2<br>(0.1 - 0.3)      | 0.5<br>(0.3 - 0.6)       |
| Other exposure to mechanical forces             | 1.8<br>(1.7 - 2.3)    | 3.0<br>(2.1 - 4.3)      | 0.9<br>(0.8 - 1.2)     | 1.7<br>(1.6 - 2.1)      | 2.6<br>(2.3 - 3.1)      | 2.3<br>(2.0 - 2.9)       |
| Adverse effects of medical treatment            | 1.8<br>(1.5 - 2.1)    | 4.2<br>(2.8 - 5.6)      | 0.3<br>(0.2 - 0.4)     | 0.8<br>(0.6 - 0.9)      | 2.9<br>(2.4 - 3.8)      | 11.1<br>(9.1 - 14.1)     |
| Animal contact                                  | 1.8<br>(1.1 - 2.4)    | 2.8<br>(1.6 - 4.2)      | 1.7<br>(1.1 - 2.4)     | 1.2<br>(0.8 - 1.5)      | 2.8<br>(1.7 - 3.7)      | 3.5<br>(2.2 - 4.6)       |
| Venomous animal contact                         | 1.4<br>(0.9 - 2.0)    | 1.9<br>(1.1 - 3.2)      | 1.4<br>(0.9 - 2.0)     | 1.1<br>(0.6 - 1.4)      | 2.3<br>(1.4 - 3.0)      | 2.3<br>(1.4 - 3.0)       |
| Non-venomous animal contact                     | 0.4<br>(0.2 - 0.5)    | 0.9<br>(0.4 - 1.3)      | 0.3<br>(0.2 - 0.5)     | 0.2<br>(0.1 - 0.2)      | 0.5<br>(0.3 - 0.8)      | 1.2<br>(0.7 - 1.8)       |
| Foreign body                                    | 2.7<br>(1.9 - 4.0)    | 11.9<br>(7.4 - 18.4)    | 0.3<br>(0.2 - 0.5)     | 0.6<br>(0.4 - 0.9)      | 2.2<br>(1.5 - 3.2)      | 14.8<br>(10.6 - 21.8)    |
| Pulmonary aspiration and foreign body in airway | 2.6<br>(1.8 - 4.0)    | 11.8<br>(7.3 - 18.3)    | 0.3<br>(0.2 - 0.5)     | 0.6<br>(0.4 - 0.9)      | 2.2<br>(1.4 - 3.1)      | 14.6<br>(10.4 - 21.6)    |
| Foreign body in other body part                 | 0.0<br>(0.0 - 0.1)    | 0.1<br>(0.1 - 0.2)      | 0.0<br>(0.0 - 0.0)     | 0.0<br>(0.0 - 0.0)      | 0.1<br>(0.0 - 0.1)      | 0.2<br>(0.1 - 0.2)       |
| Other unintentional injuries                    | 2.8<br>(2.3 - 3.1)    | 4.1<br>(2.6 - 4.8)      | 1.2<br>(0.9 - 1.3)     | 2.4<br>(2.0 - 2.7)      | 4.5<br>(3.6 - 5.0)      | 7.6<br>(5.2 - 8.7)       |
| Self-harm and interpersonal violence            | 19.8<br>(17.5 - 21.7) | 3.7<br>(2.7 - 4.6)      | 2.2<br>(1.9 - 2.6)     | 26.2<br>(23.3 - 28.7)   | 30.6<br>(27.3 - 33.7)   | 46.1<br>(39.8 - 50.4)    |
| Self-harm                                       | 13.4<br>(11.9 - 14.8) | --                      | 1.1<br>(0.9 - 1.2)     | 16.8<br>(14.8 - 18.4)   | 24.5<br>(21.7 - 27.7)   | 40.7<br>(34.4 - 44.8)    |
| Interpersonal violence                          | 6.4<br>(4.8 - 7.8)    | 3.7<br>(2.7 - 4.6)      | 1.2<br>(0.9 - 1.4)     | 9.4<br>(7.0 - 11.3)     | 6.1<br>(4.3 - 7.7)      | 5.4<br>(3.9 - 6.8)       |
| Assault by firearm                              | 2.4<br>(1.7 - 3.1)    | 0.5<br>(0.3 - 0.7)      | 0.3<br>(0.2 - 0.3)     | 3.9<br>(2.8 - 5.0)      | 2.1<br>(1.3 - 2.9)      | 1.2<br>(0.8 - 1.8)       |
| Assault by sharp object                         | 1.8<br>(1.2 - 2.4)    | 0.5<br>(0.2 - 0.7)      | 0.2<br>(0.1 - 0.3)     | 2.8<br>(1.9 - 3.9)      | 1.8<br>(1.1 - 2.5)      | 1.2<br>(0.8 - 1.6)       |
| Assault by other means                          | 2.2<br>(1.6 - 2.7)    | 2.7<br>(2.0 - 3.6)      | 0.7<br>(0.5 - 0.9)     | 2.7<br>(1.8 - 3.3)      | 2.3<br>(1.6 - 2.9)      | 3.0<br>(2.1 - 3.6)       |
| Forces of nature, war, and legal intervention   | 2.0<br>(1.5 - 3.2)    | 2.9<br>(2.8 - 3.2)      | 0.8<br>(0.6 - 1.3)     | 1.7<br>(1.1 - 3.1)      | 3.8<br>(2.5 - 6.6)      | 3.1<br>(2.0 - 5.3)       |
| Exposure to forces of nature                    | 0.6<br>(0.4 - 1.2)    | 0.8<br>(0.7 - 0.8)      | 0.2<br>(0.1 - 0.5)     | 0.5<br>(0.3 - 1.1)      | 1.4<br>(0.7 - 2.9)      | 1.3<br>(0.7 - 2.7)       |
| Collective violence and legal intervention      | 1.4<br>(1.0 - 2.0)    | 2.2<br>(2.1 - 2.5)      | 0.5<br>(0.4 - 0.8)     | 1.2<br>(0.8 - 2.0)      | 2.4<br>(1.7 - 3.8)      | 1.8<br>(1.2 - 2.8)       |

Web Table 27 - Global death rates (per 100k) with 95% UI by age, sex, and cause in 1990

| Cause                                                             | Males, All Ages          | Males, 0-4 Years               | Males, 5-14 Years        | Males, 15-49 Years       | Males, 50-69 Years             | Males, 70-80 Years             |
|-------------------------------------------------------------------|--------------------------|--------------------------------|--------------------------|--------------------------|--------------------------------|--------------------------------|
| All causes                                                        | 940.2<br>(918.2 - 959.9) | 1,943.8<br>(1,877.8 - 1,997.4) | 126.3<br>(122.1 - 130.0) | 320.1<br>(307.6 - 335.6) | 1,985.0<br>(1,909.2 - 2,051.8) | 8,503.1<br>(8,320.1 - 8,632.7) |
| Communicable, maternal, neonatal, and nutritional diseases        | 311.5<br>(297.8 - 323.0) | 1,610.9<br>(1,522.8 - 1,675.6) | 60.7<br>(56.5 - 65.3)    | 74.8<br>(70.3 - 80.4)    | 268.9<br>(251.8 - 292.8)       | 932.3<br>(872.5 - 1,001.1)     |
| HIV/AIDS and tuberculosis                                         | 47.2<br>(43.2 - 52.5)    | 18.4<br>(15.7 - 24.7)          | 3.4<br>(2.9 - 4.0)       | 38.0<br>(34.2 - 42.6)    | 134.1<br>(120.8 - 150.7)       | 263.2<br>(234.6 - 289.8)       |
| Tuberculosis                                                      | 39.5<br>(35.8 - 44.5)    | 13.1<br>(10.5 - 19.3)          | 3.2<br>(2.8 - 3.8)       | 27.2<br>(24.1 - 30.8)    | 124.2<br>(110.8 - 140.7)       | 255.5<br>(226.7 - 281.9)       |
| HIV/AIDS                                                          | 7.7<br>(6.1 - 9.9)       | 5.4<br>(5.0 - 5.9)             | 0.1<br>(0.1 - 0.2)       | 10.8<br>(8.3 - 14.3)     | 10.0<br>(7.9 - 12.9)           | 7.6<br>(6.1 - 9.6)             |
| HIV/AIDS resulting in mycobacterial infection                     | 0.8<br>(0.6 - 1.1)       | 0.6<br>(0.4 - 0.7)             | 0.0<br>(0.0 - 0.0)       | 1.1<br>(0.8 - 1.5)       | 1.1<br>(0.8 - 1.4)             | 0.8<br>(0.6 - 1.1)             |
| HIV/AIDS resulting in other diseases                              | 6.9<br>(5.4 - 8.8)       | 4.8<br>(4.4 - 5.3)             | 0.1<br>(0.1 - 0.2)       | 9.7<br>(7.5 - 12.8)      | 8.9<br>(7.0 - 11.5)            | 6.8<br>(5.4 - 8.5)             |
| Diarrhea, lower respiratory, and other common infectious diseases | 147.3<br>(137.2 - 157.5) | 792.1<br>(722.8 - 855.4)       | 39.9<br>(35.9 - 44.5)    | 23.9<br>(21.6 - 26.9)    | 96.3<br>(88.7 - 107.8)         | 554.4<br>(497.7 - 602.2)       |
| Diarrheal diseases                                                | 46.6<br>(42.4 - 50.7)    | 249.1<br>(218.7 - 279.4)       | 11.7<br>(9.9 - 13.7)     | 8.0<br>(7.1 - 8.8)       | 36.3<br>(32.2 - 40.7)          | 156.6<br>(141.5 - 170.9)       |
| Intestinal infectious diseases                                    | 5.2<br>(3.0 - 8.6)       | 13.3<br>(7.5 - 22.1)           | 7.1<br>(4.1 - 11.6)      | 3.4<br>(1.9 - 5.8)       | 1.8<br>(1.0 - 3.0)             | 2.6<br>(1.6 - 4.1)             |
| Typhoid fever                                                     | 3.6<br>(1.9 - 6.1)       | 8.4<br>(4.3 - 14.7)            | 5.1<br>(2.8 - 8.6)       | 2.5<br>(1.3 - 4.3)       | 1.2<br>(0.6 - 2.2)             | 1.7<br>(0.9 - 2.9)             |
| Paratyphoid fever                                                 | 1.3<br>(0.7 - 2.2)       | 3.4<br>(1.7 - 6.3)             | 1.8<br>(1.0 - 3.2)       | 0.8<br>(0.4 - 1.4)       | 0.4<br>(0.2 - 0.7)             | 0.5<br>(0.2 - 0.8)             |
| Other intestinal infectious diseases                              | 0.3<br>(0.3 - 0.4)       | 1.5<br>(1.2 - 1.8)             | 0.2<br>(0.1 - 0.2)       | 0.2<br>(0.1 - 0.2)       | 0.2<br>(0.2 - 0.2)             | 0.4<br>(0.4 - 0.5)             |
| Lower respiratory infections                                      | 64.1<br>(59.4 - 69.6)    | 334.7<br>(298.9 - 367.5)       | 9.3<br>(7.8 - 10.8)      | 7.5<br>(6.5 - 8.7)       | 45.6<br>(40.3 - 53.8)          | 368.3<br>(314.3 - 420.9)       |
| Upper respiratory infections                                      | 0.1<br>(0.1 - 0.1)       | 0.3<br>(0.2 - 0.4)             | 0.0<br>(0.0 - 0.0)       | 0.0<br>(0.0 - 0.1)       | 0.2<br>(0.1 - 0.3)             | 0.5<br>(0.3 - 0.7)             |
| Otitis media                                                      | 0.1<br>(0.1 - 0.1)       | 0.3<br>(0.2 - 0.3)             | 0.1<br>(0.0 - 0.1)       | 0.0<br>(0.0 - 0.0)       | 0.1<br>(0.1 - 0.1)             | 0.2<br>(0.2 - 0.2)             |
| Meningitis                                                        | 9.3<br>(7.3 - 12.5)      | 49.6<br>(32.8 - 74.2)          | 3.9<br>(3.2 - 4.6)       | 2.7<br>(2.3 - 3.0)       | 5.7<br>(4.9 - 6.4)             | 10.5<br>(9.2 - 11.8)           |
| Pneumococcal meningitis                                           | 2.2<br>(1.8 - 2.9)       | 10.1<br>(6.6 - 15.1)           | 1.2<br>(1.0 - 1.5)       | 0.8<br>(0.7 - 1.0)       | 1.7<br>(1.3 - 2.1)             | 3.2<br>(2.7 - 3.9)             |
| H influenzae type B meningitis                                    | 2.4<br>(1.7 - 3.3)       | 15.4<br>(10.0 - 23.1)          | 0.9<br>(0.7 - 1.1)       | 0.3<br>(0.3 - 0.4)       | 0.6<br>(0.4 - 0.7)             | 1.0<br>(0.8 - 1.2)             |
| Meningococcal meningitis                                          | 1.8<br>(1.4 - 2.4)       | 9.3<br>(6.0 - 14.4)            | 0.7<br>(0.6 - 0.9)       | 0.6<br>(0.5 - 0.6)       | 1.2<br>(1.0 - 1.5)             | 2.4<br>(1.9 - 2.9)             |
| Other meningitis                                                  | 2.9<br>(2.3 - 3.9)       | 14.7<br>(10.1 - 22.3)          | 1.0<br>(0.8 - 1.2)       | 1.0<br>(0.8 - 1.1)       | 2.2<br>(1.8 - 2.7)             | 3.9<br>(3.1 - 4.7)             |
| Encephalitis                                                      | 1.7<br>(1.2 - 2.2)       | 7.7<br>(4.3 - 11.2)            | 1.1<br>(0.6 - 1.4)       | 0.7<br>(0.4 - 0.8)       | 1.3<br>(0.8 - 1.6)             | 2.4<br>(1.5 - 2.9)             |
| Diphtheria                                                        | 0.1<br>(0.1 - 0.4)       | 1.0<br>(0.3 - 2.9)             | 0.1<br>(0.0 - 0.3)       | 0.0<br>(0.0 - 0.0)       | 0.0<br>(0.0 - 0.1)             | --                             |
| Whooping cough                                                    | 2.4<br>(0.9 - 5.3)       | 18.1<br>(7.0 - 40.4)           | 0.5<br>(0.2 - 1.2)       | 0.1<br>(0.0 - 0.1)       | 0.0<br>(0.0 - 0.1)             | --                             |
| Tetanus                                                           | 7.3<br>(6.0 - 11.0)      | 45.4<br>(36.5 - 70.1)          | 0.8<br>(0.4 - 1.8)       | 1.0<br>(0.6 - 1.9)       | 5.1<br>(2.8 - 8.8)             | 11.8<br>(5.6 - 21.8)           |
| Measles                                                           | 10.2<br>(5.6 - 16.6)     | 72.3<br>(39.7 - 117.5)         | 5.2<br>(2.8 - 8.6)       | 0.4<br>(0.2 - 0.9)       | 0.1<br>(0.0 - 0.1)             | --                             |
| Varicella and herpes zoster                                       | 0.2<br>(0.1 - 0.2)       | 0.4<br>(0.3 - 0.9)             | 0.1<br>(0.0 - 0.1)       | 0.1<br>(0.0 - 0.1)       | 0.1<br>(0.1 - 0.2)             | 1.3<br>(0.8 - 2.7)             |
| Neglected tropical diseases and malaria                           | 21.0<br>(18.8 - 23.5)    | 98.8<br>(80.5 - 116.5)         | 11.3<br>(10.0 - 12.7)    | 6.9<br>(5.9 - 7.9)       | 17.8<br>(15.4 - 21.1)          | 25.3<br>(21.6 - 34.2)          |
| Malaria                                                           | 16.8<br>(14.6 - 19.0)    | 89.2<br>(71.4 - 107.1)         | 7.6<br>(6.4 - 9.0)       | 4.2<br>(3.5 - 5.2)       | 12.4<br>(10.3 - 14.9)          | 15.9<br>(13.2 - 19.3)          |
| Chagas disease                                                    | 0.3<br>(0.1 - 0.9)       | 0.0<br>(0.0 - 0.0)             | 0.0<br>(0.0 - 0.0)       | 0.1<br>(0.0 - 0.4)       | 1.1<br>(0.2 - 3.4)             | 2.5<br>(0.5 - 10.0)            |
| Leishmaniasis                                                     | 1.2<br>(1.0 - 1.4)       | 3.7<br>(2.7 - 4.8)             | 1.4<br>(1.0 - 1.7)       | 0.7<br>(0.6 - 0.9)       | 0.6<br>(0.4 - 0.7)             | 0.6<br>(0.5 - 0.7)             |
| Visceral leishmaniasis                                            | 1.2<br>(1.0 - 1.4)       | 3.7<br>(2.7 - 4.8)             | 1.4<br>(1.0 - 1.7)       | 0.7<br>(0.6 - 0.9)       | 0.6<br>(0.4 - 0.7)             | 0.6<br>(0.5 - 0.7)             |
| African trypanosomiasis                                           | 0.4<br>(0.2 - 0.7)       | 0.3<br>(0.1 - 0.4)             | 0.2<br>(0.1 - 0.4)       | 0.5<br>(0.3 - 0.9)       | 0.5<br>(0.2 - 0.8)             | 0.4<br>(0.2 - 0.6)             |
| Schistosomiasis                                                   | 0.4<br>(0.3 - 0.5)       | 0.1<br>(0.0 - 0.1)             | 0.1<br>(0.1 - 0.1)       | 0.3<br>(0.2 - 0.3)       | 1.2<br>(1.0 - 1.5)             | 2.1<br>(1.7 - 2.7)             |
| Cysticercosis                                                     | 0.0<br>(0.0 - 0.0)       | 0.0<br>(0.0 - 0.0)             | 0.0<br>(0.0 - 0.0)       | 0.0<br>(0.0 - 0.0)       | 0.0<br>(0.0 - 0.0)             | 0.0<br>(0.0 - 0.0)             |
| Cystic echinococcosis                                             | 0.1<br>(0.1 - 0.1)       | 0.1<br>(0.1 - 0.1)             | 0.1<br>(0.1 - 0.1)       | 0.1<br>(0.1 - 0.1)       | 0.1<br>(0.1 - 0.1)             | 0.2<br>(0.2 - 0.2)             |
| Dengue                                                            | 0.2<br>(0.1 - 0.2)       | 0.7<br>(0.3 - 1.1)             | 0.2<br>(0.1 - 0.3)       | 0.0<br>(0.0 - 0.1)       | 0.1<br>(0.0 - 0.1)             | 0.1<br>(0.1 - 0.2)             |
| Yellow fever                                                      | 0.1<br>(0.0 - 0.1)       | 0.0<br>(0.0 - 0.1)             | 0.0<br>(0.0 - 0.1)       | 0.1<br>(0.0 - 0.1)       | 0.1<br>(0.0 - 0.1)             | 0.1<br>(0.0 - 0.1)             |
| Rabies                                                            | 0.9<br>(0.6 - 1.3)       | 1.0<br>(0.6 - 1.9)             | 1.4<br>(0.8 - 1.9)       | 0.5<br>(0.3 - 0.7)       | 1.3<br>(0.8 - 1.7)             | 1.2<br>(0.8 - 1.7)             |
| Intestinal nematode infections                                    | 0.2<br>(0.1 - 0.2)       | 1.0<br>(0.8 - 1.2)             | 0.1<br>(0.1 - 0.1)       | 0.0<br>(0.0 - 0.0)       | 0.0<br>(0.0 - 0.0)             | 0.1<br>(0.1 - 0.1)             |

Web Table 27 - Global death rates (per 100k) with 95% UI by age, sex, and cause in 1990

| Cause                                                            | Males, All Ages          | Males, 0-4 Years         | Males, 5-14 Years     | Males, 15-49 Years       | Males, 50-69 Years             | Males, 70-80 Years             |
|------------------------------------------------------------------|--------------------------|--------------------------|-----------------------|--------------------------|--------------------------------|--------------------------------|
| Ascariasis                                                       | 0.2<br>(0.1 - 0.2)       | 1.0<br>(0.8 - 1.2)       | 0.1<br>(0.1 - 0.1)    | 0.0<br>(0.0 - 0.0)       | 0.0<br>(0.0 - 0.0)             | 0.1<br>(0.1 - 0.1)             |
| Other neglected tropical diseases                                | 0.6<br>(0.4 - 0.9)       | 2.8<br>(1.6 - 4.4)       | 0.2<br>(0.2 - 0.3)    | 0.2<br>(0.2 - 0.3)       | 0.5<br>(0.4 - 0.6)             | 1.9<br>(1.3 - 2.7)             |
| Maternal disorders                                               | --                       | --                       | --                    | --                       | --                             | --                             |
| Maternal hemorrhage                                              | --                       | --                       | --                    | --                       | --                             | --                             |
| Maternal sepsis and other maternal infections                    | --                       | --                       | --                    | --                       | --                             | --                             |
| Maternal hypertensive disorders                                  | --                       | --                       | --                    | --                       | --                             | --                             |
| Maternal obstructed labor                                        | --                       | --                       | --                    | --                       | --                             | --                             |
| Maternal abortive outcome                                        | --                       | --                       | --                    | --                       | --                             | --                             |
| Indirect maternal deaths                                         | --                       | --                       | --                    | --                       | --                             | --                             |
| Late maternal deaths                                             | --                       | --                       | --                    | --                       | --                             | --                             |
| Maternal deaths aggravated by HIV/AIDS                           | --                       | --                       | --                    | --                       | --                             | --                             |
| Other maternal disorders                                         | --                       | --                       | --                    | --                       | --                             | --                             |
| Neonatal disorders                                               | 72.3<br>(68.1 - 75.3)    | 587.9<br>(554.1 - 611.9) | --                    | --                       | --                             | --                             |
| Neonatal preterm birth complications                             | 32.9<br>(24.2 - 40.8)    | 267.2<br>(196.4 - 331.9) | --                    | --                       | --                             | --                             |
| Neonatal encephalopathy due to birth asphyxia and trauma         | 18.3<br>(12.9 - 24.2)    | 148.9<br>(105.0 - 196.8) | --                    | --                       | --                             | --                             |
| Neonatal sepsis and other neonatal infections                    | 7.9<br>(3.3 - 13.0)      | 64.0<br>(27.2 - 105.4)   | --                    | --                       | --                             | --                             |
| Hemolytic disease and other neonatal jaundice                    | 1.3<br>(0.7 - 2.2)       | 10.9<br>(5.9 - 17.9)     | --                    | --                       | --                             | --                             |
| Other neonatal disorders                                         | 11.9<br>(8.5 - 18.3)     | 96.8<br>(69.0 - 148.5)   | --                    | --                       | --                             | --                             |
| Nutritional deficiencies                                         | 13.4<br>(9.4 - 18.8)     | 65.8<br>(45.1 - 92.2)    | 2.8<br>(1.9 - 4.2)    | 2.6<br>(1.7 - 3.8)       | 10.2<br>(6.9 - 15.9)           | 66.4<br>(46.3 - 99.3)          |
| Protein-energy malnutrition                                      | 9.8<br>(6.7 - 14.3)      | 55.3<br>(38.6 - 80.9)    | 1.9<br>(1.2 - 2.9)    | 1.3<br>(0.7 - 2.0)       | 5.7<br>(3.4 - 9.4)             | 38.7<br>(22.3 - 60.6)          |
| Iodine deficiency                                                | 0.0<br>(0.0 - 0.1)       | 0.1<br>(0.0 - 0.3)       | 0.0<br>(0.0 - 0.0)    | 0.0<br>(0.0 - 0.0)       | 0.1<br>(0.0 - 0.2)             | 0.1<br>(0.1 - 0.3)             |
| Iron-deficiency anemia                                           | 2.9<br>(1.5 - 5.2)       | 8.3<br>(2.5 - 19.7)      | 0.8<br>(0.3 - 1.3)    | 1.1<br>(0.6 - 1.8)       | 3.9<br>(2.2 - 6.9)             | 20.8<br>(11.2 - 39.0)          |
| Other nutritional deficiencies                                   | 0.6<br>(0.3 - 1.3)       | 2.0<br>(0.7 - 4.8)       | 0.1<br>(0.1 - 0.2)    | 0.2<br>(0.1 - 0.4)       | 0.6<br>(0.3 - 1.1)             | 6.7<br>(2.9 - 12.7)            |
| Other communicable, maternal, neonatal, and nutritional diseases | 10.3<br>(8.4 - 12.9)     | 47.9<br>(33.3 - 67.3)    | 3.3<br>(2.6 - 4.1)    | 3.4<br>(3.0 - 3.8)       | 10.5<br>(8.8 - 12.6)           | 23.1<br>(18.4 - 29.5)          |
| Sexually transmitted diseases excluding HIV                      | 4.7                      | 33.6                     | 1.4                   | 0.2                      | 0.7                            | 2.1                            |
| Syphilis                                                         | 4.6<br>(2.7 - 7.1)       | 33.6<br>(19.1 - 53.1)    | 1.4<br>(0.8 - 2.1)    | 0.1<br>(0.1 - 0.1)       | 0.5<br>(0.3 - 0.6)             | 1.7<br>(1.0 - 2.5)             |
| Chlamydial infection                                             | --                       | --                       | --                    | --                       | --                             | --                             |
| Gonococcal infection                                             | 0.0<br>(0.0 - 0.1)       | --                       | 0.0<br>(0.0 - 0.0)    | 0.0<br>(0.0 - 0.1)       | 0.1<br>(0.1 - 0.2)             | 0.2<br>(0.1 - 0.3)             |
| Other sexually transmitted diseases                              | 0.0<br>(0.0 - 0.0)       | --                       | 0.0<br>(0.0 - 0.0)    | 0.0<br>(0.0 - 0.1)       | 0.1<br>(0.0 - 0.1)             | 0.1<br>(0.1 - 0.1)             |
| Hepatitis                                                        | 3.3<br>(3.1 - 3.6)       | 6.6<br>(5.3 - 8.0)       | 1.2<br>(1.0 - 1.3)    | 2.4<br>(2.2 - 2.7)       | 5.8<br>(5.2 - 6.5)             | 9.6<br>(8.7 - 10.6)            |
| Acute hepatitis A                                                | 0.4<br>(0.1 - 0.7)       | 2.1<br>(0.7 - 4.0)       | 0.2<br>(0.1 - 0.4)    | 0.1<br>(0.0 - 0.3)       | 0.1<br>(0.0 - 0.2)             | 0.1<br>(0.0 - 0.2)             |
| Acute hepatitis B                                                | 1.9<br>(1.5 - 2.4)       | 3.8<br>(2.3 - 5.4)       | 0.3<br>(0.2 - 0.4)    | 1.1<br>(0.7 - 1.5)       | 4.6<br>(3.8 - 5.4)             | 8.6<br>(7.5 - 9.6)             |
| Acute hepatitis C                                                | 0.1<br>(0.0 - 0.1)       | --                       | 0.0<br>(0.0 - 0.1)    | 0.0<br>(0.0 - 0.1)       | 0.1<br>(0.0 - 0.3)             | 0.2<br>(0.0 - 0.5)             |
| Acute hepatitis E                                                | 1.0<br>(0.7 - 1.3)       | 0.6<br>(0.3 - 1.2)       | 0.6<br>(0.4 - 0.8)    | 1.2<br>(0.8 - 1.6)       | 1.0<br>(0.5 - 1.6)             | 0.7<br>(0.3 - 1.4)             |
| Other infectious diseases                                        | 2.3<br>(1.6 - 3.1)       | 7.7<br>(5.2 - 11.0)      | 0.7<br>(0.5 - 1.0)    | 0.8<br>(0.5 - 1.0)       | 4.0<br>(2.5 - 6.2)             | 11.5<br>(7.5 - 18.2)           |
| Non-communicable diseases                                        | 524.0<br>(505.1 - 542.3) | 203.0<br>(170.8 - 267.9) | 27.2<br>(24.2 - 30.7) | 138.2<br>(129.9 - 147.0) | 1,575.5<br>(1,506.6 - 1,633.2) | 7,298.2<br>(7,115.4 - 7,426.3) |
| Neoplasms                                                        | 118.1<br>(113.2 - 121.7) | 11.7<br>(9.7 - 15.8)     | 6.1<br>(5.3 - 6.8)    | 33.9<br>(31.6 - 36.6)    | 451.3<br>(430.3 - 466.8)       | 1,352.6<br>(1,303.2 - 1,395.8) |
| Esophageal cancer                                                | 7.4<br>(6.1 - 8.7)       | --                       | --                    | 1.5<br>(1.1 - 1.7)       | 34.1<br>(27.7 - 40.0)          | 78.7<br>(63.7 - 93.2)          |
| Stomach cancer                                                   | 17.3<br>(16.3 - 18.0)    | --                       | --                    | 4.0<br>(3.7 - 4.4)       | 70.1<br>(65.3 - 73.7)          | 211.1<br>(200.8 - 219.6)       |
| Liver cancer                                                     | 13.0<br>(11.9 - 14.0)    | --                       | 0.2<br>(0.2 - 0.3)    | 6.5<br>(5.8 - 7.5)       | 53.5<br>(48.2 - 58.2)          | 95.6<br>(87.1 - 105.8)         |

Web Table 27 - Global death rates (per 100k) with 95% UI by age, sex, and cause in 1990

| Cause                                | Males, All Ages          | Males, 0-4 Years      | Males, 5-14 Years  | Males, 15-49 Years    | Males, 50-69 Years       | Males, 70-80 Years             |
|--------------------------------------|--------------------------|-----------------------|--------------------|-----------------------|--------------------------|--------------------------------|
| Liver cancer due to hepatitis B      | 5.6<br>(5.1 - 6.2)       | --                    | 0.1<br>(0.1 - 0.1) | 3.5<br>(3.1 - 4.1)    | 23.3<br>(20.7 - 25.7)    | 29.8<br>(26.8 - 32.9)          |
| Liver cancer due to hepatitis C      | 2.1<br>(1.8 - 2.3)       | --                    | 0.0<br>(0.0 - 0.0) | 0.7<br>(0.6 - 0.8)    | 9.1<br>(7.9 - 10.2)      | 19.7<br>(17.3 - 23.0)          |
| Liver cancer due to alcohol use      | 3.3<br>(3.0 - 3.7)       | --                    | --                 | 1.0<br>(0.9 - 1.1)    | 13.9<br>(12.4 - 15.3)    | 35.7<br>(31.9 - 40.6)          |
| Liver cancer due to other causes     | 1.9<br>(1.7 - 2.2)       | --                    | 0.1<br>(0.1 - 0.2) | 1.3<br>(1.2 - 1.6)    | 7.2<br>(6.3 - 8.1)       | 10.4<br>(9.1 - 11.7)           |
| Larynx cancer                        | 2.4<br>(1.9 - 2.8)       | --                    | --                 | 0.6<br>(0.4 - 0.7)    | 11.3<br>(8.8 - 13.1)     | 23.0<br>(18.4 - 27.8)          |
| Tracheal, bronchus and lung cancer   | 28.6<br>(27.6 - 29.4)    | --                    | --                 | 4.9<br>(4.6 - 5.3)    | 128.0<br>(122.9 - 132.0) | 328.2<br>(316.1 - 337.0)       |
| Breast cancer                        | 0.2<br>(0.1 - 0.2)       | --                    | --                 | 0.1<br>(0.1 - 0.1)    | 0.7<br>(0.5 - 0.8)       | 2.1<br>(1.4 - 2.9)             |
| Cervical cancer                      | --                       | --                    | --                 | --                    | --                       | --                             |
| Uterine cancer                       | --                       | --                    | --                 | --                    | --                       | --                             |
| Prostate cancer                      | 5.9<br>(4.6 - 7.2)       | --                    | --                 | 0.1<br>(0.1 - 0.1)    | 10.7<br>(8.4 - 13.5)     | 144.6<br>(112.2 - 179.1)       |
| Colon and rectum cancer              | 9.2<br>(8.9 - 9.4)       | --                    | --                 | 2.1<br>(2.0 - 2.2)    | 31.8<br>(30.7 - 32.8)    | 132.9<br>(128.5 - 136.4)       |
| Lip and oral cavity cancer           | 2.0<br>(1.8 - 2.5)       | --                    | --                 | 0.8<br>(0.7 - 1.0)    | 8.5<br>(7.6 - 10.2)      | 19.1<br>(16.6 - 23.9)          |
| Nasopharynx cancer                   | 1.3<br>(1.2 - 1.4)       | --                    | 0.1<br>(0.1 - 0.1) | 0.9<br>(0.8 - 1.0)    | 5.1<br>(4.6 - 5.7)       | 6.0<br>(5.4 - 6.7)             |
| Other pharynx cancer                 | 1.4<br>(1.3 - 1.6)       | --                    | --                 | 0.5<br>(0.4 - 0.5)    | 7.2<br>(6.3 - 8.1)       | 10.4<br>(9.0 - 11.7)           |
| Gallbladder and biliary tract cancer | 1.5<br>(1.3 - 1.8)       | --                    | --                 | 0.3<br>(0.2 - 0.3)    | 5.5<br>(4.6 - 6.4)       | 23.4<br>(19.4 - 27.4)          |
| Pancreatic cancer                    | 3.7<br>(3.6 - 3.8)       | --                    | --                 | 0.8<br>(0.7 - 0.8)    | 14.9<br>(14.3 - 15.3)    | 46.4<br>(45.0 - 47.7)          |
| Malignant skin melanoma              | 0.7<br>(0.5 - 1.1)       | --                    | --                 | 0.4<br>(0.3 - 0.6)    | 2.5<br>(1.6 - 3.9)       | 7.8<br>(5.1 - 11.8)            |
| Non-melanoma skin cancer             | 0.5<br>(0.4 - 0.6)       | --                    | --                 | 0.2<br>(0.1 - 0.2)    | 1.3<br>(1.0 - 1.7)       | 8.0<br>(5.9 - 10.4)            |
| Ovarian cancer                       | --                       | --                    | --                 | --                    | --                       | --                             |
| Testicular cancer                    | 0.3<br>(0.2 - 0.3)       | --                    | --                 | 0.3<br>(0.3 - 0.4)    | 0.4<br>(0.3 - 0.5)       | 1.0<br>(0.7 - 1.2)             |
| Kidney cancer                        | 1.7<br>(1.7 - 1.8)       | 0.3<br>(0.2 - 0.5)    | 0.1<br>(0.1 - 0.1) | 0.4<br>(0.4 - 0.4)    | 7.3<br>(7.0 - 7.6)       | 18.0<br>(17.3 - 18.9)          |
| Bladder cancer                       | 3.6<br>(3.2 - 3.8)       | --                    | --                 | 0.4<br>(0.3 - 0.4)    | 11.8<br>(10.4 - 12.5)    | 62.7<br>(55.1 - 67.1)          |
| Brain and nervous system cancer      | 2.8<br>(2.2 - 3.5)       | 0.9<br>(0.5 - 1.6)    | 0.9<br>(0.7 - 1.2) | 1.8<br>(1.3 - 2.2)    | 9.3<br>(7.5 - 11.4)      | 15.4<br>(12.6 - 18.5)          |
| Thyroid cancer                       | 0.3<br>(0.3 - 0.3)       | --                    | 0.0<br>(0.0 - 0.0) | 0.1<br>(0.1 - 0.1)    | 1.1<br>(1.0 - 1.2)       | 3.2<br>(2.8 - 3.6)             |
| Mesothelioma                         | 0.4<br>(0.3 - 0.5)       | --                    | --                 | 0.1<br>(0.1 - 0.1)    | 1.5<br>(1.3 - 1.9)       | 4.4<br>(3.8 - 6.5)             |
| Hodgkin lymphoma                     | 0.7<br>(0.5 - 0.7)       | 0.6<br>(0.3 - 0.9)    | 0.2<br>(0.1 - 0.3) | 0.6<br>(0.4 - 0.6)    | 1.4<br>(1.0 - 1.6)       | 3.0<br>(2.2 - 3.4)             |
| Non-Hodgkin lymphoma                 | 2.9<br>(2.4 - 3.5)       | 0.9<br>(0.6 - 1.3)    | 0.7<br>(0.5 - 0.8) | 1.4<br>(1.1 - 1.6)    | 8.5<br>(7.2 - 10.5)      | 26.8<br>(22.8 - 34.8)          |
| Multiple myeloma                     | 0.9<br>(0.7 - 1.2)       | --                    | --                 | 0.2<br>(0.1 - 0.2)    | 3.1<br>(2.4 - 4.2)       | 12.4<br>(9.1 - 17.8)           |
| Leukemia                             | 4.6<br>(4.4 - 4.8)       | 3.5<br>(2.7 - 4.5)    | 2.5<br>(2.2 - 2.8) | 3.0<br>(2.8 - 3.3)    | 8.9<br>(8.5 - 9.2)       | 31.0<br>(29.9 - 32.0)          |
| Other neoplasms                      | 4.8<br>(4.5 - 5.7)       | 5.6<br>(4.3 - 9.1)    | 1.4<br>(1.2 - 2.0) | 2.2<br>(2.0 - 2.5)    | 12.7<br>(11.4 - 14.2)    | 36.9<br>(33.9 - 44.9)          |
| Cardiovascular diseases              | 223.8<br>(215.4 - 230.1) | 22.4<br>(20.0 - 25.0) | 5.2<br>(4.7 - 5.6) | 49.7<br>(46.7 - 52.8) | 680.1<br>(647.7 - 705.5) | 3,537.5<br>(3,427.5 - 3,618.8) |
| Rheumatic heart disease              | 5.8<br>(4.2 - 7.8)       | 1.2<br>(0.8 - 1.8)    | 1.1<br>(0.8 - 1.4) | 3.3<br>(2.3 - 4.3)    | 16.9<br>(12.5 - 24.3)    | 50.6<br>(37.2 - 70.8)          |
| Ischemic heart disease               | 110.2<br>(99.0 - 119.2)  | 3.3<br>(2.7 - 4.1)    | 1.0<br>(0.8 - 1.3) | 24.2<br>(21.2 - 26.8) | 356.3<br>(322.5 - 385.0) | 1,703.9<br>(1,548.7 - 1,853.3) |
| Cerebrovascular disease              | 79.0<br>(69.7 - 88.1)    | 6.4<br>(5.2 - 8.2)    | 1.9<br>(1.5 - 2.3) | 14.3<br>(12.1 - 16.7) | 226.7<br>(197.9 - 256.1) | 1,362.1<br>(1,199.2 - 1,520.1) |
| Ischemic stroke                      | 34.8<br>(28.4 - 40.3)    | 0.7<br>(0.3 - 1.4)    | 0.2<br>(0.1 - 0.4) | 2.1<br>(1.4 - 2.8)    | 79.5<br>(60.4 - 97.3)    | 762.7<br>(634.8 - 880.6)       |
| Hemorrhagic stroke                   | 44.2<br>(37.3 - 51.5)    | 5.7<br>(4.5 - 7.3)    | 1.6<br>(1.4 - 2.0) | 12.2<br>(10.3 - 14.4) | 147.1<br>(123.4 - 172.8) | 599.4<br>(485.0 - 712.3)       |
| Hypertensive heart disease           | 10.2<br>(7.5 - 14.9)     | 0.5<br>(0.2 - 0.8)    | 0.1<br>(0.1 - 0.1) | 2.0<br>(1.5 - 2.9)    | 30.3<br>(22.6 - 44.6)    | 170.5<br>(125.2 - 257.7)       |
| Cardiomyopathy and myocarditis       | 6.1<br>(4.7 - 7.6)       | 4.4<br>(1.9 - 6.2)    | 0.5<br>(0.3 - 0.7) | 2.5<br>(2.0 - 3.3)    | 17.3<br>(13.1 - 22.6)    | 64.4<br>(46.6 - 79.3)          |
| Atrial fibrillation and flutter      | 0.4<br>(0.4 - 0.4)       | --                    | --                 | 0.0<br>(0.0 - 0.0)    | 0.6<br>(0.5 - 0.6)       | 10.2<br>(8.9 - 11.5)           |
| Aortic aneurysm                      | 2.4<br>(1.9 - 2.7)       | --                    | --                 | 0.4<br>(0.3 - 0.4)    | 7.3<br>(5.7 - 8.2)       | 43.0<br>(35.1 - 47.9)          |

Web Table 27 - Global death rates (per 100k) with 95% UI by age, sex, and cause in 1990

| Cause                                               | Males, All Ages       | Males, 0-4 Years      | Males, 5-14 Years  | Males, 15-49 Years    | Males, 50-69 Years       | Males, 70-80 Years             |
|-----------------------------------------------------|-----------------------|-----------------------|--------------------|-----------------------|--------------------------|--------------------------------|
| Peripheral vascular disease                         | 0.3<br>(0.3 - 0.3)    | --                    | --                 | 0.0<br>(0.0 - 0.0)    | 0.6<br>(0.6 - 0.7)       | 6.9<br>(6.2 - 7.6)             |
| Endocarditis                                        | 0.9<br>(0.6 - 1.2)    | 0.6<br>(0.4 - 0.9)    | 0.1<br>(0.1 - 0.1) | 0.4<br>(0.3 - 0.6)    | 2.2<br>(1.5 - 3.1)       | 8.8<br>(5.8 - 12.3)            |
| Other cardiovascular and circulatory diseases       | 8.5<br>(6.8 - 10.2)   | 6.1<br>(4.7 - 8.3)    | 0.6<br>(0.4 - 0.7) | 2.5<br>(2.0 - 3.1)    | 21.8<br>(16.8 - 27.3)    | 117.1<br>(91.6 - 136.8)        |
| Chronic respiratory diseases                        | 72.0<br>(64.2 - 80.4) | 19.8<br>(15.8 - 23.0) | 2.2<br>(1.8 - 2.6) | 9.4<br>(7.8 - 10.7)   | 195.7<br>(167.8 - 222.1) | 1,284.5<br>(1,180.6 - 1,435.9) |
| Chronic obstructive pulmonary disease               | 49.5<br>(43.0 - 54.4) | 9.3<br>(7.4 - 11.3)   | 0.6<br>(0.5 - 0.8) | 3.9<br>(3.2 - 4.5)    | 121.3<br>(102.6 - 137.8) | 1,000.0<br>(882.9 - 1,111.1)   |
| Pneumoconiosis                                      | 6.2<br>(4.0 - 8.5)    | 0.2<br>(0.1 - 0.4)    | 0.1<br>(0.0 - 0.2) | 1.5<br>(0.9 - 2.0)    | 24.9<br>(15.1 - 33.9)    | 75.9<br>(50.5 - 105.0)         |
| Silicosis                                           | 2.0<br>(1.3 - 2.8)    | 0.1<br>(0.0 - 0.1)    | 0.0<br>(0.0 - 0.1) | 0.4<br>(0.3 - 0.6)    | 7.5<br>(4.6 - 10.7)      | 26.2<br>(16.7 - 38.7)          |
| Asbestosis                                          | 0.7<br>(0.4 - 1.0)    | 0.0<br>(0.0 - 0.1)    | 0.0<br>(0.0 - 0.0) | 0.2<br>(0.1 - 0.2)    | 3.1<br>(1.8 - 4.6)       | 7.5<br>(4.7 - 11.8)            |
| Coal workers pneumoconiosis                         | 1.0<br>(0.6 - 1.5)    | 0.0<br>(0.0 - 0.0)    | 0.0<br>(0.0 - 0.0) | 0.2<br>(0.1 - 0.4)    | 4.0<br>(2.3 - 6.3)       | 11.7<br>(6.8 - 19.5)           |
| Other pneumoconiosis                                | 2.6<br>(1.3 - 3.8)    | 0.1<br>(0.0 - 0.2)    | 0.0<br>(0.0 - 0.1) | 0.7<br>(0.3 - 1.0)    | 10.2<br>(5.2 - 15.5)     | 30.6<br>(15.7 - 46.3)          |
| Asthma                                              | 9.9<br>(8.0 - 15.1)   | 3.9<br>(3.0 - 5.2)    | 1.1<br>(0.9 - 1.5) | 2.9<br>(2.4 - 4.3)    | 32.4<br>(24.5 - 50.3)    | 118.2<br>(91.3 - 188.2)        |
| Interstitial lung disease and pulmonary sarcoidosis | 4.4<br>(2.5 - 5.9)    | 0.1<br>(0.0 - 0.3)    | 0.0<br>(0.0 - 0.1) | 0.6<br>(0.2 - 0.9)    | 14.5<br>(7.1 - 21.7)     | 73.2<br>(43.5 - 95.3)          |
| Other chronic respiratory diseases                  | 1.9<br>(1.4 - 2.4)    | 6.2<br>(4.5 - 7.8)    | 0.3<br>(0.2 - 0.4) | 0.5<br>(0.3 - 0.6)    | 2.6<br>(1.7 - 3.7)       | 17.2<br>(13.1 - 21.3)          |
| Cirrhosis                                           | 20.4<br>(19.5 - 21.3) | 2.7<br>(2.1 - 3.5)    | 1.0<br>(0.9 - 1.1) | 12.4<br>(11.6 - 13.1) | 77.7<br>(73.8 - 81.3)    | 126.4<br>(120.0 - 132.1)       |
| Cirrhosis due to hepatitis B                        | 5.3<br>(4.9 - 5.8)    | 0.2<br>(0.1 - 0.3)    | 0.2<br>(0.2 - 0.3) | 3.6<br>(3.2 - 4.0)    | 20.1<br>(18.3 - 22.0)    | 30.3<br>(27.6 - 33.7)          |
| Cirrhosis due to hepatitis C                        | 4.5<br>(4.1 - 4.9)    | 0.2<br>(0.1 - 0.3)    | 0.2<br>(0.1 - 0.2) | 2.5<br>(2.2 - 2.7)    | 17.9<br>(16.3 - 19.5)    | 31.7<br>(28.4 - 35.3)          |
| Cirrhosis due to alcohol use                        | 8.5<br>(7.9 - 9.0)    | --                    | --                 | 4.7<br>(4.3 - 5.1)    | 34.4<br>(31.9 - 36.7)    | 58.5<br>(55.0 - 62.2)          |
| Cirrhosis due to other causes                       | 2.1<br>(1.9 - 2.3)    | 2.3<br>(1.8 - 3.0)    | 0.6<br>(0.5 - 0.7) | 1.6<br>(1.5 - 1.8)    | 5.3<br>(4.6 - 6.1)       | 5.9<br>(5.2 - 6.9)             |
| Digestive diseases                                  | 21.6<br>(19.0 - 23.6) | 8.2<br>(6.4 - 11.2)   | 3.6<br>(3.1 - 4.1) | 10.8<br>(8.9 - 12.1)  | 59.1<br>(51.5 - 65.2)    | 224.2<br>(199.7 - 245.9)       |
| Peptic ulcer disease                                | 7.6<br>(6.5 - 9.4)    | 0.9<br>(0.5 - 1.7)    | 0.5<br>(0.4 - 0.8) | 3.5<br>(2.9 - 4.5)    | 24.6<br>(20.7 - 30.0)    | 82.6<br>(70.4 - 99.1)          |
| Gastritis and duodenitis                            | 1.1<br>(0.5 - 1.7)    | 0.4<br>(0.1 - 0.8)    | 0.2<br>(0.1 - 0.4) | 0.5<br>(0.3 - 0.8)    | 2.9<br>(1.4 - 4.9)       | 10.4<br>(5.0 - 16.9)           |
| Appendicitis                                        | 1.7<br>(1.3 - 2.3)    | 0.9<br>(0.5 - 1.7)    | 0.6<br>(0.4 - 0.9) | 1.5<br>(1.1 - 2.0)    | 3.4<br>(2.5 - 4.8)       | 9.4<br>(6.4 - 12.9)            |
| Paralytic ileus and intestinal obstruction          | 3.6<br>(2.0 - 4.8)    | 1.5<br>(0.8 - 2.3)    | 1.2<br>(0.8 - 1.6) | 1.8<br>(0.8 - 2.4)    | 9.3<br>(5.0 - 12.4)      | 34.8<br>(19.5 - 49.3)          |
| Inguinal, femoral, and abdominal hernia             | 1.2<br>(0.7 - 1.4)    | 0.5<br>(0.2 - 0.9)    | 0.2<br>(0.1 - 0.3) | 0.4<br>(0.2 - 0.6)    | 2.6<br>(1.4 - 3.3)       | 16.1<br>(9.7 - 20.9)           |
| Inflammatory bowel disease                          | 0.9<br>(0.6 - 1.2)    | 1.4<br>(0.5 - 2.6)    | 0.2<br>(0.1 - 0.4) | 0.4<br>(0.2 - 0.6)    | 1.9<br>(1.1 - 2.5)       | 8.6<br>(5.2 - 11.5)            |
| Vascular intestinal disorders                       | 0.9<br>(0.4 - 1.6)    | 0.1<br>(0.0 - 0.3)    | 0.1<br>(0.0 - 0.2) | 0.2<br>(0.1 - 0.3)    | 2.4<br>(1.0 - 4.5)       | 15.1<br>(6.5 - 28.1)           |
| Gallbladder and biliary diseases                    | 1.2<br>(1.0 - 1.4)    | 0.2<br>(0.1 - 0.4)    | 0.1<br>(0.1 - 0.1) | 0.4<br>(0.3 - 0.4)    | 3.1<br>(2.4 - 3.8)       | 18.7<br>(15.7 - 22.6)          |
| Pancreatitis                                        | 1.8<br>(1.1 - 2.7)    | 0.1<br>(0.0 - 0.3)    | 0.1<br>(0.1 - 0.2) | 1.5<br>(0.9 - 2.3)    | 5.0<br>(3.0 - 7.7)       | 11.3<br>(6.6 - 16.6)           |
| Other digestive diseases                            | 1.7<br>(1.3 - 2.1)    | 2.0<br>(1.3 - 3.0)    | 0.3<br>(0.2 - 0.4) | 0.6<br>(0.5 - 0.8)    | 4.0<br>(2.9 - 5.2)       | 17.3<br>(13.1 - 22.0)          |
| Neurological disorders                              | 17.0<br>(16.0 - 18.0) | 4.5<br>(2.9 - 7.1)    | 1.5<br>(1.2 - 2.0) | 3.2<br>(2.6 - 3.7)    | 15.1<br>(13.9 - 16.3)    | 406.2<br>(381.0 - 430.3)       |
| Alzheimer disease and other dementias               | 12.5<br>(11.6 - 13.2) | --                    | --                 | 0.0<br>(0.0 - 0.0)    | 8.1<br>(7.4 - 8.7)       | 367.8<br>(342.7 - 391.6)       |
| Parkinson disease                                   | 0.9<br>(0.8 - 0.9)    | --                    | --                 | 0.0<br>(0.0 - 0.0)    | 1.1<br>(1.0 - 1.2)       | 22.6<br>(20.9 - 24.3)          |
| Epilepsy                                            | 2.4<br>(2.0 - 3.1)    | 3.6<br>(2.1 - 6.3)    | 1.3<br>(1.0 - 1.8) | 2.4<br>(1.9 - 2.8)    | 2.4<br>(1.9 - 3.0)       | 5.9<br>(4.7 - 7.7)             |
| Multiple sclerosis                                  | 0.2<br>(0.1 - 0.4)    | --                    | --                 | 0.1<br>(0.1 - 0.3)    | 0.7<br>(0.4 - 1.4)       | 1.0<br>(0.6 - 1.9)             |
| Other neurological disorders                        | 1.1<br>(0.8 - 1.4)    | 0.9<br>(0.6 - 2.3)    | 0.2<br>(0.2 - 0.4) | 0.6<br>(0.5 - 0.8)    | 2.9<br>(2.2 - 3.4)       | 8.9<br>(6.6 - 10.5)            |
| Mental and substance use disorders                  | 5.4<br>(4.2 - 7.0)    | 0.4<br>(0.2 - 0.6)    | 0.0<br>(0.0 - 0.0) | 6.4<br>(5.0 - 8.1)    | 13.6<br>(10.8 - 20.0)    | 11.2<br>(8.7 - 15.3)           |
| Schizophrenia                                       | 0.4<br>(0.2 - 0.6)    | --                    | --                 | 0.4<br>(0.2 - 0.6)    | 1.1<br>(0.5 - 1.5)       | 1.8<br>(0.9 - 2.5)             |
| Alcohol use disorders                               | 3.4<br>(2.5 - 5.1)    | --                    | --                 | 3.6<br>(2.5 - 5.2)    | 10.9<br>(8.2 - 17.2)     | 7.3<br>(5.0 - 11.1)            |
| Drug use disorders                                  | 1.6<br>(1.3 - 2.0)    | 0.4<br>(0.2 - 0.6)    | --                 | 2.4<br>(2.0 - 3.1)    | 1.7<br>(1.4 - 2.3)       | 2.1<br>(1.7 - 2.8)             |
| Opioid use disorders                                | 0.5<br>(0.5 - 0.7)    | 0.1<br>(0.1 - 0.2)    | --                 | 0.8<br>(0.7 - 1.0)    | 0.6<br>(0.5 - 0.9)       | 0.8<br>(0.6 - 1.1)             |

Web Table 27 - Global death rates (per 100k) with 95% UI by age, sex, and cause in 1990

| Cause                                               | Males, All Ages       | Males, 0-4 Years        | Males, 5-14 Years  | Males, 15-49 Years  | Males, 50-69 Years    | Males, 70-80 Years       |
|-----------------------------------------------------|-----------------------|-------------------------|--------------------|---------------------|-----------------------|--------------------------|
| Cocaine use disorders                               | 0.1<br>(0.1 - 0.1)    | 0.0<br>(0.0 - 0.0)      | --                 | 0.1<br>(0.1 - 0.1)  | 0.1<br>(0.0 - 0.1)    | 0.1<br>(0.1 - 0.1)       |
| Amphetamine use disorders                           | 0.1<br>(0.0 - 0.1)    | 0.0<br>(0.0 - 0.0)      | --                 | 0.1<br>(0.1 - 0.1)  | 0.1<br>(0.0 - 0.1)    | 0.1<br>(0.1 - 0.1)       |
| Other drug use disorders                            | 0.9<br>(0.7 - 1.2)    | 0.2<br>(0.1 - 0.4)      | --                 | 1.5<br>(1.1 - 1.8)  | 0.9<br>(0.8 - 1.3)    | 1.1<br>(0.9 - 1.5)       |
| Eating disorders                                    | 0.0<br>(0.0 - 0.0)    | --                      | 0.0<br>(0.0 - 0.0) | 0.0<br>(0.0 - 0.0)  | --                    | --                       |
| Anorexia nervosa                                    | 0.0<br>(0.0 - 0.0)    | --                      | 0.0<br>(0.0 - 0.0) | 0.0<br>(0.0 - 0.0)  | --                    | --                       |
| Diabetes, urogenital, blood, and endocrine diseases | 28.8<br>(26.0 - 33.0) | 25.9<br>(14.1 - 51.6)   | 4.2<br>(2.6 - 6.6) | 9.7<br>(8.8 - 11.2) | 76.1<br>(71.7 - 80.2) | 330.2<br>(306.3 - 342.4) |
| Diabetes mellitus                                   | 11.5<br>(11.1 - 12.0) | 1.4<br>(1.2 - 1.5)      | 0.2<br>(0.2 - 0.3) | 2.9<br>(2.7 - 3.1)  | 40.5<br>(38.2 - 42.8) | 154.3<br>(147.7 - 160.8) |
| Acute glomerulonephritis                            | 0.4<br>(0.2 - 0.7)    | 0.7<br>(0.2 - 1.4)      | 0.2<br>(0.1 - 0.3) | 0.3<br>(0.1 - 0.4)  | 0.9<br>(0.5 - 1.5)    | 2.7<br>(1.3 - 4.4)       |
| Chronic kidney disease                              | 8.3<br>(7.1 - 8.8)    | 2.3<br>(1.7 - 2.7)      | 0.6<br>(0.5 - 0.7) | 3.4<br>(2.7 - 3.7)  | 21.6<br>(18.7 - 23.5) | 110.0<br>(92.4 - 117.2)  |
| Chronic kidney disease due to diabetes mellitus     | 0.9<br>(0.5 - 1.1)    | 0.0<br>(0.0 - 0.1)      | 0.0<br>(0.0 - 0.0) | 0.2<br>(0.1 - 0.3)  | 2.4<br>(1.5 - 3.3)    | 14.4<br>(8.3 - 19.0)     |
| Chronic kidney disease due to hypertension          | 2.4<br>(1.5 - 2.9)    | 0.2<br>(0.1 - 0.4)      | 0.0<br>(0.0 - 0.1) | 0.7<br>(0.4 - 0.9)  | 6.6<br>(4.1 - 8.2)    | 36.9<br>(24.7 - 46.1)    |
| Chronic kidney disease due to glomerulonephritis    | 2.0<br>(1.6 - 2.4)    | 1.2<br>(0.9 - 1.7)      | 0.3<br>(0.3 - 0.4) | 1.2<br>(1.0 - 1.5)  | 4.9<br>(4.0 - 6.1)    | 17.1<br>(12.9 - 21.9)    |
| Chronic kidney disease due to other causes          | 3.0<br>(2.3 - 3.8)    | 0.8<br>(0.5 - 1.1)      | 0.2<br>(0.1 - 0.3) | 1.2<br>(0.9 - 1.5)  | 7.7<br>(5.9 - 9.9)    | 41.6<br>(31.6 - 52.9)    |
| Urinary diseases and male infertility               | 3.0<br>(2.4 - 3.3)    | 1.9<br>(1.4 - 2.4)      | 0.3<br>(0.2 - 0.3) | 1.0<br>(0.8 - 1.2)  | 7.1<br>(5.5 - 8.2)    | 41.0<br>(33.8 - 46.3)    |
| Interstitial nephritis and urinary tract infections | 1.9<br>(1.5 - 2.2)    | 1.4<br>(1.0 - 1.8)      | 0.2<br>(0.1 - 0.2) | 0.7<br>(0.5 - 0.8)  | 4.5<br>(3.3 - 5.2)    | 27.2<br>(21.4 - 31.9)    |
| Urolithiasis                                        | 0.3<br>(0.2 - 0.4)    | --                      | 0.0<br>(0.0 - 0.0) | 0.1<br>(0.1 - 0.2)  | 1.0<br>(0.6 - 1.4)    | 4.4<br>(2.5 - 5.8)       |
| Other urinary diseases                              | 0.7<br>(0.5 - 1.0)    | 0.5<br>(0.3 - 0.8)      | 0.1<br>(0.0 - 0.1) | 0.2<br>(0.2 - 0.3)  | 1.6<br>(1.2 - 2.4)    | 9.5<br>(6.7 - 13.3)      |
| Gynecological diseases                              | --                    | --                      | --                 | --                  | --                    | --                       |
| Uterine fibroids                                    | --                    | --                      | --                 | --                  | --                    | --                       |
| Polycystic ovarian syndrome                         | --                    | --                      | --                 | --                  | --                    | --                       |
| Endometriosis                                       | --                    | --                      | --                 | --                  | --                    | --                       |
| Genital prolapse                                    | --                    | --                      | --                 | --                  | --                    | --                       |
| Other gynecological diseases                        | --                    | --                      | --                 | --                  | --                    | --                       |
| Hemoglobinopathies and hemolytic anemias            | 3.6<br>(1.2 - 7.3)    | 16.0<br>(4.3 - 40.9)    | 2.4<br>(0.8 - 4.8) | 1.2<br>(0.5 - 2.8)  | 1.9<br>(1.0 - 4.1)    | 6.6<br>(3.7 - 10.2)      |
| Thalassemias                                        | 0.7<br>(0.4 - 1.1)    | 3.1<br>(1.4 - 5.1)      | 0.6<br>(0.3 - 0.9) | 0.4<br>(0.2 - 0.6)  | 0.1<br>(0.0 - 0.1)    | 0.0<br>(0.0 - 0.0)       |
| Sickle cell disorders                               | 2.2<br>(0.4 - 5.7)    | 11.4<br>(1.5 - 34.9)    | 1.7<br>(0.3 - 4.0) | 0.6<br>(0.2 - 2.0)  | 0.6<br>(0.2 - 2.1)    | 0.1<br>(0.1 - 0.2)       |
| G6PD deficiency                                     | 0.1<br>(0.0 - 0.1)    | 0.3<br>(0.1 - 0.5)      | 0.0<br>(0.0 - 0.1) | 0.0<br>(0.0 - 0.1)  | 0.1<br>(0.0 - 0.1)    | 0.0<br>(0.0 - 0.1)       |
| Other hemoglobinopathies and hemolytic anemias      | 0.6<br>(0.4 - 0.9)    | 1.2<br>(0.6 - 1.8)      | 0.1<br>(0.1 - 0.2) | 0.2<br>(0.1 - 0.3)  | 1.2<br>(0.7 - 1.8)    | 6.4<br>(3.6 - 9.9)       |
| Endocrine, metabolic, blood, and immune disorders   | 2.0<br>(1.4 - 2.4)    | 3.7<br>(2.1 - 5.3)      | 0.5<br>(0.3 - 0.7) | 0.9<br>(0.7 - 1.1)  | 3.9<br>(3.0 - 5.1)    | 15.6<br>(11.1 - 19.7)    |
| Musculoskeletal disorders                           | 1.0<br>(0.7 - 1.3)    | --                      | 0.4<br>(0.2 - 0.5) | 0.5<br>(0.4 - 0.7)  | 3.1<br>(2.1 - 3.8)    | 8.7<br>(6.7 - 11.9)      |
| Rheumatoid arthritis                                | 0.3<br>(0.2 - 0.5)    | --                      | 0.1<br>(0.0 - 0.1) | 0.1<br>(0.1 - 0.2)  | 1.2<br>(0.8 - 1.7)    | 3.9<br>(2.9 - 5.2)       |
| Other musculoskeletal disorders                     | 0.7<br>(0.5 - 0.8)    | --                      | 0.3<br>(0.2 - 0.4) | 0.4<br>(0.3 - 0.5)  | 1.8<br>(1.3 - 2.3)    | 4.8<br>(3.6 - 6.8)       |
| Other non-communicable diseases                     | 16.0<br>(13.5 - 21.9) | 107.4<br>(88.0 - 154.0) | 3.1<br>(2.6 - 3.9) | 2.2<br>(2.0 - 2.4)  | 3.8<br>(3.3 - 4.2)    | 16.8<br>(15.0 - 18.3)    |
| Congenital anomalies                                | 14.6<br>(12.2 - 20.4) | 102.2<br>(83.3 - 148.0) | 2.9<br>(2.5 - 3.8) | 1.8<br>(1.6 - 2.1)  | 2.1<br>(1.5 - 2.4)    | 5.9<br>(3.7 - 6.9)       |
| Neural tube defects                                 | 2.7<br>(1.9 - 3.8)    | 20.4<br>(14.0 - 28.4)   | 0.3<br>(0.2 - 0.5) | 0.2<br>(0.1 - 0.3)  | 0.1<br>(0.1 - 0.2)    | 0.4<br>(0.2 - 0.6)       |
| Congenital heart anomalies                          | 7.1<br>(5.8 - 10.4)   | 49.4<br>(39.3 - 74.7)   | 1.7<br>(1.4 - 2.2) | 0.9<br>(0.8 - 1.1)  | 1.1<br>(0.7 - 1.3)    | 3.2<br>(1.7 - 3.9)       |
| Cleft lip and cleft palate                          | 0.2<br>(0.1 - 0.3)    | 1.3<br>(0.5 - 2.3)      | --                 | --                  | --                    | --                       |
| Down syndrome                                       | 0.7<br>(0.3 - 1.3)    | 4.2<br>(1.2 - 8.7)      | 0.2<br>(0.1 - 0.4) | 0.2<br>(0.1 - 0.3)  | 0.2<br>(0.1 - 0.3)    | 0.1<br>(0.1 - 0.2)       |
| Chromosomal unbalanced rearrangements               | 0.3<br>(0.1 - 0.7)    | 2.0<br>(0.9 - 5.2)      | 0.1<br>(0.0 - 0.1) | 0.0<br>(0.0 - 0.1)  | 0.0<br>(0.0 - 0.1)    | 0.1<br>(0.0 - 0.1)       |
| Other congenital anomalies                          | 3.6<br>(2.5 - 7.1)    | 24.9<br>(16.5 - 52.1)   | 0.6<br>(0.4 - 1.2) | 0.5<br>(0.3 - 0.6)  | 0.6<br>(0.4 - 0.8)    | 2.2<br>(1.7 - 2.6)       |

Web Table 27 - Global death rates (per 100k) with 95% UI by age, sex, and cause in 1990

| Cause                                           | Males, All Ages         | Males, 0-4 Years         | Males, 5-14 Years     | Males, 15-49 Years       | Males, 50-69 Years       | Males, 70-80 Years       |
|-------------------------------------------------|-------------------------|--------------------------|-----------------------|--------------------------|--------------------------|--------------------------|
| Skin and subcutaneous diseases                  | 0.9<br>(0.8 - 1.0)      | 1.4<br>(0.9 - 1.7)       | 0.1<br>(0.1 - 0.2)    | 0.3<br>(0.3 - 0.4)       | 1.7<br>(1.5 - 1.9)       | 10.9<br>(10.0 - 12.2)    |
| Cellulitis                                      | 0.4<br>(0.3 - 0.6)      | 0.7<br>(0.4 - 1.2)       | 0.1<br>(0.0 - 0.1)    | 0.2<br>(0.1 - 0.3)       | 0.9<br>(0.6 - 1.2)       | 3.6<br>(2.3 - 5.2)       |
| Pyoderma                                        | 0.3<br>(0.2 - 0.4)      | 0.6<br>(0.3 - 0.9)       | 0.0<br>(0.0 - 0.1)    | 0.1<br>(0.1 - 0.2)       | 0.5<br>(0.3 - 0.8)       | 3.0<br>(2.1 - 4.0)       |
| Decubitus ulcer                                 | 0.2<br>(0.1 - 0.2)      | 0.0<br>(0.0 - 0.1)       | 0.0<br>(0.0 - 0.0)    | 0.0<br>(0.0 - 0.1)       | 0.2<br>(0.2 - 0.3)       | 4.0<br>(3.3 - 4.9)       |
| Other skin and subcutaneous diseases            | 0.0<br>(0.0 - 0.0)      | 0.0<br>(0.0 - 0.1)       | 0.0<br>(0.0 - 0.0)    | 0.0<br>(0.0 - 0.0)       | 0.0<br>(0.0 - 0.0)       | 0.3<br>(0.2 - 0.4)       |
| Sudden infant death syndrome                    | 0.5<br>(0.2 - 0.8)      | 3.9<br>(1.9 - 6.7)       | --<br>(1.9 - 6.7)     | --<br>(1.9 - 6.7)        | --<br>(1.9 - 6.7)        | --<br>(1.9 - 6.7)        |
| Injuries                                        | 104.7<br>(99.4 - 111.0) | 129.9<br>(105.1 - 150.5) | 38.4<br>(35.3 - 41.2) | 107.2<br>(101.4 - 113.9) | 140.6<br>(131.7 - 152.4) | 272.6<br>(258.5 - 298.8) |
| Transport injuries                              | 31.4<br>(29.5 - 34.4)   | 21.6<br>(17.6 - 27.5)    | 11.6<br>(10.5 - 13.0) | 37.8<br>(35.5 - 41.2)    | 40.6<br>(37.3 - 44.3)    | 62.0<br>(58.0 - 68.8)    |
| Road injuries                                   | 29.0<br>(27.2 - 32.1)   | 19.2<br>(15.5 - 24.5)    | 10.8<br>(9.8 - 12.1)  | 35.3<br>(33.2 - 38.6)    | 36.9<br>(34.0 - 41.1)    | 56.6<br>(53.5 - 63.2)    |
| Pedestrian road injuries                        | 10.3<br>(8.5 - 13.0)    | 10.4<br>(7.7 - 14.5)     | 5.7<br>(4.7 - 7.0)    | 9.9<br>(7.9 - 12.7)      | 15.2<br>(12.5 - 18.8)    | 28.4<br>(24.2 - 35.1)    |
| Cyclist road injuries                           | 1.8<br>(1.5 - 2.2)      | 1.1<br>(0.7 - 1.5)       | 1.0<br>(0.8 - 1.3)    | 1.7<br>(1.4 - 2.1)       | 3.1<br>(2.5 - 3.8)       | 5.9<br>(4.8 - 7.3)       |
| Motorcyclist road injuries                      | 6.0<br>(5.0 - 7.3)      | 1.7<br>(1.1 - 2.5)       | 0.9<br>(0.7 - 1.3)    | 9.5<br>(7.8 - 11.5)      | 4.9<br>(3.7 - 6.2)       | 5.0<br>(3.7 - 6.2)       |
| Motor vehicle road injuries                     | 9.9<br>(8.6 - 11.4)     | 5.2<br>(3.6 - 6.9)       | 2.7<br>(2.2 - 3.3)    | 13.1<br>(11.5 - 15.1)    | 12.1<br>(10.1 - 13.9)    | 15.7<br>(13.0 - 18.5)    |
| Other road injuries                             | 1.0<br>(0.5 - 1.3)      | 0.9<br>(0.3 - 1.5)       | 0.5<br>(0.2 - 0.8)    | 1.0<br>(0.5 - 1.4)       | 1.6<br>(0.8 - 2.4)       | 1.7<br>(1.0 - 2.4)       |
| Other transport injuries                        | 2.4<br>(1.9 - 2.8)      | 2.4<br>(1.7 - 3.3)       | 0.8<br>(0.6 - 1.0)    | 2.6<br>(2.1 - 3.0)       | 3.7<br>(2.8 - 4.3)       | 5.3<br>(3.6 - 6.4)       |
| Unintentional injuries                          | 44.7<br>(40.8 - 48.5)   | 101.5<br>(76.5 - 120.8)  | 23.5<br>(20.3 - 25.9) | 31.7<br>(29.2 - 35.0)    | 53.4<br>(49.3 - 60.2)    | 142.5<br>(131.9 - 165.4) |
| Falls                                           | 7.4<br>(6.5 - 9.5)      | 6.8<br>(4.7 - 9.7)       | 1.9<br>(1.6 - 2.4)    | 5.0<br>(4.3 - 6.4)       | 13.9<br>(12.3 - 17.9)    | 61.0<br>(54.2 - 77.3)    |
| Drowning                                        | 13.3<br>(10.1 - 15.9)   | 37.8<br>(22.7 - 50.7)    | 13.2<br>(9.6 - 15.6)  | 8.7<br>(7.1 - 10.4)      | 8.5<br>(7.0 - 10.6)      | 12.3<br>(10.1 - 15.6)    |
| Fire, heat, and hot substances                  | 4.3<br>(3.5 - 5.1)      | 9.8<br>(6.5 - 13.0)      | 1.5<br>(1.2 - 1.9)    | 3.3<br>(2.6 - 4.0)       | 5.5<br>(4.6 - 7.0)       | 14.4<br>(11.5 - 17.3)    |
| Poisonings                                      | 2.8<br>(2.3 - 4.1)      | 4.8<br>(3.3 - 8.5)       | 0.8<br>(0.6 - 1.2)    | 2.7<br>(2.0 - 3.6)       | 3.8<br>(3.1 - 5.6)       | 6.0<br>(5.2 - 9.6)       |
| Exposure to mechanical forces                   | 6.2<br>(5.3 - 7.2)      | 17.9<br>(9.5 - 25.3)     | 2.0<br>(1.7 - 2.5)    | 5.0<br>(4.5 - 6.2)       | 6.5<br>(5.7 - 7.8)       | 6.5<br>(5.7 - 7.8)       |
| Unintentional firearm injuries                  | 1.5<br>(1.2 - 1.7)      | 1.5<br>(1.1 - 2.1)       | 0.5<br>(0.4 - 0.6)    | 1.8<br>(1.5 - 2.2)       | 1.7<br>(1.2 - 2.3)       | 2.3<br>(1.7 - 3.2)       |
| Unintentional suffocation                       | 1.8<br>(0.5 - 2.7)      | 13.0<br>(3.1 - 20.1)     | 0.3<br>(0.1 - 0.4)    | 0.2<br>(0.1 - 0.3)       | 0.3<br>(0.2 - 0.4)       | 0.6<br>(0.4 - 0.8)       |
| Other exposure to mechanical forces             | 2.9<br>(2.6 - 3.6)      | 3.4<br>(2.3 - 5.1)       | 1.2<br>(1.0 - 1.7)    | 3.0<br>(2.7 - 3.6)       | 4.5<br>(3.9 - 5.5)       | 3.6<br>(3.1 - 4.4)       |
| Adverse effects of medical treatment            | 1.9<br>(1.3 - 2.4)      | 5.1<br>(2.9 - 7.6)       | 0.4<br>(0.2 - 0.5)    | 0.8<br>(0.6 - 1.0)       | 3.0<br>(2.2 - 3.9)       | 12.0<br>(8.9 - 15.9)     |
| Animal contact                                  | 1.9<br>(1.2 - 2.3)      | 2.4<br>(1.4 - 3.7)       | 1.8<br>(1.2 - 2.4)    | 1.4<br>(0.8 - 1.7)       | 3.1<br>(1.9 - 3.8)       | 4.4<br>(2.7 - 5.5)       |
| Venomous animal contact                         | 1.5<br>(0.9 - 1.8)      | 1.3<br>(0.8 - 2.3)       | 1.5<br>(0.9 - 1.9)    | 1.2<br>(0.6 - 1.4)       | 2.5<br>(1.5 - 3.2)       | 3.1<br>(1.8 - 3.9)       |
| Non-venomous animal contact                     | 0.4<br>(0.3 - 0.6)      | 1.1<br>(0.5 - 1.7)       | 0.4<br>(0.2 - 0.5)    | 0.2<br>(0.1 - 0.3)       | 0.6<br>(0.3 - 0.7)       | 1.3<br>(0.8 - 1.8)       |
| Foreign body                                    | 3.1<br>(1.9 - 5.3)      | 12.7<br>(7.2 - 23.6)     | 0.5<br>(0.3 - 0.8)    | 0.9<br>(0.5 - 1.4)       | 3.3<br>(1.9 - 5.1)       | 18.1<br>(10.8 - 31.0)    |
| Pulmonary aspiration and foreign body in airway | 3.0<br>(1.8 - 5.2)      | 12.5<br>(7.1 - 23.5)     | 0.4<br>(0.3 - 0.8)    | 0.9<br>(0.5 - 1.3)       | 3.2<br>(1.8 - 5.0)       | 18.0<br>(10.7 - 30.9)    |
| Foreign body in other body part                 | 0.1<br>(0.0 - 0.1)      | 0.1<br>(0.1 - 0.3)       | 0.0<br>(0.0 - 0.0)    | 0.0<br>(0.0 - 0.0)       | 0.1<br>(0.1 - 0.2)       | 0.1<br>(0.1 - 0.2)       |
| Other unintentional injuries                    | 3.8<br>(3.4 - 4.2)      | 4.1<br>(3.1 - 5.0)       | 1.5<br>(1.2 - 1.7)    | 3.9<br>(3.4 - 4.5)       | 5.9<br>(5.2 - 6.7)       | 7.6<br>(6.7 - 8.7)       |
| Self-harm and interpersonal violence            | 26.2<br>(22.1 - 29.8)   | 3.8<br>(2.3 - 5.2)       | 2.4<br>(1.8 - 2.8)    | 35.5<br>(29.9 - 40.1)    | 41.8<br>(34.6 - 48.3)    | 64.0<br>(50.8 - 72.3)    |
| Self-harm                                       | 16.2<br>(13.2 - 18.1)   | --<br>(0.8 - 1.2)        | 1.0<br>(0.8 - 1.2)    | 20.2<br>(16.4 - 22.4)    | 32.0<br>(26.5 - 37.4)    | 56.1<br>(42.9 - 63.8)    |
| Interpersonal violence                          | 10.0<br>(6.8 - 12.9)    | 3.8<br>(2.3 - 5.2)       | 1.3<br>(0.9 - 1.8)    | 15.3<br>(10.6 - 19.1)    | 9.7<br>(6.2 - 13.4)      | 7.9<br>(4.9 - 11.1)      |
| Assault by firearm                              | 4.2<br>(2.8 - 5.6)      | 0.5<br>(0.2 - 0.8)       | 0.3<br>(0.2 - 0.5)    | 6.9<br>(4.8 - 9.0)       | 3.7<br>(2.1 - 5.5)       | 2.2<br>(1.2 - 3.5)       |
| Assault by sharp object                         | 2.8<br>(1.8 - 4.1)      | 0.4<br>(0.1 - 0.8)       | 0.2<br>(0.1 - 0.3)    | 4.4<br>(2.8 - 6.6)       | 2.9<br>(1.7 - 4.3)       | 1.7<br>(1.0 - 2.7)       |
| Assault by other means                          | 3.1<br>(1.9 - 3.9)      | 2.9<br>(1.8 - 4.1)       | 0.8<br>(0.5 - 1.1)    | 4.0<br>(2.3 - 5.1)       | 3.1<br>(1.9 - 4.4)       | 4.0<br>(2.3 - 5.6)       |
| Forces of nature, war, and legal intervention   | 2.4<br>(1.6 - 4.7)      | 3.0<br>(2.8 - 3.5)       | 0.9<br>(0.6 - 1.9)    | 2.2<br>(1.3 - 4.7)       | 4.9<br>(2.9 - 10.3)      | 4.2<br>(2.4 - 8.4)       |
| Exposure to forces of nature                    | 0.8<br>(0.4 - 1.7)      | 0.8<br>(0.7 - 0.8)       | 0.3<br>(0.2 - 0.7)    | 0.7<br>(0.3 - 1.6)       | 1.8<br>(0.8 - 4.3)       | 1.7<br>(0.8 - 3.8)       |
| Collective violence and legal intervention      | 1.6<br>(1.1 - 2.9)      | 2.3<br>(2.1 - 2.7)       | 0.6<br>(0.5 - 1.1)    | 1.5<br>(0.9 - 3.0)       | 3.1<br>(1.9 - 5.9)       | 2.4<br>(1.5 - 4.5)       |

Web Table 27 - Global death rates (per 100k) with 95% UI by age, sex, and cause in 1990

| Cause                                                             | Females, All Ages        | Females, 0-4 Years             | Females, 5-14 Years      | Females, 15-49 Years     | Females, 50-69 Years           | Females, 70-80 Years           |
|-------------------------------------------------------------------|--------------------------|--------------------------------|--------------------------|--------------------------|--------------------------------|--------------------------------|
| All causes                                                        | 849.1<br>(831.3 - 870.9) | 1,842.4<br>(1,780.9 - 1,909.7) | 121.8<br>(117.5 - 126.4) | 227.4<br>(217.5 - 238.1) | 1,280.1<br>(1,234.1 - 1,336.6) | 6,955.2<br>(6,846.2 - 7,104.0) |
| Communicable, maternal, neonatal, and nutritional diseases        | 297.4<br>(287.2 - 308.9) | 1,538.5<br>(1,469.5 - 1,613.3) | 69.4<br>(65.7 - 73.6)    | 86.5<br>(82.3 - 91.4)    | 188.4<br>(176.5 - 200.6)       | 717.2<br>(660.9 - 768.8)       |
| HIV/AIDS and tuberculosis                                         | 30.8<br>(28.0 - 34.3)    | 20.9<br>(18.5 - 28.3)          | 4.7<br>(4.1 - 5.7)       | 24.8<br>(22.2 - 28.0)    | 70.7<br>(61.8 - 78.9)          | 122.1<br>(104.6 - 136.8)       |
| Tuberculosis                                                      | 27.7<br>(24.8 - 31.1)    | 15.3<br>(13.0 - 22.4)          | 4.5<br>(3.9 - 5.5)       | 20.9<br>(18.4 - 23.9)    | 67.8<br>(58.8 - 75.9)          | 121.0<br>(103.6 - 135.8)       |
| HIV/AIDS                                                          | 3.1<br>(2.4 - 4.0)       | 5.6<br>(5.1 - 6.1)             | 0.2<br>(0.1 - 0.2)       | 4.0<br>(3.0 - 5.6)       | 2.9<br>(2.1 - 3.9)             | 1.1<br>(0.8 - 1.4)             |
| HIV/AIDS resulting in mycobacterial infection                     | 0.2<br>(0.2 - 0.3)       | 0.5<br>(0.4 - 0.6)             | 0.0<br>(0.0 - 0.0)       | 0.3<br>(0.2 - 0.5)       | 0.2<br>(0.2 - 0.3)             | 0.1<br>(0.1 - 0.1)             |
| HIV/AIDS resulting in other diseases                              | 2.9<br>(2.2 - 3.7)       | 5.2<br>(4.7 - 5.6)             | 0.1<br>(0.1 - 0.2)       | 3.6<br>(2.7 - 5.1)       | 2.6<br>(2.0 - 3.6)             | 1.0<br>(0.7 - 1.3)             |
| Diarrhea, lower respiratory, and other common infectious diseases | 149.9<br>(142.0 - 160.5) | 804.5<br>(750.1 - 878.2)       | 46.0<br>(41.9 - 50.4)    | 22.4<br>(20.2 - 24.8)    | 85.2<br>(77.7 - 94.4)          | 494.9<br>(443.5 - 539.3)       |
| Diarrheal diseases                                                | 50.7<br>(46.8 - 54.6)    | 253.7<br>(226.0 - 283.9)       | 14.9<br>(12.9 - 17.2)    | 9.1<br>(8.1 - 10.0)      | 42.1<br>(36.6 - 47.2)          | 163.1<br>(143.8 - 182.8)       |
| Intestinal infectious diseases                                    | 4.6<br>(2.5 - 7.5)       | 12.3<br>(6.9 - 20.6)           | 6.7<br>(3.8 - 11.1)      | 2.8<br>(1.5 - 4.8)       | 1.7<br>(0.9 - 2.9)             | 2.1<br>(1.3 - 3.4)             |
| Typhoid fever                                                     | 3.2<br>(1.7 - 5.4)       | 8.0<br>(4.1 - 13.9)            | 4.9<br>(2.6 - 8.2)       | 2.0<br>(1.0 - 3.6)       | 1.2<br>(0.6 - 2.1)             | 1.4<br>(0.8 - 2.4)             |
| Paratyphoid fever                                                 | 1.1<br>(0.6 - 1.9)       | 3.2<br>(1.6 - 5.8)             | 1.7<br>(0.9 - 3.1)       | 0.7<br>(0.3 - 1.2)       | 0.3<br>(0.2 - 0.6)             | 0.4<br>(0.2 - 0.7)             |
| Other intestinal infectious diseases                              | 0.2<br>(0.2 - 0.3)       | 1.1<br>(0.9 - 1.3)             | 0.1<br>(0.1 - 0.1)       | 0.1<br>(0.1 - 0.1)       | 0.1<br>(0.1 - 0.2)             | 0.3<br>(0.2 - 0.3)             |
| Lower respiratory infections                                      | 64.9<br>(60.2 - 70.1)    | 343.6<br>(311.2 - 377.0)       | 11.6<br>(10.0 - 13.4)    | 6.2<br>(5.5 - 7.0)       | 32.3<br>(28.5 - 37.3)          | 312.3<br>(267.9 - 347.2)       |
| Upper respiratory infections                                      | 0.1<br>(0.1 - 0.1)       | 0.3<br>(0.2 - 0.5)             | 0.0<br>(0.0 - 0.0)       | 0.0<br>(0.0 - 0.0)       | 0.1<br>(0.1 - 0.2)             | 0.4<br>(0.3 - 0.5)             |
| Otitis media                                                      | 0.1<br>(0.1 - 0.1)       | 0.3<br>(0.3 - 0.4)             | 0.1<br>(0.1 - 0.1)       | 0.0<br>(0.0 - 0.0)       | 0.1<br>(0.1 - 0.1)             | 0.3<br>(0.2 - 0.3)             |
| Meningitis                                                        | 8.2<br>(7.2 - 9.3)       | 43.5<br>(36.3 - 52.7)          | 4.0<br>(3.4 - 4.7)       | 2.3<br>(2.0 - 2.7)       | 4.8<br>(4.0 - 5.5)             | 8.7<br>(6.9 - 9.9)             |
| Pneumococcal meningitis                                           | 2.0<br>(1.7 - 2.3)       | 9.0<br>(7.3 - 11.3)            | 1.3<br>(1.0 - 1.6)       | 0.7<br>(0.6 - 0.9)       | 1.4<br>(1.1 - 1.9)             | 2.6<br>(2.0 - 3.2)             |
| H influenzae type B meningitis                                    | 2.1<br>(1.8 - 2.5)       | 13.8<br>(11.3 - 17.2)          | 1.0<br>(0.8 - 1.2)       | 0.3<br>(0.2 - 0.4)       | 0.5<br>(0.4 - 0.6)             | 0.8<br>(0.6 - 1.0)             |
| Meningococcal meningitis                                          | 1.5<br>(1.3 - 1.7)       | 7.6<br>(6.3 - 9.5)             | 0.7<br>(0.6 - 0.9)       | 0.5<br>(0.4 - 0.6)       | 1.0<br>(0.8 - 1.2)             | 2.0<br>(1.5 - 2.4)             |
| Other meningitis                                                  | 2.6<br>(2.2 - 3.0)       | 13.1<br>(10.7 - 15.8)          | 1.1<br>(0.9 - 1.4)       | 0.8<br>(0.7 - 1.0)       | 1.9<br>(1.5 - 2.4)             | 3.3<br>(2.6 - 4.0)             |
| Encephalitis                                                      | 1.7<br>(1.1 - 2.3)       | 8.2<br>(4.4 - 12.0)            | 1.2<br>(0.6 - 1.8)       | 0.6<br>(0.4 - 0.8)       | 1.1<br>(0.7 - 1.4)             | 1.5<br>(1.0 - 1.9)             |
| Diphtheria                                                        | 0.2<br>(0.1 - 0.4)       | 1.0<br>(0.3 - 3.4)             | 0.1<br>(0.0 - 0.4)       | 0.0<br>(0.0 - 0.0)       | 0.0<br>(0.0 - 0.0)             | --                             |
| Whooping cough                                                    | 2.9<br>(1.1 - 6.0)       | 22.6<br>(8.8 - 47.9)           | 0.7<br>(0.3 - 1.6)       | 0.1<br>(0.0 - 0.1)       | 0.0<br>(0.0 - 0.1)             | --                             |
| Tetanus                                                           | 6.1<br>(4.5 - 12.7)      | 42.9<br>(30.1 - 94.6)          | 0.6<br>(0.4 - 1.2)       | 0.7<br>(0.4 - 1.4)       | 2.8<br>(1.5 - 6.0)             | 5.2<br>(3.0 - 10.7)            |
| Measles                                                           | 10.3<br>(5.9 - 16.4)     | 75.5<br>(43.2 - 118.7)         | 5.8<br>(3.2 - 9.3)       | 0.5<br>(0.2 - 1.1)       | 0.0<br>(0.0 - 0.1)             | --                             |
| Varicella and herpes zoster                                       | 0.2<br>(0.1 - 0.3)       | 0.5<br>(0.2 - 0.9)             | 0.1<br>(0.0 - 0.1)       | 0.1<br>(0.0 - 0.1)       | 0.1<br>(0.1 - 0.2)             | 1.2<br>(0.7 - 2.1)             |
| Neglected tropical diseases and malaria                           | 20.2<br>(17.9 - 22.4)    | 103.2<br>(86.2 - 120.9)        | 10.8<br>(9.2 - 12.3)     | 5.5<br>(4.6 - 6.4)       | 16.1<br>(13.9 - 18.9)          | 19.2<br>(15.7 - 25.7)          |
| Malaria                                                           | 16.7<br>(14.6 - 19.1)    | 93.7<br>(76.9 - 110.9)         | 7.9<br>(6.5 - 9.3)       | 3.6<br>(2.8 - 4.4)       | 12.3<br>(10.2 - 14.6)          | 13.1<br>(10.2 - 16.1)          |
| Chagas disease                                                    | 0.2<br>(0.0 - 0.8)       | 0.0<br>(0.0 - 0.0)             | 0.0<br>(0.0 - 0.0)       | 0.1<br>(0.0 - 0.3)       | 0.6<br>(0.1 - 2.4)             | 1.6<br>(0.4 - 6.2)             |
| Leishmaniasis                                                     | 0.8<br>(0.6 - 0.9)       | 2.6<br>(1.9 - 3.4)             | 1.0<br>(0.7 - 1.3)       | 0.4<br>(0.3 - 0.5)       | 0.3<br>(0.2 - 0.3)             | 0.2<br>(0.2 - 0.3)             |
| Visceral leishmaniasis                                            | 0.8<br>(0.6 - 0.9)       | 2.6<br>(1.9 - 3.4)             | 1.0<br>(0.7 - 1.3)       | 0.4<br>(0.3 - 0.5)       | 0.3<br>(0.2 - 0.3)             | 0.2<br>(0.2 - 0.3)             |
| African trypanosomiasis                                           | 0.4<br>(0.2 - 0.7)       | 0.3<br>(0.1 - 0.4)             | 0.2<br>(0.1 - 0.4)       | 0.5<br>(0.3 - 0.9)       | 0.6<br>(0.3 - 0.9)             | 0.4<br>(0.2 - 0.6)             |
| Schistosomiasis                                                   | 0.3<br>(0.2 - 0.3)       | 0.1<br>(0.0 - 0.1)             | 0.1<br>(0.0 - 0.1)       | 0.2<br>(0.2 - 0.2)       | 0.8<br>(0.6 - 1.0)             | 1.5<br>(1.1 - 1.9)             |
| Cysticercosis                                                     | 0.0<br>(0.0 - 0.0)       | 0.0<br>(0.0 - 0.0)             | 0.0<br>(0.0 - 0.0)       | 0.0<br>(0.0 - 0.0)       | 0.0<br>(0.0 - 0.0)             | 0.0<br>(0.0 - 0.0)             |
| Cystic echinococcosis                                             | 0.1<br>(0.1 - 0.1)       | 0.1<br>(0.1 - 0.1)             | 0.1<br>(0.1 - 0.1)       | 0.1<br>(0.1 - 0.1)       | 0.1<br>(0.1 - 0.1)             | 0.2<br>(0.2 - 0.2)             |
| Dengue                                                            | 0.2<br>(0.1 - 0.2)       | 0.6<br>(0.2 - 0.9)             | 0.2<br>(0.1 - 0.4)       | 0.1<br>(0.1 - 0.1)       | 0.1<br>(0.0 - 0.1)             | 0.1<br>(0.1 - 0.1)             |
| Yellow fever                                                      | 0.0<br>(0.0 - 0.0)       | 0.0<br>(0.0 - 0.0)             | 0.0<br>(0.0 - 0.0)       | 0.0<br>(0.0 - 0.0)       | 0.0<br>(0.0 - 0.0)             | 0.0<br>(0.0 - 0.1)             |
| Rabies                                                            | 0.6<br>(0.3 - 0.7)       | 0.8<br>(0.5 - 1.3)             | 0.8<br>(0.4 - 1.1)       | 0.3<br>(0.2 - 0.4)       | 0.9<br>(0.5 - 1.1)             | 0.7<br>(0.5 - 1.0)             |
| Intestinal nematode infections                                    | 0.2<br>(0.2 - 0.2)       | 1.2<br>(1.1 - 1.4)             | 0.1<br>(0.1 - 0.1)       | 0.0<br>(0.0 - 0.0)       | 0.0<br>(0.0 - 0.0)             | 0.1<br>(0.1 - 0.1)             |



Web Table 27 - Global death rates (per 100k) with 95% UI by age, sex, and cause in 1990

| Cause                                                            | Females, All Ages        | Females, 0-4 Years       | Females, 5-14 Years   | Females, 15-49 Years   | Females, 50-69 Years         | Females, 70-80 Years           |
|------------------------------------------------------------------|--------------------------|--------------------------|-----------------------|------------------------|------------------------------|--------------------------------|
| Ascariasis                                                       | 0.2<br>(0.2 - 0.2)       | 1.2<br>(1.1 - 1.4)       | 0.1<br>(0.1 - 0.1)    | 0.0<br>(0.0 - 0.0)     | 0.0<br>(0.0 - 0.0)           | 0.1<br>(0.1 - 0.1)             |
| Other neglected tropical diseases                                | 0.7<br>(0.5 - 0.9)       | 3.8<br>(2.3 - 5.5)       | 0.3<br>(0.2 - 0.4)    | 0.2<br>(0.2 - 0.3)     | 0.5<br>(0.3 - 0.6)           | 1.3<br>(0.9 - 1.9)             |
| Maternal disorders                                               | 14.3<br>(13.1 - 15.5)    | --                       | 0.4<br>(0.3 - 0.5)    | 28.6<br>(26.1 - 31.0)  | --                           | --                             |
| Maternal hemorrhage                                              | 2.7<br>(2.5 - 3.0)       | --                       | 0.0<br>(0.0 - 0.1)    | 5.4<br>(4.9 - 6.0)     | --                           | --                             |
| Maternal sepsis and other maternal infections                    | 1.3<br>(1.2 - 1.4)       | --                       | 0.0<br>(0.0 - 0.1)    | 2.6<br>(2.3 - 2.9)     | --                           | --                             |
| Maternal hypertensive disorders                                  | 1.4<br>(1.3 - 1.5)       | --                       | 0.0<br>(0.0 - 0.1)    | 2.8<br>(2.5 - 3.0)     | --                           | --                             |
| Maternal obstructed labor                                        | 1.1<br>(1.0 - 1.2)       | --                       | 0.0<br>(0.0 - 0.0)    | 2.2<br>(2.0 - 2.5)     | --                           | --                             |
| Maternal abortive outcome                                        | 1.9<br>(1.7 - 2.1)       | --                       | 0.1<br>(0.0 - 0.1)    | 3.8<br>(3.5 - 4.2)     | --                           | --                             |
| Indirect maternal deaths                                         | 1.5<br>(1.3 - 1.7)       | --                       | 0.0<br>(0.0 - 0.0)    | 3.0<br>(2.7 - 3.4)     | --                           | --                             |
| Late maternal deaths                                             | 1.7<br>(1.4 - 2.0)       | --                       | 0.1<br>(0.1 - 0.1)    | 3.4<br>(2.8 - 4.0)     | --                           | --                             |
| Maternal deaths aggravated by HIV/AIDS                           | 0.0<br>(0.0 - 0.0)       | --                       | --                    | 0.1<br>(0.0 - 0.1)     | --                           | --                             |
| Other maternal disorders                                         | 2.6<br>(2.2 - 3.1)       | --                       | 0.1<br>(0.0 - 0.1)    | 5.2<br>(4.4 - 6.1)     | --                           | --                             |
| Neonatal disorders                                               | 57.1<br>(51.5 - 62.5)    | 483.0<br>(435.8 - 528.9) | --                    | --                     | --                           | --                             |
| Neonatal preterm birth complications                             | 26.3<br>(20.3 - 32.0)    | 222.7<br>(172.2 - 271.0) | --                    | --                     | --                           | --                             |
| Neonatal encephalopathy due to birth asphyxia and trauma         | 14.6<br>(11.3 - 18.4)    | 123.7<br>(95.3 - 156.0)  | --                    | --                     | --                           | --                             |
| Neonatal sepsis and other neonatal infections                    | 5.2<br>(2.7 - 7.8)       | 43.8<br>(22.6 - 66.3)    | --                    | --                     | --                           | --                             |
| Hemolytic disease and other neonatal jaundice                    | 1.1<br>(0.5 - 1.9)       | 9.3<br>(4.5 - 16.3)      | --                    | --                     | --                           | --                             |
| Other neonatal disorders                                         | 9.9<br>(6.4 - 13.3)      | 83.5<br>(54.2 - 112.9)   | --                    | --                     | --                           | --                             |
| Nutritional deficiencies                                         | 15.2<br>(13.6 - 17.0)    | 75.8<br>(63.8 - 88.7)    | 3.7<br>(3.1 - 4.2)    | 2.8<br>(2.5 - 3.1)     | 8.7<br>(7.7 - 9.8)           | 64.3<br>(57.2 - 71.4)          |
| Protein-energy malnutrition                                      | 9.4<br>(6.6 - 11.9)      | 56.0<br>(38.6 - 73.0)    | 2.0<br>(1.3 - 2.6)    | 0.7<br>(0.4 - 1.1)     | 3.3<br>(1.9 - 4.9)           | 33.2<br>(19.6 - 42.6)          |
| Iodine deficiency                                                | 0.0<br>(0.0 - 0.1)       | 0.2<br>(0.1 - 0.4)       | 0.0<br>(0.0 - 0.0)    | 0.0<br>(0.0 - 0.0)     | 0.0<br>(0.0 - 0.1)           | 0.2<br>(0.1 - 0.4)             |
| Iron-deficiency anemia                                           | 5.2<br>(3.2 - 8.0)       | 17.2<br>(7.0 - 33.5)     | 1.5<br>(1.0 - 2.3)    | 1.9<br>(1.4 - 2.3)     | 4.8<br>(3.1 - 6.3)           | 26.9<br>(17.2 - 41.2)          |
| Other nutritional deficiencies                                   | 0.6<br>(0.4 - 1.1)       | 2.4<br>(1.2 - 4.9)       | 0.1<br>(0.1 - 0.2)    | 0.1<br>(0.1 - 0.2)     | 0.6<br>(0.4 - 1.1)           | 4.1<br>(2.0 - 6.5)             |
| Other communicable, maternal, neonatal, and nutritional diseases | 9.9<br>(7.9 - 12.6)      | 51.2<br>(35.6 - 72.3)    | 4.0<br>(3.2 - 5.0)    | 2.5<br>(2.2 - 2.8)     | 7.7<br>(6.4 - 9.3)           | 16.6<br>(13.7 - 20.6)          |
| Sexually transmitted diseases excluding HIV                      | 5.1<br>(3.1 - 7.8)       | 36.4<br>(20.8 - 57.6)    | 1.7<br>(1.0 - 2.7)    | 0.3<br>(0.2 - 0.3)     | 0.9<br>(0.5 - 1.5)           | 2.9<br>(1.7 - 4.9)             |
| Syphilis                                                         | 4.9<br>(2.9 - 7.6)       | 36.4<br>(20.8 - 57.6)    | 1.7<br>(1.0 - 2.7)    | 0.1<br>(0.1 - 0.1)     | 0.5<br>(0.3 - 0.9)           | 2.2<br>(1.3 - 3.6)             |
| Chlamydial infection                                             | 0.1<br>(0.0 - 0.1)       | --                       | 0.0<br>(0.0 - 0.0)    | 0.1<br>(0.0 - 0.1)     | 0.1<br>(0.1 - 0.2)           | 0.2<br>(0.1 - 0.3)             |
| Gonococcal infection                                             | 0.1<br>(0.1 - 0.1)       | --                       | 0.0<br>(0.0 - 0.0)    | 0.1<br>(0.0 - 0.1)     | 0.2<br>(0.1 - 0.3)           | 0.4<br>(0.2 - 0.6)             |
| Other sexually transmitted diseases                              | 0.1<br>(0.0 - 0.1)       | --                       | 0.0<br>(0.0 - 0.0)    | 0.1<br>(0.0 - 0.1)     | 0.1<br>(0.1 - 0.2)           | 0.2<br>(0.1 - 0.4)             |
| Hepatitis                                                        | 2.8<br>(2.6 - 3.0)       | 7.1<br>(6.0 - 8.5)       | 1.5<br>(1.3 - 1.7)    | 1.7<br>(1.5 - 1.9)     | 3.8<br>(3.4 - 4.3)           | 6.1<br>(5.4 - 7.0)             |
| Acute hepatitis A                                                | 0.5<br>(0.2 - 0.8)       | 2.9<br>(1.1 - 4.8)       | 0.3<br>(0.1 - 0.6)    | 0.1<br>(0.0 - 0.2)     | 0.1<br>(0.0 - 0.2)           | 0.1<br>(0.0 - 0.2)             |
| Acute hepatitis B                                                | 1.3<br>(1.0 - 1.6)       | 3.3<br>(1.8 - 5.1)       | 0.2<br>(0.1 - 0.4)    | 0.4<br>(0.3 - 0.6)     | 2.9<br>(2.3 - 3.4)           | 5.4<br>(4.5 - 6.2)             |
| Acute hepatitis C                                                | 0.0<br>(0.0 - 0.1)       | --                       | 0.0<br>(0.0 - 0.1)    | 0.0<br>(0.0 - 0.1)     | 0.1<br>(0.0 - 0.2)           | 0.2<br>(0.0 - 0.4)             |
| Acute hepatitis E                                                | 1.0<br>(0.8 - 1.3)       | 1.0<br>(0.5 - 1.7)       | 0.9<br>(0.6 - 1.2)    | 1.2<br>(0.9 - 1.4)     | 0.8<br>(0.4 - 1.2)           | 0.5<br>(0.3 - 1.0)             |
| Other infectious diseases                                        | 2.1<br>(1.6 - 2.7)       | 7.7<br>(5.6 - 10.8)      | 0.8<br>(0.5 - 1.1)    | 0.5<br>(0.4 - 0.6)     | 2.9<br>(2.0 - 4.7)           | 7.6<br>(5.2 - 10.9)            |
| Non-communicable diseases                                        | 493.7<br>(479.5 - 509.9) | 194.8<br>(161.2 - 234.9) | 27.2<br>(24.4 - 29.9) | 97.3<br>(91.5 - 103.1) | 1,024.0<br>(982.9 - 1,069.2) | 6,038.7<br>(5,930.0 - 6,181.2) |
| Neoplasms                                                        | 95.2<br>(88.4 - 100.9)   | 11.5<br>(9.2 - 15.6)     | 5.5<br>(4.8 - 6.3)    | 32.5<br>(30.0 - 34.6)  | 295.3<br>(272.7 - 313.9)     | 802.5<br>(754.1 - 869.3)       |
| Esophageal cancer                                                | 4.4<br>(3.9 - 5.0)       | --                       | --                    | 0.8<br>(0.7 - 0.9)     | 14.8<br>(13.0 - 17.2)        | 43.0<br>(38.4 - 49.8)          |
| Stomach cancer                                                   | 11.4<br>(10.2 - 12.8)    | --                       | --                    | 3.4<br>(3.1 - 3.8)     | 33.5<br>(29.7 - 37.4)        | 113.4<br>(98.0 - 130.4)        |
| Liver cancer                                                     | 6.2<br>(5.6 - 6.8)       | --                       | 0.2<br>(0.1 - 0.3)    | 2.2<br>(1.9 - 2.5)     | 21.2<br>(19.0 - 23.8)        | 48.1<br>(43.5 - 53.8)          |

Web Table 27 - Global death rates (per 100k) with 95% UI by age, sex, and cause in 1990

| Cause                                | Females, All Ages        | Females, 0-4 Years    | Females, 5-14 Years | Females, 15-49 Years  | Females, 50-69 Years     | Females, 70-80 Years           |
|--------------------------------------|--------------------------|-----------------------|---------------------|-----------------------|--------------------------|--------------------------------|
| Liver cancer due to hepatitis B      | 1.8<br>(1.6 - 2.1)       | --                    | 0.1<br>(0.0 - 0.1)  | 0.9<br>(0.8 - 1.0)    | 6.7<br>(5.7 - 7.8)       | 10.3<br>(8.9 - 11.8)           |
| Liver cancer due to hepatitis C      | 1.2<br>(1.1 - 1.4)       | --                    | 0.0<br>(0.0 - 0.0)  | 0.3<br>(0.2 - 0.3)    | 4.0<br>(3.5 - 4.6)       | 11.7<br>(10.3 - 13.7)          |
| Liver cancer due to alcohol use      | 1.3<br>(1.2 - 1.4)       | --                    | --                  | 0.2<br>(0.2 - 0.2)    | 4.0<br>(3.6 - 4.5)       | 13.7<br>(12.3 - 15.6)          |
| Liver cancer due to other causes     | 1.9<br>(1.7 - 2.1)       | --                    | 0.1<br>(0.1 - 0.2)  | 0.8<br>(0.7 - 1.0)    | 6.5<br>(5.7 - 7.4)       | 12.5<br>(11.0 - 14.1)          |
| Larynx cancer                        | 0.4<br>(0.3 - 0.7)       | --                    | --                  | 0.1<br>(0.1 - 0.2)    | 1.6<br>(1.0 - 2.4)       | 3.6<br>(2.3 - 5.2)             |
| Tracheal, bronchus and lung cancer   | 10.8<br>(9.8 - 11.7)     | --                    | --                  | 2.4<br>(2.0 - 2.6)    | 38.4<br>(34.2 - 41.6)    | 98.1<br>(91.8 - 110.2)         |
| Breast cancer                        | 12.2<br>(10.8 - 13.8)    | --                    | --                  | 5.8<br>(5.2 - 6.2)    | 42.3<br>(37.8 - 47.8)    | 80.5<br>(68.4 - 94.8)          |
| Cervical cancer                      | 7.5<br>(6.2 - 8.1)       | --                    | --                  | 4.3<br>(3.7 - 4.9)    | 26.8<br>(21.9 - 29.6)    | 37.5<br>(30.1 - 40.6)          |
| Uterine cancer                       | 1.7<br>(1.4 - 2.1)       | --                    | --                  | 0.5<br>(0.3 - 0.6)    | 6.1<br>(4.9 - 7.6)       | 14.9<br>(12.4 - 17.4)          |
| Prostate cancer                      | --                       | --                    | --                  | --                    | --                       | --                             |
| Colon and rectum cancer              | 9.3<br>(8.9 - 10.0)      | --                    | --                  | 1.8<br>(1.7 - 1.9)    | 25.4<br>(24.2 - 27.1)    | 109.3<br>(103.7 - 117.5)       |
| Lip and oral cavity cancer           | 1.1<br>(0.8 - 1.3)       | --                    | --                  | 0.4<br>(0.3 - 0.5)    | 3.8<br>(2.8 - 4.7)       | 8.8<br>(7.0 - 10.4)            |
| Nasopharynx cancer                   | 0.7<br>(0.6 - 1.0)       | --                    | 0.1<br>(0.0 - 0.1)  | 0.5<br>(0.4 - 0.8)    | 2.4<br>(1.8 - 3.4)       | 3.2<br>(2.3 - 4.1)             |
| Other pharynx cancer                 | 0.4<br>(0.4 - 0.4)       | --                    | --                  | 0.2<br>(0.1 - 0.2)    | 1.5<br>(1.3 - 1.8)       | 2.4<br>(2.1 - 2.7)             |
| Gallbladder and biliary tract cancer | 2.8<br>(2.3 - 3.4)       | --                    | --                  | 0.4<br>(0.4 - 0.5)    | 8.5<br>(7.2 - 9.9)       | 31.7<br>(25.9 - 39.1)          |
| Pancreatic cancer                    | 3.3<br>(3.2 - 3.6)       | --                    | --                  | 0.4<br>(0.4 - 0.4)    | 9.7<br>(9.2 - 10.4)      | 39.7<br>(37.6 - 42.6)          |
| Malignant skin melanoma              | 0.7<br>(0.6 - 0.9)       | --                    | --                  | 0.4<br>(0.3 - 0.4)    | 2.1<br>(1.7 - 2.6)       | 5.6<br>(4.3 - 7.1)             |
| Non-melanoma skin cancer             | 0.4<br>(0.3 - 0.6)       | --                    | --                  | 0.1<br>(0.1 - 0.2)    | 0.8<br>(0.5 - 1.0)       | 6.2<br>(4.8 - 7.9)             |
| Ovarian cancer                       | 3.8<br>(3.5 - 4.0)       | --                    | --                  | 1.4<br>(1.3 - 1.5)    | 14.5<br>(13.5 - 15.6)    | 24.9<br>(23.5 - 27.7)          |
| Testicular cancer                    | --                       | --                    | --                  | --                    | --                       | --                             |
| Kidney cancer                        | 1.2<br>(1.1 - 1.4)       | 0.6<br>(0.3 - 0.8)    | 0.1<br>(0.1 - 0.2)  | 0.3<br>(0.2 - 0.3)    | 3.7<br>(3.2 - 4.2)       | 10.8<br>(9.3 - 13.2)           |
| Bladder cancer                       | 1.3<br>(1.0 - 1.6)       | --                    | --                  | 0.2<br>(0.1 - 0.2)    | 3.1<br>(2.3 - 3.7)       | 17.7<br>(13.6 - 22.5)          |
| Brain and nervous system cancer      | 2.3<br>(2.0 - 2.6)       | 0.8<br>(0.6 - 1.1)    | 0.8<br>(0.7 - 0.9)  | 1.3<br>(1.1 - 1.5)    | 6.5<br>(5.8 - 7.5)       | 10.5<br>(9.3 - 12.7)           |
| Thyroid cancer                       | 0.6<br>(0.5 - 0.7)       | --                    | 0.0<br>(0.0 - 0.1)  | 0.1<br>(0.1 - 0.2)    | 1.7<br>(1.4 - 2.0)       | 6.6<br>(5.3 - 7.6)             |
| Mesothelioma                         | 0.3<br>(0.2 - 0.3)       | --                    | --                  | 0.1<br>(0.1 - 0.1)    | 1.0<br>(0.9 - 1.2)       | 2.2<br>(1.7 - 2.6)             |
| Hodgkin lymphoma                     | 0.6<br>(0.4 - 0.7)       | 1.0<br>(0.5 - 1.7)    | 0.2<br>(0.1 - 0.3)  | 0.4<br>(0.2 - 0.4)    | 1.1<br>(0.7 - 1.2)       | 2.6<br>(1.6 - 2.9)             |
| Non-Hodgkin lymphoma                 | 2.2<br>(1.8 - 2.9)       | 1.0<br>(0.6 - 2.3)    | 0.5<br>(0.3 - 0.7)  | 0.8<br>(0.6 - 1.0)    | 5.4<br>(4.3 - 7.1)       | 18.4<br>(14.7 - 25.7)          |
| Multiple myeloma                     | 0.8<br>(0.7 - 1.1)       | --                    | --                  | 0.1<br>(0.1 - 0.1)    | 2.5<br>(1.9 - 3.3)       | 9.7<br>(7.1 - 14.0)            |
| Leukemia                             | 3.9<br>(3.6 - 4.2)       | 3.2<br>(2.6 - 4.1)    | 2.1<br>(1.9 - 2.4)  | 2.4<br>(2.2 - 2.6)    | 6.9<br>(6.4 - 7.5)       | 20.2<br>(19.0 - 22.1)          |
| Other neoplasms                      | 4.6<br>(4.0 - 6.1)       | 4.9<br>(3.2 - 9.2)    | 1.4<br>(1.1 - 2.2)  | 1.7<br>(1.4 - 2.4)    | 10.0<br>(8.6 - 12.2)     | 33.1<br>(29.9 - 41.5)          |
| Cardiovascular diseases              | 239.4<br>(220.4 - 258.7) | 19.6<br>(13.8 - 25.5) | 5.3<br>(4.2 - 6.9)  | 30.6<br>(26.4 - 35.8) | 438.9<br>(392.3 - 488.6) | 3,494.8<br>(3,255.9 - 3,694.7) |
| Rheumatic heart disease              | 8.4<br>(6.0 - 11.2)      | 1.3<br>(0.8 - 2.3)    | 1.3<br>(0.9 - 1.9)  | 4.4<br>(3.2 - 5.9)    | 22.3<br>(15.5 - 29.5)    | 60.3<br>(43.6 - 81.6)          |
| Ischemic heart disease               | 106.1<br>(91.2 - 120.1)  | 2.8<br>(1.9 - 4.1)    | 0.9<br>(0.6 - 1.2)  | 10.6<br>(8.3 - 13.2)  | 181.1<br>(148.9 - 211.2) | 1,640.4<br>(1,419.8 - 1,831.1) |
| Cerebrovascular disease              | 94.0<br>(80.6 - 105.2)   | 5.4<br>(3.8 - 7.8)    | 1.8<br>(1.4 - 2.4)  | 10.6<br>(8.9 - 12.7)  | 176.2<br>(150.3 - 203.7) | 1,382.5<br>(1,183.5 - 1,543.4) |
| Ischemic stroke                      | 47.6<br>(38.4 - 54.3)    | 0.7<br>(0.3 - 1.5)    | 0.2<br>(0.1 - 0.6)  | 1.5<br>(1.0 - 2.2)    | 59.0<br>(45.1 - 72.0)    | 835.2<br>(679.6 - 948.6)       |
| Hemorrhagic stroke                   | 46.4<br>(38.1 - 55.4)    | 4.7<br>(3.3 - 6.8)    | 1.6<br>(1.2 - 2.2)  | 9.1<br>(7.6 - 11.1)   | 117.2<br>(96.4 - 140.0)  | 547.3<br>(433.0 - 656.8)       |
| Hypertensive heart disease           | 13.3<br>(10.4 - 17.1)    | 0.5<br>(0.3 - 0.8)    | 0.1<br>(0.1 - 0.2)  | 1.4<br>(1.0 - 1.9)    | 24.3<br>(18.5 - 31.0)    | 200.1<br>(156.5 - 256.7)       |
| Cardiomyopathy and myocarditis       | 5.0<br>(4.0 - 6.2)       | 4.0<br>(1.6 - 6.5)    | 0.6<br>(0.3 - 0.8)  | 1.2<br>(0.8 - 1.5)    | 7.2<br>(5.6 - 9.7)       | 61.0<br>(50.2 - 74.8)          |
| Atrial fibrillation and flutter      | 0.7<br>(0.6 - 0.8)       | --                    | --                  | 0.0<br>(0.0 - 0.0)    | 0.4<br>(0.3 - 0.5)       | 13.7<br>(11.7 - 16.1)          |
| Aortic aneurysm                      | 1.3<br>(0.8 - 1.9)       | --                    | --                  | 0.2<br>(0.1 - 0.3)    | 2.5<br>(1.5 - 3.7)       | 19.3<br>(12.2 - 28.4)          |

Web Table 27 - Global death rates (per 100k) with 95% UI by age, sex, and cause in 1990

| Cause                                               | Females, All Ages     | Females, 0-4 Years    | Females, 5-14 Years | Females, 15-49 Years | Females, 50-69 Years     | Females, 70-80 Years     |
|-----------------------------------------------------|-----------------------|-----------------------|---------------------|----------------------|--------------------------|--------------------------|
| Peripheral vascular disease                         | 0.3<br>(0.3 - 0.3)    | --                    | --                  | 0.0<br>(0.0 - 0.0)   | 0.3<br>(0.2 - 0.3)       | 5.5<br>(4.7 - 6.4)       |
| Endocarditis                                        | 0.8<br>(0.6 - 1.4)    | 0.7<br>(0.4 - 1.4)    | 0.1<br>(0.1 - 0.2)  | 0.3<br>(0.2 - 0.5)   | 1.5<br>(1.0 - 2.6)       | 8.4<br>(5.2 - 13.3)      |
| Other cardiovascular and circulatory diseases       | 9.6<br>(7.7 - 11.6)   | 5.0<br>(3.3 - 7.0)    | 0.6<br>(0.4 - 0.8)  | 2.0<br>(1.4 - 2.5)   | 23.1<br>(17.6 - 28.6)    | 103.8<br>(83.0 - 126.7)  |
| Chronic respiratory diseases                        | 59.6<br>(53.9 - 66.2) | 19.4<br>(15.9 - 22.5) | 2.4<br>(2.1 - 2.7)  | 7.9<br>(7.0 - 9.0)   | 126.4<br>(111.2 - 142.4) | 775.2<br>(706.1 - 869.2) |
| Chronic obstructive pulmonary disease               | 41.8<br>(35.3 - 47.9) | 9.7<br>(7.3 - 11.7)   | 0.7<br>(0.5 - 1.0)  | 3.6<br>(2.6 - 4.5)   | 81.8<br>(65.5 - 96.6)    | 599.0<br>(515.0 - 683.4) |
| Pneumoconiosis                                      | 3.2<br>(2.2 - 4.5)    | 0.1<br>(0.1 - 0.2)    | 0.0<br>(0.0 - 0.1)  | 0.5<br>(0.3 - 0.8)   | 10.8<br>(6.8 - 15.6)     | 31.7<br>(20.1 - 48.8)    |
| Silicosis                                           | 0.1<br>(0.1 - 0.2)    | 0.0<br>(0.0 - 0.0)    | 0.0<br>(0.0 - 0.0)  | 0.0<br>(0.0 - 0.1)   | 0.3<br>(0.1 - 0.6)       | 1.1<br>(0.6 - 2.0)       |
| Asbestosis                                          | 0.1<br>(0.0 - 0.1)    | 0.0<br>(0.0 - 0.0)    | 0.0<br>(0.0 - 0.0)  | 0.0<br>(0.0 - 0.0)   | 0.3<br>(0.1 - 0.5)       | 0.7<br>(0.3 - 1.2)       |
| Coal workers pneumoconiosis                         | 0.1<br>(0.1 - 0.2)    | 0.0<br>(0.0 - 0.0)    | 0.0<br>(0.0 - 0.0)  | 0.0<br>(0.0 - 0.1)   | 0.3<br>(0.1 - 0.6)       | 1.0<br>(0.5 - 1.7)       |
| Other pneumoconiosis                                | 2.9<br>(1.9 - 4.2)    | 0.1<br>(0.0 - 0.1)    | 0.0<br>(0.0 - 0.0)  | 0.5<br>(0.3 - 0.7)   | 10.0<br>(6.3 - 14.3)     | 29.1<br>(18.5 - 45.2)    |
| Asthma                                              | 9.1<br>(6.3 - 15.8)   | 4.7<br>(3.7 - 6.1)    | 1.4<br>(1.1 - 1.8)  | 3.0<br>(2.2 - 4.3)   | 23.1<br>(14.9 - 41.9)    | 79.8<br>(52.1 - 153.7)   |
| Interstitial lung disease and pulmonary sarcoidosis | 3.8<br>(1.7 - 5.8)    | 0.2<br>(0.1 - 0.4)    | 0.1<br>(0.0 - 0.2)  | 0.5<br>(0.2 - 0.8)   | 9.0<br>(3.3 - 15.4)      | 50.2<br>(23.2 - 77.1)    |
| Other chronic respiratory diseases                  | 1.7<br>(1.3 - 2.2)    | 4.7<br>(3.7 - 6.0)    | 0.2<br>(0.1 - 0.3)  | 0.4<br>(0.3 - 0.5)   | 1.7<br>(1.2 - 2.3)       | 14.5<br>(10.3 - 20.7)    |
| Cirrhosis                                           | 11.1<br>(10.5 - 11.8) | 3.1<br>(2.5 - 3.8)    | 1.2<br>(1.0 - 1.3)  | 4.7<br>(4.4 - 5.0)   | 34.9<br>(32.8 - 37.3)    | 76.0<br>(70.5 - 81.1)    |
| Cirrhosis due to hepatitis B                        | 3.5<br>(3.1 - 3.8)    | 0.2<br>(0.1 - 0.3)    | 0.2<br>(0.2 - 0.3)  | 1.6<br>(1.5 - 1.8)   | 11.7<br>(10.4 - 13.0)    | 22.4<br>(19.7 - 24.6)    |
| Cirrhosis due to hepatitis C                        | 3.5<br>(3.2 - 3.9)    | 0.2<br>(0.1 - 0.2)    | 0.2<br>(0.1 - 0.2)  | 1.4<br>(1.3 - 1.5)   | 11.5<br>(10.4 - 13.0)    | 26.6<br>(23.7 - 29.7)    |
| Cirrhosis due to alcohol use                        | 2.5<br>(2.3 - 2.7)    | --                    | --                  | 0.7<br>(0.6 - 0.8)   | 8.2<br>(7.5 - 9.0)       | 22.2<br>(20.1 - 24.2)    |
| Cirrhosis due to other causes                       | 1.6<br>(1.5 - 1.8)    | 2.7<br>(2.2 - 3.4)    | 0.8<br>(0.7 - 0.9)  | 1.0<br>(0.8 - 1.1)   | 3.5<br>(3.0 - 4.0)       | 4.7<br>(4.0 - 5.4)       |
| Digestive diseases                                  | 18.1<br>(15.8 - 19.9) | 7.6<br>(6.3 - 9.8)    | 3.7<br>(3.1 - 4.3)  | 6.6<br>(5.6 - 7.4)   | 36.4<br>(30.7 - 40.2)    | 179.5<br>(157.3 - 201.5) |
| Peptic ulcer disease                                | 4.7<br>(3.7 - 5.9)    | 0.7<br>(0.4 - 1.1)    | 0.5<br>(0.3 - 0.8)  | 1.5<br>(1.1 - 2.0)   | 11.2<br>(8.8 - 14.3)     | 49.0<br>(37.9 - 61.3)    |
| Gastritis and duodenitis                            | 1.0<br>(0.4 - 1.7)    | 0.5<br>(0.2 - 0.9)    | 0.3<br>(0.2 - 0.6)  | 0.4<br>(0.2 - 0.7)   | 2.1<br>(0.8 - 3.3)       | 8.4<br>(3.4 - 14.7)      |
| Appendicitis                                        | 1.6<br>(1.1 - 2.0)    | 1.3<br>(0.8 - 2.2)    | 0.7<br>(0.5 - 1.0)  | 1.1<br>(0.8 - 1.4)   | 2.6<br>(1.7 - 3.5)       | 8.2<br>(5.0 - 11.4)      |
| Paralytic ileus and intestinal obstruction          | 3.1<br>(1.7 - 4.6)    | 1.3<br>(0.7 - 1.9)    | 0.7<br>(0.3 - 1.0)  | 1.3<br>(0.7 - 1.8)   | 5.9<br>(3.2 - 8.6)       | 29.5<br>(16.9 - 46.4)    |
| Inguinal, femoral, and abdominal hernia             | 0.7<br>(0.4 - 1.0)    | 0.2<br>(0.1 - 0.4)    | 0.3<br>(0.2 - 0.5)  | 0.2<br>(0.1 - 0.2)   | 1.3<br>(0.7 - 1.7)       | 8.5<br>(4.4 - 12.3)      |
| Inflammatory bowel disease                          | 1.1<br>(0.7 - 1.5)    | 1.5<br>(1.0 - 2.3)    | 0.4<br>(0.3 - 0.6)  | 0.5<br>(0.3 - 0.7)   | 1.7<br>(1.0 - 2.2)       | 9.2<br>(5.5 - 12.2)      |
| Vascular intestinal disorders                       | 1.1<br>(0.6 - 1.9)    | 0.0<br>(0.0 - 0.1)    | 0.0<br>(0.0 - 0.2)  | 0.1<br>(0.1 - 0.2)   | 1.7<br>(0.9 - 2.9)       | 17.8<br>(9.6 - 30.1)     |
| Gallbladder and biliary diseases                    | 1.8<br>(1.4 - 2.3)    | 0.3<br>(0.2 - 0.5)    | 0.2<br>(0.1 - 0.2)  | 0.4<br>(0.3 - 0.6)   | 3.9<br>(2.9 - 4.8)       | 22.3<br>(17.4 - 28.8)    |
| Pancreatitis                                        | 1.4<br>(0.9 - 2.0)    | 0.1<br>(0.0 - 0.3)    | 0.2<br>(0.1 - 0.3)  | 0.7<br>(0.4 - 1.1)   | 3.5<br>(2.1 - 5.4)       | 10.4<br>(6.4 - 15.5)     |
| Other digestive diseases                            | 1.6<br>(1.3 - 1.8)    | 1.6<br>(1.2 - 2.3)    | 0.3<br>(0.2 - 0.4)  | 0.4<br>(0.3 - 0.5)   | 2.6<br>(2.1 - 3.2)       | 16.3<br>(13.1 - 19.5)    |
| Neurological disorders                              | 21.4<br>(19.5 - 23.3) | 4.0<br>(2.6 - 5.3)    | 1.3<br>(0.9 - 1.6)  | 2.2<br>(1.8 - 2.6)   | 12.0<br>(11.2 - 13.3)    | 386.0<br>(351.8 - 419.4) |
| Alzheimer disease and other dementias               | 17.6<br>(16.0 - 19.1) | --                    | --                  | 0.0<br>(0.0 - 0.0)   | 6.5<br>(5.9 - 7.2)       | 359.3<br>(325.5 - 391.2) |
| Parkinson disease                                   | 0.8<br>(0.6 - 1.1)    | --                    | --                  | 0.0<br>(0.0 - 0.0)   | 0.8<br>(0.6 - 1.0)       | 14.7<br>(11.8 - 20.3)    |
| Epilepsy                                            | 1.8<br>(1.3 - 2.2)    | 3.2<br>(1.7 - 4.4)    | 1.1<br>(0.7 - 1.4)  | 1.7<br>(1.3 - 2.0)   | 1.5<br>(1.2 - 1.9)       | 3.4<br>(2.8 - 4.9)       |
| Multiple sclerosis                                  | 0.3<br>(0.2 - 0.4)    | --                    | --                  | 0.2<br>(0.1 - 0.3)   | 0.9<br>(0.6 - 1.5)       | 1.2<br>(0.9 - 2.0)       |
| Other neurological disorders                        | 0.9<br>(0.9 - 1.1)    | 0.8<br>(0.7 - 1.1)    | 0.2<br>(0.2 - 0.2)  | 0.3<br>(0.3 - 0.3)   | 2.4<br>(2.2 - 2.7)       | 7.3<br>(6.9 - 7.9)       |
| Mental and substance use disorders                  | 1.7<br>(1.3 - 2.4)    | 0.2<br>(0.1 - 0.5)    | 0.0<br>(0.0 - 0.0)  | 1.6<br>(1.2 - 2.2)   | 4.6<br>(3.2 - 7.3)       | 5.5<br>(4.2 - 7.3)       |
| Schizophrenia                                       | 0.5<br>(0.3 - 0.6)    | --                    | --                  | 0.4<br>(0.3 - 0.5)   | 1.1<br>(0.7 - 1.4)       | 2.3<br>(1.5 - 2.9)       |
| Alcohol use disorders                               | 0.8<br>(0.4 - 1.5)    | --                    | --                  | 0.7<br>(0.4 - 1.3)   | 2.8<br>(1.5 - 5.6)       | 1.7<br>(0.9 - 3.3)       |
| Drug use disorders                                  | 0.4<br>(0.4 - 0.5)    | 0.2<br>(0.1 - 0.5)    | --                  | 0.5<br>(0.4 - 0.6)   | 0.7<br>(0.6 - 0.9)       | 1.5<br>(1.2 - 1.8)       |
| Opioid use disorders                                | 0.1<br>(0.1 - 0.2)    | 0.1<br>(0.0 - 0.2)    | --                  | 0.2<br>(0.1 - 0.2)   | 0.2<br>(0.2 - 0.3)       | 0.5<br>(0.4 - 0.6)       |

Web Table 27 - Global death rates (per 100k) with 95% UI by age, sex, and cause in 1990

| Cause                                               | Females, All Ages     | Females, 0-4 Years      | Females, 5-14 Years | Females, 15-49 Years | Females, 50-69 Years  | Females, 70-80 Years     |
|-----------------------------------------------------|-----------------------|-------------------------|---------------------|----------------------|-----------------------|--------------------------|
| Cocaine use disorders                               | 0.0<br>(0.0 - 0.0)    | 0.0<br>(0.0 - 0.0)      | --                  | 0.0<br>(0.0 - 0.0)   | 0.0<br>(0.0 - 0.0)    | 0.1<br>(0.1 - 0.1)       |
| Amphetamine use disorders                           | 0.0<br>(0.0 - 0.0)    | 0.0<br>(0.0 - 0.0)      | --                  | 0.0<br>(0.0 - 0.0)   | 0.0<br>(0.0 - 0.1)    | 0.1<br>(0.1 - 0.1)       |
| Other drug use disorders                            | 0.2<br>(0.2 - 0.3)    | 0.1<br>(0.1 - 0.2)      | --                  | 0.2<br>(0.2 - 0.3)   | 0.4<br>(0.3 - 0.5)    | 0.7<br>(0.6 - 0.9)       |
| Eating disorders                                    | 0.0<br>(0.0 - 0.0)    | --                      | 0.0<br>(0.0 - 0.0)  | 0.0<br>(0.0 - 0.0)   | --                    | --                       |
| Anorexia nervosa                                    | 0.0<br>(0.0 - 0.0)    | --                      | 0.0<br>(0.0 - 0.0)  | 0.0<br>(0.0 - 0.0)   | --                    | --                       |
| Diabetes, urogenital, blood, and endocrine diseases | 30.4<br>(27.6 - 33.1) | 24.4<br>(15.7 - 35.0)   | 4.4<br>(3.0 - 5.8)  | 8.2<br>(7.3 - 9.1)   | 68.6<br>(62.1 - 73.8) | 289.2<br>(265.6 - 313.8) |
| Diabetes mellitus                                   | 14.3<br>(13.3 - 15.4) | 1.2<br>(0.7 - 1.9)      | 0.3<br>(0.2 - 0.5)  | 2.5<br>(2.3 - 2.8)   | 41.3<br>(37.6 - 44.7) | 157.7<br>(146.2 - 170.3) |
| Acute glomerulonephritis                            | 0.4<br>(0.2 - 0.6)    | 0.7<br>(0.2 - 1.4)      | 0.2<br>(0.1 - 0.4)  | 0.3<br>(0.2 - 0.4)   | 0.7<br>(0.4 - 1.1)    | 1.7<br>(0.8 - 2.6)       |
| Chronic kidney disease                              | 7.1<br>(6.0 - 8.1)    | 1.6<br>(1.2 - 1.9)      | 0.6<br>(0.4 - 0.6)  | 2.3<br>(1.9 - 2.6)   | 15.6<br>(13.4 - 17.8) | 77.8<br>(65.2 - 88.3)    |
| Chronic kidney disease due to diabetes mellitus     | 0.9<br>(0.7 - 1.1)    | 0.0<br>(0.0 - 0.0)      | 0.0<br>(0.0 - 0.0)  | 0.2<br>(0.1 - 0.2)   | 2.1<br>(1.6 - 2.5)    | 11.1<br>(8.5 - 13.8)     |
| Chronic kidney disease due to hypertension          | 2.1<br>(1.4 - 2.9)    | 0.2<br>(0.1 - 0.3)      | 0.0<br>(0.0 - 0.1)  | 0.5<br>(0.3 - 0.7)   | 4.4<br>(2.8 - 6.1)    | 27.8<br>(18.2 - 37.4)    |
| Chronic kidney disease due to glomerulonephritis    | 1.7<br>(1.3 - 2.1)    | 1.0<br>(0.7 - 1.2)      | 0.3<br>(0.2 - 0.4)  | 1.0<br>(0.8 - 1.2)   | 4.0<br>(2.9 - 5.1)    | 11.3<br>(8.0 - 14.7)     |
| Chronic kidney disease due to other causes          | 2.4<br>(1.7 - 3.0)    | 0.5<br>(0.3 - 0.7)      | 0.2<br>(0.1 - 0.2)  | 0.7<br>(0.5 - 0.8)   | 5.1<br>(3.8 - 6.5)    | 27.6<br>(19.4 - 36.0)    |
| Urinary diseases and male infertility               | 2.7<br>(2.2 - 3.1)    | 1.4<br>(0.9 - 1.8)      | 0.3<br>(0.2 - 0.4)  | 0.8<br>(0.6 - 0.9)   | 5.4<br>(4.0 - 6.0)    | 30.1<br>(24.7 - 36.3)    |
| Interstitial nephritis and urinary tract infections | 2.2<br>(1.7 - 2.5)    | 1.1<br>(0.7 - 1.5)      | 0.2<br>(0.1 - 0.3)  | 0.6<br>(0.5 - 0.7)   | 4.2<br>(3.1 - 4.7)    | 25.1<br>(20.6 - 30.4)    |
| Urolithiasis                                        | 0.2<br>(0.2 - 0.3)    | --                      | 0.0<br>(0.0 - 0.1)  | 0.1<br>(0.1 - 0.1)   | 0.6<br>(0.4 - 0.9)    | 2.1<br>(1.3 - 2.9)       |
| Other urinary diseases                              | 0.3<br>(0.2 - 0.4)    | 0.3<br>(0.1 - 0.5)      | 0.0<br>(0.0 - 0.1)  | 0.1<br>(0.1 - 0.2)   | 0.6<br>(0.4 - 0.9)    | 2.8<br>(2.0 - 4.1)       |
| Gynecological diseases                              | 0.2<br>(0.1 - 0.3)    | --                      | --                  | 0.2<br>(0.2 - 0.3)   | 0.3<br>(0.2 - 0.4)    | 1.2<br>(0.8 - 1.7)       |
| Uterine fibroids                                    | 0.0<br>(0.0 - 0.1)    | --                      | --                  | 0.0<br>(0.0 - 0.1)   | 0.1<br>(0.1 - 0.1)    | 0.4<br>(0.2 - 0.5)       |
| Polycystic ovarian syndrome                         | 0.0<br>(0.0 - 0.0)    | --                      | --                  | 0.0<br>(0.0 - 0.0)   | 0.0<br>(0.0 - 0.0)    | --                       |
| Endometriosis                                       | 0.0<br>(0.0 - 0.0)    | --                      | --                  | 0.0<br>(0.0 - 0.0)   | 0.0<br>(0.0 - 0.0)    | --                       |
| Genital prolapse                                    | 0.0<br>(0.0 - 0.0)    | --                      | --                  | 0.0<br>(0.0 - 0.0)   | 0.1<br>(0.0 - 0.1)    | 0.3<br>(0.2 - 0.4)       |
| Other gynecological diseases                        | 0.1<br>(0.1 - 0.1)    | --                      | --                  | 0.1<br>(0.1 - 0.1)   | 0.1<br>(0.1 - 0.2)    | 0.5<br>(0.3 - 0.8)       |
| Hemoglobinopathies and hemolytic anemias            | 3.3<br>(1.8 - 5.1)    | 14.8<br>(5.7 - 25.7)    | 2.5<br>(1.2 - 4.1)  | 1.3<br>(0.6 - 1.9)   | 1.7<br>(0.9 - 2.4)    | 4.7<br>(2.6 - 6.5)       |
| Thalassemias                                        | 0.7<br>(0.3 - 1.0)    | 2.9<br>(1.1 - 4.9)      | 0.5<br>(0.3 - 0.8)  | 0.4<br>(0.2 - 0.6)   | 0.1<br>(0.0 - 0.1)    | 0.0<br>(0.0 - 0.0)       |
| Sickle cell disorders                               | 2.1<br>(0.9 - 3.6)    | 10.9<br>(3.7 - 20.0)    | 1.8<br>(0.7 - 3.5)  | 0.7<br>(0.3 - 1.2)   | 0.7<br>(0.3 - 1.1)    | 0.2<br>(0.1 - 0.2)       |
| G6PD deficiency                                     | 0.1<br>(0.0 - 0.1)    | 0.2<br>(0.1 - 0.3)      | 0.0<br>(0.0 - 0.0)  | 0.0<br>(0.0 - 0.0)   | 0.0<br>(0.0 - 0.1)    | 0.0<br>(0.0 - 0.1)       |
| Other hemoglobinopathies and hemolytic anemias      | 0.5<br>(0.3 - 0.7)    | 0.8<br>(0.4 - 1.3)      | 0.1<br>(0.0 - 0.1)  | 0.1<br>(0.1 - 0.2)   | 0.9<br>(0.5 - 1.3)    | 4.5<br>(2.4 - 6.2)       |
| Endocrine, metabolic, blood, and immune disorders   | 2.3<br>(1.6 - 3.0)    | 4.6<br>(3.1 - 6.7)      | 0.5<br>(0.3 - 0.6)  | 0.8<br>(0.6 - 1.1)   | 3.6<br>(2.6 - 4.8)    | 16.0<br>(11.2 - 20.7)    |
| Musculoskeletal disorders                           | 1.5<br>(1.3 - 1.7)    | --                      | 0.3<br>(0.2 - 0.4)  | 0.9<br>(0.7 - 1.1)   | 3.4<br>(2.7 - 3.8)    | 11.5<br>(10.5 - 13.1)    |
| Rheumatoid arthritis                                | 0.7<br>(0.6 - 0.8)    | --                      | 0.1<br>(0.1 - 0.1)  | 0.2<br>(0.1 - 0.3)   | 1.8<br>(1.4 - 2.1)    | 7.4<br>(6.5 - 8.4)       |
| Other musculoskeletal disorders                     | 0.8<br>(0.6 - 0.9)    | --                      | 0.2<br>(0.1 - 0.3)  | 0.7<br>(0.5 - 0.9)   | 1.5<br>(1.2 - 1.8)    | 4.1<br>(3.6 - 4.9)       |
| Other non-communicable diseases                     | 15.4<br>(12.2 - 19.6) | 105.0<br>(79.9 - 139.3) | 3.3<br>(2.5 - 4.2)  | 2.0<br>(1.8 - 2.3)   | 3.4<br>(2.8 - 3.8)    | 18.4<br>(16.2 - 20.6)    |
| Congenital anomalies                                | 13.7<br>(10.7 - 17.8) | 100.2<br>(76.0 - 134.0) | 3.1<br>(2.4 - 4.0)  | 1.7<br>(1.5 - 2.0)   | 1.7<br>(1.2 - 2.0)    | 3.8<br>(2.5 - 4.4)       |
| Neural tube defects                                 | 3.0<br>(1.9 - 5.3)    | 23.7<br>(14.8 - 42.6)   | 0.4<br>(0.3 - 0.8)  | 0.2<br>(0.1 - 0.3)   | 0.1<br>(0.1 - 0.2)    | 0.2<br>(0.1 - 0.3)       |
| Congenital heart anomalies                          | 6.7<br>(4.8 - 9.0)    | 48.0<br>(33.7 - 66.9)   | 1.7<br>(1.2 - 2.3)  | 0.9<br>(0.7 - 1.1)   | 0.8<br>(0.6 - 1.1)    | 2.1<br>(1.4 - 2.7)       |
| Cleft lip and cleft palate                          | 0.1<br>(0.0 - 0.2)    | 1.1<br>(0.4 - 1.9)      | --                  | --                   | --                    | --                       |
| Down syndrome                                       | 0.9<br>(0.3 - 1.6)    | 5.7<br>(1.6 - 10.7)     | 0.4<br>(0.1 - 0.7)  | 0.3<br>(0.1 - 0.4)   | 0.2<br>(0.2 - 0.4)    | 0.1<br>(0.0 - 0.1)       |
| Chromosomal unbalanced rearrangements               | 0.4<br>(0.2 - 1.0)    | 3.1<br>(1.1 - 7.4)      | 0.1<br>(0.0 - 0.2)  | 0.1<br>(0.0 - 0.2)   | 0.0<br>(0.0 - 0.1)    | 0.1<br>(0.0 - 0.1)       |
| Other congenital anomalies                          | 2.6<br>(1.9 - 5.6)    | 18.6<br>(13.2 - 41.8)   | 0.5<br>(0.4 - 1.1)  | 0.3<br>(0.2 - 0.6)   | 0.5<br>(0.3 - 0.6)    | 1.3<br>(1.0 - 1.6)       |

Web Table 27 - Global death rates (per 100k) with 95% UI by age, sex, and cause in 1990

| Cause                                           | Females, All Ages     | Females, 0-4 Years      | Females, 5-14 Years   | Females, 15-49 Years  | Females, 50-69 Years  | Females, 70-80 Years     |
|-------------------------------------------------|-----------------------|-------------------------|-----------------------|-----------------------|-----------------------|--------------------------|
| Skin and subcutaneous diseases                  | 1.3<br>(1.2 - 1.4)    | 1.8<br>(1.2 - 2.5)      | 0.2<br>(0.1 - 0.2)    | 0.3<br>(0.3 - 0.3)    | 1.7<br>(1.5 - 2.0)    | 14.6<br>(13.1 - 16.4)    |
| Cellulitis                                      | 0.6<br>(0.4 - 0.8)    | 1.1<br>(0.5 - 1.6)      | 0.1<br>(0.1 - 0.1)    | 0.2<br>(0.1 - 0.2)    | 1.0<br>(0.6 - 1.3)    | 4.8<br>(2.6 - 6.5)       |
| Pyoderma                                        | 0.3<br>(0.2 - 0.5)    | 0.6<br>(0.3 - 1.2)      | 0.0<br>(0.0 - 0.1)    | 0.1<br>(0.0 - 0.1)    | 0.5<br>(0.3 - 0.7)    | 3.1<br>(2.4 - 4.0)       |
| Decubitus ulcer                                 | 0.3<br>(0.3 - 0.4)    | 0.0<br>(0.0 - 0.1)      | 0.0<br>(0.0 - 0.0)    | 0.0<br>(0.0 - 0.0)    | 0.2<br>(0.1 - 0.3)    | 6.3<br>(5.3 - 8.1)       |
| Other skin and subcutaneous diseases            | 0.0<br>(0.0 - 0.1)    | 0.0<br>(0.0 - 0.1)      | 0.0<br>(0.0 - 0.0)    | 0.0<br>(0.0 - 0.0)    | 0.0<br>(0.0 - 0.1)    | 0.4<br>(0.3 - 0.8)       |
| Sudden infant death syndrome                    | 0.4<br>(0.2 - 0.8)    | 3.0<br>(1.4 - 6.4)      | --                    | --                    | --                    | --                       |
| Injuries                                        | 58.0<br>(52.9 - 62.8) | 109.1<br>(86.5 - 126.7) | 25.2<br>(22.7 - 27.9) | 43.6<br>(39.9 - 47.9) | 67.8<br>(61.7 - 75.6) | 199.3<br>(179.9 - 223.2) |
| Transport injuries                              | 11.8<br>(10.8 - 13.7) | 16.6<br>(13.8 - 20.4)   | 6.8<br>(6.0 - 7.9)    | 9.9<br>(9.0 - 11.7)   | 16.5<br>(14.7 - 19.3) | 28.9<br>(24.9 - 33.1)    |
| Road injuries                                   | 10.8<br>(9.9 - 12.4)  | 14.9<br>(12.4 - 18.3)   | 6.2<br>(5.5 - 7.1)    | 9.1<br>(8.3 - 10.6)   | 15.0<br>(13.4 - 17.5) | 26.4<br>(22.8 - 30.0)    |
| Pedestrian road injuries                        | 4.3<br>(3.7 - 5.3)    | 7.1<br>(5.6 - 9.5)      | 3.0<br>(2.5 - 3.7)    | 2.6<br>(2.2 - 3.4)    | 6.8<br>(5.7 - 8.3)    | 14.6<br>(12.4 - 17.7)    |
| Cyclist road injuries                           | 0.8<br>(0.6 - 1.0)    | 0.8<br>(0.6 - 1.2)      | 0.5<br>(0.4 - 0.7)    | 0.7<br>(0.5 - 0.9)    | 1.3<br>(1.0 - 1.6)    | 1.5<br>(1.2 - 2.0)       |
| Motorcyclist road injuries                      | 1.6<br>(1.1 - 2.1)    | 1.7<br>(0.9 - 2.4)      | 0.6<br>(0.4 - 0.8)    | 1.9<br>(1.4 - 2.6)    | 1.6<br>(1.1 - 2.3)    | 1.6<br>(0.9 - 2.1)       |
| Motor vehicle road injuries                     | 3.8<br>(3.2 - 4.4)    | 4.7<br>(3.4 - 6.2)      | 1.8<br>(1.4 - 2.2)    | 3.7<br>(3.1 - 4.2)    | 5.0<br>(4.1 - 6.0)    | 8.0<br>(6.3 - 9.5)       |
| Other road injuries                             | 0.3<br>(0.1 - 0.4)    | 0.6<br>(0.1 - 1.0)      | 0.2<br>(0.1 - 0.3)    | 0.3<br>(0.1 - 0.4)    | 0.4<br>(0.2 - 0.5)    | 0.8<br>(0.4 - 1.2)       |
| Other transport injuries                        | 1.0<br>(0.9 - 1.3)    | 1.7<br>(1.3 - 2.3)      | 0.6<br>(0.5 - 0.8)    | 0.8<br>(0.6 - 1.0)    | 1.5<br>(1.2 - 1.9)    | 2.5<br>(2.0 - 3.1)       |
| Unintentional injuries                          | 31.3<br>(27.2 - 35.0) | 86.1<br>(63.3 - 103.1)  | 15.6<br>(13.4 - 18.0) | 15.8<br>(13.6 - 18.3) | 28.5<br>(25.3 - 33.6) | 134.1<br>(117.4 - 155.3) |
| Falls                                           | 5.4<br>(4.6 - 7.0)    | 5.6<br>(3.8 - 8.8)      | 1.2<br>(1.0 - 1.6)    | 1.2<br>(1.0 - 1.6)    | 5.2<br>(4.4 - 7.1)    | 68.5<br>(56.0 - 87.9)    |
| Drowning                                        | 7.2<br>(5.1 - 8.8)    | 29.1<br>(18.1 - 39.5)   | 6.9<br>(5.0 - 8.6)    | 2.7<br>(2.0 - 3.2)    | 3.9<br>(2.9 - 4.7)    | 8.7<br>(6.7 - 10.8)      |
| Fire, heat, and hot substances                  | 7.0<br>(5.9 - 8.8)    | 12.0<br>(8.4 - 16.8)    | 2.9<br>(2.4 - 3.9)    | 6.7<br>(5.3 - 8.6)    | 6.4<br>(5.2 - 8.6)    | 16.7<br>(13.2 - 21.4)    |
| Poisonings                                      | 1.8<br>(1.4 - 2.8)    | 4.0<br>(2.9 - 6.8)      | 0.7<br>(0.5 - 1.1)    | 1.4<br>(1.1 - 2.3)    | 1.8<br>(1.4 - 2.9)    | 4.3<br>(3.2 - 6.5)       |
| Exposure to mechanical forces                   | 2.6<br>(1.4 - 3.5)    | 13.9<br>(5.3 - 21.6)    | 1.1<br>(0.8 - 1.3)    | 0.8<br>(0.7 - 1.0)    | 1.4<br>(1.2 - 1.8)    | 2.5<br>(2.1 - 3.1)       |
| Unintentional firearm injuries                  | 0.4<br>(0.3 - 0.6)    | 0.9<br>(0.5 - 1.3)      | 0.3<br>(0.2 - 0.4)    | 0.4<br>(0.3 - 0.5)    | 0.5<br>(0.4 - 0.8)    | 0.6<br>(0.4 - 0.9)       |
| Unintentional suffocation                       | 1.3<br>(0.3 - 2.2)    | 10.5<br>(2.4 - 17.8)    | 0.2<br>(0.1 - 0.3)    | 0.1<br>(0.0 - 0.1)    | 0.1<br>(0.1 - 0.2)    | 0.4<br>(0.2 - 0.5)       |
| Other exposure to mechanical forces             | 0.8<br>(0.6 - 1.0)    | 2.5<br>(1.6 - 3.8)      | 0.6<br>(0.4 - 0.8)    | 0.4<br>(0.3 - 0.5)    | 0.7<br>(0.6 - 0.9)    | 1.5<br>(1.2 - 2.1)       |
| Adverse effects of medical treatment            | 1.7<br>(1.3 - 2.2)    | 3.3<br>(2.0 - 4.9)      | 0.2<br>(0.2 - 0.3)    | 0.7<br>(0.6 - 1.0)    | 2.9<br>(2.2 - 4.3)    | 10.5<br>(7.9 - 14.5)     |
| Animal contact                                  | 1.7<br>(0.7 - 2.8)    | 3.1<br>(1.4 - 6.0)      | 1.6<br>(0.6 - 2.9)    | 1.1<br>(0.4 - 1.6)    | 2.5<br>(0.9 - 4.2)    | 2.8<br>(1.0 - 4.4)       |
| Venomous animal contact                         | 1.4<br>(0.6 - 2.4)    | 2.5<br>(1.1 - 4.8)      | 1.3<br>(0.5 - 2.5)    | 1.0<br>(0.3 - 1.5)    | 2.0<br>(0.7 - 3.5)    | 1.8<br>(0.6 - 2.8)       |
| Non-venomous animal contact                     | 0.3<br>(0.1 - 0.5)    | 0.7<br>(0.2 - 1.3)      | 0.2<br>(0.1 - 0.5)    | 0.1<br>(0.0 - 0.2)    | 0.5<br>(0.2 - 0.9)    | 1.1<br>(0.4 - 2.0)       |
| Foreign body                                    | 2.3<br>(1.4 - 3.4)    | 11.1<br>(5.9 - 17.8)    | 0.2<br>(0.1 - 0.3)    | 0.3<br>(0.2 - 0.5)    | 1.3<br>(0.8 - 1.8)    | 12.6<br>(7.7 - 19.1)     |
| Pulmonary aspiration and foreign body in airway | 2.2<br>(1.3 - 3.4)    | 11.1<br>(5.8 - 17.7)    | 0.2<br>(0.1 - 0.3)    | 0.3<br>(0.2 - 0.5)    | 1.2<br>(0.8 - 1.8)    | 12.4<br>(7.5 - 18.9)     |
| Foreign body in other body part                 | 0.0<br>(0.0 - 0.1)    | 0.1<br>(0.0 - 0.2)      | 0.0<br>(0.0 - 0.0)    | 0.0<br>(0.0 - 0.0)    | 0.0<br>(0.0 - 0.0)    | 0.2<br>(0.2 - 0.3)       |
| Other unintentional injuries                    | 1.8<br>(0.9 - 2.1)    | 4.0<br>(2.0 - 5.1)      | 0.8<br>(0.5 - 1.0)    | 0.8<br>(0.4 - 0.9)    | 3.1<br>(1.4 - 3.8)    | 7.5<br>(3.3 - 9.4)       |
| Self-harm and interpersonal violence            | 13.4<br>(11.6 - 14.8) | 3.6<br>(2.6 - 5.0)      | 2.1<br>(1.7 - 2.5)    | 16.6<br>(14.5 - 18.6) | 19.9<br>(16.8 - 22.3) | 33.9<br>(27.4 - 37.8)    |
| Self-harm                                       | 10.6<br>(9.1 - 11.9)  | --                      | 1.1<br>(0.9 - 1.4)    | 13.4<br>(11.6 - 15.1) | 17.3<br>(14.3 - 19.4) | 30.2<br>(23.2 - 33.8)    |
| Interpersonal violence                          | 2.8<br>(2.0 - 3.5)    | 3.6<br>(2.6 - 5.0)      | 1.0<br>(0.7 - 1.3)    | 3.3<br>(2.3 - 4.1)    | 2.7<br>(1.9 - 3.4)    | 3.7<br>(2.6 - 4.6)       |
| Assault by firearm                              | 0.6<br>(0.4 - 0.8)    | 0.5<br>(0.2 - 0.7)      | 0.2<br>(0.1 - 0.2)    | 0.8<br>(0.5 - 1.1)    | 0.5<br>(0.3 - 0.7)    | 0.6<br>(0.3 - 0.9)       |
| Assault by sharp object                         | 0.8<br>(0.5 - 1.0)    | 0.5<br>(0.2 - 0.8)      | 0.2<br>(0.1 - 0.3)    | 1.1<br>(0.7 - 1.4)    | 0.7<br>(0.4 - 1.0)    | 0.8<br>(0.5 - 1.2)       |
| Assault by other means                          | 1.4<br>(1.0 - 1.9)    | 2.6<br>(1.9 - 3.8)      | 0.6<br>(0.5 - 0.9)    | 1.4<br>(1.0 - 1.9)    | 1.5<br>(1.0 - 2.0)    | 2.3<br>(1.6 - 3.0)       |
| Forces of nature, war, and legal intervention   | 1.6<br>(1.1 - 2.9)    | 2.8<br>(2.6 - 3.3)      | 0.6<br>(0.4 - 1.1)    | 1.3<br>(0.7 - 2.7)    | 2.8<br>(1.6 - 5.8)    | 2.4<br>(1.4 - 5.0)       |
| Exposure to forces of nature                    | 0.5<br>(0.3 - 1.0)    | 0.7<br>(0.7 - 0.8)      | 0.2<br>(0.1 - 0.4)    | 0.3<br>(0.2 - 0.8)    | 1.0<br>(0.5 - 2.4)    | 1.1<br>(0.5 - 2.3)       |
| Collective violence and legal intervention      | 1.1<br>(0.8 - 1.9)    | 2.1<br>(1.9 - 2.6)      | 0.4<br>(0.3 - 0.7)    | 0.9<br>(0.6 - 1.8)    | 1.4<br>(1.1 - 3.4)    | 1.4<br>(0.9 - 2.6)       |

**Web Table 28: Global death rates (per 100k) by age, sex, and cause in 2013**

Web Table 28 - Global death rates (per 100k) with 95% UI by age, sex, and cause in 2013

| Cause                                                             | Both Sexes, All Ages     | Both Sexes, 0-4 Years      | Both Sexes, 5-14 Years | Both Sexes, 15-49 Years  | Both Sexes, 50-69 Years        | Both Sexes, 70-80 Years        |
|-------------------------------------------------------------------|--------------------------|----------------------------|------------------------|--------------------------|--------------------------------|--------------------------------|
| All causes                                                        | 766.6<br>(748.6 - 787.1) | 952.1<br>(907.3 - 1,001.8) | 69.2<br>(66.3 - 72.5)  | 231.7<br>(222.8 - 242.6) | 1,192.1<br>(1,144.9 - 1,245.7) | 6,647.2<br>(6,524.8 - 6,764.9) |
| Communicable, maternal, neonatal, and nutritional diseases        | 165.0<br>(158.4 - 171.6) | 764.3<br>(716.7 - 813.3)   | 35.0<br>(32.5 - 37.7)  | 69.2<br>(66.1 - 72.8)    | 133.6<br>(125.7 - 142.5)       | 580.8<br>(534.2 - 615.2)       |
| HIV/AIDS and tuberculosis                                         | 36.8<br>(34.9 - 40.0)    | 16.2<br>(14.5 - 17.9)      | 6.8<br>(6.5 - 7.3)     | 38.0<br>(35.8 - 41.4)    | 58.8<br>(54.0 - 64.9)          | 88.4<br>(80.6 - 97.1)          |
| Tuberculosis                                                      | 18.0<br>(16.3 - 19.6)    | 6.5<br>(4.7 - 7.8)         | 1.4<br>(1.1 - 1.6)     | 13.0<br>(11.4 - 14.4)    | 37.6<br>(33.5 - 41.9)          | 81.0<br>(73.0 - 89.3)          |
| HIV/AIDS                                                          | 18.7<br>(17.6 - 20.7)    | 9.7<br>(8.9 - 10.9)        | 5.5<br>(5.1 - 5.9)     | 25.0<br>(23.1 - 27.9)    | 21.2<br>(19.4 - 24.4)          | 7.4<br>(6.6 - 8.7)             |
| HIV/AIDS resulting in mycobacterial infection                     | 1.2<br>(0.9 - 1.5)       | 0.6<br>(0.5 - 0.7)         | 0.3<br>(0.2 - 0.4)     | 1.6<br>(1.3 - 2.0)       | 1.4<br>(1.1 - 1.8)             | 0.5<br>(0.4 - 0.7)             |
| HIV/AIDS resulting in other diseases                              | 17.6<br>(16.5 - 19.4)    | 9.1<br>(8.3 - 10.2)        | 5.2<br>(4.8 - 5.5)     | 23.5<br>(21.6 - 26.2)    | 19.8<br>(18.1 - 22.7)          | 6.9<br>(6.2 - 8.1)             |
| Diarrhea, lower respiratory, and other common infectious diseases | 66.4<br>(61.3 - 70.3)    | 277.4<br>(251.2 - 305.9)   | 18.2<br>(16.0 - 20.8)  | 14.8<br>(13.4 - 16.6)    | 53.8<br>(47.3 - 59.0)          | 401.1<br>(355.7 - 431.0)       |
| Diarrheal diseases                                                | 17.7<br>(16.1 - 19.3)    | 78.8<br>(66.5 - 90.0)      | 4.6<br>(3.8 - 5.5)     | 4.1<br>(3.7 - 4.5)       | 17.1<br>(14.6 - 20.4)          | 89.2<br>(76.5 - 104.8)         |
| Intestinal infectious diseases                                    | 3.1<br>(1.7 - 5.1)       | 9.5<br>(5.0 - 15.7)        | 4.9<br>(2.8 - 7.7)     | 2.2<br>(1.2 - 3.7)       | 1.1<br>(0.5 - 1.9)             | 1.2<br>(0.7 - 2.0)             |
| Typhoid fever                                                     | 2.2<br>(1.2 - 3.7)       | 6.5<br>(3.3 - 11.1)        | 3.7<br>(2.1 - 5.8)     | 1.6<br>(0.9 - 2.8)       | 0.8<br>(0.4 - 1.4)             | 0.9<br>(0.5 - 1.5)             |
| Paratyphoid fever                                                 | 0.8<br>(0.4 - 1.3)       | 2.5<br>(1.3 - 4.2)         | 1.2<br>(0.7 - 2.0)     | 0.5<br>(0.3 - 0.9)       | 0.2<br>(0.1 - 0.4)             | 0.2<br>(0.1 - 0.4)             |
| Other intestinal infectious diseases                              | 0.1<br>(0.1 - 0.1)       | 0.5<br>(0.4 - 0.6)         | 0.0<br>(0.0 - 0.1)     | 0.0<br>(0.0 - 0.0)       | 0.0<br>(0.0 - 0.1)             | 0.1<br>(0.1 - 0.1)             |
| Lower respiratory infections                                      | 37.1<br>(33.1 - 39.2)    | 137.2<br>(122.8 - 151.3)   | 4.6<br>(3.9 - 5.4)     | 5.7<br>(4.9 - 6.2)       | 30.0<br>(24.4 - 32.7)          | 298.6<br>(258.1 - 322.3)       |
| Upper respiratory infections                                      | 0.1<br>(0.0 - 0.1)       | 0.1<br>(0.1 - 0.2)         | 0.0<br>(0.0 - 0.0)     | 0.0<br>(0.0 - 0.0)       | 0.1<br>(0.1 - 0.1)             | 0.3<br>(0.2 - 0.4)             |
| Otitis media                                                      | 0.0<br>(0.0 - 0.0)       | 0.1<br>(0.1 - 0.1)         | 0.0<br>(0.0 - 0.0)     | 0.0<br>(0.0 - 0.0)       | 0.0<br>(0.0 - 0.0)             | 0.2<br>(0.2 - 0.2)             |
| Meningitis                                                        | 4.2<br>(3.7 - 4.8)       | 21.5<br>(15.9 - 27.7)      | 1.9<br>(1.6 - 2.2)     | 1.9<br>(1.6 - 2.1)       | 3.5<br>(2.8 - 4.0)             | 7.0<br>(5.8 - 7.9)             |
| Pneumococcal meningitis                                           | 1.1<br>(0.9 - 1.3)       | 4.6<br>(3.3 - 6.0)         | 0.6<br>(0.5 - 0.7)     | 0.6<br>(0.5 - 0.7)       | 1.0<br>(0.8 - 1.2)             | 2.0<br>(1.7 - 2.4)             |
| H influenzae type B meningitis                                    | 0.9<br>(0.7 - 1.1)       | 6.7<br>(5.0 - 8.5)         | 0.4<br>(0.3 - 0.5)     | 0.2<br>(0.2 - 0.3)       | 0.3<br>(0.3 - 0.4)             | 0.7<br>(0.5 - 0.8)             |
| Meningococcal meningitis                                          | 0.9<br>(0.8 - 1.1)       | 4.5<br>(3.3 - 5.8)         | 0.4<br>(0.3 - 0.5)     | 0.4<br>(0.4 - 0.5)       | 0.7<br>(0.6 - 0.9)             | 1.6<br>(1.3 - 1.9)             |
| Other meningitis                                                  | 1.3<br>(1.1 - 1.5)       | 5.7<br>(4.2 - 7.3)         | 0.4<br>(0.4 - 0.5)     | 0.7<br>(0.6 - 0.8)       | 1.4<br>(1.1 - 1.6)             | 2.7<br>(2.2 - 3.2)             |
| Encephalitis                                                      | 1.1<br>(0.9 - 1.4)       | 3.9<br>(2.9 - 5.4)         | 0.8<br>(0.6 - 1.0)     | 0.6<br>(0.5 - 0.8)       | 1.1<br>(0.9 - 1.5)             | 1.9<br>(1.5 - 2.4)             |
| Diphtheria                                                        | 0.0<br>(0.0 - 0.1)       | 0.3<br>(0.1 - 0.8)         | 0.0<br>(0.0 - 0.1)     | 0.0<br>(0.0 - 0.0)       | 0.0<br>(0.0 - 0.0)             | --                             |
| Whooping cough                                                    | 0.8<br>(0.3 - 1.9)       | 8.6<br>(3.1 - 19.3)        | 0.3<br>(0.1 - 0.7)     | 0.0<br>(0.0 - 0.1)       | 0.0<br>(0.0 - 0.0)             | --                             |
| Tetanus                                                           | 0.8<br>(0.6 - 1.1)       | 4.8<br>(2.5 - 6.8)         | 0.2<br>(0.1 - 0.2)     | 0.2<br>(0.2 - 0.3)       | 0.9<br>(0.6 - 1.4)             | 1.9<br>(1.2 - 3.1)             |
| Measles                                                           | 1.3<br>(0.7 - 2.4)       | 12.4<br>(6.3 - 22.0)       | 0.9<br>(0.5 - 1.8)     | 0.1<br>(0.0 - 0.1)       | 0.0<br>(0.0 - 0.0)             | --                             |
| Varicella and herpes zoster                                       | 0.1<br>(0.1 - 0.1)       | 0.2<br>(0.2 - 0.4)         | 0.0<br>(0.0 - 0.1)     | 0.0<br>(0.0 - 0.1)       | 0.1<br>(0.0 - 0.1)             | 0.8<br>(0.5 - 1.1)             |
| Neglected tropical diseases and malaria                           | 13.9<br>(11.7 - 16.6)    | 94.4<br>(73.8 - 120.6)     | 6.2<br>(5.2 - 7.5)     | 4.2<br>(3.6 - 4.9)       | 7.4<br>(6.0 - 9.0)             | 15.2<br>(12.4 - 19.4)          |
| Malaria                                                           | 11.9<br>(9.8 - 14.4)     | 89.0<br>(68.5 - 114.7)     | 4.3<br>(3.3 - 5.5)     | 2.9<br>(2.4 - 3.6)       | 5.5<br>(4.3 - 7.0)             | 11.5<br>(8.9 - 14.8)           |
| Chagas disease                                                    | 0.1<br>(0.1 - 0.5)       | 0.0<br>(0.0 - 0.0)         | 0.0<br>(0.0 - 0.0)     | 0.0<br>(0.0 - 0.1)       | 0.4<br>(0.1 - 1.2)             | 1.2<br>(0.4 - 4.1)             |
| Leishmaniasis                                                     | 0.9<br>(0.7 - 1.0)       | 3.2<br>(2.5 - 4.1)         | 1.1<br>(0.8 - 1.3)     | 0.6<br>(0.5 - 0.7)       | 0.4<br>(0.3 - 0.5)             | 0.4<br>(0.3 - 0.4)             |
| Visceral leishmaniasis                                            | 0.9<br>(0.7 - 1.0)       | 3.2<br>(2.5 - 4.1)         | 1.1<br>(0.8 - 1.3)     | 0.6<br>(0.5 - 0.7)       | 0.4<br>(0.3 - 0.5)             | 0.4<br>(0.3 - 0.4)             |
| African trypanosomiasis                                           | 0.1<br>(0.1 - 0.2)       | 0.1<br>(0.0 - 0.1)         | 0.1<br>(0.0 - 0.1)     | 0.1<br>(0.1 - 0.2)       | 0.1<br>(0.0 - 0.1)             | 0.1<br>(0.0 - 0.1)             |
| Schistosomiasis                                                   | 0.1<br>(0.1 - 0.1)       | 0.0<br>(0.0 - 0.0)         | 0.0<br>(0.0 - 0.0)     | 0.1<br>(0.1 - 0.1)       | 0.2<br>(0.1 - 0.2)             | 0.3<br>(0.3 - 0.3)             |
| Cysticercosis                                                     | 0.0<br>(0.0 - 0.0)       | 0.0<br>(0.0 - 0.0)         | 0.0<br>(0.0 - 0.0)     | 0.0<br>(0.0 - 0.0)       | 0.0<br>(0.0 - 0.0)             | 0.0<br>(0.0 - 0.0)             |
| Cystic echinococcosis                                             | 0.0<br>(0.0 - 0.0)       | 0.0<br>(0.0 - 0.0)         | 0.0<br>(0.0 - 0.0)     | 0.0<br>(0.0 - 0.0)       | 0.0<br>(0.0 - 0.0)             | 0.1<br>(0.1 - 0.1)             |
| Dengue                                                            | 0.1<br>(0.1 - 0.2)       | 0.4<br>(0.2 - 0.5)         | 0.2<br>(0.1 - 0.2)     | 0.1<br>(0.0 - 0.1)       | 0.1<br>(0.1 - 0.1)             | 0.2<br>(0.1 - 0.2)             |
| Yellow fever                                                      | 0.0<br>(0.0 - 0.0)       | 0.0<br>(0.0 - 0.0)         | 0.0<br>(0.0 - 0.0)     | 0.0<br>(0.0 - 0.0)       | 0.0<br>(0.0 - 0.0)             | 0.0<br>(0.0 - 0.0)             |
| Rabies                                                            | 0.3<br>(0.2 - 0.4)       | 0.4<br>(0.3 - 0.6)         | 0.4<br>(0.3 - 0.6)     | 0.2<br>(0.2 - 0.3)       | 0.5<br>(0.4 - 0.6)             | 0.5<br>(0.3 - 0.6)             |
| Intestinal nematode infections                                    | 0.1<br>(0.1 - 0.1)       | 0.5<br>(0.4 - 0.6)         | 0.0<br>(0.0 - 0.1)     | 0.0<br>(0.0 - 0.0)       | 0.0<br>(0.0 - 0.0)             | 0.1<br>(0.0 - 0.1)             |

Web Table 28 - Global death rates (per 100k) with 95% UI by age, sex, and cause in 2013

| Cause                                                            | Both Sexes, All Ages     | Both Sexes, 0-4 Years    | Both Sexes, 5-14 Years | Both Sexes, 15-49 Years | Both Sexes, 50-69 Years    | Both Sexes, 70-80 Years        |
|------------------------------------------------------------------|--------------------------|--------------------------|------------------------|-------------------------|----------------------------|--------------------------------|
| Ascariasis                                                       | 0.1<br>(0.1 - 0.1)       | 0.5<br>(0.4 - 0.6)       | 0.0<br>(0.0 - 0.1)     | 0.0<br>(0.0 - 0.0)      | 0.0<br>(0.0 - 0.0)         | 0.1<br>(0.0 - 0.1)             |
| Other neglected tropical diseases                                | 0.2<br>(0.2 - 0.3)       | 0.8<br>(0.6 - 1.2)       | 0.1<br>(0.1 - 0.1)     | 0.1<br>(0.1 - 0.1)      | 0.2<br>(0.2 - 0.3)         | 0.9<br>(0.8 - 1.1)             |
| Maternal disorders                                               | 4.1<br>(3.7 - 4.6)       | --                       | 0.1<br>(0.1 - 0.1)     | 7.8<br>(7.0 - 8.8)      | --                         | --                             |
| Maternal hemorrhage                                              | 0.6<br>(0.5 - 0.7)       | --                       | 0.0<br>(0.0 - 0.0)     | 1.2<br>(1.0 - 1.4)      | --                         | --                             |
| Maternal sepsis and other maternal infections                    | 0.3<br>(0.3 - 0.4)       | --                       | 0.0<br>(0.0 - 0.0)     | 0.6<br>(0.5 - 0.7)      | --                         | --                             |
| Maternal hypertensive disorders                                  | 0.4<br>(0.4 - 0.5)       | --                       | 0.0<br>(0.0 - 0.0)     | 0.8<br>(0.7 - 0.9)      | --                         | --                             |
| Maternal obstructed labor                                        | 0.3<br>(0.2 - 0.3)       | --                       | 0.0<br>(0.0 - 0.0)     | 0.5<br>(0.4 - 0.6)      | --                         | --                             |
| Maternal abortive outcome                                        | 0.6<br>(0.5 - 0.7)       | --                       | 0.0<br>(0.0 - 0.0)     | 1.2<br>(1.0 - 1.3)      | --                         | --                             |
| Indirect maternal deaths                                         | 0.4<br>(0.4 - 0.5)       | --                       | 0.0<br>(0.0 - 0.0)     | 0.8<br>(0.7 - 1.0)      | --                         | --                             |
| Late maternal deaths                                             | 0.6<br>(0.5 - 0.7)       | --                       | 0.0<br>(0.0 - 0.0)     | 1.2<br>(1.0 - 1.4)      | --                         | --                             |
| Maternal deaths aggravated by HIV/AIDS                           | 0.0<br>(0.0 - 0.0)       | --                       | --                     | 0.1<br>(0.0 - 0.1)      | --                         | --                             |
| Other maternal disorders                                         | 0.8<br>(0.7 - 0.9)       | --                       | 0.0<br>(0.0 - 0.0)     | 1.5<br>(1.3 - 1.7)      | --                         | --                             |
| Neonatal disorders                                               | 28.6<br>(27.0 - 30.2)    | 310.5<br>(293.3 - 327.5) | --                     | --                      | --                         | --                             |
| Neonatal preterm birth complications                             | 10.4<br>(8.3 - 12.7)     | 112.5<br>(89.7 - 138.1)  | --                     | --                      | --                         | --                             |
| Neonatal encephalopathy due to birth asphyxia and trauma         | 9.0<br>(7.2 - 10.6)      | 97.6<br>(78.1 - 115.3)   | --                     | --                      | --                         | --                             |
| Neonatal sepsis and other neonatal infections                    | 5.1<br>(3.3 - 7.1)       | 55.5<br>(35.3 - 77.4)    | --                     | --                      | --                         | --                             |
| Hemolytic disease and other neonatal jaundice                    | 0.3<br>(0.2 - 0.4)       | 3.0<br>(2.0 - 4.5)       | --                     | --                      | --                         | --                             |
| Other neonatal disorders                                         | 3.9<br>(3.1 - 4.9)       | 41.9<br>(33.3 - 53.2)    | --                     | --                      | --                         | --                             |
| Nutritional deficiencies                                         | 9.5<br>(7.5 - 11.1)      | 39.5<br>(30.0 - 48.0)    | 1.9<br>(1.4 - 2.2)     | 2.2<br>(1.8 - 2.8)      | 7.7<br>(5.8 - 9.1)         | 59.7<br>(47.3 - 69.9)          |
| Protein-energy malnutrition                                      | 6.6<br>(4.9 - 7.8)       | 34.2<br>(25.5 - 42.5)    | 1.3<br>(0.9 - 1.7)     | 1.0<br>(0.7 - 1.4)      | 4.0<br>(2.6 - 4.9)         | 38.3<br>(25.3 - 46.1)          |
| Iodine deficiency                                                | 0.0<br>(0.0 - 0.1)       | 0.1<br>(0.0 - 0.2)       | 0.0<br>(0.0 - 0.0)     | 0.0<br>(0.0 - 0.0)      | 0.1<br>(0.0 - 0.2)         | 0.2<br>(0.1 - 0.4)             |
| Iron-deficiency anemia                                           | 2.6<br>(1.7 - 3.6)       | 4.8<br>(2.0 - 9.2)       | 0.5<br>(0.3 - 0.7)     | 1.1<br>(0.8 - 1.5)      | 3.1<br>(1.9 - 4.3)         | 17.5<br>(11.2 - 26.7)          |
| Other nutritional deficiencies                                   | 0.4<br>(0.2 - 0.6)       | 0.4<br>(0.2 - 0.8)       | 0.0<br>(0.0 - 0.1)     | 0.1<br>(0.1 - 0.2)      | 0.5<br>(0.3 - 0.8)         | 3.7<br>(2.1 - 5.7)             |
| Other communicable, maternal, neonatal, and nutritional diseases | 5.7<br>(4.8 - 6.8)       | 26.3<br>(17.8 - 37.3)    | 1.8<br>(1.4 - 2.3)     | 2.2<br>(1.9 - 2.4)      | 6.0<br>(5.1 - 7.4)         | 16.4<br>(13.6 - 20.1)          |
| Sexually transmitted diseases excluding HIV                      | 2.0<br>(1.2 - 3.0)       | 18.3<br>(10.5 - 28.5)    | 0.7<br>(0.4 - 1.1)     | 0.1<br>(0.1 - 0.2)      | 0.3<br>(0.2 - 0.4)         | 1.3<br>(0.9 - 2.0)             |
| Syphilis                                                         | 1.9<br>(1.2 - 2.9)       | 18.3<br>(10.5 - 28.5)    | 0.7<br>(0.4 - 1.1)     | 0.1<br>(0.0 - 0.1)      | 0.2<br>(0.1 - 0.2)         | 1.0<br>(0.7 - 1.5)             |
| Chlamydial infection                                             | 0.0<br>(0.0 - 0.0)       | --                       | 0.0<br>(0.0 - 0.0)     | 0.0<br>(0.0 - 0.0)      | 0.0<br>(0.0 - 0.0)         | 0.1<br>(0.0 - 0.1)             |
| Gonococcal infection                                             | 0.0<br>(0.0 - 0.0)       | --                       | 0.0<br>(0.0 - 0.0)     | 0.0<br>(0.0 - 0.0)      | 0.1<br>(0.0 - 0.1)         | 0.2<br>(0.1 - 0.2)             |
| Other sexually transmitted diseases                              | 0.0<br>(0.0 - 0.0)       | --                       | 0.0<br>(0.0 - 0.0)     | 0.0<br>(0.0 - 0.0)      | 0.0<br>(0.0 - 0.0)         | 0.1<br>(0.0 - 0.1)             |
| Hepatitis                                                        | 1.9<br>(1.7 - 2.3)       | 2.5<br>(1.8 - 4.3)       | 0.6<br>(0.5 - 0.8)     | 1.4<br>(1.3 - 1.7)      | 3.1<br>(2.8 - 3.6)         | 6.0<br>(5.3 - 6.7)             |
| Acute hepatitis A                                                | 0.2<br>(0.1 - 0.4)       | 1.1<br>(0.4 - 2.1)       | 0.1<br>(0.0 - 0.2)     | 0.1<br>(0.0 - 0.2)      | 0.1<br>(0.0 - 0.3)         | 0.1<br>(0.0 - 0.3)             |
| Acute hepatitis B                                                | 1.0<br>(0.7 - 1.2)       | 1.1<br>(0.5 - 2.0)       | 0.1<br>(0.1 - 0.2)     | 0.4<br>(0.3 - 0.6)      | 2.2<br>(1.7 - 2.7)         | 5.0<br>(4.2 - 5.7)             |
| Acute hepatitis C                                                | 0.0<br>(0.0 - 0.1)       | --                       | 0.0<br>(0.0 - 0.0)     | 0.0<br>(0.0 - 0.1)      | 0.1<br>(0.0 - 0.2)         | 0.2<br>(0.0 - 0.5)             |
| Acute hepatitis E                                                | 0.7<br>(0.5 - 0.9)       | 0.3<br>(0.1 - 0.8)       | 0.4<br>(0.2 - 0.5)     | 0.9<br>(0.7 - 1.1)      | 0.7<br>(0.4 - 1.1)         | 0.7<br>(0.3 - 1.2)             |
| Other infectious diseases                                        | 1.8<br>(1.3 - 2.3)       | 5.5<br>(2.8 - 9.7)       | 0.5<br>(0.3 - 0.7)     | 0.6<br>(0.4 - 0.8)      | 2.6<br>(1.9 - 3.8)         | 9.2<br>(6.5 - 12.8)            |
| Non-communicable diseases                                        | 534.7<br>(519.8 - 550.7) | 132.1<br>(110.7 - 161.9) | 17.0<br>(15.1 - 19.9)  | 101.9<br>(96.6 - 107.8) | 970.7<br>(931.3 - 1,015.2) | 5,823.0<br>(5,707.7 - 5,938.5) |
| Neoplasms                                                        | 115.1<br>(111.0 - 119.3) | 7.4<br>(6.2 - 8.5)       | 3.9<br>(3.5 - 4.3)     | 27.4<br>(26.0 - 29.0)   | 288.5<br>(275.5 - 302.5)   | 987.8<br>(944.1 - 1,017.3)     |
| Esophageal cancer                                                | 6.2<br>(5.4 - 7.2)       | --                       | --                     | 1.0<br>(0.9 - 1.2)      | 18.3<br>(16.0 - 21.9)      | 49.9<br>(44.2 - 58.4)          |
| Stomach cancer                                                   | 11.7<br>(11.1 - 12.5)    | --                       | --                     | 2.1<br>(2.0 - 2.3)      | 29.1<br>(27.1 - 31.3)      | 111.1<br>(104.4 - 119.1)       |
| Liver cancer                                                     | 11.4<br>(10.7 - 12.3)    | --                       | 0.1<br>(0.1 - 0.2)     | 3.7<br>(3.4 - 4.1)      | 33.0<br>(30.3 - 35.9)      | 76.8<br>(72.1 - 82.9)          |



Web Table 28 - Global death rates (per 100k) with 95% UI by age, sex, and cause in 2013

| Cause                                | Both Sexes, All Ages     | Both Sexes, 0-4 Years | Both Sexes, 5-14 Years | Both Sexes, 15-49 Years | Both Sexes, 50-69 Years  | Both Sexes, 70-80 Years        |
|--------------------------------------|--------------------------|-----------------------|------------------------|-------------------------|--------------------------|--------------------------------|
| Liver cancer due to hepatitis B      | 4.2<br>(3.8 - 4.6)       | --                    | 0.1<br>(0.0 - 0.1)     | 1.8<br>(1.6 - 2.1)      | 13.1<br>(11.6 - 14.6)    | 20.5<br>(18.7 - 22.3)          |
| Liver cancer due to hepatitis C      | 4.8<br>(4.4 - 5.2)       | --                    | 0.0<br>(0.0 - 0.0)     | 1.1<br>(1.0 - 1.3)      | 13.4<br>(12.1 - 14.8)    | 37.8<br>(34.8 - 41.5)          |
| Liver cancer due to alcohol use      | 1.3<br>(1.2 - 1.4)       | --                    | --                     | 0.2<br>(0.2 - 0.3)      | 3.3<br>(3.0 - 3.7)       | 11.8<br>(10.8 - 12.9)          |
| Liver cancer due to other causes     | 1.2<br>(1.0 - 1.3)       | --                    | 0.1<br>(0.1 - 0.1)     | 0.5<br>(0.4 - 0.6)      | 3.2<br>(2.9 - 3.6)       | 6.8<br>(6.2 - 7.6)             |
| Larynx cancer                        | 1.2<br>(1.0 - 1.5)       | --                    | --                     | 0.2<br>(0.2 - 0.3)      | 3.8<br>(3.2 - 4.5)       | 9.0<br>(7.4 - 10.7)            |
| Tracheal, bronchus and lung cancer   | 22.9<br>(21.9 - 23.8)    | --                    | --                     | 3.0<br>(2.8 - 3.2)      | 64.0<br>(60.6 - 67.4)    | 206.0<br>(195.0 - 213.9)       |
| Breast cancer                        | 6.6<br>(5.8 - 7.2)       | --                    | --                     | 2.7<br>(2.5 - 2.9)      | 17.8<br>(16.2 - 19.7)    | 42.9<br>(34.5 - 46.7)          |
| Cervical cancer                      | 3.3<br>(2.8 - 3.6)       | --                    | --                     | 1.6<br>(1.3 - 1.8)      | 9.6<br>(7.8 - 10.6)      | 16.8<br>(15.1 - 19.1)          |
| Uterine cancer                       | 0.9<br>(0.7 - 1.1)       | --                    | --                     | 0.2<br>(0.1 - 0.2)      | 2.6<br>(2.0 - 3.0)       | 8.2<br>(6.7 - 9.6)             |
| Prostate cancer                      | 4.1<br>(3.4 - 5.2)       | --                    | --                     | 0.0<br>(0.0 - 0.1)      | 4.6<br>(3.8 - 5.8)       | 62.7<br>(51.5 - 82.0)          |
| Colon and rectum cancer              | 10.8<br>(10.4 - 11.2)    | --                    | --                     | 1.9<br>(1.8 - 2.0)      | 22.9<br>(21.9 - 23.9)    | 114.5<br>(109.8 - 119.7)       |
| Lip and oral cavity cancer           | 1.9<br>(1.6 - 2.2)       | --                    | --                     | 0.6<br>(0.5 - 0.7)      | 5.4<br>(4.6 - 6.2)       | 13.0<br>(11.3 - 15.1)          |
| Nasopharynx cancer                   | 0.8<br>(0.8 - 1.0)       | --                    | 0.0<br>(0.0 - 0.1)     | 0.5<br>(0.4 - 0.6)      | 2.5<br>(2.3 - 2.9)       | 3.2<br>(2.9 - 3.9)             |
| Other pharynx cancer                 | 1.1<br>(0.9 - 1.2)       | --                    | --                     | 0.3<br>(0.3 - 0.4)      | 3.9<br>(3.2 - 4.3)       | 5.7<br>(4.9 - 6.2)             |
| Gallbladder and biliary tract cancer | 1.9<br>(1.7 - 2.2)       | --                    | --                     | 0.3<br>(0.2 - 0.3)      | 4.3<br>(3.7 - 4.8)       | 20.8<br>(17.1 - 23.5)          |
| Pancreatic cancer                    | 4.9<br>(4.7 - 5.1)       | --                    | --                     | 0.7<br>(0.6 - 0.7)      | 12.0<br>(11.5 - 12.5)    | 49.4<br>(47.2 - 51.5)          |
| Malignant skin melanoma              | 0.8<br>(0.6 - 1.1)       | --                    | --                     | 0.3<br>(0.3 - 0.4)      | 1.9<br>(1.4 - 2.6)       | 6.2<br>(4.6 - 8.1)             |
| Non-melanoma skin cancer             | 0.5<br>(0.5 - 0.7)       | --                    | --                     | 0.1<br>(0.1 - 0.1)      | 0.8<br>(0.6 - 1.0)       | 6.9<br>(5.8 - 8.4)             |
| Ovarian cancer                       | 2.2<br>(2.1 - 2.4)       | --                    | --                     | 0.7<br>(0.6 - 0.8)      | 6.5<br>(6.0 - 7.0)       | 15.0<br>(13.6 - 16.3)          |
| Testicular cancer                    | 0.1<br>(0.1 - 0.1)       | --                    | --                     | 0.1<br>(0.1 - 0.2)      | 0.2<br>(0.1 - 0.2)       | 0.4<br>(0.3 - 0.4)             |
| Kidney cancer                        | 1.9<br>(1.8 - 2.0)       | 0.3<br>(0.2 - 0.3)    | 0.1<br>(0.1 - 0.1)     | 0.3<br>(0.3 - 0.3)      | 4.9<br>(4.6 - 5.2)       | 16.5<br>(14.9 - 18.1)          |
| Bladder cancer                       | 2.4<br>(2.2 - 2.7)       | --                    | --                     | 0.2<br>(0.2 - 0.2)      | 4.6<br>(4.2 - 5.2)       | 29.7<br>(26.1 - 32.7)          |
| Brain and nervous system cancer      | 2.8<br>(2.4 - 3.3)       | 0.5<br>(0.4 - 0.6)    | 0.6<br>(0.5 - 0.7)     | 1.4<br>(1.2 - 1.7)      | 7.3<br>(6.3 - 8.6)       | 14.3<br>(11.5 - 15.5)          |
| Thyroid cancer                       | 0.5<br>(0.4 - 0.5)       | --                    | 0.0<br>(0.0 - 0.0)     | 0.1<br>(0.1 - 0.1)      | 1.1<br>(1.0 - 1.3)       | 4.5<br>(3.9 - 5.2)             |
| Mesothelioma                         | 0.5<br>(0.4 - 0.5)       | --                    | --                     | 0.1<br>(0.1 - 0.1)      | 1.6<br>(1.4 - 1.8)       | 3.5<br>(2.7 - 4.1)             |
| Hodgkin lymphoma                     | 0.3<br>(0.3 - 0.4)       | 0.3<br>(0.2 - 0.5)    | 0.1<br>(0.1 - 0.1)     | 0.2<br>(0.2 - 0.3)      | 0.6<br>(0.5 - 0.8)       | 1.6<br>(1.5 - 2.0)             |
| Non-Hodgkin lymphoma                 | 3.2<br>(2.6 - 3.4)       | 0.9<br>(0.6 - 1.1)    | 0.5<br>(0.4 - 0.6)     | 1.1<br>(1.0 - 1.3)      | 6.6<br>(5.6 - 7.4)       | 25.3<br>(18.9 - 28.3)          |
| Multiple myeloma                     | 1.1<br>(0.9 - 1.3)       | --                    | --                     | 0.2<br>(0.1 - 0.2)      | 2.6<br>(2.2 - 3.2)       | 11.2<br>(8.7 - 13.6)           |
| Leukemia                             | 3.7<br>(3.5 - 3.9)       | 1.4<br>(1.2 - 1.6)    | 1.4<br>(1.2 - 1.5)     | 2.0<br>(1.9 - 2.1)      | 6.2<br>(5.9 - 6.5)       | 24.5<br>(22.9 - 25.8)          |
| Other neoplasms                      | 5.2<br>(4.6 - 5.6)       | 4.1<br>(3.2 - 5.0)    | 1.1<br>(0.9 - 1.3)     | 1.8<br>(1.6 - 2.1)      | 9.9<br>(9.0 - 11.0)      | 38.2<br>(32.5 - 41.4)          |
| Cardiovascular diseases              | 241.7<br>(230.8 - 252.5) | 8.4<br>(7.4 - 10.0)   | 2.4<br>(2.1 - 2.9)     | 35.1<br>(32.2 - 37.7)   | 406.2<br>(380.9 - 430.6) | 2,948.5<br>(2,838.4 - 3,081.7) |
| Rheumatic heart disease              | 3.8<br>(3.1 - 4.9)       | 0.3<br>(0.2 - 0.4)    | 0.4<br>(0.3 - 0.5)     | 1.8<br>(1.5 - 2.4)      | 7.7<br>(6.3 - 10.5)      | 29.1<br>(22.2 - 36.0)          |
| Ischemic heart disease               | 113.7<br>(102.3 - 122.4) | 1.0<br>(0.7 - 1.5)    | 0.5<br>(0.4 - 0.7)     | 16.7<br>(14.8 - 18.6)   | 197.5<br>(176.7 - 214.7) | 1,373.0<br>(1,234.0 - 1,477.5) |
| Cerebrovascular disease              | 90.1<br>(83.3 - 100.0)   | 2.1<br>(1.8 - 2.6)    | 0.8<br>(0.6 - 0.9)     | 10.2<br>(9.0 - 11.5)    | 145.0<br>(131.8 - 161.2) | 1,148.9<br>(1,060.9 - 1,279.1) |
| Ischemic stroke                      | 45.7<br>(39.3 - 50.2)    | 0.2<br>(0.2 - 0.3)    | 0.1<br>(0.1 - 0.1)     | 1.6<br>(1.3 - 2.0)      | 51.4<br>(42.1 - 59.0)    | 689.9<br>(600.7 - 755.6)       |
| Hemorrhagic stroke                   | 44.3<br>(40.3 - 52.0)    | 1.9<br>(1.6 - 2.3)    | 0.7<br>(0.6 - 0.8)     | 8.6<br>(7.6 - 9.8)      | 93.6<br>(84.2 - 107.0)   | 459.0<br>(412.2 - 566.7)       |
| Hypertensive heart disease           | 14.9<br>(11.9 - 17.4)    | 0.2<br>(0.1 - 0.3)    | 0.1<br>(0.0 - 0.1)     | 1.8<br>(1.4 - 2.2)      | 24.3<br>(18.8 - 29.1)    | 189.0<br>(149.6 - 221.0)       |
| Cardiomyopathy and myocarditis       | 6.2<br>(5.2 - 7.2)       | 2.5<br>(1.9 - 3.1)    | 0.4<br>(0.3 - 0.4)     | 2.2<br>(1.8 - 2.5)      | 11.5<br>(9.1 - 13.3)     | 54.0<br>(46.6 - 63.8)          |
| Atrial fibrillation and flutter      | 1.6<br>(1.4 - 1.8)       | --                    | --                     | 0.0<br>(0.0 - 0.0)      | 0.7<br>(0.6 - 0.7)       | 27.4<br>(23.7 - 31.0)          |
| Aortic aneurysm                      | 2.1<br>(1.7 - 2.5)       | --                    | --                     | 0.3<br>(0.2 - 0.3)      | 3.7<br>(3.1 - 4.3)       | 25.8<br>(20.8 - 31.4)          |

Web Table 28 - Global death rates (per 100k) with 95% UI by age, sex, and cause in 2013

| Cause                                               | Both Sexes, All Ages  | Both Sexes, 0-4 Years | Both Sexes, 5-14 Years | Both Sexes, 15-49 Years | Both Sexes, 50-69 Years | Both Sexes, 70-80 Years  |
|-----------------------------------------------------|-----------------------|-----------------------|------------------------|-------------------------|-------------------------|--------------------------|
| Peripheral vascular disease                         | 0.6<br>(0.5 - 0.6)    | --                    | --                     | 0.0<br>(0.0 - 0.0)      | 0.5<br>(0.5 - 0.6)      | 9.0<br>(7.8 - 10.0)      |
| Endocarditis                                        | 0.9<br>(0.7 - 1.1)    | 0.6<br>(0.4 - 0.8)    | 0.1<br>(0.1 - 0.1)     | 0.4<br>(0.3 - 0.4)      | 1.6<br>(1.2 - 2.0)      | 7.5<br>(5.6 - 9.5)       |
| Other cardiovascular and circulatory diseases       | 7.7<br>(7.0 - 9.1)    | 1.7<br>(1.3 - 2.4)    | 0.3<br>(0.2 - 0.3)     | 1.6<br>(1.4 - 2.1)      | 13.6<br>(12.1 - 17.2)   | 84.8<br>(74.6 - 98.8)    |
| Chronic respiratory diseases                        | 59.6<br>(55.8 - 65.6) | 5.5<br>(4.8 - 6.6)    | 0.8<br>(0.7 - 1.0)     | 5.8<br>(5.1 - 6.6)      | 96.6<br>(87.6 - 108.5)  | 760.3<br>(713.3 - 834.7) |
| Chronic obstructive pulmonary disease               | 41.0<br>(36.7 - 44.9) | 2.1<br>(1.7 - 2.7)    | 0.2<br>(0.2 - 0.3)     | 2.4<br>(2.0 - 2.8)      | 59.9<br>(52.4 - 68.0)   | 561.5<br>(504.8 - 611.6) |
| Pneumoconiosis                                      | 3.6<br>(2.8 - 4.6)    | 0.0<br>(0.0 - 0.1)    | 0.0<br>(0.0 - 0.0)     | 0.6<br>(0.4 - 0.7)      | 9.0<br>(6.7 - 11.6)     | 35.1<br>(26.3 - 46.1)    |
| Silicosis                                           | 0.6<br>(0.4 - 0.9)    | 0.0<br>(0.0 - 0.0)    | 0.0<br>(0.0 - 0.0)     | 0.1<br>(0.1 - 0.2)      | 1.5<br>(1.0 - 2.2)      | 6.5<br>(4.4 - 9.1)       |
| Asbestosis                                          | 0.3<br>(0.2 - 0.5)    | 0.0<br>(0.0 - 0.0)    | 0.0<br>(0.0 - 0.0)     | 0.1<br>(0.0 - 0.1)      | 1.0<br>(0.7 - 1.3)      | 2.7<br>(1.9 - 3.7)       |
| Coal workers pneumoconiosis                         | 0.4<br>(0.3 - 0.5)    | 0.0<br>(0.0 - 0.0)    | 0.0<br>(0.0 - 0.0)     | 0.1<br>(0.1 - 0.1)      | 1.0<br>(0.7 - 1.4)      | 2.7<br>(1.9 - 3.9)       |
| Other pneumoconiosis                                | 2.3<br>(1.7 - 3.0)    | 0.0<br>(0.0 - 0.0)    | 0.0<br>(0.0 - 0.0)     | 0.3<br>(0.2 - 0.4)      | 5.5<br>(4.0 - 7.3)      | 23.2<br>(16.3 - 31.8)    |
| Asthma                                              | 6.8<br>(5.6 - 9.5)    | 1.3<br>(1.0 - 1.6)    | 0.4<br>(0.3 - 0.5)     | 1.8<br>(1.5 - 2.4)      | 14.2<br>(11.3 - 19.7)   | 64.1<br>(50.4 - 90.3)    |
| Interstitial lung disease and pulmonary sarcoidosis | 6.6<br>(5.2 - 8.5)    | 0.1<br>(0.1 - 0.2)    | 0.0<br>(0.0 - 0.1)     | 0.6<br>(0.5 - 0.8)      | 11.7<br>(8.6 - 14.6)    | 82.2<br>(65.2 - 109.5)   |
| Other chronic respiratory diseases                  | 1.6<br>(1.4 - 1.9)    | 2.0<br>(1.7 - 2.4)    | 0.2<br>(0.1 - 0.2)     | 0.4<br>(0.3 - 0.4)      | 1.9<br>(1.5 - 2.4)      | 17.4<br>(14.6 - 21.2)    |
| Cirrhosis                                           | 17.1<br>(16.4 - 17.9) | 1.5<br>(1.1 - 1.9)    | 0.7<br>(0.6 - 0.8)     | 8.6<br>(8.0 - 9.2)      | 47.2<br>(44.8 - 50.0)   | 87.2<br>(83.7 - 91.7)    |
| Cirrhosis due to hepatitis B                        | 4.4<br>(4.1 - 4.8)    | 0.1<br>(0.0 - 0.1)    | 0.1<br>(0.1 - 0.1)     | 2.3<br>(2.0 - 2.5)      | 12.3<br>(11.2 - 13.4)   | 23.1<br>(21.3 - 25.2)    |
| Cirrhosis due to hepatitis C                        | 5.0<br>(4.7 - 5.4)    | 0.1<br>(0.1 - 0.1)    | 0.1<br>(0.1 - 0.1)     | 2.1<br>(1.9 - 2.3)      | 14.3<br>(13.2 - 15.5)   | 29.2<br>(26.8 - 31.6)    |
| Cirrhosis due to alcohol use                        | 5.4<br>(5.0 - 5.8)    | --                    | --                     | 2.5<br>(2.2 - 2.8)      | 15.6<br>(14.4 - 17.1)   | 28.7<br>(26.7 - 31.0)    |
| Cirrhosis due to other causes                       | 2.3<br>(2.0 - 2.6)    | 1.3<br>(1.0 - 1.7)    | 0.5<br>(0.5 - 0.6)     | 1.8<br>(1.6 - 2.0)      | 4.9<br>(4.2 - 5.7)      | 6.2<br>(5.4 - 7.1)       |
| Digestive diseases                                  | 16.3<br>(14.9 - 17.8) | 2.6<br>(2.1 - 3.4)    | 1.4<br>(1.2 - 1.6)     | 5.8<br>(5.1 - 6.7)      | 28.7<br>(24.9 - 32.0)   | 153.7<br>(141.1 - 168.9) |
| Peptic ulcer disease                                | 4.2<br>(3.5 - 4.9)    | 0.2<br>(0.1 - 0.3)    | 0.2<br>(0.1 - 0.2)     | 1.4<br>(1.1 - 1.7)      | 8.7<br>(6.9 - 10.3)     | 38.2<br>(31.7 - 44.8)    |
| Gastritis and duodenitis                            | 0.8<br>(0.6 - 1.3)    | 0.1<br>(0.1 - 0.2)    | 0.1<br>(0.1 - 0.1)     | 0.3<br>(0.2 - 0.4)      | 1.6<br>(1.1 - 2.3)      | 7.7<br>(5.3 - 11.8)      |
| Appendicitis                                        | 1.0<br>(0.7 - 1.3)    | 0.3<br>(0.2 - 0.5)    | 0.2<br>(0.2 - 0.3)     | 0.7<br>(0.5 - 1.0)      | 1.6<br>(1.1 - 2.1)      | 5.6<br>(3.8 - 7.3)       |
| Paralytic ileus and intestinal obstruction          | 3.3<br>(2.5 - 4.6)    | 0.7<br>(0.5 - 1.1)    | 0.5<br>(0.4 - 0.6)     | 1.2<br>(0.9 - 1.6)      | 5.6<br>(4.1 - 7.9)      | 30.9<br>(22.1 - 42.9)    |
| Inguinal, femoral, and abdominal hernia             | 0.5<br>(0.4 - 0.7)    | 0.1<br>(0.0 - 0.1)    | 0.1<br>(0.0 - 0.1)     | 0.1<br>(0.1 - 0.2)      | 0.6<br>(0.5 - 1.0)      | 5.3<br>(4.0 - 7.8)       |
| Inflammatory bowel disease                          | 0.7<br>(0.6 - 1.0)    | 0.5<br>(0.3 - 0.7)    | 0.1<br>(0.1 - 0.1)     | 0.3<br>(0.2 - 0.4)      | 1.0<br>(0.8 - 1.4)      | 6.3<br>(5.2 - 8.9)       |
| Vascular intestinal disorders                       | 1.1<br>(0.7 - 1.6)    | 0.0<br>(0.0 - 0.1)    | 0.0<br>(0.0 - 0.0)     | 0.1<br>(0.1 - 0.2)      | 1.4<br>(0.9 - 2.2)      | 15.4<br>(9.9 - 21.8)     |
| Gallbladder and biliary diseases                    | 1.5<br>(1.2 - 1.7)    | 0.1<br>(0.1 - 0.1)    | 0.1<br>(0.0 - 0.1)     | 0.3<br>(0.2 - 0.3)      | 2.2<br>(1.8 - 2.5)      | 18.2<br>(15.1 - 21.3)    |
| Pancreatitis                                        | 1.7<br>(1.2 - 2.1)    | 0.0<br>(0.0 - 0.1)    | 0.1<br>(0.0 - 0.1)     | 1.0<br>(0.7 - 1.3)      | 3.6<br>(2.4 - 4.6)      | 10.9<br>(7.7 - 13.7)     |
| Other digestive diseases                            | 1.5<br>(1.3 - 1.7)    | 0.5<br>(0.4 - 0.7)    | 0.1<br>(0.1 - 0.2)     | 0.5<br>(0.4 - 0.6)      | 2.4<br>(2.0 - 2.8)      | 15.1<br>(12.7 - 17.8)    |
| Neurological disorders                              | 27.6<br>(26.2 - 29.1) | 2.9<br>(2.4 - 3.6)    | 1.0<br>(0.8 - 1.2)     | 2.2<br>(1.9 - 2.4)      | 13.0<br>(12.1 - 13.7)   | 453.3<br>(429.4 - 479.6) |
| Alzheimer disease and other dementias               | 23.1<br>(21.8 - 24.7) | --                    | --                     | 0.0<br>(0.0 - 0.0)      | 7.2<br>(6.8 - 7.7)      | 415.5<br>(391.8 - 444.1) |
| Parkinson disease                                   | 1.4<br>(1.1 - 1.6)    | --                    | --                     | 0.0<br>(0.0 - 0.0)      | 0.9<br>(0.8 - 1.0)      | 24.1<br>(18.3 - 26.7)    |
| Epilepsy                                            | 1.6<br>(1.3 - 1.8)    | 2.1<br>(1.6 - 2.9)    | 0.8<br>(0.6 - 1.0)     | 1.5<br>(1.2 - 1.8)      | 1.5<br>(1.2 - 1.7)      | 4.6<br>(3.6 - 5.2)       |
| Multiple sclerosis                                  | 0.3<br>(0.2 - 0.4)    | --                    | --                     | 0.1<br>(0.1 - 0.2)      | 0.8<br>(0.5 - 1.0)      | 1.3<br>(0.7 - 1.5)       |
| Other neurological disorders                        | 1.2<br>(1.0 - 1.3)    | 0.8<br>(0.6 - 1.0)    | 0.2<br>(0.2 - 0.2)     | 0.5<br>(0.4 - 0.5)      | 2.5<br>(2.2 - 2.8)      | 7.9<br>(6.8 - 8.6)       |
| Mental and substance use disorders                  | 3.9<br>(3.3 - 4.6)    | 0.4<br>(0.2 - 0.6)    | 0.0<br>(0.0 - 0.0)     | 4.2<br>(3.6 - 4.8)      | 7.9<br>(6.1 - 9.8)      | 8.0<br>(6.8 - 9.2)       |
| Schizophrenia                                       | 0.2<br>(0.2 - 0.3)    | --                    | --                     | 0.1<br>(0.1 - 0.2)      | 0.5<br>(0.4 - 0.7)      | 1.2<br>(1.0 - 1.6)       |
| Alcohol use disorders                               | 1.9<br>(1.3 - 2.5)    | --                    | --                     | 1.7<br>(1.1 - 2.2)      | 5.2<br>(3.2 - 6.6)      | 3.7<br>(2.3 - 4.5)       |
| Drug use disorders                                  | 1.8<br>(1.5 - 1.9)    | 0.4<br>(0.2 - 0.6)    | --                     | 2.3<br>(2.0 - 2.5)      | 2.3<br>(2.0 - 2.5)      | 3.1<br>(2.9 - 3.3)       |
| Opioid use disorders                                | 0.7<br>(0.6 - 0.8)    | 0.1<br>(0.1 - 0.2)    | --                     | 0.9<br>(0.8 - 1.0)      | 0.9<br>(0.8 - 1.0)      | 1.2<br>(1.1 - 1.3)       |

Web Table 28 - Global death rates (per 100k) with 95% UI by age, sex, and cause in 2013

| Cause                                               | Both Sexes, All Ages  | Both Sexes, 0-4 Years | Both Sexes, 5-14 Years | Both Sexes, 15-49 Years | Both Sexes, 50-69 Years | Both Sexes, 70-80 Years  |
|-----------------------------------------------------|-----------------------|-----------------------|------------------------|-------------------------|-------------------------|--------------------------|
| Cocaine use disorders                               | 0.1<br>(0.1 - 0.1)    | 0.0<br>(0.0 - 0.0)    | --                     | 0.1<br>(0.1 - 0.1)      | 0.1<br>(0.1 - 0.1)      | 0.1<br>(0.1 - 0.2)       |
| Amphetamine use disorders                           | 0.1<br>(0.0 - 0.1)    | 0.0<br>(0.0 - 0.0)    | --                     | 0.1<br>(0.1 - 0.1)      | 0.1<br>(0.1 - 0.1)      | 0.2<br>(0.1 - 0.2)       |
| Other drug use disorders                            | 0.9<br>(0.8 - 1.0)    | 0.3<br>(0.1 - 0.5)    | --                     | 1.2<br>(1.1 - 1.3)      | 1.2<br>(1.1 - 1.3)      | 1.6<br>(1.4 - 1.7)       |
| Eating disorders                                    | 0.0<br>(0.0 - 0.0)    | --                    | 0.0<br>(0.0 - 0.0)     | 0.0<br>(0.0 - 0.0)      | --                      | --                       |
| Anorexia nervosa                                    | 0.0<br>(0.0 - 0.0)    | --                    | 0.0<br>(0.0 - 0.0)     | 0.0<br>(0.0 - 0.0)      | --                      | --                       |
| Diabetes, urogenital, blood, and endocrine diseases | 41.3<br>(38.6 - 44.3) | 24.8<br>(13.0 - 43.3) | 4.0<br>(2.3 - 6.8)     | 10.1<br>(9.2 - 11.3)    | 75.9<br>(70.4 - 80.5)   | 390.6<br>(360.2 - 411.3) |
| Diabetes mellitus                                   | 18.2<br>(17.2 - 19.2) | 0.7<br>(0.5 - 0.9)    | 0.2<br>(0.1 - 0.2)     | 3.1<br>(2.9 - 3.3)      | 39.9<br>(37.6 - 42.8)   | 187.6<br>(178.1 - 199.9) |
| Acute glomerulonephritis                            | 0.3<br>(0.2 - 0.3)    | 0.3<br>(0.1 - 0.4)    | 0.1<br>(0.1 - 0.1)     | 0.1<br>(0.1 - 0.2)      | 0.4<br>(0.3 - 0.5)      | 1.4<br>(1.1 - 1.7)       |
| Chronic kidney disease                              | 13.4<br>(11.4 - 14.5) | 1.3<br>(1.1 - 1.6)    | 0.5<br>(0.4 - 0.5)     | 3.5<br>(2.9 - 3.9)      | 24.6<br>(19.8 - 27.0)   | 138.1<br>(117.8 - 150.0) |
| Chronic kidney disease due to diabetes mellitus     | 2.4<br>(1.9 - 2.9)    | 0.0<br>(0.0 - 0.1)    | 0.0<br>(0.0 - 0.0)     | 0.4<br>(0.3 - 0.5)      | 5.4<br>(4.0 - 6.0)      | 24.9<br>(20.7 - 31.8)    |
| Chronic kidney disease due to hypertension          | 3.9<br>(2.8 - 4.7)    | 0.2<br>(0.1 - 0.2)    | 0.0<br>(0.0 - 0.1)     | 0.8<br>(0.6 - 1.0)      | 6.7<br>(4.6 - 8.2)      | 43.6<br>(31.4 - 53.3)    |
| Chronic kidney disease due to glomerulonephritis    | 1.6<br>(1.3 - 2.0)    | 0.6<br>(0.5 - 0.8)    | 0.2<br>(0.2 - 0.2)     | 0.8<br>(0.7 - 1.0)      | 3.0<br>(2.4 - 3.8)      | 11.4<br>(8.8 - 14.7)     |
| Chronic kidney disease due to other causes          | 5.5<br>(4.1 - 6.3)    | 0.5<br>(0.4 - 0.7)    | 0.2<br>(0.1 - 0.2)     | 1.5<br>(1.1 - 1.8)      | 9.4<br>(6.9 - 11.1)     | 58.2<br>(44.3 - 68.8)    |
| Urinary diseases and male infertility               | 3.4<br>(2.9 - 3.7)    | 1.1<br>(0.8 - 1.3)    | 0.2<br>(0.1 - 0.2)     | 0.9<br>(0.7 - 1.0)      | 5.1<br>(4.3 - 5.6)      | 38.1<br>(31.2 - 41.7)    |
| Interstitial nephritis and urinary tract infections | 2.5<br>(2.0 - 2.7)    | 0.9<br>(0.6 - 1.1)    | 0.1<br>(0.1 - 0.1)     | 0.6<br>(0.5 - 0.7)      | 3.3<br>(2.8 - 3.7)      | 28.5<br>(22.8 - 31.6)    |
| Urolithiasis                                        | 0.2<br>(0.2 - 0.3)    | --                    | 0.0<br>(0.0 - 0.0)     | 0.1<br>(0.1 - 0.1)      | 0.4<br>(0.3 - 0.6)      | 1.9<br>(1.5 - 2.6)       |
| Other urinary diseases                              | 0.8<br>(0.6 - 0.9)    | 0.2<br>(0.2 - 0.3)    | 0.0<br>(0.0 - 0.1)     | 0.2<br>(0.2 - 0.3)      | 1.4<br>(0.9 - 1.6)      | 7.7<br>(5.6 - 9.3)       |
| Gynecological diseases                              | 0.0<br>(0.0 - 0.1)    | --                    | --                     | 0.0<br>(0.0 - 0.1)      | 0.1<br>(0.0 - 0.1)      | 0.4<br>(0.3 - 0.5)       |
| Uterine fibroids                                    | 0.0<br>(0.0 - 0.0)    | --                    | --                     | 0.0<br>(0.0 - 0.0)      | 0.0<br>(0.0 - 0.0)      | 0.1<br>(0.1 - 0.2)       |
| Polycystic ovarian syndrome                         | 0.0<br>(0.0 - 0.0)    | --                    | --                     | 0.0<br>(0.0 - 0.0)      | 0.0<br>(0.0 - 0.0)      | --                       |
| Endometriosis                                       | 0.0<br>(0.0 - 0.0)    | --                    | --                     | 0.0<br>(0.0 - 0.0)      | 0.0<br>(0.0 - 0.0)      | --                       |
| Genital prolapse                                    | 0.0<br>(0.0 - 0.0)    | --                    | --                     | 0.0<br>(0.0 - 0.0)      | 0.0<br>(0.0 - 0.0)      | 0.1<br>(0.1 - 0.1)       |
| Other gynecological diseases                        | 0.0<br>(0.0 - 0.0)    | --                    | --                     | 0.0<br>(0.0 - 0.0)      | 0.0<br>(0.0 - 0.0)      | 0.2<br>(0.1 - 0.2)       |
| Hemoglobinopathies and hemolytic anemias            | 3.4<br>(1.5 - 6.4)    | 18.0<br>(6.0 - 36.7)  | 2.7<br>(0.9 - 5.6)     | 1.4<br>(0.7 - 2.8)      | 1.5<br>(0.9 - 2.4)      | 5.0<br>(3.3 - 6.4)       |
| Thalassemias                                        | 0.3<br>(0.2 - 0.4)    | 1.4<br>(0.9 - 1.8)    | 0.4<br>(0.2 - 0.5)     | 0.3<br>(0.2 - 0.4)      | 0.1<br>(0.1 - 0.1)      | 0.0<br>(0.0 - 0.1)       |
| Sickle cell disorders                               | 2.5<br>(0.8 - 5.4)    | 16.0<br>(4.4 - 34.3)  | 2.3<br>(0.6 - 5.1)     | 0.9<br>(0.4 - 2.2)      | 0.6<br>(0.3 - 1.4)      | 0.2<br>(0.1 - 0.3)       |
| G6PD deficiency                                     | 0.1<br>(0.0 - 0.1)    | 0.2<br>(0.1 - 0.3)    | 0.0<br>(0.0 - 0.0)     | 0.0<br>(0.0 - 0.1)      | 0.1<br>(0.0 - 0.1)      | 0.1<br>(0.1 - 0.1)       |
| Other hemoglobinopathies and hemolytic anemias      | 0.5<br>(0.3 - 0.6)    | 0.5<br>(0.3 - 0.8)    | 0.1<br>(0.0 - 0.1)     | 0.2<br>(0.1 - 0.2)      | 0.7<br>(0.5 - 0.9)      | 4.7<br>(3.2 - 6.1)       |
| Endocrine, metabolic, blood, and immune disorders   | 2.7<br>(2.1 - 3.1)    | 3.4<br>(2.9 - 4.2)    | 0.4<br>(0.3 - 0.5)     | 1.0<br>(0.8 - 1.2)      | 4.3<br>(3.4 - 4.8)      | 20.1<br>(15.1 - 22.6)    |
| Musculoskeletal disorders                           | 1.6<br>(1.4 - 1.9)    | --                    | 0.3<br>(0.2 - 0.3)     | 0.7<br>(0.6 - 0.9)      | 3.1<br>(2.7 - 3.8)      | 13.0<br>(11.3 - 15.0)    |
| Rheumatoid arthritis                                | 0.5<br>(0.5 - 0.7)    | --                    | 0.0<br>(0.0 - 0.1)     | 0.1<br>(0.1 - 0.1)      | 1.1<br>(0.9 - 1.5)      | 5.4<br>(4.8 - 6.4)       |
| Other musculoskeletal disorders                     | 1.1<br>(0.9 - 1.3)    | --                    | 0.2<br>(0.2 - 0.3)     | 0.6<br>(0.5 - 0.7)      | 2.0<br>(1.6 - 2.4)      | 7.6<br>(6.3 - 8.7)       |
| Other non-communicable diseases                     | 10.4<br>(9.4 - 11.8)  | 78.6<br>(67.9 - 93.2) | 2.5<br>(2.2 - 2.8)     | 2.0<br>(1.8 - 2.3)      | 3.8<br>(3.0 - 4.2)      | 20.7<br>(17.5 - 22.3)    |
| Congenital anomalies                                | 8.8<br>(7.8 - 10.2)   | 75.1<br>(64.4 - 89.5) | 2.4<br>(2.1 - 2.7)     | 1.7<br>(1.4 - 1.9)      | 2.0<br>(1.4 - 2.4)      | 5.8<br>(3.7 - 6.6)       |
| Neural tube defects                                 | 1.0<br>(0.6 - 1.7)    | 9.6<br>(5.5 - 17.5)   | 0.2<br>(0.1 - 0.3)     | 0.1<br>(0.1 - 0.1)      | 0.0<br>(0.0 - 0.1)      | 0.1<br>(0.1 - 0.1)       |
| Congenital heart anomalies                          | 4.5<br>(4.0 - 5.2)    | 37.7<br>(32.5 - 44.9) | 1.4<br>(1.2 - 1.6)     | 0.9<br>(0.7 - 1.0)      | 1.1<br>(0.7 - 1.4)      | 3.3<br>(1.7 - 4.0)       |
| Cleft lip and cleft palate                          | 0.0<br>(0.0 - 0.1)    | 0.5<br>(0.3 - 0.8)    | --                     | --                      | --                      | --                       |
| Down syndrome                                       | 0.5<br>(0.3 - 0.7)    | 3.6<br>(1.7 - 5.7)    | 0.2<br>(0.1 - 0.3)     | 0.2<br>(0.1 - 0.3)      | 0.2<br>(0.2 - 0.3)      | 0.1<br>(0.1 - 0.1)       |
| Chromosomal unbalanced rearrangements               | 0.2<br>(0.1 - 0.4)    | 2.1<br>(1.2 - 3.5)    | 0.0<br>(0.0 - 0.1)     | 0.1<br>(0.0 - 0.1)      | 0.0<br>(0.0 - 0.0)      | 0.1<br>(0.0 - 0.1)       |
| Other congenital anomalies                          | 2.6<br>(2.1 - 3.7)    | 21.6<br>(17.1 - 33.2) | 0.6<br>(0.5 - 0.8)     | 0.5<br>(0.4 - 0.6)      | 0.6<br>(0.5 - 0.7)      | 2.4<br>(1.8 - 2.7)       |

Web Table 28 - Global death rates (per 100k) with 95% UI by age, sex, and cause in 2013

| Cause                                           | Both Sexes, All Ages  | Both Sexes, 0-4 Years | Both Sexes, 5-14 Years | Both Sexes, 15-49 Years | Both Sexes, 50-69 Years | Both Sexes, 70-80 Years  |
|-------------------------------------------------|-----------------------|-----------------------|------------------------|-------------------------|-------------------------|--------------------------|
| Skin and subcutaneous diseases                  | 1.4<br>(1.3 - 1.5)    | 1.2<br>(1.0 - 1.5)    | 0.1<br>(0.1 - 0.1)     | 0.4<br>(0.3 - 0.4)      | 1.7<br>(1.6 - 1.9)      | 14.9<br>(13.1 - 16.2)    |
| Cellulitis                                      | 0.4<br>(0.3 - 0.5)    | 0.5<br>(0.4 - 0.8)    | 0.0<br>(0.0 - 0.1)     | 0.1<br>(0.1 - 0.2)      | 0.6<br>(0.5 - 0.9)      | 3.4<br>(2.5 - 4.5)       |
| Pyoderma                                        | 0.5<br>(0.4 - 0.6)    | 0.6<br>(0.5 - 0.8)    | 0.0<br>(0.0 - 0.0)     | 0.2<br>(0.1 - 0.2)      | 0.8<br>(0.6 - 0.9)      | 4.8<br>(3.9 - 5.5)       |
| Decubitus ulcer                                 | 0.4<br>(0.3 - 0.5)    | 0.0<br>(0.0 - 0.0)    | 0.0<br>(0.0 - 0.0)     | 0.0<br>(0.0 - 0.1)      | 0.3<br>(0.2 - 0.3)      | 6.2<br>(5.4 - 7.2)       |
| Other skin and subcutaneous diseases            | 0.1<br>(0.0 - 0.1)    | 0.0<br>(0.0 - 0.1)    | 0.0<br>(0.0 - 0.0)     | 0.0<br>(0.0 - 0.0)      | 0.1<br>(0.0 - 0.1)      | 0.5<br>(0.4 - 0.7)       |
| Sudden infant death syndrome                    | 0.2<br>(0.1 - 0.3)    | 2.3<br>(1.5 - 3.2)    | --                     | --                      | --                      | --                       |
| Injuries                                        | 66.9<br>(63.0 - 70.9) | 55.7<br>(48.6 - 64.7) | 17.2<br>(15.7 - 19.0)  | 60.6<br>(56.6 - 64.7)   | 87.7<br>(81.4 - 94.1)   | 243.3<br>(219.1 - 258.7) |
| Transport injuries                              | 20.7<br>(19.1 - 22.2) | 11.3<br>(9.0 - 13.7)  | 5.8<br>(5.1 - 6.5)     | 22.0<br>(20.3 - 23.8)   | 28.5<br>(25.8 - 30.9)   | 48.1<br>(43.1 - 51.6)    |
| Road injuries                                   | 19.5<br>(18.0 - 20.9) | 10.4<br>(8.2 - 12.6)  | 5.4<br>(4.8 - 6.1)     | 20.8<br>(19.2 - 22.5)   | 26.8<br>(24.3 - 29.0)   | 45.5<br>(41.0 - 48.9)    |
| Pedestrian road injuries                        | 7.6<br>(6.3 - 8.8)    | 5.2<br>(3.9 - 6.6)    | 2.8<br>(2.3 - 3.2)     | 6.2<br>(4.9 - 7.4)      | 12.4<br>(10.3 - 14.3)   | 26.7<br>(22.9 - 29.9)    |
| Cyclist road injuries                           | 1.3<br>(1.0 - 1.5)    | 0.5<br>(0.4 - 0.7)    | 0.5<br>(0.4 - 0.6)     | 1.1<br>(0.9 - 1.3)      | 2.2<br>(1.7 - 2.7)      | 3.9<br>(3.1 - 4.6)       |
| Motorcyclist road injuries                      | 3.5<br>(2.8 - 4.1)    | 0.7<br>(0.5 - 0.9)    | 0.4<br>(0.3 - 0.5)     | 5.1<br>(4.1 - 6.0)      | 3.3<br>(2.5 - 4.0)      | 3.0<br>(2.3 - 3.7)       |
| Motor vehicle road injuries                     | 6.9<br>(6.0 - 7.8)    | 3.7<br>(2.9 - 4.6)    | 1.7<br>(1.4 - 2.0)     | 8.2<br>(7.2 - 9.3)      | 8.5<br>(7.3 - 9.8)      | 11.3<br>(9.8 - 13.2)     |
| Other road injuries                             | 0.3<br>(0.2 - 0.4)    | 0.3<br>(0.2 - 0.4)    | 0.2<br>(0.1 - 0.2)     | 0.2<br>(0.2 - 0.3)      | 0.4<br>(0.3 - 0.6)      | 0.6<br>(0.4 - 0.8)       |
| Other transport injuries                        | 1.2<br>(1.0 - 1.4)    | 1.0<br>(0.7 - 1.2)    | 0.4<br>(0.3 - 0.4)     | 1.2<br>(1.0 - 1.4)      | 1.7<br>(1.4 - 2.0)      | 2.7<br>(2.1 - 3.0)       |
| Unintentional injuries                          | 28.0<br>(25.9 - 30.5) | 41.9<br>(36.2 - 49.7) | 9.8<br>(8.7 - 11.4)    | 17.1<br>(15.6 - 19.1)   | 33.4<br>(30.3 - 36.5)   | 153.8<br>(132.1 - 166.2) |
| Falls                                           | 7.8<br>(6.3 - 8.5)    | 3.7<br>(2.9 - 4.7)    | 1.0<br>(0.8 - 1.3)     | 3.0<br>(2.5 - 3.5)      | 9.6<br>(7.7 - 10.8)     | 78.0<br>(60.2 - 86.8)    |
| Drowning                                        | 5.1<br>(4.3 - 7.2)    | 12.4<br>(9.5 - 17.2)  | 4.6<br>(3.9 - 6.3)     | 3.8<br>(3.3 - 5.3)      | 4.4<br>(3.7 - 6.5)      | 9.3<br>(7.6 - 12.8)      |
| Fire, heat, and hot substances                  | 3.3<br>(2.8 - 4.0)    | 4.8<br>(3.8 - 6.1)    | 0.9<br>(0.7 - 1.2)     | 2.8<br>(2.3 - 3.6)      | 3.8<br>(3.1 - 4.5)      | 11.9<br>(9.7 - 13.6)     |
| Poisonings                                      | 1.4<br>(1.0 - 1.5)    | 1.6<br>(1.1 - 2.1)    | 0.3<br>(0.2 - 0.4)     | 1.2<br>(0.9 - 1.4)      | 1.9<br>(1.3 - 2.2)      | 4.4<br>(3.1 - 4.9)       |
| Exposure to mechanical forces                   | 2.8<br>(2.5 - 3.4)    | 5.6<br>(4.3 - 9.4)    | 0.9<br>(0.8 - 1.2)     | 2.4<br>(2.1 - 2.7)      | 3.4<br>(3.0 - 3.9)      | 5.1<br>(4.5 - 5.8)       |
| Unintentional firearm injuries                  | 0.7<br>(0.6 - 0.8)    | 0.5<br>(0.4 - 0.6)    | 0.2<br>(0.1 - 0.2)     | 0.8<br>(0.7 - 0.9)      | 0.7<br>(0.6 - 0.9)      | 1.1<br>(0.9 - 1.4)       |
| Unintentional suffocation                       | 0.5<br>(0.4 - 1.1)    | 3.2<br>(2.3 - 7.1)    | 0.2<br>(0.1 - 0.4)     | 0.2<br>(0.2 - 0.4)      | 0.3<br>(0.3 - 0.5)      | 0.8<br>(0.6 - 1.3)       |
| Other exposure to mechanical forces             | 1.6<br>(1.3 - 1.7)    | 1.9<br>(1.4 - 2.4)    | 0.6<br>(0.5 - 0.7)     | 1.4<br>(1.2 - 1.6)      | 2.4<br>(2.0 - 2.7)      | 3.1<br>(2.6 - 3.5)       |
| Adverse effects of medical treatment            | 2.0<br>(1.5 - 2.3)    | 3.3<br>(2.3 - 4.7)    | 0.2<br>(0.2 - 0.3)     | 0.8<br>(0.6 - 1.0)      | 3.1<br>(2.3 - 3.8)      | 13.3<br>(9.7 - 15.2)     |
| Animal contact                                  | 1.1<br>(0.9 - 1.9)    | 1.6<br>(1.1 - 2.6)    | 0.8<br>(0.6 - 1.3)     | 0.8<br>(0.6 - 1.4)      | 1.7<br>(1.3 - 3.2)      | 2.8<br>(2.1 - 5.1)       |
| Venomous animal contact                         | 0.8<br>(0.6 - 1.4)    | 1.0<br>(0.6 - 1.7)    | 0.6<br>(0.4 - 0.9)     | 0.6<br>(0.5 - 1.2)      | 1.2<br>(0.9 - 2.4)      | 1.5<br>(1.1 - 2.9)       |
| Non-venomous animal contact                     | 0.3<br>(0.2 - 0.5)    | 0.5<br>(0.4 - 0.9)    | 0.2<br>(0.1 - 0.4)     | 0.2<br>(0.1 - 0.2)      | 0.5<br>(0.3 - 0.8)      | 1.3<br>(0.9 - 2.3)       |
| Foreign body                                    | 2.3<br>(1.6 - 3.1)    | 7.3<br>(5.1 - 10.1)   | 0.2<br>(0.2 - 0.4)     | 0.6<br>(0.4 - 0.7)      | 1.9<br>(1.2 - 2.5)      | 18.9<br>(12.6 - 24.8)    |
| Pulmonary aspiration and foreign body in airway | 2.3<br>(1.5 - 3.0)    | 7.2<br>(5.0 - 10.0)   | 0.2<br>(0.2 - 0.3)     | 0.5<br>(0.3 - 0.7)      | 1.8<br>(1.2 - 2.4)      | 18.6<br>(12.2 - 24.5)    |
| Foreign body in other body part                 | 0.1<br>(0.0 - 0.1)    | 0.1<br>(0.1 - 0.1)    | 0.0<br>(0.0 - 0.0)     | 0.0<br>(0.0 - 0.0)      | 0.1<br>(0.1 - 0.1)      | 0.3<br>(0.2 - 0.4)       |
| Other unintentional injuries                    | 2.3<br>(2.0 - 2.5)    | 1.7<br>(1.4 - 2.1)    | 0.7<br>(0.6 - 0.9)     | 1.7<br>(1.5 - 1.9)      | 3.5<br>(3.0 - 4.1)      | 10.1<br>(7.1 - 12.5)     |
| Self-harm and interpersonal violence            | 17.4<br>(14.9 - 19.4) | 1.7<br>(1.1 - 2.2)    | 1.4<br>(1.1 - 1.7)     | 21.0<br>(18.1 - 23.6)   | 24.4<br>(21.1 - 27.6)   | 39.4<br>(35.4 - 45.1)    |
| Self-harm                                       | 11.8<br>(10.0 - 13.1) | --                    | 0.7<br>(0.5 - 0.9)     | 12.9<br>(10.5 - 14.5)   | 19.2<br>(16.3 - 21.7)   | 33.5<br>(30.4 - 40.1)    |
| Interpersonal violence                          | 5.7<br>(4.2 - 6.9)    | 1.7<br>(1.1 - 2.2)    | 0.7<br>(0.5 - 0.9)     | 8.1<br>(6.0 - 9.9)      | 5.2<br>(3.8 - 7.2)      | 5.9<br>(4.0 - 7.5)       |
| Assault by firearm                              | 2.5<br>(1.7 - 3.2)    | 0.3<br>(0.2 - 0.4)    | 0.2<br>(0.1 - 0.3)     | 3.9<br>(2.6 - 4.9)      | 2.0<br>(1.3 - 3.0)      | 1.6<br>(0.9 - 2.4)       |
| Assault by sharp object                         | 1.6<br>(1.1 - 2.3)    | 0.3<br>(0.2 - 0.4)    | 0.1<br>(0.1 - 0.2)     | 2.3<br>(1.6 - 3.3)      | 1.6<br>(1.0 - 2.3)      | 1.4<br>(0.9 - 1.9)       |
| Assault by other means                          | 1.5<br>(1.1 - 2.0)    | 1.1<br>(0.7 - 1.5)    | 0.3<br>(0.2 - 0.5)     | 1.8<br>(1.3 - 2.4)      | 1.6<br>(1.2 - 2.2)      | 2.9<br>(1.9 - 3.7)       |
| Forces of nature, war, and legal intervention   | 0.7<br>(0.5 - 1.2)    | 0.8<br>(0.6 - 1.9)    | 0.2<br>(0.1 - 0.3)     | 0.5<br>(0.3 - 1.0)      | 1.4<br>(1.0 - 2.4)      | 2.0<br>(1.4 - 2.9)       |
| Exposure to forces of nature                    | 0.3<br>(0.2 - 0.4)    | 0.2<br>(0.1 - 1.4)    | 0.0<br>(0.0 - 0.1)     | 0.2<br>(0.1 - 0.3)      | 0.6<br>(0.4 - 0.9)      | 0.9<br>(0.7 - 1.2)       |
| Collective violence and legal intervention      | 0.4<br>(0.3 - 0.8)    | 0.5<br>(0.5 - 0.5)    | 0.1<br>(0.1 - 0.2)     | 0.3<br>(0.2 - 0.7)      | 0.8<br>(0.5 - 1.5)      | 1.1<br>(0.7 - 1.7)       |

Web Table 28 - Global death rates (per 100k) with 95% UI by age, sex, and cause in 2013

| Cause                                                             | Males, All Ages          | Males, 0-4 Years           | Males, 5-14 Years     | Males, 15-49 Years       | Males, 50-69 Years             | Males, 70-80 Years             |
|-------------------------------------------------------------------|--------------------------|----------------------------|-----------------------|--------------------------|--------------------------------|--------------------------------|
| All causes                                                        | 829.3<br>(796.3 - 862.1) | 992.0<br>(938.9 - 1,047.7) | 73.0<br>(69.7 - 76.9) | 285.5<br>(269.5 - 303.6) | 1,503.2<br>(1,413.3 - 1,593.0) | 7,418.7<br>(7,158.9 - 7,623.2) |
| Communicable, maternal, neonatal, and nutritional diseases        | 172.6<br>(164.4 - 181.1) | 798.5<br>(737.9 - 854.1)   | 34.3<br>(31.2 - 37.7) | 68.2<br>(64.2 - 73.6)    | 163.3<br>(150.2 - 177.2)       | 650.1<br>(577.8 - 701.3)       |
| HIV/AIDS and tuberculosis                                         | 43.2<br>(40.1 - 49.0)    | 16.4<br>(14.5 - 18.5)      | 6.7<br>(6.2 - 7.1)    | 42.3<br>(39.1 - 47.9)    | 78.3<br>(70.3 - 90.5)          | 127.0<br>(113.7 - 145.9)       |
| Tuberculosis                                                      | 23.2<br>(20.5 - 26.6)    | 6.8<br>(4.7 - 8.6)         | 1.3<br>(1.0 - 1.6)    | 16.5<br>(14.3 - 18.8)    | 52.7<br>(45.4 - 61.4)          | 116.3<br>(103.2 - 133.5)       |
| HIV/AIDS                                                          | 20.0<br>(18.6 - 23.1)    | 9.6<br>(8.8 - 10.8)        | 5.4<br>(5.0 - 5.7)    | 25.9<br>(23.6 - 29.6)    | 25.7<br>(23.2 - 30.6)          | 10.7<br>(9.4 - 13.0)           |
| HIV/AIDS resulting in mycobacterial infection                     | 1.4<br>(1.1 - 1.8)       | 0.6<br>(0.5 - 0.8)         | 0.3<br>(0.3 - 0.4)    | 1.8<br>(1.4 - 2.3)       | 1.9<br>(1.5 - 2.4)             | 0.8<br>(0.6 - 1.0)             |
| HIV/AIDS resulting in other diseases                              | 18.6<br>(17.3 - 21.5)    | 9.0<br>(8.2 - 10.1)        | 5.0<br>(4.7 - 5.4)    | 24.1<br>(21.9 - 27.7)    | 23.8<br>(21.5 - 28.2)          | 9.9<br>(8.7 - 12.0)            |
| Diarrhea, lower respiratory, and other common infectious diseases | 67.3<br>(61.1 - 72.4)    | 278.3<br>(245.8 - 312.0)   | 18.3<br>(15.6 - 21.4) | 16.6<br>(14.5 - 19.0)    | 61.7<br>(52.4 - 69.5)          | 428.8<br>(366.7 - 472.1)       |
| Diarrheal diseases                                                | 16.8<br>(14.9 - 19.0)    | 79.6<br>(63.6 - 96.9)      | 4.4<br>(3.4 - 5.6)    | 4.1<br>(3.6 - 4.7)       | 16.8<br>(13.4 - 21.4)          | 82.4<br>(68.0 - 99.8)          |
| Intestinal infectious diseases                                    | 3.3<br>(1.8 - 5.4)       | 9.5<br>(5.0 - 16.3)        | 5.2<br>(2.9 - 8.3)    | 2.3<br>(1.2 - 4.2)       | 1.1<br>(0.5 - 2.1)             | 1.2<br>(0.7 - 2.2)             |
| Typhoid fever                                                     | 2.4<br>(1.2 - 4.0)       | 6.5<br>(3.2 - 11.3)        | 3.8<br>(2.1 - 6.2)    | 1.7<br>(0.8 - 3.1)       | 0.8<br>(0.4 - 1.6)             | 0.9<br>(0.4 - 1.6)             |
| Paratyphoid fever                                                 | 0.8<br>(0.4 - 1.4)       | 2.5<br>(1.2 - 4.4)         | 1.3<br>(0.7 - 2.3)    | 0.6<br>(0.3 - 1.0)       | 0.2<br>(0.1 - 0.5)             | 0.2<br>(0.1 - 0.5)             |
| Other intestinal infectious diseases                              | 0.1<br>(0.1 - 0.1)       | 0.5<br>(0.4 - 0.7)         | 0.1<br>(0.0 - 0.1)    | 0.1<br>(0.0 - 0.1)       | 0.1<br>(0.0 - 0.1)             | 0.1<br>(0.1 - 0.1)             |
| Lower respiratory infections                                      | 38.3<br>(32.9 - 41.2)    | 137.9<br>(119.6 - 155.7)   | 4.6<br>(3.7 - 5.6)    | 6.9<br>(5.6 - 7.9)       | 37.3<br>(29.1 - 42.1)          | 331.7<br>(270.6 - 370.2)       |
| Upper respiratory infections                                      | 0.1<br>(0.0 - 0.1)       | 0.1<br>(0.1 - 0.2)         | 0.0<br>(0.0 - 0.0)    | 0.0<br>(0.0 - 0.0)       | 0.1<br>(0.1 - 0.2)             | 0.3<br>(0.2 - 0.5)             |
| Otitis media                                                      | 0.0<br>(0.0 - 0.0)       | 0.1<br>(0.1 - 0.1)         | 0.0<br>(0.0 - 0.0)    | 0.0<br>(0.0 - 0.0)       | 0.0<br>(0.0 - 0.0)             | 0.2<br>(0.2 - 0.2)             |
| Meningitis                                                        | 4.5<br>(3.6 - 5.5)       | 22.0<br>(13.1 - 31.2)      | 1.9<br>(1.5 - 2.4)    | 2.2<br>(1.8 - 2.5)       | 3.9<br>(3.1 - 4.7)             | 7.4<br>(6.0 - 8.9)             |
| Pneumococcal meningitis                                           | 1.2<br>(0.9 - 1.4)       | 4.7<br>(2.8 - 6.9)         | 0.6<br>(0.5 - 0.8)    | 0.7<br>(0.5 - 0.8)       | 1.1<br>(0.8 - 1.5)             | 2.1<br>(1.6 - 2.7)             |
| H influenzae type B meningitis                                    | 1.0<br>(0.7 - 1.2)       | 6.9<br>(4.1 - 9.8)         | 0.4<br>(0.3 - 0.5)    | 0.3<br>(0.2 - 0.3)       | 0.4<br>(0.3 - 0.5)             | 0.7<br>(0.6 - 1.0)             |
| Meningococcal meningitis                                          | 1.0<br>(0.8 - 1.2)       | 4.6<br>(2.7 - 6.9)         | 0.5<br>(0.3 - 0.6)    | 0.5<br>(0.4 - 0.6)       | 0.8<br>(0.6 - 1.0)             | 1.6<br>(1.3 - 2.1)             |
| Other meningitis                                                  | 1.4<br>(1.1 - 1.7)       | 5.8<br>(3.5 - 8.3)         | 0.4<br>(0.3 - 0.5)    | 0.8<br>(0.6 - 0.9)       | 1.6<br>(1.2 - 2.0)             | 2.9<br>(2.1 - 3.7)             |
| Encephalitis                                                      | 1.1<br>(0.9 - 1.5)       | 3.6<br>(2.2 - 5.5)         | 0.8<br>(0.5 - 1.1)    | 0.6<br>(0.5 - 0.9)       | 1.2<br>(0.9 - 1.8)             | 2.3<br>(1.5 - 3.1)             |
| Diphtheria                                                        | 0.0<br>(0.0 - 0.1)       | 0.3<br>(0.1 - 1.0)         | 0.0<br>(0.0 - 0.2)    | 0.0<br>(0.0 - 0.0)       | 0.0<br>(0.0 - 0.1)             | --<br>(0.0 - 0.1)              |
| Whooping cough                                                    | 0.8<br>(0.3 - 1.8)       | 7.7<br>(2.8 - 17.3)        | 0.2<br>(0.1 - 0.6)    | 0.0<br>(0.0 - 0.1)       | 0.0<br>(0.0 - 0.0)             | --<br>(0.0 - 0.0)              |
| Tetanus                                                           | 1.0<br>(0.6 - 1.4)       | 5.2<br>(2.6 - 7.8)         | 0.2<br>(0.1 - 0.3)    | 0.3<br>(0.2 - 0.4)       | 1.2<br>(0.6 - 2.1)             | 2.6<br>(1.3 - 5.2)             |
| Measles                                                           | 1.3<br>(0.7 - 2.4)       | 12.2<br>(6.2 - 22.0)       | 0.9<br>(0.4 - 1.8)    | 0.0<br>(0.0 - 0.1)       | 0.0<br>(0.0 - 0.0)             | --<br>(0.0 - 0.0)              |
| Varicella and herpes zoster                                       | 0.1<br>(0.1 - 0.1)       | 0.2<br>(0.1 - 0.4)         | 0.0<br>(0.0 - 0.1)    | 0.0<br>(0.0 - 0.1)       | 0.1<br>(0.0 - 0.1)             | 0.7<br>(0.4 - 1.2)             |
| Neglected tropical diseases and malaria                           | 14.4<br>(11.6 - 18.1)    | 96.3<br>(72.8 - 129.2)     | 5.8<br>(4.6 - 7.9)    | 4.4<br>(3.6 - 5.7)       | 7.6<br>(5.8 - 10.0)            | 15.4<br>(11.4 - 21.2)          |
| Malaria                                                           | 12.1<br>(9.4 - 15.7)     | 90.4<br>(67.1 - 122.9)     | 3.7<br>(2.5 - 5.7)    | 2.9<br>(2.1 - 4.1)       | 5.3<br>(3.6 - 7.3)             | 10.9<br>(7.2 - 15.7)           |
| Chagas disease                                                    | 0.2<br>(0.0 - 0.6)       | 0.0<br>(0.0 - 0.0)         | 0.0<br>(0.0 - 0.0)    | 0.1<br>(0.0 - 0.2)       | 0.5<br>(0.1 - 1.8)             | 1.5<br>(0.3 - 5.4)             |
| Leishmaniasis                                                     | 1.1<br>(0.9 - 1.3)       | 3.8<br>(2.7 - 5.1)         | 1.2<br>(0.9 - 1.6)    | 0.8<br>(0.6 - 1.0)       | 0.5<br>(0.4 - 0.7)             | 0.5<br>(0.4 - 0.7)             |
| Visceral leishmaniasis                                            | 1.1<br>(0.9 - 1.3)       | 3.8<br>(2.7 - 5.1)         | 1.2<br>(0.9 - 1.6)    | 0.8<br>(0.6 - 1.0)       | 0.5<br>(0.4 - 0.7)             | 0.5<br>(0.4 - 0.7)             |
| African trypanosomiasis                                           | 0.1<br>(0.1 - 0.2)       | 0.1<br>(0.0 - 0.1)         | 0.1<br>(0.0 - 0.1)    | 0.1<br>(0.1 - 0.2)       | 0.1<br>(0.0 - 0.1)             | 0.1<br>(0.0 - 0.1)             |
| Schistosomiasis                                                   | 0.1<br>(0.1 - 0.1)       | 0.0<br>(0.0 - 0.0)         | 0.0<br>(0.0 - 0.0)    | 0.1<br>(0.1 - 0.1)       | 0.2<br>(0.2 - 0.2)             | 0.3<br>(0.3 - 0.4)             |
| Cysticercosis                                                     | 0.0<br>(0.0 - 0.0)       | 0.0<br>(0.0 - 0.0)         | 0.0<br>(0.0 - 0.0)    | 0.0<br>(0.0 - 0.0)       | 0.0<br>(0.0 - 0.0)             | 0.0<br>(0.0 - 0.0)             |
| Cystic echinococcosis                                             | 0.0<br>(0.0 - 0.0)       | 0.0<br>(0.0 - 0.0)         | 0.0<br>(0.0 - 0.0)    | 0.0<br>(0.0 - 0.0)       | 0.0<br>(0.0 - 0.1)             | 0.1<br>(0.1 - 0.1)             |
| Dengue                                                            | 0.1<br>(0.1 - 0.1)       | 0.4<br>(0.2 - 0.6)         | 0.2<br>(0.1 - 0.2)    | 0.1<br>(0.0 - 0.1)       | 0.1<br>(0.1 - 0.1)             | 0.2<br>(0.1 - 0.2)             |
| Yellow fever                                                      | 0.0<br>(0.0 - 0.0)       | 0.0<br>(0.0 - 0.0)         | 0.0<br>(0.0 - 0.0)    | 0.0<br>(0.0 - 0.0)       | 0.0<br>(0.0 - 0.0)             | 0.0<br>(0.0 - 0.0)             |
| Rabies                                                            | 0.4<br>(0.2 - 0.5)       | 0.4<br>(0.2 - 0.7)         | 0.5<br>(0.3 - 0.8)    | 0.3<br>(0.2 - 0.4)       | 0.6<br>(0.3 - 0.8)             | 0.6<br>(0.3 - 0.8)             |
| Intestinal nematode infections                                    | 0.1<br>(0.1 - 0.1)       | 0.4<br>(0.3 - 0.5)         | 0.0<br>(0.0 - 0.1)    | 0.0<br>(0.0 - 0.0)       | 0.0<br>(0.0 - 0.0)             | 0.1<br>(0.0 - 0.1)             |

Web Table 28 - Global death rates (per 100k) with 95% UI by age, sex, and cause in 2013

| Cause                                                            | Males, All Ages          | Males, 0-4 Years         | Males, 5-14 Years     | Males, 15-49 Years       | Males, 50-69 Years             | Males, 70-80 Years             |
|------------------------------------------------------------------|--------------------------|--------------------------|-----------------------|--------------------------|--------------------------------|--------------------------------|
| Ascariasis                                                       | 0.1<br>(0.1 - 0.1)       | 0.4<br>(0.3 - 0.5)       | 0.0<br>(0.0 - 0.1)    | 0.0<br>(0.0 - 0.0)       | 0.0<br>(0.0 - 0.0)             | 0.1<br>(0.0 - 0.1)             |
| Other neglected tropical diseases                                | 0.2<br>(0.2 - 0.3)       | 0.8<br>(0.5 - 1.2)       | 0.1<br>(0.1 - 0.1)    | 0.1<br>(0.1 - 0.2)       | 0.2<br>(0.2 - 0.3)             | 1.1<br>(0.8 - 1.4)             |
| Maternal disorders                                               | --                       | --                       | --                    | --                       | --                             | --                             |
| Maternal hemorrhage                                              | --                       | --                       | --                    | --                       | --                             | --                             |
| Maternal sepsis and other maternal infections                    | --                       | --                       | --                    | --                       | --                             | --                             |
| Maternal hypertensive disorders                                  | --                       | --                       | --                    | --                       | --                             | --                             |
| Maternal obstructed labor                                        | --                       | --                       | --                    | --                       | --                             | --                             |
| Maternal abortive outcome                                        | --                       | --                       | --                    | --                       | --                             | --                             |
| Indirect maternal deaths                                         | --                       | --                       | --                    | --                       | --                             | --                             |
| Late maternal deaths                                             | --                       | --                       | --                    | --                       | --                             | --                             |
| Maternal deaths aggravated by HIV/AIDS                           | --                       | --                       | --                    | --                       | --                             | --                             |
| Other maternal disorders                                         | --                       | --                       | --                    | --                       | --                             | --                             |
| Neonatal disorders                                               | 32.4<br>(30.4 - 34.4)    | 342.4<br>(322.0 - 364.4) | --                    | --                       | --                             | --                             |
| Neonatal preterm birth complications                             | 11.5<br>(8.1 - 15.7)     | 122.1<br>(85.8 - 166.3)  | --                    | --                       | --                             | --                             |
| Neonatal encephalopathy due to birth asphyxia and trauma         | 10.0<br>(7.1 - 12.7)     | 105.9<br>(75.4 - 134.8)  | --                    | --                       | --                             | --                             |
| Neonatal sepsis and other neonatal infections                    | 6.2<br>(3.2 - 9.7)       | 66.0<br>(34.0 - 102.8)   | --                    | --                       | --                             | --                             |
| Hemolytic disease and other neonatal jaundice                    | 0.3<br>(0.2 - 0.6)       | 3.6<br>(2.1 - 6.6)       | --                    | --                       | --                             | --                             |
| Other neonatal disorders                                         | 4.2<br>(3.0 - 5.8)       | 44.8<br>(31.9 - 61.8)    | --                    | --                       | --                             | --                             |
| Nutritional deficiencies                                         | 9.3<br>(5.8 - 12.1)      | 39.8<br>(26.2 - 53.2)    | 1.8<br>(1.1 - 2.5)    | 2.2<br>(1.4 - 3.2)       | 8.5<br>(4.8 - 11.1)            | 60.4<br>(33.2 - 78.1)          |
| Protein-energy malnutrition                                      | 6.7<br>(4.0 - 8.6)       | 34.9<br>(22.5 - 47.8)    | 1.4<br>(0.8 - 1.9)    | 1.1<br>(0.6 - 1.8)       | 4.9<br>(2.5 - 6.8)             | 39.9<br>(18.1 - 52.9)          |
| Iodine deficiency                                                | 0.0<br>(0.0 - 0.1)       | 0.1<br>(0.0 - 0.2)       | 0.0<br>(0.0 - 0.0)    | 0.0<br>(0.0 - 0.1)       | 0.1<br>(0.0 - 0.3)             | 0.1<br>(0.0 - 0.4)             |
| Iron-deficiency anemia                                           | 2.2<br>(1.1 - 3.8)       | 4.5<br>(1.2 - 10.4)      | 0.4<br>(0.2 - 0.7)    | 0.9<br>(0.5 - 1.6)       | 3.1<br>(1.5 - 5.2)             | 15.6<br>(7.7 - 29.2)           |
| Other nutritional deficiencies                                   | 0.4<br>(0.2 - 0.7)       | 0.4<br>(0.1 - 0.9)       | 0.0<br>(0.0 - 0.1)    | 0.1<br>(0.1 - 0.2)       | 0.4<br>(0.2 - 0.7)             | 4.8<br>(1.7 - 8.3)             |
| Other communicable, maternal, neonatal, and nutritional diseases | 6.1<br>(5.0 - 7.2)       | 25.2<br>(16.9 - 35.4)    | 1.7<br>(1.3 - 2.2)    | 2.7<br>(2.3 - 3.1)       | 7.2<br>(5.8 - 9.6)             | 18.5<br>(14.2 - 24.7)          |
| Sexually transmitted diseases excluding HIV                      | 1.9<br>(1.1 - 2.9)       | 17.3<br>(10.0 - 27.4)    | 0.6<br>(0.4 - 1.0)    | 0.1<br>(0.1 - 0.1)       | 0.2<br>(0.2 - 0.4)             | 0.7<br>(0.5 - 1.1)             |
| Syphilis                                                         | 1.8<br>(1.1 - 2.8)       | 17.3<br>(10.0 - 27.4)    | 0.6<br>(0.3 - 1.0)    | 0.1<br>(0.0 - 0.1)       | 0.2<br>(0.1 - 0.3)             | 0.6<br>(0.4 - 0.9)             |
| Chlamydial infection                                             | --                       | --                       | --                    | --                       | --                             | --                             |
| Gonococcal infection                                             | 0.0<br>(0.0 - 0.0)       | --                       | 0.0<br>(0.0 - 0.0)    | 0.0<br>(0.0 - 0.0)       | 0.0<br>(0.0 - 0.1)             | 0.1<br>(0.1 - 0.1)             |
| Other sexually transmitted diseases                              | 0.0<br>(0.0 - 0.0)       | --                       | 0.0<br>(0.0 - 0.0)    | 0.0<br>(0.0 - 0.0)       | 0.0<br>(0.0 - 0.0)             | 0.0<br>(0.0 - 0.0)             |
| Hepatitis                                                        | 2.3<br>(2.0 - 2.8)       | 2.5<br>(1.5 - 4.9)       | 0.6<br>(0.5 - 0.9)    | 1.8<br>(1.5 - 2.2)       | 4.0<br>(3.4 - 4.7)             | 7.3<br>(6.1 - 8.5)             |
| Acute hepatitis A                                                | 0.2<br>(0.1 - 0.4)       | 1.0<br>(0.3 - 2.3)       | 0.1<br>(0.0 - 0.3)    | 0.1<br>(0.0 - 0.3)       | 0.1<br>(0.0 - 0.3)             | 0.1<br>(0.0 - 0.3)             |
| Acute hepatitis B                                                | 1.2<br>(0.9 - 1.5)       | 1.2<br>(0.6 - 2.6)       | 0.1<br>(0.1 - 0.2)    | 0.6<br>(0.4 - 0.9)       | 2.9<br>(2.2 - 3.6)             | 6.1<br>(4.9 - 7.3)             |
| Acute hepatitis C                                                | 0.1<br>(0.0 - 0.1)       | --                       | 0.0<br>(0.0 - 0.1)    | 0.0<br>(0.0 - 0.1)       | 0.1<br>(0.0 - 0.3)             | 0.2<br>(0.0 - 0.5)             |
| Acute hepatitis E                                                | 0.8<br>(0.5 - 1.1)       | 0.3<br>(0.1 - 0.7)       | 0.4<br>(0.2 - 0.5)    | 1.0<br>(0.7 - 1.4)       | 0.9<br>(0.4 - 1.4)             | 0.8<br>(0.4 - 1.4)             |
| Other infectious diseases                                        | 1.9<br>(1.2 - 2.6)       | 5.3<br>(2.4 - 10.2)      | 0.5<br>(0.3 - 0.8)    | 0.8<br>(0.5 - 1.0)       | 3.0<br>(1.9 - 5.1)             | 10.5<br>(6.3 - 16.4)           |
| Non-communicable diseases                                        | 566.9<br>(539.7 - 593.5) | 134.3<br>(110.6 - 176.8) | 17.6<br>(14.9 - 21.3) | 126.0<br>(117.0 - 136.6) | 1,216.0<br>(1,141.0 - 1,292.0) | 6,485.7<br>(6,245.5 - 6,686.5) |
| Neoplasms                                                        | 131.5<br>(124.5 - 138.0) | 8.0<br>(6.6 - 9.5)       | 4.3<br>(3.8 - 4.8)    | 28.7<br>(26.6 - 31.1)    | 354.1<br>(330.9 - 375.1)       | 1,302.3<br>(1,246.9 - 1,356.9) |
| Esophageal cancer                                                | 8.5<br>(7.2 - 10.6)      | --                       | --                    | 1.3<br>(1.1 - 1.7)       | 27.9<br>(23.1 - 35.0)          | 75.6<br>(63.7 - 94.4)          |
| Stomach cancer                                                   | 14.7<br>(13.6 - 15.6)    | --                       | --                    | 2.5<br>(2.3 - 2.7)       | 40.9<br>(37.2 - 44.2)          | 153.0<br>(142.6 - 162.1)       |
| Liver cancer                                                     | 15.6<br>(14.2 - 17.0)    | --                       | 0.2<br>(0.1 - 0.2)    | 5.6<br>(5.0 - 6.3)       | 49.0<br>(44.0 - 53.6)          | 107.5<br>(97.8 - 118.5)        |

Web Table 28 - Global death rates (per 100k) with 95% UI by age, sex, and cause in 2013

| Cause                                | Males, All Ages          | Males, 0-4 Years    | Males, 5-14 Years  | Males, 15-49 Years    | Males, 50-69 Years       | Males, 70-80 Years             |
|--------------------------------------|--------------------------|---------------------|--------------------|-----------------------|--------------------------|--------------------------------|
| Liver cancer due to hepatitis B      | 6.3<br>(5.5 - 7.0)       | --                  | 0.1<br>(0.1 - 0.1) | 2.9<br>(2.6 - 3.4)    | 20.5<br>(17.6 - 23.2)    | 32.3<br>(28.2 - 36.0)          |
| Liver cancer due to hepatitis C      | 6.5<br>(5.8 - 7.3)       | --                  | 0.0<br>(0.0 - 0.0) | 1.8<br>(1.5 - 2.1)    | 20.1<br>(17.7 - 23.0)    | 51.6<br>(45.7 - 58.6)          |
| Liver cancer due to alcohol use      | 1.9<br>(1.7 - 2.1)       | --                  | --                 | 0.4<br>(0.3 - 0.4)    | 5.4<br>(4.8 - 6.1)       | 18.3<br>(16.1 - 20.6)          |
| Liver cancer due to other causes     | 1.0<br>(0.9 - 1.2)       | --                  | 0.1<br>(0.1 - 0.1) | 0.6<br>(0.5 - 0.6)    | 3.0<br>(2.6 - 3.5)       | 5.2<br>(4.6 - 6.0)             |
| Larynx cancer                        | 2.1<br>(1.7 - 2.6)       | --                  | --                 | 0.4<br>(0.3 - 0.5)    | 6.8<br>(5.5 - 8.3)       | 17.7<br>(14.1 - 21.4)          |
| Tracheal, bronchus and lung cancer   | 32.0<br>(30.1 - 33.7)    | --                  | --                 | 3.9<br>(3.6 - 4.3)    | 95.6<br>(89.0 - 101.6)   | 327.6<br>(309.8 - 342.4)       |
| Breast cancer                        | 0.2<br>(0.2 - 0.3)       | --                  | --                 | 0.1<br>(0.1 - 0.1)    | 0.5<br>(0.4 - 0.7)       | 1.7<br>(1.2 - 2.5)             |
| Cervical cancer                      | --                       | --                  | --                 | --                    | --                       | --                             |
| Uterine cancer                       | --                       | --                  | --                 | --                    | --                       | --                             |
| Prostate cancer                      | 8.1<br>(6.7 - 10.4)      | --                  | --                 | 0.1<br>(0.1 - 0.1)    | 9.4<br>(7.7 - 11.9)      | 146.6<br>(120.5 - 191.8)       |
| Colon and rectum cancer              | 11.5<br>(11.0 - 12.0)    | --                  | --                 | 2.2<br>(2.0 - 2.3)    | 27.5<br>(26.0 - 28.9)    | 132.6<br>(126.8 - 138.4)       |
| Lip and oral cavity cancer           | 2.4<br>(1.9 - 2.7)       | --                  | --                 | 0.8<br>(0.6 - 1.0)    | 7.4<br>(5.7 - 8.4)       | 18.3<br>(14.9 - 21.6)          |
| Nasopharynx cancer                   | 1.2<br>(1.1 - 1.3)       | --                  | 0.1<br>(0.0 - 0.1) | 0.7<br>(0.6 - 0.8)    | 3.8<br>(3.3 - 4.3)       | 4.8<br>(4.3 - 5.4)             |
| Other pharynx cancer                 | 1.7<br>(1.4 - 1.9)       | --                  | --                 | 0.5<br>(0.4 - 0.5)    | 6.5<br>(5.2 - 7.3)       | 10.1<br>(8.4 - 11.4)           |
| Gallbladder and biliary tract cancer | 1.5<br>(1.3 - 1.7)       | --                  | --                 | 0.2<br>(0.2 - 0.2)    | 3.5<br>(3.0 - 4.1)       | 18.1<br>(14.7 - 20.9)          |
| Pancreatic cancer                    | 5.1<br>(4.9 - 5.3)       | --                  | --                 | 0.9<br>(0.8 - 0.9)    | 14.6<br>(13.9 - 15.3)    | 52.3<br>(49.9 - 54.7)          |
| Malignant skin melanoma              | 0.9<br>(0.6 - 1.4)       | --                  | --                 | 0.3<br>(0.2 - 0.6)    | 2.2<br>(1.4 - 3.6)       | 8.0<br>(4.7 - 11.8)            |
| Non-melanoma skin cancer             | 0.6<br>(0.5 - 0.8)       | --                  | --                 | 0.1<br>(0.1 - 0.2)    | 1.1<br>(0.8 - 1.5)       | 8.2<br>(6.1 - 10.9)            |
| Ovarian cancer                       | --                       | --                  | --                 | --                    | --                       | --                             |
| Testicular cancer                    | 0.2<br>(0.2 - 0.3)       | --                  | --                 | 0.3<br>(0.2 - 0.3)    | 0.3<br>(0.2 - 0.4)       | 0.8<br>(0.6 - 1.0)             |
| Kidney cancer                        | 2.4<br>(2.3 - 2.5)       | 0.2<br>(0.2 - 0.3)  | 0.1<br>(0.1 - 0.1) | 0.4<br>(0.4 - 0.5)    | 6.9<br>(6.5 - 7.4)       | 23.3<br>(21.6 - 25.1)          |
| Bladder cancer                       | 3.6<br>(3.2 - 3.9)       | --                  | --                 | 0.3<br>(0.2 - 0.3)    | 7.4<br>(6.8 - 8.5)       | 50.8<br>(43.8 - 55.1)          |
| Brain and nervous system cancer      | 3.3<br>(2.5 - 4.0)       | 0.5<br>(0.4 - 0.7)  | 0.7<br>(0.5 - 0.9) | 1.7<br>(1.2 - 2.2)    | 8.9<br>(6.9 - 11.1)      | 17.3<br>(12.6 - 20.2)          |
| Thyroid cancer                       | 0.3<br>(0.3 - 0.4)       | --                  | 0.0<br>(0.0 - 0.0) | 0.1<br>(0.1 - 0.1)    | 1.0<br>(0.9 - 1.1)       | 3.2<br>(2.8 - 3.6)             |
| Mesothelioma                         | 0.7<br>(0.6 - 0.8)       | --                  | --                 | 0.1<br>(0.1 - 0.1)    | 2.2<br>(1.9 - 2.5)       | 6.2<br>(4.4 - 7.7)             |
| Hodgkin lymphoma                     | 0.4<br>(0.3 - 0.5)       | 0.3<br>(0.1 - 0.5)  | 0.1<br>(0.1 - 0.1) | 0.3<br>(0.2 - 0.4)    | 0.7<br>(0.6 - 1.0)       | 1.9<br>(1.7 - 2.5)             |
| Non-Hodgkin lymphoma                 | 3.7<br>(3.0 - 4.1)       | 0.9<br>(0.6 - 1.2)  | 0.6<br>(0.5 - 0.7) | 1.4<br>(1.2 - 1.7)    | 8.4<br>(6.8 - 9.7)       | 31.4<br>(22.6 - 35.7)          |
| Multiple myeloma                     | 1.2<br>(0.9 - 1.5)       | --                  | --                 | 0.2<br>(0.1 - 0.2)    | 3.0<br>(2.3 - 3.9)       | 13.3<br>(9.3 - 17.5)           |
| Leukemia                             | 4.1<br>(3.9 - 4.3)       | 1.5<br>(1.3 - 1.8)  | 1.5<br>(1.3 - 1.7) | 2.2<br>(2.1 - 2.4)    | 7.2<br>(6.7 - 7.6)       | 31.3<br>(29.5 - 33.1)          |
| Other neoplasms                      | 5.4<br>(4.8 - 5.9)       | 4.6<br>(3.5 - 5.8)  | 1.2<br>(1.0 - 1.4) | 2.1<br>(1.9 - 2.5)    | 11.4<br>(10.2 - 12.8)    | 41.0<br>(34.1 - 44.8)          |
| Cardiovascular diseases              | 243.6<br>(231.3 - 256.6) | 8.7<br>(7.6 - 10.0) | 2.4<br>(2.1 - 2.7) | 46.1<br>(42.7 - 50.2) | 518.7<br>(483.7 - 556.1) | 3,018.5<br>(2,890.9 - 3,136.9) |
| Rheumatic heart disease              | 3.3<br>(2.4 - 4.6)       | 0.3<br>(0.2 - 0.5)  | 0.4<br>(0.3 - 0.5) | 1.7<br>(1.2 - 2.5)    | 7.1<br>(5.2 - 10.6)      | 25.7<br>(17.2 - 34.5)          |
| Ischemic heart disease               | 119.7<br>(106.4 - 130.9) | 1.0<br>(0.8 - 1.4)  | 0.5<br>(0.4 - 0.7) | 24.0<br>(21.0 - 27.1) | 270.9<br>(239.2 - 299.9) | 1,420.3<br>(1,259.3 - 1,561.7) |
| Cerebrovascular disease              | 88.2<br>(78.5 - 102.6)   | 2.3<br>(1.8 - 2.9)  | 0.8<br>(0.7 - 1.0) | 12.5<br>(10.6 - 15.0) | 174.8<br>(152.6 - 205.2) | 1,191.0<br>(1,054.2 - 1,361.0) |
| Ischemic stroke                      | 42.3<br>(34.8 - 49.0)    | 0.2<br>(0.2 - 0.4)  | 0.1<br>(0.1 - 0.1) | 2.1<br>(1.5 - 2.7)    | 64.1<br>(49.6 - 77.0)    | 691.9<br>(571.0 - 795.6)       |
| Hemorrhagic stroke                   | 45.9<br>(39.6 - 56.3)    | 2.1<br>(1.7 - 2.6)  | 0.7<br>(0.6 - 0.9) | 10.5<br>(8.8 - 12.7)  | 110.8<br>(94.6 - 134.5)  | 499.1<br>(423.4 - 636.0)       |
| Hypertensive heart disease           | 13.4<br>(9.6 - 17.5)     | 0.2<br>(0.1 - 0.4)  | 0.1<br>(0.0 - 0.1) | 2.2<br>(1.5 - 3.0)    | 28.3<br>(19.7 - 37.4)    | 170.7<br>(120.9 - 229.3)       |
| Cardiomyopathy and myocarditis       | 6.9<br>(5.3 - 8.4)       | 2.4<br>(1.6 - 3.2)  | 0.3<br>(0.2 - 0.4) | 3.0<br>(2.2 - 3.5)    | 15.8<br>(11.6 - 19.0)    | 56.3<br>(42.5 - 72.8)          |
| Atrial fibrillation and flutter      | 1.1<br>(0.9 - 1.3)       | --                  | --                 | 0.0<br>(0.0 - 0.0)    | 0.8<br>(0.7 - 0.9)       | 21.7<br>(17.9 - 25.2)          |
| Aortic aneurysm                      | 2.7<br>(2.2 - 3.0)       | --                  | --                 | 0.4<br>(0.3 - 0.5)    | 5.5<br>(4.5 - 6.2)       | 35.4<br>(29.7 - 40.4)          |

Web Table 28 - Global death rates (per 100k) with 95% UI by age, sex, and cause in 2013

| Cause                                               | Males, All Ages       | Males, 0-4 Years   | Males, 5-14 Years  | Males, 15-49 Years    | Males, 50-69 Years       | Males, 70-80 Years         |
|-----------------------------------------------------|-----------------------|--------------------|--------------------|-----------------------|--------------------------|----------------------------|
| Peripheral vascular disease                         | 0.5<br>(0.5 - 0.6)    | --                 | --                 | 0.0<br>(0.0 - 0.0)    | 0.7<br>(0.6 - 0.8)       | 9.0<br>(7.7 - 10.2)        |
| Endocarditis                                        | 1.0<br>(0.7 - 1.3)    | 0.6<br>(0.4 - 0.8) | 0.1<br>(0.0 - 0.1) | 0.4<br>(0.3 - 0.6)    | 2.0<br>(1.3 - 2.7)       | 8.3<br>(5.5 - 11.3)        |
| Other cardiovascular and circulatory diseases       | 6.7<br>(5.9 - 8.9)    | 1.8<br>(1.3 - 2.6) | 0.2<br>(0.2 - 0.3) | 1.8<br>(1.5 - 2.5)    | 12.6<br>(11.0 - 17.2)    | 80.0<br>(69.2 - 100.2)     |
| Chronic respiratory diseases                        | 67.1<br>(58.8 - 75.2) | 5.8<br>(4.7 - 7.2) | 0.9<br>(0.8 - 1.1) | 6.9<br>(5.8 - 8.3)    | 121.2<br>(104.6 - 140.0) | 969.0<br>(853.7 - 1,076.8) |
| Chronic obstructive pulmonary disease               | 47.6<br>(40.2 - 53.5) | 2.1<br>(1.6 - 2.9) | 0.3<br>(0.2 - 0.3) | 3.1<br>(2.4 - 3.8)    | 78.1<br>(65.5 - 90.1)    | 742.4<br>(631.8 - 831.4)   |
| Pneumoconiosis                                      | 4.1<br>(2.8 - 5.5)    | 0.1<br>(0.0 - 0.1) | 0.0<br>(0.0 - 0.1) | 0.8<br>(0.6 - 1.1)    | 10.8<br>(7.2 - 14.8)     | 42.9<br>(28.8 - 58.3)      |
| Silicosis                                           | 1.2<br>(0.8 - 1.7)    | 0.0<br>(0.0 - 0.0) | 0.0<br>(0.0 - 0.0) | 0.2<br>(0.1 - 0.3)    | 2.8<br>(1.8 - 4.1)       | 14.1<br>(9.4 - 19.9)       |
| Asbestosis                                          | 0.6<br>(0.4 - 0.8)    | 0.0<br>(0.0 - 0.0) | 0.0<br>(0.0 - 0.0) | 0.1<br>(0.1 - 0.2)    | 1.7<br>(1.1 - 2.4)       | 5.5<br>(3.6 - 7.5)         |
| Coal workers pneumoconiosis                         | 0.6<br>(0.4 - 0.9)    | 0.0<br>(0.0 - 0.0) | 0.0<br>(0.0 - 0.0) | 0.1<br>(0.1 - 0.2)    | 1.8<br>(1.3 - 2.7)       | 5.6<br>(3.9 - 8.2)         |
| Other pneumoconiosis                                | 1.7<br>(1.1 - 2.4)    | 0.0<br>(0.0 - 0.0) | 0.0<br>(0.0 - 0.0) | 0.4<br>(0.3 - 0.5)    | 4.5<br>(2.9 - 6.4)       | 17.8<br>(11.5 - 25.2)      |
| Asthma                                              | 6.8<br>(5.5 - 9.7)    | 1.2<br>(0.9 - 1.6) | 0.4<br>(0.3 - 0.5) | 1.9<br>(1.5 - 2.7)    | 15.8<br>(12.1 - 23.7)    | 69.9<br>(55.9 - 94.1)      |
| Interstitial lung disease and pulmonary sarcoidosis | 6.9<br>(5.1 - 9.5)    | 0.1<br>(0.0 - 0.2) | 0.0<br>(0.0 - 0.1) | 0.7<br>(0.5 - 0.9)    | 14.3<br>(10.1 - 19.3)    | 94.9<br>(69.6 - 133.0)     |
| Other chronic respiratory diseases                  | 1.7<br>(1.3 - 2.0)    | 2.4<br>(1.8 - 3.0) | 0.2<br>(0.1 - 0.2) | 0.4<br>(0.3 - 0.5)    | 2.2<br>(1.6 - 2.9)       | 18.9<br>(14.9 - 21.9)      |
| Cirrhosis                                           | 22.8<br>(21.6 - 24.4) | 1.5<br>(1.0 - 2.1) | 0.8<br>(0.7 - 0.9) | 12.9<br>(11.8 - 14.1) | 67.5<br>(63.3 - 72.5)    | 110.7<br>(104.5 - 117.7)   |
| Cirrhosis due to hepatitis B                        | 5.5<br>(5.0 - 6.2)    | 0.1<br>(0.0 - 0.1) | 0.1<br>(0.1 - 0.2) | 3.3<br>(2.8 - 3.8)    | 16.5<br>(14.7 - 18.5)    | 25.3<br>(23.0 - 27.9)      |
| Cirrhosis due to hepatitis C                        | 5.7<br>(5.2 - 6.3)    | 0.1<br>(0.1 - 0.1) | 0.1<br>(0.1 - 0.1) | 2.8<br>(2.4 - 3.2)    | 17.8<br>(15.9 - 19.9)    | 31.4<br>(28.7 - 34.3)      |
| Cirrhosis due to alcohol use                        | 8.7<br>(8.0 - 9.5)    | --                 | --                 | 4.4<br>(3.8 - 5.1)    | 26.7<br>(24.4 - 29.4)    | 47.0<br>(43.5 - 50.8)      |
| Cirrhosis due to other causes                       | 2.8<br>(2.5 - 3.3)    | 1.3<br>(0.9 - 1.9) | 0.5<br>(0.4 - 0.7) | 2.4<br>(2.0 - 2.9)    | 6.5<br>(5.2 - 7.8)       | 7.0<br>(5.8 - 8.2)         |
| Digestive diseases                                  | 17.3<br>(14.8 - 19.7) | 2.8<br>(2.2 - 3.9) | 1.4<br>(1.1 - 1.7) | 7.6<br>(6.4 - 9.2)    | 35.4<br>(29.5 - 41.2)    | 159.0<br>(137.6 - 175.8)   |
| Peptic ulcer disease                                | 5.0<br>(3.9 - 6.1)    | 0.3<br>(0.1 - 0.5) | 0.2<br>(0.1 - 0.2) | 2.0<br>(1.5 - 2.6)    | 11.8<br>(8.8 - 14.8)     | 45.6<br>(36.4 - 54.9)      |
| Gastritis and duodenitis                            | 0.9<br>(0.5 - 1.4)    | 0.1<br>(0.1 - 0.3) | 0.1<br>(0.0 - 0.1) | 0.3<br>(0.2 - 0.6)    | 1.9<br>(1.0 - 3.1)       | 8.1<br>(4.6 - 12.7)        |
| Appendicitis                                        | 1.1<br>(0.7 - 1.5)    | 0.3<br>(0.2 - 0.5) | 0.2<br>(0.1 - 0.3) | 1.0<br>(0.6 - 1.4)    | 1.8<br>(1.1 - 2.6)       | 5.5<br>(3.4 - 7.8)         |
| Paralytic ileus and intestinal obstruction          | 3.3<br>(2.1 - 5.1)    | 0.7<br>(0.5 - 1.3) | 0.6<br>(0.4 - 0.9) | 1.3<br>(0.9 - 2.1)    | 6.6<br>(4.3 - 10.6)      | 30.6<br>(18.9 - 46.0)      |
| Inguinal, femoral, and abdominal hernia             | 0.5<br>(0.4 - 0.9)    | 0.1<br>(0.1 - 0.2) | 0.0<br>(0.0 - 0.1) | 0.1<br>(0.1 - 0.3)    | 0.9<br>(0.6 - 1.4)       | 7.2<br>(4.8 - 11.7)        |
| Inflammatory bowel disease                          | 0.7<br>(0.5 - 0.9)    | 0.5<br>(0.3 - 0.8) | 0.1<br>(0.0 - 0.1) | 0.3<br>(0.2 - 0.4)    | 1.1<br>(0.8 - 1.6)       | 5.9<br>(4.5 - 8.2)         |
| Vascular intestinal disorders                       | 0.9<br>(0.4 - 1.8)    | 0.0<br>(0.0 - 0.1) | 0.0<br>(0.0 - 0.1) | 0.1<br>(0.1 - 0.3)    | 1.7<br>(0.7 - 3.2)       | 13.4<br>(6.0 - 24.3)       |
| Gallbladder and biliary diseases                    | 1.2<br>(1.0 - 1.5)    | 0.1<br>(0.0 - 0.1) | 0.0<br>(0.0 - 0.1) | 0.3<br>(0.2 - 0.3)    | 2.0<br>(1.6 - 2.6)       | 16.5<br>(13.2 - 19.8)      |
| Pancreatitis                                        | 2.1<br>(1.3 - 2.7)    | 0.0<br>(0.0 - 0.1) | 0.1<br>(0.0 - 0.1) | 1.5<br>(0.9 - 2.1)    | 4.6<br>(2.8 - 6.2)       | 11.8<br>(7.2 - 15.3)       |
| Other digestive diseases                            | 1.5<br>(1.1 - 1.9)    | 0.6<br>(0.4 - 0.9) | 0.1<br>(0.1 - 0.2) | 0.6<br>(0.4 - 0.8)    | 2.9<br>(2.1 - 3.7)       | 14.3<br>(11.1 - 17.7)      |
| Neurological disorders                              | 25.1<br>(23.8 - 26.4) | 2.9<br>(2.2 - 4.0) | 1.1<br>(0.9 - 1.4) | 2.7<br>(2.2 - 3.1)    | 14.8<br>(13.6 - 15.8)    | 466.9<br>(438.3 - 492.1)   |
| Alzheimer disease and other dementias               | 20.1<br>(18.9 - 21.3) | --                 | --                 | 0.0<br>(0.0 - 0.0)    | 8.2<br>(7.6 - 8.8)       | 420.3<br>(393.2 - 446.0)   |
| Parkinson disease                                   | 1.6<br>(1.2 - 1.8)    | --                 | --                 | 0.0<br>(0.0 - 0.0)    | 1.2<br>(1.0 - 1.3)       | 30.6<br>(23.0 - 34.6)      |
| Epilepsy                                            | 1.9<br>(1.5 - 2.3)    | 2.1<br>(1.5 - 3.2) | 0.9<br>(0.7 - 1.2) | 1.9<br>(1.4 - 2.2)    | 1.9<br>(1.5 - 2.3)       | 5.8<br>(4.3 - 7.0)         |
| Multiple sclerosis                                  | 0.2<br>(0.1 - 0.3)    | --                 | --                 | 0.1<br>(0.1 - 0.2)    | 0.7<br>(0.3 - 1.0)       | 1.1<br>(0.5 - 1.6)         |
| Other neurological disorders                        | 1.3<br>(1.0 - 1.5)    | 0.8<br>(0.6 - 1.3) | 0.2<br>(0.2 - 0.3) | 0.6<br>(0.5 - 0.7)    | 2.8<br>(2.2 - 3.4)       | 9.1<br>(6.8 - 11.0)        |
| Mental and substance use disorders                  | 6.1<br>(4.8 - 7.3)    | 0.5<br>(0.2 - 0.9) | 0.0<br>(0.0 - 0.0) | 6.7<br>(5.4 - 7.8)    | 12.4<br>(8.6 - 15.5)     | 11.7<br>(8.7 - 13.9)       |
| Schizophrenia                                       | 0.2<br>(0.2 - 0.4)    | --                 | --                 | 0.2<br>(0.1 - 0.3)    | 0.6<br>(0.4 - 1.0)       | 1.2<br>(0.8 - 2.0)         |
| Alcohol use disorders                               | 3.2<br>(2.0 - 4.3)    | --                 | --                 | 2.9<br>(1.9 - 3.9)    | 8.7<br>(5.2 - 11.6)      | 6.8<br>(3.8 - 8.4)         |
| Drug use disorders                                  | 2.6<br>(2.1 - 2.8)    | 0.5<br>(0.2 - 0.9) | --                 | 3.6<br>(2.8 - 3.9)    | 3.1<br>(2.5 - 3.6)       | 3.7<br>(3.3 - 4.1)         |
| Opioid use disorders                                | 1.1<br>(0.8 - 1.2)    | 0.1<br>(0.1 - 0.2) | --                 | 1.5<br>(1.1 - 1.6)    | 1.3<br>(1.0 - 1.5)       | 1.5<br>(1.3 - 1.7)         |



Web Table 28 - Global death rates (per 100k) with 95% UI by age, sex, and cause in 2013

| Cause                                               | Males, All Ages       | Males, 0-4 Years      | Males, 5-14 Years  | Males, 15-49 Years    | Males, 50-69 Years    | Males, 70-80 Years       |
|-----------------------------------------------------|-----------------------|-----------------------|--------------------|-----------------------|-----------------------|--------------------------|
| Cocaine use disorders                               | 0.1<br>(0.1 - 0.1)    | 0.0<br>(0.0 - 0.0)    | --                 | 0.1<br>(0.1 - 0.1)    | 0.1<br>(0.1 - 0.1)    | 0.1<br>(0.1 - 0.2)       |
| Amphetamine use disorders                           | 0.1<br>(0.1 - 0.1)    | 0.0<br>(0.0 - 0.0)    | --                 | 0.1<br>(0.1 - 0.1)    | 0.1<br>(0.1 - 0.1)    | 0.2<br>(0.1 - 0.2)       |
| Other drug use disorders                            | 1.4<br>(1.1 - 1.5)    | 0.4<br>(0.1 - 0.7)    | --                 | 1.9<br>(1.6 - 2.1)    | 1.7<br>(1.3 - 1.9)    | 1.9<br>(1.7 - 2.1)       |
| Eating disorders                                    | 0.0<br>(0.0 - 0.0)    | --                    | 0.0<br>(0.0 - 0.0) | 0.0<br>(0.0 - 0.0)    | --                    | --                       |
| Anorexia nervosa                                    | 0.0<br>(0.0 - 0.0)    | --                    | 0.0<br>(0.0 - 0.0) | 0.0<br>(0.0 - 0.0)    | --                    | --                       |
| Diabetes, urogenital, blood, and endocrine diseases | 41.3<br>(37.7 - 45.8) | 23.8<br>(9.8 - 52.7)  | 3.9<br>(1.9 - 7.5) | 11.6<br>(10.3 - 13.6) | 84.8<br>(77.4 - 92.0) | 417.1<br>(389.1 - 442.0) |
| Diabetes mellitus                                   | 17.2<br>(16.3 - 18.4) | 0.8<br>(0.7 - 0.9)    | 0.2<br>(0.1 - 0.2) | 3.5<br>(3.2 - 3.9)    | 42.5<br>(39.4 - 46.4) | 188.5<br>(177.2 - 201.9) |
| Acute glomerulonephritis                            | 0.3<br>(0.2 - 0.4)    | 0.3<br>(0.1 - 0.5)    | 0.1<br>(0.1 - 0.1) | 0.2<br>(0.1 - 0.2)    | 0.5<br>(0.4 - 0.7)    | 1.8<br>(1.3 - 2.3)       |
| Chronic kidney disease                              | 14.5<br>(11.9 - 16.0) | 1.5<br>(1.2 - 2.0)    | 0.5<br>(0.4 - 0.6) | 4.5<br>(3.4 - 5.2)    | 29.5<br>(23.4 - 33.4) | 161.5<br>(138.4 - 178.5) |
| Chronic kidney disease due to diabetes mellitus     | 2.5<br>(1.9 - 3.6)    | 0.0<br>(0.0 - 0.1)    | 0.0<br>(0.0 - 0.0) | 0.5<br>(0.3 - 0.7)    | 5.9<br>(3.9 - 7.0)    | 28.3<br>(22.8 - 45.6)    |
| Chronic kidney disease due to hypertension          | 4.2<br>(2.5 - 5.0)    | 0.2<br>(0.1 - 0.3)    | 0.0<br>(0.0 - 0.1) | 1.0<br>(0.6 - 1.3)    | 8.4<br>(5.0 - 10.3)   | 50.5<br>(30.3 - 61.4)    |
| Chronic kidney disease due to glomerulonephritis    | 1.8<br>(1.3 - 2.3)    | 0.7<br>(0.5 - 0.9)    | 0.2<br>(0.2 - 0.3) | 1.0<br>(0.7 - 1.2)    | 3.6<br>(2.5 - 4.6)    | 14.0<br>(9.8 - 18.8)     |
| Chronic kidney disease due to other causes          | 6.1<br>(4.3 - 7.4)    | 0.6<br>(0.4 - 0.9)    | 0.2<br>(0.1 - 0.2) | 2.0<br>(1.3 - 2.5)    | 11.6<br>(7.9 - 14.9)  | 68.7<br>(48.9 - 84.3)    |
| Urinary diseases and male infertility               | 3.4<br>(2.7 - 3.7)    | 1.2<br>(0.9 - 1.6)    | 0.2<br>(0.1 - 0.2) | 1.0<br>(0.8 - 1.1)    | 5.9<br>(4.7 - 6.7)    | 40.7<br>(32.1 - 45.0)    |
| Interstitial nephritis and urinary tract infections | 2.2<br>(1.7 - 2.5)    | 1.0<br>(0.6 - 1.3)    | 0.1<br>(0.1 - 0.1) | 0.6<br>(0.5 - 0.7)    | 3.4<br>(2.7 - 4.2)    | 26.6<br>(20.3 - 30.9)    |
| Urolithiasis                                        | 0.2<br>(0.2 - 0.3)    | --                    | 0.0<br>(0.0 - 0.0) | 0.1<br>(0.1 - 0.1)    | 0.5<br>(0.4 - 0.8)    | 2.4<br>(1.8 - 3.5)       |
| Other urinary diseases                              | 1.0<br>(0.7 - 1.3)    | 0.3<br>(0.2 - 0.4)    | 0.0<br>(0.0 - 0.1) | 0.3<br>(0.2 - 0.4)    | 2.0<br>(1.3 - 2.5)    | 11.7<br>(8.2 - 14.9)     |
| Gynecological diseases                              | --                    | --                    | --                 | --                    | --                    | --                       |
| Uterine fibroids                                    | --                    | --                    | --                 | --                    | --                    | --                       |
| Polycystic ovarian syndrome                         | --                    | --                    | --                 | --                    | --                    | --                       |
| Endometriosis                                       | --                    | --                    | --                 | --                    | --                    | --                       |
| Genital prolapse                                    | --                    | --                    | --                 | --                    | --                    | --                       |
| Other gynecological diseases                        | --                    | --                    | --                 | --                    | --                    | --                       |
| Hemoglobinopathies and hemolytic anemias            | 3.3<br>(0.9 - 7.5)    | 16.9<br>(2.7 - 46.0)  | 2.6<br>(0.5 - 6.3) | 1.4<br>(0.5 - 3.6)    | 1.6<br>(0.9 - 3.2)    | 5.8<br>(3.5 - 8.7)       |
| Thalassemias                                        | 0.4<br>(0.2 - 0.6)    | 1.5<br>(0.9 - 2.2)    | 0.4<br>(0.2 - 0.6) | 0.3<br>(0.2 - 0.4)    | 0.1<br>(0.1 - 0.1)    | 0.0<br>(0.0 - 0.1)       |
| Sickle cell disorders                               | 2.3<br>(0.3 - 6.3)    | 14.7<br>(1.4 - 43.5)  | 2.1<br>(0.2 - 5.7) | 0.9<br>(0.2 - 2.8)    | 0.6<br>(0.2 - 2.0)    | 0.2<br>(0.1 - 0.4)       |
| G6PD deficiency                                     | 0.1<br>(0.0 - 0.1)    | 0.2<br>(0.1 - 0.4)    | 0.0<br>(0.0 - 0.1) | 0.0<br>(0.0 - 0.1)    | 0.1<br>(0.1 - 0.1)    | 0.1<br>(0.1 - 0.2)       |
| Other hemoglobinopathies and hemolytic anemias      | 0.5<br>(0.3 - 0.8)    | 0.4<br>(0.2 - 0.8)    | 0.1<br>(0.0 - 0.1) | 0.2<br>(0.1 - 0.3)    | 0.8<br>(0.5 - 1.2)    | 5.5<br>(3.3 - 8.2)       |
| Endocrine, metabolic, blood, and immune disorders   | 2.5<br>(1.9 - 3.0)    | 3.1<br>(2.4 - 4.1)    | 0.4<br>(0.3 - 0.6) | 1.1<br>(0.8 - 1.3)    | 4.7<br>(3.3 - 5.5)    | 18.8<br>(13.3 - 22.5)    |
| Musculoskeletal disorders                           | 1.3<br>(1.0 - 1.7)    | --                    | 0.3<br>(0.2 - 0.3) | 0.6<br>(0.4 - 0.8)    | 3.0<br>(2.3 - 4.2)    | 10.4<br>(7.1 - 13.0)     |
| Rheumatoid arthritis                                | 0.4<br>(0.3 - 0.5)    | --                    | 0.0<br>(0.0 - 0.1) | 0.1<br>(0.1 - 0.2)    | 1.0<br>(0.7 - 1.5)    | 3.4<br>(2.4 - 4.5)       |
| Other musculoskeletal disorders                     | 1.0<br>(0.7 - 1.2)    | --                    | 0.2<br>(0.1 - 0.3) | 0.5<br>(0.4 - 0.6)    | 2.1<br>(1.4 - 2.7)    | 7.1<br>(4.7 - 8.7)       |
| Other non-communicable diseases                     | 10.7<br>(9.6 - 12.6)  | 80.2<br>(68.6 - 99.5) | 2.5<br>(2.1 - 2.9) | 2.2<br>(1.9 - 2.6)    | 4.2<br>(3.1 - 4.7)    | 20.0<br>(15.0 - 22.1)    |
| Congenital anomalies                                | 9.3<br>(8.2 - 11.1)   | 76.8<br>(65.3 - 96.1) | 2.4<br>(2.1 - 2.8) | 1.8<br>(1.5 - 2.2)    | 2.3<br>(1.5 - 2.7)    | 6.9<br>(3.9 - 8.1)       |
| Neural tube defects                                 | 0.9<br>(0.5 - 1.7)    | 9.0<br>(4.8 - 15.9)   | 0.1<br>(0.1 - 0.2) | 0.1<br>(0.1 - 0.1)    | 0.0<br>(0.0 - 0.1)    | 0.1<br>(0.1 - 0.2)       |
| Congenital heart anomalies                          | 4.8<br>(4.2 - 5.6)    | 38.5<br>(32.6 - 47.9) | 1.5<br>(1.2 - 1.7) | 1.0<br>(0.8 - 1.2)    | 1.3<br>(0.7 - 1.6)    | 3.9<br>(1.8 - 5.1)       |
| Cleft lip and cleft palate                          | 0.0<br>(0.0 - 0.1)    | 0.5<br>(0.2 - 0.9)    | --                 | --                    | --                    | --                       |
| Down syndrome                                       | 0.5<br>(0.2 - 0.8)    | 3.1<br>(1.3 - 5.8)    | 0.1<br>(0.1 - 0.2) | 0.2<br>(0.1 - 0.3)    | 0.2<br>(0.1 - 0.3)    | 0.1<br>(0.1 - 0.1)       |
| Chromosomal unbalanced rearrangements               | 0.2<br>(0.1 - 0.3)    | 1.7<br>(1.0 - 3.1)    | 0.0<br>(0.0 - 0.1) | 0.0<br>(0.0 - 0.1)    | 0.0<br>(0.0 - 0.0)    | 0.1<br>(0.0 - 0.1)       |
| Other congenital anomalies                          | 2.9<br>(2.3 - 4.4)    | 24.0<br>(17.9 - 39.8) | 0.6<br>(0.5 - 0.9) | 0.5<br>(0.4 - 0.7)    | 0.7<br>(0.5 - 0.9)    | 2.7<br>(2.0 - 3.2)       |

Web Table 28 - Global death rates (per 100k) with 95% UI by age, sex, and cause in 2013

| Cause                                           | Males, All Ages       | Males, 0-4 Years      | Males, 5-14 Years     | Males, 15-49 Years    | Males, 50-69 Years       | Males, 70-80 Years       |
|-------------------------------------------------|-----------------------|-----------------------|-----------------------|-----------------------|--------------------------|--------------------------|
| Skin and subcutaneous diseases                  | 1.2<br>(1.0 - 1.3)    | 1.0<br>(0.7 - 1.2)    | 0.1<br>(0.1 - 0.1)    | 0.4<br>(0.3 - 0.4)    | 1.9<br>(1.5 - 2.2)       | 13.1<br>(10.9 - 14.6)    |
| Cellulitis                                      | 0.4<br>(0.2 - 0.6)    | 0.4<br>(0.2 - 0.7)    | 0.0<br>(0.0 - 0.1)    | 0.1<br>(0.1 - 0.2)    | 0.7<br>(0.4 - 1.0)       | 3.0<br>(2.0 - 4.8)       |
| Pyoderma                                        | 0.5<br>(0.4 - 0.6)    | 0.5<br>(0.3 - 0.7)    | 0.0<br>(0.0 - 0.0)    | 0.2<br>(0.1 - 0.2)    | 0.9<br>(0.6 - 1.1)       | 4.9<br>(3.5 - 6.0)       |
| Decubitus ulcer                                 | 0.3<br>(0.2 - 0.3)    | 0.0<br>(0.0 - 0.0)    | 0.0<br>(0.0 - 0.0)    | 0.1<br>(0.0 - 0.1)    | 0.3<br>(0.2 - 0.4)       | 4.7<br>(3.8 - 5.6)       |
| Other skin and subcutaneous diseases            | 0.0<br>(0.0 - 0.0)    | 0.0<br>(0.0 - 0.0)    | 0.0<br>(0.0 - 0.0)    | 0.0<br>(0.0 - 0.0)    | 0.1<br>(0.0 - 0.1)       | 0.4<br>(0.3 - 0.5)       |
| Sudden infant death syndrome                    | 0.2<br>(0.1 - 0.3)    | 2.5<br>(1.4 - 3.7)    | --                    | --                    | --                       | --                       |
| Injuries                                        | 89.8<br>(83.0 - 96.4) | 59.2<br>(50.5 - 71.2) | 21.1<br>(18.9 - 23.7) | 91.3<br>(84.1 - 98.5) | 123.8<br>(111.5 - 135.2) | 282.9<br>(250.4 - 302.5) |
| Transport injuries                              | 30.6<br>(27.5 - 33.4) | 12.3<br>(9.7 - 15.7)  | 7.3<br>(6.3 - 8.3)    | 35.2<br>(31.9 - 38.5) | 41.2<br>(36.0 - 46.0)    | 67.6<br>(58.5 - 73.7)    |
| Road injuries                                   | 28.8<br>(25.8 - 31.4) | 11.2<br>(8.8 - 14.6)  | 6.8<br>(5.9 - 7.8)    | 33.2<br>(30.2 - 36.4) | 38.7<br>(33.8 - 43.2)    | 64.0<br>(55.4 - 69.8)    |
| Pedestrian road injuries                        | 10.4<br>(8.2 - 12.8)  | 5.9<br>(4.3 - 8.4)    | 3.4<br>(2.7 - 4.2)    | 9.6<br>(7.3 - 12.1)   | 16.8<br>(13.0 - 20.4)    | 34.9<br>(28.3 - 41.0)    |
| Cyclist road injuries                           | 1.9<br>(1.5 - 2.4)    | 0.7<br>(0.4 - 1.0)    | 0.6<br>(0.5 - 0.9)    | 1.7<br>(1.3 - 2.1)    | 3.4<br>(2.6 - 4.3)       | 6.8<br>(5.2 - 8.4)       |
| Motorcyclist road injuries                      | 6.0<br>(4.6 - 7.2)    | 0.8<br>(0.5 - 1.3)    | 0.6<br>(0.4 - 0.8)    | 8.9<br>(7.0 - 10.7)   | 5.5<br>(4.0 - 7.0)       | 5.3<br>(3.8 - 6.9)       |
| Motor vehicle road injuries                     | 10.1<br>(8.5 - 11.7)  | 3.5<br>(2.5 - 4.6)    | 2.0<br>(1.5 - 2.5)    | 12.7<br>(10.8 - 14.6) | 12.2<br>(10.1 - 14.6)    | 16.3<br>(13.1 - 19.8)    |
| Other road injuries                             | 0.4<br>(0.3 - 0.6)    | 0.4<br>(0.2 - 0.6)    | 0.2<br>(0.1 - 0.3)    | 0.4<br>(0.2 - 0.5)    | 0.7<br>(0.5 - 1.1)       | 0.8<br>(0.5 - 1.1)       |
| Other transport injuries                        | 1.8<br>(1.4 - 2.0)    | 1.1<br>(0.7 - 1.4)    | 0.5<br>(0.3 - 0.6)    | 1.9<br>(1.5 - 2.3)    | 2.5<br>(2.0 - 3.0)       | 3.6<br>(2.6 - 4.3)       |
| Unintentional injuries                          | 33.4<br>(30.2 - 36.8) | 44.5<br>(37.1 - 54.4) | 12.0<br>(10.5 - 14.4) | 24.5<br>(22.2 - 27.6) | 45.1<br>(39.7 - 49.9)    | 157.0<br>(129.2 - 172.5) |
| Falls                                           | 8.9<br>(6.9 - 10.0)   | 4.3<br>(3.1 - 5.7)    | 1.4<br>(1.0 - 1.8)    | 5.0<br>(4.0 - 5.8)    | 14.4<br>(10.7 - 16.6)    | 75.5<br>(55.3 - 85.9)    |
| Drowning                                        | 7.0<br>(5.7 - 9.5)    | 13.8<br>(10.2 - 19.3) | 6.0<br>(4.9 - 8.1)    | 6.1<br>(5.0 - 8.1)    | 6.3<br>(4.8 - 8.7)       | 10.8<br>(7.9 - 13.5)     |
| Fire, heat, and hot substances                  | 2.8<br>(2.2 - 3.3)    | 4.4<br>(3.3 - 6.0)    | 0.7<br>(0.5 - 0.9)    | 2.2<br>(1.8 - 2.8)    | 3.7<br>(2.9 - 4.4)       | 10.6<br>(8.2 - 12.4)     |
| Poisonings                                      | 1.7<br>(1.0 - 2.0)    | 1.8<br>(1.1 - 2.4)    | 0.3<br>(0.2 - 0.4)    | 1.6<br>(1.0 - 2.0)    | 2.5<br>(1.5 - 3.0)       | 5.2<br>(2.9 - 6.1)       |
| Exposure to mechanical forces                   | 4.0<br>(3.6 - 4.9)    | 6.1<br>(4.6 - 11.6)   | 1.1<br>(0.9 - 1.6)    | 4.0<br>(3.5 - 4.6)    | 5.4<br>(4.5 - 6.2)       | 6.8<br>(5.3 - 7.7)       |
| Unintentional firearm injuries                  | 1.0<br>(0.8 - 1.2)    | 0.5<br>(0.4 - 0.8)    | 0.2<br>(0.1 - 0.2)    | 1.3<br>(1.0 - 1.6)    | 1.0<br>(0.8 - 1.4)       | 1.7<br>(1.2 - 2.4)       |
| Unintentional suffocation                       | 0.7<br>(0.5 - 1.6)    | 3.7<br>(2.4 - 9.6)    | 0.2<br>(0.1 - 0.6)    | 0.3<br>(0.2 - 0.7)    | 0.5<br>(0.4 - 0.8)       | 1.1<br>(0.8 - 1.6)       |
| Other exposure to mechanical forces             | 2.4<br>(2.0 - 2.6)    | 1.9<br>(1.3 - 2.4)    | 0.7<br>(0.6 - 0.9)    | 2.4<br>(2.1 - 2.7)    | 3.9<br>(3.1 - 4.5)       | 4.0<br>(2.9 - 4.5)       |
| Adverse effects of medical treatment            | 2.0<br>(1.4 - 2.5)    | 3.9<br>(2.4 - 6.3)    | 0.3<br>(0.2 - 0.4)    | 0.8<br>(0.6 - 1.1)    | 3.2<br>(2.2 - 3.9)       | 13.9<br>(9.4 - 17.1)     |
| Animal contact                                  | 1.3<br>(1.0 - 2.0)    | 1.4<br>(0.8 - 2.2)    | 0.9<br>(0.6 - 1.4)    | 1.0<br>(0.7 - 1.7)    | 2.0<br>(1.5 - 3.3)       | 3.4<br>(2.6 - 5.2)       |
| Venomous animal contact                         | 0.9<br>(0.7 - 1.5)    | 0.8<br>(0.5 - 1.3)    | 0.6<br>(0.4 - 1.0)    | 0.8<br>(0.5 - 1.4)    | 1.5<br>(1.1 - 2.6)       | 2.0<br>(1.5 - 3.2)       |
| Non-venomous animal contact                     | 0.4<br>(0.3 - 0.5)    | 0.6<br>(0.3 - 1.1)    | 0.3<br>(0.2 - 0.4)    | 0.2<br>(0.1 - 0.3)    | 0.5<br>(0.4 - 0.7)       | 1.3<br>(1.0 - 1.9)       |
| Foreign body                                    | 2.5<br>(1.4 - 3.6)    | 7.1<br>(4.0 - 11.0)   | 0.3<br>(0.2 - 0.5)    | 0.8<br>(0.4 - 1.1)    | 2.7<br>(1.4 - 3.9)       | 21.0<br>(11.4 - 31.6)    |
| Pulmonary aspiration and foreign body in airway | 2.4<br>(1.3 - 3.5)    | 7.0<br>(3.9 - 10.9)   | 0.3<br>(0.2 - 0.4)    | 0.8<br>(0.4 - 1.1)    | 2.6<br>(1.3 - 3.7)       | 20.8<br>(11.2 - 31.5)    |
| Foreign body in other body part                 | 0.1<br>(0.0 - 0.1)    | 0.1<br>(0.1 - 0.2)    | 0.0<br>(0.0 - 0.0)    | 0.0<br>(0.0 - 0.1)    | 0.1<br>(0.1 - 0.2)       | 0.2<br>(0.1 - 0.3)       |
| Other unintentional injuries                    | 3.1<br>(2.8 - 3.5)    | 1.8<br>(1.4 - 2.2)    | 1.0<br>(0.8 - 1.2)    | 2.9<br>(2.6 - 3.3)    | 4.9<br>(4.1 - 6.0)       | 9.8<br>(8.1 - 11.8)      |
| Self-harm and interpersonal violence            | 25.1<br>(20.1 - 28.5) | 1.6<br>(1.0 - 2.3)    | 1.6<br>(1.1 - 2.0)    | 31.1<br>(24.5 - 35.7) | 36.0<br>(27.6 - 42.0)    | 56.6<br>(46.0 - 67.5)    |
| Self-harm                                       | 15.9<br>(12.0 - 18.2) | --                    | 0.8<br>(0.5 - 1.1)    | 17.5<br>(13.0 - 20.2) | 27.5<br>(20.4 - 31.9)    | 48.3<br>(39.0 - 59.2)    |
| Interpersonal violence                          | 9.1<br>(6.3 - 11.7)   | 1.6<br>(1.0 - 2.3)    | 0.8<br>(0.5 - 1.1)    | 13.5<br>(9.4 - 16.9)  | 8.5<br>(5.7 - 12.4)      | 8.3<br>(4.7 - 11.6)      |
| Assault by firearm                              | 4.5<br>(2.9 - 5.9)    | 0.3<br>(0.2 - 0.5)    | 0.3<br>(0.2 - 0.4)    | 7.0<br>(4.5 - 8.9)    | 3.7<br>(2.3 - 5.8)       | 2.7<br>(1.3 - 4.3)       |
| Assault by sharp object                         | 2.5<br>(1.5 - 3.8)    | 0.2<br>(0.1 - 0.4)    | 0.1<br>(0.1 - 0.2)    | 3.8<br>(2.3 - 5.6)    | 2.6<br>(1.4 - 4.0)       | 1.8<br>(0.9 - 3.0)       |
| Assault by other means                          | 2.2<br>(1.4 - 3.0)    | 1.1<br>(0.6 - 1.5)    | 0.4<br>(0.2 - 0.5)    | 2.8<br>(1.8 - 4.0)    | 2.3<br>(1.4 - 3.4)       | 3.8<br>(2.0 - 5.3)       |
| Forces of nature, war, and legal intervention   | 0.8<br>(0.5 - 1.7)    | 0.8<br>(0.6 - 2.1)    | 0.2<br>(0.1 - 0.4)    | 0.6<br>(0.3 - 1.4)    | 1.6<br>(0.9 - 3.3)       | 1.6<br>(0.9 - 3.3)       |
| Exposure to forces of nature                    | 0.2<br>(0.1 - 0.5)    | 0.2<br>(0.1 - 1.5)    | 0.0<br>(0.0 - 0.1)    | 0.2<br>(0.1 - 0.4)    | 0.5<br>(0.3 - 1.0)       | 0.4<br>(0.2 - 0.9)       |
| Collective violence and legal intervention      | 0.5<br>(0.3 - 1.2)    | 0.6<br>(0.5 - 0.6)    | 0.1<br>(0.1 - 0.3)    | 0.4<br>(0.2 - 1.1)    | 1.1<br>(0.6 - 2.3)       | 1.2<br>(0.6 - 2.4)       |

Web Table 28 - Global death rates (per 100k) with 95% UI by age, sex, and cause in 2013

| Cause                                                             | Females, All Ages        | Females, 0-4 Years       | Females, 5-14 Years   | Females, 15-49 Years     | Females, 50-69 Years     | Females, 70-80 Years           |
|-------------------------------------------------------------------|--------------------------|--------------------------|-----------------------|--------------------------|--------------------------|--------------------------------|
| All causes                                                        | 702.8<br>(681.5 - 723.6) | 909.3<br>(859.6 - 964.3) | 65.2<br>(61.7 - 68.7) | 176.0<br>(167.1 - 185.2) | 891.3<br>(842.1 - 938.7) | 6,071.1<br>(5,931.8 - 6,198.2) |
| Communicable, maternal, neonatal, and nutritional diseases        | 157.3<br>(150.1 - 164.4) | 727.8<br>(679.0 - 776.6) | 35.7<br>(32.8 - 38.7) | 70.2<br>(66.5 - 74.2)    | 105.0<br>(96.7 - 114.1)  | 529.1<br>(473.9 - 578.8)       |
| HIV/AIDS and tuberculosis                                         | 30.2<br>(27.8 - 32.7)    | 15.9<br>(14.0 - 18.0)    | 7.0<br>(6.6 - 7.5)    | 33.5<br>(31.2 - 36.5)    | 39.8<br>(35.4 - 44.3)    | 59.5<br>(48.6 - 67.8)          |
| Tuberculosis                                                      | 12.8<br>(10.1 - 14.4)    | 6.2<br>(4.1 - 7.7)       | 1.5<br>(1.1 - 1.8)    | 9.3<br>(7.4 - 11.0)      | 23.0<br>(18.8 - 26.5)    | 54.6<br>(42.9 - 62.7)          |
| HIV/AIDS                                                          | 17.4<br>(16.1 - 19.1)    | 9.8<br>(8.9 - 10.9)      | 5.6<br>(5.2 - 6.0)    | 24.2<br>(22.2 - 26.8)    | 16.8<br>(14.8 - 19.3)    | 4.9<br>(4.0 - 6.0)             |
| HIV/AIDS resulting in mycobacterial infection                     | 0.9<br>(0.8 - 1.2)       | 0.5<br>(0.4 - 0.6)       | 0.3<br>(0.2 - 0.3)    | 1.3<br>(1.0 - 1.6)       | 0.9<br>(0.7 - 1.2)       | 0.3<br>(0.2 - 0.4)             |
| HIV/AIDS resulting in other diseases                              | 16.5<br>(15.2 - 18.1)    | 9.3<br>(8.4 - 10.3)      | 5.3<br>(4.9 - 5.7)    | 22.9<br>(21.0 - 25.5)    | 15.9<br>(14.1 - 18.4)    | 4.6<br>(3.8 - 5.7)             |
| Diarrhea, lower respiratory, and other common infectious diseases | 65.4<br>(60.2 - 70.0)    | 276.5<br>(248.5 - 305.0) | 18.2<br>(15.9 - 20.7) | 13.0<br>(11.3 - 14.8)    | 46.2<br>(39.9 - 52.9)    | 380.5<br>(330.8 - 423.0)       |
| Diarrheal diseases                                                | 18.5<br>(16.2 - 21.0)    | 77.9<br>(63.2 - 94.5)    | 4.7<br>(3.6 - 6.0)    | 4.0<br>(3.4 - 4.6)       | 17.4<br>(13.8 - 22.5)    | 94.3<br>(75.9 - 118.3)         |
| Intestinal infectious diseases                                    | 2.9<br>(1.6 - 4.8)       | 9.4<br>(5.0 - 15.8)      | 4.7<br>(2.7 - 7.4)    | 2.0<br>(1.0 - 3.5)       | 1.0<br>(0.5 - 1.9)       | 1.2<br>(0.6 - 2.0)             |
| Typhoid fever                                                     | 2.1<br>(1.1 - 3.6)       | 6.6<br>(3.3 - 11.2)      | 3.5<br>(1.9 - 5.6)    | 1.5<br>(0.8 - 2.7)       | 0.8<br>(0.4 - 1.4)       | 0.9<br>(0.4 - 1.5)             |
| Paratyphoid fever                                                 | 0.7<br>(0.4 - 1.2)       | 2.4<br>(1.2 - 4.2)       | 1.1<br>(0.6 - 2.0)    | 0.5<br>(0.2 - 0.9)       | 0.2<br>(0.1 - 0.4)       | 0.2<br>(0.1 - 0.4)             |
| Other intestinal infectious diseases                              | 0.1<br>(0.1 - 0.1)       | 0.4<br>(0.3 - 0.5)       | 0.0<br>(0.0 - 0.1)    | 0.0<br>(0.0 - 0.0)       | 0.0<br>(0.0 - 0.0)       | 0.1<br>(0.1 - 0.1)             |
| Lower respiratory infections                                      | 35.8<br>(31.9 - 38.6)    | 136.5<br>(119.0 - 155.0) | 4.6<br>(3.7 - 5.6)    | 4.5<br>(3.8 - 5.0)       | 22.9<br>(18.4 - 25.6)    | 273.9<br>(230.3 - 304.8)       |
| Upper respiratory infections                                      | 0.0<br>(0.0 - 0.1)       | 0.1<br>(0.1 - 0.2)       | 0.0<br>(0.0 - 0.0)    | 0.0<br>(0.0 - 0.0)       | 0.1<br>(0.0 - 0.1)       | 0.3<br>(0.2 - 0.4)             |
| Otitis media                                                      | 0.0<br>(0.0 - 0.0)       | 0.1<br>(0.1 - 0.1)       | 0.0<br>(0.0 - 0.0)    | 0.0<br>(0.0 - 0.0)       | 0.0<br>(0.0 - 0.0)       | 0.2<br>(0.2 - 0.2)             |
| Meningitis                                                        | 4.0<br>(3.3 - 4.5)       | 21.0<br>(16.5 - 25.9)    | 1.9<br>(1.4 - 2.3)    | 1.7<br>(1.3 - 1.9)       | 3.1<br>(2.3 - 3.7)       | 6.8<br>(5.4 - 8.0)             |
| Pneumococcal meningitis                                           | 1.0<br>(0.8 - 1.2)       | 4.5<br>(3.4 - 5.7)       | 0.6<br>(0.5 - 0.8)    | 0.5<br>(0.4 - 0.6)       | 0.9<br>(0.6 - 1.2)       | 2.0<br>(1.5 - 2.5)             |
| H influenzae type B meningitis                                    | 0.8<br>(0.7 - 1.0)       | 6.4<br>(5.0 - 8.0)       | 0.4<br>(0.3 - 0.5)    | 0.2<br>(0.2 - 0.2)       | 0.3<br>(0.2 - 0.4)       | 0.6<br>(0.5 - 0.8)             |
| Meningococcal meningitis                                          | 0.9<br>(0.7 - 1.0)       | 4.4<br>(3.4 - 5.5)       | 0.4<br>(0.3 - 0.5)    | 0.4<br>(0.3 - 0.5)       | 0.7<br>(0.5 - 0.9)       | 1.6<br>(1.1 - 2.0)             |
| Other meningitis                                                  | 1.2<br>(1.0 - 1.4)       | 5.6<br>(4.4 - 7.0)       | 0.4<br>(0.3 - 0.5)    | 0.6<br>(0.4 - 0.7)       | 1.2<br>(0.9 - 1.5)       | 2.5<br>(1.9 - 3.2)             |
| Encephalitis                                                      | 1.1<br>(0.8 - 1.4)       | 4.3<br>(2.8 - 6.5)       | 0.8<br>(0.5 - 1.0)    | 0.5<br>(0.4 - 0.8)       | 1.0<br>(0.8 - 1.5)       | 1.7<br>(1.2 - 2.3)             |
| Diphtheria                                                        | 0.0<br>(0.0 - 0.1)       | 0.3<br>(0.1 - 1.2)       | 0.0<br>(0.0 - 0.2)    | 0.0<br>(0.0 - 0.0)       | 0.0<br>(0.0 - 0.0)       | --                             |
| Whooping cough                                                    | 0.9<br>(0.3 - 2.1)       | 9.5<br>(3.5 - 21.8)      | 0.3<br>(0.1 - 0.8)    | 0.0<br>(0.0 - 0.1)       | 0.0<br>(0.0 - 0.0)       | --                             |
| Tetanus                                                           | 0.7<br>(0.4 - 1.0)       | 4.3<br>(1.6 - 7.1)       | 0.1<br>(0.1 - 0.2)    | 0.1<br>(0.1 - 0.2)       | 0.6<br>(0.4 - 0.9)       | 1.4<br>(0.9 - 2.2)             |
| Measles                                                           | 1.3<br>(0.7 - 2.4)       | 12.8<br>(6.6 - 21.9)     | 1.0<br>(0.5 - 1.9)    | 0.1<br>(0.0 - 0.1)       | 0.0<br>(0.0 - 0.0)       | --                             |
| Varicella and herpes zoster                                       | 0.1<br>(0.1 - 0.1)       | 0.2<br>(0.1 - 0.5)       | 0.0<br>(0.0 - 0.1)    | 0.0<br>(0.0 - 0.1)       | 0.1<br>(0.0 - 0.1)       | 0.8<br>(0.5 - 1.3)             |
| Neglected tropical diseases and malaria                           | 13.5<br>(11.3 - 16.2)    | 92.3<br>(69.1 - 121.2)   | 6.5<br>(4.5 - 8.1)    | 3.9<br>(2.9 - 4.7)       | 7.2<br>(5.3 - 9.2)       | 15.1<br>(11.2 - 19.6)          |
| Malaria                                                           | 11.8<br>(9.6 - 14.6)     | 87.4<br>(64.1 - 116.5)   | 4.9<br>(2.8 - 6.5)    | 2.9<br>(1.8 - 3.7)       | 5.7<br>(3.8 - 7.6)       | 12.0<br>(8.2 - 16.0)           |
| Chagas disease                                                    | 0.1<br>(0.0 - 0.4)       | 0.0<br>(0.0 - 0.0)       | 0.0<br>(0.0 - 0.0)    | 0.0<br>(0.0 - 0.1)       | 0.3<br>(0.1 - 0.9)       | 1.0<br>(0.2 - 3.2)             |
| Leishmaniasis                                                     | 0.6<br>(0.5 - 0.8)       | 2.6<br>(1.9 - 3.4)       | 0.9<br>(0.6 - 1.1)    | 0.4<br>(0.3 - 0.5)       | 0.3<br>(0.2 - 0.3)       | 0.2<br>(0.2 - 0.3)             |
| Visceral leishmaniasis                                            | 0.6<br>(0.5 - 0.8)       | 2.6<br>(1.9 - 3.4)       | 0.9<br>(0.6 - 1.1)    | 0.4<br>(0.3 - 0.5)       | 0.3<br>(0.2 - 0.3)       | 0.2<br>(0.2 - 0.3)             |
| African trypanosomiasis                                           | 0.1<br>(0.0 - 0.1)       | 0.1<br>(0.0 - 0.1)       | 0.1<br>(0.0 - 0.1)    | 0.1<br>(0.1 - 0.2)       | 0.1<br>(0.0 - 0.1)       | 0.1<br>(0.0 - 0.1)             |
| Schistosomiasis                                                   | 0.1<br>(0.1 - 0.1)       | 0.0<br>(0.0 - 0.0)       | 0.0<br>(0.0 - 0.0)    | 0.0<br>(0.0 - 0.1)       | 0.1<br>(0.1 - 0.2)       | 0.3<br>(0.2 - 0.3)             |
| Cysticercosis                                                     | 0.0<br>(0.0 - 0.0)       | 0.0<br>(0.0 - 0.0)       | 0.0<br>(0.0 - 0.0)    | 0.0<br>(0.0 - 0.0)       | 0.0<br>(0.0 - 0.0)       | 0.0<br>(0.0 - 0.0)             |
| Cystic echinococcosis                                             | 0.0<br>(0.0 - 0.0)       | 0.0<br>(0.0 - 0.0)       | 0.0<br>(0.0 - 0.0)    | 0.0<br>(0.0 - 0.0)       | 0.0<br>(0.0 - 0.0)       | 0.1<br>(0.1 - 0.1)             |
| Dengue                                                            | 0.1<br>(0.1 - 0.2)       | 0.4<br>(0.2 - 0.5)       | 0.2<br>(0.1 - 0.3)    | 0.1<br>(0.1 - 0.1)       | 0.1<br>(0.0 - 0.1)       | 0.2<br>(0.1 - 0.2)             |
| Yellow fever                                                      | 0.0<br>(0.0 - 0.0)       | 0.0<br>(0.0 - 0.0)       | 0.0<br>(0.0 - 0.0)    | 0.0<br>(0.0 - 0.0)       | 0.0<br>(0.0 - 0.0)       | 0.0<br>(0.0 - 0.0)             |
| Rabies                                                            | 0.3<br>(0.2 - 0.4)       | 0.4<br>(0.2 - 0.6)       | 0.3<br>(0.2 - 0.4)    | 0.2<br>(0.1 - 0.2)       | 0.4<br>(0.3 - 0.6)       | 0.4<br>(0.3 - 0.6)             |
| Intestinal nematode infections                                    | 0.1<br>(0.1 - 0.1)       | 0.5<br>(0.4 - 0.6)       | 0.1<br>(0.0 - 0.1)    | 0.0<br>(0.0 - 0.0)       | 0.0<br>(0.0 - 0.0)       | 0.1<br>(0.0 - 0.1)             |

Web Table 28 - Global death rates (per 100k) with 95% UI by age, sex, and cause in 2013

| Cause                                                            | Females, All Ages        | Females, 0-4 Years       | Females, 5-14 Years   | Females, 15-49 Years  | Females, 50-69 Years     | Females, 70-80 Years           |
|------------------------------------------------------------------|--------------------------|--------------------------|-----------------------|-----------------------|--------------------------|--------------------------------|
| Ascariasis                                                       | 0.1<br>(0.1 - 0.1)       | 0.5<br>(0.4 - 0.6)       | 0.1<br>(0.0 - 0.1)    | 0.0<br>(0.0 - 0.0)    | 0.0<br>(0.0 - 0.0)       | 0.1<br>(0.0 - 0.1)             |
| Other neglected tropical diseases                                | 0.2<br>(0.2 - 0.3)       | 0.9<br>(0.6 - 1.4)       | 0.1<br>(0.1 - 0.1)    | 0.1<br>(0.1 - 0.1)    | 0.2<br>(0.2 - 0.3)       | 0.8<br>(0.6 - 1.1)             |
| Maternal disorders                                               | 8.3<br>(7.4 - 9.2)       | --                       | 0.2<br>(0.1 - 0.3)    | 16.0<br>(14.2 - 17.9) | --                       | --                             |
| Maternal hemorrhage                                              | 1.2<br>(1.1 - 1.4)       | --                       | 0.0<br>(0.0 - 0.0)    | 2.4<br>(2.1 - 2.8)    | --                       | --                             |
| Maternal sepsis and other maternal infections                    | 0.7<br>(0.6 - 0.8)       | --                       | 0.0<br>(0.0 - 0.0)    | 1.3<br>(1.1 - 1.5)    | --                       | --                             |
| Maternal hypertensive disorders                                  | 0.8<br>(0.7 - 0.9)       | --                       | 0.0<br>(0.0 - 0.0)    | 1.6<br>(1.4 - 1.8)    | --                       | --                             |
| Maternal obstructed labor                                        | 0.5<br>(0.5 - 0.6)       | --                       | 0.0<br>(0.0 - 0.0)    | 1.0<br>(0.9 - 1.2)    | --                       | --                             |
| Maternal abortive outcome                                        | 1.2<br>(1.1 - 1.4)       | --                       | 0.0<br>(0.0 - 0.0)    | 2.4<br>(2.1 - 2.7)    | --                       | --                             |
| Indirect maternal deaths                                         | 0.9<br>(0.8 - 1.0)       | --                       | 0.0<br>(0.0 - 0.0)    | 1.7<br>(1.5 - 1.9)    | --                       | --                             |
| Late maternal deaths                                             | 1.2<br>(1.0 - 1.5)       | --                       | 0.0<br>(0.0 - 0.1)    | 2.4<br>(1.9 - 2.8)    | --                       | --                             |
| Maternal deaths aggravated by HIV/AIDS                           | 0.1<br>(0.0 - 0.1)       | --                       | --                    | 0.1<br>(0.1 - 0.2)    | --                       | --                             |
| Other maternal disorders                                         | 1.6<br>(1.4 - 1.8)       | --                       | 0.0<br>(0.0 - 0.0)    | 3.1<br>(2.6 - 3.5)    | --                       | --                             |
| Neonatal disorders                                               | 24.8<br>(22.9 - 26.8)    | 276.3<br>(255.4 - 298.6) | --                    | --                    | --                       | --                             |
| Neonatal preterm birth complications                             | 9.2<br>(6.7 - 11.6)      | 102.3<br>(74.6 - 129.1)  | --                    | --                    | --                       | --                             |
| Neonatal encephalopathy due to birth asphyxia and trauma         | 8.0<br>(6.3 - 9.8)       | 88.7<br>(69.8 - 108.8)   | --                    | --                    | --                       | --                             |
| Neonatal sepsis and other neonatal infections                    | 4.0<br>(2.3 - 5.7)       | 44.2<br>(25.8 - 63.7)    | --                    | --                    | --                       | --                             |
| Hemolytic disease and other neonatal jaundice                    | 0.2<br>(0.1 - 0.4)       | 2.3<br>(1.3 - 3.9)       | --                    | --                    | --                       | --                             |
| Other neonatal disorders                                         | 3.5<br>(2.7 - 4.6)       | 38.8<br>(29.7 - 50.8)    | --                    | --                    | --                       | --                             |
| Nutritional deficiencies                                         | 9.7<br>(8.3 - 10.8)      | 39.2<br>(31.1 - 47.4)    | 1.9<br>(1.5 - 2.2)    | 2.2<br>(1.8 - 2.6)    | 6.9<br>(5.4 - 8.0)       | 59.1<br>(48.6 - 68.9)          |
| Protein-energy malnutrition                                      | 6.4<br>(4.7 - 7.7)       | 33.5<br>(23.8 - 42.3)    | 1.3<br>(0.9 - 1.7)    | 0.8<br>(0.5 - 1.2)    | 3.1<br>(2.1 - 4.4)       | 37.1<br>(23.9 - 48.6)          |
| Iodine deficiency                                                | 0.0<br>(0.0 - 0.1)       | 0.1<br>(0.0 - 0.3)       | 0.0<br>(0.0 - 0.0)    | 0.0<br>(0.0 - 0.0)    | 0.1<br>(0.0 - 0.2)       | 0.2<br>(0.1 - 0.6)             |
| Iron-deficiency anemia                                           | 3.0<br>(1.6 - 4.3)       | 5.2<br>(1.5 - 12.0)      | 0.5<br>(0.3 - 0.9)    | 1.4<br>(0.9 - 1.7)    | 3.2<br>(1.7 - 4.2)       | 19.0<br>(10.2 - 29.9)          |
| Other nutritional deficiencies                                   | 0.3<br>(0.2 - 0.7)       | 0.4<br>(0.2 - 1.1)       | 0.0<br>(0.0 - 0.1)    | 0.1<br>(0.0 - 0.1)    | 0.6<br>(0.3 - 1.1)       | 2.8<br>(1.6 - 5.1)             |
| Other communicable, maternal, neonatal, and nutritional diseases | 5.4<br>(4.3 - 6.6)       | 27.6<br>(18.5 - 40.0)    | 1.8<br>(1.4 - 2.4)    | 1.6<br>(1.4 - 1.9)    | 4.9<br>(3.9 - 6.3)       | 14.9<br>(11.4 - 19.5)          |
| Sexually transmitted diseases excluding HIV                      | 2.1<br>(1.3 - 3.2)       | 19.3<br>(11.0 - 30.3)    | 0.8<br>(0.4 - 1.2)    | 0.2<br>(0.1 - 0.2)    | 0.3<br>(0.2 - 0.5)       | 1.7<br>(1.1 - 2.9)             |
| Syphilis                                                         | 2.0<br>(1.2 - 3.1)       | 19.3<br>(11.0 - 30.3)    | 0.8<br>(0.4 - 1.2)    | 0.1<br>(0.1 - 0.1)    | 0.2<br>(0.1 - 0.3)       | 1.2<br>(0.8 - 2.1)             |
| Chlamydial infection                                             | 0.0<br>(0.0 - 0.0)       | --                       | 0.0<br>(0.0 - 0.0)    | 0.0<br>(0.0 - 0.0)    | 0.0<br>(0.0 - 0.1)       | 0.1<br>(0.1 - 0.2)             |
| Gonococcal infection                                             | 0.0<br>(0.0 - 0.1)       | --                       | 0.0<br>(0.0 - 0.0)    | 0.0<br>(0.0 - 0.0)    | 0.1<br>(0.0 - 0.1)       | 0.2<br>(0.1 - 0.4)             |
| Other sexually transmitted diseases                              | 0.0<br>(0.0 - 0.0)       | --                       | 0.0<br>(0.0 - 0.0)    | 0.0<br>(0.0 - 0.0)    | 0.0<br>(0.0 - 0.1)       | 0.1<br>(0.1 - 0.2)             |
| Hepatitis                                                        | 1.6<br>(1.4 - 1.9)       | 2.6<br>(1.8 - 4.2)       | 0.6<br>(0.4 - 0.8)    | 1.0<br>(0.9 - 1.3)    | 2.3<br>(2.0 - 2.8)       | 5.0<br>(4.3 - 6.0)             |
| Acute hepatitis A                                                | 0.2<br>(0.1 - 0.3)       | 1.2<br>(0.4 - 2.3)       | 0.1<br>(0.0 - 0.2)    | 0.1<br>(0.0 - 0.2)    | 0.1<br>(0.0 - 0.2)       | 0.1<br>(0.0 - 0.3)             |
| Acute hepatitis B                                                | 0.7<br>(0.5 - 0.9)       | 1.0<br>(0.4 - 1.8)       | 0.1<br>(0.0 - 0.1)    | 0.2<br>(0.1 - 0.3)    | 1.5<br>(1.2 - 1.9)       | 4.1<br>(3.3 - 4.9)             |
| Acute hepatitis C                                                | 0.0<br>(0.0 - 0.1)       | --                       | 0.0<br>(0.0 - 0.0)    | 0.0<br>(0.0 - 0.0)    | 0.1<br>(0.0 - 0.2)       | 0.2<br>(0.0 - 0.5)             |
| Acute hepatitis E                                                | 0.6<br>(0.4 - 0.8)       | 0.4<br>(0.1 - 0.8)       | 0.4<br>(0.2 - 0.6)    | 0.7<br>(0.5 - 0.9)    | 0.6<br>(0.3 - 0.9)       | 0.6<br>(0.3 - 1.1)             |
| Other infectious diseases                                        | 1.7<br>(1.1 - 2.4)       | 5.7<br>(2.6 - 11.9)      | 0.5<br>(0.2 - 0.9)    | 0.4<br>(0.3 - 0.6)    | 2.2<br>(1.4 - 3.5)       | 8.3<br>(5.0 - 12.8)            |
| Non-communicable diseases                                        | 501.9<br>(484.5 - 518.9) | 129.7<br>(107.6 - 159.1) | 16.4<br>(14.3 - 19.2) | 77.0<br>(71.7 - 82.5) | 733.5<br>(691.6 - 775.9) | 5,328.3<br>(5,204.4 - 5,448.4) |
| Neoplasms                                                        | 98.3<br>(91.6 - 103.3)   | 6.7<br>(5.5 - 8.1)       | 3.5<br>(3.1 - 3.9)    | 26.1<br>(24.3 - 27.9) | 225.1<br>(209.6 - 240.1) | 752.8<br>(684.7 - 786.4)       |
| Esophageal cancer                                                | 3.7<br>(3.3 - 4.1)       | --                       | --                    | 0.6<br>(0.5 - 0.8)    | 9.1<br>(7.9 - 10.3)      | 30.7<br>(27.6 - 34.3)          |
| Stomach cancer                                                   | 8.8<br>(7.8 - 9.8)       | --                       | --                    | 1.8<br>(1.6 - 2.0)    | 17.7<br>(15.7 - 19.8)    | 79.8<br>(70.4 - 91.7)          |
| Liver cancer                                                     | 7.1<br>(6.6 - 7.9)       | --                       | 0.1<br>(0.1 - 0.1)    | 1.7<br>(1.5 - 1.9)    | 17.6<br>(15.7 - 19.8)    | 54.0<br>(49.1 - 59.4)          |

Web Table 28 - Global death rates (per 100k) with 95% UI by age, sex, and cause in 2013

| Cause                                | Females, All Ages        | Females, 0-4 Years  | Females, 5-14 Years | Females, 15-49 Years  | Females, 50-69 Years     | Females, 70-80 Years           |
|--------------------------------------|--------------------------|---------------------|---------------------|-----------------------|--------------------------|--------------------------------|
| Liver cancer due to hepatitis B      | 2.1<br>(1.8 - 2.3)       | --                  | 0.0<br>(0.0 - 0.0)  | 0.7<br>(0.6 - 0.8)    | 5.9<br>(5.1 - 6.8)       | 11.7<br>(10.5 - 13.3)          |
| Liver cancer due to hepatitis C      | 3.1<br>(2.8 - 3.4)       | --                  | 0.0<br>(0.0 - 0.0)  | 0.5<br>(0.4 - 0.6)    | 6.9<br>(6.1 - 7.9)       | 27.4<br>(24.6 - 30.3)          |
| Liver cancer due to alcohol use      | 0.7<br>(0.6 - 0.8)       | --                  | --                  | 0.1<br>(0.1 - 0.1)    | 1.4<br>(1.2 - 1.6)       | 6.9<br>(6.0 - 7.9)             |
| Liver cancer due to other causes     | 1.3<br>(1.1 - 1.5)       | --                  | 0.1<br>(0.1 - 0.1)  | 0.5<br>(0.4 - 0.5)    | 3.5<br>(2.9 - 4.0)       | 7.9<br>(7.0 - 9.1)             |
| Larynx cancer                        | 0.3<br>(0.2 - 0.5)       | --                  | --                  | 0.1<br>(0.0 - 0.1)    | 0.9<br>(0.6 - 1.4)       | 2.5<br>(1.6 - 3.8)             |
| Tracheal, bronchus and lung cancer   | 13.7<br>(12.1 - 14.6)    | --                  | --                  | 2.0<br>(1.8 - 2.2)    | 33.5<br>(30.3 - 36.3)    | 115.2<br>(96.6 - 123.8)        |
| Breast cancer                        | 13.1<br>(11.4 - 14.3)    | --                  | --                  | 5.4<br>(5.0 - 5.9)    | 34.5<br>(31.3 - 38.3)    | 73.7<br>(58.9 - 80.3)          |
| Cervical cancer                      | 6.6<br>(5.7 - 7.3)       | --                  | --                  | 3.3<br>(2.7 - 3.6)    | 18.8<br>(15.4 - 20.9)    | 29.3<br>(26.3 - 33.4)          |
| Uterine cancer                       | 1.9<br>(1.5 - 2.2)       | --                  | --                  | 0.4<br>(0.3 - 0.5)    | 5.0<br>(3.9 - 6.0)       | 14.3<br>(11.7 - 16.8)          |
| Prostate cancer                      | --                       | --                  | --                  | --                    | --                       | --                             |
| Colon and rectum cancer              | 10.1<br>(9.4 - 10.6)     | --                  | --                  | 1.6<br>(1.5 - 1.7)    | 18.5<br>(17.2 - 19.6)    | 101.0<br>(93.8 - 108.5)        |
| Lip and oral cavity cancer           | 1.3<br>(1.0 - 1.7)       | --                  | --                  | 0.4<br>(0.3 - 0.5)    | 3.4<br>(2.6 - 4.5)       | 9.1<br>(7.3 - 11.2)            |
| Nasopharynx cancer                   | 0.5<br>(0.4 - 0.7)       | --                  | 0.0<br>(0.0 - 0.0)  | 0.3<br>(0.2 - 0.4)    | 1.3<br>(1.0 - 1.9)       | 2.0<br>(1.6 - 3.1)             |
| Other pharynx cancer                 | 0.5<br>(0.4 - 0.5)       | --                  | --                  | 0.2<br>(0.1 - 0.2)    | 1.4<br>(1.1 - 1.6)       | 2.4<br>(2.0 - 2.7)             |
| Gallbladder and biliary tract cancer | 2.4<br>(1.9 - 2.7)       | --                  | --                  | 0.3<br>(0.3 - 0.4)    | 5.0<br>(4.0 - 5.7)       | 22.8<br>(17.6 - 26.7)          |
| Pancreatic cancer                    | 4.7<br>(4.4 - 5.0)       | --                  | --                  | 0.5<br>(0.4 - 0.5)    | 9.5<br>(8.8 - 10.1)      | 47.2<br>(43.7 - 50.3)          |
| Malignant skin melanoma              | 0.7<br>(0.5 - 0.8)       | --                  | --                  | 0.3<br>(0.2 - 0.3)    | 1.5<br>(1.2 - 1.8)       | 5.0<br>(3.6 - 5.8)             |
| Non-melanoma skin cancer             | 0.5<br>(0.4 - 0.6)       | --                  | --                  | 0.1<br>(0.1 - 0.1)    | 0.5<br>(0.4 - 0.7)       | 5.9<br>(4.7 - 7.6)             |
| Ovarian cancer                       | 4.4<br>(4.2 - 4.8)       | --                  | --                  | 1.4<br>(1.3 - 1.5)    | 12.7<br>(11.7 - 13.8)    | 26.2<br>(23.8 - 28.4)          |
| Testicular cancer                    | --                       | --                  | --                  | --                    | --                       | --                             |
| Kidney cancer                        | 1.3<br>(1.1 - 1.5)       | 0.3<br>(0.2 - 0.3)  | 0.1<br>(0.1 - 0.1)  | 0.2<br>(0.2 - 0.2)    | 2.9<br>(2.5 - 3.2)       | 11.5<br>(9.0 - 13.8)           |
| Bladder cancer                       | 1.2<br>(1.0 - 1.6)       | --                  | --                  | 0.1<br>(0.1 - 0.2)    | 1.9<br>(1.5 - 2.4)       | 13.9<br>(10.7 - 18.0)          |
| Brain and nervous system cancer      | 2.4<br>(2.1 - 2.6)       | 0.5<br>(0.4 - 0.5)  | 0.5<br>(0.5 - 0.6)  | 1.1<br>(1.0 - 1.3)    | 5.8<br>(5.1 - 6.5)       | 12.0<br>(9.7 - 13.2)           |
| Thyroid cancer                       | 0.6<br>(0.5 - 0.7)       | --                  | 0.0<br>(0.0 - 0.0)  | 0.1<br>(0.1 - 0.1)    | 1.3<br>(1.0 - 1.5)       | 5.4<br>(4.5 - 6.7)             |
| Mesothelioma                         | 0.3<br>(0.2 - 0.3)       | --                  | --                  | 0.0<br>(0.0 - 0.1)    | 1.0<br>(0.8 - 1.1)       | 1.4<br>(1.1 - 1.8)             |
| Hodgkin lymphoma                     | 0.3<br>(0.3 - 0.4)       | 0.3<br>(0.2 - 0.6)  | 0.1<br>(0.0 - 0.1)  | 0.2<br>(0.1 - 0.2)    | 0.4<br>(0.4 - 0.6)       | 1.4<br>(1.2 - 1.8)             |
| Non-Hodgkin lymphoma                 | 2.6<br>(1.8 - 3.0)       | 0.8<br>(0.6 - 1.3)  | 0.4<br>(0.2 - 0.5)  | 0.7<br>(0.5 - 0.9)    | 4.9<br>(3.6 - 5.8)       | 20.7<br>(13.5 - 24.1)          |
| Multiple myeloma                     | 1.0<br>(0.8 - 1.3)       | --                  | --                  | 0.1<br>(0.1 - 0.2)    | 2.3<br>(1.8 - 3.0)       | 9.7<br>(7.3 - 12.8)            |
| Leukemia                             | 3.3<br>(3.0 - 3.5)       | 1.3<br>(1.1 - 1.5)  | 1.2<br>(1.1 - 1.4)  | 1.7<br>(1.5 - 1.9)    | 5.3<br>(4.8 - 5.8)       | 19.5<br>(17.0 - 21.1)          |
| Other neoplasms                      | 4.9<br>(4.0 - 5.5)       | 3.5<br>(2.5 - 4.7)  | 1.1<br>(0.8 - 1.4)  | 1.6<br>(1.3 - 1.9)    | 8.5<br>(7.1 - 9.9)       | 36.1<br>(29.0 - 40.3)          |
| Cardiovascular diseases              | 239.7<br>(220.6 - 259.1) | 7.9<br>(6.3 - 10.9) | 2.4<br>(1.9 - 3.4)  | 23.7<br>(19.2 - 27.6) | 297.3<br>(255.4 - 328.8) | 2,896.3<br>(2,687.5 - 3,109.4) |
| Rheumatic heart disease              | 4.4<br>(3.2 - 6.1)       | 0.3<br>(0.2 - 0.5)  | 0.4<br>(0.3 - 0.7)  | 1.9<br>(1.3 - 2.7)    | 8.3<br>(6.1 - 12.4)      | 31.7<br>(22.0 - 43.5)          |
| Ischemic heart disease               | 107.6<br>(91.6 - 121.8)  | 0.9<br>(0.5 - 2.0)  | 0.4<br>(0.3 - 0.8)  | 9.1<br>(6.6 - 11.7)   | 126.4<br>(98.3 - 148.5)  | 1,337.7<br>(1,154.2 - 1,502.5) |
| Cerebrovascular disease              | 92.0<br>(79.4 - 105.4)   | 1.8<br>(1.4 - 2.6)  | 0.7<br>(0.6 - 1.0)  | 7.9<br>(6.2 - 9.2)    | 116.2<br>(95.4 - 133.2)  | 1,117.5<br>(975.2 - 1,299.9)   |
| Ischemic stroke                      | 49.2<br>(39.6 - 56.1)    | 0.2<br>(0.2 - 0.4)  | 0.1<br>(0.1 - 0.1)  | 1.2<br>(0.8 - 1.5)    | 39.2<br>(29.0 - 46.6)    | 688.4<br>(562.1 - 789.6)       |
| Hemorrhagic stroke                   | 42.8<br>(36.5 - 52.9)    | 1.6<br>(1.3 - 2.3)  | 0.6<br>(0.5 - 0.9)  | 6.7<br>(5.3 - 7.9)    | 77.0<br>(63.3 - 91.7)    | 429.1<br>(369.8 - 555.5)       |
| Hypertensive heart disease           | 16.5<br>(12.0 - 19.3)    | 0.2<br>(0.1 - 0.3)  | 0.1<br>(0.0 - 0.1)  | 1.3<br>(0.9 - 1.7)    | 20.5<br>(14.4 - 25.7)    | 202.6<br>(148.5 - 240.8)       |
| Cardiomyopathy and myocarditis       | 5.5<br>(4.3 - 6.6)       | 2.5<br>(1.7 - 3.5)  | 0.4<br>(0.3 - 0.5)  | 1.5<br>(1.0 - 1.8)    | 7.3<br>(5.2 - 9.0)       | 52.2<br>(43.0 - 64.0)          |
| Atrial fibrillation and flutter      | 2.0<br>(1.6 - 2.4)       | --                  | --                  | 0.0<br>(0.0 - 0.0)    | 0.5<br>(0.4 - 0.6)       | 31.6<br>(25.6 - 37.8)          |
| Aortic aneurysm                      | 1.5<br>(0.9 - 2.2)       | --                  | --                  | 0.2<br>(0.1 - 0.3)    | 1.9<br>(1.2 - 2.8)       | 18.6<br>(11.3 - 27.1)          |

Web Table 28 - Global death rates (per 100k) with 95% UI by age, sex, and cause in 2013

| Cause                                               | Females, All Ages     | Females, 0-4 Years | Females, 5-14 Years | Females, 15-49 Years | Females, 50-69 Years  | Females, 70-80 Years     |
|-----------------------------------------------------|-----------------------|--------------------|---------------------|----------------------|-----------------------|--------------------------|
| Peripheral vascular disease                         | 0.6<br>(0.5 - 0.7)    | --                 | --                  | 0.0<br>(0.0 - 0.0)   | 0.3<br>(0.3 - 0.4)    | 9.0<br>(7.3 - 10.5)      |
| Endocarditis                                        | 0.8<br>(0.5 - 1.2)    | 0.6<br>(0.3 - 0.9) | 0.1<br>(0.1 - 0.1)  | 0.3<br>(0.2 - 0.4)   | 1.1<br>(0.7 - 1.7)    | 7.0<br>(4.5 - 10.1)      |
| Other cardiovascular and circulatory diseases       | 8.8<br>(7.2 - 11.1)   | 1.6<br>(1.2 - 2.6) | 0.3<br>(0.2 - 0.4)  | 1.5<br>(1.1 - 2.0)   | 14.6<br>(11.9 - 19.1) | 88.3<br>(69.8 - 108.7)   |
| Chronic respiratory diseases                        | 52.0<br>(47.4 - 59.6) | 5.2<br>(4.4 - 6.7) | 0.8<br>(0.7 - 1.0)  | 4.6<br>(4.0 - 5.5)   | 72.8<br>(62.7 - 87.6) | 604.4<br>(554.1 - 698.6) |
| Chronic obstructive pulmonary disease               | 34.2<br>(29.1 - 40.6) | 2.1<br>(1.5 - 2.8) | 0.2<br>(0.1 - 0.3)  | 1.7<br>(1.3 - 2.3)   | 42.3<br>(33.3 - 52.7) | 426.4<br>(364.0 - 500.1) |
| Pneumoconiosis                                      | 3.2<br>(2.0 - 4.6)    | 0.0<br>(0.0 - 0.0) | 0.0<br>(0.0 - 0.0)  | 0.3<br>(0.2 - 0.5)   | 7.2<br>(4.4 - 10.9)   | 29.3<br>(17.4 - 45.4)    |
| Silicosis                                           | 0.1<br>(0.1 - 0.2)    | 0.0<br>(0.0 - 0.0) | 0.0<br>(0.0 - 0.0)  | 0.0<br>(0.0 - 0.0)   | 0.3<br>(0.1 - 0.6)    | 0.8<br>(0.4 - 1.6)       |
| Asbestosis                                          | 0.1<br>(0.1 - 0.2)    | 0.0<br>(0.0 - 0.0) | 0.0<br>(0.0 - 0.0)  | 0.0<br>(0.0 - 0.0)   | 0.3<br>(0.1 - 0.5)    | 0.7<br>(0.4 - 1.3)       |
| Coal workers pneumoconiosis                         | 0.1<br>(0.0 - 0.2)    | 0.0<br>(0.0 - 0.0) | 0.0<br>(0.0 - 0.0)  | 0.0<br>(0.0 - 0.0)   | 0.2<br>(0.1 - 0.5)    | 0.6<br>(0.3 - 1.2)       |
| Other pneumoconiosis                                | 2.9<br>(1.8 - 4.2)    | 0.0<br>(0.0 - 0.0) | 0.0<br>(0.0 - 0.0)  | 0.3<br>(0.2 - 0.4)   | 6.4<br>(3.9 - 9.8)    | 27.3<br>(16.0 - 42.4)    |
| Asthma                                              | 6.8<br>(4.6 - 11.0)   | 1.3<br>(1.0 - 1.8) | 0.4<br>(0.3 - 0.5)  | 1.7<br>(1.3 - 2.3)   | 12.7<br>(8.1 - 21.0)  | 59.7<br>(39.1 - 102.2)   |
| Interstitial lung disease and pulmonary sarcoidosis | 6.3<br>(3.9 - 8.9)    | 0.1<br>(0.1 - 0.3) | 0.0<br>(0.0 - 0.1)  | 0.5<br>(0.4 - 0.8)   | 9.2<br>(5.4 - 13.4)   | 72.7<br>(46.2 - 105.0)   |
| Other chronic respiratory diseases                  | 1.6<br>(1.2 - 2.2)    | 1.7<br>(1.3 - 2.3) | 0.1<br>(0.1 - 0.2)  | 0.3<br>(0.2 - 0.4)   | 1.5<br>(1.1 - 2.2)    | 16.3<br>(11.7 - 23.0)    |
| Cirrhosis                                           | 11.2<br>(10.6 - 12.0) | 1.5<br>(1.1 - 2.1) | 0.7<br>(0.6 - 0.8)  | 4.1<br>(3.8 - 4.5)   | 27.4<br>(25.5 - 29.5) | 69.7<br>(64.8 - 76.1)    |
| Cirrhosis due to hepatitis B                        | 3.3<br>(2.9 - 3.7)    | 0.1<br>(0.0 - 0.1) | 0.1<br>(0.1 - 0.1)  | 1.2<br>(1.0 - 1.3)   | 8.2<br>(7.2 - 9.3)    | 21.5<br>(19.0 - 24.6)    |
| Cirrhosis due to hepatitis C                        | 4.3<br>(3.8 - 4.6)    | 0.1<br>(0.0 - 0.2) | 0.1<br>(0.1 - 0.1)  | 1.4<br>(1.2 - 1.6)   | 10.9<br>(9.5 - 12.0)  | 27.7<br>(23.9 - 30.7)    |
| Cirrhosis due to alcohol use                        | 2.0<br>(1.7 - 2.3)    | --                 | --                  | 0.5<br>(0.4 - 0.6)   | 4.9<br>(4.3 - 5.7)    | 15.0<br>(13.1 - 17.4)    |
| Cirrhosis due to other causes                       | 1.7<br>(1.4 - 2.0)    | 1.3<br>(0.9 - 1.9) | 0.5<br>(0.4 - 0.6)  | 1.1<br>(0.9 - 1.3)   | 3.5<br>(2.7 - 4.3)    | 5.6<br>(4.5 - 6.8)       |
| Digestive diseases                                  | 15.3<br>(13.6 - 17.6) | 2.5<br>(2.0 - 3.2) | 1.3<br>(1.0 - 1.6)  | 4.0<br>(3.4 - 4.7)   | 22.1<br>(19.2 - 26.0) | 149.7<br>(131.8 - 171.2) |
| Peptic ulcer disease                                | 3.4<br>(2.5 - 4.2)    | 0.2<br>(0.1 - 0.3) | 0.2<br>(0.1 - 0.2)  | 0.7<br>(0.5 - 1.0)   | 5.6<br>(4.1 - 7.2)    | 32.7<br>(24.7 - 41.3)    |
| Gastritis and duodenitis                            | 0.8<br>(0.4 - 1.5)    | 0.1<br>(0.1 - 0.3) | 0.1<br>(0.1 - 0.2)  | 0.2<br>(0.1 - 0.4)   | 1.2<br>(0.6 - 2.4)    | 7.3<br>(3.9 - 14.4)      |
| Appendicitis                                        | 0.9<br>(0.6 - 1.2)    | 0.4<br>(0.2 - 0.6) | 0.2<br>(0.2 - 0.3)  | 0.5<br>(0.3 - 0.7)   | 1.3<br>(0.9 - 1.9)    | 5.6<br>(3.4 - 8.1)       |
| Paralytic ileus and intestinal obstruction          | 3.3<br>(2.1 - 5.0)    | 0.7<br>(0.4 - 1.0) | 0.3<br>(0.2 - 0.5)  | 1.0<br>(0.6 - 1.6)   | 4.6<br>(2.9 - 7.1)    | 31.2<br>(19.0 - 48.4)    |
| Inguinal, femoral, and abdominal hernia             | 0.4<br>(0.2 - 0.6)    | 0.1<br>(0.0 - 0.1) | 0.1<br>(0.0 - 0.2)  | 0.1<br>(0.0 - 0.1)   | 0.4<br>(0.3 - 0.7)    | 3.9<br>(2.2 - 6.4)       |
| Inflammatory bowel disease                          | 0.8<br>(0.5 - 1.1)    | 0.5<br>(0.3 - 0.7) | 0.1<br>(0.1 - 0.2)  | 0.3<br>(0.2 - 0.4)   | 0.9<br>(0.6 - 1.4)    | 6.6<br>(4.5 - 10.3)      |
| Vascular intestinal disorders                       | 1.3<br>(0.7 - 2.1)    | 0.0<br>(0.0 - 0.0) | 0.0<br>(0.0 - 0.1)  | 0.1<br>(0.0 - 0.2)   | 1.2<br>(0.6 - 2.0)    | 16.9<br>(9.0 - 26.5)     |
| Gallbladder and biliary diseases                    | 1.7<br>(1.3 - 2.2)    | 0.1<br>(0.1 - 0.2) | 0.1<br>(0.0 - 0.1)  | 0.3<br>(0.2 - 0.4)   | 2.3<br>(1.7 - 2.9)    | 19.5<br>(14.2 - 24.5)    |
| Pancreatitis                                        | 1.3<br>(0.8 - 1.8)    | 0.0<br>(0.0 - 0.1) | 0.1<br>(0.0 - 0.1)  | 0.5<br>(0.3 - 0.7)   | 2.6<br>(1.6 - 3.7)    | 10.3<br>(6.4 - 14.3)     |
| Other digestive diseases                            | 1.5<br>(1.2 - 1.8)    | 0.4<br>(0.3 - 0.6) | 0.2<br>(0.1 - 0.2)  | 0.3<br>(0.3 - 0.4)   | 1.9<br>(1.5 - 2.4)    | 15.7<br>(12.5 - 19.3)    |
| Neurological disorders                              | 30.2<br>(27.5 - 32.8) | 2.9<br>(2.1 - 3.8) | 0.9<br>(0.6 - 1.1)  | 1.7<br>(1.4 - 2.0)   | 11.2<br>(10.2 - 12.1) | 443.2<br>(403.9 - 488.0) |
| Alzheimer disease and other dementias               | 26.2<br>(23.9 - 28.9) | --                 | --                  | 0.0<br>(0.0 - 0.0)   | 6.3<br>(5.8 - 6.8)    | 411.9<br>(375.1 - 456.8) |
| Parkinson disease                                   | 1.3<br>(0.8 - 1.5)    | --                 | --                  | 0.0<br>(0.0 - 0.0)   | 0.7<br>(0.5 - 0.9)    | 19.2<br>(11.3 - 22.4)    |
| Epilepsy                                            | 1.3<br>(1.0 - 1.6)    | 2.1<br>(1.4 - 3.1) | 0.7<br>(0.5 - 0.9)  | 1.2<br>(0.9 - 1.4)   | 1.1<br>(0.8 - 1.3)    | 3.7<br>(2.6 - 4.5)       |
| Multiple sclerosis                                  | 0.3<br>(0.2 - 0.4)    | --                 | --                  | 0.2<br>(0.1 - 0.3)   | 1.0<br>(0.5 - 1.2)    | 1.4<br>(0.7 - 1.8)       |
| Other neurological disorders                        | 1.0<br>(1.0 - 1.1)    | 0.7<br>(0.6 - 0.9) | 0.2<br>(0.1 - 0.2)  | 0.3<br>(0.3 - 0.3)   | 2.2<br>(2.0 - 2.4)    | 7.0<br>(6.3 - 7.5)       |
| Mental and substance use disorders                  | 1.8<br>(1.4 - 2.3)    | 0.3<br>(0.2 - 0.4) | 0.0<br>(0.0 - 0.0)  | 1.6<br>(1.3 - 2.0)   | 3.6<br>(2.6 - 4.9)    | 5.3<br>(4.3 - 6.4)       |
| Schizophrenia                                       | 0.2<br>(0.2 - 0.3)    | --                 | --                  | 0.1<br>(0.1 - 0.2)   | 0.4<br>(0.3 - 0.6)    | 1.3<br>(1.0 - 1.7)       |
| Alcohol use disorders                               | 0.6<br>(0.3 - 1.1)    | --                 | --                  | 0.5<br>(0.2 - 0.8)   | 1.8<br>(0.8 - 3.1)    | 1.3<br>(0.6 - 2.2)       |
| Drug use disorders                                  | 0.9<br>(0.8 - 1.0)    | 0.3<br>(0.2 - 0.4) | --                  | 1.0<br>(0.8 - 1.1)   | 1.4<br>(1.2 - 1.6)    | 2.7<br>(2.4 - 3.0)       |
| Opioid use disorders                                | 0.4<br>(0.3 - 0.4)    | 0.1<br>(0.1 - 0.2) | --                  | 0.4<br>(0.3 - 0.4)   | 0.5<br>(0.4 - 0.6)    | 1.0<br>(0.9 - 1.2)       |

Web Table 28 - Global death rates (per 100k) with 95% UI by age, sex, and cause in 2013

| Cause                                               | Females, All Ages     | Females, 0-4 Years    | Females, 5-14 Years | Females, 15-49 Years | Females, 50-69 Years  | Females, 70-80 Years     |
|-----------------------------------------------------|-----------------------|-----------------------|---------------------|----------------------|-----------------------|--------------------------|
| Cocaine use disorders                               | 0.0<br>(0.0 - 0.1)    | 0.0<br>(0.0 - 0.0)    | --                  | 0.0<br>(0.0 - 0.1)   | 0.1<br>(0.1 - 0.1)    | 0.1<br>(0.1 - 0.2)       |
| Amphetamine use disorders                           | 0.0<br>(0.0 - 0.0)    | 0.0<br>(0.0 - 0.0)    | --                  | 0.0<br>(0.0 - 0.0)   | 0.1<br>(0.1 - 0.1)    | 0.2<br>(0.1 - 0.2)       |
| Other drug use disorders                            | 0.5<br>(0.4 - 0.5)    | 0.2<br>(0.1 - 0.2)    | --                  | 0.5<br>(0.4 - 0.6)   | 0.8<br>(0.7 - 0.9)    | 1.3<br>(1.2 - 1.5)       |
| Eating disorders                                    | 0.0<br>(0.0 - 0.0)    | --                    | 0.0<br>(0.0 - 0.0)  | 0.0<br>(0.0 - 0.0)   | --                    | --                       |
| Anorexia nervosa                                    | 0.0<br>(0.0 - 0.0)    | --                    | 0.0<br>(0.0 - 0.0)  | 0.0<br>(0.0 - 0.0)   | --                    | --                       |
| Diabetes, urogenital, blood, and endocrine diseases | 41.3<br>(38.0 - 45.9) | 25.9<br>(15.0 - 49.5) | 4.1<br>(2.5 - 6.8)  | 8.5<br>(7.7 - 9.8)   | 67.3<br>(60.6 - 73.7) | 370.8<br>(329.4 - 396.7) |
| Diabetes mellitus                                   | 19.2<br>(17.6 - 20.9) | 0.6<br>(0.3 - 0.9)    | 0.2<br>(0.1 - 0.3)  | 2.7<br>(2.4 - 3.0)   | 37.5<br>(33.9 - 41.5) | 186.9<br>(170.4 - 206.6) |
| Acute glomerulonephritis                            | 0.2<br>(0.2 - 0.3)    | 0.2<br>(0.1 - 0.4)    | 0.1<br>(0.1 - 0.1)  | 0.1<br>(0.1 - 0.2)   | 0.4<br>(0.3 - 0.5)    | 1.2<br>(0.9 - 1.5)       |
| Chronic kidney disease                              | 12.2<br>(9.5 - 13.5)  | 1.2<br>(0.9 - 1.5)    | 0.4<br>(0.3 - 0.5)  | 2.5<br>(2.1 - 2.8)   | 19.9<br>(15.1 - 22.6) | 120.6<br>(91.8 - 135.0)  |
| Chronic kidney disease due to diabetes mellitus     | 2.4<br>(1.8 - 2.7)    | 0.0<br>(0.0 - 0.0)    | 0.0<br>(0.0 - 0.0)  | 0.3<br>(0.2 - 0.4)   | 4.9<br>(3.5 - 5.6)    | 22.3<br>(16.6 - 26.2)    |
| Chronic kidney disease due to hypertension          | 3.5<br>(2.2 - 4.9)    | 0.1<br>(0.1 - 0.2)    | 0.1<br>(0.0 - 0.1)  | 0.6<br>(0.4 - 0.9)   | 5.2<br>(3.2 - 7.2)    | 38.4<br>(23.9 - 52.4)    |
| Chronic kidney disease due to glomerulonephritis    | 1.4<br>(1.1 - 1.9)    | 0.6<br>(0.4 - 0.7)    | 0.2<br>(0.1 - 0.2)  | 0.7<br>(0.5 - 0.9)   | 2.6<br>(1.8 - 3.7)    | 9.5<br>(6.7 - 13.6)      |
| Chronic kidney disease due to other causes          | 4.8<br>(3.1 - 6.1)    | 0.4<br>(0.3 - 0.6)    | 0.2<br>(0.1 - 0.2)  | 0.9<br>(0.7 - 1.2)   | 7.3<br>(4.7 - 9.4)    | 50.4<br>(30.5 - 64.7)    |
| Urinary diseases and male infertility               | 3.4<br>(2.6 - 3.9)    | 0.9<br>(0.6 - 1.2)    | 0.2<br>(0.1 - 0.3)  | 0.8<br>(0.6 - 0.9)   | 4.3<br>(3.4 - 5.0)    | 36.2<br>(26.0 - 41.7)    |
| Interstitial nephritis and urinary tract infections | 2.7<br>(2.0 - 3.1)    | 0.7<br>(0.4 - 1.0)    | 0.1<br>(0.1 - 0.2)  | 0.6<br>(0.4 - 0.7)   | 3.2<br>(2.5 - 3.8)    | 29.9<br>(21.6 - 34.7)    |
| Urolithiasis                                        | 0.2<br>(0.1 - 0.3)    | --                    | 0.0<br>(0.0 - 0.0)  | 0.1<br>(0.0 - 0.1)   | 0.3<br>(0.2 - 0.5)    | 1.6<br>(1.0 - 2.5)       |
| Other urinary diseases                              | 0.5<br>(0.3 - 0.6)    | 0.2<br>(0.1 - 0.3)    | 0.0<br>(0.0 - 0.1)  | 0.1<br>(0.1 - 0.2)   | 0.8<br>(0.4 - 1.0)    | 4.7<br>(2.8 - 6.1)       |
| Gynecological diseases                              | 0.1<br>(0.1 - 0.1)    | --                    | --                  | 0.1<br>(0.1 - 0.1)   | 0.1<br>(0.1 - 0.1)    | 0.7<br>(0.5 - 0.9)       |
| Uterine fibroids                                    | 0.0<br>(0.0 - 0.0)    | --                    | --                  | 0.0<br>(0.0 - 0.0)   | 0.0<br>(0.0 - 0.0)    | 0.2<br>(0.2 - 0.3)       |
| Polycystic ovarian syndrome                         | 0.0<br>(0.0 - 0.0)    | --                    | --                  | 0.0<br>(0.0 - 0.0)   | 0.0<br>(0.0 - 0.0)    | --                       |
| Endometriosis                                       | 0.0<br>(0.0 - 0.0)    | --                    | --                  | 0.0<br>(0.0 - 0.0)   | 0.0<br>(0.0 - 0.0)    | --                       |
| Genital prolapse                                    | 0.0<br>(0.0 - 0.0)    | --                    | --                  | 0.0<br>(0.0 - 0.0)   | 0.0<br>(0.0 - 0.0)    | 0.2<br>(0.1 - 0.2)       |
| Other gynecological diseases                        | 0.0<br>(0.0 - 0.1)    | --                    | --                  | 0.0<br>(0.0 - 0.1)   | 0.1<br>(0.0 - 0.1)    | 0.3<br>(0.2 - 0.4)       |
| Hemoglobinopathies and hemolytic anemias            | 3.4<br>(1.6 - 6.5)    | 19.3<br>(7.8 - 43.6)  | 2.9<br>(1.1 - 5.5)  | 1.4<br>(0.8 - 2.4)   | 1.3<br>(0.7 - 2.0)    | 4.3<br>(2.5 - 5.9)       |
| Thalassemias                                        | 0.3<br>(0.2 - 0.4)    | 1.2<br>(0.7 - 1.8)    | 0.3<br>(0.2 - 0.5)  | 0.3<br>(0.1 - 0.4)   | 0.1<br>(0.0 - 0.1)    | 0.0<br>(0.0 - 0.0)       |
| Sickle cell disorders                               | 2.6<br>(1.0 - 5.6)    | 17.3<br>(6.5 - 40.8)  | 2.5<br>(0.8 - 5.1)  | 1.0<br>(0.5 - 2.0)   | 0.6<br>(0.3 - 1.1)    | 0.2<br>(0.1 - 0.3)       |
| G6PD deficiency                                     | 0.0<br>(0.0 - 0.1)    | 0.2<br>(0.1 - 0.3)    | 0.0<br>(0.0 - 0.0)  | 0.0<br>(0.0 - 0.0)   | 0.0<br>(0.0 - 0.1)    | 0.1<br>(0.0 - 0.1)       |
| Other hemoglobinopathies and hemolytic anemias      | 0.5<br>(0.3 - 0.7)    | 0.6<br>(0.3 - 1.1)    | 0.1<br>(0.0 - 0.1)  | 0.1<br>(0.1 - 0.2)   | 0.6<br>(0.4 - 0.8)    | 4.1<br>(2.3 - 5.6)       |
| Endocrine, metabolic, blood, and immune disorders   | 2.8<br>(2.0 - 3.5)    | 3.7<br>(2.7 - 4.9)    | 0.4<br>(0.3 - 0.5)  | 0.9<br>(0.7 - 1.2)   | 3.9<br>(2.8 - 4.9)    | 21.0<br>(14.3 - 24.9)    |
| Musculoskeletal disorders                           | 1.9<br>(1.7 - 2.2)    | --                    | 0.3<br>(0.2 - 0.3)  | 0.9<br>(0.8 - 1.0)   | 3.2<br>(2.7 - 3.6)    | 14.9<br>(13.1 - 16.9)    |
| Rheumatoid arthritis                                | 0.7<br>(0.6 - 0.8)    | --                    | 0.0<br>(0.0 - 0.1)  | 0.1<br>(0.1 - 0.2)   | 1.3<br>(1.0 - 1.5)    | 6.9<br>(5.9 - 8.1)       |
| Other musculoskeletal disorders                     | 1.2<br>(1.1 - 1.4)    | --                    | 0.2<br>(0.2 - 0.3)  | 0.8<br>(0.7 - 0.9)   | 1.9<br>(1.7 - 2.3)    | 8.0<br>(6.9 - 9.3)       |
| Other non-communicable diseases                     | 10.1<br>(8.8 - 11.9)  | 76.9<br>(62.8 - 94.9) | 2.4<br>(2.0 - 2.9)  | 1.8<br>(1.5 - 2.3)   | 3.4<br>(2.7 - 4.0)    | 21.3<br>(18.2 - 23.6)    |
| Congenital anomalies                                | 8.3<br>(7.1 - 9.9)    | 73.3<br>(59.6 - 91.2) | 2.3<br>(1.9 - 2.8)  | 1.5<br>(1.2 - 1.9)   | 1.8<br>(1.2 - 2.3)    | 5.0<br>(3.2 - 6.0)       |
| Neural tube defects                                 | 1.0<br>(0.5 - 2.1)    | 10.2<br>(5.3 - 22.0)  | 0.2<br>(0.1 - 0.3)  | 0.1<br>(0.1 - 0.1)   | 0.0<br>(0.0 - 0.1)    | 0.1<br>(0.0 - 0.1)       |
| Congenital heart anomalies                          | 4.3<br>(3.5 - 5.1)    | 36.8<br>(29.7 - 46.4) | 1.4<br>(1.1 - 1.6)  | 0.8<br>(0.6 - 1.0)   | 0.9<br>(0.5 - 1.3)    | 2.8<br>(1.5 - 3.6)       |
| Cleft lip and cleft palate                          | 0.0<br>(0.0 - 0.1)    | 0.5<br>(0.2 - 1.0)    | --                  | --                   | --                    | --                       |
| Down syndrome                                       | 0.6<br>(0.3 - 0.8)    | 4.2<br>(1.8 - 6.8)    | 0.2<br>(0.1 - 0.4)  | 0.2<br>(0.1 - 0.3)   | 0.2<br>(0.1 - 0.3)    | 0.1<br>(0.0 - 0.1)       |
| Chromosomal unbalanced rearrangements               | 0.3<br>(0.1 - 0.5)    | 2.6<br>(1.2 - 4.3)    | 0.0<br>(0.0 - 0.1)  | 0.1<br>(0.0 - 0.1)   | 0.0<br>(0.0 - 0.0)    | 0.0<br>(0.0 - 0.1)       |
| Other congenital anomalies                          | 2.2<br>(1.8 - 3.4)    | 19.0<br>(14.7 - 31.2) | 0.5<br>(0.4 - 0.8)  | 0.4<br>(0.3 - 0.5)   | 0.6<br>(0.4 - 0.7)    | 2.1<br>(1.5 - 2.5)       |

Web Table 28 - Global death rates (per 100k) with 95% UI by age, sex, and cause in 2013

| Cause                                           | Females, All Ages     | Females, 0-4 Years    | Females, 5-14 Years   | Females, 15-49 Years  | Females, 50-69 Years  | Females, 70-89 Years     |
|-------------------------------------------------|-----------------------|-----------------------|-----------------------|-----------------------|-----------------------|--------------------------|
| Skin and subcutaneous diseases                  | 1.6<br>(1.4 - 1.7)    | 1.5<br>(1.2 - 2.0)    | 0.1<br>(0.1 - 0.1)    | 0.3<br>(0.3 - 0.4)    | 1.6<br>(1.4 - 1.9)    | 16.2<br>(14.2 - 18.2)    |
| Cellulitis                                      | 0.5<br>(0.3 - 0.6)    | 0.7<br>(0.4 - 1.0)    | 0.1<br>(0.0 - 0.1)    | 0.1<br>(0.1 - 0.2)    | 0.6<br>(0.4 - 0.9)    | 3.7<br>(2.4 - 5.2)       |
| Pyoderma                                        | 0.5<br>(0.4 - 0.6)    | 0.8<br>(0.5 - 1.1)    | 0.0<br>(0.0 - 0.1)    | 0.1<br>(0.1 - 0.2)    | 0.7<br>(0.5 - 0.9)    | 4.7<br>(3.8 - 5.6)       |
| Decubitus ulcer                                 | 0.5<br>(0.4 - 0.6)    | 0.0<br>(0.0 - 0.0)    | 0.0<br>(0.0 - 0.0)    | 0.0<br>(0.0 - 0.1)    | 0.2<br>(0.2 - 0.3)    | 7.3<br>(6.1 - 8.6)       |
| Other skin and subcutaneous diseases            | 0.1<br>(0.1 - 0.1)    | 0.1<br>(0.0 - 0.1)    | 0.0<br>(0.0 - 0.0)    | 0.0<br>(0.0 - 0.0)    | 0.1<br>(0.0 - 0.1)    | 0.6<br>(0.4 - 1.0)       |
| Sudden infant death syndrome                    | 0.2<br>(0.1 - 0.3)    | 2.1<br>(1.1 - 3.5)    | --                    | --                    | --                    | --                       |
| Injuries                                        | 43.6<br>(39.9 - 47.4) | 51.8<br>(44.3 - 60.3) | 13.1<br>(11.8 - 14.7) | 28.8<br>(25.7 - 32.4) | 52.8<br>(47.5 - 60.0) | 213.7<br>(183.7 - 235.5) |
| Transport injuries                              | 10.7<br>(9.3 - 11.8)  | 10.3<br>(7.9 - 13.0)  | 4.3<br>(3.5 - 4.9)    | 8.4<br>(7.3 - 9.3)    | 16.2<br>(13.6 - 18.3) | 33.6<br>(28.5 - 38.7)    |
| Road injuries                                   | 10.1<br>(8.7 - 11.1)  | 9.4<br>(7.1 - 12.0)   | 4.0<br>(3.2 - 4.6)    | 7.9<br>(6.9 - 8.7)    | 15.3<br>(12.8 - 17.3) | 31.7<br>(26.7 - 36.2)    |
| Pedestrian road injuries                        | 4.7<br>(3.8 - 5.4)    | 4.5<br>(3.2 - 6.0)    | 2.0<br>(1.6 - 2.4)    | 2.6<br>(2.1 - 3.1)    | 8.1<br>(6.4 - 9.4)    | 20.7<br>(16.8 - 24.1)    |
| Cyclist road injuries                           | 0.6<br>(0.5 - 0.7)    | 0.4<br>(0.2 - 0.6)    | 0.3<br>(0.2 - 0.4)    | 0.5<br>(0.4 - 0.5)    | 1.0<br>(0.8 - 1.2)    | 1.6<br>(1.2 - 2.0)       |
| Motorcyclist road injuries                      | 0.9<br>(0.7 - 1.3)    | 0.5<br>(0.3 - 0.7)    | 0.2<br>(0.2 - 0.3)    | 1.1<br>(0.8 - 1.5)    | 1.2<br>(0.8 - 1.6)    | 1.3<br>(0.8 - 1.9)       |
| Motor vehicle road injuries                     | 3.7<br>(3.1 - 4.3)    | 3.9<br>(2.8 - 5.2)    | 1.3<br>(1.0 - 1.6)    | 3.5<br>(3.0 - 4.1)    | 4.8<br>(3.9 - 5.8)    | 7.7<br>(6.3 - 9.4)       |
| Other road injuries                             | 0.1<br>(0.1 - 0.2)    | 0.2<br>(0.1 - 0.3)    | 0.1<br>(0.0 - 0.1)    | 0.1<br>(0.1 - 0.2)    | 0.1<br>(0.1 - 0.2)    | 0.4<br>(0.3 - 0.7)       |
| Other transport injuries                        | 0.6<br>(0.5 - 0.8)    | 0.9<br>(0.6 - 1.1)    | 0.3<br>(0.2 - 0.4)    | 0.5<br>(0.4 - 0.6)    | 0.9<br>(0.7 - 1.1)    | 2.0<br>(1.5 - 2.4)       |
| Unintentional injuries                          | 22.6<br>(19.9 - 25.5) | 39.1<br>(32.9 - 47.1) | 7.5<br>(6.5 - 8.9)    | 9.5<br>(7.9 - 11.7)   | 22.1<br>(19.3 - 26.0) | 151.4<br>(123.2 - 168.4) |
| Falls                                           | 6.6<br>(4.8 - 7.8)    | 3.0<br>(2.1 - 4.1)    | 0.7<br>(0.5 - 0.9)    | 1.0<br>(0.7 - 1.2)    | 5.0<br>(3.6 - 6.1)    | 79.8<br>(56.7 - 96.4)    |
| Drowning                                        | 3.2<br>(2.6 - 5.0)    | 10.9<br>(7.9 - 16.4)  | 3.1<br>(2.4 - 4.4)    | 1.5<br>(1.2 - 2.5)    | 2.7<br>(2.1 - 4.4)    | 8.2<br>(6.5 - 12.2)      |
| Fire, heat, and hot substances                  | 3.9<br>(3.0 - 5.0)    | 5.2<br>(3.9 - 6.9)    | 1.1<br>(0.9 - 1.5)    | 3.4<br>(2.5 - 4.9)    | 3.9<br>(2.9 - 5.1)    | 12.9<br>(9.8 - 15.7)     |
| Poisonings                                      | 1.0<br>(0.6 - 1.2)    | 1.4<br>(0.7 - 2.1)    | 0.3<br>(0.2 - 0.4)    | 0.7<br>(0.4 - 0.9)    | 1.3<br>(0.7 - 1.6)    | 3.7<br>(2.2 - 4.6)       |
| Exposure to mechanical forces                   | 1.4<br>(1.3 - 2.0)    | 5.1<br>(3.9 - 8.8)    | 0.7<br>(0.6 - 1.0)    | 0.7<br>(0.6 - 1.0)    | 1.5<br>(1.2 - 1.9)    | 3.8<br>(3.3 - 4.7)       |
| Unintentional firearm injuries                  | 0.3<br>(0.3 - 0.4)    | 0.4<br>(0.3 - 0.6)    | 0.1<br>(0.1 - 0.2)    | 0.3<br>(0.2 - 0.4)    | 0.4<br>(0.3 - 0.7)    | 0.7<br>(0.5 - 1.0)       |
| Unintentional suffocation                       | 0.4<br>(0.3 - 0.9)    | 2.7<br>(1.9 - 6.4)    | 0.1<br>(0.1 - 0.4)    | 0.1<br>(0.1 - 0.2)    | 0.2<br>(0.1 - 0.3)    | 0.6<br>(0.4 - 1.1)       |
| Other exposure to mechanical forces             | 0.7<br>(0.6 - 0.9)    | 1.9<br>(1.4 - 2.5)    | 0.4<br>(0.4 - 0.6)    | 0.4<br>(0.3 - 0.5)    | 0.9<br>(0.7 - 1.1)    | 2.5<br>(2.1 - 3.1)       |
| Adverse effects of medical treatment            | 2.0<br>(1.4 - 2.5)    | 2.5<br>(1.7 - 3.8)    | 0.2<br>(0.1 - 0.3)    | 0.8<br>(0.6 - 1.1)    | 3.1<br>(2.1 - 4.2)    | 12.8<br>(8.3 - 15.2)     |
| Animal contact                                  | 0.9<br>(0.5 - 2.1)    | 1.7<br>(0.8 - 3.5)    | 0.7<br>(0.4 - 1.5)    | 0.6<br>(0.3 - 1.3)    | 1.4<br>(0.8 - 3.5)    | 2.5<br>(1.3 - 5.6)       |
| Venomous animal contact                         | 0.7<br>(0.4 - 1.5)    | 1.3<br>(0.5 - 2.4)    | 0.5<br>(0.3 - 1.1)    | 0.5<br>(0.3 - 1.1)    | 1.0<br>(0.5 - 2.5)    | 1.2<br>(0.6 - 2.9)       |
| Non-venomous animal contact                     | 0.3<br>(0.1 - 0.6)    | 0.4<br>(0.2 - 1.1)    | 0.2<br>(0.1 - 0.4)    | 0.1<br>(0.0 - 0.2)    | 0.4<br>(0.2 - 1.0)    | 1.3<br>(0.6 - 2.9)       |
| Foreign body                                    | 2.1<br>(1.3 - 3.1)    | 7.6<br>(4.6 - 11.4)   | 0.2<br>(0.1 - 0.3)    | 0.3<br>(0.2 - 0.5)    | 1.1<br>(0.7 - 1.7)    | 17.3<br>(10.1 - 25.0)    |
| Pulmonary aspiration and foreign body in airway | 2.1<br>(1.2 - 3.0)    | 7.5<br>(4.5 - 11.4)   | 0.2<br>(0.1 - 0.3)    | 0.3<br>(0.2 - 0.5)    | 1.1<br>(0.7 - 1.6)    | 17.0<br>(9.7 - 24.7)     |
| Foreign body in other body part                 | 0.0<br>(0.0 - 0.1)    | 0.1<br>(0.0 - 0.1)    | 0.0<br>(0.0 - 0.0)    | 0.0<br>(0.0 - 0.0)    | 0.0<br>(0.0 - 0.0)    | 0.3<br>(0.2 - 0.5)       |
| Other unintentional injuries                    | 1.4<br>(0.9 - 1.9)    | 1.6<br>(1.1 - 2.3)    | 0.5<br>(0.3 - 0.7)    | 0.4<br>(0.4 - 0.5)    | 2.2<br>(1.3 - 3.0)    | 10.4<br>(5.1 - 14.0)     |
| Self-harm and interpersonal violence            | 9.7<br>(8.4 - 11.3)   | 1.7<br>(1.1 - 2.5)    | 1.3<br>(1.0 - 1.6)    | 10.6<br>(9.0 - 12.5)  | 13.3<br>(11.4 - 16.1) | 26.6<br>(23.4 - 31.8)    |
| Self-harm                                       | 7.5<br>(6.5 - 9.0)    | --                    | 0.7<br>(0.5 - 1.0)    | 8.1<br>(6.6 - 10.0)   | 11.3<br>(9.5 - 14.0)  | 22.5<br>(19.7 - 28.6)    |
| Interpersonal violence                          | 2.1<br>(1.5 - 2.6)    | 1.7<br>(1.1 - 2.5)    | 0.6<br>(0.4 - 0.8)    | 2.5<br>(1.8 - 3.1)    | 2.0<br>(1.5 - 2.7)    | 4.1<br>(2.7 - 5.4)       |
| Assault by firearm                              | 0.5<br>(0.3 - 0.8)    | 0.3<br>(0.2 - 0.5)    | 0.1<br>(0.1 - 0.2)    | 0.7<br>(0.4 - 1.0)    | 0.4<br>(0.3 - 0.6)    | 0.8<br>(0.4 - 1.4)       |
| Assault by sharp object                         | 0.7<br>(0.5 - 1.0)    | 0.3<br>(0.2 - 0.6)    | 0.1<br>(0.1 - 0.2)    | 0.9<br>(0.6 - 1.3)    | 0.6<br>(0.4 - 0.9)    | 1.0<br>(0.6 - 1.5)       |
| Assault by other means                          | 0.9<br>(0.6 - 1.2)    | 1.1<br>(0.6 - 1.6)    | 0.3<br>(0.2 - 0.4)    | 0.9<br>(0.6 - 1.2)    | 1.0<br>(0.7 - 1.4)    | 2.2<br>(1.4 - 3.0)       |
| Forces of nature, war, and legal intervention   | 0.6<br>(0.4 - 1.2)    | 0.7<br>(0.5 - 1.8)    | 0.1<br>(0.1 - 0.3)    | 0.4<br>(0.2 - 0.8)    | 1.3<br>(0.9 - 2.3)    | 2.2<br>(1.6 - 3.6)       |
| Exposure to forces of nature                    | 0.3<br>(0.2 - 0.5)    | 0.2<br>(0.1 - 1.3)    | 0.0<br>(0.0 - 0.1)    | 0.2<br>(0.1 - 0.3)    | 0.7<br>(0.5 - 0.9)    | 1.2<br>(1.0 - 1.7)       |
| Collective violence and legal intervention      | 0.3<br>(0.2 - 0.7)    | 0.5<br>(0.5 - 0.5)    | 0.1<br>(0.1 - 0.2)    | 0.2<br>(0.1 - 0.5)    | 0.6<br>(0.3 - 1.4)    | 1.0<br>(0.6 - 1.9)       |



**Web Table 29: Global YLLS by age, sex, and cause in 1990**

Web Table 29 - Global YLLs with 95% UI by age, sex, and cause in 1990

| Cause                                                             | Both Sexes, All Ages                             | Both Sexes, 0-4 Years                            | Both Sexes, 5-14 Years                     | Both Sexes, 15-49 Years                    | Both Sexes, 50-69 Years                    | Both Sexes, 70-80 Years                    |
|-------------------------------------------------------------------|--------------------------------------------------|--------------------------------------------------|--------------------------------------------|--------------------------------------------|--------------------------------------------|--------------------------------------------|
| All causes                                                        | 2,005,502,983<br>(1,976,776,154 - 2,034,913,293) | 1,038,259,238<br>(1,023,080,593 - 1,053,625,682) | 106,113,044<br>(104,257,456 - 108,133,936) | 387,621,740<br>(376,369,048 - 400,327,512) | 298,892,612<br>(290,788,169 - 307,235,325) | 174,616,348<br>(171,984,992 - 177,498,138) |
| Communicable, maternal, neonatal, and nutritional diseases        | 1,099,296,846<br>(1,061,830,491 - 1,128,327,578) | 864,038,673<br>(831,711,171 - 888,877,642)       | 55,768,197<br>(52,844,225 - 58,926,093)    | 116,739,316<br>(111,633,758 - 122,819,863) | 42,848,977<br>(40,884,363 - 45,451,649)    | 18,901,683<br>(18,026,313 - 19,883,953)    |
| HIV/AIDS and tuberculosis                                         | 82,209,925<br>(76,792,729 - 90,379,217)          | 10,689,762<br>(9,501,974 - 14,178,839)           | 3,423,198<br>(3,089,964 - 3,921,791)       | 43,775,080<br>(40,196,937 - 47,920,782)    | 19,444,910<br>(17,955,388 - 21,211,188)    | 4,876,976<br>(4,446,882 - 5,278,389)       |
| Tuberculosis                                                      | 67,331,202<br>(62,885,148 - 74,426,311)          | 7,690,425<br>(6,586,100 - 11,076,925)            | 3,291,501<br>(2,954,465 - 3,805,363)       | 33,430,692<br>(30,626,690 - 36,771,827)    | 18,153,902<br>(16,647,148 - 19,864,884)    | 4,764,682<br>(4,324,196 - 5,173,531)       |
| HIV/AIDS                                                          | 14,878,723<br>(11,980,894 - 19,003,906)          | 2,999,337<br>(2,751,996 - 3,267,425)             | 131,697<br>(102,236 - 159,448)             | 10,344,387<br>(7,921,186 - 13,934,032)     | 1,291,008<br>(1,012,222 - 1,669,055)       | 112,293<br>(89,480 - 142,126)              |
| HIV/AIDS resulting in mycobacterial infection                     | 1,426,375<br>(1,058,879 - 1,906,526)             | 275,148<br>(221,568 - 340,853)                   | 11,232<br>(8,113 - 14,842)                 | 997,805<br>(708,547 - 1,398,293)           | 130,491<br>(95,287 - 174,943)              | 11,700<br>(8,653 - 15,690)                 |
| HIV/AIDS resulting in other diseases                              | 13,452,348<br>(10,868,834 - 17,100,197)          | 2,724,189<br>(2,490,304 - 2,975,272)             | 120,465<br>(93,563 - 146,173)              | 9,346,583<br>(7,149,370 - 12,638,196)      | 1,160,518<br>(905,484 - 1,499,125)         | 100,593<br>(80,097 - 127,674)              |
| Diarrhea, lower respiratory, and other common infectious diseases | 535,623,899<br>(503,268,097 - 569,608,925)       | 436,425,448<br>(407,169,267 - 467,467,836)       | 36,830,069<br>(33,856,884 - 40,255,108)    | 34,181,341<br>(31,253,490 - 37,795,281)    | 16,681,415<br>(15,595,318 - 18,227,260)    | 11,505,626<br>(10,699,172 - 12,262,084)    |
| Diarrheal diseases                                                | 172,145,524<br>(158,745,627 - 185,811,233)       | 137,287,519<br>(125,074,799 - 150,023,053)       | 11,419,411<br>(10,134,603 - 12,875,576)    | 12,353,748<br>(11,376,301 - 13,232,056)    | 7,213,282<br>(6,556,489 - 7,834,679)       | 3,871,565<br>(3,526,040 - 4,186,490)       |
| Intestinal infectious diseases                                    | 18,311,646<br>(10,269,847 - 30,025,167)          | 6,955,772<br>(3,962,098 - 11,471,451)            | 5,937,329<br>(3,388,846 - 9,581,387)       | 5,012,156<br>(2,640,114 - 8,339,471)       | 343,933<br>(190,236 - 573,690)             | 62,457<br>(38,806 - 99,080)                |
| Typhoid fever                                                     | 12,689,390<br>(6,814,198 - 21,237,599)           | 4,456,415<br>(2,323,066 - 7,656,311)             | 4,292,779<br>(2,363,127 - 7,035,363)       | 3,657,716<br>(1,865,646 - 6,211,295)       | 240,239<br>(118,398 - 423,030)             | 42,150<br>(23,668 - 69,767)                |
| Paratyphoid fever                                                 | 4,588,277<br>(2,407,131 - 7,756,606)             | 1,800,222<br>(917,252 - 3,237,301)               | 1,522,626<br>(843,487 - 2,605,340)         | 1,553,546<br>(577,685 - 1,996,317)         | 70,055<br>(34,837 - 127,179)               | 11,828<br>(6,704 - 20,191)                 |
| Other intestinal infectious diseases                              | 1,063,979<br>(927,878 - 1,217,992)               | 699,134<br>(588,686 - 824,895)                   | 121,924<br>(104,168 - 145,627)             | 200,895<br>(179,462 - 224,289)             | 33,548<br>(29,340 - 38,139)                | 8,478<br>(7,400 - 9,602)                   |
| Lower respiratory infections                                      | 218,642,268<br>(202,173,264 - 233,385,989)       | 185,717,244<br>(169,981,171 - 199,875,595)       | 8,989,626<br>(7,898,636 - 10,105,133)      | 9,815,897<br>(8,977,589 - 10,851,540)      | 7,079,491<br>(6,503,711 - 8,098,515)       | 7,040,010<br>(6,285,264 - 7,726,743)       |
| Upper respiratory infections                                      | 250,870<br>(205,231 - 320,524)                   | 145,961<br>(103,329 - 214,653)                   | 17,166<br>(10,494 - 29,713)                | 51,027<br>(40,559 - 65,369)                | 26,685<br>(19,659 - 37,315)                | 10,032<br>(7,628 - 13,637)                 |
| Otitis media                                                      | 306,308<br>(277,276 - 335,090)                   | 166,878<br>(143,764 - 191,044)                   | 52,682<br>(46,678 - 58,997)                | 61,847<br>(56,837 - 67,333)                | 18,541<br>(17,156 - 20,226)                | 6,360<br>(5,756 - 7,070)                   |
| Meningitis                                                        | 33,932,449<br>(28,939,287 - 41,955,458)          | 25,481,072<br>(20,624,105 - 33,245,669)          | 3,386,383<br>(2,919,838 - 3,822,633)       | 3,804,090<br>(3,389,114 - 4,167,548)       | 1,008,758<br>(899,318 - 1,103,943)         | 252,147<br>(212,081 - 275,581)             |
| Pneumococcal meningitis                                           | 7,845,874<br>(6,725,798 - 9,532,934)             | 5,226,814<br>(4,184,931 - 6,835,163)             | 1,063,343<br>(886,280 - 1,229,569)         | 1,183,217<br>(1,031,421 - 1,342,343)       | 296,327<br>(241,168 - 352,604)             | 76,173<br>(64,908 - 88,680)                |
| H influenzae type B meningitis                                    | 9,443,036<br>(7,801,248 - 11,914,128)            | 8,013,279<br>(6,417,567 - 10,448,195)            | 808,479<br>(671,734 - 951,387)             | 498,779<br>(418,661 - 583,304)             | 98,773<br>(83,837 - 114,393)               | 23,726<br>(19,693 - 27,624)                |
| Meningococcal meningitis                                          | 6,308,249<br>(5,310,160 - 7,983,530)             | 4,646,212<br>(3,694,756 - 6,224,934)             | 612,834<br>(527,729 - 719,810)             | 780,926<br>(684,730 - 879,241)             | 212,023<br>(185,446 - 241,504)             | 56,254<br>(46,891 - 64,788)                |
| Other meningitis                                                  | 10,335,290<br>(8,856,292 - 12,737,046)           | 7,594,766<br>(6,127,028 - 9,900,192)             | 901,726<br>(756,268 - 1,054,876)           | 1,341,168<br>(1,168,011 - 1,515,341)       | 401,635<br>(337,772 - 468,137)             | 95,994<br>(76,894 - 110,713)               |
| Encephalitis                                                      | 6,532,088<br>(4,503,098 - 8,473,547)             | 4,335,890<br>(2,737,827 - 5,928,770)             | 966,000<br>(557,272 - 1,355,622)           | 951,718<br>(674,915 - 1,142,133)           | 229,450<br>(165,300 - 270,875)             | 49,031<br>(33,599 - 57,141)                |
| Diphtheria                                                        | 655,641<br>(308,745 - 1,570,995)                 | 536,168<br>(224,441 - 1,429,601)                 | 93,534<br>(36,133 - 266,176)               | 21,956<br>(13,726 - 39,259)                | 3,982<br>(1,783 - 10,733)                  | --                                         |
| Whooping cough                                                    | 11,702,317<br>(4,480,745 - 25,400,613)           | 11,073,280<br>(4,260,632 - 23,955,854)           | 538,692<br>(201,124 - 1,208,407)           | 84,441<br>(34,128 - 197,048)               | 5,903<br>(2,527 - 13,636)                  | --                                         |
| Tetanus                                                           | 27,096,757<br>(22,124,917 - 45,326,167)          | 24,349,477<br>(19,722,186 - 40,744,519)          | 619,029<br>(402,086 - 1,207,163)           | 1,222,313<br>(899,538 - 2,187,237)         | 716,684<br>(496,385 - 1,284,814)           | 189,254<br>(126,518 - 336,437)             |
| Measles                                                           | 45,593,736<br>(25,481,666 - 73,322,538)          | 40,126,170<br>(22,529,375 - 63,717,131)          | 4,757,642<br>(2,591,627 - 7,735,585)       | 699,019<br>(316,360 - 1,608,689)           | 10,905<br>(4,733 - 26,481)                 | --                                         |
| Varicella and herpes zoster                                       | 454,295<br>(345,793 - 621,044)                   | 250,017<br>(154,745 - 416,880)                   | 52,577<br>(31,182 - 95,482)                | 103,129<br>(76,913 - 141,466)              | 23,800<br>(16,482 - 34,391)                | 24,772<br>(17,096 - 37,168)                |
| Neglected tropical diseases and malaria                           | 77,400,394<br>(69,076,998 - 85,899,762)          | 54,888,174<br>(46,623,887 - 63,222,231)          | 9,486,178<br>(8,510,490 - 10,470,502)      | 9,182,204<br>(7,940,567 - 10,523,570)      | 3,241,987<br>(2,893,336 - 3,687,886)       | 601,851<br>(514,196 - 761,167)             |
| Malaria                                                           | 64,976,302<br>(56,970,089 - 73,322,538)          | 49,702,220<br>(41,458,414 - 57,864,535)          | 6,678,501<br>(5,805,847 - 7,549,703)       | 5,842,253<br>(4,823,945 - 6,972,912)       | 2,350,788<br>(2,031,474 - 2,684,597)       | 402,539<br>(336,147 - 470,709)             |
| Chagas disease                                                    | 345,768<br>(135,183 - 1,008,710)                 | 2,041<br>(745 - 7,013)                           | 2,307<br>(896 - 6,762)                     | 132,587<br>(47,472 - 380,476)              | 158,157<br>(62,695 - 480,606)              | 50,678<br>(19,394 - 177,855)               |
| Leishmaniasis                                                     | 3,705,698<br>(3,122,761 - 4,369,869)             | 1,735,193<br>(1,382,064 - 2,125,460)             | 1,018,500<br>(796,860 - 1,270,547)         | 856,317<br>(706,491 - 1,012,049)           | 84,515<br>(70,549 - 99,287)                | 11,172<br>(9,512 - 12,877)                 |
| Visceral leishmaniasis                                            | 3,705,698<br>(3,122,761 - 4,369,869)             | 1,735,193<br>(1,382,064 - 2,125,460)             | 1,018,500<br>(796,860 - 1,270,547)         | 856,317<br>(706,491 - 1,012,049)           | 84,515<br>(70,549 - 99,287)                | 11,172<br>(9,512 - 12,877)                 |
| African trypanosomiasis                                           | 1,256,178<br>(624,393 - 2,049,866)               | 137,765<br>(62,679 - 231,659)                    | 195,259<br>(94,515 - 333,166)              | 807,276<br>(400,692 - 1,314,360)           | 105,222<br>(50,095 - 175,103)              | 10,655<br>(5,023 - 18,179)                 |
| Schistosomiasis                                                   | 630,391<br>(540,994 - 737,182)                   | 30,267<br>(23,088 - 38,900)                      | 48,289<br>(39,747 - 58,535)                | 318,381<br>(271,135 - 369,974)             | 185,554<br>(153,561 - 224,926)             | 47,901<br>(38,310 - 60,478)                |
| Cysticercosis                                                     | 43,743<br>(38,185 - 55,440)                      | 4,570<br>(3,102 - 7,502)                         | 4,665<br>(3,752 - 6,341)                   | 27,428<br>(24,200 - 33,713)                | 6,168<br>(5,507 - 7,401)                   | 911<br>(815 - 1,052)                       |
| Cystic echinococcosis                                             | 217,461<br>(203,936 - 231,657)                   | 48,314<br>(41,059 - 56,101)                      | 57,402<br>(52,540 - 62,733)                | 84,023<br>(78,793 - 89,450)                | 22,315<br>(21,056 - 23,597)                | 5,407<br>(5,092 - 5,713)                   |
| Dengue                                                            | 643,213<br>(366,441 - 853,855)                   | 344,762<br>(154,371 - 504,580)                   | 194,193<br>(104,486 - 256,706)             | 90,703<br>(69,155 - 107,589)               | 10,666<br>(9,153 - 13,000)                 | 2,889<br>(2,410 - 3,438)                   |
| Yellow fever                                                      | 130,478<br>(108,982 - 149,981)                   | 16,556<br>(10,292 - 25,708)                      | 31,336<br>(21,771 - 43,164)                | 73,596<br>(58,841 - 88,466)                | 7,757<br>(5,143 - 11,121)                  | 1,233<br>(603 - 2,265)                     |
| Rabies                                                            | 2,292,734<br>(1,558,519 - 2,953,181)             | 495,301<br>(308,810 - 824,684)                   | 946,279<br>(585,091 - 1,174,875)           | 612,275<br>(453,497 - 788,009)             | 212,098<br>(151,005 - 257,863)             | 26,781<br>(19,960 - 34,605)                |
| Intestinal nematode infections                                    | 725,465<br>(639,379 - 814,173)                   | 592,293<br>(510,968 - 680,333)                   | 99,493<br>(86,364 - 113,514)               | 24,988<br>(20,476 - 29,685)                | 6,244<br>(4,888 - 7,777)                   | 2,447<br>(1,870 - 3,090)                   |

Web Table 29 - Global YLLs with 95% UI by age, sex, and cause in 1990

| Cause                                                            | Both Sexes, All Ages                       | Both Sexes, 0-4 Years                      | Both Sexes, 5-14 Years                  | Both Sexes, 15-49 Years                    | Both Sexes, 50-69 Years                    | Both Sexes, 70-80 Years                    |
|------------------------------------------------------------------|--------------------------------------------|--------------------------------------------|-----------------------------------------|--------------------------------------------|--------------------------------------------|--------------------------------------------|
| Ascariasis                                                       | 725,465<br>(639,379 - 814,173)             | 592,293<br>(510,968 - 680,333)             | 99,493<br>(86,364 - 113,514)            | 24,988<br>(20,476 - 29,685)                | 6,244<br>(4,888 - 7,777)                   | 2,447<br>(1,870 - 3,090)                   |
| Other neglected tropical diseases                                | 2,432,964<br>(1,790,173 - 3,119,391)       | 1,778,892<br>(1,222,000 - 2,408,095)       | 209,954<br>(156,433 - 262,729)          | 312,377<br>(237,955 - 390,021)             | 92,504<br>(70,805 - 115,476)               | 39,238<br>(27,461 - 51,990)                |
| Maternal disorders                                               | 21,602,881<br>(19,689,447 - 23,472,139)    | --                                         | 150,428<br>(114,115 - 194,553)          | 21,452,453<br>(19,559,683 - 23,321,753)    | --                                         | --                                         |
| Maternal hemorrhage                                              | 4,070,628<br>(3,676,033 - 4,471,858)       | --                                         | 16,548<br>(12,582 - 21,490)             | 4,054,080<br>(3,659,749 - 4,454,977)       | --                                         | --                                         |
| Maternal sepsis and other maternal infections                    | 1,948,665<br>(1,739,905 - 2,175,383)       | --                                         | 16,441<br>(12,185 - 21,507)             | 1,932,224<br>(1,723,829 - 2,156,197)       | --                                         | --                                         |
| Maternal hypertensive disorders                                  | 2,126,865<br>(1,936,198 - 2,315,321)       | --                                         | 18,948<br>(14,444 - 24,490)             | 2,107,917<br>(1,916,013 - 2,296,835)       | --                                         | --                                         |
| Maternal obstructed labor                                        | 1,683,307<br>(1,507,712 - 1,883,797)       | --                                         | 8,664<br>(6,434 - 11,232)               | 1,674,643<br>(1,498,499 - 1,874,589)       | --                                         | --                                         |
| Maternal abortive outcome                                        | 2,847,512<br>(2,595,087 - 3,117,473)       | --                                         | 21,953<br>(16,462 - 29,576)             | 2,825,559<br>(2,575,435 - 3,093,983)       | --                                         | --                                         |
| Indirect maternal deaths                                         | 2,320,909<br>(2,053,236 - 2,576,030)       | --                                         | 13,223<br>(9,951 - 17,193)              | 2,307,686<br>(2,041,755 - 2,561,032)       | --                                         | --                                         |
| Late maternal deaths                                             | 2,596,835<br>(2,103,242 - 3,095,238)       | --                                         | 28,832<br>(20,914 - 39,299)             | 2,568,004<br>(2,075,856 - 3,070,337)       | --                                         | --                                         |
| Maternal deaths aggravated by HIV/AIDS                           | 46,164<br>(26,790 - 63,876)                | --                                         | --                                      | 46,164<br>(26,790 - 63,876)                | --                                         | --                                         |
| Other maternal disorders                                         | 3,918,484<br>(3,325,151 - 4,636,691)       | --                                         | 25,529<br>(18,608 - 34,188)             | 3,892,955<br>(3,297,938 - 4,606,782)       | --                                         | --                                         |
| Neonatal disorders                                               | 296,392,118<br>(278,510,403 - 309,444,887) | 296,392,118<br>(278,510,403 - 309,444,887) | --                                      | --                                         | --                                         | --                                         |
| Neonatal preterm birth complications                             | 135,606,202<br>(110,972,892 - 155,730,983) | 135,606,202<br>(110,972,892 - 155,730,983) | --                                      | --                                         | --                                         | --                                         |
| Neonatal encephalopathy due to birth asphyxia and trauma         | 75,457,724<br>(59,444,428 - 91,121,844)    | 75,457,724<br>(59,444,428 - 91,121,844)    | --                                      | --                                         | --                                         | --                                         |
| Neonatal sepsis and other neonatal infections                    | 29,901,393<br>(16,891,949 - 41,782,337)    | 29,901,393<br>(16,891,949 - 41,782,337)    | --                                      | --                                         | --                                         | --                                         |
| Hemolytic disease and other neonatal jaundice                    | 5,582,383<br>(3,404,379 - 8,305,096)       | 5,582,383<br>(3,404,379 - 8,305,096)       | --                                      | --                                         | --                                         | --                                         |
| Other neonatal disorders                                         | 49,844,416<br>(39,482,755 - 65,251,946)    | 49,844,416<br>(39,482,755 - 65,251,946)    | --                                      | --                                         | --                                         | --                                         |
| Nutritional deficiencies                                         | 48,291,897<br>(40,540,800 - 59,627,541)    | 38,474,507<br>(32,102,792 - 47,759,896)    | 2,771,682<br>(2,311,231 - 3,363,064)    | 3,873,562<br>(3,102,890 - 4,725,025)       | 1,757,725<br>(1,432,898 - 2,284,347)       | 1,414,420<br>(1,181,211 - 1,776,910)       |
| Protein-energy malnutrition                                      | 35,061,124<br>(27,301,377 - 45,798,240)    | 30,328,535<br>(23,795,824 - 39,601,743)    | 1,688,204<br>(1,247,999 - 2,192,624)    | 1,464,222<br>(977,717 - 2,069,998)         | 822,815<br>(559,472 - 1,139,609)           | 757,347<br>(519,849 - 964,276)             |
| Iodine deficiency                                                | 122,752<br>(72,018 - 217,942)              | 77,859<br>(34,616 - 164,544)               | 12,298<br>(6,145 - 25,699)              | 18,924<br>(11,119 - 32,813)                | 9,535<br>(5,164 - 21,626)                  | 4,135<br>(2,138 - 7,128)                   |
| Iron-deficiency anemia                                           | 11,359,790<br>(6,885,941 - 17,155,866)     | 6,880,386<br>(3,208,290 - 12,063,340)      | 971,502<br>(656,954 - 1,378,206)        | 2,153,458<br>(1,569,758 - 2,747,613)       | 809,198<br>(588,736 - 1,175,564)           | 545,247<br>(391,110 - 803,724)             |
| Other nutritional deficiencies                                   | 1,748,230<br>(1,160,863 - 3,053,156)       | 1,187,727<br>(727,414 - 2,290,450)         | 99,678<br>(62,840 - 161,364)            | 236,958<br>(152,270 - 383,953)             | 116,176<br>(76,054 - 188,496)              | 107,691<br>(64,889 - 170,139)              |
| Other communicable, maternal, neonatal, and nutritional diseases | 36,775,732<br>(27,902,253 - 48,556,922)    | 27,168,665<br>(18,888,875 - 38,247,750)    | 3,106,641<br>(2,533,556 - 3,909,473)    | 4,274,676<br>(3,928,362 - 4,627,815)       | 1,722,939<br>(1,503,911 - 1,954,134)       | 502,810<br>(430,616 - 610,185)             |
| Sexually transmitted diseases excluding HIV                      | 21,160,536<br>(12,289,450 - 33,001,634)    | 19,235,591<br>(10,892,303 - 30,360,846)    | 1,353,809<br>(789,631 - 2,130,357)      | 349,766<br>(286,311 - 418,066)             | 152,009<br>(101,925 - 217,626)             | 69,360<br>(44,936 - 111,696)               |
| Syphilis                                                         | 20,869,416<br>(11,991,990 - 32,714,040)    | 19,235,591<br>(10,892,303 - 30,360,846)    | 1,329,549<br>(770,711 - 2,104,932)      | 157,818<br>(128,599 - 190,166)             | 93,588<br>(63,139 - 131,845)               | 52,870<br>(34,788 - 82,423)                |
| Chlamydial infection                                             | 62,459<br>(48,661 - 74,149)                | --                                         | 4,820<br>(2,811 - 7,292)                | 41,695<br>(33,023 - 49,955)                | 12,606<br>(7,172 - 21,008)                 | 3,338<br>(1,883 - 6,708)                   |
| Gonococcal infection                                             | 125,028<br>(100,402 - 149,145)             | --                                         | 9,770<br>(7,141 - 15,493)               | 79,598<br>(64,920 - 95,810)                | 26,941<br>(18,125 - 38,682)                | 8,718<br>(5,608 - 14,431)                  |
| Other sexually transmitted diseases                              | 103,633<br>(84,016 - 122,423)              | --                                         | 9,670<br>(7,052 - 15,296)               | 70,654<br>(57,920 - 84,692)                | 18,875<br>(12,504 - 27,658)                | 4,434<br>(2,784 - 7,982)                   |
| Hepatitis                                                        | 8,997,411<br>(8,366,143 - 9,630,868)       | 3,737,351<br>(3,276,570 - 4,277,937)       | 1,123,755<br>(1,006,798 - 1,258,754)    | 3,006,269<br>(2,778,755 - 3,247,321)       | 926,207<br>(850,906 - 1,003,862)           | 203,829<br>(186,250 - 221,978)             |
| Acute hepatitis A                                                | 1,779,231<br>(625,289 - 3,129,381)         | 1,360,536<br>(500,265 - 2,315,749)         | 232,192<br>(77,659 - 431,451)           | 165,583<br>(47,718 - 335,225)              | 18,747<br>(5,164 - 42,029)                 | 2,171<br>(554 - 5,290)                     |
| Acute hepatitis B                                                | 4,073,864<br>(2,885,090 - 5,287,773)       | 1,940,646<br>(1,154,612 - 2,775,334)       | 233,274<br>(136,048 - 355,494)          | 1,009,518<br>(657,903 - 1,389,756)         | 709,973<br>(579,621 - 818,481)             | 180,454<br>(158,764 - 201,654)             |
| Acute hepatitis C                                                | 94,042<br>(18,946 - 221,637)               | --                                         | 20,485<br>(3,792 - 50,879)              | 47,887<br>(9,649 - 113,347)                | 21,345<br>(4,181 - 50,371)                 | 4,325<br>(866 - 10,140)                    |
| Acute hepatitis E                                                | 3,050,275<br>(2,306,257 - 3,879,686)       | 436,169<br>(222,318 - 764,099)             | 637,804<br>(475,157 - 811,209)          | 1,783,281<br>(1,420,474 - 2,165,562)       | 176,142<br>(98,797 - 286,550)              | 16,879<br>(7,904 - 30,661)                 |
| Other infectious diseases                                        | 6,617,785<br>(5,288,031 - 8,200,134)       | 4,195,723<br>(3,287,128 - 5,389,285)       | 629,077<br>(465,803 - 813,748)          | 918,641<br>(674,183 - 1,137,250)           | 644,723<br>(478,459 - 895,787)             | 229,621<br>(170,426 - 320,789)             |
| Non-communicable diseases                                        | 674,568,513<br>(645,789,777 - 708,696,953) | 109,022,207<br>(93,538,954 - 134,198,223)  | 23,125,103<br>(21,095,189 - 25,436,304) | 156,277,066<br>(149,255,835 - 163,484,417) | 235,872,900<br>(228,851,012 - 242,797,522) | 150,271,238<br>(147,769,309 - 153,023,563) |
| Neoplasms                                                        | 148,868,574<br>(142,466,579 - 154,111,303) | 6,332,289<br>(5,335,847 - 8,377,714)       | 4,901,992<br>(4,356,480 - 5,547,562)    | 42,984,855<br>(40,561,043 - 45,266,199)    | 68,664,071<br>(65,867,449 - 70,890,980)    | 25,985,366<br>(25,056,882 - 26,940,844)    |
| Esophageal cancer                                                | 7,367,133<br>(6,445,754 - 8,256,430)       | --                                         | --                                      | 1,365,246<br>(1,155,887 - 1,553,400)       | 4,461,300<br>(3,888,817 - 5,033,899)       | 1,540,587<br>(1,356,558 - 1,751,417)       |
| Stomach cancer                                                   | 18,064,273<br>(17,135,403 - 18,974,525)    | --                                         | --                                      | 4,702,532<br>(4,414,221 - 5,035,913)       | 9,445,434<br>(8,920,513 - 9,945,090)       | 3,916,307<br>(3,690,772 - 4,163,357)       |
| Liver cancer                                                     | 14,550,827<br>(13,465,705 - 15,720,950)    | --                                         | 171,682<br>(140,041 - 221,298)          | 5,592,326<br>(5,108,056 - 6,270,410)       | 6,981,245<br>(6,436,536 - 7,514,954)       | 1,805,575<br>(1,673,810 - 1,946,392)       |

Web Table 29 - Global YLLs with 95% UI by age, sex, and cause in 1990

| Cause                                | Both Sexes, All Ages                       | Both Sexes, 0-4 Years                  | Both Sexes, 5-14 Years               | Both Sexes, 15-49 Years                 | Both Sexes, 50-69 Years                   | Both Sexes, 70-80 Years                 |
|--------------------------------------|--------------------------------------------|----------------------------------------|--------------------------------------|-----------------------------------------|-------------------------------------------|-----------------------------------------|
| Liver cancer due to hepatitis B      | 6,247,089<br>(5,701,576 - 6,887,620)       | --                                     | 55,089<br>(44,956 - 72,105)          | 2,825,708<br>(2,539,114 - 3,222,236)    | 2,847,359<br>(2,587,939 - 3,113,838)      | 518,933<br>(474,242 - 563,738)          |
| Liver cancer due to hepatitis C      | 2,177,974<br>(1,973,450 - 2,374,058)       | --                                     | 6,089<br>(4,694 - 8,290)             | 583,468<br>(521,818 - 661,744)          | 1,203,238<br>(1,076,015 - 1,318,614)      | 385,180<br>(349,992 - 425,325)          |
| Liver cancer due to alcohol use      | 2,962,985<br>(2,729,999 - 3,199,041)       | --                                     | --                                   | 745,832<br>(674,118 - 834,143)          | 1,631,222<br>(1,482,544 - 1,781,389)      | 585,931<br>(536,840 - 643,147)          |
| Liver cancer due to other causes     | 3,162,779<br>(2,895,918 - 3,455,001)       | --                                     | 110,504<br>(88,812 - 145,383)        | 1,437,318<br>(1,311,619 - 1,603,437)    | 1,299,425<br>(1,174,119 - 1,424,127)      | 315,531<br>(282,976 - 344,646)          |
| Larynx cancer                        | 1,937,794<br>(1,588,517 - 2,225,345)       | --                                     | --                                   | 455,910<br>(350,897 - 532,315)          | 1,173,294<br>(952,667 - 1,352,539)        | 308,589<br>(256,559 - 368,190)          |
| Tracheal, bronchus and lung cancer   | 24,607,868<br>(23,526,165 - 25,350,034)    | --                                     | --                                   | 4,487,777<br>(4,157,562 - 4,749,734)    | 14,991,983<br>(14,283,942 - 15,469,157)   | 5,128,109<br>(4,954,613 - 5,297,274)    |
| Breast cancer                        | 8,905,646<br>(7,894,738 - 9,780,810)       | --                                     | --                                   | 3,528,799<br>(3,153,642 - 3,774,531)    | 4,209,446<br>(3,756,193 - 4,715,234)      | 1,167,401<br>(998,859 - 1,373,607)      |
| Cervical cancer                      | 5,868,280<br>(4,921,938 - 6,432,715)       | --                                     | --                                   | 2,627,513<br>(2,242,113 - 2,928,115)    | 2,666,708<br>(2,180,188 - 2,938,395)      | 574,060<br>(464,821 - 623,701)          |
| Uterine cancer                       | 1,081,921<br>(846,988 - 1,348,199)         | --                                     | --                                   | 279,600<br>(202,733 - 375,689)          | 581,273<br>(463,949 - 721,836)            | 221,048<br>(180,631 - 256,263)          |
| Prostate cancer                      | 2,283,317<br>(1,825,368 - 2,751,434)       | --                                     | --                                   | 54,946<br>(41,409 - 66,489)             | 876,642<br>(689,239 - 1,093,409)          | 1,351,729<br>(1,049,409 - 1,649,700)    |
| Colon and rectum cancer              | 10,490,906<br>(10,179,934 - 10,807,021)    | --                                     | --                                   | 2,478,104<br>(2,377,208 - 2,591,980)    | 5,174,214<br>(5,005,130 - 5,320,693)      | 2,838,587<br>(2,754,213 - 2,937,290)    |
| Lip and oral cavity cancer           | 2,218,962<br>(1,948,869 - 2,567,416)       | --                                     | --                                   | 731,651<br>(624,052 - 855,634)          | 1,155,941<br>(1,022,132 - 1,321,438)      | 331,370<br>(290,960 - 388,015)          |
| Nasopharynx cancer                   | 1,814,712<br>(1,611,722 - 2,171,732)       | --                                     | 65,614<br>(49,732 - 96,895)          | 912,958<br>(804,052 - 1,093,230)        | 718,672<br>(635,061 - 846,853)            | 117,467<br>(101,840 - 138,888)          |
| Other pharynx cancer                 | 1,339,417<br>(1,192,225 - 1,466,719)       | --                                     | --                                   | 377,584<br>(328,294 - 413,085)          | 812,852<br>(733,502 - 900,043)            | 148,980<br>(133,156 - 163,114)          |
| Gallbladder and biliary tract cancer | 2,390,825<br>(2,100,959 - 2,654,136)       | --                                     | --                                   | 423,751<br>(361,546 - 466,363)          | 1,278,263<br>(1,113,820 - 1,430,353)      | 688,811<br>(597,433 - 798,312)          |
| Pancreatic cancer                    | 4,004,353<br>(3,895,591 - 4,109,374)       | --                                     | --                                   | 734,319<br>(705,546 - 763,609)          | 2,218,485<br>(2,156,613 - 2,283,990)      | 1,051,549<br>(1,020,721 - 1,091,868)    |
| Malignant skin melanoma              | 1,069,258<br>(835,321 - 1,392,662)         | --                                     | --                                   | 485,958<br>(383,259 - 609,805)          | 426,859<br>(330,946 - 576,068)            | 156,441<br>(119,943 - 205,205)          |
| Non-melanoma skin cancer             | 536,947<br>(430,204 - 662,598)             | --                                     | --                                   | 193,580<br>(151,022 - 260,381)          | 190,054<br>(149,102 - 230,693)            | 153,312<br>(122,520 - 184,968)          |
| Ovarian cancer                       | 2,613,601<br>(2,445,373 - 2,773,587)       | --                                     | --                                   | 839,960<br>(774,654 - 895,698)          | 1,401,209<br>(1,297,371 - 1,502,093)      | 372,432<br>(348,354 - 411,333)          |
| Testicular cancer                    | 309,303<br>(240,189 - 369,653)             | --                                     | --                                   | 261,287<br>(203,980 - 317,740)          | 37,580<br>(27,578 - 44,087)               | 10,436<br>(7,419 - 12,169)              |
| Kidney cancer                        | 2,093,119<br>(1,952,155 - 2,226,285)       | 239,456<br>(148,398 - 322,239)         | 91,283<br>(73,772 - 109,565)         | 407,763<br>(381,592 - 433,670)          | 1,005,323<br>(954,966 - 1,062,620)        | 349,293<br>(326,690 - 381,920)          |
| Bladder cancer                       | 2,511,280<br>(2,226,210 - 2,679,157)       | --                                     | --                                   | 335,581<br>(280,989 - 367,683)          | 1,305,774<br>(1,148,809 - 1,391,334)      | 869,925<br>(770,198 - 950,302)          |
| Brain and nervous system cancer      | 5,197,011<br>(4,401,201 - 5,964,921)       | 468,088<br>(343,829 - 686,196)         | 739,055<br>(584,518 - 887,863)       | 2,161,783<br>(1,795,435 - 2,488,470)    | 1,486,139<br>(1,293,104 - 1,713,028)      | 341,946<br>(298,876 - 397,044)          |
| Thyroid cancer                       | 558,140<br>(468,364 - 618,094)             | --                                     | 12,822<br>(6,288 - 24,607)           | 155,312<br>(122,106 - 189,932)          | 263,196<br>(225,983 - 294,551)            | 126,809<br>(108,352 - 141,794)          |
| Mesothelioma                         | 411,531<br>(368,135 - 477,304)             | --                                     | --                                   | 103,271<br>(91,065 - 111,732)           | 229,592<br>(203,980 - 271,806)            | 78,667<br>(69,139 - 102,670)            |
| Hodgkin lymphoma                     | 1,565,381<br>(1,109,282 - 1,855,505)       | 433,560<br>(265,453 - 644,414)         | 176,286<br>(104,367 - 235,167)       | 653,940<br>(471,672 - 737,212)          | 230,729<br>(164,708 - 256,741)            | 70,866<br>(50,290 - 78,166)             |
| Non-Hodgkin lymphoma                 | 4,355,885<br>(3,680,640 - 5,060,277)       | 502,738<br>(365,712 - 797,969)         | 475,976<br>(335,247 - 573,521)       | 1,553,404<br>(1,260,630 - 1,761,507)    | 1,277,450<br>(1,102,150 - 1,516,198)      | 546,317<br>(481,284 - 695,246)          |
| Multiple myeloma                     | 958,895<br>(803,840 - 1,182,373)           | --                                     | --                                   | 183,800<br>(155,205 - 216,796)          | 506,429<br>(416,776 - 626,260)            | 268,667<br>(216,171 - 351,646)          |
| Leukemia                             | 9,941,754<br>(9,421,935 - 10,620,682)      | 1,808,594<br>(1,517,679 - 2,240,539)   | 1,972,731<br>(1,814,850 - 2,198,058) | 4,094,570<br>(3,855,851 - 4,371,688)    | 1,460,985<br>(1,403,491 - 1,523,727)      | 604,874<br>(583,630 - 630,167)          |
| Other neoplasms                      | 9,820,237<br>(8,700,611 - 13,265,048)      | 2,879,853<br>(2,201,372 - 4,864,086)   | 1,196,543<br>(983,512 - 1,707,790)   | 2,801,630<br>(2,573,831 - 3,395,894)    | 2,096,999<br>(1,923,645 - 2,346,084)      | 845,211<br>(789,496 - 981,679)          |
| Cardiovascular diseases              | 247,510,978<br>(235,359,771 - 259,677,826) | 11,512,991<br>(9,970,826 - 13,413,049) | 4,431,063<br>(3,930,961 - 5,172,614) | 52,427,203<br>(48,887,332 - 56,100,164) | 100,541,678<br>(95,555,391 - 105,007,789) | 78,598,043<br>(75,168,944 - 81,075,028) |
| Rheumatic heart disease              | 12,116,879<br>(9,754,284 - 15,000,815)     | 669,623<br>(488,284 - 1,004,098)       | 983,749<br>(783,508 - 1,252,386)     | 5,339,898<br>(4,194,611 - 6,536,516)    | 3,710,935<br>(2,903,205 - 4,651,780)      | 1,412,674<br>(1,149,162 - 1,782,111)    |
| Ischemic heart disease               | 109,788,059<br>(99,850,179 - 118,166,699)  | 1,649,353<br>(1,352,153 - 2,105,249)   | 793,807<br>(668,221 - 987,025)       | 22,338,295<br>(19,967,391 - 24,735,471) | 48,178,513<br>(43,623,331 - 51,482,968)   | 36,828,090<br>(33,555,694 - 39,977,005) |
| Cerebrovascular disease              | 88,075,005<br>(80,770,190 - 95,815,814)    | 3,223,931<br>(2,672,601 - 3,996,991)   | 1,558,436<br>(1,343,099 - 1,869,667) | 16,108,486<br>(14,330,015 - 18,189,879) | 36,082,349<br>(32,792,242 - 39,378,696)   | 31,101,802<br>(28,235,990 - 33,486,593) |
| Ischemic stroke                      | 32,701,589<br>(28,100,803 - 36,847,719)    | 376,320<br>(173,165 - 631,164)         | 197,085<br>(106,498 - 333,383)       | 2,334,269<br>(1,823,094 - 2,902,336)    | 12,126,482<br>(10,008,393 - 13,933,502)   | 12,667,433<br>(15,558,457 - 19,515,229) |
| Hemorrhagic stroke                   | 55,373,416<br>(49,288,477 - 61,525,219)    | 2,847,611<br>(2,391,471 - 3,546,233)   | 1,361,351<br>(1,165,348 - 1,657,432) | 13,774,217<br>(12,184,746 - 15,674,719) | 23,955,867<br>(21,110,055 - 26,800,269)   | 13,434,370<br>(11,516,699 - 15,136,358) |
| Hypertensive heart disease           | 11,697,786<br>(9,771,011 - 14,906,602)     | 265,614<br>(155,451 - 378,985)         | 88,600<br>(62,301 - 109,585)         | 2,201,287<br>(1,751,012 - 2,844,686)    | 4,894,190<br>(4,051,143 - 6,308,708)      | 4,248,095<br>(3,605,458 - 5,450,570)    |
| Cardiomyopathy and myocarditis       | 8,838,452<br>(7,047,562 - 10,547,992)      | 2,298,494<br>(1,336,989 - 3,100,657)   | 452,917<br>(287,523 - 581,307)       | 2,521,503<br>(2,055,324 - 3,044,110)    | 2,261,744<br>(1,819,481 - 2,813,724)      | 1,303,793<br>(1,096,211 - 1,529,840)    |
| Atrial fibrillation and flutter      | 330,660<br>(295,899 - 365,008)             | --                                     | --                                   | 16,427<br>(14,514 - 18,230)             | 83,490<br>(74,176 - 92,259)               | 230,743<br>(207,463 - 258,062)          |
| Aortic aneurysm                      | 1,898,420<br>(1,560,466 - 2,227,299)       | --                                     | --                                   | 363,553<br>(292,493 - 436,561)          | 849,108<br>(698,337 - 991,912)            | 685,760<br>(559,013 - 821,625)          |

Web Table 29 - Global YLLs with 95% UI by age, sex, and cause in 1990

| Cause                                               | Both Sexes, All Ages                    | Both Sexes, 0-4 Years                  | Both Sexes, 5-14 Years               | Both Sexes, 15-49 Years                 | Both Sexes, 50-69 Years                 | Both Sexes, 70-80 Years                 |
|-----------------------------------------------------|-----------------------------------------|----------------------------------------|--------------------------------------|-----------------------------------------|-----------------------------------------|-----------------------------------------|
| Peripheral vascular disease                         | 213,073<br>(193,105 - 233,671)          | --                                     | --                                   | 12,088<br>(10,574 - 13,502)             | 79,817<br>(71,464 - 87,658)             | 121,167<br>(109,696 - 133,456)          |
| Endocarditis                                        | 1,477,163<br>(1,134,461 - 1,984,787)    | 372,521<br>(243,949 - 594,176)         | 74,006<br>(50,304 - 115,485)         | 494,761<br>(377,510 - 657,197)          | 338,219<br>(263,460 - 452,552)          | 197,655<br>(149,624 - 265,870)          |
| Other cardiovascular and circulatory diseases       | 13,075,482<br>(11,150,944 - 15,180,834) | 3,033,454<br>(2,484,937 - 3,717,993)   | 479,547<br>(394,788 - 583,376)       | 3,030,905<br>(2,549,433 - 3,573,837)    | 4,063,312<br>(3,329,818 - 4,676,690)    | 2,468,264<br>(2,074,590 - 2,844,224)    |
| Chronic respiratory diseases                        | 76,000,751<br>(70,469,523 - 81,920,843) | 10,710,249<br>(9,265,844 - 11,914,291) | 1,942,656<br>(1,764,273 - 2,192,241) | 11,440,480<br>(10,383,279 - 12,531,306) | 28,511,950<br>(26,056,948 - 30,936,380) | 23,395,415<br>(22,029,938 - 25,430,486) |
| Chronic obstructive pulmonary disease               | 46,375,517<br>(40,722,900 - 50,507,166) | 5,195,429<br>(4,344,922 - 5,915,779)   | 567,707<br>(412,688 - 685,352)       | 4,859,098<br>(3,918,168 - 5,545,143)    | 17,768,787<br>(15,352,379 - 19,714,210) | 17,984,495<br>(16,137,712 - 19,569,016) |
| Pneumoconiosis                                      | 5,965,757<br>(4,254,250 - 7,555,717)    | 89,676<br>(57,426 - 136,259)           | 56,002<br>(34,367 - 85,861)          | 1,353,833<br>(860,527 - 1,735,731)      | 3,213,620<br>(2,251,305 - 4,172,120)    | 1,252,626<br>(923,438 - 1,634,194)      |
| Silicosis                                           | 1,316,190<br>(871,187 - 1,859,850)      | 21,815<br>(10,367 - 43,963)            | 15,025<br>(6,937 - 29,415)           | 287,747<br>(182,841 - 421,095)          | 692,654<br>(436,301 - 977,102)          | 298,948<br>(194,910 - 428,015)          |
| Asbestosis                                          | 539,163<br>(353,568 - 765,736)          | 13,889<br>(7,410 - 24,134)             | 9,850<br>(5,846 - 16,214)            | 132,383<br>(86,728 - 190,121)           | 298,016<br>(188,914 - 430,815)          | 85,025<br>(54,939 - 126,396)            |
| Coal workers pneumoconiosis                         | 709,171<br>(443,837 - 1,066,437)        | 11,723<br>(7,342 - 18,744)             | 8,817<br>(5,311 - 14,282)            | 173,207<br>(105,165 - 259,727)          | 383,464<br>(232,545 - 583,311)          | 131,961<br>(84,027 - 205,249)           |
| Other pneumoconiosis                                | 3,401,233<br>(2,270,554 - 4,417,639)    | 42,249<br>(26,977 - 64,119)            | 22,310<br>(14,472 - 32,234)          | 760,496<br>(434,898 - 990,761)          | 1,839,486<br>(1,212,604 - 2,448,870)    | 736,692<br>(496,788 - 999,874)          |
| Asthma                                              | 14,740,220<br>(12,115,556 - 20,404,503) | 2,327,453<br>(1,935,908 - 2,800,070)   | 1,049,341<br>(903,372 - 1,347,895)   | 3,929,481<br>(3,265,520 - 5,432,097)    | 5,025,647<br>(3,814,224 - 7,504,434)    | 2,408,297<br>(1,814,224 - 3,160,160)    |
| Interstitial lung disease and pulmonary sarcoidosis | 4,354,534<br>(2,410,349 - 6,132,714)    | 84,800<br>(28,707 - 189,039)           | 45,471<br>(21,152 - 105,313)         | 709,870<br>(319,657 - 1,074,268)        | 2,114,020<br>(1,064,765 - 3,193,778)    | 1,400,373<br>(852,616 - 2,168,017)      |
| Other chronic respiratory diseases                  | 4,564,723<br>(3,716,624 - 5,361,189)    | 3,012,891<br>(2,483,246 - 3,551,553)   | 224,136<br>(151,981 - 285,838)       | 588,198<br>(426,188 - 720,471)          | 389,875<br>(286,968 - 504,771)          | 349,623<br>(282,526 - 430,873)          |
| Cirrhosis                                           | 26,736,805<br>(25,707,453 - 27,748,880) | 1,552,858<br>(1,308,203 - 1,846,436)   | 919,264<br>(839,557 - 1,000,371)     | 11,094,344<br>(10,584,832 - 11,646,851) | 10,642,744<br>(10,210,323 - 11,072,962) | 2,527,595<br>(2,405,034 - 2,623,557)    |
| Cirrhosis due to hepatitis B                        | 7,399,701<br>(6,952,993 - 7,941,424)    | 104,288<br>(81,969 - 133,178)          | 180,594<br>(148,679 - 214,854)       | 3,404,713<br>(3,138,613 - 3,738,634)    | 3,024,829<br>(2,831,919 - 3,252,609)    | 685,277<br>(634,935 - 737,343)          |
| Cirrhosis due to hepatitis C                        | 6,215,794<br>(5,835,680 - 6,619,294)    | 101,328<br>(78,293 - 140,455)          | 142,554<br>(118,044 - 170,623)       | 2,463,876<br>(2,294,098 - 2,635,227)    | 2,769,425<br>(2,570,383 - 2,969,340)    | 738,611<br>(686,435 - 794,509)          |
| Cirrhosis due to alcohol use                        | 8,401,659<br>(7,873,467 - 8,865,680)    | --                                     | --                                   | 3,437,539<br>(3,140,413 - 3,707,099)    | 4,002,586<br>(3,766,791 - 4,212,011)    | 961,535<br>(915,773 - 1,009,943)        |
| Cirrhosis due to other causes                       | 4,719,652<br>(4,369,980 - 5,105,144)    | 1,347,243<br>(1,128,488 - 1,621,054)   | 596,116<br>(534,455 - 661,332)       | 1,788,216<br>(1,638,443 - 1,954,127)    | 845,905<br>(765,704 - 950,185)          | 142,172<br>(128,084 - 159,289)          |
| Digestive diseases                                  | 32,882,208<br>(30,015,860 - 35,668,666) | 4,257,157<br>(3,558,300 - 5,414,122)   | 3,089,169<br>(2,761,793 - 3,472,562) | 12,088,886<br>(10,458,272 - 13,101,269) | 8,887,395<br>(7,914,480 - 9,603,976)    | 4,559,602<br>(4,142,341 - 4,902,954)    |
| Peptic ulcer disease                                | 9,059,128<br>(7,942,655 - 11,008,655)   | 418,949<br>(277,581 - 722,418)         | 435,265<br>(318,159 - 619,877)       | 3,384,978<br>(2,873,846 - 4,184,145)    | 3,323,554<br>(2,896,071 - 3,936,594)    | 1,496,382<br>(1,312,354 - 1,748,854)    |
| Gastritis and duodenitis                            | 1,803,062<br>(1,119,147 - 2,513,418)    | 246,253<br>(96,620 - 389,394)          | 227,791<br>(140,268 - 363,995)       | 642,490<br>(379,477 - 950,423)          | 472,458<br>(265,025 - 687,249)          | 214,070<br>(118,076 - 309,210)          |
| Appendicitis                                        | 3,830,641<br>(3,164,266 - 4,725,254)    | 585,627<br>(384,299 - 956,547)         | 552,923<br>(432,231 - 725,856)       | 1,900,958<br>(1,516,587 - 2,293,074)    | 572,017<br>(438,721 - 711,896)          | 219,115<br>(152,672 - 280,372)          |
| Paralytic ileus and intestinal obstruction          | 5,934,948<br>(3,777,164 - 7,397,311)    | 761,746<br>(504,695 - 1,029,756)       | 842,649<br>(538,566 - 1,052,497)     | 2,190,868<br>(1,307,608 - 2,728,679)    | 1,418,565<br>(862,195 - 1,813,996)      | 721,120<br>(486,311 - 984,598)          |
| Inguinal, femoral, and abdominal hernia             | 1,491,514<br>(947,565 - 1,814,503)      | 209,774<br>(107,904 - 323,743)         | 252,576<br>(157,229 - 336,435)       | 414,176<br>(240,482 - 536,322)          | 355,544<br>(215,121 - 439,120)          | 259,445<br>(176,761 - 328,517)          |
| Inflammatory bowel disease                          | 2,209,364<br>(1,694,280 - 2,845,025)    | 795,949<br>(498,052 - 1,269,733)       | 266,783<br>(189,993 - 367,919)       | 618,945<br>(420,454 - 800,528)          | 326,935<br>(222,421 - 406,480)          | 200,751<br>(133,036 - 245,788)          |
| Vascular intestinal disorders                       | 980,329<br>(615,296 - 1,570,389)        | 38,087<br>(11,027 - 93,399)            | 43,296<br>(12,383 - 110,957)         | 181,687<br>(103,681 - 314,671)          | 355,616<br>(219,033 - 566,425)          | 361,645<br>(231,849 - 521,729)          |
| Gallbladder and biliary diseases                    | 1,888,739<br>(1,643,405 - 2,220,958)    | 144,757<br>(110,022 - 236,752)         | 109,669<br>(89,509 - 136,870)        | 536,929<br>(439,500 - 631,539)          | 640,228<br>(525,209 - 750,552)          | 457,157<br>(395,077 - 536,052)          |
| Pancreatitis                                        | 2,767,982<br>(1,976,173 - 3,770,683)    | 70,172<br>(29,283 - 123,363)           | 123,445<br>(70,365 - 204,370)        | 1,496,726<br>(1,046,089 - 2,066,196)    | 815,547<br>(580,024 - 1,094,586)        | 262,091<br>(182,851 - 354,655)          |
| Other digestive diseases                            | 2,916,500<br>(2,488,694 - 3,479,751)    | 985,844<br>(747,660 - 1,350,461)       | 234,772<br>(195,823 - 291,730)       | 721,128<br>(573,670 - 868,348)          | 606,931<br>(509,967 - 723,853)          | 367,825<br>(309,239 - 421,943)          |
| Neurological disorders                              | 17,038,502<br>(15,745,395 - 18,439,713) | 2,314,570<br>(1,668,276 - 3,125,178)   | 1,178,262<br>(957,500 - 1,422,984)   | 4,040,278<br>(3,477,107 - 4,458,183)    | 2,356,263<br>(2,234,884 - 2,541,471)    | 7,149,128<br>(6,773,187 - 7,526,740)    |
| Alzheimer disease and other dementias               | 7,615,573<br>(7,200,606 - 8,026,727)    | --                                     | --                                   | 7,169<br>(6,139 - 8,310)                | 1,185,574<br>(1,118,435 - 1,252,548)    | 6,422,831<br>(6,040,428 - 6,798,123)    |
| Parkinson disease                                   | 571,595<br>(503,697 - 703,417)          | --                                     | --                                   | 25,307<br>(21,454 - 29,619)             | 156,751<br>(135,395 - 191,223)          | 389,537<br>(342,472 - 486,350)          |
| Epilepsy                                            | 6,415,792<br>(5,373,379 - 7,676,945)    | 1,836,021<br>(1,238,602 - 2,669,319)   | 998,454<br>(795,493 - 1,249,561)     | 3,093,742<br>(2,579,106 - 3,513,306)    | 379,032<br>(319,519 - 450,964)          | 108,543<br>(93,200 - 136,904)           |
| Multiple sclerosis                                  | 404,310<br>(294,748 - 613,735)          | --                                     | --                                   | 218,643<br>(155,838 - 323,579)          | 154,848<br>(117,207 - 247,718)          | 30,819<br>(23,208 - 46,803)             |
| Other neurological disorders                        | 2,031,230<br>(1,713,045 - 2,506,541)    | 478,549<br>(386,628 - 837,654)         | 179,808<br>(148,406 - 244,577)       | 695,417<br>(567,976 - 780,039)          | 480,058<br>(419,908 - 531,347)          | 197,398<br>(174,407 - 215,780)          |
| Mental and substance use disorders                  | 7,793,816<br>(6,488,226 - 9,805,677)    | 180,715<br>(109,082 - 252,280)         | 3,200<br>(2,659 - 3,879)             | 5,598,089<br>(4,617,553 - 6,841,706)    | 1,806,061<br>(1,502,200 - 2,563,300)    | 205,751<br>(171,343 - 268,716)          |
| Schizophrenia                                       | 820,896<br>(519,865 - 1,031,773)        | --                                     | --                                   | 557,674<br>(349,447 - 709,235)          | 209,853<br>(134,998 - 259,343)          | 53,369<br>(35,719 - 64,653)             |
| Alcohol use disorders                               | 4,309,202<br>(3,186,435 - 6,314,566)    | --                                     | --                                   | 2,837,494<br>(2,030,522 - 4,030,927)    | 1,361,424<br>(1,082,924 - 2,066,999)    | 110,284<br>(83,655 - 162,510)           |
| Drug use disorders                                  | 2,642,081<br>(2,321,095 - 3,158,981)    | 180,715<br>(109,082 - 252,280)         | --                                   | 2,184,483<br>(1,886,934 - 2,652,023)    | 234,784<br>(212,549 - 304,939)          | 42,099<br>(37,041 - 51,027)             |
| Opioid use disorders                                | 883,328<br>(807,040 - 1,081,088)        | 60,336<br>(40,986 - 92,887)            | --                                   | 722,458<br>(656,787 - 896,652)          | 85,500<br>(74,505 - 113,686)            | 15,033<br>(12,997 - 18,704)             |

Web Table 29 - Global YLLs with 95% UI by age, sex, and cause in 1990

| Cause                                               | Both Sexes, All Ages                    | Both Sexes, 0-4 Years                   | Both Sexes, 5-14 Years               | Both Sexes, 15-49 Years                 | Both Sexes, 50-69 Years                 | Both Sexes, 70-80 Years              |
|-----------------------------------------------------|-----------------------------------------|-----------------------------------------|--------------------------------------|-----------------------------------------|-----------------------------------------|--------------------------------------|
| Cocaine use disorders                               | 121,146<br>(106,223 - 142,818)          | 8,823<br>(5,497 - 14,110)               | --                                   | 100,671<br>(87,657 - 119,210)           | 9,179<br>(7,959 - 10,785)               | 2,472<br>(2,044 - 3,011)             |
| Amphetamine use disorders                           | 102,760<br>(88,636 - 120,771)           | 9,720<br>(6,006 - 15,907)               | --                                   | 80,385<br>(69,041 - 95,078)             | 10,073<br>(8,710 - 11,919)              | 2,581<br>(2,154 - 3,069)             |
| Other drug use disorders                            | 1,534,846<br>(1,275,741 - 1,847,638)    | 101,836<br>(59,459 - 152,939)           | --                                   | 1,280,968<br>(1,037,273 - 1,550,937)    | 130,031<br>(116,950 - 166,174)          | 22,012<br>(19,354 - 26,470)          |
| Eating disorders                                    | 21,638<br>(19,514 - 23,939)             | --                                      | 3,200<br>(2,659 - 3,879)             | 18,438<br>(16,451 - 20,552)             | --                                      | --                                   |
| Anorexia nervosa                                    | 21,638<br>(19,514 - 23,939)             | --                                      | 3,200<br>(2,659 - 3,879)             | 18,438<br>(16,451 - 20,552)             | --                                      | --                                   |
| Diabetes, urogenital, blood, and endocrine diseases | 50,198,446<br>(42,895,712 - 60,622,272) | 13,725,939<br>(8,677,084 - 22,339,194)  | 3,661,089<br>(2,478,539 - 4,953,548) | 12,411,746<br>(11,336,336 - 13,533,031) | 13,192,082<br>(12,379,652 - 13,808,576) | 7,207,590<br>(6,781,519 - 7,552,251) |
| Diabetes mellitus                                   | 15,718,088<br>(14,948,188 - 16,452,508) | 696,713<br>(571,985 - 879,499)          | 231,525<br>(181,092 - 307,556)       | 3,540,795<br>(3,304,171 - 3,779,196)    | 7,407,439<br>(6,951,091 - 7,800,556)    | 3,841,617<br>(3,665,563 - 4,026,575) |
| Acute glomerulonephritis                            | 1,148,835<br>(608,727 - 1,651,393)      | 381,233<br>(111,426 - 704,211)          | 181,560<br>(94,709 - 268,167)        | 380,498<br>(244,304 - 523,824)          | 152,646<br>(85,843 - 226,245)           | 52,897<br>(30,642 - 82,451)          |
| Chronic kidney disease                              | 11,011,193<br>(9,724,737 - 11,738,742)  | 1,076,868<br>(853,896 - 1,232,107)      | 508,563<br>(429,311 - 560,915)       | 3,955,590<br>(3,338,495 - 4,235,738)    | 3,423,708<br>(3,087,724 - 3,682,878)    | 2,046,464<br>(1,837,495 - 2,199,642) |
| Chronic kidney disease due to diabetes mellitus     | 971,755<br>(719,618 - 1,174,076)        | 20,842<br>(10,689 - 29,115)             | 11,838<br>(7,300 - 15,962)           | 248,544<br>(164,858 - 303,505)          | 410,795<br>(313,807 - 501,849)          | 279,734<br>(214,840 - 332,863)       |
| Chronic kidney disease due to hypertension          | 2,643,029<br>(1,910,301 - 3,180,215)    | 105,283<br>(46,908 - 168,861)           | 40,920<br>(23,058 - 62,148)          | 803,804<br>(547,743 - 990,028)          | 998,493<br>(733,232 - 1,203,971)        | 694,529<br>(534,467 - 843,617)       |
| Chronic kidney disease due to glomerulonephritis    | 3,661,075<br>(3,138,387 - 4,251,147)    | 602,580<br>(466,450 - 755,783)          | 286,482<br>(238,471 - 336,511)       | 1,590,827<br>(1,395,472 - 1,811,960)    | 838,726<br>(703,644 - 994,832)          | 342,460<br>(283,256 - 411,646)       |
| Chronic kidney disease due to other causes          | 3,735,334<br>(2,937,940 - 4,581,556)    | 348,162<br>(228,412 - 451,260)          | 169,323<br>(119,652 - 202,544)       | 1,312,414<br>(982,941 - 1,504,361)      | 1,175,694<br>(978,743 - 1,403,845)      | 729,741<br>(597,479 - 889,565)       |
| Urinary diseases and male infertility               | 4,299,343<br>(3,608,228 - 4,581,860)    | 902,102<br>(715,374 - 1,075,784)        | 237,899<br>(190,170 - 278,415)       | 1,269,011<br>(1,026,801 - 1,382,730)    | 1,139,062<br>(917,996 - 1,233,783)      | 751,269<br>(663,735 - 823,232)       |
| Interstitial nephritis and urinary tract infections | 3,079,392<br>(2,483,092 - 3,379,849)    | 689,114<br>(491,500 - 835,502)          | 160,106<br>(108,527 - 200,425)       | 892,514<br>(687,849 - 1,002,143)        | 786,659<br>(618,502 - 879,165)          | 550,999<br>(478,752 - 615,278)       |
| Urolithiasis                                        | 401,190<br>(309,642 - 491,100)          | --                                      | 28,420<br>(20,476 - 43,195)          | 147,652<br>(116,330 - 184,491)          | 151,107<br>(105,957 - 191,430)          | 74,010<br>(50,869 - 91,797)          |
| Other urinary diseases                              | 818,761<br>(681,819 - 1,104,284)        | 212,989<br>(145,120 - 340,570)          | 49,373<br>(36,943 - 75,516)          | 228,844<br>(182,431 - 319,891)          | 201,296<br>(156,029 - 282,643)          | 126,260<br>(97,704 - 168,989)        |
| Gynecological diseases                              | 200,200<br>(151,191 - 263,803)          | --                                      | --                                   | 152,524<br>(115,602 - 203,844)          | 28,722<br>(21,867 - 35,760)             | 18,954<br>(12,158 - 28,723)          |
| Uterine fibroids                                    | 38,254<br>(28,233 - 51,042)             | --                                      | --                                   | 24,168<br>(17,618 - 33,672)             | 8,141<br>(6,210 - 10,291)               | 5,945<br>(3,811 - 9,029)             |
| Polycystic ovarian syndrome                         | 11,117<br>(8,472 - 14,906)              | --                                      | --                                   | 10,895<br>(8,292 - 14,604)              | 222<br>(160 - 311)                      | --                                   |
| Endometriosis                                       | 25,862<br>(19,710 - 34,344)             | --                                      | --                                   | 24,972<br>(19,067 - 33,335)             | 890<br>(644 - 1,247)                    | --                                   |
| Genital prolapse                                    | 30,694<br>(23,062 - 40,219)             | --                                      | --                                   | 20,939<br>(15,966 - 27,979)             | 4,966<br>(3,777 - 6,191)                | 4,789<br>(3,062 - 7,251)             |
| Other gynecological diseases                        | 94,273<br>(71,113 - 123,528)            | --                                      | --                                   | 71,549<br>(54,255 - 95,461)             | 14,503<br>(11,078 - 18,011)             | 8,221<br>(5,285 - 12,487)            |
| Hemoglobinopathies and hemolytic anemias            | 12,834,915<br>(9,931,527 - 22,420,445)  | 8,393,851<br>(3,409,487 - 16,455,276)   | 2,102,889<br>(945,293 - 3,411,430)   | 1,860,946<br>(993,538 - 3,255,365)      | 344,687<br>(203,103 - 578,104)          | 132,542<br>(82,788 - 175,136)        |
| Thalassemias                                        | 2,743,323<br>(1,551,413 - 3,795,569)    | 1,639,203<br>(779,368 - 2,427,563)      | 475,032<br>(279,561 - 654,876)       | 616,184<br>(385,960 - 798,213)          | 12,232<br>(7,552 - 16,537)              | 673<br>(389 - 946)                   |
| Sickle cell disorders                               | 8,674,547<br>(2,954,188 - 17,575,029)   | 6,072,172<br>(1,814,330 - 13,548,035)   | 1,496,697<br>(490,332 - 2,891,248)   | 969,273<br>(388,480 - 2,357,816)        | 132,052<br>(58,345 - 310,157)           | 4,353<br>(2,519 - 6,447)             |
| G6PD deficiency                                     | 226,131<br>(126,305 - 320,073)          | 126,475<br>(54,939 - 196,939)           | 33,218<br>(19,659 - 44,372)          | 54,249<br>(33,296 - 71,181)             | 10,871<br>(6,755 - 14,659)              | 1,318<br>(738 - 1,901)               |
| Other hemoglobinopathies and hemolytic anemias      | 1,190,914<br>(775,056 - 1,567,375)      | 556,001<br>(297,799 - 797,940)          | 97,942<br>(61,628 - 132,143)         | 221,240<br>(145,085 - 288,191)          | 189,532<br>(123,648 - 252,374)          | 126,199<br>(79,110 - 166,049)        |
| Endocrine, metabolic, blood, and immune disorders   | 4,985,871<br>(3,741,537 - 6,009,741)    | 2,275,172<br>(1,564,352 - 3,004,220)    | 398,653<br>(296,665 - 513,136)       | 1,252,383<br>(999,632 - 1,482,559)      | 695,818<br>(577,907 - 840,783)          | 363,845<br>(289,945 - 428,299)       |
| Musculoskeletal disorders                           | 2,163,902<br>(1,725,152 - 2,456,252)    | --                                      | 292,664<br>(203,027 - 351,344)       | 1,021,792<br>(808,991 - 1,193,364)      | 596,045<br>(480,340 - 673,386)          | 253,401<br>(225,210 - 296,311)       |
| Rheumatoid arthritis                                | 709,378<br>(583,922 - 837,740)          | --                                      | 72,733<br>(46,116 - 105,210)         | 209,869<br>(157,679 - 259,047)          | 279,079<br>(227,043 - 323,212)          | 147,696<br>(127,711 - 167,753)       |
| Other musculoskeletal disorders                     | 1,454,524<br>(1,106,272 - 1,718,829)    | --                                      | 219,931<br>(138,529 - 276,807)       | 811,922<br>(613,529 - 970,544)          | 316,966<br>(249,685 - 373,552)          | 105,704<br>(93,203 - 132,204)        |
| Other non-communicable diseases                     | 65,374,532<br>(53,408,700 - 84,926,252) | 58,435,437<br>(47,149,779 - 77,354,019) | 2,705,742<br>(2,263,949 - 3,327,911) | 3,169,393<br>(2,905,088 - 3,486,605)    | 674,612<br>(583,486 - 729,487)          | 389,348<br>(344,350 - 418,451)       |
| Congenital anomalies                                | 61,447,070<br>(49,777,392 - 80,013,415) | 55,680,917<br>(44,614,582 - 73,706,743) | 2,580,437<br>(2,149,022 - 3,194,071) | 2,704,712<br>(2,458,954 - 3,021,774)    | 363,186<br>(271,355 - 410,318)          | 117,817<br>(79,365 - 134,137)        |
| Neural tube defects                                 | 12,759,790<br>(9,169,627 - 21,764,350)  | 12,109,753<br>(8,646,409 - 20,872,870)  | 322,584<br>(212,982 - 513,769)       | 294,438<br>(206,360 - 439,107)          | 26,084<br>(17,935 - 36,496)             | 6,931<br>(3,543 - 10,117)            |
| Congenital heart anomalies                          | 29,873,948<br>(23,640,486 - 39,998,283) | 26,797,297<br>(20,866,613 - 36,530,900) | 1,449,674<br>(1,159,675 - 1,801,003) | 1,379,003<br>(1,204,499 - 1,604,975)    | 181,304<br>(132,512 - 214,813)          | 66,669<br>(41,128 - 78,555)          |
| Cleft lip and cleft palate                          | 659,009<br>(360,146 - 987,693)          | 659,009<br>(360,146 - 987,693)          | --                                   | --                                      | --                                      | --                                   |
| Down syndrome                                       | 3,317,088<br>(1,201,820 - 5,844,149)    | 2,678,977<br>(865,062 - 4,925,151)      | 249,807<br>(100,730 - 412,343)       | 338,390<br>(193,302 - 508,165)          | 47,646<br>(32,277 - 66,132)             | 2,268<br>(1,439 - 3,296)             |
| Chromosomal unbalanced rearrangements               | 1,565,341<br>(694,509 - 3,430,568)      | 1,408,765<br>(609,088 - 3,180,906)      | 54,052<br>(23,095 - 112,976)         | 93,763<br>(47,128 - 161,601)            | 7,254<br>(3,938 - 10,541)               | 1,508<br>(822 - 2,144)               |
| Other congenital anomalies                          | 13,271,893<br>(9,533,733 - 25,011,960)  | 12,027,115<br>(8,524,078 - 23,282,242)  | 504,320<br>(357,038 - 939,689)       | 599,117<br>(476,181 - 781,877)          | 100,898<br>(78,436 - 126,286)           | 40,442<br>(31,175 - 48,320)          |

Web Table 29 - Global YLLs with 95% UI by age, sex, and cause in 1990

| Cause                                           | Both Sexes, All Ages                       | Both Sexes, 0-4 Years                   | Both Sexes, 5-14 Years                  | Both Sexes, 15-49 Years                    | Both Sexes, 50-69 Years                 | Both Sexes, 70-80 Years              |
|-------------------------------------------------|--------------------------------------------|-----------------------------------------|-----------------------------------------|--------------------------------------------|-----------------------------------------|--------------------------------------|
| Skin and subcutaneous diseases                  | 2,025,859<br>(1,757,154 - 2,312,657)       | 852,917<br>(626,977 - 1,095,989)        | 125,306<br>(103,300 - 146,557)          | 464,680<br>(421,693 - 502,720)             | 311,425<br>(286,986 - 342,691)          | 271,530<br>(251,656 - 297,030)       |
| Cellulitis                                      | 1,110,056<br>(808,965 - 1,410,225)         | 502,544<br>(352,577 - 664,160)          | 77,161<br>(54,227 - 99,078)             | 257,818<br>(176,495 - 342,471)             | 173,338<br>(124,004 - 220,627)          | 99,195<br>(64,728 - 128,582)         |
| Pyoderma                                        | 663,919<br>(417,895 - 990,275)             | 323,526<br>(192,680 - 529,732)          | 34,992<br>(18,826 - 55,452)             | 148,204<br>(87,764 - 213,646)              | 91,076<br>(60,632 - 126,138)            | 66,121<br>(51,571 - 81,316)          |
| Decubitus ulcer                                 | 198,414<br>(152,308 - 271,988)             | 10,528<br>(2,791 - 22,369)              | 8,557<br>(4,020 - 15,488)               | 41,379<br>(27,003 - 63,153)                | 39,238<br>(30,290 - 54,825)             | 98,712<br>(85,406 - 121,237)         |
| Other skin and subcutaneous diseases            | 53,470<br>(33,355 - 87,053)                | 16,320<br>(5,912 - 38,475)              | 4,595<br>(2,505 - 8,297)                | 17,279<br>(11,759 - 24,153)                | 7,773<br>(5,892 - 9,475)                | 7,502<br>(6,080 - 10,961)            |
| Sudden infant death syndrome                    | 1,901,603<br>(1,092,952 - 3,464,096)       | 1,901,603<br>(1,092,952 - 3,464,096)    | --                                      | --                                         | --                                      | --                                   |
| Injuries                                        | 232,637,624<br>(216,679,431 - 244,819,974) | 65,198,359<br>(53,405,721 - 73,537,686) | 27,219,744<br>(25,186,329 - 29,005,387) | 114,605,358<br>(109,508,655 - 120,404,226) | 20,170,735<br>(19,193,955 - 21,601,987) | 5,443,428<br>(5,164,185 - 5,886,532) |
| Transport injuries                              | 61,497,719<br>(58,096,828 - 67,693,096)    | 10,405,163<br>(8,893,772 - 12,483,562)  | 7,911,276<br>(7,297,211 - 8,804,229)    | 36,515,419<br>(34,706,882 - 39,626,967)    | 5,552,974<br>(5,214,533 - 6,053,421)    | 1,112,888<br>(1,039,560 - 1,220,671) |
| Road injuries                                   | 56,623,718<br>(53,415,972 - 62,964,300)    | 9,265,085<br>(7,871,906 - 11,252,042)   | 7,304,085<br>(6,745,356 - 8,196,280)    | 33,989,126<br>(32,262,643 - 37,049,841)    | 5,050,256<br>(4,761,522 - 5,527,418)    | 1,015,165<br>(959,884 - 1,125,601)   |
| Pedestrian road injuries                        | 20,630,194<br>(17,772,645 - 25,278,174)    | 4,760,222<br>(3,772,528 - 6,350,330)    | 3,744,533<br>(3,271,328 - 4,431,923)    | 9,741,925<br>(7,886,406 - 11,803,287)      | 2,128,903<br>(1,848,609 - 2,515,339)    | 524,611<br>(469,380 - 608,513)       |
| Cyclist road injuries                           | 3,513,599<br>(2,995,588 - 4,289,675)       | 511,663<br>(384,405 - 685,864)          | 666,676<br>(562,862 - 832,383)          | 1,827,050<br>(1,508,399 - 2,205,919)       | 419,804<br>(354,381 - 511,465)          | 88,406<br>(74,865 - 105,541)         |
| Motorcyclist road injuries                      | 19,429,360<br>(9,377,537 - 13,118,765)     | 2,686,690<br>(635,083 - 1,238,756)      | 1,932,750<br>(496,124 - 816,704)        | 12,849,119<br>(7,496,566 - 10,465,517)     | 1,669,422<br>(520,963 - 792,216)        | 291,379<br>(60,327 - 372,372)        |
| Motor vehicle road injuries                     | 1,846,909<br>(1,732,391 - 21,893,640)      | 390,846<br>(2,155,946 - 3,344,641)      | 313,788<br>(1,638,404 - 2,239,037)      | 925,632<br>(1,411,610 - 14,357,736)        | 185,926<br>(1,445,970 - 1,880,460)      | 30,718<br>(250,899 - 331,266)        |
| Other road injuries                             | 4,874,001<br>(1,162,753 - 2,402,426)       | 1,140,077<br>(203,058 - 606,080)        | 607,190<br>(188,832 - 441,162)          | 2,526,293<br>(544,157 - 1,327,744)         | 502,718<br>(117,269 - 263,803)          | 97,722<br>(21,585 - 41,226)          |
| Other transport injuries                        | 114,993,566<br>(4,146,517 - 5,462,329)     | 51,180,833<br>(906,663 - 1,392,003)     | 16,802,811<br>(511,253 - 713,566)       | 36,117,819<br>(2,158,894 - 2,879,686)      | 7,842,978<br>(405,057 - 574,296)        | 3,049,126<br>(74,478 - 111,712)      |
| Unintentional injuries                          | 101,573,967<br>(101,573,967 - 125,047,808) | 38,974,606<br>(38,974,606 - 59,082,736) | 14,783,636<br>(14,783,636 - 18,481,975) | 33,501,602<br>(33,501,602 - 39,333,466)    | 7,351,040<br>(7,351,040 - 8,734,015)    | 2,865,404<br>(2,865,404 - 3,403,453) |
| Falls                                           | 12,393,775<br>(11,020,783 - 15,320,526)    | 3,363,857<br>(2,445,845 - 4,747,914)    | 1,341,396<br>(1,139,028 - 1,635,317)    | 4,570,463<br>(3,991,618 - 5,577,435)       | 1,797,804<br>(1,630,538 - 2,263,312)    | 1,250,255<br>(1,176,988 - 1,616,503) |
| Drowning                                        | 37,391,738<br>(26,910,118 - 44,355,660)    | 18,184,211<br>(11,362,021 - 23,479,579) | 8,650,703<br>(6,492,032 - 10,071,545)   | 9,088,730<br>(7,490,286 - 10,321,578)      | 1,204,275<br>(1,019,491 - 1,401,857)    | 263,818<br>(219,655 - 311,119)       |
| Fire, heat, and hot substances                  | 16,947,229<br>(14,689,226 - 20,121,120)    | 5,897,301<br>(4,323,916 - 7,704,366)    | 1,881,801<br>(1,619,047 - 2,358,312)    | 7,646,575<br>(6,357,843 - 9,076,579)       | 1,140,123<br>(994,990 - 1,413,337)      | 381,428<br>(321,918 - 448,652)       |
| Poisonings                                      | 6,749,945<br>(5,790,738 - 9,702,214)       | 2,403,166<br>(1,815,772 - 3,802,918)    | 604,498<br>(497,035 - 872,667)          | 3,073,795<br>(2,682,555 - 4,179,217)       | 545,078<br>(473,987 - 774,200)          | 123,409<br>(106,419 - 176,036)       |
| Exposure to mechanical forces                   | 15,362,852<br>(11,439,914 - 18,853,241)    | 8,742,274<br>(4,533,944 - 12,156,322)   | 1,316,707<br>(1,125,131 - 1,605,149)    | 4,422,179<br>(4,015,579 - 5,315,668)       | 774,818<br>(693,689 - 911,811)          | 106,874<br>(95,550 - 127,686)        |
| Unintentional firearm injuries                  | 2,913,637<br>(2,506,756 - 3,415,608)       | 653,125<br>(508,233 - 857,599)          | 327,195<br>(264,404 - 412,712)          | 1,682,871<br>(1,402,220 - 2,045,785)       | 216,114<br>(166,047 - 293,318)          | 34,333<br>(26,683 - 45,382)          |
| Unintentional suffocation                       | 6,926,456<br>(2,135,247 - 10,381,946)      | 6,461,331<br>(1,868,146 - 9,832,822)    | 191,019<br>(108,919 - 283,827)          | 219,431<br>(143,984 - 287,869)             | 43,672<br>(28,068 - 54,268)             | 11,002<br>(7,514 - 14,492)           |
| Other exposure to mechanical forces             | 5,522,759<br>(4,944,093 - 6,925,494)       | 1,627,819<br>(1,121,540 - 2,317,556)    | 798,493<br>(650,343 - 1,056,684)        | 2,519,877<br>(2,301,124 - 3,088,559)       | 515,031<br>(456,047 - 625,285)          | 61,539<br>(53,779 - 76,643)          |
| Adverse effects of medical treatment            | 4,456,147<br>(3,465,853 - 5,418,628)       | 2,309,042<br>(1,533,839 - 3,083,602)    | 266,004<br>(188,413 - 322,519)          | 1,077,523<br>(854,428 - 1,330,787)         | 551,740<br>(449,887 - 726,643)          | 251,837<br>(207,596 - 316,647)       |
| Animal contact                                  | 5,447,447<br>(3,398,518 - 7,361,069)       | 1,494,889<br>(886,615 - 2,287,739)      | 1,468,430<br>(919,172 - 2,038,002)      | 1,848,922<br>(1,120,006 - 2,304,366)       | 539,485<br>(334,635 - 718,401)          | 95,721<br>(59,913 - 126,154)         |
| Venomous animal contact                         | 4,340,696<br>(2,686,355 - 6,170,495)       | 1,018,004<br>(615,216 - 1,760,314)      | 1,207,951<br>(763,681 - 1,714,469)      | 1,609,443<br>(943,781 - 2,036,070)         | 439,239<br>(267,110 - 585,390)          | 66,059<br>(38,541 - 95,923)          |
| Non-venomous animal contact                     | 1,106,751<br>(633,901 - 1,529,991)         | 476,885<br>(228,321 - 687,384)          | 260,479<br>(143,147 - 393,182)          | 239,478<br>(129,666 - 315,432)             | 100,246<br>(64,196 - 147,337)           | 29,662<br>(18,509 - 44,176)          |
| Foreign body                                    | 8,457,131<br>(5,516,301 - 12,683,480)      | 6,555,722<br>(4,066,812 - 10,110,415)   | 289,818<br>(197,367 - 450,974)          | 867,267<br>(594,879 - 1,247,454)           | 429,080<br>(285,838 - 604,628)          | 315,243<br>(226,007 - 460,265)       |
| Pulmonary aspiration and foreign body in airway | 8,323,481<br>(5,395,500 - 12,572,693)      | 6,492,503<br>(4,001,631 - 10,074,042)   | 273,646<br>(185,136 - 436,498)          | 832,850<br>(565,713 - 1,216,355)           | 413,973<br>(274,362 - 592,638)          | 310,509<br>(222,014 - 455,783)       |
| Foreign body in other body part                 | 133,651<br>(79,709 - 206,161)              | 63,219<br>(32,643 - 121,455)            | 16,172<br>(10,515 - 23,802)             | 34,417<br>(22,745 - 46,043)                | 15,107<br>(9,037 - 20,279)              | 4,735<br>(3,485 - 6,028)             |
| Other unintentional injuries                    | 7,787,303<br>(6,196,947 - 8,607,851)       | 2,230,369<br>(1,441,007 - 2,604,577)    | 983,453<br>(745,275 - 1,119,241)        | 3,522,365<br>(3,036,957 - 3,989,821)       | 860,576<br>(693,514 - 972,956)          | 190,539<br>(130,739 - 219,166)       |
| Self-harm and interpersonal violence            | 50,538,748<br>(44,756,751 - 55,524,946)    | 2,014,036<br>(1,463,916 - 2,521,653)    | 1,853,515<br>(1,554,538 - 2,138,380)    | 39,540,236<br>(35,032,731 - 43,160,819)    | 6,033,145<br>(5,383,282 - 6,683,094)    | 1,187,816<br>(1,021,207 - 1,295,963) |
| Self-harm                                       | 31,863,432<br>(28,243,384 - 35,100,939)    | --                                      | 874,190<br>(745,007 - 1,020,655)        | 25,144,959<br>(22,076,227 - 27,582,733)    | 4,797,808<br>(4,254,955 - 5,422,595)    | 1,046,474<br>(885,942 - 1,150,556)   |
| Interpersonal violence                          | 18,675,316<br>(14,082,888 - 22,596,714)    | 2,014,036<br>(1,463,916 - 2,521,653)    | 979,324<br>(740,591 - 1,221,181)        | 14,305,277<br>(10,770,922 - 17,261,157)    | 1,235,337<br>(868,804 - 1,565,121)      | 141,342<br>(103,225 - 178,548)       |
| Assault by firearm                              | 6,960,089<br>(4,976,170 - 8,969,306)       | 264,200<br>(157,973 - 375,042)          | 211,040<br>(139,824 - 277,871)          | 6,032,190<br>(4,357,252 - 7,674,072)       | 419,642<br>(254,092 - 597,414)          | 33,017<br>(20,631 - 49,170)          |
| Assault by sharp object                         | 5,026,775<br>(3,505,925 - 6,750,885)       | 257,304<br>(120,862 - 380,418)          | 181,253<br>(100,849 - 239,266)          | 4,199,225<br>(2,914,943 - 5,821,160)       | 357,207<br>(227,428 - 498,069)          | 31,786<br>(20,293 - 43,998)          |
| Assault by other means                          | 6,688,452<br>(4,765,059 - 8,039,976)       | 1,492,532<br>(1,095,004 - 1,952,068)    | 587,031<br>(443,984 - 772,984)          | 4,073,862<br>(2,755,221 - 5,020,707)       | 458,488<br>(316,240 - 583,341)          | 76,539<br>(53,979 - 94,086)          |
| Forces of nature, war, and legal intervention   | 5,607,590<br>(4,297,078 - 8,592,676)       | 1,598,327<br>(1,558,282 - 1,748,646)    | 652,143<br>(488,101 - 1,058,250)        | 2,521,884<br>(1,673,132 - 4,479,453)       | 741,637<br>(493,267 - 1,285,321)        | 93,599<br>(60,181 - 160,573)         |
| Exposure to forces of nature                    | 1,668,874<br>(1,053,491 - 3,106,108)       | 414,997<br>(398,827 - 425,011)          | 199,857<br>(122,371 - 377,523)          | 744,430<br>(374,977 - 1,583,541)           | 269,405<br>(138,108 - 545,779)          | 40,185<br>(20,797 - 81,433)          |
| Collective violence and legal intervention      | 3,938,716<br>(3,121,159 - 5,547,882)       | 1,183,330<br>(1,157,792 - 1,341,310)    | 452,286<br>(351,673 - 658,431)          | 1,777,455<br>(1,230,508 - 2,877,525)       | 472,232<br>(327,589 - 741,555)          | 53,414<br>(37,060 - 81,579)          |

Web Table 29 - Global YLLs with 95% UI by age, sex, and cause in 1990

| Cause                                                             | Males, All Ages                                  | Males, 0-4 Years                           | Males, 5-14 Years                       | Males, 15-49 Years                         | Males, 50-69 Years                         | Males, 70-80 Years                      |
|-------------------------------------------------------------------|--------------------------------------------------|--------------------------------------------|-----------------------------------------|--------------------------------------------|--------------------------------------------|-----------------------------------------|
| All causes                                                        | 1,095,154,637<br>(1,069,834,908 - 1,120,023,116) | 547,479,969<br>(529,162,121 - 562,443,421) | 55,236,582<br>(53,378,630 - 56,840,113) | 228,859,756<br>(220,041,559 - 239,924,478) | 178,940,700<br>(172,068,620 - 185,202,134) | 84,637,629<br>(82,503,880 - 86,169,191) |
| Communicable, maternal, neonatal, and nutritional diseases        | 568,633,786<br>(540,648,827 - 588,944,279)       | 454,018,096<br>(429,387,327 - 472,121,892) | 26,670,846<br>(24,801,523 - 28,673,087) | 53,858,378<br>(50,589,180 - 57,986,282)    | 24,785,413<br>(23,142,552 - 27,000,050)    | 9,301,052<br>(8,759,259 - 9,954,207)    |
| HIV/AIDS and tuberculosis                                         | 48,573,302<br>(44,209,499 - 54,834,104)          | 5,156,719<br>(4,398,910 - 6,914,483)       | 1,476,691<br>(1,266,448 - 1,739,269)    | 26,471,993<br>(23,803,165 - 29,748,389)    | 12,524,527<br>(11,257,989 - 14,078,531)    | 2,943,372<br>(2,628,120 - 3,265,549)    |
| Tuberculosis                                                      | 38,347,445<br>(34,594,615 - 42,747,835)          | 3,645,163<br>(2,943,662 - 5,385,703)       | 1,411,220<br>(1,201,119 - 1,672,299)    | 18,903,603<br>(16,740,113 - 21,423,486)    | 11,537,366<br>(10,275,365 - 13,099,727)    | 2,800,994<br>(2,536,721 - 3,170,011)    |
| HIV/AIDS                                                          | 10,225,857<br>(8,182,793 - 13,121,364)           | 1,511,556<br>(1,387,799 - 1,649,411)       | 65,471<br>(50,893 - 79,287)             | 7,568,390<br>(5,825,849 - 10,069,899)      | 987,161<br>(778,011 - 1,266,120)           | 93,279<br>(73,644 - 118,749)            |
| HIV/AIDS resulting in mycobacterial infection                     | 1,052,619<br>(778,565 - 1,413,527)               | 155,372<br>(125,931 - 192,930)             | 6,248<br>(4,516 - 8,257)                | 775,549<br>(553,428 - 1,086,362)           | 105,345<br>(77,625 - 141,440)              | 10,105<br>(7,414 - 13,705)              |
| HIV/AIDS resulting in other diseases                              | 9,173,238<br>(7,355,536 - 11,746,985)            | 1,356,184<br>(1,238,946 - 1,485,679)       | 59,223<br>(46,131 - 71,859)             | 6,792,841<br>(5,243,057 - 9,029,606)       | 881,816<br>(694,371 - 1,132,492)           | 83,174<br>(65,762 - 105,565)            |
| Diarrhea, lower respiratory, and other common infectious diseases | 271,873,388<br>(250,786,054 - 291,581,805)       | 222,608,867<br>(203,190,869 - 240,393,578) | 17,555,718<br>(15,779,796 - 19,548,969) | 17,813,233<br>(16,009,456 - 20,192,068)    | 8,685,838<br>(8,011,383 - 9,725,034)       | 5,209,732<br>(4,728,925 - 5,666,248)    |
| Diarrheal diseases                                                | 85,743,958<br>(76,842,031 - 94,601,326)          | 69,940,647<br>(61,433,396 - 78,437,459)    | 5,158,351<br>(4,370,612 - 6,035,403)    | 5,808,336<br>(5,164,513 - 6,428,735)       | 3,280,648<br>(2,926,907 - 3,668,478)       | 1,555,975<br>(1,397,917 - 1,708,224)    |
| Intestinal infectious diseases                                    | 9,852,383<br>(5,614,469 - 16,254,029)            | 3,705,463<br>(2,102,110 - 6,162,145)       | 3,121,711<br>(1,771,621 - 5,055,080)    | 2,822,767<br>(1,502,191 - 4,728,063)       | 173,534<br>(94,457 - 293,889)              | 28,908<br>(17,567 - 44,824)             |
| Typhoid fever                                                     | 6,780,930<br>(3,572,512 - 11,467,918)            | 2,339,815<br>(1,203,345 - 4,085,691)       | 2,245,058<br>(1,220,332 - 3,777,843)    | 2,057,268<br>(1,061,558 - 3,572,815)       | 119,599<br>(58,781 - 210,683)              | 19,189<br>(10,341 - 32,014)             |
| Paratyphoid fever                                                 | 2,440,982<br>(1,297,793 - 4,188,691)             | 952,638<br>(464,122 - 1,745,937)           | 804,883<br>(426,834 - 1,397,126)        | 643,269<br>(318,517 - 1,133,721)           | 34,952<br>(16,510 - 66,085)                | 5,240<br>(2,723 - 9,072)                |
| Other intestinal infectious diseases                              | 630,472<br>(542,768 - 727,220)                   | 413,010<br>(339,733 - 493,947)             | 71,770<br>(60,307 - 85,810)             | 122,231<br>(107,441 - 138,792)             | 18,983<br>(16,403 - 21,687)                | 4,479<br>(3,787 - 5,192)                |
| Lower respiratory infections                                      | 111,165,170<br>(100,786,608 - 120,913,222)       | 94,234,731<br>(84,183,067 - 103,464,092)   | 4,104,285<br>(3,410,109 - 4,756,137)    | 5,396,990<br>(4,631,042 - 6,186,499)       | 4,071,051<br>(3,618,516 - 4,826,054)       | 3,358,113<br>(2,858,585 - 3,826,310)    |
| Upper respiratory infections                                      | 131,988<br>(104,163 - 173,055)                   | 73,876<br>(48,562 - 115,857)               | 8,700<br>(4,811 - 17,020)               | 29,291<br>(22,402 - 39,853)                | 15,257<br>(10,433 - 23,452)                | 4,864<br>(3,385 - 7,411)                |
| Otitis media                                                      | 138,636<br>(117,824 - 154,628)                   | 74,585<br>(61,329 - 88,537)                | 24,002<br>(19,996 - 27,411)             | 29,877<br>(26,250 - 32,600)                | 7,906<br>(6,979 - 8,740)                   | 2,266<br>(1,992 - 2,525)                |
| Meningitis                                                        | 18,342,867<br>(13,726,952 - 25,458,887)          | 13,922,783<br>(9,208,744 - 20,838,629)     | 1,701,300<br>(1,425,218 - 2,006,809)    | 2,067,120<br>(1,772,288 - 2,317,525)       | 535,619<br>(467,480 - 608,626)             | 116,045<br>(100,656 - 131,023)          |
| Pneumococcal meningitis                                           | 4,206,264<br>(3,226,223 - 5,664,688)             | 2,842,779<br>(1,852,248 - 4,232,334)       | 531,362<br>(420,480 - 653,618)          | 639,394<br>(524,993 - 754,326)             | 157,461<br>(124,730 - 196,945)             | 35,268<br>(28,939 - 43,238)             |
| H influenzae type B meningitis                                    | 5,073,114<br>(3,560,714 - 7,289,958)             | 4,335,762<br>(2,816,547 - 6,497,642)       | 405,786<br>(322,790 - 504,449)          | 267,878<br>(213,744 - 328,543)             | 52,761<br>(40,325 - 64,974)                | 10,926<br>(8,706 - 13,645)              |
| Meningococcal meningitis                                          | 3,503,739<br>(2,566,128 - 4,941,400)             | 2,621,747<br>(1,680,557 - 4,027,949)       | 319,549<br>(259,492 - 387,586)          | 420,204<br>(354,023 - 492,072)             | 116,152<br>(95,631 - 142,976)              | 26,088<br>(20,530 - 31,620)             |
| Other meningitis                                                  | 5,559,749<br>(4,273,966 - 7,695,497)             | 4,122,495<br>(2,828,516 - 6,273,185)       | 444,602<br>(352,535 - 542,669)          | 739,644<br>(622,360 - 862,138)             | 209,245<br>(165,080 - 252,936)             | 43,763<br>(34,495 - 53,649)             |
| Encephalitis                                                      | 3,271,847<br>(2,158,386 - 4,348,564)             | 2,156,179<br>(1,204,411 - 3,138,714)       | 466,893<br>(251,597 - 635,059)          | 502,449<br>(322,044 - 609,191)             | 119,835<br>(78,512 - 149,657)              | 26,491<br>(16,089 - 32,606)             |
| Diphtheria                                                        | 325,499<br>(125,730 - 881,207)                   | 265,129<br>(82,619 - 801,562)              | 45,658<br>(14,511 - 139,971)            | 12,314<br>(6,982 - 23,639)                 | 2,398<br>(846 - 8,330)                     | --                                      |
| Whooping cough                                                    | 5,350,100<br>(2,065,030 - 11,933,724)            | 5,070,209<br>(1,959,162 - 11,330,351)      | 234,096<br>(86,094 - 535,933)           | 42,902<br>(17,229 - 101,990)               | 2,893<br>(1,229 - 6,758)                   | --                                      |
| Tetanus                                                           | 14,511,686<br>(12,040,066 - 22,301,198)          | 12,854,296<br>(10,343,927 - 19,857,545)    | 361,565<br>(188,753 - 796,630)          | 730,460<br>(442,195 - 1,358,634)           | 459,138<br>(253,801 - 793,230)             | 106,227<br>(52,545 - 190,328)           |
| Measles                                                           | 22,809,826<br>(12,505,770 - 37,159,346)          | 20,184,668<br>(11,079,547 - 32,809,234)    | 2,302,650<br>(1,227,688 - 3,787,623)    | 316,432<br>(142,262 - 740,613)             | 6,076<br>(2,621 - 15,020)                  | --                                      |
| Varicella and herpes zoster                                       | 229,427<br>(165,489 - 353,163)                   | 126,300<br>(72,494 - 242,947)              | 26,505<br>(13,712 - 56,137)             | 54,297<br>(36,162 - 82,508)                | 11,482<br>(7,316 - 19,708)                 | 10,843<br>(6,443 - 21,094)              |
| Neglected tropical diseases and malaria                           | 39,697,574<br>(34,623,098 - 44,855,129)          | 27,598,238<br>(22,512,916 - 32,569,714)    | 4,965,450<br>(4,367,376 - 5,582,262)    | 5,183,765<br>(4,491,851 - 5,960,702)       | 1,665,470<br>(1,447,457 - 1,984,769)       | 284,652<br>(243,099 - 388,174)          |
| Malaria                                                           | 32,808,988<br>(27,874,663 - 37,832,632)          | 24,916,064<br>(19,957,654 - 29,887,659)    | 3,354,288<br>(2,799,449 - 3,931,356)    | 3,203,072<br>(2,635,362 - 3,898,786)       | 1,156,411<br>(967,480 - 1,390,221)         | 179,152<br>(147,972 - 218,570)          |
| Chagas disease                                                    | 211,906<br>(44,823 - 635,689)                    | 1,087<br>(198 - 3,719)                     | 1,260<br>(233 - 3,914)                  | 85,341<br>(16,173 - 240,094)               | 96,831<br>(18,841 - 306,739)               | 27,387<br>(4,855 - 110,686)             |
| Leishmaniasis                                                     | 2,276,049<br>(1,865,939 - 2,718,768)             | 1,038,557<br>(763,747 - 1,348,626)         | 600,800<br>(450,226 - 765,378)          | 574,134<br>(449,639 - 709,238)             | 55,477<br>(43,550 - 68,545)                | 7,081<br>(5,700 - 8,507)                |
| Visceral leishmaniasis                                            | 2,276,049<br>(1,865,939 - 2,718,768)             | 1,038,557<br>(763,747 - 1,348,626)         | 600,800<br>(450,226 - 765,378)          | 574,134<br>(449,639 - 709,238)             | 55,477<br>(43,550 - 68,545)                | 7,081<br>(5,700 - 8,507)                |
| African trypanosomiasis                                           | 628,435<br>(313,915 - 1,052,913)                 | 69,885<br>(31,838 - 124,422)               | 98,294<br>(47,296 - 167,432)            | 408,340<br>(206,333 - 672,817)             | 47,483<br>(22,587 - 80,684)                | 4,434<br>(2,062 - 7,708)                |
| Schistosomiasis                                                   | 375,511<br>(315,797 - 446,539)                   | 16,399<br>(12,175 - 22,418)                | 27,587<br>(22,250 - 34,272)             | 196,258<br>(162,819 - 235,500)             | 110,597<br>(88,910 - 136,743)              | 24,670<br>(19,297 - 31,826)             |
| Cysticercosis                                                     | 22,357<br>(19,763 - 27,417)                      | 1,920<br>(1,277 - 3,170)                   | 2,105<br>(1,702 - 2,835)                | 14,947<br>(13,361 - 17,812)                | 3,006<br>(2,690 - 3,543)                   | 378<br>(339 - 433)                      |
| Cystic echinococcosis                                             | 97,573<br>(91,054 - 105,093)                     | 19,165<br>(15,864 - 23,112)                | 24,038<br>(21,930 - 26,502)             | 41,221<br>(38,100 - 44,618)                | 10,985<br>(10,239 - 11,695)                | 2,164<br>(2,033 - 2,290)                |
| Dengue                                                            | 330,386<br>(171,608 - 456,747)                   | 199,545<br>(79,677 - 305,836)              | 89,081<br>(48,129 - 114,376)            | 34,817<br>(25,145 - 41,951)                | 5,534<br>(4,185 - 7,071)                   | 1,408<br>(968 - 1,669)                  |
| Yellow fever                                                      | 91,204<br>(72,047 - 110,298)                     | 11,261<br>(6,375 - 19,062)                 | 21,546<br>(13,210 - 31,740)             | 52,495<br>(38,805 - 67,309)                | 5,075<br>(3,059 - 7,903)                   | 827<br>(345 - 1,702)                    |
| Rabies                                                            | 1,412,932<br>(891,150 - 2,067,362)               | 277,892<br>(157,279 - 536,652)             | 596,488<br>(339,003 - 820,363)          | 398,593<br>(263,582 - 556,470)             | 124,753<br>(77,470 - 165,577)              | 15,206<br>(9,171 - 20,592)              |
| Intestinal nematode infections                                    | 335,902<br>(285,483 - 390,417)                   | 270,734<br>(224,115 - 321,585)             | 46,860<br>(39,523 - 54,822)             | 13,809<br>(10,842 - 17,285)                | 3,354<br>(2,453 - 4,377)                   | 1,145<br>(787 - 1,601)                  |



Web Table 29 - Global YLLs with 95% UI by age, sex, and cause in 1990

| Cause                                                            | Males, All Ages                            | Males, 0-4 Years                           | Males, 5-14 Years                       | Males, 15-49 Years                      | Males, 50-69 Years                         | Males, 70-80 Years                      |
|------------------------------------------------------------------|--------------------------------------------|--------------------------------------------|-----------------------------------------|-----------------------------------------|--------------------------------------------|-----------------------------------------|
| Ascariasis                                                       | 335,902<br>(285,483 - 390,417)             | 270,734<br>(224,115 - 321,585)             | 46,860<br>(39,523 - 54,822)             | 13,809<br>(10,842 - 17,285)             | 3,354<br>(2,453 - 4,377)                   | 1,145<br>(787 - 1,601)                  |
| Other neglected tropical diseases                                | 1,106,331<br>(725,302 - 1,249,093)         | 775,728<br>(440,909 - 1,249,093)           | 103,103<br>(69,830 - 137,916)           | 160,738<br>(115,585 - 207,496)          | 45,962<br>(35,318 - 55,226)                | 20,799<br>(13,824 - 29,680)             |
| Maternal disorders                                               | --                                         | --                                         | --                                      | --                                      | --                                         | --                                      |
| Maternal hemorrhage                                              | --                                         | --                                         | --                                      | --                                      | --                                         | --                                      |
| Maternal sepsis and other maternal infections                    | --                                         | --                                         | --                                      | --                                      | --                                         | --                                      |
| Maternal hypertensive disorders                                  | --                                         | --                                         | --                                      | --                                      | --                                         | --                                      |
| Maternal obstructed labor                                        | --                                         | --                                         | --                                      | --                                      | --                                         | --                                      |
| Maternal abortive outcome                                        | --                                         | --                                         | --                                      | --                                      | --                                         | --                                      |
| Indirect maternal deaths                                         | --                                         | --                                         | --                                      | --                                      | --                                         | --                                      |
| Late maternal deaths                                             | --                                         | --                                         | --                                      | --                                      | --                                         | --                                      |
| Maternal deaths aggravated by HIV/AIDS                           | --                                         | --                                         | --                                      | --                                      | --                                         | --                                      |
| Other maternal disorders                                         | --                                         | --                                         | --                                      | --                                      | --                                         | --                                      |
| Neonatal disorders                                               | 166,735,927<br>(157,160,128 - 173,540,016) | 166,735,927<br>(157,160,128 - 173,540,016) | --                                      | --                                      | --                                         | --                                      |
| Neonatal preterm birth complications                             | 75,795,475<br>(55,730,372 - 94,162,653)    | 75,795,475<br>(55,730,372 - 94,162,653)    | --                                      | --                                      | --                                         | --                                      |
| Neonatal encephalopathy due to birth asphyxia and trauma         | 42,238,178<br>(29,781,374 - 55,838,510)    | 42,238,178<br>(29,781,374 - 55,838,510)    | --                                      | --                                      | --                                         | --                                      |
| Neonatal sepsis and other neonatal infections                    | 18,148,750<br>(7,720,548 - 29,881,111)     | 18,148,750<br>(7,720,548 - 29,881,111)     | --                                      | --                                      | --                                         | --                                      |
| Hemolytic disease and other neonatal jaundice                    | 3,101,243<br>(1,661,675 - 5,081,593)       | 3,101,243<br>(1,661,675 - 5,081,593)       | --                                      | --                                      | --                                         | --                                      |
| Other neonatal disorders                                         | 27,452,281<br>(19,555,511 - 42,096,807)    | 27,452,281<br>(19,555,511 - 42,096,807)    | --                                      | --                                      | --                                         | --                                      |
| Nutritional deficiencies                                         | 23,097,409<br>(16,136,112 - 32,616,956)    | 18,410,261<br>(12,619,021 - 25,810,644)    | 1,235,396<br>(814,312 - 1,835,990)      | 1,908,458<br>(1,254,164 - 2,751,929)    | 930,978<br>(622,901 - 1,447,463)           | 612,316<br>(421,262 - 920,427)          |
| Protein-energy malnutrition                                      | 18,138,516<br>(12,419,909 - 26,436,886)    | 15,490,149<br>(10,811,221 - 22,617,727)    | 842,524<br>(516,661 - 1,271,742)        | 933,764<br>(507,335 - 1,507,873)        | 516,551<br>(306,561 - 854,056)             | 355,527<br>(201,884 - 571,260)          |
| Iodine deficiency                                                | 56,906<br>(27,743 - 123,977)               | 34,044<br>(11,543 - 94,194)                | 5,129<br>(2,074 - 12,506)               | 10,975<br>(5,116 - 23,392)              | 5,254<br>(1,940 - 16,703)                  | 1,505<br>(599 - 3,529)                  |
| Iron-deficiency anemia                                           | 4,043,971<br>(1,818,058 - 7,900,995)       | 2,334,371<br>(700,077 - 5,517,084)         | 337,590<br>(144,754 - 589,461)          | 820,924<br>(401,475 - 1,268,585)        | 355,496<br>(203,678 - 640,430)             | 195,590<br>(104,418 - 364,370)          |
| Other nutritional deficiencies                                   | 858,016<br>(424,976 - 1,871,415)           | 551,697<br>(199,487 - 1,358,233)           | 50,153<br>(23,780 - 103,341)            | 142,794<br>(72,624 - 260,301)           | 53,676<br>(25,546 - 101,261)               | 59,695<br>(26,886 - 115,584)            |
| Other communicable, maternal, neonatal, and nutritional diseases | 18,656,184<br>(14,314,546 - 24,458,943)    | 13,508,084<br>(9,374,292 - 19,001,822)     | 1,437,592<br>(1,155,982 - 1,810,286)    | 2,480,929<br>(2,212,122 - 2,781,317)    | 978,600<br>(821,007 - 1,177,768)           | 250,980<br>(198,971 - 323,132)          |
| Sexually transmitted diseases excluding HIV                      | 10,347,025<br>(5,973,212 - 16,187,023)     | 9,504,151<br>(5,389,567 - 15,004,170)      | 617,126<br>(359,784 - 964,445)          | 142,850<br>(101,912 - 195,974)          | 61,651<br>(40,679 - 84,115)                | 21,247<br>(12,822 - 29,987)             |
| Syphilis                                                         | 10,247,708<br>(5,877,186 - 16,086,225)     | 9,504,151<br>(5,389,567 - 15,004,170)      | 606,000<br>(348,099 - 953,805)          | 75,272<br>(53,613 - 102,927)            | 44,645<br>(29,454 - 60,941)                | 17,640<br>(10,632 - 24,864)             |
| Chlamydial infection                                             | --                                         | --                                         | --                                      | --                                      | --                                         | --                                      |
| Gonococcal infection                                             | 55,886<br>(40,308 - 77,635)                | --                                         | 5,636<br>(3,576 - 10,552)               | 37,016<br>(26,638 - 51,010)             | 10,676<br>(7,037 - 14,584)                 | 2,557<br>(1,543 - 3,604)                |
| Other sexually transmitted diseases                              | 43,430<br>(31,540 - 61,605)                | --                                         | 5,490<br>(3,483 - 10,277)               | 30,562<br>(22,055 - 42,196)             | 6,330<br>(4,172 - 8,682)                   | 1,049<br>(637 - 1,488)                  |
| Hepatitis                                                        | 4,787,090<br>(4,338,969 - 5,273,209)       | 1,845,615<br>(1,472,906 - 2,256,762)       | 508,227<br>(437,808 - 586,103)          | 1,774,526<br>(1,583,945 - 1,986,797)    | 550,335<br>(490,462 - 617,569)             | 108,387<br>(96,891 - 120,457)           |
| Acute hepatitis A                                                | 813,060<br>(256,891 - 1,491,566)           | 596,331<br>(184,347 - 1,107,979)           | 102,534<br>(32,861 - 194,376)           | 102,780<br>(28,508 - 218,254)           | 10,464<br>(2,821 - 23,837)                 | 951<br>(249 - 2,265)                    |
| Acute hepatitis B                                                | 2,461,467<br>(1,785,447 - 3,170,478)       | 1,071,065<br>(644,319 - 1,521,829)         | 128,332<br>(74,231 - 194,646)           | 733,139<br>(481,397 - 1,020,453)        | 431,864<br>(348,048 - 504,690)             | 97,067<br>(84,578 - 109,577)            |
| Acute hepatitis C                                                | 58,457<br>(11,544 - 141,378)               | --                                         | 11,522<br>(2,120 - 28,945)              | 32,649<br>(6,254 - 80,078)              | 12,224<br>(2,356 - 29,640)                 | 2,062<br>(400 - 5,092)                  |
| Acute hepatitis E                                                | 1,454,105<br>(1,040,036 - 1,942,363)       | 178,219<br>(77,449 - 338,971)              | 265,839<br>(188,041 - 352,459)          | 905,958<br>(659,462 - 1,186,455)        | 95,783<br>(50,763 - 158,305)               | 8,307<br>(3,742 - 15,561)               |
| Other infectious diseases                                        | 3,522,070<br>(2,438,432 - 4,715,038)       | 2,158,318<br>(1,451,004 - 3,083,240)       | 312,238<br>(197,951 - 445,271)          | 563,554<br>(367,380 - 742,538)          | 366,615<br>(231,913 - 560,641)             | 121,346<br>(78,057 - 196,333)           |
| Non-communicable diseases                                        | 375,068,958<br>(356,677,305 - 400,508,546) | 57,149,520<br>(48,114,136 - 75,380,229)    | 11,822,421<br>(10,551,872 - 13,375,165) | 92,904,718<br>(87,245,784 - 98,943,592) | 140,645,414<br>(134,363,330 - 145,980,197) | 72,546,885<br>(70,491,485 - 74,012,494) |
| Neoplasms                                                        | 83,339,896<br>(79,310,005 - 86,838,493)    | 3,284,541<br>(2,718,036 - 4,421,498)       | 2,632,016<br>(2,306,080 - 2,947,920)    | 22,467,224<br>(20,871,156 - 24,289,097) | 40,541,160<br>(38,601,247 - 41,991,286)    | 14,414,956<br>(13,886,838 - 14,865,102) |
| Esophageal cancer                                                | 4,858,987<br>(3,960,745 - 5,653,607)       | --                                         | --                                      | 892,847<br>(694,917 - 1,060,770)        | 3,080,976<br>(2,505,687 - 3,609,198)       | 885,164<br>(711,544 - 1,052,583)        |
| Stomach cancer                                                   | 11,123,814<br>(10,435,221 - 11,679,849)    | --                                         | --                                      | 2,542,893<br>(2,357,515 - 2,777,457)    | 6,291,933<br>(5,857,701 - 6,628,588)       | 2,288,989<br>(2,167,613 - 2,386,353)    |
| Liver cancer                                                     | 10,337,669<br>(9,371,589 - 11,317,039)     | --                                         | 90,848<br>(76,353 - 112,494)            | 4,211,138<br>(3,754,913 - 4,834,236)    | 4,959,136<br>(4,465,773 - 5,394,668)       | 1,076,546<br>(980,904 - 1,190,520)      |

Web Table 29 - Global YLLs with 95% UI by age, sex, and cause in 1990

| Cause                                | Males, All Ages                            | Males, 0-4 Years                     | Males, 5-14 Years                    | Males, 15-49 Years                      | Males, 50-69 Years                      | Males, 70-80 Years                      |
|--------------------------------------|--------------------------------------------|--------------------------------------|--------------------------------------|-----------------------------------------|-----------------------------------------|-----------------------------------------|
| Liver cancer due to hepatitis B      | 4,855,973<br>(4,333,038 - 5,385,100)       | --                                   | 34,004<br>(28,100 - 42,720)          | 2,271,559<br>(2,001,923 - 2,630,708)    | 2,199,421<br>(1,944,247 - 2,426,354)    | 350,989<br>(315,034 - 387,994)          |
| Liver cancer due to hepatitis C      | 1,476,520<br>(1,302,370 - 1,657,793)       | --                                   | 3,173<br>(2,486 - 4,054)             | 428,529<br>(369,988 - 506,731)          | 828,959<br>(721,472 - 936,962)          | 215,859<br>(188,792 - 250,410)          |
| Liver cancer due to alcohol use      | 2,259,350<br>(2,043,709 - 2,491,591)       | --                                   | --                                   | 614,125<br>(545,302 - 699,838)          | 1,256,570<br>(1,119,938 - 1,390,141)    | 388,654<br>(347,559 - 440,467)          |
| Liver cancer due to other causes     | 1,745,826<br>(1,558,939 - 1,972,377)       | --                                   | 53,672<br>(44,608 - 65,997)          | 896,925<br>(791,257 - 1,041,506)        | 674,186<br>(593,745 - 758,287)          | 121,043<br>(106,131 - 136,090)          |
| Larynx cancer                        | 1,648,171<br>(1,270,965 - 1,896,007)       | --                                   | --                                   | 368,290<br>(262,901 - 413,327)          | 1,026,540<br>(798,483 - 1,189,023)      | 253,341<br>(202,074 - 305,158)          |
| Tracheal, bronchus and lung cancer   | 18,080,736<br>(17,341,445 - 18,640,085)    | --                                   | --                                   | 3,045,321<br>(2,855,931 - 3,250,721)    | 11,400,062<br>(10,936,512 - 11,752,758) | 3,635,353<br>(3,500,784 - 3,740,206)    |
| Breast cancer                        | 133,044<br>(91,143 - 158,623)              | --                                   | --                                   | 51,527<br>(34,990 - 58,944)             | 60,260<br>(40,972 - 73,977)             | 21,257<br>(13,976 - 28,699)             |
| Cervical cancer                      | --                                         | --                                   | --                                   | --                                      | --                                      | --                                      |
| Uterine cancer                       | --                                         | --                                   | --                                   | --                                      | --                                      | --                                      |
| Prostate cancer                      | 2,283,317<br>(1,825,368 - 2,751,434)       | --                                   | --                                   | 54,946<br>(41,409 - 66,489)             | 876,642<br>(689,239 - 1,093,409)        | 1,351,729<br>(1,049,409 - 1,649,700)    |
| Colon and rectum cancer              | 5,552,438<br>(5,355,637 - 5,725,620)       | --                                   | --                                   | 1,377,389<br>(1,295,101 - 1,472,597)    | 2,810,532<br>(2,713,256 - 2,900,046)    | 1,364,517<br>(1,321,952 - 1,399,606)    |
| Lip and oral cavity cancer           | 1,474,372<br>(1,298,452 - 1,817,953)       | --                                   | --                                   | 480,240<br>(414,742 - 610,518)          | 790,196<br>(702,342 - 951,567)          | 203,936<br>(178,114 - 259,152)          |
| Nasopharynx cancer                   | 1,159,567<br>(1,043,554 - 1,279,916)       | --                                   | 35,634<br>(25,901 - 50,674)          | 571,706<br>(506,392 - 648,130)          | 482,269<br>(427,798 - 537,241)          | 69,959<br>(61,905 - 78,428)             |
| Other pharynx cancer                 | 1,057,242<br>(918,805 - 1,190,248)         | --                                   | --                                   | 280,168<br>(234,527 - 313,302)          | 662,666<br>(583,959 - 751,812)          | 114,408<br>(99,064 - 128,627)           |
| Gallbladder and biliary tract cancer | 897,166<br>(757,230 - 1,014,689)           | --                                   | --                                   | 165,115<br>(138,840 - 186,229)          | 489,358<br>(414,179 - 559,444)          | 242,694<br>(202,529 - 283,945)          |
| Pancreatic cancer                    | 2,305,604<br>(2,233,454 - 2,367,861)       | --                                   | --                                   | 486,229<br>(460,992 - 512,533)          | 1,324,728<br>(1,278,246 - 1,362,100)    | 494,647<br>(478,769 - 508,993)          |
| Malignant skin melanoma              | 566,637<br>(375,470 - 863,619)             | --                                   | --                                   | 259,569<br>(177,890 - 383,925)          | 225,385<br>(146,243 - 360,919)          | 81,684<br>(53,062 - 121,535)            |
| Non-melanoma skin cancer             | 306,904<br>(232,004 - 409,774)             | --                                   | --                                   | 110,332<br>(84,369 - 163,828)           | 118,854<br>(87,656 - 151,995)           | 77,718<br>(57,342 - 100,008)            |
| Ovarian cancer                       | --                                         | --                                   | --                                   | --                                      | --                                      | --                                      |
| Testicular cancer                    | 309,303<br>(240,189 - 369,653)             | --                                   | --                                   | 261,287<br>(203,980 - 317,740)          | 37,580<br>(27,578 - 44,087)             | 10,436<br>(7,419 - 12,169)              |
| Kidney cancer                        | 1,218,769<br>(1,172,512 - 1,263,857)       | 86,689<br>(56,834 - 126,551)         | 34,737<br>(29,206 - 40,897)          | 244,740<br>(230,070 - 260,717)          | 659,643<br>(631,478 - 689,684)          | 192,960<br>(184,922 - 202,295)          |
| Bladder cancer                       | 1,882,806<br>(1,658,542 - 1,987,964)       | --                                   | --                                   | 222,753<br>(184,080 - 242,331)          | 1,024,794<br>(900,250 - 1,089,677)      | 635,259<br>(559,511 - 677,813)          |
| Brain and nervous system cancer      | 2,947,374<br>(2,243,872 - 3,656,267)       | 254,920<br>(149,914 - 432,171)       | 406,726<br>(286,770 - 517,015)       | 1,252,865<br>(950,134 - 1,565,257)      | 856,951<br>(686,998 - 1,049,435)        | 175,912<br>(142,630 - 210,799)          |
| Thyroid cancer                       | 200,055<br>(172,939 - 219,739)             | --                                   | 3,457<br>(2,519 - 4,344)             | 60,169<br>(50,798 - 66,942)             | 102,212<br>(88,164 - 112,486)           | 34,217<br>(29,901 - 38,480)             |
| Mesothelioma                         | 235,640<br>(205,567 - 289,757)             | --                                   | --                                   | 54,165<br>(45,334 - 60,181)             | 134,035<br>(114,730 - 164,607)          | 47,440<br>(40,302 - 70,886)             |
| Hodgkin lymphoma                     | 798,705<br>(560,528 - 943,103)             | 156,910<br>(93,777 - 265,920)        | 84,968<br>(55,552 - 111,385)         | 396,026<br>(282,934 - 461,624)          | 127,966<br>(90,030 - 144,088)           | 32,834<br>(24,856 - 37,212)             |
| Non-Hodgkin lymphoma                 | 2,593,666<br>(2,126,426 - 3,006,521)       | 244,211<br>(158,214 - 355,810)       | 285,958<br>(198,221 - 347,911)       | 1,007,922<br>(799,506 - 1,152,036)      | 770,898<br>(649,785 - 946,888)          | 284,677<br>(243,954 - 366,586)          |
| Multiple myeloma                     | 518,240<br>(402,624 - 695,256)             | --                                   | --                                   | 112,133<br>(89,815 - 143,720)           | 275,948<br>(209,353 - 369,914)          | 130,160<br>(96,454 - 184,695)           |
| Leukemia                             | 5,528,377<br>(5,152,574 - 5,958,205)       | 969,633<br>(766,224 - 1,258,939)     | 1,086,362<br>(975,717 - 1,222,686)   | 2,350,077<br>(2,152,019 - 2,567,317)    | 799,414<br>(763,040 - 834,858)          | 322,891<br>(311,498 - 333,718)          |
| Other neoplasms                      | 5,321,293<br>(4,762,020 - 6,740,625)       | 1,572,177<br>(1,209,313 - 2,554,018) | 603,325<br>(501,767 - 845,562)       | 1,607,378<br>(1,459,005 - 1,806,018)    | 1,152,183<br>(1,032,911 - 1,283,268)    | 386,230<br>(353,378 - 465,979)          |
| Cardiovascular diseases              | 136,411,650<br>(130,648,758 - 141,332,541) | 6,295,132<br>(5,633,106 - 7,012,457) | 2,237,550<br>(2,034,634 - 2,452,444) | 32,744,889<br>(30,748,971 - 34,769,427) | 60,382,214<br>(57,559,267 - 62,744,087) | 34,751,865<br>(33,563,564 - 35,571,715) |
| Rheumatic heart disease              | 5,278,556<br>(3,840,363 - 6,886,459)       | 339,929<br>(225,958 - 505,874)       | 459,390<br>(323,230 - 602,496)       | 2,390,173<br>(1,630,340 - 3,028,834)    | 1,554,514<br>(1,140,488 - 2,226,183)    | 534,549<br>(391,141 - 740,743)          |
| Ischemic heart disease               | 65,344,200<br>(58,831,428 - 70,735,644)    | 917,399<br>(744,313 - 1,152,699)     | 436,745<br>(362,940 - 550,736)       | 15,604,782<br>(13,667,516 - 17,306,133) | 31,732,575<br>(28,753,488 - 34,257,181) | 16,652,699<br>(15,103,030 - 18,115,175) |
| Cerebrovascular disease              | 45,458,150<br>(39,986,131 - 51,132,004)    | 1,788,163<br>(1,463,773 - 2,298,003) | 809,507<br>(672,460 - 982,448)       | 9,443,111<br>(8,008,525 - 11,065,321)   | 19,961,794<br>(17,447,558 - 22,605,539) | 13,455,575<br>(11,823,671 - 15,002,351) |
| Ischemic stroke                      | 15,869,009<br>(12,588,784 - 18,829,003)    | 193,354<br>(88,741 - 395,612)        | 95,759<br>(53,761 - 175,032)         | 1,372,564<br>(921,056 - 1,812,088)      | 6,866,447<br>(5,187,096 - 8,399,238)    | 7,340,885<br>(6,023,770 - 8,443,872)    |
| Hemorrhagic stroke                   | 29,589,142<br>(25,365,547 - 34,234,944)    | 1,594,809<br>(1,277,830 - 2,064,267) | 713,748<br>(590,308 - 873,598)       | 8,070,547<br>(6,831,456 - 9,538,360)    | 13,095,347<br>(10,991,909 - 15,363,747) | 6,114,691<br>(4,946,710 - 7,275,680)    |
| Hypertensive heart disease           | 5,844,031<br>(4,333,919 - 8,413,050)       | 128,846<br>(52,532 - 213,079)        | 42,596<br>(22,383 - 58,438)          | 1,317,682<br>(949,339 - 1,884,676)      | 2,675,217<br>(1,987,731 - 3,915,265)    | 1,679,691<br>(1,227,289 - 2,509,187)    |
| Cardiomyopathy and myocarditis       | 5,368,975<br>(4,084,295 - 6,902,943)       | 1,242,687<br>(536,155 - 1,739,264)   | 217,015<br>(110,797 - 293,663)       | 1,714,876<br>(1,348,664 - 2,202,536)    | 1,589,570<br>(1,207,720 - 2,087,691)    | 604,828<br>(439,282 - 751,336)          |
| Atrial fibrillation and flutter      | 145,769<br>(128,479 - 160,833)             | --                                   | --                                   | 9,794<br>(8,341 - 10,928)               | 48,427<br>(42,443 - 54,518)             | 87,548<br>(77,065 - 96,727)             |
| Aortic aneurysm                      | 1,308,169<br>(1,024,424 - 1,481,173)       | --                                   | --                                   | 245,122<br>(190,083 - 286,969)          | 624,934<br>(488,790 - 711,586)          | 438,114<br>(346,941 - 493,825)          |

Web Table 29 - Global YLLs with 95% UI by age, sex, and cause in 1990

| Cause                                               | Males, All Ages                         | Males, 0-4 Years                     | Males, 5-14 Years                    | Males, 15-49 Years                   | Males, 50-69 Years                      | Males, 70-80 Years                      |
|-----------------------------------------------------|-----------------------------------------|--------------------------------------|--------------------------------------|--------------------------------------|-----------------------------------------|-----------------------------------------|
| Peripheral vascular disease                         | 125,362<br>(112,804 - 137,937)          | --                                   | --                                   | 7,858<br>(6,670 - 9,039)             | 54,891<br>(48,617 - 62,112)             | 62,612<br>(56,024 - 69,117)             |
| Endocarditis                                        | 788,267<br>(551,470 - 1,104,632)        | 173,453<br>(115,976 - 265,650)       | 31,233<br>(21,745 - 46,602)          | 295,255<br>(202,413 - 409,294)       | 200,652<br>(136,800 - 280,366)          | 87,674<br>(58,426 - 123,212)            |
| Other cardiovascular and circulatory diseases       | 6,750,171<br>(5,550,118 - 8,450,474)    | 1,704,654<br>(1,331,545 - 2,344,842) | 241,065<br>(185,258 - 308,101)       | 1,716,236<br>(1,376,118 - 2,114,228) | 1,939,642<br>(1,490,166 - 2,409,549)    | 1,148,574<br>(899,107 - 1,350,775)      |
| Chronic respiratory diseases                        | 42,587,674<br>(37,029,514 - 47,377,920) | 5,557,676<br>(4,443,967 - 6,455,232) | 945,845<br>(798,786 - 1,128,804)     | 6,276,584<br>(5,213,813 - 7,180,725) | 16,957,145<br>(14,522,888 - 19,238,468) | 12,850,423<br>(11,809,155 - 14,356,171) |
| Chronic obstructive pulmonary disease               | 25,771,680<br>(22,210,154 - 28,413,315) | 2,614,267<br>(2,086,207 - 3,181,296) | 272,670<br>(203,041 - 326,150)       | 2,563,832<br>(2,065,460 - 2,963,325) | 10,396,889<br>(8,795,830 - 11,806,499)  | 9,924,021<br>(8,856,385 - 11,044,745)   |
| Pneumoconiosis                                      | 4,073,988<br>(2,602,117 - 5,488,919)    | 58,814<br>(30,938 - 100,925)         | 39,479<br>(18,702 - 68,659)          | 993,215<br>(583,402 - 1,341,305)     | 2,197,169<br>(1,338,405 - 2,992,773)    | 785,310<br>(512,440 - 1,092,066)        |
| Silicosis                                           | 1,247,987<br>(808,659 - 1,777,584)      | 18,563<br>(6,743 - 40,795)           | 12,857<br>(4,802 - 27,195)           | 269,804<br>(170,011 - 403,814)       | 663,377<br>(416,583 - 941,971)          | 283,386<br>(178,213 - 412,091)          |
| Asbestosis                                          | 482,116<br>(300,190 - 697,266)          | 10,245<br>(3,765 - 20,435)           | 7,613<br>(3,753 - 14,006)            | 115,862<br>(67,721 - 170,927)        | 273,206<br>(163,524 - 405,118)          | 75,189<br>(46,972 - 115,953)            |
| Coal workers pneumoconiosis                         | 641,176<br>(375,427 - 1,004,389)        | 7,586<br>(3,557 - 13,315)            | 6,254<br>(2,796 - 11,293)            | 153,433<br>(85,662 - 243,383)        | 356,178<br>(206,555 - 553,235)          | 117,724<br>(70,472 - 192,870)           |
| Other pneumoconiosis                                | 1,702,709<br>(883,933 - 2,461,176)      | 22,420<br>(10,732 - 42,892)          | 12,754<br>(5,838 - 22,832)           | 454,116<br>(216,536 - 640,718)       | 904,408<br>(457,179 - 1,352,642)        | 309,012<br>(157,904 - 475,022)          |
| Asthma                                              | 7,673,646<br>(6,341,030 - 11,259,058)   | 1,083,801<br>(826,872 - 1,437,972)   | 481,165<br>(393,321 - 653,438)       | 2,003,342<br>(1,640,469 - 2,905,935) | 2,849,285<br>(2,169,250 - 4,442,994)    | 1,256,053<br>(960,918 - 2,001,848)      |
| Interstitial lung disease and pulmonary sarcoidosis | 2,450,725<br>(1,287,360 - 3,427,899)    | 37,772<br>(11,987 - 93,451)          | 20,971<br>(8,555 - 48,288)           | 393,436<br>(167,648 - 606,694)       | 1,278,941<br>(622,634 - 1,913,203)      | 719,605<br>(424,376 - 937,572)          |
| Other chronic respiratory diseases                  | 2,617,636<br>(1,819,409 - 3,249,748)    | 1,763,022<br>(1,263,370 - 2,204,109) | 131,560<br>(75,770 - 182,061)        | 322,758<br>(196,050 - 430,780)       | 234,862<br>(146,478 - 331,406)          | 165,434<br>(123,637 - 207,420)          |
| Cirrhosis                                           | 17,911,245<br>(17,067,880 - 18,747,571) | 751,807<br>(579,675 - 974,292)       | 436,895<br>(391,275 - 488,193)       | 8,042,544<br>(7,528,308 - 8,527,676) | 7,284,056<br>(6,915,590 - 7,639,503)    | 1,995,943<br>(1,322,686 - 2,462,406)    |
| Cirrhosis due to hepatitis B                        | 4,718,642<br>(4,321,681 - 5,172,048)    | 52,269<br>(37,307 - 71,892)          | 89,376<br>(69,897 - 109,569)         | 2,341,494<br>(2,099,279 - 2,631,212) | 1,895,050<br>(1,727,585 - 2,078,849)    | 340,454<br>(309,347 - 377,106)          |
| Cirrhosis due to hepatitis C                        | 3,722,526<br>(3,414,179 - 4,044,548)    | 57,352<br>(36,150 - 94,988)          | 72,200<br>(55,501 - 96,951)          | 1,584,458<br>(1,433,024 - 1,735,676) | 1,661,648<br>(1,516,730 - 1,819,378)    | 346,867<br>(311,248 - 383,710)          |
| Cirrhosis due to alcohol use                        | 6,867,544<br>(6,329,131 - 7,337,951)    | --                                   | --                                   | 3,004,550<br>(2,716,139 - 3,267,929) | 3,221,904<br>(2,977,064 - 3,433,712)    | 641,089<br>(600,742 - 683,388)          |
| Cirrhosis due to other causes                       | 2,602,534<br>(2,333,231 - 2,875,779)    | 642,186<br>(489,426 - 842,763)       | 275,319<br>(236,246 - 317,138)       | 1,112,043<br>(997,185 - 1,252,410)   | 505,454<br>(440,503 - 581,956)          | 67,532<br>(59,577 - 79,360)             |
| Digestive diseases                                  | 19,006,231<br>(16,523,493 - 21,103,682) | 2,261,425<br>(1,778,936 - 3,099,223) | 1,563,328<br>(1,338,074 - 1,796,143) | 7,522,372<br>(6,209,091 - 8,415,349) | 5,419,003<br>(4,714,347 - 6,000,821)    | 2,240,104<br>(1,978,788 - 2,446,322)    |
| Peptic ulcer disease                                | 5,955,563<br>(4,999,441 - 7,495,932)    | 243,848<br>(145,756 - 477,112)       | 224,723<br>(156,272 - 343,795)       | 2,380,304<br>(1,953,134 - 3,029,452) | 2,259,795<br>(1,895,951 - 2,752,797)    | 846,894<br>(723,748 - 1,019,997)        |
| Gastritis and duodenitis                            | 950,398<br>(474,921 - 1,438,665)        | 120,332<br>(36,003 - 218,622)        | 93,502<br>(41,907 - 158,641)         | 360,569<br>(174,970 - 588,602)       | 271,754<br>(131,729 - 454,798)          | 104,242<br>(50,132 - 170,606)           |
| Appendicitis                                        | 2,016,613<br>(1,554,614 - 2,700,381)    | 246,823<br>(142,282 - 468,952)       | 257,660<br>(183,599 - 370,248)       | 1,098,936<br>(811,624 - 1,453,864)   | 314,441<br>(226,247 - 431,568)          | 98,753<br>(65,602 - 134,890)            |
| Paralytic ileus and intestinal obstruction          | 3,415,304<br>(1,895,802 - 4,438,471)    | 416,358<br>(227,233 - 635,040)       | 541,219<br>(334,817 - 714,197)       | 1,263,802<br>(600,826 - 1,667,750)   | 851,971<br>(449,600 - 1,135,657)        | 341,954<br>(189,736 - 485,969)          |
| Inguinal, femoral, and abdominal hernia             | 949,736<br>(517,776 - 1,196,218)        | 151,373<br>(61,949 - 253,318)        | 106,876<br>(56,705 - 148,773)        | 304,748<br>(154,105 - 413,812)       | 233,096<br>(123,970 - 302,620)          | 153,644<br>(93,126 - 200,221)           |
| Inflammatory bowel disease                          | 1,041,293<br>(727,425 - 1,480,935)      | 400,662<br>(147,817 - 725,526)       | 100,901<br>(53,945 - 157,970)        | 286,675<br>(176,859 - 408,156)       | 169,449<br>(101,451 - 227,543)          | 84,207<br>(51,323 - 113,298)            |
| Vascular intestinal disorders                       | 529,073<br>(231,025 - 1,037,623)        | 32,480<br>(6,057 - 82,877)           | 32,995<br>(7,184 - 85,646)           | 110,266<br>(44,224 - 233,467)        | 207,561<br>(89,792 - 400,558)           | 145,772<br>(63,072 - 271,118)           |
| Gallbladder and biliary diseases                    | 803,130<br>(666,271 - 980,396)          | 60,537<br>(34,736 - 124,238)         | 42,420<br>(32,043 - 62,276)          | 248,019<br>(184,219 - 307,079)       | 274,525<br>(214,319 - 336,040)          | 177,629<br>(149,756 - 216,033)          |
| Pancreatitis                                        | 1,695,577<br>(1,039,425 - 2,568,189)    | 34,136<br>(11,322 - 69,969)          | 47,020<br>(23,511 - 87,828)          | 1,024,310<br>(628,689 - 1,545,875)   | 471,688<br>(290,512 - 732,139)          | 118,422<br>(68,737 - 175,339)           |
| Other digestive diseases                            | 1,649,543<br>(1,284,157 - 2,161,027)    | 555,477<br>(371,507 - 836,010)       | 116,013<br>(84,402 - 155,348)        | 444,743<br>(314,311 - 580,814)       | 364,722<br>(259,754 - 481,115)          | 168,588<br>(127,794 - 217,235)          |
| Neurological disorders                              | 8,869,411<br>(8,015,175 - 10,080,423)   | 1,253,890<br>(797,793 - 1,989,645)   | 658,771<br>(516,553 - 882,268)       | 2,452,827<br>(2,005,326 - 2,846,489) | 1,286,691<br>(1,178,000 - 1,393,150)    | 3,217,232<br>(3,035,475 - 3,396,339)    |
| Alzheimer disease and other dementias               | 3,484,938<br>(3,289,704 - 3,668,891)    | --                                   | --                                   | 3,637<br>(2,811 - 4,627)             | 642,447<br>(592,428 - 691,636)          | 2,838,854<br>(2,668,568 - 3,011,042)    |
| Parkinson disease                                   | 315,613<br>(292,781 - 333,537)          | --                                   | --                                   | 14,936<br>(12,295 - 16,832)          | 90,503<br>(83,046 - 97,135)             | 210,174<br>(194,444 - 223,951)          |
| Epilepsy                                            | 3,679,743<br>(2,992,903 - 4,880,718)    | 994,936<br>(577,505 - 1,760,763)     | 554,268<br>(419,085 - 787,221)       | 1,838,737<br>(1,447,364 - 2,216,058) | 229,437<br>(182,514 - 289,505)          | 62,366<br>(48,795 - 81,845)             |
| Multiple sclerosis                                  | 173,935<br>(96,747 - 328,934)           | --                                   | --                                   | 96,665<br>(52,831 - 174,240)         | 65,681<br>(38,306 - 129,773)            | 11,588<br>(6,330 - 21,858)              |
| Other neurological disorders                        | 1,215,182<br>(866,704 - 1,720,986)      | 258,954<br>(158,729 - 632,476)       | 104,503<br>(70,984 - 172,338)        | 498,853<br>(368,759 - 581,590)       | 258,623<br>(195,014 - 307,974)          | 94,249<br>(70,526 - 110,135)            |
| Mental and substance use disorders                  | 6,091,152<br>(4,864,102 - 7,887,770)    | 114,085<br>(60,983 - 182,314)        | 435<br>(349 - 529)                   | 4,510,735<br>(3,585,543 - 5,645,711) | 1,341,206<br>(1,048,222 - 1,972,318)    | 124,690<br>(96,578 - 173,054)           |
| Schizophrenia                                       | 410,594<br>(194,915 - 565,349)          | --                                   | --                                   | 288,481<br>(133,568 - 403,240)       | 102,236<br>(50,020 - 141,602)           | 19,877<br>(10,136 - 27,932)             |
| Alcohol use disorders                               | 3,533,390<br>(2,493,004 - 5,248,054)    | --                                   | --                                   | 2,376,005<br>(1,634,230 - 3,515,214) | 1,074,219<br>(815,803 - 1,700,382)      | 83,166<br>(57,931 - 128,340)            |
| Drug use disorders                                  | 2,142,762<br>(1,786,929 - 2,657,454)    | 114,085<br>(60,983 - 182,314)        | --                                   | 1,842,279<br>(1,514,814 - 2,301,816) | 164,751<br>(141,695 - 229,499)          | 21,648<br>(17,753 - 29,438)             |
| Opioid use disorders                                | 708,584<br>(639,171 - 893,320)          | 35,012<br>(19,070 - 51,025)          | --                                   | 603,195<br>(539,842 - 762,752)       | 62,446<br>(52,188 - 88,326)             | 7,930<br>(6,320 - 11,059)               |

Web Table 29 - Global YLLs with 95% UI by age, sex, and cause in 1990

| Cause                                               | Males, All Ages                         | Males, 0-4 Years                        | Males, 5-14 Years                    | Males, 15-49 Years                   | Males, 50-69 Years                   | Males, 70-80 Years                   |
|-----------------------------------------------------|-----------------------------------------|-----------------------------------------|--------------------------------------|--------------------------------------|--------------------------------------|--------------------------------------|
| Cocaine use disorders                               | 83,806<br>(71,773 - 101,822)            | 4,369<br>(2,356 - 6,980)                | --                                   | 72,964<br>(62,003 - 88,835)          | 5,385<br>(4,446 - 6,668)             | 1,087<br>(817 - 1,464)               |
| Amphetamine use disorders                           | 68,298<br>(57,276 - 83,451)             | 4,652<br>(2,444 - 7,509)                | --                                   | 56,735<br>(46,906 - 69,787)          | 5,812<br>(4,729 - 7,271)             | 1,099<br>(817 - 1,471)               |
| Other drug use disorders                            | 1,282,076<br>(1,002,204 - 1,598,596)    | 70,052<br>(37,533 - 119,114)            | --                                   | 1,109,383<br>(837,676 - 1,387,891)   | 91,109<br>(78,187 - 124,882)         | 11,531<br>(9,468 - 15,466)           |
| Eating disorders                                    | 4,406<br>(3,808 - 5,119)                | --                                      | 435<br>(349 - 529)                   | 3,971<br>(3,391 - 4,662)             | --                                   | --                                   |
| Anorexia nervosa                                    | 4,406<br>(3,808 - 5,119)                | --                                      | 435<br>(349 - 529)                   | 3,971<br>(3,391 - 4,662)             | --                                   | --                                   |
| Diabetes, urogenital, blood, and endocrine diseases | 26,048,338<br>(21,204,233 - 34,579,117) | 7,266,445<br>(3,960,745 - 14,437,505)   | 1,845,310<br>(1,115,541 - 2,877,714) | 6,831,870<br>(6,131,592 - 7,895,670) | 6,806,579<br>(6,403,739 - 7,197,856) | 3,298,134<br>(3,063,636 - 3,427,170) |
| Diabetes mellitus                                   | 7,611,339<br>(7,256,499 - 7,959,805)    | 380,806<br>(335,274 - 430,336)          | 107,805<br>(95,058 - 122,111)        | 1,910,085<br>(1,781,490 - 2,033,431) | 3,601,286<br>(3,396,523 - 3,804,017) | 1,611,356<br>(1,537,413 - 1,687,445) |
| Acute glomerulonephritis                            | 567,126<br>(281,624 - 891,368)          | 185,496<br>(49,719 - 394,673)           | 78,475<br>(38,402 - 128,808)         | 190,178<br>(104,717 - 292,372)       | 84,490<br>(41,659 - 135,399)         | 28,487<br>(13,829 - 46,588)          |
| Chronic kidney disease                              | 6,328,586<br>(5,351,053 - 6,714,139)    | 647,909<br>(489,780 - 766,715)          | 275,797<br>(225,771 - 308,022)       | 2,404,551<br>(1,925,192 - 2,618,948) | 1,947,085<br>(1,678,257 - 2,124,076) | 1,053,244<br>(890,037 - 1,214,644)   |
| Chronic kidney disease due to diabetes mellitus     | 522,062<br>(309,667 - 710,905)          | 13,452<br>(6,148 - 20,260)              | 6,632<br>(3,373 - 11,303)            | 146,593<br>(74,903 - 188,313)        | 218,172<br>(136,527 - 291,858)       | 137,213<br>(82,302 - 184,251)        |
| Chronic kidney disease due to hypertension          | 1,518,208<br>(912,822 - 1,900,684)      | 64,996<br>(21,426 - 105,388)            | 21,482<br>(8,586 - 31,333)           | 498,241<br>(284,069 - 618,513)       | 585,228<br>(364,446 - 729,699)       | 348,261<br>(224,431 - 432,521)       |
| Chronic kidney disease due to glomerulonephritis    | 2,018,387<br>(1,711,841 - 2,452,200)    | 344,868<br>(253,703 - 463,901)          | 152,027<br>(125,081 - 184,995)       | 892,310<br>(738,677 - 1,065,797)     | 450,311<br>(366,746 - 561,299)       | 178,872<br>(135,608 - 226,711)       |
| Chronic kidney disease due to other causes          | 2,269,929<br>(2,385,047 - 1,991,522)    | 224,594<br>(134,337 - 306,777)          | 95,656<br>(63,645 - 118,193)         | 867,407<br>(617,485 - 1,049,292)     | 693,373<br>(537,673 - 890,875)       | 388,898<br>(293,367 - 501,194)       |
| Urinary diseases and male infertility               | 1,593,136<br>(1,214,473 - 1,795,083)    | 399,548<br>(267,303 - 503,585)          | 73,770<br>(51,049 - 88,819)          | 469,922<br>(332,040 - 550,140)       | 398,434<br>(295,337 - 467,468)       | 251,461<br>(201,306 - 295,673)       |
| Interstitial nephritis and urinary tract infections | 232,797<br>(157,633 - 306,917)          | --                                      | 12,833<br>(9,311 - 21,110)           | 84,095<br>(55,716 - 115,580)         | 91,752<br>(55,816 - 124,522)         | 44,117<br>(25,634 - 87,712)          |
| Other urinary diseases                              | 559,114<br>(448,817 - 795,582)          | 133,720<br>(80,488 - 231,742)           | 29,773<br>(21,525 - 47,789)          | 158,262<br>(114,429 - 234,926)       | 147,420<br>(105,750 - 219,141)       | 89,940<br>(64,066 - 127,707)         |
| Gynecological diseases                              | --                                      | --                                      | --                                   | --                                   | --                                   | --                                   |
| Uterine fibroids                                    | --                                      | --                                      | --                                   | --                                   | --                                   | --                                   |
| Polycystic ovarian syndrome                         | --                                      | --                                      | --                                   | --                                   | --                                   | --                                   |
| Endometriosis                                       | --                                      | --                                      | --                                   | --                                   | --                                   | --                                   |
| Genital prolapse                                    | --                                      | --                                      | --                                   | --                                   | --                                   | --                                   |
| Other gynecological diseases                        | --                                      | --                                      | --                                   | --                                   | --                                   | --                                   |
| Hemoglobinopathies and hemolytic anemias            | 6,721,830<br>(2,130,530 - 14,840,984)   | 4,473,251<br>(1,213,349 - 11,411,220)   | 1,061,477<br>(348,547 - 2,094,481)   | 941,877<br>(385,084 - 2,120,068)     | 179,101<br>(88,130 - 387,203)        | 66,123<br>(37,024 - 103,397)         |
| Thalassemias                                        | 1,435,786<br>(779,992 - 2,225,887)      | 870,500<br>(383,722 - 1,415,714)        | 254,575<br>(142,511 - 394,262)       | 304,548<br>(169,977 - 454,148)       | 5,915<br>(3,340 - 9,597)             | 248<br>(136 - 415)                   |
| Sickle cell disorders                               | 4,452,490<br>(704,998 - 12,156,510)     | 3,187,220<br>(428,935 - 9,739,730)      | 726,887<br>(121,237 - 1,753,287)     | 473,859<br>(117,478 - 1,494,010)     | 63,156<br>(19,868 - 209,985)         | 1,367<br>(678 - 2,847)               |
| G6PD deficiency                                     | 130,136<br>(63,038 - 197,194)           | 73,815<br>(26,337 - 126,114)            | 19,640<br>(10,309 - 29,121)          | 29,993<br>(16,327 - 47,754)          | 6,094<br>(3,462 - 10,125)            | 595<br>(315 - 1,039)                 |
| Other hemoglobinopathies and hemolytic anemias      | 703,418<br>(401,974 - 1,031,221)        | 341,717<br>(156,594 - 519,192)          | 60,375<br>(33,941 - 91,582)          | 133,477<br>(75,716 - 200,111)        | 103,936<br>(60,617 - 160,144)        | 63,913<br>(35,867 - 99,015)          |
| Endocrine, metabolic, blood, and immune disorders   | 2,434,410<br>(1,603,557 - 3,126,487)    | 1,045,715<br>(599,970 - 1,479,950)      | 205,379<br>(135,083 - 290,412)       | 672,900<br>(489,047 - 797,210)       | 357,010<br>(269,013 - 455,772)       | 153,405<br>(109,169 - 195,066)       |
| Musculoskeletal disorders                           | 919,337<br>(653,070 - 1,137,192)        | --                                      | 154,833<br>(97,398 - 219,212)        | 393,037<br>(272,515 - 477,369)       | 279,231<br>(197,924 - 349,024)       | 92,236<br>(70,249 - 121,431)         |
| Rheumatoid arthritis                                | 269,148<br>(183,562 - 365,104)          | --                                      | 35,602<br>(14,371 - 62,824)          | 81,873<br>(53,215 - 116,844)         | 109,522<br>(73,220 - 148,393)        | 42,151<br>(29,846 - 54,755)          |
| Other musculoskeletal disorders                     | 650,189<br>(453,059 - 792,185)          | --                                      | 119,231<br>(71,565 - 165,271)        | 311,164<br>(210,725 - 371,262)       | 169,709<br>(116,504 - 217,274)       | 50,085<br>(37,739 - 69,069)          |
| Other non-communicable diseases                     | 33,884,024<br>(28,303,406 - 47,403,507) | 30,364,519<br>(24,878,535 - 43,509,947) | 1,347,437<br>(1,141,251 - 1,723,471) | 1,662,637<br>(1,502,805 - 1,856,041) | 348,129<br>(303,206 - 384,036)       | 161,302<br>(141,054 - 176,495)       |
| Congenital anomalies                                | 31,844,626<br>(26,398,159 - 45,058,605) | 28,880,485<br>(23,568,419 - 41,785,195) | 1,287,025<br>(1,081,431 - 1,659,602) | 1,418,209<br>(1,268,460 - 1,604,166) | 196,707<br>(139,556 - 229,948)       | 62,200<br>(38,334 - 73,348)          |
| Neural tube defects                                 | 6,097,329<br>(4,238,126 - 8,593,152)    | 5,777,420<br>(3,969,368 - 8,026,532)    | 152,149<br>(97,501 - 214,995)        | 150,007<br>(101,826 - 218,019)       | 13,715<br>(8,787 - 19,474)           | 4,036<br>(1,836 - 6,463)             |
| Congenital heart anomalies                          | 15,571,790<br>(12,630,921 - 22,960,433) | 13,958,816<br>(11,116,316 - 21,079,496) | 740,936<br>(615,172 - 959,758)       | 737,126<br>(631,278 - 861,071)       | 100,517<br>(67,385 - 123,257)        | 34,396<br>(17,849 - 43,477)          |
| Cleft lip and cleft palate                          | 362,658<br>(151,683 - 652,997)          | 362,658<br>(151,683 - 652,997)          | --                                   | --                                   | --                                   | --                                   |
| Down syndrome                                       | 1,437,894<br>(494,528 - 2,806,685)      | 1,171,224<br>(339,791 - 2,440,776)      | 90,913<br>(34,416 - 169,625)         | 152,567<br>(89,575 - 231,172)        | 22,066<br>(13,906 - 33,541)          | 1,124<br>(651 - 1,790)               |
| Chromosomal unbalanced rearrangements               | 636,508<br>(292,596 - 1,593,603)        | 571,205<br>(261,764 - 1,478,515)        | 25,286<br>(11,495 - 61,081)          | 35,598<br>(18,016 - 55,966)          | 3,697<br>(1,944 - 5,913)             | 721<br>(373 - 1,096)                 |
| Other congenital anomalies                          | 7,738,448<br>(5,240,436 - 15,738,375)   | 7,039,163<br>(4,677,416 - 14,726,511)   | 277,740<br>(184,300 - 521,036)       | 342,911<br>(260,494 - 440,903)       | 56,712<br>(40,983 - 75,071)          | 21,922<br>(16,578 - 27,307)          |

Web Table 29 - Global YLLs with 95% UI by age, sex, and cause in 1990

| Cause                                           | Males, All Ages                            | Males, 0-4 Years                        | Males, 5-14 Years                       | Males, 15-49 Years                      | Males, 50-69 Years                      | Males, 70-80 Years                   |
|-------------------------------------------------|--------------------------------------------|-----------------------------------------|-----------------------------------------|-----------------------------------------|-----------------------------------------|--------------------------------------|
| Skin and subcutaneous diseases                  | 937,493<br>(784,139 - 1,060,813)           | 382,131<br>(251,922 - 489,072)          | 60,412<br>(48,048 - 69,762)             | 244,427<br>(217,703 - 271,867)          | 151,421<br>(136,931 - 169,057)          | 99,102<br>(91,015 - 110,788)         |
| Cellulitis                                      | 470,812<br>(290,492 - 704,885)             | 205,081<br>(119,024 - 339,498)          | 33,353<br>(19,322 - 50,455)             | 119,958<br>(70,002 - 181,564)           | 78,110<br>(51,077 - 110,583)            | 34,310<br>(22,500 - 49,727)          |
| Pyoderma                                        | 348,761<br>(199,066 - 498,470)             | 162,742<br>(86,263 - 244,294)           | 19,284<br>(9,132 - 29,873)              | 90,259<br>(46,507 - 133,490)            | 48,449<br>(27,417 - 71,288)             | 28,027<br>(19,349 - 37,019)          |
| Decubitus ulcer                                 | 94,422<br>(63,710 - 126,392)               | 7,211<br>(1,408 - 16,329)               | 5,328<br>(2,184 - 9,501)                | 26,290<br>(15,595 - 36,778)             | 21,486<br>(15,238 - 28,952)             | 34,107<br>(27,700 - 41,276)          |
| Other skin and subcutaneous diseases            | 23,498<br>(12,932 - 38,332)                | 7,096<br>(2,427 - 15,658)               | 2,447<br>(1,158 - 4,643)                | 7,921<br>(4,776 - 11,623)               | 3,376<br>(2,112 - 4,381)                | 2,658<br>(1,753 - 3,214)             |
| Sudden infant death syndrome                    | 1,101,904<br>(548,281 - 1,893,841)         | 1,101,904<br>(548,281 - 1,893,841)      | -                                       | -                                       | -                                       | -                                    |
| Injuries                                        | 151,451,893<br>(141,877,155 - 160,556,727) | 36,312,353<br>(29,371,892 - 42,018,820) | 16,743,315<br>(15,364,012 - 17,936,627) | 82,096,661<br>(77,750,746 - 87,146,291) | 13,509,873<br>(12,645,641 - 14,633,723) | 2,789,692<br>(2,642,842 - 3,055,391) |
| Transport injuries                              | 44,881,603<br>(42,031,625 - 49,639,354)    | 6,025,358<br>(4,913,695 - 7,652,598)    | 5,064,440<br>(4,597,753 - 5,686,575)    | 29,200,634<br>(27,398,896 - 31,929,573) | 3,917,505<br>(3,600,436 - 4,273,703)    | 673,666<br>(626,289 - 752,639)       |
| Road injuries                                   | 41,483,197<br>(38,787,409 - 46,424,688)    | 5,344,741<br>(4,328,089 - 6,807,556)    | 4,713,040<br>(4,281,948 - 5,307,261)    | 27,249,254<br>(25,636,420 - 29,941,288) | 3,561,702<br>(3,283,020 - 3,951,518)    | 614,460<br>(577,056 - 689,579)       |
| Pedestrian road injuries                        | 14,689,448<br>(12,003,367 - 18,502,329)    | 2,899,024<br>(2,131,744 - 4,046,635)    | 2,469,779<br>(2,048,830 - 3,061,129)    | 7,552,669<br>(5,970,867 - 9,737,732)    | 1,462,832<br>(1,197,384 - 1,811,625)    | 305,144<br>(259,144 - 380,062)       |
| Cyclist road injuries                           | 2,446,338<br>(1,989,402 - 3,026,816)       | 292,296<br>(201,682 - 409,749)          | 443,780<br>(357,538 - 572,195)          | 1,350,730<br>(1,069,468 - 1,665,349)    | 295,045<br>(233,420 - 365,532)          | 64,486<br>(51,751 - 79,109)          |
| Motorcyclist road injuries                      | 8,892,404<br>(7,283,111 - 10,801,723)      | 470,331<br>(305,208 - 705,796)          | 400,346<br>(286,043 - 546,943)          | 7,486,722<br>(6,149,609 - 9,016,002)    | 479,273<br>(363,847 - 611,287)          | 55,733<br>(41,511 - 69,627)          |
| Motor vehicle road injuries                     | 14,077,760<br>(12,291,928 - 16,419,445)    | 1,437,877<br>(1,007,199 - 1,939,101)    | 1,173,351<br>(936,843 - 1,452,636)      | 10,122,213<br>(8,856,981 - 11,633,674)  | 1,173,831<br>(979,851 - 1,354,825)      | 170,487<br>(140,753 - 201,739)       |
| Other road injuries                             | 1,377,247<br>(723,087 - 1,883,068)         | 245,213<br>(88,765 - 417,293)           | 225,784<br>(104,608 - 344,165)          | 736,920<br>(395,695 - 1,109,261)        | 150,721<br>(81,133 - 225,564)           | 18,609<br>(10,856 - 27,647)          |
| Other transport injuries                        | 3,398,407<br>(2,733,451 - 3,923,999)       | 680,617<br>(485,480 - 918,798)          | 351,400<br>(281,268 - 427,545)          | 1,951,380<br>(1,587,014 - 2,296,266)    | 355,803<br>(267,310 - 418,665)          | 59,207<br>(39,046 - 72,041)          |
| Unintentional injuries                          | 69,321,444<br>(61,277,620 - 76,412,659)    | 28,374,562<br>(21,364,085 - 33,775,101) | 10,274,746<br>(8,845,052 - 11,320,743)  | 24,209,477<br>(22,272,558 - 26,746,681) | 5,081,925<br>(4,698,511 - 5,751,750)    | 1,380,734<br>(1,280,898 - 1,601,787) |
| Falls                                           | 8,282,053<br>(7,230,369 - 10,409,848)      | 1,890,774<br>(1,311,548 - 2,715,183)    | 832,563<br>(690,047 - 1,059,573)        | 3,696,353<br>(3,117,557 - 4,668,946)    | 1,307,156<br>(1,151,812 - 1,683,275)    | 555,207<br>(494,065 - 700,746)       |
| Drowning                                        | 24,214,153<br>(17,433,033 - 29,233,455)    | 10,516,540<br>(6,321,806 - 14,074,535)  | 5,763,352<br>(4,198,404 - 6,812,624)    | 6,981,563<br>(5,669,227 - 8,304,675)    | 818,146<br>(673,317 - 1,015,297)        | 134,553<br>(110,677 - 170,247)       |
| Fire, heat, and hot substances                  | 6,545,895<br>(5,193,639 - 7,859,004)       | 2,727,225<br>(1,817,496 - 3,624,081)    | 663,621<br>(527,430 - 814,410)          | 2,491,860<br>(1,918,548 - 2,969,224)    | 519,367<br>(432,654 - 670,900)          | 143,821<br>(114,918 - 174,087)       |
| Poisonings                                      | 4,119,830<br>(3,413,444 - 6,208,595)       | 1,351,961<br>(923,997 - 2,365,818)      | 326,653<br>(258,562 - 508,457)          | 2,011,072<br>(1,541,377 - 2,726,657)    | 365,286<br>(297,068 - 535,231)          | 64,857<br>(55,318 - 102,654)         |
| Exposure to mechanical forces                   | 10,447,030<br>(8,416,965 - 12,569,158)     | 5,046,324<br>(2,660,374 - 7,120,088)    | 878,131<br>(743,084 - 1,100,140)        | 3,818,683<br>(3,418,006 - 4,704,890)    | 633,427<br>(556,507 - 769,734)          | 70,466<br>(61,495 - 84,922)          |
| Unintentional firearm injuries                  | 2,225,408<br>(1,868,985 - 2,661,823)       | 419,651<br>(309,664 - 580,512)          | 217,431<br>(167,973 - 279,495)          | 1,400,027<br>(1,138,538 - 1,738,775)    | 163,156<br>(119,290 - 234,441)          | 25,143<br>(17,922 - 35,081)          |
| Unintentional suffocation                       | 3,973,625<br>(1,095,034 - 6,020,920)       | 3,662,464<br>(872,619 - 5,668,136)      | 114,413<br>(59,486 - 175,755)           | 160,022<br>(94,367 - 202,580)           | 30,537<br>(17,958 - 38,364)             | 6,189<br>(3,536 - 8,055)             |
| Other exposure to mechanical forces             | 4,247,998<br>(3,821,822 - 5,437,620)       | 964,209<br>(631,130 - 1,416,461)        | 546,286<br>(444,371 - 735,191)          | 2,258,634<br>(2,042,900 - 2,737,564)    | 439,734<br>(385,302 - 539,183)          | 39,134<br>(34,579 - 48,489)          |
| Adverse effects of medical treatment            | 2,561,481<br>(1,719,378 - 3,388,701)       | 1,434,756<br>(813,175 - 2,156,041)      | 164,110<br>(103,432 - 215,203)          | 567,030<br>(396,276 - 734,367)          | 277,912<br>(205,005 - 360,828)          | 117,673<br>(86,659 - 154,065)        |
| Animal contact                                  | 2,865,772<br>(1,792,273 - 3,483,066)       | 665,874<br>(404,658 - 1,019,810)        | 808,723<br>(511,097 - 1,041,272)        | 1,051,836<br>(583,666 - 1,306,458)      | 289,295<br>(172,009 - 361,795)          | 50,044<br>(30,361 - 62,880)          |
| Venomous animal contact                         | 2,166,988<br>(1,320,274 - 2,740,439)       | 370,148<br>(228,054 - 647,792)          | 650,249<br>(396,773 - 831,443)          | 876,780<br>(473,936 - 1,110,682)        | 234,470<br>(140,777 - 303,441)          | 35,342<br>(20,084 - 45,884)          |
| Non-venomous animal contact                     | 698,784<br>(390,095 - 933,802)             | 295,727<br>(137,638 - 466,084)          | 158,474<br>(93,362 - 237,653)           | 175,056<br>(86,175 - 217,510)           | 54,825<br>(33,975 - 70,828)             | 14,702<br>(8,695 - 19,519)           |
| Foreign body                                    | 4,894,832<br>(2,953,071 - 8,715,315)       | 3,580,889<br>(2,034,207 - 6,642,541)    | 202,088<br>(124,718 - 357,041)          | 638,385<br>(377,468 - 977,097)          | 310,558<br>(176,867 - 481,365)          | 162,912<br>(99,559 - 281,221)        |
| Pulmonary aspiration and foreign body in airway | 4,804,795<br>(2,871,759 - 8,605,033)       | 3,538,909<br>(2,007,492 - 6,614,644)    | 192,086<br>(116,943 - 344,481)          | 614,524<br>(356,203 - 948,610)          | 297,899<br>(167,235 - 469,911)          | 161,377<br>(97,367 - 279,334)        |
| Foreign body in other body part                 | 90,037<br>(46,892 - 150,164)               | 41,979<br>(17,983 - 90,162)             | 10,002<br>(5,622 - 17,052)              | 23,861<br>(13,294 - 33,755)             | 12,659<br>(6,780 - 17,786)              | 1,535<br>(815 - 2,154)               |
| Other unintentional injuries                    | 5,390,398<br>(4,704,101 - 6,032,943)       | 1,160,218<br>(862,202 - 1,399,264)      | 635,505<br>(507,906 - 727,996)          | 2,952,696<br>(2,622,691 - 3,398,071)    | 560,778<br>(496,176 - 639,294)          | 81,201<br>(70,655 - 93,438)          |
| Self-harm and interpersonal violence            | 33,851,646<br>(28,243,446 - 38,542,621)    | 1,060,512<br>(656,858 - 1,443,210)      | 1,000,778<br>(765,722 - 1,202,868)      | 27,062,516<br>(22,830,360 - 30,527,946) | 4,044,401<br>(3,363,346 - 4,668,473)    | 683,439<br>(544,466 - 770,333)       |
| Self-harm                                       | 19,275,703<br>(15,679,143 - 21,502,474)    | -                                       | 422,825<br>(315,515 - 517,384)          | 15,175,489<br>(12,329,750 - 16,813,995) | 3,080,500<br>(2,575,640 - 3,586,024)    | 596,889<br>(461,975 - 673,294)       |
| Interpersonal violence                          | 14,575,942<br>(10,039,782 - 18,418,994)    | 1,060,512<br>(656,858 - 1,443,210)      | 577,953<br>(366,982 - 769,458)          | 11,887,026<br>(8,328,445 - 14,789,424)  | 963,901<br>(609,012 - 1,330,407)        | 86,549<br>(53,730 - 122,901)         |
| Assault by firearm                              | 6,070,728<br>(4,211,094 - 8,029,114)       | 134,449<br>(60,287 - 217,599)           | 140,694<br>(78,962 - 196,544)           | 5,402,609<br>(3,817,222 - 6,994,193)    | 368,710<br>(209,076 - 543,517)          | 24,266<br>(12,637 - 38,112)          |
| Assault by sharp object                         | 3,941,721<br>(2,528,787 - 5,836,663)       | 120,675<br>(41,556 - 213,741)           | 103,012<br>(49,468 - 149,088)           | 3,416,286<br>(2,209,548 - 5,083,531)    | 282,713<br>(164,614 - 425,185)          | 19,035<br>(10,482 - 30,891)          |
| Assault by other means                          | 4,563,494<br>(2,757,396 - 5,820,569)       | 805,388<br>(505,532 - 1,146,688)        | 334,247<br>(209,184 - 462,122)          | 3,068,132<br>(1,764,747 - 3,911,149)    | 312,479<br>(183,111 - 440,658)          | 43,248<br>(25,211 - 61,246)          |
| Forces of nature, war, and legal intervention   | 3,397,201<br>(2,400,252 - 6,305,479)       | 851,922<br>(799,578 - 984,125)          | 403,351<br>(275,230 - 791,502)          | 1,624,034<br>(957,697 - 3,553,921)      | 466,041<br>(276,275 - 979,370)          | 51,853<br>(30,466 - 104,738)         |
| Exposure to forces of nature                    | 1,033,997<br>(575,242 - 2,224,403)         | 217,873<br>(195,101 - 232,161)          | 126,365<br>(68,104 - 280,452)           | 497,462<br>(215,276 - 1,227,088)        | 170,214<br>(76,063 - 398,830)           | 22,083<br>(9,729 - 48,189)           |
| Collective violence and legal intervention      | 2,363,204<br>(1,729,758 - 3,958,638)       | 634,049<br>(592,550 - 769,780)          | 276,987<br>(196,340 - 483,168)          | 1,126,572<br>(694,334 - 2,233,272)      | 295,827<br>(186,028 - 562,753)          | 29,769<br>(18,311 - 54,539)          |

Web Table 29 - Global YLLs with 95% UI by age, sex, and cause in 1990

| Cause                                                             | Females, All Ages                          | Females, 0-4 Years                         | Females, 5-14 Years                     | Females, 15-49 Years                       | Females, 50-69 Years                       | Females, 70-80 Years                    |
|-------------------------------------------------------------------|--------------------------------------------|--------------------------------------------|-----------------------------------------|--------------------------------------------|--------------------------------------------|-----------------------------------------|
| All causes                                                        | 910,348,346<br>(887,308,860 - 935,498,322) | 490,779,269<br>(474,221,514 - 508,924,296) | 50,876,463<br>(49,081,089 - 52,833,202) | 158,761,983<br>(151,705,364 - 166,170,508) | 119,951,912<br>(115,612,121 - 125,286,187) | 89,978,720<br>(88,216,097 - 92,413,373) |
| Communicable, maternal, neonatal, and nutritional diseases        | 529,663,060<br>(508,303,184 - 551,963,771) | 410,020,577<br>(391,604,378 - 430,135,770) | 29,097,351<br>(27,532,412 - 30,841,119) | 62,880,938<br>(59,860,749 - 66,410,648)    | 18,063,563<br>(16,936,645 - 19,224,560)    | 9,600,631<br>(8,906,927 - 10,224,366)   |
| HIV/AIDS and tuberculosis                                         | 33,636,623<br>(30,684,554 - 38,041,294)    | 5,533,042<br>(4,886,464 - 7,486,926)       | 1,946,507<br>(1,694,367 - 2,351,788)    | 17,303,087<br>(15,441,742 - 19,467,661)    | 6,920,383<br>(6,065,084 - 7,723,343)       | 1,933,603<br>(1,651,749 - 2,170,279)    |
| Tuberculosis                                                      | 28,983,756<br>(26,295,079 - 33,312,980)    | 4,045,262<br>(3,446,349 - 5,925,690)       | 1,880,281<br>(1,626,914 - 2,282,525)    | 14,527,089<br>(12,820,545 - 16,584,616)    | 6,616,536<br>(5,774,107 - 7,433,120)       | 1,914,589<br>(1,628,187 - 2,152,568)    |
| HIV/AIDS                                                          | 4,652,866<br>(3,769,565 - 5,897,507)       | 1,487,781<br>(1,361,898 - 1,619,037)       | 66,226<br>(51,183 - 80,173)             | 2,775,998<br>(2,065,014 - 3,899,179)       | 303,847<br>(224,634 - 411,375)             | 19,014<br>(13,688 - 25,823)             |
| HIV/AIDS resulting in mycobacterial infection                     | 373,756<br>(277,379 - 496,654)             | 119,776<br>(96,068 - 147,573)              | 4,984<br>(3,584 - 6,618)                | 222,255<br>(151,840 - 320,191)             | 25,146<br>(17,410 - 35,486)                | 1,595<br>(1,081 - 2,280)                |
| HIV/AIDS resulting in other diseases                              | 4,279,110<br>(3,468,107 - 5,434,470)       | 1,368,005<br>(1,252,777 - 1,490,857)       | 61,242<br>(47,392 - 74,088)             | 2,553,742<br>(1,900,530 - 3,583,839)       | 278,702<br>(206,495 - 376,317)             | 17,419<br>(12,551 - 23,675)             |
| Diarrhea, lower respiratory, and other common infectious diseases | 263,750,511<br>(247,411,961 - 284,880,646) | 213,816,582<br>(199,340,879 - 233,403,190) | 19,274,352<br>(17,566,021 - 21,106,607) | 16,368,107<br>(14,710,459 - 18,283,541)    | 7,995,577<br>(7,280,644 - 8,883,907)       | 6,295,894<br>(5,672,807 - 6,848,646)    |
| Diarrheal diseases                                                | 86,401,566<br>(78,305,661 - 94,874,302)    | 67,346,872<br>(59,993,193 - 75,359,444)    | 6,261,060<br>(5,395,600 - 7,242,738)    | 6,545,412<br>(5,882,293 - 7,208,768)       | 3,932,633<br>(3,434,079 - 4,385,459)       | 2,315,589<br>(2,027,434 - 2,601,127)    |
| Intestinal infectious diseases                                    | 8,459,263<br>(4,688,885 - 13,994,257)      | 3,250,309<br>(1,825,847 - 5,438,561)       | 2,815,618<br>(1,573,867 - 4,610,804)    | 2,189,389<br>(1,139,742 - 3,717,891)       | 170,399<br>(92,406 - 289,458)              | 33,548<br>(20,650 - 53,285)             |
| Typhoid fever                                                     | 5,908,460<br>(3,105,385 - 10,059,447)      | 2,116,600<br>(1,079,782 - 3,655,598)       | 2,047,721<br>(1,104,880 - 3,406,278)    | 1,600,448<br>(800,834 - 2,794,493)         | 120,730<br>(59,356 - 213,046)              | 22,961<br>(12,785 - 37,808)             |
| Paratyphoid fever                                                 | 2,117,296<br>(1,104,924 - 3,682,377)       | 847,584<br>(423,218 - 1,527,128)           | 717,743<br>(372,280 - 1,286,534)        | 510,277<br>(252,215 - 915,179)             | 35,104<br>(17,341 - 64,634)                | 6,588<br>(3,609 - 11,426)               |
| Other intestinal infectious diseases                              | 433,507<br>(380,142 - 497,075)             | 286,125<br>(242,932 - 336,324)             | 50,154<br>(41,870 - 60,596)             | 78,664<br>(68,732 - 88,607)                | 14,565<br>(12,232 - 17,129)                | 3,999<br>(3,327 - 4,699)                |
| Lower respiratory infections                                      | 107,477,098<br>(98,066,180 - 117,100,364)  | 91,482,513<br>(82,843,132 - 100,349,015)   | 4,885,341<br>(4,179,258 - 5,622,117)    | 4,418,907<br>(3,897,258 - 4,975,160)       | 3,008,440<br>(2,664,480 - 3,479,420)       | 3,681,897<br>(3,170,586 - 4,096,727)    |
| Upper respiratory infections                                      | 11,882<br>(87,347 - 180,204)               | 72,085<br>(45,065 - 131,839)               | 8,465<br>(4,318 - 17,230)               | 21,736<br>(15,646 - 31,948)                | 11,428<br>(7,630 - 18,238)                 | 5,168<br>(3,631 - 7,621)                |
| Otitis media                                                      | 167,672<br>(149,589 - 187,665)             | 92,293<br>(78,129 - 109,924)               | 28,680<br>(25,081 - 33,388)             | 31,970<br>(28,455 - 35,873)                | 10,635<br>(9,451 - 12,060)                 | 4,094<br>(3,540 - 4,764)                |
| Meningitis                                                        | 15,589,582<br>(13,544,418 - 17,975,119)    | 11,558,289<br>(9,642,662 - 14,010,508)     | 1,685,083<br>(1,413,179 - 1,953,468)    | 1,736,970<br>(1,478,782 - 1,988,291)       | 473,139<br>(398,706 - 542,889)             | 136,102<br>(108,872 - 156,472)          |
| Pneumococcal meningitis                                           | 3,639,610<br>(3,130,218 - 4,266,677)       | 2,384,036<br>(1,947,682 - 3,000,594)       | 531,981<br>(415,902 - 650,208)          | 543,823<br>(450,195 - 664,911)             | 138,866<br>(106,575 - 182,320)             | 40,904<br>(31,166 - 51,770)             |
| H influenzae type B meningitis                                    | 4,369,921<br>(3,671,716 - 5,269,659)       | 3,677,516<br>(3,015,468 - 4,560,937)       | 402,693<br>(318,309 - 492,627)          | 230,901<br>(184,592 - 288,685)             | 46,011<br>(36,131 - 58,324)                | 12,800<br>(9,730 - 15,865)              |
| Meningococcal meningitis                                          | 2,804,510<br>(2,421,249 - 3,309,180)       | 2,024,465<br>(1,685,783 - 2,521,863)       | 293,285<br>(241,338 - 367,079)          | 360,722<br>(300,576 - 433,357)             | 95,871<br>(74,996 - 116,621)               | 30,166<br>(22,455 - 37,246)             |
| Other meningitis                                                  | 4,775,540<br>(4,094,811 - 5,577,120)       | 3,472,271<br>(2,852,258 - 4,187,139)       | 457,124<br>(364,059 - 564,233)          | 601,524<br>(493,678 - 730,501)             | 192,390<br>(146,149 - 236,536)             | 52,231<br>(39,617 - 64,768)             |
| Encephalitis                                                      | 3,260,241<br>(2,015,674 - 4,426,364)       | 2,179,711<br>(1,153,619 - 3,178,050)       | 499,106<br>(257,185 - 747,715)          | 449,269<br>(280,701 - 593,906)             | 109,615<br>(71,404 - 139,653)              | 22,540<br>(14,424 - 27,579)             |
| Diphtheria                                                        | 330,141<br>(119,053 - 962,736)             | 271,039<br>(77,515 - 899,421)              | 47,876<br>(12,625 - 177,302)            | 9,642<br>(4,550 - 22,504)                  | 1,584<br>(570 - 4,610)                     | --                                      |
| Whooping cough                                                    | 6,352,217<br>(2,472,028 - 13,438,577)      | 6,003,072<br>(2,342,162 - 12,697,440)      | 304,595<br>(114,177 - 676,447)          | 41,540<br>(16,751 - 98,727)                | 3,010<br>(1,269 - 7,034)                   | --                                      |
| Tetanus                                                           | 12,585,072<br>(9,030,083 - 26,820,629)     | 11,495,181<br>(8,068,345 - 25,366,057)     | 257,464<br>(160,966 - 518,146)          | 491,853<br>(304,635 - 971,608)             | 257,546<br>(143,027 - 552,687)             | 83,028<br>(46,908 - 166,608)            |
| Measles                                                           | 22,783,910<br>(12,962,659 - 36,102,863)    | 19,941,501<br>(11,417,055 - 31,354,028)    | 2,454,992<br>(1,355,150 - 3,926,738)    | 382,587<br>(172,404 - 894,056)             | 4,829<br>(2,096 - 11,952)                  | --                                      |
| Varicella and herpes zoster                                       | 224,868<br>(156,715 - 355,071)             | 123,717<br>(65,990 - 251,516)              | 26,071<br>(13,382 - 59,960)             | 48,832<br>(33,509 - 73,260)                | 12,319<br>(7,883 - 20,530)                 | 13,929<br>(8,765 - 22,881)              |
| Neglected tropical diseases and malaria                           | 37,702,820<br>(32,956,813 - 42,320,202)    | 27,289,936<br>(22,806,024 - 31,938,011)    | 4,520,728<br>(3,859,070 - 5,145,181)    | 3,998,439<br>(3,341,469 - 4,681,757)       | 1,576,517<br>(1,355,209 - 1,846,648)       | 317,199<br>(260,072 - 413,197)          |
| Malaria                                                           | 32,167,313<br>(27,540,278 - 37,086,212)    | 24,786,156<br>(20,346,177 - 29,327,362)    | 3,324,213<br>(2,722,738 - 3,899,946)    | 2,639,181<br>(2,045,865 - 3,236,393)       | 1,194,377<br>(994,935 - 1,423,513)         | 223,387<br>(172,859 - 275,166)          |
| Chagas disease                                                    | 133,862<br>(32,365 - 496,113)              | 954<br>(201 - 3,321)                       | 1,047<br>(222 - 3,787)                  | 47,245<br>(9,551 - 162,532)                | 61,325<br>(13,817 - 223,372)               | 23,291<br>(5,502 - 93,162)              |
| Leishmaniasis                                                     | 1,429,648<br>(1,157,745 - 1,747,664)       | 696,636<br>(510,435 - 894,481)             | 417,700<br>(304,059 - 539,929)          | 282,183<br>(226,925 - 347,077)             | 29,038<br>(23,196 - 36,275)                | 4,092<br>(3,222 - 5,038)                |
| Visceral leishmaniasis                                            | 1,429,648<br>(1,157,745 - 1,747,664)       | 696,636<br>(510,435 - 894,481)             | 417,700<br>(304,059 - 539,929)          | 282,183<br>(226,925 - 347,077)             | 29,038<br>(23,196 - 36,275)                | 4,092<br>(3,222 - 5,038)                |
| African trypanosomiasis                                           | 627,742<br>(314,121 - 1,018,103)           | 67,881<br>(30,674 - 117,442)               | 96,965<br>(46,819 - 164,448)            | 398,936<br>(198,788 - 648,431)             | 57,740<br>(27,756 - 95,848)                | 6,221<br>(2,968 - 10,497)               |
| Schistosomiasis                                                   | 254,881<br>(216,238 - 299,246)             | 13,868<br>(10,123 - 18,407)                | 20,701<br>(16,332 - 25,546)             | 122,124<br>(101,879 - 144,945)             | 74,958<br>(60,979 - 92,216)                | 23,230<br>(17,980 - 30,135)             |
| Cysticercosis                                                     | 21,386<br>(18,202 - 28,283)                | 2,650<br>(1,803 - 4,345)                   | 2,560<br>(2,031 - 3,493)                | 12,481<br>(10,761 - 16,058)                | 3,162<br>(2,786 - 3,866)                   | 533<br>(470 - 622)                      |
| Cystic echinococcosis                                             | 119,888<br>(111,268 - 128,812)             | 29,149<br>(24,843 - 33,745)                | 33,365<br>(30,189 - 36,644)             | 42,802<br>(39,416 - 46,470)                | 11,330<br>(10,438 - 12,287)                | 3,243<br>(3,015 - 3,477)                |
| Dengue                                                            | 312,827<br>(165,680 - 436,086)             | 145,217<br>(62,171 - 227,208)              | 105,112<br>(46,808 - 151,468)           | 55,886<br>(37,935 - 70,547)                | 5,131<br>(4,030 - 6,768)                   | 1,480<br>(1,124 - 1,910)                |
| Yellow fever                                                      | 39,274<br>(30,204 - 50,908)                | 5,294<br>(2,542 - 10,029)                  | 9,790<br>(5,664 - 15,734)               | 21,101<br>(14,813 - 29,419)                | 2,682<br>(1,246 - 4,999)                   | 407<br>(120 - 1,156)                    |
| Rabies                                                            | 879,802<br>(526,688 - 1,185,342)           | 217,409<br>(121,196 - 347,711)             | 349,791<br>(184,520 - 459,747)          | 213,683<br>(140,162 - 294,315)             | 87,344<br>(52,828 - 110,925)               | 11,575<br>(7,750 - 16,205)              |
| Intestinal nematode infections                                    | 389,562<br>(342,743 - 441,911)             | 321,559<br>(279,286 - 368,764)             | 52,633<br>(44,189 - 61,392)             | 11,179<br>(8,578 - 14,151)                 | 2,889<br>(2,004 - 3,869)                   | 1,303<br>(932 - 1,756)                  |

Web Table 29 - Global YLLs with 95% UI by age, sex, and cause in 1990

| Cause                                                            | Females, All Ages                          | Females, 0-4 Years                         | Females, 5-14 Years                     | Females, 15-49 Years                    | Females, 50-69 Years                    | Females, 70-80 Years                    |
|------------------------------------------------------------------|--------------------------------------------|--------------------------------------------|-----------------------------------------|-----------------------------------------|-----------------------------------------|-----------------------------------------|
| Ascariasis                                                       | 389,562<br>(342,743 - 441,911)             | 321,559<br>(279,286 - 368,764)             | 52,633<br>(44,189 - 61,392)             | 11,179<br>(8,578 - 14,151)              | 2,889<br>(2,004 - 3,869)                | 1,303<br>(932 - 1,756)                  |
| Other neglected tropical diseases                                | 1,326,633<br>(870,318 - 1,801,113)         | 1,003,164<br>(605,653 - 1,459,482)         | 106,851<br>(71,135 - 147,951)           | 151,639<br>(115,877 - 192,876)          | 46,541<br>(32,957 - 65,773)             | 18,438<br>(12,802 - 25,922)             |
| Maternal disorders                                               | 21,602,881<br>(19,689,447 - 23,472,139)    | --                                         | 150,428<br>(114,115 - 194,553)          | 21,452,453<br>(19,559,683 - 23,321,753) | --                                      | --                                      |
| Maternal hemorrhage                                              | 4,070,628<br>(3,676,033 - 4,471,858)       | --                                         | 16,548<br>(12,582 - 21,490)             | 4,054,080<br>(3,659,749 - 4,454,977)    | --                                      | --                                      |
| Maternal sepsis and other maternal infections                    | 1,948,665<br>(1,739,905 - 2,175,383)       | --                                         | 16,441<br>(12,185 - 21,507)             | 1,932,224<br>(1,723,829 - 2,156,197)    | --                                      | --                                      |
| Maternal hypertensive disorders                                  | 2,126,865<br>(1,936,198 - 2,315,321)       | --                                         | 18,948<br>(14,444 - 24,490)             | 2,107,917<br>(1,916,013 - 2,296,835)    | --                                      | --                                      |
| Maternal obstructed labor                                        | 1,683,307<br>(1,507,712 - 1,883,797)       | --                                         | 8,664<br>(6,434 - 11,232)               | 1,674,643<br>(1,498,499 - 1,874,589)    | --                                      | --                                      |
| Maternal abortive outcome                                        | 2,847,512<br>(2,595,087 - 3,117,473)       | --                                         | 21,953<br>(16,462 - 29,576)             | 2,825,559<br>(2,575,435 - 3,093,983)    | --                                      | --                                      |
| Indirect maternal deaths                                         | 2,320,909<br>(2,053,236 - 2,576,030)       | --                                         | 13,223<br>(9,951 - 17,193)              | 2,307,686<br>(2,041,755 - 2,561,032)    | --                                      | --                                      |
| Late maternal deaths                                             | 2,596,835<br>(2,103,242 - 3,095,238)       | --                                         | 28,832<br>(20,914 - 39,299)             | 2,568,004<br>(2,075,856 - 3,070,337)    | --                                      | --                                      |
| Maternal deaths aggravated by HIV/AIDS                           | 46,164<br>(26,790 - 63,876)                | --                                         | --                                      | 46,164<br>(26,790 - 63,876)             | --                                      | --                                      |
| Other maternal disorders                                         | 3,918,484<br>(3,325,151 - 4,636,691)       | --                                         | 25,529<br>(18,608 - 34,188)             | 3,892,955<br>(3,297,938 - 4,606,782)    | --                                      | --                                      |
| Neonatal disorders                                               | 129,656,190<br>(116,997,860 - 141,888,214) | 129,656,190<br>(116,997,860 - 141,888,214) | --                                      | --                                      | --                                      | --                                      |
| Neonatal preterm birth complications                             | 59,810,727<br>(46,253,878 - 72,757,674)    | 59,810,727<br>(46,253,878 - 72,757,674)    | --                                      | --                                      | --                                      | --                                      |
| Neonatal encephalopathy due to birth asphyxia and trauma         | 33,219,546<br>(25,587,677 - 41,881,462)    | 33,219,546<br>(25,587,677 - 41,881,462)    | --                                      | --                                      | --                                      | --                                      |
| Neonatal sepsis and other neonatal infections                    | 11,752,643<br>(6,058,261 - 17,790,279)     | 11,752,643<br>(6,058,261 - 17,790,279)     | --                                      | --                                      | --                                      | --                                      |
| Hemolytic disease and other neonatal jaundice                    | 2,481,140<br>(1,197,057 - 4,344,797)       | 2,481,140<br>(1,197,057 - 4,344,797)       | --                                      | --                                      | --                                      | --                                      |
| Other neonatal disorders                                         | 22,392,135<br>(14,548,546 - 30,292,574)    | 22,392,135<br>(14,548,546 - 30,292,574)    | --                                      | --                                      | --                                      | --                                      |
| Nutritional deficiencies                                         | 25,194,487<br>(21,826,744 - 29,003,363)    | 20,064,246<br>(16,904,670 - 23,498,711)    | 1,536,286<br>(1,312,026 - 1,783,446)    | 1,965,104<br>(1,737,790 - 2,186,869)    | 826,747<br>(730,920 - 921,449)          | 802,104<br>(714,440 - 892,675)          |
| Protein-energy malnutrition                                      | 16,922,608<br>(11,894,526 - 21,978,922)    | 14,838,386<br>(10,241,284 - 19,346,376)    | 845,680<br>(556,607 - 1,104,331)        | 530,458<br>(288,227 - 820,764)          | 306,264<br>(178,423 - 457,943)          | 401,819<br>(235,995 - 519,999)          |
| Iodine deficiency                                                | 65,845<br>(32,678 - 129,101)               | 43,815<br>(15,252 - 105,056)               | 7,169<br>(2,656 - 18,886)               | 7,949<br>(4,120 - 14,455)               | 4,281<br>(1,978 - 7,696)                | 2,631<br>(1,061 - 5,537)                |
| Iron-deficiency anemia                                           | 7,315,819<br>(3,971,904 - 12,259,434)      | 4,546,015<br>(1,855,710 - 8,866,158)       | 633,912<br>(401,046 - 949,073)          | 1,332,533<br>(964,283 - 1,645,177)      | 453,702<br>(303,841 - 598,535)          | 349,658<br>(223,664 - 526,487)          |
| Other nutritional deficiencies                                   | 890,215<br>(509,374 - 1,666,974)           | 636,029<br>(308,582 - 1,301,058)           | 49,525<br>(24,055 - 80,859)             | 94,164<br>(47,085 - 160,500)            | 62,500<br>(36,673 - 108,924)            | 47,996<br>(23,768 - 76,136)             |
| Other communicable, maternal, neonatal, and nutritional diseases | 18,119,547<br>(13,681,792 - 24,109,089)    | 13,660,581<br>(9,477,793 - 19,321,597)     | 1,669,050<br>(1,327,584 - 2,107,223)    | 1,793,747<br>(1,606,078 - 1,981,997)    | 744,339<br>(616,171 - 889,991)          | 251,830<br>(209,067 - 320,687)          |
| Sexually transmitted diseases excluding HIV                      | 10,813,511<br>(6,355,779 - 16,979,361)     | 9,731,440<br>(5,559,260 - 15,415,213)      | 736,683<br>(433,963 - 1,162,691)        | 206,916<br>(164,359 - 248,426)          | 90,359<br>(51,170 - 150,669)            | 48,114<br>(27,895 - 90,693)             |
| Syphilis                                                         | 10,621,708<br>(6,156,384 - 16,783,748)     | 9,731,440<br>(5,559,260 - 15,415,213)      | 723,549<br>(421,290 - 1,144,529)        | 82,546<br>(65,504 - 98,831)             | 48,943<br>(27,715 - 82,245)             | 35,229<br>(20,436 - 65,099)             |
| Chlamydial infection                                             | 62,459<br>(48,661 - 74,149)                | --                                         | 4,820<br>(2,811 - 7,292)                | 41,695<br>(33,023 - 49,955)             | 12,606<br>(7,172 - 21,008)              | 3,338<br>(1,883 - 6,708)                |
| Gonococcal infection                                             | 69,142<br>(53,199 - 83,688)                | --                                         | 4,134<br>(2,410 - 6,253)                | 42,582<br>(33,813 - 51,145)             | 16,264<br>(9,236 - 27,024)              | 6,161<br>(3,513 - 12,013)               |
| Other sexually transmitted diseases                              | 60,203<br>(46,695 - 71,742)                | --                                         | 4,180<br>(2,437 - 6,323)                | 40,092<br>(31,784 - 48,061)             | 12,545<br>(7,167 - 20,860)              | 3,385<br>(1,889 - 6,992)                |
| Hepatitis                                                        | 4,210,322<br>(3,817,995 - 4,669,696)       | 1,891,736<br>(1,580,665 - 2,265,571)       | 615,528<br>(524,207 - 722,791)          | 1,231,743<br>(1,091,800 - 1,369,487)    | 375,872<br>(330,821 - 422,595)          | 95,443<br>(82,258 - 109,594)            |
| Acute hepatitis A                                                | 966,171<br>(371,830 - 1,647,601)           | 764,205<br>(304,500 - 1,271,035)           | 129,658<br>(43,203 - 246,389)           | 62,803<br>(18,270 - 126,947)            | 8,284<br>(2,206 - 18,722)               | 1,221<br>(296 - 3,013)                  |
| Acute hepatitis B                                                | 1,612,396<br>(1,063,204 - 2,211,714)       | 869,581<br>(474,553 - 1,350,886)           | 104,942<br>(57,386 - 166,667)           | 276,379<br>(172,580 - 405,840)          | 278,109<br>(223,187 - 332,722)          | 83,386<br>(70,387 - 97,265)             |
| Acute hepatitis C                                                | 35,585<br>(7,127 - 84,268)                 | --                                         | 8,963<br>(1,677 - 21,721)               | 15,238<br>(3,051 - 36,312)              | 9,120<br>(1,789 - 22,673)               | 2,263<br>(461 - 5,445)                  |
| Acute hepatitis E                                                | 1,596,170<br>(1,223,316 - 2,021,156)       | 257,950<br>(122,332 - 455,383)             | 371,965<br>(265,626 - 486,461)          | 877,323<br>(717,689 - 1,044,095)        | 80,359<br>(44,012 - 129,276)            | 8,572<br>(4,132 - 15,581)               |
| Other infectious diseases                                        | 3,095,715<br>(2,367,240 - 4,186,462)       | 2,037,405<br>(1,491,723 - 2,858,264)       | 316,839<br>(216,525 - 450,356)          | 355,088<br>(250,614 - 448,169)          | 278,109<br>(189,979 - 449,805)          | 108,274<br>(74,422 - 156,872)           |
| Non-communicable diseases                                        | 299,499,555<br>(284,003,112 - 314,936,694) | 51,872,686<br>(42,942,357 - 62,551,222)    | 11,302,682<br>(10,134,345 - 12,425,544) | 63,372,348<br>(59,378,978 - 67,240,024) | 95,227,486<br>(91,322,746 - 99,518,963) | 77,724,352<br>(76,078,529 - 79,987,299) |
| Neoplasms                                                        | 65,528,678<br>(60,668,288 - 69,466,856)    | 3,047,748<br>(2,447,989 - 4,140,118)       | 2,269,976<br>(1,985,197 - 2,627,843)    | 20,517,631<br>(18,956,145 - 21,863,270) | 28,122,912<br>(26,055,336 - 29,895,975) | 11,570,410<br>(10,836,799 - 12,496,299) |
| Esophageal cancer                                                | 2,508,146<br>(2,232,377 - 2,884,340)       | --                                         | --                                      | 472,399<br>(396,104 - 550,141)          | 1,380,324<br>(1,207,296 - 1,611,105)    | 655,423<br>(580,278 - 764,058)          |
| Stomach cancer                                                   | 6,940,459<br>(6,247,492 - 7,744,251)       | --                                         | --                                      | 2,159,639<br>(1,934,211 - 2,398,221)    | 3,153,502<br>(2,808,204 - 3,514,679)    | 1,627,319<br>(1,423,484 - 1,853,514)    |
| Liver cancer                                                     | 4,213,158<br>(3,800,862 - 4,711,668)       | --                                         | 80,833<br>(58,058 - 120,015)            | 1,381,187<br>(1,210,313 - 1,586,618)    | 2,022,108<br>(1,804,839 - 2,262,928)    | 729,029<br>(657,294 - 808,524)          |

Web Table 29 - Global YLLs with 95% UI by age, sex, and cause in 1990

| Cause                                | Females, All Ages                         | Females, 0-4 Years                   | Females, 5-14 Years                  | Females, 15-49 Years                    | Females, 50-69 Years                    | Females, 70-80 Years                    |
|--------------------------------------|-------------------------------------------|--------------------------------------|--------------------------------------|-----------------------------------------|-----------------------------------------|-----------------------------------------|
| Liver cancer due to hepatitis B      | 1,391,116<br>(1,200,252 - 1,618,771)      | --                                   | 21,086<br>(14,894 - 32,390)          | 554,149<br>(472,176 - 653,968)          | 647,938<br>(549,798 - 757,922)          | 167,944<br>(143,535 - 193,862)          |
| Liver cancer due to hepatitis C      | 701,454<br>(613,078 - 807,550)            | --                                   | 2,915<br>(1,862 - 5,248)             | 154,939<br>(131,146 - 186,133)          | 374,279<br>(326,147 - 432,974)          | 169,320<br>(147,826 - 196,790)          |
| Liver cancer due to alcohol use      | 703,636<br>(635,408 - 784,917)            | --                                   | --                                   | 131,707<br>(114,979 - 150,462)          | 374,652<br>(330,276 - 420,728)          | 197,277<br>(177,165 - 223,457)          |
| Liver cancer due to other causes     | 1,416,953<br>(1,248,897 - 1,597,214)      | --                                   | 56,832<br>(40,399 - 86,404)          | 540,393<br>(471,423 - 625,165)          | 625,240<br>(548,342 - 707,212)          | 194,488<br>(170,035 - 218,872)          |
| Larynx cancer                        | 289,623<br>(181,409 - 454,432)            | --                                   | --                                   | 87,620<br>(51,699 - 143,709)            | 146,754<br>(92,575 - 227,861)           | 55,249<br>(34,647 - 82,334)             |
| Tracheal, bronchus and lung cancer   | 6,527,133<br>(5,806,942 - 7,031,075)      | --                                   | --                                   | 1,442,456<br>(1,222,372 - 1,599,773)    | 3,591,921<br>(3,189,864 - 3,890,212)    | 1,492,756<br>(1,367,765 - 1,675,930)    |
| Breast cancer                        | 8,772,602<br>(7,780,042 - 9,660,587)      | --                                   | --                                   | 3,477,271<br>(3,107,064 - 3,723,901)    | 4,149,187<br>(3,703,224 - 4,663,618)    | 1,146,144<br>(977,995 - 1,362,022)      |
| Cervical cancer                      | 5,868,280<br>(4,921,938 - 6,432,715)      | --                                   | --                                   | 2,627,513<br>(2,242,113 - 2,928,115)    | 2,666,708<br>(2,180,188 - 2,938,395)    | 574,060<br>(464,821 - 623,701)          |
| Uterine cancer                       | 1,081,921<br>(846,988 - 1,348,199)        | --                                   | --                                   | 279,600<br>(202,733 - 375,689)          | 581,273<br>(463,949 - 721,836)          | 221,048<br>(180,631 - 256,263)          |
| Prostate cancer                      | --                                        | --                                   | --                                   | --                                      | --                                      | --                                      |
| Colon and rectum cancer              | 4,938,468<br>(4,732,836 - 5,250,127)      | --                                   | --                                   | 1,100,715<br>(1,035,184 - 1,179,527)    | 2,363,682<br>(2,255,053 - 2,524,444)    | 1,474,071<br>(1,402,174 - 1,578,813)    |
| Lip and oral cavity cancer           | 744,590<br>(545,618 - 901,056)            | --                                   | --                                   | 251,411<br>(176,941 - 319,809)          | 365,745<br>(268,774 - 450,073)          | 127,434<br>(99,548 - 153,170)           |
| Nasopharynx cancer                   | 655,145<br>(501,303 - 942,589)            | --                                   | 29,980<br>(20,071 - 56,933)          | 341,253<br>(254,766 - 489,252)          | 236,404<br>(183,335 - 343,998)          | 47,509<br>(34,916 - 64,206)             |
| Other pharynx cancer                 | 282,175<br>(250,242 - 314,958)            | --                                   | --                                   | 97,417<br>(81,474 - 114,020)            | 150,187<br>(132,447 - 171,652)          | 34,572<br>(30,372 - 39,199)             |
| Gallbladder and biliary tract cancer | 1,493,659<br>(1,273,339 - 1,732,823)      | --                                   | --                                   | 258,636<br>(213,270 - 300,375)          | 788,906<br>(663,477 - 923,336)          | 446,117<br>(367,223 - 555,592)          |
| Pancreatic cancer                    | 1,698,749<br>(1,618,675 - 1,806,828)      | --                                   | --                                   | 248,090<br>(232,426 - 265,210)          | 893,757<br>(846,218 - 956,702)          | 556,902<br>(528,193 - 597,451)          |
| Malignant skin melanoma              | 502,620<br>(406,537 - 603,059)            | --                                   | --                                   | 226,389<br>(182,740 - 259,595)          | 201,474<br>(164,686 - 250,568)          | 74,757<br>(58,071 - 94,235)             |
| Non-melanoma skin cancer             | 230,042<br>(165,578 - 303,416)            | --                                   | --                                   | 83,248<br>(54,197 - 117,627)            | 71,200<br>(51,368 - 94,229)             | 75,595<br>(58,371 - 98,200)             |
| Ovarian cancer                       | 2,613,601<br>(2,445,373 - 2,773,587)      | --                                   | --                                   | 839,960<br>(774,654 - 895,698)          | 1,401,209<br>(1,297,371 - 1,502,093)    | 372,432<br>(348,354 - 411,333)          |
| Testicular cancer                    | --                                        | --                                   | --                                   | --                                      | --                                      | --                                      |
| Kidney cancer                        | 874,350<br>(742,518 - 997,615)            | 152,767<br>(83,121 - 222,479)        | 56,547<br>(41,295 - 72,722)          | 163,024<br>(139,606 - 184,173)          | 345,680<br>(301,468 - 388,491)          | 156,333<br>(133,079 - 188,433)          |
| Bladder cancer                       | 628,474<br>(473,071 - 766,768)            | --                                   | --                                   | 112,828<br>(79,753 - 139,661)           | 280,980<br>(208,697 - 341,035)          | 234,666<br>(180,923 - 292,546)          |
| Brain and nervous system cancer      | 2,249,636<br>(1,934,225 - 2,560,687)      | 213,168<br>(156,027 - 282,753)       | 332,329<br>(272,325 - 392,494)       | 908,919<br>(764,639 - 1,009,643)        | 629,188<br>(554,898 - 718,978)          | 166,034<br>(146,271 - 199,958)          |
| Thyroid cancer                       | 358,085<br>(277,997 - 420,512)            | --                                   | 9,366<br>(3,296 - 20,767)            | 95,143<br>(66,372 - 128,168)            | 160,984<br>(131,147 - 190,159)          | 92,592<br>(74,845 - 108,621)            |
| Mesothelioma                         | 175,891<br>(151,241 - 202,646)            | --                                   | --                                   | 49,107<br>(40,511 - 54,967)             | 95,557<br>(82,393 - 112,719)            | 31,227<br>(24,750 - 38,114)             |
| Hodgkin lymphoma                     | 766,676<br>(491,133 - 999,704)            | 276,650<br>(144,404 - 465,510)       | 91,318<br>(43,058 - 137,803)         | 257,914<br>(169,394 - 299,329)          | 102,763<br>(64,459 - 120,511)           | 38,031<br>(24,181 - 43,670)             |
| Non-Hodgkin lymphoma                 | 1,762,219<br>(1,398,398 - 2,523,582)      | 258,527<br>(154,658 - 601,065)       | 190,018<br>(116,878 - 287,670)       | 545,483<br>(395,930 - 716,282)          | 506,552<br>(405,059 - 660,166)          | 261,640<br>(209,308 - 363,176)          |
| Multiple myeloma                     | 440,655<br>(350,409 - 572,038)            | --                                   | --                                   | 71,667<br>(57,098 - 85,875)             | 230,480<br>(176,618 - 299,796)          | 138,507<br>(105,165 - 196,149)          |
| Leukemia                             | 4,413,377<br>(4,082,635 - 4,820,622)      | 838,961<br>(697,104 - 1,073,388)     | 886,368<br>(790,682 - 1,003,712)     | 1,744,493<br>(1,593,335 - 1,922,564)    | 661,571<br>(611,476 - 713,353)          | 281,984<br>(264,190 - 306,781)          |
| Other neoplasms                      | 4,498,943<br>(3,586,561 - 6,667,918)      | 1,307,675<br>(855,381 - 2,440,939)   | 593,218<br>(436,274 - 936,279)       | 1,194,253<br>(998,179 - 1,669,157)      | 944,816<br>(809,260 - 1,159,215)        | 458,981<br>(412,846 - 573,208)          |
| Cardiovascular diseases              | 111,099,328<br>(99,959,074 - 123,487,261) | 5,217,859<br>(3,667,540 - 6,791,905) | 2,193,513<br>(1,742,149 - 2,870,100) | 19,682,314<br>(16,847,867 - 23,095,630) | 40,159,463<br>(35,835,972 - 44,693,871) | 43,846,178<br>(40,670,337 - 46,547,905) |
| Rheumatic heart disease              | 6,838,324<br>(4,995,986 - 9,348,811)      | 329,694<br>(209,563 - 594,072)       | 524,359<br>(382,740 - 784,916)       | 2,949,724<br>(2,146,583 - 3,976,250)    | 2,156,421<br>(1,485,886 - 2,839,751)    | 878,125<br>(641,477 - 1,196,039)        |
| Ischemic heart disease               | 44,443,859<br>(37,766,008 - 51,439,504)   | 731,954<br>(508,384 - 1,082,828)     | 357,062<br>(254,608 - 494,867)       | 6,733,513<br>(5,289,249 - 8,443,993)    | 16,445,939<br>(13,496,467 - 19,140,139) | 20,175,391<br>(17,540,615 - 22,732,308) |
| Cerebrovascular disease              | 42,616,854<br>(36,533,298 - 48,325,130)   | 1,435,768<br>(1,017,150 - 2,076,143) | 748,929<br>(588,008 - 1,006,153)     | 6,665,375<br>(5,543,556 - 8,044,347)    | 16,120,555<br>(13,761,544 - 18,592,238) | 17,646,227<br>(15,204,408 - 19,808,527) |
| Ischemic stroke                      | 16,832,580<br>(13,404,957 - 19,635,612)   | 182,966<br>(69,874 - 400,930)        | 101,326<br>(42,087 - 231,508)        | 961,705<br>(651,619 - 1,407,491)        | 5,260,035<br>(4,010,794 - 6,416,497)    | 10,326,548<br>(8,415,245 - 11,726,831)  |
| Hemorrhagic stroke                   | 25,784,274<br>(21,437,198 - 30,669,833)   | 1,252,802<br>(873,241 - 1,814,294)   | 647,603<br>(479,738 - 895,573)       | 5,703,670<br>(4,732,688 - 7,014,783)    | 10,860,520<br>(8,951,888 - 12,938,378)  | 7,319,679<br>(5,825,805 - 8,775,396)    |
| Hypertensive heart disease           | 5,853,755<br>(4,607,271 - 7,530,975)      | 136,768<br>(77,468 - 221,088)        | 46,004<br>(31,317 - 68,405)          | 883,605<br>(649,131 - 1,183,897)        | 2,218,973<br>(1,700,468 - 2,827,548)    | 2,568,404<br>(2,015,510 - 3,319,855)    |
| Cardiomyopathy and myocarditis       | 3,469,476<br>(2,331,514 - 4,456,515)      | 1,055,807<br>(421,336 - 1,722,124)   | 235,903<br>(106,128 - 347,306)       | 806,627<br>(544,300 - 1,003,609)        | 672,175<br>(517,944 - 901,864)          | 698,965<br>(574,398 - 854,406)          |
| Atrial fibrillation and flutter      | 184,891<br>(160,199 - 213,321)            | --                                   | --                                   | 6,633<br>(5,440 - 8,025)                | 35,063<br>(29,416 - 41,963)             | 143,195<br>(124,003 - 166,605)          |
| Aortic aneurysm                      | 590,251<br>(371,762 - 865,366)            | --                                   | --                                   | 118,431<br>(70,237 - 181,495)           | 224,174<br>(139,228 - 328,674)          | 247,646<br>(157,965 - 360,774)          |



Web Table 29 - Global YLLs with 95% UI by age, sex, and cause in 1990

| Cause                                               | Females, All Ages                       | Females, 0-4 Years                   | Females, 5-14 Years                  | Females, 15-49 Years                 | Females, 50-69 Years                    | Females, 70-80 Years                   |
|-----------------------------------------------------|-----------------------------------------|--------------------------------------|--------------------------------------|--------------------------------------|-----------------------------------------|----------------------------------------|
| Peripheral vascular disease                         | 87,711<br>(74,326 - 102,543)            | --                                   | --                                   | 4,230<br>(3,254 - 5,218)             | 24,926<br>(19,819 - 29,509)             | 58,555<br>(50,036 - 68,746)            |
| Endocarditis                                        | 688,896<br>(479,058 - 1,133,304)        | 199,068<br>(99,894 - 368,532)        | 42,774<br>(23,335 - 80,021)          | 199,506<br>(134,971 - 340,863)       | 137,567<br>(90,755 - 244,062)           | 109,981<br>(67,436 - 177,198)          |
| Other cardiovascular and circulatory diseases       | 6,325,312<br>(4,823,350 - 7,923,782)    | 1,328,800<br>(879,574 - 1,854,748)   | 238,482<br>(164,009 - 322,529)       | 1,314,669<br>(937,824 - 1,672,069)   | 2,123,670<br>(1,619,796 - 2,629,410)    | 1,319,690<br>(1,040,887 - 1,606,259)   |
| Chronic respiratory diseases                        | 33,413,076<br>(30,031,460 - 37,017,975) | 5,152,573<br>(4,215,777 - 5,979,958) | 996,811<br>(878,626 - 1,137,213)     | 5,163,896<br>(4,533,646 - 5,835,075) | 11,554,804<br>(10,184,928 - 13,034,056) | 10,544,992<br>(9,563,819 - 12,033,270) |
| Chronic obstructive pulmonary disease               | 20,603,837<br>(17,088,916 - 23,821,288) | 2,581,162<br>(1,950,251 - 3,110,489) | 295,037<br>(188,998 - 396,448)       | 2,295,266<br>(1,641,931 - 2,881,814) | 7,371,899<br>(5,884,536 - 8,728,243)    | 8,060,474<br>(6,898,119 - 9,215,778)   |
| Pneumoconiosis                                      | 1,891,769<br>(1,277,019 - 2,622,663)    | 30,862<br>(20,146 - 47,809)          | 16,523<br>(10,947 - 21,287)          | 360,618<br>(215,638 - 500,247)       | 1,016,451<br>(636,983 - 1,470,600)      | 467,316<br>(298,115 - 709,028)         |
| Silicosis                                           | 68,203<br>(37,770 - 132,483)            | 3,252<br>(1,881 - 7,422)             | 2,168<br>(1,483 - 3,790)             | 17,943<br>(9,491 - 37,964)           | 29,277<br>(13,828 - 63,314)             | 15,562<br>(8,872 - 28,121)             |
| Asbestosis                                          | 57,047<br>(31,877 - 102,443)            | 3,644<br>(2,168 - 7,795)             | 2,237<br>(1,570 - 3,403)             | 16,521<br>(9,276 - 30,314)           | 24,810<br>(11,833 - 48,149)             | 9,836<br>(5,085 - 18,234)              |
| Coal workers pneumoconiosis                         | 67,996<br>(40,099 - 119,782)            | 4,137<br>(2,492 - 8,194)             | 2,562<br>(1,782 - 3,641)             | 19,774<br>(11,741 - 35,656)          | 27,285<br>(13,663 - 56,052)             | 14,238<br>(7,737 - 25,652)             |
| Other pneumoconiosis                                | 1,698,523<br>(1,119,642 - 2,363,210)    | 19,829<br>(10,366 - 30,123)          | 9,555<br>(4,799 - 13,025)            | 306,379<br>(169,617 - 427,137)       | 935,078<br>(588,802 - 1,341,878)        | 427,681<br>(270,883 - 660,314)         |
| Asthma                                              | 7,066,574<br>(5,202,603 - 11,128,671)   | 1,243,652<br>(973,704 - 1,588,603)   | 568,175<br>(455,551 - 761,954)       | 1,926,139<br>(1,427,288 - 2,825,565) | 2,176,363<br>(1,411,440 - 3,964,532)    | 1,152,245<br>(748,203 - 2,240,566)     |
| Interstitial lung disease and pulmonary sarcoidosis | 1,903,809<br>(834,011 - 3,019,391)      | 47,028<br>(14,185 - 109,804)         | 24,500<br>(9,661 - 64,068)           | 316,434<br>(119,861 - 520,764)       | 835,079<br>(299,562 - 1,434,519)        | 680,768<br>(310,134 - 1,033,399)       |
| Other chronic respiratory diseases                  | 1,947,087<br>(1,534,017 - 2,394,965)    | 1,249,869<br>(989,504 - 1,605,347)   | 92,575<br>(59,805 - 121,507)         | 265,440<br>(195,223 - 332,299)       | 155,013<br>(109,412 - 216,054)          | 184,819<br>(130,753 - 261,440)         |
| Cirrhosis                                           | 8,825,560<br>(8,346,880 - 9,326,659)    | 801,052<br>(650,293 - 996,431)       | 482,369<br>(424,972 - 546,708)       | 3,051,800<br>(2,856,887 - 3,255,700) | 3,358,688<br>(3,145,347 - 3,589,090)    | 1,131,651<br>(1,054,588 - 1,204,494)   |
| Cirrhosis due to hepatitis B                        | 2,681,059<br>(2,425,521 - 2,952,024)    | 52,019<br>(36,833 - 71,583)          | 91,218<br>(68,976 - 117,691)         | 1,063,219<br>(950,662 - 1,180,205)   | 1,129,779<br>(1,009,070 - 1,254,229)    | 344,823<br>(302,835 - 379,399)         |
| Cirrhosis due to hepatitis C                        | 2,493,268<br>(2,289,924 - 2,742,257)    | 43,976<br>(33,020 - 60,627)          | 70,354<br>(51,596 - 92,370)          | 879,419<br>(796,842 - 975,840)       | 1,107,777<br>(995,817 - 1,244,286)      | 391,743<br>(350,320 - 438,154)         |
| Cirrhosis due to alcohol use                        | 1,534,115<br>(1,398,672 - 1,675,637)    | --                                   | --                                   | 432,988<br>(385,625 - 489,366)       | 780,682<br>(707,073 - 856,198)          | 320,445<br>(290,746 - 350,056)         |
| Cirrhosis due to other causes                       | 2,117,118<br>(1,887,070 - 2,357,426)    | 705,057<br>(566,164 - 881,350)       | 320,797<br>(272,575 - 375,697)       | 676,173<br>(584,435 - 774,117)       | 340,451<br>(293,802 - 393,897)          | 74,640<br>(63,956 - 86,557)            |
| Digestive diseases                                  | 13,875,977<br>(12,216,930 - 15,416,650) | 1,995,732<br>(1,665,910 - 2,572,814) | 1,525,841<br>(1,305,478 - 1,771,981) | 4,566,514<br>(3,837,782 - 5,161,995) | 3,468,392<br>(2,923,843 - 3,838,266)    | 2,319,498<br>(2,026,538 - 2,598,813)   |
| Peptic ulcer disease                                | 3,103,566<br>(2,462,959 - 4,085,485)    | 175,101<br>(113,081 - 296,020)       | 210,542<br>(132,989 - 321,582)       | 1,004,675<br>(761,071 - 1,349,865)   | 1,063,759<br>(833,030 - 1,361,443)      | 649,489<br>(509,558 - 813,106)         |
| Gastritis and duodenitis                            | 852,664<br>(398,714 - 1,417,203)        | 125,921<br>(42,359 - 223,877)        | 134,289<br>(69,198 - 256,727)        | 281,921<br>(127,061 - 470,426)       | 200,704<br>(80,096 - 319,509)           | 109,828<br>(45,706 - 190,494)          |
| Appendicitis                                        | 1,814,028<br>(1,397,028 - 2,395,623)    | 338,805<br>(210,275 - 581,783)       | 295,263<br>(214,564 - 416,303)       | 802,022<br>(566,298 - 1,034,217)     | 257,576<br>(168,662 - 346,346)          | 120,362<br>(73,598 - 167,866)          |
| Paralytic ileus and intestinal obstruction          | 2,519,643<br>(1,395,441 - 3,532,071)    | 345,388<br>(188,627 - 500,552)       | 301,430<br>(146,243 - 419,507)       | 927,066<br>(513,914 - 1,279,255)     | 566,594<br>(307,668 - 816,698)          | 379,166<br>(218,121 - 585,945)         |
| Inguinal, femoral, and abdominal hernia             | 541,778<br>(295,154 - 722,541)          | 58,401<br>(27,715 - 95,701)          | 145,700<br>(73,669 - 215,266)        | 109,428<br>(58,268 - 151,900)        | 122,448<br>(65,736 - 163,206)           | 105,802<br>(55,273 - 149,954)          |
| Inflammatory bowel disease                          | 1,168,071<br>(756,820 - 1,584,897)      | 395,887<br>(263,756 - 593,499)       | 165,882<br>(104,878 - 247,679)       | 332,271<br>(202,920 - 463,401)       | 157,487<br>(97,539 - 212,206)           | 116,545<br>(70,111 - 151,828)          |
| Vascular intestinal disorders                       | 451,256<br>(262,942 - 807,279)          | 5,607<br>(31 - 36,462)               | 10,301<br>(53 - 63,736)              | 71,421<br>(38,282 - 144,144)         | 148,054<br>(79,154 - 256,496)           | 215,873<br>(117,151 - 351,255)         |
| Gallbladder and biliary diseases                    | 1,085,609<br>(848,834 - 1,361,765)      | 84,220<br>(60,855 - 136,488)         | 67,249<br>(47,993 - 90,306)          | 288,910<br>(226,976 - 366,047)       | 365,703<br>(270,388 - 456,894)          | 279,528<br>(217,887 - 352,373)         |
| Pancreatitis                                        | 1,072,404<br>(682,566 - 1,668,511)      | 36,035<br>(10,201 - 70,657)          | 76,425<br>(36,017 - 142,305)         | 472,416<br>(298,364 - 771,209)       | 343,859<br>(209,179 - 519,673)          | 143,669<br>(88,469 - 213,580)          |
| Other digestive diseases                            | 1,266,957<br>(1,076,751 - 1,538,745)    | 430,367<br>(323,688 - 597,143)       | 118,759<br>(94,543 - 149,299)        | 276,385<br>(226,427 - 334,545)       | 242,208<br>(199,155 - 300,391)          | 199,237<br>(162,686 - 240,405)         |
| Neurological disorders                              | 8,169,090<br>(7,296,404 - 9,010,456)    | 1,060,680<br>(691,273 - 1,409,100)   | 519,491<br>(364,968 - 646,157)       | 1,587,451<br>(1,275,510 - 1,876,520) | 1,069,572<br>(992,611 - 1,185,875)      | 3,931,896<br>(3,607,217 - 4,235,419)   |
| Alzheimer disease and other dementias               | 4,130,636<br>(3,800,989 - 4,455,733)    | --                                   | --                                   | 3,532<br>(3,002 - 4,378)             | 543,127<br>(494,493 - 598,863)          | 3,583,977<br>(3,283,309 - 3,870,079)   |
| Parkinson disease                                   | 255,982<br>(199,827 - 342,025)          | --                                   | --                                   | 10,371<br>(7,675 - 13,619)           | 66,249<br>(51,090 - 88,418)             | 179,362<br>(142,884 - 245,234)         |
| Epilepsy                                            | 2,736,049<br>(1,886,923 - 3,398,579)    | 841,085<br>(462,352 - 1,153,468)     | 444,186<br>(288,902 - 561,212)       | 1,255,006<br>(942,497 - 1,531,551)   | 149,595<br>(115,279 - 188,968)          | 46,177<br>(36,614 - 62,027)            |
| Multiple sclerosis                                  | 230,376<br>(158,026 - 365,889)          | --                                   | --                                   | 121,978<br>(78,277 - 191,250)        | 89,167<br>(63,530 - 148,405)            | 19,231<br>(13,458 - 32,134)            |
| Other neurological disorders                        | 816,048<br>(758,868 - 967,117)          | 219,595<br>(190,978 - 281,339)       | 75,305<br>(66,135 - 96,104)          | 196,564<br>(180,932 - 237,696)       | 221,435<br>(207,416 - 250,088)          | 103,149<br>(96,936 - 112,403)          |
| Mental and substance use disorders                  | 1,702,664<br>(1,281,738 - 2,402,933)    | 66,630<br>(40,042 - 142,889)         | 2,765<br>(2,255 - 3,401)             | 1,087,354<br>(824,336 - 1,498,409)   | 464,855<br>(317,195 - 749,570)          | 81,061<br>(61,556 - 107,985)           |
| Schizophrenia                                       | 410,302<br>(255,041 - 529,583)          | --                                   | --                                   | 269,193<br>(165,301 - 347,713)       | 107,616<br>(67,134 - 138,637)           | 33,492<br>(21,315 - 42,784)            |
| Alcohol use disorders                               | 775,812<br>(411,019 - 1,501,002)        | --                                   | --                                   | 461,489<br>(240,937 - 870,923)       | 287,205<br>(151,829 - 570,227)          | 27,118<br>(13,520 - 53,266)            |
| Drug use disorders                                  | 499,318<br>(435,909 - 613,437)          | 66,630<br>(40,042 - 142,889)         | --                                   | 342,204<br>(298,407 - 423,045)       | 70,033<br>(58,067 - 84,147)             | 20,451<br>(16,819 - 24,867)            |
| Opioid use disorders                                | 174,744<br>(149,236 - 223,693)          | 25,324<br>(13,134 - 56,759)          | --                                   | 119,263<br>(99,795 - 149,303)        | 23,055<br>(18,610 - 28,218)             | 7,103<br>(5,694 - 8,685)               |

Web Table 29 - Global YLLs with 95% UI by age, sex, and cause in 1990

| Cause                                               | Females, All Ages                       | Females, 0-4 Years                      | Females, 5-14 Years                  | Females, 15-49 Years                 | Females, 50-69 Years                 | Females, 70-80 Years                 |
|-----------------------------------------------------|-----------------------------------------|-----------------------------------------|--------------------------------------|--------------------------------------|--------------------------------------|--------------------------------------|
| Cocaine use disorders                               | 37,341<br>(30,614 - 46,442)             | 4,454<br>(2,414 - 9,339)                | --                                   | 27,707<br>(21,808 - 34,900)          | 3,795<br>(3,147 - 4,620)             | 1,385<br>(1,071 - 1,781)             |
| Amphetamine use disorders                           | 34,463<br>(27,964 - 43,514)             | 5,068<br>(2,823 - 10,744)               | --                                   | 23,650<br>(18,277 - 30,499)          | 4,262<br>(3,521 - 5,172)             | 1,483<br>(1,154 - 1,909)             |
| Other drug use disorders                            | 252,771<br>(218,147 - 313,483)          | 31,784<br>(19,775 - 64,722)             | --                                   | 171,585<br>(147,468 - 216,978)       | 38,922<br>(32,074 - 48,017)          | 10,480<br>(8,574 - 12,960)           |
| Eating disorders                                    | 17,232<br>(15,206 - 19,545)             | --                                      | 2,765<br>(2,255 - 3,401)             | 14,467<br>(12,499 - 16,616)          | --                                   | --                                   |
| Anorexia nervosa                                    | 17,232<br>(15,206 - 19,545)             | --                                      | 2,765<br>(2,255 - 3,401)             | 14,467<br>(12,499 - 16,616)          | --                                   | --                                   |
| Diabetes, urogenital, blood, and endocrine diseases | 24,150,108<br>(20,630,512 - 27,853,230) | 6,459,494<br>(4,164,733 - 9,254,212)    | 1,815,779<br>(1,239,987 - 2,425,248) | 5,579,876<br>(4,953,376 - 6,225,940) | 6,385,503<br>(5,791,306 - 6,864,709) | 3,909,456<br>(3,597,659 - 4,219,192) |
| Diabetes mellitus                                   | 8,106,750<br>(7,507,920 - 8,803,387)    | 315,907<br>(194,047 - 501,027)          | 123,720<br>(72,716 - 197,323)        | 1,630,710<br>(1,456,086 - 1,838,482) | 3,806,153<br>(3,454,202 - 4,115,208) | 2,230,261<br>(2,073,592 - 2,404,476) |
| Acute glomerulonephritis                            | 581,709<br>(284,082 - 896,309)          | 195,738<br>(56,128 - 376,560)           | 103,085<br>(48,691 - 164,204)        | 190,320<br>(110,428 - 264,985)       | 68,155<br>(34,063 - 101,200)         | 24,411<br>(12,019 - 37,274)          |
| Chronic kidney disease                              | 4,682,606<br>(3,962,842 - 5,188,195)    | 428,959<br>(319,052 - 503,714)          | 232,766<br>(184,927 - 265,490)       | 1,551,039<br>(1,285,347 - 1,732,605) | 1,476,623<br>(1,252,569 - 1,683,033) | 993,220<br>(845,482 - 1,124,961)     |
| Chronic kidney disease due to diabetes mellitus     | 449,693<br>(340,477 - 532,058)          | 7,391<br>(3,761 - 12,090)               | 5,206<br>(3,033 - 7,804)             | 101,951<br>(69,135 - 128,438)        | 192,623<br>(151,132 - 236,764)       | 142,521<br>(110,283 - 176,235)       |
| Chronic kidney disease due to hypertension          | 1,124,820<br>(709,693 - 1,544,853)      | 40,287<br>(17,039 - 75,641)             | 19,438<br>(8,894 - 34,577)           | 305,563<br>(184,037 - 440,947)       | 413,264<br>(258,514 - 565,411)       | 346,268<br>(228,389 - 465,192)       |
| Chronic kidney disease due to glomerulonephritis    | 1,642,688<br>(1,232,848 - 2,010,588)    | 257,712<br>(176,277 - 323,087)          | 134,456<br>(99,362 - 165,027)        | 698,518<br>(537,939 - 853,936)       | 388,415<br>(280,079 - 496,909)       | 163,587<br>(116,985 - 213,770)       |
| Chronic kidney disease due to other causes          | 1,465,405<br>(1,080,731 - 1,852,033)    | 123,568<br>(75,826 - 184,588)           | 73,667<br>(48,015 - 99,971)          | 445,007<br>(306,883 - 565,349)       | 482,321<br>(357,161 - 612,513)       | 340,843<br>(244,526 - 446,498)       |
| Urinary diseases and male infertility               | 1,914,297<br>(1,487,187 - 2,116,223)    | 368,834<br>(243,441 - 483,806)          | 121,523<br>(81,768 - 156,397)        | 556,731<br>(434,639 - 627,637)       | 501,456<br>(371,967 - 560,780)       | 365,752<br>(297,485 - 431,946)       |
| Interstitial nephritis and urinary tract infections | 1,486,257<br>(1,108,583 - 1,675,856)    | 289,565<br>(178,160 - 396,909)          | 86,336<br>(48,845 - 119,015)         | 422,592<br>(314,054 - 486,625)       | 388,225<br>(284,203 - 439,617)       | 299,538<br>(246,337 - 355,833)       |
| Urolithiasis                                        | 168,393<br>(118,517 - 221,087)          | --                                      | 15,587<br>(9,528 - 27,527)           | 63,557<br>(45,698 - 87,698)          | 59,355<br>(36,706 - 80,379)          | 29,893<br>(18,001 - 40,113)          |
| Other urinary diseases                              | 259,647<br>(192,955 - 383,563)          | 79,269<br>(33,787 - 128,661)            | 19,600<br>(12,137 - 35,056)          | 70,582<br>(53,484 - 108,490)         | 53,876<br>(38,977 - 81,037)          | 36,320<br>(26,916 - 52,851)          |
| Gynecological diseases                              | 200,200<br>(151,191 - 263,803)          | --                                      | --                                   | 152,524<br>(115,602 - 203,844)       | 28,722<br>(21,867 - 35,760)          | 18,954<br>(12,158 - 28,723)          |
| Uterine fibroids                                    | 38,254<br>(28,233 - 51,042)             | --                                      | --                                   | 24,168<br>(17,618 - 33,672)          | 8,141<br>(6,210 - 10,291)            | 5,945<br>(3,811 - 9,029)             |
| Polycystic ovarian syndrome                         | 11,117<br>(8,472 - 14,906)              | --                                      | --                                   | 10,895<br>(8,292 - 14,604)           | 222<br>(160 - 311)                   | --                                   |
| Endometriosis                                       | 25,862<br>(19,710 - 34,344)             | --                                      | --                                   | 24,972<br>(19,067 - 33,335)          | 890<br>(644 - 1,247)                 | --                                   |
| Genital prolapse                                    | 30,694<br>(23,062 - 40,219)             | --                                      | --                                   | 20,939<br>(15,966 - 27,979)          | 4,966<br>(3,777 - 6,191)             | 4,789<br>(3,062 - 7,251)             |
| Other gynecological diseases                        | 94,723<br>(71,113 - 123,528)            | --                                      | --                                   | 71,549<br>(54,255 - 95,461)          | 14,503<br>(11,078 - 18,011)          | 8,221<br>(5,285 - 12,487)            |
| Hemoglobinopathies and hemolytic anemias            | 6,113,085<br>(3,028,996 - 9,621,518)    | 3,920,600<br>(1,511,297 - 6,790,058)    | 1,041,412<br>(486,184 - 1,710,649)   | 919,069<br>(477,170 - 1,390,229)     | 165,586<br>(85,181 - 243,981)        | 66,419<br>(35,581 - 90,922)          |
| Thalassemias                                        | 1,307,537<br>(596,529 - 2,067,918)      | 768,703<br>(290,844 - 1,305,044)        | 220,457<br>(105,709 - 341,313)       | 311,636<br>(164,121 - 444,287)       | 6,317<br>(3,081 - 9,255)             | 424<br>(191 - 672)                   |
| Sickle cell disorders                               | 4,222,058<br>(1,789,753 - 7,249,289)    | 2,884,952<br>(974,174 - 5,284,462)      | 769,810<br>(308,729 - 1,451,343)     | 495,414<br>(222,361 - 871,388)       | 68,897<br>(31,043 - 124,428)         | 2,986<br>(1,575 - 4,562)             |
| G6PD deficiency                                     | 95,995<br>(44,168 - 150,515)            | 52,661<br>(20,476 - 91,254)             | 13,578<br>(6,605 - 20,723)           | 24,256<br>(12,171 - 34,469)          | 4,777<br>(2,289 - 6,782)             | 723<br>(317 - 1,176)                 |
| Other hemoglobinopathies and hemolytic anemias      | 487,496<br>(275,189 - 715,905)          | 214,285<br>(103,292 - 348,149)          | 37,567<br>(19,735 - 57,223)          | 87,763<br>(47,807 - 122,938)         | 85,596<br>(45,962 - 118,030)         | 62,285<br>(33,379 - 84,739)          |
| Endocrine, metabolic, blood, and immune disorders   | 2,551,462<br>(1,876,138 - 3,475,320)    | 1,229,457<br>(822,069 - 1,771,040)      | 193,274<br>(138,695 - 260,807)       | 579,483<br>(408,742 - 764,724)       | 338,808<br>(245,001 - 447,913)       | 210,440<br>(150,179 - 271,814)       |
| Musculoskeletal disorders                           | 1,244,565<br>(1,027,488 - 1,469,498)    | --                                      | 137,831<br>(95,275 - 181,736)        | 628,755<br>(499,388 - 780,354)       | 316,814<br>(253,017 - 355,709)       | 161,164<br>(144,140 - 180,709)       |
| Rheumatoid arthritis                                | 440,230<br>(361,281 - 518,117)          | --                                      | 37,131<br>(23,482 - 52,146)          | 127,996<br>(91,044 - 171,216)        | 169,557<br>(131,683 - 193,110)       | 105,545<br>(88,795 - 119,141)        |
| Other musculoskeletal disorders                     | 804,335<br>(592,534 - 984,839)          | --                                      | 100,700<br>(54,895 - 136,172)        | 500,759<br>(376,096 - 626,499)       | 147,257<br>(109,793 - 172,639)       | 55,619<br>(49,130 - 67,996)          |
| Other non-communicable diseases                     | 31,490,508<br>(24,462,124 - 40,831,414) | 28,070,918<br>(21,381,688 - 37,236,178) | 1,358,306<br>(1,058,532 - 1,734,138) | 1,506,756<br>(1,304,061 - 1,734,590) | 326,483<br>(268,964 - 367,997)       | 228,046<br>(196,374 - 253,610)       |
| Congenital anomalies                                | 29,602,443<br>(22,847,193 - 35,809,917) | 26,800,432<br>(20,339,444 - 35,809,917) | 1,293,412<br>(1,003,500 - 1,682,954) | 1,286,503<br>(1,094,175 - 1,505,725) | 166,479<br>(118,052 - 197,875)       | 55,618<br>(36,080 - 66,899)          |
| Neural tube defects                                 | 6,662,462<br>(4,192,147 - 11,923,284)   | 6,332,333<br>(3,964,773 - 11,378,342)   | 170,434<br>(104,495 - 320,509)       | 144,431<br>(92,467 - 249,810)        | 12,369<br>(7,360 - 18,882)           | 2,895<br>(1,452 - 4,587)             |
| Congenital heart anomalies                          | 14,302,157<br>(10,228,257 - 19,591,458) | 12,838,481<br>(9,001,826 - 17,896,240)  | 708,737<br>(509,526 - 963,502)       | 641,877<br>(509,028 - 808,198)       | 80,788<br>(55,737 - 103,191)         | 32,274<br>(20,028 - 40,068)          |
| Cleft lip and cleft palate                          | 296,352<br>(101,366 - 508,612)          | 296,352<br>(101,366 - 508,612)          | --                                   | --                                   | --                                   | --                                   |
| Down syndrome                                       | 1,879,194<br>(590,190 - 3,395,887)      | 1,507,754<br>(416,203 - 2,843,607)      | 158,894<br>(56,994 - 276,594)        | 185,823<br>(85,708 - 319,869)        | 25,580<br>(15,898 - 39,307)          | 1,143<br>(641 - 1,893)               |
| Chromosomal unbalanced rearrangements               | 928,833<br>(323,334 - 2,160,531)        | 837,560<br>(287,824 - 1,977,406)        | 28,766<br>(9,033 - 71,027)           | 58,165<br>(20,886 - 124,768)         | 3,556<br>(1,494 - 6,131)             | 786<br>(326 - 1,318)                 |
| Other congenital anomalies                          | 5,533,445<br>(3,940,247 - 12,171,636)   | 4,987,953<br>(3,526,691 - 11,161,649)   | 226,580<br>(153,072 - 463,495)       | 256,206<br>(172,406 - 413,261)       | 44,187<br>(31,880 - 59,308)          | 18,520<br>(13,060 - 23,706)          |

Web Table 29 - Global YLLs with 95% UI by age, sex, and cause in 1990

| Cause                                           | Females, All Ages                       | Females, 0-4 Years                      | Females, 5-14 Years                    | Females, 15-49 Years                                  | Females, 50-69 Years                               | Females, 70-80 Years                       |
|-------------------------------------------------|-----------------------------------------|-----------------------------------------|----------------------------------------|-------------------------------------------------------|----------------------------------------------------|--------------------------------------------|
| Skin and subcutaneous diseases                  | 1,088,365<br>(926,438 - 1,299,292)      | 470,787<br>(329,190 - 665,140)          | 64,894<br>(50,669 - 81,389)            | 220,253<br>(187,269 - 242,209)                        | 160,004<br>(140,762 - 180,946)                     | 172,428<br>(153,558 - 192,305)             |
| Cellulitis                                      | 639,243<br>(392,141 - 792,491)          | 297,463<br>(144,801 - 424,822)          | 43,807<br>(24,844 - 57,852)            | 137,860<br>(77,703 - 174,809)                         | 95,228<br>(55,894 - 121,095)                       | 64,885<br>(35,446 - 86,654)                |
| Pyoderma                                        | 315,158<br>(179,975 - 569,511)          | 160,783<br>(79,810 - 324,211)           | 15,708<br>(7,998 - 31,728)             | 57,946<br>(32,397 - 102,635)                          | 42,627<br>(26,531 - 69,015)                        | 38,094<br>(28,957 - 50,334)                |
| Decubitus ulcer                                 | 103,992<br>(80,173 - 170,286)           | 3,317<br>(1,032 - 13,271)               | 3,230<br>(1,492 - 9,760)               | 15,089<br>(9,132 - 33,613)                            | 17,752<br>(12,826 - 31,109)                        | 64,605<br>(54,342 - 85,301)                |
| Other skin and subcutaneous diseases            | 29,972<br>(17,778 - 51,348)             | 9,224<br>(2,643 - 24,033)               | 2,149<br>(1,110 - 3,984)               | 9,358<br>(5,900 - 13,310)                             | 4,397<br>(3,101 - 5,578)                           | 4,844<br>(3,673 - 8,504)                   |
| Sudden infant death syndrome                    | 799,699<br>(378,720 - 1,715,833)        | 799,699<br>(378,720 - 1,715,833)        | --                                     | --                                                    | --                                                 | --                                         |
| Injuries                                        | 81,185,731<br>(72,338,709 - 88,201,197) | 28,886,006<br>(22,864,848 - 33,565,008) | 10,476,429<br>(9,451,918 - 11,612,285) | 32,508,697<br>(29,600,460 - 35,691,134)               | 6,660,862<br>(6,056,072 - 7,417,550)               | 2,653,737<br>(2,424,371 - 2,953,552)       |
| Transport injuries                              | 16,616,116<br>(15,074,704 - 19,294,532) | 4,379,804<br>(3,641,596 - 5,382,638)    | 2,846,836<br>(2,508,168 - 3,284,108)   | 7,314,785<br>(6,655,929 - 8,583,894)                  | 1,635,469<br>(1,445,060 - 1,899,924)               | 439,222<br>(386,043 - 506,935)             |
| Road injuries                                   | 15,140,522<br>(13,698,393 - 17,492,072) | 3,920,344<br>(3,261,048 - 4,836,218)    | 2,591,045<br>(2,277,746 - 2,971,411)   | 6,739,873<br>(6,115,699 - 7,812,489)                  | 1,488,554<br>(1,318,554 - 1,726,546)               | 400,706<br>(349,690 - 462,351)             |
| Pedestrian road injuries                        | 5,940,747<br>(5,075,597 - 7,340,014)    | 1,861,198<br>(1,469,000 - 2,492,658)    | 1,274,754<br>(1,052,784 - 1,534,278)   | 1,919,256<br>(1,583,655 - 2,505,962)                  | 666,071<br>(561,918 - 818,932)                     | 219,467<br>(189,689 - 266,692)             |
| Cyclist road injuries                           | 1,067,261<br>(864,138 - 1,425,653)      | 219,367<br>(152,258 - 317,273)          | 222,896<br>(175,491 - 305,047)         | 476,320<br>(372,986 - 674,246)                        | 124,759<br>(102,993 - 157,325)                     | 23,920<br>(19,185 - 31,236)                |
| Motorcyclist road injuries                      | 2,311,252<br>(1,683,062 - 3,084,110)    | 445,334<br>(251,155 - 639,913)          | 245,993<br>(158,661 - 352,040)         | 1,428,679<br>(1,088,437 - 1,920,909)                  | 166,928<br>(112,498 - 230,220)                     | 24,318<br>(14,202 - 32,916)                |
| Motor vehicle road injuries                     | 5,351,601<br>(4,502,741 - 6,265,543)    | 1,248,814<br>(900,884 - 1,645,977)      | 759,399<br>(598,204 - 916,223)         | 2,726,906<br>(2,304,250 - 3,127,333)                  | 495,591<br>(403,037 - 590,095)                     | 120,892<br>(96,275 - 145,423)              |
| Other road injuries                             | 469,662<br>(173,585 - 660,521)          | 145,633<br>(36,718 - 270,885)           | 88,003<br>(32,101 - 137,111)           | 188,712<br>(74,156 - 276,567)                         | 35,205<br>(16,055 - 50,232)                        | 12,109<br>(6,435 - 17,886)                 |
| Other transport injuries                        | 1,475,594<br>(1,258,086 - 1,880,650)    | 459,460<br>(356,523 - 603,222)          | 255,791<br>(193,728 - 327,394)         | 574,912<br>(475,977 - 772,514)                        | 146,915<br>(118,086 - 182,999)                     | 38,516<br>(30,763 - 48,057)                |
| Unintentional injuries                          | 45,672,123<br>(38,247,841 - 51,964,615) | 22,806,271<br>(16,741,494 - 27,323,125) | 6,528,065<br>(5,612,222 - 7,521,493)   | 11,908,341<br>(10,234,453 - 13,794,533)               | 2,761,053<br>(2,456,823 - 3,275,049)               | 1,668,392<br>(1,480,961 - 1,920,310)       |
| Falls                                           | 4,111,722<br>(3,441,660 - 5,633,561)    | 1,473,083<br>(1,004,631 - 2,318,241)    | 508,833<br>(398,116 - 675,750)         | 874,110<br>(712,844 - 1,155,502)                      | 490,649<br>(413,403 - 665,495)                     | 765,048<br>(628,620 - 985,855)             |
| Drowning                                        | 13,177,585<br>(8,944,273 - 16,578,793)  | 7,667,671<br>(4,768,306 - 10,375,737)   | 2,887,351<br>(2,075,445 - 3,587,985)   | 2,107,167<br>(1,546,642 - 2,471,327)                  | 386,129<br>(286,817 - 459,789)                     | 129,265<br>(97,839 - 158,832)              |
| Fire, heat, and hot substances                  | 10,401,334<br>(8,790,081 - 13,230,286)  | 3,170,076<br>(2,225,608 - 4,431,735)    | 1,218,180<br>(996,699 - 1,640,765)     | 5,154,715<br>(4,107,318 - 6,585,834)                  | 620,756<br>(503,927 - 845,308)                     | 237,607<br>(186,136 - 306,260)             |
| Poisonings                                      | 2,630,115<br>(2,073,872 - 4,334,307)    | 1,051,205<br>(753,917 - 1,805,066)      | 277,845<br>(210,178 - 439,497)         | 1,062,722<br>(842,752 - 1,273,562)                    | 179,791<br>(137,485 - 290,481)                     | 58,552<br>(43,068 - 88,791)                |
| Exposure to mechanical forces                   | 4,915,821<br>(2,472,400 - 7,036,594)    | 3,695,951<br>(1,404,924 - 5,784,534)    | 438,576<br>(333,634 - 556,661)         | 603,496<br>(498,126 - 721,815)                        | 141,390<br>(117,255 - 174,443)                     | 36,408<br>(30,219 - 45,948)                |
| Unintentional firearm injuries                  | 688,229<br>(522,823 - 857,920)          | 233,474<br>(145,154 - 341,840)          | 109,763<br>(73,960 - 156,717)          | 282,844<br>(212,804 - 385,052)                        | 52,958<br>(36,493 - 77,059)                        | 9,190<br>(6,534 - 13,560)                  |
| Unintentional suffocation                       | 2,952,831<br>(709,675 - 4,954,676)      | 2,798,866<br>(630,042 - 4,764,971)      | 76,606<br>(30,891 - 131,553)           | 59,409<br>(29,113 - 84,990)                           | 13,136<br>(7,025 - 17,595)                         | 4,814<br>(2,544 - 8,826)                   |
| Other exposure to mechanical forces             | 1,274,761<br>(958,617 - 1,695,255)      | 663,611<br>(415,517 - 1,002,307)        | 252,206<br>(186,024 - 353,476)         | 261,243<br>(223,803 - 321,771)                        | 75,297<br>(63,006 - 96,365)                        | 22,404<br>(17,971 - 30,552)                |
| Adverse effects of medical treatment            | 1,894,666<br>(1,408,151 - 2,532,320)    | 874,286<br>(538,326 - 1,299,198)        | 101,894<br>(64,767 - 133,168)          | 510,494<br>(390,030 - 740,597)                        | 273,828<br>(210,554 - 414,922)                     | 134,164<br>(102,956 - 187,484)             |
| Animal contact                                  | 2,581,674<br>(1,018,325 - 4,240,212)    | 829,015<br>(368,988 - 1,578,181)        | 659,707<br>(261,719 - 1,213,056)       | 797,085<br>(272,111 - 1,191,347)                      | 250,190<br>(86,399 - 422,612)                      | 45,677<br>(16,460 - 71,867)                |
| Venomous animal contact                         | 881,003 - 3,796,311<br>(407,967)        | 297,791 - 1,269,755<br>(181,159)        | 221,526 - 1,043,673<br>(102,005)       | 247,321 - 1,136,354<br>(64,422)                       | 71,407 - 351,425<br>(45,421)                       | 9,826 - 50,156<br>(14,960)                 |
| Non-venomous animal contact                     | 131,641 - 790,772<br>(3,562,299)        | 55,107 - 332,836<br>(2,974,834)         | 30,021 - 219,110<br>(87,730)           | 19,857 - 124,956<br>(228,882)                         | 14,908 - 88,036<br>(118,522)                       | 5,356 - 29,047<br>(152,331)                |
| Foreign body                                    | 1,985,690 - 5,566,173<br>(3,518,686)    | 1,576,836 - 4,759,708<br>(2,953,594)    | 51,758 - 136,690<br>(81,560)           | 146,553 - 349,024<br>(218,327)                        | 73,913 - 171,225<br>(116,074)                      | 91,724 - 228,308<br>(149,132)              |
| Pulmonary aspiration and foreign body in airway | 1,937,010 - 5,533,778<br>(43,613)       | 1,546,606 - 4,738,645<br>(21,240)       | 46,164 - 130,924<br>(6,170)            | 136,232 - 336,712<br>(10,556)                         | 71,631 - 168,630<br>(2,448)                        | 88,838 - 225,943<br>(3,200)                |
| Foreign body in other body part                 | 26,983 - 80,913<br>(2,396,905)          | (11,167 - 48,210)<br>(1,070,151)        | (3,932 - 10,467)<br>(347,949)          | (7,165 - 15,755)<br>(569,669)                         | (1,665 - 3,086)<br>(299,797)                       | (2,198 - 4,345)<br>(109,339)               |
| Other unintentional injuries                    | 1,276,235 - 2,814,202<br>(16,687,103)   | (535,002 - 1,351,796)<br>(953,525)      | (207,634 - 425,515)<br>(852,737)       | (323,668 - 661,933)<br>(12,387,721)                   | (137,671 - 367,338)<br>(1,988,744)                 | (48,982 - 136,337)<br>(504,377)            |
| Self-harm and interpersonal violence            | 14,481,832 - 18,752,815<br>(12,587,729) | (679,040 - 1,317,109)<br>--             | (704,235 - 1,015,229)<br>(451,366)     | (10,781,591 - 13,882,669)<br>(8,643,467 - 11,252,149) | (1,672,641 - 2,228,560)<br>(1,430,170 - 1,934,493) | (409,340 - 564,210)<br>(349,037 - 506,175) |
| Self-harm                                       | 4,099,374<br>(2,994,295 - 5,207,888)    | 953,525<br>(679,040 - 1,317,109)        | 401,371<br>(300,527 - 539,018)         | 2,418,250<br>(1,741,641 - 3,028,780)                  | 271,436<br>(190,443 - 344,152)                     | 54,792<br>(38,591 - 68,172)                |
| Interpersonal violence                          | 889,361<br>(560,676 - 1,219,500)        | 129,751<br>(64,415 - 196,929)           | 70,346<br>(42,372 - 103,167)           | 629,581<br>(405,460 - 842,223)                        | 50,932<br>(29,329 - 73,359)                        | 8,750<br>(4,974 - 13,452)                  |
| Assault by firearm                              | 1,085,054<br>(643,375 - 1,376,939)      | 136,629<br>(55,690 - 219,588)           | 78,241<br>(37,618 - 110,310)           | 782,939<br>(480,112 - 1,008,607)                      | 74,494<br>(44,148 - 97,475)                        | 12,751<br>(7,188 - 17,298)                 |
| Assault by sharp object                         | 2,124,959<br>(1,568,250 - 2,990,379)    | 687,144<br>(498,047 - 997,826)          | 252,784<br>(193,995 - 369,620)         | 1,005,730<br>(738,904 - 1,397,893)                    | 146,009<br>(101,109 - 195,396)                     | 33,291<br>(22,985 - 44,116)                |
| Assault by other means                          | 2,210,389<br>(1,631,954 - 3,809,677)    | 746,405<br>(695,694 - 885,366)          | 248,791<br>(179,684 - 442,152)         | 897,850<br>(535,888 - 1,912,866)                      | 275,596<br>(161,604 - 573,916)                     | 41,746<br>(24,495 - 85,571)                |
| Forces of nature, war, and legal intervention   | 634,877<br>(394,398 - 1,213,110)        | 197,124<br>(176,120 - 211,673)          | 73,492<br>(43,231 - 153,162)           | 246,968<br>(108,177 - 588,775)                        | 99,191<br>(45,176 - 232,814)                       | 18,102<br>(8,196 - 40,167)                 |
| Exposure to forces of nature                    | 1,575,513<br>(1,210,823 - 2,582,602)    | 549,281<br>(509,318 - 676,967)          | 175,299<br>(132,291 - 299,213)         | 650,883<br>(407,254 - 1,318,485)                      | 176,405<br>(110,339 - 344,299)                     | 23,645<br>(14,859 - 44,346)                |
| Collective violence and legal intervention      |                                         |                                         |                                        |                                                       |                                                    |                                            |

**Web Table 30: Global YLLs by age, sex, and cause in 2013**

Web Table 30 - Global YLLs with 95% UI by age, sex, and cause in 2013

| Cause                                                             | Both Sexes, All Ages                             | Both Sexes, 0-4 Years                      | Both Sexes, 5-14 Years                  | Both Sexes, 15-49 Years                    | Both Sexes, 50-69 Years                    | Both Sexes, 70-80 Years                    |
|-------------------------------------------------------------------|--------------------------------------------------|--------------------------------------------|-----------------------------------------|--------------------------------------------|--------------------------------------------|--------------------------------------------|
| All causes                                                        | 1,685,005,594<br>(1,636,381,437 - 1,737,847,726) | 538,771,985<br>(513,425,470 - 566,832,283) | 64,948,281<br>(62,203,900 - 67,995,572) | 442,740,824<br>(425,536,590 - 463,049,682) | 381,567,907<br>(366,357,414 - 398,987,461) | 256,976,598<br>(251,258,687 - 262,739,437) |
| Communicable, maternal, neonatal, and nutritional diseases        | 667,793,665<br>(638,039,231 - 699,967,822)       | 432,802,113<br>(405,925,663 - 460,482,136) | 32,910,598<br>(30,528,901 - 35,474,677) | 135,195,172<br>(129,031,274 - 142,384,398) | 44,131,341<br>(41,593,477 - 46,952,917)    | 22,754,441<br>(21,040,435 - 23,962,815)    |
| HIV/AIDS and tuberculosis                                         | 111,446,283<br>(105,826,637 - 119,816,904)       | 9,097,629<br>(8,137,186 - 10,045,835)      | 6,370,832<br>(6,015,281 - 6,755,599)    | 71,605,278<br>(67,339,930 - 77,802,942)    | 20,139,273<br>(18,519,651 - 22,295,039)    | 4,233,272<br>(3,836,142 - 4,662,108)       |
| Tuberculosis                                                      | 46,146,524<br>(41,289,222 - 50,544,052)          | 3,652,623<br>(2,663,816 - 4,402,321)       | 1,302,896<br>(1,012,193 - 1,507,399)    | 24,962,884<br>(21,959,290 - 27,815,408)    | 12,398,011<br>(11,050,851 - 13,843,095)    | 3,830,109<br>(3,439,509 - 4,263,895)       |
| HIV/AIDS                                                          | 65,299,760<br>(61,047,474 - 71,976,827)          | 5,445,005<br>(4,989,170 - 6,110,871)       | 5,067,936<br>(4,752,476 - 5,438,709)    | 46,642,394<br>(42,837,029 - 52,000,492)    | 7,741,261<br>(7,081,411 - 8,924,134)       | 403,163<br>(359,963 - 477,203)             |
| HIV/AIDS resulting in mycobacterial infection                     | 4,034,825<br>(3,242,344 - 5,051,358)             | 321,810<br>(259,378 - 399,871)             | 278,425<br>(226,129 - 341,616)          | 2,898,570<br>(2,323,852 - 3,649,710)       | 508,408<br>(403,791 - 643,618)             | 27,613<br>(21,731 - 35,266)                |
| HIV/AIDS resulting in other diseases                              | 61,264,934<br>(57,248,101 - 67,830,975)          | 5,123,196<br>(4,669,002 - 5,742,453)       | 4,789,512<br>(4,478,808 - 5,151,325)    | 43,743,824<br>(40,075,946 - 48,791,045)    | 7,232,853<br>(6,618,195 - 8,284,899)       | 375,550<br>(335,114 - 443,719)             |
| Diarrhea, lower respiratory, and other common infectious diseases | 235,515,311<br>(216,891,495 - 254,982,041)       | 156,655,598<br>(141,872,850 - 172,772,916) | 17,198,921<br>(15,102,307 - 19,622,272) | 29,765,380<br>(26,761,479 - 33,649,938)    | 17,125,643<br>(15,068,753 - 18,795,352)    | 14,769,769<br>(13,055,056 - 15,895,289)    |
| Diarrheal diseases                                                | 65,942,419<br>(58,710,200 - 72,995,427)          | 44,439,990<br>(37,524,855 - 50,788,387)    | 4,316,442<br>(3,596,579 - 5,180,750)    | 8,049,212<br>(7,273,101 - 8,928,408)       | 5,395,277<br>(4,611,993 - 6,364,493)       | 3,741,498<br>(3,203,229 - 4,365,694)       |
| Intestinal infectious diseases                                    | 15,172,745<br>(8,406,717 - 24,780,391)           | 5,296,073<br>(2,798,584 - 8,791,725)       | 4,646,252<br>(2,673,023 - 7,260,376)    | 4,803,027<br>(2,518,185 - 8,188,168)       | 368,270<br>(188,926 - 653,719)             | 59,122<br>(34,078 - 96,507)                |
| Typhoid fever                                                     | 10,969,124<br>(5,846,450 - 18,164,797)           | 3,652,109<br>(1,838,026 - 6,214,989)       | 3,432,884<br>(1,943,823 - 5,439,985)    | 3,565,577<br>(1,846,200 - 6,155,554)       | 274,844<br>(132,509 - 490,256)             | 43,710<br>(23,726 - 73,358)                |
| Paratyphoid fever                                                 | 3,782,171<br>(2,035,140 - 6,462,793)             | 1,375,435<br>(700,130 - 2,368,769)         | 1,168,219<br>(642,021 - 1,926,687)      | 1,149,534<br>(577,632 - 2,061,725)         | 77,828<br>(35,890 - 149,972)               | 11,155<br>(5,748 - 19,979)                 |
| Other intestinal infectious diseases                              | 421,450<br>(368,804 - 478,774)                   | 268,529<br>(226,279 - 315,602)             | 45,149<br>(36,740 - 55,555)             | 87,916<br>(77,048 - 99,815)                | 15,598<br>(13,459 - 17,958)                | 4,258<br>(3,635 - 4,985)                   |
| Lower respiratory infections                                      | 112,902,240<br>(102,623,087 - 121,688,299)       | 77,637,425<br>(69,508,018 - 85,655,764)    | 4,345,732<br>(3,701,636 - 5,061,922)    | 11,026,710<br>(9,505,612 - 12,088,162)     | 9,468,818<br>(7,687,663 - 10,332,310)      | 10,423,555<br>(8,925,322 - 11,189,560)     |
| Upper respiratory infections                                      | 167,969<br>(137,801 - 205,311)                   | 70,723<br>(48,393 - 105,159)               | 8,966<br>(5,368 - 14,701)               | 49,320<br>(38,554 - 64,251)                | 27,431<br>(19,426 - 39,692)                | 11,529<br>(8,423 - 16,510)                 |
| Otitis media                                                      | 110,169<br>(101,332 - 118,666)                   | 40,010<br>(34,254 - 46,376)                | 15,584<br>(13,733 - 17,741)             | 33,815<br>(31,140 - 36,547)                | 13,926<br>(12,836 - 15,052)                | 6,834<br>(6,374 - 7,319)                   |
| Meningitis                                                        | 19,335,797<br>(16,000,508 - 22,743,935)          | 12,144,460<br>(8,986,506 - 15,598,356)     | 1,786,305<br>(1,459,549 - 2,113,423)    | 3,891,561<br>(3,266,130 - 4,344,594)       | 1,181,437<br>(938,369 - 1,369,250)         | 332,034<br>(269,971 - 381,648)             |
| Pneumococcal meningitis                                           | 4,811,095<br>(3,993,993 - 5,639,841)             | 2,605,988<br>(1,870,767 - 3,367,439)       | 569,517<br>(458,368 - 689,349)          | 1,192,804<br>(991,649 - 1,384,288)         | 346,221<br>(265,145 - 425,728)             | 96,564<br>(76,841 - 118,501)               |
| H influenzae type B meningitis                                    | 4,801,619<br>(3,833,340 - 5,863,360)             | 3,775,844<br>(2,815,583 - 4,799,281)       | 397,304<br>(323,106 - 473,234)          | 478,387<br>(392,939 - 555,032)             | 118,147<br>(88,014 - 150,808)              | 31,937<br>(24,532 - 38,906)                |
| Meningococcal meningitis                                          | 4,147,395<br>(3,431,968 - 4,956,845)             | 2,526,662<br>(1,860,360 - 3,297,404)       | 404,300<br>(325,747 - 496,684)          | 892,551<br>(750,489 - 1,007,223)           | 249,442<br>(187,299 - 296,018)             | 74,440<br>(58,245 - 87,463)                |
| Other meningitis                                                  | 5,575,688<br>(4,666,630 - 6,470,440)             | 3,235,966<br>(2,382,537 - 4,111,243)       | 415,183<br>(331,401 - 490,233)          | 1,327,819<br>(1,122,475 - 1,522,031)       | 467,627<br>(382,340 - 563,926)             | 129,093<br>(103,674 - 158,387)             |
| Encephalitis                                                      | 4,575,116<br>(3,797,366 - 5,687,401)             | 2,199,018<br>(1,622,464 - 3,027,517)       | 709,406<br>(537,425 - 950,970)          | 1,214,589<br>(973,746 - 1,587,752)         | 366,262<br>(297,123 - 490,377)             | 85,840<br>(66,422 - 108,736)               |
| Diphtheria                                                        | 253,523<br>(126,465 - 535,988)                   | 180,320<br>(70,490 - 449,595)              | 45,718<br>(14,067 - 135,810)            | 22,890<br>(10,900 - 49,329)                | 4,595<br>(1,459 - 14,964)                  | --                                         |
| Whooping cough                                                    | 5,125,388<br>(1,883,530 - 11,538,953)            | 4,816,086<br>(1,771,178 - 10,841,084)      | 256,347<br>(87,079 - 649,408)           | 49,047<br>(19,997 - 117,729)               | 3,909<br>(1,842 - 8,974)                   | --                                         |
| Tetanus                                                           | 3,641,498<br>(2,300,278 - 4,899,905)             | 2,717,992<br>(1,443,536 - 3,884,952)       | 150,634<br>(116,376 - 209,889)          | 415,608<br>(323,685 - 564,501)             | 273,125<br>(177,640 - 421,100)             | 84,139<br>(55,173 - 132,301)               |
| Measles                                                           | 7,997,743<br>(4,058,819 - 14,439,751)            | 6,975,334<br>(3,544,323 - 12,330,193)      | 888,157<br>(430,694 - 1,709,790)        | 132,172<br>(58,505 - 315,721)              | 2,081<br>(908 - 4,929)                     | --                                         |
| Varicella and herpes zoster                                       | 290,705<br>(233,034 - 372,051)                   | 138,168<br>(92,038 - 216,664)              | 29,378<br>(18,443 - 49,096)             | 77,430<br>(59,328 - 105,609)               | 20,511<br>(14,783 - 29,829)                | 25,217<br>(18,122 - 35,673)                |
| Neglected tropical diseases and malaria                           | 70,576,147<br>(58,072,498 - 85,434,338)          | 52,973,575<br>(41,407,488 - 67,698,045)    | 5,826,371<br>(4,866,474 - 7,086,956)    | 8,591,585<br>(7,449,699 - 10,163,987)      | 2,446,291<br>(2,010,239 - 2,978,186)       | 738,325<br>(589,016 - 948,961)             |
| Malaria                                                           | 62,322,684<br>(50,104,075 - 77,019,993)          | 49,926,532<br>(38,437,293 - 64,382,517)    | 4,034,350<br>(3,140,781 - 5,241,732)    | 5,975,925<br>(4,903,306 - 7,498,342)       | 1,816,507<br>(1,425,009 - 2,316,580)       | 569,371<br>(429,044 - 736,411)             |
| Chagas disease                                                    | 240,964<br>(91,702 - 753,128)                    | 765<br>(297 - 2,401)                       | 1,046<br>(327 - 2,854)                  | 62,997<br>(23,913 - 216,250)               | 123,748<br>(44,601 - 382,486)              | 52,408<br>(18,264 - 184,255)               |
| Leishmaniasis                                                     | 4,233,446<br>(3,480,841 - 5,034,802)             | 1,803,765<br>(1,405,813 - 2,285,424)       | 1,004,224<br>(756,569 - 1,264,345)      | 1,271,614<br>(1,045,051 - 1,515,515)       | 135,288<br>(109,340 - 164,187)             | 18,554<br>(15,407 - 21,597)                |
| Visceral leishmaniasis                                            | 4,233,446<br>(3,480,841 - 5,034,802)             | 1,803,765<br>(1,405,813 - 2,285,424)       | 1,004,224<br>(756,569 - 1,264,345)      | 1,271,614<br>(1,045,051 - 1,515,515)       | 135,288<br>(109,340 - 164,187)             | 18,554<br>(15,407 - 21,597)                |
| African trypanosomiasis                                           | 384,697<br>(204,836 - 611,097)                   | 39,797<br>(19,114 - 67,315)                | 60,801<br>(29,142 - 97,621)             | 252,704<br>(134,733 - 402,143)             | 28,533<br>(15,119 - 44,977)                | 2,862<br>(1,529 - 4,473)                   |
| Schistosomiasis                                                   | 201,152<br>(176,506 - 228,367)                   | 6,629<br>(4,716 - 9,028)                   | 10,880<br>(8,536 - 13,937)              | 113,527<br>(98,118 - 130,433)              | 55,980<br>(48,831 - 63,907)                | 14,136<br>(12,306 - 16,216)                |
| Cysticercosis                                                     | 30,747<br>(24,238 - 45,600)                      | 2,214<br>(1,300 - 4,166)                   | 2,290<br>(1,567 - 3,848)                | 20,983<br>(16,766 - 30,471)                | 4,564<br>(3,791 - 6,146)                   | 695<br>(589 - 891)                         |
| Cystic echinococcosis                                             | 102,499<br>(96,364 - 109,376)                    | 13,555<br>(11,502 - 15,894)                | 18,905<br>(16,909 - 21,071)             | 50,790<br>(47,198 - 54,451)                | 15,022<br>(14,055 - 16,123)                | 4,227<br>(3,981 - 4,494)                   |
| Dengue                                                            | 576,881<br>(333,031 - 701,175)                   | 222,140<br>(116,014 - 295,865)             | 177,106<br>(85,501 - 227,962)           | 144,036<br>(101,362 - 169,481)             | 25,507<br>(19,147 - 28,696)                | 8,092<br>(5,903 - 9,114)                   |
| Yellow fever                                                      | 30,609<br>(25,214 - 37,053)                      | 4,167<br>(2,758 - 6,383)                   | 8,054<br>(5,458 - 12,152)               | 16,482<br>(13,294 - 20,922)                | 1,632<br>(1,156 - 2,320)                   | 275<br>(172 - 471)                         |
| Rabies                                                            | 1,242,780<br>(914,513 - 1,526,521)               | 214,678<br>(147,596 - 316,626)             | 388,421<br>(266,098 - 519,873)          | 450,913<br>(325,812 - 552,083)             | 163,344<br>(121,716 - 205,608)             | 25,425<br>(18,082 - 32,394)                |
| Intestinal nematode infections                                    | 337,759<br>(294,434 - 387,173)                   | 261,176<br>(221,220 - 307,610)             | 47,034<br>(39,083 - 55,672)             | 20,986<br>(17,433 - 25,165)                | 5,963<br>(4,689 - 7,529)                   | 2,599<br>(2,002 - 3,276)                   |

Web Table 30 - Global YLLs with 95% UI by age, sex, and cause in 2013

| Cause                                                            | Both Sexes, All Ages                       | Both Sexes, 0-4 Years                      | Both Sexes, 5-14 Years                  | Both Sexes, 15-49 Years                    | Both Sexes, 50-69 Years                    | Both Sexes, 70-80 Years                    |
|------------------------------------------------------------------|--------------------------------------------|--------------------------------------------|-----------------------------------------|--------------------------------------------|--------------------------------------------|--------------------------------------------|
| Ascariasis                                                       | 337,759<br>(294,434 - 387,173)             | 261,176<br>(221,220 - 307,610)             | 47,034<br>(39,083 - 55,672)             | 20,986<br>(17,433 - 25,165)                | 5,963<br>(4,689 - 7,529)                   | 2,599<br>(2,002 - 3,276)                   |
| Other neglected tropical diseases                                | 871,929<br>(715,722 - 1,101,773)           | 478,156<br>(357,640 - 672,580)             | 73,259<br>(57,767 - 92,355)             | 210,629<br>(177,020 - 252,144)             | 70,204<br>(57,700 - 87,944)                | 39,681<br>(32,809 - 48,117)                |
| Maternal disorders                                               | 16,686,010<br>(14,812,644 - 18,667,148)    | --                                         | 83,633<br>(59,593 - 118,889)            | 16,602,377<br>(14,737,888 - 18,581,293)    | --                                         | --                                         |
| Maternal hemorrhage                                              | 2,492,131<br>(2,153,626 - 2,857,569)       | --                                         | 7,871<br>(5,551 - 10,998)               | 2,484,259<br>(2,146,384 - 2,848,088)       | --                                         | --                                         |
| Maternal sepsis and other maternal infections                    | 1,348,211<br>(1,135,214 - 1,602,483)       | --                                         | 7,123<br>(4,903 - 9,972)                | 1,341,089<br>(1,128,095 - 1,594,300)       | --                                         | --                                         |
| Maternal hypertensive disorders                                  | 1,688,497<br>(1,469,302 - 1,932,929)       | --                                         | 9,952<br>(7,074 - 13,706)               | 1,678,544<br>(1,461,066 - 1,922,410)       | --                                         | --                                         |
| Maternal obstructed labor                                        | 1,071,965<br>(928,638 - 1,248,101)         | --                                         | 3,923<br>(2,708 - 5,701)                | 1,068,042<br>(925,400 - 1,243,936)         | --                                         | --                                         |
| Maternal abortive outcome                                        | 2,474,055<br>(2,167,325 - 2,839,650)       | --                                         | 13,251<br>(9,071 - 19,468)              | 2,460,805<br>(2,153,191 - 2,821,575)       | --                                         | --                                         |
| Indirect maternal deaths                                         | 1,790,846<br>(1,534,855 - 2,074,716)       | --                                         | 6,913<br>(4,838 - 9,829)                | 1,783,933<br>(1,527,940 - 2,067,361)       | --                                         | --                                         |
| Late maternal deaths                                             | 2,481,752<br>(2,030,447 - 2,992,176)       | --                                         | 19,232<br>(13,174 - 27,890)             | 2,462,520<br>(2,011,103 - 2,967,942)       | --                                         | --                                         |
| Maternal deaths aggravated by HIV/AIDS                           | 117,245<br>(72,648 - 162,744)              | --                                         | --                                      | 117,245<br>(72,648 - 162,744)              | --                                         | --                                         |
| Other maternal disorders                                         | 3,188,325<br>(2,753,847 - 3,657,602)       | --                                         | 15,211<br>(10,371 - 21,723)             | 3,173,114<br>(2,741,318 - 3,643,224)       | --                                         | --                                         |
| Neonatal disorders                                               | 176,952,190<br>(167,166,052 - 186,629,194) | 176,952,190<br>(167,166,052 - 186,629,194) | --                                      | --                                         | --                                         | --                                         |
| Neonatal preterm birth complications                             | 64,153,384<br>(51,107,147 - 78,703,718)    | 64,153,384<br>(51,107,147 - 78,703,718)    | --                                      | --                                         | --                                         | --                                         |
| Neonatal encephalopathy due to birth asphyxia and trauma         | 55,624,673<br>(44,503,146 - 65,716,450)    | 55,624,673<br>(44,503,146 - 65,716,450)    | --                                      | --                                         | --                                         | --                                         |
| Neonatal sepsis and other neonatal infections                    | 31,625,235<br>(20,143,206 - 44,126,946)    | 31,625,235<br>(20,143,206 - 44,126,946)    | --                                      | --                                         | --                                         | --                                         |
| Hemolytic disease and other neonatal jaundice                    | 1,692,531<br>(1,124,794 - 2,555,301)       | 1,692,531<br>(1,124,794 - 2,555,301)       | --                                      | --                                         | --                                         | --                                         |
| Other neonatal disorders                                         | 23,856,367<br>(18,960,679 - 30,286,998)    | 23,856,367<br>(18,960,679 - 30,286,998)    | --                                      | --                                         | --                                         | --                                         |
| Nutritional deficiencies                                         | 33,069,076<br>(26,085,276 - 39,311,401)    | 22,207,829<br>(16,873,611 - 26,955,774)    | 1,752,337<br>(1,328,943 - 2,127,460)    | 4,380,799<br>(3,551,040 - 5,523,688)       | 2,441,101<br>(1,840,158 - 2,914,973)       | 2,287,012<br>(1,788,004 - 2,641,988)       |
| Protein-energy malnutrition                                      | 25,135,580<br>(19,121,238 - 30,713,234)    | 19,246,964<br>(14,365,880 - 23,873,563)    | 1,261,450<br>(874,388 - 1,600,225)      | 1,933,068<br>(1,322,422 - 2,784,101)       | 1,225,882<br>(805,973 - 1,537,907)         | 1,468,217<br>(955,652 - 1,761,302)         |
| Iodine deficiency                                                | 114,635<br>(65,680 - 199,139)              | 45,924<br>(16,052 - 108,754)               | 8,363<br>(3,712 - 18,368)               | 31,410<br>(14,806 - 67,037)                | 21,191<br>(7,095 - 64,649)                 | 7,746<br>(3,005 - 19,073)                  |
| Iron-deficiency anemia                                           | 7,084,160<br>(4,352,476 - 10,396,619)      | 2,695,661<br>(1,101,167 - 5,169,047)       | 451,561<br>(261,549 - 676,570)          | 2,236,123<br>(1,582,969 - 2,911,912)       | 1,024,179<br>(632,816 - 1,405,774)         | 676,636<br>(429,414 - 1,018,934)           |
| Other nutritional deficiencies                                   | 734,701<br>(497,472 - 1,242,779)           | 219,279<br>(123,581 - 464,332)             | 30,963<br>(20,438 - 57,562)             | 180,198<br>(114,648 - 312,301)             | 169,849<br>(110,571 - 277,194)             | 134,412<br>(77,759 - 209,740)              |
| Other communicable, maternal, neonatal, and nutritional diseases | 23,548,648<br>(18,372,597 - 30,134,448)    | 14,915,294<br>(10,055,073 - 21,140,352)    | 1,678,504<br>(1,316,479 - 2,146,535)    | 4,249,752<br>(3,762,606 - 4,826,135)       | 1,979,034<br>(1,686,814 - 2,415,642)       | 726,063<br>(598,712 - 898,286)             |
| Sexually transmitted diseases excluding HIV                      | 11,473,429<br>(6,793,628 - 17,619,025)     | 10,383,397<br>(5,966,713 - 16,172,228)     | 673,982<br>(387,013 - 1,078,444)        | 257,947<br>(215,929 - 319,999)             | 98,341<br>(77,013 - 128,888)               | 59,763<br>(39,963 - 102,701)               |
| Syphilis                                                         | 11,266,100<br>(6,583,447 - 17,429,065)     | 10,383,397<br>(5,966,713 - 16,172,228)     | 661,244<br>(374,534 - 1,066,801)        | 115,882<br>(96,840 - 146,062)              | 60,363<br>(47,350 - 78,533)                | 45,214<br>(30,845 - 75,237)                |
| Chlamydial infection                                             | 45,805<br>(37,933 - 55,301)                | --                                         | 2,310<br>(1,767 - 3,198)                | 32,098<br>(25,809 - 38,636)                | 8,248<br>(5,976 - 11,982)                  | 3,150<br>(1,736 - 6,399)                   |
| Gonococcal infection                                             | 88,438<br>(75,384 - 109,615)               | --                                         | 5,246<br>(3,963 - 8,082)                | 58,217<br>(48,560 - 73,606)                | 17,456<br>(13,667 - 22,925)                | 7,520<br>(4,884 - 13,256)                  |
| Other sexually transmitted diseases                              | 73,086<br>(62,044 - 90,060)                | --                                         | 5,183<br>(3,920 - 7,949)                | 51,750<br>(43,152 - 64,540)                | 12,274<br>(9,508 - 16,232)                 | 3,879<br>(2,354 - 7,305)                   |
| Hepatitis                                                        | 6,112,757<br>(5,378,173 - 7,733,238)       | 1,433,480<br>(999,819 - 2,425,664)         | 564,060<br>(450,619 - 756,945)          | 2,798,000<br>(2,473,039 - 3,272,945)       | 1,044,977<br>(924,537 - 1,198,122)         | 272,239<br>(243,244 - 307,622)             |
| Acute hepatitis A                                                | 1,016,579<br>(348,916 - 1,890,813)         | 627,202<br>(226,089 - 1,201,610)           | 120,810<br>(39,746 - 227,669)           | 219,526<br>(62,538 - 452,542)              | 43,306<br>(12,175 - 94,257)                | 5,735<br>(1,434 - 13,050)                  |
| Acute hepatitis B                                                | 2,414,679<br>(1,672,198 - 3,335,479)       | 623,496<br>(309,114 - 1,153,816)           | 91,226<br>(50,574 - 147,774)            | 755,628<br>(459,770 - 1,122,214)           | 718,056<br>(561,400 - 876,374)             | 226,274<br>(190,724 - 262,992)             |
| Acute hepatitis C                                                | 121,148<br>(25,582 - 290,002)              | --                                         | 15,703<br>(3,064 - 38,004)              | 62,388<br>(12,686 - 152,509)               | 34,159<br>(7,140 - 79,817)                 | 8,898<br>(1,895 - 20,251)                  |
| Acute hepatitis E                                                | 2,560,350<br>(1,914,360 - 3,446,107)       | 182,782<br>(76,300 - 434,291)              | 336,322<br>(230,762 - 487,138)          | 1,760,458<br>(1,362,700 - 2,218,201)       | 249,456<br>(140,803 - 400,818)             | 31,333<br>(15,210 - 55,602)                |
| Other infectious diseases                                        | 5,962,462<br>(3,744,516 - 8,464,150)       | 3,098,417<br>(1,594,523 - 5,469,674)       | 440,463<br>(273,183 - 691,957)          | 1,193,805<br>(843,848 - 1,531,326)         | 835,716<br>(609,372 - 1,204,440)           | 394,061<br>(275,543 - 568,134)             |
| Non-communicable diseases                                        | 806,461,089<br>(774,335,255 - 842,306,798) | 74,703,311<br>(62,688,779 - 91,441,251)    | 15,924,096<br>(14,071,893 - 18,667,346) | 183,447,842<br>(173,621,496 - 194,071,631) | 307,909,548<br>(295,127,309 - 322,443,000) | 224,476,292<br>(218,965,460 - 269,668,081) |
| Neoplasms                                                        | 190,329,532<br>(182,769,975 - 198,776,373) | 4,138,410<br>(3,481,395 - 4,761,300)       | 3,647,159<br>(3,278,144 - 3,998,970)    | 48,229,980<br>(45,707,630 - 51,033,342)    | 92,395,035<br>(88,210,500 - 97,008,606)    | 41,918,948<br>(40,285,269 - 43,302,070)    |
| Esophageal cancer                                                | 9,717,330<br>(8,548,501 - 11,478,077)      | --                                         | --                                      | 1,631,342<br>(1,411,708 - 1,955,459)       | 5,810,802<br>(5,070,646 - 6,971,023)       | 2,275,186<br>(2,020,779 - 2,682,460)       |
| Stomach cancer                                                   | 17,616,104<br>(16,589,623 - 18,732,518)    | --                                         | --                                      | 3,668,778<br>(3,440,292 - 3,900,687)       | 9,231,284<br>(8,612,503 - 9,916,033)       | 4,716,043<br>(4,434,523 - 5,024,204)       |
| Liver cancer                                                     | 20,698,031<br>(19,142,629 - 22,327,882)    | --                                         | 124,862<br>(103,782 - 146,526)          | 6,377,176<br>(5,766,652 - 6,996,150)       | 10,719,244<br>(9,829,817 - 11,653,344)     | 3,476,749<br>(3,243,358 - 3,749,972)       |

Web Table 30 - Global YLLs with 95% UI by age, sex, and cause in 2013

| Cause                                | Both Sexes, All Ages                       | Both Sexes, 0-4 Years                | Both Sexes, 5-14 Years               | Both Sexes, 15-49 Years                 | Both Sexes, 50-69 Years                    | Both Sexes, 70-80 Years                    |
|--------------------------------------|--------------------------------------------|--------------------------------------|--------------------------------------|-----------------------------------------|--------------------------------------------|--------------------------------------------|
| Liver cancer due to hepatitis B      | 8,523,911<br>(7,705,888 - 9,383,337)       | --                                   | 47,701<br>(39,383 - 57,365)          | 3,178,865<br>(2,848,977 - 3,552,303)    | 4,296,364<br>(3,813,096 - 4,792,548)       | 1,000,981<br>(910,502 - 1,096,991)         |
| Liver cancer due to hepatitis C      | 7,892,510<br>(7,205,688 - 8,709,530)       | --                                   | 15,221<br>(12,365 - 18,982)          | 1,922,313<br>(1,692,634 - 2,189,955)    | 4,303,968<br>(3,889,257 - 4,781,035)       | 1,651,008<br>(1,529,567 - 1,816,047)       |
| Liver cancer due to alcohol use      | 1,950,440<br>(1,782,342 - 2,152,637)       | --                                   | --                                   | 375,923<br>(333,134 - 426,050)          | 1,060,624<br>(958,281 - 1,185,051)         | 513,893<br>(469,563 - 562,261)             |
| Liver cancer due to other causes     | 2,331,171<br>(2,081,326 - 2,572,302)       | --                                   | 61,940<br>(50,363 - 74,828)          | 900,074<br>(792,106 - 1,001,803)        | 1,058,289<br>(939,850 - 1,187,272)         | 310,868<br>(281,843 - 347,849)             |
| Larynx cancer                        | 2,050,680<br>(1,741,721 - 2,509,818)       | --                                   | --                                   | 410,477<br>(351,205 - 531,213)          | 1,226,221<br>(1,024,701 - 1,469,025)       | 413,982<br>(344,700 - 492,081)             |
| Tracheal, bronchus and lung cancer   | 34,265,517<br>(32,645,238 - 35,898,947)    | --                                   | --                                   | 4,872,600<br>(4,561,550 - 5,278,034)    | 20,198,259<br>(19,107,294 - 21,267,451)    | 9,194,658<br>(8,718,788 - 9,558,084)       |
| Breast cancer                        | 12,190,503<br>(11,175,381 - 13,413,101)    | --                                   | --                                   | 4,528,400<br>(4,173,880 - 4,952,425)    | 5,936,382<br>(5,413,636 - 6,600,485)       | 1,725,720<br>(1,415,027 - 1,898,925)       |
| Cervical cancer                      | 6,670,920<br>(5,581,918 - 7,294,633)       | --                                   | --                                   | 2,723,337<br>(2,259,352 - 3,009,762)    | 3,204,298<br>(2,593,389 - 3,560,513)       | 743,285<br>(663,344 - 835,913)             |
| Uterine cancer                       | 1,467,211<br>(1,132,415 - 1,722,553)       | --                                   | --                                   | 305,730<br>(217,288 - 377,347)          | 826,249<br>(627,056 - 976,445)             | 335,233<br>(270,972 - 392,053)             |
| Prostate cancer                      | 3,875,165<br>(3,254,597 - 4,889,976)       | --                                   | --                                   | 84,392<br>(64,334 - 108,671)            | 1,352,491<br>(1,107,097 - 1,715,345)       | 2,438,282<br>(2,030,175 - 3,145,688)       |
| Colon and rectum cancer              | 15,092,266<br>(14,528,258 - 15,645,687)    | --                                   | --                                   | 3,262,522<br>(3,095,566 - 3,430,857)    | 7,264,252<br>(6,957,357 - 7,582,410)       | 4,565,491<br>(4,394,677 - 4,733,500)       |
| Lip and oral cavity cancer           | 3,382,402<br>(2,857,559 - 3,869,898)       | --                                   | --                                   | 1,051,143<br>(852,983 - 1,233,893)      | 1,756,959<br>(1,486,601 - 2,025,723)       | 574,299<br>(498,569 - 673,291)             |
| Nasopharynx cancer                   | 1,885,768<br>(1,677,771 - 2,152,785)       | --                                   | 41,161<br>(30,105 - 58,956)          | 843,632<br>(745,951 - 976,120)          | 848,326<br>(750,678 - 974,289)             | 152,650<br>(135,341 - 179,241)             |
| Other pharynx cancer                 | 2,071,727<br>(1,763,573 - 2,293,995)       | --                                   | --                                   | 531,347<br>(450,500 - 605,850)          | 1,272,944<br>(1,057,070 - 1,426,396)       | 267,436<br>(229,435 - 294,975)             |
| Gallbladder and biliary tract cancer | 2,662,001<br>(2,300,763 - 2,931,940)       | --                                   | --                                   | 479,225<br>(394,759 - 534,712)          | 1,359,118<br>(1,171,078 - 1,511,535)       | 823,658<br>(702,992 - 929,379)             |
| Pancreatic cancer                    | 6,955,482<br>(6,707,237 - 7,201,732)       | --                                   | --                                   | 1,114,118<br>(1,058,609 - 1,174,348)    | 3,792,816<br>(3,629,770 - 3,953,506)       | 2,048,549<br>(1,961,483 - 2,123,300)       |
| Malignant skin melanoma              | 1,417,556<br>(1,119,642 - 1,907,893)       | --                                   | --                                   | 551,319<br>(458,876 - 763,081)          | 611,941<br>(467,991 - 835,328)             | 254,296<br>(187,142 - 333,823)             |
| Non-melanoma skin cancer             | 690,330<br>(581,138 - 892,501)             | --                                   | --                                   | 191,002<br>(156,957 - 284,547)          | 251,858<br>(206,789 - 320,585)             | 247,469<br>(205,426 - 305,040)             |
| Ovarian cancer                       | 3,921,624<br>(3,667,019 - 4,250,082)       | --                                   | --                                   | 1,164,381<br>(1,066,072 - 1,292,104)    | 2,122,896<br>(1,961,667 - 2,313,276)       | 634,347<br>(579,882 - 684,957)             |
| Testicular cancer                    | 344,425<br>(260,036 - 430,253)             | --                                   | --                                   | 279,439<br>(208,811 - 346,818)          | 49,794<br>(37,949 - 62,244)                | 15,193<br>(11,587 - 18,941)                |
| Kidney cancer                        | 3,011,031<br>(2,863,326 - 3,174,675)       | 142,146<br>(118,618 - 173,673)       | 67,825<br>(58,328 - 78,930)          | 547,149<br>(510,460 - 588,649)          | 1,555,070<br>(1,463,424 - 1,657,547)       | 698,841<br>(643,244 - 751,617)             |
| Bladder cancer                       | 2,960,126<br>(2,693,770 - 3,289,934)       | --                                   | --                                   | 347,869<br>(307,650 - 398,818)          | 1,432,524<br>(1,315,206 - 1,630,223)       | 1,179,732<br>(1,056,526 - 1,314,744)       |
| Brain and nervous system cancer      | 6,570,264<br>(5,487,146 - 7,641,929)       | 272,866<br>(220,504 - 336,374)       | 564,313<br>(453,373 - 661,137)       | 2,677,101<br>(2,201,018 - 3,203,837)    | 2,397,775<br>(2,055,662 - 2,822,796)       | 658,209<br>(531,284 - 716,821)             |
| Thyroid cancer                       | 724,239<br>(639,078 - 829,151)             | --                                   | 7,215<br>(5,533 - 8,992)             | 171,854<br>(149,576 - 208,740)          | 358,220<br>(309,955 - 405,129)             | 186,950<br>(162,110 - 213,669)             |
| Mesothelioma                         | 752,690<br>(676,761 - 852,798)             | --                                   | --                                   | 107,914<br>(99,024 - 123,114)           | 492,994<br>(441,513 - 556,127)             | 151,783<br>(116,942 - 178,392)             |
| Hodgkin lymphoma                     | 932,073<br>(819,348 - 1,227,800)           | 167,005<br>(106,499 - 278,451)       | 71,396<br>(56,564 - 93,253)          | 429,082<br>(386,677 - 562,077)          | 193,609<br>(173,490 - 260,296)             | 70,981<br>(64,761 - 91,266)                |
| Non-Hodgkin lymphoma                 | 6,196,631<br>(5,318,185 - 6,968,042)       | 486,269<br>(357,906 - 640,786)       | 453,079<br>(361,594 - 539,636)       | 2,096,199<br>(1,811,598 - 2,411,011)    | 2,114,250<br>(1,800,519 - 2,357,704)       | 1,046,835<br>(806,155 - 1,160,643)         |
| Multiple myeloma                     | 1,575,154<br>(1,326,535 - 1,858,484)       | --                                   | --                                   | 277,876<br>(235,204 - 320,305)          | 826,123<br>(697,133 - 988,916)             | 471,156<br>(375,141 - 570,294)             |
| Leukemia                             | 9,051,370<br>(8,642,952 - 9,478,980)       | 777,758<br>(673,459 - 895,649)       | 1,263,217<br>(1,137,493 - 1,386,209) | 3,997,184<br>(3,760,230 - 4,243,198)    | 2,004,950<br>(1,900,610 - 2,110,191)       | 1,008,260<br>(954,882 - 1,056,562)         |
| Other neoplasms                      | 11,580,911<br>(10,239,218 - 12,869,098)    | 2,292,365<br>(1,786,862 - 2,811,994) | 1,054,091<br>(862,665 - 1,219,681)   | 3,507,392<br>(3,123,651 - 4,047,063)    | 3,183,387<br>(2,882,293 - 3,536,789)       | 1,543,675<br>(1,334,730 - 1,658,586)       |
| Cardiovascular diseases              | 308,528,675<br>(290,755,190 - 325,538,424) | 4,713,083<br>(4,160,068 - 5,641,330) | 2,244,646<br>(1,955,434 - 2,727,376) | 61,824,969<br>(56,634,156 - 66,543,895) | 128,025,811<br>(120,116,309 - 135,842,435) | 111,720,165<br>(107,271,097 - 116,425,123) |
| Rheumatic heart disease              | 7,696,363<br>(6,285,709 - 10,004,683)      | 165,561<br>(116,728 - 246,672)       | 376,748<br>(289,813 - 502,861)       | 3,440,534<br>(2,799,666 - 4,494,174)    | 2,507,076<br>(2,032,869 - 3,406,151)       | 1,206,445<br>(943,294 - 1,529,522)         |
| Ischemic heart disease               | 144,434,443<br>(130,371,715 - 156,210,064) | 544,528<br>(408,223 - 854,324)       | 453,688<br>(357,234 - 636,543)       | 29,048,307<br>(25,723,904 - 32,485,549) | 62,571,469<br>(56,124,499 - 68,123,422)    | 51,816,451<br>(46,635,001 - 55,675,004)    |
| Cerebrovascular disease              | 109,135,309<br>(100,175,089 - 120,715,065) | 1,183,470<br>(990,187 - 1,440,377)   | 714,726<br>(603,912 - 881,066)       | 17,834,791<br>(15,752,739 - 20,181,137) | 45,270,623<br>(41,160,728 - 50,374,610)    | 44,131,699<br>(40,965,195 - 48,933,412)    |
| Ischemic stroke                      | 44,774,569<br>(37,886,659 - 49,626,890)    | 132,197<br>(95,951 - 188,262)        | 85,149<br>(64,826 - 116,558)         | 2,808,768<br>(2,185,296 - 3,428,793)    | 15,784,271<br>(12,944,057 - 18,095,675)    | 25,964,184<br>(22,149,540 - 28,385,516)    |
| Hemorrhagic stroke                   | 64,360,740<br>(58,499,211 - 73,445,035)    | 1,051,273<br>(880,436 - 1,289,864)   | 629,577<br>(529,293 - 782,836)       | 15,026,024<br>(13,323,643 - 17,070,982) | 29,486,352<br>(26,486,816 - 33,668,077)    | 18,167,515<br>(16,192,187 - 22,164,503)    |
| Hypertensive heart disease           | 18,054,215<br>(14,316,044 - 21,409,853)    | 120,191<br>(80,494 - 168,531)        | 57,750<br>(42,853 - 73,929)          | 3,131,801<br>(2,405,944 - 3,879,965)    | 7,609,089<br>(5,879,687 - 9,084,746)       | 7,135,384<br>(5,708,414 - 8,470,381)       |
| Cardiomyopathy and myocarditis       | 11,606,942<br>(9,396,755 - 13,078,440)     | 1,398,521<br>(1,097,625 - 1,729,522) | 340,360<br>(264,922 - 411,682)       | 4,112,389<br>(3,215,662 - 4,650,627)    | 3,774,381<br>(2,956,248 - 4,373,274)       | 1,981,293<br>(1,685,394 - 2,336,946)       |
| Atrial fibrillation and flutter      | 1,030,932<br>(904,983 - 1,147,406)         | --                                   | --                                   | 38,992<br>(34,453 - 43,345)             | 198,570<br>(173,738 - 220,432)             | 793,371<br>(692,312 - 890,733)             |
| Aortic aneurysm                      | 2,652,700<br>(2,217,380 - 3,109,609)       | --                                   | --                                   | 514,144<br>(411,372 - 609,018)          | 1,142,408<br>(952,526 - 1,323,064)         | 996,148<br>(818,916 - 1,195,565)           |

Web Table 30 - Global YLLs with 95% UI by age, sex, and cause in 2013

| Cause                                               | Both Sexes, All Ages                    | Both Sexes, 0-4 Years                | Both Sexes, 5-14 Years               | Both Sexes, 15-49 Years                 | Both Sexes, 50-69 Years                 | Both Sexes, 70-80 Years                 |
|-----------------------------------------------------|-----------------------------------------|--------------------------------------|--------------------------------------|-----------------------------------------|-----------------------------------------|-----------------------------------------|
| Peripheral vascular disease                         | 468,354<br>(416,653 - 513,033)          | --                                   | --                                   | 24,154<br>(21,284 - 27,108)             | 157,319<br>(140,777 - 173,422)          | 286,881<br>(251,409 - 318,490)          |
| Endocarditis                                        | 1,881,021<br>(1,396,523 - 2,306,017)    | 333,922<br>(229,455 - 442,140)       | 67,269<br>(50,583 - 92,852)          | 676,068<br>(483,776 - 838,458)          | 503,757<br>(367,499 - 629,057)          | 300,005<br>(224,542 - 371,194)          |
| Other cardiovascular and circulatory diseases       | 11,568,396<br>(10,226,045 - 14,394,370) | 966,891<br>(735,233 - 1,368,677)     | 234,106<br>(185,049 - 318,834)       | 3,003,790<br>(2,524,621 - 3,970,100)    | 4,291,119<br>(3,809,262 - 5,424,125)    | 3,072,490<br>(2,745,983 - 3,624,544)    |
| Chronic respiratory diseases                        | 74,092,004<br>(68,811,776 - 81,890,697) | 3,112,159<br>(2,682,292 - 3,702,012) | 793,594<br>(695,135 - 910,033)       | 10,381,780<br>(9,226,611 - 11,913,422)  | 29,613,874<br>(26,830,690 - 33,453,990) | 30,190,597<br>(28,266,722 - 33,411,394) |
| Chronic obstructive pulmonary disease               | 45,769,369<br>(40,751,723 - 50,807,266) | 1,171,717<br>(954,257 - 1,534,733)   | 218,233<br>(171,053 - 260,596)       | 4,256,632<br>(3,553,398 - 4,947,816)    | 18,160,480<br>(15,873,011 - 20,550,149) | 21,962,306<br>(19,914,230 - 24,118,277) |
| Pneumoconiosis                                      | 5,417,174<br>(4,235,507 - 6,917,940)    | 25,857<br>(17,606 - 38,262)          | 22,280<br>(16,028 - 32,147)          | 1,046,861<br>(788,334 - 1,352,583)      | 2,793,319<br>(2,098,903 - 3,639,789)    | 1,528,856<br>(1,156,308 - 1,984,337)    |
| Silicosis                                           | 972,910<br>(674,664 - 1,376,548)        | 6,543<br>(3,889 - 11,199)            | 5,768<br>(3,760 - 9,192)             | 190,879<br>(126,929 - 290,700)          | 476,343<br>(313,784 - 694,845)          | 293,377<br>(198,900 - 411,086)          |
| Asbestosis                                          | 551,467<br>(401,518 - 751,478)          | 4,776<br>(3,083 - 7,580)             | 4,592<br>(3,311 - 6,611)             | 127,249<br>(91,613 - 175,207)           | 298,678<br>(206,127 - 420,416)          | 116,173<br>(81,634 - 157,069)           |
| Coal workers pneumoconiosis                         | 593,396<br>(440,915 - 830,638)          | 4,015<br>(2,789 - 6,027)             | 4,461<br>(3,244 - 6,576)             | 142,296<br>(101,629 - 203,458)          | 323,152<br>(231,801 - 456,709)          | 119,472<br>(85,496 - 171,073)           |
| Other pneumoconiosis                                | 3,299,401<br>(2,491,813 - 4,270,192)    | 10,523<br>(7,169 - 16,315)           | 7,459<br>(5,371 - 10,429)            | 586,437<br>(436,066 - 757,964)          | 1,695,146<br>(1,228,727 - 2,279,946)    | 999,835<br>(705,069 - 1,375,150)        |
| Asthma                                              | 11,586,902<br>(9,614,373 - 15,507,453)  | 708,506<br>(551,661 - 875,659)       | 369,424<br>(304,182 - 465,324)       | 3,279,973<br>(2,739,830 - 4,312,672)    | 4,445,146<br>(3,543,269 - 6,190,778)    | 2,783,853<br>(2,173,022 - 3,972,690)    |
| Interstitial lung disease and pulmonary sarcoidosis | 8,097,301<br>(6,286,130 - 10,303,788)   | 58,151<br>(30,280 - 124,239)         | 40,929<br>(22,041 - 89,533)          | 1,114,388<br>(847,164 - 1,437,900)      | 3,633,111<br>(2,677,335 - 4,590,385)    | 3,250,721<br>(2,594,060 - 4,328,474)    |
| Other chronic respiratory diseases                  | 3,221,259<br>(2,775,177 - 3,762,688)    | 1,147,927<br>(967,134 - 1,368,626)   | 142,728<br>(110,409 - 174,438)       | 683,926<br>(562,072 - 813,700)          | 581,818<br>(461,330 - 741,130)          | 664,860<br>(564,273 - 796,335)          |
| Cirrhosis                                           | 36,313,427<br>(34,531,560 - 38,519,730) | 814,777<br>(623,282 - 1,058,458)     | 683,380<br>(596,594 - 783,602)       | 15,198,298<br>(14,178,694 - 16,356,162) | 15,674,762<br>(14,883,017 - 16,603,536) | 3,942,210<br>(3,773,354 - 4,151,258)    |
| Cirrhosis due to hepatitis B                        | 9,256,211<br>(8,422,538 - 10,144,322)   | 34,535<br>(24,523 - 49,793)          | 106,288<br>(84,779 - 133,840)        | 3,982,920<br>(3,511,254 - 4,470,558)    | 4,083,393<br>(3,722,334 - 4,459,697)    | 1,049,076<br>(964,867 - 1,139,236)      |
| Cirrhosis due to hepatitis C                        | 9,795,023<br>(9,068,212 - 10,649,161)   | 49,778<br>(36,726 - 70,459)          | 86,036<br>(67,961 - 107,961)         | 3,639,696<br>(3,270,367 - 4,063,332)    | 4,732,299<br>(4,384,330 - 5,133,602)    | 1,287,214<br>(1,185,451 - 1,385,881)    |
| Cirrhosis due to alcohol use                        | 10,755,087<br>(9,811,216 - 11,779,859)  | --                                   | --                                   | 4,256,389<br>(3,722,098 - 4,868,005)    | 5,189,345<br>(4,765,308 - 5,669,264)    | 1,309,353<br>(1,215,814 - 1,414,954)    |
| Cirrhosis due to other causes                       | 6,507,106<br>(5,864,935 - 7,310,104)    | 730,465<br>(559,141 - 956,659)       | 491,055<br>(420,602 - 567,840)       | 3,319,292<br>(2,931,722 - 3,790,474)    | 1,669,726<br>(1,431,735 - 1,945,597)    | 296,567<br>(255,918 - 340,118)          |
| Digestive diseases                                  | 28,883,262<br>(25,983,461 - 32,037,752) | 1,468,527<br>(1,178,997 - 1,866,374) | 1,285,539<br>(1,079,845 - 1,485,215) | 10,981,970<br>(9,543,657 - 12,625,465)  | 9,255,020<br>(8,031,038 - 10,349,000)   | 5,892,206<br>(5,397,557 - 6,449,253)    |
| Peptic ulcer disease                                | 7,189,216<br>(5,897,164 - 8,448,492)    | 123,548<br>(81,390 - 193,051)        | 153,727<br>(105,015 - 207,227)       | 2,561,038<br>(2,031,845 - 3,191,748)    | 2,804,791<br>(2,238,891 - 3,346,535)    | 1,546,113<br>(1,274,032 - 1,807,473)    |
| Gastritis and duodenitis                            | 1,475,853<br>(1,046,872 - 2,236,999)    | 80,146<br>(42,210 - 125,526)         | 83,359<br>(53,540 - 139,402)         | 508,449<br>(359,174 - 822,402)          | 502,531<br>(341,669 - 736,013)          | 301,368<br>(209,421 - 454,289)          |
| Appendicitis                                        | 2,570,468<br>(1,893,521 - 3,194,538)    | 175,640<br>(121,664 - 271,636)       | 191,006<br>(146,445 - 243,498)       | 1,450,747<br>(1,021,849 - 1,904,092)    | 510,166<br>(355,476 - 663,264)          | 242,908<br>(165,373 - 317,510)          |
| Paralytic ileus and intestinal obstruction          | 6,036,542<br>(4,650,235 - 8,261,952)    | 394,102<br>(292,900 - 594,111)       | 438,448<br>(332,007 - 573,553)       | 2,216,543<br>(1,673,124 - 3,076,744)    | 1,803,980<br>(1,336,077 - 2,561,669)    | 1,183,468<br>(857,066 - 1,771,830)      |
| Inguinal, femoral, and abdominal hernia             | 692,552<br>(560,294 - 1,092,099)        | 44,353<br>(27,758 - 66,083)          | 53,449<br>(33,543 - 109,662)         | 191,165<br>(139,798 - 352,565)          | 198,805<br>(155,894 - 311,498)          | 204,781<br>(154,112 - 304,341)          |
| Inflammatory bowel disease                          | 1,505,915<br>(1,211,640 - 2,045,164)    | 273,359<br>(177,079 - 402,887)       | 95,494<br>(65,064 - 132,422)         | 570,931<br>(444,157 - 778,277)          | 332,085<br>(260,783 - 450,858)          | 234,047<br>(190,381 - 321,953)          |
| Vascular intestinal disorders                       | 1,230,749<br>(789,416 - 1,828,490)      | 14,102<br>(4,239 - 30,285)           | 19,694<br>(5,373 - 44,260)           | 207,605<br>(116,286 - 367,996)          | 442,129<br>(269,608 - 695,961)          | 547,220<br>(363,609 - 771,830)          |
| Gallbladder and biliary diseases                    | 1,944,831<br>(1,624,374 - 2,238,594)    | 53,305<br>(39,822 - 69,962)          | 53,360<br>(33,221 - 66,400)          | 511,072<br>(420,759 - 604,541)          | 687,339<br>(567,309 - 803,488)          | 639,756<br>(539,753 - 744,445)          |
| Pancreatitis                                        | 3,618,974<br>(2,497,658 - 4,544,550)    | 27,364<br>(14,831 - 40,467)          | 59,875<br>(34,696 - 87,074)          | 1,883,414<br>(1,257,774 - 2,443,316)    | 1,195,034<br>(810,188 - 1,525,266)      | 453,287<br>(314,379 - 565,440)          |
| Other digestive diseases                            | 2,618,162<br>(2,181,938 - 3,029,555)    | 282,609<br>(207,156 - 389,299)       | 137,128<br>(106,721 - 168,958)       | 881,006<br>(672,451 - 1,062,002)        | 778,161<br>(642,324 - 922,823)          | 539,258<br>(455,956 - 630,804)          |
| Neurological disorders                              | 24,687,955<br>(23,207,549 - 26,020,862) | 1,620,192<br>(1,322,070 - 2,042,332) | 923,735<br>(753,480 - 1,137,599)     | 4,434,137<br>(3,776,707 - 4,989,227)    | 3,926,979<br>(3,658,710 - 4,145,622)    | 13,782,912<br>(13,141,705 - 14,462,548) |
| Alzheimer disease and other dementias               | 14,465,251<br>(13,793,481 - 15,248,435) | --                                   | --                                   | 20,484<br>(18,066 - 23,273)             | 2,076,782<br>(1,958,962 - 2,201,180)    | 12,367,986<br>(11,759,967 - 13,082,550) |
| Parkinson disease                                   | 1,134,204<br>(915,675 - 1,228,477)      | --                                   | --                                   | 38,447<br>(33,082 - 45,151)             | 266,243<br>(222,044 - 299,408)          | 829,514<br>(661,715 - 905,006)          |
| Epilepsy                                            | 5,827,881<br>(4,691,991 - 6,809,293)    | 1,184,592<br>(886,328 - 1,600,978)   | 750,562<br>(581,749 - 963,706)       | 3,192,856<br>(2,579,452 - 3,675,863)    | 512,300<br>(410,595 - 583,076)          | 187,570<br>(146,619 - 213,985)          |
| Multiple sclerosis                                  | 588,181<br>(390,154 - 783,083)          | --                                   | --                                   | 256,601<br>(182,083 - 375,727)          | 272,890<br>(163,062 - 343,069)          | 58,690<br>(33,731 - 72,066)             |
| Other neurological disorders                        | 2,672,437<br>(2,240,769 - 2,966,788)    | 435,600<br>(355,683 - 575,055)       | 173,173<br>(140,050 - 200,622)       | 925,749<br>(754,515 - 1,029,434)        | 798,765<br>(694,425 - 899,009)          | 339,152<br>(294,868 - 368,145)          |
| Mental and substance use disorders                  | 11,365,438<br>(9,525,174 - 13,099,109)  | 239,704<br>(126,240 - 361,125)       | 3,091<br>(2,489 - 3,865)             | 8,020,269<br>(6,829,961 - 9,078,557)    | 2,742,509<br>(2,103,753 - 3,405,017)    | 359,865<br>(297,793 - 415,199)          |
| Schizophrenia                                       | 482,788<br>(407,356 - 705,998)          | --                                   | --                                   | 269,349<br>(222,600 - 399,827)          | 162,288<br>(135,371 - 238,810)          | 51,150<br>(43,145 - 70,233)             |
| Alcohol use disorders                               | 5,118,443<br>(3,282,535 - 6,570,060)    | --                                   | --                                   | 3,147,196<br>(2,060,541 - 4,042,567)    | 1,790,154<br>(1,121,206 - 2,279,255)    | 181,093<br>(110,955 - 224,343)          |
| Drug use disorders                                  | 5,730,589<br>(4,956,695 - 6,160,383)    | 239,704<br>(126,240 - 361,125)       | --                                   | 4,573,197<br>(3,939,527 - 4,917,213)    | 790,067<br>(683,737 - 871,176)          | 127,622<br>(116,269 - 138,225)          |
| Opioid use disorders                                | 2,286,649<br>(1,928,782 - 2,463,077)    | 65,517<br>(40,387 - 92,803)          | --                                   | 1,850,444<br>(1,530,810 - 2,004,120)    | 320,779<br>(267,316 - 355,424)          | 49,910<br>(45,152 - 55,121)             |



Web Table 30 - Global YLLs with 95% UI by age, sex, and cause in 2013

| Cause                                               | Both Sexes, All Ages                    | Both Sexes, 0-4 Years                   | Both Sexes, 5-14 Years               | Both Sexes, 15-49 Years                 | Both Sexes, 50-69 Years                 | Both Sexes, 70-80 Years                 |
|-----------------------------------------------------|-----------------------------------------|-----------------------------------------|--------------------------------------|-----------------------------------------|-----------------------------------------|-----------------------------------------|
| Cocaine use disorders                               | 187,492<br>(166,963 - 204,630)          | 4,880<br>(3,655 - 6,245)                | --                                   | 152,628<br>(132,232 - 168,597)          | 24,149<br>(20,587 - 27,448)             | 5,836<br>(4,953 - 6,830)                |
| Amphetamine use disorders                           | 156,245<br>(141,303 - 171,623)          | 5,620<br>(4,217 - 7,205)                | --                                   | 117,747<br>(105,335 - 131,531)          | 26,203<br>(22,617 - 29,542)             | 6,675<br>(5,661 - 7,841)                |
| Other drug use disorders                            | 3,100,203<br>(2,706,233 - 3,369,861)    | 163,688<br>(76,001 - 261,210)           | --                                   | 2,452,379<br>(2,144,148 - 2,646,159)    | 418,936<br>(368,653 - 462,961)          | 65,201<br>(58,982 - 71,422)             |
| Eating disorders                                    | 33,617<br>(30,244 - 37,554)             | --                                      | 3,091<br>(2,489 - 3,865)             | 30,526<br>(27,302 - 34,479)             | --                                      | --                                      |
| Anorexia nervosa                                    | 33,617<br>(30,244 - 37,554)             | --                                      | 3,091<br>(2,489 - 3,865)             | 30,526<br>(27,302 - 34,479)             | --                                      | --                                      |
| Diabetes, urogenital, blood, and endocrine diseases | 76,059,477<br>(66,324,677 - 90,163,764) | 13,959,709<br>(7,320,620 - 24,393,499)  | 3,762,047<br>(2,130,806 - 6,351,420) | 18,916,442<br>(17,200,267 - 21,338,467) | 24,035,294<br>(22,372,405 - 25,516,436) | 15,385,985<br>(14,243,760 - 16,167,934) |
| Diabetes mellitus                                   | 26,314,519<br>(24,955,860 - 27,911,066) | 383,861<br>(309,617 - 483,013)          | 162,719<br>(125,796 - 216,044)       | 5,445,814<br>(4,997,980 - 5,854,026)    | 12,546,489<br>(11,799,865 - 13,437,927) | 7,775,636<br>(7,362,906 - 8,290,429)    |
| Acute glomerulonephritis                            | 713,511<br>(516,846 - 921,253)          | 141,348<br>(68,917 - 237,629)           | 84,029<br>(56,896 - 119,591)         | 281,631<br>(220,145 - 350,283)          | 144,672<br>(111,578 - 172,525)          | 61,830<br>(48,553 - 72,367)             |
| Chronic kidney disease                              | 20,839,972<br>(17,119,050 - 22,625,387) | 756,317<br>(618,837 - 914,455)          | 422,744<br>(341,514 - 486,434)       | 6,616,881<br>(5,365,744 - 7,321,209)    | 7,836,178<br>(6,359,917 - 8,883,681)    | 5,207,852<br>(4,401,658 - 5,629,207)    |
| Chronic kidney disease due to diabetes mellitus     | 3,447,420<br>(2,700,003 - 4,043,435)    | 20,794<br>(14,979 - 29,914)             | 16,058<br>(11,498 - 21,637)          | 717,867<br>(547,428 - 881,951)          | 1,706,173<br>(1,252,228 - 1,910,160)    | 986,528<br>(823,243 - 1,231,617)        |
| Chronic kidney disease due to hypertension          | 5,351,099<br>(3,803,408 - 6,534,763)    | 94,879<br>(60,745 - 137,279)            | 44,559<br>(30,922 - 60,953)          | 1,469,119<br>(1,051,402 - 1,849,315)    | 2,133,038<br>(1,475,177 - 2,597,693)    | 1,609,504<br>(1,159,910 - 1,953,349)    |
| Chronic kidney disease due to glomerulonephritis    | 3,630,374<br>(2,961,418 - 4,393,846)    | 350,310<br>(279,619 - 442,247)          | 188,049<br>(149,691 - 226,826)       | 1,620,128<br>(1,302,818 - 1,921,757)    | 987,727<br>(775,660 - 1,239,733)        | 484,161<br>(367,844 - 622,660)          |
| Chronic kidney disease due to other causes          | 8,411,078<br>(6,257,493 - 9,664,464)    | 290,335<br>(216,766 - 378,292)          | 174,079<br>(134,263 - 208,873)       | 2,809,767<br>(2,020,889 - 3,339,213)    | 3,009,239<br>(2,210,593 - 3,539,512)    | 2,127,659<br>(1,593,722 - 2,482,845)    |
| Urinary diseases and male infertility               | 5,412,113<br>(4,565,164 - 5,878,365)    | 610,785<br>(447,954 - 756,962)          | 161,950<br>(123,370 - 197,888)       | 1,672,032<br>(1,412,698 - 1,858,271)    | 1,614,090<br>(1,370,059 - 1,768,653)    | 1,353,255<br>(1,137,800 - 1,469,946)    |
| Interstitial nephritis and urinary tract infections | 3,749,905<br>(3,082,120 - 4,143,380)    | 484,055<br>(327,136 - 611,618)          | 107,466<br>(74,641 - 134,420)        | 1,133,105<br>(921,283 - 1,278,047)      | 1,045,026<br>(892,413 - 1,178,326)      | 890,254<br>(803,940 - 1,078,353)        |
| Urolithiasis                                        | 345,065<br>(288,800 - 476,540)          | --                                      | 15,647<br>(11,881 - 22,597)          | 119,898<br>(93,995 - 174,401)           | 132,098<br>(106,880 - 185,142)          | 77,422<br>(62,415 - 104,934)            |
| Other urinary diseases                              | 1,317,143<br>(953,155 - 1,584,519)      | 126,730<br>(92,461 - 178,715)           | 38,837<br>(28,395 - 53,749)          | 419,029<br>(303,743 - 513,686)          | 436,967<br>(298,364 - 525,910)          | 295,580<br>(213,766 - 355,541)          |
| Gynecological diseases                              | 105,927<br>(90,042 - 169,009)           | --                                      | --                                   | 71,239<br>(58,966 - 125,016)            | 16,986<br>(14,278 - 23,234)             | 17,702<br>(12,873 - 24,485)             |
| Uterine fibroids                                    | 22,652<br>(19,020 - 33,581)             | --                                      | --                                   | 12,347<br>(9,785 - 20,672)              | 4,767<br>(3,995 - 6,475)                | 5,537<br>(4,004 - 7,682)                |
| Polycystic ovarian syndrome                         | 4,964<br>(4,145 - 8,842)                | --                                      | --                                   | 4,839<br>(4,019 - 8,659)                | 125<br>(96 - 171)                       | --                                      |
| Endometriosis                                       | 11,854<br>(9,925 - 20,772)              | --                                      | --                                   | 11,352<br>(9,446 - 20,027)              | 502<br>(386 - 686)                      | --                                      |
| Genital prolapse                                    | 16,881<br>(14,415 - 25,890)             | --                                      | --                                   | 9,458<br>(7,866 - 16,670)               | 2,953<br>(2,486 - 4,077)                | 4,470<br>(3,253 - 6,183)                |
| Other gynecological diseases                        | 49,577<br>(42,284 - 79,894)             | --                                      | --                                   | 33,243<br>(27,613 - 58,757)             | 8,639<br>(7,255 - 11,905)               | 7,696<br>(5,621 - 10,639)               |
| Hemoglobinopathies and hemolytic anemias            | 16,297,071<br>(6,340,565 - 32,507,425)  | 10,132,271<br>(3,372,457 - 20,576,504)  | 2,563,222<br>(867,978 - 5,236,810)   | 2,915,409<br>(1,447,785 - 5,710,076)    | 483,527<br>(302,462 - 818,702)          | 202,642<br>(134,820 - 259,107)          |
| Thalassemias                                        | 1,752,156<br>(1,194,997 - 2,269,698)    | 780,467<br>(525,694 - 1,026,431)        | 328,317<br>(225,460 - 442,587)       | 616,932<br>(409,872 - 822,840)          | 24,320<br>(17,271 - 32,370)             | 2,119<br>(1,426 - 2,772)                |
| Sickle cell disorders                               | 13,308,439<br>(4,053,254 - 28,763,504)  | 8,973,324<br>(2,446,097 - 19,233,664)   | 2,155,321<br>(556,323 - 4,767,618)   | 1,950,566<br>(742,490 - 4,635,746)      | 218,786<br>(105,687 - 508,524)          | 10,441<br>(6,260 - 15,507)              |
| G6PD deficiency                                     | 232,849<br>(140,825 - 337,395)          | 102,412<br>(52,935 - 164,445)           | 28,331<br>(16,474 - 43,434)          | 74,109<br>(47,382 - 101,875)            | 23,498<br>(15,898 - 31,882)             | 4,499<br>(2,751 - 6,218)                |
| Other hemoglobinopathies and hemolytic anemias      | 1,003,627<br>(684,836 - 1,364,626)      | 276,067<br>(161,020 - 482,028)          | 51,253<br>(33,926 - 71,068)          | 273,801<br>(187,818 - 353,958)          | 216,923<br>(151,692 - 282,065)          | 185,582<br>(124,034 - 237,969)          |
| Endocrine, metabolic, blood, and immune disorders   | 6,376,363<br>(5,290,029 - 7,478,017)    | 1,935,126<br>(1,626,010 - 2,371,322)    | 367,382<br>(306,499 - 460,703)       | 1,913,434<br>(1,608,758 - 2,306,315)    | 1,393,352<br>(1,103,687 - 1,567,267)    | 767,068<br>(585,098 - 862,361)          |
| Musculoskeletal disorders                           | 3,204,444<br>(2,767,341 - 3,806,777)    | --                                      | 242,638<br>(207,234 - 302,882)       | 1,443,937<br>(1,248,632 - 1,711,240)    | 1,006,409<br>(867,748 - 1,235,559)      | 511,460<br>(444,840 - 598,980)          |
| Rheumatoid arthritis                                | 815,624<br>(688,010 - 1,047,629)        | --                                      | 42,087<br>(29,767 - 66,953)          | 196,251<br>(157,331 - 265,469)          | 357,051<br>(294,371 - 465,575)          | 220,235<br>(193,423 - 263,520)          |
| Other musculoskeletal disorders                     | 2,388,820<br>(2,007,765 - 2,791,063)    | --                                      | 200,551<br>(162,465 - 240,551)       | 1,247,686<br>(1,055,671 - 1,450,801)    | 649,357<br>(531,428 - 779,236)          | 291,225<br>(245,036 - 337,336)          |
| Other non-communicable diseases                     | 52,996,875<br>(46,886,445 - 61,666,862) | 44,636,750<br>(38,557,792 - 52,919,138) | 2,338,267<br>(2,046,333 - 2,645,087) | 4,016,061<br>(3,545,910 - 4,610,783)    | 1,233,853<br>(964,707 - 1,387,126)      | 771,944<br>(647,048 - 837,206)          |
| Congenital anomalies                                | 49,150,756<br>(42,978,443 - 57,510,069) | 42,643,509<br>(36,593,328 - 50,794,917) | 2,244,573<br>(1,959,245 - 2,550,814) | 3,331,388<br>(2,880,756 - 3,908,084)    | 678,266<br>(458,694 - 793,948)          | 253,019<br>(153,353 - 294,112)          |
| Neural tube defects                                 | 5,775,320<br>(3,380,820 - 10,485,089)   | 5,448,087<br>(3,125,438 - 9,908,544)    | 144,066<br>(79,601 - 257,181)        | 163,637<br>(116,297 - 263,964)          | 15,598<br>(11,557 - 24,648)             | 3,932<br>(2,712 - 6,572)                |
| Congenital heart anomalies                          | 24,988,845<br>(22,030,022 - 29,104,708) | 21,403,252<br>(18,446,238 - 25,484,418) | 1,324,873<br>(1,119,683 - 1,532,851) | 1,751,976<br>(1,446,435 - 2,104,083)    | 359,271<br>(218,271 - 452,293)          | 149,473<br>(76,351 - 185,448)           |
| Cleft lip and cleft palate                          | 283,492<br>(163,395 - 447,458)          | 283,492<br>(163,395 - 447,458)          | --                                   | --                                      | --                                      | --                                      |
| Down syndrome                                       | 2,684,323<br>(1,431,472 - 3,975,125)    | 2,042,571<br>(976,488 - 3,205,839)      | 176,256<br>(105,113 - 255,465)       | 379,727<br>(259,948 - 531,143)          | 82,088<br>(53,026 - 102,258)            | 3,681<br>(2,414 - 4,831)                |
| Chromosomal unbalanced rearrangements               | 1,382,527<br>(826,538 - 2,182,916)      | 1,212,773<br>(700,202 - 1,982,410)      | 45,267<br>(27,658 - 66,740)          | 111,474<br>(81,212 - 156,999)           | 10,741<br>(7,244 - 14,715)              | 2,271<br>(1,520 - 3,126)                |
| Other congenital anomalies                          | 14,036,248<br>(11,398,474 - 20,747,203) | 12,253,334<br>(9,728,171 - 18,811,814)  | 554,112<br>(441,761 - 760,737)       | 924,573<br>(758,218 - 1,140,111)        | 210,567<br>(161,989 - 244,994)          | 93,662<br>(70,838 - 107,128)            |

Web Table 30 - Global YLLs with 95% UI by age, sex, and cause in 2013

| Cause                                           | Both Sexes, All Ages                       | Both Sexes, 0-4 Years                   | Both Sexes, 5-14 Years                  | Both Sexes, 15-49 Years                    | Both Sexes, 50-69 Years                 | Both Sexes, 70-80 Years               |
|-------------------------------------------------|--------------------------------------------|-----------------------------------------|-----------------------------------------|--------------------------------------------|-----------------------------------------|---------------------------------------|
| Skin and subcutaneous diseases                  | 2,546,654<br>(2,267,434 - 2,805,293)       | 693,775<br>(565,878 - 838,548)          | 93,694<br>(78,995 - 109,895)            | 684,673<br>(593,498 - 767,424)             | 555,587<br>(497,865 - 618,216)          | 518,925<br>(465,620 - 564,317)        |
| Cellulitis                                      | 944,460<br>(698,864 - 1,268,740)           | 302,904<br>(201,098 - 437,174)          | 44,493<br>(31,817 - 60,380)             | 260,639<br>(191,468 - 354,130)             | 204,584<br>(155,089 - 278,821)          | 131,839<br>(98,399 - 174,956)         |
| Pyoderma                                        | 1,109,009<br>(851,661 - 1,294,959)         | 351,857<br>(256,362 - 467,810)          | 32,702<br>(24,408 - 41,262)             | 299,219<br>(227,347 - 353,479)             | 248,308<br>(188,058 - 295,722)          | 176,923<br>(142,353 - 205,309)        |
| Decubitus ulcer                                 | 383,048<br>(320,285 - 461,913)             | 11,934<br>(6,625 - 20,294)              | 9,630<br>(6,529 - 13,795)               | 83,315<br>(63,339 - 105,875)               | 84,531<br>(68,286 - 104,373)            | 193,638<br>(167,204 - 224,199)        |
| Other skin and subcutaneous diseases            | 110,137<br>(80,835 - 133,557)              | 27,080<br>(15,591 - 42,794)             | 6,869<br>(4,983 - 8,755)                | 41,499<br>(31,342 - 48,657)                | 18,164<br>(14,464 - 22,463)             | 16,525<br>(13,275 - 22,928)           |
| Sudden infant death syndrome                    | 1,299,466<br>(828,639 - 1,849,499)         | 1,299,466<br>(828,639 - 1,849,499)      | --                                      | --                                         | --                                      | --                                    |
| Injuries                                        | 210,750,840<br>(198,199,052 - 223,950,950) | 31,266,560<br>(27,315,163 - 36,326,546) | 16,113,587<br>(14,687,356 - 17,766,742) | 124,097,810<br>(116,072,534 - 132,292,694) | 29,527,018<br>(27,468,689 - 31,632,247) | 9,745,864<br>(8,847,921 - 10,354,072) |
| Transport injuries                              | 68,757,994<br>(63,166,081 - 73,688,932)    | 6,345,199<br>(5,063,437 - 7,664,851)    | 5,458,460<br>(4,767,005 - 6,057,762)    | 45,124,470<br>(41,671,615 - 48,785,365)    | 9,626,837<br>(8,729,978 - 10,471,940)   | 2,203,028<br>(1,973,070 - 2,371,578)  |
| Road injuries                                   | 64,657,730<br>(59,339,398 - 69,236,669)    | 5,795,873<br>(4,596,148 - 7,043,060)    | 5,103,803<br>(4,463,152 - 5,679,451)    | 42,628,050<br>(39,242,005 - 46,087,854)    | 9,047,439<br>(8,212,021 - 9,838,914)    | 2,082,565<br>(1,868,081 - 2,242,676)  |
| Pedestrian road injuries                        | 23,308,185<br>(19,170,558 - 27,394,306)    | 2,907,529<br>(2,207,066 - 3,711,729)    | 2,587,197<br>(2,133,255 - 2,991,760)    | 12,558,524<br>(9,961,815 - 15,039,224)     | 4,138,283<br>(3,431,200 - 4,785,626)    | 1,216,633<br>(1,046,547 - 1,374,712)  |
| Cyclist road injuries                           | 3,889,129<br>(3,232,418 - 4,574,676)       | 292,541<br>(213,374 - 396,111)          | 431,028<br>(355,330 - 545,042)          | 2,251,589<br>(1,868,265 - 2,665,873)       | 737,464<br>(591,566 - 898,281)          | 176,507<br>(141,232 - 209,992)        |
| Motorcyclist road injuries                      | 12,550,005<br>(10,208,265 - 14,928,605)    | 374,590<br>(275,611 - 525,078)          | 386,544<br>(296,972 - 498,081)          | 10,506,119<br>(8,573,312 - 12,487,570)     | 1,140,569<br>(870,548 - 1,387,449)      | 142,183<br>(111,127 - 177,181)        |
| Motor vehicle road injuries                     | 23,914,542<br>(20,833,191 - 26,796,160)    | 2,059,640<br>(1,607,790 - 2,580,022)    | 1,555,576<br>(1,290,753 - 1,846,083)    | 16,894,218<br>(14,769,183 - 19,084,334)    | 2,884,369<br>(2,487,336 - 3,334,837)    | 520,739<br>(442,149 - 604,950)        |
| Other road injuries                             | 995,869<br>(705,805 - 1,248,079)           | 161,574<br>(95,689 - 219,148)           | 143,457<br>(96,918 - 202,856)           | 517,601<br>(348,023 - 655,052)             | 146,754<br>(107,795 - 214,397)          | 26,483<br>(20,607 - 37,043)           |
| Other transport injuries                        | 4,100,264<br>(3,399,582 - 4,570,185)       | 549,326<br>(418,973 - 666,751)          | 354,658<br>(269,586 - 417,244)          | 2,496,420<br>(2,094,808 - 2,831,307)       | 579,398<br>(473,987 - 671,798)          | 120,463<br>(96,107 - 137,334)         |
| Unintentional injuries                          | 84,291,821<br>(77,675,247 - 94,540,904)    | 23,551,982<br>(20,349,390 - 27,963,496) | 9,211,873<br>(8,204,445 - 10,712,323)   | 34,739,352<br>(31,792,221 - 39,033,696)    | 11,082,712<br>(10,091,339 - 12,139,014) | 5,705,903<br>(4,976,875 - 6,168,891)  |
| Falls                                           | 14,673,287<br>(12,225,872 - 16,384,702)    | 2,064,070<br>(1,603,400 - 2,623,658)    | 975,250<br>(782,521 - 1,226,150)        | 5,824,716<br>(4,886,979 - 6,754,463)       | 3,149,813<br>(2,504,718 - 3,550,111)    | 2,659,438<br>(2,068,244 - 2,950,055)  |
| Drowning                                        | 21,234,390<br>(17,808,371 - 29,467,420)    | 6,928,117<br>(5,325,753 - 9,601,022)    | 4,312,465<br>(3,614,125 - 5,880,888)    | 8,095,853<br>(6,898,822 - 11,328,409)      | 1,495,372<br>(1,221,715 - 2,173,967)    | 402,583<br>(333,501 - 551,518)        |
| Fire, heat, and hot substances                  | 11,142,602<br>(9,397,580 - 13,524,222)     | 2,692,767<br>(2,131,172 - 3,407,367)    | 847,351<br>(689,985 - 1,087,269)        | 5,844,499<br>(4,771,518 - 7,423,603)       | 1,263,140<br>(1,047,099 - 1,509,443)    | 494,845<br>(401,688 - 569,713)        |
| Poisonings                                      | 4,456,948<br>(3,148,038 - 5,082,632)       | 901,569<br>(600,996 - 1,185,706)        | 288,507<br>(189,229 - 350,719)          | 2,431,863<br>(1,732,301 - 2,816,793)       | 647,368<br>(445,766 - 744,929)          | 187,641<br>(128,025 - 231,667)        |
| Exposure to mechanical forces                   | 10,279,917<br>(9,119,476 - 13,437,254)     | 3,149,476<br>(2,456,424 - 5,293,804)    | 878,371<br>(725,526 - 1,154,132)        | 4,866,071<br>(4,342,229 - 5,585,758)       | 1,163,892<br>(1,016,174 - 1,327,882)    | 222,107<br>(194,882 - 252,600)        |
| Unintentional firearm injuries                  | 2,356,015<br>(2,047,521 - 2,795,058)       | 271,470<br>(208,996 - 354,935)          | 148,763<br>(120,183 - 185,419)          | 1,633,520<br>(1,375,937 - 1,989,102)       | 250,525<br>(198,989 - 317,692)          | 51,737<br>(39,857 - 65,909)           |
| Unintentional suffocation                       | 2,532,674<br>(1,893,816 - 5,568,913)       | 1,814,826<br>(1,279,638 - 4,028,200)    | 181,350<br>(119,003 - 384,303)          | 401,616<br>(315,502 - 845,024)             | 103,207<br>(84,593 - 173,977)           | 31,675<br>(24,598 - 50,797)           |
| Other exposure to mechanical forces             | 5,391,233<br>(4,656,063 - 5,961,626)       | 1,063,180<br>(810,178 - 1,335,950)      | 548,257<br>(447,325 - 666,126)          | 2,830,935<br>(2,483,989 - 3,175,946)       | 810,160<br>(667,975 - 915,800)          | 138,695<br>(117,991 - 157,668)        |
| Adverse effects of medical treatment            | 5,191,233<br>(3,933,986 - 6,376,898)       | 1,847,394<br>(1,291,085 - 2,654,178)    | 234,809<br>(165,979 - 318,563)          | 1,582,540<br>(1,241,671 - 1,906,938)       | 1,010,627<br>(755,260 - 1,219,310)      | 515,864<br>(371,262 - 595,386)        |
| Animal contact                                  | 3,877,614<br>(3,034,251 - 6,488,076)       | 878,392<br>(591,664 - 1,441,066)        | 748,123<br>(548,814 - 1,197,391)        | 1,546,066<br>(1,177,387 - 2,776,085)       | 573,538<br>(421,894 - 1,069,778)        | 131,494<br>(98,765 - 240,469)         |
| Venomous animal contact                         | 2,849,388<br>(2,212,315 - 4,980,515)       | 573,588<br>(362,299 - 959,868)          | 548,839<br>(391,911 - 883,474)          | 1,234,823<br>(916,211 - 2,296,161)         | 417,481<br>(290,882 - 813,949)          | 74,657<br>(52,461 - 143,344)          |
| Non-venomous animal contact                     | 1,028,226<br>(790,539 - 1,682,243)         | 304,804<br>(199,798 - 519,810)          | 199,284<br>(139,907 - 339,722)          | 311,244<br>(228,446 - 476,716)             | 156,057<br>(107,657 - 275,022)          | 56,837<br>(39,313 - 101,234)          |
| Foreign body                                    | 6,733,952<br>(4,703,751 - 9,105,851)       | 4,150,503<br>(2,910,488 - 5,736,346)    | 231,884<br>(163,420 - 330,095)          | 1,075,775<br>(721,998 - 1,446,918)         | 629,743<br>(406,717 - 830,509)          | 646,047<br>(442,349 - 848,043)        |
| Pulmonary aspiration and foreign body in airway | 6,582,914<br>(4,531,321 - 8,942,668)       | 4,102,033<br>(2,855,434 - 5,680,624)    | 214,838<br>(147,272 - 308,906)          | 1,028,795<br>(671,445 - 1,387,333)         | 602,095<br>(379,227 - 799,057)          | 635,153<br>(430,429 - 835,677)        |
| Foreign body in other body part                 | 151,037<br>(110,760 - 232,849)             | 48,470<br>(33,591 - 80,020)             | 17,046<br>(12,765 - 28,845)             | 46,980<br>(34,948 - 73,239)                | 27,647<br>(18,280 - 43,500)             | 10,894<br>(8,086 - 14,967)            |
| Other unintentional injuries                    | 6,701,878<br>(6,052,439 - 7,438,938)       | 939,694<br>(777,087 - 1,179,928)        | 695,114<br>(591,106 - 812,201)          | 3,471,968<br>(3,132,945 - 3,863,893)       | 1,149,219<br>(981,377 - 1,348,866)      | 445,882<br>(316,312 - 553,039)        |
| Self-harm and interpersonal violence            | 55,521,113<br>(47,562,373 - 62,239,912)    | 938,337<br>(632,845 - 1,258,079)        | 1,288,753<br>(1,008,307 - 1,560,925)    | 43,208,079<br>(37,116,839 - 48,665,254)    | 8,345,301<br>(7,200,533 - 9,436,442)    | 1,740,643<br>(1,542,189 - 1,984,671)  |
| Self-harm                                       | 34,938,784<br>(28,951,991 - 39,240,625)    | --                                      | 649,228<br>(489,589 - 855,323)          | 26,278,712<br>(21,482,049 - 29,736,412)    | 6,533,228<br>(5,481,110 - 7,394,973)    | 1,477,617<br>(1,322,520 - 1,747,869)  |
| Interpersonal violence                          | 20,582,329<br>(15,247,474 - 24,902,835)    | 938,337<br>(632,845 - 1,258,079)        | 639,526<br>(451,672 - 810,347)          | 16,929,366<br>(12,458,143 - 20,450,642)    | 1,812,074<br>(1,309,292 - 2,528,723)    | 263,026<br>(179,199 - 339,623)        |
| Assault by firearm                              | 9,438,637<br>(6,309,991 - 11,955,168)      | 178,689<br>(108,838 - 252,086)          | 201,142<br>(123,284 - 263,724)          | 8,276,131<br>(5,525,974 - 10,422,535)      | 709,578<br>(473,131 - 1,071,548)        | 73,097<br>(42,041 - 109,175)          |
| Assault by sharp object                         | 5,734,644<br>(3,862,062 - 8,104,760)       | 154,178<br>(98,333 - 240,332)           | 121,107<br>(82,048 - 182,179)           | 4,853,923<br>(3,229,648 - 6,865,878)       | 542,536<br>(343,068 - 807,975)          | 62,899<br>(39,303 - 87,769)           |
| Assault by other means                          | 5,409,048<br>(3,826,544 - 6,986,734)       | 605,470<br>(402,504 - 836,467)          | 317,277<br>(213,146 - 425,195)          | 3,799,312<br>(2,685,130 - 5,043,955)       | 559,960<br>(404,401 - 761,286)          | 127,031<br>(83,379 - 161,549)         |
| Forces of nature, war, and legal intervention   | 2,179,911<br>(1,489,409 - 3,820,709)       | 431,043<br>(339,483 - 1,070,940)        | 154,500<br>(111,489 - 258,366)          | 1,025,909<br>(641,724 - 1,974,744)         | 472,168<br>(318,091 - 806,075)          | 96,291<br>(68,857 - 142,959)          |
| Exposure to forces of nature                    | 768,756<br>(500,138 - 1,563,740)           | 128,865<br>(38,393 - 768,397)           | 39,503<br>(28,318 - 59,392)             | 365,047<br>(254,961 - 577,507)             | 193,600<br>(138,999 - 293,220)          | 41,740<br>(32,489 - 57,279)           |
| Collective violence and legal intervention      | 1,411,155<br>(960,845 - 2,542,018)         | 302,177<br>(300,859 - 304,085)          | 114,997<br>(81,039 - 203,318)           | 660,862<br>(371,752 - 1,421,189)           | 278,568<br>(170,445 - 515,913)          | 54,551<br>(34,343 - 86,368)           |

Web Table 30 - Global YLLs with 95% UI by age, sex, and cause in 2013

| Cause                                                             | Males, All Ages                              | Males, 0-4 Years                           | Males, 5-14 Years                       | Males, 15-49 Years                         | Males, 50-69 Years                         | Males, 70-80 Years                         |
|-------------------------------------------------------------------|----------------------------------------------|--------------------------------------------|-----------------------------------------|--------------------------------------------|--------------------------------------------|--------------------------------------------|
| All causes                                                        | 972,387,496<br>(938,768,311 - 1,014,593,857) | 290,332,431<br>(274,906,713 - 306,560,442) | 35,375,679<br>(33,742,677 - 37,277,733) | 276,398,312<br>(261,181,435 - 293,719,563) | 237,798,012<br>(223,538,271 - 252,267,488) | 132,483,062<br>(127,016,472 - 136,866,448) |
| Communicable, maternal, neonatal, and nutritional diseases        | 355,007,353<br>(335,469,339 - 375,088,087)   | 233,840,645<br>(216,202,662 - 250,064,068) | 16,700,853<br>(15,157,760 - 18,350,652) | 66,211,509<br>(62,296,379 - 71,524,006)    | 26,697,481<br>(24,630,642 - 29,020,365)    | 11,556,865<br>(10,304,602 - 12,439,703)    |
| HIV/AIDS and tuberculosis                                         | 63,850,008<br>(59,637,850 - 71,091,097)      | 4,774,690<br>(4,206,973 - 5,369,536)       | 3,202,782<br>(2,999,921 - 3,416,586)    | 40,027,936<br>(36,999,678 - 45,251,274)    | 13,201,627<br>(11,907,584 - 15,242,542)    | 2,642,973<br>(2,330,638 - 3,082,378)       |
| Tuberculosis                                                      | 29,433,422<br>(25,903,189 - 33,931,779)      | 1,980,157<br>(1,374,709 - 2,498,344)       | 630,623<br>(493,589 - 763,336)          | 15,842,864<br>(13,744,579 - 18,119,392)    | 8,585,580<br>(7,411,134 - 10,028,497)      | 2,394,198<br>(2,099,256 - 2,793,744)       |
| HIV/AIDS                                                          | 34,416,586<br>(31,968,118 - 39,061,605)      | 2,794,533<br>(2,567,418 - 3,139,752)       | 2,572,159<br>(2,412,653 - 2,755,382)    | 24,185,073<br>(22,024,869 - 27,676,830)    | 4,616,047<br>(4,173,524 - 5,512,305)       | 248,774<br>(218,745 - 302,176)             |
| HIV/AIDS resulting in mycobacterial infection                     | 2,387,983<br>(1,920,813 - 2,994,549)         | 185,508<br>(149,719 - 230,873)             | 158,513<br>(129,163 - 193,727)          | 1,689,622<br>(1,346,627 - 2,136,726)       | 335,616<br>(266,313 - 429,989)             | 18,725<br>(14,580 - 24,131)                |
| HIV/AIDS resulting in other diseases                              | 32,028,603<br>(29,677,092 - 36,591,648)      | 2,609,025<br>(2,381,533 - 2,933,281)       | 2,413,646<br>(2,258,223 - 2,593,725)    | 22,495,451<br>(20,365,681 - 25,857,055)    | 4,280,432<br>(3,871,850 - 5,070,679)       | 230,050<br>(201,756 - 279,226)             |
| Diarrhea, lower respiratory, and other common infectious diseases | 123,845,978<br>(112,607,679 - 135,419,279)   | 81,271,160<br>(71,778,939 - 91,076,721)    | 8,912,971<br>(7,624,564 - 10,444,183)   | 16,736,767<br>(14,660,991 - 19,249,670)    | 9,736,227<br>(8,290,851 - 11,000,391)      | 7,188,853<br>(6,112,017 - 7,973,139)       |
| Diarrheal diseases                                                | 33,652,548<br>(28,874,323 - 38,894,164)      | 23,209,779<br>(18,556,737 - 28,285,779)    | 2,166,070<br>(1,675,545 - 2,739,384)    | 4,088,758<br>(3,548,691 - 4,684,223)       | 2,649,166<br>(2,115,014 - 3,340,925)       | 1,538,775<br>(1,274,624 - 1,905,205)       |
| Intestinal infectious diseases                                    | 8,114,743<br>(4,347,817 - 13,553,077)        | 2,752,382<br>(1,455,742 - 4,708,538)       | 2,531,497<br>(1,410,824 - 4,021,690)    | 2,616,738<br>(1,287,948 - 4,693,810)       | 187,816<br>(88,601 - 353,540)              | 26,310<br>(14,477 - 47,019)                |
| Typhoid fever                                                     | 5,812,100<br>(3,039,441 - 9,699,862)         | 1,869,563<br>(935,503 - 3,258,145)         | 1,854,431<br>(1,008,517 - 3,002,929)    | 1,930,663<br>(919,367 - 3,481,214)         | 138,448<br>(61,412 - 267,187)              | 18,996<br>(9,477 - 35,344)                 |
| Paratyphoid fever                                                 | 2,052,804<br>(1,054,474 - 3,498,892)         | 723,849<br>(353,507 - 1,284,831)           | 650,369<br>(334,253 - 1,106,235)        | 632,937<br>(301,000 - 1,171,750)           | 40,552<br>(15,926 - 90,540)                | 5,096<br>(2,305 - 10,386)                  |
| Other intestinal infectious diseases                              | 249,839<br>(213,739 - 288,834)               | 158,970<br>(129,961 - 191,063)             | 26,697<br>(21,209 - 33,450)             | 53,138<br>(45,379 - 60,789)                | 8,816<br>(7,312 - 10,484)                  | 2,218<br>(1,783 - 2,690)                   |
| Lower respiratory infections                                      | 40,445,398<br>(35,599,849 - 66,161,967)      | 40,336,518<br>(35,009,790 - 45,524,089)    | 2,230,642<br>(1,826,860 - 2,719,346)    | 6,686,199<br>(5,485,137 - 7,652,527)       | 5,831,559<br>(4,554,249 - 6,585,457)       | 5,360,480<br>(4,337,259 - 5,942,369)       |
| Upper respiratory infections                                      | 93,986<br>(73,791 - 124,656)                 | 36,895<br>(22,809 - 60,555)                | 4,757<br>(2,541 - 9,502)                | 30,047<br>(21,709 - 43,868)                | 16,486<br>(10,721 - 27,789)                | 5,800<br>(3,876 - 6,883)                   |
| Otitis media                                                      | 57,790<br>(52,252 - 63,729)                  | 19,747<br>(16,343 - 23,830)                | 8,117<br>(6,826 - 9,665)                | 19,820<br>(17,893 - 22,052)                | 7,103<br>(6,376 - 7,970)                   | 3,003<br>(2,722 - 3,328)                   |
| Meningitis                                                        | 10,396,178<br>(7,646,108 - 13,264,883)       | 6,433,983<br>(3,821,213 - 9,102,974)       | 943,461<br>(745,506 - 1,190,536)        | 2,211,795<br>(1,840,569 - 2,575,410)       | 653,692<br>(518,051 - 803,987)             | 153,246<br>(121,751 - 188,577)             |
| Pneumococcal meningitis                                           | 2,586,099<br>(1,974,072 - 3,276,946)         | 1,369,611<br>(803,321 - 1,998,899)         | 302,090<br>(230,182 - 394,823)          | 682,504<br>(562,064 - 810,070)             | 188,605<br>(140,581 - 248,987)             | 43,289<br>(32,207 - 57,020)                |
| H influenzae type B meningitis                                    | 2,585,469<br>(1,724,802 - 3,444,489)         | 2,020,161<br>(1,194,739 - 2,855,306)       | 209,772<br>(164,758 - 267,812)          | 273,606<br>(217,506 - 327,363)             | 66,775<br>(48,873 - 92,483)                | 15,155<br>(11,393 - 20,320)                |
| Meningococcal meningitis                                          | 2,207,910<br>(1,666,936 - 2,935,579)         | 1,336,727<br>(782,821 - 2,021,873)         | 219,078<br>(165,113 - 284,717)          | 484,801<br>(395,576 - 574,635)             | 134,116<br>(97,387 - 177,857)              | 33,188<br>(25,895 - 43,047)                |
| Other meningitis                                                  | 3,016,700<br>(2,256,771 - 3,749,882)         | 1,707,484<br>(1,019,534 - 2,416,610)       | 212,521<br>(167,615 - 262,504)          | 770,884<br>(624,374 - 925,335)             | 264,197<br>(204,907 - 344,030)             | 61,613<br>(42,780 - 60,656)                |
| Encephalitis                                                      | 2,311,622<br>(1,790,190 - 3,105,287)         | 1,035,659<br>(638,053 - 1,605,093)         | 365,015<br>(258,548 - 528,277)          | 674,274<br>(477,203 - 923,804)             | 191,194<br>(145,211 - 285,517)             | 45,479<br>(30,747 - 61,995)                |
| Diphtheria                                                        | 128,124<br>(51,625 - 331,042)                | 87,987<br>(25,358 - 283,265)               | 23,506<br>(5,438 - 86,492)              | 13,897<br>(5,469 - 37,943)                 | 2,733<br>(717 - 11,450)                    | --                                         |
| Whooping cough                                                    | 2,370,105<br>(861,325 - 5,397,745)           | 2,232,202<br>(812,537 - 5,052,719)         | 111,448<br>(38,297 - 284,858)           | 24,526<br>(10,017 - 60,749)                | 1,928<br>(901 - 4,438)                     | --                                         |
| Tetanus                                                           | 2,115,861<br>(1,269,397 - 2,965,580)         | 1,532,167<br>(758,227 - 2,299,735)         | 83,535<br>(60,216 - 138,829)            | 271,727<br>(185,475 - 409,022)             | 183,504<br>(95,716 - 326,773)              | 44,926<br>(24,512 - 84,416)                |
| Measles                                                           | 4,013,451<br>(2,018,387 - 7,392,619)         | 3,523,576<br>(1,782,742 - 6,393,059)       | 430,159<br>(206,537 - 867,876)          | 58,546<br>(25,535 - 140,651)               | 1,170<br>(522 - 2,713)                     | --                                         |
| Varicella and herpes zoster                                       | 146,174<br>(110,065 - 204,922)               | 70,264<br>(41,178 - 124,428)               | 14,763<br>(8,072 - 28,526)              | 40,439<br>(27,783 - 61,454)                | 9,874<br>(6,320 - 16,770)                  | 10,834<br>(6,981 - 17,872)                 |
| Neglected tropical diseases and malaria                           | 37,004,721<br>(29,386,817 - 47,318,167)      | 27,956,946<br>(21,137,293 - 37,470,947)    | 2,844,028<br>(2,245,949 - 3,846,050)    | 4,630,953<br>(3,814,992 - 5,921,603)       | 1,250,129<br>(958,583 - 1,644,704)         | 322,665<br>(234,150 - 451,982)             |
| Malaria                                                           | 32,137,301<br>(24,515,690 - 42,372,192)      | 26,229,644<br>(19,480,493 - 35,650,354)    | 1,789,456<br>(1,244,431 - 2,802,308)    | 3,014,695<br>(2,175,363 - 4,262,074)       | 872,783<br>(596,237 - 1,210,357)           | 230,723<br>(150,950 - 334,523)             |
| Chagas disease                                                    | 156,245<br>(34,150 - 540,449)                | 435<br>(79 - 1,605)                        | 583<br>(102 - 1,712)                    | 44,447<br>(10,336 - 172,176)               | 81,649<br>(16,336 - 292,863)               | 29,130<br>(5,253 - 106,044)                |
| Leishmaniasis                                                     | 2,651,066<br>(2,172,629 - 3,208,217)         | 1,101,481<br>(789,165 - 1,473,068)         | 607,591<br>(449,316 - 785,981)          | 840,961<br>(657,101 - 1,057,161)           | 88,899<br>(68,281 - 112,525)               | 12,134<br>(9,638 - 14,816)                 |
| Visceral leishmaniasis                                            | 2,651,066<br>(2,172,629 - 3,208,217)         | 1,101,481<br>(789,165 - 1,473,068)         | 607,591<br>(449,316 - 785,981)          | 840,961<br>(657,101 - 1,057,161)           | 88,899<br>(68,281 - 112,525)               | 12,134<br>(9,638 - 14,816)                 |
| African trypanosomiasis                                           | 204,203<br>(106,569 - 323,251)               | 20,383<br>(9,143 - 36,593)                 | 30,945<br>(13,999 - 50,597)             | 138,338<br>(71,331 - 219,095)              | 13,311<br>(7,013 - 21,127)                 | 1,226<br>(658 - 1,930)                     |
| Schistosomiasis                                                   | 119,841<br>(104,905 - 136,525)               | 3,657<br>(2,456 - 5,385)                   | 6,288<br>(4,704 - 8,404)                | 69,272<br>(59,608 - 80,561)                | 33,267<br>(28,300 - 38,542)                | 7,357<br>(6,234 - 8,677)                   |
| Cysticercosis                                                     | 15,510<br>(12,515 - 21,991)                  | 968<br>(558 - 1,853)                       | 1,045<br>(718 - 1,751)                  | 10,949<br>(8,946 - 15,276)                 | 2,257<br>(1,903 - 2,946)                   | 291<br>(246 - 370)                         |
| Cystic echinococcosis                                             | 50,527<br>(47,018 - 54,497)                  | 5,815<br>(4,781 - 7,098)                   | 8,416<br>(7,518 - 9,458)                | 26,640<br>(24,553 - 29,036)                | 7,841<br>(7,269 - 8,569)                   | 1,814<br>(1,686 - 1,945)                   |
| Dengue                                                            | 284,366<br>(153,427 - 354,058)               | 122,506<br>(55,995 - 173,434)              | 80,109<br>(38,173 - 99,828)             | 63,979<br>(42,011 - 75,232)                | 13,742<br>(9,483 - 15,959)                 | 4,031<br>(2,411 - 6,625)                   |
| Yellow fever                                                      | 21,578<br>(16,733 - 27,573)                  | 2,854<br>(1,697 - 4,732)                   | 5,629<br>(3,392 - 9,292)                | 11,810<br>(8,940 - 16,081)                 | 1,098<br>(722 - 1,694)                     | 186<br>(101 - 351)                         |
| Rabies                                                            | 758,837<br>(460,455 - 1,012,343)             | 118,264<br>(68,926 - 193,569)              | 251,348<br>(141,758 - 363,828)          | 279,538<br>(174,138 - 369,596)             | 96,257<br>(57,600 - 129,914)               | 13,431<br>(7,339 - 18,909)                 |
| Intestinal nematode infections                                    | 166,377<br>(137,780 - 200,114)               | 126,004<br>(100,863 - 156,167)             | 23,433<br>(18,251 - 29,227)             | 12,345<br>(9,441 - 15,547)                 | 3,352<br>(2,387 - 4,500)                   | 1,243<br>(844 - 1,686)                     |

Web Table 30 - Global YLLs with 95% UI by age, sex, and cause in 2013

| Cause                                                            | Males, All Ages                            | Males, 0-4 Years                          | Males, 5-14 Years                     | Males, 15-49 Years                         | Males, 50-69 Years                         | Males, 70-80 Years                         |
|------------------------------------------------------------------|--------------------------------------------|-------------------------------------------|---------------------------------------|--------------------------------------------|--------------------------------------------|--------------------------------------------|
| Ascariasis                                                       | 166,377<br>(137,780 - 200,114)             | 126,004<br>(100,863 - 156,167)            | 23,433<br>(18,251 - 29,227)           | 12,345<br>(9,441 - 15,547)                 | 3,352<br>(2,387 - 4,500)                   | 1,243<br>(844 - 1,686)                     |
| Other neglected tropical diseases                                | 438,871<br>(344,310 - 598,207)             | 224,934<br>(152,970 - 358,304)            | 39,184<br>(29,559 - 54,551)           | 117,981<br>(95,521 - 154,441)              | 35,673<br>(28,149 - 45,221)                | 21,099<br>(16,469 - 27,552)                |
| Maternal disorders                                               | --                                         | --                                        | --                                    | --                                         | --                                         | --                                         |
| Maternal hemorrhage                                              | --                                         | --                                        | --                                    | --                                         | --                                         | --                                         |
| Maternal sepsis and other maternal infections                    | --                                         | --                                        | --                                    | --                                         | --                                         | --                                         |
| Maternal hypertensive disorders                                  | --                                         | --                                        | --                                    | --                                         | --                                         | --                                         |
| Maternal obstructed labor                                        | --                                         | --                                        | --                                    | --                                         | --                                         | --                                         |
| Maternal abortive outcome                                        | --                                         | --                                        | --                                    | --                                         | --                                         | --                                         |
| Indirect maternal deaths                                         | --                                         | --                                        | --                                    | --                                         | --                                         | --                                         |
| Late maternal deaths                                             | --                                         | --                                        | --                                    | --                                         | --                                         | --                                         |
| Maternal deaths aggravated by HIV/AIDS                           | --                                         | --                                        | --                                    | --                                         | --                                         | --                                         |
| Other maternal disorders                                         | --                                         | --                                        | --                                    | --                                         | --                                         | --                                         |
| Neonatal disorders                                               | 100,898,389<br>(94,874,753 - 107,352,631)  | 100,898,389<br>(94,874,753 - 107,352,631) | --                                    | --                                         | --                                         | --                                         |
| Neonatal preterm birth complications                             | 35,983,131<br>(25,290,763 - 49,006,579)    | 35,983,131<br>(25,290,763 - 49,006,579)   | --                                    | --                                         | --                                         | --                                         |
| Neonatal encephalopathy due to birth asphyxia and trauma         | 31,212,388<br>(22,229,146 - 39,733,165)    | 31,212,388<br>(22,229,146 - 39,733,165)   | --                                    | --                                         | --                                         | --                                         |
| Neonatal sepsis and other neonatal infections                    | 19,451,434<br>(10,019,799 - 30,295,328)    | 19,451,434<br>(10,019,799 - 30,295,328)   | --                                    | --                                         | --                                         | --                                         |
| Hemolytic disease and other neonatal jaundice                    | 1,068,333<br>(604,534 - 1,933,816)         | 1,068,333<br>(604,534 - 1,933,816)        | --                                    | --                                         | --                                         | --                                         |
| Other neonatal disorders                                         | 13,183,103<br>(9,398,911 - 18,199,158)     | 13,183,103<br>(9,398,911 - 18,199,158)    | --                                    | --                                         | --                                         | --                                         |
| Nutritional deficiencies                                         | 17,020,452<br>(11,080,285 - 22,377,750)    | 11,567,410<br>(7,623,057 - 15,432,714)    | 898,049<br>(548,949 - 1,220,691)      | 2,176,892<br>(1,427,998 - 3,205,801)       | 1,338,382<br>(766,242 - 1,754,240)         | 1,039,718<br>(574,458 - 1,328,557)         |
| Protein-energy malnutrition                                      | 13,397,464<br>(8,469,091 - 17,786,442)     | 10,147,212<br>(6,548,399 - 13,896,224)    | 668,721<br>(370,260 - 946,476)        | 1,144,338<br>(638,107 - 1,819,712)         | 751,227<br>(385,672 - 1,047,946)           | 685,966<br>(304,889 - 907,081)             |
| Iodine deficiency                                                | 53,964<br>(22,768 - 114,616)               | 18,715<br>(4,420 - 50,195)                | 3,375<br>(1,100 - 8,324)              | 16,064<br>(5,546 - 47,078)                 | 12,979<br>(2,283 - 49,556)                 | 2,831<br>(908 - 8,366)                     |
| Iron-deficiency anemia                                           | 3,180,944<br>(1,467,537 - 5,760,425)       | 1,298,126<br>(346,219 - 3,032,833)        | 209,041<br>(79,752 - 365,465)         | 900,814<br>(480,947 - 1,531,676)           | 502,451<br>(239,736 - 841,236)             | 270,512<br>(134,233 - 523,263)             |
| Other nutritional deficiencies                                   | 388,079<br>(181,696 - 695,462)             | 103,357<br>(39,727 - 268,979)             | 16,912<br>(8,193 - 36,200)            | 115,676<br>(54,675 - 213,258)              | 71,725<br>(27,158 - 113,898)               | 80,409<br>(29,998 - 140,124)               |
| Other communicable, maternal, neonatal, and nutritional diseases | 12,387,806<br>(9,583,189 - 15,630,921)     | 7,372,051<br>(4,946,406 - 10,374,869)     | 843,024<br>(647,397 - 1,075,027)      | 2,638,959<br>(2,241,991 - 3,127,766)       | 1,171,116<br>(944,958 - 1,561,077)         | 362,657<br>(279,631 - 487,498)             |
| Sexually transmitted diseases excluding HIV                      | 5,556,987<br>(3,256,907 - 8,671,174)       | 5,091,348<br>(2,944,100 - 8,036,509)      | 314,758<br>(180,133 - 503,861)        | 97,588<br>(73,733 - 146,969)               | 39,343<br>(27,928 - 58,780)                | 13,949<br>(10,219 - 19,654)                |
| Syphilis                                                         | 5,491,209<br>(3,194,807 - 8,607,477)       | 5,091,348<br>(2,944,100 - 8,036,509)      | 308,313<br>(174,200 - 498,182)        | 51,519<br>(38,989 - 77,090)                | 28,443<br>(20,179 - 42,601)                | 11,585<br>(8,503 - 16,343)                 |
| Chlamydial infection                                             | --                                         | --                                        | --                                    | --                                         | --                                         | --                                         |
| Gonococcal infection                                             | 37,024<br>(27,818 - 56,368)                | --                                        | 3,265<br>(2,254 - 5,972)              | 25,251<br>(19,051 - 38,292)                | 6,828<br>(4,835 - 10,204)                  | 1,679<br>(1,222 - 2,377)                   |
| Other sexually transmitted diseases                              | 28,755<br>(21,637 - 44,485)                | --                                        | 3,180<br>(2,195 - 5,817)              | 20,818<br>(15,745 - 31,586)                | 4,072<br>(2,859 - 6,151)                   | 685<br>(500 - 979)                         |
| Hepatitis                                                        | 3,616,519<br>(3,054,039 - 4,692,780)       | 734,477<br>(441,319 - 1,434,400)          | 300,235<br>(221,804 - 426,592)        | 1,774,420<br>(1,501,710 - 2,166,511)       | 658,540<br>(556,743 - 782,989)             | 148,847<br>(124,074 - 175,448)             |
| Acute hepatitis A                                                | 527,570<br>(164,446 - 1,097,561)           | 296,359<br>(89,213 - 671,885)             | 62,616<br>(18,907 - 123,246)          | 140,804<br>(40,129 - 297,331)              | 25,106<br>(7,021 - 55,203)                 | 2,685<br>(681 - 6,279)                     |
| Acute hepatitis B                                                | 1,564,622<br>(1,076,305 - 2,192,420)       | 357,522<br>(170,226 - 752,183)            | 58,554<br>(31,934 - 96,718)           | 557,933<br>(335,801 - 829,191)             | 464,780<br>(352,641 - 581,274)             | 125,834<br>(101,127 - 150,106)             |
| Acute hepatitis C                                                | 79,049<br>(16,572 - 194,042)               | --                                        | 9,561<br>(1,812 - 25,354)             | 44,252<br>(8,685 - 112,575)                | 20,976<br>(4,187 - 50,254)                 | 4,260<br>(871 - 9,935)                     |
| Acute hepatitis E                                                | 1,445,279<br>(1,027,310 - 2,034,672)       | 80,597<br>(26,439 - 215,059)              | 169,504<br>(106,837 - 259,520)        | 1,031,431<br>(730,697 - 1,398,640)         | 147,678<br>(78,804 - 245,247)              | 16,069<br>(7,392 - 29,419)                 |
| Other infectious diseases                                        | 3,214,300<br>(1,826,576 - 4,741,261)       | 1,546,225<br>(711,696 - 2,978,037)        | 228,031<br>(125,556 - 378,172)        | 766,951<br>(505,971 - 1,020,540)           | 473,233<br>(297,464 - 802,367)             | 199,860<br>(118,979 - 321,363)             |
| Non-communicable diseases                                        | 469,089,906<br>(442,420,121 - 497,959,584) | 39,289,609<br>(32,369,576 - 51,649,707)   | 8,506,763<br>(7,175,084 - 10,291,529) | 115,203,822<br>(107,146,717 - 124,946,698) | 190,390,577<br>(178,602,847 - 202,476,332) | 115,699,135<br>(110,770,325 - 119,993,051) |
| Neoplasms                                                        | 110,489,320<br>(103,964,152 - 116,901,054) | 2,328,865<br>(1,921,488 - 2,768,496)      | 2,076,319<br>(1,853,579 - 2,311,332)  | 25,811,735<br>(24,031,914 - 27,978,856)    | 55,445,787<br>(51,801,926 - 58,874,047)    | 24,826,614<br>(23,609,561 - 25,902,865)    |
| Esophageal cancer                                                | 6,978,592<br>(5,881,723 - 8,698,226)       | --                                        | --                                    | 1,101,772<br>(896,902 - 1,408,911)         | 4,346,652<br>(3,612,019 - 5,457,806)       | 1,530,168<br>(1,284,219 - 1,918,301)       |
| Stomach cancer                                                   | 11,485,628<br>(10,581,247 - 12,279,549)    | --                                        | --                                    | 2,154,417<br>(1,992,414 - 2,339,690)       | 6,374,162<br>(5,806,161 - 6,899,889)       | 2,957,048<br>(2,731,740 - 3,139,086)       |
| Liver cancer                                                     | 15,043,487<br>(13,607,711 - 16,465,196)    | --                                        | 75,863<br>(61,153 - 91,271)           | 4,917,202<br>(4,364,651 - 5,494,393)       | 7,859,253<br>(7,055,805 - 8,601,364)       | 2,191,169<br>(1,993,475 - 2,400,742)       |

Web Table 30 - Global YLLs with 95% UI by age, sex, and cause in 2013

| Cause                                | Males, All Ages                            | Males, 0-4 Years                     | Males, 5-14 Years                    | Males, 15-49 Years                      | Males, 50-69 Years                      | Males, 70-80 Years                      |
|--------------------------------------|--------------------------------------------|--------------------------------------|--------------------------------------|-----------------------------------------|-----------------------------------------|-----------------------------------------|
| Liver cancer due to hepatitis B      | 6,644,207<br>(5,860,347 - 7,410,632)       | --                                   | 34,135<br>(27,039 - 41,908)          | 2,588,796<br>(2,279,170 - 2,935,570)    | 3,327,445<br>(2,870,381 - 3,773,693)    | 693,831<br>(602,635 - 775,036)          |
| Liver cancer due to hepatitis C      | 5,749,649<br>(5,122,964 - 6,542,767)       | --                                   | 10,148<br>(7,764 - 13,533)           | 1,510,044<br>(1,289,368 - 1,765,948)    | 3,200,804<br>(2,821,526 - 3,663,339)    | 1,028,653<br>(920,015 - 1,166,927)      |
| Liver cancer due to alcohol use      | 1,511,569<br>(1,353,179 - 1,708,487)       | --                                   | --                                   | 315,029<br>(273,192 - 365,315)          | 838,306<br>(743,875 - 953,415)          | 358,234<br>(315,575 - 402,370)          |
| Liver cancer due to other causes     | 1,138,062<br>(1,002,573 - 1,294,482)       | --                                   | 31,580<br>(24,692 - 38,908)          | 503,333<br>(432,250 - 580,127)          | 492,697<br>(421,625 - 573,795)          | 110,451<br>(96,499 - 126,057)           |
| Larynx cancer                        | 1,776,281<br>(1,465,496 - 2,209,622)       | --                                   | --                                   | 342,362<br>(290,739 - 461,511)          | 1,080,387<br>(881,716 - 1,329,596)      | 353,532<br>(280,239 - 427,203)          |
| Tracheal, bronchus and lung cancer   | 24,571,810<br>(23,022,420 - 26,055,534)    | --                                   | --                                   | 3,267,815<br>(3,009,823 - 3,586,205)    | 14,813,414<br>(13,795,939 - 15,780,326) | 6,490,581<br>(6,100,706 - 6,804,180)    |
| Breast cancer                        | 175,574<br>(141,423 - 223,114)             | --                                   | --                                   | 61,082<br>(49,606 - 72,535)             | 83,654<br>(65,168 - 107,503)            | 30,838<br>(22,457 - 44,731)             |
| Cervical cancer                      | --                                         | --                                   | --                                   | --                                      | --                                      | --                                      |
| Uterine cancer                       | --                                         | --                                   | --                                   | --                                      | --                                      | --                                      |
| Prostate cancer                      | 3,875,165<br>(3,254,597 - 4,889,976)       | --                                   | --                                   | 84,392<br>(64,334 - 108,671)            | 1,352,491<br>(1,107,097 - 1,715,345)    | 2,438,282<br>(2,030,175 - 3,145,688)    |
| Colon and rectum cancer              | 8,657,091<br>(8,239,223 - 9,046,546)       | --                                   | --                                   | 1,934,641<br>(1,804,487 - 2,079,090)    | 4,274,018<br>(4,021,630 - 4,494,190)    | 2,448,433<br>(2,337,334 - 2,544,595)    |
| Lip and oral cavity cancer           | 2,250,076<br>(1,738,841 - 2,570,403)       | --                                   | --                                   | 689,949<br>(504,106 - 830,240)          | 1,200,670<br>(927,041 - 1,364,673)      | 359,457<br>(292,809 - 428,254)          |
| Nasopharynx cancer                   | 1,367,007<br>(1,206,668 - 1,534,097)       | --                                   | 28,288<br>(18,419 - 44,700)          | 608,609<br>(532,984 - 695,163)          | 627,781<br>(547,250 - 710,937)          | 102,329<br>(89,782 - 115,339)           |
| Other pharynx cancer                 | 1,651,922<br>(1,350,961 - 1,854,975)       | --                                   | --                                   | 398,625<br>(318,328 - 465,162)          | 1,043,518<br>(849,052 - 1,184,056)      | 209,779<br>(171,326 - 236,737)          |
| Gallbladder and biliary tract cancer | 1,069,504<br>(898,301 - 1,210,576)         | --                                   | --                                   | 190,861<br>(149,883 - 216,774)          | 548,058<br>(458,522 - 628,687)          | 330,584<br>(269,710 - 381,581)          |
| Pancreatic cancer                    | 4,015,466<br>(3,831,325 - 4,189,419)       | --                                   | --                                   | 732,610<br>(686,498 - 783,840)          | 2,277,322<br>(2,162,861 - 2,391,608)    | 1,005,535<br>(959,627 - 1,051,988)      |
| Malignant skin melanoma              | 820,753<br>(549,795 - 1,279,642)           | --                                   | --                                   | 317,650<br>(226,555 - 519,459)          | 355,365<br>(229,526 - 569,300)          | 147,738<br>(89,035 - 221,172)           |
| Non-melanoma skin cancer             | 429,140<br>(339,752 - 603,156)             | --                                   | --                                   | 123,957<br>(95,086 - 204,926)           | 168,595<br>(131,691 - 228,355)          | 136,587<br>(103,598 - 182,712)          |
| Ovarian cancer                       | --                                         | --                                   | --                                   | --                                      | --                                      | --                                      |
| Testicular cancer                    | 344,425<br>(260,036 - 430,253)             | --                                   | --                                   | 279,439<br>(208,811 - 346,818)          | 49,794<br>(37,949 - 62,244)             | 15,193<br>(11,587 - 18,941)             |
| Kidney cancer                        | 1,997,041<br>(1,880,557 - 2,102,615)       | 71,458<br>(55,136 - 95,436)          | 33,131<br>(27,539 - 40,967)          | 362,393<br>(334,947 - 392,546)          | 1,091,513<br>(1,024,118 - 1,160,625)    | 438,546<br>(407,820 - 468,216)          |
| Bladder cancer                       | 2,262,020<br>(2,070,655 - 2,519,062)       | --                                   | --                                   | 234,162<br>(210,369 - 268,645)          | 1,131,091<br>(1,039,377 - 1,296,038)    | 896,767<br>(785,492 - 974,125)          |
| Brain and nervous system cancer      | 3,911,202<br>(2,972,496 - 4,898,164)       | 149,098<br>(101,111 - 205,604)       | 328,681<br>(224,680 - 422,668)       | 1,636,333<br>(1,171,551 - 2,092,783)    | 1,440,596<br>(1,122,440 - 1,796,100)    | 356,493<br>(263,816 - 421,984)          |
| Thyroid cancer                       | 300,141<br>(263,758 - 346,080)             | --                                   | 3,311<br>(2,595 - 3,961)             | 80,048<br>(67,967 - 94,415)             | 155,152<br>(136,373 - 180,157)          | 61,629<br>(53,522 - 69,803)             |
| Mesothelioma                         | 523,186<br>(451,929 - 611,292)             | --                                   | --                                   | 67,600<br>(60,210 - 81,210)             | 336,868<br>(291,609 - 390,660)          | 118,718<br>(86,080 - 145,779)           |
| Hodgkin lymphoma                     | 555,455<br>(479,096 - 761,236)             | 76,827<br>(42,277 - 153,843)         | 44,769<br>(32,915 - 63,091)          | 277,116<br>(241,338 - 377,179)          | 119,178<br>(103,247 - 166,048)          | 37,566<br>(33,057 - 51,739)             |
| Non-Hodgkin lymphoma                 | 3,866,299<br>(3,256,981 - 4,503,476)       | 263,415<br>(185,324 - 347,881)       | 289,193<br>(221,112 - 357,722)       | 1,398,943<br>(1,185,524 - 1,689,284)    | 1,326,579<br>(1,079,965 - 1,534,664)    | 588,169<br>(433,126 - 660,336)          |
| Multiple myeloma                     | 876,620<br>(681,197 - 1,111,058)           | --                                   | --                                   | 166,398<br>(128,547 - 204,947)          | 462,360<br>(354,796 - 595,535)          | 247,861<br>(176,587 - 330,530)          |
| Leukemia                             | 5,189,878<br>(4,898,924 - 5,486,429)       | 429,819<br>(362,525 - 509,479)       | 714,670<br>(630,828 - 804,596)       | 2,338,343<br>(2,168,121 - 2,543,227)    | 1,129,326<br>(1,058,582 - 1,199,805)    | 577,721<br>(544,083 - 609,772)          |
| Other neoplasms                      | 6,495,557<br>(5,807,932 - 7,308,445)       | 1,338,249<br>(1,008,049 - 1,688,165) | 558,413<br>(457,792 - 664,146)       | 2,045,014<br>(1,822,216 - 2,369,765)    | 1,797,991<br>(1,605,769 - 2,022,779)    | 755,890<br>(633,172 - 817,954)          |
| Cardiovascular diseases              | 179,626,997<br>(169,204,774 - 191,014,134) | 2,552,684<br>(2,231,363 - 2,911,699) | 1,158,953<br>(1,011,723 - 1,314,102) | 41,190,086<br>(38,099,996 - 44,791,413) | 81,086,862<br>(75,554,662 - 87,067,566) | 53,638,411<br>(51,032,291 - 55,977,284) |
| Rheumatic heart disease              | 3,543,090<br>(2,547,122 - 5,111,638)       | 90,778<br>(59,085 - 143,021)         | 177,310<br>(122,373 - 248,028)       | 1,648,107<br>(1,186,502 - 2,394,741)    | 1,139,046<br>(824,258 - 1,723,051)      | 487,849<br>(331,977 - 660,429)          |
| Ischemic heart disease               | 89,578,271<br>(79,324,993 - 98,933,822)    | 304,957<br>(224,063 - 420,129)       | 253,852<br>(193,358 - 320,161)       | 21,148,728<br>(18,486,012 - 23,893,216) | 42,641,343<br>(37,579,956 - 47,189,284) | 25,229,391<br>(22,163,288 - 27,645,063) |
| Cerebrovascular disease              | 60,494,776<br>(53,346,061 - 70,194,323)    | 682,464<br>(537,340 - 847,660)       | 393,090<br>(320,415 - 485,711)       | 11,144,983<br>(9,458,321 - 13,412,315)  | 26,980,854<br>(23,523,855 - 31,750,151) | 21,293,385<br>(18,882,415 - 24,297,518) |
| Ischemic stroke                      | 23,817,172<br>(19,192,219 - 27,704,827)    | 69,903<br>(45,327 - 110,117)         | 44,793<br>(30,826 - 63,757)          | 1,795,793<br>(1,279,256 - 2,317,572)    | 9,733,987<br>(7,537,897 - 11,749,226)   | 12,172,697<br>(10,056,184 - 13,997,475) |
| Hemorrhagic stroke                   | 36,677,604<br>(31,689,865 - 44,507,703)    | 612,562<br>(482,699 - 759,645)       | 348,298<br>(283,261 - 432,764)       | 9,349,190<br>(7,932,477 - 11,378,517)   | 17,246,867<br>(14,728,546 - 20,905,897) | 9,120,688<br>(7,179,730 - 11,586,321)   |
| Hypertensive heart disease           | 9,524,138<br>(6,802,538 - 12,442,846)      | 66,090<br>(38,558 - 104,958)         | 29,271<br>(18,743 - 40,889)          | 1,991,324<br>(1,352,454 - 2,660,334)    | 4,389,344<br>(3,046,235 - 5,791,743)    | 3,048,109<br>(2,137,500 - 4,113,448)    |
| Cardiomyopathy and myocarditis       | 7,183,305<br>(5,465,277 - 8,576,712)       | 705,306<br>(467,371 - 937,580)       | 158,969<br>(110,471 - 200,567)       | 2,768,236<br>(2,077,417 - 3,246,765)    | 2,574,458<br>(1,893,465 - 3,077,384)    | 976,337<br>(720,163 - 1,241,918)        |
| Atrial fibrillation and flutter      | 453,259<br>(381,455 - 506,402)             | --                                   | --                                   | 23,012<br>(19,549 - 25,995)             | 119,761<br>(99,011 - 133,849)           | 310,486<br>(257,745 - 351,006)          |
| Aortic aneurysm                      | 1,833,269<br>(1,506,577 - 2,080,284)       | --                                   | --                                   | 362,642<br>(287,848 - 420,276)          | 841,619<br>(689,380 - 957,352)          | 629,008<br>(526,794 - 718,775)          |

Web Table 30 - Global YLLs with 95% UI by age, sex, and cause in 2013

| Cause                                               | Males, All Ages                         | Males, 0-4 Years                     | Males, 5-14 Years              | Males, 15-49 Years                      | Males, 50-69 Years                      | Males, 70-80 Years                      |
|-----------------------------------------------------|-----------------------------------------|--------------------------------------|--------------------------------|-----------------------------------------|-----------------------------------------|-----------------------------------------|
| Peripheral vascular disease                         | 263,720<br>(227,248 - 290,169)          | --                                   | --                             | 15,526<br>(13,221 - 17,749)             | 106,509<br>(91,807 - 117,511)           | 141,685<br>(121,012 - 159,468)          |
| Endocarditis                                        | 1,109,763<br>(740,003 - 1,454,243)      | 182,531<br>(117,527 - 244,665)       | 32,670<br>(22,327 - 46,512)    | 420,579<br>(273,325 - 563,215)          | 323,399<br>(211,933 - 431,631)          | 150,584<br>(100,916 - 206,881)          |
| Other cardiovascular and circulatory diseases       | 5,643,406<br>(4,875,594 - 7,729,306)    | 520,559<br>(384,576 - 743,943)       | 113,792<br>(89,164 - 153,694)  | 1,666,949<br>(1,394,240 - 2,340,363)    | 1,970,529<br>(1,716,270 - 2,725,088)    | 1,371,577<br>(1,185,069 - 1,763,767)    |
| Chronic respiratory diseases                        | 44,040,554<br>(38,598,301 - 49,961,357) | 1,689,549<br>(1,376,487 - 2,103,180) | 435,983<br>(364,410 - 519,153) | 6,317,749<br>(5,353,564 - 7,496,961)    | 18,300,224<br>(15,822,259 - 21,171,683) | 17,297,049<br>(15,253,268 - 19,292,813) |
| Chronic obstructive pulmonary disease               | 28,271,253<br>(23,908,678 - 32,309,105) | 608,376<br>(479,778 - 862,796)       | 120,155<br>(90,988 - 148,173)  | 2,746,310<br>(2,144,145 - 3,325,534)    | 11,691,829<br>(9,806,975 - 13,497,328)  | 13,104,584<br>(11,183,449 - 14,680,951) |
| Pneumoconiosis                                      | 3,241,973<br>(2,203,687 - 4,353,134)    | 16,733<br>(9,467 - 28,573)           | 15,194<br>(9,241 - 24,849)     | 746,756<br>(515,291 - 1,037,920)        | 1,657,838<br>(1,108,417 - 2,278,850)    | 805,451<br>(536,629 - 1,085,175)        |
| Silicosis                                           | 875,441<br>(589,631 - 1,264,189)        | 5,005<br>(2,371 - 9,474)             | 4,376<br>(2,397 - 7,775)       | 167,752<br>(107,217 - 263,122)          | 425,433<br>(274,990 - 636,071)          | 272,876<br>(177,527 - 382,854)          |
| Asbestosis                                          | 465,799<br>(318,685 - 650,225)          | 3,178<br>(1,601 - 5,880)             | 3,229<br>(2,028 - 5,272)       | 106,551<br>(71,883 - 152,845)           | 254,251<br>(163,816 - 366,003)          | 98,590<br>(65,117 - 136,158)            |
| Coal workers pneumoconiosis                         | 513,530<br>(358,743 - 750,892)          | 2,464<br>(1,436 - 4,158)             | 3,054<br>(1,901 - 5,115)       | 121,028<br>(81,489 - 184,136)           | 282,711<br>(194,221 - 411,156)          | 104,274<br>(71,888 - 153,322)           |
| Other pneumoconiosis                                | 1,387,202<br>(920,841 - 1,919,438)      | 6,087<br>(3,244 - 12,087)            | 4,535<br>(2,673 - 7,556)       | 351,426<br>(231,591 - 485,608)          | 695,443<br>(447,489 - 987,444)          | 329,712<br>(214,674 - 470,955)          |
| Asthma                                              | 6,117,553<br>(4,997,545 - 8,729,830)    | 346,472<br>(245,519 - 470,149)       | 193,432<br>(153,019 - 250,028) | 1,786,728<br>(1,428,608 - 2,530,707)    | 2,428,046<br>(1,852,905 - 3,631,504)    | 1,362,876<br>(1,074,942 - 1,883,938)    |
| Interstitial lung disease and pulmonary sarcoidosis | 4,560,416<br>(3,345,989 - 6,210,315)    | 27,514<br>(12,411 - 67,598)          | 20,578<br>(10,645 - 48,386)    | 642,102<br>(440,446 - 860,414)          | 2,180,379<br>(1,544,796 - 2,953,484)    | 1,689,842<br>(1,238,762 - 2,401,448)    |
| Other chronic respiratory diseases                  | 1,849,359<br>(1,411,395 - 2,223,450)    | 690,454<br>(513,214 - 868,155)       | 86,624<br>(61,152 - 116,069)   | 395,853<br>(292,026 - 514,526)          | 342,132<br>(251,699 - 456,514)          | 334,297<br>(261,056 - 389,823)          |
| Cirrhosis                                           | 25,704,599<br>(24,085,436 - 27,684,653) | 420,019<br>(297,983 - 594,579)       | 370,721<br>(313,443 - 447,380) | 11,528,203<br>(10,547,336 - 12,623,107) | 11,129,284<br>(10,400,309 - 11,946,935) | 2,256,373<br>(2,124,635 - 2,408,542)    |
| Cirrhosis due to hepatitis B                        | 6,291,970<br>(5,586,928 - 7,059,619)    | 19,094<br>(12,283 - 30,750)          | 62,066<br>(44,872 - 84,839)    | 2,956,191<br>(2,534,242 - 3,401,883)    | 2,729,821<br>(2,420,262 - 3,056,012)    | 524,798<br>(474,267 - 580,141)          |
| Cirrhosis due to hepatitis C                        | 6,064,939<br>(5,398,425 - 6,811,268)    | 25,444<br>(16,822 - 39,157)          | 46,574<br>(34,566 - 64,455)    | 2,436,784<br>(2,089,079 - 2,833,095)    | 2,924,892<br>(2,601,190 - 3,271,133)    | 631,244<br>(576,737 - 690,516)          |
| Cirrhosis due to alcohol use                        | 9,188,388<br>(8,311,416 - 10,147,162)   | --                                   | --                             | 3,848,597<br>(3,334,373 - 4,448,476)    | 4,389,825<br>(3,991,699 - 4,830,513)    | 949,967<br>(877,116 - 1,027,614)        |
| Cirrhosis due to other causes                       | 4,159,302<br>(3,628,829 - 4,825,165)    | 375,481<br>(263,938 - 533,052)       | 262,080<br>(215,919 - 321,206) | 2,286,631<br>(1,928,811 - 2,718,738)    | 1,084,746<br>(875,143 - 1,308,786)      | 150,364<br>(123,877 - 178,524)          |
| Digestive diseases                                  | 17,236,783<br>(14,740,733 - 20,186,621) | 806,264<br>(619,253 - 1,110,440)     | 685,505<br>(536,776 - 841,249) | 7,227,062<br>(6,037,111 - 8,758,187)    | 5,665,244<br>(4,735,950 - 6,601,793)    | 2,852,708<br>(2,448,982 - 3,160,408)    |
| Peptic ulcer disease                                | 4,788,159<br>(3,674,813 - 5,919,415)    | 74,673<br>(42,501 - 132,005)         | 82,292<br>(48,480 - 120,092)   | 1,885,428<br>(1,424,969 - 2,436,970)    | 1,893,010<br>(1,400,431 - 2,374,443)    | 852,755<br>(666,292 - 1,024,665)        |
| Gastritis and duodenitis                            | 832,004<br>(483,441 - 1,371,774)        | 40,215<br>(14,638 - 72,597)          | 34,140<br>(16,370 - 64,942)    | 305,581<br>(181,430 - 568,825)          | 302,727<br>(163,355 - 486,025)          | 149,340<br>(84,292 - 230,622)           |
| Appendicitis                                        | 1,515,742<br>(1,018,936 - 2,026,820)    | 73,298<br>(44,146 - 131,697)         | 85,145<br>(59,189 - 120,772)   | 956,520<br>(624,968 - 1,360,048)        | 293,544<br>(179,071 - 420,807)          | 107,235<br>(65,600 - 152,476)           |
| Paralytic ileus and intestinal obstruction          | 3,352,530<br>(2,275,555 - 5,274,479)    | 214,900<br>(145,828 - 370,663)       | 287,819<br>(195,316 - 414,958) | 1,258,026<br>(840,144 - 1,997,568)      | 1,051,915<br>(688,179 - 1,686,176)      | 539,871<br>(341,321 - 815,080)          |
| Inguinal, femoral, and abdominal hernia             | 446,450<br>(327,661 - 772,954)          | 28,893<br>(14,786 - 48,934)          | 24,136<br>(15,878 - 42,989)    | 133,925<br>(91,204 - 269,239)           | 132,276<br>(90,329 - 221,428)           | 127,219<br>(84,595 - 208,884)           |
| Inflammatory bowel disease                          | 781,968<br>(579,821 - 1,102,655)        | 152,163<br>(75,995 - 243,408)        | 40,774<br>(23,127 - 59,831)    | 303,458<br>(211,245 - 438,243)          | 181,225<br>(127,179 - 249,979)          | 104,347<br>(77,532 - 141,674)           |
| Vascular intestinal disorders                       | 644,008<br>(284,219 - 1,225,899)        | 11,897<br>(3,287 - 29,077)           | 14,677<br>(4,322 - 35,160)     | 130,035<br>(51,330 - 275,376)           | 258,342<br>(113,782 - 492,568)          | 229,058<br>(102,520 - 414,783)          |
| Gallbladder and biliary diseases                    | 893,495<br>(706,329 - 1,106,817)        | 22,757<br>(12,800 - 36,807)          | 22,384<br>(14,140 - 28,877)    | 257,726<br>(197,044 - 322,599)          | 318,460<br>(249,309 - 404,228)          | 272,168<br>(220,225 - 327,109)          |
| Pancreatitis                                        | 2,460,076<br>(1,478,990 - 3,267,660)    | 14,228<br>(7,244 - 25,216)           | 25,956<br>(11,666 - 40,603)    | 1,428,488<br>(839,451 - 1,993,256)      | 764,614<br>(458,383 - 1,024,517)        | 226,791<br>(135,844 - 294,962)          |
| Other digestive diseases                            | 1,522,352<br>(1,100,957 - 1,894,766)    | 173,240<br>(112,722 - 265,236)       | 68,181<br>(42,740 - 94,217)    | 567,875<br>(353,807 - 741,566)          | 469,132<br>(339,912 - 594,222)          | 243,925<br>(186,512 - 301,555)          |
| Neurological disorders                              | 12,934,566<br>(12,011,122 - 13,882,629) | 844,847<br>(641,181 - 1,173,160)     | 538,639<br>(427,409 - 693,180) | 2,776,182<br>(2,241,110 - 3,191,447)    | 2,200,383<br>(2,012,769 - 2,365,331)    | 6,574,514<br>(6,211,646 - 6,896,998)    |
| Alzheimer disease and other dementias               | 6,954,901<br>(6,541,564 - 7,314,916)    | --                                   | --                             | 10,526<br>(8,741 - 12,733)              | 1,158,712<br>(1,065,338 - 1,248,394)    | 5,785,664<br>(5,442,134 - 6,096,912)    |
| Parkinson disease                                   | 668,584<br>(523,661 - 724,965)          | --                                   | --                             | 22,701<br>(20,250 - 24,872)             | 165,110<br>(139,837 - 180,272)          | 480,772<br>(370,216 - 529,626)          |
| Epilepsy                                            | 3,465,822<br>(2,717,164 - 4,226,293)    | 611,357<br>(421,595 - 934,253)       | 436,488<br>(330,236 - 589,606) | 1,983,177<br>(1,500,398 - 2,347,530)    | 324,091<br>(249,588 - 390,750)          | 110,710<br>(81,091 - 135,603)           |
| Multiple sclerosis                                  | 248,016<br>(110,715 - 389,260)          | --                                   | --                             | 114,263<br>(55,876 - 189,494)           | 111,491<br>(48,708 - 170,245)           | 22,262<br>(9,374 - 31,640)              |
| Other neurological disorders                        | 1,597,243<br>(1,198,442 - 1,866,279)    | 233,490<br>(163,987 - 366,070)       | 102,151<br>(73,640 - 127,870)  | 645,516<br>(482,934 - 751,806)          | 440,979<br>(339,955 - 529,174)          | 175,107<br>(132,554 - 207,065)          |
| Mental and substance use disorders                  | 9,036,733<br>(7,209,863 - 10,753,447)   | 157,907<br>(63,397 - 278,387)        | 418<br>(330 - 520)             | 6,519,666<br>(5,266,021 - 7,523,157)    | 2,119,143<br>(1,461,006 - 2,668,618)    | 239,598<br>(172,850 - 277,876)          |
| Schizophrenia                                       | 285,406<br>(215,923 - 479,248)          | --                                   | --                             | 168,364<br>(127,165 - 283,252)          | 93,952<br>(69,695 - 162,911)            | 23,090<br>(16,743 - 38,925)             |
| Alcohol use disorders                               | 4,334,506<br>(2,706,598 - 5,704,793)    | --                                   | --                             | 2,705,845<br>(1,694,477 - 3,573,697)    | 1,481,671<br>(884,942 - 1,983,669)      | 146,990<br>(79,305 - 179,693)           |
| Drug use disorders                                  | 4,410,046<br>(3,573,336 - 4,786,949)    | 157,907<br>(63,397 - 278,387)        | --                             | 3,639,100<br>(2,891,701 - 3,947,883)    | 543,520<br>(428,546 - 623,174)          | 69,518<br>(60,971 - 78,810)             |
| Opioid use disorders                                | 1,781,593<br>(1,391,177 - 1,950,139)    | 37,734<br>(20,576 - 62,632)          | --                             | 1,487,537<br>(1,170,696 - 1,639,979)    | 228,713<br>(175,773 - 262,228)          | 27,608<br>(23,955 - 31,873)             |

Web Table 30 - Global YLLs with 95% UI by age, sex, and cause in 2013

| Cause                                               | Males, All Ages                         | Males, 0-4 Years                        | Males, 5-14 Years                    | Males, 15-49 Years                     | Males, 50-69 Years                      | Males, 70-80 Years                   |
|-----------------------------------------------------|-----------------------------------------|-----------------------------------------|--------------------------------------|----------------------------------------|-----------------------------------------|--------------------------------------|
| Cocaine use disorders                               | 123,527<br>(102,259 - 138,252)          | 2,261<br>(1,379 - 3,316)                | --                                   | 105,161<br>(84,992 - 119,197)          | 13,463<br>(10,749 - 16,178)             | 2,642<br>(2,031 - 3,376)             |
| Amphetamine use disorders                           | 100,783<br>(86,162 - 113,830)           | 2,492<br>(1,637 - 3,517)                | --                                   | 80,860<br>(68,027 - 92,890)            | 14,507<br>(11,933 - 17,181)             | 2,924<br>(2,238 - 3,710)             |
| Other drug use disorders                            | 2,404,144<br>(1,961,952 - 2,623,967)    | 115,421<br>(39,003 - 214,981)           | --                                   | 1,965,542<br>(1,610,023 - 2,137,100)   | 286,838<br>(228,938 - 329,455)          | 36,344<br>(31,718 - 40,966)          |
| Eating disorders                                    | 6,775<br>(5,901 - 7,665)                | --                                      | 418<br>(330 - 520)                   | 6,357<br>(5,518 - 7,250)               | --                                      | --                                   |
| Anorexia nervosa                                    | 6,775<br>(5,901 - 7,665)                | --                                      | 418<br>(330 - 520)                   | 6,357<br>(5,518 - 7,250)               | --                                      | --                                   |
| Diabetes, urogenital, blood, and endocrine diseases | 40,595,672<br>(33,761,411 - 51,544,206) | 6,931,713<br>(2,844,704 - 15,309,809)   | 1,889,389<br>(908,080 - 3,638,861)   | 11,017,334<br>(9,693,713 - 13,051,011) | 13,281,101<br>(12,132,979 - 14,428,955) | 7,476,135<br>(6,930,422 - 7,933,466) |
| Diabetes mellitus                                   | 13,581,591<br>(12,789,877 - 14,585,710) | 230,356<br>(197,536 - 264,365)          | 78,352<br>(67,488 - 91,347)          | 3,112,535<br>(2,844,000 - 3,431,835)   | 6,616,093<br>(6,132,744 - 7,217,209)    | 3,544,254<br>(3,320,131 - 3,807,852) |
| Acute glomerulonephritis                            | 391,412<br>(260,988 - 520,797)          | 79,327<br>(34,769 - 144,519)            | 41,615<br>(27,154 - 62,690)          | 149,842<br>(107,593 - 198,112)         | 85,477<br>(60,230 - 108,275)            | 35,152<br>(24,275 - 44,334)          |
| Chronic kidney disease                              | 12,423,632<br>(9,696,483 - 13,910,808)  | 443,636<br>(346,809 - 582,203)          | 228,053<br>(173,633 - 276,119)       | 4,338,910<br>(3,234,417 - 4,991,528)   | 4,632,567<br>(3,600,038 - 5,244,931)    | 2,780,465<br>(2,314,117 - 3,065,859) |
| Chronic kidney disease due to diabetes mellitus     | 1,886,552<br>(1,335,406 - 2,479,318)    | 11,974<br>(7,169 - 21,300)              | 8,244<br>(4,813 - 13,474)            | 434,219<br>(285,565 - 601,559)         | 924,784<br>(606,126 - 1,098,514)        | 507,331<br>(397,052 - 778,892)       |
| Chronic kidney disease due to hypertension          | 3,171,609<br>(1,858,796 - 3,903,382)    | 56,202<br>(30,253 - 83,584)             | 21,905<br>(11,939 - 31,050)          | 930,826<br>(566,094 - 1,199,203)       | 1,306,960<br>(773,171 - 1,614,725)      | 855,715<br>(508,450 - 1,032,239)     |
| Chronic kidney disease due to glomerulonephritis    | 2,135,692<br>(1,621,488 - 2,670,629)    | 198,702<br>(146,115 - 271,330)          | 107,574<br>(82,670 - 134,778)        | 996,722<br>(742,975 - 1,219,339)       | 567,088<br>(400,761 - 729,154)          | 265,606<br>(184,367 - 353,201)       |
| Chronic kidney disease due to other causes          | 5,229,779<br>(3,473,556 - 6,367,627)    | 176,758<br>(117,790 - 250,570)          | 90,330<br>(63,606 - 119,511)         | 1,977,142<br>(1,240,892 - 2,482,574)   | 1,833,736<br>(1,221,570 - 2,344,358)    | 1,151,813<br>(818,966 - 1,401,159)   |
| Urinary diseases and male infertility               | 2,991,013<br>(2,380,471 - 3,315,181)    | 357,475<br>(259,870 - 472,641)          | 77,395<br>(59,778 - 91,631)          | 947,898<br>(747,422 - 1,073,349)       | 931,200<br>(739,515 - 1,053,283)        | 677,046<br>(543,924 - 749,717)       |
| Interstitial nephritis and urinary tract infections | 1,890,656<br>(1,481,873 - 2,194,025)    | 281,709<br>(184,596 - 381,331)          | 49,080<br>(35,470 - 61,820)          | 588,876<br>(458,725 - 697,386)         | 537,471<br>(423,197 - 647,358)          | 433,520<br>(334,973 - 501,749)       |
| Urolithiasis                                        | 197,061<br>(150,309 - 298,455)          | --                                      | 6,756<br>(4,888 - 10,474)            | 67,117<br>(48,869 - 106,838)           | 79,634<br>(59,759 - 121,511)            | 43,555<br>(33,113 - 64,836)          |
| Other urinary diseases                              | 903,296<br>(623,663 - 1,122,008)        | 75,766<br>(47,020 - 124,643)            | 21,559<br>(14,520 - 30,549)          | 291,905<br>(196,448 - 370,506)         | 314,096<br>(202,176 - 392,952)          | 199,970<br>(137,743 - 254,237)       |
| Gynecological diseases                              | --                                      | --                                      | --                                   | --                                     | --                                      | --                                   |
| Uterine fibroids                                    | --                                      | --                                      | --                                   | --                                     | --                                      | --                                   |
| Polycystic ovarian syndrome                         | --                                      | --                                      | --                                   | --                                     | --                                      | --                                   |
| Endometriosis                                       | --                                      | --                                      | --                                   | --                                     | --                                      | --                                   |
| Genital prolapse                                    | --                                      | --                                      | --                                   | --                                     | --                                      | --                                   |
| Other gynecological diseases                        | --                                      | --                                      | --                                   | --                                     | --                                      | --                                   |
| Hemoglobinopathies and hemolytic anemias            | 7,973,374<br>(1,781,386 - 19,243,347)   | 4,904,201<br>(783,475 - 13,345,611)     | 1,264,504<br>(260,367 - 3,056,616)   | 1,434,870<br>(501,028 - 3,771,228)     | 264,504<br>(136,828 - 541,542)          | 105,294<br>(62,800 - 157,282)        |
| Thalassemias                                        | 978,182<br>(572,296 - 1,430,759)        | 442,425<br>(255,009 - 652,929)          | 187,785<br>(113,458 - 277,456)       | 332,652<br>(200,146 - 490,788)         | 14,204<br>(8,889 - 21,330)              | 1,116<br>(661 - 1,668)               |
| Sickle cell disorders                               | 6,331,124<br>(741,545 - 17,173,982)     | 4,282,092<br>(392,404 - 12,627,747)     | 1,031,212<br>(103,625 - 2,776,454)   | 901,795<br>(177,118 - 2,938,925)       | 111,624<br>(40,496 - 353,470)           | 4,400<br>(2,275 - 10,092)            |
| G6PD deficiency                                     | 135,234<br>(65,753 - 218,707)           | 56,663<br>(21,300 - 110,191)            | 17,167<br>(8,490 - 28,651)           | 43,034<br>(23,793 - 68,407)            | 15,786<br>(9,616 - 24,205)              | 2,584<br>(1,440 - 4,179)             |
| Other hemoglobinopathies and hemolytic anemias      | 528,834<br>(312,394 - 803,973)          | 123,021<br>(57,966 - 221,534)           | 28,341<br>(15,725 - 44,177)          | 157,388<br>(94,613 - 242,078)          | 122,890<br>(75,251 - 180,467)           | 97,194<br>(58,550 - 144,008)         |
| Endocrine, metabolic, blood, and immune disorders   | 3,234,650<br>(2,512,468 - 3,968,589)    | 916,719<br>(716,201 - 1,190,946)        | 199,470<br>(160,342 - 270,577)       | 1,033,279<br>(810,434 - 1,265,349)     | 751,258<br>(535,517 - 876,758)          | 333,924<br>(238,528 - 397,526)       |
| Musculoskeletal disorders                           | 1,402,512<br>(1,032,012 - 1,791,913)    | --                                      | 122,633<br>(94,667 - 168,100)        | 599,964<br>(429,221 - 752,596)         | 488,454<br>(367,284 - 656,747)          | 191,462<br>(132,229 - 241,352)       |
| Rheumatoid arthritis                                | 336,358<br>(257,374 - 505,281)          | --                                      | 23,159<br>(13,938 - 41,634)          | 94,462<br>(67,949 - 146,380)           | 153,632<br>(111,633 - 239,391)          | 65,105<br>(46,320 - 89,808)          |
| Other musculoskeletal disorders                     | 1,066,154<br>(737,808 - 1,341,945)      | --                                      | 99,474<br>(72,159 - 130,930)         | 505,501<br>(344,460 - 618,735)         | 334,822<br>(230,852 - 445,048)          | 126,357<br>(84,491 - 156,819)        |
| Other non-communicable diseases                     | 28,022,170<br>(24,641,968 - 33,620,602) | 23,557,760<br>(20,148,763 - 29,191,984) | 1,228,204<br>(1,038,355 - 1,411,911) | 2,215,841<br>(1,910,632 - 2,552,026)   | 674,095<br>(501,582 - 767,398)          | 346,271<br>(248,969 - 385,536)       |
| Congenital anomalies                                | 26,089,666<br>(22,660,663 - 31,782,686) | 22,550,046<br>(19,174,648 - 28,201,184) | 1,183,526<br>(999,311 - 1,362,888)   | 1,846,259<br>(1,571,091 - 2,170,685)   | 375,861<br>(241,678 - 451,147)          | 133,975<br>(73,257 - 160,804)        |
| Neural tube defects                                 | 2,814,821<br>(1,568,443 - 5,046,523)    | 2,649,643<br>(1,415,983 - 4,683,045)    | 70,331<br>(38,032 - 108,459)         | 84,825<br>(57,656 - 145,079)           | 7,782<br>(5,385 - 14,047)               | 2,241<br>(1,358 - 4,590)             |
| Congenital heart anomalies                          | 13,286,223<br>(11,488,492 - 15,955,881) | 11,302,675<br>(9,571,750 - 14,051,071)  | 711,736<br>(568,937 - 852,129)       | 986,137<br>(790,166 - 1,202,550)       | 205,408<br>(117,100 - 261,581)          | 80,267<br>(34,789 - 105,002)         |
| Cleft lip and cleft palate                          | 140,304<br>(59,910 - 262,247)           | 140,304<br>(59,910 - 262,247)           | --                                   | --                                     | --                                      | --                                   |
| Down syndrome                                       | 1,209,123<br>(590,129 - 2,055,746)      | 903,991<br>(387,798 - 1,683,839)        | 68,462<br>(36,263 - 112,641)         | 195,038<br>(116,549 - 293,873)         | 39,757<br>(22,456 - 52,292)             | 1,873<br>(1,091 - 2,683)             |
| Chromosomal unbalanced rearrangements               | 579,223<br>(363,576 - 1,008,013)        | 506,225<br>(308,551 - 923,217)          | 22,978<br>(13,805 - 39,444)          | 43,360<br>(30,363 - 61,749)            | 5,578<br>(3,692 - 8,149)                | 1,083<br>(698 - 1,556)               |
| Other congenital anomalies                          | 8,059,971<br>(6,210,553 - 12,757,706)   | 7,047,208<br>(5,273,496 - 11,666,897)   | 310,019<br>(234,990 - 432,958)       | 536,898<br>(408,064 - 677,317)         | 117,336<br>(85,734 - 146,048)           | 48,511<br>(35,702 - 58,704)          |

Web Table 30 - Global YLLs with 95% UI by age, sex, and cause in 2013

| Cause                                           | Males, All Ages                            | Males, 0-4 Years                        | Males, 5-14 Years                      | Males, 15-49 Years                       | Males, 50-69 Years                      | Males, 70-80 Years                   |
|-------------------------------------------------|--------------------------------------------|-----------------------------------------|----------------------------------------|------------------------------------------|-----------------------------------------|--------------------------------------|
| Skin and subcutaneous diseases                  | 1,203,161<br>(1,014,735 - 1,378,357)       | 278,371<br>(218,112 - 356,100)          | 44,677<br>(36,258 - 55,343)            | 369,582<br>(317,560 - 431,501)           | 298,234<br>(244,796 - 343,175)          | 212,296<br>(173,128 - 235,695)       |
| Cellulitis                                      | 430,109<br>(271,898 - 667,361)             | 122,399<br>(66,455 - 206,363)           | 20,517<br>(12,401 - 31,199)            | 130,604<br>(79,814 - 206,959)            | 104,430<br>(67,904 - 162,961)           | 52,160<br>(34,626 - 82,396)          |
| Pyoderma                                        | 549,343<br>(374,692 - 672,776)             | 140,841<br>(86,592 - 191,194)           | 15,889<br>(10,432 - 20,647)            | 171,526<br>(116,923 - 216,572)           | 138,511<br>(89,183 - 179,791)           | 82,578<br>(57,942 - 100,793)         |
| Decubitus ulcer                                 | 180,310<br>(131,601 - 217,272)             | 6,275<br>(2,981 - 10,146)               | 5,092<br>(2,813 - 7,300)               | 50,273<br>(33,570 - 65,108)              | 47,238<br>(34,746 - 58,148)             | 71,432<br>(57,146 - 84,635)          |
| Other skin and subcutaneous diseases            | 43,399<br>(30,129 - 56,077)                | 8,856<br>(4,848 - 14,446)               | 3,180<br>(1,996 - 4,377)               | 17,180<br>(11,701 - 21,888)              | 8,055<br>(5,321 - 10,097)               | 6,127<br>(3,999 - 7,894)             |
| Sudden infant death syndrome                    | 729,343<br>(417,955 - 1,079,602)           | 729,343<br>(417,955 - 1,079,602)        | --                                     | --                                       | --                                      | --                                   |
| Injuries                                        | 148,290,237<br>(137,731,965 - 159,287,025) | 17,202,177<br>(14,674,694 - 20,679,760) | 10,168,062<br>(9,130,651 - 11,448,273) | 94,982,982<br>(87,609,646 - 102,212,150) | 20,709,954<br>(18,626,901 - 22,625,324) | 5,227,062<br>(4,640,940 - 5,623,915) |
| Transport injuries                              | 52,110,350<br>(46,924,120 - 56,785,071)    | 3,559,923<br>(2,821,376 - 4,553,982)    | 3,528,438<br>(3,044,665 - 4,013,308)   | 36,752,011<br>(33,367,203 - 40,224,272)  | 6,907,916<br>(6,060,391 - 7,743,244)    | 1,362,062<br>(1,179,704 - 1,491,781) |
| Road injuries                                   | 49,068,410<br>(44,094,542 - 53,484,302)    | 3,246,051<br>(2,549,954 - 4,209,767)    | 3,306,882<br>(2,870,131 - 3,761,962)   | 34,742,946<br>(31,580,028 - 38,005,557)  | 6,482,694<br>(5,685,171 - 7,265,442)    | 1,289,838<br>(1,119,457 - 1,413,311) |
| Pedestrian road injuries                        | 16,719,988<br>(13,064,810 - 20,591,510)    | 1,693,624<br>(1,232,993 - 2,418,262)    | 1,661,371<br>(1,298,177 - 2,016,876)   | 9,873,637<br>(7,569,953 - 12,473,891)    | 2,790,986<br>(2,171,017 - 3,399,050)    | 700,369<br>(561,617 - 829,916)       |
| Cyclist road injuries                           | 2,999,137<br>(2,357,323 - 3,635,789)       | 189,834<br>(126,526 - 284,212)          | 305,564<br>(237,110 - 411,273)         | 1,802,626<br>(1,418,323 - 2,200,589)     | 564,970<br>(426,074 - 712,423)          | 136,143<br>(104,345 - 168,621)       |
| Motorcyclist road injuries                      | 10,925,121<br>(8,553,304 - 13,233,616)     | 244,875<br>(156,633 - 371,809)          | 278,205<br>(195,708 - 384,107)         | 9,355,234<br>(7,428,555 - 11,315,553)    | 938,530<br>(681,183 - 1,193,656)        | 108,278<br>(79,730 - 143,553)        |
| Motor vehicle road injuries                     | 17,697,599<br>(14,979,863 - 20,580,869)    | 1,012,795<br>(735,692 - 1,331,130)      | 954,587<br>(744,451 - 1,200,327)       | 13,336,161<br>(11,330,827 - 15,330,446)  | 2,065,211<br>(1,699,298 - 2,476,007)    | 328,845<br>(263,831 - 402,449)       |
| Other road injuries                             | 726,565<br>(485,887 - 995,833)             | 104,923<br>(53,388 - 159,251)           | 107,154<br>(67,118 - 165,888)          | 375,288<br>(251,059 - 511,682)           | 122,997<br>(86,136 - 192,053)           | 16,202<br>(11,172 - 24,077)          |
| Other transport injuries                        | 3,041,939<br>(2,390,244 - 3,478,792)       | 313,872<br>(217,851 - 405,808)          | 221,556<br>(159,448 - 268,926)         | 2,009,065<br>(1,579,018 - 2,331,409)     | 425,222<br>(331,672 - 507,439)          | 72,224<br>(52,209 - 85,894)          |
| Unintentional injuries                          | 54,096,151<br>(49,198,342 - 60,844,566)    | 12,921,752<br>(10,792,756 - 15,796,811) | 5,817,802<br>(5,091,164 - 6,972,675)   | 25,189,311<br>(22,856,561 - 28,455,716)  | 7,456,375<br>(6,573,714 - 8,254,745)    | 2,710,911<br>(2,246,355 - 2,975,239) |
| Falls                                           | 10,375,619<br>(8,225,988 - 11,788,923)     | 1,238,044<br>(913,395 - 1,655,269)      | 661,871<br>(500,874 - 849,573)         | 4,897,178<br>(3,959,064 - 5,746,134)     | 2,348,067<br>(1,728,354 - 2,733,077)    | 1,230,459<br>(904,869 - 1,392,020)   |
| Drowning                                        | 14,711,623<br>(11,962,092 - 20,029,972)    | 3,986,174<br>(2,946,112 - 5,574,225)    | 2,895,792<br>(2,352,326 - 3,946,166)   | 6,561,255<br>(5,435,976 - 8,759,485)     | 1,053,659<br>(800,726 - 1,473,893)      | 214,743<br>(156,570 - 273,752)       |
| Fire, heat, and hot substances                  | 4,701,699<br>(3,757,621 - 5,663,818)       | 1,273,383<br>(944,844 - 1,722,307)      | 336,664<br>(262,829 - 439,063)         | 2,286,672<br>(1,825,387 - 2,860,637)     | 611,521<br>(487,541 - 737,964)          | 193,459<br>(148,008 - 225,791)       |
| Poisonings                                      | 2,900,027<br>(1,750,924 - 3,426,768)       | 512,307<br>(314,624 - 708,485)          | 162,805<br>(88,777 - 204,439)          | 1,694,957<br>(1,040,430 - 2,076,755)     | 425,622<br>(244,424 - 505,647)          | 104,337<br>(55,910 - 123,197)        |
| Exposure to mechanical forces                   | 7,497,640<br>(6,591,946 - 9,667,602)       | 1,768,737<br>(1,346,077 - 3,383,984)    | 556,110<br>(445,929 - 776,668)         | 4,124,478<br>(3,633,931 - 4,768,597)     | 914,976<br>(772,881 - 1,051,216)        | 133,338<br>(104,253 - 151,415)       |
| Unintentional firearm injuries                  | 1,806,989<br>(1,509,770 - 2,195,505)       | 153,899<br>(106,233 - 224,257)          | 92,651<br>(70,355 - 118,730)           | 1,348,145<br>(1,093,058 - 1,701,409)     | 177,514<br>(134,341 - 237,613)          | 34,779<br>(24,584 - 47,202)          |
| Unintentional suffocation                       | 1,597,989<br>(1,159,105 - 4,132,898)       | 1,073,639<br>(715,884 - 2,808,219)      | 117,376<br>(71,289 - 292,966)          | 311,904<br>(236,901 - 683,934)           | 75,782<br>(59,178 - 136,602)            | 19,289<br>(15,068 - 29,977)          |
| Other exposure to mechanical forces             | 4,092,661<br>(3,506,138 - 4,518,215)       | 541,199<br>(385,895 - 704,843)          | 346,083<br>(275,908 - 419,225)         | 2,464,429<br>(2,133,305 - 2,779,537)     | 661,680<br>(528,378 - 763,163)          | 79,270<br>(57,191 - 99,486)          |
| Adverse effects of medical treatment            | 2,884,431<br>(1,949,333 - 3,947,752)       | 1,150,564<br>(688,547 - 1,838,115)      | 146,182<br>(90,945 - 215,494)          | 830,022<br>(592,821 - 1,064,924)         | 510,513<br>(352,510 - 634,600)          | 247,151<br>(164,864 - 301,416)       |
| Animal contact                                  | 2,236,624<br>(1,763,113 - 3,454,889)       | 409,383<br>(240,292 - 639,108)          | 435,934<br>(301,608 - 664,387)         | 982,502<br>(733,245 - 1,681,761)         | 339,761<br>(248,443 - 538,513)          | 69,045<br>(52,271 - 108,521)         |
| Venomous animal contact                         | 1,596,356<br>(1,222,114 - 2,543,324)       | 225,242<br>(133,000 - 387,103)          | 311,639<br>(205,835 - 489,379)         | 763,272<br>(544,790 - 1,374,345)         | 254,102<br>(177,737 - 414,918)          | 42,102<br>(29,844 - 70,163)          |
| Non-venomous animal contact                     | 640,269<br>(437,024 - 900,093)             | 184,141<br>(97,927 - 306,677)           | 124,295<br>(82,961 - 195,259)          | 219,230<br>(149,663 - 301,122)           | 85,659<br>(62,825 - 127,104)            | 26,943<br>(19,201 - 38,228)          |
| Foreign body                                    | 3,753,222<br>(2,114,174 - 5,538,839)       | 2,072,437<br>(1,165,794 - 3,237,615)    | 143,551<br>(89,779 - 227,025)          | 766,353<br>(424,639 - 1,079,347)         | 445,411<br>(232,055 - 641,053)          | 325,471<br>(179,977 - 500,600)       |
| Pulmonary aspiration and foreign body in airway | 3,653,740<br>(1,988,700 - 5,437,453)       | 2,042,514<br>(1,133,572 - 3,193,064)    | 132,714<br>(77,357 - 214,933)          | 734,053<br>(387,520 - 1,052,585)         | 422,126<br>(209,283 - 602,792)          | 322,332<br>(178,210 - 497,495)       |
| Foreign body in other body part                 | 99,482<br>(63,319 - 168,976)               | 29,922<br>(17,678 - 54,512)             | 10,837<br>(7,142 - 20,332)             | 32,299<br>(21,100 - 55,444)              | 23,285<br>(14,233 - 38,378)             | 3,139<br>(1,840 - 4,954)             |
| Other unintentional injuries                    | 5,035,267<br>(4,578,812 - 5,643,015)       | 510,725<br>(411,024 - 635,808)          | 478,894<br>(407,842 - 565,005)         | 3,045,896<br>(2,726,619 - 3,435,737)     | 806,844<br>(675,376 - 974,472)          | 192,909<br>(158,404 - 241,086)       |
| Self-harm and interpersonal violence            | 40,809,642<br>(32,378,119 - 46,792,352)    | 478,621<br>(292,487 - 666,568)          | 731,489<br>(523,091 - 929,428)         | 32,395,286<br>(25,739,574 - 37,128,432)  | 6,087,919<br>(4,681,904 - 7,131,775)    | 1,116,327<br>(891,184 - 1,326,581)   |
| Self-harm                                       | 23,912,573<br>(17,905,789 - 27,238,873)    | --                                      | 350,077<br>(227,684 - 489,811)         | 17,992,024<br>(13,385,882 - 20,629,542)  | 4,620,882<br>(3,435,661 - 5,390,363)    | 949,590<br>(753,026 - 1,141,625)     |
| Interpersonal violence                          | 16,897,069<br>(11,674,253 - 21,281,864)    | 478,621<br>(292,487 - 666,568)          | 381,413<br>(236,172 - 510,454)         | 14,403,261<br>(10,098,088 - 17,831,902)  | 1,467,038<br>(983,732 - 2,153,593)      | 166,737<br>(93,430 - 232,338)        |
| Assault by firearm                              | 8,467,710<br>(5,501,501 - 10,910,957)      | 94,146<br>(47,860 - 149,677)            | 139,182<br>(74,097 - 198,377)          | 7,544,732<br>(4,920,916 - 9,569,005)     | 635,606<br>(398,552 - 991,210)          | 54,044<br>(25,951 - 87,783)          |
| Assault by sharp object                         | 4,576,017<br>(2,720,213 - 6,831,957)       | 67,947<br>(36,140 - 117,099)            | 67,033<br>(37,827 - 111,672)           | 3,964,553<br>(2,381,240 - 5,937,668)     | 438,596<br>(245,623 - 703,309)          | 37,886<br>(18,889 - 61,505)          |
| Assault by other means                          | 3,853,343<br>(2,422,245 - 5,398,031)       | 316,528<br>(186,856 - 447,334)          | 175,197<br>(103,574 - 251,602)         | 2,893,976<br>(1,859,812 - 4,132,850)     | 392,836<br>(238,997 - 587,056)          | 74,806<br>(39,808 - 104,056)         |
| Forces of nature, war, and legal intervention   | 1,274,095<br>(780,430 - 2,749,894)         | 241,880<br>(180,221 - 599,294)          | 90,333<br>(59,277 - 188,575)           | 646,375<br>(349,351 - 1,484,785)         | 257,744<br>(147,951 - 540,226)          | 37,762<br>(21,385 - 75,941)          |
| Exposure to forces of nature                    | 383,893<br>(206,505 - 886,560)             | 72,061<br>(18,375 - 424,134)            | 20,575<br>(12,862 - 37,655)            | 196,381<br>(114,655 - 391,907)           | 84,672<br>(48,164 - 171,946)            | 10,204<br>(5,527 - 20,671)           |
| Collective violence and legal intervention      | 890,202<br>(546,608 - 1,913,902)           | 169,820<br>(158,454 - 178,424)          | 69,758<br>(44,754 - 152,581)           | 449,994<br>(221,620 - 1,149,781)         | 173,072<br>(92,726 - 383,472)           | 27,558<br>(14,871 - 54,940)          |



Web Table 30 - Global YLLs with 95% UI by age, sex, and cause in 2013

| Cause                                                             | Females, All Ages                          | Females, 0-4 Years                         | Females, 5-14 Years                     | Females, 15-49 Years                       | Females, 50-69 Years                       | Females, 70-80 Years                       |
|-------------------------------------------------------------------|--------------------------------------------|--------------------------------------------|-----------------------------------------|--------------------------------------------|--------------------------------------------|--------------------------------------------|
| All causes                                                        | 712,618,098<br>(686,172,778 - 740,193,617) | 248,439,553<br>(234,901,598 - 263,466,586) | 29,572,602<br>(27,957,136 - 31,148,203) | 166,342,512<br>(157,757,901 - 175,178,367) | 143,769,895<br>(135,767,202 - 151,425,711) | 124,493,536<br>(120,811,608 - 127,887,990) |
| Communicable, maternal, neonatal, and nutritional diseases        | 312,786,312<br>(296,575,418 - 328,828,504) | 198,961,468<br>(185,604,493 - 212,324,410) | 16,209,744<br>(14,909,763 - 17,591,631) | 68,983,663<br>(65,221,553 - 72,908,729)    | 17,433,860<br>(16,084,375 - 18,928,695)    | 11,197,576<br>(10,087,548 - 12,280,646)    |
| HIV/AIDS and tuberculosis                                         | 47,596,275<br>(44,053,763 - 50,968,423)    | 4,322,938<br>(3,797,147 - 4,882,302)       | 3,168,050<br>(2,971,364 - 3,389,774)    | 31,577,342<br>(29,278,550 - 34,440,770)    | 6,937,646<br>(6,182,620 - 7,694,694)       | 1,590,299<br>(1,288,979 - 1,826,219)       |
| Tuberculosis                                                      | 16,713,102<br>(13,140,640 - 19,001,614)    | 1,672,466<br>(1,118,958 - 2,093,804)       | 672,273<br>(492,682 - 825,000)          | 9,120,021<br>(7,251,991 - 10,688,126)      | 3,812,432<br>(3,136,277 - 4,392,556)       | 1,435,910<br>(1,127,234 - 1,671,929)       |
| HIV/AIDS                                                          | 30,883,173<br>(28,582,272 - 33,823,358)    | 2,650,472<br>(2,427,894 - 2,966,781)       | 2,495,777<br>(2,339,298 - 2,681,224)    | 22,457,321<br>(20,554,333 - 25,010,616)    | 3,125,214<br>(2,764,902 - 3,570,369)       | 154,389<br>(126,210 - 188,972)             |
| HIV/AIDS resulting in mycobacterial infection                     | 1,646,842<br>(1,326,122 - 2,069,797)       | 136,302<br>(109,325 - 169,441)             | 119,912<br>(97,876 - 146,854)           | 1,208,949<br>(971,837 - 1,518,764)         | 172,792<br>(133,698 - 220,816)             | 8,888<br>(6,613 - 11,552)                  |
| HIV/AIDS resulting in other diseases                              | 29,236,331<br>(27,031,182 - 32,156,647)    | 2,514,171<br>(2,290,520 - 2,810,202)       | 2,375,865<br>(2,221,524 - 2,556,839)    | 21,248,373<br>(19,418,992 - 23,731,296)    | 2,952,422<br>(2,618,263 - 3,400,934)       | 145,500<br>(118,700 - 179,008)             |
| Diarrhea, lower respiratory, and other common infectious diseases | 111,669,333<br>(102,452,030 - 121,113,377) | 75,384,438<br>(67,740,524 - 83,133,276)    | 8,285,950<br>(7,244,782 - 9,458,895)    | 13,028,613<br>(11,362,913 - 14,942,298)    | 7,389,416<br>(6,390,340 - 8,447,029)       | 7,580,916<br>(6,661,085 - 8,440,113)       |
| Diarrheal diseases                                                | 32,289,871<br>(27,843,384 - 36,928,948)    | 21,230,212<br>(17,235,815 - 25,744,918)    | 2,150,372<br>(1,660,191 - 2,731,324)    | 3,960,454<br>(3,426,719 - 4,575,528)       | 2,746,111<br>(2,178,349 - 3,538,766)       | 2,202,722<br>(1,758,539 - 2,802,629)       |
| Intestinal infectious diseases                                    | 7,058,002<br>(3,860,378 - 11,657,542)      | 2,543,691<br>(1,360,160 - 4,268,730)       | 2,114,755<br>(1,208,575 - 3,366,740)    | 2,186,289<br>(1,120,140 - 3,784,690)       | 180,454<br>(88,375 - 325,066)              | 32,813<br>(17,427 - 54,904)                |
| Typhoid fever                                                     | 5,157,024<br>(2,739,909 - 8,599,183)       | 1,782,546<br>(902,310 - 3,023,850)         | 1,578,454<br>(877,330 - 2,539,894)      | 1,634,915<br>(812,314 - 2,879,095)         | 136,396<br>(64,050 - 253,684)              | 24,714<br>(12,392 - 42,350)                |
| Paratyphoid fever                                                 | 1,729,366<br>(941,370 - 2,936,964)         | 651,585<br>(329,370 - 1,146,659)           | 517,849<br>(283,145 - 887,593)          | 516,597<br>(245,915 - 946,260)             | 37,276<br>(15,809 - 74,976)                | 6,059<br>(2,833 - 11,886)                  |
| Other intestinal infectious diseases                              | 171,611<br>(149,154 - 195,967)             | 109,560<br>(90,869 - 130,124)              | 18,452<br>(14,329 - 23,401)             | 34,777<br>(29,466 - 40,591)                | 6,782<br>(5,590 - 8,208)                   | 2,040<br>(1,623 - 2,515)                   |
| Lower respiratory infections                                      | 52,456,842<br>(47,135,180 - 57,748,206)    | 37,300,907<br>(32,503,313 - 42,353,921)    | 2,115,090<br>(1,695,481 - 2,555,988)    | 4,340,510<br>(3,683,963 - 4,881,261)       | 3,637,259<br>(2,901,232 - 4,069,284)       | 5,063,075<br>(4,228,443 - 5,886,047)       |
| Upper respiratory infections                                      | 73,983<br>(57,089 - 99,738)                | 33,828<br>(19,521 - 57,116)                | 4,209<br>(2,183 - 8,153)                | 19,273<br>(13,789 - 27,754)                | 10,945<br>(6,967 - 18,203)                 | 5,728<br>(3,783 - 9,145)                   |
| Otitis media                                                      | 52,379<br>(47,845 - 57,355)                | 20,263<br>(16,902 - 24,262)                | 7,467<br>(6,512 - 8,471)                | 13,995<br>(12,763 - 15,282)                | 6,823<br>(6,157 - 7,530)                   | 3,831<br>(3,470 - 4,227)                   |
| Meningitis                                                        | 8,939,619<br>(7,478,530 - 10,405,008)      | 5,710,477<br>(4,489,412 - 7,065,787)       | 842,844<br>(653,487 - 1,034,286)        | 1,679,766<br>(1,353,577 - 1,946,577)       | 527,744<br>(392,014 - 648,735)             | 178,788<br>(138,260 - 216,397)             |
| Pneumococcal meningitis                                           | 2,224,996<br>(1,834,874 - 2,613,244)       | 1,236,377<br>(929,041 - 1,555,390)         | 267,427<br>(205,263 - 340,420)          | 510,300<br>(400,633 - 626,873)             | 157,616<br>(107,210 - 213,441)             | 53,275<br>(39,386 - 69,872)                |
| H influenzae type B meningitis                                    | 2,216,150<br>(1,803,914 - 2,662,673)       | 1,755,683<br>(1,364,122 - 2,188,348)       | 187,532<br>(143,989 - 231,540)          | 204,781<br>(163,523 - 252,861)             | 51,372<br>(34,479 - 71,195)                | 16,782<br>(11,582 - 22,055)                |
| Meningococcal meningitis                                          | 1,939,486<br>(1,569,248 - 2,274,828)       | 1,189,935<br>(925,213 - 1,499,528)         | 185,222<br>(141,740 - 236,428)          | 407,750<br>(328,589 - 495,087)             | 115,326<br>(78,650 - 151,653)              | 41,252<br>(29,061 - 52,208)                |
| Other meningitis                                                  | 2,558,988<br>(2,161,105 - 3,016,310)       | 1,528,482<br>(1,201,710 - 1,920,994)       | 202,662<br>(149,754 - 248,596)          | 556,935<br>(440,213 - 667,109)             | 203,429<br>(148,744 - 265,245)             | 67,479<br>(49,911 - 87,980)                |
| Encephalitis                                                      | 2,263,494<br>(1,735,398 - 3,094,131)       | 1,163,358<br>(773,132 - 1,757,553)         | 344,391<br>(229,601 - 470,173)          | 540,315<br>(393,070 - 805,670)             | 175,068<br>(128,787 - 255,828)             | 40,362<br>(27,884 - 55,101)                |
| Diphtheria                                                        | 125,399<br>(44,898 - 345,312)              | 92,332<br>(22,653 - 311,556)               | 22,212<br>(4,450 - 82,528)              | 8,993<br>(3,233 - 22,781)                  | 1,862<br>(430 - 8,195)                     | --                                         |
| Whooping cough                                                    | 2,755,284<br>(1,014,615 - 6,373,614)       | 2,583,884<br>(953,004 - 5,938,018)         | 144,898<br>(48,578 - 355,112)           | 24,521<br>(9,812 - 58,685)                 | 1,980<br>(909 - 4,620)                     | --                                         |
| Tetanus                                                           | 1,525,637<br>(757,242 - 2,318,661)         | 1,185,825<br>(447,793 - 1,941,849)         | 67,098<br>(47,261 - 92,225)             | 143,880<br>(109,020 - 199,554)             | 89,621<br>(59,378 - 139,936)               | 39,212<br>(23,764 - 62,651)                |
| Measles                                                           | 3,984,292<br>(2,035,143 - 7,104,524)       | 3,451,757<br>(1,785,787 - 5,928,637)       | 457,998<br>(222,227 - 873,151)          | 73,626<br>(32,280 - 172,386)               | 911<br>(399 - 2,194)                       | --                                         |
| Varicella and herpes zoster                                       | 144,531<br>(107,788 - 200,421)             | 67,904<br>(38,404 - 123,711)               | 14,615<br>(7,795 - 28,184)              | 36,991<br>(25,475 - 55,967)                | 10,637<br>(6,858 - 17,588)                 | 14,384<br>(9,335 - 23,282)                 |
| Neglected tropical diseases and malaria                           | 33,571,427<br>(27,310,467 - 41,232,094)    | 25,016,629<br>(18,738,534 - 32,856,861)    | 2,982,343<br>(2,069,027 - 3,701,350)    | 3,960,632<br>(2,918,613 - 4,818,183)       | 1,196,162<br>(884,752 - 1,537,473)         | 415,661<br>(307,712 - 547,432)             |
| Malaria                                                           | 30,185,384<br>(23,762,417 - 38,037,405)    | 23,696,888<br>(17,392,303 - 31,569,651)    | 2,244,893<br>(1,300,667 - 2,981,896)    | 2,961,230<br>(1,900,093 - 3,834,949)       | 943,724<br>(636,787 - 1,261,543)           | 338,648<br>(227,966 - 457,585)             |
| Chagas disease                                                    | 84,719<br>(19,032 - 300,416)               | 330<br>(62 - 1,043)                        | 463<br>(77 - 1,298)                     | 18,550<br>(4,353 - 72,754)                 | 42,098<br>(8,048 - 148,614)                | 23,277<br>(4,591 - 80,649)                 |
| Leishmaniasis                                                     | 1,582,380<br>(1,235,375 - 1,961,539)       | 702,284<br>(501,327 - 915,793)             | 396,634<br>(281,372 - 523,411)          | 430,652<br>(343,175 - 527,697)             | 46,389<br>(33,767 - 60,617)                | 6,421<br>(5,041 - 8,069)                   |
| Visceral leishmaniasis                                            | 1,582,380<br>(1,235,375 - 1,961,539)       | 702,284<br>(501,327 - 915,793)             | 396,634<br>(281,372 - 523,411)          | 430,652<br>(343,175 - 527,697)             | 46,389<br>(33,767 - 60,617)                | 6,421<br>(5,041 - 8,069)                   |
| African trypanosomiasis                                           | 180,494<br>(96,052 - 287,591)              | 19,413<br>(9,220 - 32,947)                 | 29,856<br>(14,777 - 48,315)             | 114,367<br>(59,947 - 185,457)              | 15,222<br>(7,777 - 24,479)                 | 1,636<br>(864 - 2,644)                     |
| Schistosomiasis                                                   | 81,312<br>(70,165 - 94,141)                | 2,972<br>(2,063 - 4,264)                   | 4,592<br>(3,490 - 5,870)                | 44,255<br>(37,048 - 52,152)                | 22,714<br>(19,261 - 26,898)                | 6,779<br>(5,664 - 8,040)                   |
| Cysticercosis                                                     | 15,237<br>(11,632 - 23,796)                | 1,246<br>(722 - 2,340)                     | 1,245<br>(842 - 2,089)                  | 10,034<br>(7,671 - 15,507)                 | 2,308<br>(1,874 - 3,191)                   | 404<br>(339 - 530)                         |
| Cystic echinococcosis                                             | 51,972<br>(48,134 - 56,127)                | 7,740<br>(6,427 - 9,197)                   | 10,489<br>(9,298 - 11,793)              | 24,150<br>(22,068 - 26,325)                | 7,181<br>(6,595 - 7,860)                   | 2,413<br>(2,241 - 2,615)                   |
| Dengue                                                            | 292,515<br>(143,178 - 370,104)             | 96,634<br>(44,408 - 137,351)               | 96,998<br>(37,964 - 133,812)            | 80,057<br>(50,077 - 100,468)               | 11,765<br>(7,586 - 14,160)                 | 4,061<br>(2,854 - 5,025)                   |
| Yellow fever                                                      | 9,032<br>(7,136 - 11,477)                  | 1,313<br>(743 - 2,373)                     | 2,425<br>(1,512 - 4,076)                | 4,672<br>(3,408 - 6,635)                   | 533<br>(315 - 887)                         | 89<br>(39 - 196)                           |
| Rabies                                                            | 483,943<br>(317,001 - 636,299)             | 96,413<br>(59,281 - 150,191)               | 137,073<br>(87,954 - 192,659)           | 171,375<br>(111,335 - 225,626)             | 67,087<br>(46,292 - 99,559)                | 11,994<br>(8,139 - 17,805)                 |
| Intestinal nematode infections                                    | 171,382<br>(147,419 - 198,876)             | 135,172<br>(112,122 - 161,752)             | 23,601<br>(18,619 - 29,075)             | 8,642<br>(6,421 - 11,273)                  | 2,611<br>(1,803 - 3,641)                   | 1,356<br>(930 - 1,874)                     |

Web Table 30 - Global YLLs with 95% UI by age, sex, and cause in 2013

| Cause                                                            | Females, All Ages                          | Females, 0-4 Years                      | Females, 5-14 Years                  | Females, 15-49 Years                    | Females, 50-69 Years                       | Females, 70-80 Years                       |
|------------------------------------------------------------------|--------------------------------------------|-----------------------------------------|--------------------------------------|-----------------------------------------|--------------------------------------------|--------------------------------------------|
| Ascariasis                                                       | 171,382<br>(147,419 - 198,876)             | 135,172<br>(112,122 - 161,752)          | 23,601<br>(18,619 - 29,075)          | 8,642<br>(6,421 - 11,273)               | 2,611<br>(1,803 - 3,641)                   | 1,356<br>(930 - 1,874)                     |
| Other neglected tropical diseases                                | 433,058<br>(331,673 - 567,680)             | 253,222<br>(166,225 - 374,991)          | 34,075<br>(23,187 - 45,363)          | 92,648<br>(74,665 - 115,043)            | 34,531<br>(25,506 - 49,180)                | 18,582<br>(14,057 - 24,547)                |
| Maternal disorders                                               | 16,686,010<br>(14,812,644 - 18,667,148)    | --                                      | 83,633<br>(59,593 - 118,889)         | 16,602,377<br>(14,737,888 - 18,581,293) | --                                         | --                                         |
| Maternal hemorrhage                                              | 2,492,131<br>(2,153,626 - 2,857,569)       | --                                      | 7,871<br>(5,551 - 10,998)            | 2,484,259<br>(2,146,384 - 2,848,088)    | --                                         | --                                         |
| Maternal sepsis and other maternal infections                    | 1,348,211<br>(1,135,214 - 1,602,483)       | --                                      | 7,123<br>(4,903 - 9,972)             | 1,341,089<br>(1,128,095 - 1,594,300)    | --                                         | --                                         |
| Maternal hypertensive disorders                                  | 1,688,497<br>(1,469,302 - 1,932,929)       | --                                      | 9,952<br>(7,074 - 13,706)            | 1,678,544<br>(1,461,066 - 1,922,410)    | --                                         | --                                         |
| Maternal obstructed labor                                        | 1,071,965<br>(928,638 - 1,248,101)         | --                                      | 3,923<br>(2,708 - 5,701)             | 1,068,042<br>(925,400 - 1,243,936)      | --                                         | --                                         |
| Maternal abortive outcome                                        | 2,474,055<br>(2,167,325 - 2,839,650)       | --                                      | 13,251<br>(9,071 - 19,468)           | 2,460,805<br>(2,153,191 - 2,821,575)    | --                                         | --                                         |
| Indirect maternal deaths                                         | 1,790,846<br>(1,534,855 - 2,074,716)       | --                                      | 6,913<br>(4,838 - 9,829)             | 1,783,933<br>(1,527,940 - 2,067,361)    | --                                         | --                                         |
| Late maternal deaths                                             | 2,481,752<br>(2,030,447 - 2,992,176)       | --                                      | 19,232<br>(13,174 - 27,890)          | 2,462,520<br>(2,011,103 - 2,967,942)    | --                                         | --                                         |
| Maternal deaths aggravated by HIV/AIDS                           | 117,245<br>(72,648 - 162,744)              | --                                      | --                                   | 117,245<br>(72,648 - 162,744)           | --                                         | --                                         |
| Other maternal disorders                                         | 3,188,325<br>(2,753,847 - 3,657,602)       | --                                      | 15,211<br>(10,371 - 21,723)          | 3,173,114<br>(2,741,318 - 3,643,224)    | --                                         | --                                         |
| Neonatal disorders                                               | 76,053,801<br>(70,307,730 - 82,156,240)    | 76,053,801<br>(70,307,730 - 82,156,240) | --                                   | --                                      | --                                         | --                                         |
| Neonatal preterm birth complications                             | 28,170,253<br>(20,553,596 - 35,541,459)    | 28,170,253<br>(20,553,596 - 35,541,459) | --                                   | --                                      | --                                         | --                                         |
| Neonatal encephalopathy due to birth asphyxia and trauma         | 24,412,284<br>(19,205,286 - 29,931,452)    | 24,412,284<br>(19,205,286 - 29,931,452) | --                                   | --                                      | --                                         | --                                         |
| Neonatal sepsis and other neonatal infections                    | 12,173,802<br>(7,098,363 - 17,538,032)     | 12,173,802<br>(7,098,363 - 17,538,032)  | --                                   | --                                      | --                                         | --                                         |
| Hemolytic disease and other neonatal jaundice                    | 624,198<br>(351,684 - 1,082,447)           | 624,198<br>(351,684 - 1,082,447)        | --                                   | --                                      | --                                         | --                                         |
| Other neonatal disorders                                         | 10,673,264<br>(8,185,185 - 13,975,271)     | 10,673,264<br>(8,185,185 - 13,975,271)  | --                                   | --                                      | --                                         | --                                         |
| Nutritional deficiencies                                         | 16,048,625<br>(13,228,174 - 18,572,101)    | 10,640,419<br>(8,426,954 - 12,861,057)  | 854,288<br>(679,037 - 1,021,137)     | 2,203,906<br>(1,812,746 - 2,547,565)    | 1,102,718<br>(868,875 - 1,269,142)         | 1,247,294<br>(1,029,502 - 1,455,791)       |
| Protein-energy malnutrition                                      | 11,738,116<br>(8,802,412 - 14,307,284)     | 9,099,751<br>(6,477,561 - 11,480,343)   | 592,729<br>(389,901 - 776,632)       | 788,729<br>(490,914 - 1,177,210)        | 474,655<br>(317,438 - 688,386)             | 782,252<br>(503,200 - 1,031,767)           |
| Iodine deficiency                                                | 60,671<br>(29,928 - 131,131)               | 27,210<br>(6,258 - 77,502)              | 4,988<br>(1,528 - 13,200)            | 15,346<br>(5,855 - 39,407)              | 8,212<br>(2,751 - 24,760)                  | 4,915<br>(1,507 - 14,957)                  |
| Iron-deficiency anemia                                           | 3,903,217<br>(2,111,013 - 6,192,165)       | 1,397,536<br>(418,647 - 3,244,253)      | 242,520<br>(115,715 - 392,750)       | 1,335,309<br>(881,546 - 1,652,571)      | 521,727<br>(274,349 - 692,955)             | 406,124<br>(214,188 - 632,257)             |
| Other nutritional deficiencies                                   | 346,622<br>(214,789 - 696,209)             | 115,922<br>(47,144 - 289,716)           | 14,051<br>(7,653 - 28,490)           | 64,521<br>(38,556 - 142,546)            | 98,124<br>(50,770 - 194,140)               | 54,003<br>(31,988 - 100,536)               |
| Other communicable, maternal, neonatal, and nutritional diseases | 11,160,841<br>(8,555,045 - 14,873,623)     | 7,543,243<br>(5,070,022 - 10,935,825)   | 835,481<br>(625,928 - 1,108,643)     | 1,610,793<br>(1,375,420 - 1,881,604)    | 807,918<br>(649,594 - 1,030,982)           | 363,406<br>(274,063 - 494,600)             |
| Sexually transmitted diseases excluding HIV                      | 5,916,442<br>(3,519,167 - 9,111,687)       | 5,292,048<br>(3,020,699 - 8,302,221)    | 359,223<br>(206,090 - 579,327)       | 160,359<br>(128,936 - 193,153)          | 58,997<br>(42,647 - 84,209)                | 45,814<br>(26,710 - 89,956)                |
| Syphilis                                                         | 5,774,892<br>(3,375,205 - 8,977,506)       | 5,292,048<br>(3,020,699 - 8,302,221)    | 352,931<br>(200,485 - 573,296)       | 64,363<br>(51,615 - 77,696)             | 31,921<br>(22,947 - 45,107)                | 33,629<br>(19,943 - 64,627)                |
| Chlamydial infection                                             | 45,805<br>(37,933 - 55,301)                | --                                      | 2,310<br>(1,767 - 3,198)             | 32,098<br>(25,809 - 38,636)             | 8,248<br>(5,976 - 11,982)                  | 3,150<br>(1,736 - 6,399)                   |
| Gonococcal infection                                             | 51,414<br>(42,408 - 62,386)                | --                                      | 1,981<br>(1,515 - 2,743)             | 32,966<br>(26,508 - 39,716)             | 10,627<br>(7,695 - 15,199)                 | 5,840<br>(3,311 - 11,733)                  |
| Other sexually transmitted diseases                              | 44,331<br>(36,754 - 53,471)                | --                                      | 2,003<br>(1,532 - 2,773)             | 30,932<br>(24,797 - 37,260)             | 8,202<br>(5,943 - 11,792)                  | 3,195<br>(1,701 - 6,701)                   |
| Hepatitis                                                        | 2,496,238<br>(2,120,871 - 3,254,854)       | 699,003<br>(484,894 - 1,129,107)        | 263,826<br>(195,472 - 368,275)       | 1,023,580<br>(865,028 - 1,251,321)      | 386,438<br>(326,282 - 468,421)             | 123,392<br>(105,207 - 146,748)             |
| Acute hepatitis A                                                | 489,010<br>(174,805 - 871,623)             | 330,844<br>(122,540 - 613,386)          | 58,195<br>(19,360 - 113,349)         | 78,722<br>(21,984 - 158,570)            | 18,200<br>(5,120 - 38,142)                 | 3,050<br>(764 - 6,881)                     |
| Acute hepatitis B                                                | 850,057<br>(579,883 - 1,184,763)           | 265,974<br>(120,986 - 495,523)          | 32,672<br>(16,370 - 56,549)          | 197,696<br>(117,019 - 306,223)          | 253,277<br>(191,245 - 320,260)             | 100,440<br>(81,478 - 122,164)              |
| Acute hepatitis C                                                | 42,099<br>(8,741 - 98,056)                 | --                                      | 6,142<br>(1,143 - 15,235)            | 18,136<br>(3,604 - 44,411)              | 13,183<br>(2,845 - 29,852)                 | 4,638<br>(968 - 10,348)                    |
| Acute hepatitis E                                                | 1,115,072<br>(818,730 - 1,550,798)         | 102,186<br>(40,055 - 224,381)           | 166,818<br>(107,882 - 253,872)       | 729,026<br>(559,127 - 938,815)          | 101,779<br>(54,843 - 164,134)              | 15,264<br>(7,162 - 28,072)                 |
| Other infectious diseases                                        | 2,748,162<br>(1,539,396 - 4,578,456)       | 1,552,192<br>(702,067 - 3,228,051)      | 212,432<br>(109,553 - 405,634)       | 426,855<br>(265,086 - 601,026)          | 362,483<br>(234,880 - 562,822)             | 194,201<br>(114,214 - 320,723)             |
| Non-communicable diseases                                        | 337,371,183<br>(320,608,937 - 354,008,281) | 35,413,702<br>(29,400,689 - 43,467,056) | 7,417,333<br>(6,454,521 - 8,710,801) | 68,244,021<br>(63,472,740 - 73,187,967) | 117,518,971<br>(110,796,973 - 124,354,566) | 108,777,157<br>(105,453,961 - 111,900,200) |
| Neoplasms                                                        | 79,840,212<br>(74,776,299 - 84,582,189)    | 1,809,545<br>(1,492,970 - 2,194,824)    | 1,570,840<br>(1,377,972 - 1,751,081) | 22,418,245<br>(20,906,397 - 23,960,264) | 36,949,249<br>(34,433,766 - 39,445,282)    | 17,092,334<br>(15,738,360 - 17,932,875)    |
| Esophageal cancer                                                | 2,738,738<br>(2,416,195 - 3,063,479)       | --                                      | --                                   | 529,570<br>(441,334 - 628,061)          | 1,464,150<br>(1,267,626 - 1,653,349)       | 745,018<br>(666,614 - 842,293)             |
| Stomach cancer                                                   | 6,130,477<br>(5,534,208 - 6,780,964)       | --                                      | --                                   | 1,514,361<br>(1,363,542 - 1,677,242)    | 2,857,121<br>(2,545,768 - 3,192,862)       | 1,758,995<br>(1,566,185 - 2,001,529)       |
| Liver cancer                                                     | 5,654,545<br>(5,127,157 - 6,249,606)       | --                                      | 48,999<br>(39,817 - 59,894)          | 1,459,974<br>(1,291,187 - 1,631,863)    | 2,859,991<br>(2,546,223 - 3,218,050)       | 1,285,581<br>(1,180,866 - 1,422,672)       |

Web Table 30 - Global YLLs with 95% UI by age, sex, and cause in 2013

| Cause                                | Females, All Ages                          | Females, 0-4 Years                   | Females, 5-14 Years                | Females, 15-49 Years                    | Females, 50-69 Years                    | Females, 70-80 Years                    |
|--------------------------------------|--------------------------------------------|--------------------------------------|------------------------------------|-----------------------------------------|-----------------------------------------|-----------------------------------------|
| Liver cancer due to hepatitis B      | 1,879,704<br>(1,665,309 - 2,125,859)       | --                                   | 13,566<br>(10,418 - 17,224)        | 590,070<br>(517,815 - 667,522)          | 968,919<br>(840,301 - 1,123,150)        | 307,150<br>(273,545 - 349,021)          |
| Liver cancer due to hepatitis C      | 2,142,861<br>(1,937,543 - 2,407,516)       | --                                   | 5,073<br>(3,852 - 6,737)           | 412,269<br>(360,818 - 472,677)          | 1,103,163<br>(977,037 - 1,268,735)      | 622,355<br>(563,509 - 687,162)          |
| Liver cancer due to alcohol use      | 438,871<br>(392,131 - 496,882)             | --                                   | --                                 | 60,895<br>(52,346 - 71,123)             | 222,317<br>(193,840 - 261,082)          | 155,659<br>(137,555 - 178,066)          |
| Liver cancer due to other causes     | 1,193,108<br>(1,037,156 - 1,354,165)       | --                                   | 30,360<br>(24,234 - 38,230)        | 396,741<br>(342,270 - 453,216)          | 565,591<br>(482,856 - 658,500)          | 200,417<br>(175,520 - 231,921)          |
| Larynx cancer                        | 274,399<br>(171,261 - 435,376)             | --                                   | --                                 | 68,115<br>(39,797 - 110,541)            | 145,833<br>(91,970 - 229,892)           | 60,450<br>(39,049 - 94,282)             |
| Tracheal, bronchus and lung cancer   | 9,693,708<br>(8,751,621 - 10,393,391)      | --                                   | --                                 | 1,604,786<br>(1,459,976 - 1,800,880)    | 5,384,845<br>(4,876,902 - 5,843,365)    | 2,704,077<br>(2,312,741 - 2,888,602)    |
| Breast cancer                        | 12,014,929<br>(10,988,778 - 13,264,479)    | --                                   | --                                 | 4,467,318<br>(4,114,210 - 4,894,189)    | 5,852,729<br>(5,332,426 - 6,508,026)    | 1,694,882<br>(1,376,866 - 1,867,666)    |
| Cervical cancer                      | 6,670,920<br>(5,581,918 - 7,294,633)       | --                                   | --                                 | 2,723,337<br>(2,259,352 - 3,009,762)    | 3,204,298<br>(2,593,389 - 3,560,513)    | 743,285<br>(663,344 - 835,913)          |
| Uterine cancer                       | 1,467,211<br>(1,132,415 - 1,722,553)       | --                                   | --                                 | 305,730<br>(217,288 - 377,347)          | 826,249<br>(627,056 - 976,445)          | 335,233<br>(270,972 - 392,053)          |
| Prostate cancer                      | --                                         | --                                   | --                                 | --                                      | --                                      | --                                      |
| Colon and rectum cancer              | 6,435,175<br>(6,039,738 - 6,780,399)       | --                                   | --                                 | 1,327,882<br>(1,235,935 - 1,419,028)    | 2,990,234<br>(2,780,217 - 3,177,053)    | 2,117,059<br>(1,981,236 - 2,252,612)    |
| Lip and oral cavity cancer           | 1,132,326<br>(856,116 - 1,457,068)         | --                                   | --                                 | 361,194<br>(260,128 - 461,410)          | 556,289<br>(424,897 - 724,413)          | 214,843<br>(171,202 - 270,953)          |
| Nasopharynx cancer                   | 518,761<br>(392,873 - 752,045)             | --                                   | 12,873<br>(8,877 - 18,997)         | 235,023<br>(176,492 - 338,504)          | 220,545<br>(165,075 - 327,546)          | 50,320<br>(40,319 - 72,591)             |
| Other pharynx cancer                 | 419,804<br>(354,195 - 491,717)             | --                                   | --                                 | 132,721<br>(101,760 - 168,482)          | 229,426<br>(188,176 - 276,489)          | 57,657<br>(49,626 - 66,347)             |
| Gallbladder and biliary tract cancer | 1,592,497<br>(1,277,935 - 1,805,012)       | --                                   | --                                 | 288,364<br>(214,618 - 334,944)          | 811,059<br>(647,136 - 923,968)          | 493,074<br>(396,293 - 577,076)          |
| Pancreatic cancer                    | 2,940,016<br>(2,738,266 - 3,089,933)       | --                                   | --                                 | 381,508<br>(352,047 - 408,131)          | 1,515,494<br>(1,397,905 - 1,610,050)    | 1,043,013<br>(966,260 - 1,104,965)      |
| Malignant skin melanoma              | 596,803<br>(485,829 - 701,620)             | --                                   | --                                 | 233,669<br>(195,899 - 276,312)          | 256,576<br>(203,164 - 302,260)          | 106,558<br>(77,938 - 124,450)           |
| Non-melanoma skin cancer             | 261,190<br>(202,474 - 349,997)             | --                                   | --                                 | 67,045<br>(48,817 - 97,578)             | 83,263<br>(62,137 - 112,881)            | 110,882<br>(88,876 - 144,046)           |
| Ovarian cancer                       | 3,921,624<br>(3,667,019 - 4,250,082)       | --                                   | --                                 | 1,164,381<br>(1,066,072 - 1,292,104)    | 2,122,896<br>(1,961,667 - 2,313,276)    | 634,347<br>(579,882 - 684,957)          |
| Testicular cancer                    | --                                         | --                                   | --                                 | --                                      | --                                      | --                                      |
| Kidney cancer                        | 1,013,991<br>(907,900 - 1,118,579)         | 70,688<br>(55,600 - 89,359)          | 34,694<br>(28,911 - 41,473)        | 184,756<br>(168,254 - 206,472)          | 463,557<br>(410,603 - 522,536)          | 260,296<br>(211,579 - 302,285)          |
| Bladder cancer                       | 698,106<br>(546,229 - 878,563)             | --                                   | --                                 | 113,707<br>(83,810 - 151,819)           | 301,434<br>(233,741 - 389,173)          | 282,965<br>(219,580 - 364,605)          |
| Brain and nervous system cancer      | 2,659,062<br>(2,385,135 - 2,897,109)       | 123,768<br>(102,853 - 147,281)       | 235,632<br>(205,177 - 264,217)     | 1,040,768<br>(939,270 - 1,139,707)      | 957,178<br>(852,499 - 1,079,183)        | 301,716<br>(246,565 - 327,917)          |
| Thyroid cancer                       | 424,098<br>(339,158 - 520,387)             | --                                   | 3,904<br>(2,529 - 5,562)           | 91,805<br>(73,512 - 125,542)            | 203,068<br>(156,672 - 245,959)          | 125,320<br>(101,511 - 151,518)          |
| Mesothelioma                         | 229,504<br>(200,520 - 268,803)             | --                                   | --                                 | 40,314<br>(35,922 - 46,127)             | 156,126<br>(133,174 - 183,860)          | 33,064<br>(27,007 - 41,324)             |
| Hodgkin lymphoma                     | 376,617<br>(319,559 - 502,274)             | 90,178<br>(51,031 - 162,321)         | 26,627<br>(20,856 - 35,413)        | 151,966<br>(135,586 - 200,809)          | 74,431<br>(64,849 - 103,833)            | 33,415<br>(29,845 - 42,387)             |
| Non-Hodgkin lymphoma                 | 2,330,333<br>(1,695,196 - 2,714,424)       | 222,854<br>(150,650 - 350,444)       | 163,886<br>(103,260 - 212,876)     | 697,256<br>(494,180 - 813,702)          | 787,671<br>(574,832 - 925,555)          | 458,666<br>(309,303 - 529,103)          |
| Multiple myeloma                     | 698,534<br>(555,407 - 874,691)             | --                                   | --                                 | 111,477<br>(90,266 - 136,136)           | 363,763<br>(287,148 - 465,878)          | 223,294<br>(170,968 - 288,696)          |
| Leukemia                             | 3,861,492<br>(3,562,627 - 4,147,242)       | 347,940<br>(289,829 - 407,199)       | 548,548<br>(478,808 - 611,827)     | 1,658,841<br>(1,496,436 - 1,806,879)    | 875,624<br>(800,386 - 958,965)          | 430,539<br>(374,456 - 467,168)          |
| Other neoplasms                      | 5,085,353<br>(4,048,366 - 5,923,687)       | 954,117<br>(683,630 - 1,277,324)     | 495,678<br>(366,978 - 614,133)     | 1,462,377<br>(1,220,285 - 1,785,540)    | 1,385,396<br>(1,151,116 - 1,612,388)    | 787,785<br>(638,021 - 885,601)          |
| Cardiovascular diseases              | 128,901,679<br>(113,733,590 - 141,668,251) | 2,160,399<br>(1,728,831 - 2,954,570) | 1,085,692<br>(871,399 - 1,516,061) | 20,634,883<br>(16,697,405 - 24,152,024) | 46,938,949<br>(40,214,013 - 51,910,706) | 58,081,755<br>(53,890,620 - 62,255,879) |
| Rheumatic heart disease              | 4,153,273<br>(3,007,909 - 5,841,915)       | 74,783<br>(44,346 - 136,523)         | 199,438<br>(141,643 - 299,428)     | 1,792,427<br>(1,252,624 - 2,468,348)    | 1,368,030<br>(997,480 - 2,031,808)      | 718,595<br>(511,066 - 994,324)          |
| Ischemic heart disease               | 54,856,172<br>(44,722,426 - 63,555,663)    | 239,571<br>(144,094 - 540,623)       | 199,836<br>(134,865 - 378,791)     | 7,899,579<br>(5,696,854 - 10,125,227)   | 19,930,126<br>(15,539,990 - 23,502,852) | 26,587,060<br>(22,749,010 - 29,694,434) |
| Cerebrovascular disease              | 48,640,533<br>(41,191,934 - 55,212,083)    | 501,006<br>(390,731 - 715,974)       | 321,636<br>(249,787 - 457,200)     | 6,689,809<br>(5,247,588 - 7,907,228)    | 18,289,769<br>(14,991,622 - 21,004,200) | 22,838,314<br>(19,937,266 - 26,207,580) |
| Ischemic stroke                      | 20,957,397<br>(16,319,223 - 24,176,424)    | 62,295<br>(41,100 - 103,458)         | 40,356<br>(27,015 - 65,065)        | 1,012,975<br>(657,925 - 1,307,160)      | 6,050,284<br>(4,489,436 - 7,199,264)    | 13,791,487<br>(11,059,033 - 15,672,418) |
| Hemorrhagic stroke                   | 27,683,136<br>(23,225,629 - 33,270,716)    | 438,711<br>(345,675 - 622,405)       | 281,279<br>(218,132 - 405,529)     | 5,676,834<br>(4,467,902 - 6,776,743)    | 12,239,485<br>(10,041,624 - 14,507,431) | 9,046,827<br>(7,843,210 - 11,676,063)   |
| Hypertensive heart disease           | 8,530,077<br>(6,243,692 - 10,200,869)      | 54,101<br>(32,499 - 89,287)          | 28,480<br>(19,469 - 40,222)        | 1,140,477<br>(779,066 - 1,428,013)      | 3,219,745<br>(2,273,860 - 4,022,264)    | 4,087,275<br>(3,052,132 - 4,842,985)    |
| Cardiomyopathy and myocarditis       | 4,423,638<br>(3,370,263 - 5,322,381)       | 693,215<br>(473,614 - 956,990)       | 181,391<br>(127,474 - 243,901)     | 1,344,153<br>(917,794 - 1,618,964)      | 1,199,923<br>(839,852 - 1,478,722)      | 1,004,956<br>(818,477 - 1,227,610)      |
| Atrial fibrillation and flutter      | 577,673<br>(476,023 - 677,479)             | --                                   | --                                 | 15,979<br>(13,012 - 19,023)             | 78,809<br>(63,466 - 95,843)             | 482,884<br>(397,234 - 573,187)          |
| Aortic aneurysm                      | 819,431<br>(497,067 - 1,190,985)           | --                                   | --                                 | 151,502<br>(88,481 - 232,244)           | 300,789<br>(181,732 - 447,483)          | 367,140<br>(224,867 - 531,716)          |

Web Table 30 - Global YLLs with 95% UI by age, sex, and cause in 2013

| Cause                                               | Females, All Ages                       | Females, 0-4 Years                   | Females, 5-14 Years            | Females, 15-49 Years                 | Females, 50-69 Years                   | Females, 70-80 Years                    |
|-----------------------------------------------------|-----------------------------------------|--------------------------------------|--------------------------------|--------------------------------------|----------------------------------------|-----------------------------------------|
| Peripheral vascular disease                         | 204,634<br>(171,880 - 236,005)          | --                                   | --                             | 8,628<br>(7,026 - 10,670)            | 50,809<br>(41,525 - 62,274)            | 145,196<br>(119,729 - 167,881)          |
| Endocarditis                                        | 771,258<br>(506,707 - 1,093,452)        | 151,391<br>(83,769 - 242,192)        | 34,598<br>(22,773 - 56,675)    | 255,490<br>(155,741 - 367,150)       | 180,358<br>(113,250 - 266,829)         | 149,420<br>(95,093 - 216,448)           |
| Other cardiovascular and circulatory diseases       | 5,924,990<br>(4,853,738 - 7,706,048)    | 446,333<br>(328,785 - 711,825)       | 120,314<br>(89,587 - 184,889)  | 1,336,840<br>(1,047,943 - 1,809,387) | 2,320,590<br>(1,890,976 - 3,031,306)   | 1,700,913<br>(1,396,435 - 2,111,729)    |
| Chronic respiratory diseases                        | 30,051,451<br>(26,978,499 - 35,305,579) | 1,422,610<br>(1,188,908 - 1,820,583) | 357,611<br>(304,613 - 434,701) | 4,064,031<br>(3,518,010 - 4,824,137) | 11,313,650<br>(9,746,205 - 13,647,668) | 12,893,548<br>(11,730,060 - 14,948,409) |
| Chronic obstructive pulmonary disease               | 17,498,116<br>(14,454,534 - 20,982,399) | 563,341<br>(419,278 - 756,854)       | 98,078<br>(65,100 - 134,096)   | 1,510,323<br>(1,116,902 - 1,988,339) | 6,468,651<br>(5,104,350 - 8,101,681)   | 8,857,722<br>(7,531,742 - 10,424,705)   |
| Pneumoconiosis                                      | 2,175,201<br>(1,423,785 - 3,121,017)    | 9,124<br>(6,300 - 13,270)            | 7,086<br>(5,403 - 8,996)       | 300,105<br>(198,213 - 426,537)       | 1,135,481<br>(705,439 - 1,714,770)     | 723,406<br>(439,471 - 1,096,374)        |
| Silicosis                                           | 97,469<br>(52,111 - 181,935)            | 1,539<br>(1,024 - 2,529)             | 1,392<br>(1,068 - 1,946)       | 23,128<br>(12,599 - 43,766)          | 50,910<br>(23,872 - 103,135)           | 20,501<br>(10,149 - 40,701)             |
| Asbestosis                                          | 85,668<br>(49,006 - 145,086)            | 1,598<br>(1,080 - 2,541)             | 1,363<br>(1,058 - 1,799)       | 20,697<br>(11,920 - 36,177)          | 44,427<br>(21,823 - 82,378)            | 17,583<br>(9,158 - 30,825)              |
| Coal workers pneumoconiosis                         | 79,866<br>(46,286 - 136,947)            | 1,552<br>(1,047 - 2,475)             | 1,407<br>(1,056 - 1,840)       | 21,269<br>(12,669 - 36,503)          | 40,441<br>(20,209 - 78,010)            | 15,198<br>(6,896 - 31,219)              |
| Other pneumoconiosis                                | 1,912,198<br>(1,248,784 - 2,766,383)    | 4,436<br>(2,892 - 6,557)             | 2,924<br>(2,042 - 3,832)       | 235,011<br>(147,965 - 343,647)       | 999,703<br>(619,047 - 1,502,357)       | 670,124<br>(401,184 - 1,024,288)        |
| Asthma                                              | 5,469,349<br>(3,861,021 - 8,372,791)    | 362,034<br>(266,967 - 484,085)       | 175,993<br>(138,147 - 230,724) | 1,493,244<br>(1,123,104 - 2,050,943) | 2,017,101<br>(1,313,601 - 3,290,488)   | 1,420,977<br>(929,308 - 2,427,070)      |
| Interstitial lung disease and pulmonary sarcoidosis | 3,536,885<br>(2,290,212 - 5,054,473)    | 30,637<br>(14,460 - 69,656)          | 20,351<br>(10,335 - 48,712)    | 472,286<br>(312,573 - 697,029)       | 1,452,731<br>(838,132 - 2,109,603)     | 1,560,880<br>(1,002,087 - 2,272,890)    |
| Other chronic respiratory diseases                  | 1,371,900<br>(1,076,715 - 1,806,086)    | 457,473<br>(354,152 - 636,462)       | 56,104<br>(40,480 - 80,055)    | 288,074<br>(230,746 - 382,610)       | 239,686<br>(169,063 - 346,236)         | 330,563<br>(241,145 - 462,335)          |
| Cirrhosis                                           | 10,608,828<br>(9,915,452 - 11,333,125)  | 394,758<br>(283,652 - 569,447)       | 312,659<br>(255,450 - 377,331) | 3,670,095<br>(3,343,474 - 4,024,693) | 4,545,478<br>(4,235,118 - 4,896,026)   | 1,685,837<br>(1,569,780 - 1,845,856)    |
| Cirrhosis due to hepatitis B                        | 2,964,241<br>(2,581,991 - 3,324,076)    | 15,441<br>(9,804 - 26,846)           | 44,222<br>(29,827 - 65,567)    | 1,026,729<br>(864,864 - 1,208,244)   | 1,353,571<br>(1,182,595 - 1,531,367)   | 524,278<br>(461,732 - 596,836)          |
| Cirrhosis due to hepatitis C                        | 3,730,084<br>(3,342,588 - 4,086,330)    | 24,334<br>(12,750 - 43,423)          | 39,462<br>(28,347 - 52,251)    | 1,202,912<br>(1,076,967 - 1,347,500) | 1,807,407<br>(1,586,886 - 1,997,784)   | 655,970<br>(567,814 - 727,237)          |
| Cirrhosis due to alcohol use                        | 1,566,699<br>(1,357,792 - 1,776,993)    | --                                   | --                             | 407,793<br>(328,656 - 476,898)       | 799,520<br>(690,530 - 923,738)         | 359,386<br>(312,233 - 418,326)          |
| Cirrhosis due to other causes                       | 2,347,804<br>(1,980,063 - 2,746,662)    | 354,984<br>(253,210 - 515,774)       | 228,975<br>(183,086 - 281,804) | 1,032,661<br>(861,951 - 1,229,563)   | 584,980<br>(451,891 - 724,351)         | 146,203<br>(117,069 - 178,976)          |
| Digestive diseases                                  | 11,646,478<br>(10,316,008 - 13,411,088) | 662,263<br>(526,071 - 851,238)       | 600,034<br>(473,524 - 730,716) | 3,754,907<br>(3,166,594 - 4,421,515) | 3,589,776<br>(3,116,578 - 4,241,115)   | 3,039,497<br>(2,696,817 - 3,472,970)    |
| Peptic ulcer disease                                | 2,401,057<br>(1,771,177 - 3,003,393)    | 48,875<br>(28,525 - 74,444)          | 71,434<br>(45,478 - 105,131)   | 675,610<br>(466,685 - 886,525)       | 911,780<br>(655,418 - 1,174,505)       | 693,358<br>(524,506 - 873,752)          |
| Gastritis and duodenitis                            | 643,849<br>(331,028 - 1,226,354)        | 39,931<br>(16,988 - 71,573)          | 49,218<br>(25,788 - 100,763)   | 202,868<br>(103,913 - 413,505)       | 199,805<br>(92,893 - 387,434)          | 152,028<br>(79,858 - 295,907)           |
| Appendicitis                                        | 1,054,726<br>(732,261 - 1,379,196)      | 102,342<br>(65,272 - 165,852)        | 105,861<br>(73,425 - 148,658)  | 494,227<br>(326,356 - 668,278)       | 216,622<br>(141,651 - 306,210)         | 135,673<br>(79,249 - 194,940)           |
| Paralytic ileus and intestinal obstruction          | 2,684,012<br>(1,708,188 - 4,050,182)    | 179,202<br>(114,946 - 273,801)       | 150,629<br>(84,467 - 211,659)  | 958,518<br>(619,191 - 1,488,484)     | 752,066<br>(475,907 - 1,172,925)       | 643,597<br>(398,420 - 993,582)          |
| Inguinal, femoral, and abdominal hernia             | 246,102<br>(158,715 - 441,901)          | 15,459<br>(8,761 - 25,961)           | 29,312<br>(14,383 - 79,642)    | 57,240<br>(35,825 - 106,502)         | 66,528<br>(44,910 - 120,615)           | 77,562<br>(44,122 - 127,327)            |
| Inflammatory bowel disease                          | 723,948<br>(497,716 - 1,064,848)        | 121,196<br>(75,244 - 191,687)        | 54,719<br>(32,566 - 80,742)    | 267,472<br>(174,735 - 390,853)       | 150,860<br>(105,640 - 232,641)         | 129,700<br>(89,732 - 200,001)           |
| Vascular intestinal disorders                       | 586,741<br>(323,272 - 973,746)          | 2,205<br>(23 - 10,723)               | 5,017<br>(40 - 24,157)         | 77,570<br>(42,777 - 152,027)         | 183,787<br>(102,153 - 312,380)         | 318,162<br>(171,246 - 503,049)          |
| Gallbladder and biliary diseases                    | 1,051,336<br>(770,473 - 1,291,158)      | 30,547<br>(19,355 - 43,507)          | 30,976<br>(15,219 - 41,699)    | 253,346<br>(185,276 - 317,294)       | 368,879<br>(269,516 - 462,881)         | 367,588<br>(270,670 - 459,875)          |
| Pancreatitis                                        | 1,158,897<br>(724,603 - 1,601,541)      | 13,137<br>(6,228 - 21,834)           | 33,919<br>(17,499 - 55,391)    | 454,926<br>(291,573 - 656,970)       | 430,420<br>(260,626 - 618,564)         | 226,496<br>(139,038 - 316,411)          |
| Other digestive diseases                            | 1,095,810<br>(895,400 - 1,326,297)      | 109,369<br>(74,234 - 153,529)        | 68,947<br>(50,986 - 91,409)    | 313,131<br>(251,404 - 386,815)       | 309,029<br>(249,737 - 386,173)         | 295,333<br>(234,733 - 361,888)          |
| Neurological disorders                              | 11,753,389<br>(10,718,637 - 12,593,003) | 775,345<br>(578,794 - 1,040,409)     | 385,096<br>(283,909 - 488,604) | 1,657,954<br>(1,366,936 - 1,953,258) | 1,726,597<br>(1,566,641 - 1,854,431)   | 7,208,398<br>(6,615,051 - 7,819,409)    |
| Alzheimer disease and other dementias               | 7,510,351<br>(6,927,737 - 8,119,664)    | --                                   | --                             | 9,958<br>(8,107 - 12,117)            | 918,070<br>(840,512 - 994,584)         | 6,582,323<br>(6,058,037 - 7,179,334)    |
| Parkinson disease                                   | 465,621<br>(300,476 - 540,718)          | --                                   | --                             | 15,746<br>(11,986 - 20,464)          | 101,132<br>(71,427 - 128,590)          | 348,742<br>(217,828 - 399,994)          |
| Epilepsy                                            | 2,362,059<br>(1,727,685 - 2,924,157)    | 573,235<br>(374,158 - 836,485)       | 314,074<br>(215,008 - 417,142) | 1,209,680<br>(909,045 - 1,482,741)   | 188,209<br>(140,222 - 232,200)         | 76,860<br>(55,419 - 92,471)             |
| Multiple sclerosis                                  | 340,165<br>(197,594 - 467,371)          | --                                   | --                             | 142,338<br>(91,851 - 219,675)        | 161,399<br>(84,063 - 207,045)          | 36,428<br>(17,209 - 46,404)             |
| Other neurological disorders                        | 1,075,194<br>(1,002,894 - 1,188,582)    | 202,110<br>(174,254 - 240,987)       | 71,022<br>(62,237 - 86,009)    | 280,232<br>(258,741 - 315,145)       | 357,786<br>(328,914 - 388,247)         | 164,045<br>(150,414 - 175,800)          |
| Mental and substance use disorders                  | 2,328,705<br>(1,909,507 - 2,980,031)    | 81,796<br>(46,425 - 116,378)         | 2,673<br>(2,115 - 3,399)       | 1,500,603<br>(1,266,118 - 1,859,446) | 623,365<br>(456,290 - 859,609)         | 120,267<br>(97,866 - 151,292)           |
| Schizophrenia                                       | 197,382<br>(166,780 - 278,954)          | --                                   | --                             | 100,985<br>(84,095 - 144,821)        | 68,337<br>(56,349 - 98,936)            | 28,060<br>(22,801 - 37,774)             |
| Alcohol use disorders                               | 783,937<br>(346,884 - 1,315,145)        | --                                   | --                             | 441,351<br>(194,607 - 743,478)       | 308,482<br>(138,298 - 539,249)         | 34,104<br>(13,966 - 56,884)             |
| Drug use disorders                                  | 1,320,544<br>(1,165,038 - 1,484,525)    | 81,796<br>(46,425 - 116,378)         | --                             | 934,097<br>(818,360 - 1,056,665)     | 246,546<br>(211,397 - 286,688)         | 58,104<br>(52,300 - 66,405)             |
| Opioid use disorders                                | 505,056<br>(439,880 - 569,523)          | 27,783<br>(14,998 - 44,183)          | --                             | 362,906<br>(313,920 - 412,163)       | 92,065<br>(77,161 - 109,080)           | 22,302<br>(19,663 - 25,761)             |

Web Table 30 - Global YLLs with 95% UI by age, sex, and cause in 2013

| Cause                                               | Females, All Ages                       | Females, 0-4 Years                      | Females, 5-14 Years                  | Females, 15-49 Years                 | Females, 50-69 Years                   | Females, 70-80 Years                 |
|-----------------------------------------------------|-----------------------------------------|-----------------------------------------|--------------------------------------|--------------------------------------|----------------------------------------|--------------------------------------|
| Cocaine use disorders                               | 63,965<br>(56,836 - 72,661)             | 2,619<br>(1,819 - 3,504)                | --                                   | 47,467<br>(41,658 - 54,701)          | 10,686<br>(8,855 - 12,742)             | 3,194<br>(2,656 - 3,875)             |
| Amphetamine use disorders                           | 55,462<br>(49,190 - 61,918)             | 3,128<br>(2,165 - 4,411)                | --                                   | 36,887<br>(32,157 - 41,776)          | 11,696<br>(9,748 - 13,912)             | 3,751<br>(3,080 - 4,540)             |
| Other drug use disorders                            | 696,060<br>(615,958 - 791,850)          | 48,267<br>(26,297 - 65,439)             | --                                   | 486,837<br>(425,176 - 560,944)       | 132,098<br>(112,292 - 154,722)         | 28,857<br>(25,309 - 33,519)          |
| Eating disorders                                    | 26,842<br>(23,607 - 30,636)             | --                                      | 2,673<br>(2,115 - 3,399)             | 24,169<br>(21,101 - 27,938)          | --                                     | --                                   |
| Anorexia nervosa                                    | 26,842<br>(23,607 - 30,636)             | --                                      | 2,673<br>(2,115 - 3,399)             | 24,169<br>(21,101 - 27,938)          | --                                     | --                                   |
| Diabetes, urogenital, blood, and endocrine diseases | 35,463,805<br>(31,129,892 - 44,180,423) | 7,027,996<br>(4,079,350 - 13,451,492)   | 1,872,658<br>(1,125,520 - 3,074,285) | 7,899,108<br>(7,095,343 - 9,166,367) | 10,754,194<br>(9,685,241 - 11,806,044) | 7,909,849<br>(7,080,813 - 8,500,230) |
| Diabetes mellitus                                   | 12,732,929<br>(11,665,252 - 13,844,946) | 153,505<br>(92,491 - 244,169)           | 84,366<br>(49,467 - 139,050)         | 2,333,279<br>(2,063,560 - 2,626,712) | 5,930,396<br>(5,373,712 - 6,556,673)   | 4,231,382<br>(3,890,724 - 4,673,668) |
| Acute glomerulonephritis                            | 322,099<br>(215,464 - 426,985)          | 62,021<br>(29,507 - 105,473)            | 42,415<br>(25,355 - 62,300)          | 131,790<br>(95,093 - 169,121)        | 59,195<br>(41,103 - 74,928)            | 26,678<br>(19,786 - 33,762)          |
| Chronic kidney disease                              | 8,416,340<br>(6,636,777 - 9,398,994)    | 312,681<br>(247,356 - 401,959)          | 194,692<br>(155,700 - 232,642)       | 2,277,971<br>(1,868,033 - 2,581,711) | 3,203,610<br>(2,449,669 - 3,637,836)   | 2,427,386<br>(1,823,343 - 2,722,561) |
| Chronic kidney disease due to diabetes mellitus     | 1,560,869<br>(1,171,238 - 1,787,818)    | 8,820<br>(6,275 - 11,005)               | 7,813<br>(5,451 - 9,865)             | 283,648<br>(211,788 - 326,333)       | 781,390<br>(563,341 - 897,124)         | 479,198<br>(359,180 - 558,005)       |
| Chronic kidney disease due to hypertension          | 2,179,490<br>(1,365,475 - 3,024,561)    | 38,678<br>(20,491 - 65,410)             | 22,653<br>(12,478 - 35,910)          | 538,292<br>(341,008 - 762,976)       | 826,078<br>(517,727 - 1,153,390)       | 753,789<br>(478,744 - 1,029,349)     |
| Chronic kidney disease due to glomerulonephritis    | 1,494,682<br>(1,117,260 - 1,972,174)    | 151,607<br>(110,335 - 193,740)          | 80,475<br>(59,206 - 103,848)         | 623,406<br>(470,245 - 803,662)       | 420,639<br>(295,888 - 608,944)         | 218,554<br>(156,356 - 317,895)       |
| Chronic kidney disease due to other causes          | 3,181,300<br>(2,160,641 - 4,017,307)    | 113,576<br>(80,868 - 171,530)           | 83,749<br>(62,168 - 107,330)         | 832,625<br>(620,567 - 1,057,816)     | 1,175,504<br>(764,418 - 1,516,617)     | 975,846<br>(606,648 - 1,237,260)     |
| Urinary diseases and male infertility               | 2,421,100<br>(1,842,795 - 2,766,629)    | 253,311<br>(159,337 - 339,669)          | 84,555<br>(55,809 - 115,017)         | 724,135<br>(561,514 - 865,413)       | 682,890<br>(540,014 - 789,610)         | 676,209<br>(500,297 - 766,845)       |
| Interstitial nephritis and urinary tract infections | 1,859,249<br>(1,398,061 - 2,142,126)    | 202,346<br>(115,305 - 278,947)          | 58,386<br>(34,089 - 80,938)          | 544,229<br>(417,168 - 656,029)       | 507,554<br>(406,437 - 606,512)         | 546,733<br>(410,512 - 628,158)       |
| Urolithiasis                                        | 148,004<br>(110,120 - 219,131)          | --                                      | 8,891<br>(5,971 - 14,004)            | 52,782<br>(39,442 - 81,547)          | 52,464<br>(38,403 - 79,366)            | 33,867<br>(22,047 - 51,633)          |
| Other urinary diseases                              | 413,847<br>(273,017 - 538,391)          | 50,964<br>(33,712 - 79,108)             | 17,278<br>(10,993 - 29,345)          | 127,124<br>(82,904 - 175,349)        | 122,871<br>(70,694 - 159,992)          | 95,610<br>(56,544 - 121,644)         |
| Gynecological diseases                              | 105,927<br>(90,042 - 169,009)           | --                                      | --                                   | 71,239<br>(58,966 - 125,016)         | 16,986<br>(14,278 - 23,234)            | 17,702<br>(12,873 - 24,485)          |
| Uterine fibroids                                    | 22,652<br>(19,020 - 33,581)             | --                                      | --                                   | 12,347<br>(9,785 - 20,672)           | 4,767<br>(3,995 - 6,475)               | 5,537<br>(4,004 - 7,682)             |
| Polycystic ovarian syndrome                         | 4,964<br>(4,145 - 8,842)                | --                                      | --                                   | 4,839<br>(4,019 - 8,659)             | 125<br>(96 - 171)                      | --                                   |
| Endometriosis                                       | 11,854<br>(9,925 - 20,772)              | --                                      | --                                   | 11,352<br>(9,446 - 20,027)           | 502<br>(386 - 686)                     | --                                   |
| Genital prolapse                                    | 16,881<br>(14,415 - 25,890)             | --                                      | --                                   | 9,458<br>(7,866 - 16,670)            | 2,953<br>(2,486 - 4,077)               | 4,470<br>(3,253 - 6,183)             |
| Other gynecological diseases                        | 49,577<br>(42,284 - 79,894)             | --                                      | --                                   | 33,243<br>(27,613 - 58,757)          | 8,639<br>(7,255 - 11,905)              | 7,696<br>(5,621 - 10,639)            |
| Hemoglobinopathies and hemolytic anemias            | 8,323,697<br>(3,692,873 - 16,773,316)   | 5,228,070<br>(2,124,324 - 11,836,888)   | 1,298,718<br>(506,890 - 2,503,256)   | 1,480,539<br>(770,674 - 2,499,400)   | 219,023<br>(121,677 - 346,688)         | 97,347<br>(56,400 - 133,594)         |
| Thalassemias                                        | 773,974<br>(464,178 - 1,067,496)        | 338,042<br>(201,448 - 482,449)          | 140,532<br>(80,093 - 207,698)        | 284,280<br>(158,344 - 400,889)       | 10,116<br>(6,058 - 14,696)             | 1,003<br>(579 - 1,417)               |
| Sickle cell disorders                               | 6,977,315<br>(2,778,473 - 15,161,011)   | 4,691,232<br>(1,766,843 - 11,089,820)   | 1,124,109<br>(380,397 - 2,307,162)   | 1,048,771<br>(493,185 - 2,059,942)   | 107,162<br>(52,513 - 200,264)          | 6,041<br>(3,182 - 8,903)             |
| G6PD deficiency                                     | 97,615<br>(53,500 - 141,395)            | 45,749<br>(23,123 - 77,771)             | 11,164<br>(5,927 - 17,152)           | 31,075<br>(16,797 - 43,559)          | 7,712<br>(4,368 - 11,294)              | 1,915<br>(939 - 3,084)               |
| Other hemoglobinopathies and hemolytic anemias      | 474,793<br>(289,284 - 691,374)          | 153,046<br>(81,697 - 295,151)           | 22,912<br>(13,293 - 33,219)          | 116,413<br>(68,401 - 158,366)        | 94,034<br>(56,645 - 133,032)           | 88,388<br>(51,557 - 122,259)         |
| Endocrine, metabolic, blood, and immune disorders   | 3,141,713<br>(2,267,309 - 3,978,748)    | 1,018,408<br>(738,153 - 1,334,968)      | 167,912<br>(124,774 - 216,291)       | 880,155<br>(645,101 - 1,133,762)     | 642,094<br>(463,504 - 795,182)         | 433,144<br>(292,601 - 513,223)       |
| Musculoskeletal disorders                           | 1,801,932<br>(1,614,342 - 2,036,277)    | --                                      | 120,005<br>(99,912 - 143,699)        | 843,974<br>(746,821 - 957,745)       | 517,955<br>(448,889 - 595,493)         | 319,998<br>(284,402 - 361,876)       |
| Rheumatoid arthritis                                | 479,265<br>(405,519 - 566,655)          | --                                      | 18,928<br>(13,700 - 31,014)          | 101,789<br>(81,973 - 136,719)        | 203,419<br>(167,122 - 243,592)         | 155,130<br>(130,791 - 179,676)       |
| Other musculoskeletal disorders                     | 1,322,666<br>(1,189,507 - 1,512,990)    | --                                      | 101,078<br>(81,096 - 119,099)        | 742,185<br>(658,486 - 836,023)       | 314,536<br>(275,978 - 379,127)         | 164,868<br>(142,815 - 194,404)       |
| Other non-communicable diseases                     | 24,974,705<br>(21,119,613 - 30,118,490) | 21,078,990<br>(17,236,766 - 26,008,726) | 1,110,063<br>(919,826 - 1,329,651)   | 1,800,220<br>(1,508,951 - 2,214,454) | 559,758<br>(437,366 - 654,192)         | 425,673<br>(363,835 - 475,816)       |
| Congenital anomalies                                | 23,061,090<br>(19,263,074 - 28,052,093) | 20,093,463<br>(16,353,637 - 24,986,653) | 1,061,047<br>(873,664 - 1,282,991)   | 1,485,129<br>(1,213,283 - 1,883,342) | 302,405<br>(201,962 - 380,419)         | 119,045<br>(72,656 - 146,997)        |
| Neural tube defects                                 | 2,960,499<br>(1,567,420 - 6,368,659)    | 2,798,445<br>(1,460,507 - 6,020,068)    | 73,734<br>(38,622 - 157,901)         | 78,813<br>(52,386 - 149,476)         | 7,816<br>(5,055 - 14,171)              | 1,691<br>(1,067 - 2,804)             |
| Congenital heart anomalies                          | 11,702,622<br>(9,614,131 - 14,447,608)  | 10,100,577<br>(8,148,673 - 12,721,221)  | 613,137<br>(487,794 - 749,244)       | 765,838<br>(603,517 - 992,205)       | 153,863<br>(89,289 - 217,098)          | 69,207<br>(36,712 - 93,480)          |
| Cleft lip and cleft palate                          | 143,188<br>(60,469 - 261,354)           | 143,188<br>(60,469 - 261,354)           | --                                   | --                                   | --                                     | --                                   |
| Down syndrome                                       | 1,475,200<br>(718,657 - 2,236,672)      | 1,138,579<br>(500,263 - 1,864,138)      | 107,794<br>(56,554 - 168,663)        | 184,689<br>(115,220 - 295,191)       | 42,331<br>(25,630 - 56,604)            | 1,808<br>(1,000 - 2,668)             |
| Chromosomal unbalanced rearrangements               | 803,304<br>(393,665 - 1,337,619)        | 706,549<br>(328,661 - 1,190,863)        | 22,289<br>(10,735 - 37,148)          | 68,115<br>(40,843 - 113,008)         | 5,163<br>(2,893 - 8,093)               | 1,188<br>(635 - 1,914)               |
| Other congenital anomalies                          | 5,976,277<br>(4,684,068 - 9,554,535)    | 5,206,126<br>(4,031,828 - 8,547,783)    | 244,093<br>(182,617 - 382,372)       | 387,675<br>(293,065 - 550,562)       | 93,231<br>(71,599 - 117,392)           | 45,152<br>(32,623 - 55,243)          |

Web Table 30 - Global YLLs with 95% UI by age, sex, and cause in 2013

| Cause                                           | Females, All Ages                       | Females, 0-4 Years                      | Females, 5-14 Years                  | Females, 15-49 Years                    | Females, 50-69 Years                  | Females, 70-80 Years                 |
|-------------------------------------------------|-----------------------------------------|-----------------------------------------|--------------------------------------|-----------------------------------------|---------------------------------------|--------------------------------------|
| Skin and subcutaneous diseases                  | 1,343,493<br>(1,173,246 - 1,502,056)    | 415,404<br>(327,237 - 531,515)          | 49,016<br>(41,028 - 57,842)          | 315,091<br>(262,427 - 359,222)          | 257,353<br>(228,102 - 293,219)        | 306,628<br>(272,000 - 342,457)       |
| Cellulitis                                      | 514,351<br>(350,340 - 710,409)          | 180,506<br>(108,783 - 274,262)          | 23,976<br>(15,229 - 33,651)          | 130,036<br>(86,547 - 177,574)           | 100,154<br>(64,215 - 139,647)         | 79,679<br>(51,313 - 112,114)         |
| Pyoderma                                        | 559,665<br>(418,900 - 702,296)          | 211,016<br>(137,540 - 308,130)          | 16,813<br>(11,701 - 22,986)          | 127,694<br>(93,477 - 159,719)           | 109,797<br>(83,039 - 144,855)         | 94,345<br>(75,373 - 114,684)         |
| Decubitus ulcer                                 | 202,738<br>(168,215 - 254,834)          | 5,659<br>(2,713 - 12,665)               | 4,538<br>(2,989 - 7,458)             | 33,043<br>(24,545 - 47,491)             | 37,293<br>(29,440 - 50,388)           | 122,206<br>(102,811 - 146,610)       |
| Other skin and subcutaneous diseases            | 66,738<br>(45,891 - 85,461)             | 18,224<br>(9,115 - 30,973)              | 3,688<br>(2,624 - 4,889)             | 24,319<br>(16,820 - 30,227)             | 10,109<br>(7,495 - 13,658)            | 10,398<br>(7,844 - 17,251)           |
| Sudden infant death syndrome                    | 570,123<br>(311,981 - 958,187)          | 570,123<br>(311,981 - 958,187)          | --                                   | --                                      | --                                    | --                                   |
| Injuries                                        | 62,460,603<br>(57,060,211 - 68,736,201) | 14,064,383<br>(12,018,434 - 16,358,133) | 5,945,525<br>(5,337,536 - 6,666,274) | 29,114,828<br>(25,959,434 - 32,719,711) | 8,817,064<br>(7,941,487 - 10,009,057) | 4,518,803<br>(3,919,198 - 4,958,931) |
| Transport injuries                              | 16,647,645<br>(14,324,258 - 18,249,666) | 2,785,276<br>(2,130,143 - 3,502,819)    | 1,930,023<br>(1,568,071 - 2,221,955) | 8,372,460<br>(7,258,712 - 9,315,307)    | 2,718,921<br>(2,286,237 - 3,082,320)  | 840,966<br>(715,686 - 961,670)       |
| Road injuries                                   | 15,589,320<br>(13,450,307 - 17,149,147) | 2,549,822<br>(1,915,628 - 3,237,544)    | 1,796,921<br>(1,459,540 - 2,068,025) | 7,885,105<br>(6,872,375 - 8,747,318)    | 2,564,745<br>(2,173,877 - 2,907,526)  | 792,727<br>(669,979 - 902,303)       |
| Pedestrian road injuries                        | 6,588,198<br>(5,238,927 - 7,469,502)    | 1,213,905<br>(854,295 - 1,610,768)      | 925,826<br>(716,315 - 1,096,150)     | 2,584,887<br>(2,047,789 - 2,995,936)    | 1,347,297<br>(1,082,319 - 1,580,453)  | 516,283<br>(410,880 - 598,014)       |
| Cyclist road injuries                           | 889,992<br>(696,469 - 1,040,626)        | 102,707<br>(64,024 - 149,285)           | 125,464<br>(91,541 - 159,544)        | 448,963<br>(352,484 - 528,651)          | 172,494<br>(133,986 - 208,748)        | 40,364<br>(31,238 - 49,298)          |
| Motorcyclist road injuries                      | 1,624,883<br>(1,138,074 - 2,173,034)    | 129,715<br>(84,607 - 197,894)           | 108,339<br>(70,281 - 156,962)        | 1,150,885<br>(824,844 - 1,520,082)      | 202,039<br>(131,548 - 275,450)        | 33,906<br>(21,499 - 49,111)          |
| Motor vehicle road injuries                     | 6,216,943<br>(5,225,181 - 7,170,722)    | 1,046,844<br>(748,645 - 1,418,195)      | 600,989<br>(457,147 - 734,342)       | 3,558,057<br>(3,046,332 - 4,115,474)    | 819,158<br>(667,047 - 985,061)        | 191,894<br>(157,024 - 237,118)       |
| Other road injuries                             | 269,304<br>(152,461 - 371,634)          | 56,651<br>(32,562 - 87,441)             | 36,303<br>(20,934 - 53,989)          | 142,313<br>(72,869 - 220,871)           | 23,756<br>(15,274 - 32,852)           | 10,281<br>(7,201 - 17,734)           |
| Other transport injuries                        | 1,058,325<br>(822,196 - 1,233,590)      | 235,454<br>(162,720 - 302,378)          | 133,101<br>(94,442 - 171,267)        | 487,355<br>(390,745 - 597,672)          | 154,176<br>(116,422 - 189,403)        | 48,238<br>(37,402 - 59,243)          |
| Unintentional injuries                          | 30,195,670<br>(26,857,014 - 34,892,336) | 10,630,229<br>(8,931,940 - 12,799,818)  | 3,994,071<br>(2,943,701 - 4,031,244) | 9,550,041<br>(8,037,965 - 11,908,277)   | 3,626,337<br>(3,170,939 - 4,285,424)  | 2,994,992<br>(2,467,273 - 3,341,056) |
| Falls                                           | 4,297,667<br>(3,230,009 - 5,064,827)    | 826,026<br>(565,005 - 1,124,083)        | 313,379<br>(226,376 - 423,653)       | 927,537<br>(714,018 - 1,163,413)        | 801,746<br>(578,430 - 976,523)        | 1,428,980<br>(1,018,775 - 1,707,396) |
| Drowning                                        | 6,522,767<br>(5,235,989 - 10,005,184)   | 2,941,944<br>(2,123,820 - 4,419,318)    | 1,416,673<br>(1,106,044 - 2,015,151) | 1,534,598<br>(1,202,920 - 2,595,153)    | 441,713<br>(356,448 - 723,255)        | 187,840<br>(149,291 - 286,652)       |
| Fire, heat, and hot substances                  | 6,440,903<br>(5,035,453 - 8,533,413)    | 1,419,384<br>(1,058,998 - 1,877,870)    | 510,687<br>(388,178 - 697,511)       | 3,557,828<br>(2,563,261 - 5,080,883)    | 651,618<br>(491,423 - 860,847)        | 301,386<br>(225,448 - 371,352)       |
| Poisonings                                      | 1,556,922<br>(870,224 - 1,888,609)      | 389,263<br>(191,633 - 567,296)          | 125,702<br>(67,626 - 159,580)        | 736,906<br>(431,687 - 905,588)          | 221,746<br>(122,363 - 273,167)        | 83,304<br>(47,152 - 100,541)         |
| Exposure to mechanical forces                   | 2,782,278<br>(2,350,146 - 4,192,856)    | 1,380,739<br>(1,068,845 - 2,401,463)    | 322,260<br>(262,892 - 449,203)       | 741,594<br>(632,869 - 977,406)          | 248,916<br>(207,197 - 318,411)        | 88,769<br>(75,958 - 111,538)         |
| Unintentional firearm injuries                  | 549,026<br>(455,087 - 682,187)          | 117,571<br>(83,754 - 165,469)           | 56,112<br>(41,816 - 76,691)          | 285,375<br>(220,746 - 375,155)          | 73,011<br>(51,233 - 106,966)          | 16,958<br>(12,234 - 23,914)          |
| Unintentional suffocation                       | 934,685<br>(669,280 - 2,239,780)        | 741,188<br>(511,858 - 1,754,649)        | 63,974<br>(41,043 - 178,453)         | 89,712<br>(56,769 - 253,196)            | 27,425<br>(19,480 - 54,997)           | 12,386<br>(7,666 - 22,352)           |
| Other exposure to mechanical forces             | 1,298,567<br>(1,102,906 - 1,566,887)    | 521,980<br>(389,894 - 681,374)          | 202,175<br>(160,124 - 262,933)       | 366,506<br>(310,984 - 445,881)          | 148,480<br>(122,626 - 185,364)        | 59,426<br>(49,324 - 76,917)          |
| Adverse effects of medical treatment            | 2,306,803<br>(1,612,122 - 3,088,724)    | 696,830<br>(460,136 - 1,035,484)        | 88,627<br>(58,118 - 116,441)         | 752,518<br>(528,172 - 1,018,511)        | 500,114<br>(342,523 - 690,982)        | 268,713<br>(177,347 - 321,358)       |
| Animal contact                                  | 1,640,989<br>(921,382 - 3,652,512)      | 469,009<br>(203,340 - 936,779)          | 312,190<br>(162,285 - 677,307)       | 563,565<br>(335,525 - 1,317,655)        | 233,777<br>(135,644 - 582,874)        | 62,449<br>(33,341 - 159,413)         |
| Venomous animal contact                         | 1,253,032<br>(681,350 - 2,763,095)      | 348,346<br>(140,903 - 656,352)          | 237,200<br>(119,131 - 506,926)       | 471,551<br>(288,770 - 1,112,093)        | 163,379<br>(89,848 - 429,372)         | 32,556<br>(16,875 - 87,950)          |
| Non-venomous animal contact                     | 387,957<br>(177,382 - 926,447)          | 120,663<br>(52,756 - 301,743)           | 74,989<br>(31,789 - 187,021)         | 92,014<br>(38,631 - 210,266)            | 70,398<br>(31,476 - 164,767)          | 29,893<br>(14,038 - 69,316)          |
| Foreign body                                    | 2,980,730<br>(1,846,501 - 4,355,619)    | 2,078,066<br>(1,264,136 - 3,132,101)    | 88,333<br>(54,425 - 131,961)         | 309,422<br>(192,315 - 454,354)          | 184,332<br>(110,873 - 269,519)        | 320,577<br>(184,332 - 462,494)       |
| Pulmonary aspiration and foreign body in airway | 2,929,174<br>(1,784,262 - 4,298,618)    | 2,059,518<br>(1,230,890 - 3,112,375)    | 82,123<br>(48,234 - 123,199)         | 294,742<br>(178,193 - 436,851)          | 179,969<br>(106,110 - 265,165)        | 312,821<br>(177,539 - 455,862)       |
| Foreign body in other body part                 | 51,556<br>(37,801 - 89,403)             | 18,548<br>(12,466 - 38,496)             | 6,210<br>(4,418 - 11,586)            | 14,680<br>(11,196 - 25,270)             | 4,363<br>(2,982 - 6,306)              | 7,755<br>(5,425 - 11,274)            |
| Other unintentional injuries                    | 1,666,610<br>(1,151,403 - 2,166,508)    | 428,969<br>(286,155 - 631,294)          | 216,219<br>(130,555 - 298,255)       | 426,073<br>(353,548 - 526,342)          | 342,375<br>(216,901 - 468,783)        | 252,974<br>(121,910 - 342,694)       |
| Self-harm and interpersonal violence            | 14,711,471<br>(12,172,903 - 17,273,467) | 459,716<br>(287,222 - 675,500)          | 557,264<br>(422,641 - 717,471)       | 10,812,793<br>(9,194,743 - 12,818,951)  | 2,257,382<br>(1,955,219 - 2,741,277)  | 624,316<br>(549,415 - 740,371)       |
| Self-harm                                       | 11,026,212<br>(9,176,375 - 13,497,034)  | --                                      | 299,151<br>(202,190 - 453,639)       | 8,286,688<br>(6,728,768 - 10,337,582)   | 1,912,346<br>(1,615,015 - 2,369,226)  | 528,027<br>(459,868 - 656,270)       |
| Interpersonal violence                          | 3,685,260<br>(2,682,182 - 4,597,191)    | 459,716<br>(287,222 - 675,500)          | 258,113<br>(171,156 - 342,650)       | 2,526,105<br>(1,858,311 - 3,208,108)    | 345,036<br>(267,949 - 470,781)        | 96,290<br>(64,894 - 127,858)         |
| Assault by firearm                              | 970,927<br>(595,593 - 1,375,952)        | 84,544<br>(42,065 - 128,761)            | 61,960<br>(34,857 - 93,529)          | 731,399<br>(448,625 - 1,026,723)        | 73,972<br>(45,628 - 110,661)          | 19,052<br>(10,007 - 31,347)          |
| Assault by sharp object                         | 1,158,628<br>(795,479 - 1,670,715)      | 86,231<br>(48,956 - 150,567)            | 54,074<br>(32,632 - 84,960)          | 889,370<br>(607,067 - 1,289,343)        | 103,940<br>(73,422 - 152,343)         | 25,013<br>(14,974 - 36,010)          |
| Assault by other means                          | 1,555,706<br>(1,052,084 - 2,117,914)    | 288,942<br>(176,624 - 443,901)          | 142,079<br>(89,442 - 200,170)        | 905,336<br>(613,696 - 1,258,407)        | 167,124<br>(122,664 - 236,398)        | 52,225<br>(32,847 - 69,949)          |
| Forces of nature, war, and legal intervention   | 905,816<br>(619,617 - 1,662,989)        | 189,163<br>(140,086 - 483,871)          | 64,167<br>(44,986 - 116,299)         | 379,534<br>(234,648 - 759,382)          | 214,424<br>(143,756 - 389,196)        | 58,529<br>(42,008 - 95,808)          |
| Exposure to forces of nature                    | 384,863<br>(264,002 - 749,855)          | 56,805<br>(15,205 - 346,220)            | 18,928<br>(13,615 - 29,475)          | 168,666<br>(123,235 - 255,559)          | 108,928<br>(83,109 - 157,874)         | 31,536<br>(25,929 - 43,535)          |
| Collective violence and legal intervention      | 520,953<br>(338,420 - 1,002,638)        | 132,358<br>(123,410 - 143,573)          | 45,239<br>(30,512 - 87,491)          | 210,868<br>(105,645 - 507,934)          | 105,495<br>(57,067 - 230,590)         | 26,993<br>(14,993 - 52,234)          |

**Web Table 31: Country deaths by age, sex, and cause in 2013**

**Web Table 31- Afghanistan deaths with 95% UI by age, sex, and cause in 2013**

| Cause                                                             | Both Sexes, All Ages           | Both Sexes, 0-4 Years        | Both Sexes, 5-14 Years      | Both Sexes, 15-49 Years     | Both Sexes, 50-69 Years     | Both Sexes, 70-80 Years     |
|-------------------------------------------------------------------|--------------------------------|------------------------------|-----------------------------|-----------------------------|-----------------------------|-----------------------------|
| All causes                                                        | 296,923<br>(252,389 - 339,465) | 94,721<br>(85,668 - 105,192) | 12,917<br>(11,382 - 14,557) | 75,620<br>(58,742 - 94,484) | 70,903<br>(53,665 - 88,815) | 42,762<br>(36,058 - 48,619) |
| Communicable, maternal, neonatal, and nutritional diseases        | 109,238<br>(90,675 - 126,969)  | 73,355<br>(58,424 - 86,144)  | 4,955<br>(3,939 - 6,305)    | 20,453<br>(15,418 - 26,830) | 6,038<br>(4,503 - 8,206)    | 4,438<br>(3,543 - 5,438)    |
| HIV/AIDS and tuberculosis                                         | 9,352<br>(5,915 - 15,083)      | 737<br>(417 - 1,160)         | 576<br>(343 - 857)          | 5,158<br>(2,778 - 8,844)    | 2,025<br>(1,245 - 3,780)    | 857<br>(532 - 1,492)        |
| Tuberculosis                                                      | 9,188<br>(5,771 - 14,906)      | 727<br>(410 - 1,142)         | 573<br>(341 - 852)          | 5,034<br>(2,691 - 8,607)    | 2,000<br>(1,231 - 3,728)    | 854<br>(526 - 1,489)        |
| HIV/AIDS                                                          | 163<br>(16 - 824)              | 9<br>(1 - 44)                | 3<br>(0 - 13)               | 124<br>(12 - 634)           | 25<br>(2 - 127)             | 2<br>(0 - 13)               |
| HIV/AIDS resulting in mycobacterial infection                     | 11<br>(1 - 52)                 | 1<br>(0 - 3)                 | 0<br>(0 - 1)                | 8<br>(1 - 39)               | 2<br>(0 - 8)                | 0<br>(0 - 1)                |
| HIV/AIDS resulting in other diseases                              | 153<br>(15 - 773)              | 9<br>(1 - 41)                | 3<br>(0 - 13)               | 116<br>(11 - 594)           | 23<br>(2 - 119)             | 2<br>(0 - 12)               |
| Diarrhea, lower respiratory, and other common infectious diseases | 58,754<br>(46,616 - 70,071)    | 45,077<br>(34,265 - 54,778)  | 3,464<br>(2,540 - 4,859)    | 4,202<br>(2,891 - 5,835)    | 2,979<br>(2,104 - 4,014)    | 3,031<br>(2,340 - 3,808)    |
| Diarrheal diseases                                                | 13,781<br>(8,131 - 20,037)     | 11,916<br>(6,441 - 18,146)   | 313<br>(166 - 557)          | 842<br>(485 - 1,347)        | 353<br>(202 - 578)          | 356<br>(214 - 539)          |
| Intestinal infectious diseases                                    | 1,434<br>(713 - 2,547)         | 442<br>(209 - 795)           | 539<br>(261 - 968)          | 392<br>(176 - 786)          | 48<br>(22 - 94)             | 13<br>(6 - 23)              |
| Typhoid fever                                                     | 1,027<br>(480 - 1,892)         | 288<br>(120 - 555)           | 406<br>(192 - 732)          | 290<br>(120 - 592)          | 34<br>(14 - 69)             | 9<br>(4 - 17)               |
| Paratyphoid fever                                                 | 306<br>(137 - 569)             | 99<br>(40 - 196)             | 118<br>(49 - 226)           | 79<br>(32 - 156)            | 8<br>(3 - 19)               | 2<br>(1 - 4)                |
| Other intestinal infectious diseases                              | 101<br>(68 - 141)              | 55<br>(32 - 84)              | 15<br>(6 - 28)              | 23<br>(11 - 42)             | 6<br>(1 - 14)               | 2<br>(0 - 7)                |
| Lower respiratory infections                                      | 31,139<br>(24,270 - 38,836)    | 22,657<br>(16,379 - 29,733)  | 1,612<br>(1,051 - 2,246)    | 2,027<br>(1,379 - 2,883)    | 2,296<br>(1,591 - 3,163)    | 2,548<br>(1,914 - 3,283)    |
| Upper respiratory infections                                      | 47<br>(24 - 82)                | 15<br>(3 - 43)               | 3<br>(0 - 8)                | 15<br>(5 - 30)              | 10<br>(2 - 24)              | 4<br>(1 - 11)               |
| Otitis media                                                      | 53<br>(36 - 69)                | 10<br>(6 - 15)               | 8<br>(5 - 11)               | 17<br>(11 - 24)             | 10<br>(7 - 15)              | 7<br>(5 - 10)               |
| Meningitis                                                        | 6,010<br>(4,187 - 8,588)       | 4,721<br>(2,988 - 7,128)     | 348<br>(174 - 608)          | 643<br>(359 - 1,059)        | 218<br>(121 - 330)          | 81<br>(50 - 120)            |
| Pneumococcal meningitis                                           | 1,215<br>(847 - 1,712)         | 866<br>(540 - 1,298)         | 101<br>(49 - 184)           | 180<br>(94 - 293)           | 49<br>(23 - 82)             | 19<br>(11 - 31)             |
| H influenzae type B meningitis                                    | 2,017<br>(1,239 - 3,061)       | 1,831<br>(1,049 - 2,889)     | 86<br>(39 - 161)            | 71<br>(36 - 128)            | 22<br>(10 - 40)             | 7<br>(4 - 14)               |
| Meningococcal meningitis                                          | 1,629<br>(1,076 - 2,425)       | 1,279<br>(747 - 2,015)       | 96<br>(44 - 175)            | 171<br>(87 - 294)           | 60<br>(29 - 98)             | 23<br>(12 - 37)             |
| Other meningitis                                                  | 1,148<br>(656 - 1,779)         | 745<br>(347 - 1,297)         | 65<br>(23 - 124)            | 221<br>(107 - 384)          | 87<br>(49 - 135)            | 31<br>(18 - 48)             |
| Encephalitis                                                      | 557<br>(314 - 813)             | 339<br>(175 - 578)           | 65<br>(28 - 136)            | 110<br>(41 - 264)           | 30<br>(13 - 65)             | 13<br>(7 - 21)              |
| Diphtheria                                                        | 46<br>(4 - 193)                | 31<br>(0 - 175)              | 9<br>(0 - 52)               | 4<br>(0 - 14)               | 1<br>(0 - 6)                | --                          |
| Whooping cough                                                    | 2,167<br>(3 - 10,059)          | 1,983<br>(3 - 9,202)         | 159<br>(0 - 730)            | 24<br>(0 - 108)             | 2<br>(0 - 10)               | --                          |
| Tetanus                                                           | 1,507<br>(921 - 2,330)         | 1,344<br>(802 - 2,073)       | 90<br>(36 - 228)            | 69<br>(14 - 345)            | 4<br>(0 - 38)               | 0<br>(0 - 0)                |
| Measles                                                           | 1,941<br>(48 - 13,323)         | 1,589<br>(37 - 10,801)       | 309<br>(8 - 2,085)          | 42<br>(1 - 293)             | 1<br>(0 - 6)                | --                          |
| Varicella and herpes zoster                                       | 73<br>(31 - 137)               | 30<br>(4 - 87)               | 10<br>(0 - 33)              | 18<br>(5 - 39)              | 6<br>(1 - 15)               | 10<br>(1 - 30)              |
| Neglected tropical diseases and malaria                           | 2,244<br>(1,285 - 4,043)       | 589<br>(160 - 2,486)         | 426<br>(231 - 759)          | 935<br>(507 - 1,608)        | 262<br>(131 - 496)          | 33<br>(18 - 50)             |
| Malaria                                                           | 1,783<br>(821 - 3,659)         | 436<br>(43 - 2,333)          | 330<br>(142 - 652)          | 774<br>(372 - 1,460)        | 226<br>(100 - 458)          | 17<br>(8 - 33)              |
| Leishmaniasis                                                     | 43<br>(27 - 65)                | 19<br>(8 - 33)               | 12<br>(5 - 20)              | 11<br>(6 - 17)              | 2<br>(1 - 3)                | 0<br>(0 - 0)                |
| Visceral leishmaniasis                                            | 43<br>(27 - 65)                | 19<br>(8 - 33)               | 12<br>(5 - 20)              | 11<br>(6 - 17)              | 2<br>(1 - 3)                | 0<br>(0 - 0)                |
| Cysticercosis                                                     | 2<br>(0 - 5)                   | 0<br>(0 - 0)                 | 0<br>(0 - 0)                | 1<br>(0 - 3)                | 0<br>(0 - 1)                | 0<br>(0 - 0)                |
| Cystic echinococcosis                                             | 18<br>(14 - 23)                | 2<br>(1 - 2)                 | 4<br>(3 - 5)                | 9<br>(6 - 12)               | 3<br>(2 - 4)                | 1<br>(1 - 1)                |
| Dengue                                                            | 13<br>(5 - 19)                 | 3<br>(1 - 5)                 | 3<br>(2 - 5)                | 6<br>(2 - 10)               | 1<br>(0 - 1)                | 0<br>(0 - 0)                |
| Rabies                                                            | 75<br>(31 - 168)               | 15<br>(4 - 40)               | 23<br>(10 - 50)             | 31<br>(12 - 68)             | 5<br>(2 - 11)               | 1<br>(1 - 2)                |
| Intestinal nematode infections                                    | 69<br>(39 - 108)               | 47<br>(23 - 77)              | 14<br>(4 - 29)              | 6<br>(0 - 17)               | 2<br>(0 - 9)                | 1<br>(0 - 6)                |
| Ascariasis                                                        | 69<br>(39 - 108)               | 47<br>(23 - 77)              | 14<br>(4 - 29)              | 6<br>(0 - 17)               | 2<br>(0 - 9)                | 1<br>(0 - 6)                |
| Other neglected tropical diseases                                 | 242<br>(110 - 396)             | 69<br>(21 - 137)             | 41<br>(17 - 72)             | 98<br>(36 - 177)            | 23<br>(9 - 38)              | 12<br>(4 - 20)              |
| Maternal disorders                                                | 8,794<br>(5,055 - 14,360)      | --                           | 41<br>(15 - 97)             | 8,753<br>(5,031 - 14,278)   | --                          | --                          |
| Maternal hemorrhage                                               | 1,630<br>(856 - 2,858)         | --                           | 5<br>(2 - 13)               | 1,624<br>(853 - 2,852)      | --                          | --                          |



**Web Table 31- Afghanistan deaths with 95% UI by age, sex, and cause in 2013**

| Cause                                                            | Both Sexes, All Ages           | Both Sexes, 0-4 Years       | Both Sexes, 5-14 Years   | Both Sexes, 15-49 Years     | Both Sexes, 50-69 Years     | Both Sexes, 70-80 Years     |
|------------------------------------------------------------------|--------------------------------|-----------------------------|--------------------------|-----------------------------|-----------------------------|-----------------------------|
| Maternal sepsis and other maternal infections                    | 829<br>(435 - 1,458)           | --                          | 4<br>(1 - 12)            | 825<br>(431 - 1,454)        | --                          | --                          |
| Maternal hypertensive disorders                                  | 1,190<br>(623 - 2,002)         | --                          | 7<br>(2 - 19)            | 1,182<br>(615 - 1,988)      | --                          | --                          |
| Maternal obstructed labor                                        | 792<br>(395 - 1,411)           | --                          | 3<br>(1 - 8)             | 789<br>(393 - 1,408)        | --                          | --                          |
| Maternal abortive outcome                                        | 1,185<br>(625 - 2,098)         | --                          | 5<br>(1 - 12)            | 1,180<br>(620 - 2,091)      | --                          | --                          |
| Indirect maternal deaths                                         | 818<br>(362 - 1,532)           | --                          | 3<br>(1 - 7)             | 816<br>(360 - 1,529)        | --                          | --                          |
| Late maternal deaths                                             | 1,042<br>(497 - 1,877)         | --                          | 8<br>(2 - 21)            | 1,034<br>(491 - 1,868)      | --                          | --                          |
| Maternal deaths aggravated by HIV/AIDS                           | 0<br>(0 - 0)                   | --                          | --                       | 0<br>(0 - 0)                | --                          | --                          |
| Other maternal disorders                                         | 1,292<br>(668 - 2,269)         | --                          | 5<br>(2 - 13)            | 1,287<br>(666 - 2,258)      | --                          | --                          |
| Neonatal disorders                                               | 25,146<br>(19,361 - 31,830)    | 25,146<br>(19,361 - 31,830) | --                       | --                          | --                          | --                          |
| Neonatal preterm birth complications                             | 13,420<br>(8,768 - 19,070)     | 13,420<br>(8,768 - 19,070)  | --                       | --                          | --                          | --                          |
| Neonatal encephalopathy due to birth asphyxia and trauma         | 4,098<br>(1,233 - 6,965)       | 4,098<br>(1,233 - 6,965)    | --                       | --                          | --                          | --                          |
| Neonatal sepsis and other neonatal infections                    | 1,010<br>(333 - 2,128)         | 1,010<br>(333 - 2,128)      | --                       | --                          | --                          | --                          |
| Hemolytic disease and other neonatal jaundice                    | 322<br>(108 - 991)             | 322<br>(108 - 991)          | --                       | --                          | --                          | --                          |
| Other neonatal disorders                                         | 6,295<br>(1,686 - 12,588)      | 6,295<br>(1,686 - 12,588)   | --                       | --                          | --                          | --                          |
| Nutritional deficiencies                                         | 3,326<br>(2,123 - 4,946)       | 1,282<br>(618 - 2,267)      | 315<br>(192 - 489)       | 966<br>(548 - 1,582)        | 405<br>(213 - 693)          | 358<br>(176 - 571)          |
| Protein-energy malnutrition                                      | 1,327<br>(733 - 2,227)         | 761<br>(340 - 1,428)        | 139<br>(48 - 256)        | 285<br>(135 - 576)          | 102<br>(45 - 204)           | 40<br>(15 - 98)             |
| Iodine deficiency                                                | 16<br>(2 - 56)                 | 7<br>(0 - 43)               | 2<br>(0 - 11)            | 3<br>(0 - 11)               | 2<br>(0 - 11)               | 1<br>(0 - 8)                |
| Iron-deficiency anemia                                           | 1,864<br>(932 - 3,040)         | 470<br>(128 - 1,033)        | 158<br>(59 - 288)        | 644<br>(290 - 1,127)        | 287<br>(144 - 507)          | 304<br>(149 - 492)          |
| Other nutritional deficiencies                                   | 120<br>(46 - 295)              | 45<br>(11 - 123)            | 16<br>(6 - 41)           | 33<br>(13 - 78)             | 13<br>(4 - 38)              | 13<br>(4 - 35)              |
| Other communicable, maternal, neonatal, and nutritional diseases | 1,622<br>(1,117 - 2,396)       | 524<br>(304 - 920)          | 134<br>(79 - 240)        | 439<br>(269 - 650)          | 367<br>(232 - 576)          | 159<br>(85 - 363)           |
| Sexually transmitted diseases excluding HIV                      | 234<br>(129 - 349)             | 114<br>(55 - 205)           | 19<br>(10 - 29)          | 65<br>(19 - 111)            | 23<br>(7 - 46)              | 14<br>(5 - 30)              |
| Syphilis                                                         | 182<br>(106 - 283)             | 114<br>(55 - 205)           | 13<br>(7 - 21)           | 30<br>(9 - 52)              | 14<br>(5 - 29)              | 11<br>(4 - 24)              |
| Chlamydial infection                                             | 10<br>(2 - 21)                 | --                          | 1<br>(0 - 2)             | 7<br>(1 - 15)               | 2<br>(0 - 5)                | 0<br>(0 - 1)                |
| Gonococcal infection                                             | 23<br>(8 - 38)                 | --                          | 2<br>(1 - 4)             | 15<br>(4 - 26)              | 4<br>(1 - 8)                | 2<br>(1 - 4)                |
| Other sexually transmitted diseases                              | 19<br>(6 - 31)                 | --                          | 2<br>(1 - 4)             | 13<br>(4 - 22)              | 3<br>(1 - 6)                | 1<br>(0 - 2)                |
| Hepatitis                                                        | 533<br>(241 - 746)             | 86<br>(30 - 154)            | 26<br>(12 - 39)          | 169<br>(61 - 267)           | 201<br>(96 - 304)           | 51<br>(31 - 74)             |
| Acute hepatitis A                                                | 70<br>(21 - 131)               | 46<br>(14 - 92)             | 11<br>(3 - 20)           | 10<br>(2 - 25)              | 4<br>(1 - 10)               | 0<br>(0 - 1)                |
| Acute hepatitis B                                                | 275<br>(119 - 428)             | 39<br>(10 - 84)             | 7<br>(3 - 13)            | 56<br>(16 - 107)            | 133<br>(57 - 216)           | 40<br>(21 - 59)             |
| Acute hepatitis C                                                | 33<br>(6 - 88)                 | --                          | 2<br>(0 - 7)             | 9<br>(1 - 25)               | 17<br>(3 - 50)              | 5<br>(1 - 14)               |
| Acute hepatitis E                                                | 155<br>(67 - 261)              | 1<br>(0 - 3)                | 6<br>(2 - 11)            | 95<br>(36 - 157)            | 47<br>(19 - 90)             | 6<br>(2 - 14)               |
| Other infectious diseases                                        | 855<br>(510 - 1,607)           | 325<br>(137 - 683)          | 89<br>(40 - 195)         | 204<br>(114 - 385)          | 143<br>(62 - 335)           | 94<br>(32 - 293)            |
| Non-communicable diseases                                        | 148,347<br>(115,020 - 184,128) | 14,939<br>(7,960 - 27,177)  | 2,904<br>(2,062 - 4,032) | 31,977<br>(22,524 - 44,222) | 60,992<br>(45,644 - 76,697) | 37,535<br>(31,416 - 42,930) |
| Neoplasms                                                        | 17,631<br>(12,676 - 23,921)    | 240<br>(124 - 522)          | 529<br>(375 - 803)       | 5,575<br>(3,630 - 8,333)    | 8,235<br>(5,857 - 10,996)   | 3,052<br>(2,434 - 3,667)    |
| Esophageal cancer                                                | 346<br>(232 - 483)             | --                          | --                       | 81<br>(52 - 119)            | 182<br>(115 - 267)          | 83<br>(58 - 113)            |
| Stomach cancer                                                   | 3,473<br>(2,316 - 4,682)       | --                          | --                       | 1,208<br>(717 - 1,830)      | 1,676<br>(1,114 - 2,275)    | 590<br>(428 - 764)          |
| Liver cancer                                                     | 957<br>(460 - 2,014)           | --                          | 13<br>(5 - 32)           | 210<br>(73 - 526)           | 531<br>(248 - 1,169)        | 202<br>(115 - 350)          |
| Liver cancer due to hepatitis B                                  | 294<br>(117 - 624)             | --                          | 5<br>(2 - 13)            | 85<br>(28 - 213)            | 159<br>(60 - 346)           | 45<br>(21 - 89)             |
| Liver cancer due to hepatitis C                                  | 452<br>(200 - 1,105)           | --                          | 1<br>(0 - 4)             | 75<br>(21 - 226)            | 267<br>(109 - 659)          | 108<br>(54 - 210)           |
| Liver cancer due to alcohol use                                  | 75<br>(36 - 150)               | --                          | --                       | 8<br>(3 - 22)               | 41<br>(18 - 88)             | 26<br>(13 - 48)             |
| Liver cancer due to other causes                                 | 136<br>(49 - 328)              | --                          | 7<br>(3 - 17)            | 42<br>(12 - 111)            | 65<br>(20 - 161)            | 23<br>(10 - 48)             |

**Web Table 31- Afghanistan deaths with 95% UI by age, sex, and cause in 2013**

| Cause                                         | Both Sexes, All Ages        | Both Sexes, 0-4 Years | Both Sexes, 5-14 Years | Both Sexes, 15-49 Years     | Both Sexes, 50-69 Years     | Both Sexes, 70-80 Years     |
|-----------------------------------------------|-----------------------------|-----------------------|------------------------|-----------------------------|-----------------------------|-----------------------------|
| Larynx cancer                                 | 364<br>(217 - 591)          | --                    | --                     | 99<br>(47 - 174)            | 201<br>(116 - 333)          | 63<br>(42 - 98)             |
| Tracheal, bronchus and lung cancer            | 3,327<br>(1,063 - 4,777)    | --                    | --                     | 739<br>(150 - 1,179)        | 1,948<br>(603 - 2,820)      | 640<br>(287 - 874)          |
| Breast cancer                                 | 1,169<br>(623 - 2,964)      | --                    | --                     | 543<br>(236 - 1,644)        | 511<br>(288 - 1,145)        | 116<br>(82 - 172)           |
| Cervical cancer                               | 831<br>(493 - 1,393)        | --                    | --                     | 381<br>(203 - 682)          | 374<br>(210 - 633)          | 76<br>(47 - 119)            |
| Uterine cancer                                | 148<br>(44 - 292)           | --                    | --                     | 35<br>(7 - 77)              | 87<br>(25 - 175)            | 26<br>(11 - 49)             |
| Prostate cancer                               | 261<br>(148 - 418)          | --                    | --                     | 6<br>(3 - 13)               | 94<br>(46 - 178)            | 161<br>(91 - 250)           |
| Colon and rectum cancer                       | 790<br>(592 - 1,008)        | --                    | --                     | 209<br>(143 - 297)          | 387<br>(277 - 499)          | 194<br>(155 - 238)          |
| Lip and oral cavity cancer                    | 171<br>(63 - 300)           | --                    | --                     | 61<br>(17 - 124)            | 82<br>(29 - 140)            | 28<br>(15 - 44)             |
| Nasopharynx cancer                            | 172<br>(86 - 312)           | --                    | 13<br>(5 - 27)         | 93<br>(39 - 173)            | 56<br>(30 - 105)            | 11<br>(6 - 19)              |
| Other pharynx cancer                          | 81<br>(32 - 135)            | --                    | --                     | 34<br>(10 - 62)             | 38<br>(16 - 69)             | 9<br>(5 - 14)               |
| Gallbladder and biliary tract cancer          | 206<br>(129 - 312)          | --                    | --                     | 41<br>(21 - 67)             | 113<br>(67 - 179)           | 52<br>(33 - 86)             |
| Pancreatic cancer                             | 264<br>(196 - 338)          | --                    | --                     | 44<br>(29 - 64)             | 148<br>(104 - 195)          | 72<br>(56 - 91)             |
| Malignant skin melanoma                       | 41<br>(21 - 92)             | --                    | --                     | 17<br>(7 - 46)              | 17<br>(8 - 38)              | 7<br>(4 - 11)               |
| Non-melanoma skin cancer                      | 85<br>(44 - 154)            | --                    | --                     | 32<br>(14 - 62)             | 31<br>(15 - 60)             | 21<br>(12 - 39)             |
| Ovarian cancer                                | 194<br>(84 - 378)           | --                    | --                     | 78<br>(23 - 181)            | 92<br>(41 - 174)            | 24<br>(15 - 38)             |
| Testicular cancer                             | 16<br>(9 - 27)              | --                    | --                     | 13<br>(7 - 22)              | 3<br>(1 - 4)                | 1<br>(1 - 2)                |
| Kidney cancer                                 | 239<br>(115 - 373)          | 18<br>(4 - 40)        | 18<br>(7 - 36)         | 62<br>(21 - 113)            | 112<br>(54 - 180)           | 29<br>(19 - 42)             |
| Bladder cancer                                | 788<br>(545 - 1,076)        | --                    | --                     | 122<br>(72 - 181)           | 447<br>(290 - 634)          | 219<br>(153 - 298)          |
| Brain and nervous system cancer               | 670<br>(360 - 1,595)        | 40<br>(13 - 156)      | 99<br>(51 - 228)       | 250<br>(126 - 680)          | 224<br>(117 - 525)          | 58<br>(33 - 111)            |
| Thyroid cancer                                | 114<br>(48 - 273)           | --                    | 2<br>(1 - 7)           | 32<br>(10 - 88)             | 55<br>(22 - 135)            | 24<br>(13 - 48)             |
| Mesothelioma                                  | 42<br>(19 - 69)             | --                    | --                     | 24<br>(7 - 43)              | 14<br>(7 - 24)              | 5<br>(3 - 8)                |
| Hodgkin lymphoma                              | 239<br>(82 - 390)           | 13<br>(3 - 26)        | 35<br>(11 - 74)        | 135<br>(38 - 236)           | 46<br>(16 - 83)             | 10<br>(6 - 19)              |
| Non-Hodgkin lymphoma                          | 563<br>(294 - 1,343)        | 21<br>(7 - 58)        | 41<br>(19 - 95)        | 238<br>(102 - 641)          | 191<br>(101 - 425)          | 72<br>(46 - 150)            |
| Multiple myeloma                              | 78<br>(47 - 156)            | --                    | --                     | 17<br>(9 - 41)              | 43<br>(26 - 92)             | 18<br>(12 - 32)             |
| Leukemia                                      | 989<br>(728 - 1,677)        | 61<br>(29 - 139)      | 200<br>(136 - 298)     | 408<br>(269 - 809)          | 213<br>(144 - 336)          | 107<br>(80 - 139)           |
| Other neoplasms                               | 1,014<br>(643 - 2,275)      | 86<br>(27 - 291)      | 108<br>(54 - 246)      | 364<br>(214 - 843)          | 321<br>(196 - 676)          | 135<br>(94 - 215)           |
| Cardiovascular diseases                       | 76,844<br>(58,298 - 97,007) | 61<br>(32 - 104)      | 283<br>(169 - 501)     | 15,797<br>(10,755 - 22,608) | 36,981<br>(27,198 - 47,033) | 23,721<br>(19,787 - 27,267) |
| Rheumatic heart disease                       | 1,730<br>(1,011 - 3,146)    | 4<br>(1 - 11)         | 41<br>(18 - 102)       | 856<br>(436 - 1,723)        | 542<br>(318 - 950)          | 287<br>(179 - 471)          |
| Ischemic heart disease                        | 41,752<br>(27,648 - 53,849) | 9<br>(4 - 20)         | 41<br>(18 - 90)        | 7,995<br>(4,562 - 11,707)   | 21,520<br>(13,765 - 28,379) | 12,186<br>(9,163 - 14,649)  |
| Cerebrovascular disease                       | 23,278<br>(16,937 - 31,926) | 20<br>(10 - 38)       | 122<br>(70 - 231)      | 4,407<br>(2,723 - 7,011)    | 10,200<br>(7,189 - 14,456)  | 8,528<br>(6,771 - 10,602)   |
| Ischemic stroke                               | 9,134<br>(5,011 - 13,560)   | 2<br>(0 - 5)          | 14<br>(4 - 32)         | 792<br>(268 - 1,953)        | 3,645<br>(1,765 - 5,768)    | 4,682<br>(2,817 - 6,246)    |
| Hemorrhagic stroke                            | 14,144<br>(8,693 - 23,875)  | 18<br>(9 - 35)        | 108<br>(60 - 214)      | 3,616<br>(1,994 - 6,416)    | 6,555<br>(3,916 - 11,349)   | 3,846<br>(2,517 - 6,150)    |
| Hypertensive heart disease                    | 3,076<br>(1,747 - 5,170)    | 0<br>(0 - 1)          | 3<br>(1 - 6)           | 472<br>(221 - 871)          | 1,377<br>(746 - 2,308)      | 1,224<br>(704 - 2,099)      |
| Cardiomyopathy and myocarditis                | 1,018<br>(565 - 1,469)      | 8<br>(2 - 16)         | 23<br>(11 - 41)        | 366<br>(164 - 589)          | 403<br>(212 - 594)          | 218<br>(137 - 316)          |
| Atrial fibrillation and flutter               | 12<br>(7 - 23)              | --                    | --                     | 1<br>(1 - 4)                | 4<br>(2 - 10)               | 7<br>(4 - 11)               |
| Aortic aneurysm                               | 307<br>(157 - 481)          | --                    | --                     | 60<br>(22 - 108)            | 167<br>(77 - 267)           | 80<br>(46 - 124)            |
| Peripheral vascular disease                   | 7<br>(3 - 12)               | --                    | --                     | 1<br>(0 - 3)                | 3<br>(1 - 5)                | 3<br>(1 - 4)                |
| Endocarditis                                  | 201<br>(105 - 371)          | 1<br>(0 - 2)          | 3<br>(1 - 8)           | 60<br>(20 - 152)            | 67<br>(31 - 130)            | 71<br>(41 - 111)            |
| Other cardiovascular and circulatory diseases | 5,462<br>(1,893 - 10,914)   | 18<br>(5 - 35)        | 51<br>(17 - 125)       | 1,579<br>(503 - 3,464)      | 2,697<br>(857 - 5,554)      | 1,117<br>(445 - 2,281)      |
| Chronic respiratory diseases                  | 9,969<br>(7,590 - 12,718)   | 78<br>(7 - 540)       | 114<br>(66 - 302)      | 1,565<br>(1,070 - 2,241)    | 4,648<br>(3,431 - 6,017)    | 3,564<br>(2,823 - 4,334)    |

**Web Table 31- Afghanistan deaths with 95% UI by age, sex, and cause in 2013**

| Cause                                               | Both Sexes, All Ages     | Both Sexes, 0-4 Years | Both Sexes, 5-14 Years | Both Sexes, 15-49 Years  | Both Sexes, 50-69 Years  | Both Sexes, 70-80 Years  |
|-----------------------------------------------------|--------------------------|-----------------------|------------------------|--------------------------|--------------------------|--------------------------|
| Chronic obstructive pulmonary disease               | 7,235<br>(5,405 - 9,303) | 60<br>(4 - 446)       | 36<br>(19 - 84)        | 777<br>(466 - 1,167)     | 3,474<br>(2,447 - 4,604) | 2,887<br>(2,213 - 3,529) |
| Pneumoconiosis                                      | 217<br>(107 - 379)       | 0<br>(0 - 0)          | 5<br>(2 - 15)          | 96<br>(47 - 173)         | 85<br>(38 - 155)         | 30<br>(14 - 56)          |
| Silicosis                                           | 40<br>(14 - 90)          | 0<br>(0 - 0)          | 2<br>(0 - 7)           | 6<br>(2 - 15)            | 16<br>(5 - 37)           | 16<br>(6 - 34)           |
| Asbestosis                                          | 16<br>(7 - 30)           | 0<br>(0 - 0)          | 1<br>(0 - 2)           | 11<br>(5 - 23)           | 3<br>(2 - 6)             | 0<br>(0 - 1)             |
| Coal workers pneumoconiosis                         | 5<br>(3 - 10)            | 0<br>(0 - 0)          | 1<br>(0 - 2)           | 3<br>(1 - 6)             | 1<br>(1 - 2)             | 0<br>(0 - 1)             |
| Other pneumoconiosis                                | 155<br>(77 - 273)        | 0<br>(0 - 0)          | 2<br>(1 - 5)           | 76<br>(36 - 139)         | 65<br>(30 - 117)         | 13<br>(6 - 24)           |
| Asthma                                              | 1,966<br>(961 - 4,395)   | 2<br>(1 - 4)          | 56<br>(24 - 197)       | 566<br>(281 - 1,130)     | 875<br>(409 - 1,986)     | 466<br>(231 - 1,085)     |
| Interstitial lung disease and pulmonary sarcoidosis | 319<br>(93 - 832)        | 0<br>(0 - 0)          | 2<br>(1 - 5)           | 37<br>(6 - 118)          | 155<br>(42 - 443)        | 124<br>(42 - 296)        |
| Other chronic respiratory diseases                  | 232<br>(121 - 398)       | 15<br>(1 - 104)       | 14<br>(6 - 31)         | 88<br>(42 - 152)         | 58<br>(27 - 110)         | 56<br>(29 - 93)          |
| Cirrhosis                                           | 4,908<br>(3,661 - 6,299) | 236<br>(102 - 469)    | 134<br>(93 - 184)      | 1,645<br>(1,126 - 2,295) | 2,170<br>(1,547 - 2,927) | 723<br>(546 - 910)       |
| Cirrhosis due to hepatitis B                        | 1,361<br>(560 - 2,202)   | 12<br>(3 - 30)        | 24<br>(7 - 45)         | 464<br>(181 - 784)       | 618<br>(246 - 1,027)     | 243<br>(95 - 395)        |
| Cirrhosis due to hepatitis C                        | 2,351<br>(1,441 - 3,425) | 17<br>(5 - 41)        | 22<br>(8 - 43)         | 792<br>(467 - 1,260)     | 1,180<br>(703 - 1,748)   | 339<br>(213 - 494)       |
| Cirrhosis due to alcohol use                        | 396<br>(230 - 606)       | --                    | --                     | 102<br>(48 - 180)        | 202<br>(110 - 324)       | 93<br>(56 - 148)         |
| Cirrhosis due to other causes                       | 800<br>(536 - 1,111)     | 207<br>(91 - 407)     | 88<br>(56 - 129)       | 287<br>(167 - 461)       | 170<br>(97 - 272)        | 48<br>(28 - 85)          |
| Digestive diseases                                  | 5,367<br>(3,392 - 8,615) | 501<br>(227 - 970)    | 293<br>(181 - 460)     | 1,829<br>(1,079 - 3,125) | 1,687<br>(998 - 2,783)   | 1,057<br>(689 - 1,486)   |
| Peptic ulcer disease                                | 2,133<br>(1,266 - 3,683) | 61<br>(19 - 149)      | 61<br>(33 - 106)       | 686<br>(379 - 1,352)     | 824<br>(470 - 1,411)     | 500<br>(315 - 747)       |
| Gastritis and duodenitis                            | 86<br>(31 - 172)         | 14<br>(4 - 30)        | 12<br>(4 - 27)         | 38<br>(12 - 84)          | 14<br>(5 - 29)           | 7<br>(3 - 15)            |
| Appendicitis                                        | 742<br>(386 - 1,458)     | 151<br>(55 - 367)     | 82<br>(34 - 164)       | 317<br>(145 - 669)       | 136<br>(68 - 255)        | 56<br>(29 - 99)          |
| Paralytic ileus and intestinal obstruction          | 306<br>(163 - 636)       | 20<br>(6 - 56)        | 15<br>(6 - 33)         | 72<br>(34 - 163)         | 93<br>(45 - 201)         | 107<br>(55 - 199)        |
| Inguinal, femoral, and abdominal hernia             | 150<br>(65 - 308)        | 24<br>(5 - 66)        | 17<br>(7 - 38)         | 50<br>(17 - 111)         | 32<br>(12 - 69)          | 27<br>(14 - 48)          |
| Inflammatory bowel disease                          | 322<br>(187 - 576)       | 58<br>(21 - 137)      | 28<br>(15 - 46)        | 128<br>(72 - 239)        | 67<br>(37 - 119)         | 42<br>(21 - 70)          |
| Vascular intestinal disorders                       | 99<br>(27 - 213)         | 5<br>(1 - 17)         | 6<br>(1 - 16)          | 41<br>(9 - 93)           | 30<br>(8 - 66)           | 17<br>(6 - 36)           |
| Gallbladder and biliary diseases                    | 687<br>(413 - 1,109)     | 65<br>(27 - 121)      | 25<br>(14 - 40)        | 205<br>(108 - 363)       | 232<br>(129 - 418)       | 160<br>(92 - 257)        |
| Pancreatitis                                        | 226<br>(83 - 415)        | 9<br>(2 - 19)         | 10<br>(3 - 23)         | 98<br>(34 - 189)         | 77<br>(29 - 150)         | 32<br>(12 - 61)          |
| Other digestive diseases                            | 616<br>(354 - 1,067)     | 94<br>(36 - 208)      | 37<br>(20 - 63)        | 193<br>(102 - 340)       | 181<br>(96 - 321)        | 110<br>(60 - 184)        |
| Neurological disorders                              | 3,178<br>(2,296 - 4,356) | 272<br>(102 - 599)    | 203<br>(87 - 393)      | 708<br>(271 - 1,354)     | 447<br>(308 - 610)       | 1,548<br>(1,266 - 1,882) |
| Alzheimer disease and other dementias               | 1,832<br>(1,476 - 2,223) | --                    | --                     | 2<br>(0 - 4)             | 327<br>(224 - 451)       | 1,503<br>(1,223 - 1,832) |
| Parkinson disease                                   | 18<br>(11 - 33)          | --                    | --                     | 2<br>(1 - 6)             | 6<br>(3 - 13)            | 10<br>(6 - 18)           |
| Epilepsy                                            | 1,173<br>(438 - 2,103)   | 222<br>(57 - 529)     | 188<br>(73 - 378)      | 649<br>(228 - 1,262)     | 91<br>(38 - 167)         | 23<br>(12 - 38)          |
| Multiple sclerosis                                  | 40<br>(6 - 102)          | --                    | --                     | 25<br>(3 - 66)           | 12<br>(2 - 33)           | 3<br>(1 - 8)             |
| Other neurological disorders                        | 114<br>(81 - 214)        | 49<br>(30 - 111)      | 15<br>(10 - 22)        | 31<br>(20 - 61)          | 10<br>(7 - 17)           | 9<br>(6 - 12)            |
| Mental and substance use disorders                  | 738<br>(326 - 1,720)     | 57<br>(7 - 155)       | 0<br>(0 - 0)           | 518<br>(196 - 1,360)     | 137<br>(66 - 257)        | 27<br>(11 - 53)          |
| Schizophrenia                                       | 16<br>(5 - 30)           | --                    | --                     | 11<br>(3 - 21)           | 4<br>(1 - 7)             | 1<br>(0 - 3)             |
| Alcohol use disorders                               | 205<br>(100 - 474)       | --                    | --                     | 124<br>(60 - 290)        | 72<br>(34 - 179)         | 9<br>(5 - 20)            |
| Drug use disorders                                  | 517<br>(156 - 1,565)     | 57<br>(7 - 155)       | --                     | 383<br>(83 - 1,267)      | 61<br>(18 - 176)         | 17<br>(3 - 44)           |
| Opioid use disorders                                | 283<br>(87 - 859)        | 33<br>(4 - 90)        | --                     | 210<br>(46 - 705)        | 31<br>(9 - 89)           | 9<br>(2 - 24)            |
| Cocaine use disorders                               | 9<br>(2 - 28)            | 1<br>(0 - 3)          | --                     | 7<br>(1 - 23)            | 1<br>(0 - 2)             | 0<br>(0 - 1)             |
| Amphetamine use disorders                           | 9<br>(2 - 27)            | 1<br>(0 - 4)          | --                     | 6<br>(1 - 21)            | 1<br>(0 - 3)             | 0<br>(0 - 1)             |
| Other drug use disorders                            | 216<br>(65 - 657)        | 21<br>(3 - 60)        | --                     | 159<br>(35 - 533)        | 29<br>(8 - 84)           | 7<br>(1 - 19)            |
| Eating disorders                                    | 1<br>(1 - 2)             | --                    | 0<br>(0 - 0)           | 1<br>(1 - 2)             | --                       | --                       |

**Web Table 31- Afghanistan deaths with 95% UI by age, sex, and cause in 2013**

| Cause                                               | Both Sexes, All Ages        | Both Sexes, 0-4 Years      | Both Sexes, 5-14 Years | Both Sexes, 15-49 Years  | Both Sexes, 50-69 Years  | Both Sexes, 70-80 Years  |
|-----------------------------------------------------|-----------------------------|----------------------------|------------------------|--------------------------|--------------------------|--------------------------|
| Anorexia nervosa                                    | 1<br>(1 - 2)                | --                         | 0<br>(0 - 0)           | 1<br>(1 - 2)             | --                       | --                       |
| Diabetes, urogenital, blood, and endocrine diseases | 15,370<br>(11,439 - 19,870) | 1,191<br>(651 - 1,749)     | 551<br>(313 - 776)     | 3,638<br>(2,395 - 5,298) | 6,400<br>(4,666 - 8,476) | 3,590<br>(2,779 - 4,505) |
| Diabetes mellitus                                   | 7,777<br>(5,746 - 10,212)   | 114<br>(72 - 168)          | 53<br>(33 - 85)        | 1,267<br>(837 - 1,830)   | 4,062<br>(2,895 - 5,524) | 2,282<br>(1,729 - 2,999) |
| Acute glomerulonephritis                            | 111<br>(63 - 174)           | 16<br>(7 - 30)             | 17<br>(9 - 27)         | 41<br>(19 - 75)          | 23<br>(13 - 37)          | 14<br>(7 - 24)           |
| Chronic kidney disease                              | 4,745<br>(2,386 - 7,306)    | 245<br>(93 - 418)          | 144<br>(70 - 235)      | 1,340<br>(594 - 2,221)   | 1,962<br>(950 - 3,033)   | 1,054<br>(614 - 1,593)   |
| Chronic kidney disease due to diabetes mellitus     | 88<br>(17 - 165)            | 4<br>(1 - 9)               | 4<br>(1 - 9)           | 28<br>(4 - 61)           | 36<br>(8 - 71)           | 15<br>(4 - 28)           |
| Chronic kidney disease due to hypertension          | 1,551<br>(761 - 2,622)      | 16<br>(3 - 40)             | 11<br>(3 - 24)         | 358<br>(135 - 676)       | 752<br>(369 - 1,251)     | 414<br>(221 - 654)       |
| Chronic kidney disease due to glomerulonephritis    | 906<br>(509 - 1,375)        | 112<br>(58 - 188)          | 63<br>(34 - 105)       | 353<br>(160 - 606)       | 254<br>(130 - 412)       | 124<br>(64 - 194)        |
| Chronic kidney disease due to other causes          | 2,199<br>(778 - 3,992)      | 113<br>(18 - 234)          | 66<br>(18 - 131)       | 600<br>(138 - 1,187)     | 920<br>(286 - 1,781)     | 500<br>(228 - 902)       |
| Urinary diseases and male infertility               | 561<br>(389 - 755)          | 83<br>(42 - 152)           | 24<br>(15 - 36)        | 161<br>(83 - 260)        | 163<br>(105 - 236)       | 129<br>(91 - 177)        |
| Interstitial nephritis and urinary tract infections | 282<br>(185 - 396)          | 49<br>(23 - 98)            | 11<br>(6 - 17)         | 80<br>(39 - 141)         | 73<br>(44 - 110)         | 69<br>(44 - 99)          |
| Urolithiasis                                        | 48<br>(20 - 88)             | --                         | 5<br>(2 - 8)           | 21<br>(5 - 47)           | 14<br>(5 - 27)           | 8<br>(4 - 15)            |
| Other urinary diseases                              | 230<br>(150 - 339)          | 34<br>(14 - 71)            | 9<br>(5 - 14)          | 60<br>(32 - 99)          | 75<br>(46 - 120)         | 52<br>(33 - 81)          |
| Gynecological diseases                              | 86<br>(44 - 204)            | --                         | --                     | 69<br>(35 - 163)         | 12<br>(5 - 32)           | 5<br>(2 - 11)            |
| Uterine fibroids                                    | 15<br>(8 - 37)              | --                         | --                     | 10<br>(5 - 24)           | 4<br>(2 - 10)            | 1<br>(1 - 3)             |
| Polycystic ovarian syndrome                         | 5<br>(3 - 12)               | --                         | --                     | 5<br>(3 - 12)            | 0<br>(0 - 0)             | --                       |
| Endometriosis                                       | 12<br>(6 - 29)              | --                         | --                     | 11<br>(6 - 28)           | 0<br>(0 - 1)             | --                       |
| Genital prolapse                                    | 13<br>(7 - 31)              | --                         | --                     | 10<br>(5 - 24)           | 2<br>(1 - 5)             | 1<br>(1 - 3)             |
| Other gynecological diseases                        | 41<br>(21 - 97)             | --                         | --                     | 33<br>(16 - 78)          | 6<br>(3 - 16)            | 2<br>(1 - 5)             |
| Hemoglobinopathies and hemolytic anemias            | 1,499<br>(466 - 2,556)      | 489<br>(122 - 907)         | 249<br>(83 - 420)      | 617<br>(177 - 1,181)     | 90<br>(33 - 171)         | 54<br>(25 - 84)          |
| Thalassemias                                        | 1,019<br>(294 - 1,743)      | 369<br>(88 - 690)          | 207<br>(70 - 352)      | 443<br>(127 - 835)       | 0<br>(0 - 0)             | 0<br>(0 - 0)             |
| Sickle cell disorders                               | 159<br>(48 - 271)           | 60<br>(14 - 113)           | 25<br>(8 - 41)         | 60<br>(17 - 109)         | 13<br>(5 - 26)           | 1<br>(0 - 1)             |
| G6PD deficiency                                     | 34<br>(10 - 58)             | 8<br>(2 - 15)              | 4<br>(1 - 6)           | 15<br>(4 - 29)           | 6<br>(2 - 11)            | 1<br>(0 - 1)             |
| Other hemoglobinopathies and hemolytic anemias      | 287<br>(108 - 500)          | 51<br>(15 - 90)            | 13<br>(4 - 22)         | 100<br>(26 - 198)        | 71<br>(27 - 136)         | 52<br>(25 - 82)          |
| Endocrine, metabolic, blood, and immune disorders   | 591<br>(290 - 1,166)        | 244<br>(97 - 582)          | 65<br>(29 - 135)       | 143<br>(55 - 303)        | 87<br>(41 - 166)         | 52<br>(32 - 82)          |
| Musculoskeletal disorders                           | 397<br>(132 - 831)          | --                         | 47<br>(13 - 98)        | 211<br>(57 - 489)        | 87<br>(32 - 166)         | 51<br>(22 - 87)          |
| Rheumatoid arthritis                                | 142<br>(38 - 373)           | --                         | 23<br>(5 - 61)         | 70<br>(13 - 211)         | 30<br>(10 - 69)          | 18<br>(7 - 36)           |
| Other musculoskeletal disorders                     | 255<br>(76 - 481)           | --                         | 24<br>(6 - 43)         | 141<br>(34 - 285)        | 57<br>(19 - 100)         | 33<br>(13 - 54)          |
| Other non-communicable diseases                     | 13,946<br>(6,649 - 27,082)  | 12,305<br>(5,608 - 24,403) | 750<br>(317 - 1,523)   | 491<br>(224 - 996)       | 200<br>(115 - 311)       | 200<br>(121 - 286)       |
| Congenital anomalies                                | 13,403<br>(6,138 - 26,531)  | 12,203<br>(5,493 - 24,272) | 740<br>(312 - 1,510)   | 369<br>(133 - 837)       | 57<br>(26 - 116)         | 34<br>(22 - 52)          |
| Neural tube defects                                 | 2,768<br>(685 - 8,767)      | 2,561<br>(607 - 8,054)     | 102<br>(22 - 341)      | 90<br>(21 - 295)         | 12<br>(3 - 36)           | 3<br>(1 - 9)             |
| Congenital heart anomalies                          | 6,264<br>(1,933 - 15,255)   | 5,763<br>(1,737 - 14,514)  | 361<br>(110 - 864)     | 119<br>(30 - 329)        | 13<br>(5 - 33)           | 8<br>(4 - 14)            |
| Cleft lip and cleft palate                          | 40<br>(11 - 97)             | 40<br>(11 - 97)            | --                     | --                       | --                       | --                       |
| Down syndrome                                       | 571<br>(74 - 1,542)         | 456<br>(56 - 1,289)        | 69<br>(10 - 191)       | 42<br>(6 - 127)          | 3<br>(1 - 7)             | 0<br>(0 - 1)             |
| Chromosomal unbalanced rearrangements               | 165<br>(17 - 545)           | 143<br>(14 - 486)          | 9<br>(1 - 26)          | 11<br>(1 - 40)           | 2<br>(0 - 5)             | 1<br>(0 - 2)             |
| Other congenital anomalies                          | 3,595<br>(998 - 9,926)      | 3,240<br>(873 - 9,095)     | 199<br>(59 - 492)      | 107<br>(31 - 289)        | 27<br>(11 - 61)          | 22<br>(14 - 36)          |
| Skin and subcutaneous diseases                      | 465<br>(293 - 637)          | 24<br>(11 - 48)            | 9<br>(5 - 17)          | 122<br>(70 - 191)        | 144<br>(81 - 219)        | 167<br>(89 - 249)        |
| Cellulitis                                          | 280<br>(137 - 455)          | 18<br>(7 - 36)             | 7<br>(3 - 14)          | 71<br>(33 - 131)         | 91<br>(39 - 164)         | 93<br>(41 - 171)         |
| Pyoderma                                            | 111<br>(29 - 235)           | 6<br>(1 - 18)              | 1<br>(0 - 4)           | 30<br>(7 - 68)           | 34<br>(7 - 79)           | 40<br>(10 - 87)          |
| Decubitus ulcer                                     | 69<br>(13 - 144)            | 0<br>(0 - 1)               | 1<br>(0 - 2)           | 18<br>(3 - 44)           | 18<br>(3 - 46)           | 32<br>(7 - 66)           |

**Web Table 31- Afghanistan deaths with 95% UI by age, sex, and cause in 2013**

| Cause                                           | Both Sexes, All Ages        | Both Sexes, 0-4 Years    | Both Sexes, 5-14 Years   | Both Sexes, 15-49 Years     | Both Sexes, 50-69 Years  | Both Sexes, 70-80 Years |
|-------------------------------------------------|-----------------------------|--------------------------|--------------------------|-----------------------------|--------------------------|-------------------------|
| Other skin and subcutaneous diseases            | 5<br>(1 - 16)               | 0<br>(0 - 1)             | 0<br>(0 - 1)             | 3<br>(0 - 10)               | 1<br>(0 - 4)             | 1<br>(0 - 2)            |
| Sudden infant death syndrome                    | 78<br>(13 - 391)            | 78<br>(13 - 391)         | --                       | --                          | --                       | --                      |
| Injuries                                        | 39,338<br>(30,471 - 50,132) | 6,427<br>(4,136 - 9,064) | 5,058<br>(3,977 - 6,070) | 23,191<br>(16,390 - 32,073) | 3,873<br>(2,685 - 5,306) | 789<br>(621 - 953)      |
| Transport injuries                              | 12,905<br>(9,450 - 17,477)  | 1,075<br>(582 - 1,757)   | 1,409<br>(995 - 1,860)   | 8,813<br>(6,040 - 12,446)   | 1,429<br>(905 - 2,167)   | 179<br>(128 - 247)      |
| Road injuries                                   | 12,158<br>(8,778 - 16,670)  | 1,003<br>(537 - 1,661)   | 1,329<br>(925 - 1,754)   | 8,341<br>(5,691 - 11,894)   | 1,320<br>(815 - 1,985)   | 165<br>(116 - 229)      |
| Pedestrian road injuries                        | 3,562<br>(2,250 - 5,423)    | 425<br>(198 - 806)       | 533<br>(329 - 785)       | 2,059<br>(1,191 - 3,352)    | 469<br>(249 - 766)       | 76<br>(46 - 119)        |
| Cyclist road injuries                           | 557<br>(329 - 898)          | 55<br>(20 - 118)         | 86<br>(44 - 147)         | 312<br>(175 - 519)          | 92<br>(52 - 156)         | 12<br>(7 - 20)          |
| Motorcyclist road injuries                      | 1,584<br>(881 - 2,509)      | 62<br>(26 - 122)         | 86<br>(44 - 141)         | 1,318<br>(703 - 2,130)      | 108<br>(55 - 189)        | 11<br>(6 - 20)          |
| Motor vehicle road injuries                     | 6,231<br>(3,971 - 9,143)    | 406<br>(177 - 731)       | 558<br>(329 - 841)       | 4,580<br>(2,795 - 6,990)    | 627<br>(349 - 997)       | 60<br>(36 - 92)         |
| Other road injuries                             | 225<br>(74 - 638)           | 56<br>(12 - 149)         | 67<br>(20 - 155)         | 72<br>(21 - 286)            | 24<br>(7 - 75)           | 6<br>(2 - 15)           |
| Other transport injuries                        | 747<br>(307 - 1,237)        | 71<br>(28 - 148)         | 79<br>(30 - 140)         | 472<br>(184 - 824)          | 109<br>(37 - 211)        | 14<br>(6 - 24)          |
| Unintentional injuries                          | 18,140<br>(14,091 - 22,437) | 5,096<br>(3,219 - 7,377) | 3,352<br>(2,562 - 4,107) | 7,438<br>(5,307 - 10,080)   | 1,707<br>(1,208 - 2,314) | 547<br>(415 - 689)      |
| Falls                                           | 3,614<br>(2,524 - 4,871)    | 1,507<br>(824 - 2,516)   | 657<br>(412 - 1,004)     | 789<br>(490 - 1,159)        | 412<br>(263 - 606)       | 249<br>(153 - 361)      |
| Drowning                                        | 4,533<br>(2,994 - 6,149)    | 1,626<br>(835 - 2,708)   | 1,199<br>(755 - 1,682)   | 1,391<br>(819 - 2,047)      | 269<br>(154 - 431)       | 48<br>(30 - 69)         |
| Fire, heat, and hot substances                  | 1,417<br>(861 - 2,295)      | 380<br>(160 - 734)       | 154<br>(82 - 242)        | 582<br>(313 - 998)          | 225<br>(135 - 367)       | 76<br>(45 - 114)        |
| Poisonings                                      | 684<br>(402 - 1,330)        | 194<br>(81 - 444)        | 78<br>(41 - 147)         | 312<br>(152 - 610)          | 82<br>(41 - 178)         | 17<br>(9 - 32)          |
| Exposure to mechanical forces                   | 2,040<br>(1,275 - 3,395)    | 314<br>(166 - 547)       | 251<br>(150 - 400)       | 1,220<br>(655 - 2,140)      | 217<br>(113 - 395)       | 37<br>(23 - 61)         |
| Unintentional firearm injuries                  | 1,106<br>(394 - 1,951)      | 117<br>(34 - 258)        | 101<br>(34 - 198)        | 755<br>(266 - 1,409)        | 115<br>(42 - 231)        | 19<br>(8 - 35)          |
| Unintentional suffocation                       | 49<br>(9 - 123)             | 18<br>(2 - 65)           | 8<br>(2 - 21)            | 16<br>(3 - 42)              | 5<br>(1 - 13)            | 1<br>(0 - 2)            |
| Other exposure to mechanical forces             | 886<br>(534 - 1,578)        | 180<br>(74 - 360)        | 142<br>(74 - 251)        | 450<br>(246 - 873)          | 97<br>(49 - 189)         | 18<br>(11 - 29)         |
| Adverse effects of medical treatment            | 415<br>(246 - 652)          | 90<br>(36 - 177)         | 32<br>(17 - 50)          | 133<br>(66 - 232)           | 107<br>(59 - 174)        | 54<br>(31 - 89)         |
| Animal contact                                  | 189<br>(60 - 344)           | 64<br>(15 - 140)         | 43<br>(13 - 83)          | 57<br>(18 - 111)            | 16<br>(6 - 30)           | 9<br>(3 - 16)           |
| Venomous animal contact                         | 117<br>(34 - 229)           | 43<br>(9 - 100)          | 28<br>(8 - 56)           | 32<br>(8 - 66)              | 10<br>(3 - 19)           | 4<br>(1 - 8)            |
| Non-venomous animal contact                     | 72<br>(21 - 143)            | 20<br>(4 - 51)           | 15<br>(4 - 34)           | 25<br>(7 - 51)              | 7<br>(2 - 13)            | 5<br>(2 - 10)           |
| Foreign body                                    | 219<br>(83 - 516)           | 128<br>(37 - 342)        | 28<br>(11 - 61)          | 34<br>(14 - 81)             | 13<br>(6 - 29)           | 16<br>(7 - 32)          |
| Pulmonary aspiration and foreign body in airway | 210<br>(76 - 509)           | 126<br>(36 - 341)        | 26<br>(9 - 58)           | 31<br>(11 - 73)             | 12<br>(5 - 27)           | 15<br>(7 - 31)          |
| Foreign body in other body part                 | 9<br>(4 - 24)               | 2<br>(1 - 6)             | 2<br>(1 - 5)             | 4<br>(2 - 11)               | 1<br>(1 - 3)             | 1<br>(0 - 1)            |
| Other unintentional injuries                    | 5,028<br>(3,701 - 6,680)    | 793<br>(419 - 1,288)     | 910<br>(654 - 1,209)     | 2,920<br>(1,898 - 4,230)    | 365<br>(214 - 581)       | 41<br>(29 - 55)         |
| Self-harm and interpersonal violence            | 8,160<br>(4,513 - 12,066)   | 255<br>(94 - 522)        | 286<br>(154 - 456)       | 6,858<br>(3,707 - 10,302)   | 702<br>(397 - 1,099)     | 59<br>(40 - 83)         |
| Self-harm                                       | 2,107<br>(1,465 - 2,985)    | --                       | 76<br>(33 - 162)         | 1,692<br>(1,147 - 2,445)    | 304<br>(183 - 478)       | 35<br>(22 - 55)         |
| Interpersonal violence                          | 6,053<br>(2,771 - 9,483)    | 255<br>(94 - 522)        | 211<br>(94 - 355)        | 5,166<br>(2,332 - 8,291)    | 399<br>(162 - 681)       | 23<br>(12 - 38)         |
| Assault by firearm                              | 2,896<br>(875 - 5,140)      | 31<br>(6 - 92)           | 48<br>(12 - 112)         | 2,626<br>(782 - 4,713)      | 183<br>(47 - 361)        | 7<br>(2 - 14)           |
| Assault by sharp object                         | 1,279<br>(252 - 2,521)      | 14<br>(1 - 43)           | 29<br>(4 - 68)           | 1,131<br>(220 - 2,258)      | 101<br>(21 - 218)        | 3<br>(1 - 7)            |
| Assault by other means                          | 1,879<br>(859 - 3,444)      | 209<br>(77 - 425)        | 133<br>(60 - 243)        | 1,409<br>(604 - 2,742)      | 115<br>(45 - 224)        | 13<br>(6 - 22)          |
| Forces of nature, war, and legal intervention   | 133<br>(67 - 217)           | 2<br>(0 - 0)             | 10<br>(5 - 16)           | 82<br>(42 - 130)            | 35<br>(17 - 56)          | 4<br>(2 - 8)            |
| Exposure to forces of nature                    | 133<br>(67 - 217)           | 2<br>(0 - 0)             | 10<br>(5 - 16)           | 82<br>(42 - 130)            | 35<br>(17 - 56)          | 4<br>(2 - 8)            |

| Web Table 31- Afghanistan deaths with 95% UI by age, sex, and cause in 2013 |                                |                             |                          |                             |                             |                             |
|-----------------------------------------------------------------------------|--------------------------------|-----------------------------|--------------------------|-----------------------------|-----------------------------|-----------------------------|
| Cause                                                                       | Males, All Ages                | Males, 0-4 Years            | Males, 5-14 Years        | Males, 15-49 Years          | Males, 50-69 Years          | Males, 70-80 Years          |
| All causes                                                                  | 144,688<br>(115,780 - 178,475) | 49,875<br>(43,674 - 56,881) | 6,423<br>(5,533 - 7,591) | 37,137<br>(24,060 - 53,449) | 34,071<br>(21,938 - 47,553) | 17,181<br>(13,276 - 20,181) |
| Communicable, maternal, neonatal, and nutritional diseases                  | 48,836<br>(38,927 - 57,661)    | 38,552<br>(29,900 - 45,781) | 1,736<br>(1,252 - 2,484) | 4,174<br>(2,826 - 6,193)    | 2,623<br>(1,766 - 3,792)    | 1,752<br>(1,273 - 2,324)    |
| HIV/AIDS and tuberculosis                                                   | 2,993<br>(1,725 - 5,311)       | 241<br>(119 - 413)          | 129<br>(65 - 216)        | 1,619<br>(833 - 2,985)      | 714<br>(368 - 1,493)        | 291<br>(152 - 595)          |
| Tuberculosis                                                                | 2,876<br>(1,666 - 5,065)       | 236<br>(116 - 397)          | 128<br>(63 - 216)        | 1,530<br>(776 - 2,827)      | 695<br>(361 - 1,436)        | 289<br>(151 - 589)          |
| HIV/AIDS                                                                    | 117<br>(11 - 597)              | 5<br>(0 - 23)               | 1<br>(0 - 7)             | 89<br>(9 - 454)             | 19<br>(1 - 95)              | 2<br>(0 - 10)               |
| HIV/AIDS resulting in mycobacterial infection                               | 8<br>(1 - 41)                  | 0<br>(0 - 2)                | 0<br>(0 - 0)             | 6<br>(1 - 31)               | 1<br>(0 - 7)                | 0<br>(0 - 1)                |
| HIV/AIDS resulting in other diseases                                        | 109<br>(11 - 556)              | 5<br>(0 - 21)               | 1<br>(0 - 7)             | 83<br>(8 - 420)             | 18<br>(1 - 88)              | 2<br>(0 - 9)                |
| Diarrhea, lower respiratory, and other common infectious diseases           | 28,847<br>(22,227 - 35,592)    | 22,965<br>(16,934 - 28,800) | 1,388<br>(947 - 2,103)   | 1,766<br>(1,117 - 2,711)    | 1,478<br>(902 - 2,191)      | 1,252<br>(862 - 1,694)      |
| Diarrheal diseases                                                          | 6,150<br>(2,830 - 10,258)      | 5,790<br>(2,510 - 9,854)    | 43<br>(17 - 89)          | 136<br>(73 - 220)           | 89<br>(42 - 157)            | 92<br>(50 - 151)            |
| Intestinal infectious diseases                                              | 747<br>(341 - 1,420)           | 234<br>(99 - 455)           | 274<br>(118 - 522)       | 209<br>(83 - 464)           | 24<br>(9 - 52)              | 6<br>(2 - 13)               |
| Typhoid fever                                                               | 529<br>(222 - 1,070)           | 151<br>(57 - 305)           | 205<br>(85 - 401)        | 153<br>(55 - 350)           | 17<br>(6 - 38)              | 4<br>(2 - 9)                |
| Paratyphoid fever                                                           | 160<br>(64 - 316)              | 51<br>(17 - 114)            | 62<br>(22 - 131)         | 43<br>(14 - 96)             | 4<br>(1 - 10)               | 1<br>(0 - 2)                |
| Other intestinal infectious diseases                                        | 59<br>(37 - 90)                | 33<br>(16 - 56)             | 8<br>(3 - 18)            | 13<br>(5 - 27)              | 3<br>(0 - 10)               | 1<br>(0 - 5)                |
| Lower respiratory infections                                                | 15,600<br>(11,250 - 20,482)    | 11,544<br>(7,736 - 16,210)  | 654<br>(396 - 973)       | 1,056<br>(618 - 1,686)      | 1,239<br>(738 - 1,889)      | 1,107<br>(748 - 1,539)      |
| Upper respiratory infections                                                | 23<br>(9 - 48)                 | 8<br>(1 - 28)               | 1<br>(0 - 5)             | 7<br>(1 - 18)               | 5<br>(0 - 15)               | 2<br>(0 - 6)                |
| Otitis media                                                                | 23<br>(10 - 35)                | 5<br>(2 - 10)               | 3<br>(1 - 5)             | 7<br>(3 - 13)               | 4<br>(2 - 8)                | 3<br>(1 - 4)                |
| Meningitis                                                                  | 3,180<br>(1,885 - 4,887)       | 2,664<br>(1,383 - 4,335)    | 141<br>(54 - 287)        | 251<br>(111 - 441)          | 92<br>(41 - 167)            | 32<br>(17 - 55)             |
| Pneumococcal meningitis                                                     | 604<br>(351 - 967)             | 468<br>(228 - 801)          | 41<br>(15 - 88)          | 69<br>(23 - 136)            | 19<br>(7 - 39)              | 7<br>(3 - 13)               |
| H influenzae type B meningitis                                              | 1,139<br>(560 - 1,955)         | 1,059<br>(484 - 1,881)      | 38<br>(10 - 81)          | 31<br>(13 - 62)             | 9<br>(3 - 22)               | 3<br>(1 - 6)                |
| Meningococcal meningitis                                                    | 869<br>(494 - 1,472)           | 724<br>(361 - 1,319)        | 38<br>(14 - 82)          | 72<br>(30 - 134)            | 26<br>(9 - 52)              | 9<br>(4 - 16)               |
| Other meningitis                                                            | 567<br>(285 - 964)             | 413<br>(158 - 807)          | 25<br>(7 - 55)           | 79<br>(32 - 154)            | 38<br>(16 - 73)             | 13<br>(6 - 24)              |
| Encephalitis                                                                | 266<br>(129 - 445)             | 169<br>(60 - 360)           | 28<br>(10 - 57)          | 49<br>(19 - 104)            | 14<br>(6 - 31)              | 6<br>(3 - 9)                |
| Diphtheria                                                                  | 23<br>(0 - 121)                | 16<br>(0 - 114)             | 4<br>(0 - 37)            | 2<br>(0 - 9)                | 1<br>(0 - 4)                | --                          |
| Whooping cough                                                              | 1,007<br>(1 - 4,848)           | 931<br>(1 - 4,495)          | 64<br>(0 - 303)          | 11<br>(0 - 53)              | 1<br>(0 - 5)                | --                          |
| Tetanus                                                                     | 837<br>(445 - 1,418)           | 790<br>(412 - 1,341)        | 30<br>(7 - 139)          | 13<br>(1 - 101)             | 4<br>(0 - 38)               | 0<br>(0 - 0)                |
| Measles                                                                     | 956<br>(24 - 6,532)            | 799<br>(20 - 5,328)         | 139<br>(3 - 925)         | 17<br>(0 - 124)             | 1<br>(0 - 3)                | --                          |
| Varicella and herpes zoster                                                 | 36<br>(11 - 85)                | 15<br>(1 - 59)              | 5<br>(0 - 20)            | 9<br>(1 - 25)               | 3<br>(0 - 9)                | 4<br>(0 - 16)               |
| Neglected tropical diseases and malaria                                     | 698<br>(384 - 1,250)           | 136<br>(63 - 491)           | 85<br>(51 - 156)         | 378<br>(180 - 777)          | 89<br>(38 - 198)            | 10<br>(5 - 17)              |
| Malaria                                                                     | 490<br>(191 - 1,019)           | 59<br>(12 - 415)            | 41<br>(14 - 106)         | 311<br>(115 - 693)          | 74<br>(24 - 185)            | 5<br>(2 - 12)               |
| Leishmaniasis                                                               | 33<br>(18 - 52)                | 15<br>(5 - 27)              | 8<br>(2 - 15)            | 8<br>(4 - 14)               | 1<br>(1 - 2)                | 0<br>(0 - 0)                |
| Visceral leishmaniasis                                                      | 33<br>(18 - 52)                | 15<br>(5 - 27)              | 8<br>(2 - 15)            | 8<br>(4 - 14)               | 1<br>(1 - 2)                | 0<br>(0 - 0)                |
| Cysticercosis                                                               | 1<br>(0 - 2)                   | 0<br>(0 - 0)                | 0<br>(0 - 0)             | 0<br>(0 - 1)                | 0<br>(0 - 0)                | 0<br>(0 - 0)                |
| Cystic echinococcosis                                                       | 7<br>(5 - 9)                   | 1<br>(0 - 1)                | 1<br>(1 - 2)             | 3<br>(2 - 5)                | 1<br>(1 - 2)                | 0<br>(0 - 0)                |
| Dengue                                                                      | 6<br>(2 - 8)                   | 1<br>(0 - 3)                | 1<br>(1 - 2)             | 3<br>(1 - 4)                | 0<br>(0 - 1)                | 0<br>(0 - 0)                |
| Rabies                                                                      | 46<br>(18 - 110)               | 10<br>(2 - 33)              | 14<br>(5 - 31)           | 18<br>(7 - 43)              | 3<br>(1 - 8)                | 1<br>(0 - 1)                |
| Intestinal nematode infections                                              | 31<br>(15 - 56)                | 22<br>(8 - 43)              | 6<br>(1 - 16)            | 3<br>(0 - 11)               | 1<br>(0 - 6)                | 0<br>(0 - 3)                |
| Ascariasis                                                                  | 31<br>(15 - 56)                | 22<br>(8 - 43)              | 6<br>(1 - 16)            | 3<br>(0 - 11)               | 1<br>(0 - 6)                | 0<br>(0 - 3)                |
| Other neglected tropical diseases                                           | 84<br>(27 - 164)               | 28<br>(6 - 72)              | 13<br>(4 - 25)           | 32<br>(10 - 64)             | 7<br>(2 - 16)               | 4<br>(1 - 8)                |
| Maternal disorders                                                          | --                             | --                          | --                       | --                          | --                          | --                          |
| Maternal hemorrhage                                                         | --                             | --                          | --                       | --                          | --                          | --                          |



| Web Table 31- Afghanistan deaths with 95% UI by age, sex, and cause in 2013 |                             |                             |                        |                            |                             |                             |
|-----------------------------------------------------------------------------|-----------------------------|-----------------------------|------------------------|----------------------------|-----------------------------|-----------------------------|
| Cause                                                                       | Males, All Ages             | Males, 0-4 Years            | Males, 5-14 Years      | Males, 15-49 Years         | Males, 50-69 Years          | Males, 70-80 Years          |
| Maternal sepsis and other maternal infections                               | --                          | --                          | --                     | --                         | --                          | --                          |
| Maternal hypertensive disorders                                             | --                          | --                          | --                     | --                         | --                          | --                          |
| Maternal obstructed labor                                                   | --                          | --                          | --                     | --                         | --                          | --                          |
| Maternal abortive outcome                                                   | --                          | --                          | --                     | --                         | --                          | --                          |
| Indirect maternal deaths                                                    | --                          | --                          | --                     | --                         | --                          | --                          |
| Late maternal deaths                                                        | --                          | --                          | --                     | --                         | --                          | --                          |
| Maternal deaths aggravated by HIV/AIDS                                      | --                          | --                          | --                     | --                         | --                          | --                          |
| Other maternal disorders                                                    | --                          | --                          | --                     | --                         | --                          | --                          |
| Neonatal disorders                                                          | 14,474<br>(10,893 - 18,895) | 14,474<br>(10,893 - 18,895) | --                     | --                         | --                          | --                          |
| Neonatal preterm birth complications                                        | 7,652<br>(4,929 - 11,409)   | 7,652<br>(4,929 - 11,409)   | --                     | --                         | --                          | --                          |
| Neonatal encephalopathy due to birth asphyxia and trauma                    | 2,451<br>(614 - 4,805)      | 2,451<br>(614 - 4,805)      | --                     | --                         | --                          | --                          |
| Neonatal sepsis and other neonatal infections                               | 572<br>(127 - 1,304)        | 572<br>(127 - 1,304)        | --                     | --                         | --                          | --                          |
| Hemolytic disease and other neonatal jaundice                               | 177<br>(37 - 711)           | 177<br>(37 - 711)           | --                     | --                         | --                          | --                          |
| Other neonatal disorders                                                    | 3,623<br>(762 - 7,752)      | 3,623<br>(762 - 7,752)      | --                     | --                         | --                          | --                          |
| Nutritional deficiencies                                                    | 1,084<br>(556 - 2,236)      | 483<br>(172 - 1,094)        | 83<br>(41 - 155)       | 216<br>(98 - 439)          | 165<br>(65 - 348)           | 137<br>(51 - 268)           |
| Protein-energy malnutrition                                                 | 603<br>(261 - 1,299)        | 376<br>(131 - 906)          | 49<br>(18 - 98)        | 106<br>(37 - 218)          | 51<br>(15 - 117)            | 21<br>(6 - 51)              |
| Iodine deficiency                                                           | 7<br>(1 - 27)               | 3<br>(0 - 19)               | 1<br>(0 - 5)           | 2<br>(0 - 8)               | 1<br>(0 - 7)                | 1<br>(0 - 4)                |
| Iron-deficiency anemia                                                      | 415<br>(169 - 908)          | 87<br>(14 - 277)            | 27<br>(8 - 64)         | 91<br>(31 - 219)           | 104<br>(35 - 239)           | 106<br>(36 - 206)           |
| Other nutritional deficiencies                                              | 58<br>(17 - 178)            | 19<br>(2 - 73)              | 6<br>(2 - 20)          | 17<br>(5 - 51)             | 8<br>(2 - 26)               | 8<br>(2 - 26)               |
| Other communicable, maternal, neonatal, and nutritional diseases            | 740<br>(456 - 1,301)        | 253<br>(126 - 503)          | 51<br>(26 - 108)       | 196<br>(103 - 344)         | 178<br>(90 - 324)           | 62<br>(29 - 166)            |
| Sexually transmitted diseases excluding HIV                                 | 112<br>(59 - 179)           | 57<br>(28 - 99)             | 9<br>(4 - 15)          | 29<br>(5 - 66)             | 11<br>(2 - 27)              | 7<br>(2 - 18)               |
| Syphilis                                                                    | 92<br>(51 - 144)            | 57<br>(28 - 99)             | 6<br>(3 - 10)          | 16<br>(3 - 36)             | 8<br>(2 - 20)               | 5<br>(1 - 15)               |
| Chlamydial infection                                                        | --                          | --                          | --                     | --                         | --                          | --                          |
| Gonococcal infection                                                        | 12<br>(2 - 24)              | --                          | 1<br>(0 - 3)           | 8<br>(1 - 17)              | 2<br>(0 - 5)                | 1<br>(0 - 2)                |
| Other sexually transmitted diseases                                         | 9<br>(2 - 19)               | --                          | 1<br>(0 - 3)           | 6<br>(1 - 14)              | 1<br>(0 - 3)                | 0<br>(0 - 1)                |
| Hepatitis                                                                   | 241<br>(82 - 382)           | 36<br>(6 - 74)              | 9<br>(3 - 14)          | 77<br>(23 - 138)           | 101<br>(37 - 176)           | 19<br>(9 - 32)              |
| Acute hepatitis A                                                           | 27<br>(6 - 58)              | 17<br>(3 - 42)              | 3<br>(1 - 7)           | 4<br>(1 - 11)              | 1<br>(0 - 4)                | 0<br>(0 - 0)                |
| Acute hepatitis B                                                           | 139<br>(42 - 237)           | 18<br>(3 - 44)              | 3<br>(1 - 6)           | 32<br>(8 - 68)             | 70<br>(22 - 127)            | 16<br>(6 - 26)              |
| Acute hepatitis C                                                           | 15<br>(2 - 46)              | --                          | 1<br>(0 - 3)           | 4<br>(0 - 15)              | 8<br>(1 - 26)               | 2<br>(0 - 5)                |
| Acute hepatitis E                                                           | 62<br>(19 - 121)            | 0<br>(0 - 1)                | 1<br>(0 - 3)           | 36<br>(9 - 70)             | 22<br>(6 - 49)              | 2<br>(0 - 5)                |
| Other infectious diseases                                                   | 386<br>(189 - 1,047)        | 160<br>(45 - 418)           | 34<br>(12 - 97)        | 90<br>(39 - 249)           | 66<br>(21 - 217)            | 36<br>(9 - 143)             |
| Non-communicable diseases                                                   | 65,000<br>(45,282 - 87,031) | 7,103<br>(3,738 - 14,780)   | 1,227<br>(884 - 1,765) | 13,258<br>(8,178 - 20,258) | 28,405<br>(18,083 - 39,934) | 15,006<br>(11,510 - 17,732) |
| Neoplasms                                                                   | 8,524<br>(5,517 - 12,263)   | 137<br>(60 - 357)           | 263<br>(167 - 438)     | 2,099<br>(1,239 - 3,281)   | 4,332<br>(2,707 - 6,347)    | 1,693<br>(1,226 - 2,136)    |
| Esophageal cancer                                                           | 225<br>(128 - 350)          | --                          | --                     | 55<br>(30 - 90)            | 124<br>(66 - 209)           | 46<br>(28 - 68)             |
| Stomach cancer                                                              | 1,762<br>(1,018 - 2,548)    | --                          | --                     | 476<br>(249 - 786)         | 960<br>(531 - 1,462)        | 326<br>(211 - 448)          |
| Liver cancer                                                                | 468<br>(242 - 1,084)        | --                          | 5<br>(2 - 14)          | 84<br>(34 - 245)           | 280<br>(131 - 681)          | 99<br>(58 - 186)            |
| Liver cancer due to hepatitis B                                             | 156<br>(44 - 394)           | --                          | 2<br>(1 - 7)           | 38<br>(12 - 111)           | 91<br>(21 - 244)            | 24<br>(5 - 55)              |
| Liver cancer due to hepatitis C                                             | 238<br>(103 - 568)          | --                          | 1<br>(0 - 2)           | 34<br>(9 - 104)            | 147<br>(59 - 372)           | 57<br>(28 - 109)            |
| Liver cancer due to alcohol use                                             | 40<br>(13 - 96)             | --                          | --                     | 4<br>(1 - 14)              | 23<br>(6 - 60)              | 13<br>(5 - 26)              |
| Liver cancer due to other causes                                            | 35<br>(8 - 104)             | --                          | 2<br>(1 - 6)           | 8<br>(2 - 28)              | 18<br>(3 - 59)              | 6<br>(1 - 15)               |

| Web Table 31- Afghanistan deaths with 95% UI by age, sex, and cause in 2013 |                             |                  |                   |                           |                             |                           |
|-----------------------------------------------------------------------------|-----------------------------|------------------|-------------------|---------------------------|-----------------------------|---------------------------|
| Cause                                                                       | Males, All Ages             | Males, 0-4 Years | Males, 5-14 Years | Males, 15-49 Years        | Males, 50-69 Years          | Males, 70-80 Years        |
| Larynx cancer                                                               | 247<br>(146 - 426)          | --               | --                | 48<br>(25 - 90)           | 149<br>(84 - 263)           | 50<br>(32 - 79)           |
| Tracheal, bronchus and lung cancer                                          | 2,138<br>(727 - 3,216)      | --               | --                | 379<br>(86 - 651)         | 1,321<br>(425 - 2,018)      | 439<br>(204 - 611)        |
| Breast cancer                                                               | 26<br>(10 - 60)             | --               | --                | 10<br>(3 - 28)            | 12<br>(4 - 29)              | 4<br>(2 - 7)              |
| Cervical cancer                                                             | --                          | --               | --                | --                        | --                          | --                        |
| Uterine cancer                                                              | --                          | --               | --                | --                        | --                          | --                        |
| Prostate cancer                                                             | 261<br>(148 - 418)          | --               | --                | 6<br>(3 - 13)             | 94<br>(46 - 178)            | 161<br>(91 - 250)         |
| Colon and rectum cancer                                                     | 391<br>(261 - 548)          | --               | --                | 96<br>(59 - 156)          | 199<br>(123 - 284)          | 96<br>(69 - 126)          |
| Lip and oral cavity cancer                                                  | 108<br>(32 - 206)           | --               | --                | 35<br>(8 - 74)            | 57<br>(15 - 113)            | 16<br>(7 - 27)            |
| Nasopharynx cancer                                                          | 54<br>(28 - 86)             | --               | 4<br>(1 - 13)     | 23<br>(11 - 40)           | 22<br>(10 - 39)             | 5<br>(3 - 9)              |
| Other pharynx cancer                                                        | 38<br>(14 - 93)             | --               | --                | 12<br>(4 - 31)            | 22<br>(7 - 54)              | 4<br>(2 - 9)              |
| Gallbladder and biliary tract cancer                                        | 56<br>(30 - 103)            | --               | --                | 9<br>(4 - 17)             | 31<br>(15 - 58)             | 16<br>(9 - 30)            |
| Pancreatic cancer                                                           | 140<br>(93 - 195)           | --               | --                | 25<br>(14 - 39)           | 81<br>(51 - 118)            | 35<br>(24 - 47)           |
| Malignant skin melanoma                                                     | 20<br>(10 - 47)             | --               | --                | 8<br>(3 - 20)             | 9<br>(4 - 21)               | 4<br>(2 - 7)              |
| Non-melanoma skin cancer                                                    | 39<br>(20 - 72)             | --               | --                | 15<br>(7 - 29)            | 15<br>(6 - 32)              | 9<br>(4 - 17)             |
| Ovarian cancer                                                              | --                          | --               | --                | --                        | --                          | --                        |
| Testicular cancer                                                           | 16<br>(9 - 27)              | --               | --                | 13<br>(7 - 22)            | 3<br>(1 - 4)                | 1<br>(1 - 2)              |
| Kidney cancer                                                               | 105<br>(51 - 185)           | 5<br>(1 - 14)    | 4<br>(2 - 8)      | 23<br>(9 - 48)            | 57<br>(26 - 105)            | 16<br>(10 - 26)           |
| Bladder cancer                                                              | 572<br>(347 - 849)          | --               | --                | 77<br>(43 - 128)          | 338<br>(193 - 523)          | 157<br>(100 - 231)        |
| Brain and nervous system cancer                                             | 420<br>(165 - 1,136)        | 28<br>(5 - 122)  | 56<br>(21 - 152)  | 156<br>(57 - 486)         | 147<br>(55 - 411)           | 33<br>(13 - 75)           |
| Thyroid cancer                                                              | 25<br>(11 - 59)             | --               | 1<br>(0 - 2)      | 8<br>(3 - 22)             | 13<br>(5 - 31)              | 4<br>(2 - 8)              |
| Mesothelioma                                                                | 10<br>(5 - 26)              | --               | --                | 3<br>(1 - 10)             | 5<br>(2 - 13)               | 2<br>(1 - 4)              |
| Hodgkin lymphoma                                                            | 121<br>(39 - 232)           | 7<br>(1 - 17)    | 16<br>(4 - 42)    | 64<br>(17 - 136)          | 28<br>(8 - 60)              | 6<br>(2 - 13)             |
| Non-Hodgkin lymphoma                                                        | 241<br>(139 - 397)          | 9<br>(3 - 24)    | 18<br>(9 - 33)    | 94<br>(49 - 181)          | 86<br>(45 - 146)            | 34<br>(21 - 52)           |
| Multiple myeloma                                                            | 53<br>(26 - 133)            | --               | --                | 12<br>(5 - 36)            | 29<br>(13 - 77)             | 12<br>(7 - 26)            |
| Leukemia                                                                    | 516<br>(345 - 743)          | 30<br>(11 - 67)  | 99<br>(62 - 150)  | 213<br>(126 - 332)        | 115<br>(66 - 178)           | 60<br>(40 - 84)           |
| Other neoplasms                                                             | 472<br>(247 - 1,323)        | 59<br>(20 - 215) | 59<br>(26 - 160)  | 157<br>(70 - 502)         | 136<br>(64 - 386)           | 61<br>(35 - 121)          |
| Cardiovascular diseases                                                     | 32,190<br>(21,567 - 44,194) | 47<br>(24 - 82)  | 100<br>(63 - 152) | 6,500<br>(3,895 - 10,031) | 16,705<br>(10,801 - 23,555) | 8,836<br>(6,782 - 10,533) |
| Rheumatic heart disease                                                     | 536<br>(251 - 1,130)        | 3<br>(1 - 9)     | 14<br>(6 - 31)    | 211<br>(90 - 459)         | 214<br>(94 - 453)           | 94<br>(49 - 188)          |
| Ischemic heart disease                                                      | 19,909<br>(12,765 - 28,141) | 7<br>(2 - 17)    | 16<br>(8 - 26)    | 4,108<br>(2,320 - 6,609)  | 11,026<br>(6,930 - 15,881)  | 4,752<br>(3,496 - 5,952)  |
| Cerebrovascular disease                                                     | 8,262<br>(5,477 - 11,620)   | 15<br>(7 - 28)   | 41<br>(23 - 64)   | 1,270<br>(742 - 2,086)    | 3,839<br>(2,377 - 5,741)    | 3,097<br>(2,237 - 4,024)  |
| Ischemic stroke                                                             | 3,545<br>(1,608 - 5,906)    | 1<br>(0 - 5)     | 4<br>(1 - 11)     | 282<br>(85 - 664)         | 1,482<br>(587 - 2,811)      | 1,775<br>(871 - 2,693)    |
| Hemorrhagic stroke                                                          | 4,716<br>(2,631 - 7,665)    | 13<br>(6 - 26)   | 37<br>(20 - 58)   | 988<br>(507 - 1,694)      | 2,356<br>(1,212 - 3,953)    | 1,322<br>(776 - 2,185)    |
| Hypertensive heart disease                                                  | 909<br>(310 - 1,571)        | 0<br>(0 - 1)     | 1<br>(0 - 2)      | 153<br>(37 - 286)         | 436<br>(135 - 770)          | 319<br>(132 - 604)        |
| Cardiomyopathy and myocarditis                                              | 487<br>(186 - 782)          | 6<br>(1 - 13)    | 10<br>(3 - 18)    | 161<br>(45 - 293)         | 220<br>(80 - 366)           | 90<br>(47 - 144)          |
| Atrial fibrillation and flutter                                             | 5<br>(2 - 10)               | --               | --                | 1<br>(0 - 2)              | 2<br>(1 - 5)                | 2<br>(1 - 4)              |
| Aortic aneurysm                                                             | 197<br>(82 - 320)           | --               | --                | 22<br>(6 - 42)            | 130<br>(49 - 215)           | 45<br>(24 - 73)           |
| Peripheral vascular disease                                                 | 3<br>(1 - 5)                | --               | --                | 0<br>(0 - 1)              | 1<br>(0 - 2)                | 1<br>(0 - 2)              |
| Endocarditis                                                                | 69<br>(35 - 127)            | 1<br>(0 - 2)     | 1<br>(0 - 2)      | 15<br>(7 - 31)            | 31<br>(14 - 61)             | 21<br>(10 - 38)           |
| Other cardiovascular and circulatory diseases                               | 1,812<br>(546 - 4,426)      | 15<br>(4 - 31)   | 17<br>(5 - 36)    | 559<br>(152 - 1,266)      | 806<br>(233 - 2,121)        | 415<br>(149 - 1,088)      |
| Chronic respiratory diseases                                                | 4,419<br>(2,954 - 6,469)    | 76<br>(6 - 538)  | 76<br>(40 - 204)  | 752<br>(461 - 1,165)      | 2,131<br>(1,307 - 3,101)    | 1,384<br>(1,014 - 1,785)  |



| Web Table 31- Afghanistan deaths with 95% UI by age, sex, and cause in 2013 |                          |                   |                   |                      |                        |                        |
|-----------------------------------------------------------------------------|--------------------------|-------------------|-------------------|----------------------|------------------------|------------------------|
| Cause                                                                       | Males, All Ages          | Males, 0-4 Years  | Males, 5-14 Years | Males, 15-49 Years   | Males, 50-69 Years     | Males, 70-80 Years     |
| Chronic obstructive pulmonary disease                                       | 3,163<br>(2,041 - 4,565) | 60<br>(3 - 445)   | 24<br>(10 - 59)   | 370<br>(192 - 649)   | 1,569<br>(919 - 2,349) | 1,141<br>(815 - 1,506) |
| Pneumoconiosis                                                              | 205<br>(93 - 369)        | 0<br>(0 - 0)      | 4<br>(1 - 14)     | 91<br>(42 - 167)     | 81<br>(32 - 152)       | 29<br>(12 - 54)        |
| Silicosis                                                                   | 39<br>(12 - 89)          | 0<br>(0 - 0)      | 2<br>(0 - 6)      | 6<br>(2 - 15)        | 16<br>(4 - 37)         | 16<br>(5 - 34)         |
| Asbestosis                                                                  | 15<br>(7 - 29)           | 0<br>(0 - 0)      | 1<br>(0 - 2)      | 11<br>(5 - 22)       | 3<br>(1 - 6)           | 0<br>(0 - 1)           |
| Coal workers pneumoconiosis                                                 | 4<br>(2 - 8)             | 0<br>(0 - 0)      | 1<br>(0 - 2)      | 2<br>(1 - 5)         | 1<br>(0 - 2)           | 0<br>(0 - 1)           |
| Other pneumoconiosis                                                        | 147<br>(69 - 263)        | 0<br>(0 - 0)      | 1<br>(0 - 4)      | 72<br>(33 - 135)     | 62<br>(26 - 115)       | 12<br>(5 - 23)         |
| Asthma                                                                      | 805<br>(290 - 1,585)     | 1<br>(0 - 3)      | 35<br>(12 - 114)  | 242<br>(93 - 467)    | 374<br>(118 - 778)     | 152<br>(56 - 302)      |
| Interstitial lung disease and pulmonary sarcoidosis                         | 129<br>(45 - 346)        | 0<br>(0 - 0)      | 1<br>(0 - 4)      | 12<br>(3 - 41)       | 72<br>(21 - 225)       | 45<br>(16 - 100)       |
| Other chronic respiratory diseases                                          | 117<br>(39 - 243)        | 15<br>(1 - 104)   | 11<br>(4 - 25)    | 37<br>(13 - 83)      | 35<br>(11 - 86)        | 18<br>(6 - 45)         |
| Cirrhosis                                                                   | 2,535<br>(1,620 - 3,691) | 113<br>(41 - 267) | 65<br>(40 - 98)   | 843<br>(495 - 1,334) | 1,190<br>(720 - 1,801) | 323<br>(219 - 444)     |
| Cirrhosis due to hepatitis B                                                | 703<br>(239 - 1,291)     | 7<br>(1 - 21)     | 14<br>(4 - 31)    | 261<br>(96 - 490)    | 332<br>(100 - 629)     | 90<br>(22 - 159)       |
| Cirrhosis due to hepatitis C                                                | 1,125<br>(609 - 1,929)   | 6<br>(0 - 23)     | 6<br>(0 - 26)     | 355<br>(161 - 685)   | 605<br>(300 - 1,039)   | 154<br>(72 - 243)      |
| Cirrhosis due to alcohol use                                                | 303<br>(152 - 511)       | --                | --                | 83<br>(32 - 159)     | 160<br>(76 - 280)      | 61<br>(31 - 100)       |
| Cirrhosis due to other causes                                               | 403<br>(211 - 660)       | 101<br>(37 - 233) | 45<br>(22 - 75)   | 144<br>(63 - 268)    | 94<br>(37 - 185)       | 19<br>(9 - 33)         |
| Digestive diseases                                                          | 2,522<br>(1,385 - 5,074) | 249<br>(86 - 573) | 125<br>(61 - 233) | 879<br>(453 - 1,876) | 830<br>(404 - 1,692)   | 439<br>(242 - 742)     |
| Peptic ulcer disease                                                        | 1,113<br>(555 - 2,451)   | 27<br>(6 - 85)    | 29<br>(11 - 63)   | 381<br>(180 - 943)   | 454<br>(206 - 969)     | 221<br>(105 - 393)     |
| Gastritis and duodenitis                                                    | 36<br>(10 - 78)          | 6<br>(1 - 15)     | 5<br>(1 - 12)     | 16<br>(4 - 37)       | 6<br>(2 - 14)          | 3<br>(1 - 8)           |
| Appendicitis                                                                | 333<br>(134 - 760)       | 79<br>(19 - 214)  | 36<br>(10 - 85)   | 138<br>(51 - 328)    | 59<br>(23 - 127)       | 20<br>(8 - 42)         |
| Paralytic ileus and intestinal obstruction                                  | 165<br>(60 - 411)        | 11<br>(3 - 36)    | 9<br>(3 - 21)     | 41<br>(14 - 110)     | 54<br>(17 - 132)       | 50<br>(17 - 115)       |
| Inguinal, femoral, and abdominal hernia                                     | 77<br>(26 - 216)         | 15<br>(2 - 54)    | 8<br>(2 - 25)     | 27<br>(7 - 78)       | 15<br>(5 - 42)         | 12<br>(5 - 26)         |
| Inflammatory bowel disease                                                  | 130<br>(61 - 268)        | 29<br>(7 - 82)    | 10<br>(4 - 20)    | 46<br>(20 - 104)     | 29<br>(11 - 60)        | 16<br>(6 - 32)         |
| Vascular intestinal disorders                                               | 48<br>(9 - 127)          | 4<br>(0 - 14)     | 4<br>(1 - 12)     | 19<br>(3 - 56)       | 14<br>(3 - 39)         | 6<br>(1 - 17)          |
| Gallbladder and biliary diseases                                            | 219<br>(85 - 471)        | 24<br>(4 - 55)    | 10<br>(3 - 20)    | 62<br>(21 - 145)     | 72<br>(24 - 175)       | 52<br>(22 - 101)       |
| Pancreatitis                                                                | 93<br>(25 - 204)         | 3<br>(1 - 8)      | 3<br>(1 - 6)      | 48<br>(12 - 116)     | 29<br>(8 - 66)         | 10<br>(3 - 23)         |
| Other digestive diseases                                                    | 307<br>(134 - 666)       | 51<br>(13 - 144)  | 11<br>(4 - 27)    | 99<br>(39 - 224)     | 98<br>(38 - 215)       | 49<br>(19 - 102)       |
| Neurological disorders                                                      | 1,486<br>(971 - 2,135)   | 140<br>(33 - 408) | 84<br>(27 - 178)  | 300<br>(106 - 575)   | 224<br>(130 - 339)     | 739<br>(532 - 939)     |
| Alzheimer disease and other dementias                                       | 879<br>(637 - 1,122)     | --                | --                | 1<br>(0 - 2)         | 164<br>(94 - 247)      | 715<br>(520 - 913)     |
| Parkinson disease                                                           | 13<br>(7 - 27)           | --                | --                | 1<br>(1 - 3)         | 5<br>(2 - 11)          | 7<br>(3 - 15)          |
| Epilepsy                                                                    | 519<br>(160 - 987)       | 118<br>(19 - 379) | 78<br>(22 - 172)  | 267<br>(80 - 525)    | 46<br>(16 - 92)        | 11<br>(5 - 20)         |
| Multiple sclerosis                                                          | 17<br>(2 - 39)           | --                | --                | 11<br>(1 - 27)       | 5<br>(1 - 12)          | 1<br>(0 - 3)           |
| Other neurological disorders                                                | 57<br>(36 - 165)         | 22<br>(10 - 88)   | 6<br>(3 - 14)     | 20<br>(12 - 51)      | 5<br>(3 - 12)          | 4<br>(3 - 6)           |
| Mental and substance use disorders                                          | 258<br>(131 - 526)       | 23<br>(3 - 79)    | 0<br>(0 - 0)      | 165<br>(78 - 370)    | 63<br>(30 - 146)       | 7<br>(4 - 14)          |
| Schizophrenia                                                               | 4<br>(1 - 14)            | --                | --                | 3<br>(1 - 10)        | 1<br>(0 - 3)           | 0<br>(0 - 1)           |
| Alcohol use disorders                                                       | 108<br>(48 - 260)        | --                | --                | 65<br>(25 - 145)     | 38<br>(16 - 100)       | 5<br>(3 - 12)          |
| Drug use disorders                                                          | 146<br>(57 - 394)        | 23<br>(3 - 79)    | --                | 97<br>(38 - 295)     | 24<br>(9 - 75)         | 2<br>(1 - 6)           |
| Opioid use disorders                                                        | 81<br>(32 - 216)         | 13<br>(2 - 47)    | --                | 54<br>(21 - 162)     | 12<br>(5 - 39)         | 1<br>(0 - 3)           |
| Cocaine use disorders                                                       | 2<br>(1 - 5)             | 0<br>(0 - 1)      | --                | 1<br>(0 - 4)         | 0<br>(0 - 1)           | 0<br>(0 - 0)           |
| Amphetamine use disorders                                                   | 2<br>(1 - 4)             | 0<br>(0 - 1)      | --                | 1<br>(0 - 3)         | 0<br>(0 - 1)           | 0<br>(0 - 0)           |
| Other drug use disorders                                                    | 61<br>(25 - 170)         | 9<br>(1 - 31)     | --                | 40<br>(16 - 123)     | 11<br>(4 - 35)         | 1<br>(0 - 3)           |
| Eating disorders                                                            | 0<br>(0 - 0)             | --                | 0<br>(0 - 0)      | 0<br>(0 - 0)         | --                     | --                     |

| Web Table 31- Afghanistan deaths with 95% UI by age, sex, and cause in 2013 |                           |                           |                    |                        |                          |                          |
|-----------------------------------------------------------------------------|---------------------------|---------------------------|--------------------|------------------------|--------------------------|--------------------------|
| Cause                                                                       | Males, All Ages           | Males, 0-4 Years          | Males, 5-14 Years  | Males, 15-49 Years     | Males, 50-69 Years       | Males, 70-80 Years       |
| Anorexia nervosa                                                            | 0<br>(0 - 0)              | --                        | 0<br>(0 - 0)       | 0<br>(0 - 0)           | --                       | --                       |
| Diabetes, urogenital, blood, and endocrine diseases                         | 6,446<br>(4,365 - 8,958)  | 675<br>(367 - 1,068)      | 223<br>(133 - 324) | 1,402<br>(829 - 2,147) | 2,736<br>(1,669 - 4,017) | 1,410<br>(1,002 - 1,859) |
| Diabetes mellitus                                                           | 3,015<br>(1,969 - 4,207)  | 71<br>(42 - 119)          | 14<br>(9 - 22)     | 502<br>(300 - 798)     | 1,622<br>(969 - 2,448)   | 806<br>(548 - 1,085)     |
| Acute glomerulonephritis                                                    | 41<br>(19 - 68)           | 6<br>(2 - 14)             | 2<br>(2 - 10)      | 13<br>(5 - 23)         | 11<br>(5 - 20)           | 6<br>(2 - 11)            |
| Chronic kidney disease                                                      | 2,163<br>(999 - 3,456)    | 144<br>(41 - 261)         | 56<br>(26 - 91)    | 555<br>(207 - 959)     | 925<br>(396 - 1,552)     | 483<br>(274 - 754)       |
| Chronic kidney disease due to diabetes mellitus                             | 40<br>(6 - 84)            | 3<br>(0 - 6)              | 2<br>(0 - 3)       | 15<br>(2 - 33)         | 14<br>(2 - 31)           | 7<br>(1 - 15)            |
| Chronic kidney disease due to hypertension                                  | 710<br>(290 - 1,354)      | 10<br>(2 - 29)            | 4<br>(1 - 10)      | 150<br>(46 - 339)      | 367<br>(139 - 704)       | 178<br>(89 - 317)        |
| Chronic kidney disease due to glomerulonephritis                            | 356<br>(209 - 541)        | 58<br>(24 - 101)          | 23<br>(14 - 40)    | 121<br>(62 - 207)      | 103<br>(51 - 184)        | 50<br>(23 - 85)          |
| Chronic kidney disease due to other causes                                  | 1,057<br>(403 - 1,962)    | 73<br>(8 - 156)           | 26<br>(7 - 52)     | 269<br>(58 - 556)      | 441<br>(153 - 863)       | 248<br>(98 - 464)        |
| Urinary diseases and male infertility                                       | 311<br>(210 - 458)        | 61<br>(25 - 132)          | 13<br>(8 - 20)     | 68<br>(39 - 112)       | 100<br>(58 - 160)        | 70<br>(44 - 107)         |
| Interstitial nephritis and urinary tract infections                         | 124<br>(73 - 192)         | 35<br>(10 - 80)           | 6<br>(3 - 10)      | 23<br>(11 - 41)        | 34<br>(17 - 59)          | 26<br>(12 - 43)          |
| Urolithiasis                                                                | 16<br>(7 - 32)            | --                        | 2<br>(1 - 4)       | 6<br>(2 - 12)          | 6<br>(2 - 13)            | 3<br>(1 - 7)             |
| Other urinary diseases                                                      | 170<br>(106 - 277)        | 26<br>(8 - 62)            | 5<br>(2 - 9)       | 39<br>(20 - 69)        | 60<br>(33 - 102)         | 41<br>(23 - 69)          |
| Gynecological diseases                                                      | --                        | --                        | --                 | --                     | --                       | --                       |
| Uterine fibroids                                                            | --                        | --                        | --                 | --                     | --                       | --                       |
| Polycystic ovarian syndrome                                                 | --                        | --                        | --                 | --                     | --                       | --                       |
| Endometriosis                                                               | --                        | --                        | --                 | --                     | --                       | --                       |
| Genital prolapse                                                            | --                        | --                        | --                 | --                     | --                       | --                       |
| Other gynecological diseases                                                | --                        | --                        | --                 | --                     | --                       | --                       |
| Hemoglobinopathies and hemolytic anemias                                    | 664<br>(182 - 1,200)      | 273<br>(59 - 536)         | 108<br>(33 - 189)  | 216<br>(65 - 400)      | 43<br>(12 - 86)          | 24<br>(10 - 45)          |
| Thalassemias                                                                | 435<br>(116 - 789)        | 202<br>(42 - 405)         | 86<br>(26 - 150)   | 147<br>(46 - 264)      | 0<br>(0 - 0)             | 0<br>(0 - 0)             |
| Sickle cell disorders                                                       | 92<br>(24 - 168)          | 42<br>(9 - 83)            | 15<br>(4 - 26)     | 27<br>(8 - 51)         | 8<br>(2 - 17)            | 1<br>(0 - 1)             |
| G6PD deficiency                                                             | 16<br>(4 - 29)            | 5<br>(1 - 9)              | 2<br>(1 - 3)       | 6<br>(2 - 11)          | 3<br>(1 - 7)             | 0<br>(0 - 1)             |
| Other hemoglobinopathies and hemolytic anemias                              | 121<br>(40 - 220)         | 25<br>(7 - 45)            | 5<br>(2 - 9)       | 37<br>(10 - 74)        | 31<br>(9 - 62)           | 23<br>(10 - 43)          |
| Endocrine, metabolic, blood, and immune disorders                           | 253<br>(118 - 624)        | 120<br>(42 - 364)         | 27<br>(11 - 63)    | 49<br>(21 - 127)       | 36<br>(16 - 81)          | 21<br>(11 - 39)          |
| Musculoskeletal disorders                                                   | 195<br>(54 - 336)         | --                        | 26<br>(6 - 47)     | 95<br>(24 - 177)       | 47<br>(14 - 85)          | 27<br>(6 - 45)           |
| Rheumatoid arthritis                                                        | 46<br>(11 - 99)           | --                        | 10<br>(2 - 23)     | 22<br>(3 - 53)         | 9<br>(3 - 21)            | 5<br>(1 - 11)            |
| Other musculoskeletal disorders                                             | 149<br>(39 - 261)         | --                        | 16<br>(4 - 30)     | 74<br>(18 - 140)       | 38<br>(10 - 71)          | 21<br>(5 - 36)           |
| Other non-communicable diseases                                             | 6,425<br>(3,266 - 14,290) | 5,642<br>(2,632 - 13,066) | 265<br>(125 - 636) | 223<br>(125 - 430)     | 147<br>(80 - 233)        | 148<br>(73 - 222)        |
| Congenital anomalies                                                        | 6,018<br>(2,868 - 13,800) | 5,594<br>(2,605 - 12,993) | 263<br>(122 - 634) | 122<br>(58 - 300)      | 25<br>(12 - 57)          | 15<br>(9 - 24)           |
| Neural tube defects                                                         | 1,014<br>(163 - 2,870)    | 950<br>(142 - 2,741)      | 34<br>(5 - 103)    | 25<br>(5 - 74)         | 4<br>(1 - 15)            | 1<br>(0 - 5)             |
| Congenital heart anomalies                                                  | 2,684<br>(955 - 7,941)    | 2,523<br>(867 - 7,556)    | 118<br>(40 - 329)  | 35<br>(13 - 99)        | 5<br>(2 - 15)            | 3<br>(1 - 6)             |
| Cleft lip and cleft palate                                                  | 21<br>(5 - 56)            | 21<br>(5 - 56)            | --                 | --                     | --                       | --                       |
| Down syndrome                                                               | 281<br>(27 - 925)         | 235<br>(21 - 807)         | 23<br>(3 - 70)     | 23<br>(3 - 73)         | 1<br>(0 - 3)             | 0<br>(0 - 1)             |
| Chromosomal unbalanced rearrangements                                       | 72<br>(8 - 275)           | 65<br>(7 - 257)           | 3<br>(1 - 11)      | 2<br>(0 - 8)           | 1<br>(0 - 2)             | 0<br>(0 - 1)             |
| Other congenital anomalies                                                  | 1,945<br>(435 - 6,321)    | 1,800<br>(389 - 5,992)    | 84<br>(21 - 251)   | 37<br>(10 - 111)       | 13<br>(5 - 36)           | 10<br>(5 - 18)           |
| Skin and subcutaneous diseases                                              | 368<br>(205 - 521)        | 10<br>(5 - 23)            | 2<br>(1 - 4)       | 101<br>(53 - 163)      | 122<br>(60 - 193)        | 133<br>(58 - 205)        |
| Cellulitis                                                                  | 212<br>(85 - 399)         | 7<br>(2 - 18)             | 1<br>(1 - 3)       | 55<br>(19 - 117)       | 75<br>(27 - 152)         | 73<br>(27 - 149)         |
| Pyoderma                                                                    | 96<br>(22 - 204)          | 3<br>(0 - 9)              | 0<br>(0 - 1)       | 26<br>(5 - 61)         | 30<br>(6 - 70)           | 36<br>(8 - 82)           |
| Decubitus ulcer                                                             | 57<br>(8 - 137)           | 0<br>(0 - 0)              | 0<br>(0 - 1)       | 17<br>(2 - 43)         | 16<br>(2 - 45)           | 24<br>(3 - 59)           |

| Web Table 31- Afghanistan deaths with 95% UI by age, sex, and cause in 2013 |                             |                          |                          |                             |                          |                    |
|-----------------------------------------------------------------------------|-----------------------------|--------------------------|--------------------------|-----------------------------|--------------------------|--------------------|
| Cause                                                                       | Males, All Ages             | Males, 0-4 Years         | Males, 5-14 Years        | Males, 15-49 Years          | Males, 50-69 Years       | Males, 70-80 Years |
| Other skin and subcutaneous diseases                                        | 4<br>(0 - 14)               | 0<br>(0 - 1)             | 0<br>(0 - 0)             | 2<br>(0 - 8)                | 1<br>(0 - 3)             | 0<br>(0 - 1)       |
| Sudden infant death syndrome                                                | 38<br>(4 - 175)             | 38<br>(4 - 175)          | --                       | --                          | --                       | --                 |
| Injuries                                                                    | 30,852<br>(22,324 - 41,573) | 4,220<br>(2,420 - 6,411) | 3,461<br>(2,717 - 4,323) | 19,705<br>(12,689 - 28,759) | 3,043<br>(1,857 - 4,500) | 424<br>(312 - 549) |
| Transport injuries                                                          | 11,004<br>(7,458 - 15,474)  | 826<br>(390 - 1,444)     | 1,027<br>(704 - 1,414)   | 7,741<br>(4,908 - 11,340)   | 1,261<br>(729 - 1,960)   | 148<br>(99 - 211)  |
| Road injuries                                                               | 10,364<br>(7,046 - 14,619)  | 766<br>(355 - 1,352)     | 967<br>(660 - 1,332)     | 7,330<br>(4,697 - 10,802)   | 1,164<br>(660 - 1,818)   | 137<br>(90 - 199)  |
| Pedestrian road injuries                                                    | 3,083<br>(1,867 - 4,793)    | 341<br>(143 - 685)       | 411<br>(238 - 627)       | 1,848<br>(1,016 - 3,117)    | 418<br>(207 - 711)       | 64<br>(37 - 103)   |
| Cyclist road injuries                                                       | 417<br>(229 - 689)          | 38<br>(13 - 85)          | 59<br>(29 - 100)         | 239<br>(118 - 424)          | 71<br>(35 - 129)         | 10<br>(5 - 17)     |
| Motorcyclist road injuries                                                  | 1,253<br>(652 - 2,100)      | 38<br>(13 - 80)          | 47<br>(21 - 87)          | 1,067<br>(542 - 1,811)      | 92<br>(44 - 169)         | 9<br>(5 - 17)      |
| Motor vehicle road injuries                                                 | 5,433<br>(3,251 - 8,255)    | 302<br>(106 - 612)       | 396<br>(217 - 649)       | 4,123<br>(2,415 - 6,486)    | 562<br>(297 - 931)       | 49<br>(26 - 80)    |
| Other road injuries                                                         | 178<br>(15 - 588)           | 47<br>(3 - 141)          | 53<br>(5 - 138)          | 54<br>(6 - 261)             | 20<br>(2 - 70)           | 4<br>(0 - 12)      |
| Other transport injuries                                                    | 639<br>(242 - 1,144)        | 60<br>(20 - 135)         | 60<br>(20 - 118)         | 411<br>(151 - 768)          | 97<br>(31 - 194)         | 12<br>(4 - 21)     |
| Unintentional injuries                                                      | 12,690<br>(9,475 - 16,632)  | 3,145<br>(1,744 - 5,005) | 2,196<br>(1,649 - 2,809) | 5,985<br>(3,824 - 8,770)    | 1,136<br>(687 - 1,715)   | 228<br>(164 - 309) |
| Falls                                                                       | 2,096<br>(1,390 - 2,996)    | 740<br>(329 - 1,457)     | 348<br>(197 - 581)       | 648<br>(367 - 1,033)        | 274<br>(147 - 457)       | 86<br>(48 - 136)   |
| Drowning                                                                    | 3,353<br>(2,084 - 4,775)    | 1,036<br>(433 - 1,983)   | 769<br>(445 - 1,168)     | 1,284<br>(709 - 1,922)      | 221<br>(103 - 378)       | 42<br>(24 - 66)    |
| Fire, heat, and hot substances                                              | 378<br>(120 - 834)          | 211<br>(53 - 493)        | 55<br>(19 - 114)         | 64<br>(12 - 181)            | 44<br>(10 - 118)         | 4<br>(1 - 13)      |
| Poisonings                                                                  | 129<br>(53 - 389)           | 80<br>(27 - 220)         | 18<br>(7 - 55)           | 16<br>(6 - 66)              | 16<br>(4 - 79)           | 0<br>(0 - 1)       |
| Exposure to mechanical forces                                               | 1,753<br>(974 - 3,120)      | 239<br>(110 - 471)       | 189<br>(104 - 343)       | 1,109<br>(553 - 2,073)      | 189<br>(90 - 371)        | 27<br>(14 - 51)    |
| Unintentional firearm injuries                                              | 1,005<br>(334 - 1,839)      | 103<br>(25 - 244)        | 83<br>(23 - 184)         | 698<br>(232 - 1,340)        | 106<br>(35 - 222)        | 15<br>(5 - 31)     |
| Unintentional suffocation                                                   | 26<br>(3 - 74)              | 9<br>(1 - 43)            | 5<br>(0 - 15)            | 9<br>(1 - 23)               | 2<br>(0 - 6)             | 0<br>(0 - 1)       |
| Other exposure to mechanical forces                                         | 722<br>(421 - 1,447)        | 126<br>(50 - 275)        | 101<br>(52 - 199)        | 402<br>(212 - 848)          | 81<br>(38 - 169)         | 12<br>(6 - 22)     |
| Adverse effects of medical treatment                                        | 202<br>(114 - 320)          | 48<br>(17 - 99)          | 13<br>(6 - 21)           | 62<br>(30 - 104)            | 53<br>(25 - 94)          | 25<br>(12 - 47)    |
| Animal contact                                                              | 103<br>(31 - 202)           | 36<br>(7 - 93)           | 24<br>(7 - 50)           | 30<br>(9 - 61)              | 8<br>(3 - 17)            | 5<br>(2 - 9)       |
| Venomous animal contact                                                     | 54<br>(15 - 114)            | 21<br>(4 - 52)           | 13<br>(3 - 28)           | 14<br>(4 - 29)              | 4<br>(1 - 10)            | 2<br>(1 - 5)       |
| Non-venomous animal contact                                                 | 49<br>(12 - 107)            | 15<br>(2 - 44)           | 11<br>(2 - 27)           | 16<br>(4 - 37)              | 4<br>(1 - 9)             | 3<br>(1 - 5)       |
| Foreign body                                                                | 149<br>(41 - 438)           | 95<br>(19 - 305)         | 18<br>(5 - 48)           | 19<br>(6 - 55)              | 8<br>(2 - 21)            | 10<br>(3 - 25)     |
| Pulmonary aspiration and foreign body in airway                             | 145<br>(37 - 434)           | 94<br>(18 - 305)         | 17<br>(5 - 47)           | 17<br>(5 - 53)              | 7<br>(2 - 21)            | 10<br>(3 - 25)     |
| Foreign body in other body part                                             | 4<br>(2 - 11)               | 1<br>(0 - 4)             | 1<br>(0 - 2)             | 2<br>(1 - 4)                | 1<br>(0 - 2)             | 0<br>(0 - 0)       |
| Other unintentional injuries                                                | 4,526<br>(3,214 - 6,146)    | 660<br>(328 - 1,132)     | 762<br>(524 - 1,060)     | 2,754<br>(1,722 - 4,072)    | 324<br>(171 - 525)       | 27<br>(17 - 39)    |
| Self-harm and interpersonal violence                                        | 7,076<br>(3,566 - 11,028)   | 249<br>(82 - 515)        | 231<br>(102 - 391)       | 5,927<br>(2,897 - 9,423)    | 624<br>(316 - 1,017)     | 45<br>(27 - 69)    |
| Self-harm                                                                   | 1,468<br>(868 - 2,274)      | --                       | 47<br>(18 - 107)         | 1,134<br>(657 - 1,807)      | 259<br>(141 - 429)       | 28<br>(16 - 47)    |
| Interpersonal violence                                                      | 5,608<br>(2,365 - 8,995)    | 249<br>(82 - 515)        | 184<br>(65 - 336)        | 4,793<br>(1,978 - 7,912)    | 366<br>(125 - 643)       | 16<br>(7 - 31)     |
| Assault by firearm                                                          | 2,796<br>(771 - 5,039)      | 30<br>(4 - 91)           | 42<br>(6 - 106)          | 2,545<br>(718 - 4,623)      | 173<br>(37 - 351)        | 6<br>(1 - 13)      |
| Assault by sharp object                                                     | 1,187<br>(228 - 2,415)      | 14<br>(1 - 43)           | 26<br>(3 - 65)           | 1,046<br>(200 - 2,161)      | 98<br>(20 - 215)         | 3<br>(1 - 6)       |
| Assault by other means                                                      | 1,625<br>(628 - 3,237)      | 205<br>(71 - 421)        | 116<br>(41 - 227)        | 1,202<br>(402 - 2,585)      | 94<br>(27 - 204)         | 8<br>(2 - 17)      |
| Forces of nature, war, and legal intervention                               | 83<br>(24 - 155)            | 1<br>(0 - 0)             | 6<br>(2 - 11)            | 52<br>(16 - 95)             | 22<br>(6 - 41)           | 3<br>(1 - 5)       |
| Exposure to forces of nature                                                | 83<br>(24 - 155)            | 1<br>(0 - 0)             | 6<br>(2 - 11)            | 52<br>(16 - 95)             | 22<br>(6 - 41)           | 3<br>(1 - 5)       |

| Web Table 31- Afghanistan deaths with 95% UI by age, sex, and cause in 2013 |                                |                             |                          |                             |                             |                             |
|-----------------------------------------------------------------------------|--------------------------------|-----------------------------|--------------------------|-----------------------------|-----------------------------|-----------------------------|
| Cause                                                                       | Females, All Ages              | Females, 0-4 Years          | Females, 5-14 Years      | Females, 15-49 Years        | Females, 50-69 Years        | Females, 70-80 Years        |
| All causes                                                                  | 152,235<br>(122,345 - 184,658) | 44,846<br>(38,604 - 51,355) | 6,494<br>(5,399 - 7,651) | 38,483<br>(27,545 - 53,752) | 36,832<br>(26,039 - 49,487) | 25,581<br>(20,547 - 30,125) |
| Communicable, maternal, neonatal, and nutritional diseases                  | 60,402<br>(48,484 - 72,887)    | 34,803<br>(26,923 - 43,112) | 3,219<br>(2,442 - 4,077) | 16,279<br>(11,741 - 22,502) | 3,415<br>(2,376 - 5,026)    | 2,686<br>(2,024 - 3,547)    |
| HIV/AIDS and tuberculosis                                                   | 6,359<br>(3,443 - 10,724)      | 496<br>(240 - 820)          | 447<br>(246 - 713)       | 3,539<br>(1,440 - 6,533)    | 1,311<br>(709 - 2,496)      | 566<br>(297 - 1,022)        |
| Tuberculosis                                                                | 6,312<br>(3,402 - 10,689)      | 492<br>(239 - 816)          | 445<br>(245 - 712)       | 3,505<br>(1,388 - 6,503)    | 1,305<br>(703 - 2,477)      | 565<br>(297 - 1,019)        |
| HIV/AIDS                                                                    | 47<br>(4 - 215)                | 4<br>(0 - 21)               | 1<br>(0 - 6)             | 34<br>(3 - 159)             | 6<br>(0 - 30)               | 1<br>(0 - 2)                |
| HIV/AIDS resulting in mycobacterial infection                               | 3<br>(0 - 12)                  | 0<br>(0 - 1)                | 0<br>(0 - 0)             | 2<br>(0 - 9)                | 0<br>(0 - 2)                | 0<br>(0 - 0)                |
| HIV/AIDS resulting in other diseases                                        | 44<br>(4 - 205)                | 4<br>(0 - 20)               | 1<br>(0 - 6)             | 33<br>(3 - 151)             | 6<br>(0 - 28)               | 0<br>(0 - 2)                |
| Diarrhea, lower respiratory, and other common infectious diseases           | 29,907<br>(22,663 - 37,875)    | 22,112<br>(15,777 - 28,963) | 2,077<br>(1,454 - 2,868) | 2,437<br>(1,461 - 3,882)    | 1,502<br>(948 - 2,221)      | 1,780<br>(1,232 - 2,436)    |
| Diarrheal diseases                                                          | 7,631<br>(4,177 - 11,946)      | 6,127<br>(2,856 - 10,303)   | 271<br>(132 - 510)       | 706<br>(371 - 1,199)        | 264<br>(129 - 468)          | 264<br>(137 - 452)          |
| Intestinal infectious diseases                                              | 687<br>(320 - 1,236)           | 208<br>(93 - 387)           | 265<br>(109 - 499)       | 183<br>(62 - 392)           | 24<br>(9 - 52)              | 6<br>(2 - 13)               |
| Typhoid fever                                                               | 498<br>(218 - 929)             | 138<br>(54 - 269)           | 202<br>(80 - 385)        | 137<br>(41 - 303)           | 17<br>(6 - 39)              | 4<br>(1 - 10)               |
| Paratyphoid fever                                                           | 147<br>(62 - 289)              | 48<br>(19 - 100)            | 57<br>(20 - 123)         | 36<br>(10 - 88)             | 5<br>(1 - 11)               | 1<br>(0 - 2)                |
| Other intestinal infectious diseases                                        | 42<br>(24 - 68)                | 22<br>(10 - 38)             | 7<br>(1 - 16)            | 10<br>(3 - 23)              | 2<br>(0 - 8)                | 1<br>(0 - 5)                |
| Lower respiratory infections                                                | 15,540<br>(11,271 - 20,817)    | 11,113<br>(7,106 - 15,773)  | 958<br>(587 - 1,423)     | 971<br>(556 - 1,576)        | 1,057<br>(643 - 1,626)      | 1,441<br>(947 - 2,025)      |
| Upper respiratory infections                                                | 24<br>(9 - 50)                 | 7<br>(0 - 28)               | 2<br>(0 - 6)             | 8<br>(1 - 20)               | 5<br>(0 - 16)               | 2<br>(0 - 8)                |
| Otitis media                                                                | 30<br>(20 - 42)                | 5<br>(3 - 8)                | 5<br>(3 - 7)             | 10<br>(6 - 16)              | 6<br>(3 - 9)                | 4<br>(3 - 6)                |
| Meningitis                                                                  | 2,830<br>(1,653 - 4,494)       | 2,057<br>(1,086 - 3,637)    | 207<br>(92 - 371)        | 392<br>(169 - 715)          | 125<br>(64 - 207)           | 48<br>(27 - 81)             |
| Pneumococcal meningitis                                                     | 611<br>(357 - 1,013)           | 398<br>(195 - 740)          | 61<br>(21 - 114)         | 111<br>(47 - 209)           | 30<br>(11 - 60)             | 11<br>(5 - 24)              |
| H influenzae type B meningitis                                              | 878<br>(473 - 1,566)           | 772<br>(394 - 1,466)        | 48<br>(20 - 92)          | 40<br>(15 - 86)             | 12<br>(5 - 27)              | 5<br>(2 - 9)                |
| Meningococcal meningitis                                                    | 760<br>(415 - 1,241)           | 556<br>(262 - 1,026)        | 58<br>(22 - 120)         | 99<br>(36 - 198)            | 34<br>(13 - 63)             | 14<br>(6 - 26)              |
| Other meningitis                                                            | 581<br>(280 - 1,023)           | 332<br>(118 - 722)          | 40<br>(12 - 85)          | 142<br>(53 - 285)           | 49<br>(22 - 87)             | 18<br>(8 - 34)              |
| Encephalitis                                                                | 291<br>(139 - 510)             | 171<br>(70 - 326)           | 37<br>(14 - 84)          | 61<br>(17 - 179)            | 15<br>(6 - 39)              | 7<br>(4 - 13)               |
| Diphtheria                                                                  | 22<br>(1 - 123)                | 15<br>(0 - 119)             | 5<br>(0 - 34)            | 2<br>(0 - 10)               | 0<br>(0 - 3)                | --                          |
| Whooping cough                                                              | 1,160<br>(2 - 5,371)           | 1,052<br>(1 - 4,898)        | 94<br>(0 - 429)          | 13<br>(0 - 63)              | 1<br>(0 - 5)                | --                          |
| Tetanus                                                                     | 670<br>(343 - 1,180)           | 554<br>(259 - 955)          | 60<br>(26 - 126)         | 56<br>(13 - 280)            | 0<br>(0 - 0)                | 0<br>(0 - 0)                |
| Measles                                                                     | 985<br>(24 - 6,923)            | 790<br>(19 - 5,473)         | 169<br>(4 - 1,135)       | 25<br>(0 - 183)             | 0<br>(0 - 3)                | --                          |
| Varicella and herpes zoster                                                 | 38<br>(11 - 87)                | 15<br>(1 - 59)              | 5<br>(0 - 24)            | 9<br>(1 - 27)               | 3<br>(0 - 9)                | 6<br>(0 - 25)               |
| Neglected tropical diseases and malaria                                     | 1,546<br>(638 - 3,328)         | 453<br>(78 - 2,182)         | 341<br>(150 - 666)       | 557<br>(207 - 1,158)        | 173<br>(67 - 368)           | 23<br>(9 - 38)              |
| Malaria                                                                     | 1,292<br>(436 - 3,052)         | 377<br>(20 - 2,096)         | 288<br>(107 - 599)       | 463<br>(130 - 1,041)        | 152<br>(51 - 341)           | 13<br>(4 - 26)              |
| Leishmaniasis                                                               | 10<br>(6 - 17)                 | 4<br>(1 - 8)                | 4<br>(1 - 7)             | 2<br>(1 - 4)                | 0<br>(0 - 1)                | 0<br>(0 - 0)                |
| Visceral leishmaniasis                                                      | 10<br>(6 - 17)                 | 4<br>(1 - 8)                | 4<br>(1 - 7)             | 2<br>(1 - 4)                | 0<br>(0 - 1)                | 0<br>(0 - 0)                |
| Cysticercosis                                                               | 1<br>(0 - 3)                   | 0<br>(0 - 0)                | 0<br>(0 - 0)             | 1<br>(0 - 2)                | 0<br>(0 - 1)                | 0<br>(0 - 0)                |
| Cystic echinococcosis                                                       | 11<br>(8 - 15)                 | 1<br>(1 - 1)                | 2<br>(2 - 3)             | 5<br>(3 - 8)                | 2<br>(1 - 3)                | 0<br>(0 - 1)                |
| Dengue                                                                      | 7<br>(3 - 13)                  | 1<br>(0 - 3)                | 2<br>(1 - 3)             | 4<br>(1 - 7)                | 0<br>(0 - 1)                | 0<br>(0 - 0)                |
| Rabies                                                                      | 29<br>(11 - 76)                | 4<br>(1 - 14)               | 9<br>(3 - 25)            | 13<br>(4 - 35)              | 2<br>(1 - 5)                | 0<br>(0 - 1)                |
| Intestinal nematode infections                                              | 37<br>(18 - 66)                | 25<br>(10 - 48)             | 8<br>(1 - 20)            | 3<br>(0 - 12)               | 1<br>(0 - 7)                | 1<br>(0 - 4)                |
| Ascariasis                                                                  | 37<br>(18 - 66)                | 25<br>(10 - 48)             | 8<br>(1 - 20)            | 3<br>(0 - 12)               | 1<br>(0 - 7)                | 1<br>(0 - 4)                |
| Other neglected tropical diseases                                           | 158<br>(53 - 293)              | 40<br>(8 - 92)              | 28<br>(9 - 54)           | 67<br>(15 - 141)            | 15<br>(5 - 30)              | 8<br>(2 - 16)               |
| Maternal disorders                                                          | 8,794<br>(5,055 - 14,360)      | --                          | 41<br>(15 - 97)          | 8,753<br>(5,031 - 14,278)   | --                          | --                          |
| Maternal hemorrhage                                                         | 1,630<br>(856 - 2,858)         | --                          | 5<br>(2 - 13)            | 1,624<br>(853 - 2,852)      | --                          | --                          |

| Web Table 31- Afghanistan deaths with 95% UI by age, sex, and cause in 2013 |                              |                            |                          |                             |                             |                             |
|-----------------------------------------------------------------------------|------------------------------|----------------------------|--------------------------|-----------------------------|-----------------------------|-----------------------------|
| Cause                                                                       | Females, All Ages            | Females, 0-4 Years         | Females, 5-14 Years      | Females, 15-49 Years        | Females, 50-69 Years        | Females, 70-80 Years        |
| Maternal sepsis and other maternal infections                               | 829<br>(435 - 1,458)         | --                         | 4<br>(1 - 12)            | 825<br>(431 - 1,454)        | --                          | --                          |
| Maternal hypertensive disorders                                             | 1,190<br>(623 - 2,002)       | --                         | 7<br>(2 - 19)            | 1,182<br>(615 - 1,988)      | --                          | --                          |
| Maternal obstructed labor                                                   | 792<br>(395 - 1,411)         | --                         | 3<br>(1 - 8)             | 789<br>(393 - 1,408)        | --                          | --                          |
| Maternal abortive outcome                                                   | 1,185<br>(625 - 2,098)       | --                         | 5<br>(1 - 12)            | 1,180<br>(620 - 2,091)      | --                          | --                          |
| Indirect maternal deaths                                                    | 818<br>(362 - 1,532)         | --                         | 3<br>(1 - 7)             | 816<br>(360 - 1,529)        | --                          | --                          |
| Late maternal deaths                                                        | 1,042<br>(497 - 1,877)       | --                         | 8<br>(2 - 21)            | 1,034<br>(491 - 1,868)      | --                          | --                          |
| Maternal deaths aggravated by HIV/AIDS                                      | 0<br>(0 - 0)                 | --                         | --                       | 0<br>(0 - 0)                | --                          | --                          |
| Other maternal disorders                                                    | 1,292<br>(668 - 2,269)       | --                         | 5<br>(2 - 13)            | 1,287<br>(666 - 2,258)      | --                          | --                          |
| Neonatal disorders                                                          | 10,671<br>(7,767 - 14,282)   | 10,671<br>(7,767 - 14,282) | --                       | --                          | --                          | --                          |
| Neonatal preterm birth complications                                        | 5,768<br>(3,051 - 8,731)     | 5,768<br>(3,051 - 8,731)   | --                       | --                          | --                          | --                          |
| Neonatal encephalopathy due to birth asphyxia and trauma                    | 1,648<br>(365 - 3,310)       | 1,648<br>(365 - 3,310)     | --                       | --                          | --                          | --                          |
| Neonatal sepsis and other neonatal infections                               | 438<br>(81 - 1,068)          | 438<br>(81 - 1,068)        | --                       | --                          | --                          | --                          |
| Hemolytic disease and other neonatal jaundice                               | 146<br>(37 - 505)            | 146<br>(37 - 505)          | --                       | --                          | --                          | --                          |
| Other neonatal disorders                                                    | 2,672<br>(788 - 6,459)       | 2,672<br>(788 - 6,459)     | --                       | --                          | --                          | --                          |
| Nutritional deficiencies                                                    | 2,242<br>(1,382 - 3,420)     | 799<br>(357 - 1,495)       | 231<br>(125 - 384)       | 750<br>(389 - 1,328)        | 240<br>(130 - 414)          | 222<br>(114 - 361)          |
| Protein-energy malnutrition                                                 | 723<br>(282 - 1,479)         | 385<br>(109 - 844)         | 90<br>(12 - 205)         | 179<br>(51 - 444)           | 50<br>(15 - 124)            | 19<br>(4 - 66)              |
| Iodine deficiency                                                           | 9<br>(1 - 43)                | 4<br>(0 - 33)              | 1<br>(0 - 9)             | 1<br>(0 - 8)                | 1<br>(0 - 7)                | 1<br>(0 - 5)                |
| Iron-deficiency anemia                                                      | 1,449<br>(565 - 2,417)       | 383<br>(77 - 887)          | 130<br>(33 - 248)        | 554<br>(208 - 1,035)        | 183<br>(81 - 344)           | 198<br>(96 - 328)           |
| Other nutritional deficiencies                                              | 61<br>(19 - 156)             | 26<br>(5 - 75)             | 9<br>(3 - 28)            | 16<br>(4 - 44)              | 5<br>(1 - 17)               | 4<br>(1 - 14)               |
| Other communicable, maternal, neonatal, and nutritional diseases            | 882<br>(537 - 1,390)         | 272<br>(134 - 529)         | 83<br>(42 - 176)         | 242<br>(128 - 424)          | 189<br>(104 - 316)          | 97<br>(44 - 227)            |
| Sexually transmitted diseases excluding HIV                                 | 122<br>(61 - 199)            | 57<br>(27 - 107)           | 10<br>(5 - 16)           | 36<br>(6 - 76)              | 12<br>(2 - 32)              | 7<br>(2 - 17)               |
| Syphilis                                                                    | 90<br>(49 - 146)             | 57<br>(27 - 107)           | 7<br>(4 - 12)            | 15<br>(2 - 31)              | 6<br>(1 - 17)               | 5<br>(1 - 13)               |
| Chlamydial infection                                                        | 10<br>(2 - 21)               | --                         | 1<br>(0 - 2)             | 7<br>(1 - 15)               | 2<br>(0 - 5)                | 0<br>(0 - 1)                |
| Gonococcal infection                                                        | 11<br>(2 - 22)               | --                         | 1<br>(0 - 2)             | 7<br>(1 - 16)               | 2<br>(0 - 6)                | 1<br>(0 - 2)                |
| Other sexually transmitted diseases                                         | 10<br>(2 - 19)               | --                         | 1<br>(0 - 2)             | 7<br>(1 - 15)               | 2<br>(0 - 5)                | 0<br>(0 - 1)                |
| Hepatitis                                                                   | 292<br>(107 - 428)           | 50<br>(18 - 91)            | 17<br>(8 - 28)           | 92<br>(28 - 163)            | 100<br>(36 - 168)           | 32<br>(14 - 52)             |
| Acute hepatitis A                                                           | 44<br>(13 - 83)              | 29<br>(8 - 57)             | 7<br>(2 - 15)            | 5<br>(1 - 16)               | 2<br>(0 - 6)                | 0<br>(0 - 1)                |
| Acute hepatitis B                                                           | 136<br>(47 - 225)            | 21<br>(5 - 45)             | 4<br>(1 - 9)             | 24<br>(5 - 57)              | 63<br>(21 - 114)            | 24<br>(10 - 41)             |
| Acute hepatitis C                                                           | 19<br>(3 - 50)               | --                         | 1<br>(0 - 5)             | 4<br>(1 - 14)               | 10<br>(1 - 29)              | 3<br>(0 - 10)               |
| Acute hepatitis E                                                           | 93<br>(37 - 164)             | 1<br>(0 - 3)               | 4<br>(1 - 10)            | 59<br>(19 - 105)            | 25<br>(9 - 53)              | 4<br>(1 - 11)               |
| Other infectious diseases                                                   | 468<br>(248 - 879)           | 164<br>(47 - 428)          | 56<br>(20 - 149)         | 114<br>(54 - 222)           | 76<br>(29 - 172)            | 58<br>(15 - 187)            |
| Non-communicable diseases                                                   | 83,347<br>(58,940 - 111,590) | 7,836<br>(3,398 - 13,959)  | 1,677<br>(1,090 - 2,441) | 18,718<br>(11,187 - 29,041) | 32,586<br>(22,658 - 44,282) | 22,529<br>(18,116 - 26,670) |
| Neoplasms                                                                   | 9,107<br>(5,716 - 13,427)    | 102<br>(49 - 207)          | 267<br>(179 - 413)       | 3,476<br>(1,941 - 5,794)    | 3,903<br>(2,430 - 5,662)    | 1,359<br>(1,003 - 1,724)    |
| Esophageal cancer                                                           | 121<br>(69 - 189)            | --                         | --                       | 26<br>(13 - 46)             | 58<br>(31 - 97)             | 37<br>(21 - 59)             |
| Stomach cancer                                                              | 1,711<br>(948 - 2,659)       | --                         | --                       | 732<br>(335 - 1,261)        | 716<br>(423 - 1,093)        | 264<br>(163 - 386)          |
| Liver cancer                                                                | 488<br>(175 - 1,149)         | --                         | 8<br>(2 - 21)            | 126<br>(27 - 361)           | 251<br>(87 - 623)           | 103<br>(45 - 216)           |
| Liver cancer due to hepatitis B                                             | 139<br>(43 - 368)            | --                         | 3<br>(0 - 8)             | 48<br>(10 - 149)            | 67<br>(21 - 186)            | 21<br>(8 - 51)              |
| Liver cancer due to hepatitis C                                             | 214<br>(59 - 589)            | --                         | 0<br>(0 - 2)             | 42<br>(6 - 142)             | 120<br>(29 - 340)           | 51<br>(17 - 126)            |
| Liver cancer due to alcohol use                                             | 35<br>(9 - 86)               | --                         | --                       | 4<br>(0 - 13)               | 17<br>(4 - 47)              | 14<br>(4 - 34)              |
| Liver cancer due to other causes                                            | 101<br>(27 - 266)            | --                         | 5<br>(2 - 13)            | 33<br>(7 - 99)              | 46<br>(10 - 130)            | 17<br>(5 - 42)              |

| Web Table 31- Afghanistan deaths with 95% UI by age, sex, and cause in 2013 |                             |                    |                     |                           |                             |                             |
|-----------------------------------------------------------------------------|-----------------------------|--------------------|---------------------|---------------------------|-----------------------------|-----------------------------|
| Cause                                                                       | Females, All Ages           | Females, 0-4 Years | Females, 5-14 Years | Females, 15-49 Years      | Females, 50-69 Years        | Females, 70-80 Years        |
| Larynx cancer                                                               | 117<br>(21 - 265)           | --                 | --                  | 51<br>(6 - 118)           | 52<br>(11 - 123)            | 14<br>(4 - 32)              |
| Tracheal, bronchus and lung cancer                                          | 1,188<br>(260 - 2,020)      | --                 | --                  | 360<br>(47 - 696)         | 627<br>(135 - 1,072)        | 201<br>(71 - 310)           |
| Breast cancer                                                               | 1,143<br>(594 - 2,918)      | --                 | --                  | 532<br>(227 - 1,631)      | 498<br>(277 - 1,124)        | 113<br>(79 - 168)           |
| Cervical cancer                                                             | 831<br>(493 - 1,393)        | --                 | --                  | 381<br>(203 - 682)        | 374<br>(210 - 633)          | 76<br>(47 - 119)            |
| Uterine cancer                                                              | 148<br>(44 - 292)           | --                 | --                  | 35<br>(7 - 77)            | 87<br>(25 - 175)            | 26<br>(11 - 49)             |
| Prostate cancer                                                             | --                          | --                 | --                  | --                        | --                          | --                          |
| Colon and rectum cancer                                                     | 398<br>(268 - 565)          | --                 | --                  | 113<br>(64 - 187)         | 188<br>(123 - 270)          | 98<br>(68 - 132)            |
| Lip and oral cavity cancer                                                  | 64<br>(21 - 162)            | --                 | --                  | 26<br>(6 - 82)            | 25<br>(9 - 62)              | 12<br>(6 - 25)              |
| Nasopharynx cancer                                                          | 119<br>(41 - 251)           | --                 | 9<br>(3 - 22)       | 70<br>(19 - 149)          | 34<br>(12 - 79)             | 6<br>(3 - 13)               |
| Other pharynx cancer                                                        | 44<br>(12 - 78)             | --                 | --                  | 23<br>(4 - 45)            | 16<br>(5 - 30)              | 5<br>(2 - 8)                |
| Gallbladder and biliary tract cancer                                        | 150<br>(85 - 245)           | --                 | --                  | 33<br>(14 - 59)           | 82<br>(43 - 140)            | 36<br>(19 - 62)             |
| Pancreatic cancer                                                           | 123<br>(82 - 181)           | --                 | --                  | 19<br>(11 - 33)           | 67<br>(43 - 105)            | 37<br>(26 - 54)             |
| Malignant skin melanoma                                                     | 21<br>(8 - 66)              | --                 | --                  | 9<br>(3 - 36)             | 8<br>(3 - 25)               | 3<br>(2 - 6)                |
| Non-melanoma skin cancer                                                    | 46<br>(11 - 101)            | --                 | --                  | 17<br>(3 - 44)            | 16<br>(3 - 37)              | 13<br>(5 - 25)              |
| Ovarian cancer                                                              | 194<br>(84 - 378)           | --                 | --                  | 78<br>(23 - 181)          | 92<br>(41 - 174)            | 24<br>(15 - 38)             |
| Testicular cancer                                                           | --                          | --                 | --                  | --                        | --                          | --                          |
| Kidney cancer                                                               | 134<br>(48 - 246)           | 13<br>(3 - 34)     | 14<br>(4 - 32)      | 40<br>(9 - 82)            | 54<br>(19 - 102)            | 13<br>(7 - 23)              |
| Bladder cancer                                                              | 217<br>(60 - 353)           | --                 | --                  | 46<br>(7 - 82)            | 109<br>(27 - 184)           | 62<br>(25 - 105)            |
| Brain and nervous system cancer                                             | 249<br>(157 - 409)          | 12<br>(4 - 32)     | 42<br>(23 - 85)     | 93<br>(48 - 176)          | 77<br>(44 - 140)            | 25<br>(15 - 40)             |
| Thyroid cancer                                                              | 89<br>(31 - 244)            | --                 | 2<br>(0 - 6)        | 24<br>(5 - 77)            | 43<br>(14 - 125)            | 20<br>(9 - 44)              |
| Mesothelioma                                                                | 32<br>(9 - 57)              | --                 | --                  | 9<br>(5 - 40)             | 9<br>(3 - 17)               | 3<br>(1 - 5)                |
| Hodgkin lymphoma                                                            | 118<br>(28 - 247)           | 6<br>(1 - 15)      | 19<br>(4 - 49)      | 71<br>(14 - 155)          | 17<br>(4 - 41)              | 5<br>(2 - 11)               |
| Non-Hodgkin lymphoma                                                        | 322<br>(112 - 1,118)        | 12<br>(3 - 52)     | 23<br>(7 - 78)      | 144<br>(35 - 536)         | 105<br>(38 - 347)           | 38<br>(18 - 113)            |
| Multiple myeloma                                                            | 25<br>(15 - 39)             | --                 | --                  | 5<br>(3 - 9)              | 14<br>(8 - 22)              | 6<br>(4 - 9)                |
| Leukemia                                                                    | 473<br>(308 - 998)          | 31<br>(11 - 82)    | 102<br>(60 - 179)   | 195<br>(108 - 489)        | 98<br>(59 - 183)            | 47<br>(32 - 70)             |
| Other neoplasms                                                             | 542<br>(328 - 989)          | 27<br>(4 - 91)     | 48<br>(21 - 111)    | 207<br>(110 - 388)        | 185<br>(107 - 333)          | 74<br>(48 - 115)            |
| Cardiovascular diseases                                                     | 44,654<br>(30,716 - 61,586) | 14<br>(5 - 33)     | 183<br>(86 - 398)   | 9,297<br>(5,396 - 15,147) | 20,276<br>(13,702 - 28,291) | 14,885<br>(11,602 - 17,973) |
| Rheumatic heart disease                                                     | 1,194<br>(540 - 2,307)      | 1<br>(0 - 3)       | 26<br>(8 - 80)      | 645<br>(245 - 1,347)      | 328<br>(148 - 637)          | 193<br>(97 - 354)           |
| Ischemic heart disease                                                      | 21,843<br>(10,349 - 32,146) | 2<br>(0 - 7)       | 25<br>(5 - 72)      | 3,887<br>(1,053 - 7,035)  | 10,495<br>(4,389 - 15,695)  | 7,434<br>(4,665 - 9,735)    |
| Cerebrovascular disease                                                     | 15,016<br>(9,911 - 23,550)  | 6<br>(2 - 14)      | 81<br>(34 - 191)    | 3,138<br>(1,631 - 5,782)  | 6,361<br>(3,998 - 10,741)   | 5,430<br>(3,911 - 7,410)    |
| Ischemic stroke                                                             | 5,589<br>(2,818 - 9,586)    | 1<br>(0 - 2)       | 9<br>(2 - 27)       | 510<br>(129 - 1,740)      | 2,162<br>(888 - 4,072)      | 2,906<br>(1,662 - 4,216)    |
| Hemorrhagic stroke                                                          | 9,428<br>(4,480 - 18,279)   | 5<br>(2 - 13)      | 72<br>(26 - 178)    | 2,628<br>(1,123 - 5,332)  | 4,199<br>(1,751 - 8,549)    | 2,524<br>(1,380 - 4,619)    |
| Hypertensive heart disease                                                  | 2,166<br>(807 - 3,974)      | 0<br>(0 - 0)       | 2<br>(0 - 5)        | 318<br>(68 - 723)         | 941<br>(294 - 1,798)        | 905<br>(400 - 1,666)        |
| Cardiomyopathy and myocarditis                                              | 530<br>(143 - 880)          | 2<br>(0 - 5)       | 13<br>(4 - 33)      | 204<br>(36 - 398)         | 183<br>(44 - 315)           | 128<br>(54 - 217)           |
| Atrial fibrillation and flutter                                             | 8<br>(4 - 15)               | --                 | --                  | 1<br>(0 - 2)              | 2<br>(1 - 6)                | 5<br>(2 - 8)                |
| Aortic aneurysm                                                             | 110<br>(24 - 239)           | --                 | --                  | 38<br>(5 - 86)            | 37<br>(6 - 89)              | 35<br>(13 - 73)             |
| Peripheral vascular disease                                                 | 5<br>(1 - 9)                | --                 | --                  | 1<br>(0 - 2)              | 2<br>(0 - 4)                | 2<br>(1 - 3)                |
| Endocarditis                                                                | 132<br>(52 - 291)           | 0<br>(0 - 1)       | 2<br>(0 - 7)        | 45<br>(10 - 136)          | 35<br>(11 - 88)             | 50<br>(25 - 88)             |
| Other cardiovascular and circulatory diseases                               | 3,650<br>(837 - 7,943)      | 3<br>(1 - 10)      | 34<br>(9 - 101)     | 1,020<br>(170 - 2,498)    | 1,891<br>(406 - 4,308)      | 702<br>(222 - 1,360)        |
| Chronic respiratory diseases                                                | 5,550<br>(3,806 - 7,670)    | 2<br>(1 - 3)       | 38<br>(21 - 127)    | 813<br>(469 - 1,391)      | 2,517<br>(1,666 - 3,612)    | 2,180<br>(1,575 - 2,838)    |



| Web Table 31- Afghanistan deaths with 95% UI by age, sex, and cause in 2013 |                          |                    |                     |                      |                          |                          |
|-----------------------------------------------------------------------------|--------------------------|--------------------|---------------------|----------------------|--------------------------|--------------------------|
| Cause                                                                       | Females, All Ages        | Females, 0-4 Years | Females, 5-14 Years | Females, 15-49 Years | Females, 50-69 Years     | Females, 70-80 Years     |
| Chronic obstructive pulmonary disease                                       | 4,072<br>(2,611 - 5,755) | 1<br>(0 - 2)       | 12<br>(6 - 38)      | 408<br>(187 - 729)   | 1,905<br>(1,132 - 2,832) | 1,746<br>(1,136 - 2,357) |
| Pneumoconiosis                                                              | 12<br>(6 - 20)           | 0<br>(0 - 0)       | 1<br>(0 - 2)        | 5<br>(2 - 9)         | 4<br>(2 - 8)             | 2<br>(1 - 3)             |
| Silicosis                                                                   | 1<br>(1 - 3)             | 0<br>(0 - 0)       | 0<br>(0 - 0)        | 0<br>(0 - 1)         | 0<br>(0 - 1)             | 0<br>(0 - 1)             |
| Asbestosis                                                                  | 1<br>(0 - 2)             | 0<br>(0 - 0)       | 0<br>(0 - 0)        | 0<br>(0 - 1)         | 0<br>(0 - 1)             | 0<br>(0 - 0)             |
| Coal workers pneumoconiosis                                                 | 1<br>(1 - 2)             | 0<br>(0 - 0)       | 0<br>(0 - 0)        | 0<br>(0 - 1)         | 0<br>(0 - 1)             | 0<br>(0 - 1)             |
| Other pneumoconiosis                                                        | 9<br>(3 - 15)            | 0<br>(0 - 0)       | 1<br>(0 - 1)        | 4<br>(1 - 7)         | 3<br>(1 - 6)             | 1<br>(0 - 2)             |
| Asthma                                                                      | 1,162<br>(501 - 3,116)   | 1<br>(0 - 2)       | 21<br>(8 - 95)      | 324<br>(121 - 794)   | 501<br>(204 - 1,402)     | 314<br>(135 - 896)       |
| Interstitial lung disease and pulmonary sarcoidosis                         | 189<br>(30 - 532)        | 0<br>(0 - 0)       | 1<br>(0 - 2)        | 25<br>(2 - 86)       | 84<br>(12 - 262)         | 79<br>(16 - 218)         |
| Other chronic respiratory diseases                                          | 115<br>(56 - 206)        | 0<br>(0 - 0)       | 3<br>(1 - 8)        | 51<br>(21 - 100)     | 23<br>(10 - 43)          | 38<br>(17 - 69)          |
| Cirrhosis                                                                   | 2,374<br>(1,589 - 3,343) | 123<br>(49 - 262)  | 69<br>(41 - 109)    | 802<br>(451 - 1,309) | 979<br>(630 - 1,416)     | 401<br>(273 - 562)       |
| Cirrhosis due to hepatitis B                                                | 659<br>(196 - 1,196)     | 5<br>(1 - 15)      | 10<br>(1 - 27)      | 204<br>(57 - 436)    | 286<br>(71 - 548)        | 153<br>(36 - 286)        |
| Cirrhosis due to hepatitis C                                                | 1,226<br>(627 - 1,964)   | 12<br>(2 - 34)     | 16<br>(3 - 33)      | 437<br>(213 - 779)   | 576<br>(276 - 924)       | 186<br>(72 - 331)        |
| Cirrhosis due to alcohol use                                                | 93<br>(45 - 190)         | --                 | --                  | 18<br>(9 - 34)       | 42<br>(20 - 90)          | 32<br>(13 - 74)          |
| Cirrhosis due to other causes                                               | 397<br>(237 - 630)       | 107<br>(43 - 233)  | 43<br>(23 - 68)     | 142<br>(67 - 256)    | 76<br>(30 - 155)         | 29<br>(11 - 70)          |
| Digestive diseases                                                          | 2,845<br>(1,664 - 4,562) | 252<br>(111 - 498) | 168<br>(99 - 267)   | 950<br>(471 - 1,684) | 857<br>(465 - 1,415)     | 618<br>(365 - 960)       |
| Peptic ulcer disease                                                        | 1,020<br>(522 - 1,720)   | 34<br>(11 - 77)    | 32<br>(15 - 57)     | 305<br>(131 - 576)   | 370<br>(185 - 671)       | 279<br>(148 - 463)       |
| Gastritis and duodenitis                                                    | 50<br>(12 - 114)         | 8<br>(1 - 20)      | 7<br>(2 - 17)       | 22<br>(4 - 57)       | 8<br>(2 - 20)            | 4<br>(1 - 9)             |
| Appendicitis                                                                | 409<br>(184 - 923)       | 72<br>(24 - 174)   | 45<br>(17 - 100)    | 179<br>(66 - 459)    | 77<br>(30 - 162)         | 35<br>(15 - 70)          |
| Paralytic ileus and intestinal obstruction                                  | 141<br>(68 - 322)        | 9<br>(2 - 26)      | 6<br>(2 - 17)       | 30<br>(12 - 78)      | 39<br>(15 - 96)          | 57<br>(25 - 121)         |
| Inguinal, femoral, and abdominal hernia                                     | 73<br>(23 - 173)         | 9<br>(1 - 24)      | 9<br>(3 - 23)       | 23<br>(5 - 64)       | 17<br>(5 - 44)           | 15<br>(6 - 32)           |
| Inflammatory bowel disease                                                  | 192<br>(98 - 369)        | 29<br>(9 - 72)     | 18<br>(8 - 33)      | 82<br>(36 - 168)     | 39<br>(17 - 79)          | 25<br>(11 - 48)          |
| Vascular intestinal disorders                                               | 51<br>(11 - 134)         | 1<br>(0 - 9)       | 1<br>(0 - 9)        | 22<br>(4 - 61)       | 16<br>(3 - 38)           | 11<br>(3 - 27)           |
| Gallbladder and biliary diseases                                            | 467<br>(265 - 810)       | 41<br>(15 - 84)    | 15<br>(7 - 26)      | 143<br>(65 - 272)    | 160<br>(79 - 301)        | 108<br>(55 - 192)        |
| Pancreatitis                                                                | 133<br>(37 - 294)        | 6<br>(1 - 14)      | 8<br>(2 - 18)       | 50<br>(9 - 125)      | 48<br>(13 - 114)         | 21<br>(6 - 49)           |
| Other digestive diseases                                                    | 309<br>(136 - 527)       | 43<br>(11 - 95)    | 26<br>(11 - 45)     | 95<br>(33 - 187)     | 83<br>(35 - 151)         | 62<br>(28 - 114)         |
| Neurological disorders                                                      | 1,692<br>(1,048 - 2,552) | 131<br>(45 - 281)  | 119<br>(35 - 259)   | 408<br>(92 - 919)    | 223<br>(134 - 332)       | 810<br>(609 - 1,039)     |
| Alzheimer disease and other dementias                                       | 953<br>(702 - 1,240)     | --                 | --                  | 1<br>(0 - 3)         | 164<br>(93 - 252)        | 788<br>(588 - 1,016)     |
| Parkinson disease                                                           | 5<br>(3 - 11)            | --                 | --                  | 1<br>(0 - 4)         | 1<br>(1 - 3)             | 3<br>(1 - 5)             |
| Epilepsy                                                                    | 654<br>(153 - 1,342)     | 105<br>(21 - 258)  | 110<br>(26 - 251)   | 382<br>(72 - 882)    | 46<br>(12 - 96)          | 12<br>(5 - 24)           |
| Multiple sclerosis                                                          | 23<br>(3 - 76)           | --                 | --                  | 14<br>(2 - 50)       | 7<br>(1 - 25)            | 2<br>(0 - 7)             |
| Other neurological disorders                                                | 56<br>(38 - 89)          | 27<br>(16 - 45)    | 9<br>(6 - 16)       | 10<br>(6 - 18)       | 5<br>(3 - 8)             | 5<br>(3 - 7)             |
| Mental and substance use disorders                                          | 480<br>(121 - 1,270)     | 34<br>(1 - 129)    | 0<br>(0 - 0)        | 353<br>(71 - 988)    | 73<br>(18 - 161)         | 20<br>(4 - 46)           |
| Schizophrenia                                                               | 11<br>(3 - 23)           | --                 | --                  | 8<br>(2 - 17)        | 3<br>(1 - 5)             | 1<br>(0 - 2)             |
| Alcohol use disorders                                                       | 97<br>(20 - 337)         | --                 | --                  | 59<br>(11 - 199)     | 34<br>(7 - 119)          | 4<br>(1 - 13)            |
| Drug use disorders                                                          | 371<br>(53 - 1,121)      | 34<br>(1 - 129)    | --                  | 286<br>(19 - 946)    | 37<br>(3 - 111)          | 15<br>(1 - 42)           |
| Opioid use disorders                                                        | 202<br>(30 - 622)        | 19<br>(1 - 74)     | --                  | 156<br>(11 - 525)    | 18<br>(2 - 55)           | 8<br>(1 - 22)            |
| Cocaine use disorders                                                       | 7<br>(1 - 23)            | 1<br>(0 - 3)       | --                  | 6<br>(0 - 20)        | 1<br>(0 - 2)             | 0<br>(0 - 1)             |
| Amphetamine use disorders                                                   | 7<br>(1 - 21)            | 1<br>(0 - 3)       | --                  | 5<br>(0 - 17)        | 1<br>(0 - 2)             | 0<br>(0 - 1)             |
| Other drug use disorders                                                    | 154<br>(22 - 490)        | 13<br>(0 - 49)     | --                  | 118<br>(8 - 408)     | 17<br>(2 - 52)           | 6<br>(1 - 18)            |
| Eating disorders                                                            | 1<br>(1 - 2)             | --                 | 0<br>(0 - 0)        | 1<br>(0 - 2)         | --                       | --                       |

| Web Table 31- Afghanistan deaths with 95% UI by age, sex, and cause in 2013 |                           |                           |                      |                          |                          |                          |
|-----------------------------------------------------------------------------|---------------------------|---------------------------|----------------------|--------------------------|--------------------------|--------------------------|
| Cause                                                                       | Females, All Ages         | Females, 0-4 Years        | Females, 5-14 Years  | Females, 15-49 Years     | Females, 50-69 Years     | Females, 70-80 Years     |
| Anorexia nervosa                                                            | 1<br>(1 - 2)              | --                        | 0<br>(0 - 0)         | 1<br>(0 - 2)             | --                       | --                       |
| Diabetes, urogenital, blood, and endocrine diseases                         | 8,924<br>(5,898 - 12,796) | 516<br>(250 - 836)        | 328<br>(160 - 512)   | 2,236<br>(1,192 - 3,721) | 3,663<br>(2,355 - 5,512) | 2,180<br>(1,541 - 2,972) |
| Diabetes mellitus                                                           | 4,762<br>(3,193 - 6,933)  | 43<br>(22 - 80)           | 39<br>(20 - 71)      | 765<br>(438 - 1,278)     | 2,440<br>(1,501 - 3,703) | 1,476<br>(1,006 - 2,088) |
| Acute glomerulonephritis                                                    | 70<br>(29 - 127)          | 10<br>(3 - 21)            | 11<br>(4 - 21)       | 28<br>(8 - 59)           | 12<br>(5 - 24)           | 8<br>(3 - 15)            |
| Chronic kidney disease                                                      | 2,582<br>(1,046 - 4,750)  | 101<br>(33 - 206)         | 88<br>(34 - 176)     | 785<br>(209 - 1,595)     | 1,037<br>(382 - 1,959)   | 571<br>(271 - 996)       |
| Chronic kidney disease due to diabetes mellitus                             | 48<br>(7 - 112)           | 2<br>(0 - 4)              | 2<br>(0 - 6)         | 14<br>(1 - 39)           | 22<br>(3 - 53)           | 8<br>(2 - 18)            |
| Chronic kidney disease due to hypertension                                  | 841<br>(324 - 1,672)      | 6<br>(1 - 18)             | 7<br>(2 - 18)        | 208<br>(53 - 481)        | 385<br>(143 - 762)       | 236<br>(104 - 431)       |
| Chronic kidney disease due to glomerulonephritis                            | 551<br>(194 - 1,005)      | 54<br>(20 - 105)          | 39<br>(16 - 76)      | 232<br>(65 - 464)        | 151<br>(46 - 289)        | 74<br>(23 - 136)         |
| Chronic kidney disease due to other causes                                  | 1,142<br>(240 - 2,598)    | 40<br>(4 - 109)           | 40<br>(7 - 97)       | 331<br>(28 - 804)        | 479<br>(81 - 1,115)      | 253<br>(75 - 546)        |
| Urinary diseases and male infertility                                       | 250<br>(123 - 403)        | 23<br>(7 - 46)            | 11<br>(5 - 20)       | 93<br>(28 - 186)         | 63<br>(28 - 106)         | 60<br>(35 - 92)          |
| Interstitial nephritis and urinary tract infections                         | 158<br>(85 - 256)         | 15<br>(4 - 32)            | 5<br>(2 - 9)         | 57<br>(19 - 113)         | 39<br>(18 - 67)          | 43<br>(24 - 71)          |
| Urolithiasis                                                                | 32<br>(9 - 69)            | --                        | 3<br>(1 - 5)         | 16<br>(2 - 40)           | 8<br>(2 - 20)            | 5<br>(2 - 11)            |
| Other urinary diseases                                                      | 60<br>(23 - 107)          | 8<br>(2 - 17)             | 4<br>(1 - 7)         | 21<br>(4 - 44)           | 16<br>(5 - 30)           | 11<br>(5 - 22)           |
| Gynecological diseases                                                      | 86<br>(44 - 204)          | --                        | --                   | 69<br>(35 - 163)         | 12<br>(5 - 32)           | 5<br>(2 - 11)            |
| Uterine fibroids                                                            | 15<br>(8 - 37)            | --                        | --                   | 10<br>(5 - 24)           | 4<br>(2 - 10)            | 1<br>(1 - 3)             |
| Polycystic ovarian syndrome                                                 | 5<br>(3 - 12)             | --                        | --                   | 5<br>(3 - 12)            | 0<br>(0 - 0)             | --                       |
| Endometriosis                                                               | 12<br>(6 - 29)            | --                        | --                   | 11<br>(6 - 28)           | 0<br>(0 - 1)             | --                       |
| Genital prolapse                                                            | 13<br>(7 - 31)            | --                        | --                   | 10<br>(5 - 24)           | 2<br>(1 - 5)             | 1<br>(1 - 3)             |
| Other gynecological diseases                                                | 41<br>(21 - 97)           | --                        | --                   | 33<br>(16 - 78)          | 6<br>(3 - 16)            | 2<br>(1 - 5)             |
| Hemoglobinopathies and hemolytic anemias                                    | 835<br>(179 - 1,695)      | 216<br>(39 - 486)         | 141<br>(34 - 282)    | 401<br>(74 - 918)        | 48<br>(13 - 104)         | 29<br>(11 - 55)          |
| Thalassemias                                                                | 584<br>(119 - 1,172)      | 167<br>(29 - 381)         | 121<br>(29 - 242)    | 296<br>(56 - 676)        | 0<br>(0 - 0)             | 0<br>(0 - 0)             |
| Sickle cell disorders                                                       | 67<br>(14 - 142)          | 18<br>(3 - 42)            | 11<br>(3 - 21)       | 33<br>(6 - 77)           | 5<br>(1 - 12)            | 0<br>(0 - 1)             |
| G6PD deficiency                                                             | 18<br>(3 - 38)            | 4<br>(1 - 8)              | 2<br>(0 - 4)         | 9<br>(2 - 22)            | 2<br>(1 - 6)             | 0<br>(0 - 1)             |
| Other hemoglobinopathies and hemolytic anemias                              | 166<br>(44 - 347)         | 27<br>(6 - 58)            | 8<br>(2 - 16)        | 63<br>(11 - 149)         | 40<br>(11 - 87)          | 29<br>(11 - 53)          |
| Endocrine, metabolic, blood, and immune disorders                           | 338<br>(123 - 668)        | 123<br>(36 - 280)         | 38<br>(12 - 87)      | 95<br>(23 - 225)         | 51<br>(17 - 108)         | 31<br>(16 - 54)          |
| Musculoskeletal disorders                                                   | 201<br>(64 - 598)         | --                        | 21<br>(6 - 64)       | 116<br>(27 - 379)        | 40<br>(13 - 105)         | 25<br>(11 - 55)          |
| Rheumatoid arthritis                                                        | 95<br>(21 - 316)          | --                        | 13<br>(3 - 44)       | 49<br>(6 - 184)          | 21<br>(5 - 58)           | 13<br>(5 - 30)           |
| Other musculoskeletal disorders                                             | 106<br>(26 - 290)         | --                        | 8<br>(2 - 21)        | 67<br>(11 - 198)         | 19<br>(6 - 49)           | 12<br>(5 - 26)           |
| Other non-communicable diseases                                             | 7,521<br>(2,820 - 14,375) | 6,662<br>(2,426 - 12,872) | 485<br>(158 - 1,074) | 268<br>(64 - 716)        | 54<br>(21 - 111)         | 52<br>(34 - 79)          |
| Congenital anomalies                                                        | 7,385<br>(2,716 - 14,184) | 6,609<br>(2,385 - 12,804) | 477<br>(152 - 1,064) | 247<br>(57 - 660)        | 32<br>(10 - 74)          | 19<br>(11 - 33)          |
| Neural tube defects                                                         | 1,753<br>(377 - 5,947)    | 1,611<br>(344 - 5,436)    | 68<br>(13 - 254)     | 65<br>(11 - 230)         | 7<br>(1 - 26)            | 2<br>(0 - 5)             |
| Congenital heart anomalies                                                  | 3,580<br>(816 - 8,568)    | 3,240<br>(713 - 7,849)    | 243<br>(53 - 631)    | 84<br>(11 - 272)         | 8<br>(2 - 23)            | 5<br>(2 - 10)            |
| Cleft lip and cleft palate                                                  | 19<br>(2 - 69)            | 19<br>(2 - 69)            | --                   | --                       | --                       | --                       |
| Down syndrome                                                               | 289<br>(37 - 797)         | 221<br>(25 - 634)         | 46<br>(6 - 135)      | 20<br>(2 - 66)           | 2<br>(0 - 5)             | 0<br>(0 - 1)             |
| Chromosomal unbalanced rearrangements                                       | 93<br>(7 - 335)           | 78<br>(5 - 294)           | 5<br>(0 - 19)        | 8<br>(0 - 35)            | 1<br>(0 - 4)             | 0<br>(0 - 1)             |
| Other congenital anomalies                                                  | 1,650<br>(448 - 5,003)    | 1,440<br>(372 - 4,459)    | 115<br>(29 - 345)    | 70<br>(14 - 224)         | 14<br>(4 - 37)           | 12<br>(6 - 22)           |
| Skin and subcutaneous diseases                                              | 97<br>(51 - 184)          | 14<br>(5 - 33)            | 7<br>(3 - 15)        | 21<br>(6 - 56)           | 22<br>(9 - 47)           | 33<br>(20 - 55)          |
| Cellulitis                                                                  | 69<br>(24 - 141)          | 11<br>(3 - 26)            | 6<br>(2 - 12)        | 16<br>(4 - 44)           | 16<br>(4 - 37)           | 21<br>(7 - 39)           |
| Pyoderma                                                                    | 16<br>(2 - 54)            | 3<br>(0 - 12)             | 1<br>(0 - 4)         | 3<br>(0 - 14)            | 4<br>(0 - 15)            | 5<br>(1 - 12)            |
| Decubitus ulcer                                                             | 12<br>(2 - 30)            | 0<br>(0 - 1)              | 0<br>(0 - 2)         | 1<br>(0 - 5)             | 2<br>(0 - 7)             | 8<br>(2 - 20)            |



**Web Table 31- Afghanistan deaths with 95% UI by age, sex, and cause in 2013**

| Cause                                           | Females, All Ages         | Females, 0-4 Years       | Females, 5-14 Years      | Females, 15-49 Years     | Females, 50-69 Years | Females, 70-80 Years |
|-------------------------------------------------|---------------------------|--------------------------|--------------------------|--------------------------|----------------------|----------------------|
| Other skin and subcutaneous diseases            | 1<br>(0 - 3)              | 0<br>(0 - 0)             | 0<br>(0 - 1)             | 0<br>(0 - 2)             | 0<br>(0 - 1)         | 0<br>(0 - 0)         |
| Sudden infant death syndrome                    | 40<br>(3 - 248)           | 40<br>(3 - 248)          | --                       | --                       | --                   | --                   |
| Injuries                                        | 8,486<br>(6,233 - 11,524) | 2,207<br>(1,381 - 3,217) | 1,597<br>(1,153 - 2,176) | 3,486<br>(2,150 - 5,393) | 831<br>(546 - 1,236) | 365<br>(267 - 483)   |
| Transport injuries                              | 1,901<br>(1,260 - 2,940)  | 248<br>(115 - 449)       | 382<br>(220 - 614)       | 1,072<br>(602 - 1,784)   | 169<br>(100 - 296)   | 31<br>(19 - 56)      |
| Road injuries                                   | 1,794<br>(1,162 - 2,806)  | 237<br>(108 - 433)       | 362<br>(211 - 582)       | 1,010<br>(566 - 1,739)   | 156<br>(90 - 287)    | 28<br>(17 - 54)      |
| Pedestrian road injuries                        | 478<br>(255 - 908)        | 84<br>(28 - 177)         | 122<br>(53 - 225)        | 210<br>(93 - 428)        | 51<br>(24 - 109)     | 12<br>(6 - 24)       |
| Cyclist road injuries                           | 140<br>(53 - 332)         | 27<br>(4 - 46)           | 27<br>(8 - 67)           | 74<br>(25 - 186)         | 21<br>(9 - 51)       | 2<br>(1 - 6)         |
| Motorcyclist road injuries                      | 331<br>(145 - 676)        | 24<br>(7 - 59)           | 38<br>(15 - 82)          | 252<br>(99 - 532)        | 16<br>(5 - 39)       | 2<br>(0 - 4)         |
| Motor vehicle road injuries                     | 797<br>(444 - 1,303)      | 104<br>(42 - 212)        | 161<br>(81 - 281)        | 457<br>(231 - 815)       | 65<br>(32 - 115)     | 11<br>(6 - 20)       |
| Other road injuries                             | 47<br>(2 - 105)           | 9<br>(0 - 25)            | 14<br>(1 - 36)           | 18<br>(1 - 45)           | 4<br>(0 - 10)        | 2<br>(0 - 4)         |
| Other transport injuries                        | 107<br>(26 - 189)         | 11<br>(3 - 26)           | 19<br>(5 - 40)           | 62<br>(13 - 118)         | 13<br>(3 - 24)       | 3<br>(1 - 5)         |
| Unintentional injuries                          | 5,450<br>(3,993 - 7,316)  | 1,952<br>(1,216 - 2,940) | 1,157<br>(797 - 1,592)   | 1,453<br>(881 - 2,230)   | 571<br>(372 - 847)   | 319<br>(223 - 432)   |
| Falls                                           | 1,518<br>(954 - 2,320)    | 767<br>(373 - 1,422)     | 309<br>(169 - 519)       | 141<br>(76 - 238)        | 138<br>(82 - 216)    | 163<br>(83 - 262)    |
| Drowning                                        | 1,181<br>(671 - 1,869)    | 590<br>(268 - 1,079)     | 431<br>(212 - 702)       | 106<br>(52 - 191)        | 48<br>(18 - 123)     | 5<br>(2 - 13)        |
| Fire, heat, and hot substances                  | 1,038<br>(638 - 1,638)    | 168<br>(72 - 330)        | 99<br>(52 - 166)         | 518<br>(272 - 894)       | 182<br>(104 - 293)   | 71<br>(42 - 110)     |
| Poisonings                                      | 555<br>(318 - 1,051)      | 115<br>(41 - 276)        | 61<br>(29 - 113)         | 297<br>(142 - 583)       | 66<br>(34 - 125)     | 17<br>(9 - 32)       |
| Exposure to mechanical forces                   | 287<br>(126 - 484)        | 76<br>(28 - 155)         | 62<br>(26 - 108)         | 112<br>(37 - 212)        | 28<br>(12 - 52)      | 10<br>(6 - 15)       |
| Unintentional firearm injuries                  | 101<br>(39 - 168)         | 14<br>(4 - 30)           | 17<br>(6 - 35)           | 57<br>(15 - 108)         | 10<br>(4 - 19)       | 3<br>(1 - 6)         |
| Unintentional suffocation                       | 22<br>(3 - 67)            | 8<br>(1 - 34)            | 3<br>(0 - 9)             | 7<br>(1 - 24)            | 3<br>(0 - 8)         | 0<br>(0 - 1)         |
| Other exposure to mechanical forces             | 164<br>(59 - 323)         | 53<br>(16 - 129)         | 41<br>(14 - 87)          | 48<br>(13 - 113)         | 16<br>(5 - 34)       | 6<br>(2 - 11)        |
| Adverse effects of medical treatment            | 214<br>(90 - 415)         | 41<br>(11 - 102)         | 19<br>(8 - 35)           | 71<br>(22 - 158)         | 54<br>(21 - 111)     | 29<br>(14 - 51)      |
| Animal contact                                  | 86<br>(17 - 171)          | 28<br>(4 - 68)           | 19<br>(3 - 41)           | 26<br>(4 - 62)           | 8<br>(2 - 16)        | 5<br>(1 - 9)         |
| Venomous animal contact                         | 63<br>(9 - 134)           | 23<br>(2 - 59)           | 15<br>(2 - 35)           | 18<br>(2 - 44)           | 5<br>(1 - 12)        | 2<br>(0 - 4)         |
| Non-venomous animal contact                     | 23<br>(3 - 67)            | 5<br>(1 - 20)            | 4<br>(0 - 13)            | 8<br>(1 - 26)            | 3<br>(0 - 8)         | 3<br>(0 - 6)         |
| Foreign body                                    | 70<br>(24 - 196)          | 33<br>(8 - 101)          | 10<br>(3 - 29)           | 16<br>(4 - 48)           | 5<br>(2 - 15)        | 6<br>(2 - 14)        |
| Pulmonary aspiration and foreign body in airway | 66<br>(21 - 184)          | 32<br>(8 - 100)          | 9<br>(3 - 28)            | 14<br>(3 - 42)           | 5<br>(1 - 15)        | 6<br>(1 - 14)        |
| Foreign body in other body part                 | 5<br>(2 - 16)             | 1<br>(0 - 4)             | 1<br>(0 - 3)             | 2<br>(1 - 8)             | 0<br>(0 - 1)         | 0<br>(0 - 1)         |
| Other unintentional injuries                    | 501<br>(295 - 734)        | 133<br>(56 - 243)        | 148<br>(61 - 241)        | 166<br>(91 - 275)        | 42<br>(24 - 67)      | 13<br>(8 - 21)       |
| Self-harm and interpersonal violence            | 1,084<br>(641 - 1,722)    | 6<br>(1 - 23)            | 55<br>(26 - 109)         | 931<br>(530 - 1,512)     | 78<br>(46 - 122)     | 14<br>(8 - 21)       |
| Self-harm                                       | 639<br>(347 - 1,048)      | --                       | 28<br>(10 - 69)          | 559<br>(298 - 940)       | 45<br>(24 - 76)      | 7<br>(4 - 12)        |
| Interpersonal violence                          | 445<br>(238 - 754)        | 6<br>(1 - 23)            | 27<br>(10 - 58)          | 373<br>(184 - 645)       | 33<br>(17 - 57)      | 7<br>(3 - 12)        |
| Assault by firearm                              | 100<br>(27 - 205)         | 1<br>(0 - 5)             | 6<br>(2 - 16)            | 81<br>(20 - 174)         | 10<br>(3 - 21)       | 1<br>(0 - 3)         |
| Assault by sharp object                         | 92<br>(12 - 222)          | 0<br>(0 - 1)             | 2<br>(0 - 6)             | 85<br>(11 - 210)         | 3<br>(0 - 7)         | 1<br>(0 - 2)         |
| Assault by other means                          | 254<br>(109 - 548)        | 4<br>(1 - 18)            | 18<br>(6 - 48)           | 206<br>(83 - 449)        | 20<br>(9 - 42)       | 5<br>(2 - 10)        |
| Forces of nature, war, and legal intervention   | 50<br>(34 - 87)           | 1<br>(0 - 0)             | 4<br>(3 - 6)             | 30<br>(20 - 52)          | 13<br>(9 - 23)       | 2<br>(1 - 3)         |
| Exposure to forces of nature                    | 50<br>(34 - 87)           | 1<br>(0 - 0)             | 4<br>(3 - 6)             | 30<br>(20 - 52)          | 13<br>(9 - 23)       | 2<br>(1 - 3)         |

Web Table 31- Albania deaths with 95% UI by age, sex, and cause in 2013

| Cause                                                             | Both Sexes, All Ages        | Both Sexes, 0-4 Years | Both Sexes, 5-14 Years | Both Sexes, 15-49 Years  | Both Sexes, 50-69 Years  | Both Sexes, 70-80 Years     |
|-------------------------------------------------------------------|-----------------------------|-----------------------|------------------------|--------------------------|--------------------------|-----------------------------|
| All causes                                                        | 24,454<br>(20,778 - 28,641) | 724<br>(347 - 1,424)  | 144<br>(86 - 234)      | 2,171<br>(1,666 - 2,738) | 6,498<br>(5,115 - 8,093) | 14,917<br>(13,127 - 16,960) |
| Communicable, maternal, neonatal, and nutritional diseases        | 1,186<br>(909 - 1,653)      | 385<br>(181 - 757)    | 20<br>(11 - 34)        | 75<br>(59 - 95)          | 151<br>(113 - 203)       | 555<br>(412 - 824)          |
| HIV/AIDS and tuberculosis                                         | 26<br>(20 - 34)             | 0<br>(0 - 1)          | 0<br>(0 - 0)           | 4<br>(3 - 6)             | 10<br>(7 - 14)           | 11<br>(8 - 15)              |
| Tuberculosis                                                      | 24<br>(19 - 33)             | 0<br>(0 - 1)          | 0<br>(0 - 0)           | 3<br>(2 - 5)             | 10<br>(7 - 14)           | 11<br>(8 - 15)              |
| HIV/AIDS                                                          | 2<br>(1 - 2)                | 0<br>(0 - 0)          | 0<br>(0 - 0)           | 1<br>(1 - 1)             | 0<br>(0 - 1)             | 0<br>(0 - 0)                |
| HIV/AIDS resulting in mycobacterial infection                     | 0<br>(0 - 0)                | 0<br>(0 - 0)          | 0<br>(0 - 0)           | 0<br>(0 - 0)             | 0<br>(0 - 0)             | 0<br>(0 - 0)                |
| HIV/AIDS resulting in other diseases                              | 2<br>(1 - 2)                | 0<br>(0 - 0)          | 0<br>(0 - 0)           | 1<br>(1 - 1)             | 0<br>(0 - 1)             | 0<br>(0 - 0)                |
| Diarrhea, lower respiratory, and other common infectious diseases | 921<br>(707 - 1,283)        | 238<br>(116 - 480)    | 16<br>(9 - 28)         | 50<br>(38 - 65)          | 116<br>(83 - 163)        | 501<br>(362 - 760)          |
| Diarrheal diseases                                                | 14<br>(9 - 26)              | 8<br>(4 - 19)         | 0<br>(0 - 0)           | 1<br>(1 - 1)             | 1<br>(1 - 2)             | 3<br>(2 - 5)                |
| Intestinal infectious diseases                                    | 7<br>(3 - 14)               | 1<br>(0 - 3)          | 1<br>(0 - 3)           | 2<br>(1 - 5)             | 1<br>(0 - 3)             | 1<br>(0 - 2)                |
| Typhoid fever                                                     | 5<br>(2 - 9)                | 1<br>(0 - 2)          | 1<br>(0 - 2)           | 2<br>(1 - 4)             | 1<br>(0 - 2)             | 0<br>(0 - 1)                |
| Paratyphoid fever                                                 | 1<br>(1 - 3)                | 0<br>(0 - 1)          | 0<br>(0 - 1)           | 1<br>(0 - 1)             | 0<br>(0 - 0)             | 0<br>(0 - 0)                |
| Other intestinal infectious diseases                              | 1<br>(0 - 4)                | 0<br>(0 - 2)          | 0<br>(0 - 1)           | 0<br>(0 - 2)             | 0<br>(0 - 1)             | 0<br>(0 - 1)                |
| Lower respiratory infections                                      | 817<br>(618 - 1,135)        | 198<br>(96 - 406)     | 9<br>(5 - 17)          | 31<br>(22 - 42)          | 99<br>(69 - 144)         | 480<br>(341 - 738)          |
| Upper respiratory infections                                      | 1<br>(0 - 2)                | 0<br>(0 - 0)          | 0<br>(0 - 0)           | 0<br>(0 - 0)             | 0<br>(0 - 1)             | 0<br>(0 - 1)                |
| Otitis media                                                      | 1<br>(1 - 1)                | 0<br>(0 - 1)          | 0<br>(0 - 0)           | 0<br>(0 - 0)             | 0<br>(0 - 0)             | 0<br>(0 - 1)                |
| Meningitis                                                        | 36<br>(27 - 53)             | 15<br>(7 - 30)        | 2<br>(1 - 3)           | 6<br>(5 - 8)             | 7<br>(5 - 9)             | 7<br>(5 - 9)                |
| Pneumococcal meningitis                                           | 9<br>(7 - 13)               | 3<br>(1 - 6)          | 1<br>(0 - 1)           | 2<br>(1 - 3)             | 2<br>(1 - 3)             | 2<br>(1 - 3)                |
| H influenzae type B meningitis                                    | 7<br>(4 - 12)               | 5<br>(2 - 10)         | 0<br>(0 - 1)           | 1<br>(0 - 1)             | 1<br>(0 - 1)             | 1<br>(0 - 1)                |
| Meningococcal meningitis                                          | 8<br>(5 - 12)               | 3<br>(1 - 7)          | 0<br>(0 - 1)           | 1<br>(1 - 2)             | 1<br>(1 - 2)             | 1<br>(1 - 2)                |
| Other meningitis                                                  | 12<br>(9 - 17)              | 4<br>(2 - 8)          | 1<br>(0 - 1)           | 2<br>(2 - 3)             | 3<br>(2 - 4)             | 3<br>(2 - 4)                |
| Encephalitis                                                      | 42<br>(30 - 64)             | 15<br>(7 - 31)        | 3<br>(2 - 6)           | 8<br>(6 - 12)            | 7<br>(5 - 11)            | 9<br>(6 - 13)               |
| Diphtheria                                                        | 0<br>(0 - 1)                | 0<br>(0 - 1)          | 0<br>(0 - 0)           | 0<br>(0 - 0)             | 0<br>(0 - 0)             | --                          |
| Whooping cough                                                    | 0<br>(0 - 1)                | 0<br>(0 - 0)          | 0<br>(0 - 0)           | 0<br>(0 - 0)             | 0<br>(0 - 0)             | --                          |
| Tetanus                                                           | 0<br>(0 - 0)                | 0<br>(0 - 0)          | 0<br>(0 - 0)           | 0<br>(0 - 0)             | 0<br>(0 - 0)             | 0<br>(0 - 0)                |
| Measles                                                           | 0<br>(0 - 0)                | 0<br>(0 - 0)          | 0<br>(0 - 0)           | 0<br>(0 - 0)             | 0<br>(0 - 0)             | --                          |
| Varicella and herpes zoster                                       | 2<br>(1 - 5)                | 0<br>(0 - 1)          | 0<br>(0 - 0)           | 0<br>(0 - 1)             | 0<br>(0 - 1)             | 1<br>(0 - 4)                |
| Neglected tropical diseases and malaria                           | 19<br>(14 - 25)             | 3<br>(1 - 5)          | 1<br>(1 - 2)           | 6<br>(4 - 9)             | 5<br>(4 - 8)             | 4<br>(2 - 5)                |
| Leishmaniasis                                                     | 15<br>(10 - 20)             | 2<br>(1 - 5)          | 1<br>(0 - 2)           | 5<br>(3 - 7)             | 5<br>(3 - 7)             | 2<br>(1 - 3)                |
| Visceral leishmaniasis                                            | 15<br>(10 - 20)             | 2<br>(1 - 5)          | 1<br>(0 - 2)           | 5<br>(3 - 7)             | 5<br>(3 - 7)             | 2<br>(1 - 3)                |
| Cysticercosis                                                     | 0<br>(0 - 0)                | 0<br>(0 - 0)          | 0<br>(0 - 0)           | 0<br>(0 - 0)             | 0<br>(0 - 0)             | 0<br>(0 - 0)                |
| Cystic echinococcosis                                             | 0<br>(0 - 0)                | 0<br>(0 - 0)          | 0<br>(0 - 0)           | 0<br>(0 - 0)             | 0<br>(0 - 0)             | 0<br>(0 - 0)                |
| Dengue                                                            | 0<br>(0 - 0)                | 0<br>(0 - 0)          | 0<br>(0 - 0)           | 0<br>(0 - 0)             | 0<br>(0 - 0)             | 0<br>(0 - 0)                |
| Rabies                                                            | 0<br>(0 - 0)                | 0<br>(0 - 0)          | 0<br>(0 - 0)           | 0<br>(0 - 0)             | 0<br>(0 - 0)             | 0<br>(0 - 0)                |
| Other neglected tropical diseases                                 | 3<br>(2 - 5)                | 0<br>(0 - 1)          | 0<br>(0 - 0)           | 1<br>(0 - 1)             | 1<br>(0 - 1)             | 2<br>(1 - 3)                |
| Maternal disorders                                                | 3<br>(2 - 4)                | --                    | 0<br>(0 - 0)           | 3<br>(2 - 4)             | --                       | --                          |
| Maternal hemorrhage                                               | 0<br>(0 - 1)                | --                    | 0<br>(0 - 0)           | 0<br>(0 - 1)             | --                       | --                          |
| Maternal sepsis and other maternal infections                     | 0<br>(0 - 0)                | --                    | 0<br>(0 - 0)           | 0<br>(0 - 0)             | --                       | --                          |
| Maternal hypertensive disorders                                   | 0<br>(0 - 1)                | --                    | 0<br>(0 - 0)           | 0<br>(0 - 1)             | --                       | --                          |
| Maternal obstructed labor                                         | 0<br>(0 - 1)                | --                    | 0<br>(0 - 0)           | 0<br>(0 - 1)             | --                       | --                          |

Web Table 31- Albania deaths with 95% UI by age, sex, and cause in 2013

| Cause                                                            | Both Sexes, All Ages        | Both Sexes, 0-4 Years | Both Sexes, 5-14 Years | Both Sexes, 15-49 Years  | Both Sexes, 50-69 Years  | Both Sexes, 70-80 Years     |
|------------------------------------------------------------------|-----------------------------|-----------------------|------------------------|--------------------------|--------------------------|-----------------------------|
| Maternal abortive outcome                                        | 1<br>(0 - 1)                | --                    | 0<br>(0 - 0)           | 1<br>(0 - 1)             | --                       | --                          |
| Indirect maternal deaths                                         | 0<br>(0 - 1)                | --                    | 0<br>(0 - 0)           | 0<br>(0 - 1)             | --                       | --                          |
| Late maternal deaths                                             | 0<br>(0 - 1)                | --                    | 0<br>(0 - 0)           | 0<br>(0 - 1)             | --                       | --                          |
| Maternal deaths aggravated by HIV/AIDS                           | 0<br>(0 - 0)                | --                    | --                     | 0<br>(0 - 0)             | --                       | --                          |
| Other maternal disorders                                         | 1<br>(0 - 1)                | --                    | 0<br>(0 - 0)           | 1<br>(0 - 1)             | --                       | --                          |
| Neonatal disorders                                               | 124<br>(52 - 221)           | 124<br>(52 - 221)     | --                     | --                       | --                       | --                          |
| Neonatal preterm birth complications                             | 38<br>(14 - 72)             | 38<br>(14 - 72)       | --                     | --                       | --                       | --                          |
| Neonatal encephalopathy due to birth asphyxia and trauma         | 11<br>(4 - 22)              | 11<br>(4 - 22)        | --                     | --                       | --                       | --                          |
| Neonatal sepsis and other neonatal infections                    | 0<br>(0 - 1)                | 0<br>(0 - 1)          | --                     | --                       | --                       | --                          |
| Hemolytic disease and other neonatal jaundice                    | 2<br>(1 - 4)                | 2<br>(1 - 4)          | --                     | --                       | --                       | --                          |
| Other neonatal disorders                                         | 73<br>(31 - 129)            | 73<br>(31 - 129)      | --                     | --                       | --                       | --                          |
| Nutritional deficiencies                                         | 46<br>(35 - 63)             | 10<br>(4 - 21)        | 1<br>(1 - 2)           | 6<br>(4 - 8)             | 8<br>(5 - 11)            | 21<br>(15 - 28)             |
| Protein-energy malnutrition                                      | 10<br>(5 - 19)              | 7<br>(3 - 16)         | 0<br>(0 - 0)           | 0<br>(0 - 1)             | 0<br>(0 - 1)             | 1<br>(1 - 3)                |
| Iodine deficiency                                                | 0<br>(0 - 1)                | 0<br>(0 - 0)          | 0<br>(0 - 0)           | 0<br>(0 - 0)             | 0<br>(0 - 0)             | 0<br>(0 - 1)                |
| Iron-deficiency anemia                                           | 34<br>(26 - 45)             | 2<br>(1 - 6)          | 1<br>(0 - 2)           | 5<br>(4 - 7)             | 7<br>(5 - 10)            | 19<br>(14 - 25)             |
| Other nutritional deficiencies                                   | 1<br>(0 - 2)                | 0<br>(0 - 0)          | 0<br>(0 - 0)           | 0<br>(0 - 0)             | 0<br>(0 - 0)             | 0<br>(0 - 1)                |
| Other communicable, maternal, neonatal, and nutritional diseases | 48<br>(36 - 68)             | 10<br>(4 - 24)        | 2<br>(1 - 3)           | 6<br>(5 - 8)             | 12<br>(8 - 17)           | 19<br>(14 - 29)             |
| Sexually transmitted diseases excluding HIV                      | 8<br>(2 - 18)               | 5<br>(0 - 15)         | 0<br>(0 - 1)           | 0<br>(0 - 1)             | 0<br>(0 - 1)             | 1<br>(0 - 2)                |
| Syphilis                                                         | 7<br>(2 - 17)               | 5<br>(0 - 15)         | 0<br>(0 - 1)           | 0<br>(0 - 0)             | 0<br>(0 - 1)             | 1<br>(0 - 1)                |
| Chlamydial infection                                             | 0<br>(0 - 0)                | --                    | 0<br>(0 - 0)           | 0<br>(0 - 0)             | 0<br>(0 - 0)             | 0<br>(0 - 0)                |
| Gonococcal infection                                             | 0<br>(0 - 1)                | --                    | 0<br>(0 - 0)           | 0<br>(0 - 0)             | 0<br>(0 - 0)             | 0<br>(0 - 0)                |
| Other sexually transmitted diseases                              | 0<br>(0 - 0)                | 0<br>(0 - 0)          | 0<br>(0 - 0)           | 0<br>(0 - 0)             | 0<br>(0 - 0)             | 0<br>(0 - 0)                |
| Hepatitis                                                        | 0<br>(0 - 0)                | 0<br>(0 - 0)          | 0<br>(0 - 0)           | 0<br>(0 - 0)             | 0<br>(0 - 0)             | 0<br>(0 - 0)                |
| Acute hepatitis A                                                | 0<br>(0 - 0)                | 0<br>(0 - 0)          | 0<br>(0 - 0)           | 0<br>(0 - 0)             | 0<br>(0 - 0)             | 0<br>(0 - 0)                |
| Acute hepatitis B                                                | 0<br>(0 - 0)                | 0<br>(0 - 0)          | 0<br>(0 - 0)           | 0<br>(0 - 0)             | 0<br>(0 - 0)             | 0<br>(0 - 0)                |
| Acute hepatitis C                                                | 0<br>(0 - 0)                | --                    | 0<br>(0 - 0)           | 0<br>(0 - 0)             | 0<br>(0 - 0)             | 0<br>(0 - 0)                |
| Other infectious diseases                                        | 40<br>(31 - 56)             | 5<br>(2 - 11)         | 1<br>(1 - 2)           | 6<br>(4 - 8)             | 11<br>(8 - 16)           | 18<br>(13 - 27)             |
| Non-communicable diseases                                        | 21,869<br>(18,529 - 25,352) | 268<br>(131 - 536)    | 63<br>(37 - 102)       | 1,323<br>(1,035 - 1,664) | 6,018<br>(4,734 - 7,497) | 14,197<br>(12,408 - 16,175) |
| Neoplasms                                                        | 4,326<br>(3,484 - 5,220)    | 35<br>(14 - 88)       | 18<br>(11 - 29)        | 497<br>(389 - 628)       | 1,948<br>(1,508 - 2,437) | 1,828<br>(1,506 - 2,173)    |
| Esophageal cancer                                                | 58<br>(42 - 77)             | --                    | --                     | 5<br>(4 - 8)             | 27<br>(19 - 38)          | 25<br>(18 - 33)             |
| Stomach cancer                                                   | 527<br>(401 - 664)          | --                    | --                     | 51<br>(37 - 69)          | 237<br>(176 - 314)       | 239<br>(180 - 301)          |
| Liver cancer                                                     | 516<br>(382 - 708)          | --                    | 1<br>(0 - 1)           | 38<br>(26 - 54)          | 231<br>(161 - 342)       | 246<br>(176 - 347)          |
| Liver cancer due to hepatitis B                                  | 114<br>(55 - 189)           | --                    | 0<br>(0 - 0)           | 12<br>(6 - 20)           | 60<br>(26 - 104)         | 42<br>(23 - 71)             |
| Liver cancer due to hepatitis C                                  | 224<br>(144 - 323)          | --                    | 0<br>(0 - 0)           | 15<br>(9 - 24)           | 100<br>(59 - 155)        | 108<br>(67 - 158)           |
| Liver cancer due to alcohol use                                  | 128<br>(82 - 198)           | --                    | --                     | 6<br>(3 - 9)             | 49<br>(29 - 82)          | 73<br>(45 - 115)            |
| Liver cancer due to other causes                                 | 50<br>(31 - 75)             | --                    | 0<br>(0 - 1)           | 6<br>(4 - 8)             | 22<br>(13 - 33)          | 22<br>(13 - 36)             |
| Larynx cancer                                                    | 103<br>(71 - 146)           | --                    | --                     | 9<br>(6 - 13)            | 53<br>(35 - 79)          | 41<br>(28 - 59)             |
| Tracheal, bronchus and lung cancer                               | 1,086<br>(841 - 1,363)      | --                    | --                     | 71<br>(52 - 96)          | 545<br>(406 - 706)       | 470<br>(369 - 583)          |
| Breast cancer                                                    | 221<br>(142 - 315)          | --                    | --                     | 58<br>(35 - 86)          | 110<br>(69 - 161)        | 53<br>(36 - 73)             |
| Cervical cancer                                                  | 81<br>(57 - 115)            | --                    | --                     | 21<br>(14 - 31)          | 38<br>(25 - 56)          | 23<br>(16 - 33)             |

Web Table 31- Albania deaths with 95% UI by age, sex, and cause in 2013

| Cause                                         | Both Sexes, All Ages        | Both Sexes, 0-4 Years | Both Sexes, 5-14 Years | Both Sexes, 15-49 Years | Both Sexes, 50-69 Years  | Both Sexes, 70-80 Years   |
|-----------------------------------------------|-----------------------------|-----------------------|------------------------|-------------------------|--------------------------|---------------------------|
| Uterine cancer                                | 40<br>(27 - 58)             | --                    | --                     | 7<br>(5 - 12)           | 21<br>(13 - 31)          | 12<br>(8 - 17)            |
| Prostate cancer                               | 263<br>(173 - 406)          | --                    | --                     | 5<br>(3 - 8)            | 68<br>(40 - 111)         | 190<br>(124 - 299)        |
| Colon and rectum cancer                       | 192<br>(156 - 232)          | --                    | --                     | 25<br>(19 - 32)         | 80<br>(61 - 101)         | 88<br>(72 - 105)          |
| Lip and oral cavity cancer                    | 52<br>(41 - 66)             | --                    | --                     | 6<br>(4 - 8)            | 20<br>(15 - 27)          | 26<br>(21 - 34)           |
| Nasopharynx cancer                            | 13<br>(9 - 21)              | --                    | 0<br>(0 - 0)           | 3<br>(2 - 4)            | 5<br>(3 - 8)             | 5<br>(4 - 9)              |
| Other pharynx cancer                          | 28<br>(21 - 40)             | --                    | --                     | 3<br>(2 - 5)            | 14<br>(9 - 20)           | 11<br>(8 - 16)            |
| Gallbladder and biliary tract cancer          | 19<br>(13 - 26)             | --                    | --                     | 2<br>(1 - 3)            | 8<br>(5 - 12)            | 9<br>(6 - 12)             |
| Pancreatic cancer                             | 193<br>(157 - 236)          | --                    | --                     | 17<br>(13 - 23)         | 92<br>(71 - 118)         | 84<br>(68 - 102)          |
| Malignant skin melanoma                       | 33<br>(22 - 62)             | --                    | --                     | 6<br>(4 - 10)           | 10<br>(6 - 19)           | 17<br>(11 - 33)           |
| Non-melanoma skin cancer                      | 47<br>(32 - 73)             | --                    | --                     | 2<br>(1 - 3)            | 11<br>(7 - 18)           | 34<br>(23 - 52)           |
| Ovarian cancer                                | 36<br>(25 - 50)             | --                    | --                     | 10<br>(6 - 14)          | 18<br>(12 - 26)          | 8<br>(6 - 11)             |
| Testicular cancer                             | 7<br>(4 - 10)               | --                    | --                     | 4<br>(3 - 7)            | 1<br>(1 - 2)             | 1<br>(1 - 2)              |
| Kidney cancer                                 | 80<br>(61 - 104)            | 0<br>(0 - 0)          | 0<br>(0 - 0)           | 6<br>(4 - 9)            | 41<br>(30 - 56)          | 32<br>(23 - 43)           |
| Bladder cancer                                | 30<br>(23 - 38)             | --                    | --                     | 1<br>(1 - 1)            | 10<br>(7 - 13)           | 19<br>(15 - 25)           |
| Brain and nervous system cancer               | 204<br>(151 - 263)          | 2<br>(1 - 3)          | 5<br>(3 - 8)           | 50<br>(37 - 66)         | 111<br>(77 - 149)        | 37<br>(25 - 50)           |
| Thyroid cancer                                | 14<br>(10 - 18)             | --                    | 0<br>(0 - 0)           | 2<br>(1 - 3)            | 6<br>(4 - 9)             | 5<br>(4 - 8)              |
| Mesothelioma                                  | 35<br>(23 - 49)             | --                    | --                     | 6<br>(4 - 10)           | 16<br>(9 - 23)           | 13<br>(8 - 19)            |
| Hodgkin lymphoma                              | 19<br>(14 - 28)             | 0<br>(0 - 0)          | 0<br>(0 - 1)           | 7<br>(5 - 10)           | 8<br>(5 - 11)            | 4<br>(3 - 6)              |
| Non-Hodgkin lymphoma                          | 40<br>(28 - 79)             | 1<br>(0 - 2)          | 1<br>(1 - 2)           | 9<br>(6 - 18)           | 17<br>(11 - 35)          | 12<br>(8 - 23)            |
| Multiple myeloma                              | 9<br>(6 - 14)               | --                    | --                     | 2<br>(1 - 3)            | 5<br>(3 - 8)             | 2<br>(1 - 3)              |
| Leukemia                                      | 135<br>(109 - 164)          | 5<br>(2 - 10)         | 7<br>(4 - 12)          | 34<br>(26 - 44)         | 53<br>(40 - 68)          | 36<br>(28 - 46)           |
| Other neoplasms                               | 246<br>(190 - 330)          | 27<br>(9 - 77)        | 4<br>(2 - 7)           | 36<br>(26 - 47)         | 90<br>(65 - 120)         | 88<br>(67 - 123)          |
| Cardiovascular diseases                       | 13,289<br>(11,280 - 15,509) | 38<br>(18 - 77)       | 15<br>(9 - 24)         | 556<br>(419 - 712)      | 3,236<br>(2,524 - 4,057) | 9,444<br>(8,234 - 10,783) |
| Rheumatic heart disease                       | 69<br>(51 - 92)             | 1<br>(0 - 2)          | 1<br>(0 - 1)           | 11<br>(8 - 16)          | 21<br>(13 - 30)          | 35<br>(24 - 49)           |
| Ischemic heart disease                        | 5,486<br>(4,223 - 6,629)    | 9<br>(4 - 18)         | 3<br>(2 - 6)           | 307<br>(224 - 408)      | 1,668<br>(1,250 - 2,128) | 3,498<br>(2,637 - 4,178)  |
| Cerebrovascular disease                       | 6,270<br>(5,345 - 7,315)    | 12<br>(5 - 23)        | 7<br>(4 - 12)          | 160<br>(119 - 209)      | 1,178<br>(921 - 1,485)   | 4,913<br>(4,256 - 5,668)  |
| Ischemic stroke                               | 1,249<br>(836 - 1,678)      | 1<br>(1 - 3)          | 1<br>(0 - 1)           | 19<br>(13 - 28)         | 188<br>(122 - 273)       | 1,039<br>(677 - 1,398)    |
| Hemorrhagic stroke                            | 5,021<br>(4,226 - 5,964)    | 10<br>(5 - 21)        | 6<br>(3 - 10)          | 141<br>(105 - 186)      | 990<br>(769 - 1,257)     | 3,874<br>(3,305 - 4,542)  |
| Hypertensive heart disease                    | 460<br>(340 - 651)          | 0<br>(0 - 0)          | 0<br>(0 - 0)           | 9<br>(6 - 14)           | 67<br>(46 - 95)          | 383<br>(273 - 561)        |
| Cardiomyopathy and myocarditis                | 195<br>(148 - 303)          | 8<br>(4 - 16)         | 2<br>(1 - 3)           | 17<br>(12 - 25)         | 41<br>(30 - 58)          | 127<br>(92 - 205)         |
| Atrial fibrillation and flutter               | 0<br>(0 - 0)                | --                    | --                     | 0<br>(0 - 0)            | 0<br>(0 - 0)             | 0<br>(0 - 0)              |
| Aortic aneurysm                               | 44<br>(33 - 56)             | --                    | --                     | 4<br>(3 - 5)            | 15<br>(11 - 21)          | 25<br>(19 - 33)           |
| Peripheral vascular disease                   | 0<br>(0 - 0)                | --                    | --                     | 0<br>(0 - 0)            | 0<br>(0 - 0)             | 0<br>(0 - 0)              |
| Endocarditis                                  | 18<br>(13 - 25)             | 1<br>(0 - 2)          | 0<br>(0 - 0)           | 3<br>(2 - 4)            | 4<br>(2 - 6)             | 10<br>(7 - 15)            |
| Other cardiovascular and circulatory diseases | 747<br>(543 - 953)          | 8<br>(3 - 16)         | 2<br>(1 - 3)           | 43<br>(30 - 60)         | 242<br>(167 - 331)       | 453<br>(314 - 596)        |
| Chronic respiratory diseases                  | 1,440<br>(1,162 - 1,789)    | 14<br>(6 - 28)        | 2<br>(1 - 3)           | 28<br>(21 - 38)         | 256<br>(187 - 340)       | 1,141<br>(926 - 1,425)    |
| Chronic obstructive pulmonary disease         | 995<br>(802 - 1,281)        | 6<br>(3 - 14)         | 1<br>(0 - 1)           | 11<br>(8 - 15)          | 145<br>(106 - 197)       | 833<br>(666 - 1,087)      |
| Pneumoconiosis                                | 44<br>(27 - 67)             | 0<br>(0 - 0)          | 0<br>(0 - 0)           | 4<br>(2 - 6)            | 20<br>(11 - 32)          | 21<br>(12 - 32)           |
| Silicosis                                     | 18<br>(10 - 27)             | 0<br>(0 - 0)          | 0<br>(0 - 0)           | 1<br>(1 - 2)            | 7<br>(4 - 11)            | 10<br>(5 - 16)            |
| Asbestosis                                    | 3<br>(2 - 5)                | 0<br>(0 - 0)          | 0<br>(0 - 0)           | 0<br>(0 - 1)            | 2<br>(1 - 3)             | 1<br>(1 - 2)              |

Web Table 31- Albania deaths with 95% UI by age, sex, and cause in 2013

| Cause                                               | Both Sexes, All Ages     | Both Sexes, 0-4 Years | Both Sexes, 5-14 Years | Both Sexes, 15-49 Years | Both Sexes, 50-69 Years | Both Sexes, 70-80 Years |
|-----------------------------------------------------|--------------------------|-----------------------|------------------------|-------------------------|-------------------------|-------------------------|
| Coal workers pneumoconiosis                         | 5<br>(3 - 8)             | 0<br>(0 - 0)          | 0<br>(0 - 0)           | 0<br>(0 - 0)            | 3<br>(2 - 5)            | 2<br>(1 - 3)            |
| Other pneumoconiosis                                | 18<br>(11 - 28)          | 0<br>(0 - 0)          | 0<br>(0 - 0)           | 2<br>(1 - 3)            | 9<br>(5 - 15)           | 8<br>(4 - 12)           |
| Asthma                                              | 247<br>(173 - 327)       | 1<br>(0 - 1)          | 0<br>(0 - 1)           | 6<br>(4 - 8)            | 54<br>(36 - 76)         | 185<br>(128 - 248)      |
| Interstitial lung disease and pulmonary sarcoidosis | 104<br>(70 - 158)        | 0<br>(0 - 1)          | 0<br>(0 - 0)           | 2<br>(1 - 3)            | 27<br>(17 - 42)         | 75<br>(49 - 116)        |
| Other chronic respiratory diseases                  | 49<br>(36 - 68)          | 6<br>(3 - 13)         | 1<br>(0 - 1)           | 5<br>(4 - 7)            | 9<br>(6 - 14)           | 28<br>(18 - 43)         |
| Cirrhosis                                           | 39<br>(32 - 48)          | 0<br>(0 - 0)          | 0<br>(0 - 0)           | 4<br>(3 - 6)            | 17<br>(13 - 21)         | 18<br>(15 - 22)         |
| Cirrhosis due to hepatitis B                        | 11<br>(7 - 15)           | 0<br>(0 - 0)          | 0<br>(0 - 0)           | 1<br>(1 - 2)            | 5<br>(3 - 7)            | 5<br>(3 - 8)            |
| Cirrhosis due to hepatitis C                        | 12<br>(7 - 17)           | 0<br>(0 - 0)          | 0<br>(0 - 0)           | 1<br>(1 - 2)            | 5<br>(3 - 8)            | 5<br>(3 - 8)            |
| Cirrhosis due to alcohol use                        | 10<br>(6 - 15)           | --                    | --                     | 1<br>(0 - 1)            | 4<br>(2 - 7)            | 5<br>(3 - 8)            |
| Cirrhosis due to other causes                       | 6<br>(4 - 9)             | 0<br>(0 - 0)          | 0<br>(0 - 0)           | 1<br>(1 - 2)            | 3<br>(2 - 4)            | 2<br>(1 - 3)            |
| Digestive diseases                                  | 417<br>(337 - 516)       | 9<br>(4 - 20)         | 3<br>(1 - 4)           | 38<br>(28 - 49)         | 140<br>(103 - 181)      | 227<br>(185 - 281)      |
| Peptic ulcer disease                                | 89<br>(64 - 121)         | 0<br>(0 - 0)          | 0<br>(0 - 0)           | 5<br>(3 - 8)            | 28<br>(18 - 42)         | 56<br>(40 - 76)         |
| Gastritis and duodenitis                            | 3<br>(2 - 5)             | 0<br>(0 - 0)          | 0<br>(0 - 0)           | 0<br>(0 - 1)            | 1<br>(1 - 2)            | 1<br>(1 - 2)            |
| Appendicitis                                        | 7<br>(5 - 12)            | 0<br>(0 - 0)          | 0<br>(0 - 0)           | 1<br>(1 - 2)            | 2<br>(1 - 4)            | 4<br>(2 - 6)            |
| Paralytic ileus and intestinal obstruction          | 41<br>(27 - 71)          | 1<br>(0 - 2)          | 1<br>(0 - 1)           | 3<br>(2 - 6)            | 15<br>(9 - 28)          | 22<br>(14 - 38)         |
| Inguinal, femoral, and abdominal hernia             | 16<br>(10 - 29)          | 0<br>(0 - 0)          | 0<br>(0 - 0)           | 1<br>(1 - 2)            | 5<br>(3 - 9)            | 10<br>(6 - 18)          |
| Inflammatory bowel disease                          | 37<br>(23 - 67)          | 6<br>(2 - 14)         | 1<br>(0 - 1)           | 3<br>(2 - 5)            | 9<br>(5 - 18)           | 18<br>(10 - 37)         |
| Vascular intestinal disorders                       | 9<br>(4 - 17)            | 0<br>(0 - 0)          | 0<br>(0 - 0)           | 0<br>(0 - 1)            | 4<br>(2 - 9)            | 4<br>(2 - 8)            |
| Gallbladder and biliary diseases                    | 34<br>(24 - 46)          | 0<br>(0 - 1)          | 0<br>(0 - 0)           | 3<br>(2 - 4)            | 12<br>(8 - 17)          | 19<br>(13 - 27)         |
| Pancreatitis                                        | 120<br>(76 - 165)        | 1<br>(0 - 1)          | 0<br>(0 - 0)           | 17<br>(10 - 25)         | 47<br>(29 - 65)         | 55<br>(34 - 82)         |
| Other digestive diseases                            | 60<br>(43 - 82)          | 1<br>(0 - 3)          | 0<br>(0 - 1)           | 5<br>(3 - 7)            | 16<br>(11 - 24)         | 37<br>(26 - 52)         |
| Neurological disorders                              | 1,284<br>(1,059 - 1,526) | 16<br>(8 - 34)        | 8<br>(4 - 13)          | 49<br>(37 - 64)         | 123<br>(93 - 157)       | 1,088<br>(887 - 1,307)  |
| Alzheimer disease and other dementias               | 1,054<br>(853 - 1,265)   | --                    | --                     | 0<br>(0 - 1)            | 62<br>(45 - 82)         | 991<br>(798 - 1,196)    |
| Parkinson disease                                   | 49<br>(35 - 63)          | --                    | --                     | 1<br>(0 - 1)            | 15<br>(11 - 21)         | 33<br>(21 - 43)         |
| Epilepsy                                            | 63<br>(48 - 84)          | 7<br>(3 - 15)         | 5<br>(2 - 8)           | 28<br>(21 - 38)         | 13<br>(9 - 18)          | 10<br>(7 - 15)          |
| Multiple sclerosis                                  | 48<br>(31 - 102)         | --                    | --                     | 8<br>(5 - 13)           | 15<br>(9 - 25)          | 26<br>(14 - 67)         |
| Other neurological disorders                        | 70<br>(54 - 89)          | 9<br>(4 - 19)         | 3<br>(2 - 5)           | 12<br>(8 - 16)          | 17<br>(12 - 23)         | 28<br>(22 - 35)         |
| Mental and substance use disorders                  | 90<br>(62 - 118)         | 2<br>(1 - 4)          | 0<br>(0 - 0)           | 39<br>(26 - 54)         | 29<br>(18 - 40)         | 20<br>(13 - 26)         |
| Schizophrenia                                       | 13<br>(6 - 21)           | --                    | --                     | 4<br>(1 - 6)            | 6<br>(3 - 11)           | 3<br>(1 - 5)            |
| Alcohol use disorders                               | 9<br>(4 - 13)            | --                    | --                     | 4<br>(1 - 6)            | 4<br>(1 - 6)            | 2<br>(1 - 2)            |
| Drug use disorders                                  | 67<br>(46 - 86)          | 2<br>(1 - 4)          | --                     | 32<br>(21 - 44)         | 19<br>(12 - 26)         | 15<br>(10 - 20)         |
| Opioid use disorders                                | 25<br>(17 - 33)          | 1<br>(0 - 2)          | --                     | 12<br>(8 - 17)          | 6<br>(4 - 9)            | 6<br>(4 - 8)            |
| Cocaine use disorders                               | 4<br>(3 - 5)             | 0<br>(0 - 0)          | --                     | 2<br>(1 - 3)            | 1<br>(1 - 1)            | 1<br>(0 - 1)            |
| Amphetamine use disorders                           | 3<br>(2 - 4)             | 0<br>(0 - 0)          | --                     | 2<br>(1 - 2)            | 1<br>(1 - 1)            | 1<br>(0 - 1)            |
| Other drug use disorders                            | 34<br>(24 - 45)          | 1<br>(0 - 2)          | --                     | 16<br>(10 - 22)         | 10<br>(7 - 14)          | 7<br>(5 - 10)           |
| Eating disorders                                    | 0<br>(0 - 0)             | --                    | 0<br>(0 - 0)           | 0<br>(0 - 0)            | --                      | --                      |
| Anorexia nervosa                                    | 0<br>(0 - 0)             | --                    | 0<br>(0 - 0)           | 0<br>(0 - 0)            | --                      | --                      |
| Diabetes, urogenital, blood, and endocrine diseases | 794<br>(656 - 992)       | 25<br>(12 - 49)       | 11<br>(6 - 17)         | 100<br>(76 - 131)       | 252<br>(194 - 328)      | 407<br>(337 - 512)      |
| Diabetes mellitus                                   | 232<br>(186 - 283)       | 1<br>(0 - 1)          | 1<br>(0 - 1)           | 14<br>(10 - 18)         | 81<br>(61 - 105)        | 136<br>(108 - 169)      |
| Acute glomerulonephritis                            | 8<br>(5 - 13)            | 0<br>(0 - 1)          | 0<br>(0 - 0)           | 2<br>(1 - 2)            | 3<br>(2 - 4)            | 3<br>(2 - 6)            |

Web Table 31- Albania deaths with 95% UI by age, sex, and cause in 2013

| Cause                                               | Both Sexes, All Ages     | Both Sexes, 0-4 Years | Both Sexes, 5-14 Years | Both Sexes, 15-49 Years | Both Sexes, 50-69 Years | Both Sexes, 70-80 Years |
|-----------------------------------------------------|--------------------------|-----------------------|------------------------|-------------------------|-------------------------|-------------------------|
| Chronic kidney disease                              | 381<br>(303 - 509)       | 3<br>(2 - 7)          | 3<br>(2 - 4)           | 52<br>(38 - 73)         | 126<br>(94 - 177)       | 197<br>(155 - 261)      |
| Chronic kidney disease due to diabetes mellitus     | 51<br>(35 - 103)         | 0<br>(0 - 1)          | 0<br>(0 - 1)           | 8<br>(5 - 16)           | 18<br>(11 - 35)         | 24<br>(15 - 49)         |
| Chronic kidney disease due to hypertension          | 62<br>(43 - 88)          | 0<br>(0 - 0)          | 0<br>(0 - 0)           | 6<br>(4 - 10)           | 17<br>(11 - 26)         | 38<br>(25 - 54)         |
| Chronic kidney disease due to glomerulonephritis    | 20<br>(15 - 28)          | 0<br>(0 - 1)          | 0<br>(0 - 1)           | 5<br>(3 - 7)            | 6<br>(4 - 8)            | 9<br>(6 - 13)           |
| Chronic kidney disease due to other causes          | 249<br>(186 - 341)       | 2<br>(1 - 4)          | 2<br>(1 - 3)           | 32<br>(22 - 50)         | 85<br>(59 - 124)        | 127<br>(91 - 177)       |
| Urinary diseases and male infertility               | 38<br>(28 - 62)          | 1<br>(1 - 3)          | 0<br>(0 - 1)           | 3<br>(2 - 5)            | 8<br>(6 - 13)           | 25<br>(17 - 42)         |
| Interstitial nephritis and urinary tract infections | 14<br>(10 - 23)          | 1<br>(0 - 1)          | 0<br>(0 - 0)           | 2<br>(1 - 3)            | 3<br>(2 - 5)            | 9<br>(6 - 15)           |
| Urolithiasis                                        | 1<br>(0 - 2)             | --                    | 0<br>(0 - 0)           | 0<br>(0 - 1)            | 0<br>(0 - 0)            | 0<br>(0 - 1)            |
| Other urinary diseases                              | 23<br>(16 - 39)          | 1<br>(0 - 2)          | 0<br>(0 - 0)           | 1<br>(1 - 2)            | 5<br>(3 - 8)            | 16<br>(10 - 29)         |
| Gynecological diseases                              | 1<br>(0 - 1)             | --                    | --                     | 0<br>(0 - 0)            | 0<br>(0 - 0)            | 0<br>(0 - 1)            |
| Uterine fibroids                                    | 0<br>(0 - 0)             | --                    | --                     | 0<br>(0 - 0)            | 0<br>(0 - 0)            | 0<br>(0 - 0)            |
| Polycystic ovarian syndrome                         | 0<br>(0 - 0)             | --                    | --                     | 0<br>(0 - 0)            | 0<br>(0 - 0)            | --                      |
| Endometriosis                                       | 0<br>(0 - 0)             | --                    | --                     | 0<br>(0 - 0)            | 0<br>(0 - 0)            | --                      |
| Genital prolapse                                    | 0<br>(0 - 0)             | --                    | --                     | 0<br>(0 - 0)            | 0<br>(0 - 0)            | 0<br>(0 - 0)            |
| Other gynecological diseases                        | 0<br>(0 - 0)             | --                    | --                     | 0<br>(0 - 0)            | 0<br>(0 - 0)            | 0<br>(0 - 0)            |
| Hemoglobinopathies and hemolytic anemias            | 46<br>(29 - 68)          | 12<br>(5 - 23)        | 4<br>(2 - 7)           | 15<br>(10 - 22)         | 7<br>(4 - 11)           | 7<br>(5 - 11)           |
| Thalassemias                                        | 18<br>(10 - 31)          | 9<br>(4 - 18)         | 3<br>(2 - 6)           | 6<br>(4 - 9)            | 0<br>(0 - 0)            | 0<br>(0 - 0)            |
| Sickle cell disorders                               | 10<br>(6 - 14)           | 2<br>(1 - 4)          | 1<br>(0 - 1)           | 5<br>(3 - 7)            | 2<br>(1 - 4)            | 0<br>(0 - 0)            |
| G6PD deficiency                                     | 1<br>(0 - 1)             | 0<br>(0 - 0)          | 0<br>(0 - 0)           | 0<br>(0 - 0)            | 0<br>(0 - 0)            | 0<br>(0 - 0)            |
| Other hemoglobinopathies and hemolytic anemias      | 17<br>(11 - 24)          | 1<br>(0 - 2)          | 0<br>(0 - 0)           | 4<br>(3 - 7)            | 4<br>(3 - 7)            | 7<br>(5 - 11)           |
| Endocrine, metabolic, blood, and immune disorders   | 89<br>(67 - 149)         | 7<br>(3 - 16)         | 3<br>(1 - 4)           | 14<br>(10 - 22)         | 27<br>(19 - 46)         | 38<br>(26 - 71)         |
| Musculoskeletal disorders                           | 27<br>(18 - 43)          | --                    | 0<br>(0 - 0)           | 3<br>(2 - 5)            | 11<br>(7 - 18)          | 12<br>(8 - 20)          |
| Rheumatoid arthritis                                | 9<br>(4 - 12)            | --                    | 0<br>(0 - 0)           | 1<br>(1 - 2)            | 4<br>(2 - 6)            | 4<br>(2 - 6)            |
| Other musculoskeletal disorders                     | 18<br>(12 - 34)          | --                    | 0<br>(0 - 0)           | 2<br>(2 - 4)            | 7<br>(5 - 15)           | 8<br>(5 - 15)           |
| Other non-communicable diseases                     | 163<br>(90 - 296)        | 129<br>(59 - 257)     | 7<br>(4 - 11)          | 9<br>(7 - 12)           | 6<br>(4 - 7)            | 13<br>(10 - 16)         |
| Congenital anomalies                                | 158<br>(85 - 289)        | 128<br>(59 - 254)     | 7<br>(4 - 11)          | 8<br>(6 - 11)           | 5<br>(3 - 6)            | 11<br>(8 - 14)          |
| Neural tube defects                                 | 12<br>(4 - 25)           | 11<br>(3 - 23)        | 0<br>(0 - 1)           | 0<br>(0 - 1)            | 0<br>(0 - 0)            | 1<br>(0 - 1)            |
| Congenital heart anomalies                          | 90<br>(48 - 174)         | 76<br>(35 - 156)      | 4<br>(2 - 6)           | 4<br>(3 - 5)            | 2<br>(1 - 3)            | 5<br>(4 - 7)            |
| Cleft lip and cleft palate                          | 1<br>(0 - 3)             | 1<br>(0 - 3)          | --                     | --                      | --                      | --                      |
| Down syndrome                                       | 9<br>(4 - 18)            | 8<br>(3 - 17)         | 1<br>(0 - 2)           | 0<br>(0 - 0)            | 0<br>(0 - 0)            | 0<br>(0 - 0)            |
| Chromosomal unbalanced rearrangements               | 6<br>(3 - 12)            | 5<br>(2 - 11)         | 0<br>(0 - 0)           | 1<br>(0 - 1)            | 0<br>(0 - 0)            | 0<br>(0 - 0)            |
| Other congenital anomalies                          | 40<br>(23 - 67)          | 28<br>(12 - 56)       | 1<br>(1 - 3)           | 3<br>(2 - 4)            | 3<br>(2 - 4)            | 5<br>(3 - 6)            |
| Skin and subcutaneous diseases                      | 5<br>(4 - 8)             | 1<br>(0 - 2)          | 0<br>(0 - 0)           | 1<br>(1 - 2)            | 1<br>(1 - 1)            | 2<br>(2 - 3)            |
| Cellulitis                                          | 1<br>(1 - 2)             | 0<br>(0 - 1)          | 0<br>(0 - 0)           | 0<br>(0 - 0)            | 0<br>(0 - 0)            | 1<br>(0 - 1)            |
| Pyoderma                                            | 2<br>(1 - 3)             | 0<br>(0 - 1)          | 0<br>(0 - 0)           | 0<br>(0 - 0)            | 0<br>(0 - 0)            | 1<br>(0 - 1)            |
| Decubitus ulcer                                     | 1<br>(1 - 2)             | 0<br>(0 - 0)          | 0<br>(0 - 0)           | 0<br>(0 - 0)            | 0<br>(0 - 0)            | 1<br>(0 - 1)            |
| Other skin and subcutaneous diseases                | 1<br>(1 - 2)             | 0<br>(0 - 1)          | 0<br>(0 - 0)           | 0<br>(0 - 0)            | 0<br>(0 - 0)            | 0<br>(0 - 1)            |
| Sudden infant death syndrome                        | 0<br>(0 - 0)             | 0<br>(0 - 0)          | --                     | --                      | --                      | --                      |
| Injuries                                            | 1,399<br>(1,083 - 1,769) | 71<br>(35 - 147)      | 60<br>(36 - 97)        | 773<br>(568 - 1,001)    | 330<br>(245 - 431)      | 165<br>(133 - 199)      |
| Transport injuries                                  | 349<br>(265 - 449)       | 11<br>(5 - 23)        | 13<br>(7 - 22)         | 186<br>(135 - 246)      | 88<br>(64 - 117)        | 50<br>(38 - 65)         |

Web Table 31- Albania deaths with 95% UI by age, sex, and cause in 2013

| Cause                                           | Both Sexes, All Ages | Both Sexes, 0-4 Years | Both Sexes, 5-14 Years | Both Sexes, 15-49 Years | Both Sexes, 50-69 Years | Both Sexes, 70-80 Years |
|-------------------------------------------------|----------------------|-----------------------|------------------------|-------------------------|-------------------------|-------------------------|
| Road injuries                                   | 306<br>(230 - 395)   | 9<br>(4 - 20)         | 12<br>(6 - 19)         | 166<br>(119 - 220)      | 76<br>(55 - 101)        | 42<br>(31 - 54)         |
| Pedestrian road injuries                        | 53<br>(24 - 81)      | 2<br>(1 - 5)          | 2<br>(1 - 4)           | 27<br>(12 - 44)         | 14<br>(6 - 22)          | 7<br>(3 - 12)           |
| Cyclist road injuries                           | 45<br>(25 - 68)      | 1<br>(0 - 3)          | 2<br>(1 - 4)           | 24<br>(13 - 39)         | 12<br>(6 - 19)          | 6<br>(3 - 10)           |
| Motorcyclist road injuries                      | 60<br>(35 - 89)      | 2<br>(0 - 4)          | 2<br>(1 - 4)           | 35<br>(19 - 54)         | 14<br>(8 - 22)          | 8<br>(4 - 12)           |
| Motor vehicle road injuries                     | 91<br>(60 - 139)     | 3<br>(1 - 6)          | 3<br>(2 - 6)           | 52<br>(32 - 80)         | 22<br>(14 - 35)         | 12<br>(7 - 20)          |
| Other road injuries                             | 56<br>(30 - 89)      | 2<br>(1 - 4)          | 2<br>(1 - 4)           | 29<br>(14 - 50)         | 15<br>(7 - 25)          | 9<br>(4 - 14)           |
| Other transport injuries                        | 43<br>(26 - 68)      | 2<br>(1 - 4)          | 2<br>(1 - 3)           | 20<br>(11 - 34)         | 12<br>(7 - 19)          | 8<br>(5 - 13)           |
| Unintentional injuries                          | 615<br>(472 - 788)   | 57<br>(27 - 120)      | 41<br>(24 - 66)        | 292<br>(215 - 386)      | 143<br>(100 - 195)      | 82<br>(63 - 101)        |
| Falls                                           | 65<br>(46 - 82)      | 3<br>(1 - 7)          | 3<br>(1 - 4)           | 25<br>(17 - 34)         | 19<br>(13 - 26)         | 15<br>(10 - 20)         |
| Drowning                                        | 89<br>(62 - 132)     | 14<br>(6 - 31)        | 16<br>(9 - 28)         | 44<br>(30 - 62)         | 11<br>(7 - 17)          | 5<br>(3 - 7)            |
| Fire, heat, and hot substances                  | 25<br>(19 - 33)      | 4<br>(2 - 8)          | 1<br>(1 - 2)           | 8<br>(6 - 11)           | 6<br>(4 - 9)            | 6<br>(4 - 9)            |
| Poisonings                                      | 27<br>(15 - 38)      | 3<br>(1 - 6)          | 1<br>(1 - 2)           | 13<br>(8 - 18)          | 6<br>(3 - 9)            | 4<br>(2 - 6)            |
| Exposure to mechanical forces                   | 167<br>(122 - 223)   | 15<br>(6 - 39)        | 8<br>(5 - 14)          | 84<br>(57 - 117)        | 42<br>(27 - 60)         | 17<br>(12 - 24)         |
| Unintentional firearm injuries                  | 12<br>(8 - 17)       | 0<br>(0 - 1)          | 1<br>(0 - 1)           | 8<br>(5 - 13)           | 2<br>(1 - 4)            | 0<br>(0 - 1)            |
| Unintentional suffocation                       | 19<br>(8 - 68)       | 9<br>(2 - 33)         | 1<br>(0 - 3)           | 6<br>(3 - 26)           | 2<br>(1 - 9)            | 1<br>(0 - 5)            |
| Other exposure to mechanical forces             | 136<br>(87 - 181)    | 6<br>(2 - 13)         | 7<br>(4 - 11)          | 70<br>(46 - 96)         | 38<br>(22 - 54)         | 16<br>(10 - 22)         |
| Adverse effects of medical treatment            | 40<br>(27 - 53)      | 7<br>(3 - 14)         | 1<br>(1 - 2)           | 9<br>(5 - 13)           | 9<br>(6 - 13)           | 13<br>(8 - 19)          |
| Animal contact                                  | 4<br>(3 - 8)         | 0<br>(0 - 1)          | 0<br>(0 - 1)           | 1<br>(1 - 3)            | 1<br>(1 - 3)            | 1<br>(0 - 1)            |
| Venomous animal contact                         | 2<br>(1 - 4)         | 0<br>(0 - 0)          | 0<br>(0 - 0)           | 1<br>(0 - 1)            | 1<br>(0 - 2)            | 0<br>(0 - 0)            |
| Non-venomous animal contact                     | 2<br>(1 - 5)         | 0<br>(0 - 0)          | 0<br>(0 - 0)           | 1<br>(0 - 1)            | 1<br>(0 - 2)            | 0<br>(0 - 1)            |
| Foreign body                                    | 7<br>(4 - 11)        | 3<br>(1 - 6)          | 0<br>(0 - 1)           | 2<br>(1 - 3)            | 1<br>(1 - 2)            | 1<br>(0 - 1)            |
| Pulmonary aspiration and foreign body in airway | 6<br>(4 - 10)        | 2<br>(1 - 5)          | 0<br>(0 - 1)           | 2<br>(1 - 3)            | 1<br>(1 - 2)            | 1<br>(0 - 1)            |
| Foreign body in other body part                 | 1<br>(0 - 1)         | 0<br>(0 - 0)          | 0<br>(0 - 0)           | 0<br>(0 - 1)            | 0<br>(0 - 0)            | 0<br>(0 - 0)            |
| Other unintentional injuries                    | 191<br>(134 - 263)   | 9<br>(3 - 22)         | 10<br>(4 - 20)         | 106<br>(66 - 156)       | 46<br>(25 - 80)         | 20<br>(12 - 30)         |
| Self-harm and interpersonal violence            | 434<br>(311 - 570)   | 3<br>(1 - 5)          | 6<br>(4 - 10)          | 294<br>(208 - 394)      | 99<br>(67 - 134)        | 33<br>(24 - 42)         |
| Self-harm                                       | 175<br>(132 - 230)   | -                     | 3<br>(1 - 4)           | 110<br>(81 - 148)       | 45<br>(31 - 60)         | 18<br>(13 - 23)         |
| Interpersonal violence                          | 259<br>(159 - 359)   | 3<br>(1 - 5)          | 4<br>(2 - 7)           | 184<br>(112 - 261)      | 54<br>(31 - 80)         | 15<br>(9 - 21)          |
| Assault by firearm                              | 186<br>(104 - 264)   | 1<br>(0 - 2)          | 3<br>(1 - 4)           | 136<br>(74 - 195)       | 38<br>(20 - 58)         | 8<br>(4 - 12)           |
| Assault by sharp object                         | 32<br>(18 - 62)      | 0<br>(0 - 0)          | 0<br>(0 - 1)           | 24<br>(12 - 48)         | 5<br>(2 - 10)           | 3<br>(1 - 5)            |
| Assault by other means                          | 41<br>(24 - 67)      | 1<br>(0 - 3)          | 1<br>(0 - 2)           | 24<br>(13 - 42)         | 11<br>(5 - 18)          | 4<br>(2 - 6)            |

Web Table 31- Albania deaths with 95% UI by age, sex, and cause in 2013

| Cause                                                              | Males, All Ages             | Males, 0-4 Years   | Males, 5-14 Years | Males, 15-49 Years       | Males, 50-69 Years       | Males, 70-80 Years       |
|--------------------------------------------------------------------|-----------------------------|--------------------|-------------------|--------------------------|--------------------------|--------------------------|
| All causes                                                         | 14,208<br>(11,105 - 17,357) | 405<br>(197 - 788) | 87<br>(53 - 139)  | 1,526<br>(1,089 - 2,030) | 4,370<br>(3,161 - 5,869) | 7,819<br>(6,232 - 9,330) |
| Communicable, maternal, neonatal, and nutritional diseases         | 658<br>(489 - 889)          | 214<br>(99 - 414)  | 11<br>(6 - 18)    | 47<br>(33 - 62)          | 100<br>(69 - 143)        | 286<br>(194 - 422)       |
| HIV/AIDS and tuberculosis                                          | 17<br>(12 - 25)             | 0<br>(0 - 0)       | 0<br>(0 - 0)      | 3<br>(2 - 4)             | 7<br>(5 - 11)            | 6<br>(4 - 10)            |
| Tuberculosis                                                       | 16<br>(11 - 23)             | 0<br>(0 - 0)       | 0<br>(0 - 0)      | 2<br>(2 - 3)             | 7<br>(4 - 11)            | 6<br>(4 - 10)            |
| HIV/AIDS                                                           | 1<br>(1 - 2)                | 0<br>(0 - 0)       | 0<br>(0 - 0)      | 1<br>(0 - 1)             | 0<br>(0 - 1)             | 0<br>(0 - 0)             |
| HIV/AIDS resulting in mycobacterial infection                      | 0<br>(0 - 0)                | 0<br>(0 - 0)       | 0<br>(0 - 0)      | 0<br>(0 - 0)             | 0<br>(0 - 0)             | 0<br>(0 - 0)             |
| HIV/AIDS resulting in other diseases                               | 1<br>(1 - 2)                | 0<br>(0 - 0)       | 0<br>(0 - 0)      | 1<br>(0 - 1)             | 0<br>(0 - 1)             | 0<br>(0 - 0)             |
| Diarrrhea, lower respiratory, and other common infectious diseases | 509<br>(377 - 707)          | 130<br>(61 - 262)  | 9<br>(5 - 14)     | 33<br>(22 - 45)          | 78<br>(50 - 117)         | 260<br>(170 - 398)       |
| Diarrheal diseases                                                 | 8<br>(5 - 14)               | 5<br>(2 - 10)      | 0<br>(0 - 0)      | 1<br>(0 - 1)             | 1<br>(1 - 2)             | 2<br>(1 - 3)             |
| Intestinal infectious diseases                                     | 4<br>(2 - 9)                | 1<br>(0 - 2)       | 1<br>(0 - 2)      | 2<br>(1 - 4)             | 1<br>(0 - 2)             | 0<br>(0 - 1)             |
| Typhoid fever                                                      | 3<br>(1 - 6)                | 0<br>(0 - 1)       | 1<br>(0 - 1)      | 1<br>(0 - 3)             | 0<br>(0 - 1)             | 0<br>(0 - 1)             |
| Paratyphoid fever                                                  | 1<br>(0 - 2)                | 0<br>(0 - 0)       | 0<br>(0 - 0)      | 0<br>(0 - 1)             | 0<br>(0 - 0)             | 0<br>(0 - 0)             |
| Other intestinal infectious diseases                               | 0<br>(0 - 3)                | 0<br>(0 - 1)       | 0<br>(0 - 0)      | 0<br>(0 - 1)             | 0<br>(0 - 1)             | 0<br>(0 - 1)             |
| Lower respiratory infections                                       | 451<br>(327 - 631)          | 108<br>(49 - 219)  | 5<br>(2 - 9)      | 22<br>(14 - 31)          | 68<br>(43 - 106)         | 249<br>(160 - 387)       |
| Upper respiratory infections                                       | 1<br>(0 - 1)                | 0<br>(0 - 0)       | 0<br>(0 - 0)      | 0<br>(0 - 0)             | 0<br>(0 - 1)             | 0<br>(0 - 1)             |
| Otitis media                                                       | 1<br>(0 - 1)                | 0<br>(0 - 0)       | 0<br>(0 - 0)      | 0<br>(0 - 0)             | 0<br>(0 - 0)             | 0<br>(0 - 0)             |
| Meningitis                                                         | 20<br>(14 - 30)             | 8<br>(3 - 17)      | 1<br>(1 - 2)      | 4<br>(3 - 5)             | 4<br>(3 - 6)             | 3<br>(2 - 5)             |
| Pneumococcal meningitis                                            | 5<br>(3 - 8)                | 2<br>(1 - 4)       | 0<br>(0 - 1)      | 1<br>(1 - 2)             | 1<br>(1 - 2)             | 1<br>(0 - 2)             |
| H influenzae type B meningitis                                     | 4<br>(2 - 7)                | 3<br>(1 - 6)       | 0<br>(0 - 0)      | 0<br>(0 - 1)             | 0<br>(0 - 1)             | 0<br>(0 - 0)             |
| Meningococcal meningitis                                           | 4<br>(3 - 7)                | 2<br>(1 - 4)       | 0<br>(0 - 1)      | 1<br>(0 - 1)             | 1<br>(0 - 1)             | 1<br>(0 - 1)             |
| Other meningitis                                                   | 7<br>(5 - 10)               | 2<br>(1 - 4)       | 0<br>(0 - 1)      | 1<br>(1 - 2)             | 2<br>(1 - 3)             | 1<br>(1 - 2)             |
| Encephalitis                                                       | 23<br>(15 - 35)             | 8<br>(3 - 18)      | 2<br>(1 - 3)      | 5<br>(3 - 8)             | 4<br>(2 - 6)             | 4<br>(3 - 8)             |
| Diphtheria                                                         | 0<br>(0 - 0)                | 0<br>(0 - 0)       | 0<br>(0 - 0)      | 0<br>(0 - 0)             | 0<br>(0 - 0)             | --<br>(0 - 0)            |
| Whooping cough                                                     | 0<br>(0 - 0)                | 0<br>(0 - 0)       | 0<br>(0 - 0)      | 0<br>(0 - 0)             | 0<br>(0 - 0)             | --<br>(0 - 0)            |
| Tetanus                                                            | 0<br>(0 - 0)                | 0<br>(0 - 0)       | 0<br>(0 - 0)      | 0<br>(0 - 0)             | 0<br>(0 - 0)             | 0<br>(0 - 0)             |
| Measles                                                            | 0<br>(0 - 0)                | 0<br>(0 - 0)       | 0<br>(0 - 0)      | 0<br>(0 - 0)             | 0<br>(0 - 0)             | --<br>(0 - 0)            |
| Varicella and herpes zoster                                        | 1<br>(0 - 2)                | 0<br>(0 - 0)       | 0<br>(0 - 0)      | 0<br>(0 - 0)             | 0<br>(0 - 0)             | 0<br>(0 - 2)             |
| Neglected tropical diseases and malaria                            | 12<br>(8 - 17)              | 2<br>(1 - 4)       | 1<br>(0 - 1)      | 4<br>(3 - 6)             | 4<br>(2 - 6)             | 2<br>(1 - 2)             |
| Leishmaniasis                                                      | 10<br>(6 - 14)              | 1<br>(1 - 3)       | 1<br>(0 - 1)      | 4<br>(2 - 6)             | 3<br>(2 - 5)             | 1<br>(0 - 1)             |
| Visceral leishmaniasis                                             | 10<br>(6 - 14)              | 1<br>(1 - 3)       | 1<br>(0 - 1)      | 4<br>(2 - 6)             | 3<br>(2 - 5)             | 1<br>(0 - 1)             |
| Cysticercosis                                                      | 0<br>(0 - 0)                | 0<br>(0 - 0)       | 0<br>(0 - 0)      | 0<br>(0 - 0)             | 0<br>(0 - 0)             | 0<br>(0 - 0)             |
| Cystic echinococcosis                                              | 0<br>(0 - 0)                | 0<br>(0 - 0)       | 0<br>(0 - 0)      | 0<br>(0 - 0)             | 0<br>(0 - 0)             | 0<br>(0 - 0)             |
| Dengue                                                             | 0<br>(0 - 0)                | 0<br>(0 - 0)       | 0<br>(0 - 0)      | 0<br>(0 - 0)             | 0<br>(0 - 0)             | 0<br>(0 - 0)             |
| Rabies                                                             | 0<br>(0 - 0)                | 0<br>(0 - 0)       | 0<br>(0 - 0)      | 0<br>(0 - 0)             | 0<br>(0 - 0)             | 0<br>(0 - 0)             |
| Other neglected tropical diseases                                  | 2<br>(1 - 3)                | 0<br>(0 - 1)       | 0<br>(0 - 0)      | 0<br>(0 - 1)             | 0<br>(0 - 0)             | 1<br>(0 - 1)             |
| Maternal disorders                                                 | --                          | --                 | --                | --                       | --                       | --                       |
| Maternal hemorrhage                                                | --                          | --                 | --                | --                       | --                       | --                       |
| Maternal sepsis and other maternal infections                      | --                          | --                 | --                | --                       | --                       | --                       |
| Maternal hypertensive disorders                                    | --                          | --                 | --                | --                       | --                       | --                       |
| Maternal obstructed labor                                          | --                          | --                 | --                | --                       | --                       | --                       |



Web Table 31- Albania deaths with 95% UI by age, sex, and cause in 2013

| Cause                                                            | Males, All Ages            | Males, 0-4 Years  | Males, 5-14 Years | Males, 15-49 Years   | Males, 50-69 Years       | Males, 70-80 Years       |
|------------------------------------------------------------------|----------------------------|-------------------|-------------------|----------------------|--------------------------|--------------------------|
| Maternal abortive outcome                                        | --                         | --                | --                | --                   | --                       | --                       |
| Indirect maternal deaths                                         | --                         | --                | --                | --                   | --                       | --                       |
| Late maternal deaths                                             | --                         | --                | --                | --                   | --                       | --                       |
| Maternal deaths aggravated by HIV/AIDS                           | --                         | --                | --                | --                   | --                       | --                       |
| Other maternal disorders                                         | --                         | --                | --                | --                   | --                       | --                       |
| Neonatal disorders                                               | 71<br>(30 - 127)           | 71<br>(30 - 127)  | --                | --                   | --                       | --                       |
| Neonatal preterm birth complications                             | 23<br>(8 - 47)             | 23<br>(8 - 47)    | --                | --                   | --                       | --                       |
| Neonatal encephalopathy due to birth asphyxia and trauma         | 8<br>(3 - 16)              | 8<br>(3 - 16)     | --                | --                   | --                       | --                       |
| Neonatal sepsis and other neonatal infections                    | 0<br>(0 - 1)               | 0<br>(0 - 1)      | --                | --                   | --                       | --                       |
| Hemolytic disease and other neonatal jaundice                    | 1<br>(0 - 4)               | 1<br>(0 - 4)      | --                | --                   | --                       | --                       |
| Other neonatal disorders                                         | 38<br>(15 - 70)            | 38<br>(15 - 70)   | --                | --                   | --                       | --                       |
| Nutritional deficiencies                                         | 24<br>(14 - 37)            | 6<br>(3 - 14)     | 1<br>(0 - 1)      | 3<br>(2 - 5)         | 4<br>(3 - 8)             | 9<br>(5 - 14)            |
| Protein-energy malnutrition                                      | 6<br>(3 - 12)              | 5<br>(2 - 10)     | 0<br>(0 - 0)      | 0<br>(0 - 1)         | 0<br>(0 - 1)             | 1<br>(0 - 2)             |
| Iodine deficiency                                                | 0<br>(0 - 1)               | 0<br>(0 - 0)      | 0<br>(0 - 0)      | 0<br>(0 - 0)         | 0<br>(0 - 0)             | 0<br>(0 - 0)             |
| Iron-deficiency anemia                                           | 17<br>(10 - 26)            | 2<br>(0 - 4)      | 1<br>(0 - 1)      | 3<br>(1 - 4)         | 4<br>(2 - 7)             | 8<br>(5 - 13)            |
| Other nutritional deficiencies                                   | 0<br>(0 - 1)               | 0<br>(0 - 0)      | 0<br>(0 - 0)      | 0<br>(0 - 0)         | 0<br>(0 - 0)             | 0<br>(0 - 0)             |
| Other communicable, maternal, neonatal, and nutritional diseases | 25<br>(17 - 38)            | 5<br>(2 - 12)     | 1<br>(0 - 1)      | 4<br>(2 - 6)         | 7<br>(4 - 12)            | 9<br>(5 - 15)            |
| Sexually transmitted diseases excluding HIV                      | 4<br>(1 - 9)               | 3<br>(0 - 8)      | 0<br>(0 - 0)      | 0<br>(0 - 0)         | 0<br>(0 - 1)             | 0<br>(0 - 1)             |
| Syphilis                                                         | 4<br>(1 - 9)               | 3<br>(0 - 8)      | 0<br>(0 - 0)      | 0<br>(0 - 0)         | 0<br>(0 - 1)             | 0<br>(0 - 1)             |
| Chlamydial infection                                             | --                         | --                | --                | --                   | --                       | --                       |
| Gonococcal infection                                             | 0<br>(0 - 0)               | --                | 0<br>(0 - 0)      | 0<br>(0 - 0)         | 0<br>(0 - 0)             | 0<br>(0 - 0)             |
| Other sexually transmitted diseases                              | 0<br>(0 - 0)               | --                | 0<br>(0 - 0)      | 0<br>(0 - 0)         | 0<br>(0 - 0)             | 0<br>(0 - 0)             |
| Hepatitis                                                        | 0<br>(0 - 0)               | 0<br>(0 - 0)      | 0<br>(0 - 0)      | 0<br>(0 - 0)         | 0<br>(0 - 0)             | 0<br>(0 - 0)             |
| Acute hepatitis A                                                | 0<br>(0 - 0)               | 0<br>(0 - 0)      | 0<br>(0 - 0)      | 0<br>(0 - 0)         | 0<br>(0 - 0)             | 0<br>(0 - 0)             |
| Acute hepatitis B                                                | 0<br>(0 - 0)               | 0<br>(0 - 0)      | 0<br>(0 - 0)      | 0<br>(0 - 0)         | 0<br>(0 - 0)             | 0<br>(0 - 0)             |
| Acute hepatitis C                                                | 0<br>(0 - 0)               | --                | 0<br>(0 - 0)      | 0<br>(0 - 0)         | 0<br>(0 - 0)             | 0<br>(0 - 0)             |
| Other infectious diseases                                        | 21<br>(15 - 33)            | 2<br>(1 - 5)      | 1<br>(0 - 1)      | 3<br>(2 - 5)         | 7<br>(4 - 12)            | 8<br>(5 - 14)            |
| Non-communicable diseases                                        | 12,471<br>(9,615 - 15,347) | 147<br>(70 - 301) | 35<br>(20 - 56)   | 838<br>(588 - 1,136) | 4,019<br>(2,883 - 5,381) | 7,433<br>(5,896 - 8,901) |
| Neoplasms                                                        | 2,767<br>(2,040 - 3,530)   | 19<br>(8 - 49)    | 11<br>(6 - 17)    | 263<br>(181 - 358)   | 1,283<br>(904 - 1,711)   | 1,191<br>(903 - 1,495)   |
| Esophageal cancer                                                | 41<br>(27 - 58)            | --                | --                | 4<br>(3 - 6)         | 21<br>(13 - 31)          | 16<br>(11 - 23)          |
| Stomach cancer                                                   | 360<br>(249 - 475)         | --                | --                | 35<br>(22 - 50)      | 173<br>(116 - 241)       | 153<br>(106 - 200)       |
| Liver cancer                                                     | 322<br>(207 - 518)         | --                | 0<br>(0 - 1)      | 24<br>(13 - 39)      | 156<br>(95 - 255)        | 142<br>(82 - 235)        |
| Liver cancer due to hepatitis B                                  | 78<br>(27 - 149)           | --                | 0<br>(0 - 0)      | 9<br>(3 - 16)        | 43<br>(12 - 87)          | 27<br>(10 - 52)          |
| Liver cancer due to hepatitis C                                  | 144<br>(75 - 238)          | --                | 0<br>(0 - 0)      | 10<br>(4 - 18)       | 69<br>(31 - 122)         | 65<br>(35 - 114)         |
| Liver cancer due to alcohol use                                  | 84<br>(46 - 145)           | --                | --                | 4<br>(2 - 8)         | 36<br>(20 - 63)          | 44<br>(22 - 79)          |
| Liver cancer due to other causes                                 | 16<br>(8 - 28)             | --                | 0<br>(0 - 0)      | 2<br>(1 - 3)         | 8<br>(4 - 14)            | 6<br>(2 - 10)            |
| Larynx cancer                                                    | 86<br>(54 - 126)           | --                | --                | 7<br>(4 - 12)        | 45<br>(28 - 70)          | 33<br>(21 - 50)          |
| Tracheal, bronchus and lung cancer                               | 844<br>(614 - 1,094)       | --                | --                | 49<br>(32 - 70)      | 440<br>(306 - 592)       | 356<br>(265 - 456)       |
| Breast cancer                                                    | 7<br>(3 - 19)              | --                | --                | 1<br>(0 - 2)         | 3<br>(1 - 7)             | 3<br>(1 - 10)            |
| Cervical cancer                                                  | --                         | --                | --                | --                   | --                       | --                       |

Web Table 31- Albania deaths with 95% UI by age, sex, and cause in 2013

| Cause                                         | Males, All Ages          | Males, 0-4 Years | Males, 5-14 Years | Males, 15-49 Years | Males, 50-69 Years       | Males, 70-80 Years       |
|-----------------------------------------------|--------------------------|------------------|-------------------|--------------------|--------------------------|--------------------------|
| Uterine cancer                                | --                       | --               | --                | --                 | --                       | --                       |
| Prostate cancer                               | 263<br>(173 - 406)       | --               | --                | 5<br>(3 - 8)       | 68<br>(40 - 111)         | 190<br>(124 - 299)       |
| Colon and rectum cancer                       | 103<br>(75 - 133)        | --               | --                | 14<br>(9 - 20)     | 45<br>(32 - 63)          | 43<br>(32 - 56)          |
| Lip and oral cavity cancer                    | 36<br>(26 - 49)          | --               | --                | 5<br>(3 - 7)       | 15<br>(10 - 21)          | 16<br>(12 - 23)          |
| Nasopharynx cancer                            | 9<br>(5 - 15)            | --               | 0<br>(0 - 0)      | 2<br>(1 - 3)       | 4<br>(2 - 6)             | 3<br>(2 - 6)             |
| Other pharynx cancer                          | 19<br>(13 - 30)          | --               | --                | 2<br>(1 - 4)       | 11<br>(7 - 17)           | 6<br>(4 - 11)            |
| Gallbladder and biliary tract cancer          | 9<br>(5 - 14)            | --               | --                | 1<br>(1 - 2)       | 4<br>(2 - 6)             | 4<br>(2 - 7)             |
| Pancreatic cancer                             | 119<br>(87 - 154)        | --               | --                | 12<br>(8 - 17)     | 60<br>(42 - 83)          | 46<br>(34 - 60)          |
| Malignant skin melanoma                       | 20<br>(11 - 43)          | --               | --                | 3<br>(2 - 7)       | 6<br>(3 - 13)            | 11<br>(5 - 24)           |
| Non-melanoma skin cancer                      | 29<br>(17 - 51)          | --               | --                | 1<br>(1 - 2)       | 7<br>(4 - 14)            | 21<br>(12 - 37)          |
| Ovarian cancer                                | --                       | --               | --                | --                 | --                       | --                       |
| Testicular cancer                             | 7<br>(4 - 10)            | --               | --                | 4<br>(3 - 7)       | 1<br>(1 - 2)             | 1<br>(1 - 2)             |
| Kidney cancer                                 | 58<br>(41 - 79)          | 0<br>(0 - 0)     | 0<br>(0 - 0)      | 5<br>(3 - 7)       | 28<br>(18 - 40)          | 25<br>(17 - 35)          |
| Bladder cancer                                | 21<br>(14 - 27)          | --               | --                | 0<br>(0 - 1)       | 9<br>(6 - 12)            | 12<br>(8 - 16)           |
| Brain and nervous system cancer               | 117<br>(76 - 166)        | 1<br>(0 - 2)     | 3<br>(1 - 4)      | 29<br>(18 - 42)    | 66<br>(42 - 99)          | 18<br>(11 - 28)          |
| Thyroid cancer                                | 6<br>(3 - 8)             | --               | 0<br>(0 - 0)      | 1<br>(1 - 2)       | 3<br>(2 - 5)             | 2<br>(1 - 3)             |
| Mesothelioma                                  | 24<br>(14 - 37)          | --               | --                | 5<br>(3 - 8)       | 11<br>(6 - 18)           | 9<br>(4 - 15)            |
| Hodgkin lymphoma                              | 13<br>(7 - 19)           | 0<br>(0 - 0)     | 0<br>(0 - 0)      | 5<br>(3 - 7)       | 5<br>(3 - 9)             | 2<br>(1 - 3)             |
| Non-Hodgkin lymphoma                          | 25<br>(16 - 55)          | 0<br>(0 - 1)     | 1<br>(0 - 1)      | 7<br>(4 - 14)      | 11<br>(6 - 25)           | 7<br>(4 - 15)            |
| Multiple myeloma                              | 6<br>(3 - 10)            | --               | --                | 1<br>(1 - 2)       | 3<br>(2 - 6)             | 1<br>(1 - 2)             |
| Leukemia                                      | 79<br>(59 - 102)         | 3<br>(1 - 6)     | 4<br>(2 - 7)      | 20<br>(14 - 28)    | 31<br>(21 - 45)          | 21<br>(14 - 29)          |
| Other neoplasms                               | 147<br>(104 - 205)       | 15<br>(5 - 42)   | 2<br>(1 - 4)      | 21<br>(13 - 31)    | 57<br>(37 - 85)          | 51<br>(34 - 80)          |
| Cardiovascular diseases                       | 7,241<br>(5,616 - 8,990) | 22<br>(11 - 45)  | 9<br>(5 - 14)     | 401<br>(278 - 542) | 2,192<br>(1,586 - 2,964) | 4,617<br>(3,686 - 5,558) |
| Rheumatic heart disease                       | 35<br>(22 - 53)          | 1<br>(0 - 1)     | 0<br>(0 - 1)      | 7<br>(4 - 11)      | 14<br>(8 - 23)           | 14<br>(8 - 22)           |
| Ischemic heart disease                        | 3,314<br>(2,429 - 4,314) | 5<br>(2 - 11)    | 2<br>(1 - 4)      | 241<br>(163 - 336) | 1,241<br>(874 - 1,712)   | 1,823<br>(1,332 - 2,320) |
| Cerebrovascular disease                       | 3,213<br>(2,499 - 4,026) | 6<br>(3 - 12)    | 4<br>(2 - 6)      | 103<br>(68 - 147)  | 737<br>(519 - 1,008)     | 2,363<br>(1,878 - 2,924) |
| Ischemic stroke                               | 664<br>(420 - 1,034)     | 1<br>(0 - 1)     | 0<br>(0 - 1)      | 12<br>(7 - 20)     | 120<br>(69 - 196)        | 530<br>(329 - 844)       |
| Hemorrhagic stroke                            | 2,549<br>(1,959 - 3,250) | 5<br>(2 - 11)    | 3<br>(2 - 6)      | 91<br>(61 - 129)   | 617<br>(424 - 845)       | 1,833<br>(1,429 - 2,300) |
| Hypertensive heart disease                    | 151<br>(87 - 221)        | 0<br>(0 - 0)     | 0<br>(0 - 0)      | 7<br>(4 - 12)      | 38<br>(21 - 59)          | 105<br>(59 - 161)        |
| Cardiomyopathy and myocarditis                | 108<br>(74 - 167)        | 5<br>(2 - 10)    | 1<br>(1 - 2)      | 11<br>(7 - 17)     | 27<br>(17 - 41)          | 64<br>(41 - 106)         |
| Atrial fibrillation and flutter               | 0<br>(0 - 0)             | --               | --                | 0<br>(0 - 0)       | 0<br>(0 - 0)             | 0<br>(0 - 0)             |
| Aortic aneurysm                               | 33<br>(24 - 45)          | --               | --                | 3<br>(2 - 4)       | 13<br>(9 - 18)           | 18<br>(13 - 24)          |
| Peripheral vascular disease                   | 0<br>(0 - 0)             | --               | --                | 0<br>(0 - 0)       | 0<br>(0 - 0)             | 0<br>(0 - 0)             |
| Endocarditis                                  | 11<br>(7 - 18)           | 0<br>(0 - 1)     | 0<br>(0 - 0)      | 2<br>(1 - 3)       | 3<br>(1 - 4)             | 6<br>(3 - 10)            |
| Other cardiovascular and circulatory diseases | 375<br>(248 - 504)       | 5<br>(2 - 10)    | 1<br>(1 - 2)      | 26<br>(16 - 39)    | 120<br>(73 - 176)        | 224<br>(143 - 308)       |
| Chronic respiratory diseases                  | 963<br>(708 - 1,264)     | 8<br>(3 - 16)    | 1<br>(0 - 1)      | 18<br>(12 - 27)    | 190<br>(126 - 271)       | 746<br>(552 - 985)       |
| Chronic obstructive pulmonary disease         | 653<br>(485 - 886)       | 4<br>(1 - 7)     | 0<br>(0 - 1)      | 7<br>(5 - 11)      | 101<br>(67 - 147)        | 540<br>(402 - 735)       |
| Pneumoconiosis                                | 44<br>(26 - 66)          | 0<br>(0 - 0)     | 0<br>(0 - 0)      | 4<br>(2 - 6)       | 20<br>(11 - 32)          | 20<br>(12 - 31)          |
| Silicosis                                     | 18<br>(10 - 27)          | 0<br>(0 - 0)     | 0<br>(0 - 0)      | 1<br>(1 - 2)       | 7<br>(4 - 11)            | 10<br>(5 - 16)           |
| Asbestosis                                    | 3<br>(2 - 5)             | 0<br>(0 - 0)     | 0<br>(0 - 0)      | 0<br>(0 - 1)       | 2<br>(1 - 3)             | 1<br>(1 - 2)             |

Web Table 31- Albania deaths with 95% UI by age, sex, and cause in 2013

| Cause                                               | Males, All Ages    | Males, 0-4 Years | Males, 5-14 Years | Males, 15-49 Years | Males, 50-69 Years | Males, 70-80 Years |
|-----------------------------------------------------|--------------------|------------------|-------------------|--------------------|--------------------|--------------------|
| Coal workers pneumoconiosis                         | 5<br>(3 - 8)       | 0<br>(0 - 0)     | 0<br>(0 - 0)      | 0<br>(0 - 0)       | 3<br>(2 - 5)       | 2<br>(1 - 3)       |
| Other pneumoconiosis                                | 17<br>(10 - 27)    | 0<br>(0 - 0)     | 0<br>(0 - 0)      | 2<br>(1 - 3)       | 8<br>(5 - 15)      | 7<br>(4 - 12)      |
| Asthma                                              | 166<br>(99 - 238)  | 0<br>(0 - 1)     | 0<br>(0 - 0)      | 3<br>(2 - 5)       | 39<br>(22 - 60)    | 123<br>(71 - 178)  |
| Interstitial lung disease and pulmonary sarcoidosis | 73<br>(44 - 117)   | 0<br>(0 - 0)     | 0<br>(0 - 0)      | 1<br>(1 - 2)       | 23<br>(14 - 37)    | 48<br>(29 - 80)    |
| Other chronic respiratory diseases                  | 28<br>(18 - 41)    | 4<br>(2 - 8)     | 0<br>(0 - 1)      | 3<br>(2 - 5)       | 7<br>(4 - 11)      | 14<br>(8 - 22)     |
| Cirrhosis                                           | 24<br>(18 - 31)    | 0<br>(0 - 0)     | 0<br>(0 - 0)      | 3<br>(2 - 4)       | 11<br>(8 - 15)     | 10<br>(7 - 12)     |
| Cirrhosis due to hepatitis B                        | 6<br>(2 - 9)       | 0<br>(0 - 0)     | 0<br>(0 - 0)      | 1<br>(0 - 1)       | 3<br>(1 - 5)       | 2<br>(1 - 4)       |
| Cirrhosis due to hepatitis C                        | 7<br>(3 - 12)      | 0<br>(0 - 0)     | 0<br>(0 - 0)      | 1<br>(0 - 2)       | 3<br>(2 - 6)       | 3<br>(1 - 5)       |
| Cirrhosis due to alcohol use                        | 8<br>(4 - 13)      | --               | --                | 1<br>(0 - 1)       | 3<br>(2 - 6)       | 4<br>(2 - 6)       |
| Cirrhosis due to other causes                       | 4<br>(2 - 7)       | 0<br>(0 - 0)     | 0<br>(0 - 0)      | 1<br>(1 - 2)       | 2<br>(1 - 3)       | 1<br>(0 - 2)       |
| Digestive diseases                                  | 247<br>(180 - 326) | 4<br>(2 - 9)     | 1<br>(1 - 2)      | 27<br>(19 - 39)    | 99<br>(68 - 138)   | 115<br>(84 - 150)  |
| Peptic ulcer disease                                | 60<br>(37 - 90)    | 0<br>(0 - 0)     | 0<br>(0 - 0)      | 4<br>(2 - 7)       | 22<br>(13 - 36)    | 33<br>(20 - 49)    |
| Gastritis and duodenitis                            | 2<br>(1 - 4)       | 0<br>(0 - 0)     | 0<br>(0 - 0)      | 0<br>(0 - 0)       | 1<br>(0 - 2)       | 1<br>(0 - 1)       |
| Appendicitis                                        | 5<br>(3 - 7)       | 0<br>(0 - 0)     | 0<br>(0 - 0)      | 1<br>(0 - 1)       | 2<br>(1 - 3)       | 2<br>(1 - 4)       |
| Paralytic ileus and intestinal obstruction          | 27<br>(17 - 51)    | 0<br>(0 - 1)     | 0<br>(0 - 0)      | 2<br>(1 - 4)       | 12<br>(6 - 23)     | 13<br>(7 - 24)     |
| Inguinal, femoral, and abdominal hernia             | 9<br>(4 - 19)      | 0<br>(0 - 0)     | 0<br>(0 - 0)      | 1<br>(0 - 1)       | 3<br>(1 - 7)       | 5<br>(2 - 11)      |
| Inflammatory bowel disease                          | 20<br>(11 - 40)    | 3<br>(1 - 6)     | 0<br>(0 - 1)      | 1<br>(1 - 2)       | 6<br>(3 - 14)      | 9<br>(5 - 21)      |
| Vascular intestinal disorders                       | 7<br>(3 - 15)      | 0<br>(0 - 0)     | 0<br>(0 - 0)      | 0<br>(0 - 1)       | 4<br>(1 - 8)       | 3<br>(1 - 7)       |
| Gallbladder and biliary diseases                    | 19<br>(12 - 28)    | 0<br>(0 - 0)     | 0<br>(0 - 0)      | 2<br>(1 - 4)       | 8<br>(4 - 12)      | 9<br>(5 - 13)      |
| Pancreatitis                                        | 61<br>(35 - 89)    | 0<br>(0 - 0)     | 0<br>(0 - 0)      | 13<br>(7 - 20)     | 28<br>(16 - 44)    | 19<br>(11 - 30)    |
| Other digestive diseases                            | 37<br>(23 - 56)    | 1<br>(0 - 2)     | 0<br>(0 - 0)      | 3<br>(2 - 6)       | 12<br>(7 - 20)     | 20<br>(12 - 32)    |
| Neurological disorders                              | 633<br>(463 - 804) | 9<br>(4 - 20)    | 4<br>(2 - 8)      | 30<br>(21 - 42)    | 71<br>(49 - 99)    | 518<br>(374 - 662) |
| Alzheimer disease and other dementias               | 505<br>(357 - 652) | --               | --                | 0<br>(0 - 0)       | 35<br>(22 - 52)    | 470<br>(328 - 611) |
| Parkinson disease                                   | 29<br>(19 - 39)    | --               | --                | 0<br>(0 - 1)       | 10<br>(6 - 16)     | 18<br>(11 - 25)    |
| Epilepsy                                            | 39<br>(27 - 55)    | 4<br>(2 - 9)     | 3<br>(1 - 5)      | 18<br>(12 - 27)    | 8<br>(5 - 13)      | 6<br>(3 - 9)       |
| Multiple sclerosis                                  | 22<br>(12 - 53)    | --               | --                | 4<br>(2 - 7)       | 7<br>(3 - 14)      | 11<br>(5 - 34)     |
| Other neurological disorders                        | 37<br>(25 - 50)    | 5<br>(2 - 11)    | 2<br>(1 - 3)      | 8<br>(4 - 11)      | 10<br>(5 - 14)     | 13<br>(9 - 18)     |
| Mental and substance use disorders                  | 63<br>(39 - 91)    | 1<br>(0 - 2)     | 0<br>(0 - 0)      | 31<br>(19 - 45)    | 20<br>(11 - 31)    | 11<br>(7 - 16)     |
| Schizophrenia                                       | 8<br>(3 - 14)      | --               | --                | 2<br>(1 - 5)       | 4<br>(1 - 8)       | 2<br>(0 - 3)       |
| Alcohol use disorders                               | 8<br>(3 - 12)      | --               | --                | 4<br>(1 - 5)       | 4<br>(1 - 6)       | 1<br>(0 - 2)       |
| Drug use disorders                                  | 47<br>(28 - 67)    | 1<br>(0 - 2)     | --                | 25<br>(15 - 37)    | 12<br>(7 - 19)     | 8<br>(5 - 13)      |
| Opioid use disorders                                | 18<br>(11 - 26)    | 0<br>(0 - 1)     | --                | 10<br>(6 - 15)     | 4<br>(2 - 7)       | 3<br>(2 - 5)       |
| Cocaine use disorders                               | 2<br>(1 - 3)       | 0<br>(0 - 0)     | --                | 1<br>(1 - 2)       | 0<br>(0 - 1)       | 0<br>(0 - 1)       |
| Amphetamine use disorders                           | 2<br>(1 - 3)       | 0<br>(0 - 0)     | --                | 1<br>(1 - 2)       | 1<br>(0 - 1)       | 0<br>(0 - 1)       |
| Other drug use disorders                            | 25<br>(15 - 35)    | 1<br>(0 - 1)     | --                | 13<br>(7 - 19)     | 7<br>(4 - 11)      | 4<br>(3 - 7)       |
| Eating disorders                                    | 0<br>(0 - 0)       | --               | 0<br>(0 - 0)      | 0<br>(0 - 0)       | --                 | --                 |
| Anorexia nervosa                                    | 0<br>(0 - 0)       | --               | 0<br>(0 - 0)      | 0<br>(0 - 0)       | --                 | --                 |
| Diabetes, urogenital, blood, and endocrine diseases | 436<br>(330 - 572) | 14<br>(6 - 28)   | 6<br>(3 - 9)      | 56<br>(38 - 84)    | 145<br>(100 - 205) | 215<br>(166 - 284) |
| Diabetes mellitus                                   | 116<br>(85 - 152)  | 0<br>(0 - 1)     | 0<br>(0 - 0)      | 9<br>(6 - 12)      | 46<br>(32 - 66)    | 60<br>(43 - 79)    |
| Acute glomerulonephritis                            | 4<br>(2 - 7)       | 0<br>(0 - 0)     | 0<br>(0 - 0)      | 1<br>(0 - 1)       | 1<br>(1 - 2)       | 1<br>(1 - 3)       |

Web Table 31- Albania deaths with 95% UI by age, sex, and cause in 2013

| Cause                                               | Males, All Ages        | Males, 0-4 Years | Males, 5-14 Years | Males, 15-49 Years | Males, 50-69 Years | Males, 70-80 Years |
|-----------------------------------------------------|------------------------|------------------|-------------------|--------------------|--------------------|--------------------|
| Chronic kidney disease                              | 218<br>(156 - 313)     | 2<br>(1 - 4)     | 1<br>(1 - 3)      | 30<br>(19 - 49)    | 72<br>(46 - 109)   | 113<br>(80 - 160)  |
| Chronic kidney disease due to diabetes mellitus     | 33<br>(19 - 75)        | 0<br>(0 - 1)     | 0<br>(0 - 0)      | 5<br>(3 - 12)      | 11<br>(6 - 27)     | 16<br>(9 - 37)     |
| Chronic kidney disease due to hypertension          | 35<br>(21 - 53)        | 0<br>(0 - 0)     | 0<br>(0 - 0)      | 3<br>(2 - 6)       | 10<br>(6 - 16)     | 21<br>(11 - 32)    |
| Chronic kidney disease due to glomerulonephritis    | 12<br>(8 - 18)         | 0<br>(0 - 0)     | 0<br>(0 - 1)      | 3<br>(2 - 6)       | 3<br>(2 - 6)       | 5<br>(3 - 8)       |
| Chronic kidney disease due to other causes          | 138<br>(83 - 207)      | 1<br>(1 - 3)     | 1<br>(0 - 2)      | 19<br>(10 - 33)    | 47<br>(25 - 74)    | 70<br>(39 - 106)   |
| Urinary diseases and male infertility               | 27<br>(18 - 45)        | 1<br>(0 - 2)     | 0<br>(0 - 0)      | 2<br>(1 - 3)       | 5<br>(3 - 9)       | 19<br>(12 - 33)    |
| Interstitial nephritis and urinary tract infections | 8<br>(5 - 14)          | 0<br>(0 - 1)     | 0<br>(0 - 0)      | 1<br>(1 - 1)       | 2<br>(1 - 3)       | 5<br>(3 - 9)       |
| Urolithiasis                                        | 0<br>(0 - 1)           | --               | 0<br>(0 - 0)      | 0<br>(0 - 0)       | 0<br>(0 - 0)       | 0<br>(0 - 0)       |
| Other urinary diseases                              | 18<br>(12 - 32)        | 0<br>(0 - 1)     | 0<br>(0 - 0)      | 1<br>(0 - 1)       | 4<br>(2 - 7)       | 13<br>(8 - 25)     |
| Gynecological diseases                              | --                     | --               | --                | --                 | --                 | --                 |
| Uterine fibroids                                    | --                     | --               | --                | --                 | --                 | --                 |
| Polycystic ovarian syndrome                         | --                     | --               | --                | --                 | --                 | --                 |
| Endometriosis                                       | --                     | --               | --                | --                 | --                 | --                 |
| Genital prolapse                                    | --                     | --               | --                | --                 | --                 | --                 |
| Other gynecological diseases                        | --                     | --               | --                | --                 | --                 | --                 |
| Hemoglobinopathies and hemolytic anemias            | 23<br>(13 - 37)        | 6<br>(2 - 14)    | 2<br>(1 - 4)      | 7<br>(4 - 12)      | 3<br>(2 - 6)       | 4<br>(2 - 6)       |
| Thalassemias                                        | 10<br>(5 - 17)         | 5<br>(2 - 11)    | 2<br>(1 - 3)      | 3<br>(2 - 5)       | 0<br>(0 - 0)       | 0<br>(0 - 0)       |
| Sickle cell disorders                               | 5<br>(2 - 8)           | 1<br>(0 - 3)     | 0<br>(0 - 1)      | 2<br>(1 - 3)       | 1<br>(1 - 2)       | 0<br>(0 - 0)       |
| G6PD deficiency                                     | 0<br>(0 - 1)           | 0<br>(0 - 0)     | 0<br>(0 - 0)      | 0<br>(0 - 0)       | 0<br>(0 - 0)       | 0<br>(0 - 0)       |
| Other hemoglobinopathies and hemolytic anemias      | 9<br>(5 - 14)          | 0<br>(0 - 1)     | 0<br>(0 - 0)      | 2<br>(1 - 3)       | 2<br>(1 - 4)       | 4<br>(2 - 6)       |
| Endocrine, metabolic, blood, and immune disorders   | 48<br>(34 - 85)        | 4<br>(2 - 9)     | 2<br>(1 - 3)      | 8<br>(5 - 13)      | 16<br>(10 - 30)    | 18<br>(11 - 35)    |
| Musculoskeletal disorders                           | 10<br>(7 - 21)         | --               | 0<br>(0 - 0)      | 2<br>(1 - 3)       | 4<br>(2 - 7)       | 5<br>(3 - 11)      |
| Rheumatoid arthritis                                | 2<br>(1 - 4)           | --               | 0<br>(0 - 0)      | 0<br>(0 - 1)       | 1<br>(0 - 1)       | 1<br>(0 - 2)       |
| Other musculoskeletal disorders                     | 8<br>(5 - 17)          | --               | 0<br>(0 - 0)      | 1<br>(1 - 3)       | 3<br>(2 - 6)       | 4<br>(2 - 9)       |
| Other non-communicable diseases                     | 86<br>(46 - 156)       | 69<br>(31 - 138) | 4<br>(2 - 6)      | 5<br>(3 - 6)       | 4<br>(2 - 5)       | 5<br>(4 - 7)       |
| Congenital anomalies                                | 83<br>(43 - 153)       | 68<br>(31 - 137) | 4<br>(2 - 6)      | 4<br>(3 - 6)       | 3<br>(2 - 5)       | 3<br>(2 - 5)       |
| Neural tube defects                                 | 6<br>(1 - 13)          | 5<br>(1 - 12)    | 0<br>(0 - 0)      | 0<br>(0 - 0)       | 0<br>(0 - 0)       | 0<br>(0 - 0)       |
| Congenital heart anomalies                          | 50<br>(25 - 96)        | 43<br>(19 - 87)  | 2<br>(1 - 4)      | 2<br>(1 - 3)       | 1<br>(1 - 2)       | 1<br>(1 - 2)       |
| Cleft lip and cleft palate                          | 1<br>(0 - 2)           | 1<br>(0 - 2)     | --                | --                 | --                 | --                 |
| Down syndrome                                       | 3<br>(1 - 7)           | 3<br>(1 - 6)     | 0<br>(0 - 0)      | 0<br>(0 - 0)       | 0<br>(0 - 0)       | 0<br>(0 - 0)       |
| Chromosomal unbalanced rearrangements               | 2<br>(1 - 4)           | 2<br>(1 - 4)     | 0<br>(0 - 0)      | 0<br>(0 - 0)       | 0<br>(0 - 0)       | 0<br>(0 - 0)       |
| Other congenital anomalies                          | 21<br>(11 - 38)        | 15<br>(6 - 31)   | 1<br>(0 - 2)      | 1<br>(1 - 2)       | 2<br>(1 - 3)       | 2<br>(1 - 3)       |
| Skin and subcutaneous diseases                      | 3<br>(2 - 4)           | 1<br>(0 - 1)     | 0<br>(0 - 0)      | 1<br>(0 - 1)       | 0<br>(0 - 1)       | 1<br>(1 - 2)       |
| Cellulitis                                          | 1<br>(0 - 1)           | 0<br>(0 - 0)     | 0<br>(0 - 0)      | 0<br>(0 - 0)       | 0<br>(0 - 0)       | 0<br>(0 - 1)       |
| Pyoderma                                            | 1<br>(1 - 2)           | 0<br>(0 - 1)     | 0<br>(0 - 0)      | 0<br>(0 - 0)       | 0<br>(0 - 0)       | 1<br>(0 - 1)       |
| Decubitus ulcer                                     | 0<br>(0 - 1)           | 0<br>(0 - 0)     | 0<br>(0 - 0)      | 0<br>(0 - 0)       | 0<br>(0 - 0)       | 0<br>(0 - 1)       |
| Other skin and subcutaneous diseases                | 1<br>(0 - 1)           | 0<br>(0 - 0)     | 0<br>(0 - 0)      | 0<br>(0 - 0)       | 0<br>(0 - 0)       | 0<br>(0 - 0)       |
| Sudden infant death syndrome                        | 0<br>(0 - 0)           | 0<br>(0 - 0)     | --                | --                 | --                 | --                 |
| Injuries                                            | 1,078<br>(782 - 1,422) | 44<br>(20 - 91)  | 42<br>(24 - 65)   | 642<br>(448 - 861) | 251<br>(170 - 343) | 100<br>(74 - 126)  |
| Transport injuries                                  | 275<br>(199 - 365)     | 7<br>(3 - 14)    | 9<br>(5 - 15)     | 161<br>(110 - 219) | 66<br>(45 - 93)    | 32<br>(22 - 43)    |

Web Table 31- Albania deaths with 95% UI by age, sex, and cause in 2013

| Cause                                           | Males, All Ages    | Males, 0-4 Years | Males, 5-14 Years | Males, 15-49 Years | Males, 50-69 Years | Males, 70-80 Years |
|-------------------------------------------------|--------------------|------------------|-------------------|--------------------|--------------------|--------------------|
| Road injuries                                   | 241<br>(174 - 317) | 6<br>(2 - 13)    | 8<br>(4 - 13)     | 143<br>(98 - 194)  | 57<br>(39 - 80)    | 27<br>(19 - 36)    |
| Pedestrian road injuries                        | 39<br>(15 - 66)    | 1<br>(0 - 3)     | 1<br>(0 - 3)      | 22<br>(9 - 40)     | 10<br>(3 - 17)     | 4<br>(1 - 8)       |
| Cyclist road injuries                           | 37<br>(19 - 59)    | 1<br>(0 - 2)     | 2<br>(0 - 3)      | 21<br>(10 - 35)    | 9<br>(4 - 16)      | 4<br>(2 - 8)       |
| Motorcyclist road injuries                      | 49<br>(27 - 77)    | 1<br>(0 - 3)     | 1<br>(0 - 3)      | 31<br>(17 - 49)    | 11<br>(6 - 19)     | 5<br>(3 - 9)       |
| Motor vehicle road injuries                     | 72<br>(43 - 116)   | 2<br>(1 - 4)     | 2<br>(1 - 4)      | 44<br>(25 - 72)    | 16<br>(9 - 28)     | 8<br>(4 - 13)      |
| Other road injuries                             | 44<br>(20 - 79)    | 1<br>(0 - 3)     | 1<br>(0 - 3)      | 25<br>(11 - 46)    | 11<br>(4 - 21)     | 5<br>(2 - 11)      |
| Other transport injuries                        | 33<br>(17 - 56)    | 1<br>(0 - 3)     | 1<br>(0 - 2)      | 17<br>(8 - 31)     | 9<br>(4 - 16)      | 5<br>(2 - 9)       |
| Unintentional injuries                          | 464<br>(331 - 615) | 35<br>(16 - 74)  | 29<br>(16 - 47)   | 245<br>(167 - 335) | 108<br>(68 - 155)  | 47<br>(33 - 63)    |
| Falls                                           | 47<br>(30 - 64)    | 2<br>(1 - 4)     | 2<br>(1 - 3)      | 21<br>(13 - 30)    | 15<br>(9 - 21)     | 8<br>(5 - 12)      |
| Drowning                                        | 66<br>(43 - 99)    | 8<br>(3 - 20)    | 11<br>(6 - 21)    | 35<br>(23 - 52)    | 8<br>(5 - 13)      | 3<br>(1 - 4)       |
| Fire, heat, and hot substances                  | 15<br>(10 - 21)    | 2<br>(1 - 5)     | 1<br>(0 - 1)      | 6<br>(4 - 9)       | 3<br>(2 - 5)       | 3<br>(2 - 4)       |
| Poisonings                                      | 18<br>(8 - 26)     | 2<br>(0 - 4)     | 1<br>(0 - 1)      | 9<br>(4 - 14)      | 4<br>(2 - 7)       | 3<br>(1 - 4)       |
| Exposure to mechanical forces                   | 130<br>(89 - 182)  | 10<br>(4 - 27)   | 6<br>(3 - 10)     | 71<br>(47 - 102)   | 32<br>(19 - 49)    | 11<br>(7 - 16)     |
| Unintentional firearm injuries                  | 10<br>(6 - 15)     | 0<br>(0 - 0)     | 0<br>(0 - 1)      | 7<br>(4 - 12)      | 2<br>(1 - 3)       | 0<br>(0 - 1)       |
| Unintentional suffocation                       | 15<br>(6 - 64)     | 6<br>(2 - 23)    | 1<br>(0 - 3)      | 6<br>(2 - 25)      | 2<br>(1 - 8)       | 1<br>(0 - 3)       |
| Other exposure to mechanical forces             | 105<br>(64 - 144)  | 4<br>(1 - 8)     | 4<br>(2 - 7)      | 58<br>(36 - 84)    | 28<br>(15 - 43)    | 10<br>(6 - 15)     |
| Adverse effects of medical treatment            | 23<br>(14 - 34)    | 4<br>(2 - 9)     | 1<br>(0 - 1)      | 7<br>(4 - 10)      | 6<br>(3 - 9)       | 6<br>(3 - 9)       |
| Animal contact                                  | 2<br>(2 - 5)       | 0<br>(0 - 0)     | 0<br>(0 - 0)      | 1<br>(1 - 2)       | 1<br>(1 - 2)       | 0<br>(0 - 1)       |
| Venomous animal contact                         | 1<br>(1 - 3)       | 0<br>(0 - 0)     | 0<br>(0 - 0)      | 1<br>(0 - 1)       | 1<br>(0 - 2)       | 0<br>(0 - 0)       |
| Non-venomous animal contact                     | 1<br>(1 - 2)       | 0<br>(0 - 0)     | 0<br>(0 - 0)      | 0<br>(0 - 0)       | 0<br>(0 - 1)       | 0<br>(0 - 1)       |
| Foreign body                                    | 5<br>(2 - 8)       | 2<br>(0 - 4)     | 0<br>(0 - 1)      | 1<br>(1 - 3)       | 1<br>(0 - 1)       | 0<br>(0 - 1)       |
| Pulmonary aspiration and foreign body in airway | 4<br>(2 - 7)       | 1<br>(0 - 4)     | 0<br>(0 - 0)      | 1<br>(1 - 2)       | 1<br>(0 - 1)       | 0<br>(0 - 1)       |
| Foreign body in other body part                 | 1<br>(0 - 1)       | 0<br>(0 - 0)     | 0<br>(0 - 0)      | 0<br>(0 - 0)       | 0<br>(0 - 0)       | 0<br>(0 - 0)       |
| Other unintentional injuries                    | 157<br>(102 - 226) | 6<br>(2 - 15)    | 8<br>(3 - 16)     | 93<br>(54 - 142)   | 38<br>(18 - 70)    | 13<br>(7 - 22)     |
| Self-harm and interpersonal violence            | 339<br>(215 - 470) | 1<br>(1 - 3)     | 4<br>(2 - 6)      | 236<br>(147 - 331) | 77<br>(47 - 111)   | 21<br>(14 - 29)    |
| Self-harm                                       | 117<br>(72 - 165)  | -                | 1<br>(1 - 3)      | 74<br>(45 - 105)   | 32<br>(19 - 47)    | 10<br>(6 - 15)     |
| Interpersonal violence                          | 222<br>(126 - 320) | 1<br>(1 - 3)     | 2<br>(1 - 4)      | 162<br>(92 - 236)  | 45<br>(23 - 71)    | 11<br>(6 - 16)     |
| Assault by firearm                              | 163<br>(84 - 240)  | 1<br>(0 - 1)     | 2<br>(1 - 3)      | 122<br>(64 - 181)  | 32<br>(15 - 52)    | 6<br>(3 - 10)      |
| Assault by sharp object                         | 27<br>(13 - 56)    | 0<br>(0 - 0)     | 0<br>(0 - 1)      | 21<br>(9 - 44)     | 4<br>(1 - 9)       | 2<br>(1 - 4)       |
| Assault by other means                          | 32<br>(16 - 59)    | 1<br>(0 - 1)     | 0<br>(0 - 1)      | 19<br>(9 - 37)     | 9<br>(4 - 17)      | 3<br>(1 - 4)       |

Web Table 31- Albania deaths with 95% UI by age, sex, and cause in 2013

| Cause                                                              | Females, All Ages          | Females, 0-4 Years | Females, 5-14 Years | Females, 15-49 Years | Females, 50-69 Years     | Females, 70-80 Years     |
|--------------------------------------------------------------------|----------------------------|--------------------|---------------------|----------------------|--------------------------|--------------------------|
| All causes                                                         | 10,246<br>(8,503 - 12,578) | 319<br>(154 - 649) | 56<br>(34 - 94)     | 644<br>(456 - 867)   | 2,129<br>(1,547 - 2,892) | 7,098<br>(6,166 - 8,487) |
| Communicable, maternal, neonatal, and nutritional diseases         | 528<br>(383 - 787)         | 171<br>(79 - 344)  | 9<br>(5 - 16)       | 28<br>(21 - 37)      | 51<br>(35 - 74)          | 268<br>(180 - 463)       |
| HIV/AIDS and tuberculosis                                          | 9<br>(6 - 13)              | 0<br>(0 - 0)       | 0<br>(0 - 0)        | 1<br>(1 - 2)         | 3<br>(2 - 5)             | 5<br>(3 - 7)             |
| Tuberculosis                                                       | 9<br>(6 - 13)              | 0<br>(0 - 0)       | 0<br>(0 - 0)        | 1<br>(1 - 1)         | 3<br>(2 - 5)             | 5<br>(3 - 7)             |
| HIV/AIDS                                                           | 0<br>(0 - 1)               | 0<br>(0 - 0)       | 0<br>(0 - 0)        | 0<br>(0 - 0)         | 0<br>(0 - 0)             | 0<br>(0 - 0)             |
| HIV/AIDS resulting in mycobacterial infection                      | 0<br>(0 - 0)               | 0<br>(0 - 0)       | 0<br>(0 - 0)        | 0<br>(0 - 0)         | 0<br>(0 - 0)             | 0<br>(0 - 0)             |
| HIV/AIDS resulting in other diseases                               | 0<br>(0 - 0)               | 0<br>(0 - 0)       | 0<br>(0 - 0)        | 0<br>(0 - 0)         | 0<br>(0 - 0)             | 0<br>(0 - 0)             |
| Diarrrhea, lower respiratory, and other common infectious diseases | 412<br>(293 - 621)         | 108<br>(52 - 226)  | 8<br>(4 - 14)       | 17<br>(12 - 23)      | 39<br>(25 - 59)          | 240<br>(154 - 427)       |
| Diarrheal diseases                                                 | 6<br>(3 - 12)              | 4<br>(1 - 9)       | 0<br>(0 - 0)        | 0<br>(0 - 0)         | 0<br>(0 - 1)             | 1<br>(1 - 2)             |
| Intestinal infectious diseases                                     | 3<br>(1 - 6)               | 1<br>(0 - 2)       | 0<br>(0 - 1)        | 1<br>(0 - 2)         | 0<br>(0 - 1)             | 0<br>(0 - 1)             |
| Typhoid fever                                                      | 2<br>(1 - 4)               | 0<br>(0 - 1)       | 0<br>(0 - 1)        | 1<br>(0 - 1)         | 0<br>(0 - 1)             | 0<br>(0 - 0)             |
| Paratyphoid fever                                                  | 1<br>(0 - 1)               | 0<br>(0 - 0)       | 0<br>(0 - 0)        | 0<br>(0 - 0)         | 0<br>(0 - 0)             | 0<br>(0 - 0)             |
| Other intestinal infectious diseases                               | 0<br>(0 - 2)               | 0<br>(0 - 1)       | 0<br>(0 - 0)        | 0<br>(0 - 1)         | 0<br>(0 - 1)             | 0<br>(0 - 1)             |
| Lower respiratory infections                                       | 365<br>(251 - 560)         | 90<br>(42 - 190)   | 4<br>(2 - 9)        | 9<br>(6 - 13)        | 31<br>(19 - 49)          | 230<br>(144 - 415)       |
| Upper respiratory infections                                       | 0<br>(0 - 1)               | 0<br>(0 - 0)       | 0<br>(0 - 0)        | 0<br>(0 - 0)         | 0<br>(0 - 0)             | 0<br>(0 - 1)             |
| Otitis media                                                       | 0<br>(0 - 1)               | 0<br>(0 - 0)       | 0<br>(0 - 0)        | 0<br>(0 - 0)         | 0<br>(0 - 0)             | 0<br>(0 - 0)             |
| Meningitis                                                         | 16<br>(11 - 25)            | 7<br>(3 - 14)      | 1<br>(0 - 2)        | 2<br>(2 - 3)         | 3<br>(2 - 4)             | 3<br>(2 - 5)             |
| Pneumococcal meningitis                                            | 4<br>(3 - 6)               | 1<br>(1 - 3)       | 0<br>(0 - 0)        | 1<br>(0 - 1)         | 1<br>(0 - 2)             | 1<br>(0 - 2)             |
| H influenzae type B meningitis                                     | 3<br>(2 - 5)               | 2<br>(1 - 4)       | 0<br>(0 - 0)        | 0<br>(0 - 0)         | 0<br>(0 - 0)             | 0<br>(0 - 1)             |
| Meningococcal meningitis                                           | 4<br>(2 - 6)               | 2<br>(1 - 4)       | 0<br>(0 - 0)        | 1<br>(0 - 1)         | 1<br>(0 - 1)             | 1<br>(0 - 1)             |
| Other meningitis                                                   | 6<br>(4 - 9)               | 2<br>(1 - 4)       | 0<br>(0 - 1)        | 1<br>(0 - 2)         | 1<br>(1 - 2)             | 1<br>(1 - 2)             |
| Encephalitis                                                       | 19<br>(13 - 31)            | 7<br>(3 - 15)      | 2<br>(1 - 3)        | 3<br>(2 - 5)         | 4<br>(2 - 7)             | 4<br>(3 - 7)             |
| Diphtheria                                                         | 0<br>(0 - 0)               | 0<br>(0 - 0)       | 0<br>(0 - 0)        | 0<br>(0 - 0)         | 0<br>(0 - 0)             | --                       |
| Whooping cough                                                     | 0<br>(0 - 0)               | 0<br>(0 - 0)       | 0<br>(0 - 0)        | 0<br>(0 - 0)         | 0<br>(0 - 0)             | --                       |
| Tetanus                                                            | 0<br>(0 - 0)               | 0<br>(0 - 0)       | 0<br>(0 - 0)        | 0<br>(0 - 0)         | 0<br>(0 - 0)             | 0<br>(0 - 0)             |
| Measles                                                            | 0<br>(0 - 0)               | 0<br>(0 - 0)       | 0<br>(0 - 0)        | 0<br>(0 - 0)         | 0<br>(0 - 0)             | --                       |
| Varicella and herpes zoster                                        | 1<br>(0 - 4)               | 0<br>(0 - 0)       | 0<br>(0 - 0)        | 0<br>(0 - 0)         | 0<br>(0 - 0)             | 1<br>(0 - 3)             |
| Neglected tropical diseases and malaria                            | 7<br>(5 - 9)               | 1<br>(0 - 2)       | 0<br>(0 - 1)        | 2<br>(1 - 3)         | 2<br>(1 - 3)             | 2<br>(1 - 3)             |
| Leishmaniasis                                                      | 5<br>(3 - 7)               | 1<br>(0 - 2)       | 0<br>(0 - 0)        | 1<br>(1 - 2)         | 1<br>(1 - 2)             | 1<br>(0 - 2)             |
| Visceral leishmaniasis                                             | 5<br>(3 - 7)               | 1<br>(0 - 2)       | 0<br>(0 - 0)        | 1<br>(1 - 2)         | 1<br>(1 - 2)             | 1<br>(0 - 2)             |
| Cysticercosis                                                      | 0<br>(0 - 0)               | 0<br>(0 - 0)       | 0<br>(0 - 0)        | 0<br>(0 - 0)         | 0<br>(0 - 0)             | 0<br>(0 - 0)             |
| Cystic echinococcosis                                              | 0<br>(0 - 0)               | 0<br>(0 - 0)       | 0<br>(0 - 0)        | 0<br>(0 - 0)         | 0<br>(0 - 0)             | 0<br>(0 - 0)             |
| Dengue                                                             | 0<br>(0 - 0)               | 0<br>(0 - 0)       | 0<br>(0 - 0)        | 0<br>(0 - 0)         | 0<br>(0 - 0)             | 0<br>(0 - 0)             |
| Rabies                                                             | 0<br>(0 - 0)               | 0<br>(0 - 0)       | 0<br>(0 - 0)        | 0<br>(0 - 0)         | 0<br>(0 - 0)             | 0<br>(0 - 0)             |
| Other neglected tropical diseases                                  | 2<br>(1 - 3)               | 0<br>(0 - 0)       | 0<br>(0 - 0)        | 0<br>(0 - 0)         | 1<br>(0 - 1)             | 1<br>(0 - 2)             |
| Maternal disorders                                                 | 3<br>(2 - 4)               | --                 | 0<br>(0 - 0)        | 3<br>(2 - 4)         | --                       | --                       |
| Maternal hemorrhage                                                | 0<br>(0 - 1)               | --                 | 0<br>(0 - 0)        | 0<br>(0 - 1)         | --                       | --                       |
| Maternal sepsis and other maternal infections                      | 0<br>(0 - 0)               | --                 | 0<br>(0 - 0)        | 0<br>(0 - 0)         | --                       | --                       |
| Maternal hypertensive disorders                                    | 0<br>(0 - 1)               | --                 | 0<br>(0 - 0)        | 0<br>(0 - 1)         | --                       | --                       |
| Maternal obstructed labor                                          | 0<br>(0 - 1)               | --                 | 0<br>(0 - 0)        | 0<br>(0 - 1)         | --                       | --                       |

Web Table 31- Albania deaths with 95% UI by age, sex, and cause in 2013

| Cause                                                            | Females, All Ages         | Females, 0-4 Years | Females, 5-14 Years | Females, 15-49 Years | Females, 50-69 Years     | Females, 70-80 Years     |
|------------------------------------------------------------------|---------------------------|--------------------|---------------------|----------------------|--------------------------|--------------------------|
| Maternal abortive outcome                                        | 1<br>(0 - 1)              | --                 | 0<br>(0 - 0)        | 1<br>(0 - 1)         | --                       | --                       |
| Indirect maternal deaths                                         | 0<br>(0 - 1)              | --                 | 0<br>(0 - 0)        | 0<br>(0 - 1)         | --                       | --                       |
| Late maternal deaths                                             | 0<br>(0 - 1)              | --                 | 0<br>(0 - 0)        | 0<br>(0 - 1)         | --                       | --                       |
| Maternal deaths aggravated by HIV/AIDS                           | 0<br>(0 - 0)              | --                 | --                  | 0<br>(0 - 0)         | --                       | --                       |
| Other maternal disorders                                         | 1<br>(0 - 1)              | --                 | 0<br>(0 - 0)        | 1<br>(0 - 1)         | --                       | --                       |
| Neonatal disorders                                               | 52<br>(22 - 94)           | 52<br>(22 - 94)    | --                  | --                   | --                       | --                       |
| Neonatal preterm birth complications                             | 14<br>(5 - 27)            | 14<br>(5 - 27)     | --                  | --                   | --                       | --                       |
| Neonatal encephalopathy due to birth asphyxia and trauma         | 2<br>(1 - 7)              | 2<br>(1 - 7)       | --                  | --                   | --                       | --                       |
| Neonatal sepsis and other neonatal infections                    | 0<br>(0 - 0)              | 0<br>(0 - 0)       | --                  | --                   | --                       | --                       |
| Hemolytic disease and other neonatal jaundice                    | 1<br>(0 - 2)              | 1<br>(0 - 2)       | --                  | --                   | --                       | --                       |
| Other neonatal disorders                                         | 35<br>(15 - 64)           | 35<br>(15 - 64)    | --                  | --                   | --                       | --                       |
| Nutritional deficiencies                                         | 22<br>(16 - 30)           | 4<br>(2 - 8)       | 1<br>(0 - 1)        | 3<br>(2 - 4)         | 3<br>(2 - 5)             | 11<br>(8 - 17)           |
| Protein-energy malnutrition                                      | 4<br>(2 - 9)              | 3<br>(1 - 7)       | 0<br>(0 - 0)        | 0<br>(0 - 0)         | 0<br>(0 - 0)             | 1<br>(0 - 2)             |
| Iodine deficiency                                                | 0<br>(0 - 1)              | 0<br>(0 - 0)       | 0<br>(0 - 0)        | 0<br>(0 - 0)         | 0<br>(0 - 0)             | 0<br>(0 - 1)             |
| Iron-deficiency anemia                                           | 17<br>(12 - 24)           | 1<br>(0 - 2)       | 0<br>(0 - 1)        | 3<br>(2 - 4)         | 3<br>(2 - 5)             | 10<br>(7 - 15)           |
| Other nutritional deficiencies                                   | 0<br>(0 - 1)              | 0<br>(0 - 0)       | 0<br>(0 - 0)        | 0<br>(0 - 0)         | 0<br>(0 - 0)             | 0<br>(0 - 1)             |
| Other communicable, maternal, neonatal, and nutritional diseases | 23<br>(16 - 34)           | 5<br>(2 - 12)      | 1<br>(0 - 2)        | 3<br>(2 - 4)         | 4<br>(3 - 7)             | 10<br>(6 - 17)           |
| Sexually transmitted diseases excluding HIV                      | 4<br>(1 - 9)              | 3<br>(0 - 7)       | 0<br>(0 - 1)        | 0<br>(0 - 0)         | 0<br>(0 - 0)             | 1<br>(0 - 1)             |
| Syphilis                                                         | 3<br>(1 - 9)              | 3<br>(0 - 7)       | 0<br>(0 - 1)        | 0<br>(0 - 0)         | 0<br>(0 - 0)             | 0<br>(0 - 1)             |
| Chlamydial infection                                             | 0<br>(0 - 0)              | --                 | 0<br>(0 - 0)        | 0<br>(0 - 0)         | 0<br>(0 - 0)             | 0<br>(0 - 0)             |
| Gonococcal infection                                             | 0<br>(0 - 0)              | --                 | 0<br>(0 - 0)        | 0<br>(0 - 0)         | 0<br>(0 - 0)             | 0<br>(0 - 0)             |
| Other sexually transmitted diseases                              | 0<br>(0 - 0)              | --                 | 0<br>(0 - 0)        | 0<br>(0 - 0)         | 0<br>(0 - 0)             | 0<br>(0 - 0)             |
| Hepatitis                                                        | 0<br>(0 - 0)              | 0<br>(0 - 0)       | 0<br>(0 - 0)        | 0<br>(0 - 0)         | 0<br>(0 - 0)             | 0<br>(0 - 0)             |
| Acute hepatitis A                                                | 0<br>(0 - 0)              | 0<br>(0 - 0)       | 0<br>(0 - 0)        | 0<br>(0 - 0)         | 0<br>(0 - 0)             | 0<br>(0 - 0)             |
| Acute hepatitis B                                                | 0<br>(0 - 0)              | 0<br>(0 - 0)       | 0<br>(0 - 0)        | 0<br>(0 - 0)         | 0<br>(0 - 0)             | 0<br>(0 - 0)             |
| Acute hepatitis C                                                | 0<br>(0 - 0)              | --                 | 0<br>(0 - 0)        | 0<br>(0 - 0)         | 0<br>(0 - 0)             | 0<br>(0 - 0)             |
| Other infectious diseases                                        | 19<br>(13 - 27)           | 3<br>(1 - 6)       | 1<br>(0 - 1)        | 2<br>(1 - 3)         | 4<br>(3 - 7)             | 10<br>(6 - 16)           |
| Non-communicable diseases                                        | 9,398<br>(7,801 - 11,568) | 121<br>(59 - 244)  | 28<br>(17 - 46)     | 485<br>(343 - 657)   | 1,999<br>(1,448 - 2,718) | 6,764<br>(5,849 - 8,070) |
| Neoplasms                                                        | 1,559<br>(1,170 - 2,096)  | 15<br>(5 - 41)     | 8<br>(4 - 13)       | 233<br>(162 - 320)   | 665<br>(469 - 931)       | 637<br>(521 - 825)       |
| Esophageal cancer                                                | 16<br>(12 - 23)           | --                 | --                  | 1<br>(1 - 2)         | 6<br>(4 - 9)             | 9<br>(7 - 13)            |
| Stomach cancer                                                   | 167<br>(110 - 244)        | --                 | --                  | 16<br>(10 - 25)      | 65<br>(40 - 101)         | 86<br>(58 - 123)         |
| Liver cancer                                                     | 194<br>(136 - 268)        | --                 | 0<br>(0 - 0)        | 14<br>(9 - 22)       | 75<br>(48 - 112)         | 104<br>(71 - 146)        |
| Liver cancer due to hepatitis B                                  | 36<br>(17 - 65)           | --                 | 0<br>(0 - 0)        | 3<br>(1 - 6)         | 17<br>(8 - 33)           | 15<br>(7 - 28)           |
| Liver cancer due to hepatitis C                                  | 80<br>(42 - 130)          | --                 | 0<br>(0 - 0)        | 6<br>(3 - 10)        | 31<br>(16 - 53)          | 43<br>(19 - 72)          |
| Liver cancer due to alcohol use                                  | 44<br>(22 - 74)           | --                 | --                  | 2<br>(1 - 3)         | 13<br>(6 - 22)           | 29<br>(14 - 52)          |
| Liver cancer due to other causes                                 | 34<br>(18 - 57)           | --                 | 0<br>(0 - 0)        | 4<br>(2 - 6)         | 14<br>(7 - 24)           | 17<br>(9 - 30)           |
| Larynx cancer                                                    | 18<br>(10 - 29)           | --                 | --                  | 1<br>(1 - 3)         | 8<br>(4 - 14)            | 8<br>(5 - 13)            |
| Tracheal, bronchus and lung cancer                               | 242<br>(170 - 332)        | --                 | --                  | 23<br>(14 - 34)      | 105<br>(69 - 155)        | 114<br>(78 - 158)        |
| Breast cancer                                                    | 214<br>(135 - 307)        | --                 | --                  | 57<br>(34 - 85)      | 108<br>(66 - 159)        | 50<br>(32 - 68)          |
| Cervical cancer                                                  | 81<br>(57 - 115)          | --                 | --                  | 21<br>(14 - 31)      | 38<br>(25 - 56)          | 23<br>(16 - 33)          |

Web Table 31- Albania deaths with 95% UI by age, sex, and cause in 2013

| Cause                                         | Females, All Ages        | Females, 0-4 Years | Females, 5-14 Years | Females, 15-49 Years | Females, 50-69 Years   | Females, 70-80 Years     |
|-----------------------------------------------|--------------------------|--------------------|---------------------|----------------------|------------------------|--------------------------|
| Uterine cancer                                | 40<br>(27 - 58)          | --                 | --                  | 7<br>(5 - 12)        | 21<br>(13 - 31)        | 12<br>(8 - 17)           |
| Prostate cancer                               | --                       | --                 | --                  | --                   | --                     | --                       |
| Colon and rectum cancer                       | 90<br>(68 - 120)         | --                 | --                  | 11<br>(8 - 16)       | 34<br>(23 - 48)        | 44<br>(35 - 59)          |
| Lip and oral cavity cancer                    | 16<br>(12 - 23)          | --                 | --                  | 1<br>(1 - 2)         | 5<br>(3 - 8)           | 10<br>(7 - 14)           |
| Nasopharynx cancer                            | 4<br>(2 - 10)            | --                 | 0<br>(0 - 0)        | 1<br>(0 - 1)         | 2<br>(1 - 3)           | 2<br>(1 - 5)             |
| Other pharynx cancer                          | 9<br>(6 - 13)            | --                 | --                  | 1<br>(1 - 1)         | 3<br>(2 - 5)           | 5<br>(3 - 7)             |
| Gallbladder and biliary tract cancer          | 10<br>(6 - 15)           | --                 | --                  | 1<br>(0 - 1)         | 4<br>(3 - 7)           | 5<br>(3 - 7)             |
| Pancreatic cancer                             | 74<br>(55 - 100)         | --                 | --                  | 5<br>(3 - 8)         | 32<br>(22 - 46)        | 37<br>(29 - 50)          |
| Malignant skin melanoma                       | 13<br>(9 - 25)           | --                 | --                  | 2<br>(1 - 4)         | 4<br>(2 - 7)           | 7<br>(4 - 14)            |
| Non-melanoma skin cancer                      | 19<br>(12 - 27)          | --                 | --                  | 1<br>(1 - 2)         | 4<br>(2 - 6)           | 14<br>(8 - 20)           |
| Ovarian cancer                                | 36<br>(25 - 50)          | --                 | --                  | 10<br>(6 - 14)       | 18<br>(12 - 26)        | 8<br>(6 - 11)            |
| Testicular cancer                             | --                       | --                 | --                  | --                   | --                     | --                       |
| Kidney cancer                                 | 22<br>(15 - 32)          | 0<br>(0 - 0)       | 0<br>(0 - 0)        | 1<br>(1 - 2)         | 14<br>(9 - 21)         | 7<br>(4 - 10)            |
| Bladder cancer                                | 9<br>(6 - 14)            | --                 | --                  | 0<br>(0 - 1)         | 1<br>(1 - 2)           | 8<br>(5 - 12)            |
| Brain and nervous system cancer               | 87<br>(58 - 121)         | 1<br>(0 - 1)       | 2<br>(1 - 4)        | 21<br>(14 - 31)      | 45<br>(28 - 65)        | 19<br>(11 - 28)          |
| Thyroid cancer                                | 8<br>(5 - 13)            | --                 | 0<br>(0 - 0)        | 1<br>(0 - 2)         | 3<br>(2 - 5)           | 4<br>(2 - 6)             |
| Mesothelioma                                  | 11<br>(6 - 16)           | --                 | --                  | 2<br>(1 - 3)         | 5<br>(2 - 8)           | 4<br>(2 - 7)             |
| Hodgkin lymphoma                              | 7<br>(4 - 11)            | 0<br>(0 - 0)       | 0<br>(0 - 0)        | 2<br>(1 - 4)         | 2<br>(1 - 4)           | 2<br>(1 - 3)             |
| Non-Hodgkin lymphoma                          | 15<br>(9 - 33)           | 0<br>(0 - 1)       | 0<br>(0 - 1)        | 3<br>(1 - 6)         | 6<br>(3 - 14)          | 6<br>(3 - 13)            |
| Multiple myeloma                              | 3<br>(2 - 5)             | --                 | --                  | 0<br>(0 - 1)         | 2<br>(1 - 4)           | 1<br>(0 - 1)             |
| Leukemia                                      | 55<br>(38 - 76)          | 2<br>(1 - 4)       | 3<br>(2 - 5)        | 14<br>(9 - 19)       | 21<br>(13 - 32)        | 16<br>(11 - 22)          |
| Other neoplasms                               | 99<br>(71 - 143)         | 13<br>(4 - 36)     | 2<br>(1 - 3)        | 15<br>(10 - 22)      | 33<br>(21 - 48)        | 37<br>(27 - 55)          |
| Cardiovascular diseases                       | 6,049<br>(4,987 - 7,359) | 16<br>(7 - 33)     | 7<br>(4 - 11)       | 155<br>(106 - 211)   | 1,044<br>(755 - 1,402) | 4,827<br>(4,091 - 5,807) |
| Rheumatic heart disease                       | 33<br>(22 - 49)          | 0<br>(0 - 1)       | 0<br>(0 - 0)        | 5<br>(3 - 8)         | 7<br>(4 - 11)          | 21<br>(14 - 31)          |
| Ischemic heart disease                        | 2,172<br>(1,466 - 2,775) | 4<br>(1 - 8)       | 1<br>(1 - 2)        | 66<br>(41 - 91)      | 427<br>(272 - 600)     | 1,675<br>(1,126 - 2,110) |
| Cerebrovascular disease                       | 3,057<br>(2,478 - 3,781) | 6<br>(2 - 11)      | 4<br>(2 - 6)        | 57<br>(38 - 80)      | 441<br>(310 - 617)     | 2,550<br>(2,099 - 3,126) |
| Ischemic stroke                               | 585<br>(330 - 833)       | 1<br>(0 - 1)       | 0<br>(0 - 1)        | 7<br>(4 - 11)        | 68<br>(39 - 106)       | 509<br>(282 - 736)       |
| Hemorrhagic stroke                            | 2,472<br>(1,986 - 3,106) | 5<br>(2 - 10)      | 3<br>(2 - 5)        | 50<br>(33 - 70)      | 373<br>(261 - 524)     | 2,041<br>(1,660 - 2,529) |
| Hypertensive heart disease                    | 309<br>(205 - 485)       | 0<br>(0 - 0)       | 0<br>(0 - 0)        | 2<br>(1 - 3)         | 29<br>(17 - 47)        | 278<br>(182 - 444)       |
| Cardiomyopathy and myocarditis                | 87<br>(61 - 154)         | 3<br>(1 - 7)       | 1<br>(0 - 1)        | 6<br>(4 - 10)        | 15<br>(10 - 24)        | 63<br>(41 - 118)         |
| Atrial fibrillation and flutter               | 0<br>(0 - 0)             | --                 | --                  | 0<br>(0 - 0)         | 0<br>(0 - 0)           | 0<br>(0 - 0)             |
| Aortic aneurysm                               | 11<br>(6 - 17)           | --                 | --                  | 1<br>(0 - 2)         | 3<br>(1 - 4)           | 7<br>(4 - 12)            |
| Peripheral vascular disease                   | 0<br>(0 - 0)             | --                 | --                  | 0<br>(0 - 0)         | 0<br>(0 - 0)           | 0<br>(0 - 0)             |
| Endocarditis                                  | 7<br>(4 - 11)            | 0<br>(0 - 1)       | 0<br>(0 - 0)        | 1<br>(0 - 1)         | 1<br>(1 - 2)           | 4<br>(2 - 7)             |
| Other cardiovascular and circulatory diseases | 372<br>(239 - 519)       | 3<br>(1 - 7)       | 1<br>(0 - 1)        | 17<br>(10 - 26)      | 122<br>(74 - 183)      | 229<br>(140 - 329)       |
| Chronic respiratory diseases                  | 477<br>(368 - 667)       | 6<br>(2 - 13)      | 1<br>(0 - 1)        | 9<br>(6 - 14)        | 65<br>(44 - 96)        | 395<br>(303 - 570)       |
| Chronic obstructive pulmonary disease         | 343<br>(255 - 487)       | 3<br>(1 - 6)       | 0<br>(0 - 1)        | 3<br>(2 - 5)         | 44<br>(29 - 67)        | 292<br>(214 - 409)       |
| Pneumoconiosis                                | 1<br>(0 - 1)             | 0<br>(0 - 0)       | 0<br>(0 - 0)        | 0<br>(0 - 0)         | 0<br>(0 - 0)           | 1<br>(0 - 1)             |
| Silicosis                                     | 0<br>(0 - 0)             | 0<br>(0 - 0)       | 0<br>(0 - 0)        | 0<br>(0 - 0)         | 0<br>(0 - 0)           | 0<br>(0 - 0)             |
| Asbestosis                                    | 0<br>(0 - 0)             | 0<br>(0 - 0)       | 0<br>(0 - 0)        | 0<br>(0 - 0)         | 0<br>(0 - 0)           | 0<br>(0 - 0)             |



Web Table 31- Albania deaths with 95% UI by age, sex, and cause in 2013

| Cause                                               | Females, All Ages  | Females, 0-4 Years | Females, 5-14 Years | Females, 15-49 Years | Females, 50-69 Years | Females, 70-80 Years |
|-----------------------------------------------------|--------------------|--------------------|---------------------|----------------------|----------------------|----------------------|
| Coal workers pneumoconiosis                         | 0<br>(0 - 0)       | 0<br>(0 - 0)       | 0<br>(0 - 0)        | 0<br>(0 - 0)         | 0<br>(0 - 0)         | 0<br>(0 - 0)         |
| Other pneumoconiosis                                | 1<br>(0 - 1)       | 0<br>(0 - 0)       | 0<br>(0 - 0)        | 0<br>(0 - 0)         | 0<br>(0 - 0)         | 1<br>(0 - 1)         |
| Asthma                                              | 80<br>(46 - 130)   | 0<br>(0 - 1)       | 0<br>(0 - 0)        | 3<br>(2 - 4)         | 15<br>(8 - 25)       | 62<br>(35 - 104)     |
| Interstitial lung disease and pulmonary sarcoidosis | 31<br>(16 - 67)    | 0<br>(0 - 0)       | 0<br>(0 - 0)        | 1<br>(0 - 2)         | 4<br>(2 - 7)         | 27<br>(13 - 59)      |
| Other chronic respiratory diseases                  | 22<br>(13 - 36)    | 2<br>(1 - 5)       | 0<br>(0 - 0)        | 2<br>(1 - 3)         | 3<br>(1 - 5)         | 14<br>(7 - 25)       |
| Cirrhosis                                           | 15<br>(11 - 20)    | 0<br>(0 - 0)       | 0<br>(0 - 0)        | 1<br>(1 - 2)         | 5<br>(4 - 8)         | 8<br>(6 - 11)        |
| Cirrhosis due to hepatitis B                        | 6<br>(3 - 9)       | 0<br>(0 - 0)       | 0<br>(0 - 0)        | 0<br>(0 - 1)         | 2<br>(1 - 3)         | 3<br>(2 - 5)         |
| Cirrhosis due to hepatitis C                        | 4<br>(2 - 7)       | 0<br>(0 - 0)       | 0<br>(0 - 0)        | 0<br>(0 - 1)         | 2<br>(1 - 3)         | 2<br>(1 - 4)         |
| Cirrhosis due to alcohol use                        | 2<br>(1 - 4)       | --                 | --                  | 0<br>(0 - 0)         | 1<br>(0 - 1)         | 2<br>(1 - 3)         |
| Cirrhosis due to other causes                       | 2<br>(1 - 4)       | 0<br>(0 - 0)       | 0<br>(0 - 0)        | 0<br>(0 - 1)         | 1<br>(0 - 2)         | 1<br>(0 - 2)         |
| Digestive diseases                                  | 169<br>(130 - 223) | 5<br>(2 - 11)      | 1<br>(1 - 2)        | 10<br>(7 - 14)       | 41<br>(28 - 59)      | 112<br>(86 - 147)    |
| Peptic ulcer disease                                | 29<br>(17 - 47)    | 0<br>(0 - 0)       | 0<br>(0 - 0)        | 1<br>(0 - 1)         | 5<br>(3 - 10)        | 23<br>(13 - 37)      |
| Gastritis and duodenitis                            | 1<br>(0 - 2)       | 0<br>(0 - 0)       | 0<br>(0 - 0)        | 0<br>(0 - 0)         | 0<br>(0 - 0)         | 1<br>(0 - 1)         |
| Appendicitis                                        | 3<br>(1 - 5)       | 0<br>(0 - 0)       | 0<br>(0 - 0)        | 0<br>(0 - 1)         | 1<br>(0 - 1)         | 2<br>(1 - 3)         |
| Paralytic ileus and intestinal obstruction          | 14<br>(7 - 29)     | 0<br>(0 - 1)       | 0<br>(0 - 1)        | 1<br>(1 - 2)         | 3<br>(1 - 7)         | 9<br>(4 - 19)        |
| Inguinal, femoral, and abdominal hernia             | 7<br>(4 - 14)      | 0<br>(0 - 0)       | 0<br>(0 - 0)        | 0<br>(0 - 0)         | 2<br>(1 - 4)         | 5<br>(3 - 10)        |
| Inflammatory bowel disease                          | 17<br>(9 - 38)     | 3<br>(1 - 8)       | 0<br>(0 - 1)        | 1<br>(1 - 3)         | 3<br>(1 - 7)         | 9<br>(4 - 22)        |
| Vascular intestinal disorders                       | 2<br>(1 - 3)       | 0<br>(0 - 0)       | 0<br>(0 - 0)        | 0<br>(0 - 0)         | 0<br>(0 - 1)         | 1<br>(1 - 2)         |
| Gallbladder and biliary diseases                    | 15<br>(9 - 23)     | 0<br>(0 - 0)       | 0<br>(0 - 0)        | 0<br>(0 - 1)         | 4<br>(2 - 7)         | 10<br>(6 - 16)       |
| Pancreatitis                                        | 59<br>(31 - 98)    | 1<br>(0 - 1)       | 0<br>(0 - 0)        | 4<br>(2 - 6)         | 19<br>(10 - 31)      | 35<br>(17 - 62)      |
| Other digestive diseases                            | 23<br>(15 - 35)    | 1<br>(0 - 1)       | 0<br>(0 - 0)        | 1<br>(1 - 2)         | 4<br>(2 - 6)         | 17<br>(10 - 27)      |
| Neurological disorders                              | 651<br>(489 - 849) | 7<br>(3 - 15)      | 4<br>(2 - 6)        | 19<br>(12 - 27)      | 52<br>(35 - 76)      | 570<br>(421 - 752)   |
| Alzheimer disease and other dementias               | 548<br>(399 - 726) | --                 | --                  | 0<br>(0 - 0)         | 27<br>(17 - 42)      | 521<br>(379 - 693)   |
| Parkinson disease                                   | 20<br>(11 - 28)    | --                 | --                  | 0<br>(0 - 0)         | 5<br>(3 - 8)         | 15<br>(8 - 22)       |
| Epilepsy                                            | 24<br>(16 - 35)    | 3<br>(1 - 7)       | 2<br>(1 - 4)        | 10<br>(6 - 14)       | 5<br>(3 - 8)         | 4<br>(3 - 7)         |
| Multiple sclerosis                                  | 26<br>(15 - 58)    | --                 | --                  | 4<br>(2 - 7)         | 8<br>(4 - 14)        | 14<br>(7 - 40)       |
| Other neurological disorders                        | 32<br>(25 - 43)    | 4<br>(2 - 8)       | 2<br>(1 - 3)        | 4<br>(3 - 6)         | 7<br>(5 - 11)        | 15<br>(11 - 21)      |
| Mental and substance use disorders                  | 26<br>(18 - 36)    | 1<br>(0 - 2)       | 0<br>(0 - 0)        | 8<br>(5 - 11)        | 9<br>(5 - 13)        | 9<br>(6 - 12)        |
| Schizophrenia                                       | 5<br>(2 - 8)       | --                 | --                  | 1<br>(0 - 2)         | 2<br>(1 - 4)         | 2<br>(1 - 3)         |
| Alcohol use disorders                               | 1<br>(0 - 2)       | --                 | --                  | 0<br>(0 - 0)         | 0<br>(0 - 1)         | 1<br>(0 - 1)         |
| Drug use disorders                                  | 20<br>(14 - 27)    | 1<br>(0 - 2)       | --                  | 6<br>(4 - 9)         | 6<br>(4 - 10)        | 6<br>(4 - 9)         |
| Opioid use disorders                                | 7<br>(5 - 10)      | 0<br>(0 - 1)       | --                  | 2<br>(1 - 3)         | 2<br>(1 - 3)         | 2<br>(1 - 4)         |
| Cocaine use disorders                               | 1<br>(1 - 2)       | 0<br>(0 - 0)       | --                  | 1<br>(0 - 1)         | 0<br>(0 - 1)         | 0<br>(0 - 1)         |
| Amphetamine use disorders                           | 1<br>(1 - 2)       | 0<br>(0 - 0)       | --                  | 0<br>(0 - 1)         | 0<br>(0 - 1)         | 0<br>(0 - 1)         |
| Other drug use disorders                            | 10<br>(7 - 14)     | 0<br>(0 - 1)       | --                  | 3<br>(2 - 4)         | 3<br>(2 - 5)         | 3<br>(2 - 5)         |
| Eating disorders                                    | 0<br>(0 - 0)       | --                 | 0<br>(0 - 0)        | 0<br>(0 - 0)         | --                   | --                   |
| Anorexia nervosa                                    | 0<br>(0 - 0)       | --                 | 0<br>(0 - 0)        | 0<br>(0 - 0)         | --                   | --                   |
| Diabetes, urogenital, blood, and endocrine diseases | 358<br>(272 - 490) | 11<br>(5 - 22)     | 5<br>(3 - 8)        | 43<br>(29 - 62)      | 107<br>(72 - 158)    | 191<br>(153 - 256)   |
| Diabetes mellitus                                   | 116<br>(85 - 155)  | 0<br>(0 - 0)       | 1<br>(0 - 1)        | 5<br>(3 - 8)         | 34<br>(23 - 51)      | 75<br>(55 - 102)     |
| Acute glomerulonephritis                            | 4<br>(2 - 7)       | 0<br>(0 - 0)       | 0<br>(0 - 0)        | 1<br>(0 - 1)         | 1<br>(1 - 2)         | 2<br>(1 - 4)         |

Web Table 31- Albania deaths with 95% UI by age, sex, and cause in 2013

| Cause                                               | Females, All Ages  | Females, 0-4 Years | Females, 5-14 Years | Females, 15-49 Years | Females, 50-69 Years | Females, 70-80 Years |
|-----------------------------------------------------|--------------------|--------------------|---------------------|----------------------|----------------------|----------------------|
| Chronic kidney disease                              | 163<br>(120 - 234) | 1<br>(1 - 3)       | 1<br>(1 - 2)        | 22<br>(14 - 32)      | 54<br>(35 - 84)      | 85<br>(63 - 122)     |
| Chronic kidney disease due to diabetes mellitus     | 18<br>(12 - 28)    | 0<br>(0 - 0)       | 0<br>(0 - 0)        | 3<br>(2 - 5)         | 7<br>(4 - 12)        | 8<br>(5 - 12)        |
| Chronic kidney disease due to hypertension          | 27<br>(15 - 46)    | 0<br>(0 - 0)       | 0<br>(0 - 0)        | 3<br>(2 - 5)         | 7<br>(4 - 14)        | 17<br>(9 - 28)       |
| Chronic kidney disease due to glomerulonephritis    | 8<br>(5 - 12)      | 0<br>(0 - 0)       | 0<br>(0 - 0)        | 2<br>(1 - 3)         | 2<br>(1 - 4)         | 4<br>(2 - 6)         |
| Chronic kidney disease due to other causes          | 110<br>(76 - 169)  | 1<br>(0 - 2)       | 1<br>(1 - 2)        | 14<br>(8 - 21)       | 38<br>(23 - 63)      | 57<br>(36 - 86)      |
| Urinary diseases and male infertility               | 11<br>(7 - 20)     | 1<br>(0 - 1)       | 0<br>(0 - 0)        | 1<br>(1 - 3)         | 3<br>(2 - 5)         | 6<br>(4 - 12)        |
| Interstitial nephritis and urinary tract infections | 6<br>(3 - 11)      | 0<br>(0 - 1)       | 0<br>(0 - 0)        | 1<br>(0 - 1)         | 2<br>(1 - 3)         | 3<br>(2 - 7)         |
| Urolithiasis                                        | 0<br>(0 - 1)       | --                 | 0<br>(0 - 0)        | 0<br>(0 - 0)         | 0<br>(0 - 0)         | 0<br>(0 - 0)         |
| Other urinary diseases                              | 5<br>(3 - 8)       | 0<br>(0 - 1)       | 0<br>(0 - 0)        | 1<br>(0 - 1)         | 1<br>(1 - 2)         | 2<br>(1 - 5)         |
| Gynecological diseases                              | 1<br>(0 - 1)       | --                 | --                  | 0<br>(0 - 0)         | 0<br>(0 - 0)         | 0<br>(0 - 1)         |
| Uterine fibroids                                    | 0<br>(0 - 0)       | --                 | --                  | 0<br>(0 - 0)         | 0<br>(0 - 0)         | 0<br>(0 - 0)         |
| Polycystic ovarian syndrome                         | 0<br>(0 - 0)       | --                 | --                  | 0<br>(0 - 0)         | 0<br>(0 - 0)         | --                   |
| Endometriosis                                       | 0<br>(0 - 0)       | --                 | --                  | 0<br>(0 - 0)         | 0<br>(0 - 0)         | --                   |
| Genital prolapse                                    | 0<br>(0 - 0)       | --                 | --                  | 0<br>(0 - 0)         | 0<br>(0 - 0)         | 0<br>(0 - 0)         |
| Other gynecological diseases                        | 0<br>(0 - 0)       | --                 | --                  | 0<br>(0 - 0)         | 0<br>(0 - 0)         | 0<br>(0 - 0)         |
| Hemoglobinopathies and hemolytic anemias            | 23<br>(13 - 36)    | 5<br>(2 - 12)      | 2<br>(1 - 4)        | 8<br>(4 - 13)        | 4<br>(2 - 6)         | 3<br>(2 - 6)         |
| Thalassemias                                        | 9<br>(4 - 16)      | 4<br>(2 - 9)       | 2<br>(1 - 3)        | 3<br>(2 - 5)         | 0<br>(0 - 0)         | 0<br>(0 - 0)         |
| Sickle cell disorders                               | 5<br>(3 - 8)       | 1<br>(0 - 2)       | 0<br>(0 - 1)        | 3<br>(1 - 4)         | 1<br>(1 - 2)         | 0<br>(0 - 0)         |
| G6PD deficiency                                     | 0<br>(0 - 0)       | 0<br>(0 - 0)       | 0<br>(0 - 0)        | 0<br>(0 - 0)         | 0<br>(0 - 0)         | 0<br>(0 - 0)         |
| Other hemoglobinopathies and hemolytic anemias      | 9<br>(5 - 14)      | 0<br>(0 - 1)       | 0<br>(0 - 0)        | 2<br>(1 - 4)         | 2<br>(1 - 4)         | 3<br>(2 - 6)         |
| Endocrine, metabolic, blood, and immune disorders   | 41<br>(28 - 75)    | 3<br>(2 - 7)       | 1<br>(1 - 2)        | 6<br>(4 - 10)        | 11<br>(7 - 19)       | 20<br>(12 - 42)      |
| Musculoskeletal disorders                           | 16<br>(10 - 26)    | --                 | 0<br>(0 - 0)        | 2<br>(1 - 3)         | 7<br>(4 - 13)        | 7<br>(4 - 11)        |
| Rheumatoid arthritis                                | 6<br>(3 - 10)      | --                 | 0<br>(0 - 0)        | 1<br>(0 - 1)         | 3<br>(1 - 5)         | 3<br>(1 - 5)         |
| Other musculoskeletal disorders                     | 10<br>(6 - 21)     | --                 | 0<br>(0 - 0)        | 1<br>(1 - 2)         | 5<br>(2 - 11)        | 4<br>(2 - 8)         |
| Other non-communicable diseases                     | 78<br>(43 - 146)   | 60<br>(27 - 125)   | 3<br>(2 - 5)        | 4<br>(3 - 6)         | 2<br>(1 - 3)         | 8<br>(5 - 11)        |
| Congenital anomalies                                | 76<br>(41 - 143)   | 60<br>(27 - 125)   | 3<br>(2 - 5)        | 4<br>(3 - 6)         | 2<br>(1 - 2)         | 7<br>(5 - 10)        |
| Neural tube defects                                 | 6<br>(2 - 13)      | 5<br>(1 - 12)      | 0<br>(0 - 0)        | 0<br>(0 - 0)         | 0<br>(0 - 0)         | 0<br>(0 - 1)         |
| Congenital heart anomalies                          | 41<br>(22 - 80)    | 33<br>(15 - 71)    | 2<br>(1 - 3)        | 2<br>(1 - 2)         | 1<br>(0 - 1)         | 4<br>(3 - 6)         |
| Cleft lip and cleft palate                          | 0<br>(0 - 1)       | 0<br>(0 - 1)       | --                  | --                   | --                   | --                   |
| Down syndrome                                       | 6<br>(2 - 13)      | 5<br>(2 - 12)      | 1<br>(0 - 1)        | 0<br>(0 - 0)         | 0<br>(0 - 0)         | 0<br>(0 - 0)         |
| Chromosomal unbalanced rearrangements               | 4<br>(1 - 8)       | 3<br>(1 - 7)       | 0<br>(0 - 0)        | 0<br>(0 - 1)         | 0<br>(0 - 0)         | 0<br>(0 - 0)         |
| Other congenital anomalies                          | 19<br>(11 - 33)    | 13<br>(6 - 28)     | 1<br>(0 - 1)        | 2<br>(1 - 2)         | 1<br>(1 - 1)         | 3<br>(2 - 4)         |
| Skin and subcutaneous diseases                      | 2<br>(1 - 3)       | 0<br>(0 - 1)       | 0<br>(0 - 0)        | 0<br>(0 - 1)         | 0<br>(0 - 1)         | 1<br>(0 - 1)         |
| Cellulitis                                          | 0<br>(0 - 1)       | 0<br>(0 - 0)       | 0<br>(0 - 0)        | 0<br>(0 - 0)         | 0<br>(0 - 0)         | 0<br>(0 - 0)         |
| Pyoderma                                            | 1<br>(0 - 1)       | 0<br>(0 - 0)       | 0<br>(0 - 0)        | 0<br>(0 - 0)         | 0<br>(0 - 0)         | 0<br>(0 - 0)         |
| Decubitus ulcer                                     | 1<br>(0 - 1)       | 0<br>(0 - 0)       | 0<br>(0 - 0)        | 0<br>(0 - 0)         | 0<br>(0 - 0)         | 0<br>(0 - 1)         |
| Other skin and subcutaneous diseases                | 0<br>(0 - 1)       | 0<br>(0 - 0)       | 0<br>(0 - 0)        | 0<br>(0 - 0)         | 0<br>(0 - 0)         | 0<br>(0 - 0)         |
| Sudden infant death syndrome                        | 0<br>(0 - 0)       | 0<br>(0 - 0)       | --                  | --                   | --                   | --                   |
| Injuries                                            | 320<br>(238 - 423) | 27<br>(13 - 61)    | 19<br>(11 - 31)     | 131<br>(91 - 176)    | 79<br>(54 - 111)     | 65<br>(50 - 85)      |
| Transport injuries                                  | 74<br>(44 - 105)   | 4<br>(1 - 10)      | 4<br>(2 - 8)        | 26<br>(14 - 37)      | 22<br>(13 - 33)      | 19<br>(12 - 27)      |

Web Table 31- Albania deaths with 95% UI by age, sex, and cause in 2013

| Cause                                           | Females, All Ages  | Females, 0-4 Years | Females, 5-14 Years | Females, 15-49 Years | Females, 50-69 Years | Females, 70-80 Years |
|-------------------------------------------------|--------------------|--------------------|---------------------|----------------------|----------------------|----------------------|
| Road injuries                                   | 64<br>(38 - 91)    | 3<br>(1 - 8)       | 4<br>(2 - 7)        | 23<br>(12 - 33)      | 19<br>(11 - 30)      | 15<br>(9 - 23)       |
| Pedestrian road injuries                        | 14<br>(6 - 23)     | 1<br>(0 - 3)       | 1<br>(0 - 2)        | 5<br>(2 - 8)         | 4<br>(2 - 7)         | 3<br>(1 - 5)         |
| Cyclist road injuries                           | 8<br>(4 - 14)      | 0<br>(0 - 1)       | 1<br>(0 - 1)        | 3<br>(1 - 5)         | 3<br>(1 - 5)         | 2<br>(1 - 4)         |
| Motorcyclist road injuries                      | 11<br>(4 - 20)     | 1<br>(0 - 1)       | 1<br>(0 - 1)        | 4<br>(2 - 8)         | 3<br>(1 - 6)         | 3<br>(1 - 5)         |
| Motor vehicle road injuries                     | 19<br>(11 - 32)    | 1<br>(0 - 3)       | 1<br>(0 - 2)        | 7<br>(4 - 12)        | 6<br>(3 - 10)        | 4<br>(2 - 8)         |
| Other road injuries                             | 12<br>(5 - 19)     | 1<br>(0 - 1)       | 1<br>(0 - 1)        | 4<br>(2 - 6)         | 4<br>(2 - 8)         | 3<br>(1 - 6)         |
| Other transport injuries                        | 10<br>(5 - 17)     | 1<br>(0 - 1)       | 0<br>(0 - 1)        | 3<br>(1 - 5)         | 2<br>(1 - 5)         | 4<br>(2 - 7)         |
| Unintentional injuries                          | 151<br>(112 - 204) | 22<br>(10 - 50)    | 12<br>(7 - 20)      | 47<br>(32 - 65)      | 35<br>(24 - 52)      | 35<br>(26 - 46)      |
| Falls                                           | 18<br>(11 - 24)    | 1<br>(0 - 3)       | 1<br>(0 - 1)        | 4<br>(3 - 6)         | 4<br>(3 - 7)         | 7<br>(4 - 10)        |
| Drowning                                        | 23<br>(16 - 40)    | 5<br>(2 - 12)      | 4<br>(2 - 8)        | 8<br>(5 - 14)        | 3<br>(2 - 5)         | 2<br>(2 - 4)         |
| Fire, heat, and hot substances                  | 10<br>(7 - 15)     | 2<br>(1 - 4)       | 0<br>(0 - 1)        | 2<br>(1 - 3)         | 3<br>(2 - 4)         | 3<br>(2 - 5)         |
| Poisonings                                      | 9<br>(5 - 13)      | 1<br>(0 - 2)       | 1<br>(0 - 1)        | 4<br>(2 - 6)         | 2<br>(1 - 3)         | 2<br>(1 - 3)         |
| Exposure to mechanical forces                   | 36<br>(25 - 62)    | 6<br>(2 - 20)      | 2<br>(1 - 4)        | 13<br>(8 - 19)       | 10<br>(6 - 15)       | 6<br>(4 - 10)        |
| Unintentional firearm injuries                  | 1<br>(1 - 2)       | 0<br>(0 - 0)       | 0<br>(0 - 0)        | 1<br>(1 - 1)         | 0<br>(0 - 0)         | 0<br>(0 - 0)         |
| Unintentional suffocation                       | 4<br>(1 - 23)      | 3<br>(1 - 18)      | 0<br>(0 - 0)        | 0<br>(0 - 2)         | 0<br>(0 - 1)         | 0<br>(0 - 3)         |
| Other exposure to mechanical forces             | 31<br>(21 - 44)    | 3<br>(1 - 6)       | 2<br>(1 - 4)        | 11<br>(7 - 17)       | 9<br>(6 - 15)        | 6<br>(3 - 8)         |
| Adverse effects of medical treatment            | 17<br>(10 - 23)    | 3<br>(1 - 6)       | 0<br>(0 - 1)        | 2<br>(1 - 3)         | 4<br>(2 - 6)         | 7<br>(4 - 12)        |
| Animal contact                                  | 1<br>(1 - 4)       | 0<br>(0 - 0)       | 0<br>(0 - 0)        | 0<br>(0 - 1)         | 0<br>(0 - 1)         | 0<br>(0 - 1)         |
| Venomous animal contact                         | 0<br>(0 - 1)       | 0<br>(0 - 0)       | 0<br>(0 - 0)        | 0<br>(0 - 0)         | 0<br>(0 - 0)         | 0<br>(0 - 0)         |
| Non-venomous animal contact                     | 1<br>(0 - 3)       | 0<br>(0 - 0)       | 0<br>(0 - 0)        | 0<br>(0 - 1)         | 0<br>(0 - 1)         | 0<br>(0 - 1)         |
| Foreign body                                    | 2<br>(1 - 4)       | 1<br>(0 - 2)       | 0<br>(0 - 0)        | 1<br>(0 - 1)         | 0<br>(0 - 1)         | 0<br>(0 - 0)         |
| Pulmonary aspiration and foreign body in airway | 2<br>(1 - 4)       | 1<br>(0 - 2)       | 0<br>(0 - 0)        | 0<br>(0 - 1)         | 0<br>(0 - 1)         | 0<br>(0 - 0)         |
| Foreign body in other body part                 | 0<br>(0 - 0)       | 0<br>(0 - 0)       | 0<br>(0 - 0)        | 0<br>(0 - 0)         | 0<br>(0 - 0)         | 0<br>(0 - 0)         |
| Other unintentional injuries                    | 34<br>(20 - 50)    | 3<br>(1 - 9)       | 2<br>(1 - 5)        | 13<br>(7 - 22)       | 9<br>(4 - 16)        | 7<br>(3 - 12)        |
| Self-harm and interpersonal violence            | 95<br>(68 - 130)   | 1<br>(0 - 2)       | 3<br>(2 - 4)        | 58<br>(40 - 80)      | 22<br>(14 - 33)      | 11<br>(8 - 16)       |
| Self-harm                                       | 58<br>(39 - 81)    | -                  | 1<br>(1 - 2)        | 37<br>(24 - 52)      | 13<br>(8 - 20)       | 8<br>(5 - 12)        |
| Interpersonal violence                          | 37<br>(23 - 52)    | 1<br>(0 - 2)       | 1<br>(1 - 3)        | 22<br>(13 - 31)      | 9<br>(5 - 14)        | 4<br>(3 - 5)         |
| Assault by firearm                              | 23<br>(13 - 34)    | 0<br>(0 - 1)       | 1<br>(0 - 1)        | 14<br>(8 - 21)       | 6<br>(3 - 9)         | 2<br>(1 - 3)         |
| Assault by sharp object                         | 5<br>(3 - 10)      | 0<br>(0 - 0)       | 0<br>(0 - 0)        | 3<br>(1 - 6)         | 1<br>(0 - 3)         | 1<br>(0 - 1)         |
| Assault by other means                          | 9<br>(5 - 16)      | 1<br>(0 - 1)       | 1<br>(0 - 1)        | 5<br>(2 - 9)         | 2<br>(1 - 3)         | 1<br>(1 - 2)         |

Web Table 31- Algeria deaths with 95% UI by age, sex, and cause in 2013

| Cause                                                             | Both Sexes, All Ages           | Both Sexes, 0-4 Years       | Both Sexes, 5-14 Years   | Both Sexes, 15-49 Years     | Both Sexes, 50-69 Years     | Both Sexes, 70-80 Years     |
|-------------------------------------------------------------------|--------------------------------|-----------------------------|--------------------------|-----------------------------|-----------------------------|-----------------------------|
| All causes                                                        | 159,282<br>(146,462 - 173,833) | 22,942<br>(20,063 - 26,412) | 2,544<br>(2,309 - 2,840) | 26,600<br>(23,428 - 30,474) | 40,200<br>(35,499 - 44,638) | 66,996<br>(62,005 - 73,914) |
| Communicable, maternal, neonatal, and nutritional diseases        | 25,809<br>(23,036 - 28,584)    | 14,929<br>(12,689 - 17,237) | 590<br>(467 - 766)       | 3,023<br>(2,649 - 3,450)    | 2,458<br>(2,107 - 2,861)    | 4,808<br>(3,998 - 5,696)    |
| HIV/AIDS and tuberculosis                                         | 1,846<br>(1,398 - 2,163)       | 23<br>(14 - 34)             | 11<br>(8 - 15)           | 713<br>(556 - 859)          | 494<br>(372 - 603)          | 605<br>(433 - 752)          |
| Tuberculosis                                                      | 1,728<br>(1,282 - 2,038)       | 22<br>(14 - 33)             | 11<br>(7 - 15)           | 614<br>(456 - 756)          | 478<br>(354 - 588)          | 603<br>(430 - 749)          |
| HIV/AIDS                                                          | 118<br>(78 - 197)              | 1<br>(0 - 2)                | 0<br>(0 - 1)             | 99<br>(66 - 164)            | 16<br>(8 - 29)              | 2<br>(1 - 3)                |
| HIV/AIDS resulting in mycobacterial infection                     | 7<br>(4 - 12)                  | 0<br>(0 - 0)                | 0<br>(0 - 0)             | 6<br>(3 - 10)               | 1<br>(0 - 2)                | 0<br>(0 - 0)                |
| HIV/AIDS resulting in other diseases                              | 111<br>(73 - 186)              | 1<br>(0 - 2)                | 0<br>(0 - 1)             | 93<br>(62 - 156)            | 15<br>(8 - 27)              | 2<br>(1 - 3)                |
| Diarrhea, lower respiratory, and other common infectious diseases | 9,424<br>(8,025 - 11,010)      | 2,728<br>(1,972 - 3,773)    | 494<br>(374 - 674)       | 1,409<br>(1,135 - 1,708)    | 1,474<br>(1,204 - 1,808)    | 3,319<br>(2,650 - 4,128)    |
| Diarrheal diseases                                                | 1,417<br>(1,029 - 1,945)       | 634<br>(318 - 1,129)        | 28<br>(16 - 45)          | 137<br>(103 - 181)          | 112<br>(79 - 160)           | 506<br>(333 - 742)          |
| Intestinal infectious diseases                                    | 805<br>(414 - 1,381)           | 240<br>(117 - 421)          | 178<br>(88 - 304)        | 308<br>(143 - 570)          | 57<br>(25 - 107)            | 22<br>(10 - 41)             |
| Typhoid fever                                                     | 588<br>(288 - 1,045)           | 163<br>(73 - 299)           | 136<br>(64 - 237)        | 231<br>(101 - 440)          | 42<br>(17 - 84)             | 16<br>(6 - 31)              |
| Paratyphoid fever                                                 | 172<br>(81 - 312)              | 56<br>(23 - 113)            | 39<br>(18 - 72)          | 62<br>(26 - 120)            | 10<br>(4 - 21)              | 4<br>(1 - 7)                |
| Other intestinal infectious diseases                              | 45<br>(30 - 63)                | 20<br>(10 - 34)             | 3<br>(1 - 8)             | 14<br>(6 - 25)              | 5<br>(1 - 11)               | 3<br>(0 - 7)                |
| Lower respiratory infections                                      | 5,476<br>(4,512 - 6,579)       | 976<br>(642 - 1,403)        | 139<br>(98 - 196)        | 602<br>(462 - 773)          | 1,119<br>(862 - 1,424)      | 2,639<br>(2,017 - 3,392)    |
| Upper respiratory infections                                      | 8<br>(4 - 13)                  | 1<br>(0 - 3)                | 0<br>(0 - 1)             | 2<br>(1 - 4)                | 2<br>(0 - 5)                | 2<br>(0 - 7)                |
| Otitis media                                                      | 12<br>(10 - 13)                | 1<br>(1 - 1)                | 1<br>(0 - 1)             | 3<br>(2 - 3)                | 3<br>(2 - 4)                | 4<br>(3 - 6)                |
| Meningitis                                                        | 704<br>(545 - 878)             | 331<br>(201 - 489)          | 56<br>(37 - 81)          | 137<br>(103 - 176)          | 100<br>(73 - 133)           | 80<br>(55 - 119)            |
| Pneumococcal meningitis                                           | 157<br>(117 - 207)             | 62<br>(35 - 101)            | 15<br>(9 - 24)           | 37<br>(23 - 53)             | 24<br>(13 - 37)             | 19<br>(11 - 31)             |
| H influenzae type B meningitis                                    | 168<br>(115 - 229)             | 117<br>(70 - 177)           | 15<br>(9 - 25)           | 17<br>(11 - 24)             | 11<br>(6 - 17)              | 8<br>(4 - 13)               |
| Meningococcal meningitis                                          | 202<br>(151 - 268)             | 100<br>(59 - 156)           | 16<br>(9 - 26)           | 37<br>(25 - 53)             | 26<br>(15 - 40)             | 23<br>(14 - 37)             |
| Other meningitis                                                  | 178<br>(136 - 225)             | 52<br>(28 - 86)             | 10<br>(5 - 16)           | 46<br>(32 - 64)             | 40<br>(25 - 57)             | 30<br>(19 - 46)             |
| Encephalitis                                                      | 630<br>(466 - 802)             | 238<br>(146 - 362)          | 55<br>(33 - 81)          | 202<br>(131 - 279)          | 76<br>(53 - 105)            | 59<br>(40 - 81)             |
| Diphtheria                                                        | 3<br>(0 - 11)                  | 2<br>(0 - 10)               | 0<br>(0 - 3)             | 0<br>(0 - 1)                | 0<br>(0 - 1)                | --                          |
| Whooping cough                                                    | 25<br>(0 - 125)                | 23<br>(0 - 118)             | 1<br>(0 - 5)             | 0<br>(0 - 2)                | 0<br>(0 - 0)                | --                          |
| Tetanus                                                           | 17<br>(12 - 24)                | 9<br>(4 - 15)               | 1<br>(1 - 2)             | 5<br>(4 - 7)                | 2<br>(1 - 4)                | 0<br>(0 - 0)                |
| Measles                                                           | 310<br>(8 - 1,778)             | 268<br>(7 - 1,514)          | 33<br>(1 - 193)          | 8<br>(0 - 49)               | 0<br>(0 - 2)                | --                          |
| Varicella and herpes zoster                                       | 18<br>(8 - 36)                 | 5<br>(1 - 14)               | 1<br>(0 - 3)             | 5<br>(1 - 10)               | 2<br>(0 - 5)                | 6<br>(1 - 21)               |
| Neglected tropical diseases and malaria                           | 179<br>(151 - 217)             | 29<br>(18 - 43)             | 14<br>(10 - 22)          | 60<br>(49 - 74)             | 45<br>(35 - 58)             | 32<br>(23 - 42)             |
| Malaria                                                           | 10<br>(7 - 14)                 | 1<br>(0 - 1)                | 2<br>(1 - 3)             | 6<br>(4 - 10)               | 1<br>(1 - 2)                | 0<br>(0 - 1)                |
| Leishmaniasis                                                     | 23<br>(18 - 29)                | 9<br>(6 - 13)               | 2<br>(1 - 2)             | 8<br>(5 - 11)               | 3<br>(2 - 5)                | 1<br>(1 - 1)                |
| Visceral leishmaniasis                                            | 23<br>(18 - 29)                | 9<br>(6 - 13)               | 2<br>(1 - 2)             | 8<br>(5 - 11)               | 3<br>(2 - 5)                | 1<br>(1 - 1)                |
| Schistosomiasis                                                   | 62<br>(47 - 79)                | 0<br>(0 - 0)                | 1<br>(0 - 1)             | 18<br>(13 - 25)             | 25<br>(17 - 36)             | 17<br>(11 - 25)             |
| Cysticercosis                                                     | 0<br>(0 - 0)                   | 0<br>(0 - 0)                | 0<br>(0 - 0)             | 0<br>(0 - 0)                | 0<br>(0 - 0)                | 0<br>(0 - 0)                |
| Cystic echinococcosis                                             | 21<br>(19 - 24)                | 1<br>(1 - 1)                | 2<br>(2 - 2)             | 9<br>(8 - 10)               | 6<br>(5 - 6)                | 3<br>(3 - 4)                |
| Dengue                                                            | 4<br>(3 - 5)                   | 0<br>(0 - 1)                | 1<br>(0 - 1)             | 2<br>(2 - 3)                | 1<br>(0 - 1)                | 0<br>(0 - 0)                |
| Rabies                                                            | 21<br>(13 - 44)                | 2<br>(1 - 4)                | 3<br>(1 - 8)             | 8<br>(5 - 15)               | 4<br>(2 - 9)                | 4<br>(2 - 9)                |
| Intestinal nematode infections                                    | 13<br>(5 - 27)                 | 7<br>(2 - 17)               | 2<br>(0 - 8)             | 2<br>(0 - 7)                | 1<br>(0 - 6)                | 1<br>(0 - 6)                |
| Ascariasis                                                        | 13<br>(5 - 27)                 | 7<br>(2 - 17)               | 2<br>(0 - 8)             | 2<br>(0 - 7)                | 1<br>(0 - 6)                | 1<br>(0 - 6)                |
| Other neglected tropical diseases                                 | 25<br>(20 - 32)                | 8<br>(5 - 14)               | 2<br>(1 - 2)             | 7<br>(5 - 10)               | 3<br>(2 - 5)                | 4<br>(3 - 6)                |
| Maternal disorders                                                | 470<br>(340 - 641)             | --                          | 1<br>(0 - 2)             | 469<br>(339 - 640)          | --                          | --                          |

Web Table 31- Algeria deaths with 95% UI by age, sex, and cause in 2013

| Cause                                                            | Both Sexes, All Ages           | Both Sexes, 0-4 Years      | Both Sexes, 5-14 Years | Both Sexes, 15-49 Years     | Both Sexes, 50-69 Years     | Both Sexes, 70-80 Years     |
|------------------------------------------------------------------|--------------------------------|----------------------------|------------------------|-----------------------------|-----------------------------|-----------------------------|
| Maternal hemorrhage                                              | 98<br>(61 - 145)               | --                         | 0<br>(0 - 0)           | 98<br>(61 - 145)            | --                          | --                          |
| Maternal sepsis and other maternal infections                    | 35<br>(21 - 53)                | --                         | 0<br>(0 - 0)           | 35<br>(20 - 53)             | --                          | --                          |
| Maternal hypertensive disorders                                  | 85<br>(58 - 120)               | --                         | 0<br>(0 - 0)           | 84<br>(57 - 119)            | --                          | --                          |
| Maternal obstructed labor                                        | 65<br>(40 - 95)                | --                         | 0<br>(0 - 0)           | 65<br>(40 - 95)             | --                          | --                          |
| Maternal abortive outcome                                        | 54<br>(29 - 90)                | --                         | 0<br>(0 - 0)           | 54<br>(29 - 90)             | --                          | --                          |
| Indirect maternal deaths                                         | 32<br>(13 - 59)                | --                         | 0<br>(0 - 0)           | 32<br>(13 - 59)             | --                          | --                          |
| Late maternal deaths                                             | 40<br>(21 - 63)                | --                         | 0<br>(0 - 0)           | 40<br>(20 - 63)             | --                          | --                          |
| Maternal deaths aggravated by HIV/AIDS                           | 0<br>(0 - 0)                   | --                         | --                     | 0<br>(0 - 0)                | --                          | --                          |
| Other maternal disorders                                         | 61<br>(36 - 98)                | --                         | 0<br>(0 - 0)           | 61<br>(36 - 98)             | --                          | --                          |
| Neonatal disorders                                               | 11,479<br>(9,691 - 13,544)     | 11,479<br>(9,691 - 13,544) | --                     | --                          | --                          | --                          |
| Neonatal preterm birth complications                             | 6,617<br>(4,859 - 8,421)       | 6,617<br>(4,859 - 8,421)   | --                     | --                          | --                          | --                          |
| Neonatal encephalopathy due to birth asphyxia and trauma         | 1,945<br>(1,167 - 2,969)       | 1,945<br>(1,167 - 2,969)   | --                     | --                          | --                          | --                          |
| Neonatal sepsis and other neonatal infections                    | 1,671<br>(817 - 2,749)         | 1,671<br>(817 - 2,749)     | --                     | --                          | --                          | --                          |
| Hemolytic disease and other neonatal jaundice                    | 67<br>(27 - 157)               | 67<br>(27 - 157)           | --                     | --                          | --                          | --                          |
| Other neonatal disorders                                         | 1,180<br>(729 - 1,865)         | 1,180<br>(729 - 1,865)     | --                     | --                          | --                          | --                          |
| Nutritional deficiencies                                         | 1,654<br>(1,213 - 2,017)       | 407<br>(255 - 631)         | 42<br>(27 - 58)        | 235<br>(178 - 292)          | 268<br>(194 - 349)          | 702<br>(476 - 949)          |
| Protein-energy malnutrition                                      | 1,007<br>(664 - 1,326)         | 340<br>(199 - 539)         | 19<br>(11 - 30)        | 78<br>(43 - 117)            | 124<br>(70 - 178)           | 446<br>(254 - 630)          |
| Iodine deficiency                                                | 7<br>(1 - 18)                  | 1<br>(0 - 7)               | 0<br>(0 - 2)           | 1<br>(0 - 5)                | 2<br>(0 - 8)                | 2<br>(0 - 9)                |
| Iron-deficiency anemia                                           | 624<br>(393 - 875)             | 60<br>(24 - 124)           | 21<br>(11 - 33)        | 151<br>(103 - 200)          | 139<br>(87 - 204)           | 252<br>(139 - 397)          |
| Other nutritional deficiencies                                   | 16<br>(10 - 37)                | 6<br>(2 - 23)              | 1<br>(1 - 2)           | 4<br>(2 - 8)                | 3<br>(1 - 5)                | 2<br>(1 - 4)                |
| Other communicable, maternal, neonatal, and nutritional diseases | 757<br>(527 - 1,066)           | 263<br>(89 - 516)          | 29<br>(15 - 49)        | 137<br>(100 - 186)          | 178<br>(132 - 249)          | 150<br>(98 - 245)           |
| Sexually transmitted diseases excluding HIV                      | 249<br>(59 - 519)              | 210<br>(37 - 459)          | 17<br>(3 - 35)         | 10<br>(7 - 15)              | 6<br>(3 - 12)               | 7<br>(3 - 14)               |
| Syphilis                                                         | 240<br>(52 - 511)              | 210<br>(37 - 459)          | 16<br>(3 - 35)         | 5<br>(3 - 7)                | 4<br>(2 - 7)                | 5<br>(3 - 11)               |
| Chlamydial infection                                             | 2<br>(1 - 3)                   | --                         | 0<br>(0 - 0)           | 1<br>(1 - 2)                | 0<br>(0 - 1)                | 0<br>(0 - 1)                |
| Gonococcal infection                                             | 4<br>(3 - 7)                   | --                         | 0<br>(0 - 0)           | 2<br>(2 - 4)                | 1<br>(1 - 2)                | 1<br>(0 - 2)                |
| Other sexually transmitted diseases                              | 3<br>(2 - 5)                   | --                         | 0<br>(0 - 0)           | 2<br>(1 - 3)                | 1<br>(0 - 2)                | 0<br>(0 - 1)                |
| Hepatitis                                                        | 208<br>(171 - 252)             | 16<br>(9 - 27)             | 3<br>(2 - 4)           | 44<br>(31 - 60)             | 95<br>(72 - 124)            | 52<br>(38 - 69)             |
| Acute hepatitis A                                                | 16<br>(5 - 31)                 | 7<br>(2 - 14)              | 1<br>(0 - 2)           | 4<br>(1 - 9)                | 3<br>(1 - 8)                | 1<br>(0 - 2)                |
| Acute hepatitis B                                                | 138<br>(100 - 181)             | 9<br>(4 - 17)              | 1<br>(0 - 2)           | 20<br>(11 - 33)             | 66<br>(45 - 92)             | 41<br>(28 - 59)             |
| Acute hepatitis C                                                | 17<br>(3 - 41)                 | --                         | 0<br>(0 - 1)           | 4<br>(1 - 10)               | 9<br>(2 - 22)               | 5<br>(1 - 12)               |
| Acute hepatitis E                                                | 38<br>(18 - 66)                | 0<br>(0 - 1)               | 0<br>(0 - 1)           | 16<br>(7 - 27)              | 17<br>(6 - 32)              | 5<br>(2 - 11)               |
| Other infectious diseases                                        | 299<br>(203 - 425)             | 37<br>(17 - 83)            | 9<br>(5 - 17)          | 84<br>(51 - 126)            | 78<br>(40 - 140)            | 91<br>(44 - 184)            |
| Non-communicable diseases                                        | 115,770<br>(105,700 - 127,531) | 6,502<br>(5,183 - 8,169)   | 1,072<br>(928 - 1,224) | 15,574<br>(13,544 - 17,683) | 34,491<br>(30,364 - 38,528) | 58,130<br>(53,614 - 64,372) |
| Neoplasms                                                        | 13,357<br>(11,810 - 15,087)    | 187<br>(117 - 271)         | 233<br>(190 - 284)     | 3,479<br>(2,972 - 4,058)    | 5,880<br>(5,108 - 6,736)    | 3,578<br>(3,196 - 4,050)    |
| Esophageal cancer                                                | 165<br>(135 - 199)             | --                         | --                     | 33<br>(26 - 42)             | 72<br>(56 - 90)             | 61<br>(48 - 77)             |
| Stomach cancer                                                   | 1,181<br>(1,004 - 1,378)       | --                         | --                     | 221<br>(177 - 271)          | 554<br>(455 - 672)          | 406<br>(329 - 497)          |
| Liver cancer                                                     | 532<br>(434 - 638)             | --                         | 3<br>(2 - 5)           | 79<br>(59 - 105)            | 265<br>(207 - 326)          | 185<br>(141 - 240)          |
| Liver cancer due to hepatitis B                                  | 188<br>(135 - 244)             | --                         | 1<br>(0 - 2)           | 36<br>(24 - 49)             | 103<br>(70 - 138)           | 48<br>(33 - 66)             |
| Liver cancer due to hepatitis C                                  | 247<br>(184 - 321)             | --                         | 0<br>(0 - 1)           | 27<br>(18 - 40)             | 119<br>(83 - 158)           | 100<br>(72 - 138)           |
| Liver cancer due to alcohol use                                  | 47<br>(29 - 67)                | --                         | --                     | 3<br>(2 - 5)                | 21<br>(12 - 31)             | 23<br>(13 - 34)             |

Web Table 31- Algeria deaths with 95% UI by age, sex, and cause in 2013

| Cause                                         | Both Sexes, All Ages        | Both Sexes, 0-4 Years | Both Sexes, 5-14 Years | Both Sexes, 15-49 Years  | Both Sexes, 50-69 Years     | Both Sexes, 70-80 Years     |
|-----------------------------------------------|-----------------------------|-----------------------|------------------------|--------------------------|-----------------------------|-----------------------------|
| Liver cancer due to other causes              | 50<br>(28 - 81)             | --                    | 1<br>(1 - 2)           | 13<br>(6 - 20)           | 23<br>(11 - 41)             | 14<br>(7 - 23)              |
| Larynx cancer                                 | 216<br>(167 - 305)          | --                    | --                     | 30<br>(21 - 44)          | 110<br>(80 - 157)           | 76<br>(54 - 112)            |
| Tracheal, bronchus and lung cancer            | 1,808<br>(1,510 - 2,184)    | --                    | --                     | 243<br>(184 - 325)       | 1,031<br>(845 - 1,253)      | 534<br>(442 - 646)          |
| Breast cancer                                 | 1,404<br>(1,119 - 1,743)    | --                    | --                     | 658<br>(492 - 834)       | 562<br>(426 - 734)          | 185<br>(145 - 237)          |
| Cervical cancer                               | 440<br>(333 - 610)          | --                    | --                     | 108<br>(73 - 155)        | 232<br>(165 - 326)          | 100<br>(69 - 143)           |
| Uterine cancer                                | 54<br>(36 - 77)             | --                    | --                     | 6<br>(4 - 9)             | 24<br>(15 - 36)             | 23<br>(15 - 36)             |
| Prostate cancer                               | 255<br>(156 - 372)          | --                    | --                     | 5<br>(3 - 8)             | 48<br>(31 - 72)             | 202<br>(120 - 296)          |
| Colon and rectum cancer                       | 1,042<br>(906 - 1,202)      | --                    | --                     | 288<br>(237 - 341)       | 455<br>(383 - 535)          | 299<br>(246 - 358)          |
| Lip and oral cavity cancer                    | 76<br>(61 - 98)             | --                    | --                     | 18<br>(14 - 25)          | 33<br>(25 - 45)             | 24<br>(18 - 33)             |
| Nasopharynx cancer                            | 446<br>(348 - 583)          | --                    | 9<br>(4 - 22)          | 200<br>(147 - 273)       | 187<br>(132 - 265)          | 50<br>(35 - 71)             |
| Other pharynx cancer                          | 66<br>(52 - 93)             | --                    | --                     | 18<br>(13 - 25)          | 35<br>(26 - 48)             | 14<br>(10 - 20)             |
| Gallbladder and biliary tract cancer          | 553<br>(396 - 731)          | --                    | --                     | 79<br>(52 - 117)         | 280<br>(196 - 387)          | 193<br>(128 - 272)          |
| Pancreatic cancer                             | 404<br>(346 - 469)          | --                    | --                     | 73<br>(58 - 91)          | 206<br>(171 - 246)          | 125<br>(102 - 152)          |
| Malignant skin melanoma                       | 36<br>(28 - 52)             | --                    | --                     | 11<br>(8 - 17)           | 14<br>(11 - 20)             | 11<br>(8 - 17)              |
| Non-melanoma skin cancer                      | 65<br>(49 - 96)             | --                    | --                     | 9<br>(6 - 13)            | 24<br>(17 - 36)             | 33<br>(23 - 47)             |
| Ovarian cancer                                | 275<br>(212 - 363)          | --                    | --                     | 90<br>(62 - 128)         | 126<br>(91 - 173)           | 59<br>(41 - 83)             |
| Testicular cancer                             | 16<br>(10 - 22)             | --                    | --                     | 9<br>(5 - 13)            | 5<br>(3 - 7)                | 2<br>(1 - 4)                |
| Kidney cancer                                 | 158<br>(130 - 189)          | 6<br>(3 - 11)         | 7<br>(4 - 11)          | 24<br>(18 - 33)          | 76<br>(58 - 96)             | 45<br>(34 - 60)             |
| Bladder cancer                                | 529<br>(427 - 654)          | --                    | --                     | 50<br>(36 - 68)          | 274<br>(210 - 355)          | 205<br>(158 - 268)          |
| Brain and nervous system cancer               | 551<br>(393 - 667)          | 14<br>(7 - 24)        | 30<br>(20 - 40)        | 203<br>(145 - 252)       | 240<br>(169 - 302)          | 63<br>(41 - 85)             |
| Thyroid cancer                                | 139<br>(106 - 187)          | --                    | 0<br>(0 - 1)           | 16<br>(11 - 22)          | 69<br>(50 - 95)             | 53<br>(38 - 75)             |
| Mesothelioma                                  | 30<br>(22 - 40)             | --                    | --                     | 6<br>(4 - 9)             | 15<br>(9 - 22)              | 9<br>(6 - 14)               |
| Hodgkin lymphoma                              | 127<br>(101 - 163)          | 3<br>(2 - 5)          | 7<br>(4 - 13)          | 74<br>(56 - 97)          | 30<br>(21 - 43)             | 13<br>(9 - 20)              |
| Non-Hodgkin lymphoma                          | 568<br>(463 - 724)          | 11<br>(6 - 17)        | 18<br>(12 - 28)        | 193<br>(150 - 245)       | 209<br>(164 - 271)          | 137<br>(104 - 181)          |
| Multiple myeloma                              | 183<br>(143 - 223)          | --                    | --                     | 32<br>(24 - 41)          | 93<br>(69 - 118)            | 58<br>(44 - 76)             |
| Leukemia                                      | 807<br>(697 - 930)          | 24<br>(13 - 41)       | 60<br>(46 - 78)        | 354<br>(295 - 423)       | 223<br>(182 - 267)          | 146<br>(118 - 174)          |
| Other neoplasms                               | 1,232<br>(1,005 - 1,445)    | 129<br>(74 - 200)     | 99<br>(70 - 136)       | 350<br>(273 - 432)       | 388<br>(300 - 484)          | 266<br>(208 - 333)          |
| Cardiovascular diseases                       | 58,011<br>(52,587 - 64,781) | 787<br>(549 - 1,081)  | 241<br>(191 - 308)     | 6,174<br>(5,273 - 7,172) | 17,551<br>(15,351 - 19,875) | 33,257<br>(30,356 - 37,150) |
| Rheumatic heart disease                       | 516<br>(377 - 658)          | 13<br>(6 - 24)        | 13<br>(8 - 19)         | 155<br>(109 - 204)       | 138<br>(96 - 182)           | 198<br>(137 - 272)          |
| Ischemic heart disease                        | 24,009<br>(20,907 - 28,246) | 162<br>(84 - 284)     | 48<br>(33 - 70)        | 2,646<br>(2,181 - 3,187) | 8,449<br>(7,216 - 9,928)    | 12,704<br>(10,948 - 15,092) |
| Cerebrovascular disease                       | 22,446<br>(19,564 - 25,851) | 183<br>(117 - 274)    | 90<br>(67 - 119)       | 1,874<br>(1,536 - 2,289) | 5,890<br>(4,922 - 6,970)    | 14,410<br>(12,589 - 16,589) |
| Ischemic stroke                               | 12,246<br>(10,330 - 14,229) | 2<br>(1 - 3)          | 2<br>(1 - 3)           | 312<br>(230 - 400)       | 2,372<br>(1,853 - 2,878)    | 9,559<br>(8,118 - 11,148)   |
| Hemorrhagic stroke                            | 10,200<br>(8,713 - 12,092)  | 181<br>(115 - 271)    | 88<br>(65 - 117)       | 1,562<br>(1,278 - 1,917) | 3,518<br>(2,911 - 4,292)    | 4,851<br>(3,997 - 5,872)    |
| Hypertensive heart disease                    | 4,458<br>(3,365 - 5,712)    | 8<br>(4 - 16)         | 4<br>(2 - 7)           | 295<br>(210 - 402)       | 1,006<br>(722 - 1,290)      | 3,145<br>(2,253 - 4,155)    |
| Cardiomyopathy and myocarditis                | 2,819<br>(2,208 - 3,460)    | 334<br>(221 - 492)    | 56<br>(40 - 76)        | 357<br>(275 - 458)       | 700<br>(522 - 893)          | 1,371<br>(975 - 1,853)      |
| Atrial fibrillation and flutter               | 3<br>(2 - 3)                | --                    | --                     | 1<br>(1 - 2)             | 1<br>(1 - 1)                | 1<br>(0 - 1)                |
| Aortic aneurysm                               | 395<br>(322 - 512)          | --                    | --                     | 33<br>(24 - 51)          | 180<br>(138 - 244)          | 182<br>(140 - 234)          |
| Peripheral vascular disease                   | 21<br>(17 - 26)             | --                    | --                     | 5<br>(4 - 7)             | 8<br>(6 - 10)               | 8<br>(6 - 10)               |
| Endocarditis                                  | 160<br>(119 - 221)          | 29<br>(17 - 48)       | 5<br>(3 - 7)           | 50<br>(36 - 71)          | 41<br>(27 - 63)             | 35<br>(24 - 51)             |
| Other cardiovascular and circulatory diseases | 3,184<br>(2,531 - 3,871)    | 59<br>(32 - 100)      | 25<br>(16 - 36)        | 758<br>(569 - 944)       | 1,139<br>(871 - 1,476)      | 1,204<br>(896 - 1,572)      |

Web Table 31- Algeria deaths with 95% UI by age, sex, and cause in 2013

| Cause                                               | Both Sexes, All Ages     | Both Sexes, 0-4 Years | Both Sexes, 5-14 Years | Both Sexes, 15-49 Years | Both Sexes, 50-69 Years  | Both Sexes, 70-80 Years  |
|-----------------------------------------------------|--------------------------|-----------------------|------------------------|-------------------------|--------------------------|--------------------------|
| Chronic respiratory diseases                        | 6,567<br>(5,673 - 7,708) | 87<br>(54 - 132)      | 19<br>(15 - 24)        | 456<br>(381 - 553)      | 1,525<br>(1,267 - 1,839) | 4,480<br>(3,826 - 5,314) |
| Chronic obstructive pulmonary disease               | 4,157<br>(3,524 - 5,007) | 61<br>(37 - 99)       | 6<br>(4 - 7)           | 139<br>(106 - 180)      | 879<br>(716 - 1,074)     | 3,072<br>(2,549 - 3,715) |
| Pneumoconiosis                                      | 137<br>(93 - 191)        | 1<br>(0 - 2)          | 1<br>(1 - 1)           | 31<br>(21 - 45)         | 30<br>(19 - 43)          | 74<br>(47 - 113)         |
| Silicosis                                           | 62<br>(40 - 93)          | 0<br>(0 - 0)          | 0<br>(0 - 0)           | 2<br>(1 - 2)            | 5<br>(3 - 7)             | 56<br>(34 - 85)          |
| Asbestosis                                          | 6<br>(5 - 9)             | 0<br>(0 - 0)          | 0<br>(0 - 0)           | 4<br>(3 - 7)            | 1<br>(1 - 2)             | 0<br>(0 - 0)             |
| Coal workers pneumoconiosis                         | 3<br>(2 - 3)             | 0<br>(0 - 0)          | 0<br>(0 - 0)           | 2<br>(1 - 2)            | 0<br>(0 - 1)             | 0<br>(0 - 0)             |
| Other pneumoconiosis                                | 66<br>(43 - 92)          | 0<br>(0 - 0)          | 0<br>(0 - 0)           | 23<br>(15 - 34)         | 24<br>(14 - 34)          | 18<br>(11 - 30)          |
| Asthma                                              | 1,275<br>(1,017 - 1,557) | 13<br>(5 - 26)        | 9<br>(6 - 12)          | 201<br>(159 - 247)      | 361<br>(282 - 462)       | 691<br>(513 - 914)       |
| Interstitial lung disease and pulmonary sarcoidosis | 855<br>(620 - 1,129)     | 0<br>(0 - 1)          | 1<br>(1 - 1)           | 60<br>(43 - 87)         | 235<br>(166 - 324)       | 559<br>(385 - 779)       |
| Other chronic respiratory diseases                  | 143<br>(110 - 188)       | 12<br>(7 - 20)        | 2<br>(2 - 4)           | 25<br>(19 - 34)         | 19<br>(14 - 26)          | 84<br>(59 - 122)         |
| Cirrhosis                                           | 1,750<br>(1,509 - 2,021) | 69<br>(35 - 117)      | 35<br>(26 - 45)        | 406<br>(331 - 494)      | 675<br>(555 - 806)       | 564<br>(462 - 696)       |
| Cirrhosis due to hepatitis B                        | 619<br>(282 - 891)       | 4<br>(1 - 8)          | 6<br>(3 - 11)          | 144<br>(60 - 221)       | 253<br>(110 - 380)       | 211<br>(98 - 324)        |
| Cirrhosis due to hepatitis C                        | 725<br>(461 - 1,143)     | 6<br>(2 - 14)         | 8<br>(4 - 15)          | 169<br>(97 - 279)       | 294<br>(173 - 483)       | 247<br>(154 - 385)       |
| Cirrhosis due to alcohol use                        | 163<br>(108 - 234)       | --                    | --                     | 23<br>(14 - 36)         | 68<br>(41 - 102)         | 71<br>(46 - 108)         |
| Cirrhosis due to other causes                       | 244<br>(180 - 326)       | 59<br>(30 - 101)      | 21<br>(14 - 28)        | 69<br>(43 - 104)        | 60<br>(38 - 93)          | 35<br>(22 - 55)          |
| Digestive diseases                                  | 4,530<br>(3,862 - 5,240) | 89<br>(52 - 137)      | 62<br>(47 - 81)        | 896<br>(725 - 1,078)    | 1,362<br>(1,097 - 1,643) | 2,121<br>(1,765 - 2,520) |
| Peptic ulcer disease                                | 513<br>(375 - 692)       | 5<br>(2 - 11)         | 5<br>(3 - 8)           | 84<br>(57 - 118)        | 168<br>(119 - 232)       | 251<br>(167 - 352)       |
| Gastritis and duodenitis                            | 8<br>(5 - 18)            | 0<br>(0 - 1)          | 1<br>(0 - 1)           | 3<br>(2 - 6)            | 3<br>(1 - 9)             | 1<br>(0 - 2)             |
| Appendicitis                                        | 148<br>(99 - 201)        | 5<br>(2 - 10)         | 7<br>(4 - 11)          | 49<br>(30 - 70)         | 51<br>(31 - 78)          | 38<br>(23 - 59)          |
| Paralytic ileus and intestinal obstruction          | 1,971<br>(1,288 - 2,511) | 48<br>(26 - 81)       | 33<br>(21 - 46)        | 378<br>(236 - 487)      | 551<br>(341 - 726)       | 962<br>(624 - 1,294)     |
| Inguinal, femoral, and abdominal hernia             | 155<br>(85 - 224)        | 1<br>(0 - 2)          | 1<br>(0 - 1)           | 15<br>(10 - 24)         | 44<br>(23 - 65)          | 94<br>(48 - 147)         |
| Inflammatory bowel disease                          | 187<br>(142 - 261)       | 4<br>(2 - 9)          | 2<br>(1 - 3)           | 79<br>(57 - 112)        | 61<br>(42 - 87)          | 41<br>(26 - 64)          |
| Vascular intestinal disorders                       | 295<br>(180 - 503)       | 0<br>(0 - 1)          | 2<br>(1 - 5)           | 51<br>(24 - 94)         | 104<br>(60 - 193)        | 137<br>(76 - 242)        |
| Gallbladder and biliary diseases                    | 511<br>(373 - 686)       | 4<br>(2 - 7)          | 4<br>(2 - 7)           | 69<br>(48 - 98)         | 142<br>(97 - 199)        | 291<br>(193 - 427)       |
| Pancreatitis                                        | 286<br>(203 - 453)       | 2<br>(1 - 6)          | 1<br>(1 - 2)           | 65<br>(42 - 108)        | 107<br>(72 - 167)        | 111<br>(70 - 174)        |
| Other digestive diseases                            | 456<br>(338 - 621)       | 18<br>(9 - 35)        | 6<br>(4 - 10)          | 102<br>(72 - 143)       | 132<br>(92 - 182)        | 197<br>(128 - 306)       |
| Neurological disorders                              | 6,419<br>(5,456 - 7,483) | 122<br>(82 - 173)     | 56<br>(41 - 79)        | 387<br>(301 - 488)      | 703<br>(554 - 870)       | 5,151<br>(4,274 - 6,120) |
| Alzheimer disease and other dementias               | 5,489<br>(4,560 - 6,500) | --                    | --                     | 4<br>(1 - 8)            | 545<br>(413 - 702)       | 4,940<br>(4,067 - 5,897) |
| Parkinson disease                                   | 13<br>(9 - 21)           | --                    | --                     | 2<br>(2 - 3)            | 1<br>(1 - 2)             | 9<br>(5 - 16)            |
| Epilepsy                                            | 536<br>(425 - 667)       | 60<br>(32 - 103)      | 40<br>(27 - 62)        | 291<br>(217 - 381)      | 82<br>(59 - 115)         | 62<br>(42 - 86)          |
| Multiple sclerosis                                  | 29<br>(20 - 45)          | --                    | --                     | 13<br>(9 - 21)          | 10<br>(6 - 17)           | 6<br>(3 - 10)            |
| Other neurological disorders                        | 353<br>(294 - 410)       | 62<br>(44 - 85)       | 16<br>(12 - 21)        | 76<br>(62 - 98)         | 64<br>(52 - 79)          | 134<br>(102 - 166)       |
| Mental and substance use disorders                  | 726<br>(569 - 959)       | 10<br>(7 - 15)        | 0<br>(0 - 0)           | 222<br>(177 - 278)      | 406<br>(285 - 581)       | 87<br>(67 - 112)         |
| Schizophrenia                                       | 12<br>(7 - 23)           | --                    | --                     | 7<br>(4 - 13)           | 4<br>(2 - 8)             | 2<br>(1 - 3)             |
| Alcohol use disorders                               | 345<br>(208 - 510)       | --                    | --                     | 7<br>(5 - 11)           | 304<br>(184 - 463)       | 33<br>(17 - 53)          |
| Drug use disorders                                  | 367<br>(303 - 437)       | 10<br>(7 - 15)        | --                     | 206<br>(164 - 256)      | 98<br>(77 - 121)         | 52<br>(40 - 68)          |
| Opioid use disorders                                | 199<br>(164 - 238)       | 6<br>(4 - 9)          | --                     | 114<br>(90 - 143)       | 50<br>(39 - 62)          | 29<br>(22 - 39)          |
| Cocaine use disorders                               | 5<br>(4 - 6)             | 0<br>(0 - 0)          | --                     | 3<br>(3 - 4)            | 1<br>(1 - 1)             | 1<br>(0 - 1)             |
| Amphetamine use disorders                           | 5<br>(4 - 6)             | 0<br>(0 - 0)          | --                     | 3<br>(2 - 4)            | 1<br>(1 - 2)             | 1<br>(0 - 1)             |
| Other drug use disorders                            | 158<br>(130 - 192)       | 4<br>(3 - 6)          | --                     | 86<br>(68 - 108)        | 46<br>(35 - 57)          | 22<br>(17 - 29)          |

Web Table 31- Algeria deaths with 95% UI by age, sex, and cause in 2013

| Cause                                               | Both Sexes, All Ages        | Both Sexes, 0-4 Years    | Both Sexes, 5-14 Years | Both Sexes, 15-49 Years  | Both Sexes, 50-69 Years  | Both Sexes, 70-80 Years  |
|-----------------------------------------------------|-----------------------------|--------------------------|------------------------|--------------------------|--------------------------|--------------------------|
| Eating disorders                                    | 2<br>(2 - 3)                | --                       | 0<br>(0 - 0)           | 2<br>(1 - 3)             | --                       | --                       |
| Anorexia nervosa                                    | 2<br>(2 - 3)                | --                       | 0<br>(0 - 0)           | 2<br>(1 - 3)             | --                       | --                       |
| Diabetes, urogenital, blood, and endocrine diseases | 18,437<br>(16,262 - 20,663) | 565<br>(432 - 743)       | 246<br>(203 - 292)     | 3,035<br>(2,533 - 3,528) | 6,109<br>(5,171 - 7,053) | 8,481<br>(7,324 - 9,720) |
| Diabetes mellitus                                   | 9,750<br>(8,544 - 11,250)   | 153<br>(102 - 226)       | 58<br>(40 - 81)        | 1,169<br>(965 - 1,396)   | 3,353<br>(2,812 - 3,949) | 5,017<br>(4,230 - 5,963) |
| Acute glomerulonephritis                            | 15<br>(13 - 20)             | 1<br>(1 - 2)             | 2<br>(1 - 2)           | 8<br>(6 - 10)            | 3<br>(2 - 4)             | 2<br>(1 - 3)             |
| Chronic kidney disease                              | 5,839<br>(4,581 - 6,795)    | 88<br>(56 - 127)         | 67<br>(50 - 87)        | 1,131<br>(837 - 1,383)   | 2,055<br>(1,570 - 2,481) | 2,497<br>(1,924 - 3,077) |
| Chronic kidney disease due to diabetes mellitus     | 17<br>(12 - 32)             | 3<br>(1 - 5)             | 2<br>(1 - 2)           | 10<br>(6 - 18)           | 2<br>(1 - 3)             | 2<br>(1 - 3)             |
| Chronic kidney disease due to hypertension          | 2,943<br>(2,218 - 3,606)    | 9<br>(5 - 16)            | 6<br>(4 - 10)          | 534<br>(400 - 674)       | 1,078<br>(769 - 1,375)   | 1,315<br>(969 - 1,673)   |
| Chronic kidney disease due to glomerulonephritis    | 211<br>(153 - 275)          | 23<br>(14 - 33)          | 15<br>(11 - 20)        | 37<br>(25 - 53)          | 61<br>(41 - 89)          | 75<br>(48 - 107)         |
| Chronic kidney disease due to other causes          | 2,668<br>(1,834 - 3,471)    | 53<br>(28 - 86)          | 44<br>(28 - 62)        | 551<br>(329 - 745)       | 913<br>(594 - 1,291)     | 1,106<br>(693 - 1,597)   |
| Urinary diseases and male infertility               | 723<br>(580 - 853)          | 52<br>(31 - 89)          | 13<br>(9 - 17)         | 161<br>(123 - 205)       | 216<br>(164 - 277)       | 281<br>(208 - 361)       |
| Interstitial nephritis and urinary tract infections | 260<br>(199 - 330)          | 31<br>(17 - 58)          | 5<br>(4 - 8)           | 70<br>(49 - 93)          | 66<br>(47 - 95)          | 87<br>(57 - 127)         |
| Urolithiasis                                        | 19<br>(13 - 29)             | --                       | 1<br>(1 - 1)           | 10<br>(6 - 16)           | 6<br>(3 - 12)            | 2<br>(1 - 5)             |
| Other urinary diseases                              | 444<br>(329 - 541)          | 21<br>(11 - 38)          | 6<br>(4 - 9)           | 82<br>(58 - 110)         | 144<br>(99 - 191)        | 191<br>(133 - 255)       |
| Gynecological diseases                              | 7<br>(5 - 10)               | --                       | --                     | 3<br>(2 - 5)             | 3<br>(1 - 5)             | 1<br>(1 - 2)             |
| Uterine fibroids                                    | 2<br>(1 - 3)                | --                       | --                     | 1<br>(0 - 1)             | 1<br>(0 - 2)             | 0<br>(0 - 1)             |
| Polycystic ovarian syndrome                         | 0<br>(0 - 0)                | --                       | --                     | 0<br>(0 - 0)             | 0<br>(0 - 0)             | --                       |
| Endometriosis                                       | 1<br>(0 - 1)                | --                       | --                     | 1<br>(0 - 1)             | 0<br>(0 - 0)             | --                       |
| Genital prolapse                                    | 1<br>(1 - 2)                | --                       | --                     | 0<br>(0 - 1)             | 0<br>(0 - 1)             | 0<br>(0 - 1)             |
| Other gynecological diseases                        | 3<br>(2 - 5)                | --                       | --                     | 2<br>(1 - 2)             | 1<br>(1 - 2)             | 1<br>(0 - 1)             |
| Hemoglobinopathies and hemolytic anemias            | 811<br>(552 - 1,047)        | 121<br>(76 - 176)        | 64<br>(44 - 89)        | 291<br>(198 - 399)       | 138<br>(89 - 188)        | 197<br>(122 - 278)       |
| Thalassemias                                        | 306<br>(214 - 410)          | 93<br>(58 - 136)         | 49<br>(33 - 69)        | 164<br>(111 - 227)       | 0<br>(0 - 0)             | 0<br>(0 - 0)             |
| Sickle cell disorders                               | 206<br>(140 - 274)          | 16<br>(10 - 23)          | 11<br>(8 - 16)         | 95<br>(64 - 130)         | 80<br>(52 - 109)         | 4<br>(3 - 6)             |
| G6PD deficiency                                     | 6<br>(4 - 7)                | 1<br>(0 - 1)             | 0<br>(0 - 1)           | 2<br>(1 - 3)             | 2<br>(1 - 2)             | 1<br>(1 - 1)             |
| Other hemoglobinopathies and hemolytic anemias      | 293<br>(191 - 395)          | 12<br>(8 - 16)           | 3<br>(2 - 5)           | 30<br>(20 - 42)          | 56<br>(36 - 78)          | 191<br>(119 - 272)       |
| Endocrine, metabolic, blood, and immune disorders   | 1,292<br>(814 - 1,604)      | 149<br>(87 - 226)        | 43<br>(27 - 63)        | 272<br>(182 - 349)       | 342<br>(216 - 445)       | 486<br>(272 - 681)       |
| Musculoskeletal disorders                           | 475<br>(392 - 610)          | --                       | 21<br>(16 - 30)        | 200<br>(155 - 259)       | 122<br>(93 - 163)        | 132<br>(99 - 176)        |
| Rheumatoid arthritis                                | 71<br>(53 - 92)             | --                       | 2<br>(1 - 3)           | 20<br>(14 - 29)          | 25<br>(17 - 35)          | 24<br>(16 - 36)          |
| Other musculoskeletal disorders                     | 404<br>(332 - 518)          | --                       | 19<br>(14 - 27)        | 180<br>(140 - 234)       | 97<br>(75 - 131)         | 108<br>(80 - 147)        |
| Other non-communicable diseases                     | 5,499<br>(4,384 - 6,968)    | 4,586<br>(3,491 - 5,987) | 158<br>(112 - 216)     | 319<br>(256 - 399)       | 158<br>(126 - 198)       | 278<br>(207 - 372)       |
| Congenital anomalies                                | 5,083<br>(3,979 - 6,508)    | 4,558<br>(3,471 - 5,944) | 151<br>(105 - 208)     | 228<br>(175 - 294)       | 73<br>(55 - 98)          | 74<br>(55 - 98)          |
| Neural tube defects                                 | 637<br>(319 - 1,077)        | 626<br>(308 - 1,066)     | 6<br>(3 - 11)          | 4<br>(3 - 6)             | 1<br>(1 - 1)             | 1<br>(0 - 1)             |
| Congenital heart anomalies                          | 1,593<br>(1,141 - 2,191)    | 1,385<br>(947 - 1,967)   | 84<br>(56 - 121)       | 95<br>(71 - 126)         | 17<br>(12 - 23)          | 13<br>(9 - 19)           |
| Cleft lip and cleft palate                          | 5<br>(2 - 10)               | 5<br>(2 - 10)            | --                     | --                       | --                       | --                       |
| Down syndrome                                       | 151<br>(94 - 238)           | 118<br>(67 - 199)        | 7<br>(4 - 11)          | 23<br>(15 - 36)          | 2<br>(1 - 5)             | 0<br>(0 - 0)             |
| Chromosomal unbalanced rearrangements               | 66<br>(40 - 115)            | 53<br>(29 - 96)          | 2<br>(1 - 4)           | 8<br>(5 - 12)            | 2<br>(1 - 3)             | 1<br>(1 - 3)             |
| Other congenital anomalies                          | 2,631<br>(1,951 - 3,507)    | 2,371<br>(1,707 - 3,216) | 53<br>(34 - 77)        | 98<br>(74 - 129)         | 51<br>(39 - 69)          | 59<br>(44 - 78)          |
| Skin and subcutaneous diseases                      | 413<br>(314 - 526)          | 26<br>(15 - 44)          | 7<br>(4 - 10)          | 91<br>(64 - 120)         | 85<br>(60 - 113)         | 204<br>(138 - 294)       |
| Cellulitis                                          | 62<br>(42 - 84)             | 8<br>(4 - 14)            | 1<br>(1 - 2)           | 17<br>(11 - 26)          | 15<br>(9 - 22)           | 21<br>(12 - 34)          |
| Pyoderma                                            | 184<br>(137 - 235)          | 14<br>(8 - 26)           | 3<br>(2 - 5)           | 49<br>(34 - 65)          | 49<br>(32 - 68)          | 69<br>(44 - 100)         |



Web Table 31- Algeria deaths with 95% UI by age, sex, and cause in 2013

| Cause                                           | Both Sexes, All Ages        | Both Sexes, 0-4 Years    | Both Sexes, 5-14 Years | Both Sexes, 15-49 Years  | Both Sexes, 50-69 Years  | Both Sexes, 70-80 Years  |
|-------------------------------------------------|-----------------------------|--------------------------|------------------------|--------------------------|--------------------------|--------------------------|
| Decubitus ulcer                                 | 154<br>(109 - 220)          | 1<br>(0 - 2)             | 1<br>(1 - 2)           | 19<br>(13 - 27)          | 20<br>(14 - 29)          | 113<br>(74 - 175)        |
| Other skin and subcutaneous diseases            | 12<br>(8 - 17)              | 3<br>(1 - 5)             | 1<br>(1 - 2)           | 6<br>(4 - 9)             | 1<br>(1 - 2)             | 1<br>(0 - 1)             |
| Sudden infant death syndrome                    | 3<br>(0 - 15)               | 3<br>(0 - 15)            | --                     | --                       | --                       | --                       |
| Injuries                                        | 17,704<br>(15,334 - 20,273) | 1,510<br>(1,095 - 1,977) | 881<br>(748 - 1,037)   | 8,003<br>(6,698 - 9,555) | 3,251<br>(2,698 - 3,790) | 4,058<br>(3,257 - 4,831) |
| Transport injuries                              | 9,110<br>(7,761 - 10,559)   | 693<br>(459 - 967)       | 511<br>(411 - 621)     | 4,688<br>(3,863 - 5,666) | 1,873<br>(1,512 - 2,253) | 1,345<br>(1,055 - 1,669) |
| Road injuries                                   | 8,650<br>(7,349 - 10,046)   | 641<br>(422 - 899)       | 480<br>(388 - 583)     | 4,475<br>(3,685 - 5,408) | 1,777<br>(1,440 - 2,138) | 1,277<br>(997 - 1,602)   |
| Pedestrian road injuries                        | 2,352<br>(1,851 - 2,959)    | 254<br>(158 - 377)       | 182<br>(132 - 240)     | 792<br>(568 - 1,107)     | 547<br>(412 - 718)       | 576<br>(428 - 741)       |
| Cyclist road injuries                           | 721<br>(548 - 894)          | 59<br>(28 - 101)         | 68<br>(46 - 95)        | 249<br>(180 - 331)       | 205<br>(150 - 272)       | 140<br>(95 - 196)        |
| Motorcyclist road injuries                      | 813<br>(569 - 1,063)        | 26<br>(16 - 43)          | 18<br>(12 - 28)        | 600<br>(416 - 816)       | 107<br>(71 - 152)        | 61<br>(38 - 89)          |
| Motor vehicle road injuries                     | 4,745<br>(3,898 - 5,692)    | 294<br>(188 - 419)       | 208<br>(155 - 272)     | 2,829<br>(2,282 - 3,514) | 915<br>(710 - 1,143)     | 499<br>(365 - 654)       |
| Other road injuries                             | 19<br>(13 - 28)             | 7<br>(4 - 13)            | 4<br>(2 - 7)           | 4<br>(2 - 6)             | 2<br>(2 - 4)             | 2<br>(1 - 3)             |
| Other transport injuries                        | 460<br>(345 - 563)          | 52<br>(32 - 78)          | 31<br>(21 - 44)        | 214<br>(158 - 282)       | 96<br>(66 - 129)         | 68<br>(46 - 97)          |
| Unintentional injuries                          | 7,441<br>(5,998 - 8,743)    | 803<br>(577 - 1,086)     | 352<br>(288 - 433)     | 2,513<br>(1,914 - 3,145) | 1,179<br>(902 - 1,506)   | 2,595<br>(1,955 - 3,247) |
| Falls                                           | 1,559<br>(1,196 - 1,993)    | 99<br>(57 - 162)         | 40<br>(26 - 57)        | 185<br>(130 - 252)       | 316<br>(235 - 418)       | 921<br>(642 - 1,283)     |
| Drowning                                        | 1,444<br>(994 - 1,985)      | 144<br>(82 - 232)        | 98<br>(68 - 143)       | 1,144<br>(749 - 1,614)   | 17<br>(12 - 24)          | 42<br>(27 - 67)          |
| Fire, heat, and hot substances                  | 1,125<br>(790 - 1,453)      | 141<br>(87 - 222)        | 29<br>(19 - 43)        | 349<br>(235 - 472)       | 185<br>(120 - 256)       | 422<br>(260 - 616)       |
| Poisonings                                      | 386<br>(256 - 494)          | 42<br>(25 - 69)          | 6<br>(4 - 10)          | 216<br>(124 - 305)       | 44<br>(30 - 62)          | 78<br>(53 - 107)         |
| Exposure to mechanical forces                   | 195<br>(156 - 257)          | 44<br>(25 - 75)          | 18<br>(11 - 29)        | 50<br>(38 - 73)          | 51<br>(37 - 70)          | 32<br>(24 - 44)          |
| Unintentional firearm injuries                  | 22<br>(17 - 30)             | 3<br>(1 - 5)             | 1<br>(0 - 1)           | 7<br>(5 - 10)            | 6<br>(4 - 8)             | 6<br>(4 - 9)             |
| Unintentional suffocation                       | 11<br>(8 - 18)              | 1<br>(0 - 3)             | 1<br>(1 - 2)           | 6<br>(4 - 11)            | 3<br>(2 - 4)             | 1<br>(0 - 1)             |
| Other exposure to mechanical forces             | 162<br>(126 - 214)          | 41<br>(22 - 71)          | 16<br>(9 - 27)         | 36<br>(26 - 53)          | 43<br>(29 - 61)          | 26<br>(18 - 36)          |
| Adverse effects of medical treatment            | 2,067<br>(1,316 - 2,774)    | 157<br>(86 - 290)        | 30<br>(19 - 46)        | 379<br>(239 - 509)       | 524<br>(322 - 773)       | 978<br>(537 - 1,490)     |
| Animal contact                                  | 264<br>(165 - 383)          | 97<br>(49 - 171)         | 91<br>(54 - 137)       | 50<br>(30 - 77)          | 12<br>(8 - 19)           | 14<br>(9 - 23)           |
| Venomous animal contact                         | 227<br>(135 - 332)          | 88<br>(42 - 157)         | 90<br>(53 - 135)       | 39<br>(23 - 62)          | 4<br>(2 - 8)             | 6<br>(4 - 12)            |
| Non-venomous animal contact                     | 37<br>(24 - 56)             | 9<br>(5 - 18)            | 2<br>(1 - 3)           | 10<br>(6 - 16)           | 8<br>(5 - 12)            | 8<br>(5 - 11)            |
| Foreign body                                    | 133<br>(86 - 223)           | 24<br>(13 - 40)          | 14<br>(8 - 30)         | 6<br>(5 - 8)             | 4<br>(3 - 5)             | 85<br>(49 - 150)         |
| Pulmonary aspiration and foreign body in airway | 124<br>(77 - 214)           | 22<br>(10 - 36)          | 13<br>(7 - 29)         | 4<br>(3 - 5)             | 3<br>(2 - 3)             | 83<br>(48 - 149)         |
| Foreign body in other body part                 | 8<br>(6 - 13)               | 3<br>(1 - 5)             | 1<br>(0 - 1)           | 2<br>(2 - 3)             | 1<br>(1 - 2)             | 1<br>(1 - 2)             |
| Other unintentional injuries                    | 268<br>(222 - 334)          | 54<br>(36 - 80)          | 26<br>(18 - 36)        | 135<br>(102 - 182)       | 28<br>(21 - 37)          | 24<br>(18 - 32)          |
| Self-harm and interpersonal violence            | 1,152<br>(939 - 1,492)      | 15<br>(8 - 23)           | 18<br>(12 - 26)        | 802<br>(626 - 1,073)     | 199<br>(155 - 256)       | 119<br>(88 - 163)        |
| Self-harm                                       | 734<br>(586 - 925)          | --                       | 6<br>(3 - 13)          | 464<br>(354 - 612)       | 155<br>(116 - 200)       | 109<br>(79 - 151)        |
| Interpersonal violence                          | 418<br>(301 - 628)          | 15<br>(8 - 23)           | 11<br>(7 - 18)         | 338<br>(234 - 521)       | 44<br>(29 - 67)          | 10<br>(6 - 16)           |
| Assault by firearm                              | 186<br>(108 - 311)          | 3<br>(2 - 7)             | 3<br>(2 - 5)           | 157<br>(89 - 270)        | 21<br>(11 - 35)          | 2<br>(1 - 3)             |
| Assault by sharp object                         | 137<br>(84 - 224)           | 3<br>(1 - 5)             | 3<br>(2 - 6)           | 117<br>(69 - 191)        | 14<br>(7 - 25)           | 1<br>(1 - 2)             |
| Assault by other means                          | 95<br>(67 - 140)            | 8<br>(5 - 14)            | 5<br>(3 - 9)           | 65<br>(43 - 100)         | 10<br>(6 - 16)           | 7<br>(4 - 11)            |

Web Table 31- Algeria deaths with 95% UI by age, sex, and cause in 2013

| Cause                                                             | Males, All Ages             | Males, 0-4 Years            | Males, 5-14 Years        | Males, 15-49 Years          | Males, 50-69 Years          | Males, 70-80 Years          |
|-------------------------------------------------------------------|-----------------------------|-----------------------------|--------------------------|-----------------------------|-----------------------------|-----------------------------|
| All causes                                                        | 84,391<br>(74,417 - 94,365) | 12,806<br>(11,059 - 14,837) | 1,516<br>(1,381 - 1,659) | 15,817<br>(13,080 - 19,355) | 22,141<br>(18,866 - 25,080) | 32,112<br>(28,521 - 35,341) |
| Communicable, maternal, neonatal, and nutritional diseases        | 14,202<br>(12,314 - 16,011) | 8,543<br>(7,101 - 9,975)    | 316<br>(241 - 423)       | 1,442<br>(1,196 - 1,741)    | 1,390<br>(1,112 - 1,670)    | 2,511<br>(1,949 - 3,158)    |
| HIV/AIDS and tuberculosis                                         | 1,023<br>(805 - 1,248)      | 6<br>(4 - 9)                | 5<br>(3 - 8)             | 413<br>(313 - 527)          | 273<br>(206 - 353)          | 326<br>(239 - 424)          |
| Tuberculosis                                                      | 955<br>(739 - 1,181)        | 5<br>(3 - 8)                | 5<br>(3 - 8)             | 357<br>(259 - 466)          | 263<br>(195 - 342)          | 324<br>(238 - 423)          |
| HIV/AIDS                                                          | 68<br>(45 - 110)            | 0<br>(0 - 1)                | 0<br>(0 - 1)             | 56<br>(37 - 89)             | 10<br>(5 - 17)              | 1<br>(1 - 2)                |
| HIV/AIDS resulting in mycobacterial infection                     | 4<br>(3 - 7)                | 0<br>(0 - 0)                | 0<br>(0 - 0)             | 4<br>(2 - 6)                | 1<br>(0 - 1)                | 0<br>(0 - 0)                |
| HIV/AIDS resulting in other diseases                              | 64<br>(42 - 102)            | 0<br>(0 - 1)                | 0<br>(0 - 1)             | 52<br>(35 - 84)             | 10<br>(5 - 16)              | 1<br>(1 - 2)                |
| Diarrhea, lower respiratory, and other common infectious diseases | 5,065<br>(4,109 - 6,160)    | 1,421<br>(947 - 2,133)      | 264<br>(190 - 374)       | 801<br>(592 - 1,054)        | 857<br>(634 - 1,090)        | 1,721<br>(1,226 - 2,326)    |
| Diarrheal diseases                                                | 700<br>(453 - 1,079)        | 316<br>(118 - 647)          | 16<br>(8 - 30)           | 74<br>(49 - 109)            | 62<br>(37 - 99)             | 232<br>(132 - 365)          |
| Intestinal infectious diseases                                    | 420<br>(207 - 735)          | 123<br>(57 - 233)           | 97<br>(46 - 179)         | 160<br>(70 - 304)           | 29<br>(11 - 57)             | 11<br>(4 - 21)              |
| Typhoid fever                                                     | 303<br>(143 - 555)          | 83<br>(34 - 161)            | 73<br>(35 - 135)         | 118<br>(48 - 230)           | 21<br>(7 - 45)              | 7<br>(2 - 16)               |
| Paratyphoid fever                                                 | 90<br>(40 - 169)            | 28<br>(10 - 59)             | 22<br>(9 - 43)           | 34<br>(13 - 70)             | 5<br>(2 - 12)               | 2<br>(0 - 4)                |
| Other intestinal infectious diseases                              | 27<br>(16 - 41)             | 12<br>(5 - 22)              | 2<br>(0 - 6)             | 8<br>(3 - 17)               | 3<br>(0 - 8)                | 2<br>(0 - 5)                |
| Lower respiratory infections                                      | 3,060<br>(2,311 - 3,906)    | 521<br>(296 - 870)          | 77<br>(47 - 122)         | 383<br>(270 - 540)          | 660<br>(456 - 882)          | 1,419<br>(956 - 1,998)      |
| Upper respiratory infections                                      | 4<br>(2 - 8)                | 1<br>(0 - 2)                | 0<br>(0 - 0)             | 1<br>(0 - 3)                | 1<br>(0 - 4)                | 1<br>(0 - 4)                |
| Otitis media                                                      | 6<br>(5 - 7)                | 0<br>(0 - 1)                | 0<br>(0 - 0)             | 1<br>(1 - 2)                | 2<br>(1 - 2)                | 2<br>(1 - 3)                |
| Meningitis                                                        | 393<br>(283 - 535)          | 186<br>(90 - 314)           | 29<br>(16 - 49)          | 80<br>(53 - 115)            | 59<br>(37 - 89)             | 39<br>(22 - 67)             |
| Pneumococcal meningitis                                           | 87<br>(55 - 126)            | 35<br>(15 - 67)             | 8<br>(3 - 14)            | 21<br>(11 - 35)             | 13<br>(6 - 24)              | 9<br>(4 - 17)               |
| H influenzae type B meningitis                                    | 96<br>(57 - 147)            | 67<br>(32 - 116)            | 8<br>(4 - 15)            | 11<br>(6 - 18)              | 6<br>(3 - 12)               | 4<br>(2 - 8)                |
| Meningococcal meningitis                                          | 110<br>(72 - 160)           | 55<br>(25 - 103)            | 8<br>(3 - 16)            | 22<br>(12 - 35)             | 15<br>(7 - 27)              | 11<br>(5 - 20)              |
| Other meningitis                                                  | 100<br>(70 - 139)           | 29<br>(11 - 57)             | 5<br>(2 - 9)             | 26<br>(15 - 41)             | 24<br>(14 - 40)             | 15<br>(8 - 27)              |
| Encephalitis                                                      | 288<br>(190 - 396)          | 113<br>(58 - 195)           | 25<br>(14 - 39)          | 91<br>(50 - 135)            | 43<br>(27 - 64)             | 14<br>(9 - 22)              |
| Diphtheria                                                        | 1<br>(0 - 8)                | 1<br>(0 - 7)                | 0<br>(0 - 2)             | 0<br>(0 - 1)                | 0<br>(0 - 1)                | --                          |
| Whooping cough                                                    | 11<br>(0 - 61)              | 11<br>(0 - 57)              | 0<br>(0 - 2)             | 0<br>(0 - 1)                | 0<br>(0 - 0)                | --                          |
| Tetanus                                                           | 13<br>(8 - 20)              | 8<br>(3 - 14)               | 1<br>(1 - 2)             | 4<br>(2 - 6)                | 0<br>(0 - 0)                | 0<br>(0 - 0)                |
| Measles                                                           | 159<br>(5 - 895)            | 139<br>(4 - 737)            | 17<br>(0 - 100)          | 3<br>(0 - 20)               | 0<br>(0 - 1)                | --                          |
| Varicella and herpes zoster                                       | 9<br>(3 - 22)               | 2<br>(0 - 11)               | 1<br>(0 - 2)             | 2<br>(0 - 7)                | 1<br>(0 - 3)                | 3<br>(0 - 13)               |
| Neglected tropical diseases and malaria                           | 104<br>(83 - 130)           | 17<br>(10 - 29)             | 6<br>(4 - 11)            | 37<br>(28 - 48)             | 26<br>(19 - 36)             | 17<br>(12 - 24)             |
| Malaria                                                           | 6<br>(3 - 9)                | 0<br>(0 - 0)                | 1<br>(0 - 2)             | 4<br>(2 - 6)                | 1<br>(0 - 1)                | 0<br>(0 - 0)                |
| Leishmaniasis                                                     | 16<br>(11 - 22)             | 6<br>(3 - 10)               | 1<br>(1 - 1)             | 6<br>(3 - 8)                | 3<br>(2 - 4)                | 1<br>(0 - 1)                |
| Visceral leishmaniasis                                            | 16<br>(11 - 22)             | 6<br>(3 - 10)               | 1<br>(1 - 1)             | 6<br>(3 - 8)                | 3<br>(2 - 4)                | 1<br>(0 - 1)                |
| Schistosomiasis                                                   | 35<br>(24 - 48)             | 0<br>(0 - 0)                | 1<br>(0 - 1)             | 11<br>(7 - 17)              | 14<br>(8 - 23)              | 9<br>(5 - 14)               |
| Cysticercosis                                                     | 0<br>(0 - 0)                | 0<br>(0 - 0)                | 0<br>(0 - 0)             | 0<br>(0 - 0)                | 0<br>(0 - 0)                | 0<br>(0 - 0)                |
| Cystic echinococcosis                                             | 10<br>(8 - 12)              | 0<br>(0 - 1)                | 1<br>(1 - 1)             | 5<br>(4 - 6)                | 3<br>(2 - 3)                | 1<br>(1 - 1)                |
| Dengue                                                            | 2<br>(2 - 3)                | 0<br>(0 - 0)                | 0<br>(0 - 0)             | 1<br>(1 - 1)                | 0<br>(0 - 0)                | 0<br>(0 - 0)                |
| Rabies                                                            | 14<br>(8 - 29)              | 1<br>(0 - 4)                | 0<br>(0 - 1)             | 6<br>(3 - 13)               | 3<br>(2 - 6)                | 3<br>(1 - 8)                |
| Intestinal nematode infections                                    | 7<br>(1 - 17)               | 4<br>(0 - 11)               | 1<br>(0 - 5)             | 1<br>(0 - 5)                | 1<br>(0 - 4)                | 1<br>(0 - 4)                |
| Ascariasis                                                        | 7<br>(1 - 17)               | 4<br>(0 - 11)               | 1<br>(0 - 5)             | 1<br>(0 - 5)                | 1<br>(0 - 4)                | 1<br>(0 - 4)                |
| Other neglected tropical diseases                                 | 14<br>(10 - 19)             | 5<br>(2 - 9)                | 1<br>(0 - 2)             | 4<br>(3 - 6)                | 2<br>(1 - 3)                | 2<br>(1 - 3)                |
| Maternal disorders                                                | --                          | --                          | --                       | --                          | --                          | --                          |

Web Table 31- Algeria deaths with 95% UI by age, sex, and cause in 2013

| Cause                                                            | Males, All Ages             | Males, 0-4 Years         | Males, 5-14 Years  | Males, 15-49 Years       | Males, 50-69 Years          | Males, 70-80 Years          |
|------------------------------------------------------------------|-----------------------------|--------------------------|--------------------|--------------------------|-----------------------------|-----------------------------|
| Maternal hemorrhage                                              | --                          | --                       | --                 | --                       | --                          | --                          |
| Maternal sepsis and other maternal infections                    | --                          | --                       | --                 | --                       | --                          | --                          |
| Maternal hypertensive disorders                                  | --                          | --                       | --                 | --                       | --                          | --                          |
| Maternal obstructed labor                                        | --                          | --                       | --                 | --                       | --                          | --                          |
| Maternal abortive outcome                                        | --                          | --                       | --                 | --                       | --                          | --                          |
| Indirect maternal deaths                                         | --                          | --                       | --                 | --                       | --                          | --                          |
| Late maternal deaths                                             | --                          | --                       | --                 | --                       | --                          | --                          |
| Maternal deaths aggravated by HIV/AIDS                           | --                          | --                       | --                 | --                       | --                          | --                          |
| Other maternal disorders                                         | --                          | --                       | --                 | --                       | --                          | --                          |
| Neonatal disorders                                               | 6,753<br>(5,551 - 8,107)    | 6,753<br>(5,551 - 8,107) | --                 | --                       | --                          | --                          |
| Neonatal preterm birth complications                             | 3,865<br>(2,624 - 5,129)    | 3,865<br>(2,624 - 5,129) | --                 | --                       | --                          | --                          |
| Neonatal encephalopathy due to birth asphyxia and trauma         | 1,127<br>(556 - 1,926)      | 1,127<br>(556 - 1,926)   | --                 | --                       | --                          | --                          |
| Neonatal sepsis and other neonatal infections                    | 1,059<br>(336 - 2,040)      | 1,059<br>(336 - 2,040)   | --                 | --                       | --                          | --                          |
| Hemolytic disease and other neonatal jaundice                    | 32<br>(12 - 73)             | 32<br>(12 - 73)          | --                 | --                       | --                          | --                          |
| Other neonatal disorders                                         | 670<br>(336 - 1,211)        | 670<br>(336 - 1,211)     | --                 | --                       | --                          | --                          |
| Nutritional deficiencies                                         | 840<br>(484 - 1,128)        | 207<br>(100 - 368)       | 26<br>(13 - 40)    | 91<br>(52 - 125)         | 142<br>(81 - 201)           | 375<br>(194 - 573)          |
| Protein-energy malnutrition                                      | 455<br>(209 - 689)          | 158<br>(70 - 283)        | 11<br>(4 - 19)     | 23<br>(8 - 38)           | 51<br>(18 - 86)             | 213<br>(77 - 365)           |
| Iodine deficiency                                                | 2<br>(0 - 6)                | 0<br>(0 - 2)             | 0<br>(0 - 1)       | 0<br>(0 - 2)             | 0<br>(0 - 2)                | 0<br>(0 - 3)                |
| Iron-deficiency anemia                                           | 379<br>(186 - 578)          | 47<br>(15 - 108)         | 14<br>(6 - 25)     | 66<br>(35 - 96)          | 90<br>(44 - 137)            | 162<br>(67 - 273)           |
| Other nutritional deficiencies                                   | 4<br>(2 - 11)               | 1<br>(0 - 5)             | 0<br>(0 - 1)       | 1<br>(1 - 3)             | 1<br>(0 - 1)                | 1<br>(0 - 1)                |
| Other communicable, maternal, neonatal, and nutritional diseases | 418<br>(273 - 593)          | 139<br>(45 - 274)        | 15<br>(8 - 26)     | 101<br>(68 - 146)        | 91<br>(57 - 151)            | 72<br>(40 - 138)            |
| Sexually transmitted diseases excluding HIV                      | 123<br>(27 - 257)           | 105<br>(17 - 232)        | 8<br>(2 - 17)      | 5<br>(3 - 9)             | 2<br>(1 - 5)                | 3<br>(1 - 7)                |
| Syphilis                                                         | 119<br>(24 - 254)           | 105<br>(17 - 232)        | 8<br>(1 - 17)      | 2<br>(1 - 5)             | 2<br>(1 - 4)                | 2<br>(1 - 6)                |
| Chlamydial infection                                             | --                          | --                       | --                 | --                       | --                          | --                          |
| Gonococcal infection                                             | 2<br>(1 - 4)                | --                       | 0<br>(0 - 0)       | 1<br>(1 - 2)             | 0<br>(0 - 1)                | 0<br>(0 - 1)                |
| Other sexually transmitted diseases                              | 1<br>(1 - 3)                | --                       | 0<br>(0 - 0)       | 1<br>(1 - 2)             | 0<br>(0 - 0)                | 0<br>(0 - 0)                |
| Hepatitis                                                        | 113<br>(88 - 144)           | 10<br>(5 - 21)           | 2<br>(1 - 3)       | 40<br>(28 - 56)          | 35<br>(24 - 48)             | 25<br>(17 - 36)             |
| Acute hepatitis A                                                | 10<br>(3 - 21)              | 4<br>(1 - 10)            | 1<br>(0 - 2)       | 4<br>(1 - 8)             | 1<br>(0 - 3)                | 0<br>(0 - 1)                |
| Acute hepatitis B                                                | 74<br>(50 - 103)            | 6<br>(2 - 13)            | 1<br>(0 - 2)       | 19<br>(10 - 31)          | 26<br>(16 - 38)             | 22<br>(13 - 33)             |
| Acute hepatitis C                                                | 8<br>(2 - 21)               | --                       | 0<br>(0 - 1)       | 3<br>(1 - 10)            | 3<br>(0 - 8)                | 2<br>(0 - 6)                |
| Acute hepatitis E                                                | 21<br>(9 - 37)              | 0<br>(0 - 0)             | 0<br>(0 - 1)       | 14<br>(6 - 25)           | 5<br>(2 - 10)               | 2<br>(0 - 4)                |
| Other infectious diseases                                        | 183<br>(104 - 288)          | 24<br>(8 - 64)           | 5<br>(2 - 11)      | 56<br>(29 - 95)          | 55<br>(22 - 108)            | 43<br>(15 - 109)            |
| Non-communicable diseases                                        | 58,184<br>(50,786 - 65,317) | 3,383<br>(2,495 - 4,473) | 610<br>(513 - 704) | 7,994<br>(6,553 - 9,782) | 18,785<br>(15,968 - 21,282) | 27,412<br>(24,382 - 30,473) |
| Neoplasms                                                        | 7,191<br>(6,144 - 8,312)    | 109<br>(59 - 175)        | 154<br>(120 - 194) | 1,566<br>(1,268 - 1,927) | 3,302<br>(2,774 - 3,848)    | 2,060<br>(1,761 - 2,403)    |
| Esophageal cancer                                                | 92<br>(68 - 119)            | --                       | --                 | 16<br>(12 - 23)          | 44<br>(31 - 59)             | 32<br>(22 - 43)             |
| Stomach cancer                                                   | 786<br>(635 - 950)          | --                       | --                 | 136<br>(100 - 177)       | 387<br>(301 - 486)          | 264<br>(203 - 340)          |
| Liver cancer                                                     | 272<br>(210 - 340)          | --                       | 2<br>(1 - 3)       | 29<br>(20 - 40)          | 149<br>(109 - 195)          | 92<br>(66 - 127)            |
| Liver cancer due to hepatitis B                                  | 111<br>(71 - 154)           | --                       | 1<br>(0 - 2)       | 15<br>(9 - 23)           | 66<br>(40 - 96)             | 29<br>(18 - 44)             |
| Liver cancer due to hepatitis C                                  | 115<br>(69 - 164)           | --                       | 0<br>(0 - 1)       | 9<br>(4 - 15)            | 60<br>(32 - 90)             | 46<br>(28 - 69)             |
| Liver cancer due to alcohol use                                  | 32<br>(19 - 49)             | --                       | --                 | 2<br>(1 - 3)             | 16<br>(9 - 25)              | 14<br>(8 - 24)              |

Web Table 31- Algeria deaths with 95% UI by age, sex, and cause in 2013

| Cause                                         | Males, All Ages             | Males, 0-4 Years   | Males, 5-14 Years | Males, 15-49 Years       | Males, 50-69 Years         | Males, 70-80 Years          |
|-----------------------------------------------|-----------------------------|--------------------|-------------------|--------------------------|----------------------------|-----------------------------|
| Liver cancer due to other causes              | 14<br>(4 - 27)              | --                 | 1<br>(0 - 2)      | 2<br>(1 - 4)             | 7<br>(1 - 15)              | 4<br>(1 - 7)                |
| Larynx cancer                                 | 192<br>(143 - 277)          | --                 | --                | 24<br>(16 - 37)          | 97<br>(70 - 140)           | 70<br>(49 - 104)            |
| Tracheal, bronchus and lung cancer            | 1,528<br>(1,238 - 1,872)    | --                 | --                | 199<br>(143 - 277)       | 896<br>(715 - 1,100)       | 433<br>(347 - 544)          |
| Breast cancer                                 | 34<br>(23 - 50)             | --                 | --                | 7<br>(4 - 11)            | 16<br>(10 - 27)            | 11<br>(6 - 19)              |
| Cervical cancer                               | --                          | --                 | --                | --                       | --                         | --                          |
| Uterine cancer                                | --                          | --                 | --                | --                       | --                         | --                          |
| Prostate cancer                               | 255<br>(156 - 372)          | --                 | --                | 5<br>(3 - 8)             | 48<br>(31 - 72)            | 202<br>(120 - 296)          |
| Colon and rectum cancer                       | 586<br>(484 - 696)          | --                 | --                | 157<br>(122 - 200)       | 261<br>(208 - 319)         | 167<br>(130 - 207)          |
| Lip and oral cavity cancer                    | 52<br>(38 - 70)             | --                 | --                | 11<br>(8 - 15)           | 24<br>(17 - 35)            | 16<br>(11 - 23)             |
| Nasopharynx cancer                            | 315<br>(232 - 421)          | --                 | 6<br>(2 - 19)     | 133<br>(89 - 193)        | 145<br>(97 - 212)          | 31<br>(19 - 48)             |
| Other pharynx cancer                          | 46<br>(34 - 71)             | --                 | --                | 12<br>(8 - 18)           | 24<br>(17 - 37)            | 10<br>(7 - 17)              |
| Gallbladder and biliary tract cancer          | 176<br>(111 - 242)          | --                 | --                | 17<br>(11 - 26)          | 84<br>(51 - 122)           | 75<br>(43 - 111)            |
| Pancreatic cancer                             | 227<br>(183 - 272)          | --                 | --                | 44<br>(32 - 58)          | 119<br>(92 - 149)          | 64<br>(48 - 83)             |
| Malignant skin melanoma                       | 20<br>(12 - 36)             | --                 | --                | 6<br>(4 - 12)            | 7<br>(4 - 12)              | 7<br>(4 - 13)               |
| Non-melanoma skin cancer                      | 37<br>(25 - 57)             | --                 | --                | 3<br>(2 - 5)             | 15<br>(9 - 24)             | 19<br>(11 - 31)             |
| Ovarian cancer                                | --                          | --                 | --                | --                       | --                         | --                          |
| Testicular cancer                             | 16<br>(10 - 22)             | --                 | --                | 9<br>(5 - 13)            | 5<br>(3 - 7)               | 2<br>(1 - 4)                |
| Kidney cancer                                 | 72<br>(56 - 89)             | 2<br>(1 - 3)       | 3<br>(1 - 5)      | 11<br>(7 - 15)           | 35<br>(25 - 47)            | 22<br>(15 - 31)             |
| Bladder cancer                                | 434<br>(341 - 549)          | --                 | --                | 36<br>(25 - 52)          | 234<br>(171 - 312)         | 164<br>(119 - 225)          |
| Brain and nervous system cancer               | 325<br>(174 - 428)          | 8<br>(2 - 16)      | 16<br>(8 - 23)    | 111<br>(61 - 154)        | 154<br>(85 - 210)          | 36<br>(17 - 54)             |
| Thyroid cancer                                | 25<br>(19 - 36)             | --                 | 0<br>(0 - 0)      | 5<br>(3 - 8)             | 12<br>(8 - 18)             | 8<br>(6 - 12)               |
| Mesothelioma                                  | 24<br>(17 - 34)             | --                 | --                | 4<br>(2 - 7)             | 14<br>(8 - 21)             | 7<br>(4 - 11)               |
| Hodgkin lymphoma                              | 76<br>(56 - 105)            | 2<br>(1 - 3)       | 5<br>(2 - 11)     | 40<br>(28 - 59)          | 22<br>(14 - 32)            | 7<br>(4 - 13)               |
| Non-Hodgkin lymphoma                          | 365<br>(276 - 487)          | 8<br>(4 - 14)      | 15<br>(9 - 23)    | 118<br>(82 - 160)        | 136<br>(98 - 188)          | 89<br>(63 - 129)            |
| Multiple myeloma                              | 86<br>(57 - 114)            | --                 | --                | 16<br>(11 - 22)          | 41<br>(25 - 57)            | 29<br>(19 - 44)             |
| Leukemia                                      | 460<br>(378 - 552)          | 14<br>(6 - 26)     | 37<br>(25 - 51)   | 203<br>(157 - 263)       | 129<br>(99 - 164)          | 77<br>(58 - 100)            |
| Other neoplasms                               | 692<br>(538 - 839)          | 77<br>(35 - 133)   | 72<br>(46 - 104)  | 213<br>(155 - 282)       | 205<br>(150 - 271)         | 126<br>(89 - 172)           |
| Cardiovascular diseases                       | 27,507<br>(23,808 - 31,136) | 410<br>(249 - 619) | 137<br>(99 - 186) | 3,332<br>(2,707 - 4,124) | 14,377<br>(7,808 - 10,658) | 14,377<br>(12,515 - 16,235) |
| Rheumatic heart disease                       | 146<br>(96 - 198)           | 3<br>(1 - 7)       | 8<br>(4 - 13)     | 50<br>(31 - 70)          | 43<br>(28 - 62)            | 43<br>(28 - 65)             |
| Ischemic heart disease                        | 12,617<br>(10,486 - 14,962) | 111<br>(46 - 215)  | 33<br>(21 - 53)   | 1,654<br>(1,281 - 2,101) | 5,018<br>(4,119 - 5,964)   | 5,802<br>(4,735 - 7,022)    |
| Cerebrovascular disease                       | 10,152<br>(8,190 - 12,347)  | 79<br>(42 - 131)   | 55<br>(35 - 81)   | 877<br>(659 - 1,186)     | 2,792<br>(2,119 - 3,518)   | 6,349<br>(5,175 - 7,623)    |
| Ischemic stroke                               | 5,553<br>(4,395 - 6,796)    | 1<br>(0 - 2)       | 1<br>(0 - 1)      | 165<br>(109 - 236)       | 1,207<br>(874 - 1,561)     | 4,179<br>(3,323 - 5,145)    |
| Hemorrhagic stroke                            | 4,599<br>(3,541 - 5,804)    | 78<br>(42 - 130)   | 54<br>(35 - 80)   | 712<br>(529 - 968)       | 1,585<br>(1,175 - 2,063)   | 2,170<br>(1,595 - 2,842)    |
| Hypertensive heart disease                    | 1,583<br>(1,039 - 2,325)    | 3<br>(1 - 7)       | 1<br>(0 - 1)      | 152<br>(94 - 232)        | 400<br>(254 - 599)         | 1,027<br>(647 - 1,552)      |
| Cardiomyopathy and myocarditis                | 1,405<br>(940 - 1,850)      | 159<br>(93 - 260)  | 30<br>(17 - 46)   | 219<br>(143 - 315)       | 396<br>(247 - 545)         | 601<br>(357 - 918)          |
| Atrial fibrillation and flutter               | 2<br>(1 - 2)                | --                 | --                | 1<br>(0 - 1)             | 0<br>(0 - 1)               | 0<br>(0 - 1)                |
| Aortic aneurysm                               | 297<br>(231 - 409)          | --                 | --                | 17<br>(12 - 24)          | 155<br>(114 - 217)         | 125<br>(91 - 174)           |
| Peripheral vascular disease                   | 10<br>(8 - 14)              | --                 | --                | 4<br>(2 - 5)             | 3<br>(2 - 5)               | 3<br>(2 - 5)                |
| Endocarditis                                  | 99<br>(64 - 153)            | 18<br>(8 - 34)     | 3<br>(1 - 5)      | 34<br>(21 - 52)          | 29<br>(18 - 50)            | 15<br>(9 - 25)              |
| Other cardiovascular and circulatory diseases | 1,196<br>(912 - 1,561)      | 37<br>(19 - 68)    | 9<br>(5 - 14)     | 326<br>(234 - 448)       | 414<br>(297 - 564)         | 410<br>(285 - 576)          |

Web Table 31- Algeria deaths with 95% UI by age, sex, and cause in 2013

| Cause                                               | Males, All Ages          | Males, 0-4 Years | Males, 5-14 Years | Males, 15-49 Years | Males, 50-69 Years     | Males, 70-80 Years       |
|-----------------------------------------------------|--------------------------|------------------|-------------------|--------------------|------------------------|--------------------------|
| Chronic respiratory diseases                        | 4,113<br>(3,394 - 4,997) | 55<br>(30 - 92)  | 12<br>(9 - 17)    | 238<br>(182 - 316) | 1,022<br>(805 - 1,289) | 2,785<br>(2,243 - 3,455) |
| Chronic obstructive pulmonary disease               | 2,754<br>(2,213 - 3,407) | 35<br>(16 - 64)  | 3<br>(2 - 4)      | 72<br>(50 - 100)   | 608<br>(478 - 780)     | 2,036<br>(1,610 - 2,565) |
| Pneumoconiosis                                      | 134<br>(90 - 188)        | 0<br>(0 - 1)     | 0<br>(0 - 1)      | 30<br>(19 - 43)    | 29<br>(18 - 42)        | 74<br>(47 - 113)         |
| Silicosis                                           | 61<br>(39 - 92)          | 0<br>(0 - 0)     | 0<br>(0 - 0)      | 1<br>(1 - 2)       | 4<br>(3 - 7)           | 55<br>(34 - 85)          |
| Asbestosis                                          | 6<br>(4 - 8)             | 0<br>(0 - 0)     | 0<br>(0 - 0)      | 4<br>(3 - 6)       | 1<br>(1 - 2)           | 0<br>(0 - 0)             |
| Coal workers pneumoconiosis                         | 2<br>(1 - 3)             | 0<br>(0 - 0)     | 0<br>(0 - 0)      | 1<br>(1 - 2)       | 0<br>(0 - 0)           | 0<br>(0 - 0)             |
| Other pneumoconiosis                                | 65<br>(42 - 91)          | 0<br>(0 - 0)     | 0<br>(0 - 0)      | 23<br>(15 - 34)    | 23<br>(14 - 34)        | 18<br>(11 - 30)          |
| Asthma                                              | 688<br>(527 - 886)       | 11<br>(4 - 25)   | 7<br>(5 - 10)     | 100<br>(73 - 137)  | 226<br>(166 - 303)     | 343<br>(239 - 483)       |
| Interstitial lung disease and pulmonary sarcoidosis | 475<br>(307 - 690)       | 0<br>(0 - 1)     | 0<br>(0 - 1)      | 28<br>(17 - 46)    | 148<br>(89 - 223)      | 299<br>(180 - 460)       |
| Other chronic respiratory diseases                  | 62<br>(46 - 87)          | 8<br>(4 - 16)    | 2<br>(1 - 3)      | 8<br>(6 - 12)      | 10<br>(6 - 14)         | 34<br>(21 - 55)          |
| Cirrhosis                                           | 868<br>(712 - 1,048)     | 32<br>(13 - 65)  | 18<br>(13 - 25)   | 191<br>(145 - 251) | 365<br>(284 - 463)     | 261<br>(201 - 336)       |
| Cirrhosis due to hepatitis B                        | 293<br>(136 - 503)       | 2<br>(0 - 5)     | 3<br>(1 - 6)      | 67<br>(25 - 123)   | 132<br>(56 - 243)      | 89<br>(43 - 150)         |
| Cirrhosis due to hepatitis C                        | 336<br>(133 - 550)       | 3<br>(1 - 8)     | 4<br>(1 - 9)      | 75<br>(22 - 140)   | 146<br>(45 - 263)      | 107<br>(44 - 169)        |
| Cirrhosis due to alcohol use                        | 123<br>(71 - 193)        | --               | --                | 18<br>(10 - 32)    | 54<br>(29 - 88)        | 51<br>(27 - 85)          |
| Cirrhosis due to other causes                       | 117<br>(65 - 177)        | 28<br>(11 - 56)  | 10<br>(6 - 16)    | 31<br>(15 - 53)    | 32<br>(13 - 59)        | 15<br>(7 - 27)           |
| Digestive diseases                                  | 2,254<br>(1,828 - 2,718) | 60<br>(31 - 102) | 490<br>(29 - 55)  | 674<br>(365 - 634) | 990<br>(519 - 846)     | 990<br>(773 - 1,256)     |
| Peptic ulcer disease                                | 260<br>(177 - 383)       | 4<br>(1 - 9)     | 3<br>(1 - 5)      | 55<br>(33 - 86)    | 82<br>(52 - 126)       | 116<br>(69 - 178)        |
| Gastritis and duodenitis                            | 3<br>(2 - 5)             | 0<br>(0 - 0)     | 0<br>(0 - 1)      | 1<br>(1 - 3)       | 0<br>(0 - 1)           | 0<br>(0 - 1)             |
| Appendicitis                                        | 66<br>(43 - 98)          | 4<br>(1 - 9)     | 6<br>(3 - 10)     | 22<br>(13 - 36)    | 18<br>(10 - 30)        | 17<br>(9 - 32)           |
| Paralytic ileus and intestinal obstruction          | 883<br>(474 - 1,172)     | 33<br>(14 - 60)  | 20<br>(11 - 30)   | 190<br>(96 - 274)  | 255<br>(127 - 365)     | 385<br>(195 - 562)       |
| Inguinal, femoral, and abdominal hernia             | 78<br>(37 - 120)         | 1<br>(0 - 1)     | 0<br>(0 - 1)      | 10<br>(5 - 15)     | 20<br>(10 - 31)        | 47<br>(21 - 82)          |
| Inflammatory bowel disease                          | 91<br>(64 - 133)         | 1<br>(0 - 3)     | 1<br>(0 - 2)      | 38<br>(25 - 59)    | 34<br>(21 - 53)        | 17<br>(10 - 27)          |
| Vascular intestinal disorders                       | 106<br>(41 - 217)        | 0<br>(0 - 1)     | 2<br>(1 - 5)      | 34<br>(12 - 69)    | 32<br>(12 - 65)        | 39<br>(14 - 84)          |
| Gallbladder and biliary diseases                    | 353<br>(231 - 499)       | 2<br>(1 - 5)     | 3<br>(2 - 7)      | 51<br>(32 - 77)    | 94<br>(55 - 142)       | 202<br>(121 - 324)       |
| Pancreatitis                                        | 232<br>(153 - 390)       | 2<br>(0 - 6)     | 1<br>(0 - 1)      | 55<br>(33 - 95)    | 85<br>(51 - 145)       | 89<br>(53 - 148)         |
| Other digestive diseases                            | 181<br>(116 - 257)       | 14<br>(5 - 29)   | 3<br>(1 - 5)      | 34<br>(20 - 49)    | 53<br>(33 - 79)        | 77<br>(44 - 128)         |
| Neurological disorders                              | 3,400<br>(2,727 - 4,185) | 63<br>(38 - 101) | 28<br>(18 - 45)   | 228<br>(161 - 313) | 403<br>(304 - 524)     | 2,678<br>(2,088 - 3,385) |
| Alzheimer disease and other dementias               | 2,853<br>(2,236 - 3,592) | --               | --                | 1<br>(0 - 4)       | 291<br>(205 - 398)     | 2,561<br>(1,980 - 3,263) |
| Parkinson disease                                   | 3<br>(2 - 4)             | --               | --                | 2<br>(1 - 2)       | 1<br>(0 - 1)           | 1<br>(0 - 1)             |
| Epilepsy                                            | 320<br>(232 - 433)       | 28<br>(11 - 58)  | 20<br>(12 - 37)   | 169<br>(112 - 246) | 63<br>(42 - 93)        | 39<br>(24 - 59)          |
| Multiple sclerosis                                  | 11<br>(6 - 20)           | --               | --                | 6<br>(3 - 9)       | 4<br>(2 - 8)           | 2<br>(1 - 4)             |
| Other neurological disorders                        | 212<br>(159 - 260)       | 35<br>(22 - 53)  | 7<br>(5 - 12)     | 50<br>(38 - 70)    | 44<br>(32 - 58)        | 75<br>(48 - 99)          |
| Mental and substance use disorders                  | 560<br>(406 - 768)       | 6<br>(4 - 10)    | 0<br>(0 - 0)      | 133<br>(97 - 183)  | 371<br>(251 - 546)     | 50<br>(33 - 71)          |
| Schizophrenia                                       | 7<br>(4 - 13)            | --               | --                | 4<br>(2 - 7)       | 2<br>(1 - 4)           | 1<br>(1 - 3)             |
| Alcohol use disorders                               | 336<br>(201 - 501)       | --               | --                | 5<br>(3 - 9)       | 300<br>(180 - 461)     | 31<br>(15 - 51)          |
| Drug use disorders                                  | 216<br>(166 - 278)       | 6<br>(4 - 10)    | --                | 124<br>(89 - 172)  | 69<br>(51 - 91)        | 17<br>(12 - 24)          |
| Opioid use disorders                                | 118<br>(90 - 152)        | 4<br>(2 - 6)     | --                | 69<br>(49 - 95)    | 36<br>(26 - 47)        | 10<br>(7 - 14)           |
| Cocaine use disorders                               | 2<br>(2 - 3)             | 0<br>(0 - 0)     | --                | 2<br>(1 - 2)       | 1<br>(0 - 1)           | 0<br>(0 - 0)             |
| Amphetamine use disorders                           | 2<br>(2 - 3)             | 0<br>(0 - 0)     | --                | 1<br>(1 - 2)       | 1<br>(0 - 1)           | 0<br>(0 - 0)             |
| Other drug use disorders                            | 94<br>(72 - 123)         | 2<br>(1 - 4)     | --                | 52<br>(37 - 73)    | 33<br>(23 - 43)        | 7<br>(5 - 10)            |

Web Table 31- Algeria deaths with 95% UI by age, sex, and cause in 2013

| Cause                                               | Males, All Ages           | Males, 0-4 Years         | Males, 5-14 Years  | Males, 15-49 Years       | Males, 50-69 Years       | Males, 70-80 Years       |
|-----------------------------------------------------|---------------------------|--------------------------|--------------------|--------------------------|--------------------------|--------------------------|
| Eating disorders                                    | 0<br>(0 - 1)              | --                       | 0<br>(0 - 0)       | 0<br>(0 - 1)             | --                       | --                       |
| Anorexia nervosa                                    | 0<br>(0 - 1)              | --                       | 0<br>(0 - 0)       | 0<br>(0 - 1)             | --                       | --                       |
| Diabetes, urogenital, blood, and endocrine diseases | 9,308<br>(7,861 - 10,776) | 300<br>(204 - 418)       | 133<br>(105 - 166) | 1,577<br>(1,240 - 1,962) | 3,270<br>(2,621 - 3,855) | 4,028<br>(3,359 - 4,761) |
| Diabetes mellitus                                   | 4,804<br>(3,990 - 5,701)  | 90<br>(54 - 148)         | 28<br>(18 - 42)    | 635<br>(485 - 818)       | 1,749<br>(1,373 - 2,155) | 2,302<br>(1,814 - 2,846) |
| Acute glomerulonephritis                            | 7<br>(6 - 11)             | 1<br>(0 - 1)             | 1<br>(1 - 1)       | 4<br>(3 - 6)             | 1<br>(1 - 2)             | 1<br>(0 - 1)             |
| Chronic kidney disease                              | 3,032<br>(2,289 - 3,735)  | 47<br>(27 - 80)          | 36<br>(25 - 51)    | 569<br>(399 - 746)       | 1,118<br>(814 - 1,428)   | 1,261<br>(916 - 1,624)   |
| Chronic kidney disease due to diabetes mellitus     | 10<br>(5 - 22)            | 1<br>(1 - 4)             | 1<br>(0 - 1)       | 6<br>(3 - 13)            | 1<br>(0 - 2)             | 1<br>(0 - 3)             |
| Chronic kidney disease due to hypertension          | 1,564<br>(1,070 - 2,035)  | 7<br>(3 - 13)            | 4<br>(2 - 6)       | 270<br>(177 - 373)       | 612<br>(396 - 832)       | 672<br>(436 - 938)       |
| Chronic kidney disease due to glomerulonephritis    | 105<br>(71 - 147)         | 12<br>(6 - 19)           | 8<br>(5 - 11)      | 14<br>(8 - 21)           | 28<br>(16 - 47)          | 43<br>(23 - 69)          |
| Chronic kidney disease due to other causes          | 1,353<br>(848 - 1,976)    | 27<br>(12 - 52)          | 24<br>(14 - 37)    | 280<br>(149 - 420)       | 477<br>(264 - 718)       | 546<br>(291 - 859)       |
| Urinary diseases and male infertility               | 437<br>(329 - 546)        | 34<br>(16 - 66)          | 8<br>(5 - 11)      | 86<br>(60 - 121)         | 144<br>(98 - 196)        | 166<br>(112 - 234)       |
| Interstitial nephritis and urinary tract infections | 98<br>(63 - 149)          | 18<br>(7 - 38)           | 3<br>(2 - 5)       | 20<br>(12 - 32)          | 22<br>(12 - 39)          | 35<br>(17 - 63)          |
| Urolithiasis                                        | 7<br>(4 - 12)             | --                       | 0<br>(0 - 1)       | 3<br>(2 - 4)             | 3<br>(1 - 7)             | 0<br>(0 - 1)             |
| Other urinary diseases                              | 332<br>(238 - 426)        | 16<br>(7 - 31)           | 4<br>(3 - 6)       | 63<br>(41 - 89)          | 119<br>(77 - 163)        | 130<br>(84 - 190)        |
| Gynecological diseases                              | --                        | --                       | --                 | --                       | --                       | --                       |
| Uterine fibroids                                    | --                        | --                       | --                 | --                       | --                       | --                       |
| Polycystic ovarian syndrome                         | --                        | --                       | --                 | --                       | --                       | --                       |
| Endometriosis                                       | --                        | --                       | --                 | --                       | --                       | --                       |
| Genital prolapse                                    | --                        | --                       | --                 | --                       | --                       | --                       |
| Other gynecological diseases                        | --                        | --                       | --                 | --                       | --                       | --                       |
| Hemoglobinopathies and hemolytic anemias            | 436<br>(246 - 619)        | 59<br>(32 - 97)          | 41<br>(25 - 61)    | 152<br>(83 - 233)        | 78<br>(42 - 115)         | 107<br>(55 - 163)        |
| Thalassemias                                        | 164<br>(98 - 244)         | 46<br>(25 - 76)          | 31<br>(19 - 47)    | 87<br>(48 - 135)         | 0<br>(0 - 0)             | 0<br>(0 - 0)             |
| Sickle cell disorders                               | 109<br>(59 - 157)         | 8<br>(4 - 13)            | 7<br>(5 - 11)      | 47<br>(25 - 71)          | 44<br>(23 - 66)          | 2<br>(1 - 4)             |
| G6PD deficiency                                     | 3<br>(2 - 4)              | 0<br>(0 - 1)             | 0<br>(0 - 0)       | 1<br>(0 - 1)             | 1<br>(0 - 1)             | 1<br>(0 - 1)             |
| Other hemoglobinopathies and hemolytic anemias      | 161<br>(84 - 230)         | 5<br>(3 - 7)             | 2<br>(1 - 3)       | 17<br>(9 - 26)           | 33<br>(18 - 50)          | 104<br>(53 - 159)        |
| Endocrine, metabolic, blood, and immune disorders   | 592<br>(302 - 766)        | 70<br>(29 - 121)         | 20<br>(11 - 32)    | 131<br>(70 - 185)        | 179<br>(93 - 256)        | 192<br>(80 - 300)        |
| Musculoskeletal disorders                           | 205<br>(144 - 281)        | --                       | 14<br>(9 - 21)     | 74<br>(50 - 108)         | 53<br>(36 - 74)          | 64<br>(42 - 89)          |
| Rheumatoid arthritis                                | 31<br>(18 - 45)           | --                       | 1<br>(1 - 2)       | 9<br>(5 - 15)            | 9<br>(5 - 14)            | 11<br>(6 - 20)           |
| Other musculoskeletal disorders                     | 174<br>(124 - 243)        | --                       | 13<br>(9 - 20)     | 65<br>(44 - 95)          | 44<br>(30 - 64)          | 52<br>(34 - 76)          |
| Other non-communicable diseases                     | 2,778<br>(2,051 - 3,669)  | 2,347<br>(1,630 - 3,236) | 73<br>(47 - 108)   | 164<br>(121 - 223)       | 75<br>(56 - 97)          | 119<br>(85 - 167)        |
| Congenital anomalies                                | 2,593<br>(1,864 - 3,480)  | 2,334<br>(1,621 - 3,215) | 71<br>(45 - 106)   | 115<br>(79 - 163)        | 37<br>(27 - 52)          | 36<br>(25 - 53)          |
| Neural tube defects                                 | 258<br>(88 - 588)         | 255<br>(85 - 584)        | 1<br>(0 - 2)       | 2<br>(1 - 4)             | 0<br>(0 - 0)             | 0<br>(0 - 0)             |
| Congenital heart anomalies                          | 875<br>(576 - 1,308)      | 770<br>(478 - 1,197)     | 42<br>(24 - 65)    | 52<br>(35 - 74)          | 7<br>(4 - 11)            | 5<br>(3 - 8)             |
| Cleft lip and cleft palate                          | 3<br>(1 - 8)              | 3<br>(1 - 8)             | --                 | --                       | --                       | --                       |
| Down syndrome                                       | 70<br>(36 - 128)          | 51<br>(21 - 103)         | 2<br>(1 - 3)       | 16<br>(9 - 27)           | 2<br>(1 - 4)             | 0<br>(0 - 0)             |
| Chromosomal unbalanced rearrangements               | 28<br>(14 - 52)           | 24<br>(11 - 47)          | 1<br>(0 - 2)       | 2<br>(1 - 3)             | 1<br>(0 - 1)             | 0<br>(0 - 1)             |
| Other congenital anomalies                          | 1,359<br>(924 - 1,967)    | 1,232<br>(803 - 1,836)   | 26<br>(15 - 41)    | 43<br>(29 - 62)          | 28<br>(19 - 39)          | 31<br>(21 - 44)          |
| Skin and subcutaneous diseases                      | 184<br>(133 - 245)        | 13<br>(6 - 24)           | 2<br>(1 - 4)       | 49<br>(34 - 69)          | 38<br>(25 - 52)          | 82<br>(52 - 126)         |
| Cellulitis                                          | 43<br>(25 - 62)           | 4<br>(2 - 8)             | 1<br>(0 - 1)       | 8<br>(5 - 12)            | 12<br>(7 - 19)           | 18<br>(9 - 30)           |
| Pyoderma                                            | 86<br>(59 - 118)          | 8<br>(4 - 16)            | 1<br>(1 - 2)       | 26<br>(17 - 37)          | 16<br>(10 - 23)          | 35<br>(20 - 55)          |

Web Table 31- Algeria deaths with 95% UI by age, sex, and cause in 2013

| Cause                                           | Males, All Ages             | Males, 0-4 Years     | Males, 5-14 Years  | Males, 15-49 Years       | Males, 50-69 Years       | Males, 70-80 Years       |
|-------------------------------------------------|-----------------------------|----------------------|--------------------|--------------------------|--------------------------|--------------------------|
| Decubitus ulcer                                 | 50<br>(33 - 78)             | 0<br>(0 - 1)         | 0<br>(0 - 1)       | 11<br>(7 - 17)           | 9<br>(6 - 14)            | 29<br>(16 - 54)          |
| Other skin and subcutaneous diseases            | 6<br>(4 - 9)                | 0<br>(0 - 1)         | 0<br>(0 - 1)       | 4<br>(3 - 7)             | 0<br>(0 - 1)             | 0<br>(0 - 1)             |
| Sudden infant death syndrome                    | 1<br>(0 - 5)                | 1<br>(0 - 5)         | --                 | --                       | --                       | --                       |
| Injuries                                        | 12,005<br>(10,028 - 14,344) | 879<br>(576 - 1,222) | 590<br>(495 - 696) | 6,381<br>(5,166 - 7,906) | 1,966<br>(1,531 - 2,367) | 2,189<br>(1,709 - 2,719) |
| Transport injuries                              | 6,899<br>(5,676 - 8,305)    | 442<br>(263 - 663)   | 357<br>(278 - 450) | 3,928<br>(3,143 - 4,913) | 1,302<br>(987 - 1,617)   | 870<br>(633 - 1,138)     |
| Road injuries                                   | 6,555<br>(5,389 - 7,886)    | 409<br>(241 - 617)   | 336<br>(262 - 418) | 3,753<br>(2,991 - 4,689) | 1,235<br>(934 - 1,540)   | 821<br>(595 - 1,083)     |
| Pedestrian road injuries                        | 1,609<br>(1,143 - 2,228)    | 163<br>(88 - 273)    | 125<br>(83 - 177)  | 634<br>(412 - 943)       | 349<br>(227 - 505)       | 336<br>(224 - 483)       |
| Cyclist road injuries                           | 576<br>(409 - 743)          | 47<br>(20 - 88)      | 59<br>(37 - 85)    | 206<br>(139 - 285)       | 150<br>(98 - 213)        | 114<br>(72 - 171)        |
| Motorcyclist road injuries                      | 725<br>(489 - 975)          | 20<br>(11 - 36)      | 15<br>(9 - 24)     | 550<br>(363 - 769)       | 89<br>(53 - 136)         | 51<br>(29 - 77)          |
| Motor vehicle road injuries                     | 3,633<br>(2,848 - 4,541)    | 173<br>(96 - 273)    | 134<br>(91 - 185)  | 2,362<br>(1,838 - 3,015) | 646<br>(481 - 851)       | 318<br>(212 - 451)       |
| Other road injuries                             | 13<br>(8 - 21)              | 6<br>(3 - 12)        | 3<br>(2 - 6)       | 2<br>(1 - 3)             | 1<br>(1 - 2)             | 1<br>(0 - 2)             |
| Other transport injuries                        | 344<br>(248 - 436)          | 33<br>(17 - 56)      | 21<br>(13 - 32)    | 175<br>(120 - 241)       | 66<br>(43 - 95)          | 49<br>(29 - 75)          |
| Unintentional injuries                          | 4,320<br>(3,343 - 5,383)    | 429<br>(282 - 614)   | 222<br>(172 - 281) | 1,879<br>(1,337 - 2,448) | 535<br>(363 - 720)       | 1,255<br>(878 - 1,702)   |
| Falls                                           | 733<br>(535 - 1,014)        | 64<br>(32 - 118)     | 30<br>(17 - 47)    | 154<br>(101 - 222)       | 99<br>(64 - 142)         | 386<br>(234 - 609)       |
| Drowning                                        | 1,274<br>(843 - 1,796)      | 48<br>(23 - 94)      | 53<br>(33 - 85)    | 1,132<br>(737 - 1,603)   | 11<br>(7 - 17)           | 29<br>(17 - 51)          |
| Fire, heat, and hot substances                  | 517<br>(306 - 728)          | 66<br>(34 - 115)     | 14<br>(9 - 22)     | 203<br>(121 - 305)       | 71<br>(41 - 107)         | 163<br>(77 - 277)        |
| Poisonings                                      | 111<br>(79 - 163)           | 24<br>(11 - 47)      | 2<br>(1 - 4)       | 21<br>(13 - 36)          | 20<br>(12 - 32)          | 43<br>(26 - 68)          |
| Exposure to mechanical forces                   | 105<br>(82 - 146)           | 11<br>(6 - 19)       | 4<br>(2 - 6)       | 35<br>(25 - 56)          | 35<br>(25 - 51)          | 20<br>(14 - 27)          |
| Unintentional firearm injuries                  | 15<br>(11 - 21)             | 2<br>(1 - 3)         | 0<br>(0 - 1)       | 5<br>(3 - 8)             | 4<br>(2 - 6)             | 4<br>(2 - 7)             |
| Unintentional suffocation                       | 7<br>(5 - 12)               | 1<br>(0 - 2)         | 1<br>(0 - 2)       | 4<br>(3 - 8)             | 1<br>(1 - 2)             | 0<br>(0 - 1)             |
| Other exposure to mechanical forces             | 83<br>(64 - 116)            | 9<br>(5 - 17)        | 2<br>(1 - 4)       | 25<br>(17 - 41)          | 30<br>(20 - 45)          | 16<br>(11 - 22)          |
| Adverse effects of medical treatment            | 1,083<br>(602 - 1,572)      | 88<br>(42 - 173)     | 14<br>(8 - 24)     | 192<br>(108 - 284)       | 272<br>(134 - 436)       | 517<br>(239 - 872)       |
| Animal contact                                  | 180<br>(94 - 268)           | 70<br>(28 - 137)     | 71<br>(34 - 114)   | 24<br>(12 - 36)          | 8<br>(5 - 14)            | 7<br>(4 - 11)            |
| Venomous animal contact                         | 162<br>(83 - 248)           | 67<br>(25 - 131)     | 70<br>(34 - 113)   | 19<br>(9 - 30)           | 3<br>(2 - 7)             | 3<br>(2 - 6)             |
| Non-venomous animal contact                     | 18<br>(11 - 25)             | 4<br>(2 - 8)         | 1<br>(0 - 2)       | 5<br>(2 - 7)             | 5<br>(3 - 8)             | 4<br>(2 - 6)             |
| Foreign body                                    | 123<br>(77 - 212)           | 23<br>(12 - 38)      | 13<br>(7 - 29)     | 3<br>(2 - 5)             | 2<br>(1 - 3)             | 81<br>(45 - 147)         |
| Pulmonary aspiration and foreign body in airway | 118<br>(70 - 206)           | 21<br>(10 - 36)      | 13<br>(7 - 29)     | 2<br>(1 - 3)             | 1<br>(1 - 2)             | 80<br>(45 - 146)         |
| Foreign body in other body part                 | 5<br>(3 - 9)                | 2<br>(1 - 4)         | 0<br>(0 - 1)       | 1<br>(1 - 2)             | 1<br>(0 - 1)             | 0<br>(0 - 1)             |
| Other unintentional injuries                    | 195<br>(154 - 252)          | 34<br>(21 - 56)      | 21<br>(14 - 30)    | 116<br>(85 - 161)        | 16<br>(12 - 23)          | 9<br>(6 - 12)            |
| Self-harm and interpersonal violence            | 786<br>(596 - 1,082)        | 8<br>(4 - 16)        | 11<br>(6 - 18)     | 573<br>(416 - 820)       | 129<br>(93 - 177)        | 65<br>(42 - 102)         |
| Self-harm                                       | 442<br>(321 - 600)          | --                   | 4<br>(1 - 9)       | 285<br>(200 - 411)       | 94<br>(64 - 131)         | 59<br>(37 - 95)          |
| Interpersonal violence                          | 345<br>(226 - 553)          | 8<br>(4 - 16)        | 7<br>(4 - 13)      | 288<br>(182 - 472)       | 36<br>(21 - 59)          | 6<br>(3 - 11)            |
| Assault by firearm                              | 173<br>(96 - 298)           | 2<br>(1 - 5)         | 2<br>(1 - 3)       | 149<br>(81 - 261)        | 18<br>(9 - 32)           | 2<br>(1 - 3)             |
| Assault by sharp object                         | 116<br>(62 - 201)           | 1<br>(1 - 3)         | 2<br>(1 - 5)       | 100<br>(51 - 173)        | 12<br>(6 - 24)           | 1<br>(0 - 2)             |
| Assault by other means                          | 56<br>(32 - 95)             | 5<br>(2 - 9)         | 3<br>(2 - 6)       | 39<br>(20 - 71)          | 5<br>(2 - 10)            | 3<br>(2 - 7)             |

Web Table 31- Algeria deaths with 95% UI by age, sex, and cause in 2013

| Cause                                                             | Females, All Ages           | Females, 0-4 Years         | Females, 5-14 Years    | Females, 15-49 Years       | Females, 50-69 Years        | Females, 70-80 Years        |
|-------------------------------------------------------------------|-----------------------------|----------------------------|------------------------|----------------------------|-----------------------------|-----------------------------|
| All causes                                                        | 74,891<br>(68,632 - 87,834) | 10,137<br>(8,716 - 11,910) | 1,028<br>(899 - 1,224) | 10,784<br>(9,053 - 12,611) | 18,059<br>(15,261 - 22,212) | 34,883<br>(32,437 - 41,612) |
| Communicable, maternal, neonatal, and nutritional diseases        | 11,607<br>(10,156 - 13,317) | 6,386<br>(5,232 - 7,732)   | 274<br>(209 - 364)     | 1,581<br>(1,339 - 1,829)   | 1,069<br>(859 - 1,340)      | 2,297<br>(1,791 - 2,990)    |
| HIV/AIDS and tuberculosis                                         | 823<br>(491 - 1,038)        | 17<br>(9 - 28)             | 6<br>(3 - 9)           | 301<br>(194 - 383)         | 220<br>(133 - 304)          | 279<br>(147 - 387)          |
| Tuberculosis                                                      | 773<br>(435 - 988)          | 17<br>(9 - 27)             | 6<br>(3 - 9)           | 258<br>(149 - 336)         | 215<br>(127 - 300)          | 279<br>(146 - 387)          |
| HIV/AIDS                                                          | 50<br>(29 - 95)             | 0<br>(0 - 1)               | 0<br>(0 - 1)           | 43<br>(26 - 79)            | 6<br>(2 - 13)               | 1<br>(0 - 1)                |
| HIV/AIDS resulting in mycobacterial infection                     | 2<br>(1 - 5)                | 0<br>(0 - 0)               | 0<br>(0 - 0)           | 2<br>(1 - 4)               | 0<br>(0 - 1)                | 0<br>(0 - 0)                |
| HIV/AIDS resulting in other diseases                              | 47<br>(28 - 91)             | 0<br>(0 - 1)               | 0<br>(0 - 1)           | 41<br>(25 - 76)            | 5<br>(2 - 12)               | 0<br>(0 - 1)                |
| Diarrhea, lower respiratory, and other common infectious diseases | 4,359<br>(3,602 - 5,380)    | 1,306<br>(906 - 1,916)     | 230<br>(166 - 319)     | 608<br>(464 - 783)         | 617<br>(462 - 829)          | 1,598<br>(1,168 - 2,225)    |
| Diarrheal diseases                                                | 718<br>(460 - 1,090)        | 317<br>(120 - 656)         | 12<br>(6 - 23)         | 63<br>(43 - 90)            | 50<br>(30 - 80)             | 275<br>(152 - 480)          |
| Intestinal infectious diseases                                    | 385<br>(196 - 693)          | 116<br>(54 - 212)          | 81<br>(37 - 147)       | 148<br>(64 - 286)          | 28<br>(12 - 56)             | 12<br>(4 - 23)              |
| Typhoid fever                                                     | 286<br>(137 - 524)          | 81<br>(34 - 152)           | 62<br>(28 - 112)       | 114<br>(47 - 223)          | 21<br>(8 - 44)              | 8<br>(2 - 18)               |
| Paratyphoid fever                                                 | 81<br>(37 - 154)            | 28<br>(11 - 58)            | 18<br>(7 - 35)         | 29<br>(11 - 60)            | 5<br>(2 - 13)               | 2<br>(0 - 5)                |
| Other intestinal infectious diseases                              | 18<br>(10 - 29)             | 8<br>(3 - 16)              | 1<br>(0 - 5)           | 6<br>(2 - 13)              | 2<br>(0 - 6)                | 1<br>(0 - 5)                |
| Lower respiratory infections                                      | 2,415<br>(1,836 - 3,115)    | 456<br>(265 - 780)         | 62<br>(39 - 95)        | 219<br>(161 - 295)         | 459<br>(321 - 643)          | 1,220<br>(830 - 1,761)      |
| Upper respiratory infections                                      | 3<br>(1 - 7)                | 1<br>(0 - 2)               | 0<br>(0 - 0)           | 1<br>(0 - 2)               | 1<br>(0 - 3)                | 1<br>(0 - 4)                |
| Otitis media                                                      | 6<br>(5 - 7)                | 0<br>(0 - 1)               | 0<br>(0 - 0)           | 1<br>(1 - 2)               | 2<br>(1 - 2)                | 2<br>(2 - 3)                |
| Meningitis                                                        | 311<br>(232 - 411)          | 146<br>(82 - 230)          | 26<br>(15 - 43)        | 57<br>(39 - 81)            | 41<br>(26 - 62)             | 41<br>(24 - 64)             |
| Pneumococcal meningitis                                           | 70<br>(46 - 101)            | 27<br>(11 - 52)            | 7<br>(4 - 13)          | 15<br>(8 - 26)             | 10<br>(4 - 19)              | 5<br>(1 - 18)               |
| H influenzae type B meningitis                                    | 72<br>(46 - 107)            | 51<br>(27 - 84)            | 6<br>(3 - 12)          | 6<br>(3 - 11)              | 4<br>(2 - 8)                | 4<br>(2 - 7)                |
| Meningococcal meningitis                                          | 92<br>(61 - 130)            | 45<br>(23 - 77)            | 8<br>(3 - 14)          | 16<br>(9 - 26)             | 11<br>(5 - 20)              | 13<br>(6 - 22)              |
| Other meningitis                                                  | 78<br>(56 - 104)            | 23<br>(10 - 42)            | 5<br>(2 - 9)           | 20<br>(12 - 32)            | 16<br>(8 - 26)              | 14<br>(6 - 25)              |
| Encephalitis                                                      | 342<br>(240 - 464)          | 125<br>(65 - 206)          | 30<br>(16 - 48)        | 110<br>(65 - 165)          | 33<br>(21 - 50)             | 44<br>(27 - 66)             |
| Diphtheria                                                        | 1<br>(0 - 5)                | 1<br>(0 - 5)               | 0<br>(0 - 1)           | 0<br>(0 - 1)               | 0<br>(0 - 0)                | --                          |
| Whooping cough                                                    | 13<br>(0 - 71)              | 12<br>(0 - 67)             | 1<br>(0 - 3)           | 0<br>(0 - 1)               | 0<br>(0 - 0)                | --                          |
| Tetanus                                                           | 4<br>(3 - 7)                | 1<br>(0 - 1)               | 0<br>(0 - 0)           | 1<br>(1 - 2)               | 1<br>(1 - 4)                | 0<br>(0 - 0)                |
| Measles                                                           | 151<br>(4 - 844)            | 130<br>(4 - 725)           | 17<br>(0 - 96)         | 5<br>(0 - 29)              | 0<br>(0 - 1)                | --                          |
| Varicella and herpes zoster                                       | 9<br>(3 - 22)               | 2<br>(0 - 9)               | 0<br>(0 - 2)           | 2<br>(0 - 7)               | 1<br>(0 - 3)                | 3<br>(0 - 16)               |
| Neglected tropical diseases and malaria                           | 75<br>(60 - 97)             | 11<br>(6 - 19)             | 7<br>(4 - 14)          | 23<br>(18 - 31)            | 19<br>(13 - 27)             | 14<br>(10 - 22)             |
| Malaria                                                           | 4<br>(3 - 7)                | 0<br>(0 - 1)               | 1<br>(0 - 1)           | 3<br>(2 - 4)               | 1<br>(0 - 1)                | 0<br>(0 - 0)                |
| Leishmaniasis                                                     | 7<br>(5 - 9)                | 3<br>(2 - 5)               | 1<br>(0 - 1)           | 2<br>(1 - 3)               | 1<br>(0 - 1)                | 0<br>(0 - 0)                |
| Visceral leishmaniasis                                            | 7<br>(5 - 9)                | 3<br>(2 - 5)               | 1<br>(0 - 1)           | 2<br>(1 - 3)               | 1<br>(0 - 1)                | 0<br>(0 - 0)                |
| Schistosomiasis                                                   | 27<br>(19 - 38)             | 0<br>(0 - 0)               | 0<br>(0 - 1)           | 7<br>(4 - 11)              | 11<br>(6 - 18)              | 8<br>(4 - 14)               |
| Cysticercosis                                                     | 0<br>(0 - 0)                | 0<br>(0 - 0)               | 0<br>(0 - 0)           | 0<br>(0 - 0)               | 0<br>(0 - 0)                | 0<br>(0 - 0)                |
| Cystic echinococcosis                                             | 11<br>(10 - 13)             | 0<br>(0 - 1)               | 1<br>(1 - 1)           | 5<br>(4 - 5)               | 3<br>(2 - 4)                | 2<br>(2 - 3)                |
| Dengue                                                            | 2<br>(1 - 3)                | 0<br>(0 - 0)               | 0<br>(0 - 0)           | 1<br>(1 - 2)               | 0<br>(0 - 0)                | 0<br>(0 - 0)                |
| Rabies                                                            | 7<br>(4 - 18)               | 0<br>(0 - 1)               | 3<br>(1 - 8)           | 2<br>(1 - 4)               | 1<br>(1 - 4)                | 1<br>(0 - 2)                |
| Intestinal nematode infections                                    | 6<br>(1 - 16)               | 3<br>(0 - 10)              | 1<br>(0 - 6)           | 1<br>(0 - 4)               | 1<br>(0 - 4)                | 1<br>(0 - 4)                |
| Ascariasis                                                        | 6<br>(1 - 16)               | 3<br>(0 - 10)              | 1<br>(0 - 6)           | 1<br>(0 - 4)               | 1<br>(0 - 4)                | 1<br>(0 - 4)                |
| Other neglected tropical diseases                                 | 11<br>(8 - 15)              | 3<br>(2 - 6)               | 1<br>(0 - 1)           | 3<br>(2 - 5)               | 2<br>(1 - 3)                | 2<br>(1 - 4)                |
| Maternal disorders                                                | 470<br>(340 - 641)          | --                         | 1<br>(0 - 2)           | 469<br>(339 - 640)         | --                          | --                          |



Web Table 31- Algeria deaths with 95% UI by age, sex, and cause in 2013

| Cause                                                            | Females, All Ages           | Females, 0-4 Years       | Females, 5-14 Years | Females, 15-49 Years     | Females, 50-69 Years        | Females, 70-80 Years        |
|------------------------------------------------------------------|-----------------------------|--------------------------|---------------------|--------------------------|-----------------------------|-----------------------------|
| Maternal hemorrhage                                              | 98<br>(61 - 145)            | --                       | 0<br>(0 - 0)        | 98<br>(61 - 145)         | --                          | --                          |
| Maternal sepsis and other maternal infections                    | 35<br>(21 - 53)             | --                       | 0<br>(0 - 0)        | 35<br>(20 - 53)          | --                          | --                          |
| Maternal hypertensive disorders                                  | 85<br>(58 - 120)            | --                       | 0<br>(0 - 0)        | 84<br>(57 - 119)         | --                          | --                          |
| Maternal obstructed labor                                        | 65<br>(40 - 95)             | --                       | 0<br>(0 - 0)        | 65<br>(40 - 95)          | --                          | --                          |
| Maternal abortive outcome                                        | 54<br>(29 - 90)             | --                       | 0<br>(0 - 0)        | 54<br>(29 - 90)          | --                          | --                          |
| Indirect maternal deaths                                         | 32<br>(13 - 59)             | --                       | 0<br>(0 - 0)        | 32<br>(13 - 59)          | --                          | --                          |
| Late maternal deaths                                             | 40<br>(21 - 63)             | --                       | 0<br>(0 - 0)        | 40<br>(20 - 63)          | --                          | --                          |
| Maternal deaths aggravated by HIV/AIDS                           | 0<br>(0 - 0)                | --                       | --                  | 0<br>(0 - 0)             | --                          | --                          |
| Other maternal disorders                                         | 61<br>(36 - 98)             | --                       | 0<br>(0 - 0)        | 61<br>(36 - 98)          | --                          | --                          |
| Neonatal disorders                                               | 4,727<br>(3,841 - 5,893)    | 4,727<br>(3,841 - 5,893) | --                  | --                       | --                          | --                          |
| Neonatal preterm birth complications                             | 2,752<br>(1,866 - 3,799)    | 2,752<br>(1,866 - 3,799) | --                  | --                       | --                          | --                          |
| Neonatal encephalopathy due to birth asphyxia and trauma         | 817<br>(411 - 1,418)        | 817<br>(411 - 1,418)     | --                  | --                       | --                          | --                          |
| Neonatal sepsis and other neonatal infections                    | 613<br>(257 - 1,086)        | 613<br>(257 - 1,086)     | --                  | --                       | --                          | --                          |
| Hemolytic disease and other neonatal jaundice                    | 34<br>(9 - 115)             | 34<br>(9 - 115)          | --                  | --                       | --                          | --                          |
| Other neonatal disorders                                         | 510<br>(266 - 874)          | 510<br>(266 - 874)       | --                  | --                       | --                          | --                          |
| Nutritional deficiencies                                         | 814<br>(615 - 1,065)        | 201<br>(110 - 342)       | 16<br>(10 - 25)     | 144<br>(105 - 191)       | 126<br>(87 - 178)           | 327<br>(216 - 491)          |
| Protein-energy malnutrition                                      | 552<br>(359 - 776)          | 182<br>(94 - 318)        | 8<br>(4 - 14)       | 55<br>(27 - 93)          | 73<br>(35 - 114)            | 233<br>(127 - 369)          |
| Iodine deficiency                                                | 5<br>(0 - 17)               | 1<br>(0 - 6)             | 0<br>(0 - 2)        | 1<br>(0 - 4)             | 1<br>(0 - 8)                | 1<br>(0 - 8)                |
| Iron-deficiency anemia                                           | 245<br>(129 - 409)          | 13<br>(3 - 38)           | 7<br>(3 - 12)       | 85<br>(49 - 124)         | 49<br>(25 - 89)             | 91<br>(36 - 182)            |
| Other nutritional deficiencies                                   | 12<br>(6 - 31)              | 5<br>(1 - 20)            | 1<br>(0 - 1)        | 3<br>(1 - 6)             | 2<br>(1 - 4)                | 1<br>(1 - 3)                |
| Other communicable, maternal, neonatal, and nutritional diseases | 338<br>(226 - 497)          | 123<br>(37 - 249)        | 14<br>(6 - 25)      | 36<br>(23 - 55)          | 87<br>(61 - 125)            | 78<br>(42 - 147)            |
| Sexually transmitted diseases excluding HIV                      | 127<br>(31 - 260)           | 105<br>(18 - 229)        | 9<br>(2 - 19)       | 5<br>(3 - 9)             | 3<br>(1 - 9)                | 4<br>(1 - 9)                |
| Syphilis                                                         | 120<br>(26 - 254)           | 105<br>(18 - 229)        | 8<br>(1 - 19)       | 2<br>(1 - 4)             | 2<br>(1 - 5)                | 3<br>(1 - 7)                |
| Chlamydial infection                                             | 2<br>(1 - 3)                | --                       | 0<br>(0 - 0)        | 1<br>(1 - 2)             | 0<br>(0 - 1)                | 0<br>(0 - 1)                |
| Gonococcal infection                                             | 2<br>(1 - 4)                | --                       | 0<br>(0 - 0)        | 1<br>(1 - 2)             | 1<br>(0 - 2)                | 0<br>(0 - 1)                |
| Other sexually transmitted diseases                              | 2<br>(1 - 3)                | --                       | 0<br>(0 - 0)        | 1<br>(1 - 2)             | 0<br>(0 - 1)                | 0<br>(0 - 0)                |
| Hepatitis                                                        | 96<br>(70 - 129)            | 5<br>(3 - 9)             | 1<br>(0 - 1)        | 3<br>(2 - 5)             | 60<br>(41 - 87)             | 26<br>(16 - 40)             |
| Acute hepatitis A                                                | 6<br>(2 - 11)               | 3<br>(1 - 5)             | 0<br>(0 - 1)        | 0<br>(0 - 1)             | 2<br>(1 - 5)                | 0<br>(0 - 1)                |
| Acute hepatitis B                                                | 64<br>(41 - 93)             | 3<br>(1 - 5)             | 0<br>(0 - 0)        | 1<br>(1 - 2)             | 40<br>(23 - 61)             | 20<br>(11 - 32)             |
| Acute hepatitis C                                                | 9<br>(1 - 24)               | --                       | 0<br>(0 - 0)        | 0<br>(0 - 1)             | 6<br>(1 - 16)               | 3<br>(0 - 8)                |
| Acute hepatitis E                                                | 17<br>(6 - 35)              | 0<br>(0 - 0)             | 0<br>(0 - 0)        | 2<br>(1 - 3)             | 12<br>(4 - 26)              | 3<br>(1 - 8)                |
| Other infectious diseases                                        | 116<br>(67 - 195)           | 13<br>(5 - 37)           | 4<br>(2 - 9)        | 27<br>(16 - 45)          | 23<br>(10 - 49)             | 48<br>(16 - 114)            |
| Non-communicable diseases                                        | 57,586<br>(52,213 - 68,387) | 3,119<br>(2,366 - 4,044) | 462<br>(379 - 570)  | 7,580<br>(6,296 - 8,995) | 15,706<br>(13,236 - 19,304) | 30,718<br>(28,348 - 36,711) |
| Neoplasms                                                        | 6,166<br>(5,187 - 7,595)    | 78<br>(44 - 122)         | 79<br>(59 - 101)    | 1,912<br>(1,531 - 2,353) | 2,578<br>(2,097 - 3,248)    | 1,518<br>(1,306 - 1,869)    |
| Esophageal cancer                                                | 74<br>(56 - 97)             | --                       | --                  | 16<br>(11 - 23)          | 28<br>(19 - 40)             | 29<br>(21 - 40)             |
| Stomach cancer                                                   | 394<br>(314 - 507)          | --                       | --                  | 86<br>(62 - 116)         | 168<br>(124 - 227)          | 141<br>(102 - 196)          |
| Liver cancer                                                     | 260<br>(200 - 342)          | --                       | 1<br>(1 - 2)        | 50<br>(34 - 71)          | 117<br>(82 - 162)           | 93<br>(62 - 136)            |
| Liver cancer due to hepatitis B                                  | 77<br>(52 - 115)            | --                       | 0<br>(0 - 1)        | 20<br>(12 - 31)          | 37<br>(22 - 58)             | 20<br>(11 - 32)             |
| Liver cancer due to hepatitis C                                  | 132<br>(88 - 183)           | --                       | 0<br>(0 - 0)        | 18<br>(10 - 29)          | 59<br>(37 - 87)             | 55<br>(34 - 84)             |
| Liver cancer due to alcohol use                                  | 15<br>(5 - 27)              | --                       | --                  | 1<br>(0 - 3)             | 5<br>(2 - 10)               | 8<br>(3 - 16)               |

Web Table 31- Algeria deaths with 95% UI by age, sex, and cause in 2013

| Cause                                         | Females, All Ages           | Females, 0-4 Years | Females, 5-14 Years | Females, 15-49 Years     | Females, 50-69 Years      | Females, 70-80 Years        |
|-----------------------------------------------|-----------------------------|--------------------|---------------------|--------------------------|---------------------------|-----------------------------|
| Liver cancer due to other causes              | 36<br>(19 - 65)             | --                 | 1<br>(0 - 1)        | 10<br>(5 - 17)           | 16<br>(7 - 31)            | 10<br>(4 - 18)              |
| Larynx cancer                                 | 24<br>(14 - 48)             | --                 | --                  | 6<br>(3 - 12)            | 12<br>(6 - 25)            | 6<br>(3 - 12)               |
| Tracheal, bronchus and lung cancer            | 281<br>(224 - 366)          | --                 | --                  | 45<br>(32 - 63)          | 135<br>(102 - 180)        | 101<br>(73 - 140)           |
| Breast cancer                                 | 1,370<br>(1,084 - 1,711)    | --                 | --                  | 650<br>(487 - 825)       | 546<br>(412 - 719)        | 174<br>(135 - 227)          |
| Cervical cancer                               | 440<br>(333 - 610)          | --                 | --                  | 108<br>(73 - 155)        | 232<br>(165 - 326)        | 100<br>(69 - 143)           |
| Uterine cancer                                | 54<br>(36 - 77)             | --                 | --                  | 6<br>(4 - 9)             | 24<br>(15 - 36)           | 23<br>(15 - 36)             |
| Prostate cancer                               | --                          | --                 | --                  | --                       | --                        | --                          |
| Colon and rectum cancer                       | 457<br>(377 - 574)          | --                 | --                  | 131<br>(101 - 167)       | 194<br>(149 - 248)        | 132<br>(99 - 174)           |
| Lip and oral cavity cancer                    | 24<br>(18 - 36)             | --                 | --                  | 7<br>(5 - 11)            | 9<br>(6 - 13)             | 8<br>(6 - 12)               |
| Nasopharynx cancer                            | 131<br>(85 - 212)           | --                 | 3<br>(1 - 6)        | 67<br>(41 - 111)         | 43<br>(23 - 81)           | 19<br>(11 - 31)             |
| Other pharynx cancer                          | 20<br>(15 - 27)             | --                 | --                  | 6<br>(4 - 10)            | 10<br>(7 - 15)            | 3<br>(2 - 5)                |
| Gallbladder and biliary tract cancer          | 376<br>(254 - 533)          | --                 | --                  | 62<br>(38 - 99)          | 196<br>(126 - 292)        | 118<br>(71 - 185)           |
| Pancreatic cancer                             | 177<br>(144 - 228)          | --                 | --                  | 29<br>(22 - 38)          | 87<br>(65 - 116)          | 61<br>(47 - 82)             |
| Malignant skin melanoma                       | 16<br>(12 - 21)             | --                 | --                  | 4<br>(3 - 6)             | 7<br>(5 - 10)             | 4<br>(3 - 6)                |
| Non-melanoma skin cancer                      | 29<br>(19 - 45)             | --                 | --                  | 5<br>(3 - 9)             | 9<br>(5 - 17)             | 14<br>(8 - 23)              |
| Ovarian cancer                                | 275<br>(212 - 363)          | --                 | --                  | 90<br>(62 - 128)         | 126<br>(91 - 173)         | 59<br>(41 - 83)             |
| Testicular cancer                             | --                          | --                 | --                  | --                       | --                        | --                          |
| Kidney cancer                                 | 86<br>(65 - 114)            | 4<br>(2 - 9)       | 4<br>(2 - 8)        | 14<br>(9 - 21)           | 41<br>(27 - 58)           | 23<br>(15 - 35)             |
| Bladder cancer                                | 96<br>(65 - 144)            | --                 | --                  | 13<br>(8 - 24)           | 40<br>(27 - 62)           | 42<br>(26 - 62)             |
| Brain and nervous system cancer               | 226<br>(174 - 282)          | 6<br>(3 - 12)      | 14<br>(10 - 22)     | 92<br>(69 - 121)         | 86<br>(58 - 117)          | 27<br>(17 - 39)             |
| Thyroid cancer                                | 113<br>(81 - 161)           | --                 | 0<br>(0 - 1)        | 11<br>(7 - 16)           | 57<br>(38 - 83)           | 45<br>(30 - 67)             |
| Mesothelioma                                  | 5<br>(4 - 7)                | --                 | --                  | 2<br>(1 - 3)             | 1<br>(1 - 2)              | 2<br>(1 - 4)                |
| Hodgkin lymphoma                              | 52<br>(38 - 71)             | 1<br>(1 - 2)       | 2<br>(1 - 5)        | 33<br>(23 - 48)          | 9<br>(5 - 14)             | 6<br>(4 - 9)                |
| Non-Hodgkin lymphoma                          | 202<br>(147 - 280)          | 3<br>(1 - 5)       | 4<br>(2 - 6)        | 74<br>(51 - 104)         | 73<br>(50 - 105)          | 48<br>(32 - 70)             |
| Multiple myeloma                              | 97<br>(70 - 132)            | --                 | --                  | 16<br>(11 - 22)          | 52<br>(36 - 73)           | 29<br>(20 - 42)             |
| Leukemia                                      | 347<br>(287 - 424)          | 10<br>(5 - 20)     | 24<br>(16 - 34)     | 150<br>(116 - 189)       | 94<br>(70 - 126)          | 68<br>(50 - 90)             |
| Other neoplasms                               | 540<br>(407 - 707)          | 52<br>(25 - 91)    | 27<br>(16 - 42)     | 137<br>(95 - 188)        | 183<br>(124 - 260)        | 140<br>(98 - 193)           |
| Cardiovascular diseases                       | 30,503<br>(27,084 - 36,887) | 377<br>(237 - 577) | 104<br>(74 - 146)   | 2,841<br>(2,249 - 3,484) | 8,301<br>(6,877 - 10,387) | 18,880<br>(16,950 - 22,601) |
| Rheumatic heart disease                       | 370<br>(247 - 512)          | 10<br>(4 - 20)     | 5<br>(3 - 9)        | 105<br>(69 - 154)        | 95<br>(60 - 143)          | 155<br>(96 - 227)           |
| Ischemic heart disease                        | 11,391<br>(9,340 - 14,632)  | 51<br>(21 - 106)   | 16<br>(9 - 26)      | 992<br>(731 - 1,306)     | 3,431<br>(2,650 - 4,557)  | 6,902<br>(5,525 - 8,922)    |
| Cerebrovascular disease                       | 12,294<br>(10,131 - 15,117) | 104<br>(57 - 173)  | 35<br>(22 - 50)     | 997<br>(756 - 1,290)     | 3,097<br>(2,405 - 3,966)  | 8,061<br>(6,600 - 9,874)    |
| Ischemic stroke                               | 6,693<br>(5,296 - 8,455)    | 1<br>(0 - 2)       | 1<br>(0 - 1)        | 147<br>(95 - 206)        | 1,164<br>(818 - 1,538)    | 5,380<br>(4,255 - 6,743)    |
| Hemorrhagic stroke                            | 5,601<br>(4,488 - 7,076)    | 102<br>(56 - 172)  | 34<br>(22 - 49)     | 850<br>(643 - 1,112)     | 1,933<br>(1,486 - 2,544)  | 2,681<br>(2,005 - 3,543)    |
| Hypertensive heart disease                    | 2,875<br>(1,969 - 3,936)    | 5<br>(1 - 13)      | 3<br>(2 - 6)        | 143<br>(90 - 210)        | 607<br>(393 - 853)        | 2,117<br>(1,421 - 2,991)    |
| Cardiomyopathy and myocarditis                | 1,414<br>(1,017 - 1,922)    | 175<br>(97 - 302)  | 26<br>(16 - 42)     | 138<br>(95 - 197)        | 304<br>(203 - 442)        | 770<br>(466 - 1,176)        |
| Atrial fibrillation and flutter               | 1<br>(1 - 2)                | --                 | --                  | 1<br>(0 - 1)             | 0<br>(0 - 1)              | 0<br>(0 - 0)                |
| Aortic aneurysm                               | 97<br>(60 - 150)            | --                 | --                  | 16<br>(10 - 24)          | 25<br>(15 - 42)           | 56<br>(34 - 86)             |
| Peripheral vascular disease                   | 11<br>(8 - 14)              | --                 | --                  | 1<br>(1 - 2)             | 5<br>(3 - 7)              | 5<br>(3 - 6)                |
| Endocarditis                                  | 61<br>(40 - 94)             | 11<br>(5 - 21)     | 2<br>(1 - 4)        | 16<br>(10 - 26)          | 12<br>(7 - 20)            | 20<br>(12 - 32)             |
| Other cardiovascular and circulatory diseases | 1,988<br>(1,491 - 2,525)    | 21<br>(11 - 44)    | 16<br>(10 - 25)     | 432<br>(286 - 583)       | 724<br>(521 - 996)        | 794<br>(562 - 1,083)        |

Web Table 31- Algeria deaths with 95% UI by age, sex, and cause in 2013

| Cause                                               | Females, All Ages        | Females, 0-4 Years | Females, 5-14 Years | Females, 15-49 Years | Females, 50-69 Years | Females, 70-80 Years     |
|-----------------------------------------------------|--------------------------|--------------------|---------------------|----------------------|----------------------|--------------------------|
| Chronic respiratory diseases                        | 2,454<br>(2,018 - 3,099) | 32<br>(19 - 55)    | 6<br>(4 - 9)        | 218<br>(169 - 281)   | 503<br>(376 - 664)   | 1,695<br>(1,331 - 2,207) |
| Chronic obstructive pulmonary disease               | 1,403<br>(1,043 - 1,889) | 27<br>(15 - 46)    | 3<br>(2 - 4)        | 67<br>(43 - 97)      | 270<br>(183 - 382)   | 1,036<br>(752 - 1,406)   |
| Pneumoconiosis                                      | 3<br>(2 - 5)             | 0<br>(0 - 1)       | 0<br>(0 - 0)        | 1<br>(1 - 2)         | 1<br>(1 - 1)         | 1<br>(0 - 1)             |
| Silicosis                                           | 1<br>(1 - 1)             | 0<br>(0 - 0)       | 0<br>(0 - 0)        | 0<br>(0 - 0)         | 0<br>(0 - 0)         | 0<br>(0 - 0)             |
| Asbestosis                                          | 1<br>(1 - 1)             | 0<br>(0 - 0)       | 0<br>(0 - 0)        | 0<br>(0 - 0)         | 0<br>(0 - 0)         | 0<br>(0 - 0)             |
| Coal workers pneumoconiosis                         | 1<br>(1 - 1)             | 0<br>(0 - 0)       | 0<br>(0 - 0)        | 0<br>(0 - 0)         | 0<br>(0 - 0)         | 0<br>(0 - 0)             |
| Other pneumoconiosis                                | 1<br>(1 - 1)             | 0<br>(0 - 0)       | 0<br>(0 - 0)        | 0<br>(0 - 0)         | 0<br>(0 - 0)         | 0<br>(0 - 0)             |
| Asthma                                              | 587<br>(393 - 828)       | 1<br>(1 - 3)       | 2<br>(1 - 3)        | 101<br>(72 - 135)    | 135<br>(83 - 204)    | 348<br>(212 - 525)       |
| Interstitial lung disease and pulmonary sarcoidosis | 380<br>(222 - 585)       | 0<br>(0 - 1)       | 0<br>(0 - 1)        | 32<br>(20 - 50)      | 87<br>(47 - 143)     | 260<br>(141 - 424)       |
| Other chronic respiratory diseases                  | 81<br>(53 - 121)         | 4<br>(2 - 7)       | 1<br>(0 - 1)        | 17<br>(12 - 25)      | 9<br>(5 - 15)        | 50<br>(29 - 84)          |
| Cirrhosis                                           | 882<br>(732 - 1,106)     | 37<br>(17 - 70)    | 17<br>(11 - 25)     | 215<br>(165 - 279)   | 310<br>(238 - 409)   | 303<br>(228 - 415)       |
| Cirrhosis due to hepatitis B                        | 326<br>(102 - 588)       | 2<br>(0 - 6)       | 3<br>(1 - 7)        | 78<br>(26 - 153)     | 121<br>(37 - 230)    | 122<br>(27 - 224)        |
| Cirrhosis due to hepatitis C                        | 389<br>(167 - 654)       | 4<br>(1 - 9)       | 4<br>(2 - 8)        | 94<br>(27 - 165)     | 147<br>(50 - 270)    | 140<br>(61 - 246)        |
| Cirrhosis due to alcohol use                        | 40<br>(19 - 74)          | --                 | --                  | 5<br>(2 - 10)        | 14<br>(6 - 27)       | 21<br>(9 - 42)           |
| Cirrhosis due to other causes                       | 127<br>(81 - 190)        | 31<br>(14 - 59)    | 10<br>(6 - 16)      | 38<br>(18 - 66)      | 28<br>(12 - 54)      | 20<br>(10 - 37)          |
| Digestive diseases                                  | 2,276<br>(1,815 - 2,838) | 29<br>(17 - 45)    | 22<br>(15 - 31)     | 405<br>(308 - 519)   | 688<br>(504 - 906)   | 1,131<br>(870 - 1,475)   |
| Peptic ulcer disease                                | 253<br>(163 - 373)       | 2<br>(1 - 4)       | 2<br>(1 - 3)        | 29<br>(17 - 44)      | 86<br>(50 - 136)     | 135<br>(77 - 216)        |
| Gastritis and duodenitis                            | 6<br>(3 - 14)            | 0<br>(0 - 1)       | 0<br>(0 - 1)        | 2<br>(1 - 4)         | 3<br>(1 - 8)         | 1<br>(0 - 1)             |
| Appendicitis                                        | 82<br>(45 - 132)         | 1<br>(0 - 3)       | 1<br>(0 - 2)        | 27<br>(13 - 47)      | 33<br>(15 - 61)      | 21<br>(10 - 38)          |
| Paralytic ileus and intestinal obstruction          | 1,087<br>(640 - 1,502)   | 15<br>(7 - 27)     | 12<br>(7 - 19)      | 188<br>(108 - 260)   | 295<br>(168 - 440)   | 576<br>(332 - 842)       |
| Inguinal, femoral, and abdominal hernia             | 77<br>(33 - 132)         | 0<br>(0 - 1)       | 0<br>(0 - 1)        | 5<br>(3 - 12)        | 24<br>(10 - 41)      | 47<br>(17 - 90)          |
| Inflammatory bowel disease                          | 96<br>(60 - 154)         | 3<br>(1 - 7)       | 1<br>(1 - 2)        | 41<br>(25 - 66)      | 26<br>(14 - 45)      | 24<br>(12 - 45)          |
| Vascular intestinal disorders                       | 188<br>(104 - 389)       | 0<br>(0 - 0)       | 0<br>(0 - 1)        | 18<br>(8 - 45)       | 72<br>(36 - 157)     | 98<br>(45 - 202)         |
| Gallbladder and biliary diseases                    | 158<br>(100 - 249)       | 2<br>(1 - 3)       | 1<br>(0 - 1)        | 18<br>(11 - 28)      | 48<br>(27 - 78)      | 89<br>(46 - 157)         |
| Pancreatitis                                        | 54<br>(31 - 89)          | 0<br>(0 - 1)       | 1<br>(0 - 1)        | 10<br>(6 - 18)       | 21<br>(12 - 37)      | 21<br>(11 - 39)          |
| Other digestive diseases                            | 274<br>(184 - 427)       | 4<br>(2 - 9)       | 3<br>(2 - 6)        | 68<br>(43 - 105)     | 80<br>(49 - 120)     | 119<br>(67 - 211)        |
| Neurological disorders                              | 3,019<br>(2,342 - 3,812) | 59<br>(37 - 95)    | 28<br>(18 - 44)     | 159<br>(116 - 216)   | 300<br>(205 - 423)   | 2,473<br>(1,856 - 3,227) |
| Alzheimer disease and other dementias               | 2,635<br>(1,981 - 3,409) | --                 | --                  | 2<br>(0 - 5)         | 254<br>(163 - 371)   | 2,379<br>(1,767 - 3,115) |
| Parkinson disease                                   | 10<br>(6 - 17)           | --                 | --                  | 1<br>(1 - 1)         | 1<br>(0 - 1)         | 8<br>(5 - 15)            |
| Epilepsy                                            | 216<br>(157 - 295)       | 32<br>(15 - 65)    | 20<br>(11 - 35)     | 122<br>(83 - 176)    | 19<br>(11 - 30)      | 23<br>(13 - 39)          |
| Multiple sclerosis                                  | 18<br>(11 - 29)          | --                 | --                  | 8<br>(5 - 13)        | 6<br>(3 - 11)        | 4<br>(2 - 7)             |
| Other neurological disorders                        | 140<br>(119 - 171)       | 27<br>(19 - 38)    | 8<br>(6 - 11)       | 26<br>(21 - 32)      | 20<br>(15 - 26)      | 59<br>(44 - 79)          |
| Mental and substance use disorders                  | 166<br>(132 - 207)       | 4<br>(3 - 7)       | 0<br>(0 - 0)        | 89<br>(67 - 113)     | 35<br>(25 - 47)      | 37<br>(27 - 54)          |
| Schizophrenia                                       | 5<br>(3 - 12)            | --                 | --                  | 3<br>(2 - 7)         | 2<br>(1 - 5)         | 0<br>(0 - 1)             |
| Alcohol use disorders                               | 8<br>(4 - 17)            | --                 | --                  | 2<br>(1 - 4)         | 4<br>(2 - 9)         | 2<br>(1 - 4)             |
| Drug use disorders                                  | 150<br>(120 - 187)       | 4<br>(3 - 7)       | --                  | 83<br>(62 - 104)     | 29<br>(20 - 39)      | 35<br>(25 - 50)          |
| Opioid use disorders                                | 81<br>(64 - 102)         | 2<br>(1 - 4)       | --                  | 45<br>(33 - 57)      | 14<br>(10 - 20)      | 19<br>(13 - 28)          |
| Cocaine use disorders                               | 3<br>(2 - 3)             | 0<br>(0 - 0)       | --                  | 2<br>(1 - 2)         | 0<br>(0 - 1)         | 0<br>(0 - 1)             |
| Amphetamine use disorders                           | 3<br>(2 - 3)             | 0<br>(0 - 0)       | --                  | 2<br>(1 - 2)         | 1<br>(0 - 1)         | 1<br>(0 - 1)             |
| Other drug use disorders                            | 64<br>(49 - 80)          | 2<br>(1 - 3)       | --                  | 34<br>(25 - 43)      | 13<br>(10 - 19)      | 15<br>(10 - 21)          |

Web Table 31- Algeria deaths with 95% UI by age, sex, and cause in 2013

| Cause                                               | Females, All Ages         | Females, 0-4 Years       | Females, 5-14 Years | Females, 15-49 Years     | Females, 50-69 Years     | Females, 70-80 Years     |
|-----------------------------------------------------|---------------------------|--------------------------|---------------------|--------------------------|--------------------------|--------------------------|
| Eating disorders                                    | 2<br>(1 - 3)              | --                       | 0<br>(0 - 0)        | 2<br>(1 - 3)             | --                       | --                       |
| Anorexia nervosa                                    | 2<br>(1 - 3)              | --                       | 0<br>(0 - 0)        | 2<br>(1 - 3)             | --                       | --                       |
| Diabetes, urogenital, blood, and endocrine diseases | 9,128<br>(7,679 - 11,062) | 264<br>(185 - 360)       | 113<br>(85 - 148)   | 1,459<br>(1,146 - 1,781) | 2,839<br>(2,250 - 3,544) | 4,453<br>(3,659 - 5,601) |
| Diabetes mellitus                                   | 4,945<br>(4,105 - 6,184)  | 63<br>(33 - 107)         | 30<br>(17 - 48)     | 534<br>(408 - 674)       | 1,603<br>(1,231 - 2,065) | 2,716<br>(2,129 - 3,525) |
| Acute glomerulonephritis                            | 8<br>(6 - 11)             | 1<br>(0 - 1)             | 1<br>(1 - 1)        | 4<br>(3 - 5)             | 1<br>(1 - 2)             | 1<br>(1 - 2)             |
| Chronic kidney disease                              | 2,807<br>(2,004 - 3,587)  | 41<br>(22 - 66)          | 31<br>(20 - 45)     | 562<br>(381 - 730)       | 937<br>(635 - 1,261)     | 1,236<br>(867 - 1,665)   |
| Chronic kidney disease due to diabetes mellitus     | 8<br>(5 - 11)             | 1<br>(1 - 2)             | 1<br>(1 - 1)        | 4<br>(2 - 6)             | 1<br>(1 - 2)             | 1<br>(0 - 1)             |
| Chronic kidney disease due to hypertension          | 1,379<br>(899 - 1,875)    | 2<br>(1 - 5)             | 3<br>(1 - 5)        | 264<br>(163 - 378)       | 467<br>(280 - 683)       | 643<br>(420 - 901)       |
| Chronic kidney disease due to glomerulonephritis    | 106<br>(67 - 152)         | 11<br>(6 - 18)           | 7<br>(5 - 10)       | 23<br>(13 - 36)          | 33<br>(19 - 53)          | 32<br>(16 - 53)          |
| Chronic kidney disease due to other causes          | 1,314<br>(775 - 1,924)    | 26<br>(11 - 49)          | 20<br>(10 - 33)     | 271<br>(131 - 422)       | 437<br>(224 - 729)       | 561<br>(283 - 931)       |
| Urinary diseases and male infertility               | 286<br>(208 - 368)        | 18<br>(9 - 40)           | 5<br>(3 - 9)        | 75<br>(52 - 108)         | 72<br>(49 - 105)         | 115<br>(73 - 173)        |
| Interstitial nephritis and urinary tract infections | 162<br>(112 - 215)        | 14<br>(6 - 31)           | 2<br>(1 - 4)        | 49<br>(32 - 71)          | 44<br>(28 - 67)          | 53<br>(30 - 85)          |
| Urolithiasis                                        | 12<br>(7 - 21)            | --                       | 0<br>(0 - 1)        | 7<br>(4 - 13)            | 3<br>(1 - 7)             | 2<br>(1 - 4)             |
| Other urinary diseases                              | 112<br>(73 - 163)         | 5<br>(2 - 11)            | 2<br>(1 - 4)        | 19<br>(11 - 29)          | 25<br>(14 - 40)          | 61<br>(35 - 98)          |
| Gynecological diseases                              | 7<br>(5 - 10)             | --                       | --                  | 3<br>(2 - 5)             | 3<br>(1 - 5)             | 1<br>(1 - 2)             |
| Uterine fibroids                                    | 2<br>(1 - 3)              | --                       | --                  | 1<br>(0 - 1)             | 1<br>(0 - 2)             | 0<br>(0 - 1)             |
| Polycystic ovarian syndrome                         | 0<br>(0 - 0)              | --                       | --                  | 0<br>(0 - 0)             | 0<br>(0 - 0)             | --                       |
| Endometriosis                                       | 1<br>(0 - 1)              | --                       | --                  | 1<br>(0 - 1)             | 0<br>(0 - 0)             | --                       |
| Genital prolapse                                    | 1<br>(1 - 2)              | --                       | --                  | 0<br>(0 - 1)             | 0<br>(0 - 1)             | 0<br>(0 - 1)             |
| Other gynecological diseases                        | 3<br>(2 - 5)              | --                       | --                  | 2<br>(1 - 2)             | 1<br>(1 - 2)             | 1<br>(0 - 1)             |
| Hemoglobinopathies and hemolytic anemias            | 375<br>(224 - 530)        | 62<br>(36 - 98)          | 24<br>(14 - 37)     | 140<br>(85 - 205)        | 60<br>(33 - 92)          | 90<br>(48 - 148)         |
| Thalassemias                                        | 143<br>(88 - 205)         | 47<br>(27 - 76)          | 19<br>(11 - 29)     | 77<br>(46 - 113)         | 0<br>(0 - 0)             | 0<br>(0 - 0)             |
| Sickle cell disorders                               | 97<br>(59 - 142)          | 7<br>(4 - 12)            | 4<br>(2 - 6)        | 48<br>(29 - 72)          | 36<br>(20 - 56)          | 2<br>(1 - 3)             |
| G6PD deficiency                                     | 3<br>(2 - 4)              | 0<br>(0 - 1)             | 0<br>(0 - 0)        | 1<br>(1 - 2)             | 1<br>(0 - 1)             | 0<br>(0 - 1)             |
| Other hemoglobinopathies and hemolytic anemias      | 132<br>(75 - 204)         | 7<br>(4 - 11)            | 1<br>(1 - 2)        | 13<br>(8 - 20)           | 23<br>(13 - 35)          | 87<br>(46 - 145)         |
| Endocrine, metabolic, blood, and immune disorders   | 700<br>(433 - 929)        | 80<br>(44 - 133)         | 23<br>(12 - 40)     | 141<br>(88 - 195)        | 163<br>(95 - 245)        | 294<br>(157 - 448)       |
| Musculoskeletal disorders                           | 271<br>(208 - 349)        | --                       | 7<br>(5 - 11)       | 126<br>(89 - 167)        | 68<br>(46 - 100)         | 69<br>(44 - 102)         |
| Rheumatoid arthritis                                | 40<br>(27 - 57)           | --                       | 1<br>(1 - 2)        | 11<br>(6 - 17)           | 16<br>(9 - 25)           | 12<br>(7 - 21)           |
| Other musculoskeletal disorders                     | 230<br>(178 - 297)        | --                       | 6<br>(4 - 9)        | 115<br>(82 - 151)        | 53<br>(36 - 76)          | 56<br>(36 - 85)          |
| Other non-communicable diseases                     | 2,720<br>(2,028 - 3,581)  | 2,239<br>(1,563 - 3,048) | 85<br>(52 - 127)    | 154<br>(114 - 201)       | 83<br>(60 - 114)         | 159<br>(112 - 229)       |
| Congenital anomalies                                | 2,490<br>(1,796 - 3,323)  | 2,224<br>(1,554 - 3,032) | 81<br>(49 - 123)    | 113<br>(79 - 153)        | 35<br>(23 - 53)          | 37<br>(24 - 57)          |
| Neural tube defects                                 | 379<br>(147 - 731)        | 371<br>(138 - 723)       | 5<br>(2 - 10)       | 2<br>(1 - 3)             | 0<br>(0 - 1)             | 0<br>(0 - 1)             |
| Congenital heart anomalies                          | 718<br>(446 - 1,105)      | 615<br>(355 - 1,001)     | 42<br>(24 - 68)     | 43<br>(28 - 62)          | 10<br>(6 - 15)           | 8<br>(4 - 14)            |
| Cleft lip and cleft palate                          | 2<br>(1 - 4)              | 2<br>(1 - 4)             | --                  | --                       | --                       | --                       |
| Down syndrome                                       | 81<br>(44 - 143)          | 68<br>(34 - 126)         | 5<br>(2 - 9)        | 8<br>(4 - 14)            | 1<br>(0 - 1)             | 0<br>(0 - 0)             |
| Chromosomal unbalanced rearrangements               | 38<br>(19 - 76)           | 29<br>(12 - 63)          | 1<br>(1 - 2)        | 6<br>(3 - 10)            | 1<br>(0 - 2)             | 1<br>(0 - 2)             |
| Other congenital anomalies                          | 1,272<br>(842 - 1,851)    | 1,139<br>(722 - 1,697)   | 27<br>(15 - 46)     | 54<br>(36 - 77)          | 23<br>(15 - 36)          | 28<br>(18 - 43)          |
| Skin and subcutaneous diseases                      | 228<br>(162 - 309)        | 13<br>(6 - 24)           | 4<br>(3 - 6)        | 42<br>(25 - 60)          | 48<br>(30 - 70)          | 122<br>(76 - 193)        |
| Cellulitis                                          | 20<br>(11 - 31)           | 4<br>(1 - 8)             | 1<br>(0 - 1)        | 10<br>(5 - 16)           | 2<br>(1 - 4)             | 4<br>(2 - 7)             |
| Pyoderma                                            | 97<br>(68 - 134)          | 6<br>(3 - 13)            | 2<br>(1 - 3)        | 22<br>(13 - 34)          | 33<br>(21 - 49)          | 33<br>(18 - 57)          |

Web Table 31- Algeria deaths with 95% UI by age, sex, and cause in 2013

| Cause                                           | Females, All Ages        | Females, 0-4 Years | Females, 5-14 Years | Females, 15-49 Years     | Females, 50-69 Years   | Females, 70-80 Years     |
|-------------------------------------------------|--------------------------|--------------------|---------------------|--------------------------|------------------------|--------------------------|
| Decubitus ulcer                                 | 105<br>(68 - 160)        | 1<br>(0 - 1)       | 1<br>(0 - 1)        | 8<br>(5 - 12)            | 11<br>(6 - 18)         | 84<br>(50 - 137)         |
| Other skin and subcutaneous diseases            | 6<br>(4 - 10)            | 2<br>(1 - 5)       | 1<br>(0 - 2)        | 2<br>(1 - 3)             | 1<br>(0 - 2)           | 0<br>(0 - 1)             |
| Sudden infant death syndrome                    | 2<br>(0 - 13)            | 2<br>(0 - 13)      | --                  | --                       | --                     | --                       |
| Injuries                                        | 5,698<br>(4,767 - 6,863) | 631<br>(444 - 850) | 291<br>(226 - 369)  | 1,622<br>(1,309 - 1,969) | 1,285<br>(984 - 1,652) | 1,869<br>(1,408 - 2,427) |
| Transport injuries                              | 2,211<br>(1,835 - 2,690) | 251<br>(156 - 377) | 154<br>(107 - 211)  | 760<br>(581 - 973)       | 571<br>(420 - 775)     | 475<br>(337 - 650)       |
| Road injuries                                   | 2,094<br>(1,733 - 2,546) | 231<br>(142 - 352) | 144<br>(101 - 198)  | 721<br>(552 - 924)       | 542<br>(396 - 737)     | 456<br>(326 - 622)       |
| Pedestrian road injuries                        | 743<br>(574 - 974)       | 91<br>(50 - 147)   | 57<br>(35 - 84)     | 158<br>(109 - 222)       | 198<br>(137 - 293)     | 239<br>(159 - 346)       |
| Cyclist road injuries                           | 145<br>(106 - 190)       | 11<br>(5 - 23)     | 9<br>(5 - 15)       | 43<br>(29 - 61)          | 56<br>(36 - 82)        | 25<br>(15 - 40)          |
| Motorcyclist road injuries                      | 88<br>(56 - 127)         | 6<br>(3 - 12)      | 3<br>(2 - 6)        | 50<br>(32 - 75)          | 19<br>(11 - 30)        | 10<br>(5 - 17)           |
| Motor vehicle road injuries                     | 1,112<br>(877 - 1,380)   | 121<br>(70 - 193)  | 74<br>(48 - 108)    | 468<br>(350 - 613)       | 268<br>(188 - 377)     | 180<br>(115 - 264)       |
| Other road injuries                             | 6<br>(4 - 9)             | 1<br>(1 - 3)       | 0<br>(0 - 1)        | 2<br>(1 - 3)             | 1<br>(1 - 2)           | 1<br>(0 - 2)             |
| Other transport injuries                        | 116<br>(81 - 152)        | 20<br>(10 - 33)    | 9<br>(5 - 16)       | 39<br>(26 - 55)          | 29<br>(18 - 43)        | 19<br>(10 - 31)          |
| Unintentional injuries                          | 3,122<br>(2,426 - 3,883) | 374<br>(257 - 522) | 130<br>(97 - 174)   | 633<br>(458 - 821)       | 644<br>(456 - 898)     | 1,340<br>(938 - 1,816)   |
| Falls                                           | 827<br>(581 - 1,137)     | 34<br>(18 - 59)    | 10<br>(6 - 16)      | 31<br>(20 - 43)          | 217<br>(146 - 311)     | 535<br>(332 - 817)       |
| Drowning                                        | 171<br>(112 - 264)       | 96<br>(48 - 177)   | 45<br>(25 - 75)     | 11<br>(7 - 20)           | 5<br>(3 - 10)          | 13<br>(8 - 22)           |
| Fire, heat, and hot substances                  | 608<br>(420 - 841)       | 75<br>(38 - 135)   | 15<br>(8 - 24)      | 146<br>(95 - 206)        | 114<br>(69 - 170)      | 259<br>(157 - 408)       |
| Poisonings                                      | 275<br>(151 - 387)       | 18<br>(8 - 32)     | 4<br>(2 - 7)        | 195<br>(99 - 285)        | 24<br>(12 - 37)        | 34<br>(19 - 54)          |
| Exposure to mechanical forces                   | 90<br>(68 - 126)         | 33<br>(17 - 59)    | 14<br>(8 - 25)      | 15<br>(11 - 20)          | 15<br>(11 - 22)        | 12<br>(9 - 18)           |
| Unintentional firearm injuries                  | 7<br>(5 - 10)            | 1<br>(0 - 2)       | 0<br>(0 - 1)        | 2<br>(1 - 3)             | 2<br>(1 - 3)           | 2<br>(1 - 3)             |
| Unintentional suffocation                       | 4<br>(3 - 7)             | 1<br>(0 - 1)       | 0<br>(0 - 1)        | 2<br>(1 - 3)             | 1<br>(1 - 2)           | 0<br>(0 - 0)             |
| Other exposure to mechanical forces             | 79<br>(57 - 113)         | 32<br>(16 - 57)    | 14<br>(8 - 24)      | 11<br>(8 - 16)           | 12<br>(8 - 18)         | 10<br>(6 - 15)           |
| Adverse effects of medical treatment            | 984<br>(573 - 1,438)     | 69<br>(30 - 153)   | 16<br>(8 - 28)      | 186<br>(105 - 279)       | 252<br>(133 - 414)     | 461<br>(222 - 787)       |
| Animal contact                                  | 84<br>(34 - 155)         | 27<br>(9 - 58)     | 20<br>(7 - 37)      | 26<br>(10 - 50)          | 4<br>(2 - 8)           | 7<br>(3 - 15)            |
| Venomous animal contact                         | 65<br>(26 - 116)         | 21<br>(7 - 50)     | 19<br>(7 - 35)      | 20<br>(8 - 41)           | 1<br>(0 - 2)           | 3<br>(1 - 8)             |
| Non-venomous animal contact                     | 19<br>(8 - 37)           | 5<br>(2 - 14)      | 1<br>(0 - 2)        | 6<br>(2 - 11)            | 3<br>(1 - 6)           | 4<br>(1 - 7)             |
| Foreign body                                    | 10<br>(7 - 15)           | 1<br>(1 - 2)       | 1<br>(0 - 1)        | 3<br>(2 - 4)             | 2<br>(1 - 2)           | 4<br>(2 - 6)             |
| Pulmonary aspiration and foreign body in airway | 6<br>(4 - 10)            | 1<br>(0 - 1)       | 0<br>(0 - 1)        | 2<br>(1 - 3)             | 1<br>(1 - 2)           | 3<br>(2 - 5)             |
| Foreign body in other body part                 | 4<br>(2 - 5)             | 1<br>(0 - 1)       | 0<br>(0 - 0)        | 1<br>(1 - 2)             | 1<br>(0 - 1)           | 1<br>(0 - 1)             |
| Other unintentional injuries                    | 72<br>(56 - 103)         | 21<br>(12 - 37)    | 6<br>(3 - 9)        | 19<br>(14 - 31)          | 11<br>(7 - 18)         | 15<br>(10 - 23)          |
| Self-harm and interpersonal violence            | 366<br>(280 - 483)       | 6<br>(3 - 11)      | 7<br>(4 - 12)       | 229<br>(165 - 308)       | 70<br>(47 - 104)       | 54<br>(34 - 85)          |
| Self-harm                                       | 292<br>(216 - 405)       | --                 | 3<br>(1 - 6)        | 179<br>(123 - 256)       | 61<br>(40 - 92)        | 50<br>(30 - 82)          |
| Interpersonal violence                          | 74<br>(50 - 106)         | 6<br>(3 - 11)      | 4<br>(2 - 8)        | 51<br>(32 - 75)          | 9<br>(5 - 14)          | 4<br>(2 - 7)             |
| Assault by firearm                              | 13<br>(7 - 23)           | 1<br>(0 - 3)       | 1<br>(1 - 3)        | 8<br>(4 - 15)            | 2<br>(1 - 5)           | 0<br>(0 - 0)             |
| Assault by sharp object                         | 21<br>(13 - 34)          | 1<br>(1 - 2)       | 1<br>(0 - 2)        | 17<br>(10 - 28)          | 1<br>(1 - 3)           | 0<br>(0 - 1)             |
| Assault by other means                          | 39<br>(25 - 59)          | 4<br>(2 - 7)       | 2<br>(1 - 4)        | 25<br>(15 - 39)          | 5<br>(3 - 8)           | 3<br>(2 - 6)             |

Web Table 31- Andorra deaths with 95% UI by age, sex, and cause in 2013

| Cause                                                             | Both Sexes, All Ages | Both Sexes, 0-4 Years | Both Sexes, 5-14 Years | Both Sexes, 15-49 Years | Both Sexes, 50-69 Years | Both Sexes, 70-80 Years |
|-------------------------------------------------------------------|----------------------|-----------------------|------------------------|-------------------------|-------------------------|-------------------------|
| All causes                                                        | 652<br>(579 - 729)   | 2<br>(1 - 3)          | 1<br>(0 - 1)           | 25<br>(20 - 32)         | 87<br>(67 - 107)        | 537<br>(488 - 590)      |
| Communicable, maternal, neonatal, and nutritional diseases        | 47<br>(35 - 64)      | 1<br>(0 - 1)          | 0<br>(0 - 0)           | 5<br>(2 - 6)            | 3<br>(2 - 4)            | 39<br>(27 - 55)         |
| HIV/AIDS and tuberculosis                                         | 6<br>(3 - 9)         | 0<br>(0 - 0)          | 0<br>(0 - 0)           | 4<br>(2 - 6)            | 1<br>(1 - 2)            | 1<br>(0 - 1)            |
| Tuberculosis                                                      | 0<br>(0 - 1)         | 0<br>(0 - 0)          | 0<br>(0 - 0)           | 0<br>(0 - 0)            | 0<br>(0 - 0)            | 0<br>(0 - 1)            |
| HIV/AIDS                                                          | 6<br>(3 - 8)         | 0<br>(0 - 0)          | 0<br>(0 - 0)           | 4<br>(2 - 6)            | 1<br>(1 - 2)            | 0<br>(0 - 1)            |
| HIV/AIDS resulting in mycobacterial infection                     | 0<br>(0 - 0)         | 0<br>(0 - 0)          | 0<br>(0 - 0)           | 0<br>(0 - 0)            | 0<br>(0 - 0)            | 0<br>(0 - 0)            |
| HIV/AIDS resulting in other diseases                              | 5<br>(2 - 8)         | 0<br>(0 - 0)          | 0<br>(0 - 0)           | 4<br>(2 - 6)            | 1<br>(1 - 2)            | 0<br>(0 - 1)            |
| Diarrhea, lower respiratory, and other common infectious diseases | 39<br>(27 - 55)      | 0<br>(0 - 0)          | 0<br>(0 - 0)           | 0<br>(0 - 1)            | 1<br>(1 - 2)            | 37<br>(25 - 53)         |
| Diarrheal diseases                                                | 1<br>(0 - 2)         | 0<br>(0 - 0)          | 0<br>(0 - 0)           | 0<br>(0 - 0)            | 0<br>(0 - 0)            | 1<br>(0 - 1)            |
| Intestinal infectious diseases                                    | 0<br>(0 - 0)         | 0<br>(0 - 0)          | 0<br>(0 - 0)           | 0<br>(0 - 0)            | 0<br>(0 - 0)            | 0<br>(0 - 0)            |
| Typhoid fever                                                     | 0<br>(0 - 0)         | 0<br>(0 - 0)          | 0<br>(0 - 0)           | 0<br>(0 - 0)            | 0<br>(0 - 0)            | 0<br>(0 - 0)            |
| Paratyphoid fever                                                 | 0<br>(0 - 0)         | 0<br>(0 - 0)          | 0<br>(0 - 0)           | 0<br>(0 - 0)            | 0<br>(0 - 0)            | 0<br>(0 - 0)            |
| Other intestinal infectious diseases                              | 0<br>(0 - 0)         | 0<br>(0 - 0)          | 0<br>(0 - 0)           | 0<br>(0 - 0)            | 0<br>(0 - 0)            | 0<br>(0 - 0)            |
| Lower respiratory infections                                      | 37<br>(25 - 53)      | 0<br>(0 - 0)          | 0<br>(0 - 0)           | 0<br>(0 - 0)            | 1<br>(1 - 2)            | 36<br>(24 - 52)         |
| Upper respiratory infections                                      | 0<br>(0 - 0)         | 0<br>(0 - 0)          | 0<br>(0 - 0)           | 0<br>(0 - 0)            | 0<br>(0 - 0)            | 0<br>(0 - 0)            |
| Otitis media                                                      | 0<br>(0 - 0)         | 0<br>(0 - 0)          | 0<br>(0 - 0)           | 0<br>(0 - 0)            | 0<br>(0 - 0)            | 0<br>(0 - 0)            |
| Meningitis                                                        | 0<br>(0 - 0)         | 0<br>(0 - 0)          | 0<br>(0 - 0)           | 0<br>(0 - 0)            | 0<br>(0 - 0)            | 0<br>(0 - 0)            |
| Pneumococcal meningitis                                           | 0<br>(0 - 0)         | 0<br>(0 - 0)          | 0<br>(0 - 0)           | 0<br>(0 - 0)            | 0<br>(0 - 0)            | 0<br>(0 - 0)            |
| H influenzae type B meningitis                                    | 0<br>(0 - 0)         | 0<br>(0 - 0)          | 0<br>(0 - 0)           | 0<br>(0 - 0)            | 0<br>(0 - 0)            | 0<br>(0 - 0)            |
| Meningococcal meningitis                                          | 0<br>(0 - 0)         | 0<br>(0 - 0)          | 0<br>(0 - 0)           | 0<br>(0 - 0)            | 0<br>(0 - 0)            | 0<br>(0 - 0)            |
| Other meningitis                                                  | 0<br>(0 - 0)         | 0<br>(0 - 0)          | 0<br>(0 - 0)           | 0<br>(0 - 0)            | 0<br>(0 - 0)            | 0<br>(0 - 0)            |
| Encephalitis                                                      | 0<br>(0 - 0)         | 0<br>(0 - 0)          | 0<br>(0 - 0)           | 0<br>(0 - 0)            | 0<br>(0 - 0)            | 0<br>(0 - 0)            |
| Diphtheria                                                        | 0<br>(0 - 0)         | 0<br>(0 - 0)          | 0<br>(0 - 0)           | 0<br>(0 - 0)            | 0<br>(0 - 0)            | --                      |
| Whooping cough                                                    | 0<br>(0 - 0)         | 0<br>(0 - 0)          | 0<br>(0 - 0)           | 0<br>(0 - 0)            | 0<br>(0 - 0)            | --                      |
| Tetanus                                                           | 0<br>(0 - 0)         | 0<br>(0 - 0)          | 0<br>(0 - 0)           | 0<br>(0 - 0)            | 0<br>(0 - 0)            | 0<br>(0 - 0)            |
| Measles                                                           | 0<br>(0 - 0)         | 0<br>(0 - 0)          | 0<br>(0 - 0)           | 0<br>(0 - 0)            | 0<br>(0 - 0)            | --                      |
| Varicella and herpes zoster                                       | 0<br>(0 - 0)         | 0<br>(0 - 0)          | 0<br>(0 - 0)           | 0<br>(0 - 0)            | 0<br>(0 - 0)            | 0<br>(0 - 0)            |
| Neglected tropical diseases and malaria                           | 0<br>(0 - 0)         | 0<br>(0 - 0)          | 0<br>(0 - 0)           | 0<br>(0 - 0)            | 0<br>(0 - 0)            | 0<br>(0 - 0)            |
| Cysticercosis                                                     | 0<br>(0 - 0)         | 0<br>(0 - 0)          | 0<br>(0 - 0)           | 0<br>(0 - 0)            | 0<br>(0 - 0)            | 0<br>(0 - 0)            |
| Cystic echinococcosis                                             | 0<br>(0 - 0)         | 0<br>(0 - 0)          | 0<br>(0 - 0)           | 0<br>(0 - 0)            | 0<br>(0 - 0)            | 0<br>(0 - 0)            |
| Dengue                                                            | 0<br>(0 - 0)         | 0<br>(0 - 0)          | 0<br>(0 - 0)           | 0<br>(0 - 0)            | 0<br>(0 - 0)            | 0<br>(0 - 0)            |
| Rabies                                                            | 0<br>(0 - 0)         | 0<br>(0 - 0)          | 0<br>(0 - 0)           | 0<br>(0 - 0)            | 0<br>(0 - 0)            | 0<br>(0 - 0)            |
| Other neglected tropical diseases                                 | 0<br>(0 - 0)         | 0<br>(0 - 0)          | 0<br>(0 - 0)           | 0<br>(0 - 0)            | 0<br>(0 - 0)            | 0<br>(0 - 0)            |
| Maternal disorders                                                | 0<br>(0 - 0)         | --                    | 0<br>(0 - 0)           | 0<br>(0 - 0)            | --                      | --                      |
| Maternal hemorrhage                                               | 0<br>(0 - 0)         | --                    | 0<br>(0 - 0)           | 0<br>(0 - 0)            | --                      | --                      |
| Maternal sepsis and other maternal infections                     | 0<br>(0 - 0)         | --                    | 0<br>(0 - 0)           | 0<br>(0 - 0)            | --                      | --                      |
| Maternal hypertensive disorders                                   | 0<br>(0 - 0)         | --                    | 0<br>(0 - 0)           | 0<br>(0 - 0)            | --                      | --                      |
| Maternal obstructed labor                                         | 0<br>(0 - 0)         | --                    | 0<br>(0 - 0)           | 0<br>(0 - 0)            | --                      | --                      |
| Maternal abortive outcome                                         | 0<br>(0 - 0)         | --                    | 0<br>(0 - 0)           | 0<br>(0 - 0)            | --                      | --                      |
| Indirect maternal deaths                                          | 0<br>(0 - 0)         | --                    | 0<br>(0 - 0)           | 0<br>(0 - 0)            | --                      | --                      |

Web Table 31- Andorra deaths with 95% UI by age, sex, and cause in 2013

| Cause                                                            | Both Sexes, All Ages | Both Sexes, 0-4 Years | Both Sexes, 5-14 Years | Both Sexes, 15-49 Years | Both Sexes, 50-69 Years | Both Sexes, 70-80 Years |
|------------------------------------------------------------------|----------------------|-----------------------|------------------------|-------------------------|-------------------------|-------------------------|
| Late maternal deaths                                             | 0<br>(0 - 0)         | --                    | 0<br>(0 - 0)           | 0<br>(0 - 0)            | --                      | --                      |
| Maternal deaths aggravated by HIV/AIDS                           | 0<br>(0 - 0)         | --                    | --                     | 0<br>(0 - 0)            | --                      | --                      |
| Other maternal disorders                                         | 0<br>(0 - 0)         | --                    | 0<br>(0 - 0)           | 0<br>(0 - 0)            | --                      | --                      |
| Neonatal disorders                                               | 1<br>(0 - 1)         | 1<br>(0 - 1)          | --                     | --                      | --                      | --                      |
| Neonatal preterm birth complications                             | 0<br>(0 - 1)         | 0<br>(0 - 1)          | --                     | --                      | --                      | --                      |
| Neonatal encephalopathy due to birth asphyxia and trauma         | 0<br>(0 - 0)         | 0<br>(0 - 0)          | --                     | --                      | --                      | --                      |
| Neonatal sepsis and other neonatal infections                    | 0<br>(0 - 0)         | 0<br>(0 - 0)          | --                     | --                      | --                      | --                      |
| Hemolytic disease and other neonatal jaundice                    | 0<br>(0 - 0)         | 0<br>(0 - 0)          | --                     | --                      | --                      | --                      |
| Other neonatal disorders                                         | 0<br>(0 - 0)         | 0<br>(0 - 0)          | --                     | --                      | --                      | --                      |
| Nutritional deficiencies                                         | 1<br>(1 - 2)         | 0<br>(0 - 0)          | 0<br>(0 - 0)           | 0<br>(0 - 0)            | 0<br>(0 - 0)            | 1<br>(1 - 2)            |
| Protein-energy malnutrition                                      | 0<br>(0 - 0)         | 0<br>(0 - 0)          | 0<br>(0 - 0)           | 0<br>(0 - 0)            | 0<br>(0 - 0)            | 0<br>(0 - 0)            |
| Iodine deficiency                                                | 0<br>(0 - 0)         | 0<br>(0 - 0)          | 0<br>(0 - 0)           | 0<br>(0 - 0)            | 0<br>(0 - 0)            | 0<br>(0 - 0)            |
| Iron-deficiency anemia                                           | 1<br>(1 - 1)         | 0<br>(0 - 0)          | 0<br>(0 - 0)           | 0<br>(0 - 0)            | 0<br>(0 - 0)            | 1<br>(0 - 1)            |
| Other nutritional deficiencies                                   | 0<br>(0 - 0)         | 0<br>(0 - 0)          | 0<br>(0 - 0)           | 0<br>(0 - 0)            | 0<br>(0 - 0)            | 0<br>(0 - 0)            |
| Other communicable, maternal, neonatal, and nutritional diseases | 1<br>(0 - 1)         | 0<br>(0 - 0)          | 0<br>(0 - 0)           | 0<br>(0 - 0)            | 0<br>(0 - 0)            | 0<br>(0 - 1)            |
| Sexually transmitted diseases excluding HIV                      | 0<br>(0 - 0)         | 0<br>(0 - 0)          | 0<br>(0 - 0)           | 0<br>(0 - 0)            | 0<br>(0 - 0)            | 0<br>(0 - 0)            |
| Syphilis                                                         | 0<br>(0 - 0)         | 0<br>(0 - 0)          | 0<br>(0 - 0)           | 0<br>(0 - 0)            | 0<br>(0 - 0)            | 0<br>(0 - 0)            |
| Chlamydial infection                                             | 0<br>(0 - 0)         | --                    | 0<br>(0 - 0)           | 0<br>(0 - 0)            | 0<br>(0 - 0)            | 0<br>(0 - 0)            |
| Gonococcal infection                                             | 0<br>(0 - 0)         | --                    | 0<br>(0 - 0)           | 0<br>(0 - 0)            | 0<br>(0 - 0)            | 0<br>(0 - 0)            |
| Other sexually transmitted diseases                              | 0<br>(0 - 0)         | --                    | 0<br>(0 - 0)           | 0<br>(0 - 0)            | 0<br>(0 - 0)            | 0<br>(0 - 0)            |
| Hepatitis                                                        | 0<br>(0 - 0)         | 0<br>(0 - 0)          | 0<br>(0 - 0)           | 0<br>(0 - 0)            | 0<br>(0 - 0)            | 0<br>(0 - 0)            |
| Acute hepatitis A                                                | 0<br>(0 - 0)         | 0<br>(0 - 0)          | 0<br>(0 - 0)           | 0<br>(0 - 0)            | 0<br>(0 - 0)            | 0<br>(0 - 0)            |
| Acute hepatitis B                                                | 0<br>(0 - 0)         | 0<br>(0 - 0)          | 0<br>(0 - 0)           | 0<br>(0 - 0)            | 0<br>(0 - 0)            | 0<br>(0 - 0)            |
| Acute hepatitis C                                                | 0<br>(0 - 0)         | --                    | 0<br>(0 - 0)           | 0<br>(0 - 0)            | 0<br>(0 - 0)            | 0<br>(0 - 0)            |
| Other infectious diseases                                        | 1<br>(0 - 1)         | 0<br>(0 - 0)          | 0<br>(0 - 0)           | 0<br>(0 - 0)            | 0<br>(0 - 0)            | 0<br>(0 - 1)            |
| Non-communicable diseases                                        | 576<br>(513 - 650)   | 1<br>(1 - 2)          | 0<br>(0 - 0)           | 14<br>(11 - 19)         | 79<br>(62 - 99)         | 481<br>(436 - 532)      |
| Neoplasms                                                        | 182<br>(149 - 218)   | 0<br>(0 - 0)          | 0<br>(0 - 0)           | 7<br>(5 - 10)           | 47<br>(36 - 60)         | 127<br>(107 - 152)      |
| Esophageal cancer                                                | 4<br>(2 - 6)         | --                    | --                     | 0<br>(0 - 0)            | 1<br>(1 - 2)            | 3<br>(2 - 4)            |
| Stomach cancer                                                   | 9<br>(7 - 12)        | --                    | --                     | 0<br>(0 - 0)            | 2<br>(1 - 2)            | 7<br>(5 - 10)           |
| Liver cancer                                                     | 4<br>(2 - 6)         | --                    | 0<br>(0 - 0)           | 0<br>(0 - 0)            | 1<br>(1 - 2)            | 3<br>(2 - 4)            |
| Liver cancer due to hepatitis B                                  | 1<br>(0 - 1)         | --                    | 0<br>(0 - 0)           | 0<br>(0 - 0)            | 0<br>(0 - 1)            | 0<br>(0 - 1)            |
| Liver cancer due to hepatitis C                                  | 2<br>(1 - 3)         | --                    | 0<br>(0 - 0)           | 0<br>(0 - 0)            | 1<br>(0 - 1)            | 1<br>(1 - 2)            |
| Liver cancer due to alcohol use                                  | 1<br>(1 - 2)         | --                    | --                     | 0<br>(0 - 0)            | 0<br>(0 - 1)            | 1<br>(0 - 1)            |
| Liver cancer due to other causes                                 | 0<br>(0 - 0)         | --                    | 0<br>(0 - 0)           | 0<br>(0 - 0)            | 0<br>(0 - 0)            | 0<br>(0 - 0)            |
| Larynx cancer                                                    | 1<br>(1 - 1)         | --                    | --                     | 0<br>(0 - 0)            | 0<br>(0 - 1)            | 1<br>(0 - 1)            |
| Tracheal, bronchus and lung cancer                               | 41<br>(31 - 54)      | --                    | --                     | 1<br>(1 - 2)            | 14<br>(10 - 20)         | 26<br>(19 - 34)         |
| Breast cancer                                                    | 12<br>(7 - 19)       | --                    | --                     | 1<br>(0 - 2)            | 3<br>(2 - 6)            | 8<br>(5 - 12)           |
| Cervical cancer                                                  | 1<br>(1 - 2)         | --                    | --                     | 0<br>(0 - 0)            | 0<br>(0 - 1)            | 1<br>(0 - 1)            |
| Uterine cancer                                                   | 1<br>(1 - 2)         | --                    | --                     | 0<br>(0 - 0)            | 0<br>(0 - 1)            | 1<br>(1 - 2)            |
| Prostate cancer                                                  | 17<br>(12 - 24)      | --                    | --                     | 0<br>(0 - 0)            | 2<br>(1 - 3)            | 15<br>(10 - 21)         |

Web Table 31- Andorra deaths with 95% UI by age, sex, and cause in 2013

| Cause                                         | Both Sexes, All Ages | Both Sexes, 0-4 Years | Both Sexes, 5-14 Years | Both Sexes, 15-49 Years | Both Sexes, 50-69 Years | Both Sexes, 70-80 Years |
|-----------------------------------------------|----------------------|-----------------------|------------------------|-------------------------|-------------------------|-------------------------|
| Colon and rectum cancer                       | 26<br>(21 - 33)      | --                    | --                     | 1<br>(0 - 1)            | 5<br>(4 - 7)            | 20<br>(16 - 26)         |
| Lip and oral cavity cancer                    | 2<br>(1 - 3)         | --                    | --                     | 0<br>(0 - 0)            | 1<br>(0 - 1)            | 1<br>(1 - 1)            |
| Nasopharynx cancer                            | 0<br>(0 - 0)         | --                    | 0<br>(0 - 0)           | 0<br>(0 - 0)            | 0<br>(0 - 0)            | 0<br>(0 - 0)            |
| Other pharynx cancer                          | 1<br>(0 - 1)         | --                    | --                     | 0<br>(0 - 0)            | 0<br>(0 - 1)            | 0<br>(0 - 0)            |
| Gallbladder and biliary tract cancer          | 2<br>(1 - 3)         | --                    | --                     | 0<br>(0 - 0)            | 0<br>(0 - 1)            | 2<br>(1 - 3)            |
| Pancreatic cancer                             | 15<br>(11 - 18)      | --                    | --                     | 0<br>(0 - 1)            | 4<br>(3 - 6)            | 10<br>(8 - 12)          |
| Malignant skin melanoma                       | 2<br>(1 - 3)         | --                    | --                     | 0<br>(0 - 0)            | 1<br>(0 - 1)            | 1<br>(1 - 2)            |
| Non-melanoma skin cancer                      | 1<br>(1 - 1)         | --                    | --                     | 0<br>(0 - 0)            | 0<br>(0 - 0)            | 1<br>(0 - 1)            |
| Ovarian cancer                                | 5<br>(3 - 7)         | --                    | --                     | 0<br>(0 - 0)            | 2<br>(1 - 3)            | 3<br>(2 - 4)            |
| Testicular cancer                             | 0<br>(0 - 0)         | --                    | --                     | 0<br>(0 - 0)            | 0<br>(0 - 0)            | 0<br>(0 - 0)            |
| Kidney cancer                                 | 4<br>(2 - 6)         | 0<br>(0 - 0)          | 0<br>(0 - 0)           | 0<br>(0 - 0)            | 1<br>(1 - 2)            | 3<br>(2 - 4)            |
| Bladder cancer                                | 5<br>(3 - 6)         | --                    | --                     | 0<br>(0 - 0)            | 1<br>(0 - 1)            | 4<br>(3 - 5)            |
| Brain and nervous system cancer               | 5<br>(4 - 6)         | 0<br>(0 - 0)          | 0<br>(0 - 0)           | 1<br>(1 - 1)            | 2<br>(1 - 3)            | 2<br>(1 - 3)            |
| Thyroid cancer                                | 1<br>(0 - 1)         | --                    | 0<br>(0 - 0)           | 0<br>(0 - 0)            | 0<br>(0 - 0)            | 1<br>(0 - 1)            |
| Mesothelioma                                  | 1<br>(1 - 3)         | --                    | --                     | 0<br>(0 - 0)            | 1<br>(0 - 1)            | 1<br>(0 - 2)            |
| Hodgkin lymphoma                              | 0<br>(0 - 0)         | 0<br>(0 - 0)          | 0<br>(0 - 0)           | 0<br>(0 - 0)            | 0<br>(0 - 0)            | 0<br>(0 - 0)            |
| Non-Hodgkin lymphoma                          | 6<br>(3 - 8)         | 0<br>(0 - 0)          | 0<br>(0 - 0)           | 0<br>(0 - 1)            | 1<br>(1 - 2)            | 4<br>(2 - 6)            |
| Multiple myeloma                              | 4<br>(2 - 5)         | --                    | --                     | 0<br>(0 - 0)            | 1<br>(1 - 1)            | 3<br>(2 - 4)            |
| Leukemia                                      | 6<br>(4 - 8)         | 0<br>(0 - 0)          | 0<br>(0 - 0)           | 0<br>(0 - 1)            | 1<br>(1 - 2)            | 4<br>(3 - 5)            |
| Other neoplasms                               | 7<br>(5 - 10)        | 0<br>(0 - 0)          | 0<br>(0 - 0)           | 1<br>(0 - 1)            | 2<br>(1 - 2)            | 5<br>(4 - 7)            |
| Cardiovascular diseases                       | 231<br>(186 - 272)   | 0<br>(0 - 0)          | 0<br>(0 - 0)           | 3<br>(2 - 4)            | 19<br>(14 - 25)         | 209<br>(167 - 244)      |
| Rheumatic heart disease                       | 1<br>(1 - 2)         | 0<br>(0 - 0)          | 0<br>(0 - 0)           | 0<br>(0 - 0)            | 0<br>(0 - 0)            | 1<br>(0 - 1)            |
| Ischemic heart disease                        | 117<br>(79 - 145)    | 0<br>(0 - 0)          | 0<br>(0 - 0)           | 2<br>(1 - 2)            | 12<br>(8 - 16)          | 103<br>(69 - 128)       |
| Cerebrovascular disease                       | 75<br>(56 - 100)     | 0<br>(0 - 0)          | 0<br>(0 - 0)           | 1<br>(0 - 1)            | 4<br>(3 - 6)            | 70<br>(52 - 93)         |
| Ischemic stroke                               | 48<br>(35 - 65)      | 0<br>(0 - 0)          | 0<br>(0 - 0)           | 0<br>(0 - 0)            | 2<br>(1 - 2)            | 47<br>(34 - 63)         |
| Hemorrhagic stroke                            | 26<br>(17 - 37)      | 0<br>(0 - 0)          | 0<br>(0 - 0)           | 1<br>(0 - 1)            | 3<br>(2 - 4)            | 23<br>(15 - 34)         |
| Hypertensive heart disease                    | 4<br>(2 - 6)         | 0<br>(0 - 0)          | 0<br>(0 - 0)           | 0<br>(0 - 0)            | 0<br>(0 - 1)            | 4<br>(2 - 6)            |
| Cardiomyopathy and myocarditis                | 5<br>(3 - 9)         | 0<br>(0 - 0)          | 0<br>(0 - 0)           | 0<br>(0 - 0)            | 1<br>(0 - 1)            | 5<br>(2 - 8)            |
| Atrial fibrillation and flutter               | 9<br>(5 - 18)        | --                    | --                     | 0<br>(0 - 0)            | 0<br>(0 - 1)            | 9<br>(4 - 17)           |
| Aortic aneurysm                               | 6<br>(4 - 8)         | --                    | --                     | 0<br>(0 - 0)            | 1<br>(0 - 1)            | 5<br>(3 - 7)            |
| Peripheral vascular disease                   | 2<br>(1 - 4)         | --                    | --                     | 0<br>(0 - 0)            | 0<br>(0 - 0)            | 2<br>(1 - 3)            |
| Endocarditis                                  | 1<br>(0 - 1)         | 0<br>(0 - 0)          | 0<br>(0 - 0)           | 0<br>(0 - 0)            | 0<br>(0 - 0)            | 1<br>(0 - 1)            |
| Other cardiovascular and circulatory diseases | 11<br>(6 - 17)       | 0<br>(0 - 0)          | 0<br>(0 - 0)           | 0<br>(0 - 0)            | 1<br>(1 - 2)            | 10<br>(6 - 15)          |
| Chronic respiratory diseases                  | 37<br>(29 - 48)      | 0<br>(0 - 0)          | 0<br>(0 - 0)           | 0<br>(0 - 0)            | 3<br>(2 - 4)            | 33<br>(26 - 43)         |
| Chronic obstructive pulmonary disease         | 32<br>(25 - 43)      | 0<br>(0 - 0)          | 0<br>(0 - 0)           | 0<br>(0 - 0)            | 3<br>(2 - 4)            | 30<br>(23 - 39)         |
| Pneumoconiosis                                | 1<br>(0 - 2)         | 0<br>(0 - 0)          | 0<br>(0 - 0)           | 0<br>(0 - 0)            | 0<br>(0 - 0)            | 1<br>(0 - 1)            |
| Silicosis                                     | 0<br>(0 - 0)         | 0<br>(0 - 0)          | 0<br>(0 - 0)           | 0<br>(0 - 0)            | 0<br>(0 - 0)            | 0<br>(0 - 0)            |
| Asbestosis                                    | 0<br>(0 - 1)         | 0<br>(0 - 0)          | 0<br>(0 - 0)           | 0<br>(0 - 0)            | 0<br>(0 - 0)            | 0<br>(0 - 1)            |
| Coal workers pneumoconiosis                   | 0<br>(0 - 0)         | 0<br>(0 - 0)          | 0<br>(0 - 0)           | 0<br>(0 - 0)            | 0<br>(0 - 0)            | 0<br>(0 - 0)            |
| Other pneumoconiosis                          | 0<br>(0 - 1)         | 0<br>(0 - 0)          | 0<br>(0 - 0)           | 0<br>(0 - 0)            | 0<br>(0 - 0)            | 0<br>(0 - 1)            |



Web Table 31- Andorra deaths with 95% UI by age, sex, and cause in 2013

| Cause                                               | Both Sexes, All Ages | Both Sexes, 0-4 Years | Both Sexes, 5-14 Years | Both Sexes, 15-49 Years | Both Sexes, 50-69 Years | Both Sexes, 70-80 Years |
|-----------------------------------------------------|----------------------|-----------------------|------------------------|-------------------------|-------------------------|-------------------------|
| Asthma                                              | 1<br>(1 - 3)         | 0<br>(0 - 0)          | 0<br>(0 - 0)           | 0<br>(0 - 0)            | 0<br>(0 - 0)            | 1<br>(1 - 2)            |
| Interstitial lung disease and pulmonary sarcoidosis | 2<br>(0 - 4)         | 0<br>(0 - 0)          | 0<br>(0 - 0)           | 0<br>(0 - 0)            | 0<br>(0 - 1)            | 1<br>(0 - 4)            |
| Other chronic respiratory diseases                  | 0<br>(0 - 1)         | 0<br>(0 - 0)          | 0<br>(0 - 0)           | 0<br>(0 - 0)            | 0<br>(0 - 0)            | 0<br>(0 - 0)            |
| Cirrhosis                                           | 7<br>(5 - 9)         | 0<br>(0 - 0)          | 0<br>(0 - 0)           | 1<br>(1 - 1)            | 2<br>(2 - 3)            | 3<br>(3 - 5)            |
| Cirrhosis due to hepatitis B                        | 1<br>(0 - 1)         | 0<br>(0 - 0)          | 0<br>(0 - 0)           | 0<br>(0 - 0)            | 0<br>(0 - 0)            | 0<br>(0 - 1)            |
| Cirrhosis due to hepatitis C                        | 3<br>(2 - 5)         | 0<br>(0 - 0)          | 0<br>(0 - 0)           | 0<br>(0 - 1)            | 1<br>(1 - 2)            | 2<br>(1 - 3)            |
| Cirrhosis due to alcohol use                        | 2<br>(1 - 4)         | --                    | --                     | 0<br>(0 - 0)            | 1<br>(0 - 1)            | 1<br>(1 - 2)            |
| Cirrhosis due to other causes                       | 1<br>(0 - 1)         | 0<br>(0 - 0)          | 0<br>(0 - 0)           | 0<br>(0 - 0)            | 0<br>(0 - 0)            | 0<br>(0 - 0)            |
| Digestive diseases                                  | 18<br>(14 - 23)      | 0<br>(0 - 0)          | 0<br>(0 - 0)           | 0<br>(0 - 0)            | 1<br>(1 - 2)            | 16<br>(12 - 21)         |
| Peptic ulcer disease                                | 3<br>(2 - 5)         | 0<br>(0 - 0)          | 0<br>(0 - 0)           | 0<br>(0 - 0)            | 0<br>(0 - 0)            | 3<br>(2 - 4)            |
| Gastritis and duodenitis                            | 0<br>(0 - 0)         | 0<br>(0 - 0)          | 0<br>(0 - 0)           | 0<br>(0 - 0)            | 0<br>(0 - 0)            | 0<br>(0 - 0)            |
| Appendicitis                                        | 0<br>(0 - 0)         | 0<br>(0 - 0)          | 0<br>(0 - 0)           | 0<br>(0 - 0)            | 0<br>(0 - 0)            | 0<br>(0 - 0)            |
| Paralytic ileus and intestinal obstruction          | 4<br>(2 - 6)         | 0<br>(0 - 0)          | 0<br>(0 - 0)           | 0<br>(0 - 0)            | 0<br>(0 - 0)            | 3<br>(2 - 5)            |
| Inguinal, femoral, and abdominal hernia             | 1<br>(0 - 1)         | 0<br>(0 - 0)          | 0<br>(0 - 0)           | 0<br>(0 - 0)            | 0<br>(0 - 0)            | 0<br>(0 - 1)            |
| Inflammatory bowel disease                          | 1<br>(0 - 2)         | 0<br>(0 - 0)          | 0<br>(0 - 0)           | 0<br>(0 - 0)            | 0<br>(0 - 0)            | 1<br>(0 - 2)            |
| Vascular intestinal disorders                       | 3<br>(1 - 4)         | 0<br>(0 - 0)          | 0<br>(0 - 0)           | 0<br>(0 - 0)            | 0<br>(0 - 0)            | 2<br>(1 - 4)            |
| Gallbladder and biliary diseases                    | 2<br>(1 - 4)         | 0<br>(0 - 0)          | 0<br>(0 - 0)           | 0<br>(0 - 0)            | 0<br>(0 - 0)            | 2<br>(1 - 3)            |
| Pancreatitis                                        | 1<br>(1 - 2)         | 0<br>(0 - 0)          | 0<br>(0 - 0)           | 0<br>(0 - 0)            | 0<br>(0 - 0)            | 1<br>(1 - 2)            |
| Other digestive diseases                            | 3<br>(2 - 5)         | 0<br>(0 - 0)          | 0<br>(0 - 0)           | 0<br>(0 - 0)            | 0<br>(0 - 0)            | 3<br>(2 - 5)            |
| Neurological disorders                              | 68<br>(49 - 89)      | 0<br>(0 - 0)          | 0<br>(0 - 0)           | 1<br>(0 - 1)            | 3<br>(2 - 4)            | 65<br>(46 - 85)         |
| Alzheimer disease and other dementias               | 58<br>(39 - 77)      | --                    | --                     | 0<br>(0 - 0)            | 1<br>(1 - 2)            | 57<br>(38 - 76)         |
| Parkinson disease                                   | 6<br>(4 - 11)        | --                    | --                     | 0<br>(0 - 0)            | 0<br>(0 - 1)            | 6<br>(4 - 10)           |
| Epilepsy                                            | 1<br>(0 - 1)         | 0<br>(0 - 0)          | 0<br>(0 - 0)           | 0<br>(0 - 0)            | 0<br>(0 - 0)            | 0<br>(0 - 1)            |
| Multiple sclerosis                                  | 1<br>(0 - 1)         | --                    | --                     | 0<br>(0 - 0)            | 0<br>(0 - 0)            | 0<br>(0 - 0)            |
| Other neurological disorders                        | 3<br>(2 - 4)         | 0<br>(0 - 0)          | 0<br>(0 - 0)           | 0<br>(0 - 0)            | 1<br>(1 - 1)            | 2<br>(1 - 2)            |
| Mental and substance use disorders                  | 2<br>(2 - 3)         | 0<br>(0 - 0)          | 0<br>(0 - 0)           | 1<br>(1 - 2)            | 1<br>(0 - 1)            | 0<br>(0 - 0)            |
| Schizophrenia                                       | 0<br>(0 - 0)         | --                    | --                     | 0<br>(0 - 0)            | 0<br>(0 - 0)            | 0<br>(0 - 0)            |
| Alcohol use disorders                               | 1<br>(0 - 1)         | --                    | --                     | 0<br>(0 - 0)            | 0<br>(0 - 1)            | 0<br>(0 - 0)            |
| Drug use disorders                                  | 1<br>(1 - 2)         | 0<br>(0 - 0)          | --                     | 1<br>(1 - 2)            | 0<br>(0 - 0)            | 0<br>(0 - 0)            |
| Opioid use disorders                                | 1<br>(0 - 1)         | 0<br>(0 - 0)          | --                     | 0<br>(0 - 1)            | 0<br>(0 - 0)            | 0<br>(0 - 0)            |
| Cocaine use disorders                               | 0<br>(0 - 0)         | 0<br>(0 - 0)          | --                     | 0<br>(0 - 0)            | 0<br>(0 - 0)            | 0<br>(0 - 0)            |
| Amphetamine use disorders                           | 0<br>(0 - 0)         | 0<br>(0 - 0)          | --                     | 0<br>(0 - 0)            | 0<br>(0 - 0)            | 0<br>(0 - 0)            |
| Other drug use disorders                            | 1<br>(1 - 1)         | 0<br>(0 - 0)          | --                     | 1<br>(0 - 1)            | 0<br>(0 - 0)            | 0<br>(0 - 0)            |
| Eating disorders                                    | 0<br>(0 - 0)         | --                    | 0<br>(0 - 0)           | 0<br>(0 - 0)            | --                      | --                      |
| Anorexia nervosa                                    | 0<br>(0 - 0)         | --                    | 0<br>(0 - 0)           | 0<br>(0 - 0)            | --                      | --                      |
| Diabetes, urogenital, blood, and endocrine diseases | 25<br>(19 - 33)      | 0<br>(0 - 0)          | 0<br>(0 - 0)           | 1<br>(0 - 1)            | 2<br>(2 - 3)            | 23<br>(17 - 30)         |
| Diabetes mellitus                                   | 10<br>(7 - 14)       | 0<br>(0 - 0)          | 0<br>(0 - 0)           | 0<br>(0 - 0)            | 1<br>(1 - 1)            | 9<br>(6 - 12)           |
| Acute glomerulonephritis                            | 0<br>(0 - 0)         | 0<br>(0 - 0)          | 0<br>(0 - 0)           | 0<br>(0 - 0)            | 0<br>(0 - 0)            | 0<br>(0 - 0)            |
| Chronic kidney disease                              | 10<br>(6 - 15)       | 0<br>(0 - 0)          | 0<br>(0 - 0)           | 0<br>(0 - 0)            | 1<br>(0 - 1)            | 9<br>(6 - 14)           |
| Chronic kidney disease due to diabetes mellitus     | 2<br>(1 - 3)         | 0<br>(0 - 0)          | 0<br>(0 - 0)           | 0<br>(0 - 0)            | 0<br>(0 - 0)            | 2<br>(1 - 3)            |

Web Table 31- Andorra deaths with 95% UI by age, sex, and cause in 2013

| Cause                                               | Both Sexes, All Ages | Both Sexes, 0-4 Years | Both Sexes, 5-14 Years | Both Sexes, 15-49 Years | Both Sexes, 50-69 Years | Both Sexes, 70-80 Years |
|-----------------------------------------------------|----------------------|-----------------------|------------------------|-------------------------|-------------------------|-------------------------|
| Chronic kidney disease due to hypertension          | 3<br>(1 - 5)         | 0<br>(0 - 0)          | 0<br>(0 - 0)           | 0<br>(0 - 0)            | 0<br>(0 - 0)            | 2<br>(1 - 4)            |
| Chronic kidney disease due to glomerulonephritis    | 0<br>(0 - 0)         | 0<br>(0 - 0)          | 0<br>(0 - 0)           | 0<br>(0 - 0)            | 0<br>(0 - 0)            | 0<br>(0 - 0)            |
| Chronic kidney disease due to other causes          | 5<br>(2 - 9)         | 0<br>(0 - 0)          | 0<br>(0 - 0)           | 0<br>(0 - 0)            | 0<br>(0 - 1)            | 5<br>(2 - 9)            |
| Urinary diseases and male infertility               | 3<br>(2 - 6)         | 0<br>(0 - 0)          | 0<br>(0 - 0)           | 0<br>(0 - 0)            | 0<br>(0 - 0)            | 3<br>(2 - 5)            |
| Interstitial nephritis and urinary tract infections | 3<br>(2 - 5)         | 0<br>(0 - 0)          | 0<br>(0 - 0)           | 0<br>(0 - 0)            | 0<br>(0 - 0)            | 3<br>(2 - 5)            |
| Urolithiasis                                        | 0<br>(0 - 0)         | --                    | 0<br>(0 - 0)           | 0<br>(0 - 0)            | 0<br>(0 - 0)            | 0<br>(0 - 0)            |
| Other urinary diseases                              | 0<br>(0 - 1)         | 0<br>(0 - 0)          | 0<br>(0 - 0)           | 0<br>(0 - 0)            | 0<br>(0 - 0)            | 0<br>(0 - 1)            |
| Gynecological diseases                              | 0<br>(0 - 0)         | --                    | --                     | 0<br>(0 - 0)            | 0<br>(0 - 0)            | 0<br>(0 - 0)            |
| Uterine fibroids                                    | 0<br>(0 - 0)         | --                    | --                     | 0<br>(0 - 0)            | 0<br>(0 - 0)            | 0<br>(0 - 0)            |
| Polycystic ovarian syndrome                         | 0<br>(0 - 0)         | --                    | --                     | 0<br>(0 - 0)            | 0<br>(0 - 0)            | --                      |
| Endometriosis                                       | 0<br>(0 - 0)         | --                    | --                     | 0<br>(0 - 0)            | 0<br>(0 - 0)            | --                      |
| Genital prolapse                                    | 0<br>(0 - 0)         | --                    | --                     | 0<br>(0 - 0)            | 0<br>(0 - 0)            | 0<br>(0 - 0)            |
| Other gynecological diseases                        | 0<br>(0 - 0)         | --                    | --                     | 0<br>(0 - 0)            | 0<br>(0 - 0)            | 0<br>(0 - 0)            |
| Hemoglobinopathies and hemolytic anemias            | 0<br>(0 - 1)         | 0<br>(0 - 0)          | 0<br>(0 - 0)           | 0<br>(0 - 0)            | 0<br>(0 - 0)            | 0<br>(0 - 1)            |
| Thalassemias                                        | 0<br>(0 - 0)         | 0<br>(0 - 0)          | 0<br>(0 - 0)           | 0<br>(0 - 0)            | 0<br>(0 - 0)            | 0<br>(0 - 0)            |
| Sickle cell disorders                               | 0<br>(0 - 0)         | 0<br>(0 - 0)          | 0<br>(0 - 0)           | 0<br>(0 - 0)            | 0<br>(0 - 0)            | 0<br>(0 - 0)            |
| G6PD deficiency                                     | 0<br>(0 - 0)         | 0<br>(0 - 0)          | 0<br>(0 - 0)           | 0<br>(0 - 0)            | 0<br>(0 - 0)            | 0<br>(0 - 0)            |
| Other hemoglobinopathies and hemolytic anemias      | 0<br>(0 - 1)         | 0<br>(0 - 0)          | 0<br>(0 - 0)           | 0<br>(0 - 0)            | 0<br>(0 - 0)            | 0<br>(0 - 1)            |
| Endocrine, metabolic, blood, and immune disorders   | 2<br>(1 - 3)         | 0<br>(0 - 0)          | 0<br>(0 - 0)           | 0<br>(0 - 0)            | 0<br>(0 - 1)            | 1<br>(1 - 2)            |
| Musculoskeletal disorders                           | 2<br>(1 - 3)         | --                    | 0<br>(0 - 0)           | 0<br>(0 - 0)            | 0<br>(0 - 0)            | 1<br>(1 - 2)            |
| Rheumatoid arthritis                                | 1<br>(0 - 1)         | --                    | 0<br>(0 - 0)           | 0<br>(0 - 0)            | 0<br>(0 - 0)            | 0<br>(0 - 1)            |
| Other musculoskeletal disorders                     | 1<br>(1 - 2)         | --                    | 0<br>(0 - 0)           | 0<br>(0 - 0)            | 0<br>(0 - 0)            | 1<br>(0 - 2)            |
| Other non-communicable diseases                     | 4<br>(3 - 5)         | 1<br>(1 - 2)          | 0<br>(0 - 0)           | 0<br>(0 - 0)            | 0<br>(0 - 0)            | 2<br>(1 - 3)            |
| Congenital anomalies                                | 2<br>(1 - 2)         | 1<br>(0 - 1)          | 0<br>(0 - 0)           | 0<br>(0 - 0)            | 0<br>(0 - 0)            | 0<br>(0 - 0)            |
| Neural tube defects                                 | 0<br>(0 - 0)         | 0<br>(0 - 0)          | 0<br>(0 - 0)           | 0<br>(0 - 0)            | 0<br>(0 - 0)            | 0<br>(0 - 0)            |
| Congenital heart anomalies                          | 1<br>(0 - 1)         | 0<br>(0 - 0)          | 0<br>(0 - 0)           | 0<br>(0 - 0)            | 0<br>(0 - 0)            | 0<br>(0 - 0)            |
| Cleft lip and cleft palate                          | 0<br>(0 - 0)         | 0<br>(0 - 0)          | --                     | --                      | --                      | --                      |
| Down syndrome                                       | 0<br>(0 - 0)         | 0<br>(0 - 0)          | 0<br>(0 - 0)           | 0<br>(0 - 0)            | 0<br>(0 - 0)            | 0<br>(0 - 0)            |
| Chromosomal unbalanced rearrangements               | 0<br>(0 - 0)         | 0<br>(0 - 0)          | 0<br>(0 - 0)           | 0<br>(0 - 0)            | 0<br>(0 - 0)            | 0<br>(0 - 0)            |
| Other congenital anomalies                          | 1<br>(1 - 1)         | 0<br>(0 - 1)          | 0<br>(0 - 0)           | 0<br>(0 - 0)            | 0<br>(0 - 0)            | 0<br>(0 - 0)            |
| Skin and subcutaneous diseases                      | 2<br>(1 - 3)         | 0<br>(0 - 0)          | 0<br>(0 - 0)           | 0<br>(0 - 0)            | 0<br>(0 - 0)            | 2<br>(1 - 3)            |
| Cellulitis                                          | 0<br>(0 - 1)         | 0<br>(0 - 0)          | 0<br>(0 - 0)           | 0<br>(0 - 0)            | 0<br>(0 - 0)            | 0<br>(0 - 1)            |
| Pyoderma                                            | 1<br>(0 - 1)         | 0<br>(0 - 0)          | 0<br>(0 - 0)           | 0<br>(0 - 0)            | 0<br>(0 - 0)            | 1<br>(0 - 1)            |
| Decubitus ulcer                                     | 1<br>(0 - 2)         | 0<br>(0 - 0)          | 0<br>(0 - 0)           | 0<br>(0 - 0)            | 0<br>(0 - 0)            | 1<br>(0 - 2)            |
| Other skin and subcutaneous diseases                | 0<br>(0 - 0)         | 0<br>(0 - 0)          | 0<br>(0 - 0)           | 0<br>(0 - 0)            | 0<br>(0 - 0)            | 0<br>(0 - 0)            |
| Sudden infant death syndrome                        | 0<br>(0 - 0)         | 0<br>(0 - 0)          | --                     | --                      | --                      | --                      |
| Injuries                                            | 28<br>(21 - 36)      | 0<br>(0 - 0)          | 0<br>(0 - 0)           | 6<br>(4 - 9)            | 4<br>(3 - 6)            | 17<br>(12 - 23)         |
| Transport injuries                                  | 4<br>(3 - 6)         | 0<br>(0 - 0)          | 0<br>(0 - 0)           | 2<br>(1 - 3)            | 1<br>(1 - 1)            | 1<br>(1 - 2)            |
| Road injuries                                       | 4<br>(3 - 5)         | 0<br>(0 - 0)          | 0<br>(0 - 0)           | 2<br>(1 - 2)            | 1<br>(0 - 1)            | 1<br>(1 - 2)            |
| Pedestrian road injuries                            | 1<br>(1 - 2)         | 0<br>(0 - 0)          | 0<br>(0 - 0)           | 0<br>(0 - 0)            | 0<br>(0 - 0)            | 1<br>(0 - 1)            |

Web Table 31- Andorra deaths with 95% UI by age, sex, and cause in 2013

| Cause                                           | Both Sexes, All Ages | Both Sexes, 0-4 Years | Both Sexes, 5-14 Years | Both Sexes, 15-49 Years | Both Sexes, 50-69 Years | Both Sexes, 70-80 Years |
|-------------------------------------------------|----------------------|-----------------------|------------------------|-------------------------|-------------------------|-------------------------|
| Cyclist road injuries                           | 0<br>(0 - 1)         | 0<br>(0 - 0)          | 0<br>(0 - 0)           | 0<br>(0 - 0)            | 0<br>(0 - 0)            | 0<br>(0 - 0)            |
| Motorcyclist road injuries                      | 0<br>(0 - 1)         | 0<br>(0 - 0)          | 0<br>(0 - 0)           | 0<br>(0 - 1)            | 0<br>(0 - 0)            | 0<br>(0 - 0)            |
| Motor vehicle road injuries                     | 2<br>(1 - 3)         | 0<br>(0 - 0)          | 0<br>(0 - 0)           | 1<br>(1 - 2)            | 0<br>(0 - 1)            | 1<br>(0 - 1)            |
| Other road injuries                             | 0<br>(0 - 0)         | 0<br>(0 - 0)          | 0<br>(0 - 0)           | 0<br>(0 - 0)            | 0<br>(0 - 0)            | 0<br>(0 - 0)            |
| Other transport injuries                        | 0<br>(0 - 0)         | 0<br>(0 - 0)          | 0<br>(0 - 0)           | 0<br>(0 - 0)            | 0<br>(0 - 0)            | 0<br>(0 - 0)            |
| Unintentional injuries                          | 16<br>(12 - 23)      | 0<br>(0 - 0)          | 0<br>(0 - 0)           | 1<br>(1 - 2)            | 1<br>(1 - 2)            | 14<br>(9 - 20)          |
| Falls                                           | 12<br>(8 - 18)       | 0<br>(0 - 0)          | 0<br>(0 - 0)           | 0<br>(0 - 1)            | 1<br>(0 - 1)            | 11<br>(7 - 16)          |
| Drowning                                        | 0<br>(0 - 1)         | 0<br>(0 - 0)          | 0<br>(0 - 0)           | 0<br>(0 - 0)            | 0<br>(0 - 0)            | 0<br>(0 - 0)            |
| Fire, heat, and hot substances                  | 1<br>(0 - 1)         | 0<br>(0 - 0)          | 0<br>(0 - 0)           | 0<br>(0 - 0)            | 0<br>(0 - 0)            | 0<br>(0 - 1)            |
| Poisonings                                      | 0<br>(0 - 0)         | 0<br>(0 - 0)          | 0<br>(0 - 0)           | 0<br>(0 - 0)            | 0<br>(0 - 0)            | 0<br>(0 - 0)            |
| Exposure to mechanical forces                   | 0<br>(0 - 0)         | 0<br>(0 - 0)          | 0<br>(0 - 0)           | 0<br>(0 - 0)            | 0<br>(0 - 0)            | 0<br>(0 - 0)            |
| Unintentional firearm injuries                  | 0<br>(0 - 0)         | 0<br>(0 - 0)          | 0<br>(0 - 0)           | 0<br>(0 - 0)            | 0<br>(0 - 0)            | 0<br>(0 - 0)            |
| Unintentional suffocation                       | 0<br>(0 - 0)         | 0<br>(0 - 0)          | 0<br>(0 - 0)           | 0<br>(0 - 0)            | 0<br>(0 - 0)            | 0<br>(0 - 0)            |
| Other exposure to mechanical forces             | 0<br>(0 - 0)         | 0<br>(0 - 0)          | 0<br>(0 - 0)           | 0<br>(0 - 0)            | 0<br>(0 - 0)            | 0<br>(0 - 0)            |
| Adverse effects of medical treatment            | 1<br>(1 - 2)         | 0<br>(0 - 0)          | 0<br>(0 - 0)           | 0<br>(0 - 0)            | 0<br>(0 - 0)            | 1<br>(1 - 2)            |
| Animal contact                                  | 0<br>(0 - 0)         | 0<br>(0 - 0)          | 0<br>(0 - 0)           | 0<br>(0 - 0)            | 0<br>(0 - 0)            | 0<br>(0 - 0)            |
| Venomous animal contact                         | 0<br>(0 - 0)         | 0<br>(0 - 0)          | 0<br>(0 - 0)           | 0<br>(0 - 0)            | 0<br>(0 - 0)            | 0<br>(0 - 0)            |
| Non-venomous animal contact                     | 0<br>(0 - 0)         | 0<br>(0 - 0)          | 0<br>(0 - 0)           | 0<br>(0 - 0)            | 0<br>(0 - 0)            | 0<br>(0 - 0)            |
| Foreign body                                    | 1<br>(1 - 2)         | 0<br>(0 - 0)          | 0<br>(0 - 0)           | 0<br>(0 - 0)            | 0<br>(0 - 0)            | 1<br>(0 - 2)            |
| Pulmonary aspiration and foreign body in airway | 1<br>(1 - 2)         | 0<br>(0 - 0)          | 0<br>(0 - 0)           | 0<br>(0 - 0)            | 0<br>(0 - 0)            | 1<br>(0 - 2)            |
| Foreign body in other body part                 | 0<br>(0 - 0)         | 0<br>(0 - 0)          | 0<br>(0 - 0)           | 0<br>(0 - 0)            | 0<br>(0 - 0)            | 0<br>(0 - 0)            |
| Other unintentional injuries                    | 0<br>(0 - 1)         | 0<br>(0 - 0)          | 0<br>(0 - 0)           | 0<br>(0 - 0)            | 0<br>(0 - 0)            | 0<br>(0 - 0)            |
| Self-harm and interpersonal violence            | 7<br>(4 - 11)        | 0<br>(0 - 0)          | 0<br>(0 - 0)           | 3<br>(2 - 5)            | 2<br>(1 - 3)            | 2<br>(1 - 3)            |
| Self-harm                                       | 7<br>(4 - 10)        | --                    | 0<br>(0 - 0)           | 3<br>(2 - 5)            | 2<br>(1 - 3)            | 2<br>(1 - 3)            |
| Interpersonal violence                          | 0<br>(0 - 1)         | 0<br>(0 - 0)          | 0<br>(0 - 0)           | 0<br>(0 - 0)            | 0<br>(0 - 0)            | 0<br>(0 - 0)            |
| Assault by firearm                              | 0<br>(0 - 0)         | 0<br>(0 - 0)          | 0<br>(0 - 0)           | 0<br>(0 - 0)            | 0<br>(0 - 0)            | 0<br>(0 - 0)            |
| Assault by sharp object                         | 0<br>(0 - 0)         | 0<br>(0 - 0)          | 0<br>(0 - 0)           | 0<br>(0 - 0)            | 0<br>(0 - 0)            | 0<br>(0 - 0)            |
| Assault by other means                          | 0<br>(0 - 0)         | 0<br>(0 - 0)          | 0<br>(0 - 0)           | 0<br>(0 - 0)            | 0<br>(0 - 0)            | 0<br>(0 - 0)            |

Web Table 31- Andorra deaths with 95% UI by age, sex, and cause in 2013

| Cause                                                             | Males, All Ages    | Males, 0-4 Years | Males, 5-14 Years | Males, 15-49 Years | Males, 50-69 Years | Males, 70-80 Years |
|-------------------------------------------------------------------|--------------------|------------------|-------------------|--------------------|--------------------|--------------------|
| All causes                                                        | 323<br>(261 - 378) | 1<br>(1 - 2)     | 0<br>(0 - 0)      | 18<br>(13 - 24)    | 59<br>(41 - 77)    | 245<br>(205 - 278) |
| Communicable, maternal, neonatal, and nutritional diseases        | 22<br>(15 - 31)    | 0<br>(0 - 1)     | 0<br>(0 - 0)      | 4<br>(2 - 5)       | 2<br>(1 - 3)       | 16<br>(10 - 24)    |
| HIV/AIDS and tuberculosis                                         | 5<br>(2 - 7)       | 0<br>(0 - 0)     | 0<br>(0 - 0)      | 3<br>(2 - 5)       | 1<br>(1 - 2)       | 0<br>(0 - 1)       |
| Tuberculosis                                                      | 0<br>(0 - 0)       | 0<br>(0 - 0)     | 0<br>(0 - 0)      | 0<br>(0 - 0)       | 0<br>(0 - 0)       | 0<br>(0 - 0)       |
| HIV/AIDS                                                          | 5<br>(2 - 7)       | 0<br>(0 - 0)     | 0<br>(0 - 0)      | 3<br>(1 - 5)       | 1<br>(0 - 2)       | 0<br>(0 - 0)       |
| HIV/AIDS resulting in mycobacterial infection                     | 0<br>(0 - 0)       | 0<br>(0 - 0)     | 0<br>(0 - 0)      | 0<br>(0 - 0)       | 0<br>(0 - 0)       | 0<br>(0 - 0)       |
| HIV/AIDS resulting in other diseases                              | 4<br>(2 - 7)       | 0<br>(0 - 0)     | 0<br>(0 - 0)      | 3<br>(1 - 5)       | 1<br>(0 - 2)       | 0<br>(0 - 0)       |
| Diarrhea, lower respiratory, and other common infectious diseases | 16<br>(10 - 25)    | 0<br>(0 - 0)     | 0<br>(0 - 0)      | 0<br>(0 - 0)       | 1<br>(1 - 1)       | 15<br>(9 - 23)     |
| Diarrheal diseases                                                | 0<br>(0 - 1)       | 0<br>(0 - 0)     | 0<br>(0 - 0)      | 0<br>(0 - 0)       | 0<br>(0 - 0)       | 0<br>(0 - 1)       |
| Intestinal infectious diseases                                    | 0<br>(0 - 0)       | 0<br>(0 - 0)     | 0<br>(0 - 0)      | 0<br>(0 - 0)       | 0<br>(0 - 0)       | 0<br>(0 - 0)       |
| Typhoid fever                                                     | 0<br>(0 - 0)       | 0<br>(0 - 0)     | 0<br>(0 - 0)      | 0<br>(0 - 0)       | 0<br>(0 - 0)       | 0<br>(0 - 0)       |
| Paratyphoid fever                                                 | 0<br>(0 - 0)       | 0<br>(0 - 0)     | 0<br>(0 - 0)      | 0<br>(0 - 0)       | 0<br>(0 - 0)       | 0<br>(0 - 0)       |
| Other intestinal infectious diseases                              | 0<br>(0 - 0)       | 0<br>(0 - 0)     | 0<br>(0 - 0)      | 0<br>(0 - 0)       | 0<br>(0 - 0)       | 0<br>(0 - 0)       |
| Lower respiratory infections                                      | 16<br>(10 - 24)    | 0<br>(0 - 0)     | 0<br>(0 - 0)      | 0<br>(0 - 0)       | 1<br>(1 - 1)       | 14<br>(9 - 23)     |
| Upper respiratory infections                                      | 0<br>(0 - 0)       | 0<br>(0 - 0)     | 0<br>(0 - 0)      | 0<br>(0 - 0)       | 0<br>(0 - 0)       | 0<br>(0 - 0)       |
| Otitis media                                                      | 0<br>(0 - 0)       | 0<br>(0 - 0)     | 0<br>(0 - 0)      | 0<br>(0 - 0)       | 0<br>(0 - 0)       | 0<br>(0 - 0)       |
| Meningitis                                                        | 0<br>(0 - 0)       | 0<br>(0 - 0)     | 0<br>(0 - 0)      | 0<br>(0 - 0)       | 0<br>(0 - 0)       | 0<br>(0 - 0)       |
| Pneumococcal meningitis                                           | 0<br>(0 - 0)       | 0<br>(0 - 0)     | 0<br>(0 - 0)      | 0<br>(0 - 0)       | 0<br>(0 - 0)       | 0<br>(0 - 0)       |
| H influenzae type B meningitis                                    | 0<br>(0 - 0)       | 0<br>(0 - 0)     | 0<br>(0 - 0)      | 0<br>(0 - 0)       | 0<br>(0 - 0)       | 0<br>(0 - 0)       |
| Meningococcal meningitis                                          | 0<br>(0 - 0)       | 0<br>(0 - 0)     | 0<br>(0 - 0)      | 0<br>(0 - 0)       | 0<br>(0 - 0)       | 0<br>(0 - 0)       |
| Other meningitis                                                  | 0<br>(0 - 0)       | 0<br>(0 - 0)     | 0<br>(0 - 0)      | 0<br>(0 - 0)       | 0<br>(0 - 0)       | 0<br>(0 - 0)       |
| Encephalitis                                                      | 0<br>(0 - 0)       | 0<br>(0 - 0)     | 0<br>(0 - 0)      | 0<br>(0 - 0)       | 0<br>(0 - 0)       | 0<br>(0 - 0)       |
| Diphtheria                                                        | 0<br>(0 - 0)       | 0<br>(0 - 0)     | 0<br>(0 - 0)      | 0<br>(0 - 0)       | 0<br>(0 - 0)       | --                 |
| Whooping cough                                                    | 0<br>(0 - 0)       | 0<br>(0 - 0)     | 0<br>(0 - 0)      | 0<br>(0 - 0)       | 0<br>(0 - 0)       | --                 |
| Tetanus                                                           | 0<br>(0 - 0)       | 0<br>(0 - 0)     | 0<br>(0 - 0)      | 0<br>(0 - 0)       | 0<br>(0 - 0)       | 0<br>(0 - 0)       |
| Measles                                                           | 0<br>(0 - 0)       | 0<br>(0 - 0)     | 0<br>(0 - 0)      | 0<br>(0 - 0)       | 0<br>(0 - 0)       | --                 |
| Varicella and herpes zoster                                       | 0<br>(0 - 0)       | 0<br>(0 - 0)     | 0<br>(0 - 0)      | 0<br>(0 - 0)       | 0<br>(0 - 0)       | 0<br>(0 - 0)       |
| Neglected tropical diseases and malaria                           | 0<br>(0 - 0)       | 0<br>(0 - 0)     | 0<br>(0 - 0)      | 0<br>(0 - 0)       | 0<br>(0 - 0)       | 0<br>(0 - 0)       |
| Cysticercosis                                                     | 0<br>(0 - 0)       | 0<br>(0 - 0)     | 0<br>(0 - 0)      | 0<br>(0 - 0)       | 0<br>(0 - 0)       | 0<br>(0 - 0)       |
| Cystic echinococcosis                                             | 0<br>(0 - 0)       | 0<br>(0 - 0)     | 0<br>(0 - 0)      | 0<br>(0 - 0)       | 0<br>(0 - 0)       | 0<br>(0 - 0)       |
| Dengue                                                            | 0<br>(0 - 0)       | 0<br>(0 - 0)     | 0<br>(0 - 0)      | 0<br>(0 - 0)       | 0<br>(0 - 0)       | 0<br>(0 - 0)       |
| Rabies                                                            | 0<br>(0 - 0)       | 0<br>(0 - 0)     | 0<br>(0 - 0)      | 0<br>(0 - 0)       | 0<br>(0 - 0)       | 0<br>(0 - 0)       |
| Other neglected tropical diseases                                 | 0<br>(0 - 0)       | 0<br>(0 - 0)     | 0<br>(0 - 0)      | 0<br>(0 - 0)       | 0<br>(0 - 0)       | 0<br>(0 - 0)       |
| Maternal disorders                                                | --                 | --               | --                | --                 | --                 | --                 |
| Maternal hemorrhage                                               | --                 | --               | --                | --                 | --                 | --                 |
| Maternal sepsis and other maternal infections                     | --                 | --               | --                | --                 | --                 | --                 |
| Maternal hypertensive disorders                                   | --                 | --               | --                | --                 | --                 | --                 |
| Maternal obstructed labor                                         | --                 | --               | --                | --                 | --                 | --                 |
| Maternal abortive outcome                                         | --                 | --               | --                | --                 | --                 | --                 |
| Indirect maternal deaths                                          | --                 | --               | --                | --                 | --                 | --                 |

Web Table 31- Andorra deaths with 95% UI by age, sex, and cause in 2013

| Cause                                                            | Males, All Ages    | Males, 0-4 Years | Males, 5-14 Years | Males, 15-49 Years | Males, 50-69 Years | Males, 70-80 Years |
|------------------------------------------------------------------|--------------------|------------------|-------------------|--------------------|--------------------|--------------------|
| Late maternal deaths                                             | --                 | --               | --                | --                 | --                 | --                 |
| Maternal deaths aggravated by HIV/AIDS                           | --                 | --               | --                | --                 | --                 | --                 |
| Other maternal disorders                                         | --                 | --               | --                | --                 | --                 | --                 |
| Neonatal disorders                                               | 0<br>(0 - 1)       | 0<br>(0 - 1)     | --                | --                 | --                 | --                 |
| Neonatal preterm birth complications                             | 0<br>(0 - 0)       | 0<br>(0 - 0)     | --                | --                 | --                 | --                 |
| Neonatal encephalopathy due to birth asphyxia and trauma         | 0<br>(0 - 0)       | 0<br>(0 - 0)     | --                | --                 | --                 | --                 |
| Neonatal sepsis and other neonatal infections                    | 0<br>(0 - 0)       | 0<br>(0 - 0)     | --                | --                 | --                 | --                 |
| Hemolytic disease and other neonatal jaundice                    | 0<br>(0 - 0)       | 0<br>(0 - 0)     | --                | --                 | --                 | --                 |
| Other neonatal disorders                                         | 0<br>(0 - 0)       | 0<br>(0 - 0)     | --                | --                 | --                 | --                 |
| Nutritional deficiencies                                         | 0<br>(0 - 1)       | 0<br>(0 - 0)     | 0<br>(0 - 0)      | 0<br>(0 - 0)       | 0<br>(0 - 0)       | 0<br>(0 - 0)       |
| Protein-energy malnutrition                                      | 0<br>(0 - 0)       | 0<br>(0 - 0)     | 0<br>(0 - 0)      | 0<br>(0 - 0)       | 0<br>(0 - 0)       | 0<br>(0 - 0)       |
| Iodine deficiency                                                | 0<br>(0 - 0)       | 0<br>(0 - 0)     | 0<br>(0 - 0)      | 0<br>(0 - 0)       | 0<br>(0 - 0)       | 0<br>(0 - 0)       |
| Iron-deficiency anemia                                           | 0<br>(0 - 0)       | 0<br>(0 - 0)     | 0<br>(0 - 0)      | 0<br>(0 - 0)       | 0<br>(0 - 0)       | 0<br>(0 - 0)       |
| Other nutritional deficiencies                                   | 0<br>(0 - 0)       | 0<br>(0 - 0)     | 0<br>(0 - 0)      | 0<br>(0 - 0)       | 0<br>(0 - 0)       | 0<br>(0 - 0)       |
| Other communicable, maternal, neonatal, and nutritional diseases | 0<br>(0 - 1)       | 0<br>(0 - 0)     | 0<br>(0 - 0)      | 0<br>(0 - 0)       | 0<br>(0 - 0)       | 0<br>(0 - 0)       |
| Sexually transmitted diseases excluding HIV                      | 0<br>(0 - 0)       | 0<br>(0 - 0)     | 0<br>(0 - 0)      | 0<br>(0 - 0)       | 0<br>(0 - 0)       | 0<br>(0 - 0)       |
| Syphilis                                                         | 0<br>(0 - 0)       | 0<br>(0 - 0)     | 0<br>(0 - 0)      | 0<br>(0 - 0)       | 0<br>(0 - 0)       | 0<br>(0 - 0)       |
| Chlamydial infection                                             | --                 | --               | --                | --                 | --                 | --                 |
| Gonococcal infection                                             | 0<br>(0 - 0)       | --               | 0<br>(0 - 0)      | 0<br>(0 - 0)       | 0<br>(0 - 0)       | 0<br>(0 - 0)       |
| Other sexually transmitted diseases                              | 0<br>(0 - 0)       | --               | 0<br>(0 - 0)      | 0<br>(0 - 0)       | 0<br>(0 - 0)       | 0<br>(0 - 0)       |
| Hepatitis                                                        | 0<br>(0 - 0)       | 0<br>(0 - 0)     | 0<br>(0 - 0)      | 0<br>(0 - 0)       | 0<br>(0 - 0)       | 0<br>(0 - 0)       |
| Acute hepatitis A                                                | 0<br>(0 - 0)       | 0<br>(0 - 0)     | 0<br>(0 - 0)      | 0<br>(0 - 0)       | 0<br>(0 - 0)       | 0<br>(0 - 0)       |
| Acute hepatitis B                                                | 0<br>(0 - 0)       | 0<br>(0 - 0)     | 0<br>(0 - 0)      | 0<br>(0 - 0)       | 0<br>(0 - 0)       | 0<br>(0 - 0)       |
| Acute hepatitis C                                                | 0<br>(0 - 0)       | --               | 0<br>(0 - 0)      | 0<br>(0 - 0)       | 0<br>(0 - 0)       | 0<br>(0 - 0)       |
| Other infectious diseases                                        | 0<br>(0 - 1)       | 0<br>(0 - 0)     | 0<br>(0 - 0)      | 0<br>(0 - 0)       | 0<br>(0 - 0)       | 0<br>(0 - 0)       |
| Non-communicable diseases                                        | 285<br>(229 - 335) | 1<br>(0 - 1)     | 0<br>(0 - 0)      | 9<br>(6 - 13)      | 53<br>(37 - 70)    | 221<br>(184 - 252) |
| Neoplasms                                                        | 106<br>(80 - 133)  | 0<br>(0 - 0)     | 0<br>(0 - 0)      | 4<br>(3 - 6)       | 30<br>(20 - 41)    | 72<br>(56 - 88)    |
| Esophageal cancer                                                | 3<br>(1 - 5)       | --               | --                | 0<br>(0 - 0)       | 1<br>(0 - 2)       | 2<br>(1 - 3)       |
| Stomach cancer                                                   | 5<br>(4 - 7)       | --               | --                | 0<br>(0 - 0)       | 1<br>(1 - 2)       | 4<br>(3 - 6)       |
| Liver cancer                                                     | 3<br>(1 - 4)       | --               | 0<br>(0 - 0)      | 0<br>(0 - 0)       | 1<br>(0 - 1)       | 2<br>(0 - 2)       |
| Liver cancer due to hepatitis B                                  | 1<br>(0 - 1)       | --               | 0<br>(0 - 0)      | 0<br>(0 - 0)       | 0<br>(0 - 1)       | 0<br>(0 - 1)       |
| Liver cancer due to hepatitis C                                  | 1<br>(0 - 2)       | --               | 0<br>(0 - 0)      | 0<br>(0 - 0)       | 0<br>(0 - 1)       | 1<br>(0 - 1)       |
| Liver cancer due to alcohol use                                  | 1<br>(0 - 2)       | --               | --                | 0<br>(0 - 0)       | 0<br>(0 - 0)       | 1<br>(0 - 1)       |
| Liver cancer due to other causes                                 | 0<br>(0 - 0)       | --               | 0<br>(0 - 0)      | 0<br>(0 - 0)       | 0<br>(0 - 0)       | 0<br>(0 - 0)       |
| Larynx cancer                                                    | 1<br>(0 - 1)       | --               | --                | 0<br>(0 - 0)       | 1<br>(0 - 1)       | 1<br>(0 - 1)       |
| Tracheal, bronchus and lung cancer                               | 29<br>(20 - 42)    | --               | --                | 1<br>(0 - 1)       | 10<br>(6 - 16)     | 18<br>(13 - 25)    |
| Breast cancer                                                    | 0<br>(0 - 0)       | --               | --                | 0<br>(0 - 0)       | 0<br>(0 - 0)       | 0<br>(0 - 0)       |
| Cervical cancer                                                  | --                 | --               | --                | --                 | --                 | --                 |
| Uterine cancer                                                   | --                 | --               | --                | --                 | --                 | --                 |
| Prostate cancer                                                  | 17<br>(12 - 24)    | --               | --                | 0<br>(0 - 0)       | 2<br>(1 - 3)       | 15<br>(10 - 21)    |

Web Table 31- Andorra deaths with 95% UI by age, sex, and cause in 2013

| Cause                                         | Males, All Ages  | Males, 0-4 Years | Males, 5-14 Years | Males, 15-49 Years | Males, 50-69 Years | Males, 70-80 Years |
|-----------------------------------------------|------------------|------------------|-------------------|--------------------|--------------------|--------------------|
| Colon and rectum cancer                       | 15<br>(11 - 19)  | --               | --                | 0<br>(0 - 1)       | 4<br>(3 - 6)       | 11<br>(8 - 14)     |
| Lip and oral cavity cancer                    | 1<br>(1 - 2)     | --               | --                | 0<br>(0 - 0)       | 1<br>(0 - 1)       | 1<br>(0 - 1)       |
| Nasopharynx cancer                            | 0<br>(0 - 0)     | --               | 0<br>(0 - 0)      | 0<br>(0 - 0)       | 0<br>(0 - 0)       | 0<br>(0 - 0)       |
| Other pharynx cancer                          | 1<br>(0 - 1)     | --               | --                | 0<br>(0 - 0)       | 0<br>(0 - 1)       | 0<br>(0 - 0)       |
| Gallbladder and biliary tract cancer          | 1<br>(0 - 1)     | --               | --                | 0<br>(0 - 0)       | 0<br>(0 - 0)       | 0<br>(0 - 1)       |
| Pancreatic cancer                             | 8<br>(6 - 10)    | --               | --                | 0<br>(0 - 0)       | 3<br>(2 - 4)       | 5<br>(3 - 6)       |
| Malignant skin melanoma                       | 1<br>(0 - 2)     | --               | --                | 0<br>(0 - 0)       | 0<br>(0 - 1)       | 1<br>(0 - 1)       |
| Non-melanoma skin cancer                      | 0<br>(0 - 1)     | --               | --                | 0<br>(0 - 0)       | 0<br>(0 - 0)       | 0<br>(0 - 1)       |
| Ovarian cancer                                | --               | --               | --                | --                 | --                 | --                 |
| Testicular cancer                             | 0<br>(0 - 0)     | --               | --                | 0<br>(0 - 0)       | 0<br>(0 - 0)       | 0<br>(0 - 0)       |
| Kidney cancer                                 | 2<br>(1 - 4)     | 0<br>(0 - 0)     | 0<br>(0 - 0)      | 0<br>(0 - 0)       | 1<br>(0 - 1)       | 1<br>(1 - 3)       |
| Bladder cancer                                | 3<br>(2 - 5)     | --               | --                | 0<br>(0 - 0)       | 1<br>(0 - 1)       | 3<br>(2 - 4)       |
| Brain and nervous system cancer               | 3<br>(2 - 4)     | 0<br>(0 - 0)     | 0<br>(0 - 0)      | 0<br>(0 - 1)       | 1<br>(1 - 2)       | 1<br>(1 - 1)       |
| Thyroid cancer                                | 0<br>(0 - 0)     | --               | 0<br>(0 - 0)      | 0<br>(0 - 0)       | 0<br>(0 - 0)       | 0<br>(0 - 0)       |
| Mesothelioma                                  | 1<br>(0 - 2)     | --               | --                | 0<br>(0 - 0)       | 0<br>(0 - 1)       | 1<br>(0 - 2)       |
| Hodgkin lymphoma                              | 0<br>(0 - 0)     | 0<br>(0 - 0)     | 0<br>(0 - 0)      | 0<br>(0 - 0)       | 0<br>(0 - 0)       | 0<br>(0 - 0)       |
| Non-Hodgkin lymphoma                          | 3<br>(1 - 5)     | 0<br>(0 - 0)     | 0<br>(0 - 0)      | 0<br>(0 - 0)       | 1<br>(0 - 2)       | 2<br>(1 - 3)       |
| Multiple myeloma                              | 2<br>(1 - 3)     | --               | --                | 0<br>(0 - 0)       | 1<br>(0 - 1)       | 1<br>(1 - 2)       |
| Leukemia                                      | 3<br>(2 - 5)     | 0<br>(0 - 0)     | 0<br>(0 - 0)      | 0<br>(0 - 0)       | 1<br>(0 - 1)       | 2<br>(2 - 3)       |
| Other neoplasms                               | 3<br>(2 - 5)     | 0<br>(0 - 0)     | 0<br>(0 - 0)      | 0<br>(0 - 0)       | 1<br>(0 - 1)       | 2<br>(1 - 3)       |
| Cardiovascular diseases                       | 99<br>(78 - 124) | 0<br>(0 - 0)     | 0<br>(0 - 0)      | 2<br>(1 - 3)       | 14<br>(10 - 20)    | 83<br>(67 - 101)   |
| Rheumatic heart disease                       | 0<br>(0 - 0)     | 0<br>(0 - 0)     | 0<br>(0 - 0)      | 0<br>(0 - 0)       | 0<br>(0 - 0)       | 0<br>(0 - 0)       |
| Ischemic heart disease                        | 53<br>(38 - 69)  | 0<br>(0 - 0)     | 0<br>(0 - 0)      | 1<br>(1 - 2)       | 9<br>(6 - 13)      | 43<br>(31 - 55)    |
| Cerebrovascular disease                       | 30<br>(21 - 42)  | 0<br>(0 - 0)     | 0<br>(0 - 0)      | 0<br>(0 - 1)       | 3<br>(2 - 4)       | 27<br>(19 - 36)    |
| Ischemic stroke                               | 19<br>(13 - 27)  | 0<br>(0 - 0)     | 0<br>(0 - 0)      | 0<br>(0 - 0)       | 1<br>(1 - 2)       | 18<br>(12 - 25)    |
| Hemorrhagic stroke                            | 11<br>(7 - 16)   | 0<br>(0 - 0)     | 0<br>(0 - 0)      | 0<br>(0 - 1)       | 2<br>(1 - 3)       | 9<br>(5 - 13)      |
| Hypertensive heart disease                    | 1<br>(1 - 3)     | 0<br>(0 - 0)     | 0<br>(0 - 0)      | 0<br>(0 - 0)       | 0<br>(0 - 0)       | 1<br>(1 - 2)       |
| Cardiomyopathy and myocarditis                | 2<br>(1 - 4)     | 0<br>(0 - 0)     | 0<br>(0 - 0)      | 0<br>(0 - 0)       | 0<br>(0 - 1)       | 2<br>(1 - 3)       |
| Atrial fibrillation and flutter               | 3<br>(1 - 5)     | --               | --                | 0<br>(0 - 0)       | 0<br>(0 - 0)       | 3<br>(1 - 5)       |
| Aortic aneurysm                               | 4<br>(2 - 6)     | --               | --                | 0<br>(0 - 0)       | 1<br>(0 - 1)       | 3<br>(2 - 5)       |
| Peripheral vascular disease                   | 1<br>(0 - 2)     | --               | --                | 0<br>(0 - 0)       | 0<br>(0 - 0)       | 1<br>(0 - 2)       |
| Endocarditis                                  | 0<br>(0 - 1)     | 0<br>(0 - 0)     | 0<br>(0 - 0)      | 0<br>(0 - 0)       | 0<br>(0 - 0)       | 0<br>(0 - 0)       |
| Other cardiovascular and circulatory diseases | 4<br>(3 - 6)     | 0<br>(0 - 0)     | 0<br>(0 - 0)      | 0<br>(0 - 0)       | 1<br>(0 - 1)       | 3<br>(2 - 5)       |
| Chronic respiratory diseases                  | 22<br>(16 - 31)  | 0<br>(0 - 0)     | 0<br>(0 - 0)      | 0<br>(0 - 0)       | 2<br>(1 - 3)       | 20<br>(14 - 27)    |
| Chronic obstructive pulmonary disease         | 19<br>(14 - 28)  | 0<br>(0 - 0)     | 0<br>(0 - 0)      | 0<br>(0 - 0)       | 2<br>(1 - 3)       | 17<br>(12 - 25)    |
| Pneumoconiosis                                | 1<br>(0 - 2)     | 0<br>(0 - 0)     | 0<br>(0 - 0)      | 0<br>(0 - 0)       | 0<br>(0 - 0)       | 1<br>(0 - 1)       |
| Silicosis                                     | 0<br>(0 - 0)     | 0<br>(0 - 0)     | 0<br>(0 - 0)      | 0<br>(0 - 0)       | 0<br>(0 - 0)       | 0<br>(0 - 0)       |
| Asbestosis                                    | 0<br>(0 - 1)     | 0<br>(0 - 0)     | 0<br>(0 - 0)      | 0<br>(0 - 0)       | 0<br>(0 - 0)       | 0<br>(0 - 1)       |
| Coal workers pneumoconiosis                   | 0<br>(0 - 0)     | 0<br>(0 - 0)     | 0<br>(0 - 0)      | 0<br>(0 - 0)       | 0<br>(0 - 0)       | 0<br>(0 - 0)       |
| Other pneumoconiosis                          | 0<br>(0 - 1)     | 0<br>(0 - 0)     | 0<br>(0 - 0)      | 0<br>(0 - 0)       | 0<br>(0 - 0)       | 0<br>(0 - 1)       |

Web Table 31- Andorra deaths with 95% UI by age, sex, and cause in 2013

| Cause                                               | Males, All Ages | Males, 0-4 Years | Males, 5-14 Years | Males, 15-49 Years | Males, 50-69 Years | Males, 70-80 Years |
|-----------------------------------------------------|-----------------|------------------|-------------------|--------------------|--------------------|--------------------|
| Asthma                                              | 0<br>(0 - 1)    | 0<br>(0 - 0)     | 0<br>(0 - 0)      | 0<br>(0 - 0)       | 0<br>(0 - 0)       | 0<br>(0 - 1)       |
| Interstitial lung disease and pulmonary sarcoidosis | 1<br>(0 - 3)    | 0<br>(0 - 0)     | 0<br>(0 - 0)      | 0<br>(0 - 0)       | 0<br>(0 - 0)       | 1<br>(0 - 3)       |
| Other chronic respiratory diseases                  | 0<br>(0 - 0)    | 0<br>(0 - 0)     | 0<br>(0 - 0)      | 0<br>(0 - 0)       | 0<br>(0 - 0)       | 0<br>(0 - 0)       |
| Cirrhosis                                           | 4<br>(3 - 6)    | 0<br>(0 - 0)     | 0<br>(0 - 0)      | 1<br>(0 - 1)       | 2<br>(1 - 3)       | 2<br>(1 - 2)       |
| Cirrhosis due to hepatitis B                        | 0<br>(0 - 1)    | 0<br>(0 - 0)     | 0<br>(0 - 0)      | 0<br>(0 - 0)       | 0<br>(0 - 0)       | 0<br>(0 - 0)       |
| Cirrhosis due to hepatitis C                        | 2<br>(1 - 3)    | 0<br>(0 - 0)     | 0<br>(0 - 0)      | 0<br>(0 - 1)       | 1<br>(0 - 1)       | 1<br>(0 - 1)       |
| Cirrhosis due to alcohol use                        | 2<br>(1 - 3)    | --               | --                | 0<br>(0 - 0)       | 1<br>(0 - 1)       | 1<br>(0 - 1)       |
| Cirrhosis due to other causes                       | 0<br>(0 - 1)    | 0<br>(0 - 0)     | 0<br>(0 - 0)      | 0<br>(0 - 0)       | 0<br>(0 - 0)       | 0<br>(0 - 0)       |
| Digestive diseases                                  | 7<br>(5 - 9)    | 0<br>(0 - 0)     | 0<br>(0 - 0)      | 0<br>(0 - 0)       | 1<br>(1 - 1)       | 6<br>(4 - 8)       |
| Peptic ulcer disease                                | 1<br>(1 - 2)    | 0<br>(0 - 0)     | 0<br>(0 - 0)      | 0<br>(0 - 0)       | 0<br>(0 - 0)       | 1<br>(1 - 2)       |
| Gastritis and duodenitis                            | 0<br>(0 - 0)    | 0<br>(0 - 0)     | 0<br>(0 - 0)      | 0<br>(0 - 0)       | 0<br>(0 - 0)       | 0<br>(0 - 0)       |
| Appendicitis                                        | 0<br>(0 - 0)    | 0<br>(0 - 0)     | 0<br>(0 - 0)      | 0<br>(0 - 0)       | 0<br>(0 - 0)       | 0<br>(0 - 0)       |
| Paralytic ileus and intestinal obstruction          | 1<br>(1 - 2)    | 0<br>(0 - 0)     | 0<br>(0 - 0)      | 0<br>(0 - 0)       | 0<br>(0 - 0)       | 1<br>(1 - 2)       |
| Inguinal, femoral, and abdominal hernia             | 0<br>(0 - 0)    | 0<br>(0 - 0)     | 0<br>(0 - 0)      | 0<br>(0 - 0)       | 0<br>(0 - 0)       | 0<br>(0 - 0)       |
| Inflammatory bowel disease                          | 0<br>(0 - 1)    | 0<br>(0 - 0)     | 0<br>(0 - 0)      | 0<br>(0 - 0)       | 0<br>(0 - 0)       | 0<br>(0 - 1)       |
| Vascular intestinal disorders                       | 1<br>(0 - 2)    | 0<br>(0 - 0)     | 0<br>(0 - 0)      | 0<br>(0 - 0)       | 0<br>(0 - 0)       | 1<br>(0 - 2)       |
| Gallbladder and biliary diseases                    | 1<br>(0 - 2)    | 0<br>(0 - 0)     | 0<br>(0 - 0)      | 0<br>(0 - 0)       | 0<br>(0 - 0)       | 1<br>(0 - 1)       |
| Pancreatitis                                        | 1<br>(0 - 1)    | 0<br>(0 - 0)     | 0<br>(0 - 0)      | 0<br>(0 - 0)       | 0<br>(0 - 0)       | 0<br>(0 - 1)       |
| Other digestive diseases                            | 1<br>(0 - 2)    | 0<br>(0 - 0)     | 0<br>(0 - 0)      | 0<br>(0 - 0)       | 0<br>(0 - 0)       | 1<br>(0 - 2)       |
| Neurological disorders                              | 30<br>(19 - 41) | 0<br>(0 - 0)     | 0<br>(0 - 0)      | 0<br>(0 - 1)       | 2<br>(1 - 2)       | 28<br>(18 - 39)    |
| Alzheimer disease and other dementias               | 24<br>(14 - 35) | --               | --                | 0<br>(0 - 0)       | 1<br>(0 - 1)       | 23<br>(14 - 35)    |
| Parkinson disease                                   | 4<br>(2 - 7)    | --               | --                | 0<br>(0 - 0)       | 0<br>(0 - 0)       | 3<br>(2 - 7)       |
| Epilepsy                                            | 0<br>(0 - 1)    | 0<br>(0 - 0)     | 0<br>(0 - 0)      | 0<br>(0 - 0)       | 0<br>(0 - 0)       | 0<br>(0 - 0)       |
| Multiple sclerosis                                  | 0<br>(0 - 0)    | --               | --                | 0<br>(0 - 0)       | 0<br>(0 - 0)       | 0<br>(0 - 0)       |
| Other neurological disorders                        | 1<br>(1 - 2)    | 0<br>(0 - 0)     | 0<br>(0 - 0)      | 0<br>(0 - 0)       | 0<br>(0 - 1)       | 1<br>(0 - 1)       |
| Mental and substance use disorders                  | 2<br>(1 - 3)    | 0<br>(0 - 0)     | 0<br>(0 - 0)      | 1<br>(1 - 2)       | 0<br>(0 - 1)       | 0<br>(0 - 0)       |
| Schizophrenia                                       | 0<br>(0 - 0)    | --               | --                | 0<br>(0 - 0)       | 0<br>(0 - 0)       | 0<br>(0 - 0)       |
| Alcohol use disorders                               | 1<br>(0 - 1)    | --               | --                | 0<br>(0 - 0)       | 0<br>(0 - 1)       | 0<br>(0 - 0)       |
| Drug use disorders                                  | 1<br>(1 - 2)    | 0<br>(0 - 0)     | --                | 1<br>(1 - 2)       | 0<br>(0 - 0)       | 0<br>(0 - 0)       |
| Opioid use disorders                                | 0<br>(0 - 1)    | 0<br>(0 - 0)     | --                | 0<br>(0 - 1)       | 0<br>(0 - 0)       | 0<br>(0 - 0)       |
| Cocaine use disorders                               | 0<br>(0 - 0)    | 0<br>(0 - 0)     | --                | 0<br>(0 - 0)       | 0<br>(0 - 0)       | 0<br>(0 - 0)       |
| Amphetamine use disorders                           | 0<br>(0 - 0)    | 0<br>(0 - 0)     | --                | 0<br>(0 - 0)       | 0<br>(0 - 0)       | 0<br>(0 - 0)       |
| Other drug use disorders                            | 1<br>(0 - 1)    | 0<br>(0 - 0)     | --                | 1<br>(0 - 1)       | 0<br>(0 - 0)       | 0<br>(0 - 0)       |
| Eating disorders                                    | 0<br>(0 - 0)    | --               | 0<br>(0 - 0)      | 0<br>(0 - 0)       | --                 | --                 |
| Anorexia nervosa                                    | 0<br>(0 - 0)    | --               | 0<br>(0 - 0)      | 0<br>(0 - 0)       | --                 | --                 |
| Diabetes, urogenital, blood, and endocrine diseases | 12<br>(8 - 16)  | 0<br>(0 - 0)     | 0<br>(0 - 0)      | 0<br>(0 - 1)       | 1<br>(1 - 2)       | 10<br>(7 - 14)     |
| Diabetes mellitus                                   | 4<br>(3 - 7)    | 0<br>(0 - 0)     | 0<br>(0 - 0)      | 0<br>(0 - 0)       | 1<br>(0 - 1)       | 3<br>(2 - 5)       |
| Acute glomerulonephritis                            | 0<br>(0 - 0)    | 0<br>(0 - 0)     | 0<br>(0 - 0)      | 0<br>(0 - 0)       | 0<br>(0 - 0)       | 0<br>(0 - 0)       |
| Chronic kidney disease                              | 5<br>(3 - 9)    | 0<br>(0 - 0)     | 0<br>(0 - 0)      | 0<br>(0 - 0)       | 0<br>(0 - 1)       | 5<br>(2 - 8)       |
| Chronic kidney disease due to diabetes mellitus     | 1<br>(0 - 2)    | 0<br>(0 - 0)     | 0<br>(0 - 0)      | 0<br>(0 - 0)       | 0<br>(0 - 0)       | 1<br>(0 - 2)       |

Web Table 31- Andorra deaths with 95% UI by age, sex, and cause in 2013

| Cause                                               | Males, All Ages | Males, 0-4 Years | Males, 5-14 Years | Males, 15-49 Years | Males, 50-69 Years | Males, 70-80 Years |
|-----------------------------------------------------|-----------------|------------------|-------------------|--------------------|--------------------|--------------------|
| Chronic kidney disease due to hypertension          | 1<br>(0 - 2)    | 0<br>(0 - 0)     | 0<br>(0 - 0)      | 0<br>(0 - 0)       | 0<br>(0 - 0)       | 1<br>(0 - 2)       |
| Chronic kidney disease due to glomerulonephritis    | 0<br>(0 - 0)    | 0<br>(0 - 0)     | 0<br>(0 - 0)      | 0<br>(0 - 0)       | 0<br>(0 - 0)       | 0<br>(0 - 0)       |
| Chronic kidney disease due to other causes          | 3<br>(1 - 6)    | 0<br>(0 - 0)     | 0<br>(0 - 0)      | 0<br>(0 - 0)       | 0<br>(0 - 1)       | 3<br>(1 - 5)       |
| Urinary diseases and male infertility               | 1<br>(1 - 2)    | 0<br>(0 - 0)     | 0<br>(0 - 0)      | 0<br>(0 - 0)       | 0<br>(0 - 0)       | 1<br>(1 - 2)       |
| Interstitial nephritis and urinary tract infections | 1<br>(1 - 2)    | 0<br>(0 - 0)     | 0<br>(0 - 0)      | 0<br>(0 - 0)       | 0<br>(0 - 0)       | 1<br>(1 - 2)       |
| Urolithiasis                                        | 0<br>(0 - 0)    | --               | 0<br>(0 - 0)      | 0<br>(0 - 0)       | 0<br>(0 - 0)       | 0<br>(0 - 0)       |
| Other urinary diseases                              | 0<br>(0 - 1)    | 0<br>(0 - 0)     | 0<br>(0 - 0)      | 0<br>(0 - 0)       | 0<br>(0 - 0)       | 0<br>(0 - 0)       |
| Gynecological diseases                              | --              | --               | --                | --                 | --                 | --                 |
| Uterine fibroids                                    | --              | --               | --                | --                 | --                 | --                 |
| Polycystic ovarian syndrome                         | --              | --               | --                | --                 | --                 | --                 |
| Endometriosis                                       | --              | --               | --                | --                 | --                 | --                 |
| Genital prolapse                                    | --              | --               | --                | --                 | --                 | --                 |
| Other gynecological diseases                        | --              | --               | --                | --                 | --                 | --                 |
| Hemoglobinopathies and hemolytic anemias            | 0<br>(0 - 0)    | 0<br>(0 - 0)     | 0<br>(0 - 0)      | 0<br>(0 - 0)       | 0<br>(0 - 0)       | 0<br>(0 - 0)       |
| Thalassemias                                        | 0<br>(0 - 0)    | 0<br>(0 - 0)     | 0<br>(0 - 0)      | 0<br>(0 - 0)       | 0<br>(0 - 0)       | 0<br>(0 - 0)       |
| Sickle cell disorders                               | 0<br>(0 - 0)    | 0<br>(0 - 0)     | 0<br>(0 - 0)      | 0<br>(0 - 0)       | 0<br>(0 - 0)       | 0<br>(0 - 0)       |
| G6PD deficiency                                     | 0<br>(0 - 0)    | 0<br>(0 - 0)     | 0<br>(0 - 0)      | 0<br>(0 - 0)       | 0<br>(0 - 0)       | 0<br>(0 - 0)       |
| Other hemoglobinopathies and hemolytic anemias      | 0<br>(0 - 0)    | 0<br>(0 - 0)     | 0<br>(0 - 0)      | 0<br>(0 - 0)       | 0<br>(0 - 0)       | 0<br>(0 - 0)       |
| Endocrine, metabolic, blood, and immune disorders   | 1<br>(0 - 1)    | 0<br>(0 - 0)     | 0<br>(0 - 0)      | 0<br>(0 - 0)       | 0<br>(0 - 0)       | 1<br>(0 - 1)       |
| Musculoskeletal disorders                           | 0<br>(0 - 1)    | --               | 0<br>(0 - 0)      | 0<br>(0 - 0)       | 0<br>(0 - 0)       | 0<br>(0 - 1)       |
| Rheumatoid arthritis                                | 0<br>(0 - 0)    | --               | 0<br>(0 - 0)      | 0<br>(0 - 0)       | 0<br>(0 - 0)       | 0<br>(0 - 0)       |
| Other musculoskeletal disorders                     | 0<br>(0 - 1)    | --               | 0<br>(0 - 0)      | 0<br>(0 - 0)       | 0<br>(0 - 0)       | 0<br>(0 - 0)       |
| Other non-communicable diseases                     | 2<br>(1 - 2)    | 1<br>(0 - 1)     | 0<br>(0 - 0)      | 0<br>(0 - 0)       | 0<br>(0 - 0)       | 1<br>(0 - 1)       |
| Congenital anomalies                                | 1<br>(1 - 1)    | 0<br>(0 - 1)     | 0<br>(0 - 0)      | 0<br>(0 - 0)       | 0<br>(0 - 0)       | 0<br>(0 - 0)       |
| Neural tube defects                                 | 0<br>(0 - 0)    | 0<br>(0 - 0)     | 0<br>(0 - 0)      | 0<br>(0 - 0)       | 0<br>(0 - 0)       | 0<br>(0 - 0)       |
| Congenital heart anomalies                          | 0<br>(0 - 1)    | 0<br>(0 - 0)     | 0<br>(0 - 0)      | 0<br>(0 - 0)       | 0<br>(0 - 0)       | 0<br>(0 - 0)       |
| Cleft lip and cleft palate                          | 0<br>(0 - 0)    | 0<br>(0 - 0)     | --                | --                 | --                 | --                 |
| Down syndrome                                       | 0<br>(0 - 0)    | 0<br>(0 - 0)     | 0<br>(0 - 0)      | 0<br>(0 - 0)       | 0<br>(0 - 0)       | 0<br>(0 - 0)       |
| Chromosomal unbalanced rearrangements               | 0<br>(0 - 0)    | 0<br>(0 - 0)     | 0<br>(0 - 0)      | 0<br>(0 - 0)       | 0<br>(0 - 0)       | 0<br>(0 - 0)       |
| Other congenital anomalies                          | 0<br>(0 - 1)    | 0<br>(0 - 0)     | 0<br>(0 - 0)      | 0<br>(0 - 0)       | 0<br>(0 - 0)       | 0<br>(0 - 0)       |
| Skin and subcutaneous diseases                      | 1<br>(0 - 1)    | 0<br>(0 - 0)     | 0<br>(0 - 0)      | 0<br>(0 - 0)       | 0<br>(0 - 0)       | 1<br>(0 - 1)       |
| Cellulitis                                          | 0<br>(0 - 0)    | 0<br>(0 - 0)     | 0<br>(0 - 0)      | 0<br>(0 - 0)       | 0<br>(0 - 0)       | 0<br>(0 - 0)       |
| Pyoderma                                            | 0<br>(0 - 0)    | 0<br>(0 - 0)     | 0<br>(0 - 0)      | 0<br>(0 - 0)       | 0<br>(0 - 0)       | 0<br>(0 - 0)       |
| Decubitus ulcer                                     | 0<br>(0 - 0)    | 0<br>(0 - 0)     | 0<br>(0 - 0)      | 0<br>(0 - 0)       | 0<br>(0 - 0)       | 0<br>(0 - 0)       |
| Other skin and subcutaneous diseases                | 0<br>(0 - 0)    | 0<br>(0 - 0)     | 0<br>(0 - 0)      | 0<br>(0 - 0)       | 0<br>(0 - 0)       | 0<br>(0 - 0)       |
| Sudden infant death syndrome                        | 0<br>(0 - 0)    | 0<br>(0 - 0)     | --                | --                 | --                 | --                 |
| Injuries                                            | 16<br>(11 - 22) | 0<br>(0 - 0)     | 0<br>(0 - 0)      | 5<br>(3 - 8)       | 3<br>(2 - 5)       | 7<br>(5 - 11)      |
| Transport injuries                                  | 3<br>(2 - 4)    | 0<br>(0 - 0)     | 0<br>(0 - 0)      | 2<br>(1 - 2)       | 1<br>(0 - 1)       | 1<br>(1 - 1)       |
| Road injuries                                       | 3<br>(2 - 4)    | 0<br>(0 - 0)     | 0<br>(0 - 0)      | 1<br>(1 - 2)       | 1<br>(0 - 1)       | 1<br>(1 - 1)       |
| Pedestrian road injuries                            | 1<br>(0 - 1)    | 0<br>(0 - 0)     | 0<br>(0 - 0)      | 0<br>(0 - 0)       | 0<br>(0 - 0)       | 0<br>(0 - 1)       |



Web Table 31- Andorra deaths with 95% UI by age, sex, and cause in 2013

| Cause                                           | Males, All Ages | Males, 0-4 Years | Males, 5-14 Years | Males, 15-49 Years | Males, 50-69 Years | Males, 70-80 Years |
|-------------------------------------------------|-----------------|------------------|-------------------|--------------------|--------------------|--------------------|
| Cyclist road injuries                           | 0<br>(0 - 0)    | 0<br>(0 - 0)     | 0<br>(0 - 0)      | 0<br>(0 - 0)       | 0<br>(0 - 0)       | 0<br>(0 - 0)       |
| Motorcyclist road injuries                      | 0<br>(0 - 1)    | 0<br>(0 - 0)     | 0<br>(0 - 0)      | 0<br>(0 - 1)       | 0<br>(0 - 0)       | 0<br>(0 - 0)       |
| Motor vehicle road injuries                     | 2<br>(1 - 2)    | 0<br>(0 - 0)     | 0<br>(0 - 0)      | 1<br>(1 - 1)       | 0<br>(0 - 1)       | 0<br>(0 - 1)       |
| Other road injuries                             | 0<br>(0 - 0)    | 0<br>(0 - 0)     | 0<br>(0 - 0)      | 0<br>(0 - 0)       | 0<br>(0 - 0)       | 0<br>(0 - 0)       |
| Other transport injuries                        | 0<br>(0 - 0)    | 0<br>(0 - 0)     | 0<br>(0 - 0)      | 0<br>(0 - 0)       | 0<br>(0 - 0)       | 0<br>(0 - 0)       |
| Unintentional injuries                          | 8<br>(5 - 11)   | 0<br>(0 - 0)     | 0<br>(0 - 0)      | 1<br>(1 - 2)       | 1<br>(1 - 2)       | 5<br>(3 - 8)       |
| Falls                                           | 5<br>(3 - 8)    | 0<br>(0 - 0)     | 0<br>(0 - 0)      | 0<br>(0 - 1)       | 1<br>(0 - 1)       | 4<br>(2 - 7)       |
| Drowning                                        | 0<br>(0 - 1)    | 0<br>(0 - 0)     | 0<br>(0 - 0)      | 0<br>(0 - 0)       | 0<br>(0 - 0)       | 0<br>(0 - 0)       |
| Fire, heat, and hot substances                  | 0<br>(0 - 1)    | 0<br>(0 - 0)     | 0<br>(0 - 0)      | 0<br>(0 - 0)       | 0<br>(0 - 0)       | 0<br>(0 - 0)       |
| Poisonings                                      | 0<br>(0 - 0)    | 0<br>(0 - 0)     | 0<br>(0 - 0)      | 0<br>(0 - 0)       | 0<br>(0 - 0)       | 0<br>(0 - 0)       |
| Exposure to mechanical forces                   | 0<br>(0 - 0)    | 0<br>(0 - 0)     | 0<br>(0 - 0)      | 0<br>(0 - 0)       | 0<br>(0 - 0)       | 0<br>(0 - 0)       |
| Unintentional firearm injuries                  | 0<br>(0 - 0)    | 0<br>(0 - 0)     | 0<br>(0 - 0)      | 0<br>(0 - 0)       | 0<br>(0 - 0)       | 0<br>(0 - 0)       |
| Unintentional suffocation                       | 0<br>(0 - 0)    | 0<br>(0 - 0)     | 0<br>(0 - 0)      | 0<br>(0 - 0)       | 0<br>(0 - 0)       | 0<br>(0 - 0)       |
| Other exposure to mechanical forces             | 0<br>(0 - 0)    | 0<br>(0 - 0)     | 0<br>(0 - 0)      | 0<br>(0 - 0)       | 0<br>(0 - 0)       | 0<br>(0 - 0)       |
| Adverse effects of medical treatment            | 0<br>(0 - 1)    | 0<br>(0 - 0)     | 0<br>(0 - 0)      | 0<br>(0 - 0)       | 0<br>(0 - 0)       | 0<br>(0 - 1)       |
| Animal contact                                  | 0<br>(0 - 0)    | 0<br>(0 - 0)     | 0<br>(0 - 0)      | 0<br>(0 - 0)       | 0<br>(0 - 0)       | 0<br>(0 - 0)       |
| Venomous animal contact                         | 0<br>(0 - 0)    | 0<br>(0 - 0)     | 0<br>(0 - 0)      | 0<br>(0 - 0)       | 0<br>(0 - 0)       | 0<br>(0 - 0)       |
| Non-venomous animal contact                     | 0<br>(0 - 0)    | 0<br>(0 - 0)     | 0<br>(0 - 0)      | 0<br>(0 - 0)       | 0<br>(0 - 0)       | 0<br>(0 - 0)       |
| Foreign body                                    | 1<br>(0 - 1)    | 0<br>(0 - 0)     | 0<br>(0 - 0)      | 0<br>(0 - 0)       | 0<br>(0 - 0)       | 1<br>(0 - 1)       |
| Pulmonary aspiration and foreign body in airway | 1<br>(0 - 1)    | 0<br>(0 - 0)     | 0<br>(0 - 0)      | 0<br>(0 - 0)       | 0<br>(0 - 0)       | 1<br>(0 - 1)       |
| Foreign body in other body part                 | 0<br>(0 - 0)    | 0<br>(0 - 0)     | 0<br>(0 - 0)      | 0<br>(0 - 0)       | 0<br>(0 - 0)       | 0<br>(0 - 0)       |
| Other unintentional injuries                    | 0<br>(0 - 1)    | 0<br>(0 - 0)     | 0<br>(0 - 0)      | 0<br>(0 - 0)       | 0<br>(0 - 0)       | 0<br>(0 - 0)       |
| Self-harm and interpersonal violence            | 6<br>(2 - 9)    | 0<br>(0 - 0)     | 0<br>(0 - 0)      | 3<br>(1 - 5)       | 2<br>(1 - 3)       | 1<br>(1 - 2)       |
| Self-harm                                       | 6<br>(2 - 9)    | --               | 0<br>(0 - 0)      | 3<br>(1 - 4)       | 2<br>(0 - 3)       | 1<br>(1 - 2)       |
| Interpersonal violence                          | 0<br>(0 - 0)    | 0<br>(0 - 0)     | 0<br>(0 - 0)      | 0<br>(0 - 0)       | 0<br>(0 - 0)       | 0<br>(0 - 0)       |
| Assault by firearm                              | 0<br>(0 - 0)    | 0<br>(0 - 0)     | 0<br>(0 - 0)      | 0<br>(0 - 0)       | 0<br>(0 - 0)       | 0<br>(0 - 0)       |
| Assault by sharp object                         | 0<br>(0 - 0)    | 0<br>(0 - 0)     | 0<br>(0 - 0)      | 0<br>(0 - 0)       | 0<br>(0 - 0)       | 0<br>(0 - 0)       |
| Assault by other means                          | 0<br>(0 - 0)    | 0<br>(0 - 0)     | 0<br>(0 - 0)      | 0<br>(0 - 0)       | 0<br>(0 - 0)       | 0<br>(0 - 0)       |

Web Table 31- Andorra deaths with 95% UI by age, sex, and cause in 2013

| Cause                                                             | Females, All Ages  | Females, 0-4 Years | Females, 5-14 Years | Females, 15-49 Years | Females, 50-69 Years | Females, 70-80 Years |
|-------------------------------------------------------------------|--------------------|--------------------|---------------------|----------------------|----------------------|----------------------|
| All causes                                                        | 328<br>(282 - 377) | 1<br>(1 - 1)       | 0<br>(0 - 0)        | 7<br>(5 - 10)        | 28<br>(19 - 38)      | 292<br>(256 - 328)   |
| Communicable, maternal, neonatal, and nutritional diseases        | 25<br>(15 - 40)    | 0<br>(0 - 1)       | 0<br>(0 - 0)        | 1<br>(0 - 1)         | 1<br>(0 - 1)         | 23<br>(13 - 38)      |
| HIV/AIDS and tuberculosis                                         | 1<br>(1 - 2)       | 0<br>(0 - 0)       | 0<br>(0 - 0)        | 1<br>(0 - 1)         | 0<br>(0 - 0)         | 0<br>(0 - 0)         |
| Tuberculosis                                                      | 0<br>(0 - 0)       | 0<br>(0 - 0)       | 0<br>(0 - 0)        | 0<br>(0 - 0)         | 0<br>(0 - 0)         | 0<br>(0 - 0)         |
| HIV/AIDS                                                          | 1<br>(0 - 2)       | 0<br>(0 - 0)       | 0<br>(0 - 0)        | 1<br>(0 - 1)         | 0<br>(0 - 0)         | 0<br>(0 - 0)         |
| HIV/AIDS resulting in mycobacterial infection                     | 0<br>(0 - 0)       | 0<br>(0 - 0)       | 0<br>(0 - 0)        | 0<br>(0 - 0)         | 0<br>(0 - 0)         | 0<br>(0 - 0)         |
| HIV/AIDS resulting in other diseases                              | 1<br>(0 - 2)       | 0<br>(0 - 0)       | 0<br>(0 - 0)        | 1<br>(0 - 1)         | 0<br>(0 - 0)         | 0<br>(0 - 0)         |
| Diarrhea, lower respiratory, and other common infectious diseases | 23<br>(13 - 37)    | 0<br>(0 - 0)       | 0<br>(0 - 0)        | 0<br>(0 - 0)         | 0<br>(0 - 1)         | 22<br>(12 - 37)      |
| Diarrheal diseases                                                | 1<br>(0 - 1)       | 0<br>(0 - 0)       | 0<br>(0 - 0)        | 0<br>(0 - 0)         | 0<br>(0 - 0)         | 1<br>(0 - 1)         |
| Intestinal infectious diseases                                    | 0<br>(0 - 0)       | 0<br>(0 - 0)       | 0<br>(0 - 0)        | 0<br>(0 - 0)         | 0<br>(0 - 0)         | 0<br>(0 - 0)         |
| Typhoid fever                                                     | 0<br>(0 - 0)       | 0<br>(0 - 0)       | 0<br>(0 - 0)        | 0<br>(0 - 0)         | 0<br>(0 - 0)         | 0<br>(0 - 0)         |
| Paratyphoid fever                                                 | 0<br>(0 - 0)       | 0<br>(0 - 0)       | 0<br>(0 - 0)        | 0<br>(0 - 0)         | 0<br>(0 - 0)         | 0<br>(0 - 0)         |
| Other intestinal infectious diseases                              | 0<br>(0 - 0)       | 0<br>(0 - 0)       | --<br>(0 - 0)       | 0<br>(0 - 0)         | 0<br>(0 - 0)         | 0<br>(0 - 0)         |
| Lower respiratory infections                                      | 22<br>(12 - 37)    | 0<br>(0 - 0)       | 0<br>(0 - 0)        | 0<br>(0 - 0)         | 0<br>(0 - 1)         | 21<br>(12 - 36)      |
| Upper respiratory infections                                      | 0<br>(0 - 0)       | 0<br>(0 - 0)       | 0<br>(0 - 0)        | 0<br>(0 - 0)         | 0<br>(0 - 0)         | 0<br>(0 - 0)         |
| Otitis media                                                      | 0<br>(0 - 0)       | 0<br>(0 - 0)       | 0<br>(0 - 0)        | 0<br>(0 - 0)         | 0<br>(0 - 0)         | 0<br>(0 - 0)         |
| Meningitis                                                        | 0<br>(0 - 0)       | 0<br>(0 - 0)       | 0<br>(0 - 0)        | 0<br>(0 - 0)         | 0<br>(0 - 0)         | 0<br>(0 - 0)         |
| Pneumococcal meningitis                                           | 0<br>(0 - 0)       | 0<br>(0 - 0)       | 0<br>(0 - 0)        | 0<br>(0 - 0)         | 0<br>(0 - 0)         | 0<br>(0 - 0)         |
| H influenzae type B meningitis                                    | 0<br>(0 - 0)       | 0<br>(0 - 0)       | 0<br>(0 - 0)        | 0<br>(0 - 0)         | 0<br>(0 - 0)         | 0<br>(0 - 0)         |
| Meningococcal meningitis                                          | 0<br>(0 - 0)       | 0<br>(0 - 0)       | 0<br>(0 - 0)        | 0<br>(0 - 0)         | 0<br>(0 - 0)         | 0<br>(0 - 0)         |
| Other meningitis                                                  | 0<br>(0 - 0)       | 0<br>(0 - 0)       | 0<br>(0 - 0)        | 0<br>(0 - 0)         | 0<br>(0 - 0)         | 0<br>(0 - 0)         |
| Encephalitis                                                      | 0<br>(0 - 0)       | 0<br>(0 - 0)       | 0<br>(0 - 0)        | 0<br>(0 - 0)         | 0<br>(0 - 0)         | 0<br>(0 - 0)         |
| Diphtheria                                                        | 0<br>(0 - 0)       | 0<br>(0 - 0)       | 0<br>(0 - 0)        | 0<br>(0 - 0)         | 0<br>(0 - 0)         | --<br>(0 - 0)        |
| Whooping cough                                                    | 0<br>(0 - 0)       | 0<br>(0 - 0)       | 0<br>(0 - 0)        | 0<br>(0 - 0)         | 0<br>(0 - 0)         | --<br>(0 - 0)        |
| Tetanus                                                           | 0<br>(0 - 0)       | 0<br>(0 - 0)       | 0<br>(0 - 0)        | 0<br>(0 - 0)         | 0<br>(0 - 0)         | 0<br>(0 - 0)         |
| Measles                                                           | 0<br>(0 - 0)       | 0<br>(0 - 0)       | 0<br>(0 - 0)        | 0<br>(0 - 0)         | 0<br>(0 - 0)         | --<br>(0 - 0)        |
| Varicella and herpes zoster                                       | 0<br>(0 - 0)       | 0<br>(0 - 0)       | 0<br>(0 - 0)        | 0<br>(0 - 0)         | 0<br>(0 - 0)         | 0<br>(0 - 0)         |
| Neglected tropical diseases and malaria                           | 0<br>(0 - 0)       | 0<br>(0 - 0)       | 0<br>(0 - 0)        | 0<br>(0 - 0)         | 0<br>(0 - 0)         | 0<br>(0 - 0)         |
| Cysticercosis                                                     | 0<br>(0 - 0)       | 0<br>(0 - 0)       | 0<br>(0 - 0)        | 0<br>(0 - 0)         | 0<br>(0 - 0)         | 0<br>(0 - 0)         |
| Cystic echinococcosis                                             | 0<br>(0 - 0)       | 0<br>(0 - 0)       | 0<br>(0 - 0)        | 0<br>(0 - 0)         | 0<br>(0 - 0)         | 0<br>(0 - 0)         |
| Dengue                                                            | 0<br>(0 - 0)       | 0<br>(0 - 0)       | 0<br>(0 - 0)        | 0<br>(0 - 0)         | 0<br>(0 - 0)         | 0<br>(0 - 0)         |
| Rabies                                                            | 0<br>(0 - 0)       | 0<br>(0 - 0)       | 0<br>(0 - 0)        | 0<br>(0 - 0)         | 0<br>(0 - 0)         | 0<br>(0 - 0)         |
| Other neglected tropical diseases                                 | 0<br>(0 - 0)       | 0<br>(0 - 0)       | 0<br>(0 - 0)        | 0<br>(0 - 0)         | 0<br>(0 - 0)         | 0<br>(0 - 0)         |
| Maternal disorders                                                | 0<br>(0 - 0)       | --<br>(0 - 0)      | 0<br>(0 - 0)        | 0<br>(0 - 0)         | --<br>(0 - 0)        | --<br>(0 - 0)        |
| Maternal hemorrhage                                               | 0<br>(0 - 0)       | --<br>(0 - 0)      | 0<br>(0 - 0)        | 0<br>(0 - 0)         | --<br>(0 - 0)        | --<br>(0 - 0)        |
| Maternal sepsis and other maternal infections                     | 0<br>(0 - 0)       | --<br>(0 - 0)      | 0<br>(0 - 0)        | 0<br>(0 - 0)         | --<br>(0 - 0)        | --<br>(0 - 0)        |
| Maternal hypertensive disorders                                   | 0<br>(0 - 0)       | --<br>(0 - 0)      | 0<br>(0 - 0)        | 0<br>(0 - 0)         | --<br>(0 - 0)        | --<br>(0 - 0)        |
| Maternal obstructed labor                                         | 0<br>(0 - 0)       | --<br>(0 - 0)      | 0<br>(0 - 0)        | 0<br>(0 - 0)         | --<br>(0 - 0)        | --<br>(0 - 0)        |
| Maternal abortive outcome                                         | 0<br>(0 - 0)       | --<br>(0 - 0)      | 0<br>(0 - 0)        | 0<br>(0 - 0)         | --<br>(0 - 0)        | --<br>(0 - 0)        |
| Indirect maternal deaths                                          | 0<br>(0 - 0)       | --<br>(0 - 0)      | 0<br>(0 - 0)        | 0<br>(0 - 0)         | --<br>(0 - 0)        | --<br>(0 - 0)        |

Web Table 31- Andorra deaths with 95% UI by age, sex, and cause in 2013

| Cause                                                            | Females, All Ages  | Females, 0-4 Years | Females, 5-14 Years | Females, 15-49 Years | Females, 50-69 Years | Females, 70-80 Years |
|------------------------------------------------------------------|--------------------|--------------------|---------------------|----------------------|----------------------|----------------------|
| Late maternal deaths                                             | 0<br>(0 - 0)       | --                 | 0<br>(0 - 0)        | 0<br>(0 - 0)         | --                   | --                   |
| Maternal deaths aggravated by HIV/AIDS                           | 0<br>(0 - 0)       | --                 | --                  | 0<br>(0 - 0)         | --                   | --                   |
| Other maternal disorders                                         | 0<br>(0 - 0)       | --                 | 0<br>(0 - 0)        | 0<br>(0 - 0)         | --                   | --                   |
| Neonatal disorders                                               | 0<br>(0 - 1)       | 0<br>(0 - 1)       | --                  | --                   | --                   | --                   |
| Neonatal preterm birth complications                             | 0<br>(0 - 0)       | 0<br>(0 - 0)       | --                  | --                   | --                   | --                   |
| Neonatal encephalopathy due to birth asphyxia and trauma         | 0<br>(0 - 0)       | 0<br>(0 - 0)       | --                  | --                   | --                   | --                   |
| Neonatal sepsis and other neonatal infections                    | 0<br>(0 - 0)       | 0<br>(0 - 0)       | --                  | --                   | --                   | --                   |
| Hemolytic disease and other neonatal jaundice                    | 0<br>(0 - 0)       | 0<br>(0 - 0)       | --                  | --                   | --                   | --                   |
| Other neonatal disorders                                         | 0<br>(0 - 0)       | 0<br>(0 - 0)       | --                  | --                   | --                   | --                   |
| Nutritional deficiencies                                         | 1<br>(0 - 1)       | 0<br>(0 - 0)       | 0<br>(0 - 0)        | 0<br>(0 - 0)         | 0<br>(0 - 0)         | 1<br>(0 - 1)         |
| Protein-energy malnutrition                                      | 0<br>(0 - 0)       | 0<br>(0 - 0)       | 0<br>(0 - 0)        | 0<br>(0 - 0)         | 0<br>(0 - 0)         | 0<br>(0 - 0)         |
| Iodine deficiency                                                | 0<br>(0 - 0)       | 0<br>(0 - 0)       | 0<br>(0 - 0)        | 0<br>(0 - 0)         | 0<br>(0 - 0)         | 0<br>(0 - 0)         |
| Iron-deficiency anemia                                           | 1<br>(0 - 1)       | 0<br>(0 - 0)       | 0<br>(0 - 0)        | 0<br>(0 - 0)         | 0<br>(0 - 0)         | 1<br>(0 - 1)         |
| Other nutritional deficiencies                                   | 0<br>(0 - 0)       | 0<br>(0 - 0)       | 0<br>(0 - 0)        | 0<br>(0 - 0)         | 0<br>(0 - 0)         | 0<br>(0 - 0)         |
| Other communicable, maternal, neonatal, and nutritional diseases | 0<br>(0 - 1)       | 0<br>(0 - 0)       | 0<br>(0 - 0)        | 0<br>(0 - 0)         | 0<br>(0 - 0)         | 0<br>(0 - 1)         |
| Sexually transmitted diseases excluding HIV                      | 0<br>(0 - 0)       | 0<br>(0 - 0)       | 0<br>(0 - 0)        | 0<br>(0 - 0)         | 0<br>(0 - 0)         | 0<br>(0 - 0)         |
| Syphilis                                                         | 0<br>(0 - 0)       | 0<br>(0 - 0)       | 0<br>(0 - 0)        | 0<br>(0 - 0)         | 0<br>(0 - 0)         | 0<br>(0 - 0)         |
| Chlamydial infection                                             | 0<br>(0 - 0)       | --                 | 0<br>(0 - 0)        | 0<br>(0 - 0)         | 0<br>(0 - 0)         | 0<br>(0 - 0)         |
| Gonococcal infection                                             | 0<br>(0 - 0)       | --                 | 0<br>(0 - 0)        | 0<br>(0 - 0)         | 0<br>(0 - 0)         | 0<br>(0 - 0)         |
| Other sexually transmitted diseases                              | 0<br>(0 - 0)       | --                 | 0<br>(0 - 0)        | 0<br>(0 - 0)         | 0<br>(0 - 0)         | 0<br>(0 - 0)         |
| Hepatitis                                                        | 0<br>(0 - 0)       | 0<br>(0 - 0)       | 0<br>(0 - 0)        | 0<br>(0 - 0)         | 0<br>(0 - 0)         | 0<br>(0 - 0)         |
| Acute hepatitis A                                                | 0<br>(0 - 0)       | 0<br>(0 - 0)       | 0<br>(0 - 0)        | 0<br>(0 - 0)         | 0<br>(0 - 0)         | 0<br>(0 - 0)         |
| Acute hepatitis B                                                | 0<br>(0 - 0)       | 0<br>(0 - 0)       | 0<br>(0 - 0)        | 0<br>(0 - 0)         | 0<br>(0 - 0)         | 0<br>(0 - 0)         |
| Acute hepatitis C                                                | 0<br>(0 - 0)       | --                 | 0<br>(0 - 0)        | 0<br>(0 - 0)         | 0<br>(0 - 0)         | 0<br>(0 - 0)         |
| Other infectious diseases                                        | 0<br>(0 - 1)       | 0<br>(0 - 0)       | 0<br>(0 - 0)        | 0<br>(0 - 0)         | 0<br>(0 - 0)         | 0<br>(0 - 1)         |
| Non-communicable diseases                                        | 292<br>(247 - 337) | 0<br>(0 - 1)       | 0<br>(0 - 0)        | 5<br>(3 - 7)         | 26<br>(18 - 36)      | 260<br>(223 - 295)   |
| Neoplasms                                                        | 76<br>(57 - 98)    | 0<br>(0 - 0)       | 0<br>(0 - 0)        | 3<br>(2 - 5)         | 17<br>(11 - 24)      | 55<br>(41 - 72)      |
| Esophageal cancer                                                | 1<br>(1 - 2)       | --                 | --                  | 0<br>(0 - 0)         | 0<br>(0 - 0)         | 1<br>(1 - 2)         |
| Stomach cancer                                                   | 4<br>(2 - 6)       | --                 | --                  | 0<br>(0 - 0)         | 0<br>(0 - 1)         | 3<br>(2 - 5)         |
| Liver cancer                                                     | 2<br>(1 - 3)       | --                 | 0<br>(0 - 0)        | 0<br>(0 - 0)         | 0<br>(0 - 1)         | 1<br>(1 - 2)         |
| Liver cancer due to hepatitis B                                  | 0<br>(0 - 1)       | --                 | 0<br>(0 - 0)        | 0<br>(0 - 0)         | 0<br>(0 - 0)         | 0<br>(0 - 0)         |
| Liver cancer due to hepatitis C                                  | 1<br>(0 - 2)       | --                 | 0<br>(0 - 0)        | 0<br>(0 - 0)         | 0<br>(0 - 0)         | 1<br>(0 - 1)         |
| Liver cancer due to alcohol use                                  | 0<br>(0 - 1)       | --                 | --                  | 0<br>(0 - 0)         | 0<br>(0 - 0)         | 0<br>(0 - 1)         |
| Liver cancer due to other causes                                 | 0<br>(0 - 0)       | --                 | 0<br>(0 - 0)        | 0<br>(0 - 0)         | 0<br>(0 - 0)         | 0<br>(0 - 0)         |
| Larynx cancer                                                    | 0<br>(0 - 0)       | --                 | --                  | 0<br>(0 - 0)         | 0<br>(0 - 0)         | 0<br>(0 - 0)         |
| Tracheal, bronchus and lung cancer                               | 12<br>(7 - 17)     | --                 | --                  | 0<br>(0 - 1)         | 4<br>(2 - 6)         | 8<br>(4 - 11)        |
| Breast cancer                                                    | 12<br>(7 - 19)     | --                 | --                  | 1<br>(0 - 2)         | 3<br>(2 - 6)         | 7<br>(5 - 12)        |
| Cervical cancer                                                  | 1<br>(1 - 2)       | --                 | --                  | 0<br>(0 - 0)         | 0<br>(0 - 1)         | 1<br>(0 - 1)         |
| Uterine cancer                                                   | 1<br>(1 - 2)       | --                 | --                  | 0<br>(0 - 0)         | 0<br>(0 - 1)         | 1<br>(1 - 2)         |
| Prostate cancer                                                  | --                 | --                 | --                  | --                   | --                   | --                   |

Web Table 31- Andorra deaths with 95% UI by age, sex, and cause in 2013

| Cause                                         | Females, All Ages | Females, 0-4 Years | Females, 5-14 Years | Females, 15-49 Years | Females, 50-69 Years | Females, 70-80 Years |
|-----------------------------------------------|-------------------|--------------------|---------------------|----------------------|----------------------|----------------------|
| Colon and rectum cancer                       | 11<br>(8 - 17)    | --                 | --                  | 0<br>(0 - 0)         | 1<br>(1 - 2)         | 10<br>(6 - 15)       |
| Lip and oral cavity cancer                    | 1<br>(0 - 1)      | --                 | --                  | 0<br>(0 - 0)         | 0                    | 0<br>(0 - 1)         |
| Nasopharynx cancer                            | 0<br>(0 - 0)      | --                 | 0<br>(0 - 0)        | 0<br>(0 - 0)         | 0                    | 0<br>(0 - 0)         |
| Other pharynx cancer                          | 0<br>(0 - 0)      | --                 | --                  | 0<br>(0 - 0)         | 0                    | 0<br>(0 - 0)         |
| Gallbladder and biliary tract cancer          | 1<br>(1 - 3)      | --                 | --                  | 0<br>(0 - 0)         | 0                    | 1<br>(1 - 2)         |
| Pancreatic cancer                             | 7<br>(5 - 9)      | --                 | --                  | 0<br>(0 - 0)         | 1<br>(1 - 2)         | 5<br>(4 - 7)         |
| Malignant skin melanoma                       | 1<br>(0 - 2)      | --                 | --                  | 0<br>(0 - 0)         | 0                    | 1<br>(0 - 1)         |
| Non-melanoma skin cancer                      | 0<br>(0 - 1)      | --                 | --                  | 0<br>(0 - 0)         | 0                    | 0<br>(0 - 1)         |
| Ovarian cancer                                | 5<br>(3 - 7)      | --                 | --                  | 0<br>(0 - 0)         | 2<br>(1 - 3)         | 3<br>(2 - 4)         |
| Testicular cancer                             | --                | --                 | --                  | --                   | --                   | --                   |
| Kidney cancer                                 | 2<br>(1 - 3)      | 0<br>(0 - 0)       | 0<br>(0 - 0)        | 0<br>(0 - 0)         | 0<br>(0 - 1)         | 1<br>(1 - 2)         |
| Bladder cancer                                | 1<br>(1 - 2)      | --                 | --                  | 0<br>(0 - 0)         | 0                    | 1<br>(1 - 2)         |
| Brain and nervous system cancer               | 2<br>(1 - 3)      | 0<br>(0 - 0)       | 0<br>(0 - 0)        | 0<br>(0 - 0)         | 1<br>(0 - 1)         | 1<br>(1 - 1)         |
| Thyroid cancer                                | 0<br>(0 - 1)      | --                 | 0<br>(0 - 0)        | 0<br>(0 - 0)         | 0                    | 0<br>(0 - 1)         |
| Mesothelioma                                  | 0<br>(0 - 0)      | --                 | --                  | 0<br>(0 - 0)         | 0                    | 0<br>(0 - 0)         |
| Hodgkin lymphoma                              | 0<br>(0 - 0)      | 0<br>(0 - 0)       | 0<br>(0 - 0)        | 0<br>(0 - 0)         | 0                    | 0<br>(0 - 0)         |
| Non-Hodgkin lymphoma                          | 3<br>(1 - 4)      | 0<br>(0 - 0)       | 0<br>(0 - 0)        | 0<br>(0 - 0)         | 1<br>(0 - 1)         | 2<br>(1 - 3)         |
| Multiple myeloma                              | 2<br>(1 - 3)      | --                 | --                  | 0<br>(0 - 0)         | 0                    | 1<br>(1 - 2)         |
| Leukemia                                      | 2<br>(1 - 4)      | 0<br>(0 - 0)       | 0<br>(0 - 0)        | 0<br>(0 - 0)         | 0                    | 2<br>(1 - 3)         |
| Other neoplasms                               | 4<br>(3 - 6)      | 0<br>(0 - 0)       | 0<br>(0 - 0)        | 0<br>(0 - 0)         | 1<br>(0 - 1)         | 3<br>(2 - 5)         |
| Cardiovascular diseases                       | 132<br>(91 - 165) | 0<br>(0 - 0)       | 0<br>(0 - 0)        | 1<br>(0 - 1)         | 5<br>(3 - 8)         | 126<br>(86 - 157)    |
| Rheumatic heart disease                       | 1<br>(0 - 1)      | 0<br>(0 - 0)       | 0<br>(0 - 0)        | 0<br>(0 - 0)         | 0                    | 1<br>(0 - 1)         |
| Ischemic heart disease                        | 63<br>(35 - 86)   | 0<br>(0 - 0)       | 0<br>(0 - 0)        | 0<br>(0 - 0)         | 3<br>(1 - 5)         | 61<br>(33 - 82)      |
| Cerebrovascular disease                       | 45<br>(28 - 66)   | 0<br>(0 - 0)       | 0<br>(0 - 0)        | 0<br>(0 - 0)         | 1                    | 43<br>(27 - 63)      |
| Ischemic stroke                               | 29<br>(18 - 45)   | 0<br>(0 - 0)       | 0<br>(0 - 0)        | 0<br>(0 - 0)         | 0                    | 29<br>(17 - 44)      |
| Hemorrhagic stroke                            | 15<br>(8 - 25)    | 0<br>(0 - 0)       | 0<br>(0 - 0)        | 0<br>(0 - 0)         | 1<br>(0 - 2)         | 14<br>(7 - 24)       |
| Hypertensive heart disease                    | 3<br>(1 - 5)      | 0<br>(0 - 0)       | 0<br>(0 - 0)        | 0<br>(0 - 0)         | 0                    | 3<br>(1 - 5)         |
| Cardiomyopathy and myocarditis                | 3<br>(1 - 6)      | 0<br>(0 - 0)       | 0<br>(0 - 0)        | 0<br>(0 - 0)         | 0                    | 3<br>(1 - 6)         |
| Atrial fibrillation and flutter               | 6<br>(2 - 14)     | --                 | --                  | 0<br>(0 - 0)         | 0                    | 6<br>(2 - 14)        |
| Aortic aneurysm                               | 2<br>(1 - 4)      | --                 | --                  | 0<br>(0 - 0)         | 0                    | 2<br>(1 - 3)         |
| Peripheral vascular disease                   | 1<br>(1 - 2)      | --                 | --                  | 0<br>(0 - 0)         | 0                    | 1<br>(1 - 2)         |
| Endocarditis                                  | 0<br>(0 - 1)      | 0<br>(0 - 0)       | 0<br>(0 - 0)        | 0<br>(0 - 0)         | 0                    | 0<br>(0 - 1)         |
| Other cardiovascular and circulatory diseases | 7<br>(3 - 12)     | 0<br>(0 - 0)       | 0<br>(0 - 0)        | 0<br>(0 - 0)         | 0                    | 7<br>(3 - 11)        |
| Chronic respiratory diseases                  | 15<br>(10 - 21)   | 0<br>(0 - 0)       | 0<br>(0 - 0)        | 0<br>(0 - 0)         | 1                    | 14<br>(9 - 20)       |
| Chronic obstructive pulmonary disease         | 13<br>(9 - 20)    | 0<br>(0 - 0)       | 0<br>(0 - 0)        | 0<br>(0 - 0)         | 1<br>(0 - 1)         | 12<br>(8 - 19)       |
| Pneumoconiosis                                | 0<br>(0 - 0)      | 0<br>(0 - 0)       | 0<br>(0 - 0)        | 0<br>(0 - 0)         | 0                    | 0<br>(0 - 0)         |
| Silicosis                                     | 0<br>(0 - 0)      | 0<br>(0 - 0)       | 0<br>(0 - 0)        | 0<br>(0 - 0)         | 0                    | 0<br>(0 - 0)         |
| Asbestosis                                    | 0<br>(0 - 0)      | 0<br>(0 - 0)       | 0<br>(0 - 0)        | 0<br>(0 - 0)         | 0                    | 0<br>(0 - 0)         |
| Coal workers pneumoconiosis                   | 0<br>(0 - 0)      | 0<br>(0 - 0)       | 0<br>(0 - 0)        | 0<br>(0 - 0)         | 0                    | 0<br>(0 - 0)         |
| Other pneumoconiosis                          | 0<br>(0 - 0)      | 0<br>(0 - 0)       | 0<br>(0 - 0)        | 0<br>(0 - 0)         | 0                    | 0<br>(0 - 0)         |

Web Table 31- Andorra deaths with 95% UI by age, sex, and cause in 2013

| Cause                                               | Females, All Ages | Females, 0-4 Years | Females, 5-14 Years | Females, 15-49 Years | Females, 50-69 Years | Females, 70-80 Years |
|-----------------------------------------------------|-------------------|--------------------|---------------------|----------------------|----------------------|----------------------|
| Asthma                                              | 1<br>(0 - 2)      | 0<br>(0 - 0)       | 0<br>(0 - 0)        | 0<br>(0 - 0)         | 0<br>(0 - 0)         | 1<br>(0 - 2)         |
| Interstitial lung disease and pulmonary sarcoidosis | 1<br>(0 - 2)      | 0<br>(0 - 0)       | 0<br>(0 - 0)        | 0<br>(0 - 0)         | 0<br>(0 - 0)         | 0<br>(0 - 1)         |
| Other chronic respiratory diseases                  | 0<br>(0 - 0)      | 0<br>(0 - 0)       | 0<br>(0 - 0)        | 0<br>(0 - 0)         | 0<br>(0 - 0)         | 0<br>(0 - 0)         |
| Cirrhosis                                           | 2<br>(2 - 4)      | 0<br>(0 - 0)       | 0<br>(0 - 0)        | 0<br>(0 - 0)         | 1<br>(0 - 1)         | 2<br>(1 - 3)         |
| Cirrhosis due to hepatitis B                        | 0<br>(0 - 1)      | 0<br>(0 - 0)       | 0<br>(0 - 0)        | 0<br>(0 - 0)         | 0<br>(0 - 0)         | 0<br>(0 - 0)         |
| Cirrhosis due to hepatitis C                        | 1<br>(1 - 2)      | 0<br>(0 - 0)       | 0<br>(0 - 0)        | 0<br>(0 - 0)         | 0<br>(0 - 1)         | 1<br>(0 - 2)         |
| Cirrhosis due to alcohol use                        | 1<br>(0 - 1)      | --                 | --                  | 0<br>(0 - 0)         | 0<br>(0 - 0)         | 0<br>(0 - 1)         |
| Cirrhosis due to other causes                       | 0<br>(0 - 0)      | 0<br>(0 - 0)       | 0<br>(0 - 0)        | 0<br>(0 - 0)         | 0<br>(0 - 0)         | 0<br>(0 - 0)         |
| Digestive diseases                                  | 11<br>(7 - 15)    | 0<br>(0 - 0)       | 0<br>(0 - 0)        | 0<br>(0 - 0)         | 0<br>(0 - 1)         | 10<br>(7 - 15)       |
| Peptic ulcer disease                                | 2<br>(1 - 3)      | 0<br>(0 - 0)       | 0<br>(0 - 0)        | 0<br>(0 - 0)         | 0<br>(0 - 0)         | 2<br>(1 - 3)         |
| Gastritis and duodenitis                            | 0<br>(0 - 0)      | 0<br>(0 - 0)       | 0<br>(0 - 0)        | 0<br>(0 - 0)         | 0<br>(0 - 0)         | 0<br>(0 - 0)         |
| Appendicitis                                        | 0<br>(0 - 0)      | 0<br>(0 - 0)       | 0<br>(0 - 0)        | 0<br>(0 - 0)         | 0<br>(0 - 0)         | 0<br>(0 - 0)         |
| Paralytic ileus and intestinal obstruction          | 2<br>(1 - 4)      | 0<br>(0 - 0)       | 0<br>(0 - 0)        | 0<br>(0 - 0)         | 0<br>(0 - 0)         | 2<br>(1 - 4)         |
| Inguinal, femoral, and abdominal hernia             | 0<br>(0 - 1)      | 0<br>(0 - 0)       | 0<br>(0 - 0)        | 0<br>(0 - 0)         | 0<br>(0 - 0)         | 0<br>(0 - 1)         |
| Inflammatory bowel disease                          | 1<br>(0 - 1)      | 0<br>(0 - 0)       | 0<br>(0 - 0)        | 0<br>(0 - 0)         | 0<br>(0 - 0)         | 1<br>(0 - 1)         |
| Vascular intestinal disorders                       | 2<br>(1 - 3)      | 0<br>(0 - 0)       | 0<br>(0 - 0)        | 0<br>(0 - 0)         | 0<br>(0 - 0)         | 2<br>(1 - 3)         |
| Gallbladder and biliary diseases                    | 1<br>(1 - 3)      | 0<br>(0 - 0)       | 0<br>(0 - 0)        | 0<br>(0 - 0)         | 0<br>(0 - 0)         | 1<br>(1 - 3)         |
| Pancreatitis                                        | 1<br>(0 - 1)      | 0<br>(0 - 0)       | 0<br>(0 - 0)        | 0<br>(0 - 0)         | 0<br>(0 - 0)         | 1<br>(0 - 1)         |
| Other digestive diseases                            | 2<br>(1 - 4)      | 0<br>(0 - 0)       | 0<br>(0 - 0)        | 0<br>(0 - 0)         | 0<br>(0 - 0)         | 2<br>(1 - 4)         |
| Neurological disorders                              | 39<br>(24 - 57)   | 0<br>(0 - 0)       | 0<br>(0 - 0)        | 0<br>(0 - 0)         | 1<br>(1 - 2)         | 37<br>(23 - 55)      |
| Alzheimer disease and other dementias               | 34<br>(19 - 51)   | --                 | --                  | 0<br>(0 - 0)         | 0<br>(0 - 1)         | 33<br>(19 - 50)      |
| Parkinson disease                                   | 3<br>(1 - 5)      | --                 | --                  | 0<br>(0 - 0)         | 0<br>(0 - 0)         | 3<br>(1 - 5)         |
| Epilepsy                                            | 0<br>(0 - 1)      | 0<br>(0 - 0)       | 0<br>(0 - 0)        | 0<br>(0 - 0)         | 0<br>(0 - 0)         | 0<br>(0 - 0)         |
| Multiple sclerosis                                  | 0<br>(0 - 1)      | --                 | --                  | 0<br>(0 - 0)         | 0<br>(0 - 0)         | 0<br>(0 - 0)         |
| Other neurological disorders                        | 1<br>(1 - 2)      | 0<br>(0 - 0)       | 0<br>(0 - 0)        | 0<br>(0 - 0)         | 0<br>(0 - 1)         | 1<br>(1 - 1)         |
| Mental and substance use disorders                  | 0<br>(0 - 1)      | 0<br>(0 - 0)       | 0<br>(0 - 0)        | 0<br>(0 - 0)         | 0<br>(0 - 0)         | 0<br>(0 - 0)         |
| Schizophrenia                                       | 0<br>(0 - 0)      | --                 | --                  | 0<br>(0 - 0)         | 0<br>(0 - 0)         | 0<br>(0 - 0)         |
| Alcohol use disorders                               | 0<br>(0 - 0)      | --                 | --                  | 0<br>(0 - 0)         | 0<br>(0 - 0)         | 0<br>(0 - 0)         |
| Drug use disorders                                  | 0<br>(0 - 0)      | 0<br>(0 - 0)       | --                  | 0<br>(0 - 0)         | 0<br>(0 - 0)         | 0<br>(0 - 0)         |
| Opioid use disorders                                | 0<br>(0 - 0)      | 0<br>(0 - 0)       | --                  | 0<br>(0 - 0)         | 0<br>(0 - 0)         | 0<br>(0 - 0)         |
| Cocaine use disorders                               | 0<br>(0 - 0)      | 0<br>(0 - 0)       | --                  | 0<br>(0 - 0)         | 0<br>(0 - 0)         | 0<br>(0 - 0)         |
| Amphetamine use disorders                           | 0<br>(0 - 0)      | 0<br>(0 - 0)       | --                  | 0<br>(0 - 0)         | 0<br>(0 - 0)         | 0<br>(0 - 0)         |
| Other drug use disorders                            | 0<br>(0 - 0)      | 0<br>(0 - 0)       | --                  | 0<br>(0 - 0)         | 0<br>(0 - 0)         | 0<br>(0 - 0)         |
| Eating disorders                                    | 0<br>(0 - 0)      | --                 | 0<br>(0 - 0)        | 0<br>(0 - 0)         | --                   | --                   |
| Anorexia nervosa                                    | 0<br>(0 - 0)      | --                 | 0<br>(0 - 0)        | 0<br>(0 - 0)         | --                   | --                   |
| Diabetes, urogenital, blood, and endocrine diseases | 14<br>(9 - 19)    | 0<br>(0 - 0)       | 0<br>(0 - 0)        | 0<br>(0 - 0)         | 1<br>(0 - 1)         | 13<br>(9 - 18)       |
| Diabetes mellitus                                   | 6<br>(4 - 9)      | 0<br>(0 - 0)       | 0<br>(0 - 0)        | 0<br>(0 - 0)         | 0<br>(0 - 1)         | 5<br>(3 - 8)         |
| Acute glomerulonephritis                            | 0<br>(0 - 0)      | 0<br>(0 - 0)       | 0<br>(0 - 0)        | 0<br>(0 - 0)         | 0<br>(0 - 0)         | 0<br>(0 - 0)         |
| Chronic kidney disease                              | 4<br>(2 - 8)      | 0<br>(0 - 0)       | 0<br>(0 - 0)        | 0<br>(0 - 0)         | 0<br>(0 - 0)         | 4<br>(2 - 8)         |
| Chronic kidney disease due to diabetes mellitus     | 1<br>(0 - 1)      | 0<br>(0 - 0)       | 0<br>(0 - 0)        | 0<br>(0 - 0)         | 0<br>(0 - 0)         | 1<br>(0 - 1)         |

Web Table 31- Andorra deaths with 95% UI by age, sex, and cause in 2013

| Cause                                               | Females, All Ages | Females, 0-4 Years | Females, 5-14 Years | Females, 15-49 Years | Females, 50-69 Years | Females, 70-80 Years |
|-----------------------------------------------------|-------------------|--------------------|---------------------|----------------------|----------------------|----------------------|
| Chronic kidney disease due to hypertension          | 1<br>(1 - 3)      | 0<br>(0 - 0)       | 0<br>(0 - 0)        | 0<br>(0 - 0)         | 0<br>(0 - 0)         | 1<br>(1 - 3)         |
| Chronic kidney disease due to glomerulonephritis    | 0<br>(0 - 0)      | 0<br>(0 - 0)       | 0<br>(0 - 0)        | 0<br>(0 - 0)         | 0<br>(0 - 0)         | 0<br>(0 - 0)         |
| Chronic kidney disease due to other causes          | 2<br>(1 - 5)      | 0<br>(0 - 0)       | 0<br>(0 - 0)        | 0<br>(0 - 0)         | 0<br>(0 - 0)         | 2<br>(1 - 5)         |
| Urinary diseases and male infertility               | 2<br>(1 - 4)      | 0<br>(0 - 0)       | 0<br>(0 - 0)        | 0<br>(0 - 0)         | 0<br>(0 - 0)         | 2<br>(1 - 4)         |
| Interstitial nephritis and urinary tract infections | 2<br>(1 - 4)      | 0<br>(0 - 0)       | 0<br>(0 - 0)        | 0<br>(0 - 0)         | 0<br>(0 - 0)         | 2<br>(1 - 4)         |
| Urolithiasis                                        | 0<br>(0 - 0)      | --                 | 0<br>(0 - 0)        | 0<br>(0 - 0)         | 0<br>(0 - 0)         | 0<br>(0 - 0)         |
| Other urinary diseases                              | 0<br>(0 - 0)      | 0<br>(0 - 0)       | 0<br>(0 - 0)        | 0<br>(0 - 0)         | 0<br>(0 - 0)         | 0<br>(0 - 0)         |
| Gynecological diseases                              | 0<br>(0 - 0)      | --                 | --                  | 0<br>(0 - 0)         | 0<br>(0 - 0)         | 0<br>(0 - 0)         |
| Uterine fibroids                                    | 0<br>(0 - 0)      | --                 | --                  | 0<br>(0 - 0)         | 0<br>(0 - 0)         | 0<br>(0 - 0)         |
| Polycystic ovarian syndrome                         | 0<br>(0 - 0)      | --                 | --                  | 0<br>(0 - 0)         | 0<br>(0 - 0)         | --                   |
| Endometriosis                                       | 0<br>(0 - 0)      | --                 | --                  | 0<br>(0 - 0)         | 0<br>(0 - 0)         | --                   |
| Genital prolapse                                    | 0<br>(0 - 0)      | --                 | --                  | 0<br>(0 - 0)         | 0<br>(0 - 0)         | 0<br>(0 - 0)         |
| Other gynecological diseases                        | 0<br>(0 - 0)      | --                 | --                  | 0<br>(0 - 0)         | 0<br>(0 - 0)         | 0<br>(0 - 0)         |
| Hemoglobinopathies and hemolytic anemias            | 0<br>(0 - 0)      | 0<br>(0 - 0)       | 0<br>(0 - 0)        | 0<br>(0 - 0)         | 0<br>(0 - 0)         | 0<br>(0 - 0)         |
| Thalassemias                                        | 0<br>(0 - 0)      | 0<br>(0 - 0)       | 0<br>(0 - 0)        | 0<br>(0 - 0)         | 0<br>(0 - 0)         | 0<br>(0 - 0)         |
| Sickle cell disorders                               | 0<br>(0 - 0)      | 0<br>(0 - 0)       | 0<br>(0 - 0)        | 0<br>(0 - 0)         | 0<br>(0 - 0)         | 0<br>(0 - 0)         |
| G6PD deficiency                                     | 0<br>(0 - 0)      | 0<br>(0 - 0)       | 0<br>(0 - 0)        | 0<br>(0 - 0)         | 0<br>(0 - 0)         | 0<br>(0 - 0)         |
| Other hemoglobinopathies and hemolytic anemias      | 0<br>(0 - 0)      | 0<br>(0 - 0)       | 0<br>(0 - 0)        | 0<br>(0 - 0)         | 0<br>(0 - 0)         | 0<br>(0 - 0)         |
| Endocrine, metabolic, blood, and immune disorders   | 1<br>(1 - 2)      | 0<br>(0 - 0)       | 0<br>(0 - 0)        | 0<br>(0 - 0)         | 0<br>(0 - 0)         | 1<br>(0 - 2)         |
| Musculoskeletal disorders                           | 1<br>(1 - 2)      | --                 | 0<br>(0 - 0)        | 0<br>(0 - 0)         | 0<br>(0 - 0)         | 1<br>(1 - 2)         |
| Rheumatoid arthritis                                | 0<br>(0 - 1)      | --                 | 0<br>(0 - 0)        | 0<br>(0 - 0)         | 0<br>(0 - 0)         | 0<br>(0 - 1)         |
| Other musculoskeletal disorders                     | 1<br>(0 - 2)      | --                 | 0<br>(0 - 0)        | 0<br>(0 - 0)         | 0<br>(0 - 0)         | 1<br>(0 - 1)         |
| Other non-communicable diseases                     | 2<br>(1 - 3)      | 0<br>(0 - 1)       | 0<br>(0 - 0)        | 0<br>(0 - 0)         | 0<br>(0 - 0)         | 1<br>(1 - 2)         |
| Congenital anomalies                                | 1<br>(0 - 1)      | 0<br>(0 - 1)       | 0<br>(0 - 0)        | 0<br>(0 - 0)         | 0<br>(0 - 0)         | 0<br>(0 - 0)         |
| Neural tube defects                                 | 0<br>(0 - 0)      | 0<br>(0 - 0)       | 0<br>(0 - 0)        | 0<br>(0 - 0)         | 0<br>(0 - 0)         | 0<br>(0 - 0)         |
| Congenital heart anomalies                          | 0<br>(0 - 0)      | 0<br>(0 - 0)       | 0<br>(0 - 0)        | 0<br>(0 - 0)         | 0<br>(0 - 0)         | 0<br>(0 - 0)         |
| Cleft lip and cleft palate                          | 0<br>(0 - 0)      | 0<br>(0 - 0)       | --                  | --                   | --                   | --                   |
| Down syndrome                                       | 0<br>(0 - 0)      | 0<br>(0 - 0)       | 0<br>(0 - 0)        | 0<br>(0 - 0)         | 0<br>(0 - 0)         | 0<br>(0 - 0)         |
| Chromosomal unbalanced rearrangements               | 0<br>(0 - 0)      | 0<br>(0 - 0)       | 0<br>(0 - 0)        | 0<br>(0 - 0)         | 0<br>(0 - 0)         | 0<br>(0 - 0)         |
| Other congenital anomalies                          | 0<br>(0 - 1)      | 0<br>(0 - 0)       | 0<br>(0 - 0)        | 0<br>(0 - 0)         | 0<br>(0 - 0)         | 0<br>(0 - 0)         |
| Skin and subcutaneous diseases                      | 1<br>(1 - 2)      | 0<br>(0 - 0)       | 0<br>(0 - 0)        | 0<br>(0 - 0)         | 0<br>(0 - 0)         | 1<br>(1 - 2)         |
| Cellulitis                                          | 0<br>(0 - 0)      | 0<br>(0 - 0)       | 0<br>(0 - 0)        | 0<br>(0 - 0)         | 0<br>(0 - 0)         | 0<br>(0 - 0)         |
| Pyoderma                                            | 0<br>(0 - 1)      | 0<br>(0 - 0)       | 0<br>(0 - 0)        | 0<br>(0 - 0)         | 0<br>(0 - 0)         | 0<br>(0 - 1)         |
| Decubitus ulcer                                     | 1<br>(0 - 1)      | 0<br>(0 - 0)       | 0<br>(0 - 0)        | 0<br>(0 - 0)         | 0<br>(0 - 0)         | 1<br>(0 - 1)         |
| Other skin and subcutaneous diseases                | 0<br>(0 - 0)      | 0<br>(0 - 0)       | 0<br>(0 - 0)        | 0<br>(0 - 0)         | 0<br>(0 - 0)         | 0<br>(0 - 0)         |
| Sudden infant death syndrome                        | 0<br>(0 - 0)      | 0<br>(0 - 0)       | --                  | --                   | --                   | --                   |
| Injuries                                            | 11<br>(7 - 17)    | 0<br>(0 - 0)       | 0<br>(0 - 0)        | 1<br>(1 - 2)         | 1<br>(1 - 2)         | 9<br>(6 - 15)        |
| Transport injuries                                  | 1<br>(1 - 2)      | 0<br>(0 - 0)       | 0<br>(0 - 0)        | 0<br>(0 - 0)         | 0<br>(0 - 0)         | 1<br>(0 - 1)         |
| Road injuries                                       | 1<br>(1 - 1)      | 0<br>(0 - 0)       | 0<br>(0 - 0)        | 0<br>(0 - 0)         | 0<br>(0 - 0)         | 1<br>(0 - 1)         |
| Pedestrian road injuries                            | 0<br>(0 - 1)      | 0<br>(0 - 0)       | 0<br>(0 - 0)        | 0<br>(0 - 0)         | 0<br>(0 - 0)         | 0<br>(0 - 0)         |

Web Table 31- Andorra deaths with 95% UI by age, sex, and cause in 2013

| Cause                                           | Females, All Ages | Females, 0-4 Years | Females, 5-14 Years | Females, 15-49 Years | Females, 50-69 Years | Females, 70-80 Years |
|-------------------------------------------------|-------------------|--------------------|---------------------|----------------------|----------------------|----------------------|
| Cyclist road injuries                           | 0<br>(0 - 0)      | 0<br>(0 - 0)       | 0<br>(0 - 0)        | 0<br>(0 - 0)         | 0<br>(0 - 0)         | 0<br>(0 - 0)         |
| Motorcyclist road injuries                      | 0<br>(0 - 0)      | 0<br>(0 - 0)       | 0<br>(0 - 0)        | 0<br>(0 - 0)         | 0<br>(0 - 0)         | 0<br>(0 - 0)         |
| Motor vehicle road injuries                     | 0<br>(0 - 1)      | 0<br>(0 - 0)       | 0<br>(0 - 0)        | 0<br>(0 - 0)         | 0<br>(0 - 0)         | 0<br>(0 - 0)         |
| Other road injuries                             | 0<br>(0 - 0)      | 0<br>(0 - 0)       | 0<br>(0 - 0)        | 0<br>(0 - 0)         | 0<br>(0 - 0)         | 0<br>(0 - 0)         |
| Other transport injuries                        | 0<br>(0 - 0)      | 0<br>(0 - 0)       | 0<br>(0 - 0)        | 0<br>(0 - 0)         | 0<br>(0 - 0)         | 0<br>(0 - 0)         |
| Unintentional injuries                          | 9<br>(5 - 14)     | 0<br>(0 - 0)       | 0<br>(0 - 0)        | 0<br>(0 - 0)         | 0<br>(0 - 1)         | 8<br>(5 - 14)        |
| Falls                                           | 7<br>(4 - 12)     | 0<br>(0 - 0)       | 0<br>(0 - 0)        | 0<br>(0 - 0)         | 0<br>(0 - 0)         | 7<br>(3 - 12)        |
| Drowning                                        | 0<br>(0 - 0)      | 0<br>(0 - 0)       | 0<br>(0 - 0)        | 0<br>(0 - 0)         | 0<br>(0 - 0)         | 0<br>(0 - 0)         |
| Fire, heat, and hot substances                  | 0<br>(0 - 1)      | 0<br>(0 - 0)       | 0<br>(0 - 0)        | 0<br>(0 - 0)         | 0<br>(0 - 0)         | 0<br>(0 - 1)         |
| Poisonings                                      | 0<br>(0 - 0)      | 0<br>(0 - 0)       | 0<br>(0 - 0)        | 0<br>(0 - 0)         | 0<br>(0 - 0)         | 0<br>(0 - 0)         |
| Exposure to mechanical forces                   | 0<br>(0 - 0)      | 0<br>(0 - 0)       | 0<br>(0 - 0)        | 0<br>(0 - 0)         | 0<br>(0 - 0)         | 0<br>(0 - 0)         |
| Unintentional firearm injuries                  | 0<br>(0 - 0)      | 0<br>(0 - 0)       | 0<br>(0 - 0)        | 0<br>(0 - 0)         | 0<br>(0 - 0)         | 0<br>(0 - 0)         |
| Unintentional suffocation                       | 0<br>(0 - 0)      | 0<br>(0 - 0)       | 0<br>(0 - 0)        | 0<br>(0 - 0)         | 0<br>(0 - 0)         | 0<br>(0 - 0)         |
| Other exposure to mechanical forces             | 0<br>(0 - 0)      | 0<br>(0 - 0)       | 0<br>(0 - 0)        | 0<br>(0 - 0)         | 0<br>(0 - 0)         | 0<br>(0 - 0)         |
| Adverse effects of medical treatment            | 1<br>(0 - 1)      | 0<br>(0 - 0)       | 0<br>(0 - 0)        | 0<br>(0 - 0)         | 0<br>(0 - 0)         | 1<br>(0 - 1)         |
| Animal contact                                  | 0<br>(0 - 0)      | 0<br>(0 - 0)       | 0<br>(0 - 0)        | 0<br>(0 - 0)         | 0<br>(0 - 0)         | 0<br>(0 - 0)         |
| Venomous animal contact                         | 0<br>(0 - 0)      | 0<br>(0 - 0)       | 0<br>(0 - 0)        | 0<br>(0 - 0)         | 0<br>(0 - 0)         | 0<br>(0 - 0)         |
| Non-venomous animal contact                     | 0<br>(0 - 0)      | 0<br>(0 - 0)       | 0<br>(0 - 0)        | 0<br>(0 - 0)         | 0<br>(0 - 0)         | 0<br>(0 - 0)         |
| Foreign body                                    | 1<br>(0 - 1)      | 0<br>(0 - 0)       | 0<br>(0 - 0)        | 0<br>(0 - 0)         | 0<br>(0 - 0)         | 1<br>(0 - 1)         |
| Pulmonary aspiration and foreign body in airway | 1<br>(0 - 1)      | 0<br>(0 - 0)       | 0<br>(0 - 0)        | 0<br>(0 - 0)         | 0<br>(0 - 0)         | 1<br>(0 - 1)         |
| Foreign body in other body part                 | 0<br>(0 - 0)      | 0<br>(0 - 0)       | 0<br>(0 - 0)        | 0<br>(0 - 0)         | 0<br>(0 - 0)         | 0<br>(0 - 0)         |
| Other unintentional injuries                    | 0<br>(0 - 0)      | 0<br>(0 - 0)       | 0<br>(0 - 0)        | 0<br>(0 - 0)         | 0<br>(0 - 0)         | 0<br>(0 - 0)         |
| Self-harm and interpersonal violence            | 2<br>(1 - 3)      | 0<br>(0 - 0)       | 0<br>(0 - 0)        | 1<br>(0 - 1)         | 0<br>(0 - 1)         | 1<br>(0 - 1)         |
| Self-harm                                       | 1<br>(1 - 3)      | --                 | 0<br>(0 - 0)        | 1<br>(0 - 1)         | 0<br>(0 - 1)         | 0<br>(0 - 1)         |
| Interpersonal violence                          | 0<br>(0 - 0)      | 0<br>(0 - 0)       | 0<br>(0 - 0)        | 0<br>(0 - 0)         | 0<br>(0 - 0)         | 0<br>(0 - 0)         |
| Assault by firearm                              | 0<br>(0 - 0)      | 0<br>(0 - 0)       | 0<br>(0 - 0)        | 0<br>(0 - 0)         | 0<br>(0 - 0)         | 0<br>(0 - 0)         |
| Assault by sharp object                         | 0<br>(0 - 0)      | 0<br>(0 - 0)       | 0<br>(0 - 0)        | 0<br>(0 - 0)         | 0<br>(0 - 0)         | 0<br>(0 - 0)         |
| Assault by other means                          | 0<br>(0 - 0)      | 0<br>(0 - 0)       | 0<br>(0 - 0)        | 0<br>(0 - 0)         | 0<br>(0 - 0)         | 0<br>(0 - 0)         |

Web Table 31- Angola deaths with 95% UI by age, sex, and cause in 2013

| Cause                                                             | Both Sexes, All Ages           | Both Sexes, 0-4 Years        | Both Sexes, 5-14 Years    | Both Sexes, 15-49 Years     | Both Sexes, 50-69 Years     | Both Sexes, 70-80 Years     |
|-------------------------------------------------------------------|--------------------------------|------------------------------|---------------------------|-----------------------------|-----------------------------|-----------------------------|
| All causes                                                        | 189,971<br>(160,748 - 234,559) | 83,369<br>(67,197 - 101,505) | 8,142<br>(6,518 - 10,289) | 42,241<br>(33,024 - 55,373) | 31,029<br>(22,975 - 47,356) | 25,190<br>(21,047 - 34,022) |
| Communicable, maternal, neonatal, and nutritional diseases        | 110,615<br>(94,386 - 131,447)  | 64,905<br>(51,922 - 79,926)  | 4,415<br>(3,421 - 5,798)  | 23,797<br>(18,945 - 29,702) | 10,382<br>(7,514 - 15,560)  | 7,115<br>(4,929 - 9,887)    |
| HIV/AIDS and tuberculosis                                         | 25,031<br>(19,361 - 31,933)    | 2,596<br>(2,049 - 3,300)     | 864<br>(678 - 1,113)      | 15,034<br>(11,034 - 20,089) | 5,105<br>(3,539 - 7,168)    | 1,433<br>(844 - 2,040)      |
| Tuberculosis                                                      | 8,832<br>(5,359 - 13,612)      | 842<br>(490 - 1,376)         | 179<br>(112 - 273)        | 3,636<br>(2,101 - 5,699)    | 2,960<br>(1,519 - 5,033)    | 1,216<br>(644 - 1,836)      |
| HIV/AIDS                                                          | 16,199<br>(11,785 - 22,209)    | 1,754<br>(1,308 - 2,239)     | 685<br>(496 - 901)        | 11,398<br>(7,182 - 16,546)  | 2,145<br>(1,519 - 2,848)    | 217<br>(139 - 303)          |
| HIV/AIDS resulting in mycobacterial infection                     | 993<br>(666 - 1,409)           | 104<br>(72 - 141)            | 37<br>(26 - 52)           | 697<br>(432 - 1,067)        | 139<br>(92 - 192)           | 15<br>(9 - 22)              |
| HIV/AIDS resulting in other diseases                              | 15,207<br>(11,003 - 20,698)    | 1,650<br>(1,235 - 2,104)     | 647<br>(469 - 855)        | 10,701<br>(6,794 - 15,553)  | 2,006<br>(1,423 - 2,665)    | 202<br>(129 - 282)          |
| Diarrhea, lower respiratory, and other common infectious diseases | 42,948<br>(32,811 - 56,392)    | 27,813<br>(19,195 - 39,374)  | 2,362<br>(1,613 - 3,384)  | 4,058<br>(2,750 - 5,956)    | 4,109<br>(2,754 - 6,618)    | 4,606<br>(3,174 - 6,610)    |
| Diarrheal diseases                                                | 15,396<br>(10,441 - 22,481)    | 9,722<br>(5,205 - 16,275)    | 855<br>(483 - 1,435)      | 1,603<br>(1,024 - 2,445)    | 1,628<br>(975 - 2,704)      | 1,588<br>(1,049 - 2,415)    |
| Intestinal infectious diseases                                    | 889<br>(443 - 1,622)           | 409<br>(199 - 776)           | 246<br>(118 - 467)        | 198<br>(88 - 376)           | 27<br>(12 - 52)             | 8<br>(4 - 15)               |
| Typhoid fever                                                     | 584<br>(268 - 1,123)           | 247<br>(104 - 505)           | 176<br>(79 - 339)         | 138<br>(57 - 273)           | 17<br>(7 - 35)              | 5<br>(2 - 10)               |
| Paratyphoid fever                                                 | 198<br>(89 - 397)              | 88<br>(35 - 183)             | 60<br>(26 - 120)          | 44<br>(17 - 92)             | 5<br>(2 - 11)               | 1<br>(1 - 3)                |
| Other intestinal infectious diseases                              | 107<br>(66 - 160)              | 74<br>(42 - 123)             | 10<br>(4 - 22)            | 16<br>(7 - 30)              | 5<br>(1 - 12)               | 2<br>(0 - 7)                |
| Lower respiratory infections                                      | 20,903<br>(14,546 - 29,373)    | 13,668<br>(8,079 - 21,138)   | 714<br>(462 - 1,063)      | 1,487<br>(956 - 2,248)      | 2,147<br>(1,296 - 3,617)    | 2,886<br>(1,784 - 4,241)    |
| Upper respiratory infections                                      | 18<br>(8 - 40)                 | 10<br>(2 - 31)               | 1<br>(0 - 3)              | 3<br>(1 - 7)                | 2<br>(0 - 6)                | 1<br>(0 - 3)                |
| Otitis media                                                      | 22<br>(15 - 32)                | 14<br>(8 - 22)               | 3<br>(2 - 5)              | 3<br>(2 - 5)                | 1<br>(1 - 2)                | 1<br>(0 - 1)                |
| Meningitis                                                        | 4,179<br>(2,804 - 6,340)       | 2,659<br>(1,450 - 4,715)     | 439<br>(261 - 683)        | 690<br>(432 - 1,036)        | 281<br>(158 - 493)          | 111<br>(63 - 175)           |
| Pneumococcal meningitis                                           | 1,294<br>(875 - 1,944)         | 706<br>(364 - 1,318)         | 178<br>(102 - 282)        | 264<br>(157 - 420)          | 105<br>(51 - 188)           | 41<br>(21 - 71)             |
| H influenzae type B meningitis                                    | 1,311<br>(795 - 2,149)         | 1,054<br>(555 - 1,886)       | 120<br>(68 - 198)         | 97<br>(54 - 156)            | 29<br>(14 - 54)             | 11<br>(6 - 19)              |
| Meningococcal meningitis                                          | 551<br>(374 - 836)             | 311<br>(154 - 576)           | 54<br>(29 - 89)           | 116<br>(67 - 198)           | 51<br>(26 - 93)             | 20<br>(11 - 33)             |
| Other meningitis                                                  | 1,023<br>(671 - 1,544)         | 588<br>(308 - 1,062)         | 87<br>(43 - 150)          | 214<br>(113 - 346)          | 97<br>(53 - 173)            | 38<br>(19 - 66)             |
| Encephalitis                                                      | 284<br>(161 - 471)             | 188<br>(90 - 345)            | 32<br>(16 - 56)           | 44<br>(21 - 75)             | 14<br>(8 - 25)              | 6<br>(3 - 9)                |
| Diphtheria                                                        | 36<br>(1 - 177)                | 31<br>(0 - 172)              | 4<br>(0 - 25)             | 1<br>(0 - 4)                | 0<br>(0 - 1)                | --                          |
| Whooping cough                                                    | 716<br>(2 - 3,888)             | 684<br>(2 - 3,674)           | 28<br>(0 - 146)           | 4<br>(0 - 20)               | 0<br>(0 - 2)                | --                          |
| Tetanus                                                           | 164<br>(72 - 320)              | 130<br>(49 - 269)            | 9<br>(4 - 20)             | 16<br>(7 - 37)              | 7<br>(2 - 18)               | 2<br>(1 - 6)                |
| Measles                                                           | 315<br>(7 - 1,783)             | 283<br>(6 - 1,587)           | 28<br>(1 - 169)           | 3<br>(0 - 20)               | 0<br>(0 - 0)                | --                          |
| Varicella and herpes zoster                                       | 27<br>(11 - 57)                | 14<br>(2 - 44)               | 3<br>(0 - 9)              | 4<br>(1 - 10)               | 2<br>(0 - 5)                | 4<br>(0 - 11)               |
| Neglected tropical diseases and malaria                           | 11,195<br>(4,647 - 22,425)     | 9,228<br>(3,020 - 20,556)    | 620<br>(298 - 1,198)      | 782<br>(414 - 1,416)        | 377<br>(184 - 815)          | 188<br>(85 - 448)           |
| Malaria                                                           | 10,661<br>(4,178 - 21,870)     | 8,987<br>(2,716 - 20,348)    | 552<br>(233 - 1,134)      | 637<br>(301 - 1,263)        | 317<br>(134 - 740)          | 167<br>(65 - 428)           |
| Leishmaniasis                                                     | 50<br>(34 - 76)                | 22<br>(11 - 40)              | 7<br>(4 - 11)             | 15<br>(8 - 25)              | 5<br>(2 - 9)                | 2<br>(1 - 3)                |
| Visceral leishmaniasis                                            | 50<br>(34 - 76)                | 22<br>(11 - 40)              | 7<br>(4 - 11)             | 15<br>(8 - 25)              | 5<br>(2 - 9)                | 2<br>(1 - 3)                |
| African trypanosomiasis                                           | 55<br>(27 - 92)                | 5<br>(2 - 8)                 | 7<br>(4 - 12)             | 35<br>(16 - 60)             | 8<br>(4 - 14)               | 1<br>(1 - 2)                |
| Schistosomiasis                                                   | 77<br>(50 - 122)               | 3<br>(1 - 5)                 | 4<br>(2 - 6)              | 33<br>(20 - 52)             | 28<br>(15 - 50)             | 10<br>(6 - 17)              |
| Cysticercosis                                                     | 12<br>(8 - 16)                 | 1<br>(1 - 2)                 | 1<br>(1 - 1)              | 7<br>(4 - 10)               | 2<br>(1 - 4)                | 0<br>(0 - 1)                |
| Cystic echinococcosis                                             | 9<br>(7 - 12)                  | 2<br>(1 - 4)                 | 2<br>(1 - 2)              | 4<br>(2 - 5)                | 1<br>(1 - 2)                | 0<br>(0 - 1)                |
| Dengue                                                            | 11<br>(7 - 19)                 | 6<br>(2 - 12)                | 2<br>(1 - 4)              | 2<br>(1 - 4)                | 0<br>(0 - 1)                | 0<br>(0 - 0)                |
| Yellow fever                                                      | 1<br>(0 - 1)                   | 0<br>(0 - 0)                 | 0<br>(0 - 0)              | 0<br>(0 - 1)                | 0<br>(0 - 0)                | 0<br>(0 - 0)                |
| Rabies                                                            | 64<br>(40 - 119)               | 23<br>(8 - 59)               | 19<br>(11 - 34)           | 17<br>(10 - 31)             | 4<br>(2 - 8)                | 1<br>(0 - 2)                |
| Intestinal nematode infections                                    | 98<br>(55 - 162)               | 84<br>(45 - 143)             | 9<br>(2 - 22)             | 3<br>(0 - 10)               | 1<br>(0 - 7)                | 1<br>(0 - 4)                |
| Ascariasis                                                        | 98<br>(55 - 162)               | 84<br>(45 - 143)             | 9<br>(2 - 22)             | 3<br>(0 - 10)               | 1<br>(0 - 7)                | 1<br>(0 - 4)                |



Web Table 31- Angola deaths with 95% UI by age, sex, and cause in 2013

| Cause                                                            | Both Sexes, All Ages        | Both Sexes, 0-4 Years       | Both Sexes, 5-14 Years   | Both Sexes, 15-49 Years    | Both Sexes, 50-69 Years     | Both Sexes, 70-80 Years     |
|------------------------------------------------------------------|-----------------------------|-----------------------------|--------------------------|----------------------------|-----------------------------|-----------------------------|
| Other neglected tropical diseases                                | 158<br>(72 - 281)           | 96<br>(28 - 207)            | 16<br>(8 - 31)           | 29<br>(16 - 49)            | 11<br>(6 - 19)              | 6<br>(3 - 9)                |
| Maternal disorders                                               | 3,032<br>(1,939 - 4,618)    | --                          | 14<br>(4 - 33)           | 3,018<br>(1,924 - 4,599)   | --                          | --                          |
| Maternal hemorrhage                                              | 434<br>(252 - 681)          | --                          | 1<br>(0 - 3)             | 433<br>(251 - 680)         | --                          | --                          |
| Maternal sepsis and other maternal infections                    | 263<br>(138 - 438)          | --                          | 1<br>(0 - 4)             | 262<br>(138 - 435)         | --                          | --                          |
| Maternal hypertensive disorders                                  | 323<br>(174 - 523)          | --                          | 2<br>(1 - 5)             | 320<br>(173 - 520)         | --                          | --                          |
| Maternal obstructed labor                                        | 176<br>(102 - 278)          | --                          | 1<br>(0 - 1)             | 175<br>(101 - 277)         | --                          | --                          |
| Maternal abortive outcome                                        | 533<br>(317 - 855)          | --                          | 2<br>(1 - 5)             | 531<br>(315 - 853)         | --                          | --                          |
| Indirect maternal deaths                                         | 246<br>(141 - 399)          | --                          | 1<br>(0 - 3)             | 245<br>(141 - 398)         | --                          | --                          |
| Late maternal deaths                                             | 445<br>(219 - 763)          | --                          | 3<br>(1 - 8)             | 442<br>(217 - 759)         | --                          | --                          |
| Maternal deaths aggravated by HIV/AIDS                           | 31<br>(15 - 54)             | --                          | --                       | 31<br>(15 - 54)            | --                          | --                          |
| Other maternal disorders                                         | 576<br>(324 - 968)          | --                          | 2<br>(1 - 6)             | 574<br>(322 - 961)         | --                          | --                          |
| Neonatal disorders                                               | 15,322<br>(10,109 - 21,206) | 15,322<br>(10,109 - 21,206) | --                       | --                         | --                          | --                          |
| Neonatal preterm birth complications                             | 4,991<br>(2,551 - 7,828)    | 4,991<br>(2,551 - 7,828)    | --                       | --                         | --                          | --                          |
| Neonatal encephalopathy due to birth asphyxia and trauma         | 4,577<br>(2,747 - 7,232)    | 4,577<br>(2,747 - 7,232)    | --                       | --                         | --                          | --                          |
| Neonatal sepsis and other neonatal infections                    | 2,563<br>(1,080 - 4,459)    | 2,563<br>(1,080 - 4,459)    | --                       | --                         | --                          | --                          |
| Hemolytic disease and other neonatal jaundice                    | 120<br>(44 - 264)           | 120<br>(44 - 264)           | --                       | --                         | --                          | --                          |
| Other neonatal disorders                                         | 3,071<br>(1,742 - 4,707)    | 3,071<br>(1,742 - 4,707)    | --                       | --                         | --                          | --                          |
| Nutritional deficiencies                                         | 9,318<br>(4,956 - 14,308)   | 6,918<br>(3,330 - 11,590)   | 329<br>(183 - 520)       | 623<br>(369 - 999)         | 635<br>(335 - 1,070)        | 813<br>(414 - 1,234)        |
| Protein-energy malnutrition                                      | 6,628<br>(2,935 - 11,089)   | 5,229<br>(2,121 - 9,512)    | 250<br>(110 - 405)       | 251<br>(109 - 495)         | 384<br>(140 - 665)          | 514<br>(164 - 838)          |
| Iodine deficiency                                                | 54<br>(4 - 292)             | 43<br>(0 - 277)             | 2<br>(0 - 12)            | 4<br>(0 - 16)              | 3<br>(0 - 15)               | 2<br>(0 - 11)               |
| Iron-deficiency anemia                                           | 2,451<br>(1,135 - 4,933)    | 1,506<br>(325 - 3,887)      | 71<br>(24 - 162)         | 351<br>(178 - 574)         | 237<br>(101 - 471)          | 286<br>(127 - 507)          |
| Other nutritional deficiencies                                   | 186<br>(54 - 560)           | 141<br>(22 - 475)           | 6<br>(2 - 17)            | 16<br>(7 - 39)             | 11<br>(4 - 28)              | 11<br>(5 - 28)              |
| Other communicable, maternal, neonatal, and nutritional diseases | 3,767<br>(1,204 - 7,291)    | 3,028<br>(653 - 6,409)      | 227<br>(73 - 449)        | 282<br>(174 - 435)         | 156<br>(86 - 282)           | 74<br>(40 - 136)            |
| Sexually transmitted diseases excluding HIV                      | 2,576<br>(125 - 5,990)      | 2,299<br>(0 - 5,558)        | 148<br>(6 - 343)         | 75<br>(36 - 139)           | 36<br>(14 - 86)             | 19<br>(7 - 40)              |
| Syphilis                                                         | 2,511<br>(64 - 5,940)       | 2,299<br>(0 - 5,558)        | 143<br>(2 - 339)         | 33<br>(16 - 62)            | 22<br>(9 - 52)              | 15<br>(6 - 31)              |
| Chlamydial infection                                             | 16<br>(7 - 29)              | --                          | 1<br>(0 - 2)             | 11<br>(4 - 20)             | 3<br>(1 - 9)                | 1<br>(0 - 2)                |
| Gonococcal infection                                             | 27<br>(14 - 50)             | --                          | 2<br>(1 - 4)             | 17<br>(8 - 31)             | 6<br>(2 - 15)               | 2<br>(1 - 5)                |
| Other sexually transmitted diseases                              | 22<br>(12 - 41)             | --                          | 2<br>(1 - 4)             | 15<br>(7 - 28)             | 5<br>(2 - 11)               | 1<br>(0 - 3)                |
| Hepatitis                                                        | 219<br>(127 - 459)          | 84<br>(42 - 159)            | 19<br>(9 - 39)           | 70<br>(37 - 174)           | 36<br>(17 - 115)            | 11<br>(5 - 39)              |
| Acute hepatitis A                                                | 31<br>(8 - 72)              | 23<br>(5 - 57)              | 4<br>(1 - 11)            | 3<br>(1 - 10)              | 1<br>(0 - 2)                | 0<br>(0 - 0)                |
| Acute hepatitis B                                                | 128<br>(66 - 268)           | 58<br>(26 - 114)            | 8<br>(3 - 17)            | 25<br>(11 - 69)            | 27<br>(12 - 84)             | 9<br>(4 - 32)               |
| Acute hepatitis C                                                | 6<br>(1 - 22)               | --                          | 1<br>(0 - 3)             | 3<br>(0 - 8)               | 2<br>(0 - 9)                | 1<br>(0 - 3)                |
| Acute hepatitis E                                                | 53<br>(26 - 137)            | 3<br>(1 - 7)                | 5<br>(2 - 12)            | 39<br>(19 - 97)            | 6<br>(2 - 22)               | 1<br>(0 - 4)                |
| Other infectious diseases                                        | 972<br>(439 - 1,826)        | 645<br>(200 - 1,458)        | 61<br>(24 - 125)         | 137<br>(72 - 233)          | 84<br>(40 - 173)            | 45<br>(19 - 92)             |
| Non-communicable diseases                                        | 61,352<br>(48,219 - 84,343) | 12,255<br>(8,288 - 17,496)  | 1,820<br>(1,296 - 2,530) | 10,783<br>(7,436 - 15,972) | 19,093<br>(13,527 - 29,837) | 17,401<br>(14,059 - 23,405) |
| Neoplasms                                                        | 8,268<br>(6,136 - 12,127)   | 320<br>(179 - 636)          | 223<br>(157 - 323)       | 1,947<br>(1,337 - 2,929)   | 3,783<br>(2,658 - 6,002)    | 1,995<br>(1,569 - 2,771)    |
| Esophageal cancer                                                | 410<br>(261 - 643)          | --                          | --                       | 61<br>(36 - 102)           | 234<br>(140 - 380)          | 116<br>(78 - 173)           |
| Stomach cancer                                                   | 706<br>(499 - 1,089)        | --                          | --                       | 153<br>(99 - 242)          | 352<br>(236 - 572)          | 200<br>(144 - 294)          |
| Liver cancer                                                     | 654<br>(420 - 1,022)        | --                          | 9<br>(5 - 16)            | 135<br>(76 - 225)          | 341<br>(209 - 570)          | 170<br>(113 - 248)          |
| Liver cancer due to hepatitis B                                  | 226<br>(106 - 401)          | --                          | 3<br>(1 - 7)             | 61<br>(28 - 113)           | 121<br>(52 - 227)           | 42<br>(21 - 70)             |

Web Table 31- Angola deaths with 95% UI by age, sex, and cause in 2013

| Cause                                | Both Sexes, All Ages        | Both Sexes, 0-4 Years | Both Sexes, 5-14 Years | Both Sexes, 15-49 Years  | Both Sexes, 50-69 Years   | Both Sexes, 70-80 Years   |
|--------------------------------------|-----------------------------|-----------------------|------------------------|--------------------------|---------------------------|---------------------------|
| Liver cancer due to hepatitis C      | 213<br>(120 - 356)          | --                    | 1<br>(0 - 1)           | 30<br>(13 - 56)          | 114<br>(60 - 202)         | 68<br>(41 - 109)          |
| Liver cancer due to alcohol use      | 101<br>(54 - 173)           | --                    | --                     | 12<br>(5 - 23)           | 53<br>(26 - 97)           | 36<br>(21 - 60)           |
| Liver cancer due to other causes     | 114<br>(71 - 183)           | --                    | 5<br>(3 - 10)          | 32<br>(18 - 56)          | 54<br>(30 - 92)           | 24<br>(13 - 39)           |
| Larynx cancer                        | 84<br>(58 - 132)            | --                    | --                     | 15<br>(9 - 25)           | 48<br>(31 - 77)           | 20<br>(14 - 30)           |
| Tracheal, bronchus and lung cancer   | 585<br>(414 - 899)          | --                    | --                     | 81<br>(53 - 129)         | 345<br>(236 - 548)        | 159<br>(114 - 246)        |
| Breast cancer                        | 802<br>(522 - 1,282)        | --                    | --                     | 253<br>(164 - 411)       | 418<br>(246 - 686)        | 131<br>(68 - 201)         |
| Cervical cancer                      | 875<br>(568 - 1,392)        | --                    | --                     | 351<br>(220 - 560)       | 406<br>(237 - 691)        | 117<br>(69 - 190)         |
| Uterine cancer                       | 76<br>(42 - 139)            | --                    | --                     | 11<br>(6 - 20)           | 45<br>(23 - 87)           | 20<br>(10 - 38)           |
| Prostate cancer                      | 323<br>(206 - 521)          | --                    | --                     | 6<br>(3 - 12)            | 109<br>(62 - 183)         | 208<br>(129 - 335)        |
| Colon and rectum cancer              | 725<br>(532 - 1,091)        | --                    | --                     | 123<br>(81 - 188)        | 353<br>(247 - 569)        | 249<br>(190 - 347)        |
| Lip and oral cavity cancer           | 123<br>(77 - 193)           | --                    | --                     | 32<br>(18 - 53)          | 63<br>(38 - 104)          | 28<br>(18 - 43)           |
| Nasopharynx cancer                   | 42<br>(28 - 66)             | --                    | 2<br>(1 - 4)           | 18<br>(11 - 29)          | 18<br>(11 - 30)           | 5<br>(3 - 7)              |
| Other pharynx cancer                 | 66<br>(40 - 106)            | --                    | --                     | 14<br>(9 - 23)           | 40<br>(23 - 68)           | 11<br>(7 - 19)            |
| Gallbladder and biliary tract cancer | 193<br>(115 - 321)          | --                    | --                     | 22<br>(12 - 37)          | 106<br>(60 - 188)         | 66<br>(38 - 104)          |
| Pancreatic cancer                    | 232<br>(167 - 356)          | --                    | --                     | 31<br>(19 - 50)          | 126<br>(83 - 206)         | 76<br>(56 - 107)          |
| Malignant skin melanoma              | 46<br>(29 - 74)             | --                    | --                     | 16<br>(9 - 27)           | 20<br>(12 - 34)           | 10<br>(6 - 16)            |
| Non-melanoma skin cancer             | 30<br>(19 - 48)             | --                    | --                     | 7<br>(4 - 12)            | 11<br>(7 - 19)            | 12<br>(7 - 19)            |
| Ovarian cancer                       | 138<br>(83 - 235)           | --                    | --                     | 38<br>(19 - 66)          | 76<br>(44 - 136)          | 24<br>(14 - 43)           |
| Testicular cancer                    | 18<br>(11 - 28)             | --                    | --                     | 14<br>(8 - 23)           | 3<br>(1 - 4)              | 1<br>(1 - 2)              |
| Kidney cancer                        | 136<br>(89 - 203)           | 20<br>(6 - 48)        | 6<br>(3 - 11)          | 23<br>(14 - 37)          | 62<br>(35 - 106)          | 25<br>(14 - 41)           |
| Bladder cancer                       | 176<br>(125 - 263)          | --                    | --                     | 20<br>(13 - 33)          | 82<br>(54 - 131)          | 74<br>(52 - 106)          |
| Brain and nervous system cancer      | 167<br>(119 - 243)          | 20<br>(8 - 51)        | 24<br>(15 - 37)        | 56<br>(36 - 87)          | 51<br>(33 - 84)           | 16<br>(10 - 24)           |
| Thyroid cancer                       | 33<br>(20 - 53)             | --                    | 0<br>(0 - 1)           | 6<br>(4 - 9)             | 16<br>(9 - 28)            | 10<br>(6 - 16)            |
| Mesothelioma                         | 21<br>(12 - 34)             | --                    | --                     | 5<br>(3 - 8)             | 11<br>(6 - 20)            | 5<br>(3 - 8)              |
| Hodgkin lymphoma                     | 56<br>(34 - 86)             | 8<br>(2 - 18)         | 7<br>(3 - 14)          | 26<br>(15 - 43)          | 10<br>(6 - 18)            | 4<br>(2 - 7)              |
| Non-Hodgkin lymphoma                 | 385<br>(262 - 580)          | 41<br>(19 - 85)       | 32<br>(20 - 51)        | 118<br>(75 - 181)        | 127<br>(70 - 217)         | 67<br>(36 - 111)          |
| Multiple myeloma                     | 77<br>(52 - 120)            | --                    | --                     | 12<br>(7 - 19)           | 43<br>(27 - 71)           | 23<br>(15 - 34)           |
| Leukemia                             | 221<br>(164 - 295)          | 35<br>(18 - 71)       | 44<br>(29 - 66)        | 74<br>(49 - 108)         | 43<br>(27 - 68)           | 25<br>(16 - 37)           |
| Other neoplasms                      | 870<br>(624 - 1,311)        | 195<br>(97 - 453)     | 99<br>(61 - 169)       | 226<br>(148 - 366)       | 225<br>(140 - 375)        | 125<br>(75 - 188)         |
| Cardiovascular diseases              | 23,121<br>(17,461 - 33,532) | 852<br>(514 - 1,376)  | 217<br>(143 - 316)     | 3,481<br>(2,370 - 5,374) | 8,832<br>(6,194 - 13,710) | 9,739<br>(7,681 - 13,360) |
| Rheumatic heart disease              | 722<br>(463 - 1,157)        | 38<br>(13 - 92)       | 34<br>(19 - 56)        | 280<br>(171 - 484)       | 237<br>(140 - 411)        | 133<br>(87 - 207)         |
| Ischemic heart disease               | 6,000<br>(4,243 - 9,200)    | 32<br>(13 - 64)       | 11<br>(6 - 18)         | 791<br>(517 - 1,240)     | 2,489<br>(1,657 - 3,934)  | 2,677<br>(1,886 - 4,166)  |
| Cerebrovascular disease              | 11,419<br>(8,495 - 16,752)  | 247<br>(131 - 438)    | 80<br>(48 - 122)       | 1,487<br>(987 - 2,374)   | 4,370<br>(3,013 - 6,869)  | 5,235<br>(4,054 - 7,191)  |
| Ischemic stroke                      | 5,204<br>(3,778 - 7,795)    | 49<br>(11 - 113)      | 12<br>(6 - 24)         | 264<br>(151 - 470)       | 1,621<br>(1,011 - 2,661)  | 3,259<br>(2,420 - 4,626)  |
| Hemorrhagic stroke                   | 6,215<br>(4,254 - 9,353)    | 199<br>(106 - 351)    | 68<br>(41 - 104)       | 1,223<br>(804 - 1,935)   | 2,749<br>(1,796 - 4,361)  | 1,976<br>(1,250 - 2,994)  |
| Hypertensive heart disease           | 1,509<br>(934 - 2,658)      | 12<br>(5 - 23)        | 4<br>(2 - 6)           | 152<br>(91 - 260)        | 554<br>(316 - 1,041)      | 788<br>(475 - 1,419)      |
| Cardiomyopathy and myocarditis       | 1,193<br>(830 - 1,717)      | 314<br>(132 - 559)    | 48<br>(26 - 77)        | 298<br>(181 - 485)       | 319<br>(200 - 527)        | 214<br>(127 - 384)        |
| Atrial fibrillation and flutter      | 9<br>(4 - 15)               | --                    | --                     | 1<br>(0 - 1)             | 2<br>(1 - 4)              | 6<br>(2 - 10)             |
| Aortic aneurysm                      | 174<br>(106 - 280)          | --                    | --                     | 29<br>(16 - 50)          | 74<br>(42 - 129)          | 71<br>(45 - 111)          |
| Peripheral vascular disease          | 11<br>(7 - 18)              | --                    | --                     | 1<br>(0 - 1)             | 4<br>(2 - 7)              | 7<br>(4 - 11)             |

Web Table 31- Angola deaths with 95% UI by age, sex, and cause in 2013

| Cause                                               | Both Sexes, All Ages     | Both Sexes, 0-4 Years | Both Sexes, 5-14 Years | Both Sexes, 15-49 Years | Both Sexes, 50-69 Years  | Both Sexes, 70-80 Years  |
|-----------------------------------------------------|--------------------------|-----------------------|------------------------|-------------------------|--------------------------|--------------------------|
| Endocarditis                                        | 238<br>(141 - 395)       | 33<br>(15 - 66)       | 7<br>(4 - 13)          | 62<br>(34 - 104)        | 70<br>(38 - 125)         | 66<br>(35 - 123)         |
| Other cardiovascular and circulatory diseases       | 1,846<br>(1,245 - 2,902) | 176<br>(85 - 307)     | 34<br>(19 - 54)        | 380<br>(235 - 591)      | 712<br>(441 - 1,197)     | 543<br>(355 - 942)       |
| Chronic respiratory diseases                        | 4,913<br>(3,738 - 6,808) | 748<br>(420 - 1,227)  | 103<br>(69 - 147)      | 653<br>(424 - 1,006)    | 1,548<br>(1,058 - 2,464) | 1,861<br>(1,445 - 2,580) |
| Chronic obstructive pulmonary disease               | 3,116<br>(2,331 - 4,460) | 290<br>(162 - 497)    | 27<br>(16 - 41)        | 278<br>(174 - 439)      | 1,082<br>(722 - 1,715)   | 1,438<br>(1,098 - 2,020) |
| Pneumoconiosis                                      | 161<br>(99 - 263)        | 11<br>(4 - 23)        | 4<br>(2 - 6)           | 35<br>(19 - 61)         | 64<br>(36 - 115)         | 47<br>(28 - 80)          |
| Silicosis                                           | 41<br>(19 - 80)          | 3<br>(1 - 7)          | 1<br>(0 - 2)           | 8<br>(3 - 16)           | 16<br>(6 - 32)           | 14<br>(7 - 28)           |
| Asbestosis                                          | 21<br>(12 - 38)          | 2<br>(0 - 4)          | 1<br>(0 - 1)           | 5<br>(2 - 8)            | 10<br>(5 - 19)           | 5<br>(2 - 8)             |
| Coal workers pneumoconiosis                         | 17<br>(10 - 29)          | 1<br>(0 - 2)          | 0<br>(0 - 1)           | 3<br>(2 - 6)            | 8<br>(4 - 14)            | 5<br>(3 - 9)             |
| Other pneumoconiosis                                | 81<br>(52 - 132)         | 6<br>(2 - 13)         | 2<br>(1 - 3)           | 19<br>(11 - 33)         | 31<br>(17 - 56)          | 24<br>(13 - 41)          |
| Asthma                                              | 1,024<br>(589 - 1,555)   | 227<br>(97 - 451)     | 50<br>(29 - 75)        | 254<br>(147 - 411)      | 278<br>(143 - 501)       | 216<br>(123 - 353)       |
| Interstitial lung disease and pulmonary sarcoidosis | 258<br>(95 - 470)        | 12<br>(2 - 39)        | 4<br>(1 - 8)           | 29<br>(11 - 61)         | 93<br>(32 - 181)         | 121<br>(36 - 225)        |
| Other chronic respiratory diseases                  | 354<br>(226 - 534)       | 208<br>(106 - 362)    | 19<br>(11 - 31)        | 57<br>(34 - 93)         | 32<br>(18 - 55)          | 38<br>(23 - 61)          |
| Cirrhosis                                           | 2,512<br>(1,815 - 3,746) | 105<br>(44 - 205)     | 45<br>(29 - 65)        | 748<br>(494 - 1,139)    | 1,175<br>(809 - 1,871)   | 439<br>(328 - 634)       |
| Cirrhosis due to hepatitis B                        | 504<br>(259 - 854)       | 3<br>(1 - 9)          | 4<br>(0 - 10)          | 133<br>(59 - 243)       | 258<br>(129 - 456)       | 106<br>(55 - 185)        |
| Cirrhosis due to hepatitis C                        | 796<br>(433 - 1,351)     | 7<br>(2 - 16)         | 10<br>(3 - 19)         | 251<br>(118 - 449)      | 394<br>(210 - 686)       | 134<br>(81 - 212)        |
| Cirrhosis due to alcohol use                        | 812<br>(519 - 1,272)     | --                    | --                     | 227<br>(130 - 387)      | 416<br>(260 - 692)       | 168<br>(112 - 251)       |
| Cirrhosis due to other causes                       | 401<br>(254 - 593)       | 95<br>(38 - 189)      | 32<br>(19 - 49)        | 136<br>(80 - 219)       | 107<br>(57 - 188)        | 30<br>(19 - 52)          |
| Digestive diseases                                  | 3,676<br>(2,646 - 5,142) | 677<br>(344 - 1,181)  | 161<br>(106 - 232)     | 980<br>(634 - 1,483)    | 1,048<br>(714 - 1,696)   | 810<br>(604 - 1,145)     |
| Peptic ulcer disease                                | 843<br>(579 - 1,247)     | 50<br>(17 - 111)      | 15<br>(9 - 25)         | 237<br>(146 - 388)      | 317<br>(203 - 514)       | 224<br>(148 - 329)       |
| Gastritis and duodenitis                            | 154<br>(71 - 262)        | 34<br>(11 - 72)       | 10<br>(5 - 18)         | 43<br>(20 - 76)         | 38<br>(14 - 80)          | 29<br>(10 - 67)          |
| Appendicitis                                        | 303<br>(196 - 467)       | 98<br>(41 - 197)      | 36<br>(20 - 58)        | 96<br>(57 - 152)        | 48<br>(28 - 82)          | 26<br>(15 - 42)          |
| Paralytic ileus and intestinal obstruction          | 799<br>(470 - 1,188)     | 96<br>(41 - 196)      | 38<br>(21 - 61)        | 170<br>(94 - 273)       | 238<br>(132 - 410)       | 257<br>(147 - 383)       |
| Inguinal, femoral, and abdominal hernia             | 77<br>(50 - 123)         | 15<br>(3 - 39)        | 4<br>(2 - 7)           | 15<br>(9 - 26)          | 21<br>(13 - 39)          | 22<br>(13 - 37)          |
| Inflammatory bowel disease                          | 356<br>(211 - 561)       | 165<br>(65 - 321)     | 17<br>(9 - 28)         | 82<br>(45 - 135)        | 55<br>(25 - 99)          | 37<br>(17 - 64)          |
| Vascular intestinal disorders                       | 32<br>(15 - 64)          | 4<br>(1 - 10)         | 1<br>(0 - 2)           | 6<br>(3 - 12)           | 10<br>(5 - 22)           | 10<br>(4 - 24)           |
| Gallbladder and biliary diseases                    | 247<br>(162 - 371)       | 21<br>(9 - 41)        | 6<br>(4 - 9)           | 60<br>(35 - 97)         | 87<br>(51 - 146)         | 73<br>(44 - 115)         |
| Pancreatitis                                        | 269<br>(164 - 428)       | 15<br>(3 - 30)        | 5<br>(3 - 9)           | 130<br>(70 - 214)       | 84<br>(49 - 148)         | 35<br>(20 - 58)          |
| Other digestive diseases                            | 597<br>(372 - 902)       | 179<br>(70 - 369)     | 29<br>(16 - 46)        | 142<br>(80 - 227)       | 150<br>(88 - 257)        | 97<br>(59 - 151)         |
| Neurological disorders                              | 1,887<br>(1,348 - 2,511) | 330<br>(111 - 691)    | 126<br>(67 - 199)      | 439<br>(264 - 655)      | 213<br>(144 - 345)       | 779<br>(597 - 1,045)     |
| Alzheimer disease and other dementias               | 842<br>(643 - 1,147)     | --                    | --                     | 1<br>(0 - 1)            | 110<br>(71 - 173)        | 731<br>(554 - 984)       |
| Parkinson disease                                   | 14<br>(8 - 22)           | --                    | --                     | 1<br>(1 - 2)            | 4<br>(2 - 7)             | 9<br>(5 - 14)            |
| Epilepsy                                            | 852<br>(440 - 1,291)     | 276<br>(69 - 617)     | 111<br>(54 - 181)      | 385<br>(223 - 582)      | 60<br>(37 - 107)         | 20<br>(12 - 34)          |
| Multiple sclerosis                                  | 6<br>(3 - 11)            | --                    | --                     | 3<br>(1 - 6)            | 2<br>(1 - 5)             | 1<br>(0 - 1)             |
| Other neurological disorders                        | 172<br>(126 - 248)       | 53<br>(32 - 111)      | 15<br>(10 - 23)        | 49<br>(33 - 73)         | 37<br>(25 - 60)          | 18<br>(13 - 25)          |
| Mental and substance use disorders                  | 715<br>(453 - 1,104)     | 51<br>(14 - 108)      | 1<br>(0 - 2)           | 464<br>(280 - 722)      | 173<br>(106 - 292)       | 26<br>(17 - 39)          |
| Schizophrenia                                       | 15<br>(8 - 24)           | --                    | --                     | 8<br>(4 - 13)           | 5<br>(3 - 9)             | 2<br>(1 - 3)             |
| Alcohol use disorders                               | 446<br>(231 - 730)       | --                    | --                     | 281<br>(142 - 474)      | 146<br>(83 - 259)        | 19<br>(10 - 30)          |
| Drug use disorders                                  | 250<br>(135 - 381)       | 51<br>(14 - 108)      | --                     | 171<br>(99 - 263)       | 22<br>(11 - 39)          | 5<br>(2 - 9)             |
| Opioid use disorders                                | 27<br>(14 - 41)          | 6<br>(1 - 13)         | --                     | 18<br>(10 - 28)         | 2<br>(1 - 4)             | 1<br>(0 - 1)             |
| Cocaine use disorders                               | 1<br>(1 - 2)             | 0<br>(0 - 1)          | --                     | 1<br>(0 - 1)            | 0<br>(0 - 0)             | 0<br>(0 - 0)             |

Web Table 31- Angola deaths with 95% UI by age, sex, and cause in 2013

| Cause                                               | Both Sexes, All Ages      | Both Sexes, 0-4 Years     | Both Sexes, 5-14 Years | Both Sexes, 15-49 Years  | Both Sexes, 50-69 Years  | Both Sexes, 70-80 Years  |
|-----------------------------------------------------|---------------------------|---------------------------|------------------------|--------------------------|--------------------------|--------------------------|
| Amphetamine use disorders                           | 1<br>(0 - 1)              | 0<br>(0 - 0)              | --                     | 0<br>(0 - 1)             | 0<br>(0 - 0)             | 0<br>(0 - 0)             |
| Other drug use disorders                            | 222<br>(119 - 337)        | 45<br>(12 - 95)           | --                     | 152<br>(88 - 234)        | 20<br>(10 - 35)          | 5<br>(2 - 8)             |
| Eating disorders                                    | 4<br>(2 - 6)              | --                        | 1<br>(0 - 2)           | 3<br>(2 - 5)             | --                       | --                       |
| Anorexia nervosa                                    | 4<br>(2 - 6)              | --                        | 1<br>(0 - 2)           | 3<br>(2 - 5)             | --                       | --                       |
| Diabetes, urogenital, blood, and endocrine diseases | 8,731<br>(6,358 - 11,931) | 2,546<br>(1,483 - 4,423)  | 671<br>(372 - 1,134)   | 1,748<br>(1,140 - 2,649) | 2,157<br>(1,443 - 3,490) | 1,610<br>(1,175 - 2,258) |
| Diabetes mellitus                                   | 2,602<br>(1,764 - 3,954)  | 45<br>(27 - 70)           | 16<br>(10 - 25)        | 372<br>(234 - 586)       | 1,252<br>(787 - 2,096)   | 916<br>(635 - 1,311)     |
| Acute glomerulonephritis                            | 49<br>(25 - 86)           | 17<br>(5 - 44)            | 8<br>(4 - 14)          | 14<br>(7 - 23)           | 6<br>(4 - 11)            | 3<br>(2 - 5)             |
| Chronic kidney disease                              | 1,388<br>(861 - 2,206)    | 200<br>(103 - 334)        | 66<br>(38 - 101)       | 373<br>(224 - 649)       | 395<br>(219 - 733)       | 354<br>(216 - 561)       |
| Chronic kidney disease due to diabetes mellitus     | 8<br>(5 - 15)             | 1<br>(0 - 1)              | 1<br>(0 - 1)           | 2<br>(1 - 4)             | 3<br>(1 - 7)             | 2<br>(1 - 4)             |
| Chronic kidney disease due to hypertension          | 503<br>(313 - 824)        | 24<br>(8 - 55)            | 8<br>(4 - 15)          | 103<br>(59 - 182)        | 187<br>(107 - 333)       | 181<br>(113 - 302)       |
| Chronic kidney disease due to glomerulonephritis    | 456<br>(274 - 687)        | 114<br>(56 - 185)         | 36<br>(21 - 54)        | 149<br>(86 - 237)        | 95<br>(48 - 169)         | 63<br>(33 - 105)         |
| Chronic kidney disease due to other causes          | 421<br>(201 - 768)        | 62<br>(23 - 120)          | 22<br>(9 - 40)         | 119<br>(56 - 229)        | 111<br>(39 - 252)        | 107<br>(41 - 203)        |
| Urinary diseases and male infertility               | 688<br>(495 - 975)        | 156<br>(81 - 284)         | 21<br>(13 - 31)        | 150<br>(96 - 226)        | 181<br>(115 - 296)       | 180<br>(125 - 276)       |
| Interstitial nephritis and urinary tract infections | 491<br>(349 - 709)        | 101<br>(49 - 195)         | 12<br>(7 - 18)         | 102<br>(64 - 156)        | 133<br>(83 - 221)        | 143<br>(99 - 225)        |
| Urolithiasis                                        | 22<br>(13 - 38)           | --                        | 2<br>(1 - 4)           | 8<br>(4 - 17)            | 8<br>(4 - 15)            | 5<br>(2 - 9)             |
| Other urinary diseases                              | 175<br>(119 - 271)        | 56<br>(24 - 106)          | 7<br>(4 - 12)          | 40<br>(23 - 65)          | 40<br>(21 - 72)          | 33<br>(17 - 60)          |
| Gynecological diseases                              | 20<br>(10 - 36)           | --                        | --                     | 15<br>(7 - 27)           | 4<br>(1 - 7)             | 2<br>(1 - 3)             |
| Uterine fibroids                                    | 4<br>(2 - 7)              | --                        | --                     | 2<br>(1 - 4)             | 1<br>(0 - 2)             | 1<br>(0 - 1)             |
| Polycystic ovarian syndrome                         | 1<br>(1 - 2)              | --                        | --                     | 1<br>(1 - 2)             | 0<br>(0 - 0)             | --                       |
| Endometriosis                                       | 3<br>(1 - 5)              | --                        | --                     | 2<br>(1 - 5)             | 0<br>(0 - 0)             | --                       |
| Genital prolapse                                    | 3<br>(2 - 6)              | --                        | --                     | 2<br>(1 - 4)             | 1<br>(0 - 1)             | 0<br>(0 - 1)             |
| Other gynecological diseases                        | 10<br>(5 - 17)            | --                        | --                     | 7<br>(3 - 13)            | 2<br>(1 - 4)             | 1<br>(0 - 1)             |
| Hemoglobinopathies and hemolytic anemias            | 2,589<br>(1,230 - 4,716)  | 1,460<br>(570 - 3,007)    | 461<br>(193 - 870)     | 531<br>(232 - 1,049)     | 108<br>(47 - 222)        | 28<br>(17 - 47)          |
| Thalassemias                                        | 1<br>(0 - 2)              | 1<br>(0 - 2)              | 0<br>(0 - 0)           | 0<br>(0 - 0)             | 0<br>(0 - 0)             | 0<br>(0 - 0)             |
| Sickle cell disorders                               | 2,518<br>(1,188 - 4,616)  | 1,428<br>(555 - 2,958)    | 458<br>(191 - 863)     | 525<br>(229 - 1,035)     | 102<br>(44 - 211)        | 4<br>(2 - 7)             |
| G6PD deficiency                                     | 10<br>(5 - 21)            | 6<br>(3 - 14)             | 1<br>(0 - 2)           | 2<br>(1 - 4)             | 1<br>(0 - 1)             | 1<br>(0 - 1)             |
| Other hemoglobinopathies and hemolytic anemias      | 60<br>(37 - 95)           | 25<br>(12 - 42)           | 2<br>(1 - 4)           | 5<br>(2 - 10)            | 5<br>(3 - 10)            | 23<br>(14 - 40)          |
| Endocrine, metabolic, blood, and immune disorders   | 1,395<br>(894 - 2,133)    | 667<br>(336 - 1,334)      | 99<br>(56 - 172)       | 292<br>(179 - 456)       | 210<br>(123 - 355)       | 126<br>(72 - 200)        |
| Musculoskeletal disorders                           | 205<br>(115 - 312)        | --                        | 24<br>(11 - 36)        | 91<br>(46 - 151)         | 57<br>(32 - 97)          | 32<br>(19 - 50)          |
| Rheumatoid arthritis                                | 38<br>(18 - 64)           | --                        | 3<br>(1 - 6)           | 8<br>(4 - 15)            | 15<br>(6 - 28)           | 11<br>(5 - 19)           |
| Other musculoskeletal disorders                     | 168<br>(96 - 255)         | --                        | 21<br>(9 - 32)         | 83<br>(42 - 135)         | 42<br>(25 - 72)          | 21<br>(13 - 33)          |
| Other non-communicable diseases                     | 7,323<br>(4,379 - 11,425) | 6,627<br>(3,721 - 10,660) | 248<br>(142 - 422)     | 231<br>(151 - 346)       | 107<br>(67 - 178)        | 110<br>(61 - 176)        |
| Congenital anomalies                                | 6,738<br>(3,871 - 10,754) | 6,307<br>(3,535 - 10,222) | 229<br>(125 - 398)     | 161<br>(99 - 247)        | 29<br>(19 - 48)          | 13<br>(9 - 19)           |
| Neural tube defects                                 | 1,463<br>(380 - 3,472)    | 1,414<br>(350 - 3,335)    | 29<br>(9 - 63)         | 18<br>(6 - 39)           | 2<br>(1 - 4)             | 1<br>(0 - 1)             |
| Congenital heart anomalies                          | 3,231<br>(1,652 - 6,055)  | 2,987<br>(1,477 - 5,694)  | 135<br>(64 - 259)      | 91<br>(51 - 149)         | 13<br>(8 - 21)           | 6<br>(4 - 9)             |
| Cleft lip and cleft palate                          | 41<br>(12 - 109)          | 41<br>(12 - 109)          | --                     | --                       | --                       | --                       |
| Down syndrome                                       | 377<br>(109 - 766)        | 337<br>(88 - 707)         | 19<br>(7 - 39)         | 17<br>(8 - 30)           | 4<br>(2 - 7)             | 0<br>(0 - 0)             |
| Chromosomal unbalanced rearrangements               | 220<br>(95 - 435)         | 209<br>(87 - 420)         | 5<br>(2 - 10)          | 5<br>(3 - 9)             | 1<br>(0 - 1)             | 0<br>(0 - 0)             |
| Other congenital anomalies                          | 1,407<br>(640 - 2,927)    | 1,321<br>(574 - 2,781)    | 41<br>(19 - 88)        | 30<br>(17 - 52)          | 10<br>(6 - 17)           | 6<br>(4 - 9)             |
| Skin and subcutaneous diseases                      | 419<br>(287 - 568)        | 154<br>(70 - 254)         | 19<br>(12 - 29)        | 71<br>(45 - 107)         | 78<br>(47 - 132)         | 97<br>(50 - 159)         |

Web Table 31- Angola deaths with 95% UI by age, sex, and cause in 2013

| Cause                                           | Both Sexes, All Ages        | Both Sexes, 0-4 Years    | Both Sexes, 5-14 Years   | Both Sexes, 15-49 Years   | Both Sexes, 50-69 Years  | Both Sexes, 70-80 Years |
|-------------------------------------------------|-----------------------------|--------------------------|--------------------------|---------------------------|--------------------------|-------------------------|
| Cellulitis                                      | 193<br>(105 - 313)          | 70<br>(31 - 135)         | 10<br>(5 - 16)           | 34<br>(18 - 59)           | 39<br>(18 - 77)          | 40<br>(17 - 78)         |
| Pyoderma                                        | 174<br>(96 - 273)           | 76<br>(26 - 145)         | 7<br>(3 - 13)            | 27<br>(14 - 48)           | 30<br>(15 - 53)          | 34<br>(18 - 58)         |
| Decubitus ulcer                                 | 36<br>(19 - 61)             | 3<br>(0 - 8)             | 1<br>(1 - 3)             | 5<br>(2 - 9)              | 6<br>(3 - 12)            | 21<br>(9 - 39)          |
| Other skin and subcutaneous diseases            | 16<br>(7 - 31)              | 5<br>(1 - 16)            | 1<br>(0 - 3)             | 4<br>(2 - 8)              | 3<br>(1 - 5)             | 2<br>(1 - 5)            |
| Sudden infant death syndrome                    | 166<br>(41 - 454)           | 166<br>(41 - 454)        | --                       | --                        | --                       | --                      |
| Injuries                                        | 18,004<br>(13,721 - 23,496) | 6,208<br>(3,863 - 9,394) | 1,907<br>(1,321 - 2,567) | 7,661<br>(5,218 - 10,870) | 1,553<br>(1,029 - 2,519) | 675<br>(501 - 968)      |
| Transport injuries                              | 6,005<br>(3,434 - 9,678)    | 1,503<br>(654 - 2,940)   | 804<br>(437 - 1,332)     | 2,959<br>(1,573 - 4,896)  | 555<br>(267 - 1,009)     | 183<br>(94 - 294)       |
| Road injuries                                   | 5,636<br>(3,227 - 8,951)    | 1,369<br>(607 - 2,628)   | 755<br>(411 - 1,236)     | 2,813<br>(1,505 - 4,578)  | 524<br>(255 - 958)       | 175<br>(90 - 279)       |
| Pedestrian road injuries                        | 2,230<br>(1,157 - 3,704)    | 682<br>(291 - 1,379)     | 361<br>(184 - 628)       | 874<br>(408 - 1,502)      | 222<br>(101 - 414)       | 90<br>(45 - 152)        |
| Cyclist road injuries                           | 612<br>(288 - 1,064)        | 164<br>(54 - 371)        | 123<br>(55 - 215)        | 237<br>(105 - 425)        | 70<br>(29 - 140)         | 19<br>(8 - 35)          |
| Motorcyclist road injuries                      | 935<br>(475 - 1,688)        | 109<br>(41 - 224)        | 54<br>(26 - 97)          | 704<br>(352 - 1,268)      | 58<br>(26 - 113)         | 11<br>(5 - 20)          |
| Motor vehicle road injuries                     | 1,827<br>(973 - 3,181)      | 405<br>(168 - 864)       | 212<br>(102 - 366)       | 985<br>(523 - 1,707)      | 170<br>(81 - 304)        | 54<br>(25 - 96)         |
| Other road injuries                             | 32<br>(14 - 56)             | 9<br>(3 - 20)            | 5<br>(2 - 11)            | 13<br>(4 - 25)            | 3<br>(1 - 7)             | 1<br>(0 - 3)            |
| Other transport injuries                        | 369<br>(156 - 939)          | 134<br>(43 - 353)        | 49<br>(20 - 114)         | 146<br>(61 - 338)         | 32<br>(12 - 75)          | 8<br>(3 - 19)           |
| Unintentional injuries                          | 8,880<br>(6,262 - 12,094)   | 4,564<br>(2,368 - 7,222) | 993<br>(690 - 1,392)     | 2,272<br>(1,550 - 3,346)  | 646<br>(445 - 1,006)     | 405<br>(301 - 569)      |
| Falls                                           | 1,089<br>(634 - 1,685)      | 314<br>(79 - 701)        | 80<br>(36 - 140)         | 349<br>(201 - 578)        | 170<br>(106 - 291)       | 176<br>(110 - 263)      |
| Drowning                                        | 2,440<br>(1,312 - 4,047)    | 1,355<br>(418 - 2,761)   | 416<br>(237 - 669)       | 561<br>(345 - 876)        | 84<br>(53 - 138)         | 24<br>(15 - 43)         |
| Fire, heat, and hot substances                  | 1,432<br>(566 - 2,380)      | 887<br>(208 - 1,788)     | 128<br>(54 - 212)        | 272<br>(140 - 426)        | 88<br>(52 - 152)         | 57<br>(35 - 96)         |
| Poisonings                                      | 467<br>(282 - 864)          | 226<br>(99 - 504)        | 36<br>(19 - 67)          | 160<br>(93 - 294)         | 34<br>(20 - 65)          | 11<br>(7 - 20)          |
| Exposure to mechanical forces                   | 1,212<br>(806 - 2,106)      | 444<br>(187 - 855)       | 156<br>(93 - 279)        | 507<br>(304 - 881)        | 88<br>(52 - 166)         | 18<br>(11 - 31)         |
| Unintentional firearm injuries                  | 338<br>(222 - 498)          | 78<br>(34 - 146)         | 41<br>(22 - 69)          | 193<br>(109 - 319)        | 21<br>(12 - 39)          | 5<br>(3 - 8)            |
| Unintentional suffocation                       | 90<br>(15 - 241)            | 66<br>(9 - 208)          | 7<br>(2 - 16)            | 13<br>(2 - 25)            | 3<br>(1 - 6)             | 1<br>(0 - 2)            |
| Other exposure to mechanical forces             | 784<br>(478 - 1,662)        | 300<br>(99 - 702)        | 108<br>(53 - 224)        | 301<br>(163 - 632)        | 64<br>(34 - 132)         | 12<br>(7 - 23)          |
| Adverse effects of medical treatment            | 503<br>(266 - 792)          | 228<br>(77 - 467)        | 26<br>(12 - 44)          | 104<br>(55 - 170)         | 81<br>(45 - 139)         | 64<br>(34 - 107)        |
| Animal contact                                  | 317<br>(168 - 750)          | 162<br>(49 - 434)        | 53<br>(27 - 119)         | 62<br>(35 - 133)          | 29<br>(15 - 65)          | 11<br>(6 - 26)          |
| Venomous animal contact                         | 222<br>(108 - 636)          | 116<br>(32 - 385)        | 38<br>(18 - 97)          | 42<br>(22 - 102)          | 19<br>(9 - 46)           | 6<br>(3 - 15)           |
| Non-venomous animal contact                     | 95<br>(46 - 165)            | 45<br>(12 - 101)         | 15<br>(7 - 30)           | 20<br>(10 - 36)           | 10<br>(5 - 22)           | 5<br>(2 - 12)           |
| Foreign body                                    | 958<br>(338 - 1,606)        | 773<br>(217 - 1,360)     | 42<br>(19 - 70)          | 76<br>(37 - 127)          | 35<br>(19 - 61)          | 32<br>(18 - 50)         |
| Pulmonary aspiration and foreign body in airway | 945<br>(328 - 1,596)        | 768<br>(214 - 1,355)     | 39<br>(17 - 67)          | 73<br>(35 - 122)          | 34<br>(18 - 58)          | 31<br>(17 - 49)         |
| Foreign body in other body part                 | 13<br>(7 - 22)              | 6<br>(2 - 13)            | 2<br>(1 - 3)             | 3<br>(2 - 6)              | 1<br>(1 - 2)             | 1<br>(0 - 1)            |
| Other unintentional injuries                    | 461<br>(258 - 810)          | 174<br>(72 - 352)        | 57<br>(29 - 106)         | 180<br>(91 - 346)         | 37<br>(19 - 74)          | 12<br>(7 - 23)          |
| Self-harm and interpersonal violence            | 3,117<br>(1,643 - 4,604)    | 138<br>(66 - 274)        | 109<br>(58 - 178)        | 2,431<br>(1,213 - 3,612)  | 352<br>(169 - 600)       | 86<br>(40 - 137)        |
| Self-harm                                       | 2,047<br>(872 - 3,162)      | --                       | 56<br>(17 - 122)         | 1,607<br>(669 - 2,458)    | 302<br>(129 - 515)       | 81<br>(36 - 131)        |
| Interpersonal violence                          | 1,070<br>(651 - 1,614)      | 138<br>(66 - 274)        | 53<br>(29 - 93)          | 823<br>(471 - 1,262)      | 50<br>(28 - 91)          | 5<br>(3 - 9)            |
| Assault by firearm                              | 353<br>(164 - 619)          | 19<br>(6 - 54)           | 11<br>(5 - 23)           | 307<br>(128 - 538)        | 15<br>(7 - 30)           | 1<br>(0 - 2)            |
| Assault by sharp object                         | 275<br>(134 - 463)          | 13<br>(4 - 33)           | 7<br>(3 - 15)            | 240<br>(108 - 418)        | 14<br>(7 - 27)           | 1<br>(1 - 2)            |
| Assault by other means                          | 442<br>(278 - 715)          | 106<br>(50 - 213)        | 34<br>(18 - 61)          | 277<br>(160 - 469)        | 21<br>(11 - 39)          | 3<br>(2 - 6)            |
| Forces of nature, war, and legal intervention   | 2<br>(0 - 0)                | 2<br>(0 - 0)             | --                       | --                        | --                       | --                      |
| Exposure to forces of nature                    | 2<br>(0 - 0)                | 2<br>(0 - 0)             | --                       | --                        | --                       | --                      |

Web Table 31- Angola deaths with 95% UI by age, sex, and cause in 2013

| Cause                                                             | Males, All Ages              | Males, 0-4 Years            | Males, 5-14 Years        | Males, 15-49 Years          | Males, 50-69 Years          | Males, 70-80 Years          |
|-------------------------------------------------------------------|------------------------------|-----------------------------|--------------------------|-----------------------------|-----------------------------|-----------------------------|
| All causes                                                        | 99,592<br>(84,587 - 122,048) | 44,447<br>(36,160 - 55,132) | 4,226<br>(3,407 - 5,327) | 22,451<br>(17,124 - 29,750) | 16,931<br>(13,070 - 25,657) | 11,538<br>(10,237 - 15,258) |
| Communicable, maternal, neonatal, and nutritional diseases        | 57,565<br>(48,653 - 69,055)  | 34,868<br>(27,906 - 43,870) | 2,336<br>(1,768 - 3,165) | 10,965<br>(8,322 - 14,095)  | 5,890<br>(4,194 - 8,850)    | 3,505<br>(2,491 - 4,761)    |
| HIV/AIDS and tuberculosis                                         | 13,638<br>(10,266 - 17,555)  | 1,425<br>(1,084 - 1,860)    | 449<br>(351 - 576)       | 7,703<br>(5,563 - 10,400)   | 3,135<br>(1,938 - 4,613)    | 926<br>(518 - 1,373)        |
| Tuberculosis                                                      | 5,969<br>(3,248 - 9,477)     | 518<br>(287 - 911)          | 92<br>(52 - 153)         | 2,495<br>(1,178 - 4,022)    | 2,059<br>(939 - 3,585)      | 805<br>(406 - 1,247)        |
| HIV/AIDS                                                          | 7,668<br>(5,298 - 10,586)    | 907<br>(674 - 1,171)        | 356<br>(259 - 470)       | 5,208<br>(3,174 - 7,737)    | 1,076<br>(719 - 1,460)      | 120<br>(63 - 175)           |
| HIV/AIDS resulting in mycobacterial infection                     | 538<br>(353 - 761)           | 60<br>(42 - 83)             | 22<br>(15 - 30)          | 366<br>(221 - 551)          | 80<br>(51 - 115)            | 9<br>(5 - 14)               |
| HIV/AIDS resulting in other diseases                              | 7,131<br>(4,966 - 9,867)     | 847<br>(631 - 1,091)        | 335<br>(242 - 443)       | 4,842<br>(2,975 - 7,193)    | 996<br>(662 - 1,341)        | 111<br>(58 - 162)           |
| Diarrhea, lower respiratory, and other common infectious diseases | 22,760<br>(16,668 - 30,914)  | 15,167<br>(9,728 - 22,418)  | 1,199<br>(802 - 1,780)   | 2,229<br>(1,429 - 3,319)    | 2,096<br>(1,441 - 3,378)    | 2,069<br>(1,495 - 2,911)    |
| Diarrheal diseases                                                | 8,187<br>(4,723 - 12,832)    | 5,372<br>(2,301 - 9,873)    | 449<br>(223 - 826)       | 849<br>(509 - 1,349)        | 803<br>(453 - 1,409)        | 713<br>(431 - 1,129)        |
| Intestinal infectious diseases                                    | 449<br>(230 - 824)           | 199<br>(89 - 384)           | 119<br>(54 - 227)        | 116<br>(50 - 226)           | 12<br>(5 - 26)              | 4<br>(2 - 8)                |
| Typhoid fever                                                     | 284<br>(127 - 547)           | 112<br>(43 - 244)           | 82<br>(36 - 165)         | 79<br>(30 - 165)            | 8<br>(3 - 18)               | 2<br>(1 - 4)                |
| Paratyphoid fever                                                 | 102<br>(44 - 205)            | 43<br>(15 - 90)             | 30<br>(12 - 66)          | 27<br>(9 - 57)              | 2<br>(1 - 6)                | 1<br>(0 - 1)                |
| Other intestinal infectious diseases                              | 63<br>(37 - 104)             | 44<br>(22 - 82)             | 6<br>(1 - 14)            | 10<br>(3 - 22)              | 2<br>(0 - 8)                | 1<br>(0 - 4)                |
| Lower respiratory infections                                      | 10,774<br>(6,981 - 15,971)   | 7,172<br>(3,593 - 12,043)   | 344<br>(210 - 546)       | 840<br>(492 - 1,339)        | 1,121<br>(707 - 1,861)      | 1,297<br>(831 - 1,903)      |
| Upper respiratory infections                                      | 10<br>(3 - 24)               | 6<br>(0 - 20)               | 0<br>(0 - 2)             | 2<br>(0 - 5)                | 1<br>(0 - 4)                | 1<br>(0 - 2)                |
| Otitis media                                                      | 11<br>(7 - 17)               | 7<br>(4 - 13)               | 1<br>(1 - 2)             | 2<br>(1 - 2)                | 0<br>(0 - 1)                | 0<br>(0 - 0)                |
| Meningitis                                                        | 2,557<br>(1,487 - 4,438)     | 1,748<br>(737 - 3,622)      | 234<br>(116 - 403)       | 380<br>(220 - 635)          | 146<br>(78 - 273)           | 49<br>(26 - 84)             |
| Pneumococcal meningitis                                           | 761<br>(446 - 1,302)         | 451<br>(174 - 971)          | 94<br>(44 - 169)         | 145<br>(76 - 254)           | 53<br>(24 - 103)            | 18<br>(9 - 33)              |
| H influenzae type B meningitis                                    | 828<br>(405 - 1,638)         | 690<br>(280 - 1,476)        | 64<br>(30 - 115)         | 53<br>(27 - 95)             | 15<br>(6 - 31)              | 5<br>(2 - 10)               |
| Meningococcal meningitis                                          | 326<br>(187 - 579)           | 201<br>(76 - 453)           | 30<br>(12 - 58)          | 60<br>(31 - 111)            | 25<br>(12 - 49)             | 9<br>(4 - 16)               |
| Other meningitis                                                  | 642<br>(385 - 1,100)         | 405<br>(177 - 851)          | 46<br>(18 - 95)          | 122<br>(62 - 208)           | 52<br>(24 - 104)            | 17<br>(8 - 30)              |
| Encephalitis                                                      | 170<br>(86 - 316)            | 117<br>(44 - 254)           | 18<br>(7 - 33)           | 25<br>(11 - 42)             | 8<br>(4 - 14)               | 3<br>(2 - 4)                |
| Diphtheria                                                        | 20<br>(0 - 127)              | 17<br>(0 - 124)             | 2<br>(0 - 16)            | 1<br>(0 - 3)                | 0<br>(0 - 1)                | --                          |
| Whooping cough                                                    | 329<br>(1 - 1,755)           | 315<br>(1 - 1,663)          | 11<br>(0 - 58)           | 2<br>(0 - 10)               | 0<br>(0 - 1)                | --                          |
| Tetanus                                                           | 82<br>(34 - 191)             | 63<br>(20 - 158)            | 6<br>(2 - 15)            | 9<br>(3 - 27)               | 3<br>(1 - 12)               | 1<br>(0 - 3)                |
| Measles                                                           | 157<br>(4 - 919)             | 143<br>(3 - 814)            | 13<br>(0 - 77)           | 1<br>(0 - 9)                | 0<br>(0 - 0)                | --                          |
| Varicella and herpes zoster                                       | 13<br>(4 - 37)               | 7<br>(0 - 30)               | 1<br>(0 - 6)             | 2<br>(0 - 6)                | 1<br>(0 - 3)                | 1<br>(0 - 6)                |
| Neglected tropical diseases and malaria                           | 5,701<br>(2,384 - 12,451)    | 4,382<br>(1,070 - 10,759)   | 412<br>(189 - 799)       | 553<br>(267 - 1,077)        | 241<br>(109 - 474)          | 113<br>(46 - 261)           |
| Malaria                                                           | 5,421<br>(2,082 - 12,081)    | 4,256<br>(957 - 10,677)     | 378<br>(157 - 770)       | 474<br>(203 - 976)          | 210<br>(85 - 433)           | 103<br>(36 - 251)           |
| Leishmaniasis                                                     | 32<br>(17 - 53)              | 15<br>(6 - 33)              | 4<br>(2 - 8)             | 9<br>(4 - 17)               | 2<br>(1 - 4)                | 1<br>(0 - 2)                |
| Visceral leishmaniasis                                            | 32<br>(17 - 53)              | 15<br>(6 - 33)              | 4<br>(2 - 8)             | 9<br>(4 - 17)               | 2<br>(1 - 4)                | 1<br>(0 - 2)                |
| African trypanosomiasis                                           | 28<br>(14 - 47)              | 2<br>(1 - 5)                | 3<br>(2 - 6)             | 19<br>(9 - 32)              | 3<br>(2 - 6)                | 1<br>(0 - 1)                |
| Schistosomiasis                                                   | 44<br>(28 - 68)              | 1<br>(0 - 3)                | 2<br>(1 - 4)             | 20<br>(11 - 33)             | 15<br>(8 - 28)              | 5<br>(2 - 9)                |
| Cysticercosis                                                     | 5<br>(4 - 8)                 | 1<br>(0 - 1)                | 0<br>(0 - 1)             | 3<br>(2 - 5)                | 1<br>(1 - 2)                | 0<br>(0 - 0)                |
| Cystic echinococcosis                                             | 4<br>(3 - 5)                 | 1<br>(1 - 2)                | 1<br>(1 - 1)             | 2<br>(1 - 2)                | 1<br>(0 - 1)                | 0<br>(0 - 0)                |
| Dengue                                                            | 8<br>(3 - 14)                | 4<br>(1 - 10)               | 1<br>(1 - 3)             | 1<br>(1 - 3)                | 0<br>(0 - 1)                | 0<br>(0 - 0)                |
| Yellow fever                                                      | 1<br>(0 - 1)                 | 0<br>(0 - 0)                | 0<br>(0 - 0)             | 0<br>(0 - 1)                | 0<br>(0 - 0)                | 0<br>(0 - 0)                |
| Rabies                                                            | 34<br>(18 - 74)              | 13<br>(3 - 42)              | 10<br>(5 - 20)           | 9<br>(5 - 19)               | 2<br>(1 - 4)                | 0<br>(0 - 1)                |
| Intestinal nematode infections                                    | 50<br>(23 - 94)              | 43<br>(18 - 87)             | 4<br>(0 - 13)            | 1<br>(0 - 7)                | 1<br>(0 - 4)                | 0<br>(0 - 2)                |
| Ascariasis                                                        | 50<br>(23 - 94)              | 43<br>(18 - 87)             | 4<br>(0 - 13)            | 1<br>(0 - 7)                | 1<br>(0 - 4)                | 0<br>(0 - 2)                |

Web Table 31- Angola deaths with 95% UI by age, sex, and cause in 2013

| Cause                                                            | Males, All Ages             | Males, 0-4 Years          | Males, 5-14 Years    | Males, 15-49 Years       | Males, 50-69 Years         | Males, 70-80 Years        |
|------------------------------------------------------------------|-----------------------------|---------------------------|----------------------|--------------------------|----------------------------|---------------------------|
| Other neglected tropical diseases                                | 75<br>(32 - 162)            | 45<br>(10 - 125)          | 7<br>(3 - 16)        | 14<br>(8 - 25)           | 5<br>(3 - 10)              | 3<br>(2 - 5)              |
| Maternal disorders                                               | --                          | --                        | --                   | --                       | --                         | --                        |
| Maternal hemorrhage                                              | --                          | --                        | --                   | --                       | --                         | --                        |
| Maternal sepsis and other maternal infections                    | --                          | --                        | --                   | --                       | --                         | --                        |
| Maternal hypertensive disorders                                  | --                          | --                        | --                   | --                       | --                         | --                        |
| Maternal obstructed labor                                        | --                          | --                        | --                   | --                       | --                         | --                        |
| Maternal abortive outcome                                        | --                          | --                        | --                   | --                       | --                         | --                        |
| Indirect maternal deaths                                         | --                          | --                        | --                   | --                       | --                         | --                        |
| Late maternal deaths                                             | --                          | --                        | --                   | --                       | --                         | --                        |
| Maternal deaths aggravated by HIV/AIDS                           | --                          | --                        | --                   | --                       | --                         | --                        |
| Other maternal disorders                                         | --                          | --                        | --                   | --                       | --                         | --                        |
| Neonatal disorders                                               | 8,434<br>(5,918 - 11,498)   | 8,434<br>(5,918 - 11,498) | --                   | --                       | --                         | --                        |
| Neonatal preterm birth complications                             | 2,727<br>(1,319 - 4,562)    | 2,727<br>(1,319 - 4,562)  | --                   | --                       | --                         | --                        |
| Neonatal encephalopathy due to birth asphyxia and trauma         | 2,441<br>(1,320 - 3,969)    | 2,441<br>(1,320 - 3,969)  | --                   | --                       | --                         | --                        |
| Neonatal sepsis and other neonatal infections                    | 1,504<br>(544 - 2,884)      | 1,504<br>(544 - 2,884)    | --                   | --                       | --                         | --                        |
| Hemolytic disease and other neonatal jaundice                    | 76<br>(17 - 201)            | 76<br>(17 - 201)          | --                   | --                       | --                         | --                        |
| Other neonatal disorders                                         | 1,685<br>(911 - 2,907)      | 1,685<br>(911 - 2,907)    | --                   | --                       | --                         | --                        |
| Nutritional deficiencies                                         | 5,151<br>(2,147 - 8,849)    | 3,938<br>(1,525 - 7,369)  | 171<br>(71 - 317)    | 337<br>(157 - 634)       | 341<br>(130 - 623)         | 363<br>(129 - 594)        |
| Protein-energy malnutrition                                      | 3,495<br>(1,187 - 7,092)    | 2,692<br>(664 - 5,990)    | 136<br>(45 - 255)    | 183<br>(65 - 400)        | 232<br>(58 - 428)          | 252<br>(56 - 447)         |
| Iodine deficiency                                                | 36<br>(1 - 246)             | 30<br>(0 - 242)           | 1<br>(0 - 7)         | 2<br>(0 - 12)            | 1<br>(0 - 8)               | 1<br>(0 - 5)              |
| Iron-deficiency anemia                                           | 1,486<br>(335 - 3,809)      | 1,106<br>(102 - 3,457)    | 31<br>(6 - 86)       | 142<br>(34 - 300)        | 102<br>(22 - 232)          | 105<br>(21 - 230)         |
| Other nutritional deficiencies                                   | 134<br>(23 - 463)           | 110<br>(9 - 417)          | 3<br>(1 - 10)        | 10<br>(3 - 29)           | 6<br>(2 - 17)              | 5<br>(1 - 17)             |
| Other communicable, maternal, neonatal, and nutritional diseases | 1,882<br>(616 - 3,840)      | 1,522<br>(340 - 3,385)    | 106<br>(33 - 212)    | 143<br>(79 - 245)        | 77<br>(39 - 158)           | 34<br>(16 - 70)           |
| Sexually transmitted diseases excluding HIV                      | 1,217<br>(36 - 2,905)       | 1,110<br>(0 - 2,721)      | 66<br>(3 - 157)      | 22<br>(11 - 60)          | 12<br>(5 - 31)             | 7<br>(2 - 18)             |
| Syphilis                                                         | 1,200<br>(22 - 2,886)       | 1,110<br>(0 - 2,721)      | 64<br>(1 - 156)      | 12<br>(6 - 32)           | 9<br>(4 - 22)              | 5<br>(2 - 15)             |
| Chlamydial infection                                             | --                          | --                        | --                   | --                       | --                         | --                        |
| Gonococcal infection                                             | 10<br>(5 - 26)              | --                        | 1<br>(0 - 3)         | 6<br>(3 - 15)            | 2<br>(1 - 5)               | 1<br>(0 - 2)              |
| Other sexually transmitted diseases                              | 7<br>(4 - 20)               | --                        | 1<br>(0 - 3)         | 5<br>(2 - 13)            | 1<br>(0 - 3)               | 0<br>(0 - 1)              |
| Hepatitis                                                        | 125<br>(65 - 317)           | 49<br>(20 - 103)          | 10<br>(4 - 24)       | 40<br>(18 - 126)         | 21<br>(9 - 78)             | 6<br>(2 - 25)             |
| Acute hepatitis A                                                | 17<br>(3 - 45)              | 12<br>(2 - 35)            | 2<br>(0 - 7)         | 2<br>(0 - 7)             | 0<br>(0 - 1)               | 0<br>(0 - 0)              |
| Acute hepatitis B                                                | 79<br>(37 - 192)            | 36<br>(14 - 78)           | 5<br>(2 - 13)        | 18<br>(7 - 56)           | 16<br>(6 - 55)             | 5<br>(2 - 20)             |
| Acute hepatitis C                                                | 3<br>(0 - 13)               | --                        | 0<br>(0 - 2)         | 2<br>(0 - 5)             | 1<br>(0 - 5)               | 0<br>(0 - 2)              |
| Acute hepatitis E                                                | 25<br>(10 - 81)             | 0<br>(0 - 1)              | 2<br>(1 - 5)         | 19<br>(7 - 61)           | 4<br>(1 - 16)              | 0<br>(0 - 3)              |
| Other infectious diseases                                        | 540<br>(192 - 1,182)        | 363<br>(71 - 992)         | 30<br>(10 - 71)      | 81<br>(38 - 148)         | 44<br>(17 - 104)           | 22<br>(8 - 51)            |
| Non-communicable diseases                                        | 30,611<br>(24,292 - 41,677) | 6,113<br>(3,832 - 9,666)  | 825<br>(553 - 1,228) | 5,919<br>(3,980 - 8,673) | 10,052<br>(7,439 - 15,765) | 7,702<br>(6,461 - 10,295) |
| Neoplasms                                                        | 3,776<br>(2,882 - 5,531)    | 164<br>(83 - 366)         | 113<br>(75 - 162)    | 771<br>(509 - 1,166)     | 1,715<br>(1,233 - 2,686)   | 1,014<br>(813 - 1,411)    |
| Esophageal cancer                                                | 289<br>(172 - 470)          | --                        | --                   | 49<br>(27 - 84)          | 171<br>(97 - 286)          | 69<br>(42 - 107)          |
| Stomach cancer                                                   | 426<br>(300 - 664)          | --                        | --                   | 89<br>(54 - 142)         | 218<br>(144 - 360)         | 120<br>(83 - 178)         |
| Liver cancer                                                     | 358<br>(225 - 610)          | --                        | 5<br>(2 - 9)         | 79<br>(41 - 139)         | 192<br>(112 - 341)         | 83<br>(51 - 132)          |
| Liver cancer due to hepatitis B                                  | 150<br>(69 - 266)           | --                        | 2<br>(1 - 5)         | 42<br>(20 - 78)          | 80<br>(32 - 150)           | 26<br>(11 - 47)           |

Web Table 31- Angola deaths with 95% UI by age, sex, and cause in 2013

| Cause                                | Males, All Ages            | Males, 0-4 Years   | Males, 5-14 Years | Males, 15-49 Years       | Males, 50-69 Years       | Males, 70-80 Years       |
|--------------------------------------|----------------------------|--------------------|-------------------|--------------------------|--------------------------|--------------------------|
| Liver cancer due to hepatitis C      | 93<br>(31 - 193)           | --                 | 0<br>(0 - 1)      | 15<br>(4 - 34)           | 53<br>(16 - 115)         | 25<br>(8 - 54)           |
| Liver cancer due to alcohol use      | 68<br>(34 - 124)           | --                 | --                | 8<br>(3 - 18)            | 37<br>(16 - 70)          | 23<br>(13 - 41)          |
| Liver cancer due to other causes     | 47<br>(25 - 88)            | --                 | 2<br>(1 - 4)      | 14<br>(6 - 26)           | 22<br>(11 - 45)          | 8<br>(4 - 14)            |
| Larynx cancer                        | 71<br>(50 - 110)           | --                 | --                | 12<br>(7 - 21)           | 41<br>(27 - 66)          | 18<br>(12 - 27)          |
| Tracheal, bronchus and lung cancer   | 396<br>(287 - 603)         | --                 | --                | 52<br>(33 - 85)          | 238<br>(167 - 382)       | 105<br>(77 - 158)        |
| Breast cancer                        | 10<br>(6 - 16)             | --                 | --                | 3<br>(2 - 6)             | 4<br>(2 - 8)             | 2<br>(1 - 4)             |
| Cervical cancer                      | --                         | --                 | --                | --                       | --                       | --                       |
| Uterine cancer                       | --                         | --                 | --                | --                       | --                       | --                       |
| Prostate cancer                      | 323<br>(206 - 521)         | --                 | --                | 6<br>(3 - 12)            | 109<br>(62 - 183)        | 208<br>(129 - 335)       |
| Colon and rectum cancer              | 371<br>(274 - 556)         | --                 | --                | 69<br>(44 - 106)         | 181<br>(125 - 288)       | 121<br>(91 - 169)        |
| Lip and oral cavity cancer           | 76<br>(46 - 125)           | --                 | --                | 20<br>(12 - 33)          | 41<br>(23 - 69)          | 15<br>(9 - 27)           |
| Nasopharynx cancer                   | 27<br>(17 - 43)            | --                 | 1<br>(0 - 3)      | 11<br>(6 - 18)           | 12<br>(7 - 22)           | 3<br>(2 - 5)             |
| Other pharynx cancer                 | 49<br>(27 - 82)            | --                 | --                | 10<br>(6 - 17)           | 31<br>(16 - 53)          | 8<br>(4 - 15)            |
| Gallbladder and biliary tract cancer | 51<br>(30 - 81)            | --                 | --                | 7<br>(3 - 11)            | 27<br>(14 - 46)          | 17<br>(10 - 28)          |
| Pancreatic cancer                    | 122<br>(86 - 190)          | --                 | --                | 20<br>(12 - 33)          | 68<br>(44 - 109)         | 35<br>(25 - 50)          |
| Malignant skin melanoma              | 25<br>(13 - 48)            | --                 | --                | 9<br>(4 - 20)            | 10<br>(5 - 19)           | 5<br>(3 - 9)             |
| Non-melanoma skin cancer             | 15<br>(9 - 25)             | --                 | --                | 4<br>(2 - 7)             | 6<br>(3 - 11)            | 5<br>(3 - 9)             |
| Ovarian cancer                       | --                         | --                 | --                | --                       | --                       | --                       |
| Testicular cancer                    | 18<br>(11 - 28)            | --                 | --                | 14<br>(8 - 23)           | 3<br>(1 - 4)             | 1<br>(1 - 2)             |
| Kidney cancer                        | 76<br>(48 - 112)           | 9<br>(2 - 25)      | 2<br>(1 - 4)      | 13<br>(8 - 21)           | 37<br>(21 - 62)          | 14<br>(8 - 23)           |
| Bladder cancer                       | 120<br>(86 - 179)          | --                 | --                | 12<br>(7 - 19)           | 57<br>(36 - 92)          | 52<br>(36 - 75)          |
| Brain and nervous system cancer      | 86<br>(56 - 136)           | 11<br>(3 - 41)     | 12<br>(6 - 21)    | 31<br>(18 - 52)          | 26<br>(15 - 45)          | 7<br>(4 - 11)            |
| Thyroid cancer                       | 11<br>(7 - 18)             | --                 | 0<br>(0 - 0)      | 3<br>(2 - 5)             | 5<br>(3 - 9)             | 3<br>(2 - 5)             |
| Mesothelioma                         | 13<br>(7 - 22)             | --                 | --                | 3<br>(1 - 5)             | 7<br>(3 - 14)            | 3<br>(2 - 6)             |
| Hodgkin lymphoma                     | 29<br>(17 - 49)            | 4<br>(1 - 12)      | 4<br>(1 - 10)     | 13<br>(7 - 24)           | 6<br>(3 - 11)            | 2<br>(1 - 4)             |
| Non-Hodgkin lymphoma                 | 227<br>(152 - 336)         | 22<br>(8 - 57)     | 20<br>(11 - 32)   | 74<br>(44 - 115)         | 74<br>(40 - 129)         | 37<br>(18 - 62)          |
| Multiple myeloma                     | 37<br>(23 - 60)            | --                 | --                | 7<br>(4 - 12)            | 20<br>(12 - 34)          | 10<br>(6 - 16)           |
| Leukemia                             | 112<br>(81 - 159)          | 18<br>(7 - 39)     | 22<br>(13 - 35)   | 40<br>(25 - 62)          | 20<br>(13 - 32)          | 12<br>(8 - 18)           |
| Other neoplasms                      | 438<br>(301 - 697)         | 100<br>(43 - 267)  | 47<br>(26 - 80)   | 121<br>(75 - 198)        | 112<br>(67 - 190)        | 57<br>(34 - 88)          |
| Cardiovascular diseases              | 10,725<br>(8,448 - 15,520) | 428<br>(223 - 747) | 90<br>(54 - 145)  | 1,980<br>(1,323 - 3,026) | 4,533<br>(3,364 - 7,100) | 3,694<br>(3,073 - 4,895) |
| Rheumatic heart disease              | 285<br>(176 - 488)         | 21<br>(6 - 58)     | 14<br>(7 - 26)    | 115<br>(64 - 196)        | 92<br>(52 - 167)         | 43<br>(25 - 75)          |
| Ischemic heart disease               | 3,186<br>(2,336 - 4,756)   | 19<br>(6 - 44)     | 5<br>(3 - 10)     | 571<br>(356 - 910)       | 1,527<br>(1,060 - 2,386) | 1,064<br>(788 - 1,501)   |
| Cerebrovascular disease              | 5,239<br>(3,911 - 7,752)   | 143<br>(66 - 285)  | 36<br>(20 - 61)   | 827<br>(524 - 1,320)     | 2,179<br>(1,528 - 3,502) | 2,052<br>(1,587 - 2,782) |
| Ischemic stroke                      | 2,353<br>(1,552 - 3,563)   | 30<br>(6 - 87)     | 6<br>(2 - 11)     | 153<br>(83 - 271)        | 870<br>(519 - 1,489)     | 1,294<br>(865 - 1,849)   |
| Hemorrhagic stroke                   | 2,886<br>(1,975 - 4,430)   | 114<br>(49 - 218)  | 30<br>(17 - 52)   | 674<br>(428 - 1,069)     | 1,310<br>(864 - 2,126)   | 758<br>(429 - 1,164)     |
| Hypertensive heart disease           | 511<br>(268 - 973)         | 5<br>(1 - 13)      | 1<br>(1 - 3)      | 74<br>(35 - 140)         | 223<br>(108 - 443)       | 208<br>(99 - 447)        |
| Cardiomyopathy and myocarditis       | 552<br>(296 - 839)         | 140<br>(30 - 292)  | 17<br>(6 - 31)    | 157<br>(78 - 269)        | 163<br>(95 - 270)        | 74<br>(44 - 119)         |
| Atrial fibrillation and flutter      | 2<br>(1 - 4)               | --                 | --                | 0<br>(0 - 0)             | 1<br>(0 - 1)             | 1<br>(0 - 2)             |
| Aortic aneurysm                      | 94<br>(51 - 157)           | --                 | --                | 16<br>(8 - 30)           | 44<br>(22 - 78)          | 34<br>(18 - 57)          |
| Peripheral vascular disease          | 5<br>(3 - 10)              | --                 | --                | 0<br>(0 - 1)             | 2<br>(1 - 4)             | 3<br>(2 - 5)             |



Web Table 31- Angola deaths with 95% UI by age, sex, and cause in 2013

| Cause                                               | Males, All Ages          | Males, 0-4 Years   | Males, 5-14 Years | Males, 15-49 Years | Males, 50-69 Years   | Males, 70-80 Years     |
|-----------------------------------------------------|--------------------------|--------------------|-------------------|--------------------|----------------------|------------------------|
| Endocarditis                                        | 113<br>(62 - 196)        | 13<br>(5 - 30)     | 2<br>(1 - 5)      | 34<br>(17 - 62)    | 39<br>(19 - 73)      | 25<br>(14 - 44)        |
| Other cardiovascular and circulatory diseases       | 737<br>(477 - 1,136)     | 87<br>(32 - 182)   | 13<br>(7 - 24)    | 184<br>(101 - 299) | 263<br>(158 - 445)   | 190<br>(118 - 298)     |
| Chronic respiratory diseases                        | 2,845<br>(2,110 - 4,059) | 431<br>(202 - 796) | 51<br>(32 - 78)   | 341<br>(213 - 536) | 931<br>(639 - 1,501) | 1,092<br>(829 - 1,569) |
| Chronic obstructive pulmonary disease               | 1,873<br>(1,408 - 2,714) | 175<br>(75 - 336)  | 14<br>(8 - 23)    | 153<br>(93 - 250)  | 662<br>(451 - 1,071) | 869<br>(641 - 1,254)   |
| Pneumoconiosis                                      | 152<br>(91 - 252)        | 8<br>(3 - 19)      | 2<br>(1 - 4)      | 33<br>(17 - 57)    | 63<br>(35 - 114)     | 46<br>(27 - 79)        |
| Silicosis                                           | 41<br>(18 - 79)          | 3<br>(1 - 7)       | 1<br>(0 - 2)      | 8<br>(3 - 16)      | 16<br>(6 - 32)       | 14<br>(7 - 28)         |
| Asbestosis                                          | 21<br>(11 - 38)          | 1<br>(0 - 4)       | 1<br>(0 - 1)      | 4<br>(2 - 8)       | 10<br>(5 - 19)       | 5<br>(2 - 8)           |
| Coal workers pneumoconiosis                         | 16<br>(9 - 29)           | 0<br>(0 - 2)       | 0<br>(0 - 1)      | 3<br>(2 - 6)       | 7<br>(4 - 14)        | 5<br>(2 - 9)           |
| Other pneumoconiosis                                | 74<br>(45 - 124)         | 4<br>(1 - 10)      | 1<br>(0 - 2)      | 17<br>(9 - 30)     | 30<br>(16 - 54)      | 23<br>(13 - 39)        |
| Asthma                                              | 496<br>(253 - 816)       | 122<br>(36 - 294)  | 24<br>(12 - 40)   | 115<br>(57 - 200)  | 135<br>(62 - 262)    | 101<br>(50 - 177)      |
| Interstitial lung disease and pulmonary sarcoidosis | 131<br>(50 - 242)        | 5<br>(1 - 21)      | 1<br>(0 - 3)      | 13<br>(5 - 29)     | 53<br>(18 - 109)     | 59<br>(19 - 118)       |
| Other chronic respiratory diseases                  | 193<br>(107 - 327)       | 121<br>(51 - 250)  | 9<br>(5 - 17)     | 27<br>(15 - 47)    | 18<br>(10 - 34)      | 17<br>(9 - 30)         |
| Cirrhosis                                           | 1,611<br>(1,150 - 2,405) | 60<br>(21 - 137)   | 22<br>(13 - 33)   | 530<br>(333 - 828) | 766<br>(528 - 1,203) | 234<br>(170 - 341)     |
| Cirrhosis due to hepatitis B                        | 325<br>(149 - 578)       | 2<br>(0 - 6)       | 2<br>(0 - 6)      | 98<br>(39 - 184)   | 169<br>(74 - 314)    | 54<br>(25 - 97)        |
| Cirrhosis due to hepatitis C                        | 480<br>(223 - 833)       | 4<br>(0 - 11)      | 5<br>(0 - 11)     | 157<br>(51 - 296)  | 237<br>(104 - 424)   | 78<br>(49 - 122)       |
| Cirrhosis due to alcohol use                        | 581<br>(362 - 946)       | --                 | --                | 190<br>(106 - 332) | 301<br>(175 - 506)   | 90<br>(59 - 139)       |
| Cirrhosis due to other causes                       | 225<br>(125 - 360)       | 54<br>(18 - 126)   | 15<br>(7 - 25)    | 85<br>(42 - 153)   | 59<br>(26 - 111)     | 12<br>(6 - 20)         |
| Digestive diseases                                  | 2,093<br>(1,465 - 2,981) | 418<br>(185 - 809) | 84<br>(49 - 135)  | 600<br>(371 - 918) | 599<br>(396 - 985)   | 392<br>(281 - 568)     |
| Peptic ulcer disease                                | 536<br>(351 - 838)       | 33<br>(9 - 84)     | 8<br>(4 - 16)     | 166<br>(95 - 288)  | 206<br>(124 - 351)   | 124<br>(77 - 199)      |
| Gastritis and duodenitis                            | 85<br>(35 - 166)         | 20<br>(5 - 48)     | 5<br>(2 - 10)     | 24<br>(9 - 53)     | 22<br>(7 - 53)       | 14<br>(4 - 39)         |
| Appendicitis                                        | 154<br>(93 - 265)        | 54<br>(18 - 134)   | 17<br>(8 - 32)    | 48<br>(27 - 84)    | 23<br>(12 - 42)      | 12<br>(6 - 22)         |
| Paralytic ileus and intestinal obstruction          | 412<br>(221 - 698)       | 56<br>(18 - 134)   | 21<br>(9 - 40)    | 102<br>(48 - 184)  | 123<br>(60 - 219)    | 110<br>(57 - 183)      |
| Inguinal, femoral, and abdominal hernia             | 51<br>(28 - 95)          | 11<br>(2 - 33)     | 3<br>(1 - 6)      | 11<br>(6 - 20)     | 13<br>(7 - 26)       | 13<br>(7 - 25)         |
| Inflammatory bowel disease                          | 184<br>(83 - 311)        | 97<br>(19 - 210)   | 8<br>(3 - 15)     | 37<br>(14 - 64)    | 26<br>(8 - 51)       | 16<br>(5 - 33)         |
| Vascular intestinal disorders                       | 18<br>(6 - 39)           | 3<br>(0 - 9)       | 1<br>(0 - 2)      | 4<br>(1 - 8)       | 6<br>(2 - 13)        | 5<br>(1 - 11)          |
| Gallbladder and biliary diseases                    | 108<br>(69 - 167)        | 12<br>(2 - 28)     | 3<br>(1 - 5)      | 25<br>(14 - 42)    | 37<br>(19 - 66)      | 31<br>(16 - 55)        |
| Pancreatitis                                        | 180<br>(102 - 299)       | 9<br>(1 - 23)      | 3<br>(1 - 5)      | 96<br>(50 - 164)   | 54<br>(27 - 95)      | 18<br>(9 - 34)         |
| Other digestive diseases                            | 365<br>(202 - 601)       | 123<br>(32 - 306)  | 16<br>(7 - 29)    | 87<br>(45 - 151)   | 90<br>(47 - 159)     | 49<br>(26 - 89)        |
| Neurological disorders                              | 948<br>(668 - 1,311)     | 184<br>(51 - 451)  | 63<br>(29 - 110)  | 241<br>(143 - 380) | 105<br>(72 - 168)    | 355<br>(274 - 470)     |
| Alzheimer disease and other dementias               | 385<br>(297 - 516)       | --                 | --                | 0<br>(0 - 1)       | 53<br>(34 - 88)      | 332<br>(251 - 442)     |
| Parkinson disease                                   | 7<br>(4 - 12)            | --                 | --                | 1<br>(0 - 1)       | 2<br>(1 - 4)         | 5<br>(2 - 8)           |
| Epilepsy                                            | 453<br>(219 - 752)       | 154<br>(30 - 417)  | 54<br>(22 - 101)  | 204<br>(113 - 331) | 31<br>(18 - 54)      | 10<br>(6 - 18)         |
| Multiple sclerosis                                  | 2<br>(1 - 3)             | --                 | --                | 1<br>(0 - 2)       | 1<br>(0 - 1)         | 0<br>(0 - 0)           |
| Other neurological disorders                        | 101<br>(67 - 171)        | 30<br>(14 - 88)    | 9<br>(5 - 16)     | 35<br>(22 - 55)    | 19<br>(12 - 30)      | 8<br>(6 - 12)          |
| Mental and substance use disorders                  | 586<br>(361 - 922)       | 39<br>(7 - 93)     | 0<br>(0 - 0)      | 387<br>(223 - 626) | 140<br>(83 - 240)    | 19<br>(12 - 31)        |
| Schizophrenia                                       | 6<br>(3 - 10)            | --                 | --                | 3<br>(1 - 6)       | 2<br>(1 - 4)         | 1<br>(0 - 1)           |
| Alcohol use disorders                               | 376<br>(203 - 637)       | --                 | --                | 240<br>(120 - 419) | 121<br>(69 - 218)    | 15<br>(8 - 26)         |
| Drug use disorders                                  | 203<br>(100 - 313)       | 39<br>(7 - 93)     | --                | 143<br>(77 - 222)  | 17<br>(8 - 30)       | 4<br>(1 - 6)           |
| Opioid use disorders                                | 22<br>(11 - 34)          | 4<br>(1 - 11)      | --                | 15<br>(8 - 24)     | 2<br>(1 - 3)         | 0<br>(0 - 1)           |
| Cocaine use disorders                               | 1<br>(0 - 1)             | 0<br>(0 - 0)       | --                | 1<br>(0 - 1)       | 0<br>(0 - 0)         | 0<br>(0 - 0)           |

Web Table 31- Angola deaths with 95% UI by age, sex, and cause in 2013

| Cause                                               | Males, All Ages          | Males, 0-4 Years         | Males, 5-14 Years  | Males, 15-49 Years   | Males, 50-69 Years     | Males, 70-80 Years   |
|-----------------------------------------------------|--------------------------|--------------------------|--------------------|----------------------|------------------------|----------------------|
| Amphetamine use disorders                           | 1<br>(0 - 1)             | 0<br>(0 - 0)             | --                 | 0<br>(0 - 1)         | 0<br>(0 - 0)           | 0<br>(0 - 0)         |
| Other drug use disorders                            | 180<br>(89 - 279)        | 35<br>(7 - 82)           | --                 | 127<br>(69 - 198)    | 15<br>(7 - 28)         | 3<br>(1 - 5)         |
| Eating disorders                                    | 1<br>(0 - 1)             | --                       | 0<br>(0 - 0)       | 0<br>(0 - 1)         | --                     | --                   |
| Anorexia nervosa                                    | 1<br>(0 - 1)             | --                       | 0<br>(0 - 0)       | 0<br>(0 - 1)         | --                     | --                   |
| Diabetes, urogenital, blood, and endocrine diseases | 4,436<br>(3,165 - 6,498) | 1,191<br>(591 - 2,439)   | 279<br>(116 - 588) | 918<br>(575 - 1,512) | 1,192<br>(787 - 1,940) | 855<br>(614 - 1,200) |
| Diabetes mellitus                                   | 1,598<br>(1,025 - 2,482) | 37<br>(21 - 60)          | 11<br>(6 - 18)     | 252<br>(149 - 397)   | 766<br>(454 - 1,287)   | 532<br>(347 - 783)   |
| Acute glomerulonephritis                            | 21<br>(11 - 41)          | 8<br>(2 - 22)            | 3<br>(1 - 6)       | 5<br>(3 - 10)        | 3<br>(2 - 5)           | 2<br>(1 - 3)         |
| Chronic kidney disease                              | 676<br>(445 - 1,050)     | 110<br>(54 - 203)        | 27<br>(15 - 45)    | 216<br>(125 - 345)   | 173<br>(96 - 335)      | 150<br>(91 - 244)    |
| Chronic kidney disease due to diabetes mellitus     | 4<br>(1 - 9)             | 0<br>(0 - 1)             | 0<br>(0 - 1)       | 1<br>(0 - 3)         | 1<br>(0 - 4)           | 1<br>(0 - 2)         |
| Chronic kidney disease due to hypertension          | 236<br>(146 - 407)       | 13<br>(3 - 35)           | 3<br>(1 - 7)       | 56<br>(29 - 103)     | 86<br>(45 - 165)       | 78<br>(46 - 136)     |
| Chronic kidney disease due to glomerulonephritis    | 219<br>(135 - 329)       | 63<br>(29 - 117)         | 15<br>(9 - 24)     | 77<br>(43 - 123)     | 37<br>(16 - 69)        | 27<br>(12 - 46)      |
| Chronic kidney disease due to other causes          | 218<br>(107 - 383)       | 34<br>(12 - 80)          | 9<br>(3 - 18)      | 81<br>(36 - 144)     | 49<br>(16 - 119)       | 45<br>(16 - 94)      |
| Urinary diseases and male infertility               | 406<br>(275 - 604)       | 108<br>(41 - 224)        | 11<br>(6 - 19)     | 82<br>(48 - 136)     | 102<br>(63 - 173)      | 102<br>(64 - 160)    |
| Interstitial nephritis and urinary tract infections | 276<br>(183 - 418)       | 73<br>(28 - 167)         | 7<br>(4 - 12)      | 53<br>(30 - 90)      | 69<br>(41 - 119)       | 75<br>(45 - 120)     |
| Urolithiasis                                        | 7<br>(4 - 14)            | --                       | 1<br>(0 - 1)       | 2<br>(1 - 4)         | 3<br>(1 - 6)           | 2<br>(1 - 5)         |
| Other urinary diseases                              | 122<br>(75 - 204)        | 36<br>(10 - 82)          | 4<br>(2 - 8)       | 27<br>(14 - 46)      | 30<br>(15 - 56)        | 26<br>(11 - 51)      |
| Gynecological diseases                              | --                       | --                       | --                 | --                   | --                     | --                   |
| Uterine fibroids                                    | --                       | --                       | --                 | --                   | --                     | --                   |
| Polycystic ovarian syndrome                         | --                       | --                       | --                 | --                   | --                     | --                   |
| Endometriosis                                       | --                       | --                       | --                 | --                   | --                     | --                   |
| Genital prolapse                                    | --                       | --                       | --                 | --                   | --                     | --                   |
| Other gynecological diseases                        | --                       | --                       | --                 | --                   | --                     | --                   |
| Hemoglobinopathies and hemolytic anemias            | 1,074<br>(316 - 2,595)   | 625<br>(195 - 1,724)     | 179<br>(34 - 465)  | 213<br>(42 - 598)    | 43<br>(12 - 126)       | 14<br>(7 - 30)       |
| Thalassemias                                        | 0<br>(0 - 1)             | 0<br>(0 - 1)             | 0<br>(0 - 0)       | 0<br>(0 - 0)         | 0<br>(0 - 0)           | 0<br>(0 - 0)         |
| Sickle cell disorders                               | 1,044<br>(302 - 2,549)   | 614<br>(192 - 1,700)     | 177<br>(34 - 461)  | 210<br>(42 - 589)    | 40<br>(10 - 119)       | 2<br>(1 - 4)         |
| G6PD deficiency                                     | 6<br>(2 - 15)            | 4<br>(1 - 11)            | 1<br>(0 - 2)       | 1<br>(0 - 3)         | 0<br>(0 - 1)           | 0<br>(0 - 1)         |
| Other hemoglobinopathies and hemolytic anemias      | 23<br>(10 - 49)          | 7<br>(2 - 16)            | 1<br>(0 - 2)       | 2<br>(0 - 7)         | 2<br>(1 - 6)           | 11<br>(6 - 25)       |
| Endocrine, metabolic, blood, and immune disorders   | 661<br>(387 - 1,177)     | 302<br>(118 - 730)       | 47<br>(23 - 92)    | 150<br>(83 - 247)    | 105<br>(60 - 192)      | 55<br>(30 - 92)      |
| Musculoskeletal disorders                           | 97<br>(56 - 146)         | --                       | 14<br>(6 - 22)     | 40<br>(22 - 62)      | 28<br>(15 - 49)        | 15<br>(9 - 25)       |
| Rheumatoid arthritis                                | 14<br>(6 - 24)           | --                       | 2<br>(0 - 4)       | 4<br>(1 - 7)         | 5<br>(2 - 10)          | 4<br>(1 - 7)         |
| Other musculoskeletal disorders                     | 83<br>(50 - 127)         | --                       | 12<br>(5 - 20)     | 36<br>(20 - 56)      | 23<br>(13 - 40)        | 12<br>(7 - 19)       |
| Other non-communicable diseases                     | 3,494<br>(2,003 - 6,004) | 3,197<br>(1,727 - 5,693) | 111<br>(63 - 197)  | 112<br>(72 - 165)    | 43<br>(27 - 70)        | 31<br>(19 - 53)      |
| Congenital anomalies                                | 3,217<br>(1,802 - 5,750) | 3,012<br>(1,615 - 5,512) | 103<br>(56 - 189)  | 81<br>(50 - 121)     | 15<br>(9 - 25)         | 6<br>(4 - 9)         |
| Neural tube defects                                 | 638<br>(128 - 1,629)     | 617<br>(119 - 1,601)     | 11<br>(2 - 27)     | 9<br>(2 - 19)        | 1<br>(0 - 2)           | 0<br>(0 - 1)         |
| Congenital heart anomalies                          | 1,596<br>(802 - 3,386)   | 1,475<br>(705 - 3,226)   | 64<br>(31 - 127)   | 48<br>(29 - 72)      | 7<br>(4 - 12)          | 3<br>(1 - 4)         |
| Cleft lip and cleft palate                          | 23<br>(5 - 68)           | 23<br>(5 - 68)           | --                 | --                   | --                     | --                   |
| Down syndrome                                       | 178<br>(44 - 455)        | 161<br>(32 - 433)        | 7<br>(2 - 18)      | 8<br>(4 - 16)        | 2<br>(1 - 3)           | 0<br>(0 - 0)         |
| Chromosomal unbalanced rearrangements               | 63<br>(22 - 189)         | 59<br>(20 - 181)         | 2<br>(1 - 5)       | 1<br>(1 - 3)         | 0<br>(0 - 1)           | 0<br>(0 - 0)         |
| Other congenital anomalies                          | 719<br>(265 - 1,818)     | 676<br>(233 - 1,759)     | 19<br>(6 - 47)     | 15<br>(8 - 26)       | 5<br>(3 - 8)           | 3<br>(2 - 5)         |
| Skin and subcutaneous diseases                      | 167<br>(108 - 245)       | 76<br>(24 - 143)         | 8<br>(4 - 12)      | 31<br>(18 - 48)      | 28<br>(17 - 49)        | 25<br>(14 - 46)      |

Web Table 31- Angola deaths with 95% UI by age, sex, and cause in 2013

| Cause                                           | Males, All Ages            | Males, 0-4 Years         | Males, 5-14 Years      | Males, 15-49 Years       | Males, 50-69 Years   | Males, 70-80 Years |
|-------------------------------------------------|----------------------------|--------------------------|------------------------|--------------------------|----------------------|--------------------|
| Cellulitis                                      | 82<br>(32 - 157)           | 37<br>(10 - 91)          | 4<br>(1 - 8)           | 16<br>(6 - 30)           | 15<br>(6 - 31)       | 12<br>(4 - 27)     |
| Pyoderma                                        | 69<br>(27 - 116)           | 35<br>(7 - 74)           | 3<br>(1 - 5)           | 12<br>(5 - 21)           | 10<br>(4 - 20)       | 9<br>(3 - 16)      |
| Decubitus ulcer                                 | 12<br>(5 - 21)             | 2<br>(0 - 7)             | 1<br>(0 - 2)           | 3<br>(1 - 5)             | 2<br>(1 - 4)         | 4<br>(1 - 9)       |
| Other skin and subcutaneous diseases            | 5<br>(1 - 13)              | 2<br>(0 - 8)             | 0<br>(0 - 1)           | 1<br>(0 - 3)             | 1<br>(0 - 1)         | 0<br>(0 - 1)       |
| Sudden infant death syndrome                    | 109<br>(23 - 368)          | 109<br>(23 - 368)        | --                     | --                       | --                   | --                 |
| Injuries                                        | 11,417<br>(8,254 - 15,599) | 3,465<br>(1,840 - 5,848) | 1,064<br>(726 - 1,506) | 5,568<br>(3,699 - 8,073) | 989<br>(655 - 1,595) | 331<br>(243 - 474) |
| Transport injuries                              | 3,674<br>(1,831 - 6,239)   | 810<br>(260 - 1,887)     | 407<br>(187 - 733)     | 2,053<br>(986 - 3,537)   | 316<br>(139 - 626)   | 88<br>(41 - 163)   |
| Road injuries                                   | 3,479<br>(1,736 - 5,875)   | 748<br>(243 - 1,707)     | 385<br>(178 - 678)     | 1,964<br>(946 - 3,402)   | 298<br>(133 - 595)   | 84<br>(39 - 157)   |
| Pedestrian road injuries                        | 1,328<br>(576 - 2,451)     | 392<br>(116 - 952)       | 187<br>(80 - 357)      | 586<br>(225 - 1,150)     | 123<br>(47 - 251)    | 40<br>(16 - 78)    |
| Cyclist road injuries                           | 359<br>(137 - 683)         | 96<br>(20 - 267)         | 69<br>(25 - 138)       | 143<br>(58 - 281)        | 40<br>(15 - 88)      | 12<br>(4 - 25)     |
| Motorcyclist road injuries                      | 680<br>(307 - 1,318)       | 58<br>(16 - 147)         | 30<br>(12 - 60)        | 547<br>(236 - 1,050)     | 39<br>(15 - 83)      | 6<br>(2 - 13)      |
| Motor vehicle road injuries                     | 1,094<br>(493 - 2,088)     | 198<br>(52 - 508)        | 97<br>(36 - 195)       | 679<br>(301 - 1,257)     | 94<br>(35 - 198)     | 25<br>(9 - 52)     |
| Other road injuries                             | 18<br>(2 - 40)             | 4<br>(0 - 13)            | 2<br>(0 - 6)           | 9<br>(1 - 21)            | 2<br>(0 - 5)         | 1<br>(0 - 2)       |
| Other transport injuries                        | 195<br>(72 - 510)          | 62<br>(15 - 181)         | 22<br>(7 - 61)         | 89<br>(33 - 220)         | 17<br>(6 - 47)       | 4<br>(1 - 10)      |
| Unintentional injuries                          | 5,479<br>(3,744 - 7,784)   | 2,583<br>(1,179 - 4,413) | 596<br>(399 - 874)     | 1,706<br>(1,142 - 2,548) | 411<br>(283 - 656)   | 182<br>(133 - 259) |
| Falls                                           | 714<br>(407 - 1,191)       | 181<br>(39 - 476)        | 51<br>(20 - 98)        | 285<br>(161 - 489)       | 121<br>(73 - 208)    | 75<br>(45 - 120)   |
| Drowning                                        | 1,617<br>(775 - 2,877)     | 817<br>(198 - 1,885)     | 274<br>(134 - 462)     | 454<br>(274 - 739)       | 58<br>(35 - 100)     | 14<br>(8 - 28)     |
| Fire, heat, and hot substances                  | 742<br>(294 - 1,400)       | 467<br>(91 - 1,105)      | 55<br>(23 - 93)        | 150<br>(84 - 252)        | 45<br>(26 - 79)      | 24<br>(14 - 43)    |
| Poisonings                                      | 276<br>(152 - 562)         | 131<br>(39 - 339)        | 19<br>(9 - 40)         | 100<br>(55 - 194)        | 20<br>(11 - 43)      | 6<br>(3 - 11)      |
| Exposure to mechanical forces                   | 914<br>(591 - 1,484)       | 287<br>(116 - 577)       | 105<br>(60 - 180)      | 441<br>(255 - 767)       | 71<br>(40 - 127)     | 11<br>(7 - 19)     |
| Unintentional firearm injuries                  | 262<br>(157 - 405)         | 51<br>(19 - 107)         | 27<br>(12 - 52)        | 163<br>(83 - 281)        | 17<br>(8 - 32)       | 3<br>(2 - 6)       |
| Unintentional suffocation                       | 57<br>(2 - 165)            | 40<br>(1 - 149)          | 5<br>(0 - 12)          | 9<br>(0 - 19)            | 2<br>(0 - 5)         | 1<br>(0 - 1)       |
| Other exposure to mechanical forces             | 595<br>(342 - 1,083)       | 196<br>(55 - 452)        | 72<br>(33 - 135)       | 268<br>(137 - 507)       | 52<br>(27 - 106)     | 7<br>(4 - 13)      |
| Adverse effects of medical treatment            | 259<br>(125 - 468)         | 130<br>(32 - 311)        | 12<br>(5 - 22)         | 52<br>(28 - 90)          | 38<br>(19 - 71)      | 26<br>(13 - 47)    |
| Animal contact                                  | 138<br>(75 - 255)          | 66<br>(16 - 165)         | 22<br>(11 - 42)        | 31<br>(16 - 53)          | 13<br>(7 - 26)       | 5<br>(2 - 10)      |
| Venomous animal contact                         | 76<br>(39 - 156)           | 36<br>(8 - 106)          | 13<br>(6 - 27)         | 18<br>(9 - 32)           | 7<br>(3 - 15)        | 2<br>(1 - 5)       |
| Non-venomous animal contact                     | 61<br>(25 - 121)           | 29<br>(4 - 81)           | 10<br>(3 - 20)         | 13<br>(5 - 24)           | 6<br>(2 - 13)        | 3<br>(1 - 6)       |
| Foreign body                                    | 500<br>(158 - 981)         | 397<br>(93 - 822)        | 22<br>(8 - 40)         | 48<br>(20 - 86)          | 20<br>(8 - 36)       | 14<br>(6 - 23)     |
| Pulmonary aspiration and foreign body in airway | 491<br>(152 - 970)         | 393<br>(92 - 818)        | 21<br>(7 - 38)         | 45<br>(18 - 82)          | 19<br>(7 - 35)       | 14<br>(5 - 23)     |
| Foreign body in other body part                 | 9<br>(4 - 17)              | 4<br>(1 - 11)            | 1<br>(1 - 2)           | 3<br>(1 - 5)             | 1<br>(0 - 2)         | 0<br>(0 - 1)       |
| Other unintentional injuries                    | 319<br>(164 - 633)         | 107<br>(27 - 260)        | 37<br>(16 - 80)        | 143<br>(66 - 295)        | 25<br>(11 - 56)      | 6<br>(3 - 12)      |
| Self-harm and interpersonal violence            | 2,263<br>(1,148 - 3,388)   | 71<br>(28 - 165)         | 60<br>(27 - 104)       | 1,809<br>(888 - 2,746)   | 262<br>(122 - 447)   | 61<br>(24 - 106)   |
| Self-harm                                       | 1,483<br>(591 - 2,312)     | --                       | 33<br>(9 - 75)         | 1,168<br>(463 - 1,853)   | 224<br>(88 - 387)    | 58<br>(21 - 102)   |
| Interpersonal violence                          | 779<br>(374 - 1,204)       | 71<br>(28 - 165)         | 27<br>(12 - 50)        | 641<br>(293 - 1,019)     | 37<br>(17 - 71)      | 3<br>(1 - 6)       |
| Assault by firearm                              | 281<br>(94 - 524)          | 7<br>(1 - 24)            | 5<br>(1 - 13)          | 255<br>(84 - 472)        | 12<br>(4 - 24)       | 1<br>(0 - 1)       |
| Assault by sharp object                         | 204<br>(76 - 374)          | 5<br>(1 - 17)            | 3<br>(1 - 8)           | 184<br>(66 - 344)        | 11<br>(4 - 22)       | 1<br>(0 - 1)       |
| Assault by other means                          | 295<br>(158 - 509)         | 59<br>(23 - 139)         | 18<br>(8 - 35)         | 202<br>(99 - 362)        | 15<br>(7 - 30)       | 2<br>(1 - 4)       |
| Forces of nature, war, and legal intervention   | 1<br>(0 - 0)               | 1<br>(0 - 0)             | --                     | --                       | --                   | --                 |
| Exposure to forces of nature                    | 1<br>(0 - 0)               | 1<br>(0 - 0)             | --                     | --                       | --                   | --                 |

Web Table 31- Angola deaths with 95% UI by age, sex, and cause in 2013

| Cause                                                             | Females, All Ages            | Females, 0-4 Years          | Females, 5-14 Years      | Females, 15-49 Years        | Females, 50-69 Years       | Females, 70-80 Years        |
|-------------------------------------------------------------------|------------------------------|-----------------------------|--------------------------|-----------------------------|----------------------------|-----------------------------|
| All causes                                                        | 90,378<br>(75,065 - 110,907) | 38,922<br>(30,398 - 48,250) | 3,916<br>(2,943 - 4,998) | 19,790<br>(15,886 - 25,700) | 14,098<br>(9,805 - 21,648) | 13,652<br>(10,723 - 18,788) |
| Communicable, maternal, neonatal, and nutritional diseases        | 53,050<br>(44,061 - 63,004)  | 30,037<br>(22,635 - 38,166) | 2,079<br>(1,538 - 2,794) | 12,832<br>(10,226 - 16,077) | 4,492<br>(3,169 - 6,752)   | 3,609<br>(2,318 - 5,295)    |
| HIV/AIDS and tuberculosis                                         | 11,394<br>(8,640 - 14,768)   | 1,171<br>(880 - 1,510)      | 415<br>(323 - 536)       | 7,331<br>(5,190 - 10,319)   | 1,970<br>(1,404 - 2,693)   | 507<br>(321 - 746)          |
| Tuberculosis                                                      | 2,863<br>(1,863 - 4,366)     | 324<br>(163 - 572)          | 87<br>(49 - 141)         | 1,141<br>(725 - 1,781)      | 901<br>(470 - 1,529)       | 410<br>(214 - 654)          |
| HIV/AIDS                                                          | 8,531<br>(6,012 - 11,969)    | 847<br>(636 - 1,093)        | 328<br>(238 - 432)       | 6,189<br>(3,976 - 9,347)    | 1,069<br>(693 - 1,496)     | 97<br>(51 - 149)            |
| HIV/AIDS resulting in mycobacterial infection                     | 455<br>(294 - 663)           | 43<br>(30 - 58)             | 15<br>(11 - 22)          | 331<br>(202 - 510)          | 60<br>(37 - 88)            | 6<br>(3 - 9)                |
| HIV/AIDS resulting in other diseases                              | 8,076<br>(5,700 - 11,297)    | 804<br>(606 - 1,031)        | 313<br>(226 - 412)       | 5,859<br>(3,761 - 8,849)    | 1,010<br>(653 - 1,417)     | 91<br>(48 - 140)            |
| Diarrhea, lower respiratory, and other common infectious diseases | 20,188<br>(14,589 - 27,419)  | 12,645<br>(8,137 - 19,048)  | 1,163<br>(753 - 1,714)   | 1,829<br>(1,220 - 2,723)    | 2,013<br>(1,193 - 3,458)   | 2,537<br>(1,535 - 3,856)    |
| Diarrheal diseases                                                | 7,210<br>(4,420 - 11,014)    | 4,351<br>(1,896 - 7,923)    | 406<br>(213 - 707)       | 754<br>(454 - 1,241)        | 824<br>(425 - 1,502)       | 875<br>(487 - 1,544)        |
| Intestinal infectious diseases                                    | 439<br>(211 - 847)           | 210<br>(97 - 427)           | 128<br>(55 - 254)        | 82<br>(34 - 169)            | 14<br>(5 - 28)             | 5<br>(2 - 10)               |
| Typhoid fever                                                     | 300<br>(134 - 596)           | 135<br>(53 - 300)           | 94<br>(39 - 193)         | 59<br>(22 - 127)            | 10<br>(3 - 21)             | 3<br>(1 - 6)                |
| Paratyphoid fever                                                 | 96<br>(39 - 204)             | 46<br>(15 - 104)            | 30<br>(10 - 65)          | 17<br>(6 - 42)              | 2<br>(1 - 6)               | 1<br>(0 - 2)                |
| Other intestinal infectious diseases                              | 43<br>(24 - 71)              | 30<br>(13 - 54)             | 4<br>(1 - 12)            | 6<br>(1 - 14)               | 2<br>(0 - 8)               | 1<br>(0 - 5)                |
| Lower respiratory infections                                      | 10,128<br>(6,559 - 15,089)   | 6,496<br>(3,223 - 10,819)   | 370<br>(218 - 564)       | 647<br>(393 - 1,013)        | 1,026<br>(508 - 1,831)     | 1,589<br>(855 - 2,488)      |
| Upper respiratory infections                                      | 8<br>(2 - 21)                | 5<br>(0 - 17)               | 0<br>(0 - 2)             | 1<br>(0 - 4)                | 1<br>(0 - 3)               | 1<br>(0 - 3)                |
| Otitis media                                                      | 11<br>(7 - 16)               | 6<br>(3 - 12)               | 2<br>(1 - 3)             | 2<br>(1 - 3)                | 1<br>(0 - 1)               | 0<br>(0 - 1)                |
| Meningitis                                                        | 1,622<br>(1,022 - 2,384)     | 911<br>(427 - 1,601)        | 205<br>(116 - 335)       | 310<br>(177 - 506)          | 135<br>(64 - 257)          | 62<br>(28 - 107)            |
| Pneumococcal meningitis                                           | 533<br>(343 - 801)           | 255<br>(118 - 468)          | 84<br>(44 - 145)         | 119<br>(62 - 205)           | 51<br>(20 - 103)           | 23<br>(10 - 44)             |
| H influenzae type B meningitis                                    | 483<br>(281 - 787)           | 364<br>(171 - 655)          | 56<br>(30 - 95)          | 44<br>(21 - 77)             | 13<br>(5 - 29)             | 6<br>(3 - 11)               |
| Meningococcal meningitis                                          | 225<br>(146 - 332)           | 109<br>(48 - 205)           | 23<br>(11 - 42)          | 56<br>(28 - 102)            | 26<br>(10 - 52)            | 11<br>(5 - 21)              |
| Other meningitis                                                  | 381<br>(213 - 594)           | 183<br>(70 - 352)           | 41<br>(18 - 76)          | 91<br>(36 - 161)            | 44<br>(16 - 91)            | 21<br>(7 - 42)              |
| Encephalitis                                                      | 114<br>(58 - 206)            | 70<br>(27 - 145)            | 15<br>(7 - 27)           | 19<br>(9 - 36)              | 7<br>(3 - 12)              | 3<br>(1 - 5)                |
| Diphtheria                                                        | 16<br>(0 - 97)               | 14<br>(0 - 95)              | 2<br>(0 - 15)            | 1<br>(0 - 2)                | 0<br>(0 - 1)               | --                          |
| Whooping cough                                                    | 387<br>(1 - 2,066)           | 369<br>(1 - 1,965)          | 16<br>(0 - 88)           | 2<br>(0 - 10)               | 0<br>(0 - 1)               | --                          |
| Tetanus                                                           | 82<br>(31 - 198)             | 67<br>(18 - 177)            | 4<br>(1 - 8)             | 7<br>(3 - 13)               | 3<br>(1 - 8)               | 1<br>(0 - 3)                |
| Measles                                                           | 157<br>(3 - 903)             | 140<br>(3 - 801)            | 15<br>(0 - 92)           | 2<br>(0 - 11)               | 0<br>(0 - 0)               | --                          |
| Varicella and herpes zoster                                       | 13<br>(4 - 37)               | 7<br>(0 - 30)               | 1<br>(0 - 6)             | 2<br>(0 - 6)                | 1<br>(0 - 3)               | 2<br>(0 - 9)                |
| Neglected tropical diseases and malaria                           | 5,495<br>(1,338 - 13,142)    | 4,846<br>(780 - 12,739)     | 208<br>(61 - 627)        | 229<br>(90 - 635)           | 136<br>(40 - 451)          | 75<br>(18 - 260)            |
| Malaria                                                           | 5,240<br>(1,083 - 12,889)    | 4,731<br>(662 - 12,621)     | 175<br>(31 - 594)        | 164<br>(32 - 563)           | 107<br>(17 - 426)          | 64<br>(9 - 248)             |
| Leishmaniasis                                                     | 18<br>(9 - 29)               | 7<br>(2 - 14)               | 3<br>(1 - 5)             | 5<br>(2 - 10)               | 2<br>(1 - 5)               | 1<br>(0 - 1)                |
| Visceral leishmaniasis                                            | 18<br>(9 - 29)               | 7<br>(2 - 14)               | 3<br>(1 - 5)             | 5<br>(2 - 10)               | 2<br>(1 - 5)               | 1<br>(0 - 1)                |
| African trypanosomiasis                                           | 27<br>(13 - 45)              | 2<br>(1 - 4)                | 4<br>(2 - 6)             | 16<br>(7 - 28)              | 4<br>(2 - 8)               | 1<br>(0 - 1)                |
| Schistosomiasis                                                   | 33<br>(21 - 55)              | 1<br>(0 - 2)                | 2<br>(1 - 3)             | 13<br>(8 - 22)              | 12<br>(6 - 24)             | 5<br>(3 - 10)               |
| Cysticercosis                                                     | 6<br>(4 - 9)                 | 1<br>(0 - 1)                | 1<br>(0 - 1)             | 3<br>(2 - 5)                | 1<br>(1 - 2)               | 0<br>(0 - 0)                |
| Cystic echinococcosis                                             | 5<br>(4 - 7)                 | 1<br>(1 - 2)                | 1<br>(1 - 1)             | 2<br>(1 - 3)                | 1<br>(0 - 1)               | 0<br>(0 - 0)                |
| Dengue                                                            | 4<br>(2 - 7)                 | 2<br>(1 - 4)                | 1<br>(0 - 2)             | 1<br>(0 - 2)                | 0<br>(0 - 0)               | 0<br>(0 - 0)                |
| Yellow fever                                                      | 0<br>(0 - 0)                 | 0<br>(0 - 0)                | 0<br>(0 - 0)             | 0<br>(0 - 0)                | 0<br>(0 - 0)               | 0<br>(0 - 0)                |
| Rabies                                                            | 30<br>(16 - 52)              | 9<br>(3 - 24)               | 9<br>(4 - 16)            | 8<br>(5 - 14)               | 2<br>(1 - 5)               | 0<br>(0 - 1)                |
| Intestinal nematode infections                                    | 48<br>(23 - 87)              | 41<br>(17 - 79)             | 5<br>(1 - 15)            | 1<br>(0 - 6)                | 1<br>(0 - 5)               | 0<br>(0 - 3)                |
| Ascariasis                                                        | 48<br>(23 - 87)              | 41<br>(17 - 79)             | 5<br>(1 - 15)            | 1<br>(0 - 6)                | 1<br>(0 - 5)               | 0<br>(0 - 3)                |

Web Table 31- Angola deaths with 95% UI by age, sex, and cause in 2013

| Cause                                                            | Females, All Ages           | Females, 0-4 Years        | Females, 5-14 Years  | Females, 15-49 Years     | Females, 50-69 Years      | Females, 70-80 Years      |
|------------------------------------------------------------------|-----------------------------|---------------------------|----------------------|--------------------------|---------------------------|---------------------------|
| Other neglected tropical diseases                                | 83<br>(30 - 167)            | 51<br>(11 - 118)          | 9<br>(3 - 20)        | 15<br>(6 - 27)           | 6<br>(3 - 11)             | 3<br>(1 - 5)              |
| Maternal disorders                                               | 3,032<br>(1,939 - 4,618)    | --                        | 14<br>(4 - 33)       | 3,018<br>(1,924 - 4,599) | --                        | --                        |
| Maternal hemorrhage                                              | 434<br>(252 - 681)          | --                        | 1<br>(0 - 3)         | 433<br>(251 - 680)       | --                        | --                        |
| Maternal sepsis and other maternal infections                    | 263<br>(138 - 438)          | --                        | 1<br>(0 - 4)         | 262<br>(138 - 435)       | --                        | --                        |
| Maternal hypertensive disorders                                  | 323<br>(174 - 523)          | --                        | 2<br>(1 - 5)         | 320<br>(173 - 520)       | --                        | --                        |
| Maternal obstructed labor                                        | 176<br>(102 - 278)          | --                        | 1<br>(0 - 1)         | 175<br>(101 - 277)       | --                        | --                        |
| Maternal abortive outcome                                        | 533<br>(317 - 855)          | --                        | 2<br>(1 - 5)         | 531<br>(315 - 853)       | --                        | --                        |
| Indirect maternal deaths                                         | 246<br>(141 - 399)          | --                        | 1<br>(0 - 3)         | 245<br>(141 - 398)       | --                        | --                        |
| Late maternal deaths                                             | 445<br>(219 - 763)          | --                        | 3<br>(1 - 8)         | 442<br>(217 - 759)       | --                        | --                        |
| Maternal deaths aggravated by HIV/AIDS                           | 31<br>(15 - 54)             | --                        | --                   | 31<br>(15 - 54)          | --                        | --                        |
| Other maternal disorders                                         | 576<br>(324 - 968)          | --                        | 2<br>(1 - 6)         | 574<br>(322 - 961)       | --                        | --                        |
| Neonatal disorders                                               | 6,889<br>(3,703 - 10,490)   | 6,889<br>(3,703 - 10,490) | --                   | --                       | --                        | --                        |
| Neonatal preterm birth complications                             | 2,264<br>(918 - 4,023)      | 2,264<br>(918 - 4,023)    | --                   | --                       | --                        | --                        |
| Neonatal encephalopathy due to birth asphyxia and trauma         | 2,136<br>(964 - 3,857)      | 2,136<br>(964 - 3,857)    | --                   | --                       | --                        | --                        |
| Neonatal sepsis and other neonatal infections                    | 1,059<br>(292 - 2,117)      | 1,059<br>(292 - 2,117)    | --                   | --                       | --                        | --                        |
| Hemolytic disease and other neonatal jaundice                    | 44<br>(10 - 115)            | 44<br>(10 - 115)          | --                   | --                       | --                        | --                        |
| Other neonatal disorders                                         | 1,386<br>(669 - 2,456)      | 1,386<br>(669 - 2,456)    | --                   | --                       | --                        | --                        |
| Nutritional deficiencies                                         | 4,167<br>(2,109 - 6,537)    | 2,980<br>(1,276 - 5,259)  | 157<br>(78 - 271)    | 285<br>(166 - 451)       | 294<br>(149 - 503)        | 450<br>(208 - 738)        |
| Protein-energy malnutrition                                      | 3,132<br>(1,289 - 5,285)    | 2,537<br>(972 - 4,612)    | 114<br>(41 - 206)    | 68<br>(22 - 148)         | 152<br>(41 - 300)         | 262<br>(64 - 489)         |
| Iodine deficiency                                                | 19<br>(1 - 119)             | 13<br>(0 - 115)           | 1<br>(0 - 9)         | 2<br>(0 - 9)             | 2<br>(0 - 11)             | 1<br>(0 - 9)              |
| Iron-deficiency anemia                                           | 965<br>(399 - 2,137)        | 400<br>(70 - 1,321)       | 40<br>(10 - 96)      | 209<br>(101 - 349)       | 135<br>(51 - 266)         | 181<br>(61 - 374)         |
| Other nutritional deficiencies                                   | 51<br>(17 - 159)            | 31<br>(5 - 125)           | 3<br>(1 - 8)         | 6<br>(2 - 16)            | 5<br>(2 - 15)             | 6<br>(2 - 17)             |
| Other communicable, maternal, neonatal, and nutritional diseases | 1,885<br>(544 - 3,782)      | 1,506<br>(273 - 3,253)    | 121<br>(34 - 258)    | 140<br>(83 - 223)        | 78<br>(38 - 154)          | 40<br>(18 - 80)           |
| Sexually transmitted diseases excluding HIV                      | 1,359<br>(85 - 3,137)       | 1,189<br>(0 - 2,869)      | 82<br>(3 - 193)      | 53<br>(22 - 102)         | 24<br>(6 - 66)            | 12<br>(3 - 31)            |
| Syphilis                                                         | 1,311<br>(41 - 3,081)       | 1,189<br>(0 - 2,869)      | 79<br>(1 - 191)      | 21<br>(9 - 41)           | 13<br>(4 - 36)            | 9<br>(3 - 23)             |
| Chlamydial infection                                             | 16<br>(7 - 29)              | --                        | 1<br>(0 - 2)         | 11<br>(4 - 20)           | 3<br>(1 - 9)              | 1<br>(0 - 2)              |
| Gonococcal infection                                             | 18<br>(8 - 33)              | --                        | 1<br>(0 - 2)         | 11<br>(4 - 21)           | 4<br>(1 - 12)             | 1<br>(0 - 4)              |
| Other sexually transmitted diseases                              | 15<br>(7 - 29)              | --                        | 1<br>(0 - 2)         | 10<br>(4 - 20)           | 3<br>(1 - 9)              | 1<br>(0 - 2)              |
| Hepatitis                                                        | 94<br>(57 - 190)            | 35<br>(17 - 70)           | 9<br>(4 - 20)        | 30<br>(16 - 62)          | 15<br>(7 - 46)            | 5<br>(2 - 17)             |
| Acute hepatitis A                                                | 15<br>(4 - 34)              | 11<br>(3 - 26)            | 2<br>(0 - 5)         | 1<br>(0 - 3)             | 0<br>(0 - 1)              | 0<br>(0 - 0)              |
| Acute hepatitis B                                                | 48<br>(26 - 101)            | 22<br>(9 - 45)            | 3<br>(1 - 7)         | 8<br>(3 - 18)            | 11<br>(5 - 33)            | 4<br>(2 - 14)             |
| Acute hepatitis C                                                | 3<br>(0 - 9)                | --                        | 0<br>(0 - 1)         | 1<br>(0 - 3)             | 1<br>(0 - 4)              | 0<br>(0 - 1)              |
| Acute hepatitis E                                                | 28<br>(14 - 57)             | 2<br>(0 - 6)              | 4<br>(1 - 9)         | 20<br>(10 - 41)          | 2<br>(0 - 9)              | 0<br>(0 - 1)              |
| Other infectious diseases                                        | 432<br>(190 - 943)          | 282<br>(76 - 784)         | 30<br>(9 - 81)       | 57<br>(25 - 105)         | 40<br>(15 - 89)           | 23<br>(7 - 59)            |
| Non-communicable diseases                                        | 30,741<br>(23,236 - 42,127) | 6,142<br>(3,664 - 9,368)  | 995<br>(685 - 1,378) | 4,864<br>(3,391 - 7,366) | 9,041<br>(6,009 - 14,520) | 9,699<br>(7,365 - 13,395) |
| Neoplasms                                                        | 4,492<br>(3,204 - 6,719)    | 156<br>(79 - 315)         | 110<br>(71 - 173)    | 1,177<br>(803 - 1,784)   | 2,068<br>(1,368 - 3,338)  | 981<br>(697 - 1,402)      |
| Esophageal cancer                                                | 122<br>(71 - 204)           | --                        | --                   | 12<br>(7 - 22)           | 63<br>(34 - 111)          | 47<br>(28 - 80)           |
| Stomach cancer                                                   | 279<br>(180 - 446)          | --                        | --                   | 65<br>(40 - 102)         | 134<br>(79 - 229)         | 80<br>(49 - 129)          |
| Liver cancer                                                     | 296<br>(175 - 484)          | --                        | 4<br>(2 - 9)         | 56<br>(28 - 101)         | 149<br>(82 - 270)         | 87<br>(51 - 140)          |
| Liver cancer due to hepatitis B                                  | 77<br>(30 - 157)            | --                        | 1<br>(0 - 2)         | 19<br>(5 - 43)           | 41<br>(13 - 92)           | 16<br>(7 - 33)            |

Web Table 31- Angola deaths with 95% UI by age, sex, and cause in 2013

| Cause                                | Females, All Ages          | Females, 0-4 Years | Females, 5-14 Years | Females, 15-49 Years   | Females, 50-69 Years     | Females, 70-80 Years     |
|--------------------------------------|----------------------------|--------------------|---------------------|------------------------|--------------------------|--------------------------|
| Liver cancer due to hepatitis C      | 120<br>(57 - 201)          | --                 | 0<br>(0 - 1)        | 15<br>(4 - 31)         | 61<br>(27 - 110)         | 43<br>(22 - 72)          |
| Liver cancer due to alcohol use      | 32<br>(15 - 62)            | --                 | --                  | 3<br>(1 - 7)           | 16<br>(6 - 33)           | 13<br>(6 - 25)           |
| Liver cancer due to other causes     | 68<br>(35 - 120)           | --                 | 3<br>(1 - 7)        | 18<br>(8 - 39)         | 31<br>(14 - 59)          | 15<br>(7 - 28)           |
| Larynx cancer                        | 12<br>(5 - 28)             | --                 | --                  | 3<br>(1 - 7)           | 7<br>(3 - 15)            | 3<br>(1 - 6)             |
| Tracheal, bronchus and lung cancer   | 188<br>(116 - 317)         | --                 | --                  | 29<br>(18 - 47)        | 107<br>(63 - 185)        | 53<br>(30 - 101)         |
| Breast cancer                        | 792<br>(515 - 1,264)       | --                 | --                  | 249<br>(162 - 407)     | 414<br>(243 - 680)       | 129<br>(66 - 199)        |
| Cervical cancer                      | 875<br>(568 - 1,392)       | --                 | --                  | 351<br>(220 - 560)     | 406<br>(237 - 691)       | 117<br>(69 - 190)        |
| Uterine cancer                       | 76<br>(42 - 139)           | --                 | --                  | 11<br>(6 - 20)         | 45<br>(23 - 87)          | 20<br>(10 - 38)          |
| Prostate cancer                      | --                         | --                 | --                  | --                     | --                       | --                       |
| Colon and rectum cancer              | 355<br>(240 - 542)         | --                 | --                  | 54<br>(36 - 88)        | 172<br>(110 - 285)       | 128<br>(84 - 190)        |
| Lip and oral cavity cancer           | 47<br>(24 - 84)            | --                 | --                  | 12<br>(5 - 26)         | 23<br>(10 - 43)          | 12<br>(7 - 21)           |
| Nasopharynx cancer                   | 15<br>(7 - 26)             | --                 | 1<br>(0 - 2)        | 7<br>(3 - 13)          | 6<br>(2 - 12)            | 2<br>(1 - 3)             |
| Other pharynx cancer                 | 16<br>(10 - 26)            | --                 | --                  | 4<br>(2 - 7)           | 9<br>(5 - 16)            | 3<br>(2 - 5)             |
| Gallbladder and biliary tract cancer | 142<br>(78 - 240)          | --                 | --                  | 15<br>(7 - 27)         | 79<br>(41 - 141)         | 48<br>(25 - 82)          |
| Pancreatic cancer                    | 110<br>(74 - 170)          | --                 | --                  | 11<br>(7 - 18)         | 58<br>(36 - 97)          | 41<br>(26 - 61)          |
| Malignant skin melanoma              | 21<br>(13 - 35)            | --                 | --                  | 7<br>(4 - 11)          | 10<br>(5 - 17)           | 5<br>(3 - 8)             |
| Non-melanoma skin cancer             | 15<br>(8 - 26)             | --                 | --                  | 4<br>(2 - 7)           | 5<br>(2 - 9)             | 7<br>(3 - 12)            |
| Ovarian cancer                       | 138<br>(83 - 235)          | --                 | --                  | 38<br>(19 - 66)        | 76<br>(44 - 136)         | 24<br>(14 - 43)          |
| Testicular cancer                    | --                         | --                 | --                  | --                     | --                       | --                       |
| Kidney cancer                        | 60<br>(34 - 102)           | 12<br>(3 - 31)     | 4<br>(1 - 8)        | 10<br>(6 - 18)         | 24<br>(12 - 47)          | 11<br>(5 - 21)           |
| Bladder cancer                       | 55<br>(31 - 90)            | --                 | --                  | 9<br>(5 - 15)          | 25<br>(13 - 43)          | 22<br>(12 - 36)          |
| Brain and nervous system cancer      | 81<br>(55 - 116)           | 9<br>(3 - 21)      | 12<br>(6 - 20)      | 26<br>(16 - 40)        | 25<br>(15 - 44)          | 9<br>(5 - 15)            |
| Thyroid cancer                       | 22<br>(11 - 36)            | --                 | 0<br>(0 - 1)        | 3<br>(2 - 5)           | 11<br>(5 - 19)           | 7<br>(3 - 13)            |
| Mesothelioma                         | 8<br>(4 - 13)              | --                 | --                  | 2<br>(1 - 4)           | 4<br>(2 - 8)             | 1<br>(1 - 3)             |
| Hodgkin lymphoma                     | 27<br>(14 - 43)            | 4<br>(1 - 10)      | 3<br>(1 - 7)        | 13<br>(6 - 23)         | 5<br>(2 - 9)             | 2<br>(1 - 4)             |
| Non-Hodgkin lymphoma                 | 158<br>(89 - 255)          | 19<br>(7 - 44)     | 12<br>(6 - 22)      | 44<br>(25 - 72)        | 53<br>(23 - 104)         | 29<br>(11 - 58)          |
| Multiple myeloma                     | 40<br>(24 - 66)            | --                 | --                  | 5<br>(3 - 8)           | 23<br>(13 - 39)          | 13<br>(7 - 20)           |
| Leukemia                             | 109<br>(76 - 152)          | 17<br>(7 - 40)     | 22<br>(13 - 35)     | 33<br>(22 - 51)        | 23<br>(12 - 37)          | 13<br>(6 - 20)           |
| Other neoplasms                      | 432<br>(294 - 685)         | 95<br>(39 - 239)   | 52<br>(27 - 104)    | 105<br>(64 - 178)      | 113<br>(64 - 195)        | 67<br>(34 - 110)         |
| Cardiovascular diseases              | 12,396<br>(8,773 - 18,846) | 424<br>(186 - 778) | 128<br>(76 - 201)   | 1,501<br>(958 - 2,451) | 4,299<br>(2,754 - 6,990) | 6,045<br>(4,437 - 8,667) |
| Rheumatic heart disease              | 436<br>(264 - 753)         | 17<br>(4 - 51)     | 20<br>(10 - 39)     | 165<br>(92 - 318)      | 145<br>(76 - 269)        | 89<br>(53 - 151)         |
| Ischemic heart disease               | 2,813<br>(1,737 - 4,847)   | 13<br>(3 - 35)     | 6<br>(3 - 11)       | 220<br>(132 - 383)     | 962<br>(559 - 1,687)     | 1,613<br>(991 - 2,972)   |
| Cerebrovascular disease              | 6,180<br>(4,259 - 9,304)   | 104<br>(42 - 246)  | 44<br>(22 - 78)     | 659<br>(405 - 1,131)   | 2,191<br>(1,363 - 3,534) | 3,182<br>(2,236 - 4,590) |
| Ischemic stroke                      | 2,851<br>(1,925 - 4,327)   | 19<br>(3 - 50)     | 7<br>(2 - 15)       | 110<br>(53 - 233)      | 752<br>(428 - 1,322)     | 1,964<br>(1,361 - 2,901) |
| Hemorrhagic stroke                   | 3,329<br>(2,096 - 5,268)   | 85<br>(32 - 206)   | 37<br>(19 - 68)     | 549<br>(331 - 963)     | 1,440<br>(850 - 2,394)   | 1,218<br>(712 - 1,991)   |
| Hypertensive heart disease           | 999<br>(552 - 2,057)       | 7<br>(2 - 17)      | 3<br>(1 - 5)        | 78<br>(40 - 139)       | 331<br>(159 - 720)       | 580<br>(303 - 1,211)     |
| Cardiomyopathy and myocarditis       | 641<br>(395 - 1,037)       | 174<br>(43 - 346)  | 31<br>(12 - 55)     | 141<br>(68 - 248)      | 156<br>(82 - 300)        | 140<br>(68 - 310)        |
| Atrial fibrillation and flutter      | 7<br>(2 - 13)              | --                 | --                  | 0<br>(0 - 1)           | 2<br>(1 - 3)             | 5<br>(2 - 9)             |
| Aortic aneurysm                      | 80<br>(43 - 136)           | --                 | --                  | 13<br>(5 - 24)         | 30<br>(14 - 55)          | 37<br>(20 - 61)          |
| Peripheral vascular disease          | 6<br>(3 - 10)              | --                 | --                  | 0<br>(0 - 1)           | 2<br>(1 - 3)             | 4<br>(2 - 7)             |

Web Table 31- Angola deaths with 95% UI by age, sex, and cause in 2013

| Cause                                               | Females, All Ages        | Females, 0-4 Years | Females, 5-14 Years | Females, 15-49 Years | Females, 50-69 Years | Females, 70-80 Years |
|-----------------------------------------------------|--------------------------|--------------------|---------------------|----------------------|----------------------|----------------------|
| Endocarditis                                        | 125<br>(63 - 265)        | 20<br>(6 - 48)     | 5<br>(2 - 10)       | 28<br>(12 - 60)      | 31<br>(13 - 75)      | 41<br>(15 - 100)     |
| Other cardiovascular and circulatory diseases       | 1,108<br>(682 - 1,858)   | 89<br>(35 - 185)   | 21<br>(10 - 35)     | 196<br>(115 - 317)   | 449<br>(247 - 804)   | 353<br>(198 - 681)   |
| Chronic respiratory diseases                        | 2,068<br>(1,484 - 3,021) | 317<br>(161 - 570) | 53<br>(32 - 80)     | 312<br>(202 - 471)   | 617<br>(373 - 1,039) | 769<br>(537 - 1,136) |
| Chronic obstructive pulmonary disease               | 1,243<br>(824 - 1,891)   | 115<br>(49 - 221)  | 13<br>(7 - 24)      | 125<br>(70 - 218)    | 420<br>(246 - 724)   | 570<br>(379 - 842)   |
| Pneumoconiosis                                      | 9<br>(5 - 15)            | 3<br>(1 - 6)       | 1<br>(1 - 2)        | 3<br>(2 - 5)         | 1<br>(1 - 3)         | 1<br>(1 - 2)         |
| Silicosis                                           | 1<br>(0 - 2)             | 0<br>(0 - 1)       | 0<br>(0 - 0)        | 0<br>(0 - 0)         | 0<br>(0 - 0)         | 0<br>(0 - 0)         |
| Asbestosis                                          | 1<br>(0 - 1)             | 0<br>(0 - 1)       | 0<br>(0 - 0)        | 0<br>(0 - 0)         | 0<br>(0 - 0)         | 0<br>(0 - 0)         |
| Coal workers pneumoconiosis                         | 1<br>(0 - 1)             | 0<br>(0 - 1)       | 0<br>(0 - 0)        | 0<br>(0 - 0)         | 0<br>(0 - 0)         | 0<br>(0 - 0)         |
| Other pneumoconiosis                                | 7<br>(4 - 11)            | 2<br>(1 - 5)       | 1<br>(0 - 1)        | 2<br>(1 - 4)         | 1<br>(1 - 2)         | 1<br>(0 - 2)         |
| Asthma                                              | 527<br>(283 - 873)       | 104<br>(32 - 224)  | 26<br>(14 - 43)     | 139<br>(75 - 236)    | 143<br>(62 - 280)    | 115<br>(55 - 218)    |
| Interstitial lung disease and pulmonary sarcoidosis | 127<br>(31 - 261)        | 7<br>(1 - 21)      | 2<br>(1 - 5)        | 17<br>(5 - 34)       | 40<br>(9 - 88)       | 62<br>(12 - 141)     |
| Other chronic respiratory diseases                  | 162<br>(92 - 287)        | 88<br>(37 - 179)   | 10<br>(5 - 18)      | 29<br>(16 - 53)      | 14<br>(6 - 28)       | 21<br>(10 - 39)      |
| Cirrhosis                                           | 902<br>(617 - 1,370)     | 45<br>(18 - 97)    | 24<br>(14 - 39)     | 218<br>(142 - 337)   | 410<br>(253 - 682)   | 205<br>(131 - 310)   |
| Cirrhosis due to hepatitis B                        | 179<br>(70 - 347)        | 1<br>(0 - 4)       | 2<br>(0 - 5)        | 35<br>(11 - 75)      | 89<br>(32 - 178)     | 52<br>(21 - 106)     |
| Cirrhosis due to hepatitis C                        | 317<br>(128 - 556)       | 3<br>(1 - 8)       | 6<br>(2 - 11)       | 95<br>(47 - 159)     | 157<br>(48 - 302)    | 56<br>(20 - 102)     |
| Cirrhosis due to alcohol use                        | 231<br>(129 - 397)       | --                 | --                  | 38<br>(17 - 69)      | 115<br>(57 - 211)    | 78<br>(43 - 133)     |
| Cirrhosis due to other causes                       | 176<br>(108 - 277)       | 41<br>(16 - 88)    | 17<br>(9 - 28)      | 51<br>(28 - 83)      | 49<br>(21 - 108)     | 19<br>(9 - 41)       |
| Digestive diseases                                  | 1,583<br>(1,099 - 2,236) | 259<br>(126 - 472) | 77<br>(47 - 115)    | 381<br>(242 - 588)   | 448<br>(276 - 750)   | 419<br>(279 - 626)   |
| Peptic ulcer disease                                | 307<br>(190 - 489)       | 18<br>(7 - 39)     | 7<br>(4 - 11)       | 71<br>(39 - 125)     | 111<br>(58 - 201)    | 100<br>(55 - 169)    |
| Gastritis and duodenitis                            | 69<br>(25 - 132)         | 14<br>(3 - 31)     | 6<br>(2 - 11)       | 18<br>(7 - 35)       | 16<br>(5 - 39)       | 15<br>(4 - 44)       |
| Appendicitis                                        | 148<br>(85 - 238)        | 44<br>(16 - 93)    | 18<br>(9 - 33)      | 48<br>(25 - 83)      | 25<br>(12 - 48)      | 14<br>(7 - 25)       |
| Paralytic ileus and intestinal obstruction          | 387<br>(197 - 608)       | 41<br>(14 - 90)    | 17<br>(8 - 31)      | 68<br>(32 - 118)     | 115<br>(52 - 209)    | 147<br>(72 - 244)    |
| Inguinal, femoral, and abdominal hernia             | 25<br>(13 - 44)          | 3<br>(1 - 9)       | 1<br>(1 - 2)        | 4<br>(2 - 8)         | 8<br>(3 - 16)        | 9<br>(3 - 18)        |
| Inflammatory bowel disease                          | 173<br>(79 - 288)        | 68<br>(24 - 148)   | 9<br>(4 - 17)       | 45<br>(20 - 81)      | 29<br>(10 - 56)      | 21<br>(7 - 41)       |
| Vascular intestinal disorders                       | 14<br>(6 - 33)           | 0<br>(0 - 2)       | 0<br>(0 - 1)        | 3<br>(1 - 5)         | 5<br>(2 - 11)        | 6<br>(2 - 15)        |
| Gallbladder and biliary diseases                    | 139<br>(82 - 216)        | 9<br>(3 - 19)      | 3<br>(2 - 5)        | 35<br>(19 - 59)      | 50<br>(24 - 91)      | 42<br>(20 - 73)      |
| Pancreatitis                                        | 89<br>(46 - 149)         | 5<br>(1 - 12)      | 3<br>(1 - 5)        | 34<br>(14 - 60)      | 30<br>(15 - 55)      | 17<br>(8 - 29)       |
| Other digestive diseases                            | 232<br>(139 - 352)       | 56<br>(17 - 126)   | 13<br>(7 - 22)      | 54<br>(31 - 90)      | 61<br>(33 - 109)     | 48<br>(25 - 88)      |
| Neurological disorders                              | 939<br>(643 - 1,296)     | 145<br>(46 - 315)  | 63<br>(30 - 110)    | 198<br>(104 - 319)   | 108<br>(66 - 182)    | 424<br>(286 - 606)   |
| Alzheimer disease and other dementias               | 457<br>(305 - 668)       | --                 | --                  | 0<br>(0 - 1)         | 57<br>(32 - 96)      | 399<br>(270 - 575)   |
| Parkinson disease                                   | 7<br>(4 - 11)            | --                 | --                  | 0<br>(0 - 1)         | 2<br>(1 - 4)         | 4<br>(2 - 8)         |
| Epilepsy                                            | 399<br>(194 - 632)       | 122<br>(29 - 286)  | 56<br>(24 - 101)    | 182<br>(90 - 299)    | 29<br>(15 - 58)      | 10<br>(5 - 22)       |
| Multiple sclerosis                                  | 4<br>(2 - 9)             | --                 | --                  | 2<br>(1 - 5)         | 2<br>(1 - 4)         | 0<br>(0 - 1)         |
| Other neurological disorders                        | 71<br>(52 - 96)          | 23<br>(13 - 37)    | 7<br>(4 - 10)       | 14<br>(9 - 20)       | 18<br>(11 - 30)      | 9<br>(6 - 14)        |
| Mental and substance use disorders                  | 129<br>(75 - 210)        | 12<br>(4 - 23)     | 1<br>(0 - 1)        | 77<br>(42 - 125)     | 33<br>(14 - 61)      | 7<br>(4 - 11)        |
| Schizophrenia                                       | 9<br>(4 - 16)            | --                 | --                  | 5<br>(2 - 8)         | 3<br>(1 - 6)         | 1<br>(1 - 2)         |
| Alcohol use disorders                               | 70<br>(20 - 128)         | --                 | --                  | 42<br>(12 - 78)      | 24<br>(7 - 49)       | 4<br>(1 - 7)         |
| Drug use disorders                                  | 47<br>(28 - 78)          | 12<br>(4 - 23)     | --                  | 28<br>(16 - 51)      | 6<br>(2 - 12)        | 2<br>(1 - 4)         |
| Opioid use disorders                                | 5<br>(3 - 8)             | 1<br>(0 - 3)       | --                  | 3<br>(2 - 5)         | 0<br>(0 - 1)         | 0<br>(0 - 0)         |
| Cocaine use disorders                               | 0<br>(0 - 0)             | 0<br>(0 - 0)       | --                  | 0<br>(0 - 0)         | 0<br>(0 - 0)         | 0<br>(0 - 0)         |

Web Table 31- Angola deaths with 95% UI by age, sex, and cause in 2013

| Cause                                               | Females, All Ages        | Females, 0-4 Years       | Females, 5-14 Years | Females, 15-49 Years | Females, 50-69 Years | Females, 70-80 Years |
|-----------------------------------------------------|--------------------------|--------------------------|---------------------|----------------------|----------------------|----------------------|
| Amphetamine use disorders                           | 0<br>(0 - 0)             | 0<br>(0 - 0)             | --                  | 0<br>(0 - 0)         | 0<br>(0 - 0)         | 0<br>(0 - 0)         |
| Other drug use disorders                            | 42<br>(25 - 69)          | 11<br>(3 - 21)           | --                  | 25<br>(14 - 46)      | 5<br>(2 - 11)        | 1<br>(1 - 3)         |
| Eating disorders                                    | 3<br>(2 - 6)             | --                       | 1<br>(0 - 1)        | 3<br>(1 - 5)         | --                   | --                   |
| Anorexia nervosa                                    | 3<br>(2 - 6)             | --                       | 1<br>(0 - 1)        | 3<br>(1 - 5)         | --                   | --                   |
| Diabetes, urogenital, blood, and endocrine diseases | 4,296<br>(2,920 - 6,110) | 1,355<br>(674 - 2,338)   | 392<br>(220 - 628)  | 830<br>(524 - 1,269) | 965<br>(596 - 1,621) | 754<br>(492 - 1,124) |
| Diabetes mellitus                                   | 1,004<br>(598 - 1,582)   | 8<br>(4 - 16)            | 6<br>(3 - 10)       | 121<br>(75 - 198)    | 486<br>(267 - 844)   | 384<br>(212 - 587)   |
| Acute glomerulonephritis                            | 28<br>(11 - 54)          | 10<br>(2 - 25)           | 5<br>(2 - 9)        | 9<br>(3 - 16)        | 3<br>(2 - 6)         | 2<br>(1 - 3)         |
| Chronic kidney disease                              | 712<br>(376 - 1,251)     | 90<br>(38 - 169)         | 39<br>(19 - 66)     | 157<br>(77 - 316)    | 223<br>(102 - 437)   | 204<br>(103 - 362)   |
| Chronic kidney disease due to diabetes mellitus     | 4<br>(2 - 8)             | 0<br>(0 - 0)             | 0<br>(0 - 1)        | 1<br>(0 - 1)         | 2<br>(1 - 4)         | 1<br>(0 - 2)         |
| Chronic kidney disease due to hypertension          | 267<br>(118 - 491)       | 11<br>(3 - 30)           | 5<br>(1 - 10)       | 46<br>(19 - 102)     | 101<br>(39 - 199)    | 103<br>(45 - 192)    |
| Chronic kidney disease due to glomerulonephritis    | 237<br>(120 - 397)       | 50<br>(21 - 89)          | 21<br>(10 - 34)     | 72<br>(33 - 130)     | 58<br>(24 - 116)     | 37<br>(14 - 71)      |
| Chronic kidney disease due to other causes          | 204<br>(66 - 433)        | 28<br>(7 - 65)           | 13<br>(4 - 27)      | 38<br>(9 - 104)      | 62<br>(15 - 160)     | 63<br>(15 - 137)     |
| Urinary diseases and male infertility               | 283<br>(186 - 415)       | 48<br>(13 - 100)         | 9<br>(4 - 16)       | 68<br>(37 - 112)     | 79<br>(44 - 136)     | 78<br>(45 - 140)     |
| Interstitial nephritis and urinary tract infections | 214<br>(135 - 320)       | 28<br>(8 - 62)           | 5<br>(2 - 9)        | 49<br>(26 - 81)      | 64<br>(36 - 113)     | 69<br>(38 - 121)     |
| Urolithiasis                                        | 15<br>(7 - 30)           | --                       | 1<br>(0 - 3)        | 6<br>(2 - 14)        | 5<br>(2 - 11)        | 3<br>(1 - 6)         |
| Other urinary diseases                              | 53<br>(29 - 89)          | 20<br>(5 - 43)           | 3<br>(1 - 6)        | 14<br>(6 - 26)       | 10<br>(4 - 19)       | 7<br>(3 - 15)        |
| Gynecological diseases                              | 20<br>(10 - 36)          | --                       | --                  | 15<br>(7 - 27)       | 4<br>(1 - 7)         | 2<br>(1 - 3)         |
| Uterine fibroids                                    | 4<br>(2 - 7)             | --                       | --                  | 2<br>(1 - 4)         | 1<br>(0 - 2)         | 1<br>(0 - 1)         |
| Polycystic ovarian syndrome                         | 1<br>(1 - 2)             | --                       | --                  | 1<br>(1 - 2)         | 0<br>(0 - 0)         | --                   |
| Endometriosis                                       | 3<br>(1 - 5)             | --                       | --                  | 2<br>(1 - 5)         | 0<br>(0 - 0)         | --                   |
| Genital prolapse                                    | 3<br>(2 - 6)             | --                       | --                  | 2<br>(1 - 4)         | 1<br>(0 - 1)         | 0<br>(0 - 1)         |
| Other gynecological diseases                        | 10<br>(5 - 17)           | --                       | --                  | 7<br>(3 - 13)        | 2<br>(1 - 4)         | 1<br>(0 - 1)         |
| Hemoglobinopathies and hemolytic anemias            | 1,515<br>(680 - 2,663)   | 835<br>(264 - 1,736)     | 282<br>(130 - 498)  | 318<br>(158 - 554)   | 65<br>(31 - 123)     | 14<br>(7 - 26)       |
| Thalassemias                                        | 1<br>(0 - 1)             | 0<br>(0 - 1)             | 0<br>(0 - 0)        | 0<br>(0 - 0)         | 0<br>(0 - 0)         | 0<br>(0 - 0)         |
| Sickle cell disorders                               | 1,474<br>(649 - 2,603)   | 814<br>(253 - 1,708)     | 280<br>(129 - 494)  | 315<br>(156 - 549)   | 62<br>(29 - 118)     | 2<br>(1 - 4)         |
| G6PD deficiency                                     | 4<br>(2 - 7)             | 2<br>(1 - 5)             | 1<br>(0 - 1)        | 1<br>(0 - 1)         | 0<br>(0 - 0)         | 0<br>(0 - 0)         |
| Other hemoglobinopathies and hemolytic anemias      | 37<br>(21 - 61)          | 18<br>(8 - 34)           | 1<br>(1 - 2)        | 2<br>(1 - 4)         | 3<br>(2 - 6)         | 12<br>(6 - 22)       |
| Endocrine, metabolic, blood, and immune disorders   | 734<br>(408 - 1,201)     | 365<br>(147 - 771)       | 51<br>(23 - 105)    | 142<br>(74 - 245)    | 105<br>(47 - 189)    | 71<br>(31 - 123)     |
| Musculoskeletal disorders                           | 108<br>(42 - 185)        | --                       | 11<br>(4 - 18)      | 51<br>(19 - 95)      | 29<br>(11 - 53)      | 17<br>(6 - 30)       |
| Rheumatoid arthritis                                | 23<br>(9 - 42)           | --                       | 1<br>(0 - 3)        | 5<br>(2 - 10)        | 10<br>(4 - 19)       | 7<br>(2 - 14)        |
| Other musculoskeletal disorders                     | 84<br>(31 - 143)         | --                       | 9<br>(3 - 15)       | 47<br>(17 - 85)      | 19<br>(7 - 34)       | 9<br>(4 - 18)        |
| Other non-communicable diseases                     | 3,830<br>(1,971 - 6,615) | 3,430<br>(1,612 - 6,137) | 137<br>(63 - 274)   | 119<br>(67 - 200)    | 65<br>(36 - 113)     | 79<br>(40 - 136)     |
| Congenital anomalies                                | 3,521<br>(1,692 - 6,317) | 3,295<br>(1,542 - 6,005) | 126<br>(55 - 255)   | 79<br>(39 - 142)     | 14<br>(8 - 25)       | 7<br>(4 - 11)        |
| Neural tube defects                                 | 825<br>(178 - 2,158)     | 796<br>(167 - 2,116)     | 17<br>(4 - 46)      | 10<br>(3 - 23)       | 1<br>(0 - 2)         | 0<br>(0 - 1)         |
| Congenital heart anomalies                          | 1,635<br>(650 - 3,348)   | 1,511<br>(582 - 3,144)   | 71<br>(25 - 167)    | 43<br>(17 - 86)      | 6<br>(3 - 11)        | 3<br>(2 - 5)         |
| Cleft lip and cleft palate                          | 18<br>(2 - 68)           | 18<br>(2 - 68)           | --                  | --                   | --                   | --                   |
| Down syndrome                                       | 199<br>(46 - 450)        | 176<br>(37 - 416)        | 12<br>(4 - 27)      | 9<br>(3 - 16)        | 2<br>(1 - 4)         | 0<br>(0 - 0)         |
| Chromosomal unbalanced rearrangements               | 157<br>(55 - 370)        | 150<br>(51 - 358)        | 3<br>(1 - 8)        | 4<br>(1 - 7)         | 0<br>(0 - 1)         | 0<br>(0 - 0)         |
| Other congenital anomalies                          | 688<br>(292 - 1,507)     | 644<br>(261 - 1,419)     | 22<br>(8 - 51)      | 14<br>(7 - 29)       | 5<br>(3 - 9)         | 3<br>(2 - 5)         |
| Skin and subcutaneous diseases                      | 252<br>(164 - 360)       | 78<br>(29 - 151)         | 12<br>(7 - 19)      | 40<br>(24 - 64)      | 50<br>(26 - 90)      | 72<br>(35 - 129)     |



Web Table 31- Angola deaths with 95% UI by age, sex, and cause in 2013

| Cause                                           | Females, All Ages        | Females, 0-4 Years       | Females, 5-14 Years  | Females, 15-49 Years     | Females, 50-69 Years | Females, 70-80 Years |
|-------------------------------------------------|--------------------------|--------------------------|----------------------|--------------------------|----------------------|----------------------|
| Cellulitis                                      | 111<br>(61 - 186)        | 34<br>(8 - 77)           | 6<br>(2 - 10)        | 19<br>(9 - 33)           | 25<br>(11 - 50)      | 28<br>(11 - 60)      |
| Pyoderma                                        | 106<br>(51 - 170)        | 40<br>(11 - 89)          | 4<br>(2 - 8)         | 16<br>(7 - 28)           | 20<br>(9 - 37)       | 25<br>(12 - 47)      |
| Decubitus ulcer                                 | 25<br>(11 - 45)          | 1<br>(0 - 3)             | 1<br>(0 - 2)         | 2<br>(1 - 5)             | 4<br>(2 - 8)         | 17<br>(6 - 34)       |
| Other skin and subcutaneous diseases            | 11<br>(5 - 21)           | 3<br>(0 - 10)            | 1<br>(0 - 2)         | 3<br>(1 - 6)             | 2<br>(1 - 4)         | 2<br>(1 - 5)         |
| Sudden infant death syndrome                    | 56<br>(7 - 235)          | 56<br>(7 - 235)          | --                   | --                       | --                   | --                   |
| Injuries                                        | 6,587<br>(4,560 - 9,532) | 2,743<br>(1,500 - 4,497) | 843<br>(526 - 1,274) | 2,094<br>(1,381 - 3,156) | 564<br>(343 - 935)   | 343<br>(234 - 515)   |
| Transport injuries                              | 2,331<br>(978 - 4,394)   | 693<br>(247 - 1,521)     | 397<br>(168 - 760)   | 906<br>(369 - 1,777)     | 239<br>(89 - 455)    | 96<br>(37 - 167)     |
| Road injuries                                   | 2,157<br>(916 - 4,008)   | 621<br>(224 - 1,359)     | 370<br>(159 - 701)   | 849<br>(349 - 1,643)     | 225<br>(84 - 428)    | 91<br>(35 - 158)     |
| Pedestrian road injuries                        | 902<br>(365 - 1,858)     | 291<br>(95 - 722)        | 174<br>(70 - 368)    | 288<br>(114 - 575)       | 100<br>(38 - 192)    | 50<br>(20 - 93)      |
| Cyclist road injuries                           | 253<br>(94 - 497)        | 68<br>(18 - 178)         | 54<br>(20 - 110)     | 93<br>(34 - 192)         | 30<br>(10 - 63)      | 7<br>(3 - 14)        |
| Motorcyclist road injuries                      | 255<br>(89 - 531)        | 51<br>(11 - 128)         | 24<br>(8 - 56)       | 157<br>(55 - 350)        | 18<br>(6 - 42)       | 4<br>(1 - 9)         |
| Motor vehicle road injuries                     | 733<br>(278 - 1,453)     | 207<br>(58 - 479)        | 115<br>(40 - 233)    | 306<br>(111 - 655)       | 76<br>(27 - 158)     | 29<br>(10 - 56)      |
| Other road injuries                             | 15<br>(5 - 30)           | 5<br>(1 - 13)            | 3<br>(1 - 7)         | 5<br>(1 - 10)            | 2<br>(0 - 4)         | 1<br>(0 - 2)         |
| Other transport injuries                        | 175<br>(62 - 461)        | 72<br>(17 - 208)         | 27<br>(9 - 75)       | 57<br>(20 - 154)         | 14<br>(4 - 37)       | 5<br>(1 - 12)        |
| Unintentional injuries                          | 3,401<br>(2,056 - 4,984) | 1,981<br>(869 - 3,421)   | 397<br>(249 - 605)   | 566<br>(362 - 854)       | 234<br>(147 - 382)   | 223<br>(150 - 338)   |
| Falls                                           | 375<br>(184 - 602)       | 133<br>(29 - 297)        | 29<br>(11 - 55)      | 64<br>(28 - 109)         | 49<br>(26 - 88)      | 100<br>(53 - 175)    |
| Drowning                                        | 823<br>(326 - 1,557)     | 538<br>(137 - 1,199)     | 143<br>(65 - 256)    | 107<br>(53 - 180)        | 26<br>(15 - 47)      | 10<br>(5 - 18)       |
| Fire, heat, and hot substances                  | 690<br>(246 - 1,276)     | 420<br>(93 - 955)        | 73<br>(26 - 138)     | 122<br>(50 - 212)        | 43<br>(20 - 81)      | 33<br>(16 - 61)      |
| Poisonings                                      | 191<br>(95 - 468)        | 95<br>(32 - 264)         | 17<br>(7 - 42)       | 59<br>(29 - 143)         | 14<br>(7 - 31)       | 5<br>(3 - 13)        |
| Exposure to mechanical forces                   | 298<br>(158 - 584)       | 157<br>(55 - 364)        | 51<br>(27 - 102)     | 66<br>(38 - 121)         | 17<br>(9 - 37)       | 6<br>(4 - 13)        |
| Unintentional firearm injuries                  | 76<br>(36 - 121)         | 27<br>(7 - 60)           | 13<br>(6 - 27)       | 30<br>(14 - 54)          | 5<br>(2 - 9)         | 1<br>(1 - 3)         |
| Unintentional suffocation                       | 33<br>(1 - 119)          | 26<br>(1 - 109)          | 2<br>(0 - 6)         | 3<br>(0 - 9)             | 1<br>(0 - 2)         | 0<br>(0 - 1)         |
| Other exposure to mechanical forces             | 189<br>(89 - 452)        | 105<br>(30 - 286)        | 35<br>(16 - 89)      | 33<br>(17 - 89)          | 11<br>(5 - 30)       | 5<br>(2 - 11)        |
| Adverse effects of medical treatment            | 244<br>(117 - 405)       | 98<br>(31 - 232)         | 14<br>(6 - 26)       | 52<br>(21 - 89)          | 43<br>(20 - 82)      | 37<br>(17 - 72)      |
| Animal contact                                  | 179<br>(73 - 597)        | 96<br>(19 - 380)         | 31<br>(11 - 99)      | 31<br>(14 - 93)          | 15<br>(6 - 48)       | 6<br>(2 - 18)        |
| Venomous animal contact                         | 146<br>(48 - 540)        | 80<br>(12 - 330)         | 25<br>(8 - 85)       | 25<br>(11 - 78)          | 12<br>(5 - 36)       | 4<br>(1 - 12)        |
| Non-venomous animal contact                     | 33<br>(9 - 93)           | 16<br>(3 - 51)           | 5<br>(1 - 17)        | 6<br>(2 - 17)            | 4<br>(1 - 11)        | 2<br>(1 - 7)         |
| Foreign body                                    | 458<br>(134 - 982)       | 377<br>(84 - 838)        | 20<br>(7 - 39)       | 28<br>(11 - 55)          | 16<br>(7 - 30)       | 18<br>(8 - 31)       |
| Pulmonary aspiration and foreign body in airway | 454<br>(132 - 978)       | 375<br>(83 - 836)        | 19<br>(6 - 39)       | 27<br>(10 - 53)          | 15<br>(7 - 30)       | 18<br>(8 - 31)       |
| Foreign body in other body part                 | 4<br>(1 - 8)             | 2<br>(0 - 5)             | 1<br>(0 - 1)         | 1<br>(0 - 2)             | 0<br>(0 - 1)         | 0<br>(0 - 1)         |
| Other unintentional injuries                    | 142<br>(69 - 270)        | 67<br>(19 - 150)         | 20<br>(9 - 42)       | 37<br>(19 - 70)          | 12<br>(5 - 25)       | 6<br>(3 - 13)        |
| Self-harm and interpersonal violence            | 854<br>(433 - 1,300)     | 68<br>(26 - 151)         | 49<br>(24 - 89)      | 622<br>(291 - 985)       | 90<br>(39 - 156)     | 25<br>(10 - 45)      |
| Self-harm                                       | 564<br>(194 - 882)       | --                       | 23<br>(6 - 56)       | 440<br>(152 - 717)       | 78<br>(26 - 139)     | 23<br>(7 - 41)       |
| Interpersonal violence                          | 290<br>(176 - 492)       | 68<br>(26 - 151)         | 26<br>(12 - 52)      | 182<br>(103 - 313)       | 13<br>(6 - 24)       | 2<br>(1 - 5)         |
| Assault by firearm                              | 72<br>(33 - 148)         | 12<br>(3 - 36)           | 6<br>(2 - 14)        | 51<br>(22 - 102)         | 3<br>(1 - 8)         | 0<br>(0 - 1)         |
| Assault by sharp object                         | 71<br>(35 - 131)         | 9<br>(2 - 23)            | 4<br>(1 - 9)         | 56<br>(26 - 106)         | 3<br>(1 - 7)         | 0<br>(0 - 1)         |
| Assault by other means                          | 147<br>(80 - 265)        | 48<br>(18 - 110)         | 16<br>(7 - 33)       | 75<br>(37 - 140)         | 6<br>(3 - 12)        | 1<br>(1 - 3)         |
| Forces of nature, war, and legal intervention   | 1<br>(0 - 0)             | 1<br>(0 - 0)             | --                   | --                       | --                   | --                   |
| Exposure to forces of nature                    | 1<br>(0 - 0)             | 1<br>(0 - 0)             | --                   | --                       | --                   | --                   |

Web Table 31- Antigua and Barbuda deaths with 95% UI by age, sex, and cause in 2013

| Cause                                                             | Both Sexes, All Ages | Both Sexes, 0-4 Years | Both Sexes, 5-14 Years | Both Sexes, 15-49 Years | Both Sexes, 50-69 Years | Both Sexes, 70-80 Years |
|-------------------------------------------------------------------|----------------------|-----------------------|------------------------|-------------------------|-------------------------|-------------------------|
| All causes                                                        | 565<br>(479 - 656)   | 23<br>(10 - 46)       | 4<br>(3 - 7)           | 85<br>(67 - 107)        | 141<br>(107 - 176)      | 312<br>(265 - 355)      |
| Communicable, maternal, neonatal, and nutritional diseases        | 64<br>(52 - 79)      | 16<br>(7 - 31)        | 1<br>(1 - 1)           | 13<br>(11 - 16)         | 8<br>(7 - 10)           | 25<br>(20 - 31)         |
| HIV/AIDS and tuberculosis                                         | 12<br>(10 - 15)      | 0<br>(0 - 0)          | 0<br>(0 - 0)           | 8<br>(7 - 10)           | 3<br>(2 - 4)            | 1<br>(1 - 1)            |
| Tuberculosis                                                      | 2<br>(2 - 3)         | 0<br>(0 - 0)          | 0<br>(0 - 0)           | 1<br>(0 - 1)            | 1<br>(1 - 1)            | 1<br>(1 - 1)            |
| HIV/AIDS                                                          | 10<br>(8 - 12)       | 0<br>(0 - 0)          | 0<br>(0 - 0)           | 7<br>(6 - 9)            | 2<br>(1 - 3)            | 0<br>(0 - 0)            |
| HIV/AIDS resulting in mycobacterial infection                     | 1<br>(0 - 1)         | 0<br>(0 - 0)          | 0<br>(0 - 0)           | 0<br>(0 - 1)            | 0<br>(0 - 0)            | 0<br>(0 - 0)            |
| HIV/AIDS resulting in other diseases                              | 9<br>(7 - 12)        | 0<br>(0 - 0)          | 0<br>(0 - 0)           | 7<br>(5 - 9)            | 2<br>(1 - 3)            | 0<br>(0 - 0)            |
| Diarrhea, lower respiratory, and other common infectious diseases | 31<br>(25 - 38)      | 3<br>(2 - 7)          | 1<br>(0 - 1)           | 3<br>(2 - 4)            | 4<br>(3 - 5)            | 20<br>(15 - 25)         |
| Diarrheal diseases                                                | 3<br>(2 - 4)         | 1<br>(0 - 2)          | 0<br>(0 - 0)           | 0<br>(0 - 0)            | 0<br>(0 - 0)            | 1<br>(1 - 2)            |
| Intestinal infectious diseases                                    | 1<br>(0 - 1)         | 0<br>(0 - 1)          | 0<br>(0 - 0)           | 0<br>(0 - 0)            | 0<br>(0 - 0)            | 0<br>(0 - 0)            |
| Typhoid fever                                                     | 0<br>(0 - 1)         | 0<br>(0 - 0)          | 0<br>(0 - 0)           | 0<br>(0 - 0)            | 0<br>(0 - 0)            | 0<br>(0 - 0)            |
| Paratyphoid fever                                                 | 0<br>(0 - 0)         | 0<br>(0 - 0)          | 0<br>(0 - 0)           | 0<br>(0 - 0)            | 0<br>(0 - 0)            | 0<br>(0 - 0)            |
| Other intestinal infectious diseases                              | 0<br>(0 - 0)         | 0<br>(0 - 0)          | 0<br>(0 - 0)           | 0<br>(0 - 0)            | 0<br>(0 - 0)            | 0<br>(0 - 0)            |
| Lower respiratory infections                                      | 25<br>(20 - 31)      | 2<br>(1 - 4)          | 0<br>(0 - 0)           | 2<br>(2 - 3)            | 3<br>(2 - 4)            | 18<br>(14 - 23)         |
| Upper respiratory infections                                      | 0<br>(0 - 0)         | 0<br>(0 - 0)          | 0<br>(0 - 0)           | 0<br>(0 - 0)            | 0<br>(0 - 0)            | 0<br>(0 - 0)            |
| Otitis media                                                      | 0<br>(0 - 0)         | 0<br>(0 - 0)          | 0<br>(0 - 0)           | 0<br>(0 - 0)            | 0<br>(0 - 0)            | 0<br>(0 - 0)            |
| Meningitis                                                        | 1<br>(1 - 1)         | 0<br>(0 - 0)          | 0<br>(0 - 0)           | 0<br>(0 - 0)            | 0<br>(0 - 0)            | 0<br>(0 - 0)            |
| Pneumococcal meningitis                                           | 0<br>(0 - 0)         | 0<br>(0 - 0)          | 0<br>(0 - 0)           | 0<br>(0 - 0)            | 0<br>(0 - 0)            | 0<br>(0 - 0)            |
| H influenzae type B meningitis                                    | 0<br>(0 - 0)         | 0<br>(0 - 0)          | 0<br>(0 - 0)           | 0<br>(0 - 0)            | 0<br>(0 - 0)            | 0<br>(0 - 0)            |
| Meningococcal meningitis                                          | 0<br>(0 - 0)         | 0<br>(0 - 0)          | 0<br>(0 - 0)           | 0<br>(0 - 0)            | 0<br>(0 - 0)            | 0<br>(0 - 0)            |
| Other meningitis                                                  | 0<br>(0 - 1)         | 0<br>(0 - 0)          | 0<br>(0 - 0)           | 0<br>(0 - 0)            | 0<br>(0 - 0)            | 0<br>(0 - 0)            |
| Encephalitis                                                      | 1<br>(0 - 1)         | 0<br>(0 - 0)          | 0<br>(0 - 0)           | 0<br>(0 - 0)            | 0<br>(0 - 0)            | 0<br>(0 - 0)            |
| Diphtheria                                                        | 0<br>(0 - 0)         | 0<br>(0 - 0)          | 0<br>(0 - 0)           | 0<br>(0 - 0)            | 0<br>(0 - 0)            | --                      |
| Whooping cough                                                    | 0<br>(0 - 0)         | 0<br>(0 - 0)          | 0<br>(0 - 0)           | 0<br>(0 - 0)            | 0<br>(0 - 0)            | --                      |
| Tetanus                                                           | 0<br>(0 - 0)         | 0<br>(0 - 0)          | 0<br>(0 - 0)           | 0<br>(0 - 0)            | 0<br>(0 - 0)            | 0<br>(0 - 0)            |
| Measles                                                           | 0<br>(0 - 0)         | 0<br>(0 - 0)          | 0<br>(0 - 0)           | 0<br>(0 - 0)            | 0<br>(0 - 0)            | --                      |
| Varicella and herpes zoster                                       | 0<br>(0 - 0)         | 0<br>(0 - 0)          | 0<br>(0 - 0)           | 0<br>(0 - 0)            | 0<br>(0 - 0)            | 0<br>(0 - 0)            |
| Neglected tropical diseases and malaria                           | 1<br>(0 - 1)         | 0<br>(0 - 0)          | 0<br>(0 - 0)           | 0<br>(0 - 0)            | 0<br>(0 - 0)            | 0<br>(0 - 0)            |
| Leishmaniasis                                                     | 0<br>(0 - 0)         | 0<br>(0 - 0)          | 0<br>(0 - 0)           | 0<br>(0 - 0)            | 0<br>(0 - 0)            | 0<br>(0 - 0)            |
| Visceral leishmaniasis                                            | 0<br>(0 - 0)         | 0<br>(0 - 0)          | 0<br>(0 - 0)           | 0<br>(0 - 0)            | 0<br>(0 - 0)            | 0<br>(0 - 0)            |
| Schistosomiasis                                                   | 0<br>(0 - 0)         | 0<br>(0 - 0)          | 0<br>(0 - 0)           | 0<br>(0 - 0)            | 0<br>(0 - 0)            | 0<br>(0 - 0)            |
| Cysticercosis                                                     | 0<br>(0 - 0)         | 0<br>(0 - 0)          | 0<br>(0 - 0)           | 0<br>(0 - 0)            | 0<br>(0 - 0)            | 0<br>(0 - 0)            |
| Cystic echinococcosis                                             | 0<br>(0 - 0)         | 0<br>(0 - 0)          | 0<br>(0 - 0)           | 0<br>(0 - 0)            | 0<br>(0 - 0)            | 0<br>(0 - 0)            |
| Dengue                                                            | 0<br>(0 - 0)         | 0<br>(0 - 0)          | 0<br>(0 - 0)           | 0<br>(0 - 0)            | 0<br>(0 - 0)            | 0<br>(0 - 0)            |
| Rabies                                                            | 0<br>(0 - 0)         | 0<br>(0 - 0)          | 0<br>(0 - 0)           | 0<br>(0 - 0)            | 0<br>(0 - 0)            | 0<br>(0 - 0)            |
| Intestinal nematode infections                                    | 0<br>(0 - 0)         | 0<br>(0 - 0)          | 0<br>(0 - 0)           | 0<br>(0 - 0)            | 0<br>(0 - 0)            | 0<br>(0 - 0)            |
| Ascariasis                                                        | 0<br>(0 - 0)         | 0<br>(0 - 0)          | 0<br>(0 - 0)           | 0<br>(0 - 0)            | 0<br>(0 - 0)            | 0<br>(0 - 0)            |
| Other neglected tropical diseases                                 | 0<br>(0 - 0)         | 0<br>(0 - 0)          | 0<br>(0 - 0)           | 0<br>(0 - 0)            | 0<br>(0 - 0)            | 0<br>(0 - 0)            |
| Maternal disorders                                                | 1<br>(0 - 1)         | --                    | 0<br>(0 - 0)           | 1<br>(0 - 1)            | --                      | --                      |
| Maternal hemorrhage                                               | 0<br>(0 - 0)         | --                    | 0<br>(0 - 0)           | 0<br>(0 - 0)            | --                      | --                      |

Web Table 31- Antigua and Barbuda deaths with 95% UI by age, sex, and cause in 2013

| Cause                                                            | Both Sexes, All Ages | Both Sexes, 0-4 Years | Both Sexes, 5-14 Years | Both Sexes, 15-49 Years | Both Sexes, 50-69 Years | Both Sexes, 70-80 Years |
|------------------------------------------------------------------|----------------------|-----------------------|------------------------|-------------------------|-------------------------|-------------------------|
| Maternal sepsis and other maternal infections                    | 0<br>(0 - 0)         | --                    | 0<br>(0 - 0)           | 0<br>(0 - 0)            | --                      | --                      |
| Maternal hypertensive disorders                                  | 0<br>(0 - 0)         | --                    | 0<br>(0 - 0)           | 0<br>(0 - 0)            | --                      | --                      |
| Maternal obstructed labor                                        | 0<br>(0 - 0)         | --                    | 0<br>(0 - 0)           | 0<br>(0 - 0)            | --                      | --                      |
| Maternal abortive outcome                                        | 0<br>(0 - 0)         | --                    | 0<br>(0 - 0)           | 0<br>(0 - 0)            | --                      | --                      |
| Indirect maternal deaths                                         | 0<br>(0 - 0)         | --                    | 0<br>(0 - 0)           | 0<br>(0 - 0)            | --                      | --                      |
| Late maternal deaths                                             | 0<br>(0 - 0)         | --                    | 0<br>(0 - 0)           | 0<br>(0 - 0)            | --                      | --                      |
| Maternal deaths aggravated by HIV/AIDS                           | 0<br>(0 - 0)         | --                    | 0<br>(0 - 0)           | 0<br>(0 - 0)            | --                      | --                      |
| Other maternal disorders                                         | 0<br>(0 - 0)         | --                    | 0<br>(0 - 0)           | 0<br>(0 - 0)            | --                      | --                      |
| Neonatal disorders                                               | 11<br>(5 - 22)       | 11<br>(5 - 22)        | --                     | --                      | --                      | --                      |
| Neonatal preterm birth complications                             | 6<br>(2 - 11)        | 6<br>(2 - 11)         | --                     | --                      | --                      | --                      |
| Neonatal encephalopathy due to birth asphyxia and trauma         | 2<br>(1 - 5)         | 2<br>(1 - 5)          | --                     | --                      | --                      | --                      |
| Neonatal sepsis and other neonatal infections                    | 2<br>(1 - 4)         | 2<br>(1 - 4)          | --                     | --                      | --                      | --                      |
| Hemolytic disease and other neonatal jaundice                    | 0<br>(0 - 0)         | 0<br>(0 - 0)          | --                     | --                      | --                      | --                      |
| Other neonatal disorders                                         | 1<br>(1 - 3)         | 1<br>(1 - 3)          | --                     | --                      | --                      | --                      |
| Nutritional deficiencies                                         | 7<br>(5 - 9)         | 1<br>(0 - 2)          | 0<br>(0 - 0)           | 1<br>(1 - 1)            | 1<br>(1 - 1)            | 4<br>(3 - 5)            |
| Protein-energy malnutrition                                      | 3<br>(2 - 4)         | 1<br>(0 - 2)          | 0<br>(0 - 0)           | 0<br>(0 - 0)            | 0<br>(0 - 1)            | 2<br>(1 - 2)            |
| Iodine deficiency                                                | 0<br>(0 - 0)         | 0<br>(0 - 0)          | 0<br>(0 - 0)           | 0<br>(0 - 0)            | 0<br>(0 - 0)            | 0<br>(0 - 0)            |
| Iron-deficiency anemia                                           | 3<br>(2 - 5)         | 0<br>(0 - 0)          | 0<br>(0 - 0)           | 1<br>(0 - 1)            | 1<br>(0 - 1)            | 2<br>(1 - 3)            |
| Other nutritional deficiencies                                   | 0<br>(0 - 1)         | 0<br>(0 - 0)          | 0<br>(0 - 0)           | 0<br>(0 - 0)            | 0<br>(0 - 0)            | 0<br>(0 - 0)            |
| Other communicable, maternal, neonatal, and nutritional diseases | 1<br>(1 - 2)         | 0<br>(0 - 0)          | 0<br>(0 - 0)           | 0<br>(0 - 1)            | 0<br>(0 - 1)            | 0<br>(0 - 1)            |
| Sexually transmitted diseases excluding HIV                      | 0<br>(0 - 0)         | 0<br>(0 - 0)          | 0<br>(0 - 0)           | 0<br>(0 - 0)            | 0<br>(0 - 0)            | 0<br>(0 - 0)            |
| Syphilis                                                         | 0<br>(0 - 0)         | 0<br>(0 - 0)          | 0<br>(0 - 0)           | 0<br>(0 - 0)            | 0<br>(0 - 0)            | 0<br>(0 - 0)            |
| Chlamydial infection                                             | 0<br>(0 - 0)         | --                    | 0<br>(0 - 0)           | 0<br>(0 - 0)            | 0<br>(0 - 0)            | 0<br>(0 - 0)            |
| Gonococcal infection                                             | 0<br>(0 - 0)         | --                    | 0<br>(0 - 0)           | 0<br>(0 - 0)            | 0<br>(0 - 0)            | 0<br>(0 - 0)            |
| Other sexually transmitted diseases                              | 0<br>(0 - 0)         | --                    | 0<br>(0 - 0)           | 0<br>(0 - 0)            | 0<br>(0 - 0)            | 0<br>(0 - 0)            |
| Hepatitis                                                        | 0<br>(0 - 0)         | 0<br>(0 - 0)          | 0<br>(0 - 0)           | 0<br>(0 - 0)            | 0<br>(0 - 0)            | 0<br>(0 - 0)            |
| Acute hepatitis A                                                | 0<br>(0 - 0)         | 0<br>(0 - 0)          | 0<br>(0 - 0)           | 0<br>(0 - 0)            | 0<br>(0 - 0)            | 0<br>(0 - 0)            |
| Acute hepatitis B                                                | 0<br>(0 - 0)         | 0<br>(0 - 0)          | 0<br>(0 - 0)           | 0<br>(0 - 0)            | 0<br>(0 - 0)            | 0<br>(0 - 0)            |
| Acute hepatitis C                                                | 0<br>(0 - 0)         | --                    | 0<br>(0 - 0)           | 0<br>(0 - 0)            | 0<br>(0 - 0)            | 0<br>(0 - 0)            |
| Other infectious diseases                                        | 1<br>(1 - 2)         | 0<br>(0 - 0)          | 0<br>(0 - 0)           | 0<br>(0 - 1)            | 0<br>(0 - 0)            | 0<br>(0 - 1)            |
| Non-communicable diseases                                        | 457<br>(378 - 535)   | 6<br>(3 - 12)         | 2<br>(1 - 3)           | 48<br>(36 - 61)         | 124<br>(93 - 155)       | 278<br>(236 - 317)      |
| Neoplasms                                                        | 92<br>(74 - 112)     | 0<br>(0 - 1)          | 1<br>(0 - 1)           | 13<br>(9 - 17)          | 30<br>(23 - 38)         | 49<br>(39 - 58)         |
| Esophageal cancer                                                | 2<br>(2 - 3)         | --                    | --                     | 0<br>(0 - 0)            | 1<br>(1 - 1)            | 1<br>(1 - 1)            |
| Stomach cancer                                                   | 6<br>(4 - 7)         | --                    | --                     | 0<br>(0 - 1)            | 2<br>(1 - 2)            | 3<br>(3 - 4)            |
| Liver cancer                                                     | 3<br>(2 - 4)         | --                    | 0<br>(0 - 0)           | 0<br>(0 - 1)            | 1<br>(1 - 2)            | 1<br>(1 - 2)            |
| Liver cancer due to hepatitis B                                  | 1<br>(0 - 1)         | --                    | 0<br>(0 - 0)           | 0<br>(0 - 0)            | 0<br>(0 - 1)            | 0<br>(0 - 0)            |
| Liver cancer due to hepatitis C                                  | 1<br>(1 - 2)         | --                    | 0<br>(0 - 0)           | 0<br>(0 - 0)            | 1<br>(0 - 1)            | 1<br>(1 - 1)            |
| Liver cancer due to alcohol use                                  | 1<br>(0 - 1)         | --                    | --                     | 0<br>(0 - 0)            | 0<br>(0 - 0)            | 0<br>(0 - 1)            |
| Liver cancer due to other causes                                 | 0<br>(0 - 0)         | --                    | 0<br>(0 - 0)           | 0<br>(0 - 0)            | 0<br>(0 - 0)            | 0<br>(0 - 0)            |
| Larynx cancer                                                    | 1<br>(1 - 1)         | --                    | --                     | 0<br>(0 - 0)            | 0<br>(0 - 1)            | 0<br>(0 - 0)            |

Web Table 31- Antigua and Barbuda deaths with 95% UI by age, sex, and cause in 2013

| Cause                                         | Both Sexes, All Ages | Both Sexes, 0-4 Years | Both Sexes, 5-14 Years | Both Sexes, 15-49 Years | Both Sexes, 50-69 Years | Both Sexes, 70-80 Years |
|-----------------------------------------------|----------------------|-----------------------|------------------------|-------------------------|-------------------------|-------------------------|
| Tracheal, bronchus and lung cancer            | 9<br>(7 - 11)        | --                    | --                     | 1<br>(1 - 1)            | 4<br>(3 - 5)            | 4<br>(3 - 5)            |
| Breast cancer                                 | 9<br>(7 - 13)        | --                    | --                     | 2<br>(2 - 4)            | 4<br>(2 - 5)            | 4<br>(3 - 5)            |
| Cervical cancer                               | 5<br>(4 - 8)         | --                    | --                     | 1<br>(1 - 2)            | 2<br>(1 - 3)            | 2<br>(1 - 3)            |
| Uterine cancer                                | 2<br>(1 - 3)         | --                    | --                     | 0<br>(0 - 0)            | 1<br>(0 - 1)            | 1<br>(1 - 2)            |
| Prostate cancer                               | 18<br>(11 - 26)      | --                    | --                     | 0<br>(0 - 0)            | 3<br>(2 - 5)            | 14<br>(9 - 21)          |
| Colon and rectum cancer                       | 10<br>(8 - 12)       | --                    | --                     | 1<br>(1 - 1)            | 3<br>(2 - 4)            | 6<br>(5 - 7)            |
| Lip and oral cavity cancer                    | 1<br>(1 - 2)         | --                    | --                     | 0<br>(0 - 0)            | 0<br>(0 - 1)            | 1<br>(0 - 1)            |
| Nasopharynx cancer                            | 0<br>(0 - 0)         | --                    | 0<br>(0 - 0)           | 0<br>(0 - 0)            | 0<br>(0 - 0)            | 0<br>(0 - 0)            |
| Other pharynx cancer                          | 1<br>(0 - 1)         | --                    | --                     | 0<br>(0 - 0)            | 0<br>(0 - 0)            | 0<br>(0 - 0)            |
| Gallbladder and biliary tract cancer          | 1<br>(1 - 2)         | --                    | --                     | 0<br>(0 - 0)            | 0<br>(0 - 1)            | 1<br>(0 - 1)            |
| Pancreatic cancer                             | 4<br>(3 - 5)         | --                    | --                     | 0<br>(0 - 0)            | 1<br>(1 - 2)            | 2<br>(2 - 3)            |
| Malignant skin melanoma                       | 0<br>(0 - 1)         | --                    | --                     | 0<br>(0 - 0)            | 0<br>(0 - 0)            | 0<br>(0 - 0)            |
| Non-melanoma skin cancer                      | 0<br>(0 - 0)         | --                    | --                     | 0<br>(0 - 0)            | 0<br>(0 - 0)            | 0<br>(0 - 0)            |
| Ovarian cancer                                | 2<br>(2 - 3)         | --                    | --                     | 0<br>(0 - 1)            | 1<br>(1 - 1)            | 1<br>(1 - 1)            |
| Testicular cancer                             | 0<br>(0 - 0)         | --                    | --                     | 0<br>(0 - 0)            | 0<br>(0 - 0)            | 0<br>(0 - 0)            |
| Kidney cancer                                 | 1<br>(1 - 2)         | 0<br>(0 - 0)          | 0<br>(0 - 0)           | 0<br>(0 - 0)            | 1<br>(0 - 1)            | 1<br>(0 - 1)            |
| Bladder cancer                                | 1<br>(1 - 2)         | --                    | --                     | 0<br>(0 - 0)            | 0<br>(0 - 0)            | 1<br>(1 - 1)            |
| Brain and nervous system cancer               | 1<br>(1 - 2)         | 0<br>(0 - 0)          | 0<br>(0 - 0)           | 0<br>(0 - 0)            | 0<br>(0 - 1)            | 0<br>(0 - 0)            |
| Thyroid cancer                                | 0<br>(0 - 1)         | --                    | 0<br>(0 - 0)           | 0<br>(0 - 0)            | 0<br>(0 - 0)            | 0<br>(0 - 0)            |
| Mesothelioma                                  | 0<br>(0 - 0)         | --                    | --                     | 0<br>(0 - 0)            | 0<br>(0 - 0)            | 0<br>(0 - 0)            |
| Hodgkin lymphoma                              | 0<br>(0 - 0)         | 0<br>(0 - 0)          | 0<br>(0 - 0)           | 0<br>(0 - 0)            | 0<br>(0 - 0)            | 0<br>(0 - 0)            |
| Non-Hodgkin lymphoma                          | 3<br>(3 - 4)         | 0<br>(0 - 0)          | 0<br>(0 - 0)           | 1<br>(1 - 1)            | 1<br>(1 - 2)            | 1<br>(1 - 1)            |
| Multiple myeloma                              | 1<br>(1 - 2)         | --                    | --                     | 0<br>(0 - 0)            | 1<br>(0 - 1)            | 1<br>(0 - 1)            |
| Leukemia                                      | 3<br>(2 - 3)         | 0<br>(0 - 0)          | 0<br>(0 - 0)           | 1<br>(1 - 1)            | 1<br>(0 - 1)            | 1<br>(1 - 1)            |
| Other neoplasms                               | 5<br>(4 - 6)         | 0<br>(0 - 0)          | 0<br>(0 - 0)           | 1<br>(1 - 2)            | 2<br>(1 - 2)            | 2<br>(1 - 2)            |
| Cardiovascular diseases                       | 198<br>(165 - 233)   | 0<br>(0 - 1)          | 0<br>(0 - 1)           | 15<br>(11 - 20)         | 50<br>(38 - 63)         | 132<br>(113 - 153)      |
| Rheumatic heart disease                       | 1<br>(1 - 1)         | 0<br>(0 - 0)          | 0<br>(0 - 0)           | 0<br>(0 - 1)            | 0<br>(0 - 0)            | 0<br>(0 - 0)            |
| Ischemic heart disease                        | 84<br>(67 - 102)     | 0<br>(0 - 0)          | 0<br>(0 - 0)           | 7<br>(5 - 9)            | 23<br>(17 - 29)         | 55<br>(44 - 66)         |
| Cerebrovascular disease                       | 72<br>(59 - 87)      | 0<br>(0 - 0)          | 0<br>(0 - 0)           | 5<br>(3 - 6)            | 18<br>(13 - 23)         | 49<br>(40 - 61)         |
| Ischemic stroke                               | 44<br>(35 - 55)      | 0<br>(0 - 0)          | 0<br>(0 - 0)           | 1<br>(1 - 2)            | 9<br>(7 - 12)           | 33<br>(27 - 43)         |
| Hemorrhagic stroke                            | 28<br>(22 - 35)      | 0<br>(0 - 0)          | 0<br>(0 - 0)           | 3<br>(2 - 5)            | 9<br>(6 - 11)           | 16<br>(12 - 20)         |
| Hypertensive heart disease                    | 21<br>(15 - 27)      | 0<br>(0 - 0)          | 0<br>(0 - 0)           | 1<br>(1 - 2)            | 5<br>(3 - 6)            | 15<br>(11 - 20)         |
| Cardiomyopathy and myocarditis                | 5<br>(4 - 7)         | 0<br>(0 - 0)          | 0<br>(0 - 0)           | 1<br>(1 - 1)            | 2<br>(1 - 2)            | 3<br>(2 - 3)            |
| Atrial fibrillation and flutter               | 3<br>(2 - 4)         | --                    | --                     | 0<br>(0 - 0)            | 0<br>(0 - 1)            | 2<br>(2 - 3)            |
| Aortic aneurysm                               | 2<br>(2 - 3)         | --                    | --                     | 0<br>(0 - 0)            | 1<br>(0 - 1)            | 1<br>(1 - 2)            |
| Peripheral vascular disease                   | 2<br>(1 - 2)         | --                    | --                     | 0<br>(0 - 0)            | 0<br>(0 - 0)            | 1<br>(1 - 2)            |
| Endocarditis                                  | 1<br>(1 - 1)         | 0<br>(0 - 0)          | 0<br>(0 - 0)           | 0<br>(0 - 0)            | 0<br>(0 - 0)            | 0<br>(0 - 1)            |
| Other cardiovascular and circulatory diseases | 8<br>(6 - 10)        | 0<br>(0 - 0)          | 0<br>(0 - 0)           | 1<br>(1 - 2)            | 2<br>(1 - 3)            | 4<br>(3 - 6)            |
| Chronic respiratory diseases                  | 16<br>(13 - 20)      | 0<br>(0 - 0)          | 0<br>(0 - 0)           | 2<br>(1 - 2)            | 4<br>(3 - 5)            | 10<br>(8 - 13)          |
| Chronic obstructive pulmonary disease         | 11<br>(9 - 13)       | 0<br>(0 - 0)          | 0<br>(0 - 0)           | 1<br>(0 - 1)            | 2<br>(2 - 3)            | 8<br>(6 - 9)            |

Web Table 31- Antigua and Barbuda deaths with 95% UI by age, sex, and cause in 2013

| Cause                                               | Both Sexes, All Ages | Both Sexes, 0-4 Years | Both Sexes, 5-14 Years | Both Sexes, 15-49 Years | Both Sexes, 50-69 Years | Both Sexes, 70-80 Years |
|-----------------------------------------------------|----------------------|-----------------------|------------------------|-------------------------|-------------------------|-------------------------|
| Pneumoconiosis                                      | 1<br>(0 - 1)         | 0<br>(0 - 0)          | 0<br>(0 - 0)           | 0<br>(0 - 0)            | 0<br>(0 - 0)            | 0<br>(0 - 0)            |
| Silicosis                                           | 0<br>(0 - 0)         | 0<br>(0 - 0)          | 0<br>(0 - 0)           | 0<br>(0 - 0)            | 0<br>(0 - 0)            | 0<br>(0 - 0)            |
| Asbestosis                                          | 0<br>(0 - 0)         | 0<br>(0 - 0)          | 0<br>(0 - 0)           | 0<br>(0 - 0)            | 0<br>(0 - 0)            | 0<br>(0 - 0)            |
| Coal workers pneumoconiosis                         | 0<br>(0 - 0)         | 0<br>(0 - 0)          | 0<br>(0 - 0)           | 0<br>(0 - 0)            | 0<br>(0 - 0)            | 0<br>(0 - 0)            |
| Other pneumoconiosis                                | 0<br>(0 - 0)         | 0<br>(0 - 0)          | 0<br>(0 - 0)           | 0<br>(0 - 0)            | 0<br>(0 - 0)            | 0<br>(0 - 0)            |
| Asthma                                              | 3<br>(2 - 4)         | 0<br>(0 - 0)          | 0<br>(0 - 0)           | 1<br>(0 - 1)            | 1<br>(1 - 1)            | 1<br>(1 - 2)            |
| Interstitial lung disease and pulmonary sarcoidosis | 1<br>(1 - 2)         | 0<br>(0 - 0)          | 0<br>(0 - 0)           | 0<br>(0 - 0)            | 0<br>(0 - 1)            | 1<br>(0 - 1)            |
| Other chronic respiratory diseases                  | 0<br>(0 - 1)         | 0<br>(0 - 0)          | 0<br>(0 - 0)           | 0<br>(0 - 0)            | 0<br>(0 - 0)            | 0<br>(0 - 0)            |
| Cirrhosis                                           | 10<br>(8 - 13)       | 0<br>(0 - 0)          | 0<br>(0 - 0)           | 3<br>(2 - 4)            | 5<br>(3 - 6)            | 3<br>(2 - 3)            |
| Cirrhosis due to hepatitis B                        | 1<br>(0 - 1)         | 0<br>(0 - 0)          | 0<br>(0 - 0)           | 0<br>(0 - 0)            | 0<br>(0 - 1)            | 0<br>(0 - 0)            |
| Cirrhosis due to hepatitis C                        | 3<br>(2 - 5)         | 0<br>(0 - 0)          | 0<br>(0 - 0)           | 1<br>(1 - 1)            | 2<br>(1 - 2)            | 1<br>(1 - 1)            |
| Cirrhosis due to alcohol use                        | 4<br>(3 - 6)         | --                    | --                     | 1<br>(1 - 2)            | 2<br>(1 - 3)            | 1<br>(1 - 2)            |
| Cirrhosis due to other causes                       | 2<br>(1 - 2)         | 0<br>(0 - 0)          | 0<br>(0 - 0)           | 1<br>(0 - 1)            | 1<br>(0 - 1)            | 0<br>(0 - 0)            |
| Digestive diseases                                  | 12<br>(10 - 15)      | 0<br>(0 - 0)          | 0<br>(0 - 0)           | 2<br>(2 - 3)            | 3<br>(2 - 4)            | 6<br>(5 - 8)            |
| Peptic ulcer disease                                | 3<br>(2 - 4)         | 0<br>(0 - 0)          | 0<br>(0 - 0)           | 1<br>(0 - 1)            | 1<br>(1 - 1)            | 2<br>(1 - 2)            |
| Gastritis and duodenitis                            | 1<br>(0 - 1)         | 0<br>(0 - 0)          | 0<br>(0 - 0)           | 0<br>(0 - 0)            | 0<br>(0 - 0)            | 0<br>(0 - 1)            |
| Appendicitis                                        | 0<br>(0 - 1)         | 0<br>(0 - 0)          | 0<br>(0 - 0)           | 0<br>(0 - 0)            | 0<br>(0 - 0)            | 0<br>(0 - 0)            |
| Paralytic ileus and intestinal obstruction          | 2<br>(1 - 2)         | 0<br>(0 - 0)          | 0<br>(0 - 0)           | 0<br>(0 - 0)            | 0<br>(0 - 1)            | 1<br>(0 - 2)            |
| Inguinal, femoral, and abdominal hernia             | 1<br>(0 - 1)         | 0<br>(0 - 0)          | 0<br>(0 - 0)           | 0<br>(0 - 0)            | 0<br>(0 - 0)            | 0<br>(0 - 1)            |
| Inflammatory bowel disease                          | 1<br>(1 - 2)         | 0<br>(0 - 0)          | 0<br>(0 - 0)           | 0<br>(0 - 0)            | 0<br>(0 - 0)            | 0<br>(1 - 1)            |
| Vascular intestinal disorders                       | 1<br>(0 - 1)         | 0<br>(0 - 0)          | 0<br>(0 - 0)           | 0<br>(0 - 0)            | 0<br>(0 - 0)            | 0<br>(0 - 1)            |
| Gallbladder and biliary diseases                    | 1<br>(1 - 1)         | 0<br>(0 - 0)          | 0<br>(0 - 0)           | 0<br>(0 - 0)            | 0<br>(0 - 0)            | 0<br>(0 - 1)            |
| Pancreatitis                                        | 1<br>(1 - 1)         | 0<br>(0 - 0)          | 0<br>(0 - 0)           | 0<br>(0 - 0)            | 0<br>(0 - 0)            | 0<br>(0 - 0)            |
| Other digestive diseases                            | 2<br>(1 - 3)         | 0<br>(0 - 0)          | 0<br>(0 - 0)           | 0<br>(0 - 0)            | 0<br>(0 - 1)            | 1<br>(1 - 2)            |
| Neurological disorders                              | 28<br>(22 - 35)      | 0<br>(0 - 0)          | 0<br>(0 - 0)           | 1<br>(1 - 2)            | 3<br>(2 - 3)            | 24<br>(19 - 31)         |
| Alzheimer disease and other dementias               | 23<br>(18 - 30)      | --                    | --                     | 0<br>(0 - 0)            | 1<br>(1 - 2)            | 22<br>(17 - 28)         |
| Parkinson disease                                   | 2<br>(1 - 2)         | --                    | --                     | 0<br>(0 - 0)            | 0<br>(0 - 0)            | 1<br>(1 - 2)            |
| Epilepsy                                            | 2<br>(1 - 2)         | 0<br>(0 - 0)          | 0<br>(0 - 0)           | 1<br>(1 - 1)            | 0<br>(0 - 0)            | 0<br>(0 - 0)            |
| Multiple sclerosis                                  | 0<br>(0 - 0)         | --                    | --                     | 0<br>(0 - 0)            | 0<br>(0 - 0)            | 0<br>(0 - 0)            |
| Other neurological disorders                        | 1<br>(1 - 1)         | 0<br>(0 - 0)          | 0<br>(0 - 0)           | 0<br>(0 - 0)            | 0<br>(0 - 0)            | 0<br>(0 - 0)            |
| Mental and substance use disorders                  | 2<br>(2 - 3)         | 0<br>(0 - 0)          | 0<br>(0 - 0)           | 1<br>(1 - 1)            | 1<br>(1 - 1)            | 0<br>(0 - 1)            |
| Schizophrenia                                       | 0<br>(0 - 0)         | --                    | --                     | 0<br>(0 - 0)            | 0<br>(0 - 0)            | 0<br>(0 - 0)            |
| Alcohol use disorders                               | 1<br>(1 - 2)         | --                    | --                     | 0<br>(0 - 1)            | 1<br>(0 - 1)            | 0<br>(0 - 0)            |
| Drug use disorders                                  | 1<br>(1 - 1)         | 0<br>(0 - 0)          | --                     | 0<br>(0 - 1)            | 0<br>(0 - 0)            | 0<br>(0 - 0)            |
| Opioid use disorders                                | 0<br>(0 - 0)         | 0<br>(0 - 0)          | --                     | 0<br>(0 - 0)            | 0<br>(0 - 0)            | 0<br>(0 - 0)            |
| Cocaine use disorders                               | 0<br>(0 - 0)         | 0<br>(0 - 0)          | --                     | 0<br>(0 - 0)            | 0<br>(0 - 0)            | 0<br>(0 - 0)            |
| Amphetamine use disorders                           | 0<br>(0 - 0)         | 0<br>(0 - 0)          | --                     | 0<br>(0 - 0)            | 0<br>(0 - 0)            | 0<br>(0 - 0)            |
| Other drug use disorders                            | 0<br>(0 - 1)         | 0<br>(0 - 0)          | --                     | 0<br>(0 - 0)            | 0<br>(0 - 0)            | 0<br>(0 - 0)            |
| Eating disorders                                    | 0<br>(0 - 0)         | --                    | 0<br>(0 - 0)           | 0<br>(0 - 0)            | --                      | --                      |
| Anorexia nervosa                                    | 0<br>(0 - 0)         | --                    | 0<br>(0 - 0)           | 0<br>(0 - 0)            | --                      | --                      |

Web Table 31- Antigua and Barbuda deaths with 95% UI by age, sex, and cause in 2013

| Cause                                               | Both Sexes, All Ages | Both Sexes, 0-4 Years | Both Sexes, 5-14 Years | Both Sexes, 15-49 Years | Both Sexes, 50-69 Years | Both Sexes, 70-80 Years |
|-----------------------------------------------------|----------------------|-----------------------|------------------------|-------------------------|-------------------------|-------------------------|
| Diabetes, urogenital, blood, and endocrine diseases | 86<br>(68 - 104)     | 1<br>(0 - 1)          | 0<br>(0 - 0)           | 9<br>(7 - 12)           | 27<br>(20 - 34)         | 49<br>(39 - 59)         |
| Diabetes mellitus                                   | 58<br>(45 - 70)      | 0<br>(0 - 0)          | 0<br>(0 - 0)           | 4<br>(3 - 6)            | 19<br>(14 - 24)         | 34<br>(27 - 42)         |
| Acute glomerulonephritis                            | 0<br>(0 - 0)         | 0<br>(0 - 0)          | 0<br>(0 - 0)           | 0<br>(0 - 0)            | 0<br>(0 - 0)            | 0<br>(0 - 0)            |
| Chronic kidney disease                              | 18<br>(14 - 24)      | 0<br>(0 - 0)          | 0<br>(0 - 0)           | 3<br>(2 - 4)            | 5<br>(4 - 7)            | 10<br>(7 - 14)          |
| Chronic kidney disease due to diabetes mellitus     | 3<br>(2 - 5)         | 0<br>(0 - 0)          | 0<br>(0 - 0)           | 0<br>(0 - 1)            | 1<br>(1 - 2)            | 1<br>(1 - 2)            |
| Chronic kidney disease due to hypertension          | 9<br>(7 - 12)        | 0<br>(0 - 0)          | 0<br>(0 - 0)           | 1<br>(1 - 2)            | 3<br>(2 - 4)            | 5<br>(4 - 7)            |
| Chronic kidney disease due to glomerulonephritis    | 0<br>(0 - 1)         | 0<br>(0 - 0)          | 0<br>(0 - 0)           | 0<br>(0 - 0)            | 0<br>(0 - 0)            | 0<br>(0 - 0)            |
| Chronic kidney disease due to other causes          | 5<br>(3 - 8)         | 0<br>(0 - 0)          | 0<br>(0 - 0)           | 1<br>(1 - 1)            | 1<br>(1 - 2)            | 3<br>(2 - 5)            |
| Urinary diseases and male infertility               | 4<br>(2 - 5)         | 0<br>(0 - 0)          | 0<br>(0 - 0)           | 0<br>(0 - 0)            | 1<br>(0 - 1)            | 2<br>(2 - 3)            |
| Interstitial nephritis and urinary tract infections | 3<br>(2 - 4)         | 0<br>(0 - 0)          | 0<br>(0 - 0)           | 0<br>(0 - 0)            | 1<br>(0 - 1)            | 2<br>(1 - 3)            |
| Urolithiasis                                        | 0<br>(0 - 0)         | --                    | 0<br>(0 - 0)           | 0<br>(0 - 0)            | 0<br>(0 - 0)            | 0<br>(0 - 0)            |
| Other urinary diseases                              | 1<br>(0 - 1)         | 0<br>(0 - 0)          | 0<br>(0 - 0)           | 0<br>(0 - 0)            | 0<br>(0 - 0)            | 0<br>(0 - 1)            |
| Gynecological diseases                              | 0<br>(0 - 0)         | --                    | --                     | 0<br>(0 - 0)            | 0<br>(0 - 0)            | 0<br>(0 - 0)            |
| Uterine fibroids                                    | 0<br>(0 - 0)         | --                    | --                     | 0<br>(0 - 0)            | 0<br>(0 - 0)            | 0<br>(0 - 0)            |
| Polycystic ovarian syndrome                         | 0<br>(0 - 0)         | --                    | --                     | 0<br>(0 - 0)            | 0<br>(0 - 0)            | --                      |
| Endometriosis                                       | 0<br>(0 - 0)         | --                    | --                     | 0<br>(0 - 0)            | 0<br>(0 - 0)            | --                      |
| Genital prolapse                                    | 0<br>(0 - 0)         | --                    | --                     | 0<br>(0 - 0)            | 0<br>(0 - 0)            | 0<br>(0 - 0)            |
| Other gynecological diseases                        | 0<br>(0 - 0)         | --                    | --                     | 0<br>(0 - 0)            | 0<br>(0 - 0)            | 0<br>(0 - 0)            |
| Hemoglobinopathies and hemolytic anemias            | 1<br>(1 - 2)         | 0<br>(0 - 0)          | 0<br>(0 - 0)           | 0<br>(0 - 1)            | 0<br>(0 - 0)            | 0<br>(0 - 0)            |
| Thalassemias                                        | 0<br>(0 - 0)         | 0<br>(0 - 0)          | 0<br>(0 - 0)           | 0<br>(0 - 0)            | 0<br>(0 - 0)            | 0<br>(0 - 0)            |
| Sickle cell disorders                               | 1<br>(1 - 1)         | 0<br>(0 - 0)          | 0<br>(0 - 0)           | 0<br>(0 - 1)            | 0<br>(0 - 0)            | 0<br>(0 - 0)            |
| G6PD deficiency                                     | 0<br>(0 - 0)         | 0<br>(0 - 0)          | 0<br>(0 - 0)           | 0<br>(0 - 0)            | 0<br>(0 - 0)            | 0<br>(0 - 0)            |
| Other hemoglobinopathies and hemolytic anemias      | 0<br>(0 - 0)         | 0<br>(0 - 0)          | 0<br>(0 - 0)           | 0<br>(0 - 0)            | 0<br>(0 - 0)            | 0<br>(0 - 0)            |
| Endocrine, metabolic, blood, and immune disorders   | 5<br>(4 - 9)         | 0<br>(0 - 0)          | 0<br>(0 - 0)           | 1<br>(1 - 2)            | 1<br>(1 - 3)            | 2<br>(2 - 4)            |
| Musculoskeletal disorders                           | 2<br>(1 - 3)         | --                    | 0<br>(0 - 0)           | 1<br>(0 - 1)            | 0<br>(0 - 1)            | 1<br>(0 - 1)            |
| Rheumatoid arthritis                                | 0<br>(0 - 0)         | --                    | 0<br>(0 - 0)           | 0<br>(0 - 0)            | 0<br>(0 - 0)            | 0<br>(0 - 0)            |
| Other musculoskeletal disorders                     | 2<br>(1 - 2)         | --                    | 0<br>(0 - 0)           | 1<br>(0 - 1)            | 0<br>(0 - 1)            | 1<br>(0 - 1)            |
| Other non-communicable diseases                     | 10<br>(7 - 15)       | 4<br>(2 - 8)          | 0<br>(0 - 1)           | 1<br>(1 - 1)            | 1<br>(1 - 1)            | 4<br>(2 - 5)            |
| Congenital anomalies                                | 5<br>(3 - 9)         | 4<br>(2 - 7)          | 0<br>(0 - 1)           | 1<br>(0 - 1)            | 0<br>(0 - 0)            | 0<br>(0 - 0)            |
| Neural tube defects                                 | 0<br>(0 - 0)         | 0<br>(0 - 0)          | 0<br>(0 - 0)           | 0<br>(0 - 0)            | 0<br>(0 - 0)            | 0<br>(0 - 0)            |
| Congenital heart anomalies                          | 3<br>(2 - 5)         | 2<br>(1 - 3)          | 0<br>(0 - 0)           | 0<br>(0 - 1)            | 0<br>(0 - 0)            | 0<br>(0 - 0)            |
| Cleft lip and cleft palate                          | 0<br>(0 - 0)         | 0<br>(0 - 0)          | --                     | --                      | --                      | --                      |
| Down syndrome                                       | 0<br>(0 - 0)         | 0<br>(0 - 0)          | 0<br>(0 - 0)           | 0<br>(0 - 0)            | 0<br>(0 - 0)            | 0<br>(0 - 0)            |
| Chromosomal unbalanced rearrangements               | 0<br>(0 - 0)         | 0<br>(0 - 0)          | 0<br>(0 - 0)           | 0<br>(0 - 0)            | 0<br>(0 - 0)            | 0<br>(0 - 0)            |
| Other congenital anomalies                          | 2<br>(1 - 4)         | 1<br>(1 - 3)          | 0<br>(0 - 0)           | 0<br>(0 - 0)            | 0<br>(0 - 0)            | 0<br>(0 - 0)            |
| Skin and subcutaneous diseases                      | 4<br>(2 - 6)         | 0<br>(0 - 0)          | 0<br>(0 - 0)           | 0<br>(0 - 0)            | 1<br>(0 - 1)            | 4<br>(1 - 5)            |
| Cellulitis                                          | 0<br>(0 - 1)         | 0<br>(0 - 0)          | 0<br>(0 - 0)           | 0<br>(0 - 0)            | 0<br>(0 - 0)            | 0<br>(0 - 0)            |
| Pyoderma                                            | 1<br>(0 - 1)         | 0<br>(0 - 0)          | 0<br>(0 - 0)           | 0<br>(0 - 0)            | 0<br>(0 - 0)            | 1<br>(0 - 1)            |
| Decubitus ulcer                                     | 3<br>(1 - 5)         | 0<br>(0 - 0)          | 0<br>(0 - 0)           | 0<br>(0 - 0)            | 0<br>(0 - 0)            | 3<br>(1 - 4)            |
| Other skin and subcutaneous diseases                | 0<br>(0 - 0)         | 0<br>(0 - 0)          | 0<br>(0 - 0)           | 0<br>(0 - 0)            | 0<br>(0 - 0)            | 0<br>(0 - 0)            |

Web Table 31- Antigua and Barbuda deaths with 95% UI by age, sex, and cause in 2013

| Cause                                           | Both Sexes, All Ages | Both Sexes, 0-4 Years | Both Sexes, 5-14 Years | Both Sexes, 15-49 Years | Both Sexes, 50-69 Years | Both Sexes, 70-80 Years |
|-------------------------------------------------|----------------------|-----------------------|------------------------|-------------------------|-------------------------|-------------------------|
| Sudden infant death syndrome                    | 0<br>(0 - 1)         | 0<br>(0 - 1)          | --                     | --                      | --                      | --                      |
| Injuries                                        | 45<br>(35 - 56)      | 2<br>(1 - 3)          | 2<br>(1 - 3)           | 24<br>(17 - 31)         | 9<br>(6 - 12)           | 9<br>(7 - 11)           |
| Transport injuries                              | 12<br>(9 - 15)       | 0<br>(0 - 1)          | 1<br>(0 - 1)           | 6<br>(4 - 8)            | 3<br>(2 - 4)            | 2<br>(1 - 3)            |
| Road injuries                                   | 11<br>(8 - 14)       | 0<br>(0 - 0)          | 1<br>(0 - 1)           | 6<br>(4 - 8)            | 2<br>(2 - 3)            | 2<br>(1 - 2)            |
| Pedestrian road injuries                        | 3<br>(2 - 4)         | 0<br>(0 - 0)          | 0<br>(0 - 0)           | 1<br>(1 - 2)            | 1<br>(0 - 1)            | 1<br>(0 - 1)            |
| Cyclist road injuries                           | 1<br>(0 - 1)         | 0<br>(0 - 0)          | 0<br>(0 - 0)           | 0<br>(0 - 0)            | 0<br>(0 - 0)            | 0<br>(0 - 0)            |
| Motorcyclist road injuries                      | 1<br>(1 - 1)         | 0<br>(0 - 0)          | 0<br>(0 - 0)           | 1<br>(0 - 1)            | 0<br>(0 - 0)            | 0<br>(0 - 0)            |
| Motor vehicle road injuries                     | 6<br>(5 - 8)         | 0<br>(0 - 0)          | 0<br>(0 - 0)           | 4<br>(3 - 5)            | 1<br>(1 - 2)            | 1<br>(1 - 1)            |
| Other road injuries                             | 0<br>(0 - 0)         | 0<br>(0 - 0)          | 0<br>(0 - 0)           | 0<br>(0 - 0)            | 0<br>(0 - 0)            | 0<br>(0 - 0)            |
| Other transport injuries                        | 1<br>(0 - 1)         | 0<br>(0 - 0)          | 0<br>(0 - 0)           | 0<br>(0 - 1)            | 0<br>(0 - 0)            | 0<br>(0 - 0)            |
| Unintentional injuries                          | 17<br>(13 - 21)      | 1<br>(1 - 2)          | 1<br>(0 - 1)           | 6<br>(4 - 8)            | 3<br>(2 - 4)            | 6<br>(4 - 7)            |
| Falls                                           | 3<br>(3 - 4)         | 0<br>(0 - 0)          | 0<br>(0 - 0)           | 1<br>(0 - 1)            | 1<br>(0 - 1)            | 2<br>(1 - 3)            |
| Drowning                                        | 4<br>(2 - 5)         | 0<br>(0 - 0)          | 0<br>(0 - 1)           | 2<br>(1 - 3)            | 1<br>(0 - 1)            | 0<br>(0 - 0)            |
| Fire, heat, and hot substances                  | 2<br>(1 - 2)         | 0<br>(0 - 0)          | 0<br>(0 - 0)           | 0<br>(0 - 1)            | 0<br>(0 - 0)            | 1<br>(1 - 1)            |
| Poisonings                                      | 0<br>(0 - 0)         | 0<br>(0 - 0)          | 0<br>(0 - 0)           | 0<br>(0 - 0)            | 0<br>(0 - 0)            | 0<br>(0 - 0)            |
| Exposure to mechanical forces                   | 2<br>(1 - 3)         | 0<br>(0 - 0)          | 0<br>(0 - 0)           | 1<br>(1 - 2)            | 0<br>(0 - 1)            | 0<br>(0 - 0)            |
| Unintentional firearm injuries                  | 1<br>(1 - 2)         | 0<br>(0 - 0)          | 0<br>(0 - 0)           | 1<br>(0 - 1)            | 0<br>(0 - 0)            | 0<br>(0 - 0)            |
| Unintentional suffocation                       | 0<br>(0 - 0)         | 0<br>(0 - 0)          | 0<br>(0 - 0)           | 0<br>(0 - 0)            | 0<br>(0 - 0)            | 0<br>(0 - 0)            |
| Other exposure to mechanical forces             | 1<br>(1 - 1)         | 0<br>(0 - 0)          | 0<br>(0 - 0)           | 0<br>(0 - 1)            | 0<br>(0 - 0)            | 0<br>(0 - 0)            |
| Adverse effects of medical treatment            | 2<br>(1 - 3)         | 0<br>(0 - 0)          | 0<br>(0 - 0)           | 0<br>(0 - 1)            | 0<br>(0 - 1)            | 1<br>(1 - 2)            |
| Animal contact                                  | 0<br>(0 - 1)         | 0<br>(0 - 0)          | 0<br>(0 - 0)           | 0<br>(0 - 0)            | 0<br>(0 - 0)            | 0<br>(0 - 0)            |
| Venomous animal contact                         | 0<br>(0 - 0)         | 0<br>(0 - 0)          | 0<br>(0 - 0)           | 0<br>(0 - 0)            | 0<br>(0 - 0)            | 0<br>(0 - 0)            |
| Non-venomous animal contact                     | 0<br>(0 - 0)         | 0<br>(0 - 0)          | 0<br>(0 - 0)           | 0<br>(0 - 0)            | 0<br>(0 - 0)            | 0<br>(0 - 0)            |
| Foreign body                                    | 2<br>(2 - 3)         | 0<br>(0 - 1)          | 0<br>(0 - 0)           | 0<br>(0 - 1)            | 0<br>(0 - 1)            | 1<br>(1 - 1)            |
| Pulmonary aspiration and foreign body in airway | 2<br>(1 - 3)         | 0<br>(0 - 1)          | 0<br>(0 - 0)           | 0<br>(0 - 1)            | 0<br>(0 - 1)            | 1<br>(1 - 1)            |
| Foreign body in other body part                 | 0<br>(0 - 0)         | 0<br>(0 - 0)          | 0<br>(0 - 0)           | 0<br>(0 - 0)            | 0<br>(0 - 0)            | 0<br>(0 - 0)            |
| Other unintentional injuries                    | 1<br>(0 - 1)         | 0<br>(0 - 0)          | 0<br>(0 - 0)           | 0<br>(0 - 0)            | 0<br>(0 - 0)            | 0<br>(0 - 0)            |
| Self-harm and interpersonal violence            | 16<br>(12 - 21)      | 0<br>(0 - 0)          | 0<br>(0 - 0)           | 11<br>(8 - 15)          | 3<br>(2 - 4)            | 1<br>(1 - 1)            |
| Self-harm                                       | 8<br>(6 - 10)        | --                    | 0<br>(0 - 0)           | 5<br>(4 - 7)            | 2<br>(1 - 2)            | 1<br>(1 - 1)            |
| Interpersonal violence                          | 8<br>(5 - 12)        | 0<br>(0 - 0)          | 0<br>(0 - 0)           | 6<br>(4 - 9)            | 1<br>(1 - 2)            | 0<br>(0 - 1)            |
| Assault by firearm                              | 4<br>(2 - 6)         | 0<br>(0 - 0)          | 0<br>(0 - 0)           | 4<br>(2 - 5)            | 0<br>(0 - 1)            | 0<br>(0 - 0)            |
| Assault by sharp object                         | 2<br>(1 - 4)         | 0<br>(0 - 0)          | 0<br>(0 - 0)           | 2<br>(1 - 3)            | 0<br>(0 - 1)            | 0<br>(0 - 0)            |
| Assault by other means                          | 2<br>(1 - 3)         | 0<br>(0 - 0)          | 0<br>(0 - 0)           | 1<br>(1 - 2)            | 0<br>(0 - 1)            | 0<br>(0 - 0)            |

Web Table 31- Antigua and Barbuda deaths with 95% UI by age, sex, and cause in 2013

| Cause                                                             | Males, All Ages    | Males, 0-4 Years | Males, 5-14 Years | Males, 15-49 Years | Males, 50-69 Years | Males, 70-80 Years |
|-------------------------------------------------------------------|--------------------|------------------|-------------------|--------------------|--------------------|--------------------|
| All causes                                                        | 294<br>(238 - 371) | 13<br>(6 - 26)   | 3<br>(1 - 4)      | 55<br>(40 - 74)    | 85<br>(62 - 116)   | 139<br>(116 - 165) |
| Communicable, maternal, neonatal, and nutritional diseases        | 35<br>(29 - 45)    | 9<br>(4 - 18)    | 0<br>(0 - 1)      | 9<br>(7 - 11)      | 6<br>(4 - 8)       | 11<br>(9 - 14)     |
| HIV/AIDS and tuberculosis                                         | 9<br>(7 - 11)      | 0<br>(0 - 0)     | 0<br>(0 - 0)      | 6<br>(4 - 7)       | 2<br>(2 - 3)       | 1<br>(1 - 1)       |
| Tuberculosis                                                      | 2<br>(1 - 2)       | 0<br>(0 - 0)     | 0<br>(0 - 0)      | 1<br>(0 - 1)       | 1<br>(0 - 1)       | 1<br>(0 - 1)       |
| HIV/AIDS                                                          | 7<br>(5 - 9)       | 0<br>(0 - 0)     | 0<br>(0 - 0)      | 5<br>(4 - 6)       | 2<br>(1 - 2)       | 0<br>(0 - 0)       |
| HIV/AIDS resulting in mycobacterial infection                     | 0<br>(0 - 1)       | 0<br>(0 - 0)     | 0<br>(0 - 0)      | 0<br>(0 - 0)       | 0<br>(0 - 0)       | 0<br>(0 - 0)       |
| HIV/AIDS resulting in other diseases                              | 7<br>(5 - 8)       | 0<br>(0 - 0)     | 0<br>(0 - 0)      | 5<br>(4 - 6)       | 2<br>(1 - 2)       | 0<br>(0 - 0)       |
| Diarrhea, lower respiratory, and other common infectious diseases | 15<br>(12 - 20)    | 2<br>(1 - 4)     | 0<br>(0 - 1)      | 2<br>(1 - 3)       | 3<br>(2 - 4)       | 8<br>(6 - 11)      |
| Diarrheal diseases                                                | 2<br>(1 - 2)       | 1<br>(0 - 1)     | 0<br>(0 - 0)      | 0<br>(0 - 0)       | 0<br>(0 - 0)       | 1<br>(0 - 1)       |
| Intestinal infectious diseases                                    | 0<br>(0 - 1)       | 0<br>(0 - 0)     | 0<br>(0 - 0)      | 0<br>(0 - 0)       | 0<br>(0 - 0)       | 0<br>(0 - 0)       |
| Typhoid fever                                                     | 0<br>(0 - 1)       | 0<br>(0 - 0)     | 0<br>(0 - 0)      | 0<br>(0 - 0)       | 0<br>(0 - 0)       | 0<br>(0 - 0)       |
| Paratyphoid fever                                                 | 0<br>(0 - 0)       | 0<br>(0 - 0)     | 0<br>(0 - 0)      | 0<br>(0 - 0)       | 0<br>(0 - 0)       | 0<br>(0 - 0)       |
| Other intestinal infectious diseases                              | 0<br>(0 - 0)       | 0<br>(0 - 0)     | 0<br>(0 - 0)      | 0<br>(0 - 0)       | 0<br>(0 - 0)       | 0<br>(0 - 0)       |
| Lower respiratory infections                                      | 12<br>(9 - 16)     | 1<br>(0 - 2)     | 0<br>(0 - 0)      | 2<br>(1 - 2)       | 2<br>(1 - 3)       | 8<br>(5 - 10)      |
| Upper respiratory infections                                      | 0<br>(0 - 0)       | 0<br>(0 - 0)     | 0<br>(0 - 0)      | 0<br>(0 - 0)       | 0<br>(0 - 0)       | 0<br>(0 - 0)       |
| Otitis media                                                      | 0<br>(0 - 0)       | 0<br>(0 - 0)     | 0<br>(0 - 0)      | 0<br>(0 - 0)       | 0<br>(0 - 0)       | 0<br>(0 - 0)       |
| Meningitis                                                        | 1<br>(0 - 1)       | 0<br>(0 - 0)     | 0<br>(0 - 0)      | 0<br>(0 - 0)       | 0<br>(0 - 0)       | 0<br>(0 - 0)       |
| Pneumococcal meningitis                                           | 0<br>(0 - 0)       | 0<br>(0 - 0)     | 0<br>(0 - 0)      | 0<br>(0 - 0)       | 0<br>(0 - 0)       | 0<br>(0 - 0)       |
| H influenzae type B meningitis                                    | 0<br>(0 - 0)       | 0<br>(0 - 0)     | 0<br>(0 - 0)      | 0<br>(0 - 0)       | 0<br>(0 - 0)       | 0<br>(0 - 0)       |
| Meningococcal meningitis                                          | 0<br>(0 - 0)       | 0<br>(0 - 0)     | 0<br>(0 - 0)      | 0<br>(0 - 0)       | 0<br>(0 - 0)       | 0<br>(0 - 0)       |
| Other meningitis                                                  | 0<br>(0 - 0)       | 0<br>(0 - 0)     | 0<br>(0 - 0)      | 0<br>(0 - 0)       | 0<br>(0 - 0)       | 0<br>(0 - 0)       |
| Encephalitis                                                      | 0<br>(0 - 1)       | 0<br>(0 - 0)     | 0<br>(0 - 0)      | 0<br>(0 - 0)       | 0<br>(0 - 0)       | 0<br>(0 - 0)       |
| Diphtheria                                                        | 0<br>(0 - 0)       | 0<br>(0 - 0)     | 0<br>(0 - 0)      | 0<br>(0 - 0)       | 0<br>(0 - 0)       | --                 |
| Whooping cough                                                    | 0<br>(0 - 0)       | 0<br>(0 - 0)     | 0<br>(0 - 0)      | 0<br>(0 - 0)       | 0<br>(0 - 0)       | --                 |
| Tetanus                                                           | 0<br>(0 - 0)       | 0<br>(0 - 0)     | 0<br>(0 - 0)      | 0<br>(0 - 0)       | 0<br>(0 - 0)       | 0<br>(0 - 0)       |
| Measles                                                           | 0<br>(0 - 0)       | 0<br>(0 - 0)     | 0<br>(0 - 0)      | 0<br>(0 - 0)       | 0<br>(0 - 0)       | --                 |
| Varicella and herpes zoster                                       | 0<br>(0 - 0)       | 0<br>(0 - 0)     | 0<br>(0 - 0)      | 0<br>(0 - 0)       | 0<br>(0 - 0)       | 0<br>(0 - 0)       |
| Neglected tropical diseases and malaria                           | 0<br>(0 - 1)       | 0<br>(0 - 0)     | 0<br>(0 - 0)      | 0<br>(0 - 0)       | 0<br>(0 - 0)       | 0<br>(0 - 0)       |
| Leishmaniasis                                                     | 0<br>(0 - 0)       | 0<br>(0 - 0)     | 0<br>(0 - 0)      | 0<br>(0 - 0)       | 0<br>(0 - 0)       | 0<br>(0 - 0)       |
| Visceral leishmaniasis                                            | 0<br>(0 - 0)       | 0<br>(0 - 0)     | 0<br>(0 - 0)      | 0<br>(0 - 0)       | 0<br>(0 - 0)       | 0<br>(0 - 0)       |
| Schistosomiasis                                                   | 0<br>(0 - 0)       | 0<br>(0 - 0)     | 0<br>(0 - 0)      | 0<br>(0 - 0)       | 0<br>(0 - 0)       | 0<br>(0 - 0)       |
| Cysticercosis                                                     | 0<br>(0 - 0)       | 0<br>(0 - 0)     | 0<br>(0 - 0)      | 0<br>(0 - 0)       | 0<br>(0 - 0)       | 0<br>(0 - 0)       |
| Cystic echinococcosis                                             | 0<br>(0 - 0)       | 0<br>(0 - 0)     | 0<br>(0 - 0)      | 0<br>(0 - 0)       | 0<br>(0 - 0)       | 0<br>(0 - 0)       |
| Dengue                                                            | 0<br>(0 - 0)       | 0<br>(0 - 0)     | 0<br>(0 - 0)      | 0<br>(0 - 0)       | 0<br>(0 - 0)       | 0<br>(0 - 0)       |
| Rabies                                                            | 0<br>(0 - 0)       | 0<br>(0 - 0)     | 0<br>(0 - 0)      | 0<br>(0 - 0)       | 0<br>(0 - 0)       | 0<br>(0 - 0)       |
| Intestinal nematode infections                                    | 0<br>(0 - 0)       | 0<br>(0 - 0)     | 0<br>(0 - 0)      | 0<br>(0 - 0)       | 0<br>(0 - 0)       | 0<br>(0 - 0)       |
| Ascariasis                                                        | 0<br>(0 - 0)       | 0<br>(0 - 0)     | 0<br>(0 - 0)      | 0<br>(0 - 0)       | 0<br>(0 - 0)       | 0<br>(0 - 0)       |
| Other neglected tropical diseases                                 | 0<br>(0 - 0)       | 0<br>(0 - 0)     | 0<br>(0 - 0)      | 0<br>(0 - 0)       | 0<br>(0 - 0)       | 0<br>(0 - 0)       |
| Maternal disorders                                                | --                 | --               | --                | --                 | --                 | --                 |
| Maternal hemorrhage                                               | --                 | --               | --                | --                 | --                 | --                 |



Web Table 31- Antigua and Barbuda deaths with 95% UI by age, sex, and cause in 2013

| Cause                                                            | Males, All Ages    | Males, 0-4 Years | Males, 5-14 Years | Males, 15-49 Years | Males, 50-69 Years | Males, 70-80 Years |
|------------------------------------------------------------------|--------------------|------------------|-------------------|--------------------|--------------------|--------------------|
| Maternal sepsis and other maternal infections                    | --                 | --               | --                | --                 | --                 | --                 |
| Maternal hypertensive disorders                                  | --                 | --               | --                | --                 | --                 | --                 |
| Maternal obstructed labor                                        | --                 | --               | --                | --                 | --                 | --                 |
| Maternal abortive outcome                                        | --                 | --               | --                | --                 | --                 | --                 |
| Indirect maternal deaths                                         | --                 | --               | --                | --                 | --                 | --                 |
| Late maternal deaths                                             | --                 | --               | --                | --                 | --                 | --                 |
| Maternal deaths aggravated by HIV/AIDS                           | --                 | --               | --                | --                 | --                 | --                 |
| Other maternal disorders                                         | --                 | --               | --                | --                 | --                 | --                 |
| Neonatal disorders                                               | 6<br>(3 - 13)      | 6<br>(3 - 13)    | --                | --                 | --                 | --                 |
| Neonatal preterm birth complications                             | 3<br>(1 - 7)       | 3<br>(1 - 7)     | --                | --                 | --                 | --                 |
| Neonatal encephalopathy due to birth asphyxia and trauma         | 1<br>(0 - 3)       | 1<br>(0 - 3)     | --                | --                 | --                 | --                 |
| Neonatal sepsis and other neonatal infections                    | 1<br>(0 - 3)       | 1<br>(0 - 3)     | --                | --                 | --                 | --                 |
| Hemolytic disease and other neonatal jaundice                    | 0<br>(0 - 0)       | 0<br>(0 - 0)     | --                | --                 | --                 | --                 |
| Other neonatal disorders                                         | 1<br>(0 - 2)       | 1<br>(0 - 2)     | --                | --                 | --                 | --                 |
| Nutritional deficiencies                                         | 3<br>(2 - 5)       | 0<br>(0 - 1)     | 0<br>(0 - 0)      | 0<br>(0 - 1)       | 1<br>(0 - 1)       | 2<br>(1 - 3)       |
| Protein-energy malnutrition                                      | 2<br>(1 - 3)       | 0<br>(0 - 1)     | 0<br>(0 - 0)      | 0<br>(0 - 0)       | 0<br>(0 - 0)       | 1<br>(0 - 1)       |
| Iodine deficiency                                                | 0<br>(0 - 0)       | 0<br>(0 - 0)     | 0<br>(0 - 0)      | 0<br>(0 - 0)       | 0<br>(0 - 0)       | 0<br>(0 - 0)       |
| Iron-deficiency anemia                                           | 2<br>(1 - 3)       | 0<br>(0 - 0)     | 0<br>(0 - 0)      | 0<br>(0 - 0)       | 0<br>(0 - 1)       | 1<br>(0 - 2)       |
| Other nutritional deficiencies                                   | 0<br>(0 - 0)       | 0<br>(0 - 0)     | 0<br>(0 - 0)      | 0<br>(0 - 0)       | 0<br>(0 - 0)       | 0<br>(0 - 0)       |
| Other communicable, maternal, neonatal, and nutritional diseases | 1<br>(0 - 1)       | 0<br>(0 - 0)     | 0<br>(0 - 0)      | 0<br>(0 - 1)       | 0<br>(0 - 0)       | 0<br>(0 - 0)       |
| Sexually transmitted diseases excluding HIV                      | 0<br>(0 - 0)       | 0<br>(0 - 0)     | 0<br>(0 - 0)      | 0<br>(0 - 0)       | 0<br>(0 - 0)       | 0<br>(0 - 0)       |
| Syphilis                                                         | 0<br>(0 - 0)       | 0<br>(0 - 0)     | 0<br>(0 - 0)      | 0<br>(0 - 0)       | 0<br>(0 - 0)       | 0<br>(0 - 0)       |
| Chlamydial infection                                             | --                 | --               | --                | --                 | --                 | --                 |
| Gonococcal infection                                             | 0<br>(0 - 0)       | --               | 0<br>(0 - 0)      | 0<br>(0 - 0)       | 0<br>(0 - 0)       | 0<br>(0 - 0)       |
| Other sexually transmitted diseases                              | 0<br>(0 - 0)       | --               | 0<br>(0 - 0)      | 0<br>(0 - 0)       | 0<br>(0 - 0)       | 0<br>(0 - 0)       |
| Hepatitis                                                        | 0<br>(0 - 0)       | 0<br>(0 - 0)     | 0<br>(0 - 0)      | 0<br>(0 - 0)       | 0<br>(0 - 0)       | 0<br>(0 - 0)       |
| Acute hepatitis A                                                | 0<br>(0 - 0)       | 0<br>(0 - 0)     | 0<br>(0 - 0)      | 0<br>(0 - 0)       | 0<br>(0 - 0)       | 0<br>(0 - 0)       |
| Acute hepatitis B                                                | 0<br>(0 - 0)       | 0<br>(0 - 0)     | 0<br>(0 - 0)      | 0<br>(0 - 0)       | 0<br>(0 - 0)       | 0<br>(0 - 0)       |
| Acute hepatitis C                                                | 0<br>(0 - 0)       | --               | 0<br>(0 - 0)      | 0<br>(0 - 0)       | 0<br>(0 - 0)       | 0<br>(0 - 0)       |
| Other infectious diseases                                        | 1<br>(0 - 1)       | 0<br>(0 - 0)     | 0<br>(0 - 0)      | 0<br>(0 - 0)       | 0<br>(0 - 0)       | 0<br>(0 - 0)       |
| Non-communicable diseases                                        | 226<br>(178 - 288) | 3<br>(1 - 6)     | 1<br>(1 - 2)      | 27<br>(18 - 38)    | 72<br>(52 - 99)    | 123<br>(103 - 147) |
| Neoplasms                                                        | 49<br>(38 - 63)    | 0<br>(0 - 0)     | 0<br>(0 - 0)      | 5<br>(3 - 7)       | 16<br>(12 - 22)    | 27<br>(21 - 35)    |
| Esophageal cancer                                                | 1<br>(1 - 2)       | --               | --                | 0<br>(0 - 1)       | 1<br>(0 - 1)       | 1<br>(0 - 1)       |
| Stomach cancer                                                   | 3<br>(2 - 4)       | --               | --                | 0<br>(0 - 0)       | 1<br>(1 - 2)       | 2<br>(1 - 2)       |
| Liver cancer                                                     | 2<br>(1 - 2)       | --               | 0<br>(0 - 0)      | 0<br>(0 - 0)       | 1<br>(1 - 1)       | 1<br>(0 - 1)       |
| Liver cancer due to hepatitis B                                  | 0<br>(0 - 1)       | --               | 0<br>(0 - 0)      | 0<br>(0 - 0)       | 0<br>(0 - 0)       | 0<br>(0 - 0)       |
| Liver cancer due to hepatitis C                                  | 1<br>(0 - 1)       | --               | 0<br>(0 - 0)      | 0<br>(0 - 0)       | 0<br>(0 - 1)       | 0<br>(0 - 1)       |
| Liver cancer due to alcohol use                                  | 0<br>(0 - 1)       | --               | --                | 0<br>(0 - 0)       | 0<br>(0 - 0)       | 0<br>(0 - 0)       |
| Liver cancer due to other causes                                 | 0<br>(0 - 0)       | --               | 0<br>(0 - 0)      | 0<br>(0 - 0)       | 0<br>(0 - 0)       | 0<br>(0 - 0)       |
| Larynx cancer                                                    | 1<br>(1 - 1)       | --               | --                | 0<br>(0 - 0)       | 0<br>(0 - 1)       | 0<br>(0 - 0)       |

Web Table 31- Antigua and Barbuda deaths with 95% UI by age, sex, and cause in 2013

| Cause                                         | Males, All Ages  | Males, 0-4 Years | Males, 5-14 Years | Males, 15-49 Years | Males, 50-69 Years | Males, 70-80 Years |
|-----------------------------------------------|------------------|------------------|-------------------|--------------------|--------------------|--------------------|
| Tracheal, bronchus and lung cancer            | 7<br>(5 - 9)     | --               | --                | 1<br>(0 - 1)       | 3<br>(2 - 4)       | 3<br>(2 - 3)       |
| Breast cancer                                 | 0<br>(0 - 0)     | --               | --                | 0<br>(0 - 0)       | 0<br>(0 - 0)       | 0<br>(0 - 0)       |
| Cervical cancer                               | --               | --               | --                | --                 | --                 | --                 |
| Uterine cancer                                | --               | --               | --                | --                 | --                 | --                 |
| Prostate cancer                               | 18<br>(11 - 26)  | --               | --                | 0<br>(0 - 0)       | 3<br>(2 - 5)       | 14<br>(9 - 21)     |
| Colon and rectum cancer                       | 5<br>(4 - 6)     | --               | --                | 1<br>(0 - 1)       | 2<br>(1 - 3)       | 2<br>(2 - 3)       |
| Lip and oral cavity cancer                    | 1<br>(1 - 1)     | --               | --                | 0<br>(0 - 0)       | 0<br>(0 - 1)       | 0<br>(0 - 0)       |
| Nasopharynx cancer                            | 0<br>(0 - 0)     | --               | 0<br>(0 - 0)      | 0<br>(0 - 0)       | 0<br>(0 - 0)       | 0<br>(0 - 0)       |
| Other pharynx cancer                          | 0<br>(0 - 1)     | --               | --                | 0<br>(0 - 0)       | 0<br>(0 - 0)       | 0<br>(0 - 0)       |
| Gallbladder and biliary tract cancer          | 0<br>(0 - 1)     | --               | --                | 0<br>(0 - 0)       | 0<br>(0 - 0)       | 0<br>(0 - 0)       |
| Pancreatic cancer                             | 2<br>(1 - 2)     | --               | --                | 0<br>(0 - 0)       | 1<br>(1 - 1)       | 1<br>(1 - 1)       |
| Malignant skin melanoma                       | 0<br>(0 - 0)     | --               | --                | 0<br>(0 - 0)       | 0<br>(0 - 0)       | 0<br>(0 - 0)       |
| Non-melanoma skin cancer                      | 0<br>(0 - 0)     | --               | --                | 0<br>(0 - 0)       | 0<br>(0 - 0)       | 0<br>(0 - 0)       |
| Ovarian cancer                                | --               | --               | --                | --                 | --                 | --                 |
| Testicular cancer                             | 0<br>(0 - 0)     | --               | --                | 0<br>(0 - 0)       | 0<br>(0 - 0)       | 0<br>(0 - 0)       |
| Kidney cancer                                 | 1<br>(1 - 1)     | 0<br>(0 - 0)     | 0<br>(0 - 0)      | 0<br>(0 - 0)       | 0<br>(0 - 1)       | 0<br>(0 - 0)       |
| Bladder cancer                                | 1<br>(1 - 1)     | --               | --                | 0<br>(0 - 0)       | 0<br>(0 - 0)       | 1<br>(0 - 1)       |
| Brain and nervous system cancer               | 1<br>(0 - 1)     | 0<br>(0 - 0)     | 0<br>(0 - 0)      | 0<br>(0 - 0)       | 0<br>(0 - 0)       | 0<br>(0 - 0)       |
| Thyroid cancer                                | 0<br>(0 - 0)     | --               | 0<br>(0 - 0)      | 0<br>(0 - 0)       | 0<br>(0 - 0)       | 0<br>(0 - 0)       |
| Mesothelioma                                  | 0<br>(0 - 0)     | --               | --                | 0<br>(0 - 0)       | 0<br>(0 - 0)       | 0<br>(0 - 0)       |
| Hodgkin lymphoma                              | 0<br>(0 - 0)     | 0<br>(0 - 0)     | 0<br>(0 - 0)      | 0<br>(0 - 0)       | 0<br>(0 - 0)       | 0<br>(0 - 0)       |
| Non-Hodgkin lymphoma                          | 2<br>(1 - 3)     | 0<br>(0 - 0)     | 0<br>(0 - 0)      | 1<br>(0 - 1)       | 1<br>(0 - 1)       | 1<br>(0 - 1)       |
| Multiple myeloma                              | 1<br>(0 - 1)     | --               | --                | 0<br>(0 - 0)       | 0<br>(0 - 1)       | 0<br>(0 - 0)       |
| Leukemia                                      | 1<br>(1 - 2)     | 0<br>(0 - 0)     | 0<br>(0 - 0)      | 0<br>(0 - 1)       | 0<br>(0 - 1)       | 0<br>(0 - 1)       |
| Other neoplasms                               | 2<br>(2 - 3)     | 0<br>(0 - 0)     | 0<br>(0 - 0)      | 1<br>(0 - 1)       | 1<br>(1 - 1)       | 1<br>(0 - 1)       |
| Cardiovascular diseases                       | 92<br>(72 - 118) | 0<br>(0 - 0)     | 0<br>(0 - 0)      | 10<br>(6 - 14)     | 31<br>(22 - 42)    | 52<br>(42 - 62)    |
| Rheumatic heart disease                       | 0<br>(0 - 1)     | 0<br>(0 - 0)     | 0<br>(0 - 0)      | 0<br>(0 - 0)       | 0<br>(0 - 0)       | 0<br>(0 - 0)       |
| Ischemic heart disease                        | 41<br>(31 - 54)  | 0<br>(0 - 0)     | 0<br>(0 - 0)      | 5<br>(3 - 7)       | 15<br>(10 - 21)    | 22<br>(16 - 28)    |
| Cerebrovascular disease                       | 34<br>(25 - 43)  | 0<br>(0 - 0)     | 0<br>(0 - 0)      | 3<br>(2 - 4)       | 11<br>(7 - 15)     | 20<br>(16 - 25)    |
| Ischemic stroke                               | 20<br>(15 - 26)  | 0<br>(0 - 0)     | 0<br>(0 - 0)      | 1<br>(0 - 1)       | 6<br>(4 - 8)       | 14<br>(10 - 18)    |
| Hemorrhagic stroke                            | 13<br>(9 - 18)   | 0<br>(0 - 0)     | 0<br>(0 - 0)      | 2<br>(1 - 3)       | 5<br>(3 - 7)       | 6<br>(4 - 9)       |
| Hypertensive heart disease                    | 8<br>(5 - 12)    | 0<br>(0 - 0)     | 0<br>(0 - 0)      | 1<br>(0 - 1)       | 2<br>(2 - 4)       | 5<br>(3 - 7)       |
| Cardiomyopathy and myocarditis                | 3<br>(2 - 4)     | 0<br>(0 - 0)     | 0<br>(0 - 0)      | 1<br>(0 - 1)       | 1<br>(1 - 2)       | 1<br>(1 - 2)       |
| Atrial fibrillation and flutter               | 1<br>(1 - 2)     | --               | --                | 0<br>(0 - 0)       | 0<br>(0 - 0)       | 1<br>(1 - 1)       |
| Aortic aneurysm                               | 1<br>(1 - 2)     | --               | --                | 0<br>(0 - 0)       | 0<br>(0 - 1)       | 1<br>(1 - 1)       |
| Peripheral vascular disease                   | 1<br>(0 - 1)     | --               | --                | 0<br>(0 - 0)       | 0<br>(0 - 0)       | 1<br>(0 - 1)       |
| Endocarditis                                  | 0<br>(0 - 1)     | 0<br>(0 - 0)     | 0<br>(0 - 0)      | 0<br>(0 - 0)       | 0<br>(0 - 0)       | 0<br>(0 - 0)       |
| Other cardiovascular and circulatory diseases | 3<br>(2 - 4)     | 0<br>(0 - 0)     | 0<br>(0 - 0)      | 1<br>(0 - 1)       | 1<br>(1 - 1)       | 2<br>(1 - 2)       |
| Chronic respiratory diseases                  | 11<br>(8 - 14)   | 0<br>(0 - 0)     | 0<br>(0 - 0)      | 1<br>(1 - 2)       | 3<br>(2 - 4)       | 7<br>(5 - 9)       |
| Chronic obstructive pulmonary disease         | 8<br>(6 - 10)    | 0<br>(0 - 0)     | 0<br>(0 - 0)      | 0<br>(0 - 1)       | 2<br>(1 - 3)       | 5<br>(4 - 7)       |

Web Table 31- Antigua and Barbuda deaths with 95% UI by age, sex, and cause in 2013

| Cause                                               | Males, All Ages | Males, 0-4 Years | Males, 5-14 Years | Males, 15-49 Years | Males, 50-69 Years | Males, 70-80 Years |
|-----------------------------------------------------|-----------------|------------------|-------------------|--------------------|--------------------|--------------------|
| Pneumoconiosis                                      | 0<br>(0 - 1)    | 0<br>(0 - 0)     | 0<br>(0 - 0)      | 0<br>(0 - 0)       | 0<br>(0 - 0)       | 0<br>(0 - 0)       |
| Silicosis                                           | 0<br>(0 - 0)    | 0<br>(0 - 0)     | 0<br>(0 - 0)      | 0<br>(0 - 0)       | 0<br>(0 - 0)       | 0<br>(0 - 0)       |
| Asbestosis                                          | 0<br>(0 - 0)    | 0<br>(0 - 0)     | 0<br>(0 - 0)      | 0<br>(0 - 0)       | 0<br>(0 - 0)       | 0<br>(0 - 0)       |
| Coal workers pneumoconiosis                         | 0<br>(0 - 0)    | 0<br>(0 - 0)     | 0<br>(0 - 0)      | 0<br>(0 - 0)       | 0<br>(0 - 0)       | 0<br>(0 - 0)       |
| Other pneumoconiosis                                | 0<br>(0 - 0)    | 0<br>(0 - 0)     | 0<br>(0 - 0)      | 0<br>(0 - 0)       | 0<br>(0 - 0)       | 0<br>(0 - 0)       |
| Asthma                                              | 2<br>(1 - 2)    | 0<br>(0 - 0)     | 0<br>(0 - 0)      | 0<br>(0 - 1)       | 1<br>(0 - 1)       | 1<br>(1 - 1)       |
| Interstitial lung disease and pulmonary sarcoidosis | 1<br>(1 - 1)    | 0<br>(0 - 0)     | 0<br>(0 - 0)      | 0<br>(0 - 0)       | 0<br>(0 - 0)       | 0<br>(0 - 1)       |
| Other chronic respiratory diseases                  | 0<br>(0 - 0)    | 0<br>(0 - 0)     | 0<br>(0 - 0)      | 0<br>(0 - 0)       | 0<br>(0 - 0)       | 0<br>(0 - 0)       |
| Cirrhosis                                           | 7<br>(5 - 10)   | 0<br>(0 - 0)     | 0<br>(0 - 0)      | 2<br>(1 - 3)       | 3<br>(2 - 5)       | 2<br>(1 - 2)       |
| Cirrhosis due to hepatitis B                        | 1<br>(0 - 1)    | 0<br>(0 - 0)     | 0<br>(0 - 0)      | 0<br>(0 - 0)       | 0<br>(0 - 1)       | 0<br>(0 - 0)       |
| Cirrhosis due to hepatitis C                        | 2<br>(1 - 3)    | 0<br>(0 - 0)     | 0<br>(0 - 0)      | 0<br>(0 - 1)       | 1<br>(0 - 2)       | 0<br>(0 - 1)       |
| Cirrhosis due to alcohol use                        | 4<br>(2 - 5)    | --               | --                | 1<br>(1 - 2)       | 2<br>(1 - 3)       | 1<br>(1 - 1)       |
| Cirrhosis due to other causes                       | 1<br>(1 - 2)    | 0<br>(0 - 0)     | 0<br>(0 - 0)      | 1<br>(0 - 1)       | 0<br>(0 - 1)       | 0<br>(0 - 0)       |
| Digestive diseases                                  | 7<br>(5 - 9)    | 0<br>(0 - 0)     | 0<br>(0 - 0)      | 1<br>(1 - 2)       | 2<br>(2 - 3)       | 3<br>(2 - 4)       |
| Peptic ulcer disease                                | 2<br>(1 - 3)    | 0<br>(0 - 0)     | 0<br>(0 - 0)      | 0<br>(0 - 1)       | 1<br>(0 - 1)       | 1<br>(1 - 1)       |
| Gastritis and duodenitis                            | 0<br>(0 - 1)    | 0<br>(0 - 0)     | 0<br>(0 - 0)      | 0<br>(0 - 0)       | 0<br>(0 - 0)       | 0<br>(0 - 0)       |
| Appendicitis                                        | 0<br>(0 - 0)    | 0<br>(0 - 0)     | 0<br>(0 - 0)      | 0<br>(0 - 0)       | 0<br>(0 - 0)       | 0<br>(0 - 0)       |
| Paralytic ileus and intestinal obstruction          | 1<br>(0 - 1)    | 0<br>(0 - 0)     | 0<br>(0 - 0)      | 0<br>(0 - 0)       | 0<br>(0 - 0)       | 0<br>(0 - 1)       |
| Inguinal, femoral, and abdominal hernia             | 0<br>(0 - 1)    | 0<br>(0 - 0)     | 0<br>(0 - 0)      | 0<br>(0 - 0)       | 0<br>(0 - 0)       | 0<br>(0 - 0)       |
| Inflammatory bowel disease                          | 1<br>(0 - 1)    | 0<br>(0 - 0)     | 0<br>(0 - 0)      | 0<br>(0 - 0)       | 0<br>(0 - 0)       | 0<br>(0 - 1)       |
| Vascular intestinal disorders                       | 0<br>(0 - 1)    | 0<br>(0 - 0)     | 0<br>(0 - 0)      | 0<br>(0 - 0)       | 0<br>(0 - 0)       | 0<br>(0 - 0)       |
| Gallbladder and biliary diseases                    | 0<br>(0 - 0)    | 0<br>(0 - 0)     | 0<br>(0 - 0)      | 0<br>(0 - 0)       | 0<br>(0 - 0)       | 0<br>(0 - 0)       |
| Pancreatitis                                        | 1<br>(0 - 1)    | 0<br>(0 - 0)     | 0<br>(0 - 0)      | 0<br>(0 - 0)       | 0<br>(0 - 0)       | 0<br>(0 - 0)       |
| Other digestive diseases                            | 1<br>(0 - 1)    | 0<br>(0 - 0)     | 0<br>(0 - 0)      | 0<br>(0 - 0)       | 0<br>(0 - 0)       | 0<br>(0 - 1)       |
| Neurological disorders                              | 14<br>(11 - 18) | 0<br>(0 - 0)     | 0<br>(0 - 0)      | 1<br>(1 - 1)       | 2<br>(1 - 2)       | 12<br>(9 - 15)     |
| Alzheimer disease and other dementias               | 12<br>(9 - 15)  | --               | --                | 0<br>(0 - 0)       | 1<br>(1 - 1)       | 11<br>(8 - 14)     |
| Parkinson disease                                   | 1<br>(1 - 1)    | --               | --                | 0<br>(0 - 0)       | 0<br>(0 - 0)       | 1<br>(0 - 1)       |
| Epilepsy                                            | 1<br>(1 - 2)    | 0<br>(0 - 0)     | 0<br>(0 - 0)      | 1<br>(0 - 1)       | 0<br>(0 - 0)       | 0<br>(0 - 0)       |
| Multiple sclerosis                                  | 0<br>(0 - 0)    | --               | --                | 0<br>(0 - 0)       | 0<br>(0 - 0)       | 0<br>(0 - 0)       |
| Other neurological disorders                        | 1<br>(0 - 1)    | 0<br>(0 - 0)     | 0<br>(0 - 0)      | 0<br>(0 - 0)       | 0<br>(0 - 0)       | 0<br>(0 - 0)       |
| Mental and substance use disorders                  | 2<br>(1 - 3)    | 0<br>(0 - 0)     | 0<br>(0 - 0)      | 1<br>(0 - 1)       | 1<br>(0 - 1)       | 0<br>(0 - 0)       |
| Schizophrenia                                       | 0<br>(0 - 0)    | --               | --                | 0<br>(0 - 0)       | 0<br>(0 - 0)       | 0<br>(0 - 0)       |
| Alcohol use disorders                               | 1<br>(1 - 2)    | --               | --                | 0<br>(0 - 1)       | 1<br>(0 - 1)       | 0<br>(0 - 0)       |
| Drug use disorders                                  | 1<br>(0 - 1)    | 0<br>(0 - 0)     | --                | 0<br>(0 - 0)       | 0<br>(0 - 0)       | 0<br>(0 - 0)       |
| Opioid use disorders                                | 0<br>(0 - 0)    | 0<br>(0 - 0)     | --                | 0<br>(0 - 0)       | 0<br>(0 - 0)       | 0<br>(0 - 0)       |
| Cocaine use disorders                               | 0<br>(0 - 0)    | 0<br>(0 - 0)     | --                | 0<br>(0 - 0)       | 0<br>(0 - 0)       | 0<br>(0 - 0)       |
| Amphetamine use disorders                           | 0<br>(0 - 0)    | 0<br>(0 - 0)     | --                | 0<br>(0 - 0)       | 0<br>(0 - 0)       | 0<br>(0 - 0)       |
| Other drug use disorders                            | 0<br>(0 - 1)    | --               | --                | 0<br>(0 - 0)       | --                 | --                 |
| Eating disorders                                    | 0<br>(0 - 0)    | --               | 0<br>(0 - 0)      | 0<br>(0 - 0)       | --                 | --                 |
| Anorexia nervosa                                    | 0<br>(0 - 0)    | --               | 0<br>(0 - 0)      | 0<br>(0 - 0)       | --                 | --                 |

Web Table 31- Antigua and Barbuda deaths with 95% UI by age, sex, and cause in 2013

| Cause                                               | Males, All Ages | Males, 0-4 Years | Males, 5-14 Years | Males, 15-49 Years | Males, 50-69 Years | Males, 70-80 Years |
|-----------------------------------------------------|-----------------|------------------|-------------------|--------------------|--------------------|--------------------|
| Diabetes, urogenital, blood, and endocrine diseases | 39<br>(30 - 51) | 0<br>(0 - 1)     | 0<br>(0 - 0)      | 5<br>(3 - 7)       | 14<br>(10 - 19)    | 20<br>(15 - 25)    |
| Diabetes mellitus                                   | 24<br>(18 - 31) | 0<br>(0 - 0)     | 0<br>(0 - 0)      | 2<br>(1 - 3)       | 9<br>(7 - 13)      | 12<br>(10 - 16)    |
| Acute glomerulonephritis                            | 0<br>(0 - 0)    | 0<br>(0 - 0)     | 0<br>(0 - 0)      | 0<br>(0 - 0)       | 0<br>(0 - 0)       | 0<br>(0 - 0)       |
| Chronic kidney disease                              | 10<br>(7 - 14)  | 0<br>(0 - 0)     | 0<br>(0 - 0)      | 2<br>(1 - 2)       | 3<br>(2 - 5)       | 5<br>(3 - 7)       |
| Chronic kidney disease due to diabetes mellitus     | 2<br>(1 - 3)    | 0<br>(0 - 0)     | 0<br>(0 - 0)      | 0<br>(0 - 1)       | 1<br>(0 - 2)       | 1<br>(0 - 1)       |
| Chronic kidney disease due to hypertension          | 5<br>(3 - 7)    | 0<br>(0 - 0)     | 0<br>(0 - 0)      | 1<br>(0 - 1)       | 2<br>(1 - 2)       | 3<br>(2 - 4)       |
| Chronic kidney disease due to glomerulonephritis    | 0<br>(0 - 0)    | 0<br>(0 - 0)     | 0<br>(0 - 0)      | 0<br>(0 - 0)       | 0<br>(0 - 0)       | 0<br>(0 - 0)       |
| Chronic kidney disease due to other causes          | 3<br>(1 - 5)    | 0<br>(0 - 0)     | 0<br>(0 - 0)      | 0<br>(0 - 1)       | 1<br>(0 - 1)       | 2<br>(1 - 3)       |
| Urinary diseases and male infertility               | 2<br>(1 - 3)    | 0<br>(0 - 0)     | 0<br>(0 - 0)      | 0<br>(0 - 0)       | 1<br>(0 - 1)       | 1<br>(1 - 2)       |
| Interstitial nephritis and urinary tract infections | 2<br>(1 - 2)    | 0<br>(0 - 0)     | 0<br>(0 - 0)      | 0<br>(0 - 0)       | 0<br>(0 - 0)       | 1<br>(1 - 2)       |
| Urolithiasis                                        | 0<br>(0 - 0)    | --               | 0<br>(0 - 0)      | 0<br>(0 - 0)       | 0<br>(0 - 0)       | 0<br>(0 - 0)       |
| Other urinary diseases                              | 1<br>(0 - 1)    | 0<br>(0 - 0)     | 0<br>(0 - 0)      | 0<br>(0 - 0)       | 0<br>(0 - 0)       | 0<br>(0 - 1)       |
| Gynecological diseases                              | --              | --               | --                | --                 | --                 | --                 |
| Uterine fibroids                                    | --              | --               | --                | --                 | --                 | --                 |
| Polycystic ovarian syndrome                         | --              | --               | --                | --                 | --                 | --                 |
| Endometriosis                                       | --              | --               | --                | --                 | --                 | --                 |
| Genital prolapse                                    | --              | --               | --                | --                 | --                 | --                 |
| Other gynecological diseases                        | --              | --               | --                | --                 | --                 | --                 |
| Hemoglobinopathies and hemolytic anemias            | 1<br>(0 - 1)    | 0<br>(0 - 0)     | 0<br>(0 - 0)      | 0<br>(0 - 0)       | 0<br>(0 - 0)       | 0<br>(0 - 0)       |
| Thalassemias                                        | 0<br>(0 - 0)    | 0<br>(0 - 0)     | 0<br>(0 - 0)      | 0<br>(0 - 0)       | 0<br>(0 - 0)       | 0<br>(0 - 0)       |
| Sickle cell disorders                               | 0<br>(0 - 1)    | 0<br>(0 - 0)     | 0<br>(0 - 0)      | 0<br>(0 - 0)       | 0<br>(0 - 0)       | 0<br>(0 - 0)       |
| G6PD deficiency                                     | 0<br>(0 - 0)    | 0<br>(0 - 0)     | 0<br>(0 - 0)      | 0<br>(0 - 0)       | 0<br>(0 - 0)       | 0<br>(0 - 0)       |
| Other hemoglobinopathies and hemolytic anemias      | 0<br>(0 - 0)    | 0<br>(0 - 0)     | 0<br>(0 - 0)      | 0<br>(0 - 0)       | 0<br>(0 - 0)       | 0<br>(0 - 0)       |
| Endocrine, metabolic, blood, and immune disorders   | 2<br>(1 - 5)    | 0<br>(0 - 0)     | 0<br>(0 - 0)      | 1<br>(0 - 1)       | 1<br>(0 - 2)       | 1<br>(0 - 2)       |
| Musculoskeletal disorders                           | 1<br>(0 - 1)    | --               | 0<br>(0 - 0)      | 0<br>(0 - 0)       | 0<br>(0 - 0)       | 0<br>(0 - 0)       |
| Rheumatoid arthritis                                | 0<br>(0 - 0)    | --               | 0<br>(0 - 0)      | 0<br>(0 - 0)       | 0<br>(0 - 0)       | 0<br>(0 - 0)       |
| Other musculoskeletal disorders                     | 1<br>(0 - 1)    | --               | 0<br>(0 - 0)      | 0<br>(0 - 0)       | 0<br>(0 - 0)       | 0<br>(0 - 0)       |
| Other non-communicable diseases                     | 4<br>(3 - 7)    | 2<br>(1 - 4)     | 0<br>(0 - 0)      | 1<br>(0 - 1)       | 0<br>(0 - 1)       | 1<br>(1 - 2)       |
| Congenital anomalies                                | 3<br>(1 - 5)    | 2<br>(1 - 4)     | 0<br>(0 - 0)      | 0<br>(0 - 1)       | 0<br>(0 - 0)       | 0<br>(0 - 0)       |
| Neural tube defects                                 | 0<br>(0 - 0)    | 0<br>(0 - 0)     | 0<br>(0 - 0)      | 0<br>(0 - 0)       | 0<br>(0 - 0)       | 0<br>(0 - 0)       |
| Congenital heart anomalies                          | 1<br>(1 - 2)    | 1<br>(0 - 2)     | 0<br>(0 - 0)      | 0<br>(0 - 0)       | 0<br>(0 - 0)       | 0<br>(0 - 0)       |
| Cleft lip and cleft palate                          | 0<br>(0 - 0)    | 0<br>(0 - 0)     | --                | --                 | --                 | --                 |
| Down syndrome                                       | 0<br>(0 - 0)    | 0<br>(0 - 0)     | 0<br>(0 - 0)      | 0<br>(0 - 0)       | 0<br>(0 - 0)       | 0<br>(0 - 0)       |
| Chromosomal unbalanced rearrangements               | 0<br>(0 - 0)    | 0<br>(0 - 0)     | 0<br>(0 - 0)      | 0<br>(0 - 0)       | 0<br>(0 - 0)       | 0<br>(0 - 0)       |
| Other congenital anomalies                          | 1<br>(1 - 2)    | 1<br>(0 - 2)     | 0<br>(0 - 0)      | 0<br>(0 - 0)       | 0<br>(0 - 0)       | 0<br>(0 - 0)       |
| Skin and subcutaneous diseases                      | 2<br>(1 - 2)    | 0<br>(0 - 0)     | 0<br>(0 - 0)      | 0<br>(0 - 0)       | 0<br>(0 - 0)       | 1<br>(0 - 2)       |
| Cellulitis                                          | 0<br>(0 - 0)    | 0<br>(0 - 0)     | 0<br>(0 - 0)      | 0<br>(0 - 0)       | 0<br>(0 - 0)       | 0<br>(0 - 0)       |
| Pyoderma                                            | 0<br>(0 - 1)    | 0<br>(0 - 0)     | 0<br>(0 - 0)      | 0<br>(0 - 0)       | 0<br>(0 - 0)       | 0<br>(0 - 0)       |
| Decubitus ulcer                                     | 1<br>(0 - 1)    | 0<br>(0 - 0)     | 0<br>(0 - 0)      | 0<br>(0 - 0)       | 0<br>(0 - 0)       | 1<br>(0 - 1)       |
| Other skin and subcutaneous diseases                | 0<br>(0 - 0)    | 0<br>(0 - 0)     | 0<br>(0 - 0)      | 0<br>(0 - 0)       | 0<br>(0 - 0)       | 0<br>(0 - 0)       |

Web Table 31- Antigua and Barbuda deaths with 95% UI by age, sex, and cause in 2013

| Cause                                           | Males, All Ages | Males, 0-4 Years | Males, 5-14 Years | Males, 15-49 Years | Males, 50-69 Years | Males, 70-80 Years |
|-------------------------------------------------|-----------------|------------------|-------------------|--------------------|--------------------|--------------------|
| Sudden infant death syndrome                    | 0<br>(0 - 1)    | 0<br>(0 - 1)     | --                | --                 | --                 | --                 |
| Injuries                                        | 33<br>(25 - 44) | 1<br>(0 - 2)     | 1<br>(1 - 2)      | 20<br>(14 - 27)    | 7<br>(5 - 10)      | 4<br>(3 - 5)       |
| Transport injuries                              | 9<br>(6 - 12)   | 0<br>(0 - 0)     | 0<br>(0 - 1)      | 5<br>(3 - 7)       | 2<br>(1 - 3)       | 1<br>(1 - 2)       |
| Road injuries                                   | 8<br>(6 - 11)   | 0<br>(0 - 0)     | 0<br>(0 - 1)      | 5<br>(3 - 7)       | 2<br>(1 - 3)       | 1<br>(1 - 1)       |
| Pedestrian road injuries                        | 2<br>(1 - 3)    | 0<br>(0 - 0)     | 0<br>(0 - 0)      | 1<br>(1 - 1)       | 1<br>(0 - 1)       | 0<br>(0 - 1)       |
| Cyclist road injuries                           | 1<br>(0 - 1)    | 0<br>(0 - 0)     | 0<br>(0 - 0)      | 0<br>(0 - 0)       | 0<br>(0 - 0)       | 0<br>(0 - 0)       |
| Motorcyclist road injuries                      | 1<br>(0 - 1)    | 0<br>(0 - 0)     | 0<br>(0 - 0)      | 1<br>(0 - 1)       | 0<br>(0 - 0)       | 0<br>(0 - 0)       |
| Motor vehicle road injuries                     | 5<br>(3 - 7)    | 0<br>(0 - 0)     | 0<br>(0 - 0)      | 3<br>(2 - 4)       | 1<br>(1 - 2)       | 0<br>(0 - 1)       |
| Other road injuries                             | 0<br>(0 - 0)    | 0<br>(0 - 0)     | 0<br>(0 - 0)      | 0<br>(0 - 0)       | 0<br>(0 - 0)       | 0<br>(0 - 0)       |
| Other transport injuries                        | 1<br>(0 - 1)    | 0<br>(0 - 0)     | 0<br>(0 - 0)      | 0<br>(0 - 1)       | 0<br>(0 - 0)       | 0<br>(0 - 0)       |
| Unintentional injuries                          | 11<br>(8 - 14)  | 1<br>(0 - 1)     | 0<br>(0 - 1)      | 5<br>(3 - 7)       | 2<br>(2 - 3)       | 2<br>(2 - 3)       |
| Falls                                           | 2<br>(1 - 3)    | 0<br>(0 - 0)     | 0<br>(0 - 0)      | 1<br>(0 - 1)       | 0<br>(0 - 1)       | 1<br>(0 - 1)       |
| Drowning                                        | 3<br>(2 - 5)    | 0<br>(0 - 0)     | 0<br>(0 - 0)      | 2<br>(1 - 3)       | 1<br>(0 - 1)       | 0<br>(0 - 0)       |
| Fire, heat, and hot substances                  | 1<br>(1 - 1)    | 0<br>(0 - 0)     | 0<br>(0 - 0)      | 0<br>(0 - 0)       | 0<br>(0 - 0)       | 0<br>(0 - 0)       |
| Poisonings                                      | 0<br>(0 - 0)    | 0<br>(0 - 0)     | 0<br>(0 - 0)      | 0<br>(0 - 0)       | 0<br>(0 - 0)       | 0<br>(0 - 0)       |
| Exposure to mechanical forces                   | 2<br>(1 - 2)    | 0<br>(0 - 0)     | 0<br>(0 - 0)      | 1<br>(1 - 2)       | 0<br>(0 - 1)       | 0<br>(0 - 0)       |
| Unintentional firearm injuries                  | 1<br>(1 - 1)    | 0<br>(0 - 0)     | 0<br>(0 - 0)      | 1<br>(0 - 1)       | 0<br>(0 - 0)       | 0<br>(0 - 0)       |
| Unintentional suffocation                       | 0<br>(0 - 0)    | 0<br>(0 - 0)     | 0<br>(0 - 0)      | 0<br>(0 - 0)       | 0<br>(0 - 0)       | 0<br>(0 - 0)       |
| Other exposure to mechanical forces             | 1<br>(0 - 1)    | 0<br>(0 - 0)     | 0<br>(0 - 0)      | 0<br>(0 - 1)       | 0<br>(0 - 0)       | 0<br>(0 - 0)       |
| Adverse effects of medical treatment            | 1<br>(1 - 1)    | 0<br>(0 - 0)     | 0<br>(0 - 0)      | 0<br>(0 - 0)       | 0<br>(0 - 0)       | 0<br>(0 - 1)       |
| Animal contact                                  | 0<br>(0 - 0)    | 0<br>(0 - 0)     | 0<br>(0 - 0)      | 0<br>(0 - 0)       | 0<br>(0 - 0)       | 0<br>(0 - 0)       |
| Venomous animal contact                         | 0<br>(0 - 0)    | 0<br>(0 - 0)     | 0<br>(0 - 0)      | 0<br>(0 - 0)       | 0<br>(0 - 0)       | 0<br>(0 - 0)       |
| Non-venomous animal contact                     | 0<br>(0 - 0)    | 0<br>(0 - 0)     | 0<br>(0 - 0)      | 0<br>(0 - 0)       | 0<br>(0 - 0)       | 0<br>(0 - 0)       |
| Foreign body                                    | 1<br>(1 - 2)    | 0<br>(0 - 1)     | 0<br>(0 - 0)      | 0<br>(0 - 1)       | 0<br>(0 - 0)       | 0<br>(0 - 1)       |
| Pulmonary aspiration and foreign body in airway | 1<br>(1 - 2)    | 0<br>(0 - 1)     | 0<br>(0 - 0)      | 0<br>(0 - 1)       | 0<br>(0 - 0)       | 0<br>(0 - 1)       |
| Foreign body in other body part                 | 0<br>(0 - 0)    | 0<br>(0 - 0)     | 0<br>(0 - 0)      | 0<br>(0 - 0)       | 0<br>(0 - 0)       | 0<br>(0 - 0)       |
| Other unintentional injuries                    | 0<br>(0 - 1)    | 0<br>(0 - 0)     | 0<br>(0 - 0)      | 0<br>(0 - 0)       | 0<br>(0 - 0)       | 0<br>(0 - 0)       |
| Self-harm and interpersonal violence            | 13<br>(9 - 18)  | 0<br>(0 - 0)     | 0<br>(0 - 0)      | 9<br>(6 - 14)      | 2<br>(2 - 4)       | 1<br>(1 - 1)       |
| Self-harm                                       | 6<br>(4 - 9)    | --               | 0<br>(0 - 0)      | 4<br>(3 - 6)       | 1<br>(1 - 2)       | 1<br>(0 - 1)       |
| Interpersonal violence                          | 7<br>(4 - 10)   | 0<br>(0 - 0)     | 0<br>(0 - 0)      | 5<br>(3 - 8)       | 1<br>(1 - 2)       | 0<br>(0 - 0)       |
| Assault by firearm                              | 4<br>(2 - 6)    | 0<br>(0 - 0)     | 0<br>(0 - 0)      | 3<br>(2 - 5)       | 0<br>(0 - 1)       | 0<br>(0 - 0)       |
| Assault by sharp object                         | 2<br>(1 - 3)    | 0<br>(0 - 0)     | 0<br>(0 - 0)      | 1<br>(1 - 2)       | 0<br>(0 - 0)       | 0<br>(0 - 0)       |
| Assault by other means                          | 1<br>(1 - 2)    | 0<br>(0 - 0)     | 0<br>(0 - 0)      | 1<br>(0 - 1)       | 0<br>(0 - 1)       | 0<br>(0 - 0)       |

Web Table 31- Antigua and Barbuda deaths with 95% UI by age, sex, and cause in 2013

| Cause                                                             | Females, All Ages  | Females, 0-4 Years | Females, 5-14 Years | Females, 15-49 Years | Females, 50-69 Years | Females, 70-80 Years |
|-------------------------------------------------------------------|--------------------|--------------------|---------------------|----------------------|----------------------|----------------------|
| All causes                                                        | 271<br>(214 - 344) | 10<br>(4 - 20)     | 2<br>(1 - 3)        | 30<br>(21 - 43)      | 56<br>(37 - 77)      | 173<br>(143 - 212)   |
| Communicable, maternal, neonatal, and nutritional diseases        | 28<br>(22 - 37)    | 7<br>(3 - 14)      | 0<br>(0 - 1)        | 5<br>(4 - 6)         | 3<br>(2 - 3)         | 14<br>(10 - 19)      |
| HIV/AIDS and tuberculosis                                         | 3<br>(3 - 4)       | 0<br>(0 - 0)       | 0<br>(0 - 0)        | 2<br>(2 - 3)         | 1<br>(0 - 1)         | 0<br>(0 - 0)         |
| Tuberculosis                                                      | 1<br>(0 - 1)       | 0<br>(0 - 0)       | 0<br>(0 - 0)        | 0<br>(0 - 0)         | 0<br>(0 - 0)         | 0<br>(0 - 0)         |
| HIV/AIDS                                                          | 3<br>(2 - 4)       | 0<br>(0 - 0)       | 0<br>(0 - 0)        | 2<br>(2 - 3)         | 1<br>(0 - 1)         | 0<br>(0 - 0)         |
| HIV/AIDS resulting in mycobacterial infection                     | 0<br>(0 - 0)       | 0<br>(0 - 0)       | 0<br>(0 - 0)        | 0<br>(0 - 0)         | 0<br>(0 - 0)         | 0<br>(0 - 0)         |
| HIV/AIDS resulting in other diseases                              | 3<br>(2 - 4)       | 0<br>(0 - 0)       | 0<br>(0 - 0)        | 2<br>(2 - 3)         | 0<br>(0 - 1)         | 0<br>(0 - 0)         |
| Diarrhea, lower respiratory, and other common infectious diseases | 16<br>(11 - 21)    | 2<br>(1 - 3)       | 0<br>(0 - 0)        | 1<br>(1 - 2)         | 1<br>(1 - 2)         | 11<br>(8 - 16)       |
| Diarrheal diseases                                                | 1<br>(1 - 2)       | 0<br>(0 - 1)       | 0<br>(0 - 0)        | 0<br>(0 - 0)         | 0<br>(0 - 0)         | 1<br>(0 - 1)         |
| Intestinal infectious diseases                                    | 0<br>(0 - 1)       | 0<br>(0 - 0)       | 0<br>(0 - 0)        | 0<br>(0 - 0)         | 0<br>(0 - 0)         | 0<br>(0 - 0)         |
| Typhoid fever                                                     | 0<br>(0 - 0)       | 0<br>(0 - 0)       | 0<br>(0 - 0)        | 0<br>(0 - 0)         | 0<br>(0 - 0)         | 0<br>(0 - 0)         |
| Paratyphoid fever                                                 | 0<br>(0 - 0)       | 0<br>(0 - 0)       | 0<br>(0 - 0)        | 0<br>(0 - 0)         | 0<br>(0 - 0)         | 0<br>(0 - 0)         |
| Other intestinal infectious diseases                              | 0<br>(0 - 0)       | 0<br>(0 - 0)       | 0<br>(0 - 0)        | 0<br>(0 - 0)         | 0<br>(0 - 0)         | 0<br>(0 - 0)         |
| Lower respiratory infections                                      | 13<br>(9 - 18)     | 1<br>(0 - 2)       | 0<br>(0 - 0)        | 1<br>(0 - 1)         | 1<br>(1 - 2)         | 10<br>(7 - 15)       |
| Upper respiratory infections                                      | 0<br>(0 - 0)       | 0<br>(0 - 0)       | 0<br>(0 - 0)        | 0<br>(0 - 0)         | 0<br>(0 - 0)         | 0<br>(0 - 0)         |
| Otitis media                                                      | 0<br>(0 - 0)       | 0<br>(0 - 0)       | 0<br>(0 - 0)        | 0<br>(0 - 0)         | 0<br>(0 - 0)         | 0<br>(0 - 0)         |
| Meningitis                                                        | 0<br>(0 - 1)       | 0<br>(0 - 0)       | 0<br>(0 - 0)        | 0<br>(0 - 0)         | 0<br>(0 - 0)         | 0<br>(0 - 0)         |
| Pneumococcal meningitis                                           | 0<br>(0 - 0)       | 0<br>(0 - 0)       | 0<br>(0 - 0)        | 0<br>(0 - 0)         | 0<br>(0 - 0)         | 0<br>(0 - 0)         |
| H influenzae type B meningitis                                    | 0<br>(0 - 0)       | 0<br>(0 - 0)       | 0<br>(0 - 0)        | 0<br>(0 - 0)         | 0<br>(0 - 0)         | 0<br>(0 - 0)         |
| Meningococcal meningitis                                          | 0<br>(0 - 0)       | 0<br>(0 - 0)       | 0<br>(0 - 0)        | 0<br>(0 - 0)         | 0<br>(0 - 0)         | 0<br>(0 - 0)         |
| Other meningitis                                                  | 0<br>(0 - 0)       | 0<br>(0 - 0)       | 0<br>(0 - 0)        | 0<br>(0 - 0)         | 0<br>(0 - 0)         | 0<br>(0 - 0)         |
| Encephalitis                                                      | 0<br>(0 - 0)       | 0<br>(0 - 0)       | 0<br>(0 - 0)        | 0<br>(0 - 0)         | 0<br>(0 - 0)         | 0<br>(0 - 0)         |
| Diphtheria                                                        | 0<br>(0 - 0)       | 0<br>(0 - 0)       | 0<br>(0 - 0)        | 0<br>(0 - 0)         | 0<br>(0 - 0)         | --                   |
| Whooping cough                                                    | 0<br>(0 - 0)       | 0<br>(0 - 0)       | 0<br>(0 - 0)        | 0<br>(0 - 0)         | 0<br>(0 - 0)         | --                   |
| Tetanus                                                           | 0<br>(0 - 0)       | 0<br>(0 - 0)       | 0<br>(0 - 0)        | 0<br>(0 - 0)         | 0<br>(0 - 0)         | 0<br>(0 - 0)         |
| Measles                                                           | 0<br>(0 - 0)       | 0<br>(0 - 0)       | 0<br>(0 - 0)        | 0<br>(0 - 0)         | 0<br>(0 - 0)         | --                   |
| Varicella and herpes zoster                                       | 0<br>(0 - 0)       | 0<br>(0 - 0)       | 0<br>(0 - 0)        | 0<br>(0 - 0)         | 0<br>(0 - 0)         | 0<br>(0 - 0)         |
| Neglected tropical diseases and malaria                           | 0<br>(0 - 0)       | 0<br>(0 - 0)       | 0<br>(0 - 0)        | 0<br>(0 - 0)         | 0<br>(0 - 0)         | 0<br>(0 - 0)         |
| Leishmaniasis                                                     | 0<br>(0 - 0)       | 0<br>(0 - 0)       | 0<br>(0 - 0)        | 0<br>(0 - 0)         | 0<br>(0 - 0)         | 0<br>(0 - 0)         |
| Visceral leishmaniasis                                            | 0<br>(0 - 0)       | 0<br>(0 - 0)       | 0<br>(0 - 0)        | 0<br>(0 - 0)         | 0<br>(0 - 0)         | 0<br>(0 - 0)         |
| Schistosomiasis                                                   | 0<br>(0 - 0)       | 0<br>(0 - 0)       | 0<br>(0 - 0)        | 0<br>(0 - 0)         | 0<br>(0 - 0)         | 0<br>(0 - 0)         |
| Cysticercosis                                                     | 0<br>(0 - 0)       | 0<br>(0 - 0)       | 0<br>(0 - 0)        | 0<br>(0 - 0)         | 0<br>(0 - 0)         | 0<br>(0 - 0)         |
| Cystic echinococcosis                                             | 0<br>(0 - 0)       | 0<br>(0 - 0)       | 0<br>(0 - 0)        | 0<br>(0 - 0)         | 0<br>(0 - 0)         | 0<br>(0 - 0)         |
| Dengue                                                            | 0<br>(0 - 0)       | 0<br>(0 - 0)       | 0<br>(0 - 0)        | 0<br>(0 - 0)         | 0<br>(0 - 0)         | 0<br>(0 - 0)         |
| Rabies                                                            | 0<br>(0 - 0)       | 0<br>(0 - 0)       | 0<br>(0 - 0)        | 0<br>(0 - 0)         | 0<br>(0 - 0)         | 0<br>(0 - 0)         |
| Intestinal nematode infections                                    | 0<br>(0 - 0)       | 0<br>(0 - 0)       | 0<br>(0 - 0)        | 0<br>(0 - 0)         | 0<br>(0 - 0)         | 0<br>(0 - 0)         |
| Ascariasis                                                        | 0<br>(0 - 0)       | 0<br>(0 - 0)       | 0<br>(0 - 0)        | 0<br>(0 - 0)         | 0<br>(0 - 0)         | 0<br>(0 - 0)         |
| Other neglected tropical diseases                                 | 0<br>(0 - 0)       | 0<br>(0 - 0)       | 0<br>(0 - 0)        | 0<br>(0 - 0)         | 0<br>(0 - 0)         | 0<br>(0 - 0)         |
| Maternal disorders                                                | 1<br>(0 - 1)       | --                 | 0<br>(0 - 0)        | 1<br>(0 - 1)         | --                   | --                   |
| Maternal hemorrhage                                               | 0<br>(0 - 0)       | --                 | 0<br>(0 - 0)        | 0<br>(0 - 0)         | --                   | --                   |

Web Table 31- Antigua and Barbuda deaths with 95% UI by age, sex, and cause in 2013

| Cause                                                            | Females, All Ages | Females, 0-4 Years | Females, 5-14 Years | Females, 15-49 Years | Females, 50-69 Years | Females, 70-80 Years |
|------------------------------------------------------------------|-------------------|--------------------|---------------------|----------------------|----------------------|----------------------|
| Maternal sepsis and other maternal infections                    | 0<br>(0-0)        | --                 | 0<br>(0-0)          | 0<br>(0-0)           | --                   | --                   |
| Maternal hypertensive disorders                                  | 0<br>(0-0)        | --                 | 0<br>(0-0)          | 0<br>(0-0)           | --                   | --                   |
| Maternal obstructed labor                                        | 0<br>(0-0)        | --                 | 0<br>(0-0)          | 0<br>(0-0)           | --                   | --                   |
| Maternal abortive outcome                                        | 0<br>(0-0)        | --                 | 0<br>(0-0)          | 0<br>(0-0)           | --                   | --                   |
| Indirect maternal deaths                                         | 0<br>(0-0)        | --                 | 0<br>(0-0)          | 0<br>(0-0)           | --                   | --                   |
| Late maternal deaths                                             | 0<br>(0-0)        | --                 | 0<br>(0-0)          | 0<br>(0-0)           | --                   | --                   |
| Maternal deaths aggravated by HIV/AIDS                           | 0<br>(0-0)        | --                 | 0<br>(0-0)          | 0<br>(0-0)           | --                   | --                   |
| Other maternal disorders                                         | 0<br>(0-0)        | --                 | 0<br>(0-0)          | 0<br>(0-0)           | --                   | --                   |
| Neonatal disorders                                               | 5<br>(2-9)        | 5<br>(2-9)         | --                  | --                   | --                   | --                   |
| Neonatal preterm birth complications                             | 2<br>(1-5)        | 2<br>(1-5)         | --                  | --                   | --                   | --                   |
| Neonatal encephalopathy due to birth asphyxia and trauma         | 1<br>(0-2)        | 1<br>(0-2)         | --                  | --                   | --                   | --                   |
| Neonatal sepsis and other neonatal infections                    | 1<br>(0-2)        | 1<br>(0-2)         | --                  | --                   | --                   | --                   |
| Hemolytic disease and other neonatal jaundice                    | 0<br>(0-0)        | 0<br>(0-0)         | --                  | --                   | --                   | --                   |
| Other neonatal disorders                                         | 1<br>(0-1)        | 1<br>(0-1)         | --                  | --                   | --                   | --                   |
| Nutritional deficiencies                                         | 3<br>(2-4)        | 0<br>(0-1)         | 0<br>(0-0)          | 0<br>(0-1)           | 0<br>(0-0)           | 2<br>(1-3)           |
| Protein-energy malnutrition                                      | 1<br>(1-2)        | 0<br>(0-1)         | 0<br>(0-0)          | 0<br>(0-0)           | 0<br>(0-0)           | 1<br>(0-1)           |
| Iodine deficiency                                                | 0<br>(0-0)        | 0<br>(0-0)         | 0<br>(0-0)          | 0<br>(0-0)           | 0<br>(0-0)           | 0<br>(0-0)           |
| Iron-deficiency anemia                                           | 2<br>(1-3)        | 0<br>(0-0)         | 0<br>(0-0)          | 0<br>(0-0)           | 0<br>(0-0)           | 1<br>(1-2)           |
| Other nutritional deficiencies                                   | 0<br>(0-0)        | 0<br>(0-0)         | 0<br>(0-0)          | 0<br>(0-0)           | 0<br>(0-0)           | 0<br>(0-0)           |
| Other communicable, maternal, neonatal, and nutritional diseases | 1<br>(0-1)        | 0<br>(0-0)         | 0<br>(0-0)          | 0<br>(0-0)           | 0<br>(0-0)           | 0<br>(0-0)           |
| Sexually transmitted diseases excluding HIV                      | 0<br>(0-0)        | 0<br>(0-0)         | 0<br>(0-0)          | 0<br>(0-0)           | 0<br>(0-0)           | 0<br>(0-0)           |
| Syphilis                                                         | 0<br>(0-0)        | 0<br>(0-0)         | 0<br>(0-0)          | 0<br>(0-0)           | 0<br>(0-0)           | 0<br>(0-0)           |
| Chlamydial infection                                             | 0<br>(0-0)        | --                 | 0<br>(0-0)          | 0<br>(0-0)           | 0<br>(0-0)           | 0<br>(0-0)           |
| Gonococcal infection                                             | 0<br>(0-0)        | --                 | 0<br>(0-0)          | 0<br>(0-0)           | 0<br>(0-0)           | 0<br>(0-0)           |
| Other sexually transmitted diseases                              | 0<br>(0-0)        | --                 | 0<br>(0-0)          | 0<br>(0-0)           | 0<br>(0-0)           | 0<br>(0-0)           |
| Hepatitis                                                        | 0<br>(0-0)        | 0<br>(0-0)         | 0<br>(0-0)          | 0<br>(0-0)           | 0<br>(0-0)           | 0<br>(0-0)           |
| Acute hepatitis A                                                | 0<br>(0-0)        | 0<br>(0-0)         | 0<br>(0-0)          | 0<br>(0-0)           | 0<br>(0-0)           | 0<br>(0-0)           |
| Acute hepatitis B                                                | 0<br>(0-0)        | 0<br>(0-0)         | 0<br>(0-0)          | 0<br>(0-0)           | 0<br>(0-0)           | 0<br>(0-0)           |
| Acute hepatitis C                                                | 0<br>(0-0)        | --                 | 0<br>(0-0)          | 0<br>(0-0)           | 0<br>(0-0)           | 0<br>(0-0)           |
| Other infectious diseases                                        | 0<br>(0-1)        | 0<br>(0-0)         | 0<br>(0-0)          | 0<br>(0-0)           | 0<br>(0-0)           | 0<br>(0-0)           |
| Non-communicable diseases                                        | 230<br>(180-296)  | 3<br>(1-5)         | 1<br>(0-1)          | 21<br>(14-31)        | 51<br>(34-72)        | 155<br>(128-190)     |
| Neoplasms                                                        | 43<br>(31-58)     | 0<br>(0-0)         | 0<br>(0-0)          | 7<br>(5-11)          | 14<br>(9-20)         | 21<br>(16-27)        |
| Esophageal cancer                                                | 1<br>(0-1)        | --                 | --                  | 0<br>(0-0)           | 0<br>(0-0)           | 0<br>(0-1)           |
| Stomach cancer                                                   | 2<br>(2-3)        | --                 | --                  | 0<br>(0-0)           | 1<br>(0-1)           | 2<br>(1-2)           |
| Liver cancer                                                     | 1<br>(1-2)        | --                 | 0<br>(0-0)          | 0<br>(0-0)           | 0<br>(0-1)           | 1<br>(1-1)           |
| Liver cancer due to hepatitis B                                  | 0<br>(0-0)        | --                 | 0<br>(0-0)          | 0<br>(0-0)           | 0<br>(0-0)           | 0<br>(0-0)           |
| Liver cancer due to hepatitis C                                  | 1<br>(0-1)        | --                 | 0<br>(0-0)          | 0<br>(0-0)           | 0<br>(0-0)           | 0<br>(0-1)           |
| Liver cancer due to alcohol use                                  | 0<br>(0-0)        | --                 | --                  | 0<br>(0-0)           | 0<br>(0-0)           | 0<br>(0-0)           |
| Liver cancer due to other causes                                 | 0<br>(0-0)        | --                 | 0<br>(0-0)          | 0<br>(0-0)           | 0<br>(0-0)           | 0<br>(0-0)           |
| Larynx cancer                                                    | 0<br>(0-0)        | --                 | --                  | 0<br>(0-0)           | 0<br>(0-0)           | 0<br>(0-0)           |

Web Table 31- Antigua and Barbuda deaths with 95% UI by age, sex, and cause in 2013

| Cause                                         | Females, All Ages | Females, 0-4 Years | Females, 5-14 Years | Females, 15-49 Years | Females, 50-69 Years | Females, 70-80 Years |
|-----------------------------------------------|-------------------|--------------------|---------------------|----------------------|----------------------|----------------------|
| Tracheal, bronchus and lung cancer            | 2<br>(2 - 3)      | --                 | --                  | 0<br>(0 - 0)         | 1<br>(1 - 1)         | 1<br>(1 - 2)         |
| Breast cancer                                 | 9<br>(6 - 13)     | --                 | --                  | 2<br>(2 - 4)         | 3<br>(2 - 5)         | 3<br>(2 - 5)         |
| Cervical cancer                               | 5<br>(4 - 8)      | --                 | --                  | 1<br>(1 - 2)         | 2<br>(1 - 3)         | 2<br>(1 - 3)         |
| Uterine cancer                                | 2<br>(1 - 3)      | --                 | --                  | 0<br>(0 - 0)         | 1<br>(0 - 1)         | 1<br>(1 - 2)         |
| Prostate cancer                               | --                | --                 | --                  | --                   | --                   | --                   |
| Colon and rectum cancer                       | 5<br>(4 - 7)      | --                 | --                  | 0<br>(0 - 1)         | 1<br>(1 - 2)         | 4<br>(3 - 5)         |
| Lip and oral cavity cancer                    | 0<br>(0 - 1)      | --                 | --                  | 0<br>(0 - 0)         | 0<br>(0 - 0)         | 0<br>(0 - 0)         |
| Nasopharynx cancer                            | 0<br>(0 - 0)      | --                 | 0<br>(0 - 0)        | 0<br>(0 - 0)         | 0<br>(0 - 0)         | 0<br>(0 - 0)         |
| Other pharynx cancer                          | 0<br>(0 - 0)      | --                 | --                  | 0<br>(0 - 0)         | 0<br>(0 - 0)         | 0<br>(0 - 0)         |
| Gallbladder and biliary tract cancer          | 1<br>(0 - 1)      | --                 | --                  | 0<br>(0 - 0)         | 0<br>(0 - 0)         | 1<br>(0 - 1)         |
| Pancreatic cancer                             | 2<br>(1 - 3)      | --                 | --                  | 0<br>(0 - 0)         | 1<br>(0 - 1)         | 1<br>(1 - 2)         |
| Malignant skin melanoma                       | 0<br>(0 - 0)      | --                 | --                  | 0<br>(0 - 0)         | 0<br>(0 - 0)         | 0<br>(0 - 0)         |
| Non-melanoma skin cancer                      | 0<br>(0 - 0)      | --                 | --                  | 0<br>(0 - 0)         | 0<br>(0 - 0)         | 0<br>(0 - 0)         |
| Ovarian cancer                                | 2<br>(2 - 3)      | --                 | --                  | 0<br>(0 - 1)         | 1<br>(1 - 1)         | 1<br>(1 - 1)         |
| Testicular cancer                             | --                | --                 | --                  | --                   | --                   | --                   |
| Kidney cancer                                 | 1<br>(0 - 1)      | 0<br>(0 - 0)       | 0<br>(0 - 0)        | 0<br>(0 - 0)         | 0<br>(0 - 0)         | 0<br>(0 - 0)         |
| Bladder cancer                                | 0<br>(0 - 1)      | --                 | --                  | 0<br>(0 - 0)         | 0<br>(0 - 0)         | 0<br>(0 - 1)         |
| Brain and nervous system cancer               | 1<br>(0 - 1)      | 0<br>(0 - 0)       | 0<br>(0 - 0)        | 0<br>(0 - 0)         | 0<br>(0 - 0)         | 0<br>(0 - 0)         |
| Thyroid cancer                                | 0<br>(0 - 0)      | --                 | 0<br>(0 - 0)        | 0<br>(0 - 0)         | 0<br>(0 - 0)         | 0<br>(0 - 0)         |
| Mesothelioma                                  | 0<br>(0 - 0)      | --                 | --                  | 0<br>(0 - 0)         | 0<br>(0 - 0)         | 0<br>(0 - 0)         |
| Hodgkin lymphoma                              | 0<br>(0 - 0)      | 0<br>(0 - 0)       | 0<br>(0 - 0)        | 0<br>(0 - 0)         | 0<br>(0 - 0)         | 0<br>(0 - 0)         |
| Non-Hodgkin lymphoma                          | 2<br>(1 - 2)      | 0<br>(0 - 0)       | 0<br>(0 - 0)        | 0<br>(0 - 1)         | 1<br>(0 - 1)         | 1<br>(0 - 1)         |
| Multiple myeloma                              | 1<br>(0 - 1)      | --                 | --                  | 0<br>(0 - 0)         | 0<br>(0 - 0)         | 0<br>(0 - 1)         |
| Leukemia                                      | 1<br>(1 - 2)      | 0<br>(0 - 0)       | 0<br>(0 - 0)        | 0<br>(0 - 1)         | 0<br>(0 - 0)         | 0<br>(0 - 1)         |
| Other neoplasms                               | 3<br>(2 - 4)      | 0<br>(0 - 0)       | 0<br>(0 - 0)        | 1<br>(0 - 1)         | 1<br>(0 - 1)         | 1<br>(1 - 1)         |
| Cardiovascular diseases                       | 106<br>(83 - 137) | 0<br>(0 - 0)       | 0<br>(0 - 0)        | 6<br>(4 - 9)         | 19<br>(13 - 27)      | 81<br>(66 - 101)     |
| Rheumatic heart disease                       | 1<br>(0 - 1)      | 0<br>(0 - 0)       | 0<br>(0 - 0)        | 0<br>(0 - 0)         | 0<br>(0 - 0)         | 0<br>(0 - 0)         |
| Ischemic heart disease                        | 43<br>(31 - 57)   | 0<br>(0 - 0)       | 0<br>(0 - 0)        | 2<br>(1 - 3)         | 8<br>(5 - 12)        | 33<br>(25 - 44)      |
| Cerebrovascular disease                       | 38<br>(28 - 53)   | 0<br>(0 - 0)       | 0<br>(0 - 0)        | 2<br>(1 - 3)         | 7<br>(5 - 11)        | 29<br>(22 - 40)      |
| Ischemic stroke                               | 23<br>(17 - 33)   | 0<br>(0 - 0)       | 0<br>(0 - 0)        | 0<br>(0 - 1)         | 3<br>(2 - 5)         | 20<br>(15 - 27)      |
| Hemorrhagic stroke                            | 15<br>(10 - 21)   | 0<br>(0 - 0)       | 0<br>(0 - 0)        | 1<br>(1 - 2)         | 4<br>(2 - 6)         | 9<br>(7 - 13)        |
| Hypertensive heart disease                    | 13<br>(8 - 19)    | 0<br>(0 - 0)       | 0<br>(0 - 0)        | 1<br>(0 - 1)         | 2<br>(1 - 3)         | 11<br>(6 - 15)       |
| Cardiomyopathy and myocarditis                | 2<br>(2 - 3)      | 0<br>(0 - 0)       | 0<br>(0 - 0)        | 0<br>(0 - 1)         | 0<br>(0 - 1)         | 1<br>(1 - 2)         |
| Atrial fibrillation and flutter               | 2<br>(1 - 3)      | --                 | --                  | 0<br>(0 - 0)         | 0<br>(0 - 0)         | 2<br>(1 - 3)         |
| Aortic aneurysm                               | 1<br>(1 - 2)      | --                 | --                  | 0<br>(0 - 0)         | 0<br>(0 - 0)         | 1<br>(0 - 1)         |
| Peripheral vascular disease                   | 1<br>(1 - 1)      | --                 | --                  | 0<br>(0 - 0)         | 0<br>(0 - 0)         | 1<br>(0 - 1)         |
| Endocarditis                                  | 0<br>(0 - 1)      | 0<br>(0 - 0)       | 0<br>(0 - 0)        | 0<br>(0 - 0)         | 0<br>(0 - 0)         | 0<br>(0 - 0)         |
| Other cardiovascular and circulatory diseases | 4<br>(3 - 6)      | 0<br>(0 - 0)       | 0<br>(0 - 0)        | 1<br>(0 - 1)         | 1<br>(1 - 2)         | 3<br>(2 - 4)         |
| Chronic respiratory diseases                  | 5<br>(4 - 7)      | 0<br>(0 - 0)       | 0<br>(0 - 0)        | 1<br>(0 - 1)         | 1<br>(1 - 2)         | 3<br>(2 - 5)         |
| Chronic obstructive pulmonary disease         | 3<br>(2 - 4)      | 0<br>(0 - 0)       | 0<br>(0 - 0)        | 0<br>(0 - 0)         | 1<br>(0 - 1)         | 2<br>(2 - 3)         |



Web Table 31- Antigua and Barbuda deaths with 95% UI by age, sex, and cause in 2013

| Cause                                               | Females, All Ages | Females, 0-4 Years | Females, 5-14 Years | Females, 15-49 Years | Females, 50-69 Years | Females, 70-80 Years |
|-----------------------------------------------------|-------------------|--------------------|---------------------|----------------------|----------------------|----------------------|
| Pneumoconiosis                                      | 0<br>(0-0)        | 0<br>(0-0)         | 0<br>(0-0)          | 0<br>(0-0)           | 0<br>(0-0)           | 0<br>(0-0)           |
| Silicosis                                           | 0<br>(0-0)        | 0<br>(0-0)         | 0<br>(0-0)          | 0<br>(0-0)           | 0<br>(0-0)           | 0<br>(0-0)           |
| Asbestosis                                          | 0<br>(0-0)        | 0<br>(0-0)         | 0<br>(0-0)          | 0<br>(0-0)           | 0<br>(0-0)           | 0<br>(0-0)           |
| Coal workers pneumoconiosis                         | 0<br>(0-0)        | 0<br>(0-0)         | 0<br>(0-0)          | 0<br>(0-0)           | 0<br>(0-0)           | 0<br>(0-0)           |
| Other pneumoconiosis                                | 0<br>(0-0)        | 0<br>(0-0)         | 0<br>(0-0)          | 0<br>(0-0)           | 0<br>(0-0)           | 0<br>(0-0)           |
| Asthma                                              | 1<br>(1-2)        | 0<br>(0-0)         | 0<br>(0-0)          | 0<br>(0-0)           | 0<br>(0-1)           | 1<br>(0-1)           |
| Interstitial lung disease and pulmonary sarcoidosis | 0<br>(0-1)        | 0<br>(0-0)         | 0<br>(0-0)          | 0<br>(0-0)           | 0<br>(0-0)           | 0<br>(0-0)           |
| Other chronic respiratory diseases                  | 0<br>(0-0)        | 0<br>(0-0)         | 0<br>(0-0)          | 0<br>(0-0)           | 0<br>(0-0)           | 0<br>(0-0)           |
| Cirrhosis                                           | 3<br>(2-4)        | 0<br>(0-0)         | 0<br>(0-0)          | 1<br>(1-1)           | 1<br>(1-2)           | 1<br>(1-2)           |
| Cirrhosis due to hepatitis B                        | 0<br>(0-1)        | 0<br>(0-0)         | 0<br>(0-0)          | 0<br>(0-0)           | 0<br>(0-0)           | 0<br>(0-0)           |
| Cirrhosis due to hepatitis C                        | 2<br>(1-2)        | 0<br>(0-0)         | 0<br>(0-0)          | 0<br>(0-1)           | 1<br>(0-1)           | 1<br>(0-1)           |
| Cirrhosis due to alcohol use                        | 1<br>(0-1)        | --                 | --                  | 0<br>(0-0)           | 0<br>(0-0)           | 0<br>(0-1)           |
| Cirrhosis due to other causes                       | 1<br>(0-1)        | 0<br>(0-0)         | 0<br>(0-0)          | 0<br>(0-0)           | 0<br>(0-0)           | 0<br>(0-0)           |
| Digestive diseases                                  | 6<br>(4-7)        | 0<br>(0-0)         | 0<br>(0-0)          | 1<br>(0-1)           | 1<br>(1-2)           | 4<br>(3-5)           |
| Peptic ulcer disease                                | 1<br>(1-2)        | 0<br>(0-0)         | 0<br>(0-0)          | 0<br>(0-0)           | 0<br>(0-0)           | 1<br>(0-1)           |
| Gastritis and duodenitis                            | 0<br>(0-1)        | 0<br>(0-0)         | 0<br>(0-0)          | 0<br>(0-0)           | 0<br>(0-0)           | 0<br>(0-0)           |
| Appendicitis                                        | 0<br>(0-0)        | 0<br>(0-0)         | 0<br>(0-0)          | 0<br>(0-0)           | 0<br>(0-0)           | 0<br>(0-0)           |
| Paralytic ileus and intestinal obstruction          | 1<br>(0-1)        | 0<br>(0-0)         | 0<br>(0-0)          | 0<br>(0-0)           | 0<br>(0-0)           | 1<br>(0-1)           |
| Inguinal, femoral, and abdominal hernia             | 0<br>(0-1)        | 0<br>(0-0)         | 0<br>(0-0)          | 0<br>(0-0)           | 0<br>(0-0)           | 0<br>(0-0)           |
| Inflammatory bowel disease                          | 1<br>(0-1)        | 0<br>(0-0)         | 0<br>(0-0)          | 0<br>(0-0)           | 0<br>(0-0)           | 0<br>(0-1)           |
| Vascular intestinal disorders                       | 0<br>(0-1)        | 0<br>(0-0)         | 0<br>(0-0)          | 0<br>(0-0)           | 0<br>(0-0)           | 0<br>(0-0)           |
| Gallbladder and biliary diseases                    | 0<br>(0-1)        | 0<br>(0-0)         | 0<br>(0-0)          | 0<br>(0-0)           | 0<br>(0-0)           | 0<br>(0-0)           |
| Pancreatitis                                        | 0<br>(0-0)        | 0<br>(0-0)         | 0<br>(0-0)          | 0<br>(0-0)           | 0<br>(0-0)           | 0<br>(0-0)           |
| Other digestive diseases                            | 1<br>(1-2)        | 0<br>(0-0)         | 0<br>(0-0)          | 0<br>(0-0)           | 0<br>(0-0)           | 1<br>(0-1)           |
| Neurological disorders                              | 14<br>(10-18)     | 0<br>(0-0)         | 0<br>(0-0)          | 0<br>(0-1)           | 1<br>(1-1)           | 12<br>(9-16)         |
| Alzheimer disease and other dementias               | 12<br>(9-16)      | --                 | --                  | 0<br>(0-0)           | 1<br>(0-1)           | 11<br>(8-15)         |
| Parkinson disease                                   | 1<br>(1-1)        | --                 | --                  | 0<br>(0-0)           | 0<br>(0-0)           | 1<br>(0-1)           |
| Epilepsy                                            | 1<br>(0-1)        | 0<br>(0-0)         | 0<br>(0-0)          | 0<br>(0-1)           | 0<br>(0-0)           | 0<br>(0-0)           |
| Multiple sclerosis                                  | 0<br>(0-0)        | --                 | --                  | 0<br>(0-0)           | 0<br>(0-0)           | 0<br>(0-0)           |
| Other neurological disorders                        | 0<br>(0-1)        | 0<br>(0-0)         | 0<br>(0-0)          | 0<br>(0-0)           | 0<br>(0-0)           | 0<br>(0-0)           |
| Mental and substance use disorders                  | 0<br>(0-1)        | 0<br>(0-0)         | 0<br>(0-0)          | 0<br>(0-0)           | 0<br>(0-0)           | 0<br>(0-0)           |
| Schizophrenia                                       | 0<br>(0-0)        | --                 | --                  | 0<br>(0-0)           | 0<br>(0-0)           | 0<br>(0-0)           |
| Alcohol use disorders                               | 0<br>(0-0)        | --                 | --                  | 0<br>(0-0)           | 0<br>(0-0)           | 0<br>(0-0)           |
| Drug use disorders                                  | 0<br>(0-0)        | 0<br>(0-0)         | --                  | 0<br>(0-0)           | 0<br>(0-0)           | 0<br>(0-0)           |
| Opioid use disorders                                | 0<br>(0-0)        | 0<br>(0-0)         | --                  | 0<br>(0-0)           | 0<br>(0-0)           | 0<br>(0-0)           |
| Cocaine use disorders                               | 0<br>(0-0)        | 0<br>(0-0)         | --                  | 0<br>(0-0)           | 0<br>(0-0)           | 0<br>(0-0)           |
| Amphetamine use disorders                           | 0<br>(0-0)        | 0<br>(0-0)         | --                  | 0<br>(0-0)           | 0<br>(0-0)           | 0<br>(0-0)           |
| Other drug use disorders                            | 0<br>(0-0)        | 0<br>(0-0)         | --                  | 0<br>(0-0)           | 0<br>(0-0)           | 0<br>(0-0)           |
| Eating disorders                                    | 0<br>(0-0)        | --                 | 0<br>(0-0)          | 0<br>(0-0)           | --                   | --                   |
| Anorexia nervosa                                    | 0<br>(0-0)        | --                 | 0<br>(0-0)          | 0<br>(0-0)           | --                   | --                   |

Web Table 31- Antigua and Barbuda deaths with 95% UI by age, sex, and cause in 2013

| Cause                                               | Females, All Ages | Females, 0-4 Years | Females, 5-14 Years | Females, 15-49 Years | Females, 50-69 Years | Females, 70-80 Years |
|-----------------------------------------------------|-------------------|--------------------|---------------------|----------------------|----------------------|----------------------|
| Diabetes, urogenital, blood, and endocrine diseases | 47<br>(34 - 62)   | 0<br>(0 - 1)       | 0<br>(0 - 0)        | 4<br>(3 - 6)         | 13<br>(8 - 18)       | 29<br>(22 - 38)      |
| Diabetes mellitus                                   | 33<br>(24 - 45)   | 0<br>(0 - 0)       | 0<br>(0 - 0)        | 2<br>(1 - 3)         | 10<br>(6 - 14)       | 22<br>(16 - 28)      |
| Acute glomerulonephritis                            | 0<br>(0 - 0)      | 0<br>(0 - 0)       | 0<br>(0 - 0)        | 0<br>(0 - 0)         | 0<br>(0 - 0)         | 0<br>(0 - 0)         |
| Chronic kidney disease                              | 8<br>(6 - 13)     | 0<br>(0 - 0)       | 0<br>(0 - 0)        | 1<br>(1 - 2)         | 2<br>(1 - 3)         | 5<br>(3 - 7)         |
| Chronic kidney disease due to diabetes mellitus     | 2<br>(1 - 3)      | 0<br>(0 - 0)       | 0<br>(0 - 0)        | 0<br>(0 - 0)         | 1<br>(0 - 1)         | 1<br>(0 - 1)         |
| Chronic kidney disease due to hypertension          | 4<br>(3 - 7)      | 0<br>(0 - 0)       | 0<br>(0 - 0)        | 1<br>(0 - 1)         | 1<br>(1 - 2)         | 3<br>(2 - 4)         |
| Chronic kidney disease due to glomerulonephritis    | 0<br>(0 - 0)      | 0<br>(0 - 0)       | 0<br>(0 - 0)        | 0<br>(0 - 0)         | 0<br>(0 - 0)         | 0<br>(0 - 0)         |
| Chronic kidney disease due to other causes          | 2<br>(1 - 4)      | 0<br>(0 - 0)       | 0<br>(0 - 0)        | 0<br>(0 - 1)         | 1<br>(0 - 1)         | 1<br>(1 - 3)         |
| Urinary diseases and male infertility               | 1<br>(1 - 2)      | 0<br>(0 - 0)       | 0<br>(0 - 0)        | 0<br>(0 - 0)         | 0<br>(0 - 0)         | 1<br>(1 - 2)         |
| Interstitial nephritis and urinary tract infections | 1<br>(1 - 2)      | 0<br>(0 - 0)       | 0<br>(0 - 0)        | 0<br>(0 - 0)         | 0<br>(0 - 0)         | 1<br>(0 - 1)         |
| Urolithiasis                                        | 0<br>(0 - 0)      | --                 | 0<br>(0 - 0)        | 0<br>(0 - 0)         | 0<br>(0 - 0)         | 0<br>(0 - 0)         |
| Other urinary diseases                              | 0<br>(0 - 0)      | 0<br>(0 - 0)       | 0<br>(0 - 0)        | 0<br>(0 - 0)         | 0<br>(0 - 0)         | 0<br>(0 - 0)         |
| Gynecological diseases                              | 0<br>(0 - 0)      | --                 | --                  | 0<br>(0 - 0)         | 0<br>(0 - 0)         | 0<br>(0 - 0)         |
| Uterine fibroids                                    | 0<br>(0 - 0)      | --                 | --                  | 0<br>(0 - 0)         | 0<br>(0 - 0)         | 0<br>(0 - 0)         |
| Polycystic ovarian syndrome                         | 0<br>(0 - 0)      | --                 | --                  | 0<br>(0 - 0)         | 0<br>(0 - 0)         | --                   |
| Endometriosis                                       | 0<br>(0 - 0)      | --                 | --                  | 0<br>(0 - 0)         | 0<br>(0 - 0)         | --                   |
| Genital prolapse                                    | 0<br>(0 - 0)      | --                 | --                  | 0<br>(0 - 0)         | 0<br>(0 - 0)         | 0<br>(0 - 0)         |
| Other gynecological diseases                        | 0<br>(0 - 0)      | --                 | --                  | 0<br>(0 - 0)         | 0<br>(0 - 0)         | 0<br>(0 - 0)         |
| Hemoglobinopathies and hemolytic anemias            | 1<br>(0 - 1)      | 0<br>(0 - 0)       | 0<br>(0 - 0)        | 0<br>(0 - 0)         | 0<br>(0 - 0)         | 0<br>(0 - 0)         |
| Thalassemias                                        | 0<br>(0 - 0)      | 0<br>(0 - 0)       | 0<br>(0 - 0)        | 0<br>(0 - 0)         | 0<br>(0 - 0)         | 0<br>(0 - 0)         |
| Sickle cell disorders                               | 0<br>(0 - 1)      | 0<br>(0 - 0)       | 0<br>(0 - 0)        | 0<br>(0 - 0)         | 0<br>(0 - 0)         | 0<br>(0 - 0)         |
| G6PD deficiency                                     | 0<br>(0 - 0)      | 0<br>(0 - 0)       | 0<br>(0 - 0)        | 0<br>(0 - 0)         | 0<br>(0 - 0)         | 0<br>(0 - 0)         |
| Other hemoglobinopathies and hemolytic anemias      | 0<br>(0 - 0)      | 0<br>(0 - 0)       | 0<br>(0 - 0)        | 0<br>(0 - 0)         | 0<br>(0 - 0)         | 0<br>(0 - 0)         |
| Endocrine, metabolic, blood, and immune disorders   | 3<br>(2 - 5)      | 0<br>(0 - 0)       | 0<br>(0 - 0)        | 1<br>(0 - 1)         | 1<br>(0 - 1)         | 2<br>(1 - 3)         |
| Musculoskeletal disorders                           | 1<br>(1 - 2)      | --                 | 0<br>(0 - 0)        | 1<br>(0 - 1)         | 0<br>(0 - 0)         | 1<br>(0 - 1)         |
| Rheumatoid arthritis                                | 0<br>(0 - 0)      | --                 | 0<br>(0 - 0)        | 0<br>(0 - 0)         | 0<br>(0 - 0)         | 0<br>(0 - 0)         |
| Other musculoskeletal disorders                     | 1<br>(1 - 2)      | --                 | 0<br>(0 - 0)        | 1<br>(0 - 1)         | 0<br>(0 - 0)         | 0<br>(0 - 1)         |
| Other non-communicable diseases                     | 6<br>(3 - 8)      | 2<br>(1 - 4)       | 0<br>(0 - 0)        | 0<br>(0 - 1)         | 0<br>(0 - 1)         | 3<br>(1 - 4)         |
| Congenital anomalies                                | 3<br>(1 - 5)      | 2<br>(1 - 4)       | 0<br>(0 - 0)        | 0<br>(0 - 0)         | 0<br>(0 - 0)         | 0<br>(0 - 0)         |
| Neural tube defects                                 | 0<br>(0 - 0)      | 0<br>(0 - 0)       | 0<br>(0 - 0)        | 0<br>(0 - 0)         | 0<br>(0 - 0)         | 0<br>(0 - 0)         |
| Congenital heart anomalies                          | 1<br>(1 - 2)      | 1<br>(0 - 2)       | 0<br>(0 - 0)        | 0<br>(0 - 0)         | 0<br>(0 - 0)         | 0<br>(0 - 0)         |
| Cleft lip and cleft palate                          | 0<br>(0 - 0)      | 0<br>(0 - 0)       | --                  | --                   | --                   | --                   |
| Down syndrome                                       | 0<br>(0 - 0)      | 0<br>(0 - 0)       | 0<br>(0 - 0)        | 0<br>(0 - 0)         | 0<br>(0 - 0)         | 0<br>(0 - 0)         |
| Chromosomal unbalanced rearrangements               | 0<br>(0 - 0)      | 0<br>(0 - 0)       | 0<br>(0 - 0)        | 0<br>(0 - 0)         | 0<br>(0 - 0)         | 0<br>(0 - 0)         |
| Other congenital anomalies                          | 1<br>(0 - 2)      | 1<br>(0 - 1)       | 0<br>(0 - 0)        | 0<br>(0 - 0)         | 0<br>(0 - 0)         | 0<br>(0 - 0)         |
| Skin and subcutaneous diseases                      | 3<br>(1 - 4)      | 0<br>(0 - 0)       | 0<br>(0 - 0)        | 0<br>(0 - 0)         | 0<br>(0 - 0)         | 3<br>(1 - 4)         |
| Cellulitis                                          | 0<br>(0 - 0)      | 0<br>(0 - 0)       | 0<br>(0 - 0)        | 0<br>(0 - 0)         | 0<br>(0 - 0)         | 0<br>(0 - 0)         |
| Pyoderma                                            | 0<br>(0 - 1)      | 0<br>(0 - 0)       | 0<br>(0 - 0)        | 0<br>(0 - 0)         | 0<br>(0 - 0)         | 0<br>(0 - 1)         |
| Decubitus ulcer                                     | 2<br>(1 - 4)      | 0<br>(0 - 0)       | 0<br>(0 - 0)        | 0<br>(0 - 0)         | 0<br>(0 - 0)         | 2<br>(1 - 3)         |
| Other skin and subcutaneous diseases                | 0<br>(0 - 0)      | 0<br>(0 - 0)       | 0<br>(0 - 0)        | 0<br>(0 - 0)         | 0<br>(0 - 0)         | 0<br>(0 - 0)         |

Web Table 31- Antigua and Barbuda deaths with 95% UI by age, sex, and cause in 2013

| Cause                                           | Females, All Ages | Females, 0-4 Years | Females, 5-14 Years | Females, 15-49 Years | Females, 50-69 Years | Females, 70-80 Years |
|-------------------------------------------------|-------------------|--------------------|---------------------|----------------------|----------------------|----------------------|
| Sudden infant death syndrome                    | 0<br>(0 - 0)      | 0<br>(0 - 0)       | --                  | --                   | --                   | --                   |
| Injuries                                        | 12<br>(9 - 16)    | 1<br>(0 - 1)       | 1<br>(0 - 1)        | 4<br>(3 - 6)         | 2<br>(1 - 3)         | 5<br>(3 - 6)         |
| Transport injuries                              | 3<br>(2 - 4)      | 0<br>(0 - 0)       | 0<br>(0 - 0)        | 1<br>(1 - 2)         | 1<br>(0 - 1)         | 1<br>(1 - 1)         |
| Road injuries                                   | 3<br>(2 - 4)      | 0<br>(0 - 0)       | 0<br>(0 - 0)        | 1<br>(1 - 2)         | 1<br>(0 - 1)         | 1<br>(0 - 1)         |
| Pedestrian road injuries                        | 1<br>(0 - 1)      | 0<br>(0 - 0)       | 0<br>(0 - 0)        | 0<br>(0 - 0)         | 0<br>(0 - 0)         | 0<br>(0 - 0)         |
| Cyclist road injuries                           | 0<br>(0 - 0)      | 0<br>(0 - 0)       | 0<br>(0 - 0)        | 0<br>(0 - 0)         | 0<br>(0 - 0)         | 0<br>(0 - 0)         |
| Motorcyclist road injuries                      | 0<br>(0 - 0)      | 0<br>(0 - 0)       | 0<br>(0 - 0)        | 0<br>(0 - 0)         | 0<br>(0 - 0)         | 0<br>(0 - 0)         |
| Motor vehicle road injuries                     | 2<br>(1 - 2)      | 0<br>(0 - 0)       | 0<br>(0 - 0)        | 1<br>(0 - 1)         | 0<br>(0 - 0)         | 0<br>(0 - 1)         |
| Other road injuries                             | 0<br>(0 - 0)      | 0<br>(0 - 0)       | 0<br>(0 - 0)        | 0<br>(0 - 0)         | 0<br>(0 - 0)         | 0<br>(0 - 0)         |
| Other transport injuries                        | 0<br>(0 - 0)      | 0<br>(0 - 0)       | 0<br>(0 - 0)        | 0<br>(0 - 0)         | 0<br>(0 - 0)         | 0<br>(0 - 0)         |
| Unintentional injuries                          | 6<br>(4 - 8)      | 0<br>(0 - 1)       | 0<br>(0 - 0)        | 1<br>(1 - 2)         | 1<br>(0 - 1)         | 3<br>(2 - 5)         |
| Falls                                           | 2<br>(1 - 2)      | 0<br>(0 - 0)       | 0<br>(0 - 0)        | 0<br>(0 - 0)         | 0<br>(0 - 0)         | 1<br>(1 - 2)         |
| Drowning                                        | 1<br>(0 - 1)      | 0<br>(0 - 0)       | 0<br>(0 - 0)        | 0<br>(0 - 0)         | 0<br>(0 - 0)         | 0<br>(0 - 0)         |
| Fire, heat, and hot substances                  | 1<br>(1 - 1)      | 0<br>(0 - 0)       | 0<br>(0 - 0)        | 0<br>(0 - 0)         | 0<br>(0 - 0)         | 1<br>(0 - 1)         |
| Poisonings                                      | 0<br>(0 - 0)      | 0<br>(0 - 0)       | 0<br>(0 - 0)        | 0<br>(0 - 0)         | 0<br>(0 - 0)         | 0<br>(0 - 0)         |
| Exposure to mechanical forces                   | 0<br>(0 - 0)      | 0<br>(0 - 0)       | 0<br>(0 - 0)        | 0<br>(0 - 0)         | 0<br>(0 - 0)         | 0<br>(0 - 0)         |
| Unintentional firearm injuries                  | 0<br>(0 - 0)      | 0<br>(0 - 0)       | 0<br>(0 - 0)        | 0<br>(0 - 0)         | 0<br>(0 - 0)         | 0<br>(0 - 0)         |
| Unintentional suffocation                       | 0<br>(0 - 0)      | 0<br>(0 - 0)       | 0<br>(0 - 0)        | 0<br>(0 - 0)         | 0<br>(0 - 0)         | 0<br>(0 - 0)         |
| Other exposure to mechanical forces             | 0<br>(0 - 0)      | 0<br>(0 - 0)       | 0<br>(0 - 0)        | 0<br>(0 - 0)         | 0<br>(0 - 0)         | 0<br>(0 - 0)         |
| Adverse effects of medical treatment            | 1<br>(1 - 2)      | 0<br>(0 - 0)       | 0<br>(0 - 0)        | 0<br>(0 - 0)         | 0<br>(0 - 0)         | 1<br>(0 - 1)         |
| Animal contact                                  | 0<br>(0 - 0)      | 0<br>(0 - 0)       | 0<br>(0 - 0)        | 0<br>(0 - 0)         | 0<br>(0 - 0)         | 0<br>(0 - 0)         |
| Venomous animal contact                         | 0<br>(0 - 0)      | 0<br>(0 - 0)       | 0<br>(0 - 0)        | 0<br>(0 - 0)         | 0<br>(0 - 0)         | 0<br>(0 - 0)         |
| Non-venomous animal contact                     | 0<br>(0 - 0)      | 0<br>(0 - 0)       | 0<br>(0 - 0)        | 0<br>(0 - 0)         | 0<br>(0 - 0)         | 0<br>(0 - 0)         |
| Foreign body                                    | 1<br>(1 - 2)      | 0<br>(0 - 1)       | 0<br>(0 - 0)        | 0<br>(0 - 0)         | 0<br>(0 - 0)         | 1<br>(0 - 1)         |
| Pulmonary aspiration and foreign body in airway | 1<br>(1 - 2)      | 0<br>(0 - 0)       | 0<br>(0 - 0)        | 0<br>(0 - 0)         | 0<br>(0 - 0)         | 1<br>(0 - 1)         |
| Foreign body in other body part                 | 0<br>(0 - 0)      | 0<br>(0 - 0)       | 0<br>(0 - 0)        | 0<br>(0 - 0)         | 0<br>(0 - 0)         | 0<br>(0 - 0)         |
| Other unintentional injuries                    | 0<br>(0 - 0)      | 0<br>(0 - 0)       | 0<br>(0 - 0)        | 0<br>(0 - 0)         | 0<br>(0 - 0)         | 0<br>(0 - 0)         |
| Self-harm and interpersonal violence            | 3<br>(2 - 4)      | 0<br>(0 - 0)       | 0<br>(0 - 0)        | 2<br>(1 - 3)         | 1<br>(0 - 1)         | 0<br>(0 - 1)         |
| Self-harm                                       | 2<br>(1 - 2)      | --                 | 0<br>(0 - 0)        | 1<br>(1 - 2)         | 0<br>(0 - 0)         | 0<br>(0 - 0)         |
| Interpersonal violence                          | 1<br>(1 - 2)      | 0<br>(0 - 0)       | 0<br>(0 - 0)        | 1<br>(1 - 2)         | 0<br>(0 - 0)         | 0<br>(0 - 0)         |
| Assault by firearm                              | 0<br>(0 - 1)      | 0<br>(0 - 0)       | 0<br>(0 - 0)        | 0<br>(0 - 0)         | 0<br>(0 - 0)         | 0<br>(0 - 0)         |
| Assault by sharp object                         | 0<br>(0 - 1)      | 0<br>(0 - 0)       | 0<br>(0 - 0)        | 0<br>(0 - 1)         | 0<br>(0 - 0)         | 0<br>(0 - 0)         |
| Assault by other means                          | 1<br>(0 - 1)      | 0<br>(0 - 0)       | 0<br>(0 - 0)        | 1<br>(0 - 1)         | 0<br>(0 - 0)         | 0<br>(0 - 0)         |

Web Table 31- Argentina deaths with 95% UI by age, sex, and cause in 2013

| Cause                                                             | Both Sexes, All Ages           | Both Sexes, 0-4 Years     | Both Sexes, 5-14 Years   | Both Sexes, 15-49 Years     | Both Sexes, 50-69 Years     | Both Sexes, 70-80 Years        |
|-------------------------------------------------------------------|--------------------------------|---------------------------|--------------------------|-----------------------------|-----------------------------|--------------------------------|
| All causes                                                        | 335,093<br>(324,461 - 344,953) | 9,828<br>(7,521 - 12,849) | 1,641<br>(1,414 - 1,927) | 30,330<br>(28,786 - 31,802) | 80,669<br>(76,732 - 84,550) | 212,624<br>(207,509 - 218,025) |
| Communicable, maternal, neonatal, and nutritional diseases        | 37,946<br>(27,032 - 43,805)    | 5,214<br>(3,841 - 6,850)  | 204<br>(170 - 248)       | 3,414<br>(2,974 - 3,871)    | 5,633<br>(3,753 - 6,750)    | 23,481<br>(14,683 - 28,693)    |
| HIV/AIDS and tuberculosis                                         | 2,353<br>(1,790 - 2,991)       | 19<br>(12 - 28)           | 10<br>(5 - 16)           | 1,363<br>(1,009 - 1,761)    | 637<br>(457 - 880)          | 324<br>(259 - 411)             |
| Tuberculosis                                                      | 726<br>(650 - 901)             | 10<br>(7 - 14)            | 6<br>(5 - 9)             | 191<br>(166 - 233)          | 262<br>(223 - 329)          | 257<br>(212 - 333)             |
| HIV/AIDS                                                          | 1,627<br>(1,082 - 2,247)       | 9<br>(3 - 17)             | 4<br>(0 - 9)             | 1,172<br>(816 - 1,568)      | 375<br>(200 - 616)          | 67<br>(29 - 118)               |
| HIV/AIDS resulting in mycobacterial infection                     | 96<br>(62 - 140)               | 0<br>(0 - 1)              | 0<br>(0 - 0)             | 68<br>(45 - 94)             | 23<br>(12 - 39)             | 4<br>(2 - 8)                   |
| HIV/AIDS resulting in other diseases                              | 1,531<br>(1,020 - 2,100)       | 9<br>(3 - 16)             | 4<br>(0 - 9)             | 1,104<br>(767 - 1,475)      | 352<br>(187 - 578)          | 62<br>(27 - 111)               |
| Diarrhea, lower respiratory, and other common infectious diseases | 27,351<br>(15,602 - 33,232)    | 1,039<br>(773 - 1,377)    | 149<br>(119 - 186)       | 1,312<br>(867 - 1,560)      | 4,131<br>(2,213 - 5,127)    | 20,720<br>(11,340 - 26,029)    |
| Diarrheal diseases                                                | 694<br>(550 - 895)             | 155<br>(103 - 219)        | 8<br>(6 - 12)            | 40<br>(33 - 47)             | 69<br>(55 - 86)             | 422<br>(299 - 623)             |
| Intestinal infectious diseases                                    | 31<br>(17 - 50)                | 8<br>(4 - 15)             | 6<br>(3 - 12)            | 11<br>(6 - 20)              | 3<br>(1 - 7)                | 2<br>(1 - 6)                   |
| Typhoid fever                                                     | 18<br>(9 - 33)                 | 4<br>(2 - 7)              | 4<br>(2 - 8)             | 7<br>(3 - 13)               | 2<br>(1 - 3)                | 1<br>(0 - 2)                   |
| Paratyphoid fever                                                 | 6<br>(3 - 11)                  | 1<br>(1 - 3)              | 2<br>(1 - 3)             | 2<br>(1 - 4)                | 0<br>(0 - 1)                | 0<br>(0 - 1)                   |
| Other intestinal infectious diseases                              | 6<br>(2 - 13)                  | 2<br>(0 - 7)              | 1<br>(0 - 3)             | 2<br>(0 - 5)                | 1<br>(0 - 4)                | 1<br>(0 - 4)                   |
| Lower respiratory infections                                      | 25,644<br>(13,929 - 31,540)    | 644<br>(456 - 896)        | 81<br>(57 - 108)         | 1,062<br>(616 - 1,303)      | 3,844<br>(1,941 - 4,834)    | 20,013<br>(10,540 - 25,297)    |
| Upper respiratory infections                                      | 10<br>(4 - 22)                 | 0<br>(0 - 1)              | 0<br>(0 - 0)             | 1<br>(0 - 3)                | 3<br>(1 - 7)                | 5<br>(1 - 17)                  |
| Otitis media                                                      | 26<br>(21 - 32)                | 2<br>(1 - 3)              | 1<br>(1 - 1)             | 2<br>(2 - 3)                | 5<br>(4 - 6)                | 16<br>(11 - 21)                |
| Meningitis                                                        | 624<br>(501 - 708)             | 143<br>(98 - 204)         | 31<br>(23 - 41)          | 123<br>(103 - 141)          | 142<br>(107 - 165)          | 185<br>(137 - 221)             |
| Pneumococcal meningitis                                           | 135<br>(104 - 168)             | 27<br>(18 - 41)           | 6<br>(4 - 9)             | 24<br>(17 - 31)             | 34<br>(22 - 49)             | 44<br>(30 - 62)                |
| H influenzae type B meningitis                                    | 71<br>(54 - 92)                | 36<br>(23 - 54)           | 4<br>(2 - 6)             | 8<br>(6 - 11)               | 10<br>(6 - 15)              | 13<br>(8 - 18)                 |
| Meningococcal meningitis                                          | 225<br>(177 - 263)             | 49<br>(32 - 71)           | 15<br>(10 - 21)          | 46<br>(37 - 58)             | 48<br>(36 - 60)             | 67<br>(47 - 86)                |
| Other meningitis                                                  | 193<br>(142 - 236)             | 31<br>(17 - 48)           | 6<br>(3 - 10)            | 45<br>(33 - 57)             | 51<br>(29 - 72)             | 61<br>(39 - 82)                |
| Encephalitis                                                      | 238<br>(199 - 322)             | 43<br>(28 - 66)           | 20<br>(13 - 32)          | 63<br>(48 - 89)             | 58<br>(44 - 84)             | 54<br>(38 - 75)                |
| Diphtheria                                                        | 2<br>(0 - 5)                   | 1<br>(0 - 4)              | 0<br>(0 - 2)             | 0<br>(0 - 2)                | 0<br>(0 - 1)                | --<br>(0 - 1)                  |
| Whooping cough                                                    | 42<br>(10 - 156)               | 38<br>(8 - 153)           | 1<br>(1 - 1)             | 2<br>(2 - 2)                | 0<br>(0 - 0)                | --<br>(0 - 0)                  |
| Tetanus                                                           | 11<br>(8 - 20)                 | 1<br>(1 - 1)              | 1<br>(0 - 1)             | 3<br>(2 - 4)                | 3<br>(2 - 8)                | 3<br>(2 - 7)                   |
| Measles                                                           | 0<br>(0 - 0)                   | 0<br>(0 - 0)              | 0<br>(0 - 0)             | 0<br>(0 - 0)                | 0<br>(0 - 0)                | --<br>(0 - 0)                  |
| Varicella and herpes zoster                                       | 30<br>(9 - 79)                 | 3<br>(0 - 10)             | 1<br>(0 - 3)             | 4<br>(1 - 8)                | 3<br>(0 - 7)                | 19<br>(1 - 70)                 |
| Neglected tropical diseases and malaria                           | 958<br>(420 - 3,438)           | 9<br>(5 - 17)             | 7<br>(5 - 11)            | 118<br>(55 - 395)           | 385<br>(140 - 1,321)        | 439<br>(169 - 1,627)           |
| Malaria                                                           | 0<br>(0 - 2)                   | 0<br>(0 - 0)              | 0<br>(0 - 0)             | 0<br>(0 - 0)                | 0<br>(0 - 0)                | 0<br>(0 - 1)                   |
| Chagas disease                                                    | 886<br>(345 - 3,365)           | 2<br>(1 - 7)              | 1<br>(0 - 3)             | 98<br>(35 - 374)            | 367<br>(122 - 1,304)        | 419<br>(150 - 1,603)           |
| Leishmaniasis                                                     | 0<br>(0 - 0)                   | 0<br>(0 - 0)              | 0<br>(0 - 0)             | 0<br>(0 - 0)                | 0<br>(0 - 0)                | 0<br>(0 - 0)                   |
| Visceral leishmaniasis                                            | 0<br>(0 - 0)                   | 0<br>(0 - 0)              | 0<br>(0 - 0)             | 0<br>(0 - 0)                | 0<br>(0 - 0)                | 0<br>(0 - 0)                   |
| Cysticercosis                                                     | 1<br>(1 - 1)                   | 0<br>(0 - 0)              | 0<br>(0 - 0)             | 0<br>(0 - 0)                | 0<br>(0 - 0)                | 0<br>(0 - 0)                   |
| Cystic echinococcosis                                             | 28<br>(26 - 30)                | 0<br>(0 - 0)              | 1<br>(1 - 2)             | 9<br>(8 - 9)                | 9<br>(8 - 10)               | 9<br>(8 - 9)                   |
| Dengue                                                            | 18<br>(14 - 27)                | 4<br>(2 - 7)              | 3<br>(2 - 5)             | 4<br>(4 - 7)                | 3<br>(2 - 4)                | 3<br>(2 - 6)                   |
| Yellow fever                                                      | 1<br>(0 - 1)                   | 0<br>(0 - 0)              | 0<br>(0 - 0)             | 0<br>(0 - 1)                | 0<br>(0 - 0)                | 0<br>(0 - 0)                   |
| Rabies                                                            | 4<br>(3 - 4)                   | 0<br>(0 - 0)              | 1<br>(0 - 1)             | 2<br>(1 - 2)                | 1<br>(0 - 1)                | 0<br>(0 - 0)                   |
| Intestinal nematode infections                                    | 5<br>(1 - 14)                  | 1<br>(0 - 6)              | 1<br>(0 - 4)             | 1<br>(0 - 5)                | 1<br>(0 - 5)                | 2<br>(0 - 6)                   |
| Ascariasis                                                        | 5<br>(1 - 14)                  | 1<br>(0 - 6)              | 1<br>(0 - 4)             | 1<br>(0 - 5)                | 1<br>(0 - 5)                | 2<br>(0 - 6)                   |
| Other neglected tropical diseases                                 | 16<br>(13 - 26)                | 1<br>(1 - 1)              | 1<br>(0 - 1)             | 4<br>(3 - 5)                | 5<br>(3 - 8)                | 6<br>(4 - 11)                  |

Web Table 31- Argentina deaths with 95% UI by age, sex, and cause in 2013

| Cause                                                            | Both Sexes, All Ages           | Both Sexes, 0-4 Years    | Both Sexes, 5-14 Years | Both Sexes, 15-49 Years     | Both Sexes, 50-69 Years     | Both Sexes, 70-80 Years        |
|------------------------------------------------------------------|--------------------------------|--------------------------|------------------------|-----------------------------|-----------------------------|--------------------------------|
| Maternal disorders                                               | 387<br>(320 - 456)             | --                       | 3<br>(2 - 4)           | 384<br>(318 - 454)          | --                          | --                             |
| Maternal hemorrhage                                              | 39<br>(31 - 50)                | --                       | 0<br>(0 - 0)           | 39<br>(31 - 49)             | --                          | --                             |
| Maternal sepsis and other maternal infections                    | 64<br>(50 - 80)                | --                       | 1<br>(0 - 1)           | 64<br>(50 - 79)             | --                          | --                             |
| Maternal hypertensive disorders                                  | 37<br>(28 - 48)                | --                       | 1<br>(0 - 1)           | 36<br>(27 - 47)             | --                          | --                             |
| Maternal obstructed labor                                        | 24<br>(16 - 32)                | --                       | 0<br>(0 - 0)           | 24<br>(16 - 32)             | --                          | --                             |
| Maternal abortive outcome                                        | 82<br>(65 - 101)               | --                       | 0<br>(0 - 1)           | 81<br>(65 - 101)            | --                          | --                             |
| Indirect maternal deaths                                         | 72<br>(58 - 89)                | --                       | 0<br>(0 - 1)           | 72<br>(57 - 88)             | --                          | --                             |
| Late maternal deaths                                             | 26<br>(19 - 33)                | --                       | 0<br>(0 - 1)           | 26<br>(19 - 33)             | --                          | --                             |
| Maternal deaths aggravated by HIV/AIDS                           | 0<br>(0 - 1)                   | --                       | --                     | 0<br>(0 - 1)                | --                          | --                             |
| Other maternal disorders                                         | 42<br>(33 - 52)                | --                       | 0<br>(0 - 0)           | 42<br>(33 - 51)             | --                          | --                             |
| Neonatal disorders                                               | 3,933<br>(2,854 - 5,280)       | 3,933<br>(2,854 - 5,280) | --                     | --                          | --                          | --                             |
| Neonatal preterm birth complications                             | 2,245<br>(1,499 - 3,181)       | 2,245<br>(1,499 - 3,181) | --                     | --                          | --                          | --                             |
| Neonatal encephalopathy due to birth asphyxia and trauma         | 483<br>(317 - 708)             | 483<br>(317 - 708)       | --                     | --                          | --                          | --                             |
| Neonatal sepsis and other neonatal infections                    | 658<br>(392 - 1,149)           | 658<br>(392 - 1,149)     | --                     | --                          | --                          | --                             |
| Hemolytic disease and other neonatal jaundice                    | 24<br>(10 - 47)                | 24<br>(10 - 47)          | --                     | --                          | --                          | --                             |
| Other neonatal disorders                                         | 523<br>(338 - 793)             | 523<br>(338 - 793)       | --                     | --                          | --                          | --                             |
| Nutritional deficiencies                                         | 2,301<br>(1,872 - 3,023)       | 128<br>(82 - 240)        | 19<br>(14 - 28)        | 137<br>(108 - 226)          | 297<br>(234 - 452)          | 1,720<br>(1,346 - 2,217)       |
| Protein-energy malnutrition                                      | 1,439<br>(999 - 1,996)         | 120<br>(76 - 224)        | 14<br>(10 - 21)        | 69<br>(48 - 122)            | 183<br>(126 - 288)          | 1,053<br>(662 - 1,434)         |
| Iodine deficiency                                                | 3<br>(0 - 10)                  | 0<br>(0 - 1)             | 0<br>(0 - 0)           | 0<br>(0 - 1)                | 1<br>(0 - 3)                | 1<br>(0 - 9)                   |
| Iron-deficiency anemia                                           | 752<br>(474 - 1,234)           | 5<br>(2 - 11)            | 2<br>(1 - 3)           | 56<br>(37 - 99)             | 99<br>(61 - 186)            | 591<br>(363 - 979)             |
| Other nutritional deficiencies                                   | 107<br>(66 - 209)              | 3<br>(1 - 7)             | 3<br>(2 - 6)           | 12<br>(7 - 24)              | 15<br>(8 - 29)              | 74<br>(40 - 145)               |
| Other communicable, maternal, neonatal, and nutritional diseases | 663<br>(549 - 776)             | 86<br>(38 - 161)         | 16<br>(11 - 22)        | 100<br>(84 - 116)           | 183<br>(149 - 217)          | 278<br>(215 - 350)             |
| Sexually transmitted diseases excluding HIV                      | 100<br>(49 - 177)              | 59<br>(13 - 129)         | 5<br>(1 - 11)          | 12<br>(9 - 16)              | 10<br>(7 - 16)              | 14<br>(8 - 23)                 |
| Syphilis                                                         | 86<br>(35 - 163)               | 59<br>(13 - 129)         | 5<br>(1 - 10)          | 5<br>(4 - 7)                | 6<br>(4 - 10)               | 11<br>(7 - 19)                 |
| Chlamydial infection                                             | 3<br>(2 - 5)                   | --                       | 0<br>(0 - 0)           | 2<br>(1 - 3)                | 1<br>(1 - 1)                | 1<br>(0 - 1)                   |
| Gonococcal infection                                             | 6<br>(4 - 9)                   | --                       | 0<br>(0 - 0)           | 2<br>(2 - 3)                | 2<br>(1 - 3)                | 2<br>(1 - 3)                   |
| Other sexually transmitted diseases                              | 4<br>(3 - 6)                   | --                       | 0<br>(0 - 0)           | 2<br>(2 - 3)                | 1<br>(1 - 2)                | 1<br>(0 - 1)                   |
| Hepatitis                                                        | 148<br>(126 - 174)             | 5<br>(3 - 8)             | 4<br>(2 - 5)           | 32<br>(26 - 40)             | 58<br>(45 - 77)             | 49<br>(35 - 67)                |
| Acute hepatitis A                                                | 63<br>(30 - 100)               | 4<br>(2 - 7)             | 3<br>(2 - 5)           | 21<br>(12 - 30)             | 22<br>(7 - 39)              | 13<br>(3 - 28)                 |
| Acute hepatitis B                                                | 78<br>(46 - 114)               | 1<br>(0 - 2)             | 0<br>(0 - 1)           | 10<br>(4 - 19)              | 35<br>(19 - 53)             | 33<br>(18 - 50)                |
| Acute hepatitis C                                                | 6<br>(1 - 16)                  | --                       | 0<br>(0 - 0)           | 1<br>(0 - 3)                | 2<br>(0 - 5)                | 3<br>(0 - 9)                   |
| Other infectious diseases                                        | 415<br>(315 - 512)             | 23<br>(15 - 32)          | 7<br>(5 - 9)           | 56<br>(41 - 68)             | 115<br>(84 - 144)           | 215<br>(148 - 286)             |
| Non-communicable diseases                                        | 272,087<br>(260,803 - 286,029) | 3,626<br>(2,761 - 4,791) | 743<br>(626 - 882)     | 16,731<br>(15,749 - 17,846) | 69,790<br>(66,259 - 73,385) | 181,197<br>(173,783 - 191,358) |
| Neoplasms                                                        | 71,024<br>(67,137 - 75,973)    | 166<br>(113 - 240)       | 313<br>(259 - 377)     | 6,331<br>(5,894 - 6,795)    | 26,781<br>(25,205 - 28,378) | 37,434<br>(34,823 - 40,846)    |
| Esophageal cancer                                                | 2,469<br>(2,068 - 3,276)       | --                       | --                     | 121<br>(93 - 167)           | 990<br>(793 - 1,376)        | 1,358<br>(1,109 - 1,817)       |
| Stomach cancer                                                   | 5,057<br>(4,520 - 5,661)       | --                       | --                     | 341<br>(294 - 393)          | 1,834<br>(1,626 - 2,093)    | 2,882<br>(2,446 - 3,402)       |
| Liver cancer                                                     | 2,284<br>(1,994 - 2,623)       | --                       | 4<br>(3 - 5)           | 125<br>(103 - 151)          | 877<br>(740 - 1,030)        | 1,278<br>(1,031 - 1,591)       |
| Liver cancer due to hepatitis B                                  | 230<br>(145 - 337)             | --                       | 1<br>(1 - 2)           | 26<br>(18 - 37)             | 111<br>(61 - 172)           | 93<br>(56 - 143)               |
| Liver cancer due to hepatitis C                                  | 1,177<br>(934 - 1,438)         | --                       | 1<br>(0 - 1)           | 53<br>(38 - 70)             | 444<br>(340 - 561)          | 680<br>(513 - 879)             |
| Liver cancer due to alcohol use                                  | 643<br>(465 - 826)             | --                       | --                     | 24<br>(15 - 34)             | 232<br>(154 - 305)          | 388<br>(271 - 526)             |

Web Table 31- Argentina deaths with 95% UI by age, sex, and cause in 2013

| Cause                                         | Both Sexes, All Ages          | Both Sexes, 0-4 Years | Both Sexes, 5-14 Years | Both Sexes, 15-49 Years  | Both Sexes, 50-69 Years     | Both Sexes, 70-80 Years     |
|-----------------------------------------------|-------------------------------|-----------------------|------------------------|--------------------------|-----------------------------|-----------------------------|
| Liver cancer due to other causes              | 233<br>(156 - 328)            | -                     | 2<br>(1 - 3)           | 23<br>(16 - 31)          | 90<br>(58 - 125)            | 118<br>(70 - 185)           |
| Larynx cancer                                 | 1,036<br>(843 - 1,403)        | -                     | -                      | 67<br>(49 - 106)         | 563<br>(444 - 792)          | 407<br>(312 - 549)          |
| Tracheal, bronchus and lung cancer            | 11,076<br>(10,165 - 12,147)   | -                     | -                      | 652<br>(558 - 756)       | 5,482<br>(4,949 - 6,089)    | 4,942<br>(4,350 - 5,609)    |
| Breast cancer                                 | 6,650<br>(5,825 - 7,603)      | -                     | -                      | 907<br>(776 - 1,061)     | 2,672<br>(2,311 - 3,058)    | 3,071<br>(2,521 - 3,834)    |
| Cervical cancer                               | 2,057<br>(1,633 - 2,449)      | -                     | -                      | 626<br>(450 - 762)       | 799<br>(597 - 1,004)        | 632<br>(475 - 849)          |
| Uterine cancer                                | 840<br>(537 - 1,111)          | -                     | -                      | 47<br>(29 - 66)          | 329<br>(193 - 445)          | 465<br>(302 - 680)          |
| Prostate cancer                               | 5,038<br>(3,281 - 7,273)      | -                     | -                      | 21<br>(13 - 33)          | 968<br>(633 - 1,445)        | 4,049<br>(2,583 - 5,941)    |
| Colon and rectum cancer                       | 9,526<br>(8,597 - 10,588)     | -                     | -                      | 560<br>(493 - 635)       | 3,103<br>(2,792 - 3,403)    | 5,862<br>(5,023 - 6,874)    |
| Lip and oral cavity cancer                    | 775<br>(628 - 950)            | -                     | -                      | 77<br>(60 - 103)         | 362<br>(278 - 450)          | 335<br>(252 - 425)          |
| Nasopharynx cancer                            | 159<br>(131 - 200)            | -                     | 1<br>(1 - 2)           | 33<br>(25 - 44)          | 82<br>(63 - 108)            | 43<br>(33 - 61)             |
| Other pharynx cancer                          | 265<br>(224 - 368)            | -                     | -                      | 25<br>(19 - 42)          | 162<br>(129 - 224)          | 78<br>(62 - 106)            |
| Gallbladder and biliary tract cancer          | 1,967<br>(1,539 - 2,585)      | -                     | -                      | 87<br>(63 - 116)         | 694<br>(541 - 875)          | 1,186<br>(870 - 1,634)      |
| Pancreatic cancer                             | 4,396<br>(3,968 - 4,894)      | -                     | -                      | 204<br>(175 - 239)       | 1,615<br>(1,431 - 1,816)    | 2,578<br>(2,226 - 3,038)    |
| Malignant skin melanoma                       | 590<br>(417 - 776)            | -                     | -                      | 110<br>(80 - 162)        | 226<br>(154 - 310)          | 253<br>(176 - 328)          |
| Non-melanoma skin cancer                      | 430<br>(321 - 587)            | -                     | -                      | 20<br>(15 - 28)          | 89<br>(65 - 125)            | 322<br>(238 - 439)          |
| Ovarian cancer                                | 1,499<br>(1,294 - 1,727)      | -                     | -                      | 186<br>(152 - 230)       | 653<br>(541 - 777)          | 660<br>(508 - 843)          |
| Testicular cancer                             | 136<br>(48 - 225)             | -                     | -                      | 104<br>(36 - 180)        | 20<br>(7 - 35)              | 12<br>(4 - 23)              |
| Kidney cancer                                 | 2,070<br>(1,811 - 2,352)      | 3<br>(1 - 4)          | 3<br>(2 - 5)           | 152<br>(125 - 183)       | 952<br>(810 - 1,129)        | 960<br>(781 - 1,164)        |
| Bladder cancer                                | 1,776<br>(1,495 - 2,257)      | -                     | -                      | 42<br>(33 - 55)          | 504<br>(415 - 652)          | 1,231<br>(998 - 1,584)      |
| Brain and nervous system cancer               | 1,473<br>(1,161 - 1,821)      | 23<br>(13 - 39)       | 54<br>(38 - 72)        | 298<br>(237 - 380)       | 625<br>(498 - 800)          | 472<br>(351 - 593)          |
| Thyroid cancer                                | 285<br>(230 - 377)            | -                     | 0<br>(0 - 1)           | 23<br>(18 - 32)          | 99<br>(79 - 136)            | 163<br>(125 - 220)          |
| Mesothelioma                                  | 179<br>(150 - 214)            | -                     | -                      | 20<br>(14 - 28)          | 89<br>(68 - 116)            | 70<br>(53 - 92)             |
| Hodgkin lymphoma                              | 165<br>(61 - 223)             | 1<br>(1 - 2)          | 4<br>(2 - 8)           | 53<br>(19 - 75)          | 54<br>(19 - 81)             | 53<br>(17 - 78)             |
| Non-Hodgkin lymphoma                          | 1,957<br>(1,625 - 2,386)      | 10<br>(6 - 16)        | 20<br>(14 - 29)        | 305<br>(254 - 390)       | 702<br>(578 - 881)          | 921<br>(696 - 1,153)        |
| Multiple myeloma                              | 741<br>(561 - 877)            | -                     | -                      | 49<br>(38 - 60)          | 307<br>(234 - 370)          | 385<br>(282 - 480)          |
| Leukemia                                      | 2,045<br>(1,863 - 2,257)      | 54<br>(33 - 86)       | 116<br>(90 - 148)      | 421<br>(375 - 474)       | 544<br>(479 - 612)          | 911<br>(784 - 1,063)        |
| Other neoplasms                               | 4,082<br>(3,386 - 4,692)      | 76<br>(48 - 117)      | 110<br>(83 - 143)      | 655<br>(556 - 810)       | 1,387<br>(1,153 - 1,688)    | 1,854<br>(1,343 - 2,218)    |
| Cardiovascular diseases                       | 103,413<br>(95,930 - 119,071) | 160<br>(121 - 217)    | 87<br>(70 - 109)       | 4,690<br>(4,300 - 5,305) | 23,661<br>(21,894 - 26,088) | 74,814<br>(68,083 - 87,877) |
| Rheumatic heart disease                       | 739<br>(362 - 969)            | 1<br>(1 - 2)          | 4<br>(3 - 6)           | 72<br>(54 - 97)          | 127<br>(92 - 172)           | 535<br>(189 - 758)          |
| Ischemic heart disease                        | 49,296<br>(43,234 - 65,250)   | 16<br>(11 - 24)       | 13<br>(9 - 17)         | 2,043<br>(1,785 - 2,505) | 11,702<br>(10,392 - 14,217) | 35,522<br>(30,259 - 48,675) |
| Cerebrovascular disease                       | 30,401<br>(26,259 - 37,642)   | 24<br>(17 - 34)       | 33<br>(25 - 43)        | 1,575<br>(1,362 - 1,869) | 6,801<br>(5,821 - 7,994)    | 21,968<br>(18,598 - 28,089) |
| Ischemic stroke                               | 15,944<br>(12,773 - 23,072)   | 6<br>(3 - 10)         | 6<br>(4 - 10)          | 203<br>(143 - 351)       | 2,041<br>(1,504 - 3,240)    | 13,689<br>(10,981 - 19,806) |
| Hemorrhagic stroke                            | 14,457<br>(11,224 - 16,998)   | 19<br>(13 - 27)       | 27<br>(21 - 34)        | 1,373<br>(1,164 - 1,596) | 4,759<br>(3,728 - 5,626)    | 8,280<br>(6,002 - 10,203)   |
| Hypertensive heart disease                    | 7,431<br>(3,837 - 10,723)     | 2<br>(1 - 4)          | 1<br>(1 - 2)           | 147<br>(96 - 199)        | 920<br>(591 - 1,198)        | 6,360<br>(3,099 - 9,473)    |
| Cardiomyopathy and myocarditis                | 4,382<br>(3,651 - 5,804)      | 57<br>(40 - 82)       | 18<br>(14 - 24)        | 316<br>(261 - 406)       | 1,071<br>(901 - 1,397)      | 2,919<br>(2,276 - 3,971)    |
| Atrial fibrillation and flutter               | 893<br>(697 - 1,145)          | -                     | -                      | 8<br>(6 - 11)            | 103<br>(83 - 126)           | 782<br>(585 - 1,033)        |
| Aortic aneurysm                               | 1,644<br>(1,364 - 2,001)      | -                     | -                      | 69<br>(54 - 84)          | 509<br>(415 - 609)          | 1,066<br>(855 - 1,337)      |
| Peripheral vascular disease                   | 151<br>(120 - 194)            | -                     | -                      | 1<br>(1 - 2)             | 21<br>(17 - 27)             | 128<br>(99 - 170)           |
| Endocarditis                                  | 1,210<br>(866 - 1,590)        | 22<br>(14 - 32)       | 4<br>(3 - 6)           | 108<br>(78 - 149)        | 323<br>(220 - 438)          | 753<br>(529 - 1,045)        |
| Other cardiovascular and circulatory diseases | 7,265<br>(5,344 - 8,904)      | 37<br>(25 - 55)       | 14<br>(10 - 20)        | 350<br>(280 - 443)       | 2,083<br>(1,454 - 2,571)    | 4,781<br>(3,397 - 6,178)    |

Web Table 31- Argentina deaths with 95% UI by age, sex, and cause in 2013

| Cause                                               | Both Sexes, All Ages        | Both Sexes, 0-4 Years | Both Sexes, 5-14 Years | Both Sexes, 15-49 Years | Both Sexes, 50-69 Years  | Both Sexes, 70-80 Years     |
|-----------------------------------------------------|-----------------------------|-----------------------|------------------------|-------------------------|--------------------------|-----------------------------|
| Chronic respiratory diseases                        | 34,669<br>(25,808 - 38,747) | 113<br>(75 - 159)     | 37<br>(26 - 47)        | 973<br>(791 - 1,088)    | 6,016<br>(4,545 - 6,747) | 27,531<br>(20,311 - 31,069) |
| Chronic obstructive pulmonary disease               | 27,919<br>(20,222 - 31,420) | 84<br>(54 - 120)      | 21<br>(15 - 27)        | 647<br>(514 - 740)      | 4,812<br>(3,559 - 5,439) | 22,354<br>(15,937 - 25,548) |
| Pneumoconiosis                                      | 467<br>(300 - 657)          | 1<br>(0 - 1)          | 1<br>(0 - 1)           | 52<br>(34 - 73)         | 118<br>(76 - 172)        | 296<br>(178 - 432)          |
| Silicosis                                           | 81<br>(51 - 121)            | 0<br>(0 - 0)          | 0<br>(0 - 0)           | 12<br>(8 - 18)          | 24<br>(15 - 36)          | 45<br>(25 - 71)             |
| Asbestosis                                          | 46<br>(28 - 67)             | 0<br>(0 - 0)          | 0<br>(0 - 0)           | 2<br>(2 - 3)            | 6<br>(4 - 9)             | 37<br>(21 - 57)             |
| Coal workers pneumoconiosis                         | 65<br>(42 - 93)             | 0<br>(0 - 0)          | 0<br>(0 - 0)           | 10<br>(6 - 14)          | 49<br>(30 - 72)          | 6<br>(3 - 10)               |
| Other pneumoconiosis                                | 274<br>(177 - 391)          | 0<br>(0 - 0)          | 0<br>(0 - 0)           | 28<br>(18 - 38)         | 38<br>(25 - 56)          | 208<br>(129 - 304)          |
| Asthma                                              | 1,274<br>(834 - 1,632)      | 4<br>(2 - 7)          | 8<br>(5 - 11)          | 182<br>(140 - 217)      | 315<br>(202 - 408)       | 765<br>(460 - 1,040)        |
| Interstitial lung disease and pulmonary sarcoidosis | 4,375<br>(2,823 - 5,955)    | 6<br>(3 - 10)         | 3<br>(2 - 5)           | 54<br>(38 - 74)         | 701<br>(486 - 931)       | 3,611<br>(2,249 - 5,052)    |
| Other chronic respiratory diseases                  | 635<br>(414 - 897)          | 18<br>(11 - 28)       | 4<br>(2 - 5)           | 37<br>(29 - 48)         | 70<br>(50 - 91)          | 506<br>(314 - 749)          |
| Cirrhosis                                           | 6,898<br>(6,408 - 7,409)    | 9<br>(6 - 14)         | 15<br>(12 - 18)        | 960<br>(844 - 1,081)    | 3,320<br>(3,009 - 3,653) | 2,595<br>(2,325 - 2,912)    |
| Cirrhosis due to hepatitis B                        | 802<br>(337 - 1,263)        | 0<br>(0 - 0)          | 1<br>(0 - 1)           | 83<br>(41 - 147)        | 347<br>(155 - 569)       | 372<br>(123 - 639)          |
| Cirrhosis due to hepatitis C                        | 2,745<br>(1,861 - 3,609)    | 2<br>(1 - 3)          | 5<br>(3 - 8)           | 421<br>(281 - 572)      | 1,363<br>(900 - 1,819)   | 953<br>(607 - 1,399)        |
| Cirrhosis due to alcohol use                        | 2,735<br>(2,010 - 3,343)    | -                     | -                      | 316<br>(190 - 438)      | 1,319<br>(913 - 1,655)   | 1,100<br>(826 - 1,392)      |
| Cirrhosis due to other causes                       | 615<br>(365 - 906)          | 8<br>(5 - 11)         | 9<br>(6 - 12)          | 139<br>(89 - 204)       | 291<br>(155 - 451)       | 169<br>(86 - 272)           |
| Digestive diseases                                  | 7,397<br>(6,546 - 9,842)    | 21<br>(13 - 33)       | 24<br>(19 - 34)        | 508<br>(436 - 709)      | 1,744<br>(1,520 - 2,350) | 5,100<br>(4,416 - 6,845)    |
| Peptic ulcer disease                                | 813<br>(618 - 1,234)        | 1<br>(0 - 1)          | 1<br>(1 - 2)           | 48<br>(35 - 72)         | 219<br>(166 - 334)       | 544<br>(396 - 851)          |
| Gastritis and duodenitis                            | 95<br>(64 - 182)            | 0<br>(0 - 1)          | 1<br>(0 - 1)           | 6<br>(4 - 11)           | 22<br>(15 - 43)          | 65<br>(40 - 130)            |
| Appendicitis                                        | 402<br>(278 - 691)          | 4<br>(2 - 8)          | 6<br>(4 - 10)          | 46<br>(32 - 73)         | 96<br>(62 - 164)         | 250<br>(160 - 434)          |
| Paralytic ileus and intestinal obstruction          | 1,023<br>(149 - 1,830)      | 5<br>(2 - 10)         | 5<br>(2 - 7)           | 45<br>(13 - 72)         | 183<br>(31 - 310)        | 785<br>(100 - 1,468)        |
| Inguinal, femoral, and abdominal hernia             | 388<br>(181 - 952)          | 1<br>(0 - 4)          | 1<br>(1 - 3)           | 20<br>(10 - 45)         | 81<br>(41 - 186)         | 285<br>(121 - 748)          |
| Inflammatory bowel disease                          | 150<br>(114 - 249)          | 1<br>(1 - 2)          | 1<br>(1 - 1)           | 18<br>(13 - 27)         | 40<br>(30 - 61)          | 90<br>(61 - 163)            |
| Vascular intestinal disorders                       | 1,250<br>(762 - 2,143)      | 2<br>(0 - 5)          | 1<br>(0 - 2)           | 33<br>(18 - 58)         | 260<br>(150 - 430)       | 954<br>(586 - 1,663)        |
| Gallbladder and biliary diseases                    | 1,277<br>(981 - 2,130)      | 1<br>(1 - 2)          | 1<br>(1 - 2)           | 70<br>(55 - 119)        | 256<br>(195 - 456)       | 948<br>(698 - 1,566)        |
| Pancreatitis                                        | 1,080<br>(780 - 1,709)      | 1<br>(1 - 2)          | 3<br>(2 - 5)           | 155<br>(121 - 235)      | 356<br>(266 - 543)       | 565<br>(350 - 975)          |
| Other digestive diseases                            | 920<br>(742 - 1,319)        | 4<br>(2 - 6)          | 5<br>(3 - 6)           | 67<br>(54 - 94)         | 230<br>(180 - 312)       | 614<br>(463 - 936)          |
| Neurological disorders                              | 17,236<br>(14,345 - 20,404) | 54<br>(39 - 75)       | 37<br>(29 - 46)        | 351<br>(309 - 412)      | 1,039<br>(916 - 1,173)   | 15,755<br>(12,889 - 18,814) |
| Alzheimer disease and other dementias               | 15,031<br>(12,188 - 18,142) | -                     | -                      | 1<br>(0 - 3)            | 529<br>(426 - 629)       | 14,500<br>(11,671 - 17,579) |
| Parkinson disease                                   | 1,103<br>(895 - 1,421)      | -                     | -                      | 6<br>(5 - 8)            | 135<br>(110 - 184)       | 963<br>(765 - 1,238)        |
| Epilepsy                                            | 301<br>(230 - 356)          | 12<br>(6 - 19)        | 16<br>(12 - 21)        | 156<br>(130 - 189)      | 58<br>(39 - 74)          | 59<br>(33 - 85)             |
| Multiple sclerosis                                  | 180<br>(124 - 260)          | -                     | -                      | 54<br>(37 - 82)         | 85<br>(55 - 122)         | 40<br>(26 - 62)             |
| Other neurological disorders                        | 621<br>(542 - 701)          | 42<br>(30 - 58)       | 21<br>(16 - 27)        | 133<br>(112 - 158)      | 232<br>(197 - 267)       | 193<br>(164 - 225)          |
| Mental and substance use disorders                  | 2,013<br>(1,267 - 2,637)    | 12<br>(5 - 18)        | 0<br>(0 - 1)           | 1,222<br>(491 - 1,532)  | 564<br>(436 - 877)       | 214<br>(150 - 297)          |
| Schizophrenia                                       | 28<br>(22 - 40)             | -                     | -                      | 7<br>(5 - 11)           | 12<br>(9 - 18)           | 9<br>(6 - 14)               |
| Alcohol use disorders                               | 867<br>(668 - 1,408)        | -                     | -                      | 228<br>(172 - 426)      | 465<br>(340 - 786)       | 174<br>(115 - 261)          |
| Drug use disorders                                  | 1,113<br>(297 - 1,336)      | 12<br>(5 - 18)        | -                      | 983<br>(195 - 1,202)    | 87<br>(70 - 105)         | 30<br>(21 - 38)             |
| Opioid use disorders                                | 104<br>(27 - 130)           | 1<br>(1 - 2)          | -                      | 93<br>(18 - 119)        | 7<br>(5 - 8)             | 3<br>(2 - 4)                |
| Cocaine use disorders                               | 26<br>(7 - 32)              | 0<br>(0 - 1)          | -                      | 23<br>(5 - 29)          | 2<br>(1 - 2)             | 1<br>(0 - 1)                |
| Amphetamine use disorders                           | 16<br>(5 - 20)              | 0<br>(0 - 0)          | -                      | 14<br>(3 - 18)          | 2<br>(1 - 2)             | 0<br>(0 - 1)                |
| Other drug use disorders                            | 967<br>(258 - 1,156)        | 10<br>(4 - 15)        | -                      | 853<br>(169 - 1,039)    | 77<br>(62 - 92)          | 26<br>(18 - 33)             |

Web Table 31- Argentina deaths with 95% UI by age, sex, and cause in 2013

| Cause                                               | Both Sexes, All Ages        | Both Sexes, 0-4 Years    | Both Sexes, 5-14 Years | Both Sexes, 15-49 Years  | Both Sexes, 50-69 Years  | Both Sexes, 70-80 Years     |
|-----------------------------------------------------|-----------------------------|--------------------------|------------------------|--------------------------|--------------------------|-----------------------------|
| Eating disorders                                    | 5<br>(3 - 6)                | --                       | 0<br>(0 - 1)           | 4<br>(3 - 6)             | --                       | --                          |
| Anorexia nervosa                                    | 5<br>(3 - 6)                | --                       | 0<br>(0 - 1)           | 4<br>(3 - 6)             | --                       | --                          |
| Diabetes, urogenital, blood, and endocrine diseases | 23,305<br>(20,854 - 25,847) | 234<br>(164 - 393)       | 87<br>(68 - 115)       | 1,263<br>(1,136 - 1,525) | 6,011<br>(5,467 - 6,581) | 15,710<br>(13,703 - 17,723) |
| Diabetes mellitus                                   | 9,426<br>(8,535 - 10,387)   | 9<br>(6 - 12)            | 9<br>(6 - 12)          | 376<br>(333 - 425)       | 2,939<br>(2,641 - 3,305) | 6,093<br>(5,329 - 6,928)    |
| Acute glomerulonephritis                            | 9<br>(7 - 12)               | 0<br>(0 - 1)             | 1<br>(0 - 1)           | 2<br>(2 - 3)             | 2<br>(2 - 3)             | 4<br>(3 - 6)                |
| Chronic kidney disease                              | 8,856<br>(7,728 - 10,867)   | 33<br>(23 - 47)          | 20<br>(15 - 29)        | 485<br>(421 - 681)       | 2,183<br>(1,867 - 2,571) | 6,136<br>(5,197 - 7,561)    |
| Chronic kidney disease due to diabetes mellitus     | 3,362<br>(2,710 - 4,473)    | 2<br>(1 - 3)             | 2<br>(1 - 2)           | 183<br>(141 - 250)       | 1,082<br>(866 - 1,406)   | 2,093<br>(1,627 - 2,827)    |
| Chronic kidney disease due to hypertension          | 1,520<br>(1,044 - 2,289)    | 8<br>(5 - 12)            | 3<br>(2 - 4)           | 66<br>(45 - 108)         | 205<br>(134 - 386)       | 1,239<br>(844 - 1,843)      |
| Chronic kidney disease due to glomerulonephritis    | 166<br>(118 - 238)          | 5<br>(3 - 7)             | 3<br>(2 - 4)           | 19<br>(14 - 26)          | 41<br>(29 - 64)          | 99<br>(67 - 151)            |
| Chronic kidney disease due to other causes          | 3,809<br>(2,803 - 5,073)    | 18<br>(12 - 29)          | 13<br>(9 - 20)         | 217<br>(161 - 363)       | 856<br>(545 - 1,156)     | 2,705<br>(1,969 - 3,735)    |
| Urinary diseases and male infertility               | 2,843<br>(1,368 - 3,739)    | 21<br>(13 - 30)          | 5<br>(2 - 6)           | 107<br>(49 - 135)        | 424<br>(187 - 541)       | 2,287<br>(1,077 - 3,109)    |
| Interstitial nephritis and urinary tract infections | 2,378<br>(1,043 - 3,279)    | 19<br>(11 - 27)          | 3<br>(1 - 4)           | 70<br>(28 - 95)          | 293<br>(114 - 396)       | 1,992<br>(852 - 2,812)      |
| Urolithiasis                                        | 21<br>(12 - 37)             | --                       | 1<br>(0 - 1)           | 3<br>(2 - 6)             | 7<br>(4 - 13)            | 10<br>(6 - 19)              |
| Other urinary diseases                              | 444<br>(253 - 758)          | 2<br>(1 - 4)             | 1<br>(0 - 2)           | 33<br>(16 - 50)          | 123<br>(60 - 193)        | 285<br>(172 - 529)          |
| Gynecological diseases                              | 5<br>(4 - 12)               | --                       | --                     | 3<br>(2 - 6)             | 1<br>(1 - 2)             | 2<br>(1 - 4)                |
| Uterine fibroids                                    | 1<br>(1 - 3)                | --                       | --                     | 0<br>(0 - 1)             | 0<br>(0 - 1)             | 1<br>(0 - 1)                |
| Polycystic ovarian syndrome                         | 0<br>(0 - 0)                | --                       | --                     | 0<br>(0 - 0)             | 0<br>(0 - 0)             | --                          |
| Endometriosis                                       | 0<br>(0 - 1)                | --                       | --                     | 0<br>(0 - 1)             | 0<br>(0 - 0)             | --                          |
| Genital prolapse                                    | 1<br>(1 - 2)                | --                       | --                     | 0<br>(0 - 1)             | 0<br>(0 - 0)             | 0<br>(0 - 1)                |
| Other gynecological diseases                        | 2<br>(2 - 6)                | --                       | --                     | 1<br>(1 - 3)             | 0<br>(0 - 1)             | 1<br>(0 - 2)                |
| Hemoglobinopathies and hemolytic anemias            | 395<br>(263 - 511)          | 65<br>(40 - 111)         | 24<br>(16 - 34)        | 92<br>(61 - 121)         | 79<br>(54 - 107)         | 135<br>(77 - 198)           |
| Thalassemias                                        | 42<br>(30 - 58)             | 14<br>(9 - 24)           | 6<br>(4 - 9)           | 20<br>(13 - 26)          | 1<br>(0 - 1)             | 0<br>(0 - 0)                |
| Sickle cell disorders                               | 39<br>(28 - 58)             | 18<br>(11 - 31)          | 7<br>(5 - 10)          | 10<br>(7 - 14)           | 3<br>(2 - 4)             | 0<br>(0 - 1)                |
| G6PD deficiency                                     | 11<br>(8 - 15)              | 3<br>(2 - 5)             | 1<br>(1 - 2)           | 4<br>(3 - 5)             | 2<br>(2 - 3)             | 1<br>(0 - 1)                |
| Other hemoglobinopathies and hemolytic anemias      | 303<br>(199 - 386)          | 30<br>(18 - 53)          | 9<br>(6 - 13)          | 57<br>(38 - 75)          | 73<br>(51 - 99)          | 134<br>(76 - 196)           |
| Endocrine, metabolic, blood, and immune disorders   | 1,770<br>(1,403 - 3,215)    | 106<br>(67 - 229)        | 29<br>(21 - 46)        | 199<br>(162 - 326)       | 382<br>(314 - 585)       | 1,054<br>(748 - 2,165)      |
| Musculoskeletal disorders                           | 1,216<br>(914 - 1,420)      | --                       | 12<br>(8 - 15)         | 183<br>(131 - 213)       | 341<br>(244 - 404)       | 680<br>(491 - 846)          |
| Rheumatoid arthritis                                | 222<br>(148 - 278)          | --                       | 2<br>(1 - 3)           | 22<br>(15 - 28)          | 90<br>(55 - 116)         | 108<br>(65 - 152)           |
| Other musculoskeletal disorders                     | 994<br>(739 - 1,176)        | --                       | 10<br>(7 - 13)         | 162<br>(115 - 189)       | 251<br>(178 - 299)       | 572<br>(418 - 726)          |
| Other non-communicable diseases                     | 4,916<br>(4,005 - 5,979)    | 2,856<br>(2,150 - 3,789) | 132<br>(102 - 170)     | 250<br>(217 - 299)       | 314<br>(248 - 362)       | 1,365<br>(755 - 1,778)      |
| Congenital anomalies                                | 3,104<br>(2,414 - 4,002)    | 2,545<br>(1,873 - 3,407) | 128<br>(99 - 167)      | 199<br>(169 - 250)       | 101<br>(85 - 124)        | 131<br>(97 - 170)           |
| Neural tube defects                                 | 163<br>(105 - 247)          | 146<br>(89 - 230)        | 8<br>(5 - 12)          | 8<br>(5 - 10)            | 1<br>(1 - 1)             | 0<br>(0 - 0)                |
| Congenital heart anomalies                          | 1,240<br>(945 - 1,609)      | 1,023<br>(751 - 1,383)   | 63<br>(47 - 86)        | 101<br>(83 - 128)        | 33<br>(25 - 45)          | 19<br>(12 - 28)             |
| Cleft lip and cleft palate                          | 4<br>(1 - 14)               | 4<br>(1 - 14)            | --                     | --                       | --                       | --                          |
| Down syndrome                                       | 146<br>(102 - 202)          | 86<br>(51 - 133)         | 10<br>(6 - 16)         | 29<br>(21 - 38)          | 20<br>(12 - 27)          | 1<br>(1 - 2)                |
| Chromosomal unbalanced rearrangements               | 94<br>(56 - 139)            | 86<br>(49 - 131)         | 2<br>(1 - 3)           | 4<br>(3 - 6)             | 1<br>(1 - 2)             | 1<br>(0 - 1)                |
| Other congenital anomalies                          | 1,457<br>(1,094 - 1,913)    | 1,199<br>(849 - 1,664)   | 44<br>(31 - 63)        | 57<br>(45 - 75)          | 46<br>(36 - 59)          | 110<br>(82 - 143)           |
| Skin and subcutaneous diseases                      | 1,515<br>(825 - 1,940)      | 14<br>(9 - 20)           | 3<br>(2 - 5)           | 51<br>(33 - 60)          | 214<br>(136 - 255)       | 1,233<br>(641 - 1,640)      |
| Cellulitis                                          | 174<br>(94 - 268)           | 3<br>(1 - 4)             | 1<br>(0 - 1)           | 12<br>(7 - 15)           | 44<br>(26 - 63)          | 115<br>(55 - 199)           |
| Pyoderma                                            | 437<br>(275 - 583)          | 9<br>(6 - 14)            | 1<br>(1 - 2)           | 22<br>(14 - 27)          | 88<br>(56 - 110)         | 317<br>(182 - 462)          |



Web Table 31- Argentina deaths with 95% UI by age, sex, and cause in 2013

| Cause                                           | Both Sexes, All Ages        | Both Sexes, 0-4 Years | Both Sexes, 5-14 Years | Both Sexes, 15-49 Years    | Both Sexes, 50-69 Years  | Both Sexes, 70-80 Years  |
|-------------------------------------------------|-----------------------------|-----------------------|------------------------|----------------------------|--------------------------|--------------------------|
| Decubitus ulcer                                 | 854<br>(419 - 1,151)        | 0<br>(0 - 1)          | 1<br>(0 - 1)           | 10<br>(6 - 13)             | 69<br>(39 - 88)          | 773<br>(368 - 1,065)     |
| Other skin and subcutaneous diseases            | 51<br>(29 - 85)             | 2<br>(1 - 4)          | 1<br>(0 - 1)           | 7<br>(5 - 10)              | 13<br>(7 - 18)           | 28<br>(12 - 61)          |
| Sudden infant death syndrome                    | 298<br>(166 - 569)          | 298<br>(166 - 569)    | --                     | --                         | --                       | --                       |
| Injuries                                        | 25,060<br>(22,245 - 26,837) | 989<br>(742 - 1,317)  | 694<br>(588 - 819)     | 10,186<br>(9,336 - 10,957) | 5,246<br>(4,541 - 5,784) | 7,945<br>(6,417 - 9,027) |
| Transport injuries                              | 7,529<br>(6,127 - 8,235)    | 158<br>(102 - 230)    | 306<br>(246 - 378)     | 3,729<br>(3,066 - 4,140)   | 1,791<br>(1,371 - 2,045) | 1,546<br>(1,224 - 1,789) |
| Road injuries                                   | 6,818<br>(5,553 - 7,454)    | 152<br>(99 - 222)     | 289<br>(233 - 358)     | 3,445<br>(2,803 - 3,829)   | 1,547<br>(1,189 - 1,763) | 1,384<br>(1,091 - 1,598) |
| Pedestrian road injuries                        | 1,420<br>(1,111 - 1,769)    | 38<br>(22 - 58)       | 72<br>(52 - 96)        | 508<br>(385 - 664)         | 318<br>(233 - 421)       | 484<br>(369 - 621)       |
| Cyclist road injuries                           | 453<br>(344 - 554)          | 12<br>(6 - 21)        | 36<br>(26 - 49)        | 168<br>(127 - 208)         | 136<br>(95 - 180)        | 101<br>(69 - 132)        |
| Motorcyclist road injuries                      | 740<br>(494 - 983)          | 4<br>(2 - 6)          | 12<br>(7 - 18)         | 593<br>(387 - 806)         | 98<br>(61 - 136)         | 34<br>(20 - 48)          |
| Motor vehicle road injuries                     | 4,151<br>(3,252 - 4,642)    | 97<br>(62 - 142)      | 166<br>(129 - 212)     | 2,156<br>(1,731 - 2,458)   | 977<br>(711 - 1,130)     | 755<br>(549 - 909)       |
| Other road injuries                             | 54<br>(36 - 81)             | 1<br>(1 - 2)          | 4<br>(2 - 7)           | 21<br>(13 - 32)            | 17<br>(10 - 28)          | 10<br>(6 - 16)           |
| Other transport injuries                        | 712<br>(542 - 820)          | 6<br>(4 - 9)          | 17<br>(12 - 25)        | 284<br>(224 - 352)         | 244<br>(143 - 311)       | 162<br>(115 - 208)       |
| Unintentional injuries                          | 11,077<br>(8,985 - 12,391)  | 783<br>(570 - 1,052)  | 272<br>(220 - 333)     | 2,311<br>(2,059 - 2,635)   | 2,092<br>(1,588 - 2,379) | 5,618<br>(4,121 - 6,661) |
| Falls                                           | 2,980<br>(1,802 - 3,808)    | 17<br>(11 - 25)       | 15<br>(10 - 19)        | 141<br>(114 - 172)         | 525<br>(236 - 656)       | 2,283<br>(1,362 - 3,033) |
| Drowning                                        | 926<br>(734 - 1,389)        | 140<br>(85 - 234)     | 100<br>(70 - 153)      | 469<br>(354 - 726)         | 142<br>(106 - 219)       | 74<br>(56 - 105)         |
| Fire, heat, and hot substances                  | 895<br>(594 - 1,126)        | 61<br>(36 - 94)       | 26<br>(16 - 38)        | 181<br>(125 - 227)         | 201<br>(124 - 265)       | 426<br>(268 - 572)       |
| Poisonings                                      | 555<br>(263 - 719)          | 29<br>(18 - 43)       | 14<br>(8 - 19)         | 112<br>(73 - 135)          | 100<br>(48 - 129)        | 301<br>(99 - 441)        |
| Exposure to mechanical forces                   | 1,354<br>(1,161 - 1,673)    | 23<br>(15 - 35)       | 40<br>(29 - 66)        | 779<br>(640 - 983)         | 272<br>(211 - 348)       | 240<br>(148 - 327)       |
| Unintentional firearm injuries                  | 1,003<br>(513 - 1,209)      | 6<br>(3 - 9)          | 21<br>(13 - 29)        | 608<br>(355 - 763)         | 195<br>(83 - 258)        | 174<br>(60 - 251)        |
| Unintentional suffocation                       | 168<br>(132 - 297)          | 9<br>(5 - 14)         | 4<br>(2 - 7)           | 66<br>(49 - 125)           | 39<br>(27 - 63)          | 51<br>(33 - 97)          |
| Other exposure to mechanical forces             | 183<br>(141 - 487)          | 9<br>(5 - 17)         | 15<br>(9 - 40)         | 105<br>(74 - 317)          | 39<br>(29 - 90)          | 15<br>(11 - 28)          |
| Adverse effects of medical treatment            | 2,063<br>(1,514 - 2,473)    | 36<br>(24 - 63)       | 10<br>(7 - 14)         | 187<br>(147 - 234)         | 543<br>(397 - 672)       | 1,288<br>(884 - 1,630)   |
| Animal contact                                  | 41<br>(14 - 52)             | 4<br>(1 - 7)          | 3<br>(2 - 5)           | 9<br>(4 - 12)              | 13<br>(4 - 19)           | 11<br>(3 - 16)           |
| Venomous animal contact                         | 21<br>(7 - 28)              | 2<br>(1 - 3)          | 2<br>(1 - 3)           | 5<br>(2 - 6)               | 9<br>(2 - 13)            | 4<br>(1 - 6)             |
| Non-venomous animal contact                     | 20<br>(6 - 26)              | 2<br>(1 - 4)          | 2<br>(1 - 2)           | 4<br>(2 - 6)               | 5<br>(1 - 7)             | 7<br>(2 - 11)            |
| Foreign body                                    | 1,791<br>(1,218 - 2,428)    | 445<br>(290 - 655)    | 26<br>(17 - 38)        | 166<br>(100 - 223)         | 204<br>(124 - 269)       | 949<br>(587 - 1,357)     |
| Pulmonary aspiration and foreign body in airway | 1,783<br>(1,210 - 2,420)    | 445<br>(289 - 654)    | 25<br>(17 - 37)        | 164<br>(98 - 220)          | 202<br>(122 - 268)       | 947<br>(586 - 1,355)     |
| Foreign body in other body part                 | 8<br>(6 - 11)               | 1<br>(0 - 1)          | 1<br>(1 - 1)           | 3<br>(2 - 4)               | 2<br>(1 - 3)             | 2<br>(1 - 3)             |
| Other unintentional injuries                    | 471<br>(373 - 583)          | 28<br>(15 - 46)       | 38<br>(22 - 60)        | 267<br>(199 - 351)         | 91<br>(59 - 139)         | 46<br>(26 - 64)          |
| Self-harm and interpersonal violence            | 6,381<br>(5,622 - 7,636)    | 47<br>(28 - 84)       | 115<br>(87 - 153)      | 4,127<br>(3,522 - 4,770)   | 1,335<br>(1,137 - 1,841) | 757<br>(615 - 1,194)     |
| Self-harm                                       | 3,899<br>(3,469 - 4,850)    | --                    | 62<br>(45 - 85)        | 2,312<br>(1,813 - 2,605)   | 928<br>(791 - 1,363)     | 597<br>(474 - 1,028)     |
| Interpersonal violence                          | 2,482<br>(1,788 - 3,407)    | 47<br>(28 - 84)       | 52<br>(33 - 84)        | 1,815<br>(1,297 - 2,510)   | 406<br>(271 - 631)       | 160<br>(89 - 254)        |
| Assault by firearm                              | 1,277<br>(844 - 1,957)      | 12<br>(6 - 24)        | 29<br>(17 - 50)        | 987<br>(646 - 1,488)       | 193<br>(115 - 331)       | 57<br>(28 - 96)          |
| Assault by sharp object                         | 933<br>(551 - 1,398)        | 10<br>(6 - 18)        | 10<br>(5 - 17)         | 720<br>(412 - 1,078)       | 149<br>(80 - 246)        | 43<br>(22 - 72)          |
| Assault by other means                          | 272<br>(162 - 370)          | 25<br>(15 - 43)       | 14<br>(8 - 22)         | 108<br>(60 - 153)          | 64<br>(35 - 97)          | 60<br>(31 - 100)         |
| Forces of nature, war, and legal intervention   | 73<br>(32 - 142)            | 0<br>(0 - 0)          | 1<br>(0 - 2)           | 20<br>(8 - 37)             | 28<br>(12 - 53)          | 24<br>(10 - 48)          |
| Exposure to forces of nature                    | 73<br>(32 - 142)            | 0<br>(0 - 0)          | 1<br>(0 - 2)           | 20<br>(8 - 37)             | 28<br>(12 - 53)          | 24<br>(10 - 48)          |

Web Table 31- Argentina deaths with 95% UI by age, sex, and cause in 2013

| Cause                                                             | Males, All Ages                | Males, 0-4 Years         | Males, 5-14 Years    | Males, 15-49 Years          | Males, 50-69 Years          | Males, 70-80 Years          |
|-------------------------------------------------------------------|--------------------------------|--------------------------|----------------------|-----------------------------|-----------------------------|-----------------------------|
| All causes                                                        | 174,368<br>(166,906 - 182,395) | 5,529<br>(4,195 - 7,346) | 958<br>(802 - 1,153) | 20,358<br>(19,111 - 21,704) | 52,211<br>(49,224 - 55,454) | 95,312<br>(92,125 - 98,733) |
| Communicable, maternal, neonatal, and nutritional diseases        | 18,931<br>(13,844 - 22,209)    | 2,971<br>(2,177 - 3,974) | 104<br>(80 - 133)    | 2,152<br>(1,797 - 2,561)    | 3,744<br>(2,435 - 4,691)    | 9,961<br>(6,304 - 12,722)   |
| HIV/AIDS and tuberculosis                                         | 1,879<br>(1,396 - 2,437)       | 9<br>(6 - 15)            | 5<br>(3 - 8)         | 1,127<br>(814 - 1,466)      | 520<br>(365 - 734)          | 218<br>(168 - 290)          |
| Tuberculosis                                                      | 483<br>(417 - 641)             | 5<br>(3 - 8)             | 3<br>(2 - 4)         | 124<br>(103 - 161)          | 194<br>(158 - 257)          | 158<br>(125 - 227)          |
| HIV/AIDS                                                          | 1,396<br>(937 - 1,932)         | 5<br>(2 - 9)             | 2<br>(0 - 5)         | 1,003<br>(695 - 1,333)      | 327<br>(178 - 539)          | 60<br>(27 - 109)            |
| HIV/AIDS resulting in mycobacterial infection                     | 85<br>(54 - 125)               | 0<br>(0 - 0)             | 0<br>(0 - 0)         | 60<br>(39 - 85)             | 21<br>(11 - 35)             | 4<br>(2 - 7)                |
| HIV/AIDS resulting in other diseases                              | 1,311<br>(880 - 1,811)         | 4<br>(1 - 8)             | 2<br>(0 - 4)         | 942<br>(652 - 1,249)        | 306<br>(166 - 503)          | 56<br>(25 - 102)            |
| Diarrhea, lower respiratory, and other common infectious diseases | 12,817<br>(7,475 - 15,961)     | 579<br>(418 - 783)       | 78<br>(58 - 102)     | 817<br>(507 - 1,026)        | 2,652<br>(1,382 - 3,476)    | 8,690<br>(4,909 - 11,436)   |
| Diarrheal diseases                                                | 286<br>(221 - 368)             | 85<br>(49 - 131)         | 4<br>(3 - 7)         | 21<br>(16 - 27)             | 37<br>(26 - 49)             | 140<br>(92 - 209)           |
| Intestinal infectious diseases                                    | 15<br>(8 - 27)                 | 4<br>(2 - 9)             | 3<br>(2 - 7)         | 6<br>(3 - 10)               | 1<br>(0 - 4)                | 1<br>(0 - 3)                |
| Typhoid fever                                                     | 9<br>(4 - 16)                  | 2<br>(1 - 4)             | 2<br>(1 - 4)         | 4<br>(2 - 7)                | 1<br>(0 - 1)                | 0<br>(0 - 1)                |
| Paratyphoid fever                                                 | 3<br>(1 - 6)                   | 1<br>(0 - 2)             | 1<br>(0 - 2)         | 1<br>(0 - 3)                | 0<br>(0 - 1)                | 0<br>(0 - 0)                |
| Other intestinal infectious diseases                              | 4<br>(1 - 9)                   | 1<br>(0 - 5)             | 0<br>(0 - 2)         | 1<br>(0 - 4)                | 1<br>(0 - 3)                | 0<br>(0 - 3)                |
| Lower respiratory infections                                      | 11,996<br>(6,708 - 15,149)     | 362<br>(236 - 521)       | 42<br>(26 - 61)      | 671<br>(363 - 873)          | 2,490<br>(1,223 - 3,316)    | 8,431<br>(4,620 - 11,188)   |
| Upper respiratory infections                                      | 5<br>(2 - 12)                  | 0<br>(0 - 1)             | 0<br>(0 - 0)         | 1<br>(0 - 2)                | 2<br>(0 - 6)                | 2<br>(0 - 8)                |
| Otitis media                                                      | 12<br>(9 - 15)                 | 1<br>(1 - 2)             | 0<br>(0 - 1)         | 1<br>(1 - 1)                | 3<br>(2 - 4)                | 6<br>(4 - 9)                |
| Meningitis                                                        | 333<br>(274 - 389)             | 80<br>(46 - 122)         | 17<br>(12 - 23)      | 76<br>(61 - 90)             | 84<br>(62 - 101)            | 78<br>(60 - 96)             |
| Pneumococcal meningitis                                           | 71<br>(54 - 90)                | 15<br>(8 - 25)           | 3<br>(2 - 5)         | 14<br>(9 - 20)              | 20<br>(12 - 29)             | 19<br>(11 - 27)             |
| H influenzae type B meningitis                                    | 38<br>(28 - 52)                | 20<br>(11 - 33)          | 2<br>(1 - 3)         | 5<br>(3 - 7)                | 6<br>(3 - 8)                | 5<br>(3 - 8)                |
| Meningococcal meningitis                                          | 119<br>(94 - 146)              | 26<br>(15 - 43)          | 8<br>(5 - 12)        | 28<br>(20 - 38)             | 28<br>(18 - 39)             | 28<br>(18 - 39)             |
| Other meningitis                                                  | 105<br>(71 - 134)              | 17<br>(9 - 31)           | 3<br>(1 - 6)         | 28<br>(19 - 38)             | 30<br>(14 - 46)             | 26<br>(15 - 37)             |
| Encephalitis                                                      | 129<br>(101 - 189)             | 25<br>(14 - 41)          | 10<br>(6 - 18)       | 37<br>(27 - 57)             | 32<br>(22 - 57)             | 25<br>(16 - 42)             |
| Diphtheria                                                        | 1<br>(0 - 4)                   | 0<br>(0 - 3)             | 0<br>(0 - 1)         | 0<br>(0 - 2)                | 0<br>(0 - 1)                | --<br>(0 - 1)               |
| Whooping cough                                                    | 22<br>(4 - 93)                 | 20<br>(2 - 91)           | 0<br>(0 - 0)         | 1<br>(1 - 1)                | 0<br>(0 - 0)                | --<br>(0 - 0)               |
| Tetanus                                                           | 5<br>(4 - 10)                  | 1<br>(0 - 1)             | 0<br>(0 - 1)         | 1<br>(1 - 2)                | 2<br>(1 - 4)                | 1<br>(1 - 3)                |
| Measles                                                           | 0<br>(0 - 0)                   | 0<br>(0 - 0)             | 0<br>(0 - 0)         | 0<br>(0 - 0)                | 0<br>(0 - 0)                | --<br>(0 - 0)               |
| Varicella and herpes zoster                                       | 11<br>(3 - 36)                 | 2<br>(0 - 6)             | 0<br>(0 - 2)         | 2<br>(0 - 5)                | 1<br>(0 - 4)                | 6<br>(0 - 30)               |
| Neglected tropical diseases and malaria                           | 593<br>(184 - 2,251)           | 5<br>(2 - 11)            | 4<br>(3 - 7)         | 76<br>(26 - 270)            | 272<br>(67 - 1,064)         | 237<br>(61 - 1,011)         |
| Malaria                                                           | 0<br>(0 - 1)                   | 0<br>(0 - 0)             | 0<br>(0 - 0)         | 0<br>(0 - 0)                | 0<br>(0 - 0)                | 0<br>(0 - 0)                |
| Chagas disease                                                    | 554<br>(144 - 2,212)           | 1<br>(0 - 5)             | 0<br>(0 - 2)         | 64<br>(15 - 257)            | 261<br>(56 - 1,053)         | 227<br>(50 - 1,002)         |
| Leishmaniasis                                                     | 0<br>(0 - 0)                   | 0<br>(0 - 0)             | 0<br>(0 - 0)         | 0<br>(0 - 0)                | 0<br>(0 - 0)                | 0<br>(0 - 0)                |
| Visceral leishmaniasis                                            | 0<br>(0 - 0)                   | 0<br>(0 - 0)             | 0<br>(0 - 0)         | 0<br>(0 - 0)                | 0<br>(0 - 0)                | 0<br>(0 - 0)                |
| Cysticercosis                                                     | 0<br>(0 - 0)                   | 0<br>(0 - 0)             | 0<br>(0 - 0)         | 0<br>(0 - 0)                | 0<br>(0 - 0)                | 0<br>(0 - 0)                |
| Cystic echinococcosis                                             | 14<br>(13 - 16)                | 0<br>(0 - 0)             | 1<br>(1 - 1)         | 5<br>(5 - 6)                | 5<br>(5 - 5)                | 3<br>(3 - 4)                |
| Dengue                                                            | 9<br>(7 - 15)                  | 2<br>(1 - 4)             | 2<br>(1 - 3)         | 3<br>(2 - 4)                | 1<br>(1 - 2)                | 2<br>(1 - 3)                |
| Yellow fever                                                      | 0<br>(0 - 1)                   | 0<br>(0 - 0)             | 0<br>(0 - 0)         | 0<br>(0 - 0)                | 0<br>(0 - 0)                | 0<br>(0 - 0)                |
| Rabies                                                            | 2<br>(1 - 2)                   | 0<br>(0 - 0)             | 0<br>(0 - 0)         | 1<br>(1 - 1)                | 0<br>(0 - 0)                | 0<br>(0 - 0)                |
| Intestinal nematode infections                                    | 3<br>(0 - 10)                  | 1<br>(0 - 5)             | 0<br>(0 - 2)         | 0<br>(0 - 4)                | 1<br>(0 - 4)                | 1<br>(0 - 4)                |
| Ascariasis                                                        | 3<br>(0 - 10)                  | 1<br>(0 - 5)             | 0<br>(0 - 2)         | 0<br>(0 - 4)                | 1<br>(0 - 4)                | 1<br>(0 - 4)                |
| Other neglected tropical diseases                                 | 10<br>(8 - 14)                 | 1<br>(0 - 1)             | 0<br>(0 - 0)         | 2<br>(2 - 3)                | 3<br>(2 - 5)                | 3<br>(2 - 6)                |

Web Table 31- Argentina deaths with 95% UI by age, sex, and cause in 2013

| Cause                                                            | Males, All Ages                | Males, 0-4 Years         | Males, 5-14 Years  | Males, 15-49 Years        | Males, 50-69 Years          | Males, 70-80 Years          |
|------------------------------------------------------------------|--------------------------------|--------------------------|--------------------|---------------------------|-----------------------------|-----------------------------|
| Maternal disorders                                               | --                             | --                       | --                 | --                        | --                          | --                          |
| Maternal hemorrhage                                              | --                             | --                       | --                 | --                        | --                          | --                          |
| Maternal sepsis and other maternal infections                    | --                             | --                       | --                 | --                        | --                          | --                          |
| Maternal hypertensive disorders                                  | --                             | --                       | --                 | --                        | --                          | --                          |
| Maternal obstructed labor                                        | --                             | --                       | --                 | --                        | --                          | --                          |
| Maternal abortive outcome                                        | --                             | --                       | --                 | --                        | --                          | --                          |
| Indirect maternal deaths                                         | --                             | --                       | --                 | --                        | --                          | --                          |
| Late maternal deaths                                             | --                             | --                       | --                 | --                        | --                          | --                          |
| Maternal deaths aggravated by HIV/AIDS                           | --                             | --                       | --                 | --                        | --                          | --                          |
| Other maternal disorders                                         | --                             | --                       | --                 | --                        | --                          | --                          |
| Neonatal disorders                                               | 2,261<br>(1,619 - 3,057)       | 2,261<br>(1,619 - 3,057) | --                 | --                        | --                          | --                          |
| Neonatal preterm birth complications                             | 1,281<br>(803 - 1,838)         | 1,281<br>(803 - 1,838)   | --                 | --                        | --                          | --                          |
| Neonatal encephalopathy due to birth asphyxia and trauma         | 279<br>(156 - 438)             | 279<br>(156 - 438)       | --                 | --                        | --                          | --                          |
| Neonatal sepsis and other neonatal infections                    | 379<br>(175 - 746)             | 379<br>(175 - 746)       | --                 | --                        | --                          | --                          |
| Hemolytic disease and other neonatal jaundice                    | 14<br>(5 - 32)                 | 14<br>(5 - 32)           | --                 | --                        | --                          | --                          |
| Other neonatal disorders                                         | 307<br>(177 - 499)             | 307<br>(177 - 499)       | --                 | --                        | --                          | --                          |
| Nutritional deficiencies                                         | 1,040<br>(731 - 1,717)         | 72<br>(39 - 168)         | 9<br>(6 - 16)      | 72<br>(51 - 148)          | 195<br>(139 - 339)          | 692<br>(447 - 1,112)        |
| Protein-energy malnutrition                                      | 689<br>(439 - 1,187)           | 67<br>(36 - 160)         | 7<br>(4 - 13)      | 43<br>(28 - 91)           | 126<br>(77 - 230)           | 446<br>(239 - 729)          |
| Iodine deficiency                                                | 1<br>(0 - 5)                   | 0<br>(0 - 0)             | 0<br>(0 - 0)       | 0<br>(0 - 1)              | 0<br>(0 - 2)                | 0<br>(0 - 3)                |
| Iron-deficiency anemia                                           | 302<br>(136 - 654)             | 2<br>(0 - 7)             | 1<br>(0 - 1)       | 22<br>(11 - 56)           | 61<br>(28 - 133)            | 217<br>(94 - 458)           |
| Other nutritional deficiencies                                   | 47<br>(23 - 110)               | 2<br>(0 - 6)             | 2<br>(1 - 4)       | 7<br>(3 - 17)             | 8<br>(3 - 21)               | 28<br>(11 - 68)             |
| Other communicable, maternal, neonatal, and nutritional diseases | 341<br>(260 - 418)             | 44<br>(20 - 82)          | 8<br>(5 - 11)      | 60<br>(46 - 74)           | 104<br>(76 - 133)           | 124<br>(87 - 169)           |
| Sexually transmitted diseases excluding HIV                      | 42<br>(17 - 81)                | 29<br>(7 - 65)           | 2<br>(1 - 5)       | 2<br>(1 - 4)              | 4<br>(2 - 9)                | 5<br>(2 - 11)               |
| Syphilis                                                         | 39<br>(14 - 78)                | 29<br>(7 - 65)           | 2<br>(1 - 5)       | 1<br>(1 - 2)              | 3<br>(1 - 6)                | 4<br>(1 - 9)                |
| Chlamydial infection                                             | --                             | --                       | --                 | --                        | --                          | --                          |
| Gonococcal infection                                             | 2<br>(1 - 4)                   | --                       | 0<br>(0 - 0)       | 0<br>(0 - 1)              | 1<br>(0 - 1)                | 1<br>(0 - 1)                |
| Other sexually transmitted diseases                              | 1<br>(1 - 2)                   | --                       | 0<br>(0 - 0)       | 0<br>(0 - 1)              | 0<br>(0 - 1)                | 0<br>(0 - 0)                |
| Hepatitis                                                        | 84<br>(68 - 103)               | 3<br>(1 - 5)             | 2<br>(1 - 3)       | 21<br>(15 - 28)           | 35<br>(26 - 49)             | 23<br>(15 - 33)             |
| Acute hepatitis A                                                | 35<br>(15 - 58)                | 2<br>(1 - 5)             | 2<br>(1 - 3)       | 13<br>(6 - 19)            | 12<br>(4 - 24)              | 5<br>(1 - 14)               |
| Acute hepatitis B                                                | 47<br>(26 - 69)                | 0<br>(0 - 1)             | 0<br>(0 - 1)       | 7<br>(3 - 14)             | 22<br>(11 - 34)             | 17<br>(9 - 26)              |
| Acute hepatitis C                                                | 2<br>(0 - 6)                   | --                       | 0<br>(0 - 0)       | 1<br>(0 - 2)              | 1<br>(0 - 2)                | 1<br>(0 - 2)                |
| Other infectious diseases                                        | 215<br>(137 - 282)             | 12<br>(7 - 19)           | 3<br>(2 - 5)       | 38<br>(24 - 48)           | 65<br>(38 - 89)             | 97<br>(56 - 139)            |
| Non-communicable diseases                                        | 138,270<br>(130,855 - 146,016) | 1,986<br>(1,489 - 2,664) | 400<br>(327 - 487) | 9,865<br>(9,100 - 10,708) | 44,506<br>(41,612 - 47,412) | 81,512<br>(77,465 - 85,880) |
| Neoplasms                                                        | 38,480<br>(35,689 - 42,475)    | 96<br>(62 - 147)         | 178<br>(142 - 224) | 2,896<br>(2,630 - 3,210)  | 15,612<br>(14,349 - 16,972) | 19,697<br>(17,921 - 22,335) |
| Esophageal cancer                                                | 1,740<br>(1,379 - 2,530)       | --                       | --                 | 93<br>(67 - 139)          | 795<br>(599 - 1,173)        | 852<br>(647 - 1,267)        |
| Stomach cancer                                                   | 3,304<br>(2,896 - 3,779)       | --                       | --                 | 223<br>(184 - 271)        | 1,362<br>(1,163 - 1,603)    | 1,719<br>(1,416 - 2,091)    |
| Liver cancer                                                     | 1,283<br>(1,088 - 1,506)       | --                       | 2<br>(2 - 4)       | 70<br>(54 - 90)           | 581<br>(469 - 707)          | 629<br>(489 - 809)          |
| Liver cancer due to hepatitis B                                  | 141<br>(75 - 225)              | --                       | 1<br>(0 - 2)       | 16<br>(10 - 23)           | 74<br>(32 - 126)            | 50<br>(26 - 84)             |
| Liver cancer due to hepatitis C                                  | 656<br>(488 - 839)             | --                       | 0<br>(0 - 1)       | 31<br>(20 - 45)           | 298<br>(217 - 400)          | 327<br>(226 - 454)          |
| Liver cancer due to alcohol use                                  | 418<br>(280 - 554)             | --                       | --                 | 17<br>(9 - 26)            | 176<br>(111 - 244)          | 225<br>(144 - 322)          |

Web Table 31- Argentina deaths with 95% UI by age, sex, and cause in 2013

| Cause                                         | Males, All Ages             | Males, 0-4 Years | Males, 5-14 Years | Males, 15-49 Years       | Males, 50-69 Years          | Males, 70-80 Years          |
|-----------------------------------------------|-----------------------------|------------------|-------------------|--------------------------|-----------------------------|-----------------------------|
| Liver cancer due to other causes              | 68<br>(43 - 100)            | --               | 1<br>(1 - 2)      | 7<br>(4 - 10)            | 33<br>(19 - 52)             | 27<br>(16 - 43)             |
| Larynx cancer                                 | 925<br>(746 - 1,306)        | --               | --                | 59<br>(43 - 98)          | 518<br>(403 - 755)          | 348<br>(262 - 474)          |
| Tracheal, bronchus and lung cancer            | 8,094<br>(7,312 - 9,059)    | --               | --                | 449<br>(363 - 536)       | 4,204<br>(3,727 - 4,741)    | 3,442<br>(2,985 - 4,008)    |
| Breast cancer                                 | 72<br>(49 - 148)            | --               | --                | 7<br>(4 - 17)            | 25<br>(15 - 52)             | 40<br>(23 - 80)             |
| Cervical cancer                               | --                          | --               | --                | --                       | --                          | --                          |
| Uterine cancer                                | --                          | --               | --                | --                       | --                          | --                          |
| Prostate cancer                               | 5,038<br>(3,281 - 7,273)    | --               | --                | 21<br>(13 - 33)          | 968<br>(633 - 1,445)        | 4,049<br>(2,583 - 5,941)    |
| Colon and rectum cancer                       | 5,003<br>(4,429 - 5,648)    | --               | --                | 315<br>(265 - 368)       | 1,875<br>(1,628 - 2,145)    | 2,814<br>(2,355 - 3,335)    |
| Lip and oral cavity cancer                    | 550<br>(417 - 726)          | --               | --                | 60<br>(43 - 85)          | 292<br>(217 - 386)          | 199<br>(142 - 275)          |
| Nasopharynx cancer                            | 122<br>(98 - 153)           | --               | 1<br>(0 - 1)      | 26<br>(18 - 36)          | 69<br>(52 - 93)             | 27<br>(19 - 38)             |
| Other pharynx cancer                          | 225<br>(184 - 327)          | --               | --                | 22<br>(16 - 38)          | 144<br>(112 - 207)          | 58<br>(43 - 85)             |
| Gallbladder and biliary tract cancer          | 769<br>(577 - 1,065)        | --               | --                | 32<br>(22 - 47)          | 302<br>(217 - 416)          | 435<br>(305 - 616)          |
| Pancreatic cancer                             | 2,105<br>(1,863 - 2,390)    | --               | --                | 126<br>(101 - 153)       | 934<br>(801 - 1,092)        | 1,045<br>(866 - 1,266)      |
| Malignant skin melanoma                       | 350<br>(182 - 535)          | --               | --                | 66<br>(38 - 114)         | 140<br>(70 - 218)           | 144<br>(70 - 211)           |
| Non-melanoma skin cancer                      | 266<br>(187 - 405)          | --               | --                | 13<br>(10 - 21)          | 67<br>(47 - 105)            | 185<br>(128 - 285)          |
| Ovarian cancer                                | --                          | --               | --                | --                       | --                          | --                          |
| Testicular cancer                             | 136<br>(48 - 225)           | --               | --                | 104<br>(36 - 180)        | 20<br>(7 - 35)              | 12<br>(4 - 23)              |
| Kidney cancer                                 | 1,390<br>(1,196 - 1,626)    | 2<br>(1 - 3)     | 2<br>(1 - 2)      | 104<br>(80 - 131)        | 698<br>(571 - 864)          | 585<br>(450 - 735)          |
| Bladder cancer                                | 1,343<br>(1,101 - 1,802)    | --               | --                | 27<br>(20 - 38)          | 413<br>(331 - 558)          | 903<br>(707 - 1,201)        |
| Brain and nervous system cancer               | 806<br>(554 - 1,115)        | 14<br>(6 - 27)   | 30<br>(17 - 44)   | 176<br>(120 - 250)       | 375<br>(258 - 539)          | 210<br>(129 - 297)          |
| Thyroid cancer                                | 99<br>(81 - 138)            | --               | 0<br>(0 - 0)      | 10<br>(7 - 15)           | 43<br>(32 - 60)             | 47<br>(36 - 65)             |
| Mesothelioma                                  | 113<br>(89 - 144)           | --               | --                | 14<br>(9 - 21)           | 59<br>(42 - 82)             | 40<br>(27 - 58)             |
| Hodgkin lymphoma                              | 94<br>(31 - 138)            | 1<br>(0 - 1)     | 3<br>(1 - 6)      | 31<br>(9 - 49)           | 35<br>(11 - 57)             | 25<br>(7 - 42)              |
| Non-Hodgkin lymphoma                          | 1,103<br>(846 - 1,377)      | 6<br>(3 - 11)    | 13<br>(8 - 21)    | 200<br>(155 - 269)       | 431<br>(325 - 568)          | 453<br>(316 - 588)          |
| Multiple myeloma                              | 377<br>(257 - 473)          | --               | --                | 30<br>(20 - 41)          | 172<br>(116 - 231)          | 175<br>(113 - 235)          |
| Leukemia                                      | 1,134<br>(1,009 - 1,292)    | 30<br>(15 - 53)  | 66<br>(47 - 92)   | 241<br>(205 - 284)       | 323<br>(271 - 377)          | 474<br>(391 - 574)          |
| Other neoplasms                               | 2,039<br>(1,545 - 2,340)    | 44<br>(25 - 70)  | 62<br>(43 - 83)   | 377<br>(312 - 465)       | 767<br>(571 - 915)          | 790<br>(523 - 983)          |
| Cardiovascular diseases                       | 47,824<br>(44,405 - 51,917) | 84<br>(62 - 115) | 46<br>(35 - 58)   | 3,117<br>(2,810 - 3,452) | 16,004<br>(14,762 - 17,306) | 28,573<br>(26,174 - 31,745) |
| Rheumatic heart disease                       | 179<br>(95 - 233)           | 1<br>(0 - 1)     | 2<br>(1 - 3)      | 27<br>(17 - 38)          | 63<br>(34 - 89)             | 86<br>(38 - 125)            |
| Ischemic heart disease                        | 22,883<br>(20,012 - 29,188) | 9<br>(5 - 13)    | 7<br>(4 - 9)      | 1,463<br>(1,254 - 1,812) | 8,539<br>(7,508 - 10,131)   | 12,865<br>(10,804 - 17,561) |
| Cerebrovascular disease                       | 15,179<br>(12,483 - 17,926) | 15<br>(10 - 22)  | 18<br>(13 - 24)   | 958<br>(758 - 1,160)     | 4,479<br>(3,611 - 5,357)    | 9,709<br>(7,835 - 11,753)   |
| Ischemic stroke                               | 7,588<br>(5,954 - 10,483)   | 3<br>(2 - 5)     | 3<br>(2 - 6)      | 130<br>(86 - 232)        | 1,423<br>(1,009 - 2,258)    | 6,028<br>(4,679 - 8,163)    |
| Hemorrhagic stroke                            | 7,590<br>(5,087 - 9,436)    | 11<br>(7 - 17)   | 15<br>(10 - 20)   | 828<br>(617 - 1,018)     | 3,055<br>(2,037 - 3,861)    | 3,681<br>(2,186 - 4,833)    |
| Hypertensive heart disease                    | 2,254<br>(1,248 - 3,223)    | 1<br>(1 - 2)     | 1<br>(0 - 1)      | 106<br>(60 - 154)        | 613<br>(347 - 859)          | 1,534<br>(782 - 2,276)      |
| Cardiomyopathy and myocarditis                | 2,357<br>(1,861 - 3,270)    | 28<br>(18 - 41)  | 9<br>(6 - 13)     | 238<br>(182 - 320)       | 792<br>(605 - 1,122)        | 1,291<br>(943 - 1,939)      |
| Atrial fibrillation and flutter               | 348<br>(258 - 450)          | --               | --                | 5<br>(4 - 7)             | 65<br>(49 - 84)             | 278<br>(192 - 377)          |
| Aortic aneurysm                               | 1,163<br>(924 - 1,390)      | --               | --                | 49<br>(36 - 61)          | 411<br>(322 - 500)          | 702<br>(550 - 868)          |
| Peripheral vascular disease                   | 70<br>(53 - 92)             | --               | --                | 1<br>(1 - 1)             | 16<br>(11 - 21)             | 54<br>(39 - 74)             |
| Endocarditis                                  | 632<br>(394 - 940)          | 13<br>(7 - 21)   | 3<br>(2 - 5)      | 71<br>(44 - 107)         | 214<br>(126 - 323)          | 331<br>(204 - 530)          |
| Other cardiovascular and circulatory diseases | 2,758<br>(1,927 - 3,360)    | 17<br>(11 - 26)  | 7<br>(5 - 10)     | 199<br>(155 - 255)       | 812<br>(591 - 1,039)        | 1,724<br>(1,108 - 2,192)    |

Web Table 31- Argentina deaths with 95% UI by age, sex, and cause in 2013

| Cause                                               | Males, All Ages             | Males, 0-4 Years | Males, 5-14 Years | Males, 15-49 Years     | Males, 50-69 Years       | Males, 70-80 Years          |
|-----------------------------------------------------|-----------------------------|------------------|-------------------|------------------------|--------------------------|-----------------------------|
| Chronic respiratory diseases                        | 19,903<br>(14,875 - 22,235) | 64<br>(39 - 97)  | 20<br>(14 - 27)   | 582<br>(423 - 686)     | 4,246<br>(3,112 - 4,874) | 14,991<br>(11,151 - 16,969) |
| Chronic obstructive pulmonary disease               | 16,668<br>(12,370 - 18,751) | 50<br>(30 - 77)  | 11<br>(8 - 16)    | 394<br>(284 - 468)     | 3,437<br>(2,512 - 3,976) | 12,776<br>(9,436 - 14,567)  |
| Pneumoconiosis                                      | 399<br>(241 - 577)          | 0<br>(0 - 0)     | 0<br>(0 - 1)      | 50<br>(31 - 71)        | 111<br>(69 - 163)        | 237<br>(136 - 363)          |
| Silicosis                                           | 78<br>(47 - 116)            | 0<br>(0 - 0)     | 0<br>(0 - 0)      | 12<br>(8 - 18)         | 23<br>(14 - 35)          | 42<br>(23 - 68)             |
| Asbestosis                                          | 36<br>(21 - 55)             | 0<br>(0 - 0)     | 0<br>(0 - 0)      | 2<br>(1 - 3)           | 5<br>(3 - 8)             | 29<br>(16 - 46)             |
| Coal workers pneumoconiosis                         | 61<br>(38 - 88)             | 0<br>(0 - 0)     | 0<br>(0 - 0)      | 10<br>(6 - 14)         | 49<br>(30 - 71)          | 3<br>(1 - 4)                |
| Other pneumoconiosis                                | 224<br>(137 - 330)          | 0<br>(0 - 0)     | 0<br>(0 - 0)      | 26<br>(16 - 37)        | 34<br>(20 - 51)          | 164<br>(96 - 253)           |
| Asthma                                              | 476<br>(341 - 573)          | 2<br>(1 - 4)     | 4<br>(3 - 6)      | 96<br>(70 - 118)       | 135<br>(96 - 173)        | 238<br>(158 - 314)          |
| Interstitial lung disease and pulmonary sarcoidosis | 2,112<br>(1,357 - 2,960)    | 2<br>(1 - 4)     | 2<br>(1 - 3)      | 25<br>(16 - 35)        | 519<br>(331 - 743)       | 1,563<br>(959 - 2,291)      |
| Other chronic respiratory diseases                  | 247<br>(173 - 323)          | 10<br>(6 - 17)   | 2<br>(1 - 4)      | 17<br>(12 - 22)        | 43<br>(30 - 59)          | 175<br>(114 - 245)          |
| Cirrhosis                                           | 4,909<br>(4,482 - 5,383)    | 5<br>(3 - 8)     | 6<br>(5 - 8)      | 762<br>(654 - 879)     | 2,606<br>(2,314 - 2,930) | 1,529<br>(1,315 - 1,776)    |
| Cirrhosis due to hepatitis B                        | 420<br>(163 - 745)          | 0<br>(0 - 0)     | 0<br>(0 - 1)      | 61<br>(21 - 116)       | 224<br>(84 - 405)        | 134<br>(53 - 247)           |
| Cirrhosis due to hepatitis C                        | 1,993<br>(1,277 - 2,767)    | 1<br>(0 - 2)     | 2<br>(1 - 4)      | 322<br>(181 - 482)     | 1,062<br>(634 - 1,525)   | 606<br>(379 - 835)          |
| Cirrhosis due to alcohol use                        | 2,140<br>(1,504 - 2,703)    | -                | -                 | 284<br>(165 - 409)     | 1,134<br>(758 - 1,471)   | 721<br>(505 - 938)          |
| Cirrhosis due to other causes                       | 356<br>(179 - 570)          | 4<br>(2 - 7)     | 4<br>(2 - 5)      | 94<br>(55 - 149)       | 186<br>(81 - 315)        | 68<br>(31 - 115)            |
| Digestive diseases                                  | 3,530<br>(3,047 - 4,962)    | 11<br>(6 - 19)   | 12<br>(9 - 17)    | 305<br>(252 - 459)     | 1,079<br>(913 - 1,538)   | 2,123<br>(1,784 - 3,022)    |
| Peptic ulcer disease                                | 470<br>(328 - 774)          | 0<br>(0 - 1)     | 0<br>(0 - 1)      | 35<br>(24 - 57)        | 161<br>(111 - 263)       | 273<br>(183 - 467)          |
| Gastritis and duodenitis                            | 49<br>(30 - 101)            | 0<br>(0 - 1)     | 0<br>(0 - 1)      | 4<br>(2 - 8)           | 16<br>(10 - 34)          | 28<br>(16 - 61)             |
| Appendicitis                                        | 201<br>(127 - 355)          | 2<br>(1 - 5)     | 3<br>(2 - 5)      | 28<br>(17 - 50)        | 62<br>(35 - 115)         | 105<br>(61 - 196)           |
| Paralytic ileus and intestinal obstruction          | 455<br>(60 - 785)           | 3<br>(1 - 6)     | 2<br>(1 - 4)      | 27<br>(6 - 43)         | 113<br>(17 - 193)        | 310<br>(34 - 669)           |
| Inguinal, femoral, and abdominal hernia             | 173<br>(81 - 446)           | 1<br>(0 - 2)     | 1<br>(0 - 2)      | 11<br>(6 - 29)         | 46<br>(23 - 114)         | 115<br>(48 - 321)           |
| Inflammatory bowel disease                          | 67<br>(48 - 120)            | 0<br>(0 - 1)     | 0<br>(0 - 1)      | 10<br>(7 - 17)         | 23<br>(15 - 37)          | 33<br>(21 - 64)             |
| Vascular intestinal disorders                       | 550<br>(232 - 1,061)        | 1<br>(0 - 4)     | 1<br>(0 - 1)      | 18<br>(7 - 39)         | 157<br>(64 - 305)        | 374<br>(151 - 733)          |
| Gallbladder and biliary diseases                    | 543<br>(383 - 966)          | 0<br>(0 - 1)     | 0<br>(0 - 1)      | 30<br>(21 - 59)        | 133<br>(90 - 242)        | 379<br>(255 - 660)          |
| Pancreatitis                                        | 592<br>(422 - 1,029)        | 0<br>(0 - 1)     | 1<br>(1 - 3)      | 104<br>(76 - 171)      | 230<br>(159 - 383)       | 256<br>(158 - 494)          |
| Other digestive diseases                            | 431<br>(299 - 640)          | 2<br>(1 - 4)     | 2<br>(1 - 3)      | 39<br>(27 - 59)        | 139<br>(96 - 203)        | 249<br>(161 - 388)          |
| Neurological disorders                              | 7,308<br>(5,693 - 9,252)    | 30<br>(20 - 44)  | 21<br>(15 - 28)   | 211<br>(178 - 258)     | 586<br>(497 - 703)       | 6,460<br>(4,878 - 8,439)    |
| Alzheimer disease and other dementias               | 6,153<br>(4,557 - 8,044)    | -                | -                 | 1<br>(0 - 3)           | 299<br>(227 - 391)       | 5,853<br>(4,282 - 7,760)    |
| Parkinson disease                                   | 559<br>(438 - 716)          | -                | -                 | 4<br>(3 - 5)           | 85<br>(66 - 110)         | 471<br>(359 - 618)          |
| Epilepsy                                            | 179<br>(135 - 214)          | 7<br>(3 - 12)    | 9<br>(6 - 12)     | 97<br>(78 - 125)       | 38<br>(25 - 50)          | 28<br>(16 - 40)             |
| Multiple sclerosis                                  | 81<br>(40 - 139)            | -                | -                 | 24<br>(12 - 42)        | 39<br>(18 - 68)          | 18<br>(8 - 34)              |
| Other neurological disorders                        | 336<br>(263 - 408)          | 23<br>(16 - 34)  | 12<br>(8 - 17)    | 85<br>(66 - 108)       | 125<br>(98 - 160)        | 89<br>(67 - 111)            |
| Mental and substance use disorders                  | 1,742<br>(1,041 - 2,272)    | 8<br>(3 - 12)    | 0<br>(0 - 0)      | 1,114<br>(378 - 1,407) | 448<br>(317 - 738)       | 172<br>(114 - 257)          |
| Schizophrenia                                       | 15<br>(10 - 24)             | -                | -                 | 4<br>(3 - 8)           | 6<br>(4 - 11)            | 4<br>(2 - 7)                |
| Alcohol use disorders                               | 760<br>(572 - 1,273)        | -                | -                 | 187<br>(136 - 375)     | 421<br>(292 - 713)       | 152<br>(95 - 240)           |
| Drug use disorders                                  | 966<br>(158 - 1,190)        | 8<br>(3 - 12)    | -                 | 921<br>(135 - 1,143)   | 21<br>(10 - 28)          | 16<br>(6 - 22)              |
| Opioid use disorders                                | 92<br>(15 - 117)            | 1<br>(0 - 1)     | -                 | 88<br>(13 - 113)       | 2<br>(1 - 2)             | 2<br>(1 - 2)                |
| Cocaine use disorders                               | 21<br>(3 - 28)              | 0<br>(0 - 0)     | -                 | 21<br>(3 - 27)         | 0<br>(0 - 0)             | 0<br>(0 - 0)                |
| Amphetamine use disorders                           | 13<br>(2 - 17)              | 0<br>(0 - 0)     | -                 | 13<br>(2 - 16)         | 0<br>(0 - 0)             | 0<br>(0 - 0)                |
| Other drug use disorders                            | 840<br>(137 - 1,026)        | 7<br>(2 - 11)    | -                 | 800<br>(117 - 989)     | 19<br>(9 - 24)           | 14<br>(6 - 19)              |

Web Table 31- Argentina deaths with 95% UI by age, sex, and cause in 2013

| Cause                                               | Males, All Ages             | Males, 0-4 Years         | Males, 5-14 Years | Males, 15-49 Years | Males, 50-69 Years       | Males, 70-80 Years       |
|-----------------------------------------------------|-----------------------------|--------------------------|-------------------|--------------------|--------------------------|--------------------------|
| Eating disorders                                    | 1<br>(1 - 1)                | --                       | 0<br>(0 - 0)      | 1<br>(1 - 1)       | --                       | --                       |
| Anorexia nervosa                                    | 1<br>(1 - 1)                | --                       | 0<br>(0 - 0)      | 1<br>(1 - 1)       | --                       | --                       |
| Diabetes, urogenital, blood, and endocrine diseases | 11,756<br>(10,665 - 13,421) | 133<br>(88 - 236)        | 45<br>(34 - 62)   | 691<br>(608 - 879) | 3,611<br>(3,226 - 4,063) | 7,277<br>(6,453 - 8,475) |
| Diabetes mellitus                                   | 4,801<br>(4,297 - 5,394)    | 5<br>(4 - 8)             | 4<br>(3 - 6)      | 217<br>(184 - 252) | 1,792<br>(1,548 - 2,067) | 2,783<br>(2,356 - 3,260) |
| Acute glomerulonephritis                            | 6<br>(4 - 8)                | 0<br>(0 - 0)             | 0<br>(0 - 0)      | 1<br>(1 - 1)       | 1<br>(1 - 2)             | 2<br>(1 - 4)             |
| Chronic kidney disease                              | 4,703<br>(3,973 - 6,069)    | 18<br>(12 - 28)          | 10<br>(7 - 14)    | 269<br>(223 - 396) | 1,312<br>(1,079 - 1,636) | 3,093<br>(2,521 - 3,975) |
| Chronic kidney disease due to diabetes mellitus     | 1,795<br>(1,268 - 2,883)    | 1<br>(0 - 2)             | 1<br>(0 - 1)      | 106<br>(68 - 164)  | 635<br>(448 - 935)       | 1,053<br>(693 - 1,807)   |
| Chronic kidney disease due to hypertension          | 746<br>(461 - 1,311)        | 5<br>(3 - 8)             | 1<br>(1 - 2)      | 36<br>(19 - 64)    | 136<br>(76 - 297)        | 568<br>(333 - 984)       |
| Chronic kidney disease due to glomerulonephritis    | 90<br>(59 - 143)            | 2<br>(1 - 4)             | 2<br>(1 - 3)      | 11<br>(7 - 16)     | 28<br>(18 - 49)          | 46<br>(27 - 76)          |
| Chronic kidney disease due to other causes          | 2,073<br>(1,294 - 2,925)    | 10<br>(6 - 17)           | 6<br>(4 - 9)      | 116<br>(76 - 213)  | 513<br>(269 - 749)       | 1,427<br>(862 - 2,107)   |
| Urinary diseases and male infertility               | 1,282<br>(596 - 1,644)      | 13<br>(7 - 19)           | 2<br>(1 - 4)      | 49<br>(20 - 62)    | 256<br>(100 - 329)       | 962<br>(446 - 1,270)     |
| Interstitial nephritis and urinary tract infections | 892<br>(343 - 1,207)        | 11<br>(6 - 17)           | 2<br>(1 - 2)      | 20<br>(6 - 29)     | 141<br>(44 - 200)        | 719<br>(285 - 998)       |
| Urolithiasis                                        | 11<br>(6 - 19)              | --                       | 0<br>(0 - 1)      | 1<br>(1 - 2)       | 4<br>(2 - 7)             | 6<br>(3 - 10)            |
| Other urinary diseases                              | 378<br>(190 - 613)          | 1<br>(1 - 2)             | 1<br>(0 - 1)      | 27<br>(12 - 40)    | 111<br>(50 - 176)        | 238<br>(123 - 417)       |
| Gynecological diseases                              | --                          | --                       | --                | --                 | --                       | --                       |
| Uterine fibroids                                    | --                          | --                       | --                | --                 | --                       | --                       |
| Polycystic ovarian syndrome                         | --                          | --                       | --                | --                 | --                       | --                       |
| Endometriosis                                       | --                          | --                       | --                | --                 | --                       | --                       |
| Genital prolapse                                    | --                          | --                       | --                | --                 | --                       | --                       |
| Other gynecological diseases                        | --                          | --                       | --                | --                 | --                       | --                       |
| Hemoglobinopathies and hemolytic anemias            | 192<br>(123 - 298)          | 34<br>(18 - 65)          | 12<br>(7 - 20)    | 47<br>(30 - 76)    | 35<br>(21 - 54)          | 64<br>(37 - 97)          |
| Thalassemias                                        | 19<br>(12 - 32)             | 7<br>(4 - 13)            | 3<br>(2 - 5)      | 9<br>(6 - 14)      | 0<br>(0 - 1)             | 0<br>(0 - 0)             |
| Sickle cell disorders                               | 25<br>(15 - 41)             | 12<br>(7 - 23)           | 4<br>(3 - 7)      | 6<br>(4 - 10)      | 2<br>(1 - 3)             | 0<br>(0 - 0)             |
| G6PD deficiency                                     | 6<br>(4 - 10)               | 2<br>(1 - 3)             | 1<br>(0 - 1)      | 2<br>(1 - 3)       | 1<br>(1 - 2)             | 0<br>(0 - 1)             |
| Other hemoglobinopathies and hemolytic anemias      | 142<br>(90 - 221)           | 13<br>(7 - 25)           | 4<br>(2 - 7)      | 30<br>(19 - 49)    | 31<br>(19 - 49)          | 64<br>(37 - 96)          |
| Endocrine, metabolic, blood, and immune disorders   | 772<br>(588 - 1,513)        | 62<br>(35 - 144)         | 16<br>(10 - 27)   | 108<br>(82 - 189)  | 214<br>(161 - 358)       | 372<br>(245 - 829)       |
| Musculoskeletal disorders                           | 414<br>(246 - 520)          | --                       | 4<br>(2 - 6)      | 49<br>(27 - 61)    | 130<br>(67 - 165)        | 231<br>(137 - 310)       |
| Rheumatoid arthritis                                | 49<br>(25 - 75)             | --                       | 1<br>(0 - 1)      | 6<br>(3 - 9)       | 19<br>(8 - 31)           | 24<br>(11 - 41)          |
| Other musculoskeletal disorders                     | 364<br>(216 - 461)          | --                       | 3<br>(2 - 5)      | 43<br>(25 - 55)    | 111<br>(59 - 143)        | 207<br>(122 - 279)       |
| Other non-communicable diseases                     | 2,404<br>(1,936 - 2,995)    | 1,555<br>(1,142 - 2,120) | 67<br>(48 - 93)   | 138<br>(117 - 168) | 185<br>(149 - 221)       | 460<br>(299 - 604)       |
| Congenital anomalies                                | 1,679<br>(1,275 - 2,235)    | 1,388<br>(999 - 1,916)   | 65<br>(47 - 91)   | 110<br>(91 - 140)  | 62<br>(50 - 79)          | 54<br>(41 - 71)          |
| Neural tube defects                                 | 79<br>(45 - 131)            | 72<br>(37 - 122)         | 3<br>(1 - 5)      | 4<br>(2 - 6)       | 1<br>(0 - 1)             | 0<br>(0 - 0)             |
| Congenital heart anomalies                          | 679<br>(500 - 921)          | 562<br>(388 - 786)       | 34<br>(22 - 51)   | 56<br>(44 - 73)    | 23<br>(17 - 33)          | 5<br>(3 - 8)             |
| Cleft lip and cleft palate                          | 3<br>(0 - 13)               | 3<br>(0 - 13)            | --                | --                 | --                       | --                       |
| Down syndrome                                       | 79<br>(48 - 124)            | 45<br>(22 - 80)          | 4<br>(2 - 8)      | 18<br>(12 - 26)    | 11<br>(5 - 16)           | 1<br>(0 - 1)             |
| Chromosomal unbalanced rearrangements               | 40<br>(21 - 64)             | 37<br>(18 - 61)          | 1<br>(0 - 1)      | 1<br>(1 - 2)       | 1<br>(0 - 1)             | 0<br>(0 - 0)             |
| Other congenital anomalies                          | 799<br>(584 - 1,107)        | 670<br>(460 - 970)       | 24<br>(14 - 37)   | 31<br>(22 - 44)    | 27<br>(20 - 37)          | 48<br>(36 - 64)          |
| Skin and subcutaneous diseases                      | 565<br>(366 - 712)          | 7<br>(4 - 10)            | 2<br>(1 - 2)      | 28<br>(17 - 35)    | 123<br>(77 - 155)        | 406<br>(249 - 546)       |
| Cellulitis                                          | 79<br>(40 - 125)            | 1<br>(0 - 2)             | 0<br>(0 - 1)      | 6<br>(3 - 9)       | 25<br>(11 - 41)          | 46<br>(19 - 84)          |
| Pyoderma                                            | 186<br>(121 - 254)          | 4<br>(3 - 7)             | 1<br>(0 - 1)      | 12<br>(8 - 16)     | 50<br>(31 - 69)          | 119<br>(71 - 182)        |

Web Table 31- Argentina deaths with 95% UI by age, sex, and cause in 2013

| Cause                                           | Males, All Ages             | Males, 0-4 Years   | Males, 5-14 Years  | Males, 15-49 Years       | Males, 50-69 Years       | Males, 70-80 Years       |
|-------------------------------------------------|-----------------------------|--------------------|--------------------|--------------------------|--------------------------|--------------------------|
| Decubitus ulcer                                 | 281<br>(157 - 377)          | 0<br>(0 - 0)       | 0<br>(0 - 1)       | 7<br>(4 - 9)             | 41<br>(24 - 57)          | 233<br>(126 - 327)       |
| Other skin and subcutaneous diseases            | 19<br>(11 - 30)             | 1<br>(0 - 2)       | 0<br>(0 - 1)       | 3<br>(2 - 5)             | 6<br>(3 - 9)             | 8<br>(3 - 18)            |
| Sudden infant death syndrome                    | 160<br>(79 - 336)           | 160<br>(79 - 336)  | --                 | --                       | --                       | --                       |
| Injuries                                        | 17,168<br>(15,457 - 18,488) | 572<br>(397 - 792) | 454<br>(376 - 549) | 8,341<br>(7,568 - 9,053) | 3,961<br>(3,398 - 4,421) | 3,839<br>(3,214 - 4,316) |
| Transport injuries                              | 5,477<br>(4,390 - 6,057)    | 93<br>(58 - 142)   | 194<br>(151 - 247) | 2,998<br>(2,432 - 3,379) | 1,312<br>(956 - 1,526)   | 879<br>(666 - 1,053)     |
| Road injuries                                   | 4,949<br>(3,976 - 5,503)    | 89<br>(56 - 137)   | 183<br>(143 - 235) | 2,765<br>(2,228 - 3,120) | 1,123<br>(836 - 1,317)   | 788<br>(591 - 948)       |
| Pedestrian road injuries                        | 872<br>(610 - 1,213)        | 24<br>(12 - 40)    | 46<br>(29 - 65)    | 333<br>(229 - 485)       | 219<br>(145 - 328)       | 250<br>(167 - 364)       |
| Cyclist road injuries                           | 373<br>(271 - 475)          | 11<br>(6 - 19)     | 31<br>(21 - 43)    | 133<br>(97 - 171)        | 115<br>(78 - 160)        | 83<br>(53 - 114)         |
| Motorcyclist road injuries                      | 642<br>(414 - 867)          | 2<br>(1 - 4)       | 7<br>(4 - 12)      | 524<br>(334 - 725)       | 82<br>(46 - 119)         | 27<br>(15 - 40)          |
| Motor vehicle road injuries                     | 3,016<br>(2,379 - 3,456)    | 51<br>(32 - 79)    | 96<br>(69 - 128)   | 1,756<br>(1,380 - 2,053) | 692<br>(490 - 828)       | 421<br>(295 - 532)       |
| Other road injuries                             | 47<br>(29 - 73)             | 1<br>(0 - 1)       | 3<br>(2 - 6)       | 19<br>(11 - 30)          | 16<br>(9 - 26)           | 8<br>(4 - 14)            |
| Other transport injuries                        | 528<br>(382 - 626)          | 4<br>(2 - 6)       | 11<br>(7 - 18)     | 233<br>(176 - 300)       | 189<br>(98 - 251)        | 91<br>(60 - 126)         |
| Unintentional injuries                          | 6,454<br>(5,357 - 7,180)    | 453<br>(306 - 633) | 185<br>(144 - 234) | 1,891<br>(1,652 - 2,215) | 1,567<br>(1,166 - 1,796) | 2,359<br>(1,712 - 2,753) |
| Falls                                           | 1,444<br>(830 - 1,754)      | 10<br>(6 - 16)     | 10<br>(7 - 14)     | 123<br>(98 - 156)        | 486<br>(198 - 619)       | 815<br>(464 - 1,059)     |
| Drowning                                        | 767<br>(591 - 1,190)        | 89<br>(50 - 161)   | 75<br>(50 - 115)   | 427<br>(318 - 685)       | 120<br>(86 - 192)        | 55<br>(39 - 82)          |
| Fire, heat, and hot substances                  | 468<br>(303 - 591)          | 36<br>(18 - 63)    | 15<br>(8 - 25)     | 122<br>(80 - 162)        | 111<br>(67 - 152)        | 183<br>(113 - 255)       |
| Poisonings                                      | 289<br>(128 - 353)          | 15<br>(8 - 25)     | 7<br>(4 - 11)      | 73<br>(43 - 95)          | 66<br>(28 - 86)          | 127<br>(38 - 177)        |
| Exposure to mechanical forces                   | 1,124<br>(939 - 1,429)      | 11<br>(7 - 19)     | 25<br>(17 - 42)    | 686<br>(547 - 876)       | 228<br>(166 - 301)       | 174<br>(91 - 251)        |
| Unintentional firearm injuries                  | 866<br>(428 - 1,062)        | 3<br>(1 - 6)       | 14<br>(7 - 21)     | 543<br>(319 - 700)       | 165<br>(63 - 228)        | 142<br>(42 - 215)        |
| Unintentional suffocation                       | 114<br>(86 - 231)           | 4<br>(2 - 8)       | 3<br>(1 - 5)       | 51<br>(35 - 109)         | 31<br>(20 - 56)          | 25<br>(15 - 50)          |
| Other exposure to mechanical forces             | 144<br>(107 - 418)          | 4<br>(2 - 9)       | 9<br>(5 - 25)      | 92<br>(64 - 295)         | 32<br>(24 - 80)          | 7<br>(5 - 15)            |
| Adverse effects of medical treatment            | 1,007<br>(712 - 1,322)      | 20<br>(12 - 40)    | 5<br>(3 - 8)       | 99<br>(70 - 135)         | 327<br>(221 - 450)       | 556<br>(368 - 766)       |
| Animal contact                                  | 26<br>(8 - 32)              | 3<br>(1 - 5)       | 2<br>(1 - 3)       | 7<br>(3 - 10)            | 8<br>(2 - 10)            | 6<br>(1 - 9)             |
| Venomous animal contact                         | 12<br>(4 - 16)              | 1<br>(0 - 2)       | 1<br>(0 - 2)       | 4<br>(2 - 5)             | 4<br>(1 - 5)             | 2<br>(1 - 4)             |
| Non-venomous animal contact                     | 13<br>(3 - 17)              | 2<br>(0 - 3)       | 1<br>(0 - 2)       | 3<br>(1 - 5)             | 4<br>(1 - 6)             | 4<br>(1 - 6)             |
| Foreign body                                    | 948<br>(525 - 1,462)        | 250<br>(133 - 403) | 16<br>(8 - 24)     | 122<br>(61 - 175)        | 146<br>(73 - 214)        | 415<br>(219 - 689)       |
| Pulmonary aspiration and foreign body in airway | 944<br>(521 - 1,457)        | 249<br>(133 - 403) | 15<br>(8 - 24)     | 121<br>(60 - 174)        | 145<br>(71 - 213)        | 414<br>(219 - 688)       |
| Foreign body in other body part                 | 4<br>(3 - 7)                | 0<br>(0 - 1)       | 0<br>(0 - 1)       | 1<br>(1 - 2)             | 1<br>(1 - 2)             | 1<br>(1 - 2)             |
| Other unintentional injuries                    | 382<br>(296 - 486)          | 19<br>(9 - 36)     | 29<br>(15 - 49)    | 230<br>(162 - 313)       | 76<br>(45 - 121)         | 28<br>(18 - 43)          |
| Self-harm and interpersonal violence            | 5,198<br>(4,456 - 6,418)    | 27<br>(13 - 53)    | 74<br>(51 - 108)   | 3,439<br>(2,864 - 4,074) | 1,066<br>(883 - 1,524)   | 593<br>(464 - 981)       |
| Self-harm                                       | 3,109<br>(2,585 - 3,945)    | --                 | 39<br>(24 - 58)    | 1,856<br>(1,321 - 2,155) | 729<br>(601 - 1,120)     | 485<br>(374 - 865)       |
| Interpersonal violence                          | 2,089<br>(1,435 - 2,980)    | 27<br>(13 - 53)    | 35<br>(19 - 62)    | 1,583<br>(1,095 - 2,240) | 337<br>(206 - 575)       | 107<br>(50 - 189)        |
| Assault by firearm                              | 1,116<br>(691 - 1,783)      | 7<br>(2 - 16)      | 22<br>(11 - 43)    | 880<br>(533 - 1,379)     | 165<br>(88 - 304)        | 43<br>(17 - 81)          |
| Assault by sharp object                         | 795<br>(424 - 1,268)        | 6<br>(3 - 13)      | 6<br>(2 - 13)      | 627<br>(333 - 988)       | 127<br>(61 - 223)        | 29<br>(11 - 56)          |
| Assault by other means                          | 178<br>(90 - 274)           | 14<br>(6 - 27)     | 8<br>(3 - 15)      | 76<br>(36 - 121)         | 45<br>(20 - 76)          | 35<br>(14 - 68)          |
| Forces of nature, war, and legal intervention   | 38<br>(15 - 88)             | 0<br>(0 - 0)       | 0<br>(0 - 1)       | 13<br>(5 - 29)           | 17<br>(7 - 39)           | 8<br>(3 - 18)            |
| Exposure to forces of nature                    | 38<br>(15 - 88)             | 0<br>(0 - 0)       | 0<br>(0 - 1)       | 13<br>(5 - 29)           | 17<br>(7 - 39)           | 8<br>(3 - 18)            |

Web Table 31- Argentina deaths with 95% UI by age, sex, and cause in 2013

| Cause                                                             | Females, All Ages              | Females, 0-4 Years       | Females, 5-14 Years | Females, 15-49 Years      | Females, 50-69 Years        | Females, 70-80 Years           |
|-------------------------------------------------------------------|--------------------------------|--------------------------|---------------------|---------------------------|-----------------------------|--------------------------------|
| All causes                                                        | 160,725<br>(154,854 - 167,031) | 4,299<br>(3,258 - 5,585) | 684<br>(591 - 797)  | 9,972<br>(9,287 - 10,673) | 28,458<br>(26,761 - 30,303) | 117,312<br>(113,598 - 121,214) |
| Communicable, maternal, neonatal, and nutritional diseases        | 19,016<br>(12,263 - 23,156)    | 2,243<br>(1,635 - 2,986) | 101<br>(81 - 122)   | 1,262<br>(1,064 - 1,443)  | 1,890<br>(1,130 - 2,301)    | 13,521<br>(7,634 - 17,536)     |
| HIV/AIDS and tuberculosis                                         | 474<br>(343 - 672)             | 9<br>(6 - 14)            | 5<br>(3 - 8)        | 236<br>(152 - 366)        | 117<br>(78 - 175)           | 106<br>(77 - 143)              |
| Tuberculosis                                                      | 243<br>(203 - 301)             | 5<br>(3 - 7)             | 3<br>(2 - 5)        | 67<br>(54 - 83)           | 69<br>(53 - 89)             | 100<br>(72 - 136)              |
| HIV/AIDS                                                          | 231<br>(113 - 420)             | 4<br>(1 - 8)             | 2<br>(0 - 4)        | 170<br>(88 - 300)         | 48<br>(17 - 105)            | 6<br>(0 - 20)                  |
| HIV/AIDS resulting in mycobacterial infection                     | 11<br>(5 - 20)                 | 0<br>(0 - 0)             | 0<br>(0 - 0)        | 8<br>(4 - 14)             | 2<br>(1 - 5)                | 0<br>(0 - 1)                   |
| HIV/AIDS resulting in other diseases                              | 220<br>(108 - 400)             | 4<br>(1 - 8)             | 2<br>(0 - 4)        | 162<br>(84 - 286)         | 46<br>(16 - 100)            | 6<br>(0 - 19)                  |
| Diarrhea, lower respiratory, and other common infectious diseases | 14,534<br>(7,581 - 18,768)     | 459<br>(326 - 634)       | 72<br>(56 - 90)     | 495<br>(310 - 590)        | 1,478<br>(738 - 1,871)      | 12,030<br>(5,946 - 16,155)     |
| Diarrheal diseases                                                | 408<br>(284 - 598)             | 70<br>(41 - 111)         | 4<br>(2 - 7)        | 19<br>(15 - 24)           | 32<br>(23 - 43)             | 283<br>(166 - 482)             |
| Intestinal infectious diseases                                    | 15<br>(7 - 26)                 | 4<br>(2 - 7)             | 3<br>(1 - 6)        | 5<br>(2 - 10)             | 2<br>(1 - 4)                | 1<br>(0 - 4)                   |
| Typhoid fever                                                     | 9<br>(4 - 18)                  | 2<br>(1 - 4)             | 2<br>(1 - 4)        | 4<br>(2 - 7)              | 1<br>(0 - 2)                | 1<br>(0 - 1)                   |
| Paratyphoid fever                                                 | 3<br>(1 - 5)                   | 1<br>(0 - 2)             | 1<br>(0 - 1)        | 1<br>(0 - 2)              | 0<br>(0 - 1)                | 0<br>(0 - 0)                   |
| Other intestinal infectious diseases                              | 3<br>(0 - 7)                   | 1<br>(0 - 4)             | 0<br>(0 - 2)        | 1<br>(0 - 3)              | 0<br>(0 - 3)                | 1<br>(0 - 3)                   |
| Lower respiratory infections                                      | 13,649<br>(6,751 - 17,850)     | 282<br>(181 - 405)       | 39<br>(27 - 53)     | 391<br>(207 - 480)        | 1,354<br>(621 - 1,744)      | 11,582<br>(5,516 - 15,625)     |
| Upper respiratory infections                                      | 5<br>(1 - 15)                  | 0<br>(0 - 1)             | 0<br>(0 - 0)        | 0<br>(0 - 1)              | 1<br>(0 - 3)                | 3<br>(0 - 13)                  |
| Otitis media                                                      | 14<br>(11 - 20)                | 1<br>(1 - 2)             | 0<br>(0 - 1)        | 1<br>(1 - 1)              | 2<br>(2 - 3)                | 9<br>(6 - 15)                  |
| Meningitis                                                        | 290<br>(211 - 342)             | 63<br>(43 - 92)          | 14<br>(10 - 19)     | 48<br>(35 - 57)           | 59<br>(40 - 73)             | 107<br>(68 - 138)              |
| Pneumococcal meningitis                                           | 64<br>(43 - 84)                | 12<br>(7 - 18)           | 3<br>(1 - 5)        | 9<br>(6 - 15)             | 14<br>(7 - 22)              | 26<br>(12 - 40)                |
| H influenzae type B meningitis                                    | 32<br>(23 - 44)                | 16<br>(10 - 24)          | 2<br>(1 - 3)        | 3<br>(2 - 5)              | 4<br>(2 - 8)                | 7<br>(4 - 12)                  |
| Meningococcal meningitis                                          | 106<br>(75 - 128)              | 22<br>(14 - 33)          | 7<br>(5 - 9)        | 18<br>(13 - 22)           | 20<br>(14 - 26)             | 39<br>(25 - 54)                |
| Other meningitis                                                  | 88<br>(66 - 109)               | 13<br>(8 - 22)           | 3<br>(1 - 4)        | 17<br>(12 - 22)           | 20<br>(13 - 28)             | 35<br>(20 - 50)                |
| Encephalitis                                                      | 109<br>(83 - 152)              | 19<br>(11 - 34)          | 10<br>(6 - 18)      | 25<br>(18 - 40)           | 26<br>(16 - 38)             | 29<br>(17 - 43)                |
| Diphtheria                                                        | 1<br>(0 - 3)                   | 0<br>(0 - 2)             | 0<br>(0 - 1)        | 0<br>(0 - 1)              | 0<br>(0 - 1)                | --<br>(0 - 1)                  |
| Whooping cough                                                    | 20<br>(3 - 91)                 | 18<br>(2 - 89)           | 0<br>(0 - 1)        | 1<br>(1 - 1)              | 0<br>(0 - 0)                | --<br>(0 - 0)                  |
| Tetanus                                                           | 6<br>(4 - 11)                  | 0<br>(0 - 1)             | 0<br>(0 - 0)        | 1<br>(1 - 2)              | 2<br>(1 - 4)                | 2<br>(1 - 4)                   |
| Measles                                                           | 0<br>(0 - 0)                   | 0<br>(0 - 0)             | 0<br>(0 - 0)        | 0<br>(0 - 0)              | 0<br>(0 - 0)                | --<br>(0 - 0)                  |
| Varicella and herpes zoster                                       | 18<br>(4 - 65)                 | 2<br>(0 - 6)             | 0<br>(0 - 2)        | 2<br>(0 - 5)              | 1<br>(0 - 5)                | 13<br>(0 - 60)                 |
| Neglected tropical diseases and malaria                           | 365<br>(122 - 1,498)           | 4<br>(2 - 9)             | 4<br>(3 - 6)        | 42<br>(17 - 168)          | 113<br>(32 - 495)           | 202<br>(47 - 794)              |
| Malaria                                                           | 0<br>(0 - 1)                   | 0<br>(0 - 0)             | 0<br>(0 - 0)        | 0<br>(0 - 0)              | 0<br>(0 - 0)                | 0<br>(0 - 1)                   |
| Chagas disease                                                    | 332<br>(87 - 1,462)            | 1<br>(0 - 3)             | 0<br>(0 - 1)        | 33<br>(9 - 159)           | 106<br>(24 - 486)           | 191<br>(36 - 780)              |
| Leishmaniasis                                                     | 0<br>(0 - 0)                   | 0<br>(0 - 0)             | 0<br>(0 - 0)        | 0<br>(0 - 0)              | 0<br>(0 - 0)                | 0<br>(0 - 0)                   |
| Visceral leishmaniasis                                            | 0<br>(0 - 0)                   | 0<br>(0 - 0)             | 0<br>(0 - 0)        | 0<br>(0 - 0)              | 0<br>(0 - 0)                | 0<br>(0 - 0)                   |
| Cysticercosis                                                     | 0<br>(0 - 0)                   | 0<br>(0 - 0)             | 0<br>(0 - 0)        | 0<br>(0 - 0)              | 0<br>(0 - 0)                | 0<br>(0 - 0)                   |
| Cystic echinococcosis                                             | 14<br>(13 - 15)                | 0<br>(0 - 0)             | 1<br>(1 - 1)        | 4<br>(3 - 4)              | 4<br>(4 - 4)                | 5<br>(5 - 6)                   |
| Dengue                                                            | 8<br>(6 - 14)                  | 2<br>(1 - 4)             | 2<br>(1 - 2)        | 2<br>(1 - 3)              | 1<br>(1 - 2)                | 2<br>(1 - 4)                   |
| Yellow fever                                                      | 0<br>(0 - 0)                   | 0<br>(0 - 0)             | 0<br>(0 - 0)        | 0<br>(0 - 0)              | 0<br>(0 - 0)                | 0<br>(0 - 0)                   |
| Rabies                                                            | 2<br>(1 - 2)                   | 0<br>(0 - 0)             | 0<br>(0 - 0)        | 1<br>(1 - 1)              | 0<br>(0 - 0)                | 0<br>(0 - 0)                   |
| Intestinal nematode infections                                    | 2<br>(0 - 8)                   | 1<br>(0 - 4)             | 0<br>(0 - 2)        | 0<br>(0 - 2)              | 0<br>(0 - 3)                | 1<br>(0 - 5)                   |
| Ascariasis                                                        | 2<br>(0 - 8)                   | 1<br>(0 - 4)             | 0<br>(0 - 2)        | 0<br>(0 - 2)              | 0<br>(0 - 3)                | 1<br>(0 - 5)                   |
| Other neglected tropical diseases                                 | 6<br>(5 - 12)                  | 0<br>(0 - 1)             | 0<br>(0 - 0)        | 2<br>(1 - 2)              | 2<br>(1 - 3)                | 3<br>(2 - 6)                   |



Web Table 31- Argentina deaths with 95% UI by age, sex, and cause in 2013

| Cause                                                            | Females, All Ages              | Females, 0-4 Years       | Females, 5-14 Years | Females, 15-49 Years     | Females, 50-69 Years        | Females, 70-80 Years         |
|------------------------------------------------------------------|--------------------------------|--------------------------|---------------------|--------------------------|-----------------------------|------------------------------|
| Maternal disorders                                               | 387<br>(320 - 456)             | --                       | 3<br>(2 - 4)        | 384<br>(318 - 454)       | --                          | --                           |
| Maternal hemorrhage                                              | 39<br>(31 - 50)                | --                       | 0<br>(0 - 0)        | 39<br>(31 - 49)          | --                          | --                           |
| Maternal sepsis and other maternal infections                    | 64<br>(50 - 80)                | --                       | 1<br>(0 - 1)        | 64<br>(50 - 79)          | --                          | --                           |
| Maternal hypertensive disorders                                  | 37<br>(28 - 48)                | --                       | 1<br>(0 - 1)        | 36<br>(27 - 47)          | --                          | --                           |
| Maternal obstructed labor                                        | 24<br>(16 - 32)                | --                       | 0<br>(0 - 0)        | 24<br>(16 - 32)          | --                          | --                           |
| Maternal abortive outcome                                        | 82<br>(65 - 101)               | --                       | 0<br>(0 - 1)        | 81<br>(65 - 101)         | --                          | --                           |
| Indirect maternal deaths                                         | 72<br>(58 - 89)                | --                       | 0<br>(0 - 1)        | 72<br>(57 - 88)          | --                          | --                           |
| Late maternal deaths                                             | 26<br>(19 - 33)                | --                       | 0<br>(0 - 1)        | 26<br>(19 - 33)          | --                          | --                           |
| Maternal deaths aggravated by HIV/AIDS                           | 0<br>(0 - 1)                   | --                       | --                  | 0<br>(0 - 1)             | --                          | --                           |
| Other maternal disorders                                         | 42<br>(33 - 52)                | --                       | 0<br>(0 - 0)        | 42<br>(33 - 51)          | --                          | --                           |
| Neonatal disorders                                               | 1,672<br>(1,203 - 2,276)       | 1,672<br>(1,203 - 2,276) | --                  | --                       | --                          | --                           |
| Neonatal preterm birth complications                             | 964<br>(625 - 1,392)           | 964<br>(625 - 1,392)     | --                  | --                       | --                          | --                           |
| Neonatal encephalopathy due to birth asphyxia and trauma         | 204<br>(121 - 326)             | 204<br>(121 - 326)       | --                  | --                       | --                          | --                           |
| Neonatal sepsis and other neonatal infections                    | 278<br>(136 - 515)             | 278<br>(136 - 515)       | --                  | --                       | --                          | --                           |
| Hemolytic disease and other neonatal jaundice                    | 10<br>(3 - 29)                 | 10<br>(3 - 29)           | --                  | --                       | --                          | --                           |
| Other neonatal disorders                                         | 216<br>(119 - 351)             | 216<br>(119 - 351)       | --                  | --                       | --                          | --                           |
| Nutritional deficiencies                                         | 1,261<br>(974 - 1,633)         | 56<br>(36 - 88)          | 10<br>(7 - 13)      | 65<br>(53 - 90)          | 102<br>(82 - 135)           | 1,029<br>(751 - 1,377)       |
| Protein-energy malnutrition                                      | 750<br>(422 - 1,085)           | 53<br>(34 - 86)          | 7<br>(5 - 10)       | 26<br>(14 - 39)          | 57<br>(31 - 80)             | 607<br>(304 - 918)           |
| Iodine deficiency                                                | 2<br>(0 - 8)                   | 0<br>(0 - 0)             | 0<br>(0 - 0)        | 0<br>(0 - 1)             | 0<br>(0 - 2)                | 1<br>(0 - 7)                 |
| Iron-deficiency anemia                                           | 450<br>(220 - 773)             | 2<br>(0 - 6)             | 1<br>(0 - 3)        | 34<br>(20 - 52)          | 39<br>(19 - 66)             | 374<br>(174 - 673)           |
| Other nutritional deficiencies                                   | 60<br>(28 - 123)               | 1<br>(0 - 3)             | 1<br>(1 - 2)        | 5<br>(2 - 10)            | 6<br>(3 - 12)               | 47<br>(19 - 100)             |
| Other communicable, maternal, neonatal, and nutritional diseases | 322<br>(259 - 402)             | 42<br>(18 - 78)          | 8<br>(5 - 11)       | 40<br>(32 - 48)          | 79<br>(61 - 100)            | 154<br>(108 - 219)           |
| Sexually transmitted diseases excluding HIV                      | 58<br>(32 - 96)                | 29<br>(7 - 65)           | 3<br>(1 - 6)        | 10<br>(7 - 13)           | 6<br>(4 - 9)                | 10<br>(5 - 16)               |
| Syphilis                                                         | 47<br>(22 - 84)                | 29<br>(7 - 65)           | 3<br>(1 - 6)        | 4<br>(3 - 5)             | 3<br>(2 - 5)                | 8<br>(4 - 13)                |
| Chlamydial infection                                             | 3<br>(2 - 5)                   | --                       | 0<br>(0 - 0)        | 2<br>(1 - 3)             | 1<br>(1 - 1)                | 1<br>(0 - 1)                 |
| Gonococcal infection                                             | 4<br>(3 - 6)                   | --                       | 0<br>(0 - 0)        | 2<br>(1 - 3)             | 1<br>(1 - 2)                | 1<br>(1 - 2)                 |
| Other sexually transmitted diseases                              | 3<br>(2 - 4)                   | --                       | 0<br>(0 - 0)        | 2<br>(1 - 3)             | 1<br>(1 - 1)                | 1<br>(0 - 1)                 |
| Hepatitis                                                        | 64<br>(49 - 81)                | 2<br>(1 - 4)             | 2<br>(1 - 3)        | 12<br>(8 - 15)           | 23<br>(15 - 34)             | 26<br>(16 - 42)              |
| Acute hepatitis A                                                | 29<br>(14 - 46)                | 2<br>(1 - 3)             | 1<br>(1 - 2)        | 8<br>(5 - 12)            | 10<br>(3 - 18)              | 8<br>(2 - 17)                |
| Acute hepatitis B                                                | 32<br>(16 - 51)                | 0<br>(0 - 1)             | 0<br>(0 - 0)        | 3<br>(1 - 6)             | 12<br>(6 - 22)              | 16<br>(7 - 28)               |
| Acute hepatitis C                                                | 4<br>(1 - 11)                  | --                       | 0<br>(0 - 0)        | 0<br>(0 - 1)             | 1<br>(0 - 3)                | 2<br>(0 - 8)                 |
| Other infectious diseases                                        | 200<br>(137 - 274)             | 11<br>(7 - 16)           | 3<br>(2 - 5)        | 19<br>(13 - 24)          | 50<br>(36 - 70)             | 118<br>(73 - 178)            |
| Non-communicable diseases                                        | 133,817<br>(126,727 - 143,224) | 1,639<br>(1,212 - 2,171) | 344<br>(289 - 410)  | 6,865<br>(6,322 - 7,490) | 25,283<br>(23,681 - 27,035) | 99,685<br>(94,419 - 107,028) |
| Neoplasms                                                        | 32,543<br>(29,451 - 35,288)    | 69<br>(47 - 103)         | 134<br>(109 - 168)  | 3,434<br>(3,109 - 3,775) | 11,168<br>(10,069 - 12,131) | 17,737<br>(15,618 - 19,621)  |
| Esophageal cancer                                                | 729<br>(585 - 902)             | --                       | --                  | 27<br>(20 - 36)          | 195<br>(153 - 246)          | 507<br>(386 - 656)           |
| Stomach cancer                                                   | 1,753<br>(1,403 - 2,194)       | --                       | --                  | 117<br>(93 - 145)        | 472<br>(391 - 563)          | 1,163<br>(842 - 1,563)       |
| Liver cancer                                                     | 1,001<br>(792 - 1,271)         | --                       | 1<br>(1 - 2)        | 55<br>(41 - 72)          | 295<br>(228 - 370)          | 649<br>(461 - 903)           |
| Liver cancer due to hepatitis B                                  | 89<br>(42 - 153)               | --                       | 0<br>(0 - 0)        | 10<br>(5 - 17)           | 37<br>(16 - 65)             | 42<br>(18 - 80)              |
| Liver cancer due to hepatitis C                                  | 522<br>(366 - 697)             | --                       | 0<br>(0 - 0)        | 22<br>(13 - 33)          | 146<br>(94 - 204)           | 353<br>(233 - 511)           |
| Liver cancer due to alcohol use                                  | 225<br>(131 - 338)             | --                       | --                  | 7<br>(3 - 11)            | 55<br>(31 - 88)             | 163<br>(89 - 267)            |

Web Table 31- Argentina deaths with 95% UI by age, sex, and cause in 2013

| Cause                                         | Females, All Ages           | Females, 0-4 Years | Females, 5-14 Years | Females, 15-49 Years     | Females, 50-69 Years     | Females, 70-80 Years        |
|-----------------------------------------------|-----------------------------|--------------------|---------------------|--------------------------|--------------------------|-----------------------------|
| Liver cancer due to other causes              | 165<br>(87 - 251)           | --                 | 1<br>(1 - 2)        | 16<br>(10 - 23)          | 57<br>(28 - 88)          | 91<br>(45 - 158)            |
| Larynx cancer                                 | 111<br>(54 - 187)           | --                 | --                  | 8<br>(4 - 13)            | 45<br>(21 - 74)          | 58<br>(26 - 103)            |
| Tracheal, bronchus and lung cancer            | 2,982<br>(2,538 - 3,460)    | --                 | --                  | 203<br>(163 - 249)       | 1,278<br>(1,036 - 1,486) | 1,500<br>(1,179 - 1,896)    |
| Breast cancer                                 | 6,578<br>(5,753 - 7,542)    | --                 | --                  | 899<br>(768 - 1,049)     | 2,647<br>(2,286 - 3,029) | 3,032<br>(2,486 - 3,770)    |
| Cervical cancer                               | 2,057<br>(1,633 - 2,449)    | --                 | --                  | 626<br>(450 - 762)       | 799<br>(597 - 1,004)     | 632<br>(475 - 849)          |
| Uterine cancer                                | 840<br>(537 - 1,111)        | --                 | --                  | 47<br>(29 - 66)          | 329<br>(193 - 445)       | 465<br>(302 - 680)          |
| Prostate cancer                               | --                          | --                 | --                  | --                       | --                       | --                          |
| Colon and rectum cancer                       | 4,522<br>(3,765 - 5,357)    | --                 | --                  | 245<br>(204 - 293)       | 1,229<br>(1,057 - 1,407) | 3,049<br>(2,391 - 3,911)    |
| Lip and oral cavity cancer                    | 225<br>(148 - 298)          | --                 | --                  | 18<br>(11 - 25)          | 70<br>(45 - 95)          | 137<br>(88 - 192)           |
| Nasopharynx cancer                            | 37<br>(25 - 66)             | --                 | 0<br>(0 - 1)        | 7<br>(4 - 13)            | 13<br>(8 - 24)           | 17<br>(10 - 31)             |
| Other pharynx cancer                          | 40<br>(30 - 53)             | --                 | --                  | 3<br>(2 - 5)             | 17<br>(12 - 24)          | 20<br>(13 - 29)             |
| Gallbladder and biliary tract cancer          | 1,198<br>(812 - 1,661)      | --                 | --                  | 55<br>(33 - 77)          | 392<br>(264 - 516)       | 751<br>(469 - 1,130)        |
| Pancreatic cancer                             | 2,292<br>(1,927 - 2,712)    | --                 | --                  | 78<br>(62 - 97)          | 680<br>(566 - 808)       | 1,533<br>(1,210 - 1,931)    |
| Malignant skin melanoma                       | 240<br>(200 - 284)          | --                 | --                  | 44<br>(34 - 55)          | 87<br>(69 - 107)         | 110<br>(81 - 148)           |
| Non-melanoma skin cancer                      | 165<br>(101 - 240)          | --                 | --                  | 7<br>(4 - 10)            | 21<br>(13 - 31)          | 137<br>(82 - 203)           |
| Ovarian cancer                                | 1,499<br>(1,294 - 1,727)    | --                 | --                  | 186<br>(152 - 230)       | 653<br>(541 - 777)       | 660<br>(508 - 843)          |
| Testicular cancer                             | --                          | --                 | --                  | --                       | --                       | --                          |
| Kidney cancer                                 | 680<br>(547 - 844)          | 1<br>(1 - 2)       | 2<br>(1 - 3)        | 48<br>(35 - 62)          | 254<br>(193 - 327)       | 376<br>(266 - 518)          |
| Bladder cancer                                | 433<br>(300 - 648)          | --                 | --                  | 15<br>(10 - 23)          | 91<br>(64 - 137)         | 328<br>(217 - 500)          |
| Brain and nervous system cancer               | 667<br>(558 - 790)          | 9<br>(5 - 16)      | 24<br>(17 - 34)     | 122<br>(98 - 149)        | 250<br>(199 - 310)       | 262<br>(191 - 351)          |
| Thyroid cancer                                | 186<br>(136 - 263)          | --                 | 0<br>(0 - 0)        | 13<br>(9 - 19)           | 56<br>(40 - 84)          | 117<br>(80 - 168)           |
| Mesothelioma                                  | 67<br>(50 - 87)             | --                 | --                  | 6<br>(4 - 9)             | 31<br>(20 - 44)          | 30<br>(19 - 44)             |
| Hodgkin lymphoma                              | 71<br>(24 - 97)             | 1<br>(0 - 1)       | 2<br>(1 - 3)        | 22<br>(7 - 32)           | 19<br>(6 - 30)           | 28<br>(8 - 45)              |
| Non-Hodgkin lymphoma                          | 855<br>(592 - 1,098)        | 4<br>(2 - 6)       | 7<br>(4 - 10)       | 105<br>(76 - 141)        | 271<br>(199 - 359)       | 468<br>(301 - 648)          |
| Multiple myeloma                              | 363<br>(259 - 456)          | --                 | --                  | 19<br>(14 - 25)          | 134<br>(94 - 175)        | 210<br>(140 - 282)          |
| Leukemia                                      | 911<br>(784 - 1,048)        | 23<br>(13 - 40)    | 50<br>(36 - 67)     | 180<br>(151 - 212)       | 220<br>(182 - 263)       | 437<br>(339 - 549)          |
| Other neoplasms                               | 2,043<br>(1,539 - 2,620)    | 32<br>(19 - 53)    | 48<br>(34 - 70)     | 279<br>(209 - 387)       | 621<br>(492 - 898)       | 1,064<br>(706 - 1,372)      |
| Cardiovascular diseases                       | 55,589<br>(49,411 - 68,926) | 76<br>(53 - 123)   | 41<br>(32 - 56)     | 1,573<br>(1,344 - 2,065) | 7,657<br>(6,726 - 9,556) | 46,241<br>(40,638 - 57,369) |
| Rheumatic heart disease                       | 560<br>(229 - 777)          | 1<br>(0 - 1)       | 2<br>(1 - 4)        | 45<br>(33 - 66)          | 64<br>(46 - 111)         | 449<br>(132 - 669)          |
| Ischemic heart disease                        | 26,413<br>(21,748 - 38,108) | 7<br>(5 - 14)      | 6<br>(4 - 9)        | 579<br>(464 - 852)       | 3,163<br>(2,608 - 4,627) | 22,657<br>(18,329 - 32,929) |
| Cerebrovascular disease                       | 15,222<br>(12,369 - 22,018) | 9<br>(6 - 17)      | 15<br>(11 - 22)     | 617<br>(508 - 875)       | 2,322<br>(1,915 - 3,277) | 12,259<br>(9,651 - 17,951)  |
| Ischemic stroke                               | 8,356<br>(6,238 - 13,797)   | 2<br>(1 - 5)       | 3<br>(2 - 6)        | 72<br>(48 - 147)         | 618<br>(412 - 1,207)     | 7,660<br>(5,697 - 12,555)   |
| Hemorrhagic stroke                            | 6,867<br>(5,127 - 9,454)    | 7<br>(5 - 12)      | 12<br>(9 - 17)      | 545<br>(449 - 731)       | 1,704<br>(1,332 - 2,205) | 4,599<br>(3,182 - 6,651)    |
| Hypertensive heart disease                    | 5,178<br>(2,185 - 8,071)    | 1<br>(1 - 2)       | 1<br>(0 - 1)        | 41<br>(26 - 55)          | 308<br>(176 - 414)       | 4,827<br>(1,917 - 7,699)    |
| Cardiomyopathy and myocarditis                | 2,025<br>(1,465 - 2,895)    | 29<br>(19 - 47)    | 9<br>(6 - 13)       | 78<br>(60 - 115)         | 280<br>(210 - 405)       | 1,628<br>(1,146 - 2,442)    |
| Atrial fibrillation and flutter               | 544<br>(374 - 768)          | --                 | --                  | 3<br>(2 - 4)             | 38<br>(28 - 51)          | 504<br>(339 - 725)          |
| Aortic aneurysm                               | 481<br>(297 - 738)          | --                 | --                  | 20<br>(12 - 30)          | 97<br>(57 - 147)         | 363<br>(216 - 571)          |
| Peripheral vascular disease                   | 81<br>(56 - 118)            | --                 | --                  | 0<br>(0 - 1)             | 6<br>(4 - 8)             | 75<br>(50 - 111)            |
| Endocarditis                                  | 578<br>(336 - 850)          | 9<br>(5 - 16)      | 2<br>(1 - 2)        | 37<br>(23 - 55)          | 108<br>(58 - 157)        | 423<br>(241 - 650)          |
| Other cardiovascular and circulatory diseases | 4,507<br>(2,905 - 5,793)    | 20<br>(12 - 34)    | 7<br>(5 - 12)       | 151<br>(111 - 213)       | 1,272<br>(726 - 1,618)   | 3,057<br>(1,875 - 4,241)    |

Web Table 31- Argentina deaths with 95% UI by age, sex, and cause in 2013

| Cause                                               | Females, All Ages          | Females, 0-4 Years | Females, 5-14 Years | Females, 15-49 Years | Females, 50-69 Years     | Females, 70-80 Years       |
|-----------------------------------------------------|----------------------------|--------------------|---------------------|----------------------|--------------------------|----------------------------|
| Chronic respiratory diseases                        | 14,766<br>(9,166 - 17,511) | 49<br>(29 - 71)    | 17<br>(12 - 22)     | 391<br>(322 - 459)   | 1,770<br>(1,125 - 2,097) | 12,540<br>(7,595 - 15,236) |
| Chronic obstructive pulmonary disease               | 11,250<br>(6,811 - 13,817) | 34<br>(19 - 52)    | 10<br>(6 - 13)      | 254<br>(197 - 310)   | 1,375<br>(861 - 1,658)   | 9,578<br>(5,689 - 12,024)  |
| Pneumoconiosis                                      | 68<br>(34 - 116)           | 0<br>(0 - 1)       | 0<br>(0 - 1)        | 2<br>(1 - 3)         | 7<br>(3 - 12)            | 58<br>(27 - 106)           |
| Silicosis                                           | 4<br>(2 - 8)               | 0<br>(0 - 0)       | 0<br>(0 - 0)        | 0<br>(0 - 0)         | 1<br>(0 - 2)             | 3<br>(1 - 6)               |
| Asbestosis                                          | 10<br>(4 - 20)             | 0<br>(0 - 0)       | 0<br>(0 - 0)        | 0<br>(0 - 0)         | 1<br>(0 - 1)             | 8<br>(3 - 19)              |
| Coal workers pneumoconiosis                         | 4<br>(2 - 9)               | 0<br>(0 - 0)       | 0<br>(0 - 0)        | 0<br>(0 - 0)         | 1<br>(0 - 1)             | 3<br>(1 - 8)               |
| Other pneumoconiosis                                | 50<br>(25 - 87)            | 0<br>(0 - 0)       | 0<br>(0 - 0)        | 1<br>(1 - 2)         | 5<br>(2 - 8)             | 44<br>(21 - 79)            |
| Asthma                                              | 798<br>(412 - 1,140)       | 2<br>(1 - 3)       | 4<br>(2 - 6)        | 86<br>(51 - 120)     | 180<br>(90 - 263)        | 526<br>(258 - 793)         |
| Interstitial lung disease and pulmonary sarcoidosis | 2,263<br>(1,088 - 3,743)   | 4<br>(2 - 8)       | 2<br>(1 - 3)        | 29<br>(16 - 46)      | 182<br>(84 - 290)        | 2,047<br>(949 - 3,444)     |
| Other chronic respiratory diseases                  | 387<br>(217 - 637)         | 8<br>(4 - 15)      | 1<br>(1 - 2)        | 21<br>(13 - 30)      | 27<br>(14 - 41)          | 331<br>(174 - 573)         |
| Cirrhosis                                           | 1,989<br>(1,740 - 2,255)   | 4<br>(3 - 6)       | 8<br>(7 - 10)       | 198<br>(169 - 232)   | 713<br>(607 - 827)       | 1,066<br>(881 - 1,276)     |
| Cirrhosis due to hepatitis B                        | 381<br>(85 - 774)          | 0<br>(0 - 0)       | 0<br>(0 - 1)        | 21<br>(4 - 47)       | 122<br>(25 - 254)        | 238<br>(53 - 481)          |
| Cirrhosis due to hepatitis C                        | 752<br>(197 - 1,333)       | 1<br>(0 - 2)       | 3<br>(1 - 5)        | 99<br>(50 - 145)     | 302<br>(86 - 491)        | 348<br>(56 - 739)          |
| Cirrhosis due to alcohol use                        | 596<br>(295 - 975)         | -                  | -                   | 32<br>(15 - 60)      | 184<br>(99 - 315)        | 379<br>(155 - 637)         |
| Cirrhosis due to other causes                       | 260<br>(97 - 480)          | 3<br>(2 - 5)       | 5<br>(3 - 7)        | 46<br>(20 - 81)      | 105<br>(32 - 198)        | 101<br>(28 - 205)          |
| Digestive diseases                                  | 3,867<br>(3,275 - 5,115)   | 10<br>(6 - 15)     | 12<br>(9 - 18)      | 202<br>(170 - 272)   | 665<br>(556 - 900)       | 2,978<br>(2,446 - 4,014)   |
| Peptic ulcer disease                                | 343<br>(213 - 506)         | 0<br>(0 - 0)       | 1<br>(0 - 1)        | 13<br>(8 - 18)       | 58<br>(37 - 84)          | 271<br>(163 - 422)         |
| Gastritis and duodenitis                            | 47<br>(25 - 104)           | 0<br>(0 - 0)       | 0<br>(0 - 1)        | 2<br>(1 - 4)         | 7<br>(4 - 15)            | 37<br>(18 - 85)            |
| Appendicitis                                        | 201<br>(122 - 355)         | 2<br>(1 - 4)       | 3<br>(2 - 5)        | 17<br>(12 - 28)      | 34<br>(21 - 63)          | 145<br>(77 - 265)          |
| Paralytic ileus and intestinal obstruction          | 568<br>(60 - 1,134)        | 2<br>(1 - 5)       | 2<br>(1 - 3)        | 19<br>(4 - 32)       | 70<br>(9 - 136)          | 474<br>(44 - 982)          |
| Inguinal, femoral, and abdominal hernia             | 215<br>(85 - 649)          | 1<br>(0 - 2)       | 0<br>(0 - 1)        | 9<br>(4 - 23)        | 35<br>(15 - 99)          | 170<br>(62 - 528)          |
| Inflammatory bowel disease                          | 83<br>(55 - 155)           | 1<br>(0 - 1)       | 0<br>(0 - 1)        | 8<br>(5 - 12)        | 17<br>(12 - 29)          | 57<br>(33 - 115)           |
| Vascular intestinal disorders                       | 699<br>(417 - 1,411)       | 0<br>(0 - 2)       | 0<br>(0 - 1)        | 15<br>(8 - 31)       | 103<br>(58 - 202)        | 580<br>(329 - 1,179)       |
| Gallbladder and biliary diseases                    | 734<br>(523 - 1,313)       | 1<br>(0 - 1)       | 1<br>(0 - 1)        | 40<br>(30 - 70)      | 123<br>(90 - 229)        | 569<br>(383 - 1,006)       |
| Pancreatitis                                        | 488<br>(308 - 808)         | 1<br>(0 - 1)       | 2<br>(1 - 3)        | 51<br>(37 - 77)      | 126<br>(85 - 198)        | 308<br>(169 - 555)         |
| Other digestive diseases                            | 489<br>(357 - 744)         | 2<br>(1 - 3)       | 3<br>(2 - 4)        | 29<br>(22 - 40)      | 91<br>(69 - 128)         | 365<br>(246 - 584)         |
| Neurological disorders                              | 9,928<br>(7,369 - 12,857)  | 24<br>(16 - 33)    | 16<br>(12 - 21)     | 140<br>(118 - 166)   | 453<br>(377 - 536)       | 9,295<br>(6,720 - 12,249)  |
| Alzheimer disease and other dementias               | 8,878<br>(6,343 - 11,851)  | -                  | -                   | 0<br>(0 - 1)         | 231<br>(171 - 295)       | 8,647<br>(6,075 - 11,619)  |
| Parkinson disease                                   | 544<br>(385 - 779)         | -                  | -                   | 2<br>(2 - 3)         | 50<br>(36 - 79)          | 491<br>(338 - 707)         |
| Epilepsy                                            | 123<br>(80 - 156)          | 5<br>(3 - 9)       | 7<br>(5 - 10)       | 59<br>(44 - 77)      | 20<br>(12 - 28)          | 31<br>(15 - 50)            |
| Multiple sclerosis                                  | 99<br>(61 - 145)           | -                  | -                   | 30<br>(19 - 48)      | 46<br>(26 - 66)          | 22<br>(12 - 35)            |
| Other neurological disorders                        | 286<br>(253 - 320)         | 19<br>(13 - 26)    | 9<br>(7 - 12)       | 48<br>(41 - 56)      | 106<br>(89 - 125)        | 104<br>(84 - 125)          |
| Mental and substance use disorders                  | 271<br>(207 - 378)         | 5<br>(1 - 8)       | 0<br>(0 - 1)        | 108<br>(83 - 152)    | 116<br>(89 - 169)        | 42<br>(27 - 61)            |
| Schizophrenia                                       | 14<br>(9 - 19)             | -                  | -                   | 3<br>(2 - 4)         | 6<br>(4 - 8)             | 5<br>(3 - 9)               |
| Alcohol use disorders                               | 107<br>(52 - 221)          | -                  | -                   | 41<br>(19 - 86)      | 44<br>(21 - 98)          | 22<br>(10 - 42)            |
| Drug use disorders                                  | 147<br>(125 - 170)         | 5<br>(1 - 8)       | -                   | 62<br>(50 - 74)      | 66<br>(52 - 82)          | 14<br>(10 - 19)            |
| Opioid use disorders                                | 12<br>(10 - 15)            | 0<br>(0 - 1)       | -                   | 5<br>(4 - 7)         | 5<br>(4 - 7)             | 1<br>(1 - 2)               |
| Cocaine use disorders                               | 4<br>(3 - 5)               | 0<br>(0 - 0)       | -                   | 2<br>(2 - 3)         | 2<br>(1 - 2)             | 0<br>(0 - 0)               |
| Amphetamine use disorders                           | 3<br>(3 - 4)               | 0<br>(0 - 0)       | -                   | 1<br>(1 - 2)         | 1<br>(1 - 2)             | 0<br>(0 - 0)               |
| Other drug use disorders                            | 127<br>(108 - 148)         | 4<br>(1 - 7)       | -                   | 53<br>(43 - 63)      | 58<br>(46 - 72)          | 12<br>(9 - 17)             |

Web Table 31- Argentina deaths with 95% UI by age, sex, and cause in 2013

| Cause                                               | Females, All Ages          | Females, 0-4 Years     | Females, 5-14 Years | Females, 15-49 Years | Females, 50-69 Years     | Females, 70-80 Years     |
|-----------------------------------------------------|----------------------------|------------------------|---------------------|----------------------|--------------------------|--------------------------|
| Eating disorders                                    | 4<br>(2 - 5)               | --                     | 0<br>(0 - 1)        | 3<br>(2 - 5)         | --                       | --                       |
| Anorexia nervosa                                    | 4<br>(2 - 5)               | --                     | 0<br>(0 - 1)        | 3<br>(2 - 5)         | --                       | --                       |
| Diabetes, urogenital, blood, and endocrine diseases | 11,548<br>(9,341 - 13,489) | 101<br>(71 - 172)      | 42<br>(32 - 57)     | 572<br>(484 - 680)   | 2,399<br>(1,989 - 2,797) | 8,434<br>(6,607 - 9,990) |
| Diabetes mellitus                                   | 4,625<br>(3,893 - 5,440)   | 4<br>(2 - 6)           | 5<br>(3 - 8)        | 160<br>(134 - 189)   | 1,147<br>(950 - 1,423)   | 3,310<br>(2,656 - 4,009) |
| Acute glomerulonephritis                            | 4<br>(3 - 5)               | 0<br>(0 - 0)           | 0<br>(0 - 0)        | 1<br>(1 - 1)         | 1<br>(0 - 1)             | 2<br>(1 - 3)             |
| Chronic kidney disease                              | 4,153<br>(3,314 - 5,419)   | 14<br>(10 - 23)        | 10<br>(7 - 16)      | 215<br>(178 - 295)   | 871<br>(673 - 1,095)     | 3,043<br>(2,341 - 4,049) |
| Chronic kidney disease due to diabetes mellitus     | 1,566<br>(1,179 - 2,021)   | 1<br>(0 - 1)           | 1<br>(1 - 1)        | 77<br>(57 - 101)     | 447<br>(329 - 589)       | 1,040<br>(742 - 1,408)   |
| Chronic kidney disease due to hypertension          | 774<br>(439 - 1,320)       | 3<br>(2 - 6)           | 1<br>(1 - 2)        | 30<br>(17 - 52)      | 68<br>(35 - 124)         | 672<br>(370 - 1,155)     |
| Chronic kidney disease due to glomerulonephritis    | 76<br>(49 - 120)           | 2<br>(1 - 3)           | 1<br>(1 - 2)        | 8<br>(6 - 11)        | 13<br>(8 - 19)           | 52<br>(31 - 88)          |
| Chronic kidney disease due to other causes          | 1,736<br>(1,144 - 2,596)   | 8<br>(4 - 15)          | 7<br>(4 - 11)       | 100<br>(71 - 157)    | 343<br>(186 - 533)       | 1,278<br>(774 - 2,068)   |
| Urinary diseases and male infertility               | 1,561<br>(580 - 2,315)     | 8<br>(5 - 13)          | 2<br>(1 - 3)        | 58<br>(24 - 79)      | 167<br>(64 - 235)        | 1,325<br>(449 - 2,053)   |
| Interstitial nephritis and urinary tract infections | 1,486<br>(523 - 2,221)     | 8<br>(4 - 12)          | 1<br>(0 - 2)        | 51<br>(19 - 71)      | 152<br>(54 - 218)        | 1,274<br>(411 - 1,978)   |
| Urolithiasis                                        | 9<br>(5 - 21)              | --                     | 0<br>(0 - 1)        | 2<br>(1 - 4)         | 3<br>(1 - 7)             | 4<br>(2 - 11)            |
| Other urinary diseases                              | 66<br>(31 - 199)           | 1<br>(0 - 1)           | 0<br>(0 - 1)        | 6<br>(3 - 13)        | 12<br>(6 - 29)           | 47<br>(18 - 161)         |
| Gynecological diseases                              | 5<br>(4 - 12)              | --                     | --                  | 3<br>(2 - 6)         | 1<br>(1 - 2)             | 2<br>(1 - 4)             |
| Uterine fibroids                                    | 1<br>(1 - 3)               | --                     | --                  | 0<br>(0 - 1)         | 0<br>(0 - 1)             | 1<br>(0 - 1)             |
| Polycystic ovarian syndrome                         | 0<br>(0 - 0)               | --                     | --                  | 0<br>(0 - 0)         | 0<br>(0 - 0)             | --                       |
| Endometriosis                                       | 0<br>(0 - 1)               | --                     | --                  | 0<br>(0 - 1)         | 0<br>(0 - 0)             | --                       |
| Genital prolapse                                    | 1<br>(1 - 2)               | --                     | --                  | 0<br>(0 - 1)         | 0<br>(0 - 0)             | 0<br>(0 - 1)             |
| Other gynecological diseases                        | 2<br>(2 - 6)               | --                     | --                  | 1<br>(1 - 3)         | 0<br>(0 - 1)             | 1<br>(0 - 2)             |
| Hemoglobinopathies and hemolytic anemias            | 203<br>(109 - 287)         | 32<br>(18 - 61)        | 12<br>(7 - 18)      | 44<br>(23 - 67)      | 45<br>(27 - 64)          | 71<br>(27 - 129)         |
| Thalassemias                                        | 23<br>(13 - 33)            | 7<br>(4 - 14)          | 4<br>(2 - 5)        | 11<br>(6 - 17)       | 0<br>(0 - 0)             | 0<br>(0 - 0)             |
| Sickle cell disorders                               | 14<br>(9 - 22)             | 6<br>(3 - 11)          | 3<br>(2 - 4)        | 4<br>(2 - 6)         | 1<br>(1 - 2)             | 0<br>(0 - 0)             |
| G6PD deficiency                                     | 5<br>(3 - 7)               | 1<br>(1 - 2)           | 0<br>(0 - 1)        | 2<br>(1 - 3)         | 1<br>(1 - 2)             | 0<br>(0 - 0)             |
| Other hemoglobinopathies and hemolytic anemias      | 161<br>(84 - 233)          | 18<br>(10 - 34)        | 5<br>(3 - 8)        | 27<br>(14 - 41)      | 42<br>(25 - 60)          | 70<br>(27 - 129)         |
| Endocrine, metabolic, blood, and immune disorders   | 998<br>(737 - 1,898)       | 43<br>(27 - 98)        | 13<br>(9 - 23)      | 91<br>(71 - 152)     | 168<br>(127 - 256)       | 682<br>(448 - 1,396)     |
| Musculoskeletal disorders                           | 802<br>(581 - 989)         | --                     | 7<br>(5 - 10)       | 134<br>(79 - 161)    | 212<br>(118 - 259)       | 449<br>(306 - 597)       |
| Rheumatoid arthritis                                | 173<br>(99 - 226)          | --                     | 1<br>(1 - 2)        | 16<br>(9 - 22)       | 71<br>(36 - 94)          | 84<br>(47 - 124)         |
| Other musculoskeletal disorders                     | 629<br>(448 - 782)         | --                     | 6<br>(4 - 8)        | 118<br>(66 - 142)    | 140<br>(80 - 176)        | 365<br>(246 - 496)       |
| Other non-communicable diseases                     | 2,512<br>(1,906 - 3,122)   | 1,301<br>(932 - 1,756) | 65<br>(47 - 91)     | 112<br>(89 - 139)    | 129<br>(90 - 155)        | 905<br>(425 - 1,254)     |
| Congenital anomalies                                | 1,425<br>(1,041 - 1,868)   | 1,157<br>(810 - 1,585) | 63<br>(46 - 89)     | 89<br>(69 - 118)     | 39<br>(27 - 52)          | 77<br>(50 - 110)         |
| Neural tube defects                                 | 85<br>(48 - 142)           | 75<br>(39 - 130)       | 5<br>(3 - 8)        | 4<br>(2 - 6)         | 0<br>(0 - 1)             | 0<br>(0 - 0)             |
| Congenital heart anomalies                          | 561<br>(401 - 742)         | 462<br>(310 - 637)     | 29<br>(20 - 43)     | 45<br>(34 - 62)      | 10<br>(6 - 14)           | 14<br>(9 - 23)           |
| Cleft lip and cleft palate                          | 1<br>(0 - 2)               | 1<br>(0 - 2)           | --                  | --                   | --                       | --                       |
| Down syndrome                                       | 67<br>(39 - 98)            | 41<br>(21 - 67)        | 6<br>(3 - 10)       | 11<br>(7 - 16)       | 9<br>(5 - 13)            | 0<br>(0 - 1)             |
| Chromosomal unbalanced rearrangements               | 54<br>(26 - 86)            | 49<br>(23 - 80)        | 1<br>(1 - 2)        | 3<br>(2 - 4)         | 1<br>(0 - 1)             | 0<br>(0 - 1)             |
| Other congenital anomalies                          | 657<br>(459 - 898)         | 530<br>(350 - 758)     | 21<br>(13 - 31)     | 26<br>(19 - 35)      | 19<br>(13 - 27)          | 62<br>(40 - 90)          |
| Skin and subcutaneous diseases                      | 950<br>(438 - 1,302)       | 7<br>(5 - 12)          | 2<br>(1 - 2)        | 23<br>(14 - 28)      | 91<br>(53 - 113)         | 828<br>(360 - 1,177)     |
| Cellulitis                                          | 95<br>(40 - 180)           | 1<br>(1 - 3)           | 0<br>(0 - 1)        | 6<br>(3 - 8)         | 19<br>(9 - 30)           | 69<br>(23 - 150)         |
| Pyoderma                                            | 251<br>(119 - 381)         | 5<br>(3 - 8)           | 1<br>(0 - 1)        | 9<br>(6 - 12)        | 37<br>(22 - 51)          | 199<br>(85 - 324)        |

Web Table 31- Argentina deaths with 95% UI by age, sex, and cause in 2013

| Cause                                           | Females, All Ages        | Females, 0-4 Years | Females, 5-14 Years | Females, 15-49 Years     | Females, 50-69 Years     | Females, 70-80 Years     |
|-------------------------------------------------|--------------------------|--------------------|---------------------|--------------------------|--------------------------|--------------------------|
| Decubitus ulcer                                 | 573<br>(250 - 830)       | 0<br>(0 - 0)       | 0<br>(0 - 1)        | 4<br>(2 - 5)             | 28<br>(16 - 39)          | 540<br>(223 - 796)       |
| Other skin and subcutaneous diseases            | 32<br>(14 - 65)          | 1<br>(0 - 2)       | 0<br>(0 - 1)        | 4<br>(2 - 6)             | 7<br>(3 - 12)            | 20<br>(5 - 52)           |
| Sudden infant death syndrome                    | 137<br>(51 - 359)        | 137<br>(51 - 359)  | --                  | --                       | --                       | --                       |
| Injuries                                        | 7,892<br>(6,218 - 9,062) | 417<br>(307 - 561) | 239<br>(197 - 283)  | 1,845<br>(1,579 - 2,047) | 1,285<br>(1,018 - 1,476) | 4,106<br>(2,861 - 5,043) |
| Transport injuries                              | 2,052<br>(1,502 - 2,337) | 65<br>(38 - 95)    | 112<br>(85 - 141)   | 731<br>(544 - 844)       | 478<br>(327 - 578)       | 666<br>(457 - 844)       |
| Road injuries                                   | 1,869<br>(1,357 - 2,127) | 63<br>(37 - 92)    | 106<br>(80 - 135)   | 680<br>(503 - 789)       | 424<br>(288 - 515)       | 596<br>(405 - 757)       |
| Pedestrian road injuries                        | 548<br>(390 - 697)       | 14<br>(8 - 23)     | 26<br>(17 - 37)     | 175<br>(128 - 223)       | 100<br>(65 - 134)        | 234<br>(158 - 327)       |
| Cyclist road injuries                           | 80<br>(53 - 101)         | 1<br>(1 - 3)       | 5<br>(3 - 8)        | 35<br>(23 - 45)          | 21<br>(12 - 29)          | 18<br>(10 - 27)          |
| Motorcyclist road injuries                      | 98<br>(46 - 132)         | 1<br>(0 - 2)       | 4<br>(2 - 7)        | 69<br>(31 - 96)          | 17<br>(8 - 25)           | 7<br>(3 - 12)            |
| Motor vehicle road injuries                     | 1,135<br>(768 - 1,341)   | 46<br>(26 - 68)    | 70<br>(51 - 92)     | 399<br>(281 - 475)       | 285<br>(187 - 351)       | 334<br>(198 - 438)       |
| Other road injuries                             | 7<br>(4 - 11)            | 0<br>(0 - 1)       | 1<br>(0 - 1)        | 2<br>(1 - 3)             | 1<br>(1 - 3)             | 3<br>(1 - 5)             |
| Other transport injuries                        | 184<br>(127 - 232)       | 2<br>(1 - 4)       | 6<br>(3 - 8)        | 51<br>(37 - 65)          | 54<br>(34 - 74)          | 70<br>(42 - 105)         |
| Unintentional injuries                          | 4,622<br>(3,328 - 5,619) | 331<br>(231 - 479) | 87<br>(70 - 108)    | 420<br>(347 - 480)       | 526<br>(381 - 628)       | 3,259<br>(2,149 - 4,129) |
| Falls                                           | 1,536<br>(866 - 2,200)   | 6<br>(4 - 10)      | 4<br>(3 - 6)        | 18<br>(13 - 22)          | 39<br>(29 - 52)          | 1,468<br>(809 - 2,132)   |
| Drowning                                        | 159<br>(122 - 247)       | 51<br>(30 - 91)    | 25<br>(17 - 39)     | 42<br>(32 - 64)          | 22<br>(16 - 34)          | 19<br>(14 - 29)          |
| Fire, heat, and hot substances                  | 428<br>(241 - 578)       | 26<br>(14 - 39)    | 11<br>(6 - 16)      | 59<br>(37 - 76)          | 90<br>(48 - 125)         | 243<br>(126 - 356)       |
| Poisonings                                      | 266<br>(86 - 399)        | 14<br>(7 - 22)     | 6<br>(3 - 10)       | 39<br>(19 - 51)          | 35<br>(12 - 50)          | 173<br>(41 - 292)        |
| Exposure to mechanical forces                   | 230<br>(191 - 289)       | 12<br>(7 - 19)     | 14<br>(10 - 24)     | 93<br>(75 - 117)         | 44<br>(34 - 56)          | 66<br>(45 - 100)         |
| Unintentional firearm injuries                  | 136<br>(92 - 166)        | 2<br>(1 - 4)       | 7<br>(4 - 10)       | 65<br>(44 - 82)          | 30<br>(20 - 39)          | 32<br>(18 - 49)          |
| Unintentional suffocation                       | 54<br>(35 - 112)         | 4<br>(2 - 8)       | 1<br>(1 - 3)        | 15<br>(10 - 30)          | 8<br>(5 - 14)            | 26<br>(13 - 58)          |
| Other exposure to mechanical forces             | 39<br>(31 - 78)          | 5<br>(3 - 9)       | 6<br>(4 - 16)       | 13<br>(10 - 29)          | 7<br>(5 - 13)            | 8<br>(6 - 14)            |
| Adverse effects of medical treatment            | 1,056<br>(644 - 1,377)   | 17<br>(10 - 34)    | 5<br>(3 - 8)        | 87<br>(61 - 118)         | 215<br>(125 - 278)       | 732<br>(396 - 1,026)     |
| Animal contact                                  | 15<br>(3 - 22)           | 1<br>(0 - 3)       | 1<br>(0 - 2)        | 2<br>(1 - 3)             | 6<br>(1 - 9)             | 5<br>(1 - 9)             |
| Venomous animal contact                         | 9<br>(2 - 13)            | 1<br>(0 - 2)       | 1<br>(0 - 1)        | 1<br>(0 - 2)             | 5<br>(1 - 8)             | 2<br>(0 - 3)             |
| Non-venomous animal contact                     | 6<br>(1 - 11)            | 1<br>(0 - 1)       | 1<br>(0 - 1)        | 1<br>(0 - 2)             | 1<br>(0 - 2)             | 3<br>(0 - 7)             |
| Foreign body                                    | 843<br>(465 - 1,301)     | 195<br>(112 - 320) | 11<br>(6 - 18)      | 44<br>(24 - 62)          | 58<br>(33 - 85)          | 534<br>(268 - 887)       |
| Pulmonary aspiration and foreign body in airway | 839<br>(461 - 1,296)     | 195<br>(112 - 320) | 10<br>(6 - 17)      | 43<br>(23 - 61)          | 57<br>(31 - 84)          | 533<br>(268 - 886)       |
| Foreign body in other body part                 | 4<br>(3 - 6)             | 0<br>(0 - 0)       | 0<br>(0 - 0)        | 1<br>(1 - 2)             | 1<br>(1 - 2)             | 1<br>(0 - 2)             |
| Other unintentional injuries                    | 89<br>(12 - 120)         | 9<br>(1 - 17)      | 10<br>(1 - 17)      | 37<br>(5 - 55)           | 16<br>(2 - 26)           | 18<br>(2 - 30)           |
| Self-harm and interpersonal violence            | 1,183<br>(999 - 1,502)   | 21<br>(10 - 39)    | 40<br>(29 - 53)     | 688<br>(585 - 812)       | 269<br>(213 - 395)       | 164<br>(117 - 280)       |
| Self-harm                                       | 790<br>(684 - 1,103)     | --                 | 23<br>(16 - 32)     | 456<br>(377 - 541)       | 199<br>(159 - 332)       | 111<br>(82 - 234)        |
| Interpersonal violence                          | 393<br>(261 - 509)       | 21<br>(10 - 39)    | 17<br>(9 - 27)      | 232<br>(159 - 327)       | 70<br>(40 - 103)         | 53<br>(25 - 103)         |
| Assault by firearm                              | 161<br>(96 - 243)        | 5<br>(2 - 11)      | 7<br>(4 - 13)       | 107<br>(64 - 164)        | 28<br>(15 - 48)          | 14<br>(5 - 27)           |
| Assault by sharp object                         | 138<br>(80 - 196)        | 4<br>(2 - 9)       | 3<br>(1 - 6)        | 93<br>(54 - 139)         | 23<br>(11 - 37)          | 14<br>(5 - 28)           |
| Assault by other means                          | 94<br>(51 - 132)         | 12<br>(6 - 22)     | 6<br>(3 - 11)       | 32<br>(16 - 49)          | 19<br>(9 - 31)           | 25<br>(10 - 48)          |
| Forces of nature, war, and legal intervention   | 35<br>(13 - 82)          | 0<br>(0 - 0)       | 0<br>(0 - 1)        | 7<br>(3 - 16)            | 12<br>(4 - 27)           | 16<br>(6 - 38)           |
| Exposure to forces of nature                    | 35<br>(13 - 82)          | 0<br>(0 - 0)       | 0<br>(0 - 1)        | 7<br>(3 - 16)            | 12<br>(4 - 27)           | 16<br>(6 - 38)           |

Web Table 31- Armenia deaths with 95% UI by age, sex, and cause in 2013

| Cause                                                             | Both Sexes, All Ages        | Both Sexes, 0-4 Years | Both Sexes, 5-14 Years | Both Sexes, 15-49 Years  | Both Sexes, 50-69 Years  | Both Sexes, 70-80 Years     |
|-------------------------------------------------------------------|-----------------------------|-----------------------|------------------------|--------------------------|--------------------------|-----------------------------|
| All causes                                                        | 28,500<br>(26,803 - 30,321) | 690<br>(624 - 767)    | 124<br>(114 - 133)     | 2,630<br>(2,412 - 2,831) | 6,852<br>(6,327 - 7,454) | 18,204<br>(17,240 - 19,587) |
| Communicable, maternal, neonatal, and nutritional diseases        | 1,016<br>(818 - 1,121)      | 425<br>(372 - 482)    | 19<br>(15 - 23)        | 160<br>(134 - 178)       | 134<br>(104 - 153)       | 278<br>(151 - 343)          |
| HIV/AIDS and tuberculosis                                         | 141<br>(89 - 163)           | 1<br>(0 - 1)          | 0<br>(0 - 0)           | 68<br>(42 - 80)          | 50<br>(34 - 61)          | 22<br>(13 - 27)             |
| Tuberculosis                                                      | 134<br>(83 - 156)           | 1<br>(0 - 1)          | 0<br>(0 - 0)           | 63<br>(38 - 74)          | 49<br>(32 - 60)          | 22<br>(12 - 27)             |
| HIV/AIDS                                                          | 7<br>(4 - 12)               | 0<br>(0 - 0)          | 0<br>(0 - 0)           | 5<br>(3 - 9)             | 1<br>(1 - 3)             | 0<br>(0 - 1)                |
| HIV/AIDS resulting in mycobacterial infection                     | 0<br>(0 - 1)                | 0<br>(0 - 0)          | 0<br>(0 - 0)           | 0<br>(0 - 1)             | 0<br>(0 - 0)             | 0<br>(0 - 0)                |
| HIV/AIDS resulting in other diseases                              | 6<br>(4 - 11)               | 0<br>(0 - 0)          | 0<br>(0 - 0)           | 5<br>(3 - 8)             | 1<br>(1 - 3)             | 0<br>(0 - 0)                |
| Diarrhea, lower respiratory, and other common infectious diseases | 556<br>(388 - 647)          | 155<br>(125 - 183)    | 17<br>(13 - 21)        | 64<br>(51 - 75)          | 71<br>(51 - 87)          | 249<br>(127 - 314)          |
| Diarrheal diseases                                                | 26<br>(21 - 32)             | 16<br>(11 - 22)       | 1<br>(1 - 1)           | 3<br>(3 - 4)             | 2<br>(2 - 3)             | 3<br>(3 - 5)                |
| Intestinal infectious diseases                                    | 3<br>(1 - 6)                | 1<br>(0 - 2)          | 1<br>(0 - 1)           | 1<br>(0 - 2)             | 0<br>(0 - 1)             | 0<br>(0 - 1)                |
| Typhoid fever                                                     | 2<br>(1 - 3)                | 0<br>(0 - 1)          | 0<br>(0 - 1)           | 1<br>(0 - 1)             | 0<br>(0 - 0)             | 0<br>(0 - 0)                |
| Paratyphoid fever                                                 | 1<br>(0 - 1)                | 0<br>(0 - 0)          | 0<br>(0 - 0)           | 0<br>(0 - 0)             | 0<br>(0 - 0)             | 0<br>(0 - 0)                |
| Other intestinal infectious diseases                              | 1<br>(0 - 3)                | 0<br>(0 - 1)          | 0<br>(0 - 0)           | 0<br>(0 - 1)             | 0<br>(0 - 1)             | 0<br>(0 - 1)                |
| Lower respiratory infections                                      | 498<br>(329 - 587)          | 133<br>(106 - 159)    | 12<br>(9 - 16)         | 49<br>(36 - 60)          | 63<br>(43 - 78)          | 241<br>(118 - 306)          |
| Upper respiratory infections                                      | 1<br>(1 - 3)                | 0<br>(0 - 0)          | 0<br>(0 - 0)           | 0<br>(0 - 0)             | 0<br>(0 - 1)             | 1<br>(0 - 2)                |
| Otitis media                                                      | 0<br>(0 - 0)                | 0<br>(0 - 0)          | 0<br>(0 - 0)           | 0<br>(0 - 0)             | 0<br>(0 - 0)             | 0<br>(0 - 0)                |
| Meningitis                                                        | 14<br>(13 - 17)             | 2<br>(1 - 3)          | 1<br>(1 - 1)           | 6<br>(5 - 7)             | 3<br>(3 - 4)             | 2<br>(2 - 3)                |
| Pneumococcal meningitis                                           | 4<br>(3 - 5)                | 0<br>(0 - 1)          | 0<br>(0 - 0)           | 2<br>(1 - 2)             | 1<br>(1 - 1)             | 1<br>(0 - 1)                |
| H influenzae type B meningitis                                    | 3<br>(2 - 4)                | 1<br>(1 - 1)          | 0<br>(0 - 0)           | 1<br>(1 - 1)             | 1<br>(0 - 1)             | 0<br>(0 - 0)                |
| Meningococcal meningitis                                          | 3<br>(3 - 4)                | 0<br>(0 - 1)          | 0<br>(0 - 0)           | 1<br>(1 - 2)             | 1<br>(0 - 1)             | 0<br>(0 - 1)                |
| Other meningitis                                                  | 4<br>(3 - 5)                | 0<br>(0 - 0)          | 0<br>(0 - 0)           | 2<br>(1 - 2)             | 1<br>(1 - 2)             | 1<br>(1 - 1)                |
| Encephalitis                                                      | 9<br>(7 - 12)               | 3<br>(2 - 5)          | 1<br>(1 - 2)           | 3<br>(3 - 4)             | 1<br>(1 - 2)             | 0<br>(0 - 0)                |
| Diphtheria                                                        | 0<br>(0 - 1)                | 0<br>(0 - 0)          | 0<br>(0 - 0)           | 0<br>(0 - 0)             | 0<br>(0 - 0)             | --                          |
| Whooping cough                                                    | 0<br>(0 - 1)                | 0<br>(0 - 0)          | 0<br>(0 - 0)           | 0<br>(0 - 0)             | 0<br>(0 - 0)             | --                          |
| Tetanus                                                           | 1<br>(1 - 1)                | 0<br>(0 - 0)          | 0<br>(0 - 0)           | 0<br>(0 - 0)             | 0<br>(0 - 0)             | 0<br>(0 - 0)                |
| Measles                                                           | 0<br>(0 - 0)                | 0<br>(0 - 0)          | 0<br>(0 - 0)           | 0<br>(0 - 0)             | 0<br>(0 - 0)             | --                          |
| Varicella and herpes zoster                                       | 2<br>(1 - 6)                | 0<br>(0 - 1)          | 0<br>(0 - 0)           | 0<br>(0 - 1)             | 0<br>(0 - 0)             | 1<br>(0 - 5)                |
| Neglected tropical diseases and malaria                           | 4<br>(3 - 7)                | 1<br>(1 - 2)          | 0<br>(0 - 1)           | 1<br>(1 - 2)             | 1<br>(1 - 2)             | 1<br>(0 - 2)                |
| Leishmaniasis                                                     | 1<br>(1 - 1)                | 0<br>(0 - 0)          | 0<br>(0 - 0)           | 0<br>(0 - 1)             | 0<br>(0 - 0)             | 0<br>(0 - 0)                |
| Visceral leishmaniasis                                            | 1<br>(1 - 1)                | 0<br>(0 - 0)          | 0<br>(0 - 0)           | 0<br>(0 - 1)             | 0<br>(0 - 0)             | 0<br>(0 - 0)                |
| Cysticercosis                                                     | 0<br>(0 - 0)                | 0<br>(0 - 0)          | 0<br>(0 - 0)           | 0<br>(0 - 0)             | 0<br>(0 - 0)             | 0<br>(0 - 0)                |
| Cystic echinococcosis                                             | 1<br>(1 - 1)                | 0<br>(0 - 0)          | 0<br>(0 - 0)           | 0<br>(0 - 0)             | 0<br>(0 - 0)             | 0<br>(0 - 0)                |
| Dengue                                                            | 0<br>(0 - 0)                | 0<br>(0 - 0)          | 0<br>(0 - 0)           | 0<br>(0 - 0)             | 0<br>(0 - 0)             | 0<br>(0 - 0)                |
| Rabies                                                            | 1<br>(1 - 2)                | 0<br>(0 - 1)          | 0<br>(0 - 0)           | 0<br>(0 - 0)             | 0<br>(0 - 0)             | 0<br>(0 - 0)                |
| Intestinal nematode infections                                    | 0<br>(0 - 3)                | 0<br>(0 - 1)          | 0<br>(0 - 0)           | 0<br>(0 - 0)             | 0<br>(0 - 1)             | 0<br>(0 - 1)                |
| Ascariasis                                                        | 0<br>(0 - 3)                | 0<br>(0 - 1)          | 0<br>(0 - 0)           | 0<br>(0 - 0)             | 0<br>(0 - 1)             | 0<br>(0 - 1)                |
| Other neglected tropical diseases                                 | 1<br>(1 - 1)                | 0<br>(0 - 1)          | 0<br>(0 - 0)           | 0<br>(0 - 0)             | 0<br>(0 - 0)             | 0<br>(0 - 0)                |
| Maternal disorders                                                | 8<br>(6 - 10)               | --                    | 0<br>(0 - 0)           | 8<br>(6 - 10)            | --                       | --                          |
| Maternal hemorrhage                                               | 1<br>(1 - 2)                | --                    | 0<br>(0 - 0)           | 1<br>(1 - 2)             | --                       | --                          |
| Maternal sepsis and other maternal infections                     | 1<br>(0 - 1)                | --                    | 0<br>(0 - 0)           | 1<br>(0 - 1)             | --                       | --                          |

Web Table 31- Armenia deaths with 95% UI by age, sex, and cause in 2013

| Cause                                                            | Both Sexes, All Ages        | Both Sexes, 0-4 Years | Both Sexes, 5-14 Years | Both Sexes, 15-49 Years  | Both Sexes, 50-69 Years  | Both Sexes, 70-80 Years     |
|------------------------------------------------------------------|-----------------------------|-----------------------|------------------------|--------------------------|--------------------------|-----------------------------|
| Maternal hypertensive disorders                                  | 1<br>(1 - 1)                | --                    | 0<br>(0 - 0)           | 1<br>(1 - 1)             | --                       | --                          |
| Maternal obstructed labor                                        | 1<br>(0 - 1)                | --                    | 0<br>(0 - 0)           | 1<br>(0 - 1)             | --                       | --                          |
| Maternal abortive outcome                                        | 1<br>(1 - 1)                | --                    | 0<br>(0 - 0)           | 1<br>(1 - 1)             | --                       | --                          |
| Indirect maternal deaths                                         | 1<br>(1 - 1)                | --                    | 0<br>(0 - 0)           | 1<br>(1 - 1)             | --                       | --                          |
| Late maternal deaths                                             | 1<br>(1 - 2)                | --                    | 0<br>(0 - 0)           | 1<br>(1 - 2)             | --                       | --                          |
| Maternal deaths aggravated by HIV/AIDS                           | 0<br>(0 - 0)                | --                    | --                     | 0<br>(0 - 0)             | --                       | --                          |
| Other maternal disorders                                         | 1<br>(1 - 2)                | --                    | 0<br>(0 - 0)           | 1<br>(1 - 2)             | --                       | --                          |
| Neonatal disorders                                               | 263<br>(227 - 302)          | 263<br>(227 - 302)    | --                     | --                       | --                       | --                          |
| Neonatal preterm birth complications                             | 121<br>(81 - 165)           | 121<br>(81 - 165)     | --                     | --                       | --                       | --                          |
| Neonatal encephalopathy due to birth asphyxia and trauma         | 41<br>(20 - 70)             | 41<br>(20 - 70)       | --                     | --                       | --                       | --                          |
| Neonatal sepsis and other neonatal infections                    | 41<br>(21 - 69)             | 41<br>(21 - 69)       | --                     | --                       | --                       | --                          |
| Hemolytic disease and other neonatal jaundice                    | 3<br>(1 - 8)                | 3<br>(1 - 8)          | --                     | --                       | --                       | --                          |
| Other neonatal disorders                                         | 57<br>(35 - 88)             | 57<br>(35 - 88)       | --                     | --                       | --                       | --                          |
| Nutritional deficiencies                                         | 20<br>(15 - 41)             | 0<br>(0 - 1)          | 0<br>(0 - 1)           | 10<br>(7 - 23)           | 5<br>(4 - 10)            | 4<br>(3 - 7)                |
| Protein-energy malnutrition                                      | 4<br>(2 - 9)                | 0<br>(0 - 0)          | 0<br>(0 - 0)           | 2<br>(1 - 6)             | 1<br>(1 - 3)             | 0<br>(0 - 0)                |
| Iodine deficiency                                                | 1<br>(0 - 2)                | 0<br>(0 - 0)          | 0<br>(0 - 0)           | 0<br>(0 - 1)             | 0<br>(0 - 1)             | 0<br>(0 - 0)                |
| Iron-deficiency anemia                                           | 13<br>(9 - 26)              | 0<br>(0 - 0)          | 0<br>(0 - 0)           | 6<br>(4 - 14)            | 3<br>(2 - 6)             | 4<br>(3 - 7)                |
| Other nutritional deficiencies                                   | 4<br>(2 - 9)                | 0<br>(0 - 0)          | 0<br>(0 - 0)           | 2<br>(1 - 5)             | 1<br>(0 - 2)             | 0<br>(0 - 1)                |
| Other communicable, maternal, neonatal, and nutritional diseases | 24<br>(20 - 29)             | 5<br>(3 - 8)          | 1<br>(1 - 1)           | 9<br>(8 - 11)            | 6<br>(4 - 8)             | 3<br>(2 - 5)                |
| Sexually transmitted diseases excluding HIV                      | 6<br>(3 - 10)               | 2<br>(0 - 4)          | 0<br>(0 - 0)           | 1<br>(1 - 2)             | 1<br>(1 - 3)             | 1<br>(1 - 3)                |
| Syphilis                                                         | 4<br>(2 - 8)                | 2<br>(0 - 4)          | 0<br>(0 - 0)           | 1<br>(0 - 1)             | 1<br>(0 - 2)             | 1<br>(0 - 2)                |
| Chlamydial infection                                             | 0<br>(0 - 0)                | --                    | 0<br>(0 - 0)           | 0<br>(0 - 0)             | 0<br>(0 - 0)             | 0<br>(0 - 0)                |
| Gonococcal infection                                             | 1<br>(0 - 1)                | --                    | 0<br>(0 - 0)           | 0<br>(0 - 1)             | 0<br>(0 - 1)             | 0<br>(0 - 0)                |
| Other sexually transmitted diseases                              | 0<br>(0 - 1)                | --                    | 0<br>(0 - 0)           | 0<br>(0 - 0)             | 0<br>(0 - 0)             | 0<br>(0 - 0)                |
| Hepatitis                                                        | 14<br>(12 - 16)             | 1<br>(1 - 2)          | 1<br>(0 - 1)           | 7<br>(6 - 9)             | 4<br>(3 - 5)             | 1<br>(1 - 2)                |
| Acute hepatitis A                                                | 1<br>(0 - 2)                | 0<br>(0 - 1)          | 0<br>(0 - 0)           | 1<br>(0 - 1)             | 0<br>(0 - 0)             | 0<br>(0 - 0)                |
| Acute hepatitis B                                                | 9<br>(7 - 12)               | 1<br>(0 - 1)          | 0<br>(0 - 0)           | 4<br>(3 - 6)             | 3<br>(2 - 4)             | 1<br>(1 - 1)                |
| Acute hepatitis C                                                | 1<br>(0 - 3)                | --                    | 0<br>(0 - 0)           | 1<br>(0 - 2)             | 0<br>(0 - 1)             | 0<br>(0 - 0)                |
| Acute hepatitis E                                                | 2<br>(1 - 4)                | 0<br>(0 - 0)          | 0<br>(0 - 0)           | 2<br>(1 - 3)             | 0<br>(0 - 1)             | 0<br>(0 - 0)                |
| Other infectious diseases                                        | 4<br>(3 - 7)                | 2<br>(1 - 5)          | 0<br>(0 - 0)           | 1<br>(0 - 1)             | 1<br>(0 - 1)             | 1<br>(0 - 1)                |
| Non-communicable diseases                                        | 26,107<br>(24,511 - 27,878) | 229<br>(196 - 264)    | 61<br>(53 - 68)        | 1,711<br>(1,554 - 1,866) | 6,440<br>(5,932 - 7,017) | 17,667<br>(16,729 - 19,010) |
| Neoplasms                                                        | 5,422<br>(4,922 - 5,903)    | 18<br>(12 - 26)       | 29<br>(24 - 33)        | 672<br>(606 - 733)       | 2,312<br>(2,093 - 2,541) | 2,391<br>(2,145 - 2,638)    |
| Esophageal cancer                                                | 55<br>(45 - 74)             | --                    | --                     | 3<br>(2 - 4)             | 22<br>(17 - 31)          | 30<br>(24 - 40)             |
| Stomach cancer                                                   | 465<br>(422 - 516)          | --                    | --                     | 44<br>(39 - 51)          | 179<br>(158 - 203)       | 242<br>(214 - 274)          |
| Liver cancer                                                     | 380<br>(334 - 434)          | --                    | 0<br>(0 - 1)           | 27<br>(22 - 32)          | 135<br>(115 - 157)       | 217<br>(181 - 260)          |
| Liver cancer due to hepatitis B                                  | 122<br>(100 - 146)          | --                    | 0<br>(0 - 0)           | 11<br>(9 - 14)           | 51<br>(42 - 62)          | 59<br>(45 - 75)             |
| Liver cancer due to hepatitis C                                  | 138<br>(115 - 168)          | --                    | 0<br>(0 - 0)           | 8<br>(6 - 11)            | 47<br>(37 - 58)          | 83<br>(65 - 105)            |
| Liver cancer due to alcohol use                                  | 86<br>(64 - 112)            | --                    | --                     | 3<br>(2 - 5)             | 25<br>(18 - 32)          | 58<br>(41 - 78)             |
| Liver cancer due to other causes                                 | 34<br>(24 - 46)             | --                    | 0<br>(0 - 0)           | 4<br>(3 - 5)             | 12<br>(9 - 18)           | 17<br>(11 - 25)             |
| Larynx cancer                                                    | 100<br>(82 - 143)           | --                    | --                     | 7<br>(6 - 11)            | 55<br>(44 - 82)          | 38<br>(29 - 51)             |

Web Table 31- Armenia deaths with 95% UI by age, sex, and cause in 2013

| Cause                                         | Both Sexes, All Ages        | Both Sexes, 0-4 Years | Both Sexes, 5-14 Years | Both Sexes, 15-49 Years | Both Sexes, 50-69 Years  | Both Sexes, 70-80 Years     |
|-----------------------------------------------|-----------------------------|-----------------------|------------------------|-------------------------|--------------------------|-----------------------------|
| Tracheal, bronchus and lung cancer            | 1,264<br>(1,139 - 1,409)    | --                    | --                     | 92<br>(80 - 105)        | 626<br>(549 - 712)       | 546<br>(484 - 617)          |
| Breast cancer                                 | 527<br>(443 - 605)          | --                    | --                     | 107<br>(89 - 126)       | 256<br>(211 - 298)       | 164<br>(132 - 197)          |
| Cervical cancer                               | 132<br>(100 - 156)          | --                    | --                     | 38<br>(26 - 47)         | 61<br>(47 - 74)          | 33<br>(24 - 42)             |
| Uterine cancer                                | 52<br>(31 - 66)             | --                    | --                     | 5<br>(3 - 7)            | 24<br>(14 - 31)          | 23<br>(12 - 30)             |
| Prostate cancer                               | 184<br>(73 - 259)           | --                    | --                     | 3<br>(1 - 4)            | 43<br>(20 - 60)          | 138<br>(51 - 200)           |
| Colon and rectum cancer                       | 446<br>(405 - 494)          | --                    | --                     | 40<br>(35 - 45)         | 164<br>(145 - 184)       | 241<br>(214 - 273)          |
| Lip and oral cavity cancer                    | 52<br>(40 - 65)             | --                    | --                     | 7<br>(5 - 9)            | 25<br>(18 - 32)          | 21<br>(16 - 27)             |
| Nasopharynx cancer                            | 7<br>(5 - 8)                | --                    | 0<br>(0 - 0)           | 2<br>(2 - 3)            | 3<br>(2 - 4)             | 1<br>(1 - 1)                |
| Other pharynx cancer                          | 16<br>(13 - 19)             | --                    | --                     | 2<br>(1 - 2)            | 10<br>(7 - 13)           | 4<br>(3 - 6)                |
| Gallbladder and biliary tract cancer          | 66<br>(50 - 81)             | --                    | --                     | 3<br>(2 - 4)            | 20<br>(15 - 25)          | 43<br>(30 - 57)             |
| Pancreatic cancer                             | 353<br>(318 - 395)          | --                    | --                     | 21<br>(18 - 25)         | 145<br>(127 - 166)       | 187<br>(162 - 219)          |
| Malignant skin melanoma                       | 39<br>(31 - 51)             | --                    | --                     | 13<br>(9 - 19)          | 16<br>(13 - 20)          | 11<br>(8 - 15)              |
| Non-melanoma skin cancer                      | 5<br>(2 - 8)                | --                    | --                     | 1<br>(0 - 1)            | 1<br>(0 - 1)             | 4<br>(1 - 6)                |
| Ovarian cancer                                | 114<br>(96 - 136)           | --                    | --                     | 20<br>(15 - 25)         | 53<br>(42 - 64)          | 41<br>(33 - 54)             |
| Testicular cancer                             | 4<br>(3 - 7)                | --                    | --                     | 3<br>(2 - 5)            | 1<br>(0 - 1)             | 0<br>(0 - 1)                |
| Kidney cancer                                 | 132<br>(109 - 161)          | 0<br>(0 - 0)          | 0<br>(0 - 0)           | 10<br>(7 - 14)          | 52<br>(40 - 66)          | 70<br>(52 - 92)             |
| Bladder cancer                                | 191<br>(162 - 224)          | --                    | --                     | 6<br>(4 - 8)            | 59<br>(47 - 72)          | 126<br>(105 - 152)          |
| Brain and nervous system cancer               | 219<br>(162 - 254)          | 6<br>(3 - 10)         | 9<br>(6 - 12)          | 64<br>(44 - 77)         | 96<br>(70 - 115)         | 44<br>(32 - 54)             |
| Thyroid cancer                                | 7<br>(5 - 9)                | --                    | 0<br>(0 - 0)           | 1<br>(1 - 1)            | 2<br>(2 - 3)             | 4<br>(3 - 5)                |
| Mesothelioma                                  | 6<br>(5 - 8)                | --                    | --                     | 1<br>(0 - 1)            | 2<br>(2 - 4)             | 3<br>(2 - 4)                |
| Hodgkin lymphoma                              | 7<br>(5 - 12)               | 0<br>(0 - 0)          | 0<br>(0 - 0)           | 3<br>(2 - 6)            | 2<br>(1 - 4)             | 2<br>(1 - 3)                |
| Non-Hodgkin lymphoma                          | 66<br>(48 - 78)             | 0<br>(0 - 1)          | 1<br>(1 - 1)           | 15<br>(11 - 19)         | 29<br>(20 - 36)          | 20<br>(14 - 26)             |
| Multiple myeloma                              | 16<br>(12 - 19)             | --                    | --                     | 3<br>(2 - 4)            | 8<br>(7 - 10)            | 4<br>(3 - 5)                |
| Leukemia                                      | 163<br>(146 - 180)          | 5<br>(3 - 8)          | 11<br>(9 - 13)         | 53<br>(45 - 59)         | 60<br>(52 - 68)          | 35<br>(30 - 40)             |
| Other neoplasms                               | 354<br>(271 - 416)          | 6<br>(4 - 10)         | 7<br>(5 - 9)           | 79<br>(66 - 93)         | 163<br>(128 - 195)       | 99<br>(62 - 134)            |
| Cardiovascular diseases                       | 14,406<br>(13,406 - 15,556) | 1<br>(1 - 2)          | 3<br>(3 - 4)           | 595<br>(530 - 664)      | 2,787<br>(2,538 - 3,056) | 11,019<br>(10,302 - 11,983) |
| Rheumatic heart disease                       | 118<br>(93 - 150)           | 0<br>(0 - 0)          | 1<br>(0 - 1)           | 31<br>(24 - 46)         | 49<br>(39 - 72)          | 37<br>(19 - 48)             |
| Ischemic heart disease                        | 9,412<br>(8,562 - 10,717)   | 0<br>(0 - 1)          | 1<br>(1 - 2)           | 424<br>(372 - 479)      | 1,883<br>(1,685 - 2,096) | 7,103<br>(6,410 - 8,222)    |
| Cerebrovascular disease                       | 3,834<br>(3,263 - 4,322)    | 0<br>(0 - 1)          | 1<br>(1 - 1)           | 106<br>(86 - 129)       | 676<br>(580 - 788)       | 3,051<br>(2,561 - 3,436)    |
| Ischemic stroke                               | 2,554<br>(2,105 - 2,902)    | 0<br>(0 - 0)          | 1<br>(0 - 1)           | 26<br>(19 - 33)         | 297<br>(241 - 362)       | 2,230<br>(1,828 - 2,542)    |
| Hemorrhagic stroke                            | 1,280<br>(1,075 - 1,565)    | 0<br>(0 - 0)          | 0<br>(0 - 0)           | 80<br>(64 - 97)         | 378<br>(317 - 456)       | 821<br>(653 - 1,043)        |
| Hypertensive heart disease                    | 621<br>(424 - 819)          | 0<br>(0 - 0)          | 0<br>(0 - 0)           | 6<br>(4 - 10)           | 61<br>(45 - 80)          | 554<br>(369 - 738)          |
| Cardiomyopathy and myocarditis                | 69<br>(53 - 89)             | 0<br>(0 - 0)          | 0<br>(0 - 0)           | 10<br>(7 - 16)          | 21<br>(16 - 27)          | 37<br>(25 - 54)             |
| Atrial fibrillation and flutter               | 0<br>(0 - 0)                | --                    | --                     | 0<br>(0 - 0)            | 0<br>(0 - 0)             | 0<br>(0 - 0)                |
| Aortic aneurysm                               | 241<br>(172 - 296)          | --                    | --                     | 8<br>(6 - 11)           | 69<br>(52 - 86)          | 164<br>(114 - 214)          |
| Peripheral vascular disease                   | 0<br>(0 - 0)                | --                    | --                     | 0<br>(0 - 0)            | 0<br>(0 - 0)             | 0<br>(0 - 0)                |
| Endocarditis                                  | 7<br>(5 - 11)               | 0<br>(0 - 0)          | 0<br>(0 - 0)           | 1<br>(1 - 2)            | 1<br>(1 - 2)             | 5<br>(3 - 7)                |
| Other cardiovascular and circulatory diseases | 104<br>(39 - 137)           | 0<br>(0 - 0)          | 0<br>(0 - 0)           | 9<br>(4 - 11)           | 28<br>(14 - 38)          | 68<br>(21 - 94)             |
| Chronic respiratory diseases                  | 1,294<br>(1,151 - 1,627)    | 0<br>(0 - 0)          | 0<br>(0 - 0)           | 28<br>(24 - 36)         | 211<br>(176 - 301)       | 1,054<br>(931 - 1,292)      |
| Chronic obstructive pulmonary disease         | 1,098<br>(956 - 1,371)      | 0<br>(0 - 0)          | 0<br>(0 - 0)           | 23<br>(20 - 29)         | 189<br>(159 - 268)       | 885<br>(762 - 1,068)        |



Web Table 31- Armenia deaths with 95% UI by age, sex, and cause in 2013

| Cause                                               | Both Sexes, All Ages     | Both Sexes, 0-4 Years | Both Sexes, 5-14 Years | Both Sexes, 15-49 Years | Both Sexes, 50-69 Years | Both Sexes, 70-80 Years  |
|-----------------------------------------------------|--------------------------|-----------------------|------------------------|-------------------------|-------------------------|--------------------------|
| Pneumoconiosis                                      | 21<br>(14 - 33)          | 0<br>(0 - 0)          | 0<br>(0 - 0)           | 1<br>(1 - 1)            | 5<br>(3 - 8)            | 15<br>(10 - 24)          |
| Silicosis                                           | 4<br>(3 - 6)             | 0<br>(0 - 0)          | 0<br>(0 - 0)           | 0<br>(0 - 0)            | 2<br>(1 - 3)            | 2<br>(1 - 3)             |
| Asbestosis                                          | 5<br>(3 - 8)             | 0<br>(0 - 0)          | 0<br>(0 - 0)           | 0<br>(0 - 0)            | 0<br>(0 - 1)            | 4<br>(3 - 7)             |
| Coal workers pneumoconiosis                         | 7<br>(4 - 11)            | 0<br>(0 - 0)          | 0<br>(0 - 0)           | 0<br>(0 - 0)            | 1<br>(1 - 2)            | 6<br>(4 - 9)             |
| Other pneumoconiosis                                | 5<br>(3 - 8)             | 0<br>(0 - 0)          | 0<br>(0 - 0)           | 0<br>(0 - 0)            | 2<br>(1 - 3)            | 3<br>(2 - 5)             |
| Asthma                                              | 23<br>(16 - 35)          | 0<br>(0 - 0)          | 0<br>(0 - 0)           | 2<br>(1 - 3)            | 3<br>(1 - 6)            | 19<br>(13 - 28)          |
| Interstitial lung disease and pulmonary sarcoidosis | 146<br>(100 - 217)       | 0<br>(0 - 0)          | 0<br>(0 - 0)           | 1<br>(0 - 1)            | 13<br>(8 - 24)          | 132<br>(89 - 200)        |
| Other chronic respiratory diseases                  | 7<br>(5 - 9)             | 0<br>(0 - 0)          | 0<br>(0 - 0)           | 2<br>(1 - 2)            | 1<br>(1 - 2)            | 3<br>(2 - 5)             |
| Cirrhosis                                           | 1,006<br>(913 - 1,112)   | 1<br>(0 - 1)          | 2<br>(1 - 2)           | 131<br>(115 - 149)      | 300<br>(265 - 341)      | 573<br>(508 - 656)       |
| Cirrhosis due to hepatitis B                        | 438<br>(337 - 537)       | 0<br>(0 - 0)          | 0<br>(0 - 1)           | 55<br>(32 - 73)         | 128<br>(92 - 162)       | 255<br>(188 - 335)       |
| Cirrhosis due to hepatitis C                        | 249<br>(174 - 331)       | 0<br>(0 - 0)          | 0<br>(0 - 0)           | 31<br>(15 - 46)         | 72<br>(44 - 100)        | 146<br>(80 - 203)        |
| Cirrhosis due to alcohol use                        | 245<br>(155 - 331)       | --                    | --                     | 27<br>(13 - 47)         | 76<br>(45 - 112)        | 141<br>(87 - 192)        |
| Cirrhosis due to other causes                       | 74<br>(52 - 107)         | 1<br>(0 - 1)          | 1<br>(1 - 1)           | 19<br>(12 - 30)         | 24<br>(14 - 35)         | 31<br>(21 - 43)          |
| Digestive diseases                                  | 490<br>(362 - 557)       | 2<br>(1 - 2)          | 2<br>(1 - 2)           | 53<br>(45 - 61)         | 132<br>(111 - 151)      | 302<br>(189 - 359)       |
| Peptic ulcer disease                                | 169<br>(114 - 225)       | 0<br>(0 - 0)          | 0<br>(0 - 0)           | 21<br>(15 - 26)         | 51<br>(37 - 66)         | 96<br>(52 - 139)         |
| Gastritis and duodenitis                            | 11<br>(6 - 21)           | 0<br>(0 - 0)          | 0<br>(0 - 0)           | 1<br>(1 - 2)            | 1<br>(0 - 3)            | 8<br>(4 - 17)            |
| Appendicitis                                        | 10<br>(6 - 13)           | 0<br>(0 - 0)          | 0<br>(0 - 1)           | 4<br>(2 - 5)            | 3<br>(1 - 4)            | 3<br>(1 - 4)             |
| Paralytic ileus and intestinal obstruction          | 43<br>(27 - 70)          | 1<br>(1 - 1)          | 1<br>(0 - 1)           | 5<br>(3 - 7)            | 8<br>(6 - 13)           | 29<br>(16 - 49)          |
| Inguinal, femoral, and abdominal hernia             | 21<br>(10 - 32)          | 0<br>(0 - 0)          | 0<br>(0 - 0)           | 1<br>(0 - 1)            | 5<br>(3 - 7)            | 16<br>(6 - 25)           |
| Inflammatory bowel disease                          | 8<br>(6 - 13)            | 0<br>(0 - 0)          | 0<br>(0 - 0)           | 3<br>(3 - 5)            | 2<br>(1 - 3)            | 3<br>(2 - 5)             |
| Vascular intestinal disorders                       | 104<br>(64 - 156)        | 0<br>(0 - 0)          | 0<br>(0 - 0)           | 1<br>(1 - 2)            | 23<br>(14 - 36)         | 80<br>(46 - 121)         |
| Gallbladder and biliary diseases                    | 75<br>(42 - 99)          | 0<br>(0 - 0)          | 0<br>(0 - 0)           | 10<br>(7 - 12)          | 22<br>(14 - 27)         | 43<br>(20 - 63)          |
| Pancreatitis                                        | 32<br>(19 - 51)          | 0<br>(0 - 0)          | 0<br>(0 - 0)           | 5<br>(3 - 8)            | 12<br>(7 - 18)          | 14<br>(7 - 26)           |
| Other digestive diseases                            | 18<br>(13 - 26)          | 0<br>(0 - 0)          | 0<br>(0 - 0)           | 3<br>(2 - 4)            | 5<br>(4 - 8)            | 10<br>(6 - 16)           |
| Neurological disorders                              | 1,314<br>(1,124 - 1,577) | 2<br>(2 - 4)          | 4<br>(3 - 6)           | 33<br>(26 - 40)         | 64<br>(54 - 76)         | 1,210<br>(1,024 - 1,462) |
| Alzheimer disease and other dementias               | 1,239<br>(1,051 - 1,498) | --                    | --                     | 0<br>(0 - 1)            | 49<br>(40 - 61)         | 1,190<br>(1,003 - 1,443) |
| Parkinson disease                                   | 17<br>(12 - 24)          | --                    | --                     | 0<br>(0 - 0)            | 3<br>(2 - 4)            | 14<br>(9 - 20)           |
| Epilepsy                                            | 42<br>(32 - 50)          | 2<br>(1 - 3)          | 4<br>(3 - 6)           | 26<br>(19 - 32)         | 7<br>(5 - 9)            | 3<br>(2 - 4)             |
| Multiple sclerosis                                  | 6<br>(4 - 9)             | --                    | --                     | 3<br>(2 - 4)            | 2<br>(1 - 2)            | 2<br>(1 - 3)             |
| Other neurological disorders                        | 9<br>(7 - 16)            | 1<br>(0 - 1)          | 0<br>(0 - 1)           | 4<br>(3 - 8)            | 3<br>(2 - 5)            | 1<br>(1 - 2)             |
| Mental and substance use disorders                  | 64<br>(44 - 76)          | 0<br>(0 - 0)          | 0<br>(0 - 0)           | 31<br>(22 - 38)         | 23<br>(14 - 30)         | 9<br>(6 - 11)            |
| Schizophrenia                                       | 1<br>(1 - 3)             | --                    | --                     | 1<br>(0 - 2)            | 0<br>(0 - 1)            | 0<br>(0 - 0)             |
| Alcohol use disorders                               | 41<br>(22 - 52)          | --                    | --                     | 18<br>(10 - 23)         | 18<br>(9 - 25)          | 5<br>(3 - 6)             |
| Drug use disorders                                  | 21<br>(15 - 25)          | 0<br>(0 - 0)          | --                     | 13<br>(8 - 16)          | 4<br>(3 - 6)            | 4<br>(3 - 5)             |
| Opioid use disorders                                | 5<br>(3 - 6)             | 0<br>(0 - 0)          | --                     | 3<br>(2 - 4)            | 1<br>(1 - 1)            | 1<br>(1 - 1)             |
| Cocaine use disorders                               | 1<br>(0 - 1)             | 0<br>(0 - 0)          | --                     | 0<br>(0 - 0)            | 0<br>(0 - 0)            | 0<br>(0 - 0)             |
| Amphetamine use disorders                           | 1<br>(0 - 1)             | 0<br>(0 - 0)          | --                     | 0<br>(0 - 0)            | 0<br>(0 - 0)            | 0<br>(0 - 0)             |
| Other drug use disorders                            | 16<br>(11 - 19)          | 0<br>(0 - 0)          | --                     | 9<br>(6 - 12)           | 3<br>(2 - 4)            | 3<br>(2 - 4)             |
| Eating disorders                                    | 0<br>(0 - 0)             | --                    | 0<br>(0 - 0)           | 0<br>(0 - 0)            | --                      | --                       |
| Anorexia nervosa                                    | 0<br>(0 - 0)             | --                    | 0<br>(0 - 0)           | 0<br>(0 - 0)            | --                      | --                       |

Web Table 31- Armenia deaths with 95% UI by age, sex, and cause in 2013

| Cause                                               | Both Sexes, All Ages     | Both Sexes, 0-4 Years | Both Sexes, 5-14 Years | Both Sexes, 15-49 Years | Both Sexes, 50-69 Years | Both Sexes, 70-80 Years |
|-----------------------------------------------------|--------------------------|-----------------------|------------------------|-------------------------|-------------------------|-------------------------|
| Diabetes, urogenital, blood, and endocrine diseases | 1,847<br>(1,524 - 2,071) | 5<br>(4 - 7)          | 7<br>(5 - 8)           | 139<br>(118 - 158)      | 601<br>(522 - 671)      | 1,096<br>(853 - 1,261)  |
| Diabetes mellitus                                   | 1,267<br>(1,113 - 1,422) | 0<br>(0 - 1)          | 1<br>(1 - 2)           | 67<br>(58 - 77)         | 445<br>(395 - 501)      | 753<br>(644 - 861)      |
| Acute glomerulonephritis                            | 3<br>(2 - 4)             | 0<br>(0 - 0)          | 0<br>(0 - 0)           | 1<br>(1 - 1)            | 1<br>(1 - 1)            | 1<br>(1 - 1)            |
| Chronic kidney disease                              | 150<br>(125 - 264)       | 0<br>(0 - 1)          | 1<br>(1 - 2)           | 30<br>(24 - 54)         | 50<br>(40 - 93)         | 69<br>(57 - 113)        |
| Chronic kidney disease due to diabetes mellitus     | 1<br>(0 - 1)             | 0<br>(0 - 0)          | 0<br>(0 - 0)           | 0<br>(0 - 1)            | 0<br>(0 - 0)            | 0<br>(0 - 0)            |
| Chronic kidney disease due to hypertension          | 21<br>(14 - 38)          | 0<br>(0 - 0)          | 0<br>(0 - 0)           | 2<br>(1 - 5)            | 4<br>(2 - 8)            | 15<br>(9 - 26)          |
| Chronic kidney disease due to glomerulonephritis    | 62<br>(51 - 92)          | 0<br>(0 - 0)          | 0<br>(0 - 0)           | 10<br>(7 - 17)          | 23<br>(18 - 34)         | 29<br>(22 - 38)         |
| Chronic kidney disease due to other causes          | 67<br>(48 - 139)         | 0<br>(0 - 1)          | 1<br>(1 - 2)           | 17<br>(12 - 32)         | 23<br>(15 - 52)         | 25<br>(17 - 55)         |
| Urinary diseases and male infertility               | 381<br>(165 - 486)       | 0<br>(0 - 1)          | 1<br>(0 - 1)           | 30<br>(18 - 37)         | 94<br>(51 - 117)        | 255<br>(90 - 339)       |
| Interstitial nephritis and urinary tract infections | 310<br>(123 - 410)       | 0<br>(0 - 1)          | 1<br>(0 - 1)           | 27<br>(15 - 34)         | 79<br>(41 - 101)        | 203<br>(62 - 283)       |
| Urolithiasis                                        | 33<br>(10 - 81)          | --                    | 0<br>(0 - 0)           | 1<br>(0 - 2)            | 8<br>(3 - 15)           | 25<br>(6 - 66)          |
| Other urinary diseases                              | 38<br>(24 - 73)          | 0<br>(0 - 0)          | 0<br>(0 - 0)           | 3<br>(2 - 6)            | 8<br>(5 - 14)           | 28<br>(16 - 55)         |
| Gynecological diseases                              | 0<br>(0 - 1)             | --                    | --                     | 0<br>(0 - 0)            | 0<br>(0 - 0)            | 0<br>(0 - 0)            |
| Uterine fibroids                                    | 0<br>(0 - 0)             | --                    | --                     | 0<br>(0 - 0)            | 0<br>(0 - 0)            | 0<br>(0 - 0)            |
| Polycystic ovarian syndrome                         | 0<br>(0 - 0)             | --                    | --                     | 0<br>(0 - 0)            | 0<br>(0 - 0)            | --                      |
| Endometriosis                                       | 0<br>(0 - 0)             | --                    | --                     | 0<br>(0 - 0)            | 0<br>(0 - 0)            | --                      |
| Genital prolapse                                    | 0<br>(0 - 0)             | --                    | --                     | 0<br>(0 - 0)            | 0<br>(0 - 0)            | 0<br>(0 - 0)            |
| Other gynecological diseases                        | 0<br>(0 - 0)             | --                    | --                     | 0<br>(0 - 0)            | 0<br>(0 - 0)            | 0<br>(0 - 0)            |
| Hemoglobinopathies and hemolytic anemias            | 8<br>(6 - 11)            | 2<br>(1 - 3)          | 1<br>(1 - 2)           | 2<br>(2 - 4)            | 1<br>(1 - 2)            | 1<br>(1 - 2)            |
| Thalassemias                                        | 4<br>(3 - 6)             | 1<br>(1 - 2)          | 1<br>(1 - 2)           | 2<br>(1 - 2)            | 0<br>(0 - 0)            | 0<br>(0 - 0)            |
| Sickle cell disorders                               | 0<br>(0 - 0)             | 0<br>(0 - 0)          | 0<br>(0 - 0)           | 0<br>(0 - 0)            | 0<br>(0 - 0)            | 0<br>(0 - 0)            |
| G6PD deficiency                                     | 0<br>(0 - 0)             | 0<br>(0 - 0)          | 0<br>(0 - 0)           | 0<br>(0 - 0)            | 0<br>(0 - 0)            | 0<br>(0 - 0)            |
| Other hemoglobinopathies and hemolytic anemias      | 4<br>(3 - 5)             | 0<br>(0 - 1)          | 0<br>(0 - 0)           | 1<br>(1 - 1)            | 1<br>(1 - 2)            | 1<br>(1 - 2)            |
| Endocrine, metabolic, blood, and immune disorders   | 37<br>(14 - 46)          | 2<br>(1 - 3)          | 2<br>(1 - 2)           | 8<br>(3 - 10)           | 9<br>(3 - 12)           | 16<br>(5 - 21)          |
| Musculoskeletal disorders                           | 2<br>(1 - 2)             | --                    | 0<br>(0 - 0)           | 1<br>(1 - 1)            | 0<br>(0 - 1)            | 0<br>(0 - 0)            |
| Rheumatoid arthritis                                | 0<br>(0 - 0)             | --                    | 0<br>(0 - 0)           | 0<br>(0 - 0)            | 0<br>(0 - 0)            | 0<br>(0 - 0)            |
| Other musculoskeletal disorders                     | 1<br>(1 - 1)             | --                    | 0<br>(0 - 0)           | 1<br>(0 - 1)            | 0<br>(0 - 0)            | 0<br>(0 - 0)            |
| Other non-communicable diseases                     | 263<br>(226 - 298)       | 199<br>(166 - 232)    | 15<br>(11 - 18)        | 27<br>(20 - 33)         | 10<br>(8 - 13)          | 12<br>(9 - 18)          |
| Congenital anomalies                                | 260<br>(223 - 295)       | 198<br>(165 - 230)    | 14<br>(11 - 18)        | 27<br>(20 - 33)         | 10<br>(8 - 13)          | 12<br>(8 - 18)          |
| Neural tube defects                                 | 13<br>(5 - 21)           | 12<br>(5 - 19)        | 1<br>(0 - 2)           | 0<br>(0 - 1)            | 0<br>(0 - 0)            | 0<br>(0 - 0)            |
| Congenital heart anomalies                          | 119<br>(94 - 147)        | 90<br>(66 - 119)      | 11<br>(8 - 13)         | 17<br>(13 - 22)         | 1<br>(1 - 1)            | 0<br>(0 - 0)            |
| Cleft lip and cleft palate                          | 1<br>(0 - 3)             | 1<br>(0 - 3)          | --                     | --                      | --                      | --                      |
| Down syndrome                                       | 2<br>(1 - 4)             | 1<br>(0 - 3)          | 1<br>(0 - 1)           | 0<br>(0 - 0)            | 0<br>(0 - 0)            | 0<br>(0 - 0)            |
| Chromosomal unbalanced rearrangements               | 0<br>(0 - 1)             | 0<br>(0 - 0)          | 0<br>(0 - 0)           | 0<br>(0 - 0)            | 0<br>(0 - 0)            | 0<br>(0 - 0)            |
| Other congenital anomalies                          | 125<br>(101 - 152)       | 94<br>(72 - 116)      | 2<br>(1 - 4)           | 9<br>(6 - 11)           | 9<br>(7 - 12)           | 12<br>(8 - 17)          |
| Skin and subcutaneous diseases                      | 1<br>(1 - 1)             | 0<br>(0 - 0)          | 0<br>(0 - 0)           | 0<br>(0 - 1)            | 0<br>(0 - 0)            | 0<br>(0 - 0)            |
| Cellulitis                                          | 0<br>(0 - 0)             | 0<br>(0 - 0)          | 0<br>(0 - 0)           | 0<br>(0 - 0)            | 0<br>(0 - 0)            | 0<br>(0 - 0)            |
| Pyoderma                                            | 1<br>(0 - 1)             | 0<br>(0 - 0)          | 0<br>(0 - 0)           | 0<br>(0 - 0)            | 0<br>(0 - 0)            | 0<br>(0 - 0)            |
| Decubitus ulcer                                     | 0<br>(0 - 0)             | 0<br>(0 - 0)          | 0<br>(0 - 0)           | 0<br>(0 - 0)            | 0<br>(0 - 0)            | 0<br>(0 - 0)            |
| Other skin and subcutaneous diseases                | 0<br>(0 - 0)             | 0<br>(0 - 0)          | 0<br>(0 - 0)           | 0<br>(0 - 0)            | 0<br>(0 - 0)            | 0<br>(0 - 0)            |

Web Table 31- Armenia deaths with 95% UI by age, sex, and cause in 2013

| Cause                                           | Both Sexes, All Ages     | Both Sexes, 0-4 Years | Both Sexes, 5-14 Years | Both Sexes, 15-49 Years | Both Sexes, 50-69 Years | Both Sexes, 70-80 Years |
|-------------------------------------------------|--------------------------|-----------------------|------------------------|-------------------------|-------------------------|-------------------------|
| Sudden infant death syndrome                    | 2<br>(1 - 5)             | 2<br>(1 - 5)          | --                     | --                      | --                      | --                      |
| Injuries                                        | 1,377<br>(1,215 - 1,585) | 36<br>(23 - 61)       | 44<br>(36 - 55)        | 759<br>(665 - 852)      | 279<br>(240 - 336)      | 259<br>(223 - 314)      |
| Transport injuries                              | 481<br>(419 - 553)       | 6<br>(4 - 9)          | 17<br>(13 - 22)        | 318<br>(268 - 363)      | 87<br>(73 - 120)        | 54<br>(45 - 74)         |
| Road injuries                                   | 463<br>(404 - 531)       | 5<br>(3 - 8)          | 16<br>(12 - 20)        | 305<br>(256 - 348)      | 85<br>(71 - 118)        | 52<br>(43 - 72)         |
| Pedestrian road injuries                        | 102<br>(77 - 135)        | 2<br>(1 - 3)          | 6<br>(4 - 8)           | 52<br>(37 - 72)         | 21<br>(15 - 32)         | 21<br>(16 - 30)         |
| Cyclist road injuries                           | 10<br>(7 - 15)           | 0<br>(0 - 0)          | 1<br>(0 - 1)           | 4<br>(3 - 6)            | 3<br>(2 - 5)            | 2<br>(1 - 3)            |
| Motorcyclist road injuries                      | 72<br>(50 - 93)          | 0<br>(0 - 1)          | 1<br>(0 - 1)           | 61<br>(42 - 81)         | 8<br>(5 - 12)           | 2<br>(1 - 3)            |
| Motor vehicle road injuries                     | 277<br>(233 - 320)       | 3<br>(2 - 4)          | 9<br>(6 - 11)          | 186<br>(151 - 219)      | 52<br>(43 - 74)         | 27<br>(21 - 39)         |
| Other road injuries                             | 2<br>(2 - 4)             | 0<br>(0 - 0)          | 0<br>(0 - 0)           | 1<br>(1 - 2)            | 1<br>(0 - 1)            | 0<br>(0 - 0)            |
| Other transport injuries                        | 18<br>(14 - 22)          | 1<br>(0 - 1)          | 1<br>(1 - 1)           | 13<br>(9 - 17)          | 2<br>(1 - 3)            | 1<br>(1 - 3)            |
| Unintentional injuries                          | 494<br>(371 - 747)       | 30<br>(18 - 55)       | 23<br>(17 - 37)        | 204<br>(142 - 331)      | 96<br>(72 - 144)        | 140<br>(111 - 195)      |
| Falls                                           | 92<br>(67 - 176)         | 3<br>(2 - 8)          | 2<br>(1 - 3)           | 30<br>(20 - 66)         | 20<br>(13 - 41)         | 38<br>(28 - 66)         |
| Drowning                                        | 115<br>(63 - 229)        | 8<br>(3 - 22)         | 11<br>(6 - 24)         | 74<br>(39 - 146)        | 14<br>(8 - 28)          | 8<br>(4 - 15)           |
| Fire, heat, and hot substances                  | 66<br>(39 - 114)         | 6<br>(3 - 16)         | 2<br>(1 - 3)           | 22<br>(12 - 41)         | 15<br>(9 - 27)          | 20<br>(12 - 36)         |
| Poisonings                                      | 18<br>(11 - 49)          | 0<br>(0 - 1)          | 0<br>(0 - 0)           | 9<br>(5 - 26)           | 5<br>(3 - 14)           | 3<br>(2 - 8)            |
| Exposure to mechanical forces                   | 33<br>(28 - 39)          | 1<br>(1 - 2)          | 2<br>(1 - 2)           | 16<br>(12 - 20)         | 8<br>(6 - 11)           | 6<br>(5 - 8)            |
| Unintentional firearm injuries                  | 9<br>(7 - 13)            | 0<br>(0 - 0)          | 0<br>(0 - 0)           | 6<br>(4 - 9)            | 2<br>(1 - 3)            | 1<br>(1 - 2)            |
| Unintentional suffocation                       | 2<br>(2 - 4)             | 0<br>(0 - 1)          | 0<br>(0 - 1)           | 1<br>(0 - 1)            | 0<br>(0 - 1)            | 1<br>(1 - 2)            |
| Other exposure to mechanical forces             | 21<br>(17 - 25)          | 1<br>(0 - 2)          | 1<br>(1 - 2)           | 9<br>(7 - 13)           | 6<br>(4 - 9)            | 4<br>(3 - 6)            |
| Adverse effects of medical treatment            | 60<br>(44 - 82)          | 2<br>(1 - 3)          | 1<br>(1 - 1)           | 7<br>(5 - 10)           | 12<br>(9 - 17)          | 38<br>(25 - 56)         |
| Animal contact                                  | 10<br>(7 - 14)           | 1<br>(0 - 1)          | 1<br>(1 - 1)           | 3<br>(2 - 4)            | 3<br>(2 - 5)            | 2<br>(2 - 4)            |
| Venomous animal contact                         | 5<br>(3 - 7)             | 0<br>(0 - 1)          | 1<br>(0 - 1)           | 1<br>(1 - 2)            | 1<br>(1 - 2)            | 1<br>(1 - 2)            |
| Non-venomous animal contact                     | 5<br>(4 - 7)             | 0<br>(0 - 1)          | 0<br>(0 - 1)           | 1<br>(1 - 2)            | 2<br>(1 - 3)            | 1<br>(1 - 2)            |
| Foreign body                                    | 32<br>(24 - 53)          | 6<br>(4 - 10)         | 0<br>(0 - 1)           | 6<br>(4 - 10)           | 7<br>(5 - 13)           | 13<br>(9 - 21)          |
| Pulmonary aspiration and foreign body in airway | 31<br>(23 - 52)          | 6<br>(4 - 10)         | 0<br>(0 - 1)           | 5<br>(4 - 9)            | 7<br>(5 - 13)           | 12<br>(8 - 21)          |
| Foreign body in other body part                 | 1<br>(1 - 1)             | 0<br>(0 - 0)          | 0<br>(0 - 0)           | 0<br>(0 - 0)            | 0<br>(0 - 0)            | 1<br>(0 - 1)            |
| Other unintentional injuries                    | 68<br>(58 - 79)          | 2<br>(1 - 4)          | 5<br>(4 - 7)           | 38<br>(31 - 46)         | 11<br>(8 - 14)          | 12<br>(9 - 14)          |
| Self-harm and interpersonal violence            | 402<br>(246 - 474)       | 0<br>(0 - 1)          | 4<br>(2 - 5)           | 237<br>(147 - 282)      | 96<br>(54 - 118)        | 65<br>(35 - 80)         |
| Self-harm                                       | 253<br>(118 - 303)       | --                    | 2<br>(1 - 3)           | 133<br>(58 - 161)       | 69<br>(33 - 86)         | 50<br>(23 - 62)         |
| Interpersonal violence                          | 149<br>(99 - 191)        | 0<br>(0 - 1)          | 1<br>(1 - 2)           | 104<br>(68 - 138)       | 27<br>(16 - 39)         | 16<br>(9 - 24)          |
| Assault by firearm                              | 35<br>(18 - 55)          | 0<br>(0 - 0)          | 0<br>(0 - 0)           | 27<br>(14 - 43)         | 5<br>(2 - 8)            | 3<br>(1 - 5)            |
| Assault by sharp object                         | 29<br>(19 - 48)          | 0<br>(0 - 0)          | 0<br>(0 - 0)           | 19<br>(12 - 34)         | 6<br>(3 - 12)           | 3<br>(2 - 5)            |
| Assault by other means                          | 86<br>(49 - 110)         | 0<br>(0 - 1)          | 1<br>(1 - 2)           | 58<br>(32 - 77)         | 17<br>(9 - 23)          | 10<br>(5 - 15)          |

Web Table 31- Armenia deaths with 95% UI by age, sex, and cause in 2013

| Cause                                                             | Males, All Ages             | Males, 0-4 Years   | Males, 5-14 Years | Males, 15-49 Years       | Males, 50-69 Years       | Males, 70-80 Years       |
|-------------------------------------------------------------------|-----------------------------|--------------------|-------------------|--------------------------|--------------------------|--------------------------|
| All causes                                                        | 15,518<br>(14,217 - 17,002) | 406<br>(362 - 459) | 84<br>(77 - 92)   | 1,923<br>(1,701 - 2,098) | 4,427<br>(3,962 - 4,986) | 8,678<br>(8,070 - 9,423) |
| Communicable, maternal, neonatal, and nutritional diseases        | 631<br>(514 - 705)          | 254<br>(219 - 293) | 12<br>(9 - 15)    | 121<br>(97 - 137)        | 102<br>(79 - 119)        | 142<br>(83 - 183)        |
| HIV/AIDS and tuberculosis                                         | 124<br>(79 - 145)           | 0<br>(0 - 1)       | 0<br>(0 - 0)      | 60<br>(37 - 71)          | 45<br>(30 - 56)          | 18<br>(10 - 23)          |
| Tuberculosis                                                      | 118<br>(73 - 139)           | 0<br>(0 - 1)       | 0<br>(0 - 0)      | 56<br>(34 - 67)          | 44<br>(29 - 54)          | 18<br>(10 - 23)          |
| HIV/AIDS                                                          | 6<br>(3 - 10)               | 0<br>(0 - 0)       | 0<br>(0 - 0)      | 4<br>(2 - 8)             | 1<br>(1 - 2)             | 0<br>(0 - 0)             |
| HIV/AIDS resulting in mycobacterial infection                     | 0<br>(0 - 1)                | 0<br>(0 - 0)       | 0<br>(0 - 0)      | 0<br>(0 - 1)             | 0<br>(0 - 0)             | 0<br>(0 - 0)             |
| HIV/AIDS resulting in other diseases                              | 5<br>(3 - 10)               | 0<br>(0 - 0)       | 0<br>(0 - 0)      | 4<br>(2 - 7)             | 1<br>(1 - 2)             | 0<br>(0 - 0)             |
| Diarrhea, lower respiratory, and other common infectious diseases | 315<br>(220 - 376)          | 88<br>(68 - 109)   | 10<br>(7 - 14)    | 46<br>(35 - 57)          | 50<br>(34 - 64)          | 121<br>(64 - 162)        |
| Diarrheal diseases                                                | 15<br>(11 - 19)             | 9<br>(6 - 14)      | 1<br>(0 - 1)      | 2<br>(1 - 2)             | 1<br>(1 - 2)             | 2<br>(1 - 3)             |
| Intestinal infectious diseases                                    | 2<br>(1 - 4)                | 0<br>(0 - 1)       | 0<br>(0 - 1)      | 1<br>(0 - 2)             | 0<br>(0 - 1)             | 0<br>(0 - 1)             |
| Typhoid fever                                                     | 1<br>(0 - 2)                | 0<br>(0 - 0)       | 0<br>(0 - 0)      | 0<br>(0 - 1)             | 0<br>(0 - 0)             | 0<br>(0 - 0)             |
| Paratyphoid fever                                                 | 0<br>(0 - 1)                | 0<br>(0 - 0)       | 0<br>(0 - 0)      | 0<br>(0 - 0)             | 0<br>(0 - 0)             | 0<br>(0 - 0)             |
| Other intestinal infectious diseases                              | 0<br>(0 - 2)                | 0<br>(0 - 1)       | 0<br>(0 - 0)      | 0<br>(0 - 1)             | 0<br>(0 - 1)             | 0<br>(0 - 0)             |
| Lower respiratory infections                                      | 281<br>(188 - 340)          | 75<br>(57 - 94)    | 8<br>(5 - 11)     | 37<br>(25 - 47)          | 44<br>(29 - 58)          | 117<br>(60 - 157)        |
| Upper respiratory infections                                      | 1<br>(0 - 2)                | 0<br>(0 - 0)       | 0<br>(0 - 0)      | 0<br>(0 - 0)             | 0<br>(0 - 1)             | 0<br>(0 - 1)             |
| Otitis media                                                      | 0<br>(0 - 0)                | 0<br>(0 - 0)       | 0<br>(0 - 0)      | 0<br>(0 - 0)             | 0<br>(0 - 0)             | 0<br>(0 - 0)             |
| Meningitis                                                        | 10<br>(8 - 11)              | 1<br>(1 - 2)       | 1<br>(1 - 1)      | 4<br>(3 - 5)             | 2<br>(2 - 3)             | 1<br>(1 - 2)             |
| Pneumococcal meningitis                                           | 3<br>(2 - 4)                | 0<br>(0 - 0)       | 0<br>(0 - 0)      | 1<br>(1 - 2)             | 1<br>(0 - 1)             | 0<br>(0 - 1)             |
| H influenzae type B meningitis                                    | 2<br>(2 - 3)                | 1<br>(0 - 1)       | 0<br>(0 - 0)      | 1<br>(1 - 1)             | 0<br>(0 - 1)             | 0<br>(0 - 0)             |
| Meningococcal meningitis                                          | 2<br>(2 - 3)                | 0<br>(0 - 0)       | 0<br>(0 - 0)      | 1<br>(1 - 1)             | 0<br>(0 - 1)             | 0<br>(0 - 0)             |
| Other meningitis                                                  | 3<br>(2 - 4)                | 0<br>(0 - 0)       | 0<br>(0 - 0)      | 1<br>(1 - 2)             | 1<br>(1 - 1)             | 0<br>(0 - 1)             |
| Encephalitis                                                      | 6<br>(4 - 8)                | 2<br>(1 - 3)       | 1<br>(0 - 1)      | 2<br>(1 - 3)             | 1<br>(1 - 1)             | 0<br>(0 - 0)             |
| Diphtheria                                                        | 0<br>(0 - 0)                | 0<br>(0 - 0)       | 0<br>(0 - 0)      | 0<br>(0 - 0)             | 0<br>(0 - 0)             | --<br>(0 - 0)            |
| Whooping cough                                                    | 0<br>(0 - 0)                | 0<br>(0 - 0)       | 0<br>(0 - 0)      | 0<br>(0 - 0)             | 0<br>(0 - 0)             | --<br>(0 - 0)            |
| Tetanus                                                           | 0<br>(0 - 1)                | 0<br>(0 - 0)       | 0<br>(0 - 0)      | 0<br>(0 - 0)             | 0<br>(0 - 0)             | 0<br>(0 - 0)             |
| Measles                                                           | 0<br>(0 - 0)                | 0<br>(0 - 0)       | 0<br>(0 - 0)      | 0<br>(0 - 0)             | 0<br>(0 - 0)             | --<br>(0 - 0)            |
| Varicella and herpes zoster                                       | 1<br>(0 - 3)                | 0<br>(0 - 0)       | 0<br>(0 - 0)      | 0<br>(0 - 0)             | 0<br>(0 - 0)             | 0<br>(0 - 2)             |
| Neglected tropical diseases and malaria                           | 3<br>(2 - 4)                | 1<br>(0 - 1)       | 0<br>(0 - 1)      | 1<br>(1 - 1)             | 1<br>(0 - 1)             | 0<br>(0 - 1)             |
| Leishmaniasis                                                     | 1<br>(1 - 1)                | 0<br>(0 - 0)       | 0<br>(0 - 0)      | 0<br>(0 - 0)             | 0<br>(0 - 0)             | 0<br>(0 - 0)             |
| Visceral leishmaniasis                                            | 1<br>(1 - 1)                | 0<br>(0 - 0)       | 0<br>(0 - 0)      | 0<br>(0 - 0)             | 0<br>(0 - 0)             | 0<br>(0 - 0)             |
| Cysticercosis                                                     | 0<br>(0 - 0)                | 0<br>(0 - 0)       | 0<br>(0 - 0)      | 0<br>(0 - 0)             | 0<br>(0 - 0)             | 0<br>(0 - 0)             |
| Cystic echinococcosis                                             | 0<br>(0 - 0)                | 0<br>(0 - 0)       | 0<br>(0 - 0)      | 0<br>(0 - 0)             | 0<br>(0 - 0)             | 0<br>(0 - 0)             |
| Dengue                                                            | 0<br>(0 - 0)                | 0<br>(0 - 0)       | 0<br>(0 - 0)      | 0<br>(0 - 0)             | 0<br>(0 - 0)             | 0<br>(0 - 0)             |
| Rabies                                                            | 1<br>(0 - 1)                | 0<br>(0 - 0)       | 0<br>(0 - 0)      | 0<br>(0 - 0)             | 0<br>(0 - 0)             | 0<br>(0 - 0)             |
| Intestinal nematode infections                                    | 0<br>(0 - 2)                | 0<br>(0 - 1)       | 0<br>(0 - 0)      | 0<br>(0 - 0)             | 0<br>(0 - 0)             | 0<br>(0 - 1)             |
| Ascariasis                                                        | 0<br>(0 - 2)                | 0<br>(0 - 1)       | 0<br>(0 - 0)      | 0<br>(0 - 0)             | 0<br>(0 - 0)             | 0<br>(0 - 1)             |
| Other neglected tropical diseases                                 | 0<br>(0 - 1)                | 0<br>(0 - 0)       | 0<br>(0 - 0)      | 0<br>(0 - 0)             | 0<br>(0 - 0)             | 0<br>(0 - 0)             |
| Maternal disorders                                                | --                          | --                 | --                | --                       | --                       | --                       |
| Maternal hemorrhage                                               | --                          | --                 | --                | --                       | --                       | --                       |
| Maternal sepsis and other maternal infections                     | --                          | --                 | --                | --                       | --                       | --                       |

Web Table 31- Armenia deaths with 95% UI by age, sex, and cause in 2013

| Cause                                                            | Males, All Ages             | Males, 0-4 Years   | Males, 5-14 Years | Males, 15-49 Years     | Males, 50-69 Years       | Males, 70-80 Years       |
|------------------------------------------------------------------|-----------------------------|--------------------|-------------------|------------------------|--------------------------|--------------------------|
| Maternal hypertensive disorders                                  | --                          | --                 | --                | --                     | --                       | --                       |
| Maternal obstructed labor                                        | --                          | --                 | --                | --                     | --                       | --                       |
| Maternal abortive outcome                                        | --                          | --                 | --                | --                     | --                       | --                       |
| Indirect maternal deaths                                         | --                          | --                 | --                | --                     | --                       | --                       |
| Late maternal deaths                                             | --                          | --                 | --                | --                     | --                       | --                       |
| Maternal deaths aggravated by HIV/AIDS                           | --                          | --                 | --                | --                     | --                       | --                       |
| Other maternal disorders                                         | --                          | --                 | --                | --                     | --                       | --                       |
| Neonatal disorders                                               | 162<br>(138 - 186)          | 162<br>(138 - 186) | --                | --                     | --                       | --                       |
| Neonatal preterm birth complications                             | 73<br>(43 - 106)            | 73<br>(43 - 106)   | --                | --                     | --                       | --                       |
| Neonatal encephalopathy due to birth asphyxia and trauma         | 25<br>(10 - 49)             | 25<br>(10 - 49)    | --                | --                     | --                       | --                       |
| Neonatal sepsis and other neonatal infections                    | 24<br>(9 - 49)              | 24<br>(9 - 49)     | --                | --                     | --                       | --                       |
| Hemolytic disease and other neonatal jaundice                    | 1<br>(0 - 2)                | 1<br>(0 - 2)       | --                | --                     | --                       | --                       |
| Other neonatal disorders                                         | 38<br>(20 - 66)             | 38<br>(20 - 66)    | --                | --                     | --                       | --                       |
| Nutritional deficiencies                                         | 11<br>(6 - 30)              | 0<br>(0 - 1)       | 0<br>(0 - 1)      | 7<br>(4 - 18)          | 2<br>(1 - 7)             | 2<br>(1 - 4)             |
| Protein-energy malnutrition                                      | 2<br>(1 - 7)                | 0<br>(0 - 0)       | 0<br>(0 - 0)      | 1<br>(1 - 5)           | 1<br>(0 - 2)             | 0<br>(0 - 0)             |
| Iodine deficiency                                                | 0<br>(0 - 2)                | 0<br>(0 - 0)       | 0<br>(0 - 0)      | 0<br>(0 - 1)           | 0<br>(0 - 1)             | 0<br>(0 - 0)             |
| Iron-deficiency anemia                                           | 6<br>(3 - 17)               | 0<br>(0 - 0)       | 0<br>(0 - 0)      | 4<br>(2 - 11)          | 1<br>(1 - 3)             | 1<br>(1 - 4)             |
| Other nutritional deficiencies                                   | 2<br>(1 - 7)                | 0<br>(0 - 0)       | 0<br>(0 - 0)      | 1<br>(1 - 4)           | 1<br>(0 - 2)             | 0<br>(0 - 1)             |
| Other communicable, maternal, neonatal, and nutritional diseases | 16<br>(13 - 21)             | 3<br>(2 - 6)       | 1<br>(0 - 1)      | 7<br>(6 - 9)           | 4<br>(3 - 6)             | 1<br>(1 - 3)             |
| Sexually transmitted diseases excluding HIV                      | 3<br>(1 - 7)                | 1<br>(0 - 2)       | 0<br>(0 - 0)      | 1<br>(0 - 2)           | 1<br>(0 - 3)             | 1<br>(0 - 2)             |
| Syphilis                                                         | 2<br>(1 - 5)                | 1<br>(0 - 2)       | 0<br>(0 - 0)      | 0<br>(0 - 1)           | 1<br>(0 - 2)             | 0<br>(0 - 1)             |
| Chlamydial infection                                             | --                          | --                 | --                | --                     | --                       | --                       |
| Gonococcal infection                                             | 0<br>(0 - 1)                | --                 | 0<br>(0 - 0)      | 0<br>(0 - 0)           | 0<br>(0 - 0)             | 0<br>(0 - 0)             |
| Other sexually transmitted diseases                              | 0<br>(0 - 1)                | --                 | 0<br>(0 - 0)      | 0<br>(0 - 0)           | 0<br>(0 - 0)             | 0<br>(0 - 0)             |
| Hepatitis                                                        | 11<br>(9 - 14)              | 1<br>(0 - 1)       | 0<br>(0 - 1)      | 6<br>(5 - 8)           | 3<br>(2 - 5)             | 1<br>(0 - 1)             |
| Acute hepatitis A                                                | 1<br>(0 - 2)                | 0<br>(0 - 0)       | 0<br>(0 - 0)      | 0<br>(0 - 1)           | 0<br>(0 - 0)             | 0<br>(0 - 0)             |
| Acute hepatitis B                                                | 8<br>(5 - 10)               | 1<br>(0 - 1)       | 0<br>(0 - 0)      | 4<br>(2 - 6)           | 2<br>(2 - 4)             | 1<br>(0 - 1)             |
| Acute hepatitis C                                                | 1<br>(0 - 2)                | --                 | 0<br>(0 - 0)      | 1<br>(0 - 1)           | 0<br>(0 - 1)             | 0<br>(0 - 0)             |
| Acute hepatitis E                                                | 2<br>(1 - 3)                | 0<br>(0 - 0)       | 0<br>(0 - 0)      | 1<br>(1 - 2)           | 0<br>(0 - 1)             | 0<br>(0 - 0)             |
| Other infectious diseases                                        | 3<br>(1 - 5)                | 1<br>(1 - 4)       | 0<br>(0 - 0)      | 0<br>(0 - 1)           | 0<br>(0 - 1)             | 0<br>(0 - 1)             |
| Non-communicable diseases                                        | 13,800<br>(12,617 - 15,170) | 127<br>(104 - 153) | 37<br>(31 - 43)   | 1,130<br>(991 - 1,264) | 4,113<br>(3,669 - 4,642) | 8,392<br>(7,798 - 9,129) |
| Neoplasms                                                        | 3,153<br>(2,811 - 3,528)    | 10<br>(6 - 15)     | 18<br>(14 - 22)   | 335<br>(291 - 375)     | 1,372<br>(1,214 - 1,557) | 1,418<br>(1,254 - 1,589) |
| Esophageal cancer                                                | 40<br>(31 - 59)             | --                 | --                | 2<br>(2 - 4)           | 18<br>(13 - 27)          | 20<br>(15 - 29)          |
| Stomach cancer                                                   | 299<br>(262 - 341)          | --                 | --                | 30<br>(25 - 35)        | 121<br>(104 - 142)       | 148<br>(126 - 174)       |
| Liver cancer                                                     | 218<br>(185 - 257)          | --                 | 0<br>(0 - 1)      | 16<br>(13 - 21)        | 83<br>(68 - 100)         | 118<br>(93 - 147)        |
| Liver cancer due to hepatitis B                                  | 81<br>(64 - 100)            | --                 | 0<br>(0 - 0)      | 8<br>(6 - 10)          | 35<br>(26 - 44)          | 38<br>(27 - 51)          |
| Liver cancer due to hepatitis C                                  | 77<br>(59 - 97)             | --                 | 0<br>(0 - 0)      | 5<br>(3 - 7)           | 28<br>(21 - 37)          | 44<br>(32 - 57)          |
| Liver cancer due to alcohol use                                  | 51<br>(36 - 69)             | --                 | --                | 2<br>(1 - 4)           | 16<br>(11 - 22)          | 32<br>(22 - 46)          |
| Liver cancer due to other causes                                 | 9<br>(5 - 13)               | --                 | 0<br>(0 - 0)      | 1<br>(1 - 2)           | 4<br>(2 - 6)             | 4<br>(2 - 6)             |
| Larynx cancer                                                    | 92<br>(74 - 134)            | --                 | --                | 7<br>(5 - 10)          | 52<br>(40 - 78)          | 33<br>(26 - 46)          |

Web Table 31- Armenia deaths with 95% UI by age, sex, and cause in 2013

| Cause                                         | Males, All Ages          | Males, 0-4 Years | Males, 5-14 Years | Males, 15-49 Years | Males, 50-69 Years       | Males, 70-80 Years       |
|-----------------------------------------------|--------------------------|------------------|-------------------|--------------------|--------------------------|--------------------------|
| Tracheal, bronchus and lung cancer            | 1,029<br>(914 - 1,175)   | --               | --                | 70<br>(59 - 82)    | 528<br>(456 - 615)       | 431<br>(375 - 501)       |
| Breast cancer                                 | 3<br>(0 - 5)             | --               | --                | 0<br>(0 - 1)       | 1<br>(0 - 2)             | 2<br>(0 - 3)             |
| Cervical cancer                               | --                       | --               | --                | --                 | --                       | --                       |
| Uterine cancer                                | --                       | --               | --                | --                 | --                       | --                       |
| Prostate cancer                               | 184<br>(73 - 259)        | --               | --                | 3<br>(1 - 4)       | 43<br>(20 - 60)          | 138<br>(51 - 200)        |
| Colon and rectum cancer                       | 218<br>(193 - 247)       | --               | --                | 20<br>(17 - 23)    | 76<br>(65 - 90)          | 122<br>(103 - 141)       |
| Lip and oral cavity cancer                    | 39<br>(28 - 50)          | --               | --                | 5<br>(3 - 6)       | 21<br>(14 - 28)          | 14<br>(9 - 19)           |
| Nasopharynx cancer                            | 5<br>(4 - 6)             | --               | 0<br>(0 - 0)      | 2<br>(1 - 3)       | 2<br>(2 - 3)             | 1<br>(1 - 1)             |
| Other pharynx cancer                          | 14<br>(11 - 18)          | --               | --                | 1<br>(1 - 2)       | 9<br>(7 - 12)            | 4<br>(3 - 5)             |
| Gallbladder and biliary tract cancer          | 28<br>(20 - 36)          | --               | --                | 1<br>(1 - 2)       | 9<br>(6 - 13)            | 18<br>(12 - 25)          |
| Pancreatic cancer                             | 195<br>(168 - 224)       | --               | --                | 15<br>(12 - 19)    | 92<br>(77 - 111)         | 87<br>(73 - 104)         |
| Malignant skin melanoma                       | 17<br>(10 - 28)          | --               | --                | 8<br>(4 - 13)      | 4<br>(2 - 7)             | 5<br>(3 - 9)             |
| Non-melanoma skin cancer                      | 3<br>(1 - 4)             | --               | --                | 0<br>(0 - 1)       | 2<br>(0 - 0)             | 2<br>(1 - 3)             |
| Ovarian cancer                                | --                       | --               | --                | --                 | --                       | --                       |
| Testicular cancer                             | 4<br>(3 - 7)             | --               | --                | 3<br>(2 - 5)       | 1<br>(0 - 1)             | 0<br>(0 - 1)             |
| Kidney cancer                                 | 97<br>(78 - 122)         | 0<br>(0 - 0)     | 0<br>(0 - 0)      | 9<br>(7 - 13)      | 44<br>(33 - 57)          | 44<br>(31 - 62)          |
| Bladder cancer                                | 171<br>(143 - 204)       | --               | --                | 5<br>(3 - 7)       | 54<br>(43 - 68)          | 112<br>(92 - 136)        |
| Brain and nervous system cancer               | 122<br>(72 - 150)        | 3<br>(1 - 6)     | 5<br>(3 - 7)      | 43<br>(24 - 55)    | 51<br>(30 - 68)          | 19<br>(11 - 26)          |
| Thyroid cancer                                | 3<br>(2 - 4)             | --               | 0<br>(0 - 0)      | 1<br>(0 - 1)       | 1<br>(1 - 1)             | 1<br>(1 - 2)             |
| Mesothelioma                                  | 3<br>(2 - 4)             | --               | --                | 0<br>(0 - 0)       | 1<br>(1 - 2)             | 1<br>(1 - 2)             |
| Hodgkin lymphoma                              | 5<br>(3 - 9)             | 0<br>(0 - 0)     | 0<br>(0 - 0)      | 2<br>(1 - 4)       | 1<br>(1 - 3)             | 2<br>(1 - 3)             |
| Non-Hodgkin lymphoma                          | 43<br>(30 - 53)          | 0<br>(0 - 0)     | 1<br>(1 - 1)      | 11<br>(7 - 13)     | 19<br>(13 - 25)          | 13<br>(8 - 17)           |
| Multiple myeloma                              | 8<br>(6 - 10)            | --               | --                | 1<br>(1 - 2)       | 4<br>(3 - 6)             | 2<br>(2 - 3)             |
| Leukemia                                      | 98<br>(85 - 112)         | 3<br>(2 - 5)     | 7<br>(5 - 9)      | 32<br>(26 - 38)    | 35<br>(29 - 42)          | 20<br>(17 - 25)          |
| Other neoplasms                               | 214<br>(162 - 255)       | 3<br>(2 - 6)     | 4<br>(3 - 6)      | 46<br>(36 - 56)    | 99<br>(75 - 126)         | 60<br>(40 - 83)          |
| Cardiovascular diseases                       | 7,311<br>(6,715 - 8,069) | 1<br>(1 - 1)     | 2<br>(1 - 2)      | 480<br>(422 - 545) | 1,929<br>(1,712 - 2,186) | 4,900<br>(4,543 - 5,372) |
| Rheumatic heart disease                       | 45<br>(34 - 80)          | 0<br>(0 - 0)     | 0<br>(0 - 0)      | 15<br>(11 - 29)    | 20<br>(13 - 37)          | 9<br>(6 - 14)            |
| Ischemic heart disease                        | 5,031<br>(4,502 - 5,705) | 0<br>(0 - 0)     | 1<br>(1 - 1)      | 371<br>(319 - 426) | 1,410<br>(1,235 - 1,615) | 3,250<br>(2,884 - 3,731) |
| Cerebrovascular disease                       | 1,752<br>(1,377 - 2,105) | 0<br>(0 - 0)     | 1<br>(0 - 1)      | 69<br>(51 - 88)    | 386<br>(302 - 478)       | 1,297<br>(1,013 - 1,566) |
| Ischemic stroke                               | 1,136<br>(869 - 1,382)   | 0<br>(0 - 0)     | 0<br>(0 - 1)      | 21<br>(14 - 27)    | 173<br>(121 - 220)       | 942<br>(724 - 1,149)     |
| Hemorrhagic stroke                            | 616<br>(464 - 790)       | 0<br>(0 - 0)     | 0<br>(0 - 0)      | 49<br>(35 - 63)    | 213<br>(162 - 273)       | 355<br>(245 - 475)       |
| Hypertensive heart disease                    | 230<br>(140 - 335)       | 0<br>(0 - 0)     | 0<br>(0 - 0)      | 4<br>(2 - 7)       | 32<br>(21 - 49)          | 193<br>(113 - 287)       |
| Cardiomyopathy and myocarditis                | 42<br>(29 - 55)          | 0<br>(0 - 0)     | 0<br>(0 - 0)      | 10<br>(7 - 15)     | 14<br>(9 - 19)           | 18<br>(11 - 28)          |
| Atrial fibrillation and flutter               | 0<br>(0 - 0)             | --               | --                | 0<br>(0 - 0)       | 0<br>(0 - 0)             | 0<br>(0 - 0)             |
| Aortic aneurysm                               | 155<br>(105 - 195)       | --               | --                | 6<br>(4 - 9)       | 52<br>(37 - 67)          | 97<br>(62 - 128)         |
| Peripheral vascular disease                   | 0<br>(0 - 0)             | --               | --                | 0<br>(0 - 0)       | 0<br>(0 - 0)             | 0<br>(0 - 0)             |
| Endocarditis                                  | 4<br>(3 - 7)             | 0<br>(0 - 0)     | 0<br>(0 - 0)      | 1<br>(0 - 2)       | 1<br>(0 - 1)             | 2<br>(1 - 4)             |
| Other cardiovascular and circulatory diseases | 52<br>(18 - 69)          | 0<br>(0 - 0)     | 0<br>(0 - 0)      | 4<br>(2 - 6)       | 14<br>(7 - 20)           | 33<br>(9 - 46)           |
| Chronic respiratory diseases                  | 798<br>(696 - 1,047)     | 0<br>(0 - 0)     | 0<br>(0 - 0)      | 20<br>(16 - 26)    | 157<br>(128 - 244)       | 620<br>(535 - 798)       |
| Chronic obstructive pulmonary disease         | 689<br>(589 - 914)       | 0<br>(0 - 0)     | 0<br>(0 - 0)      | 18<br>(14 - 24)    | 143<br>(116 - 223)       | 527<br>(444 - 689)       |

Web Table 31- Armenia deaths with 95% UI by age, sex, and cause in 2013

| Cause                                               | Males, All Ages    | Males, 0-4 Years | Males, 5-14 Years | Males, 15-49 Years | Males, 50-69 Years | Males, 70-80 Years |
|-----------------------------------------------------|--------------------|------------------|-------------------|--------------------|--------------------|--------------------|
| Pneumoconiosis                                      | 20<br>(13 - 32)    | 0<br>(0 - 0)     | 0<br>(0 - 0)      | 1<br>(0 - 1)       | 5<br>(3 - 8)       | 15<br>(10 - 24)    |
| Silicosis                                           | 4<br>(2 - 6)       | 0<br>(0 - 0)     | 0<br>(0 - 0)      | 0<br>(0 - 0)       | 2<br>(1 - 3)       | 2<br>(1 - 3)       |
| Asbestosis                                          | 5<br>(3 - 8)       | 0<br>(0 - 0)     | 0<br>(0 - 0)      | 0<br>(0 - 0)       | 0<br>(0 - 1)       | 4<br>(3 - 7)       |
| Coal workers pneumoconiosis                         | 7<br>(4 - 11)      | 0<br>(0 - 0)     | 0<br>(0 - 0)      | 0<br>(0 - 0)       | 1<br>(1 - 2)       | 6<br>(4 - 9)       |
| Other pneumoconiosis                                | 5<br>(3 - 8)       | 0<br>(0 - 0)     | 0<br>(0 - 0)      | 0<br>(0 - 0)       | 2<br>(1 - 3)       | 3<br>(2 - 5)       |
| Asthma                                              | 10<br>(6 - 14)     | 0<br>(0 - 0)     | 0<br>(0 - 0)      | 0<br>(0 - 0)       | 0<br>(0 - 1)       | 9<br>(6 - 14)      |
| Interstitial lung disease and pulmonary sarcoidosis | 76<br>(47 - 120)   | 0<br>(0 - 0)     | 0<br>(0 - 0)      | 0<br>(0 - 1)       | 8<br>(5 - 15)      | 67<br>(40 - 107)   |
| Other chronic respiratory diseases                  | 3<br>(2 - 5)       | 0<br>(0 - 0)     | 0<br>(0 - 0)      | 1<br>(1 - 1)       | 1<br>(1 - 2)       | 1<br>(1 - 2)       |
| Cirrhosis                                           | 601<br>(537 - 680) | 0<br>(0 - 1)     | 1<br>(1 - 1)      | 112<br>(97 - 130)  | 222<br>(191 - 259) | 266<br>(229 - 307) |
| Cirrhosis due to hepatitis B                        | 241<br>(154 - 330) | 0<br>(0 - 0)     | 0<br>(0 - 0)      | 46<br>(22 - 65)    | 92<br>(57 - 127)   | 103<br>(64 - 144)  |
| Cirrhosis due to hepatitis C                        | 121<br>(51 - 186)  | 0<br>(0 - 0)     | 0<br>(0 - 0)      | 25<br>(10 - 40)    | 44<br>(17 - 70)    | 52<br>(21 - 88)    |
| Cirrhosis due to alcohol use                        | 194<br>(122 - 278) | --               | --                | 26<br>(12 - 46)    | 69<br>(40 - 104)   | 99<br>(62 - 137)   |
| Cirrhosis due to other causes                       | 45<br>(24 - 69)    | 0<br>(0 - 1)     | 1<br>(0 - 1)      | 15<br>(9 - 26)     | 17<br>(7 - 27)     | 12<br>(6 - 20)     |
| Digestive diseases                                  | 269<br>(223 - 307) | 1<br>(0 - 1)     | 1<br>(1 - 1)      | 35<br>(29 - 44)    | 85<br>(72 - 104)   | 147<br>(104 - 173) |
| Peptic ulcer disease                                | 117<br>(81 - 151)  | 0<br>(0 - 0)     | 0<br>(0 - 0)      | 18<br>(12 - 22)    | 42<br>(30 - 54)    | 57<br>(33 - 80)    |
| Gastritis and duodenitis                            | 3<br>(1 - 7)       | 0<br>(0 - 0)     | 0<br>(0 - 0)      | 0<br>(0 - 1)       | 1<br>(0 - 3)       | 1<br>(1 - 3)       |
| Appendicitis                                        | 5<br>(3 - 7)       | 0<br>(0 - 0)     | 0<br>(0 - 0)      | 2<br>(1 - 3)       | 1<br>(1 - 2)       | 1<br>(1 - 2)       |
| Paralytic ileus and intestinal obstruction          | 18<br>(11 - 33)    | 1<br>(0 - 1)     | 0<br>(0 - 0)      | 2<br>(1 - 3)       | 5<br>(3 - 9)       | 10<br>(6 - 20)     |
| Inguinal, femoral, and abdominal hernia             | 10<br>(4 - 15)     | 0<br>(0 - 0)     | 0<br>(0 - 0)      | 1<br>(0 - 1)       | 7<br>(1 - 4)       | 7<br>(2 - 11)      |
| Inflammatory bowel disease                          | 4<br>(3 - 8)       | 0<br>(0 - 0)     | 0<br>(0 - 0)      | 1<br>(1 - 3)       | 1<br>(1 - 2)       | 2<br>(1 - 4)       |
| Vascular intestinal disorders                       | 53<br>(23 - 92)    | 0<br>(0 - 0)     | 0<br>(0 - 0)      | 0<br>(0 - 1)       | 14<br>(6 - 26)     | 39<br>(17 - 68)    |
| Gallbladder and biliary diseases                    | 30<br>(19 - 41)    | 0<br>(0 - 0)     | 0<br>(0 - 0)      | 4<br>(3 - 6)       | 8<br>(5 - 11)      | 18<br>(10 - 27)    |
| Pancreatitis                                        | 20<br>(13 - 32)    | 0<br>(0 - 0)     | 0<br>(0 - 0)      | 4<br>(3 - 7)       | 9<br>(5 - 13)      | 7<br>(4 - 14)      |
| Other digestive diseases                            | 9<br>(6 - 14)      | 0<br>(0 - 0)     | 0<br>(0 - 0)      | 2<br>(2 - 4)       | 2<br>(1 - 5)       | 4<br>(2 - 7)       |
| Neurological disorders                              | 611<br>(477 - 763) | 1<br>(1 - 2)     | 3<br>(2 - 4)      | 21<br>(16 - 27)    | 35<br>(27 - 44)    | 551<br>(419 - 699) |
| Alzheimer disease and other dementias               | 570<br>(435 - 718) | --               | --                | 0<br>(0 - 0)       | 27<br>(20 - 36)    | 543<br>(411 - 689) |
| Parkinson disease                                   | 7<br>(5 - 12)      | --               | --                | 0<br>(0 - 0)       | 1<br>(1 - 2)       | 6<br>(3 - 10)      |
| Epilepsy                                            | 26<br>(19 - 33)    | 1<br>(1 - 2)     | 2<br>(2 - 4)      | 16<br>(11 - 21)    | 5<br>(3 - 6)       | 2<br>(1 - 3)       |
| Multiple sclerosis                                  | 3<br>(1 - 5)       | --               | --                | 2<br>(1 - 3)       | 1<br>(0 - 1)       | 1<br>(0 - 1)       |
| Other neurological disorders                        | 5<br>(3 - 11)      | 0<br>(0 - 0)     | 0<br>(0 - 0)      | 3<br>(2 - 7)       | 1<br>(1 - 3)       | 0<br>(0 - 1)       |
| Mental and substance use disorders                  | 49<br>(31 - 60)    | 0<br>(0 - 0)     | 0<br>(0 - 0)      | 26<br>(17 - 32)    | 18<br>(9 - 24)     | 5<br>(3 - 6)       |
| Schizophrenia                                       | 1<br>(0 - 3)       | --               | --                | 1<br>(0 - 2)       | 0<br>(0 - 1)       | 0<br>(0 - 0)       |
| Alcohol use disorders                               | 32<br>(15 - 41)    | --               | --                | 14<br>(7 - 19)     | 14<br>(6 - 20)     | 3<br>(2 - 4)       |
| Drug use disorders                                  | 16<br>(9 - 19)     | 0<br>(0 - 0)     | --                | 11<br>(6 - 14)     | 3<br>(2 - 4)       | 2<br>(1 - 3)       |
| Opioid use disorders                                | 3<br>(2 - 4)       | 0<br>(0 - 0)     | --                | 2<br>(1 - 3)       | 1<br>(0 - 1)       | 0<br>(0 - 1)       |
| Cocaine use disorders                               | 0<br>(0 - 0)       | 0<br>(0 - 0)     | --                | 0<br>(0 - 0)       | 0<br>(0 - 0)       | 0<br>(0 - 0)       |
| Amphetamine use disorders                           | 0<br>(0 - 0)       | 0<br>(0 - 0)     | --                | 0<br>(0 - 0)       | 0<br>(0 - 0)       | 0<br>(0 - 0)       |
| Other drug use disorders                            | 12<br>(7 - 14)     | 0<br>(0 - 0)     | --                | 8<br>(4 - 10)      | 2<br>(1 - 3)       | 1<br>(1 - 2)       |
| Eating disorders                                    | 0<br>(0 - 0)       | --               | 0<br>(0 - 0)      | 0<br>(0 - 0)       | --                 | --                 |
| Anorexia nervosa                                    | 0<br>(0 - 0)       | --               | 0<br>(0 - 0)      | 0<br>(0 - 0)       | --                 | --                 |

Web Table 31- Armenia deaths with 95% UI by age, sex, and cause in 2013

| Cause                                               | Males, All Ages    | Males, 0-4 Years  | Males, 5-14 Years | Males, 15-49 Years | Males, 50-69 Years | Males, 70-80 Years |
|-----------------------------------------------------|--------------------|-------------------|-------------------|--------------------|--------------------|--------------------|
| Diabetes, urogenital, blood, and endocrine diseases | 861<br>(698 - 985) | 3<br>(2 - 4)      | 4<br>(3 - 5)      | 84<br>(70 - 98)    | 289<br>(243 - 338) | 480<br>(363 - 561) |
| Diabetes mellitus                                   | 515<br>(454 - 591) | 0<br>(0 - 0)      | 1<br>(1 - 1)      | 41<br>(34 - 47)    | 194<br>(167 - 229) | 280<br>(238 - 325) |
| Acute glomerulonephritis                            | 2<br>(2 - 3)       | 0<br>(0 - 0)      | 0<br>(0 - 0)      | 1<br>(0 - 1)       | 1<br>(1 - 1)       | 1<br>(0 - 1)       |
| Chronic kidney disease                              | 90<br>(72 - 166)   | 0<br>(0 - 0)      | 1<br>(0 - 1)      | 19<br>(14 - 36)    | 30<br>(23 - 59)    | 40<br>(31 - 69)    |
| Chronic kidney disease due to diabetes mellitus     | 0<br>(0 - 1)       | 0<br>(0 - 0)      | 0<br>(0 - 0)      | 0<br>(0 - 0)       | 0<br>(0 - 0)       | 0<br>(0 - 0)       |
| Chronic kidney disease due to hypertension          | 7<br>(4 - 18)      | 0<br>(0 - 0)      | 0<br>(0 - 0)      | 2<br>(1 - 4)       | 1<br>(1 - 4)       | 4<br>(2 - 11)      |
| Chronic kidney disease due to glomerulonephritis    | 43<br>(34 - 63)    | 0<br>(0 - 0)      | 0<br>(0 - 0)      | 7<br>(5 - 12)      | 18<br>(13 - 27)    | 19<br>(14 - 25)    |
| Chronic kidney disease due to other causes          | 39<br>(26 - 85)    | 0<br>(0 - 0)      | 1<br>(0 - 1)      | 10<br>(6 - 21)     | 11<br>(6 - 29)     | 17<br>(10 - 38)    |
| Urinary diseases and male infertility               | 230<br>(95 - 295)  | 0<br>(0 - 0)      | 0<br>(0 - 1)      | 18<br>(10 - 23)    | 58<br>(27 - 74)    | 153<br>(53 - 204)  |
| Interstitial nephritis and urinary tract infections | 192<br>(70 - 257)  | 0<br>(0 - 0)      | 0<br>(0 - 1)      | 16<br>(8 - 21)     | 50<br>(23 - 66)    | 125<br>(35 - 176)  |
| Urolithiasis                                        | 14<br>(4 - 34)     | --                | 0<br>(0 - 0)      | 0<br>(0 - 0)       | 3<br>(1 - 8)       | 11<br>(3 - 27)     |
| Other urinary diseases                              | 24<br>(12 - 54)    | 0<br>(0 - 0)      | 0<br>(0 - 0)      | 2<br>(1 - 5)       | 4<br>(2 - 9)       | 17<br>(8 - 41)     |
| Gynecological diseases                              | --                 | --                | --                | --                 | --                 | --                 |
| Uterine fibroids                                    | --                 | --                | --                | --                 | --                 | --                 |
| Polycystic ovarian syndrome                         | --                 | --                | --                | --                 | --                 | --                 |
| Endometriosis                                       | --                 | --                | --                | --                 | --                 | --                 |
| Genital prolapse                                    | --                 | --                | --                | --                 | --                 | --                 |
| Other gynecological diseases                        | --                 | --                | --                | --                 | --                 | --                 |
| Hemoglobinopathies and hemolytic anemias            | 4<br>(3 - 7)       | 1<br>(0 - 1)      | 1<br>(1 - 1)      | 1<br>(1 - 2)       | 1<br>(1 - 1)       | 1<br>(0 - 1)       |
| Thalassemias                                        | 2<br>(1 - 3)       | 1<br>(0 - 1)      | 1<br>(0 - 1)      | 1<br>(0 - 1)       | 0<br>(0 - 0)       | 0<br>(0 - 0)       |
| Sickle cell disorders                               | 0<br>(0 - 0)       | 0<br>(0 - 0)      | 0<br>(0 - 0)      | 0<br>(0 - 0)       | 0<br>(0 - 0)       | 0<br>(0 - 0)       |
| G6PD deficiency                                     | 0<br>(0 - 0)       | 0<br>(0 - 0)      | 0<br>(0 - 0)      | 0<br>(0 - 0)       | 0<br>(0 - 0)       | 0<br>(0 - 0)       |
| Other hemoglobinopathies and hemolytic anemias      | 2<br>(1 - 3)       | 0<br>(0 - 0)      | 0<br>(0 - 0)      | 0<br>(0 - 1)       | 1<br>(0 - 1)       | 1<br>(0 - 1)       |
| Endocrine, metabolic, blood, and immune disorders   | 20<br>(6 - 25)     | 1<br>(0 - 2)      | 1<br>(0 - 2)      | 5<br>(2 - 7)       | 5<br>(1 - 8)       | 7<br>(2 - 10)      |
| Musculoskeletal disorders                           | 1<br>(0 - 1)       | --                | 0<br>(0 - 0)      | 0<br>(0 - 0)       | 0<br>(0 - 0)       | 0<br>(0 - 0)       |
| Rheumatoid arthritis                                | 0<br>(0 - 0)       | --                | 0<br>(0 - 0)      | 0<br>(0 - 0)       | 0<br>(0 - 0)       | 0<br>(0 - 0)       |
| Other musculoskeletal disorders                     | 0<br>(0 - 1)       | --                | 0<br>(0 - 0)      | 0<br>(0 - 0)       | 0<br>(0 - 0)       | 0<br>(0 - 0)       |
| Other non-communicable diseases                     | 148<br>(125 - 174) | 112<br>(90 - 135) | 8<br>(6 - 11)     | 17<br>(12 - 21)    | 5<br>(4 - 7)       | 6<br>(4 - 10)      |
| Congenital anomalies                                | 145<br>(123 - 171) | 110<br>(88 - 133) | 8<br>(5 - 11)     | 16<br>(12 - 21)    | 5<br>(4 - 7)       | 6<br>(4 - 10)      |
| Neural tube defects                                 | 6<br>(2 - 11)      | 6<br>(2 - 10)     | 0<br>(0 - 1)      | 0<br>(0 - 0)       | 0<br>(0 - 0)       | 0<br>(0 - 0)       |
| Congenital heart anomalies                          | 68<br>(50 - 89)    | 51<br>(34 - 71)   | 6<br>(4 - 8)      | 10<br>(8 - 14)     | 0<br>(0 - 1)       | 0<br>(0 - 0)       |
| Cleft lip and cleft palate                          | 1<br>(0 - 3)       | 1<br>(0 - 3)      | --                | --                 | --                 | --                 |
| Down syndrome                                       | 1<br>(0 - 3)       | 1<br>(0 - 3)      | 0<br>(0 - 0)      | 0<br>(0 - 0)       | 0<br>(0 - 0)       | 0<br>(0 - 0)       |
| Chromosomal unbalanced rearrangements               | 0<br>(0 - 0)       | 0<br>(0 - 0)      | 0<br>(0 - 0)      | 0<br>(0 - 0)       | 0<br>(0 - 0)       | 0<br>(0 - 0)       |
| Other congenital anomalies                          | 69<br>(52 - 91)    | 51<br>(37 - 69)   | 2<br>(1 - 3)      | 6<br>(4 - 7)       | 5<br>(3 - 7)       | 6<br>(4 - 10)      |
| Skin and subcutaneous diseases                      | 1<br>(0 - 1)       | 0<br>(0 - 0)      | 0<br>(0 - 0)      | 0<br>(0 - 0)       | 0<br>(0 - 0)       | 0<br>(0 - 0)       |
| Cellulitis                                          | 0<br>(0 - 0)       | 0<br>(0 - 0)      | 0<br>(0 - 0)      | 0<br>(0 - 0)       | 0<br>(0 - 0)       | 0<br>(0 - 0)       |
| Pyoderma                                            | 0<br>(0 - 0)       | 0<br>(0 - 0)      | 0<br>(0 - 0)      | 0<br>(0 - 0)       | 0<br>(0 - 0)       | 0<br>(0 - 0)       |
| Decubitus ulcer                                     | 0<br>(0 - 0)       | 0<br>(0 - 0)      | 0<br>(0 - 0)      | 0<br>(0 - 0)       | 0<br>(0 - 0)       | 0<br>(0 - 0)       |
| Other skin and subcutaneous diseases                | 0<br>(0 - 0)       | 0<br>(0 - 0)      | 0<br>(0 - 0)      | 0<br>(0 - 0)       | 0<br>(0 - 0)       | 0<br>(0 - 0)       |



Web Table 31- Armenia deaths with 95% UI by age, sex, and cause in 2013

| Cause                                           | Males, All Ages        | Males, 0-4 Years | Males, 5-14 Years | Males, 15-49 Years | Males, 50-69 Years | Males, 70-80 Years |
|-------------------------------------------------|------------------------|------------------|-------------------|--------------------|--------------------|--------------------|
| Sudden infant death syndrome                    | 2<br>(1 - 5)           | 2<br>(1 - 5)     | --                | --                 | --                 | --                 |
| Injuries                                        | 1,087<br>(943 - 1,251) | 25<br>(15 - 43)  | 35<br>(29 - 43)   | 672<br>(578 - 754) | 213<br>(180 - 258) | 143<br>(120 - 179) |
| Transport injuries                              | 397<br>(335 - 460)     | 4<br>(2 - 7)     | 13<br>(9 - 17)    | 283<br>(232 - 327) | 65<br>(52 - 92)    | 33<br>(26 - 47)    |
| Road injuries                                   | 382<br>(324 - 443)     | 3<br>(2 - 6)     | 12<br>(9 - 16)    | 271<br>(223 - 313) | 63<br>(51 - 90)    | 32<br>(25 - 46)    |
| Pedestrian road injuries                        | 80<br>(57 - 110)       | 1<br>(1 - 3)     | 5<br>(3 - 8)      | 45<br>(31 - 65)    | 16<br>(10 - 25)    | 12<br>(8 - 19)     |
| Cyclist road injuries                           | 8<br>(4 - 12)          | 0<br>(0 - 0)     | 1<br>(0 - 1)      | 3<br>(2 - 6)       | 2<br>(1 - 4)       | 1<br>(1 - 2)       |
| Motorcyclist road injuries                      | 68<br>(46 - 89)        | 0<br>(0 - 0)     | 1<br>(0 - 1)      | 59<br>(39 - 78)    | 7<br>(5 - 11)      | 1<br>(1 - 2)       |
| Motor vehicle road injuries                     | 225<br>(183 - 267)     | 1<br>(1 - 3)     | 5<br>(4 - 8)      | 163<br>(129 - 196) | 37<br>(28 - 52)    | 17<br>(12 - 26)    |
| Other road injuries                             | 2<br>(1 - 3)           | 0<br>(0 - 0)     | 0<br>(0 - 0)      | 1<br>(1 - 2)       | 0<br>(0 - 1)       | 0<br>(0 - 0)       |
| Other transport injuries                        | 15<br>(11 - 20)        | 0<br>(0 - 1)     | 1<br>(0 - 1)      | 12<br>(8 - 16)     | 2<br>(1 - 3)       | 1<br>(0 - 2)       |
| Unintentional injuries                          | 358<br>(264 - 565)     | 21<br>(12 - 39)  | 19<br>(14 - 30)   | 180<br>(124 - 293) | 71<br>(52 - 111)   | 67<br>(51 - 100)   |
| Falls                                           | 60<br>(42 - 133)       | 2<br>(1 - 5)     | 1<br>(1 - 3)      | 25<br>(17 - 60)    | 15<br>(10 - 34)    | 16<br>(11 - 36)    |
| Drowning                                        | 102<br>(58 - 202)      | 6<br>(2 - 17)    | 10<br>(5 - 20)    | 70<br>(37 - 138)   | 12<br>(7 - 23)     | 5<br>(3 - 11)      |
| Fire, heat, and hot substances                  | 43<br>(24 - 80)        | 4<br>(1 - 11)    | 1<br>(1 - 2)      | 18<br>(9 - 35)     | 10<br>(5 - 20)     | 9<br>(5 - 18)      |
| Poisonings                                      | 12<br>(7 - 36)         | 0<br>(0 - 1)     | 0<br>(0 - 0)      | 7<br>(4 - 22)      | 3<br>(2 - 9)       | 1<br>(1 - 5)       |
| Exposure to mechanical forces                   | 26<br>(21 - 31)        | 1<br>(0 - 1)     | 1<br>(1 - 1)      | 13<br>(10 - 17)    | 7<br>(5 - 10)      | 4<br>(3 - 5)       |
| Unintentional firearm injuries                  | 7<br>(5 - 10)          | 0<br>(0 - 0)     | 0<br>(0 - 0)      | 5<br>(3 - 7)       | 1<br>(1 - 2)       | 1<br>(0 - 1)       |
| Unintentional suffocation                       | 1<br>(1 - 2)           | 0<br>(0 - 0)     | 0<br>(0 - 1)      | 0<br>(0 - 1)       | 0<br>(0 - 0)       | 0<br>(0 - 1)       |
| Other exposure to mechanical forces             | 18<br>(14 - 22)        | 0<br>(0 - 1)     | 1<br>(0 - 1)      | 8<br>(6 - 11)      | 6<br>(4 - 8)       | 3<br>(2 - 4)       |
| Adverse effects of medical treatment            | 29<br>(18 - 42)        | 1<br>(1 - 2)     | 1<br>(0 - 1)      | 4<br>(3 - 6)       | 7<br>(4 - 11)      | 16<br>(8 - 27)     |
| Animal contact                                  | 7<br>(5 - 9)           | 0<br>(0 - 1)     | 1<br>(0 - 1)      | 2<br>(1 - 3)       | 2<br>(2 - 3)       | 2<br>(1 - 3)       |
| Venomous animal contact                         | 3<br>(2 - 4)           | 0<br>(0 - 0)     | 0<br>(0 - 1)      | 1<br>(1 - 1)       | 1<br>(1 - 2)       | 1<br>(0 - 1)       |
| Non-venomous animal contact                     | 4<br>(3 - 5)           | 0<br>(0 - 1)     | 0<br>(0 - 1)      | 1<br>(1 - 2)       | 1<br>(1 - 2)       | 1<br>(1 - 2)       |
| Foreign body                                    | 21<br>(15 - 38)        | 4<br>(2 - 8)     | 0<br>(0 - 1)      | 5<br>(3 - 9)       | 6<br>(3 - 11)      | 6<br>(4 - 12)      |
| Pulmonary aspiration and foreign body in airway | 21<br>(14 - 38)        | 4<br>(2 - 8)     | 0<br>(0 - 1)      | 5<br>(3 - 9)       | 5<br>(3 - 10)      | 6<br>(4 - 12)      |
| Foreign body in other body part                 | 0<br>(0 - 1)           | 0<br>(0 - 0)     | 0<br>(0 - 0)      | 0<br>(0 - 0)       | 0<br>(0 - 0)       | 0<br>(0 - 0)       |
| Other unintentional injuries                    | 58<br>(48 - 68)        | 2<br>(1 - 3)     | 5<br>(3 - 6)      | 36<br>(29 - 44)    | 9<br>(7 - 12)      | 6<br>(5 - 8)       |
| Self-harm and interpersonal violence            | 332<br>(189 - 397)     | 0<br>(0 - 1)     | 3<br>(1 - 4)      | 209<br>(124 - 252) | 77<br>(39 - 99)    | 43<br>(21 - 56)    |
| Self-harm                                       | 208<br>(85 - 253)      | --               | 2<br>(1 - 3)      | 115<br>(46 - 143)  | 56<br>(23 - 73)    | 34<br>(13 - 45)    |
| Interpersonal violence                          | 124<br>(77 - 167)      | 0<br>(0 - 1)     | 1<br>(1 - 2)      | 94<br>(58 - 128)   | 20<br>(11 - 31)    | 9<br>(4 - 15)      |
| Assault by firearm                              | 32<br>(15 - 52)        | 0<br>(0 - 0)     | 0<br>(0 - 0)      | 26<br>(12 - 42)    | 4<br>(2 - 8)       | 2<br>(1 - 4)       |
| Assault by sharp object                         | 23<br>(14 - 42)        | 0<br>(0 - 0)     | 0<br>(0 - 0)      | 16<br>(9 - 31)     | 5<br>(3 - 11)      | 2<br>(1 - 3)       |
| Assault by other means                          | 69<br>(37 - 91)        | 0<br>(0 - 1)     | 1<br>(0 - 1)      | 51<br>(27 - 70)    | 11<br>(5 - 17)     | 6<br>(2 - 10)      |

Web Table 31- Armenia deaths with 95% UI by age, sex, and cause in 2013

| Cause                                                             | Females, All Ages           | Females, 0-4 Years | Females, 5-14 Years | Females, 15-49 Years | Females, 50-69 Years     | Females, 70-80 Years      |
|-------------------------------------------------------------------|-----------------------------|--------------------|---------------------|----------------------|--------------------------|---------------------------|
| All causes                                                        | 12,982<br>(12,005 - 14,725) | 283<br>(246 - 327) | 40<br>(37 - 43)     | 707<br>(623 - 789)   | 2,425<br>(2,177 - 2,704) | 9,527<br>(8,859 - 10,951) |
| Communicable, maternal, neonatal, and nutritional diseases        | 384<br>(288 - 446)          | 170<br>(141 - 203) | 7<br>(5 - 9)        | 40<br>(34 - 45)      | 32<br>(24 - 38)          | 136<br>(62 - 182)         |
| HIV/AIDS and tuberculosis                                         | 17<br>(9 - 21)              | 0<br>(0 - 0)       | 0<br>(0 - 0)        | 8<br>(4 - 10)        | 5<br>(3 - 7)             | 3<br>(2 - 5)              |
| Tuberculosis                                                      | 16<br>(8 - 20)              | 0<br>(0 - 0)       | 0<br>(0 - 0)        | 7<br>(4 - 9)         | 5<br>(3 - 7)             | 3<br>(2 - 5)              |
| HIV/AIDS                                                          | 1<br>(0 - 2)                | 0<br>(0 - 0)       | 0<br>(0 - 0)        | 1<br>(0 - 1)         | 0<br>(0 - 0)             | 0<br>(0 - 0)              |
| HIV/AIDS resulting in mycobacterial infection                     | 0<br>(0 - 0)                | 0<br>(0 - 0)       | 0<br>(0 - 0)        | 0<br>(0 - 0)         | 0<br>(0 - 0)             | 0<br>(0 - 0)              |
| HIV/AIDS resulting in other diseases                              | 1<br>(0 - 2)                | 0<br>(0 - 0)       | 0<br>(0 - 0)        | 1<br>(0 - 1)         | 0<br>(0 - 0)             | 0<br>(0 - 0)              |
| Diarrhea, lower respiratory, and other common infectious diseases | 240<br>(152 - 290)          | 66<br>(53 - 83)    | 6<br>(5 - 8)        | 18<br>(14 - 21)      | 22<br>(15 - 27)          | 128<br>(54 - 173)         |
| Diarrheal diseases                                                | 11<br>(8 - 15)              | 7<br>(4 - 10)      | 0<br>(0 - 1)        | 1<br>(1 - 2)         | 1<br>(1 - 2)             | 2<br>(1 - 2)              |
| Intestinal infectious diseases                                    | 1<br>(1 - 3)                | 0<br>(0 - 1)       | 0<br>(0 - 1)        | 0<br>(0 - 1)         | 0<br>(0 - 0)             | 0<br>(0 - 1)              |
| Typhoid fever                                                     | 1<br>(0 - 2)                | 0<br>(0 - 0)       | 0<br>(0 - 0)        | 0<br>(0 - 1)         | 0<br>(0 - 0)             | 0<br>(0 - 0)              |
| Paratyphoid fever                                                 | 0<br>(0 - 1)                | 0<br>(0 - 0)       | 0<br>(0 - 0)        | 0<br>(0 - 0)         | 0<br>(0 - 0)             | 0<br>(0 - 0)              |
| Other intestinal infectious diseases                              | 0<br>(0 - 2)                | 0<br>(0 - 1)       | 0<br>(0 - 0)        | 0<br>(0 - 0)         | 0<br>(0 - 0)             | 0<br>(0 - 1)              |
| Lower respiratory infections                                      | 217<br>(130 - 266)          | 57<br>(45 - 72)    | 5<br>(3 - 6)        | 13<br>(9 - 16)       | 19<br>(11 - 24)          | 124<br>(51 - 169)         |
| Upper respiratory infections                                      | 1<br>(0 - 2)                | 0<br>(0 - 0)       | 0<br>(0 - 0)        | 0<br>(0 - 0)         | 0<br>(0 - 0)             | 0<br>(0 - 1)              |
| Otitis media                                                      | 0<br>(0 - 0)                | 0<br>(0 - 0)       | 0<br>(0 - 0)        | 0<br>(0 - 0)         | 0<br>(0 - 0)             | 0<br>(0 - 0)              |
| Meningitis                                                        | 5<br>(4 - 6)                | 1<br>(0 - 1)       | 0<br>(0 - 0)        | 2<br>(1 - 2)         | 1<br>(1 - 2)             | 1<br>(1 - 1)              |
| Pneumococcal meningitis                                           | 1<br>(1 - 2)                | 0<br>(0 - 0)       | 0<br>(0 - 0)        | 1<br>(0 - 1)         | 0<br>(0 - 1)             | 0<br>(0 - 0)              |
| H influenzae type B meningitis                                    | 1<br>(1 - 1)                | 0<br>(0 - 0)       | 0<br>(0 - 0)        | 0<br>(0 - 0)         | 0<br>(0 - 0)             | 0<br>(0 - 0)              |
| Meningococcal meningitis                                          | 1<br>(1 - 2)                | 0<br>(0 - 0)       | 0<br>(0 - 0)        | 0<br>(0 - 1)         | 0<br>(0 - 0)             | 0<br>(0 - 0)              |
| Other meningitis                                                  | 1<br>(1 - 2)                | 0<br>(0 - 0)       | 0<br>(0 - 0)        | 0<br>(0 - 1)         | 0<br>(0 - 1)             | 0<br>(0 - 1)              |
| Encephalitis                                                      | 3<br>(3 - 5)                | 1<br>(1 - 2)       | 1<br>(0 - 1)        | 1<br>(1 - 2)         | 0<br>(0 - 1)             | 0<br>(0 - 0)              |
| Diphtheria                                                        | 0<br>(0 - 0)                | 0<br>(0 - 0)       | 0<br>(0 - 0)        | 0<br>(0 - 0)         | 0<br>(0 - 0)             | --<br>(0 - 0)             |
| Whooping cough                                                    | 0<br>(0 - 0)                | 0<br>(0 - 0)       | 0<br>(0 - 0)        | 0<br>(0 - 0)         | 0<br>(0 - 0)             | --<br>(0 - 0)             |
| Tetanus                                                           | 0<br>(0 - 0)                | 0<br>(0 - 0)       | 0<br>(0 - 0)        | 0<br>(0 - 0)         | 0<br>(0 - 0)             | 0<br>(0 - 0)              |
| Measles                                                           | 0<br>(0 - 0)                | 0<br>(0 - 0)       | 0<br>(0 - 0)        | 0<br>(0 - 0)         | 0<br>(0 - 0)             | --<br>(0 - 0)             |
| Varicella and herpes zoster                                       | 1<br>(0 - 4)                | 0<br>(0 - 0)       | 0<br>(0 - 0)        | 0<br>(0 - 0)         | 0<br>(0 - 0)             | 1<br>(0 - 4)              |
| Neglected tropical diseases and malaria                           | 2<br>(1 - 3)                | 0<br>(0 - 0)       | 0<br>(0 - 0)        | 1<br>(0 - 1)         | 0<br>(0 - 0)             | 0<br>(0 - 1)              |
| Leishmaniasis                                                     | 0<br>(0 - 1)                | 0<br>(0 - 0)       | 0<br>(0 - 0)        | 0<br>(0 - 0)         | 0<br>(0 - 0)             | 0<br>(0 - 0)              |
| Visceral leishmaniasis                                            | 0<br>(0 - 1)                | 0<br>(0 - 0)       | 0<br>(0 - 0)        | 0<br>(0 - 0)         | 0<br>(0 - 0)             | 0<br>(0 - 0)              |
| Cysticercosis                                                     | 0<br>(0 - 0)                | 0<br>(0 - 0)       | 0<br>(0 - 0)        | 0<br>(0 - 0)         | 0<br>(0 - 0)             | 0<br>(0 - 0)              |
| Cystic echinococcosis                                             | 0<br>(0 - 0)                | 0<br>(0 - 0)       | 0<br>(0 - 0)        | 0<br>(0 - 0)         | 0<br>(0 - 0)             | 0<br>(0 - 0)              |
| Dengue                                                            | 0<br>(0 - 0)                | 0<br>(0 - 0)       | 0<br>(0 - 0)        | 0<br>(0 - 0)         | 0<br>(0 - 0)             | 0<br>(0 - 0)              |
| Rabies                                                            | 0<br>(0 - 0)                | 0<br>(0 - 0)       | 0<br>(0 - 0)        | 0<br>(0 - 0)         | 0<br>(0 - 0)             | 0<br>(0 - 0)              |
| Intestinal nematode infections                                    | 0<br>(0 - 1)                | 0<br>(0 - 0)       | 0<br>(0 - 0)        | 0<br>(0 - 0)         | 0<br>(0 - 0)             | 0<br>(0 - 1)              |
| Ascariasis                                                        | 0<br>(0 - 1)                | 0<br>(0 - 0)       | 0<br>(0 - 0)        | 0<br>(0 - 0)         | 0<br>(0 - 0)             | 0<br>(0 - 1)              |
| Other neglected tropical diseases                                 | 0<br>(0 - 0)                | 0<br>(0 - 0)       | 0<br>(0 - 0)        | 0<br>(0 - 0)         | 0<br>(0 - 0)             | 0<br>(0 - 0)              |
| Maternal disorders                                                | 8<br>(6 - 10)               | --                 | 0<br>(0 - 0)        | 8<br>(6 - 10)        | --                       | --                        |
| Maternal hemorrhage                                               | 1<br>(1 - 2)                | --                 | 0<br>(0 - 0)        | 1<br>(1 - 2)         | --                       | --                        |
| Maternal sepsis and other maternal infections                     | 1<br>(0 - 1)                | --                 | 0<br>(0 - 0)        | 1<br>(0 - 1)         | --                       | --                        |

Web Table 31- Armenia deaths with 95% UI by age, sex, and cause in 2013

| Cause                                                            | Females, All Ages           | Females, 0-4 Years | Females, 5-14 Years | Females, 15-49 Years | Females, 50-69 Years     | Females, 70-80 Years      |
|------------------------------------------------------------------|-----------------------------|--------------------|---------------------|----------------------|--------------------------|---------------------------|
| Maternal hypertensive disorders                                  | 1<br>(1 - 1)                | --                 | 0<br>(0 - 0)        | 1<br>(1 - 1)         | --                       | --                        |
| Maternal obstructed labor                                        | 1<br>(0 - 1)                | --                 | 0<br>(0 - 0)        | 1<br>(0 - 1)         | --                       | --                        |
| Maternal abortive outcome                                        | 1<br>(1 - 1)                | --                 | 0<br>(0 - 0)        | 1<br>(1 - 1)         | --                       | --                        |
| Indirect maternal deaths                                         | 1<br>(1 - 1)                | --                 | 0<br>(0 - 0)        | 1<br>(1 - 1)         | --                       | --                        |
| Late maternal deaths                                             | 1<br>(1 - 2)                | --                 | 0<br>(0 - 0)        | 1<br>(1 - 2)         | --                       | --                        |
| Maternal deaths aggravated by HIV/AIDS                           | 0<br>(0 - 0)                | --                 | --                  | 0<br>(0 - 0)         | --                       | --                        |
| Other maternal disorders                                         | 1<br>(1 - 2)                | --                 | 0<br>(0 - 0)        | 1<br>(1 - 2)         | --                       | --                        |
| Neonatal disorders                                               | 101<br>(81 - 124)           | 101<br>(81 - 124)  | --                  | --                   | --                       | --                        |
| Neonatal preterm birth complications                             | 48<br>(27 - 71)             | 48<br>(27 - 71)    | --                  | --                   | --                       | --                        |
| Neonatal encephalopathy due to birth asphyxia and trauma         | 16<br>(6 - 29)              | 16<br>(6 - 29)     | --                  | --                   | --                       | --                        |
| Neonatal sepsis and other neonatal infections                    | 17<br>(8 - 32)              | 17<br>(8 - 32)     | --                  | --                   | --                       | --                        |
| Hemolytic disease and other neonatal jaundice                    | 2<br>(0 - 7)                | 2<br>(0 - 7)       | --                  | --                   | --                       | --                        |
| Other neonatal disorders                                         | 19<br>(10 - 33)             | 19<br>(10 - 33)    | --                  | --                   | --                       | --                        |
| Nutritional deficiencies                                         | 9<br>(7 - 17)               | 0<br>(0 - 0)       | 0<br>(0 - 0)        | 4<br>(3 - 7)         | 3<br>(2 - 5)             | 2<br>(2 - 4)              |
| Protein-energy malnutrition                                      | 1<br>(1 - 2)                | 0<br>(0 - 0)       | 0<br>(0 - 0)        | 1<br>(0 - 1)         | 0<br>(0 - 1)             | 0<br>(0 - 0)              |
| Iodine deficiency                                                | 0<br>(0 - 1)                | 0<br>(0 - 0)       | 0<br>(0 - 0)        | 0<br>(0 - 0)         | 0<br>(0 - 1)             | 0<br>(0 - 0)              |
| Iron-deficiency anemia                                           | 6<br>(5 - 12)               | 0<br>(0 - 0)       | 0<br>(0 - 0)        | 2<br>(1 - 4)         | 2<br>(1 - 3)             | 2<br>(2 - 4)              |
| Other nutritional deficiencies                                   | 1<br>(1 - 2)                | 0<br>(0 - 0)       | 0<br>(0 - 0)        | 1<br>(0 - 1)         | 0<br>(0 - 1)             | 0<br>(0 - 0)              |
| Other communicable, maternal, neonatal, and nutritional diseases | 8<br>(6 - 10)               | 2<br>(1 - 4)       | 0<br>(0 - 0)        | 2<br>(2 - 3)         | 2<br>(1 - 3)             | 1<br>(1 - 2)              |
| Sexually transmitted diseases excluding HIV                      | 3<br>(1 - 5)                | 1<br>(0 - 2)       | 0<br>(0 - 0)        | 1<br>(0 - 1)         | 1<br>(0 - 1)             | 1<br>(0 - 1)              |
| Syphilis                                                         | 2<br>(1 - 4)                | 1<br>(0 - 2)       | 0<br>(0 - 0)        | 0<br>(0 - 0)         | 0<br>(0 - 1)             | 1<br>(0 - 1)              |
| Chlamydial infection                                             | 0<br>(0 - 0)                | --                 | 0<br>(0 - 0)        | 0<br>(0 - 0)         | 0<br>(0 - 0)             | 0<br>(0 - 0)              |
| Gonococcal infection                                             | 0<br>(0 - 1)                | --                 | 0<br>(0 - 0)        | 0<br>(0 - 0)         | 0<br>(0 - 0)             | 0<br>(0 - 0)              |
| Other sexually transmitted diseases                              | 0<br>(0 - 0)                | --                 | 0<br>(0 - 0)        | 0<br>(0 - 0)         | 0<br>(0 - 0)             | 0<br>(0 - 0)              |
| Hepatitis                                                        | 3<br>(2 - 3)                | 0<br>(0 - 0)       | 0<br>(0 - 0)        | 1<br>(1 - 2)         | 1<br>(0 - 1)             | 0<br>(0 - 1)              |
| Acute hepatitis A                                                | 0<br>(0 - 1)                | 0<br>(0 - 0)       | 0<br>(0 - 0)        | 0<br>(0 - 0)         | 0<br>(0 - 0)             | 0<br>(0 - 0)              |
| Acute hepatitis B                                                | 2<br>(1 - 2)                | 0<br>(0 - 0)       | 0<br>(0 - 0)        | 1<br>(0 - 1)         | 1<br>(0 - 1)             | 0<br>(0 - 1)              |
| Acute hepatitis C                                                | 0<br>(0 - 1)                | --                 | 0<br>(0 - 0)        | 0<br>(0 - 0)         | 0<br>(0 - 0)             | 0<br>(0 - 0)              |
| Acute hepatitis E                                                | 1<br>(0 - 1)                | 0<br>(0 - 0)       | 0<br>(0 - 0)        | 1<br>(0 - 1)         | 0<br>(0 - 0)             | 0<br>(0 - 0)              |
| Other infectious diseases                                        | 2<br>(1 - 3)                | 1<br>(0 - 2)       | 0<br>(0 - 0)        | 0<br>(0 - 0)         | 0<br>(0 - 1)             | 0<br>(0 - 1)              |
| Non-communicable diseases                                        | 12,307<br>(11,358 - 13,996) | 102<br>(84 - 121)  | 24<br>(21 - 27)     | 580<br>(507 - 652)   | 2,327<br>(2,085 - 2,595) | 9,275<br>(8,628 - 10,654) |
| Neoplasms                                                        | 2,269<br>(1,968 - 2,599)    | 9<br>(6 - 12)      | 10<br>(8 - 12)      | 337<br>(292 - 381)   | 940<br>(804 - 1,057)     | 973<br>(822 - 1,150)      |
| Esophageal cancer                                                | 15<br>(13 - 19)             | --                 | --                  | 1<br>(1 - 1)         | 4<br>(3 - 5)             | 10<br>(8 - 13)            |
| Stomach cancer                                                   | 166<br>(141 - 195)          | --                 | --                  | 15<br>(12 - 18)      | 57<br>(47 - 69)          | 94<br>(78 - 115)          |
| Liver cancer                                                     | 162<br>(131 - 200)          | --                 | 0<br>(0 - 0)        | 11<br>(8 - 14)       | 52<br>(41 - 66)          | 99<br>(74 - 133)          |
| Liver cancer due to hepatitis B                                  | 41<br>(29 - 55)             | --                 | 0<br>(0 - 0)        | 3<br>(2 - 5)         | 17<br>(12 - 23)          | 21<br>(13 - 31)           |
| Liver cancer due to hepatitis C                                  | 61<br>(44 - 80)             | --                 | 0<br>(0 - 0)        | 3<br>(2 - 5)         | 19<br>(13 - 25)          | 39<br>(26 - 56)           |
| Liver cancer due to alcohol use                                  | 35<br>(20 - 52)             | --                 | --                  | 1<br>(1 - 2)         | 8<br>(5 - 12)            | 26<br>(14 - 40)           |
| Liver cancer due to other causes                                 | 25<br>(16 - 36)             | --                 | 0<br>(0 - 0)        | 3<br>(2 - 4)         | 9<br>(5 - 13)            | 13<br>(8 - 21)            |
| Larynx cancer                                                    | 8<br>(4 - 14)               | --                 | --                  | 1<br>(0 - 1)         | 3<br>(2 - 6)             | 4<br>(2 - 7)              |

Web Table 31- Armenia deaths with 95% UI by age, sex, and cause in 2013

| Cause                                         | Females, All Ages        | Females, 0-4 Years | Females, 5-14 Years | Females, 15-49 Years | Females, 50-69 Years | Females, 70-80 Years     |
|-----------------------------------------------|--------------------------|--------------------|---------------------|----------------------|----------------------|--------------------------|
| Tracheal, bronchus and lung cancer            | 235<br>(197 - 273)       | --                 | --                  | 22<br>(18 - 27)      | 98<br>(81 - 115)     | 115<br>(90 - 138)        |
| Breast cancer                                 | 524<br>(439 - 602)       | --                 | --                  | 106<br>(88 - 125)    | 255<br>(210 - 297)   | 163<br>(131 - 195)       |
| Cervical cancer                               | 132<br>(100 - 156)       | --                 | --                  | 38<br>(26 - 47)      | 61<br>(47 - 74)      | 33<br>(24 - 42)          |
| Uterine cancer                                | 52<br>(31 - 66)          | --                 | --                  | 5<br>(3 - 7)         | 24<br>(14 - 31)      | 23<br>(12 - 30)          |
| Prostate cancer                               | --                       | --                 | --                  | --                   | --                   | --                       |
| Colon and rectum cancer                       | 228<br>(195 - 268)       | --                 | --                  | 20<br>(17 - 24)      | 88<br>(75 - 103)     | 120<br>(100 - 149)       |
| Lip and oral cavity cancer                    | 13<br>(9 - 18)           | --                 | --                  | 2<br>(1 - 3)         | 4<br>(3 - 6)         | 7<br>(5 - 10)            |
| Nasopharynx cancer                            | 2<br>(1 - 2)             | --                 | 0<br>(0 - 0)        | 0<br>(0 - 1)         | 1<br>(0 - 1)         | 0<br>(0 - 0)             |
| Other pharynx cancer                          | 2<br>(1 - 2)             | --                 | --                  | 0<br>(0 - 0)         | 1<br>(1 - 1)         | 1<br>(0 - 1)             |
| Gallbladder and biliary tract cancer          | 37<br>(25 - 51)          | --                 | --                  | 1<br>(1 - 2)         | 11<br>(8 - 15)       | 25<br>(14 - 37)          |
| Pancreatic cancer                             | 159<br>(133 - 193)       | --                 | --                  | 6<br>(4 - 8)         | 53<br>(44 - 65)      | 100<br>(80 - 126)        |
| Malignant skin melanoma                       | 22<br>(18 - 27)          | --                 | --                  | 5<br>(4 - 7)         | 11<br>(9 - 15)       | 6<br>(4 - 8)             |
| Non-melanoma skin cancer                      | 2<br>(1 - 4)             | --                 | --                  | 0<br>(0 - 0)         | 0<br>(0 - 1)         | 2<br>(0 - 3)             |
| Ovarian cancer                                | 114<br>(96 - 136)        | --                 | --                  | 20<br>(15 - 25)      | 53<br>(42 - 64)      | 41<br>(33 - 54)          |
| Testicular cancer                             | --                       | --                 | --                  | --                   | --                   | --                       |
| Kidney cancer                                 | 35<br>(24 - 49)          | 0<br>(0 - 0)       | 0<br>(0 - 0)        | 1<br>(0 - 1)         | 8<br>(6 - 12)        | 26<br>(16 - 40)          |
| Bladder cancer                                | 20<br>(14 - 29)          | --                 | --                  | 1<br>(1 - 2)         | 5<br>(3 - 7)         | 14<br>(9 - 22)           |
| Brain and nervous system cancer               | 97<br>(75 - 116)         | 3<br>(2 - 6)       | 4<br>(3 - 6)        | 21<br>(16 - 26)      | 45<br>(33 - 56)      | 24<br>(18 - 33)          |
| Thyroid cancer                                | 4<br>(2 - 6)             | --                 | 0<br>(0 - 0)        | 0<br>(0 - 0)         | 1<br>(1 - 2)         | 3<br>(1 - 4)             |
| Mesothelioma                                  | 3<br>(2 - 5)             | --                 | --                  | 0<br>(0 - 1)         | 1<br>(1 - 2)         | 2<br>(1 - 3)             |
| Hodgkin lymphoma                              | 2<br>(1 - 4)             | 0<br>(0 - 0)       | 0<br>(0 - 0)        | 1<br>(1 - 2)         | 1<br>(0 - 2)         | 0<br>(0 - 0)             |
| Non-Hodgkin lymphoma                          | 23<br>(12 - 29)          | 0<br>(0 - 0)       | 0<br>(0 - 0)        | 5<br>(3 - 6)         | 10<br>(5 - 13)       | 8<br>(4 - 11)            |
| Multiple myeloma                              | 8<br>(6 - 10)            | --                 | --                  | 2<br>(1 - 2)         | 4<br>(3 - 6)         | 2<br>(1 - 3)             |
| Leukemia                                      | 65<br>(56 - 74)          | 2<br>(1 - 3)       | 4<br>(3 - 5)        | 20<br>(17 - 24)      | 25<br>(20 - 30)      | 14<br>(11 - 17)          |
| Other neoplasms                               | 140<br>(90 - 176)        | 3<br>(2 - 5)       | 2<br>(1 - 3)        | 33<br>(24 - 43)      | 64<br>(43 - 82)      | 39<br>(17 - 60)          |
| Cardiovascular diseases                       | 7,095<br>(6,454 - 8,124) | 1<br>(0 - 1)       | 1<br>(1 - 2)        | 115<br>(91 - 142)    | 858<br>(738 - 1,025) | 6,120<br>(5,592 - 7,015) |
| Rheumatic heart disease                       | 73<br>(44 - 90)          | 0<br>(0 - 0)       | 0<br>(0 - 1)        | 16<br>(11 - 23)      | 29<br>(20 - 40)      | 28<br>(11 - 38)          |
| Ischemic heart disease                        | 4,380<br>(3,781 - 5,458) | 0<br>(0 - 0)       | 0<br>(0 - 1)        | 53<br>(38 - 71)      | 473<br>(385 - 595)   | 3,854<br>(3,317 - 4,753) |
| Cerebrovascular disease                       | 2,082<br>(1,614 - 2,489) | 0<br>(0 - 0)       | 0<br>(0 - 1)        | 37<br>(26 - 47)      | 290<br>(236 - 370)   | 1,754<br>(1,343 - 2,104) |
| Ischemic stroke                               | 1,419<br>(1,073 - 1,696) | 0<br>(0 - 0)       | 0<br>(0 - 0)        | 5<br>(3 - 7)         | 124<br>(95 - 165)    | 1,288<br>(945 - 1,554)   |
| Hemorrhagic stroke                            | 664<br>(522 - 878)       | 0<br>(0 - 0)       | 0<br>(0 - 0)        | 32<br>(22 - 41)      | 166<br>(130 - 212)   | 466<br>(337 - 655)       |
| Hypertensive heart disease                    | 391<br>(241 - 568)       | 0<br>(0 - 0)       | 0<br>(0 - 0)        | 2<br>(1 - 3)         | 29<br>(18 - 41)      | 361<br>(218 - 532)       |
| Cardiomyopathy and myocarditis                | 27<br>(18 - 44)          | 0<br>(0 - 0)       | 0<br>(0 - 0)        | 1<br>(0 - 2)         | 7<br>(5 - 12)        | 18<br>(10 - 33)          |
| Atrial fibrillation and flutter               | 0<br>(0 - 0)             | --                 | --                  | 0<br>(0 - 0)         | 0<br>(0 - 0)         | 0<br>(0 - 0)             |
| Aortic aneurysm                               | 86<br>(49 - 128)         | --                 | --                  | 2<br>(1 - 3)         | 17<br>(9 - 25)       | 67<br>(37 - 106)         |
| Peripheral vascular disease                   | 0<br>(0 - 0)             | --                 | --                  | 0<br>(0 - 0)         | 0<br>(0 - 0)         | 0<br>(0 - 0)             |
| Endocarditis                                  | 3<br>(2 - 5)             | 0<br>(0 - 0)       | 0<br>(0 - 0)        | 0<br>(0 - 1)         | 0<br>(0 - 0)         | 2<br>(1 - 4)             |
| Other cardiovascular and circulatory diseases | 53<br>(19 - 74)          | 0<br>(0 - 0)       | 0<br>(0 - 0)        | 4<br>(2 - 6)         | 13<br>(6 - 19)       | 35<br>(10 - 52)          |
| Chronic respiratory diseases                  | 496<br>(408 - 666)       | 0<br>(0 - 0)       | 0<br>(0 - 0)        | 8<br>(7 - 11)        | 53<br>(43 - 77)      | 434<br>(351 - 571)       |
| Chronic obstructive pulmonary disease         | 409<br>(322 - 545)       | 0<br>(0 - 0)       | 0<br>(0 - 0)        | 5<br>(4 - 7)         | 46<br>(35 - 62)      | 358<br>(278 - 482)       |

Web Table 31- Armenia deaths with 95% UI by age, sex, and cause in 2013

| Cause                                               | Females, All Ages  | Females, 0-4 Years | Females, 5-14 Years | Females, 15-49 Years | Females, 50-69 Years | Females, 70-80 Years |
|-----------------------------------------------------|--------------------|--------------------|---------------------|----------------------|----------------------|----------------------|
| Pneumoconiosis                                      | 0<br>(0 - 0)       | 0<br>(0 - 0)       | 0<br>(0 - 0)        | 0<br>(0 - 0)         | 0<br>(0 - 0)         | 0<br>(0 - 0)         |
| Silicosis                                           | 0<br>(0 - 0)       | 0<br>(0 - 0)       | 0<br>(0 - 0)        | 0<br>(0 - 0)         | 0<br>(0 - 0)         | 0<br>(0 - 0)         |
| Asbestosis                                          | 0<br>(0 - 0)       | 0<br>(0 - 0)       | 0<br>(0 - 0)        | 0<br>(0 - 0)         | 0<br>(0 - 0)         | 0<br>(0 - 0)         |
| Coal workers pneumoconiosis                         | 0<br>(0 - 0)       | 0<br>(0 - 0)       | 0<br>(0 - 0)        | 0<br>(0 - 0)         | 0<br>(0 - 0)         | 0<br>(0 - 0)         |
| Other pneumoconiosis                                | 0<br>(0 - 0)       | 0<br>(0 - 0)       | 0<br>(0 - 0)        | 0<br>(0 - 0)         | 0<br>(0 - 0)         | 0<br>(0 - 0)         |
| Asthma                                              | 13<br>(8 - 24)     | 0<br>(0 - 0)       | 0<br>(0 - 0)        | 1<br>(1 - 2)         | 2<br>(1 - 5)         | 10<br>(5 - 18)       |
| Interstitial lung disease and pulmonary sarcoidosis | 70<br>(35 - 131)   | 0<br>(0 - 0)       | 0<br>(0 - 0)        | 0<br>(0 - 1)         | 5<br>(2 - 12)        | 65<br>(31 - 119)     |
| Other chronic respiratory diseases                  | 3<br>(2 - 5)       | 0<br>(0 - 0)       | 0<br>(0 - 0)        | 1<br>(1 - 1)         | 0<br>(0 - 0)         | 2<br>(1 - 4)         |
| Cirrhosis                                           | 405<br>(343 - 486) | 0<br>(0 - 0)       | 1<br>(1 - 1)        | 19<br>(16 - 23)      | 78<br>(65 - 93)      | 308<br>(256 - 379)   |
| Cirrhosis due to hepatitis B                        | 197<br>(126 - 277) | 0<br>(0 - 0)       | 0<br>(0 - 0)        | 9<br>(6 - 12)        | 36<br>(24 - 50)      | 152<br>(91 - 220)    |
| Cirrhosis due to hepatitis C                        | 129<br>(52 - 195)  | 0<br>(0 - 0)       | 0<br>(0 - 0)        | 6<br>(3 - 9)         | 28<br>(14 - 43)      | 95<br>(32 - 148)     |
| Cirrhosis due to alcohol use                        | 50<br>(22 - 92)    | --                 | --                  | 1<br>(0 - 2)         | 7<br>(3 - 13)        | 42<br>(18 - 81)      |
| Cirrhosis due to other causes                       | 30<br>(17 - 44)    | 0<br>(0 - 0)       | 0<br>(0 - 1)        | 3<br>(2 - 5)         | 7<br>(3 - 11)        | 19<br>(10 - 30)      |
| Digestive diseases                                  | 221<br>(127 - 273) | 1<br>(0 - 1)       | 1<br>(0 - 1)        | 18<br>(13 - 21)      | 46<br>(34 - 56)      | 155<br>(76 - 200)    |
| Peptic ulcer disease                                | 52<br>(22 - 84)    | 0<br>(0 - 0)       | 0<br>(0 - 0)        | 3<br>(2 - 5)         | 10<br>(6 - 14)       | 39<br>(13 - 67)      |
| Gastritis and duodenitis                            | 8<br>(3 - 16)      | 0<br>(0 - 0)       | 0<br>(0 - 0)        | 1<br>(0 - 2)         | 0<br>(0 - 0)         | 7<br>(3 - 15)        |
| Appendicitis                                        | 4<br>(2 - 7)       | 0<br>(0 - 0)       | 0<br>(0 - 0)        | 2<br>(1 - 2)         | 1<br>(0 - 2)         | 2<br>(0 - 3)         |
| Paralytic ileus and intestinal obstruction          | 25<br>(11 - 46)    | 0<br>(0 - 1)       | 0<br>(0 - 0)        | 3<br>(1 - 4)         | 4<br>(2 - 6)         | 18<br>(7 - 36)       |
| Inguinal, femoral, and abdominal hernia             | 12<br>(4 - 20)     | 0<br>(0 - 0)       | 0<br>(0 - 0)        | 0<br>(0 - 0)         | 2<br>(1 - 4)         | 9<br>(2 - 17)        |
| Inflammatory bowel disease                          | 4<br>(2 - 6)       | 0<br>(0 - 0)       | 0<br>(0 - 0)        | 2<br>(1 - 3)         | 1<br>(0 - 1)         | 1<br>(0 - 3)         |
| Vascular intestinal disorders                       | 51<br>(22 - 81)    | 0<br>(0 - 0)       | 0<br>(0 - 0)        | 1<br>(0 - 2)         | 9<br>(5 - 14)        | 41<br>(16 - 68)      |
| Gallbladder and biliary diseases                    | 44<br>(19 - 63)    | 0<br>(0 - 0)       | 0<br>(0 - 0)        | 5<br>(3 - 7)         | 14<br>(7 - 18)       | 25<br>(8 - 40)       |
| Pancreatitis                                        | 11<br>(4 - 24)     | 0<br>(0 - 0)       | 0<br>(0 - 0)        | 1<br>(0 - 1)         | 4<br>(1 - 7)         | 7<br>(2 - 16)        |
| Other digestive diseases                            | 9<br>(5 - 15)      | 0<br>(0 - 0)       | 0<br>(0 - 0)        | 0<br>(0 - 1)         | 3<br>(2 - 4)         | 6<br>(3 - 11)        |
| Neurological disorders                              | 703<br>(562 - 908) | 1<br>(1 - 2)       | 2<br>(1 - 3)        | 12<br>(8 - 15)       | 29<br>(23 - 36)      | 659<br>(522 - 859)   |
| Alzheimer disease and other dementias               | 670<br>(533 - 872) | --                 | --                  | 0<br>(0 - 0)         | 22<br>(17 - 29)      | 647<br>(512 - 848)   |
| Parkinson disease                                   | 10<br>(5 - 16)     | --                 | --                  | 0<br>(0 - 0)         | 2<br>(1 - 3)         | 8<br>(4 - 14)        |
| Epilepsy                                            | 15<br>(10 - 19)    | 1<br>(0 - 1)       | 1<br>(1 - 2)        | 9<br>(6 - 12)        | 2<br>(1 - 3)         | 1<br>(1 - 2)         |
| Multiple sclerosis                                  | 3<br>(2 - 5)       | --                 | --                  | 1<br>(1 - 2)         | 1<br>(0 - 1)         | 1<br>(1 - 2)         |
| Other neurological disorders                        | 4<br>(4 - 5)       | 1<br>(0 - 1)       | 0<br>(0 - 1)        | 1<br>(1 - 1)         | 2<br>(1 - 2)         | 1<br>(1 - 1)         |
| Mental and substance use disorders                  | 15<br>(9 - 20)     | 0<br>(0 - 0)       | 0<br>(0 - 0)        | 6<br>(3 - 8)         | 5<br>(3 - 8)         | 4<br>(2 - 5)         |
| Schizophrenia                                       | 0<br>(0 - 1)       | --                 | --                  | 0<br>(0 - 0)         | 0<br>(0 - 0)         | 0<br>(0 - 0)         |
| Alcohol use disorders                               | 9<br>(3 - 14)      | --                 | --                  | 4<br>(1 - 6)         | 4<br>(1 - 7)         | 2<br>(1 - 3)         |
| Drug use disorders                                  | 6<br>(4 - 7)       | 0<br>(0 - 0)       | --                  | 2<br>(2 - 3)         | 1<br>(1 - 2)         | 2<br>(1 - 3)         |
| Opioid use disorders                                | 1<br>(1 - 1)       | 0<br>(0 - 0)       | --                  | 0<br>(0 - 1)         | 0<br>(0 - 0)         | 0<br>(0 - 1)         |
| Cocaine use disorders                               | 0<br>(0 - 0)       | 0<br>(0 - 0)       | --                  | 0<br>(0 - 0)         | 0<br>(0 - 0)         | 0<br>(0 - 0)         |
| Amphetamine use disorders                           | 0<br>(0 - 0)       | 0<br>(0 - 0)       | --                  | 0<br>(0 - 0)         | 0<br>(0 - 0)         | 0<br>(0 - 0)         |
| Other drug use disorders                            | 4<br>(3 - 5)       | 0<br>(0 - 0)       | --                  | 1<br>(1 - 2)         | 1<br>(1 - 1)         | 2<br>(1 - 2)         |
| Eating disorders                                    | 0<br>(0 - 0)       | --                 | 0<br>(0 - 0)        | 0<br>(0 - 0)         | --                   | --                   |
| Anorexia nervosa                                    | 0<br>(0 - 0)       | --                 | 0<br>(0 - 0)        | 0<br>(0 - 0)         | --                   | --                   |

Web Table 31- Armenia deaths with 95% UI by age, sex, and cause in 2013

| Cause                                               | Females, All Ages    | Females, 0-4 Years | Females, 5-14 Years | Females, 15-49 Years | Females, 50-69 Years | Females, 70-80 Years |
|-----------------------------------------------------|----------------------|--------------------|---------------------|----------------------|----------------------|----------------------|
| Diabetes, urogenital, blood, and endocrine diseases | 986<br>(765 - 1,162) | 2<br>(2 - 3)       | 3<br>(2 - 3)        | 54<br>(43 - 64)      | 311<br>(254 - 363)   | 616<br>(451 - 753)   |
| Diabetes mellitus                                   | 752<br>(620 - 880)   | 0<br>(0 - 1)       | 1<br>(0 - 1)        | 26<br>(21 - 32)      | 251<br>(206 - 296)   | 474<br>(377 - 579)   |
| Acute glomerulonephritis                            | 1<br>(1 - 1)         | 0<br>(0 - 0)       | 0<br>(0 - 0)        | 0<br>(0 - 0)         | 0<br>(0 - 0)         | 0<br>(0 - 0)         |
| Chronic kidney disease                              | 61<br>(48 - 103)     | 0<br>(0 - 0)       | 1<br>(0 - 1)        | 11<br>(8 - 20)       | 19<br>(14 - 38)      | 30<br>(23 - 45)      |
| Chronic kidney disease due to diabetes mellitus     | 0<br>(0 - 0)         | 0<br>(0 - 0)       | 0<br>(0 - 0)        | 0<br>(0 - 0)         | 0<br>(0 - 0)         | 0<br>(0 - 0)         |
| Chronic kidney disease due to hypertension          | 14<br>(8 - 23)       | 0<br>(0 - 0)       | 0<br>(0 - 0)        | 1<br>(0 - 1)         | 3<br>(1 - 5)         | 11<br>(6 - 17)       |
| Chronic kidney disease due to glomerulonephritis    | 19<br>(13 - 28)      | 0<br>(0 - 0)       | 0<br>(0 - 0)        | 3<br>(2 - 5)         | 5<br>(3 - 9)         | 10<br>(7 - 15)       |
| Chronic kidney disease due to other causes          | 28<br>(18 - 56)      | 0<br>(0 - 0)       | 0<br>(0 - 1)        | 7<br>(5 - 14)        | 11<br>(7 - 26)       | 9<br>(5 - 17)        |
| Urinary diseases and male infertility               | 152<br>(55 - 215)    | 0<br>(0 - 0)       | 0<br>(0 - 1)        | 12<br>(6 - 17)       | 36<br>(19 - 48)      | 102<br>(27 - 157)    |
| Interstitial nephritis and urinary tract infections | 118<br>(41 - 172)    | 0<br>(0 - 0)       | 0<br>(0 - 1)        | 11<br>(5 - 15)       | 29<br>(15 - 39)      | 78<br>(19 - 124)     |
| Urolithiasis                                        | 19<br>(4 - 54)       | --                 | 0<br>(0 - 0)        | 1<br>(0 - 1)         | 4<br>(1 - 9)         | 14<br>(2 - 46)       |
| Other urinary diseases                              | 14<br>(6 - 28)       | 0<br>(0 - 0)       | 0<br>(0 - 0)        | 1<br>(0 - 2)         | 3<br>(2 - 6)         | 10<br>(3 - 21)       |
| Gynecological diseases                              | 0<br>(0 - 1)         | --                 | --                  | 0<br>(0 - 0)         | 0<br>(0 - 0)         | 0<br>(0 - 0)         |
| Uterine fibroids                                    | 0<br>(0 - 0)         | --                 | --                  | 0<br>(0 - 0)         | 0<br>(0 - 0)         | 0<br>(0 - 0)         |
| Polycystic ovarian syndrome                         | 0<br>(0 - 0)         | --                 | --                  | 0<br>(0 - 0)         | 0<br>(0 - 0)         | --                   |
| Endometriosis                                       | 0<br>(0 - 0)         | --                 | --                  | 0<br>(0 - 0)         | 0<br>(0 - 0)         | --                   |
| Genital prolapse                                    | 0<br>(0 - 0)         | --                 | --                  | 0<br>(0 - 0)         | 0<br>(0 - 0)         | 0<br>(0 - 0)         |
| Other gynecological diseases                        | 0<br>(0 - 0)         | --                 | --                  | 0<br>(0 - 0)         | 0<br>(0 - 0)         | 0<br>(0 - 0)         |
| Hemoglobinopathies and hemolytic anemias            | 3<br>(2 - 5)         | 1<br>(0 - 2)       | 0<br>(0 - 0)        | 1<br>(1 - 2)         | 0<br>(0 - 1)         | 1<br>(0 - 1)         |
| Thalassemias                                        | 2<br>(1 - 3)         | 1<br>(0 - 1)       | 0<br>(0 - 0)        | 1<br>(1 - 2)         | 0<br>(0 - 0)         | 0<br>(0 - 0)         |
| Sickle cell disorders                               | 0<br>(0 - 0)         | 0<br>(0 - 0)       | 0<br>(0 - 0)        | 0<br>(0 - 0)         | 0<br>(0 - 0)         | 0<br>(0 - 0)         |
| G6PD deficiency                                     | 0<br>(0 - 0)         | 0<br>(0 - 0)       | 0<br>(0 - 0)        | 0<br>(0 - 0)         | 0<br>(0 - 0)         | 0<br>(0 - 0)         |
| Other hemoglobinopathies and hemolytic anemias      | 2<br>(1 - 2)         | 0<br>(0 - 0)       | 0<br>(0 - 0)        | 0<br>(0 - 1)         | 0<br>(0 - 1)         | 1<br>(0 - 1)         |
| Endocrine, metabolic, blood, and immune disorders   | 17<br>(6 - 22)       | 1<br>(0 - 1)       | 1<br>(0 - 1)        | 3<br>(1 - 4)         | 3<br>(1 - 5)         | 9<br>(2 - 13)        |
| Musculoskeletal disorders                           | 1<br>(1 - 1)         | --                 | 0<br>(0 - 0)        | 0<br>(0 - 0)         | 0<br>(0 - 0)         | 0<br>(0 - 0)         |
| Rheumatoid arthritis                                | 0<br>(0 - 0)         | --                 | 0<br>(0 - 0)        | 0<br>(0 - 0)         | 0<br>(0 - 0)         | 0<br>(0 - 0)         |
| Other musculoskeletal disorders                     | 1<br>(0 - 1)         | --                 | 0<br>(0 - 0)        | 0<br>(0 - 0)         | 0<br>(0 - 0)         | 0<br>(0 - 0)         |
| Other non-communicable diseases                     | 116<br>(96 - 138)    | 88<br>(71 - 107)   | 6<br>(5 - 8)        | 11<br>(7 - 14)       | 5<br>(3 - 7)         | 6<br>(4 - 10)        |
| Congenital anomalies                                | 115<br>(96 - 137)    | 88<br>(70 - 107)   | 6<br>(5 - 8)        | 11<br>(7 - 14)       | 5<br>(3 - 6)         | 6<br>(4 - 10)        |
| Neural tube defects                                 | 7<br>(2 - 12)        | 6<br>(2 - 11)      | 0<br>(0 - 1)        | 0<br>(0 - 0)         | 0<br>(0 - 0)         | 0<br>(0 - 0)         |
| Congenital heart anomalies                          | 51<br>(37 - 66)      | 39<br>(25 - 53)    | 5<br>(3 - 6)        | 7<br>(5 - 9)         | 1<br>(0 - 1)         | 0<br>(0 - 0)         |
| Cleft lip and cleft palate                          | 0<br>(0 - 1)         | 0<br>(0 - 1)       | --                  | --                   | --                   | --                   |
| Down syndrome                                       | 1<br>(0 - 1)         | 0<br>(0 - 0)       | 0<br>(0 - 1)        | 0<br>(0 - 0)         | 0<br>(0 - 0)         | 0<br>(0 - 0)         |
| Chromosomal unbalanced rearrangements               | 0<br>(0 - 0)         | 0<br>(0 - 0)       | 0<br>(0 - 0)        | 0<br>(0 - 0)         | 0<br>(0 - 0)         | 0<br>(0 - 0)         |
| Other congenital anomalies                          | 56<br>(42 - 72)      | 42<br>(30 - 56)    | 1<br>(0 - 1)        | 3<br>(2 - 4)         | 4<br>(3 - 6)         | 6<br>(4 - 10)        |
| Skin and subcutaneous diseases                      | 1<br>(0 - 1)         | 0<br>(0 - 0)       | 0<br>(0 - 0)        | 0<br>(0 - 0)         | 0<br>(0 - 0)         | 0<br>(0 - 0)         |
| Cellulitis                                          | 0<br>(0 - 0)         | 0<br>(0 - 0)       | 0<br>(0 - 0)        | 0<br>(0 - 0)         | 0<br>(0 - 0)         | 0<br>(0 - 0)         |
| Pyoderma                                            | 0<br>(0 - 0)         | 0<br>(0 - 0)       | 0<br>(0 - 0)        | 0<br>(0 - 0)         | 0<br>(0 - 0)         | 0<br>(0 - 0)         |
| Decubitus ulcer                                     | 0<br>(0 - 0)         | 0<br>(0 - 0)       | 0<br>(0 - 0)        | 0<br>(0 - 0)         | 0<br>(0 - 0)         | 0<br>(0 - 0)         |
| Other skin and subcutaneous diseases                | 0<br>(0 - 0)         | 0<br>(0 - 0)       | 0<br>(0 - 0)        | 0<br>(0 - 0)         | 0<br>(0 - 0)         | 0<br>(0 - 0)         |

Web Table 31- Armenia deaths with 95% UI by age, sex, and cause in 2013

| Cause                                           | Females, All Ages  | Females, 0-4 Years | Females, 5-14 Years | Females, 15-49 Years | Females, 50-69 Years | Females, 70-80 Years |
|-------------------------------------------------|--------------------|--------------------|---------------------|----------------------|----------------------|----------------------|
| Sudden infant death syndrome                    | 0<br>(0 - 0)       | 0<br>(0 - 0)       | --                  | --                   | --                   | --                   |
| Injuries                                        | 291<br>(241 - 374) | 11<br>(7 - 20)     | 9<br>(7 - 13)       | 87<br>(71 - 112)     | 66<br>(53 - 90)      | 116<br>(95 - 157)    |
| Transport injuries                              | 84<br>(69 - 116)   | 2<br>(1 - 3)       | 4<br>(3 - 6)        | 35<br>(27 - 46)      | 22<br>(17 - 35)      | 21<br>(16 - 32)      |
| Road injuries                                   | 81<br>(67 - 112)   | 2<br>(1 - 3)       | 4<br>(3 - 6)        | 33<br>(26 - 43)      | 22<br>(16 - 34)      | 20<br>(15 - 31)      |
| Pedestrian road injuries                        | 22<br>(16 - 34)    | 0<br>(0 - 0)       | 1<br>(0 - 1)        | 7<br>(5 - 10)        | 5<br>(3 - 10)        | 9<br>(6 - 14)        |
| Cyclist road injuries                           | 3<br>(1 - 3)       | 0<br>(0 - 0)       | 0<br>(0 - 0)        | 1<br>(0 - 1)         | 1<br>(1 - 2)         | 1<br>(0 - 1)         |
| Motorcyclist road injuries                      | 4<br>(2 - 5)       | 0<br>(0 - 0)       | 0<br>(0 - 0)        | 3<br>(2 - 4)         | 1<br>(0 - 1)         | 0<br>(0 - 1)         |
| Motor vehicle road injuries                     | 52<br>(42 - 72)    | 1<br>(1 - 2)       | 3<br>(2 - 4)        | 23<br>(17 - 30)      | 15<br>(11 - 23)      | 10<br>(7 - 16)       |
| Other road injuries                             | 1<br>(0 - 1)       | 0<br>(0 - 0)       | 0<br>(0 - 0)        | 0<br>(0 - 0)         | 0<br>(0 - 0)         | 0<br>(0 - 0)         |
| Other transport injuries                        | 3<br>(2 - 5)       | 0<br>(0 - 0)       | 0<br>(0 - 0)        | 1<br>(1 - 2)         | 0<br>(0 - 1)         | 1<br>(0 - 1)         |
| Unintentional injuries                          | 136<br>(100 - 203) | 9<br>(5 - 18)      | 4<br>(3 - 7)        | 25<br>(16 - 40)      | 25<br>(18 - 38)      | 73<br>(55 - 109)     |
| Falls                                           | 32<br>(22 - 57)    | 1<br>(1 - 2)       | 0<br>(0 - 1)        | 4<br>(3 - 9)         | 5<br>(3 - 10)        | 22<br>(15 - 37)      |
| Drowning                                        | 13<br>(5 - 34)     | 2<br>(0 - 6)       | 1<br>(0 - 4)        | 5<br>(2 - 13)        | 3<br>(1 - 6)         | 2<br>(1 - 6)         |
| Fire, heat, and hot substances                  | 23<br>(14 - 43)    | 2<br>(1 - 6)       | 0<br>(0 - 1)        | 4<br>(2 - 8)         | 5<br>(3 - 9)         | 11<br>(6 - 22)       |
| Poisonings                                      | 6<br>(4 - 15)      | 0<br>(0 - 0)       | 0<br>(0 - 0)        | 2<br>(1 - 5)         | 2<br>(1 - 6)         | 2<br>(1 - 4)         |
| Exposure to mechanical forces                   | 7<br>(6 - 9)       | 1<br>(0 - 1)       | 1<br>(0 - 1)        | 3<br>(2 - 4)         | 1<br>(1 - 1)         | 2<br>(1 - 3)         |
| Unintentional firearm injuries                  | 2<br>(2 - 3)       | 0<br>(0 - 0)       | 0<br>(0 - 0)        | 1<br>(1 - 2)         | 0<br>(0 - 1)         | 0<br>(0 - 1)         |
| Unintentional suffocation                       | 1<br>(1 - 2)       | 0<br>(0 - 0)       | 0<br>(0 - 0)        | 0<br>(0 - 0)         | 0<br>(0 - 0)         | 1<br>(0 - 1)         |
| Other exposure to mechanical forces             | 3<br>(3 - 5)       | 0<br>(0 - 1)       | 0<br>(0 - 1)        | 1<br>(1 - 2)         | 0<br>(0 - 0)         | 1<br>(1 - 2)         |
| Adverse effects of medical treatment            | 31<br>(20 - 49)    | 1<br>(0 - 1)       | 0<br>(0 - 0)        | 3<br>(2 - 4)         | 5<br>(3 - 8)         | 22<br>(12 - 38)      |
| Animal contact                                  | 3<br>(1 - 5)       | 0<br>(0 - 1)       | 0<br>(0 - 1)        | 0<br>(0 - 1)         | 1<br>(0 - 2)         | 1<br>(0 - 1)         |
| Venomous animal contact                         | 2<br>(1 - 3)       | 0<br>(0 - 0)       | 0<br>(0 - 1)        | 0<br>(0 - 1)         | 0<br>(0 - 1)         | 0<br>(0 - 1)         |
| Non-venomous animal contact                     | 1<br>(0 - 2)       | 0<br>(0 - 0)       | 0<br>(0 - 0)        | 0<br>(0 - 0)         | 0<br>(0 - 1)         | 0<br>(0 - 0)         |
| Foreign body                                    | 11<br>(7 - 18)     | 2<br>(1 - 3)       | 0<br>(0 - 0)        | 1<br>(0 - 1)         | 2<br>(1 - 3)         | 6<br>(4 - 11)        |
| Pulmonary aspiration and foreign body in airway | 10<br>(7 - 18)     | 2<br>(1 - 3)       | 0<br>(0 - 0)        | 1<br>(0 - 1)         | 2<br>(1 - 3)         | 6<br>(4 - 11)        |
| Foreign body in other body part                 | 1<br>(0 - 1)       | 0<br>(0 - 0)       | 0<br>(0 - 0)        | 0<br>(0 - 0)         | 0<br>(0 - 0)         | 0<br>(0 - 1)         |
| Other unintentional injuries                    | 11<br>(6 - 13)     | 1<br>(0 - 1)       | 1<br>(0 - 1)        | 2<br>(1 - 3)         | 2<br>(1 - 2)         | 5<br>(2 - 8)         |
| Self-harm and interpersonal violence            | 70<br>(45 - 84)    | 0<br>(0 - 0)       | 1<br>(0 - 1)        | 28<br>(19 - 35)      | 19<br>(12 - 24)      | 22<br>(11 - 30)      |
| Self-harm                                       | 46<br>(23 - 55)    | --                 | 0<br>(0 - 1)        | 17<br>(9 - 22)       | 12<br>(6 - 15)       | 16<br>(7 - 20)       |
| Interpersonal violence                          | 25<br>(15 - 33)    | 0<br>(0 - 0)       | 0<br>(0 - 1)        | 11<br>(7 - 15)       | 7<br>(4 - 10)        | 7<br>(3 - 12)        |
| Assault by firearm                              | 3<br>(1 - 5)       | 0<br>(0 - 0)       | 0<br>(0 - 0)        | 1<br>(0 - 2)         | 1<br>(0 - 1)         | 1<br>(0 - 2)         |
| Assault by sharp object                         | 5<br>(3 - 8)       | 0<br>(0 - 0)       | 0<br>(0 - 0)        | 3<br>(2 - 4)         | 1<br>(0 - 1)         | 2<br>(1 - 4)         |
| Assault by other means                          | 17<br>(10 - 23)    | 0<br>(0 - 0)       | 0<br>(0 - 0)        | 7<br>(4 - 10)        | 6<br>(3 - 9)         | 4<br>(1 - 8)         |

Web Table 31- Australia deaths with 95% UI by age, sex, and cause in 2013

| Cause                                                             | Both Sexes, All Ages           | Both Sexes, 0-4 Years    | Both Sexes, 5-14 Years | Both Sexes, 15-49 Years   | Both Sexes, 50-69 Years     | Both Sexes, 70-80 Years        |
|-------------------------------------------------------------------|--------------------------------|--------------------------|------------------------|---------------------------|-----------------------------|--------------------------------|
| All causes                                                        | 165,064<br>(159,470 - 171,479) | 1,332<br>(1,135 - 1,572) | 258<br>(234 - 284)     | 9,922<br>(9,368 - 10,520) | 30,144<br>(28,708 - 31,679) | 123,407<br>(119,714 - 127,799) |
| Communicable, maternal, neonatal, and nutritional diseases        | 5,801<br>(4,892 - 6,755)       | 592<br>(485 - 716)       | 22<br>(16 - 31)        | 296<br>(259 - 337)        | 554<br>(470 - 630)          | 4,337<br>(3,499 - 5,306)       |
| HIV/AIDS and tuberculosis                                         | 191<br>(148 - 245)             | 0<br>(0 - 0)             | 0<br>(0 - 0)           | 68<br>(47 - 99)           | 56<br>(36 - 83)             | 66<br>(52 - 81)                |
| Tuberculosis                                                      | 84<br>(69 - 98)                | 0<br>(0 - 0)             | 0<br>(0 - 0)           | 5<br>(4 - 6)              | 17<br>(14 - 20)             | 61<br>(49 - 75)                |
| HIV/AIDS                                                          | 107<br>(70 - 160)              | 0<br>(0 - 0)             | 0<br>(0 - 0)           | 63<br>(42 - 93)           | 39<br>(18 - 66)             | 5<br>(1 - 11)                  |
| HIV/AIDS resulting in mycobacterial infection                     | 6<br>(3 - 9)                   | 0<br>(0 - 0)             | 0<br>(0 - 0)           | 3<br>(2 - 5)              | 2<br>(1 - 4)                | 0<br>(0 - 1)                   |
| HIV/AIDS resulting in other diseases                              | 101<br>(66 - 152)              | 0<br>(0 - 0)             | 0<br>(0 - 0)           | 60<br>(40 - 89)           | 37<br>(17 - 62)             | 5<br>(1 - 10)                  |
| Diarrhea, lower respiratory, and other common infectious diseases | 4,352<br>(3,506 - 5,300)       | 69<br>(51 - 87)          | 16<br>(11 - 25)        | 131<br>(109 - 155)        | 336<br>(277 - 390)          | 3,801<br>(2,782 - 4,744)       |
| Diarrheal diseases                                                | 183<br>(136 - 245)             | 8<br>(5 - 11)            | 1<br>(0 - 1)           | 5<br>(4 - 7)              | 16<br>(12 - 20)             | 153<br>(107 - 217)             |
| Intestinal infectious diseases                                    | 38<br>(13 - 80)                | 7<br>(2 - 16)            | 7<br>(2 - 15)          | 16<br>(5 - 34)            | 5<br>(1 - 11)               | 4<br>(1 - 8)                   |
| Typhoid fever                                                     | 26<br>(8 - 59)                 | 5<br>(1 - 11)            | 5<br>(2 - 11)          | 11<br>(3 - 26)            | 3<br>(1 - 8)                | 2<br>(1 - 5)                   |
| Paratyphoid fever                                                 | 9<br>(3 - 20)                  | 2<br>(1 - 5)             | 2<br>(1 - 4)           | 4<br>(1 - 9)              | 1<br>(0 - 2)                | 1<br>(0 - 2)                   |
| Other intestinal infectious diseases                              | 2<br>(0 - 6)                   | 1<br>(0 - 3)             | 0<br>(0 - 1)           | 1<br>(0 - 3)              | 0<br>(0 - 2)                | 1<br>(0 - 3)                   |
| Lower respiratory infections                                      | 3,986<br>(3,161 - 4,924)       | 35<br>(25 - 47)          | 4<br>(3 - 5)           | 85<br>(71 - 100)          | 288<br>(234 - 341)          | 3,573<br>(2,782 - 4,521)       |
| Upper respiratory infections                                      | 3<br>(1 - 8)                   | 0<br>(0 - 0)             | 0<br>(0 - 0)           | 0<br>(0 - 1)              | 1<br>(0 - 2)                | 2<br>(0 - 7)                   |
| Otitis media                                                      | 6<br>(5 - 8)                   | 0<br>(0 - 1)             | 0<br>(0 - 0)           | 1<br>(1 - 1)              | 1<br>(1 - 1)                | 3<br>(2 - 5)                   |
| Meningitis                                                        | 72<br>(63 - 81)                | 13<br>(9 - 18)           | 2<br>(1 - 2)           | 12<br>(10 - 14)           | 14<br>(12 - 16)             | 31<br>(25 - 39)                |
| Pneumococcal meningitis                                           | 19<br>(15 - 22)                | 3<br>(2 - 4)             | 1<br>(0 - 1)           | 3<br>(2 - 4)              | 4<br>(3 - 5)                | 9<br>(6 - 11)                  |
| H influenzae type B meningitis                                    | 8<br>(7 - 10)                  | 3<br>(2 - 5)             | 0<br>(0 - 0)           | 1<br>(1 - 1)              | 1<br>(1 - 2)                | 2<br>(2 - 4)                   |
| Meningococcal meningitis                                          | 16<br>(13 - 20)                | 2<br>(2 - 3)             | 0<br>(0 - 1)           | 3<br>(2 - 4)              | 3<br>(2 - 4)                | 7<br>(5 - 10)                  |
| Other meningitis                                                  | 29<br>(24 - 34)                | 4<br>(3 - 7)             | 1<br>(0 - 1)           | 5<br>(3 - 6)              | 6<br>(5 - 8)                | 13<br>(10 - 17)                |
| Encephalitis                                                      | 40<br>(24 - 51)                | 3<br>(2 - 5)             | 2<br>(1 - 2)           | 7<br>(4 - 10)             | 8<br>(5 - 11)               | 19<br>(10 - 27)                |
| Diphtheria                                                        | 0<br>(0 - 1)                   | 0<br>(0 - 1)             | 0<br>(0 - 0)           | 0<br>(0 - 1)              | 0<br>(0 - 0)                | --                             |
| Whooping cough                                                    | 2<br>(1 - 3)                   | 0<br>(0 - 1)             | 0<br>(0 - 0)           | 1<br>(1 - 1)              | 0<br>(0 - 0)                | --                             |
| Tetanus                                                           | 2<br>(1 - 3)                   | 0<br>(0 - 0)             | 0<br>(0 - 0)           | 1<br>(0 - 1)              | 1<br>(0 - 1)                | 0<br>(0 - 1)                   |
| Measles                                                           | 0<br>(0 - 1)                   | 0<br>(0 - 1)             | 0<br>(0 - 0)           | 0<br>(0 - 0)              | 0<br>(0 - 0)                | --                             |
| Varicella and herpes zoster                                       | 20<br>(6 - 59)                 | 1<br>(0 - 4)             | 0<br>(0 - 1)           | 2<br>(1 - 5)              | 2<br>(0 - 5)                | 14<br>(1 - 55)                 |
| Neglected tropical diseases and malaria                           | 22<br>(19 - 26)                | 1<br>(1 - 1)             | 1<br>(1 - 1)           | 5<br>(4 - 6)              | 6<br>(5 - 7)                | 9<br>(7 - 12)                  |
| Cysticercosis                                                     | 0<br>(0 - 0)                   | 0<br>(0 - 0)             | 0<br>(0 - 0)           | 0<br>(0 - 0)              | 0<br>(0 - 0)                | 0<br>(0 - 0)                   |
| Cystic echinococcosis                                             | 5<br>(4 - 5)                   | 0<br>(0 - 0)             | 0<br>(0 - 0)           | 1<br>(1 - 1)              | 1<br>(1 - 2)                | 2<br>(2 - 2)                   |
| Dengue                                                            | 2<br>(2 - 3)                   | 0<br>(0 - 0)             | 0<br>(0 - 0)           | 1<br>(1 - 1)              | 1<br>(0 - 1)                | 0<br>(0 - 0)                   |
| Rabies                                                            | 2<br>(2 - 4)                   | 0<br>(0 - 0)             | 0<br>(0 - 0)           | 1<br>(1 - 2)              | 1<br>(0 - 1)                | 0<br>(0 - 0)                   |
| Other neglected tropical diseases                                 | 13<br>(10 - 16)                | 1<br>(0 - 1)             | 0<br>(0 - 0)           | 2<br>(1 - 2)              | 3<br>(2 - 5)                | 7<br>(4 - 10)                  |
| Maternal disorders                                                | 15<br>(12 - 18)                | --                       | 0<br>(0 - 0)           | 15<br>(11 - 18)           | --                          | --                             |
| Maternal hemorrhage                                               | 2<br>(1 - 2)                   | --                       | 0<br>(0 - 0)           | 2<br>(1 - 2)              | --                          | --                             |
| Maternal sepsis and other maternal infections                     | 1<br>(1 - 2)                   | --                       | 0<br>(0 - 0)           | 1<br>(1 - 2)              | --                          | --                             |
| Maternal hypertensive disorders                                   | 2<br>(2 - 3)                   | --                       | 0<br>(0 - 0)           | 2<br>(2 - 3)              | --                          | --                             |
| Maternal obstructed labor                                         | 2<br>(1 - 2)                   | --                       | 0<br>(0 - 0)           | 2<br>(1 - 2)              | --                          | --                             |
| Maternal abortive outcome                                         | 2<br>(1 - 2)                   | --                       | 0<br>(0 - 0)           | 2<br>(1 - 2)              | --                          | --                             |
| Indirect maternal deaths                                          | 2<br>(1 - 3)                   | --                       | 0<br>(0 - 0)           | 2<br>(1 - 3)              | --                          | --                             |



Web Table 31- Australia deaths with 95% UI by age, sex, and cause in 2013

| Cause                                                            | Both Sexes, All Ages           | Both Sexes, 0-4 Years | Both Sexes, 5-14 Years | Both Sexes, 15-49 Years  | Both Sexes, 50-69 Years     | Both Sexes, 70-80 Years        |
|------------------------------------------------------------------|--------------------------------|-----------------------|------------------------|--------------------------|-----------------------------|--------------------------------|
| Late maternal deaths                                             | 1<br>(1 - 2)                   | --                    | 0<br>(0 - 0)           | 1<br>(1 - 2)             | --                          | --                             |
| Maternal deaths aggravated by HIV/AIDS                           | 0<br>(0 - 0)                   | --                    | --                     | 0<br>(0 - 0)             | --                          | --                             |
| Other maternal disorders                                         | 3<br>(2 - 5)                   | --                    | 0<br>(0 - 0)           | 3<br>(2 - 4)             | --                          | --                             |
| Neonatal disorders                                               | 498<br>(406 - 605)             | 498<br>(406 - 605)    | --                     | --                       | --                          | --                             |
| Neonatal preterm birth complications                             | 210<br>(156 - 291)             | 210<br>(156 - 291)    | --                     | --                       | --                          | --                             |
| Neonatal encephalopathy due to birth asphyxia and trauma         | 142<br>(89 - 189)              | 142<br>(89 - 189)     | --                     | --                       | --                          | --                             |
| Neonatal sepsis and other neonatal infections                    | 21<br>(12 - 38)                | 21<br>(12 - 38)       | --                     | --                       | --                          | --                             |
| Hemolytic disease and other neonatal jaundice                    | 1<br>(1 - 2)                   | 1<br>(1 - 2)          | --                     | --                       | --                          | --                             |
| Other neonatal disorders                                         | 124<br>(67 - 171)              | 124<br>(67 - 171)     | --                     | --                       | --                          | --                             |
| Nutritional deficiencies                                         | 319<br>(252 - 419)             | 2<br>(1 - 3)          | 0<br>(0 - 0)           | 7<br>(5 - 8)             | 21<br>(16 - 26)             | 290<br>(225 - 387)             |
| Protein-energy malnutrition                                      | 108<br>(58 - 160)              | 1<br>(1 - 2)          | 0<br>(0 - 0)           | 2<br>(1 - 3)             | 10<br>(6 - 13)              | 95<br>(49 - 144)               |
| Iodine deficiency                                                | 1<br>(0 - 5)                   | 0<br>(0 - 0)          | 0<br>(0 - 0)           | 0<br>(0 - 0)             | 0<br>(0 - 1)                | 1<br>(0 - 5)                   |
| Iron-deficiency anemia                                           | 172<br>(117 - 254)             | 0<br>(0 - 1)          | 0<br>(0 - 0)           | 3<br>(2 - 4)             | 8<br>(5 - 12)               | 161<br>(109 - 238)             |
| Other nutritional deficiencies                                   | 37<br>(20 - 66)                | 0<br>(0 - 1)          | 0<br>(0 - 0)           | 1<br>(1 - 2)             | 3<br>(2 - 5)                | 32<br>(16 - 59)                |
| Other communicable, maternal, neonatal, and nutritional diseases | 404<br>(290 - 483)             | 23<br>(12 - 35)       | 4<br>(3 - 5)           | 70<br>(56 - 86)          | 136<br>(102 - 166)          | 171<br>(100 - 223)             |
| Sexually transmitted diseases excluding HIV                      | 23<br>(14 - 35)                | 11<br>(2 - 22)        | 1<br>(0 - 2)           | 2<br>(1 - 2)             | 2<br>(1 - 3)                | 9<br>(5 - 14)                  |
| Syphilis                                                         | 20<br>(11 - 32)                | 11<br>(2 - 22)        | 1<br>(0 - 2)           | 1<br>(1 - 1)             | 1<br>(1 - 2)                | 7<br>(4 - 11)                  |
| Chlamydial infection                                             | 1<br>(1 - 1)                   | --                    | 0<br>(0 - 0)           | 0<br>(0 - 0)             | 0<br>(0 - 0)                | 0<br>(0 - 1)                   |
| Gonococcal infection                                             | 2<br>(1 - 2)                   | --                    | 0<br>(0 - 0)           | 0<br>(0 - 0)             | 0<br>(0 - 0)                | 1<br>(1 - 2)                   |
| Other sexually transmitted diseases                              | 1<br>(1 - 1)                   | --                    | 0<br>(0 - 0)           | 0<br>(0 - 0)             | 0<br>(0 - 0)                | 0<br>(0 - 1)                   |
| Hepatitis                                                        | 166<br>(142 - 193)             | 1<br>(1 - 2)          | 1<br>(1 - 1)           | 47<br>(36 - 61)          | 81<br>(64 - 100)            | 36<br>(26 - 48)                |
| Acute hepatitis A                                                | 12<br>(3 - 28)                 | 0<br>(0 - 1)          | 0<br>(0 - 1)           | 6<br>(1 - 12)            | 5<br>(1 - 11)               | 1<br>(0 - 4)                   |
| Acute hepatitis B                                                | 144<br>(117 - 172)             | 1<br>(0 - 1)          | 1<br>(0 - 1)           | 39<br>(28 - 52)          | 72<br>(54 - 90)             | 32<br>(23 - 43)                |
| Acute hepatitis C                                                | 9<br>(2 - 24)                  | --                    | 0<br>(0 - 0)           | 3<br>(1 - 8)             | 4<br>(1 - 11)               | 2<br>(0 - 6)                   |
| Other infectious diseases                                        | 214<br>(108 - 281)             | 11<br>(5 - 16)        | 2<br>(1 - 3)           | 21<br>(13 - 27)          | 54<br>(27 - 72)             | 127<br>(57 - 175)              |
| Non-communicable diseases                                        | 149,701<br>(144,521 - 155,967) | 596<br>(493 - 723)    | 142<br>(126 - 160)     | 6,122<br>(5,757 - 6,529) | 27,926<br>(26,634 - 29,406) | 114,916<br>(111,327 - 119,403) |
| Neoplasms                                                        | 47,565<br>(43,901 - 50,432)    | 47<br>(34 - 62)       | 68<br>(58 - 80)        | 2,666<br>(2,484 - 2,928) | 15,238<br>(14,242 - 16,143) | 29,546<br>(26,565 - 31,753)    |
| Esophageal cancer                                                | 1,497<br>(1,172 - 1,680)       | --                    | --                     | 53<br>(38 - 65)          | 549<br>(413 - 633)          | 895<br>(700 - 1,029)           |
| Stomach cancer                                                   | 1,943<br>(1,696 - 2,259)       | --                    | --                     | 89<br>(75 - 105)         | 524<br>(465 - 594)          | 1,330<br>(1,120 - 1,588)       |
| Liver cancer                                                     | 1,349<br>(820 - 1,734)         | --                    | 1<br>(1 - 1)           | 76<br>(50 - 102)         | 499<br>(321 - 649)          | 774<br>(439 - 1,033)           |
| Liver cancer due to hepatitis B                                  | 277<br>(149 - 453)             | --                    | 0<br>(0 - 1)           | 30<br>(17 - 47)          | 136<br>(69 - 230)           | 110<br>(58 - 185)              |
| Liver cancer due to hepatitis C                                  | 774<br>(463 - 1,068)           | --                    | 0<br>(0 - 0)           | 30<br>(17 - 45)          | 257<br>(159 - 372)          | 487<br>(271 - 687)             |
| Liver cancer due to alcohol use                                  | 193<br>(107 - 296)             | --                    | --                     | 7<br>(4 - 12)            | 65<br>(35 - 105)            | 120<br>(63 - 191)              |
| Liver cancer due to other causes                                 | 106<br>(51 - 159)              | --                    | 0<br>(0 - 1)           | 9<br>(5 - 14)            | 40<br>(20 - 62)             | 56<br>(25 - 88)                |
| Larynx cancer                                                    | 296<br>(211 - 358)             | --                    | --                     | 11<br>(9 - 15)           | 118<br>(93 - 157)           | 167<br>(107 - 210)             |
| Tracheal, bronchus and lung cancer                               | 9,363<br>(8,257 - 10,173)      | --                    | --                     | 283<br>(251 - 324)       | 3,455<br>(3,108 - 3,787)    | 5,625<br>(4,769 - 6,292)       |
| Breast cancer                                                    | 3,283<br>(2,587 - 3,810)       | --                    | --                     | 408<br>(339 - 505)       | 1,344<br>(1,049 - 1,550)    | 1,531<br>(1,132 - 1,883)       |
| Cervical cancer                                                  | 437<br>(365 - 533)             | --                    | --                     | 77<br>(64 - 97)          | 156<br>(123 - 192)          | 203<br>(157 - 263)             |
| Uterine cancer                                                   | 335<br>(271 - 435)             | --                    | --                     | 13<br>(10 - 20)          | 115<br>(91 - 154)           | 206<br>(154 - 278)             |
| Prostate cancer                                                  | 4,156<br>(3,219 - 5,930)       | --                    | --                     | 10<br>(6 - 16)           | 656<br>(477 - 940)          | 3,490<br>(2,687 - 5,065)       |

Web Table 31- Australia deaths with 95% UI by age, sex, and cause in 2013

| Cause                                         | Both Sexes, All Ages        | Both Sexes, 0-4 Years | Both Sexes, 5-14 Years | Both Sexes, 15-49 Years  | Both Sexes, 50-69 Years  | Both Sexes, 70-80 Years     |
|-----------------------------------------------|-----------------------------|-----------------------|------------------------|--------------------------|--------------------------|-----------------------------|
| Colon and rectum cancer                       | 6,039<br>(5,503 - 6,610)    | --                    | --                     | 252<br>(225 - 280)       | 1,813<br>(1,669 - 1,970) | 3,973<br>(3,501 - 4,471)    |
| Lip and oral cavity cancer                    | 374<br>(269 - 433)          | --                    | --                     | 30<br>(24 - 37)          | 158<br>(115 - 186)       | 186<br>(130 - 232)          |
| Nasopharynx cancer                            | 83<br>(64 - 105)            | --                    | 0<br>(0 - 0)           | 18<br>(13 - 25)          | 35<br>(26 - 45)          | 31<br>(21 - 41)             |
| Other pharynx cancer                          | 317<br>(232 - 371)          | --                    | --                     | 18<br>(13 - 23)          | 182<br>(130 - 224)       | 117<br>(86 - 144)           |
| Gallbladder and biliary tract cancer          | 550<br>(380 - 700)          | --                    | --                     | 17<br>(12 - 22)          | 140<br>(107 - 175)       | 393<br>(254 - 526)          |
| Pancreatic cancer                             | 2,917<br>(2,649 - 3,191)    | --                    | --                     | 98<br>(85 - 112)         | 967<br>(880 - 1,065)     | 1,851<br>(1,635 - 2,082)    |
| Malignant skin melanoma                       | 1,656<br>(1,001 - 2,412)    | --                    | --                     | 243<br>(173 - 405)       | 609<br>(374 - 909)       | 804<br>(455 - 1,150)        |
| Non-melanoma skin cancer                      | 574<br>(395 - 794)          | --                    | --                     | 19<br>(13 - 28)          | 109<br>(70 - 162)        | 447<br>(305 - 621)          |
| Ovarian cancer                                | 1,085<br>(920 - 1,273)      | --                    | --                     | 73<br>(60 - 88)          | 428<br>(361 - 504)       | 585<br>(451 - 743)          |
| Testicular cancer                             | 29<br>(22 - 40)             | --                    | --                     | 19<br>(14 - 26)          | 6<br>(4 - 9)             | 4<br>(3 - 6)                |
| Kidney cancer                                 | 1,162<br>(1,000 - 1,355)    | 2<br>(1 - 3)          | 2<br>(1 - 3)           | 66<br>(55 - 80)          | 429<br>(365 - 505)       | 664<br>(527 - 831)          |
| Bladder cancer                                | 1,145<br>(898 - 1,326)      | --                    | --                     | 15<br>(12 - 19)          | 206<br>(166 - 238)       | 924<br>(709 - 1,096)        |
| Brain and nervous system cancer               | 1,368<br>(1,124 - 1,601)    | 10<br>(6 - 14)        | 20<br>(15 - 26)        | 217<br>(182 - 257)       | 622<br>(517 - 747)       | 499<br>(380 - 608)          |
| Thyroid cancer                                | 145<br>(107 - 175)          | --                    | 0<br>(0 - 0)           | 9<br>(7 - 10)            | 42<br>(34 - 50)          | 94<br>(65 - 120)            |
| Mesothelioma                                  | 720<br>(383 - 938)          | --                    | --                     | 21<br>(15 - 34)          | 254<br>(162 - 380)       | 445<br>(184 - 631)          |
| Hodgkin lymphoma                              | 113<br>(89 - 166)           | 0<br>(0 - 0)          | 1<br>(0 - 2)           | 39<br>(31 - 61)          | 30<br>(23 - 45)          | 43<br>(31 - 58)             |
| Non-Hodgkin lymphoma                          | 2,001<br>(1,298 - 2,528)    | 2<br>(1 - 4)          | 5<br>(3 - 8)           | 140<br>(92 - 208)        | 595<br>(370 - 823)       | 1,259<br>(797 - 1,603)      |
| Multiple myeloma                              | 1,000<br>(676 - 1,426)      | --                    | --                     | 31<br>(22 - 48)          | 313<br>(212 - 457)       | 656<br>(428 - 925)          |
| Leukemia                                      | 1,665<br>(1,488 - 1,833)    | 11<br>(7 - 17)        | 21<br>(16 - 26)        | 136<br>(121 - 152)       | 408<br>(361 - 454)       | 1,089<br>(942 - 1,242)      |
| Other neoplasms                               | 1,960<br>(1,474 - 2,279)    | 22<br>(15 - 30)       | 19<br>(14 - 24)        | 185<br>(156 - 212)       | 475<br>(394 - 543)       | 1,260<br>(833 - 1,548)      |
| Cardiovascular diseases                       | 54,202<br>(49,982 - 62,064) | 9<br>(7 - 11)         | 6<br>(5 - 8)           | 1,259<br>(1,143 - 1,390) | 6,638<br>(6,100 - 7,587) | 46,291<br>(42,384 - 53,077) |
| Rheumatic heart disease                       | 571<br>(343 - 718)          | 0<br>(0 - 0)          | 0<br>(0 - 1)           | 29<br>(19 - 35)          | 75<br>(51 - 97)          | 467<br>(270 - 606)          |
| Ischemic heart disease                        | 28,869<br>(25,567 - 35,841) | 0<br>(0 - 0)          | 1<br>(0 - 1)           | 706<br>(624 - 813)       | 4,138<br>(3,721 - 5,046) | 24,024<br>(21,066 - 30,190) |
| Cerebrovascular disease                       | 14,633<br>(12,318 - 17,591) | 1<br>(1 - 1)          | 1<br>(1 - 2)           | 230<br>(178 - 275)       | 1,193<br>(918 - 1,434)   | 13,208<br>(11,133 - 15,997) |
| Ischemic stroke                               | 9,911<br>(8,171 - 12,549)   | 0<br>(0 - 0)          | 0<br>(0 - 0)           | 25<br>(17 - 32)          | 255<br>(185 - 342)       | 9,631<br>(7,939 - 12,245)   |
| Hemorrhagic stroke                            | 4,722<br>(3,352 - 5,714)    | 1<br>(1 - 1)          | 1<br>(1 - 2)           | 205<br>(157 - 245)       | 938<br>(708 - 1,138)     | 3,576<br>(2,435 - 4,504)    |
| Hypertensive heart disease                    | 1,987<br>(1,421 - 2,935)    | 0<br>(0 - 0)          | 0<br>(0 - 0)           | 18<br>(13 - 24)          | 125<br>(95 - 176)        | 1,843<br>(1,298 - 2,747)    |
| Cardiomyopathy and myocarditis                | 1,449<br>(1,185 - 1,932)    | 6<br>(4 - 8)          | 3<br>(2 - 4)           | 142<br>(113 - 181)       | 345<br>(279 - 460)       | 954<br>(739 - 1,343)        |
| Atrial fibrillation and flutter               | 1,728<br>(1,297 - 2,209)    | --                    | --                     | 3<br>(2 - 4)             | 73<br>(55 - 88)          | 1,653<br>(1,228 - 2,134)    |
| Aortic aneurysm                               | 1,533<br>(1,255 - 2,106)    | --                    | --                     | 27<br>(22 - 35)          | 242<br>(197 - 325)       | 1,263<br>(1,016 - 1,797)    |
| Peripheral vascular disease                   | 737<br>(539 - 930)          | --                    | --                     | 1<br>(1 - 1)             | 46<br>(34 - 57)          | 690<br>(493 - 879)          |
| Endocarditis                                  | 266<br>(180 - 373)          | 0<br>(0 - 1)          | 0<br>(0 - 0)           | 18<br>(13 - 25)          | 51<br>(36 - 78)          | 196<br>(126 - 277)          |
| Other cardiovascular and circulatory diseases | 2,430<br>(1,738 - 3,097)    | 1<br>(1 - 2)          | 1<br>(0 - 1)           | 86<br>(54 - 105)         | 349<br>(244 - 428)       | 1,992<br>(1,381 - 2,636)    |
| Chronic respiratory diseases                  | 10,780<br>(9,388 - 12,133)  | 8<br>(6 - 12)         | 7<br>(6 - 8)           | 171<br>(151 - 194)       | 1,570<br>(1,362 - 1,753) | 9,024<br>(7,822 - 10,255)   |
| Chronic obstructive pulmonary disease         | 7,730<br>(6,503 - 8,896)    | 5<br>(3 - 7)          | 1<br>(1 - 1)           | 65<br>(54 - 79)          | 1,218<br>(1,053 - 1,393) | 6,441<br>(5,375 - 7,487)    |
| Pneumoconiosis                                | 465<br>(273 - 684)          | 0<br>(0 - 0)          | 0<br>(0 - 0)           | 12<br>(8 - 17)           | 49<br>(29 - 74)          | 403<br>(226 - 600)          |
| Silicosis                                     | 226<br>(121 - 350)          | 0<br>(0 - 0)          | 0<br>(0 - 0)           | 3<br>(2 - 4)             | 16<br>(9 - 24)           | 207<br>(108 - 326)          |
| Asbestosis                                    | 175<br>(102 - 267)          | 0<br>(0 - 0)          | 0<br>(0 - 0)           | 1<br>(1 - 2)             | 19<br>(11 - 30)          | 154<br>(87 - 239)           |
| Coal workers pneumoconiosis                   | 23<br>(14 - 34)             | 0<br>(0 - 0)          | 0<br>(0 - 0)           | 2<br>(1 - 3)             | 5<br>(3 - 7)             | 17<br>(9 - 26)              |
| Other pneumoconiosis                          | 41<br>(27 - 60)             | 0<br>(0 - 0)          | 0<br>(0 - 0)           | 6<br>(3 - 8)             | 9<br>(6 - 14)            | 26<br>(15 - 40)             |

Web Table 31- Australia deaths with 95% UI by age, sex, and cause in 2013

| Cause                                               | Both Sexes, All Ages        | Both Sexes, 0-4 Years | Both Sexes, 5-14 Years | Both Sexes, 15-49 Years | Both Sexes, 50-69 Years  | Both Sexes, 70-80 Years     |
|-----------------------------------------------------|-----------------------------|-----------------------|------------------------|-------------------------|--------------------------|-----------------------------|
| Asthma                                              | 525<br>(372 - 686)          | 1<br>(1 - 2)          | 5<br>(4 - 6)           | 69<br>(58 - 82)         | 116<br>(86 - 150)        | 333<br>(212 - 468)          |
| Interstitial lung disease and pulmonary sarcoidosis | 1,903<br>(1,279 - 2,646)    | 0<br>(0 - 1)          | 0<br>(0 - 1)           | 21<br>(15 - 27)         | 174<br>(110 - 225)       | 1,708<br>(1,133 - 2,416)    |
| Other chronic respiratory diseases                  | 157<br>(110 - 213)          | 2<br>(1 - 3)          | 0<br>(0 - 0)           | 4<br>(3 - 5)            | 13<br>(10 - 17)          | 138<br>(93 - 194)           |
| Cirrhosis                                           | 1,903<br>(1,762 - 2,051)    | 1<br>(0 - 1)          | 1<br>(1 - 1)           | 297<br>(263 - 331)      | 842<br>(764 - 925)       | 762<br>(674 - 858)          |
| Cirrhosis due to hepatitis B                        | 406<br>(245 - 587)          | 0<br>(0 - 0)          | 0<br>(0 - 0)           | 66<br>(44 - 92)         | 178<br>(111 - 254)       | 162<br>(81 - 265)           |
| Cirrhosis due to hepatitis C                        | 763<br>(557 - 982)          | 0<br>(0 - 0)          | 0<br>(0 - 0)           | 121<br>(84 - 160)       | 336<br>(231 - 443)       | 306<br>(197 - 409)          |
| Cirrhosis due to alcohol use                        | 593<br>(438 - 748)          | --<br>(0 - 0)         | --<br>(0 - 0)          | 74<br>(49 - 101)        | 264<br>(188 - 348)       | 255<br>(181 - 329)          |
| Cirrhosis due to other causes                       | 140<br>(82 - 201)           | 1<br>(0 - 1)          | 0<br>(0 - 1)           | 37<br>(24 - 49)         | 64<br>(34 - 96)          | 38<br>(20 - 61)             |
| Digestive diseases                                  | 3,618<br>(3,151 - 4,179)    | 2<br>(2 - 3)          | 2<br>(2 - 2)           | 90<br>(79 - 104)        | 411<br>(365 - 472)       | 3,113<br>(2,670 - 3,626)    |
| Peptic ulcer disease                                | 507<br>(375 - 744)          | 0<br>(0 - 0)          | 0<br>(0 - 0)           | 11<br>(9 - 15)          | 60<br>(47 - 80)          | 435<br>(311 - 662)          |
| Gastritis and duodenitis                            | 30<br>(19 - 49)             | 0<br>(0 - 0)          | 0<br>(0 - 0)           | 3<br>(2 - 5)            | 5<br>(3 - 9)             | 21<br>(13 - 37)             |
| Appendicitis                                        | 46<br>(29 - 64)             | 0<br>(0 - 0)          | 0<br>(0 - 0)           | 4<br>(3 - 5)            | 8<br>(5 - 11)            | 33<br>(19 - 50)             |
| Paralytic ileus and intestinal obstruction          | 660<br>(433 - 936)          | 1<br>(0 - 1)          | 0<br>(0 - 1)           | 9<br>(6 - 13)           | 47<br>(30 - 69)          | 602<br>(389 - 860)          |
| Inguinal, femoral, and abdominal hernia             | 112<br>(51 - 161)           | 0<br>(0 - 0)          | 0<br>(0 - 0)           | 2<br>(1 - 3)            | 11<br>(6 - 16)           | 98<br>(42 - 145)            |
| Inflammatory bowel disease                          | 248<br>(138 - 336)          | 1<br>(0 - 1)          | 0<br>(0 - 0)           | 8<br>(5 - 10)           | 27<br>(16 - 35)          | 212<br>(111 - 297)          |
| Vascular intestinal disorders                       | 647<br>(404 - 965)          | 0<br>(0 - 0)          | 0<br>(0 - 0)           | 9<br>(6 - 15)           | 81<br>(51 - 125)         | 556<br>(335 - 835)          |
| Gallbladder and biliary diseases                    | 409<br>(298 - 511)          | 0<br>(0 - 0)          | 0<br>(0 - 0)           | 8<br>(7 - 10)           | 41<br>(31 - 51)          | 359<br>(255 - 456)          |
| Pancreatitis                                        | 246<br>(186 - 335)          | 0<br>(0 - 0)          | 0<br>(0 - 0)           | 22<br>(17 - 30)         | 58<br>(44 - 82)          | 166<br>(119 - 232)          |
| Other digestive diseases                            | 715<br>(554 - 910)          | 1<br>(0 - 1)          | 0<br>(0 - 0)           | 13<br>(10 - 16)         | 71<br>(54 - 87)          | 630<br>(482 - 814)          |
| Neurological disorders                              | 16,952<br>(13,803 - 20,145) | 33<br>(25 - 44)       | 15<br>(12 - 18)        | 282<br>(237 - 321)      | 1,035<br>(911 - 1,158)   | 15,587<br>(12,396 - 18,763) |
| Alzheimer disease and other dementias               | 13,769<br>(10,590 - 16,855) | --<br>(0 - 0)         | --<br>(0 - 0)          | 1<br>(0 - 1)            | 359<br>(272 - 446)       | 13,409<br>(10,245 - 16,511) |
| Parkinson disease                                   | 1,513<br>(1,142 - 1,884)    | --<br>(0 - 0)         | --<br>(0 - 0)          | 2<br>(2 - 3)            | 86<br>(68 - 106)         | 1,425<br>(1,066 - 1,788)    |
| Epilepsy                                            | 292<br>(213 - 345)          | 6<br>(4 - 8)          | 6<br>(4 - 8)           | 127<br>(94 - 150)       | 60<br>(44 - 73)          | 94<br>(59 - 126)            |
| Multiple sclerosis                                  | 178<br>(113 - 241)          | --<br>(0 - 0)         | --<br>(0 - 0)          | 35<br>(23 - 53)         | 89<br>(51 - 120)         | 54<br>(30 - 77)             |
| Other neurological disorders                        | 1,200<br>(1,021 - 1,335)    | 28<br>(20 - 37)       | 9<br>(7 - 12)          | 117<br>(99 - 137)       | 441<br>(361 - 503)       | 605<br>(507 - 697)          |
| Mental and substance use disorders                  | 1,305<br>(1,081 - 1,464)    | 1<br>(0 - 1)          | 0<br>(0 - 0)           | 811<br>(687 - 918)      | 305<br>(220 - 361)       | 188<br>(128 - 228)          |
| Schizophrenia                                       | 58<br>(28 - 84)             | --<br>(0 - 0)         | --<br>(0 - 0)          | 5<br>(2 - 7)            | 10<br>(5 - 14)           | 43<br>(19 - 67)             |
| Alcohol use disorders                               | 341<br>(195 - 419)          | --<br>(0 - 0)         | --<br>(0 - 0)          | 92<br>(55 - 116)        | 153<br>(84 - 198)        | 95<br>(51 - 126)            |
| Drug use disorders                                  | 902<br>(781 - 1,007)        | 1<br>(0 - 1)          | --<br>(0 - 0)          | 710<br>(600 - 809)      | 142<br>(107 - 170)       | 50<br>(40 - 63)             |
| Opioid use disorders                                | 526<br>(451 - 591)          | 0<br>(0 - 1)          | --<br>(0 - 0)          | 419<br>(351 - 483)      | 78<br>(59 - 93)          | 29<br>(23 - 37)             |
| Cocaine use disorders                               | 24<br>(20 - 29)             | 0<br>(0 - 0)          | --<br>(0 - 0)          | 20<br>(16 - 24)         | 3<br>(2 - 4)             | 1<br>(1 - 2)                |
| Amphetamine use disorders                           | 29<br>(24 - 33)             | 0<br>(0 - 0)          | --<br>(0 - 0)          | 22<br>(18 - 26)         | 5<br>(4 - 7)             | 2<br>(1 - 2)                |
| Other drug use disorders                            | 323<br>(277 - 368)          | 0<br>(0 - 0)          | --<br>(0 - 0)          | 249<br>(206 - 289)      | 56<br>(42 - 68)          | 18<br>(14 - 23)             |
| Eating disorders                                    | 4<br>(3 - 6)                | --<br>(0 - 0)         | 0<br>(0 - 0)           | 4<br>(3 - 6)            | --<br>(0 - 0)            | --<br>(0 - 0)               |
| Anorexia nervosa                                    | 4<br>(3 - 6)                | --<br>(0 - 0)         | 0<br>(0 - 0)           | 4<br>(3 - 6)            | --<br>(0 - 0)            | --<br>(0 - 0)               |
| Diabetes, urogenital, blood, and endocrine diseases | 11,233<br>(10,209 - 13,233) | 38<br>(29 - 49)       | 20<br>(16 - 25)        | 382<br>(345 - 441)      | 1,599<br>(1,455 - 1,863) | 9,194<br>(8,236 - 11,003)   |
| Diabetes mellitus                                   | 4,537<br>(4,040 - 5,144)    | 1<br>(1 - 2)          | 1<br>(1 - 2)           | 124<br>(108 - 141)      | 782<br>(693 - 875)       | 3,629<br>(3,149 - 4,198)    |
| Acute glomerulonephritis                            | 6<br>(4 - 10)               | 0<br>(0 - 0)          | 0<br>(0 - 0)           | 1<br>(1 - 2)            | 1<br>(1 - 2)             | 3<br>(1 - 6)                |
| Chronic kidney disease                              | 3,926<br>(3,247 - 5,669)    | 1<br>(1 - 2)          | 1<br>(1 - 1)           | 68<br>(57 - 97)         | 360<br>(304 - 527)       | 3,496<br>(2,857 - 5,125)    |
| Chronic kidney disease due to diabetes mellitus     | 508<br>(348 - 933)          | 0<br>(0 - 0)          | 0<br>(0 - 0)           | 16<br>(11 - 25)         | 97<br>(64 - 137)         | 395<br>(261 - 785)          |

Web Table 31- Australia deaths with 95% UI by age, sex, and cause in 2013

| Cause                                               | Both Sexes, All Ages      | Both Sexes, 0-4 Years | Both Sexes, 5-14 Years | Both Sexes, 15-49 Years  | Both Sexes, 50-69 Years  | Both Sexes, 70-80 Years  |
|-----------------------------------------------------|---------------------------|-----------------------|------------------------|--------------------------|--------------------------|--------------------------|
| Chronic kidney disease due to hypertension          | 1,485<br>(1,029 - 1,944)  | 0<br>(0 - 0)          | 0<br>(0 - 0)           | 14<br>(9 - 20)           | 92<br>(62 - 150)         | 1,379<br>(960 - 1,805)   |
| Chronic kidney disease due to glomerulonephritis    | 147<br>(73 - 285)         | 0<br>(0 - 0)          | 0<br>(0 - 0)           | 9<br>(5 - 16)            | 39<br>(18 - 75)          | 99<br>(47 - 201)         |
| Chronic kidney disease due to other causes          | 1,786<br>(1,251 - 2,972)  | 1<br>(1 - 1)          | 0<br>(0 - 0)           | 29<br>(21 - 47)          | 132<br>(86 - 231)        | 1,623<br>(1,103 - 2,709) |
| Urinary diseases and male infertility               | 1,011<br>(786 - 1,499)    | 1<br>(1 - 2)          | 0<br>(0 - 0)           | 20<br>(16 - 26)          | 85<br>(70 - 120)         | 904<br>(684 - 1,362)     |
| Interstitial nephritis and urinary tract infections | 809<br>(610 - 1,223)      | 1<br>(1 - 2)          | 0<br>(0 - 0)           | 13<br>(11 - 18)          | 58<br>(47 - 84)          | 736<br>(539 - 1,124)     |
| Urolithiasis                                        | 38<br>(26 - 64)           | --                    | 0<br>(0 - 0)           | 2<br>(1 - 3)             | 7<br>(5 - 12)            | 29<br>(19 - 53)          |
| Other urinary diseases                              | 164<br>(107 - 247)        | 0<br>(0 - 0)          | 0<br>(0 - 0)           | 5<br>(4 - 7)             | 19<br>(14 - 26)          | 139<br>(87 - 221)        |
| Gynecological diseases                              | 5<br>(4 - 8)              | --                    | --                     | 1<br>(1 - 1)             | 1<br>(1 - 1)             | 3<br>(2 - 6)             |
| Uterine fibroids                                    | 1<br>(1 - 2)              | --                    | --                     | 0<br>(0 - 0)             | 0<br>(0 - 0)             | 1<br>(1 - 2)             |
| Polycystic ovarian syndrome                         | 0<br>(0 - 0)              | --                    | --                     | 0<br>(0 - 0)             | 0<br>(0 - 0)             | --                       |
| Endometriosis                                       | 0<br>(0 - 0)              | --                    | --                     | 0<br>(0 - 0)             | 0<br>(0 - 0)             | --                       |
| Genital prolapse                                    | 1<br>(1 - 2)              | --                    | --                     | 0<br>(0 - 0)             | 0<br>(0 - 0)             | 1<br>(0 - 1)             |
| Other gynecological diseases                        | 2<br>(2 - 4)              | --                    | --                     | 0<br>(0 - 1)             | 0<br>(0 - 1)             | 1<br>(1 - 3)             |
| Hemoglobinopathies and hemolytic anemias            | 129<br>(95 - 188)         | 2<br>(1 - 3)          | 2<br>(1 - 2)           | 11<br>(8 - 15)           | 18<br>(13 - 26)          | 96<br>(68 - 145)         |
| Thalassemias                                        | 10<br>(8 - 14)            | 1<br>(1 - 2)          | 1<br>(1 - 1)           | 6<br>(4 - 8)             | 2<br>(1 - 2)             | 1<br>(1 - 1)             |
| Sickle cell disorders                               | 6<br>(5 - 9)              | 0<br>(0 - 0)          | 0<br>(0 - 0)           | 2<br>(1 - 2)             | 3<br>(2 - 4)             | 1<br>(1 - 2)             |
| G6PD deficiency                                     | 1<br>(1 - 2)              | 0<br>(0 - 0)          | 0<br>(0 - 0)           | 0<br>(0 - 0)             | 0<br>(0 - 1)             | 0<br>(0 - 1)             |
| Other hemoglobinopathies and hemolytic anemias      | 111<br>(81 - 164)         | 1<br>(0 - 1)          | 0<br>(0 - 0)           | 4<br>(3 - 5)             | 13<br>(9 - 19)           | 93<br>(66 - 141)         |
| Endocrine, metabolic, blood, and immune disorders   | 1,620<br>(1,203 - 1,959)  | 32<br>(22 - 42)       | 16<br>(12 - 21)        | 157<br>(120 - 194)       | 353<br>(284 - 482)       | 1,063<br>(710 - 1,364)   |
| Musculoskeletal disorders                           | 813<br>(663 - 990)        | --                    | 1<br>(1 - 2)           | 42<br>(36 - 51)          | 162<br>(137 - 211)       | 607<br>(468 - 764)       |
| Rheumatoid arthritis                                | 232<br>(175 - 313)        | --                    | 0<br>(0 - 0)           | 3<br>(2 - 5)             | 41<br>(31 - 58)          | 187<br>(133 - 260)       |
| Other musculoskeletal disorders                     | 581<br>(462 - 723)        | --                    | 1<br>(1 - 1)           | 39<br>(33 - 47)          | 121<br>(100 - 160)       | 420<br>(313 - 546)       |
| Other non-communicable diseases                     | 1,330<br>(1,157 - 1,528)  | 457<br>(370 - 573)    | 22<br>(17 - 26)        | 120<br>(104 - 139)       | 126<br>(109 - 144)       | 605<br>(465 - 765)       |
| Congenital anomalies                                | 765<br>(670 - 897)        | 350<br>(282 - 440)    | 22<br>(17 - 26)        | 112<br>(96 - 131)        | 86<br>(73 - 102)         | 195<br>(151 - 258)       |
| Neural tube defects                                 | 21<br>(15 - 30)           | 17<br>(11 - 26)       | 1<br>(0 - 1)           | 2<br>(2 - 3)             | 1<br>(0 - 1)             | 0<br>(0 - 0)             |
| Congenital heart anomalies                          | 300<br>(252 - 360)        | 105<br>(83 - 137)     | 9<br>(6 - 12)          | 51<br>(42 - 62)          | 24<br>(18 - 30)          | 111<br>(79 - 155)        |
| Cleft lip and cleft palate                          | 0<br>(0 - 0)              | 0<br>(0 - 0)          | --                     | --                       | --                       | --                       |
| Down syndrome                                       | 64<br>(44 - 82)           | 16<br>(9 - 25)        | 1<br>(1 - 2)           | 15<br>(10 - 20)          | 29<br>(20 - 39)          | 3<br>(2 - 4)             |
| Chromosomal unbalanced rearrangements               | 53<br>(36 - 81)           | 46<br>(30 - 73)       | 1<br>(1 - 1)           | 3<br>(2 - 5)             | 2<br>(1 - 3)             | 1<br>(0 - 1)             |
| Other congenital anomalies                          | 327<br>(277 - 397)        | 165<br>(128 - 221)    | 10<br>(7 - 13)         | 40<br>(33 - 50)          | 31<br>(23 - 39)          | 81<br>(59 - 111)         |
| Skin and subcutaneous diseases                      | 460<br>(322 - 616)        | 1<br>(1 - 2)          | 0<br>(0 - 0)           | 9<br>(6 - 11)            | 40<br>(27 - 49)          | 410<br>(279 - 567)       |
| Cellulitis                                          | 187<br>(87 - 283)         | 0<br>(0 - 0)          | 0<br>(0 - 0)           | 3<br>(2 - 5)             | 20<br>(10 - 27)          | 164<br>(72 - 256)        |
| Pyoderma                                            | 199<br>(119 - 301)        | 1<br>(0 - 1)          | 0<br>(0 - 0)           | 3<br>(2 - 4)             | 15<br>(10 - 22)          | 179<br>(103 - 278)       |
| Decubitus ulcer                                     | 51<br>(30 - 88)           | 0<br>(0 - 0)          | 0<br>(0 - 0)           | 1<br>(1 - 1)             | 2<br>(2 - 4)             | 47<br>(27 - 84)          |
| Other skin and subcutaneous diseases                | 24<br>(12 - 48)           | 0<br>(0 - 1)          | 0<br>(0 - 0)           | 1<br>(1 - 2)             | 3<br>(2 - 5)             | 19<br>(8 - 43)           |
| Sudden infant death syndrome                        | 105<br>(67 - 162)         | 105<br>(67 - 162)     | --                     | --                       | --                       | --                       |
| Injuries                                            | 9,561<br>(8,429 - 10,466) | 144<br>(111 - 183)    | 95<br>(83 - 108)       | 3,504<br>(3,261 - 3,789) | 1,664<br>(1,504 - 1,845) | 4,154<br>(3,099 - 4,937) |
| Transport injuries                                  | 2,084<br>(1,907 - 2,331)  | 39<br>(27 - 52)       | 48<br>(40 - 58)        | 1,151<br>(1,038 - 1,282) | 433<br>(382 - 499)       | 414<br>(353 - 483)       |
| Road injuries                                       | 1,942<br>(1,778 - 2,186)  | 37<br>(26 - 50)       | 44<br>(36 - 53)        | 1,069<br>(960 - 1,195)   | 394<br>(347 - 457)       | 398<br>(339 - 467)       |
| Pedestrian road injuries                            | 421<br>(289 - 576)        | 14<br>(8 - 22)        | 13<br>(9 - 18)         | 123<br>(73 - 190)        | 99<br>(64 - 143)         | 173<br>(121 - 235)       |

Web Table 31- Australia deaths with 95% UI by age, sex, and cause in 2013

| Cause                                           | Both Sexes, All Ages     | Both Sexes, 0-4 Years | Both Sexes, 5-14 Years | Both Sexes, 15-49 Years  | Both Sexes, 50-69 Years | Both Sexes, 70-80 Years  |
|-------------------------------------------------|--------------------------|-----------------------|------------------------|--------------------------|-------------------------|--------------------------|
| Cyclist road injuries                           | 49<br>(35 - 70)          | 1<br>(0 - 2)          | 6<br>(4 - 8)           | 22<br>(15 - 32)          | 11<br>(7 - 17)          | 9<br>(6 - 15)            |
| Motorcyclist road injuries                      | 234<br>(136 - 308)       | 1<br>(1 - 2)          | 3<br>(2 - 4)           | 191<br>(111 - 253)       | 29<br>(13 - 43)         | 9<br>(5 - 14)            |
| Motor vehicle road injuries                     | 1,227<br>(1,037 - 1,463) | 21<br>(14 - 28)       | 22<br>(17 - 29)        | 727<br>(617 - 862)       | 253<br>(207 - 313)      | 204<br>(154 - 265)       |
| Other road injuries                             | 11<br>(6 - 16)           | 0<br>(0 - 0)          | 0<br>(0 - 1)           | 6<br>(3 - 8)             | 2<br>(1 - 4)            | 2<br>(1 - 4)             |
| Other transport injuries                        | 142<br>(109 - 187)       | 1<br>(1 - 3)          | 4<br>(3 - 6)           | 82<br>(63 - 113)         | 39<br>(27 - 53)         | 16<br>(10 - 22)          |
| Unintentional injuries                          | 4,488<br>(3,409 - 5,289) | 93<br>(71 - 126)      | 34<br>(28 - 41)        | 491<br>(435 - 580)       | 503<br>(424 - 559)      | 3,368<br>(2,321 - 4,143) |
| Falls                                           | 2,564<br>(1,687 - 3,158) | 5<br>(3 - 8)          | 3<br>(2 - 4)           | 91<br>(74 - 108)         | 172<br>(116 - 205)      | 2,293<br>(1,459 - 2,876) |
| Drowning                                        | 287<br>(225 - 440)       | 41<br>(26 - 73)       | 13<br>(9 - 20)         | 133<br>(102 - 198)       | 60<br>(46 - 97)         | 40<br>(29 - 53)          |
| Fire, heat, and hot substances                  | 163<br>(130 - 197)       | 7<br>(5 - 12)         | 3<br>(2 - 4)           | 35<br>(27 - 43)          | 33<br>(25 - 42)         | 86<br>(64 - 109)         |
| Poisonings                                      | 86<br>(66 - 116)         | 2<br>(1 - 3)          | 1<br>(1 - 1)           | 35<br>(28 - 53)          | 21<br>(15 - 26)         | 27<br>(17 - 40)          |
| Exposure to mechanical forces                   | 195<br>(174 - 254)       | 16<br>(11 - 23)       | 7<br>(5 - 9)           | 99<br>(84 - 134)         | 41<br>(34 - 55)         | 33<br>(26 - 43)          |
| Unintentional firearm injuries                  | 21<br>(18 - 27)          | 0<br>(0 - 1)          | 1<br>(1 - 2)           | 13<br>(10 - 18)          | 4<br>(3 - 6)            | 3<br>(2 - 4)             |
| Unintentional suffocation                       | 52<br>(33 - 66)          | 10<br>(6 - 16)        | 2<br>(1 - 3)           | 24<br>(15 - 31)          | 7<br>(4 - 10)           | 9<br>(5 - 15)            |
| Other exposure to mechanical forces             | 121<br>(105 - 171)       | 5<br>(3 - 8)          | 3<br>(2 - 5)           | 62<br>(50 - 98)          | 30<br>(24 - 43)         | 21<br>(16 - 29)          |
| Adverse effects of medical treatment            | 543<br>(364 - 688)       | 4<br>(2 - 6)          | 1<br>(1 - 2)           | 26<br>(18 - 31)          | 88<br>(62 - 118)        | 424<br>(270 - 562)       |
| Animal contact                                  | 24<br>(17 - 38)          | 2<br>(1 - 2)          | 1<br>(1 - 2)           | 8<br>(6 - 12)            | 6<br>(4 - 10)           | 8<br>(5 - 13)            |
| Venomous animal contact                         | 7<br>(5 - 13)            | 0<br>(0 - 1)          | 0<br>(0 - 1)           | 3<br>(2 - 5)             | 2<br>(1 - 4)            | 2<br>(1 - 4)             |
| Non-venomous animal contact                     | 17<br>(11 - 25)          | 1<br>(1 - 2)          | 1<br>(0 - 1)           | 5<br>(4 - 8)             | 4<br>(3 - 6)            | 6<br>(3 - 10)            |
| Foreign body                                    | 584<br>(281 - 826)       | 13<br>(8 - 19)        | 4<br>(3 - 5)           | 47<br>(30 - 63)          | 72<br>(42 - 90)         | 448<br>(186 - 677)       |
| Pulmonary aspiration and foreign body in airway | 580<br>(276 - 822)       | 13<br>(8 - 19)        | 4<br>(2 - 5)           | 46<br>(29 - 62)          | 71<br>(41 - 90)         | 446<br>(185 - 675)       |
| Foreign body in other body part                 | 4<br>(3 - 6)             | 0<br>(0 - 0)          | 0<br>(0 - 0)           | 1<br>(1 - 2)             | 1<br>(1 - 1)            | 2<br>(1 - 3)             |
| Other unintentional injuries                    | 41<br>(33 - 51)          | 3<br>(2 - 4)          | 1<br>(1 - 2)           | 19<br>(14 - 26)          | 9<br>(6 - 13)           | 9<br>(6 - 14)            |
| Self-harm and interpersonal violence            | 2,989<br>(2,510 - 3,314) | 12<br>(8 - 17)        | 13<br>(10 - 16)        | 1,863<br>(1,578 - 2,056) | 729<br>(586 - 848)      | 373<br>(312 - 468)       |
| Self-harm                                       | 2,660<br>(2,209 - 2,960) | --                    | 7<br>(4 - 9)           | 1,646<br>(1,359 - 1,836) | 667<br>(535 - 780)      | 340<br>(282 - 435)       |
| Interpersonal violence                          | 329<br>(240 - 415)       | 12<br>(8 - 17)        | 6<br>(4 - 8)           | 217<br>(156 - 279)       | 61<br>(43 - 82)         | 33<br>(23 - 42)          |
| Assault by firearm                              | 71<br>(49 - 122)         | 1<br>(1 - 2)          | 1<br>(1 - 2)           | 49<br>(33 - 85)          | 13<br>(8 - 23)          | 7<br>(4 - 11)            |
| Assault by sharp object                         | 113<br>(78 - 159)        | 2<br>(1 - 3)          | 2<br>(1 - 2)           | 80<br>(55 - 113)         | 21<br>(13 - 31)         | 9<br>(6 - 14)            |
| Assault by other means                          | 145<br>(93 - 179)        | 9<br>(6 - 13)         | 3<br>(2 - 4)           | 88<br>(55 - 114)         | 28<br>(17 - 36)         | 16<br>(10 - 21)          |
| Forces of nature, war, and legal intervention   | 0<br>(0 - 0)             | 0<br>(0 - 0)          | --                     | --                       | --                      | 0<br>(0 - 0)             |
| Exposure to forces of nature                    | 0<br>(0 - 0)             | 0<br>(0 - 0)          | --                     | --                       | --                      | 0<br>(0 - 0)             |

Web Table 31- Australia deaths with 95% UI by age, sex, and cause in 2013

| Cause                                                             | Males, All Ages             | Males, 0-4 Years   | Males, 5-14 Years  | Males, 15-49 Years       | Males, 50-69 Years          | Males, 70-80 Years          |
|-------------------------------------------------------------------|-----------------------------|--------------------|--------------------|--------------------------|-----------------------------|-----------------------------|
| All causes                                                        | 85,504<br>(81,260 - 90,182) | 748<br>(628 - 878) | 148<br>(132 - 164) | 6,509<br>(6,039 - 7,018) | 18,536<br>(17,325 - 19,887) | 59,563<br>(56,972 - 62,420) |
| Communicable, maternal, neonatal, and nutritional diseases        | 2,779<br>(2,318 - 3,308)    | 333<br>(269 - 402) | 12<br>(8 - 19)     | 192<br>(162 - 229)       | 348<br>(290 - 410)          | 1,893<br>(1,464 - 2,395)    |
| HIV/AIDS and tuberculosis                                         | 142<br>(105 - 194)          | 0<br>(0 - 0)       | 0<br>(0 - 0)       | 58<br>(39 - 87)          | 44<br>(26 - 69)             | 40<br>(30 - 52)             |
| Tuberculosis                                                      | 48<br>(37 - 60)             | 0<br>(0 - 0)       | 0<br>(0 - 0)       | 3<br>(2 - 4)             | 9<br>(7 - 12)               | 35<br>(26 - 46)             |
| HIV/AIDS                                                          | 94<br>(60 - 146)            | 0<br>(0 - 0)       | 0<br>(0 - 0)       | 55<br>(36 - 84)          | 35<br>(16 - 60)             | 5<br>(1 - 10)               |
| HIV/AIDS resulting in mycobacterial infection                     | 5<br>(3 - 8)                | 0<br>(0 - 0)       | 0<br>(0 - 0)       | 3<br>(2 - 5)             | 2<br>(1 - 3)                | 0<br>(0 - 1)                |
| HIV/AIDS resulting in other diseases                              | 89<br>(57 - 138)            | 0<br>(0 - 0)       | 0<br>(0 - 0)       | 52<br>(34 - 80)          | 33<br>(15 - 57)             | 4<br>(1 - 9)                |
| Diarrhea, lower respiratory, and other common infectious diseases | 1,978<br>(1,526 - 2,508)    | 40<br>(27 - 55)    | 9<br>(6 - 16)      | 80<br>(64 - 100)         | 198<br>(158 - 244)          | 1,650<br>(1,226 - 2,141)    |
| Diarrheal diseases                                                | 69<br>(50 - 98)             | 5<br>(3 - 7)       | 0<br>(0 - 0)       | 3<br>(2 - 4)             | 7<br>(5 - 10)               | 54<br>(35 - 82)             |
| Intestinal infectious diseases                                    | 27<br>(10 - 59)             | 5<br>(2 - 12)      | 5<br>(2 - 11)      | 11<br>(3 - 26)           | 3<br>(1 - 8)                | 3<br>(1 - 6)                |
| Typhoid fever                                                     | 19<br>(6 - 43)              | 3<br>(1 - 9)       | 4<br>(1 - 8)       | 8<br>(2 - 19)            | 2<br>(1 - 6)                | 2<br>(0 - 4)                |
| Paratyphoid fever                                                 | 7<br>(2 - 16)               | 1<br>(0 - 4)       | 1<br>(0 - 3)       | 3<br>(1 - 7)             | 1<br>(0 - 2)                | 1<br>(0 - 2)                |
| Other intestinal infectious diseases                              | 1<br>(0 - 5)                | 0<br>(0 - 2)       | 0<br>(0 - 1)       | 0<br>(0 - 3)             | 0<br>(0 - 2)                | 0<br>(0 - 2)                |
| Lower respiratory infections                                      | 1,804<br>(1,362 - 2,328)    | 19<br>(12 - 29)    | 2<br>(1 - 2)       | 51<br>(41 - 65)          | 172<br>(133 - 217)          | 1,559<br>(1,138 - 2,058)    |
| Upper respiratory infections                                      | 2<br>(0 - 5)                | 0<br>(0 - 0)       | 0<br>(0 - 0)       | 0<br>(0 - 1)             | 0<br>(0 - 1)                | 1<br>(0 - 4)                |
| Otitis media                                                      | 4<br>(3 - 5)                | 0<br>(0 - 0)       | 0<br>(0 - 0)       | 1<br>(1 - 1)             | 1<br>(0 - 1)                | 2<br>(1 - 3)                |
| Meningitis                                                        | 39<br>(32 - 46)             | 8<br>(5 - 12)      | 1<br>(1 - 1)       | 7<br>(6 - 8)             | 8<br>(6 - 10)               | 15<br>(12 - 20)             |
| Pneumococcal meningitis                                           | 10<br>(7 - 13)              | 2<br>(1 - 3)       | 0<br>(0 - 0)       | 2<br>(1 - 2)             | 2<br>(1 - 3)                | 4<br>(3 - 6)                |
| H influenzae type B meningitis                                    | 5<br>(3 - 6)                | 2<br>(1 - 3)       | 0<br>(0 - 0)       | 1<br>(0 - 1)             | 1<br>(0 - 1)                | 1<br>(1 - 2)                |
| Meningococcal meningitis                                          | 9<br>(7 - 11)               | 1<br>(1 - 2)       | 0<br>(0 - 0)       | 2<br>(1 - 3)             | 2<br>(1 - 3)                | 4<br>(2 - 5)                |
| Other meningitis                                                  | 15<br>(11 - 19)             | 3<br>(1 - 5)       | 0<br>(0 - 0)       | 3<br>(1 - 4)             | 3<br>(2 - 5)                | 6<br>(4 - 9)                |
| Encephalitis                                                      | 22<br>(11 - 29)             | 2<br>(1 - 3)       | 1<br>(0 - 2)       | 4<br>(2 - 6)             | 5<br>(3 - 7)                | 10<br>(4 - 15)              |
| Diphtheria                                                        | 0<br>(0 - 1)                | 0<br>(0 - 0)       | 0<br>(0 - 0)       | 0<br>(0 - 0)             | 0<br>(0 - 0)                | --                          |
| Whooping cough                                                    | 1<br>(1 - 2)                | 0<br>(0 - 1)       | 0<br>(0 - 0)       | 1<br>(0 - 1)             | 0<br>(0 - 0)                | --                          |
| Tetanus                                                           | 1<br>(0 - 2)                | 0<br>(0 - 0)       | 0<br>(0 - 0)       | 1<br>(0 - 1)             | 0<br>(0 - 0)                | 0<br>(0 - 0)                |
| Measles                                                           | 0<br>(0 - 0)                | 0<br>(0 - 0)       | 0<br>(0 - 0)       | 0<br>(0 - 0)             | 0<br>(0 - 0)                | --                          |
| Varicella and herpes zoster                                       | 9<br>(2 - 36)               | 1<br>(0 - 3)       | 0<br>(0 - 1)       | 1<br>(0 - 3)             | 1<br>(0 - 4)                | 6<br>(0 - 32)               |
| Neglected tropical diseases and malaria                           | 14<br>(11 - 17)             | 1<br>(0 - 1)       | 0<br>(0 - 1)       | 3<br>(2 - 3)             | 4<br>(3 - 5)                | 6<br>(4 - 8)                |
| Cysticercosis                                                     | 0<br>(0 - 0)                | 0<br>(0 - 0)       | 0<br>(0 - 0)       | 0<br>(0 - 0)             | 0<br>(0 - 0)                | 0<br>(0 - 0)                |
| Cystic echinococcosis                                             | 2<br>(2 - 3)                | 0<br>(0 - 0)       | 0<br>(0 - 0)       | 1<br>(1 - 1)             | 1<br>(1 - 1)                | 1<br>(1 - 1)                |
| Dengue                                                            | 1<br>(1 - 1)                | 0<br>(0 - 0)       | 0<br>(0 - 0)       | 1<br>(0 - 1)             | 0<br>(0 - 0)                | 0<br>(0 - 0)                |
| Rabies                                                            | 1<br>(1 - 2)                | 0<br>(0 - 0)       | 0<br>(0 - 0)       | 1<br>(0 - 1)             | 0<br>(0 - 0)                | 0<br>(0 - 0)                |
| Other neglected tropical diseases                                 | 9<br>(6 - 12)               | 0<br>(0 - 1)       | 0<br>(0 - 0)       | 1<br>(1 - 1)             | 3<br>(2 - 4)                | 5<br>(3 - 7)                |
| Maternal disorders                                                | --                          | --                 | --                 | --                       | --                          | --                          |
| Maternal hemorrhage                                               | --                          | --                 | --                 | --                       | --                          | --                          |
| Maternal sepsis and other maternal infections                     | --                          | --                 | --                 | --                       | --                          | --                          |
| Maternal hypertensive disorders                                   | --                          | --                 | --                 | --                       | --                          | --                          |
| Maternal obstructed labor                                         | --                          | --                 | --                 | --                       | --                          | --                          |
| Maternal abortive outcome                                         | --                          | --                 | --                 | --                       | --                          | --                          |
| Indirect maternal deaths                                          | --                          | --                 | --                 | --                       | --                          | --                          |

Web Table 31- Australia deaths with 95% UI by age, sex, and cause in 2013

| Cause                                                            | Males, All Ages             | Males, 0-4 Years   | Males, 5-14 Years | Males, 15-49 Years       | Males, 50-69 Years          | Males, 70-80 Years          |
|------------------------------------------------------------------|-----------------------------|--------------------|-------------------|--------------------------|-----------------------------|-----------------------------|
| Late maternal deaths                                             | --                          | --                 | --                | --                       | --                          | --                          |
| Maternal deaths aggravated by HIV/AIDS                           | --                          | --                 | --                | --                       | --                          | --                          |
| Other maternal disorders                                         | --                          | --                 | --                | --                       | --                          | --                          |
| Neonatal disorders                                               | 279<br>(225 - 339)          | 279<br>(225 - 339) | --                | --                       | --                          | --                          |
| Neonatal preterm birth complications                             | 121<br>(84 - 177)           | 121<br>(84 - 177)  | --                | --                       | --                          | --                          |
| Neonatal encephalopathy due to birth asphyxia and trauma         | 73<br>(41 - 100)            | 73<br>(41 - 100)   | --                | --                       | --                          | --                          |
| Neonatal sepsis and other neonatal infections                    | 13<br>(5 - 25)              | 13<br>(5 - 25)     | --                | --                       | --                          | --                          |
| Hemolytic disease and other neonatal jaundice                    | 1<br>(0 - 2)                | 1<br>(0 - 2)       | --                | --                       | --                          | --                          |
| Other neonatal disorders                                         | 72<br>(34 - 102)            | 72<br>(34 - 102)   | --                | --                       | --                          | --                          |
| Nutritional deficiencies                                         | 127<br>(79 - 207)           | 1<br>(0 - 1)       | 0<br>(0 - 0)      | 3<br>(2 - 4)             | 11<br>(7 - 16)              | 113<br>(70 - 184)           |
| Protein-energy malnutrition                                      | 49<br>(21 - 86)             | 1<br>(0 - 1)       | 0<br>(0 - 0)      | 1<br>(0 - 2)             | 5<br>(2 - 8)                | 43<br>(18 - 74)             |
| Iodine deficiency                                                | 0<br>(0 - 2)                | 0<br>(0 - 0)       | 0<br>(0 - 0)      | 0<br>(0 - 0)             | 0<br>(0 - 1)                | 0<br>(0 - 2)                |
| Iron-deficiency anemia                                           | 62<br>(29 - 107)            | 0<br>(0 - 0)       | 0<br>(0 - 0)      | 1<br>(0 - 2)             | 4<br>(2 - 9)                | 57<br>(26 - 99)             |
| Other nutritional deficiencies                                   | 15<br>(7 - 36)              | 0<br>(0 - 0)       | 0<br>(0 - 0)      | 1<br>(0 - 1)             | 2<br>(1 - 4)                | 12<br>(5 - 31)              |
| Other communicable, maternal, neonatal, and nutritional diseases | 239<br>(169 - 292)          | 13<br>(6 - 19)     | 2<br>(1 - 3)      | 48<br>(37 - 62)          | 91<br>(67 - 115)            | 84<br>(43 - 114)            |
| Sexually transmitted diseases excluding HIV                      | 8<br>(3 - 14)               | 5<br>(1 - 11)      | 0<br>(0 - 1)      | 1<br>(0 - 1)             | 1<br>(0 - 1)                | 2<br>(1 - 4)                |
| Syphilis                                                         | 8<br>(3 - 14)               | 5<br>(1 - 11)      | 0<br>(0 - 1)      | 0<br>(0 - 0)             | 0<br>(0 - 1)                | 1<br>(1 - 3)                |
| Chlamydial infection                                             | --                          | --                 | --                | --                       | --                          | --                          |
| Gonococcal infection                                             | 0<br>(0 - 1)                | --                 | 0<br>(0 - 0)      | 0<br>(0 - 0)             | 0<br>(0 - 0)                | 0<br>(0 - 0)                |
| Other sexually transmitted diseases                              | 0<br>(0 - 0)                | --                 | 0<br>(0 - 0)      | 0<br>(0 - 0)             | 0<br>(0 - 0)                | 0<br>(0 - 0)                |
| Hepatitis                                                        | 116<br>(95 - 141)           | 1<br>(0 - 1)       | 1<br>(0 - 1)      | 35<br>(25 - 48)          | 61<br>(45 - 78)             | 19<br>(13 - 27)             |
| Acute hepatitis A                                                | 7<br>(2 - 17)               | 0<br>(0 - 0)       | 0<br>(0 - 0)      | 3<br>(1 - 8)             | 3<br>(1 - 8)                | 1<br>(0 - 2)                |
| Acute hepatitis B                                                | 103<br>(81 - 127)           | 1<br>(0 - 1)       | 0<br>(0 - 1)      | 30<br>(21 - 42)          | 55<br>(39 - 72)             | 18<br>(12 - 25)             |
| Acute hepatitis C                                                | 6<br>(1 - 14)               | --                 | 0<br>(0 - 0)      | 2<br>(0 - 6)             | 3<br>(0 - 8)                | 1<br>(0 - 2)                |
| Other infectious diseases                                        | 115<br>(50 - 154)           | 7<br>(3 - 11)      | 1<br>(0 - 2)      | 13<br>(7 - 17)           | 30<br>(13 - 43)             | 64<br>(24 - 93)             |
| Non-communicable diseases                                        | 76,662<br>(72,731 - 80,749) | 330<br>(268 - 411) | 76<br>(65 - 88)   | 3,614<br>(3,332 - 3,941) | 17,002<br>(15,882 - 18,188) | 55,639<br>(53,073 - 58,322) |
| Neoplasms                                                        | 27,388<br>(25,354 - 29,340) | 25<br>(16 - 36)    | 38<br>(30 - 46)   | 1,282<br>(1,152 - 1,446) | 8,777<br>(8,111 - 9,494)    | 17,267<br>(15,761 - 18,715) |
| Esophageal cancer                                                | 1,015<br>(720 - 1,175)      | --                 | --                | 44<br>(29 - 56)          | 440<br>(308 - 523)          | 532<br>(360 - 644)          |
| Stomach cancer                                                   | 1,230<br>(1,068 - 1,400)    | --                 | --                | 55<br>(46 - 66)          | 370<br>(324 - 421)          | 805<br>(663 - 963)          |
| Liver cancer                                                     | 863<br>(491 - 1,206)        | --                 | 1<br>(0 - 1)      | 52<br>(30 - 77)          | 367<br>(208 - 509)          | 443<br>(228 - 664)          |
| Liver cancer due to hepatitis B                                  | 219<br>(102 - 393)          | --                 | 0<br>(0 - 1)      | 24<br>(12 - 41)          | 115<br>(50 - 210)           | 80<br>(35 - 147)            |
| Liver cancer due to hepatitis C                                  | 455<br>(225 - 720)          | --                 | 0<br>(0 - 0)      | 18<br>(8 - 34)           | 177<br>(89 - 287)           | 259<br>(121 - 418)          |
| Liver cancer due to alcohol use                                  | 147<br>(69 - 245)           | --                 | --                | 6<br>(3 - 11)            | 55<br>(26 - 95)             | 86<br>(37 - 152)            |
| Liver cancer due to other causes                                 | 43<br>(15 - 77)             | --                 | 0<br>(0 - 0)      | 4<br>(2 - 8)             | 20<br>(7 - 36)              | 19<br>(6 - 36)              |
| Larynx cancer                                                    | 257<br>(172 - 318)          | --                 | --                | 10<br>(7 - 14)           | 102<br>(77 - 140)           | 145<br>(85 - 188)           |
| Tracheal, bronchus and lung cancer                               | 5,927<br>(5,407 - 6,478)    | --                 | --                | 150<br>(127 - 178)       | 2,109<br>(1,882 - 2,366)    | 3,667<br>(3,278 - 4,086)    |
| Breast cancer                                                    | 33<br>(14 - 77)             | --                 | --                | 2<br>(1 - 4)             | 11<br>(4 - 26)              | 20<br>(8 - 48)              |
| Cervical cancer                                                  | --                          | --                 | --                | --                       | --                          | --                          |
| Uterine cancer                                                   | --                          | --                 | --                | --                       | --                          | --                          |
| Prostate cancer                                                  | 4,156<br>(3,219 - 5,930)    | --                 | --                | 10<br>(6 - 16)           | 656<br>(477 - 940)          | 3,490<br>(2,687 - 5,065)    |

Web Table 31- Australia deaths with 95% UI by age, sex, and cause in 2013

| Cause                                         | Males, All Ages             | Males, 0-4 Years | Males, 5-14 Years | Males, 15-49 Years | Males, 50-69 Years       | Males, 70-80 Years          |
|-----------------------------------------------|-----------------------------|------------------|-------------------|--------------------|--------------------------|-----------------------------|
| Colon and rectum cancer                       | 3,253<br>(2,942 - 3,588)    | --               | --                | 129<br>(111 - 150) | 1,102<br>(986 - 1,229)   | 2,022<br>(1,764 - 2,301)    |
| Lip and oral cavity cancer                    | 270<br>(165 - 319)          | --               | --                | 22<br>(17 - 29)    | 122<br>(80 - 149)        | 125<br>(67 - 161)           |
| Nasopharynx cancer                            | 57<br>(43 - 71)             | --               | 0<br>(0 - 0)      | 12<br>(8 - 18)     | 27<br>(19 - 37)          | 18<br>(11 - 24)             |
| Other pharynx cancer                          | 264<br>(184 - 320)          | --               | --                | 15<br>(11 - 20)    | 159<br>(107 - 202)       | 90<br>(62 - 115)            |
| Gallbladder and biliary tract cancer          | 188<br>(127 - 258)          | --               | --                | 6<br>(4 - 8)       | 48<br>(33 - 69)          | 134<br>(90 - 184)           |
| Pancreatic cancer                             | 1,487<br>(1,338 - 1,646)    | --               | --                | 61<br>(51 - 74)    | 583<br>(515 - 656)       | 842<br>(728 - 959)          |
| Malignant skin melanoma                       | 1,120<br>(525 - 1,849)      | --               | --                | 155<br>(91 - 298)  | 427<br>(218 - 728)       | 537<br>(232 - 823)          |
| Non-melanoma skin cancer                      | 406<br>(249 - 628)          | --               | --                | 15<br>(9 - 24)     | 90<br>(53 - 143)         | 300<br>(181 - 470)          |
| Ovarian cancer                                | --                          | --               | --                | --                 | --                       | --                          |
| Testicular cancer                             | 29<br>(22 - 40)             | --               | --                | 19<br>(14 - 26)    | 6<br>(4 - 9)             | 4<br>(3 - 6)                |
| Kidney cancer                                 | 752<br>(639 - 885)          | 1<br>(0 - 2)     | 1<br>(0 - 1)      | 46<br>(37 - 57)    | 297<br>(244 - 355)       | 407<br>(318 - 526)          |
| Bladder cancer                                | 829<br>(626 - 984)          | --               | --                | 10<br>(8 - 12)     | 158<br>(121 - 185)       | 661<br>(490 - 806)          |
| Brain and nervous system cancer               | 819<br>(620 - 1,020)        | 6<br>(3 - 9)     | 10<br>(7 - 15)    | 134<br>(103 - 168) | 388<br>(300 - 508)       | 281<br>(191 - 377)          |
| Thyroid cancer                                | 60<br>(50 - 71)             | --               | 0<br>(0 - 0)      | 4<br>(3 - 5)       | 22<br>(17 - 27)          | 34<br>(26 - 43)             |
| Mesothelioma                                  | 609<br>(299 - 824)          | --               | --                | 14<br>(9 - 27)     | 216<br>(129 - 350)       | 378<br>(135 - 563)          |
| Hodgkin lymphoma                              | 65<br>(45 - 111)            | 0<br>(0 - 0)     | 0<br>(0 - 1)      | 23<br>(17 - 43)    | 19<br>(13 - 33)          | 22<br>(14 - 35)             |
| Non-Hodgkin lymphoma                          | 1,149<br>(556 - 1,481)      | 1<br>(1 - 3)     | 4<br>(2 - 6)      | 90<br>(50 - 134)   | 362<br>(157 - 508)       | 692<br>(326 - 927)          |
| Multiple myeloma                              | 565<br>(324 - 891)          | --               | --                | 19<br>(11 - 34)    | 184<br>(99 - 317)        | 362<br>(198 - 562)          |
| Leukemia                                      | 986<br>(870 - 1,110)        | 6<br>(3 - 10)    | 12<br>(8 - 16)    | 79<br>(68 - 91)    | 253<br>(218 - 291)       | 636<br>(535 - 747)          |
| Other neoplasms                               | 999<br>(685 - 1,209)        | 11<br>(6 - 17)   | 10<br>(5 - 14)    | 103<br>(80 - 126)  | 258<br>(193 - 322)       | 616<br>(360 - 813)          |
| Cardiovascular diseases                       | 25,701<br>(23,788 - 27,919) | 5<br>(3 - 6)     | 3<br>(2 - 4)      | 894<br>(793 - 999) | 4,623<br>(4,241 - 5,047) | 20,177<br>(18,553 - 22,041) |
| Rheumatic heart disease                       | 191<br>(96 - 279)           | 0<br>(0 - 0)     | 0<br>(0 - 0)      | 12<br>(8 - 17)     | 30<br>(15 - 42)          | 149<br>(70 - 223)           |
| Ischemic heart disease                        | 14,960<br>(13,340 - 17,800) | 0<br>(0 - 0)     | 0<br>(0 - 0)      | 563<br>(488 - 656) | 3,108<br>(2,787 - 3,510) | 11,288<br>(9,895 - 13,709)  |
| Cerebrovascular disease                       | 5,978<br>(4,565 - 7,429)    | 1<br>(0 - 1)     | 1<br>(0 - 1)      | 119<br>(84 - 153)  | 685<br>(454 - 865)       | 5,173<br>(3,915 - 6,513)    |
| Ischemic stroke                               | 3,889<br>(2,926 - 4,914)    | 0<br>(0 - 0)     | 0<br>(0 - 0)      | 14<br>(9 - 20)     | 178<br>(113 - 245)       | 3,697<br>(2,781 - 4,692)    |
| Hemorrhagic stroke                            | 2,089<br>(1,279 - 2,723)    | 0<br>(0 - 1)     | 1<br>(0 - 1)      | 105<br>(74 - 135)  | 507<br>(328 - 649)       | 1,476<br>(823 - 2,014)      |
| Hypertensive heart disease                    | 642<br>(407 - 995)          | 0<br>(0 - 0)     | 0<br>(0 - 0)      | 12<br>(8 - 17)     | 74<br>(47 - 112)         | 556<br>(334 - 890)          |
| Cardiomyopathy and myocarditis                | 867<br>(652 - 1,285)        | 3<br>(2 - 4)     | 1<br>(1 - 2)      | 108<br>(84 - 148)  | 264<br>(198 - 381)       | 491<br>(343 - 793)          |
| Atrial fibrillation and flutter               | 640<br>(441 - 882)          | --               | --                | 2<br>(1 - 2)       | 44<br>(29 - 57)          | 595<br>(398 - 834)          |
| Aortic aneurysm                               | 852<br>(698 - 1,287)        | --               | --                | 19<br>(15 - 25)    | 166<br>(134 - 228)       | 666<br>(529 - 1,018)        |
| Peripheral vascular disease                   | 347<br>(241 - 474)          | --               | --                | 1<br>(0 - 1)       | 31<br>(22 - 42)          | 316<br>(214 - 439)          |
| Endocarditis                                  | 138<br>(80 - 224)           | 0<br>(0 - 0)     | 0<br>(0 - 0)      | 12<br>(8 - 19)     | 34<br>(20 - 59)          | 90<br>(48 - 149)            |
| Other cardiovascular and circulatory diseases | 1,086<br>(664 - 1,374)      | 0<br>(0 - 1)     | 0<br>(0 - 0)      | 46<br>(26 - 56)    | 186<br>(108 - 229)       | 853<br>(517 - 1,130)        |
| Chronic respiratory diseases                  | 6,072<br>(5,207 - 7,346)    | 5<br>(3 - 7)     | 3<br>(2 - 4)      | 94<br>(73 - 110)   | 900<br>(748 - 1,074)     | 5,070<br>(4,373 - 6,180)    |
| Chronic obstructive pulmonary disease         | 4,526<br>(3,847 - 5,680)    | 3<br>(2 - 5)     | 0<br>(0 - 1)      | 36<br>(28 - 45)    | 687<br>(566 - 846)       | 3,799<br>(3,199 - 4,829)    |
| Pneumoconiosis                                | 453<br>(260 - 675)          | 0<br>(0 - 0)     | 0<br>(0 - 0)      | 11<br>(7 - 16)     | 48<br>(28 - 73)          | 393<br>(215 - 589)          |
| Silicosis                                     | 225<br>(120 - 349)          | 0<br>(0 - 0)     | 0<br>(0 - 0)      | 3<br>(2 - 4)       | 16<br>(9 - 24)           | 206<br>(108 - 326)          |
| Asbestosis                                    | 170<br>(96 - 263)           | 0<br>(0 - 0)     | 0<br>(0 - 0)      | 1<br>(1 - 1)       | 19<br>(11 - 29)          | 150<br>(83 - 236)           |
| Coal workers pneumoconiosis                   | 23<br>(13 - 34)             | 0<br>(0 - 0)     | 0<br>(0 - 0)      | 2<br>(1 - 3)       | 4<br>(2 - 7)             | 17<br>(9 - 25)              |
| Other pneumoconiosis                          | 35<br>(21 - 53)             | 0<br>(0 - 0)     | 0<br>(0 - 0)      | 6<br>(3 - 8)       | 9<br>(5 - 14)            | 20<br>(11 - 34)             |



Web Table 31- Australia deaths with 95% UI by age, sex, and cause in 2013

| Cause                                               | Males, All Ages          | Males, 0-4 Years | Males, 5-14 Years | Males, 15-49 Years | Males, 50-69 Years   | Males, 70-80 Years       |
|-----------------------------------------------------|--------------------------|------------------|-------------------|--------------------|----------------------|--------------------------|
| Asthma                                              | 168<br>(130 - 206)       | 1<br>(0 - 1)     | 2<br>(2 - 3)      | 31<br>(25 - 38)    | 42<br>(31 - 54)      | 91<br>(65 - 122)         |
| Interstitial lung disease and pulmonary sarcoidosis | 855<br>(502 - 1,189)     | 0<br>(0 - 0)     | 0<br>(0 - 0)      | 13<br>(8 - 17)     | 115<br>(62 - 158)    | 727<br>(417 - 1,029)     |
| Other chronic respiratory diseases                  | 71<br>(49 - 99)          | 1<br>(1 - 2)     | 0<br>(0 - 0)      | 2<br>(2 - 3)       | 8<br>(6 - 12)        | 59<br>(39 - 87)          |
| Cirrhosis                                           | 1,247<br>(1,138 - 1,368) | 0<br>(0 - 1)     | 0<br>(0 - 0)      | 199<br>(171 - 230) | 614<br>(542 - 690)   | 434<br>(377 - 501)       |
| Cirrhosis due to hepatitis B                        | 242<br>(115 - 370)       | 0<br>(0 - 0)     | 0<br>(0 - 0)      | 43<br>(23 - 65)    | 121<br>(60 - 190)    | 78<br>(23 - 133)         |
| Cirrhosis due to hepatitis C                        | 459<br>(276 - 631)       | 0<br>(0 - 0)     | 0<br>(0 - 0)      | 74<br>(35 - 109)   | 227<br>(117 - 323)   | 158<br>(80 - 221)        |
| Cirrhosis due to alcohol use                        | 472<br>(319 - 636)       | --               | --                | 63<br>(40 - 90)    | 227<br>(149 - 311)   | 182<br>(121 - 256)       |
| Cirrhosis due to other causes                       | 75<br>(36 - 124)         | 0<br>(0 - 0)     | 0<br>(0 - 0)      | 20<br>(11 - 31)    | 38<br>(16 - 67)      | 17<br>(8 - 28)           |
| Digestive diseases                                  | 1,526<br>(1,291 - 1,797) | 1<br>(1 - 2)     | 1<br>(1 - 1)      | 53<br>(45 - 64)    | 234<br>(199 - 275)   | 1,237<br>(1,018 - 1,477) |
| Peptic ulcer disease                                | 219<br>(152 - 328)       | 0<br>(0 - 0)     | 0<br>(0 - 0)      | 7<br>(5 - 10)      | 38<br>(27 - 52)      | 174<br>(113 - 267)       |
| Gastritis and duodenitis                            | 15<br>(8 - 27)           | 0<br>(0 - 0)     | 0<br>(0 - 0)      | 2<br>(1 - 3)       | 4<br>(2 - 7)         | 10<br>(5 - 18)           |
| Appendicitis                                        | 21<br>(12 - 32)          | 0<br>(0 - 0)     | 0<br>(0 - 0)      | 2<br>(2 - 4)       | 4<br>(3 - 7)         | 14<br>(7 - 23)           |
| Paralytic ileus and intestinal obstruction          | 275<br>(152 - 425)       | 0<br>(0 - 1)     | 0<br>(0 - 0)      | 5<br>(3 - 7)       | 26<br>(13 - 42)      | 244<br>(132 - 377)       |
| Inguinal, femoral, and abdominal hernia             | 49<br>(20 - 76)          | 0<br>(0 - 0)     | 0<br>(0 - 0)      | 1<br>(0 - 1)       | 6<br>(3 - 9)         | 42<br>(16 - 67)          |
| Inflammatory bowel disease                          | 98<br>(48 - 136)         | 0<br>(0 - 1)     | 0<br>(0 - 0)      | 4<br>(2 - 5)       | 14<br>(7 - 20)       | 79<br>(37 - 116)         |
| Vascular intestinal disorders                       | 255<br>(109 - 476)       | 0<br>(0 - 0)     | 0<br>(0 - 0)      | 5<br>(2 - 10)      | 41<br>(17 - 77)      | 210<br>(87 - 401)        |
| Gallbladder and biliary diseases                    | 177<br>(109 - 237)       | 0<br>(0 - 0)     | 0<br>(0 - 0)      | 4<br>(3 - 5)       | 22<br>(15 - 29)      | 151<br>(91 - 208)        |
| Pancreatitis                                        | 127<br>(87 - 192)        | 0<br>(0 - 0)     | 0<br>(0 - 0)      | 15<br>(11 - 23)    | 39<br>(26 - 60)      | 73<br>(46 - 120)         |
| Other digestive diseases                            | 288<br>(199 - 386)       | 0<br>(0 - 0)     | 0<br>(0 - 0)      | 8<br>(5 - 10)      | 41<br>(27 - 54)      | 239<br>(158 - 335)       |
| Neurological disorders                              | 7,376<br>(5,722 - 9,289) | 18<br>(13 - 28)  | 9<br>(7 - 12)     | 178<br>(143 - 209) | 568<br>(473 - 667)   | 6,604<br>(4,980 - 8,484) |
| Alzheimer disease and other dementias               | 5,521<br>(3,884 - 7,298) | --               | --                | 0<br>(0 - 0)       | 188<br>(129 - 251)   | 5,332<br>(3,671 - 7,137) |
| Parkinson disease                                   | 938<br>(704 - 1,211)     | --               | --                | 1<br>(1 - 2)       | 59<br>(44 - 74)      | 878<br>(644 - 1,150)     |
| Epilepsy                                            | 175<br>(123 - 210)       | 3<br>(2 - 5)     | 3<br>(2 - 5)      | 84<br>(58 - 103)   | 37<br>(26 - 48)      | 48<br>(30 - 67)          |
| Multiple sclerosis                                  | 57<br>(23 - 95)          | --               | --                | 12<br>(5 - 21)     | 28<br>(10 - 46)      | 17<br>(7 - 29)           |
| Other neurological disorders                        | 685<br>(524 - 812)       | 15<br>(10 - 24)  | 6<br>(4 - 8)      | 81<br>(63 - 100)   | 256<br>(189 - 309)   | 328<br>(241 - 406)       |
| Mental and substance use disorders                  | 926<br>(737 - 1,063)     | 0<br>(0 - 1)     | 0<br>(0 - 0)      | 616<br>(505 - 721) | 202<br>(130 - 249)   | 108<br>(67 - 136)        |
| Schizophrenia                                       | 22<br>(10 - 31)          | --               | --                | 4<br>(1 - 5)       | 5<br>(2 - 8)         | 13<br>(5 - 20)           |
| Alcohol use disorders                               | 270<br>(144 - 339)       | --               | --                | 73<br>(41 - 94)    | 123<br>(60 - 162)    | 74<br>(36 - 101)         |
| Drug use disorders                                  | 633<br>(516 - 738)       | 0<br>(0 - 1)     | --                | 539<br>(434 - 641) | 73<br>(42 - 96)      | 21<br>(15 - 28)          |
| Opioid use disorders                                | 374<br>(305 - 440)       | 0<br>(0 - 0)     | --                | 321<br>(256 - 384) | 41<br>(24 - 54)      | 12<br>(9 - 17)           |
| Cocaine use disorders                               | 15<br>(12 - 19)          | 0<br>(0 - 0)     | --                | 13<br>(10 - 17)    | 1<br>(1 - 2)         | 0<br>(0 - 1)             |
| Amphetamine use disorders                           | 17<br>(13 - 21)          | 0<br>(0 - 0)     | --                | 14<br>(11 - 19)    | 2<br>(1 - 3)         | 0<br>(0 - 1)             |
| Other drug use disorders                            | 227<br>(183 - 268)       | 0<br>(0 - 0)     | --                | 190<br>(149 - 230) | 29<br>(17 - 39)      | 8<br>(5 - 11)            |
| Eating disorders                                    | 1<br>(0 - 1)             | --               | 0<br>(0 - 0)      | 1<br>(0 - 1)       | --                   | --                       |
| Anorexia nervosa                                    | 1<br>(0 - 1)             | --               | 0<br>(0 - 0)      | 1<br>(0 - 1)       | --                   | --                       |
| Diabetes, urogenital, blood, and endocrine diseases | 5,503<br>(4,904 - 6,663) | 22<br>(15 - 32)  | 11<br>(8 - 15)    | 220<br>(191 - 272) | 959<br>(854 - 1,138) | 4,293<br>(3,733 - 5,238) |
| Diabetes mellitus                                   | 2,359<br>(2,037 - 2,718) | 1<br>(1 - 1)     | 1<br>(0 - 1)      | 79<br>(66 - 93)    | 499<br>(435 - 574)   | 1,779<br>(1,479 - 2,106) |
| Acute glomerulonephritis                            | 3<br>(2 - 6)             | 0<br>(0 - 0)     | 0<br>(0 - 0)      | 1<br>(0 - 1)       | 1<br>(0 - 2)         | 2<br>(1 - 4)             |
| Chronic kidney disease                              | 1,875<br>(1,518 - 2,740) | 1<br>(1 - 1)     | 0<br>(0 - 0)      | 37<br>(29 - 55)    | 192<br>(155 - 280)   | 1,645<br>(1,307 - 2,452) |
| Chronic kidney disease due to diabetes mellitus     | 308<br>(189 - 683)       | 0<br>(0 - 0)     | 0<br>(0 - 0)      | 9<br>(5 - 18)      | 57<br>(28 - 94)      | 242<br>(142 - 587)       |

Web Table 31- Australia deaths with 95% UI by age, sex, and cause in 2013

| Cause                                               | Males, All Ages          | Males, 0-4 Years   | Males, 5-14 Years | Males, 15-49 Years       | Males, 50-69 Years       | Males, 70-80 Years       |
|-----------------------------------------------------|--------------------------|--------------------|-------------------|--------------------------|--------------------------|--------------------------|
| Chronic kidney disease due to hypertension          | 617<br>(378 - 939)       | 0<br>(0 - 0)       | 0<br>(0 - 0)      | 8<br>(4 - 15)            | 46<br>(26 - 79)          | 562<br>(348 - 859)       |
| Chronic kidney disease due to glomerulonephritis    | 65<br>(35 - 146)         | 0<br>(0 - 0)       | 0<br>(0 - 0)      | 5<br>(3 - 9)             | 15<br>(8 - 34)           | 45<br>(22 - 108)         |
| Chronic kidney disease due to other causes          | 885<br>(517 - 1,512)     | 0<br>(0 - 1)       | 0<br>(0 - 0)      | 16<br>(9 - 25)           | 73<br>(40 - 117)         | 795<br>(451 - 1,366)     |
| Urinary diseases and male infertility               | 397<br>(296 - 538)       | 1<br>(1 - 1)       | 0<br>(0 - 0)      | 7<br>(6 - 9)             | 38<br>(29 - 47)          | 351<br>(255 - 490)       |
| Interstitial nephritis and urinary tract infections | 275<br>(195 - 375)       | 1<br>(0 - 1)       | 0<br>(0 - 0)      | 4<br>(3 - 5)             | 22<br>(16 - 31)          | 247<br>(168 - 346)       |
| Urolithiasis                                        | 18<br>(11 - 32)          | --                 | 0<br>(0 - 0)      | 1<br>(0 - 1)             | 3<br>(2 - 5)             | 14<br>(8 - 27)           |
| Other urinary diseases                              | 105<br>(57 - 168)        | 0<br>(0 - 0)       | 0<br>(0 - 0)      | 3<br>(2 - 4)             | 12<br>(7 - 17)           | 90<br>(47 - 153)         |
| Gynecological diseases                              | --                       | --                 | --                | --                       | --                       | --                       |
| Uterine fibroids                                    | --                       | --                 | --                | --                       | --                       | --                       |
| Polycystic ovarian syndrome                         | --                       | --                 | --                | --                       | --                       | --                       |
| Endometriosis                                       | --                       | --                 | --                | --                       | --                       | --                       |
| Genital prolapse                                    | --                       | --                 | --                | --                       | --                       | --                       |
| Other gynecological diseases                        | --                       | --                 | --                | --                       | --                       | --                       |
| Hemoglobinopathies and hemolytic anemias            | 58<br>(37 - 93)          | 1<br>(1 - 2)       | 1<br>(0 - 1)      | 6<br>(3 - 9)             | 9<br>(6 - 14)            | 41<br>(26 - 69)          |
| Thalassemias                                        | 5<br>(3 - 8)             | 1<br>(0 - 1)       | 1<br>(0 - 1)      | 3<br>(2 - 4)             | 1<br>(1 - 1)             | 0<br>(0 - 1)             |
| Sickle cell disorders                               | 3<br>(2 - 4)             | 0<br>(0 - 0)       | 0<br>(0 - 0)      | 1<br>(0 - 1)             | 1<br>(1 - 2)             | 1<br>(0 - 1)             |
| G6PD deficiency                                     | 1<br>(0 - 1)             | 0<br>(0 - 0)       | 0<br>(0 - 0)      | 0<br>(0 - 0)             | 0<br>(0 - 0)             | 0<br>(0 - 0)             |
| Other hemoglobinopathies and hemolytic anemias      | 49<br>(31 - 80)          | 0<br>(0 - 1)       | 0<br>(0 - 0)      | 2<br>(1 - 3)             | 7<br>(4 - 10)            | 40<br>(25 - 67)          |
| Endocrine, metabolic, blood, and immune disorders   | 810<br>(576 - 1,150)     | 18<br>(12 - 28)    | 9<br>(6 - 13)     | 90<br>(65 - 128)         | 220<br>(167 - 336)       | 474<br>(293 - 690)       |
| Musculoskeletal disorders                           | 284<br>(203 - 381)       | --                 | 1<br>(0 - 1)      | 12<br>(9 - 17)           | 62<br>(48 - 89)          | 210<br>(139 - 288)       |
| Rheumatoid arthritis                                | 66<br>(44 - 107)         | --                 | 0<br>(0 - 0)      | 1<br>(1 - 2)             | 16<br>(9 - 28)           | 49<br>(29 - 82)          |
| Other musculoskeletal disorders                     | 218<br>(148 - 292)       | --                 | 0<br>(0 - 1)      | 11<br>(8 - 15)           | 45<br>(32 - 65)          | 161<br>(101 - 219)       |
| Other non-communicable diseases                     | 637<br>(551 - 735)       | 254<br>(204 - 322) | 11<br>(8 - 14)    | 67<br>(57 - 81)          | 65<br>(54 - 77)          | 240<br>(179 - 305)       |
| Congenital anomalies                                | 383<br>(331 - 458)       | 191<br>(148 - 249) | 11<br>(8 - 14)    | 62<br>(52 - 76)          | 43<br>(35 - 52)          | 77<br>(60 - 103)         |
| Neural tube defects                                 | 9<br>(6 - 14)            | 7<br>(4 - 13)      | 0<br>(0 - 0)      | 1<br>(1 - 2)             | 0<br>(0 - 1)             | 0<br>(0 - 0)             |
| Congenital heart anomalies                          | 143<br>(115 - 179)       | 60<br>(43 - 82)    | 5<br>(3 - 7)      | 29<br>(23 - 37)          | 12<br>(8 - 17)           | 37<br>(24 - 56)          |
| Cleft lip and cleft palate                          | 0<br>(0 - 0)             | 0<br>(0 - 0)       | --                | --                       | --                       | --                       |
| Down syndrome                                       | 33<br>(17 - 46)          | 8<br>(3 - 15)      | 1<br>(0 - 1)      | 7<br>(4 - 12)            | 14<br>(7 - 21)           | 2<br>(1 - 3)             |
| Chromosomal unbalanced rearrangements               | 23<br>(14 - 38)          | 20<br>(11 - 34)    | 0<br>(0 - 1)      | 1<br>(1 - 2)             | 1<br>(0 - 1)             | 0<br>(0 - 1)             |
| Other congenital anomalies                          | 176<br>(142 - 217)       | 95<br>(70 - 129)   | 5<br>(3 - 7)      | 23<br>(17 - 30)          | 16<br>(11 - 22)          | 38<br>(25 - 56)          |
| Skin and subcutaneous diseases                      | 192<br>(118 - 251)       | 1<br>(0 - 1)       | 0<br>(0 - 0)      | 5<br>(3 - 6)             | 22<br>(13 - 29)          | 163<br>(98 - 222)        |
| Cellulitis                                          | 80<br>(33 - 125)         | 0<br>(0 - 0)       | 0<br>(0 - 0)      | 2<br>(1 - 3)             | 11<br>(5 - 16)           | 67<br>(24 - 110)         |
| Pyoderma                                            | 81<br>(45 - 128)         | 0<br>(0 - 1)       | 0<br>(0 - 0)      | 2<br>(1 - 3)             | 9<br>(5 - 14)            | 70<br>(37 - 117)         |
| Decubitus ulcer                                     | 23<br>(12 - 42)          | 0<br>(0 - 0)       | 0<br>(0 - 0)      | 1<br>(0 - 1)             | 1<br>(1 - 2)             | 21<br>(11 - 40)          |
| Other skin and subcutaneous diseases                | 8<br>(4 - 17)            | 0<br>(0 - 0)       | 0<br>(0 - 0)      | 1<br>(0 - 1)             | 1<br>(1 - 2)             | 6<br>(2 - 14)            |
| Sudden infant death syndrome                        | 62<br>(34 - 99)          | 62<br>(34 - 99)    | --                | --                       | --                       | --                       |
| Injuries                                            | 6,064<br>(5,349 - 6,666) | 85<br>(60 - 114)   | 60<br>(51 - 68)   | 2,703<br>(2,457 - 2,955) | 1,185<br>(1,025 - 1,346) | 2,031<br>(1,500 - 2,427) |
| Transport injuries                                  | 1,478<br>(1,324 - 1,621) | 23<br>(15 - 33)    | 30<br>(23 - 37)   | 882<br>(778 - 991)       | 307<br>(265 - 354)       | 236<br>(197 - 286)       |
| Road injuries                                       | 1,362<br>(1,215 - 1,492) | 22<br>(14 - 32)    | 27<br>(21 - 34)   | 813<br>(718 - 912)       | 274<br>(234 - 317)       | 225<br>(187 - 273)       |
| Pedestrian road injuries                            | 272<br>(146 - 436)       | 9<br>(5 - 16)      | 8<br>(5 - 12)     | 91<br>(44 - 159)         | 71<br>(38 - 117)         | 92<br>(52 - 138)         |

Web Table 31- Australia deaths with 95% UI by age, sex, and cause in 2013

| Cause                                           | Males, All Ages          | Males, 0-4 Years | Males, 5-14 Years | Males, 15-49 Years       | Males, 50-69 Years | Males, 70-80 Years     |
|-------------------------------------------------|--------------------------|------------------|-------------------|--------------------------|--------------------|------------------------|
| Cyclist road injuries                           | 41<br>(26 - 60)          | 1<br>(0 - 1)     | 4<br>(3 - 7)      | 19<br>(11 - 28)          | 9<br>(6 - 15)      | 8<br>(4 - 13)          |
| Motorcyclist road injuries                      | 216<br>(119 - 289)       | 1<br>(0 - 1)     | 3<br>(1 - 4)      | 179<br>(101 - 243)       | 26<br>(11 - 39)    | 7<br>(4 - 12)          |
| Motor vehicle road injuries                     | 826<br>(638 - 1,004)     | 11<br>(6 - 17)   | 12<br>(8 - 17)    | 520<br>(419 - 619)       | 166<br>(120 - 212) | 116<br>(72 - 160)      |
| Other road injuries                             | 7<br>(3 - 12)            | 0<br>(0 - 0)     | 0<br>(0 - 0)      | 4<br>(2 - 6)             | 2<br>(1 - 3)       | 2<br>(1 - 3)           |
| Other transport injuries                        | 116<br>(86 - 156)        | 1<br>(1 - 2)     | 2<br>(1 - 4)      | 68<br>(49 - 98)          | 33<br>(22 - 47)    | 11<br>(7 - 17)         |
| Unintentional injuries                          | 2,325<br>(1,752 - 2,734) | 54<br>(38 - 77)  | 22<br>(18 - 28)   | 392<br>(343 - 478)       | 335<br>(271 - 386) | 1,521<br>(988 - 1,909) |
| Falls                                           | 1,207<br>(767 - 1,515)   | 3<br>(2 - 5)     | 2<br>(1 - 3)      | 76<br>(61 - 93)          | 127<br>(81 - 157)  | 998<br>(601 - 1,294)   |
| Drowning                                        | 226<br>(169 - 353)       | 26<br>(15 - 46)  | 9<br>(6 - 15)     | 115<br>(85 - 178)        | 48<br>(35 - 79)    | 27<br>(18 - 39)        |
| Fire, heat, and hot substances                  | 90<br>(69 - 118)         | 4<br>(2 - 8)     | 2<br>(1 - 3)      | 24<br>(18 - 33)          | 21<br>(15 - 29)    | 39<br>(28 - 54)        |
| Poisonings                                      | 43<br>(33 - 62)          | 1<br>(1 - 2)     | 0<br>(0 - 1)      | 22<br>(17 - 37)          | 11<br>(7 - 15)     | 8<br>(5 - 11)          |
| Exposure to mechanical forces                   | 153<br>(134 - 208)       | 8<br>(5 - 13)    | 4<br>(3 - 6)      | 86<br>(72 - 123)         | 35<br>(29 - 49)    | 19<br>(15 - 26)        |
| Unintentional firearm injuries                  | 19<br>(15 - 24)          | 0<br>(0 - 0)     | 1<br>(1 - 2)      | 12<br>(9 - 16)           | 3<br>(2 - 5)       | 2<br>(1 - 4)           |
| Unintentional suffocation                       | 36<br>(20 - 46)          | 6<br>(3 - 10)    | 1<br>(1 - 2)      | 18<br>(10 - 25)          | 5<br>(3 - 8)       | 5<br>(2 - 9)           |
| Other exposure to mechanical forces             | 99<br>(85 - 147)         | 2<br>(1 - 4)     | 2<br>(1 - 3)      | 56<br>(45 - 91)          | 27<br>(21 - 39)    | 12<br>(9 - 17)         |
| Adverse effects of medical treatment            | 229<br>(134 - 315)       | 2<br>(1 - 4)     | 1<br>(0 - 1)      | 13<br>(8 - 17)           | 37<br>(22 - 54)    | 177<br>(97 - 254)      |
| Animal contact                                  | 15<br>(11 - 24)          | 1<br>(0 - 2)     | 1<br>(0 - 1)      | 6<br>(4 - 10)            | 4<br>(3 - 7)       | 4<br>(2 - 6)           |
| Venomous animal contact                         | 5<br>(3 - 9)             | 0<br>(0 - 0)     | 0<br>(0 - 1)      | 2<br>(1 - 4)             | 2<br>(1 - 3)       | 1<br>(0 - 2)           |
| Non-venomous animal contact                     | 10<br>(7 - 15)           | 1<br>(0 - 1)     | 0<br>(0 - 1)      | 4<br>(3 - 6)             | 3<br>(2 - 4)       | 3<br>(2 - 5)           |
| Foreign body                                    | 330<br>(124 - 497)       | 7<br>(4 - 11)    | 2<br>(1 - 4)      | 32<br>(18 - 47)          | 44<br>(20 - 60)    | 244<br>(78 - 403)      |
| Pulmonary aspiration and foreign body in airway | 328<br>(123 - 495)       | 7<br>(3 - 11)    | 2<br>(1 - 3)      | 32<br>(17 - 46)          | 43<br>(19 - 60)    | 244<br>(78 - 402)      |
| Foreign body in other body part                 | 2<br>(1 - 3)             | 0<br>(0 - 0)     | 0<br>(0 - 0)      | 1<br>(0 - 1)             | 0<br>(0 - 1)       | 0<br>(0 - 1)           |
| Other unintentional injuries                    | 33<br>(26 - 42)          | 2<br>(1 - 3)     | 1<br>(0 - 2)      | 17<br>(12 - 25)          | 7<br>(4 - 12)      | 5<br>(3 - 9)           |
| Self-harm and interpersonal violence            | 2,261<br>(1,832 - 2,593) | 7<br>(4 - 11)    | 7<br>(5 - 10)     | 1,429<br>(1,159 - 1,626) | 543<br>(420 - 662) | 274<br>(218 - 364)     |
| Self-harm                                       | 2,048<br>(1,634 - 2,363) | --               | 5<br>(3 - 7)      | 1,285<br>(1,028 - 1,468) | 501<br>(376 - 612) | 257<br>(203 - 350)     |
| Interpersonal violence                          | 212<br>(136 - 292)       | 7<br>(4 - 11)    | 3<br>(2 - 4)      | 144<br>(90 - 200)        | 41<br>(26 - 59)    | 17<br>(10 - 26)        |
| Assault by firearm                              | 50<br>(25 - 91)          | 1<br>(0 - 1)     | 1<br>(0 - 1)      | 35<br>(18 - 66)          | 9<br>(5 - 18)      | 4<br>(2 - 8)           |
| Assault by sharp object                         | 76<br>(42 - 118)         | 1<br>(0 - 2)     | 1<br>(0 - 1)      | 54<br>(29 - 84)          | 16<br>(8 - 25)     | 5<br>(2 - 8)           |
| Assault by other means                          | 86<br>(44 - 118)         | 5<br>(3 - 8)     | 1<br>(1 - 2)      | 55<br>(27 - 79)          | 16<br>(8 - 24)     | 8<br>(4 - 12)          |
| Forces of nature, war, and legal intervention   | 0<br>(0 - 0)             | 0<br>(0 - 0)     | --                | --                       | --                 | 0<br>(0 - 0)           |
| Exposure to forces of nature                    | 0<br>(0 - 0)             | 0<br>(0 - 0)     | --                | --                       | --                 | 0<br>(0 - 0)           |

Web Table 31- Australia deaths with 95% UI by age, sex, and cause in 2013

| Cause                                                             | Females, All Ages           | Females, 0-4 Years | Females, 5-14 Years | Females, 15-49 Years     | Females, 50-69 Years        | Females, 70-80 Years        |
|-------------------------------------------------------------------|-----------------------------|--------------------|---------------------|--------------------------|-----------------------------|-----------------------------|
| All causes                                                        | 79,560<br>(75,515 - 83,862) | 584<br>(488 - 702) | 110<br>(100 - 122)  | 3,413<br>(3,131 - 3,693) | 11,609<br>(10,818 - 12,454) | 63,844<br>(60,816 - 67,083) |
| Communicable, maternal, neonatal, and nutritional diseases        | 3,022<br>(2,332 - 3,851)    | 259<br>(199 - 329) | 9<br>(7 - 12)       | 104<br>(89 - 119)        | 206<br>(159 - 244)          | 2,444<br>(1,788 - 3,245)    |
| HIV/AIDS and tuberculosis                                         | 49<br>(37 - 61)             | 0<br>(0 - 0)       | 0<br>(0 - 0)        | 10<br>(7 - 15)           | 12<br>(9 - 15)              | 27<br>(17 - 37)             |
| Tuberculosis                                                      | 36<br>(26 - 47)             | 0<br>(0 - 0)       | 0<br>(0 - 0)        | 2<br>(2 - 3)             | 8<br>(6 - 10)               | 26<br>(17 - 36)             |
| HIV/AIDS                                                          | 13<br>(7 - 20)              | 0<br>(0 - 0)       | 0<br>(0 - 0)        | 8<br>(5 - 13)            | 4<br>(2 - 7)                | 0<br>(0 - 1)                |
| HIV/AIDS resulting in mycobacterial infection                     | 1<br>(0 - 1)                | 0<br>(0 - 0)       | 0<br>(0 - 0)        | 0<br>(0 - 1)             | 0<br>(0 - 0)                | 0<br>(0 - 0)                |
| HIV/AIDS resulting in other diseases                              | 12<br>(7 - 20)              | 0<br>(0 - 0)       | 0<br>(0 - 0)        | 8<br>(5 - 13)            | 4<br>(2 - 7)                | 0<br>(0 - 1)                |
| Diarrhea, lower respiratory, and other common infectious diseases | 2,374<br>(1,721 - 3,155)    | 29<br>(21 - 38)    | 6<br>(5 - 9)        | 51<br>(42 - 61)          | 137<br>(103 - 166)          | 2,151<br>(1,509 - 2,929)    |
| Diarrheal diseases                                                | 114<br>(75 - 175)           | 3<br>(2 - 5)       | 0<br>(0 - 1)        | 2<br>(2 - 3)             | 8<br>(6 - 11)               | 99<br>(61 - 160)            |
| Intestinal infectious diseases                                    | 10<br>(3 - 22)              | 2<br>(1 - 5)       | 2<br>(1 - 4)        | 4<br>(1 - 10)            | 1<br>(0 - 3)                | 1<br>(0 - 3)                |
| Typhoid fever                                                     | 7<br>(2 - 17)               | 1<br>(0 - 3)       | 1<br>(0 - 3)        | 3<br>(1 - 8)             | 1<br>(0 - 2)                | 1<br>(0 - 1)                |
| Paratyphoid fever                                                 | 2<br>(1 - 5)                | 0<br>(0 - 1)       | 0<br>(0 - 1)        | 1<br>(0 - 2)             | 0<br>(0 - 1)                | 0<br>(0 - 0)                |
| Other intestinal infectious diseases                              | 1<br>(0 - 4)                | 0<br>(0 - 2)       | 0<br>(0 - 0)        | 0<br>(0 - 2)             | 0<br>(0 - 1)                | 0<br>(0 - 2)                |
| Lower respiratory infections                                      | 2,181<br>(1,537 - 2,951)    | 16<br>(10 - 23)    | 2<br>(1 - 3)        | 34<br>(26 - 41)          | 116<br>(83 - 144)           | 2,014<br>(1,383 - 2,785)    |
| Upper respiratory infections                                      | 2<br>(0 - 6)                | 0<br>(0 - 0)       | 0<br>(0 - 0)        | 0<br>(0 - 0)             | 0<br>(0 - 1)                | 1<br>(0 - 6)                |
| Otitis media                                                      | 2<br>(2 - 3)                | 0<br>(0 - 0)       | 0<br>(0 - 0)        | 1<br>(0 - 1)             | 0<br>(0 - 1)                | 1<br>(1 - 2)                |
| Meningitis                                                        | 33<br>(28 - 39)             | 5<br>(4 - 7)       | 1<br>(1 - 1)        | 5<br>(4 - 6)             | 6<br>(5 - 8)                | 16<br>(12 - 22)             |
| Pneumococcal meningitis                                           | 9<br>(7 - 11)               | 1<br>(1 - 2)       | 0<br>(0 - 0)        | 1<br>(1 - 2)             | 2<br>(1 - 2)                | 4<br>(3 - 6)                |
| H influenzae type B meningitis                                    | 4<br>(3 - 5)                | 1<br>(1 - 2)       | 0<br>(0 - 0)        | 0<br>(0 - 1)             | 0<br>(0 - 1)                | 1<br>(1 - 2)                |
| Meningococcal meningitis                                          | 7<br>(5 - 10)               | 1<br>(1 - 1)       | 0<br>(0 - 0)        | 1<br>(1 - 2)             | 1<br>(1 - 2)                | 4<br>(2 - 6)                |
| Other meningitis                                                  | 14<br>(10 - 17)             | 2<br>(1 - 3)       | 0<br>(0 - 0)        | 2<br>(1 - 3)             | 3<br>(2 - 4)                | 7<br>(4 - 10)               |
| Encephalitis                                                      | 18<br>(10 - 24)             | 2<br>(1 - 3)       | 1<br>(0 - 1)        | 3<br>(2 - 4)             | 3<br>(2 - 5)                | 9<br>(4 - 14)               |
| Diphtheria                                                        | 0<br>(0 - 1)                | 0<br>(0 - 0)       | 0<br>(0 - 0)        | 0<br>(0 - 0)             | 0<br>(0 - 0)                | --                          |
| Whooping cough                                                    | 1<br>(1 - 1)                | 0<br>(0 - 0)       | 0<br>(0 - 0)        | 1<br>(0 - 1)             | 0<br>(0 - 0)                | --                          |
| Tetanus                                                           | 1<br>(1 - 2)                | 0<br>(0 - 0)       | 0<br>(0 - 0)        | 1<br>(0 - 1)             | 0<br>(0 - 1)                | 0<br>(0 - 1)                |
| Measles                                                           | 0<br>(0 - 0)                | 0<br>(0 - 0)       | 0<br>(0 - 0)        | 0<br>(0 - 0)             | 0<br>(0 - 0)                | --                          |
| Varicella and herpes zoster                                       | 11<br>(2 - 46)              | 1<br>(0 - 3)       | 0<br>(0 - 1)        | 1<br>(0 - 3)             | 1<br>(0 - 3)                | 8<br>(0 - 44)               |
| Neglected tropical diseases and malaria                           | 8<br>(7 - 10)               | 0<br>(0 - 0)       | 0<br>(0 - 1)        | 2<br>(2 - 3)             | 2<br>(2 - 2)                | 4<br>(3 - 5)                |
| Cysticercosis                                                     | 0<br>(0 - 0)                | 0<br>(0 - 0)       | 0<br>(0 - 0)        | 0<br>(0 - 0)             | 0<br>(0 - 0)                | 0<br>(0 - 0)                |
| Cystic echinococcosis                                             | 2<br>(2 - 3)                | 0<br>(0 - 0)       | 0<br>(0 - 0)        | 0<br>(0 - 1)             | 1<br>(1 - 1)                | 1<br>(1 - 1)                |
| Dengue                                                            | 1<br>(1 - 1)                | 0<br>(0 - 0)       | 0<br>(0 - 0)        | 1<br>(0 - 1)             | 0<br>(0 - 0)                | 0<br>(0 - 0)                |
| Rabies                                                            | 1<br>(1 - 2)                | 0<br>(0 - 0)       | 0<br>(0 - 0)        | 1<br>(0 - 1)             | 0<br>(0 - 0)                | 0<br>(0 - 0)                |
| Other neglected tropical diseases                                 | 4<br>(2 - 5)                | 0<br>(0 - 0)       | 0<br>(0 - 0)        | 1<br>(0 - 1)             | 1<br>(0 - 1)                | 2<br>(1 - 3)                |
| Maternal disorders                                                | 15<br>(12 - 18)             | --                 | 0<br>(0 - 0)        | 15<br>(11 - 18)          | --                          | --                          |
| Maternal hemorrhage                                               | 2<br>(1 - 2)                | --                 | 0<br>(0 - 0)        | 2<br>(1 - 2)             | --                          | --                          |
| Maternal sepsis and other maternal infections                     | 1<br>(1 - 2)                | --                 | 0<br>(0 - 0)        | 1<br>(1 - 2)             | --                          | --                          |
| Maternal hypertensive disorders                                   | 2<br>(2 - 3)                | --                 | 0<br>(0 - 0)        | 2<br>(2 - 3)             | --                          | --                          |
| Maternal obstructed labor                                         | 2<br>(1 - 2)                | --                 | 0<br>(0 - 0)        | 2<br>(1 - 2)             | --                          | --                          |
| Maternal abortive outcome                                         | 2<br>(1 - 2)                | --                 | 0<br>(0 - 0)        | 2<br>(1 - 2)             | --                          | --                          |
| Indirect maternal deaths                                          | 2<br>(1 - 3)                | --                 | 0<br>(0 - 0)        | 2<br>(1 - 3)             | --                          | --                          |

Web Table 31- Australia deaths with 95% UI by age, sex, and cause in 2013

| Cause                                                            | Females, All Ages           | Females, 0-4 Years | Females, 5-14 Years | Females, 15-49 Years     | Females, 50-69 Years        | Females, 70-80 Years        |
|------------------------------------------------------------------|-----------------------------|--------------------|---------------------|--------------------------|-----------------------------|-----------------------------|
| Late maternal deaths                                             | 1<br>(1 - 2)                | --                 | 0<br>(0 - 0)        | 1<br>(1 - 2)             | --                          | --                          |
| Maternal deaths aggravated by HIV/AIDS                           | 0<br>(0 - 0)                | --                 | --                  | 0<br>(0 - 0)             | --                          | --                          |
| Other maternal disorders                                         | 3<br>(2 - 5)                | --                 | 0<br>(0 - 0)        | 3<br>(2 - 4)             | --                          | --                          |
| Neonatal disorders                                               | 219<br>(167 - 284)          | 219<br>(167 - 284) | --                  | --                       | --                          | --                          |
| Neonatal preterm birth complications                             | 89<br>(59 - 131)            | 89<br>(59 - 131)   | --                  | --                       | --                          | --                          |
| Neonatal encephalopathy due to birth asphyxia and trauma         | 69<br>(40 - 99)             | 69<br>(40 - 99)    | --                  | --                       | --                          | --                          |
| Neonatal sepsis and other neonatal infections                    | 9<br>(4 - 19)               | 9<br>(4 - 19)      | --                  | --                       | --                          | --                          |
| Hemolytic disease and other neonatal jaundice                    | 0<br>(0 - 1)                | 0<br>(0 - 1)       | --                  | --                       | --                          | --                          |
| Other neonatal disorders                                         | 52<br>(26 - 78)             | 52<br>(26 - 78)    | --                  | --                       | --                          | --                          |
| Nutritional deficiencies                                         | 192<br>(143 - 255)          | 1<br>(1 - 1)       | 0<br>(0 - 0)        | 4<br>(3 - 5)             | 10<br>(8 - 13)              | 177<br>(129 - 240)          |
| Protein-energy malnutrition                                      | 59<br>(23 - 99)             | 1<br>(0 - 1)       | 0<br>(0 - 0)        | 1<br>(1 - 2)             | 5<br>(2 - 7)                | 52<br>(19 - 90)             |
| Iodine deficiency                                                | 1<br>(0 - 5)                | 0<br>(0 - 0)       | 0<br>(0 - 0)        | 0<br>(0 - 0)             | 0<br>(0 - 1)                | 1<br>(0 - 5)                |
| Iron-deficiency anemia                                           | 110<br>(66 - 168)           | 0<br>(0 - 0)       | 0<br>(0 - 0)        | 2<br>(1 - 3)             | 4<br>(2 - 7)                | 104<br>(61 - 161)           |
| Other nutritional deficiencies                                   | 22<br>(9 - 47)              | 0<br>(0 - 0)       | 0<br>(0 - 0)        | 1<br>(0 - 1)             | 1<br>(1 - 2)                | 20<br>(7 - 44)              |
| Other communicable, maternal, neonatal, and nutritional diseases | 165<br>(109 - 210)          | 10<br>(5 - 16)     | 2<br>(1 - 3)        | 22<br>(16 - 29)          | 45<br>(29 - 58)             | 87<br>(48 - 120)            |
| Sexually transmitted diseases excluding HIV                      | 15<br>(9 - 23)              | 5<br>(1 - 11)      | 0<br>(0 - 1)        | 1<br>(1 - 2)             | 1<br>(1 - 2)                | 7<br>(4 - 12)               |
| Syphilis                                                         | 12<br>(7 - 19)              | 5<br>(1 - 11)      | 0<br>(0 - 1)        | 0<br>(0 - 1)             | 1<br>(0 - 1)                | 6<br>(3 - 10)               |
| Chlamydial infection                                             | 1<br>(1 - 1)                | --                 | 0<br>(0 - 0)        | 0<br>(0 - 0)             | 0<br>(0 - 0)                | 0<br>(0 - 1)                |
| Gonococcal infection                                             | 1<br>(1 - 2)                | --                 | 0<br>(0 - 0)        | 0<br>(0 - 0)             | 0<br>(0 - 0)                | 1<br>(0 - 1)                |
| Other sexually transmitted diseases                              | 1<br>(0 - 1)                | --                 | 0<br>(0 - 0)        | 0<br>(0 - 0)             | 0<br>(0 - 0)                | 0<br>(0 - 1)                |
| Hepatitis                                                        | 50<br>(39 - 63)             | 1<br>(0 - 1)       | 0<br>(0 - 1)        | 12<br>(8 - 18)           | 20<br>(14 - 28)             | 17<br>(10 - 26)             |
| Acute hepatitis A                                                | 5<br>(1 - 12)               | 0<br>(0 - 0)       | 0<br>(0 - 0)        | 2<br>(1 - 5)             | 2<br>(0 - 4)                | 1<br>(0 - 3)                |
| Acute hepatitis B                                                | 41<br>(30 - 54)             | 0<br>(0 - 1)       | 0<br>(0 - 0)        | 9<br>(5 - 14)            | 17<br>(11 - 25)             | 15<br>(8 - 23)              |
| Acute hepatitis C                                                | 4<br>(1 - 10)               | --                 | 0<br>(0 - 0)        | 1<br>(0 - 3)             | 1<br>(0 - 4)                | 1<br>(0 - 5)                |
| Other infectious diseases                                        | 100<br>(47 - 140)           | 4<br>(2 - 7)       | 1<br>(1 - 1)        | 9<br>(5 - 12)            | 23<br>(11 - 33)             | 63<br>(25 - 94)             |
| Non-communicable diseases                                        | 73,040<br>(69,210 - 77,112) | 266<br>(216 - 329) | 66<br>(58 - 74)     | 2,508<br>(2,295 - 2,734) | 10,924<br>(10,172 - 11,708) | 59,277<br>(56,385 - 62,436) |
| Neoplasms                                                        | 20,176<br>(17,388 - 22,340) | 22<br>(16 - 28)    | 30<br>(26 - 36)     | 1,385<br>(1,250 - 1,549) | 6,461<br>(5,765 - 7,042)    | 12,279<br>(10,105 - 13,904) |
| Esophageal cancer                                                | 482<br>(395 - 574)          | --                 | --                  | 9<br>(7 - 12)            | 109<br>(89 - 131)           | 364<br>(285 - 446)          |
| Stomach cancer                                                   | 713<br>(524 - 1,005)        | --                 | --                  | 34<br>(25 - 46)          | 154<br>(113 - 201)          | 525<br>(366 - 781)          |
| Liver cancer                                                     | 486<br>(239 - 622)          | --                 | 0<br>(0 - 1)        | 23<br>(15 - 30)          | 132<br>(73 - 168)           | 331<br>(137 - 453)          |
| Liver cancer due to hepatitis B                                  | 57<br>(22 - 92)             | --                 | 0<br>(0 - 0)        | 6<br>(3 - 9)             | 21<br>(8 - 35)              | 30<br>(11 - 51)             |
| Liver cancer due to hepatitis C                                  | 319<br>(148 - 425)          | --                 | 0<br>(0 - 0)        | 11<br>(7 - 16)           | 80<br>(45 - 107)            | 227<br>(95 - 324)           |
| Liver cancer due to alcohol use                                  | 46<br>(18 - 73)             | --                 | --                  | 1<br>(1 - 2)             | 10<br>(5 - 16)              | 35<br>(13 - 58)             |
| Liver cancer due to other causes                                 | 64<br>(27 - 101)            | --                 | 0<br>(0 - 0)        | 5<br>(3 - 8)             | 21<br>(9 - 32)              | 38<br>(14 - 64)             |
| Larynx cancer                                                    | 39<br>(26 - 56)             | --                 | --                  | 2<br>(1 - 2)             | 16<br>(10 - 23)             | 22<br>(14 - 32)             |
| Tracheal, bronchus and lung cancer                               | 3,436<br>(2,379 - 4,035)    | --                 | --                  | 133<br>(106 - 161)       | 1,346<br>(1,020 - 1,565)    | 1,958<br>(1,137 - 2,466)    |
| Breast cancer                                                    | 3,250<br>(2,562 - 3,771)    | --                 | --                  | 406<br>(338 - 503)       | 1,334<br>(1,038 - 1,537)    | 1,511<br>(1,111 - 1,854)    |
| Cervical cancer                                                  | 437<br>(365 - 533)          | --                 | --                  | 77<br>(64 - 97)          | 156<br>(123 - 192)          | 203<br>(157 - 263)          |
| Uterine cancer                                                   | 335<br>(271 - 435)          | --                 | --                  | 13<br>(10 - 20)          | 115<br>(91 - 154)           | 206<br>(154 - 278)          |
| Prostate cancer                                                  | --                          | --                 | --                  | --                       | --                          | --                          |

Web Table 31- Australia deaths with 95% UI by age, sex, and cause in 2013

| Cause                                         | Females, All Ages           | Females, 0-4 Years | Females, 5-14 Years | Females, 15-49 Years | Females, 50-69 Years     | Females, 70-80 Years        |
|-----------------------------------------------|-----------------------------|--------------------|---------------------|----------------------|--------------------------|-----------------------------|
| Colon and rectum cancer                       | 2,786<br>(2,381 - 3,271)    | --                 | --                  | 123<br>(105 - 144)   | 711<br>(629 - 797)       | 1,951<br>(1,597 - 2,379)    |
| Lip and oral cavity cancer                    | 104<br>(82 - 138)           | --                 | --                  | 8<br>(6 - 9)         | 35<br>(28 - 44)          | 61<br>(45 - 91)             |
| Nasopharynx cancer                            | 26<br>(11 - 44)             | --                 | 0<br>(0 - 0)        | 6<br>(3 - 11)        | 8<br>(3 - 13)            | 13<br>(5 - 23)              |
| Other pharynx cancer                          | 53<br>(41 - 67)             | --                 | --                  | 3<br>(2 - 5)         | 23<br>(17 - 30)          | 27<br>(19 - 36)             |
| Gallbladder and biliary tract cancer          | 362<br>(219 - 503)          | --                 | --                  | 11<br>(7 - 15)       | 92<br>(66 - 120)         | 259<br>(142 - 386)          |
| Pancreatic cancer                             | 1,430<br>(1,237 - 1,657)    | --                 | --                  | 37<br>(30 - 45)      | 384<br>(333 - 439)       | 1,009<br>(841 - 1,207)      |
| Malignant skin melanoma                       | 536<br>(342 - 723)          | --                 | --                  | 88<br>(68 - 137)     | 182<br>(116 - 246)       | 266<br>(159 - 368)          |
| Non-melanoma skin cancer                      | 169<br>(106 - 235)          | --                 | --                  | 4<br>(3 - 5)         | 18<br>(13 - 24)          | 147<br>(88 - 209)           |
| Ovarian cancer                                | 1,085<br>(920 - 1,273)      | --                 | --                  | 73<br>(60 - 88)      | 428<br>(361 - 504)       | 585<br>(451 - 743)          |
| Testicular cancer                             | --                          | --                 | --                  | --                   | --                       | --                          |
| Kidney cancer                                 | 411<br>(295 - 531)          | 1<br>(0 - 1)       | 1<br>(1 - 2)        | 20<br>(15 - 27)      | 132<br>(102 - 175)       | 257<br>(163 - 378)          |
| Bladder cancer                                | 316<br>(207 - 435)          | --                 | --                  | 5<br>(4 - 8)         | 48<br>(34 - 67)          | 263<br>(166 - 375)          |
| Brain and nervous system cancer               | 548<br>(422 - 671)          | 4<br>(2 - 6)       | 9<br>(7 - 13)       | 83<br>(66 - 105)     | 234<br>(184 - 298)       | 217<br>(150 - 279)          |
| Thyroid cancer                                | 85<br>(52 - 111)            | --                 | 0<br>(0 - 0)        | 4<br>(3 - 6)         | 21<br>(13 - 27)          | 60<br>(36 - 84)             |
| Mesothelioma                                  | 112<br>(50 - 151)           | --                 | --                  | 6<br>(4 - 9)         | 38<br>(19 - 54)          | 67<br>(25 - 101)            |
| Hodgkin lymphoma                              | 48<br>(35 - 68)             | 0<br>(0 - 0)       | 0<br>(0 - 1)        | 15<br>(11 - 22)      | 11<br>(8 - 17)           | 20<br>(14 - 30)             |
| Non-Hodgkin lymphoma                          | 852<br>(440 - 1,313)        | 1<br>(0 - 1)       | 1<br>(1 - 2)        | 50<br>(31 - 86)      | 233<br>(128 - 395)       | 567<br>(267 - 843)          |
| Multiple myeloma                              | 436<br>(270 - 696)          | --                 | --                  | 12<br>(7 - 20)       | 129<br>(81 - 213)        | 295<br>(171 - 474)          |
| Leukemia                                      | 679<br>(544 - 793)          | 5<br>(3 - 8)       | 9<br>(6 - 12)       | 57<br>(48 - 68)      | 156<br>(118 - 182)       | 453<br>(343 - 559)          |
| Other neoplasms                               | 962<br>(653 - 1,199)        | 11<br>(8 - 15)     | 9<br>(7 - 12)       | 82<br>(65 - 98)      | 216<br>(165 - 258)       | 644<br>(379 - 868)          |
| Cardiovascular diseases                       | 28,501<br>(25,032 - 35,231) | 4<br>(3 - 6)       | 3<br>(2 - 4)        | 365<br>(275 - 438)   | 2,015<br>(1,685 - 2,860) | 26,113<br>(22,814 - 32,008) |
| Rheumatic heart disease                       | 380<br>(210 - 511)          | 0<br>(0 - 0)       | 0<br>(0 - 0)        | 16<br>(9 - 21)       | 45<br>(28 - 65)          | 318<br>(170 - 441)          |
| Ischemic heart disease                        | 13,909<br>(11,304 - 19,578) | 0<br>(0 - 0)       | 0<br>(0 - 0)        | 142<br>(100 - 190)   | 1,030<br>(804 - 1,708)   | 12,736<br>(10,340 - 17,838) |
| Cerebrovascular disease                       | 8,655<br>(7,042 - 11,337)   | 0<br>(0 - 1)       | 1<br>(0 - 1)        | 111<br>(79 - 139)    | 508<br>(395 - 734)       | 8,035<br>(6,497 - 10,541)   |
| Ischemic stroke                               | 6,022<br>(4,737 - 8,314)    | 0<br>(0 - 0)       | 0<br>(0 - 0)        | 11<br>(7 - 15)       | 76<br>(51 - 135)         | 5,935<br>(4,667 - 8,157)    |
| Hemorrhagic stroke                            | 2,633<br>(1,763 - 3,434)    | 0<br>(0 - 0)       | 1<br>(0 - 1)        | 100<br>(71 - 128)    | 432<br>(329 - 614)       | 2,100<br>(1,284 - 2,830)    |
| Hypertensive heart disease                    | 1,345<br>(864 - 2,172)      | 0<br>(0 - 0)       | 0<br>(0 - 0)        | 6<br>(4 - 9)         | 52<br>(36 - 80)          | 1,287<br>(819 - 2,078)      |
| Cardiomyopathy and myocarditis                | 582<br>(408 - 909)          | 3<br>(2 - 4)       | 1<br>(1 - 2)        | 33<br>(22 - 43)      | 81<br>(54 - 115)         | 463<br>(314 - 770)          |
| Atrial fibrillation and flutter               | 1,088<br>(733 - 1,551)      | --                 | --                  | 1<br>(1 - 2)         | 29<br>(20 - 41)          | 1,058<br>(704 - 1,517)      |
| Aortic aneurysm                               | 681<br>(431 - 1,155)        | --                 | --                  | 8<br>(5 - 13)        | 76<br>(49 - 125)         | 596<br>(373 - 1,024)        |
| Peripheral vascular disease                   | 390<br>(260 - 551)          | --                 | --                  | 0<br>(0 - 1)         | 15<br>(10 - 21)          | 374<br>(246 - 536)          |
| Endocarditis                                  | 129<br>(73 - 209)           | 0<br>(0 - 0)       | 0<br>(0 - 0)        | 6<br>(3 - 9)         | 17<br>(10 - 32)          | 106<br>(57 - 168)           |
| Other cardiovascular and circulatory diseases | 1,344<br>(885 - 1,820)      | 1<br>(0 - 1)       | 0<br>(0 - 0)        | 41<br>(24 - 55)      | 163<br>(105 - 226)       | 1,139<br>(708 - 1,601)      |
| Chronic respiratory diseases                  | 4,708<br>(3,521 - 5,611)    | 4<br>(2 - 5)       | 3<br>(3 - 4)        | 78<br>(66 - 94)      | 670<br>(536 - 770)       | 3,954<br>(2,840 - 4,827)    |
| Chronic obstructive pulmonary disease         | 3,204<br>(2,272 - 4,014)    | 2<br>(1 - 3)       | 0<br>(0 - 1)        | 29<br>(20 - 40)      | 531<br>(404 - 630)       | 2,641<br>(1,780 - 3,397)    |
| Pneumoconiosis                                | 12<br>(7 - 21)              | 0<br>(0 - 0)       | 0<br>(0 - 0)        | 1<br>(0 - 1)         | 1<br>(1 - 2)             | 10<br>(5 - 19)              |
| Silicosis                                     | 1<br>(0 - 1)                | 0<br>(0 - 0)       | 0<br>(0 - 0)        | 0<br>(0 - 0)         | 0<br>(0 - 0)             | 0<br>(0 - 1)                |
| Asbestosis                                    | 5<br>(2 - 9)                | 0<br>(0 - 0)       | 0<br>(0 - 0)        | 0<br>(0 - 0)         | 0<br>(0 - 0)             | 4<br>(2 - 9)                |
| Coal workers pneumoconiosis                   | 1<br>(0 - 1)                | 0<br>(0 - 0)       | 0<br>(0 - 0)        | 0<br>(0 - 0)         | 0<br>(0 - 0)             | 0<br>(0 - 0)                |
| Other pneumoconiosis                          | 6<br>(3 - 11)               | 0<br>(0 - 0)       | 0<br>(0 - 0)        | 0<br>(0 - 0)         | 0<br>(0 - 1)             | 5<br>(2 - 11)               |

Web Table 31- Australia deaths with 95% UI by age, sex, and cause in 2013

| Cause                                               | Females, All Ages         | Females, 0-4 Years | Females, 5-14 Years | Females, 15-49 Years | Females, 50-69 Years | Females, 70-80 Years      |
|-----------------------------------------------------|---------------------------|--------------------|---------------------|----------------------|----------------------|---------------------------|
| Asthma                                              | 357<br>(207 - 509)        | 1<br>(0 - 1)       | 2<br>(2 - 3)        | 38<br>(29 - 50)      | 74<br>(45 - 108)     | 242<br>(121 - 377)        |
| Interstitial lung disease and pulmonary sarcoidosis | 1,048<br>(566 - 1,727)    | 0<br>(0 - 0)       | 0<br>(0 - 0)        | 8<br>(5 - 14)        | 59<br>(31 - 94)      | 981<br>(514 - 1,621)      |
| Other chronic respiratory diseases                  | 86<br>(50 - 139)          | 1<br>(0 - 1)       | 0<br>(0 - 0)        | 2<br>(1 - 2)         | 5<br>(3 - 8)         | 79<br>(43 - 131)          |
| Cirrhosis                                           | 655<br>(574 - 750)        | 0<br>(0 - 0)       | 0<br>(0 - 1)        | 98<br>(83 - 116)     | 229<br>(194 - 262)   | 328<br>(267 - 398)        |
| Cirrhosis due to hepatitis B                        | 164<br>(66 - 294)         | 0<br>(0 - 0)       | 0<br>(0 - 0)        | 23<br>(10 - 44)      | 57<br>(25 - 104)     | 85<br>(29 - 160)          |
| Cirrhosis due to hepatitis C                        | 304<br>(84 - 430)         | 0<br>(0 - 0)       | 0<br>(0 - 0)        | 47<br>(18 - 66)      | 109<br>(33 - 153)    | 148<br>(36 - 226)         |
| Cirrhosis due to alcohol use                        | 121<br>(65 - 220)         | --<br>(0 - 0)      | --<br>(0 - 0)       | 11<br>(5 - 21)       | 37<br>(20 - 65)      | 74<br>(36 - 138)          |
| Cirrhosis due to other causes                       | 65<br>(33 - 115)          | 0<br>(0 - 0)       | 0<br>(0 - 0)        | 17<br>(9 - 28)       | 26<br>(12 - 49)      | 22<br>(9 - 43)            |
| Digestive diseases                                  | 2,092<br>(1,703 - 2,555)  | 1<br>(1 - 2)       | 1<br>(1 - 1)        | 37<br>(31 - 44)      | 177<br>(147 - 216)   | 1,876<br>(1,501 - 2,325)  |
| Peptic ulcer disease                                | 288<br>(188 - 475)        | 0<br>(0 - 0)       | 0<br>(0 - 0)        | 4<br>(3 - 6)         | 22<br>(15 - 33)      | 261<br>(165 - 441)        |
| Gastritis and duodenitis                            | 14<br>(7 - 29)            | 0<br>(0 - 0)       | 0<br>(0 - 0)        | 1<br>(0 - 1)         | 2<br>(1 - 3)         | 12<br>(5 - 25)            |
| Appendicitis                                        | 24<br>(13 - 39)           | 0<br>(0 - 0)       | 0<br>(0 - 0)        | 2<br>(1 - 2)         | 4<br>(2 - 6)         | 19<br>(9 - 33)            |
| Paralytic ileus and intestinal obstruction          | 384<br>(202 - 634)        | 0<br>(0 - 1)       | 0<br>(0 - 0)        | 4<br>(2 - 7)         | 22<br>(11 - 37)      | 358<br>(186 - 592)        |
| Inguinal, femoral, and abdominal hernia             | 63<br>(23 - 105)          | 0<br>(0 - 0)       | 0<br>(0 - 0)        | 1<br>(1 - 2)         | 6<br>(2 - 8)         | 56<br>(19 - 97)           |
| Inflammatory bowel disease                          | 150<br>(64 - 229)         | 0<br>(0 - 1)       | 0<br>(0 - 0)        | 4<br>(2 - 5)         | 13<br>(7 - 18)       | 133<br>(53 - 209)         |
| Vascular intestinal disorders                       | 392<br>(190 - 659)        | 0<br>(0 - 0)       | 0<br>(0 - 0)        | 5<br>(2 - 8)         | 41<br>(23 - 70)      | 346<br>(161 - 587)        |
| Gallbladder and biliary diseases                    | 232<br>(145 - 319)        | 0<br>(0 - 0)       | 0<br>(0 - 0)        | 5<br>(3 - 6)         | 19<br>(12 - 26)      | 208<br>(128 - 292)        |
| Pancreatitis                                        | 119<br>(76 - 179)         | 0<br>(0 - 0)       | 0<br>(0 - 0)        | 7<br>(4 - 10)        | 19<br>(13 - 30)      | 93<br>(56 - 141)          |
| Other digestive diseases                            | 427<br>(297 - 576)        | 0<br>(0 - 0)       | 0<br>(0 - 0)        | 5<br>(4 - 7)         | 30<br>(22 - 39)      | 391<br>(268 - 539)        |
| Neurological disorders                              | 9,575<br>(7,011 - 12,019) | 15<br>(10 - 20)    | 6<br>(5 - 8)        | 104<br>(83 - 123)    | 467<br>(389 - 547)   | 8,983<br>(6,442 - 11,411) |
| Alzheimer disease and other dementias               | 8,248<br>(5,644 - 10,665) | --<br>(0 - 0)      | --<br>(0 - 1)       | 1<br>(0 - 1)         | 171<br>(115 - 234)   | 8,077<br>(5,513 - 10,507) |
| Parkinson disease                                   | 574<br>(318 - 816)        | --<br>(0 - 0)      | --<br>(0 - 0)       | 1<br>(1 - 1)         | 27<br>(18 - 38)      | 546<br>(293 - 788)        |
| Epilepsy                                            | 117<br>(70 - 151)         | 3<br>(1 - 4)       | 3<br>(2 - 4)        | 43<br>(28 - 55)      | 23<br>(14 - 30)      | 46<br>(24 - 69)           |
| Multiple sclerosis                                  | 121<br>(62 - 167)         | --<br>(0 - 0)      | --<br>(0 - 0)       | 24<br>(13 - 37)      | 60<br>(30 - 85)      | 37<br>(17 - 56)           |
| Other neurological disorders                        | 515<br>(442 - 590)        | 12<br>(8 - 17)     | 3<br>(3 - 5)        | 37<br>(30 - 43)      | 185<br>(155 - 218)   | 277<br>(221 - 339)        |
| Mental and substance use disorders                  | 379<br>(306 - 446)        | 0<br>(0 - 0)       | 0<br>(0 - 0)        | 195<br>(166 - 232)   | 103<br>(74 - 130)    | 80<br>(46 - 110)          |
| Schizophrenia                                       | 36<br>(14 - 59)           | --<br>(0 - 0)      | --<br>(0 - 0)       | 1<br>(1 - 2)         | 5<br>(2 - 7)         | 30<br>(10 - 52)           |
| Alcohol use disorders                               | 71<br>(24 - 101)          | --<br>(0 - 0)      | --<br>(0 - 0)       | 20<br>(7 - 30)       | 30<br>(10 - 44)      | 21<br>(7 - 33)            |
| Drug use disorders                                  | 269<br>(234 - 310)        | 0<br>(0 - 0)       | --<br>(0 - 0)       | 171<br>(145 - 204)   | 69<br>(54 - 85)      | 29<br>(21 - 40)           |
| Opioid use disorders                                | 152<br>(132 - 175)        | 0<br>(0 - 0)       | --<br>(0 - 0)       | 98<br>(82 - 118)     | 37<br>(29 - 47)      | 17<br>(12 - 23)           |
| Cocaine use disorders                               | 9<br>(8 - 11)             | 0<br>(0 - 0)       | --<br>(0 - 0)       | 7<br>(5 - 8)         | 2<br>(1 - 3)         | 1<br>(1 - 1)              |
| Amphetamine use disorders                           | 12<br>(10 - 14)           | 0<br>(0 - 0)       | --<br>(0 - 0)       | 8<br>(6 - 9)         | 3<br>(2 - 4)         | 1<br>(1 - 2)              |
| Other drug use disorders                            | 96<br>(82 - 112)          | 0<br>(0 - 0)       | --<br>(0 - 0)       | 59<br>(49 - 71)      | 27<br>(21 - 34)      | 10<br>(7 - 14)            |
| Eating disorders                                    | 3<br>(2 - 5)              | --<br>(0 - 0)      | 0<br>(0 - 0)        | 3<br>(2 - 5)         | --<br>(0 - 0)        | --<br>(0 - 0)             |
| Anorexia nervosa                                    | 3<br>(2 - 5)              | --<br>(0 - 0)      | 0<br>(0 - 0)        | 3<br>(2 - 5)         | --<br>(0 - 0)        | --<br>(0 - 0)             |
| Diabetes, urogenital, blood, and endocrine diseases | 5,730<br>(4,904 - 6,851)  | 17<br>(11 - 23)    | 9<br>(7 - 12)       | 163<br>(139 - 187)   | 641<br>(556 - 777)   | 4,901<br>(4,114 - 5,929)  |
| Diabetes mellitus                                   | 2,178<br>(1,794 - 2,650)  | 1<br>(0 - 1)       | 1<br>(0 - 1)        | 45<br>(37 - 54)      | 283<br>(235 - 342)   | 1,849<br>(1,486 - 2,285)  |
| Acute glomerulonephritis                            | 2<br>(2 - 5)              | 0<br>(0 - 0)       | 0<br>(0 - 0)        | 1<br>(0 - 1)         | 0<br>(0 - 1)         | 1<br>(0 - 3)              |
| Chronic kidney disease                              | 2,051<br>(1,586 - 2,962)  | 1<br>(0 - 1)       | 0<br>(0 - 0)        | 31<br>(25 - 47)      | 168<br>(132 - 275)   | 1,851<br>(1,395 - 2,669)  |
| Chronic kidney disease due to diabetes mellitus     | 200<br>(119 - 296)        | 0<br>(0 - 0)       | 0<br>(0 - 0)        | 7<br>(5 - 10)        | 39<br>(23 - 59)      | 153<br>(86 - 248)         |

Web Table 31- Australia deaths with 95% UI by age, sex, and cause in 2013

| Cause                                               | Females, All Ages        | Females, 0-4 Years | Females, 5-14 Years | Females, 15-49 Years | Females, 50-69 Years | Females, 70-80 Years     |
|-----------------------------------------------------|--------------------------|--------------------|---------------------|----------------------|----------------------|--------------------------|
| Chronic kidney disease due to hypertension          | 868<br>(512 - 1,253)     | 0<br>(0 - 0)       | 0<br>(0 - 0)        | 6<br>(3 - 9)         | 46<br>(25 - 77)      | 816<br>(478 - 1,192)     |
| Chronic kidney disease due to glomerulonephritis    | 82<br>(33 - 184)         | 0<br>(0 - 0)       | 0<br>(0 - 0)        | 5<br>(2 - 9)         | 23<br>(8 - 49)       | 54<br>(21 - 130)         |
| Chronic kidney disease due to other causes          | 901<br>(553 - 1,571)     | 0<br>(0 - 1)       | 0<br>(0 - 0)        | 13<br>(8 - 24)       | 60<br>(31 - 114)     | 828<br>(494 - 1,463)     |
| Urinary diseases and male infertility               | 613<br>(424 - 1,059)     | 1<br>(0 - 1)       | 0<br>(0 - 0)        | 12<br>(10 - 18)      | 47<br>(35 - 78)      | 553<br>(367 - 980)       |
| Interstitial nephritis and urinary tract infections | 535<br>(359 - 925)       | 0<br>(0 - 1)       | 0<br>(0 - 0)        | 9<br>(7 - 13)        | 36<br>(26 - 60)      | 489<br>(314 - 870)       |
| Urolithiasis                                        | 20<br>(11 - 42)          | --                 | 0<br>(0 - 0)        | 1<br>(1 - 2)         | 4<br>(2 - 7)         | 15<br>(7 - 33)           |
| Other urinary diseases                              | 59<br>(31 - 126)         | 0<br>(0 - 0)       | 0<br>(0 - 0)        | 2<br>(1 - 4)         | 7<br>(4 - 13)        | 49<br>(22 - 114)         |
| Gynecological diseases                              | 5<br>(4 - 8)             | --                 | --                  | 1<br>(1 - 1)         | 1<br>(1 - 1)         | 3<br>(2 - 6)             |
| Uterine fibroids                                    | 1<br>(1 - 2)             | --                 | --                  | 0<br>(0 - 0)         | 0<br>(0 - 0)         | 1<br>(1 - 2)             |
| Polycystic ovarian syndrome                         | 0<br>(0 - 0)             | --                 | --                  | 0<br>(0 - 0)         | 0<br>(0 - 0)         | --                       |
| Endometriosis                                       | 0<br>(0 - 0)             | --                 | --                  | 0<br>(0 - 0)         | 0<br>(0 - 0)         | --                       |
| Genital prolapse                                    | 1<br>(1 - 2)             | --                 | --                  | 0<br>(0 - 0)         | 0<br>(0 - 0)         | 1<br>(0 - 1)             |
| Other gynecological diseases                        | 2<br>(2 - 4)             | --                 | --                  | 0<br>(0 - 1)         | 0<br>(0 - 1)         | 1<br>(1 - 3)             |
| Hemoglobinopathies and hemolytic anemias            | 71<br>(45 - 117)         | 1<br>(1 - 2)       | 1<br>(0 - 1)        | 6<br>(4 - 9)         | 9<br>(6 - 14)        | 55<br>(33 - 94)          |
| Thalassemias                                        | 5<br>(3 - 8)             | 1<br>(0 - 1)       | 0<br>(0 - 1)        | 3<br>(2 - 4)         | 1<br>(1 - 1)         | 0<br>(0 - 1)             |
| Sickle cell disorders                               | 3<br>(2 - 5)             | 0<br>(0 - 0)       | 0<br>(0 - 0)        | 1<br>(1 - 1)         | 1<br>(1 - 2)         | 1<br>(1 - 1)             |
| G6PD deficiency                                     | 1<br>(0 - 1)             | 0<br>(0 - 0)       | 0<br>(0 - 0)        | 0<br>(0 - 0)         | 0<br>(0 - 0)         | 0<br>(0 - 0)             |
| Other hemoglobinopathies and hemolytic anemias      | 62<br>(39 - 104)         | 0<br>(0 - 1)       | 0<br>(0 - 0)        | 2<br>(1 - 3)         | 6<br>(4 - 10)        | 53<br>(32 - 92)          |
| Endocrine, metabolic, blood, and immune disorders   | 810<br>(487 - 1,038)     | 14<br>(8 - 20)     | 7<br>(5 - 10)       | 67<br>(43 - 83)      | 133<br>(91 - 168)    | 589<br>(311 - 806)       |
| Musculoskeletal disorders                           | 529<br>(410 - 682)       | --                 | 1<br>(1 - 1)        | 30<br>(24 - 38)      | 101<br>(80 - 129)    | 397<br>(289 - 533)       |
| Rheumatoid arthritis                                | 165<br>(115 - 236)       | --                 | 0<br>(0 - 0)        | 2<br>(1 - 3)         | 25<br>(17 - 35)      | 138<br>(91 - 199)        |
| Other musculoskeletal disorders                     | 363<br>(273 - 478)       | --                 | 1<br>(0 - 1)        | 28<br>(22 - 35)      | 76<br>(59 - 96)      | 259<br>(182 - 358)       |
| Other non-communicable diseases                     | 693<br>(576 - 842)       | 203<br>(158 - 268) | 11<br>(8 - 14)      | 53<br>(43 - 67)      | 61<br>(49 - 74)      | 365<br>(258 - 482)       |
| Congenital anomalies                                | 381<br>(315 - 472)       | 159<br>(123 - 210) | 11<br>(8 - 14)      | 50<br>(40 - 63)      | 43<br>(34 - 55)      | 118<br>(81 - 169)        |
| Neural tube defects                                 | 12<br>(7 - 18)           | 10<br>(5 - 16)     | 0<br>(0 - 1)        | 1<br>(1 - 2)         | 0<br>(0 - 0)         | 0<br>(0 - 0)             |
| Congenital heart anomalies                          | 157<br>(123 - 204)       | 45<br>(33 - 63)    | 4<br>(3 - 6)        | 22<br>(17 - 28)      | 12<br>(8 - 16)       | 74<br>(48 - 110)         |
| Cleft lip and cleft palate                          | 0<br>(0 - 0)             | 0<br>(0 - 0)       | --                  | --                   | --                   | --                       |
| Down syndrome                                       | 32<br>(15 - 44)          | 7<br>(3 - 13)      | 1<br>(0 - 1)        | 7<br>(3 - 11)        | 15<br>(7 - 22)       | 1<br>(1 - 2)             |
| Chromosomal unbalanced rearrangements               | 30<br>(19 - 52)          | 27<br>(16 - 47)    | 0<br>(0 - 1)        | 2<br>(1 - 3)         | 1<br>(1 - 2)         | 0<br>(0 - 0)             |
| Other congenital anomalies                          | 151<br>(116 - 193)       | 71<br>(50 - 98)    | 5<br>(4 - 7)        | 18<br>(13 - 24)      | 15<br>(10 - 21)      | 43<br>(28 - 65)          |
| Skin and subcutaneous diseases                      | 268<br>(178 - 370)       | 1<br>(0 - 1)       | 0<br>(0 - 0)        | 4<br>(3 - 5)         | 18<br>(11 - 22)      | 246<br>(159 - 349)       |
| Cellulitis                                          | 107<br>(40 - 182)        | 0<br>(0 - 0)       | 0<br>(0 - 0)        | 1<br>(1 - 2)         | 8<br>(4 - 12)        | 97<br>(33 - 170)         |
| Pyoderma                                            | 118<br>(64 - 194)        | 0<br>(0 - 1)       | 0<br>(0 - 0)        | 1<br>(1 - 2)         | 7<br>(4 - 11)        | 109<br>(58 - 184)        |
| Decubitus ulcer                                     | 28<br>(14 - 54)          | 0<br>(0 - 0)       | 0<br>(0 - 0)        | 0<br>(0 - 1)         | 1<br>(1 - 2)         | 27<br>(13 - 53)          |
| Other skin and subcutaneous diseases                | 16<br>(5 - 38)           | 0<br>(0 - 0)       | 0<br>(0 - 0)        | 1<br>(0 - 1)         | 1<br>(1 - 3)         | 13<br>(3 - 36)           |
| Sudden infant death syndrome                        | 43<br>(18 - 81)          | 43<br>(18 - 81)    | --                  | --                   | --                   | --                       |
| Injuries                                            | 3,498<br>(2,751 - 4,136) | 59<br>(48 - 75)    | 35<br>(30 - 43)     | 801<br>(716 - 908)   | 479<br>(411 - 552)   | 2,123<br>(1,417 - 2,716) |
| Transport injuries                                  | 606<br>(519 - 821)       | 15<br>(11 - 21)    | 18<br>(14 - 26)     | 269<br>(231 - 370)   | 126<br>(101 - 176)   | 178<br>(132 - 239)       |
| Road injuries                                       | 580<br>(498 - 784)       | 15<br>(11 - 21)    | 17<br>(13 - 24)     | 255<br>(219 - 352)   | 120<br>(97 - 169)    | 173<br>(128 - 230)       |
| Pedestrian road injuries                            | 150<br>(98 - 223)        | 5<br>(3 - 8)       | 5<br>(3 - 8)        | 31<br>(19 - 48)      | 27<br>(16 - 44)      | 81<br>(48 - 122)         |



Web Table 31- Australia deaths with 95% UI by age, sex, and cause in 2013

| Cause                                           | Females, All Ages        | Females, 0-4 Years | Females, 5-14 Years | Females, 15-49 Years | Females, 50-69 Years | Females, 70-80 Years     |
|-------------------------------------------------|--------------------------|--------------------|---------------------|----------------------|----------------------|--------------------------|
| Cyclist road injuries                           | 8<br>(5 - 13)            | 0<br>(0 - 0)       | 1<br>(1 - 2)        | 4<br>(2 - 6)         | 2<br>(1 - 3)         | 1<br>(1 - 3)             |
| Motorcyclist road injuries                      | 18<br>(7 - 35)           | 0<br>(0 - 1)       | 1<br>(0 - 1)        | 12<br>(5 - 23)       | 3<br>(1 - 6)         | 2<br>(1 - 5)             |
| Motor vehicle road injuries                     | 401<br>(334 - 569)       | 9<br>(6 - 13)      | 10<br>(7 - 14)      | 206<br>(174 - 289)   | 87<br>(67 - 125)     | 88<br>(59 - 135)         |
| Other road injuries                             | 3<br>(2 - 7)             | 0<br>(0 - 0)       | 0<br>(0 - 0)        | 2<br>(1 - 3)         | 1<br>(0 - 2)         | 1<br>(0 - 2)             |
| Other transport injuries                        | 26<br>(16 - 41)          | 0<br>(0 - 1)       | 2<br>(1 - 3)        | 14<br>(9 - 22)       | 5<br>(3 - 9)         | 4<br>(2 - 8)             |
| Unintentional injuries                          | 2,163<br>(1,441 - 2,745) | 39<br>(30 - 52)    | 12<br>(9 - 14)      | 98<br>(83 - 115)     | 168<br>(131 - 198)   | 1,847<br>(1,159 - 2,419) |
| Falls                                           | 1,357<br>(792 - 1,891)   | 2<br>(1 - 3)       | 1<br>(1 - 1)        | 14<br>(11 - 18)      | 45<br>(27 - 57)      | 1,295<br>(742 - 1,813)   |
| Drowning                                        | 62<br>(46 - 89)          | 16<br>(10 - 26)    | 4<br>(2 - 6)        | 17<br>(13 - 24)      | 12<br>(8 - 17)       | 13<br>(9 - 18)           |
| Fire, heat, and hot substances                  | 73<br>(50 - 95)          | 3<br>(2 - 5)       | 1<br>(1 - 2)        | 10<br>(7 - 13)       | 12<br>(8 - 15)       | 47<br>(30 - 65)          |
| Poisonings                                      | 43<br>(28 - 61)          | 1<br>(1 - 2)       | 0<br>(0 - 1)        | 12<br>(9 - 19)       | 9<br>(5 - 13)        | 19<br>(10 - 32)          |
| Exposure to mechanical forces                   | 42<br>(32 - 51)          | 7<br>(5 - 11)      | 2<br>(2 - 3)        | 13<br>(10 - 15)      | 6<br>(4 - 7)         | 14<br>(10 - 20)          |
| Unintentional firearm injuries                  | 3<br>(2 - 3)             | 0<br>(0 - 0)       | 0<br>(0 - 0)        | 1<br>(1 - 2)         | 1<br>(0 - 1)         | 0<br>(0 - 1)             |
| Unintentional suffocation                       | 17<br>(9 - 24)           | 5<br>(2 - 8)       | 1<br>(0 - 1)        | 6<br>(3 - 8)         | 2<br>(1 - 3)         | 4<br>(1 - 8)             |
| Other exposure to mechanical forces             | 22<br>(18 - 28)          | 3<br>(2 - 4)       | 1<br>(1 - 2)        | 5<br>(4 - 7)         | 3<br>(2 - 4)         | 10<br>(6 - 14)           |
| Adverse effects of medical treatment            | 315<br>(189 - 443)       | 2<br>(1 - 3)       | 1<br>(0 - 1)        | 13<br>(9 - 18)       | 52<br>(34 - 77)      | 248<br>(135 - 370)       |
| Animal contact                                  | 10<br>(4 - 18)           | 1<br>(0 - 1)       | 1<br>(0 - 1)        | 2<br>(1 - 4)         | 2<br>(1 - 4)         | 4<br>(2 - 9)             |
| Venomous animal contact                         | 2<br>(1 - 6)             | 0<br>(0 - 0)       | 0<br>(0 - 0)        | 1<br>(0 - 1)         | 1<br>(0 - 1)         | 1<br>(0 - 3)             |
| Non-venomous animal contact                     | 7<br>(3 - 13)            | 1<br>(0 - 1)       | 0<br>(0 - 1)        | 1<br>(1 - 3)         | 2<br>(1 - 3)         | 3<br>(1 - 6)             |
| Foreign body                                    | 254<br>(115 - 399)       | 6<br>(4 - 10)      | 2<br>(1 - 2)        | 15<br>(8 - 22)       | 28<br>(16 - 41)      | 204<br>(82 - 346)        |
| Pulmonary aspiration and foreign body in airway | 252<br>(114 - 397)       | 6<br>(4 - 10)      | 1<br>(1 - 2)        | 14<br>(8 - 21)       | 28<br>(15 - 40)      | 203<br>(81 - 345)        |
| Foreign body in other body part                 | 2<br>(1 - 3)             | 0<br>(0 - 0)       | 0<br>(0 - 0)        | 1<br>(0 - 1)         | 0<br>(0 - 1)         | 1<br>(0 - 2)             |
| Other unintentional injuries                    | 8<br>(5 - 13)            | 1<br>(0 - 1)       | 0<br>(0 - 0)        | 2<br>(1 - 3)         | 1<br>(1 - 3)         | 4<br>(2 - 7)             |
| Self-harm and interpersonal violence            | 728<br>(615 - 829)       | 5<br>(3 - 7)       | 5<br>(4 - 7)        | 434<br>(363 - 497)   | 186<br>(150 - 221)   | 98<br>(77 - 124)         |
| Self-harm                                       | 612<br>(496 - 699)       | --                 | 2<br>(1 - 3)        | 361<br>(287 - 415)   | 166<br>(130 - 199)   | 83<br>(64 - 106)         |
| Interpersonal violence                          | 117<br>(85 - 162)        | 5<br>(3 - 7)       | 3<br>(2 - 5)        | 73<br>(52 - 105)     | 20<br>(15 - 28)      | 16<br>(9 - 21)           |
| Assault by firearm                              | 22<br>(13 - 41)          | 1<br>(0 - 1)       | 1<br>(0 - 1)        | 14<br>(8 - 28)       | 4<br>(2 - 7)         | 3<br>(1 - 5)             |
| Assault by sharp object                         | 37<br>(24 - 56)          | 1<br>(0 - 1)       | 1<br>(0 - 1)        | 25<br>(16 - 40)      | 5<br>(3 - 9)         | 4<br>(2 - 7)             |
| Assault by other means                          | 58<br>(36 - 78)          | 4<br>(2 - 6)       | 2<br>(1 - 3)        | 33<br>(21 - 46)      | 11<br>(7 - 15)       | 9<br>(5 - 12)            |
| Forces of nature, war, and legal intervention   | 0<br>(0 - 0)             | 0<br>(0 - 0)       | --                  | --                   | --                   | 0<br>(0 - 0)             |
| Exposure to forces of nature                    | 0<br>(0 - 0)             | 0<br>(0 - 0)       | --                  | --                   | --                   | 0<br>(0 - 0)             |

Web Table 31- Austria deaths with 95% UI by age, sex, and cause in 2013

| Cause                                                             | Both Sexes, All Ages        | Both Sexes, 0-4 Years | Both Sexes, 5-14 Years | Both Sexes, 15-49 Years  | Both Sexes, 50-69 Years     | Both Sexes, 70-80 Years     |
|-------------------------------------------------------------------|-----------------------------|-----------------------|------------------------|--------------------------|-----------------------------|-----------------------------|
| All causes                                                        | 84,892<br>(81,115 - 88,758) | 329<br>(261 - 415)    | 75<br>(65 - 85)        | 3,691<br>(3,451 - 3,934) | 13,920<br>(13,094 - 14,749) | 66,876<br>(64,117 - 69,629) |
| Communicable, maternal, neonatal, and nutritional diseases        | 2,183<br>(1,857 - 2,613)    | 141<br>(110 - 179)    | 5<br>(4 - 6)           | 115<br>(84 - 155)        | 185<br>(159 - 215)          | 1,738<br>(1,437 - 2,164)    |
| HIV/AIDS and tuberculosis                                         | 133<br>(88 - 186)           | 0<br>(0 - 1)          | 0<br>(0 - 0)           | 58<br>(28 - 98)          | 32<br>(21 - 47)             | 42<br>(33 - 62)             |
| Tuberculosis                                                      | 60<br>(49 - 93)             | 0<br>(0 - 0)          | 0<br>(0 - 0)           | 5<br>(4 - 8)             | 16<br>(13 - 26)             | 39<br>(31 - 60)             |
| HIV/AIDS                                                          | 73<br>(32 - 129)            | 0<br>(0 - 1)          | 0<br>(0 - 0)           | 53<br>(24 - 93)          | 16<br>(7 - 31)              | 3<br>(1 - 8)                |
| HIV/AIDS resulting in mycobacterial infection                     | 4<br>(2 - 7)                | 0<br>(0 - 0)          | 0<br>(0 - 0)           | 3<br>(1 - 5)             | 1<br>(0 - 2)                | 0<br>(0 - 0)                |
| HIV/AIDS resulting in other diseases                              | 70<br>(31 - 122)            | 0<br>(0 - 1)          | 0<br>(0 - 0)           | 51<br>(22 - 88)          | 15<br>(6 - 30)              | 3<br>(1 - 7)                |
| Diarrhea, lower respiratory, and other common infectious diseases | 1,773<br>(1,470 - 2,202)    | 15<br>(11 - 21)       | 3<br>(3 - 4)           | 43<br>(37 - 52)          | 129<br>(109 - 156)          | 1,583<br>(1,280 - 2,003)    |
| Diarrheal diseases                                                | 59<br>(43 - 83)             | 3<br>(2 - 4)          | 0<br>(0 - 0)           | 2<br>(2 - 2)             | 5<br>(4 - 6)                | 50<br>(34 - 73)             |
| Intestinal infectious diseases                                    | 5<br>(2 - 10)               | 1<br>(0 - 2)          | 1<br>(0 - 2)           | 2<br>(1 - 4)             | 1<br>(0 - 2)                | 1<br>(0 - 3)                |
| Typhoid fever                                                     | 3<br>(1 - 6)                | 0<br>(0 - 1)          | 0<br>(0 - 1)           | 1<br>(0 - 3)             | 0<br>(0 - 1)                | 0<br>(0 - 1)                |
| Paratyphoid fever                                                 | 1<br>(0 - 2)                | 0<br>(0 - 0)          | 0<br>(0 - 0)           | 0<br>(0 - 1)             | 0<br>(0 - 0)                | 0<br>(0 - 0)                |
| Other intestinal infectious diseases                              | 1<br>(0 - 4)                | 0<br>(0 - 1)          | 0<br>(0 - 0)           | 0<br>(0 - 2)             | 0<br>(0 - 2)                | 0<br>(0 - 2)                |
| Lower respiratory infections                                      | 1,635<br>(1,335 - 2,067)    | 7<br>(5 - 11)         | 1<br>(1 - 2)           | 27<br>(22 - 35)          | 104<br>(86 - 131)           | 1,495<br>(1,193 - 2,012)    |
| Upper respiratory infections                                      | 2<br>(0 - 4)                | 0<br>(0 - 0)          | 0<br>(0 - 0)           | 0<br>(0 - 0)             | 0<br>(0 - 1)                | 1<br>(0 - 4)                |
| Otitis media                                                      | 1<br>(1 - 1)                | 0<br>(0 - 0)          | 0<br>(0 - 0)           | 0<br>(0 - 0)             | 0<br>(0 - 0)                | 0<br>(0 - 0)                |
| Meningitis                                                        | 32<br>(28 - 36)             | 3<br>(2 - 4)          | 0<br>(0 - 1)           | 4<br>(4 - 5)             | 9<br>(8 - 10)               | 16<br>(13 - 20)             |
| Pneumococcal meningitis                                           | 6<br>(5 - 8)                | 0<br>(0 - 1)          | 0<br>(0 - 0)           | 1<br>(1 - 1)             | 2<br>(1 - 2)                | 3<br>(2 - 4)                |
| H influenzae type B meningitis                                    | 4<br>(3 - 5)                | 1<br>(0 - 1)          | 0<br>(0 - 0)           | 0<br>(0 - 1)             | 1<br>(1 - 1)                | 2<br>(1 - 2)                |
| Meningococcal meningitis                                          | 10<br>(8 - 12)              | 1<br>(1 - 1)          | 0<br>(0 - 0)           | 1<br>(1 - 2)             | 3<br>(2 - 4)                | 5<br>(4 - 7)                |
| Other meningitis                                                  | 12<br>(9 - 16)              | 1<br>(0 - 1)          | 0<br>(0 - 0)           | 2<br>(1 - 2)             | 4<br>(2 - 5)                | 6<br>(4 - 9)                |
| Encephalitis                                                      | 27<br>(18 - 35)             | 1<br>(1 - 1)          | 1<br>(0 - 1)           | 6<br>(4 - 9)             | 9<br>(6 - 12)               | 11<br>(6 - 16)              |
| Diphtheria                                                        | 0<br>(0 - 1)                | 0<br>(0 - 0)          | 0<br>(0 - 0)           | 0<br>(0 - 0)             | 0<br>(0 - 0)                | --<br>(0 - 0)               |
| Whooping cough                                                    | 1<br>(0 - 1)                | 0<br>(0 - 0)          | 0<br>(0 - 0)           | 0<br>(0 - 0)             | 0<br>(0 - 0)                | --<br>(0 - 0)               |
| Tetanus                                                           | 1<br>(1 - 1)                | 0<br>(0 - 0)          | 0<br>(0 - 0)           | 0<br>(0 - 0)             | 0<br>(0 - 0)                | 0<br>(0 - 0)                |
| Measles                                                           | 0<br>(0 - 0)                | 0<br>(0 - 0)          | 0<br>(0 - 0)           | 0<br>(0 - 0)             | 0<br>(0 - 0)                | --<br>(0 - 0)               |
| Varicella and herpes zoster                                       | 10<br>(3 - 38)              | 0<br>(0 - 1)          | 0<br>(0 - 0)           | 1<br>(0 - 2)             | 1<br>(0 - 2)                | 8<br>(1 - 35)               |
| Neglected tropical diseases and malaria                           | 4<br>(3 - 4)                | 0<br>(0 - 0)          | 0<br>(0 - 0)           | 1<br>(1 - 1)             | 1<br>(1 - 1)                | 1<br>(1 - 1)                |
| Cysticercosis                                                     | 0<br>(0 - 0)                | 0<br>(0 - 0)          | 0<br>(0 - 0)           | 0<br>(0 - 0)             | 0<br>(0 - 0)                | 0<br>(0 - 0)                |
| Cystic echinococcosis                                             | 1<br>(1 - 1)                | 0<br>(0 - 0)          | 0<br>(0 - 0)           | 0<br>(0 - 0)             | 0<br>(0 - 0)                | 0<br>(0 - 0)                |
| Dengue                                                            | 1<br>(1 - 1)                | 0<br>(0 - 0)          | 0<br>(0 - 0)           | 0<br>(0 - 0)             | 0<br>(0 - 0)                | 0<br>(0 - 0)                |
| Rabies                                                            | 1<br>(0 - 1)                | 0<br>(0 - 0)          | 0<br>(0 - 0)           | 0<br>(0 - 0)             | 0<br>(0 - 0)                | 0<br>(0 - 0)                |
| Other neglected tropical diseases                                 | 1<br>(1 - 2)                | 0<br>(0 - 0)          | 0<br>(0 - 0)           | 0<br>(0 - 0)             | 0<br>(0 - 0)                | 0<br>(0 - 1)                |
| Maternal disorders                                                | 3<br>(2 - 3)                | --                    | 0<br>(0 - 0)           | 3<br>(2 - 3)             | --                          | --                          |
| Maternal hemorrhage                                               | 0<br>(0 - 0)                | --                    | 0<br>(0 - 0)           | 0<br>(0 - 0)             | --                          | --                          |
| Maternal sepsis and other maternal infections                     | 0<br>(0 - 0)                | --                    | 0<br>(0 - 0)           | 0<br>(0 - 0)             | --                          | --                          |
| Maternal hypertensive disorders                                   | 0<br>(0 - 1)                | --                    | 0<br>(0 - 0)           | 0<br>(0 - 1)             | --                          | --                          |
| Maternal obstructed labor                                         | 0<br>(0 - 0)                | --                    | 0<br>(0 - 0)           | 0<br>(0 - 0)             | --                          | --                          |
| Maternal abortive outcome                                         | 1<br>(0 - 1)                | --                    | 0<br>(0 - 0)           | 1<br>(0 - 1)             | --                          | --                          |
| Indirect maternal deaths                                          | 0<br>(0 - 0)                | --                    | 0<br>(0 - 0)           | 0<br>(0 - 0)             | --                          | --                          |

Web Table 31- Austria deaths with 95% UI by age, sex, and cause in 2013

| Cause                                                            | Both Sexes, All Ages        | Both Sexes, 0-4 Years | Both Sexes, 5-14 Years | Both Sexes, 15-49 Years  | Both Sexes, 50-69 Years     | Both Sexes, 70-80 Years     |
|------------------------------------------------------------------|-----------------------------|-----------------------|------------------------|--------------------------|-----------------------------|-----------------------------|
| Late maternal deaths                                             | 0<br>(0 - 0)                | --                    | 0<br>(0 - 0)           | 0<br>(0 - 0)             | --                          | --                          |
| Maternal deaths aggravated by HIV/AIDS                           | 0<br>(0 - 0)                | --                    | --                     | 0<br>(0 - 0)             | --                          | --                          |
| Other maternal disorders                                         | 1<br>(0 - 1)                | --                    | 0<br>(0 - 0)           | 1<br>(0 - 1)             | --                          | --                          |
| Neonatal disorders                                               | 122<br>(94 - 155)           | 122<br>(94 - 155)     | --                     | --                       | --                          | --                          |
| Neonatal preterm birth complications                             | 74<br>(55 - 98)             | 74<br>(55 - 98)       | --                     | --                       | --                          | --                          |
| Neonatal encephalopathy due to birth asphyxia and trauma         | 30<br>(21 - 43)             | 30<br>(21 - 43)       | --                     | --                       | --                          | --                          |
| Neonatal sepsis and other neonatal infections                    | 2<br>(1 - 4)                | 2<br>(1 - 4)          | --                     | --                       | --                          | --                          |
| Hemolytic disease and other neonatal jaundice                    | 0<br>(0 - 0)                | 0<br>(0 - 0)          | --                     | --                       | --                          | --                          |
| Other neonatal disorders                                         | 15<br>(8 - 23)              | 15<br>(8 - 23)        | --                     | --                       | --                          | --                          |
| Nutritional deficiencies                                         | 95<br>(68 - 120)            | 1<br>(1 - 1)          | 0<br>(0 - 0)           | 4<br>(3 - 5)             | 7<br>(5 - 9)                | 83<br>(59 - 107)            |
| Protein-energy malnutrition                                      | 1<br>(1 - 2)                | 0<br>(0 - 1)          | 0<br>(0 - 0)           | 0<br>(0 - 1)             | 0<br>(0 - 1)                | 0<br>(0 - 0)                |
| Iodine deficiency                                                | 1<br>(0 - 3)                | 0<br>(0 - 0)          | 0<br>(0 - 0)           | 0<br>(0 - 0)             | 0<br>(0 - 0)                | 0<br>(0 - 3)                |
| Iron-deficiency anemia                                           | 78<br>(55 - 102)            | 0<br>(0 - 0)          | 0<br>(0 - 0)           | 3<br>(2 - 4)             | 5<br>(4 - 7)                | 70<br>(48 - 92)             |
| Other nutritional deficiencies                                   | 15<br>(7 - 27)              | 0<br>(0 - 1)          | 0<br>(0 - 0)           | 0<br>(0 - 1)             | 1<br>(1 - 2)                | 13<br>(5 - 24)              |
| Other communicable, maternal, neonatal, and nutritional diseases | 53<br>(29 - 71)             | 3<br>(1 - 5)          | 1<br>(0 - 1)           | 6<br>(3 - 7)             | 15<br>(9 - 20)              | 29<br>(14 - 41)             |
| Sexually transmitted diseases excluding HIV                      | 4<br>(3 - 6)                | 1<br>(0 - 3)          | 0<br>(0 - 0)           | 0<br>(0 - 1)             | 1<br>(1 - 1)                | 2<br>(1 - 3)                |
| Syphilis                                                         | 3<br>(2 - 5)                | 1<br>(0 - 3)          | 0<br>(0 - 0)           | 0<br>(0 - 0)             | 0<br>(0 - 1)                | 2<br>(1 - 2)                |
| Chlamydial infection                                             | 0<br>(0 - 0)                | --                    | 0<br>(0 - 0)           | 0<br>(0 - 0)             | 0<br>(0 - 0)                | 0<br>(0 - 0)                |
| Gonococcal infection                                             | 0<br>(0 - 1)                | --                    | 0<br>(0 - 0)           | 0<br>(0 - 0)             | 0<br>(0 - 0)                | 0<br>(0 - 0)                |
| Other sexually transmitted diseases                              | 0<br>(0 - 0)                | --                    | 0<br>(0 - 0)           | 0<br>(0 - 0)             | 0<br>(0 - 0)                | 0<br>(0 - 0)                |
| Hepatitis                                                        | 3<br>(2 - 4)                | 0<br>(0 - 0)          | 0<br>(0 - 0)           | 1<br>(1 - 1)             | 1<br>(1 - 1)                | 1<br>(1 - 2)                |
| Acute hepatitis A                                                | 1<br>(0 - 1)                | 0<br>(0 - 0)          | 0<br>(0 - 0)           | 0<br>(0 - 0)             | 0<br>(0 - 0)                | 0<br>(0 - 0)                |
| Acute hepatitis B                                                | 2<br>(1 - 3)                | 0<br>(0 - 0)          | 0<br>(0 - 0)           | 0<br>(0 - 1)             | 1<br>(0 - 1)                | 1<br>(1 - 1)                |
| Acute hepatitis C                                                | 0<br>(0 - 1)                | --                    | 0<br>(0 - 0)           | 0<br>(0 - 0)             | 0<br>(0 - 0)                | 0<br>(0 - 0)                |
| Other infectious diseases                                        | 46<br>(22 - 63)             | 2<br>(1 - 3)          | 1<br>(0 - 1)           | 4<br>(2 - 6)             | 14<br>(7 - 19)              | 26<br>(10 - 38)             |
| Non-communicable diseases                                        | 78,355<br>(74,895 - 81,753) | 166<br>(131 - 210)    | 46<br>(39 - 53)        | 2,474<br>(2,285 - 2,648) | 12,746<br>(11,997 - 13,462) | 62,924<br>(60,302 - 65,523) |
| Neoplasms                                                        | 22,013<br>(20,545 - 23,423) | 11<br>(8 - 15)        | 21<br>(17 - 25)        | 1,069<br>(982 - 1,165)   | 6,413<br>(5,993 - 6,829)    | 14,498<br>(13,426 - 15,554) |
| Esophageal cancer                                                | 354<br>(304 - 415)          | --                    | --                     | 23<br>(17 - 31)          | 156<br>(127 - 188)          | 175<br>(146 - 208)          |
| Stomach cancer                                                   | 1,270<br>(1,085 - 1,522)    | --                    | --                     | 42<br>(35 - 50)          | 255<br>(222 - 297)          | 974<br>(814 - 1,197)        |
| Liver cancer                                                     | 910<br>(709 - 1,227)        | --                    | 0<br>(0 - 0)           | 31<br>(23 - 43)          | 304<br>(229 - 414)          | 575<br>(425 - 807)          |
| Liver cancer due to hepatitis B                                  | 187<br>(111 - 306)          | --                    | 0<br>(0 - 0)           | 12<br>(7 - 21)           | 84<br>(44 - 144)            | 91<br>(50 - 151)            |
| Liver cancer due to hepatitis C                                  | 454<br>(259 - 670)          | --                    | 0<br>(0 - 0)           | 12<br>(5 - 20)           | 141<br>(71 - 220)           | 302<br>(171 - 449)          |
| Liver cancer due to alcohol use                                  | 229<br>(127 - 381)          | --                    | --                     | 4<br>(2 - 9)             | 66<br>(34 - 115)            | 158<br>(85 - 274)           |
| Liver cancer due to other causes                                 | 40<br>(18 - 68)             | --                    | 0<br>(0 - 0)           | 2<br>(1 - 5)             | 13<br>(6 - 27)              | 24<br>(10 - 42)             |
| Larynx cancer                                                    | 141<br>(114 - 200)          | --                    | --                     | 11<br>(7 - 17)           | 67<br>(53 - 95)             | 63<br>(49 - 91)             |
| Tracheal, bronchus and lung cancer                               | 4,023<br>(3,602 - 4,365)    | --                    | --                     | 171<br>(145 - 198)       | 1,658<br>(1,446 - 1,831)    | 2,193<br>(1,948 - 2,443)    |
| Breast cancer                                                    | 1,719<br>(1,332 - 2,059)    | --                    | --                     | 148<br>(123 - 181)       | 530<br>(432 - 656)          | 1,041<br>(758 - 1,280)      |
| Cervical cancer                                                  | 271<br>(219 - 400)          | --                    | --                     | 37<br>(29 - 52)          | 87<br>(70 - 123)            | 147<br>(110 - 230)          |
| Uterine cancer                                                   | 251<br>(202 - 353)          | --                    | --                     | 5<br>(3 - 7)             | 61<br>(48 - 93)             | 185<br>(142 - 265)          |
| Prostate cancer                                                  | 1,561<br>(1,187 - 2,402)    | --                    | --                     | 4<br>(2 - 6)             | 188<br>(137 - 303)          | 1,369<br>(1,016 - 2,114)    |

Web Table 31- Austria deaths with 95% UI by age, sex, and cause in 2013

| Cause                                         | Both Sexes, All Ages        | Both Sexes, 0-4 Years | Both Sexes, 5-14 Years | Both Sexes, 15-49 Years | Both Sexes, 50-69 Years  | Both Sexes, 70-80 Years     |
|-----------------------------------------------|-----------------------------|-----------------------|------------------------|-------------------------|--------------------------|-----------------------------|
| Colon and rectum cancer                       | 2,823<br>(2,566 - 3,111)    | --                    | --                     | 75<br>(65 - 86)         | 645<br>(580 - 708)       | 2,104<br>(1,884 - 2,356)    |
| Lip and oral cavity cancer                    | 270<br>(220 - 307)          | --                    | --                     | 27<br>(22 - 33)         | 133<br>(103 - 153)       | 110<br>(90 - 130)           |
| Nasopharynx cancer                            | 24<br>(19 - 34)             | --                    | 0<br>(0 - 0)           | 4<br>(3 - 5)            | 11<br>(8 - 15)           | 9<br>(7 - 16)               |
| Other pharynx cancer                          | 182<br>(124 - 215)          | --                    | --                     | 19<br>(15 - 27)         | 110<br>(71 - 136)        | 52<br>(32 - 65)             |
| Gallbladder and biliary tract cancer          | 384<br>(313 - 579)          | --                    | --                     | 7<br>(5 - 9)            | 80<br>(65 - 117)         | 298<br>(237 - 459)          |
| Pancreatic cancer                             | 1,707<br>(1,565 - 1,866)    | --                    | --                     | 61<br>(51 - 71)         | 516<br>(463 - 566)       | 1,131<br>(1,018 - 1,262)    |
| Malignant skin melanoma                       | 389<br>(263 - 560)          | --                    | --                     | 51<br>(36 - 79)         | 126<br>(83 - 196)        | 212<br>(143 - 301)          |
| Non-melanoma skin cancer                      | 99<br>(74 - 131)            | --                    | --                     | 4<br>(3 - 5)            | 16<br>(12 - 25)          | 79<br>(57 - 104)            |
| Ovarian cancer                                | 595<br>(509 - 748)          | --                    | --                     | 34<br>(26 - 50)         | 193<br>(162 - 253)       | 368<br>(304 - 465)          |
| Testicular cancer                             | 15<br>(10 - 20)             | --                    | --                     | 9<br>(6 - 12)           | 3<br>(2 - 4)             | 3<br>(2 - 5)                |
| Kidney cancer                                 | 688<br>(593 - 832)          | 0<br>(0 - 1)          | 1<br>(0 - 1)           | 22<br>(17 - 28)         | 198<br>(167 - 234)       | 467<br>(380 - 584)          |
| Bladder cancer                                | 591<br>(496 - 702)          | --                    | --                     | 6<br>(5 - 8)            | 99<br>(83 - 116)         | 485<br>(401 - 588)          |
| Brain and nervous system cancer               | 509<br>(410 - 585)          | 3<br>(2 - 4)          | 7<br>(5 - 9)           | 82<br>(68 - 99)         | 210<br>(172 - 251)       | 207<br>(141 - 256)          |
| Thyroid cancer                                | 93<br>(72 - 145)            | --                    | 0<br>(0 - 0)           | 4<br>(3 - 6)            | 23<br>(17 - 35)          | 66<br>(50 - 104)            |
| Mesothelioma                                  | 130<br>(98 - 203)           | --                    | --                     | 7<br>(5 - 12)           | 46<br>(34 - 71)          | 76<br>(53 - 125)            |
| Hodgkin lymphoma                              | 43<br>(33 - 88)             | 0<br>(0 - 0)          | 0<br>(0 - 0)           | 8<br>(6 - 15)           | 12<br>(9 - 25)           | 22<br>(16 - 46)             |
| Non-Hodgkin lymphoma                          | 838<br>(465 - 1,076)        | 0<br>(0 - 1)          | 1<br>(1 - 2)           | 42<br>(24 - 53)         | 210<br>(123 - 266)       | 584<br>(303 - 781)          |
| Multiple myeloma                              | 362<br>(241 - 499)          | --                    | --                     | 9<br>(6 - 13)           | 96<br>(65 - 140)         | 257<br>(164 - 357)          |
| Leukemia                                      | 799<br>(700 - 898)          | 2<br>(2 - 4)          | 6<br>(5 - 8)           | 56<br>(48 - 65)         | 162<br>(140 - 184)       | 573<br>(484 - 667)          |
| Other neoplasms                               | 972<br>(723 - 1,149)        | 5<br>(4 - 8)          | 5<br>(4 - 7)           | 72<br>(54 - 85)         | 219<br>(169 - 252)       | 670<br>(451 - 827)          |
| Cardiovascular diseases                       | 34,353<br>(32,038 - 37,760) | 2<br>(1 - 3)          | 2<br>(2 - 3)           | 484<br>(432 - 547)      | 3,246<br>(2,961 - 3,672) | 30,619<br>(28,502 - 33,675) |
| Rheumatic heart disease                       | 212<br>(134 - 271)          | 0<br>(0 - 0)          | 0<br>(0 - 0)           | 8<br>(5 - 10)           | 27<br>(20 - 40)          | 178<br>(107 - 233)          |
| Ischemic heart disease                        | 18,942<br>(16,087 - 20,795) | 0<br>(0 - 0)          | 0<br>(0 - 1)           | 281<br>(242 - 320)      | 2,033<br>(1,825 - 2,347) | 16,628<br>(13,798 - 18,286) |
| Cerebrovascular disease                       | 7,623<br>(6,436 - 10,063)   | 1<br>(0 - 1)          | 1<br>(1 - 1)           | 98<br>(78 - 119)        | 614<br>(505 - 748)       | 6,910<br>(5,790 - 9,279)    |
| Ischemic stroke                               | 4,867<br>(3,851 - 6,905)    | 0<br>(0 - 0)          | 0<br>(0 - 0)           | 14<br>(9 - 20)          | 217<br>(156 - 298)       | 4,636<br>(3,649 - 6,592)    |
| Hemorrhagic stroke                            | 2,757<br>(2,192 - 3,683)    | 0<br>(0 - 1)          | 1<br>(0 - 1)           | 84<br>(67 - 102)        | 398<br>(322 - 485)       | 2,274<br>(1,757 - 3,158)    |
| Hypertensive heart disease                    | 1,820<br>(1,090 - 2,402)    | 0<br>(0 - 0)          | 0<br>(0 - 0)           | 10<br>(7 - 13)          | 108<br>(80 - 145)        | 1,702<br>(989 - 2,287)      |
| Cardiomyopathy and myocarditis                | 1,941<br>(1,326 - 4,220)    | 1<br>(0 - 1)          | 0<br>(0 - 1)           | 27<br>(20 - 45)         | 133<br>(101 - 217)       | 1,780<br>(1,194 - 3,988)    |
| Atrial fibrillation and flutter               | 1,176<br>(896 - 1,519)      | --                    | --                     | 2<br>(1 - 2)            | 31<br>(23 - 38)          | 1,144<br>(868 - 1,482)      |
| Aortic aneurysm                               | 425<br>(336 - 536)          | --                    | --                     | 16<br>(12 - 20)         | 82<br>(66 - 104)         | 327<br>(252 - 422)          |
| Peripheral vascular disease                   | 593<br>(447 - 743)          | --                    | --                     | 2<br>(1 - 3)            | 44<br>(34 - 55)          | 547<br>(409 - 693)          |
| Endocarditis                                  | 73<br>(32 - 136)            | 0<br>(0 - 0)          | 0<br>(0 - 0)           | 5<br>(2 - 9)            | 16<br>(7 - 31)           | 52<br>(22 - 98)             |
| Other cardiovascular and circulatory diseases | 1,548<br>(1,070 - 1,944)    | 0<br>(0 - 1)          | 0<br>(0 - 0)           | 36<br>(25 - 46)         | 158<br>(121 - 201)       | 1,353<br>(878 - 1,737)      |
| Chronic respiratory diseases                  | 3,469<br>(2,833 - 3,845)    | 1<br>(1 - 2)          | 1<br>(1 - 1)           | 45<br>(34 - 52)         | 489<br>(346 - 555)       | 2,933<br>(2,428 - 3,292)    |
| Chronic obstructive pulmonary disease         | 3,052<br>(2,435 - 3,420)    | 1<br>(0 - 1)          | 0<br>(0 - 0)           | 27<br>(19 - 33)         | 412<br>(278 - 474)       | 2,611<br>(2,131 - 2,952)    |
| Pneumoconiosis                                | 60<br>(40 - 87)             | 0<br>(0 - 0)          | 0<br>(0 - 0)           | 2<br>(1 - 2)            | 10<br>(6 - 14)           | 49<br>(31 - 73)             |
| Silicosis                                     | 12<br>(8 - 17)              | 0<br>(0 - 0)          | 0<br>(0 - 0)           | 1<br>(0 - 1)            | 3<br>(2 - 4)             | 9<br>(5 - 13)               |
| Asbestosis                                    | 16<br>(10 - 24)             | 0<br>(0 - 0)          | 0<br>(0 - 0)           | 0<br>(0 - 1)            | 2<br>(1 - 3)             | 13<br>(8 - 21)              |
| Coal workers pneumoconiosis                   | 5<br>(3 - 8)                | 0<br>(0 - 0)          | 0<br>(0 - 0)           | 0<br>(0 - 0)            | 1<br>(0 - 1)             | 4<br>(3 - 7)                |
| Other pneumoconiosis                          | 27<br>(18 - 40)             | 0<br>(0 - 0)          | 0<br>(0 - 0)           | 1<br>(0 - 1)            | 4<br>(2 - 6)             | 22<br>(14 - 34)             |

Web Table 31- Austria deaths with 95% UI by age, sex, and cause in 2013

| Cause                                               | Both Sexes, All Ages     | Both Sexes, 0-4 Years | Both Sexes, 5-14 Years | Both Sexes, 15-49 Years | Both Sexes, 50-69 Years | Both Sexes, 70-80 Years  |
|-----------------------------------------------------|--------------------------|-----------------------|------------------------|-------------------------|-------------------------|--------------------------|
| Asthma                                              | 153<br>(110 - 220)       | 0<br>(0 - 0)          | 0<br>(0 - 0)           | 8<br>(6 - 10)           | 34<br>(24 - 45)         | 111<br>(75 - 170)        |
| Interstitial lung disease and pulmonary sarcoidosis | 183<br>(103 - 253)       | 0<br>(0 - 0)          | 0<br>(0 - 0)           | 5<br>(3 - 7)            | 29<br>(15 - 42)         | 149<br>(82 - 209)        |
| Other chronic respiratory diseases                  | 21<br>(15 - 26)          | 0<br>(0 - 0)          | 0<br>(0 - 0)           | 2<br>(2 - 3)            | 4<br>(3 - 6)            | 14<br>(10 - 19)          |
| Cirrhosis                                           | 1,944<br>(1,773 - 2,104) | 0<br>(0 - 0)          | 0<br>(0 - 0)           | 250<br>(219 - 282)      | 890<br>(803 - 977)      | 804<br>(715 - 900)       |
| Cirrhosis due to hepatitis B                        | 203<br>(108 - 283)       | 0<br>(0 - 0)          | 0<br>(0 - 0)           | 26<br>(13 - 41)         | 90<br>(46 - 131)        | 87<br>(48 - 126)         |
| Cirrhosis due to hepatitis C                        | 864<br>(517 - 1,193)     | 0<br>(0 - 0)          | 0<br>(0 - 0)           | 105<br>(42 - 171)       | 386<br>(208 - 583)      | 373<br>(237 - 488)       |
| Cirrhosis due to alcohol use                        | 698<br>(432 - 1,020)     | --<br>(0 - 0)         | --<br>(0 - 0)          | 77<br>(15 - 128)        | 327<br>(150 - 499)      | 293<br>(202 - 422)       |
| Cirrhosis due to other causes                       | 179<br>(97 - 330)        | 0<br>(0 - 0)          | 0<br>(0 - 0)           | 42<br>(20 - 77)         | 87<br>(43 - 172)        | 50<br>(27 - 81)          |
| Digestive diseases                                  | 1,661<br>(1,449 - 2,082) | 1<br>(1 - 1)          | 1<br>(1 - 1)           | 47<br>(40 - 61)         | 218<br>(190 - 273)      | 1,394<br>(1,203 - 1,769) |
| Peptic ulcer disease                                | 253<br>(189 - 377)       | 0<br>(0 - 0)          | 0<br>(0 - 0)           | 7<br>(5 - 9)            | 39<br>(30 - 52)         | 208<br>(150 - 317)       |
| Gastritis and duodenitis                            | 18<br>(9 - 28)           | 0<br>(0 - 0)          | 0<br>(0 - 0)           | 1<br>(1 - 1)            | 3<br>(2 - 4)            | 14<br>(7 - 23)           |
| Appendicitis                                        | 19<br>(13 - 29)          | 0<br>(0 - 0)          | 0<br>(0 - 0)           | 1<br>(1 - 2)            | 4<br>(3 - 6)            | 13<br>(8 - 22)           |
| Paralytic ileus and intestinal obstruction          | 242<br>(139 - 345)       | 0<br>(0 - 0)          | 0<br>(0 - 0)           | 4<br>(3 - 6)            | 25<br>(15 - 35)         | 213<br>(118 - 305)       |
| Inguinal, femoral, and abdominal hernia             | 49<br>(31 - 82)          | 0<br>(0 - 0)          | 0<br>(0 - 0)           | 1<br>(0 - 1)            | 5<br>(4 - 8)            | 43<br>(26 - 75)          |
| Inflammatory bowel disease                          | 138<br>(86 - 187)        | 0<br>(0 - 1)          | 0<br>(0 - 0)           | 6<br>(4 - 8)            | 17<br>(12 - 22)         | 114<br>(67 - 161)        |
| Vascular intestinal disorders                       | 368<br>(240 - 562)       | 0<br>(0 - 0)          | 0<br>(0 - 0)           | 3<br>(2 - 6)            | 35<br>(21 - 57)         | 329<br>(212 - 521)       |
| Gallbladder and biliary diseases                    | 169<br>(127 - 253)       | 0<br>(0 - 0)          | 0<br>(0 - 0)           | 3<br>(2 - 4)            | 17<br>(13 - 26)         | 150<br>(111 - 224)       |
| Pancreatitis                                        | 155<br>(117 - 227)       | 0<br>(0 - 0)          | 0<br>(0 - 0)           | 17<br>(13 - 26)         | 42<br>(31 - 63)         | 96<br>(68 - 144)         |
| Other digestive diseases                            | 249<br>(185 - 320)       | 0<br>(0 - 0)          | 0<br>(0 - 0)           | 5<br>(3 - 6)            | 30<br>(22 - 37)         | 214<br>(157 - 281)       |
| Neurological disorders                              | 7,996<br>(5,731 - 9,871) | 8<br>(6 - 11)         | 5<br>(4 - 6)           | 84<br>(68 - 99)         | 350<br>(289 - 417)      | 7,550<br>(5,322 - 9,397) |
| Alzheimer disease and other dementias               | 6,715<br>(4,555 - 8,560) | --<br>(0 - 2)         | --<br>(0 - 2)          | 1<br>(0 - 2)            | 145<br>(98 - 202)       | 6,569<br>(4,431 - 8,393) |
| Parkinson disease                                   | 814<br>(619 - 1,023)     | --<br>(1 - 1)         | --<br>(1 - 2)          | 1<br>(1 - 1)            | 33<br>(26 - 42)         | 780<br>(587 - 984)       |
| Epilepsy                                            | 85<br>(60 - 104)         | 1<br>(1 - 2)          | 2<br>(1 - 2)           | 31<br>(22 - 38)         | 25<br>(18 - 31)         | 27<br>(16 - 37)          |
| Multiple sclerosis                                  | 97<br>(56 - 124)         | --<br>(7 - 7)         | --<br>(3 - 3)          | 20<br>(12 - 29)         | 47<br>(26 - 61)         | 30<br>(15 - 43)          |
| Other neurological disorders                        | 285<br>(231 - 320)       | 7<br>(5 - 9)          | 3<br>(2 - 4)           | 32<br>(26 - 37)         | 100<br>(82 - 116)       | 144<br>(112 - 168)       |
| Mental and substance use disorders                  | 596<br>(364 - 695)       | 0<br>(0 - 0)          | 0<br>(0 - 0)           | 286<br>(210 - 331)      | 212<br>(93 - 264)       | 99<br>(38 - 129)         |
| Schizophrenia                                       | 1<br>(1 - 2)             | --<br>(0 - 1)         | --<br>(0 - 1)          | 0<br>(0 - 1)            | 0<br>(0 - 1)            | 0<br>(0 - 0)             |
| Alcohol use disorders                               | 361<br>(153 - 442)       | --<br>(0 - 0)         | --<br>(0 - 0)          | 76<br>(40 - 97)         | 194<br>(78 - 246)       | 92<br>(31 - 122)         |
| Drug use disorders                                  | 233<br>(163 - 272)       | 0<br>(0 - 0)          | --<br>(0 - 0)          | 208<br>(146 - 246)      | 17<br>(11 - 22)         | 7<br>(5 - 8)             |
| Opioid use disorders                                | 86<br>(59 - 102)         | 0<br>(0 - 0)          | --<br>(0 - 0)          | 78<br>(54 - 93)         | 6<br>(4 - 8)            | 2<br>(2 - 3)             |
| Cocaine use disorders                               | 7<br>(5 - 8)             | 0<br>(0 - 0)          | --<br>(0 - 0)          | 6<br>(4 - 8)            | 0<br>(0 - 1)            | 0<br>(0 - 0)             |
| Amphetamine use disorders                           | 7<br>(5 - 8)             | 0<br>(0 - 0)          | --<br>(0 - 0)          | 6<br>(4 - 7)            | 1<br>(0 - 1)            | 0<br>(0 - 0)             |
| Other drug use disorders                            | 133<br>(94 - 155)        | 0<br>(0 - 0)          | --<br>(0 - 0)          | 118<br>(84 - 140)       | 11<br>(7 - 14)          | 4<br>(3 - 5)             |
| Eating disorders                                    | 1<br>(1 - 2)             | --<br>(0 - 0)         | 0<br>(0 - 0)           | 1<br>(1 - 2)            | --<br>(0 - 1)           | --<br>(0 - 0)            |
| Anorexia nervosa                                    | 1<br>(1 - 2)             | --<br>(0 - 0)         | 0<br>(0 - 0)           | 1<br>(1 - 2)            | --<br>(0 - 1)           | --<br>(0 - 0)            |
| Diabetes, urogenital, blood, and endocrine diseases | 5,860<br>(4,638 - 6,558) | 11<br>(5 - 16)        | 6<br>(4 - 8)           | 158<br>(107 - 183)      | 854<br>(646 - 957)      | 4,831<br>(3,830 - 5,472) |
| Diabetes mellitus                                   | 2,482<br>(2,159 - 2,819) | 0<br>(0 - 1)          | 0<br>(0 - 0)           | 39<br>(33 - 46)         | 339<br>(298 - 383)      | 2,103<br>(1,791 - 2,445) |
| Acute glomerulonephritis                            | 1<br>(1 - 2)             | 0<br>(0 - 0)          | 0<br>(0 - 0)           | 0<br>(0 - 1)            | 0<br>(0 - 1)            | 0<br>(0 - 1)             |
| Chronic kidney disease                              | 2,185<br>(1,557 - 2,589) | 0<br>(0 - 1)          | 0<br>(0 - 1)           | 29<br>(24 - 39)         | 183<br>(152 - 229)      | 1,972<br>(1,348 - 2,381) |
| Chronic kidney disease due to diabetes mellitus     | 736<br>(482 - 923)       | 0<br>(0 - 0)          | 0<br>(0 - 0)           | 8<br>(5 - 11)           | 72<br>(43 - 97)         | 656<br>(424 - 832)       |

Web Table 31- Austria deaths with 95% UI by age, sex, and cause in 2013

| Cause                                               | Both Sexes, All Ages     | Both Sexes, 0-4 Years | Both Sexes, 5-14 Years | Both Sexes, 15-49 Years  | Both Sexes, 50-69 Years | Both Sexes, 70-89 Years  |
|-----------------------------------------------------|--------------------------|-----------------------|------------------------|--------------------------|-------------------------|--------------------------|
| Chronic kidney disease due to hypertension          | 391<br>(224 - 538)       | 0<br>(0 - 0)          | 0<br>(0 - 0)           | 6<br>(4 - 9)             | 26<br>(18 - 45)         | 359<br>(196 - 500)       |
| Chronic kidney disease due to glomerulonephritis    | 20<br>(11 - 34)          | 0<br>(0 - 0)          | 0<br>(0 - 0)           | 2<br>(1 - 3)             | 6<br>(3 - 11)           | 12<br>(6 - 22)           |
| Chronic kidney disease due to other causes          | 1,038<br>(619 - 1,350)   | 0<br>(0 - 0)          | 0<br>(0 - 0)           | 14<br>(10 - 22)          | 79<br>(57 - 112)        | 944<br>(519 - 1,256)     |
| Urinary diseases and male infertility               | 350<br>(275 - 514)       | 0<br>(0 - 0)          | 0<br>(0 - 0)           | 7<br>(5 - 10)            | 37<br>(29 - 62)         | 305<br>(233 - 453)       |
| Interstitial nephritis and urinary tract infections | 273<br>(206 - 428)       | 0<br>(0 - 0)          | 0<br>(0 - 0)           | 5<br>(3 - 8)             | 26<br>(18 - 47)         | 242<br>(181 - 381)       |
| Urolithiasis                                        | 21<br>(13 - 42)          | --                    | 0<br>(0 - 0)           | 0<br>(0 - 1)             | 3<br>(2 - 6)            | 18<br>(11 - 37)          |
| Other urinary diseases                              | 55<br>(24 - 82)          | 0<br>(0 - 0)          | 0<br>(0 - 0)           | 2<br>(1 - 2)             | 8<br>(4 - 12)           | 45<br>(17 - 70)          |
| Gynecological diseases                              | 2<br>(1 - 2)             | --                    | --                     | 0<br>(0 - 0)             | 0<br>(0 - 0)            | 1<br>(1 - 2)             |
| Uterine fibroids                                    | 0<br>(0 - 1)             | --                    | --                     | 0<br>(0 - 0)             | 0<br>(0 - 0)            | 0<br>(0 - 1)             |
| Polycystic ovarian syndrome                         | 0<br>(0 - 0)             | --                    | --                     | 0<br>(0 - 0)             | 0<br>(0 - 0)            | --                       |
| Endometriosis                                       | 0<br>(0 - 0)             | --                    | --                     | 0<br>(0 - 0)             | 0<br>(0 - 0)            | --                       |
| Genital prolapse                                    | 0<br>(0 - 1)             | --                    | --                     | 0<br>(0 - 0)             | 0<br>(0 - 0)            | 0<br>(0 - 0)             |
| Other gynecological diseases                        | 1<br>(0 - 1)             | --                    | --                     | 0<br>(0 - 0)             | 0<br>(0 - 0)            | 0<br>(0 - 1)             |
| Hemoglobinopathies and hemolytic anemias            | 42<br>(28 - 57)          | 0<br>(0 - 1)          | 0<br>(0 - 1)           | 3<br>(2 - 4)             | 7<br>(5 - 9)            | 31<br>(20 - 43)          |
| Thalassemias                                        | 1<br>(0 - 1)             | 0<br>(0 - 0)          | 0<br>(0 - 0)           | 0<br>(0 - 1)             | 0<br>(0 - 0)            | 0<br>(0 - 0)             |
| Sickle cell disorders                               | 6<br>(4 - 8)             | 0<br>(0 - 0)          | 0<br>(0 - 0)           | 1<br>(1 - 2)             | 3<br>(2 - 4)            | 2<br>(1 - 2)             |
| G6PD deficiency                                     | 0<br>(0 - 0)             | 0<br>(0 - 0)          | 0<br>(0 - 0)           | 0<br>(0 - 0)             | 0<br>(0 - 0)            | 0<br>(0 - 0)             |
| Other hemoglobinopathies and hemolytic anemias      | 35<br>(23 - 48)          | 0<br>(0 - 0)          | 0<br>(0 - 0)           | 1<br>(1 - 2)             | 4<br>(3 - 6)            | 30<br>(19 - 41)          |
| Endocrine, metabolic, blood, and immune disorders   | 799<br>(254 - 999)       | 10<br>(4 - 14)        | 5<br>(2 - 7)           | 79<br>(28 - 102)         | 288<br>(84 - 371)       | 418<br>(129 - 552)       |
| Musculoskeletal disorders                           | 166<br>(138 - 221)       | --                    | 0<br>(0 - 0)           | 10<br>(9 - 15)           | 37<br>(30 - 53)         | 119<br>(93 - 157)        |
| Rheumatoid arthritis                                | 59<br>(45 - 80)          | --                    | 0<br>(0 - 0)           | 1<br>(1 - 2)             | 12<br>(9 - 17)          | 46<br>(33 - 63)          |
| Other musculoskeletal disorders                     | 107<br>(87 - 145)        | --                    | 0<br>(0 - 0)           | 9<br>(8 - 14)            | 25<br>(20 - 37)         | 73<br>(55 - 99)          |
| Other non-communicable diseases                     | 296<br>(252 - 339)       | 132<br>(101 - 169)    | 10<br>(7 - 12)         | 41<br>(31 - 48)          | 37<br>(28 - 44)         | 77<br>(52 - 97)          |
| Congenital anomalies                                | 200<br>(166 - 237)       | 105<br>(81 - 136)     | 10<br>(7 - 12)         | 39<br>(29 - 47)          | 30<br>(21 - 36)         | 17<br>(11 - 21)          |
| Neural tube defects                                 | 2<br>(2 - 3)             | 1<br>(1 - 2)          | 0<br>(0 - 0)           | 1<br>(0 - 1)             | 0<br>(0 - 0)            | 0<br>(0 - 0)             |
| Congenital heart anomalies                          | 62<br>(50 - 75)          | 38<br>(28 - 49)       | 3<br>(2 - 4)           | 13<br>(10 - 16)          | 5<br>(3 - 7)            | 3<br>(2 - 5)             |
| Cleft lip and cleft palate                          | 0<br>(0 - 0)             | 0<br>(0 - 0)          | --                     | --                       | --                      | --                       |
| Down syndrome                                       | 35<br>(20 - 48)          | 6<br>(3 - 9)          | 1<br>(0 - 1)           | 9<br>(5 - 13)            | 17<br>(10 - 24)         | 1<br>(1 - 3)             |
| Chromosomal unbalanced rearrangements               | 11<br>(7 - 15)           | 9<br>(6 - 13)         | 0<br>(0 - 0)           | 1<br>(1 - 1)             | 0<br>(0 - 1)            | 0<br>(0 - 0)             |
| Other congenital anomalies                          | 91<br>(73 - 111)         | 51<br>(38 - 70)       | 5<br>(4 - 6)           | 16<br>(12 - 19)          | 7<br>(4 - 11)           | 12<br>(8 - 15)           |
| Skin and subcutaneous diseases                      | 69<br>(50 - 90)          | 0<br>(0 - 0)          | 0<br>(0 - 0)           | 2<br>(1 - 2)             | 8<br>(6 - 9)            | 60<br>(41 - 81)          |
| Cellulitis                                          | 6<br>(3 - 10)            | 0<br>(0 - 0)          | 0<br>(0 - 0)           | 0<br>(0 - 1)             | 1<br>(1 - 2)            | 5<br>(2 - 8)             |
| Pyoderma                                            | 36<br>(21 - 48)          | 0<br>(0 - 0)          | 0<br>(0 - 0)           | 1<br>(0 - 1)             | 4<br>(3 - 5)            | 31<br>(18 - 43)          |
| Decubitus ulcer                                     | 23<br>(15 - 34)          | 0<br>(0 - 0)          | 0<br>(0 - 0)           | 0<br>(0 - 0)             | 1<br>(1 - 2)            | 21<br>(13 - 32)          |
| Other skin and subcutaneous diseases                | 5<br>(2 - 8)             | 0<br>(0 - 0)          | 0<br>(0 - 0)           | 0<br>(0 - 1)             | 1<br>(1 - 1)            | 3<br>(1 - 6)             |
| Sudden infant death syndrome                        | 26<br>(15 - 49)          | 26<br>(15 - 49)       | --                     | --                       | --                      | --                       |
| Injuries                                            | 4,354<br>(3,930 - 5,056) | 22<br>(16 - 29)       | 24<br>(20 - 30)        | 1,103<br>(1,008 - 1,276) | 990<br>(892 - 1,166)    | 2,214<br>(1,914 - 2,694) |
| Transport injuries                                  | 708<br>(643 - 805)       | 4<br>(3 - 6)          | 11<br>(9 - 14)         | 316<br>(282 - 353)       | 173<br>(151 - 202)      | 204<br>(173 - 249)       |
| Road injuries                                       | 641<br>(582 - 742)       | 4<br>(3 - 5)          | 10<br>(8 - 12)         | 288<br>(256 - 323)       | 152<br>(132 - 181)      | 187<br>(160 - 233)       |
| Pedestrian road injuries                            | 159<br>(111 - 211)       | 1<br>(1 - 2)          | 3<br>(2 - 5)           | 27<br>(16 - 40)          | 43<br>(27 - 59)         | 84<br>(61 - 116)         |

Web Table 31- Austria deaths with 95% UI by age, sex, and cause in 2013

| Cause                                           | Both Sexes, All Ages     | Both Sexes, 0-4 Years | Both Sexes, 5-14 Years | Both Sexes, 15-49 Years | Both Sexes, 50-69 Years | Both Sexes, 70-80 Years  |
|-------------------------------------------------|--------------------------|-----------------------|------------------------|-------------------------|-------------------------|--------------------------|
| Cyclist road injuries                           | 60<br>(39 - 76)          | 0<br>(0 - 0)          | 2<br>(1 - 3)           | 13<br>(7 - 17)          | 22<br>(14 - 29)         | 23<br>(15 - 32)          |
| Motorcyclist road injuries                      | 87<br>(56 - 124)         | 0<br>(0 - 0)          | 0<br>(0 - 0)           | 57<br>(35 - 79)         | 18<br>(11 - 27)         | 12<br>(8 - 21)           |
| Motor vehicle road injuries                     | 332<br>(281 - 421)       | 2<br>(1 - 3)          | 4<br>(3 - 6)           | 191<br>(163 - 228)      | 68<br>(52 - 93)         | 67<br>(50 - 95)          |
| Other road injuries                             | 2<br>(2 - 5)             | 0<br>(0 - 0)          | 0<br>(0 - 0)           | 1<br>(0 - 1)            | 1<br>(0 - 2)            | 1<br>(0 - 2)             |
| Other transport injuries                        | 67<br>(45 - 87)          | 0<br>(0 - 1)          | 1<br>(1 - 2)           | 28<br>(18 - 38)         | 21<br>(13 - 29)         | 17<br>(10 - 24)          |
| Unintentional injuries                          | 2,138<br>(1,824 - 2,576) | 15<br>(11 - 21)       | 10<br>(8 - 13)         | 190<br>(165 - 246)      | 338<br>(295 - 413)      | 1,585<br>(1,300 - 1,959) |
| Falls                                           | 1,613<br>(1,317 - 2,062) | 2<br>(1 - 3)          | 2<br>(1 - 3)           | 79<br>(65 - 111)        | 195<br>(163 - 246)      | 1,335<br>(1,059 - 1,728) |
| Drowning                                        | 71<br>(57 - 110)         | 4<br>(2 - 7)          | 3<br>(2 - 5)           | 23<br>(17 - 37)         | 20<br>(16 - 30)         | 22<br>(17 - 31)          |
| Fire, heat, and hot substances                  | 49<br>(40 - 70)          | 1<br>(1 - 2)          | 1<br>(0 - 1)           | 8<br>(6 - 12)           | 11<br>(8 - 15)          | 29<br>(22 - 41)          |
| Poisonings                                      | 20<br>(16 - 30)          | 0<br>(0 - 0)          | 0<br>(0 - 0)           | 7<br>(5 - 10)           | 5<br>(3 - 7)            | 8<br>(6 - 14)            |
| Exposure to mechanical forces                   | 76<br>(66 - 101)         | 2<br>(1 - 3)          | 2<br>(1 - 2)           | 31<br>(26 - 43)         | 29<br>(23 - 38)         | 13<br>(10 - 17)          |
| Unintentional firearm injuries                  | 1<br>(1 - 2)             | 0<br>(0 - 0)          | 0<br>(0 - 0)           | 1<br>(1 - 1)            | 0<br>(0 - 1)            | 0<br>(0 - 0)             |
| Unintentional suffocation                       | 2<br>(2 - 3)             | 1<br>(0 - 1)          | 0<br>(0 - 0)           | 1<br>(0 - 1)            | 0<br>(0 - 0)            | 1<br>(0 - 1)             |
| Other exposure to mechanical forces             | 72<br>(62 - 96)          | 1<br>(1 - 2)          | 1<br>(1 - 2)           | 30<br>(24 - 41)         | 28<br>(22 - 37)         | 12<br>(9 - 16)           |
| Adverse effects of medical treatment            | 141<br>(77 - 186)        | 1<br>(1 - 2)          | 1<br>(0 - 1)           | 15<br>(8 - 19)          | 40<br>(23 - 51)         | 84<br>(40 - 121)         |
| Animal contact                                  | 12<br>(9 - 18)           | 0<br>(0 - 0)          | 0<br>(0 - 0)           | 2<br>(2 - 4)            | 4<br>(3 - 6)            | 5<br>(4 - 8)             |
| Venomous animal contact                         | 5<br>(3 - 7)             | 0<br>(0 - 0)          | 0<br>(0 - 0)           | 1<br>(1 - 2)            | 2<br>(1 - 3)            | 1<br>(1 - 2)             |
| Non-venomous animal contact                     | 7<br>(5 - 11)            | 0<br>(0 - 0)          | 0<br>(0 - 0)           | 1<br>(1 - 2)            | 2<br>(1 - 3)            | 4<br>(3 - 6)             |
| Foreign body                                    | 142<br>(83 - 180)        | 5<br>(3 - 7)          | 1<br>(1 - 2)           | 19<br>(11 - 25)         | 31<br>(19 - 40)         | 86<br>(46 - 119)         |
| Pulmonary aspiration and foreign body in airway | 141<br>(82 - 179)        | 5<br>(3 - 7)          | 1<br>(1 - 2)           | 18<br>(11 - 24)         | 31<br>(19 - 40)         | 86<br>(46 - 119)         |
| Foreign body in other body part                 | 1<br>(1 - 1)             | 0<br>(0 - 0)          | 0<br>(0 - 0)           | 0<br>(0 - 1)            | 0<br>(0 - 0)            | 0<br>(0 - 0)             |
| Other unintentional injuries                    | 15<br>(12 - 19)          | 1<br>(0 - 1)          | 0<br>(0 - 0)           | 6<br>(4 - 8)            | 5<br>(3 - 7)            | 4<br>(3 - 6)             |
| Self-harm and interpersonal violence            | 1,508<br>(1,315 - 1,917) | 2<br>(2 - 4)          | 4<br>(3 - 5)           | 597<br>(502 - 717)      | 479<br>(406 - 610)      | 425<br>(356 - 577)       |
| Self-harm                                       | 1,452<br>(1,263 - 1,857) | --                    | 2<br>(2 - 4)           | 568<br>(479 - 678)      | 466<br>(396 - 594)      | 415<br>(347 - 565)       |
| Interpersonal violence                          | 56<br>(45 - 78)          | 2<br>(2 - 4)          | 1<br>(1 - 2)           | 28<br>(22 - 40)         | 14<br>(11 - 20)         | 10<br>(8 - 14)           |
| Assault by firearm                              | 16<br>(11 - 25)          | 0<br>(0 - 0)          | 0<br>(0 - 1)           | 9<br>(6 - 14)           | 4<br>(3 - 7)            | 2<br>(1 - 4)             |
| Assault by sharp object                         | 18<br>(13 - 28)          | 0<br>(0 - 1)          | 0<br>(0 - 0)           | 11<br>(7 - 17)          | 4<br>(3 - 7)            | 3<br>(2 - 4)             |
| Assault by other means                          | 22<br>(16 - 30)          | 2<br>(1 - 3)          | 1<br>(1 - 1)           | 9<br>(6 - 13)           | 5<br>(4 - 7)            | 5<br>(4 - 7)             |
| Forces of nature, war, and legal intervention   | 0<br>(0 - 0)             | 0<br>(0 - 0)          | --                     | --                      | --                      | 0<br>(0 - 0)             |
| Exposure to forces of nature                    | 0<br>(0 - 0)             | 0<br>(0 - 0)          | --                     | --                      | --                      | 0<br>(0 - 0)             |

Web Table 31- Austria deaths with 95% UI by age, sex, and cause in 2013

| Cause                                                              | Males, All Ages             | Males, 0-4 Years   | Males, 5-14 Years | Males, 15-49 Years       | Males, 50-69 Years       | Males, 70-80 Years          |
|--------------------------------------------------------------------|-----------------------------|--------------------|-------------------|--------------------------|--------------------------|-----------------------------|
| All causes                                                         | 39,522<br>(37,227 - 41,742) | 186<br>(147 - 237) | 41<br>(35 - 48)   | 2,452<br>(2,252 - 2,648) | 8,922<br>(8,253 - 9,577) | 27,921<br>(26,485 - 29,306) |
| Communicable, maternal, neonatal, and nutritional diseases         | 946<br>(788 - 1,161)        | 79<br>(61 - 102)   | 2<br>(2 - 3)      | 77<br>(53 - 108)         | 118<br>(97 - 147)        | 670<br>(523 - 867)          |
| HIV/AIDS and tuberculosis                                          | 93<br>(58 - 138)            | 0<br>(0 - 0)       | 0<br>(0 - 0)      | 46<br>(22 - 77)          | 24<br>(15 - 37)          | 23<br>(18 - 37)             |
| Tuberculosis                                                       | 35<br>(28 - 62)             | 0<br>(0 - 0)       | 0<br>(0 - 0)      | 3<br>(3 - 6)             | 11<br>(9 - 20)           | 21<br>(16 - 35)             |
| HIV/AIDS                                                           | 58<br>(25 - 105)            | 0<br>(0 - 0)       | 0<br>(0 - 0)      | 42<br>(18 - 74)          | 13<br>(5 - 26)           | 3<br>(1 - 7)                |
| HIV/AIDS resulting in mycobacterial infection                      | 3<br>(1 - 6)                | 0<br>(0 - 0)       | 0<br>(0 - 0)      | 2<br>(1 - 4)             | 1<br>(0 - 1)             | 0<br>(0 - 0)                |
| HIV/AIDS resulting in other diseases                               | 55<br>(24 - 99)             | 0<br>(0 - 0)       | 0<br>(0 - 0)      | 40<br>(17 - 70)          | 12<br>(5 - 25)           | 3<br>(1 - 6)                |
| Diarrrhea, lower respiratory, and other common infectious diseases | 730<br>(576 - 941)          | 9<br>(6 - 12)      | 2<br>(1 - 2)      | 26<br>(20 - 34)          | 81<br>(64 - 106)         | 614<br>(468 - 813)          |
| Diarrheal diseases                                                 | 17<br>(12 - 24)             | 1<br>(1 - 2)       | 0<br>(0 - 0)      | 1<br>(1 - 1)             | 3<br>(2 - 4)             | 12<br>(8 - 19)              |
| Intestinal infectious diseases                                     | 3<br>(1 - 6)                | 0<br>(0 - 1)       | 0<br>(0 - 1)      | 1<br>(0 - 2)             | 0<br>(0 - 1)             | 0<br>(0 - 2)                |
| Typhoid fever                                                      | 1<br>(0 - 3)                | 0<br>(0 - 0)       | 0<br>(0 - 0)      | 1<br>(0 - 1)             | 0<br>(0 - 1)             | 0<br>(0 - 0)                |
| Paratyphoid fever                                                  | 0<br>(0 - 1)                | 0<br>(0 - 0)       | 0<br>(0 - 0)      | 0<br>(0 - 0)             | 0<br>(0 - 0)             | 0<br>(0 - 0)                |
| Other intestinal infectious diseases                               | 1<br>(0 - 3)                | 0<br>(0 - 1)       | 0<br>(0 - 0)      | 0<br>(0 - 1)             | 0<br>(0 - 1)             | 0<br>(0 - 2)                |
| Lower respiratory infections                                       | 676<br>(520 - 885)          | 4<br>(3 - 7)       | 1<br>(0 - 1)      | 17<br>(13 - 25)          | 67<br>(51 - 92)          | 586<br>(440 - 787)          |
| Upper respiratory infections                                       | 1<br>(0 - 2)                | 0<br>(0 - 0)       | 0<br>(0 - 0)      | 0<br>(0 - 0)             | 0<br>(0 - 1)             | 0<br>(0 - 2)                |
| Otitis media                                                       | 1<br>(0 - 1)                | 0<br>(0 - 0)       | 0<br>(0 - 0)      | 0<br>(0 - 0)             | 0<br>(0 - 0)             | 0<br>(0 - 0)                |
| Meningitis                                                         | 17<br>(14 - 19)             | 2<br>(1 - 2)       | 0<br>(0 - 0)      | 3<br>(2 - 3)             | 5<br>(4 - 6)             | 7<br>(6 - 9)                |
| Pneumococcal meningitis                                            | 3<br>(2 - 4)                | 0<br>(0 - 0)       | 0<br>(0 - 0)      | 0<br>(0 - 1)             | 1<br>(0 - 1)             | 1<br>(1 - 2)                |
| H influenzae type B meningitis                                     | 2<br>(1 - 3)                | 0<br>(0 - 1)       | 0<br>(0 - 0)      | 0<br>(0 - 0)             | 1<br>(0 - 1)             | 1<br>(0 - 1)                |
| Meningococcal meningitis                                           | 5<br>(4 - 7)                | 0<br>(0 - 1)       | 0<br>(0 - 0)      | 1<br>(0 - 1)             | 1<br>(1 - 2)             | 2<br>(2 - 3)                |
| Other meningitis                                                   | 6<br>(4 - 8)                | 0<br>(0 - 1)       | 0<br>(0 - 0)      | 1<br>(1 - 2)             | 2<br>(1 - 3)             | 3<br>(2 - 4)                |
| Encephalitis                                                       | 13<br>(8 - 19)              | 1<br>(0 - 1)       | 0<br>(0 - 1)      | 3<br>(2 - 5)             | 4<br>(3 - 7)             | 5<br>(2 - 7)                |
| Diphtheria                                                         | 0<br>(0 - 0)                | 0<br>(0 - 0)       | 0<br>(0 - 0)      | 0<br>(0 - 0)             | 0<br>(0 - 0)             | --<br>(0 - 0)               |
| Whooping cough                                                     | 0<br>(0 - 0)                | 0<br>(0 - 0)       | 0<br>(0 - 0)      | 0<br>(0 - 0)             | 0<br>(0 - 0)             | --<br>(0 - 0)               |
| Tetanus                                                            | 0<br>(0 - 0)                | 0<br>(0 - 0)       | 0<br>(0 - 0)      | 0<br>(0 - 0)             | 0<br>(0 - 0)             | 0<br>(0 - 0)                |
| Measles                                                            | 0<br>(0 - 0)                | 0<br>(0 - 0)       | 0<br>(0 - 0)      | 0<br>(0 - 0)             | 0<br>(0 - 0)             | --<br>(0 - 0)               |
| Varicella and herpes zoster                                        | 4<br>(1 - 14)               | 0<br>(0 - 1)       | 0<br>(0 - 0)      | 0<br>(0 - 1)             | 0<br>(0 - 2)             | 3<br>(0 - 13)               |
| Neglected tropical diseases and malaria                            | 2<br>(2 - 2)                | 0<br>(0 - 0)       | 0<br>(0 - 0)      | 1<br>(1 - 1)             | 1<br>(0 - 1)             | 1<br>(0 - 1)                |
| Cysticercosis                                                      | 0<br>(0 - 0)                | 0<br>(0 - 0)       | 0<br>(0 - 0)      | 0<br>(0 - 0)             | 0<br>(0 - 0)             | 0<br>(0 - 0)                |
| Cystic echinococcosis                                              | 0<br>(0 - 0)                | 0<br>(0 - 0)       | 0<br>(0 - 0)      | 0<br>(0 - 0)             | 0<br>(0 - 0)             | 0<br>(0 - 0)                |
| Dengue                                                             | 0<br>(0 - 0)                | 0<br>(0 - 0)       | 0<br>(0 - 0)      | 0<br>(0 - 0)             | 0<br>(0 - 0)             | 0<br>(0 - 0)                |
| Rabies                                                             | 0<br>(0 - 0)                | 0<br>(0 - 0)       | 0<br>(0 - 0)      | 0<br>(0 - 0)             | 0<br>(0 - 0)             | 0<br>(0 - 0)                |
| Other neglected tropical diseases                                  | 1<br>(1 - 1)                | 0<br>(0 - 0)       | 0<br>(0 - 0)      | 0<br>(0 - 0)             | 0<br>(0 - 0)             | 0<br>(0 - 0)                |
| Maternal disorders                                                 | --                          | --                 | --                | --                       | --                       | --                          |
| Maternal hemorrhage                                                | --                          | --                 | --                | --                       | --                       | --                          |
| Maternal sepsis and other maternal infections                      | --                          | --                 | --                | --                       | --                       | --                          |
| Maternal hypertensive disorders                                    | --                          | --                 | --                | --                       | --                       | --                          |
| Maternal obstructed labor                                          | --                          | --                 | --                | --                       | --                       | --                          |
| Maternal abortive outcome                                          | --                          | --                 | --                | --                       | --                       | --                          |
| Indirect maternal deaths                                           | --                          | --                 | --                | --                       | --                       | --                          |



Web Table 31- Austria deaths with 95% UI by age, sex, and cause in 2013

| Cause                                                            | Males, All Ages             | Males, 0-4 Years | Males, 5-14 Years | Males, 15-49 Years       | Males, 50-69 Years       | Males, 70-80 Years          |
|------------------------------------------------------------------|-----------------------------|------------------|-------------------|--------------------------|--------------------------|-----------------------------|
| Late maternal deaths                                             | --                          | --               | --                | --                       | --                       | --                          |
| Maternal deaths aggravated by HIV/AIDS                           | --                          | --               | --                | --                       | --                       | --                          |
| Other maternal disorders                                         | --                          | --               | --                | --                       | --                       | --                          |
| Neonatal disorders                                               | 68<br>(53 - 88)             | 68<br>(53 - 88)  | --                | --                       | --                       | --                          |
| Neonatal preterm birth complications                             | 41<br>(29 - 57)             | 41<br>(29 - 57)  | --                | --                       | --                       | --                          |
| Neonatal encephalopathy due to birth asphyxia and trauma         | 16<br>(10 - 25)             | 16<br>(10 - 25)  | --                | --                       | --                       | --                          |
| Neonatal sepsis and other neonatal infections                    | 1<br>(0 - 3)                | 1<br>(0 - 3)     | --                | --                       | --                       | --                          |
| Hemolytic disease and other neonatal jaundice                    | 0<br>(0 - 0)                | 0<br>(0 - 0)     | --                | --                       | --                       | --                          |
| Other neonatal disorders                                         | 9<br>(4 - 15)               | 9<br>(4 - 15)    | --                | --                       | --                       | --                          |
| Nutritional deficiencies                                         | 25<br>(14 - 35)             | 0<br>(0 - 1)     | 0<br>(0 - 0)      | 2<br>(1 - 3)             | 4<br>(2 - 5)             | 19<br>(10 - 28)             |
| Protein-energy malnutrition                                      | 1<br>(0 - 1)                | 0<br>(0 - 0)     | 0<br>(0 - 0)      | 0<br>(0 - 0)             | 0<br>(0 - 0)             | 0<br>(0 - 0)                |
| Iodine deficiency                                                | 0<br>(0 - 1)                | 0<br>(0 - 0)     | 0<br>(0 - 0)      | 0<br>(0 - 0)             | 0<br>(0 - 0)             | 0<br>(0 - 1)                |
| Iron-deficiency anemia                                           | 20<br>(11 - 29)             | 0<br>(0 - 0)     | 0<br>(0 - 0)      | 1<br>(1 - 2)             | 3<br>(1 - 4)             | 16<br>(8 - 23)              |
| Other nutritional deficiencies                                   | 4<br>(1 - 8)                | 0<br>(0 - 0)     | 0<br>(0 - 0)      | 0<br>(0 - 0)             | 1<br>(0 - 1)             | 3<br>(1 - 7)                |
| Other communicable, maternal, neonatal, and nutritional diseases | 27<br>(14 - 37)             | 1<br>(1 - 3)     | 0<br>(0 - 1)      | 3<br>(2 - 5)             | 9<br>(5 - 12)            | 13<br>(6 - 19)              |
| Sexually transmitted diseases excluding HIV                      | 1<br>(1 - 2)                | 1<br>(0 - 1)     | 0<br>(0 - 0)      | 0<br>(0 - 0)             | 0<br>(0 - 1)             | 0<br>(0 - 1)                |
| Syphilis                                                         | 1<br>(1 - 2)                | 1<br>(0 - 1)     | 0<br>(0 - 0)      | 0<br>(0 - 0)             | 0<br>(0 - 0)             | 0<br>(0 - 1)                |
| Chlamydial infection                                             | --                          | --               | --                | --                       | --                       | --                          |
| Gonococcal infection                                             | 0<br>(0 - 0)                | --               | 0<br>(0 - 0)      | 0<br>(0 - 0)             | 0<br>(0 - 0)             | 0<br>(0 - 0)                |
| Other sexually transmitted diseases                              | 0<br>(0 - 0)                | --               | 0<br>(0 - 0)      | 0<br>(0 - 0)             | 0<br>(0 - 0)             | 0<br>(0 - 0)                |
| Hepatitis                                                        | 2<br>(2 - 3)                | 0<br>(0 - 0)     | 0<br>(0 - 0)      | 0<br>(0 - 1)             | 1<br>(0 - 1)             | 1<br>(1 - 1)                |
| Acute hepatitis A                                                | 0<br>(0 - 1)                | 0<br>(0 - 0)     | 0<br>(0 - 0)      | 0<br>(0 - 0)             | 0<br>(0 - 0)             | 0<br>(0 - 0)                |
| Acute hepatitis B                                                | 1<br>(1 - 2)                | 0<br>(0 - 0)     | 0<br>(0 - 0)      | 0<br>(0 - 0)             | 0<br>(0 - 1)             | 1<br>(0 - 1)                |
| Acute hepatitis C                                                | 0<br>(0 - 1)                | --               | 0<br>(0 - 0)      | 0<br>(0 - 0)             | 0<br>(0 - 0)             | 0<br>(0 - 0)                |
| Other infectious diseases                                        | 24<br>(10 - 33)             | 1<br>(0 - 2)     | 0<br>(0 - 1)      | 3<br>(1 - 4)             | 8<br>(4 - 11)            | 12<br>(4 - 17)              |
| Non-communicable diseases                                        | 35,870<br>(33,771 - 37,880) | 94<br>(73 - 122) | 23<br>(19 - 28)   | 1,509<br>(1,340 - 1,648) | 8,071<br>(7,465 - 8,659) | 26,172<br>(24,802 - 27,461) |
| Neoplasms                                                        | 11,730<br>(10,848 - 12,774) | 6<br>(4 - 8)     | 11<br>(9 - 13)    | 525<br>(464 - 591)       | 3,759<br>(3,446 - 4,098) | 7,430<br>(6,817 - 8,146)    |
| Esophageal cancer                                                | 290<br>(241 - 351)          | --               | --                | 20<br>(15 - 29)          | 137<br>(109 - 169)       | 133<br>(105 - 163)          |
| Stomach cancer                                                   | 633<br>(565 - 711)          | --               | --                | 23<br>(18 - 29)          | 158<br>(138 - 180)       | 452<br>(394 - 518)          |
| Liver cancer                                                     | 616<br>(435 - 913)          | --               | 0<br>(0 - 0)      | 21<br>(14 - 33)          | 236<br>(168 - 349)       | 358<br>(227 - 573)          |
| Liver cancer due to hepatitis B                                  | 147<br>(74 - 254)           | --               | 0<br>(0 - 0)      | 9<br>(5 - 17)            | 71<br>(33 - 130)         | 66<br>(31 - 125)            |
| Liver cancer due to hepatitis C                                  | 289<br>(102 - 489)          | --               | 0<br>(0 - 0)      | 8<br>(3 - 15)            | 106<br>(35 - 185)        | 175<br>(66 - 299)           |
| Liver cancer due to alcohol use                                  | 167<br>(84 - 297)           | --               | --                | 3<br>(1 - 7)             | 54<br>(26 - 98)          | 110<br>(53 - 204)           |
| Liver cancer due to other causes                                 | 13<br>(4 - 32)              | --               | 0<br>(0 - 0)      | 1<br>(0 - 2)             | 6<br>(2 - 14)            | 7<br>(2 - 17)               |
| Larynx cancer                                                    | 125<br>(99 - 183)           | --               | --                | 9<br>(6 - 16)            | 61<br>(46 - 89)          | 55<br>(42 - 81)             |
| Tracheal, bronchus and lung cancer                               | 2,708<br>(2,447 - 2,997)    | --               | --                | 101<br>(84 - 121)        | 1,145<br>(1,030 - 1,277) | 1,462<br>(1,304 - 1,647)    |
| Breast cancer                                                    | 20<br>(9 - 62)              | --               | --                | 1<br>(0 - 3)             | 6<br>(3 - 17)            | 13<br>(5 - 41)              |
| Cervical cancer                                                  | --                          | --               | --                | --                       | --                       | --                          |
| Uterine cancer                                                   | --                          | --               | --                | --                       | --                       | --                          |
| Prostate cancer                                                  | 1,561<br>(1,187 - 2,402)    | --               | --                | 4<br>(2 - 6)             | 188<br>(137 - 303)       | 1,369<br>(1,016 - 2,114)    |

Web Table 31- Austria deaths with 95% UI by age, sex, and cause in 2013

| Cause                                         | Males, All Ages             | Males, 0-4 Years | Males, 5-14 Years | Males, 15-49 Years | Males, 50-69 Years       | Males, 70-80 Years          |
|-----------------------------------------------|-----------------------------|------------------|-------------------|--------------------|--------------------------|-----------------------------|
| Colon and rectum cancer                       | 1,470<br>(1,318 - 1,631)    | --               | --                | 41<br>(34 - 49)    | 408<br>(359 - 460)       | 1,021<br>(899 - 1,162)      |
| Lip and oral cavity cancer                    | 204<br>(169 - 231)          | --               | --                | 22<br>(17 - 27)    | 110<br>(83 - 129)        | 72<br>(53 - 85)             |
| Nasopharynx cancer                            | 16<br>(12 - 21)             | --               | 0<br>(0 - 0)      | 3<br>(2 - 4)       | 9<br>(6 - 11)            | 5<br>(4 - 7)                |
| Other pharynx cancer                          | 157<br>(101 - 190)          | --               | --                | 17<br>(12 - 24)    | 99<br>(60 - 124)         | 41<br>(23 - 54)             |
| Gallbladder and biliary tract cancer          | 129<br>(92 - 205)           | --               | --                | 3<br>(2 - 4)       | 35<br>(24 - 54)          | 92<br>(67 - 148)            |
| Pancreatic cancer                             | 838<br>(751 - 930)          | --               | --                | 38<br>(31 - 48)    | 309<br>(271 - 351)       | 491<br>(430 - 560)          |
| Malignant skin melanoma                       | 222<br>(113 - 396)          | --               | --                | 31<br>(16 - 55)    | 79<br>(40 - 144)         | 112<br>(53 - 197)           |
| Non-melanoma skin cancer                      | 49<br>(31 - 75)             | --               | --                | 2<br>(1 - 4)       | 12<br>(8 - 20)           | 35<br>(21 - 54)             |
| Ovarian cancer                                | --                          | --               | --                | --                 | --                       | --                          |
| Testicular cancer                             | 15<br>(10 - 20)             | --               | --                | 9<br>(6 - 12)      | 3<br>(2 - 4)             | 3<br>(2 - 5)                |
| Kidney cancer                                 | 383<br>(331 - 444)          | 0<br>(0 - 0)     | 0<br>(0 - 0)      | 14<br>(10 - 18)    | 128<br>(107 - 150)       | 241<br>(197 - 289)          |
| Bladder cancer                                | 401<br>(327 - 469)          | --               | --                | 4<br>(3 - 5)       | 73<br>(60 - 89)          | 323<br>(262 - 383)          |
| Brain and nervous system cancer               | 276<br>(208 - 342)          | 1<br>(1 - 2)     | 4<br>(3 - 5)      | 50<br>(38 - 65)    | 123<br>(95 - 162)        | 98<br>(63 - 131)            |
| Thyroid cancer                                | 37<br>(28 - 54)             | --               | 0<br>(0 - 0)      | 2<br>(1 - 4)       | 13<br>(9 - 19)           | 22<br>(16 - 34)             |
| Mesothelioma                                  | 91<br>(60 - 142)            | --               | --                | 5<br>(3 - 9)       | 35<br>(23 - 55)          | 51<br>(29 - 81)             |
| Hodgkin lymphoma                              | 22<br>(16 - 47)             | 0<br>(0 - 0)     | 0<br>(0 - 0)      | 5<br>(3 - 10)      | 8<br>(5 - 17)            | 10<br>(6 - 22)              |
| Non-Hodgkin lymphoma                          | 449<br>(172 - 605)          | 0<br>(0 - 0)     | 1<br>(0 - 1)      | 25<br>(10 - 32)    | 128<br>(47 - 171)        | 296<br>(105 - 429)          |
| Multiple myeloma                              | 176<br>(91 - 265)           | --               | --                | 6<br>(3 - 9)       | 51<br>(27 - 83)          | 120<br>(60 - 181)           |
| Leukemia                                      | 433<br>(375 - 498)          | 1<br>(1 - 2)     | 3<br>(2 - 5)      | 31<br>(26 - 38)    | 100<br>(83 - 118)        | 297<br>(247 - 354)          |
| Other neoplasms                               | 410<br>(239 - 498)          | 3<br>(1 - 4)     | 2<br>(1 - 3)      | 39<br>(21 - 50)    | 105<br>(63 - 130)        | 260<br>(145 - 338)          |
| Cardiovascular diseases                       | 13,707<br>(12,747 - 14,732) | 1<br>(1 - 1)     | 1<br>(1 - 1)      | 339<br>(293 - 384) | 2,260<br>(2,050 - 2,469) | 11,106<br>(10,292 - 11,956) |
| Rheumatic heart disease                       | 54<br>(27 - 77)             | 0<br>(0 - 0)     | 0<br>(0 - 0)      | 4<br>(2 - 6)       | 11<br>(6 - 16)           | 39<br>(18 - 61)             |
| Ischemic heart disease                        | 7,879<br>(6,898 - 8,772)    | 0<br>(0 - 0)     | 0<br>(0 - 0)      | 220<br>(184 - 255) | 1,491<br>(1,326 - 1,689) | 6,168<br>(5,276 - 6,916)    |
| Cerebrovascular disease                       | 3,011<br>(2,357 - 3,691)    | 0<br>(0 - 0)     | 0<br>(0 - 0)      | 54<br>(37 - 72)    | 385<br>(284 - 476)       | 2,572<br>(1,997 - 3,188)    |
| Ischemic stroke                               | 1,829<br>(1,336 - 2,305)    | 0<br>(0 - 0)     | 0<br>(0 - 0)      | 8<br>(5 - 12)      | 146<br>(97 - 199)        | 1,675<br>(1,222 - 2,106)    |
| Hemorrhagic stroke                            | 1,182<br>(751 - 1,628)      | 0<br>(0 - 0)     | 0<br>(0 - 0)      | 46<br>(31 - 60)    | 238<br>(160 - 308)       | 897<br>(535 - 1,277)        |
| Hypertensive heart disease                    | 503<br>(302 - 715)          | 0<br>(0 - 0)     | 0<br>(0 - 0)      | 6<br>(4 - 10)      | 67<br>(44 - 102)         | 429<br>(251 - 634)          |
| Cardiomyopathy and myocarditis                | 847<br>(516 - 1,703)        | 0<br>(0 - 1)     | 0<br>(0 - 0)      | 21<br>(15 - 36)    | 99<br>(72 - 170)         | 726<br>(417 - 1,532)        |
| Atrial fibrillation and flutter               | 385<br>(274 - 521)          | --               | --                | 1<br>(1 - 2)       | 20<br>(13 - 26)          | 364<br>(255 - 497)          |
| Aortic aneurysm                               | 246<br>(206 - 308)          | --               | --                | 10<br>(7 - 13)     | 58<br>(47 - 74)          | 178<br>(145 - 227)          |
| Peripheral vascular disease                   | 247<br>(186 - 313)          | --               | --                | 1<br>(1 - 2)       | 33<br>(24 - 43)          | 213<br>(154 - 275)          |
| Endocarditis                                  | 37<br>(16 - 75)             | 0<br>(0 - 0)     | 0<br>(0 - 0)      | 4<br>(1 - 7)       | 10<br>(4 - 22)           | 23<br>(10 - 48)             |
| Other cardiovascular and circulatory diseases | 497<br>(356 - 614)          | 0<br>(0 - 0)     | 0<br>(0 - 0)      | 18<br>(12 - 24)    | 85<br>(61 - 109)         | 393<br>(274 - 497)          |
| Chronic respiratory diseases                  | 2,000<br>(1,547 - 2,275)    | 1<br>(0 - 1)     | 0<br>(0 - 1)      | 26<br>(19 - 33)    | 327<br>(233 - 382)       | 1,646<br>(1,300 - 1,888)    |
| Chronic obstructive pulmonary disease         | 1,754<br>(1,325 - 2,006)    | 0<br>(0 - 1)     | 0<br>(0 - 0)      | 18<br>(12 - 23)    | 289<br>(201 - 339)       | 1,447<br>(1,104 - 1,679)    |
| Pneumoconiosis                                | 57<br>(37 - 84)             | 0<br>(0 - 0)     | 0<br>(0 - 0)      | 1<br>(1 - 2)       | 9<br>(6 - 14)            | 47<br>(29 - 70)             |
| Silicosis                                     | 12<br>(8 - 17)              | 0<br>(0 - 0)     | 0<br>(0 - 0)      | 0<br>(0 - 1)       | 3<br>(2 - 4)             | 9<br>(5 - 13)               |
| Asbestosis                                    | 16<br>(10 - 24)             | 0<br>(0 - 0)     | 0<br>(0 - 0)      | 0<br>(0 - 0)       | 2<br>(1 - 3)             | 13<br>(8 - 21)              |
| Coal workers pneumoconiosis                   | 5<br>(3 - 7)                | 0<br>(0 - 0)     | 0<br>(0 - 0)      | 0<br>(0 - 0)       | 1<br>(0 - 1)             | 4<br>(3 - 7)                |
| Other pneumoconiosis                          | 24<br>(15 - 37)             | 0<br>(0 - 0)     | 0<br>(0 - 0)      | 0<br>(0 - 1)       | 4<br>(2 - 5)             | 20<br>(12 - 32)             |

Web Table 31- Austria deaths with 95% UI by age, sex, and cause in 2013

| Cause                                               | Males, All Ages          | Males, 0-4 Years | Males, 5-14 Years | Males, 15-49 Years | Males, 50-69 Years | Males, 70-80 Years       |
|-----------------------------------------------------|--------------------------|------------------|-------------------|--------------------|--------------------|--------------------------|
| Asthma                                              | 53<br>(41 - 68)          | 0<br>(0 - 0)     | 0<br>(0 - 0)      | 3<br>(2 - 4)       | 12<br>(9 - 16)     | 38<br>(27 - 51)          |
| Interstitial lung disease and pulmonary sarcoidosis | 122<br>(65 - 194)        | 0<br>(0 - 0)     | 0<br>(0 - 0)      | 2<br>(1 - 4)       | 14<br>(6 - 21)     | 106<br>(55 - 171)        |
| Other chronic respiratory diseases                  | 13<br>(9 - 17)           | 0<br>(0 - 0)     | 0<br>(0 - 0)      | 1<br>(1 - 2)       | 3<br>(2 - 4)       | 9<br>(6 - 13)            |
| Cirrhosis                                           | 1,274<br>(1,140 - 1,409) | 0<br>(0 - 0)     | 0<br>(0 - 0)      | 185<br>(157 - 216) | 657<br>(578 - 737) | 432<br>(373 - 497)       |
| Cirrhosis due to hepatitis B                        | 116<br>(50 - 184)        | 0<br>(0 - 0)     | 0<br>(0 - 0)      | 18<br>(8 - 32)     | 60<br>(26 - 97)    | 38<br>(15 - 63)          |
| Cirrhosis due to hepatitis C                        | 489<br>(198 - 795)       | 0<br>(0 - 0)     | 0<br>(0 - 0)      | 70<br>(18 - 130)   | 254<br>(97 - 438)  | 165<br>(72 - 243)        |
| Cirrhosis due to alcohol use                        | 558<br>(292 - 872)       | --<br>(0 - 0)    | --<br>(0 - 0)     | 68<br>(9 - 118)    | 284<br>(117 - 447) | 205<br>(128 - 313)       |
| Cirrhosis due to other causes                       | 111<br>(31 - 242)        | 0<br>(0 - 0)     | 0<br>(0 - 0)      | 28<br>(10 - 63)    | 58<br>(14 - 136)   | 24<br>(5 - 48)           |
| Digestive diseases                                  | 616<br>(534 - 802)       | 0<br>(0 - 1)     | 0<br>(0 - 0)      | 30<br>(24 - 41)    | 129<br>(109 - 168) | 455<br>(387 - 594)       |
| Peptic ulcer disease                                | 101<br>(70 - 158)        | 0<br>(0 - 0)     | 0<br>(0 - 0)      | 4<br>(3 - 7)       | 24<br>(17 - 35)    | 72<br>(47 - 117)         |
| Gastritis and duodenitis                            | 8<br>(4 - 14)            | 0<br>(0 - 0)     | 0<br>(0 - 0)      | 1<br>(0 - 1)       | 2<br>(1 - 4)       | 5<br>(3 - 10)            |
| Appendicitis                                        | 8<br>(5 - 13)            | 0<br>(0 - 0)     | 0<br>(0 - 0)      | 1<br>(1 - 1)       | 3<br>(2 - 4)       | 5<br>(3 - 8)             |
| Paralytic ileus and intestinal obstruction          | 89<br>(44 - 131)         | 0<br>(0 - 0)     | 0<br>(0 - 0)      | 2<br>(1 - 4)       | 15<br>(7 - 22)     | 72<br>(34 - 107)         |
| Inguinal, femoral, and abdominal hernia             | 20<br>(11 - 37)          | 0<br>(0 - 0)     | 0<br>(0 - 0)      | 0<br>(0 - 1)       | 3<br>(2 - 5)       | 17<br>(9 - 32)           |
| Inflammatory bowel disease                          | 41<br>(27 - 60)          | 0<br>(0 - 0)     | 0<br>(0 - 0)      | 3<br>(2 - 4)       | 8<br>(5 - 12)      | 30<br>(18 - 46)          |
| Vascular intestinal disorders                       | 122<br>(54 - 225)        | 0<br>(0 - 0)     | 0<br>(0 - 0)      | 2<br>(1 - 4)       | 20<br>(8 - 39)     | 100<br>(45 - 185)        |
| Gallbladder and biliary diseases                    | 66<br>(45 - 97)          | 0<br>(0 - 0)     | 0<br>(0 - 0)      | 1<br>(1 - 2)       | 9<br>(6 - 15)      | 55<br>(36 - 82)          |
| Pancreatitis                                        | 84<br>(57 - 136)         | 0<br>(0 - 0)     | 0<br>(0 - 0)      | 13<br>(9 - 21)     | 29<br>(20 - 47)    | 42<br>(26 - 68)          |
| Other digestive diseases                            | 78<br>(51 - 106)         | 0<br>(0 - 0)     | 0<br>(0 - 0)      | 3<br>(2 - 4)       | 16<br>(10 - 22)    | 58<br>(37 - 83)          |
| Neurological disorders                              | 3,389<br>(2,588 - 4,127) | 4<br>(3 - 6)     | 3<br>(2 - 4)      | 49<br>(38 - 61)    | 192<br>(153 - 239) | 3,141<br>(2,354 - 3,878) |
| Alzheimer disease and other dementias               | 2,751<br>(1,976 - 3,483) | --<br>(0 - 0)    | --<br>(0 - 0)     | 0<br>(0 - 1)       | 80<br>(48 - 121)   | 2,671<br>(1,903 - 3,406) |
| Parkinson disease                                   | 399<br>(290 - 509)       | --<br>(0 - 0)    | --<br>(0 - 0)     | 0<br>(0 - 1)       | 21<br>(16 - 27)    | 377<br>(272 - 487)       |
| Epilepsy                                            | 52<br>(38 - 66)          | 1<br>(0 - 1)     | 1<br>(1 - 1)      | 21<br>(15 - 29)    | 17<br>(13 - 22)    | 13<br>(8 - 17)           |
| Multiple sclerosis                                  | 33<br>(14 - 52)          | --<br>(0 - 0)    | --<br>(0 - 0)     | 7<br>(3 - 13)      | 17<br>(7 - 26)     | 9<br>(4 - 15)            |
| Other neurological disorders                        | 154<br>(104 - 180)       | 4<br>(2 - 6)     | 2<br>(1 - 3)      | 20<br>(15 - 25)    | 58<br>(41 - 70)    | 71<br>(43 - 89)          |
| Mental and substance use disorders                  | 488<br>(270 - 573)       | 0<br>(0 - 0)     | 0<br>(0 - 0)      | 231<br>(159 - 275) | 176<br>(65 - 221)  | 80<br>(23 - 109)         |
| Schizophrenia                                       | 0<br>(0 - 1)             | --<br>(0 - 0)    | --<br>(0 - 0)     | 0<br>(0 - 0)       | 0<br>(0 - 0)       | 0<br>(0 - 0)             |
| Alcohol use disorders                               | 300<br>(108 - 368)       | --<br>(0 - 0)    | --<br>(0 - 0)     | 59<br>(26 - 77)    | 164<br>(57 - 208)  | 78<br>(21 - 106)         |
| Drug use disorders                                  | 187<br>(118 - 224)       | 0<br>(0 - 0)     | --<br>(0 - 0)     | 172<br>(110 - 207) | 12<br>(5 - 16)     | 3<br>(2 - 4)             |
| Opioid use disorders                                | 70<br>(43 - 85)          | 0<br>(0 - 0)     | --<br>(0 - 0)     | 65<br>(41 - 80)    | 4<br>(2 - 6)       | 1<br>(1 - 1)             |
| Cocaine use disorders                               | 5<br>(3 - 6)             | 0<br>(0 - 0)     | --<br>(0 - 0)     | 5<br>(3 - 6)       | 0<br>(0 - 0)       | 0<br>(0 - 0)             |
| Amphetamine use disorders                           | 5<br>(3 - 6)             | 0<br>(0 - 0)     | --<br>(0 - 0)     | 4<br>(3 - 6)       | 0<br>(0 - 0)       | 0<br>(0 - 0)             |
| Other drug use disorders                            | 107<br>(69 - 128)        | 0<br>(0 - 0)     | --<br>(0 - 0)     | 98<br>(64 - 119)   | 7<br>(3 - 10)      | 2<br>(1 - 2)             |
| Eating disorders                                    | 0<br>(0 - 0)             | --<br>(0 - 0)    | 0<br>(0 - 0)      | 0<br>(0 - 0)       | --<br>(0 - 0)      | --<br>(0 - 0)            |
| Anorexia nervosa                                    | 0<br>(0 - 0)             | --<br>(0 - 0)    | 0<br>(0 - 0)      | 0<br>(0 - 0)       | --<br>(0 - 0)      | --<br>(0 - 0)            |
| Diabetes, urogenital, blood, and endocrine diseases | 2,477<br>(2,039 - 2,795) | 7<br>(3 - 10)    | 3<br>(2 - 5)      | 99<br>(62 - 120)   | 540<br>(403 - 623) | 1,828<br>(1,540 - 2,080) |
| Diabetes mellitus                                   | 1,063<br>(930 - 1,203)   | 0<br>(0 - 0)     | 0<br>(0 - 0)      | 27<br>(22 - 33)    | 230<br>(199 - 265) | 805<br>(686 - 946)       |
| Acute glomerulonephritis                            | 1<br>(1 - 1)             | 0<br>(0 - 0)     | 0<br>(0 - 0)      | 0<br>(0 - 0)       | 0<br>(0 - 0)       | 0<br>(0 - 0)             |
| Chronic kidney disease                              | 902<br>(711 - 1,090)     | 0<br>(0 - 0)     | 0<br>(0 - 0)      | 17<br>(12 - 25)    | 119<br>(94 - 161)  | 766<br>(590 - 935)       |
| Chronic kidney disease due to diabetes mellitus     | 327<br>(162 - 478)       | 0<br>(0 - 0)     | 0<br>(0 - 0)      | 5<br>(2 - 8)       | 50<br>(28 - 75)    | 272<br>(139 - 395)       |

Web Table 31- Austria deaths with 95% UI by age, sex, and cause in 2013

| Cause                                               | Males, All Ages          | Males, 0-4 Years | Males, 5-14 Years | Males, 15-49 Years   | Males, 50-69 Years | Males, 70-80 Years     |
|-----------------------------------------------------|--------------------------|------------------|-------------------|----------------------|--------------------|------------------------|
| Chronic kidney disease due to hypertension          | 148<br>(67 - 207)        | 0<br>(0 - 0)     | 0<br>(0 - 0)      | 3<br>(2 - 6)         | 14<br>(8 - 31)     | 131<br>(56 - 186)      |
| Chronic kidney disease due to glomerulonephritis    | 9<br>(6 - 18)            | 0<br>(0 - 0)     | 0<br>(0 - 0)      | 1<br>(1 - 2)         | 3<br>(2 - 7)       | 5<br>(3 - 10)          |
| Chronic kidney disease due to other causes          | 417<br>(252 - 598)       | 0<br>(0 - 0)     | 0<br>(0 - 0)      | 8<br>(5 - 15)        | 52<br>(32 - 83)    | 357<br>(203 - 524)     |
| Urinary diseases and male infertility               | 113<br>(89 - 157)        | 0<br>(0 - 0)     | 0<br>(0 - 0)      | 3<br>(2 - 4)         | 16<br>(12 - 25)    | 95<br>(71 - 128)       |
| Interstitial nephritis and urinary tract infections | 83<br>(61 - 128)         | 0<br>(0 - 0)     | 0<br>(0 - 0)      | 2<br>(1 - 3)         | 10<br>(7 - 18)     | 72<br>(51 - 109)       |
| Urolithiasis                                        | 6<br>(4 - 11)            | --               | 0<br>(0 - 0)      | 0<br>(0 - 0)         | 1<br>(1 - 2)       | 5<br>(3 - 9)           |
| Other urinary diseases                              | 24<br>(9 - 37)           | 0<br>(0 - 0)     | 0<br>(0 - 0)      | 1<br>(0 - 1)         | 5<br>(2 - 7)       | 18<br>(6 - 31)         |
| Gynecological diseases                              | --                       | --               | --                | --                   | --                 | --                     |
| Uterine fibroids                                    | --                       | --               | --                | --                   | --                 | --                     |
| Polycystic ovarian syndrome                         | --                       | --               | --                | --                   | --                 | --                     |
| Endometriosis                                       | --                       | --               | --                | --                   | --                 | --                     |
| Genital prolapse                                    | --                       | --               | --                | --                   | --                 | --                     |
| Other gynecological diseases                        | --                       | --               | --                | --                   | --                 | --                     |
| Hemoglobinopathies and hemolytic anemias            | 17<br>(10 - 26)          | 0<br>(0 - 0)     | 0<br>(0 - 0)      | 2<br>(1 - 3)         | 3<br>(2 - 5)       | 12<br>(7 - 18)         |
| Thalassemias                                        | 0<br>(0 - 1)             | 0<br>(0 - 0)     | 0<br>(0 - 0)      | 0<br>(0 - 0)         | 0<br>(0 - 0)       | 0<br>(0 - 0)           |
| Sickle cell disorders                               | 3<br>(2 - 4)             | 0<br>(0 - 0)     | 0<br>(0 - 0)      | 1<br>(0 - 1)         | 1<br>(1 - 2)       | 1<br>(0 - 1)           |
| G6PD deficiency                                     | 0<br>(0 - 0)             | 0<br>(0 - 0)     | 0<br>(0 - 0)      | 0<br>(0 - 0)         | 0<br>(0 - 0)       | 0<br>(0 - 0)           |
| Other hemoglobinopathies and hemolytic anemias      | 14<br>(8 - 21)           | 0<br>(0 - 0)     | 0<br>(0 - 0)      | 1<br>(0 - 1)         | 2<br>(1 - 3)       | 11<br>(6 - 17)         |
| Endocrine, metabolic, blood, and immune disorders   | 382<br>(105 - 486)       | 6<br>(2 - 9)     | 3<br>(1 - 4)      | 50<br>(15 - 68)      | 171<br>(43 - 231)  | 151<br>(41 - 210)      |
| Musculoskeletal disorders                           | 46<br>(36 - 75)          | --               | 0<br>(0 - 0)      | 4<br>(3 - 6)         | 12<br>(9 - 21)     | 31<br>(22 - 50)        |
| Rheumatoid arthritis                                | 13<br>(8 - 23)           | --               | 0<br>(0 - 0)      | 0<br>(0 - 1)         | 3<br>(2 - 6)       | 9<br>(5 - 17)          |
| Other musculoskeletal disorders                     | 34<br>(25 - 56)          | --               | 0<br>(0 - 0)      | 3<br>(2 - 6)         | 9<br>(6 - 15)      | 22<br>(15 - 36)        |
| Other non-communicable diseases                     | 143<br>(119 - 170)       | 75<br>(58 - 99)  | 5<br>(3 - 6)      | 21<br>(15 - 25)      | 19<br>(14 - 23)    | 23<br>(15 - 29)        |
| Congenital anomalies                                | 106<br>(87 - 128)        | 60<br>(45 - 80)  | 5<br>(3 - 6)      | 20<br>(15 - 24)      | 15<br>(11 - 19)    | 6<br>(4 - 8)           |
| Neural tube defects                                 | 1<br>(1 - 2)             | 1<br>(0 - 1)     | 0<br>(0 - 0)      | 0<br>(0 - 0)         | 0<br>(0 - 0)       | 0<br>(0 - 0)           |
| Congenital heart anomalies                          | 34<br>(26 - 44)          | 23<br>(16 - 31)  | 2<br>(1 - 2)      | 7<br>(5 - 9)         | 3<br>(2 - 4)       | 1<br>(1 - 1)           |
| Cleft lip and cleft palate                          | 0<br>(0 - 0)             | 0<br>(0 - 0)     | --                | --                   | --                 | --                     |
| Down syndrome                                       | 17<br>(8 - 24)           | 3<br>(1 - 6)     | 0<br>(0 - 1)      | 5<br>(2 - 7)         | 8<br>(4 - 12)      | 1<br>(0 - 1)           |
| Chromosomal unbalanced rearrangements               | 4<br>(3 - 6)             | 4<br>(2 - 5)     | 0<br>(0 - 0)      | 0<br>(0 - 0)         | 0<br>(0 - 0)       | 0<br>(0 - 0)           |
| Other congenital anomalies                          | 49<br>(37 - 64)          | 30<br>(21 - 43)  | 2<br>(1 - 4)      | 8<br>(5 - 11)        | 4<br>(2 - 7)       | 5<br>(3 - 6)           |
| Skin and subcutaneous diseases                      | 22<br>(13 - 28)          | 0<br>(0 - 0)     | 0<br>(0 - 0)      | 1<br>(1 - 1)         | 4<br>(3 - 5)       | 17<br>(10 - 23)        |
| Cellulitis                                          | 3<br>(1 - 5)             | 0<br>(0 - 0)     | 0<br>(0 - 0)      | 0<br>(0 - 0)         | 1<br>(0 - 1)       | 2<br>(1 - 4)           |
| Pyoderma                                            | 12<br>(7 - 16)           | 0<br>(0 - 0)     | 0<br>(0 - 0)      | 0<br>(0 - 1)         | 2<br>(1 - 3)       | 9<br>(5 - 13)          |
| Decubitus ulcer                                     | 5<br>(3 - 8)             | 0<br>(0 - 0)     | 0<br>(0 - 0)      | 0<br>(0 - 0)         | 0<br>(0 - 1)       | 4<br>(2 - 7)           |
| Other skin and subcutaneous diseases                | 2<br>(1 - 3)             | 0<br>(0 - 0)     | 0<br>(0 - 0)      | 0<br>(0 - 0)         | 0<br>(0 - 1)       | 1<br>(0 - 2)           |
| Sudden infant death syndrome                        | 15<br>(7 - 31)           | 15<br>(7 - 31)   | --                | --                   | --                 | --                     |
| Injuries                                            | 2,706<br>(2,427 - 3,145) | 13<br>(9 - 18)   | 15<br>(13 - 19)   | 866<br>(770 - 1,007) | 734<br>(642 - 896) | 1,078<br>(909 - 1,268) |
| Transport injuries                                  | 516<br>(461 - 573)       | 3<br>(2 - 4)     | 7<br>(5 - 9)      | 249<br>(215 - 283)   | 130<br>(111 - 150) | 129<br>(108 - 154)     |
| Road injuries                                       | 461<br>(410 - 514)       | 2<br>(1 - 3)     | 6<br>(4 - 8)      | 224<br>(193 - 255)   | 112<br>(94 - 131)  | 117<br>(96 - 140)      |
| Pedestrian road injuries                            | 103<br>(56 - 150)        | 1<br>(0 - 1)     | 2<br>(1 - 3)      | 21<br>(9 - 34)       | 33<br>(16 - 49)    | 47<br>(26 - 68)        |

Web Table 31- Austria deaths with 95% UI by age, sex, and cause in 2013

| Cause                                           | Males, All Ages        | Males, 0-4 Years | Males, 5-14 Years | Males, 15-49 Years | Males, 50-69 Years | Males, 70-80 Years |
|-------------------------------------------------|------------------------|------------------|-------------------|--------------------|--------------------|--------------------|
| Cyclist road injuries                           | 40<br>(23 - 53)        | 0<br>(0 - 0)     | 1<br>(1 - 2)      | 9<br>(4 - 12)      | 14<br>(8 - 19)     | 17<br>(9 - 25)     |
| Motorcyclist road injuries                      | 79<br>(48 - 115)       | 0<br>(0 - 0)     | 0<br>(0 - 0)      | 51<br>(29 - 73)    | 16<br>(9 - 25)     | 11<br>(7 - 20)     |
| Motor vehicle road injuries                     | 238<br>(194 - 309)     | 1<br>(1 - 2)     | 2<br>(1 - 3)      | 144<br>(118 - 178) | 49<br>(35 - 72)    | 42<br>(28 - 63)    |
| Other road injuries                             | 1<br>(1 - 3)           | 0<br>(0 - 0)     | 0<br>(0 - 0)      | 0<br>(0 - 1)       | 0<br>(0 - 1)       | 1<br>(0 - 1)       |
| Other transport injuries                        | 55<br>(33 - 73)        | 0<br>(0 - 1)     | 1<br>(0 - 1)      | 25<br>(14 - 34)    | 18<br>(10 - 26)    | 12<br>(6 - 18)     |
| Unintentional injuries                          | 1,074<br>(899 - 1,245) | 9<br>(6 - 13)    | 7<br>(5 - 9)      | 156<br>(134 - 204) | 257<br>(219 - 321) | 646<br>(490 - 777) |
| Falls                                           | 764<br>(596 - 940)     | 1<br>(1 - 2)     | 2<br>(1 - 2)      | 69<br>(56 - 99)    | 155<br>(123 - 206) | 537<br>(399 - 670) |
| Drowning                                        | 50<br>(38 - 81)        | 2<br>(1 - 5)     | 2<br>(1 - 4)      | 19<br>(14 - 32)    | 15<br>(11 - 25)    | 12<br>(9 - 18)     |
| Fire, heat, and hot substances                  | 26<br>(20 - 39)        | 1<br>(0 - 1)     | 0<br>(0 - 1)      | 6<br>(4 - 10)      | 7<br>(5 - 11)      | 12<br>(8 - 18)     |
| Poisonings                                      | 12<br>(9 - 18)         | 0<br>(0 - 0)     | 0<br>(0 - 0)      | 5<br>(4 - 8)       | 3<br>(2 - 5)       | 3<br>(2 - 5)       |
| Exposure to mechanical forces                   | 67<br>(57 - 89)        | 1<br>(1 - 2)     | 1<br>(1 - 2)      | 29<br>(23 - 39)    | 26<br>(21 - 35)    | 10<br>(8 - 13)     |
| Unintentional firearm injuries                  | 1<br>(1 - 2)           | 0<br>(0 - 0)     | 0<br>(0 - 0)      | 1<br>(0 - 1)       | 0<br>(0 - 1)       | 0<br>(0 - 0)       |
| Unintentional suffocation                       | 1<br>(1 - 2)           | 0<br>(0 - 1)     | 0<br>(0 - 0)      | 0<br>(0 - 1)       | 0<br>(0 - 0)       | 0<br>(0 - 0)       |
| Other exposure to mechanical forces             | 65<br>(55 - 85)        | 1<br>(0 - 1)     | 1<br>(1 - 2)      | 28<br>(22 - 38)    | 26<br>(20 - 34)    | 10<br>(7 - 13)     |
| Adverse effects of medical treatment            | 63<br>(34 - 84)        | 1<br>(0 - 1)     | 0<br>(0 - 1)      | 8<br>(4 - 11)      | 24<br>(12 - 32)    | 31<br>(15 - 45)    |
| Animal contact                                  | 8<br>(6 - 12)          | 0<br>(0 - 0)     | 0<br>(0 - 0)      | 2<br>(1 - 3)       | 3<br>(2 - 5)       | 3<br>(2 - 4)       |
| Venomous animal contact                         | 4<br>(2 - 5)           | 0<br>(0 - 0)     | 0<br>(0 - 0)      | 1<br>(1 - 2)       | 2<br>(1 - 3)       | 1<br>(0 - 1)       |
| Non-venomous animal contact                     | 4<br>(3 - 6)           | 0<br>(0 - 0)     | 0<br>(0 - 0)      | 1<br>(0 - 1)       | 1<br>(1 - 2)       | 2<br>(1 - 3)       |
| Foreign body                                    | 71<br>(33 - 95)        | 3<br>(1 - 4)     | 1<br>(0 - 1)      | 13<br>(6 - 18)     | 20<br>(9 - 27)     | 35<br>(14 - 51)    |
| Pulmonary aspiration and foreign body in airway | 71<br>(32 - 94)        | 3<br>(1 - 4)     | 1<br>(0 - 1)      | 13<br>(6 - 18)     | 20<br>(9 - 27)     | 35<br>(14 - 51)    |
| Foreign body in other body part                 | 0<br>(0 - 1)           | 0<br>(0 - 0)     | 0<br>(0 - 0)      | 0<br>(0 - 0)       | 0<br>(0 - 0)       | 0<br>(0 - 0)       |
| Other unintentional injuries                    | 12<br>(9 - 16)         | 1<br>(0 - 1)     | 0<br>(0 - 0)      | 5<br>(4 - 8)       | 4<br>(2 - 6)       | 3<br>(1 - 4)       |
| Self-harm and interpersonal violence            | 1,116<br>(922 - 1,481) | 1<br>(1 - 2)     | 2<br>(1 - 4)      | 461<br>(363 - 577) | 347<br>(278 - 472) | 304<br>(241 - 420) |
| Self-harm                                       | 1,088<br>(895 - 1,452) | --               | 2<br>(1 - 3)      | 446<br>(348 - 559) | 340<br>(272 - 460) | 301<br>(237 - 414) |
| Interpersonal violence                          | 28<br>(20 - 44)        | 1<br>(1 - 2)     | 1<br>(0 - 1)      | 15<br>(11 - 24)    | 8<br>(5 - 12)      | 3<br>(2 - 5)       |
| Assault by firearm                              | 8<br>(4 - 15)          | 0<br>(0 - 0)     | 0<br>(0 - 0)      | 5<br>(2 - 9)       | 2<br>(1 - 4)       | 0<br>(0 - 1)       |
| Assault by sharp object                         | 10<br>(6 - 18)         | 0<br>(0 - 0)     | 0<br>(0 - 0)      | 6<br>(3 - 11)      | 3<br>(2 - 5)       | 1<br>(1 - 2)       |
| Assault by other means                          | 10<br>(6 - 16)         | 1<br>(1 - 2)     | 0<br>(0 - 0)      | 5<br>(3 - 8)       | 3<br>(1 - 4)       | 2<br>(1 - 3)       |
| Forces of nature, war, and legal intervention   | 0<br>(0 - 0)           | 0<br>(0 - 0)     | --                | --                 | --                 | 0<br>(0 - 0)       |
| Exposure to forces of nature                    | 0<br>(0 - 0)           | 0<br>(0 - 0)     | --                | --                 | --                 | 0<br>(0 - 0)       |

Web Table 31- Austria deaths with 95% UI by age, sex, and cause in 2013

| Cause                                                              | Females, All Ages           | Females, 0-4 Years | Females, 5-14 Years | Females, 15-49 Years     | Females, 50-69 Years     | Females, 70-80 Years        |
|--------------------------------------------------------------------|-----------------------------|--------------------|---------------------|--------------------------|--------------------------|-----------------------------|
| All causes                                                         | 45,369<br>(42,639 - 48,095) | 143<br>(111 - 179) | 34<br>(29 - 38)     | 1,240<br>(1,122 - 1,364) | 4,998<br>(4,589 - 5,413) | 38,956<br>(36,737 - 41,134) |
| Communicable, maternal, neonatal, and nutritional diseases         | 1,237<br>(958 - 1,592)      | 62<br>(46 - 79)    | 2<br>(2 - 3)        | 38<br>(29 - 48)          | 67<br>(54 - 78)          | 1,068<br>(804 - 1,427)      |
| HIV/AIDS and tuberculosis                                          | 40<br>(28 - 55)             | 0<br>(0 - 0)       | 0<br>(0 - 0)        | 13<br>(7 - 22)           | 8<br>(5 - 11)            | 19<br>(13 - 28)             |
| Tuberculosis                                                       | 24<br>(19 - 35)             | 0<br>(0 - 0)       | 0<br>(0 - 0)        | 2<br>(1 - 2)             | 4<br>(3 - 6)             | 18<br>(13 - 28)             |
| HIV/AIDS                                                           | 15<br>(7 - 29)              | 0<br>(0 - 0)       | 0<br>(0 - 0)        | 11<br>(5 - 21)           | 3<br>(1 - 6)             | 1<br>(0 - 1)                |
| HIV/AIDS resulting in mycobacterial infection                      | 1<br>(0 - 1)                | 0<br>(0 - 0)       | 0<br>(0 - 0)        | 0<br>(0 - 1)             | 0<br>(0 - 0)             | 0<br>(0 - 0)                |
| HIV/AIDS resulting in other diseases                               | 15<br>(6 - 28)              | 0<br>(0 - 0)       | 0<br>(0 - 0)        | 11<br>(5 - 20)           | 3<br>(1 - 6)             | 1<br>(0 - 1)                |
| Diarrrhea, lower respiratory, and other common infectious diseases | 1,043<br>(775 - 1,407)      | 6<br>(4 - 9)       | 2<br>(1 - 2)        | 17<br>(14 - 21)          | 48<br>(38 - 59)          | 969<br>(708 - 1,331)        |
| Diarrheal diseases                                                 | 42<br>(27 - 64)             | 1<br>(1 - 2)       | 0<br>(0 - 0)        | 1<br>(1 - 1)             | 2<br>(1 - 3)             | 38<br>(23 - 60)             |
| Intestinal infectious diseases                                     | 2<br>(1 - 5)                | 0<br>(0 - 1)       | 0<br>(0 - 1)        | 1<br>(0 - 2)             | 0<br>(0 - 1)             | 0<br>(0 - 2)                |
| Typhoid fever                                                      | 1<br>(0 - 3)                | 0<br>(0 - 0)       | 0<br>(0 - 0)        | 1<br>(0 - 1)             | 0<br>(0 - 0)             | 0<br>(0 - 0)                |
| Paratyphoid fever                                                  | 0<br>(0 - 1)                | 0<br>(0 - 0)       | 0<br>(0 - 0)        | 0<br>(0 - 0)             | 0<br>(0 - 0)             | 0<br>(0 - 0)                |
| Other intestinal infectious diseases                               | 0<br>(0 - 2)                | 0<br>(0 - 1)       | 0<br>(0 - 0)        | 0<br>(0 - 1)             | 0<br>(0 - 1)             | 0<br>(0 - 1)                |
| Lower respiratory infections                                       | 960<br>(692 - 1,317)        | 3<br>(2 - 5)       | 1<br>(1 - 1)        | 10<br>(8 - 13)           | 37<br>(28 - 47)          | 909<br>(649 - 1,264)        |
| Upper respiratory infections                                       | 1<br>(0 - 4)                | 0<br>(0 - 0)       | 0<br>(0 - 0)        | 0<br>(0 - 0)             | 0<br>(0 - 0)             | 1<br>(0 - 3)                |
| Otitis media                                                       | 1<br>(1 - 1)                | 0<br>(0 - 0)       | 0<br>(0 - 0)        | 0<br>(0 - 0)             | 0<br>(0 - 0)             | 0<br>(0 - 0)                |
| Meningitis                                                         | 16<br>(13 - 19)             | 1<br>(1 - 2)       | 0<br>(0 - 0)        | 2<br>(1 - 2)             | 4<br>(3 - 5)             | 9<br>(6 - 11)               |
| Pneumococcal meningitis                                            | 3<br>(2 - 4)                | 0<br>(0 - 0)       | 0<br>(0 - 0)        | 0<br>(0 - 0)             | 1<br>(0 - 1)             | 2<br>(1 - 3)                |
| H influenzae type B meningitis                                     | 2<br>(1 - 2)                | 0<br>(0 - 1)       | 0<br>(0 - 0)        | 0<br>(0 - 0)             | 0<br>(0 - 1)             | 1<br>(0 - 1)                |
| Meningococcal meningitis                                           | 5<br>(4 - 7)                | 0<br>(0 - 1)       | 0<br>(0 - 0)        | 1<br>(0 - 1)             | 1<br>(1 - 2)             | 3<br>(2 - 4)                |
| Other meningitis                                                   | 6<br>(4 - 8)                | 0<br>(0 - 1)       | 0<br>(0 - 0)        | 1<br>(0 - 1)             | 2<br>(1 - 2)             | 3<br>(2 - 5)                |
| Encephalitis                                                       | 15<br>(9 - 20)              | 0<br>(0 - 1)       | 0<br>(0 - 0)        | 3<br>(2 - 5)             | 4<br>(2 - 6)             | 7<br>(3 - 10)               |
| Diphtheria                                                         | 0<br>(0 - 0)                | 0<br>(0 - 0)       | 0<br>(0 - 0)        | 0<br>(0 - 0)             | 0<br>(0 - 0)             | --                          |
| Whooping cough                                                     | 0<br>(0 - 0)                | 0<br>(0 - 0)       | 0<br>(0 - 0)        | 0<br>(0 - 0)             | 0<br>(0 - 0)             | --                          |
| Tetanus                                                            | 1<br>(0 - 1)                | 0<br>(0 - 0)       | 0<br>(0 - 0)        | 0<br>(0 - 0)             | 0<br>(0 - 0)             | 0<br>(0 - 0)                |
| Measles                                                            | 0<br>(0 - 0)                | 0<br>(0 - 0)       | 0<br>(0 - 0)        | 0<br>(0 - 0)             | 0<br>(0 - 0)             | --                          |
| Varicella and herpes zoster                                        | 6<br>(1 - 31)               | 0<br>(0 - 1)       | 0<br>(0 - 0)        | 0<br>(0 - 1)             | 0<br>(0 - 1)             | 5<br>(0 - 31)               |
| Neglected tropical diseases and malaria                            | 2<br>(1 - 2)                | 0<br>(0 - 0)       | 0<br>(0 - 0)        | 1<br>(0 - 1)             | 0<br>(0 - 1)             | 1<br>(0 - 1)                |
| Cysticercosis                                                      | 0<br>(0 - 0)                | 0<br>(0 - 0)       | 0<br>(0 - 0)        | 0<br>(0 - 0)             | 0<br>(0 - 0)             | 0<br>(0 - 0)                |
| Cystic echinococcosis                                              | 0<br>(0 - 0)                | 0<br>(0 - 0)       | 0<br>(0 - 0)        | 0<br>(0 - 0)             | 0<br>(0 - 0)             | 0<br>(0 - 0)                |
| Dengue                                                             | 0<br>(0 - 1)                | 0<br>(0 - 0)       | 0<br>(0 - 0)        | 0<br>(0 - 0)             | 0<br>(0 - 0)             | 0<br>(0 - 0)                |
| Rabies                                                             | 0<br>(0 - 0)                | 0<br>(0 - 0)       | 0<br>(0 - 0)        | 0<br>(0 - 0)             | 0<br>(0 - 0)             | 0<br>(0 - 0)                |
| Other neglected tropical diseases                                  | 0<br>(0 - 1)                | 0<br>(0 - 0)       | 0<br>(0 - 0)        | 0<br>(0 - 0)             | 0<br>(0 - 0)             | 0<br>(0 - 0)                |
| Maternal disorders                                                 | 3<br>(2 - 3)                | --                 | 0<br>(0 - 0)        | 3<br>(2 - 3)             | --                       | --                          |
| Maternal hemorrhage                                                | 0<br>(0 - 0)                | --                 | 0<br>(0 - 0)        | 0<br>(0 - 0)             | --                       | --                          |
| Maternal sepsis and other maternal infections                      | 0<br>(0 - 0)                | --                 | 0<br>(0 - 0)        | 0<br>(0 - 0)             | --                       | --                          |
| Maternal hypertensive disorders                                    | 0<br>(0 - 1)                | --                 | 0<br>(0 - 0)        | 0<br>(0 - 1)             | --                       | --                          |
| Maternal obstructed labor                                          | 0<br>(0 - 0)                | --                 | 0<br>(0 - 0)        | 0<br>(0 - 0)             | --                       | --                          |
| Maternal abortive outcome                                          | 1<br>(0 - 1)                | --                 | 0<br>(0 - 0)        | 1<br>(0 - 1)             | --                       | --                          |
| Indirect maternal deaths                                           | 0<br>(0 - 0)                | --                 | 0<br>(0 - 0)        | 0<br>(0 - 0)             | --                       | --                          |

Web Table 31- Austria deaths with 95% UI by age, sex, and cause in 2013

| Cause                                                            | Females, All Ages           | Females, 0-4 Years | Females, 5-14 Years | Females, 15-49 Years | Females, 50-69 Years     | Females, 70-80 Years        |
|------------------------------------------------------------------|-----------------------------|--------------------|---------------------|----------------------|--------------------------|-----------------------------|
| Late maternal deaths                                             | 0<br>(0 - 0)                | --                 | 0<br>(0 - 0)        | 0<br>(0 - 0)         | --                       | --                          |
| Maternal deaths aggravated by HIV/AIDS                           | 0<br>(0 - 0)                | --                 | --                  | 0<br>(0 - 0)         | --                       | --                          |
| Other maternal disorders                                         | 1<br>(0 - 1)                | --                 | 0<br>(0 - 0)        | 1<br>(0 - 1)         | --                       | --                          |
| Neonatal disorders                                               | 53<br>(40 - 69)             | 53<br>(40 - 69)    | --                  | --                   | --                       | --                          |
| Neonatal preterm birth complications                             | 33<br>(23 - 45)             | 33<br>(23 - 45)    | --                  | --                   | --                       | --                          |
| Neonatal encephalopathy due to birth asphyxia and trauma         | 14<br>(9 - 20)              | 14<br>(9 - 20)     | --                  | --                   | --                       | --                          |
| Neonatal sepsis and other neonatal infections                    | 1<br>(0 - 2)                | 1<br>(0 - 2)       | --                  | --                   | --                       | --                          |
| Hemolytic disease and other neonatal jaundice                    | 0<br>(0 - 0)                | 0<br>(0 - 0)       | --                  | --                   | --                       | --                          |
| Other neonatal disorders                                         | 6<br>(3 - 9)                | 6<br>(3 - 9)       | --                  | --                   | --                       | --                          |
| Nutritional deficiencies                                         | 70<br>(49 - 93)             | 0<br>(0 - 1)       | 0<br>(0 - 0)        | 2<br>(1 - 2)         | 4<br>(3 - 5)             | 64<br>(43 - 87)             |
| Protein-energy malnutrition                                      | 1<br>(0 - 1)                | 0<br>(0 - 0)       | 0<br>(0 - 0)        | 0<br>(0 - 0)         | 0<br>(0 - 0)             | 0<br>(0 - 0)                |
| Iodine deficiency                                                | 0<br>(0 - 2)                | 0<br>(0 - 0)       | 0<br>(0 - 0)        | 0<br>(0 - 0)         | 0<br>(0 - 0)             | 0<br>(0 - 2)                |
| Iron-deficiency anemia                                           | 58<br>(38 - 80)             | 0<br>(0 - 0)       | 0<br>(0 - 0)        | 1<br>(1 - 2)         | 3<br>(2 - 4)             | 54<br>(35 - 75)             |
| Other nutritional deficiencies                                   | 11<br>(4 - 23)              | 0<br>(0 - 0)       | 0<br>(0 - 0)        | 0<br>(0 - 0)         | 1<br>(0 - 1)             | 9<br>(3 - 21)               |
| Other communicable, maternal, neonatal, and nutritional diseases | 26<br>(13 - 37)             | 1<br>(1 - 2)       | 0<br>(0 - 1)        | 2<br>(1 - 3)         | 7<br>(3 - 9)             | 16<br>(7 - 24)              |
| Sexually transmitted diseases excluding HIV                      | 3<br>(2 - 4)                | 1<br>(0 - 1)       | 0<br>(0 - 0)        | 0<br>(0 - 0)         | 0<br>(0 - 1)             | 2<br>(1 - 3)                |
| Syphilis                                                         | 2<br>(1 - 3)                | 1<br>(0 - 1)       | 0<br>(0 - 0)        | 0<br>(0 - 0)         | 0<br>(0 - 0)             | 1<br>(1 - 2)                |
| Chlamydial infection                                             | 0<br>(0 - 0)                | --                 | 0<br>(0 - 0)        | 0<br>(0 - 0)         | 0<br>(0 - 0)             | 0<br>(0 - 0)                |
| Gonococcal infection                                             | 0<br>(0 - 0)                | --                 | 0<br>(0 - 0)        | 0<br>(0 - 0)         | 0<br>(0 - 0)             | 0<br>(0 - 0)                |
| Other sexually transmitted diseases                              | 0<br>(0 - 0)                | --                 | 0<br>(0 - 0)        | 0<br>(0 - 0)         | 0<br>(0 - 0)             | 0<br>(0 - 0)                |
| Hepatitis                                                        | 1<br>(1 - 1)                | 0<br>(0 - 0)       | 0<br>(0 - 0)        | 0<br>(0 - 0)         | 0<br>(0 - 0)             | 0<br>(0 - 1)                |
| Acute hepatitis A                                                | 0<br>(0 - 1)                | 0<br>(0 - 0)       | 0<br>(0 - 0)        | 0<br>(0 - 0)         | 0<br>(0 - 0)             | 0<br>(0 - 0)                |
| Acute hepatitis B                                                | 1<br>(0 - 1)                | 0<br>(0 - 0)       | 0<br>(0 - 0)        | 0<br>(0 - 0)         | 0<br>(0 - 0)             | 0<br>(0 - 0)                |
| Acute hepatitis C                                                | 0<br>(0 - 0)                | --                 | 0<br>(0 - 0)        | 0<br>(0 - 0)         | 0<br>(0 - 0)             | 0<br>(0 - 0)                |
| Other infectious diseases                                        | 22<br>(9 - 33)              | 1<br>(0 - 1)       | 0<br>(0 - 0)        | 2<br>(1 - 3)         | 6<br>(3 - 8)             | 14<br>(5 - 22)              |
| Non-communicable diseases                                        | 42,485<br>(40,004 - 45,097) | 72<br>(56 - 93)    | 22<br>(19 - 26)     | 964<br>(869 - 1,065) | 4,675<br>(4,301 - 5,061) | 36,751<br>(34,715 - 38,882) |
| Neoplasms                                                        | 10,282<br>(9,022 - 11,350)  | 6<br>(4 - 7)       | 10<br>(8 - 12)      | 545<br>(487 - 608)   | 2,654<br>(2,333 - 2,925) | 7,068<br>(6,125 - 7,900)    |
| Esophageal cancer                                                | 64<br>(52 - 75)             | --                 | --                  | 2<br>(2 - 3)         | 19<br>(15 - 23)          | 43<br>(33 - 53)             |
| Stomach cancer                                                   | 637<br>(477 - 850)          | --                 | --                  | 19<br>(14 - 26)      | 97<br>(72 - 134)         | 521<br>(382 - 713)          |
| Liver cancer                                                     | 295<br>(221 - 377)          | --                 | 0<br>(0 - 0)        | 10<br>(7 - 13)       | 67<br>(52 - 83)          | 218<br>(156 - 291)          |
| Liver cancer due to hepatitis B                                  | 40<br>(15 - 72)             | --                 | 0<br>(0 - 0)        | 3<br>(1 - 6)         | 13<br>(3 - 25)           | 25<br>(9 - 45)              |
| Liver cancer due to hepatitis C                                  | 166<br>(93 - 244)           | --                 | 0<br>(0 - 0)        | 4<br>(1 - 7)         | 35<br>(15 - 55)          | 127<br>(69 - 193)           |
| Liver cancer due to alcohol use                                  | 62<br>(18 - 126)            | --                 | --                  | 1<br>(0 - 3)         | 12<br>(2 - 30)           | 49<br>(15 - 95)             |
| Liver cancer due to other causes                                 | 27<br>(11 - 52)             | --                 | 0<br>(0 - 0)        | 2<br>(1 - 3)         | 8<br>(3 - 18)            | 18<br>(7 - 36)              |
| Larynx cancer                                                    | 16<br>(11 - 24)             | --                 | --                  | 1<br>(1 - 2)         | 6<br>(4 - 9)             | 9<br>(5 - 13)               |
| Tracheal, bronchus and lung cancer                               | 1,315<br>(909 - 1,568)      | --                 | --                  | 70<br>(51 - 91)      | 513<br>(316 - 624)       | 731<br>(502 - 900)          |
| Breast cancer                                                    | 1,699<br>(1,305 - 2,040)    | --                 | --                  | 147<br>(121 - 180)   | 524<br>(422 - 649)       | 1,028<br>(732 - 1,262)      |
| Cervical cancer                                                  | 271<br>(219 - 400)          | --                 | --                  | 37<br>(29 - 52)      | 87<br>(70 - 123)         | 147<br>(110 - 230)          |
| Uterine cancer                                                   | 251<br>(202 - 353)          | --                 | --                  | 5<br>(3 - 7)         | 61<br>(48 - 93)          | 185<br>(142 - 265)          |
| Prostate cancer                                                  | --                          | --                 | --                  | --                   | --                       | --                          |

Web Table 31- Austria deaths with 95% UI by age, sex, and cause in 2013

| Cause                                         | Females, All Ages           | Females, 0-4 Years | Females, 5-14 Years | Females, 15-49 Years | Females, 50-69 Years | Females, 70-80 Years        |
|-----------------------------------------------|-----------------------------|--------------------|---------------------|----------------------|----------------------|-----------------------------|
| Colon and rectum cancer                       | 1,354<br>(1,158 - 1,575)    | --                 | --                  | 34<br>(28 - 42)      | 237<br>(201 - 271)   | 1,083<br>(900 - 1,290)      |
| Lip and oral cavity cancer                    | 66<br>(53 - 89)             | --                 | --                  | 5<br>(4 - 7)         | 22<br>(17 - 31)      | 38<br>(30 - 53)             |
| Nasopharynx cancer                            | 8<br>(4 - 18)               | --                 | 0<br>(0 - 0)        | 1<br>(0 - 2)         | 2<br>(1 - 5)         | 5<br>(2 - 10)               |
| Other pharynx cancer                          | 25<br>(19 - 35)             | --                 | --                  | 3<br>(2 - 4)         | 12<br>(8 - 18)       | 10<br>(7 - 15)              |
| Gallbladder and biliary tract cancer          | 255<br>(197 - 406)          | --                 | --                  | 4<br>(3 - 6)         | 45<br>(34 - 77)      | 206<br>(155 - 330)          |
| Pancreatic cancer                             | 869<br>(753 - 992)          | --                 | --                  | 22<br>(18 - 28)      | 206<br>(174 - 239)   | 640<br>(541 - 749)          |
| Malignant skin melanoma                       | 168<br>(105 - 222)          | --                 | --                  | 21<br>(14 - 28)      | 48<br>(30 - 63)      | 99<br>(59 - 137)            |
| Non-melanoma skin cancer                      | 50<br>(35 - 68)             | --                 | --                  | 1<br>(1 - 2)         | 4<br>(3 - 5)         | 45<br>(30 - 62)             |
| Ovarian cancer                                | 595<br>(509 - 748)          | --                 | --                  | 34<br>(26 - 50)      | 193<br>(162 - 253)   | 368<br>(304 - 465)          |
| Testicular cancer                             | --                          | --                 | --                  | --                   | --                   | --                          |
| Kidney cancer                                 | 305<br>(228 - 428)          | 0<br>(0 - 0)       | 0<br>(0 - 0)        | 8<br>(6 - 12)        | 70<br>(52 - 94)      | 226<br>(152 - 324)          |
| Bladder cancer                                | 190<br>(127 - 283)          | --                 | --                  | 3<br>(2 - 4)         | 25<br>(17 - 36)      | 162<br>(107 - 243)          |
| Brain and nervous system cancer               | 233<br>(162 - 281)          | 1<br>(1 - 2)       | 3<br>(2 - 5)        | 32<br>(24 - 41)      | 87<br>(64 - 109)     | 109<br>(61 - 140)           |
| Thyroid cancer                                | 56<br>(41 - 95)             | --                 | 0<br>(0 - 0)        | 1<br>(1 - 3)         | 10<br>(7 - 18)       | 44<br>(30 - 77)             |
| Mesothelioma                                  | 39<br>(27 - 82)             | --                 | --                  | 2<br>(1 - 4)         | 12<br>(8 - 21)       | 25<br>(16 - 61)             |
| Hodgkin lymphoma                              | 20<br>(15 - 41)             | 0<br>(0 - 0)       | 0<br>(0 - 0)        | 4<br>(3 - 7)         | 4<br>(3 - 8)         | 12<br>(8 - 27)              |
| Non-Hodgkin lymphoma                          | 389<br>(152 - 530)          | 0<br>(0 - 0)       | 0<br>(0 - 0)        | 17<br>(7 - 24)       | 82<br>(34 - 111)     | 289<br>(108 - 419)          |
| Multiple myeloma                              | 186<br>(114 - 293)          | --                 | --                  | 3<br>(2 - 6)         | 45<br>(27 - 73)      | 138<br>(81 - 220)           |
| Leukemia                                      | 366<br>(287 - 438)          | 1<br>(1 - 2)       | 3<br>(2 - 4)        | 25<br>(20 - 30)      | 62<br>(49 - 74)      | 276<br>(208 - 346)          |
| Other neoplasms                               | 562<br>(391 - 703)          | 3<br>(2 - 4)       | 3<br>(2 - 4)        | 33<br>(27 - 40)      | 113<br>(88 - 136)    | 410<br>(255 - 542)          |
| Cardiovascular diseases                       | 20,646<br>(18,452 - 24,000) | 1<br>(1 - 1)       | 1<br>(1 - 2)        | 145<br>(118 - 191)   | 987<br>(828 - 1,385) | 19,513<br>(17,390 - 22,464) |
| Rheumatic heart disease                       | 158<br>(93 - 215)           | 0<br>(0 - 0)       | 0<br>(0 - 0)        | 4<br>(2 - 5)         | 15<br>(11 - 28)      | 138<br>(77 - 192)           |
| Ischemic heart disease                        | 11,063<br>(8,479 - 12,841)  | 0<br>(0 - 0)       | 0<br>(0 - 0)        | 61<br>(45 - 88)      | 542<br>(438 - 803)   | 10,460<br>(7,940 - 12,059)  |
| Cerebrovascular disease                       | 4,613<br>(3,606 - 7,207)    | 0<br>(0 - 0)       | 0<br>(0 - 1)        | 44<br>(34 - 62)      | 230<br>(177 - 371)   | 4,338<br>(3,373 - 6,800)    |
| Ischemic stroke                               | 3,037<br>(2,220 - 5,005)    | 0<br>(0 - 0)       | 0<br>(0 - 0)        | 5<br>(4 - 10)        | 70<br>(45 - 133)     | 2,961<br>(2,162 - 4,891)    |
| Hemorrhagic stroke                            | 1,575<br>(1,171 - 2,476)    | 0<br>(0 - 0)       | 0<br>(0 - 1)        | 39<br>(30 - 55)      | 159<br>(123 - 245)   | 1,377<br>(993 - 2,239)      |
| Hypertensive heart disease                    | 1,317<br>(691 - 1,848)      | 0<br>(0 - 0)       | 0<br>(0 - 0)        | 3<br>(2 - 5)         | 41<br>(28 - 60)      | 1,273<br>(658 - 1,797)      |
| Cardiomyopathy and myocarditis                | 1,094<br>(702 - 2,806)      | 0<br>(0 - 0)       | 0<br>(0 - 0)        | 6<br>(5 - 13)        | 34<br>(23 - 75)      | 1,054<br>(670 - 2,733)      |
| Atrial fibrillation and flutter               | 791<br>(547 - 1,118)        | --                 | --                  | 1<br>(0 - 1)         | 11<br>(8 - 16)       | 779<br>(535 - 1,106)        |
| Aortic aneurysm                               | 178<br>(103 - 274)          | --                 | --                  | 6<br>(4 - 9)         | 24<br>(14 - 37)      | 149<br>(85 - 232)           |
| Peripheral vascular disease                   | 346<br>(227 - 481)          | --                 | --                  | 1<br>(0 - 1)         | 11<br>(8 - 16)       | 334<br>(218 - 469)          |
| Endocarditis                                  | 36<br>(14 - 83)             | 0<br>(0 - 0)       | 0<br>(0 - 0)        | 1<br>(1 - 3)         | 6<br>(2 - 15)        | 29<br>(11 - 66)             |
| Other cardiovascular and circulatory diseases | 1,051<br>(656 - 1,403)      | 0<br>(0 - 0)       | 0<br>(0 - 0)        | 17<br>(11 - 24)      | 73<br>(51 - 104)     | 959<br>(564 - 1,289)        |
| Chronic respiratory diseases                  | 1,469<br>(1,069 - 1,743)    | 0<br>(0 - 1)       | 0<br>(0 - 1)        | 18<br>(13 - 22)      | 162<br>(95 - 195)    | 1,288<br>(949 - 1,547)      |
| Chronic obstructive pulmonary disease         | 1,298<br>(910 - 1,554)      | 0<br>(0 - 0)       | 0<br>(0 - 0)        | 10<br>(6 - 13)       | 123<br>(65 - 153)    | 1,164<br>(833 - 1,408)      |
| Pneumoconiosis                                | 3<br>(2 - 5)                | 0<br>(0 - 0)       | 0<br>(0 - 0)        | 0<br>(0 - 0)         | 0<br>(0 - 1)         | 2<br>(1 - 4)                |
| Silicosis                                     | 0<br>(0 - 0)                | 0<br>(0 - 0)       | 0<br>(0 - 0)        | 0<br>(0 - 0)         | 0<br>(0 - 0)         | 0<br>(0 - 0)                |
| Asbestosis                                    | 0<br>(0 - 0)                | 0<br>(0 - 0)       | 0<br>(0 - 0)        | 0<br>(0 - 0)         | 0<br>(0 - 0)         | 0<br>(0 - 0)                |
| Coal workers pneumoconiosis                   | 0<br>(0 - 0)                | 0<br>(0 - 0)       | 0<br>(0 - 0)        | 0<br>(0 - 0)         | 0<br>(0 - 0)         | 0<br>(0 - 0)                |
| Other pneumoconiosis                          | 2<br>(1 - 4)                | 0<br>(0 - 0)       | 0<br>(0 - 0)        | 0<br>(0 - 0)         | 0<br>(0 - 1)         | 2<br>(1 - 4)                |



Web Table 31- Austria deaths with 95% UI by age, sex, and cause in 2013

| Cause                                               | Females, All Ages        | Females, 0-4 Years | Females, 5-14 Years | Females, 15-49 Years | Females, 50-69 Years | Females, 70-80 Years     |
|-----------------------------------------------------|--------------------------|--------------------|---------------------|----------------------|----------------------|--------------------------|
| Asthma                                              | 99<br>(58 - 161)         | 0<br>(0 - 0)       | 0<br>(0 - 0)        | 5<br>(3 - 7)         | 21<br>(12 - 33)      | 73<br>(39 - 127)         |
| Interstitial lung disease and pulmonary sarcoidosis | 61<br>(21 - 107)         | 0<br>(0 - 0)       | 0<br>(0 - 0)        | 3<br>(1 - 4)         | 15<br>(5 - 27)       | 43<br>(13 - 79)          |
| Other chronic respiratory diseases                  | 8<br>(4 - 12)            | 0<br>(0 - 0)       | 0<br>(0 - 0)        | 1<br>(0 - 1)         | 2<br>(1 - 3)         | 5<br>(3 - 9)             |
| Cirrhosis                                           | 670<br>(568 - 768)       | 0<br>(0 - 0)       | 0<br>(0 - 0)        | 65<br>(53 - 78)      | 233<br>(200 - 270)   | 372<br>(305 - 450)       |
| Cirrhosis due to hepatitis B                        | 86<br>(47 - 140)         | 0<br>(0 - 0)       | 0<br>(0 - 0)        | 8<br>(4 - 14)        | 30<br>(15 - 50)      | 49<br>(25 - 79)          |
| Cirrhosis due to hepatitis C                        | 375<br>(259 - 492)       | 0<br>(0 - 0)       | 0<br>(0 - 0)        | 35<br>(17 - 50)      | 132<br>(83 - 177)    | 208<br>(126 - 284)       |
| Cirrhosis due to alcohol use                        | 140<br>(77 - 264)        | --<br>(0 - 0)      | --<br>(0 - 0)       | 9<br>(4 - 19)        | 43<br>(23 - 83)      | 88<br>(45 - 163)         |
| Cirrhosis due to other causes                       | 68<br>(28 - 124)         | 0<br>(0 - 0)       | 0<br>(0 - 0)        | 13<br>(5 - 24)       | 28<br>(10 - 52)      | 27<br>(10 - 52)          |
| Digestive diseases                                  | 1,045<br>(863 - 1,351)   | 0<br>(0 - 1)       | 0<br>(0 - 1)        | 17<br>(14 - 21)      | 88<br>(73 - 110)     | 939<br>(769 - 1,223)     |
| Peptic ulcer disease                                | 152<br>(103 - 246)       | 0<br>(0 - 0)       | 0<br>(0 - 0)        | 2<br>(1 - 3)         | 14<br>(10 - 20)      | 136<br>(88 - 224)        |
| Gastritis and duodenitis                            | 10<br>(3 - 18)           | 0<br>(0 - 0)       | 0<br>(0 - 0)        | 0<br>(0 - 1)         | 1<br>(0 - 2)         | 9<br>(3 - 16)            |
| Appendicitis                                        | 10<br>(6 - 18)           | 0<br>(0 - 0)       | 0<br>(0 - 0)        | 1<br>(0 - 1)         | 2<br>(1 - 3)         | 8<br>(4 - 16)            |
| Paralytic ileus and intestinal obstruction          | 153<br>(75 - 245)        | 0<br>(0 - 0)       | 0<br>(0 - 0)        | 2<br>(1 - 3)         | 11<br>(5 - 17)       | 141<br>(67 - 225)        |
| Inguinal, femoral, and abdominal hernia             | 29<br>(15 - 59)          | 0<br>(0 - 0)       | 0<br>(0 - 0)        | 0<br>(0 - 0)         | 2<br>(1 - 4)         | 27<br>(13 - 55)          |
| Inflammatory bowel disease                          | 97<br>(47 - 145)         | 0<br>(0 - 0)       | 0<br>(0 - 0)        | 3<br>(2 - 4)         | 9<br>(5 - 13)        | 85<br>(40 - 129)         |
| Vascular intestinal disorders                       | 246<br>(136 - 430)       | 0<br>(0 - 0)       | 0<br>(0 - 0)        | 2<br>(1 - 3)         | 15<br>(8 - 26)       | 229<br>(126 - 402)       |
| Gallbladder and biliary diseases                    | 104<br>(69 - 170)        | 0<br>(0 - 0)       | 0<br>(0 - 0)        | 1<br>(1 - 2)         | 8<br>(5 - 13)        | 95<br>(62 - 155)         |
| Pancreatitis                                        | 72<br>(46 - 118)         | 0<br>(0 - 0)       | 0<br>(0 - 0)        | 4<br>(3 - 6)         | 13<br>(9 - 20)       | 54<br>(33 - 92)          |
| Other digestive diseases                            | 171<br>(119 - 237)       | 0<br>(0 - 0)       | 0<br>(0 - 0)        | 2<br>(1 - 2)         | 14<br>(10 - 18)      | 156<br>(105 - 218)       |
| Neurological disorders                              | 4,608<br>(2,784 - 6,219) | 4<br>(2 - 5)       | 2<br>(2 - 3)        | 35<br>(26 - 44)      | 158<br>(120 - 200)   | 4,409<br>(2,595 - 5,992) |
| Alzheimer disease and other dementias               | 3,964<br>(2,255 - 5,539) | --<br>(0 - 0)      | --<br>(0 - 0)       | 1<br>(0 - 1)         | 65<br>(38 - 99)      | 3,898<br>(2,194 - 5,464) |
| Parkinson disease                                   | 416<br>(250 - 578)       | --<br>(0 - 0)      | --<br>(0 - 0)       | 0<br>(0 - 1)         | 12<br>(8 - 17)       | 403<br>(237 - 564)       |
| Epilepsy                                            | 33<br>(18 - 46)          | 1<br>(0 - 1)       | 1<br>(1 - 1)        | 10<br>(6 - 14)       | 8<br>(4 - 11)        | 14<br>(6 - 23)           |
| Multiple sclerosis                                  | 64<br>(29 - 85)          | --<br>(0 - 0)      | --<br>(0 - 0)       | 13<br>(6 - 19)       | 30<br>(13 - 42)      | 21<br>(9 - 32)           |
| Other neurological disorders                        | 131<br>(112 - 152)       | 3<br>(2 - 4)       | 1<br>(1 - 2)        | 12<br>(10 - 14)      | 42<br>(35 - 51)      | 72<br>(59 - 89)          |
| Mental and substance use disorders                  | 108<br>(67 - 138)        | 0<br>(0 - 0)       | 0<br>(0 - 0)        | 55<br>(42 - 67)      | 36<br>(15 - 52)      | 18<br>(8 - 26)           |
| Schizophrenia                                       | 1<br>(0 - 1)             | --<br>(0 - 0)      | --<br>(0 - 0)       | 0<br>(0 - 0)         | 0<br>(0 - 0)         | 0<br>(0 - 0)             |
| Alcohol use disorders                               | 61<br>(20 - 88)          | --<br>(0 - 0)      | --<br>(0 - 0)       | 17<br>(6 - 26)       | 30<br>(9 - 46)       | 14<br>(4 - 22)           |
| Drug use disorders                                  | 46<br>(38 - 54)          | 0<br>(0 - 0)       | --<br>(0 - 0)       | 37<br>(30 - 44)      | 5<br>(4 - 7)         | 4<br>(3 - 5)             |
| Opioid use disorders                                | 16<br>(13 - 19)          | 0<br>(0 - 0)       | --<br>(0 - 0)       | 13<br>(10 - 16)      | 2<br>(1 - 2)         | 1<br>(1 - 2)             |
| Cocaine use disorders                               | 2<br>(1 - 2)             | 0<br>(0 - 0)       | --<br>(0 - 0)       | 2<br>(1 - 2)         | 0<br>(0 - 0)         | 0<br>(0 - 0)             |
| Amphetamine use disorders                           | 2<br>(2 - 2)             | 0<br>(0 - 0)       | --<br>(0 - 0)       | 2<br>(1 - 2)         | 0<br>(0 - 0)         | 0<br>(0 - 0)             |
| Other drug use disorders                            | 26<br>(21 - 31)          | 0<br>(0 - 0)       | --<br>(0 - 0)       | 20<br>(16 - 24)      | 3<br>(2 - 4)         | 2<br>(2 - 3)             |
| Eating disorders                                    | 1<br>(1 - 2)             | --<br>(0 - 0)      | 0<br>(0 - 0)        | 1<br>(1 - 2)         | --<br>(0 - 0)        | --<br>(0 - 0)            |
| Anorexia nervosa                                    | 1<br>(1 - 2)             | --<br>(0 - 0)      | 0<br>(0 - 0)        | 1<br>(1 - 2)         | --<br>(0 - 0)        | --<br>(0 - 0)            |
| Diabetes, urogenital, blood, and endocrine diseases | 3,383<br>(2,485 - 3,990) | 4<br>(2 - 6)       | 3<br>(2 - 4)        | 59<br>(38 - 71)      | 314<br>(225 - 369)   | 3,003<br>(2,216 - 3,581) |
| Diabetes mellitus                                   | 1,419<br>(1,136 - 1,725) | 0<br>(0 - 0)       | 0<br>(0 - 0)        | 12<br>(9 - 15)       | 108<br>(87 - 134)    | 1,299<br>(1,014 - 1,609) |
| Acute glomerulonephritis                            | 1<br>(1 - 1)             | 0<br>(0 - 0)       | 0<br>(0 - 0)        | 0<br>(0 - 0)         | 0<br>(0 - 0)         | 0<br>(0 - 0)             |
| Chronic kidney disease                              | 1,283<br>(736 - 1,637)   | 0<br>(0 - 0)       | 0<br>(0 - 0)        | 12<br>(10 - 16)      | 64<br>(51 - 84)      | 1,206<br>(667 - 1,558)   |
| Chronic kidney disease due to diabetes mellitus     | 409<br>(241 - 557)       | 0<br>(0 - 0)       | 0<br>(0 - 0)        | 3<br>(2 - 4)         | 22<br>(14 - 30)      | 384<br>(222 - 530)       |

Web Table 31- Austria deaths with 95% UI by age, sex, and cause in 2013

| Cause                                               | Females, All Ages        | Females, 0-4 Years | Females, 5-14 Years | Females, 15-49 Years | Females, 50-69 Years | Females, 70-80 Years   |
|-----------------------------------------------------|--------------------------|--------------------|---------------------|----------------------|----------------------|------------------------|
| Chronic kidney disease due to hypertension          | 242<br>(107 - 370)       | 0<br>(0 - 0)       | 0<br>(0 - 0)        | 3<br>(2 - 4)         | 12<br>(7 - 21)       | 228<br>(97 - 356)      |
| Chronic kidney disease due to glomerulonephritis    | 11<br>(5 - 20)           | 0<br>(0 - 0)       | 0<br>(0 - 0)        | 1<br>(0 - 1)         | 3<br>(1 - 5)         | 7<br>(3 - 15)          |
| Chronic kidney disease due to other causes          | 621<br>(269 - 902)       | 0<br>(0 - 0)       | 0<br>(0 - 0)        | 6<br>(4 - 9)         | 27<br>(18 - 41)      | 587<br>(236 - 869)     |
| Urinary diseases and male infertility               | 236<br>(169 - 373)       | 0<br>(0 - 0)       | 0<br>(0 - 0)        | 4<br>(3 - 7)         | 21<br>(15 - 39)      | 211<br>(146 - 338)     |
| Interstitial nephritis and urinary tract infections | 190<br>(131 - 318)       | 0<br>(0 - 0)       | 0<br>(0 - 0)        | 3<br>(2 - 5)         | 16<br>(10 - 31)      | 171<br>(116 - 292)     |
| Urolithiasis                                        | 16<br>(8 - 35)           | --                 | 0<br>(0 - 0)        | 0<br>(0 - 1)         | 2<br>(1 - 4)         | 13<br>(7 - 31)         |
| Other urinary diseases                              | 31<br>(10 - 53)          | 0<br>(0 - 0)       | 0<br>(0 - 0)        | 1<br>(0 - 1)         | 4<br>(1 - 6)         | 26<br>(8 - 48)         |
| Gynecological diseases                              | 2<br>(1 - 2)             | --                 | --                  | 0<br>(0 - 0)         | 0<br>(0 - 0)         | 1<br>(1 - 2)           |
| Uterine fibroids                                    | 0<br>(0 - 1)             | --                 | --                  | 0<br>(0 - 0)         | 0<br>(0 - 0)         | 0<br>(0 - 1)           |
| Polycystic ovarian syndrome                         | 0<br>(0 - 0)             | --                 | --                  | 0<br>(0 - 0)         | 0<br>(0 - 0)         | --                     |
| Endometriosis                                       | 0<br>(0 - 0)             | --                 | --                  | 0<br>(0 - 0)         | 0<br>(0 - 0)         | --                     |
| Genital prolapse                                    | 0<br>(0 - 1)             | --                 | --                  | 0<br>(0 - 0)         | 0<br>(0 - 0)         | 0<br>(0 - 0)           |
| Other gynecological diseases                        | 1<br>(0 - 1)             | --                 | --                  | 0<br>(0 - 0)         | 0<br>(0 - 0)         | 0<br>(0 - 1)           |
| Hemoglobinopathies and hemolytic anemias            | 25<br>(15 - 37)          | 0<br>(0 - 0)       | 0<br>(0 - 0)        | 1<br>(1 - 2)         | 4<br>(2 - 6)         | 20<br>(11 - 30)        |
| Thalassemias                                        | 0<br>(0 - 0)             | 0<br>(0 - 0)       | 0<br>(0 - 0)        | 0<br>(0 - 0)         | 0<br>(0 - 0)         | 0<br>(0 - 0)           |
| Sickle cell disorders                               | 3<br>(2 - 5)             | 0<br>(0 - 0)       | 0<br>(0 - 0)        | 1<br>(0 - 1)         | 1<br>(1 - 2)         | 1<br>(1 - 2)           |
| G6PD deficiency                                     | 0<br>(0 - 0)             | 0<br>(0 - 0)       | 0<br>(0 - 0)        | 0<br>(0 - 0)         | 0<br>(0 - 0)         | 0<br>(0 - 0)           |
| Other hemoglobinopathies and hemolytic anemias      | 22<br>(13 - 32)          | 0<br>(0 - 0)       | 0<br>(0 - 0)        | 1<br>(0 - 1)         | 2<br>(1 - 3)         | 19<br>(11 - 29)        |
| Endocrine, metabolic, blood, and immune disorders   | 417<br>(119 - 557)       | 4<br>(1 - 6)       | 2<br>(1 - 3)        | 28<br>(9 - 38)       | 117<br>(32 - 158)    | 267<br>(71 - 377)      |
| Musculoskeletal disorders                           | 120<br>(94 - 158)        | --                 | 0<br>(0 - 0)        | 7<br>(5 - 10)        | 25<br>(19 - 34)      | 88<br>(65 - 122)       |
| Rheumatoid arthritis                                | 46<br>(33 - 65)          | --                 | 0<br>(0 - 0)        | 1<br>(0 - 1)         | 9<br>(6 - 12)        | 37<br>(25 - 53)        |
| Other musculoskeletal disorders                     | 74<br>(57 - 100)         | --                 | 0<br>(0 - 0)        | 6<br>(5 - 9)         | 16<br>(12 - 24)      | 51<br>(36 - 73)        |
| Other non-communicable diseases                     | 153<br>(123 - 182)       | 57<br>(42 - 75)    | 5<br>(4 - 6)        | 20<br>(14 - 26)      | 18<br>(12 - 23)      | 54<br>(35 - 72)        |
| Congenital anomalies                                | 94<br>(73 - 114)         | 45<br>(33 - 60)    | 5<br>(4 - 6)        | 19<br>(13 - 25)      | 15<br>(9 - 19)       | 10<br>(6 - 15)         |
| Neural tube defects                                 | 1<br>(1 - 2)             | 0<br>(0 - 1)       | 0<br>(0 - 0)        | 0<br>(0 - 0)         | 0<br>(0 - 0)         | 0<br>(0 - 0)           |
| Congenital heart anomalies                          | 27<br>(21 - 34)          | 15<br>(10 - 21)    | 2<br>(1 - 2)        | 6<br>(4 - 8)         | 2<br>(1 - 4)         | 2<br>(1 - 4)           |
| Cleft lip and cleft palate                          | 0<br>(0 - 0)             | 0<br>(0 - 0)       | --                  | --                   | --                   | --                     |
| Down syndrome                                       | 18<br>(9 - 26)           | 3<br>(1 - 4)       | 0<br>(0 - 1)        | 5<br>(2 - 7)         | 9<br>(4 - 14)        | 1<br>(0 - 2)           |
| Chromosomal unbalanced rearrangements               | 6<br>(4 - 10)            | 5<br>(3 - 9)       | 0<br>(0 - 0)        | 0<br>(0 - 1)         | 0<br>(0 - 0)         | 0<br>(0 - 0)           |
| Other congenital anomalies                          | 42<br>(32 - 52)          | 21<br>(15 - 29)    | 3<br>(2 - 3)        | 8<br>(5 - 10)        | 3<br>(2 - 5)         | 7<br>(4 - 10)          |
| Skin and subcutaneous diseases                      | 48<br>(32 - 67)          | 0<br>(0 - 0)       | 0<br>(0 - 0)        | 1<br>(1 - 1)         | 4<br>(3 - 5)         | 43<br>(27 - 62)        |
| Cellulitis                                          | 3<br>(1 - 6)             | 0<br>(0 - 0)       | 0<br>(0 - 0)        | 0<br>(0 - 0)         | 0<br>(0 - 1)         | 3<br>(1 - 5)           |
| Pyoderma                                            | 24<br>(13 - 35)          | 0<br>(0 - 0)       | 0<br>(0 - 0)        | 0<br>(0 - 0)         | 2<br>(1 - 3)         | 22<br>(12 - 32)        |
| Decubitus ulcer                                     | 18<br>(10 - 28)          | 0<br>(0 - 0)       | 0<br>(0 - 0)        | 0<br>(0 - 0)         | 1<br>(1 - 1)         | 17<br>(10 - 27)        |
| Other skin and subcutaneous diseases                | 3<br>(1 - 6)             | 0<br>(0 - 0)       | 0<br>(0 - 0)        | 0<br>(0 - 0)         | 1<br>(0 - 1)         | 2<br>(1 - 5)           |
| Sudden infant death syndrome                        | 12<br>(5 - 24)           | 12<br>(5 - 24)     | --                  | --                   | --                   | --                     |
| Injuries                                            | 1,648<br>(1,355 - 2,109) | 9<br>(7 - 12)      | 9<br>(7 - 12)       | 237<br>(207 - 278)   | 257<br>(217 - 310)   | 1,136<br>(871 - 1,546) |
| Transport injuries                                  | 191<br>(160 - 274)       | 2<br>(1 - 2)       | 4<br>(3 - 6)        | 67<br>(55 - 88)      | 43<br>(33 - 63)      | 75<br>(56 - 115)       |
| Road injuries                                       | 179<br>(149 - 256)       | 2<br>(1 - 2)       | 4<br>(3 - 6)        | 63<br>(52 - 83)      | 40<br>(31 - 60)      | 70<br>(53 - 110)       |
| Pedestrian road injuries                            | 57<br>(38 - 87)          | 1<br>(0 - 1)       | 1<br>(1 - 2)        | 7<br>(4 - 10)        | 11<br>(7 - 17)       | 37<br>(24 - 62)        |

Web Table 31- Austria deaths with 95% UI by age, sex, and cause in 2013

| Cause                                           | Females, All Ages      | Females, 0-4 Years | Females, 5-14 Years | Females, 15-49 Years | Females, 50-69 Years | Females, 70-80 Years |
|-------------------------------------------------|------------------------|--------------------|---------------------|----------------------|----------------------|----------------------|
| Cyclist road injuries                           | 19<br>(12 - 27)        | 0<br>(0 - 0)       | 1<br>(0 - 1)        | 4<br>(2 - 5)         | 8<br>(5 - 13)        | 7<br>(3 - 10)        |
| Motorcyclist road injuries                      | 8<br>(4 - 17)          | 0<br>(0 - 0)       | 0<br>(0 - 0)        | 5<br>(2 - 10)        | 2<br>(1 - 4)         | 1<br>(0 - 2)         |
| Motor vehicle road injuries                     | 94<br>(75 - 137)       | 1<br>(1 - 1)       | 2<br>(1 - 3)        | 47<br>(38 - 62)      | 19<br>(14 - 30)      | 25<br>(16 - 43)      |
| Other road injuries                             | 1<br>(1 - 3)           | 0<br>(0 - 0)       | 0<br>(0 - 0)        | 0<br>(0 - 1)         | 0<br>(0 - 1)         | 0<br>(0 - 1)         |
| Other transport injuries                        | 12<br>(8 - 19)         | 0<br>(0 - 0)       | 0<br>(0 - 1)        | 4<br>(2 - 6)         | 3<br>(2 - 5)         | 5<br>(3 - 9)         |
| Unintentional injuries                          | 1,064<br>(802 - 1,424) | 6<br>(4 - 9)       | 3<br>(2 - 4)        | 34<br>(28 - 42)      | 81<br>(65 - 98)      | 940<br>(682 - 1,292) |
| Falls                                           | 848<br>(602 - 1,225)   | 1<br>(0 - 1)       | 0<br>(0 - 1)        | 10<br>(8 - 14)       | 40<br>(30 - 54)      | 798<br>(558 - 1,162) |
| Drowning                                        | 21<br>(16 - 32)        | 1<br>(1 - 3)       | 1<br>(1 - 2)        | 4<br>(3 - 6)         | 5<br>(3 - 7)         | 10<br>(7 - 15)       |
| Fire, heat, and hot substances                  | 23<br>(17 - 35)        | 0<br>(0 - 1)       | 0<br>(0 - 0)        | 2<br>(1 - 3)         | 4<br>(3 - 5)         | 17<br>(11 - 27)      |
| Poisonings                                      | 8<br>(6 - 15)          | 0<br>(0 - 0)       | 0<br>(0 - 0)        | 2<br>(1 - 3)         | 1<br>(1 - 2)         | 5<br>(3 - 11)        |
| Exposure to mechanical forces                   | 9<br>(7 - 14)          | 1<br>(0 - 1)       | 0<br>(0 - 1)        | 3<br>(2 - 4)         | 2<br>(2 - 4)         | 3<br>(2 - 4)         |
| Unintentional firearm injuries                  | 0<br>(0 - 1)           | 0<br>(0 - 0)       | 0<br>(0 - 0)        | 0<br>(0 - 0)         | 0<br>(0 - 0)         | 0<br>(0 - 0)         |
| Unintentional suffocation                       | 1<br>(0 - 1)           | 0<br>(0 - 0)       | 0<br>(0 - 0)        | 0<br>(0 - 0)         | 0<br>(0 - 0)         | 0<br>(0 - 1)         |
| Other exposure to mechanical forces             | 8<br>(6 - 12)          | 0<br>(0 - 1)       | 0<br>(0 - 1)        | 2<br>(2 - 4)         | 2<br>(2 - 4)         | 2<br>(2 - 4)         |
| Adverse effects of medical treatment            | 78<br>(36 - 108)       | 1<br>(0 - 1)       | 0<br>(0 - 1)        | 7<br>(4 - 10)        | 16<br>(8 - 23)       | 53<br>(21 - 80)      |
| Animal contact                                  | 4<br>(2 - 8)           | 0<br>(0 - 0)       | 0<br>(0 - 0)        | 1<br>(0 - 1)         | 1<br>(0 - 2)         | 2<br>(1 - 5)         |
| Venomous animal contact                         | 1<br>(1 - 3)           | 0<br>(0 - 0)       | 0<br>(0 - 0)        | 0<br>(0 - 1)         | 0<br>(0 - 1)         | 0<br>(0 - 1)         |
| Non-venomous animal contact                     | 3<br>(1 - 6)           | 0<br>(0 - 0)       | 0<br>(0 - 0)        | 0<br>(0 - 1)         | 1<br>(0 - 1)         | 2<br>(1 - 4)         |
| Foreign body                                    | 71<br>(37 - 102)       | 2<br>(1 - 4)       | 0<br>(0 - 1)        | 6<br>(3 - 9)         | 11<br>(7 - 17)       | 51<br>(23 - 78)      |
| Pulmonary aspiration and foreign body in airway | 70<br>(36 - 101)       | 2<br>(1 - 4)       | 0<br>(0 - 1)        | 5<br>(3 - 9)         | 11<br>(7 - 17)       | 51<br>(23 - 77)      |
| Foreign body in other body part                 | 0<br>(0 - 1)           | 0<br>(0 - 0)       | 0<br>(0 - 0)        | 0<br>(0 - 0)         | 0<br>(0 - 0)         | 0<br>(0 - 0)         |
| Other unintentional injuries                    | 3<br>(2 - 4)           | 0<br>(0 - 0)       | 0<br>(0 - 0)        | 1<br>(0 - 1)         | 1<br>(0 - 1)         | 1<br>(1 - 2)         |
| Self-harm and interpersonal violence            | 392<br>(335 - 495)     | 1<br>(1 - 2)       | 1<br>(1 - 2)        | 136<br>(116 - 164)   | 132<br>(106 - 166)   | 122<br>(96 - 177)    |
| Self-harm                                       | 364<br>(307 - 466)     | --                 | 1<br>(0 - 1)        | 123<br>(103 - 151)   | 126<br>(101 - 159)   | 115<br>(91 - 169)    |
| Interpersonal violence                          | 28<br>(20 - 41)        | 1<br>(1 - 2)       | 1<br>(1 - 1)        | 13<br>(9 - 19)       | 6<br>(4 - 9)         | 7<br>(5 - 10)        |
| Assault by firearm                              | 8<br>(5 - 13)          | 0<br>(0 - 0)       | 0<br>(0 - 0)        | 4<br>(2 - 7)         | 2<br>(1 - 3)         | 2<br>(1 - 3)         |
| Assault by sharp object                         | 9<br>(6 - 13)          | 0<br>(0 - 0)       | 0<br>(0 - 0)        | 5<br>(3 - 7)         | 2<br>(1 - 3)         | 2<br>(1 - 3)         |
| Assault by other means                          | 12<br>(8 - 17)         | 1<br>(1 - 1)       | 0<br>(0 - 1)        | 4<br>(3 - 7)         | 2<br>(1 - 4)         | 3<br>(2 - 5)         |
| Forces of nature, war, and legal intervention   | 0<br>(0 - 0)           | 0<br>(0 - 0)       | --                  | --                   | --                   | 0<br>(0 - 0)         |
| Exposure to forces of nature                    | 0<br>(0 - 0)           | 0<br>(0 - 0)       | --                  | --                   | --                   | 0<br>(0 - 0)         |

Web Table 31- Azerbaijan deaths with 95% UI by age, sex, and cause in 2013

| Cause                                                             | Both Sexes, All Ages        | Both Sexes, 0-4 Years    | Both Sexes, 5-14 Years | Both Sexes, 15-49 Years   | Both Sexes, 50-69 Years     | Both Sexes, 70-80 Years     |
|-------------------------------------------------------------------|-----------------------------|--------------------------|------------------------|---------------------------|-----------------------------|-----------------------------|
| All causes                                                        | 60,006<br>(53,990 - 66,091) | 5,884<br>(5,323 - 6,534) | 768<br>(715 - 827)     | 9,554<br>(8,249 - 11,050) | 16,233<br>(13,910 - 18,659) | 27,567<br>(25,387 - 29,747) |
| Communicable, maternal, neonatal, and nutritional diseases        | 6,752<br>(5,943 - 7,516)    | 4,503<br>(3,974 - 5,088) | 187<br>(157 - 219)     | 1,053<br>(753 - 1,251)    | 483<br>(365 - 584)          | 526<br>(332 - 670)          |
| HIV/AIDS and tuberculosis                                         | 908<br>(618 - 1,158)        | 4<br>(3 - 7)             | 5<br>(3 - 7)           | 631<br>(388 - 811)        | 218<br>(158 - 287)          | 50<br>(38 - 65)             |
| Tuberculosis                                                      | 716<br>(525 - 874)          | 4<br>(2 - 5)             | 5<br>(3 - 7)           | 482<br>(320 - 600)        | 181<br>(136 - 235)          | 44<br>(35 - 59)             |
| HIV/AIDS                                                          | 193<br>(53 - 395)           | 1<br>(0 - 3)             | 0<br>(0 - 1)           | 149<br>(43 - 285)         | 38<br>(8 - 94)              | 5<br>(1 - 13)               |
| HIV/AIDS resulting in mycobacterial infection                     | 12<br>(3 - 25)              | 0<br>(0 - 0)             | 0<br>(0 - 0)           | 0<br>(3 - 19)             | 2<br>(0 - 6)                | 0<br>(0 - 1)                |
| HIV/AIDS resulting in other diseases                              | 180<br>(50 - 369)           | 1<br>(0 - 3)             | 0<br>(0 - 1)           | 140<br>(40 - 267)         | 35<br>(7 - 88)              | 5<br>(1 - 13)               |
| Diarrhea, lower respiratory, and other common infectious diseases | 3,501<br>(2,923 - 4,029)    | 2,357<br>(1,991 - 2,772) | 161<br>(134 - 193)     | 312<br>(223 - 392)        | 226<br>(151 - 297)          | 445<br>(247 - 586)          |
| Diarrheal diseases                                                | 228<br>(159 - 325)          | 206<br>(136 - 301)       | 4<br>(3 - 7)           | 9<br>(7 - 12)             | 4<br>(3 - 6)                | 4<br>(3 - 7)                |
| Intestinal infectious diseases                                    | 12<br>(6 - 20)              | 4<br>(1 - 9)             | 2<br>(1 - 4)           | 4<br>(2 - 9)              | 1<br>(0 - 4)                | 1<br>(0 - 3)                |
| Typhoid fever                                                     | 5<br>(2 - 10)               | 1<br>(1 - 3)             | 1<br>(0 - 2)           | 2<br>(1 - 4)              | 0<br>(0 - 1)                | 0<br>(0 - 0)                |
| Paratyphoid fever                                                 | 2<br>(1 - 3)                | 1<br>(0 - 1)             | 0<br>(0 - 1)           | 1<br>(0 - 1)              | 0<br>(0 - 0)                | 0<br>(0 - 0)                |
| Other intestinal infectious diseases                              | 5<br>(1 - 12)               | 2<br>(0 - 7)             | 0<br>(0 - 2)           | 2<br>(0 - 5)              | 1<br>(0 - 3)                | 0<br>(0 - 3)                |
| Lower respiratory infections                                      | 3,008<br>(2,472 - 3,493)    | 2,034<br>(1,680 - 2,442) | 123<br>(98 - 153)      | 232<br>(159 - 300)        | 194<br>(122 - 260)          | 425<br>(224 - 564)          |
| Upper respiratory infections                                      | 3<br>(1 - 4)                | 0<br>(0 - 1)             | 0<br>(0 - 0)           | 1<br>(0 - 1)              | 1<br>(0 - 2)                | 1<br>(0 - 2)                |
| Otitis media                                                      | 2<br>(1 - 2)                | 0<br>(0 - 0)             | 0<br>(0 - 0)           | 1<br>(0 - 1)              | 0<br>(0 - 0)                | 0<br>(0 - 1)                |
| Meningitis                                                        | 108<br>(79 - 133)           | 44<br>(29 - 62)          | 14<br>(9 - 19)         | 35<br>(26 - 44)           | 9<br>(6 - 12)               | 6<br>(4 - 8)                |
| Pneumococcal meningitis                                           | 27<br>(20 - 33)             | 8<br>(5 - 11)            | 4<br>(2 - 5)           | 11<br>(7 - 14)            | 3<br>(2 - 4)                | 2<br>(1 - 3)                |
| H influenzae type B meningitis                                    | 34<br>(25 - 45)             | 22<br>(14 - 30)          | 5<br>(3 - 7)           | 6<br>(4 - 8)              | 1<br>(1 - 2)                | 1<br>(1 - 1)                |
| Meningococcal meningitis                                          | 24<br>(16 - 30)             | 9<br>(6 - 13)            | 4<br>(2 - 5)           | 8<br>(5 - 11)             | 2<br>(1 - 3)                | 1<br>(1 - 2)                |
| Other meningitis                                                  | 22<br>(16 - 30)             | 5<br>(2 - 8)             | 2<br>(1 - 3)           | 10<br>(7 - 15)            | 3<br>(2 - 5)                | 2<br>(1 - 3)                |
| Encephalitis                                                      | 118<br>(85 - 155)           | 59<br>(36 - 92)          | 16<br>(10 - 23)        | 25<br>(16 - 34)           | 14<br>(9 - 22)              | 3<br>(2 - 5)                |
| Diphtheria                                                        | 3<br>(0 - 13)               | 2<br>(0 - 12)            | 1<br>(0 - 3)           | 0<br>(0 - 2)              | 0<br>(0 - 1)                | --                          |
| Whooping cough                                                    | 6<br>(2 - 21)               | 5<br>(1 - 19)            | 0<br>(0 - 1)           | 1<br>(1 - 1)              | 0<br>(0 - 0)                | --                          |
| Tetanus                                                           | 2<br>(1 - 3)                | 0<br>(0 - 0)             | 0<br>(0 - 0)           | 1<br>(0 - 1)              | 1<br>(0 - 1)                | 0<br>(0 - 0)                |
| Measles                                                           | 0<br>(0 - 1)                | 0<br>(0 - 1)             | 0<br>(0 - 0)           | 0<br>(0 - 0)              | 0<br>(0 - 0)                | --                          |
| Varicella and herpes zoster                                       | 12<br>(5 - 24)              | 2<br>(0 - 8)             | 0<br>(0 - 2)           | 3<br>(1 - 6)              | 1<br>(0 - 3)                | 5<br>(0 - 15)               |
| Neglected tropical diseases and malaria                           | 17<br>(13 - 24)             | 5<br>(3 - 10)            | 2<br>(1 - 5)           | 6<br>(4 - 9)              | 2<br>(2 - 4)                | 1<br>(1 - 3)                |
| Malaria                                                           | 0<br>(0 - 0)                | 0<br>(0 - 0)             | 0<br>(0 - 0)           | 0<br>(0 - 0)              | 0<br>(0 - 0)                | 0<br>(0 - 0)                |
| Leishmaniasis                                                     | 2<br>(2 - 2)                | 1<br>(0 - 1)             | 0<br>(0 - 0)           | 1<br>(0 - 1)              | 0<br>(0 - 1)                | 0<br>(0 - 0)                |
| Visceral leishmaniasis                                            | 2<br>(2 - 2)                | 1<br>(0 - 1)             | 0<br>(0 - 0)           | 1<br>(0 - 1)              | 0<br>(0 - 1)                | 0<br>(0 - 0)                |
| Cysticercosis                                                     | 0<br>(0 - 0)                | 0<br>(0 - 0)             | 0<br>(0 - 0)           | 0<br>(0 - 0)              | 0<br>(0 - 0)                | 0<br>(0 - 0)                |
| Cystic echinococcosis                                             | 2<br>(2 - 3)                | 0<br>(0 - 0)             | 0<br>(0 - 0)           | 1<br>(1 - 1)              | 1<br>(1 - 1)                | 0<br>(0 - 0)                |
| Dengue                                                            | 1<br>(1 - 1)                | 0<br>(0 - 0)             | 0<br>(0 - 0)           | 1<br>(0 - 1)              | 0<br>(0 - 0)                | 0<br>(0 - 0)                |
| Rabies                                                            | 6<br>(4 - 10)               | 0<br>(0 - 0)             | 2<br>(1 - 3)           | 3<br>(2 - 6)              | 1<br>(0 - 1)                | 0<br>(0 - 0)                |
| Intestinal nematode infections                                    | 2<br>(0 - 7)                | 1<br>(0 - 5)             | 0<br>(0 - 3)           | 0<br>(0 - 3)              | 0<br>(0 - 2)                | 0<br>(0 - 2)                |
| Ascariasis                                                        | 2<br>(0 - 7)                | 1<br>(0 - 5)             | 0<br>(0 - 3)           | 0<br>(0 - 3)              | 0<br>(0 - 2)                | 0<br>(0 - 2)                |
| Other neglected tropical diseases                                 | 4<br>(3 - 7)                | 3<br>(2 - 6)             | 0<br>(0 - 0)           | 1<br>(0 - 1)              | 0<br>(0 - 0)                | 0<br>(0 - 0)                |
| Maternal disorders                                                | 40<br>(29 - 57)             | --                       | 0<br>(0 - 0)           | 40<br>(29 - 57)           | --                          | --                          |
| Maternal hemorrhage                                               | 7<br>(5 - 10)               | --                       | 0<br>(0 - 0)           | 7<br>(5 - 10)             | --                          | --                          |

Web Table 31- Azerbaijan deaths with 95% UI by age, sex, and cause in 2013

| Cause                                                            | Both Sexes, All Ages        | Both Sexes, 0-4 Years    | Both Sexes, 5-14 Years | Both Sexes, 15-49 Years  | Both Sexes, 50-69 Years     | Both Sexes, 70-80 Years     |
|------------------------------------------------------------------|-----------------------------|--------------------------|------------------------|--------------------------|-----------------------------|-----------------------------|
| Maternal sepsis and other maternal infections                    | 5<br>(3 - 7)                | --                       | 0<br>(0 - 0)           | 5<br>(3 - 7)             | --                          | --                          |
| Maternal hypertensive disorders                                  | 4<br>(2 - 6)                | --                       | 0<br>(0 - 0)           | 4<br>(2 - 6)             | --                          | --                          |
| Maternal obstructed labor                                        | 4<br>(2 - 6)                | --                       | 0<br>(0 - 0)           | 4<br>(2 - 6)             | --                          | --                          |
| Maternal abortive outcome                                        | 4<br>(2 - 6)                | --                       | 0<br>(0 - 0)           | 4<br>(2 - 6)             | --                          | --                          |
| Indirect maternal deaths                                         | 5<br>(2 - 8)                | --                       | 0<br>(0 - 0)           | 5<br>(2 - 8)             | --                          | --                          |
| Late maternal deaths                                             | 6<br>(3 - 9)                | --                       | 0<br>(0 - 0)           | 6<br>(3 - 9)             | --                          | --                          |
| Maternal deaths aggravated by HIV/AIDS                           | 0<br>(0 - 0)                | --                       | --                     | 0<br>(0 - 0)             | --                          | --                          |
| Other maternal disorders                                         | 7<br>(4 - 10)               | --                       | 0<br>(0 - 0)           | 7<br>(4 - 10)            | --                          | --                          |
| Neonatal disorders                                               | 2,002<br>(1,682 - 2,320)    | 2,002<br>(1,682 - 2,320) | --                     | --                       | --                          | --                          |
| Neonatal preterm birth complications                             | 531<br>(209 - 909)          | 531<br>(209 - 909)       | --                     | --                       | --                          | --                          |
| Neonatal encephalopathy due to birth asphyxia and trauma         | 982<br>(651 - 1,295)        | 982<br>(651 - 1,295)     | --                     | --                       | --                          | --                          |
| Neonatal sepsis and other neonatal infections                    | 24<br>(3 - 60)              | 24<br>(3 - 60)           | --                     | --                       | --                          | --                          |
| Hemolytic disease and other neonatal jaundice                    | 14<br>(4 - 35)              | 14<br>(4 - 35)           | --                     | --                       | --                          | --                          |
| Other neonatal disorders                                         | 451<br>(211 - 817)          | 451<br>(211 - 817)       | --                     | --                       | --                          | --                          |
| Nutritional deficiencies                                         | 99<br>(77 - 129)            | 33<br>(21 - 55)          | 6<br>(4 - 8)           | 30<br>(20 - 38)          | 15<br>(10 - 20)             | 15<br>(11 - 20)             |
| Protein-energy malnutrition                                      | 15<br>(7 - 28)              | 10<br>(3 - 22)           | 1<br>(1 - 2)           | 2<br>(1 - 3)             | 2<br>(1 - 3)                | 0<br>(0 - 1)                |
| Iodine deficiency                                                | 3<br>(0 - 14)               | 2<br>(0 - 13)            | 0<br>(0 - 1)           | 0<br>(0 - 1)             | 0<br>(0 - 1)                | 0<br>(0 - 1)                |
| Iron-deficiency anemia                                           | 77<br>(58 - 98)             | 18<br>(11 - 30)          | 4<br>(3 - 6)           | 27<br>(18 - 35)          | 13<br>(8 - 17)              | 15<br>(10 - 19)             |
| Other nutritional deficiencies                                   | 4<br>(2 - 13)               | 2<br>(0 - 9)             | 0<br>(0 - 1)           | 1<br>(0 - 2)             | 0<br>(0 - 1)                | 0<br>(0 - 0)                |
| Other communicable, maternal, neonatal, and nutritional diseases | 185<br>(131 - 253)          | 103<br>(53 - 166)        | 11<br>(8 - 16)         | 35<br>(27 - 44)          | 21<br>(15 - 27)             | 15<br>(11 - 20)             |
| Sexually transmitted diseases excluding HIV                      | 62<br>(19 - 122)            | 50<br>(11 - 107)         | 3<br>(1 - 7)           | 4<br>(2 - 6)             | 3<br>(1 - 4)                | 2<br>(1 - 4)                |
| Syphilis                                                         | 58<br>(16 - 119)            | 50<br>(11 - 107)         | 3<br>(1 - 7)           | 2<br>(1 - 3)             | 2<br>(1 - 3)                | 2<br>(1 - 3)                |
| Chlamydial infection                                             | 0<br>(0 - 1)                | --                       | 0<br>(0 - 0)           | 0<br>(0 - 0)             | 0<br>(0 - 0)                | 0<br>(0 - 0)                |
| Gonococcal infection                                             | 2<br>(1 - 2)                | --                       | 0<br>(0 - 0)           | 1<br>(1 - 1)             | 0<br>(0 - 1)                | 0<br>(0 - 0)                |
| Other sexually transmitted diseases                              | 1<br>(1 - 2)                | --                       | 0<br>(0 - 0)           | 1<br>(0 - 1)             | 0<br>(0 - 0)                | 0<br>(0 - 0)                |
| Hepatitis                                                        | 63<br>(51 - 79)             | 13<br>(7 - 21)           | 5<br>(4 - 8)           | 25<br>(18 - 32)          | 12<br>(8 - 16)              | 9<br>(6 - 13)               |
| Acute hepatitis A                                                | 7<br>(2 - 15)               | 3<br>(1 - 8)             | 1<br>(0 - 3)           | 2<br>(1 - 5)             | 0<br>(0 - 1)                | 0<br>(0 - 0)                |
| Acute hepatitis B                                                | 42<br>(31 - 56)             | 9<br>(5 - 17)            | 3<br>(1 - 5)           | 13<br>(8 - 19)           | 9<br>(6 - 13)               | 8<br>(5 - 11)               |
| Acute hepatitis C                                                | 4<br>(1 - 10)               | --                       | 1<br>(0 - 1)           | 2<br>(0 - 5)             | 1<br>(0 - 3)                | 1<br>(0 - 2)                |
| Acute hepatitis E                                                | 10<br>(5 - 15)              | 0<br>(0 - 0)             | 1<br>(0 - 1)           | 8<br>(4 - 12)            | 1<br>(0 - 2)                | 0<br>(0 - 1)                |
| Other infectious diseases                                        | 60<br>(38 - 103)            | 40<br>(22 - 83)          | 3<br>(1 - 5)           | 6<br>(4 - 9)             | 7<br>(4 - 11)               | 4<br>(2 - 7)                |
| Non-communicable diseases                                        | 50,027<br>(44,744 - 55,332) | 1,193<br>(851 - 1,504)   | 373<br>(329 - 414)     | 6,435<br>(5,435 - 7,538) | 15,212<br>(12,976 - 17,510) | 26,815<br>(24,667 - 28,932) |
| Neoplasms                                                        | 7,431<br>(6,414 - 8,604)    | 76<br>(53 - 105)         | 139<br>(117 - 160)     | 1,846<br>(1,570 - 2,165) | 3,405<br>(2,873 - 4,002)    | 1,966<br>(1,714 - 2,282)    |
| Esophageal cancer                                                | 495<br>(366 - 699)          | --                       | --                     | 68<br>(51 - 92)          | 232<br>(170 - 321)          | 194<br>(134 - 294)          |
| Stomach cancer                                                   | 1,026<br>(855 - 1,237)      | --                       | --                     | 162<br>(131 - 200)       | 459<br>(367 - 571)          | 406<br>(337 - 492)          |
| Liver cancer                                                     | 558<br>(458 - 674)          | --                       | 2<br>(1 - 3)           | 87<br>(64 - 114)         | 269<br>(206 - 342)          | 200<br>(155 - 258)          |
| Liver cancer due to hepatitis B                                  | 201<br>(159 - 255)          | --                       | 1<br>(0 - 1)           | 37<br>(27 - 51)          | 106<br>(80 - 143)           | 57<br>(42 - 73)             |
| Liver cancer due to hepatitis C                                  | 192<br>(150 - 242)          | --                       | 0<br>(0 - 1)           | 26<br>(18 - 36)          | 91<br>(67 - 119)            | 75<br>(57 - 100)            |
| Liver cancer due to alcohol use                                  | 109<br>(74 - 145)           | --                       | --                     | 11<br>(7 - 16)           | 48<br>(31 - 68)             | 50<br>(34 - 72)             |
| Liver cancer due to other causes                                 | 55<br>(39 - 81)             | --                       | 1<br>(1 - 2)           | 13<br>(9 - 18)           | 24<br>(16 - 35)             | 18<br>(11 - 31)             |

Web Table 31- Azerbaijan deaths with 95% UI by age, sex, and cause in 2013

| Cause                                         | Both Sexes, All Ages        | Both Sexes, 0-4 Years | Both Sexes, 5-14 Years | Both Sexes, 15-49 Years  | Both Sexes, 50-69 Years  | Both Sexes, 70-80 Years     |
|-----------------------------------------------|-----------------------------|-----------------------|------------------------|--------------------------|--------------------------|-----------------------------|
| Larynx cancer                                 | 152<br>(115 - 223)          | --                    | --                     | 32<br>(23 - 45)          | 89<br>(66 - 131)         | 31<br>(24 - 48)             |
| Tracheal, bronchus and lung cancer            | 1,114<br>(900 - 1,401)      | --                    | --                     | 203<br>(159 - 265)       | 649<br>(505 - 829)       | 262<br>(214 - 329)          |
| Breast cancer                                 | 585<br>(448 - 737)          | --                    | --                     | 255<br>(187 - 330)       | 261<br>(193 - 341)       | 70<br>(55 - 95)             |
| Cervical cancer                               | 183<br>(138 - 236)          | --                    | --                     | 70<br>(46 - 93)          | 84<br>(60 - 115)         | 29<br>(23 - 42)             |
| Uterine cancer                                | 77<br>(55 - 124)            | --                    | --                     | 16<br>(10 - 26)          | 40<br>(27 - 67)          | 21<br>(15 - 35)             |
| Prostate cancer                               | 262<br>(147 - 381)          | --                    | --                     | 9<br>(6 - 14)            | 79<br>(45 - 117)         | 174<br>(94 - 254)           |
| Colon and rectum cancer                       | 511<br>(432 - 602)          | --                    | --                     | 131<br>(108 - 155)       | 240<br>(197 - 289)       | 140<br>(118 - 164)          |
| Lip and oral cavity cancer                    | 69<br>(47 - 88)             | --                    | --                     | 20<br>(14 - 27)          | 32<br>(20 - 44)          | 18<br>(12 - 23)             |
| Nasopharynx cancer                            | 12<br>(8 - 15)              | --                    | 1<br>(0 - 1)           | 7<br>(5 - 10)            | 3<br>(2 - 4)             | 1<br>(1 - 1)                |
| Other pharynx cancer                          | 36<br>(24 - 48)             | --                    | --                     | 10<br>(7 - 14)           | 21<br>(14 - 29)          | 5<br>(3 - 7)                |
| Gallbladder and biliary tract cancer          | 134<br>(101 - 165)          | --                    | --                     | 22<br>(15 - 28)          | 68<br>(50 - 87)          | 44<br>(32 - 59)             |
| Pancreatic cancer                             | 345<br>(287 - 412)          | --                    | --                     | 64<br>(49 - 82)          | 170<br>(134 - 213)       | 112<br>(91 - 139)           |
| Malignant skin melanoma                       | 65<br>(45 - 89)             | --                    | --                     | 18<br>(13 - 24)          | 33<br>(22 - 45)          | 14<br>(9 - 20)              |
| Non-melanoma skin cancer                      | 9<br>(6 - 13)               | --                    | --                     | 2<br>(1 - 3)             | 4<br>(2 - 6)             | 3<br>(2 - 5)                |
| Ovarian cancer                                | 145<br>(102 - 201)          | --                    | --                     | 54<br>(36 - 79)          | 70<br>(47 - 101)         | 20<br>(13 - 30)             |
| Testicular cancer                             | 18<br>(11 - 26)             | --                    | --                     | 16<br>(10 - 24)          | 1<br>(1 - 2)             | 0<br>(0 - 0)                |
| Kidney cancer                                 | 278<br>(223 - 341)          | 6<br>(3 - 12)         | 8<br>(5 - 12)          | 68<br>(51 - 88)          | 147<br>(109 - 192)       | 49<br>(38 - 65)             |
| Bladder cancer                                | 120<br>(94 - 154)           | --                    | --                     | 15<br>(11 - 21)          | 58<br>(43 - 78)          | 47<br>(35 - 62)             |
| Brain and nervous system cancer               | 428<br>(317 - 541)          | 6<br>(3 - 11)         | 23<br>(16 - 33)        | 184<br>(136 - 237)       | 180<br>(124 - 239)       | 35<br>(26 - 48)             |
| Thyroid cancer                                | 36<br>(28 - 46)             | --                    | 0<br>(0 - 0)           | 11<br>(8 - 14)           | 15<br>(11 - 20)          | 10<br>(7 - 13)              |
| Mesothelioma                                  | 6<br>(5 - 9)                | --                    | --                     | 3<br>(2 - 5)             | 2<br>(1 - 3)             | 2<br>(1 - 2)                |
| Hodgkin lymphoma                              | 27<br>(16 - 38)             | 1<br>(0 - 2)          | 3<br>(1 - 7)           | 15<br>(9 - 21)           | 6<br>(4 - 10)            | 2<br>(1 - 2)                |
| Non-Hodgkin lymphoma                          | 171<br>(127 - 214)          | 6<br>(3 - 10)         | 8<br>(5 - 12)          | 62<br>(45 - 81)          | 62<br>(45 - 83)          | 32<br>(23 - 42)             |
| Multiple myeloma                              | 17<br>(13 - 22)             | --                    | --                     | 7<br>(5 - 9)             | 8<br>(6 - 11)            | 3<br>(2 - 4)                |
| Leukemia                                      | 324<br>(275 - 374)          | 35<br>(23 - 51)       | 65<br>(51 - 80)        | 147<br>(123 - 178)       | 59<br>(47 - 72)          | 17<br>(14 - 21)             |
| Other neoplasms                               | 227<br>(174 - 277)          | 22<br>(12 - 35)       | 28<br>(20 - 38)        | 88<br>(66 - 112)         | 64<br>(45 - 84)          | 26<br>(19 - 34)             |
| Cardiovascular diseases                       | 31,028<br>(27,850 - 34,380) | 23<br>(17 - 32)       | 43<br>(34 - 52)        | 2,723<br>(2,262 - 3,247) | 8,650<br>(7,327 - 9,981) | 19,589<br>(18,062 - 21,138) |
| Rheumatic heart disease                       | 173<br>(121 - 216)          | 1<br>(0 - 1)          | 6<br>(4 - 9)           | 85<br>(58 - 112)         | 52<br>(31 - 71)          | 29<br>(21 - 40)             |
| Ischemic heart disease                        | 20,943<br>(18,542 - 23,722) | 3<br>(2 - 6)          | 19<br>(15 - 24)        | 1,945<br>(1,583 - 2,367) | 5,812<br>(4,813 - 6,842) | 13,164<br>(11,930 - 14,873) |
| Cerebrovascular disease                       | 8,601<br>(6,897 - 9,927)    | 1<br>(1 - 2)          | 7<br>(6 - 10)          | 558<br>(437 - 686)       | 2,368<br>(1,878 - 2,828) | 5,667<br>(4,527 - 6,512)    |
| Ischemic stroke                               | 3,176<br>(2,415 - 3,842)    | 0<br>(0 - 0)          | 0<br>(0 - 0)           | 80<br>(57 - 116)         | 614<br>(465 - 808)       | 2,481<br>(1,845 - 3,006)    |
| Hemorrhagic stroke                            | 5,425<br>(4,248 - 6,336)    | 1<br>(1 - 2)          | 7<br>(6 - 9)           | 478<br>(371 - 587)       | 1,754<br>(1,375 - 2,110) | 3,185<br>(2,403 - 3,755)    |
| Hypertensive heart disease                    | 649<br>(494 - 917)          | 0<br>(0 - 0)          | 0<br>(0 - 0)           | 34<br>(25 - 46)          | 141<br>(101 - 198)       | 473<br>(349 - 705)          |
| Cardiomyopathy and myocarditis                | 183<br>(143 - 233)          | 15<br>(9 - 21)        | 7<br>(4 - 10)          | 23<br>(16 - 36)          | 51<br>(39 - 68)          | 86<br>(59 - 123)            |
| Atrial fibrillation and flutter               | 1<br>(1 - 1)                | --                    | --                     | 0<br>(0 - 0)             | 0<br>(0 - 0)             | 0<br>(0 - 0)                |
| Aortic aneurysm                               | 16<br>(12 - 23)             | --                    | --                     | 3<br>(2 - 5)             | 2<br>(2 - 5)             | 11<br>(8 - 15)              |
| Peripheral vascular disease                   | 2<br>(1 - 2)                | --                    | --                     | 0<br>(0 - 0)             | 1<br>(1 - 1)             | 1<br>(0 - 1)                |
| Endocarditis                                  | 94<br>(58 - 128)            | 2<br>(1 - 4)          | 1<br>(1 - 1)           | 14<br>(8 - 20)           | 32<br>(17 - 49)          | 45<br>(27 - 64)             |
| Other cardiovascular and circulatory diseases | 367<br>(120 - 479)          | 1<br>(1 - 2)          | 2<br>(1 - 3)           | 62<br>(25 - 83)          | 190<br>(48 - 260)        | 113<br>(42 - 155)           |
| Chronic respiratory diseases                  | 2,262<br>(1,708 - 2,645)    | 7<br>(5 - 10)         | 9<br>(7 - 11)          | 213<br>(164 - 263)       | 682<br>(469 - 850)       | 1,350<br>(1,047 - 1,588)    |

Web Table 31- Azerbaijan deaths with 95% UI by age, sex, and cause in 2013

| Cause                                               | Both Sexes, All Ages     | Both Sexes, 0-4 Years | Both Sexes, 5-14 Years | Both Sexes, 15-49 Years | Both Sexes, 50-69 Years | Both Sexes, 70-80 Years  |
|-----------------------------------------------------|--------------------------|-----------------------|------------------------|-------------------------|-------------------------|--------------------------|
| Chronic obstructive pulmonary disease               | 1,416<br>(1,053 - 1,737) | 4<br>(2 - 6)          | 4<br>(3 - 6)           | 138<br>(101 - 174)      | 470<br>(326 - 595)      | 801<br>(584 - 1,003)     |
| Pneumoconiosis                                      | 153<br>(81 - 240)        | 0<br>(0 - 0)          | 0<br>(0 - 1)           | 15<br>(9 - 22)          | 58<br>(29 - 97)         | 79<br>(40 - 129)         |
| Silicosis                                           | 22<br>(12 - 35)          | 0<br>(0 - 0)          | 0<br>(0 - 0)           | 6<br>(3 - 8)            | 14<br>(7 - 23)          | 2<br>(1 - 4)             |
| Asbestosis                                          | 41<br>(22 - 64)          | 0<br>(0 - 0)          | 0<br>(0 - 0)           | 3<br>(2 - 4)            | 10<br>(5 - 16)          | 28<br>(15 - 46)          |
| Coal workers pneumoconiosis                         | 56<br>(29 - 92)          | 0<br>(0 - 0)          | 0<br>(0 - 0)           | 2<br>(1 - 4)            | 20<br>(10 - 34)         | 34<br>(17 - 58)          |
| Other pneumoconiosis                                | 34<br>(18 - 53)          | 0<br>(0 - 0)          | 0<br>(0 - 0)           | 4<br>(2 - 6)            | 15<br>(7 - 25)          | 15<br>(7 - 25)           |
| Asthma                                              | 118<br>(78 - 161)        | 0<br>(0 - 0)          | 0<br>(0 - 1)           | 13<br>(9 - 19)          | 35<br>(22 - 49)         | 70<br>(41 - 101)         |
| Interstitial lung disease and pulmonary sarcoidosis | 461<br>(272 - 841)       | 0<br>(0 - 0)          | 2<br>(1 - 3)           | 9<br>(4 - 20)           | 91<br>(50 - 190)        | 360<br>(209 - 646)       |
| Other chronic respiratory diseases                  | 113<br>(79 - 155)        | 3<br>(2 - 5)          | 2<br>(1 - 3)           | 39<br>(27 - 53)         | 28<br>(15 - 42)         | 41<br>(25 - 63)          |
| Cirrhosis                                           | 2,560<br>(2,189 - 3,012) | 2<br>(2 - 3)          | 10<br>(9 - 12)         | 516<br>(419 - 627)      | 1,005<br>(833 - 1,222)  | 1,027<br>(882 - 1,214)   |
| Cirrhosis due to hepatitis B                        | 1,075<br>(809 - 1,354)   | 0<br>(0 - 0)          | 3<br>(2 - 4)           | 220<br>(164 - 286)      | 420<br>(309 - 553)      | 432<br>(308 - 549)       |
| Cirrhosis due to hepatitis C                        | 670<br>(451 - 937)       | 0<br>(0 - 0)          | 2<br>(1 - 3)           | 126<br>(77 - 181)       | 264<br>(167 - 386)      | 278<br>(186 - 398)       |
| Cirrhosis due to alcohol use                        | 593<br>(446 - 801)       | --<br>(0 - 0)         | --<br>(0 - 0)          | 94<br>(58 - 140)        | 240<br>(165 - 345)      | 259<br>(181 - 352)       |
| Cirrhosis due to other causes                       | 223<br>(153 - 303)       | 2<br>(1 - 3)          | 6<br>(4 - 7)           | 77<br>(51 - 104)        | 80<br>(49 - 114)        | 59<br>(35 - 85)          |
| Digestive diseases                                  | 580<br>(490 - 694)       | 5<br>(3 - 7)          | 9<br>(8 - 11)          | 166<br>(135 - 210)      | 209<br>(169 - 258)      | 190<br>(157 - 223)       |
| Peptic ulcer disease                                | 208<br>(160 - 261)       | 0<br>(0 - 0)          | 1<br>(1 - 2)           | 65<br>(50 - 87)         | 78<br>(56 - 103)        | 63<br>(46 - 79)          |
| Gastritis and duodenitis                            | 1<br>(1 - 2)             | 0<br>(0 - 0)          | 0<br>(0 - 0)           | 1<br>(0 - 1)            | 0<br>(0 - 0)            | 0<br>(0 - 0)             |
| Appendicitis                                        | 19<br>(14 - 26)          | 0<br>(0 - 0)          | 2<br>(2 - 3)           | 10<br>(7 - 15)          | 4<br>(3 - 6)            | 2<br>(1 - 3)             |
| Paralytic ileus and intestinal obstruction          | 48<br>(31 - 66)          | 3<br>(2 - 4)          | 3<br>(2 - 4)           | 11<br>(7 - 16)          | 14<br>(8 - 21)          | 18<br>(11 - 26)          |
| Inguinal, femoral, and abdominal hernia             | 11<br>(7 - 16)           | 0<br>(0 - 0)          | 1<br>(0 - 1)           | 2<br>(1 - 4)            | 6<br>(4 - 9)            | 2<br>(1 - 4)             |
| Inflammatory bowel disease                          | 9<br>(6 - 17)            | 0<br>(0 - 0)          | 0<br>(0 - 0)           | 3<br>(2 - 7)            | 3<br>(2 - 6)            | 2<br>(1 - 4)             |
| Vascular intestinal disorders                       | 16<br>(7 - 30)           | 0<br>(0 - 0)          | 0<br>(0 - 0)           | 5<br>(2 - 10)           | 7<br>(3 - 14)           | 3<br>(1 - 7)             |
| Gallbladder and biliary diseases                    | 40<br>(31 - 67)          | 0<br>(0 - 0)          | 0<br>(0 - 1)           | 10<br>(7 - 17)          | 14<br>(10 - 23)         | 16<br>(12 - 28)          |
| Pancreatitis                                        | 31<br>(16 - 57)          | 0<br>(0 - 0)          | 0<br>(0 - 1)           | 13<br>(7 - 24)          | 10<br>(5 - 21)          | 6<br>(3 - 12)            |
| Other digestive diseases                            | 198<br>(143 - 241)       | 1<br>(1 - 3)          | 2<br>(1 - 2)           | 44<br>(32 - 57)         | 73<br>(49 - 95)         | 77<br>(55 - 97)          |
| Neurological disorders                              | 2,250<br>(1,932 - 2,624) | 26<br>(14 - 49)       | 35<br>(23 - 48)        | 186<br>(124 - 252)      | 193<br>(134 - 243)      | 1,810<br>(1,532 - 2,158) |
| Alzheimer disease and other dementias               | 1,800<br>(1,517 - 2,154) | --<br>(0 - 0)         | --<br>(0 - 0)          | 1<br>(1 - 2)            | 111<br>(84 - 143)       | 1,688<br>(1,415 - 2,019) |
| Parkinson disease                                   | 155<br>(47 - 230)        | --<br>(0 - 0)         | --<br>(0 - 0)          | 8<br>(3 - 11)           | 42<br>(7 - 63)          | 105<br>(33 - 168)        |
| Epilepsy                                            | 267<br>(171 - 368)       | 24<br>(13 - 47)       | 33<br>(21 - 47)        | 164<br>(103 - 228)      | 33<br>(16 - 51)         | 12<br>(7 - 16)           |
| Multiple sclerosis                                  | 10<br>(7 - 19)           | --<br>(0 - 0)         | --<br>(0 - 0)          | 5<br>(3 - 9)            | 2<br>(1 - 4)            | 3<br>(2 - 6)             |
| Other neurological disorders                        | 19<br>(15 - 23)          | 2<br>(1 - 2)          | 2<br>(1 - 2)           | 8<br>(6 - 10)           | 5<br>(4 - 7)            | 2<br>(2 - 3)             |
| Mental and substance use disorders                  | 241<br>(154 - 310)       | 2<br>(1 - 3)          | 0<br>(0 - 0)           | 173<br>(111 - 224)      | 56<br>(27 - 77)         | 10<br>(7 - 13)           |
| Schizophrenia                                       | 4<br>(3 - 7)             | --<br>(0 - 0)         | --<br>(0 - 0)          | 4<br>(2 - 6)            | 0<br>(0 - 1)            | 0<br>(0 - 0)             |
| Alcohol use disorders                               | 123<br>(53 - 167)        | --<br>(0 - 0)         | --<br>(0 - 0)          | 76<br>(34 - 104)        | 42<br>(17 - 61)         | 5<br>(2 - 7)             |
| Drug use disorders                                  | 113<br>(69 - 145)        | 2<br>(1 - 3)          | --<br>(0 - 0)          | 93<br>(54 - 124)        | 13<br>(9 - 18)          | 5<br>(4 - 7)             |
| Opioid use disorders                                | 25<br>(15 - 32)          | 0<br>(0 - 1)          | --<br>(0 - 0)          | 21<br>(12 - 28)         | 3<br>(2 - 4)            | 1<br>(1 - 2)             |
| Cocaine use disorders                               | 3<br>(2 - 4)             | 0<br>(0 - 0)          | --<br>(0 - 0)          | 2<br>(1 - 3)            | 0<br>(0 - 0)            | 0<br>(0 - 0)             |
| Amphetamine use disorders                           | 3<br>(2 - 4)             | 0<br>(0 - 0)          | --<br>(0 - 0)          | 2<br>(1 - 3)            | 0<br>(0 - 0)            | 0<br>(0 - 0)             |
| Other drug use disorders                            | 83<br>(50 - 106)         | 1<br>(1 - 2)          | --<br>(0 - 0)          | 67<br>(40 - 91)         | 10<br>(7 - 13)          | 4<br>(3 - 5)             |
| Eating disorders                                    | 1<br>(1 - 1)             | --<br>(0 - 0)         | 0<br>(0 - 0)           | 1<br>(0 - 1)            | --<br>(0 - 0)           | --<br>(0 - 0)            |

Web Table 31- Azerbaijan deaths with 95% UI by age, sex, and cause in 2013

| Cause                                               | Both Sexes, All Ages     | Both Sexes, 0-4 Years | Both Sexes, 5-14 Years | Both Sexes, 15-49 Years | Both Sexes, 50-69 Years | Both Sexes, 70-80 Years |
|-----------------------------------------------------|--------------------------|-----------------------|------------------------|-------------------------|-------------------------|-------------------------|
| Anorexia nervosa                                    | 1<br>(1 - 1)             | --                    | 0<br>(0 - 0)           | 1<br>(0 - 1)            | --                      | --                      |
| Diabetes, urogenital, blood, and endocrine diseases | 2,727<br>(2,357 - 3,157) | 197<br>(146 - 273)    | 91<br>(76 - 107)       | 575<br>(482 - 687)      | 1,003<br>(840 - 1,213)  | 861<br>(735 - 1,007)    |
| Diabetes mellitus                                   | 1,285<br>(1,085 - 1,533) | 3<br>(2 - 4)          | 9<br>(6 - 12)          | 190<br>(153 - 229)      | 628<br>(515 - 775)      | 456<br>(378 - 548)      |
| Acute glomerulonephritis                            | 12<br>(8 - 17)           | 2<br>(1 - 3)          | 1<br>(1 - 2)           | 5<br>(3 - 7)            | 2<br>(1 - 3)            | 2<br>(1 - 3)            |
| Chronic kidney disease                              | 699<br>(575 - 898)       | 12<br>(9 - 19)        | 19<br>(15 - 24)        | 206<br>(163 - 271)      | 222<br>(172 - 290)      | 239<br>(190 - 312)      |
| Chronic kidney disease due to diabetes mellitus     | 13<br>(9 - 30)           | 0<br>(0 - 1)          | 2<br>(1 - 3)           | 5<br>(3 - 12)           | 2<br>(1 - 4)            | 3<br>(1 - 11)           |
| Chronic kidney disease due to hypertension          | 146<br>(107 - 234)       | 5<br>(3 - 7)          | 4<br>(2 - 5)           | 34<br>(23 - 56)         | 32<br>(19 - 52)         | 72<br>(47 - 118)        |
| Chronic kidney disease due to glomerulonephritis    | 283<br>(217 - 350)       | 2<br>(1 - 3)          | 3<br>(2 - 4)           | 79<br>(60 - 103)        | 112<br>(84 - 142)       | 86<br>(60 - 112)        |
| Chronic kidney disease due to other causes          | 257<br>(190 - 359)       | 5<br>(2 - 10)         | 10<br>(7 - 15)         | 89<br>(62 - 127)        | 76<br>(50 - 117)        | 78<br>(48 - 121)        |
| Urinary diseases and male infertility               | 344<br>(246 - 419)       | 8<br>(5 - 11)         | 7<br>(5 - 9)           | 93<br>(63 - 116)        | 108<br>(75 - 138)       | 128<br>(90 - 162)       |
| Interstitial nephritis and urinary tract infections | 301<br>(207 - 371)       | 7<br>(5 - 10)         | 6<br>(4 - 7)           | 82<br>(55 - 103)        | 97<br>(64 - 125)        | 110<br>(71 - 142)       |
| Urolithiasis                                        | 7<br>(4 - 14)            | --                    | 0<br>(0 - 0)           | 2<br>(1 - 3)            | 1<br>(1 - 3)            | 4<br>(2 - 9)            |
| Other urinary diseases                              | 35<br>(24 - 58)          | 0<br>(0 - 1)          | 1<br>(1 - 2)           | 10<br>(6 - 14)          | 14<br>(6 - 17)          | 14<br>(8 - 27)          |
| Gynecological diseases                              | 0<br>(0 - 1)             | --                    | --                     | 0<br>(0 - 0)            | 0<br>(0 - 0)            | 0<br>(0 - 0)            |
| Uterine fibroids                                    | 0<br>(0 - 0)             | --                    | --                     | 0<br>(0 - 0)            | 0<br>(0 - 0)            | 0<br>(0 - 0)            |
| Polycystic ovarian syndrome                         | 0<br>(0 - 0)             | --                    | --                     | 0<br>(0 - 0)            | 0<br>(0 - 0)            | --                      |
| Endometriosis                                       | 0<br>(0 - 0)             | --                    | --                     | 0<br>(0 - 0)            | 0<br>(0 - 0)            | --                      |
| Genital prolapse                                    | 0<br>(0 - 0)             | --                    | --                     | 0<br>(0 - 0)            | 0<br>(0 - 0)            | 0<br>(0 - 0)            |
| Other gynecological diseases                        | 0<br>(0 - 0)             | --                    | --                     | 0<br>(0 - 0)            | 0<br>(0 - 0)            | 0<br>(0 - 0)            |
| Hemoglobinopathies and hemolytic anemias            | 165<br>(102 - 252)       | 75<br>(41 - 139)      | 28<br>(18 - 41)        | 31<br>(20 - 44)         | 16<br>(10 - 23)         | 14<br>(8 - 20)          |
| Thalassemias                                        | 111<br>(67 - 186)        | 67<br>(37 - 125)      | 26<br>(17 - 39)        | 17<br>(11 - 25)         | 0<br>(0 - 0)            | 0<br>(0 - 0)            |
| Sickle cell disorders                               | 4<br>(3 - 6)             | 1<br>(0 - 1)          | 0<br>(0 - 0)           | 2<br>(1 - 2)            | 1<br>(1 - 2)            | 0<br>(0 - 0)            |
| G6PD deficiency                                     | 2<br>(1 - 2)             | 0<br>(0 - 1)          | 0<br>(0 - 0)           | 0<br>(0 - 1)            | 0<br>(0 - 1)            | 0<br>(0 - 0)            |
| Other hemoglobinopathies and hemolytic anemias      | 48<br>(30 - 65)          | 7<br>(4 - 12)         | 1<br>(1 - 2)           | 12<br>(7 - 17)          | 14<br>(9 - 20)          | 13<br>(8 - 20)          |
| Endocrine, metabolic, blood, and immune disorders   | 224<br>(152 - 286)       | 97<br>(57 - 144)      | 27<br>(18 - 36)        | 50<br>(31 - 63)         | 28<br>(15 - 37)         | 22<br>(14 - 29)         |
| Musculoskeletal disorders                           | 19<br>(15 - 26)          | --                    | 4<br>(3 - 5)           | 7<br>(5 - 10)           | 4<br>(3 - 6)            | 4<br>(3 - 7)            |
| Rheumatoid arthritis                                | 3<br>(2 - 6)             | --                    | 1<br>(1 - 1)           | 1<br>(0 - 1)            | 1<br>(0 - 2)            | 1<br>(0 - 2)            |
| Other musculoskeletal disorders                     | 16<br>(12 - 21)          | --                    | 3<br>(2 - 4)           | 6<br>(5 - 9)            | 3<br>(2 - 4)            | 4<br>(2 - 5)            |
| Other non-communicable diseases                     | 928<br>(612 - 1,224)     | 854<br>(548 - 1,140)  | 32<br>(24 - 42)        | 28<br>(22 - 36)         | 6<br>(4 - 7)            | 7<br>(6 - 9)            |
| Congenital anomalies                                | 868<br>(550 - 1,169)     | 797<br>(491 - 1,091)  | 32<br>(24 - 41)        | 27<br>(21 - 35)         | 5<br>(4 - 6)            | 7<br>(5 - 9)            |
| Neural tube defects                                 | 26<br>(15 - 48)          | 25<br>(14 - 47)       | 1<br>(0 - 1)           | 0<br>(0 - 0)            | 0<br>(0 - 0)            | 0<br>(0 - 0)            |
| Congenital heart anomalies                          | 599<br>(355 - 835)       | 557<br>(319 - 784)    | 23<br>(16 - 30)        | 16<br>(12 - 21)         | 1<br>(1 - 1)            | 3<br>(2 - 4)            |
| Cleft lip and cleft palate                          | 9<br>(4 - 19)            | 9<br>(4 - 19)         | --                     | --                      | --                      | --                      |
| Down syndrome                                       | 38<br>(19 - 75)          | 35<br>(16 - 72)       | 2<br>(1 - 3)           | 1<br>(0 - 1)            | 0<br>(0 - 0)            | 0<br>(0 - 0)            |
| Chromosomal unbalanced rearrangements               | 2<br>(1 - 4)             | 1<br>(0 - 3)          | 0<br>(0 - 0)           | 1<br>(0 - 1)            | 0<br>(0 - 0)            | 0<br>(0 - 0)            |
| Other congenital anomalies                          | 193<br>(120 - 288)       | 170<br>(99 - 262)     | 7<br>(4 - 9)           | 10<br>(7 - 13)          | 3<br>(3 - 4)            | 4<br>(3 - 5)            |
| Skin and subcutaneous diseases                      | 4<br>(2 - 4)             | 0<br>(0 - 1)          | 0<br>(0 - 0)           | 1<br>(1 - 2)            | 1<br>(1 - 1)            | 1<br>(0 - 1)            |
| Cellulitis                                          | 1<br>(0 - 1)             | 0<br>(0 - 0)          | 0<br>(0 - 0)           | 0<br>(0 - 0)            | 0<br>(0 - 0)            | 0<br>(0 - 0)            |
| Pyoderma                                            | 2<br>(1 - 2)             | 0<br>(0 - 1)          | 0<br>(0 - 0)           | 0<br>(0 - 1)            | 1<br>(0 - 1)            | 0<br>(0 - 0)            |
| Decubitus ulcer                                     | 1<br>(0 - 1)             | 0<br>(0 - 0)          | 0<br>(0 - 0)           | 0<br>(0 - 0)            | 0<br>(0 - 0)            | 0<br>(0 - 0)            |



Web Table 31- Azerbaijan deaths with 95% UI by age, sex, and cause in 2013

| Cause                                           | Both Sexes, All Ages     | Both Sexes, 0-4 Years | Both Sexes, 5-14 Years | Both Sexes, 15-49 Years  | Both Sexes, 50-69 Years | Both Sexes, 70-80 Years |
|-------------------------------------------------|--------------------------|-----------------------|------------------------|--------------------------|-------------------------|-------------------------|
| Other skin and subcutaneous diseases            | 0<br>(0 - 1)             | 0<br>(0 - 0)          | 0<br>(0 - 0)           | 0<br>(0 - 0)             | 0<br>(0 - 0)            | 0<br>(0 - 0)            |
| Sudden infant death syndrome                    | 57<br>(9 - 175)          | 57<br>(9 - 175)       | --                     | --                       | --                      | --                      |
| Injuries                                        | 3,227<br>(2,663 - 4,081) | 188<br>(129 - 284)    | 209<br>(175 - 270)     | 2,066<br>(1,670 - 2,636) | 538<br>(432 - 698)      | 226<br>(187 - 302)      |
| Transport injuries                              | 1,171<br>(908 - 1,547)   | 12<br>(8 - 18)        | 68<br>(51 - 91)        | 806<br>(613 - 1,050)     | 213<br>(155 - 314)      | 71<br>(53 - 112)        |
| Road injuries                                   | 1,152<br>(891 - 1,517)   | 8<br>(5 - 13)         | 64<br>(48 - 85)        | 801<br>(609 - 1,045)     | 209<br>(154 - 305)      | 69<br>(52 - 109)        |
| Pedestrian road injuries                        | 61<br>(34 - 109)         | 1<br>(0 - 2)          | 8<br>(4 - 14)          | 15<br>(6 - 29)           | 15<br>(8 - 29)          | 22<br>(14 - 40)         |
| Cyclist road injuries                           | 89<br>(59 - 126)         | 2<br>(1 - 3)          | 15<br>(10 - 24)        | 31<br>(19 - 47)          | 34<br>(22 - 52)         | 7<br>(4 - 10)           |
| Motorcyclist road injuries                      | 224<br>(136 - 333)       | 0<br>(0 - 1)          | 3<br>(2 - 5)           | 195<br>(116 - 284)       | 22<br>(13 - 39)         | 3<br>(2 - 5)            |
| Motor vehicle road injuries                     | 772<br>(588 - 1,009)     | 5<br>(3 - 7)          | 37<br>(27 - 49)        | 555<br>(415 - 726)       | 137<br>(98 - 194)       | 38<br>(27 - 57)         |
| Other road injuries                             | 7<br>(4 - 15)            | 0<br>(0 - 0)          | 1<br>(1 - 3)           | 4<br>(2 - 9)             | 1<br>(0 - 2)            | 1<br>(0 - 2)            |
| Other transport injuries                        | 19<br>(12 - 37)          | 4<br>(3 - 6)          | 4<br>(2 - 7)           | 5<br>(3 - 12)            | 4<br>(2 - 11)           | 2<br>(1 - 4)            |
| Unintentional injuries                          | 1,295<br>(1,057 - 1,724) | 173<br>(118 - 269)    | 127<br>(97 - 186)      | 673<br>(518 - 934)       | 206<br>(166 - 262)      | 116<br>(97 - 141)       |
| Falls                                           | 178<br>(127 - 303)       | 18<br>(10 - 30)       | 10<br>(7 - 16)         | 85<br>(58 - 157)         | 36<br>(25 - 65)         | 29<br>(20 - 49)         |
| Drowning                                        | 398<br>(267 - 752)       | 46<br>(23 - 116)      | 63<br>(40 - 123)       | 239<br>(151 - 440)       | 38<br>(25 - 71)         | 12<br>(7 - 20)          |
| Fire, heat, and hot substances                  | 303<br>(239 - 386)       | 58<br>(37 - 100)      | 22<br>(16 - 31)        | 150<br>(113 - 195)       | 47<br>(33 - 64)         | 26<br>(18 - 36)         |
| Poisonings                                      | 81<br>(64 - 121)         | 7<br>(5 - 10)         | 4<br>(3 - 6)           | 44<br>(32 - 73)          | 16<br>(11 - 23)         | 10<br>(7 - 14)          |
| Exposure to mechanical forces                   | 145<br>(114 - 191)       | 22<br>(13 - 38)       | 15<br>(10 - 23)        | 76<br>(55 - 104)         | 28<br>(18 - 40)         | 4<br>(3 - 6)            |
| Unintentional firearm injuries                  | 37<br>(25 - 49)          | 3<br>(1 - 5)          | 2<br>(1 - 3)           | 23<br>(15 - 32)          | 8<br>(4 - 13)           | 1<br>(1 - 2)            |
| Unintentional suffocation                       | 11<br>(5 - 26)           | 5<br>(2 - 15)         | 2<br>(1 - 6)           | 2<br>(1 - 7)             | 0<br>(0 - 1)            | 0<br>(0 - 1)            |
| Other exposure to mechanical forces             | 97<br>(72 - 134)         | 14<br>(7 - 26)        | 11<br>(6 - 18)         | 50<br>(33 - 76)          | 19<br>(12 - 31)         | 3<br>(2 - 5)            |
| Adverse effects of medical treatment            | 59<br>(29 - 91)          | 6<br>(3 - 13)         | 1<br>(1 - 1)           | 9<br>(5 - 14)            | 23<br>(10 - 40)         | 19<br>(8 - 33)          |
| Animal contact                                  | 12<br>(8 - 18)           | 2<br>(1 - 3)          | 2<br>(1 - 3)           | 5<br>(3 - 7)             | 3<br>(2 - 5)            | 1<br>(1 - 2)            |
| Venomous animal contact                         | 6<br>(4 - 9)             | 1<br>(0 - 1)          | 1<br>(0 - 1)           | 4<br>(2 - 6)             | 0<br>(0 - 1)            | 0<br>(0 - 1)            |
| Non-venomous animal contact                     | 6<br>(4 - 10)            | 1<br>(1 - 2)          | 1<br>(0 - 1)           | 1<br>(1 - 2)             | 2<br>(1 - 4)            | 1<br>(1 - 2)            |
| Foreign body                                    | 40<br>(27 - 64)          | 13<br>(8 - 23)        | 3<br>(2 - 6)           | 10<br>(7 - 17)           | 4<br>(2 - 6)            | 9<br>(6 - 17)           |
| Pulmonary aspiration and foreign body in airway | 36<br>(24 - 62)          | 12<br>(7 - 22)        | 3<br>(2 - 6)           | 9<br>(5 - 16)            | 3<br>(2 - 6)            | 9<br>(5 - 16)           |
| Foreign body in other body part                 | 3<br>(2 - 5)             | 1<br>(0 - 1)          | 0<br>(0 - 1)           | 1<br>(1 - 2)             | 1<br>(0 - 1)            | 0<br>(0 - 1)            |
| Other unintentional injuries                    | 80<br>(62 - 101)         | 2<br>(1 - 3)          | 6<br>(5 - 9)           | 56<br>(41 - 74)          | 10<br>(7 - 15)          | 6<br>(4 - 8)            |
| Self-harm and interpersonal violence            | 761<br>(571 - 1,143)     | 2<br>(1 - 4)          | 14<br>(10 - 22)        | 587<br>(435 - 885)       | 120<br>(86 - 180)       | 39<br>(27 - 68)         |
| Self-harm                                       | 346<br>(210 - 445)       | --                    | 6<br>(3 - 9)           | 250<br>(142 - 327)       | 70<br>(45 - 94)         | 21<br>(16 - 28)         |
| Interpersonal violence                          | 416<br>(275 - 785)       | 2<br>(1 - 4)          | 8<br>(5 - 16)          | 337<br>(220 - 638)       | 50<br>(29 - 107)        | 18<br>(9 - 45)          |
| Assault by firearm                              | 231<br>(142 - 437)       | 0<br>(0 - 1)          | 2<br>(1 - 3)           | 188<br>(113 - 358)       | 36<br>(20 - 77)         | 6<br>(3 - 14)           |
| Assault by sharp object                         | 108<br>(58 - 233)        | 1<br>(0 - 1)          | 2<br>(1 - 5)           | 97<br>(51 - 209)         | 4<br>(2 - 9)            | 4<br>(2 - 12)           |
| Assault by other means                          | 77<br>(41 - 184)         | 1<br>(1 - 2)          | 4<br>(2 - 9)           | 52<br>(25 - 136)         | 11<br>(5 - 27)          | 8<br>(4 - 21)           |

Web Table 31- Azerbaijan deaths with 95% UI by age, sex, and cause in 2013

| Cause                                                             | Males, All Ages             | Males, 0-4 Years         | Males, 5-14 Years  | Males, 15-49 Years       | Males, 50-69 Years         | Males, 70-80 Years          |
|-------------------------------------------------------------------|-----------------------------|--------------------------|--------------------|--------------------------|----------------------------|-----------------------------|
| All causes                                                        | 33,841<br>(28,687 - 38,642) | 3,441<br>(3,039 - 3,875) | 480<br>(438 - 525) | 6,650<br>(5,454 - 8,091) | 10,347<br>(8,286 - 12,362) | 12,923<br>(11,154 - 14,402) |
| Communicable, maternal, neonatal, and nutritional diseases        | 4,110<br>(3,583 - 4,626)    | 2,603<br>(2,263 - 2,979) | 105<br>(82 - 132)  | 780<br>(532 - 952)       | 353<br>(260 - 444)         | 269<br>(174 - 363)          |
| HIV/AIDS and tuberculosis                                         | 755<br>(498 - 978)          | 3<br>(2 - 5)             | 3<br>(2 - 4)       | 533<br>(321 - 691)       | 183<br>(127 - 245)         | 33<br>(24 - 47)             |
| Tuberculosis                                                      | 595<br>(418 - 757)          | 3<br>(2 - 4)             | 3<br>(2 - 4)       | 409<br>(263 - 526)       | 151<br>(108 - 205)         | 29<br>(21 - 43)             |
| HIV/AIDS                                                          | 161<br>(45 - 320)           | 0<br>(0 - 2)             | 0<br>(0 - 0)       | 124<br>(35 - 233)        | 32<br>(7 - 77)             | 5<br>(1 - 12)               |
| HIV/AIDS resulting in mycobacterial infection                     | 11<br>(3 - 22)              | 0<br>(0 - 0)             | 0<br>(0 - 0)       | 8<br>(2 - 16)            | 2<br>(0 - 5)               | 0<br>(0 - 1)                |
| HIV/AIDS resulting in other diseases                              | 150<br>(42 - 298)           | 0<br>(0 - 2)             | 0<br>(0 - 0)       | 116<br>(33 - 217)        | 30<br>(6 - 72)             | 4<br>(1 - 11)               |
| Diarrhea, lower respiratory, and other common infectious diseases | 1,995<br>(1,626 - 2,345)    | 1,331<br>(1,060 - 1,630) | 91<br>(69 - 116)   | 204<br>(141 - 275)       | 148<br>(93 - 211)          | 221<br>(125 - 314)          |
| Diarrheal diseases                                                | 134<br>(82 - 216)           | 121<br>(70 - 203)        | 2<br>(1 - 4)       | 5<br>(4 - 9)             | 3<br>(1 - 4)               | 2<br>(1 - 4)                |
| Intestinal infectious diseases                                    | 7<br>(3 - 13)               | 2<br>(1 - 6)             | 1<br>(0 - 2)       | 3<br>(1 - 6)             | 1<br>(0 - 3)               | 0<br>(0 - 2)                |
| Typhoid fever                                                     | 3<br>(1 - 5)                | 1<br>(0 - 1)             | 1<br>(0 - 1)       | 1<br>(0 - 3)             | 0<br>(0 - 1)               | 0<br>(0 - 0)                |
| Paratyphoid fever                                                 | 1<br>(0 - 2)                | 0<br>(0 - 1)             | 0<br>(0 - 0)       | 0<br>(0 - 1)             | 0<br>(0 - 0)               | 0<br>(0 - 0)                |
| Other intestinal infectious diseases                              | 3<br>(0 - 8)                | 1<br>(0 - 5)             | 0<br>(0 - 2)       | 1<br>(0 - 4)             | 0<br>(0 - 2)               | 0<br>(0 - 2)                |
| Lower respiratory infections                                      | 1,725<br>(1,371 - 2,059)    | 1,158<br>(893 - 1,447)   | 68<br>(47 - 92)    | 155<br>(102 - 214)       | 133<br>(79 - 194)          | 210<br>(116 - 303)          |
| Upper respiratory infections                                      | 1<br>(1 - 3)                | 0<br>(0 - 1)             | 0<br>(0 - 0)       | 0<br>(0 - 1)             | 0<br>(0 - 1)               | 0<br>(0 - 1)                |
| Otitis media                                                      | 1<br>(1 - 1)                | 0<br>(0 - 0)             | 0<br>(0 - 0)       | 0<br>(0 - 0)             | 0<br>(0 - 0)               | 0<br>(0 - 0)                |
| Meningitis                                                        | 67<br>(47 - 88)             | 26<br>(13 - 40)          | 8<br>(5 - 12)      | 23<br>(16 - 32)          | 6<br>(4 - 9)               | 4<br>(2 - 5)                |
| Pneumococcal meningitis                                           | 17<br>(12 - 23)             | 5<br>(2 - 8)             | 2<br>(1 - 4)       | 7<br>(5 - 11)            | 2<br>(1 - 3)               | 1<br>(1 - 2)                |
| H influenzae type B meningitis                                    | 21<br>(13 - 29)             | 13<br>(7 - 20)           | 3<br>(1 - 4)       | 4<br>(2 - 6)             | 1<br>(0 - 1)               | 1<br>(0 - 1)                |
| Meningococcal meningitis                                          | 15<br>(10 - 20)             | 5<br>(3 - 9)             | 2<br>(1 - 4)       | 5<br>(3 - 8)             | 1<br>(1 - 2)               | 1<br>(0 - 1)                |
| Other meningitis                                                  | 14<br>(9 - 21)              | 3<br>(1 - 6)             | 1<br>(1 - 2)       | 7<br>(4 - 11)            | 2<br>(1 - 4)               | 1<br>(1 - 2)                |
| Encephalitis                                                      | 49<br>(32 - 69)             | 18<br>(9 - 32)           | 10<br>(5 - 15)     | 14<br>(8 - 22)           | 4<br>(2 - 8)               | 3<br>(2 - 5)                |
| Diphtheria                                                        | 2<br>(0 - 11)               | 1<br>(0 - 10)            | 0<br>(0 - 3)       | 0<br>(0 - 1)             | 0<br>(0 - 1)               | --                          |
| Whooping cough                                                    | 3<br>(1 - 7)                | 2<br>(0 - 6)             | 0<br>(0 - 0)       | 1<br>(0 - 1)             | 0<br>(0 - 0)               | --                          |
| Tetanus                                                           | 1<br>(0 - 2)                | 0<br>(0 - 0)             | 0<br>(0 - 0)       | 0<br>(0 - 1)             | 0<br>(0 - 0)               | 0<br>(0 - 0)                |
| Measles                                                           | 0<br>(0 - 0)                | 0<br>(0 - 0)             | 0<br>(0 - 0)       | 0<br>(0 - 0)             | 0<br>(0 - 0)               | --                          |
| Varicella and herpes zoster                                       | 5<br>(2 - 13)               | 1<br>(0 - 6)             | 0<br>(0 - 1)       | 1<br>(0 - 4)             | 1<br>(0 - 2)               | 2<br>(0 - 9)                |
| Neglected tropical diseases and malaria                           | 11<br>(8 - 17)              | 2<br>(1 - 6)             | 2<br>(1 - 4)       | 5<br>(3 - 8)             | 2<br>(1 - 3)               | 0<br>(0 - 1)                |
| Malaria                                                           | 0<br>(0 - 0)                | 0<br>(0 - 0)             | 0<br>(0 - 0)       | 0<br>(0 - 0)             | 0<br>(0 - 0)               | 0<br>(0 - 0)                |
| Leishmaniasis                                                     | 1<br>(1 - 2)                | 0<br>(0 - 1)             | 0<br>(0 - 0)       | 0<br>(0 - 1)             | 0<br>(0 - 0)               | 0<br>(0 - 0)                |
| Visceral leishmaniasis                                            | 1<br>(1 - 2)                | 0<br>(0 - 1)             | 0<br>(0 - 0)       | 0<br>(0 - 1)             | 0<br>(0 - 0)               | 0<br>(0 - 0)                |
| Cysticercosis                                                     | 0<br>(0 - 0)                | 0<br>(0 - 0)             | 0<br>(0 - 0)       | 0<br>(0 - 0)             | 0<br>(0 - 0)               | 0<br>(0 - 0)                |
| Cystic echinococcosis                                             | 1<br>(1 - 1)                | 0<br>(0 - 0)             | 0<br>(0 - 0)       | 1<br>(0 - 1)             | 0<br>(0 - 0)               | 0<br>(0 - 0)                |
| Dengue                                                            | 0<br>(0 - 1)                | 0<br>(0 - 0)             | 0<br>(0 - 0)       | 0<br>(0 - 0)             | 0<br>(0 - 0)               | 0<br>(0 - 0)                |
| Rabies                                                            | 5<br>(3 - 9)                | 0<br>(0 - 0)             | 1<br>(1 - 3)       | 3<br>(1 - 5)             | 1<br>(0 - 1)               | 0<br>(0 - 0)                |
| Intestinal nematode infections                                    | 1<br>(0 - 6)                | 0<br>(0 - 4)             | 0<br>(0 - 2)       | 0<br>(0 - 2)             | 0<br>(0 - 1)               | 0<br>(0 - 1)                |
| Ascariasis                                                        | 1<br>(0 - 6)                | 0<br>(0 - 4)             | 0<br>(0 - 2)       | 0<br>(0 - 2)             | 0<br>(0 - 1)               | 0<br>(0 - 1)                |
| Other neglected tropical diseases                                 | 2<br>(1 - 4)                | 1<br>(1 - 3)             | 0<br>(0 - 0)       | 0<br>(0 - 1)             | 0<br>(0 - 0)               | 0<br>(0 - 0)                |
| Maternal disorders                                                | --                          | --                       | --                 | --                       | --                         | --                          |
| Maternal hemorrhage                                               | --                          | --                       | --                 | --                       | --                         | --                          |

Web Table 31- Azerbaijan deaths with 95% UI by age, sex, and cause in 2013

| Cause                                                            | Males, All Ages             | Males, 0-4 Years       | Males, 5-14 Years  | Males, 15-49 Years       | Males, 50-69 Years        | Males, 70-80 Years          |
|------------------------------------------------------------------|-----------------------------|------------------------|--------------------|--------------------------|---------------------------|-----------------------------|
| Maternal sepsis and other maternal infections                    | --                          | --                     | --                 | --                       | --                        | --                          |
| Maternal hypertensive disorders                                  | --                          | --                     | --                 | --                       | --                        | --                          |
| Maternal obstructed labor                                        | --                          | --                     | --                 | --                       | --                        | --                          |
| Maternal abortive outcome                                        | --                          | --                     | --                 | --                       | --                        | --                          |
| Indirect maternal deaths                                         | --                          | --                     | --                 | --                       | --                        | --                          |
| Late maternal deaths                                             | --                          | --                     | --                 | --                       | --                        | --                          |
| Maternal deaths aggravated by HIV/AIDS                           | --                          | --                     | --                 | --                       | --                        | --                          |
| Other maternal disorders                                         | --                          | --                     | --                 | --                       | --                        | --                          |
| Neonatal disorders                                               | 1,194<br>(993 - 1,392)      | 1,194<br>(993 - 1,392) | --                 | --                       | --                        | --                          |
| Neonatal preterm birth complications                             | 342<br>(121 - 645)          | 342<br>(121 - 645)     | --                 | --                       | --                        | --                          |
| Neonatal encephalopathy due to birth asphyxia and trauma         | 647<br>(392 - 916)          | 647<br>(392 - 916)     | --                 | --                       | --                        | --                          |
| Neonatal sepsis and other neonatal infections                    | 8<br>(0 - 31)               | 8<br>(0 - 31)          | --                 | --                       | --                        | --                          |
| Hemolytic disease and other neonatal jaundice                    | 9<br>(2 - 29)               | 9<br>(2 - 29)          | --                 | --                       | --                        | --                          |
| Other neonatal disorders                                         | 188<br>(47 - 527)           | 188<br>(47 - 527)      | --                 | --                       | --                        | --                          |
| Nutritional deficiencies                                         | 53<br>(32 - 82)             | 20<br>(11 - 40)        | 3<br>(2 - 5)       | 15<br>(7 - 23)           | 8<br>(4 - 12)             | 6<br>(3 - 9)                |
| Protein-energy malnutrition                                      | 13<br>(5 - 25)              | 10<br>(2 - 21)         | 1<br>(1 - 2)       | 1<br>(0 - 2)             | 1<br>(0 - 2)              | 0<br>(0 - 0)                |
| Iodine deficiency                                                | 2<br>(0 - 13)               | 2<br>(0 - 12)          | 0<br>(0 - 1)       | 0<br>(0 - 0)             | 0<br>(0 - 1)              | 0<br>(0 - 0)                |
| Iron-deficiency anemia                                           | 34<br>(18 - 51)             | 6<br>(3 - 15)          | 2<br>(1 - 3)       | 14<br>(6 - 20)           | 7<br>(3 - 11)             | 6<br>(3 - 9)                |
| Other nutritional deficiencies                                   | 4<br>(1 - 12)               | 2<br>(0 - 9)           | 0<br>(0 - 1)       | 1<br>(0 - 1)             | 0<br>(0 - 1)              | 0<br>(0 - 0)                |
| Other communicable, maternal, neonatal, and nutritional diseases | 102<br>(70 - 142)           | 53<br>(28 - 90)        | 6<br>(4 - 9)       | 23<br>(17 - 31)          | 12<br>(8 - 17)            | 8<br>(5 - 12)               |
| Sexually transmitted diseases excluding HIV                      | 32<br>(11 - 64)             | 25<br>(5 - 56)         | 2<br>(0 - 3)       | 2<br>(1 - 4)             | 2<br>(1 - 3)              | 1<br>(1 - 3)                |
| Syphilis                                                         | 30<br>(9 - 62)              | 25<br>(5 - 56)         | 1<br>(0 - 3)       | 1<br>(1 - 2)             | 1<br>(1 - 2)              | 1<br>(0 - 2)                |
| Chlamydial infection                                             | --                          | --                     | --                 | --                       | --                        | --                          |
| Gonococcal infection                                             | 1<br>(1 - 2)                | --                     | 0<br>(0 - 0)       | 1<br>(0 - 1)             | 0<br>(0 - 0)              | 0<br>(0 - 0)                |
| Other sexually transmitted diseases                              | 1<br>(0 - 1)                | --                     | 0<br>(0 - 0)       | 0<br>(0 - 1)             | 0<br>(0 - 0)              | 0<br>(0 - 0)                |
| Hepatitis                                                        | 42<br>(32 - 55)             | 9<br>(4 - 17)          | 4<br>(2 - 6)       | 17<br>(11 - 24)          | 8<br>(5 - 12)             | 5<br>(3 - 8)                |
| Acute hepatitis A                                                | 5<br>(1 - 9)                | 2<br>(0 - 5)           | 1<br>(0 - 2)       | 1<br>(0 - 3)             | 0<br>(0 - 0)              | 0<br>(0 - 0)                |
| Acute hepatitis B                                                | 29<br>(21 - 40)             | 7<br>(3 - 13)          | 2<br>(1 - 4)       | 10<br>(6 - 15)           | 6<br>(4 - 10)             | 5<br>(3 - 7)                |
| Acute hepatitis C                                                | 3<br>(1 - 6)                | --                     | 0<br>(0 - 1)       | 1<br>(0 - 3)             | 1<br>(0 - 2)              | 0<br>(0 - 1)                |
| Acute hepatitis E                                                | 6<br>(3 - 10)               | 0<br>(0 - 0)           | 0<br>(0 - 1)       | 4<br>(2 - 8)             | 1<br>(0 - 1)              | 0<br>(0 - 1)                |
| Other infectious diseases                                        | 28<br>(16 - 57)             | 19<br>(9 - 48)         | 1<br>(0 - 3)       | 4<br>(2 - 7)             | 3<br>(1 - 6)              | 1<br>(1 - 4)                |
| Non-communicable diseases                                        | 27,184<br>(22,728 - 31,401) | 714<br>(476 - 951)     | 225<br>(187 - 257) | 4,123<br>(3,279 - 5,127) | 9,601<br>(7,677 - 11,526) | 12,522<br>(10,801 - 13,945) |
| Neoplasms                                                        | 4,384<br>(3,551 - 5,263)    | 52<br>(34 - 77)        | 92<br>(73 - 110)   | 943<br>(750 - 1,173)     | 2,118<br>(1,671 - 2,599)  | 1,180<br>(966 - 1,393)      |
| Esophageal cancer                                                | 342<br>(223 - 539)          | --                     | --                 | 44<br>(30 - 67)          | 168<br>(112 - 253)        | 131<br>(74 - 223)           |
| Stomach cancer                                                   | 654<br>(510 - 812)          | --                     | --                 | 106<br>(79 - 140)        | 311<br>(232 - 400)        | 237<br>(185 - 299)          |
| Liver cancer                                                     | 327<br>(253 - 414)          | --                     | 1<br>(1 - 2)       | 51<br>(36 - 73)          | 173<br>(124 - 233)        | 101<br>(71 - 137)           |
| Liver cancer due to hepatitis B                                  | 133<br>(98 - 173)           | --                     | 1<br>(0 - 1)       | 25<br>(16 - 36)          | 74<br>(51 - 107)          | 34<br>(22 - 48)             |
| Liver cancer due to hepatitis C                                  | 111<br>(81 - 149)           | --                     | 0<br>(0 - 0)       | 15<br>(10 - 23)          | 58<br>(39 - 83)           | 38<br>(25 - 54)             |
| Liver cancer due to alcohol use                                  | 67<br>(41 - 96)             | --                     | --                 | 7<br>(4 - 12)            | 33<br>(19 - 51)           | 26<br>(16 - 39)             |
| Liver cancer due to other causes                                 | 16<br>(10 - 23)             | --                     | 1<br>(0 - 1)       | 4<br>(2 - 6)             | 8<br>(4 - 12)             | 3<br>(2 - 6)                |

Web Table 31- Azerbaijan deaths with 95% UI by age, sex, and cause in 2013

| Cause                                         | Males, All Ages             | Males, 0-4 Years | Males, 5-14 Years | Males, 15-49 Years       | Males, 50-69 Years       | Males, 70-80 Years       |
|-----------------------------------------------|-----------------------------|------------------|-------------------|--------------------------|--------------------------|--------------------------|
| Larynx cancer                                 | 127<br>(93 - 194)           | --               | --                | 25<br>(17 - 36)          | 78<br>(55 - 120)         | 25<br>(18 - 39)          |
| Tracheal, bronchus and lung cancer            | 866<br>(669 - 1,122)        | --               | --                | 154<br>(114 - 209)       | 524<br>(391 - 691)       | 188<br>(143 - 239)       |
| Breast cancer                                 | 2<br>(1 - 4)                | --               | --                | 1<br>(0 - 2)             | 1<br>(0 - 1)             | 0<br>(0 - 1)             |
| Cervical cancer                               | --                          | --               | --                | --                       | --                       | --                       |
| Uterine cancer                                | --                          | --               | --                | --                       | --                       | --                       |
| Prostate cancer                               | 262<br>(147 - 381)          | --               | --                | 9<br>(6 - 14)            | 79<br>(45 - 117)         | 174<br>(94 - 254)        |
| Colon and rectum cancer                       | 284<br>(225 - 347)          | --               | --                | 70<br>(54 - 89)          | 138<br>(105 - 176)       | 77<br>(60 - 95)          |
| Lip and oral cavity cancer                    | 48<br>(27 - 65)             | --               | --                | 13<br>(7 - 19)           | 24<br>(13 - 35)          | 11<br>(6 - 16)           |
| Nasopharynx cancer                            | 8<br>(6 - 11)               | --               | 0<br>(0 - 1)      | 5<br>(3 - 8)             | 2<br>(1 - 3)             | 1<br>(0 - 1)             |
| Other pharynx cancer                          | 32<br>(20 - 43)             | --               | --                | 9<br>(6 - 13)            | 19<br>(11 - 27)          | 4<br>(2 - 6)             |
| Gallbladder and biliary tract cancer          | 56<br>(36 - 73)             | --               | --                | 9<br>(5 - 12)            | 29<br>(17 - 42)          | 18<br>(11 - 25)          |
| Pancreatic cancer                             | 223<br>(174 - 279)          | --               | --                | 49<br>(35 - 66)          | 117<br>(86 - 153)        | 58<br>(43 - 74)          |
| Malignant skin melanoma                       | 40<br>(20 - 64)             | --               | --                | 9<br>(5 - 15)            | 21<br>(10 - 33)          | 10<br>(5 - 16)           |
| Non-melanoma skin cancer                      | 5<br>(3 - 7)                | --               | --                | 2<br>(1 - 2)             | 2<br>(1 - 4)             | 1<br>(1 - 2)             |
| Ovarian cancer                                | --                          | --               | --                | --                       | --                       | --                       |
| Testicular cancer                             | 18<br>(11 - 26)             | --               | --                | 16<br>(10 - 24)          | 1<br>(1 - 2)             | 0<br>(0 - 0)             |
| Kidney cancer                                 | 207<br>(156 - 264)          | 5<br>(2 - 10)    | 5<br>(3 - 9)      | 51<br>(35 - 71)          | 115<br>(81 - 158)        | 31<br>(22 - 43)          |
| Bladder cancer                                | 100<br>(74 - 131)           | --               | --                | 11<br>(7 - 17)           | 50<br>(34 - 70)          | 38<br>(27 - 53)          |
| Brain and nervous system cancer               | 276<br>(164 - 381)          | 5<br>(2 - 9)     | 15<br>(9 - 23)    | 109<br>(61 - 152)        | 126<br>(72 - 182)        | 21<br>(12 - 31)          |
| Thyroid cancer                                | 16<br>(12 - 22)             | --               | 0<br>(0 - 0)      | 5<br>(3 - 7)             | 8<br>(5 - 11)            | 4<br>(2 - 5)             |
| Mesothelioma                                  | 4<br>(3 - 6)                | --               | --                | 3<br>(2 - 4)             | 1<br>(1 - 2)             | 0<br>(0 - 1)             |
| Hodgkin lymphoma                              | 19<br>(9 - 29)              | 1<br>(0 - 2)     | 2<br>(1 - 6)      | 9<br>(4 - 14)            | 5<br>(3 - 9)             | 1<br>(1 - 2)             |
| Non-Hodgkin lymphoma                          | 120<br>(81 - 157)           | 5<br>(2 - 8)     | 6<br>(3 - 10)     | 42<br>(27 - 58)          | 45<br>(29 - 64)          | 22<br>(15 - 31)          |
| Multiple myeloma                              | 11<br>(7 - 15)              | --               | --                | 3<br>(2 - 5)             | 6<br>(3 - 8)             | 2<br>(1 - 3)             |
| Leukemia                                      | 202<br>(164 - 247)          | 25<br>(14 - 39)  | 43<br>(31 - 55)   | 88<br>(68 - 113)         | 36<br>(27 - 48)          | 11<br>(8 - 14)           |
| Other neoplasms                               | 134<br>(97 - 173)           | 13<br>(6 - 24)   | 18<br>(12 - 27)   | 49<br>(35 - 67)          | 39<br>(24 - 56)          | 15<br>(10 - 22)          |
| Cardiovascular diseases                       | 16,389<br>(13,657 - 18,893) | 14<br>(10 - 18)  | 23<br>(18 - 29)   | 1,960<br>(1,543 - 2,452) | 5,568<br>(4,429 - 6,669) | 8,824<br>(7,573 - 9,871) |
| Rheumatic heart disease                       | 96<br>(56 - 132)            | 0<br>(0 - 1)     | 4<br>(2 - 5)      | 48<br>(29 - 71)          | 29<br>(14 - 45)          | 14<br>(8 - 23)           |
| Ischemic heart disease                        | 11,837<br>(9,701 - 13,935)  | 2<br>(1 - 4)     | 10<br>(8 - 14)    | 1,522<br>(1,197 - 1,911) | 6,272<br>(3,158 - 4,934) | 6,272<br>(5,300 - 7,217) |
| Cerebrovascular disease                       | 3,894<br>(3,031 - 4,776)    | 1<br>(0 - 1)     | 4<br>(3 - 5)      | 319<br>(231 - 435)       | 2,280<br>(953 - 1,621)   | 2,291<br>(1,809 - 2,775) |
| Ischemic stroke                               | 1,418<br>(1,050 - 1,856)    | 0<br>(0 - 0)     | 0<br>(0 - 0)      | 49<br>(31 - 78)          | 372<br>(256 - 536)       | 996<br>(732 - 1,313)     |
| Hemorrhagic stroke                            | 2,477<br>(1,876 - 3,127)    | 1<br>(0 - 1)     | 4<br>(3 - 5)      | 271<br>(195 - 367)       | 907<br>(657 - 1,173)     | 1,294<br>(945 - 1,645)   |
| Hypertensive heart disease                    | 200<br>(134 - 316)          | 0<br>(0 - 0)     | 0<br>(0 - 0)      | 18<br>(12 - 29)          | 73<br>(45 - 121)         | 108<br>(68 - 180)        |
| Cardiomyopathy and myocarditis                | 96<br>(69 - 131)            | 8<br>(5 - 12)    | 4<br>(2 - 6)      | 11<br>(7 - 22)           | 26<br>(17 - 39)          | 47<br>(28 - 74)          |
| Atrial fibrillation and flutter               | 0<br>(0 - 0)                | --               | --                | 0<br>(0 - 0)             | 0<br>(0 - 0)             | 0<br>(0 - 0)             |
| Aortic aneurysm                               | 9<br>(7 - 15)               | --               | --                | 1<br>(1 - 3)             | 2<br>(2 - 5)             | 6<br>(4 - 8)             |
| Peripheral vascular disease                   | 1<br>(1 - 1)                | --               | --                | 0<br>(0 - 0)             | 0<br>(0 - 0)             | 0<br>(0 - 0)             |
| Endocarditis                                  | 57<br>(31 - 84)             | 2<br>(1 - 3)     | 1<br>(0 - 1)      | 2<br>(1 - 4)             | 29<br>(15 - 46)          | 22<br>(12 - 36)          |
| Other cardiovascular and circulatory diseases | 200<br>(57 - 273)           | 1<br>(0 - 1)     | 1<br>(0 - 1)      | 37<br>(12 - 53)          | 98<br>(24 - 138)         | 64<br>(19 - 90)          |
| Chronic respiratory diseases                  | 1,382<br>(893 - 1,728)      | 5<br>(3 - 8)     | 5<br>(4 - 7)      | 137<br>(91 - 184)        | 497<br>(295 - 653)       | 738<br>(488 - 921)       |

Web Table 31- Azerbaijan deaths with 95% UI by age, sex, and cause in 2013

| Cause                                               | Males, All Ages          | Males, 0-4 Years | Males, 5-14 Years | Males, 15-49 Years | Males, 50-69 Years | Males, 70-80 Years |
|-----------------------------------------------------|--------------------------|------------------|-------------------|--------------------|--------------------|--------------------|
| Chronic obstructive pulmonary disease               | 865<br>(538 - 1,147)     | 2<br>(1 - 4)     | 4<br>(3 - 5)      | 90<br>(59 - 123)   | 321<br>(188 - 441) | 448<br>(280 - 597) |
| Pneumoconiosis                                      | 152<br>(80 - 239)        | 0<br>(0 - 0)     | 0<br>(0 - 0)      | 15<br>(8 - 22)     | 58<br>(29 - 97)    | 79<br>(40 - 128)   |
| Silicosis                                           | 22<br>(12 - 34)          | 0<br>(0 - 0)     | 0<br>(0 - 0)      | 6<br>(3 - 8)       | 14<br>(7 - 23)     | 2<br>(1 - 4)       |
| Asbestosis                                          | 41<br>(22 - 64)          | 0<br>(0 - 0)     | 0<br>(0 - 0)      | 3<br>(2 - 4)       | 10<br>(5 - 16)     | 28<br>(15 - 46)    |
| Coal workers pneumoconiosis                         | 56<br>(29 - 92)          | 0<br>(0 - 0)     | 0<br>(0 - 0)      | 2<br>(1 - 4)       | 20<br>(10 - 34)    | 34<br>(17 - 58)    |
| Other pneumoconiosis                                | 33<br>(17 - 52)          | 0<br>(0 - 0)     | 0<br>(0 - 0)      | 4<br>(2 - 6)       | 15<br>(7 - 25)     | 14<br>(7 - 25)     |
| Asthma                                              | 55<br>(35 - 79)          | 0<br>(0 - 0)     | 0<br>(0 - 0)      | 6<br>(4 - 9)       | 19<br>(11 - 29)    | 30<br>(17 - 45)    |
| Interstitial lung disease and pulmonary sarcoidosis | 249<br>(134 - 510)       | 0<br>(0 - 0)     | 0<br>(0 - 0)      | 6<br>(3 - 15)      | 75<br>(38 - 164)   | 167<br>(83 - 337)  |
| Other chronic respiratory diseases                  | 61<br>(34 - 91)          | 3<br>(2 - 5)     | 1<br>(1 - 2)      | 20<br>(11 - 32)    | 23<br>(11 - 37)    | 14<br>(7 - 24)     |
| Cirrhosis                                           | 1,467<br>(1,178 - 1,791) | 2<br>(1 - 3)     | 6<br>(5 - 7)      | 368<br>(285 - 473) | 630<br>(488 - 796) | 461<br>(369 - 568) |
| Cirrhosis due to hepatitis B                        | 586<br>(403 - 799)       | 0<br>(0 - 0)     | 2<br>(1 - 3)      | 153<br>(94 - 216)  | 256<br>(169 - 364) | 174<br>(104 - 247) |
| Cirrhosis due to hepatitis C                        | 295<br>(156 - 466)       | 0<br>(0 - 0)     | 1<br>(0 - 2)      | 80<br>(37 - 132)   | 125<br>(57 - 217)  | 90<br>(43 - 141)   |
| Cirrhosis due to alcohol use                        | 462<br>(315 - 681)       | --               | --                | 85<br>(50 - 129)   | 203<br>(127 - 307) | 174<br>(119 - 248) |
| Cirrhosis due to other causes                       | 124<br>(72 - 192)        | 1<br>(1 - 2)     | 3<br>(2 - 4)      | 50<br>(29 - 79)    | 47<br>(24 - 78)    | 23<br>(11 - 38)    |
| Digestive diseases                                  | 360<br>(284 - 455)       | 3<br>(2 - 5)     | 6<br>(5 - 8)      | 114<br>(88 - 150)  | 137<br>(101 - 182) | 100<br>(76 - 124)  |
| Peptic ulcer disease                                | 152<br>(107 - 202)       | 0<br>(0 - 0)     | 1<br>(0 - 1)      | 51<br>(36 - 72)    | 61<br>(40 - 85)    | 38<br>(25 - 53)    |
| Gastritis and duodenitis                            | 1<br>(0 - 1)             | 0<br>(0 - 0)     | 0<br>(0 - 0)      | 0<br>(0 - 1)       | 0<br>(0 - 0)       | 0<br>(0 - 0)       |
| Appendicitis                                        | 11<br>(7 - 18)           | 0<br>(0 - 0)     | 1<br>(1 - 2)      | 6<br>(4 - 10)      | 2<br>(1 - 4)       | 1<br>(1 - 2)       |
| Paralytic ileus and intestinal obstruction          | 24<br>(13 - 37)          | 2<br>(1 - 3)     | 2<br>(1 - 3)      | 7<br>(3 - 11)      | 6<br>(3 - 10)      | 8<br>(4 - 13)      |
| Inguinal, femoral, and abdominal hernia             | 8<br>(4 - 12)            | 0<br>(0 - 0)     | 1<br>(0 - 1)      | 2<br>(1 - 3)       | 4<br>(2 - 7)       | 1<br>(0 - 1)       |
| Inflammatory bowel disease                          | 6<br>(4 - 12)            | 0<br>(0 - 0)     | 0<br>(0 - 0)      | 2<br>(1 - 5)       | 2<br>(1 - 4)       | 2<br>(1 - 3)       |
| Vascular intestinal disorders                       | 13<br>(5 - 28)           | 0<br>(0 - 0)     | 0<br>(0 - 0)      | 5<br>(2 - 10)      | 5<br>(2 - 11)      | 3<br>(1 - 7)       |
| Gallbladder and biliary diseases                    | 16<br>(10 - 32)          | 0<br>(0 - 0)     | 0<br>(0 - 0)      | 4<br>(2 - 8)       | 6<br>(3 - 12)      | 6<br>(4 - 12)      |
| Pancreatitis                                        | 22<br>(11 - 44)          | 0<br>(0 - 0)     | 0<br>(0 - 0)      | 10<br>(6 - 19)     | 8<br>(3 - 18)      | 3<br>(1 - 8)       |
| Other digestive diseases                            | 108<br>(57 - 144)        | 1<br>(0 - 2)     | 1<br>(1 - 2)      | 26<br>(13 - 37)    | 42<br>(22 - 60)    | 38<br>(20 - 52)    |
| Neurological disorders                              | 1,043<br>(832 - 1,282)   | 17<br>(9 - 36)   | 21<br>(12 - 32)   | 119<br>(74 - 174)  | 103<br>(74 - 135)  | 783<br>(617 - 964) |
| Alzheimer disease and other dementias               | 815<br>(644 - 999)       | --               | --                | 1<br>(0 - 2)       | 61<br>(42 - 83)    | 753<br>(590 - 926) |
| Parkinson disease                                   | 35<br>(14 - 52)          | --               | --                | 2<br>(1 - 4)       | 12<br>(4 - 19)     | 20<br>(7 - 35)     |
| Epilepsy                                            | 175<br>(103 - 261)       | 16<br>(8 - 35)   | 20<br>(11 - 31)   | 108<br>(63 - 161)  | 25<br>(11 - 40)    | 6<br>(3 - 9)       |
| Multiple sclerosis                                  | 6<br>(3 - 11)            | --               | --                | 3<br>(1 - 5)       | 1<br>(1 - 3)       | 2<br>(1 - 4)       |
| Other neurological disorders                        | 12<br>(8 - 16)           | 1<br>(1 - 1)     | 1<br>(0 - 1)      | 6<br>(4 - 8)       | 4<br>(2 - 5)       | 1<br>(1 - 2)       |
| Mental and substance use disorders                  | 188<br>(110 - 246)       | 1<br>(0 - 2)     | 0<br>(0 - 0)      | 142<br>(84 - 189)  | 40<br>(17 - 58)    | 5<br>(3 - 6)       |
| Schizophrenia                                       | 2<br>(1 - 4)             | --               | --                | 2<br>(1 - 4)       | 0<br>(0 - 0)       | 0<br>(0 - 0)       |
| Alcohol use disorders                               | 93<br>(36 - 128)         | --               | --                | 59<br>(23 - 84)    | 31<br>(10 - 47)    | 3<br>(1 - 4)       |
| Drug use disorders                                  | 92<br>(50 - 124)         | 1<br>(0 - 2)     | --                | 80<br>(43 - 111)   | 9<br>(5 - 13)      | 2<br>(1 - 2)       |
| Opioid use disorders                                | 20<br>(11 - 28)          | 0<br>(0 - 0)     | --                | 18<br>(9 - 25)     | 2<br>(1 - 3)       | 0<br>(0 - 1)       |
| Cocaine use disorders                               | 2<br>(1 - 3)             | 0<br>(0 - 0)     | --                | 2<br>(1 - 3)       | 0<br>(0 - 0)       | 0<br>(0 - 0)       |
| Amphetamine use disorders                           | 2<br>(1 - 3)             | 0<br>(0 - 0)     | --                | 2<br>(1 - 3)       | 0<br>(0 - 0)       | 0<br>(0 - 0)       |
| Other drug use disorders                            | 67<br>(37 - 92)          | 1<br>(0 - 1)     | --                | 59<br>(32 - 82)    | 7<br>(4 - 10)      | 1<br>(1 - 2)       |
| Eating disorders                                    | 0<br>(0 - 0)             | --               | 0<br>(0 - 0)      | 0<br>(0 - 0)       | --                 | --                 |

Web Table 31- Azerbaijan deaths with 95% UI by age, sex, and cause in 2013

| Cause                                               | Males, All Ages          | Males, 0-4 Years   | Males, 5-14 Years | Males, 15-49 Years | Males, 50-69 Years | Males, 70-80 Years |
|-----------------------------------------------------|--------------------------|--------------------|-------------------|--------------------|--------------------|--------------------|
| Anorexia nervosa                                    | 0<br>(0 - 0)             | --                 | 0<br>(0 - 0)      | 0<br>(0 - 0)       | --                 | --                 |
| Diabetes, urogenital, blood, and endocrine diseases | 1,429<br>(1,172 - 1,711) | 125<br>(82 - 186)  | 52<br>(40 - 66)   | 322<br>(255 - 408) | 502<br>(388 - 635) | 427<br>(343 - 518) |
| Diabetes mellitus                                   | 589<br>(466 - 731)       | 2<br>(1 - 2)       | 4<br>(3 - 5)      | 104<br>(78 - 135)  | 289<br>(222 - 378) | 189<br>(144 - 241) |
| Acute glomerulonephritis                            | 7<br>(5 - 12)            | 1<br>(0 - 2)       | 1<br>(0 - 1)      | 3<br>(2 - 5)       | 1<br>(1 - 2)       | 1<br>(1 - 2)       |
| Chronic kidney disease                              | 406<br>(309 - 539)       | 8<br>(5 - 13)      | 11<br>(8 - 14)    | 120<br>(87 - 164)  | 124<br>(87 - 175)  | 144<br>(108 - 192) |
| Chronic kidney disease due to diabetes mellitus     | 9<br>(5 - 24)            | 0<br>(0 - 1)       | 1<br>(1 - 3)      | 4<br>(2 - 9)       | 1<br>(0 - 1)       | 3<br>(1 - 10)      |
| Chronic kidney disease due to hypertension          | 80<br>(53 - 145)         | 4<br>(2 - 6)       | 2<br>(1 - 3)      | 24<br>(15 - 42)    | 7<br>(3 - 20)      | 43<br>(24 - 78)    |
| Chronic kidney disease due to glomerulonephritis    | 179<br>(120 - 235)       | 1<br>(1 - 2)       | 2<br>(1 - 3)      | 47<br>(32 - 66)    | 75<br>(51 - 104)   | 53<br>(31 - 75)    |
| Chronic kidney disease due to other causes          | 139<br>(86 - 212)        | 3<br>(1 - 7)       | 5<br>(3 - 8)      | 45<br>(26 - 71)    | 40<br>(21 - 74)    | 45<br>(23 - 77)    |
| Urinary diseases and male infertility               | 191<br>(123 - 243)       | 4<br>(3 - 7)       | 4<br>(2 - 5)      | 48<br>(30 - 64)    | 60<br>(37 - 82)    | 76<br>(48 - 101)   |
| Interstitial nephritis and urinary tract infections | 164<br>(97 - 210)        | 4<br>(2 - 6)       | 3<br>(1 - 4)      | 40<br>(24 - 55)    | 52<br>(30 - 73)    | 64<br>(35 - 88)    |
| Urolithiasis                                        | 2<br>(1 - 7)             | --                 | 0<br>(0 - 0)      | 1<br>(0 - 1)       | 1<br>(0 - 3)       | 1<br>(0 - 4)       |
| Other urinary diseases                              | 25<br>(15 - 45)          | 0<br>(0 - 1)       | 1<br>(1 - 2)      | 7<br>(4 - 11)      | 7<br>(4 - 13)      | 10<br>(5 - 21)     |
| Gynecological diseases                              | --                       | --                 | --                | --                 | --                 | --                 |
| Uterine fibroids                                    | --                       | --                 | --                | --                 | --                 | --                 |
| Polycystic ovarian syndrome                         | --                       | --                 | --                | --                 | --                 | --                 |
| Endometriosis                                       | --                       | --                 | --                | --                 | --                 | --                 |
| Genital prolapse                                    | --                       | --                 | --                | --                 | --                 | --                 |
| Other gynecological diseases                        | --                       | --                 | --                | --                 | --                 | --                 |
| Hemoglobinopathies and hemolytic anemias            | 96<br>(50 - 162)         | 45<br>(21 - 87)    | 16<br>(8 - 27)    | 18<br>(9 - 27)     | 10<br>(5 - 16)     | 8<br>(4 - 12)      |
| Thalassemias                                        | 66<br>(33 - 118)         | 41<br>(20 - 81)    | 15<br>(8 - 25)    | 10<br>(5 - 16)     | 0<br>(0 - 0)       | 0<br>(0 - 0)       |
| Sickle cell disorders                               | 2<br>(1 - 3)             | 0<br>(0 - 1)       | 0<br>(0 - 0)      | 1<br>(0 - 1)       | 1<br>(0 - 1)       | 0<br>(0 - 0)       |
| G6PD deficiency                                     | 1<br>(1 - 2)             | 0<br>(0 - 1)       | 0<br>(0 - 0)      | 0<br>(0 - 0)       | 0<br>(0 - 1)       | 0<br>(0 - 0)       |
| Other hemoglobinopathies and hemolytic anemias      | 27<br>(14 - 40)          | 3<br>(1 - 6)       | 1<br>(0 - 1)      | 7<br>(3 - 10)      | 9<br>(5 - 14)      | 8<br>(4 - 12)      |
| Endocrine, metabolic, blood, and immune disorders   | 139<br>(78 - 188)        | 66<br>(33 - 106)   | 17<br>(10 - 25)   | 29<br>(15 - 41)    | 17<br>(7 - 25)     | 10<br>(4 - 15)     |
| Musculoskeletal disorders                           | 7<br>(5 - 12)            | --                 | 2<br>(1 - 3)      | 2<br>(2 - 4)       | 2<br>(1 - 3)       | 1<br>(1 - 3)       |
| Rheumatoid arthritis                                | 1<br>(1 - 2)             | --                 | 0<br>(0 - 0)      | 0<br>(0 - 1)       | 0<br>(0 - 1)       | 0<br>(0 - 1)       |
| Other musculoskeletal disorders                     | 6<br>(5 - 9)             | --                 | 2<br>(1 - 3)      | 2<br>(1 - 3)       | 1<br>(1 - 2)       | 1<br>(1 - 2)       |
| Other non-communicable diseases                     | 534<br>(317 - 734)       | 495<br>(284 - 691) | 17<br>(11 - 25)   | 16<br>(12 - 22)    | 3<br>(2 - 4)       | 3<br>(2 - 3)       |
| Congenital anomalies                                | 516<br>(300 - 707)       | 478<br>(271 - 664) | 17<br>(11 - 25)   | 16<br>(11 - 21)    | 3<br>(2 - 3)       | 2<br>(2 - 3)       |
| Neural tube defects                                 | 18<br>(9 - 37)           | 18<br>(8 - 37)     | 0<br>(0 - 1)      | 0<br>(0 - 0)       | 0<br>(0 - 0)       | 0<br>(0 - 0)       |
| Congenital heart anomalies                          | 393<br>(215 - 552)       | 370<br>(196 - 529) | 12<br>(8 - 18)    | 10<br>(7 - 14)     | 1<br>(0 - 1)       | 0<br>(0 - 1)       |
| Cleft lip and cleft palate                          | 4<br>(2 - 11)            | 4<br>(2 - 11)      | --                | --                 | --                 | --                 |
| Down syndrome                                       | 22<br>(8 - 54)           | 21<br>(7 - 53)     | 1<br>(0 - 1)      | 0<br>(0 - 1)       | 0<br>(0 - 0)       | 0<br>(0 - 0)       |
| Chromosomal unbalanced rearrangements               | 1<br>(0 - 3)             | 1<br>(0 - 2)       | 0<br>(0 - 0)      | 0<br>(0 - 0)       | 0<br>(0 - 0)       | 0<br>(0 - 0)       |
| Other congenital anomalies                          | 77<br>(42 - 127)         | 65<br>(31 - 113)   | 4<br>(2 - 6)      | 5<br>(3 - 7)       | 2<br>(1 - 3)       | 2<br>(1 - 3)       |
| Skin and subcutaneous diseases                      | 2<br>(1 - 3)             | 0<br>(0 - 1)       | 0<br>(0 - 0)      | 1<br>(0 - 1)       | 1<br>(0 - 1)       | 0<br>(0 - 0)       |
| Cellulitis                                          | 0<br>(0 - 1)             | 0<br>(0 - 0)       | 0<br>(0 - 0)      | 0<br>(0 - 0)       | 0<br>(0 - 0)       | 0<br>(0 - 0)       |
| Pyoderma                                            | 1<br>(0 - 1)             | 0<br>(0 - 0)       | 0<br>(0 - 0)      | 0<br>(0 - 0)       | 0<br>(0 - 1)       | 0<br>(0 - 0)       |
| Decubitus ulcer                                     | 0<br>(0 - 1)             | 0<br>(0 - 0)       | 0<br>(0 - 0)      | 0<br>(0 - 0)       | 0<br>(0 - 0)       | 0<br>(0 - 0)       |

Web Table 31- Azerbaijan deaths with 95% UI by age, sex, and cause in 2013

| Cause                                           | Males, All Ages          | Males, 0-4 Years  | Males, 5-14 Years  | Males, 15-49 Years       | Males, 50-69 Years | Males, 70-80 Years |
|-------------------------------------------------|--------------------------|-------------------|--------------------|--------------------------|--------------------|--------------------|
| Other skin and subcutaneous diseases            | 0<br>(0 - 0)             | 0<br>(0 - 0)      | 0<br>(0 - 0)       | 0<br>(0 - 0)             | 0<br>(0 - 0)       | 0<br>(0 - 0)       |
| Sudden infant death syndrome                    | 17<br>(3 - 61)           | 17<br>(3 - 61)    | --                 | --                       | --                 | --                 |
| Injuries                                        | 2,547<br>(2,048 - 3,305) | 124<br>(80 - 194) | 150<br>(122 - 196) | 1,747<br>(1,384 - 2,269) | 393<br>(300 - 526) | 132<br>(103 - 184) |
| Transport injuries                              | 948<br>(691 - 1,292)     | 9<br>(5 - 14)     | 46<br>(31 - 66)    | 699<br>(509 - 945)       | 149<br>(100 - 227) | 45<br>(31 - 75)    |
| Road injuries                                   | 935<br>(681 - 1,269)     | 6<br>(3 - 10)     | 44<br>(29 - 62)    | 695<br>(505 - 939)       | 146<br>(98 - 222)  | 45<br>(31 - 74)    |
| Pedestrian road injuries                        | 43<br>(20 - 79)          | 1<br>(0 - 1)      | 6<br>(3 - 12)      | 11<br>(3 - 24)           | 10<br>(4 - 21)     | 14<br>(8 - 26)     |
| Cyclist road injuries                           | 67<br>(38 - 104)         | 1<br>(0 - 3)      | 11<br>(6 - 19)     | 27<br>(15 - 43)          | 23<br>(12 - 40)    | 5<br>(3 - 9)       |
| Motorcyclist road injuries                      | 207<br>(121 - 315)       | 0<br>(0 - 1)      | 3<br>(1 - 5)       | 183<br>(104 - 272)       | 20<br>(10 - 35)    | 2<br>(1 - 4)       |
| Motor vehicle road injuries                     | 612<br>(434 - 838)       | 3<br>(2 - 5)      | 23<br>(14 - 33)    | 471<br>(335 - 638)       | 93<br>(59 - 140)   | 23<br>(15 - 39)    |
| Other road injuries                             | 6<br>(3 - 13)            | 0<br>(0 - 0)      | 1<br>(0 - 2)       | 4<br>(2 - 9)             | 0<br>(0 - 2)       | 0<br>(0 - 1)       |
| Other transport injuries                        | 12<br>(7 - 27)           | 3<br>(2 - 5)      | 3<br>(1 - 5)       | 4<br>(2 - 10)            | 3<br>(1 - 8)       | 1<br>(0 - 1)       |
| Unintentional injuries                          | 969<br>(763 - 1,359)     | 114<br>(73 - 184) | 93<br>(69 - 137)   | 545<br>(404 - 795)       | 153<br>(116 - 206) | 63<br>(49 - 82)    |
| Falls                                           | 134<br>(89 - 245)        | 10<br>(5 - 19)    | 7<br>(5 - 12)      | 72<br>(46 - 139)         | 29<br>(18 - 55)    | 15<br>(10 - 29)    |
| Drowning                                        | 328<br>(213 - 615)       | 31<br>(14 - 78)   | 48<br>(29 - 94)    | 210<br>(128 - 386)       | 32<br>(20 - 60)    | 7<br>(4 - 13)      |
| Fire, heat, and hot substances                  | 195<br>(143 - 262)       | 37<br>(20 - 71)   | 14<br>(9 - 21)     | 100<br>(70 - 138)        | 32<br>(21 - 48)    | 12<br>(7 - 18)     |
| Poisonings                                      | 56<br>(40 - 90)          | 4<br>(2 - 7)      | 2<br>(1 - 4)       | 32<br>(22 - 58)          | 5<br>(7 - 18)      | 5<br>(3 - 8)       |
| Exposure to mechanical forces                   | 114<br>(86 - 152)        | 15<br>(8 - 27)    | 11<br>(7 - 18)     | 62<br>(41 - 88)          | 23<br>(14 - 34)    | 3<br>(2 - 4)       |
| Unintentional firearm injuries                  | 22<br>(13 - 32)          | 2<br>(1 - 3)      | 1<br>(0 - 2)       | 12<br>(6 - 20)           | 6<br>(3 - 10)      | 1<br>(0 - 1)       |
| Unintentional suffocation                       | 8<br>(4 - 21)            | 4<br>(1 - 13)     | 2<br>(1 - 4)       | 2<br>(1 - 6)             | 0<br>(0 - 0)       | 0<br>(0 - 0)       |
| Other exposure to mechanical forces             | 84<br>(60 - 119)         | 9<br>(4 - 18)     | 8<br>(4 - 14)      | 47<br>(31 - 71)          | 17<br>(10 - 28)    | 2<br>(1 - 3)       |
| Adverse effects of medical treatment            | 36<br>(16 - 60)          | 3<br>(1 - 7)      | 1<br>(0 - 1)       | 6<br>(3 - 10)            | 15<br>(5 - 28)     | 11<br>(4 - 22)     |
| Animal contact                                  | 9<br>(7 - 14)            | 1<br>(0 - 2)      | 1<br>(1 - 2)       | 4<br>(3 - 6)             | 2<br>(1 - 4)       | 1<br>(0 - 1)       |
| Venomous animal contact                         | 5<br>(3 - 7)             | 0<br>(0 - 1)      | 1<br>(0 - 1)       | 3<br>(2 - 5)             | 0<br>(0 - 1)       | 0<br>(0 - 0)       |
| Non-venomous animal contact                     | 5<br>(3 - 7)             | 1<br>(0 - 1)      | 1<br>(0 - 1)       | 1<br>(0 - 1)             | 2<br>(1 - 3)       | 1<br>(0 - 1)       |
| Foreign body                                    | 26<br>(15 - 49)          | 11<br>(5 - 20)    | 3<br>(2 - 6)       | 6<br>(3 - 12)            | 1<br>(0 - 1)       | 5<br>(3 - 12)      |
| Pulmonary aspiration and foreign body in airway | 23<br>(13 - 46)          | 10<br>(5 - 19)    | 3<br>(1 - 6)       | 5<br>(2 - 12)            | 0<br>(0 - 0)       | 5<br>(2 - 12)      |
| Foreign body in other body part                 | 3<br>(1 - 4)             | 1<br>(0 - 1)      | 0<br>(0 - 0)       | 1<br>(0 - 2)             | 1<br>(0 - 1)       | 0<br>(0 - 0)       |
| Other unintentional injuries                    | 73<br>(56 - 93)          | 1<br>(1 - 2)      | 6<br>(4 - 8)       | 53<br>(39 - 71)          | 8<br>(5 - 13)      | 4<br>(3 - 6)       |
| Self-harm and interpersonal violence            | 629<br>(460 - 983)       | 10<br>(1 - 2)     | 10<br>(6 - 17)     | 503<br>(362 - 780)       | 91<br>(61 - 144)   | 24<br>(15 - 48)    |
| Self-harm                                       | 280<br>(153 - 375)       | --                | 5<br>(2 - 8)       | 208<br>(108 - 284)       | 55<br>(32 - 77)    | 12<br>(8 - 18)     |
| Interpersonal violence                          | 349<br>(226 - 690)       | 1<br>(1 - 2)      | 5<br>(3 - 11)      | 294<br>(189 - 574)       | 36<br>(19 - 78)    | 12<br>(5 - 34)     |
| Assault by firearm                              | 223<br>(135 - 429)       | 0<br>(0 - 0)      | 1<br>(0 - 3)       | 187<br>(112 - 356)       | 31<br>(16 - 66)    | 4<br>(2 - 12)      |
| Assault by sharp object                         | 67<br>(31 - 168)         | 0<br>(0 - 1)      | 2<br>(1 - 4)       | 62<br>(27 - 156)         | 1<br>(0 - 2)       | 3<br>(1 - 9)       |
| Assault by other means                          | 59<br>(27 - 156)         | 1<br>(0 - 1)      | 2<br>(1 - 6)       | 46<br>(20 - 127)         | 5<br>(2 - 14)      | 5<br>(2 - 15)      |

Web Table 31- Azerbaijan deaths with 95% UI by age, sex, and cause in 2013

| Cause                                                             | Females, All Ages           | Females, 0-4 Years       | Females, 5-14 Years | Females, 15-49 Years     | Females, 50-69 Years     | Females, 70-80 Years        |
|-------------------------------------------------------------------|-----------------------------|--------------------------|---------------------|--------------------------|--------------------------|-----------------------------|
| All causes                                                        | 26,165<br>(23,743 - 29,558) | 2,443<br>(2,140 - 2,824) | 288<br>(265 - 315)  | 2,903<br>(2,351 - 3,541) | 5,886<br>(4,925 - 7,073) | 14,644<br>(13,817 - 16,153) |
| Communicable, maternal, neonatal, and nutritional diseases        | 2,642<br>(2,241 - 3,039)    | 1,900<br>(1,611 - 2,224) | 82<br>(66 - 99)     | 273<br>(206 - 333)       | 130<br>(90 - 166)        | 257<br>(140 - 358)          |
| HIV/AIDS and tuberculosis                                         | 153<br>(105 - 217)          | 1<br>(1 - 3)             | 2<br>(1 - 4)        | 98<br>(62 - 140)         | 35<br>(23 - 53)          | 16<br>(11 - 23)             |
| Tuberculosis                                                      | 121<br>(86 - 160)           | 1<br>(1 - 2)             | 2<br>(1 - 4)        | 72<br>(46 - 98)          | 30<br>(20 - 44)          | 16<br>(11 - 22)             |
| HIV/AIDS                                                          | 32<br>(9 - 78)              | 0<br>(0 - 1)             | 0<br>(0 - 0)        | 25<br>(7 - 57)           | 6<br>(1 - 17)            | 1<br>(0 - 2)                |
| HIV/AIDS resulting in mycobacterial infection                     | 2<br>(0 - 4)                | 0<br>(0 - 0)             | 0<br>(0 - 0)        | 1<br>(0 - 3)             | 0<br>(0 - 1)             | 0<br>(0 - 0)                |
| HIV/AIDS resulting in other diseases                              | 30<br>(8 - 75)              | 0<br>(0 - 1)             | 0<br>(0 - 0)        | 24<br>(7 - 54)           | 5<br>(1 - 16)            | 1<br>(0 - 2)                |
| Diarrhea, lower respiratory, and other common infectious diseases | 1,506<br>(1,232 - 1,787)    | 1,026<br>(825 - 1,270)   | 71<br>(56 - 87)     | 108<br>(74 - 140)        | 78<br>(47 - 106)         | 224<br>(110 - 323)          |
| Diarrheal diseases                                                | 94<br>(51 - 157)            | 84<br>(43 - 147)         | 2<br>(1 - 4)        | 4<br>(3 - 6)             | 2<br>(1 - 2)             | 2<br>(1 - 3)                |
| Intestinal infectious diseases                                    | 5<br>(2 - 10)               | 2<br>(0 - 5)             | 1<br>(0 - 2)        | 2<br>(0 - 4)             | 1<br>(0 - 2)             | 0<br>(0 - 2)                |
| Typhoid fever                                                     | 2<br>(1 - 5)                | 1<br>(0 - 1)             | 0<br>(0 - 1)        | 1<br>(0 - 2)             | 0<br>(0 - 1)             | 0<br>(0 - 0)                |
| Paratyphoid fever                                                 | 1<br>(0 - 1)                | 0<br>(0 - 1)             | 0<br>(0 - 0)        | 0<br>(0 - 1)             | 0<br>(0 - 0)             | 0<br>(0 - 0)                |
| Other intestinal infectious diseases                              | 2<br>(0 - 7)                | 1<br>(0 - 4)             | 0<br>(0 - 1)        | 1<br>(0 - 3)             | 0<br>(0 - 2)             | 0<br>(0 - 2)                |
| Lower respiratory infections                                      | 1,284<br>(1,023 - 1,541)    | 876<br>(678 - 1,099)     | 55<br>(41 - 71)     | 77<br>(49 - 103)         | 61<br>(34 - 85)          | 215<br>(99 - 313)           |
| Upper respiratory infections                                      | 1<br>(0 - 3)                | 0<br>(0 - 1)             | 0<br>(0 - 0)        | 0<br>(0 - 0)             | 0<br>(0 - 0)             | 1<br>(0 - 2)                |
| Otitis media                                                      | 1<br>(1 - 1)                | 0<br>(0 - 0)             | 0<br>(0 - 0)        | 0<br>(0 - 0)             | 0<br>(0 - 0)             | 0<br>(0 - 0)                |
| Meningitis                                                        | 41<br>(30 - 51)             | 18<br>(12 - 26)          | 6<br>(3 - 8)        | 12<br>(8 - 16)           | 3<br>(2 - 5)             | 2<br>(1 - 3)                |
| Pneumococcal meningitis                                           | 10<br>(7 - 13)              | 3<br>(2 - 5)             | 2<br>(1 - 2)        | 4<br>(2 - 5)             | 1<br>(1 - 2)             | 1<br>(0 - 1)                |
| H influenzae type B meningitis                                    | 14<br>(10 - 18)             | 9<br>(6 - 13)            | 2<br>(1 - 3)        | 2<br>(1 - 3)             | 1<br>(0 - 1)             | 0<br>(0 - 1)                |
| Meningococcal meningitis                                          | 9<br>(6 - 12)               | 4<br>(2 - 6)             | 1<br>(1 - 2)        | 3<br>(2 - 4)             | 1<br>(0 - 1)             | 1<br>(0 - 1)                |
| Other meningitis                                                  | 8<br>(6 - 11)               | 2<br>(1 - 3)             | 1<br>(0 - 1)        | 3<br>(2 - 5)             | 1<br>(1 - 2)             | 1<br>(0 - 1)                |
| Encephalitis                                                      | 69<br>(46 - 103)            | 41<br>(21 - 71)          | 6<br>(4 - 10)       | 11<br>(7 - 16)           | 10<br>(6 - 16)           | 1<br>(0 - 1)                |
| Diphtheria                                                        | 1<br>(0 - 6)                | 1<br>(0 - 5)             | 0<br>(0 - 2)        | 0<br>(0 - 1)             | 0<br>(0 - 1)             | --                          |
| Whooping cough                                                    | 3<br>(1 - 16)               | 3<br>(0 - 15)            | 0<br>(0 - 0)        | 0<br>(0 - 1)             | 0<br>(0 - 0)             | --                          |
| Tetanus                                                           | 1<br>(0 - 1)                | 0<br>(0 - 0)             | 0<br>(0 - 0)        | 0<br>(0 - 1)             | 0<br>(0 - 1)             | 0<br>(0 - 0)                |
| Measles                                                           | 0<br>(0 - 0)                | 0<br>(0 - 0)             | 0<br>(0 - 0)        | 0<br>(0 - 0)             | 0<br>(0 - 0)             | --                          |
| Varicella and herpes zoster                                       | 6<br>(2 - 17)               | 1<br>(0 - 4)             | 0<br>(0 - 1)        | 1<br>(0 - 4)             | 1<br>(0 - 2)             | 3<br>(0 - 13)               |
| Neglected tropical diseases and malaria                           | 6<br>(4 - 10)               | 2<br>(1 - 6)             | 1<br>(0 - 2)        | 2<br>(1 - 3)             | 1<br>(1 - 2)             | 1<br>(0 - 2)                |
| Malaria                                                           | 0<br>(0 - 0)                | 0<br>(0 - 0)             | 0<br>(0 - 0)        | 0<br>(0 - 0)             | 0<br>(0 - 0)             | 0<br>(0 - 0)                |
| Leishmaniasis                                                     | 1<br>(0 - 1)                | 0<br>(0 - 0)             | 0<br>(0 - 0)        | 0<br>(0 - 0)             | 0<br>(0 - 0)             | 0<br>(0 - 0)                |
| Visceral leishmaniasis                                            | 1<br>(0 - 1)                | 0<br>(0 - 0)             | 0<br>(0 - 0)        | 0<br>(0 - 0)             | 0<br>(0 - 0)             | 0<br>(0 - 0)                |
| Cysticercosis                                                     | 0<br>(0 - 0)                | 0<br>(0 - 0)             | 0<br>(0 - 0)        | 0<br>(0 - 0)             | 0<br>(0 - 0)             | 0<br>(0 - 0)                |
| Cystic echinococcosis                                             | 1<br>(1 - 1)                | 0<br>(0 - 0)             | 0<br>(0 - 0)        | 0<br>(0 - 0)             | 0<br>(0 - 0)             | 0<br>(0 - 0)                |
| Dengue                                                            | 0<br>(0 - 1)                | 0<br>(0 - 0)             | 0<br>(0 - 0)        | 0<br>(0 - 0)             | 0<br>(0 - 0)             | 0<br>(0 - 0)                |
| Rabies                                                            | 1<br>(1 - 2)                | 0<br>(0 - 0)             | 0<br>(0 - 0)        | 0<br>(0 - 1)             | 0<br>(0 - 0)             | 0<br>(0 - 0)                |
| Intestinal nematode infections                                    | 1<br>(0 - 4)                | 0<br>(0 - 3)             | 0<br>(0 - 1)        | 0<br>(0 - 1)             | 0<br>(0 - 1)             | 0<br>(0 - 1)                |
| Ascariasis                                                        | 1<br>(0 - 4)                | 0<br>(0 - 3)             | 0<br>(0 - 1)        | 0<br>(0 - 1)             | 0<br>(0 - 1)             | 0<br>(0 - 1)                |
| Other neglected tropical diseases                                 | 2<br>(1 - 4)                | 2<br>(1 - 4)             | 0<br>(0 - 0)        | 0<br>(0 - 0)             | 0<br>(0 - 0)             | 0<br>(0 - 0)                |
| Maternal disorders                                                | 40<br>(29 - 57)             | --                       | 0<br>(0 - 0)        | 40<br>(29 - 57)          | --                       | --                          |
| Maternal hemorrhage                                               | 7<br>(5 - 10)               | --                       | 0<br>(0 - 0)        | 7<br>(5 - 10)            | --                       | --                          |



Web Table 31- Azerbaijan deaths with 95% UI by age, sex, and cause in 2013

| Cause                                                            | Females, All Ages           | Females, 0-4 Years | Females, 5-14 Years | Females, 15-49 Years     | Females, 50-69 Years     | Females, 70-80 Years        |
|------------------------------------------------------------------|-----------------------------|--------------------|---------------------|--------------------------|--------------------------|-----------------------------|
| Maternal sepsis and other maternal infections                    | 5<br>(3 - 7)                | --                 | 0<br>(0 - 0)        | 5<br>(3 - 7)             | --                       | --                          |
| Maternal hypertensive disorders                                  | 4<br>(2 - 6)                | --                 | 0<br>(0 - 0)        | 4<br>(2 - 6)             | --                       | --                          |
| Maternal obstructed labor                                        | 4<br>(2 - 6)                | --                 | 0<br>(0 - 0)        | 4<br>(2 - 6)             | --                       | --                          |
| Maternal abortive outcome                                        | 4<br>(2 - 6)                | --                 | 0<br>(0 - 0)        | 4<br>(2 - 6)             | --                       | --                          |
| Indirect maternal deaths                                         | 5<br>(2 - 8)                | --                 | 0<br>(0 - 0)        | 5<br>(2 - 8)             | --                       | --                          |
| Late maternal deaths                                             | 6<br>(3 - 9)                | --                 | 0<br>(0 - 0)        | 6<br>(3 - 9)             | --                       | --                          |
| Maternal deaths aggravated by HIV/AIDS                           | 0<br>(0 - 0)                | --                 | --                  | 0<br>(0 - 0)             | --                       | --                          |
| Other maternal disorders                                         | 7<br>(4 - 10)               | --                 | 0<br>(0 - 0)        | 7<br>(4 - 10)            | --                       | --                          |
| Neonatal disorders                                               | 808<br>(643 - 966)          | 808<br>(643 - 966) | --                  | --                       | --                       | --                          |
| Neonatal preterm birth complications                             | 189<br>(66 - 368)           | 189<br>(66 - 368)  | --                  | --                       | --                       | --                          |
| Neonatal encephalopathy due to birth asphyxia and trauma         | 335<br>(177 - 512)          | 335<br>(177 - 512) | --                  | --                       | --                       | --                          |
| Neonatal sepsis and other neonatal infections                    | 16<br>(2 - 47)              | 16<br>(2 - 47)     | --                  | --                       | --                       | --                          |
| Hemolytic disease and other neonatal jaundice                    | 5<br>(1 - 12)               | 5<br>(1 - 12)      | --                  | --                       | --                       | --                          |
| Other neonatal disorders                                         | 263<br>(129 - 427)          | 263<br>(129 - 427) | --                  | --                       | --                       | --                          |
| Nutritional deficiencies                                         | 46<br>(36 - 60)             | 13<br>(8 - 22)     | 3<br>(2 - 4)        | 14<br>(10 - 19)          | 7<br>(5 - 10)            | 9<br>(6 - 13)               |
| Protein-energy malnutrition                                      | 3<br>(1 - 6)                | 1<br>(0 - 2)       | 0<br>(0 - 0)        | 1<br>(0 - 2)             | 1<br>(0 - 2)             | 0<br>(0 - 1)                |
| Iodine deficiency                                                | 1<br>(0 - 4)                | 0<br>(0 - 4)       | 0<br>(0 - 1)        | 0<br>(0 - 0)             | 0<br>(0 - 1)             | 0<br>(0 - 0)                |
| Iron-deficiency anemia                                           | 42<br>(32 - 55)             | 12<br>(6 - 20)     | 2<br>(2 - 3)        | 13<br>(9 - 18)           | 6<br>(4 - 8)             | 9<br>(6 - 12)               |
| Other nutritional deficiencies                                   | 1<br>(0 - 1)                | 0<br>(0 - 0)       | 0<br>(0 - 0)        | 0<br>(0 - 0)             | 0<br>(0 - 0)             | 0<br>(0 - 0)                |
| Other communicable, maternal, neonatal, and nutritional diseases | 82<br>(54 - 123)            | 50<br>(24 - 90)    | 5<br>(3 - 8)        | 12<br>(8 - 17)           | 9<br>(5 - 13)            | 7<br>(5 - 11)               |
| Sexually transmitted diseases excluding HIV                      | 30<br>(9 - 59)              | 24<br>(5 - 53)     | 2<br>(0 - 4)        | 1<br>(1 - 2)             | 1<br>(1 - 2)             | 1<br>(0 - 2)                |
| Syphilis                                                         | 28<br>(7 - 58)              | 24<br>(5 - 53)     | 2<br>(0 - 4)        | 1<br>(0 - 1)             | 1<br>(0 - 1)             | 1<br>(0 - 1)                |
| Chlamydial infection                                             | 0<br>(0 - 1)                | --                 | 0<br>(0 - 0)        | 0<br>(0 - 0)             | 0<br>(0 - 0)             | 0<br>(0 - 0)                |
| Gonococcal infection                                             | 1<br>(0 - 1)                | --                 | 0<br>(0 - 0)        | 0<br>(0 - 0)             | 0<br>(0 - 0)             | 0<br>(0 - 0)                |
| Other sexually transmitted diseases                              | 0<br>(0 - 1)                | --                 | 0<br>(0 - 0)        | 0<br>(0 - 0)             | 0<br>(0 - 0)             | 0<br>(0 - 0)                |
| Hepatitis                                                        | 21<br>(16 - 29)             | 4<br>(2 - 9)       | 2<br>(1 - 3)        | 8<br>(5 - 12)            | 4<br>(2 - 6)             | 4<br>(2 - 7)                |
| Acute hepatitis A                                                | 3<br>(1 - 6)                | 1<br>(0 - 4)       | 1<br>(0 - 1)        | 1<br>(0 - 2)             | 0<br>(0 - 0)             | 0<br>(0 - 0)                |
| Acute hepatitis B                                                | 13<br>(9 - 19)              | 3<br>(1 - 6)       | 1<br>(0 - 1)        | 3<br>(2 - 6)             | 3<br>(2 - 5)             | 3<br>(2 - 6)                |
| Acute hepatitis C                                                | 2<br>(0 - 4)                | --                 | 0<br>(0 - 1)        | 1<br>(0 - 2)             | 0<br>(0 - 1)             | 1<br>(0 - 1)                |
| Acute hepatitis E                                                | 4<br>(2 - 7)                | 0<br>(0 - 0)       | 0<br>(0 - 0)        | 3<br>(2 - 6)             | 0<br>(0 - 1)             | 0<br>(0 - 0)                |
| Other infectious diseases                                        | 31<br>(18 - 64)             | 21<br>(9 - 53)     | 2<br>(1 - 3)        | 2<br>(1 - 4)             | 4<br>(2 - 8)             | 2<br>(1 - 5)                |
| Non-communicable diseases                                        | 22,843<br>(20,669 - 26,019) | 479<br>(331 - 645) | 148<br>(130 - 166)  | 2,311<br>(1,847 - 2,832) | 5,611<br>(4,696 - 6,750) | 14,294<br>(13,507 - 15,804) |
| Neoplasms                                                        | 3,047<br>(2,523 - 3,801)    | 24<br>(16 - 34)    | 47<br>(39 - 57)     | 904<br>(710 - 1,121)     | 1,286<br>(1,036 - 1,627) | 786<br>(688 - 1,000)        |
| Esophageal cancer                                                | 153<br>(118 - 200)          | --                 | --                  | 24<br>(17 - 34)          | 65<br>(48 - 88)          | 64<br>(48 - 85)             |
| Stomach cancer                                                   | 372<br>(298 - 488)          | --                 | --                  | 56<br>(41 - 75)          | 148<br>(111 - 200)       | 168<br>(131 - 230)          |
| Liver cancer                                                     | 231<br>(174 - 309)          | --                 | 1<br>(0 - 1)        | 36<br>(23 - 53)          | 96<br>(66 - 134)         | 98<br>(66 - 142)            |
| Liver cancer due to hepatitis B                                  | 68<br>(47 - 94)             | --                 | 0<br>(0 - 0)        | 13<br>(8 - 20)           | 32<br>(21 - 48)          | 23<br>(14 - 34)             |
| Liver cancer due to hepatitis C                                  | 81<br>(58 - 110)            | --                 | 0<br>(0 - 0)        | 11<br>(7 - 17)           | 32<br>(22 - 48)          | 37<br>(24 - 55)             |
| Liver cancer due to alcohol use                                  | 42<br>(23 - 67)             | --                 | --                  | 4<br>(2 - 7)             | 15<br>(8 - 24)           | 24<br>(12 - 41)             |
| Liver cancer due to other causes                                 | 40<br>(25 - 63)             | --                 | 0<br>(0 - 1)        | 9<br>(5 - 13)            | 16<br>(9 - 27)           | 14<br>(8 - 27)              |

Web Table 31- Azerbaijan deaths with 95% UI by age, sex, and cause in 2013

| Cause                                         | Females, All Ages           | Females, 0-4 Years | Females, 5-14 Years | Females, 15-49 Years | Females, 50-69 Years     | Females, 70-80 Years       |
|-----------------------------------------------|-----------------------------|--------------------|---------------------|----------------------|--------------------------|----------------------------|
| Larynx cancer                                 | 25<br>(13 - 45)             | --                 | --                  | 8<br>(4 - 14)        | 11<br>(5 - 20)           | 7<br>(3 - 12)              |
| Tracheal, bronchus and lung cancer            | 248<br>(196 - 335)          | --                 | --                  | 49<br>(35 - 69)      | 125<br>(94 - 172)        | 74<br>(59 - 103)           |
| Breast cancer                                 | 583<br>(446 - 735)          | --                 | --                  | 254<br>(185 - 329)   | 260<br>(192 - 341)       | 69<br>(55 - 95)            |
| Cervical cancer                               | 183<br>(138 - 236)          | --                 | --                  | 70<br>(46 - 93)      | 84<br>(60 - 115)         | 29<br>(23 - 42)            |
| Uterine cancer                                | 77<br>(55 - 124)            | --                 | --                  | 16<br>(10 - 26)      | 40<br>(27 - 67)          | 21<br>(15 - 35)            |
| Prostate cancer                               | --                          | --                 | --                  | --                   | --                       | --                         |
| Colon and rectum cancer                       | 226<br>(183 - 281)          | --                 | --                  | 61<br>(47 - 77)      | 102<br>(78 - 130)        | 63<br>(51 - 82)            |
| Lip and oral cavity cancer                    | 22<br>(14 - 30)             | --                 | --                  | 7<br>(4 - 11)        | 8<br>(5 - 12)            | 7<br>(4 - 10)              |
| Nasopharynx cancer                            | 3<br>(2 - 5)                | --                 | 0<br>(0 - 0)        | 2<br>(1 - 3)         | 1<br>(0 - 1)             | 0<br>(0 - 1)               |
| Other pharynx cancer                          | 4<br>(3 - 6)                | --                 | --                  | 1<br>(1 - 2)         | 2<br>(2 - 4)             | 1<br>(0 - 1)               |
| Gallbladder and biliary tract cancer          | 78<br>(53 - 104)            | --                 | --                  | 13<br>(8 - 18)       | 39<br>(26 - 54)          | 27<br>(16 - 39)            |
| Pancreatic cancer                             | 122<br>(98 - 156)           | --                 | --                  | 15<br>(11 - 20)      | 53<br>(40 - 71)          | 54<br>(41 - 72)            |
| Malignant skin melanoma                       | 24<br>(18 - 32)             | --                 | --                  | 8<br>(6 - 11)        | 11<br>(8 - 16)           | 5<br>(3 - 7)               |
| Non-melanoma skin cancer                      | 4<br>(2 - 7)                | --                 | --                  | 1<br>(0 - 1)         | 2<br>(1 - 3)             | 2<br>(1 - 4)               |
| Ovarian cancer                                | 145<br>(102 - 201)          | --                 | --                  | 54<br>(36 - 79)      | 70<br>(47 - 101)         | 20<br>(13 - 30)            |
| Testicular cancer                             | --                          | --                 | --                  | --                   | --                       | --                         |
| Kidney cancer                                 | 71<br>(52 - 98)             | 1<br>(1 - 3)       | 3<br>(2 - 5)        | 17<br>(11 - 25)      | 31<br>(20 - 47)          | 18<br>(12 - 28)            |
| Bladder cancer                                | 20<br>(14 - 30)             | --                 | --                  | 4<br>(2 - 6)         | 8<br>(5 - 12)            | 9<br>(6 - 13)              |
| Brain and nervous system cancer               | 152<br>(115 - 197)          | 2<br>(1 - 3)       | 8<br>(5 - 12)       | 74<br>(53 - 100)     | 54<br>(36 - 76)          | 14<br>(10 - 20)            |
| Thyroid cancer                                | 20<br>(12 - 27)             | --                 | 0<br>(0 - 0)        | 6<br>(3 - 8)         | 8<br>(5 - 12)            | 6<br>(4 - 9)               |
| Mesothelioma                                  | 2<br>(1 - 3)                | --                 | --                  | 0<br>(0 - 0)         | 0<br>(0 - 0)             | 1<br>(1 - 2)               |
| Hodgkin lymphoma                              | 8<br>(5 - 12)               | 0<br>(0 - 0)       | 0<br>(0 - 1)        | 6<br>(3 - 10)        | 1<br>(1 - 2)             | 0<br>(0 - 1)               |
| Non-Hodgkin lymphoma                          | 51<br>(33 - 69)             | 1<br>(0 - 2)       | 2<br>(1 - 4)        | 20<br>(13 - 29)      | 18<br>(11 - 26)          | 10<br>(6 - 14)             |
| Multiple myeloma                              | 7<br>(5 - 9)                | --                 | --                  | 3<br>(2 - 5)         | 3<br>(2 - 4)             | 1<br>(1 - 1)               |
| Leukemia                                      | 121<br>(98 - 149)           | 11<br>(5 - 16)     | 23<br>(17 - 30)     | 59<br>(45 - 75)      | 22<br>(17 - 30)          | 7<br>(5 - 9)               |
| Other neoplasms                               | 93<br>(62 - 122)            | 9<br>(5 - 15)      | 10<br>(6 - 14)      | 39<br>(25 - 55)      | 25<br>(16 - 36)          | 10<br>(7 - 15)             |
| Cardiovascular diseases                       | 14,639<br>(13,025 - 16,724) | 10<br>(5 - 17)     | 20<br>(14 - 26)     | 763<br>(576 - 988)   | 3,081<br>(2,514 - 3,806) | 10,765<br>(9,918 - 11,991) |
| Rheumatic heart disease                       | 77<br>(48 - 106)            | 0<br>(0 - 0)       | 3<br>(2 - 4)        | 36<br>(22 - 52)      | 23<br>(13 - 33)          | 15<br>(10 - 23)            |
| Ischemic heart disease                        | 9,106<br>(7,927 - 10,930)   | 1<br>(0 - 3)       | 8<br>(6 - 11)       | 424<br>(315 - 573)   | 1,781<br>(1,419 - 2,282) | 6,892<br>(6,107 - 8,128)   |
| Cerebrovascular disease                       | 4,707<br>(3,380 - 5,690)    | 1<br>(0 - 1)       | 4<br>(2 - 5)        | 239<br>(162 - 317)   | 1,088<br>(765 - 1,388)   | 3,376<br>(2,420 - 4,042)   |
| Ischemic stroke                               | 1,759<br>(1,131 - 2,254)    | 0<br>(0 - 0)       | 0<br>(0 - 0)        | 32<br>(19 - 49)      | 242<br>(149 - 335)       | 1,485<br>(958 - 1,898)     |
| Hemorrhagic stroke                            | 2,949<br>(2,070 - 3,649)    | 0<br>(0 - 1)       | 3<br>(2 - 5)        | 207<br>(141 - 275)   | 846<br>(586 - 1,079)     | 1,891<br>(1,295 - 2,369)   |
| Hypertensive heart disease                    | 449<br>(315 - 671)          | 0<br>(0 - 0)       | 0<br>(0 - 0)        | 15<br>(9 - 23)       | 69<br>(45 - 101)         | 365<br>(237 - 572)         |
| Cardiomyopathy and myocarditis                | 87<br>(59 - 121)            | 7<br>(3 - 13)      | 4<br>(2 - 6)        | 12<br>(7 - 17)       | 25<br>(16 - 36)          | 39<br>(22 - 67)            |
| Atrial fibrillation and flutter               | 0<br>(0 - 1)                | --                 | --                  | 0<br>(0 - 0)         | 0<br>(0 - 0)             | 0<br>(0 - 0)               |
| Aortic aneurysm                               | 7<br>(4 - 12)               | --                 | --                  | 2<br>(1 - 3)         | 0<br>(0 - 0)             | 5<br>(3 - 9)               |
| Peripheral vascular disease                   | 1<br>(0 - 1)                | --                 | --                  | 0<br>(0 - 0)         | 0<br>(0 - 0)             | 0<br>(0 - 0)               |
| Endocarditis                                  | 37<br>(18 - 55)             | 0<br>(0 - 0)       | 0<br>(0 - 0)        | 11<br>(5 - 17)       | 3<br>(1 - 4)             | 23<br>(10 - 37)            |
| Other cardiovascular and circulatory diseases | 167<br>(51 - 236)           | 1<br>(0 - 1)       | 1<br>(0 - 2)        | 25<br>(11 - 37)      | 92<br>(19 - 138)         | 49<br>(18 - 72)            |
| Chronic respiratory diseases                  | 880<br>(720 - 1,139)        | 2<br>(2 - 4)       | 3<br>(3 - 5)        | 77<br>(56 - 101)     | 185<br>(141 - 240)       | 612<br>(490 - 811)         |

Web Table 31- Azerbaijan deaths with 95% UI by age, sex, and cause in 2013

| Cause                                               | Females, All Ages      | Females, 0-4 Years | Females, 5-14 Years | Females, 15-49 Years | Females, 50-69 Years | Females, 70-80 Years   |
|-----------------------------------------------------|------------------------|--------------------|---------------------|----------------------|----------------------|------------------------|
| Chronic obstructive pulmonary disease               | 551<br>(372 - 746)     | 2<br>(1 - 3)       | 1<br>(0 - 1)        | 48<br>(33 - 65)      | 149<br>(107 - 197)   | 353<br>(207 - 502)     |
| Pneumoconiosis                                      | 1<br>(1 - 2)           | 0<br>(0 - 0)       | 0<br>(0 - 1)        | 0<br>(0 - 1)         | 0<br>(0 - 0)         | 0<br>(0 - 0)           |
| Silicosis                                           | 0<br>(0 - 0)           | 0<br>(0 - 0)       | 0<br>(0 - 0)        | 0<br>(0 - 0)         | 0<br>(0 - 0)         | 0<br>(0 - 0)           |
| Asbestosis                                          | 0<br>(0 - 0)           | 0<br>(0 - 0)       | 0<br>(0 - 0)        | 0<br>(0 - 0)         | 0<br>(0 - 0)         | 0<br>(0 - 0)           |
| Coal workers pneumoconiosis                         | 0<br>(0 - 0)           | 0<br>(0 - 0)       | 0<br>(0 - 0)        | 0<br>(0 - 0)         | 0<br>(0 - 0)         | 0<br>(0 - 0)           |
| Other pneumoconiosis                                | 1<br>(1 - 1)           | 0<br>(0 - 0)       | 0<br>(0 - 0)        | 0<br>(0 - 0)         | 0<br>(0 - 0)         | 0<br>(0 - 0)           |
| Asthma                                              | 63<br>(28 - 99)        | 0<br>(0 - 0)       | 0<br>(0 - 0)        | 7<br>(4 - 12)        | 16<br>(7 - 26)       | 40<br>(16 - 68)        |
| Interstitial lung disease and pulmonary sarcoidosis | 213<br>(103 - 414)     | 0<br>(0 - 0)       | 1<br>(1 - 3)        | 2<br>(1 - 6)         | 16<br>(6 - 40)       | 193<br>(94 - 371)      |
| Other chronic respiratory diseases                  | 52<br>(32 - 80)        | 1<br>(0 - 1)       | 1<br>(0 - 1)        | 19<br>(12 - 28)      | 5<br>(3 - 8)         | 26<br>(14 - 46)        |
| Cirrhosis                                           | 1,093<br>(909 - 1,376) | 1<br>(0 - 1)       | 4<br>(3 - 5)        | 148<br>(110 - 187)   | 374<br>(290 - 487)   | 566<br>(462 - 718)     |
| Cirrhosis due to hepatitis B                        | 489<br>(308 - 655)     | 0<br>(0 - 0)       | 1<br>(1 - 2)        | 66<br>(41 - 93)      | 164<br>(101 - 230)   | 257<br>(155 - 366)     |
| Cirrhosis due to hepatitis C                        | 374<br>(229 - 571)     | 0<br>(0 - 0)       | 0<br>(0 - 1)        | 46<br>(21 - 75)      | 140<br>(78 - 218)    | 188<br>(114 - 303)     |
| Cirrhosis due to alcohol use                        | 131<br>(66 - 210)      | --                 | --                  | 9<br>(4 - 17)        | 37<br>(18 - 64)      | 85<br>(39 - 140)       |
| Cirrhosis due to other causes                       | 99<br>(53 - 152)       | 1<br>(0 - 1)       | 3<br>(2 - 3)        | 27<br>(15 - 42)      | 33<br>(14 - 56)      | 36<br>(16 - 60)        |
| Digestive diseases                                  | 220<br>(179 - 273)     | 1<br>(1 - 2)       | 3<br>(3 - 4)        | 52<br>(39 - 71)      | 73<br>(55 - 95)      | 90<br>(71 - 112)       |
| Peptic ulcer disease                                | 56<br>(41 - 74)        | 0<br>(0 - 0)       | 1<br>(0 - 1)        | 14<br>(10 - 20)      | 17<br>(11 - 24)      | 24<br>(17 - 34)        |
| Gastritis and duodenitis                            | 1<br>(0 - 1)           | 0<br>(0 - 0)       | 0<br>(0 - 0)        | 0<br>(0 - 1)         | 0<br>(0 - 0)         | 0<br>(0 - 0)           |
| Appendicitis                                        | 7<br>(5 - 11)          | 0<br>(0 - 0)       | 1<br>(1 - 2)        | 4<br>(2 - 6)         | 2<br>(1 - 3)         | 1<br>(0 - 2)           |
| Paralytic ileus and intestinal obstruction          | 24<br>(13 - 38)        | 1<br>(0 - 1)       | 1<br>(0 - 1)        | 5<br>(2 - 8)         | 8<br>(4 - 13)        | 10<br>(5 - 17)         |
| Inguinal, femoral, and abdominal hernia             | 3<br>(2 - 7)           | 0<br>(0 - 0)       | 0<br>(0 - 0)        | 0<br>(0 - 1)         | 1<br>(1 - 3)         | 1<br>(0 - 3)           |
| Inflammatory bowel disease                          | 3<br>(2 - 6)           | 0<br>(0 - 0)       | 0<br>(0 - 0)        | 1<br>(1 - 2)         | 1<br>(1 - 3)         | 0<br>(0 - 1)           |
| Vascular intestinal disorders                       | 3<br>(1 - 7)           | 0<br>(0 - 0)       | 0<br>(0 - 0)        | 0<br>(0 - 1)         | 2<br>(1 - 5)         | 0<br>(0 - 1)           |
| Gallbladder and biliary diseases                    | 25<br>(18 - 38)        | 0<br>(0 - 0)       | 0<br>(0 - 0)        | 6<br>(4 - 9)         | 8<br>(5 - 12)        | 10<br>(7 - 17)         |
| Pancreatitis                                        | 9<br>(4 - 16)          | 0<br>(0 - 0)       | 0<br>(0 - 0)        | 3<br>(1 - 6)         | 3<br>(1 - 5)         | 3<br>(1 - 5)           |
| Other digestive diseases                            | 89<br>(68 - 114)       | 0<br>(0 - 1)       | 0<br>(0 - 0)        | 18<br>(13 - 26)      | 31<br>(21 - 42)      | 39<br>(28 - 53)        |
| Neurological disorders                              | 1,206<br>(959 - 1,538) | 9<br>(4 - 19)      | 14<br>(9 - 21)      | 67<br>(41 - 100)     | 89<br>(46 - 122)     | 1,027<br>(791 - 1,323) |
| Alzheimer disease and other dementias               | 984<br>(749 - 1,319)   | --                 | --                  | 0<br>(0 - 1)         | 49<br>(33 - 71)      | 935<br>(701 - 1,262)   |
| Parkinson disease                                   | 120<br>(23 - 190)      | --                 | --                  | 6<br>(1 - 9)         | 29<br>(2 - 49)       | 85<br>(20 - 144)       |
| Epilepsy                                            | 91<br>(54 - 140)       | 8<br>(4 - 18)      | 14<br>(8 - 20)      | 56<br>(32 - 88)      | 8<br>(4 - 12)        | 6<br>(3 - 9)           |
| Multiple sclerosis                                  | 4<br>(2 - 9)           | --                 | --                  | 2<br>(1 - 5)         | 1<br>(1 - 2)         | 1<br>(0 - 2)           |
| Other neurological disorders                        | 6<br>(5 - 8)           | 1<br>(1 - 1)       | 1<br>(0 - 1)        | 2<br>(2 - 3)         | 2<br>(1 - 2)         | 1<br>(1 - 1)           |
| Mental and substance use disorders                  | 54<br>(31 - 75)        | 1<br>(1 - 2)       | 0<br>(0 - 0)        | 31<br>(18 - 45)      | 16<br>(7 - 24)       | 5<br>(3 - 8)           |
| Schizophrenia                                       | 2<br>(1 - 3)           | --                 | --                  | 2<br>(1 - 3)         | 0<br>(0 - 0)         | 0<br>(0 - 0)           |
| Alcohol use disorders                               | 30<br>(9 - 49)         | --                 | --                  | 17<br>(5 - 28)       | 11<br>(3 - 19)       | 2<br>(1 - 3)           |
| Drug use disorders                                  | 21<br>(16 - 27)        | 1<br>(1 - 2)       | --                  | 12<br>(8 - 17)       | 4<br>(3 - 6)         | 4<br>(2 - 5)           |
| Opioid use disorders                                | 4<br>(3 - 6)           | 0<br>(0 - 0)       | --                  | 3<br>(2 - 4)         | 1<br>(0 - 1)         | 1<br>(0 - 1)           |
| Cocaine use disorders                               | 1<br>(1 - 1)           | 0<br>(0 - 0)       | --                  | 0<br>(0 - 1)         | 0<br>(0 - 0)         | 0<br>(0 - 0)           |
| Amphetamine use disorders                           | 1<br>(1 - 1)           | 0<br>(0 - 0)       | --                  | 0<br>(0 - 1)         | 0<br>(0 - 0)         | 0<br>(0 - 0)           |
| Other drug use disorders                            | 15<br>(11 - 20)        | 1<br>(0 - 1)       | --                  | 9<br>(6 - 12)        | 3<br>(2 - 5)         | 3<br>(2 - 4)           |
| Eating disorders                                    | 1<br>(0 - 1)           | --                 | 0<br>(0 - 0)        | 1<br>(0 - 1)         | --                   | --                     |

Web Table 31- Azerbaijan deaths with 95% UI by age, sex, and cause in 2013

| Cause                                               | Females, All Ages        | Females, 0-4 Years | Females, 5-14 Years | Females, 15-49 Years | Females, 50-69 Years | Females, 70-80 Years |
|-----------------------------------------------------|--------------------------|--------------------|---------------------|----------------------|----------------------|----------------------|
| Anorexia nervosa                                    | 1<br>(0 - 1)             | --                 | 0<br>(0 - 0)        | 1<br>(0 - 1)         | --                   | --                   |
| Diabetes, urogenital, blood, and endocrine diseases | 1,298<br>(1,081 - 1,603) | 71<br>(50 - 101)   | 39<br>(31 - 48)     | 253<br>(197 - 316)   | 502<br>(390 - 642)   | 434<br>(358 - 538)   |
| Diabetes mellitus                                   | 696<br>(558 - 898)       | 1<br>(1 - 2)       | 5<br>(3 - 8)        | 85<br>(61 - 109)     | 339<br>(257 - 449)   | 266<br>(207 - 339)   |
| Acute glomerulonephritis                            | 4<br>(3 - 7)             | 1<br>(0 - 2)       | 1<br>(0 - 1)        | 2<br>(1 - 3)         | 1<br>(0 - 1)         | 0<br>(0 - 1)         |
| Chronic kidney disease                              | 292<br>(227 - 405)       | 4<br>(3 - 8)       | 8<br>(6 - 11)       | 87<br>(63 - 125)     | 98<br>(71 - 141)     | 95<br>(70 - 134)     |
| Chronic kidney disease due to diabetes mellitus     | 4<br>(3 - 6)             | 0<br>(0 - 0)       | 1<br>(1 - 1)        | 1<br>(1 - 2)         | 1<br>(1 - 3)         | 0<br>(0 - 0)         |
| Chronic kidney disease due to hypertension          | 66<br>(40 - 105)         | 1<br>(1 - 2)       | 2<br>(1 - 3)        | 10<br>(5 - 18)       | 24<br>(14 - 38)      | 29<br>(16 - 48)      |
| Chronic kidney disease due to glomerulonephritis    | 104<br>(77 - 145)        | 1<br>(1 - 2)       | 1<br>(1 - 2)        | 32<br>(23 - 45)      | 36<br>(23 - 55)      | 33<br>(22 - 48)      |
| Chronic kidney disease due to other causes          | 119<br>(77 - 177)        | 2<br>(1 - 5)       | 4<br>(3 - 7)        | 44<br>(27 - 68)      | 36<br>(19 - 59)      | 33<br>(17 - 53)      |
| Urinary diseases and male infertility               | 152<br>(105 - 195)       | 3<br>(2 - 6)       | 4<br>(2 - 5)        | 45<br>(29 - 61)      | 47<br>(30 - 65)      | 53<br>(33 - 72)      |
| Interstitial nephritis and urinary tract infections | 137<br>(92 - 176)        | 3<br>(2 - 6)       | 3<br>(2 - 5)        | 41<br>(26 - 56)      | 44<br>(28 - 60)      | 46<br>(27 - 64)      |
| Urolithiasis                                        | 5<br>(3 - 9)             | --                 | 0<br>(0 - 0)        | 1<br>(0 - 2)         | 1<br>(0 - 1)         | 3<br>(1 - 7)         |
| Other urinary diseases                              | 10<br>(6 - 17)           | 0<br>(0 - 0)       | 0<br>(0 - 1)        | 3<br>(1 - 5)         | 3<br>(1 - 5)         | 4<br>(2 - 8)         |
| Gynecological diseases                              | 0<br>(0 - 1)             | --                 | --                  | 0<br>(0 - 0)         | 0<br>(0 - 0)         | 0<br>(0 - 0)         |
| Uterine fibroids                                    | 0<br>(0 - 0)             | --                 | --                  | 0<br>(0 - 0)         | 0<br>(0 - 0)         | 0<br>(0 - 0)         |
| Polycystic ovarian syndrome                         | 0<br>(0 - 0)             | --                 | --                  | 0<br>(0 - 0)         | 0<br>(0 - 0)         | --                   |
| Endometriosis                                       | 0<br>(0 - 0)             | --                 | --                  | 0<br>(0 - 0)         | 0<br>(0 - 0)         | --                   |
| Genital prolapse                                    | 0<br>(0 - 0)             | --                 | --                  | 0<br>(0 - 0)         | 0<br>(0 - 0)         | 0<br>(0 - 0)         |
| Other gynecological diseases                        | 0<br>(0 - 0)             | --                 | --                  | 0<br>(0 - 0)         | 0<br>(0 - 0)         | 0<br>(0 - 0)         |
| Hemoglobinopathies and hemolytic anemias            | 68<br>(38 - 110)         | 31<br>(15 - 59)    | 12<br>(7 - 19)      | 14<br>(7 - 22)       | 6<br>(3 - 10)        | 6<br>(3 - 10)        |
| Thalassemias                                        | 45<br>(25 - 75)          | 26<br>(13 - 51)    | 11<br>(7 - 18)      | 7<br>(4 - 12)        | 0<br>(0 - 0)         | 0<br>(0 - 0)         |
| Sickle cell disorders                               | 2<br>(1 - 3)             | 0<br>(0 - 0)       | 0<br>(0 - 0)        | 1<br>(0 - 1)         | 1<br>(0 - 1)         | 0<br>(0 - 0)         |
| G6PD deficiency                                     | 1<br>(0 - 1)             | 0<br>(0 - 0)       | 0<br>(0 - 0)        | 0<br>(0 - 0)         | 0<br>(0 - 0)         | 0<br>(0 - 0)         |
| Other hemoglobinopathies and hemolytic anemias      | 21<br>(12 - 32)          | 4<br>(2 - 7)       | 1<br>(0 - 1)        | 5<br>(3 - 8)         | 5<br>(3 - 9)         | 6<br>(3 - 10)        |
| Endocrine, metabolic, blood, and immune disorders   | 85<br>(51 - 114)         | 31<br>(17 - 51)    | 10<br>(6 - 14)      | 20<br>(12 - 28)      | 11<br>(5 - 16)       | 13<br>(6 - 18)       |
| Musculoskeletal disorders                           | 12<br>(9 - 16)           | --                 | 2<br>(1 - 3)        | 5<br>(3 - 7)         | 2<br>(1 - 3)         | 3<br>(2 - 5)         |
| Rheumatoid arthritis                                | 2<br>(1 - 4)             | --                 | 1<br>(0 - 1)        | 0<br>(0 - 0)         | 0<br>(0 - 1)         | 1<br>(0 - 1)         |
| Other musculoskeletal disorders                     | 10<br>(7 - 13)           | --                 | 1<br>(1 - 2)        | 4<br>(3 - 6)         | 1<br>(1 - 2)         | 2<br>(1 - 4)         |
| Other non-communicable diseases                     | 394<br>(255 - 562)       | 360<br>(223 - 526) | 15<br>(10 - 20)     | 12<br>(9 - 17)       | 2<br>(2 - 3)         | 5<br>(4 - 6)         |
| Congenital anomalies                                | 352<br>(220 - 519)       | 319<br>(191 - 483) | 15<br>(10 - 20)     | 12<br>(8 - 16)       | 2<br>(1 - 3)         | 4<br>(3 - 6)         |
| Neural tube defects                                 | 8<br>(4 - 16)            | 8<br>(3 - 15)      | 0<br>(0 - 0)        | 0<br>(0 - 0)         | 0<br>(0 - 0)         | 0<br>(0 - 0)         |
| Congenital heart anomalies                          | 206<br>(118 - 327)       | 187<br>(102 - 304) | 10<br>(7 - 15)      | 6<br>(4 - 9)         | 0<br>(0 - 1)         | 2<br>(1 - 3)         |
| Cleft lip and cleft palate                          | 5<br>(1 - 13)            | 5<br>(1 - 13)      | --                  | --                   | --                   | --                   |
| Down syndrome                                       | 16<br>(8 - 29)           | 14<br>(7 - 26)     | 1<br>(1 - 2)        | 0<br>(0 - 0)         | 0<br>(0 - 0)         | 0<br>(0 - 0)         |
| Chromosomal unbalanced rearrangements               | 1<br>(0 - 2)             | 0<br>(0 - 1)       | 0<br>(0 - 0)        | 0<br>(0 - 1)         | 0<br>(0 - 0)         | 0<br>(0 - 0)         |
| Other congenital anomalies                          | 116<br>(66 - 185)        | 105<br>(56 - 172)  | 3<br>(1 - 4)        | 5<br>(3 - 7)         | 2<br>(1 - 2)         | 2<br>(1 - 3)         |
| Skin and subcutaneous diseases                      | 2<br>(1 - 2)             | 0<br>(0 - 0)       | 0<br>(0 - 0)        | 1<br>(0 - 1)         | 0<br>(0 - 1)         | 0<br>(0 - 0)         |
| Cellulitis                                          | 0<br>(0 - 1)             | 0<br>(0 - 0)       | 0<br>(0 - 0)        | 0<br>(0 - 0)         | 0<br>(0 - 0)         | 0<br>(0 - 0)         |
| Pyoderma                                            | 1<br>(0 - 1)             | 0<br>(0 - 0)       | 0<br>(0 - 0)        | 0<br>(0 - 0)         | 0<br>(0 - 0)         | 0<br>(0 - 0)         |
| Decubitus ulcer                                     | 0<br>(0 - 0)             | 0<br>(0 - 0)       | 0<br>(0 - 0)        | 0<br>(0 - 0)         | 0<br>(0 - 0)         | 0<br>(0 - 0)         |

Web Table 31- Azerbaijan deaths with 95% UI by age, sex, and cause in 2013

| Cause                                           | Females, All Ages  | Females, 0-4 Years | Females, 5-14 Years | Females, 15-49 Years | Females, 50-69 Years | Females, 70-80 Years |
|-------------------------------------------------|--------------------|--------------------|---------------------|----------------------|----------------------|----------------------|
| Other skin and subcutaneous diseases            | 0<br>(0 - 0)       | 0<br>(0 - 0)       | 0<br>(0 - 0)        | 0<br>(0 - 0)         | 0<br>(0 - 0)         | 0<br>(0 - 0)         |
| Sudden infant death syndrome                    | 40<br>(3 - 153)    | 40<br>(3 - 153)    | --                  | --                   | --                   | --                   |
| Injuries                                        | 681<br>(548 - 905) | 64<br>(44 - 98)    | 59<br>(46 - 79)     | 319<br>(243 - 424)   | 145<br>(111 - 204)   | 94<br>(77 - 126)     |
| Transport injuries                              | 223<br>(162 - 314) | 4<br>(2 - 5)       | 22<br>(15 - 30)     | 107<br>(77 - 144)    | 64<br>(43 - 101)     | 26<br>(18 - 44)      |
| Road injuries                                   | 217<br>(158 - 306) | 2<br>(1 - 4)       | 21<br>(15 - 28)     | 106<br>(76 - 141)    | 63<br>(42 - 98)      | 25<br>(17 - 41)      |
| Pedestrian road injuries                        | 18<br>(10 - 39)    | 0<br>(0 - 1)       | 1<br>(0 - 3)        | 4<br>(2 - 10)        | 5<br>(2 - 11)        | 8<br>(4 - 16)        |
| Cyclist road injuries                           | 21<br>(14 - 31)    | 0<br>(0 - 1)       | 4<br>(3 - 7)        | 4<br>(3 - 7)         | 11<br>(7 - 18)       | 1<br>(1 - 2)         |
| Motorcyclist road injuries                      | 16<br>(9 - 25)     | 0<br>(0 - 0)       | 0<br>(0 - 1)        | 13<br>(7 - 20)       | 3<br>(1 - 5)         | 1<br>(0 - 1)         |
| Motor vehicle road injuries                     | 159<br>(113 - 223) | 2<br>(1 - 2)       | 14<br>(10 - 20)     | 84<br>(59 - 113)     | 45<br>(29 - 67)      | 15<br>(9 - 23)       |
| Other road injuries                             | 1<br>(1 - 3)       | 0<br>(0 - 0)       | 0<br>(0 - 1)        | 0<br>(0 - 1)         | 0<br>(0 - 1)         | 0<br>(0 - 1)         |
| Other transport injuries                        | 6<br>(4 - 13)      | 1<br>(1 - 2)       | 1<br>(1 - 3)        | 1<br>(1 - 3)         | 1<br>(1 - 3)         | 1<br>(1 - 3)         |
| Unintentional injuries                          | 326<br>(268 - 426) | 58<br>(39 - 93)    | 33<br>(25 - 49)     | 128<br>(96 - 172)    | 53<br>(40 - 69)      | 53<br>(43 - 68)      |
| Falls                                           | 44<br>(30 - 77)    | 7<br>(4 - 13)      | 3<br>(2 - 5)        | 13<br>(8 - 24)       | 7<br>(5 - 13)        | 14<br>(9 - 25)       |
| Drowning                                        | 70<br>(47 - 149)   | 15<br>(7 - 41)     | 15<br>(9 - 28)      | 29<br>(19 - 57)      | 7<br>(4 - 13)        | 4<br>(2 - 8)         |
| Fire, heat, and hot substances                  | 108<br>(77 - 147)  | 21<br>(13 - 37)    | 8<br>(5 - 12)       | 49<br>(33 - 68)      | 15<br>(9 - 21)       | 14<br>(9 - 21)       |
| Poisonings                                      | 26<br>(18 - 41)    | 3<br>(2 - 5)       | 2<br>(1 - 3)        | 11<br>(8 - 21)       | 5<br>(3 - 7)         | 5<br>(3 - 8)         |
| Exposure to mechanical forces                   | 31<br>(23 - 47)    | 7<br>(3 - 14)      | 4<br>(2 - 7)        | 14<br>(9 - 21)       | 5<br>(3 - 8)         | 1<br>(1 - 3)         |
| Unintentional firearm injuries                  | 15<br>(10 - 21)    | 1<br>(0 - 2)       | 1<br>(0 - 2)        | 10<br>(6 - 16)       | 2<br>(1 - 4)         | 0<br>(0 - 1)         |
| Unintentional suffocation                       | 2<br>(1 - 11)      | 1<br>(0 - 4)       | 0<br>(0 - 2)        | 1<br>(0 - 3)         | 0<br>(0 - 1)         | 0<br>(0 - 0)         |
| Other exposure to mechanical forces             | 13<br>(9 - 25)     | 5<br>(2 - 11)      | 3<br>(1 - 5)        | 3<br>(2 - 6)         | 2<br>(1 - 4)         | 1<br>(1 - 2)         |
| Adverse effects of medical treatment            | 23<br>(10 - 38)    | 3<br>(1 - 7)       | 0<br>(0 - 1)        | 3<br>(2 - 5)         | 8<br>(3 - 15)        | 8<br>(3 - 15)        |
| Animal contact                                  | 3<br>(1 - 6)       | 1<br>(0 - 1)       | 0<br>(0 - 1)        | 1<br>(0 - 2)         | 1<br>(0 - 1)         | 0<br>(0 - 1)         |
| Venomous animal contact                         | 1<br>(0 - 2)       | 0<br>(0 - 0)       | 0<br>(0 - 1)        | 0<br>(0 - 1)         | 0<br>(0 - 1)         | 0<br>(0 - 0)         |
| Non-venomous animal contact                     | 2<br>(1 - 4)       | 0<br>(0 - 1)       | 0<br>(0 - 1)        | 0<br>(0 - 1)         | 0<br>(0 - 1)         | 0<br>(0 - 1)         |
| Foreign body                                    | 14<br>(9 - 24)     | 2<br>(1 - 5)       | 0<br>(0 - 0)        | 4<br>(2 - 7)         | 3<br>(2 - 6)         | 4<br>(2 - 8)         |
| Pulmonary aspiration and foreign body in airway | 13<br>(8 - 23)     | 2<br>(1 - 5)       | 0<br>(0 - 0)        | 4<br>(2 - 7)         | 3<br>(2 - 5)         | 4<br>(2 - 7)         |
| Foreign body in other body part                 | 1<br>(1 - 1)       | 0<br>(0 - 0)       | 0<br>(0 - 0)        | 0<br>(0 - 0)         | 0<br>(0 - 0)         | 0<br>(0 - 0)         |
| Other unintentional injuries                    | 7<br>(5 - 10)      | 0<br>(0 - 1)       | 1<br>(1 - 1)        | 2<br>(1 - 3)         | 2<br>(1 - 3)         | 2<br>(1 - 3)         |
| Self-harm and interpersonal violence            | 132<br>(95 - 214)  | 1<br>(1 - 2)       | 4<br>(2 - 7)        | 84<br>(58 - 138)     | 29<br>(19 - 52)      | 15<br>(10 - 25)      |
| Self-harm                                       | 65<br>(47 - 87)    | --                 | 1<br>(1 - 2)        | 41<br>(28 - 56)      | 15<br>(10 - 20)      | 9<br>(6 - 13)        |
| Interpersonal violence                          | 67<br>(38 - 143)   | 1<br>(1 - 2)       | 3<br>(1 - 6)        | 43<br>(23 - 95)      | 14<br>(7 - 36)       | 6<br>(3 - 15)        |
| Assault by firearm                              | 8<br>(4 - 21)      | 0<br>(0 - 0)       | 0<br>(0 - 1)        | 1<br>(0 - 4)         | 5<br>(2 - 14)        | 1<br>(0 - 4)         |
| Assault by sharp object                         | 40<br>(22 - 93)    | 0<br>(0 - 1)       | 1<br>(0 - 1)        | 35<br>(19 - 81)      | 3<br>(1 - 8)         | 1<br>(0 - 4)         |
| Assault by other means                          | 18<br>(10 - 41)    | 1<br>(0 - 2)       | 2<br>(1 - 4)        | 6<br>(3 - 15)        | 6<br>(3 - 17)        | 3<br>(1 - 8)         |

Web Table 31- Bahrain deaths with 95% UI by age, sex, and cause in 2013

| Cause                                                             | Both Sexes, All Ages     | Both Sexes, 0-4 Years | Both Sexes, 5-14 Years | Both Sexes, 15-49 Years | Both Sexes, 50-69 Years | Both Sexes, 70-80 Years |
|-------------------------------------------------------------------|--------------------------|-----------------------|------------------------|-------------------------|-------------------------|-------------------------|
| All causes                                                        | 2,811<br>(2,361 - 3,330) | 138<br>(124 - 150)    | 25<br>(23 - 28)        | 846<br>(688 - 1,019)    | 853<br>(687 - 1,045)    | 950<br>(824 - 1,095)    |
| Communicable, maternal, neonatal, and nutritional diseases        | 243<br>(208 - 280)       | 72<br>(61 - 82)       | 6<br>(3 - 9)           | 57<br>(47 - 71)         | 40<br>(32 - 50)         | 68<br>(53 - 83)         |
| HIV/AIDS and tuberculosis                                         | 24<br>(19 - 29)          | 0<br>(0 - 1)          | 0<br>(0 - 0)           | 16<br>(13 - 20)         | 4<br>(4 - 6)            | 2<br>(2 - 5)            |
| Tuberculosis                                                      | 9<br>(7 - 11)            | 0<br>(0 - 0)          | 0<br>(0 - 0)           | 4<br>(3 - 6)            | 2<br>(2 - 3)            | 2<br>(2 - 3)            |
| HIV/AIDS                                                          | 15<br>(11 - 19)          | 0<br>(0 - 1)          | 0<br>(0 - 0)           | 12<br>(9 - 15)          | 2<br>(1 - 3)            | 0<br>(0 - 3)            |
| HIV/AIDS resulting in mycobacterial infection                     | 1<br>(1 - 1)             | 0<br>(0 - 0)          | 0<br>(0 - 0)           | 1<br>(0 - 1)            | 0<br>(0 - 0)            | 0<br>(0 - 0)            |
| HIV/AIDS resulting in other diseases                              | 14<br>(11 - 18)          | 0<br>(0 - 1)          | 0<br>(0 - 0)           | 11<br>(9 - 14)          | 2<br>(1 - 3)            | 0<br>(0 - 3)            |
| Diarrhea, lower respiratory, and other common infectious diseases | 120<br>(92 - 150)        | 9<br>(6 - 14)         | 5<br>(3 - 8)           | 27<br>(19 - 40)         | 22<br>(16 - 29)         | 57<br>(42 - 72)         |
| Diarrheal diseases                                                | 8<br>(6 - 10)            | 1<br>(0 - 1)          | 0<br>(0 - 0)           | 1<br>(1 - 2)            | 1<br>(1 - 2)            | 4<br>(3 - 6)            |
| Intestinal infectious diseases                                    | 18<br>(6 - 38)           | 4<br>(1 - 8)          | 4<br>(1 - 7)           | 9<br>(3 - 20)           | 1<br>(0 - 3)            | 0<br>(0 - 1)            |
| Typhoid fever                                                     | 14<br>(5 - 30)           | 3<br>(1 - 6)          | 3<br>(1 - 6)           | 7<br>(2 - 16)           | 1<br>(0 - 2)            | 0<br>(0 - 0)            |
| Paratyphoid fever                                                 | 4<br>(1 - 8)             | 1<br>(0 - 2)          | 1<br>(0 - 2)           | 2<br>(1 - 4)            | 0<br>(0 - 1)            | 0<br>(0 - 0)            |
| Other intestinal infectious diseases                              | 0<br>(0 - 1)             | 0<br>(0 - 0)          | 0<br>(0 - 0)           | 0<br>(0 - 1)            | 0<br>(0 - 0)            | 0<br>(0 - 0)            |
| Lower respiratory infections                                      | 84<br>(62 - 104)         | 2<br>(2 - 4)          | 1<br>(0 - 1)           | 12<br>(9 - 16)          | 17<br>(12 - 24)         | 51<br>(36 - 65)         |
| Upper respiratory infections                                      | 0<br>(0 - 0)             | 0<br>(0 - 0)          | 0<br>(0 - 0)           | 0<br>(0 - 0)            | 0<br>(0 - 0)            | 0<br>(0 - 0)            |
| Otitis media                                                      | 0<br>(0 - 1)             | 0<br>(0 - 0)          | 0<br>(0 - 0)           | 0<br>(0 - 0)            | 0<br>(0 - 0)            | 0<br>(0 - 0)            |
| Meningitis                                                        | 4<br>(3 - 5)             | 1<br>(0 - 1)          | 0<br>(0 - 0)           | 2<br>(1 - 2)            | 1<br>(1 - 1)            | 0<br>(0 - 1)            |
| Pneumococcal meningitis                                           | 1<br>(1 - 1)             | 0<br>(0 - 0)          | 0<br>(0 - 0)           | 0<br>(0 - 1)            | 0<br>(0 - 0)            | 0<br>(0 - 0)            |
| H influenzae type B meningitis                                    | 1<br>(0 - 1)             | 0<br>(0 - 0)          | 0<br>(0 - 0)           | 0<br>(0 - 0)            | 0<br>(0 - 0)            | 0<br>(0 - 0)            |
| Meningococcal meningitis                                          | 1<br>(1 - 1)             | 0<br>(0 - 0)          | 0<br>(0 - 0)           | 0<br>(0 - 1)            | 0<br>(0 - 0)            | 0<br>(0 - 0)            |
| Other meningitis                                                  | 1<br>(1 - 2)             | 0<br>(0 - 0)          | 0<br>(0 - 0)           | 1<br>(0 - 1)            | 0<br>(0 - 1)            | 0<br>(0 - 0)            |
| Encephalitis                                                      | 5<br>(3 - 7)             | 0<br>(0 - 1)          | 0<br>(0 - 0)           | 3<br>(2 - 5)            | 1<br>(0 - 1)            | 0<br>(0 - 1)            |
| Diphtheria                                                        | 0<br>(0 - 0)             | 0<br>(0 - 0)          | 0<br>(0 - 0)           | 0<br>(0 - 0)            | 0<br>(0 - 0)            | --                      |
| Whooping cough                                                    | 0<br>(0 - 1)             | 0<br>(0 - 1)          | 0<br>(0 - 0)           | 0<br>(0 - 0)            | 0<br>(0 - 0)            | --                      |
| Tetanus                                                           | 0<br>(0 - 0)             | 0<br>(0 - 0)          | 0<br>(0 - 0)           | 0<br>(0 - 0)            | 0<br>(0 - 0)            | 0<br>(0 - 0)            |
| Measles                                                           | 1<br>(0 - 4)             | 0<br>(0 - 3)          | 0<br>(0 - 0)           | 0<br>(0 - 0)            | 0<br>(0 - 0)            | --                      |
| Varicella and herpes zoster                                       | 0<br>(0 - 1)             | 0<br>(0 - 0)          | 0<br>(0 - 0)           | 0<br>(0 - 0)            | 0<br>(0 - 0)            | 0<br>(0 - 0)            |
| Neglected tropical diseases and malaria                           | 2<br>(1 - 2)             | 0<br>(0 - 0)          | 0<br>(0 - 0)           | 1<br>(1 - 1)            | 0<br>(0 - 0)            | 0<br>(0 - 0)            |
| Leishmaniasis                                                     | 0<br>(0 - 1)             | 0<br>(0 - 0)          | 0<br>(0 - 0)           | 0<br>(0 - 0)            | 0<br>(0 - 0)            | 0<br>(0 - 0)            |
| Visceral leishmaniasis                                            | 0<br>(0 - 1)             | 0<br>(0 - 0)          | 0<br>(0 - 0)           | 0<br>(0 - 0)            | 0<br>(0 - 0)            | 0<br>(0 - 0)            |
| Cysticercosis                                                     | 0<br>(0 - 0)             | 0<br>(0 - 0)          | 0<br>(0 - 0)           | 0<br>(0 - 0)            | 0<br>(0 - 0)            | 0<br>(0 - 0)            |
| Cystic echinococcosis                                             | 0<br>(0 - 0)             | 0<br>(0 - 0)          | 0<br>(0 - 0)           | 0<br>(0 - 0)            | 0<br>(0 - 0)            | 0<br>(0 - 0)            |
| Dengue                                                            | 0<br>(0 - 0)             | 0<br>(0 - 0)          | 0<br>(0 - 0)           | 0<br>(0 - 0)            | 0<br>(0 - 0)            | 0<br>(0 - 0)            |
| Rabies                                                            | 0<br>(0 - 0)             | 0<br>(0 - 0)          | 0<br>(0 - 0)           | 0<br>(0 - 0)            | 0<br>(0 - 0)            | 0<br>(0 - 0)            |
| Intestinal nematode infections                                    | 0<br>(0 - 0)             | 0<br>(0 - 0)          | 0<br>(0 - 0)           | 0<br>(0 - 0)            | 0<br>(0 - 0)            | 0<br>(0 - 0)            |
| Ascariasis                                                        | 0<br>(0 - 0)             | 0<br>(0 - 0)          | 0<br>(0 - 0)           | 0<br>(0 - 0)            | 0<br>(0 - 0)            | 0<br>(0 - 0)            |
| Other neglected tropical diseases                                 | 1<br>(1 - 1)             | 0<br>(0 - 0)          | 0<br>(0 - 0)           | 0<br>(0 - 0)            | 0<br>(0 - 0)            | 0<br>(0 - 0)            |
| Maternal disorders                                                | 4<br>(3 - 6)             | --                    | 0<br>(0 - 0)           | 4<br>(3 - 6)            | --                      | --                      |
| Maternal hemorrhage                                               | 1<br>(1 - 1)             | --                    | 0<br>(0 - 0)           | 1<br>(1 - 1)            | --                      | --                      |
| Maternal sepsis and other maternal infections                     | 0<br>(0 - 1)             | --                    | 0<br>(0 - 0)           | 0<br>(0 - 1)            | --                      | --                      |

Web Table 31- Bahrain deaths with 95% UI by age, sex, and cause in 2013

| Cause                                                            | Both Sexes, All Ages     | Both Sexes, 0-4 Years | Both Sexes, 5-14 Years | Both Sexes, 15-49 Years | Both Sexes, 50-69 Years | Both Sexes, 70-80 Years |
|------------------------------------------------------------------|--------------------------|-----------------------|------------------------|-------------------------|-------------------------|-------------------------|
| Maternal hypertensive disorders                                  | 1<br>(0 - 1)             | --                    | 0<br>(0 - 0)           | 1<br>(0 - 1)            | --                      | --                      |
| Maternal obstructed labor                                        | 0<br>(0 - 1)             | --                    | 0<br>(0 - 0)           | 0<br>(0 - 1)            | --                      | --                      |
| Maternal abortive outcome                                        | 1<br>(0 - 1)             | --                    | 0<br>(0 - 0)           | 1<br>(0 - 1)            | --                      | --                      |
| Indirect maternal deaths                                         | 0<br>(0 - 1)             | --                    | 0<br>(0 - 0)           | 0<br>(0 - 1)            | --                      | --                      |
| Late maternal deaths                                             | 0<br>(0 - 1)             | --                    | 0<br>(0 - 0)           | 0<br>(0 - 1)            | --                      | --                      |
| Maternal deaths aggravated by HIV/AIDS                           | 0<br>(0 - 0)             | --                    | --                     | 0<br>(0 - 0)            | --                      | --                      |
| Other maternal disorders                                         | 1<br>(0 - 1)             | --                    | 0<br>(0 - 0)           | 1<br>(0 - 1)            | --                      | --                      |
| Neonatal disorders                                               | 62<br>(51 - 71)          | 62<br>(51 - 71)       | --                     | --                      | --                      | --                      |
| Neonatal preterm birth complications                             | 41<br>(33 - 49)          | 41<br>(33 - 49)       | --                     | --                      | --                      | --                      |
| Neonatal encephalopathy due to birth asphyxia and trauma         | 9<br>(5 - 12)            | 9<br>(5 - 12)         | --                     | --                      | --                      | --                      |
| Neonatal sepsis and other neonatal infections                    | 2<br>(1 - 3)             | 2<br>(1 - 3)          | --                     | --                      | --                      | --                      |
| Hemolytic disease and other neonatal jaundice                    | 0<br>(0 - 0)             | 0<br>(0 - 0)          | --                     | --                      | --                      | --                      |
| Other neonatal disorders                                         | 10<br>(7 - 14)           | 10<br>(7 - 14)        | --                     | --                      | --                      | --                      |
| Nutritional deficiencies                                         | 7<br>(5 - 9)             | 0<br>(0 - 0)          | 0<br>(0 - 0)           | 1<br>(1 - 2)            | 1<br>(1 - 2)            | 4<br>(3 - 5)            |
| Protein-energy malnutrition                                      | 3<br>(2 - 4)             | 0<br>(0 - 0)          | 0<br>(0 - 0)           | 0<br>(0 - 1)            | 0<br>(0 - 1)            | 2<br>(1 - 3)            |
| Iodine deficiency                                                | 0<br>(0 - 0)             | 0<br>(0 - 0)          | 0<br>(0 - 0)           | 0<br>(0 - 0)            | 0<br>(0 - 0)            | 0<br>(0 - 0)            |
| Iron-deficiency anemia                                           | 3<br>(2 - 5)             | 0<br>(0 - 0)          | 0<br>(0 - 0)           | 1<br>(1 - 1)            | 1<br>(0 - 1)            | 2<br>(1 - 3)            |
| Other nutritional deficiencies                                   | 1<br>(0 - 1)             | 0<br>(0 - 0)          | 0<br>(0 - 0)           | 0<br>(0 - 0)            | 0<br>(0 - 0)            | 0<br>(0 - 0)            |
| Other communicable, maternal, neonatal, and nutritional diseases | 25<br>(19 - 33)          | 1<br>(0 - 1)          | 0<br>(0 - 0)           | 7<br>(5 - 10)           | 12<br>(8 - 18)          | 5<br>(4 - 7)            |
| Sexually transmitted diseases excluding HIV                      | 1<br>(1 - 2)             | 0<br>(0 - 1)          | 0<br>(0 - 0)           | 0<br>(0 - 1)            | 0<br>(0 - 0)            | 0<br>(0 - 1)            |
| Syphilis                                                         | 1<br>(0 - 1)             | 0<br>(0 - 1)          | 0<br>(0 - 0)           | 0<br>(0 - 0)            | 0<br>(0 - 0)            | 0<br>(0 - 1)            |
| Chlamydial infection                                             | 0<br>(0 - 0)             | --                    | 0<br>(0 - 0)           | 0<br>(0 - 0)            | 0<br>(0 - 0)            | 0<br>(0 - 0)            |
| Gonococcal infection                                             | 0<br>(0 - 0)             | --                    | 0<br>(0 - 0)           | 0<br>(0 - 0)            | 0<br>(0 - 0)            | 0<br>(0 - 0)            |
| Other sexually transmitted diseases                              | 0<br>(0 - 0)             | --                    | 0<br>(0 - 0)           | 0<br>(0 - 0)            | 0<br>(0 - 0)            | 0<br>(0 - 0)            |
| Hepatitis                                                        | 18<br>(13 - 26)          | 0<br>(0 - 0)          | 0<br>(0 - 0)           | 5<br>(4 - 8)            | 10<br>(7 - 16)          | 2<br>(1 - 3)            |
| Acute hepatitis A                                                | 1<br>(0 - 3)             | 0<br>(0 - 0)          | 0<br>(0 - 0)           | 0<br>(0 - 1)            | 0<br>(0 - 1)            | 0<br>(0 - 0)            |
| Acute hepatitis B                                                | 11<br>(7 - 16)           | 0<br>(0 - 0)          | 0<br>(0 - 0)           | 3<br>(1 - 4)            | 7<br>(4 - 11)           | 2<br>(1 - 3)            |
| Acute hepatitis C                                                | 1<br>(0 - 4)             | --                    | 0<br>(0 - 0)           | 0<br>(0 - 1)            | 1<br>(0 - 3)            | 0<br>(0 - 1)            |
| Acute hepatitis E                                                | 4<br>(2 - 8)             | 0<br>(0 - 0)          | 0<br>(0 - 0)           | 2<br>(1 - 4)            | 2<br>(1 - 4)            | 0<br>(0 - 0)            |
| Other infectious diseases                                        | 6<br>(4 - 8)             | 0<br>(0 - 0)          | 0<br>(0 - 0)           | 2<br>(1 - 2)            | 2<br>(1 - 2)            | 3<br>(2 - 3)            |
| Non-communicable diseases                                        | 2,140<br>(1,779 - 2,538) | 58<br>(49 - 70)       | 11<br>(9 - 13)         | 499<br>(398 - 597)      | 742<br>(596 - 907)      | 829<br>(719 - 958)      |
| Neoplasms                                                        | 434<br>(347 - 532)       | 1<br>(1 - 2)          | 3<br>(2 - 4)           | 130<br>(103 - 158)      | 186<br>(146 - 232)      | 113<br>(93 - 138)       |
| Esophageal cancer                                                | 7<br>(5 - 10)            | --                    | --                     | 1<br>(1 - 2)            | 4<br>(3 - 5)            | 2<br>(2 - 3)            |
| Stomach cancer                                                   | 21<br>(17 - 26)          | --                    | --                     | 4<br>(3 - 6)            | 9<br>(7 - 12)           | 7<br>(6 - 10)           |
| Liver cancer                                                     | 17<br>(12 - 23)          | --                    | 0<br>(0 - 0)           | 3<br>(2 - 4)            | 9<br>(6 - 12)           | 6<br>(4 - 8)            |
| Liver cancer due to hepatitis B                                  | 6<br>(3 - 10)            | --                    | 0<br>(0 - 0)           | 1<br>(1 - 2)            | 3<br>(2 - 5)            | 1<br>(1 - 2)            |
| Liver cancer due to hepatitis C                                  | 7<br>(5 - 12)            | --                    | 0<br>(0 - 0)           | 1<br>(1 - 2)            | 4<br>(2 - 6)            | 3<br>(2 - 4)            |
| Liver cancer due to alcohol use                                  | 2<br>(1 - 3)             | --                    | --                     | 0<br>(0 - 0)            | 1<br>(0 - 1)            | 1<br>(0 - 2)            |
| Liver cancer due to other causes                                 | 2<br>(1 - 3)             | --                    | 0<br>(0 - 0)           | 0<br>(0 - 1)            | 1<br>(0 - 1)            | 1<br>(0 - 1)            |
| Larynx cancer                                                    | 3<br>(2 - 5)             | --                    | --                     | 0<br>(0 - 0)            | 1<br>(1 - 2)            | 2<br>(1 - 3)            |

Web Table 31- Bahrain deaths with 95% UI by age, sex, and cause in 2013

| Cause                                         | Both Sexes, All Ages | Both Sexes, 0-4 Years | Both Sexes, 5-14 Years | Both Sexes, 15-49 Years | Both Sexes, 50-69 Years | Both Sexes, 70-80 Years |
|-----------------------------------------------|----------------------|-----------------------|------------------------|-------------------------|-------------------------|-------------------------|
| Tracheal, bronchus and lung cancer            | 63<br>(49 - 88)      | --                    | --                     | 7<br>(5 - 10)           | 31<br>(23 - 43)         | 26<br>(20 - 35)         |
| Breast cancer                                 | 68<br>(48 - 89)      | --                    | --                     | 34<br>(23 - 44)         | 27<br>(18 - 38)         | 8<br>(6 - 10)           |
| Cervical cancer                               | 7<br>(5 - 10)        | --                    | --                     | 2<br>(2 - 3)            | 3<br>(2 - 5)            | 2<br>(1 - 2)            |
| Uterine cancer                                | 2<br>(1 - 4)         | --                    | --                     | 0<br>(0 - 0)            | 1<br>(1 - 2)            | 1<br>(0 - 1)            |
| Prostate cancer                               | 16<br>(9 - 26)       | --                    | --                     | 0<br>(0 - 1)            | 5<br>(3 - 9)            | 10<br>(6 - 16)          |
| Colon and rectum cancer                       | 42<br>(33 - 51)      | --                    | --                     | 14<br>(11 - 18)         | 19<br>(15 - 24)         | 8<br>(7 - 10)           |
| Lip and oral cavity cancer                    | 5<br>(3 - 8)         | --                    | --                     | 1<br>(1 - 2)            | 3<br>(2 - 5)            | 1<br>(1 - 2)            |
| Nasopharynx cancer                            | 2<br>(2 - 3)         | --                    | 0<br>(0 - 0)           | 1<br>(1 - 2)            | 1<br>(1 - 1)            | 0<br>(0 - 1)            |
| Other pharynx cancer                          | 1<br>(1 - 2)         | --                    | --                     | 0<br>(0 - 0)            | 1<br>(0 - 1)            | 0<br>(0 - 0)            |
| Gallbladder and biliary tract cancer          | 3<br>(2 - 4)         | --                    | --                     | 0<br>(0 - 1)            | 1<br>(1 - 2)            | 1<br>(0 - 1)            |
| Pancreatic cancer                             | 28<br>(23 - 35)      | --                    | --                     | 6<br>(5 - 8)            | 15<br>(11 - 19)         | 7<br>(6 - 10)           |
| Malignant skin melanoma                       | 2<br>(1 - 3)         | --                    | --                     | 1<br>(0 - 1)            | 1<br>(0 - 1)            | 0<br>(0 - 0)            |
| Non-melanoma skin cancer                      | 2<br>(1 - 3)         | --                    | --                     | 0<br>(0 - 1)            | 1<br>(0 - 1)            | 1<br>(0 - 1)            |
| Ovarian cancer                                | 14<br>(9 - 19)       | --                    | --                     | 4<br>(3 - 6)            | 6<br>(4 - 9)            | 3<br>(2 - 5)            |
| Testicular cancer                             | 1<br>(0 - 1)         | --                    | --                     | 1<br>(0 - 1)            | 0<br>(0 - 0)            | 0<br>(0 - 0)            |
| Kidney cancer                                 | 11<br>(8 - 15)       | 0<br>(0 - 0)          | 0<br>(0 - 0)           | 2<br>(2 - 3)            | 6<br>(4 - 9)            | 3<br>(2 - 4)            |
| Bladder cancer                                | 9<br>(7 - 13)        | --                    | --                     | 1<br>(1 - 1)            | 4<br>(3 - 6)            | 5<br>(3 - 7)            |
| Brain and nervous system cancer               | 15<br>(10 - 22)      | 0<br>(0 - 0)          | 1<br>(0 - 1)           | 7<br>(4 - 10)           | 6<br>(4 - 10)           | 1<br>(1 - 2)            |
| Thyroid cancer                                | 2<br>(1 - 3)         | --                    | 0<br>(0 - 0)           | 0<br>(0 - 1)            | 1<br>(0 - 1)            | 1<br>(1 - 1)            |
| Mesothelioma                                  | 2<br>(1 - 2)         | --                    | --                     | 0<br>(0 - 0)            | 1<br>(0 - 1)            | 1<br>(0 - 1)            |
| Hodgkin lymphoma                              | 4<br>(2 - 6)         | 0<br>(0 - 0)          | 0<br>(0 - 0)           | 2<br>(1 - 3)            | 1<br>(1 - 2)            | 0<br>(0 - 0)            |
| Non-Hodgkin lymphoma                          | 23<br>(16 - 30)      | 0<br>(0 - 0)          | 0<br>(0 - 0)           | 10<br>(7 - 14)          | 7<br>(5 - 10)           | 5<br>(3 - 7)            |
| Multiple myeloma                              | 5<br>(3 - 8)         | --                    | --                     | 1<br>(0 - 1)            | 3<br>(2 - 4)            | 2<br>(1 - 2)            |
| Leukemia                                      | 27<br>(21 - 33)      | 0<br>(0 - 1)          | 1<br>(1 - 1)           | 13<br>(10 - 16)         | 8<br>(6 - 11)           | 5<br>(4 - 6)            |
| Other neoplasms                               | 32<br>(22 - 43)      | 1<br>(0 - 1)          | 1<br>(1 - 1)           | 14<br>(9 - 19)          | 11<br>(7 - 15)          | 6<br>(4 - 8)            |
| Cardiovascular diseases                       | 726<br>(600 - 867)   | 2<br>(2 - 3)          | 1<br>(1 - 2)           | 153<br>(120 - 189)      | 269<br>(215 - 333)      | 300<br>(256 - 353)      |
| Rheumatic heart disease                       | 5<br>(3 - 7)         | 0<br>(0 - 0)          | 0<br>(0 - 0)           | 2<br>(1 - 3)            | 1<br>(1 - 2)            | 2<br>(1 - 2)            |
| Ischemic heart disease                        | 415<br>(333 - 517)   | 0<br>(0 - 0)          | 0<br>(0 - 0)           | 97<br>(73 - 124)        | 170<br>(133 - 215)      | 149<br>(122 - 190)      |
| Cerebrovascular disease                       | 192<br>(154 - 232)   | 1<br>(1 - 2)          | 0<br>(0 - 1)           | 31<br>(23 - 39)         | 58<br>(43 - 73)         | 102<br>(84 - 122)       |
| Ischemic stroke                               | 111<br>(85 - 138)    | 0<br>(0 - 0)          | 0<br>(0 - 0)           | 7<br>(4 - 10)           | 27<br>(18 - 36)         | 77<br>(61 - 94)         |
| Hemorrhagic stroke                            | 81<br>(64 - 101)     | 1<br>(1 - 1)          | 0<br>(0 - 1)           | 23<br>(18 - 30)         | 31<br>(23 - 40)         | 25<br>(19 - 33)         |
| Hypertensive heart disease                    | 20<br>(15 - 27)      | 0<br>(0 - 0)          | 0<br>(0 - 0)           | 3<br>(2 - 4)            | 7<br>(5 - 10)           | 10<br>(7 - 13)          |
| Cardiomyopathy and myocarditis                | 26<br>(20 - 35)      | 0<br>(0 - 1)          | 0<br>(0 - 1)           | 8<br>(6 - 10)           | 10<br>(7 - 15)          | 7<br>(5 - 10)           |
| Atrial fibrillation and flutter               | 13<br>(9 - 17)       | --                    | --                     | 1<br>(1 - 2)            | 3<br>(2 - 4)            | 9<br>(6 - 13)           |
| Aortic aneurysm                               | 12<br>(9 - 17)       | --                    | --                     | 2<br>(1 - 2)            | 7<br>(5 - 9)            | 4<br>(3 - 6)            |
| Peripheral vascular disease                   | 8<br>(6 - 12)        | --                    | --                     | 1<br>(1 - 2)            | 3<br>(2 - 4)            | 4<br>(3 - 6)            |
| Endocarditis                                  | 6<br>(4 - 9)         | 0<br>(0 - 0)          | 0<br>(0 - 0)           | 1<br>(1 - 2)            | 2<br>(1 - 3)            | 3<br>(2 - 5)            |
| Other cardiovascular and circulatory diseases | 28<br>(21 - 36)      | 0<br>(0 - 0)          | 0<br>(0 - 0)           | 8<br>(6 - 11)           | 9<br>(7 - 13)           | 10<br>(7 - 14)          |
| Chronic respiratory diseases                  | 130<br>(105 - 157)   | 1<br>(1 - 1)          | 1<br>(0 - 1)           | 16<br>(12 - 20)         | 35<br>(26 - 44)         | 78<br>(63 - 94)         |
| Chronic obstructive pulmonary disease         | 87<br>(68 - 106)     | 0<br>(0 - 1)          | 0<br>(0 - 0)           | 4<br>(3 - 5)            | 21<br>(16 - 28)         | 61<br>(48 - 74)         |



Web Table 31- Bahrain deaths with 95% UI by age, sex, and cause in 2013

| Cause                                               | Both Sexes, All Ages | Both Sexes, 0-4 Years | Both Sexes, 5-14 Years | Both Sexes, 15-49 Years | Both Sexes, 50-69 Years | Both Sexes, 70-80 Years |
|-----------------------------------------------------|----------------------|-----------------------|------------------------|-------------------------|-------------------------|-------------------------|
| Pneumoconiosis                                      | 2<br>(1 - 2)         | 0<br>(0 - 0)          | 0<br>(0 - 0)           | 1<br>(1 - 1)            | 0<br>(0 - 1)            | 0<br>(0 - 1)            |
| Silicosis                                           | 0<br>(0 - 1)         | 0<br>(0 - 0)          | 0<br>(0 - 0)           | 0<br>(0 - 0)            | 0<br>(0 - 0)            | 0<br>(0 - 0)            |
| Asbestosis                                          | 0<br>(0 - 0)         | 0<br>(0 - 0)          | 0<br>(0 - 0)           | 0<br>(0 - 0)            | 0<br>(0 - 0)            | 0<br>(0 - 0)            |
| Coal workers pneumoconiosis                         | 0<br>(0 - 0)         | 0<br>(0 - 0)          | 0<br>(0 - 0)           | 0<br>(0 - 0)            | 0<br>(0 - 0)            | 0<br>(0 - 0)            |
| Other pneumoconiosis                                | 1<br>(1 - 1)         | 0<br>(0 - 0)          | 0<br>(0 - 0)           | 0<br>(0 - 1)            | 0<br>(0 - 0)            | 0<br>(0 - 0)            |
| Asthma                                              | 22<br>(16 - 27)      | 0<br>(0 - 0)          | 0<br>(0 - 0)           | 7<br>(5 - 9)            | 7<br>(5 - 9)            | 8<br>(5 - 10)           |
| Interstitial lung disease and pulmonary sarcoidosis | 15<br>(10 - 21)      | 0<br>(0 - 0)          | 0<br>(0 - 0)           | 2<br>(1 - 3)            | 5<br>(3 - 7)            | 8<br>(5 - 12)           |
| Other chronic respiratory diseases                  | 4<br>(3 - 6)         | 0<br>(0 - 0)          | 0<br>(0 - 0)           | 2<br>(1 - 3)            | 1<br>(1 - 1)            | 1<br>(1 - 2)            |
| Cirrhosis                                           | 37<br>(29 - 46)      | 0<br>(0 - 0)          | 0<br>(0 - 0)           | 13<br>(10 - 17)         | 16<br>(12 - 21)         | 8<br>(6 - 10)           |
| Cirrhosis due to hepatitis B                        | 11<br>(6 - 18)       | 0<br>(0 - 0)          | 0<br>(0 - 0)           | 4<br>(2 - 6)            | 5<br>(2 - 8)            | 3<br>(1 - 5)            |
| Cirrhosis due to hepatitis C                        | 18<br>(11 - 25)      | 0<br>(0 - 0)          | 0<br>(0 - 0)           | 6<br>(4 - 9)            | 8<br>(5 - 12)           | 3<br>(2 - 5)            |
| Cirrhosis due to alcohol use                        | 5<br>(3 - 8)         | --                    | --                     | 1<br>(1 - 2)            | 2<br>(1 - 4)            | 2<br>(1 - 2)            |
| Cirrhosis due to other causes                       | 4<br>(2 - 6)         | 0<br>(0 - 0)          | 0<br>(0 - 0)           | 2<br>(1 - 3)            | 1<br>(1 - 2)            | 0<br>(0 - 1)            |
| Digestive diseases                                  | 39<br>(33 - 48)      | 0<br>(0 - 0)          | 0<br>(0 - 0)           | 9<br>(7 - 12)           | 11<br>(9 - 14)          | 18<br>(15 - 22)         |
| Peptic ulcer disease                                | 7<br>(5 - 9)         | 0<br>(0 - 0)          | 0<br>(0 - 0)           | 1<br>(1 - 1)            | 2<br>(1 - 3)            | 4<br>(3 - 5)            |
| Gastritis and duodenitis                            | 1<br>(1 - 2)         | 0<br>(0 - 0)          | 0<br>(0 - 0)           | 0<br>(0 - 1)            | 0<br>(0 - 0)            | 0<br>(0 - 1)            |
| Appendicitis                                        | 2<br>(1 - 3)         | 0<br>(0 - 0)          | 0<br>(0 - 0)           | 0<br>(0 - 1)            | 0<br>(0 - 1)            | 1<br>(1 - 1)            |
| Paralytic ileus and intestinal obstruction          | 5<br>(3 - 7)         | 0<br>(0 - 0)          | 0<br>(0 - 0)           | 1<br>(1 - 1)            | 1<br>(1 - 2)            | 3<br>(2 - 4)            |
| Inguinal, femoral, and abdominal hernia             | 1<br>(0 - 1)         | 0<br>(0 - 0)          | 0<br>(0 - 0)           | 0<br>(0 - 0)            | 0<br>(0 - 0)            | 0<br>(0 - 1)            |
| Inflammatory bowel disease                          | 3<br>(2 - 3)         | 0<br>(0 - 0)          | 0<br>(0 - 0)           | 1<br>(1 - 2)            | 1<br>(0 - 1)            | 1<br>(0 - 1)            |
| Vascular intestinal disorders                       | 4<br>(2 - 7)         | 0<br>(0 - 0)          | 0<br>(0 - 0)           | 1<br>(0 - 1)            | 1<br>(0 - 2)            | 2<br>(1 - 4)            |
| Gallbladder and biliary diseases                    | 8<br>(6 - 10)        | 0<br>(0 - 0)          | 0<br>(0 - 0)           | 2<br>(1 - 2)            | 3<br>(2 - 3)            | 3<br>(2 - 4)            |
| Pancreatitis                                        | 3<br>(2 - 5)         | 0<br>(0 - 0)          | 0<br>(0 - 0)           | 2<br>(1 - 2)            | 1<br>(1 - 1)            | 1<br>(0 - 1)            |
| Other digestive diseases                            | 6<br>(5 - 8)         | 0<br>(0 - 0)          | 0<br>(0 - 0)           | 1<br>(1 - 2)            | 2<br>(2 - 3)            | 3<br>(2 - 4)            |
| Neurological disorders                              | 100<br>(83 - 120)    | 1<br>(1 - 2)          | 1<br>(1 - 1)           | 12<br>(9 - 17)          | 15<br>(11 - 19)         | 72<br>(59 - 86)         |
| Alzheimer disease and other dementias               | 79<br>(64 - 96)      | --                    | --                     | 0<br>(0 - 0)            | 10<br>(8 - 14)          | 68<br>(56 - 83)         |
| Parkinson disease                                   | 1<br>(1 - 2)         | --                    | --                     | 0<br>(0 - 0)            | 0<br>(0 - 0)            | 1<br>(1 - 1)            |
| Epilepsy                                            | 12<br>(9 - 17)       | 0<br>(0 - 1)          | 0<br>(0 - 1)           | 8<br>(6 - 12)           | 2<br>(1 - 3)            | 1<br>(1 - 1)            |
| Multiple sclerosis                                  | 0<br>(0 - 1)         | --                    | --                     | 0<br>(0 - 1)            | 0<br>(0 - 0)            | 0<br>(0 - 0)            |
| Other neurological disorders                        | 8<br>(6 - 10)        | 1<br>(1 - 1)          | 0<br>(0 - 0)           | 3<br>(2 - 4)            | 2<br>(2 - 3)            | 1<br>(1 - 2)            |
| Mental and substance use disorders                  | 63<br>(43 - 88)      | 0<br>(0 - 0)          | 0<br>(0 - 0)           | 49<br>(33 - 70)         | 12<br>(8 - 18)          | 2<br>(1 - 2)            |
| Schizophrenia                                       | 0<br>(0 - 1)         | --                    | --                     | 0<br>(0 - 0)            | 0<br>(0 - 0)            | 0<br>(0 - 0)            |
| Alcohol use disorders                               | 5<br>(3 - 8)         | --                    | --                     | 3<br>(2 - 5)            | 2<br>(1 - 2)            | 0<br>(0 - 1)            |
| Drug use disorders                                  | 58<br>(39 - 81)      | 0<br>(0 - 0)          | --                     | 46<br>(31 - 65)         | 11<br>(6 - 16)          | 1<br>(1 - 1)            |
| Opioid use disorders                                | 32<br>(21 - 45)      | 0<br>(0 - 0)          | --                     | 26<br>(17 - 37)         | 5<br>(3 - 9)            | 1<br>(0 - 1)            |
| Cocaine use disorders                               | 1<br>(0 - 1)         | 0<br>(0 - 0)          | --                     | 1<br>(0 - 1)            | 0<br>(0 - 0)            | 0<br>(0 - 0)            |
| Amphetamine use disorders                           | 1<br>(0 - 1)         | 0<br>(0 - 0)          | --                     | 1<br>(0 - 1)            | 0<br>(0 - 0)            | 0<br>(0 - 0)            |
| Other drug use disorders                            | 25<br>(16 - 35)      | 0<br>(0 - 0)          | --                     | 19<br>(13 - 28)         | 5<br>(3 - 7)            | 0<br>(0 - 1)            |
| Eating disorders                                    | 0<br>(0 - 0)         | --                    | 0<br>(0 - 0)           | 0<br>(0 - 0)            | --                      | --                      |
| Anorexia nervosa                                    | 0<br>(0 - 0)         | --                    | 0<br>(0 - 0)           | 0<br>(0 - 0)            | --                      | --                      |

Web Table 31- Bahrain deaths with 95% UI by age, sex, and cause in 2013

| Cause                                               | Both Sexes, All Ages | Both Sexes, 0-4 Years | Both Sexes, 5-14 Years | Both Sexes, 15-49 Years | Both Sexes, 50-69 Years | Both Sexes, 70-80 Years |
|-----------------------------------------------------|----------------------|-----------------------|------------------------|-------------------------|-------------------------|-------------------------|
| Diabetes, urogenital, blood, and endocrine diseases | 491<br>(404 - 587)   | 4<br>(3 - 6)          | 3<br>(2 - 3)           | 98<br>(76 - 124)        | 182<br>(146 - 226)      | 203<br>(172 - 237)      |
| Diabetes mellitus                                   | 282<br>(231 - 340)   | 0<br>(0 - 0)          | 0<br>(0 - 1)           | 34<br>(27 - 43)         | 122<br>(96 - 153)       | 125<br>(104 - 149)      |
| Acute glomerulonephritis                            | 0<br>(0 - 1)         | 0<br>(0 - 0)          | 0<br>(0 - 0)           | 0<br>(0 - 0)            | 0<br>(0 - 0)            | 0<br>(0 - 0)            |
| Chronic kidney disease                              | 107<br>(86 - 135)    | 0<br>(0 - 1)          | 0<br>(0 - 0)           | 19<br>(14 - 25)         | 41<br>(31 - 54)         | 47<br>(37 - 58)         |
| Chronic kidney disease due to diabetes mellitus     | 4<br>(3 - 9)         | 0<br>(0 - 0)          | 0<br>(0 - 0)           | 1<br>(1 - 3)            | 2<br>(1 - 3)            | 1<br>(1 - 3)            |
| Chronic kidney disease due to hypertension          | 57<br>(43 - 75)      | 0<br>(0 - 0)          | 0<br>(0 - 0)           | 9<br>(7 - 13)           | 22<br>(16 - 30)         | 25<br>(19 - 33)         |
| Chronic kidney disease due to glomerulonephritis    | 3<br>(2 - 4)         | 0<br>(0 - 0)          | 0<br>(0 - 0)           | 1<br>(1 - 1)            | 1<br>(0 - 1)            | 1<br>(1 - 2)            |
| Chronic kidney disease due to other causes          | 43<br>(30 - 60)      | 0<br>(0 - 0)          | 0<br>(0 - 0)           | 7<br>(5 - 11)           | 16<br>(10 - 25)         | 19<br>(13 - 27)         |
| Urinary diseases and male infertility               | 27<br>(17 - 36)      | 0<br>(0 - 0)          | 0<br>(0 - 0)           | 3<br>(2 - 4)            | 5<br>(3 - 6)            | 20<br>(11 - 27)         |
| Interstitial nephritis and urinary tract infections | 4<br>(3 - 6)         | 0<br>(0 - 0)          | 0<br>(0 - 0)           | 1<br>(1 - 2)            | 1<br>(1 - 2)            | 2<br>(1 - 3)            |
| Urolithiasis                                        | 1<br>(0 - 1)         | --                    | 0<br>(0 - 0)           | 0<br>(0 - 0)            | 0<br>(0 - 1)            | 0<br>(0 - 1)            |
| Other urinary diseases                              | 22<br>(13 - 29)      | 0<br>(0 - 0)          | 0<br>(0 - 0)           | 1<br>(1 - 2)            | 3<br>(2 - 4)            | 18<br>(10 - 24)         |
| Gynecological diseases                              | 0<br>(0 - 0)         | --                    | --                     | 0<br>(0 - 0)            | 0<br>(0 - 0)            | 0<br>(0 - 0)            |
| Uterine fibroids                                    | 0<br>(0 - 0)         | --                    | --                     | 0<br>(0 - 0)            | 0<br>(0 - 0)            | 0<br>(0 - 0)            |
| Polycystic ovarian syndrome                         | 0<br>(0 - 0)         | --                    | --                     | 0<br>(0 - 0)            | 0<br>(0 - 0)            | --                      |
| Endometriosis                                       | 0<br>(0 - 0)         | --                    | --                     | 0<br>(0 - 0)            | 0<br>(0 - 0)            | --                      |
| Genital prolapse                                    | 0<br>(0 - 0)         | --                    | --                     | 0<br>(0 - 0)            | 0<br>(0 - 0)            | 0<br>(0 - 0)            |
| Other gynecological diseases                        | 0<br>(0 - 0)         | --                    | --                     | 0<br>(0 - 0)            | 0<br>(0 - 0)            | 0<br>(0 - 0)            |
| Hemoglobinopathies and hemolytic anemias            | 43<br>(26 - 66)      | 1<br>(0 - 1)          | 1<br>(0 - 1)           | 33<br>(20 - 51)         | 5<br>(3 - 8)            | 3<br>(2 - 4)            |
| Thalassemias                                        | 10<br>(7 - 16)       | 0<br>(0 - 1)          | 0<br>(0 - 1)           | 10<br>(6 - 15)          | 0<br>(0 - 0)            | 0<br>(0 - 0)            |
| Sickle cell disorders                               | 27<br>(16 - 41)      | 0<br>(0 - 0)          | 0<br>(0 - 1)           | 21<br>(13 - 33)         | 5<br>(3 - 7)            | 0<br>(0 - 0)            |
| G6PD deficiency                                     | 1<br>(1 - 2)         | 0<br>(0 - 0)          | 0<br>(0 - 0)           | 1<br>(1 - 2)            | 0<br>(0 - 0)            | 0<br>(0 - 0)            |
| Other hemoglobinopathies and hemolytic anemias      | 4<br>(2 - 6)         | 0<br>(0 - 0)          | 0<br>(0 - 0)           | 1<br>(1 - 2)            | 0<br>(0 - 1)            | 2<br>(1 - 4)            |
| Endocrine, metabolic, blood, and immune disorders   | 31<br>(23 - 43)      | 3<br>(2 - 5)          | 1<br>(1 - 1)           | 10<br>(7 - 14)          | 9<br>(6 - 13)           | 9<br>(6 - 13)           |
| Musculoskeletal disorders                           | 19<br>(15 - 26)      | --                    | 1<br>(1 - 1)           | 9<br>(7 - 12)           | 5<br>(3 - 7)            | 5<br>(3 - 6)            |
| Rheumatoid arthritis                                | 3<br>(2 - 5)         | --                    | 0<br>(0 - 0)           | 1<br>(1 - 2)            | 1<br>(1 - 2)            | 1<br>(0 - 1)            |
| Other musculoskeletal disorders                     | 16<br>(12 - 21)      | --                    | 1<br>(0 - 1)           | 8<br>(6 - 10)           | 4<br>(3 - 5)            | 4<br>(3 - 5)            |
| Other non-communicable diseases                     | 98<br>(82 - 119)     | 47<br>(39 - 57)       | 1<br>(1 - 2)           | 9<br>(6 - 11)           | 10<br>(7 - 14)          | 31<br>(23 - 41)         |
| Congenital anomalies                                | 56<br>(47 - 67)      | 47<br>(39 - 56)       | 1<br>(1 - 2)           | 4<br>(3 - 5)            | 2<br>(2 - 3)            | 2<br>(2 - 3)            |
| Neural tube defects                                 | 2<br>(1 - 3)         | 2<br>(1 - 3)          | 0<br>(0 - 0)           | 0<br>(0 - 0)            | 0<br>(0 - 0)            | 0<br>(0 - 0)            |
| Congenital heart anomalies                          | 19<br>(14 - 23)      | 17<br>(13 - 21)       | 1<br>(0 - 1)           | 1<br>(1 - 1)            | 0<br>(0 - 0)            | 0<br>(0 - 0)            |
| Cleft lip and cleft palate                          | 0<br>(0 - 0)         | 0<br>(0 - 0)          | --                     | --                      | --                      | --                      |
| Down syndrome                                       | 0<br>(0 - 0)         | 0<br>(0 - 0)          | 0<br>(0 - 0)           | 0<br>(0 - 0)            | 0<br>(0 - 0)            | 0<br>(0 - 0)            |
| Chromosomal unbalanced rearrangements               | 4<br>(2 - 6)         | 3<br>(2 - 5)          | 0<br>(0 - 0)           | 0<br>(0 - 0)            | 0<br>(0 - 0)            | 0<br>(0 - 0)            |
| Other congenital anomalies                          | 32<br>(25 - 39)      | 25<br>(20 - 31)       | 1<br>(0 - 1)           | 2<br>(2 - 3)            | 2<br>(1 - 2)            | 2<br>(1 - 2)            |
| Skin and subcutaneous diseases                      | 42<br>(30 - 56)      | 0<br>(0 - 1)          | 0<br>(0 - 0)           | 5<br>(3 - 7)            | 8<br>(5 - 11)           | 29<br>(21 - 39)         |
| Cellulitis                                          | 1<br>(1 - 2)         | 0<br>(0 - 0)          | 0<br>(0 - 0)           | 0<br>(0 - 0)            | 0<br>(0 - 0)            | 1<br>(0 - 1)            |
| Pyoderma                                            | 38<br>(28 - 51)      | 0<br>(0 - 0)          | 0<br>(0 - 0)           | 3<br>(2 - 5)            | 7<br>(5 - 10)           | 27<br>(20 - 37)         |
| Decubitus ulcer                                     | 2<br>(2 - 4)         | 0<br>(0 - 0)          | 0<br>(0 - 0)           | 1<br>(1 - 1)            | 1<br>(0 - 1)            | 1<br>(0 - 1)            |
| Other skin and subcutaneous diseases                | 0<br>(0 - 1)         | 0<br>(0 - 0)          | 0<br>(0 - 0)           | 0<br>(0 - 0)            | 0<br>(0 - 0)            | 0<br>(0 - 0)            |

Web Table 31- Bahrain deaths with 95% UI by age, sex, and cause in 2013

| Cause                                           | Both Sexes, All Ages | Both Sexes, 0-4 Years | Both Sexes, 5-14 Years | Both Sexes, 15-49 Years | Both Sexes, 50-69 Years | Both Sexes, 70-80 Years |
|-------------------------------------------------|----------------------|-----------------------|------------------------|-------------------------|-------------------------|-------------------------|
| Sudden infant death syndrome                    | 0<br>(0 - 1)         | 0<br>(0 - 1)          | --                     | --                      | --                      | --                      |
| Injuries                                        | 429<br>(344 - 532)   | 8<br>(6 - 10)         | 9<br>(7 - 10)          | 289<br>(226 - 364)      | 71<br>(55 - 92)         | 52<br>(42 - 65)         |
| Transport injuries                              | 167<br>(130 - 210)   | 3<br>(2 - 5)          | 5<br>(4 - 6)           | 123<br>(94 - 157)       | 25<br>(19 - 33)         | 10<br>(8 - 13)          |
| Road injuries                                   | 161<br>(124 - 202)   | 3<br>(2 - 4)          | 5<br>(4 - 6)           | 119<br>(90 - 151)       | 24<br>(18 - 31)         | 10<br>(7 - 13)          |
| Pedestrian road injuries                        | 10<br>(7 - 15)       | 0<br>(0 - 1)          | 0<br>(0 - 1)           | 6<br>(4 - 10)           | 2<br>(1 - 3)            | 2<br>(1 - 3)            |
| Cyclist road injuries                           | 2<br>(2 - 3)         | 0<br>(0 - 0)          | 0<br>(0 - 0)           | 1<br>(1 - 2)            | 1<br>(0 - 1)            | 0<br>(0 - 1)            |
| Motorcyclist road injuries                      | 5<br>(3 - 7)         | 0<br>(0 - 0)          | 0<br>(0 - 0)           | 4<br>(2 - 6)            | 1<br>(0 - 1)            | 0<br>(0 - 1)            |
| Motor vehicle road injuries                     | 142<br>(109 - 179)   | 2<br>(2 - 4)          | 4<br>(3 - 5)           | 107<br>(81 - 138)       | 21<br>(15 - 28)         | 7<br>(5 - 9)            |
| Other road injuries                             | 1<br>(0 - 1)         | 0<br>(0 - 0)          | 0<br>(0 - 0)           | 0<br>(0 - 0)            | 0<br>(0 - 0)            | 0<br>(0 - 0)            |
| Other transport injuries                        | 6<br>(5 - 8)         | 0<br>(0 - 0)          | 0<br>(0 - 0)           | 4<br>(3 - 6)            | 1<br>(1 - 2)            | 0<br>(0 - 1)            |
| Unintentional injuries                          | 105<br>(83 - 134)    | 4<br>(2 - 5)          | 3<br>(2 - 3)           | 43<br>(33 - 57)         | 21<br>(16 - 29)         | 35<br>(27 - 44)         |
| Falls                                           | 13<br>(9 - 18)       | 0<br>(0 - 0)          | 0<br>(0 - 0)           | 7<br>(4 - 9)            | 3<br>(2 - 4)            | 3<br>(2 - 4)            |
| Drowning                                        | 13<br>(9 - 20)       | 1<br>(1 - 2)          | 1<br>(1 - 2)           | 8<br>(5 - 13)           | 2<br>(1 - 3)            | 1<br>(0 - 1)            |
| Fire, heat, and hot substances                  | 13<br>(8 - 18)       | 0<br>(0 - 1)          | 0<br>(0 - 0)           | 7<br>(4 - 10)           | 2<br>(1 - 4)            | 3<br>(2 - 4)            |
| Poisonings                                      | 2<br>(1 - 2)         | 0<br>(0 - 0)          | 0<br>(0 - 0)           | 1<br>(1 - 1)            | 0<br>(0 - 0)            | 0<br>(0 - 1)            |
| Exposure to mechanical forces                   | 9<br>(7 - 11)        | 0<br>(0 - 0)          | 0<br>(0 - 0)           | 5<br>(4 - 7)            | 2<br>(1 - 3)            | 1<br>(1 - 2)            |
| Unintentional firearm injuries                  | 3<br>(2 - 4)         | 0<br>(0 - 0)          | 0<br>(0 - 0)           | 2<br>(1 - 3)            | 0<br>(0 - 1)            | 0<br>(0 - 0)            |
| Unintentional suffocation                       | 1<br>(1 - 1)         | 0<br>(0 - 0)          | 0<br>(0 - 0)           | 0<br>(0 - 1)            | 0<br>(0 - 0)            | 0<br>(0 - 0)            |
| Other exposure to mechanical forces             | 6<br>(4 - 7)         | 0<br>(0 - 0)          | 0<br>(0 - 0)           | 3<br>(2 - 4)            | 1<br>(1 - 2)            | 1<br>(1 - 1)            |
| Adverse effects of medical treatment            | 41<br>(28 - 56)      | 1<br>(0 - 1)          | 0<br>(0 - 1)           | 8<br>(4 - 11)           | 10<br>(6 - 15)          | 23<br>(15 - 31)         |
| Animal contact                                  | 3<br>(2 - 4)         | 0<br>(0 - 0)          | 0<br>(0 - 0)           | 1<br>(1 - 2)            | 1<br>(0 - 1)            | 1<br>(0 - 1)            |
| Venomous animal contact                         | 1<br>(1 - 2)         | 0<br>(0 - 0)          | 0<br>(0 - 0)           | 1<br>(0 - 1)            | 0<br>(0 - 1)            | 0<br>(0 - 0)            |
| Non-venomous animal contact                     | 2<br>(1 - 3)         | 0<br>(0 - 0)          | 0<br>(0 - 0)           | 1<br>(0 - 1)            | 0<br>(0 - 1)            | 0<br>(0 - 1)            |
| Foreign body                                    | 2<br>(2 - 4)         | 0<br>(0 - 0)          | 0<br>(0 - 0)           | 1<br>(1 - 1)            | 0<br>(0 - 1)            | 1<br>(1 - 1)            |
| Pulmonary aspiration and foreign body in airway | 2<br>(1 - 3)         | 0<br>(0 - 0)          | 0<br>(0 - 0)           | 1<br>(0 - 1)            | 0<br>(0 - 1)            | 1<br>(1 - 1)            |
| Foreign body in other body part                 | 0<br>(0 - 0)         | 0<br>(0 - 0)          | 0<br>(0 - 0)           | 0<br>(0 - 0)            | 0<br>(0 - 0)            | 0<br>(0 - 0)            |
| Other unintentional injuries                    | 10<br>(7 - 13)       | 0<br>(0 - 0)          | 0<br>(0 - 1)           | 6<br>(4 - 10)           | 1<br>(1 - 2)            | 2<br>(1 - 2)            |
| Self-harm and interpersonal violence            | 157<br>(112 - 209)   | 1<br>(0 - 1)          | 1<br>(0 - 1)           | 123<br>(87 - 165)       | 25<br>(16 - 35)         | 7<br>(5 - 10)           |
| Self-harm                                       | 128<br>(88 - 174)    | --                    | 0<br>(0 - 1)           | 101<br>(70 - 137)       | 21<br>(13 - 30)         | 6<br>(5 - 8)            |
| Interpersonal violence                          | 28<br>(16 - 42)      | 1<br>(0 - 1)          | 1<br>(0 - 1)           | 22<br>(13 - 32)         | 4<br>(2 - 6)            | 1<br>(1 - 2)            |
| Assault by firearm                              | 7<br>(3 - 12)        | 0<br>(0 - 0)          | 0<br>(0 - 0)           | 6<br>(3 - 10)           | 1<br>(0 - 2)            | 0<br>(0 - 0)            |
| Assault by sharp object                         | 5<br>(3 - 9)         | 0<br>(0 - 0)          | 0<br>(0 - 0)           | 4<br>(2 - 8)            | 1<br>(0 - 2)            | 0<br>(0 - 0)            |
| Assault by other means                          | 17<br>(8 - 25)       | 1<br>(0 - 1)          | 0<br>(0 - 1)           | 13<br>(6 - 19)          | 2<br>(1 - 4)            | 1<br>(0 - 2)            |
| Forces of nature, war, and legal intervention   | 0<br>(0 - 0)         | 0<br>(0 - 0)          | 0<br>(0 - 0)           | 0<br>(0 - 0)            | 0<br>(0 - 0)            | 0<br>(0 - 0)            |
| Collective violence and legal intervention      | 0<br>(0 - 0)         | 0<br>(0 - 0)          | 0<br>(0 - 0)           | 0<br>(0 - 0)            | 0<br>(0 - 0)            | 0<br>(0 - 0)            |

Web Table 31- Bahrain deaths with 95% UI by age, sex, and cause in 2013

| Cause                                                             | Males, All Ages          | Males, 0-4 Years | Males, 5-14 Years | Males, 15-49 Years | Males, 50-69 Years | Males, 70-80 Years |
|-------------------------------------------------------------------|--------------------------|------------------|-------------------|--------------------|--------------------|--------------------|
| All causes                                                        | 1,725<br>(1,366 - 2,149) | 71<br>(62 - 80)  | 13<br>(11 - 15)   | 616<br>(466 - 773) | 552<br>(426 - 707) | 472<br>(389 - 584) |
| Communicable, maternal, neonatal, and nutritional diseases        | 137<br>(114 - 165)       | 36<br>(30 - 42)  | 3<br>(2 - 5)      | 37<br>(29 - 48)    | 27<br>(20 - 36)    | 34<br>(25 - 45)    |
| HIV/AIDS and tuberculosis                                         | 17<br>(14 - 22)          | 0<br>(0 - 0)     | 0<br>(0 - 0)      | 12<br>(9 - 14)     | 3<br>(3 - 4)       | 2<br>(1 - 4)       |
| Tuberculosis                                                      | 6<br>(5 - 9)             | 0<br>(0 - 0)     | 0<br>(0 - 0)      | 3<br>(2 - 4)       | 2<br>(1 - 3)       | 2<br>(1 - 2)       |
| HIV/AIDS                                                          | 11<br>(8 - 15)           | 0<br>(0 - 0)     | 0<br>(0 - 0)      | 9<br>(7 - 11)      | 1<br>(1 - 2)       | 0<br>(0 - 3)       |
| HIV/AIDS resulting in mycobacterial infection                     | 1<br>(0 - 1)             | 0<br>(0 - 0)     | 0<br>(0 - 0)      | 1<br>(0 - 1)       | 0<br>(0 - 0)       | 0<br>(0 - 0)       |
| HIV/AIDS resulting in other diseases                              | 10<br>(8 - 14)           | 0<br>(0 - 0)     | 0<br>(0 - 0)      | 8<br>(6 - 10)      | 1<br>(1 - 2)       | 0<br>(0 - 3)       |
| Diarrhea, lower respiratory, and other common infectious diseases | 67<br>(48 - 88)          | 5<br>(3 - 7)     | 3<br>(1 - 5)      | 19<br>(12 - 29)    | 13<br>(9 - 19)     | 27<br>(19 - 38)    |
| Diarrheal diseases                                                | 4<br>(3 - 6)             | 0<br>(0 - 1)     | 0<br>(0 - 0)      | 1<br>(1 - 1)       | 1<br>(1 - 1)       | 2<br>(1 - 3)       |
| Intestinal infectious diseases                                    | 10<br>(3 - 23)           | 2<br>(1 - 4)     | 2<br>(1 - 4)      | 6<br>(1 - 14)      | 1<br>(0 - 2)       | 0<br>(0 - 0)       |
| Typhoid fever                                                     | 8<br>(2 - 18)            | 1<br>(0 - 3)     | 1<br>(1 - 3)      | 4<br>(1 - 11)      | 1<br>(0 - 2)       | 0<br>(0 - 0)       |
| Paratyphoid fever                                                 | 2<br>(1 - 5)             | 0<br>(0 - 1)     | 0<br>(0 - 1)      | 1<br>(0 - 3)       | 0<br>(0 - 0)       | 0<br>(0 - 0)       |
| Other intestinal infectious diseases                              | 0<br>(0 - 1)             | 0<br>(0 - 0)     | 0<br>(0 - 0)      | 0<br>(0 - 1)       | 0<br>(0 - 0)       | 0<br>(0 - 0)       |
| Lower respiratory infections                                      | 45<br>(31 - 61)          | 1<br>(1 - 2)     | 0<br>(0 - 1)      | 9<br>(5 - 12)      | 11<br>(7 - 16)     | 24<br>(16 - 34)    |
| Upper respiratory infections                                      | 0<br>(0 - 0)             | 0<br>(0 - 0)     | 0<br>(0 - 0)      | 0<br>(0 - 0)       | 0<br>(0 - 0)       | 0<br>(0 - 0)       |
| Otitis media                                                      | 0<br>(0 - 0)             | 0<br>(0 - 0)     | 0<br>(0 - 0)      | 0<br>(0 - 0)       | 0<br>(0 - 0)       | 0<br>(0 - 0)       |
| Meningitis                                                        | 2<br>(2 - 3)             | 0<br>(0 - 0)     | 0<br>(0 - 0)      | 1<br>(1 - 2)       | 1<br>(0 - 1)       | 0<br>(0 - 1)       |
| Pneumococcal meningitis                                           | 1<br>(0 - 1)             | 0<br>(0 - 0)     | 0<br>(0 - 0)      | 0<br>(0 - 0)       | 0<br>(0 - 0)       | 0<br>(0 - 0)       |
| H influenzae type B meningitis                                    | 0<br>(0 - 1)             | 0<br>(0 - 0)     | 0<br>(0 - 0)      | 0<br>(0 - 0)       | 0<br>(0 - 0)       | 0<br>(0 - 0)       |
| Meningococcal meningitis                                          | 1<br>(0 - 1)             | 0<br>(0 - 0)     | 0<br>(0 - 0)      | 0<br>(0 - 1)       | 0<br>(0 - 0)       | 0<br>(0 - 0)       |
| Other meningitis                                                  | 1<br>(1 - 1)             | 0<br>(0 - 0)     | 0<br>(0 - 0)      | 0<br>(0 - 1)       | 0<br>(0 - 0)       | 0<br>(0 - 0)       |
| Encephalitis                                                      | 3<br>(2 - 5)             | 0<br>(0 - 1)     | 0<br>(0 - 0)      | 2<br>(1 - 3)       | 0<br>(0 - 1)       | 0<br>(0 - 0)       |
| Diphtheria                                                        | 0<br>(0 - 0)             | 0<br>(0 - 0)     | 0<br>(0 - 0)      | 0<br>(0 - 0)       | 0<br>(0 - 0)       | --                 |
| Whooping cough                                                    | 0<br>(0 - 1)             | 0<br>(0 - 1)     | 0<br>(0 - 0)      | 0<br>(0 - 0)       | 0<br>(0 - 0)       | --                 |
| Tetanus                                                           | 0<br>(0 - 0)             | 0<br>(0 - 0)     | 0<br>(0 - 0)      | 0<br>(0 - 0)       | 0<br>(0 - 0)       | 0<br>(0 - 0)       |
| Measles                                                           | 0<br>(0 - 2)             | 0<br>(0 - 2)     | 0<br>(0 - 0)      | 0<br>(0 - 0)       | 0<br>(0 - 0)       | --                 |
| Varicella and herpes zoster                                       | 0<br>(0 - 0)             | 0<br>(0 - 0)     | 0<br>(0 - 0)      | 0<br>(0 - 0)       | 0<br>(0 - 0)       | 0<br>(0 - 0)       |
| Neglected tropical diseases and malaria                           | 1<br>(1 - 1)             | 0<br>(0 - 0)     | 0<br>(0 - 0)      | 1<br>(0 - 1)       | 0<br>(0 - 0)       | 0<br>(0 - 0)       |
| Leishmaniasis                                                     | 0<br>(0 - 1)             | 0<br>(0 - 0)     | 0<br>(0 - 0)      | 0<br>(0 - 0)       | 0<br>(0 - 0)       | 0<br>(0 - 0)       |
| Visceral leishmaniasis                                            | 0<br>(0 - 1)             | 0<br>(0 - 0)     | 0<br>(0 - 0)      | 0<br>(0 - 0)       | 0<br>(0 - 0)       | 0<br>(0 - 0)       |
| Cysticercosis                                                     | 0<br>(0 - 0)             | 0<br>(0 - 0)     | 0<br>(0 - 0)      | 0<br>(0 - 0)       | 0<br>(0 - 0)       | 0<br>(0 - 0)       |
| Cystic echinococcosis                                             | 0<br>(0 - 0)             | 0<br>(0 - 0)     | 0<br>(0 - 0)      | 0<br>(0 - 0)       | 0<br>(0 - 0)       | 0<br>(0 - 0)       |
| Dengue                                                            | 0<br>(0 - 0)             | 0<br>(0 - 0)     | 0<br>(0 - 0)      | 0<br>(0 - 0)       | 0<br>(0 - 0)       | 0<br>(0 - 0)       |
| Rabies                                                            | 0<br>(0 - 0)             | 0<br>(0 - 0)     | 0<br>(0 - 0)      | 0<br>(0 - 0)       | 0<br>(0 - 0)       | 0<br>(0 - 0)       |
| Intestinal nematode infections                                    | 0<br>(0 - 0)             | 0<br>(0 - 0)     | 0<br>(0 - 0)      | 0<br>(0 - 0)       | 0<br>(0 - 0)       | 0<br>(0 - 0)       |
| Ascariasis                                                        | 0<br>(0 - 0)             | 0<br>(0 - 0)     | 0<br>(0 - 0)      | 0<br>(0 - 0)       | 0<br>(0 - 0)       | 0<br>(0 - 0)       |
| Other neglected tropical diseases                                 | 1<br>(0 - 1)             | 0<br>(0 - 0)     | 0<br>(0 - 0)      | 0<br>(0 - 0)       | 0<br>(0 - 0)       | 0<br>(0 - 0)       |
| Maternal disorders                                                | --                       | --               | --                | --                 | --                 | --                 |
| Maternal hemorrhage                                               | --                       | --               | --                | --                 | --                 | --                 |
| Maternal sepsis and other maternal infections                     | --                       | --               | --                | --                 | --                 | --                 |

Web Table 31- Bahrain deaths with 95% UI by age, sex, and cause in 2013

| Cause                                                            | Males, All Ages        | Males, 0-4 Years | Males, 5-14 Years | Males, 15-49 Years | Males, 50-69 Years | Males, 70-80 Years |
|------------------------------------------------------------------|------------------------|------------------|-------------------|--------------------|--------------------|--------------------|
| Maternal hypertensive disorders                                  | --                     | --               | --                | --                 | --                 | --                 |
| Maternal obstructed labor                                        | --                     | --               | --                | --                 | --                 | --                 |
| Maternal abortive outcome                                        | --                     | --               | --                | --                 | --                 | --                 |
| Indirect maternal deaths                                         | --                     | --               | --                | --                 | --                 | --                 |
| Late maternal deaths                                             | --                     | --               | --                | --                 | --                 | --                 |
| Maternal deaths aggravated by HIV/AIDS                           | --                     | --               | --                | --                 | --                 | --                 |
| Other maternal disorders                                         | --                     | --               | --                | --                 | --                 | --                 |
| Neonatal disorders                                               | 31<br>(25 - 36)        | 31<br>(25 - 36)  | --                | --                 | --                 | --                 |
| Neonatal preterm birth complications                             | 20<br>(15 - 25)        | 20<br>(15 - 25)  | --                | --                 | --                 | --                 |
| Neonatal encephalopathy due to birth asphyxia and trauma         | 5<br>(3 - 8)           | 5<br>(3 - 8)     | --                | --                 | --                 | --                 |
| Neonatal sepsis and other neonatal infections                    | 1<br>(0 - 1)           | 1<br>(0 - 1)     | --                | --                 | --                 | --                 |
| Hemolytic disease and other neonatal jaundice                    | 0<br>(0 - 0)           | 0<br>(0 - 0)     | --                | --                 | --                 | --                 |
| Other neonatal disorders                                         | 5<br>(3 - 8)           | 5<br>(3 - 8)     | --                | --                 | --                 | --                 |
| Nutritional deficiencies                                         | 3<br>(2 - 4)           | 0<br>(0 - 0)     | 0<br>(0 - 0)      | 1<br>(0 - 1)       | 1<br>(0 - 1)       | 2<br>(1 - 3)       |
| Protein-energy malnutrition                                      | 1<br>(1 - 2)           | 0<br>(0 - 0)     | 0<br>(0 - 0)      | 0<br>(0 - 0)       | 0<br>(0 - 0)       | 1<br>(0 - 1)       |
| Iodine deficiency                                                | 0<br>(0 - 0)           | 0<br>(0 - 0)     | 0<br>(0 - 0)      | 0<br>(0 - 0)       | 0<br>(0 - 0)       | 0<br>(0 - 0)       |
| Iron-deficiency anemia                                           | 1<br>(1 - 2)           | 0<br>(0 - 0)     | 0<br>(0 - 0)      | 0<br>(0 - 0)       | 0<br>(0 - 1)       | 1<br>(0 - 1)       |
| Other nutritional deficiencies                                   | 0<br>(0 - 1)           | 0<br>(0 - 0)     | 0<br>(0 - 0)      | 0<br>(0 - 0)       | 0<br>(0 - 0)       | 0<br>(0 - 0)       |
| Other communicable, maternal, neonatal, and nutritional diseases | 19<br>(13 - 27)        | 0<br>(0 - 1)     | 0<br>(0 - 0)      | 6<br>(4 - 9)       | 10<br>(6 - 15)     | 3<br>(2 - 4)       |
| Sexually transmitted diseases excluding HIV                      | 1<br>(0 - 1)           | 0<br>(0 - 0)     | 0<br>(0 - 0)      | 0<br>(0 - 0)       | 0<br>(0 - 0)       | 0<br>(0 - 0)       |
| Syphilis                                                         | 0<br>(0 - 1)           | 0<br>(0 - 0)     | 0<br>(0 - 0)      | 0<br>(0 - 0)       | 0<br>(0 - 0)       | 0<br>(0 - 0)       |
| Chlamydial infection                                             | --                     | --               | --                | --                 | --                 | --                 |
| Gonococcal infection                                             | 0<br>(0 - 0)           | --               | 0<br>(0 - 0)      | 0<br>(0 - 0)       | 0<br>(0 - 0)       | 0<br>(0 - 0)       |
| Other sexually transmitted diseases                              | 0<br>(0 - 0)           | --               | 0<br>(0 - 0)      | 0<br>(0 - 0)       | 0<br>(0 - 0)       | 0<br>(0 - 0)       |
| Hepatitis                                                        | 14<br>(9 - 22)         | 0<br>(0 - 0)     | 0<br>(0 - 0)      | 4<br>(2 - 7)       | 9<br>(5 - 14)      | 2<br>(1 - 3)       |
| Acute hepatitis A                                                | 1<br>(0 - 2)           | 0<br>(0 - 0)     | 0<br>(0 - 0)      | 0<br>(0 - 1)       | 0<br>(0 - 1)       | 0<br>(0 - 0)       |
| Acute hepatitis B                                                | 9<br>(5 - 14)          | 0<br>(0 - 0)     | 0<br>(0 - 0)      | 2<br>(1 - 4)       | 6<br>(3 - 9)       | 1<br>(1 - 2)       |
| Acute hepatitis C                                                | 1<br>(0 - 3)           | --               | 0<br>(0 - 0)      | 0<br>(0 - 1)       | 1<br>(0 - 2)       | 0<br>(0 - 1)       |
| Acute hepatitis E                                                | 4<br>(1 - 7)           | 0<br>(0 - 0)     | 0<br>(0 - 0)      | 2<br>(1 - 3)       | 2<br>(1 - 4)       | 0<br>(0 - 0)       |
| Other infectious diseases                                        | 4<br>(2 - 6)           | 0<br>(0 - 0)     | 0<br>(0 - 0)      | 1<br>(1 - 2)       | 1<br>(1 - 2)       | 1<br>(1 - 2)       |
| Non-communicable diseases                                        | 1,248<br>(977 - 1,573) | 31<br>(25 - 38)  | 5<br>(4 - 6)      | 332<br>(246 - 425) | 469<br>(362 - 602) | 411<br>(337 - 508) |
| Neoplasms                                                        | 244<br>(185 - 315)     | 1<br>(0 - 1)     | 2<br>(1 - 3)      | 63<br>(45 - 83)    | 110<br>(82 - 143)  | 69<br>(53 - 88)    |
| Esophageal cancer                                                | 5<br>(4 - 8)           | --               | --                | 1<br>(1 - 1)       | 3<br>(2 - 4)       | 2<br>(1 - 2)       |
| Stomach cancer                                                   | 14<br>(10 - 19)        | --               | --                | 3<br>(2 - 4)       | 7<br>(5 - 9)       | 4<br>(3 - 6)       |
| Liver cancer                                                     | 11<br>(7 - 16)         | --               | 0<br>(0 - 0)      | 2<br>(1 - 3)       | 6<br>(4 - 9)       | 3<br>(2 - 5)       |
| Liver cancer due to hepatitis B                                  | 4<br>(2 - 7)           | --               | 0<br>(0 - 0)      | 1<br>(0 - 2)       | 2<br>(1 - 4)       | 1<br>(0 - 2)       |
| Liver cancer due to hepatitis C                                  | 5<br>(3 - 8)           | --               | 0<br>(0 - 0)      | 1<br>(0 - 2)       | 3<br>(1 - 5)       | 1<br>(1 - 3)       |
| Liver cancer due to alcohol use                                  | 1<br>(1 - 3)           | --               | --                | 0<br>(0 - 0)       | 1<br>(0 - 1)       | 1<br>(0 - 1)       |
| Liver cancer due to other causes                                 | 1<br>(0 - 1)           | --               | 0<br>(0 - 0)      | 0<br>(0 - 0)       | 0<br>(0 - 1)       | 0<br>(0 - 0)       |
| Larynx cancer                                                    | 3<br>(2 - 5)           | --               | --                | 0<br>(0 - 0)       | 1<br>(1 - 2)       | 2<br>(1 - 3)       |

Web Table 31- Bahrain deaths with 95% UI by age, sex, and cause in 2013

| Cause                                         | Males, All Ages    | Males, 0-4 Years | Males, 5-14 Years | Males, 15-49 Years | Males, 50-69 Years | Males, 70-80 Years |
|-----------------------------------------------|--------------------|------------------|-------------------|--------------------|--------------------|--------------------|
| Tracheal, bronchus and lung cancer            | 45<br>(33 - 66)    | --               | --                | 5<br>(3 - 7)       | 23<br>(16 - 34)    | 17<br>(12 - 24)    |
| Breast cancer                                 | 1<br>(1 - 1)       | --               | --                | 1<br>(0 - 1)       | 0<br>(0 - 0)       | 0<br>(0 - 0)       |
| Cervical cancer                               | --                 | --               | --                | --                 | --                 | --                 |
| Uterine cancer                                | --                 | --               | --                | --                 | --                 | --                 |
| Prostate cancer                               | 16<br>(9 - 26)     | --               | --                | 0<br>(0 - 1)       | 5<br>(3 - 9)       | 10<br>(6 - 16)     |
| Colon and rectum cancer                       | 24<br>(18 - 32)    | --               | --                | 7<br>(5 - 10)      | 12<br>(9 - 16)     | 5<br>(3 - 7)       |
| Lip and oral cavity cancer                    | 4<br>(3 - 7)       | --               | --                | 1<br>(1 - 1)       | 3<br>(2 - 4)       | 1<br>(0 - 1)       |
| Nasopharynx cancer                            | 2<br>(1 - 3)       | --               | 0<br>(0 - 0)      | 1<br>(1 - 1)       | 1<br>(0 - 1)       | 0<br>(0 - 0)       |
| Other pharynx cancer                          | 1<br>(1 - 2)       | --               | --                | 0<br>(0 - 0)       | 1<br>(0 - 1)       | 0<br>(0 - 0)       |
| Gallbladder and biliary tract cancer          | 1<br>(1 - 2)       | --               | --                | 0<br>(0 - 0)       | 1<br>(0 - 1)       | 0<br>(0 - 0)       |
| Pancreatic cancer                             | 20<br>(15 - 26)    | --               | --                | 5<br>(3 - 7)       | 10<br>(7 - 14)     | 5<br>(3 - 7)       |
| Malignant skin melanoma                       | 1<br>(1 - 2)       | --               | --                | 0<br>(0 - 1)       | 1<br>(0 - 1)       | 0<br>(0 - 0)       |
| Non-melanoma skin cancer                      | 1<br>(1 - 2)       | --               | --                | 0<br>(0 - 0)       | 0<br>(0 - 1)       | 0<br>(0 - 1)       |
| Ovarian cancer                                | --                 | --               | --                | --                 | --                 | --                 |
| Testicular cancer                             | 1<br>(0 - 1)       | --               | --                | 1<br>(0 - 1)       | 0<br>(0 - 0)       | 0<br>(0 - 0)       |
| Kidney cancer                                 | 8<br>(6 - 12)      | 0<br>(0 - 0)     | 0<br>(0 - 0)      | 2<br>(1 - 2)       | 5<br>(3 - 8)       | 2<br>(1 - 3)       |
| Bladder cancer                                | 8<br>(6 - 12)      | --               | --                | 1<br>(0 - 1)       | 4<br>(3 - 5)       | 4<br>(3 - 6)       |
| Brain and nervous system cancer               | 11<br>(6 - 18)     | 0<br>(0 - 0)     | 0<br>(0 - 1)      | 5<br>(3 - 8)       | 5<br>(3 - 9)       | 1<br>(0 - 1)       |
| Thyroid cancer                                | 0<br>(0 - 1)       | --               | 0<br>(0 - 0)      | 0<br>(0 - 0)       | 0<br>(0 - 0)       | 0<br>(0 - 0)       |
| Mesothelioma                                  | 1<br>(1 - 2)       | --               | --                | 0<br>(0 - 0)       | 1<br>(0 - 1)       | 1<br>(0 - 1)       |
| Hodgkin lymphoma                              | 3<br>(2 - 5)       | 0<br>(0 - 0)     | 0<br>(0 - 0)      | 1<br>(1 - 2)       | 1<br>(1 - 2)       | 0<br>(0 - 0)       |
| Non-Hodgkin lymphoma                          | 15<br>(9 - 22)     | 0<br>(0 - 0)     | 0<br>(0 - 0)      | 7<br>(4 - 11)      | 4<br>(2 - 7)       | 3<br>(2 - 5)       |
| Multiple myeloma                              | 4<br>(2 - 6)       | --               | --                | 1<br>(0 - 1)       | 2<br>(1 - 4)       | 1<br>(1 - 2)       |
| Leukemia                                      | 19<br>(14 - 25)    | 0<br>(0 - 0)     | 1<br>(0 - 1)      | 9<br>(6 - 12)      | 6<br>(4 - 8)       | 4<br>(2 - 5)       |
| Other neoplasms                               | 23<br>(15 - 32)    | 0<br>(0 - 1)     | 1<br>(0 - 1)      | 10<br>(6 - 14)     | 8<br>(5 - 12)      | 4<br>(3 - 6)       |
| Cardiovascular diseases                       | 430<br>(332 - 549) | 1<br>(1 - 1)     | 1<br>(0 - 1)      | 118<br>(86 - 152)  | 177<br>(134 - 230) | 134<br>(107 - 169) |
| Rheumatic heart disease                       | 2<br>(1 - 4)       | 0<br>(0 - 0)     | 0<br>(0 - 0)      | 1<br>(0 - 2)       | 1<br>(0 - 1)       | 0<br>(0 - 1)       |
| Ischemic heart disease                        | 271<br>(203 - 355) | 0<br>(0 - 0)     | 0<br>(0 - 0)      | 82<br>(59 - 108)   | 118<br>(88 - 156)  | 71<br>(55 - 94)    |
| Cerebrovascular disease                       | 92<br>(65 - 126)   | 1<br>(0 - 1)     | 0<br>(0 - 0)      | 20<br>(13 - 27)    | 31<br>(21 - 44)    | 41<br>(29 - 55)    |
| Ischemic stroke                               | 53<br>(35 - 72)    | 0<br>(0 - 0)     | 0<br>(0 - 0)      | 6<br>(3 - 9)       | 15<br>(9 - 22)     | 32<br>(22 - 43)    |
| Hemorrhagic stroke                            | 39<br>(26 - 57)    | 0<br>(0 - 1)     | 0<br>(0 - 0)      | 14<br>(9 - 20)     | 16<br>(10 - 24)    | 9<br>(6 - 14)      |
| Hypertensive heart disease                    | 9<br>(5 - 13)      | 0<br>(0 - 0)     | 0<br>(0 - 0)      | 2<br>(1 - 3)       | 3<br>(2 - 6)       | 3<br>(2 - 5)       |
| Cardiomyopathy and myocarditis                | 17<br>(11 - 25)    | 0<br>(0 - 0)     | 0<br>(0 - 0)      | 5<br>(3 - 7)       | 8<br>(5 - 12)      | 4<br>(3 - 7)       |
| Atrial fibrillation and flutter               | 6<br>(4 - 9)       | --               | --                | 1<br>(0 - 1)       | 2<br>(1 - 3)       | 4<br>(2 - 6)       |
| Aortic aneurysm                               | 10<br>(7 - 15)     | --               | --                | 1<br>(1 - 2)       | 6<br>(4 - 9)       | 3<br>(2 - 4)       |
| Peripheral vascular disease                   | 6<br>(4 - 9)       | --               | --                | 1<br>(1 - 2)       | 2<br>(1 - 4)       | 2<br>(1 - 4)       |
| Endocarditis                                  | 3<br>(2 - 5)       | 0<br>(0 - 0)     | 0<br>(0 - 0)      | 1<br>(0 - 1)       | 1<br>(1 - 2)       | 1<br>(1 - 2)       |
| Other cardiovascular and circulatory diseases | 13<br>(9 - 17)     | 0<br>(0 - 0)     | 0<br>(0 - 0)      | 5<br>(3 - 7)       | 4<br>(3 - 6)       | 3<br>(2 - 5)       |
| Chronic respiratory diseases                  | 77<br>(56 - 98)    | 0<br>(0 - 1)     | 0<br>(0 - 0)      | 9<br>(6 - 12)      | 21<br>(15 - 29)    | 45<br>(33 - 58)    |
| Chronic obstructive pulmonary disease         | 52<br>(38 - 67)    | 0<br>(0 - 0)     | 0<br>(0 - 0)      | 2<br>(2 - 3)       | 14<br>(9 - 19)     | 36<br>(26 - 46)    |

Web Table 31- Bahrain deaths with 95% UI by age, sex, and cause in 2013

| Cause                                               | Males, All Ages | Males, 0-4 Years | Males, 5-14 Years | Males, 15-49 Years | Males, 50-69 Years | Males, 70-80 Years |
|-----------------------------------------------------|-----------------|------------------|-------------------|--------------------|--------------------|--------------------|
| Pneumoconiosis                                      | 1<br>(1 - 2)    | 0<br>(0 - 0)     | 0<br>(0 - 0)      | 1<br>(0 - 1)       | 0<br>(0 - 1)       | 0<br>(0 - 1)       |
| Silicosis                                           | 0<br>(0 - 0)    | 0<br>(0 - 0)     | 0<br>(0 - 0)      | 0<br>(0 - 0)       | 0<br>(0 - 0)       | 0<br>(0 - 0)       |
| Asbestosis                                          | 0<br>(0 - 0)    | 0<br>(0 - 0)     | 0<br>(0 - 0)      | 0<br>(0 - 0)       | 0<br>(0 - 0)       | 0<br>(0 - 0)       |
| Coal workers pneumoconiosis                         | 0<br>(0 - 0)    | 0<br>(0 - 0)     | 0<br>(0 - 0)      | 0<br>(0 - 0)       | 0<br>(0 - 0)       | 0<br>(0 - 0)       |
| Other pneumoconiosis                                | 1<br>(0 - 1)    | 0<br>(0 - 0)     | 0<br>(0 - 0)      | 0<br>(0 - 1)       | 0<br>(0 - 0)       | 0<br>(0 - 0)       |
| Asthma                                              | 11<br>(7 - 14)  | 0<br>(0 - 0)     | 0<br>(0 - 0)      | 4<br>(3 - 5)       | 3<br>(2 - 5)       | 3<br>(2 - 5)       |
| Interstitial lung disease and pulmonary sarcoidosis | 10<br>(5 - 15)  | 0<br>(0 - 0)     | 0<br>(0 - 0)      | 1<br>(1 - 2)       | 3<br>(2 - 5)       | 5<br>(3 - 8)       |
| Other chronic respiratory diseases                  | 2<br>(2 - 3)    | 0<br>(0 - 0)     | 0<br>(0 - 0)      | 1<br>(1 - 2)       | 1<br>(0 - 1)       | 1<br>(0 - 1)       |
| Cirrhosis                                           | 28<br>(21 - 37) | 0<br>(0 - 0)     | 0<br>(0 - 0)      | 11<br>(8 - 14)     | 13<br>(9 - 17)     | 5<br>(4 - 6)       |
| Cirrhosis due to hepatitis B                        | 8<br>(3 - 15)   | 0<br>(0 - 0)     | 0<br>(0 - 0)      | 3<br>(1 - 6)       | 4<br>(1 - 6)       | 2<br>(1 - 3)       |
| Cirrhosis due to hepatitis C                        | 13<br>(7 - 20)  | 0<br>(0 - 0)     | 0<br>(0 - 0)      | 5<br>(3 - 8)       | 6<br>(3 - 9)       | 2<br>(1 - 3)       |
| Cirrhosis due to alcohol use                        | 4<br>(2 - 8)    | --               | --                | 1<br>(1 - 2)       | 2<br>(1 - 4)       | 1<br>(1 - 2)       |
| Cirrhosis due to other causes                       | 3<br>(1 - 5)    | 0<br>(0 - 0)     | 0<br>(0 - 0)      | 2<br>(1 - 3)       | 1<br>(0 - 2)       | 0<br>(0 - 0)       |
| Digestive diseases                                  | 22<br>(16 - 28) | 0<br>(0 - 0)     | 0<br>(0 - 0)      | 7<br>(5 - 10)      | 7<br>(5 - 10)      | 7<br>(6 - 10)      |
| Peptic ulcer disease                                | 4<br>(3 - 6)    | 0<br>(0 - 0)     | 0<br>(0 - 0)      | 1<br>(1 - 1)       | 2<br>(1 - 2)       | 2<br>(1 - 3)       |
| Gastritis and duodenitis                            | 0<br>(0 - 1)    | 0<br>(0 - 0)     | 0<br>(0 - 0)      | 0<br>(0 - 1)       | 0<br>(0 - 0)       | 0<br>(0 - 0)       |
| Appendicitis                                        | 1<br>(1 - 1)    | 0<br>(0 - 0)     | 0<br>(0 - 0)      | 0<br>(0 - 1)       | 0<br>(0 - 0)       | 0<br>(0 - 1)       |
| Paralytic ileus and intestinal obstruction          | 3<br>(2 - 4)    | 0<br>(0 - 0)     | 0<br>(0 - 0)      | 1<br>(0 - 1)       | 1<br>(0 - 1)       | 1<br>(1 - 2)       |
| Inguinal, femoral, and abdominal hernia             | 0<br>(0 - 0)    | 0<br>(0 - 0)     | 0<br>(0 - 0)      | 0<br>(0 - 0)       | 0<br>(0 - 0)       | 0<br>(0 - 0)       |
| Inflammatory bowel disease                          | 2<br>(1 - 2)    | 0<br>(0 - 0)     | 0<br>(0 - 0)      | 1<br>(0 - 1)       | 0<br>(0 - 1)       | 0<br>(0 - 0)       |
| Vascular intestinal disorders                       | 2<br>(1 - 3)    | 0<br>(0 - 0)     | 0<br>(0 - 0)      | 1<br>(0 - 1)       | 1<br>(0 - 1)       | 0<br>(0 - 1)       |
| Gallbladder and biliary diseases                    | 4<br>(3 - 6)    | 0<br>(0 - 0)     | 0<br>(0 - 0)      | 1<br>(1 - 2)       | 1<br>(1 - 2)       | 2<br>(1 - 3)       |
| Pancreatitis                                        | 2<br>(1 - 4)    | 0<br>(0 - 0)     | 0<br>(0 - 0)      | 1<br>(1 - 2)       | 1<br>(0 - 1)       | 0<br>(0 - 1)       |
| Other digestive diseases                            | 3<br>(2 - 5)    | 0<br>(0 - 0)     | 0<br>(0 - 0)      | 1<br>(1 - 1)       | 1<br>(1 - 2)       | 1<br>(1 - 1)       |
| Neurological disorders                              | 56<br>(42 - 71) | 1<br>(0 - 1)     | 0<br>(0 - 0)      | 8<br>(5 - 11)      | 9<br>(6 - 13)      | 38<br>(28 - 49)    |
| Alzheimer disease and other dementias               | 43<br>(32 - 55) | --               | --                | 0<br>(0 - 0)       | 6<br>(4 - 9)       | 36<br>(26 - 47)    |
| Parkinson disease                                   | 1<br>(1 - 2)    | --               | --                | 0<br>(0 - 0)       | 0<br>(0 - 0)       | 1<br>(0 - 1)       |
| Epilepsy                                            | 7<br>(5 - 11)   | 0<br>(0 - 0)     | 0<br>(0 - 0)      | 5<br>(3 - 8)       | 1<br>(1 - 2)       | 0<br>(0 - 1)       |
| Multiple sclerosis                                  | 0<br>(0 - 1)    | --               | --                | 0<br>(0 - 1)       | 0<br>(0 - 0)       | 0<br>(0 - 0)       |
| Other neurological disorders                        | 5<br>(3 - 7)    | 0<br>(0 - 1)     | 0<br>(0 - 0)      | 2<br>(2 - 3)       | 1<br>(1 - 2)       | 1<br>(1 - 1)       |
| Mental and substance use disorders                  | 57<br>(37 - 81) | 0<br>(0 - 0)     | 0<br>(0 - 0)      | 45<br>(29 - 66)    | 11<br>(7 - 17)     | 1<br>(1 - 1)       |
| Schizophrenia                                       | 0<br>(0 - 1)    | --               | --                | 0<br>(0 - 0)       | 0<br>(0 - 0)       | 0<br>(0 - 0)       |
| Alcohol use disorders                               | 4<br>(2 - 7)    | --               | --                | 3<br>(1 - 4)       | 1<br>(1 - 2)       | 0<br>(0 - 0)       |
| Drug use disorders                                  | 53<br>(34 - 76) | 0<br>(0 - 0)     | --                | 42<br>(27 - 62)    | 10<br>(6 - 16)     | 0<br>(0 - 1)       |
| Opioid use disorders                                | 29<br>(19 - 42) | 0<br>(0 - 0)     | --                | 24<br>(15 - 35)    | 5<br>(3 - 8)       | 0<br>(0 - 0)       |
| Cocaine use disorders                               | 1<br>(0 - 1)    | 0<br>(0 - 0)     | --                | 1<br>(0 - 1)       | 0<br>(0 - 0)       | 0<br>(0 - 0)       |
| Amphetamine use disorders                           | 1<br>(0 - 1)    | 0<br>(0 - 0)     | --                | 0<br>(0 - 1)       | 0<br>(0 - 0)       | 0<br>(0 - 0)       |
| Other drug use disorders                            | 23<br>(14 - 33) | 0<br>(0 - 0)     | --                | 18<br>(11 - 26)    | 5<br>(3 - 7)       | 0<br>(0 - 0)       |
| Eating disorders                                    | 0<br>(0 - 0)    | --               | 0<br>(0 - 0)      | 0<br>(0 - 0)       | --                 | --                 |
| Anorexia nervosa                                    | 0<br>(0 - 0)    | --               | 0<br>(0 - 0)      | 0<br>(0 - 0)       | --                 | --                 |

Web Table 31- Bahrain deaths with 95% UI by age, sex, and cause in 2013

| Cause                                               | Males, All Ages    | Males, 0-4 Years | Males, 5-14 Years | Males, 15-49 Years | Males, 50-69 Years | Males, 70-80 Years |
|-----------------------------------------------------|--------------------|------------------|-------------------|--------------------|--------------------|--------------------|
| Diabetes, urogenital, blood, and endocrine diseases | 275<br>(214 - 353) | 2<br>(2 - 4)     | 1<br>(1 - 1)      | 61<br>(44 - 84)    | 114<br>(86 - 149)  | 96<br>(76 - 123)   |
| Diabetes mellitus                                   | 160<br>(124 - 206) | 0<br>(0 - 0)     | 0<br>(0 - 0)      | 23<br>(16 - 30)    | 78<br>(58 - 103)   | 60<br>(45 - 77)    |
| Acute glomerulonephritis                            | 0<br>(0 - 0)       | 0<br>(0 - 0)     | 0<br>(0 - 0)      | 0<br>(0 - 0)       | 0<br>(0 - 0)       | 0<br>(0 - 0)       |
| Chronic kidney disease                              | 63<br>(45 - 87)    | 0<br>(0 - 0)     | 0<br>(0 - 0)      | 12<br>(8 - 18)     | 26<br>(18 - 37)    | 24<br>(17 - 34)    |
| Chronic kidney disease due to diabetes mellitus     | 3<br>(1 - 6)       | 0<br>(0 - 0)     | 0<br>(0 - 0)      | 1<br>(0 - 2)       | 1<br>(0 - 2)       | 1<br>(0 - 2)       |
| Chronic kidney disease due to hypertension          | 35<br>(22 - 51)    | 0<br>(0 - 0)     | 0<br>(0 - 0)      | 6<br>(4 - 10)      | 15<br>(9 - 23)     | 13<br>(9 - 20)     |
| Chronic kidney disease due to glomerulonephritis    | 1<br>(1 - 2)       | 0<br>(0 - 0)     | 0<br>(0 - 0)      | 0<br>(0 - 1)       | 0<br>(0 - 1)       | 0<br>(0 - 1)       |
| Chronic kidney disease due to other causes          | 24<br>(14 - 37)    | 0<br>(0 - 0)     | 0<br>(0 - 0)      | 5<br>(2 - 8)       | 10<br>(5 - 17)     | 9<br>(5 - 15)      |
| Urinary diseases and male infertility               | 12<br>(7 - 16)     | 0<br>(0 - 0)     | 0<br>(0 - 0)      | 2<br>(1 - 2)       | 3<br>(1 - 4)       | 7<br>(4 - 11)      |
| Interstitial nephritis and urinary tract infections | 1<br>(1 - 3)       | 0<br>(0 - 0)     | 0<br>(0 - 0)      | 1<br>(0 - 1)       | 0<br>(0 - 1)       | 0<br>(0 - 1)       |
| Urolithiasis                                        | 0<br>(0 - 1)       | --               | 0<br>(0 - 0)      | 0<br>(0 - 0)       | 0<br>(0 - 1)       | 0<br>(0 - 0)       |
| Other urinary diseases                              | 10<br>(5 - 14)     | 0<br>(0 - 0)     | 0<br>(0 - 0)      | 1<br>(0 - 1)       | 2<br>(1 - 3)       | 7<br>(4 - 10)      |
| Gynecological diseases                              | --                 | --               | --                | --                 | --                 | --                 |
| Uterine fibroids                                    | --                 | --               | --                | --                 | --                 | --                 |
| Polycystic ovarian syndrome                         | --                 | --               | --                | --                 | --                 | --                 |
| Endometriosis                                       | --                 | --               | --                | --                 | --                 | --                 |
| Genital prolapse                                    | --                 | --               | --                | --                 | --                 | --                 |
| Other gynecological diseases                        | --                 | --               | --                | --                 | --                 | --                 |
| Hemoglobinopathies and hemolytic anemias            | 24<br>(12 - 39)    | 0<br>(0 - 1)     | 0<br>(0 - 0)      | 19<br>(10 - 32)    | 2<br>(1 - 4)       | 2<br>(1 - 2)       |
| Thalassemias                                        | 6<br>(3 - 10)      | 0<br>(0 - 1)     | 0<br>(0 - 0)      | 6<br>(3 - 9)       | 0<br>(0 - 0)       | 0<br>(0 - 0)       |
| Sickle cell disorders                               | 14<br>(7 - 24)     | 0<br>(0 - 0)     | 0<br>(0 - 0)      | 12<br>(6 - 20)     | 2<br>(1 - 3)       | 0<br>(0 - 0)       |
| G6PD deficiency                                     | 1<br>(0 - 2)       | 0<br>(0 - 0)     | 0<br>(0 - 0)      | 1<br>(0 - 1)       | 0<br>(0 - 0)       | 0<br>(0 - 0)       |
| Other hemoglobinopathies and hemolytic anemias      | 2<br>(1 - 3)       | 0<br>(0 - 0)     | 0<br>(0 - 0)      | 1<br>(0 - 1)       | 0<br>(0 - 0)       | 1<br>(1 - 2)       |
| Endocrine, metabolic, blood, and immune disorders   | 17<br>(11 - 28)    | 2<br>(1 - 3)     | 0<br>(0 - 1)      | 6<br>(3 - 10)      | 5<br>(3 - 9)       | 4<br>(2 - 7)       |
| Musculoskeletal disorders                           | 8<br>(5 - 12)      | --               | 0<br>(0 - 0)      | 4<br>(2 - 5)       | 2<br>(1 - 4)       | 2<br>(1 - 3)       |
| Rheumatoid arthritis                                | 2<br>(1 - 3)       | --               | 0<br>(0 - 0)      | 1<br>(1 - 2)       | 1<br>(0 - 1)       | 0<br>(0 - 0)       |
| Other musculoskeletal disorders                     | 6<br>(4 - 10)      | --               | 0<br>(0 - 0)      | 3<br>(2 - 4)       | 2<br>(1 - 3)       | 2<br>(1 - 2)       |
| Other non-communicable diseases                     | 51<br>(41 - 64)    | 25<br>(20 - 31)  | 1<br>(0 - 1)      | 6<br>(4 - 8)       | 6<br>(4 - 9)       | 14<br>(9 - 20)     |
| Congenital anomalies                                | 31<br>(25 - 37)    | 25<br>(20 - 31)  | 1<br>(0 - 1)      | 3<br>(2 - 4)       | 1<br>(1 - 2)       | 1<br>(1 - 1)       |
| Neural tube defects                                 | 1<br>(1 - 2)       | 1<br>(0 - 2)     | 0<br>(0 - 0)      | 0<br>(0 - 0)       | 0<br>(0 - 0)       | 0<br>(0 - 0)       |
| Congenital heart anomalies                          | 9<br>(6 - 12)      | 8<br>(5 - 11)    | 0<br>(0 - 0)      | 1<br>(0 - 1)       | 0<br>(0 - 0)       | 0<br>(0 - 0)       |
| Cleft lip and cleft palate                          | 0<br>(0 - 0)       | 0<br>(0 - 0)     | --                | --                 | --                 | --                 |
| Down syndrome                                       | 0<br>(0 - 0)       | 0<br>(0 - 0)     | 0<br>(0 - 0)      | 0<br>(0 - 0)       | 0<br>(0 - 0)       | 0<br>(0 - 0)       |
| Chromosomal unbalanced rearrangements               | 1<br>(1 - 2)       | 1<br>(1 - 2)     | 0<br>(0 - 0)      | 0<br>(0 - 0)       | 0<br>(0 - 0)       | 0<br>(0 - 0)       |
| Other congenital anomalies                          | 19<br>(14 - 25)    | 15<br>(11 - 20)  | 0<br>(0 - 0)      | 2<br>(1 - 2)       | 1<br>(1 - 2)       | 1<br>(1 - 1)       |
| Skin and subcutaneous diseases                      | 20<br>(14 - 30)    | 0<br>(0 - 0)     | 0<br>(0 - 0)      | 3<br>(2 - 5)       | 4<br>(3 - 7)       | 13<br>(8 - 18)     |
| Cellulitis                                          | 1<br>(0 - 1)       | 0<br>(0 - 0)     | 0<br>(0 - 0)      | 0<br>(0 - 0)       | 0<br>(0 - 0)       | 0<br>(0 - 1)       |
| Pyoderma                                            | 18<br>(12 - 26)    | 0<br>(0 - 0)     | 0<br>(0 - 0)      | 2<br>(1 - 4)       | 4<br>(2 - 6)       | 12<br>(7 - 17)     |
| Decubitus ulcer                                     | 1<br>(1 - 3)       | 0<br>(0 - 0)     | 0<br>(0 - 0)      | 1<br>(0 - 1)       | 0<br>(0 - 1)       | 0<br>(0 - 1)       |
| Other skin and subcutaneous diseases                | 0<br>(0 - 0)       | 0<br>(0 - 0)     | 0<br>(0 - 0)      | 0<br>(0 - 0)       | 0<br>(0 - 0)       | 0<br>(0 - 0)       |



Web Table 31- Bahrain deaths with 95% UI by age, sex, and cause in 2013

| Cause                                           | Males, All Ages    | Males, 0-4 Years | Males, 5-14 Years | Males, 15-49 Years | Males, 50-69 Years | Males, 70-80 Years |
|-------------------------------------------------|--------------------|------------------|-------------------|--------------------|--------------------|--------------------|
| Sudden infant death syndrome                    | 0<br>(0 - 0)       | 0<br>(0 - 0)     | --                | --                 | --                 | --                 |
| Injuries                                        | 340<br>(259 - 439) | 4<br>(3 - 6)     | 5<br>(4 - 7)      | 248<br>(185 - 320) | 55<br>(40 - 74)    | 27<br>(20 - 37)    |
| Transport injuries                              | 139<br>(101 - 179) | 2<br>(1 - 3)     | 3<br>(2 - 4)      | 107<br>(76 - 140)  | 20<br>(14 - 27)    | 7<br>(5 - 10)      |
| Road injuries                                   | 135<br>(98 - 175)  | 2<br>(1 - 3)     | 3<br>(2 - 4)      | 104<br>(74 - 137)  | 19<br>(13 - 26)    | 7<br>(5 - 10)      |
| Pedestrian road injuries                        | 8<br>(4 - 12)      | 0<br>(0 - 0)     | 0<br>(0 - 0)      | 5<br>(3 - 9)       | 1<br>(0 - 2)       | 1<br>(0 - 1)       |
| Cyclist road injuries                           | 2<br>(1 - 2)       | 0<br>(0 - 0)     | 0<br>(0 - 0)      | 1<br>(1 - 1)       | 0<br>(0 - 1)       | 0<br>(0 - 0)       |
| Motorcyclist road injuries                      | 4<br>(2 - 6)       | 0<br>(0 - 0)     | 0<br>(0 - 0)      | 4<br>(2 - 6)       | 0<br>(0 - 1)       | 0<br>(0 - 0)       |
| Motor vehicle road injuries                     | 121<br>(87 - 158)  | 2<br>(1 - 2)     | 3<br>(2 - 4)      | 94<br>(67 - 123)   | 17<br>(12 - 24)    | 6<br>(4 - 8)       |
| Other road injuries                             | 0<br>(0 - 1)       | 0<br>(0 - 0)     | 0<br>(0 - 0)      | 0<br>(0 - 0)       | 0<br>(0 - 0)       | 0<br>(0 - 0)       |
| Other transport injuries                        | 4<br>(3 - 5)       | 0<br>(0 - 0)     | 0<br>(0 - 0)      | 3<br>(2 - 4)       | 1<br>(0 - 1)       | 0<br>(0 - 0)       |
| Unintentional injuries                          | 68<br>(50 - 95)    | 2<br>(1 - 3)     | 2<br>(1 - 2)      | 35<br>(25 - 48)    | 14<br>(10 - 21)    | 15<br>(11 - 22)    |
| Falls                                           | 9<br>(6 - 13)      | 0<br>(0 - 0)     | 0<br>(0 - 0)      | 5<br>(3 - 8)       | 2<br>(1 - 3)       | 1<br>(1 - 2)       |
| Drowning                                        | 10<br>(7 - 17)     | 1<br>(0 - 1)     | 1<br>(0 - 1)      | 7<br>(5 - 12)      | 1<br>(1 - 2)       | 0<br>(0 - 1)       |
| Fire, heat, and hot substances                  | 9<br>(5 - 14)      | 0<br>(0 - 0)     | 0<br>(0 - 0)      | 5<br>(3 - 9)       | 1<br>(1 - 2)       | 1<br>(1 - 2)       |
| Poisonings                                      | 1<br>(1 - 1)       | 0<br>(0 - 0)     | 0<br>(0 - 0)      | 1<br>(0 - 1)       | 0<br>(0 - 0)       | 0<br>(0 - 0)       |
| Exposure to mechanical forces                   | 7<br>(5 - 9)       | 0<br>(0 - 0)     | 0<br>(0 - 0)      | 4<br>(3 - 6)       | 1<br>(1 - 2)       | 1<br>(0 - 1)       |
| Unintentional firearm injuries                  | 2<br>(1 - 3)       | 0<br>(0 - 0)     | 0<br>(0 - 0)      | 2<br>(1 - 2)       | 0<br>(0 - 1)       | 0<br>(0 - 0)       |
| Unintentional suffocation                       | 1<br>(0 - 1)       | 0<br>(0 - 0)     | 0<br>(0 - 0)      | 0<br>(0 - 1)       | 0<br>(0 - 0)       | 0<br>(0 - 0)       |
| Other exposure to mechanical forces             | 4<br>(3 - 5)       | 0<br>(0 - 0)     | 0<br>(0 - 0)      | 2<br>(2 - 3)       | 1<br>(1 - 1)       | 0<br>(0 - 1)       |
| Adverse effects of medical treatment            | 22<br>(13 - 34)    | 0<br>(0 - 0)     | 0<br>(0 - 0)      | 5<br>(3 - 9)       | 7<br>(3 - 11)      | 10<br>(6 - 15)     |
| Animal contact                                  | 2<br>(1 - 3)       | 0<br>(0 - 0)     | 0<br>(0 - 0)      | 1<br>(1 - 1)       | 0<br>(0 - 1)       | 0<br>(0 - 1)       |
| Venomous animal contact                         | 1<br>(1 - 1)       | 0<br>(0 - 0)     | 0<br>(0 - 0)      | 0<br>(0 - 1)       | 0<br>(0 - 1)       | 0<br>(0 - 0)       |
| Non-venomous animal contact                     | 1<br>(1 - 1)       | 0<br>(0 - 0)     | 0<br>(0 - 0)      | 0<br>(0 - 1)       | 0<br>(0 - 0)       | 0<br>(0 - 0)       |
| Foreign body                                    | 2<br>(1 - 3)       | 0<br>(0 - 0)     | 0<br>(0 - 0)      | 1<br>(0 - 1)       | 0<br>(0 - 1)       | 1<br>(0 - 1)       |
| Pulmonary aspiration and foreign body in airway | 1<br>(1 - 2)       | 0<br>(0 - 0)     | 0<br>(0 - 0)      | 0<br>(0 - 1)       | 0<br>(0 - 0)       | 1<br>(0 - 1)       |
| Foreign body in other body part                 | 0<br>(0 - 0)       | 0<br>(0 - 0)     | 0<br>(0 - 0)      | 0<br>(0 - 0)       | 0<br>(0 - 0)       | 0<br>(0 - 0)       |
| Other unintentional injuries                    | 7<br>(5 - 11)      | 0<br>(0 - 0)     | 0<br>(0 - 0)      | 5<br>(3 - 8)       | 1<br>(0 - 1)       | 1<br>(0 - 1)       |
| Self-harm and interpersonal violence            | 132<br>(87 - 184)  | 0<br>(0 - 1)     | 0<br>(0 - 1)      | 106<br>(70 - 147)  | 21<br>(13 - 32)    | 5<br>(3 - 7)       |
| Self-harm                                       | 109<br>(70 - 155)  | --               | 0<br>(0 - 0)      | 87<br>(55 - 123)   | 18<br>(11 - 27)    | 4<br>(3 - 6)       |
| Interpersonal violence                          | 23<br>(13 - 36)    | 0<br>(0 - 1)     | 0<br>(0 - 0)      | 19<br>(10 - 29)    | 3<br>(2 - 6)       | 1<br>(0 - 1)       |
| Assault by firearm                              | 7<br>(3 - 12)      | 0<br>(0 - 0)     | 0<br>(0 - 0)      | 5<br>(3 - 10)      | 1<br>(0 - 2)       | 0<br>(0 - 0)       |
| Assault by sharp object                         | 4<br>(2 - 8)       | 0<br>(0 - 0)     | 0<br>(0 - 0)      | 3<br>(2 - 7)       | 1<br>(0 - 2)       | 0<br>(0 - 0)       |
| Assault by other means                          | 13<br>(5 - 20)     | 0<br>(0 - 1)     | 0<br>(0 - 0)      | 10<br>(4 - 16)     | 2<br>(0 - 3)       | 0<br>(0 - 1)       |
| Forces of nature, war, and legal intervention   | 0<br>(0 - 0)       | 0<br>(0 - 0)     | 0<br>(0 - 0)      | 0<br>(0 - 0)       | 0<br>(0 - 0)       | 0<br>(0 - 0)       |
| Collective violence and legal intervention      | 0<br>(0 - 0)       | 0<br>(0 - 0)     | 0<br>(0 - 0)      | 0<br>(0 - 0)       | 0<br>(0 - 0)       | 0<br>(0 - 0)       |

Web Table 31- Bahrain deaths with 95% UI by age, sex, and cause in 2013

| Cause                                                             | Females, All Ages      | Females, 0-4 Years | Females, 5-14 Years | Females, 15-49 Years | Females, 50-69 Years | Females, 70-80 Years |
|-------------------------------------------------------------------|------------------------|--------------------|---------------------|----------------------|----------------------|----------------------|
| All causes                                                        | 1,086<br>(893 - 1,305) | 67<br>(59 - 75)    | 12<br>(10 - 14)     | 229<br>(184 - 279)   | 301<br>(219 - 394)   | 478<br>(408 - 552)   |
| Communicable, maternal, neonatal, and nutritional diseases        | 106<br>(85 - 125)      | 36<br>(28 - 43)    | 3<br>(2 - 5)        | 20<br>(16 - 25)      | 13<br>(9 - 18)       | 34<br>(24 - 44)      |
| HIV/AIDS and tuberculosis                                         | 6<br>(5 - 8)           | 0<br>(0 - 0)       | 0<br>(0 - 0)        | 4<br>(3 - 6)         | 1<br>(1 - 2)         | 1<br>(0 - 1)         |
| Tuberculosis                                                      | 3<br>(2 - 3)           | 0<br>(0 - 0)       | 0<br>(0 - 0)        | 1<br>(1 - 2)         | 1<br>(0 - 1)         | 1<br>(0 - 1)         |
| HIV/AIDS                                                          | 4<br>(3 - 5)           | 0<br>(0 - 0)       | 0<br>(0 - 0)        | 3<br>(2 - 4)         | 1<br>(0 - 1)         | 0<br>(0 - 0)         |
| HIV/AIDS resulting in mycobacterial infection                     | 0<br>(0 - 0)           | 0<br>(0 - 0)       | 0<br>(0 - 0)        | 0<br>(0 - 0)         | 0<br>(0 - 0)         | 0<br>(0 - 0)         |
| HIV/AIDS resulting in other diseases                              | 4<br>(3 - 5)           | 0<br>(0 - 0)       | 0<br>(0 - 0)        | 3<br>(2 - 4)         | 0<br>(0 - 1)         | 0<br>(0 - 0)         |
| Diarrhea, lower respiratory, and other common infectious diseases | 53<br>(38 - 69)        | 4<br>(2 - 6)       | 2<br>(1 - 4)        | 9<br>(6 - 14)        | 9<br>(6 - 12)        | 29<br>(20 - 40)      |
| Diarrheal diseases                                                | 3<br>(2 - 5)           | 0<br>(0 - 0)       | 0<br>(0 - 0)        | 0<br>(0 - 1)         | 0<br>(0 - 1)         | 2<br>(1 - 4)         |
| Intestinal infectious diseases                                    | 7<br>(2 - 16)          | 2<br>(1 - 4)       | 2<br>(1 - 4)        | 3<br>(1 - 8)         | 1<br>(0 - 1)         | 0<br>(0 - 0)         |
| Typhoid fever                                                     | 6<br>(2 - 12)          | 1<br>(0 - 3)       | 1<br>(0 - 3)        | 2<br>(1 - 6)         | 0<br>(0 - 1)         | 0<br>(0 - 0)         |
| Paratyphoid fever                                                 | 2<br>(1 - 4)           | 0<br>(0 - 1)       | 0<br>(0 - 1)        | 1<br>(0 - 2)         | 0<br>(0 - 0)         | 0<br>(0 - 0)         |
| Other intestinal infectious diseases                              | 0<br>(0 - 0)           | 0<br>(0 - 0)       | 0<br>(0 - 0)        | 0<br>(0 - 0)         | 0<br>(0 - 0)         | 0<br>(0 - 0)         |
| Lower respiratory infections                                      | 38<br>(26 - 51)        | 1<br>(1 - 2)       | 0<br>(0 - 0)        | 4<br>(2 - 5)         | 7<br>(4 - 10)        | 26<br>(17 - 37)      |
| Upper respiratory infections                                      | 0<br>(0 - 0)           | 0<br>(0 - 0)       | 0<br>(0 - 0)        | 0<br>(0 - 0)         | 0<br>(0 - 0)         | 0<br>(0 - 0)         |
| Otitis media                                                      | 0<br>(0 - 0)           | 0<br>(0 - 0)       | 0<br>(0 - 0)        | 0<br>(0 - 0)         | 0<br>(0 - 0)         | 0<br>(0 - 0)         |
| Meningitis                                                        | 1<br>(1 - 2)           | 0<br>(0 - 0)       | 0<br>(0 - 0)        | 0<br>(0 - 1)         | 0<br>(0 - 1)         | 0<br>(0 - 0)         |
| Pneumococcal meningitis                                           | 0<br>(0 - 1)           | 0<br>(0 - 0)       | 0<br>(0 - 0)        | 0<br>(0 - 0)         | 0<br>(0 - 0)         | 0<br>(0 - 0)         |
| H influenzae type B meningitis                                    | 0<br>(0 - 0)           | 0<br>(0 - 0)       | 0<br>(0 - 0)        | 0<br>(0 - 0)         | 0<br>(0 - 0)         | 0<br>(0 - 0)         |
| Meningococcal meningitis                                          | 0<br>(0 - 1)           | 0<br>(0 - 0)       | 0<br>(0 - 0)        | 0<br>(0 - 0)         | 0<br>(0 - 0)         | 0<br>(0 - 0)         |
| Other meningitis                                                  | 1<br>(0 - 1)           | 0<br>(0 - 0)       | 0<br>(0 - 0)        | 0<br>(0 - 0)         | 0<br>(0 - 0)         | 0<br>(0 - 0)         |
| Encephalitis                                                      | 2<br>(1 - 3)           | 0<br>(0 - 0)       | 0<br>(0 - 0)        | 1<br>(1 - 2)         | 0<br>(0 - 1)         | 0<br>(0 - 0)         |
| Diphtheria                                                        | 0<br>(0 - 0)           | 0<br>(0 - 0)       | 0<br>(0 - 0)        | 0<br>(0 - 0)         | 0<br>(0 - 0)         | --                   |
| Whooping cough                                                    | 0<br>(0 - 1)           | 0<br>(0 - 1)       | 0<br>(0 - 0)        | 0<br>(0 - 0)         | 0<br>(0 - 0)         | --                   |
| Tetanus                                                           | 0<br>(0 - 0)           | 0<br>(0 - 0)       | 0<br>(0 - 0)        | 0<br>(0 - 0)         | 0<br>(0 - 0)         | 0<br>(0 - 0)         |
| Measles                                                           | 0<br>(0 - 2)           | 0<br>(0 - 2)       | 0<br>(0 - 0)        | 0<br>(0 - 0)         | 0<br>(0 - 0)         | --                   |
| Varicella and herpes zoster                                       | 0<br>(0 - 0)           | 0<br>(0 - 0)       | 0<br>(0 - 0)        | 0<br>(0 - 0)         | 0<br>(0 - 0)         | 0<br>(0 - 0)         |
| Neglected tropical diseases and malaria                           | 1<br>(0 - 1)           | 0<br>(0 - 0)       | 0<br>(0 - 0)        | 0<br>(0 - 0)         | 0<br>(0 - 0)         | 0<br>(0 - 0)         |
| Leishmaniasis                                                     | 0<br>(0 - 0)           | 0<br>(0 - 0)       | 0<br>(0 - 0)        | 0<br>(0 - 0)         | 0<br>(0 - 0)         | 0<br>(0 - 0)         |
| Visceral leishmaniasis                                            | 0<br>(0 - 0)           | 0<br>(0 - 0)       | 0<br>(0 - 0)        | 0<br>(0 - 0)         | 0<br>(0 - 0)         | 0<br>(0 - 0)         |
| Cysticercosis                                                     | 0<br>(0 - 0)           | 0<br>(0 - 0)       | 0<br>(0 - 0)        | 0<br>(0 - 0)         | 0<br>(0 - 0)         | 0<br>(0 - 0)         |
| Cystic echinococcosis                                             | 0<br>(0 - 0)           | 0<br>(0 - 0)       | 0<br>(0 - 0)        | 0<br>(0 - 0)         | 0<br>(0 - 0)         | 0<br>(0 - 0)         |
| Dengue                                                            | 0<br>(0 - 0)           | 0<br>(0 - 0)       | 0<br>(0 - 0)        | 0<br>(0 - 0)         | 0<br>(0 - 0)         | 0<br>(0 - 0)         |
| Rabies                                                            | 0<br>(0 - 0)           | 0<br>(0 - 0)       | 0<br>(0 - 0)        | 0<br>(0 - 0)         | 0<br>(0 - 0)         | 0<br>(0 - 0)         |
| Intestinal nematode infections                                    | 0<br>(0 - 0)           | 0<br>(0 - 0)       | 0<br>(0 - 0)        | 0<br>(0 - 0)         | 0<br>(0 - 0)         | 0<br>(0 - 0)         |
| Ascariasis                                                        | 0<br>(0 - 0)           | 0<br>(0 - 0)       | 0<br>(0 - 0)        | 0<br>(0 - 0)         | 0<br>(0 - 0)         | 0<br>(0 - 0)         |
| Other neglected tropical diseases                                 | 0<br>(0 - 0)           | 0<br>(0 - 0)       | 0<br>(0 - 0)        | 0<br>(0 - 0)         | 0<br>(0 - 0)         | 0<br>(0 - 0)         |
| Maternal disorders                                                | 4<br>(3 - 6)           | --                 | 0<br>(0 - 0)        | 4<br>(3 - 6)         | --                   | --                   |
| Maternal hemorrhage                                               | 1<br>(1 - 1)           | --                 | 0<br>(0 - 0)        | 1<br>(1 - 1)         | --                   | --                   |
| Maternal sepsis and other maternal infections                     | 0<br>(0 - 1)           | --                 | 0<br>(0 - 0)        | 0<br>(0 - 1)         | --                   | --                   |

Web Table 31- Bahrain deaths with 95% UI by age, sex, and cause in 2013

| Cause                                                            | Females, All Ages    | Females, 0-4 Years | Females, 5-14 Years | Females, 15-49 Years | Females, 50-69 Years | Females, 70-80 Years |
|------------------------------------------------------------------|----------------------|--------------------|---------------------|----------------------|----------------------|----------------------|
| Maternal hypertensive disorders                                  | 1<br>(0 - 1)         | --                 | 0<br>(0 - 0)        | 1<br>(0 - 1)         | --                   | --                   |
| Maternal obstructed labor                                        | 0<br>(0 - 1)         | --                 | 0<br>(0 - 0)        | 0<br>(0 - 1)         | --                   | --                   |
| Maternal abortive outcome                                        | 1<br>(0 - 1)         | --                 | 0<br>(0 - 0)        | 1<br>(0 - 1)         | --                   | --                   |
| Indirect maternal deaths                                         | 0<br>(0 - 1)         | --                 | 0<br>(0 - 0)        | 0<br>(0 - 1)         | --                   | --                   |
| Late maternal deaths                                             | 0<br>(0 - 1)         | --                 | 0<br>(0 - 0)        | 0<br>(0 - 1)         | --                   | --                   |
| Maternal deaths aggravated by HIV/AIDS                           | 0<br>(0 - 0)         | --                 | --                  | 0<br>(0 - 0)         | --                   | --                   |
| Other maternal disorders                                         | 1<br>(0 - 1)         | --                 | 0<br>(0 - 0)        | 1<br>(0 - 1)         | --                   | --                   |
| Neonatal disorders                                               | 31<br>(24 - 38)      | 31<br>(24 - 38)    | --                  | --                   | --                   | --                   |
| Neonatal preterm birth complications                             | 21<br>(16 - 27)      | 21<br>(16 - 27)    | --                  | --                   | --                   | --                   |
| Neonatal encephalopathy due to birth asphyxia and trauma         | 4<br>(2 - 6)         | 4<br>(2 - 6)       | --                  | --                   | --                   | --                   |
| Neonatal sepsis and other neonatal infections                    | 1<br>(0 - 2)         | 1<br>(0 - 2)       | --                  | --                   | --                   | --                   |
| Hemolytic disease and other neonatal jaundice                    | 0<br>(0 - 0)         | 0<br>(0 - 0)       | --                  | --                   | --                   | --                   |
| Other neonatal disorders                                         | 5<br>(3 - 8)         | 5<br>(3 - 8)       | --                  | --                   | --                   | --                   |
| Nutritional deficiencies                                         | 4<br>(3 - 5)         | 0<br>(0 - 0)       | 0<br>(0 - 0)        | 1<br>(1 - 1)         | 1<br>(0 - 1)         | 2<br>(2 - 3)         |
| Protein-energy malnutrition                                      | 2<br>(1 - 3)         | 0<br>(0 - 0)       | 0<br>(0 - 0)        | 0<br>(0 - 0)         | 0<br>(0 - 0)         | 1<br>(1 - 2)         |
| Iodine deficiency                                                | 0<br>(0 - 0)         | 0<br>(0 - 0)       | 0<br>(0 - 0)        | 0<br>(0 - 0)         | 0<br>(0 - 0)         | 0<br>(0 - 0)         |
| Iron-deficiency anemia                                           | 2<br>(1 - 3)         | 0<br>(0 - 0)       | 0<br>(0 - 0)        | 0<br>(0 - 1)         | 0<br>(0 - 1)         | 1<br>(0 - 2)         |
| Other nutritional deficiencies                                   | 0<br>(0 - 0)         | 0<br>(0 - 0)       | 0<br>(0 - 0)        | 0<br>(0 - 0)         | 0<br>(0 - 0)         | 0<br>(0 - 0)         |
| Other communicable, maternal, neonatal, and nutritional diseases | 6<br>(5 - 8)         | 0<br>(0 - 0)       | 0<br>(0 - 0)        | 2<br>(1 - 3)         | 2<br>(1 - 4)         | 2<br>(1 - 3)         |
| Sexually transmitted diseases excluding HIV                      | 1<br>(0 - 1)         | 0<br>(0 - 0)       | 0<br>(0 - 0)        | 0<br>(0 - 0)         | 0<br>(0 - 0)         | 0<br>(0 - 0)         |
| Syphilis                                                         | 0<br>(0 - 1)         | 0<br>(0 - 0)       | 0<br>(0 - 0)        | 0<br>(0 - 0)         | 0<br>(0 - 0)         | 0<br>(0 - 0)         |
| Chlamydial infection                                             | 0<br>(0 - 0)         | --                 | 0<br>(0 - 0)        | 0<br>(0 - 0)         | 0<br>(0 - 0)         | 0<br>(0 - 0)         |
| Gonococcal infection                                             | 0<br>(0 - 0)         | --                 | 0<br>(0 - 0)        | 0<br>(0 - 0)         | 0<br>(0 - 0)         | 0<br>(0 - 0)         |
| Other sexually transmitted diseases                              | 0<br>(0 - 0)         | --                 | 0<br>(0 - 0)        | 0<br>(0 - 0)         | 0<br>(0 - 0)         | 0<br>(0 - 0)         |
| Hepatitis                                                        | 4<br>(2 - 5)         | 0<br>(0 - 0)       | 0<br>(0 - 0)        | 1<br>(1 - 2)         | 2<br>(1 - 3)         | 1<br>(0 - 1)         |
| Acute hepatitis A                                                | 0<br>(0 - 1)         | 0<br>(0 - 0)       | 0<br>(0 - 0)        | 0<br>(0 - 0)         | 0<br>(0 - 0)         | 0<br>(0 - 0)         |
| Acute hepatitis B                                                | 2<br>(1 - 3)         | 0<br>(0 - 0)       | 0<br>(0 - 0)        | 0<br>(0 - 1)         | 1<br>(1 - 2)         | 0<br>(0 - 1)         |
| Acute hepatitis C                                                | 0<br>(0 - 1)         | --                 | 0<br>(0 - 0)        | 0<br>(0 - 0)         | 0<br>(0 - 1)         | 0<br>(0 - 0)         |
| Acute hepatitis E                                                | 1<br>(0 - 2)         | 0<br>(0 - 0)       | 0<br>(0 - 0)        | 1<br>(0 - 1)         | 0<br>(0 - 1)         | 0<br>(0 - 0)         |
| Other infectious diseases                                        | 2<br>(1 - 3)         | 0<br>(0 - 0)       | 0<br>(0 - 0)        | 0<br>(0 - 1)         | 0<br>(0 - 1)         | 1<br>(1 - 2)         |
| Non-communicable diseases                                        | 892<br>(718 - 1,090) | 28<br>(22 - 35)    | 6<br>(4 - 7)        | 168<br>(132 - 209)   | 272<br>(197 - 357)   | 419<br>(357 - 489)   |
| Neoplasms                                                        | 190<br>(145 - 244)   | 1<br>(0 - 1)       | 1<br>(1 - 1)        | 67<br>(51 - 86)      | 76<br>(54 - 105)     | 44<br>(36 - 54)      |
| Esophageal cancer                                                | 2<br>(1 - 3)         | --                 | --                  | 0<br>(0 - 0)         | 1<br>(1 - 1)         | 1<br>(0 - 1)         |
| Stomach cancer                                                   | 7<br>(5 - 10)        | --                 | --                  | 1<br>(1 - 2)         | 3<br>(2 - 4)         | 3<br>(2 - 4)         |
| Liver cancer                                                     | 6<br>(4 - 8)         | --                 | 0<br>(0 - 0)        | 1<br>(1 - 1)         | 3<br>(2 - 4)         | 3<br>(2 - 4)         |
| Liver cancer due to hepatitis B                                  | 2<br>(1 - 3)         | --                 | 0<br>(0 - 0)        | 0<br>(0 - 1)         | 1<br>(0 - 2)         | 1<br>(0 - 1)         |
| Liver cancer due to hepatitis C                                  | 3<br>(1 - 4)         | --                 | 0<br>(0 - 0)        | 0<br>(0 - 0)         | 1<br>(0 - 2)         | 1<br>(1 - 2)         |
| Liver cancer due to alcohol use                                  | 1<br>(0 - 1)         | --                 | --                  | 0<br>(0 - 0)         | 0<br>(0 - 1)         | 0<br>(0 - 1)         |
| Liver cancer due to other causes                                 | 1<br>(0 - 2)         | --                 | 0<br>(0 - 0)        | 0<br>(0 - 0)         | 0<br>(0 - 1)         | 0<br>(0 - 1)         |
| Larynx cancer                                                    | 0<br>(0 - 1)         | --                 | --                  | 0<br>(0 - 0)         | 0<br>(0 - 0)         | 0<br>(0 - 0)         |

Web Table 31- Bahrain deaths with 95% UI by age, sex, and cause in 2013

| Cause                                         | Females, All Ages  | Females, 0-4 Years | Females, 5-14 Years | Females, 15-49 Years | Females, 50-69 Years | Females, 70-80 Years |
|-----------------------------------------------|--------------------|--------------------|---------------------|----------------------|----------------------|----------------------|
| Tracheal, bronchus and lung cancer            | 18<br>(13 - 26)    | --                 | --                  | 2<br>(1 - 3)         | 8<br>(5 - 12)        | 9<br>(6 - 12)        |
| Breast cancer                                 | 67<br>(47 - 88)    | --                 | --                  | 33<br>(23 - 44)      | 26<br>(17 - 38)      | 8<br>(5 - 10)        |
| Cervical cancer                               | 7<br>(5 - 10)      | --                 | --                  | 2<br>(2 - 3)         | 3<br>(2 - 5)         | 2<br>(1 - 2)         |
| Uterine cancer                                | 2<br>(1 - 4)       | --                 | --                  | 0<br>(0 - 0)         | 1<br>(1 - 2)         | 1<br>(0 - 1)         |
| Prostate cancer                               | --                 | --                 | --                  | --                   | --                   | --                   |
| Colon and rectum cancer                       | 17<br>(13 - 22)    | --                 | --                  | 7<br>(5 - 9)         | 7<br>(5 - 10)        | 4<br>(2 - 5)         |
| Lip and oral cavity cancer                    | 1<br>(1 - 1)       | --                 | --                  | 0<br>(0 - 0)         | 0<br>(0 - 1)         | 0<br>(0 - 0)         |
| Nasopharynx cancer                            | 0<br>(0 - 0)       | --                 | 0<br>(0 - 0)        | 0<br>(0 - 0)         | 0<br>(0 - 0)         | 0<br>(0 - 0)         |
| Other pharynx cancer                          | 0<br>(0 - 0)       | --                 | --                  | 0<br>(0 - 0)         | 0<br>(0 - 0)         | 0<br>(0 - 0)         |
| Gallbladder and biliary tract cancer          | 1<br>(1 - 2)       | --                 | --                  | 0<br>(0 - 0)         | 1<br>(0 - 1)         | 0<br>(0 - 1)         |
| Pancreatic cancer                             | 9<br>(6 - 11)      | --                 | --                  | 1<br>(1 - 2)         | 4<br>(3 - 6)         | 3<br>(2 - 4)         |
| Malignant skin melanoma                       | 0<br>(0 - 1)       | --                 | --                  | 0<br>(0 - 0)         | 0<br>(0 - 0)         | 0<br>(0 - 0)         |
| Non-melanoma skin cancer                      | 1<br>(0 - 1)       | --                 | --                  | 0<br>(0 - 0)         | 0<br>(0 - 0)         | 0<br>(0 - 0)         |
| Ovarian cancer                                | 14<br>(9 - 19)     | --                 | --                  | 4<br>(3 - 6)         | 6<br>(4 - 9)         | 3<br>(2 - 5)         |
| Testicular cancer                             | --                 | --                 | --                  | --                   | --                   | --                   |
| Kidney cancer                                 | 3<br>(2 - 4)       | 0<br>(0 - 0)       | 0<br>(0 - 0)        | 1<br>(0 - 1)         | 1<br>(1 - 2)         | 1<br>(1 - 1)         |
| Bladder cancer                                | 1<br>(1 - 2)       | --                 | --                  | 0<br>(0 - 0)         | 0<br>(0 - 0)         | 1<br>(0 - 1)         |
| Brain and nervous system cancer               | 4<br>(3 - 6)       | 0<br>(0 - 0)       | 0<br>(0 - 0)        | 2<br>(1 - 3)         | 1<br>(1 - 2)         | 1<br>(0 - 1)         |
| Thyroid cancer                                | 1<br>(1 - 2)       | --                 | 0<br>(0 - 0)        | 0<br>(0 - 0)         | 0<br>(0 - 1)         | 1<br>(0 - 1)         |
| Mesothelioma                                  | 0<br>(0 - 0)       | --                 | --                  | 0<br>(0 - 0)         | 0<br>(0 - 0)         | 0<br>(0 - 0)         |
| Hodgkin lymphoma                              | 1<br>(1 - 2)       | 0<br>(0 - 0)       | 0<br>(0 - 0)        | 1<br>(0 - 1)         | 0<br>(0 - 1)         | 0<br>(0 - 0)         |
| Non-Hodgkin lymphoma                          | 8<br>(5 - 11)      | 0<br>(0 - 0)       | 0<br>(0 - 0)        | 3<br>(2 - 4)         | 3<br>(2 - 5)         | 2<br>(1 - 3)         |
| Multiple myeloma                              | 1<br>(1 - 2)       | --                 | --                  | 0<br>(0 - 0)         | 1<br>(0 - 1)         | 0<br>(0 - 1)         |
| Leukemia                                      | 8<br>(6 - 10)      | 0<br>(0 - 0)       | 0<br>(0 - 1)        | 4<br>(3 - 5)         | 2<br>(1 - 3)         | 1<br>(1 - 2)         |
| Other neoplasms                               | 9<br>(6 - 14)      | 0<br>(0 - 0)       | 0<br>(0 - 0)        | 4<br>(2 - 6)         | 2<br>(1 - 4)         | 2<br>(2 - 4)         |
| Cardiovascular diseases                       | 296<br>(233 - 385) | 1<br>(1 - 2)       | 1<br>(0 - 1)        | 35<br>(26 - 49)      | 92<br>(66 - 129)     | 166<br>(137 - 205)   |
| Rheumatic heart disease                       | 3<br>(1 - 4)       | 0<br>(0 - 0)       | 0<br>(0 - 0)        | 1<br>(0 - 1)         | 1<br>(0 - 1)         | 1<br>(1 - 2)         |
| Ischemic heart disease                        | 144<br>(108 - 205) | 0<br>(0 - 0)       | 0<br>(0 - 0)        | 15<br>(10 - 23)      | 52<br>(35 - 76)      | 77<br>(60 - 107)     |
| Cerebrovascular disease                       | 100<br>(74 - 127)  | 1<br>(0 - 1)       | 0<br>(0 - 0)        | 11<br>(8 - 15)       | 26<br>(18 - 37)      | 61<br>(46 - 77)      |
| Ischemic stroke                               | 59<br>(42 - 75)    | 0<br>(0 - 0)       | 0<br>(0 - 0)        | 1<br>(1 - 2)         | 12<br>(7 - 17)       | 45<br>(33 - 58)      |
| Hemorrhagic stroke                            | 41<br>(30 - 56)    | 1<br>(0 - 1)       | 0<br>(0 - 0)        | 10<br>(7 - 14)       | 15<br>(10 - 21)      | 16<br>(11 - 23)      |
| Hypertensive heart disease                    | 11<br>(8 - 17)     | 0<br>(0 - 0)       | 0<br>(0 - 0)        | 1<br>(1 - 2)         | 4<br>(2 - 6)         | 6<br>(4 - 9)         |
| Cardiomyopathy and myocarditis                | 9<br>(6 - 13)      | 0<br>(0 - 1)       | 0<br>(0 - 0)        | 3<br>(2 - 5)         | 2<br>(1 - 4)         | 3<br>(2 - 4)         |
| Atrial fibrillation and flutter               | 6<br>(4 - 9)       | --                 | --                  | 0<br>(0 - 0)         | 1<br>(1 - 1)         | 5<br>(3 - 8)         |
| Aortic aneurysm                               | 2<br>(1 - 3)       | --                 | --                  | 0<br>(0 - 1)         | 0<br>(0 - 0)         | 1<br>(1 - 2)         |
| Peripheral vascular disease                   | 2<br>(2 - 4)       | --                 | --                  | 0<br>(0 - 0)         | 0<br>(0 - 1)         | 2<br>(1 - 3)         |
| Endocarditis                                  | 3<br>(2 - 5)       | 0<br>(0 - 0)       | 0<br>(0 - 0)        | 0<br>(0 - 1)         | 1<br>(0 - 1)         | 2<br>(1 - 3)         |
| Other cardiovascular and circulatory diseases | 15<br>(11 - 22)    | 0<br>(0 - 0)       | 0<br>(0 - 0)        | 3<br>(2 - 5)         | 5<br>(3 - 8)         | 7<br>(4 - 10)        |
| Chronic respiratory diseases                  | 54<br>(41 - 69)    | 0<br>(0 - 1)       | 0<br>(0 - 0)        | 7<br>(5 - 9)         | 13<br>(9 - 18)       | 33<br>(25 - 42)      |
| Chronic obstructive pulmonary disease         | 35<br>(26 - 46)    | 0<br>(0 - 0)       | 0<br>(0 - 0)        | 2<br>(1 - 2)         | 8<br>(5 - 12)        | 25<br>(19 - 33)      |

Web Table 31- Bahrain deaths with 95% UI by age, sex, and cause in 2013

| Cause                                               | Females, All Ages | Females, 0-4 Years | Females, 5-14 Years | Females, 15-49 Years | Females, 50-69 Years | Females, 70-80 Years |
|-----------------------------------------------------|-------------------|--------------------|---------------------|----------------------|----------------------|----------------------|
| Pneumoconiosis                                      | 0<br>(0 - 0)      | 0<br>(0 - 0)       | 0<br>(0 - 0)        | 0<br>(0 - 0)         | 0<br>(0 - 0)         | 0<br>(0 - 0)         |
| Silicosis                                           | 0<br>(0 - 0)      | 0<br>(0 - 0)       | 0<br>(0 - 0)        | 0<br>(0 - 0)         | 0<br>(0 - 0)         | 0<br>(0 - 0)         |
| Asbestosis                                          | 0<br>(0 - 0)      | 0<br>(0 - 0)       | 0<br>(0 - 0)        | 0<br>(0 - 0)         | 0<br>(0 - 0)         | 0<br>(0 - 0)         |
| Coal workers pneumoconiosis                         | 0<br>(0 - 0)      | 0<br>(0 - 0)       | 0<br>(0 - 0)        | 0<br>(0 - 0)         | 0<br>(0 - 0)         | 0<br>(0 - 0)         |
| Other pneumoconiosis                                | 0<br>(0 - 0)      | 0<br>(0 - 0)       | 0<br>(0 - 0)        | 0<br>(0 - 0)         | 0<br>(0 - 0)         | 0<br>(0 - 0)         |
| Asthma                                              | 11<br>(7 - 16)    | 0<br>(0 - 0)       | 0<br>(0 - 0)        | 3<br>(2 - 5)         | 3<br>(2 - 5)         | 4<br>(2 - 6)         |
| Interstitial lung disease and pulmonary sarcoidosis | 5<br>(3 - 8)      | 0<br>(0 - 0)       | 0<br>(0 - 0)        | 1<br>(0 - 1)         | 1<br>(1 - 3)         | 3<br>(1 - 5)         |
| Other chronic respiratory diseases                  | 2<br>(1 - 3)      | 0<br>(0 - 0)       | 0<br>(0 - 0)        | 1<br>(1 - 1)         | 0<br>(0 - 1)         | 0<br>(0 - 1)         |
| Cirrhosis                                           | 9<br>(7 - 12)     | 0<br>(0 - 0)       | 0<br>(0 - 0)        | 2<br>(2 - 3)         | 4<br>(2 - 5)         | 3<br>(2 - 4)         |
| Cirrhosis due to hepatitis B                        | 3<br>(1 - 6)      | 0<br>(0 - 0)       | 0<br>(0 - 0)        | 1<br>(0 - 1)         | 1<br>(0 - 2)         | 1<br>(0 - 2)         |
| Cirrhosis due to hepatitis C                        | 5<br>(2 - 8)      | 0<br>(0 - 0)       | 0<br>(0 - 0)        | 1<br>(1 - 2)         | 2<br>(1 - 3)         | 2<br>(1 - 3)         |
| Cirrhosis due to alcohol use                        | 1<br>(0 - 1)      | --                 | --                  | 0<br>(0 - 0)         | 0<br>(0 - 0)         | 0<br>(0 - 1)         |
| Cirrhosis due to other causes                       | 1<br>(0 - 2)      | 0<br>(0 - 0)       | 0<br>(0 - 0)        | 0<br>(0 - 1)         | 0<br>(0 - 1)         | 0<br>(0 - 0)         |
| Digestive diseases                                  | 18<br>(14 - 23)   | 0<br>(0 - 0)       | 0<br>(0 - 0)        | 2<br>(2 - 3)         | 4<br>(3 - 6)         | 11<br>(8 - 14)       |
| Peptic ulcer disease                                | 3<br>(2 - 4)      | 0<br>(0 - 0)       | 0<br>(0 - 0)        | 0<br>(0 - 0)         | 1<br>(0 - 1)         | 2<br>(1 - 3)         |
| Gastritis and duodenitis                            | 1<br>(0 - 1)      | 0<br>(0 - 0)       | 0<br>(0 - 0)        | 0<br>(0 - 0)         | 0<br>(0 - 0)         | 0<br>(0 - 1)         |
| Appendicitis                                        | 1<br>(1 - 2)      | 0<br>(0 - 0)       | 0<br>(0 - 0)        | 0<br>(0 - 0)         | 0<br>(0 - 0)         | 1<br>(0 - 1)         |
| Paralytic ileus and intestinal obstruction          | 2<br>(1 - 4)      | 0<br>(0 - 0)       | 0<br>(0 - 0)        | 0<br>(0 - 0)         | 0<br>(0 - 1)         | 2<br>(1 - 3)         |
| Inguinal, femoral, and abdominal hernia             | 0<br>(0 - 1)      | 0<br>(0 - 0)       | 0<br>(0 - 0)        | 0<br>(0 - 0)         | 0<br>(0 - 0)         | 0<br>(0 - 1)         |
| Inflammatory bowel disease                          | 1<br>(1 - 1)      | 0<br>(0 - 0)       | 0<br>(0 - 0)        | 0<br>(0 - 0)         | 0<br>(0 - 0)         | 1<br>(0 - 1)         |
| Vascular intestinal disorders                       | 2<br>(1 - 5)      | 0<br>(0 - 0)       | 0<br>(0 - 0)        | 0<br>(0 - 0)         | 0<br>(0 - 1)         | 2<br>(1 - 4)         |
| Gallbladder and biliary diseases                    | 3<br>(2 - 4)      | 0<br>(0 - 0)       | 0<br>(0 - 0)        | 1<br>(0 - 1)         | 1<br>(1 - 2)         | 1<br>(1 - 2)         |
| Pancreatitis                                        | 1<br>(1 - 1)      | 0<br>(0 - 0)       | 0<br>(0 - 0)        | 0<br>(0 - 0)         | 0<br>(0 - 0)         | 0<br>(0 - 1)         |
| Other digestive diseases                            | 3<br>(2 - 4)      | 0<br>(0 - 0)       | 0<br>(0 - 0)        | 0<br>(0 - 0)         | 1<br>(1 - 1)         | 2<br>(1 - 3)         |
| Neurological disorders                              | 44<br>(34 - 56)   | 1<br>(0 - 1)       | 0<br>(0 - 1)        | 4<br>(3 - 6)         | 6<br>(4 - 8)         | 33<br>(25 - 43)      |
| Alzheimer disease and other dementias               | 37<br>(27 - 47)   | --                 | --                  | 0<br>(0 - 0)         | 4<br>(2 - 6)         | 32<br>(24 - 42)      |
| Parkinson disease                                   | 0<br>(0 - 0)      | --                 | --                  | 0<br>(0 - 0)         | 0<br>(0 - 0)         | 0<br>(0 - 0)         |
| Epilepsy                                            | 5<br>(3 - 7)      | 0<br>(0 - 0)       | 0<br>(0 - 0)        | 3<br>(2 - 5)         | 1<br>(0 - 1)         | 0<br>(0 - 1)         |
| Multiple sclerosis                                  | 0<br>(0 - 0)      | --                 | --                  | 0<br>(0 - 0)         | 0<br>(0 - 0)         | 0<br>(0 - 0)         |
| Other neurological disorders                        | 3<br>(2 - 4)      | 1<br>(0 - 1)       | 0<br>(0 - 0)        | 1<br>(1 - 1)         | 1<br>(1 - 1)         | 1<br>(0 - 1)         |
| Mental and substance use disorders                  | 6<br>(4 - 9)      | 0<br>(0 - 0)       | 0<br>(0 - 0)        | 4<br>(3 - 6)         | 1<br>(1 - 2)         | 1<br>(0 - 1)         |
| Schizophrenia                                       | 0<br>(0 - 0)      | --                 | --                  | 0<br>(0 - 0)         | 0<br>(0 - 0)         | 0<br>(0 - 0)         |
| Alcohol use disorders                               | 1<br>(0 - 1)      | --                 | --                  | 0<br>(0 - 1)         | 0<br>(0 - 1)         | 0<br>(0 - 0)         |
| Drug use disorders                                  | 5<br>(4 - 7)      | 0<br>(0 - 0)       | --                  | 4<br>(3 - 6)         | 1<br>(0 - 1)         | 1<br>(0 - 1)         |
| Opioid use disorders                                | 3<br>(2 - 4)      | 0<br>(0 - 0)       | --                  | 2<br>(1 - 3)         | 0<br>(0 - 1)         | 0<br>(0 - 0)         |
| Cocaine use disorders                               | 0<br>(0 - 0)      | 0<br>(0 - 0)       | --                  | 0<br>(0 - 0)         | 0<br>(0 - 0)         | 0<br>(0 - 0)         |
| Amphetamine use disorders                           | 0<br>(0 - 0)      | 0<br>(0 - 0)       | --                  | 0<br>(0 - 0)         | 0<br>(0 - 0)         | 0<br>(0 - 0)         |
| Other drug use disorders                            | 2<br>(2 - 3)      | 0<br>(0 - 0)       | --                  | 2<br>(1 - 2)         | 0<br>(0 - 1)         | 0<br>(0 - 0)         |
| Eating disorders                                    | 0<br>(0 - 0)      | --                 | 0<br>(0 - 0)        | 0<br>(0 - 0)         | --                   | --                   |
| Anorexia nervosa                                    | 0<br>(0 - 0)      | --                 | 0<br>(0 - 0)        | 0<br>(0 - 0)         | --                   | --                   |

Web Table 31- Bahrain deaths with 95% UI by age, sex, and cause in 2013

| Cause                                               | Females, All Ages  | Females, 0-4 Years | Females, 5-14 Years | Females, 15-49 Years | Females, 50-69 Years | Females, 70-80 Years |
|-----------------------------------------------------|--------------------|--------------------|---------------------|----------------------|----------------------|----------------------|
| Diabetes, urogenital, blood, and endocrine diseases | 216<br>(169 - 271) | 2<br>(1 - 3)       | 2<br>(1 - 2)        | 37<br>(28 - 48)      | 69<br>(49 - 94)      | 107<br>(86 - 130)    |
| Diabetes mellitus                                   | 122<br>(94 - 157)  | 0<br>(0 - 0)       | 0<br>(0 - 1)        | 11<br>(8 - 15)       | 45<br>(32 - 62)      | 66<br>(51 - 82)      |
| Acute glomerulonephritis                            | 0<br>(0 - 0)       | 0<br>(0 - 0)       | 0<br>(0 - 0)        | 0<br>(0 - 0)         | 0<br>(0 - 0)         | 0<br>(0 - 0)         |
| Chronic kidney disease                              | 44<br>(33 - 61)    | 0<br>(0 - 0)       | 0<br>(0 - 0)        | 6<br>(5 - 9)         | 15<br>(10 - 22)      | 23<br>(17 - 31)      |
| Chronic kidney disease due to diabetes mellitus     | 2<br>(1 - 3)       | 0<br>(0 - 0)       | 0<br>(0 - 0)        | 0<br>(0 - 1)         | 1<br>(0 - 1)         | 1<br>(0 - 1)         |
| Chronic kidney disease due to hypertension          | 22<br>(14 - 32)    | 0<br>(0 - 0)       | 0<br>(0 - 0)        | 3<br>(2 - 5)         | 7<br>(4 - 11)        | 12<br>(8 - 16)       |
| Chronic kidney disease due to glomerulonephritis    | 1<br>(1 - 2)       | 0<br>(0 - 0)       | 0<br>(0 - 0)        | 0<br>(0 - 1)         | 0<br>(0 - 1)         | 1<br>(0 - 1)         |
| Chronic kidney disease due to other causes          | 19<br>(11 - 31)    | 0<br>(0 - 0)       | 0<br>(0 - 0)        | 3<br>(1 - 4)         | 6<br>(3 - 11)        | 10<br>(5 - 16)       |
| Urinary diseases and male infertility               | 16<br>(8 - 23)     | 0<br>(0 - 0)       | 0<br>(0 - 0)        | 1<br>(1 - 2)         | 2<br>(1 - 3)         | 12<br>(6 - 19)       |
| Interstitial nephritis and urinary tract infections | 3<br>(1 - 5)       | 0<br>(0 - 0)       | 0<br>(0 - 0)        | 1<br>(0 - 1)         | 1<br>(0 - 1)         | 2<br>(1 - 3)         |
| Urolithiasis                                        | 0<br>(0 - 1)       | --                 | 0<br>(0 - 0)        | 0<br>(0 - 0)         | 0<br>(0 - 0)         | 0<br>(0 - 0)         |
| Other urinary diseases                              | 13<br>(6 - 19)     | 0<br>(0 - 0)       | 0<br>(0 - 0)        | 0<br>(0 - 1)         | 1<br>(1 - 2)         | 11<br>(5 - 16)       |
| Gynecological diseases                              | 0<br>(0 - 0)       | --                 | --                  | 0<br>(0 - 0)         | 0<br>(0 - 0)         | 0<br>(0 - 0)         |
| Uterine fibroids                                    | 0<br>(0 - 0)       | --                 | --                  | 0<br>(0 - 0)         | 0<br>(0 - 0)         | 0<br>(0 - 0)         |
| Polycystic ovarian syndrome                         | 0<br>(0 - 0)       | --                 | --                  | 0<br>(0 - 0)         | 0<br>(0 - 0)         | --                   |
| Endometriosis                                       | 0<br>(0 - 0)       | --                 | --                  | 0<br>(0 - 0)         | 0<br>(0 - 0)         | --                   |
| Genital prolapse                                    | 0<br>(0 - 0)       | --                 | --                  | 0<br>(0 - 0)         | 0<br>(0 - 0)         | 0<br>(0 - 0)         |
| Other gynecological diseases                        | 0<br>(0 - 0)       | --                 | --                  | 0<br>(0 - 0)         | 0<br>(0 - 0)         | 0<br>(0 - 0)         |
| Hemoglobinopathies and hemolytic anemias            | 19<br>(11 - 29)    | 0<br>(0 - 1)       | 0<br>(0 - 1)        | 14<br>(7 - 21)       | 3<br>(2 - 5)         | 1<br>(1 - 2)         |
| Thalassemias                                        | 4<br>(3 - 7)       | 0<br>(0 - 0)       | 0<br>(0 - 0)        | 4<br>(2 - 6)         | 0<br>(0 - 0)         | 0<br>(0 - 0)         |
| Sickle cell disorders                               | 12<br>(7 - 19)     | 0<br>(0 - 0)       | 0<br>(0 - 0)        | 9<br>(5 - 14)        | 3<br>(2 - 5)         | 0<br>(0 - 0)         |
| G6PD deficiency                                     | 1<br>(0 - 1)       | 0<br>(0 - 0)       | 0<br>(0 - 0)        | 0<br>(0 - 1)         | 0<br>(0 - 0)         | 0<br>(0 - 0)         |
| Other hemoglobinopathies and hemolytic anemias      | 2<br>(1 - 3)       | 0<br>(0 - 0)       | 0<br>(0 - 0)        | 0<br>(0 - 1)         | 0<br>(0 - 0)         | 1<br>(1 - 2)         |
| Endocrine, metabolic, blood, and immune disorders   | 14<br>(10 - 20)    | 1<br>(1 - 2)       | 1<br>(0 - 1)        | 4<br>(3 - 6)         | 4<br>(2 - 6)         | 5<br>(3 - 7)         |
| Musculoskeletal disorders                           | 12<br>(8 - 15)     | --                 | 0<br>(0 - 1)        | 6<br>(4 - 8)         | 3<br>(2 - 4)         | 3<br>(2 - 4)         |
| Rheumatoid arthritis                                | 2<br>(1 - 3)       | --                 | 0<br>(0 - 0)        | 0<br>(0 - 1)         | 1<br>(0 - 1)         | 1<br>(0 - 1)         |
| Other musculoskeletal disorders                     | 10<br>(7 - 13)     | --                 | 0<br>(0 - 1)        | 5<br>(4 - 7)         | 2<br>(1 - 3)         | 2<br>(1 - 3)         |
| Other non-communicable diseases                     | 48<br>(38 - 60)    | 22<br>(17 - 29)    | 1<br>(1 - 1)        | 3<br>(2 - 4)         | 4<br>(3 - 6)         | 17<br>(12 - 25)      |
| Congenital anomalies                                | 25<br>(20 - 32)    | 22<br>(16 - 28)    | 1<br>(0 - 1)        | 1<br>(1 - 2)         | 1<br>(0 - 1)         | 1<br>(1 - 2)         |
| Neural tube defects                                 | 1<br>(0 - 2)       | 1<br>(0 - 2)       | 0<br>(0 - 0)        | 0<br>(0 - 0)         | 0<br>(0 - 0)         | 0<br>(0 - 0)         |
| Congenital heart anomalies                          | 10<br>(7 - 13)     | 9<br>(6 - 12)      | 0<br>(0 - 1)        | 0<br>(0 - 0)         | 0<br>(0 - 0)         | 0<br>(0 - 0)         |
| Cleft lip and cleft palate                          | 0<br>(0 - 0)       | 0<br>(0 - 0)       | --                  | --                   | --                   | --                   |
| Down syndrome                                       | 0<br>(0 - 0)       | 0<br>(0 - 0)       | 0<br>(0 - 0)        | 0<br>(0 - 0)         | 0<br>(0 - 0)         | 0<br>(0 - 0)         |
| Chromosomal unbalanced rearrangements               | 2<br>(1 - 4)       | 2<br>(1 - 4)       | 0<br>(0 - 0)        | 0<br>(0 - 0)         | 0<br>(0 - 0)         | 0<br>(0 - 0)         |
| Other congenital anomalies                          | 13<br>(10 - 16)    | 10<br>(7 - 13)     | 1<br>(0 - 1)        | 1<br>(1 - 1)         | 1<br>(0 - 1)         | 1<br>(1 - 1)         |
| Skin and subcutaneous diseases                      | 22<br>(15 - 30)    | 0<br>(0 - 0)       | 0<br>(0 - 0)        | 1<br>(1 - 2)         | 4<br>(2 - 6)         | 16<br>(10 - 23)      |
| Cellulitis                                          | 0<br>(0 - 1)       | 0<br>(0 - 0)       | 0<br>(0 - 0)        | 0<br>(0 - 0)         | 0<br>(0 - 0)         | 0<br>(0 - 1)         |
| Pyoderma                                            | 20<br>(14 - 28)    | 0<br>(0 - 0)       | 0<br>(0 - 0)        | 1<br>(1 - 2)         | 3<br>(2 - 5)         | 16<br>(10 - 22)      |
| Decubitus ulcer                                     | 1<br>(1 - 1)       | 0<br>(0 - 0)       | 0<br>(0 - 0)        | 0<br>(0 - 0)         | 0<br>(0 - 0)         | 0<br>(0 - 1)         |
| Other skin and subcutaneous diseases                | 0<br>(0 - 0)       | 0<br>(0 - 0)       | 0<br>(0 - 0)        | 0<br>(0 - 0)         | 0<br>(0 - 0)         | 0<br>(0 - 0)         |

Web Table 31- Bahrain deaths with 95% UI by age, sex, and cause in 2013

| Cause                                           | Females, All Ages | Females, 0-4 Years | Females, 5-14 Years | Females, 15-49 Years | Females, 50-69 Years | Females, 70-80 Years |
|-------------------------------------------------|-------------------|--------------------|---------------------|----------------------|----------------------|----------------------|
| Sudden infant death syndrome                    | 0<br>(0 - 1)      | 0<br>(0 - 1)       | --                  | --                   | --                   | --                   |
| Injuries                                        | 89<br>(72 - 110)  | 3<br>(3 - 4)       | 3<br>(3 - 4)        | 42<br>(33 - 52)      | 16<br>(11 - 21)      | 25<br>(19 - 32)      |
| Transport injuries                              | 28<br>(22 - 36)   | 1<br>(1 - 2)       | 2<br>(1 - 3)        | 16<br>(13 - 21)      | 5<br>(4 - 8)         | 3<br>(2 - 5)         |
| Road injuries                                   | 26<br>(20 - 33)   | 1<br>(1 - 2)       | 2<br>(1 - 2)        | 15<br>(11 - 19)      | 5<br>(3 - 7)         | 3<br>(2 - 4)         |
| Pedestrian road injuries                        | 3<br>(2 - 4)      | 0<br>(0 - 0)       | 0<br>(0 - 0)        | 1<br>(1 - 1)         | 1<br>(0 - 1)         | 1<br>(1 - 2)         |
| Cyclist road injuries                           | 1<br>(1 - 1)      | 0<br>(0 - 0)       | 0<br>(0 - 0)        | 0<br>(0 - 0)         | 0<br>(0 - 0)         | 0<br>(0 - 0)         |
| Motorcyclist road injuries                      | 1<br>(1 - 1)      | 0<br>(0 - 0)       | 0<br>(0 - 0)        | 0<br>(0 - 1)         | 0<br>(0 - 0)         | 0<br>(0 - 0)         |
| Motor vehicle road injuries                     | 21<br>(16 - 27)   | 1<br>(1 - 1)       | 2<br>(1 - 2)        | 13<br>(10 - 17)      | 4<br>(2 - 5)         | 1<br>(1 - 2)         |
| Other road injuries                             | 0<br>(0 - 0)      | 0<br>(0 - 0)       | 0<br>(0 - 0)        | 0<br>(0 - 0)         | 0<br>(0 - 0)         | 0<br>(0 - 0)         |
| Other transport injuries                        | 3<br>(2 - 4)      | 0<br>(0 - 0)       | 0<br>(0 - 0)        | 2<br>(1 - 2)         | 0<br>(0 - 1)         | 0<br>(0 - 0)         |
| Unintentional injuries                          | 37<br>(27 - 47)   | 2<br>(1 - 2)       | 1<br>(1 - 1)        | 8<br>(6 - 10)        | 7<br>(5 - 10)        | 19<br>(14 - 25)      |
| Falls                                           | 4<br>(2 - 5)      | 0<br>(0 - 0)       | 0<br>(0 - 0)        | 1<br>(1 - 2)         | 1<br>(0 - 1)         | 2<br>(1 - 3)         |
| Drowning                                        | 2<br>(1 - 3)      | 0<br>(0 - 1)       | 0<br>(0 - 0)        | 1<br>(0 - 1)         | 0<br>(0 - 1)         | 0<br>(0 - 0)         |
| Fire, heat, and hot substances                  | 4<br>(2 - 5)      | 0<br>(0 - 0)       | 0<br>(0 - 0)        | 1<br>(1 - 2)         | 1<br>(1 - 1)         | 2<br>(1 - 2)         |
| Poisonings                                      | 1<br>(0 - 1)      | 0<br>(0 - 0)       | 0<br>(0 - 0)        | 0<br>(0 - 0)         | 0<br>(0 - 0)         | 0<br>(0 - 0)         |
| Exposure to mechanical forces                   | 2<br>(2 - 3)      | 0<br>(0 - 0)       | 0<br>(0 - 0)        | 1<br>(0 - 1)         | 1<br>(0 - 1)         | 1<br>(0 - 1)         |
| Unintentional firearm injuries                  | 0<br>(0 - 0)      | 0<br>(0 - 0)       | 0<br>(0 - 0)        | 0<br>(0 - 0)         | 0<br>(0 - 0)         | 0<br>(0 - 0)         |
| Unintentional suffocation                       | 0<br>(0 - 1)      | 0<br>(0 - 0)       | 0<br>(0 - 0)        | 0<br>(0 - 0)         | 0<br>(0 - 0)         | 0<br>(0 - 0)         |
| Other exposure to mechanical forces             | 2<br>(1 - 2)      | 0<br>(0 - 0)       | 0<br>(0 - 0)        | 0<br>(0 - 1)         | 0<br>(0 - 1)         | 1<br>(0 - 1)         |
| Adverse effects of medical treatment            | 19<br>(12 - 28)   | 1<br>(0 - 1)       | 0<br>(0 - 0)        | 2<br>(1 - 3)         | 3<br>(2 - 6)         | 13<br>(8 - 19)       |
| Animal contact                                  | 1<br>(0 - 2)      | 0<br>(0 - 0)       | 0<br>(0 - 0)        | 0<br>(0 - 1)         | 0<br>(0 - 1)         | 0<br>(0 - 1)         |
| Venomous animal contact                         | 0<br>(0 - 1)      | 0<br>(0 - 0)       | 0<br>(0 - 0)        | 0<br>(0 - 0)         | 0<br>(0 - 0)         | 0<br>(0 - 0)         |
| Non-venomous animal contact                     | 1<br>(0 - 1)      | 0<br>(0 - 0)       | 0<br>(0 - 0)        | 0<br>(0 - 1)         | 0<br>(0 - 0)         | 0<br>(0 - 0)         |
| Foreign body                                    | 1<br>(1 - 1)      | 0<br>(0 - 0)       | 0<br>(0 - 0)        | 0<br>(0 - 0)         | 0<br>(0 - 0)         | 0<br>(0 - 1)         |
| Pulmonary aspiration and foreign body in airway | 1<br>(0 - 1)      | 0<br>(0 - 0)       | 0<br>(0 - 0)        | 0<br>(0 - 0)         | 0<br>(0 - 0)         | 0<br>(0 - 1)         |
| Foreign body in other body part                 | 0<br>(0 - 0)      | 0<br>(0 - 0)       | 0<br>(0 - 0)        | 0<br>(0 - 0)         | 0<br>(0 - 0)         | 0<br>(0 - 0)         |
| Other unintentional injuries                    | 3<br>(2 - 4)      | 0<br>(0 - 0)       | 0<br>(0 - 0)        | 1<br>(1 - 2)         | 0<br>(0 - 1)         | 1<br>(0 - 1)         |
| Self-harm and interpersonal violence            | 24<br>(18 - 31)   | 0<br>(0 - 1)       | 0<br>(0 - 1)        | 17<br>(13 - 23)      | 3<br>(2 - 5)         | 3<br>(2 - 4)         |
| Self-harm                                       | 19<br>(13 - 26)   | --                 | 0<br>(0 - 0)        | 14<br>(10 - 19)      | 3<br>(2 - 4)         | 2<br>(1 - 3)         |
| Interpersonal violence                          | 5<br>(2 - 8)      | 0<br>(0 - 1)       | 0<br>(0 - 1)        | 3<br>(2 - 5)         | 1<br>(0 - 1)         | 1<br>(0 - 1)         |
| Assault by firearm                              | 0<br>(0 - 1)      | 0<br>(0 - 0)       | 0<br>(0 - 0)        | 0<br>(0 - 0)         | 0<br>(0 - 0)         | 0<br>(0 - 0)         |
| Assault by sharp object                         | 1<br>(0 - 1)      | 0<br>(0 - 0)       | 0<br>(0 - 0)        | 1<br>(0 - 1)         | 0<br>(0 - 0)         | 0<br>(0 - 0)         |
| Assault by other means                          | 4<br>(2 - 6)      | 0<br>(0 - 1)       | 0<br>(0 - 1)        | 3<br>(1 - 4)         | 1<br>(0 - 1)         | 0<br>(0 - 1)         |
| Forces of nature, war, and legal intervention   | 0                 | 0                  | 0                   | 0                    | 0                    | 0                    |
| Collective violence and legal intervention      | 0<br>(0 - 0)      | 0<br>(0 - 0)       | 0<br>(0 - 0)        | 0<br>(0 - 0)         | 0<br>(0 - 0)         | 0<br>(0 - 0)         |

**Web Table 31- Bangladesh deaths with 95% UI by age, sex, and cause in 2013**

| Cause                                                             | Both Sexes, All Ages             | Both Sexes, 0-4 Years          | Both Sexes, 5-14 Years      | Both Sexes, 15-49 Years        | Both Sexes, 50-69 Years        | Both Sexes, 70-80 Years        |
|-------------------------------------------------------------------|----------------------------------|--------------------------------|-----------------------------|--------------------------------|--------------------------------|--------------------------------|
| All causes                                                        | 968,163<br>(843,342 - 1,076,117) | 128,228<br>(116,019 - 142,660) | 19,262<br>(17,487 - 21,195) | 194,097<br>(160,554 - 231,026) | 251,803<br>(202,096 - 296,290) | 374,773<br>(331,291 - 407,955) |
| Communicable, maternal, neonatal, and nutritional diseases        | 199,850<br>(183,099 - 219,433)   | 100,715<br>(90,460 - 111,941)  | 6,942<br>(5,533 - 8,715)    | 33,837<br>(28,694 - 39,363)    | 20,384<br>(16,481 - 24,899)    | 37,971<br>(31,988 - 47,317)    |
| HIV/AIDS and tuberculosis                                         | 16,117<br>(12,619 - 21,050)      | 56<br>(38 - 78)                | 113<br>(84 - 152)           | 6,118<br>(4,752 - 8,012)       | 6,220<br>(4,635 - 8,529)       | 3,609<br>(2,742 - 4,766)       |
| Tuberculosis                                                      | 15,545<br>(12,078 - 20,443)      | 41<br>(25 - 62)                | 102<br>(73 - 142)           | 5,683<br>(4,354 - 7,568)       | 6,124<br>(4,550 - 8,440)       | 3,596<br>(2,727 - 4,754)       |
| HIV/AIDS                                                          | 571<br>(441 - 753)               | 15<br>(9 - 26)                 | 11<br>(8 - 16)              | 435<br>(344 - 561)             | 96<br>(57 - 151)               | 14<br>(8 - 22)                 |
| HIV/AIDS resulting in mycobacterial infection                     | 35<br>(25 - 48)                  | 1<br>(0 - 1)                   | 1<br>(0 - 1)                | 26<br>(19 - 37)                | 6<br>(4 - 10)                  | 1<br>(1 - 2)                   |
| HIV/AIDS resulting in other diseases                              | 537<br>(413 - 708)               | 15<br>(8 - 25)                 | 11<br>(7 - 15)              | 409<br>(322 - 525)             | 90<br>(53 - 141)               | 13<br>(8 - 20)                 |
| Diarrhea, lower respiratory, and other common infectious diseases | 68,567<br>(56,948 - 81,370)      | 23,299<br>(18,481 - 28,375)    | 4,684<br>(3,156 - 6,683)    | 10,269<br>(6,950 - 14,614)     | 8,504<br>(6,276 - 11,213)      | 21,811<br>(17,037 - 28,108)    |
| Diarrheal diseases                                                | 16,633<br>(12,708 - 22,203)      | 1,718<br>(958 - 2,830)         | 344<br>(213 - 544)          | 1,945<br>(1,434 - 2,530)       | 3,579<br>(2,338 - 5,376)       | 9,046<br>(6,171 - 13,161)      |
| Intestinal infectious diseases                                    | 13,553<br>(6,930 - 22,956)       | 3,729<br>(1,842 - 6,647)       | 3,212<br>(1,633 - 5,494)    | 5,464<br>(2,547 - 9,559)       | 798<br>(351 - 1,513)           | 351<br>(166 - 633)             |
| Typhoid fever                                                     | 11,323<br>(5,881 - 18,952)       | 3,065<br>(1,504 - 5,578)       | 2,681<br>(1,341 - 4,547)    | 4,581<br>(2,163 - 8,006)       | 690<br>(305 - 1,283)           | 307<br>(143 - 555)             |
| Paratyphoid fever                                                 | 2,208<br>(1,039 - 4,056)         | 654<br>(267 - 1,288)           | 529<br>(212 - 1,033)        | 876<br>(369 - 1,792)           | 106<br>(39 - 227)              | 43<br>(18 - 85)                |
| Other intestinal infectious diseases                              | 23<br>(12 - 36)                  | 10<br>(4 - 20)                 | 2<br>(0 - 6)                | 7<br>(2 - 15)                  | 2<br>(0 - 7)                   | 2<br>(0 - 5)                   |
| Lower respiratory infections                                      | 33,477<br>(24,422 - 40,141)      | 14,800<br>(11,568 - 18,504)    | 576<br>(297 - 929)          | 2,052<br>(1,207 - 2,772)       | 3,967<br>(2,357 - 5,388)       | 12,082<br>(6,956 - 15,981)     |
| Upper respiratory infections                                      | 92<br>(49 - 156)                 | 13<br>(3 - 33)                 | 3<br>(0 - 8)                | 25<br>(8 - 52)                 | 23<br>(6 - 53)                 | 28<br>(5 - 78)                 |
| Otitis media                                                      | 36<br>(26 - 50)                  | 6<br>(4 - 9)                   | 5<br>(3 - 7)                | 14<br>(10 - 21)                | 7<br>(5 - 11)                  | 4<br>(3 - 6)                   |
| Meningitis                                                        | 2,045<br>(1,037 - 2,743)         | 1,257<br>(606 - 1,888)         | 238<br>(93 - 371)           | 332<br>(196 - 466)             | 56<br>(32 - 88)                | 162<br>(90 - 227)              |
| Pneumococcal meningitis                                           | 689<br>(351 - 921)               | 351<br>(162 - 540)             | 106<br>(39 - 169)           | 143<br>(80 - 210)              | 23<br>(12 - 38)                | 66<br>(37 - 102)               |
| H influenzae type B meningitis                                    | 634<br>(321 - 923)               | 501<br>(246 - 775)             | 58<br>(24 - 98)             | 52<br>(29 - 80)                | 6<br>(3 - 11)                  | 18<br>(8 - 29)                 |
| Meningococcal meningitis                                          | 210<br>(104 - 283)               | 94<br>(43 - 149)               | 25<br>(10 - 44)             | 53<br>(24 - 81)                | 9<br>(4 - 16)                  | 29<br>(16 - 46)                |
| Other meningitis                                                  | 512<br>(284 - 701)               | 311<br>(143 - 484)             | 49<br>(19 - 86)             | 85<br>(45 - 138)               | 18<br>(10 - 31)                | 49<br>(24 - 78)                |
| Encephalitis                                                      | 775<br>(563 - 1,184)             | 235<br>(141 - 399)             | 142<br>(88 - 209)           | 322<br>(200 - 584)             | 38<br>(26 - 61)                | 38<br>(26 - 61)                |
| Diphtheria                                                        | 18<br>(2 - 71)                   | 10<br>(0 - 52)                 | 4<br>(0 - 20)               | 3<br>(0 - 11)                  | 1<br>(0 - 5)                   | --                             |
| Whooping cough                                                    | 792<br>(1 - 4,284)               | 740<br>(1 - 3,987)             | 39<br>(0 - 222)             | 12<br>(0 - 66)                 | 1<br>(0 - 8)                   | --                             |
| Tetanus                                                           | 53<br>(29 - 179)                 | 21<br>(6 - 117)                | 6<br>(4 - 12)               | 15<br>(10 - 24)                | 7<br>(4 - 21)                  | 4<br>(2 - 8)                   |
| Measles                                                           | 820<br>(402 - 1,460)             | 701<br>(341 - 1,254)           | 98<br>(50 - 168)            | 21<br>(11 - 37)                | 1<br>(0 - 1)                   | --                             |
| Varicella and herpes zoster                                       | 272<br>(119 - 551)               | 70<br>(8 - 198)                | 16<br>(1 - 52)              | 66<br>(21 - 139)               | 25<br>(4 - 63)                 | 96<br>(9 - 346)                |
| Neglected tropical diseases and malaria                           | 4,653<br>(3,497 - 6,085)         | 1,421<br>(871 - 2,131)         | 807<br>(527 - 1,120)        | 1,760<br>(1,250 - 2,439)       | 441<br>(298 - 609)             | 225<br>(173 - 294)             |
| Malaria                                                           | 32<br>(23 - 43)                  | 4<br>(2 - 6)                   | 4<br>(2 - 6)                | 19<br>(12 - 29)                | 3<br>(2 - 5)                   | 2<br>(1 - 3)                   |
| Leishmaniasis                                                     | 4,021<br>(2,957 - 5,307)         | 1,335<br>(800 - 2,036)         | 709<br>(454 - 1,019)        | 1,520<br>(1,058 - 2,166)       | 340<br>(219 - 474)             | 116<br>(78 - 161)              |
| Visceral leishmaniasis                                            | 4,021<br>(2,957 - 5,307)         | 1,335<br>(800 - 2,036)         | 709<br>(454 - 1,019)        | 1,520<br>(1,058 - 2,166)       | 340<br>(219 - 474)             | 116<br>(78 - 161)              |
| Cysticercosis                                                     | 4<br>(1 - 10)                    | 0<br>(0 - 0)                   | 0<br>(0 - 0)                | 2<br>(0 - 6)                   | 1<br>(0 - 3)                   | 0<br>(0 - 1)                   |
| Cystic echinococcosis                                             | 30<br>(25 - 36)                  | 1<br>(1 - 2)                   | 3<br>(3 - 4)                | 14<br>(12 - 17)                | 7<br>(5 - 9)                   | 4<br>(3 - 6)                   |
| Dengue                                                            | 262<br>(143 - 374)               | 40<br>(22 - 69)                | 19<br>(12 - 35)             | 106<br>(57 - 151)              | 47<br>(20 - 69)                | 49<br>(26 - 67)                |
| Rabies                                                            | 175<br>(70 - 485)                | 8<br>(3 - 20)                  | 64<br>(19 - 206)            | 71<br>(31 - 181)               | 25<br>(8 - 75)                 | 7<br>(2 - 21)                  |
| Intestinal nematode infections                                    | 9<br>(2 - 21)                    | 5<br>(1 - 13)                  | 2<br>(0 - 6)                | 1<br>(0 - 7)                   | 1<br>(0 - 4)                   | 1<br>(0 - 5)                   |
| Ascariasis                                                        | 9<br>(2 - 21)                    | 5<br>(1 - 13)                  | 2<br>(0 - 6)                | 1<br>(0 - 7)                   | 1<br>(0 - 4)                   | 1<br>(0 - 5)                   |
| Other neglected tropical diseases                                 | 122<br>(97 - 158)                | 29<br>(18 - 46)                | 5<br>(4 - 8)                | 26<br>(18 - 35)                | 16<br>(12 - 24)                | 45<br>(30 - 66)                |
| Maternal disorders                                                | 7,737<br>(5,459 - 10,422)        | --                             | 24<br>(10 - 49)             | 7,713<br>(5,449 - 10,401)      | --                             | --                             |
| Maternal hemorrhage                                               | 1,690<br>(1,090 - 2,460)         | --                             | 3<br>(1 - 6)                | 1,687<br>(1,088 - 2,457)       | --                             | --                             |



Web Table 31- Bangladesh deaths with 95% UI by age, sex, and cause in 2013

| Cause                                                            | Both Sexes, All Ages           | Both Sexes, 0-4 Years       | Both Sexes, 5-14 Years   | Both Sexes, 15-49 Years       | Both Sexes, 50-69 Years        | Both Sexes, 70-80 Years        |
|------------------------------------------------------------------|--------------------------------|-----------------------------|--------------------------|-------------------------------|--------------------------------|--------------------------------|
| Maternal sepsis and other maternal infections                    | 259<br>(140 - 402)             | --                          | 1<br>(0 - 2)             | 258<br>(140 - 400)            | --                             | --                             |
| Maternal hypertensive disorders                                  | 1,120<br>(756 - 1,560)         | --                          | 6<br>(2 - 13)            | 1,114<br>(750 - 1,555)        | --                             | --                             |
| Maternal obstructed labor                                        | 338<br>(215 - 504)             | --                          | 1<br>(0 - 1)             | 338<br>(214 - 503)            | --                             | --                             |
| Maternal abortive outcome                                        | 669<br>(383 - 1,030)           | --                          | 1<br>(0 - 3)             | 668<br>(382 - 1,029)          | --                             | --                             |
| Indirect maternal deaths                                         | 662<br>(369 - 990)             | --                          | 2<br>(1 - 4)             | 660<br>(367 - 989)            | --                             | --                             |
| Late maternal deaths                                             | 1,867<br>(1,207 - 2,672)       | --                          | 8<br>(3 - 17)            | 1,859<br>(1,202 - 2,664)      | --                             | --                             |
| Maternal deaths aggravated by HIV/AIDS                           | 0<br>(0 - 0)                   | --                          | --                       | 0<br>(0 - 0)                  | --                             | --                             |
| Other maternal disorders                                         | 1,118<br>(585 - 1,751)         | --                          | 2<br>(1 - 6)             | 1,116<br>(583 - 1,749)        | --                             | --                             |
| Neonatal disorders                                               | 67,991<br>(62,007 - 74,962)    | 67,991<br>(62,007 - 74,962) | --                       | --                            | --                             | --                             |
| Neonatal preterm birth complications                             | 19,077<br>(12,691 - 30,480)    | 19,077<br>(12,691 - 30,480) | --                       | --                            | --                             | --                             |
| Neonatal encephalopathy due to birth asphyxia and trauma         | 28,412<br>(19,479 - 35,567)    | 28,412<br>(19,479 - 35,567) | --                       | --                            | --                             | --                             |
| Neonatal sepsis and other neonatal infections                    | 13,856<br>(7,747 - 22,115)     | 13,856<br>(7,747 - 22,115)  | --                       | --                            | --                             | --                             |
| Hemolytic disease and other neonatal jaundice                    | 110<br>(31 - 267)              | 110<br>(31 - 267)           | --                       | --                            | --                             | --                             |
| Other neonatal disorders                                         | 6,537<br>(4,371 - 10,598)      | 6,537<br>(4,371 - 10,598)   | --                       | --                            | --                             | --                             |
| Nutritional deficiencies                                         | 16,359<br>(13,145 - 21,805)    | 3,038<br>(1,869 - 4,714)    | 435<br>(285 - 600)       | 1,241<br>(890 - 1,992)        | 1,803<br>(1,300 - 2,558)       | 9,842<br>(7,399 - 13,526)      |
| Protein-energy malnutrition                                      | 14,772<br>(11,481 - 20,079)    | 2,806<br>(1,725 - 4,346)    | 348<br>(222 - 531)       | 1,020<br>(680 - 1,742)        | 1,623<br>(1,135 - 2,331)       | 8,975<br>(6,666 - 12,316)      |
| Iodine deficiency                                                | 12<br>(2 - 40)                 | 2<br>(0 - 14)               | 1<br>(0 - 5)             | 2<br>(0 - 8)                  | 2<br>(0 - 10)                  | 5<br>(0 - 28)                  |
| Iron-deficiency anemia                                           | 1,181<br>(486 - 2,081)         | 210<br>(22 - 585)           | 83<br>(16 - 177)         | 203<br>(83 - 372)             | 142<br>(48 - 293)              | 543<br>(180 - 1,286)           |
| Other nutritional deficiencies                                   | 394<br>(212 - 881)             | 20<br>(6 - 47)              | 4<br>(2 - 8)             | 17<br>(8 - 37)                | 36<br>(18 - 83)                | 319<br>(156 - 744)             |
| Other communicable, maternal, neonatal, and nutritional diseases | 18,425<br>(14,763 - 22,955)    | 4,910<br>(2,926 - 7,545)    | 879<br>(627 - 1,203)     | 6,735<br>(5,201 - 8,650)      | 3,416<br>(2,478 - 4,716)       | 2,485<br>(1,777 - 3,741)       |
| Sexually transmitted diseases excluding HIV                      | 5,189<br>(3,109 - 8,122)       | 4,013<br>(2,139 - 6,597)    | 251<br>(123 - 443)       | 204<br>(97 - 399)             | 299<br>(147 - 596)             | 422<br>(175 - 959)             |
| Syphilis                                                         | 4,881<br>(2,827 - 7,745)       | 4,013<br>(2,139 - 6,597)    | 249<br>(122 - 441)       | 94<br>(44 - 184)              | 185<br>(93 - 362)              | 339<br>(140 - 769)             |
| Chlamydial infection                                             | 65<br>(32 - 125)               | --                          | 0<br>(0 - 0)             | 26<br>(11 - 54)               | 26<br>(9 - 63)                 | 13<br>(4 - 35)                 |
| Gonococcal infection                                             | 146<br>(79 - 270)              | --                          | 1<br>(0 - 1)             | 45<br>(21 - 87)               | 52<br>(25 - 105)               | 49<br>(20 - 110)               |
| Other sexually transmitted diseases                              | 96<br>(52 - 175)               | --                          | 1<br>(0 - 1)             | 39<br>(19 - 76)               | 36<br>(17 - 74)                | 21<br>(9 - 47)                 |
| Hepatitis                                                        | 11,222<br>(8,894 - 14,140)     | 462<br>(258 - 1,032)        | 554<br>(376 - 855)       | 6,138<br>(4,725 - 7,927)      | 2,629<br>(1,836 - 3,618)       | 1,439<br>(1,046 - 1,938)       |
| Acute hepatitis A                                                | 942<br>(274 - 1,900)           | 217<br>(70 - 468)           | 128<br>(37 - 247)        | 464<br>(120 - 1,053)          | 111<br>(26 - 262)              | 23<br>(5 - 59)                 |
| Acute hepatitis B                                                | 4,123<br>(2,575 - 5,882)       | 203<br>(78 - 447)           | 79<br>(32 - 158)         | 1,179<br>(603 - 1,976)        | 1,540<br>(914 - 2,366)         | 1,121<br>(733 - 1,572)         |
| Acute hepatitis C                                                | 81<br>(15 - 213)               | --                          | 5<br>(1 - 16)            | 40<br>(6 - 115)               | 24<br>(4 - 68)                 | 11<br>(2 - 32)                 |
| Acute hepatitis E                                                | 6,076<br>(4,309 - 8,249)       | 42<br>(10 - 138)            | 342<br>(183 - 625)       | 4,454<br>(3,215 - 5,981)      | 954<br>(468 - 1,587)           | 283<br>(104 - 552)             |
| Other infectious diseases                                        | 2,014<br>(1,409 - 3,007)       | 435<br>(237 - 791)          | 74<br>(41 - 125)         | 393<br>(251 - 563)            | 488<br>(275 - 893)             | 624<br>(322 - 1,437)           |
| Non-communicable diseases                                        | 676,409<br>(568,897 - 768,823) | 13,676<br>(10,445 - 17,292) | 6,468<br>(5,256 - 7,763) | 122,757<br>(99,199 - 149,260) | 218,219<br>(172,696 - 258,748) | 315,289<br>(276,855 - 346,180) |
| Neoplasms                                                        | 112,465<br>(91,845 - 134,903)  | 1,065<br>(758 - 1,453)      | 2,276<br>(1,786 - 2,793) | 34,396<br>(27,599 - 42,144)   | 47,009<br>(36,916 - 57,663)    | 27,719<br>(23,069 - 34,150)    |
| Esophageal cancer                                                | 5,914<br>(4,317 - 8,799)       | --                          | --                       | 726<br>(469 - 1,115)          | 3,044<br>(2,175 - 4,355)       | 2,144<br>(1,476 - 3,761)       |
| Stomach cancer                                                   | 10,385<br>(8,159 - 13,029)     | --                          | --                       | 2,440<br>(1,804 - 3,184)      | 4,931<br>(3,718 - 6,353)       | 3,014<br>(2,325 - 4,027)       |
| Liver cancer                                                     | 20,267<br>(15,961 - 25,347)    | --                          | 316<br>(199 - 490)       | 7,131<br>(5,470 - 9,286)      | 9,047<br>(6,697 - 11,934)      | 3,773<br>(2,827 - 4,943)       |
| Liver cancer due to hepatitis B                                  | 5,941<br>(2,939 - 9,502)       | --                          | 107<br>(49 - 189)        | 2,661<br>(1,283 - 4,139)      | 2,381<br>(1,088 - 4,084)       | 791<br>(358 - 1,441)           |
| Liver cancer due to hepatitis C                                  | 9,764<br>(5,560 - 13,779)      | --                          | 37<br>(5 - 82)           | 2,848<br>(1,565 - 4,292)      | 4,806<br>(2,561 - 7,072)       | 2,073<br>(1,136 - 2,978)       |
| Liver cancer due to alcohol use                                  | 1,691<br>(1,018 - 2,686)       | --                          | --                       | 376<br>(191 - 621)            | 789<br>(450 - 1,309)           | 526<br>(308 - 856)             |
| Liver cancer due to other causes                                 | 2,871<br>(1,904 - 4,295)       | --                          | 171<br>(95 - 304)        | 1,246<br>(786 - 1,856)        | 1,070<br>(652 - 1,769)         | 383<br>(225 - 660)             |

Web Table 31- Bangladesh deaths with 95% UI by age, sex, and cause in 2013

| Cause                                         | Both Sexes, All Ages           | Both Sexes, 0-4 Years    | Both Sexes, 5-14 Years | Both Sexes, 15-49 Years     | Both Sexes, 50-69 Years       | Both Sexes, 70-80 Years        |
|-----------------------------------------------|--------------------------------|--------------------------|------------------------|-----------------------------|-------------------------------|--------------------------------|
| Larynx cancer                                 | 1,797<br>(1,322 - 2,555)       | --                       | --                     | 269<br>(179 - 399)          | 826<br>(561 - 1,224)          | 702<br>(515 - 1,011)           |
| Tracheal, bronchus and lung cancer            | 14,803<br>(11,518 - 18,315)    | --                       | --                     | 2,409<br>(1,744 - 3,267)    | 7,763<br>(5,843 - 9,841)      | 4,632<br>(3,643 - 5,815)       |
| Breast cancer                                 | 5,309<br>(3,679 - 7,689)       | --                       | --                     | 2,252<br>(1,605 - 3,152)    | 2,177<br>(1,377 - 3,395)      | 880<br>(588 - 1,376)           |
| Cervical cancer                               | 3,785<br>(2,548 - 5,522)       | --                       | --                     | 1,017<br>(645 - 1,530)      | 1,928<br>(1,193 - 2,936)      | 840<br>(530 - 1,402)           |
| Uterine cancer                                | 504<br>(323 - 891)             | --                       | --                     | 95<br>(57 - 162)            | 303<br>(178 - 550)            | 106<br>(63 - 208)              |
| Prostate cancer                               | 1,168<br>(753 - 1,890)         | --                       | --                     | 6<br>(3 - 9)                | 147<br>(84 - 257)             | 1,015<br>(645 - 1,658)         |
| Colon and rectum cancer                       | 5,386<br>(4,269 - 6,719)       | --                       | --                     | 2,764<br>(2,147 - 3,597)    | 1,724<br>(1,306 - 2,238)      | 898<br>(712 - 1,129)           |
| Lip and oral cavity cancer                    | 6,480<br>(4,944 - 8,637)       | --                       | --                     | 1,582<br>(1,115 - 2,133)    | 2,849<br>(2,078 - 3,886)      | 2,049<br>(1,526 - 2,901)       |
| Nasopharynx cancer                            | 1,504<br>(1,140 - 2,022)       | --                       | 72<br>(30 - 162)       | 592<br>(416 - 839)          | 600<br>(420 - 845)            | 240<br>(171 - 350)             |
| Other pharynx cancer                          | 2,759<br>(2,057 - 3,653)       | --                       | --                     | 693<br>(473 - 957)          | 1,225<br>(859 - 1,658)        | 841<br>(593 - 1,264)           |
| Gallbladder and biliary tract cancer          | 1,753<br>(1,254 - 2,597)       | --                       | --                     | 436<br>(300 - 614)          | 853<br>(579 - 1,328)          | 465<br>(302 - 824)             |
| Pancreatic cancer                             | 803<br>(634 - 1,002)           | --                       | --                     | 403<br>(308 - 515)          | 275<br>(209 - 355)            | 125<br>(98 - 164)              |
| Malignant skin melanoma                       | 138<br>(100 - 225)             | --                       | --                     | 28<br>(19 - 43)             | 31<br>(21 - 43)               | 80<br>(55 - 143)               |
| Non-melanoma skin cancer                      | 217<br>(145 - 357)             | --                       | --                     | 82<br>(48 - 148)            | 70<br>(43 - 125)              | 65<br>(44 - 106)               |
| Ovarian cancer                                | 3,213<br>(2,193 - 4,636)       | --                       | --                     | 1,091<br>(755 - 1,543)      | 1,417<br>(870 - 2,190)        | 705<br>(446 - 1,158)           |
| Testicular cancer                             | 205<br>(63 - 525)              | --                       | --                     | 187<br>(49 - 501)           | 11<br>(6 - 17)                | 7<br>(4 - 13)                  |
| Kidney cancer                                 | 601<br>(464 - 755)             | 10<br>(6 - 18)           | 18<br>(11 - 29)        | 73<br>(52 - 102)            | 230<br>(161 - 314)            | 270<br>(198 - 371)             |
| Bladder cancer                                | 1,851<br>(1,367 - 2,312)       | --                       | --                     | 238<br>(148 - 389)          | 889<br>(572 - 1,200)          | 723<br>(535 - 922)             |
| Brain and nervous system cancer               | 2,116<br>(1,513 - 3,095)       | 4<br>(2 - 7)             | 57<br>(35 - 110)       | 1,336<br>(919 - 2,103)      | 545<br>(377 - 750)            | 173<br>(115 - 261)             |
| Thyroid cancer                                | 45<br>(32 - 77)                | --                       | 2<br>(1 - 3)           | 13<br>(10 - 17)             | 16<br>(9 - 35)                | 14<br>(9 - 25)                 |
| Mesothelioma                                  | 63<br>(48 - 85)                | --                       | --                     | 18<br>(13 - 27)             | 29<br>(21 - 41)               | 16<br>(11 - 24)                |
| Hodgkin lymphoma                              | 294<br>(212 - 471)             | 26<br>(15 - 49)          | 18<br>(10 - 32)        | 61<br>(41 - 94)             | 48<br>(32 - 77)               | 141<br>(89 - 258)              |
| Non-Hodgkin lymphoma                          | 8,436<br>(4,362 - 11,647)      | 263<br>(166 - 388)       | 449<br>(255 - 689)     | 2,940<br>(1,543 - 4,186)    | 2,831<br>(1,122 - 4,330)      | 1,953<br>(981 - 2,932)         |
| Multiple myeloma                              | 195<br>(133 - 297)             | --                       | --                     | 69<br>(39 - 124)            | 69<br>(48 - 103)              | 56<br>(38 - 88)                |
| Leukemia                                      | 6,578<br>(5,384 - 8,085)       | 279<br>(167 - 442)       | 711<br>(507 - 942)     | 3,180<br>(2,470 - 3,982)    | 1,648<br>(1,204 - 2,190)      | 760<br>(577 - 1,028)           |
| Other neoplasms                               | 5,895<br>(4,818 - 7,182)       | 483<br>(295 - 739)       | 633<br>(435 - 881)     | 2,266<br>(1,747 - 2,871)    | 1,482<br>(1,090 - 1,924)      | 1,031<br>(764 - 1,394)         |
| Cardiovascular diseases                       | 333,462<br>(247,341 - 394,527) | 258<br>(140 - 392)       | 568<br>(342 - 779)     | 40,118<br>(27,926 - 51,858) | 106,943<br>(75,445 - 132,864) | 185,575<br>(142,220 - 212,256) |
| Rheumatic heart disease                       | 8,698<br>(6,329 - 12,098)      | 33<br>(11 - 65)          | 197<br>(99 - 302)      | 3,128<br>(2,047 - 4,424)    | 2,715<br>(1,833 - 4,011)      | 2,626<br>(1,803 - 4,156)       |
| Ischemic heart disease                        | 106,880<br>(52,492 - 135,047)  | 10<br>(3 - 23)           | 109<br>(58 - 173)      | 18,610<br>(9,818 - 25,378)  | 40,902<br>(19,610 - 53,261)   | 47,249<br>(22,325 - 58,743)    |
| Cerebrovascular disease                       | 178,354<br>(127,309 - 214,742) | 19<br>(9 - 32)           | 127<br>(72 - 193)      | 13,114<br>(8,476 - 17,260)  | 51,255<br>(35,152 - 64,635)   | 113,840<br>(81,810 - 133,846)  |
| Ischemic stroke                               | 84,050<br>(43,324 - 109,295)   | 2<br>(1 - 5)             | 14<br>(5 - 25)         | 1,898<br>(765 - 3,042)      | 16,390<br>(8,057 - 23,589)    | 65,745<br>(34,500 - 83,761)    |
| Hemorrhagic stroke                            | 94,304<br>(62,328 - 126,815)   | 16<br>(8 - 28)           | 113<br>(65 - 170)      | 11,216<br>(7,078 - 15,089)  | 34,864<br>(22,632 - 46,627)   | 48,095<br>(30,911 - 68,393)    |
| Hypertensive heart disease                    | 28,246<br>(19,456 - 46,554)    | 37<br>(17 - 75)          | 32<br>(18 - 50)        | 2,873<br>(1,889 - 4,860)    | 8,721<br>(5,868 - 14,158)     | 16,582<br>(10,880 - 27,815)    |
| Cardiomyopathy and myocarditis                | 4,619<br>(2,961 - 6,705)       | 124<br>(62 - 199)        | 76<br>(38 - 126)       | 1,326<br>(784 - 1,973)      | 1,416<br>(857 - 2,125)        | 1,678<br>(1,038 - 2,653)       |
| Atrial fibrillation and flutter               | 278<br>(120 - 467)             | --                       | --                     | 15<br>(7 - 26)              | 57<br>(24 - 96)               | 205<br>(84 - 361)              |
| Aortic aneurysm                               | 1,930<br>(1,285 - 2,672)       | --                       | --                     | 222<br>(136 - 325)          | 608<br>(389 - 875)            | 1,100<br>(733 - 1,568)         |
| Peripheral vascular disease                   | 97<br>(57 - 146)               | --                       | --                     | 4<br>(2 - 7)                | 22<br>(13 - 36)               | 71<br>(41 - 106)               |
| Endocarditis                                  | 1,177<br>(712 - 1,758)         | 25<br>(11 - 48)          | 14<br>(6 - 25)         | 355<br>(204 - 545)          | 326<br>(189 - 505)            | 458<br>(274 - 704)             |
| Other cardiovascular and circulatory diseases | 3,183<br>(2,048 - 5,581)       | 11<br>(4 - 27)           | 14<br>(7 - 25)         | 471<br>(291 - 844)          | 920<br>(534 - 1,767)          | 1,768<br>(1,104 - 3,042)       |
| Chronic respiratory diseases                  | 92,253<br>(74,896 - 124,761)   | 2,600<br>(1,854 - 3,446) | 573<br>(434 - 726)     | 12,155<br>(9,291 - 16,353)  | 26,834<br>(19,829 - 38,571)   | 50,091<br>(41,346 - 66,782)    |

Web Table 31- Bangladesh deaths with 95% UI by age, sex, and cause in 2013

| Cause                                               | Both Sexes, All Ages        | Both Sexes, 0-4 Years    | Both Sexes, 5-14 Years | Both Sexes, 15-49 Years    | Both Sexes, 50-69 Years    | Both Sexes, 70-80 Years     |
|-----------------------------------------------------|-----------------------------|--------------------------|------------------------|----------------------------|----------------------------|-----------------------------|
| Chronic obstructive pulmonary disease               | 43,019<br>(15,785 - 61,308) | 469<br>(207 - 883)       | 145<br>(46 - 242)      | 4,177<br>(1,558 - 6,413)   | 12,450<br>(4,424 - 18,471) | 25,778<br>(9,155 - 37,319)  |
| Pneumoconiosis                                      | 5,612<br>(1,819 - 9,059)    | 3<br>(1 - 7)             | 6<br>(2 - 13)          | 909<br>(295 - 1,567)       | 1,872<br>(584 - 3,127)     | 2,822<br>(867 - 4,913)      |
| Silicosis                                           | 1,084<br>(318 - 2,071)      | 1<br>(0 - 2)             | 2<br>(0 - 4)           | 204<br>(66 - 412)          | 375<br>(107 - 770)         | 502<br>(139 - 980)          |
| Asbestosis                                          | 475<br>(141 - 793)          | 1<br>(0 - 2)             | 1<br>(0 - 3)           | 107<br>(33 - 185)          | 191<br>(53 - 339)          | 175<br>(51 - 299)           |
| Coal workers pneumoconiosis                         | 688<br>(269 - 1,294)        | 1<br>(0 - 2)             | 2<br>(1 - 4)           | 156<br>(63 - 293)          | 255<br>(95 - 477)          | 276<br>(106 - 548)          |
| Other pneumoconiosis                                | 3,366<br>(1,017 - 5,697)    | 1<br>(0 - 2)             | 2<br>(1 - 4)           | 443<br>(128 - 804)         | 1,051<br>(307 - 1,799)     | 1,869<br>(520 - 3,512)      |
| Asthma                                              | 10,316<br>(3,443 - 17,292)  | 297<br>(84 - 569)        | 211<br>(58 - 341)      | 2,714<br>(944 - 4,542)     | 2,887<br>(892 - 5,102)     | 4,207<br>(1,339 - 7,324)    |
| Interstitial lung disease and pulmonary sarcoidosis | 30,218<br>(9,362 - 65,650)  | 114<br>(2 - 515)         | 126<br>(6 - 459)       | 3,937<br>(1,394 - 8,990)   | 9,264<br>(2,908 - 20,011)  | 16,776<br>(4,327 - 36,808)  |
| Other chronic respiratory diseases                  | 3,089<br>(1,947 - 4,437)    | 1,717<br>(1,214 - 2,314) | 85<br>(28 - 163)       | 418<br>(157 - 791)         | 361<br>(142 - 661)         | 507<br>(190 - 984)          |
| Cirrhosis                                           | 24,783<br>(19,465 - 30,511) | 150<br>(71 - 277)        | 448<br>(319 - 584)     | 11,308<br>(8,769 - 14,265) | 8,403<br>(6,298 - 10,760)  | 4,473<br>(3,497 - 5,870)    |
| Cirrhosis due to hepatitis B                        | 6,800<br>(4,744 - 9,588)    | 6<br>(2 - 13)            | 76<br>(34 - 124)       | 3,116<br>(1,905 - 4,564)   | 2,343<br>(1,551 - 3,420)   | 1,259<br>(801 - 1,923)      |
| Cirrhosis due to hepatitis C                        | 5,010<br>(3,004 - 7,751)    | 5<br>(1 - 13)            | 27<br>(5 - 77)         | 1,793<br>(791 - 3,209)     | 2,024<br>(1,160 - 3,320)   | 1,162<br>(650 - 1,745)      |
| Cirrhosis due to alcohol use                        | 6,854<br>(4,311 - 10,220)   | --                       | --                     | 2,671<br>(1,498 - 4,345)   | 2,625<br>(1,596 - 3,961)   | 1,558<br>(957 - 2,404)      |
| Cirrhosis due to other causes                       | 6,119<br>(4,181 - 8,530)    | 139<br>(65 - 259)        | 345<br>(229 - 468)     | 3,729<br>(2,470 - 5,371)   | 1,411<br>(796 - 2,141)     | 494<br>(294 - 759)          |
| Digestive diseases                                  | 24,966<br>(18,920 - 40,381) | 51<br>(27 - 82)          | 261<br>(192 - 354)     | 6,748<br>(4,957 - 10,503)  | 9,502<br>(6,650 - 16,035)  | 8,405<br>(6,323 - 13,581)   |
| Peptic ulcer disease                                | 8,489<br>(6,461 - 11,597)   | 5<br>(1 - 12)            | 19<br>(8 - 34)         | 1,441<br>(958 - 2,060)     | 3,475<br>(2,443 - 4,922)   | 3,550<br>(2,663 - 4,969)    |
| Gastritis and duodenitis                            | 1,684<br>(926 - 4,029)      | 5<br>(2 - 10)            | 12<br>(6 - 25)         | 337<br>(181 - 819)         | 636<br>(321 - 1,504)       | 695<br>(351 - 1,819)        |
| Appendicitis                                        | 1,225<br>(766 - 2,109)      | 3<br>(1 - 6)             | 8<br>(4 - 15)          | 749<br>(470 - 1,223)       | 282<br>(139 - 546)         | 183<br>(87 - 357)           |
| Paralytic ileus and intestinal obstruction          | 6,507<br>(4,322 - 11,846)   | 22<br>(12 - 38)          | 182<br>(118 - 276)     | 2,455<br>(1,642 - 4,376)   | 2,330<br>(1,383 - 4,529)   | 1,518<br>(891 - 2,844)      |
| Inguinal, femoral, and abdominal hernia             | 111<br>(64 - 234)           | 0<br>(0 - 1)             | 3<br>(1 - 5)           | 37<br>(23 - 69)            | 15<br>(8 - 31)             | 56<br>(24 - 141)            |
| Inflammatory bowel disease                          | 960<br>(649 - 1,569)        | 9<br>(4 - 18)            | 11<br>(5 - 19)         | 264<br>(175 - 405)         | 329<br>(197 - 590)         | 347<br>(208 - 608)          |
| Vascular intestinal disorders                       | 714<br>(347 - 1,577)        | 1<br>(0 - 2)             | 3<br>(1 - 7)           | 101<br>(49 - 207)          | 251<br>(114 - 583)         | 358<br>(167 - 818)          |
| Gallbladder and biliary diseases                    | 1,104<br>(669 - 2,120)      | 1<br>(0 - 2)             | 5<br>(2 - 8)           | 165<br>(98 - 276)          | 474<br>(260 - 970)         | 460<br>(245 - 970)          |
| Pancreatitis                                        | 3,176<br>(1,495 - 6,471)    | 1<br>(1 - 3)             | 10<br>(3 - 21)         | 964<br>(482 - 1,991)       | 1,307<br>(601 - 2,859)     | 894<br>(373 - 1,787)        |
| Other digestive diseases                            | 995<br>(690 - 1,734)        | 3<br>(1 - 6)             | 9<br>(4 - 15)          | 236<br>(152 - 399)         | 404<br>(248 - 780)         | 344<br>(206 - 641)          |
| Neurological disorders                              | 18,479<br>(14,273 - 24,874) | 177<br>(120 - 257)       | 470<br>(233 - 931)     | 2,581<br>(1,635 - 4,268)   | 1,635<br>(1,166 - 2,283)   | 13,616<br>(10,481 - 18,264) |
| Alzheimer disease and other dementias               | 14,151<br>(10,803 - 18,795) | --                       | --                     | 8<br>(3 - 13)              | 1,014<br>(722 - 1,386)     | 13,130<br>(10,024 - 17,583) |
| Parkinson disease                                   | 15<br>(12 - 21)             | --                       | --                     | 8<br>(7 - 11)              | 4<br>(2 - 7)               | 3<br>(2 - 5)                |
| Epilepsy                                            | 3,162<br>(1,925 - 5,558)    | 58<br>(28 - 120)         | 417<br>(182 - 884)     | 2,180<br>(1,300 - 3,778)   | 283<br>(150 - 537)         | 223<br>(124 - 394)          |
| Multiple sclerosis                                  | 188<br>(86 - 288)           | --                       | --                     | 70<br>(35 - 112)           | 63<br>(31 - 103)           | 55<br>(18 - 96)             |
| Other neurological disorders                        | 963<br>(720 - 1,321)        | 119<br>(81 - 186)        | 53<br>(36 - 78)        | 315<br>(226 - 433)         | 271<br>(180 - 387)         | 206<br>(143 - 289)          |
| Mental and substance use disorders                  | 569<br>(374 - 819)          | 16<br>(6 - 30)           | 0<br>(0 - 1)           | 226<br>(137 - 372)         | 215<br>(137 - 314)         | 111<br>(75 - 174)           |
| Schizophrenia                                       | 89<br>(29 - 210)            | --                       | --                     | 32<br>(9 - 82)             | 31<br>(10 - 75)            | 25<br>(9 - 57)              |
| Alcohol use disorders                               | 101<br>(69 - 181)           | --                       | --                     | 42<br>(27 - 84)            | 21<br>(13 - 36)            | 39<br>(25 - 75)             |
| Drug use disorders                                  | 375<br>(236 - 569)          | 16<br>(6 - 30)           | --                     | 149<br>(86 - 254)          | 163<br>(82 - 258)          | 48<br>(27 - 73)             |
| Opioid use disorders                                | 201<br>(126 - 306)          | 9<br>(3 - 17)            | --                     | 82<br>(46 - 138)           | 84<br>(43 - 134)           | 26<br>(15 - 40)             |
| Cocaine use disorders                               | 4<br>(3 - 6)                | 0<br>(0 - 1)             | --                     | 2<br>(1 - 3)               | 2<br>(1 - 3)               | 0<br>(0 - 1)                |
| Amphetamine use disorders                           | 4<br>(3 - 7)                | 0<br>(0 - 1)             | --                     | 2<br>(1 - 3)               | 2<br>(1 - 3)               | 1<br>(0 - 1)                |
| Other drug use disorders                            | 166<br>(102 - 250)          | 6<br>(2 - 12)            | --                     | 64<br>(36 - 109)           | 75<br>(39 - 119)           | 21<br>(12 - 32)             |
| Eating disorders                                    | 3<br>(2 - 5)                | --                       | 0<br>(0 - 1)           | 3<br>(2 - 5)               | --                         | --                          |

Web Table 31- Bangladesh deaths with 95% UI by age, sex, and cause in 2013

| Cause                                               | Both Sexes, All Ages        | Both Sexes, 0-4 Years     | Both Sexes, 5-14 Years | Both Sexes, 15-49 Years    | Both Sexes, 50-69 Years     | Both Sexes, 70-80 Years     |
|-----------------------------------------------------|-----------------------------|---------------------------|------------------------|----------------------------|-----------------------------|-----------------------------|
| Anorexia nervosa                                    | 3<br>(2 - 5)                | --                        | 0<br>(0 - 1)           | 3<br>(2 - 5)               | --                          | --                          |
| Diabetes, urogenital, blood, and endocrine diseases | 52,686<br>(42,983 - 64,894) | 1,482<br>(1,112 - 1,923)  | 763<br>(586 - 969)     | 12,384<br>(9,889 - 15,297) | 15,648<br>(12,063 - 20,405) | 22,410<br>(18,273 - 28,518) |
| Diabetes mellitus                                   | 29,171<br>(23,314 - 37,366) | 46<br>(29 - 71)           | 70<br>(46 - 104)       | 4,069<br>(3,160 - 5,121)   | 9,254<br>(6,953 - 12,458)   | 15,732<br>(12,400 - 20,163) |
| Acute glomerulonephritis                            | 570<br>(264 - 951)          | 99<br>(19 - 224)          | 58<br>(26 - 111)       | 191<br>(93 - 328)          | 107<br>(57 - 175)           | 115<br>(60 - 180)           |
| Chronic kidney disease                              | 11,843<br>(9,524 - 15,272)  | 288<br>(192 - 415)        | 215<br>(157 - 308)     | 4,756<br>(3,701 - 6,167)   | 3,720<br>(2,756 - 4,965)    | 2,863<br>(2,224 - 4,206)    |
| Chronic kidney disease due to diabetes mellitus     | 564<br>(207 - 875)          | 4<br>(1 - 7)              | 5<br>(2 - 7)           | 152<br>(54 - 244)          | 255<br>(89 - 414)           | 148<br>(59 - 261)           |
| Chronic kidney disease due to hypertension          | 2,934<br>(1,375 - 4,429)    | 21<br>(5 - 40)            | 13<br>(5 - 24)         | 664<br>(249 - 1,093)       | 1,023<br>(453 - 1,602)      | 1,212<br>(617 - 1,937)      |
| Chronic kidney disease due to glomerulonephritis    | 3,100<br>(2,033 - 4,805)    | 105<br>(70 - 151)         | 98<br>(69 - 138)       | 1,273<br>(860 - 1,970)     | 926<br>(536 - 1,538)        | 698<br>(403 - 1,247)        |
| Chronic kidney disease due to other causes          | 5,246<br>(3,843 - 7,218)    | 158<br>(83 - 267)         | 99<br>(61 - 163)       | 2,667<br>(1,893 - 3,671)   | 1,516<br>(925 - 2,318)      | 806<br>(456 - 1,423)        |
| Urinary diseases and male infertility               | 4,331<br>(3,335 - 6,102)    | 144<br>(90 - 236)         | 74<br>(52 - 104)       | 1,451<br>(1,100 - 1,957)   | 1,144<br>(801 - 1,769)      | 1,519<br>(1,066 - 2,336)    |
| Interstitial nephritis and urinary tract infections | 3,166<br>(2,279 - 4,820)    | 126<br>(78 - 206)         | 51<br>(34 - 72)        | 1,083<br>(792 - 1,517)     | 823<br>(529 - 1,406)        | 1,084<br>(673 - 1,887)      |
| Urolithiasis                                        | 343<br>(203 - 598)          | --                        | 9<br>(4 - 20)          | 125<br>(62 - 236)          | 103<br>(51 - 206)           | 106<br>(54 - 202)           |
| Other urinary diseases                              | 822<br>(503 - 1,224)        | 18<br>(6 - 38)            | 14<br>(7 - 25)         | 242<br>(143 - 389)         | 218<br>(122 - 350)          | 330<br>(163 - 552)          |
| Gynecological diseases                              | 110<br>(20 - 317)           | --                        | --                     | 46<br>(10 - 130)           | 8<br>(3 - 25)               | 56<br>(5 - 181)             |
| Uterine fibroids                                    | 32<br>(5 - 94)              | --                        | --                     | 12<br>(2 - 36)             | 2<br>(1 - 7)                | 18<br>(2 - 57)              |
| Polycystic ovarian syndrome                         | 2<br>(1 - 7)                | --                        | --                     | 2<br>(1 - 7)               | 0<br>(0 - 0)                | --                          |
| Endometriosis                                       | 7<br>(2 - 18)               | --                        | --                     | 6<br>(2 - 18)              | 0<br>(0 - 1)                | --                          |
| Genital prolapse                                    | 21<br>(3 - 61)              | --                        | --                     | 5<br>(1 - 14)              | 1<br>(1 - 4)                | 14<br>(1 - 45)              |
| Other gynecological diseases                        | 49<br>(9 - 140)             | --                        | --                     | 20<br>(5 - 57)             | 4<br>(1 - 12)               | 24<br>(2 - 79)              |
| Hemoglobinopathies and hemolytic anemias            | 1,966<br>(1,264 - 3,002)    | 542<br>(338 - 890)        | 203<br>(121 - 351)     | 617<br>(367 - 986)         | 216<br>(127 - 337)          | 389<br>(246 - 625)          |
| Thalassemias                                        | 1,120<br>(697 - 1,760)      | 476<br>(294 - 793)        | 184<br>(110 - 319)     | 416<br>(234 - 711)         | 36<br>(22 - 55)             | 8<br>(5 - 13)               |
| Sickle cell disorders                               | 11<br>(7 - 17)              | 4<br>(3 - 7)              | 1<br>(1 - 2)           | 4<br>(3 - 6)               | 1<br>(1 - 2)                | 0<br>(0 - 0)                |
| G6PD deficiency                                     | 98<br>(62 - 146)            | 15<br>(9 - 25)            | 6<br>(3 - 11)          | 42<br>(26 - 64)            | 23<br>(13 - 37)             | 12<br>(8 - 19)              |
| Other hemoglobinopathies and hemolytic anemias      | 737<br>(479 - 1,095)        | 46<br>(30 - 69)           | 12<br>(7 - 19)         | 155<br>(102 - 221)         | 155<br>(91 - 245)           | 369<br>(233 - 591)          |
| Endocrine, metabolic, blood, and immune disorders   | 4,695<br>(3,616 - 6,014)    | 363<br>(201 - 552)        | 143<br>(92 - 216)      | 1,255<br>(906 - 1,654)     | 1,199<br>(829 - 1,710)      | 1,735<br>(1,230 - 2,515)    |
| Musculoskeletal disorders                           | 2,132<br>(1,619 - 3,093)    | --                        | 91<br>(65 - 129)       | 610<br>(451 - 889)         | 778<br>(558 - 1,128)        | 654<br>(452 - 1,090)        |
| Rheumatoid arthritis                                | 999<br>(652 - 1,611)        | --                        | 20<br>(9 - 40)         | 144<br>(75 - 274)          | 395<br>(244 - 625)          | 440<br>(282 - 735)          |
| Other musculoskeletal disorders                     | 1,133<br>(838 - 1,751)      | --                        | 71<br>(49 - 97)        | 466<br>(339 - 662)         | 383<br>(254 - 606)          | 214<br>(135 - 439)          |
| Other non-communicable diseases                     | 14,613<br>(11,224 - 18,190) | 7,877<br>(5,174 - 10,746) | 1,019<br>(631 - 1,479) | 2,230<br>(1,593 - 2,839)   | 1,253<br>(921 - 1,706)      | 2,234<br>(1,677 - 3,201)    |
| Congenital anomalies                                | 11,108<br>(7,920 - 14,281)  | 7,457<br>(4,877 - 10,234) | 967<br>(590 - 1,420)   | 1,678<br>(1,081 - 2,205)   | 483<br>(322 - 691)          | 523<br>(315 - 706)          |
| Neural tube defects                                 | 725<br>(326 - 1,573)        | 568<br>(209 - 1,313)      | 41<br>(18 - 105)       | 90<br>(52 - 183)           | 16<br>(8 - 34)              | 11<br>(4 - 21)              |
| Congenital heart anomalies                          | 6,282<br>(3,454 - 8,957)    | 4,276<br>(2,075 - 6,524)  | 584<br>(269 - 941)     | 713<br>(425 - 1,042)       | 317<br>(196 - 472)          | 393<br>(207 - 543)          |
| Cleft lip and cleft palate                          | 65<br>(26 - 142)            | 65<br>(26 - 142)          | --                     | --                         | --                          | --                          |
| Down syndrome                                       | 685<br>(315 - 1,107)        | 312<br>(100 - 608)        | 79<br>(30 - 146)       | 253<br>(132 - 393)         | 35<br>(20 - 56)             | 4<br>(2 - 7)                |
| Chromosomal unbalanced rearrangements               | 347<br>(122 - 600)          | 236<br>(73 - 456)         | 23<br>(8 - 41)         | 77<br>(29 - 121)           | 7<br>(3 - 11)               | 4<br>(2 - 6)                |
| Other congenital anomalies                          | 3,004<br>(1,895 - 4,187)    | 2,000<br>(1,105 - 3,043)  | 240<br>(123 - 404)     | 545<br>(335 - 746)         | 109<br>(64 - 156)           | 111<br>(61 - 162)           |
| Skin and subcutaneous diseases                      | 3,199<br>(2,447 - 4,514)    | 114<br>(73 - 177)         | 52<br>(36 - 73)        | 552<br>(408 - 759)         | 769<br>(549 - 1,099)        | 1,712<br>(1,183 - 2,648)    |
| Cellulitis                                          | 1,743<br>(869 - 2,948)      | 89<br>(49 - 153)          | 35<br>(19 - 56)        | 318<br>(168 - 535)         | 433<br>(208 - 753)          | 868<br>(370 - 1,600)        |
| Pyoderma                                            | 976<br>(275 - 1,761)        | 19<br>(3 - 47)            | 9<br>(2 - 19)          | 171<br>(45 - 314)          | 264<br>(62 - 480)           | 513<br>(141 - 988)          |
| Decubitus ulcer                                     | 451<br>(95 - 1,154)         | 3<br>(0 - 12)             | 7<br>(1 - 17)          | 52<br>(11 - 131)           | 67<br>(13 - 190)            | 322<br>(62 - 848)           |

Web Table 31- Bangladesh deaths with 95% UI by age, sex, and cause in 2013

| Cause                                           | Both Sexes, All Ages         | Both Sexes, 0-4 Years      | Both Sexes, 5-14 Years   | Both Sexes, 15-49 Years     | Both Sexes, 50-69 Years     | Both Sexes, 70-80 Years     |
|-------------------------------------------------|------------------------------|----------------------------|--------------------------|-----------------------------|-----------------------------|-----------------------------|
| Other skin and subcutaneous diseases            | 29<br>(8 - 57)               | 2<br>(0 - 6)               | 2<br>(0 - 4)             | 11<br>(3 - 21)              | 6<br>(2 - 12)               | 9<br>(2 - 17)               |
| Sudden infant death syndrome                    | 306<br>(58 - 868)            | 306<br>(58 - 868)          | --                       | --                          | --                          | --                          |
| Injuries                                        | 91,904<br>(77,311 - 113,056) | 13,836<br>(9,850 - 19,880) | 5,852<br>(4,611 - 7,475) | 37,503<br>(30,303 - 46,719) | 13,200<br>(10,154 - 16,779) | 21,513<br>(17,335 - 29,437) |
| Transport injuries                              | 14,192<br>(10,911 - 17,722)  | 460<br>(261 - 657)         | 713<br>(472 - 943)       | 7,676<br>(5,657 - 10,265)   | 2,977<br>(2,219 - 3,799)    | 2,367<br>(1,833 - 2,950)    |
| Road injuries                                   | 13,066<br>(9,935 - 16,385)   | 387<br>(214 - 550)         | 675<br>(441 - 900)       | 7,229<br>(5,325 - 9,718)    | 2,653<br>(1,936 - 3,405)    | 2,123<br>(1,617 - 2,668)    |
| Pedestrian road injuries                        | 6,471<br>(4,751 - 8,386)     | 216<br>(108 - 322)         | 475<br>(297 - 648)       | 2,918<br>(1,935 - 4,139)    | 1,562<br>(1,111 - 2,052)    | 1,300<br>(959 - 1,696)      |
| Cyclist road injuries                           | 777<br>(555 - 1,081)         | 6<br>(2 - 12)              | 14<br>(8 - 21)           | 560<br>(382 - 818)          | 119<br>(75 - 177)           | 78<br>(55 - 111)            |
| Motorcyclist road injuries                      | 945<br>(660 - 1,382)         | 21<br>(11 - 32)            | 12<br>(7 - 19)           | 682<br>(447 - 1,038)        | 101<br>(65 - 153)           | 129<br>(84 - 194)           |
| Motor vehicle road injuries                     | 4,721<br>(3,215 - 6,442)     | 129<br>(72 - 193)          | 166<br>(102 - 240)       | 3,021<br>(2,003 - 4,378)    | 827<br>(563 - 1,119)        | 578<br>(392 - 788)          |
| Other road injuries                             | 152<br>(94 - 220)            | 15<br>(7 - 24)             | 9<br>(4 - 15)            | 47<br>(27 - 73)             | 43<br>(24 - 69)             | 38<br>(21 - 69)             |
| Other transport injuries                        | 1,126<br>(883 - 1,456)       | 73<br>(45 - 108)           | 38<br>(24 - 58)          | 447<br>(312 - 644)          | 324<br>(236 - 458)          | 244<br>(172 - 343)          |
| Unintentional injuries                          | 56,739<br>(47,114 - 72,832)  | 13,111<br>(9,169 - 19,356) | 4,417<br>(3,260 - 5,982) | 13,067<br>(10,148 - 16,881) | 7,916<br>(5,942 - 10,727)   | 18,227<br>(14,213 - 26,036) |
| Falls                                           | 18,002<br>(13,611 - 27,055)  | 696<br>(444 - 1,091)       | 366<br>(232 - 562)       | 1,361<br>(905 - 2,427)      | 2,758<br>(1,937 - 4,348)    | 12,821<br>(9,272 - 19,619)  |
| Drowning                                        | 22,427<br>(15,493 - 30,237)  | 10,777<br>(6,905 - 16,610) | 3,283<br>(2,102 - 4,833) | 4,251<br>(2,566 - 6,173)    | 2,400<br>(1,499 - 3,351)    | 1,716<br>(1,118 - 2,370)    |
| Fire, heat, and hot substances                  | 2,556<br>(1,883 - 3,748)     | 142<br>(84 - 249)          | 41<br>(26 - 63)          | 699<br>(516 - 969)          | 472<br>(289 - 778)          | 1,202<br>(800 - 1,917)      |
| Poisonings                                      | 491<br>(375 - 814)           | 97<br>(63 - 163)           | 13<br>(9 - 19)           | 153<br>(101 - 287)          | 107<br>(71 - 183)           | 122<br>(83 - 202)           |
| Exposure to mechanical forces                   | 1,960<br>(1,573 - 2,501)     | 440<br>(291 - 666)         | 133<br>(84 - 203)        | 637<br>(452 - 899)          | 435<br>(302 - 654)          | 315<br>(228 - 472)          |
| Unintentional firearm injuries                  | 350<br>(266 - 477)           | 42<br>(24 - 67)            | 10<br>(6 - 15)           | 174<br>(110 - 282)          | 66<br>(45 - 92)             | 59<br>(40 - 86)             |
| Unintentional suffocation                       | 90<br>(54 - 181)             | 54<br>(23 - 122)           | 7<br>(4 - 12)            | 16<br>(11 - 32)             | 7<br>(5 - 16)               | 6<br>(4 - 12)               |
| Other exposure to mechanical forces             | 1,520<br>(1,205 - 2,001)     | 345<br>(208 - 560)         | 116<br>(70 - 186)        | 446<br>(305 - 649)          | 362<br>(240 - 559)          | 250<br>(171 - 389)          |
| Adverse effects of medical treatment            | 5,427<br>(3,760 - 8,421)     | 201<br>(95 - 444)          | 134<br>(74 - 265)        | 2,980<br>(1,971 - 4,768)    | 1,167<br>(723 - 2,025)      | 944<br>(558 - 1,748)        |
| Animal contact                                  | 1,233<br>(811 - 2,678)       | 42<br>(23 - 94)            | 139<br>(83 - 275)        | 752<br>(485 - 1,579)        | 157<br>(83 - 424)           | 143<br>(67 - 461)           |
| Venomous animal contact                         | 785<br>(504 - 1,699)         | 13<br>(5 - 39)             | 111<br>(65 - 218)        | 556<br>(351 - 1,223)        | 91<br>(41 - 282)            | 15<br>(6 - 46)              |
| Non-venomous animal contact                     | 447<br>(286 - 1,027)         | 29<br>(16 - 61)            | 28<br>(14 - 60)          | 196<br>(119 - 385)          | 65<br>(36 - 162)            | 129<br>(59 - 438)           |
| Foreign body                                    | 1,167<br>(792 - 1,979)       | 621<br>(318 - 1,261)       | 9<br>(7 - 12)            | 108<br>(61 - 221)           | 31<br>(22 - 46)             | 397<br>(247 - 613)          |
| Pulmonary aspiration and foreign body in airway | 1,114<br>(746 - 1,925)       | 613<br>(312 - 1,253)       | 5<br>(3 - 8)             | 87<br>(44 - 195)            | 20<br>(13 - 30)             | 389<br>(239 - 601)          |
| Foreign body in other body part                 | 52<br>(38 - 86)              | 7<br>(4 - 13)              | 4<br>(3 - 6)             | 21<br>(15 - 38)             | 11<br>(7 - 21)              | 8<br>(5 - 13)               |
| Other unintentional injuries                    | 3,476<br>(2,758 - 4,406)     | 95<br>(68 - 140)           | 299<br>(206 - 444)       | 2,127<br>(1,568 - 2,879)    | 389<br>(276 - 562)          | 567<br>(420 - 824)          |
| Self-harm and interpersonal violence            | 20,972<br>(16,812 - 25,957)  | 264<br>(158 - 428)         | 721<br>(457 - 1,153)     | 16,761<br>(13,254 - 21,143) | 2,307<br>(1,711 - 3,151)    | 919<br>(692 - 1,269)        |
| Self-harm                                       | 15,655<br>(12,268 - 19,811)  | --                         | 555<br>(302 - 978)       | 12,807<br>(9,900 - 16,166)  | 1,705<br>(1,208 - 2,332)    | 589<br>(420 - 828)          |
| Interpersonal violence                          | 5,316<br>(3,782 - 7,315)     | 264<br>(158 - 428)         | 166<br>(102 - 262)       | 3,954<br>(2,646 - 5,560)    | 602<br>(410 - 909)          | 330<br>(213 - 517)          |
| Assault by firearm                              | 1,175<br>(722 - 1,856)       | 29<br>(14 - 59)            | 26<br>(13 - 52)          | 905<br>(544 - 1,460)        | 162<br>(88 - 287)           | 53<br>(29 - 101)            |
| Assault by sharp object                         | 1,054<br>(675 - 1,615)       | 25<br>(13 - 48)            | 25<br>(12 - 51)          | 849<br>(527 - 1,322)        | 135<br>(77 - 230)           | 21<br>(11 - 38)             |
| Assault by other means                          | 3,087<br>(2,185 - 4,324)     | 210<br>(122 - 350)         | 115<br>(69 - 178)        | 2,200<br>(1,451 - 3,180)    | 305<br>(199 - 474)          | 257<br>(161 - 396)          |
| Forces of nature, war, and legal intervention   | 1<br>(0 - 0)                 | 1<br>(0 - 0)               | --                       | --                          | --                          | --                          |
| Exposure to forces of nature                    | 1<br>(0 - 0)                 | 1<br>(0 - 0)               | --                       | --                          | --                          | --                          |

Web Table 31- Bangladesh deaths with 95% UI by age, sex, and cause in 2013

| Cause                                                             | Males, All Ages                | Males, 0-4 Years            | Males, 5-14 Years          | Males, 15-49 Years            | Males, 50-69 Years             | Males, 70-80 Years             |
|-------------------------------------------------------------------|--------------------------------|-----------------------------|----------------------------|-------------------------------|--------------------------------|--------------------------------|
| All causes                                                        | 539,092<br>(443,620 - 619,986) | 68,955<br>(61,084 - 77,269) | 10,768<br>(9,677 - 12,021) | 114,303<br>(86,205 - 147,315) | 143,743<br>(109,491 - 172,582) | 201,323<br>(171,700 - 219,169) |
| Communicable, maternal, neonatal, and nutritional diseases        | 104,215<br>(92,732 - 116,243)  | 54,737<br>(49,018 - 60,645) | 3,699<br>(2,798 - 4,863)   | 15,206<br>(11,880 - 19,448)   | 11,739<br>(9,173 - 14,615)     | 18,833<br>(14,150 - 22,875)    |
| HIV/AIDS and tuberculosis                                         | 12,648<br>(9,456 - 17,286)     | 44<br>(28 - 66)             | 64<br>(42 - 94)            | 4,528<br>(3,298 - 6,333)      | 4,922<br>(3,449 - 7,092)       | 3,089<br>(2,264 - 4,152)       |
| Tuberculosis                                                      | 12,257<br>(9,086 - 16,868)     | 36<br>(21 - 57)             | 59<br>(37 - 89)            | 4,234<br>(3,000 - 6,028)      | 4,851<br>(3,374 - 7,035)       | 3,078<br>(2,253 - 4,140)       |
| HIV/AIDS                                                          | 390<br>(303 - 505)             | 8<br>(5 - 13)               | 6<br>(4 - 8)               | 294<br>(228 - 377)            | 71<br>(45 - 112)               | 11<br>(6 - 17)                 |
| HIV/AIDS resulting in mycobacterial infection                     | 26<br>(19 - 36)                | 0<br>(0 - 1)                | 0<br>(0 - 0)               | 19<br>(14 - 26)               | 5<br>(3 - 8)                   | 1<br>(0 - 1)                   |
| HIV/AIDS resulting in other diseases                              | 364<br>(283 - 470)             | 7<br>(4 - 13)               | 5<br>(4 - 8)               | 275<br>(213 - 353)            | 66<br>(41 - 104)               | 10<br>(6 - 16)                 |
| Diarrhea, lower respiratory, and other common infectious diseases | 34,082<br>(25,963 - 41,943)    | 11,369<br>(8,540 - 14,564)  | 2,456<br>(1,555 - 3,758)   | 5,487<br>(3,429 - 8,315)      | 4,127<br>(2,656 - 5,889)       | 10,643<br>(6,756 - 13,873)     |
| Diarrheal diseases                                                | 7,219<br>(5,132 - 9,617)       | 829<br>(393 - 1,631)        | 169<br>(86 - 288)          | 962<br>(634 - 1,386)          | 1,400<br>(825 - 2,184)         | 3,858<br>(2,450 - 5,632)       |
| Intestinal infectious diseases                                    | 7,082<br>(3,530 - 12,568)      | 1,943<br>(882 - 3,714)      | 1,773<br>(854 - 3,141)     | 2,783<br>(1,158 - 5,520)      | 413<br>(145 - 870)             | 170<br>(64 - 331)              |
| Typhoid fever                                                     | 5,931<br>(2,943 - 10,331)      | 1,616<br>(710 - 3,062)      | 1,483<br>(691 - 2,638)     | 2,325<br>(967 - 4,567)        | 358<br>(126 - 766)             | 149<br>(54 - 295)              |
| Paratyphoid fever                                                 | 1,138<br>(463 - 2,318)         | 321<br>(95 - 752)           | 288<br>(90 - 645)          | 454<br>(157 - 1,090)          | 54<br>(11 - 138)               | 21<br>(5 - 57)                 |
| Other intestinal infectious diseases                              | 13<br>(6 - 23)                 | 6<br>(1 - 13)               | 1<br>(0 - 4)               | 4<br>(1 - 11)                 | 1<br>(0 - 5)                   | 1<br>(0 - 4)                   |
| Lower respiratory infections                                      | 17,428<br>(11,685 - 21,908)    | 7,307<br>(5,353 - 9,549)    | 267<br>(124 - 451)         | 1,190<br>(660 - 1,800)        | 2,243<br>(1,190 - 3,324)       | 6,421<br>(3,247 - 9,296)       |
| Upper respiratory infections                                      | 50<br>(20 - 96)                | 6<br>(1 - 21)               | 1<br>(0 - 6)               | 15<br>(3 - 36)                | 12<br>(1 - 36)                 | 15<br>(1 - 51)                 |
| Otitis media                                                      | 25<br>(17 - 38)                | 3<br>(2 - 5)                | 3<br>(2 - 5)               | 11<br>(7 - 18)                | 5<br>(3 - 9)                   | 3<br>(2 - 4)                   |
| Meningitis                                                        | 758<br>(431 - 1,161)           | 389<br>(145 - 782)          | 43<br>(15 - 73)            | 209<br>(122 - 332)            | 11<br>(5 - 17)                 | 105<br>(56 - 160)              |
| Pneumococcal meningitis                                           | 266<br>(158 - 400)             | 112<br>(38 - 221)           | 19<br>(7 - 33)             | 89<br>(46 - 144)              | 4<br>(2 - 7)                   | 43<br>(23 - 69)                |
| H influenzae type B meningitis                                    | 222<br>(110 - 393)             | 165<br>(60 - 334)           | 12<br>(4 - 22)             | 33<br>(17 - 57)               | 1<br>(1 - 2)                   | 11<br>(5 - 19)                 |
| Meningococcal meningitis                                          | 88<br>(50 - 130)               | 31<br>(10 - 64)             | 5<br>(1 - 9)               | 32<br>(15 - 56)               | 2<br>(1 - 3)                   | 18<br>(9 - 32)                 |
| Other meningitis                                                  | 182<br>(97 - 288)              | 81<br>(30 - 169)            | 8<br>(3 - 16)              | 55<br>(25 - 100)              | 4<br>(1 - 7)                   | 33<br>(13 - 59)                |
| Encephalitis                                                      | 583<br>(404 - 933)             | 156<br>(78 - 303)           | 122<br>(68 - 184)          | 261<br>(155 - 494)            | 25<br>(15 - 44)                | 20<br>(13 - 33)                |
| Diphtheria                                                        | 10<br>(0 - 39)                 | 5<br>(0 - 32)               | 2<br>(0 - 16)              | 2<br>(0 - 8)                  | 1<br>(0 - 4)                   | --                             |
| Whooping cough                                                    | 362<br>(0 - 1,892)             | 338<br>(0 - 1,767)          | 17<br>(0 - 97)             | 6<br>(0 - 32)                 | 1<br>(0 - 4)                   | --                             |
| Tetanus                                                           | 31<br>(17 - 114)               | 13<br>(4 - 83)              | 4<br>(2 - 7)               | 8<br>(5 - 14)                 | 4<br>(2 - 11)                  | 2<br>(1 - 6)                   |
| Measles                                                           | 400<br>(191 - 732)             | 345<br>(160 - 635)          | 46<br>(23 - 81)            | 9<br>(4 - 16)                 | 0<br>(0 - 1)                   | --                             |
| Varicella and herpes zoster                                       | 136<br>(43 - 347)              | 35<br>(1 - 139)             | 8<br>(0 - 34)              | 32<br>(5 - 85)                | 12<br>(1 - 39)                 | 48<br>(1 - 231)                |
| Neglected tropical diseases and malaria                           | 2,978<br>(2,091 - 4,081)       | 879<br>(412 - 1,480)        | 509<br>(289 - 755)         | 1,178<br>(738 - 1,823)        | 287<br>(170 - 427)             | 125<br>(87 - 170)              |
| Malaria                                                           | 19<br>(10 - 29)                | 2<br>(1 - 3)                | 2<br>(1 - 3)               | 13<br>(7 - 21)                | 1<br>(1 - 2)                   | 1<br>(0 - 1)                   |
| Leishmaniasis                                                     | 2,689<br>(1,855 - 3,706)       | 845<br>(385 - 1,444)        | 460<br>(262 - 687)         | 1,066<br>(649 - 1,671)        | 241<br>(130 - 365)             | 77<br>(45 - 116)               |
| Visceral leishmaniasis                                            | 2,689<br>(1,855 - 3,706)       | 845<br>(385 - 1,444)        | 460<br>(262 - 687)         | 1,066<br>(649 - 1,671)        | 241<br>(130 - 365)             | 77<br>(45 - 116)               |
| Cysticercosis                                                     | 2<br>(0 - 5)                   | 0<br>(0 - 0)                | 0<br>(0 - 0)               | 1<br>(0 - 3)                  | 0<br>(0 - 1)                   | 0<br>(0 - 0)                   |
| Cystic echinococcosis                                             | 14<br>(11 - 17)                | 0<br>(0 - 1)                | 2<br>(1 - 2)               | 7<br>(5 - 10)                 | 3<br>(2 - 4)                   | 2<br>(1 - 2)                   |
| Dengue                                                            | 96<br>(48 - 135)               | 16<br>(9 - 28)              | 7<br>(5 - 12)              | 35<br>(18 - 52)               | 20<br>(7 - 29)                 | 18<br>(8 - 23)                 |
| Rabies                                                            | 96<br>(33 - 306)               | 3<br>(1 - 9)                | 35<br>(7 - 139)            | 38<br>(15 - 114)              | 13<br>(4 - 40)                 | 6<br>(2 - 20)                  |
| Intestinal nematode infections                                    | 4<br>(1 - 12)                  | 2<br>(0 - 8)                | 1<br>(0 - 4)               | 1<br>(0 - 5)                  | 0<br>(0 - 3)                   | 0<br>(0 - 3)                   |
| Ascariasis                                                        | 4<br>(1 - 12)                  | 2<br>(0 - 8)                | 1<br>(0 - 4)               | 1<br>(0 - 5)                  | 0<br>(0 - 3)                   | 0<br>(0 - 3)                   |
| Other neglected tropical diseases                                 | 59<br>(43 - 79)                | 11<br>(6 - 20)              | 2<br>(1 - 4)               | 18<br>(11 - 27)               | 8<br>(5 - 12)                  | 21<br>(13 - 33)                |
| Maternal disorders                                                | --                             | --                          | --                         | --                            | --                             | --                             |
| Maternal hemorrhage                                               | --                             | --                          | --                         | --                            | --                             | --                             |

Web Table 31- Bangladesh deaths with 95% UI by age, sex, and cause in 2013

| Cause                                                            | Males, All Ages                | Males, 0-4 Years            | Males, 5-14 Years        | Males, 15-49 Years          | Males, 50-69 Years            | Males, 70-80 Years             |
|------------------------------------------------------------------|--------------------------------|-----------------------------|--------------------------|-----------------------------|-------------------------------|--------------------------------|
| Maternal sepsis and other maternal infections                    | --                             | --                          | --                       | --                          | --                            | --                             |
| Maternal hypertensive disorders                                  | --                             | --                          | --                       | --                          | --                            | --                             |
| Maternal obstructed labor                                        | --                             | --                          | --                       | --                          | --                            | --                             |
| Maternal abortive outcome                                        | --                             | --                          | --                       | --                          | --                            | --                             |
| Indirect maternal deaths                                         | --                             | --                          | --                       | --                          | --                            | --                             |
| Late maternal deaths                                             | --                             | --                          | --                       | --                          | --                            | --                             |
| Maternal deaths aggravated by HIV/AIDS                           | --                             | --                          | --                       | --                          | --                            | --                             |
| Other maternal disorders                                         | --                             | --                          | --                       | --                          | --                            | --                             |
| Neonatal disorders                                               | 38,827<br>(35,537 - 42,170)    | 38,827<br>(35,537 - 42,170) | --                       | --                          | --                            | --                             |
| Neonatal preterm birth complications                             | 11,122<br>(6,817 - 19,087)     | 11,122<br>(6,817 - 19,087)  | --                       | --                          | --                            | --                             |
| Neonatal encephalopathy due to birth asphyxia and trauma         | 15,957<br>(8,908 - 20,666)     | 15,957<br>(8,908 - 20,666)  | --                       | --                          | --                            | --                             |
| Neonatal sepsis and other neonatal infections                    | 8,805<br>(3,734 - 15,988)      | 8,805<br>(3,734 - 15,988)   | --                       | --                          | --                            | --                             |
| Hemolytic disease and other neonatal jaundice                    | 27<br>(10 - 62)                | 27<br>(10 - 62)             | --                       | --                          | --                            | --                             |
| Other neonatal disorders                                         | 2,917<br>(1,729 - 5,783)       | 2,917<br>(1,729 - 5,783)    | --                       | --                          | --                            | --                             |
| Nutritional deficiencies                                         | 6,585<br>(3,856 - 9,092)       | 1,242<br>(642 - 2,116)      | 212<br>(112 - 337)       | 773<br>(487 - 1,443)        | 739<br>(396 - 1,114)          | 3,619<br>(1,809 - 5,329)       |
| Protein-energy malnutrition                                      | 5,898<br>(3,428 - 8,158)       | 1,135<br>(603 - 1,944)      | 166<br>(91 - 275)        | 659<br>(395 - 1,260)        | 675<br>(355 - 1,029)          | 3,263<br>(1,572 - 4,790)       |
| Iodine deficiency                                                | 4<br>(0 - 16)                  | 1<br>(0 - 5)                | 0<br>(0 - 3)             | 1<br>(0 - 6)                | 1<br>(0 - 6)                  | 2<br>(0 - 12)                  |
| Iron-deficiency anemia                                           | 503<br>(154 - 1,324)           | 98<br>(10 - 286)            | 45<br>(7 - 100)          | 101<br>(30 - 248)           | 48<br>(2 - 164)               | 213<br>(6 - 725)               |
| Other nutritional deficiencies                                   | 179<br>(39 - 378)              | 8<br>(2 - 21)               | 1<br>(0 - 2)             | 12<br>(3 - 30)              | 16<br>(4 - 41)                | 142<br>(25 - 319)              |
| Other communicable, maternal, neonatal, and nutritional diseases | 9,094<br>(6,997 - 11,786)      | 2,376<br>(1,351 - 3,770)    | 458<br>(306 - 643)       | 3,239<br>(2,275 - 4,755)    | 1,664<br>(1,121 - 2,362)      | 1,357<br>(932 - 2,089)         |
| Sexually transmitted diseases excluding HIV                      | 2,443<br>(1,370 - 3,837)       | 1,971<br>(1,019 - 3,343)    | 113<br>(55 - 203)        | 73<br>(29 - 182)            | 100<br>(40 - 200)             | 186<br>(62 - 484)              |
| Syphilis                                                         | 2,353<br>(1,307 - 3,758)       | 1,971<br>(1,019 - 3,343)    | 113<br>(54 - 202)        | 41<br>(16 - 102)            | 74<br>(30 - 147)              | 155<br>(52 - 406)              |
| Chlamydial infection                                             | --                             | --                          | --                       | --                          | --                            | --                             |
| Gonococcal infection                                             | 57<br>(27 - 122)               | --                          | 0<br>(0 - 0)             | 18<br>(7 - 44)              | 17<br>(7 - 34)                | 22<br>(8 - 57)                 |
| Other sexually transmitted diseases                              | 33<br>(16 - 70)                | --                          | 0<br>(0 - 0)             | 15<br>(6 - 36)              | 9<br>(4 - 19)                 | 9<br>(3 - 21)                  |
| Hepatitis                                                        | 5,586<br>(4,167 - 7,524)       | 239<br>(102 - 595)          | 297<br>(181 - 476)       | 2,924<br>(2,037 - 4,288)    | 1,305<br>(833 - 1,943)        | 821<br>(550 - 1,170)           |
| Acute hepatitis A                                                | 431<br>(118 - 923)             | 101<br>(25 - 272)           | 69<br>(18 - 150)         | 207<br>(51 - 502)           | 43<br>(10 - 111)              | 11<br>(2 - 30)                 |
| Acute hepatitis B                                                | 2,185<br>(1,323 - 3,244)       | 119<br>(38 - 311)           | 51<br>(17 - 109)         | 581<br>(230 - 1,095)        | 784<br>(422 - 1,230)          | 650<br>(380 - 957)             |
| Acute hepatitis C                                                | 38<br>(6 - 110)                | --                          | 3<br>(0 - 9)             | 19<br>(2 - 60)              | 11<br>(2 - 36)                | 5<br>(1 - 18)                  |
| Acute hepatitis E                                                | 2,932<br>(1,892 - 4,292)       | 19<br>(1 - 81)              | 174<br>(74 - 336)        | 2,118<br>(1,327 - 3,176)    | 467<br>(192 - 860)            | 155<br>(42 - 355)              |
| Other infectious diseases                                        | 1,065<br>(614 - 1,685)         | 166<br>(67 - 360)           | 47<br>(21 - 90)          | 242<br>(131 - 393)          | 259<br>(113 - 505)            | 351<br>(134 - 843)             |
| Non-communicable diseases                                        | 384,136<br>(308,301 - 450,038) | 7,049<br>(5,026 - 9,353)    | 3,496<br>(2,729 - 4,252) | 74,561<br>(54,495 - 98,580) | 124,880<br>(94,668 - 150,945) | 174,149<br>(147,591 - 192,776) |
| Neoplasms                                                        | 65,334<br>(50,260 - 81,111)    | 437<br>(277 - 645)          | 1,277<br>(972 - 1,633)   | 19,440<br>(14,199 - 26,200) | 26,723<br>(19,942 - 33,523)   | 17,458<br>(14,039 - 20,620)    |
| Esophageal cancer                                                | 2,848<br>(1,823 - 4,574)       | --                          | --                       | 405<br>(217 - 725)          | 1,417<br>(874 - 2,351)        | 1,026<br>(647 - 1,743)         |
| Stomach cancer                                                   | 6,108<br>(4,523 - 7,755)       | --                          | --                       | 1,431<br>(969 - 2,021)      | 2,970<br>(2,157 - 3,913)      | 1,707<br>(1,243 - 2,207)       |
| Liver cancer                                                     | 13,253<br>(9,777 - 17,432)     | --                          | 158<br>(92 - 259)        | 4,651<br>(3,210 - 6,713)    | 5,894<br>(4,120 - 8,231)      | 2,550<br>(1,827 - 3,481)       |
| Liver cancer due to hepatitis B                                  | 4,682<br>(1,575 - 8,264)       | --                          | 70<br>(21 - 135)         | 2,036<br>(609 - 3,463)      | 1,921<br>(561 - 3,552)        | 654<br>(231 - 1,296)           |
| Liver cancer due to hepatitis C                                  | 6,087<br>(2,710 - 9,620)       | --                          | 21<br>(1 - 62)           | 1,809<br>(693 - 3,146)      | 2,941<br>(1,175 - 4,796)      | 1,316<br>(524 - 2,075)         |
| Liver cancer due to alcohol use                                  | 1,371<br>(713 - 2,326)         | --                          | --                       | 312<br>(142 - 547)          | 631<br>(309 - 1,131)          | 428<br>(209 - 750)             |
| Liver cancer due to other causes                                 | 1,114<br>(648 - 1,971)         | --                          | 67<br>(31 - 127)         | 495<br>(267 - 863)          | 401<br>(201 - 817)            | 151<br>(78 - 283)              |

Web Table 31- Bangladesh deaths with 95% UI by age, sex, and cause in 2013

| Cause                                         | Males, All Ages                | Males, 0-4 Years       | Males, 5-14 Years  | Males, 15-49 Years          | Males, 50-69 Years          | Males, 70-80 Years           |
|-----------------------------------------------|--------------------------------|------------------------|--------------------|-----------------------------|-----------------------------|------------------------------|
| Larynx cancer                                 | 1,497<br>(1,046 - 2,109)       | --                     | --                 | 214<br>(128 - 342)          | 684<br>(449 - 1,041)        | 598<br>(403 - 858)           |
| Tracheal, bronchus and lung cancer            | 12,974<br>(9,835 - 16,261)     | --                     | --                 | 2,130<br>(1,482 - 3,016)    | 6,785<br>(4,937 - 8,710)    | 4,058<br>(3,104 - 5,065)     |
| Breast cancer                                 | 61<br>(41 - 93)                | --                     | --                 | 14<br>(10 - 22)             | 16<br>(9 - 27)              | 31<br>(17 - 54)              |
| Cervical cancer                               | --                             | --                     | --                 | --                          | --                          | --                           |
| Uterine cancer                                | --                             | --                     | --                 | --                          | --                          | --                           |
| Prostate cancer                               | 1,168<br>(753 - 1,890)         | --                     | --                 | 6<br>(3 - 9)                | 147<br>(84 - 257)           | 1,015<br>(645 - 1,658)       |
| Colon and rectum cancer                       | 3,652<br>(2,722 - 4,819)       | --                     | --                 | 2,057<br>(1,473 - 2,912)    | 941<br>(665 - 1,248)        | 653<br>(500 - 829)           |
| Lip and oral cavity cancer                    | 4,091<br>(2,682 - 5,620)       | --                     | --                 | 908<br>(526 - 1,337)        | 1,706<br>(1,067 - 2,439)    | 1,477<br>(999 - 2,125)       |
| Nasopharynx cancer                            | 944<br>(675 - 1,267)           | --                     | 46<br>(12 - 132)   | 341<br>(210 - 532)          | 389<br>(251 - 572)          | 168<br>(114 - 251)           |
| Other pharynx cancer                          | 2,222<br>(1,584 - 3,080)       | --                     | --                 | 536<br>(326 - 793)          | 939<br>(614 - 1,329)        | 747<br>(512 - 1,150)         |
| Gallbladder and biliary tract cancer          | 621<br>(420 - 918)             | --                     | --                 | 136<br>(81 - 218)           | 303<br>(189 - 482)          | 182<br>(116 - 309)           |
| Pancreatic cancer                             | 476<br>(350 - 622)             | --                     | --                 | 212<br>(139 - 297)          | 190<br>(137 - 251)          | 74<br>(54 - 95)              |
| Malignant skin melanoma                       | 91<br>(55 - 169)               | --                     | --                 | 18<br>(11 - 33)             | 19<br>(8 - 29)              | 54<br>(32 - 109)             |
| Non-melanoma skin cancer                      | 96<br>(64 - 162)               | --                     | --                 | 13<br>(8 - 22)              | 37<br>(21 - 68)             | 46<br>(29 - 74)              |
| Ovarian cancer                                | --                             | --                     | --                 | --                          | --                          | --                           |
| Testicular cancer                             | 205<br>(63 - 525)              | --                     | --                 | 187<br>(49 - 501)           | 11<br>(6 - 17)              | 7<br>(4 - 13)                |
| Kidney cancer                                 | 513<br>(384 - 659)             | 6<br>(3 - 11)          | 16<br>(9 - 27)     | 42<br>(29 - 59)             | 207<br>(140 - 288)          | 242<br>(171 - 341)           |
| Bladder cancer                                | 965<br>(686 - 1,252)           | --                     | --                 | 87<br>(51 - 142)            | 366<br>(185 - 530)          | 512<br>(364 - 701)           |
| Brain and nervous system cancer               | 1,733<br>(1,125 - 2,608)       | 2<br>(1 - 5)           | 50<br>(28 - 102)   | 1,075<br>(673 - 1,738)      | 454<br>(266 - 648)          | 152<br>(92 - 223)            |
| Thyroid cancer                                | 17<br>(12 - 23)                | --                     | 1<br>(0 - 1)       | 6<br>(4 - 9)                | 4<br>(2 - 5)                | 6<br>(4 - 10)                |
| Mesothelioma                                  | 40<br>(28 - 57)                | --                     | --                 | 12<br>(7 - 20)              | 19<br>(12 - 29)             | 10<br>(6 - 15)               |
| Hodgkin lymphoma                              | 176<br>(119 - 290)             | 9<br>(4 - 21)          | 12<br>(5 - 25)     | 38<br>(23 - 64)             | 25<br>(15 - 38)             | 92<br>(54 - 171)             |
| Non-Hodgkin lymphoma                          | 4,420<br>(2,887 - 5,928)       | 120<br>(62 - 209)      | 227<br>(129 - 366) | 1,883<br>(1,245 - 2,697)    | 1,321<br>(690 - 1,992)      | 868<br>(582 - 1,271)         |
| Multiple myeloma                              | 137<br>(89 - 219)              | --                     | --                 | 57<br>(28 - 112)            | 51<br>(33 - 79)             | 29<br>(20 - 42)              |
| Leukemia                                      | 3,401<br>(2,596 - 4,392)       | 111<br>(57 - 201)      | 349<br>(233 - 483) | 1,668<br>(1,188 - 2,368)    | 821<br>(562 - 1,138)        | 452<br>(331 - 585)           |
| Other neoplasms                               | 3,625<br>(2,691 - 4,647)       | 188<br>(101 - 305)     | 419<br>(255 - 636) | 1,312<br>(898 - 1,876)      | 1,005<br>(667 - 1,403)      | 700<br>(496 - 970)           |
| Cardiovascular diseases                       | 186,650<br>(149,418 - 219,218) | 135<br>(81 - 210)      | 288<br>(187 - 424) | 26,013<br>(18,620 - 35,048) | 62,551<br>(46,770 - 76,719) | 97,663<br>(81,988 - 108,849) |
| Rheumatic heart disease                       | 4,325<br>(2,649 - 7,364)       | 14<br>(5 - 31)         | 99<br>(51 - 161)   | 1,599<br>(915 - 2,623)      | 1,242<br>(697 - 2,314)      | 1,372<br>(799 - 2,468)       |
| Ischemic heart disease                        | 71,375<br>(36,553 - 92,286)    | 8<br>(2 - 20)          | 56<br>(26 - 98)    | 13,773<br>(7,739 - 19,311)  | 29,098<br>(14,922 - 38,359) | 28,440<br>(13,272 - 36,048)  |
| Cerebrovascular disease                       | 86,545<br>(66,235 - 111,733)   | 8<br>(4 - 15)          | 73<br>(39 - 120)   | 7,217<br>(4,901 - 10,783)   | 24,549<br>(17,402 - 34,271) | 54,698<br>(43,412 - 66,438)  |
| Ischemic stroke                               | 41,763<br>(22,786 - 57,365)    | 1<br>(0 - 3)           | 8<br>(3 - 16)      | 1,109<br>(359 - 2,081)      | 8,598<br>(3,756 - 13,862)   | 32,047<br>(19,027 - 42,277)  |
| Hemorrhagic stroke                            | 44,783<br>(28,712 - 75,766)    | 7<br>(3 - 12)          | 65<br>(34 - 107)   | 6,108<br>(4,046 - 9,264)    | 15,951<br>(10,311 - 25,862) | 22,651<br>(13,050 - 40,291)  |
| Hypertensive heart disease                    | 17,396<br>(9,862 - 34,860)     | 22<br>(9 - 48)         | 17<br>(9 - 30)     | 1,948<br>(1,016 - 4,055)    | 5,486<br>(2,786 - 11,366)   | 9,923<br>(5,360 - 19,965)    |
| Cardiomyopathy and myocarditis                | 2,733<br>(1,641 - 4,639)       | 62<br>(33 - 107)       | 31<br>(15 - 57)    | 817<br>(465 - 1,411)        | 891<br>(488 - 1,630)        | 932<br>(510 - 1,660)         |
| Atrial fibrillation and flutter               | 167<br>(57 - 272)              | --                     | --                 | 10<br>(4 - 16)              | 38<br>(13 - 65)             | 120<br>(41 - 213)            |
| Aortic aneurysm                               | 1,344<br>(863 - 2,058)         | --                     | --                 | 147<br>(88 - 241)           | 437<br>(258 - 692)          | 760<br>(467 - 1,197)         |
| Peripheral vascular disease                   | 56<br>(28 - 96)                | --                     | --                 | 2<br>(1 - 5)                | 14<br>(7 - 26)              | 39<br>(20 - 68)              |
| Endocarditis                                  | 764<br>(394 - 1,237)           | 15<br>(6 - 31)         | 6<br>(3 - 12)      | 238<br>(116 - 418)          | 230<br>(111 - 401)          | 274<br>(138 - 448)           |
| Other cardiovascular and circulatory diseases | 1,945<br>(1,151 - 4,235)       | 5<br>(2 - 17)          | 6<br>(3 - 15)      | 262<br>(144 - 666)          | 567<br>(304 - 1,344)        | 1,105<br>(637 - 2,267)       |
| Chronic respiratory diseases                  | 54,112<br>(41,925 - 69,763)    | 1,346<br>(879 - 1,937) | 276<br>(193 - 360) | 7,107<br>(4,886 - 10,061)   | 15,226<br>(10,737 - 21,306) | 30,157<br>(23,862 - 37,078)  |



Web Table 31- Bangladesh deaths with 95% UI by age, sex, and cause in 2013

| Cause                                               | Males, All Ages             | Males, 0-4 Years       | Males, 5-14 Years  | Males, 15-49 Years        | Males, 50-69 Years        | Males, 70-80 Years         |
|-----------------------------------------------------|-----------------------------|------------------------|--------------------|---------------------------|---------------------------|----------------------------|
| Chronic obstructive pulmonary disease               | 25,698<br>(9,347 - 39,165)  | 48<br>(12 - 134)       | 66<br>(19 - 122)   | 2,244<br>(852 - 3,821)    | 6,804<br>(2,223 - 11,114) | 16,537<br>(5,960 - 25,200) |
| Pneumoconiosis                                      | 3,140<br>(912 - 5,673)      | 2<br>(0 - 7)           | 5<br>(2 - 12)      | 625<br>(184 - 1,180)      | 1,058<br>(280 - 2,080)    | 1,451<br>(419 - 2,705)     |
| Silicosis                                           | 954<br>(271 - 1,910)        | 1<br>(0 - 2)           | 1<br>(0 - 3)       | 176<br>(53 - 378)         | 320<br>(84 - 701)         | 456<br>(120 - 925)         |
| Asbestosis                                          | 349<br>(85 - 638)           | 0<br>(0 - 1)           | 1<br>(0 - 3)       | 79<br>(20 - 152)          | 138<br>(32 - 269)         | 130<br>(31 - 238)          |
| Coal workers pneumoconiosis                         | 582<br>(209 - 1,197)        | 1<br>(0 - 2)           | 1<br>(0 - 3)       | 129<br>(47 - 264)         | 210<br>(69 - 435)         | 241<br>(84 - 503)          |
| Other pneumoconiosis                                | 1,255<br>(314 - 2,554)      | 1<br>(0 - 2)           | 1<br>(0 - 3)       | 240<br>(59 - 523)         | 390<br>(82 - 843)         | 624<br>(170 - 1,328)       |
| Asthma                                              | 5,596<br>(1,852 - 9,083)    | 145<br>(34 - 331)      | 98<br>(28 - 176)   | 1,560<br>(528 - 2,667)    | 1,559<br>(452 - 2,757)    | 2,233<br>(712 - 3,852)     |
| Interstitial lung disease and pulmonary sarcoidosis | 17,777<br>(5,134 - 41,488)  | 59<br>(1 - 304)        | 62<br>(3 - 233)    | 2,400<br>(870 - 5,646)    | 5,606<br>(1,606 - 12,571) | 9,650<br>(2,231 - 23,524)  |
| Other chronic respiratory diseases                  | 1,900<br>(996 - 3,009)      | 1,092<br>(693 - 1,598) | 46<br>(10 - 102)   | 278<br>(72 - 620)         | 199<br>(48 - 451)         | 286<br>(72 - 661)          |
| Cirrhosis                                           | 17,147<br>(12,755 - 21,875) | 100<br>(43 - 192)      | 298<br>(202 - 412) | 8,405<br>(5,981 - 11,369) | 5,525<br>(3,961 - 7,304)  | 2,819<br>(2,107 - 3,660)   |
| Cirrhosis due to hepatitis B                        | 4,291<br>(2,654 - 6,465)    | 4<br>(1 - 10)          | 52<br>(21 - 96)    | 2,212<br>(1,175 - 3,540)  | 1,359<br>(799 - 2,136)    | 665<br>(402 - 1,048)       |
| Cirrhosis due to hepatitis C                        | 2,862<br>(1,188 - 5,306)    | 3<br>(0 - 11)          | 15<br>(1 - 57)     | 1,064<br>(262 - 2,345)    | 1,105<br>(443 - 2,098)    | 675<br>(263 - 1,222)       |
| Cirrhosis due to alcohol use                        | 5,766<br>(3,216 - 9,286)    | --                     | --                 | 2,407<br>(1,201 - 4,160)  | 2,177<br>(1,211 - 3,503)  | 1,182<br>(666 - 1,814)     |
| Cirrhosis due to other causes                       | 4,228<br>(2,409 - 6,450)    | 92<br>(38 - 180)       | 232<br>(134 - 335) | 2,722<br>(1,500 - 4,316)  | 884<br>(363 - 1,527)      | 297<br>(128 - 530)         |
| Digestive diseases                                  | 13,617<br>(9,740 - 22,126)  | 25<br>(12 - 44)        | 116<br>(77 - 165)  | 3,740<br>(2,517 - 6,223)  | 5,126<br>(3,386 - 8,840)  | 4,611<br>(3,416 - 6,887)   |
| Peptic ulcer disease                                | 5,025<br>(3,340 - 7,255)    | 2<br>(1 - 6)           | 11<br>(4 - 20)     | 961<br>(554 - 1,548)      | 2,081<br>(1,269 - 3,306)  | 1,970<br>(1,287 - 2,838)   |
| Gastritis and duodenitis                            | 709<br>(358 - 1,631)        | 2<br>(1 - 5)           | 5<br>(2 - 12)      | 160<br>(76 - 417)         | 272<br>(122 - 663)        | 270<br>(117 - 584)         |
| Appendicitis                                        | 614<br>(353 - 1,126)        | 1<br>(0 - 2)           | 6<br>(2 - 13)      | 402<br>(229 - 747)        | 123<br>(58 - 258)         | 82<br>(36 - 169)           |
| Paralytic ileus and intestinal obstruction          | 3,975<br>(2,437 - 7,433)    | 12<br>(5 - 23)         | 75<br>(46 - 121)   | 1,226<br>(692 - 2,309)    | 1,415<br>(764 - 2,917)    | 1,247<br>(697 - 2,320)     |
| Inguinal, femoral, and abdominal hernia             | 72<br>(36 - 172)            | 0<br>(0 - 0)           | 1<br>(0 - 2)       | 24<br>(12 - 53)           | 5<br>(3 - 9)              | 42<br>(16 - 116)           |
| Inflammatory bowel disease                          | 415<br>(240 - 718)          | 4<br>(1 - 9)           | 5<br>(2 - 9)       | 117<br>(62 - 207)         | 139<br>(73 - 258)         | 151<br>(81 - 278)          |
| Vascular intestinal disorders                       | 318<br>(106 - 748)          | 1<br>(0 - 2)           | 2<br>(0 - 6)       | 51<br>(17 - 122)          | 117<br>(36 - 301)         | 147<br>(48 - 353)          |
| Gallbladder and biliary diseases                    | 365<br>(195 - 905)          | 0<br>(0 - 1)           | 2<br>(1 - 3)       | 63<br>(34 - 135)          | 140<br>(66 - 338)         | 161<br>(71 - 424)          |
| Pancreatitis                                        | 1,694<br>(573 - 3,578)      | 1<br>(0 - 2)           | 5<br>(1 - 10)      | 616<br>(238 - 1,353)      | 665<br>(216 - 1,584)      | 408<br>(115 - 782)         |
| Other digestive diseases                            | 429<br>(203 - 802)          | 1<br>(0 - 3)           | 4<br>(1 - 7)       | 120<br>(42 - 245)         | 171<br>(77 - 358)         | 133<br>(64 - 248)          |
| Neurological disorders                              | 10,325<br>(7,867 - 12,951)  | 83<br>(53 - 132)       | 183<br>(88 - 329)  | 1,595<br>(997 - 2,534)    | 831<br>(573 - 1,133)      | 7,632<br>(5,729 - 9,766)   |
| Alzheimer disease and other dementias               | 7,894<br>(5,823 - 10,113)   | --                     | --                 | 4<br>(1 - 8)              | 547<br>(346 - 787)        | 7,343<br>(5,427 - 9,441)   |
| Parkinson disease                                   | 6<br>(4 - 8)                | --                     | --                 | 4<br>(3 - 6)              | 1<br>(1 - 1)              | 1<br>(0 - 1)               |
| Epilepsy                                            | 1,834<br>(1,155 - 2,988)    | 31<br>(13 - 66)        | 156<br>(64 - 303)  | 1,360<br>(793 - 2,311)    | 124<br>(72 - 195)         | 163<br>(97 - 264)          |
| Multiple sclerosis                                  | 93<br>(23 - 169)            | --                     | --                 | 35<br>(10 - 65)           | 30<br>(8 - 59)            | 28<br>(5 - 61)             |
| Other neurological disorders                        | 497<br>(327 - 742)          | 52<br>(32 - 82)        | 27<br>(17 - 40)    | 192<br>(117 - 298)        | 129<br>(75 - 200)         | 98<br>(60 - 150)           |
| Mental and substance use disorders                  | 410<br>(243 - 636)          | 8<br>(3 - 19)          | 0<br>(0 - 0)       | 180<br>(97 - 306)         | 156<br>(76 - 253)         | 66<br>(41 - 97)            |
| Schizophrenia                                       | 46<br>(15 - 118)            | --                     | --                 | 18<br>(4 - 52)            | 16<br>(5 - 40)            | 11<br>(4 - 26)             |
| Alcohol use disorders                               | 61<br>(39 - 108)            | --                     | --                 | 34<br>(20 - 73)           | 9<br>(5 - 14)             | 18<br>(11 - 29)            |
| Drug use disorders                                  | 303<br>(162 - 512)          | 8<br>(3 - 19)          | --                 | 127<br>(63 - 233)         | 131<br>(42 - 228)         | 37<br>(13 - 67)            |
| Opioid use disorders                                | 162<br>(87 - 275)           | 4<br>(2 - 12)          | --                 | 70<br>(35 - 127)          | 68<br>(22 - 120)          | 20<br>(7 - 36)             |
| Cocaine use disorders                               | 3<br>(2 - 5)                | 0<br>(0 - 0)           | --                 | 2<br>(1 - 3)              | 1<br>(0 - 2)              | 0<br>(0 - 1)               |
| Amphetamine use disorders                           | 3<br>(2 - 5)                | 0<br>(0 - 0)           | --                 | 1<br>(1 - 2)              | 1<br>(0 - 2)              | 0<br>(0 - 1)               |
| Other drug use disorders                            | 134<br>(71 - 226)           | 3<br>(1 - 7)           | --                 | 55<br>(26 - 100)          | 61<br>(19 - 107)          | 16<br>(6 - 30)             |
| Eating disorders                                    | 0<br>(0 - 1)                | --                     | 0<br>(0 - 0)       | 0<br>(0 - 1)              | --                        | --                         |

Web Table 31- Bangladesh deaths with 95% UI by age, sex, and cause in 2013

| Cause                                               | Males, All Ages             | Males, 0-4 Years         | Males, 5-14 Years  | Males, 15-49 Years       | Males, 50-69 Years       | Males, 70-80 Years         |
|-----------------------------------------------------|-----------------------------|--------------------------|--------------------|--------------------------|--------------------------|----------------------------|
| Anorexia nervosa                                    | 0<br>(0 - 1)                | --                       | 0<br>(0 - 0)       | 0<br>(0 - 1)             | --                       | --                         |
| Diabetes, urogenital, blood, and endocrine diseases | 27,825<br>(21,857 - 33,603) | 760<br>(523 - 1,057)     | 423<br>(317 - 550) | 6,506<br>(4,700 - 8,769) | 7,679<br>(5,586 - 9,726) | 12,458<br>(9,835 - 15,012) |
| Diabetes mellitus                                   | 15,332<br>(11,716 - 18,926) | 17<br>(10 - 26)          | 33<br>(21 - 49)    | 1,938<br>(1,344 - 2,691) | 4,497<br>(3,169 - 5,968) | 8,848<br>(6,724 - 11,104)  |
| Acute glomerulonephritis                            | 319<br>(122 - 571)          | 61<br>(10 - 144)         | 30<br>(12 - 61)    | 103<br>(41 - 194)        | 59<br>(25 - 112)         | 65<br>(28 - 121)           |
| Chronic kidney disease                              | 7,061<br>(5,318 - 9,217)    | 184<br>(112 - 284)       | 121<br>(85 - 168)  | 3,026<br>(2,097 - 4,235) | 1,983<br>(1,367 - 2,751) | 1,748<br>(1,299 - 2,318)   |
| Chronic kidney disease due to diabetes mellitus     | 299<br>(31 - 521)           | 2<br>(0 - 4)             | 2<br>(0 - 4)       | 83<br>(9 - 156)          | 128<br>(13 - 236)        | 84<br>(8 - 159)            |
| Chronic kidney disease due to hypertension          | 1,822<br>(435 - 2,909)      | 13<br>(2 - 28)           | 7<br>(1 - 14)      | 417<br>(87 - 777)        | 623<br>(130 - 1,137)     | 761<br>(207 - 1,215)       |
| Chronic kidney disease due to glomerulonephritis    | 1,556<br>(960 - 2,413)      | 55<br>(34 - 84)          | 51<br>(34 - 72)    | 659<br>(395 - 1,040)     | 415<br>(228 - 702)       | 376<br>(187 - 650)         |
| Chronic kidney disease due to other causes          | 3,384<br>(2,261 - 4,842)    | 114<br>(52 - 205)        | 60<br>(35 - 98)    | 1,866<br>(1,187 - 2,779) | 817<br>(412 - 1,354)     | 526<br>(245 - 910)         |
| Urinary diseases and male infertility               | 2,106<br>(1,561 - 2,792)    | 71<br>(34 - 140)         | 47<br>(29 - 76)    | 620<br>(413 - 888)       | 536<br>(361 - 764)       | 831<br>(558 - 1,206)       |
| Interstitial nephritis and urinary tract infections | 1,390<br>(926 - 2,024)      | 60<br>(27 - 123)         | 29<br>(16 - 49)    | 424<br>(255 - 642)       | 345<br>(205 - 554)       | 532<br>(305 - 883)         |
| Urolithiasis                                        | 213<br>(87 - 431)           | --                       | 6<br>(2 - 16)      | 68<br>(22 - 160)         | 64<br>(22 - 151)         | 74<br>(28 - 162)           |
| Other urinary diseases                              | 503<br>(272 - 791)          | 11<br>(3 - 30)           | 12<br>(5 - 22)     | 127<br>(60 - 222)        | 127<br>(56 - 224)        | 225<br>(95 - 394)          |
| Gynecological diseases                              | --                          | --                       | --                 | --                       | --                       | --                         |
| Uterine fibroids                                    | --                          | --                       | --                 | --                       | --                       | --                         |
| Polycystic ovarian syndrome                         | --                          | --                       | --                 | --                       | --                       | --                         |
| Endometriosis                                       | --                          | --                       | --                 | --                       | --                       | --                         |
| Genital prolapse                                    | --                          | --                       | --                 | --                       | --                       | --                         |
| Other gynecological diseases                        | --                          | --                       | --                 | --                       | --                       | --                         |
| Hemoglobinopathies and hemolytic anemias            | 1,125<br>(667 - 1,728)      | 282<br>(155 - 495)       | 137<br>(77 - 226)  | 359<br>(195 - 582)       | 135<br>(82 - 213)        | 211<br>(116 - 350)         |
| Thalassemias                                        | 656<br>(379 - 1,064)        | 249<br>(135 - 448)       | 125<br>(70 - 206)  | 254<br>(131 - 444)       | 24<br>(14 - 39)          | 4<br>(2 - 7)               |
| Sickle cell disorders                               | 6<br>(4 - 10)               | 2<br>(1 - 4)             | 1<br>(0 - 1)       | 2<br>(1 - 4)             | 1<br>(1 - 2)             | 0<br>(0 - 0)               |
| G6PD deficiency                                     | 42<br>(26 - 64)             | 6<br>(3 - 10)            | 3<br>(2 - 5)       | 17<br>(10 - 27)          | 12<br>(7 - 20)           | 4<br>(2 - 7)               |
| Other hemoglobinopathies and hemolytic anemias      | 420<br>(250 - 632)          | 26<br>(16 - 41)          | 8<br>(5 - 13)      | 87<br>(50 - 138)         | 98<br>(59 - 153)         | 202<br>(111 - 336)         |
| Endocrine, metabolic, blood, and immune disorders   | 1,882<br>(1,061 - 2,495)    | 144<br>(63 - 235)        | 55<br>(27 - 91)    | 459<br>(292 - 697)       | 469<br>(242 - 695)       | 755<br>(379 - 1,138)       |
| Musculoskeletal disorders                           | 1,105<br>(785 - 1,657)      | --                       | 38<br>(26 - 56)    | 450<br>(310 - 698)       | 403<br>(266 - 608)       | 214<br>(142 - 333)         |
| Rheumatoid arthritis                                | 371<br>(212 - 659)          | --                       | 9<br>(3 - 19)      | 102<br>(42 - 223)        | 156<br>(84 - 276)        | 104<br>(58 - 181)          |
| Other musculoskeletal disorders                     | 734<br>(468 - 1,130)        | --                       | 29<br>(18 - 42)    | 349<br>(225 - 539)       | 246<br>(138 - 389)       | 110<br>(61 - 184)          |
| Other non-communicable diseases                     | 7,611<br>(5,509 - 9,683)    | 4,156<br>(2,513 - 5,904) | 595<br>(343 - 912) | 1,128<br>(765 - 1,590)   | 660<br>(441 - 921)       | 1,072<br>(735 - 1,487)     |
| Congenital anomalies                                | 5,946<br>(3,995 - 7,843)    | 3,951<br>(2,380 - 5,680) | 570<br>(315 - 882) | 825<br>(533 - 1,182)     | 272<br>(140 - 410)       | 327<br>(135 - 445)         |
| Neural tube defects                                 | 390<br>(157 - 899)          | 303<br>(89 - 764)        | 27<br>(9 - 73)     | 46<br>(23 - 92)          | 7<br>(3 - 14)            | 7<br>(2 - 15)              |
| Congenital heart anomalies                          | 3,258<br>(1,636 - 4,893)    | 2,136<br>(900 - 3,538)   | 339<br>(144 - 567) | 354<br>(189 - 557)       | 182<br>(81 - 289)        | 247<br>(81 - 346)          |
| Cleft lip and cleft palate                          | 30<br>(10 - 77)             | 30<br>(10 - 77)          | --                 | --                       | --                       | --                         |
| Down syndrome                                       | 341<br>(159 - 608)          | 167<br>(50 - 373)        | 40<br>(14 - 84)    | 115<br>(59 - 193)        | 17<br>(8 - 31)           | 3<br>(1 - 4)               |
| Chromosomal unbalanced rearrangements               | 160<br>(55 - 312)           | 113<br>(36 - 250)        | 14<br>(5 - 29)     | 27<br>(11 - 43)          | 4<br>(2 - 7)             | 2<br>(1 - 4)               |
| Other congenital anomalies                          | 1,766<br>(1,063 - 2,590)    | 1,203<br>(624 - 1,921)   | 149<br>(65 - 277)  | 284<br>(165 - 431)       | 63<br>(31 - 107)         | 67<br>(28 - 112)           |
| Skin and subcutaneous diseases                      | 1,504<br>(1,067 - 2,041)    | 44<br>(25 - 78)          | 26<br>(17 - 37)    | 302<br>(209 - 443)       | 388<br>(254 - 566)       | 745<br>(464 - 1,161)       |
| Cellulitis                                          | 659<br>(165 - 1,454)        | 29<br>(10 - 64)          | 14<br>(4 - 30)     | 142<br>(35 - 312)        | 179<br>(42 - 399)        | 295<br>(59 - 726)          |
| Pyoderma                                            | 642<br>(52 - 1,190)         | 12<br>(1 - 32)           | 7<br>(0 - 15)      | 126<br>(9 - 251)         | 173<br>(13 - 350)        | 325<br>(32 - 670)          |
| Decubitus ulcer                                     | 187<br>(14 - 411)           | 1<br>(0 - 4)             | 4<br>(0 - 8)       | 28<br>(2 - 62)           | 33<br>(2 - 79)           | 121<br>(10 - 284)          |

Web Table 31- Bangladesh deaths with 95% UI by age, sex, and cause in 2013

| Cause                                           | Males, All Ages             | Males, 0-4 Years          | Males, 5-14 Years        | Males, 15-49 Years          | Males, 50-69 Years       | Males, 70-80 Years        |
|-------------------------------------------------|-----------------------------|---------------------------|--------------------------|-----------------------------|--------------------------|---------------------------|
| Other skin and subcutaneous diseases            | 16<br>(2 - 33)              | 1<br>(0 - 3)              | 1<br>(0 - 2)             | 6<br>(1 - 13)               | 3<br>(0 - 8)             | 4<br>(1 - 10)             |
| Sudden infant death syndrome                    | 161<br>(22 - 587)           | 161<br>(22 - 587)         | --                       | --                          | --                       | --                        |
| Injuries                                        | 50,741<br>(40,732 - 64,336) | 7,168<br>(4,691 - 10,798) | 3,573<br>(2,700 - 4,688) | 24,537<br>(18,289 - 32,681) | 7,123<br>(5,153 - 9,296) | 8,341<br>(6,506 - 10,817) |
| Transport injuries                              | 10,927<br>(8,181 - 14,254)  | 226<br>(132 - 352)        | 445<br>(286 - 608)       | 6,744<br>(4,788 - 9,312)    | 1,834<br>(1,285 - 2,460) | 1,678<br>(1,239 - 2,214)  |
| Road injuries                                   | 10,186<br>(7,613 - 13,397)  | 197<br>(112 - 310)        | 430<br>(278 - 589)       | 6,381<br>(4,549 - 8,834)    | 1,631<br>(1,126 - 2,176) | 1,547<br>(1,130 - 2,029)  |
| Pedestrian road injuries                        | 5,096<br>(3,600 - 7,003)    | 113<br>(59 - 186)         | 318<br>(198 - 459)       | 2,641<br>(1,693 - 3,899)    | 995<br>(656 - 1,386)     | 1,029<br>(717 - 1,391)    |
| Cyclist road injuries                           | 579<br>(377 - 887)          | 4<br>(1 - 9)              | 8<br>(4 - 14)            | 424<br>(261 - 672)          | 94<br>(54 - 149)         | 49<br>(29 - 75)           |
| Motorcyclist road injuries                      | 775<br>(501 - 1,191)        | 11<br>(6 - 20)            | 6<br>(3 - 11)            | 622<br>(380 - 973)          | 47<br>(27 - 74)          | 89<br>(52 - 145)          |
| Motor vehicle road injuries                     | 3,645<br>(2,404 - 5,300)    | 61<br>(32 - 101)          | 93<br>(50 - 152)         | 2,660<br>(1,712 - 3,951)    | 471<br>(292 - 703)       | 359<br>(212 - 540)        |
| Other road injuries                             | 93<br>(54 - 157)            | 8<br>(4 - 16)             | 4<br>(2 - 9)             | 33<br>(17 - 61)             | 25<br>(12 - 49)          | 22<br>(10 - 44)           |
| Other transport injuries                        | 741<br>(525 - 1,077)        | 29<br>(16 - 48)           | 14<br>(8 - 24)           | 364<br>(231 - 554)          | 203<br>(124 - 321)       | 131<br>(83 - 200)         |
| Unintentional injuries                          | 28,827<br>(23,234 - 36,978) | 6,839<br>(4,421 - 10,480) | 2,791<br>(2,018 - 3,894) | 9,057<br>(6,455 - 12,375)   | 3,974<br>(2,802 - 5,475) | 6,166<br>(4,623 - 8,576)  |
| Falls                                           | 6,555<br>(4,806 - 9,626)    | 314<br>(163 - 576)        | 188<br>(104 - 326)       | 965<br>(595 - 1,788)        | 1,179<br>(754 - 1,766)   | 3,910<br>(2,579 - 6,165)  |
| Drowning                                        | 12,956<br>(8,685 - 17,953)  | 5,616<br>(3,354 - 8,918)  | 2,051<br>(1,272 - 3,159) | 3,126<br>(1,748 - 4,769)    | 1,492<br>(838 - 2,286)   | 672<br>(393 - 1,028)      |
| Fire, heat, and hot substances                  | 649<br>(440 - 981)          | 42<br>(20 - 81)           | 10<br>(5 - 16)           | 245<br>(146 - 411)          | 69<br>(43 - 102)         | 284<br>(172 - 448)        |
| Poisonings                                      | 271<br>(188 - 494)          | 51<br>(26 - 95)           | 6<br>(3 - 9)             | 100<br>(59 - 208)           | 51<br>(30 - 87)          | 64<br>(37 - 112)          |
| Exposure to mechanical forces                   | 1,215<br>(922 - 1,577)      | 210<br>(130 - 330)        | 81<br>(45 - 129)         | 520<br>(339 - 775)          | 235<br>(152 - 354)       | 168<br>(118 - 228)        |
| Unintentional firearm injuries                  | 223<br>(142 - 345)          | 15<br>(7 - 30)            | 3<br>(1 - 4)             | 143<br>(80 - 249)           | 29<br>(17 - 44)          | 33<br>(19 - 53)           |
| Unintentional suffocation                       | 59<br>(30 - 132)            | 42<br>(14 - 106)          | 3<br>(1 - 6)             | 8<br>(5 - 16)               | 3<br>(2 - 6)             | 3<br>(2 - 6)              |
| Other exposure to mechanical forces             | 932<br>(681 - 1,225)        | 154<br>(85 - 258)         | 76<br>(40 - 124)         | 368<br>(230 - 565)          | 204<br>(127 - 318)       | 131<br>(84 - 187)         |
| Adverse effects of medical treatment            | 3,368<br>(1,923 - 6,029)    | 118<br>(39 - 310)         | 103<br>(49 - 225)        | 1,768<br>(947 - 3,332)      | 716<br>(369 - 1,435)     | 663<br>(338 - 1,411)      |
| Animal contact                                  | 677<br>(458 - 1,307)        | 20<br>(10 - 41)           | 93<br>(53 - 171)         | 461<br>(286 - 862)          | 63<br>(34 - 128)         | 41<br>(25 - 91)           |
| Venomous animal contact                         | 435<br>(287 - 845)          | 3<br>(1 - 7)              | 80<br>(45 - 158)         | 309<br>(188 - 591)          | 33<br>(16 - 76)          | 10<br>(4 - 35)            |
| Non-venomous animal contact                     | 242<br>(155 - 458)          | 17<br>(9 - 34)            | 13<br>(4 - 26)           | 151<br>(84 - 318)           | 30<br>(16 - 54)          | 31<br>(19 - 57)           |
| Foreign body                                    | 606<br>(348 - 1,112)        | 428<br>(199 - 890)        | 5<br>(2 - 7)             | 27<br>(18 - 46)             | 16<br>(11 - 27)          | 130<br>(65 - 196)         |
| Pulmonary aspiration and foreign body in airway | 576<br>(320 - 1,076)        | 426<br>(198 - 888)        | 3<br>(1 - 5)             | 12<br>(7 - 21)              | 9<br>(4 - 14)            | 127<br>(62 - 193)         |
| Foreign body in other body part                 | 30<br>(19 - 56)             | 2<br>(1 - 4)              | 2<br>(1 - 3)             | 15<br>(9 - 31)              | 8<br>(4 - 16)            | 3<br>(2 - 5)              |
| Other unintentional injuries                    | 2,530<br>(1,880 - 3,350)    | 40<br>(27 - 60)           | 256<br>(169 - 376)       | 1,847<br>(1,308 - 2,603)    | 152<br>(100 - 220)       | 235<br>(166 - 322)        |
| Self-harm and interpersonal violence            | 10,986<br>(7,961 - 15,135)  | 103<br>(57 - 183)         | 337<br>(187 - 593)       | 8,735<br>(6,222 - 12,220)   | 1,315<br>(894 - 1,907)   | 497<br>(338 - 722)        |
| Self-harm                                       | 7,348<br>(5,205 - 10,930)   | --                        | 249<br>(110 - 483)       | 5,853<br>(4,062 - 8,698)    | 930<br>(599 - 1,495)     | 316<br>(192 - 492)        |
| Interpersonal violence                          | 3,638<br>(2,182 - 5,486)    | 103<br>(57 - 183)         | 88<br>(45 - 161)         | 2,882<br>(1,676 - 4,505)    | 384<br>(212 - 607)       | 181<br>(95 - 303)         |
| Assault by firearm                              | 943<br>(518 - 1,565)        | 13<br>(4 - 32)            | 18<br>(7 - 39)           | 752<br>(404 - 1,280)        | 137<br>(66 - 253)        | 23<br>(8 - 52)            |
| Assault by sharp object                         | 811<br>(426 - 1,356)        | 8<br>(3 - 21)             | 20<br>(7 - 44)           | 660<br>(331 - 1,122)        | 116<br>(56 - 204)        | 7<br>(3 - 14)             |
| Assault by other means                          | 1,884<br>(1,057 - 2,840)    | 83<br>(44 - 146)          | 51<br>(24 - 95)          | 1,469<br>(817 - 2,341)      | 131<br>(62 - 228)        | 151<br>(76 - 250)         |
| Forces of nature, war, and legal intervention   | 1<br>(0 - 0)                | 1<br>(0 - 0)              | --                       | --                          | --                       | --                        |
| Exposure to forces of nature                    | 1<br>(0 - 0)                | 1<br>(0 - 0)              | --                       | --                          | --                       | --                        |

Web Table 31- Bangladesh deaths with 95% UI by age, sex, and cause in 2013

| Cause                                                             | Females, All Ages              | Females, 0-4 Years          | Females, 5-14 Years      | Females, 15-49 Years        | Females, 50-69 Years          | Females, 70-80 Years           |
|-------------------------------------------------------------------|--------------------------------|-----------------------------|--------------------------|-----------------------------|-------------------------------|--------------------------------|
| All causes                                                        | 429,071<br>(351,934 - 498,842) | 59,273<br>(51,983 - 68,698) | 8,493<br>(7,091 - 9,812) | 79,794<br>(62,966 - 97,757) | 108,060<br>(77,514 - 137,853) | 173,450<br>(143,222 - 196,459) |
| Communicable, maternal, neonatal, and nutritional diseases        | 95,636<br>(83,600 - 112,259)   | 45,978<br>(39,133 - 53,515) | 3,243<br>(2,403 - 4,273) | 18,632<br>(15,028 - 22,710) | 8,645<br>(5,959 - 12,770)     | 19,138<br>(13,953 - 28,912)    |
| HIV/AIDS and tuberculosis                                         | 3,469<br>(2,402 - 5,176)       | 12<br>(8 - 18)              | 49<br>(31 - 77)          | 1,590<br>(1,107 - 2,333)    | 1,297<br>(815 - 2,126)        | 521<br>(328 - 887)             |
| Tuberculosis                                                      | 3,288<br>(2,214 - 4,983)       | 5<br>(3 - 8)                | 44<br>(26 - 70)          | 1,449<br>(987 - 2,194)      | 1,273<br>(791 - 2,090)        | 518<br>(325 - 884)             |
| HIV/AIDS                                                          | 181<br>(109 - 273)             | 7<br>(4 - 13)               | 5<br>(4 - 8)             | 141<br>(90 - 205)           | 25<br>(8 - 47)                | 3<br>(1 - 6)                   |
| HIV/AIDS resulting in mycobacterial infection                     | 9<br>(5 - 14)                  | 0<br>(0 - 1)                | 0<br>(0 - 0)             | 7<br>(4 - 11)               | 1<br>(0 - 2)                  | 0<br>(0 - 0)                   |
| HIV/AIDS resulting in other diseases                              | 172<br>(103 - 260)             | 7<br>(4 - 12)               | 5<br>(4 - 7)             | 134<br>(85 - 195)           | 23<br>(8 - 44)                | 3<br>(1 - 5)                   |
| Diarrhea, lower respiratory, and other common infectious diseases | 34,485<br>(27,181 - 44,278)    | 11,931<br>(8,902 - 15,246)  | 2,228<br>(1,356 - 3,329) | 4,782<br>(2,909 - 7,302)    | 4,377<br>(2,793 - 6,992)      | 11,168<br>(7,781 - 17,408)     |
| Diarrheal diseases                                                | 9,414<br>(6,329 - 14,377)      | 890<br>(405 - 1,681)        | 175<br>(91 - 298)        | 982<br>(645 - 1,442)        | 2,179<br>(1,191 - 3,722)      | 5,188<br>(2,913 - 9,090)       |
| Intestinal infectious diseases                                    | 6,471<br>(3,267 - 10,992)      | 1,786<br>(864 - 3,242)      | 1,439<br>(657 - 2,570)   | 2,681<br>(1,162 - 5,004)    | 385<br>(149 - 786)            | 180<br>(74 - 383)              |
| Typhoid fever                                                     | 5,392<br>(2,680 - 9,161)       | 1,449<br>(691 - 2,653)      | 1,198<br>(551 - 2,174)   | 2,256<br>(960 - 4,182)      | 331<br>(128 - 687)            | 158<br>(64 - 346)              |
| Paratyphoid fever                                                 | 1,070<br>(495 - 1,938)         | 334<br>(128 - 688)          | 240<br>(92 - 515)        | 422<br>(158 - 908)          | 52<br>(14 - 131)              | 22<br>(6 - 50)                 |
| Other intestinal infectious diseases                              | 9<br>(3 - 19)                  | 4<br>(1 - 11)               | 1<br>(0 - 4)             | 3<br>(0 - 9)                | 1<br>(0 - 4)                  | 1<br>(0 - 4)                   |
| Lower respiratory infections                                      | 16,049<br>(11,851 - 21,180)    | 7,493<br>(5,273 - 10,395)   | 310<br>(140 - 505)       | 862<br>(428 - 1,269)        | 1,723<br>(966 - 2,889)        | 5,661<br>(3,241 - 9,344)       |
| Upper respiratory infections                                      | 42<br>(15 - 93)                | 6<br>(0 - 21)               | 1<br>(0 - 5)             | 10<br>(2 - 28)              | 11<br>(1 - 35)                | 14<br>(1 - 50)                 |
| Otitis media                                                      | 11<br>(8 - 14)                 | 3<br>(2 - 5)                | 1<br>(1 - 2)             | 3<br>(2 - 4)                | 2<br>(1 - 3)                  | 1<br>(1 - 2)                   |
| Meningitis                                                        | 1,288<br>(546 - 1,809)         | 868<br>(328 - 1,350)        | 195<br>(71 - 314)        | 123<br>(51 - 189)           | 45<br>(24 - 77)               | 57<br>(31 - 98)                |
| Pneumococcal meningitis                                           | 422<br>(179 - 603)             | 239<br>(87 - 386)           | 87<br>(30 - 146)         | 54<br>(19 - 90)             | 19<br>(9 - 33)                | 24<br>(11 - 45)                |
| H influenzae type B meningitis                                    | 413<br>(171 - 643)             | 336<br>(126 - 551)          | 46<br>(17 - 83)          | 19<br>(7 - 36)              | 5<br>(2 - 10)                 | 6<br>(2 - 10)                  |
| Meningococcal meningitis                                          | 122<br>(50 - 180)              | 63<br>(22 - 105)            | 21<br>(8 - 39)           | 21<br>(8 - 40)              | 7<br>(3 - 14)                 | 11<br>(4 - 21)                 |
| Other meningitis                                                  | 330<br>(150 - 521)             | 230<br>(81 - 397)           | 41<br>(13 - 76)          | 29<br>(12 - 55)             | 14<br>(6 - 26)                | 16<br>(8 - 29)                 |
| Encephalitis                                                      | 192<br>(124 - 315)             | 79<br>(40 - 154)            | 21<br>(12 - 33)          | 61<br>(31 - 131)            | 14<br>(8 - 22)                | 18<br>(10 - 37)                |
| Diphtheria                                                        | 8<br>(0 - 40)                  | 5<br>(0 - 36)               | 2<br>(0 - 12)            | 1<br>(0 - 5)                | 0<br>(0 - 3)                  | --                             |
| Whooping cough                                                    | 430<br>(0 - 2,370)             | 401<br>(0 - 2,203)          | 22<br>(0 - 129)          | 6<br>(0 - 35)               | 1<br>(0 - 4)                  | --                             |
| Tetanus                                                           | 23<br>(10 - 73)                | 9<br>(2 - 46)               | 3<br>(1 - 5)             | 6<br>(4 - 12)               | 3<br>(1 - 13)                 | 1<br>(1 - 3)                   |
| Measles                                                           | 420<br>(209 - 746)             | 356<br>(175 - 640)          | 51<br>(26 - 90)          | 12<br>(6 - 21)              | 0<br>(0 - 1)                  | --                             |
| Varicella and herpes zoster                                       | 137<br>(43 - 341)              | 34<br>(1 - 130)             | 8<br>(0 - 35)            | 34<br>(5 - 100)             | 13<br>(1 - 44)                | 47<br>(1 - 233)                |
| Neglected tropical diseases and malaria                           | 1,675<br>(1,217 - 2,259)       | 541<br>(337 - 797)          | 298<br>(174 - 465)       | 582<br>(357 - 884)          | 155<br>(92 - 251)             | 100<br>(70 - 154)              |
| Malaria                                                           | 13<br>(9 - 19)                 | 2<br>(1 - 4)                | 2<br>(1 - 4)             | 6<br>(4 - 9)                | 2<br>(1 - 3)                  | 1<br>(1 - 2)                   |
| Leishmaniasis                                                     | 1,332<br>(925 - 1,821)         | 490<br>(292 - 745)          | 249<br>(131 - 412)       | 454<br>(252 - 701)          | 100<br>(52 - 167)             | 39<br>(21 - 69)                |
| Visceral leishmaniasis                                            | 1,332<br>(925 - 1,821)         | 490<br>(292 - 745)          | 249<br>(131 - 412)       | 454<br>(252 - 701)          | 100<br>(52 - 167)             | 39<br>(21 - 69)                |
| Cysticercosis                                                     | 2<br>(0 - 5)                   | 0<br>(0 - 0)                | 0<br>(0 - 0)             | 1<br>(0 - 3)                | 1<br>(0 - 2)                  | 0<br>(0 - 1)                   |
| Cystic echinococcosis                                             | 16<br>(12 - 21)                | 1<br>(0 - 1)                | 2<br>(1 - 2)             | 7<br>(5 - 9)                | 4<br>(3 - 6)                  | 2<br>(2 - 4)                   |
| Dengue                                                            | 166<br>(68 - 254)              | 23<br>(8 - 44)              | 12<br>(6 - 25)           | 72<br>(29 - 108)            | 27<br>(9 - 43)                | 32<br>(14 - 49)                |
| Rabies                                                            | 79<br>(31 - 265)               | 5<br>(2 - 14)               | 29<br>(9 - 107)          | 32<br>(13 - 105)            | 12<br>(3 - 49)                | 1<br>(0 - 1)                   |
| Intestinal nematode infections                                    | 5<br>(1 - 13)                  | 3<br>(0 - 10)               | 1<br>(0 - 4)             | 1<br>(0 - 4)                | 0<br>(0 - 3)                  | 0<br>(0 - 3)                   |
| Ascariasis                                                        | 5<br>(1 - 13)                  | 3<br>(0 - 10)               | 1<br>(0 - 4)             | 1<br>(0 - 4)                | 0<br>(0 - 3)                  | 0<br>(0 - 3)                   |
| Other neglected tropical diseases                                 | 63<br>(44 - 92)                | 18<br>(10 - 31)             | 3<br>(2 - 5)             | 8<br>(5 - 12)               | 9<br>(5 - 15)                 | 24<br>(13 - 45)                |
| Maternal disorders                                                | 7,737<br>(5,459 - 10,422)      | --                          | 24<br>(10 - 49)          | 7,713<br>(5,449 - 10,401)   | --                            | --                             |
| Maternal hemorrhage                                               | 1,690<br>(1,090 - 2,460)       | --                          | 3<br>(1 - 6)             | 1,687<br>(1,088 - 2,457)    | --                            | --                             |

Web Table 31- Bangladesh deaths with 95% UI by age, sex, and cause in 2013

| Cause                                                            | Females, All Ages              | Females, 0-4 Years          | Females, 5-14 Years      | Females, 15-49 Years        | Females, 50-69 Years         | Females, 70-80 Years           |
|------------------------------------------------------------------|--------------------------------|-----------------------------|--------------------------|-----------------------------|------------------------------|--------------------------------|
| Maternal sepsis and other maternal infections                    | 259<br>(140 - 402)             | --                          | 1<br>(0 - 2)             | 258<br>(140 - 400)          | --                           | --                             |
| Maternal hypertensive disorders                                  | 1,120<br>(756 - 1,560)         | --                          | 6<br>(2 - 13)            | 1,114<br>(750 - 1,555)      | --                           | --                             |
| Maternal obstructed labor                                        | 338<br>(215 - 504)             | --                          | 1<br>(0 - 1)             | 338<br>(214 - 503)          | --                           | --                             |
| Maternal abortive outcome                                        | 669<br>(383 - 1,030)           | --                          | 1<br>(0 - 3)             | 668<br>(382 - 1,029)        | --                           | --                             |
| Indirect maternal deaths                                         | 662<br>(369 - 990)             | --                          | 2<br>(1 - 4)             | 660<br>(367 - 989)          | --                           | --                             |
| Late maternal deaths                                             | 1,867<br>(1,207 - 2,672)       | --                          | 8<br>(3 - 17)            | 1,859<br>(1,202 - 2,664)    | --                           | --                             |
| Maternal deaths aggravated by HIV/AIDS                           | 0<br>(0 - 0)                   | --                          | --                       | 0<br>(0 - 0)                | --                           | --                             |
| Other maternal disorders                                         | 1,118<br>(585 - 1,751)         | --                          | 2<br>(1 - 6)             | 1,116<br>(583 - 1,749)      | --                           | --                             |
| Neonatal disorders                                               | 29,164<br>(25,289 - 33,405)    | 29,164<br>(25,289 - 33,405) | --                       | --                          | --                           | --                             |
| Neonatal preterm birth complications                             | 7,955<br>(4,773 - 13,617)      | 7,955<br>(4,773 - 13,617)   | --                       | --                          | --                           | --                             |
| Neonatal encephalopathy due to birth asphyxia and trauma         | 12,456<br>(8,058 - 16,237)     | 12,456<br>(8,058 - 16,237)  | --                       | --                          | --                           | --                             |
| Neonatal sepsis and other neonatal infections                    | 5,051<br>(2,230 - 8,898)       | 5,051<br>(2,230 - 8,898)    | --                       | --                          | --                           | --                             |
| Hemolytic disease and other neonatal jaundice                    | 83<br>(9 - 233)                | 83<br>(9 - 233)             | --                       | --                          | --                           | --                             |
| Other neonatal disorders                                         | 3,620<br>(2,354 - 5,634)       | 3,620<br>(2,354 - 5,634)    | --                       | --                          | --                           | --                             |
| Nutritional deficiencies                                         | 9,774<br>(7,064 - 14,369)      | 1,796<br>(1,067 - 2,823)    | 223<br>(137 - 343)       | 469<br>(325 - 698)          | 1,064<br>(644 - 1,774)       | 6,222<br>(4,098 - 10,182)      |
| Protein-energy malnutrition                                      | 8,874<br>(6,307 - 13,328)      | 1,671<br>(985 - 2,728)      | 182<br>(102 - 305)       | 361<br>(218 - 609)          | 949<br>(553 - 1,687)         | 5,712<br>(3,676 - 9,388)       |
| Iodine deficiency                                                | 7<br>(0 - 33)                  | 1<br>(0 - 10)               | 1<br>(0 - 4)             | 1<br>(0 - 4)                | 1<br>(0 - 8)                 | 3<br>(0 - 23)                  |
| Iron-deficiency anemia                                           | 678<br>(167 - 1,505)           | 113<br>(5 - 383)            | 38<br>(5 - 98)           | 102<br>(26 - 198)           | 95<br>(19 - 214)             | 330<br>(94 - 811)              |
| Other nutritional deficiencies                                   | 215<br>(90 - 693)              | 11<br>(2 - 33)              | 2<br>(1 - 7)             | 5<br>(2 - 15)               | 19<br>(8 - 68)               | 177<br>(64 - 605)              |
| Other communicable, maternal, neonatal, and nutritional diseases | 9,331<br>(6,906 - 12,571)      | 2,534<br>(1,502 - 4,001)    | 421<br>(270 - 621)       | 3,496<br>(2,450 - 4,856)    | 1,752<br>(1,041 - 2,801)     | 1,127<br>(658 - 2,037)         |
| Sexually transmitted diseases excluding HIV                      | 2,745<br>(1,634 - 4,287)       | 2,042<br>(1,074 - 3,443)    | 137<br>(67 - 242)        | 131<br>(54 - 277)           | 199<br>(71 - 469)            | 236<br>(68 - 622)              |
| Syphilis                                                         | 2,528<br>(1,448 - 4,037)       | 2,042<br>(1,074 - 3,443)    | 136<br>(66 - 241)        | 53<br>(22 - 115)            | 111<br>(40 - 260)            | 185<br>(52 - 487)              |
| Chlamydial infection                                             | 65<br>(32 - 125)               | --                          | 0<br>(0 - 0)             | 26<br>(11 - 54)             | 26<br>(9 - 63)               | 13<br>(4 - 35)                 |
| Gonococcal infection                                             | 89<br>(44 - 180)               | --                          | 0<br>(0 - 0)             | 27<br>(11 - 57)             | 35<br>(12 - 83)              | 27<br>(8 - 73)                 |
| Other sexually transmitted diseases                              | 63<br>(32 - 121)               | --                          | 0<br>(0 - 0)             | 25<br>(10 - 52)             | 26<br>(9 - 63)               | 12<br>(4 - 32)                 |
| Hepatitis                                                        | 5,636<br>(4,041 - 7,802)       | 223<br>(122 - 424)          | 257<br>(148 - 430)       | 3,214<br>(2,217 - 4,545)    | 1,324<br>(761 - 2,164)       | 618<br>(371 - 1,007)           |
| Acute hepatitis A                                                | 511<br>(150 - 1,070)           | 116<br>(39 - 243)           | 59<br>(15 - 124)         | 257<br>(58 - 602)           | 68<br>(14 - 176)             | 12<br>(3 - 32)                 |
| Acute hepatitis B                                                | 1,937<br>(1,086 - 3,183)       | 84<br>(29 - 188)            | 28<br>(9 - 62)           | 598<br>(250 - 1,161)        | 756<br>(385 - 1,341)         | 471<br>(258 - 794)             |
| Acute hepatitis C                                                | 43<br>(8 - 112)                | --                          | 2<br>(0 - 7)             | 22<br>(3 - 65)              | 13<br>(2 - 36)               | 6<br>(1 - 22)                  |
| Acute hepatitis E                                                | 3,144<br>(2,072 - 4,638)       | 23<br>(5 - 78)              | 168<br>(76 - 308)        | 2,337<br>(1,554 - 3,412)    | 488<br>(210 - 914)           | 129<br>(36 - 294)              |
| Other infectious diseases                                        | 949<br>(580 - 1,601)           | 269<br>(130 - 557)          | 26<br>(12 - 56)          | 152<br>(81 - 246)           | 229<br>(101 - 513)           | 273<br>(99 - 849)              |
| Non-communicable diseases                                        | 292,273<br>(227,853 - 357,113) | 6,627<br>(4,453 - 8,744)    | 2,972<br>(2,286 - 3,782) | 48,196<br>(36,287 - 62,295) | 93,338<br>(66,542 - 120,945) | 141,140<br>(114,929 - 163,760) |
| Neoplasms                                                        | 47,131<br>(34,929 - 62,656)    | 628<br>(420 - 892)          | 998<br>(702 - 1,342)     | 14,957<br>(11,285 - 19,208) | 20,286<br>(14,157 - 28,187)  | 10,262<br>(7,693 - 14,774)     |
| Esophageal cancer                                                | 3,067<br>(2,066 - 4,981)       | --                          | --                       | 321<br>(197 - 519)          | 1,627<br>(1,021 - 2,453)     | 1,118<br>(717 - 2,387)         |
| Stomach cancer                                                   | 4,277<br>(2,919 - 6,412)       | --                          | --                       | 1,010<br>(628 - 1,435)      | 1,961<br>(1,211 - 3,069)     | 1,307<br>(835 - 2,160)         |
| Liver cancer                                                     | 7,013<br>(4,874 - 10,012)      | --                          | 158<br>(89 - 263)        | 2,480<br>(1,702 - 3,484)    | 3,153<br>(1,976 - 4,933)     | 1,223<br>(766 - 2,017)         |
| Liver cancer due to hepatitis B                                  | 1,259<br>(657 - 2,203)         | --                          | 37<br>(9 - 71)           | 625<br>(298 - 1,032)        | 460<br>(159 - 907)           | 137<br>(56 - 277)              |
| Liver cancer due to hepatitis C                                  | 3,678<br>(2,151 - 5,677)       | --                          | 17<br>(4 - 36)           | 1,039<br>(580 - 1,607)      | 1,865<br>(961 - 3,153)       | 757<br>(429 - 1,296)           |
| Liver cancer due to alcohol use                                  | 320<br>(151 - 554)             | --                          | --                       | 64<br>(19 - 123)            | 158<br>(72 - 295)            | 98<br>(44 - 184)               |
| Liver cancer due to other causes                                 | 1,757<br>(1,017 - 2,991)       | --                          | 104<br>(53 - 188)        | 751<br>(414 - 1,291)        | 669<br>(339 - 1,253)         | 232<br>(111 - 458)             |

Web Table 31- Bangladesh deaths with 95% UI by age, sex, and cause in 2013

| Cause                                         | Females, All Ages             | Females, 0-4 Years     | Females, 5-14 Years | Females, 15-49 Years       | Females, 50-69 Years        | Females, 70-80 Years         |
|-----------------------------------------------|-------------------------------|------------------------|---------------------|----------------------------|-----------------------------|------------------------------|
| Larynx cancer                                 | 300<br>(138 - 629)            | --                     | --                  | 55<br>(25 - 105)           | 141<br>(63 - 306)           | 104<br>(45 - 235)            |
| Tracheal, bronchus and lung cancer            | 1,829<br>(1,246 - 2,834)      | --                     | --                  | 279<br>(182 - 427)         | 977<br>(624 - 1,547)        | 573<br>(376 - 1,009)         |
| Breast cancer                                 | 5,248<br>(3,626 - 7,640)      | --                     | --                  | 2,238<br>(1,590 - 3,138)   | 2,161<br>(1,363 - 3,381)    | 849<br>(557 - 1,341)         |
| Cervical cancer                               | 3,785<br>(2,548 - 5,522)      | --                     | --                  | 1,017<br>(645 - 1,530)     | 1,928<br>(1,193 - 2,936)    | 840<br>(530 - 1,402)         |
| Uterine cancer                                | 504<br>(323 - 891)            | --                     | --                  | 95<br>(57 - 162)           | 303<br>(178 - 550)          | 106<br>(63 - 208)            |
| Prostate cancer                               | --                            | --                     | --                  | --                         | --                          | --                           |
| Colon and rectum cancer                       | 1,735<br>(1,235 - 2,462)      | --                     | --                  | 707<br>(506 - 945)         | 783<br>(516 - 1,210)        | 245<br>(164 - 397)           |
| Lip and oral cavity cancer                    | 2,388<br>(1,500 - 3,612)      | --                     | --                  | 674<br>(412 - 1,007)       | 1,143<br>(686 - 1,876)      | 572<br>(336 - 919)           |
| Nasopharynx cancer                            | 559<br>(365 - 918)            | --                     | 26<br>(11 - 62)     | 251<br>(151 - 414)         | 211<br>(121 - 363)          | 71<br>(40 - 145)             |
| Other pharynx cancer                          | 537<br>(356 - 795)            | --                     | --                  | 157<br>(92 - 276)          | 286<br>(168 - 446)          | 94<br>(59 - 158)             |
| Gallbladder and biliary tract cancer          | 1,132<br>(711 - 1,893)        | --                     | --                  | 300<br>(191 - 459)         | 549<br>(313 - 1,010)        | 283<br>(153 - 572)           |
| Pancreatic cancer                             | 327<br>(237 - 451)            | --                     | --                  | 191<br>(139 - 266)         | 85<br>(54 - 131)            | 51<br>(32 - 85)              |
| Malignant skin melanoma                       | 48<br>(33 - 72)               | --                     | --                  | 9<br>(7 - 13)              | 12<br>(8 - 20)              | 26<br>(17 - 44)              |
| Non-melanoma skin cancer                      | 121<br>(67 - 233)             | --                     | --                  | 69<br>(36 - 133)           | 33<br>(15 - 76)             | 18<br>(10 - 38)              |
| Ovarian cancer                                | 3,213<br>(2,193 - 4,636)      | --                     | --                  | 1,091<br>(755 - 1,543)     | 1,417<br>(870 - 2,190)      | 705<br>(446 - 1,158)         |
| Testicular cancer                             | --                            | --                     | --                  | --                         | --                          | --                           |
| Kidney cancer                                 | 89<br>(59 - 132)              | 5<br>(2 - 9)           | 2<br>(1 - 4)        | 31<br>(18 - 60)            | 22<br>(14 - 37)             | 28<br>(17 - 49)              |
| Bladder cancer                                | 885<br>(489 - 1,283)          | --                     | --                  | 151<br>(75 - 286)          | 523<br>(260 - 813)          | 211<br>(100 - 320)           |
| Brain and nervous system cancer               | 382<br>(261 - 694)            | 2<br>(1 - 3)           | 7<br>(4 - 12)       | 262<br>(176 - 495)         | 91<br>(56 - 153)            | 21<br>(11 - 57)              |
| Thyroid cancer                                | 29<br>(17 - 58)               | --                     | 1<br>(0 - 2)        | 7<br>(4 - 10)              | 13<br>(6 - 31)              | 8<br>(4 - 17)                |
| Mesothelioma                                  | 23<br>(15 - 36)               | --                     | --                  | 6<br>(4 - 9)               | 10<br>(6 - 18)              | 6<br>(3 - 12)                |
| Hodgkin lymphoma                              | 118<br>(76 - 219)             | 16<br>(9 - 32)         | 6<br>(3 - 12)       | 23<br>(14 - 39)            | 23<br>(12 - 45)             | 49<br>(26 - 112)             |
| Non-Hodgkin lymphoma                          | 4,016<br>(907 - 6,627)        | 143<br>(74 - 243)      | 222<br>(91 - 415)   | 1,057<br>(174 - 1,752)     | 1,510<br>(306 - 2,691)      | 1,084<br>(214 - 1,999)       |
| Multiple myeloma                              | 58<br>(34 - 101)              | --                     | --                  | 12<br>(8 - 18)             | 18<br>(10 - 33)             | 28<br>(14 - 53)              |
| Leukemia                                      | 3,176<br>(2,341 - 4,209)      | 168<br>(90 - 281)      | 362<br>(235 - 529)  | 1,512<br>(1,101 - 2,004)   | 827<br>(527 - 1,284)        | 308<br>(195 - 547)           |
| Other neoplasms                               | 2,270<br>(1,589 - 3,389)      | 295<br>(160 - 507)     | 213<br>(122 - 335)  | 954<br>(634 - 1,422)       | 476<br>(285 - 827)          | 331<br>(197 - 588)           |
| Cardiovascular diseases                       | 146,812<br>(77,650 - 194,563) | 123<br>(37 - 228)      | 279<br>(107 - 449)  | 14,106<br>(5,985 - 20,817) | 44,392<br>(21,075 - 63,648) | 87,912<br>(49,600 - 110,510) |
| Rheumatic heart disease                       | 4,374<br>(2,315 - 6,537)      | 19<br>(4 - 44)         | 98<br>(32 - 183)    | 1,530<br>(612 - 2,519)     | 1,473<br>(775 - 2,433)      | 1,254<br>(748 - 2,111)       |
| Ischemic heart disease                        | 35,505<br>(12,924 - 49,754)   | 2<br>(0 - 7)           | 53<br>(19 - 109)    | 4,837<br>(1,618 - 7,448)   | 11,804<br>(3,692 - 18,192)  | 18,809<br>(7,081 - 25,751)   |
| Cerebrovascular disease                       | 91,809<br>(47,559 - 122,187)  | 11<br>(3 - 22)         | 54<br>(17 - 100)    | 5,897<br>(2,439 - 8,939)   | 26,706<br>(13,194 - 38,253) | 59,142<br>(30,975 - 75,964)  |
| Ischemic stroke                               | 42,287<br>(14,898 - 62,318)   | 1<br>(0 - 3)           | 6<br>(1 - 13)       | 789<br>(175 - 1,558)       | 7,793<br>(2,487 - 13,322)   | 33,698<br>(12,093 - 48,169)  |
| Hemorrhagic stroke                            | 49,522<br>(26,930 - 70,387)   | 9<br>(3 - 20)          | 48<br>(15 - 90)     | 5,107<br>(2,132 - 7,663)   | 18,913<br>(9,753 - 27,625)  | 25,444<br>(14,080 - 38,061)  |
| Hypertensive heart disease                    | 10,850<br>(6,938 - 16,020)    | 15<br>(3 - 39)         | 15<br>(4 - 33)      | 925<br>(384 - 1,657)       | 3,236<br>(1,579 - 5,430)    | 6,659<br>(4,250 - 10,489)    |
| Cardiomyopathy and myocarditis                | 1,886<br>(840 - 3,292)        | 62<br>(16 - 117)       | 45<br>(11 - 89)     | 509<br>(173 - 892)         | 525<br>(222 - 880)          | 746<br>(324 - 1,606)         |
| Atrial fibrillation and flutter               | 111<br>(35 - 254)             | --                     | --                  | 6<br>(2 - 13)              | 20<br>(6 - 45)              | 85<br>(25 - 198)             |
| Aortic aneurysm                               | 586<br>(270 - 1,063)          | --                     | --                  | 75<br>(27 - 148)           | 172<br>(70 - 304)           | 339<br>(159 - 624)           |
| Peripheral vascular disease                   | 42<br>(20 - 69)               | --                     | --                  | 2<br>(1 - 3)               | 9<br>(3 - 15)               | 32<br>(15 - 56)              |
| Endocarditis                                  | 413<br>(137 - 754)            | 9<br>(2 - 25)          | 8<br>(2 - 17)       | 116<br>(33 - 227)          | 96<br>(29 - 182)            | 183<br>(71 - 347)            |
| Other cardiovascular and circulatory diseases | 1,237<br>(721 - 1,989)        | 5<br>(2 - 13)          | 7<br>(3 - 15)       | 209<br>(102 - 358)         | 352<br>(190 - 598)          | 663<br>(369 - 1,100)         |
| Chronic respiratory diseases                  | 38,142<br>(27,266 - 59,028)   | 1,254<br>(806 - 1,858) | 297<br>(209 - 404)  | 5,048<br>(3,592 - 7,330)   | 11,609<br>(7,372 - 19,202)  | 19,934<br>(14,284 - 32,030)  |

Web Table 31- Bangladesh deaths with 95% UI by age, sex, and cause in 2013

| Cause                                               | Females, All Ages          | Females, 0-4 Years | Females, 5-14 Years | Females, 15-49 Years     | Females, 50-69 Years      | Females, 70-80 Years      |
|-----------------------------------------------------|----------------------------|--------------------|---------------------|--------------------------|---------------------------|---------------------------|
| Chronic obstructive pulmonary disease               | 17,321<br>(4,912 - 28,432) | 421<br>(162 - 845) | 79<br>(21 - 144)    | 1,933<br>(524 - 3,261)   | 5,646<br>(1,587 - 10,140) | 9,241<br>(2,277 - 15,143) |
| Pneumoconiosis                                      | 2,472<br>(650 - 4,437)     | 1<br>(0 - 1)       | 2<br>(0 - 3)        | 285<br>(70 - 519)        | 814<br>(210 - 1,544)      | 1,372<br>(329 - 2,828)    |
| Silicosis                                           | 130<br>(30 - 285)          | 0<br>(0 - 0)       | 0<br>(0 - 1)        | 28<br>(6 - 61)           | 55<br>(12 - 136)          | 47<br>(9 - 124)           |
| Asbestosis                                          | 126<br>(31 - 289)          | 0<br>(0 - 0)       | 0<br>(0 - 1)        | 28<br>(7 - 61)           | 53<br>(13 - 127)          | 45<br>(9 - 115)           |
| Coal workers pneumoconiosis                         | 106<br>(26 - 235)          | 0<br>(0 - 0)       | 0<br>(0 - 1)        | 26<br>(7 - 59)           | 45<br>(10 - 108)          | 35<br>(6 - 96)            |
| Other pneumoconiosis                                | 2,110<br>(542 - 3,831)     | 0<br>(0 - 1)       | 1<br>(0 - 1)        | 203<br>(47 - 384)        | 661<br>(172 - 1,256)      | 1,245<br>(303 - 2,533)    |
| Asthma                                              | 4,719<br>(1,087 - 10,248)  | 151<br>(29 - 324)  | 113<br>(22 - 204)   | 1,154<br>(258 - 2,215)   | 1,328<br>(286 - 3,029)    | 1,973<br>(415 - 4,758)    |
| Interstitial lung disease and pulmonary sarcoidosis | 12,441<br>(3,417 - 34,780) | 55<br>(1 - 305)    | 64<br>(2 - 269)     | 1,537<br>(424 - 4,426)   | 3,658<br>(975 - 10,282)   | 7,126<br>(1,691 - 20,502) |
| Other chronic respiratory diseases                  | 1,189<br>(601 - 1,891)     | 625<br>(387 - 967) | 39<br>(7 - 83)      | 140<br>(29 - 275)        | 163<br>(36 - 354)         | 221<br>(46 - 482)         |
| Cirrhosis                                           | 7,636<br>(5,375 - 10,958)  | 50<br>(24 - 94)    | 150<br>(95 - 222)   | 2,903<br>(2,073 - 3,901) | 2,878<br>(1,886 - 4,473)  | 1,654<br>(1,065 - 2,715)  |
| Cirrhosis due to hepatitis B                        | 2,509<br>(1,435 - 3,848)   | 2<br>(1 - 5)       | 24<br>(9 - 48)      | 904<br>(497 - 1,361)     | 984<br>(520 - 1,615)      | 594<br>(279 - 1,085)      |
| Cirrhosis due to hepatitis C                        | 2,148<br>(908 - 3,837)     | 1<br>(0 - 5)       | 13<br>(2 - 38)      | 729<br>(292 - 1,362)     | 919<br>(302 - 1,811)      | 487<br>(167 - 885)        |
| Cirrhosis due to alcohol use                        | 1,088<br>(473 - 2,040)     | --                 | --                  | 264<br>(74 - 538)        | 448<br>(176 - 871)        | 376<br>(122 - 921)        |
| Cirrhosis due to other causes                       | 1,891<br>(1,211 - 2,958)   | 47<br>(22 - 89)    | 113<br>(68 - 175)   | 1,007<br>(623 - 1,498)   | 527<br>(239 - 991)        | 197<br>(85 - 390)         |
| Digestive diseases                                  | 11,349<br>(7,566 - 20,135) | 26<br>(13 - 42)    | 145<br>(97 - 214)   | 3,009<br>(2,023 - 4,896) | 4,375<br>(2,634 - 8,280)  | 3,794<br>(2,457 - 7,176)  |
| Peptic ulcer disease                                | 3,464<br>(2,219 - 5,619)   | 2<br>(1 - 6)       | 8<br>(2 - 18)       | 480<br>(236 - 773)       | 1,394<br>(808 - 2,334)    | 1,580<br>(960 - 2,771)    |
| Gastritis and duodenitis                            | 975<br>(394 - 2,905)       | 3<br>(1 - 8)       | 6<br>(2 - 18)       | 177<br>(73 - 496)        | 364<br>(140 - 1,020)      | 425<br>(150 - 1,406)      |
| Appendicitis                                        | 612<br>(337 - 1,151)       | 2<br>(1 - 4)       | 2<br>(1 - 4)        | 347<br>(195 - 621)       | 159<br>(60 - 357)         | 101<br>(39 - 228)         |
| Paralytic ileus and intestinal obstruction          | 2,532<br>(1,431 - 5,173)   | 10<br>(4 - 19)     | 107<br>(62 - 173)   | 1,230<br>(695 - 2,375)   | 914<br>(413 - 2,071)      | 271<br>(112 - 692)        |
| Inguinal, femoral, and abdominal hernia             | 38<br>(21 - 88)            | 0<br>(0 - 1)       | 2<br>(0 - 4)        | 13<br>(6 - 25)           | 10<br>(4 - 25)            | 14<br>(5 - 41)            |
| Inflammatory bowel disease                          | 544<br>(308 - 1,093)       | 5<br>(2 - 10)      | 6<br>(2 - 13)       | 147<br>(76 - 259)        | 191<br>(88 - 420)         | 196<br>(88 - 439)         |
| Vascular intestinal disorders                       | 395<br>(169 - 1,103)       | 0<br>(0 - 1)       | 1<br>(0 - 3)        | 50<br>(21 - 120)         | 134<br>(50 - 384)         | 210<br>(81 - 628)         |
| Gallbladder and biliary diseases                    | 739<br>(413 - 1,490)       | 1<br>(0 - 1)       | 3<br>(1 - 6)        | 102<br>(52 - 180)        | 334<br>(160 - 729)        | 300<br>(135 - 640)        |
| Pancreatitis                                        | 1,482<br>(634 - 3,279)     | 1<br>(0 - 2)       | 5<br>(1 - 14)       | 347<br>(154 - 699)       | 642<br>(265 - 1,475)      | 487<br>(175 - 1,109)      |
| Other digestive diseases                            | 567<br>(319 - 1,185)       | 2<br>(1 - 4)       | 5<br>(1 - 11)       | 116<br>(62 - 218)        | 233<br>(111 - 519)        | 211<br>(96 - 483)         |
| Neurological disorders                              | 8,155<br>(5,326 - 13,529)  | 94<br>(60 - 159)   | 287<br>(110 - 678)  | 987<br>(508 - 2,063)     | 803<br>(464 - 1,335)      | 5,984<br>(3,881 - 9,948)  |
| Alzheimer disease and other dementias               | 6,257<br>(4,044 - 10,236)  | --                 | --                  | 4<br>(1 - 9)             | 467<br>(270 - 751)        | 5,786<br>(3,704 - 9,625)  |
| Parkinson disease                                   | 9<br>(6 - 15)              | --                 | --                  | 4<br>(3 - 6)             | 3<br>(1 - 6)              | 3<br>(1 - 5)              |
| Epilepsy                                            | 1,328<br>(630 - 3,042)     | 27<br>(11 - 59)    | 260<br>(87 - 650)   | 821<br>(386 - 1,893)     | 159<br>(59 - 387)         | 61<br>(17 - 179)          |
| Multiple sclerosis                                  | 95<br>(43 - 159)           | --                 | --                  | 34<br>(15 - 67)          | 33<br>(15 - 63)           | 27<br>(8 - 52)            |
| Other neurological disorders                        | 466<br>(301 - 799)         | 68<br>(42 - 132)   | 27<br>(16 - 53)     | 123<br>(78 - 219)        | 142<br>(80 - 249)         | 108<br>(63 - 188)         |
| Mental and substance use disorders                  | 159<br>(79 - 323)          | 9<br>(2 - 20)      | 0<br>(0 - 1)        | 46<br>(22 - 94)          | 58<br>(26 - 120)          | 45<br>(22 - 104)          |
| Schizophrenia                                       | 43<br>(11 - 135)           | --                 | --                  | 14<br>(3 - 48)           | 15<br>(4 - 48)            | 14<br>(4 - 42)            |
| Alcohol use disorders                               | 41<br>(19 - 97)            | --                 | --                  | 8<br>(4 - 16)            | 11<br>(5 - 26)            | 21<br>(10 - 53)           |
| Drug use disorders                                  | 72<br>(32 - 133)           | 9<br>(2 - 20)      | --                  | 21<br>(9 - 39)           | 32<br>(13 - 62)           | 10<br>(3 - 24)            |
| Opioid use disorders                                | 38<br>(17 - 71)            | 5<br>(1 - 11)      | --                  | 12<br>(5 - 21)           | 16<br>(7 - 32)            | 6<br>(2 - 13)             |
| Cocaine use disorders                               | 1<br>(1 - 2)               | 0<br>(0 - 0)       | --                  | 0<br>(0 - 1)             | 0<br>(0 - 1)              | 0<br>(0 - 0)              |
| Amphetamine use disorders                           | 1<br>(1 - 2)               | 0<br>(0 - 1)       | --                  | 0<br>(0 - 1)             | 1<br>(0 - 1)              | 0<br>(0 - 0)              |
| Other drug use disorders                            | 31<br>(14 - 58)            | 3<br>(1 - 8)       | --                  | 9<br>(4 - 17)            | 15<br>(6 - 29)            | 4<br>(1 - 10)             |
| Eating disorders                                    | 3<br>(2 - 5)               | --                 | 0<br>(0 - 1)        | 3<br>(1 - 4)             | --                        | --                        |

Web Table 31- Bangladesh deaths with 95% UI by age, sex, and cause in 2013

| Cause                                               | Females, All Ages           | Females, 0-4 Years       | Females, 5-14 Years | Females, 15-49 Years     | Females, 50-69 Years      | Females, 70-80 Years      |
|-----------------------------------------------------|-----------------------------|--------------------------|---------------------|--------------------------|---------------------------|---------------------------|
| Anorexia nervosa                                    | 3<br>(2 - 5)                | --                       | 0<br>(0 - 1)        | 3<br>(1 - 4)             | --                        | --                        |
| Diabetes, urogenital, blood, and endocrine diseases | 24,861<br>(17,990 - 35,233) | 722<br>(507 - 1,011)     | 340<br>(236 - 486)  | 5,879<br>(4,255 - 7,797) | 7,969<br>(5,212 - 12,065) | 9,952<br>(7,013 - 15,751) |
| Diabetes mellitus                                   | 13,839<br>(9,616 - 20,774)  | 29<br>(14 - 54)          | 37<br>(19 - 70)     | 2,130<br>(1,464 - 2,952) | 4,757<br>(3,012 - 7,409)  | 6,885<br>(4,624 - 10,925) |
| Acute glomerulonephritis                            | 251<br>(100 - 456)          | 38<br>(5 - 102)          | 27<br>(9 - 63)      | 88<br>(38 - 162)         | 48<br>(22 - 85)           | 50<br>(22 - 86)           |
| Chronic kidney disease                              | 4,782<br>(3,376 - 7,441)    | 104<br>(60 - 165)        | 94<br>(58 - 176)    | 1,731<br>(1,190 - 2,595) | 1,737<br>(1,113 - 2,767)  | 1,116<br>(702 - 2,182)    |
| Chronic kidney disease due to diabetes mellitus     | 264<br>(86 - 471)           | 2<br>(1 - 4)             | 2<br>(1 - 4)        | 69<br>(22 - 133)         | 127<br>(38 - 235)         | 64<br>(21 - 131)          |
| Chronic kidney disease due to hypertension          | 1,112<br>(475 - 2,128)      | 7<br>(2 - 18)            | 6<br>(2 - 14)       | 247<br>(81 - 513)        | 400<br>(157 - 783)        | 451<br>(203 - 918)        |
| Chronic kidney disease due to glomerulonephritis    | 1,544<br>(674 - 2,710)      | 50<br>(26 - 79)          | 47<br>(24 - 80)     | 614<br>(276 - 976)       | 511<br>(181 - 998)        | 322<br>(100 - 689)        |
| Chronic kidney disease due to other causes          | 1,862<br>(1,072 - 3,157)    | 44<br>(19 - 84)          | 39<br>(17 - 93)     | 800<br>(450 - 1,355)     | 699<br>(327 - 1,229)      | 279<br>(106 - 687)        |
| Urinary diseases and male infertility               | 2,226<br>(1,528 - 3,643)    | 72<br>(40 - 134)         | 27<br>(17 - 43)     | 831<br>(550 - 1,206)     | 608<br>(348 - 1,192)      | 688<br>(396 - 1,320)      |
| Interstitial nephritis and urinary tract infections | 1,776<br>(1,102 - 3,121)    | 66<br>(37 - 123)         | 22<br>(14 - 34)     | 659<br>(412 - 1,024)     | 477<br>(243 - 1,003)      | 552<br>(277 - 1,172)      |
| Urolithiasis                                        | 130<br>(68 - 243)           | --                       | 2<br>(1 - 6)        | 57<br>(25 - 118)         | 39<br>(16 - 87)           | 31<br>(11 - 74)           |
| Other urinary diseases                              | 320<br>(128 - 574)          | 6<br>(2 - 17)            | 3<br>(1 - 6)        | 115<br>(49 - 235)        | 92<br>(30 - 170)          | 104<br>(26 - 220)         |
| Gynecological diseases                              | 110<br>(20 - 317)           | --                       | --                  | 46<br>(10 - 130)         | 8<br>(3 - 25)             | 56<br>(5 - 181)           |
| Uterine fibroids                                    | 32<br>(5 - 94)              | --                       | --                  | 12<br>(2 - 36)           | 2<br>(1 - 7)              | 18<br>(2 - 57)            |
| Polycystic ovarian syndrome                         | 2<br>(1 - 7)                | --                       | --                  | 2<br>(1 - 7)             | 0<br>(0 - 0)              | --                        |
| Endometriosis                                       | 7<br>(2 - 18)               | --                       | --                  | 6<br>(2 - 18)            | 0<br>(0 - 1)              | --                        |
| Genital prolapse                                    | 21<br>(3 - 61)              | --                       | --                  | 5<br>(1 - 14)            | 1<br>(1 - 4)              | 14<br>(1 - 45)            |
| Other gynecological diseases                        | 49<br>(9 - 140)             | --                       | --                  | 20<br>(5 - 57)           | 4<br>(1 - 12)             | 24<br>(2 - 79)            |
| Hemoglobinopathies and hemolytic anemias            | 841<br>(410 - 1,426)        | 260<br>(133 - 461)       | 66<br>(24 - 163)    | 257<br>(115 - 466)       | 80<br>(25 - 185)          | 178<br>(92 - 339)         |
| Thalassemias                                        | 465<br>(218 - 832)          | 228<br>(117 - 407)       | 59<br>(21 - 147)    | 162<br>(64 - 318)        | 12<br>(4 - 26)            | 4<br>(2 - 8)              |
| Sickle cell disorders                               | 5<br>(2 - 8)                | 2<br>(1 - 3)             | 0<br>(0 - 1)        | 2<br>(1 - 4)             | 0<br>(0 - 1)              | 0<br>(0 - 0)              |
| G6PD deficiency                                     | 55<br>(27 - 95)             | 9<br>(5 - 17)            | 3<br>(1 - 7)        | 25<br>(12 - 44)          | 10<br>(3 - 24)            | 7<br>(4 - 14)             |
| Other hemoglobinopathies and hemolytic anemias      | 317<br>(161 - 577)          | 20<br>(10 - 37)          | 4<br>(1 - 8)        | 68<br>(35 - 113)         | 58<br>(18 - 135)          | 167<br>(86 - 317)         |
| Endocrine, metabolic, blood, and immune disorders   | 2,813<br>(1,960 - 4,383)    | 219<br>(105 - 370)       | 89<br>(49 - 149)    | 796<br>(506 - 1,155)     | 730<br>(432 - 1,237)      | 980<br>(582 - 1,821)      |
| Musculoskeletal disorders                           | 1,027<br>(687 - 1,631)      | --                       | 52<br>(35 - 81)     | 159<br>(110 - 224)       | 375<br>(229 - 624)        | 440<br>(262 - 817)        |
| Rheumatoid arthritis                                | 628<br>(390 - 1,051)        | --                       | 11<br>(5 - 26)      | 42<br>(24 - 78)          | 239<br>(135 - 416)        | 336<br>(194 - 586)        |
| Other musculoskeletal disorders                     | 399<br>(261 - 733)          | --                       | 42<br>(25 - 64)     | 117<br>(80 - 165)        | 136<br>(75 - 270)         | 104<br>(51 - 293)         |
| Other non-communicable diseases                     | 7,002<br>(4,746 - 9,436)    | 3,721<br>(1,877 - 5,510) | 423<br>(195 - 693)  | 1,102<br>(683 - 1,543)   | 593<br>(378 - 968)        | 1,163<br>(763 - 2,036)    |
| Congenital anomalies                                | 5,162<br>(2,599 - 7,263)    | 3,506<br>(1,682 - 5,291) | 397<br>(169 - 667)  | 852<br>(437 - 1,240)     | 211<br>(121 - 358)        | 196<br>(98 - 325)         |
| Neural tube defects                                 | 335<br>(122 - 907)          | 265<br>(74 - 747)        | 13<br>(4 - 46)      | 44<br>(20 - 110)         | 9<br>(4 - 23)             | 3<br>(1 - 9)              |
| Congenital heart anomalies                          | 3,024<br>(1,474 - 4,814)    | 2,140<br>(918 - 3,570)   | 244<br>(94 - 471)   | 359<br>(179 - 588)       | 135<br>(74 - 240)         | 146<br>(73 - 250)         |
| Cleft lip and cleft palate                          | 35<br>(9 - 95)              | 35<br>(9 - 95)           | --                  | --                       | --                        | --                        |
| Down syndrome                                       | 343<br>(117 - 649)          | 145<br>(34 - 338)        | 39<br>(10 - 83)     | 139<br>(54 - 245)        | 18<br>(8 - 35)            | 2<br>(1 - 4)              |
| Chromosomal unbalanced rearrangements               | 187<br>(35 - 419)           | 124<br>(20 - 316)        | 9<br>(1 - 21)       | 49<br>(12 - 93)          | 3<br>(1 - 6)              | 2<br>(0 - 4)              |
| Other congenital anomalies                          | 1,238<br>(563 - 1,982)      | 797<br>(325 - 1,416)     | 91<br>(33 - 170)    | 261<br>(127 - 407)       | 46<br>(24 - 78)           | 43<br>(19 - 74)           |
| Skin and subcutaneous diseases                      | 1,695<br>(1,164 - 2,725)    | 70<br>(42 - 121)         | 26<br>(16 - 41)     | 250<br>(177 - 372)       | 382<br>(225 - 639)        | 967<br>(600 - 1,871)      |
| Cellulitis                                          | 1,084<br>(327 - 1,967)      | 60<br>(30 - 108)         | 20<br>(7 - 35)      | 176<br>(59 - 301)        | 254<br>(85 - 485)         | 573<br>(134 - 1,141)      |
| Pyoderma                                            | 334<br>(19 - 898)           | 7<br>(0 - 29)            | 2<br>(0 - 8)        | 45<br>(2 - 125)          | 91<br>(5 - 277)           | 188<br>(11 - 520)         |
| Decubitus ulcer                                     | 264<br>(19 - 875)           | 2<br>(0 - 10)            | 3<br>(0 - 12)       | 24<br>(1 - 88)           | 34<br>(2 - 128)           | 201<br>(15 - 672)         |



Web Table 31- Bangladesh deaths with 95% UI by age, sex, and cause in 2013

| Cause                                           | Females, All Ages           | Females, 0-4 Years       | Females, 5-14 Years      | Females, 15-49 Years       | Females, 50-69 Years     | Females, 70-80 Years       |
|-------------------------------------------------|-----------------------------|--------------------------|--------------------------|----------------------------|--------------------------|----------------------------|
| Other skin and subcutaneous diseases            | 13<br>(1 - 37)              | 1<br>(0 - 4)             | 1<br>(0 - 2)             | 5<br>(0 - 13)              | 3<br>(0 - 7)             | 5<br>(0 - 13)              |
| Sudden infant death syndrome                    | 145<br>(12 - 566)           | 145<br>(12 - 566)        | --                       | --                         | --                       | --                         |
| Injuries                                        | 41,162<br>(32,209 - 54,200) | 6,668<br>(4,727 - 9,554) | 2,279<br>(1,595 - 3,127) | 12,967<br>(9,671 - 16,895) | 6,077<br>(4,081 - 9,154) | 13,172<br>(9,533 - 20,546) |
| Transport injuries                              | 3,265<br>(2,008 - 4,410)    | 234<br>(102 - 372)       | 269<br>(146 - 415)       | 931<br>(498 - 1,317)       | 1,143<br>(723 - 1,692)   | 689<br>(415 - 1,045)       |
| Road injuries                                   | 2,880<br>(1,726 - 3,887)    | 190<br>(79 - 303)        | 245<br>(126 - 389)       | 848<br>(448 - 1,211)       | 1,021<br>(641 - 1,519)   | 576<br>(335 - 896)         |
| Pedestrian road injuries                        | 1,375<br>(813 - 1,885)      | 103<br>(40 - 173)        | 157<br>(75 - 256)        | 276<br>(153 - 416)         | 568<br>(350 - 866)       | 271<br>(148 - 417)         |
| Cyclist road injuries                           | 198<br>(111 - 278)          | 2<br>(1 - 5)             | 6<br>(3 - 10)            | 136<br>(65 - 203)          | 26<br>(14 - 44)          | 29<br>(16 - 50)            |
| Motorcyclist road injuries                      | 170<br>(79 - 272)           | 10<br>(3 - 18)           | 6<br>(2 - 12)            | 60<br>(24 - 95)            | 54<br>(26 - 91)          | 41<br>(19 - 76)            |
| Motor vehicle road injuries                     | 1,076<br>(624 - 1,524)      | 68<br>(28 - 113)         | 72<br>(36 - 125)         | 361<br>(167 - 536)         | 356<br>(205 - 550)       | 219<br>(124 - 344)         |
| Other road injuries                             | 60<br>(28 - 96)             | 7<br>(2 - 13)            | 4<br>(1 - 9)             | 15<br>(5 - 25)             | 18<br>(8 - 34)           | 16<br>(7 - 34)             |
| Other transport injuries                        | 385<br>(239 - 528)          | 44<br>(19 - 74)          | 24<br>(12 - 41)          | 83<br>(42 - 129)           | 122<br>(72 - 183)        | 113<br>(61 - 190)          |
| Unintentional injuries                          | 27,911<br>(21,274 - 39,986) | 6,273<br>(4,320 - 9,229) | 1,626<br>(1,038 - 2,458) | 4,009<br>(2,876 - 5,823)   | 3,942<br>(2,498 - 6,398) | 12,061<br>(8,586 - 19,367) |
| Falls                                           | 11,447<br>(7,871 - 19,308)  | 382<br>(217 - 651)       | 178<br>(97 - 290)        | 396<br>(227 - 847)         | 1,579<br>(932 - 2,986)   | 8,911<br>(5,911 - 15,261)  |
| Drowning                                        | 9,471<br>(6,116 - 14,232)   | 5,161<br>(3,141 - 8,212) | 1,232<br>(686 - 2,012)   | 1,125<br>(590 - 1,782)     | 908<br>(497 - 1,479)     | 1,044<br>(599 - 1,670)     |
| Fire, heat, and hot substances                  | 1,907<br>(1,293 - 2,965)    | 100<br>(55 - 189)        | 32<br>(18 - 53)          | 454<br>(301 - 656)         | 403<br>(227 - 705)       | 918<br>(555 - 1,550)       |
| Poisonings                                      | 219<br>(146 - 417)          | 46<br>(24 - 92)          | 7<br>(4 - 12)            | 53<br>(31 - 105)           | 56<br>(31 - 117)         | 58<br>(34 - 114)           |
| Exposure to mechanical forces                   | 745<br>(547 - 1,088)        | 230<br>(141 - 368)       | 52<br>(33 - 83)          | 117<br>(81 - 174)          | 199<br>(121 - 351)       | 147<br>(93 - 265)          |
| Unintentional firearm injuries                  | 127<br>(91 - 183)           | 27<br>(14 - 47)          | 7<br>(4 - 12)            | 31<br>(21 - 46)            | 37<br>(21 - 61)          | 25<br>(14 - 43)            |
| Unintentional suffocation                       | 31<br>(18 - 71)             | 12<br>(4 - 29)           | 4<br>(2 - 8)             | 8<br>(5 - 19)              | 4<br>(2 - 12)            | 3<br>(1 - 8)               |
| Other exposure to mechanical forces             | 587<br>(418 - 892)          | 191<br>(111 - 328)       | 41<br>(24 - 70)          | 78<br>(51 - 123)           | 158<br>(94 - 288)        | 119<br>(72 - 214)          |
| Adverse effects of medical treatment            | 2,059<br>(1,394 - 3,246)    | 83<br>(37 - 177)         | 32<br>(18 - 61)          | 1,213<br>(786 - 1,935)     | 451<br>(243 - 826)       | 281<br>(143 - 542)         |
| Animal contact                                  | 556<br>(275 - 1,783)        | 22<br>(10 - 65)          | 46<br>(20 - 124)         | 291<br>(142 - 893)         | 94<br>(33 - 336)         | 102<br>(35 - 413)          |
| Venomous animal contact                         | 350<br>(169 - 1,095)        | 10<br>(3 - 35)           | 30<br>(13 - 86)          | 246<br>(116 - 768)         | 59<br>(17 - 237)         | 4<br>(1 - 19)              |
| Non-venomous animal contact                     | 205<br>(90 - 708)           | 12<br>(5 - 33)           | 15<br>(5 - 47)           | 45<br>(14 - 137)           | 35<br>(12 - 125)         | 98<br>(33 - 403)           |
| Foreign body                                    | 561<br>(346 - 1,085)        | 192<br>(73 - 453)        | 4<br>(3 - 7)             | 81<br>(39 - 186)           | 15<br>(9 - 25)           | 268<br>(141 - 470)         |
| Pulmonary aspiration and foreign body in airway | 538<br>(325 - 1,047)        | 187<br>(68 - 449)        | 2<br>(1 - 5)             | 75<br>(33 - 180)           | 11<br>(6 - 21)           | 262<br>(137 - 463)         |
| Foreign body in other body part                 | 23<br>(16 - 38)             | 5<br>(3 - 10)            | 2<br>(1 - 3)             | 7<br>(4 - 10)              | 4<br>(2 - 7)             | 5<br>(3 - 10)              |
| Other unintentional injuries                    | 946<br>(679 - 1,463)        | 55<br>(34 - 99)          | 43<br>(24 - 90)          | 279<br>(180 - 449)         | 237<br>(144 - 388)       | 332<br>(216 - 560)         |
| Self-harm and interpersonal violence            | 9,986<br>(7,227 - 13,274)   | 161<br>(81 - 287)        | 384<br>(210 - 654)       | 8,026<br>(5,678 - 10,809)  | 992<br>(619 - 1,570)     | 422<br>(268 - 692)         |
| Self-harm                                       | 8,307<br>(5,373 - 11,084)   | --                       | 306<br>(140 - 557)       | 6,954<br>(4,416 - 9,404)   | 774<br>(459 - 1,240)     | 273<br>(164 - 471)         |
| Interpersonal violence                          | 1,678<br>(1,063 - 2,667)    | 161<br>(81 - 287)        | 78<br>(40 - 139)         | 1,073<br>(643 - 1,735)     | 218<br>(118 - 418)       | 149<br>(73 - 302)          |
| Assault by firearm                              | 232<br>(125 - 433)          | 17<br>(6 - 37)           | 8<br>(3 - 19)            | 153<br>(79 - 290)          | 25<br>(11 - 57)          | 30<br>(13 - 67)            |
| Assault by sharp object                         | 243<br>(142 - 427)          | 17<br>(8 - 34)           | 5<br>(2 - 11)            | 188<br>(103 - 334)         | 19<br>(9 - 46)           | 14<br>(6 - 29)             |
| Assault by other means                          | 1,203<br>(774 - 1,879)      | 127<br>(63 - 231)        | 64<br>(31 - 116)         | 731<br>(445 - 1,196)       | 174<br>(94 - 321)        | 106<br>(49 - 218)          |
| Forces of nature, war, and legal intervention   | 1<br>(0 - 0)                | 1<br>(0 - 0)             | --                       | --                         | --                       | --                         |
| Exposure to forces of nature                    | 1<br>(0 - 0)                | 1<br>(0 - 0)             | --                       | --                         | --                       | --                         |

Web Table 31- Barbados deaths with 95% UI by age, sex, and cause in 2013

| Cause                                                             | Both Sexes, All Ages     | Both Sexes, 0-4 Years | Both Sexes, 5-14 Years | Both Sexes, 15-49 Years | Both Sexes, 50-69 Years | Both Sexes, 70-80 Years  |
|-------------------------------------------------------------------|--------------------------|-----------------------|------------------------|-------------------------|-------------------------|--------------------------|
| All causes                                                        | 2,383<br>(2,068 - 2,703) | 59<br>(26 - 121)      | 11<br>(6 - 17)         | 235<br>(196 - 284)      | 665<br>(530 - 790)      | 1,413<br>(1,234 - 1,588) |
| Communicable, maternal, neonatal, and nutritional diseases        | 248<br>(201 - 297)       | 41<br>(18 - 81)       | 2<br>(1 - 3)           | 35<br>(30 - 43)         | 38<br>(31 - 47)         | 132<br>(94 - 168)        |
| HIV/AIDS and tuberculosis                                         | 35<br>(27 - 48)          | 0<br>(0 - 0)          | 0<br>(0 - 0)           | 21<br>(16 - 28)         | 11<br>(7 - 16)          | 4<br>(3 - 5)             |
| Tuberculosis                                                      | 8<br>(5 - 10)            | 0<br>(0 - 0)          | 0<br>(0 - 0)           | 2<br>(1 - 3)            | 3<br>(2 - 4)            | 3<br>(2 - 4)             |
| HIV/AIDS                                                          | 27<br>(19 - 40)          | 0<br>(0 - 0)          | 0<br>(0 - 0)           | 19<br>(14 - 26)         | 8<br>(4 - 13)           | 1<br>(0 - 2)             |
| HIV/AIDS resulting in mycobacterial infection                     | 2<br>(1 - 2)             | 0<br>(0 - 0)          | 0<br>(0 - 0)           | 1<br>(1 - 2)            | 0<br>(0 - 1)            | 0<br>(0 - 0)             |
| HIV/AIDS resulting in other diseases                              | 25<br>(18 - 38)          | 0<br>(0 - 0)          | 0<br>(0 - 0)           | 18<br>(13 - 25)         | 7<br>(4 - 13)           | 1<br>(0 - 1)             |
| Diarrhea, lower respiratory, and other common infectious diseases | 149<br>(110 - 184)       | 8<br>(4 - 16)         | 1<br>(1 - 2)           | 9<br>(7 - 12)           | 20<br>(15 - 25)         | 110<br>(74 - 145)        |
| Diarrheal diseases                                                | 10<br>(7 - 13)           | 2<br>(1 - 5)          | 0<br>(0 - 0)           | 1<br>(1 - 1)            | 2<br>(1 - 2)            | 5<br>(3 - 8)             |
| Intestinal infectious diseases                                    | 2<br>(0 - 3)             | 0<br>(0 - 1)          | 0<br>(0 - 1)           | 1<br>(0 - 1)            | 0<br>(0 - 0)            | 0<br>(0 - 0)             |
| Typhoid fever                                                     | 1<br>(0 - 3)             | 0<br>(0 - 1)          | 0<br>(0 - 1)           | 0<br>(0 - 1)            | 0<br>(0 - 0)            | 0<br>(0 - 0)             |
| Paratyphoid fever                                                 | 0<br>(0 - 1)             | 0<br>(0 - 0)          | 0<br>(0 - 0)           | 0<br>(0 - 0)            | 0<br>(0 - 0)            | 0<br>(0 - 0)             |
| Other intestinal infectious diseases                              | 0<br>(0 - 0)             | 0<br>(0 - 0)          | 0<br>(0 - 0)           | 0<br>(0 - 0)            | 0<br>(0 - 0)            | 0<br>(0 - 0)             |
| Lower respiratory infections                                      | 130<br>(92 - 165)        | 4<br>(2 - 9)          | 1<br>(0 - 1)           | 6<br>(5 - 8)            | 16<br>(12 - 22)         | 103<br>(67 - 136)        |
| Upper respiratory infections                                      | 0<br>(0 - 0)             | 0<br>(0 - 0)          | 0<br>(0 - 0)           | 0<br>(0 - 0)            | 0<br>(0 - 0)            | 0<br>(0 - 0)             |
| Otitis media                                                      | 0<br>(0 - 0)             | 0<br>(0 - 0)          | 0<br>(0 - 0)           | 0<br>(0 - 0)            | 0<br>(0 - 0)            | 0<br>(0 - 0)             |
| Meningitis                                                        | 4<br>(3 - 5)             | 0<br>(0 - 1)          | 0<br>(0 - 0)           | 1<br>(1 - 1)            | 1<br>(1 - 1)            | 1<br>(1 - 2)             |
| Pneumococcal meningitis                                           | 1<br>(1 - 1)             | 0<br>(0 - 0)          | 0<br>(0 - 0)           | 0<br>(0 - 0)            | 0<br>(0 - 0)            | 0<br>(0 - 1)             |
| H influenzae type B meningitis                                    | 0<br>(0 - 1)             | 0<br>(0 - 0)          | 0<br>(0 - 0)           | 0<br>(0 - 0)            | 0<br>(0 - 0)            | 0<br>(0 - 0)             |
| Meningococcal meningitis                                          | 0<br>(0 - 1)             | 0<br>(0 - 0)          | 0<br>(0 - 0)           | 0<br>(0 - 0)            | 0<br>(0 - 0)            | 0<br>(0 - 0)             |
| Other meningitis                                                  | 2<br>(1 - 2)             | 0<br>(0 - 0)          | 0<br>(0 - 0)           | 0<br>(0 - 0)            | 0<br>(0 - 1)            | 1<br>(0 - 1)             |
| Encephalitis                                                      | 2<br>(2 - 3)             | 0<br>(0 - 1)          | 0<br>(0 - 0)           | 1<br>(0 - 1)            | 1<br>(0 - 1)            | 1<br>(0 - 1)             |
| Diphtheria                                                        | 0<br>(0 - 0)             | 0<br>(0 - 0)          | 0<br>(0 - 0)           | 0<br>(0 - 0)            | 0<br>(0 - 0)            | --<br>(0 - 0)            |
| Whooping cough                                                    | 0<br>(0 - 0)             | 0<br>(0 - 0)          | 0<br>(0 - 0)           | 0<br>(0 - 0)            | 0<br>(0 - 0)            | --<br>(0 - 0)            |
| Tetanus                                                           | 0<br>(0 - 1)             | 0<br>(0 - 0)          | 0<br>(0 - 0)           | 0<br>(0 - 0)            | 0<br>(0 - 0)            | 0<br>(0 - 0)             |
| Measles                                                           | 0<br>(0 - 0)             | 0<br>(0 - 0)          | 0<br>(0 - 0)           | 0<br>(0 - 0)            | 0<br>(0 - 0)            | --<br>(0 - 0)            |
| Varicella and herpes zoster                                       | 0<br>(0 - 1)             | 0<br>(0 - 0)          | 0<br>(0 - 0)           | 0<br>(0 - 0)            | 0<br>(0 - 0)            | 0<br>(0 - 0)             |
| Neglected tropical diseases and malaria                           | 1<br>(1 - 2)             | 0<br>(0 - 0)          | 0<br>(0 - 0)           | 0<br>(0 - 1)            | 0<br>(0 - 1)            | 0<br>(0 - 1)             |
| Leishmaniasis                                                     | 0<br>(0 - 0)             | 0<br>(0 - 0)          | 0<br>(0 - 0)           | 0<br>(0 - 0)            | 0<br>(0 - 0)            | 0<br>(0 - 0)             |
| Visceral leishmaniasis                                            | 0<br>(0 - 0)             | 0<br>(0 - 0)          | 0<br>(0 - 0)           | 0<br>(0 - 0)            | 0<br>(0 - 0)            | 0<br>(0 - 0)             |
| Cysticercosis                                                     | 0<br>(0 - 0)             | 0<br>(0 - 0)          | 0<br>(0 - 0)           | 0<br>(0 - 0)            | 0<br>(0 - 0)            | 0<br>(0 - 0)             |
| Cystic echinococcosis                                             | 0<br>(0 - 0)             | 0<br>(0 - 0)          | 0<br>(0 - 0)           | 0<br>(0 - 0)            | 0<br>(0 - 0)            | 0<br>(0 - 0)             |
| Dengue                                                            | 1<br>(0 - 1)             | 0<br>(0 - 0)          | 0<br>(0 - 0)           | 0<br>(0 - 0)            | 0<br>(0 - 0)            | 0<br>(0 - 0)             |
| Rabies                                                            | 0<br>(0 - 0)             | 0<br>(0 - 0)          | 0<br>(0 - 0)           | 0<br>(0 - 0)            | 0<br>(0 - 0)            | 0<br>(0 - 0)             |
| Intestinal nematode infections                                    | 0<br>(0 - 1)             | 0<br>(0 - 0)          | 0<br>(0 - 0)           | 0<br>(0 - 0)            | 0<br>(0 - 0)            | 0<br>(0 - 0)             |
| Ascariasis                                                        | 0<br>(0 - 1)             | 0<br>(0 - 0)          | 0<br>(0 - 0)           | 0<br>(0 - 0)            | 0<br>(0 - 0)            | 0<br>(0 - 0)             |
| Other neglected tropical diseases                                 | 1<br>(1 - 1)             | 0<br>(0 - 0)          | 0<br>(0 - 0)           | 0<br>(0 - 0)            | 0<br>(0 - 0)            | 0<br>(0 - 0)             |
| Maternal disorders                                                | 2<br>(1 - 3)             | --                    | 0<br>(0 - 0)           | 2<br>(1 - 3)            | --                      | --                       |
| Maternal hemorrhage                                               | 0<br>(0 - 0)             | --                    | 0<br>(0 - 0)           | 0<br>(0 - 0)            | --                      | --                       |
| Maternal sepsis and other maternal infections                     | 0<br>(0 - 0)             | --                    | 0<br>(0 - 0)           | 0<br>(0 - 0)            | --                      | --                       |

Web Table 31- Barbados deaths with 95% UI by age, sex, and cause in 2013

| Cause                                                            | Both Sexes, All Ages     | Both Sexes, 0-4 Years | Both Sexes, 5-14 Years | Both Sexes, 15-49 Years | Both Sexes, 50-69 Years | Both Sexes, 70-80 Years  |
|------------------------------------------------------------------|--------------------------|-----------------------|------------------------|-------------------------|-------------------------|--------------------------|
| Maternal hypertensive disorders                                  | 0<br>(0 - 1)             | --                    | 0<br>(0 - 0)           | 0<br>(0 - 1)            | --                      | --                       |
| Maternal obstructed labor                                        | 0<br>(0 - 0)             | --                    | 0<br>(0 - 0)           | 0<br>(0 - 0)            | --                      | --                       |
| Maternal abortive outcome                                        | 0<br>(0 - 1)             | --                    | 0<br>(0 - 0)           | 0<br>(0 - 1)            | --                      | --                       |
| Indirect maternal deaths                                         | 0<br>(0 - 0)             | --                    | 0<br>(0 - 0)           | 0<br>(0 - 0)            | --                      | --                       |
| Late maternal deaths                                             | 0<br>(0 - 0)             | --                    | 0<br>(0 - 0)           | 0<br>(0 - 0)            | --                      | --                       |
| Maternal deaths aggravated by HIV/AIDS                           | 0<br>(0 - 0)             | --                    | 0<br>(0 - 0)           | 0<br>(0 - 0)            | --                      | --                       |
| Other maternal disorders                                         | 0<br>(0 - 0)             | --                    | 0<br>(0 - 0)           | 0<br>(0 - 0)            | --                      | --                       |
| Neonatal disorders                                               | 31<br>(13 - 61)          | 31<br>(13 - 61)       | --                     | --                      | --                      | --                       |
| Neonatal preterm birth complications                             | 13<br>(5 - 27)           | 13<br>(5 - 27)        | --                     | --                      | --                      | --                       |
| Neonatal encephalopathy due to birth asphyxia and trauma         | 8<br>(3 - 16)            | 8<br>(3 - 16)         | --                     | --                      | --                      | --                       |
| Neonatal sepsis and other neonatal infections                    | 5<br>(2 - 11)            | 5<br>(2 - 11)         | --                     | --                      | --                      | --                       |
| Hemolytic disease and other neonatal jaundice                    | 0<br>(0 - 1)             | 0<br>(0 - 1)          | --                     | --                      | --                      | --                       |
| Other neonatal disorders                                         | 4<br>(2 - 9)             | 4<br>(2 - 9)          | --                     | --                      | --                      | --                       |
| Nutritional deficiencies                                         | 24<br>(18 - 31)          | 2<br>(1 - 4)          | 0<br>(0 - 0)           | 2<br>(2 - 3)            | 5<br>(3 - 6)            | 15<br>(11 - 20)          |
| Protein-energy malnutrition                                      | 9<br>(7 - 15)            | 2<br>(1 - 4)          | 0<br>(0 - 0)           | 1<br>(0 - 1)            | 2<br>(1 - 3)            | 5<br>(3 - 9)             |
| Iodine deficiency                                                | 0<br>(0 - 0)             | 0<br>(0 - 0)          | 0<br>(0 - 0)           | 0<br>(0 - 0)            | 0<br>(0 - 0)            | 0<br>(0 - 0)             |
| Iron-deficiency anemia                                           | 13<br>(8 - 18)           | 0<br>(0 - 1)          | 0<br>(0 - 0)           | 1<br>(1 - 2)            | 3<br>(2 - 4)            | 9<br>(5 - 13)            |
| Other nutritional deficiencies                                   | 1<br>(1 - 2)             | 0<br>(0 - 0)          | 0<br>(0 - 0)           | 0<br>(0 - 0)            | 0<br>(0 - 0)            | 1<br>(0 - 1)             |
| Other communicable, maternal, neonatal, and nutritional diseases | 6<br>(4 - 8)             | 0<br>(0 - 1)          | 0<br>(0 - 0)           | 1<br>(1 - 2)            | 2<br>(1 - 3)            | 2<br>(1 - 3)             |
| Sexually transmitted diseases excluding HIV                      | 1<br>(1 - 1)             | 0<br>(0 - 0)          | 0<br>(0 - 0)           | 0<br>(0 - 0)            | 0<br>(0 - 0)            | 0<br>(0 - 0)             |
| Syphilis                                                         | 1<br>(0 - 1)             | 0<br>(0 - 0)          | 0<br>(0 - 0)           | 0<br>(0 - 0)            | 0<br>(0 - 0)            | 0<br>(0 - 0)             |
| Chlamydial infection                                             | 0<br>(0 - 0)             | --                    | 0<br>(0 - 0)           | 0<br>(0 - 0)            | 0<br>(0 - 0)            | 0<br>(0 - 0)             |
| Gonococcal infection                                             | 0<br>(0 - 0)             | --                    | 0<br>(0 - 0)           | 0<br>(0 - 0)            | 0<br>(0 - 0)            | 0<br>(0 - 0)             |
| Other sexually transmitted diseases                              | 0<br>(0 - 0)             | --                    | 0<br>(0 - 0)           | 0<br>(0 - 0)            | 0<br>(0 - 0)            | 0<br>(0 - 0)             |
| Hepatitis                                                        | 1<br>(0 - 1)             | 0<br>(0 - 0)          | 0<br>(0 - 0)           | 0<br>(0 - 0)            | 0<br>(0 - 0)            | 0<br>(0 - 0)             |
| Acute hepatitis A                                                | 0<br>(0 - 0)             | 0<br>(0 - 0)          | 0<br>(0 - 0)           | 0<br>(0 - 0)            | 0<br>(0 - 0)            | 0<br>(0 - 0)             |
| Acute hepatitis B                                                | 0<br>(0 - 1)             | 0<br>(0 - 0)          | 0<br>(0 - 0)           | 0<br>(0 - 0)            | 0<br>(0 - 0)            | 0<br>(0 - 0)             |
| Acute hepatitis C                                                | 0<br>(0 - 0)             | --                    | 0<br>(0 - 0)           | 0<br>(0 - 0)            | 0<br>(0 - 0)            | 0<br>(0 - 0)             |
| Other infectious diseases                                        | 5<br>(3 - 6)             | 0<br>(0 - 0)          | 0<br>(0 - 0)           | 1<br>(1 - 2)            | 2<br>(1 - 2)            | 2<br>(1 - 3)             |
| Non-communicable diseases                                        | 1,988<br>(1,705 - 2,268) | 15<br>(7 - 33)        | 5<br>(3 - 8)           | 135<br>(110 - 167)      | 590<br>(485 - 701)      | 1,244<br>(1,077 - 1,410) |
| Neoplasms                                                        | 443<br>(367 - 520)       | 1<br>(0 - 1)          | 1<br>(1 - 2)           | 38<br>(31 - 48)         | 162<br>(130 - 196)      | 240<br>(196 - 283)       |
| Esophageal cancer                                                | 10<br>(8 - 13)           | --                    | --                     | 0<br>(0 - 1)            | 4<br>(3 - 6)            | 5<br>(4 - 7)             |
| Stomach cancer                                                   | 28<br>(23 - 34)          | --                    | --                     | 1<br>(1 - 2)            | 10<br>(8 - 12)          | 17<br>(14 - 21)          |
| Liver cancer                                                     | 14<br>(11 - 17)          | --                    | 0<br>(0 - 0)           | 1<br>(1 - 2)            | 6<br>(4 - 7)            | 6<br>(5 - 8)             |
| Liver cancer due to hepatitis B                                  | 3<br>(2 - 5)             | --                    | 0<br>(0 - 0)           | 1<br>(0 - 1)            | 2<br>(1 - 2)            | 1<br>(1 - 2)             |
| Liver cancer due to hepatitis C                                  | 6<br>(5 - 9)             | --                    | 0<br>(0 - 0)           | 0<br>(0 - 1)            | 3<br>(2 - 4)            | 3<br>(2 - 5)             |
| Liver cancer due to alcohol use                                  | 3<br>(2 - 4)             | --                    | --                     | 0<br>(0 - 0)            | 1<br>(1 - 2)            | 2<br>(1 - 2)             |
| Liver cancer due to other causes                                 | 1<br>(1 - 2)             | --                    | 0<br>(0 - 0)           | 0<br>(0 - 0)            | 1<br>(0 - 1)            | 1<br>(0 - 1)             |
| Larynx cancer                                                    | 4<br>(3 - 5)             | --                    | --                     | 0<br>(0 - 0)            | 2<br>(1 - 3)            | 2<br>(1 - 2)             |
| Tracheal, bronchus and lung cancer                               | 39<br>(32 - 48)          | --                    | --                     | 3<br>(2 - 4)            | 19<br>(14 - 23)         | 17<br>(14 - 22)          |

Web Table 31- Barbados deaths with 95% UI by age, sex, and cause in 2013

| Cause                                         | Both Sexes, All Ages | Both Sexes, 0-4 Years | Both Sexes, 5-14 Years | Both Sexes, 15-49 Years | Both Sexes, 50-69 Years | Both Sexes, 70-80 Years |
|-----------------------------------------------|----------------------|-----------------------|------------------------|-------------------------|-------------------------|-------------------------|
| Breast cancer                                 | 50<br>(37 - 65)      | --                    | --                     | 8<br>(5 - 11)           | 22<br>(15 - 30)         | 20<br>(15 - 27)         |
| Cervical cancer                               | 24<br>(17 - 35)      | --                    | --                     | 4<br>(3 - 6)            | 10<br>(7 - 15)          | 10<br>(7 - 15)          |
| Uterine cancer                                | 10<br>(5 - 15)       | --                    | --                     | 0<br>(0 - 0)            | 4<br>(2 - 6)            | 6<br>(3 - 9)            |
| Prostate cancer                               | 85<br>(51 - 115)     | --                    | --                     | 0<br>(0 - 1)            | 17<br>(10 - 25)         | 67<br>(41 - 92)         |
| Colon and rectum cancer                       | 55<br>(45 - 66)      | --                    | --                     | 3<br>(2 - 4)            | 19<br>(15 - 23)         | 33<br>(27 - 41)         |
| Lip and oral cavity cancer                    | 5<br>(4 - 7)         | --                    | --                     | 0<br>(0 - 1)            | 2<br>(2 - 3)            | 2<br>(2 - 3)            |
| Nasopharynx cancer                            | 2<br>(1 - 2)         | --                    | 0<br>(0 - 0)           | 0<br>(0 - 0)            | 1<br>(1 - 1)            | 0<br>(0 - 1)            |
| Other pharynx cancer                          | 2<br>(2 - 3)         | --                    | --                     | 0<br>(0 - 0)            | 1<br>(1 - 2)            | 1<br>(1 - 1)            |
| Gallbladder and biliary tract cancer          | 6<br>(4 - 10)        | --                    | --                     | 0<br>(0 - 0)            | 2<br>(1 - 4)            | 3<br>(2 - 6)            |
| Pancreatic cancer                             | 19<br>(15 - 24)      | --                    | --                     | 1<br>(1 - 1)            | 7<br>(6 - 9)            | 11<br>(8 - 14)          |
| Malignant skin melanoma                       | 2<br>(1 - 3)         | --                    | --                     | 0<br>(0 - 0)            | 1<br>(0 - 1)            | 1<br>(0 - 1)            |
| Non-melanoma skin cancer                      | 2<br>(1 - 3)         | --                    | --                     | 0<br>(0 - 0)            | 0<br>(0 - 1)            | 1<br>(1 - 2)            |
| Ovarian cancer                                | 12<br>(9 - 16)       | --                    | --                     | 1<br>(1 - 2)            | 6<br>(4 - 8)            | 5<br>(4 - 7)            |
| Testicular cancer                             | 0<br>(0 - 0)         | --                    | --                     | 0<br>(0 - 0)            | 0<br>(0 - 0)            | 0<br>(0 - 0)            |
| Kidney cancer                                 | 6<br>(5 - 7)         | 0<br>(0 - 0)          | 0<br>(0 - 0)           | 1<br>(0 - 1)            | 3<br>(2 - 3)            | 2<br>(2 - 3)            |
| Bladder cancer                                | 6<br>(5 - 9)         | --                    | --                     | 0<br>(0 - 0)            | 2<br>(1 - 2)            | 4<br>(3 - 6)            |
| Brain and nervous system cancer               | 5<br>(2 - 6)         | 0<br>(0 - 0)          | 0<br>(0 - 0)           | 1<br>(0 - 1)            | 2<br>(1 - 3)            | 1<br>(1 - 2)            |
| Thyroid cancer                                | 2<br>(1 - 2)         | --                    | 0<br>(0 - 0)           | 0<br>(0 - 0)            | 1<br>(1 - 1)            | 1<br>(1 - 1)            |
| Mesothelioma                                  | 1<br>(1 - 1)         | --                    | --                     | 0<br>(0 - 0)            | 0<br>(0 - 1)            | 1<br>(0 - 1)            |
| Hodgkin lymphoma                              | 1<br>(0 - 1)         | 0<br>(0 - 0)          | 0<br>(0 - 0)           | 0<br>(0 - 0)            | 0<br>(0 - 0)            | 0<br>(0 - 0)            |
| Non-Hodgkin lymphoma                          | 15<br>(11 - 19)      | 0<br>(0 - 0)          | 0<br>(0 - 0)           | 3<br>(2 - 4)            | 6<br>(5 - 8)            | 5<br>(4 - 7)            |
| Multiple myeloma                              | 7<br>(5 - 10)        | --                    | --                     | 0<br>(0 - 1)            | 4<br>(2 - 5)            | 3<br>(2 - 4)            |
| Leukemia                                      | 10<br>(9 - 12)       | 0<br>(0 - 0)          | 0<br>(0 - 1)           | 2<br>(2 - 3)            | 3<br>(3 - 4)            | 4<br>(3 - 5)            |
| Other neoplasms                               | 20<br>(16 - 26)      | 0<br>(0 - 1)          | 0<br>(0 - 1)           | 4<br>(3 - 5)            | 8<br>(6 - 10)           | 8<br>(6 - 11)           |
| Cardiovascular diseases                       | 784<br>(661 - 933)   | 1<br>(0 - 2)          | 1<br>(0 - 1)           | 40<br>(32 - 50)         | 215<br>(175 - 260)      | 528<br>(444 - 639)      |
| Rheumatic heart disease                       | 3<br>(2 - 4)         | 0<br>(0 - 0)          | 0<br>(0 - 0)           | 1<br>(1 - 1)            | 1<br>(1 - 1)            | 1<br>(1 - 2)            |
| Ischemic heart disease                        | 311<br>(251 - 415)   | 0<br>(0 - 0)          | 0<br>(0 - 0)           | 17<br>(13 - 22)         | 100<br>(80 - 126)       | 195<br>(152 - 274)      |
| Cerebrovascular disease                       | 295<br>(242 - 364)   | 0<br>(0 - 1)          | 0<br>(0 - 0)           | 11<br>(8 - 14)          | 69<br>(54 - 86)         | 214<br>(174 - 270)      |
| Ischemic stroke                               | 190<br>(153 - 247)   | 0<br>(0 - 0)          | 0<br>(0 - 0)           | 3<br>(2 - 4)            | 35<br>(27 - 45)         | 151<br>(120 - 202)      |
| Hemorrhagic stroke                            | 105<br>(78 - 135)    | 0<br>(0 - 0)          | 0<br>(0 - 0)           | 8<br>(6 - 11)           | 34<br>(25 - 44)         | 63<br>(44 - 84)         |
| Hypertensive heart disease                    | 76<br>(48 - 101)     | 0<br>(0 - 0)          | 0<br>(0 - 0)           | 3<br>(2 - 4)            | 19<br>(13 - 25)         | 53<br>(32 - 75)         |
| Cardiomyopathy and myocarditis                | 21<br>(16 - 27)      | 0<br>(0 - 1)          | 0<br>(0 - 0)           | 3<br>(2 - 4)            | 8<br>(6 - 10)           | 9<br>(6 - 13)           |
| Atrial fibrillation and flutter               | 16<br>(10 - 23)      | --                    | --                     | 0<br>(0 - 0)            | 2<br>(2 - 3)            | 13<br>(8 - 20)          |
| Aortic aneurysm                               | 10<br>(8 - 14)       | --                    | --                     | 1<br>(0 - 1)            | 4<br>(3 - 5)            | 6<br>(4 - 9)            |
| Peripheral vascular disease                   | 12<br>(8 - 17)       | --                    | --                     | 0<br>(0 - 0)            | 1<br>(1 - 1)            | 11<br>(7 - 16)          |
| Endocarditis                                  | 3<br>(2 - 5)         | 0<br>(0 - 0)          | 0<br>(0 - 0)           | 0<br>(0 - 1)            | 1<br>(0 - 1)            | 2<br>(1 - 3)            |
| Other cardiovascular and circulatory diseases | 36<br>(25 - 47)      | 0<br>(0 - 0)          | 0<br>(0 - 0)           | 3<br>(2 - 4)            | 10<br>(7 - 14)          | 22<br>(15 - 31)         |
| Chronic respiratory diseases                  | 67<br>(55 - 87)      | 0<br>(0 - 1)          | 0<br>(0 - 0)           | 5<br>(4 - 6)            | 19<br>(15 - 25)         | 42<br>(34 - 56)         |
| Chronic obstructive pulmonary disease         | 44<br>(36 - 59)      | 0<br>(0 - 0)          | 0<br>(0 - 0)           | 2<br>(1 - 3)            | 11<br>(9 - 15)          | 31<br>(25 - 42)         |
| Pneumoconiosis                                | 2<br>(1 - 3)         | 0<br>(0 - 0)          | 0<br>(0 - 0)           | 0<br>(0 - 0)            | 1<br>(1 - 1)            | 1<br>(1 - 2)            |

Web Table 31- Barbados deaths with 95% UI by age, sex, and cause in 2013

| Cause                                               | Both Sexes, All Ages | Both Sexes, 0-4 Years | Both Sexes, 5-14 Years | Both Sexes, 15-49 Years | Both Sexes, 50-69 Years | Both Sexes, 70-80 Years |
|-----------------------------------------------------|----------------------|-----------------------|------------------------|-------------------------|-------------------------|-------------------------|
| Silicosis                                           | 0<br>(0-0)           | 0<br>(0-0)            | 0<br>(0-0)             | 0<br>(0-0)              | 0<br>(0-0)              | 0<br>(0-0)              |
| Asbestosis                                          | 0<br>(0-1)           | 0<br>(0-0)            | 0<br>(0-0)             | 0<br>(0-0)              | 0<br>(0-0)              | 0<br>(0-0)              |
| Coal workers pneumoconiosis                         | 0<br>(0-1)           | 0<br>(0-0)            | 0<br>(0-0)             | 0<br>(0-0)              | 0<br>(0-0)              | 0<br>(0-0)              |
| Other pneumoconiosis                                | 1<br>(1-2)           | 0<br>(0-0)            | 0<br>(0-0)             | 0<br>(0-0)              | 0<br>(0-0)              | 1<br>(1-1)              |
| Asthma                                              | 13<br>(10-17)        | 0<br>(0-0)            | 0<br>(0-0)             | 2<br>(2-3)              | 4<br>(3-6)              | 6<br>(5-9)              |
| Interstitial lung disease and pulmonary sarcoidosis | 5<br>(4-8)           | 0<br>(0-0)            | 0<br>(0-0)             | 0<br>(0-1)              | 2<br>(1-3)              | 3<br>(2-5)              |
| Other chronic respiratory diseases                  | 2<br>(1-2)           | 0<br>(0-0)            | 0<br>(0-0)             | 0<br>(0-0)              | 0<br>(0-1)              | 1<br>(1-1)              |
| Cirrhosis                                           | 40<br>(33-48)        | 0<br>(0-0)            | 0<br>(0-0)             | 8<br>(6-11)             | 20<br>(16-25)           | 11<br>(9-14)            |
| Cirrhosis due to hepatitis B                        | 3<br>(2-5)           | 0<br>(0-0)            | 0<br>(0-0)             | 1<br>(0-1)              | 2<br>(1-3)              | 1<br>(1-2)              |
| Cirrhosis due to hepatitis C                        | 14<br>(9-20)         | 0<br>(0-0)            | 0<br>(0-0)             | 2<br>(1-4)              | 7<br>(4-10)             | 5<br>(3-7)              |
| Cirrhosis due to alcohol use                        | 17<br>(11-22)        | --                    | --                     | 3<br>(2-5)              | 9<br>(6-12)             | 5<br>(3-7)              |
| Cirrhosis due to other causes                       | 6<br>(4-8)           | 0<br>(0-0)            | 0<br>(0-0)             | 2<br>(1-3)              | 3<br>(2-4)              | 1<br>(1-2)              |
| Digestive diseases                                  | 53<br>(44-63)        | 0<br>(0-0)            | 0<br>(0-0)             | 6<br>(5-8)              | 15<br>(12-19)           | 31<br>(25-38)           |
| Peptic ulcer disease                                | 14<br>(11-18)        | 0<br>(0-0)            | 0<br>(0-0)             | 1<br>(1-2)              | 5<br>(3-6)              | 8<br>(6-11)             |
| Gastritis and duodenitis                            | 4<br>(2-5)           | 0<br>(0-0)            | 0<br>(0-0)             | 0<br>(0-1)              | 1<br>(1-2)              | 2<br>(1-3)              |
| Appendicitis                                        | 2<br>(1-3)           | 0<br>(0-0)            | 0<br>(0-0)             | 0<br>(0-1)              | 1<br>(0-1)              | 1<br>(1-1)              |
| Paralytic ileus and intestinal obstruction          | 7<br>(3-11)          | 0<br>(0-0)            | 0<br>(0-0)             | 1<br>(0-1)              | 2<br>(1-3)              | 5<br>(2-7)              |
| Inguinal, femoral, and abdominal hernia             | 3<br>(1-7)           | 0<br>(0-0)            | 0<br>(0-0)             | 0<br>(0-1)              | 1<br>(0-2)              | 2<br>(1-4)              |
| Inflammatory bowel disease                          | 5<br>(3-7)           | 0<br>(0-0)            | 0<br>(0-0)             | 0<br>(0-1)              | 1<br>(1-1)              | 3<br>(2-5)              |
| Vascular intestinal disorders                       | 3<br>(2-5)           | 0<br>(0-0)            | 0<br>(0-0)             | 0<br>(0-0)              | 1<br>(0-1)              | 2<br>(1-3)              |
| Gallbladder and biliary diseases                    | 4<br>(3-5)           | 0<br>(0-0)            | 0<br>(0-0)             | 0<br>(0-1)              | 1<br>(1-2)              | 2<br>(1-3)              |
| Pancreatitis                                        | 3<br>(2-4)           | 0<br>(0-0)            | 0<br>(0-0)             | 1<br>(1-1)              | 1<br>(1-2)              | 1<br>(1-1)              |
| Other digestive diseases                            | 9<br>(7-12)          | 0<br>(0-0)            | 0<br>(0-0)             | 1<br>(1-1)              | 2<br>(2-3)              | 6<br>(4-8)              |
| Neurological disorders                              | 132<br>(107-162)     | 0<br>(0-0)            | 0<br>(0-1)             | 4<br>(3-6)              | 14<br>(11-17)           | 114<br>(90-142)         |
| Alzheimer disease and other dementias               | 112<br>(88-141)      | --                    | --                     | 0<br>(0-0)              | 8<br>(6-11)             | 104<br>(81-131)         |
| Parkinson disease                                   | 8<br>(6-11)          | --                    | --                     | 0<br>(0-0)              | 2<br>(1-2)              | 7<br>(5-9)              |
| Epilepsy                                            | 7<br>(5-10)          | 0<br>(0-0)            | 0<br>(0-0)             | 3<br>(2-4)              | 2<br>(1-3)              | 2<br>(1-2)              |
| Multiple sclerosis                                  | 0<br>(0-1)           | --                    | --                     | 0<br>(0-0)              | 0<br>(0-0)              | 0<br>(0-0)              |
| Other neurological disorders                        | 4<br>(3-5)           | 0<br>(0-0)            | 0<br>(0-0)             | 1<br>(1-1)              | 2<br>(1-2)              | 1<br>(1-2)              |
| Mental and substance use disorders                  | 8<br>(5-10)          | 0<br>(0-0)            | 0<br>(0-0)             | 2<br>(2-3)              | 3<br>(2-5)              | 2<br>(1-3)              |
| Schizophrenia                                       | 1<br>(0-1)           | --                    | --                     | 0<br>(0-0)              | 0<br>(0-0)              | 0<br>(0-0)              |
| Alcohol use disorders                               | 5<br>(3-7)           | --                    | --                     | 1<br>(1-2)              | 3<br>(2-4)              | 1<br>(1-1)              |
| Drug use disorders                                  | 2<br>(1-3)           | 0<br>(0-0)            | --                     | 1<br>(0-1)              | 1<br>(0-1)              | 1<br>(0-1)              |
| Opioid use disorders                                | 1<br>(0-1)           | 0<br>(0-0)            | --                     | 0<br>(0-0)              | 0<br>(0-0)              | 0<br>(0-0)              |
| Cocaine use disorders                               | 0<br>(0-0)           | 0<br>(0-0)            | --                     | 0<br>(0-0)              | 0<br>(0-0)              | 0<br>(0-0)              |
| Amphetamine use disorders                           | 0<br>(0-0)           | 0<br>(0-0)            | --                     | 0<br>(0-0)              | 0<br>(0-0)              | 0<br>(0-0)              |
| Other drug use disorders                            | 1<br>(1-2)           | 0<br>(0-0)            | --                     | 1<br>(0-1)              | 0<br>(0-1)              | 0<br>(0-1)              |
| Eating disorders                                    | 0<br>(0-0)           | --                    | 0<br>(0-0)             | 0<br>(0-0)              | --                      | --                      |
| Anorexia nervosa                                    | 0<br>(0-0)           | --                    | 0<br>(0-0)             | 0<br>(0-0)              | --                      | --                      |
| Diabetes, urogenital, blood, and endocrine diseases | 406<br>(337-485)     | 1<br>(1-3)            | 1<br>(0-1)             | 26<br>(21-34)           | 133<br>(106-162)        | 245<br>(199-296)        |

Web Table 31- Barbados deaths with 95% UI by age, sex, and cause in 2013

| Cause                                               | Both Sexes, All Ages | Both Sexes, 0-4 Years | Both Sexes, 5-14 Years | Both Sexes, 15-49 Years | Both Sexes, 50-69 Years | Both Sexes, 70-80 Years |
|-----------------------------------------------------|----------------------|-----------------------|------------------------|-------------------------|-------------------------|-------------------------|
| Diabetes mellitus                                   | 286<br>(232 - 344)   | 0<br>(0 - 0)          | 0<br>(0 - 0)           | 12<br>(9 - 16)          | 95<br>(75 - 117)        | 179<br>(142 - 219)      |
| Acute glomerulonephritis                            | 0<br>(0 - 0)         | 0<br>(0 - 0)          | 0<br>(0 - 0)           | 0<br>(0 - 0)            | 0<br>(0 - 0)            | 0<br>(0 - 0)            |
| Chronic kidney disease                              | 75<br>(57 - 105)     | 0<br>(0 - 1)          | 0<br>(0 - 0)           | 8<br>(6 - 12)           | 26<br>(19 - 37)         | 40<br>(29 - 60)         |
| Chronic kidney disease due to diabetes mellitus     | 14<br>(8 - 20)       | 0<br>(0 - 0)          | 0<br>(0 - 0)           | 1<br>(1 - 2)            | 7<br>(4 - 10)           | 5<br>(3 - 9)            |
| Chronic kidney disease due to hypertension          | 41<br>(30 - 57)      | 0<br>(0 - 0)          | 0<br>(0 - 0)           | 4<br>(3 - 6)            | 13<br>(9 - 19)          | 23<br>(17 - 34)         |
| Chronic kidney disease due to glomerulonephritis    | 2<br>(1 - 3)         | 0<br>(0 - 0)          | 0<br>(0 - 0)           | 0<br>(0 - 1)            | 1<br>(0 - 1)            | 1<br>(1 - 2)            |
| Chronic kidney disease due to other causes          | 18<br>(11 - 36)      | 0<br>(0 - 0)          | 0<br>(0 - 0)           | 2<br>(1 - 5)            | 6<br>(3 - 11)           | 10<br>(5 - 22)          |
| Urinary diseases and male infertility               | 20<br>(11 - 26)      | 0<br>(0 - 0)          | 0<br>(0 - 0)           | 1<br>(1 - 1)            | 4<br>(3 - 6)            | 14<br>(7 - 20)          |
| Interstitial nephritis and urinary tract infections | 16<br>(9 - 21)       | 0<br>(0 - 0)          | 0<br>(0 - 0)           | 1<br>(0 - 1)            | 3<br>(2 - 4)            | 12<br>(6 - 17)          |
| Urolithiasis                                        | 1<br>(0 - 1)         | --                    | 0<br>(0 - 0)           | 0<br>(0 - 0)            | 0<br>(0 - 1)            | 0<br>(0 - 1)            |
| Other urinary diseases                              | 3<br>(2 - 5)         | 0<br>(0 - 0)          | 0<br>(0 - 0)           | 0<br>(0 - 0)            | 1<br>(1 - 1)            | 2<br>(1 - 4)            |
| Gynecological diseases                              | 0<br>(0 - 0)         | --                    | --                     | 0<br>(0 - 0)            | 0<br>(0 - 0)            | 0<br>(0 - 0)            |
| Uterine fibroids                                    | 0<br>(0 - 0)         | --                    | --                     | 0<br>(0 - 0)            | 0<br>(0 - 0)            | 0<br>(0 - 0)            |
| Polycystic ovarian syndrome                         | 0<br>(0 - 0)         | --                    | --                     | 0<br>(0 - 0)            | 0<br>(0 - 0)            | --                      |
| Endometriosis                                       | 0<br>(0 - 0)         | --                    | --                     | 0<br>(0 - 0)            | 0<br>(0 - 0)            | --                      |
| Genital prolapse                                    | 0<br>(0 - 0)         | --                    | --                     | 0<br>(0 - 0)            | 0<br>(0 - 0)            | 0<br>(0 - 0)            |
| Other gynecological diseases                        | 0<br>(0 - 0)         | --                    | --                     | 0<br>(0 - 0)            | 0<br>(0 - 0)            | 0<br>(0 - 0)            |
| Hemoglobinopathies and hemolytic anemias            | 4<br>(3 - 6)         | 0<br>(0 - 1)          | 0<br>(0 - 1)           | 2<br>(1 - 2)            | 1<br>(1 - 2)            | 1<br>(1 - 2)            |
| Thalassemias                                        | 0<br>(0 - 0)         | 0<br>(0 - 0)          | 0<br>(0 - 0)           | 0<br>(0 - 0)            | 0<br>(0 - 0)            | 0<br>(0 - 0)            |
| Sickle cell disorders                               | 3<br>(2 - 4)         | 0<br>(0 - 1)          | 0<br>(0 - 0)           | 1<br>(1 - 2)            | 1<br>(1 - 1)            | 0<br>(0 - 0)            |
| G6PD deficiency                                     | 0<br>(0 - 0)         | 0<br>(0 - 0)          | 0<br>(0 - 0)           | 0<br>(0 - 0)            | 0<br>(0 - 0)            | 0<br>(0 - 0)            |
| Other hemoglobinopathies and hemolytic anemias      | 1<br>(1 - 2)         | 0<br>(0 - 0)          | 0<br>(0 - 0)           | 0<br>(0 - 0)            | 0<br>(0 - 0)            | 1<br>(1 - 1)            |
| Endocrine, metabolic, blood, and immune disorders   | 21<br>(16 - 34)      | 0<br>(0 - 1)          | 0<br>(0 - 0)           | 3<br>(2 - 6)            | 6<br>(4 - 11)           | 11<br>(7 - 17)          |
| Musculoskeletal disorders                           | 10<br>(4 - 13)       | --                    | 0<br>(0 - 0)           | 3<br>(1 - 4)            | 3<br>(1 - 4)            | 4<br>(2 - 6)            |
| Rheumatoid arthritis                                | 2<br>(1 - 2)         | --                    | 0<br>(0 - 0)           | 0<br>(0 - 0)            | 0<br>(0 - 1)            | 1<br>(0 - 2)            |
| Other musculoskeletal disorders                     | 8<br>(4 - 11)        | --                    | 0<br>(0 - 0)           | 3<br>(1 - 4)            | 2<br>(1 - 3)            | 3<br>(1 - 4)            |
| Other non-communicable diseases                     | 46<br>(22 - 62)      | 12<br>(5 - 25)        | 1<br>(1 - 2)           | 3<br>(2 - 4)            | 5<br>(2 - 6)            | 26<br>(7 - 38)          |
| Congenital anomalies                                | 16<br>(10 - 28)      | 10<br>(5 - 22)        | 1<br>(1 - 2)           | 2<br>(1 - 3)            | 1<br>(1 - 2)            | 2<br>(1 - 2)            |
| Neural tube defects                                 | 1<br>(0 - 1)         | 1<br>(0 - 1)          | 0<br>(0 - 0)           | 0<br>(0 - 0)            | 0<br>(0 - 0)            | 0<br>(0 - 0)            |
| Congenital heart anomalies                          | 8<br>(5 - 13)        | 5<br>(2 - 10)         | 1<br>(0 - 1)           | 1<br>(1 - 2)            | 0<br>(0 - 1)            | 1<br>(0 - 1)            |
| Cleft lip and cleft palate                          | 0<br>(0 - 0)         | 0<br>(0 - 0)          | --                     | --                      | --                      | --                      |
| Down syndrome                                       | 1<br>(1 - 2)         | 0<br>(0 - 1)          | 0<br>(0 - 0)           | 0<br>(0 - 0)            | 0<br>(0 - 0)            | 0<br>(0 - 0)            |
| Chromosomal unbalanced rearrangements               | 0<br>(0 - 1)         | 0<br>(0 - 1)          | 0<br>(0 - 0)           | 0<br>(0 - 0)            | 0<br>(0 - 0)            | 0<br>(0 - 0)            |
| Other congenital anomalies                          | 7<br>(4 - 12)        | 4<br>(2 - 9)          | 0<br>(0 - 1)           | 1<br>(0 - 1)            | 1<br>(1 - 1)            | 1<br>(1 - 1)            |
| Skin and subcutaneous diseases                      | 28<br>(6 - 41)       | 0<br>(0 - 0)          | 0<br>(0 - 0)           | 1<br>(0 - 1)            | 3<br>(1 - 4)            | 24<br>(5 - 36)          |
| Cellulitis                                          | 1<br>(0 - 2)         | 0<br>(0 - 0)          | 0<br>(0 - 0)           | 0<br>(0 - 0)            | 0<br>(0 - 1)            | 1<br>(0 - 2)            |
| Pyoderma                                            | 4<br>(1 - 6)         | 0<br>(0 - 0)          | 0<br>(0 - 0)           | 0<br>(0 - 0)            | 1<br>(0 - 1)            | 3<br>(1 - 4)            |
| Decubitus ulcer                                     | 23<br>(5 - 33)       | 0<br>(0 - 0)          | 0<br>(0 - 0)           | 0<br>(0 - 1)            | 2<br>(1 - 2)            | 20<br>(5 - 31)          |
| Other skin and subcutaneous diseases                | 1<br>(0 - 1)         | 0<br>(0 - 0)          | 0<br>(0 - 0)           | 0<br>(0 - 0)            | 0<br>(0 - 0)            | 0<br>(0 - 1)            |
| Sudden infant death syndrome                        | 1<br>(0 - 3)         | 1<br>(0 - 3)          | --                     | --                      | --                      | --                      |

Web Table 31- Barbados deaths with 95% UI by age, sex, and cause in 2013

| Cause                                           | Both Sexes, All Ages | Both Sexes, 0-4 Years | Both Sexes, 5-14 Years | Both Sexes, 15-49 Years | Both Sexes, 50-69 Years | Both Sexes, 70-80 Years |
|-------------------------------------------------|----------------------|-----------------------|------------------------|-------------------------|-------------------------|-------------------------|
| Injuries                                        | 146<br>(120 - 175)   | 3<br>(2 - 7)          | 4<br>(2 - 6)           | 64<br>(50 - 82)         | 37<br>(29 - 46)         | 38<br>(30 - 46)         |
| Transport injuries                              | 38<br>(29 - 46)      | 0<br>(0 - 1)          | 1<br>(1 - 2)           | 17<br>(12 - 22)         | 11<br>(8 - 14)          | 8<br>(6 - 11)           |
| Road injuries                                   | 35<br>(27 - 42)      | 0<br>(0 - 1)          | 1<br>(1 - 2)           | 15<br>(11 - 20)         | 10<br>(7 - 13)          | 7<br>(5 - 10)           |
| Pedestrian road injuries                        | 9<br>(7 - 12)        | 0<br>(0 - 0)          | 1<br>(0 - 1)           | 3<br>(2 - 5)            | 3<br>(2 - 4)            | 2<br>(2 - 3)            |
| Cyclist road injuries                           | 2<br>(1 - 3)         | 0<br>(0 - 0)          | 0<br>(0 - 0)           | 1<br>(0 - 1)            | 1<br>(0 - 1)            | 0<br>(0 - 1)            |
| Motorcyclist road injuries                      | 2<br>(2 - 3)         | 0<br>(0 - 0)          | 0<br>(0 - 0)           | 1<br>(1 - 2)            | 0<br>(0 - 1)            | 0<br>(0 - 1)            |
| Motor vehicle road injuries                     | 21<br>(16 - 26)      | 0<br>(0 - 1)          | 1<br>(0 - 1)           | 10<br>(7 - 13)          | 6<br>(4 - 8)            | 4<br>(3 - 5)            |
| Other road injuries                             | 0<br>(0 - 1)         | 0<br>(0 - 0)          | 0<br>(0 - 0)           | 0<br>(0 - 0)            | 0<br>(0 - 0)            | 0<br>(0 - 0)            |
| Other transport injuries                        | 3<br>(2 - 4)         | 0<br>(0 - 0)          | 0<br>(0 - 0)           | 1<br>(1 - 2)            | 1<br>(0 - 1)            | 1<br>(0 - 1)            |
| Unintentional injuries                          | 59<br>(49 - 70)      | 3<br>(1 - 5)          | 2<br>(1 - 3)           | 17<br>(13 - 22)         | 14<br>(11 - 17)         | 25<br>(19 - 31)         |
| Falls                                           | 13<br>(10 - 16)      | 0<br>(0 - 0)          | 0<br>(0 - 0)           | 2<br>(1 - 3)            | 3<br>(2 - 4)            | 8<br>(6 - 10)           |
| Drowning                                        | 11<br>(8 - 16)       | 0<br>(0 - 1)          | 1<br>(0 - 1)           | 6<br>(4 - 9)            | 3<br>(2 - 4)            | 1<br>(1 - 2)            |
| Fire, heat, and hot substances                  | 7<br>(5 - 9)         | 0<br>(0 - 1)          | 0<br>(0 - 0)           | 1<br>(1 - 2)            | 1<br>(1 - 2)            | 4<br>(2 - 5)            |
| Poisonings                                      | 1<br>(1 - 2)         | 0<br>(0 - 0)          | 0<br>(0 - 0)           | 0<br>(0 - 1)            | 0<br>(0 - 0)            | 0<br>(0 - 1)            |
| Exposure to mechanical forces                   | 7<br>(5 - 9)         | 0<br>(0 - 0)          | 0<br>(0 - 0)           | 4<br>(3 - 5)            | 2<br>(1 - 2)            | 1<br>(1 - 1)            |
| Unintentional firearm injuries                  | 4<br>(3 - 5)         | 0<br>(0 - 0)          | 0<br>(0 - 0)           | 2<br>(2 - 4)            | 1<br>(1 - 1)            | 0<br>(0 - 0)            |
| Unintentional suffocation                       | 1<br>(0 - 1)         | 0<br>(0 - 0)          | 0<br>(0 - 0)           | 0<br>(0 - 0)            | 0<br>(0 - 0)            | 0<br>(0 - 0)            |
| Other exposure to mechanical forces             | 2<br>(2 - 4)         | 0<br>(0 - 0)          | 0<br>(0 - 0)           | 1<br>(1 - 2)            | 1<br>(0 - 1)            | 0<br>(0 - 0)            |
| Adverse effects of medical treatment            | 8<br>(5 - 12)        | 0<br>(0 - 1)          | 0<br>(0 - 0)           | 1<br>(1 - 2)            | 2<br>(1 - 3)            | 5<br>(3 - 7)            |
| Animal contact                                  | 1<br>(1 - 2)         | 0<br>(0 - 0)          | 0<br>(0 - 0)           | 0<br>(0 - 0)            | 0<br>(0 - 1)            | 1<br>(0 - 1)            |
| Venomous animal contact                         | 1<br>(0 - 1)         | 0<br>(0 - 0)          | 0<br>(0 - 0)           | 0<br>(0 - 0)            | 0<br>(0 - 1)            | 0<br>(0 - 0)            |
| Non-venomous animal contact                     | 1<br>(0 - 1)         | 0<br>(0 - 0)          | 0<br>(0 - 0)           | 0<br>(0 - 0)            | 0<br>(0 - 0)            | 0<br>(0 - 1)            |
| Foreign body                                    | 10<br>(6 - 13)       | 1<br>(1 - 3)          | 0<br>(0 - 0)           | 1<br>(1 - 2)            | 2<br>(1 - 3)            | 5<br>(3 - 7)            |
| Pulmonary aspiration and foreign body in airway | 9<br>(6 - 13)        | 1<br>(1 - 3)          | 0<br>(0 - 0)           | 1<br>(1 - 2)            | 2<br>(1 - 3)            | 5<br>(3 - 7)            |
| Foreign body in other body part                 | 0<br>(0 - 0)         | 0<br>(0 - 0)          | 0<br>(0 - 0)           | 0<br>(0 - 0)            | 0<br>(0 - 0)            | 0<br>(0 - 0)            |
| Other unintentional injuries                    | 2<br>(1 - 2)         | 0<br>(0 - 0)          | 0<br>(0 - 0)           | 1<br>(0 - 1)            | 0<br>(0 - 1)            | 1<br>(0 - 1)            |
| Self-harm and interpersonal violence            | 49<br>(37 - 62)      | 0<br>(0 - 1)          | 1<br>(0 - 1)           | 31<br>(23 - 41)         | 12<br>(9 - 16)          | 5<br>(4 - 6)            |
| Self-harm                                       | 22<br>(17 - 28)      | --                    | 0<br>(0 - 0)           | 12<br>(9 - 17)          | 7<br>(5 - 9)            | 3<br>(2 - 4)            |
| Interpersonal violence                          | 27<br>(17 - 36)      | 0<br>(0 - 1)          | 0<br>(0 - 1)           | 19<br>(11 - 26)         | 6<br>(3 - 8)            | 2<br>(1 - 3)            |
| Assault by firearm                              | 14<br>(8 - 20)       | 0<br>(0 - 0)          | 0<br>(0 - 0)           | 11<br>(6 - 16)          | 2<br>(1 - 4)            | 0<br>(0 - 1)            |
| Assault by sharp object                         | 7<br>(4 - 11)        | 0<br>(0 - 0)          | 0<br>(0 - 0)           | 5<br>(3 - 8)            | 2<br>(1 - 2)            | 0<br>(0 - 1)            |
| Assault by other means                          | 6<br>(4 - 8)         | 0<br>(0 - 0)          | 0<br>(0 - 0)           | 3<br>(1 - 4)            | 2<br>(1 - 3)            | 1<br>(1 - 2)            |

Web Table 31- Barbados deaths with 95% UI by age, sex, and cause in 2013

| Cause                                                             | Males, All Ages        | Males, 0-4 Years | Males, 5-14 Years | Males, 15-49 Years | Males, 50-69 Years | Males, 70-80 Years |
|-------------------------------------------------------------------|------------------------|------------------|-------------------|--------------------|--------------------|--------------------|
| All causes                                                        | 1,134<br>(943 - 1,329) | 33<br>(15 - 68)  | 6<br>(3 - 10)     | 151<br>(119 - 193) | 370<br>(287 - 463) | 574<br>(483 - 667) |
| Communicable, maternal, neonatal, and nutritional diseases        | 126<br>(103 - 153)     | 23<br>(10 - 46)  | 1<br>(1 - 2)      | 24<br>(19 - 31)    | 25<br>(19 - 32)    | 52<br>(37 - 70)    |
| HIV/AIDS and tuberculosis                                         | 27<br>(20 - 39)        | 0<br>(0 - 0)     | 0<br>(0 - 0)      | 16<br>(12 - 22)    | 9<br>(6 - 14)      | 3<br>(2 - 3)       |
| Tuberculosis                                                      | 6<br>(4 - 8)           | 0<br>(0 - 0)     | 0<br>(0 - 0)      | 1<br>(1 - 2)       | 2<br>(1 - 3)       | 2<br>(1 - 3)       |
| HIV/AIDS                                                          | 21<br>(14 - 33)        | 0<br>(0 - 0)     | 0<br>(0 - 0)      | 14<br>(10 - 20)    | 6<br>(3 - 12)      | 1<br>(0 - 1)       |
| HIV/AIDS resulting in mycobacterial infection                     | 1<br>(1 - 2)           | 0<br>(0 - 0)     | 0<br>(0 - 0)      | 1<br>(1 - 1)       | 0<br>(0 - 1)       | 0<br>(0 - 0)       |
| HIV/AIDS resulting in other diseases                              | 20<br>(13 - 31)        | 0<br>(0 - 0)     | 0<br>(0 - 0)      | 13<br>(10 - 19)    | 6<br>(3 - 11)      | 1<br>(0 - 1)       |
| Diarrhea, lower respiratory, and other common infectious diseases | 66<br>(50 - 84)        | 4<br>(2 - 9)     | 1<br>(0 - 1)      | 6<br>(4 - 8)       | 12<br>(8 - 17)     | 42<br>(29 - 59)    |
| Diarrheal diseases                                                | 5<br>(3 - 7)           | 1<br>(1 - 3)     | 0<br>(0 - 0)      | 0<br>(0 - 1)       | 1<br>(1 - 1)       | 2<br>(1 - 3)       |
| Intestinal infectious diseases                                    | 1<br>(0 - 2)           | 0<br>(0 - 1)     | 0<br>(0 - 0)      | 0<br>(0 - 1)       | 0<br>(0 - 0)       | 0<br>(0 - 0)       |
| Typhoid fever                                                     | 1<br>(0 - 1)           | 0<br>(0 - 0)     | 0<br>(0 - 0)      | 0<br>(0 - 1)       | 0<br>(0 - 0)       | 0<br>(0 - 0)       |
| Paratyphoid fever                                                 | 0<br>(0 - 0)           | 0<br>(0 - 0)     | 0<br>(0 - 0)      | 0<br>(0 - 0)       | 0<br>(0 - 0)       | 0<br>(0 - 0)       |
| Other intestinal infectious diseases                              | 0<br>(0 - 0)           | 0<br>(0 - 0)     | 0<br>(0 - 0)      | 0<br>(0 - 0)       | 0<br>(0 - 0)       | 0<br>(0 - 0)       |
| Lower respiratory infections                                      | 57<br>(40 - 75)        | 2<br>(1 - 5)     | 0<br>(0 - 1)      | 4<br>(3 - 6)       | 10<br>(7 - 15)     | 39<br>(26 - 56)    |
| Upper respiratory infections                                      | 0<br>(0 - 0)           | 0<br>(0 - 0)     | 0<br>(0 - 0)      | 0<br>(0 - 0)       | 0<br>(0 - 0)       | 0<br>(0 - 0)       |
| Otitis media                                                      | 0<br>(0 - 0)           | 0<br>(0 - 0)     | 0<br>(0 - 0)      | 0<br>(0 - 0)       | 0<br>(0 - 0)       | 0<br>(0 - 0)       |
| Meningitis                                                        | 2<br>(2 - 3)           | 0<br>(0 - 1)     | 0<br>(0 - 0)      | 0<br>(0 - 1)       | 1<br>(0 - 1)       | 1<br>(0 - 1)       |
| Pneumococcal meningitis                                           | 1<br>(0 - 1)           | 0<br>(0 - 0)     | 0<br>(0 - 0)      | 0<br>(0 - 0)       | 0<br>(0 - 0)       | 0<br>(0 - 0)       |
| H influenzae type B meningitis                                    | 0<br>(0 - 0)           | 0<br>(0 - 0)     | 0<br>(0 - 0)      | 0<br>(0 - 0)       | 0<br>(0 - 0)       | 0<br>(0 - 0)       |
| Meningococcal meningitis                                          | 0<br>(0 - 0)           | 0<br>(0 - 0)     | 0<br>(0 - 0)      | 0<br>(0 - 0)       | 0<br>(0 - 0)       | 0<br>(0 - 0)       |
| Other meningitis                                                  | 1<br>(1 - 1)           | 0<br>(0 - 0)     | 0<br>(0 - 0)      | 0<br>(0 - 0)       | 0<br>(0 - 0)       | 0<br>(0 - 0)       |
| Encephalitis                                                      | 1<br>(1 - 2)           | 0<br>(0 - 0)     | 0<br>(0 - 0)      | 0<br>(0 - 1)       | 0<br>(0 - 1)       | 0<br>(0 - 0)       |
| Diphtheria                                                        | 0<br>(0 - 0)           | 0<br>(0 - 0)     | 0<br>(0 - 0)      | 0<br>(0 - 0)       | 0<br>(0 - 0)       | --<br>(0 - 0)      |
| Whooping cough                                                    | 0<br>(0 - 0)           | 0<br>(0 - 0)     | 0<br>(0 - 0)      | 0<br>(0 - 0)       | 0<br>(0 - 0)       | --<br>(0 - 0)      |
| Tetanus                                                           | 0<br>(0 - 0)           | 0<br>(0 - 0)     | 0<br>(0 - 0)      | 0<br>(0 - 0)       | 0<br>(0 - 0)       | 0<br>(0 - 0)       |
| Measles                                                           | 0<br>(0 - 0)           | 0<br>(0 - 0)     | 0<br>(0 - 0)      | 0<br>(0 - 0)       | 0<br>(0 - 0)       | --<br>(0 - 0)      |
| Varicella and herpes zoster                                       | 0<br>(0 - 0)           | 0<br>(0 - 0)     | 0<br>(0 - 0)      | 0<br>(0 - 0)       | 0<br>(0 - 0)       | 0<br>(0 - 0)       |
| Neglected tropical diseases and malaria                           | 1<br>(1 - 1)           | 0<br>(0 - 0)     | 0<br>(0 - 0)      | 0<br>(0 - 0)       | 0<br>(0 - 0)       | 0<br>(0 - 0)       |
| Leishmaniasis                                                     | 0<br>(0 - 0)           | 0<br>(0 - 0)     | 0<br>(0 - 0)      | 0<br>(0 - 0)       | 0<br>(0 - 0)       | 0<br>(0 - 0)       |
| Visceral leishmaniasis                                            | 0<br>(0 - 0)           | 0<br>(0 - 0)     | 0<br>(0 - 0)      | 0<br>(0 - 0)       | 0<br>(0 - 0)       | 0<br>(0 - 0)       |
| Cysticercosis                                                     | 0<br>(0 - 0)           | 0<br>(0 - 0)     | 0<br>(0 - 0)      | 0<br>(0 - 0)       | 0<br>(0 - 0)       | 0<br>(0 - 0)       |
| Cystic echinococcosis                                             | 0<br>(0 - 0)           | 0<br>(0 - 0)     | 0<br>(0 - 0)      | 0<br>(0 - 0)       | 0<br>(0 - 0)       | 0<br>(0 - 0)       |
| Dengue                                                            | 0<br>(0 - 0)           | 0<br>(0 - 0)     | 0<br>(0 - 0)      | 0<br>(0 - 0)       | 0<br>(0 - 0)       | 0<br>(0 - 0)       |
| Rabies                                                            | 0<br>(0 - 0)           | 0<br>(0 - 0)     | 0<br>(0 - 0)      | 0<br>(0 - 0)       | 0<br>(0 - 0)       | 0<br>(0 - 0)       |
| Intestinal nematode infections                                    | 0<br>(0 - 0)           | 0<br>(0 - 0)     | 0<br>(0 - 0)      | 0<br>(0 - 0)       | 0<br>(0 - 0)       | 0<br>(0 - 0)       |
| Ascariasis                                                        | 0<br>(0 - 0)           | 0<br>(0 - 0)     | 0<br>(0 - 0)      | 0<br>(0 - 0)       | 0<br>(0 - 0)       | 0<br>(0 - 0)       |
| Other neglected tropical diseases                                 | 0<br>(0 - 1)           | 0<br>(0 - 0)     | 0<br>(0 - 0)      | 0<br>(0 - 0)       | 0<br>(0 - 0)       | 0<br>(0 - 0)       |
| Maternal disorders                                                | --                     | --               | --                | --                 | --                 | --                 |
| Maternal hemorrhage                                               | --                     | --               | --                | --                 | --                 | --                 |
| Maternal sepsis and other maternal infections                     | --                     | --               | --                | --                 | --                 | --                 |



Web Table 31- Barbados deaths with 95% UI by age, sex, and cause in 2013

| Cause                                                            | Males, All Ages      | Males, 0-4 Years | Males, 5-14 Years | Males, 15-49 Years | Males, 50-69 Years | Males, 70-80 Years |
|------------------------------------------------------------------|----------------------|------------------|-------------------|--------------------|--------------------|--------------------|
| Maternal hypertensive disorders                                  | --                   | --               | --                | --                 | --                 | --                 |
| Maternal obstructed labor                                        | --                   | --               | --                | --                 | --                 | --                 |
| Maternal abortive outcome                                        | --                   | --               | --                | --                 | --                 | --                 |
| Indirect maternal deaths                                         | --                   | --               | --                | --                 | --                 | --                 |
| Late maternal deaths                                             | --                   | --               | --                | --                 | --                 | --                 |
| Maternal deaths aggravated by HIV/AIDS                           | --                   | --               | --                | --                 | --                 | --                 |
| Other maternal disorders                                         | --                   | --               | --                | --                 | --                 | --                 |
| Neonatal disorders                                               | 18<br>(7 - 35)       | 18<br>(7 - 35)   | --                | --                 | --                 | --                 |
| Neonatal preterm birth complications                             | 7<br>(3 - 16)        | 7<br>(3 - 16)    | --                | --                 | --                 | --                 |
| Neonatal encephalopathy due to birth asphyxia and trauma         | 5<br>(2 - 10)        | 5<br>(2 - 10)    | --                | --                 | --                 | --                 |
| Neonatal sepsis and other neonatal infections                    | 3<br>(1 - 7)         | 3<br>(1 - 7)     | --                | --                 | --                 | --                 |
| Hemolytic disease and other neonatal jaundice                    | 0<br>(0 - 1)         | 0<br>(0 - 1)     | --                | --                 | --                 | --                 |
| Other neonatal disorders                                         | 3<br>(1 - 5)         | 3<br>(1 - 5)     | --                | --                 | --                 | --                 |
| Nutritional deficiencies                                         | 11<br>(7 - 18)       | 1<br>(0 - 2)     | 0<br>(0 - 0)      | 1<br>(1 - 2)       | 3<br>(2 - 4)       | 6<br>(4 - 10)      |
| Protein-energy malnutrition                                      | 5<br>(3 - 9)         | 1<br>(0 - 2)     | 0<br>(0 - 0)      | 0<br>(0 - 1)       | 1<br>(0 - 2)       | 2<br>(1 - 5)       |
| Iodine deficiency                                                | 0<br>(0 - 0)         | 0<br>(0 - 0)     | 0<br>(0 - 0)      | 0<br>(0 - 0)       | 0<br>(0 - 0)       | 0<br>(0 - 0)       |
| Iron-deficiency anemia                                           | 6<br>(3 - 9)         | 0<br>(0 - 0)     | 0<br>(0 - 0)      | 1<br>(0 - 1)       | 2<br>(1 - 3)       | 3<br>(1 - 6)       |
| Other nutritional deficiencies                                   | 1<br>(0 - 1)         | 0<br>(0 - 0)     | 0<br>(0 - 0)      | 0<br>(0 - 0)       | 0<br>(0 - 0)       | 0<br>(0 - 1)       |
| Other communicable, maternal, neonatal, and nutritional diseases | 3<br>(2 - 4)         | 0<br>(0 - 0)     | 0<br>(0 - 0)      | 1<br>(1 - 1)       | 1<br>(1 - 2)       | 1<br>(0 - 1)       |
| Sexually transmitted diseases excluding HIV                      | 0<br>(0 - 0)         | 0<br>(0 - 0)     | 0<br>(0 - 0)      | 0<br>(0 - 0)       | 0<br>(0 - 0)       | 0<br>(0 - 0)       |
| Syphilis                                                         | 0<br>(0 - 0)         | 0<br>(0 - 0)     | 0<br>(0 - 0)      | 0<br>(0 - 0)       | 0<br>(0 - 0)       | 0<br>(0 - 0)       |
| Chlamydial infection                                             | --                   | --               | --                | --                 | --                 | --                 |
| Gonococcal infection                                             | 0<br>(0 - 0)         | --               | 0<br>(0 - 0)      | 0<br>(0 - 0)       | 0<br>(0 - 0)       | 0<br>(0 - 0)       |
| Other sexually transmitted diseases                              | 0<br>(0 - 0)         | --               | 0<br>(0 - 0)      | 0<br>(0 - 0)       | 0<br>(0 - 0)       | 0<br>(0 - 0)       |
| Hepatitis                                                        | 0<br>(0 - 0)         | 0<br>(0 - 0)     | 0<br>(0 - 0)      | 0<br>(0 - 0)       | 0<br>(0 - 0)       | 0<br>(0 - 0)       |
| Acute hepatitis A                                                | 0<br>(0 - 0)         | 0<br>(0 - 0)     | 0<br>(0 - 0)      | 0<br>(0 - 0)       | 0<br>(0 - 0)       | 0<br>(0 - 0)       |
| Acute hepatitis B                                                | 0<br>(0 - 0)         | 0<br>(0 - 0)     | 0<br>(0 - 0)      | 0<br>(0 - 0)       | 0<br>(0 - 0)       | 0<br>(0 - 0)       |
| Acute hepatitis C                                                | 0<br>(0 - 0)         | --               | 0<br>(0 - 0)      | 0<br>(0 - 0)       | 0<br>(0 - 0)       | 0<br>(0 - 0)       |
| Other infectious diseases                                        | 3<br>(1 - 4)         | 0<br>(0 - 0)     | 0<br>(0 - 0)      | 1<br>(0 - 1)       | 1<br>(0 - 1)       | 1<br>(0 - 1)       |
| Non-communicable diseases                                        | 907<br>(738 - 1,071) | 8<br>(4 - 18)    | 3<br>(1 - 4)      | 74<br>(56 - 97)    | 317<br>(244 - 397) | 504<br>(422 - 592) |
| Neoplasms                                                        | 223<br>(173 - 272)   | 0<br>(0 - 1)     | 1<br>(0 - 1)      | 15<br>(11 - 20)    | 79<br>(59 - 99)    | 128<br>(98 - 160)  |
| Esophageal cancer                                                | 7<br>(5 - 10)        | --               | --                | 0<br>(0 - 1)       | 3<br>(2 - 5)       | 3<br>(2 - 5)       |
| Stomach cancer                                                   | 15<br>(12 - 19)      | --               | --                | 1<br>(1 - 1)       | 6<br>(5 - 8)       | 8<br>(6 - 10)      |
| Liver cancer                                                     | 7<br>(5 - 9)         | --               | 0<br>(0 - 0)      | 1<br>(1 - 1)       | 3<br>(2 - 4)       | 3<br>(2 - 4)       |
| Liver cancer due to hepatitis B                                  | 2<br>(1 - 3)         | --               | 0<br>(0 - 0)      | 0<br>(0 - 1)       | 1<br>(0 - 2)       | 0<br>(0 - 1)       |
| Liver cancer due to hepatitis C                                  | 3<br>(2 - 5)         | --               | 0<br>(0 - 0)      | 0<br>(0 - 0)       | 1<br>(1 - 2)       | 1<br>(1 - 2)       |
| Liver cancer due to alcohol use                                  | 1<br>(1 - 2)         | --               | --                | 0<br>(0 - 0)       | 1<br>(0 - 1)       | 1<br>(0 - 1)       |
| Liver cancer due to other causes                                 | 0<br>(0 - 1)         | --               | 0<br>(0 - 0)      | 0<br>(0 - 0)       | 0<br>(0 - 0)       | 0<br>(0 - 0)       |
| Larynx cancer                                                    | 4<br>(3 - 5)         | --               | --                | 0<br>(0 - 0)       | 2<br>(1 - 2)       | 1<br>(1 - 2)       |
| Tracheal, bronchus and lung cancer                               | 27<br>(21 - 35)      | --               | --                | 2<br>(1 - 3)       | 14<br>(10 - 18)    | 12<br>(9 - 15)     |

Web Table 31- Barbados deaths with 95% UI by age, sex, and cause in 2013

| Cause                                         | Males, All Ages    | Males, 0-4 Years | Males, 5-14 Years | Males, 15-49 Years | Males, 50-69 Years | Males, 70-80 Years |
|-----------------------------------------------|--------------------|------------------|-------------------|--------------------|--------------------|--------------------|
| Breast cancer                                 | 1<br>(1 - 2)       | --               | --                | 0<br>(0 - 0)       | 0<br>(0 - 1)       | 0<br>(0 - 1)       |
| Cervical cancer                               | --                 | --               | --                | --                 | --                 | --                 |
| Uterine cancer                                | --                 | --               | --                | --                 | --                 | --                 |
| Prostate cancer                               | 85<br>(51 - 115)   | --               | --                | 0<br>(0 - 1)       | 17<br>(10 - 25)    | 67<br>(41 - 92)    |
| Colon and rectum cancer                       | 23<br>(18 - 29)    | --               | --                | 2<br>(1 - 2)       | 9<br>(7 - 12)      | 12<br>(9 - 15)     |
| Lip and oral cavity cancer                    | 3<br>(2 - 5)       | --               | --                | 0<br>(0 - 1)       | 2<br>(1 - 2)       | 1<br>(1 - 2)       |
| Nasopharynx cancer                            | 1<br>(1 - 1)       | --               | 0<br>(0 - 0)      | 0<br>(0 - 0)       | 0<br>(0 - 1)       | 0<br>(0 - 0)       |
| Other pharynx cancer                          | 2<br>(1 - 2)       | --               | --                | 0<br>(0 - 0)       | 1<br>(1 - 1)       | 1<br>(0 - 1)       |
| Gallbladder and biliary tract cancer          | 2<br>(1 - 4)       | --               | --                | 0<br>(0 - 0)       | 1<br>(0 - 2)       | 1<br>(1 - 2)       |
| Pancreatic cancer                             | 8<br>(6 - 10)      | --               | --                | 1<br>(1 - 1)       | 4<br>(3 - 5)       | 4<br>(3 - 5)       |
| Malignant skin melanoma                       | 1<br>(1 - 2)       | --               | --                | 0<br>(0 - 0)       | 0<br>(0 - 1)       | 0<br>(0 - 1)       |
| Non-melanoma skin cancer                      | 1<br>(1 - 1)       | --               | --                | 0<br>(0 - 0)       | 0<br>(0 - 0)       | 1<br>(0 - 1)       |
| Ovarian cancer                                | --                 | --               | --                | --                 | --                 | --                 |
| Testicular cancer                             | 0<br>(0 - 0)       | --               | --                | 0<br>(0 - 0)       | 0<br>(0 - 0)       | 0<br>(0 - 0)       |
| Kidney cancer                                 | 3<br>(2 - 4)       | 0<br>(0 - 0)     | 0<br>(0 - 0)      | 0<br>(0 - 0)       | 2<br>(1 - 2)       | 1<br>(1 - 1)       |
| Bladder cancer                                | 4<br>(3 - 6)       | --               | --                | 0<br>(0 - 0)       | 1<br>(1 - 2)       | 3<br>(2 - 4)       |
| Brain and nervous system cancer               | 2<br>(1 - 3)       | 0<br>(0 - 0)     | 0<br>(0 - 0)      | 1<br>(0 - 1)       | 1<br>(0 - 1)       | 1<br>(0 - 1)       |
| Thyroid cancer                                | 1<br>(0 - 1)       | --               | 0<br>(0 - 0)      | 0<br>(0 - 0)       | 0<br>(0 - 0)       | 0<br>(0 - 0)       |
| Mesothelioma                                  | 1<br>(1 - 1)       | --               | --                | 0<br>(0 - 0)       | 0<br>(0 - 0)       | 0<br>(0 - 1)       |
| Hodgkin lymphoma                              | 0<br>(0 - 1)       | 0<br>(0 - 0)     | 0<br>(0 - 0)      | 0<br>(0 - 0)       | 0<br>(0 - 0)       | 0<br>(0 - 0)       |
| Non-Hodgkin lymphoma                          | 8<br>(6 - 11)      | 0<br>(0 - 0)     | 0<br>(0 - 0)      | 2<br>(1 - 3)       | 3<br>(2 - 5)       | 2<br>(2 - 4)       |
| Multiple myeloma                              | 3<br>(2 - 4)       | --               | --                | 0<br>(0 - 0)       | 2<br>(1 - 3)       | 1<br>(1 - 2)       |
| Leukemia                                      | 5<br>(4 - 6)       | 0<br>(0 - 0)     | 0<br>(0 - 1)      | 1<br>(1 - 2)       | 2<br>(1 - 2)       | 2<br>(1 - 2)       |
| Other neoplasms                               | 9<br>(7 - 11)      | 0<br>(0 - 0)     | 0<br>(0 - 0)      | 2<br>(1 - 3)       | 4<br>(3 - 5)       | 3<br>(2 - 4)       |
| Cardiovascular diseases                       | 333<br>(269 - 400) | 0<br>(0 - 1)     | 0<br>(0 - 1)      | 25<br>(18 - 33)    | 124<br>(95 - 155)  | 183<br>(151 - 222) |
| Rheumatic heart disease                       | 1<br>(1 - 2)       | 0<br>(0 - 0)     | 0<br>(0 - 0)      | 0<br>(0 - 1)       | 0<br>(0 - 1)       | 0<br>(0 - 1)       |
| Ischemic heart disease                        | 143<br>(112 - 182) | 0<br>(0 - 0)     | 0<br>(0 - 0)      | 11<br>(8 - 16)     | 61<br>(45 - 78)    | 71<br>(55 - 95)    |
| Cerebrovascular disease                       | 124<br>(92 - 157)  | 0<br>(0 - 0)     | 0<br>(0 - 0)      | 7<br>(4 - 9)       | 40<br>(28 - 53)    | 77<br>(58 - 99)    |
| Ischemic stroke                               | 78<br>(57 - 100)   | 0<br>(0 - 0)     | 0<br>(0 - 0)      | 2<br>(1 - 3)       | 21<br>(15 - 28)    | 55<br>(40 - 71)    |
| Hemorrhagic stroke                            | 46<br>(28 - 63)    | 0<br>(0 - 0)     | 0<br>(0 - 0)      | 5<br>(3 - 7)       | 19<br>(11 - 26)    | 23<br>(12 - 32)    |
| Hypertensive heart disease                    | 24<br>(13 - 34)    | 0<br>(0 - 0)     | 0<br>(0 - 0)      | 2<br>(1 - 3)       | 9<br>(5 - 13)      | 13<br>(7 - 20)     |
| Cardiomyopathy and myocarditis                | 12<br>(8 - 16)     | 0<br>(0 - 0)     | 0<br>(0 - 0)      | 2<br>(1 - 3)       | 5<br>(3 - 8)       | 4<br>(3 - 6)       |
| Atrial fibrillation and flutter               | 5<br>(3 - 7)       | --               | --                | 0<br>(0 - 0)       | 1<br>(1 - 2)       | 4<br>(2 - 6)       |
| Aortic aneurysm                               | 6<br>(4 - 8)       | --               | --                | 0<br>(0 - 1)       | 2<br>(2 - 3)       | 3<br>(2 - 4)       |
| Peripheral vascular disease                   | 3<br>(2 - 4)       | --               | --                | 0<br>(0 - 0)       | 0<br>(0 - 1)       | 3<br>(2 - 4)       |
| Endocarditis                                  | 1<br>(1 - 2)       | 0<br>(0 - 0)     | 0<br>(0 - 0)      | 0<br>(0 - 0)       | 0<br>(0 - 1)       | 1<br>(0 - 1)       |
| Other cardiovascular and circulatory diseases | 13<br>(9 - 17)     | 0<br>(0 - 0)     | 0<br>(0 - 0)      | 2<br>(1 - 2)       | 4<br>(3 - 6)       | 7<br>(5 - 10)      |
| Chronic respiratory diseases                  | 43<br>(33 - 60)    | 0<br>(0 - 1)     | 0<br>(0 - 0)      | 3<br>(2 - 4)       | 13<br>(9 - 18)     | 27<br>(21 - 39)    |
| Chronic obstructive pulmonary disease         | 30<br>(23 - 42)    | 0<br>(0 - 0)     | 0<br>(0 - 0)      | 1<br>(1 - 2)       | 8<br>(6 - 12)      | 20<br>(15 - 29)    |
| Pneumoconiosis                                | 2<br>(1 - 3)       | 0<br>(0 - 0)     | 0<br>(0 - 0)      | 0<br>(0 - 0)       | 1<br>(1 - 1)       | 1<br>(1 - 1)       |

Web Table 31- Barbados deaths with 95% UI by age, sex, and cause in 2013

| Cause                                               | Males, All Ages  | Males, 0-4 Years | Males, 5-14 Years | Males, 15-49 Years | Males, 50-69 Years | Males, 70-80 Years |
|-----------------------------------------------------|------------------|------------------|-------------------|--------------------|--------------------|--------------------|
| Silicosis                                           | 0<br>(0-0)       | 0<br>(0-0)       | 0<br>(0-0)        | 0<br>(0-0)         | 0<br>(0-0)         | 0<br>(0-0)         |
| Asbestosis                                          | 0<br>(0-1)       | 0<br>(0-0)       | 0<br>(0-0)        | 0<br>(0-0)         | 0<br>(0-0)         | 0<br>(0-0)         |
| Coal workers pneumoconiosis                         | 0<br>(0-1)       | 0<br>(0-0)       | 0<br>(0-0)        | 0<br>(0-0)         | 0<br>(0-0)         | 0<br>(0-0)         |
| Other pneumoconiosis                                | 1<br>(1-2)       | 0<br>(0-0)       | 0<br>(0-0)        | 0<br>(0-0)         | 0<br>(0-0)         | 1<br>(0-1)         |
| Asthma                                              | 7<br>(5-10)      | 0<br>(0-0)       | 0<br>(0-0)        | 1<br>(1-2)         | 2<br>(2-3)         | 3<br>(2-5)         |
| Interstitial lung disease and pulmonary sarcoidosis | 3<br>(2-5)       | 0<br>(0-0)       | 0<br>(0-0)        | 0<br>(0-0)         | 1<br>(1-2)         | 2<br>(1-3)         |
| Other chronic respiratory diseases                  | 1<br>(1-1)       | 0<br>(0-0)       | 0<br>(0-0)        | 0<br>(0-0)         | 0<br>(0-0)         | 0<br>(0-1)         |
| Cirrhosis                                           | 26<br>(20-33)    | 0<br>(0-0)       | 0<br>(0-0)        | 6<br>(4-8)         | 14<br>(10-18)      | 6<br>(4-8)         |
| Cirrhosis due to hepatitis B                        | 2<br>(1-4)       | 0<br>(0-0)       | 0<br>(0-0)        | 1<br>(0-1)         | 1<br>(1-2)         | 0<br>(0-1)         |
| Cirrhosis due to hepatitis C                        | 7<br>(4-11)      | 0<br>(0-0)       | 0<br>(0-0)        | 1<br>(0-2)         | 4<br>(2-6)         | 2<br>(1-3)         |
| Cirrhosis due to alcohol use                        | 13<br>(9-19)     | --               | --                | 3<br>(1-4)         | 7<br>(5-11)        | 3<br>(2-4)         |
| Cirrhosis due to other causes                       | 4<br>(2-6)       | 0<br>(0-0)       | 0<br>(0-0)        | 1<br>(1-2)         | 2<br>(1-3)         | 0<br>(0-1)         |
| Digestive diseases                                  | 25<br>(20-32)    | 0<br>(0-0)       | 0<br>(0-0)        | 4<br>(3-5)         | 9<br>(7-13)        | 12<br>(9-16)       |
| Peptic ulcer disease                                | 7<br>(5-11)      | 0<br>(0-0)       | 0<br>(0-0)        | 1<br>(1-2)         | 3<br>(2-4)         | 3<br>(2-5)         |
| Gastritis and duodenitis                            | 2<br>(1-3)       | 0<br>(0-0)       | 0<br>(0-0)        | 0<br>(0-1)         | 1<br>(0-1)         | 1<br>(0-2)         |
| Appendicitis                                        | 1<br>(1-1)       | 0<br>(0-0)       | 0<br>(0-0)        | 0<br>(0-0)         | 0<br>(0-1)         | 0<br>(0-1)         |
| Paralytic ileus and intestinal obstruction          | 3<br>(1-5)       | 0<br>(0-0)       | 0<br>(0-0)        | 0<br>(0-1)         | 1<br>(0-2)         | 2<br>(1-3)         |
| Inguinal, femoral, and abdominal hernia             | 2<br>(1-4)       | 0<br>(0-0)       | 0<br>(0-0)        | 0<br>(0-0)         | 0<br>(0-1)         | 1<br>(0-2)         |
| Inflammatory bowel disease                          | 2<br>(1-3)       | 0<br>(0-0)       | 0<br>(0-0)        | 0<br>(0-0)         | 1<br>(0-1)         | 1<br>(1-2)         |
| Vascular intestinal disorders                       | 1<br>(1-3)       | 0<br>(0-0)       | 0<br>(0-0)        | 0<br>(0-0)         | 0<br>(0-1)         | 1<br>(0-2)         |
| Gallbladder and biliary diseases                    | 1<br>(1-2)       | 0<br>(0-0)       | 0<br>(0-0)        | 0<br>(0-0)         | 1<br>(0-1)         | 1<br>(0-1)         |
| Pancreatitis                                        | 2<br>(1-3)       | 0<br>(0-0)       | 0<br>(0-0)        | 1<br>(0-1)         | 1<br>(1-1)         | 0<br>(0-0)         |
| Other digestive diseases                            | 4<br>(2-5)       | 0<br>(0-0)       | 0<br>(0-0)        | 0<br>(0-1)         | 1<br>(1-2)         | 2<br>(1-3)         |
| Neurological disorders                              | 64<br>(50-80)    | 0<br>(0-0)       | 0<br>(0-0)        | 3<br>(2-4)         | 8<br>(6-11)        | 53<br>(39-67)      |
| Alzheimer disease and other dementias               | 53<br>(39-67)    | --               | --                | 0<br>(0-0)         | 5<br>(3-7)         | 48<br>(35-61)      |
| Parkinson disease                                   | 4<br>(3-6)       | --               | --                | 0<br>(0-0)         | 1<br>(1-1)         | 3<br>(2-5)         |
| Epilepsy                                            | 4<br>(3-6)       | 0<br>(0-0)       | 0<br>(0-0)        | 2<br>(1-3)         | 1<br>(1-2)         | 1<br>(1-1)         |
| Multiple sclerosis                                  | 0<br>(0-0)       | --               | --                | 0<br>(0-0)         | 0<br>(0-0)         | 0<br>(0-0)         |
| Other neurological disorders                        | 2<br>(2-3)       | 0<br>(0-0)       | 0<br>(0-0)        | 1<br>(0-1)         | 1<br>(1-1)         | 1<br>(0-1)         |
| Mental and substance use disorders                  | 6<br>(4-8)       | 0<br>(0-0)       | 0<br>(0-0)        | 2<br>(1-3)         | 3<br>(2-4)         | 1<br>(1-2)         |
| Schizophrenia                                       | 0<br>(0-1)       | --               | --                | 0<br>(0-0)         | 0<br>(0-0)         | 0<br>(0-0)         |
| Alcohol use disorders                               | 4<br>(2-6)       | --               | --                | 1<br>(1-2)         | 2<br>(1-3)         | 1<br>(0-1)         |
| Drug use disorders                                  | 2<br>(1-2)       | 0<br>(0-0)       | --                | 1<br>(0-1)         | 1<br>(0-1)         | 0<br>(0-1)         |
| Opioid use disorders                                | 0<br>(0-1)       | 0<br>(0-0)       | --                | 0<br>(0-0)         | 0<br>(0-0)         | 0<br>(0-0)         |
| Cocaine use disorders                               | 0<br>(0-0)       | 0<br>(0-0)       | --                | 0<br>(0-0)         | 0<br>(0-0)         | 0<br>(0-0)         |
| Amphetamine use disorders                           | 0<br>(0-0)       | 0<br>(0-0)       | --                | 0<br>(0-0)         | 0<br>(0-0)         | 0<br>(0-0)         |
| Other drug use disorders                            | 1<br>(1-1)       | 0<br>(0-0)       | --                | 0<br>(0-1)         | 0<br>(0-1)         | 0<br>(0-0)         |
| Eating disorders                                    | 0<br>(0-0)       | --               | 0<br>(0-0)        | 0<br>(0-0)         | --                 | --                 |
| Anorexia nervosa                                    | 0<br>(0-0)       | --               | 0<br>(0-0)        | 0<br>(0-0)         | --                 | --                 |
| Diabetes, urogenital, blood, and endocrine diseases | 167<br>(133-207) | 1<br>(0-1)       | 0<br>(0-1)        | 14<br>(10-19)      | 64<br>(49-84)      | 88<br>(70-110)     |

Web Table 31- Barbados deaths with 95% UI by age, sex, and cause in 2013

| Cause                                               | Males, All Ages   | Males, 0-4 Years | Males, 5-14 Years | Males, 15-49 Years | Males, 50-69 Years | Males, 70-80 Years |
|-----------------------------------------------------|-------------------|------------------|-------------------|--------------------|--------------------|--------------------|
| Diabetes mellitus                                   | 110<br>(87 - 139) | 0<br>(0 - 0)     | 0<br>(0 - 0)      | 6<br>(4 - 9)       | 45<br>(34 - 59)    | 58<br>(45 - 76)    |
| Acute glomerulonephritis                            | 0<br>(0 - 0)      | 0<br>(0 - 0)     | 0<br>(0 - 0)      | 0<br>(0 - 0)       | 0<br>(0 - 0)       | 0<br>(0 - 0)       |
| Chronic kidney disease                              | 36<br>(26 - 51)   | 0<br>(0 - 0)     | 0<br>(0 - 0)      | 4<br>(3 - 6)       | 13<br>(9 - 19)     | 18<br>(13 - 28)    |
| Chronic kidney disease due to diabetes mellitus     | 6<br>(3 - 12)     | 0<br>(0 - 0)     | 0<br>(0 - 0)      | 1<br>(0 - 1)       | 3<br>(2 - 6)       | 2<br>(1 - 4)       |
| Chronic kidney disease due to hypertension          | 19<br>(13 - 27)   | 0<br>(0 - 0)     | 0<br>(0 - 0)      | 2<br>(1 - 3)       | 7<br>(4 - 11)      | 10<br>(7 - 15)     |
| Chronic kidney disease due to glomerulonephritis    | 1<br>(1 - 2)      | 0<br>(0 - 0)     | 0<br>(0 - 0)      | 0<br>(0 - 0)       | 0<br>(0 - 1)       | 1<br>(0 - 1)       |
| Chronic kidney disease due to other causes          | 9<br>(5 - 19)     | 0<br>(0 - 0)     | 0<br>(0 - 0)      | 1<br>(1 - 2)       | 3<br>(1 - 6)       | 5<br>(2 - 12)      |
| Urinary diseases and male infertility               | 11<br>(6 - 15)    | 0<br>(0 - 0)     | 0<br>(0 - 0)      | 1<br>(0 - 1)       | 3<br>(1 - 4)       | 8<br>(4 - 12)      |
| Interstitial nephritis and urinary tract infections | 8<br>(3 - 11)     | 0<br>(0 - 0)     | 0<br>(0 - 0)      | 0<br>(0 - 0)       | 2<br>(1 - 2)       | 6<br>(2 - 9)       |
| Urolithiasis                                        | 1<br>(0 - 1)      | --               | 0<br>(0 - 0)      | 0<br>(0 - 0)       | 0<br>(0 - 0)       | 0<br>(0 - 1)       |
| Other urinary diseases                              | 3<br>(1 - 4)      | 0<br>(0 - 0)     | 0<br>(0 - 0)      | 0<br>(0 - 0)       | 1<br>(0 - 1)       | 2<br>(1 - 3)       |
| Gynecological diseases                              | --                | --               | --                | --                 | --                 | --                 |
| Uterine fibroids                                    | --                | --               | --                | --                 | --                 | --                 |
| Polycystic ovarian syndrome                         | --                | --               | --                | --                 | --                 | --                 |
| Endometriosis                                       | --                | --               | --                | --                 | --                 | --                 |
| Genital prolapse                                    | --                | --               | --                | --                 | --                 | --                 |
| Other gynecological diseases                        | --                | --               | --                | --                 | --                 | --                 |
| Hemoglobinopathies and hemolytic anemias            | 2<br>(1 - 3)      | 0<br>(0 - 0)     | 0<br>(0 - 0)      | 1<br>(0 - 1)       | 1<br>(0 - 1)       | 0<br>(0 - 1)       |
| Thalassemias                                        | 0<br>(0 - 0)      | 0<br>(0 - 0)     | 0<br>(0 - 0)      | 0<br>(0 - 0)       | 0<br>(0 - 0)       | 0<br>(0 - 0)       |
| Sickle cell disorders                               | 1<br>(1 - 2)      | 0<br>(0 - 0)     | 0<br>(0 - 0)      | 1<br>(0 - 1)       | 0<br>(0 - 1)       | 0<br>(0 - 0)       |
| G6PD deficiency                                     | 0<br>(0 - 0)      | 0<br>(0 - 0)     | 0<br>(0 - 0)      | 0<br>(0 - 0)       | 0<br>(0 - 0)       | 0<br>(0 - 0)       |
| Other hemoglobinopathies and hemolytic anemias      | 1<br>(0 - 1)      | 0<br>(0 - 0)     | 0<br>(0 - 0)      | 0<br>(0 - 0)       | 0<br>(0 - 0)       | 0<br>(0 - 1)       |
| Endocrine, metabolic, blood, and immune disorders   | 8<br>(5 - 16)     | 0<br>(0 - 1)     | 0<br>(0 - 0)      | 2<br>(1 - 4)       | 3<br>(2 - 6)       | 3<br>(2 - 6)       |
| Musculoskeletal disorders                           | 3<br>(1 - 4)      | --               | 0<br>(0 - 0)      | 1<br>(0 - 1)       | 1<br>(0 - 1)       | 1<br>(0 - 2)       |
| Rheumatoid arthritis                                | 0<br>(0 - 1)      | --               | 0<br>(0 - 0)      | 0<br>(0 - 0)       | 0<br>(0 - 0)       | 0<br>(0 - 0)       |
| Other musculoskeletal disorders                     | 2<br>(1 - 3)      | --               | 0<br>(0 - 0)      | 1<br>(0 - 1)       | 1<br>(0 - 1)       | 1<br>(0 - 1)       |
| Other non-communicable diseases                     | 17<br>(11 - 25)   | 6<br>(3 - 14)    | 1<br>(0 - 1)      | 2<br>(1 - 2)       | 2<br>(1 - 3)       | 6<br>(2 - 9)       |
| Congenital anomalies                                | 8<br>(5 - 15)     | 5<br>(2 - 12)    | 1<br>(0 - 1)      | 1<br>(1 - 2)       | 1<br>(1 - 1)       | 1<br>(0 - 1)       |
| Neural tube defects                                 | 0<br>(0 - 1)      | 0<br>(0 - 1)     | 0<br>(0 - 0)      | 0<br>(0 - 0)       | 0<br>(0 - 0)       | 0<br>(0 - 0)       |
| Congenital heart anomalies                          | 4<br>(2 - 7)      | 2<br>(1 - 5)     | 0<br>(0 - 1)      | 1<br>(0 - 1)       | 0<br>(0 - 0)       | 0<br>(0 - 0)       |
| Cleft lip and cleft palate                          | 0<br>(0 - 0)      | 0<br>(0 - 0)     | --                | --                 | --                 | --                 |
| Down syndrome                                       | 0<br>(0 - 1)      | 0<br>(0 - 0)     | 0<br>(0 - 0)      | 0<br>(0 - 0)       | 0<br>(0 - 0)       | 0<br>(0 - 0)       |
| Chromosomal unbalanced rearrangements               | 0<br>(0 - 0)      | 0<br>(0 - 0)     | 0<br>(0 - 0)      | 0<br>(0 - 0)       | 0<br>(0 - 0)       | 0<br>(0 - 0)       |
| Other congenital anomalies                          | 4<br>(2 - 7)      | 2<br>(1 - 5)     | 0<br>(0 - 0)      | 0<br>(0 - 1)       | 0<br>(0 - 1)       | 0<br>(0 - 1)       |
| Skin and subcutaneous diseases                      | 8<br>(2 - 11)     | 0<br>(0 - 0)     | 0<br>(0 - 0)      | 0<br>(0 - 1)       | 2<br>(0 - 2)       | 6<br>(1 - 8)       |
| Cellulitis                                          | 1<br>(0 - 1)      | 0<br>(0 - 0)     | 0<br>(0 - 0)      | 0<br>(0 - 0)       | 0<br>(0 - 0)       | 0<br>(0 - 1)       |
| Pyoderma                                            | 2<br>(0 - 2)      | 0<br>(0 - 0)     | 0<br>(0 - 0)      | 0<br>(0 - 0)       | 0<br>(0 - 1)       | 1<br>(0 - 2)       |
| Decubitus ulcer                                     | 5<br>(1 - 7)      | 0<br>(0 - 0)     | 0<br>(0 - 0)      | 0<br>(0 - 0)       | 1<br>(0 - 1)       | 4<br>(1 - 6)       |
| Other skin and subcutaneous diseases                | 0<br>(0 - 0)      | 0<br>(0 - 0)     | 0<br>(0 - 0)      | 0<br>(0 - 0)       | 0<br>(0 - 0)       | 0<br>(0 - 0)       |
| Sudden infant death syndrome                        | 1<br>(0 - 2)      | 1<br>(0 - 2)     | --                | --                 | --                 | --                 |

Web Table 31- Barbados deaths with 95% UI by age, sex, and cause in 2013

| Cause                                           | Males, All Ages   | Males, 0-4 Years | Males, 5-14 Years | Males, 15-49 Years | Males, 50-69 Years | Males, 70-80 Years |
|-------------------------------------------------|-------------------|------------------|-------------------|--------------------|--------------------|--------------------|
| Injuries                                        | 102<br>(80 - 127) | 2<br>(1 - 4)     | 3<br>(1 - 4)      | 53<br>(40 - 70)    | 27<br>(20 - 36)    | 17<br>(13 - 21)    |
| Transport injuries                              | 27<br>(20 - 34)   | 0<br>(0 - 1)     | 1<br>(1 - 2)      | 13<br>(9 - 18)     | 8<br>(5 - 11)      | 4<br>(3 - 6)       |
| Road injuries                                   | 25<br>(18 - 32)   | 0<br>(0 - 0)     | 1<br>(0 - 2)      | 12<br>(9 - 17)     | 7<br>(5 - 10)      | 4<br>(3 - 6)       |
| Pedestrian road injuries                        | 7<br>(4 - 10)     | 0<br>(0 - 0)     | 0<br>(0 - 1)      | 2<br>(1 - 4)       | 2<br>(1 - 3)       | 2<br>(1 - 2)       |
| Cyclist road injuries                           | 2<br>(1 - 2)      | 0<br>(0 - 0)     | 0<br>(0 - 0)      | 1<br>(0 - 1)       | 0<br>(0 - 1)       | 0<br>(0 - 1)       |
| Motorcyclist road injuries                      | 2<br>(1 - 3)      | 0<br>(0 - 0)     | 0<br>(0 - 0)      | 1<br>(1 - 2)       | 0<br>(0 - 1)       | 0<br>(0 - 0)       |
| Motor vehicle road injuries                     | 14<br>(10 - 19)   | 0<br>(0 - 0)     | 0<br>(0 - 1)      | 8<br>(5 - 11)      | 4<br>(3 - 6)       | 2<br>(1 - 3)       |
| Other road injuries                             | 0<br>(0 - 0)      | 0<br>(0 - 0)     | 0<br>(0 - 0)      | 0<br>(0 - 0)       | 0<br>(0 - 0)       | 0<br>(0 - 0)       |
| Other transport injuries                        | 2<br>(1 - 3)      | 0<br>(0 - 0)     | 0<br>(0 - 0)      | 1<br>(0 - 2)       | 1<br>(0 - 1)       | 0<br>(0 - 1)       |
| Unintentional injuries                          | 36<br>(28 - 45)   | 1<br>(1 - 3)     | 1<br>(1 - 2)      | 14<br>(10 - 19)    | 10<br>(7 - 13)     | 10<br>(7 - 12)     |
| Falls                                           | 6<br>(5 - 8)      | 0<br>(0 - 0)     | 0<br>(0 - 0)      | 2<br>(1 - 3)       | 2<br>(1 - 3)       | 3<br>(2 - 4)       |
| Drowning                                        | 9<br>(6 - 14)     | 0<br>(0 - 0)     | 1<br>(0 - 1)      | 5<br>(3 - 8)       | 2<br>(1 - 3)       | 1<br>(1 - 1)       |
| Fire, heat, and hot substances                  | 3<br>(2 - 4)      | 0<br>(0 - 0)     | 0<br>(0 - 0)      | 1<br>(0 - 1)       | 1<br>(1 - 1)       | 1<br>(1 - 2)       |
| Poisonings                                      | 1<br>(0 - 1)      | 0<br>(0 - 0)     | 0<br>(0 - 0)      | 0<br>(0 - 1)       | 0<br>(0 - 0)       | 0<br>(0 - 0)       |
| Exposure to mechanical forces                   | 6<br>(4 - 7)      | 0<br>(0 - 0)     | 0<br>(0 - 0)      | 3<br>(2 - 5)       | 1<br>(1 - 2)       | 0<br>(0 - 1)       |
| Unintentional firearm injuries                  | 3<br>(2 - 5)      | 0<br>(0 - 0)     | 0<br>(0 - 0)      | 2<br>(1 - 3)       | 1<br>(0 - 1)       | 0<br>(0 - 0)       |
| Unintentional suffocation                       | 0<br>(0 - 1)      | 0<br>(0 - 0)     | 0<br>(0 - 0)      | 0<br>(0 - 0)       | 0<br>(0 - 0)       | 0<br>(0 - 0)       |
| Other exposure to mechanical forces             | 2<br>(1 - 3)      | 0<br>(0 - 0)     | 0<br>(0 - 0)      | 1<br>(1 - 2)       | 0<br>(0 - 1)       | 0<br>(0 - 0)       |
| Adverse effects of medical treatment            | 4<br>(2 - 5)      | 0<br>(0 - 0)     | 0<br>(0 - 0)      | 1<br>(0 - 1)       | 1<br>(1 - 2)       | 2<br>(1 - 3)       |
| Animal contact                                  | 1<br>(1 - 1)      | 0<br>(0 - 0)     | 0<br>(0 - 0)      | 0<br>(0 - 0)       | 0<br>(0 - 0)       | 0<br>(0 - 0)       |
| Venomous animal contact                         | 1<br>(0 - 1)      | 0<br>(0 - 0)     | 0<br>(0 - 0)      | 0<br>(0 - 0)       | 0<br>(0 - 0)       | 0<br>(0 - 0)       |
| Non-venomous animal contact                     | 0<br>(0 - 0)      | 0<br>(0 - 0)     | 0<br>(0 - 0)      | 0<br>(0 - 0)       | 0<br>(0 - 0)       | 0<br>(0 - 0)       |
| Foreign body                                    | 5<br>(3 - 7)      | 1<br>(0 - 2)     | 0<br>(0 - 0)      | 1<br>(0 - 2)       | 1<br>(1 - 2)       | 2<br>(1 - 3)       |
| Pulmonary aspiration and foreign body in airway | 5<br>(3 - 7)      | 1<br>(0 - 2)     | 0<br>(0 - 0)      | 1<br>(0 - 1)       | 1<br>(1 - 2)       | 2<br>(1 - 3)       |
| Foreign body in other body part                 | 0<br>(0 - 0)      | 0<br>(0 - 0)     | 0<br>(0 - 0)      | 0<br>(0 - 0)       | 0<br>(0 - 0)       | 0<br>(0 - 0)       |
| Other unintentional injuries                    | 1<br>(1 - 2)      | 0<br>(0 - 0)     | 0<br>(0 - 0)      | 1<br>(0 - 1)       | 0<br>(0 - 1)       | 0<br>(0 - 1)       |
| Self-harm and interpersonal violence            | 39<br>(28 - 52)   | 0<br>(0 - 1)     | 0<br>(0 - 1)      | 26<br>(18 - 36)    | 10<br>(7 - 14)     | 3<br>(2 - 4)       |
| Self-harm                                       | 17<br>(12 - 23)   | --               | 0<br>(0 - 0)      | 10<br>(7 - 14)     | 5<br>(4 - 7)       | 2<br>(1 - 3)       |
| Interpersonal violence                          | 22<br>(13 - 32)   | 0<br>(0 - 1)     | 0<br>(0 - 1)      | 16<br>(9 - 24)     | 4<br>(2 - 7)       | 1<br>(1 - 2)       |
| Assault by firearm                              | 13<br>(6 - 19)    | 0<br>(0 - 0)     | 0<br>(0 - 0)      | 10<br>(5 - 16)     | 2<br>(1 - 3)       | 0<br>(0 - 0)       |
| Assault by sharp object                         | 6<br>(3 - 10)     | 0<br>(0 - 0)     | 0<br>(0 - 0)      | 4<br>(2 - 7)       | 1<br>(1 - 2)       | 0<br>(0 - 1)       |
| Assault by other means                          | 4<br>(2 - 6)      | 0<br>(0 - 0)     | 0<br>(0 - 0)      | 2<br>(1 - 3)       | 1<br>(1 - 2)       | 1<br>(0 - 1)       |

Web Table 31- Barbados deaths with 95% UI by age, sex, and cause in 2013

| Cause                                                             | Females, All Ages        | Females, 0-4 Years | Females, 5-14 Years | Females, 15-49 Years | Females, 50-69 Years | Females, 70-80 Years |
|-------------------------------------------------------------------|--------------------------|--------------------|---------------------|----------------------|----------------------|----------------------|
| All causes                                                        | 1,248<br>(1,024 - 1,488) | 26<br>(11 - 54)    | 4<br>(3 - 7)        | 84<br>(64 - 110)     | 295<br>(216 - 373)   | 840<br>(707 - 977)   |
| Communicable, maternal, neonatal, and nutritional diseases        | 122<br>(91 - 155)        | 18<br>(8 - 36)     | 1<br>(1 - 1)        | 11<br>(9 - 14)       | 12<br>(9 - 16)       | 80<br>(52 - 108)     |
| HIV/AIDS and tuberculosis                                         | 8<br>(6 - 11)            | 0<br>(0 - 0)       | 0<br>(0 - 0)        | 5<br>(4 - 7)         | 2<br>(1 - 2)         | 1<br>(1 - 2)         |
| Tuberculosis                                                      | 2<br>(1 - 3)             | 0<br>(0 - 0)       | 0<br>(0 - 0)        | 0<br>(0 - 1)         | 1<br>(0 - 1)         | 1<br>(1 - 2)         |
| HIV/AIDS                                                          | 6<br>(4 - 9)             | 0<br>(0 - 0)       | 0<br>(0 - 0)        | 4<br>(3 - 6)         | 1<br>(1 - 2)         | 0<br>(0 - 0)         |
| HIV/AIDS resulting in mycobacterial infection                     | 0<br>(0 - 0)             | 0<br>(0 - 0)       | 0<br>(0 - 0)        | 0<br>(0 - 0)         | 0<br>(0 - 0)         | 0<br>(0 - 0)         |
| HIV/AIDS resulting in other diseases                              | 5<br>(4 - 8)             | 0<br>(0 - 0)       | 0<br>(0 - 0)        | 4<br>(3 - 6)         | 1<br>(1 - 2)         | 0<br>(0 - 0)         |
| Diarrhea, lower respiratory, and other common infectious diseases | 83<br>(54 - 112)         | 3<br>(1 - 7)       | 1<br>(0 - 1)        | 3<br>(2 - 4)         | 8<br>(5 - 11)        | 68<br>(40 - 96)      |
| Diarrheal diseases                                                | 5<br>(3 - 8)             | 1<br>(0 - 2)       | 0<br>(0 - 0)        | 0<br>(0 - 0)         | 1<br>(0 - 1)         | 3<br>(2 - 5)         |
| Intestinal infectious diseases                                    | 1<br>(0 - 2)             | 0<br>(0 - 1)       | 0<br>(0 - 0)        | 0<br>(0 - 1)         | 0<br>(0 - 0)         | 0<br>(0 - 0)         |
| Typhoid fever                                                     | 1<br>(0 - 1)             | 0<br>(0 - 0)       | 0<br>(0 - 0)        | 0<br>(0 - 0)         | 0<br>(0 - 0)         | 0<br>(0 - 0)         |
| Paratyphoid fever                                                 | 0<br>(0 - 0)             | 0<br>(0 - 0)       | 0<br>(0 - 0)        | 0<br>(0 - 0)         | 0<br>(0 - 0)         | 0<br>(0 - 0)         |
| Other intestinal infectious diseases                              | 0<br>(0 - 0)             | 0<br>(0 - 0)       | 0<br>(0 - 0)        | 0<br>(0 - 0)         | 0<br>(0 - 0)         | 0<br>(0 - 0)         |
| Lower respiratory infections                                      | 74<br>(46 - 102)         | 2<br>(1 - 4)       | 0<br>(0 - 0)        | 2<br>(1 - 3)         | 6<br>(4 - 9)         | 64<br>(37 - 91)      |
| Upper respiratory infections                                      | 0<br>(0 - 0)             | 0<br>(0 - 0)       | 0<br>(0 - 0)        | 0<br>(0 - 0)         | 0<br>(0 - 0)         | 0<br>(0 - 0)         |
| Otitis media                                                      | 0<br>(0 - 0)             | 0<br>(0 - 0)       | 0<br>(0 - 0)        | 0<br>(0 - 0)         | 0<br>(0 - 0)         | 0<br>(0 - 0)         |
| Meningitis                                                        | 2<br>(1 - 2)             | 0<br>(0 - 0)       | 0<br>(0 - 0)        | 0<br>(0 - 0)         | 0<br>(0 - 1)         | 1<br>(1 - 1)         |
| Pneumococcal meningitis                                           | 1<br>(0 - 1)             | 0<br>(0 - 0)       | 0<br>(0 - 0)        | 0<br>(0 - 0)         | 0<br>(0 - 0)         | 0<br>(0 - 0)         |
| H influenzae type B meningitis                                    | 0<br>(0 - 0)             | 0<br>(0 - 0)       | 0<br>(0 - 0)        | 0<br>(0 - 0)         | 0<br>(0 - 0)         | 0<br>(0 - 0)         |
| Meningococcal meningitis                                          | 0<br>(0 - 0)             | 0<br>(0 - 0)       | 0<br>(0 - 0)        | 0<br>(0 - 0)         | 0<br>(0 - 0)         | 0<br>(0 - 0)         |
| Other meningitis                                                  | 1<br>(1 - 1)             | 0<br>(0 - 0)       | 0<br>(0 - 0)        | 0<br>(0 - 0)         | 0<br>(0 - 0)         | 0<br>(0 - 1)         |
| Encephalitis                                                      | 1<br>(1 - 2)             | 0<br>(0 - 0)       | 0<br>(0 - 0)        | 0<br>(0 - 0)         | 0<br>(0 - 0)         | 0<br>(0 - 0)         |
| Diphtheria                                                        | 0<br>(0 - 0)             | 0<br>(0 - 0)       | 0<br>(0 - 0)        | 0<br>(0 - 0)         | 0<br>(0 - 0)         | --<br>(0 - 0)        |
| Whooping cough                                                    | 0<br>(0 - 0)             | 0<br>(0 - 0)       | 0<br>(0 - 0)        | 0<br>(0 - 0)         | 0<br>(0 - 0)         | --<br>(0 - 0)        |
| Tetanus                                                           | 0<br>(0 - 0)             | 0<br>(0 - 0)       | 0<br>(0 - 0)        | 0<br>(0 - 0)         | 0<br>(0 - 0)         | 0<br>(0 - 0)         |
| Measles                                                           | 0<br>(0 - 0)             | 0<br>(0 - 0)       | 0<br>(0 - 0)        | 0<br>(0 - 0)         | 0<br>(0 - 0)         | --<br>(0 - 0)        |
| Varicella and herpes zoster                                       | 0<br>(0 - 0)             | 0<br>(0 - 0)       | 0<br>(0 - 0)        | 0<br>(0 - 0)         | 0<br>(0 - 0)         | 0<br>(0 - 0)         |
| Neglected tropical diseases and malaria                           | 1<br>(0 - 1)             | 0<br>(0 - 0)       | 0<br>(0 - 0)        | 0<br>(0 - 0)         | 0<br>(0 - 0)         | 0<br>(0 - 0)         |
| Leishmaniasis                                                     | 0<br>(0 - 0)             | 0<br>(0 - 0)       | 0<br>(0 - 0)        | 0<br>(0 - 0)         | 0<br>(0 - 0)         | 0<br>(0 - 0)         |
| Visceral leishmaniasis                                            | 0<br>(0 - 0)             | 0<br>(0 - 0)       | 0<br>(0 - 0)        | 0<br>(0 - 0)         | 0<br>(0 - 0)         | 0<br>(0 - 0)         |
| Cysticercosis                                                     | 0<br>(0 - 0)             | 0<br>(0 - 0)       | 0<br>(0 - 0)        | 0<br>(0 - 0)         | 0<br>(0 - 0)         | 0<br>(0 - 0)         |
| Cystic echinococcosis                                             | 0<br>(0 - 0)             | 0<br>(0 - 0)       | 0<br>(0 - 0)        | 0<br>(0 - 0)         | 0<br>(0 - 0)         | 0<br>(0 - 0)         |
| Dengue                                                            | 0<br>(0 - 0)             | 0<br>(0 - 0)       | 0<br>(0 - 0)        | 0<br>(0 - 0)         | 0<br>(0 - 0)         | 0<br>(0 - 0)         |
| Rabies                                                            | 0<br>(0 - 0)             | 0<br>(0 - 0)       | 0<br>(0 - 0)        | 0<br>(0 - 0)         | 0<br>(0 - 0)         | 0<br>(0 - 0)         |
| Intestinal nematode infections                                    | 0<br>(0 - 0)             | 0<br>(0 - 0)       | 0<br>(0 - 0)        | 0<br>(0 - 0)         | 0<br>(0 - 0)         | 0<br>(0 - 0)         |
| Ascariasis                                                        | 0<br>(0 - 0)             | 0<br>(0 - 0)       | 0<br>(0 - 0)        | 0<br>(0 - 0)         | 0<br>(0 - 0)         | 0<br>(0 - 0)         |
| Other neglected tropical diseases                                 | 0<br>(0 - 0)             | 0<br>(0 - 0)       | 0<br>(0 - 0)        | 0<br>(0 - 0)         | 0<br>(0 - 0)         | 0<br>(0 - 0)         |
| Maternal disorders                                                | 2<br>(1 - 3)             | --                 | 0<br>(0 - 0)        | 2<br>(1 - 3)         | --                   | --                   |
| Maternal hemorrhage                                               | 0<br>(0 - 0)             | --                 | 0<br>(0 - 0)        | 0<br>(0 - 0)         | --                   | --                   |
| Maternal sepsis and other maternal infections                     | 0<br>(0 - 0)             | --                 | 0<br>(0 - 0)        | 0<br>(0 - 0)         | --                   | --                   |

Web Table 31- Barbados deaths with 95% UI by age, sex, and cause in 2013

| Cause                                                            | Females, All Ages      | Females, 0-4 Years | Females, 5-14 Years | Females, 15-49 Years | Females, 50-69 Years | Females, 70-80 Years |
|------------------------------------------------------------------|------------------------|--------------------|---------------------|----------------------|----------------------|----------------------|
| Maternal hypertensive disorders                                  | 0<br>(0 - 1)           | --                 | 0<br>(0 - 0)        | 0<br>(0 - 1)         | --                   | --                   |
| Maternal obstructed labor                                        | 0<br>(0 - 0)           | --                 | 0<br>(0 - 0)        | 0<br>(0 - 0)         | --                   | --                   |
| Maternal abortive outcome                                        | 0<br>(0 - 1)           | --                 | 0<br>(0 - 0)        | 0<br>(0 - 1)         | --                   | --                   |
| Indirect maternal deaths                                         | 0<br>(0 - 0)           | --                 | 0<br>(0 - 0)        | 0<br>(0 - 0)         | --                   | --                   |
| Late maternal deaths                                             | 0<br>(0 - 0)           | --                 | 0<br>(0 - 0)        | 0<br>(0 - 0)         | --                   | --                   |
| Maternal deaths aggravated by HIV/AIDS                           | 0<br>(0 - 0)           | --                 | --                  | 0<br>(0 - 0)         | --                   | --                   |
| Other maternal disorders                                         | 0<br>(0 - 0)           | --                 | 0<br>(0 - 0)        | 0<br>(0 - 0)         | --                   | --                   |
| Neonatal disorders                                               | 13<br>(6 - 26)         | 13<br>(6 - 26)     | --                  | --                   | --                   | --                   |
| Neonatal preterm birth complications                             | 6<br>(2 - 12)          | 6<br>(2 - 12)      | --                  | --                   | --                   | --                   |
| Neonatal encephalopathy due to birth asphyxia and trauma         | 3<br>(1 - 7)           | 3<br>(1 - 7)       | --                  | --                   | --                   | --                   |
| Neonatal sepsis and other neonatal infections                    | 2<br>(1 - 5)           | 2<br>(1 - 5)       | --                  | --                   | --                   | --                   |
| Hemolytic disease and other neonatal jaundice                    | 0<br>(0 - 0)           | 0<br>(0 - 0)       | --                  | --                   | --                   | --                   |
| Other neonatal disorders                                         | 2<br>(1 - 4)           | 2<br>(1 - 4)       | --                  | --                   | --                   | --                   |
| Nutritional deficiencies                                         | 13<br>(10 - 17)        | 1<br>(0 - 2)       | 0<br>(0 - 0)        | 1<br>(1 - 2)         | 2<br>(1 - 3)         | 9<br>(6 - 13)        |
| Protein-energy malnutrition                                      | 5<br>(2 - 8)           | 1<br>(0 - 2)       | 0<br>(0 - 0)        | 0<br>(0 - 0)         | 1<br>(0 - 1)         | 3<br>(1 - 6)         |
| Iodine deficiency                                                | 0<br>(0 - 0)           | 0<br>(0 - 0)       | 0<br>(0 - 0)        | 0<br>(0 - 0)         | 0<br>(0 - 0)         | 0<br>(0 - 0)         |
| Iron-deficiency anemia                                           | 7<br>(4 - 11)          | 0<br>(0 - 0)       | 0<br>(0 - 0)        | 1<br>(1 - 1)         | 1<br>(1 - 2)         | 5<br>(3 - 9)         |
| Other nutritional deficiencies                                   | 1<br>(0 - 1)           | 0<br>(0 - 0)       | 0<br>(0 - 0)        | 0<br>(0 - 0)         | 0<br>(0 - 0)         | 1<br>(0 - 1)         |
| Other communicable, maternal, neonatal, and nutritional diseases | 3<br>(2 - 4)           | 0<br>(0 - 0)       | 0<br>(0 - 0)        | 0<br>(0 - 1)         | 1<br>(1 - 1)         | 1<br>(1 - 2)         |
| Sexually transmitted diseases excluding HIV                      | 1<br>(0 - 1)           | 0<br>(0 - 0)       | 0<br>(0 - 0)        | 0<br>(0 - 0)         | 0<br>(0 - 0)         | 0<br>(0 - 0)         |
| Syphilis                                                         | 0<br>(0 - 1)           | 0<br>(0 - 0)       | 0<br>(0 - 0)        | 0<br>(0 - 0)         | 0<br>(0 - 0)         | 0<br>(0 - 0)         |
| Chlamydial infection                                             | 0<br>(0 - 0)           | --                 | 0<br>(0 - 0)        | 0<br>(0 - 0)         | 0<br>(0 - 0)         | 0<br>(0 - 0)         |
| Gonococcal infection                                             | 0<br>(0 - 0)           | --                 | 0<br>(0 - 0)        | 0<br>(0 - 0)         | 0<br>(0 - 0)         | 0<br>(0 - 0)         |
| Other sexually transmitted diseases                              | 0<br>(0 - 0)           | --                 | 0<br>(0 - 0)        | 0<br>(0 - 0)         | 0<br>(0 - 0)         | 0<br>(0 - 0)         |
| Hepatitis                                                        | 0<br>(0 - 0)           | 0<br>(0 - 0)       | 0<br>(0 - 0)        | 0<br>(0 - 0)         | 0<br>(0 - 0)         | 0<br>(0 - 0)         |
| Acute hepatitis A                                                | 0<br>(0 - 0)           | 0<br>(0 - 0)       | 0<br>(0 - 0)        | 0<br>(0 - 0)         | 0<br>(0 - 0)         | 0<br>(0 - 0)         |
| Acute hepatitis B                                                | 0<br>(0 - 0)           | 0<br>(0 - 0)       | 0<br>(0 - 0)        | 0<br>(0 - 0)         | 0<br>(0 - 0)         | 0<br>(0 - 0)         |
| Acute hepatitis C                                                | 0<br>(0 - 0)           | --                 | 0<br>(0 - 0)        | 0<br>(0 - 0)         | 0<br>(0 - 0)         | 0<br>(0 - 0)         |
| Other infectious diseases                                        | 2<br>(1 - 3)           | 0<br>(0 - 0)       | 0<br>(0 - 0)        | 0<br>(0 - 0)         | 1<br>(0 - 1)         | 1<br>(1 - 2)         |
| Non-communicable diseases                                        | 1,082<br>(875 - 1,299) | 7<br>(3 - 15)      | 2<br>(1 - 3)        | 61<br>(45 - 83)      | 273<br>(200 - 346)   | 739<br>(616 - 874)   |
| Neoplasms                                                        | 220<br>(168 - 278)     | 0<br>(0 - 1)       | 1<br>(0 - 1)        | 23<br>(16 - 31)      | 84<br>(61 - 109)     | 112<br>(88 - 139)    |
| Esophageal cancer                                                | 3<br>(2 - 4)           | --                 | --                  | 0<br>(0 - 0)         | 1<br>(1 - 2)         | 2<br>(1 - 3)         |
| Stomach cancer                                                   | 13<br>(10 - 18)        | --                 | --                  | 1<br>(0 - 1)         | 3<br>(2 - 5)         | 9<br>(7 - 13)        |
| Liver cancer                                                     | 7<br>(5 - 9)           | --                 | 0<br>(0 - 0)        | 0<br>(0 - 1)         | 3<br>(2 - 4)         | 4<br>(2 - 5)         |
| Liver cancer due to hepatitis B                                  | 1<br>(1 - 2)           | --                 | 0<br>(0 - 0)        | 0<br>(0 - 0)         | 1<br>(0 - 1)         | 1<br>(0 - 1)         |
| Liver cancer due to hepatitis C                                  | 3<br>(2 - 5)           | --                 | 0<br>(0 - 0)        | 0<br>(0 - 0)         | 1<br>(1 - 2)         | 2<br>(1 - 3)         |
| Liver cancer due to alcohol use                                  | 1<br>(1 - 2)           | --                 | --                  | 0<br>(0 - 0)         | 0<br>(0 - 1)         | 1<br>(0 - 2)         |
| Liver cancer due to other causes                                 | 1<br>(0 - 1)           | --                 | 0<br>(0 - 0)        | 0<br>(0 - 0)         | 0<br>(0 - 1)         | 0<br>(0 - 1)         |
| Larynx cancer                                                    | 0<br>(0 - 1)           | --                 | --                  | 0<br>(0 - 0)         | 0<br>(0 - 0)         | 0<br>(0 - 0)         |
| Tracheal, bronchus and lung cancer                               | 12<br>(9 - 16)         | --                 | --                  | 1<br>(1 - 1)         | 5<br>(3 - 7)         | 6<br>(4 - 8)         |

Web Table 31- Barbados deaths with 95% UI by age, sex, and cause in 2013

| Cause                                         | Females, All Ages  | Females, 0-4 Years | Females, 5-14 Years | Females, 15-49 Years | Females, 50-69 Years | Females, 70-80 Years |
|-----------------------------------------------|--------------------|--------------------|---------------------|----------------------|----------------------|----------------------|
| Breast cancer                                 | 49<br>(36 - 64)    | --                 | --                  | 7<br>(5 - 10)        | 21<br>(15 - 29)      | 20<br>(15 - 26)      |
| Cervical cancer                               | 24<br>(17 - 35)    | --                 | --                  | 4<br>(3 - 6)         | 10<br>(7 - 15)       | 10<br>(7 - 15)       |
| Uterine cancer                                | 10<br>(5 - 15)     | --                 | --                  | 0<br>(0 - 0)         | 4<br>(2 - 6)         | 6<br>(3 - 9)         |
| Prostate cancer                               | --                 | --                 | --                  | --                   | --                   | --                   |
| Colon and rectum cancer                       | 32<br>(24 - 41)    | --                 | --                  | 1<br>(1 - 2)         | 9<br>(7 - 13)        | 21<br>(16 - 28)      |
| Lip and oral cavity cancer                    | 2<br>(1 - 3)       | --                 | --                  | 0<br>(0 - 0)         | 1<br>(0 - 1)         | 1<br>(1 - 2)         |
| Nasopharynx cancer                            | 1<br>(0 - 1)       | --                 | 0<br>(0 - 0)        | 0<br>(0 - 0)         | 0<br>(0 - 0)         | 0<br>(0 - 0)         |
| Other pharynx cancer                          | 1<br>(0 - 1)       | --                 | --                  | 0<br>(0 - 0)         | 0<br>(0 - 0)         | 0<br>(0 - 0)         |
| Gallbladder and biliary tract cancer          | 4<br>(3 - 7)       | --                 | --                  | 0<br>(0 - 0)         | 1<br>(1 - 2)         | 2<br>(1 - 4)         |
| Pancreatic cancer                             | 11<br>(8 - 15)     | --                 | --                  | 0<br>(0 - 0)         | 3<br>(2 - 5)         | 7<br>(5 - 10)        |
| Malignant skin melanoma                       | 1<br>(0 - 1)       | --                 | --                  | 0<br>(0 - 0)         | 0<br>(0 - 0)         | 0<br>(0 - 0)         |
| Non-melanoma skin cancer                      | 1<br>(1 - 2)       | --                 | --                  | 0<br>(0 - 0)         | 0<br>(0 - 0)         | 1<br>(0 - 2)         |
| Ovarian cancer                                | 12<br>(9 - 16)     | --                 | --                  | 1<br>(1 - 2)         | 6<br>(4 - 8)         | 5<br>(4 - 7)         |
| Testicular cancer                             | --                 | --                 | --                  | --                   | --                   | --                   |
| Kidney cancer                                 | 3<br>(2 - 4)       | 0<br>(0 - 0)       | 0<br>(0 - 0)        | 0<br>(0 - 0)         | 1<br>(1 - 1)         | 1<br>(1 - 2)         |
| Bladder cancer                                | 3<br>(2 - 4)       | --                 | --                  | 0<br>(0 - 0)         | 1<br>(0 - 1)         | 2<br>(1 - 3)         |
| Brain and nervous system cancer               | 3<br>(1 - 3)       | 0<br>(0 - 0)       | 0<br>(0 - 0)        | 0<br>(0 - 1)         | 1<br>(0 - 1)         | 1<br>(0 - 1)         |
| Thyroid cancer                                | 1<br>(1 - 2)       | --                 | 0<br>(0 - 0)        | 0<br>(0 - 0)         | 0<br>(0 - 1)         | 1<br>(0 - 1)         |
| Mesothelioma                                  | 0<br>(0 - 1)       | --                 | --                  | 0<br>(0 - 0)         | 0<br>(0 - 0)         | 0<br>(0 - 0)         |
| Hodgkin lymphoma                              | 0<br>(0 - 0)       | 0<br>(0 - 0)       | 0<br>(0 - 0)        | 0<br>(0 - 0)         | 0<br>(0 - 0)         | 0<br>(0 - 0)         |
| Non-Hodgkin lymphoma                          | 7<br>(4 - 10)      | 0<br>(0 - 0)       | 0<br>(0 - 0)        | 1<br>(1 - 2)         | 3<br>(2 - 4)         | 3<br>(1 - 4)         |
| Multiple myeloma                              | 4<br>(2 - 6)       | --                 | --                  | 0<br>(0 - 0)         | 2<br>(1 - 3)         | 2<br>(1 - 3)         |
| Leukemia                                      | 5<br>(4 - 7)       | 0<br>(0 - 0)       | 0<br>(0 - 0)        | 1<br>(1 - 1)         | 2<br>(1 - 2)         | 2<br>(2 - 3)         |
| Other neoplasms                               | 11<br>(8 - 16)     | 0<br>(0 - 0)       | 0<br>(0 - 0)        | 2<br>(1 - 3)         | 4<br>(3 - 7)         | 5<br>(3 - 7)         |
| Cardiovascular diseases                       | 451<br>(354 - 580) | 0<br>(0 - 1)       | 0<br>(0 - 1)        | 15<br>(10 - 21)      | 91<br>(64 - 122)     | 344<br>(274 - 445)   |
| Rheumatic heart disease                       | 2<br>(1 - 3)       | 0<br>(0 - 0)       | 0<br>(0 - 0)        | 1<br>(0 - 1)         | 1<br>(0 - 1)         | 1<br>(1 - 1)         |
| Ischemic heart disease                        | 168<br>(123 - 255) | 0<br>(0 - 0)       | 0<br>(0 - 0)        | 5<br>(4 - 8)         | 39<br>(26 - 57)      | 123<br>(90 - 190)    |
| Cerebrovascular disease                       | 171<br>(130 - 236) | 0<br>(0 - 0)       | 0<br>(0 - 0)        | 4<br>(3 - 6)         | 29<br>(20 - 40)      | 137<br>(104 - 194)   |
| Ischemic stroke                               | 112<br>(82 - 166)  | 0<br>(0 - 0)       | 0<br>(0 - 0)        | 1<br>(1 - 2)         | 15<br>(10 - 21)      | 96<br>(70 - 145)     |
| Hemorrhagic stroke                            | 59<br>(40 - 82)    | 0<br>(0 - 0)       | 0<br>(0 - 0)        | 3<br>(2 - 5)         | 15<br>(10 - 21)      | 40<br>(27 - 59)      |
| Hypertensive heart disease                    | 52<br>(31 - 73)    | 0<br>(0 - 0)       | 0<br>(0 - 0)        | 1<br>(1 - 2)         | 10<br>(6 - 15)       | 40<br>(22 - 59)      |
| Cardiomyopathy and myocarditis                | 9<br>(6 - 13)      | 0<br>(0 - 0)       | 0<br>(0 - 0)        | 1<br>(1 - 2)         | 3<br>(2 - 4)         | 5<br>(3 - 8)         |
| Atrial fibrillation and flutter               | 11<br>(6 - 17)     | --                 | --                  | 0<br>(0 - 0)         | 1<br>(1 - 2)         | 9<br>(5 - 16)        |
| Aortic aneurysm                               | 5<br>(3 - 7)       | --                 | --                  | 0<br>(0 - 0)         | 1<br>(1 - 2)         | 3<br>(2 - 5)         |
| Peripheral vascular disease                   | 9<br>(5 - 13)      | --                 | --                  | 0<br>(0 - 0)         | 0<br>(0 - 1)         | 8<br>(5 - 13)        |
| Endocarditis                                  | 2<br>(1 - 3)       | 0<br>(0 - 0)       | 0<br>(0 - 0)        | 0<br>(0 - 0)         | 0<br>(0 - 0)         | 1<br>(1 - 2)         |
| Other cardiovascular and circulatory diseases | 23<br>(14 - 32)    | 0<br>(0 - 0)       | 0<br>(0 - 0)        | 2<br>(1 - 2)         | 6<br>(3 - 9)         | 15<br>(9 - 23)       |
| Chronic respiratory diseases                  | 24<br>(18 - 33)    | 0<br>(0 - 0)       | 0<br>(0 - 0)        | 2<br>(1 - 3)         | 6<br>(4 - 8)         | 16<br>(12 - 22)      |
| Chronic obstructive pulmonary disease         | 15<br>(11 - 22)    | 0<br>(0 - 0)       | 0<br>(0 - 0)        | 1<br>(0 - 1)         | 3<br>(2 - 5)         | 11<br>(8 - 16)       |
| Pneumoconiosis                                | 0<br>(0 - 0)       | 0<br>(0 - 0)       | 0<br>(0 - 0)        | 0<br>(0 - 0)         | 0<br>(0 - 0)         | 0<br>(0 - 0)         |



Web Table 31- Barbados deaths with 95% UI by age, sex, and cause in 2013

| Cause                                               | Females, All Ages | Females, 0-4 Years | Females, 5-14 Years | Females, 15-49 Years | Females, 50-69 Years | Females, 70-80 Years |
|-----------------------------------------------------|-------------------|--------------------|---------------------|----------------------|----------------------|----------------------|
| Silicosis                                           | 0<br>(0-0)        | 0<br>(0-0)         | 0<br>(0-0)          | 0<br>(0-0)           | 0<br>(0-0)           | 0<br>(0-0)           |
| Asbestosis                                          | 0<br>(0-0)        | 0<br>(0-0)         | 0<br>(0-0)          | 0<br>(0-0)           | 0<br>(0-0)           | 0<br>(0-0)           |
| Coal workers pneumoconiosis                         | 0<br>(0-0)        | 0<br>(0-0)         | 0<br>(0-0)          | 0<br>(0-0)           | 0<br>(0-0)           | 0<br>(0-0)           |
| Other pneumoconiosis                                | 0<br>(0-0)        | 0<br>(0-0)         | 0<br>(0-0)          | 0<br>(0-0)           | 0<br>(0-0)           | 0<br>(0-0)           |
| Asthma                                              | 6<br>(4-9)        | 0<br>(0-0)         | 0<br>(0-0)          | 1<br>(1-1)           | 2<br>(1-3)           | 3<br>(2-5)           |
| Interstitial lung disease and pulmonary sarcoidosis | 2<br>(1-4)        | 0<br>(0-0)         | 0<br>(0-0)          | 0<br>(0-0)           | 1<br>(0-1)           | 1<br>(1-2)           |
| Other chronic respiratory diseases                  | 1<br>(0-1)        | 0<br>(0-0)         | 0<br>(0-0)          | 0<br>(0-0)           | 0<br>(0-0)           | 0<br>(0-1)           |
| Cirrhosis                                           | 14<br>(11-19)     | 0<br>(0-0)         | 0<br>(0-0)          | 2<br>(2-3)           | 6<br>(4-9)           | 6<br>(4-7)           |
| Cirrhosis due to hepatitis B                        | 1<br>(1-3)        | 0<br>(0-0)         | 0<br>(0-0)          | 0<br>(0-0)           | 1<br>(0-1)           | 1<br>(0-1)           |
| Cirrhosis due to hepatitis C                        | 7<br>(4-11)       | 0<br>(0-0)         | 0<br>(0-0)          | 1<br>(1-2)           | 3<br>(2-5)           | 3<br>(1-4)           |
| Cirrhosis due to alcohol use                        | 3<br>(1-5)        | --                 | --                  | 0<br>(0-1)           | 1<br>(1-2)           | 2<br>(1-3)           |
| Cirrhosis due to other causes                       | 2<br>(1-4)        | 0<br>(0-0)         | 0<br>(0-0)          | 1<br>(0-1)           | 1<br>(0-2)           | 1<br>(0-1)           |
| Digestive diseases                                  | 27<br>(21-35)     | 0<br>(0-0)         | 0<br>(0-0)          | 2<br>(1-3)           | 6<br>(4-9)           | 19<br>(14-24)        |
| Peptic ulcer disease                                | 6<br>(4-9)        | 0<br>(0-0)         | 0<br>(0-0)          | 0<br>(0-1)           | 2<br>(1-2)           | 4<br>(3-6)           |
| Gastritis and duodenitis                            | 2<br>(1-3)        | 0<br>(0-0)         | 0<br>(0-0)          | 0<br>(0-0)           | 0<br>(0-1)           | 1<br>(1-2)           |
| Appendicitis                                        | 1<br>(1-2)        | 0<br>(0-0)         | 0<br>(0-0)          | 0<br>(0-0)           | 0<br>(0-0)           | 1<br>(0-1)           |
| Paralytic ileus and intestinal obstruction          | 4<br>(1-6)        | 0<br>(0-0)         | 0<br>(0-0)          | 0<br>(0-0)           | 1<br>(0-1)           | 3<br>(1-5)           |
| Inguinal, femoral, and abdominal hernia             | 1<br>(1-4)        | 0<br>(0-0)         | 0<br>(0-0)          | 0<br>(0-0)           | 0<br>(0-1)           | 1<br>(0-3)           |
| Inflammatory bowel disease                          | 3<br>(2-4)        | 0<br>(0-0)         | 0<br>(0-0)          | 0<br>(0-0)           | 1<br>(0-1)           | 2<br>(1-3)           |
| Vascular intestinal disorders                       | 1<br>(1-3)        | 0<br>(0-0)         | 0<br>(0-0)          | 0<br>(0-0)           | 0<br>(0-1)           | 1<br>(0-2)           |
| Gallbladder and biliary diseases                    | 2<br>(2-3)        | 0<br>(0-0)         | 0<br>(0-0)          | 0<br>(0-0)           | 1<br>(0-1)           | 1<br>(1-2)           |
| Pancreatitis                                        | 1<br>(1-2)        | 0<br>(0-0)         | 0<br>(0-0)          | 0<br>(0-0)           | 0<br>(0-1)           | 1<br>(0-1)           |
| Other digestive diseases                            | 6<br>(4-8)        | 0<br>(0-0)         | 0<br>(0-0)          | 1<br>(0-1)           | 1<br>(1-2)           | 4<br>(2-6)           |
| Neurological disorders                              | 68<br>(50-94)     | 0<br>(0-0)         | 0<br>(0-0)          | 1<br>(1-2)           | 6<br>(4-8)           | 61<br>(44-86)        |
| Alzheimer disease and other dementias               | 59<br>(42-84)     | --                 | --                  | 0<br>(0-0)           | 3<br>(2-5)           | 56<br>(39-80)        |
| Parkinson disease                                   | 4<br>(3-6)        | --                 | --                  | 0<br>(0-0)           | 1<br>(0-1)           | 3<br>(2-5)           |
| Epilepsy                                            | 3<br>(2-4)        | 0<br>(0-0)         | 0<br>(0-0)          | 1<br>(1-1)           | 1<br>(0-1)           | 1<br>(0-1)           |
| Multiple sclerosis                                  | 0<br>(0-1)        | --                 | --                  | 0<br>(0-0)           | 0<br>(0-0)           | 0<br>(0-0)           |
| Other neurological disorders                        | 2<br>(2-3)        | 0<br>(0-0)         | 0<br>(0-0)          | 0<br>(0-0)           | 1<br>(1-1)           | 1<br>(1-1)           |
| Mental and substance use disorders                  | 2<br>(1-2)        | 0<br>(0-0)         | 0<br>(0-0)          | 0<br>(0-1)           | 1<br>(0-1)           | 1<br>(0-1)           |
| Schizophrenia                                       | 0<br>(0-0)        | --                 | --                  | 0<br>(0-0)           | 0<br>(0-0)           | 0<br>(0-0)           |
| Alcohol use disorders                               | 1<br>(0-1)        | --                 | --                  | 0<br>(0-0)           | 0<br>(0-1)           | 0<br>(0-0)           |
| Drug use disorders                                  | 1<br>(0-1)        | 0<br>(0-0)         | --                  | 0<br>(0-0)           | 0<br>(0-0)           | 0<br>(0-0)           |
| Opioid use disorders                                | 0<br>(0-0)        | 0<br>(0-0)         | --                  | 0<br>(0-0)           | 0<br>(0-0)           | 0<br>(0-0)           |
| Cocaine use disorders                               | 0<br>(0-0)        | 0<br>(0-0)         | --                  | 0<br>(0-0)           | 0<br>(0-0)           | 0<br>(0-0)           |
| Amphetamine use disorders                           | 0<br>(0-0)        | 0<br>(0-0)         | --                  | 0<br>(0-0)           | 0<br>(0-0)           | 0<br>(0-0)           |
| Other drug use disorders                            | 0<br>(0-0)        | 0<br>(0-0)         | --                  | 0<br>(0-0)           | 0<br>(0-0)           | 0<br>(0-0)           |
| Eating disorders                                    | 0<br>(0-0)        | --                 | 0<br>(0-0)          | 0<br>(0-0)           | --                   | --                   |
| Anorexia nervosa                                    | 0<br>(0-0)        | --                 | 0<br>(0-0)          | 0<br>(0-0)           | --                   | --                   |
| Diabetes, urogenital, blood, and endocrine diseases | 240<br>(181-304)  | 1<br>(0-1)         | 0<br>(0-1)          | 12<br>(9-17)         | 69<br>(49-92)        | 157<br>(118-199)     |

Web Table 31- Barbados deaths with 95% UI by age, sex, and cause in 2013

| Cause                                               | Females, All Ages  | Females, 0-4 Years | Females, 5-14 Years | Females, 15-49 Years | Females, 50-69 Years | Females, 70-80 Years |
|-----------------------------------------------------|--------------------|--------------------|---------------------|----------------------|----------------------|----------------------|
| Diabetes mellitus                                   | 176<br>(130 - 226) | 0<br>(0 - 0)       | 0<br>(0 - 0)        | 6<br>(4 - 8)         | 50<br>(35 - 67)      | 121<br>(88 - 155)    |
| Acute glomerulonephritis                            | 0<br>(0 - 0)       | 0<br>(0 - 0)       | 0<br>(0 - 0)        | 0<br>(0 - 0)         | 0<br>(0 - 0)         | 0<br>(0 - 0)         |
| Chronic kidney disease                              | 39<br>(27 - 60)    | 0<br>(0 - 0)       | 0<br>(0 - 0)        | 4<br>(2 - 6)         | 13<br>(8 - 21)       | 22<br>(14 - 35)      |
| Chronic kidney disease due to diabetes mellitus     | 7<br>(4 - 12)      | 0<br>(0 - 0)       | 0<br>(0 - 0)        | 1<br>(0 - 1)         | 4<br>(2 - 6)         | 3<br>(1 - 6)         |
| Chronic kidney disease due to hypertension          | 22<br>(14 - 35)    | 0<br>(0 - 0)       | 0<br>(0 - 0)        | 2<br>(1 - 3)         | 6<br>(4 - 11)        | 13<br>(8 - 22)       |
| Chronic kidney disease due to glomerulonephritis    | 1<br>(0 - 1)       | 0<br>(0 - 0)       | 0<br>(0 - 0)        | 0<br>(0 - 0)         | 0<br>(0 - 0)         | 0<br>(0 - 1)         |
| Chronic kidney disease due to other causes          | 9<br>(5 - 19)      | 0<br>(0 - 0)       | 0<br>(0 - 0)        | 1<br>(1 - 2)         | 3<br>(1 - 6)         | 5<br>(2 - 11)        |
| Urinary diseases and male infertility               | 9<br>(5 - 13)      | 0<br>(0 - 0)       | 0<br>(0 - 0)        | 1<br>(0 - 1)         | 2<br>(1 - 2)         | 6<br>(3 - 10)        |
| Interstitial nephritis and urinary tract infections | 8<br>(4 - 11)      | 0<br>(0 - 0)       | 0<br>(0 - 0)        | 0<br>(0 - 1)         | 1<br>(1 - 2)         | 6<br>(2 - 9)         |
| Urolithiasis                                        | 0<br>(0 - 1)       | --                 | 0<br>(0 - 0)        | 0<br>(0 - 0)         | 0<br>(0 - 0)         | 0<br>(0 - 0)         |
| Other urinary diseases                              | 1<br>(0 - 2)       | 0<br>(0 - 0)       | 0<br>(0 - 0)        | 0<br>(0 - 0)         | 0<br>(0 - 0)         | 1<br>(0 - 1)         |
| Gynecological diseases                              | 0<br>(0 - 0)       | --                 | --                  | 0<br>(0 - 0)         | 0<br>(0 - 0)         | 0<br>(0 - 0)         |
| Uterine fibroids                                    | 0<br>(0 - 0)       | --                 | --                  | 0<br>(0 - 0)         | 0<br>(0 - 0)         | 0<br>(0 - 0)         |
| Polycystic ovarian syndrome                         | 0<br>(0 - 0)       | --                 | --                  | 0<br>(0 - 0)         | 0<br>(0 - 0)         | --                   |
| Endometriosis                                       | 0<br>(0 - 0)       | --                 | --                  | 0<br>(0 - 0)         | 0<br>(0 - 0)         | --                   |
| Genital prolapse                                    | 0<br>(0 - 0)       | --                 | --                  | 0<br>(0 - 0)         | 0<br>(0 - 0)         | 0<br>(0 - 0)         |
| Other gynecological diseases                        | 0<br>(0 - 0)       | --                 | --                  | 0<br>(0 - 0)         | 0<br>(0 - 0)         | 0<br>(0 - 0)         |
| Hemoglobinopathies and hemolytic anemias            | 2<br>(1 - 4)       | 0<br>(0 - 0)       | 0<br>(0 - 0)        | 1<br>(0 - 1)         | 1<br>(0 - 1)         | 1<br>(0 - 1)         |
| Thalassemias                                        | 0<br>(0 - 0)       | 0<br>(0 - 0)       | 0<br>(0 - 0)        | 0<br>(0 - 0)         | 0<br>(0 - 0)         | 0<br>(0 - 0)         |
| Sickle cell disorders                               | 2<br>(1 - 3)       | 0<br>(0 - 0)       | 0<br>(0 - 0)        | 1<br>(0 - 1)         | 1<br>(0 - 1)         | 0<br>(0 - 0)         |
| G6PD deficiency                                     | 0<br>(0 - 0)       | 0<br>(0 - 0)       | 0<br>(0 - 0)        | 0<br>(0 - 0)         | 0<br>(0 - 0)         | 0<br>(0 - 0)         |
| Other hemoglobinopathies and hemolytic anemias      | 1<br>(0 - 1)       | 0<br>(0 - 0)       | 0<br>(0 - 0)        | 0<br>(0 - 0)         | 0<br>(0 - 0)         | 1<br>(0 - 1)         |
| Endocrine, metabolic, blood, and immune disorders   | 13<br>(9 - 20)     | 0<br>(0 - 1)       | 0<br>(0 - 0)        | 1<br>(1 - 2)         | 3<br>(2 - 5)         | 8<br>(5 - 13)        |
| Musculoskeletal disorders                           | 7<br>(2 - 10)      | --                 | 0<br>(0 - 0)        | 2<br>(1 - 3)         | 2<br>(1 - 3)         | 3<br>(1 - 4)         |
| Rheumatoid arthritis                                | 1<br>(0 - 2)       | --                 | 0<br>(0 - 0)        | 0<br>(0 - 0)         | 0<br>(0 - 1)         | 1<br>(0 - 1)         |
| Other musculoskeletal disorders                     | 6<br>(2 - 8)       | --                 | 0<br>(0 - 0)        | 2<br>(1 - 3)         | 2<br>(1 - 2)         | 2<br>(1 - 3)         |
| Other non-communicable diseases                     | 29<br>(11 - 42)    | 5<br>(2 - 11)      | 1<br>(0 - 1)        | 1<br>(1 - 2)         | 2<br>(1 - 3)         | 20<br>(4 - 31)       |
| Congenital anomalies                                | 8<br>(5 - 13)      | 5<br>(2 - 10)      | 0<br>(0 - 1)        | 1<br>(1 - 1)         | 1<br>(0 - 1)         | 1<br>(1 - 2)         |
| Neural tube defects                                 | 0<br>(0 - 1)       | 0<br>(0 - 1)       | 0<br>(0 - 0)        | 0<br>(0 - 0)         | 0<br>(0 - 0)         | 0<br>(0 - 0)         |
| Congenital heart anomalies                          | 4<br>(2 - 7)       | 2<br>(1 - 5)       | 0<br>(0 - 1)        | 1<br>(0 - 1)         | 0<br>(0 - 0)         | 1<br>(0 - 1)         |
| Cleft lip and cleft palate                          | 0<br>(0 - 0)       | 0<br>(0 - 0)       | --                  | --                   | --                   | --                   |
| Down syndrome                                       | 0<br>(0 - 1)       | 0<br>(0 - 0)       | 0<br>(0 - 0)        | 0<br>(0 - 0)         | 0<br>(0 - 0)         | 0<br>(0 - 0)         |
| Chromosomal unbalanced rearrangements               | 0<br>(0 - 0)       | 0<br>(0 - 0)       | 0<br>(0 - 0)        | 0<br>(0 - 0)         | 0<br>(0 - 0)         | 0<br>(0 - 0)         |
| Other congenital anomalies                          | 3<br>(2 - 6)       | 2<br>(1 - 4)       | 0<br>(0 - 0)        | 0<br>(0 - 0)         | 0<br>(0 - 1)         | 0<br>(0 - 1)         |
| Skin and subcutaneous diseases                      | 21<br>(4 - 32)     | 0<br>(0 - 0)       | 0<br>(0 - 0)        | 0<br>(0 - 0)         | 2<br>(0 - 2)         | 19<br>(4 - 30)       |
| Cellulitis                                          | 1<br>(0 - 1)       | 0<br>(0 - 0)       | 0<br>(0 - 0)        | 0<br>(0 - 0)         | 0<br>(0 - 0)         | 0<br>(0 - 1)         |
| Pyoderma                                            | 2<br>(0 - 4)       | 0<br>(0 - 0)       | 0<br>(0 - 0)        | 0<br>(0 - 0)         | 0<br>(0 - 1)         | 2<br>(0 - 3)         |
| Decubitus ulcer                                     | 18<br>(4 - 27)     | 0<br>(0 - 0)       | 0<br>(0 - 0)        | 0<br>(0 - 0)         | 1<br>(0 - 1)         | 17<br>(3 - 26)       |
| Other skin and subcutaneous diseases                | 0<br>(0 - 1)       | 0<br>(0 - 0)       | 0<br>(0 - 0)        | 0<br>(0 - 0)         | 0<br>(0 - 0)         | 0<br>(0 - 0)         |
| Sudden infant death syndrome                        | 0<br>(0 - 1)       | 0<br>(0 - 1)       | --                  | --                   | --                   | --                   |

Web Table 31- Barbados deaths with 95% UI by age, sex, and cause in 2013

| Cause                                           | Females, All Ages | Females, 0-4 Years | Females, 5-14 Years | Females, 15-49 Years | Females, 50-69 Years | Females, 70-80 Years |
|-------------------------------------------------|-------------------|--------------------|---------------------|----------------------|----------------------|----------------------|
| Injuries                                        | 44<br>(33 - 57)   | 1<br>(1 - 3)       | 1<br>(1 - 2)        | 11<br>(8 - 15)       | 10<br>(6 - 13)       | 21<br>(15 - 27)      |
| Transport injuries                              | 11<br>(7 - 15)    | 0<br>(0 - 0)       | 1<br>(0 - 1)        | 3<br>(2 - 5)         | 3<br>(2 - 4)         | 4<br>(2 - 6)         |
| Road injuries                                   | 10<br>(6 - 13)    | 0<br>(0 - 0)       | 0<br>(0 - 1)        | 3<br>(2 - 4)         | 3<br>(2 - 4)         | 4<br>(2 - 5)         |
| Pedestrian road injuries                        | 3<br>(2 - 4)      | 0<br>(0 - 0)       | 0<br>(0 - 0)        | 1<br>(0 - 1)         | 1<br>(1 - 1)         | 1<br>(0 - 1)         |
| Cyclist road injuries                           | 0<br>(0 - 1)      | 0<br>(0 - 0)       | 0<br>(0 - 0)        | 0<br>(0 - 0)         | 0<br>(0 - 0)         | 0<br>(0 - 0)         |
| Motorcyclist road injuries                      | 0<br>(0 - 1)      | 0<br>(0 - 0)       | 0<br>(0 - 0)        | 0<br>(0 - 0)         | 0<br>(0 - 0)         | 0<br>(0 - 0)         |
| Motor vehicle road injuries                     | 6<br>(4 - 8)      | 0<br>(0 - 0)       | 0<br>(0 - 0)        | 2<br>(1 - 3)         | 2<br>(1 - 2)         | 2<br>(1 - 3)         |
| Other road injuries                             | 0<br>(0 - 0)      | 0<br>(0 - 0)       | 0<br>(0 - 0)        | 0<br>(0 - 0)         | 0<br>(0 - 0)         | 0<br>(0 - 0)         |
| Other transport injuries                        | 1<br>(0 - 2)      | 0<br>(0 - 0)       | 0<br>(0 - 0)        | 0<br>(0 - 0)         | 0<br>(0 - 1)         | 0<br>(0 - 1)         |
| Unintentional injuries                          | 24<br>(17 - 31)   | 1<br>(0 - 2)       | 1<br>(0 - 1)        | 3<br>(2 - 4)         | 4<br>(3 - 6)         | 15<br>(10 - 20)      |
| Falls                                           | 6<br>(4 - 9)      | 0<br>(0 - 0)       | 0<br>(0 - 0)        | 0<br>(0 - 0)         | 1<br>(0 - 1)         | 5<br>(3 - 7)         |
| Drowning                                        | 2<br>(1 - 3)      | 0<br>(0 - 0)       | 0<br>(0 - 0)        | 1<br>(0 - 1)         | 0<br>(0 - 1)         | 0<br>(0 - 1)         |
| Fire, heat, and hot substances                  | 4<br>(2 - 5)      | 0<br>(0 - 0)       | 0<br>(0 - 0)        | 0<br>(0 - 1)         | 1<br>(0 - 1)         | 2<br>(1 - 4)         |
| Poisonings                                      | 0<br>(0 - 1)      | 0<br>(0 - 0)       | 0<br>(0 - 0)        | 0<br>(0 - 0)         | 0<br>(0 - 0)         | 0<br>(0 - 0)         |
| Exposure to mechanical forces                   | 1<br>(1 - 2)      | 0<br>(0 - 0)       | 0<br>(0 - 0)        | 0<br>(0 - 1)         | 0<br>(0 - 0)         | 0<br>(0 - 1)         |
| Unintentional firearm injuries                  | 1<br>(0 - 1)      | 0<br>(0 - 0)       | 0<br>(0 - 0)        | 0<br>(0 - 0)         | 0<br>(0 - 0)         | 0<br>(0 - 0)         |
| Unintentional suffocation                       | 0<br>(0 - 0)      | 0<br>(0 - 0)       | 0<br>(0 - 0)        | 0<br>(0 - 0)         | 0<br>(0 - 0)         | 0<br>(0 - 0)         |
| Other exposure to mechanical forces             | 1<br>(0 - 1)      | 0<br>(0 - 0)       | 0<br>(0 - 0)        | 0<br>(0 - 0)         | 0<br>(0 - 0)         | 0<br>(0 - 0)         |
| Adverse effects of medical treatment            | 5<br>(2 - 7)      | 0<br>(0 - 0)       | 0<br>(0 - 0)        | 1<br>(0 - 1)         | 1<br>(0 - 2)         | 3<br>(1 - 5)         |
| Animal contact                                  | 1<br>(0 - 1)      | 0<br>(0 - 0)       | 0<br>(0 - 0)        | 0<br>(0 - 0)         | 0<br>(0 - 0)         | 0<br>(0 - 1)         |
| Venomous animal contact                         | 0<br>(0 - 0)      | 0<br>(0 - 0)       | 0<br>(0 - 0)        | 0<br>(0 - 0)         | 0<br>(0 - 0)         | 0<br>(0 - 0)         |
| Non-venomous animal contact                     | 0<br>(0 - 1)      | 0<br>(0 - 0)       | 0<br>(0 - 0)        | 0<br>(0 - 0)         | 0<br>(0 - 0)         | 0<br>(0 - 0)         |
| Foreign body                                    | 4<br>(2 - 7)      | 1<br>(0 - 1)       | 0<br>(0 - 0)        | 0<br>(0 - 1)         | 0<br>(0 - 1)         | 3<br>(2 - 5)         |
| Pulmonary aspiration and foreign body in airway | 4<br>(2 - 7)      | 1<br>(0 - 1)       | 0<br>(0 - 0)        | 0<br>(0 - 1)         | 0<br>(0 - 1)         | 3<br>(1 - 5)         |
| Foreign body in other body part                 | 0<br>(0 - 0)      | 0<br>(0 - 0)       | 0<br>(0 - 0)        | 0<br>(0 - 0)         | 0<br>(0 - 0)         | 0<br>(0 - 0)         |
| Other unintentional injuries                    | 0<br>(0 - 1)      | 0<br>(0 - 0)       | 0<br>(0 - 0)        | 0<br>(0 - 0)         | 0<br>(0 - 0)         | 0<br>(0 - 0)         |
| Self-harm and interpersonal violence            | 10<br>(7 - 13)    | 0<br>(0 - 0)       | 0<br>(0 - 0)        | 5<br>(4 - 7)         | 3<br>(2 - 4)         | 2<br>(1 - 3)         |
| Self-harm                                       | 5<br>(4 - 7)      | --                 | 0<br>(0 - 0)        | 3<br>(2 - 4)         | 1<br>(1 - 2)         | 1<br>(1 - 2)         |
| Interpersonal violence                          | 5<br>(3 - 7)      | 0<br>(0 - 0)       | 0<br>(0 - 0)        | 3<br>(1 - 4)         | 1<br>(1 - 2)         | 1<br>(0 - 1)         |
| Assault by firearm                              | 1<br>(1 - 2)      | 0<br>(0 - 0)       | 0<br>(0 - 0)        | 1<br>(0 - 1)         | 0<br>(0 - 1)         | 0<br>(0 - 0)         |
| Assault by sharp object                         | 2<br>(1 - 2)      | 0<br>(0 - 0)       | 0<br>(0 - 0)        | 1<br>(1 - 2)         | 0<br>(0 - 1)         | 0<br>(0 - 0)         |
| Assault by other means                          | 2<br>(1 - 3)      | 0<br>(0 - 0)       | 0<br>(0 - 0)        | 1<br>(0 - 1)         | 0<br>(0 - 1)         | 0<br>(0 - 1)         |

Web Table 31- Belarus deaths with 95% UI by age, sex, and cause in 2013

| Cause                                                              | Both Sexes, All Ages           | Both Sexes, 0-4 Years | Both Sexes, 5-14 Years | Both Sexes, 15-49 Years     | Both Sexes, 50-69 Years     | Both Sexes, 70-80 Years     |
|--------------------------------------------------------------------|--------------------------------|-----------------------|------------------------|-----------------------------|-----------------------------|-----------------------------|
| All causes                                                         | 145,988<br>(138,179 - 154,195) | 783<br>(569 - 1,072)  | 202<br>(165 - 248)     | 15,883<br>(14,504 - 17,205) | 43,855<br>(40,614 - 46,936) | 85,266<br>(81,230 - 89,375) |
| Communicable, maternal, neonatal, and nutritional diseases         | 2,863<br>(1,136 - 3,187)       | 341<br>(242 - 477)    | 14<br>(11 - 19)        | 1,070<br>(817 - 1,228)      | 1,055<br>(800 - 1,244)      | 383<br>(321 - 523)          |
| HIV/AIDS and tuberculosis                                          | 1,136<br>(817 - 1,336)         | 0<br>(0 - 1)          | 0<br>(0 - 0)           | 592<br>(421 - 701)          | 439<br>(301 - 538)          | 104<br>(83 - 128)           |
| Tuberculosis                                                       | 722<br>(427 - 852)             | 0<br>(0 - 1)          | 0<br>(0 - 0)           | 299<br>(145 - 369)          | 338<br>(206 - 419)          | 85<br>(68 - 104)            |
| HIV/AIDS                                                           | 413<br>(277 - 571)             | 0<br>(0 - 0)          | 0<br>(0 - 0)           | 293<br>(207 - 376)          | 101<br>(55 - 174)           | 19<br>(9 - 33)              |
| HIV/AIDS resulting in mycobacterial infection                      | 27<br>(17 - 39)                | 0<br>(0 - 0)          | 0<br>(0 - 0)           | 19<br>(13 - 26)             | 7<br>(4 - 12)               | 1<br>(1 - 2)                |
| HIV/AIDS resulting in other diseases                               | 386<br>(258 - 533)             | 0<br>(0 - 0)          | 0<br>(0 - 0)           | 274<br>(193 - 352)          | 95<br>(51 - 162)            | 18<br>(9 - 31)              |
| Diarrrhea, lower respiratory, and other common infectious diseases | 1,310<br>(1,049 - 1,526)       | 76<br>(50 - 110)      | 11<br>(8 - 15)         | 417<br>(297 - 515)          | 555<br>(389 - 705)          | 252<br>(196 - 386)          |
| Diarrheal diseases                                                 | 15<br>(12 - 19)                | 3<br>(2 - 6)          | 0<br>(0 - 0)           | 4<br>(3 - 5)                | 4<br>(3 - 6)                | 4<br>(3 - 6)                |
| Intestinal infectious diseases                                     | 18<br>(8 - 33)                 | 2<br>(1 - 5)          | 2<br>(1 - 3)           | 7<br>(3 - 13)               | 4<br>(2 - 8)                | 3<br>(1 - 6)                |
| Typhoid fever                                                      | 13<br>(6 - 24)                 | 2<br>(1 - 4)          | 1<br>(1 - 2)           | 5<br>(2 - 9)                | 3<br>(1 - 6)                | 2<br>(1 - 4)                |
| Paratyphoid fever                                                  | 4<br>(2 - 7)                   | 1<br>(0 - 1)          | 0<br>(0 - 1)           | 2<br>(1 - 3)                | 1<br>(0 - 2)                | 1<br>(0 - 1)                |
| Other intestinal infectious diseases                               | 1<br>(0 - 4)                   | 0<br>(0 - 2)          | 0<br>(0 - 1)           | 0<br>(0 - 2)                | 0<br>(0 - 2)                | 0<br>(0 - 2)                |
| Lower respiratory infections                                       | 1,135<br>(878 - 1,338)         | 42<br>(26 - 65)       | 5<br>(3 - 7)           | 361<br>(245 - 458)          | 503<br>(338 - 649)          | 224<br>(171 - 354)          |
| Upper respiratory infections                                       | 5<br>(2 - 10)                  | 0<br>(0 - 0)          | 0<br>(0 - 0)           | 1<br>(0 - 2)                | 2<br>(0 - 4)                | 2<br>(0 - 7)                |
| Otitis media                                                       | 2<br>(2 - 2)                   | 0<br>(0 - 0)          | 0<br>(0 - 0)           | 1<br>(1 - 1)                | 1<br>(1 - 1)                | 0<br>(0 - 0)                |
| Meningitis                                                         | 83<br>(72 - 98)                | 16<br>(10 - 26)       | 1<br>(1 - 2)           | 25<br>(21 - 30)             | 30<br>(24 - 36)             | 12<br>(10 - 14)             |
| Pneumococcal meningitis                                            | 21<br>(16 - 26)                | 3<br>(2 - 5)          | 0<br>(0 - 0)           | 7<br>(5 - 9)                | 8<br>(5 - 11)               | 3<br>(2 - 4)                |
| H influenzae type B meningitis                                     | 14<br>(11 - 19)                | 6<br>(4 - 11)         | 0<br>(0 - 1)           | 3<br>(2 - 4)                | 3<br>(2 - 5)                | 1<br>(1 - 2)                |
| Meningococcal meningitis                                           | 17<br>(13 - 21)                | 4<br>(2 - 6)          | 0<br>(0 - 1)           | 5<br>(4 - 7)                | 6<br>(4 - 8)                | 2<br>(2 - 3)                |
| Other meningitis                                                   | 31<br>(23 - 39)                | 3<br>(1 - 5)          | 0<br>(0 - 0)           | 10<br>(7 - 14)              | 13<br>(8 - 18)              | 5<br>(3 - 7)                |
| Encephalitis                                                       | 43<br>(34 - 55)                | 11<br>(6 - 18)        | 3<br>(2 - 5)           | 17<br>(13 - 23)             | 10<br>(8 - 14)              | 1<br>(1 - 2)                |
| Diphtheria                                                         | 0<br>(0 - 1)                   | 0<br>(0 - 0)          | 0<br>(0 - 0)           | 0<br>(0 - 1)                | 0<br>(0 - 1)                | --                          |
| Whooping cough                                                     | 1<br>(1 - 1)                   | 0<br>(0 - 0)          | 0<br>(0 - 0)           | 1<br>(0 - 1)                | 0<br>(0 - 0)                | --                          |
| Tetanus                                                            | 1<br>(1 - 2)                   | 0<br>(0 - 0)          | 0<br>(0 - 0)           | 1<br>(0 - 1)                | 0<br>(0 - 1)                | 0<br>(0 - 1)                |
| Measles                                                            | 0<br>(0 - 0)                   | 0<br>(0 - 0)          | 0<br>(0 - 0)           | 0<br>(0 - 0)                | 0<br>(0 - 0)                | --                          |
| Varicella and herpes zoster                                        | 7<br>(2 - 21)                  | 0<br>(0 - 1)          | 0<br>(0 - 0)           | 1<br>(0 - 2)                | 1<br>(0 - 2)                | 5<br>(0 - 19)               |
| Neglected tropical diseases and malaria                            | 8<br>(7 - 10)                  | 0<br>(0 - 0)          | 0<br>(0 - 0)           | 4<br>(3 - 4)                | 3<br>(2 - 3)                | 2<br>(1 - 2)                |
| Cysticercosis                                                      | 0<br>(0 - 0)                   | 0<br>(0 - 0)          | 0<br>(0 - 0)           | 0<br>(0 - 0)                | 0<br>(0 - 0)                | 0<br>(0 - 0)                |
| Cystic echinococcosis                                              | 3<br>(3 - 4)                   | 0<br>(0 - 0)          | 0<br>(0 - 0)           | 1<br>(1 - 1)                | 1<br>(1 - 1)                | 1<br>(1 - 1)                |
| Dengue                                                             | 1<br>(1 - 2)                   | 0<br>(0 - 0)          | 0<br>(0 - 0)           | 1<br>(0 - 1)                | 0<br>(0 - 0)                | 0<br>(0 - 0)                |
| Rabies                                                             | 2<br>(1 - 3)                   | 0<br>(0 - 0)          | 0<br>(0 - 0)           | 1<br>(1 - 2)                | 0<br>(0 - 1)                | 0<br>(0 - 0)                |
| Other neglected tropical diseases                                  | 2<br>(2 - 2)                   | 0<br>(0 - 0)          | 0<br>(0 - 0)           | 1<br>(1 - 1)                | 1<br>(0 - 1)                | 0<br>(0 - 0)                |
| Maternal disorders                                                 | 11<br>(8 - 15)                 | --                    | 0<br>(0 - 0)           | 11<br>(8 - 15)              | --                          | --                          |
| Maternal hemorrhage                                                | 1<br>(1 - 2)                   | --                    | 0<br>(0 - 0)           | 1<br>(1 - 2)                | --                          | --                          |
| Maternal sepsis and other maternal infections                      | 1<br>(0 - 1)                   | --                    | 0<br>(0 - 0)           | 1<br>(0 - 1)                | --                          | --                          |
| Maternal hypertensive disorders                                    | 1<br>(0 - 2)                   | --                    | 0<br>(0 - 0)           | 1<br>(0 - 2)                | --                          | --                          |
| Maternal obstructed labor                                          | 1<br>(1 - 2)                   | --                    | 0<br>(0 - 0)           | 1<br>(1 - 2)                | --                          | --                          |
| Maternal abortive outcome                                          | 2<br>(2 - 3)                   | --                    | 0<br>(0 - 0)           | 2<br>(2 - 3)                | --                          | --                          |
| Indirect maternal deaths                                           | 1<br>(1 - 2)                   | --                    | 0<br>(0 - 0)           | 1<br>(1 - 2)                | --                          | --                          |

Web Table 31- Belarus deaths with 95% UI by age, sex, and cause in 2013

| Cause                                                            | Both Sexes, All Ages           | Both Sexes, 0-4 Years | Both Sexes, 5-14 Years | Both Sexes, 15-49 Years  | Both Sexes, 50-69 Years     | Both Sexes, 70-80 Years     |
|------------------------------------------------------------------|--------------------------------|-----------------------|------------------------|--------------------------|-----------------------------|-----------------------------|
| Late maternal deaths                                             | 1<br>(0 - 2)                   | --                    | 0<br>(0 - 0)           | 1<br>(0 - 2)             | --                          | --                          |
| Maternal deaths aggravated by HIV/AIDS                           | 0<br>(0 - 0)                   | --                    | --                     | 0<br>(0 - 0)             | --                          | --                          |
| Other maternal disorders                                         | 2<br>(1 - 3)                   | --                    | 0<br>(0 - 0)           | 2<br>(1 - 3)             | --                          | --                          |
| Neonatal disorders                                               | 252<br>(180 - 356)             | 252<br>(180 - 356)    | --                     | --                       | --                          | --                          |
| Neonatal preterm birth complications                             | 77<br>(43 - 131)               | 77<br>(43 - 131)      | --                     | --                       | --                          | --                          |
| Neonatal encephalopathy due to birth asphyxia and trauma         | 93<br>(58 - 145)               | 93<br>(58 - 145)      | --                     | --                       | --                          | --                          |
| Neonatal sepsis and other neonatal infections                    | 25<br>(12 - 47)                | 25<br>(12 - 47)       | --                     | --                       | --                          | --                          |
| Hemolytic disease and other neonatal jaundice                    | 1<br>(0 - 1)                   | 1<br>(0 - 1)          | --                     | --                       | --                          | --                          |
| Other neonatal disorders                                         | 55<br>(34 - 89)                | 55<br>(34 - 89)       | --                     | --                       | --                          | --                          |
| Nutritional deficiencies                                         | 66<br>(53 - 103)               | 3<br>(2 - 5)          | 1<br>(1 - 2)           | 19<br>(15 - 28)          | 27<br>(21 - 47)             | 15<br>(12 - 24)             |
| Protein-energy malnutrition                                      | 26<br>(18 - 46)                | 2<br>(1 - 4)          | 0<br>(0 - 1)           | 8<br>(5 - 13)            | 12<br>(7 - 23)              | 3<br>(2 - 6)                |
| Iodine deficiency                                                | 3<br>(1 - 7)                   | 0<br>(0 - 1)          | 0<br>(0 - 0)           | 1<br>(0 - 2)             | 1<br>(0 - 4)                | 1<br>(0 - 3)                |
| Iron-deficiency anemia                                           | 23<br>(16 - 39)                | 0<br>(0 - 1)          | 0<br>(0 - 0)           | 5<br>(3 - 9)             | 9<br>(6 - 16)               | 8<br>(5 - 13)               |
| Other nutritional deficiencies                                   | 14<br>(8 - 23)                 | 0<br>(0 - 1)          | 0<br>(0 - 0)           | 5<br>(2 - 7)             | 6<br>(3 - 10)               | 3<br>(2 - 5)                |
| Other communicable, maternal, neonatal, and nutritional diseases | 80<br>(65 - 102)               | 10<br>(6 - 19)        | 1<br>(1 - 2)           | 28<br>(22 - 34)          | 31<br>(22 - 45)             | 10<br>(7 - 17)              |
| Sexually transmitted diseases excluding HIV                      | 8<br>(4 - 15)                  | 0<br>(0 - 1)          | 0<br>(0 - 0)           | 2<br>(1 - 5)             | 3<br>(2 - 7)                | 2<br>(1 - 3)                |
| Syphilis                                                         | 5<br>(3 - 10)                  | 0<br>(0 - 1)          | 0<br>(0 - 0)           | 1<br>(1 - 3)             | 2<br>(1 - 5)                | 1<br>(0 - 2)                |
| Chlamydial infection                                             | 0<br>(0 - 1)                   | --                    | 0<br>(0 - 0)           | 0<br>(0 - 0)             | 0<br>(0 - 0)                | 0<br>(0 - 0)                |
| Gonococcal infection                                             | 1<br>(1 - 3)                   | --                    | 0<br>(0 - 0)           | 0<br>(0 - 1)             | 1<br>(0 - 1)                | 0<br>(0 - 0)                |
| Other sexually transmitted diseases                              | 1<br>(0 - 2)                   | --                    | 0<br>(0 - 0)           | 0<br>(0 - 1)             | 0<br>(0 - 1)                | 0<br>(0 - 0)                |
| Hepatitis                                                        | 26<br>(22 - 31)                | 2<br>(1 - 3)          | 1<br>(0 - 1)           | 11<br>(8 - 13)           | 9<br>(7 - 12)               | 4<br>(3 - 5)                |
| Acute hepatitis A                                                | 5<br>(2 - 9)                   | 1<br>(0 - 2)          | 0<br>(0 - 0)           | 3<br>(1 - 5)             | 1<br>(0 - 2)                | 0<br>(0 - 0)                |
| Acute hepatitis B                                                | 20<br>(15 - 25)                | 1<br>(1 - 2)          | 0<br>(0 - 0)           | 7<br>(5 - 10)            | 8<br>(5 - 11)               | 3<br>(2 - 5)                |
| Acute hepatitis C                                                | 1<br>(0 - 4)                   | --                    | 0<br>(0 - 0)           | 1<br>(0 - 2)             | 0<br>(0 - 1)                | 0<br>(0 - 1)                |
| Other infectious diseases                                        | 47<br>(34 - 64)                | 8<br>(4 - 17)         | 1<br>(0 - 1)           | 15<br>(10 - 21)          | 18<br>(11 - 32)             | 5<br>(2 - 11)               |
| Non-communicable diseases                                        | 130,000<br>(123,339 - 137,039) | 341<br>(236 - 475)    | 68<br>(53 - 85)        | 8,367<br>(7,590 - 9,140) | 38,061<br>(35,261 - 40,763) | 83,164<br>(79,271 - 87,218) |
| Neoplasms                                                        | 21,402<br>(19,700 - 23,266)    | 18<br>(11 - 28)       | 29<br>(22 - 37)        | 2,015<br>(1,818 - 2,224) | 10,640<br>(9,711 - 11,584)  | 8,700<br>(7,866 - 9,445)    |
| Esophageal cancer                                                | 433<br>(310 - 516)             | --                    | --                     | 36<br>(26 - 48)          | 274<br>(180 - 342)          | 123<br>(95 - 148)           |
| Stomach cancer                                                   | 3,093<br>(2,622 - 3,733)       | --                    | --                     | 272<br>(220 - 334)       | 1,440<br>(1,171 - 1,717)    | 1,380<br>(1,140 - 1,757)    |
| Liver cancer                                                     | 434<br>(350 - 566)             | --                    | 1<br>(0 - 1)           | 33<br>(25 - 44)          | 205<br>(160 - 273)          | 196<br>(149 - 258)          |
| Liver cancer due to hepatitis B                                  | 72<br>(44 - 110)               | --                    | 0<br>(0 - 0)           | 8<br>(4 - 13)            | 39<br>(22 - 62)             | 25<br>(15 - 38)             |
| Liver cancer due to hepatitis C                                  | 208<br>(157 - 287)             | --                    | 0<br>(0 - 0)           | 14<br>(10 - 21)          | 99<br>(71 - 142)            | 95<br>(68 - 128)            |
| Liver cancer due to alcohol use                                  | 108<br>(75 - 148)              | --                    | --                     | 5<br>(3 - 8)             | 47<br>(29 - 68)             | 56<br>(37 - 79)             |
| Liver cancer due to other causes                                 | 46<br>(31 - 63)                | --                    | 0<br>(0 - 1)           | 5<br>(4 - 7)             | 20<br>(13 - 28)             | 20<br>(13 - 31)             |
| Larynx cancer                                                    | 503<br>(388 - 768)             | --                    | --                     | 58<br>(39 - 103)         | 343<br>(252 - 516)          | 103<br>(77 - 145)           |
| Tracheal, bronchus and lung cancer                               | 4,474<br>(4,005 - 4,939)       | --                    | --                     | 278<br>(224 - 339)       | 2,685<br>(2,348 - 3,027)    | 1,511<br>(1,342 - 1,713)    |
| Breast cancer                                                    | 1,525<br>(1,098 - 1,935)       | --                    | --                     | 232<br>(186 - 338)       | 770<br>(547 - 991)          | 522<br>(330 - 662)          |
| Cervical cancer                                                  | 619<br>(487 - 766)             | --                    | --                     | 115<br>(85 - 145)        | 278<br>(208 - 355)          | 227<br>(168 - 305)          |
| Uterine cancer                                                   | 117<br>(83 - 237)              | --                    | --                     | 5<br>(3 - 10)            | 56<br>(36 - 118)            | 56<br>(37 - 121)            |
| Prostate cancer                                                  | 802<br>(460 - 1,149)           | --                    | --                     | 6<br>(3 - 10)            | 240<br>(130 - 373)          | 556<br>(311 - 783)          |

Web Table 31- Belarus deaths with 95% UI by age, sex, and cause in 2013

| Cause                                         | Both Sexes, All Ages        | Both Sexes, 0-4 Years | Both Sexes, 5-14 Years | Both Sexes, 15-49 Years  | Both Sexes, 50-69 Years     | Both Sexes, 70-80 Years     |
|-----------------------------------------------|-----------------------------|-----------------------|------------------------|--------------------------|-----------------------------|-----------------------------|
| Colon and rectum cancer                       | 2,347<br>(2,095 - 2,682)    | --                    | --                     | 129<br>(111 - 150)       | 956<br>(851 - 1,088)        | 1,262<br>(1,097 - 1,512)    |
| Lip and oral cavity cancer                    | 530<br>(436 - 627)          | --                    | --                     | 62<br>(47 - 81)          | 354<br>(272 - 441)          | 114<br>(94 - 139)           |
| Nasopharynx cancer                            | 52<br>(39 - 70)             | --                    | 0<br>(0 - 1)           | 13<br>(9 - 20)           | 33<br>(23 - 46)             | 6<br>(4 - 9)                |
| Other pharynx cancer                          | 257<br>(196 - 316)          | --                    | --                     | 31<br>(22 - 42)          | 194<br>(142 - 247)          | 32<br>(23 - 42)             |
| Gallbladder and biliary tract cancer          | 337<br>(167 - 446)          | --                    | --                     | 15<br>(8 - 20)           | 132<br>(71 - 172)           | 190<br>(85 - 271)           |
| Pancreatic cancer                             | 1,086<br>(975 - 1,215)      | --                    | --                     | 79<br>(65 - 94)          | 517<br>(452 - 586)          | 491<br>(427 - 585)          |
| Malignant skin melanoma                       | 266<br>(170 - 360)          | --                    | --                     | 53<br>(32 - 74)          | 119<br>(74 - 164)           | 94<br>(60 - 130)            |
| Non-melanoma skin cancer                      | 154<br>(105 - 216)          | --                    | --                     | 8<br>(5 - 13)            | 37<br>(22 - 59)             | 108<br>(70 - 165)           |
| Ovarian cancer                                | 655<br>(542 - 825)          | --                    | --                     | 84<br>(65 - 109)         | 331<br>(265 - 431)          | 240<br>(185 - 316)          |
| Testicular cancer                             | 13<br>(9 - 20)              | --                    | --                     | 10<br>(7 - 14)           | 3<br>(2 - 5)                | 1<br>(1 - 2)                |
| Kidney cancer                                 | 810<br>(664 - 1,005)        | 2<br>(1 - 3)          | 1<br>(1 - 2)           | 76<br>(61 - 98)          | 435<br>(353 - 544)          | 295<br>(215 - 424)          |
| Bladder cancer                                | 498<br>(427 - 607)          | --                    | --                     | 12<br>(9 - 15)           | 170<br>(140 - 220)          | 316<br>(264 - 387)          |
| Brain and nervous system cancer               | 451<br>(365 - 525)          | 4<br>(2 - 7)          | 8<br>(6 - 11)          | 122<br>(97 - 146)        | 253<br>(205 - 299)          | 64<br>(42 - 81)             |
| Thyroid cancer                                | 118<br>(78 - 146)           | --                    | 0<br>(0 - 0)           | 9<br>(7 - 12)            | 48<br>(33 - 61)             | 60<br>(37 - 80)             |
| Mesothelioma                                  | 55<br>(32 - 73)             | --                    | --                     | 8<br>(4 - 11)            | 31<br>(17 - 46)             | 17<br>(10 - 24)             |
| Hodgkin lymphoma                              | 26<br>(20 - 54)             | 0<br>(0 - 0)          | 0<br>(0 - 1)           | 13<br>(10 - 26)          | 9<br>(6 - 19)               | 4<br>(3 - 9)                |
| Non-Hodgkin lymphoma                          | 460<br>(281 - 579)          | 1<br>(0 - 2)          | 2<br>(1 - 4)           | 60<br>(38 - 79)          | 194<br>(119 - 251)          | 203<br>(111 - 267)          |
| Multiple myeloma                              | 182<br>(117 - 249)          | --                    | --                     | 11<br>(7 - 17)           | 95<br>(60 - 133)            | 76<br>(46 - 110)            |
| Leukemia                                      | 734<br>(655 - 830)          | 7<br>(4 - 12)         | 11<br>(7 - 15)         | 119<br>(103 - 138)       | 287<br>(248 - 336)          | 310<br>(265 - 359)          |
| Other neoplasms                               | 370<br>(302 - 437)          | 4<br>(3 - 7)          | 5<br>(3 - 7)           | 65<br>(53 - 77)          | 152<br>(124 - 184)          | 143<br>(110 - 178)          |
| Cardiovascular diseases                       | 89,024<br>(82,042 - 93,991) | 2<br>(2 - 4)          | 3<br>(2 - 3)           | 3,514<br>(3,099 - 3,933) | 21,647<br>(19,810 - 23,307) | 63,859<br>(58,246 - 67,532) |
| Rheumatic heart disease                       | 370<br>(287 - 604)          | 0<br>(0 - 0)          | 0<br>(0 - 0)           | 76<br>(48 - 167)         | 228<br>(173 - 375)          | 65<br>(48 - 84)             |
| Ischemic heart disease                        | 61,879<br>(55,124 - 66,250) | 1<br>(0 - 1)          | 1<br>(0 - 1)           | 2,033<br>(1,740 - 2,386) | 13,998<br>(12,192 - 15,475) | 45,848<br>(40,514 - 49,110) |
| Cerebrovascular disease                       | 22,275<br>(19,715 - 25,496) | 0<br>(0 - 0)          | 1<br>(0 - 1)           | 758<br>(613 - 945)       | 5,615<br>(4,802 - 6,792)    | 15,901<br>(13,541 - 18,092) |
| Ischemic stroke                               | 16,641<br>(14,442 - 19,185) | 0<br>(0 - 0)          | 0<br>(0 - 0)           | 182<br>(124 - 283)       | 3,181<br>(2,545 - 4,198)    | 13,278<br>(11,124 - 15,244) |
| Hemorrhagic stroke                            | 5,634<br>(4,502 - 7,000)    | 0<br>(0 - 0)          | 1<br>(0 - 1)           | 576<br>(460 - 724)       | 2,434<br>(1,871 - 3,078)    | 2,624<br>(1,894 - 3,512)    |
| Hypertensive heart disease                    | 1,779<br>(1,121 - 2,372)    | 0<br>(0 - 0)          | 0<br>(0 - 0)           | 47<br>(24 - 69)          | 385<br>(223 - 559)          | 1,347<br>(827 - 1,855)      |
| Cardiomyopathy and myocarditis                | 1,978<br>(1,274 - 2,505)    | 1<br>(1 - 2)          | 1<br>(1 - 1)           | 527<br>(305 - 719)       | 1,112<br>(657 - 1,486)      | 336<br>(229 - 527)          |
| Atrial fibrillation and flutter               | 19<br>(12 - 29)             | --                    | --                     | 1<br>(0 - 1)             | 5<br>(3 - 7)                | 13<br>(7 - 22)              |
| Aortic aneurysm                               | 412<br>(306 - 544)          | --                    | --                     | 31<br>(22 - 42)          | 167<br>(119 - 229)          | 214<br>(153 - 307)          |
| Peripheral vascular disease                   | 29<br>(20 - 38)             | --                    | --                     | 1<br>(1 - 1)             | 8<br>(5 - 11)               | 20<br>(13 - 28)             |
| Endocarditis                                  | 53<br>(35 - 68)             | 0<br>(0 - 0)          | 0<br>(0 - 0)           | 15<br>(8 - 20)           | 23<br>(14 - 32)             | 15<br>(10 - 21)             |
| Other cardiovascular and circulatory diseases | 231<br>(182 - 330)          | 0<br>(0 - 0)          | 0<br>(0 - 0)           | 26<br>(19 - 37)          | 106<br>(78 - 162)           | 99<br>(70 - 143)            |
| Chronic respiratory diseases                  | 4,689<br>(3,770 - 8,928)    | 0<br>(0 - 0)          | 1<br>(0 - 1)           | 177<br>(137 - 301)       | 1,327<br>(1,047 - 2,295)    | 3,184<br>(2,524 - 6,508)    |
| Chronic obstructive pulmonary disease         | 4,147<br>(3,299 - 7,858)    | 0<br>(0 - 0)          | 0<br>(0 - 0)           | 123<br>(91 - 212)        | 1,141<br>(886 - 2,003)      | 2,882<br>(2,254 - 5,736)    |
| Pneumoconiosis                                | 7<br>(4 - 14)               | 0<br>(0 - 0)          | 0<br>(0 - 0)           | 2<br>(1 - 3)             | 3<br>(2 - 6)                | 3<br>(1 - 5)                |
| Silicosis                                     | 3<br>(2 - 5)                | 0<br>(0 - 0)          | 0<br>(0 - 0)           | 0<br>(0 - 1)             | 1<br>(1 - 2)                | 1<br>(1 - 2)                |
| Asbestosis                                    | 1<br>(1 - 2)                | 0<br>(0 - 0)          | 0<br>(0 - 0)           | 0<br>(0 - 1)             | 0<br>(0 - 1)                | 0<br>(0 - 1)                |
| Coal workers pneumoconiosis                   | 1<br>(1 - 2)                | 0<br>(0 - 0)          | 0<br>(0 - 0)           | 0<br>(0 - 1)             | 0<br>(0 - 1)                | 0<br>(0 - 1)                |
| Other pneumoconiosis                          | 2<br>(1 - 5)                | 0<br>(0 - 0)          | 0<br>(0 - 0)           | 1<br>(0 - 1)             | 1<br>(0 - 2)                | 1<br>(0 - 2)                |

Web Table 31- Belarus deaths with 95% UI by age, sex, and cause in 2013

| Cause                                               | Both Sexes, All Ages     | Both Sexes, 0-4 Years | Both Sexes, 5-14 Years | Both Sexes, 15-49 Years | Both Sexes, 50-69 Years  | Both Sexes, 70-80 Years  |
|-----------------------------------------------------|--------------------------|-----------------------|------------------------|-------------------------|--------------------------|--------------------------|
| Asthma                                              | 440<br>(302 - 961)       | 0<br>(0 - 0)          | 0<br>(0 - 0)           | 36<br>(26 - 64)         | 151<br>(102 - 276)       | 253<br>(156 - 628)       |
| Interstitial lung disease and pulmonary sarcoidosis | 75<br>(34 - 148)         | 0<br>(0 - 0)          | 0<br>(0 - 0)           | 7<br>(2 - 12)           | 26<br>(11 - 45)          | 42<br>(20 - 98)          |
| Other chronic respiratory diseases                  | 21<br>(13 - 40)          | 0<br>(0 - 0)          | 0<br>(0 - 0)           | 9<br>(6 - 18)           | 6<br>(3 - 13)            | 5<br>(3 - 12)            |
| Cirrhosis                                           | 2,935<br>(2,627 - 3,305) | 1<br>(0 - 1)          | 1<br>(1 - 2)           | 779<br>(671 - 901)      | 1,766<br>(1,558 - 2,010) | 388<br>(339 - 464)       |
| Cirrhosis due to hepatitis B                        | 501<br>(328 - 674)       | 0<br>(0 - 0)          | 0<br>(0 - 0)           | 133<br>(86 - 183)       | 301<br>(196 - 411)       | 67<br>(40 - 93)          |
| Cirrhosis due to hepatitis C                        | 1,114<br>(816 - 1,425)   | 0<br>(0 - 0)          | 0<br>(0 - 0)           | 280<br>(189 - 378)      | 688<br>(496 - 889)       | 146<br>(104 - 192)       |
| Cirrhosis due to alcohol use                        | 1,027<br>(773 - 1,273)   | --                    | --                     | 248<br>(168 - 324)      | 628<br>(471 - 789)       | 151<br>(115 - 200)       |
| Cirrhosis due to other causes                       | 292<br>(180 - 436)       | 0<br>(0 - 1)          | 1<br>(1 - 1)           | 117<br>(69 - 174)       | 149<br>(83 - 234)        | 24<br>(13 - 38)          |
| Digestive diseases                                  | 1,764<br>(1,538 - 1,989) | 1<br>(1 - 2)          | 1<br>(1 - 2)           | 302<br>(252 - 348)      | 605<br>(521 - 723)       | 854<br>(696 - 995)       |
| Peptic ulcer disease                                | 274<br>(208 - 371)       | 0<br>(0 - 0)          | 0<br>(0 - 0)           | 50<br>(34 - 75)         | 125<br>(89 - 186)        | 99<br>(70 - 135)         |
| Gastritis and duodenitis                            | 15<br>(10 - 25)          | 0<br>(0 - 0)          | 0<br>(0 - 0)           | 3<br>(2 - 5)            | 5<br>(3 - 9)             | 6<br>(3 - 13)            |
| Appendicitis                                        | 27<br>(20 - 36)          | 0<br>(0 - 1)          | 0<br>(0 - 0)           | 6<br>(4 - 8)            | 10<br>(7 - 14)           | 11<br>(6 - 16)           |
| Paralytic ileus and intestinal obstruction          | 131<br>(89 - 201)        | 0<br>(0 - 1)          | 0<br>(0 - 0)           | 17<br>(10 - 27)         | 32<br>(21 - 54)          | 81<br>(49 - 130)         |
| Inguinal, femoral, and abdominal hernia             | 42<br>(26 - 69)          | 0<br>(0 - 0)          | 0<br>(0 - 0)           | 2<br>(1 - 4)            | 10<br>(6 - 16)           | 29<br>(17 - 52)          |
| Inflammatory bowel disease                          | 61<br>(43 - 84)          | 0<br>(0 - 0)          | 0<br>(0 - 0)           | 11<br>(7 - 15)          | 23<br>(15 - 32)          | 27<br>(17 - 45)          |
| Vascular intestinal disorders                       | 431<br>(255 - 603)       | 0<br>(0 - 0)          | 0<br>(0 - 0)           | 12<br>(6 - 25)          | 99<br>(56 - 160)         | 320<br>(185 - 438)       |
| Gallbladder and biliary diseases                    | 175<br>(131 - 272)       | 0<br>(0 - 0)          | 0<br>(0 - 0)           | 11<br>(8 - 17)          | 52<br>(37 - 90)          | 112<br>(81 - 168)        |
| Pancreatitis                                        | 527<br>(394 - 678)       | 0<br>(0 - 0)          | 0<br>(0 - 0)           | 176<br>(124 - 218)      | 214<br>(149 - 278)       | 137<br>(88 - 224)        |
| Other digestive diseases                            | 82<br>(61 - 111)         | 0<br>(0 - 0)          | 0<br>(0 - 0)           | 15<br>(10 - 23)         | 34<br>(24 - 46)          | 33<br>(22 - 50)          |
| Neurological disorders                              | 5,825<br>(4,925 - 6,993) | 6<br>(4 - 9)          | 5<br>(4 - 7)           | 173<br>(139 - 211)      | 360<br>(309 - 428)       | 5,281<br>(4,392 - 6,447) |
| Alzheimer disease and other dementias               | 5,385<br>(4,491 - 6,567) | --                    | --                     | 1<br>(0 - 2)            | 205<br>(164 - 263)       | 5,179<br>(4,293 - 6,338) |
| Parkinson disease                                   | 67<br>(48 - 95)          | --                    | --                     | 1<br>(1 - 1)            | 15<br>(10 - 19)          | 52<br>(34 - 78)          |
| Epilepsy                                            | 178<br>(125 - 223)       | 1<br>(0 - 2)          | 3<br>(2 - 5)           | 111<br>(79 - 142)       | 55<br>(33 - 73)          | 8<br>(5 - 10)            |
| Multiple sclerosis                                  | 60<br>(44 - 104)         | --                    | --                     | 28<br>(20 - 49)         | 23<br>(16 - 38)          | 9<br>(5 - 20)            |
| Other neurological disorders                        | 135<br>(115 - 159)       | 5<br>(3 - 8)          | 2<br>(1 - 3)           | 32<br>(25 - 39)         | 62<br>(51 - 76)          | 33<br>(28 - 43)          |
| Mental and substance use disorders                  | 1,977<br>(1,369 - 2,502) | 0<br>(0 - 1)          | 0<br>(0 - 0)           | 1,017<br>(721 - 1,305)  | 880<br>(558 - 1,197)     | 79<br>(56 - 99)          |
| Schizophrenia                                       | 13<br>(10 - 18)          | --                    | --                     | 4<br>(3 - 5)            | 6<br>(4 - 8)             | 4<br>(2 - 6)             |
| Alcohol use disorders                               | 1,592<br>(1,000 - 2,094) | --                    | --                     | 783<br>(502 - 1,045)    | 761<br>(446 - 1,073)     | 49<br>(27 - 67)          |
| Drug use disorders                                  | 370<br>(296 - 458)       | 0<br>(0 - 1)          | --                     | 229<br>(176 - 296)      | 113<br>(84 - 154)        | 27<br>(20 - 35)          |
| Opioid use disorders                                | 158<br>(126 - 197)       | 0<br>(0 - 0)          | --                     | 101<br>(77 - 132)       | 46<br>(33 - 63)          | 12<br>(9 - 16)           |
| Cocaine use disorders                               | 9<br>(7 - 12)            | 0<br>(0 - 0)          | --                     | 6<br>(5 - 8)            | 2<br>(2 - 3)             | 1<br>(0 - 1)             |
| Amphetamine use disorders                           | 9<br>(7 - 11)            | 0<br>(0 - 0)          | --                     | 5<br>(4 - 7)            | 3<br>(2 - 4)             | 1<br>(0 - 1)             |
| Other drug use disorders                            | 194<br>(154 - 243)       | 0<br>(0 - 0)          | --                     | 117<br>(89 - 152)       | 63<br>(46 - 87)          | 14<br>(10 - 18)          |
| Eating disorders                                    | 1<br>(1 - 2)             | --                    | 0<br>(0 - 0)           | 1<br>(1 - 2)            | --                       | --                       |
| Anorexia nervosa                                    | 1<br>(1 - 2)             | --                    | 0<br>(0 - 0)           | 1<br>(1 - 2)            | --                       | --                       |
| Diabetes, urogenital, blood, and endocrine diseases | 1,711<br>(1,500 - 2,083) | 7<br>(4 - 11)         | 4<br>(3 - 6)           | 259<br>(226 - 329)      | 707<br>(614 - 933)       | 733<br>(597 - 874)       |
| Diabetes mellitus                                   | 530<br>(463 - 740)       | 0<br>(0 - 1)          | 0<br>(0 - 1)           | 74<br>(63 - 88)         | 234<br>(197 - 326)       | 221<br>(185 - 328)       |
| Acute glomerulonephritis                            | 7<br>(6 - 10)            | 0<br>(0 - 0)          | 0<br>(0 - 0)           | 2<br>(2 - 3)            | 3<br>(2 - 4)             | 2<br>(1 - 2)             |
| Chronic kidney disease                              | 283<br>(223 - 594)       | 0<br>(0 - 1)          | 1<br>(0 - 1)           | 66<br>(52 - 137)        | 133<br>(100 - 281)       | 83<br>(65 - 163)         |
| Chronic kidney disease due to diabetes mellitus     | 9<br>(5 - 18)            | 0<br>(0 - 0)          | 0<br>(0 - 0)           | 3<br>(2 - 4)            | 4<br>(2 - 9)             | 2<br>(1 - 5)             |

Web Table 31- Belarus deaths with 95% UI by age, sex, and cause in 2013

| Cause                                               | Both Sexes, All Ages        | Both Sexes, 0-4 Years | Both Sexes, 5-14 Years | Both Sexes, 15-49 Years  | Both Sexes, 50-69 Years  | Both Sexes, 70-80 Years  |
|-----------------------------------------------------|-----------------------------|-----------------------|------------------------|--------------------------|--------------------------|--------------------------|
| Chronic kidney disease due to hypertension          | 61<br>(42 - 105)            | 0<br>(0 - 0)          | 0<br>(0 - 0)           | 7<br>(4 - 13)            | 26<br>(16 - 44)          | 29<br>(19 - 52)          |
| Chronic kidney disease due to glomerulonephritis    | 97<br>(76 - 144)            | 0<br>(0 - 0)          | 0<br>(0 - 0)           | 27<br>(21 - 39)          | 45<br>(32 - 67)          | 25<br>(18 - 41)          |
| Chronic kidney disease due to other causes          | 116<br>(74 - 336)           | 0<br>(0 - 0)          | 0<br>(0 - 1)           | 30<br>(18 - 83)          | 58<br>(33 - 170)         | 28<br>(16 - 75)          |
| Urinary diseases and male infertility               | 699<br>(577 - 814)          | 0<br>(0 - 1)          | 1<br>(0 - 1)           | 77<br>(65 - 98)          | 268<br>(220 - 343)       | 352<br>(253 - 441)       |
| Interstitial nephritis and urinary tract infections | 591<br>(487 - 696)          | 0<br>(0 - 1)          | 1<br>(0 - 1)           | 69<br>(57 - 86)          | 232<br>(192 - 299)       | 289<br>(202 - 365)       |
| Urolithiasis                                        | 54<br>(33 - 79)             | --                    | 0<br>(0 - 0)           | 3<br>(2 - 6)             | 17<br>(10 - 27)          | 33<br>(17 - 56)          |
| Other urinary diseases                              | 53<br>(35 - 76)             | 0<br>(0 - 0)          | 0<br>(0 - 0)           | 5<br>(3 - 7)             | 18<br>(11 - 27)          | 30<br>(19 - 47)          |
| Gynecological diseases                              | 1<br>(0 - 1)                | --                    | --                     | 0<br>(0 - 0)             | 0<br>(0 - 0)             | 0<br>(0 - 0)             |
| Uterine fibroids                                    | 0<br>(0 - 0)                | --                    | --                     | 0<br>(0 - 0)             | 0<br>(0 - 0)             | 0<br>(0 - 0)             |
| Polycystic ovarian syndrome                         | 0<br>(0 - 0)                | --                    | --                     | 0<br>(0 - 0)             | 0<br>(0 - 0)             | --                       |
| Endometriosis                                       | 0<br>(0 - 0)                | --                    | --                     | 0<br>(0 - 0)             | 0<br>(0 - 0)             | --                       |
| Genital prolapse                                    | 0<br>(0 - 0)                | --                    | --                     | 0<br>(0 - 0)             | 0<br>(0 - 0)             | 0<br>(0 - 0)             |
| Other gynecological diseases                        | 0<br>(0 - 0)                | --                    | --                     | 0<br>(0 - 0)             | 0<br>(0 - 0)             | 0<br>(0 - 0)             |
| Hemoglobinopathies and hemolytic anemias            | 26<br>(19 - 36)             | 3<br>(1 - 5)          | 1<br>(1 - 2)           | 10<br>(7 - 14)           | 8<br>(5 - 11)            | 4<br>(3 - 6)             |
| Thalassemias                                        | 6<br>(4 - 9)                | 2<br>(1 - 3)          | 1<br>(1 - 2)           | 3<br>(2 - 4)             | 0<br>(0 - 0)             | 0<br>(0 - 0)             |
| Sickle cell disorders                               | 1<br>(1 - 1)                | 0<br>(0 - 0)          | 0<br>(0 - 0)           | 0<br>(0 - 1)             | 0<br>(0 - 0)             | 0<br>(0 - 0)             |
| G6PD deficiency                                     | 0<br>(0 - 1)                | 0<br>(0 - 0)          | 0<br>(0 - 0)           | 0<br>(0 - 0)             | 0<br>(0 - 0)             | 0<br>(0 - 0)             |
| Other hemoglobinopathies and hemolytic anemias      | 19<br>(13 - 26)             | 0<br>(0 - 1)          | 0<br>(0 - 0)           | 6<br>(4 - 9)             | 7<br>(5 - 10)            | 4<br>(3 - 6)             |
| Endocrine, metabolic, blood, and immune disorders   | 166<br>(47 - 212)           | 4<br>(1 - 6)          | 1<br>(0 - 2)           | 30<br>(9 - 39)           | 61<br>(17 - 82)          | 70<br>(17 - 98)          |
| Musculoskeletal disorders                           | 209<br>(156 - 319)          | --                    | 1<br>(1 - 2)           | 41<br>(30 - 56)          | 90<br>(64 - 139)         | 76<br>(51 - 154)         |
| Rheumatoid arthritis                                | 96<br>(68 - 139)            | --                    | 0<br>(0 - 0)           | 8<br>(5 - 11)            | 42<br>(27 - 62)          | 46<br>(30 - 78)          |
| Other musculoskeletal disorders                     | 113<br>(83 - 185)           | --                    | 1<br>(1 - 2)           | 33<br>(25 - 45)          | 49<br>(34 - 79)          | 30<br>(19 - 61)          |
| Other non-communicable diseases                     | 465<br>(357 - 602)          | 305<br>(210 - 429)    | 22<br>(16 - 29)        | 89<br>(74 - 116)         | 39<br>(32 - 51)          | 10<br>(8 - 12)           |
| Congenital anomalies                                | 426<br>(320 - 562)          | 273<br>(177 - 401)    | 22<br>(16 - 29)        | 88<br>(73 - 115)         | 36<br>(28 - 48)          | 8<br>(6 - 10)            |
| Neural tube defects                                 | 21<br>(13 - 37)             | 17<br>(9 - 30)        | 2<br>(1 - 2)           | 2<br>(1 - 3)             | 1<br>(0 - 1)             | 0<br>(0 - 0)             |
| Congenital heart anomalies                          | 226<br>(162 - 306)          | 147<br>(86 - 224)     | 11<br>(8 - 15)         | 53<br>(43 - 69)          | 13<br>(10 - 19)          | 2<br>(1 - 2)             |
| Cleft lip and cleft palate                          | 1<br>(0 - 2)                | 1<br>(0 - 2)          | --                     | --                       | --                       | --                       |
| Down syndrome                                       | 20<br>(13 - 28)             | 4<br>(2 - 9)          | 1<br>(1 - 2)           | 9<br>(6 - 13)            | 4<br>(3 - 6)             | 0<br>(0 - 1)             |
| Chromosomal unbalanced rearrangements               | 7<br>(5 - 11)               | 5<br>(3 - 8)          | 0<br>(0 - 1)           | 1<br>(1 - 2)             | 0<br>(0 - 1)             | 0<br>(0 - 0)             |
| Other congenital anomalies                          | 151<br>(106 - 210)          | 99<br>(60 - 155)      | 8<br>(5 - 11)          | 22<br>(17 - 32)          | 17<br>(13 - 24)          | 5<br>(4 - 7)             |
| Skin and subcutaneous diseases                      | 7<br>(5 - 8)                | 0<br>(0 - 0)          | 0<br>(0 - 0)           | 1<br>(1 - 2)             | 3<br>(2 - 4)             | 2<br>(1 - 3)             |
| Cellulitis                                          | 3<br>(2 - 4)                | 0<br>(0 - 0)          | 0<br>(0 - 0)           | 1<br>(0 - 1)             | 1<br>(1 - 2)             | 1<br>(0 - 1)             |
| Pyoderma                                            | 4<br>(2 - 5)                | 0<br>(0 - 0)          | 0<br>(0 - 0)           | 1<br>(0 - 1)             | 2<br>(1 - 2)             | 1<br>(1 - 2)             |
| Decubitus ulcer                                     | 1<br>(0 - 1)                | 0<br>(0 - 0)          | 0<br>(0 - 0)           | 0<br>(0 - 0)             | 0<br>(0 - 0)             | 0<br>(0 - 0)             |
| Other skin and subcutaneous diseases                | 0<br>(0 - 0)                | 0<br>(0 - 0)          | 0<br>(0 - 0)           | 0<br>(0 - 0)             | 0<br>(0 - 0)             | 0<br>(0 - 0)             |
| Sudden infant death syndrome                        | 32<br>(8 - 71)              | 32<br>(8 - 71)        | --                     | --                       | --                       | --                       |
| Injuries                                            | 13,125<br>(11,654 - 14,393) | 101<br>(67 - 147)     | 120<br>(96 - 150)      | 6,446<br>(5,746 - 7,109) | 4,739<br>(3,956 - 5,352) | 1,719<br>(1,509 - 1,932) |
| Transport injuries                                  | 2,526<br>(2,199 - 2,846)    | 10<br>(6 - 16)        | 37<br>(26 - 48)        | 1,462<br>(1,257 - 1,667) | 753<br>(632 - 878)       | 264<br>(218 - 325)       |
| Road injuries                                       | 2,354<br>(2,038 - 2,664)    | 9<br>(5 - 15)         | 35<br>(24 - 45)        | 1,365<br>(1,166 - 1,570) | 698<br>(585 - 821)       | 247<br>(203 - 305)       |
| Pedestrian road injuries                            | 782<br>(451 - 1,026)        | 4<br>(2 - 7)          | 17<br>(10 - 23)        | 308<br>(149 - 442)       | 301<br>(162 - 405)       | 152<br>(115 - 192)       |



Web Table 31- Belarus deaths with 95% UI by age, sex, and cause in 2013

| Cause                                           | Both Sexes, All Ages     | Both Sexes, 0-4 Years | Both Sexes, 5-14 Years | Both Sexes, 15-49 Years  | Both Sexes, 50-69 Years  | Both Sexes, 70-80 Years |
|-------------------------------------------------|--------------------------|-----------------------|------------------------|--------------------------|--------------------------|-------------------------|
| Cyclist road injuries                           | 160<br>(107 - 231)       | 0<br>(0 - 0)          | 4<br>(2 - 6)           | 68<br>(45 - 97)          | 69<br>(40 - 106)         | 19<br>(10 - 30)         |
| Motorcyclist road injuries                      | 183<br>(113 - 357)       | 0<br>(0 - 0)          | 1<br>(0 - 3)           | 141<br>(84 - 285)        | 34<br>(18 - 69)          | 6<br>(3 - 10)           |
| Motor vehicle road injuries                     | 1,188<br>(891 - 1,499)   | 5<br>(2 - 8)          | 12<br>(7 - 18)         | 821<br>(610 - 1,053)     | 284<br>(196 - 401)       | 66<br>(42 - 105)        |
| Other road injuries                             | 42<br>(19 - 87)          | 0<br>(0 - 0)          | 1<br>(0 - 1)           | 27<br>(11 - 52)          | 10<br>(4 - 33)           | 3<br>(1 - 10)           |
| Other transport injuries                        | 172<br>(122 - 243)       | 1<br>(0 - 2)          | 2<br>(1 - 5)           | 97<br>(65 - 143)         | 55<br>(33 - 86)          | 17<br>(10 - 28)         |
| Unintentional injuries                          | 5,339<br>(4,542 - 6,064) | 86<br>(56 - 128)      | 70<br>(52 - 95)        | 2,234<br>(1,906 - 2,701) | 2,129<br>(1,614 - 2,497) | 821<br>(697 - 958)      |
| Falls                                           | 1,648<br>(1,137 - 1,966) | 11<br>(6 - 18)        | 7<br>(5 - 10)          | 599<br>(452 - 769)       | 695<br>(398 - 859)       | 336<br>(247 - 428)      |
| Drowning                                        | 1,195<br>(938 - 1,727)   | 20<br>(11 - 40)       | 44<br>(31 - 73)        | 715<br>(541 - 1,078)     | 321<br>(203 - 468)       | 96<br>(61 - 130)        |
| Fire, heat, and hot substances                  | 855<br>(554 - 1,071)     | 15<br>(9 - 27)        | 7<br>(4 - 10)          | 285<br>(189 - 378)       | 354<br>(200 - 493)       | 194<br>(127 - 248)      |
| Poisonings                                      | 403<br>(299 - 818)       | 7<br>(4 - 12)         | 3<br>(2 - 4)           | 151<br>(95 - 382)        | 174<br>(125 - 323)       | 68<br>(51 - 107)        |
| Exposure to mechanical forces                   | 259<br>(179 - 346)       | 6<br>(2 - 12)         | 4<br>(3 - 7)           | 139<br>(95 - 196)        | 94<br>(57 - 143)         | 15<br>(10 - 29)         |
| Unintentional firearm injuries                  | 10<br>(7 - 15)           | 0<br>(0 - 0)          | 0<br>(0 - 1)           | 7<br>(5 - 12)            | 2<br>(1 - 3)             | 0<br>(0 - 1)            |
| Unintentional suffocation                       | 11<br>(3 - 18)           | 3<br>(1 - 9)          | 0<br>(0 - 1)           | 4<br>(1 - 6)             | 2<br>(1 - 4)             | 1<br>(0 - 1)            |
| Other exposure to mechanical forces             | 238<br>(163 - 327)       | 2<br>(1 - 5)          | 4<br>(2 - 6)           | 128<br>(85 - 186)        | 90<br>(53 - 139)         | 14<br>(9 - 27)          |
| Adverse effects of medical treatment            | 136<br>(99 - 170)        | 3<br>(2 - 6)          | 0<br>(0 - 0)           | 25<br>(18 - 33)          | 82<br>(55 - 110)         | 26<br>(16 - 36)         |
| Animal contact                                  | 51<br>(37 - 71)          | 1<br>(0 - 2)          | 0<br>(0 - 1)           | 12<br>(8 - 18)           | 31<br>(21 - 45)          | 7<br>(4 - 10)           |
| Venomous animal contact                         | 15<br>(9 - 26)           | 0<br>(0 - 1)          | 0<br>(0 - 0)           | 4<br>(2 - 8)             | 9<br>(5 - 16)            | 1<br>(0 - 2)            |
| Non-venomous animal contact                     | 36<br>(23 - 50)          | 1<br>(0 - 1)          | 0<br>(0 - 1)           | 8<br>(4 - 11)            | 22<br>(13 - 33)          | 6<br>(4 - 9)            |
| Foreign body                                    | 588<br>(286 - 855)       | 22<br>(11 - 38)       | 2<br>(1 - 4)           | 202<br>(85 - 321)        | 287<br>(127 - 458)       | 74<br>(41 - 145)        |
| Pulmonary aspiration and foreign body in airway | 587<br>(285 - 854)       | 22<br>(11 - 38)       | 2<br>(1 - 4)           | 202<br>(84 - 320)        | 287<br>(127 - 458)       | 73<br>(40 - 145)        |
| Foreign body in other body part                 | 1<br>(1 - 2)             | 0<br>(0 - 0)          | 0<br>(0 - 0)           | 1<br>(0 - 1)             | 0<br>(0 - 0)             | 0<br>(0 - 0)            |
| Other unintentional injuries                    | 204<br>(167 - 245)       | 2<br>(1 - 2)          | 2<br>(1 - 2)           | 104<br>(80 - 131)        | 91<br>(69 - 116)         | 6<br>(4 - 8)            |
| Self-harm and interpersonal violence            | 5,260<br>(4,275 - 5,884) | 5<br>(3 - 7)          | 13<br>(9 - 18)         | 2,751<br>(2,252 - 3,143) | 1,857<br>(1,463 - 2,169) | 634<br>(478 - 751)      |
| Self-harm                                       | 4,211<br>(3,231 - 4,750) | --                    | 9<br>(5 - 13)          | 2,159<br>(1,655 - 2,500) | 1,520<br>(1,159 - 1,802) | 523<br>(368 - 625)      |
| Interpersonal violence                          | 1,049<br>(770 - 1,364)   | 5<br>(3 - 7)          | 4<br>(3 - 5)           | 592<br>(437 - 802)       | 337<br>(223 - 435)       | 112<br>(82 - 146)       |
| Assault by firearm                              | 67<br>(31 - 121)         | 0<br>(0 - 0)          | 0<br>(0 - 1)           | 53<br>(23 - 98)          | 12<br>(6 - 25)           | 1<br>(1 - 2)            |
| Assault by sharp object                         | 367<br>(232 - 501)       | 1<br>(0 - 2)          | 1<br>(1 - 1)           | 217<br>(138 - 313)       | 119<br>(63 - 171)        | 29<br>(19 - 45)         |
| Assault by other means                          | 615<br>(447 - 838)       | 4<br>(2 - 6)          | 3<br>(2 - 4)           | 321<br>(232 - 462)       | 206<br>(139 - 280)       | 81<br>(58 - 109)        |

Web Table 31- Belarus deaths with 95% UI by age, sex, and cause in 2013

| Cause                                                             | Males, All Ages             | Males, 0-4 Years   | Males, 5-14 Years  | Males, 15-49 Years          | Males, 50-69 Years          | Males, 70-80 Years          |
|-------------------------------------------------------------------|-----------------------------|--------------------|--------------------|-----------------------------|-----------------------------|-----------------------------|
| All causes                                                        | 75,184<br>(68,875 - 80,791) | 445<br>(319 - 613) | 126<br>(101 - 157) | 12,427<br>(11,087 - 13,667) | 30,575<br>(27,553 - 33,291) | 31,611<br>(29,662 - 33,249) |
| Communicable, maternal, neonatal, and nutritional diseases        | 2,190<br>(1,716 - 2,486)    | 198<br>(136 - 282) | 8<br>(6 - 11)      | 896<br>(668 - 1,047)        | 887<br>(647 - 1,067)        | 202<br>(162 - 265)          |
| HIV/AIDS and tuberculosis                                         | 991<br>(698 - 1,188)        | 0<br>(0 - 0)       | 0<br>(0 - 0)       | 532<br>(374 - 636)          | 396<br>(264 - 493)          | 63<br>(48 - 82)             |
| Tuberculosis                                                      | 612<br>(340 - 743)          | 0<br>(0 - 0)       | 0<br>(0 - 0)       | 267<br>(122 - 337)          | 300<br>(180 - 378)          | 45<br>(33 - 58)             |
| HIV/AIDS                                                          | 379<br>(244 - 531)          | 0<br>(0 - 0)       | 0<br>(0 - 0)       | 265<br>(184 - 346)          | 95<br>(50 - 166)            | 18<br>(8 - 32)              |
| HIV/AIDS resulting in mycobacterial infection                     | 25<br>(16 - 38)             | 0<br>(0 - 0)       | 0<br>(0 - 0)       | 18<br>(12 - 24)             | 7<br>(3 - 12)               | 1<br>(1 - 2)                |
| HIV/AIDS resulting in other diseases                              | 353<br>(228 - 496)          | 0<br>(0 - 0)       | 0<br>(0 - 0)       | 248<br>(170 - 324)          | 89<br>(47 - 154)            | 17<br>(8 - 30)              |
| Diarrhea, lower respiratory, and other common infectious diseases | 967<br>(717 - 1,172)        | 43<br>(27 - 65)    | 6<br>(4 - 9)       | 332<br>(223 - 429)          | 457<br>(309 - 604)          | 128<br>(93 - 186)           |
| Diarrheal diseases                                                | 9<br>(7 - 12)               | 2<br>(1 - 4)       | 0<br>(0 - 0)       | 3<br>(2 - 4)                | 3<br>(2 - 5)                | 1<br>(1 - 2)                |
| Intestinal infectious diseases                                    | 9<br>(4 - 18)               | 1<br>(0 - 3)       | 1<br>(0 - 2)       | 4<br>(1 - 9)                | 2<br>(1 - 4)                | 1<br>(0 - 2)                |
| Typhoid fever                                                     | 7<br>(3 - 14)               | 1<br>(0 - 2)       | 1<br>(0 - 1)       | 3<br>(1 - 7)                | 2<br>(0 - 3)                | 1<br>(0 - 2)                |
| Paratyphoid fever                                                 | 2<br>(1 - 4)                | 0<br>(0 - 1)       | 0<br>(0 - 0)       | 1<br>(0 - 2)                | 0<br>(0 - 1)                | 0<br>(0 - 0)                |
| Other intestinal infectious diseases                              | 0<br>(0 - 3)                | 0<br>(0 - 1)       | 0<br>(0 - 0)       | 0<br>(0 - 1)                | 0<br>(0 - 1)                | 0<br>(0 - 1)                |
| Lower respiratory infections                                      | 860<br>(615 - 1,063)        | 24<br>(14 - 39)    | 2<br>(1 - 4)       | 294<br>(186 - 389)          | 422<br>(272 - 566)          | 117<br>(84 - 176)           |
| Upper respiratory infections                                      | 3<br>(1 - 6)                | 0<br>(0 - 0)       | 0<br>(0 - 0)       | 1<br>(0 - 2)                | 1<br>(0 - 4)                | 1<br>(0 - 3)                |
| Otitis media                                                      | 1<br>(1 - 1)                | 0<br>(0 - 0)       | 0<br>(0 - 0)       | 0<br>(0 - 1)                | 1<br>(0 - 1)                | 0<br>(0 - 0)                |
| Meningitis                                                        | 54<br>(44 - 66)             | 9<br>(5 - 17)      | 1<br>(0 - 1)       | 18<br>(14 - 22)             | 21<br>(16 - 26)             | 5<br>(4 - 7)                |
| Pneumococcal meningitis                                           | 13<br>(9 - 18)              | 2<br>(1 - 3)       | 0<br>(0 - 0)       | 5<br>(3 - 7)                | 5<br>(3 - 8)                | 1<br>(1 - 2)                |
| H influenzae type B meningitis                                    | 9<br>(6 - 12)               | 4<br>(2 - 7)       | 0<br>(0 - 0)       | 2<br>(1 - 3)                | 2<br>(1 - 3)                | 1<br>(0 - 1)                |
| Meningococcal meningitis                                          | 11<br>(8 - 14)              | 2<br>(1 - 4)       | 0<br>(0 - 0)       | 4<br>(2 - 5)                | 4<br>(2 - 6)                | 1<br>(1 - 2)                |
| Other meningitis                                                  | 21<br>(15 - 27)             | 2<br>(1 - 3)       | 0<br>(0 - 0)       | 7<br>(5 - 11)               | 10<br>(6 - 14)              | 2<br>(1 - 3)                |
| Encephalitis                                                      | 27<br>(19 - 37)             | 6<br>(3 - 11)      | 2<br>(1 - 3)       | 12<br>(8 - 16)              | 7<br>(5 - 10)               | 1<br>(0 - 1)                |
| Diphtheria                                                        | 0<br>(0 - 1)                | 0<br>(0 - 0)       | 0<br>(0 - 0)       | 0<br>(0 - 1)                | 0<br>(0 - 1)                | --                          |
| Whooping cough                                                    | 0<br>(0 - 1)                | 0<br>(0 - 0)       | 0<br>(0 - 0)       | 0<br>(0 - 0)                | 0<br>(0 - 0)                | --                          |
| Tetanus                                                           | 1<br>(0 - 1)                | 0<br>(0 - 0)       | 0<br>(0 - 0)       | 0<br>(0 - 0)                | 0<br>(0 - 0)                | 0<br>(0 - 0)                |
| Measles                                                           | 0<br>(0 - 0)                | 0<br>(0 - 0)       | 0<br>(0 - 0)       | 0<br>(0 - 0)                | 0<br>(0 - 0)                | --                          |
| Varicella and herpes zoster                                       | 2<br>(1 - 6)                | 0<br>(0 - 1)       | 0<br>(0 - 0)       | 0<br>(0 - 1)                | 0<br>(0 - 1)                | 1<br>(0 - 5)                |
| Neglected tropical diseases and malaria                           | 5<br>(4 - 6)                | 0<br>(0 - 0)       | 0<br>(0 - 0)       | 2<br>(2 - 3)                | 2<br>(1 - 2)                | 1<br>(0 - 1)                |
| Cysticercosis                                                     | 0<br>(0 - 0)                | 0<br>(0 - 0)       | 0<br>(0 - 0)       | 0<br>(0 - 0)                | 0<br>(0 - 0)                | 0<br>(0 - 0)                |
| Cystic echinococcosis                                             | 2<br>(2 - 2)                | 0<br>(0 - 0)       | 0<br>(0 - 0)       | 1<br>(1 - 1)                | 1<br>(1 - 1)                | 0<br>(0 - 0)                |
| Dengue                                                            | 0<br>(0 - 1)                | 0<br>(0 - 0)       | 0<br>(0 - 0)       | 0<br>(0 - 0)                | 0<br>(0 - 0)                | 0<br>(0 - 0)                |
| Rabies                                                            | 1<br>(1 - 2)                | 0<br>(0 - 0)       | 0<br>(0 - 0)       | 1<br>(0 - 1)                | 0<br>(0 - 1)                | 0<br>(0 - 0)                |
| Other neglected tropical diseases                                 | 1<br>(1 - 1)                | 0<br>(0 - 0)       | 0<br>(0 - 0)       | 1<br>(0 - 1)                | 0<br>(0 - 1)                | 0<br>(0 - 0)                |
| Maternal disorders                                                | --                          | --                 | --                 | --                          | --                          | --                          |
| Maternal hemorrhage                                               | --                          | --                 | --                 | --                          | --                          | --                          |
| Maternal sepsis and other maternal infections                     | --                          | --                 | --                 | --                          | --                          | --                          |
| Maternal hypertensive disorders                                   | --                          | --                 | --                 | --                          | --                          | --                          |
| Maternal obstructed labor                                         | --                          | --                 | --                 | --                          | --                          | --                          |
| Maternal abortive outcome                                         | --                          | --                 | --                 | --                          | --                          | --                          |
| Indirect maternal deaths                                          | --                          | --                 | --                 | --                          | --                          | --                          |

Web Table 31- Belarus deaths with 95% UI by age, sex, and cause in 2013

| Cause                                                            | Males, All Ages             | Males, 0-4 Years   | Males, 5-14 Years | Males, 15-49 Years       | Males, 50-69 Years          | Males, 70-80 Years          |
|------------------------------------------------------------------|-----------------------------|--------------------|-------------------|--------------------------|-----------------------------|-----------------------------|
| Late maternal deaths                                             | --                          | --                 | --                | --                       | --                          | --                          |
| Maternal deaths aggravated by HIV/AIDS                           | --                          | --                 | --                | --                       | --                          | --                          |
| Other maternal disorders                                         | --                          | --                 | --                | --                       | --                          | --                          |
| Neonatal disorders                                               | 146<br>(100 - 213)          | 146<br>(100 - 213) | --                | --                       | --                          | --                          |
| Neonatal preterm birth complications                             | 46<br>(21 - 82)             | 46<br>(21 - 82)    | --                | --                       | --                          | --                          |
| Neonatal encephalopathy due to birth asphyxia and trauma         | 50<br>(26 - 85)             | 50<br>(26 - 85)    | --                | --                       | --                          | --                          |
| Neonatal sepsis and other neonatal infections                    | 17<br>(5 - 35)              | 17<br>(5 - 35)     | --                | --                       | --                          | --                          |
| Hemolytic disease and other neonatal jaundice                    | 0<br>(0 - 1)                | 0<br>(0 - 1)       | --                | --                       | --                          | --                          |
| Other neonatal disorders                                         | 34<br>(18 - 57)             | 34<br>(18 - 57)    | --                | --                       | --                          | --                          |
| Nutritional deficiencies                                         | 37<br>(26 - 65)             | 2<br>(1 - 3)       | 1<br>(0 - 1)      | 12<br>(8 - 20)           | 16<br>(10 - 31)             | 6<br>(4 - 11)               |
| Protein-energy malnutrition                                      | 16<br>(10 - 31)             | 1<br>(1 - 2)       | 0<br>(0 - 1)      | 5<br>(3 - 9)             | 8<br>(4 - 17)               | 1<br>(1 - 3)                |
| Iodine deficiency                                                | 2<br>(0 - 5)                | 0<br>(0 - 0)       | 0<br>(0 - 0)      | 1<br>(0 - 2)             | 1<br>(0 - 4)                | 0<br>(0 - 2)                |
| Iron-deficiency anemia                                           | 10<br>(5 - 21)              | 0<br>(0 - 0)       | 0<br>(0 - 0)      | 3<br>(1 - 6)             | 4<br>(2 - 9)                | 3<br>(1 - 5)                |
| Other nutritional deficiencies                                   | 9<br>(4 - 18)               | 0<br>(0 - 1)       | 0<br>(0 - 0)      | 4<br>(2 - 6)             | 4<br>(1 - 8)                | 2<br>(1 - 4)                |
| Other communicable, maternal, neonatal, and nutritional diseases | 44<br>(33 - 61)             | 6<br>(3 - 12)      | 1<br>(0 - 1)      | 17<br>(12 - 23)          | 16<br>(10 - 27)             | 4<br>(3 - 7)                |
| Sexually transmitted diseases excluding HIV                      | 4<br>(2 - 10)               | 0<br>(0 - 1)       | 0<br>(0 - 0)      | 1<br>(1 - 4)             | 2<br>(1 - 5)                | 1<br>(0 - 2)                |
| Syphilis                                                         | 3<br>(1 - 7)                | 0<br>(0 - 1)       | 0<br>(0 - 0)      | 1<br>(0 - 2)             | 1<br>(0 - 4)                | 0<br>(0 - 2)                |
| Chlamydial infection                                             | --                          | --                 | --                | --                       | --                          | --                          |
| Gonococcal infection                                             | 1<br>(0 - 2)                | --                 | 0<br>(0 - 0)      | 0<br>(0 - 1)             | 0<br>(0 - 1)                | 0<br>(0 - 0)                |
| Other sexually transmitted diseases                              | 0<br>(0 - 1)                | --                 | 0<br>(0 - 0)      | 0<br>(0 - 1)             | 0<br>(0 - 1)                | 0<br>(0 - 0)                |
| Hepatitis                                                        | 15<br>(12 - 19)             | 1<br>(1 - 2)       | 0<br>(0 - 0)      | 7<br>(5 - 9)             | 5<br>(3 - 8)                | 2<br>(1 - 3)                |
| Acute hepatitis A                                                | 2<br>(1 - 5)                | 0<br>(0 - 1)       | 0<br>(0 - 0)      | 2<br>(0 - 3)             | 0<br>(0 - 1)                | 0<br>(0 - 0)                |
| Acute hepatitis B                                                | 12<br>(8 - 16)              | 1<br>(0 - 1)       | 0<br>(0 - 0)      | 5<br>(3 - 7)             | 5<br>(3 - 7)                | 2<br>(1 - 3)                |
| Acute hepatitis C                                                | 1<br>(0 - 2)                | --                 | 0<br>(0 - 0)      | 0<br>(0 - 1)             | 0<br>(0 - 1)                | 0<br>(0 - 0)                |
| Other infectious diseases                                        | 25<br>(15 - 39)             | 5<br>(2 - 11)      | 0<br>(0 - 1)      | 9<br>(5 - 15)            | 9<br>(4 - 19)               | 2<br>(1 - 5)                |
| Non-communicable diseases                                        | 62,762<br>(57,495 - 67,301) | 188<br>(128 - 270) | 37<br>(27 - 48)   | 6,081<br>(5,346 - 6,832) | 25,934<br>(23,282 - 28,299) | 30,522<br>(28,644 - 32,066) |
| Neoplasms                                                        | 12,638<br>(11,257 - 13,880) | 10<br>(5 - 16)     | 16<br>(12 - 22)   | 1,103<br>(956 - 1,263)   | 7,040<br>(6,226 - 7,792)    | 4,470<br>(3,919 - 4,951)    |
| Esophageal cancer                                                | 389<br>(266 - 470)          | --                 | --                | 34<br>(24 - 47)          | 262<br>(169 - 330)          | 93<br>(66 - 117)            |
| Stomach cancer                                                   | 1,746<br>(1,359 - 2,036)    | --                 | --                | 157<br>(113 - 197)       | 924<br>(703 - 1,113)        | 666<br>(516 - 805)          |
| Liver cancer                                                     | 252<br>(179 - 361)          | --                 | 0<br>(0 - 1)      | 22<br>(14 - 33)          | 143<br>(101 - 210)          | 86<br>(58 - 128)            |
| Liver cancer due to hepatitis B                                  | 45<br>(21 - 75)             | --                 | 0<br>(0 - 0)      | 5<br>(2 - 10)            | 27<br>(12 - 46)             | 12<br>(6 - 22)              |
| Liver cancer due to hepatitis C                                  | 122<br>(80 - 189)           | --                 | 0<br>(0 - 0)      | 10<br>(6 - 16)           | 71<br>(46 - 113)            | 41<br>(25 - 65)             |
| Liver cancer due to alcohol use                                  | 70<br>(43 - 104)            | --                 | --                | 4<br>(2 - 7)             | 37<br>(21 - 57)             | 29<br>(18 - 45)             |
| Liver cancer due to other causes                                 | 15<br>(8 - 23)              | --                 | 0<br>(0 - 0)      | 2<br>(1 - 4)             | 8<br>(4 - 14)               | 4<br>(2 - 7)                |
| Larynx cancer                                                    | 491<br>(374 - 755)          | --                 | --                | 56<br>(38 - 101)         | 337<br>(246 - 511)          | 98<br>(72 - 139)            |
| Tracheal, bronchus and lung cancer                               | 3,881<br>(3,447 - 4,310)    | --                 | --                | 241<br>(189 - 301)       | 2,448<br>(2,117 - 2,783)    | 1,191<br>(1,043 - 1,347)    |
| Breast cancer                                                    | 2<br>(0 - 3)                | --                 | --                | 1<br>(0 - 1)             | 1<br>(0 - 2)                | 1<br>(0 - 1)                |
| Cervical cancer                                                  | --                          | --                 | --                | --                       | --                          | --                          |
| Uterine cancer                                                   | --                          | --                 | --                | --                       | --                          | --                          |
| Prostate cancer                                                  | 802<br>(460 - 1,149)        | --                 | --                | 6<br>(3 - 10)            | 240<br>(130 - 373)          | 556<br>(311 - 783)          |

Web Table 31- Belarus deaths with 95% UI by age, sex, and cause in 2013

| Cause                                         | Males, All Ages             | Males, 0-4 Years | Males, 5-14 Years | Males, 15-49 Years       | Males, 50-69 Years          | Males, 70-80 Years          |
|-----------------------------------------------|-----------------------------|------------------|-------------------|--------------------------|-----------------------------|-----------------------------|
| Colon and rectum cancer                       | 1,270<br>(1,115 - 1,426)    | --               | --                | 71<br>(58 - 85)          | 583<br>(497 - 671)          | 617<br>(527 - 710)          |
| Lip and oral cavity cancer                    | 468<br>(374 - 561)          | --               | --                | 57<br>(42 - 77)          | 334<br>(253 - 421)          | 76<br>(59 - 97)             |
| Nasopharynx cancer                            | 46<br>(33 - 64)             | --               | 0<br>(0 - 1)      | 11<br>(7 - 18)           | 30<br>(20 - 43)             | 4<br>(2 - 7)                |
| Other pharynx cancer                          | 245<br>(183 - 304)          | --               | --                | 29<br>(21 - 40)          | 188<br>(135 - 241)          | 28<br>(19 - 38)             |
| Gallbladder and biliary tract cancer          | 98<br>(49 - 126)            | --               | --                | 7<br>(4 - 10)            | 50<br>(25 - 70)             | 40<br>(20 - 56)             |
| Pancreatic cancer                             | 600<br>(527 - 674)          | --               | --                | 61<br>(48 - 75)          | 351<br>(294 - 407)          | 189<br>(160 - 222)          |
| Malignant skin melanoma                       | 117<br>(58 - 193)           | --               | --                | 29<br>(13 - 46)          | 57<br>(27 - 95)             | 32<br>(15 - 54)             |
| Non-melanoma skin cancer                      | 71<br>(38 - 112)            | --               | --                | 6<br>(3 - 10)            | 26<br>(13 - 47)             | 40<br>(19 - 69)             |
| Ovarian cancer                                | --                          | --               | --                | --                       | --                          | --                          |
| Testicular cancer                             | 13<br>(9 - 20)              | --               | --                | 10<br>(7 - 14)           | 3<br>(2 - 5)                | 1<br>(1 - 2)                |
| Kidney cancer                                 | 537<br>(450 - 644)          | 1<br>(0 - 2)     | 1<br>(0 - 1)      | 59<br>(45 - 79)          | 325<br>(258 - 402)          | 151<br>(115 - 195)          |
| Bladder cancer                                | 401<br>(335 - 494)          | --               | --                | 9<br>(7 - 13)            | 150<br>(119 - 198)          | 242<br>(196 - 303)          |
| Brain and nervous system cancer               | 243<br>(177 - 296)          | 2<br>(1 - 4)     | 5<br>(3 - 7)      | 71<br>(50 - 91)          | 138<br>(101 - 177)          | 27<br>(18 - 36)             |
| Thyroid cancer                                | 38<br>(28 - 50)             | --               | 0<br>(0 - 0)      | 5<br>(3 - 7)             | 21<br>(14 - 29)             | 12<br>(9 - 17)              |
| Mesothelioma                                  | 38<br>(19 - 56)             | --               | --                | 6<br>(3 - 9)             | 23<br>(10 - 38)             | 10<br>(4 - 17)              |
| Hodgkin lymphoma                              | 16<br>(11 - 35)             | 0<br>(0 - 0)     | 0<br>(0 - 0)      | 9<br>(6 - 18)            | 6<br>(4 - 13)               | 2<br>(1 - 4)                |
| Non-Hodgkin lymphoma                          | 247<br>(138 - 323)          | 1<br>(0 - 1)     | 2<br>(1 - 3)      | 39<br>(22 - 55)          | 118<br>(67 - 160)           | 87<br>(47 - 123)            |
| Multiple myeloma                              | 79<br>(41 - 114)            | --               | --                | 6<br>(3 - 10)            | 43<br>(22 - 64)             | 30<br>(14 - 46)             |
| Leukemia                                      | 376<br>(334 - 423)          | 4<br>(2 - 7)     | 6<br>(4 - 9)      | 66<br>(54 - 78)          | 162<br>(135 - 191)          | 139<br>(116 - 163)          |
| Other neoplasms                               | 171<br>(125 - 208)          | 2<br>(1 - 4)     | 2<br>(1 - 4)      | 35<br>(25 - 44)          | 79<br>(55 - 102)            | 53<br>(35 - 72)             |
| Cardiovascular diseases                       | 39,500<br>(36,437 - 42,485) | 1<br>(1 - 2)     | 1<br>(1 - 2)      | 2,846<br>(2,464 - 3,229) | 15,055<br>(13,534 - 16,554) | 21,596<br>(20,224 - 22,895) |
| Rheumatic heart disease                       | 171<br>(115 - 338)          | 0<br>(0 - 0)     | 0<br>(0 - 0)      | 49<br>(28 - 117)         | 106<br>(67 - 207)           | 15<br>(10 - 26)             |
| Ischemic heart disease                        | 28,210<br>(25,359 - 30,896) | 0<br>(0 - 0)     | 0<br>(0 - 0)      | 1,732<br>(1,446 - 2,072) | 10,185<br>(8,929 - 11,458)  | 16,293<br>(14,763 - 17,662) |
| Cerebrovascular disease                       | 8,576<br>(7,113 - 10,407)   | 0<br>(0 - 0)     | 0<br>(0 - 0)      | 525<br>(390 - 698)       | 3,413<br>(2,721 - 4,333)    | 4,638<br>(3,840 - 5,673)    |
| Ischemic stroke                               | 6,009<br>(4,857 - 7,633)    | 0<br>(0 - 0)     | 0<br>(0 - 0)      | 134<br>(81 - 225)        | 2,022<br>(1,534 - 2,776)    | 3,852<br>(3,114 - 4,726)    |
| Hemorrhagic stroke                            | 2,568<br>(1,788 - 3,446)    | 0<br>(0 - 0)     | 0<br>(0 - 0)      | 390<br>(278 - 523)       | 1,391<br>(946 - 1,906)      | 787<br>(502 - 1,129)        |
| Hypertensive heart disease                    | 498<br>(260 - 726)          | 0<br>(0 - 0)     | 0<br>(0 - 0)      | 35<br>(15 - 55)          | 216<br>(93 - 355)           | 248<br>(137 - 377)          |
| Cardiomyopathy and myocarditis                | 1,594<br>(967 - 2,100)      | 1<br>(0 - 1)     | 1<br>(0 - 1)      | 456<br>(253 - 643)       | 919<br>(526 - 1,280)        | 219<br>(128 - 379)          |
| Atrial fibrillation and flutter               | 6<br>(4 - 11)               | --               | --                | 0<br>(0 - 1)             | 2<br>(1 - 4)                | 3<br>(2 - 6)                |
| Aortic aneurysm                               | 286<br>(207 - 405)          | --               | --                | 26<br>(17 - 37)          | 136<br>(95 - 195)           | 125<br>(85 - 196)           |
| Peripheral vascular disease                   | 18<br>(10 - 25)             | --               | --                | 1<br>(0 - 1)             | 7<br>(4 - 10)               | 10<br>(6 - 16)              |
| Endocarditis                                  | 32<br>(18 - 45)             | 0<br>(0 - 0)     | 0<br>(0 - 0)      | 11<br>(6 - 16)           | 15<br>(9 - 23)              | 6<br>(4 - 10)               |
| Other cardiovascular and circulatory diseases | 108<br>(80 - 170)           | 0<br>(0 - 0)     | 0<br>(0 - 0)      | 13<br>(9 - 20)           | 57<br>(40 - 91)             | 38<br>(27 - 59)             |
| Chronic respiratory diseases                  | 3,191<br>(2,598 - 5,239)    | 0<br>(0 - 0)     | 0<br>(0 - 0)      | 142<br>(105 - 245)       | 1,118<br>(862 - 1,924)      | 1,931<br>(1,563 - 3,071)    |
| Chronic obstructive pulmonary disease         | 2,884<br>(2,342 - 4,745)    | 0<br>(0 - 0)     | 0<br>(0 - 0)      | 106<br>(75 - 185)        | 985<br>(749 - 1,716)        | 1,793<br>(1,455 - 2,866)    |
| Pneumoconiosis                                | 6<br>(3 - 12)               | 0<br>(0 - 0)     | 0<br>(0 - 0)      | 1<br>(1 - 2)             | 3<br>(1 - 6)                | 2<br>(1 - 4)                |
| Silicosis                                     | 3<br>(1 - 4)                | 0<br>(0 - 0)     | 0<br>(0 - 0)      | 0<br>(0 - 0)             | 1<br>(1 - 2)                | 1<br>(1 - 2)                |
| Asbestosis                                    | 1<br>(0 - 2)                | 0<br>(0 - 0)     | 0<br>(0 - 0)      | 0<br>(0 - 0)             | 0<br>(0 - 1)                | 0<br>(0 - 0)                |
| Coal workers pneumoconiosis                   | 1<br>(0 - 1)                | 0<br>(0 - 0)     | 0<br>(0 - 0)      | 0<br>(0 - 0)             | 0<br>(0 - 1)                | 0<br>(0 - 0)                |
| Other pneumoconiosis                          | 2<br>(1 - 4)                | 0<br>(0 - 0)     | 0<br>(0 - 0)      | 0<br>(0 - 1)             | 1<br>(0 - 2)                | 1<br>(0 - 2)                |

Web Table 31- Belarus deaths with 95% UI by age, sex, and cause in 2013

| Cause                                               | Males, All Ages          | Males, 0-4 Years | Males, 5-14 Years | Males, 15-49 Years   | Males, 50-69 Years     | Males, 70-80 Years       |
|-----------------------------------------------------|--------------------------|------------------|-------------------|----------------------|------------------------|--------------------------|
| Asthma                                              | 239<br>(164 - 385)       | 0<br>(0 - 0)     | 0<br>(0 - 0)      | 23<br>(15 - 37)      | 106<br>(66 - 184)      | 110<br>(69 - 177)        |
| Interstitial lung disease and pulmonary sarcoidosis | 47<br>(21 - 81)          | 0<br>(0 - 0)     | 0<br>(0 - 0)      | 5<br>(1 - 10)        | 19<br>(8 - 35)         | 22<br>(11 - 43)          |
| Other chronic respiratory diseases                  | 15<br>(10 - 30)          | 0<br>(0 - 0)     | 0<br>(0 - 0)      | 7<br>(4 - 15)        | 5<br>(2 - 10)          | 3<br>(2 - 6)             |
| Cirrhosis                                           | 1,784<br>(1,551 - 2,023) | 0<br>(0 - 0)     | 0<br>(0 - 1)      | 542<br>(451 - 648)   | 1,048<br>(891 - 1,224) | 193<br>(163 - 227)       |
| Cirrhosis due to hepatitis B                        | 269<br>(156 - 407)       | 0<br>(0 - 0)     | 0<br>(0 - 0)      | 82<br>(47 - 127)     | 157<br>(89 - 244)      | 29<br>(14 - 48)          |
| Cirrhosis due to hepatitis C                        | 592<br>(376 - 822)       | 0<br>(0 - 0)     | 0<br>(0 - 0)      | 177<br>(105 - 262)   | 351<br>(215 - 492)     | 63<br>(42 - 91)          |
| Cirrhosis due to alcohol use                        | 767<br>(545 - 987)       | --<br>(0 - 0)    | --<br>(0 - 0)     | 210<br>(131 - 285)   | 466<br>(330 - 615)     | 91<br>(68 - 117)         |
| Cirrhosis due to other causes                       | 157<br>(94 - 234)        | 0<br>(0 - 0)     | 0<br>(0 - 0)      | 73<br>(41 - 112)     | 73<br>(39 - 113)       | 10<br>(5 - 16)           |
| Digestive diseases                                  | 966<br>(831 - 1,111)     | 1<br>(0 - 1)     | 1<br>(0 - 1)      | 245<br>(196 - 290)   | 420<br>(350 - 510)     | 300<br>(251 - 350)       |
| Peptic ulcer disease                                | 191<br>(133 - 277)       | 0<br>(0 - 0)     | 0<br>(0 - 0)      | 43<br>(27 - 67)      | 102<br>(68 - 155)      | 47<br>(29 - 69)          |
| Gastritis and duodenitis                            | 9<br>(5 - 15)            | 0<br>(0 - 0)     | 0<br>(0 - 0)      | 2<br>(1 - 4)         | 4<br>(2 - 6)           | 3<br>(1 - 5)             |
| Appendicitis                                        | 15<br>(10 - 21)          | 0<br>(0 - 0)     | 0<br>(0 - 0)      | 4<br>(2 - 6)         | 6<br>(3 - 8)           | 5<br>(3 - 8)             |
| Paralytic ileus and intestinal obstruction          | 58<br>(32 - 97)          | 0<br>(0 - 1)     | 0<br>(0 - 0)      | 12<br>(7 - 23)       | 20<br>(10 - 38)        | 25<br>(13 - 43)          |
| Inguinal, femoral, and abdominal hernia             | 15<br>(8 - 24)           | 0<br>(0 - 0)     | 0<br>(0 - 0)      | 1<br>(1 - 3)         | 5<br>(3 - 8)           | 8<br>(4 - 14)            |
| Inflammatory bowel disease                          | 31<br>(19 - 45)          | 0<br>(0 - 0)     | 0<br>(0 - 0)      | 7<br>(4 - 11)        | 14<br>(8 - 22)         | 10<br>(5 - 16)           |
| Vascular intestinal disorders                       | 168<br>(80 - 296)        | 0<br>(0 - 0)     | 0<br>(0 - 0)      | 9<br>(3 - 20)        | 65<br>(28 - 124)       | 94<br>(45 - 159)         |
| Gallbladder and biliary diseases                    | 72<br>(46 - 115)         | 0<br>(0 - 0)     | 0<br>(0 - 0)      | 6<br>(4 - 10)        | 25<br>(15 - 45)        | 41<br>(25 - 63)          |
| Pancreatitis                                        | 357<br>(247 - 462)       | 0<br>(0 - 0)     | 0<br>(0 - 0)      | 148<br>(99 - 189)    | 156<br>(99 - 215)      | 53<br>(31 - 85)          |
| Other digestive diseases                            | 49<br>(32 - 69)          | 0<br>(0 - 0)     | 0<br>(0 - 0)      | 13<br>(7 - 20)       | 24<br>(14 - 35)        | 13<br>(7 - 20)           |
| Neurological disorders                              | 1,998<br>(1,576 - 2,417) | 4<br>(2 - 6)     | 3<br>(2 - 4)      | 111<br>(82 - 146)    | 189<br>(147 - 236)     | 1,692<br>(1,300 - 2,088) |
| Alzheimer disease and other dementias               | 1,747<br>(1,327 - 2,152) | --<br>(0 - 0)    | --<br>(0 - 1)     | 0<br>(0 - 1)         | 100<br>(67 - 136)      | 1,647<br>(1,255 - 2,048) |
| Parkinson disease                                   | 34<br>(21 - 56)          | --<br>(0 - 1)    | --<br>(1 - 3)     | 0<br>(0 - 1)         | 9<br>(5 - 13)          | 25<br>(14 - 46)          |
| Epilepsy                                            | 123<br>(79 - 162)        | 1<br>(0 - 1)     | 2<br>(1 - 3)      | 78<br>(50 - 104)     | 39<br>(22 - 55)        | 4<br>(2 - 5)             |
| Multiple sclerosis                                  | 25<br>(16 - 58)          | --<br>(0 - 3)    | --<br>(1 - 2)     | 11<br>(7 - 28)       | 10<br>(5 - 23)         | 3<br>(2 - 9)             |
| Other neurological disorders                        | 69<br>(50 - 86)          | 3<br>(2 - 5)     | 1<br>(1 - 2)      | 21<br>(14 - 27)      | 31<br>(22 - 42)        | 12<br>(10 - 17)          |
| Mental and substance use disorders                  | 1,569<br>(1,020 - 2,042) | 0<br>(0 - 0)     | 0<br>(0 - 0)      | 864<br>(591 - 1,127) | 662<br>(386 - 959)     | 43<br>(26 - 59)          |
| Schizophrenia                                       | 7<br>(4 - 10)            | --<br>(0 - 1)    | --<br>(0 - 1)     | 2<br>(1 - 4)         | 3<br>(2 - 5)           | 1<br>(1 - 2)             |
| Alcohol use disorders                               | 1,274<br>(729 - 1,699)   | --<br>(0 - 0)    | --<br>(0 - 0)     | 664<br>(379 - 909)   | 580<br>(311 - 878)     | 30<br>(15 - 45)          |
| Drug use disorders                                  | 288<br>(217 - 373)       | 0<br>(0 - 0)     | --<br>(0 - 0)     | 197<br>(146 - 265)   | 79<br>(52 - 118)       | 12<br>(8 - 18)           |
| Opioid use disorders                                | 125<br>(92 - 164)        | 0<br>(0 - 0)     | --<br>(0 - 0)     | 87<br>(63 - 117)     | 32<br>(21 - 48)        | 5<br>(3 - 8)             |
| Cocaine use disorders                               | 7<br>(5 - 9)             | 0<br>(0 - 0)     | --<br>(0 - 0)     | 5<br>(3 - 7)         | 1<br>(1 - 2)           | 0<br>(0 - 0)             |
| Amphetamine use disorders                           | 6<br>(4 - 8)             | 0<br>(0 - 0)     | --<br>(0 - 0)     | 4<br>(3 - 6)         | 2<br>(1 - 3)           | 0<br>(0 - 0)             |
| Other drug use disorders                            | 151<br>(113 - 196)       | 0<br>(0 - 0)     | --<br>(0 - 0)     | 101<br>(73 - 137)    | 44<br>(29 - 67)        | 6<br>(4 - 9)             |
| Eating disorders                                    | 0<br>(0 - 1)             | --<br>(0 - 1)    | 0<br>(0 - 0)      | 0<br>(0 - 1)         | --<br>(0 - 1)          | --<br>(0 - 1)            |
| Anorexia nervosa                                    | 0<br>(0 - 1)             | --<br>(0 - 1)    | 0<br>(0 - 0)      | 0<br>(0 - 1)         | --<br>(0 - 1)          | --<br>(0 - 1)            |
| Diabetes, urogenital, blood, and endocrine diseases | 795<br>(674 - 964)       | 4<br>(2 - 7)     | 2<br>(1 - 3)      | 159<br>(131 - 202)   | 352<br>(292 - 452)     | 277<br>(221 - 328)       |
| Diabetes mellitus                                   | 198<br>(172 - 230)       | 0<br>(0 - 0)     | 0<br>(0 - 0)      | 41<br>(34 - 51)      | 100<br>(81 - 122)      | 57<br>(47 - 70)          |
| Acute glomerulonephritis                            | 4<br>(3 - 7)             | 0<br>(0 - 0)     | 0<br>(0 - 0)      | 2<br>(1 - 2)         | 2<br>(1 - 3)           | 1<br>(0 - 1)             |
| Chronic kidney disease                              | 162<br>(123 - 343)       | 0<br>(0 - 0)     | 0<br>(0 - 0)      | 42<br>(31 - 88)      | 78<br>(56 - 175)       | 42<br>(31 - 85)          |
| Chronic kidney disease due to diabetes mellitus     | 4<br>(2 - 10)            | 0<br>(0 - 0)     | 0<br>(0 - 0)      | 1<br>(1 - 3)         | 2<br>(1 - 5)           | 1<br>(0 - 2)             |

Web Table 31- Belarus deaths with 95% UI by age, sex, and cause in 2013

| Cause                                               | Males, All Ages            | Males, 0-4 Years   | Males, 5-14 Years | Males, 15-49 Years       | Males, 50-69 Years       | Males, 70-80 Years   |
|-----------------------------------------------------|----------------------------|--------------------|-------------------|--------------------------|--------------------------|----------------------|
| Chronic kidney disease due to hypertension          | 33<br>(20 - 65)            | 0<br>(0 - 0)       | 0<br>(0 - 0)      | 5<br>(2 - 10)            | 16<br>(8 - 31)           | 13<br>(7 - 23)       |
| Chronic kidney disease due to glomerulonephritis    | 58<br>(41 - 87)            | 0<br>(0 - 0)       | 0<br>(0 - 0)      | 19<br>(13 - 28)          | 28<br>(18 - 43)          | 12<br>(8 - 18)       |
| Chronic kidney disease due to other causes          | 66<br>(38 - 196)           | 0<br>(0 - 0)       | 0<br>(0 - 0)      | 18<br>(9 - 49)           | 32<br>(16 - 102)         | 16<br>(8 - 47)       |
| Urinary diseases and male infertility               | 324<br>(261 - 396)         | 0<br>(0 - 0)       | 0<br>(0 - 0)      | 44<br>(34 - 60)          | 131<br>(102 - 176)       | 150<br>(111 - 193)   |
| Interstitial nephritis and urinary tract infections | 270<br>(209 - 332)         | 0<br>(0 - 0)       | 0<br>(0 - 0)      | 38<br>(30 - 53)          | 110<br>(84 - 150)        | 121<br>(83 - 156)    |
| Urolithiasis                                        | 23<br>(13 - 37)            | --                 | 0<br>(0 - 0)      | 2<br>(1 - 4)             | 8<br>(4 - 15)            | 14<br>(6 - 24)       |
| Other urinary diseases                              | 31<br>(18 - 50)            | 0<br>(0 - 0)       | 0<br>(0 - 0)      | 3<br>(2 - 6)             | 12<br>(7 - 22)           | 15<br>(8 - 26)       |
| Gynecological diseases                              | --                         | --                 | --                | --                       | --                       | --                   |
| Uterine fibroids                                    | --                         | --                 | --                | --                       | --                       | --                   |
| Polycystic ovarian syndrome                         | --                         | --                 | --                | --                       | --                       | --                   |
| Endometriosis                                       | --                         | --                 | --                | --                       | --                       | --                   |
| Genital prolapse                                    | --                         | --                 | --                | --                       | --                       | --                   |
| Other gynecological diseases                        | --                         | --                 | --                | --                       | --                       | --                   |
| Hemoglobinopathies and hemolytic anemias            | 16<br>(10 - 24)            | 1<br>(1 - 2)       | 1<br>(0 - 1)      | 9<br>(5 - 13)            | 4<br>(2 - 6)             | 2<br>(1 - 3)         |
| Thalassemias                                        | 4<br>(2 - 6)               | 1<br>(0 - 2)       | 1<br>(0 - 1)      | 3<br>(2 - 4)             | 0<br>(0 - 0)             | 0<br>(0 - 0)         |
| Sickle cell disorders                               | 1<br>(0 - 1)               | 0<br>(0 - 0)       | 0<br>(0 - 0)      | 0<br>(0 - 1)             | 0<br>(0 - 0)             | 0<br>(0 - 0)         |
| G6PD deficiency                                     | 0<br>(0 - 1)               | 0<br>(0 - 0)       | 0<br>(0 - 0)      | 0<br>(0 - 0)             | 0<br>(0 - 0)             | 0<br>(0 - 0)         |
| Other hemoglobinopathies and hemolytic anemias      | 11<br>(7 - 17)             | 0<br>(0 - 0)       | 0<br>(0 - 0)      | 5<br>(3 - 8)             | 4<br>(2 - 6)             | 2<br>(1 - 3)         |
| Endocrine, metabolic, blood, and immune disorders   | 89<br>(20 - 118)           | 2<br>(1 - 5)       | 1<br>(0 - 1)      | 22<br>(5 - 30)           | 38<br>(7 - 54)           | 26<br>(5 - 38)       |
| Musculoskeletal disorders                           | 64<br>(47 - 118)           | --                 | 1<br>(0 - 1)      | 17<br>(11 - 27)          | 29<br>(19 - 55)          | 18<br>(12 - 39)      |
| Rheumatoid arthritis                                | 17<br>(10 - 36)            | --                 | 0<br>(0 - 0)      | 3<br>(1 - 5)             | 8<br>(4 - 16)            | 6<br>(3 - 16)        |
| Other musculoskeletal disorders                     | 47<br>(34 - 86)            | --                 | 1<br>(0 - 1)      | 14<br>(9 - 23)           | 22<br>(14 - 40)          | 11<br>(7 - 25)       |
| Other non-communicable diseases                     | 256<br>(193 - 337)         | 168<br>(112 - 244) | 12<br>(8 - 17)    | 51<br>(41 - 70)          | 21<br>(16 - 29)          | 4<br>(3 - 5)         |
| Congenital anomalies                                | 238<br>(176 - 318)         | 153<br>(97 - 231)  | 12<br>(8 - 17)    | 51<br>(40 - 69)          | 19<br>(15 - 27)          | 3<br>(2 - 4)         |
| Neural tube defects                                 | 11<br>(6 - 22)             | 8<br>(4 - 18)      | 1<br>(0 - 2)      | 1<br>(1 - 2)             | 1<br>(0 - 1)             | 0<br>(0 - 0)         |
| Congenital heart anomalies                          | 126<br>(85 - 176)          | 82<br>(45 - 130)   | 6<br>(3 - 9)      | 30<br>(23 - 41)          | 7<br>(5 - 10)            | 1<br>(0 - 1)         |
| Cleft lip and cleft palate                          | 1<br>(0 - 2)               | 1<br>(0 - 2)       | --                | --                       | --                       | --                   |
| Down syndrome                                       | 10<br>(6 - 16)             | 2<br>(1 - 6)       | 1<br>(0 - 1)      | 5<br>(2 - 7)             | 2<br>(1 - 4)             | 0<br>(0 - 0)         |
| Chromosomal unbalanced rearrangements               | 4<br>(2 - 6)               | 3<br>(1 - 5)       | 0<br>(0 - 1)      | 1<br>(0 - 1)             | 0<br>(0 - 0)             | 0<br>(0 - 0)         |
| Other congenital anomalies                          | 86<br>(58 - 128)           | 57<br>(31 - 95)    | 4<br>(2 - 7)      | 14<br>(10 - 22)          | 9<br>(6 - 14)            | 2<br>(2 - 3)         |
| Skin and subcutaneous diseases                      | 3<br>(2 - 4)               | 0<br>(0 - 0)       | 0<br>(0 - 0)      | 1<br>(1 - 1)             | 2<br>(1 - 2)             | 1<br>(0 - 1)         |
| Cellulitis                                          | 2<br>(1 - 2)               | 0<br>(0 - 0)       | 0<br>(0 - 0)      | 0<br>(0 - 1)             | 1<br>(0 - 1)             | 0<br>(0 - 0)         |
| Pyoderma                                            | 1<br>(1 - 2)               | 0<br>(0 - 0)       | 0<br>(0 - 0)      | 0<br>(0 - 0)             | 1<br>(0 - 1)             | 0<br>(0 - 0)         |
| Decubitus ulcer                                     | 0<br>(0 - 0)               | 0<br>(0 - 0)       | 0<br>(0 - 0)      | 0<br>(0 - 0)             | 0<br>(0 - 0)             | 0<br>(0 - 0)         |
| Other skin and subcutaneous diseases                | 0<br>(0 - 0)               | 0<br>(0 - 0)       | 0<br>(0 - 0)      | 0<br>(0 - 0)             | 0<br>(0 - 0)             | 0<br>(0 - 0)         |
| Sudden infant death syndrome                        | 15<br>(3 - 42)             | 15<br>(3 - 42)     | --                | --                       | --                       | --                   |
| Injuries                                            | 10,232<br>(8,907 - 11,412) | 58<br>(37 - 89)    | 82<br>(64 - 103)  | 5,450<br>(4,767 - 6,078) | 3,754<br>(3,025 - 4,308) | 887<br>(697 - 1,022) |
| Transport injuries                                  | 1,902<br>(1,629 - 2,200)   | 6<br>(3 - 10)      | 22<br>(15 - 30)   | 1,191<br>(1,002 - 1,387) | 557<br>(455 - 675)       | 126<br>(102 - 158)   |
| Road injuries                                       | 1,763<br>(1,503 - 2,059)   | 5<br>(2 - 9)       | 21<br>(14 - 28)   | 1,107<br>(936 - 1,293)   | 512<br>(417 - 634)       | 118<br>(94 - 149)    |
| Pedestrian road injuries                            | 511<br>(213 - 733)         | 2<br>(1 - 5)       | 9<br>(5 - 14)     | 230<br>(86 - 364)        | 209<br>(84 - 308)        | 60<br>(34 - 86)      |

Web Table 31- Belarus deaths with 95% UI by age, sex, and cause in 2013

| Cause                                           | Males, All Ages          | Males, 0-4 Years | Males, 5-14 Years | Males, 15-49 Years       | Males, 50-69 Years       | Males, 70-80 Years |
|-------------------------------------------------|--------------------------|------------------|-------------------|--------------------------|--------------------------|--------------------|
| Cyclist road injuries                           | 134<br>(79 - 201)        | 0<br>(0 - 0)     | 3<br>(1 - 5)      | 54<br>(32 - 83)          | 61<br>(31 - 97)          | 16<br>(7 - 26)     |
| Motorcyclist road injuries                      | 175<br>(106 - 350)       | 0<br>(0 - 0)     | 1<br>(0 - 3)      | 137<br>(79 - 280)        | 32<br>(16 - 66)          | 5<br>(3 - 9)       |
| Motor vehicle road injuries                     | 904<br>(626 - 1,200)     | 2<br>(1 - 4)     | 7<br>(3 - 11)     | 661<br>(453 - 873)       | 201<br>(120 - 311)       | 33<br>(18 - 55)    |
| Other road injuries                             | 38<br>(15 - 82)          | 0<br>(0 - 0)     | 1<br>(0 - 1)      | 26<br>(9 - 50)           | 9<br>(2 - 32)            | 3<br>(1 - 8)       |
| Other transport injuries                        | 139<br>(91 - 209)        | 1<br>(0 - 1)     | 2<br>(1 - 4)      | 84<br>(51 - 130)         | 45<br>(25 - 73)          | 9<br>(4 - 15)      |
| Unintentional injuries                          | 4,208<br>(3,495 - 4,864) | 50<br>(31 - 78)  | 50<br>(37 - 70)   | 1,963<br>(1,648 - 2,396) | 1,745<br>(1,240 - 2,083) | 399<br>(312 - 476) |
| Falls                                           | 1,268<br>(811 - 1,571)   | 7<br>(4 - 11)    | 5<br>(3 - 7)      | 521<br>(390 - 689)       | 580<br>(308 - 741)       | 155<br>(94 - 201)  |
| Drowning                                        | 1,000<br>(771 - 1,485)   | 12<br>(6 - 27)   | 33<br>(22 - 52)   | 644<br>(476 - 999)       | 264<br>(159 - 398)       | 47<br>(27 - 71)    |
| Fire, heat, and hot substances                  | 630<br>(372 - 829)       | 9<br>(5 - 18)    | 4<br>(2 - 7)      | 246<br>(155 - 335)       | 286<br>(147 - 413)       | 85<br>(51 - 116)   |
| Poisonings                                      | 289<br>(203 - 639)       | 3<br>(1 - 6)     | 2<br>(1 - 3)      | 120<br>(72 - 336)        | 133<br>(90 - 263)        | 32<br>(22 - 51)    |
| Exposure to mechanical forces                   | 234<br>(157 - 316)       | 3<br>(1 - 7)     | 3<br>(2 - 5)      | 131<br>(87 - 186)        | 87<br>(51 - 134)         | 11<br>(6 - 17)     |
| Unintentional firearm injuries                  | 9<br>(6 - 14)            | 0<br>(0 - 0)     | 0<br>(0 - 0)      | 7<br>(4 - 11)            | 1<br>(1 - 3)             | 0<br>(0 - 1)       |
| Unintentional suffocation                       | 6<br>(1 - 11)            | 2<br>(0 - 6)     | 0<br>(0 - 1)      | 3<br>(0 - 5)             | 1<br>(0 - 3)             | 0<br>(0 - 0)       |
| Other exposure to mechanical forces             | 219<br>(144 - 299)       | 1<br>(0 - 2)     | 3<br>(1 - 4)      | 121<br>(79 - 177)        | 84<br>(49 - 131)         | 10<br>(6 - 16)     |
| Adverse effects of medical treatment            | 74<br>(47 - 101)         | 2<br>(1 - 4)     | 0<br>(0 - 0)      | 14<br>(9 - 21)           | 47<br>(27 - 72)          | 11<br>(5 - 18)     |
| Animal contact                                  | 40<br>(27 - 57)          | 0<br>(0 - 1)     | 0<br>(0 - 1)      | 10<br>(6 - 16)           | 24<br>(15 - 37)          | 4<br>(3 - 7)       |
| Venomous animal contact                         | 11<br>(6 - 21)           | 0<br>(0 - 0)     | 0<br>(0 - 0)      | 4<br>(2 - 7)             | 7<br>(3 - 13)            | 0<br>(0 - 2)       |
| Non-venomous animal contact                     | 28<br>(17 - 41)          | 0<br>(0 - 1)     | 0<br>(0 - 0)      | 6<br>(3 - 10)            | 17<br>(9 - 27)           | 4<br>(2 - 7)       |
| Foreign body                                    | 487<br>(196 - 754)       | 13<br>(5 - 26)   | 2<br>(1 - 3)      | 179<br>(67 - 293)        | 242<br>(92 - 401)        | 51<br>(25 - 115)   |
| Pulmonary aspiration and foreign body in airway | 487<br>(196 - 754)       | 13<br>(5 - 26)   | 2<br>(1 - 3)      | 179<br>(67 - 292)        | 242<br>(92 - 401)        | 51<br>(25 - 115)   |
| Foreign body in other body part                 | 1<br>(0 - 1)             | 0<br>(0 - 0)     | 0<br>(0 - 0)      | 0<br>(0 - 0)             | 0<br>(0 - 0)             | 0<br>(0 - 0)       |
| Other unintentional injuries                    | 186<br>(149 - 226)       | 1<br>(1 - 2)     | 1<br>(1 - 2)      | 98<br>(74 - 124)         | 82<br>(59 - 107)         | 4<br>(3 - 6)       |
| Self-harm and interpersonal violence            | 4,121<br>(3,108 - 4,728) | 2<br>(1 - 4)     | 9<br>(5 - 13)     | 2,296<br>(1,778 - 2,674) | 1,453<br>(1,071 - 1,747) | 361<br>(223 - 455) |
| Self-harm                                       | 3,412<br>(2,451 - 3,942) | --               | 7<br>(4 - 12)     | 1,861<br>(1,377 - 2,197) | 1,222<br>(864 - 1,487)   | 321<br>(187 - 411) |
| Interpersonal violence                          | 710<br>(445 - 997)       | 2<br>(1 - 4)     | 2<br>(1 - 2)      | 435<br>(275 - 637)       | 230<br>(126 - 325)       | 40<br>(24 - 61)    |
| Assault by firearm                              | 56<br>(20 - 108)         | 0<br>(0 - 0)     | 0<br>(0 - 0)      | 46<br>(16 - 88)          | 9<br>(3 - 22)            | 0<br>(0 - 1)       |
| Assault by sharp object                         | 257<br>(128 - 377)       | 0<br>(0 - 1)     | 0<br>(0 - 1)      | 162<br>(83 - 240)        | 84<br>(32 - 135)         | 11<br>(5 - 18)     |
| Assault by other means                          | 396<br>(244 - 612)       | 2<br>(1 - 3)     | 1<br>(1 - 2)      | 227<br>(144 - 357)       | 137<br>(76 - 216)        | 29<br>(17 - 44)    |

Web Table 31- Belarus deaths with 95% UI by age, sex, and cause in 2013

| Cause                                                             | Females, All Ages           | Females, 0-4 Years | Females, 5-14 Years | Females, 15-49 Years     | Females, 50-69 Years        | Females, 70-80 Years        |
|-------------------------------------------------------------------|-----------------------------|--------------------|---------------------|--------------------------|-----------------------------|-----------------------------|
| All causes                                                        | 70,804<br>(65,183 - 76,024) | 339<br>(241 - 464) | 75<br>(62 - 90)     | 3,456<br>(3,041 - 3,862) | 13,280<br>(11,940 - 14,542) | 53,655<br>(49,732 - 57,202) |
| Communicable, maternal, neonatal, and nutritional diseases        | 673<br>(585 - 787)          | 144<br>(100 - 203) | 6<br>(5 - 8)        | 174<br>(143 - 200)       | 168<br>(135 - 202)          | 181<br>(140 - 288)          |
| HIV/AIDS and tuberculosis                                         | 144<br>(106 - 177)          | 0<br>(0 - 0)       | 0<br>(0 - 0)        | 60<br>(43 - 76)          | 44<br>(29 - 57)             | 41<br>(29 - 56)             |
| Tuberculosis                                                      | 110<br>(73 - 138)           | 0<br>(0 - 0)       | 0<br>(0 - 0)        | 32<br>(16 - 44)          | 37<br>(23 - 51)             | 40<br>(28 - 55)             |
| HIV/AIDS                                                          | 35<br>(23 - 50)             | 0<br>(0 - 0)       | 0<br>(0 - 0)        | 27<br>(18 - 39)          | 6<br>(3 - 11)               | 1<br>(0 - 2)                |
| HIV/AIDS resulting in mycobacterial infection                     | 2<br>(1 - 2)                | 0<br>(0 - 0)       | 0<br>(0 - 0)        | 1<br>(1 - 2)             | 0<br>(0 - 1)                | 0<br>(0 - 0)                |
| HIV/AIDS resulting in other diseases                              | 33<br>(22 - 47)             | 0<br>(0 - 0)       | 0<br>(0 - 0)        | 26<br>(17 - 37)          | 6<br>(3 - 10)               | 1<br>(0 - 2)                |
| Diarrhea, lower respiratory, and other common infectious diseases | 344<br>(284 - 443)          | 32<br>(21 - 49)    | 5<br>(4 - 7)        | 85<br>(62 - 104)         | 97<br>(70 - 124)            | 124<br>(89 - 223)           |
| Diarrheal diseases                                                | 6<br>(4 - 8)                | 1<br>(1 - 3)       | 0<br>(0 - 0)        | 1<br>(1 - 1)             | 1<br>(1 - 2)                | 3<br>(1 - 4)                |
| Intestinal infectious diseases                                    | 8<br>(4 - 17)               | 1<br>(0 - 3)       | 1<br>(0 - 2)        | 3<br>(1 - 6)             | 2<br>(0 - 5)                | 2<br>(1 - 4)                |
| Typhoid fever                                                     | 6<br>(3 - 12)               | 1<br>(0 - 2)       | 1<br>(0 - 1)        | 2<br>(1 - 4)             | 1<br>(0 - 4)                | 1<br>(0 - 3)                |
| Paratyphoid fever                                                 | 2<br>(1 - 4)                | 0<br>(0 - 1)       | 0<br>(0 - 0)        | 1<br>(0 - 1)             | 0<br>(0 - 1)                | 0<br>(0 - 1)                |
| Other intestinal infectious diseases                              | 0<br>(0 - 3)                | 0<br>(0 - 1)       | 0<br>(0 - 0)        | 0<br>(0 - 1)             | 0<br>(0 - 1)                | 0<br>(0 - 1)                |
| Lower respiratory infections                                      | 275<br>(220 - 363)          | 18<br>(10 - 30)    | 2<br>(2 - 3)        | 67<br>(45 - 85)          | 80<br>(52 - 105)            | 107<br>(73 - 203)           |
| Upper respiratory infections                                      | 2<br>(0 - 7)                | 0<br>(0 - 0)       | 0<br>(0 - 0)        | 0<br>(0 - 0)             | 0<br>(0 - 2)                | 2<br>(0 - 6)                |
| Otitis media                                                      | 1<br>(1 - 1)                | 0<br>(0 - 0)       | 0<br>(0 - 0)        | 0<br>(0 - 0)             | 0<br>(0 - 0)                | 0<br>(0 - 0)                |
| Meningitis                                                        | 29<br>(24 - 38)             | 6<br>(4 - 11)      | 1<br>(0 - 1)        | 7<br>(5 - 9)             | 9<br>(7 - 13)               | 6<br>(5 - 9)                |
| Pneumococcal meningitis                                           | 7<br>(5 - 10)               | 1<br>(1 - 2)       | 0<br>(0 - 0)        | 2<br>(1 - 2)             | 3<br>(2 - 4)                | 2<br>(1 - 3)                |
| H influenzae type B meningitis                                    | 5<br>(4 - 8)                | 3<br>(1 - 4)       | 0<br>(0 - 0)        | 1<br>(1 - 1)             | 1<br>(0 - 2)                | 1<br>(0 - 1)                |
| Meningococcal meningitis                                          | 6<br>(5 - 9)                | 2<br>(1 - 3)       | 0<br>(0 - 0)        | 1<br>(1 - 2)             | 2<br>(1 - 3)                | 1<br>(1 - 2)                |
| Other meningitis                                                  | 10<br>(7 - 14)              | 1<br>(1 - 2)       | 0<br>(0 - 0)        | 3<br>(2 - 4)             | 4<br>(2 - 5)                | 3<br>(2 - 4)                |
| Encephalitis                                                      | 16<br>(12 - 22)             | 5<br>(2 - 8)       | 1<br>(1 - 2)        | 6<br>(4 - 8)             | 4<br>(2 - 5)                | 1<br>(1 - 1)                |
| Diphtheria                                                        | 0<br>(0 - 0)                | 0<br>(0 - 0)       | 0<br>(0 - 0)        | 0<br>(0 - 0)             | 0<br>(0 - 0)                | --                          |
| Whooping cough                                                    | 0<br>(0 - 1)                | 0<br>(0 - 0)       | 0<br>(0 - 0)        | 0<br>(0 - 0)             | 0<br>(0 - 0)                | --                          |
| Tetanus                                                           | 1<br>(1 - 1)                | 0<br>(0 - 0)       | 0<br>(0 - 0)        | 0<br>(0 - 0)             | 0<br>(0 - 1)                | 0<br>(0 - 0)                |
| Measles                                                           | 0<br>(0 - 0)                | 0<br>(0 - 0)       | 0<br>(0 - 0)        | 0<br>(0 - 0)             | 0<br>(0 - 0)                | --                          |
| Varicella and herpes zoster                                       | 5<br>(1 - 19)               | 0<br>(0 - 1)       | 0<br>(0 - 0)        | 0<br>(0 - 1)             | 0<br>(0 - 1)                | 4<br>(0 - 18)               |
| Neglected tropical diseases and malaria                           | 3<br>(3 - 4)                | 0<br>(0 - 0)       | 0<br>(0 - 0)        | 1<br>(1 - 1)             | 1<br>(1 - 1)                | 1<br>(1 - 1)                |
| Cysticercosis                                                     | 0<br>(0 - 0)                | 0<br>(0 - 0)       | 0<br>(0 - 0)        | 0<br>(0 - 0)             | 0<br>(0 - 0)                | 0<br>(0 - 0)                |
| Cystic echinococcosis                                             | 2<br>(1 - 2)                | 0<br>(0 - 0)       | 0<br>(0 - 0)        | 0<br>(0 - 0)             | 1<br>(0 - 1)                | 1<br>(1 - 1)                |
| Dengue                                                            | 1<br>(0 - 1)                | 0<br>(0 - 0)       | 0<br>(0 - 0)        | 0<br>(0 - 0)             | 0<br>(0 - 0)                | 0<br>(0 - 0)                |
| Rabies                                                            | 1<br>(0 - 1)                | 0<br>(0 - 0)       | 0<br>(0 - 0)        | 0<br>(0 - 0)             | 0<br>(0 - 0)                | 0<br>(0 - 0)                |
| Other neglected tropical diseases                                 | 1<br>(1 - 1)                | 0<br>(0 - 0)       | 0<br>(0 - 0)        | 0<br>(0 - 1)             | 0<br>(0 - 0)                | 0<br>(0 - 0)                |
| Maternal disorders                                                | 11<br>(8 - 15)              | --                 | 0<br>(0 - 0)        | 11<br>(8 - 15)           | --                          | --                          |
| Maternal hemorrhage                                               | 1<br>(1 - 2)                | --                 | 0<br>(0 - 0)        | 1<br>(1 - 2)             | --                          | --                          |
| Maternal sepsis and other maternal infections                     | 1<br>(0 - 1)                | --                 | 0<br>(0 - 0)        | 1<br>(0 - 1)             | --                          | --                          |
| Maternal hypertensive disorders                                   | 1<br>(0 - 2)                | --                 | 0<br>(0 - 0)        | 1<br>(0 - 2)             | --                          | --                          |
| Maternal obstructed labor                                         | 1<br>(1 - 2)                | --                 | 0<br>(0 - 0)        | 1<br>(1 - 2)             | --                          | --                          |
| Maternal abortive outcome                                         | 2<br>(2 - 3)                | --                 | 0<br>(0 - 0)        | 2<br>(2 - 3)             | --                          | --                          |
| Indirect maternal deaths                                          | 1<br>(1 - 2)                | --                 | 0<br>(0 - 0)        | 1<br>(1 - 2)             | --                          | --                          |



Web Table 31- Belarus deaths with 95% UI by age, sex, and cause in 2013

| Cause                                                            | Females, All Ages           | Females, 0-4 Years | Females, 5-14 Years | Females, 15-49 Years     | Females, 50-69 Years        | Females, 70-80 Years        |
|------------------------------------------------------------------|-----------------------------|--------------------|---------------------|--------------------------|-----------------------------|-----------------------------|
| Late maternal deaths                                             | 1<br>(0 - 2)                | --                 | 0<br>(0 - 0)        | 1<br>(0 - 2)             | --                          | --                          |
| Maternal deaths aggravated by HIV/AIDS                           | 0<br>(0 - 0)                | --                 | --                  | 0<br>(0 - 0)             | --                          | --                          |
| Other maternal disorders                                         | 2<br>(1 - 3)                | --                 | 0<br>(0 - 0)        | 2<br>(1 - 3)             | --                          | --                          |
| Neonatal disorders                                               | 105<br>(73 - 151)           | 105<br>(73 - 151)  | --                  | --                       | --                          | --                          |
| Neonatal preterm birth complications                             | 32<br>(14 - 60)             | 32<br>(14 - 60)    | --                  | --                       | --                          | --                          |
| Neonatal encephalopathy due to birth asphyxia and trauma         | 44<br>(24 - 70)             | 44<br>(24 - 70)    | --                  | --                       | --                          | --                          |
| Neonatal sepsis and other neonatal infections                    | 8<br>(3 - 17)               | 8<br>(3 - 17)      | --                  | --                       | --                          | --                          |
| Hemolytic disease and other neonatal jaundice                    | 0<br>(0 - 1)                | 0<br>(0 - 1)       | --                  | --                       | --                          | --                          |
| Other neonatal disorders                                         | 21<br>(11 - 39)             | 21<br>(11 - 39)    | --                  | --                       | --                          | --                          |
| Nutritional deficiencies                                         | 29<br>(23 - 48)             | 1<br>(1 - 2)       | 0<br>(0 - 1)        | 7<br>(6 - 10)            | 11<br>(8 - 20)              | 9<br>(6 - 15)               |
| Protein-energy malnutrition                                      | 10<br>(6 - 16)              | 1<br>(1 - 2)       | 0<br>(0 - 0)        | 4<br>(2 - 5)             | 4<br>(2 - 7)                | 2<br>(1 - 4)                |
| Iodine deficiency                                                | 1<br>(0 - 4)                | 0<br>(0 - 0)       | 0<br>(0 - 0)        | 0<br>(0 - 1)             | 1<br>(0 - 2)                | 0<br>(0 - 2)                |
| Iron-deficiency anemia                                           | 13<br>(8 - 25)              | 0<br>(0 - 0)       | 0<br>(0 - 0)        | 2<br>(1 - 5)             | 5<br>(3 - 10)               | 5<br>(3 - 10)               |
| Other nutritional deficiencies                                   | 4<br>(2 - 8)                | 0<br>(0 - 0)       | 0<br>(0 - 0)        | 1<br>(0 - 2)             | 2<br>(1 - 4)                | 1<br>(1 - 3)                |
| Other communicable, maternal, neonatal, and nutritional diseases | 36<br>(27 - 51)             | 4<br>(2 - 9)       | 1<br>(0 - 1)        | 10<br>(7 - 14)           | 15<br>(9 - 26)              | 6<br>(3 - 11)               |
| Sexually transmitted diseases excluding HIV                      | 4<br>(2 - 6)                | 0<br>(0 - 1)       | 0<br>(0 - 0)        | 1<br>(0 - 1)             | 2<br>(1 - 3)                | 1<br>(0 - 2)                |
| Syphilis                                                         | 2<br>(1 - 4)                | 0<br>(0 - 1)       | 0<br>(0 - 0)        | 0<br>(0 - 1)             | 1<br>(0 - 2)                | 1<br>(0 - 1)                |
| Chlamydial infection                                             | 0<br>(0 - 1)                | --                 | 0<br>(0 - 0)        | 0<br>(0 - 0)             | 0<br>(0 - 0)                | 0<br>(0 - 0)                |
| Gonococcal infection                                             | 1<br>(0 - 1)                | --                 | 0<br>(0 - 0)        | 0<br>(0 - 0)             | 0<br>(0 - 1)                | 0<br>(0 - 0)                |
| Other sexually transmitted diseases                              | 0<br>(0 - 1)                | --                 | 0<br>(0 - 0)        | 0<br>(0 - 0)             | 0<br>(0 - 0)                | 0<br>(0 - 0)                |
| Hepatitis                                                        | 11<br>(8 - 14)              | 1<br>(0 - 2)       | 0<br>(0 - 0)        | 4<br>(3 - 5)             | 4<br>(2 - 6)                | 2<br>(1 - 3)                |
| Acute hepatitis A                                                | 2<br>(1 - 4)                | 0<br>(0 - 1)       | 0<br>(0 - 0)        | 1<br>(0 - 2)             | 0<br>(0 - 1)                | 0<br>(0 - 0)                |
| Acute hepatitis B                                                | 8<br>(5 - 11)               | 0<br>(0 - 1)       | 0<br>(0 - 0)        | 2<br>(1 - 4)             | 3<br>(2 - 5)                | 2<br>(1 - 3)                |
| Acute hepatitis C                                                | 1<br>(0 - 1)                | --                 | 0<br>(0 - 0)        | 0<br>(0 - 1)             | 0<br>(0 - 1)                | 0<br>(0 - 0)                |
| Other infectious diseases                                        | 21<br>(14 - 34)             | 3<br>(1 - 7)       | 0<br>(0 - 1)        | 6<br>(3 - 9)             | 9<br>(4 - 19)               | 3<br>(1 - 8)                |
| Non-communicable diseases                                        | 67,238<br>(61,854 - 72,158) | 153<br>(104 - 217) | 31<br>(24 - 38)     | 2,286<br>(1,988 - 2,581) | 12,127<br>(10,887 - 13,324) | 52,642<br>(48,779 - 56,142) |
| Neoplasms                                                        | 8,763<br>(7,714 - 10,375)   | 9<br>(5 - 13)      | 13<br>(10 - 17)     | 912<br>(782 - 1,065)     | 3,599<br>(3,138 - 4,283)    | 4,230<br>(3,717 - 5,026)    |
| Esophageal cancer                                                | 44<br>(35 - 56)             | --                 | --                  | 2<br>(1 - 2)             | 12<br>(9 - 16)              | 30<br>(23 - 40)             |
| Stomach cancer                                                   | 1,346<br>(993 - 1,934)      | --                 | --                  | 115<br>(85 - 159)        | 517<br>(374 - 723)          | 714<br>(500 - 1,088)        |
| Liver cancer                                                     | 183<br>(141 - 243)          | --                 | 0<br>(0 - 1)        | 11<br>(8 - 15)           | 62<br>(45 - 84)             | 109<br>(77 - 154)           |
| Liver cancer due to hepatitis B                                  | 27<br>(12 - 45)             | --                 | 0<br>(0 - 0)        | 3<br>(2 - 5)             | 12<br>(4 - 20)              | 13<br>(5 - 22)              |
| Liver cancer due to hepatitis C                                  | 86<br>(60 - 118)            | --                 | 0<br>(0 - 0)        | 4<br>(2 - 6)             | 28<br>(17 - 40)             | 54<br>(36 - 78)             |
| Liver cancer due to alcohol use                                  | 38<br>(21 - 61)             | --                 | --                  | 1<br>(0 - 2)             | 10<br>(5 - 18)              | 27<br>(15 - 44)             |
| Liver cancer due to other causes                                 | 31<br>(19 - 47)             | --                 | 0<br>(0 - 0)        | 3<br>(2 - 4)             | 12<br>(7 - 18)              | 16<br>(9 - 27)              |
| Larynx cancer                                                    | 12<br>(8 - 20)              | --                 | --                  | 2<br>(1 - 3)             | 6<br>(3 - 9)                | 5<br>(3 - 8)                |
| Tracheal, bronchus and lung cancer                               | 593<br>(498 - 768)          | --                 | --                  | 37<br>(28 - 49)          | 236<br>(191 - 301)          | 319<br>(253 - 436)          |
| Breast cancer                                                    | 1,523<br>(1,095 - 1,934)    | --                 | --                  | 232<br>(185 - 337)       | 769<br>(547 - 990)          | 522<br>(330 - 662)          |
| Cervical cancer                                                  | 619<br>(487 - 766)          | --                 | --                  | 115<br>(85 - 145)        | 278<br>(208 - 355)          | 227<br>(168 - 305)          |
| Uterine cancer                                                   | 117<br>(83 - 237)           | --                 | --                  | 5<br>(3 - 10)            | 56<br>(36 - 118)            | 56<br>(37 - 121)            |
| Prostate cancer                                                  | --                          | --                 | --                  | --                       | --                          | --                          |

Web Table 31- Belarus deaths with 95% UI by age, sex, and cause in 2013

| Cause                                         | Females, All Ages           | Females, 0-4 Years | Females, 5-14 Years | Females, 15-49 Years | Females, 50-69 Years     | Females, 70-80 Years        |
|-----------------------------------------------|-----------------------------|--------------------|---------------------|----------------------|--------------------------|-----------------------------|
| Colon and rectum cancer                       | 1,077<br>(901 - 1,346)      | --                 | --                  | 59<br>(47 - 73)      | 373<br>(315 - 469)       | 645<br>(508 - 861)          |
| Lip and oral cavity cancer                    | 62<br>(50 - 79)             | --                 | --                  | 5<br>(4 - 7)         | 19<br>(15 - 26)          | 37<br>(28 - 52)             |
| Nasopharynx cancer                            | 6<br>(3 - 13)               | --                 | 0<br>(0 - 0)        | 2<br>(1 - 3)         | 3<br>(1 - 6)             | 2<br>(1 - 4)                |
| Other pharynx cancer                          | 12<br>(10 - 16)             | --                 | --                  | 2<br>(1 - 2)         | 7<br>(5 - 9)             | 4<br>(3 - 6)                |
| Gallbladder and biliary tract cancer          | 239<br>(99 - 343)           | --                 | --                  | 7<br>(3 - 11)        | 82<br>(38 - 116)         | 150<br>(57 - 227)           |
| Pancreatic cancer                             | 486<br>(418 - 604)          | --                 | --                  | 18<br>(14 - 24)      | 165<br>(137 - 203)       | 302<br>(248 - 392)          |
| Malignant skin melanoma                       | 149<br>(86 - 198)           | --                 | --                  | 25<br>(14 - 33)      | 62<br>(35 - 85)          | 62<br>(37 - 88)             |
| Non-melanoma skin cancer                      | 83<br>(51 - 135)            | --                 | --                  | 3<br>(1 - 4)         | 11<br>(6 - 21)           | 69<br>(39 - 118)            |
| Ovarian cancer                                | 655<br>(542 - 825)          | --                 | --                  | 84<br>(65 - 109)     | 331<br>(265 - 431)       | 240<br>(185 - 316)          |
| Testicular cancer                             | --                          | --                 | --                  | --                   | --                       | --                          |
| Kidney cancer                                 | 273<br>(174 - 419)          | 1<br>(0 - 2)       | 1<br>(0 - 2)        | 17<br>(12 - 25)      | 110<br>(73 - 166)        | 144<br>(81 - 255)           |
| Bladder cancer                                | 97<br>(70 - 151)            | --                 | --                  | 2<br>(2 - 4)         | 20<br>(14 - 31)          | 75<br>(52 - 116)            |
| Brain and nervous system cancer               | 208<br>(150 - 260)          | 2<br>(1 - 4)       | 4<br>(2 - 5)        | 51<br>(39 - 66)      | 115<br>(84 - 151)        | 37<br>(21 - 51)             |
| Thyroid cancer                                | 79<br>(47 - 103)            | --                 | 0<br>(0 - 0)        | 4<br>(3 - 6)         | 27<br>(18 - 37)          | 47<br>(26 - 66)             |
| Mesothelioma                                  | 17<br>(10 - 25)             | --                 | --                  | 2<br>(1 - 3)         | 8<br>(4 - 13)            | 7<br>(4 - 11)               |
| Hodgkin lymphoma                              | 10<br>(7 - 20)              | 0<br>(0 - 0)       | 0<br>(0 - 0)        | 5<br>(3 - 9)         | 3<br>(2 - 6)             | 2<br>(1 - 5)                |
| Non-Hodgkin lymphoma                          | 213<br>(93 - 291)           | 0<br>(0 - 0)       | 0<br>(0 - 1)        | 21<br>(10 - 30)      | 75<br>(34 - 106)         | 116<br>(46 - 164)           |
| Multiple myeloma                              | 103<br>(61 - 155)           | --                 | --                  | 5<br>(3 - 9)         | 52<br>(30 - 79)          | 46<br>(26 - 73)             |
| Leukemia                                      | 358<br>(296 - 435)          | 3<br>(1 - 6)       | 5<br>(3 - 8)        | 53<br>(42 - 66)      | 125<br>(100 - 162)       | 172<br>(134 - 214)          |
| Other neoplasms                               | 199<br>(158 - 246)          | 2<br>(1 - 4)       | 3<br>(2 - 5)        | 30<br>(23 - 38)      | 73<br>(56 - 95)          | 91<br>(66 - 121)            |
| Cardiovascular diseases                       | 49,525<br>(43,163 - 53,675) | 1<br>(1 - 2)       | 1<br>(1 - 2)        | 668<br>(489 - 818)   | 6,592<br>(5,494 - 7,422) | 42,263<br>(37,125 - 45,644) |
| Rheumatic heart disease                       | 199<br>(151 - 331)          | 0<br>(0 - 0)       | 0<br>(0 - 0)        | 27<br>(17 - 60)      | 122<br>(88 - 205)        | 50<br>(32 - 67)             |
| Ischemic heart disease                        | 33,669<br>(27,845 - 37,206) | 0<br>(0 - 1)       | 0<br>(0 - 0)        | 301<br>(181 - 385)   | 3,813<br>(2,698 - 4,406) | 29,555<br>(24,688 - 32,681) |
| Cerebrovascular disease                       | 13,699<br>(11,389 - 16,016) | 0<br>(0 - 0)       | 0<br>(0 - 1)        | 233<br>(179 - 316)   | 2,202<br>(1,807 - 2,841) | 11,263<br>(8,970 - 13,255)  |
| Ischemic stroke                               | 10,632<br>(8,378 - 12,628)  | 0<br>(0 - 0)       | 0<br>(0 - 0)        | 48<br>(30 - 83)      | 1,158<br>(872 - 1,625)   | 9,426<br>(7,386 - 11,226)   |
| Hemorrhagic stroke                            | 3,067<br>(2,209 - 4,057)    | 0<br>(0 - 0)       | 0<br>(0 - 1)        | 185<br>(140 - 243)   | 1,043<br>(775 - 1,401)   | 1,837<br>(1,237 - 2,587)    |
| Hypertensive heart disease                    | 1,281<br>(723 - 1,801)      | 0<br>(0 - 0)       | 0<br>(0 - 0)        | 12<br>(6 - 19)       | 170<br>(90 - 242)        | 1,099<br>(609 - 1,602)      |
| Cardiomyopathy and myocarditis                | 384<br>(258 - 519)          | 1<br>(0 - 1)       | 0<br>(0 - 1)        | 72<br>(33 - 104)     | 193<br>(103 - 276)       | 118<br>(70 - 204)           |
| Atrial fibrillation and flutter               | 13<br>(6 - 23)              | --                 | --                  | 0<br>(0 - 1)         | 2<br>(1 - 4)             | 10<br>(4 - 19)              |
| Aortic aneurysm                               | 126<br>(71 - 212)           | --                 | --                  | 5<br>(3 - 9)         | 31<br>(16 - 49)          | 89<br>(49 - 156)            |
| Peripheral vascular disease                   | 11<br>(7 - 16)              | --                 | --                  | 0<br>(0 - 0)         | 1<br>(1 - 2)             | 9<br>(5 - 14)               |
| Endocarditis                                  | 20<br>(11 - 29)             | 0<br>(0 - 0)       | 0<br>(0 - 0)        | 4<br>(2 - 6)         | 8<br>(4 - 12)            | 9<br>(5 - 14)               |
| Other cardiovascular and circulatory diseases | 123<br>(86 - 180)           | 0<br>(0 - 0)       | 0<br>(0 - 0)        | 12<br>(8 - 21)       | 49<br>(32 - 77)          | 61<br>(41 - 91)             |
| Chronic respiratory diseases                  | 1,498<br>(1,052 - 4,187)    | 0<br>(0 - 0)       | 0<br>(0 - 0)        | 35<br>(26 - 74)      | 209<br>(152 - 494)       | 1,253<br>(851 - 3,602)      |
| Chronic obstructive pulmonary disease         | 1,262<br>(868 - 3,560)      | 0<br>(0 - 0)       | 0<br>(0 - 0)        | 18<br>(11 - 38)      | 156<br>(107 - 368)       | 1,089<br>(731 - 3,153)      |
| Pneumoconiosis                                | 1<br>(1 - 3)                | 0<br>(0 - 0)       | 0<br>(0 - 0)        | 1<br>(0 - 1)         | 0<br>(0 - 1)             | 0<br>(0 - 1)                |
| Silicosis                                     | 0<br>(0 - 1)                | 0<br>(0 - 0)       | 0<br>(0 - 0)        | 0<br>(0 - 0)         | 0<br>(0 - 0)             | 0<br>(0 - 0)                |
| Asbestosis                                    | 0<br>(0 - 1)                | 0<br>(0 - 0)       | 0<br>(0 - 0)        | 0<br>(0 - 0)         | 0<br>(0 - 0)             | 0<br>(0 - 0)                |
| Coal workers pneumoconiosis                   | 0<br>(0 - 1)                | 0<br>(0 - 0)       | 0<br>(0 - 0)        | 0<br>(0 - 0)         | 0<br>(0 - 0)             | 0<br>(0 - 0)                |
| Other pneumoconiosis                          | 0<br>(0 - 1)                | 0<br>(0 - 0)       | 0<br>(0 - 0)        | 0<br>(0 - 0)         | 0<br>(0 - 0)             | 0<br>(0 - 0)                |

Web Table 31- Belarus deaths with 95% UI by age, sex, and cause in 2013

| Cause                                               | Females, All Ages        | Females, 0-4 Years | Females, 5-14 Years | Females, 15-49 Years | Females, 50-69 Years | Females, 70-80 Years     |
|-----------------------------------------------------|--------------------------|--------------------|---------------------|----------------------|----------------------|--------------------------|
| Asthma                                              | 201<br>(104 - 645)       | 0<br>(0 - 0)       | 0<br>(0 - 0)        | 13<br>(8 - 32)       | 45<br>(25 - 116)     | 142<br>(66 - 501)        |
| Interstitial lung disease and pulmonary sarcoidosis | 28<br>(9 - 80)           | 0<br>(0 - 0)       | 0<br>(0 - 0)        | 2<br>(0 - 4)         | 7<br>(2 - 14)        | 19<br>(6 - 62)           |
| Other chronic respiratory diseases                  | 5<br>(3 - 14)            | 0<br>(0 - 0)       | 0<br>(0 - 0)        | 2<br>(1 - 4)         | 1<br>(1 - 3)         | 2<br>(1 - 7)             |
| Cirrhosis                                           | 1,151<br>(986 - 1,396)   | 0<br>(0 - 0)       | 1<br>(1 - 1)        | 236<br>(188 - 288)   | 718<br>(604 - 902)   | 196<br>(157 - 258)       |
| Cirrhosis due to hepatitis B                        | 233<br>(123 - 361)       | 0<br>(0 - 0)       | 0<br>(0 - 0)        | 51<br>(27 - 78)      | 144<br>(76 - 229)    | 38<br>(18 - 61)          |
| Cirrhosis due to hepatitis C                        | 523<br>(315 - 739)       | 0<br>(0 - 0)       | 0<br>(0 - 0)        | 103<br>(57 - 149)    | 336<br>(196 - 491)   | 83<br>(51 - 125)         |
| Cirrhosis due to alcohol use                        | 260<br>(157 - 388)       | --                 | --                  | 38<br>(21 - 63)      | 162<br>(92 - 246)    | 61<br>(34 - 97)          |
| Cirrhosis due to other causes                       | 135<br>(77 - 220)        | 0<br>(0 - 0)       | 0<br>(0 - 1)        | 44<br>(25 - 72)      | 76<br>(39 - 127)     | 14<br>(7 - 24)           |
| Digestive diseases                                  | 798<br>(622 - 962)       | 1<br>(0 - 1)       | 1<br>(0 - 1)        | 57<br>(46 - 70)      | 185<br>(152 - 237)   | 554<br>(404 - 692)       |
| Peptic ulcer disease                                | 83<br>(52 - 123)         | 0<br>(0 - 0)       | 0<br>(0 - 0)        | 7<br>(5 - 11)        | 24<br>(15 - 36)      | 52<br>(29 - 82)          |
| Gastritis and duodenitis                            | 6<br>(3 - 14)            | 0<br>(0 - 0)       | 0<br>(0 - 0)        | 1<br>(0 - 1)         | 2<br>(1 - 3)         | 3<br>(1 - 10)            |
| Appendicitis                                        | 12<br>(7 - 19)           | 0<br>(0 - 0)       | 0<br>(0 - 0)        | 2<br>(1 - 3)         | 5<br>(3 - 8)         | 5<br>(2 - 10)            |
| Paralytic ileus and intestinal obstruction          | 72<br>(37 - 133)         | 0<br>(0 - 0)       | 0<br>(0 - 0)        | 4<br>(2 - 7)         | 13<br>(7 - 24)       | 55<br>(27 - 103)         |
| Inguinal, femoral, and abdominal hernia             | 27<br>(14 - 52)          | 0<br>(0 - 0)       | 0<br>(0 - 0)        | 1<br>(0 - 1)         | 5<br>(3 - 9)         | 21<br>(10 - 44)          |
| Inflammatory bowel disease                          | 30<br>(18 - 50)          | 0<br>(0 - 0)       | 0<br>(0 - 0)        | 4<br>(2 - 6)         | 8<br>(5 - 13)        | 17<br>(9 - 36)           |
| Vascular intestinal disorders                       | 263<br>(123 - 366)       | 0<br>(0 - 0)       | 0<br>(0 - 0)        | 3<br>(2 - 7)         | 34<br>(16 - 54)      | 225<br>(102 - 319)       |
| Gallbladder and biliary diseases                    | 103<br>(71 - 180)        | 0<br>(0 - 0)       | 0<br>(0 - 0)        | 5<br>(3 - 8)         | 27<br>(18 - 53)      | 71<br>(46 - 124)         |
| Pancreatitis                                        | 170<br>(113 - 267)       | 0<br>(0 - 0)       | 0<br>(0 - 0)        | 28<br>(18 - 37)      | 58<br>(38 - 82)      | 84<br>(46 - 158)         |
| Other digestive diseases                            | 33<br>(21 - 52)          | 0<br>(0 - 0)       | 0<br>(0 - 0)        | 3<br>(2 - 4)         | 10<br>(7 - 15)       | 20<br>(11 - 34)          |
| Neurological disorders                              | 3,827<br>(3,005 - 5,078) | 2<br>(2 - 4)       | 2<br>(2 - 3)        | 62<br>(48 - 79)      | 171<br>(138 - 214)   | 3,590<br>(2,787 - 4,832) |
| Alzheimer disease and other dementias               | 3,638<br>(2,825 - 4,897) | --                 | --                  | 0<br>(0 - 1)         | 105<br>(77 - 143)    | 3,532<br>(2,734 - 4,767) |
| Parkinson disease                                   | 33<br>(21 - 53)          | --                 | --                  | 1<br>(0 - 1)         | 6<br>(4 - 9)         | 27<br>(16 - 45)          |
| Epilepsy                                            | 55<br>(37 - 75)          | 0<br>(0 - 1)       | 1<br>(1 - 2)        | 34<br>(22 - 46)      | 16<br>(9 - 23)       | 4<br>(3 - 6)             |
| Multiple sclerosis                                  | 35<br>(21 - 59)          | --                 | --                  | 17<br>(10 - 27)      | 13<br>(7 - 20)       | 5<br>(3 - 12)            |
| Other neurological disorders                        | 66<br>(55 - 81)          | 2<br>(1 - 3)       | 1<br>(0 - 1)        | 11<br>(9 - 14)       | 31<br>(25 - 40)      | 21<br>(16 - 29)          |
| Mental and substance use disorders                  | 408<br>(210 - 599)       | 0<br>(0 - 0)       | 0<br>(0 - 0)        | 153<br>(82 - 233)    | 218<br>(99 - 341)    | 37<br>(23 - 53)          |
| Schizophrenia                                       | 7<br>(5 - 10)            | --                 | --                  | 1<br>(1 - 2)         | 3<br>(2 - 4)         | 3<br>(1 - 5)             |
| Alcohol use disorders                               | 318<br>(127 - 507)       | --                 | --                  | 118<br>(50 - 199)    | 181<br>(65 - 307)    | 19<br>(7 - 33)           |
| Drug use disorders                                  | 82<br>(63 - 103)         | 0<br>(0 - 0)       | --                  | 32<br>(24 - 43)      | 34<br>(24 - 48)      | 15<br>(10 - 21)          |
| Opioid use disorders                                | 34<br>(26 - 42)          | 0<br>(0 - 0)       | --                  | 14<br>(10 - 18)      | 13<br>(9 - 19)       | 6<br>(4 - 9)             |
| Cocaine use disorders                               | 3<br>(2 - 3)             | 0<br>(0 - 0)       | --                  | 1<br>(1 - 2)         | 1<br>(1 - 1)         | 0<br>(0 - 1)             |
| Amphetamine use disorders                           | 3<br>(2 - 4)             | 0<br>(0 - 0)       | --                  | 1<br>(1 - 2)         | 1<br>(1 - 2)         | 0<br>(0 - 1)             |
| Other drug use disorders                            | 43<br>(33 - 54)          | 0<br>(0 - 0)       | --                  | 16<br>(12 - 22)      | 19<br>(13 - 26)      | 8<br>(5 - 11)            |
| Eating disorders                                    | 1<br>(1 - 2)             | --                 | 0<br>(0 - 0)        | 1<br>(1 - 2)         | --                   | --                       |
| Anorexia nervosa                                    | 1<br>(1 - 2)             | --                 | 0<br>(0 - 0)        | 1<br>(1 - 2)         | --                   | --                       |
| Diabetes, urogenital, blood, and endocrine diseases | 916<br>(765 - 1,161)     | 3<br>(2 - 5)       | 2<br>(1 - 3)        | 100<br>(83 - 132)    | 356<br>(294 - 493)   | 456<br>(349 - 582)       |
| Diabetes mellitus                                   | 331<br>(272 - 542)       | 0<br>(0 - 0)       | 0<br>(0 - 0)        | 32<br>(26 - 41)      | 135<br>(106 - 227)   | 164<br>(130 - 271)       |
| Acute glomerulonephritis                            | 3<br>(2 - 4)             | 0<br>(0 - 0)       | 0<br>(0 - 0)        | 1<br>(0 - 1)         | 1<br>(1 - 2)         | 1<br>(1 - 2)             |
| Chronic kidney disease                              | 121<br>(90 - 253)        | 0<br>(0 - 0)       | 0<br>(0 - 0)        | 24<br>(17 - 48)      | 55<br>(39 - 118)     | 41<br>(30 - 88)          |
| Chronic kidney disease due to diabetes mellitus     | 5<br>(2 - 7)             | 0<br>(0 - 0)       | 0<br>(0 - 0)        | 1<br>(1 - 2)         | 2<br>(1 - 4)         | 1<br>(1 - 2)             |

Web Table 31- Belarus deaths with 95% UI by age, sex, and cause in 2013

| Cause                                               | Females, All Ages        | Females, 0-4 Years | Females, 5-14 Years | Females, 15-49 Years | Females, 50-69 Years | Females, 70-80 Years |
|-----------------------------------------------------|--------------------------|--------------------|---------------------|----------------------|----------------------|----------------------|
| Chronic kidney disease due to hypertension          | 28<br>(16 - 51)          | 0<br>(0 - 0)       | 0<br>(0 - 0)        | 2<br>(1 - 4)         | 10<br>(5 - 19)       | 16<br>(9 - 29)       |
| Chronic kidney disease due to glomerulonephritis    | 39<br>(27 - 63)          | 0<br>(0 - 0)       | 0<br>(0 - 0)        | 9<br>(6 - 12)        | 17<br>(11 - 28)      | 13<br>(8 - 24)       |
| Chronic kidney disease due to other causes          | 49<br>(30 - 136)         | 0<br>(0 - 0)       | 0<br>(0 - 0)        | 12<br>(7 - 33)       | 26<br>(13 - 73)      | 12<br>(6 - 31)       |
| Urinary diseases and male infertility               | 374<br>(268 - 470)       | 0<br>(0 - 0)       | 0<br>(0 - 1)        | 34<br>(26 - 45)      | 137<br>(104 - 197)   | 203<br>(118 - 284)   |
| Interstitial nephritis and urinary tract infections | 321<br>(234 - 408)       | 0<br>(0 - 0)       | 0<br>(0 - 0)        | 31<br>(23 - 40)      | 122<br>(91 - 182)    | 168<br>(98 - 238)    |
| Urolithiasis                                        | 31<br>(14 - 54)          | --                 | 0<br>(0 - 0)        | 2<br>(1 - 3)         | 9<br>(4 - 18)        | 20<br>(8 - 42)       |
| Other urinary diseases                              | 23<br>(11 - 36)          | 0<br>(0 - 0)       | 0<br>(0 - 0)        | 2<br>(1 - 3)         | 6<br>(3 - 10)        | 15<br>(6 - 26)       |
| Gynecological diseases                              | 1<br>(0 - 1)             | --                 | --                  | 0<br>(0 - 0)         | 0<br>(0 - 0)         | 0<br>(0 - 0)         |
| Uterine fibroids                                    | 0<br>(0 - 0)             | --                 | --                  | 0<br>(0 - 0)         | 0<br>(0 - 0)         | 0<br>(0 - 0)         |
| Polycystic ovarian syndrome                         | 0<br>(0 - 0)             | --                 | --                  | 0<br>(0 - 0)         | 0<br>(0 - 0)         | --                   |
| Endometriosis                                       | 0<br>(0 - 0)             | --                 | --                  | 0<br>(0 - 0)         | 0<br>(0 - 0)         | --                   |
| Genital prolapse                                    | 0<br>(0 - 0)             | --                 | --                  | 0<br>(0 - 0)         | 0<br>(0 - 0)         | 0<br>(0 - 0)         |
| Other gynecological diseases                        | 0<br>(0 - 0)             | --                 | --                  | 0<br>(0 - 0)         | 0<br>(0 - 0)         | 0<br>(0 - 0)         |
| Hemoglobinopathies and hemolytic anemias            | 10<br>(7 - 16)           | 1<br>(1 - 3)       | 1<br>(0 - 1)        | 1<br>(1 - 3)         | 4<br>(2 - 6)         | 3<br>(2 - 4)         |
| Thalassemias                                        | 2<br>(1 - 3)             | 1<br>(0 - 2)       | 0<br>(0 - 1)        | 1<br>(0 - 1)         | 0<br>(0 - 0)         | 0<br>(0 - 0)         |
| Sickle cell disorders                               | 0<br>(0 - 0)             | 0<br>(0 - 0)       | 0<br>(0 - 0)        | 0<br>(0 - 0)         | 0<br>(0 - 0)         | 0<br>(0 - 0)         |
| G6PD deficiency                                     | 0<br>(0 - 0)             | 0<br>(0 - 0)       | 0<br>(0 - 0)        | 0<br>(0 - 0)         | 0<br>(0 - 0)         | 0<br>(0 - 0)         |
| Other hemoglobinopathies and hemolytic anemias      | 8<br>(5 - 12)            | 0<br>(0 - 1)       | 0<br>(0 - 0)        | 1<br>(0 - 2)         | 4<br>(2 - 6)         | 3<br>(2 - 4)         |
| Endocrine, metabolic, blood, and immune disorders   | 76<br>(21 - 106)         | 1<br>(0 - 2)       | 0<br>(0 - 1)        | 7<br>(3 - 10)        | 23<br>(7 - 33)       | 44<br>(10 - 67)      |
| Musculoskeletal disorders                           | 144<br>(99 - 250)        | --                 | 1<br>(0 - 1)        | 25<br>(16 - 36)      | 61<br>(39 - 100)     | 58<br>(35 - 128)     |
| Rheumatoid arthritis                                | 79<br>(52 - 118)         | --                 | 0<br>(0 - 0)        | 5<br>(3 - 8)         | 34<br>(20 - 55)      | 40<br>(24 - 69)      |
| Other musculoskeletal disorders                     | 65<br>(42 - 126)         | --                 | 1<br>(0 - 1)        | 20<br>(13 - 30)      | 27<br>(16 - 50)      | 18<br>(9 - 44)       |
| Other non-communicable diseases                     | 208<br>(158 - 276)       | 137<br>(91 - 195)  | 10<br>(7 - 14)      | 38<br>(28 - 54)      | 18<br>(13 - 26)      | 6<br>(5 - 8)         |
| Congenital anomalies                                | 188<br>(135 - 254)       | 120<br>(75 - 181)  | 10<br>(7 - 14)      | 37<br>(27 - 53)      | 16<br>(12 - 25)      | 5<br>(3 - 7)         |
| Neural tube defects                                 | 10<br>(6 - 18)           | 8<br>(4 - 16)      | 1<br>(0 - 1)        | 1<br>(1 - 1)         | 0<br>(0 - 0)         | 0<br>(0 - 0)         |
| Congenital heart anomalies                          | 100<br>(68 - 143)        | 65<br>(36 - 105)   | 5<br>(3 - 7)        | 23<br>(17 - 33)      | 6<br>(4 - 10)        | 1<br>(1 - 2)         |
| Cleft lip and cleft palate                          | 0<br>(0 - 1)             | 0<br>(0 - 1)       | --                  | --                   | --                   | --                   |
| Down syndrome                                       | 10<br>(5 - 14)           | 2<br>(1 - 4)       | 1<br>(0 - 1)        | 5<br>(2 - 7)         | 2<br>(1 - 3)         | 0<br>(0 - 1)         |
| Chromosomal unbalanced rearrangements               | 3<br>(2 - 6)             | 3<br>(1 - 5)       | 0<br>(0 - 0)        | 1<br>(0 - 1)         | 0<br>(0 - 0)         | 0<br>(0 - 0)         |
| Other congenital anomalies                          | 65<br>(43 - 95)          | 42<br>(23 - 68)    | 3<br>(2 - 5)        | 8<br>(5 - 13)        | 8<br>(5 - 12)        | 3<br>(2 - 5)         |
| Skin and subcutaneous diseases                      | 4<br>(3 - 5)             | 0<br>(0 - 0)       | 0<br>(0 - 0)        | 1<br>(0 - 1)         | 2<br>(1 - 2)         | 2<br>(1 - 2)         |
| Cellulitis                                          | 1<br>(1 - 2)             | 0<br>(0 - 0)       | 0<br>(0 - 0)        | 0<br>(0 - 0)         | 1<br>(0 - 1)         | 0<br>(0 - 1)         |
| Pyoderma                                            | 2<br>(1 - 3)             | 0<br>(0 - 0)       | 0<br>(0 - 0)        | 0<br>(0 - 0)         | 1<br>(1 - 1)         | 1<br>(0 - 1)         |
| Decubitus ulcer                                     | 0<br>(0 - 0)             | 0<br>(0 - 0)       | 0<br>(0 - 0)        | 0<br>(0 - 0)         | 0<br>(0 - 0)         | 0<br>(0 - 0)         |
| Other skin and subcutaneous diseases                | 0<br>(0 - 0)             | 0<br>(0 - 0)       | 0<br>(0 - 0)        | 0<br>(0 - 0)         | 0<br>(0 - 0)         | 0<br>(0 - 0)         |
| Sudden infant death syndrome                        | 16<br>(3 - 46)           | 16<br>(3 - 46)     | --                  | --                   | --                   | --                   |
| Injuries                                            | 2,893<br>(2,480 - 3,348) | 42<br>(29 - 61)    | 38<br>(30 - 47)     | 996<br>(845 - 1,149) | 985<br>(813 - 1,156) | 832<br>(705 - 1,046) |
| Transport injuries                                  | 624<br>(486 - 747)       | 5<br>(2 - 8)       | 15<br>(10 - 20)     | 271<br>(201 - 332)   | 196<br>(134 - 252)   | 138<br>(100 - 192)   |
| Road injuries                                       | 591<br>(460 - 709)       | 4<br>(2 - 7)       | 14<br>(9 - 19)      | 258<br>(192 - 316)   | 186<br>(127 - 239)   | 129<br>(93 - 183)    |
| Pedestrian road injuries                            | 271<br>(186 - 357)       | 2<br>(1 - 3)       | 7<br>(4 - 11)       | 78<br>(49 - 115)     | 93<br>(54 - 132)     | 91<br>(62 - 126)     |

Web Table 31- Belarus deaths with 95% UI by age, sex, and cause in 2013

| Cause                                           | Females, All Ages      | Females, 0-4 Years | Females, 5-14 Years | Females, 15-49 Years | Females, 50-69 Years | Females, 70-80 Years |
|-------------------------------------------------|------------------------|--------------------|---------------------|----------------------|----------------------|----------------------|
| Cyclist road injuries                           | 26<br>(15 - 43)        | 0<br>(0 - 0)       | 1<br>(0 - 2)        | 14<br>(8 - 24)       | 8<br>(4 - 16)        | 3<br>(1 - 6)         |
| Motorcyclist road injuries                      | 7<br>(3 - 20)          | 0<br>(0 - 0)       | 0<br>(0 - 0)        | 5<br>(2 - 14)        | 2<br>(1 - 4)         | 1<br>(0 - 2)         |
| Motor vehicle road injuries                     | 283<br>(193 - 373)     | 2<br>(1 - 4)       | 6<br>(3 - 9)        | 160<br>(110 - 208)   | 82<br>(50 - 121)     | 33<br>(17 - 64)      |
| Other road injuries                             | 4<br>(2 - 7)           | 0<br>(0 - 0)       | 0<br>(0 - 0)        | 2<br>(1 - 3)         | 1<br>(1 - 3)         | 1<br>(0 - 2)         |
| Other transport injuries                        | 33<br>(18 - 56)        | 0<br>(0 - 1)       | 1<br>(0 - 1)        | 13<br>(7 - 24)       | 10<br>(4 - 20)       | 9<br>(4 - 17)        |
| Unintentional injuries                          | 1,131<br>(930 - 1,360) | 35<br>(24 - 52)    | 19<br>(14 - 28)     | 270<br>(223 - 334)   | 384<br>(302 - 460)   | 422<br>(336 - 538)   |
| Falls                                           | 380<br>(250 - 477)     | 4<br>(2 - 7)       | 2<br>(1 - 3)        | 78<br>(51 - 99)      | 114<br>(69 - 148)    | 181<br>(122 - 261)   |
| Drowning                                        | 195<br>(146 - 311)     | 8<br>(4 - 16)      | 11<br>(7 - 20)      | 70<br>(51 - 113)     | 57<br>(37 - 91)      | 48<br>(31 - 73)      |
| Fire, heat, and hot substances                  | 225<br>(133 - 294)     | 6<br>(3 - 12)      | 2<br>(1 - 4)        | 39<br>(24 - 52)      | 68<br>(38 - 92)      | 109<br>(62 - 155)    |
| Poisonings                                      | 114<br>(80 - 215)      | 3<br>(2 - 7)       | 1<br>(1 - 2)        | 31<br>(19 - 69)      | 41<br>(26 - 82)      | 37<br>(22 - 65)      |
| Exposure to mechanical forces                   | 25<br>(17 - 42)        | 3<br>(1 - 7)       | 1<br>(1 - 2)        | 9<br>(6 - 12)        | 7<br>(5 - 14)        | 5<br>(3 - 13)        |
| Unintentional firearm injuries                  | 1<br>(1 - 1)           | 0<br>(0 - 0)       | 0<br>(0 - 0)        | 1<br>(0 - 1)         | 0<br>(0 - 0)         | 0<br>(0 - 0)         |
| Unintentional suffocation                       | 5<br>(1 - 9)           | 2<br>(0 - 5)       | 0<br>(0 - 0)        | 1<br>(0 - 2)         | 1<br>(0 - 2)         | 1<br>(0 - 1)         |
| Other exposure to mechanical forces             | 19<br>(14 - 37)        | 1<br>(0 - 3)       | 1<br>(1 - 2)        | 7<br>(4 - 10)        | 6<br>(4 - 13)        | 4<br>(2 - 12)        |
| Adverse effects of medical treatment            | 62<br>(39 - 86)        | 1<br>(1 - 3)       | 0<br>(0 - 0)        | 11<br>(7 - 16)       | 35<br>(19 - 52)      | 15<br>(8 - 24)       |
| Animal contact                                  | 11<br>(6 - 26)         | 0<br>(0 - 1)       | 0<br>(0 - 0)        | 2<br>(1 - 5)         | 7<br>(3 - 15)        | 2<br>(1 - 5)         |
| Venomous animal contact                         | 3<br>(1 - 8)           | 0<br>(0 - 0)       | 0<br>(0 - 0)        | 1<br>(0 - 2)         | 2<br>(1 - 6)         | 0<br>(0 - 1)         |
| Non-venomous animal contact                     | 8<br>(3 - 17)          | 0<br>(0 - 1)       | 0<br>(0 - 0)        | 1<br>(1 - 3)         | 5<br>(2 - 10)        | 2<br>(1 - 4)         |
| Foreign body                                    | 101<br>(46 - 158)      | 9<br>(3 - 18)      | 1<br>(0 - 1)        | 24<br>(8 - 42)       | 45<br>(17 - 79)      | 23<br>(11 - 52)      |
| Pulmonary aspiration and foreign body in airway | 100<br>(45 - 157)      | 9<br>(3 - 18)      | 0<br>(0 - 1)        | 23<br>(8 - 42)       | 45<br>(17 - 78)      | 23<br>(11 - 52)      |
| Foreign body in other body part                 | 1<br>(0 - 1)           | 0<br>(0 - 0)       | 0<br>(0 - 0)        | 0<br>(0 - 0)         | 0<br>(0 - 0)         | 0<br>(0 - 0)         |
| Other unintentional injuries                    | 19<br>(14 - 24)        | 0<br>(0 - 1)       | 0<br>(0 - 0)        | 7<br>(5 - 9)         | 9<br>(6 - 13)        | 2<br>(1 - 3)         |
| Self-harm and interpersonal violence            | 1,138<br>(943 - 1,352) | 2<br>(1 - 4)       | 4<br>(3 - 5)        | 455<br>(370 - 550)   | 404<br>(317 - 494)   | 273<br>(214 - 350)   |
| Self-harm                                       | 799<br>(639 - 955)     | --                 | 2<br>(1 - 3)        | 298<br>(214 - 362)   | 298<br>(229 - 369)   | 201<br>(150 - 275)   |
| Interpersonal violence                          | 339<br>(250 - 457)     | 2<br>(1 - 4)       | 2<br>(1 - 3)        | 157<br>(117 - 224)   | 106<br>(72 - 145)    | 72<br>(48 - 101)     |
| Assault by firearm                              | 11<br>(5 - 19)         | 0<br>(0 - 0)       | 0<br>(0 - 0)        | 7<br>(3 - 13)        | 3<br>(1 - 6)         | 1<br>(0 - 2)         |
| Assault by sharp object                         | 109<br>(71 - 168)      | 0<br>(0 - 1)       | 1<br>(0 - 1)        | 55<br>(36 - 93)      | 35<br>(19 - 55)      | 18<br>(10 - 31)      |
| Assault by other means                          | 219<br>(144 - 299)     | 2<br>(1 - 3)       | 1<br>(1 - 2)        | 94<br>(61 - 133)     | 69<br>(42 - 96)      | 52<br>(32 - 77)      |

Web Table 31- Belgium deaths with 95% UI by age, sex, and cause in 2013

| Cause                                                             | Both Sexes, All Ages           | Both Sexes, 0-4 Years | Both Sexes, 5-14 Years | Both Sexes, 15-49 Years  | Both Sexes, 50-69 Years     | Both Sexes, 70-80 Years     |
|-------------------------------------------------------------------|--------------------------------|-----------------------|------------------------|--------------------------|-----------------------------|-----------------------------|
| All causes                                                        | 114,146<br>(107,911 - 120,343) | 547<br>(467 - 644)    | 124<br>(113 - 137)     | 5,129<br>(4,700 - 5,573) | 19,577<br>(18,124 - 21,046) | 88,769<br>(84,351 - 93,334) |
| Communicable, maternal, neonatal, and nutritional diseases        | 7,651<br>(5,910 - 9,259)       | 245<br>(205 - 295)    | 9<br>(7 - 12)          | 173<br>(142 - 202)       | 555<br>(422 - 660)          | 6,668<br>(5,044 - 8,197)    |
| HIV/AIDS and tuberculosis                                         | 177<br>(146 - 212)             | 0<br>(0 - 0)          | 0<br>(0 - 0)           | 48<br>(36 - 64)          | 38<br>(29 - 50)             | 91<br>(70 - 112)            |
| Tuberculosis                                                      | 118<br>(96 - 141)              | 0<br>(0 - 0)          | 0<br>(0 - 0)           | 7<br>(6 - 9)             | 22<br>(19 - 28)             | 88<br>(67 - 110)            |
| HIV/AIDS                                                          | 59<br>(39 - 86)                | 0<br>(0 - 0)          | 0<br>(0 - 0)           | 41<br>(28 - 56)          | 16<br>(8 - 27)              | 2<br>(1 - 5)                |
| HIV/AIDS resulting in mycobacterial infection                     | 3<br>(2 - 5)                   | 0<br>(0 - 0)          | 0<br>(0 - 0)           | 2<br>(1 - 3)             | 1<br>(0 - 1)                | 0<br>(0 - 0)                |
| HIV/AIDS resulting in other diseases                              | 56<br>(37 - 82)                | 0<br>(0 - 0)          | 0<br>(0 - 0)           | 39<br>(27 - 54)          | 15<br>(8 - 25)              | 2<br>(1 - 5)                |
| Diarrhea, lower respiratory, and other common infectious diseases | 6,575<br>(4,901 - 8,110)       | 29<br>(21 - 38)       | 7<br>(6 - 9)           | 92<br>(71 - 110)         | 446<br>(329 - 542)          | 6,000<br>(4,457 - 7,500)    |
| Diarrheal diseases                                                | 572<br>(392 - 830)             | 6<br>(4 - 8)          | 1<br>(0 - 1)           | 7<br>(6 - 9)             | 29<br>(23 - 37)             | 529<br>(349 - 783)          |
| Intestinal infectious diseases                                    | 9<br>(3 - 18)                  | 1<br>(0 - 4)          | 1<br>(0 - 3)           | 3<br>(1 - 7)             | 1<br>(0 - 3)                | 1<br>(0 - 3)                |
| Typhoid fever                                                     | 6<br>(2 - 14)                  | 1<br>(0 - 2)          | 1<br>(0 - 2)           | 2<br>(1 - 5)             | 1<br>(0 - 2)                | 1<br>(0 - 2)                |
| Paratyphoid fever                                                 | 2<br>(0 - 3)                   | 0<br>(0 - 1)          | 0<br>(0 - 1)           | 1<br>(0 - 1)             | 0<br>(0 - 0)                | 0<br>(0 - 0)                |
| Other intestinal infectious diseases                              | 1<br>(0 - 4)                   | 0<br>(0 - 2)          | 0<br>(0 - 1)           | 0<br>(0 - 1)             | 0<br>(0 - 2)                | 0<br>(0 - 2)                |
| Lower respiratory infections                                      | 5,874<br>(4,241 - 7,376)       | 12<br>(8 - 16)        | 3<br>(2 - 4)           | 66<br>(48 - 82)          | 392<br>(278 - 486)          | 5,401<br>(3,886 - 6,881)    |
| Upper respiratory infections                                      | 2<br>(1 - 6)                   | 0<br>(0 - 0)          | 0<br>(0 - 0)           | 0<br>(0 - 0)             | 0<br>(0 - 1)                | 2<br>(0 - 5)                |
| Otitis media                                                      | 4<br>(3 - 5)                   | 0<br>(0 - 1)          | 0<br>(0 - 0)           | 1<br>(0 - 1)             | 1<br>(0 - 1)                | 3<br>(2 - 4)                |
| Meningitis                                                        | 59<br>(44 - 70)                | 7<br>(4 - 9)          | 1<br>(1 - 1)           | 7<br>(5 - 8)             | 12<br>(8 - 14)              | 33<br>(25 - 41)             |
| Pneumococcal meningitis                                           | 11<br>(7 - 15)                 | 1<br>(0 - 1)          | 0<br>(0 - 0)           | 1<br>(1 - 2)             | 2<br>(1 - 3)                | 7<br>(4 - 10)               |
| H influenzae type B meningitis                                    | 8<br>(6 - 11)                  | 2<br>(1 - 3)          | 0<br>(0 - 0)           | 1<br>(1 - 1)             | 1<br>(1 - 2)                | 4<br>(3 - 5)                |
| Meningococcal meningitis                                          | 21<br>(15 - 26)                | 2<br>(1 - 3)          | 0<br>(0 - 1)           | 2<br>(2 - 3)             | 4<br>(3 - 6)                | 12<br>(8 - 16)              |
| Other meningitis                                                  | 19<br>(14 - 24)                | 2<br>(1 - 3)          | 0<br>(0 - 0)           | 2<br>(2 - 3)             | 4<br>(2 - 5)                | 10<br>(7 - 14)              |
| Encephalitis                                                      | 41<br>(27 - 52)                | 2<br>(2 - 4)          | 1<br>(1 - 2)           | 6<br>(4 - 8)             | 9<br>(6 - 12)               | 23<br>(14 - 31)             |
| Diphtheria                                                        | 0<br>(0 - 0)                   | 0<br>(0 - 0)          | 0<br>(0 - 0)           | 0<br>(0 - 0)             | 0<br>(0 - 0)                | --                          |
| Whooping cough                                                    | 1<br>(1 - 2)                   | 0<br>(0 - 1)          | 0<br>(0 - 0)           | 0<br>(0 - 1)             | 0<br>(0 - 0)                | --                          |
| Tetanus                                                           | 2<br>(1 - 2)                   | 0<br>(0 - 0)          | 0<br>(0 - 0)           | 0<br>(0 - 1)             | 0<br>(0 - 1)                | 1<br>(0 - 1)                |
| Measles                                                           | 0<br>(0 - 0)                   | 0<br>(0 - 0)          | 0<br>(0 - 0)           | 0<br>(0 - 0)             | 0<br>(0 - 0)                | --                          |
| Varicella and herpes zoster                                       | 10<br>(2 - 36)                 | 0<br>(0 - 1)          | 0<br>(0 - 0)           | 1<br>(0 - 2)             | 1<br>(0 - 2)                | 8<br>(0 - 34)               |
| Neglected tropical diseases and malaria                           | 10<br>(7 - 12)                 | 0<br>(0 - 0)          | 0<br>(0 - 0)           | 2<br>(1 - 2)             | 2<br>(2 - 3)                | 5<br>(3 - 7)                |
| Cysticercosis                                                     | 0<br>(0 - 0)                   | 0<br>(0 - 0)          | 0<br>(0 - 0)           | 0<br>(0 - 0)             | 0<br>(0 - 0)                | 0<br>(0 - 0)                |
| Cystic echinococcosis                                             | 1<br>(1 - 1)                   | 0<br>(0 - 0)          | 0<br>(0 - 0)           | 0<br>(0 - 0)             | 0<br>(0 - 0)                | 1<br>(0 - 1)                |
| Dengue                                                            | 1<br>(1 - 1)                   | 0<br>(0 - 0)          | 0<br>(0 - 0)           | 0<br>(0 - 1)             | 0<br>(0 - 0)                | 0<br>(0 - 0)                |
| Rabies                                                            | 1<br>(1 - 1)                   | 0<br>(0 - 0)          | 0<br>(0 - 0)           | 0<br>(0 - 1)             | 0<br>(0 - 0)                | 0<br>(0 - 0)                |
| Other neglected tropical diseases                                 | 7<br>(4 - 9)                   | 0<br>(0 - 0)          | 0<br>(0 - 0)           | 1<br>(1 - 1)             | 2<br>(1 - 2)                | 4<br>(2 - 6)                |
| Maternal disorders                                                | 9<br>(7 - 11)                  | --                    | 0<br>(0 - 0)           | 9<br>(7 - 11)            | --                          | --                          |
| Maternal hemorrhage                                               | 1<br>(1 - 1)                   | --                    | 0<br>(0 - 0)           | 1<br>(1 - 1)             | --                          | --                          |
| Maternal sepsis and other maternal infections                     | 1<br>(1 - 1)                   | --                    | 0<br>(0 - 0)           | 1<br>(1 - 1)             | --                          | --                          |
| Maternal hypertensive disorders                                   | 1<br>(1 - 2)                   | --                    | 0<br>(0 - 0)           | 1<br>(1 - 2)             | --                          | --                          |
| Maternal obstructed labor                                         | 1<br>(0 - 1)                   | --                    | 0<br>(0 - 0)           | 1<br>(0 - 1)             | --                          | --                          |
| Maternal abortive outcome                                         | 2<br>(1 - 3)                   | --                    | 0<br>(0 - 0)           | 2<br>(1 - 3)             | --                          | --                          |
| Indirect maternal deaths                                          | 1<br>(1 - 1)                   | --                    | 0<br>(0 - 0)           | 1<br>(1 - 1)             | --                          | --                          |

Web Table 31- Belgium deaths with 95% UI by age, sex, and cause in 2013

| Cause                                                            | Both Sexes, All Ages         | Both Sexes, 0-4 Years | Both Sexes, 5-14 Years | Both Sexes, 15-49 Years  | Both Sexes, 50-69 Years     | Both Sexes, 70-80 Years     |
|------------------------------------------------------------------|------------------------------|-----------------------|------------------------|--------------------------|-----------------------------|-----------------------------|
| Late maternal deaths                                             | 1<br>(0 - 1)                 | --                    | 0<br>(0 - 0)           | 1<br>(0 - 1)             | --                          | --                          |
| Maternal deaths aggravated by HIV/AIDS                           | 0<br>(0 - 0)                 | --                    | --                     | 0<br>(0 - 0)             | --                          | --                          |
| Other maternal disorders                                         | 2<br>(1 - 2)                 | --                    | 0<br>(0 - 0)           | 2<br>(1 - 2)             | --                          | --                          |
| Neonatal disorders                                               | 210<br>(175 - 254)           | 210<br>(175 - 254)    | --                     | --                       | --                          | --                          |
| Neonatal preterm birth complications                             | 85<br>(63 - 123)             | 85<br>(63 - 123)      | --                     | --                       | --                          | --                          |
| Neonatal encephalopathy due to birth asphyxia and trauma         | 62<br>(42 - 82)              | 62<br>(42 - 82)       | --                     | --                       | --                          | --                          |
| Neonatal sepsis and other neonatal infections                    | 15<br>(9 - 27)               | 15<br>(9 - 27)        | --                     | --                       | --                          | --                          |
| Hemolytic disease and other neonatal jaundice                    | 0<br>(0 - 1)                 | 0<br>(0 - 1)          | --                     | --                       | --                          | --                          |
| Other neonatal disorders                                         | 46<br>(27 - 64)              | 46<br>(27 - 64)       | --                     | --                       | --                          | --                          |
| Nutritional deficiencies                                         | 443<br>(330 - 574)           | 0<br>(0 - 1)          | 0<br>(0 - 0)           | 6<br>(4 - 7)             | 18<br>(14 - 23)             | 419<br>(308 - 548)          |
| Protein-energy malnutrition                                      | 166<br>(60 - 260)            | 0<br>(0 - 0)          | 0<br>(0 - 0)           | 1<br>(0 - 1)             | 6<br>(2 - 8)                | 159<br>(57 - 252)           |
| Iodine deficiency                                                | 1<br>(0 - 4)                 | 0<br>(0 - 0)          | 0<br>(0 - 0)           | 0<br>(0 - 0)             | 0<br>(0 - 1)                | 1<br>(0 - 4)                |
| Iron-deficiency anemia                                           | 260<br>(173 - 384)           | 0<br>(0 - 0)          | 0<br>(0 - 0)           | 4<br>(3 - 6)             | 11<br>(8 - 16)              | 244<br>(160 - 366)          |
| Other nutritional deficiencies                                   | 17<br>(8 - 39)               | 0<br>(0 - 0)          | 0<br>(0 - 0)           | 0<br>(0 - 1)             | 1<br>(1 - 3)                | 15<br>(7 - 36)              |
| Other communicable, maternal, neonatal, and nutritional diseases | 227<br>(126 - 302)           | 5<br>(3 - 8)          | 1<br>(1 - 2)           | 17<br>(10 - 21)          | 50<br>(29 - 66)             | 154<br>(79 - 213)           |
| Sexually transmitted diseases excluding HIV                      | 8<br>(5 - 12)                | 1<br>(0 - 3)          | 0<br>(0 - 0)           | 1<br>(0 - 1)             | 1<br>(1 - 2)                | 5<br>(3 - 8)                |
| Syphilis                                                         | 6<br>(4 - 10)                | 1<br>(0 - 3)          | 0<br>(0 - 0)           | 0<br>(0 - 0)             | 1<br>(0 - 1)                | 4<br>(2 - 7)                |
| Chlamydial infection                                             | 0<br>(0 - 1)                 | --                    | 0<br>(0 - 0)           | 0<br>(0 - 0)             | 0<br>(0 - 0)                | 0<br>(0 - 0)                |
| Gonococcal infection                                             | 1<br>(1 - 1)                 | --                    | 0<br>(0 - 0)           | 0<br>(0 - 0)             | 0<br>(0 - 0)                | 1<br>(0 - 1)                |
| Other sexually transmitted diseases                              | 0<br>(0 - 1)                 | --                    | 0<br>(0 - 0)           | 0<br>(0 - 0)             | 0<br>(0 - 0)                | 0<br>(0 - 0)                |
| Hepatitis                                                        | 29<br>(22 - 39)              | 0<br>(0 - 0)          | 0<br>(0 - 0)           | 3<br>(2 - 4)             | 7<br>(6 - 10)               | 18<br>(12 - 28)             |
| Acute hepatitis A                                                | 6<br>(2 - 12)                | 0<br>(0 - 0)          | 0<br>(0 - 0)           | 1<br>(0 - 2)             | 2<br>(1 - 3)                | 3<br>(1 - 8)                |
| Acute hepatitis B                                                | 22<br>(15 - 32)              | 0<br>(0 - 0)          | 0<br>(0 - 0)           | 2<br>(1 - 3)             | 6<br>(4 - 8)                | 15<br>(9 - 23)              |
| Acute hepatitis C                                                | 1<br>(0 - 2)                 | --                    | 0<br>(0 - 0)           | 0<br>(0 - 0)             | 0<br>(0 - 0)                | 0<br>(0 - 2)                |
| Other infectious diseases                                        | 190<br>(90 - 265)            | 4<br>(2 - 6)          | 1<br>(1 - 2)           | 13<br>(7 - 18)           | 42<br>(21 - 58)             | 130<br>(56 - 189)           |
| Non-communicable diseases                                        | 98,808<br>(93,402 - 104,906) | 252<br>(207 - 302)    | 66<br>(59 - 75)        | 2,965<br>(2,709 - 3,254) | 17,459<br>(16,161 - 18,837) | 78,065<br>(73,966 - 82,520) |
| Neoplasms                                                        | 29,908<br>(27,621 - 32,320)  | 16<br>(12 - 21)       | 33<br>(28 - 38)        | 1,442<br>(1,303 - 1,592) | 9,402<br>(8,615 - 10,189)   | 19,016<br>(17,454 - 20,752) |
| Esophageal cancer                                                | 855<br>(721 - 983)           | --                    | --                     | 41<br>(32 - 56)          | 364<br>(293 - 428)          | 450<br>(368 - 528)          |
| Stomach cancer                                                   | 1,315<br>(1,098 - 1,600)     | --                    | --                     | 42<br>(34 - 51)          | 278<br>(241 - 321)          | 995<br>(800 - 1,243)        |
| Liver cancer                                                     | 750<br>(575 - 919)           | --                    | 1<br>(0 - 1)           | 32<br>(22 - 41)          | 267<br>(189 - 336)          | 452<br>(345 - 578)          |
| Liver cancer due to hepatitis B                                  | 156<br>(75 - 262)            | --                    | 0<br>(0 - 0)           | 12<br>(6 - 19)           | 70<br>(26 - 127)            | 74<br>(38 - 128)            |
| Liver cancer due to hepatitis C                                  | 370<br>(220 - 546)           | --                    | 0<br>(0 - 0)           | 13<br>(7 - 21)           | 128<br>(70 - 202)           | 228<br>(134 - 327)          |
| Liver cancer due to alcohol use                                  | 193<br>(113 - 300)           | --                    | --                     | 4<br>(2 - 8)             | 59<br>(29 - 100)            | 130<br>(76 - 200)           |
| Liver cancer due to other causes                                 | 32<br>(14 - 59)              | --                    | 0<br>(0 - 0)           | 2<br>(1 - 3)             | 10<br>(5 - 19)              | 20<br>(7 - 38)              |
| Larynx cancer                                                    | 238<br>(197 - 328)           | --                    | --                     | 14<br>(10 - 24)          | 111<br>(89 - 156)           | 112<br>(88 - 158)           |
| Tracheal, bronchus and lung cancer                               | 7,226<br>(6,431 - 7,940)     | --                    | --                     | 257<br>(216 - 298)       | 2,949<br>(2,588 - 3,287)    | 4,020<br>(3,524 - 4,484)    |
| Breast cancer                                                    | 2,482<br>(1,969 - 3,028)     | --                    | --                     | 240<br>(193 - 297)       | 907<br>(746 - 1,152)        | 1,335<br>(1,005 - 1,678)    |
| Cervical cancer                                                  | 291<br>(233 - 397)           | --                    | --                     | 44<br>(33 - 56)          | 91<br>(71 - 121)            | 156<br>(111 - 226)          |
| Uterine cancer                                                   | 353<br>(275 - 439)           | --                    | --                     | 5<br>(4 - 8)             | 87<br>(66 - 112)            | 261<br>(191 - 338)          |
| Prostate cancer                                                  | 1,986<br>(1,398 - 3,203)     | --                    | --                     | 5<br>(3 - 8)             | 281<br>(203 - 428)          | 1,700<br>(1,165 - 2,833)    |

Web Table 31- Belgium deaths with 95% UI by age, sex, and cause in 2013

| Cause                                         | Both Sexes, All Ages        | Both Sexes, 0-4 Years | Both Sexes, 5-14 Years | Both Sexes, 15-49 Years | Both Sexes, 50-69 Years  | Both Sexes, 70-80 Years     |
|-----------------------------------------------|-----------------------------|-----------------------|------------------------|-------------------------|--------------------------|-----------------------------|
| Colon and rectum cancer                       | 3,828<br>(3,399 - 4,334)    | --                    | --                     | 105<br>(91 - 121)       | 913<br>(823 - 1,008)     | 2,810<br>(2,423 - 3,271)    |
| Lip and oral cavity cancer                    | 345<br>(297 - 393)          | --                    | --                     | 35<br>(27 - 44)         | 170<br>(137 - 201)       | 140<br>(116 - 168)          |
| Nasopharynx cancer                            | 41<br>(32 - 55)             | --                    | 0<br>(0 - 0)           | 8<br>(6 - 12)           | 20<br>(15 - 27)          | 13<br>(9 - 19)              |
| Other pharynx cancer                          | 222<br>(161 - 270)          | --                    | --                     | 23<br>(17 - 31)         | 135<br>(89 - 169)        | 64<br>(48 - 81)             |
| Gallbladder and biliary tract cancer          | 304<br>(238 - 448)          | --                    | --                     | 5<br>(4 - 7)            | 63<br>(50 - 84)          | 236<br>(180 - 360)          |
| Pancreatic cancer                             | 1,778<br>(1,597 - 1,975)    | --                    | --                     | 62<br>(51 - 73)         | 584<br>(523 - 650)       | 1,132<br>(994 - 1,286)      |
| Malignant skin melanoma                       | 378<br>(252 - 524)          | --                    | --                     | 63<br>(42 - 87)         | 128<br>(82 - 178)        | 187<br>(125 - 259)          |
| Non-melanoma skin cancer                      | 134<br>(97 - 178)           | --                    | --                     | 5<br>(3 - 6)            | 21<br>(15 - 29)          | 109<br>(77 - 145)           |
| Ovarian cancer                                | 760<br>(631 - 964)          | --                    | --                     | 40<br>(31 - 53)         | 258<br>(213 - 348)       | 462<br>(355 - 606)          |
| Testicular cancer                             | 11<br>(8 - 15)              | --                    | --                     | 5<br>(4 - 8)            | 2<br>(1 - 3)             | 3<br>(2 - 6)                |
| Kidney cancer                                 | 770<br>(648 - 920)          | 0<br>(0 - 1)          | 1<br>(0 - 1)           | 28<br>(22 - 35)         | 244<br>(202 - 288)       | 497<br>(393 - 631)          |
| Bladder cancer                                | 868<br>(726 - 1,076)        | --                    | --                     | 9<br>(7 - 11)           | 154<br>(130 - 198)       | 705<br>(573 - 879)          |
| Brain and nervous system cancer               | 711<br>(597 - 946)          | 4<br>(2 - 7)          | 10<br>(7 - 13)         | 109<br>(90 - 140)       | 303<br>(249 - 416)       | 285<br>(226 - 409)          |
| Thyroid cancer                                | 111<br>(86 - 169)           | --                    | --                     | 4<br>(3 - 6)            | 29<br>(24 - 35)          | 78<br>(55 - 129)            |
| Mesothelioma                                  | 260<br>(143 - 334)          | --                    | --                     | 8<br>(5 - 12)           | 97<br>(54 - 133)         | 155<br>(80 - 215)           |
| Hodgkin lymphoma                              | 63<br>(52 - 91)             | 0<br>(0 - 0)          | 0<br>(0 - 1)           | 17<br>(13 - 24)         | 19<br>(15 - 28)          | 27<br>(20 - 41)             |
| Non-Hodgkin lymphoma                          | 986<br>(616 - 1,229)        | 1<br>(1 - 2)          | 3<br>(2 - 4)           | 58<br>(34 - 73)         | 263<br>(156 - 327)       | 661<br>(401 - 854)          |
| Multiple myeloma                              | 606<br>(405 - 855)          | --                    | --                     | 16<br>(11 - 23)         | 156<br>(102 - 220)       | 434<br>(289 - 628)          |
| Leukemia                                      | 920<br>(813 - 1,030)        | 4<br>(3 - 6)          | 10<br>(8 - 13)         | 72<br>(62 - 83)         | 219<br>(188 - 247)       | 615<br>(531 - 712)          |
| Other neoplasms                               | 1,316<br>(989 - 1,575)      | 6<br>(4 - 8)          | 8<br>(6 - 10)          | 90<br>(70 - 107)        | 288<br>(215 - 340)       | 924<br>(652 - 1,155)        |
| Cardiovascular diseases                       | 37,086<br>(33,770 - 41,248) | 4<br>(3 - 5)          | 4<br>(3 - 5)           | 615<br>(542 - 703)      | 4,243<br>(3,841 - 4,832) | 32,220<br>(29,199 - 35,881) |
| Rheumatic heart disease                       | 294<br>(100 - 415)          | 0<br>(0 - 0)          | 0<br>(0 - 0)           | 8<br>(3 - 11)           | 36<br>(16 - 48)          | 250<br>(77 - 362)           |
| Ischemic heart disease                        | 18,773<br>(16,612 - 22,326) | 0<br>(0 - 0)          | 1<br>(0 - 1)           | 337<br>(287 - 411)      | 2,511<br>(2,220 - 3,000) | 15,924<br>(13,873 - 19,021) |
| Cerebrovascular disease                       | 10,399<br>(8,917 - 13,020)  | 1<br>(1 - 1)          | 1<br>(1 - 2)           | 146<br>(119 - 178)      | 931<br>(785 - 1,136)     | 9,319<br>(7,914 - 11,690)   |
| Ischemic stroke                               | 5,746<br>(4,657 - 7,971)    | 0<br>(0 - 0)          | 0<br>(0 - 0)           | 17<br>(13 - 25)         | 279<br>(214 - 402)       | 5,449<br>(4,391 - 7,533)    |
| Hemorrhagic stroke                            | 4,653<br>(3,580 - 5,638)    | 1<br>(1 - 1)          | 1<br>(1 - 2)           | 129<br>(104 - 156)      | 652<br>(530 - 784)       | 3,870<br>(2,854 - 4,764)    |
| Hypertensive heart disease                    | 440<br>(229 - 648)          | 0<br>(0 - 0)          | 0<br>(0 - 0)           | 5<br>(3 - 7)            | 32<br>(20 - 43)          | 403<br>(199 - 605)          |
| Cardiomyopathy and myocarditis                | 1,164<br>(880 - 1,460)      | 2<br>(1 - 2)          | 1<br>(1 - 1)           | 30<br>(22 - 37)         | 138<br>(102 - 171)       | 993<br>(732 - 1,282)        |
| Atrial fibrillation and flutter               | 1,762<br>(1,312 - 2,351)    | --                    | --                     | 5<br>(4 - 7)            | 73<br>(57 - 92)          | 1,684<br>(1,238 - 2,269)    |
| Aortic aneurysm                               | 762<br>(629 - 955)          | --                    | --                     | 14<br>(11 - 19)         | 128<br>(104 - 158)       | 620<br>(502 - 794)          |
| Peripheral vascular disease                   | 240<br>(179 - 311)          | --                    | --                     | 1<br>(1 - 2)            | 18<br>(14 - 24)          | 220<br>(161 - 288)          |
| Endocarditis                                  | 191<br>(135 - 269)          | 0<br>(0 - 0)          | 0<br>(0 - 0)           | 8<br>(6 - 12)           | 36<br>(25 - 53)          | 147<br>(98 - 209)           |
| Other cardiovascular and circulatory diseases | 3,062<br>(1,954 - 3,974)    | 1<br>(0 - 1)          | 1<br>(0 - 1)           | 61<br>(37 - 79)         | 339<br>(229 - 425)       | 2,661<br>(1,665 - 3,522)    |
| Chronic respiratory diseases                  | 7,801<br>(6,703 - 8,715)    | 3<br>(2 - 4)          | 2<br>(1 - 2)           | 83<br>(70 - 100)        | 1,059<br>(918 - 1,233)   | 6,655<br>(5,667 - 7,502)    |
| Chronic obstructive pulmonary disease         | 6,690<br>(5,715 - 7,570)    | 2<br>(1 - 2)          | 1<br>(0 - 1)           | 48<br>(38 - 60)         | 883<br>(746 - 1,036)     | 5,757<br>(4,856 - 6,528)    |
| Pneumoconiosis                                | 364<br>(229 - 563)          | 0<br>(0 - 0)          | 0<br>(0 - 0)           | 3<br>(2 - 4)            | 52<br>(20 - 95)          | 310<br>(199 - 476)          |
| Silicosis                                     | 34<br>(20 - 55)             | 0<br>(0 - 0)          | 0<br>(0 - 0)           | 1<br>(0 - 1)            | 8<br>(3 - 16)            | 25<br>(15 - 41)             |
| Asbestosis                                    | 68<br>(42 - 109)            | 0<br>(0 - 0)          | 0<br>(0 - 0)           | 1<br>(0 - 1)            | 14<br>(5 - 26)           | 54<br>(34 - 85)             |
| Coal workers pneumoconiosis                   | 186<br>(116 - 290)          | 0<br>(0 - 0)          | 0<br>(0 - 0)           | 1<br>(0 - 1)            | 16<br>(6 - 29)           | 169<br>(108 - 265)          |
| Other pneumoconiosis                          | 76<br>(48 - 118)            | 0<br>(0 - 0)          | 0<br>(0 - 0)           | 1<br>(0 - 1)            | 14<br>(6 - 25)           | 61<br>(39 - 98)             |



Web Table 31- Belgium deaths with 95% UI by age, sex, and cause in 2013

| Cause                                               | Both Sexes, All Ages       | Both Sexes, 0-4 Years | Both Sexes, 5-14 Years | Both Sexes, 15-49 Years | Both Sexes, 50-69 Years | Both Sexes, 70-80 Years    |
|-----------------------------------------------------|----------------------------|-----------------------|------------------------|-------------------------|-------------------------|----------------------------|
| Asthma                                              | 232<br>(164 - 323)         | 0<br>(0 - 0)          | 1<br>(0 - 1)           | 21<br>(16 - 27)         | 59<br>(43 - 81)         | 152<br>(99 - 225)          |
| Interstitial lung disease and pulmonary sarcoidosis | 460<br>(266 - 642)         | 0<br>(0 - 0)          | 0<br>(0 - 0)           | 7<br>(4 - 10)           | 56<br>(30 - 80)         | 396<br>(225 - 559)         |
| Other chronic respiratory diseases                  | 54<br>(40 - 73)            | 1<br>(0 - 1)          | 0<br>(0 - 0)           | 4<br>(3 - 5)            | 9<br>(7 - 12)           | 40<br>(28 - 57)            |
| Cirrhosis                                           | 1,887<br>(1,709 - 2,079)   | 0<br>(0 - 1)          | 1<br>(0 - 1)           | 219<br>(190 - 254)      | 819<br>(725 - 924)      | 848<br>(740 - 967)         |
| Cirrhosis due to hepatitis B                        | 170<br>(106 - 250)         | 0<br>(0 - 0)          | 0<br>(0 - 0)           | 19<br>(11 - 31)         | 73<br>(43 - 107)        | 78<br>(47 - 126)           |
| Cirrhosis due to hepatitis C                        | 880<br>(644 - 1,165)       | 0<br>(0 - 0)          | 0<br>(0 - 0)           | 98<br>(59 - 144)        | 374<br>(247 - 532)      | 407<br>(293 - 530)         |
| Cirrhosis due to alcohol use                        | 646<br>(446 - 888)         | --                    | --                     | 61<br>(33 - 106)        | 278<br>(176 - 415)      | 307<br>(215 - 420)         |
| Cirrhosis due to other causes                       | 192<br>(81 - 348)          | 0<br>(0 - 1)          | 0<br>(0 - 0)           | 40<br>(18 - 74)         | 94<br>(35 - 179)        | 57<br>(25 - 105)           |
| Digestive diseases                                  | 3,156<br>(2,747 - 3,613)   | 1<br>(1 - 1)          | 1<br>(1 - 1)           | 67<br>(57 - 78)         | 350<br>(287 - 402)      | 2,737<br>(2,359 - 3,198)   |
| Peptic ulcer disease                                | 392<br>(287 - 512)         | 0<br>(0 - 0)          | 0<br>(0 - 0)           | 10<br>(7 - 12)          | 51<br>(35 - 67)         | 331<br>(239 - 442)         |
| Gastritis and duodenitis                            | 14<br>(8 - 21)             | 0<br>(0 - 0)          | 0<br>(0 - 0)           | 1<br>(0 - 1)            | 2<br>(1 - 3)            | 12<br>(6 - 18)             |
| Appendicitis                                        | 35<br>(23 - 51)            | 0<br>(0 - 0)          | 0<br>(0 - 0)           | 3<br>(2 - 3)            | 6<br>(4 - 9)            | 27<br>(16 - 41)            |
| Paralytic ileus and intestinal obstruction          | 606<br>(408 - 876)         | 0<br>(0 - 1)          | 0<br>(0 - 0)           | 9<br>(6 - 13)           | 53<br>(34 - 77)         | 544<br>(362 - 795)         |
| Inguinal, femoral, and abdominal hernia             | 71<br>(40 - 112)           | 0<br>(0 - 0)          | 0<br>(0 - 0)           | 1<br>(1 - 1)            | 8<br>(4 - 11)           | 63<br>(33 - 102)           |
| Inflammatory bowel disease                          | 250<br>(160 - 346)         | 0<br>(0 - 0)          | 0<br>(0 - 0)           | 6<br>(4 - 8)            | 23<br>(16 - 29)         | 220<br>(137 - 314)         |
| Vascular intestinal disorders                       | 756<br>(463 - 1,113)       | 0<br>(0 - 0)          | 0<br>(0 - 0)           | 7<br>(4 - 12)           | 81<br>(48 - 122)        | 668<br>(406 - 982)         |
| Gallbladder and biliary diseases                    | 369<br>(275 - 519)         | 0<br>(0 - 0)          | 0<br>(0 - 0)           | 4<br>(3 - 5)            | 27<br>(20 - 35)         | 339<br>(248 - 480)         |
| Pancreatitis                                        | 216<br>(161 - 309)         | 0<br>(0 - 0)          | 0<br>(0 - 0)           | 19<br>(14 - 25)         | 49<br>(35 - 68)         | 148<br>(102 - 220)         |
| Other digestive diseases                            | 445<br>(319 - 566)         | 0<br>(0 - 0)          | 0<br>(0 - 0)           | 8<br>(5 - 10)           | 50<br>(29 - 64)         | 386<br>(279 - 505)         |
| Neurological disorders                              | 11,663<br>(9,423 - 14,228) | 12<br>(9 - 15)        | 7<br>(5 - 8)           | 124<br>(96 - 148)       | 607<br>(494 - 716)      | 10,914<br>(8,697 - 13,453) |
| Alzheimer disease and other dementias               | 9,684<br>(7,483 - 12,227)  | --                    | --                     | 1<br>(0 - 3)            | 230<br>(160 - 312)      | 9,454<br>(7,274 - 11,990)  |
| Parkinson disease                                   | 1,027<br>(750 - 1,284)     | --                    | --                     | 2<br>(1 - 2)            | 56<br>(43 - 71)         | 970<br>(700 - 1,225)       |
| Epilepsy                                            | 231<br>(140 - 312)         | 3<br>(2 - 4)          | 3<br>(2 - 4)           | 48<br>(31 - 62)         | 55<br>(35 - 73)         | 123<br>(66 - 185)          |
| Multiple sclerosis                                  | 163<br>(99 - 216)          | --                    | --                     | 25<br>(15 - 35)         | 78<br>(47 - 108)        | 60<br>(32 - 82)            |
| Other neurological disorders                        | 557<br>(469 - 642)         | 9<br>(6 - 12)         | 4<br>(3 - 5)           | 48<br>(38 - 57)         | 188<br>(153 - 218)      | 308<br>(257 - 365)         |
| Mental and substance use disorders                  | 613<br>(410 - 727)         | 0<br>(0 - 0)          | 0<br>(0 - 0)           | 235<br>(164 - 282)      | 238<br>(128 - 300)      | 140<br>(97 - 174)          |
| Schizophrenia                                       | 33<br>(14 - 48)            | --                    | --                     | 4<br>(2 - 6)            | 9<br>(4 - 14)           | 20<br>(7 - 32)             |
| Alcohol use disorders                               | 362<br>(185 - 456)         | --                    | --                     | 90<br>(55 - 120)        | 198<br>(92 - 257)       | 74<br>(40 - 98)            |
| Drug use disorders                                  | 217<br>(155 - 255)         | 0<br>(0 - 0)          | --                     | 139<br>(90 - 171)       | 31<br>(23 - 38)         | 47<br>(37 - 60)            |
| Opioid use disorders                                | 80<br>(56 - 93)            | 0<br>(0 - 0)          | --                     | 52<br>(33 - 65)         | 10<br>(8 - 13)          | 17<br>(13 - 23)            |
| Cocaine use disorders                               | 6<br>(4 - 7)               | 0<br>(0 - 0)          | --                     | 4<br>(3 - 5)            | 1<br>(1 - 1)            | 1<br>(1 - 2)               |
| Amphetamine use disorders                           | 6<br>(5 - 7)               | 0<br>(0 - 0)          | --                     | 4<br>(2 - 5)            | 1<br>(1 - 1)            | 1<br>(1 - 2)               |
| Other drug use disorders                            | 125<br>(90 - 147)          | 0<br>(0 - 0)          | --                     | 79<br>(51 - 98)         | 19<br>(14 - 23)         | 27<br>(21 - 35)            |
| Eating disorders                                    | 2<br>(1 - 3)               | --                    | 0<br>(0 - 0)           | 2<br>(1 - 3)            | --                      | --                         |
| Anorexia nervosa                                    | 2<br>(1 - 3)               | --                    | 0<br>(0 - 0)           | 2<br>(1 - 3)            | --                      | --                         |
| Diabetes, urogenital, blood, and endocrine diseases | 5,589<br>(4,714 - 6,543)   | 15<br>(11 - 20)       | 8<br>(7 - 11)          | 128<br>(110 - 151)      | 631<br>(550 - 748)      | 4,806<br>(4,006 - 5,654)   |
| Diabetes mellitus                                   | 1,905<br>(1,633 - 2,376)   | 1<br>(0 - 1)          | 0<br>(0 - 1)           | 39<br>(32 - 46)         | 266<br>(232 - 317)      | 1,599<br>(1,335 - 2,028)   |
| Acute glomerulonephritis                            | 2<br>(1 - 2)               | 0<br>(0 - 0)          | 0<br>(0 - 0)           | 0<br>(0 - 1)            | 0<br>(0 - 1)            | 1<br>(0 - 1)               |
| Chronic kidney disease                              | 2,068<br>(1,672 - 2,986)   | 1<br>(0 - 1)          | 0<br>(0 - 1)           | 28<br>(22 - 45)         | 167<br>(133 - 283)      | 1,872<br>(1,501 - 2,643)   |
| Chronic kidney disease due to diabetes mellitus     | 339<br>(214 - 506)         | 0<br>(0 - 0)          | 0<br>(0 - 0)           | 5<br>(3 - 10)           | 35<br>(24 - 56)         | 298<br>(183 - 453)         |

Web Table 31- Belgium deaths with 95% UI by age, sex, and cause in 2013

| Cause                                               | Both Sexes, All Ages     | Both Sexes, 0-4 Years | Both Sexes, 5-14 Years | Both Sexes, 15-49 Years  | Both Sexes, 50-69 Years  | Both Sexes, 70-80 Years  |
|-----------------------------------------------------|--------------------------|-----------------------|------------------------|--------------------------|--------------------------|--------------------------|
| Chronic kidney disease due to hypertension          | 652<br>(466 - 987)       | 0<br>(0 - 0)          | 0<br>(0 - 0)           | 7<br>(5 - 11)            | 43<br>(30 - 78)          | 602<br>(429 - 906)       |
| Chronic kidney disease due to glomerulonephritis    | 26<br>(16 - 36)          | 0<br>(0 - 0)          | 0<br>(0 - 0)           | 1<br>(1 - 1)             | 4<br>(2 - 5)             | 21<br>(13 - 30)          |
| Chronic kidney disease due to other causes          | 1,052<br>(739 - 1,682)   | 0<br>(0 - 1)          | 0<br>(0 - 0)           | 15<br>(10 - 26)          | 85<br>(58 - 164)         | 952<br>(655 - 1,522)     |
| Urinary diseases and male infertility               | 866<br>(384 - 1,186)     | 0<br>(0 - 1)          | 0<br>(0 - 0)           | 10<br>(5 - 13)           | 60<br>(29 - 77)          | 796<br>(345 - 1,104)     |
| Interstitial nephritis and urinary tract infections | 728<br>(290 - 1,037)     | 0<br>(0 - 1)          | 0<br>(0 - 0)           | 7<br>(3 - 10)            | 42<br>(18 - 57)          | 679<br>(263 - 980)       |
| Urolithiasis                                        | 28<br>(14 - 61)          | --                    | 0<br>(0 - 0)           | 1<br>(1 - 2)             | 4<br>(2 - 8)             | 23<br>(11 - 53)          |
| Other urinary diseases                              | 109<br>(62 - 209)        | 0<br>(0 - 0)          | 0<br>(0 - 0)           | 2<br>(1 - 3)             | 13<br>(7 - 21)           | 94<br>(52 - 190)         |
| Gynecological diseases                              | 5<br>(2 - 8)             | --                    | --                     | 0<br>(0 - 0)             | 0<br>(0 - 1)             | 4<br>(2 - 7)             |
| Uterine fibroids                                    | 1<br>(1 - 2)             | --                    | --                     | 0<br>(0 - 0)             | 0<br>(0 - 0)             | 1<br>(1 - 2)             |
| Polycystic ovarian syndrome                         | 0<br>(0 - 0)             | --                    | --                     | 0<br>(0 - 0)             | 0<br>(0 - 0)             | --                       |
| Endometriosis                                       | 0<br>(0 - 0)             | --                    | --                     | 0<br>(0 - 0)             | 0<br>(0 - 0)             | --                       |
| Genital prolapse                                    | 1<br>(1 - 2)             | --                    | --                     | 0<br>(0 - 0)             | 0<br>(0 - 0)             | 1<br>(0 - 2)             |
| Other gynecological diseases                        | 2<br>(1 - 3)             | --                    | --                     | 0<br>(0 - 0)             | 0<br>(0 - 0)             | 2<br>(1 - 3)             |
| Hemoglobinopathies and hemolytic anemias            | 82<br>(59 - 115)         | 1<br>(1 - 1)          | 1<br>(1 - 1)           | 5<br>(3 - 7)             | 11<br>(8 - 15)           | 65<br>(45 - 93)          |
| Thalassemias                                        | 1<br>(1 - 1)             | 0<br>(0 - 0)          | 0<br>(0 - 0)           | 1<br>(0 - 1)             | 0<br>(0 - 0)             | 0<br>(0 - 0)             |
| Sickle cell disorders                               | 15<br>(11 - 21)          | 1<br>(0 - 1)          | 1<br>(0 - 1)           | 3<br>(2 - 4)             | 7<br>(5 - 9)             | 5<br>(3 - 6)             |
| G6PD deficiency                                     | 0<br>(0 - 0)             | 0<br>(0 - 0)          | 0<br>(0 - 0)           | 0<br>(0 - 0)             | 0<br>(0 - 0)             | 0<br>(0 - 0)             |
| Other hemoglobinopathies and hemolytic anemias      | 66<br>(46 - 94)          | 0<br>(0 - 0)          | 0<br>(0 - 0)           | 1<br>(1 - 2)             | 4<br>(3 - 6)             | 60<br>(41 - 87)          |
| Endocrine, metabolic, blood, and immune disorders   | 662<br>(509 - 870)       | 12<br>(8 - 17)        | 6<br>(5 - 8)           | 46<br>(34 - 58)          | 126<br>(93 - 152)        | 471<br>(336 - 655)       |
| Musculoskeletal disorders                           | 361<br>(275 - 454)       | --                    | 1<br>(0 - 1)           | 13<br>(11 - 16)          | 59<br>(46 - 73)          | 288<br>(211 - 373)       |
| Rheumatoid arthritis                                | 83<br>(58 - 122)         | --                    | 0<br>(0 - 0)           | 1<br>(1 - 2)             | 13<br>(9 - 20)           | 68<br>(44 - 101)         |
| Other musculoskeletal disorders                     | 279<br>(203 - 350)       | --                    | 0<br>(0 - 1)           | 12<br>(9 - 15)           | 46<br>(35 - 56)          | 220<br>(155 - 288)       |
| Other non-communicable diseases                     | 743<br>(612 - 896)       | 201<br>(162 - 250)    | 10<br>(8 - 13)         | 39<br>(33 - 46)          | 53<br>(43 - 62)          | 440<br>(322 - 583)       |
| Congenital anomalies                                | 256<br>(219 - 298)       | 152<br>(124 - 186)    | 10<br>(8 - 13)         | 35<br>(29 - 42)          | 28<br>(22 - 34)          | 31<br>(23 - 40)          |
| Neural tube defects                                 | 7<br>(5 - 9)             | 5<br>(4 - 8)          | 0<br>(0 - 0)           | 1<br>(1 - 1)             | 0<br>(0 - 0)             | 0<br>(0 - 0)             |
| Congenital heart anomalies                          | 71<br>(57 - 86)          | 47<br>(34 - 60)       | 4<br>(3 - 5)           | 11<br>(9 - 14)           | 4<br>(3 - 5)             | 6<br>(4 - 8)             |
| Cleft lip and cleft palate                          | 0<br>(0 - 0)             | 0<br>(0 - 0)          | --                     | --                       | --                       | --                       |
| Down syndrome                                       | 33<br>(23 - 42)          | 8<br>(4 - 12)         | 1<br>(1 - 2)           | 8<br>(5 - 10)            | 15<br>(10 - 20)          | 2<br>(1 - 3)             |
| Chromosomal unbalanced rearrangements               | 18<br>(13 - 25)          | 14<br>(9 - 19)        | 1<br>(0 - 1)           | 2<br>(2 - 3)             | 1<br>(1 - 2)             | 0<br>(0 - 1)             |
| Other congenital anomalies                          | 127<br>(107 - 152)       | 79<br>(62 - 101)      | 5<br>(3 - 6)           | 14<br>(11 - 17)          | 7<br>(5 - 9)             | 23<br>(17 - 30)          |
| Skin and subcutaneous diseases                      | 438<br>(317 - 581)       | 0<br>(0 - 1)          | 0<br>(0 - 0)           | 4<br>(3 - 5)             | 25<br>(19 - 31)          | 409<br>(289 - 552)       |
| Cellulitis                                          | 26<br>(14 - 49)          | 0<br>(0 - 0)          | 0<br>(0 - 0)           | 1<br>(0 - 1)             | 4<br>(2 - 6)             | 22<br>(11 - 43)          |
| Pyoderma                                            | 113<br>(71 - 164)        | 0<br>(0 - 0)          | 0<br>(0 - 0)           | 2<br>(1 - 2)             | 2<br>(7 - 14)            | 101<br>(61 - 151)        |
| Decubitus ulcer                                     | 283<br>(198 - 401)       | 0<br>(0 - 0)          | 0<br>(0 - 0)           | 1<br>(1 - 1)             | 10<br>(7 - 13)           | 272<br>(189 - 391)       |
| Other skin and subcutaneous diseases                | 16<br>(7 - 35)           | 0<br>(0 - 0)          | 0<br>(0 - 0)           | 1<br>(0 - 1)             | 2<br>(1 - 2)             | 14<br>(6 - 32)           |
| Sudden infant death syndrome                        | 49<br>(29 - 83)          | 49<br>(29 - 83)       | --                     | --                       | --                       | --                       |
| Injuries                                            | 7,688<br>(6,788 - 8,542) | 50<br>(39 - 62)       | 48<br>(42 - 55)        | 1,991<br>(1,781 - 2,227) | 1,563<br>(1,384 - 1,753) | 4,036<br>(3,340 - 4,698) |
| Transport injuries                                  | 1,246<br>(1,115 - 1,419) | 11<br>(8 - 15)        | 25<br>(21 - 30)        | 629<br>(553 - 724)       | 290<br>(248 - 340)       | 291<br>(245 - 350)       |
| Road injuries                                       | 1,186<br>(1,061 - 1,367) | 11<br>(8 - 15)        | 24<br>(20 - 29)        | 602<br>(532 - 695)       | 271<br>(231 - 321)       | 279<br>(234 - 337)       |
| Pedestrian road injuries                            | 249<br>(188 - 362)       | 4<br>(2 - 6)          | 9<br>(6 - 12)          | 60<br>(38 - 105)         | 61<br>(43 - 94)          | 116<br>(87 - 164)        |

Web Table 31- Belgium deaths with 95% UI by age, sex, and cause in 2013

| Cause                                           | Both Sexes, All Ages     | Both Sexes, 0-4 Years | Both Sexes, 5-14 Years | Both Sexes, 15-49 Years | Both Sexes, 50-69 Years | Both Sexes, 70-80 Years  |
|-------------------------------------------------|--------------------------|-----------------------|------------------------|-------------------------|-------------------------|--------------------------|
| Cyclist road injuries                           | 149<br>(116 - 214)       | 1<br>(0 - 1)          | 5<br>(3 - 7)           | 40<br>(30 - 62)         | 47<br>(35 - 69)         | 56<br>(40 - 83)          |
| Motorcyclist road injuries                      | 197<br>(137 - 320)       | 1<br>(0 - 1)          | 1<br>(1 - 3)           | 158<br>(107 - 258)      | 24<br>(16 - 39)         | 13<br>(8 - 23)           |
| Motor vehicle road injuries                     | 582<br>(413 - 708)       | 6<br>(3 - 8)          | 9<br>(6 - 12)          | 340<br>(235 - 421)      | 136<br>(100 - 168)      | 92<br>(57 - 124)         |
| Other road injuries                             | 9<br>(4 - 24)            | 0<br>(0 - 0)          | 0<br>(0 - 1)           | 3<br>(1 - 9)            | 2<br>(1 - 7)            | 2<br>(1 - 8)             |
| Other transport injuries                        | 60<br>(37 - 80)          | 1<br>(0 - 1)          | 1<br>(1 - 2)           | 27<br>(15 - 37)         | 19<br>(10 - 29)         | 13<br>(8 - 18)           |
| Unintentional injuries                          | 4,061<br>(3,290 - 4,732) | 34<br>(25 - 42)       | 16<br>(13 - 19)        | 257<br>(225 - 296)      | 506<br>(413 - 575)      | 3,249<br>(2,508 - 3,900) |
| Falls                                           | 2,523<br>(1,840 - 3,128) | 4<br>(3 - 5)          | 2<br>(2 - 3)           | 89<br>(70 - 108)        | 237<br>(155 - 285)      | 2,192<br>(1,569 - 2,782) |
| Drowning                                        | 88<br>(72 - 139)         | 5<br>(3 - 9)          | 4<br>(3 - 7)           | 29<br>(23 - 48)         | 27<br>(21 - 42)         | 22<br>(18 - 33)          |
| Fire, heat, and hot substances                  | 145<br>(106 - 180)       | 5<br>(3 - 8)          | 3<br>(2 - 4)           | 25<br>(19 - 31)         | 25<br>(17 - 32)         | 87<br>(61 - 114)         |
| Poisonings                                      | 64<br>(51 - 96)          | 1<br>(1 - 1)          | 1<br>(1 - 2)           | 17<br>(14 - 27)         | 14<br>(11 - 21)         | 30<br>(22 - 48)          |
| Exposure to mechanical forces                   | 84<br>(65 - 99)          | 5<br>(3 - 8)          | 2<br>(1 - 3)           | 31<br>(24 - 38)         | 20<br>(14 - 25)         | 26<br>(16 - 35)          |
| Unintentional firearm injuries                  | 3<br>(2 - 4)             | 0<br>(0 - 0)          | 0<br>(0 - 0)           | 1<br>(1 - 2)            | 1<br>(0 - 1)            | 0<br>(0 - 1)             |
| Unintentional suffocation                       | 21<br>(13 - 29)          | 4<br>(2 - 6)          | 0<br>(0 - 1)           | 1<br>(1 - 2)            | 2<br>(1 - 3)            | 13<br>(6 - 20)           |
| Other exposure to mechanical forces             | 61<br>(45 - 72)          | 1<br>(1 - 2)          | 2<br>(1 - 2)           | 29<br>(21 - 35)         | 17<br>(12 - 22)         | 13<br>(8 - 17)           |
| Adverse effects of medical treatment            | 446<br>(344 - 650)       | 2<br>(1 - 3)          | 1<br>(1 - 2)           | 25<br>(19 - 37)         | 86<br>(66 - 126)        | 333<br>(246 - 510)       |
| Animal contact                                  | 12<br>(6 - 15)           | 0<br>(0 - 0)          | 0<br>(0 - 0)           | 2<br>(1 - 3)            | 4<br>(2 - 5)            | 6<br>(3 - 8)             |
| Venomous animal contact                         | 2<br>(1 - 3)             | 0<br>(0 - 0)          | 0<br>(0 - 0)           | 1<br>(0 - 1)            | 1<br>(0 - 1)            | 0<br>(0 - 1)             |
| Non-venomous animal contact                     | 10<br>(5 - 13)           | 0<br>(0 - 0)          | 0<br>(0 - 0)           | 1<br>(1 - 2)            | 3<br>(1 - 4)            | 5<br>(2 - 8)             |
| Foreign body                                    | 669<br>(346 - 942)       | 11<br>(6 - 15)        | 2<br>(1 - 3)           | 30<br>(17 - 40)         | 87<br>(43 - 119)        | 540<br>(268 - 783)       |
| Pulmonary aspiration and foreign body in airway | 666<br>(343 - 939)       | 10<br>(6 - 15)        | 2<br>(1 - 2)           | 30<br>(16 - 39)         | 86<br>(42 - 119)        | 538<br>(268 - 781)       |
| Foreign body in other body part                 | 3<br>(1 - 5)             | 0<br>(0 - 0)          | 0<br>(0 - 0)           | 1<br>(0 - 1)            | 0<br>(0 - 1)            | 1<br>(0 - 4)             |
| Other unintentional injuries                    | 30<br>(23 - 38)          | 1<br>(1 - 2)          | 0<br>(0 - 1)           | 7<br>(5 - 11)           | 7<br>(4 - 11)           | 14<br>(9 - 20)           |
| Self-harm and interpersonal violence            | 2,380<br>(2,036 - 2,756) | 5<br>(3 - 7)          | 7<br>(5 - 9)           | 1,105<br>(895 - 1,275)  | 767<br>(632 - 908)      | 496<br>(410 - 703)       |
| Self-harm                                       | 2,226<br>(1,879 - 2,598) | --                    | 4<br>(2 - 5)           | 1,023<br>(813 - 1,186)  | 731<br>(599 - 871)      | 468<br>(383 - 677)       |
| Interpersonal violence                          | 155<br>(118 - 206)       | 5<br>(3 - 7)          | 3<br>(3 - 5)           | 83<br>(64 - 114)        | 36<br>(27 - 53)         | 27<br>(19 - 34)          |
| Assault by firearm                              | 58<br>(42 - 93)          | 1<br>(0 - 2)          | 1<br>(1 - 2)           | 37<br>(26 - 61)         | 13<br>(8 - 23)          | 5<br>(4 - 9)             |
| Assault by sharp object                         | 39<br>(26 - 56)          | 0<br>(0 - 1)          | 1<br>(0 - 1)           | 22<br>(14 - 33)         | 10<br>(6 - 16)          | 6<br>(4 - 8)             |
| Assault by other means                          | 58<br>(38 - 74)          | 4<br>(2 - 5)          | 2<br>(1 - 3)           | 23<br>(15 - 32)         | 13<br>(8 - 18)          | 16<br>(10 - 21)          |

Web Table 31- Belgium deaths with 95% UI by age, sex, and cause in 2013

| Cause                                                             | Males, All Ages             | Males, 0-4 Years   | Males, 5-14 Years | Males, 15-49 Years       | Males, 50-69 Years          | Males, 70-80 Years          |
|-------------------------------------------------------------------|-----------------------------|--------------------|-------------------|--------------------------|-----------------------------|-----------------------------|
| All causes                                                        | 56,104<br>(51,735 - 61,246) | 310<br>(262 - 369) | 70<br>(62 - 78)   | 3,337<br>(2,962 - 3,780) | 12,443<br>(11,180 - 13,969) | 39,943<br>(37,222 - 43,169) |
| Communicable, maternal, neonatal, and nutritional diseases        | 3,346<br>(2,597 - 4,173)    | 139<br>(114 - 167) | 5<br>(4 - 6)      | 101<br>(80 - 125)        | 354<br>(262 - 442)          | 2,747<br>(2,045 - 3,549)    |
| HIV/AIDS and tuberculosis                                         | 111<br>(89 - 137)           | 0<br>(0 - 0)       | 0<br>(0 - 0)      | 33<br>(23 - 47)          | 27<br>(20 - 37)             | 51<br>(37 - 66)             |
| Tuberculosis                                                      | 71<br>(56 - 88)             | 0<br>(0 - 0)       | 0<br>(0 - 0)      | 5<br>(4 - 6)             | 16<br>(13 - 22)             | 50<br>(36 - 64)             |
| HIV/AIDS                                                          | 41<br>(25 - 66)             | 0<br>(0 - 0)       | 0<br>(0 - 0)      | 28<br>(18 - 43)          | 11<br>(5 - 20)              | 2<br>(1 - 4)                |
| HIV/AIDS resulting in mycobacterial infection                     | 2<br>(1 - 4)                | 0<br>(0 - 0)       | 0<br>(0 - 0)      | 2<br>(1 - 2)             | 1<br>(0 - 1)                | 0<br>(0 - 0)                |
| HIV/AIDS resulting in other diseases                              | 38<br>(24 - 62)             | 0<br>(0 - 0)       | 0<br>(0 - 0)      | 26<br>(17 - 40)          | 10<br>(5 - 19)              | 2<br>(1 - 4)                |
| Diarrhea, lower respiratory, and other common infectious diseases | 2,871<br>(2,132 - 3,683)    | 16<br>(11 - 22)    | 4<br>(3 - 5)      | 55<br>(40 - 70)          | 287<br>(205 - 367)          | 2,510<br>(1,840 - 3,304)    |
| Diarrheal diseases                                                | 186<br>(122 - 286)          | 3<br>(2 - 5)       | 0<br>(0 - 0)      | 4<br>(3 - 5)             | 15<br>(11 - 22)             | 163<br>(99 - 263)           |
| Intestinal infectious diseases                                    | 4<br>(1 - 9)                | 1<br>(0 - 2)       | 1<br>(0 - 1)      | 2<br>(0 - 4)             | 1<br>(0 - 2)                | 1<br>(0 - 2)                |
| Typhoid fever                                                     | 3<br>(1 - 6)                | 0<br>(0 - 1)       | 0<br>(0 - 1)      | 1<br>(0 - 3)             | 0<br>(0 - 1)                | 0<br>(0 - 1)                |
| Paratyphoid fever                                                 | 1<br>(0 - 2)                | 0<br>(0 - 0)       | 0<br>(0 - 0)      | 0<br>(0 - 1)             | 0<br>(0 - 0)                | 0<br>(0 - 0)                |
| Other intestinal infectious diseases                              | 1<br>(0 - 3)                | 0<br>(0 - 1)       | 0<br>(0 - 0)      | 0<br>(0 - 1)             | 0<br>(0 - 1)                | 0<br>(0 - 1)                |
| Lower respiratory infections                                      | 2,625<br>(1,907 - 3,416)    | 6<br>(4 - 10)      | 1<br>(1 - 2)      | 41<br>(27 - 55)          | 258<br>(178 - 338)          | 2,319<br>(1,655 - 3,079)    |
| Upper respiratory infections                                      | 1<br>(0 - 3)                | 0<br>(0 - 0)       | 0<br>(0 - 0)      | 0<br>(0 - 0)             | 0<br>(0 - 1)                | 1<br>(0 - 3)                |
| Otitis media                                                      | 2<br>(1 - 2)                | 0<br>(0 - 0)       | 0<br>(0 - 0)      | 0<br>(0 - 0)             | 0<br>(0 - 0)                | 1<br>(1 - 2)                |
| Meningitis                                                        | 29<br>(21 - 34)             | 4<br>(2 - 6)       | 1<br>(0 - 1)      | 4<br>(3 - 5)             | 6<br>(5 - 8)                | 14<br>(10 - 18)             |
| Pneumococcal meningitis                                           | 5<br>(3 - 7)                | 1<br>(0 - 1)       | 0<br>(0 - 0)      | 1<br>(0 - 1)             | 1<br>(1 - 2)                | 3<br>(1 - 4)                |
| H influenzae type B meningitis                                    | 4<br>(3 - 6)                | 1<br>(1 - 2)       | 0<br>(0 - 0)      | 1<br>(0 - 1)             | 1<br>(0 - 1)                | 2<br>(1 - 3)                |
| Meningococcal meningitis                                          | 10<br>(7 - 13)              | 1<br>(1 - 2)       | 0<br>(0 - 0)      | 1<br>(1 - 2)             | 2<br>(1 - 3)                | 5<br>(3 - 7)                |
| Other meningitis                                                  | 9<br>(6 - 13)               | 1<br>(0 - 2)       | 0<br>(0 - 0)      | 1<br>(1 - 2)             | 2<br>(1 - 3)                | 4<br>(3 - 7)                |
| Encephalitis                                                      | 20<br>(12 - 27)             | 1<br>(1 - 2)       | 1<br>(0 - 1)      | 4<br>(2 - 5)             | 5<br>(3 - 8)                | 9<br>(4 - 14)               |
| Diphtheria                                                        | 0<br>(0 - 0)                | 0<br>(0 - 0)       | 0<br>(0 - 0)      | 0<br>(0 - 0)             | 0<br>(0 - 0)                | --<br>(0 - 0)               |
| Whooping cough                                                    | 0<br>(0 - 1)                | 0<br>(0 - 0)       | 0<br>(0 - 0)      | 0<br>(0 - 0)             | 0<br>(0 - 0)                | --<br>(0 - 0)               |
| Tetanus                                                           | 1<br>(0 - 1)                | 0<br>(0 - 0)       | 0<br>(0 - 0)      | 0<br>(0 - 0)             | 0<br>(0 - 0)                | 0<br>(0 - 0)                |
| Measles                                                           | 0<br>(0 - 0)                | 0<br>(0 - 0)       | 0<br>(0 - 0)      | 0<br>(0 - 0)             | 0<br>(0 - 0)                | --<br>(0 - 0)               |
| Varicella and herpes zoster                                       | 4<br>(1 - 15)               | 0<br>(0 - 1)       | 0<br>(0 - 0)      | 0<br>(0 - 1)             | 0<br>(0 - 1)                | 3<br>(0 - 14)               |
| Neglected tropical diseases and malaria                           | 5<br>(3 - 7)                | 0<br>(0 - 0)       | 0<br>(0 - 0)      | 1<br>(1 - 1)             | 2<br>(1 - 2)                | 2<br>(1 - 4)                |
| Cysticercosis                                                     | 0<br>(0 - 0)                | 0<br>(0 - 0)       | 0<br>(0 - 0)      | 0<br>(0 - 0)             | 0<br>(0 - 0)                | 0<br>(0 - 0)                |
| Cystic echinococcosis                                             | 0<br>(0 - 1)                | 0<br>(0 - 0)       | 0<br>(0 - 0)      | 0<br>(0 - 0)             | 0<br>(0 - 0)                | 0<br>(0 - 0)                |
| Dengue                                                            | 1<br>(0 - 1)                | 0<br>(0 - 0)       | 0<br>(0 - 0)      | 0<br>(0 - 0)             | 0<br>(0 - 0)                | 0<br>(0 - 0)                |
| Rabies                                                            | 0<br>(0 - 1)                | 0<br>(0 - 0)       | 0<br>(0 - 0)      | 0<br>(0 - 0)             | 0<br>(0 - 0)                | 0<br>(0 - 0)                |
| Other neglected tropical diseases                                 | 4<br>(1 - 5)                | 0<br>(0 - 0)       | 0<br>(0 - 0)      | 0<br>(0 - 1)             | 1<br>(0 - 2)                | 2<br>(1 - 3)                |
| Maternal disorders                                                | --                          | --                 | --                | --                       | --                          | --                          |
| Maternal hemorrhage                                               | --                          | --                 | --                | --                       | --                          | --                          |
| Maternal sepsis and other maternal infections                     | --                          | --                 | --                | --                       | --                          | --                          |
| Maternal hypertensive disorders                                   | --                          | --                 | --                | --                       | --                          | --                          |
| Maternal obstructed labor                                         | --                          | --                 | --                | --                       | --                          | --                          |
| Maternal abortive outcome                                         | --                          | --                 | --                | --                       | --                          | --                          |
| Indirect maternal deaths                                          | --                          | --                 | --                | --                       | --                          | --                          |

Web Table 31- Belgium deaths with 95% UI by age, sex, and cause in 2013

| Cause                                                            | Males, All Ages             | Males, 0-4 Years   | Males, 5-14 Years | Males, 15-49 Years       | Males, 50-69 Years         | Males, 70-80 Years          |
|------------------------------------------------------------------|-----------------------------|--------------------|-------------------|--------------------------|----------------------------|-----------------------------|
| Late maternal deaths                                             | --                          | --                 | --                | --                       | --                         | --                          |
| Maternal deaths aggravated by HIV/AIDS                           | --                          | --                 | --                | --                       | --                         | --                          |
| Other maternal disorders                                         | --                          | --                 | --                | --                       | --                         | --                          |
| Neonatal disorders                                               | 119<br>(98 - 144)           | 119<br>(98 - 144)  | --                | --                       | --                         | --                          |
| Neonatal preterm birth complications                             | 48<br>(32 - 74)             | 48<br>(32 - 74)    | --                | --                       | --                         | --                          |
| Neonatal encephalopathy due to birth asphyxia and trauma         | 36<br>(21 - 51)             | 36<br>(21 - 51)    | --                | --                       | --                         | --                          |
| Neonatal sepsis and other neonatal infections                    | 9<br>(4 - 19)               | 9<br>(4 - 19)      | --                | --                       | --                         | --                          |
| Hemolytic disease and other neonatal jaundice                    | 0<br>(0 - 1)                | 0<br>(0 - 1)       | --                | --                       | --                         | --                          |
| Other neonatal disorders                                         | 27<br>(14 - 39)             | 27<br>(14 - 39)    | --                | --                       | --                         | --                          |
| Nutritional deficiencies                                         | 126<br>(65 - 178)           | 0<br>(0 - 0)       | 0<br>(0 - 0)      | 3<br>(2 - 4)             | 10<br>(6 - 15)             | 112<br>(56 - 162)           |
| Protein-energy malnutrition                                      | 47<br>(8 - 81)              | 0<br>(0 - 0)       | 0<br>(0 - 0)      | 1<br>(0 - 1)             | 4<br>(1 - 6)               | 42<br>(7 - 76)              |
| Iodine deficiency                                                | 0<br>(0 - 2)                | 0<br>(0 - 0)       | 0<br>(0 - 0)      | 0<br>(0 - 0)             | 0<br>(0 - 0)               | 0<br>(0 - 2)                |
| Iron-deficiency anemia                                           | 71<br>(38 - 125)            | 0<br>(0 - 0)       | 0<br>(0 - 0)      | 2<br>(1 - 3)             | 6<br>(3 - 10)              | 64<br>(33 - 113)            |
| Other nutritional deficiencies                                   | 7<br>(3 - 18)               | 0<br>(0 - 0)       | 0<br>(0 - 0)      | 0<br>(0 - 1)             | 1<br>(0 - 2)               | 6<br>(2 - 16)               |
| Other communicable, maternal, neonatal, and nutritional diseases | 113<br>(53 - 156)           | 3<br>(1 - 5)       | 1<br>(0 - 1)      | 10<br>(6 - 13)           | 28<br>(14 - 40)            | 71<br>(29 - 104)            |
| Sexually transmitted diseases excluding HIV                      | 2<br>(1 - 4)                | 1<br>(0 - 1)       | 0<br>(0 - 0)      | 0<br>(0 - 0)             | 0<br>(0 - 1)               | 1<br>(0 - 3)                |
| Syphilis                                                         | 2<br>(1 - 4)                | 1<br>(0 - 1)       | 0<br>(0 - 0)      | 0<br>(0 - 0)             | 0<br>(0 - 1)               | 1<br>(0 - 2)                |
| Chlamydial infection                                             | --                          | --                 | --                | --                       | --                         | --                          |
| Gonococcal infection                                             | 0<br>(0 - 1)                | --                 | 0<br>(0 - 0)      | 0<br>(0 - 0)             | 0<br>(0 - 0)               | 0<br>(0 - 0)                |
| Other sexually transmitted diseases                              | 0<br>(0 - 0)                | --                 | 0<br>(0 - 0)      | 0<br>(0 - 0)             | 0<br>(0 - 0)               | 0<br>(0 - 0)                |
| Hepatitis                                                        | 12<br>(9 - 15)              | 0<br>(0 - 0)       | 0<br>(0 - 0)      | 1<br>(1 - 2)             | 4<br>(3 - 6)               | 6<br>(4 - 9)                |
| Acute hepatitis A                                                | 2<br>(1 - 5)                | 0<br>(0 - 0)       | 0<br>(0 - 0)      | 1<br>(0 - 1)             | 1<br>(0 - 2)               | 1<br>(0 - 2)                |
| Acute hepatitis B                                                | 9<br>(6 - 13)               | 0<br>(0 - 0)       | 0<br>(0 - 0)      | 1<br>(0 - 2)             | 3<br>(2 - 5)               | 5<br>(3 - 8)                |
| Acute hepatitis C                                                | 0<br>(0 - 0)                | --                 | 0<br>(0 - 0)      | 0<br>(0 - 0)             | 0<br>(0 - 0)               | 0<br>(0 - 0)                |
| Other infectious diseases                                        | 99<br>(38 - 142)            | 2<br>(1 - 4)       | 1<br>(0 - 1)      | 8<br>(4 - 12)            | 24<br>(9 - 34)             | 64<br>(22 - 97)             |
| Non-communicable diseases                                        | 48,370<br>(44,494 - 53,023) | 143<br>(116 - 175) | 35<br>(30 - 41)   | 1,710<br>(1,510 - 1,982) | 11,038<br>(9,927 - 12,382) | 35,443<br>(32,871 - 38,471) |
| Neoplasms                                                        | 17,029<br>(15,221 - 19,112) | 9<br>(6 - 12)      | 18<br>(15 - 22)   | 699<br>(608 - 820)       | 5,714<br>(5,100 - 6,437)   | 10,589<br>(9,408 - 12,106)  |
| Esophageal cancer                                                | 633<br>(494 - 755)          | --                 | --                | 36<br>(26 - 50)          | 297<br>(226 - 361)         | 301<br>(222 - 369)          |
| Stomach cancer                                                   | 712<br>(604 - 842)          | --                 | --                | 27<br>(21 - 34)          | 196<br>(169 - 231)         | 489<br>(399 - 606)          |
| Liver cancer                                                     | 468<br>(307 - 619)          | --                 | 0<br>(0 - 1)      | 20<br>(12 - 29)          | 193<br>(116 - 260)         | 254<br>(166 - 359)          |
| Liver cancer due to hepatitis B                                  | 105<br>(25 - 206)           | --                 | 0<br>(0 - 0)      | 8<br>(3 - 15)            | 52<br>(8 - 110)            | 44<br>(11 - 90)             |
| Liver cancer due to hepatitis C                                  | 214<br>(74 - 373)           | --                 | 0<br>(0 - 0)      | 8<br>(1 - 15)            | 88<br>(24 - 162)           | 119<br>(46 - 211)           |
| Liver cancer due to alcohol use                                  | 139<br>(58 - 231)           | --                 | --                | 4<br>(1 - 7)             | 49<br>(19 - 89)            | 86<br>(32 - 147)            |
| Liver cancer due to other causes                                 | 9<br>(3 - 23)               | --                 | 0<br>(0 - 0)      | 1<br>(0 - 2)             | 4<br>(1 - 11)              | 4<br>(1 - 10)               |
| Larynx cancer                                                    | 204<br>(163 - 297)          | --                 | --                | 12<br>(8 - 22)           | 97<br>(76 - 141)           | 95<br>(73 - 141)            |
| Tracheal, bronchus and lung cancer                               | 5,542<br>(4,951 - 6,255)    | --                 | --                | 158<br>(127 - 195)       | 2,213<br>(1,930 - 2,537)   | 3,171<br>(2,802 - 3,595)    |
| Breast cancer                                                    | 25<br>(13 - 67)             | --                 | --                | 1<br>(1 - 3)             | 8<br>(4 - 21)              | 16<br>(8 - 44)              |
| Cervical cancer                                                  | --                          | --                 | --                | --                       | --                         | --                          |
| Uterine cancer                                                   | --                          | --                 | --                | --                       | --                         | --                          |
| Prostate cancer                                                  | 1,986<br>(1,398 - 3,203)    | --                 | --                | 5<br>(3 - 8)             | 281<br>(203 - 428)         | 1,700<br>(1,165 - 2,833)    |

Web Table 31- Belgium deaths with 95% UI by age, sex, and cause in 2013

| Cause                                         | Males, All Ages             | Males, 0-4 Years | Males, 5-14 Years | Males, 15-49 Years | Males, 50-69 Years       | Males, 70-80 Years          |
|-----------------------------------------------|-----------------------------|------------------|-------------------|--------------------|--------------------------|-----------------------------|
| Colon and rectum cancer                       | 1,997<br>(1,741 - 2,288)    | --               | --                | 58<br>(47 - 71)    | 566<br>(492 - 646)       | 1,372<br>(1,156 - 1,613)    |
| Lip and oral cavity cancer                    | 250<br>(208 - 295)          | --               | --                | 27<br>(20 - 36)    | 137<br>(105 - 167)       | 86<br>(67 - 109)            |
| Nasopharynx cancer                            | 30<br>(23 - 40)             | --               | 0<br>(0 - 0)      | 6<br>(4 - 10)      | 15<br>(11 - 22)          | 8<br>(5 - 12)               |
| Other pharynx cancer                          | 182<br>(126 - 229)          | --               | --                | 19<br>(14 - 27)    | 116<br>(73 - 149)        | 48<br>(32 - 64)             |
| Gallbladder and biliary tract cancer          | 106<br>(78 - 165)           | --               | --                | 3<br>(2 - 4)       | 29<br>(20 - 42)          | 74<br>(53 - 119)            |
| Pancreatic cancer                             | 888<br>(776 - 1,012)        | --               | --                | 37<br>(29 - 47)    | 349<br>(301 - 406)       | 502<br>(427 - 589)          |
| Malignant skin melanoma                       | 194<br>(92 - 327)           | --               | --                | 34<br>(16 - 59)    | 70<br>(33 - 117)         | 89<br>(43 - 152)            |
| Non-melanoma skin cancer                      | 73<br>(44 - 111)            | --               | --                | 3<br>(2 - 5)       | 15<br>(9 - 23)           | 55<br>(32 - 85)             |
| Ovarian cancer                                | --                          | --               | --                | --                 | --                       | --                          |
| Testicular cancer                             | 11<br>(8 - 15)              | --               | --                | 5<br>(4 - 8)       | 2<br>(1 - 3)             | 3<br>(2 - 6)                |
| Kidney cancer                                 | 456<br>(378 - 542)          | 0<br>(0 - 0)     | 0<br>(0 - 0)      | 18<br>(13 - 25)    | 168<br>(135 - 206)       | 269<br>(207 - 345)          |
| Bladder cancer                                | 618<br>(506 - 793)          | --               | --                | 6<br>(4 - 8)       | 121<br>(98 - 161)        | 491<br>(395 - 630)          |
| Brain and nervous system cancer               | 423<br>(338 - 584)          | 3<br>(1 - 5)     | 5<br>(4 - 8)      | 70<br>(54 - 96)    | 193<br>(148 - 275)       | 152<br>(113 - 225)          |
| Thyroid cancer                                | 39<br>(32 - 47)             | --               | 0<br>(0 - 0)      | 3<br>(2 - 4)       | 15<br>(12 - 18)          | 21<br>(16 - 28)             |
| Mesothelioma                                  | 214<br>(103 - 291)          | --               | --                | 6<br>(3 - 10)      | 81<br>(40 - 116)         | 127<br>(53 - 186)           |
| Hodgkin lymphoma                              | 35<br>(25 - 57)             | 0<br>(0 - 0)     | 0<br>(0 - 0)      | 10<br>(7 - 15)     | 12<br>(8 - 20)           | 13<br>(9 - 22)              |
| Non-Hodgkin lymphoma                          | 531<br>(217 - 678)          | 1<br>(0 - 1)     | 2<br>(1 - 3)      | 36<br>(15 - 48)    | 162<br>(70 - 210)        | 330<br>(136 - 449)          |
| Multiple myeloma                              | 316<br>(168 - 472)          | --               | --                | 9<br>(5 - 15)      | 91<br>(48 - 148)         | 216<br>(116 - 330)          |
| Leukemia                                      | 491<br>(424 - 566)          | 2<br>(1 - 4)     | 6<br>(4 - 8)      | 38<br>(32 - 46)    | 127<br>(106 - 151)       | 318<br>(264 - 379)          |
| Other neoplasms                               | 608<br>(429 - 766)          | 3<br>(1 - 4)     | 4<br>(2 - 6)      | 52<br>(34 - 65)    | 160<br>(98 - 201)        | 390<br>(255 - 527)          |
| Cardiovascular diseases                       | 15,974<br>(14,437 - 17,672) | 2<br>(1 - 3)     | 2<br>(1 - 2)      | 410<br>(347 - 481) | 2,886<br>(2,560 - 3,264) | 12,673<br>(11,379 - 14,064) |
| Rheumatic heart disease                       | 74<br>(20 - 121)            | 0<br>(0 - 0)     | 0<br>(0 - 0)      | 4<br>(1 - 6)       | 13<br>(4 - 21)           | 57<br>(14 - 99)             |
| Ischemic heart disease                        | 8,536<br>(7,409 - 10,153)   | 0<br>(0 - 0)     | 0<br>(0 - 0)      | 255<br>(210 - 316) | 1,814<br>(1,572 - 2,128) | 6,466<br>(5,534 - 7,780)    |
| Cerebrovascular disease                       | 4,322<br>(3,399 - 5,279)    | 1<br>(0 - 1)     | 1<br>(0 - 1)      | 77<br>(56 - 99)    | 559<br>(429 - 701)       | 3,685<br>(2,873 - 4,544)    |
| Ischemic stroke                               | 2,280<br>(1,721 - 3,019)    | 0<br>(0 - 0)     | 0<br>(0 - 0)      | 10<br>(6 - 14)     | 183<br>(131 - 252)       | 2,088<br>(1,572 - 2,783)    |
| Hemorrhagic stroke                            | 2,041<br>(1,322 - 2,607)    | 0<br>(0 - 1)     | 1<br>(0 - 1)      | 67<br>(48 - 87)    | 377<br>(264 - 483)       | 1,597<br>(1,007 - 2,077)    |
| Hypertensive heart disease                    | 112<br>(58 - 178)           | 0<br>(0 - 0)     | 0<br>(0 - 0)      | 3<br>(1 - 4)       | 18<br>(10 - 26)          | 92<br>(45 - 152)            |
| Cardiomyopathy and myocarditis                | 506<br>(336 - 667)          | 1<br>(1 - 1)     | 1<br>(0 - 1)      | 21<br>(14 - 29)    | 98<br>(63 - 127)         | 385<br>(252 - 525)          |
| Atrial fibrillation and flutter               | 569<br>(391 - 782)          | --               | --                | 3<br>(2 - 5)       | 46<br>(33 - 62)          | 520<br>(348 - 723)          |
| Aortic aneurysm                               | 525<br>(425 - 647)          | --               | --                | 10<br>(7 - 13)     | 104<br>(82 - 130)        | 411<br>(327 - 520)          |
| Peripheral vascular disease                   | 101<br>(74 - 137)           | --               | --                | 1<br>(0 - 1)       | 14<br>(10 - 19)          | 87<br>(60 - 122)            |
| Endocarditis                                  | 90<br>(56 - 141)            | 0<br>(0 - 0)     | 0<br>(0 - 0)      | 5<br>(3 - 9)       | 22<br>(12 - 34)          | 63<br>(37 - 102)            |
| Other cardiovascular and circulatory diseases | 1,138<br>(699 - 1,428)      | 0<br>(0 - 0)     | 0<br>(0 - 0)      | 31<br>(18 - 41)    | 198<br>(117 - 250)       | 909<br>(539 - 1,180)        |
| Chronic respiratory diseases                  | 4,963<br>(4,219 - 5,765)    | 1<br>(1 - 2)     | 1<br>(1 - 1)      | 47<br>(37 - 64)    | 731<br>(615 - 924)       | 4,183<br>(3,516 - 4,868)    |
| Chronic obstructive pulmonary disease         | 4,209<br>(3,505 - 4,884)    | 1<br>(0 - 1)     | 0<br>(0 - 0)      | 29<br>(22 - 40)    | 622<br>(518 - 779)       | 3,557<br>(2,946 - 4,180)    |
| Pneumoconiosis                                | 353<br>(218 - 554)          | 0<br>(0 - 0)     | 0<br>(0 - 0)      | 2<br>(1 - 4)       | 51<br>(19 - 94)          | 300<br>(190 - 468)          |
| Silicosis                                     | 34<br>(20 - 55)             | 0<br>(0 - 0)     | 0<br>(0 - 0)      | 0<br>(0 - 1)       | 8<br>(3 - 16)            | 25<br>(15 - 41)             |
| Asbestosis                                    | 68<br>(41 - 107)            | 0<br>(0 - 0)     | 0<br>(0 - 0)      | 1<br>(0 - 1)       | 14<br>(5 - 26)           | 53<br>(34 - 84)             |
| Coal workers pneumoconiosis                   | 185<br>(115 - 290)          | 0<br>(0 - 0)     | 0<br>(0 - 0)      | 1<br>(0 - 1)       | 16<br>(6 - 29)           | 169<br>(107 - 264)          |
| Other pneumoconiosis                          | 66<br>(39 - 108)            | 0<br>(0 - 0)     | 0<br>(0 - 0)      | 1<br>(0 - 1)       | 13<br>(5 - 24)           | 53<br>(32 - 89)             |

Web Table 31- Belgium deaths with 95% UI by age, sex, and cause in 2013

| Cause                                               | Males, All Ages          | Males, 0-4 Years | Males, 5-14 Years | Males, 15-49 Years | Males, 50-69 Years | Males, 70-80 Years       |
|-----------------------------------------------------|--------------------------|------------------|-------------------|--------------------|--------------------|--------------------------|
| Asthma                                              | 68<br>(53 - 86)          | 0<br>(0 - 0)     | 0<br>(0 - 0)      | 9<br>(7 - 12)      | 22<br>(16 - 29)    | 37<br>(26 - 50)          |
| Interstitial lung disease and pulmonary sarcoidosis | 304<br>(163 - 451)       | 0<br>(0 - 0)     | 0<br>(0 - 0)      | 4<br>(2 - 7)       | 31<br>(14 - 48)    | 268<br>(144 - 406)       |
| Other chronic respiratory diseases                  | 30<br>(21 - 42)          | 0<br>(0 - 1)     | 0<br>(0 - 0)      | 3<br>(2 - 4)       | 6<br>(4 - 8)       | 21<br>(14 - 32)          |
| Cirrhosis                                           | 1,108<br>(972 - 1,268)   | 0<br>(0 - 0)     | 0<br>(0 - 0)      | 145<br>(119 - 176) | 560<br>(475 - 657) | 403<br>(343 - 477)       |
| Cirrhosis due to hepatitis B                        | 86<br>(46 - 139)         | 0<br>(0 - 0)     | 0<br>(0 - 0)      | 11<br>(5 - 22)     | 44<br>(22 - 75)    | 31<br>(17 - 49)          |
| Cirrhosis due to hepatitis C                        | 486<br>(281 - 712)       | 0<br>(0 - 0)     | 0<br>(0 - 0)      | 63<br>(26 - 99)    | 247<br>(129 - 375) | 176<br>(107 - 250)       |
| Cirrhosis due to alcohol use                        | 437<br>(258 - 672)       | --               | --                | 48<br>(21 - 92)    | 215<br>(117 - 353) | 174<br>(102 - 261)       |
| Cirrhosis due to other causes                       | 100<br>(33 - 182)        | 0<br>(0 - 0)     | 0<br>(0 - 0)      | 23<br>(8 - 42)     | 54<br>(16 - 105)   | 22<br>(6 - 43)           |
| Digestive diseases                                  | 1,236<br>(1,012 - 1,458) | 1<br>(0 - 1)     | 1<br>(0 - 1)      | 43<br>(35 - 53)    | 210<br>(159 - 256) | 982<br>(802 - 1,171)     |
| Peptic ulcer disease                                | 172<br>(115 - 235)       | 0<br>(0 - 0)     | 0<br>(0 - 0)      | 6<br>(4 - 9)       | 34<br>(21 - 48)    | 131<br>(85 - 184)        |
| Gastritis and duodenitis                            | 7<br>(3 - 11)            | 0<br>(0 - 0)     | 0<br>(0 - 0)      | 1<br>(0 - 1)       | 1<br>(0 - 2)       | 5<br>(2 - 8)             |
| Appendicitis                                        | 15<br>(9 - 24)           | 0<br>(0 - 0)     | 0<br>(0 - 0)      | 2<br>(1 - 2)       | 3<br>(2 - 5)       | 10<br>(5 - 17)           |
| Paralytic ileus and intestinal obstruction          | 224<br>(127 - 353)       | 0<br>(0 - 0)     | 0<br>(0 - 0)      | 5<br>(3 - 8)       | 31<br>(17 - 49)    | 187<br>(104 - 302)       |
| Inguinal, femoral, and abdominal hernia             | 31<br>(13 - 51)          | 0<br>(0 - 0)     | 0<br>(0 - 0)      | 0<br>(0 - 1)       | 4<br>(2 - 6)       | 26<br>(11 - 45)          |
| Inflammatory bowel disease                          | 88<br>(52 - 129)         | 0<br>(0 - 0)     | 0<br>(0 - 0)      | 3<br>(2 - 5)       | 12<br>(7 - 18)     | 72<br>(41 - 111)         |
| Vascular intestinal disorders                       | 296<br>(129 - 534)       | 0<br>(0 - 0)     | 0<br>(0 - 0)      | 4<br>(1 - 8)       | 48<br>(21 - 87)    | 244<br>(107 - 441)       |
| Gallbladder and biliary diseases                    | 132<br>(86 - 194)        | 0<br>(0 - 0)     | 0<br>(0 - 0)      | 2<br>(1 - 2)       | 14<br>(9 - 20)     | 116<br>(73 - 175)        |
| Pancreatitis                                        | 104<br>(67 - 158)        | 0<br>(0 - 0)     | 0<br>(0 - 0)      | 14<br>(10 - 20)    | 31<br>(19 - 45)    | 58<br>(35 - 98)          |
| Other digestive diseases                            | 168<br>(93 - 233)        | 0<br>(0 - 0)     | 0<br>(0 - 0)      | 5<br>(3 - 8)       | 31<br>(13 - 42)    | 132<br>(73 - 190)        |
| Neurological disorders                              | 4,898<br>(3,574 - 6,338) | 7<br>(4 - 10)    | 4<br>(3 - 5)      | 78<br>(58 - 98)    | 338<br>(263 - 422) | 4,472<br>(3,160 - 5,887) |
| Alzheimer disease and other dementias               | 3,879<br>(2,591 - 5,313) | --               | --                | 0<br>(0 - 1)       | 124<br>(76 - 185)  | 3,755<br>(2,453 - 5,178) |
| Parkinson disease                                   | 540<br>(388 - 699)       | --               | --                | 1<br>(1 - 1)       | 36<br>(27 - 46)    | 503<br>(351 - 661)       |
| Epilepsy                                            | 114<br>(69 - 149)        | 2<br>(1 - 2)     | 1<br>(1 - 2)      | 32<br>(20 - 43)    | 35<br>(20 - 48)    | 45<br>(25 - 65)          |
| Multiple sclerosis                                  | 70<br>(30 - 108)         | --               | --                | 11<br>(5 - 19)     | 36<br>(14 - 60)    | 23<br>(8 - 37)           |
| Other neurological disorders                        | 295<br>(226 - 367)       | 5<br>(3 - 8)     | 2<br>(2 - 4)      | 33<br>(24 - 42)    | 107<br>(76 - 135)  | 147<br>(113 - 192)       |
| Mental and substance use disorders                  | 438<br>(264 - 534)       | 0<br>(0 - 0)     | 0<br>(0 - 0)      | 186<br>(120 - 233) | 172<br>(80 - 227)  | 80<br>(49 - 100)         |
| Schizophrenia                                       | 14<br>(6 - 21)           | --               | --                | 2<br>(1 - 3)       | 5<br>(2 - 8)       | 6<br>(2 - 11)            |
| Alcohol use disorders                               | 271<br>(124 - 346)       | --               | --                | 68<br>(36 - 96)    | 151<br>(60 - 202)  | 52<br>(24 - 69)          |
| Drug use disorders                                  | 153<br>(91 - 187)        | 0<br>(0 - 0)     | --                | 115<br>(66 - 146)  | 16<br>(11 - 22)    | 21<br>(14 - 29)          |
| Opioid use disorders                                | 57<br>(34 - 71)          | 0<br>(0 - 0)     | --                | 43<br>(25 - 56)    | 5<br>(4 - 8)       | 8<br>(5 - 11)            |
| Cocaine use disorders                               | 4<br>(2 - 5)             | 0<br>(0 - 0)     | --                | 3<br>(2 - 4)       | 0<br>(0 - 0)       | 0<br>(0 - 1)             |
| Amphetamine use disorders                           | 4<br>(2 - 5)             | 0<br>(0 - 0)     | --                | 3<br>(2 - 4)       | 0<br>(0 - 1)       | 0<br>(0 - 1)             |
| Other drug use disorders                            | 88<br>(53 - 109)         | 0<br>(0 - 0)     | --                | 66<br>(37 - 85)    | 10<br>(7 - 14)     | 12<br>(8 - 17)           |
| Eating disorders                                    | 0<br>(0 - 1)             | --               | 0<br>(0 - 0)      | 0<br>(0 - 1)       | --                 | --                       |
| Anorexia nervosa                                    | 0<br>(0 - 1)             | --               | 0<br>(0 - 0)      | 0<br>(0 - 1)       | --                 | --                       |
| Diabetes, urogenital, blood, and endocrine diseases | 2,307<br>(1,959 - 2,889) | 8<br>(5 - 12)    | 4<br>(3 - 6)      | 77<br>(63 - 96)    | 373<br>(315 - 455) | 1,845<br>(1,546 - 2,330) |
| Diabetes mellitus                                   | 760<br>(644 - 890)       | 0<br>(0 - 0)     | 0<br>(0 - 0)      | 26<br>(21 - 33)    | 168<br>(141 - 200) | 565<br>(464 - 683)       |
| Acute glomerulonephritis                            | 1<br>(1 - 1)             | 0<br>(0 - 0)     | 0<br>(0 - 0)      | 0<br>(0 - 0)       | 0<br>(0 - 0)       | 0<br>(0 - 1)             |
| Chronic kidney disease                              | 926<br>(694 - 1,555)     | 0<br>(0 - 1)     | 0<br>(0 - 0)      | 16<br>(11 - 31)    | 99<br>(73 - 183)   | 810<br>(597 - 1,333)     |
| Chronic kidney disease due to diabetes mellitus     | 169<br>(83 - 342)        | 0<br>(0 - 0)     | 0<br>(0 - 0)      | 4<br>(2 - 8)       | 23<br>(13 - 43)    | 142<br>(68 - 286)        |

Web Table 31- Belgium deaths with 95% UI by age, sex, and cause in 2013

| Cause                                               | Males, All Ages          | Males, 0-4 Years  | Males, 5-14 Years | Males, 15-49 Years       | Males, 50-69 Years     | Males, 70-80 Years       |
|-----------------------------------------------------|--------------------------|-------------------|-------------------|--------------------------|------------------------|--------------------------|
| Chronic kidney disease due to hypertension          | 256<br>(171 - 491)       | 0<br>(0 - 0)      | 0<br>(0 - 0)      | 3<br>(2 - 8)             | 22<br>(14 - 51)        | 230<br>(148 - 430)       |
| Chronic kidney disease due to glomerulonephritis    | 11<br>(6 - 16)           | 0<br>(0 - 0)      | 0<br>(0 - 0)      | 0<br>(0 - 1)             | 2<br>(1 - 3)           | 8<br>(4 - 13)            |
| Chronic kidney disease due to other causes          | 490<br>(279 - 973)       | 0<br>(0 - 0)      | 0<br>(0 - 0)      | 9<br>(5 - 19)            | 51<br>(28 - 102)       | 430<br>(237 - 860)       |
| Urinary diseases and male infertility               | 308<br>(129 - 421)       | 0<br>(0 - 0)      | 0<br>(0 - 0)      | 4<br>(2 - 6)             | 29<br>(12 - 38)        | 274<br>(109 - 384)       |
| Interstitial nephritis and urinary tract infections | 222<br>(76 - 328)        | 0<br>(0 - 0)      | 0<br>(0 - 0)      | 3<br>(1 - 4)             | 16<br>(6 - 24)         | 203<br>(66 - 306)        |
| Urolithiasis                                        | 11<br>(4 - 24)           | --                | 0<br>(0 - 0)      | 0<br>(0 - 1)             | 2<br>(1 - 4)           | 9<br>(3 - 20)            |
| Other urinary diseases                              | 75<br>(35 - 150)         | 0<br>(0 - 0)      | 0<br>(0 - 0)      | 1<br>(1 - 2)             | 11<br>(5 - 16)         | 63<br>(29 - 133)         |
| Gynecological diseases                              | --                       | --                | --                | --                       | --                     | --                       |
| Uterine fibroids                                    | --                       | --                | --                | --                       | --                     | --                       |
| Polycystic ovarian syndrome                         | --                       | --                | --                | --                       | --                     | --                       |
| Endometriosis                                       | --                       | --                | --                | --                       | --                     | --                       |
| Genital prolapse                                    | --                       | --                | --                | --                       | --                     | --                       |
| Other gynecological diseases                        | --                       | --                | --                | --                       | --                     | --                       |
| Hemoglobinopathies and hemolytic anemias            | 38<br>(23 - 58)          | 0<br>(0 - 1)      | 0<br>(0 - 1)      | 3<br>(2 - 4)             | 5<br>(3 - 8)           | 29<br>(17 - 45)          |
| Thalassemias                                        | 1<br>(0 - 1)             | 0<br>(0 - 0)      | 0<br>(0 - 0)      | 0<br>(0 - 0)             | 0<br>(0 - 0)           | 0<br>(0 - 0)             |
| Sickle cell disorders                               | 8<br>(5 - 12)            | 0<br>(0 - 1)      | 0<br>(0 - 0)      | 2<br>(1 - 3)             | 3<br>(2 - 5)           | 2<br>(1 - 3)             |
| G6PD deficiency                                     | 0<br>(0 - 0)             | 0<br>(0 - 0)      | 0<br>(0 - 0)      | 0<br>(0 - 0)             | 0<br>(0 - 0)           | 0<br>(0 - 0)             |
| Other hemoglobinopathies and hemolytic anemias      | 29<br>(17 - 46)          | 0<br>(0 - 0)      | 0<br>(0 - 0)      | 1<br>(0 - 1)             | 2<br>(1 - 3)           | 27<br>(15 - 41)          |
| Endocrine, metabolic, blood, and immune disorders   | 275<br>(202 - 390)       | 7<br>(4 - 10)     | 3<br>(2 - 5)      | 26<br>(18 - 36)          | 73<br>(46 - 95)        | 166<br>(113 - 267)       |
| Musculoskeletal disorders                           | 122<br>(70 - 157)        | --                | 0<br>(0 - 0)      | 6<br>(3 - 7)             | 26<br>(16 - 35)        | 90<br>(48 - 121)         |
| Rheumatoid arthritis                                | 21<br>(12 - 37)          | --                | 0<br>(0 - 0)      | 1<br>(0 - 1)             | 5<br>(3 - 9)           | 16<br>(8 - 28)           |
| Other musculoskeletal disorders                     | 100<br>(54 - 130)        | --                | 0<br>(0 - 0)      | 5<br>(3 - 7)             | 21<br>(12 - 28)        | 74<br>(38 - 101)         |
| Other non-communicable diseases                     | 295<br>(248 - 351)       | 115<br>(91 - 143) | 5<br>(4 - 7)      | 20<br>(16 - 25)          | 27<br>(21 - 33)        | 128<br>(87 - 178)        |
| Congenital anomalies                                | 134<br>(112 - 161)       | 86<br>(67 - 110)  | 5<br>(4 - 7)      | 18<br>(14 - 22)          | 14<br>(11 - 17)        | 12<br>(9 - 16)           |
| Neural tube defects                                 | 3<br>(2 - 5)             | 2<br>(1 - 4)      | 0<br>(0 - 0)      | 0<br>(0 - 0)             | 0<br>(0 - 0)           | 0<br>(0 - 0)             |
| Congenital heart anomalies                          | 40<br>(30 - 53)          | 27<br>(19 - 38)   | 2<br>(1 - 3)      | 6<br>(4 - 8)             | 2<br>(2 - 4)           | 2<br>(1 - 3)             |
| Cleft lip and cleft palate                          | 0<br>(0 - 0)             | 0<br>(0 - 0)      | --                | --                       | --                     | --                       |
| Down syndrome                                       | 15<br>(8 - 22)           | 4<br>(2 - 8)      | 0<br>(0 - 1)      | 4<br>(2 - 6)             | 7<br>(4 - 9)           | 1<br>(0 - 1)             |
| Chromosomal unbalanced rearrangements               | 8<br>(5 - 11)            | 5<br>(3 - 9)      | 0<br>(0 - 0)      | 1<br>(1 - 1)             | 1<br>(0 - 1)           | 0<br>(0 - 0)             |
| Other congenital anomalies                          | 69<br>(55 - 87)          | 47<br>(35 - 64)   | 2<br>(1 - 3)      | 7<br>(5 - 10)            | 4<br>(2 - 6)           | 9<br>(6 - 12)            |
| Skin and subcutaneous diseases                      | 132<br>(92 - 183)        | 0<br>(0 - 0)      | 0<br>(0 - 0)      | 3<br>(2 - 3)             | 13<br>(9 - 18)         | 116<br>(76 - 166)        |
| Cellulitis                                          | 11<br>(5 - 22)           | 0<br>(0 - 0)      | 0<br>(0 - 0)      | 0<br>(0 - 1)             | 2<br>(1 - 4)           | 8<br>(3 - 19)            |
| Pyoderma                                            | 42<br>(25 - 64)          | 0<br>(0 - 0)      | 0<br>(0 - 0)      | 1<br>(1 - 2)             | 6<br>(3 - 9)           | 35<br>(19 - 57)          |
| Decubitus ulcer                                     | 74<br>(50 - 105)         | 0<br>(0 - 0)      | 0<br>(0 - 0)      | 1<br>(0 - 1)             | 5<br>(3 - 7)           | 69<br>(44 - 98)          |
| Other skin and subcutaneous diseases                | 5<br>(2 - 11)            | 0<br>(0 - 0)      | 0<br>(0 - 0)      | 0<br>(0 - 0)             | 1<br>(0 - 1)           | 4<br>(1 - 9)             |
| Sudden infant death syndrome                        | 28<br>(16 - 52)          | 28<br>(16 - 52)   | --                | --                       | --                     | --                       |
| Injuries                                            | 4,389<br>(3,791 - 4,960) | 29<br>(21 - 38)   | 30<br>(26 - 35)   | 1,526<br>(1,333 - 1,751) | 1,051<br>(871 - 1,229) | 1,753<br>(1,390 - 2,066) |
| Transport injuries                                  | 915<br>(802 - 1,047)     | 6<br>(4 - 10)     | 16<br>(12 - 20)   | 509<br>(436 - 596)       | 215<br>(177 - 256)     | 169<br>(141 - 203)       |
| Road injuries                                       | 866<br>(760 - 998)       | 6<br>(4 - 9)      | 15<br>(12 - 19)   | 486<br>(417 - 573)       | 198<br>(163 - 237)     | 161<br>(133 - 194)       |
| Pedestrian road injuries                            | 145<br>(83 - 244)        | 2<br>(1 - 4)      | 5<br>(3 - 8)      | 44<br>(22 - 85)          | 37<br>(19 - 63)        | 57<br>(34 - 89)          |



Web Table 31- Belgium deaths with 95% UI by age, sex, and cause in 2013

| Cause                                           | Males, All Ages          | Males, 0-4 Years | Males, 5-14 Years | Males, 15-49 Years | Males, 50-69 Years | Males, 70-80 Years     |
|-------------------------------------------------|--------------------------|------------------|-------------------|--------------------|--------------------|------------------------|
| Cyclist road injuries                           | 108<br>(77 - 162)        | 1<br>(0 - 1)     | 3<br>(2 - 6)      | 29<br>(20 - 48)    | 33<br>(22 - 53)    | 41<br>(27 - 65)        |
| Motorcyclist road injuries                      | 179<br>(125 - 289)       | 0<br>(0 - 1)     | 1<br>(1 - 2)      | 146<br>(98 - 238)  | 22<br>(13 - 35)    | 10<br>(6 - 17)         |
| Motor vehicle road injuries                     | 431<br>(283 - 540)       | 3<br>(1 - 5)     | 5<br>(3 - 7)      | 265<br>(167 - 339) | 106<br>(71 - 137)  | 52<br>(28 - 74)        |
| Other road injuries                             | 4<br>(2 - 13)            | 0<br>(0 - 0)     | 0<br>(0 - 0)      | 1<br>(1 - 5)       | 1<br>(0 - 5)       | 1<br>(0 - 3)           |
| Other transport injuries                        | 48<br>(26 - 69)          | 0<br>(0 - 1)     | 1<br>(0 - 1)      | 23<br>(12 - 33)    | 17<br>(8 - 26)     | 8<br>(4 - 12)          |
| Unintentional injuries                          | 1,775<br>(1,342 - 2,104) | 20<br>(14 - 27)  | 10<br>(8 - 13)    | 185<br>(156 - 220) | 319<br>(243 - 377) | 1,241<br>(880 - 1,533) |
| Falls                                           | 1,022<br>(668 - 1,297)   | 2<br>(2 - 4)     | 2<br>(1 - 2)      | 71<br>(53 - 88)    | 160<br>(94 - 200)  | 788<br>(488 - 1,040)   |
| Drowning                                        | 61<br>(46 - 99)          | 3<br>(2 - 7)     | 3<br>(2 - 6)      | 23<br>(17 - 38)    | 19<br>(13 - 31)    | 14<br>(10 - 20)        |
| Fire, heat, and hot substances                  | 69<br>(49 - 92)          | 3<br>(2 - 5)     | 1<br>(1 - 2)      | 16<br>(12 - 22)    | 14<br>(9 - 20)     | 34<br>(23 - 49)        |
| Poisonings                                      | 31<br>(24 - 52)          | 0<br>(0 - 1)     | 0<br>(0 - 1)      | 11<br>(8 - 19)     | 7<br>(5 - 12)      | 13<br>(9 - 22)         |
| Exposure to mechanical forces                   | 61<br>(47 - 72)          | 3<br>(2 - 5)     | 1<br>(1 - 2)      | 27<br>(21 - 34)    | 17<br>(11 - 21)    | 12<br>(8 - 16)         |
| Unintentional firearm injuries                  | 2<br>(1 - 3)             | 0<br>(0 - 0)     | 0<br>(0 - 0)      | 1<br>(1 - 1)       | 0<br>(0 - 1)       | 0<br>(0 - 1)           |
| Unintentional suffocation                       | 9<br>(5 - 13)            | 2<br>(1 - 4)     | 0<br>(0 - 1)      | 1<br>(0 - 1)       | 1<br>(1 - 2)       | 4<br>(2 - 7)           |
| Other exposure to mechanical forces             | 50<br>(36 - 60)          | 1<br>(0 - 1)     | 1<br>(1 - 1)      | 25<br>(19 - 32)    | 15<br>(10 - 19)    | 7<br>(4 - 10)          |
| Adverse effects of medical treatment            | 187<br>(134 - 317)       | 1<br>(1 - 2)     | 0<br>(0 - 1)      | 11<br>(8 - 19)     | 41<br>(27 - 75)    | 134<br>(91 - 230)      |
| Animal contact                                  | 8<br>(3 - 10)            | 0<br>(0 - 0)     | 0<br>(0 - 0)      | 2<br>(1 - 2)       | 3<br>(1 - 4)       | 3<br>(1 - 5)           |
| Venomous animal contact                         | 1<br>(1 - 2)             | 0<br>(0 - 0)     | 0<br>(0 - 0)      | 1<br>(0 - 1)       | 1<br>(0 - 1)       | 0<br>(0 - 0)           |
| Non-venomous animal contact                     | 7<br>(3 - 8)             | 0<br>(0 - 0)     | 0<br>(0 - 0)      | 1<br>(0 - 1)       | 2<br>(1 - 3)       | 3<br>(1 - 5)           |
| Foreign body                                    | 315<br>(125 - 458)       | 5<br>(2 - 9)     | 1<br>(1 - 2)      | 18<br>(8 - 26)     | 53<br>(20 - 77)    | 237<br>(91 - 362)      |
| Pulmonary aspiration and foreign body in airway | 314<br>(124 - 457)       | 5<br>(2 - 9)     | 1<br>(0 - 2)      | 18<br>(8 - 26)     | 53<br>(20 - 77)    | 236<br>(91 - 361)      |
| Foreign body in other body part                 | 1<br>(0 - 1)             | 0<br>(0 - 0)     | 0<br>(0 - 0)      | 0<br>(0 - 0)       | 0<br>(0 - 0)       | 0<br>(0 - 1)           |
| Other unintentional injuries                    | 21<br>(16 - 27)          | 1<br>(0 - 2)     | 0<br>(0 - 1)      | 6<br>(4 - 10)      | 6<br>(3 - 9)       | 7<br>(4 - 12)          |
| Self-harm and interpersonal violence            | 1,699<br>(1,353 - 2,032) | 3<br>(2 - 4)     | 4<br>(3 - 6)      | 833<br>(619 - 995) | 517<br>(390 - 647) | 343<br>(264 - 512)     |
| Self-harm                                       | 1,606<br>(1,253 - 1,929) | --               | 3<br>(2 - 4)      | 779<br>(562 - 934) | 494<br>(362 - 625) | 331<br>(252 - 500)     |
| Interpersonal violence                          | 93<br>(63 - 142)         | 3<br>(2 - 4)     | 2<br>(1 - 3)      | 54<br>(36 - 83)    | 22<br>(14 - 39)    | 12<br>(7 - 17)         |
| Assault by firearm                              | 40<br>(23 - 73)          | 0<br>(0 - 1)     | 0<br>(0 - 1)      | 27<br>(15 - 48)    | 9<br>(5 - 18)      | 3<br>(1 - 6)           |
| Assault by sharp object                         | 23<br>(12 - 40)          | 0<br>(0 - 1)     | 0<br>(0 - 0)      | 14<br>(7 - 23)     | 6<br>(3 - 11)      | 3<br>(1 - 5)           |
| Assault by other means                          | 30<br>(16 - 43)          | 2<br>(1 - 3)     | 1<br>(1 - 2)      | 13<br>(7 - 21)     | 7<br>(4 - 12)      | 6<br>(3 - 9)           |

Web Table 31- Belgium deaths with 95% UI by age, sex, and cause in 2013

| Cause                                                             | Females, All Ages           | Females, 0-4 Years | Females, 5-14 Years | Females, 15-49 Years     | Females, 50-69 Years     | Females, 70-80 Years        |
|-------------------------------------------------------------------|-----------------------------|--------------------|---------------------|--------------------------|--------------------------|-----------------------------|
| All causes                                                        | 58,042<br>(53,360 - 62,888) | 237<br>(199 - 282) | 54<br>(49 - 60)     | 1,791<br>(1,564 - 2,048) | 7,134<br>(6,363 - 7,954) | 48,826<br>(45,138 - 52,604) |
| Communicable, maternal, neonatal, and nutritional diseases        | 4,305<br>(3,079 - 5,630)    | 107<br>(84 - 132)  | 5<br>(3 - 6)        | 72<br>(57 - 84)          | 201<br>(143 - 245)       | 3,921<br>(2,733 - 5,228)    |
| HIV/AIDS and tuberculosis                                         | 66<br>(49 - 86)             | 0<br>(0 - 0)       | 0<br>(0 - 0)        | 16<br>(11 - 24)          | 11<br>(8 - 15)           | 39<br>(26 - 55)             |
| Tuberculosis                                                      | 48<br>(34 - 64)             | 0<br>(0 - 0)       | 0<br>(0 - 0)        | 3<br>(2 - 4)             | 6<br>(5 - 8)             | 39<br>(26 - 54)             |
| HIV/AIDS                                                          | 18<br>(11 - 32)             | 0<br>(0 - 0)       | 0<br>(0 - 0)        | 13<br>(8 - 22)           | 5<br>(2 - 9)             | 1<br>(0 - 2)                |
| HIV/AIDS resulting in mycobacterial infection                     | 1<br>(0 - 1)                | 0<br>(0 - 0)       | 0<br>(0 - 0)        | 1<br>(0 - 1)             | 0<br>(0 - 0)             | 0<br>(0 - 0)                |
| HIV/AIDS resulting in other diseases                              | 18<br>(11 - 30)             | 0<br>(0 - 0)       | 0<br>(0 - 0)        | 13<br>(8 - 21)           | 4<br>(2 - 8)             | 1<br>(0 - 2)                |
| Diarrhea, lower respiratory, and other common infectious diseases | 3,704<br>(2,562 - 4,989)    | 13<br>(9 - 18)     | 4<br>(3 - 5)        | 37<br>(27 - 45)          | 159<br>(109 - 198)       | 3,490<br>(2,368 - 4,757)    |
| Diarrheal diseases                                                | 386<br>(224 - 628)          | 3<br>(2 - 4)       | 0<br>(0 - 1)        | 3<br>(2 - 5)             | 14<br>(10 - 19)          | 366<br>(204 - 606)          |
| Intestinal infectious diseases                                    | 5<br>(2 - 10)               | 1<br>(0 - 2)       | 1<br>(0 - 2)        | 2<br>(1 - 4)             | 1<br>(0 - 2)             | 1<br>(0 - 3)                |
| Typhoid fever                                                     | 3<br>(1 - 8)                | 1<br>(0 - 1)       | 1<br>(0 - 1)        | 1<br>(0 - 3)             | 0<br>(0 - 1)             | 1<br>(0 - 1)                |
| Paratyphoid fever                                                 | 1<br>(0 - 2)                | 0<br>(0 - 0)       | 0<br>(0 - 0)        | 0<br>(0 - 1)             | 0<br>(0 - 0)             | 0<br>(0 - 0)                |
| Other intestinal infectious diseases                              | 1<br>(0 - 3)                | 0<br>(0 - 1)       | 0<br>(0 - 0)        | 0<br>(0 - 1)             | 0<br>(0 - 1)             | 0<br>(0 - 2)                |
| Lower respiratory infections                                      | 3,249<br>(2,115 - 4,498)    | 5<br>(3 - 8)       | 1<br>(1 - 2)        | 25<br>(17 - 33)          | 134<br>(85 - 172)        | 3,082<br>(1,980 - 4,317)    |
| Upper respiratory infections                                      | 1<br>(0 - 5)                | 0<br>(0 - 0)       | 0<br>(0 - 0)        | 0<br>(0 - 0)             | 0<br>(0 - 1)             | 1<br>(0 - 4)                |
| Otitis media                                                      | 2<br>(2 - 3)                | 0<br>(0 - 0)       | 0<br>(0 - 0)        | 0<br>(0 - 0)             | 0<br>(0 - 0)             | 2<br>(1 - 3)                |
| Meningitis                                                        | 31<br>(22 - 38)             | 3<br>(2 - 4)       | 0<br>(0 - 1)        | 3<br>(2 - 4)             | 5<br>(3 - 7)             | 19<br>(14 - 26)             |
| Pneumococcal meningitis                                           | 6<br>(4 - 10)               | 0<br>(0 - 1)       | 0<br>(0 - 0)        | 0<br>(0 - 1)             | 1<br>(1 - 2)             | 4<br>(2 - 7)                |
| H influenzae type B meningitis                                    | 4<br>(3 - 5)                | 1<br>(0 - 1)       | 0<br>(0 - 0)        | 0<br>(0 - 1)             | 1<br>(0 - 1)             | 2<br>(1 - 3)                |
| Meningococcal meningitis                                          | 11<br>(7 - 15)              | 1<br>(1 - 2)       | 0<br>(0 - 0)        | 1<br>(1 - 1)             | 2<br>(1 - 3)             | 7<br>(4 - 10)               |
| Other meningitis                                                  | 10<br>(6 - 14)              | 1<br>(0 - 1)       | 0<br>(0 - 0)        | 1<br>(1 - 1)             | 2<br>(1 - 3)             | 6<br>(3 - 9)                |
| Encephalitis                                                      | 22<br>(13 - 30)             | 1<br>(1 - 2)       | 1<br>(0 - 1)        | 3<br>(2 - 4)             | 4<br>(2 - 6)             | 14<br>(7 - 21)              |
| Diphtheria                                                        | 0<br>(0 - 0)                | 0<br>(0 - 0)       | 0<br>(0 - 0)        | 0<br>(0 - 0)             | 0<br>(0 - 0)             | --                          |
| Whooping cough                                                    | 1<br>(0 - 1)                | 0<br>(0 - 1)       | 0<br>(0 - 0)        | 0<br>(0 - 0)             | 0<br>(0 - 0)             | --                          |
| Tetanus                                                           | 1<br>(1 - 1)                | 0<br>(0 - 0)       | 0<br>(0 - 0)        | 0<br>(0 - 0)             | 0<br>(0 - 0)             | 0<br>(0 - 1)                |
| Measles                                                           | 0<br>(0 - 0)                | 0<br>(0 - 0)       | 0<br>(0 - 0)        | 0<br>(0 - 0)             | 0<br>(0 - 0)             | --                          |
| Varicella and herpes zoster                                       | 6<br>(1 - 31)               | 0<br>(0 - 1)       | 0<br>(0 - 0)        | 0<br>(0 - 1)             | 0<br>(0 - 1)             | 5<br>(0 - 30)               |
| Neglected tropical diseases and malaria                           | 5<br>(3 - 6)                | 0<br>(0 - 0)       | 0<br>(0 - 0)        | 1<br>(1 - 1)             | 1<br>(1 - 1)             | 3<br>(1 - 4)                |
| Cysticercosis                                                     | 0<br>(0 - 0)                | 0<br>(0 - 0)       | 0<br>(0 - 0)        | 0<br>(0 - 0)             | 0<br>(0 - 0)             | 0<br>(0 - 0)                |
| Cystic echinococcosis                                             | 1<br>(1 - 1)                | 0<br>(0 - 0)       | 0<br>(0 - 0)        | 0<br>(0 - 0)             | 0<br>(0 - 0)             | 0<br>(0 - 0)                |
| Dengue                                                            | 1<br>(0 - 1)                | 0<br>(0 - 0)       | 0<br>(0 - 0)        | 0<br>(0 - 0)             | 0<br>(0 - 0)             | 0<br>(0 - 0)                |
| Rabies                                                            | 1<br>(0 - 1)                | 0<br>(0 - 0)       | 0<br>(0 - 0)        | 0<br>(0 - 0)             | 0<br>(0 - 0)             | 0<br>(0 - 0)                |
| Other neglected tropical diseases                                 | 3<br>(1 - 4)                | 0<br>(0 - 0)       | 0<br>(0 - 0)        | 0<br>(0 - 0)             | 0<br>(0 - 1)             | 2<br>(1 - 3)                |
| Maternal disorders                                                | 9<br>(7 - 11)               | --                 | 0<br>(0 - 0)        | 9<br>(7 - 11)            | --                       | --                          |
| Maternal hemorrhage                                               | 1<br>(1 - 1)                | --                 | 0<br>(0 - 0)        | 1<br>(1 - 1)             | --                       | --                          |
| Maternal sepsis and other maternal infections                     | 1<br>(1 - 1)                | --                 | 0<br>(0 - 0)        | 1<br>(1 - 1)             | --                       | --                          |
| Maternal hypertensive disorders                                   | 1<br>(1 - 2)                | --                 | 0<br>(0 - 0)        | 1<br>(1 - 2)             | --                       | --                          |
| Maternal obstructed labor                                         | 1<br>(0 - 1)                | --                 | 0<br>(0 - 0)        | 1<br>(0 - 1)             | --                       | --                          |
| Maternal abortive outcome                                         | 2<br>(1 - 3)                | --                 | 0<br>(0 - 0)        | 2<br>(1 - 3)             | --                       | --                          |
| Indirect maternal deaths                                          | 1<br>(1 - 1)                | --                 | 0<br>(0 - 0)        | 1<br>(1 - 1)             | --                       | --                          |

Web Table 31- Belgium deaths with 95% UI by age, sex, and cause in 2013

| Cause                                                            | Females, All Ages           | Females, 0-4 Years | Females, 5-14 Years | Females, 15-49 Years     | Females, 50-69 Years     | Females, 70-80 Years        |
|------------------------------------------------------------------|-----------------------------|--------------------|---------------------|--------------------------|--------------------------|-----------------------------|
| Late maternal deaths                                             | 1<br>(0 - 1)                | --                 | 0<br>(0 - 0)        | 1<br>(0 - 1)             | --                       | --                          |
| Maternal deaths aggravated by HIV/AIDS                           | 0<br>(0 - 0)                | --                 | --                  | 0<br>(0 - 0)             | --                       | --                          |
| Other maternal disorders                                         | 2<br>(1 - 2)                | --                 | 0<br>(0 - 0)        | 2<br>(1 - 2)             | --                       | --                          |
| Neonatal disorders                                               | 91<br>(71 - 114)            | 91<br>(71 - 114)   | --                  | --                       | --                       | --                          |
| Neonatal preterm birth complications                             | 38<br>(25 - 54)             | 38<br>(25 - 54)    | --                  | --                       | --                       | --                          |
| Neonatal encephalopathy due to birth asphyxia and trauma         | 27<br>(17 - 38)             | 27<br>(17 - 38)    | --                  | --                       | --                       | --                          |
| Neonatal sepsis and other neonatal infections                    | 7<br>(3 - 13)               | 7<br>(3 - 13)      | --                  | --                       | --                       | --                          |
| Hemolytic disease and other neonatal jaundice                    | 0<br>(0 - 0)                | 0<br>(0 - 0)       | --                  | --                       | --                       | --                          |
| Other neonatal disorders                                         | 19<br>(10 - 29)             | 19<br>(10 - 29)    | --                  | --                       | --                       | --                          |
| Nutritional deficiencies                                         | 317<br>(227 - 439)          | 0<br>(0 - 0)       | 0<br>(0 - 0)        | 3<br>(2 - 4)             | 8<br>(6 - 10)            | 306<br>(218 - 426)          |
| Protein-energy malnutrition                                      | 119<br>(36 - 205)           | 0<br>(0 - 0)       | 0<br>(0 - 0)        | 0<br>(0 - 0)             | 2<br>(1 - 3)             | 116<br>(36 - 201)           |
| Iodine deficiency                                                | 1<br>(0 - 3)                | 0<br>(0 - 0)       | 0<br>(0 - 0)        | 0<br>(0 - 0)             | 0<br>(0 - 0)             | 0<br>(0 - 3)                |
| Iron-deficiency anemia                                           | 188<br>(111 - 286)          | 0<br>(0 - 0)       | 0<br>(0 - 0)        | 2<br>(1 - 3)             | 5<br>(4 - 8)             | 181<br>(104 - 278)          |
| Other nutritional deficiencies                                   | 10<br>(3 - 25)              | 0<br>(0 - 0)       | 0<br>(0 - 0)        | 0<br>(0 - 0)             | 0<br>(0 - 1)             | 9<br>(3 - 23)               |
| Other communicable, maternal, neonatal, and nutritional diseases | 114<br>(64 - 159)           | 2<br>(1 - 4)       | 1<br>(0 - 1)        | 7<br>(4 - 9)             | 22<br>(12 - 31)          | 83<br>(44 - 121)            |
| Sexually transmitted diseases excluding HIV                      | 6<br>(3 - 9)                | 1<br>(0 - 1)       | 0<br>(0 - 0)        | 0<br>(0 - 0)             | 1<br>(0 - 1)             | 4<br>(2 - 7)                |
| Syphilis                                                         | 4<br>(2 - 7)                | 1<br>(0 - 1)       | 0<br>(0 - 0)        | 0<br>(0 - 0)             | 0<br>(0 - 1)             | 3<br>(2 - 5)                |
| Chlamydial infection                                             | 0<br>(0 - 1)                | --                 | 0<br>(0 - 0)        | 0<br>(0 - 0)             | 0<br>(0 - 0)             | 0<br>(0 - 0)                |
| Gonococcal infection                                             | 1<br>(0 - 1)                | --                 | 0<br>(0 - 0)        | 0<br>(0 - 0)             | 0<br>(0 - 0)             | 0<br>(0 - 1)                |
| Other sexually transmitted diseases                              | 0<br>(0 - 1)                | --                 | 0<br>(0 - 0)        | 0<br>(0 - 0)             | 0<br>(0 - 0)             | 0<br>(0 - 0)                |
| Hepatitis                                                        | 17<br>(11 - 27)             | 0<br>(0 - 0)       | 0<br>(0 - 0)        | 1<br>(1 - 2)             | 3<br>(2 - 5)             | 13<br>(7 - 22)              |
| Acute hepatitis A                                                | 4<br>(1 - 9)                | 0<br>(0 - 0)       | 0<br>(0 - 0)        | 1<br>(0 - 1)             | 1<br>(0 - 2)             | 2<br>(1 - 6)                |
| Acute hepatitis B                                                | 13<br>(8 - 22)              | 0<br>(0 - 0)       | 0<br>(0 - 0)        | 1<br>(0 - 1)             | 2<br>(1 - 4)             | 10<br>(5 - 18)              |
| Acute hepatitis C                                                | 0<br>(0 - 2)                | --                 | 0<br>(0 - 0)        | 0<br>(0 - 0)             | 0<br>(0 - 0)             | 0<br>(0 - 1)                |
| Other infectious diseases                                        | 91<br>(41 - 133)            | 2<br>(1 - 3)       | 0<br>(0 - 1)        | 5<br>(2 - 7)             | 18<br>(9 - 26)           | 66<br>(27 - 102)            |
| Non-communicable diseases                                        | 50,438<br>(46,118 - 54,699) | 109<br>(89 - 134)  | 31<br>(27 - 36)     | 1,255<br>(1,086 - 1,431) | 6,421<br>(5,733 - 7,142) | 42,621<br>(39,098 - 46,044) |
| Neoplasms                                                        | 12,879<br>(11,174 - 14,447) | 7<br>(5 - 9)       | 15<br>(12 - 18)     | 743<br>(638 - 860)       | 3,688<br>(3,185 - 4,124) | 8,427<br>(7,230 - 9,523)    |
| Esophageal cancer                                                | 222<br>(185 - 265)          | --                 | --                  | 6<br>(4 - 7)             | 67<br>(55 - 82)          | 149<br>(120 - 186)          |
| Stomach cancer                                                   | 604<br>(422 - 875)          | --                 | --                  | 15<br>(11 - 21)          | 82<br>(62 - 108)         | 506<br>(336 - 752)          |
| Liver cancer                                                     | 283<br>(211 - 363)          | --                 | 0<br>(0 - 0)        | 11<br>(7 - 15)           | 73<br>(52 - 95)          | 198<br>(141 - 265)          |
| Liver cancer due to hepatitis B                                  | 51<br>(18 - 90)             | --                 | 0<br>(0 - 0)        | 4<br>(2 - 6)             | 18<br>(5 - 34)           | 30<br>(10 - 60)             |
| Liver cancer due to hepatitis C                                  | 155<br>(91 - 231)           | --                 | 0<br>(0 - 0)        | 6<br>(3 - 9)             | 40<br>(21 - 60)          | 109<br>(60 - 172)           |
| Liver cancer due to alcohol use                                  | 54<br>(18 - 103)            | --                 | --                  | 1<br>(0 - 2)             | 10<br>(3 - 17)           | 44<br>(13 - 86)             |
| Liver cancer due to other causes                                 | 23<br>(6 - 49)              | --                 | 0<br>(0 - 0)        | 1<br>(0 - 2)             | 6<br>(2 - 12)            | 15<br>(4 - 35)              |
| Larynx cancer                                                    | 34<br>(23 - 49)             | --                 | --                  | 2<br>(1 - 3)             | 14<br>(9 - 21)           | 17<br>(11 - 26)             |
| Tracheal, bronchus and lung cancer                               | 1,684<br>(1,093 - 2,030)    | --                 | --                  | 100<br>(67 - 128)        | 736<br>(452 - 900)       | 849<br>(537 - 1,060)        |
| Breast cancer                                                    | 2,457<br>(1,943 - 3,001)    | --                 | --                  | 239<br>(192 - 295)       | 899<br>(735 - 1,142)     | 1,319<br>(986 - 1,661)      |
| Cervical cancer                                                  | 291<br>(233 - 397)          | --                 | --                  | 44<br>(33 - 56)          | 91<br>(71 - 121)         | 156<br>(111 - 226)          |
| Uterine cancer                                                   | 353<br>(275 - 439)          | --                 | --                  | 5<br>(4 - 8)             | 87<br>(66 - 112)         | 261<br>(191 - 338)          |
| Prostate cancer                                                  | --                          | --                 | --                  | --                       | --                       | --                          |

Web Table 31- Belgium deaths with 95% UI by age, sex, and cause in 2013

| Cause                                         | Females, All Ages           | Females, 0-4 Years | Females, 5-14 Years | Females, 15-49 Years | Females, 50-69 Years     | Females, 70-80 Years        |
|-----------------------------------------------|-----------------------------|--------------------|---------------------|----------------------|--------------------------|-----------------------------|
| Colon and rectum cancer                       | 1,831<br>(1,509 - 2,234)    | --                 | --                  | 47<br>(38 - 57)      | 347<br>(296 - 401)       | 1,437<br>(1,136 - 1,817)    |
| Lip and oral cavity cancer                    | 95<br>(78 - 115)            | --                 | --                  | 8<br>(6 - 10)        | 33<br>(26 - 42)          | 54<br>(42 - 69)             |
| Nasopharynx cancer                            | 11<br>(5 - 22)              | --                 | 0<br>(0 - 0)        | 2<br>(1 - 3)         | 4<br>(2 - 8)             | 5<br>(2 - 11)               |
| Other pharynx cancer                          | 40<br>(30 - 55)             | --                 | --                  | 4<br>(3 - 7)         | 20<br>(14 - 31)          | 16<br>(12 - 22)             |
| Gallbladder and biliary tract cancer          | 199<br>(142 - 315)          | --                 | --                  | 3<br>(2 - 4)         | 34<br>(25 - 50)          | 162<br>(112 - 268)          |
| Pancreatic cancer                             | 890<br>(749 - 1,041)        | --                 | --                  | 25<br>(19 - 31)      | 235<br>(199 - 276)       | 630<br>(522 - 758)          |
| Malignant skin melanoma                       | 185<br>(113 - 241)          | --                 | --                  | 29<br>(18 - 38)      | 58<br>(36 - 77)          | 98<br>(60 - 139)            |
| Non-melanoma skin cancer                      | 61<br>(41 - 83)             | --                 | --                  | 1<br>(1 - 2)         | 7<br>(5 - 9)             | 53<br>(34 - 74)             |
| Ovarian cancer                                | 760<br>(631 - 964)          | --                 | --                  | 40<br>(31 - 53)      | 258<br>(213 - 348)       | 462<br>(355 - 606)          |
| Testicular cancer                             | --                          | --                 | --                  | --                   | --                       | --                          |
| Kidney cancer                                 | 314<br>(228 - 429)          | 0<br>(0 - 0)       | 0<br>(0 - 1)        | 9<br>(7 - 13)        | 76<br>(56 - 102)         | 228<br>(152 - 334)          |
| Bladder cancer                                | 251<br>(178 - 378)          | --                 | --                  | 3<br>(2 - 4)         | 34<br>(24 - 49)          | 214<br>(148 - 330)          |
| Brain and nervous system cancer               | 288<br>(231 - 443)          | 2<br>(1 - 3)       | 4<br>(3 - 6)        | 39<br>(30 - 54)      | 110<br>(86 - 170)        | 133<br>(99 - 219)           |
| Thyroid cancer                                | 73<br>(50 - 129)            | --                 | 0<br>(0 - 0)        | 2<br>(1 - 2)         | 14<br>(11 - 19)          | 57<br>(35 - 107)            |
| Mesothelioma                                  | 46<br>(29 - 65)             | --                 | --                  | 2<br>(1 - 3)         | 16<br>(9 - 23)           | 28<br>(17 - 42)             |
| Hodgkin lymphoma                              | 28<br>(21 - 41)             | 0<br>(0 - 0)       | 0<br>(0 - 0)        | 7<br>(5 - 10)        | 7<br>(5 - 11)            | 13<br>(9 - 22)              |
| Non-Hodgkin lymphoma                          | 455<br>(205 - 618)          | 0<br>(0 - 1)       | 1<br>(0 - 2)        | 22<br>(10 - 31)      | 101<br>(46 - 142)        | 331<br>(147 - 467)          |
| Multiple myeloma                              | 290<br>(180 - 461)          | --                 | --                  | 7<br>(4 - 11)        | 65<br>(38 - 105)         | 218<br>(132 - 357)          |
| Leukemia                                      | 429<br>(359 - 517)          | 2<br>(1 - 3)       | 4<br>(3 - 6)        | 34<br>(26 - 42)      | 91<br>(73 - 110)         | 297<br>(239 - 377)          |
| Other neoplasms                               | 708<br>(481 - 904)          | 3<br>(2 - 4)       | 4<br>(3 - 6)        | 39<br>(29 - 49)      | 128<br>(96 - 159)        | 534<br>(335 - 718)          |
| Cardiovascular diseases                       | 21,113<br>(18,213 - 25,263) | 2<br>(1 - 3)       | 2<br>(2 - 3)        | 205<br>(160 - 260)   | 1,356<br>(1,129 - 1,859) | 19,547<br>(16,803 - 23,188) |
| Rheumatic heart disease                       | 220<br>(68 - 323)           | 0<br>(0 - 0)       | 0<br>(0 - 0)        | 4<br>(2 - 6)         | 23<br>(10 - 31)          | 193<br>(55 - 291)           |
| Ischemic heart disease                        | 10,237<br>(8,428 - 13,433)  | 0<br>(0 - 0)       | 0<br>(0 - 0)        | 82<br>(62 - 116)     | 697<br>(559 - 1,046)     | 9,458<br>(7,690 - 12,398)   |
| Cerebrovascular disease                       | 6,077<br>(4,852 - 8,601)    | 0<br>(0 - 1)       | 1<br>(1 - 1)        | 70<br>(52 - 94)      | 372<br>(285 - 534)       | 5,634<br>(4,450 - 8,018)    |
| Ischemic stroke                               | 3,465<br>(2,589 - 5,307)    | 0<br>(0 - 0)       | 0<br>(0 - 0)        | 7<br>(5 - 13)        | 97<br>(65 - 172)         | 3,361<br>(2,495 - 5,133)    |
| Hemorrhagic stroke                            | 2,611<br>(1,867 - 3,623)    | 0<br>(0 - 1)       | 1<br>(0 - 1)        | 62<br>(47 - 84)      | 275<br>(210 - 387)       | 2,273<br>(1,598 - 3,203)    |
| Hypertensive heart disease                    | 328<br>(144 - 504)          | 0<br>(0 - 0)       | 0<br>(0 - 0)        | 2<br>(1 - 4)         | 15<br>(8 - 21)           | 311<br>(133 - 484)          |
| Cardiomyopathy and myocarditis                | 658<br>(452 - 932)          | 1<br>(1 - 1)       | 0<br>(0 - 1)        | 8<br>(6 - 12)        | 40<br>(28 - 57)          | 608<br>(410 - 867)          |
| Atrial fibrillation and flutter               | 1,193<br>(793 - 1,776)      | --                 | --                  | 2<br>(1 - 2)         | 27<br>(19 - 38)          | 1,164<br>(759 - 1,740)      |
| Aortic aneurysm                               | 237<br>(143 - 390)          | --                 | --                  | 4<br>(3 - 7)         | 24<br>(14 - 39)          | 209<br>(123 - 346)          |
| Peripheral vascular disease                   | 138<br>(93 - 201)           | --                 | --                  | 1<br>(0 - 1)         | 4<br>(3 - 6)             | 133<br>(87 - 195)           |
| Endocarditis                                  | 101<br>(61 - 165)           | 0<br>(0 - 0)       | 0<br>(0 - 0)        | 3<br>(2 - 5)         | 14<br>(9 - 25)           | 84<br>(49 - 137)            |
| Other cardiovascular and circulatory diseases | 1,924<br>(1,070 - 2,630)    | 0<br>(0 - 1)       | 0<br>(0 - 0)        | 30<br>(16 - 41)      | 141<br>(88 - 197)        | 1,753<br>(939 - 2,437)      |
| Chronic respiratory diseases                  | 2,839<br>(2,146 - 3,453)    | 1<br>(1 - 2)       | 1<br>(1 - 1)        | 36<br>(28 - 44)      | 328<br>(208 - 393)       | 2,473<br>(1,871 - 3,056)    |
| Chronic obstructive pulmonary disease         | 2,481<br>(1,875 - 3,049)    | 1<br>(0 - 1)       | 0<br>(0 - 1)        | 19<br>(13 - 26)      | 261<br>(160 - 319)       | 2,200<br>(1,673 - 2,736)    |
| Pneumoconiosis                                | 12<br>(6 - 21)              | 0<br>(0 - 0)       | 0<br>(0 - 0)        | 0<br>(0 - 0)         | 1<br>(1 - 2)             | 10<br>(4 - 19)              |
| Silicosis                                     | 0<br>(0 - 0)                | 0<br>(0 - 0)       | 0<br>(0 - 0)        | 0<br>(0 - 0)         | 0<br>(0 - 0)             | 0<br>(0 - 0)                |
| Asbestosis                                    | 1<br>(0 - 2)                | 0<br>(0 - 0)       | 0<br>(0 - 0)        | 0<br>(0 - 0)         | 0<br>(0 - 0)             | 1<br>(0 - 1)                |
| Coal workers pneumoconiosis                   | 1<br>(0 - 1)                | 0<br>(0 - 0)       | 0<br>(0 - 0)        | 0<br>(0 - 0)         | 0<br>(0 - 0)             | 1<br>(0 - 1)                |
| Other pneumoconiosis                          | 10<br>(5 - 18)              | 0<br>(0 - 0)       | 0<br>(0 - 0)        | 0<br>(0 - 0)         | 1<br>(0 - 2)             | 8<br>(4 - 17)               |

Web Table 31- Belgium deaths with 95% UI by age, sex, and cause in 2013

| Cause                                               | Females, All Ages        | Females, 0-4 Years | Females, 5-14 Years | Females, 15-49 Years | Females, 50-69 Years | Females, 70-80 Years     |
|-----------------------------------------------------|--------------------------|--------------------|---------------------|----------------------|----------------------|--------------------------|
| Asthma                                              | 165<br>(100 - 255)       | 0<br>(0 - 0)       | 0<br>(0 - 0)        | 12<br>(8 - 17)       | 37<br>(22 - 58)      | 115<br>(64 - 187)        |
| Interstitial lung disease and pulmonary sarcoidosis | 157<br>(56 - 290)        | 0<br>(0 - 0)       | 0<br>(0 - 0)        | 3<br>(1 - 4)         | 25<br>(10 - 44)      | 129<br>(42 - 243)        |
| Other chronic respiratory diseases                  | 25<br>(13 - 40)          | 0<br>(0 - 1)       | 0<br>(0 - 0)        | 1<br>(1 - 2)         | 4<br>(2 - 6)         | 19<br>(10 - 33)          |
| Cirrhosis                                           | 779<br>(665 - 904)       | 0<br>(0 - 0)       | 0<br>(0 - 0)        | 74<br>(60 - 90)      | 259<br>(216 - 307)   | 445<br>(362 - 545)       |
| Cirrhosis due to hepatitis B                        | 84<br>(45 - 136)         | 0<br>(0 - 0)       | 0<br>(0 - 0)        | 8<br>(4 - 14)        | 29<br>(14 - 50)      | 47<br>(24 - 86)          |
| Cirrhosis due to hepatitis C                        | 394<br>(223 - 561)       | 0<br>(0 - 0)       | 0<br>(0 - 0)        | 36<br>(12 - 58)      | 127<br>(59 - 202)    | 231<br>(133 - 325)       |
| Cirrhosis due to alcohol use                        | 209<br>(117 - 343)       | --<br>(0 - 0)      | --<br>(0 - 0)       | 13<br>(6 - 25)       | 63<br>(32 - 111)     | 133<br>(68 - 217)        |
| Cirrhosis due to other causes                       | 92<br>(38 - 194)         | 0<br>(0 - 0)       | 0<br>(0 - 0)        | 17<br>(7 - 39)       | 39<br>(13 - 89)      | 35<br>(15 - 71)          |
| Digestive diseases                                  | 1,920<br>(1,567 - 2,363) | 0<br>(0 - 1)       | 1<br>(0 - 1)        | 24<br>(19 - 30)      | 140<br>(109 - 166)   | 1,755<br>(1,420 - 2,180) |
| Peptic ulcer disease                                | 220<br>(144 - 323)       | 0<br>(0 - 0)       | 0<br>(0 - 0)        | 3<br>(2 - 4)         | 17<br>(11 - 24)      | 200<br>(129 - 297)       |
| Gastritis and duodenitis                            | 8<br>(3 - 14)            | 0<br>(0 - 0)       | 0<br>(0 - 0)        | 0<br>(0 - 1)         | 1<br>(0 - 1)         | 7<br>(3 - 13)            |
| Appendicitis                                        | 20<br>(10 - 34)          | 0<br>(0 - 0)       | 0<br>(0 - 0)        | 1<br>(1 - 1)         | 3<br>(1 - 4)         | 16<br>(8 - 29)           |
| Paralytic ileus and intestinal obstruction          | 383<br>(217 - 652)       | 0<br>(0 - 0)       | 0<br>(0 - 0)        | 4<br>(2 - 7)         | 22<br>(12 - 37)      | 356<br>(200 - 613)       |
| Inguinal, femoral, and abdominal hernia             | 41<br>(18 - 80)          | 0<br>(0 - 0)       | 0<br>(0 - 0)        | 1<br>(0 - 1)         | 4<br>(2 - 6)         | 37<br>(15 - 75)          |
| Inflammatory bowel disease                          | 162<br>(89 - 255)        | 0<br>(0 - 0)       | 0<br>(0 - 0)        | 3<br>(2 - 4)         | 11<br>(6 - 15)       | 149<br>(79 - 238)        |
| Vascular intestinal disorders                       | 460<br>(210 - 752)       | 0<br>(0 - 0)       | 0<br>(0 - 0)        | 3<br>(2 - 6)         | 33<br>(16 - 49)      | 424<br>(190 - 703)       |
| Gallbladder and biliary diseases                    | 237<br>(153 - 372)       | 0<br>(0 - 0)       | 0<br>(0 - 0)        | 2<br>(1 - 3)         | 13<br>(8 - 19)       | 223<br>(141 - 352)       |
| Pancreatitis                                        | 112<br>(71 - 187)        | 0<br>(0 - 0)       | 0<br>(0 - 0)        | 5<br>(3 - 7)         | 18<br>(11 - 28)      | 89<br>(54 - 155)         |
| Other digestive diseases                            | 277<br>(179 - 387)       | 0<br>(0 - 0)       | 0<br>(0 - 0)        | 3<br>(2 - 4)         | 20<br>(13 - 27)      | 254<br>(161 - 361)       |
| Neurological disorders                              | 6,765<br>(4,842 - 8,981) | 5<br>(4 - 7)       | 3<br>(2 - 4)        | 46<br>(32 - 58)      | 269<br>(209 - 338)   | 6,442<br>(4,520 - 8,644) |
| Alzheimer disease and other dementias               | 5,805<br>(3,904 - 8,035) | --<br>(0 - 0)      | --<br>(0 - 0)       | 1<br>(0 - 2)         | 106<br>(64 - 159)    | 5,699<br>(3,795 - 7,928) |
| Parkinson disease                                   | 487<br>(269 - 698)       | --<br>(0 - 0)      | --<br>(0 - 0)       | 1<br>(1 - 1)         | 20<br>(13 - 29)      | 467<br>(257 - 672)       |
| Epilepsy                                            | 117<br>(57 - 177)        | 1<br>(1 - 2)       | 1<br>(1 - 2)        | 16<br>(9 - 22)       | 20<br>(11 - 29)      | 78<br>(35 - 129)         |
| Multiple sclerosis                                  | 93<br>(45 - 125)         | --<br>(0 - 0)      | --<br>(0 - 0)       | 14<br>(7 - 21)       | 42<br>(22 - 60)      | 37<br>(15 - 56)          |
| Other neurological disorders                        | 262<br>(221 - 309)       | 4<br>(3 - 6)       | 1<br>(1 - 2)        | 15<br>(12 - 18)      | 81<br>(65 - 97)      | 161<br>(128 - 200)       |
| Mental and substance use disorders                  | 176<br>(107 - 229)       | 0<br>(0 - 0)       | 0<br>(0 - 0)        | 49<br>(34 - 66)      | 66<br>(32 - 93)      | 61<br>(38 - 81)          |
| Schizophrenia                                       | 19<br>(6 - 31)           | --<br>(0 - 0)      | --<br>(0 - 0)       | 2<br>(1 - 3)         | 4<br>(2 - 6)         | 13<br>(4 - 24)           |
| Alcohol use disorders                               | 91<br>(34 - 147)         | --<br>(0 - 0)      | --<br>(0 - 0)       | 22<br>(9 - 38)       | 47<br>(16 - 74)      | 21<br>(8 - 36)           |
| Drug use disorders                                  | 65<br>(52 - 79)          | 0<br>(0 - 0)       | --<br>(0 - 0)       | 24<br>(18 - 30)      | 14<br>(11 - 19)      | 26<br>(18 - 36)          |
| Opioid use disorders                                | 23<br>(18 - 28)          | 0<br>(0 - 0)       | --<br>(0 - 0)       | 8<br>(6 - 11)        | 5<br>(3 - 6)         | 10<br>(7 - 14)           |
| Cocaine use disorders                               | 2<br>(2 - 3)             | 0<br>(0 - 0)       | --<br>(0 - 0)       | 1<br>(1 - 1)         | 0<br>(0 - 1)         | 1<br>(0 - 1)             |
| Amphetamine use disorders                           | 2<br>(2 - 3)             | 0<br>(0 - 0)       | --<br>(0 - 0)       | 1<br>(1 - 1)         | 1<br>(0 - 1)         | 1<br>(1 - 1)             |
| Other drug use disorders                            | 37<br>(30 - 45)          | 0<br>(0 - 0)       | --<br>(0 - 0)       | 13<br>(10 - 17)      | 9<br>(6 - 12)        | 15<br>(11 - 21)          |
| Eating disorders                                    | 1<br>(1 - 2)             | --<br>(0 - 0)      | 0<br>(0 - 0)        | 1<br>(1 - 2)         | --<br>(0 - 0)        | --<br>(0 - 0)            |
| Anorexia nervosa                                    | 1<br>(1 - 2)             | --<br>(0 - 0)      | 0<br>(0 - 0)        | 1<br>(1 - 2)         | --<br>(0 - 0)        | --<br>(0 - 0)            |
| Diabetes, urogenital, blood, and endocrine diseases | 3,281<br>(2,608 - 3,998) | 7<br>(4 - 9)       | 4<br>(3 - 5)        | 52<br>(42 - 64)      | 257<br>(210 - 318)   | 2,962<br>(2,332 - 3,665) |
| Diabetes mellitus                                   | 1,145<br>(904 - 1,556)   | 0<br>(0 - 0)       | 0<br>(0 - 0)        | 12<br>(10 - 16)      | 99<br>(78 - 142)     | 1,033<br>(807 - 1,431)   |
| Acute glomerulonephritis                            | 1<br>(1 - 1)             | 0<br>(0 - 0)       | 0<br>(0 - 0)        | 0<br>(0 - 0)         | 0<br>(0 - 0)         | 0<br>(0 - 1)             |
| Chronic kidney disease                              | 1,142<br>(872 - 1,576)   | 0<br>(0 - 0)       | 0<br>(0 - 0)        | 12<br>(9 - 17)       | 68<br>(52 - 112)     | 1,062<br>(799 - 1,462)   |
| Chronic kidney disease due to diabetes mellitus     | 170<br>(98 - 254)        | 0<br>(0 - 0)       | 0<br>(0 - 0)        | 2<br>(1 - 2)         | 12<br>(7 - 17)       | 157<br>(88 - 238)        |

Web Table 31- Belgium deaths with 95% UI by age, sex, and cause in 2013

| Cause                                               | Females, All Ages        | Females, 0-4 Years | Females, 5-14 Years | Females, 15-49 Years | Females, 50-69 Years | Females, 70-80 Years     |
|-----------------------------------------------------|--------------------------|--------------------|---------------------|----------------------|----------------------|--------------------------|
| Chronic kidney disease due to hypertension          | 396<br>(247 - 638)       | 0<br>(0 - 0)       | 0<br>(0 - 0)        | 3<br>(2 - 6)         | 21<br>(13 - 36)      | 371<br>(228 - 606)       |
| Chronic kidney disease due to glomerulonephritis    | 15<br>(8 - 24)           | 0<br>(0 - 0)       | 0<br>(0 - 0)        | 0<br>(0 - 1)         | 2<br>(1 - 3)         | 12<br>(6 - 21)           |
| Chronic kidney disease due to other causes          | 562<br>(353 - 861)       | 0<br>(0 - 0)       | 0<br>(0 - 0)        | 6<br>(4 - 10)        | 33<br>(20 - 66)      | 522<br>(322 - 815)       |
| Urinary diseases and male infertility               | 558<br>(215 - 848)       | 0<br>(0 - 0)       | 0<br>(0 - 0)        | 6<br>(3 - 8)         | 31<br>(13 - 44)      | 521<br>(195 - 806)       |
| Interstitial nephritis and urinary tract infections | 506<br>(184 - 788)       | 0<br>(0 - 0)       | 0<br>(0 - 0)        | 5<br>(2 - 7)         | 26<br>(10 - 38)      | 476<br>(167 - 748)       |
| Urolithiasis                                        | 17<br>(6 - 42)           | --                 | 0<br>(0 - 0)        | 1<br>(0 - 1)         | 2<br>(1 - 4)         | 14<br>(5 - 37)           |
| Other urinary diseases                              | 35<br>(14 - 92)          | 0<br>(0 - 0)       | 0<br>(0 - 0)        | 1<br>(0 - 1)         | 3<br>(1 - 6)         | 31<br>(11 - 87)          |
| Gynecological diseases                              | 5<br>(2 - 8)             | --                 | --                  | 0<br>(0 - 0)         | 0<br>(0 - 1)         | 4<br>(2 - 7)             |
| Uterine fibroids                                    | 1<br>(1 - 2)             | --                 | --                  | 0<br>(0 - 0)         | 0<br>(0 - 0)         | 1<br>(1 - 2)             |
| Polycystic ovarian syndrome                         | 0<br>(0 - 0)             | --                 | --                  | 0<br>(0 - 0)         | 0<br>(0 - 0)         | --                       |
| Endometriosis                                       | 0<br>(0 - 0)             | --                 | --                  | 0<br>(0 - 0)         | 0<br>(0 - 0)         | --                       |
| Genital prolapse                                    | 1<br>(1 - 2)             | --                 | --                  | 0<br>(0 - 0)         | 0<br>(0 - 0)         | 1<br>(0 - 2)             |
| Other gynecological diseases                        | 2<br>(1 - 3)             | --                 | --                  | 0<br>(0 - 0)         | 0<br>(0 - 0)         | 2<br>(1 - 3)             |
| Hemoglobinopathies and hemolytic anemias            | 44<br>(27 - 69)          | 0<br>(0 - 1)       | 0<br>(0 - 1)        | 2<br>(1 - 3)         | 6<br>(3 - 9)         | 36<br>(21 - 57)          |
| Thalassemias                                        | 0<br>(0 - 1)             | 0<br>(0 - 0)       | 0<br>(0 - 0)        | 0<br>(0 - 0)         | 0<br>(0 - 0)         | 0<br>(0 - 0)             |
| Sickle cell disorders                               | 8<br>(5 - 12)            | 0<br>(0 - 0)       | 0<br>(0 - 0)        | 1<br>(1 - 2)         | 3<br>(2 - 5)         | 2<br>(1 - 4)             |
| G6PD deficiency                                     | 0<br>(0 - 0)             | 0<br>(0 - 0)       | 0<br>(0 - 0)        | 0<br>(0 - 0)         | 0<br>(0 - 0)         | 0<br>(0 - 0)             |
| Other hemoglobinopathies and hemolytic anemias      | 36<br>(21 - 58)          | 0<br>(0 - 0)       | 0<br>(0 - 0)        | 0<br>(0 - 1)         | 2<br>(1 - 3)         | 33<br>(19 - 54)          |
| Endocrine, metabolic, blood, and immune disorders   | 386<br>(256 - 557)       | 5<br>(3 - 8)       | 3<br>(2 - 4)        | 20<br>(13 - 27)      | 54<br>(34 - 71)      | 305<br>(191 - 457)       |
| Musculoskeletal disorders                           | 239<br>(176 - 317)       | --                 | 0<br>(0 - 0)        | 8<br>(6 - 10)        | 33<br>(25 - 43)      | 198<br>(139 - 269)       |
| Rheumatoid arthritis                                | 61<br>(39 - 94)          | --                 | 0<br>(0 - 0)        | 1<br>(1 - 1)         | 8<br>(5 - 12)        | 52<br>(32 - 84)          |
| Other musculoskeletal disorders                     | 178<br>(128 - 243)       | --                 | 0<br>(0 - 0)        | 7<br>(5 - 9)         | 25<br>(19 - 32)      | 146<br>(99 - 209)        |
| Other non-communicable diseases                     | 448<br>(334 - 589)       | 86<br>(67 - 111)   | 5<br>(4 - 7)        | 19<br>(14 - 24)      | 26<br>(19 - 32)      | 312<br>(208 - 445)       |
| Congenital anomalies                                | 121<br>(97 - 148)        | 66<br>(50 - 85)    | 5<br>(4 - 7)        | 17<br>(13 - 22)      | 14<br>(10 - 19)      | 19<br>(12 - 27)          |
| Neural tube defects                                 | 4<br>(2 - 6)             | 3<br>(2 - 5)       | 0<br>(0 - 0)        | 0<br>(0 - 1)         | 0<br>(0 - 0)         | 0<br>(0 - 0)             |
| Congenital heart anomalies                          | 31<br>(23 - 40)          | 19<br>(13 - 27)    | 2<br>(1 - 2)        | 5<br>(4 - 7)         | 1<br>(1 - 2)         | 4<br>(2 - 6)             |
| Cleft lip and cleft palate                          | 0<br>(0 - 0)             | 0<br>(0 - 0)       | --                  | --                   | --                   | --                       |
| Down syndrome                                       | 18<br>(10 - 24)          | 4<br>(2 - 7)       | 1<br>(0 - 1)        | 4<br>(2 - 6)         | 9<br>(5 - 12)        | 1<br>(0 - 2)             |
| Chromosomal unbalanced rearrangements               | 11<br>(6 - 16)           | 8<br>(5 - 13)      | 0<br>(0 - 1)        | 1<br>(1 - 2)         | 1<br>(0 - 1)         | 0<br>(0 - 0)             |
| Other congenital anomalies                          | 58<br>(44 - 74)          | 31<br>(22 - 44)    | 2<br>(1 - 3)        | 7<br>(5 - 9)         | 3<br>(2 - 5)         | 14<br>(9 - 21)           |
| Skin and subcutaneous diseases                      | 306<br>(204 - 444)       | 0<br>(0 - 0)       | 0<br>(0 - 0)        | 1<br>(1 - 2)         | 12<br>(9 - 15)       | 293<br>(190 - 427)       |
| Cellulitis                                          | 15<br>(6 - 35)           | 0<br>(0 - 0)       | 0<br>(0 - 0)        | 0<br>(0 - 0)         | 1<br>(1 - 3)         | 13<br>(5 - 33)           |
| Pyoderma                                            | 71<br>(36 - 116)         | 0<br>(0 - 0)       | 0<br>(0 - 0)        | 0<br>(0 - 1)         | 4<br>(3 - 6)         | 66<br>(32 - 111)         |
| Decubitus ulcer                                     | 209<br>(134 - 313)       | 0<br>(0 - 0)       | 0<br>(0 - 0)        | 0<br>(0 - 0)         | 5<br>(3 - 7)         | 203<br>(129 - 308)       |
| Other skin and subcutaneous diseases                | 11<br>(3 - 30)           | 0<br>(0 - 0)       | 0<br>(0 - 0)        | 0<br>(0 - 0)         | 1<br>(0 - 1)         | 10<br>(3 - 29)           |
| Sudden infant death syndrome                        | 20<br>(10 - 42)          | 20<br>(10 - 42)    | --                  | --                   | --                   | --                       |
| Injuries                                            | 3,299<br>(2,638 - 3,951) | 21<br>(16 - 26)    | 18<br>(15 - 22)     | 465<br>(395 - 545)   | 512<br>(432 - 608)   | 2,283<br>(1,685 - 2,872) |
| Transport injuries                                  | 331<br>(273 - 448)       | 5<br>(3 - 6)       | 10<br>(7 - 13)      | 120<br>(98 - 154)    | 75<br>(58 - 110)     | 122<br>(90 - 175)        |
| Road injuries                                       | 320<br>(265 - 432)       | 4<br>(3 - 6)       | 9<br>(7 - 13)       | 116<br>(95 - 149)    | 72<br>(56 - 107)     | 117<br>(86 - 170)        |
| Pedestrian road injuries                            | 104<br>(77 - 158)        | 1<br>(1 - 2)       | 3<br>(2 - 5)        | 16<br>(10 - 26)      | 25<br>(16 - 40)      | 58<br>(40 - 94)          |

Web Table 31- Belgium deaths with 95% UI by age, sex, and cause in 2013

| Cause                                           | Females, All Ages        | Females, 0-4 Years | Females, 5-14 Years | Females, 15-49 Years | Females, 50-69 Years | Females, 70-80 Years     |
|-------------------------------------------------|--------------------------|--------------------|---------------------|----------------------|----------------------|--------------------------|
| Cyclist road injuries                           | 41<br>(30 - 62)          | 0<br>(0 - 0)       | 2<br>(1 - 2)        | 11<br>(8 - 17)       | 14<br>(9 - 22)       | 15<br>(9 - 23)           |
| Motorcyclist road injuries                      | 18<br>(9 - 44)           | 0<br>(0 - 0)       | 0<br>(0 - 1)        | 12<br>(6 - 29)       | 2<br>(1 - 6)         | 3<br>(1 - 8)             |
| Motor vehicle road injuries                     | 152<br>(98 - 193)        | 3<br>(2 - 4)       | 4<br>(3 - 6)        | 75<br>(51 - 95)      | 30<br>(16 - 42)      | 40<br>(21 - 59)          |
| Other road injuries                             | 5<br>(2 - 15)            | 0<br>(0 - 0)       | 0<br>(0 - 1)        | 2<br>(1 - 6)         | 1<br>(0 - 4)         | 2<br>(0 - 6)             |
| Other transport injuries                        | 12<br>(7 - 18)           | 0<br>(0 - 0)       | 0<br>(0 - 1)        | 3<br>(2 - 6)         | 3<br>(1 - 4)         | 5<br>(3 - 9)             |
| Unintentional injuries                          | 2,287<br>(1,682 - 2,871) | 14<br>(10 - 18)    | 6<br>(5 - 7)        | 72<br>(59 - 87)      | 187<br>(143 - 222)   | 2,008<br>(1,427 - 2,571) |
| Falls                                           | 1,502<br>(995 - 2,067)   | 1<br>(1 - 2)       | 1<br>(1 - 1)        | 18<br>(13 - 24)      | 77<br>(49 - 99)      | 1,404<br>(926 - 1,958)   |
| Drowning                                        | 26<br>(21 - 43)          | 1<br>(1 - 3)       | 1<br>(1 - 2)        | 7<br>(5 - 12)        | 8<br>(6 - 13)        | 9<br>(6 - 14)            |
| Fire, heat, and hot substances                  | 76<br>(48 - 103)         | 2<br>(1 - 4)       | 1<br>(1 - 2)        | 9<br>(6 - 12)        | 10<br>(7 - 14)       | 54<br>(31 - 76)          |
| Poisonings                                      | 32<br>(23 - 55)          | 0<br>(0 - 1)       | 0<br>(0 - 1)        | 7<br>(5 - 11)        | 7<br>(5 - 12)        | 18<br>(11 - 33)          |
| Exposure to mechanical forces                   | 24<br>(16 - 32)          | 2<br>(1 - 4)       | 1<br>(0 - 1)        | 4<br>(3 - 5)         | 3<br>(2 - 4)         | 14<br>(7 - 22)           |
| Unintentional firearm injuries                  | 1<br>(1 - 1)             | 0<br>(0 - 0)       | 0<br>(0 - 0)        | 0<br>(0 - 1)         | 0<br>(0 - 0)         | 0<br>(0 - 0)             |
| Unintentional suffocation                       | 11<br>(4 - 19)           | 2<br>(1 - 3)       | 0<br>(0 - 0)        | 0<br>(0 - 1)         | 1<br>(0 - 1)         | 8<br>(3 - 16)            |
| Other exposure to mechanical forces             | 12<br>(7 - 14)           | 1<br>(0 - 1)       | 1<br>(0 - 1)        | 3<br>(2 - 4)         | 2<br>(1 - 3)         | 5<br>(3 - 7)             |
| Adverse effects of medical treatment            | 259<br>(171 - 404)       | 1<br>(1 - 2)       | 1<br>(0 - 1)        | 14<br>(10 - 23)      | 45<br>(31 - 67)      | 199<br>(122 - 335)       |
| Animal contact                                  | 4<br>(1 - 6)             | 0<br>(0 - 0)       | 0<br>(0 - 0)        | 1<br>(0 - 1)         | 1<br>(0 - 2)         | 2<br>(1 - 4)             |
| Venomous animal contact                         | 1<br>(0 - 1)             | 0<br>(0 - 0)       | 0<br>(0 - 0)        | 0<br>(0 - 0)         | 0<br>(0 - 1)         | 0<br>(0 - 0)             |
| Non-venomous animal contact                     | 3<br>(1 - 5)             | 0<br>(0 - 0)       | 0<br>(0 - 0)        | 0<br>(0 - 1)         | 1<br>(0 - 1)         | 2<br>(0 - 4)             |
| Foreign body                                    | 354<br>(158 - 549)       | 5<br>(3 - 9)       | 1<br>(0 - 1)        | 12<br>(6 - 17)       | 34<br>(16 - 49)      | 303<br>(130 - 489)       |
| Pulmonary aspiration and foreign body in airway | 352<br>(157 - 548)       | 5<br>(3 - 9)       | 1<br>(0 - 1)        | 11<br>(6 - 17)       | 33<br>(16 - 48)      | 302<br>(129 - 488)       |
| Foreign body in other body part                 | 2<br>(1 - 4)             | 0<br>(0 - 0)       | 0<br>(0 - 0)        | 0<br>(0 - 0)         | 0<br>(0 - 0)         | 1<br>(0 - 3)             |
| Other unintentional injuries                    | 9<br>(5 - 14)            | 0<br>(0 - 1)       | 0<br>(0 - 0)        | 1<br>(1 - 1)         | 1<br>(1 - 2)         | 7<br>(3 - 11)            |
| Self-harm and interpersonal violence            | 681<br>(567 - 832)       | 2<br>(2 - 3)       | 3<br>(2 - 4)        | 273<br>(221 - 328)   | 251<br>(202 - 317)   | 153<br>(120 - 237)       |
| Self-harm                                       | 620<br>(515 - 776)       | --                 | 1<br>(1 - 1)        | 244<br>(195 - 297)   | 237<br>(190 - 303)   | 138<br>(105 - 223)       |
| Interpersonal violence                          | 62<br>(44 - 85)          | 2<br>(2 - 3)       | 2<br>(1 - 3)        | 29<br>(20 - 40)      | 13<br>(9 - 19)       | 16<br>(10 - 21)          |
| Assault by firearm                              | 18<br>(11 - 31)          | 0<br>(0 - 1)       | 1<br>(0 - 1)        | 11<br>(7 - 18)       | 4<br>(2 - 7)         | 3<br>(1 - 5)             |
| Assault by sharp object                         | 16<br>(9 - 23)           | 0<br>(0 - 0)       | 0<br>(0 - 1)        | 8<br>(5 - 12)        | 4<br>(2 - 6)         | 3<br>(2 - 5)             |
| Assault by other means                          | 28<br>(17 - 38)          | 2<br>(1 - 2)       | 1<br>(1 - 1)        | 10<br>(6 - 15)       | 6<br>(3 - 8)         | 10<br>(6 - 14)           |

Web Table 31- Belize deaths with 95% UI by age, sex, and cause in 2013

| Cause                                                              | Both Sexes, All Ages     | Both Sexes, 0-4 Years | Both Sexes, 5-14 Years | Both Sexes, 15-49 Years | Both Sexes, 50-69 Years | Both Sexes, 70-80 Years |
|--------------------------------------------------------------------|--------------------------|-----------------------|------------------------|-------------------------|-------------------------|-------------------------|
| All causes                                                         | 1,918<br>(1,668 - 2,181) | 144<br>(70 - 275)     | 28<br>(19 - 40)        | 468<br>(387 - 560)      | 487<br>(399 - 579)      | 791<br>(715 - 863)      |
| Communicable, maternal, neonatal, and nutritional diseases         | 277<br>(214 - 362)       | 96<br>(45 - 180)      | 5<br>(3 - 8)           | 76<br>(62 - 89)         | 29<br>(24 - 36)         | 70<br>(58 - 84)         |
| HIV/AIDS and tuberculosis                                          | 58<br>(42 - 74)          | 0<br>(0 - 1)          | 0<br>(0 - 0)           | 45<br>(32 - 57)         | 9<br>(6 - 14)           | 3<br>(2 - 4)            |
| Tuberculosis                                                       | 10<br>(6 - 12)           | 0<br>(0 - 0)          | 0<br>(0 - 0)           | 4<br>(3 - 6)            | 3<br>(2 - 4)            | 2<br>(1 - 3)            |
| HIV/AIDS                                                           | 49<br>(32 - 65)          | 0<br>(0 - 1)          | 0<br>(0 - 0)           | 41<br>(27 - 53)         | 6<br>(3 - 11)           | 1<br>(0 - 1)            |
| HIV/AIDS resulting in mycobacterial infection                      | 3<br>(2 - 4)             | 0<br>(0 - 0)          | 0<br>(0 - 0)           | 2<br>(2 - 3)            | 0<br>(0 - 1)            | 0<br>(0 - 0)            |
| HIV/AIDS resulting in other diseases                               | 46<br>(30 - 61)          | 0<br>(0 - 1)          | 0<br>(0 - 0)           | 39<br>(26 - 50)         | 6<br>(3 - 10)           | 1<br>(0 - 1)            |
| Diarrrhea, lower respiratory, and other common infectious diseases | 110<br>(90 - 136)        | 20<br>(10 - 40)       | 4<br>(2 - 5)           | 17<br>(14 - 22)         | 14<br>(11 - 18)         | 55<br>(44 - 68)         |
| Diarrheal diseases                                                 | 13<br>(9 - 20)           | 6<br>(3 - 13)         | 0<br>(0 - 1)           | 1<br>(1 - 2)            | 1<br>(1 - 2)            | 3<br>(2 - 5)            |
| Intestinal infectious diseases                                     | 3<br>(1 - 5)             | 1<br>(0 - 2)          | 1<br>(0 - 1)           | 1<br>(0 - 2)            | 0<br>(0 - 0)            | 0<br>(0 - 0)            |
| Typhoid fever                                                      | 2<br>(1 - 4)             | 1<br>(0 - 2)          | 1<br>(0 - 1)           | 1<br>(0 - 1)            | 0<br>(0 - 0)            | 0<br>(0 - 0)            |
| Paratyphoid fever                                                  | 1<br>(0 - 1)             | 0<br>(0 - 1)          | 0<br>(0 - 0)           | 0<br>(0 - 0)            | 0<br>(0 - 0)            | 0<br>(0 - 0)            |
| Other intestinal infectious diseases                               | 0<br>(0 - 1)             | 0<br>(0 - 0)          | 0<br>(0 - 0)           | 0<br>(0 - 0)            | 0<br>(0 - 0)            | 0<br>(0 - 0)            |
| Lower respiratory infections                                       | 86<br>(71 - 104)         | 10<br>(5 - 21)        | 2<br>(1 - 2)           | 12<br>(9 - 16)          | 12<br>(9 - 15)          | 50<br>(39 - 63)         |
| Upper respiratory infections                                       | 0<br>(0 - 0)             | 0<br>(0 - 0)          | 0<br>(0 - 0)           | 0<br>(0 - 0)            | 0<br>(0 - 0)            | 0<br>(0 - 0)            |
| Otitis media                                                       | 0<br>(0 - 0)             | 0<br>(0 - 0)          | 0<br>(0 - 0)           | 0<br>(0 - 0)            | 0<br>(0 - 0)            | 0<br>(0 - 0)            |
| Meningitis                                                         | 5<br>(4 - 6)             | 1<br>(1 - 2)          | 0<br>(0 - 0)           | 2<br>(1 - 2)            | 1<br>(1 - 1)            | 1<br>(1 - 1)            |
| Pneumococcal meningitis                                            | 1<br>(1 - 2)             | 0<br>(0 - 1)          | 0<br>(0 - 0)           | 0<br>(0 - 1)            | 0<br>(0 - 0)            | 0<br>(0 - 0)            |
| H influenzae type B meningitis                                     | 1<br>(1 - 1)             | 0<br>(0 - 1)          | 0<br>(0 - 0)           | 0<br>(0 - 0)            | 0<br>(0 - 0)            | 0<br>(0 - 0)            |
| Meningococcal meningitis                                           | 1<br>(0 - 1)             | 0<br>(0 - 0)          | 0<br>(0 - 0)           | 0<br>(0 - 0)            | 0<br>(0 - 0)            | 0<br>(0 - 0)            |
| Other meningitis                                                   | 2<br>(1 - 3)             | 0<br>(0 - 1)          | 0<br>(0 - 0)           | 1<br>(0 - 1)            | 0<br>(0 - 1)            | 0<br>(0 - 1)            |
| Encephalitis                                                       | 3<br>(2 - 5)             | 1<br>(0 - 2)          | 0<br>(0 - 1)           | 1<br>(1 - 2)            | 0<br>(0 - 1)            | 0<br>(0 - 0)            |
| Diphtheria                                                         | 0<br>(0 - 0)             | 0<br>(0 - 0)          | 0<br>(0 - 0)           | 0<br>(0 - 0)            | 0<br>(0 - 0)            | 0<br>(0 - 0)            |
| Whooping cough                                                     | 0<br>(0 - 0)             | 0<br>(0 - 0)          | 0<br>(0 - 0)           | 0<br>(0 - 0)            | 0<br>(0 - 0)            | 0<br>(0 - 0)            |
| Tetanus                                                            | 0<br>(0 - 0)             | 0<br>(0 - 0)          | 0<br>(0 - 0)           | 0<br>(0 - 0)            | 0<br>(0 - 0)            | 0<br>(0 - 0)            |
| Measles                                                            | 0<br>(0 - 0)             | 0<br>(0 - 0)          | 0<br>(0 - 0)           | 0<br>(0 - 0)            | 0<br>(0 - 0)            | 0<br>(0 - 0)            |
| Varicella and herpes zoster                                        | 0<br>(0 - 0)             | 0<br>(0 - 0)          | 0<br>(0 - 0)           | 0<br>(0 - 0)            | 0<br>(0 - 0)            | 0<br>(0 - 0)            |
| Neglected tropical diseases and malaria                            | 4<br>(3 - 5)             | 0<br>(0 - 1)          | 0<br>(0 - 1)           | 2<br>(1 - 3)            | 1<br>(0 - 1)            | 0<br>(0 - 0)            |
| Malaria                                                            | 1<br>(1 - 2)             | 0<br>(0 - 0)          | 0<br>(0 - 0)           | 1<br>(0 - 1)            | 0<br>(0 - 0)            | 0<br>(0 - 0)            |
| Chagas disease                                                     | 0<br>(0 - 0)             | 0<br>(0 - 0)          | 0<br>(0 - 0)           | 0<br>(0 - 0)            | 0<br>(0 - 0)            | 0<br>(0 - 0)            |
| Leishmaniasis                                                      | 0<br>(0 - 0)             | 0<br>(0 - 0)          | 0<br>(0 - 0)           | 0<br>(0 - 0)            | 0<br>(0 - 0)            | 0<br>(0 - 0)            |
| Visceral leishmaniasis                                             | 0<br>(0 - 0)             | 0<br>(0 - 0)          | 0<br>(0 - 0)           | 0<br>(0 - 0)            | 0<br>(0 - 0)            | 0<br>(0 - 0)            |
| Cysticercosis                                                      | 0<br>(0 - 0)             | 0<br>(0 - 0)          | 0<br>(0 - 0)           | 0<br>(0 - 0)            | 0<br>(0 - 0)            | 0<br>(0 - 0)            |
| Cystic echinococcosis                                              | 0<br>(0 - 0)             | 0<br>(0 - 0)          | 0<br>(0 - 0)           | 0<br>(0 - 0)            | 0<br>(0 - 0)            | 0<br>(0 - 0)            |
| Dengue                                                             | 1<br>(1 - 1)             | 0<br>(0 - 0)          | 0<br>(0 - 0)           | 0<br>(0 - 1)            | 0<br>(0 - 0)            | 0<br>(0 - 0)            |
| Rabies                                                             | 0<br>(0 - 0)             | 0<br>(0 - 0)          | 0<br>(0 - 0)           | 0<br>(0 - 0)            | 0<br>(0 - 0)            | 0<br>(0 - 0)            |
| Intestinal nematode infections                                     | 0<br>(0 - 2)             | 0<br>(0 - 1)          | 0<br>(0 - 0)           | 0<br>(0 - 0)            | 0<br>(0 - 0)            | 0<br>(0 - 0)            |
| Ascariasis                                                         | 0<br>(0 - 2)             | 0<br>(0 - 1)          | 0<br>(0 - 0)           | 0<br>(0 - 0)            | 0<br>(0 - 0)            | 0<br>(0 - 0)            |
| Other neglected tropical diseases                                  | 1<br>(1 - 1)             | 0<br>(0 - 0)          | 0<br>(0 - 0)           | 0<br>(0 - 0)            | 0<br>(0 - 0)            | 0<br>(0 - 0)            |
| Maternal disorders                                                 | 4<br>(3 - 6)             | --                    | 0<br>(0 - 0)           | 4<br>(3 - 6)            | --                      | --                      |



Web Table 31- Belize deaths with 95% UI by age, sex, and cause in 2013

| Cause                                                            | Both Sexes, All Ages     | Both Sexes, 0-4 Years | Both Sexes, 5-14 Years | Both Sexes, 15-49 Years | Both Sexes, 50-69 Years | Both Sexes, 70-80 Years |
|------------------------------------------------------------------|--------------------------|-----------------------|------------------------|-------------------------|-------------------------|-------------------------|
| Maternal hemorrhage                                              | 1<br>(0 - 1)             | --                    | 0<br>(0 - 0)           | 1<br>(0 - 1)            | --                      | --                      |
| Maternal sepsis and other maternal infections                    | 0<br>(0 - 1)             | --                    | 0<br>(0 - 0)           | 0<br>(0 - 1)            | --                      | --                      |
| Maternal hypertensive disorders                                  | 1<br>(0 - 1)             | --                    | 0<br>(0 - 0)           | 1<br>(0 - 1)            | --                      | --                      |
| Maternal obstructed labor                                        | 0<br>(0 - 1)             | --                    | 0<br>(0 - 0)           | 0<br>(0 - 1)            | --                      | --                      |
| Maternal abortive outcome                                        | 1<br>(0 - 1)             | --                    | 0<br>(0 - 0)           | 1<br>(0 - 1)            | --                      | --                      |
| Indirect maternal deaths                                         | 0<br>(0 - 1)             | --                    | 0<br>(0 - 0)           | 0<br>(0 - 1)            | --                      | --                      |
| Late maternal deaths                                             | 0<br>(0 - 1)             | --                    | 0<br>(0 - 0)           | 0<br>(0 - 1)            | --                      | --                      |
| Maternal deaths aggravated by HIV/AIDS                           | 0<br>(0 - 0)             | --                    | --                     | 0<br>(0 - 0)            | --                      | --                      |
| Other maternal disorders                                         | 1<br>(0 - 1)             | --                    | 0<br>(0 - 0)           | 1<br>(0 - 1)            | --                      | --                      |
| Neonatal disorders                                               | 70<br>(31 - 129)         | 70<br>(31 - 129)      | --                     | --                      | --                      | --                      |
| Neonatal preterm birth complications                             | 32<br>(14 - 60)          | 32<br>(14 - 60)       | --                     | --                      | --                      | --                      |
| Neonatal encephalopathy due to birth asphyxia and trauma         | 17<br>(7 - 32)           | 17<br>(7 - 32)        | --                     | --                      | --                      | --                      |
| Neonatal sepsis and other neonatal infections                    | 12<br>(5 - 23)           | 12<br>(5 - 23)        | --                     | --                      | --                      | --                      |
| Hemolytic disease and other neonatal jaundice                    | 1<br>(0 - 3)             | 1<br>(0 - 3)          | --                     | --                      | --                      | --                      |
| Other neonatal disorders                                         | 8<br>(3 - 15)            | 8<br>(3 - 15)         | --                     | --                      | --                      | --                      |
| Nutritional deficiencies                                         | 25<br>(19 - 33)          | 5<br>(2 - 10)         | 1<br>(0 - 1)           | 5<br>(4 - 7)            | 4<br>(3 - 5)            | 11<br>(8 - 15)          |
| Protein-energy malnutrition                                      | 11<br>(7 - 18)           | 4<br>(2 - 9)          | 0<br>(0 - 1)           | 1<br>(1 - 2)            | 1<br>(1 - 2)            | 4<br>(3 - 7)            |
| Iodine deficiency                                                | 0<br>(0 - 0)             | 0<br>(0 - 0)          | 0<br>(0 - 0)           | 0<br>(0 - 0)            | 0<br>(0 - 0)            | 0<br>(0 - 0)            |
| Iron-deficiency anemia                                           | 12<br>(8 - 17)           | 1<br>(0 - 2)          | 0<br>(0 - 0)           | 3<br>(2 - 5)            | 2<br>(1 - 3)            | 6<br>(4 - 9)            |
| Other nutritional deficiencies                                   | 1<br>(1 - 2)             | 0<br>(0 - 0)          | 0<br>(0 - 0)           | 0<br>(0 - 1)            | 0<br>(0 - 0)            | 1<br>(0 - 1)            |
| Other communicable, maternal, neonatal, and nutritional diseases | 7<br>(5 - 10)            | 1<br>(0 - 3)          | 0<br>(0 - 0)           | 3<br>(2 - 4)            | 1<br>(1 - 2)            | 1<br>(1 - 2)            |
| Sexually transmitted diseases excluding HIV                      | 1<br>(0 - 3)             | 1<br>(0 - 3)          | 0<br>(0 - 0)           | 0<br>(0 - 0)            | 0<br>(0 - 0)            | 0<br>(0 - 0)            |
| Syphilis                                                         | 1<br>(0 - 3)             | 1<br>(0 - 3)          | 0<br>(0 - 0)           | 0<br>(0 - 0)            | 0<br>(0 - 0)            | 0<br>(0 - 0)            |
| Chlamydial infection                                             | 0<br>(0 - 0)             | --                    | 0<br>(0 - 0)           | 0<br>(0 - 0)            | 0<br>(0 - 0)            | 0<br>(0 - 0)            |
| Gonococcal infection                                             | 0<br>(0 - 0)             | --                    | 0<br>(0 - 0)           | 0<br>(0 - 0)            | 0<br>(0 - 0)            | 0<br>(0 - 0)            |
| Other sexually transmitted diseases                              | 0<br>(0 - 0)             | --                    | 0<br>(0 - 0)           | 0<br>(0 - 0)            | 0<br>(0 - 0)            | 0<br>(0 - 0)            |
| Hepatitis                                                        | 1<br>(0 - 1)             | 0<br>(0 - 0)          | 0<br>(0 - 0)           | 0<br>(0 - 0)            | 0<br>(0 - 0)            | 0<br>(0 - 0)            |
| Acute hepatitis A                                                | 0<br>(0 - 0)             | 0<br>(0 - 0)          | 0<br>(0 - 0)           | 0<br>(0 - 0)            | 0<br>(0 - 0)            | 0<br>(0 - 0)            |
| Acute hepatitis B                                                | 0<br>(0 - 0)             | 0<br>(0 - 0)          | 0<br>(0 - 0)           | 0<br>(0 - 0)            | 0<br>(0 - 0)            | 0<br>(0 - 0)            |
| Acute hepatitis C                                                | 0<br>(0 - 0)             | --                    | 0<br>(0 - 0)           | 0<br>(0 - 0)            | 0<br>(0 - 0)            | 0<br>(0 - 0)            |
| Other infectious diseases                                        | 5<br>(3 - 7)             | 0<br>(0 - 1)          | 0<br>(0 - 0)           | 2<br>(1 - 3)            | 1<br>(1 - 2)            | 1<br>(1 - 1)            |
| Non-communicable diseases                                        | 1,399<br>(1,213 - 1,603) | 37<br>(19 - 72)       | 12<br>(8 - 17)         | 230<br>(182 - 283)      | 424<br>(346 - 505)      | 696<br>(630 - 763)      |
| Neoplasms                                                        | 289<br>(243 - 337)       | 2<br>(1 - 4)          | 3<br>(2 - 5)           | 60<br>(47 - 76)         | 103<br>(83 - 124)       | 121<br>(102 - 138)      |
| Esophageal cancer                                                | 7<br>(5 - 9)             | --                    | --                     | 1<br>(1 - 1)            | 3<br>(2 - 4)            | 3<br>(2 - 4)            |
| Stomach cancer                                                   | 19<br>(16 - 22)          | --                    | --                     | 3<br>(2 - 3)            | 7<br>(5 - 9)            | 9<br>(8 - 11)           |
| Liver cancer                                                     | 10<br>(8 - 13)           | --                    | 0<br>(0 - 0)           | 2<br>(2 - 3)            | 4<br>(3 - 5)            | 4<br>(3 - 5)            |
| Liver cancer due to hepatitis B                                  | 3<br>(2 - 4)             | --                    | 0<br>(0 - 0)           | 1<br>(0 - 1)            | 1<br>(1 - 2)            | 1<br>(0 - 1)            |
| Liver cancer due to hepatitis C                                  | 5<br>(3 - 6)             | --                    | 0<br>(0 - 0)           | 1<br>(0 - 1)            | 2<br>(1 - 3)            | 2<br>(1 - 3)            |
| Liver cancer due to alcohol use                                  | 2<br>(1 - 3)             | --                    | --                     | 0<br>(0 - 0)            | 1<br>(0 - 1)            | 1<br>(1 - 1)            |
| Liver cancer due to other causes                                 | 1<br>(1 - 2)             | --                    | 0<br>(0 - 0)           | 0<br>(0 - 1)            | 0<br>(0 - 1)            | 0<br>(0 - 0)            |

Web Table 31- Belize deaths with 95% UI by age, sex, and cause in 2013

| Cause                                         | Both Sexes, All Ages | Both Sexes, 0-4 Years | Both Sexes, 5-14 Years | Both Sexes, 15-49 Years | Both Sexes, 50-69 Years | Both Sexes, 70-80 Years |
|-----------------------------------------------|----------------------|-----------------------|------------------------|-------------------------|-------------------------|-------------------------|
| Larynx cancer                                 | 3<br>(2 - 4)         | --                    | --                     | 1<br>(0 - 1)            | 2<br>(1 - 2)            | 1<br>(1 - 1)            |
| Tracheal, bronchus and lung cancer            | 32<br>(26 - 38)      | --                    | --                     | 5<br>(4 - 7)            | 15<br>(12 - 19)         | 11<br>(9 - 13)          |
| Breast cancer                                 | 27<br>(21 - 36)      | --                    | --                     | 9<br>(6 - 13)           | 10<br>(7 - 14)          | 8<br>(6 - 10)           |
| Cervical cancer                               | 21<br>(15 - 30)      | --                    | --                     | 8<br>(5 - 12)           | 7<br>(5 - 11)           | 5<br>(4 - 8)            |
| Uterine cancer                                | 6<br>(3 - 8)         | --                    | --                     | 0<br>(0 - 1)            | 2<br>(1 - 4)            | 3<br>(1 - 4)            |
| Prostate cancer                               | 41<br>(23 - 56)      | --                    | --                     | 0<br>(0 - 1)            | 10<br>(5 - 15)          | 31<br>(16 - 42)         |
| Colon and rectum cancer                       | 30<br>(25 - 35)      | --                    | --                     | 4<br>(3 - 5)            | 11<br>(8 - 13)          | 15<br>(12 - 18)         |
| Lip and oral cavity cancer                    | 4<br>(3 - 5)         | --                    | --                     | 1<br>(1 - 1)            | 2<br>(1 - 2)            | 1<br>(1 - 2)            |
| Nasopharynx cancer                            | 1<br>(1 - 2)         | --                    | 0<br>(0 - 0)           | 1<br>(0 - 1)            | 1<br>(0 - 1)            | 0<br>(0 - 0)            |
| Other pharynx cancer                          | 2<br>(1 - 2)         | --                    | --                     | 0<br>(0 - 1)            | 1<br>(1 - 1)            | 1<br>(0 - 1)            |
| Gallbladder and biliary tract cancer          | 4<br>(2 - 7)         | --                    | --                     | 0<br>(0 - 1)            | 1<br>(1 - 2)            | 2<br>(1 - 3)            |
| Pancreatic cancer                             | 11<br>(9 - 13)       | --                    | --                     | 1<br>(1 - 2)            | 4<br>(3 - 5)            | 5<br>(5 - 7)            |
| Malignant skin melanoma                       | 1<br>(1 - 2)         | --                    | --                     | 0<br>(0 - 1)            | 0<br>(0 - 1)            | 0<br>(0 - 1)            |
| Non-melanoma skin cancer                      | 1<br>(1 - 2)         | --                    | --                     | 0<br>(0 - 0)            | 0<br>(0 - 0)            | 1<br>(0 - 1)            |
| Ovarian cancer                                | 8<br>(6 - 11)        | --                    | --                     | 2<br>(1 - 3)            | 3<br>(2 - 5)            | 3<br>(2 - 3)            |
| Testicular cancer                             | 0<br>(0 - 0)         | --                    | --                     | 0<br>(0 - 0)            | 0<br>(0 - 0)            | 0<br>(0 - 0)            |
| Kidney cancer                                 | 4<br>(3 - 5)         | 0<br>(0 - 0)          | 0<br>(0 - 0)           | 1<br>(1 - 1)            | 2<br>(1 - 2)            | 1<br>(1 - 2)            |
| Bladder cancer                                | 4<br>(3 - 6)         | --                    | --                     | 0<br>(0 - 0)            | 1<br>(1 - 2)            | 2<br>(2 - 4)            |
| Brain and nervous system cancer               | 4<br>(2 - 6)         | 0<br>(0 - 0)          | 0<br>(0 - 1)           | 2<br>(1 - 2)            | 1<br>(1 - 2)            | 1<br>(0 - 1)            |
| Thyroid cancer                                | 1<br>(1 - 2)         | --                    | 0<br>(0 - 0)           | 0<br>(0 - 0)            | 0<br>(0 - 1)            | 1<br>(0 - 1)            |
| Mesothelioma                                  | 1<br>(1 - 1)         | --                    | --                     | 0<br>(0 - 0)            | 0<br>(0 - 0)            | 0<br>(0 - 0)            |
| Hodgkin lymphoma                              | 1<br>(0 - 2)         | 0<br>(0 - 0)          | 0<br>(0 - 0)           | 1<br>(0 - 1)            | 0<br>(0 - 0)            | 0<br>(0 - 0)            |
| Non-Hodgkin lymphoma                          | 13<br>(10 - 18)      | 0<br>(0 - 0)          | 0<br>(0 - 1)           | 5<br>(4 - 7)            | 4<br>(3 - 6)            | 3<br>(2 - 4)            |
| Multiple myeloma                              | 4<br>(3 - 6)         | --                    | --                     | 1<br>(0 - 1)            | 2<br>(1 - 3)            | 2<br>(1 - 2)            |
| Leukemia                                      | 10<br>(8 - 13)       | 1<br>(0 - 1)          | 1<br>(1 - 2)           | 4<br>(3 - 5)            | 2<br>(2 - 3)            | 2<br>(2 - 3)            |
| Other neoplasms                               | 17<br>(14 - 22)      | 1<br>(0 - 2)          | 1<br>(1 - 2)           | 6<br>(5 - 8)            | 5<br>(4 - 7)            | 4<br>(3 - 6)            |
| Cardiovascular diseases                       | 566<br>(490 - 652)   | 2<br>(1 - 5)          | 2<br>(1 - 3)           | 65<br>(50 - 84)         | 162<br>(131 - 195)      | 334<br>(298 - 374)      |
| Rheumatic heart disease                       | 4<br>(3 - 6)         | 0<br>(0 - 0)          | 0<br>(0 - 0)           | 2<br>(1 - 3)            | 1<br>(1 - 1)            | 1<br>(1 - 1)            |
| Ischemic heart disease                        | 258<br>(217 - 318)   | 0<br>(0 - 1)          | 0<br>(0 - 1)           | 27<br>(20 - 36)         | 77<br>(61 - 97)         | 153<br>(132 - 187)      |
| Cerebrovascular disease                       | 183<br>(155 - 217)   | 1<br>(0 - 2)          | 1<br>(0 - 1)           | 19<br>(14 - 25)         | 52<br>(41 - 64)         | 111<br>(94 - 129)       |
| Ischemic stroke                               | 112<br>(94 - 135)    | 0<br>(0 - 0)          | 0<br>(0 - 0)           | 5<br>(4 - 8)            | 27<br>(21 - 35)         | 79<br>(66 - 94)         |
| Hemorrhagic stroke                            | 71<br>(55 - 87)      | 1<br>(0 - 1)          | 0<br>(0 - 1)           | 13<br>(10 - 18)         | 24<br>(18 - 31)         | 32<br>(23 - 40)         |
| Hypertensive heart disease                    | 58<br>(41 - 73)      | 0<br>(0 - 0)          | 0<br>(0 - 0)           | 5<br>(3 - 7)            | 16<br>(11 - 21)         | 37<br>(26 - 47)         |
| Cardiomyopathy and myocarditis                | 18<br>(14 - 23)      | 1<br>(0 - 1)          | 0<br>(0 - 1)           | 5<br>(4 - 7)            | 5<br>(4 - 7)            | 7<br>(5 - 9)            |
| Atrial fibrillation and flutter               | 7<br>(5 - 9)         | --                    | --                     | 0<br>(0 - 0)            | 1<br>(1 - 2)            | 5<br>(4 - 7)            |
| Aortic aneurysm                               | 7<br>(5 - 9)         | --                    | --                     | 1<br>(1 - 1)            | 2<br>(2 - 3)            | 4<br>(3 - 5)            |
| Peripheral vascular disease                   | 4<br>(3 - 5)         | --                    | --                     | 0<br>(0 - 0)            | 0<br>(0 - 0)            | 3<br>(2 - 4)            |
| Endocarditis                                  | 2<br>(2 - 3)         | 0<br>(0 - 0)          | 0<br>(0 - 0)           | 1<br>(0 - 1)            | 0<br>(0 - 1)            | 1<br>(1 - 2)            |
| Other cardiovascular and circulatory diseases | 26<br>(19 - 33)      | 1<br>(0 - 1)          | 0<br>(0 - 0)           | 6<br>(4 - 8)            | 7<br>(5 - 10)           | 12<br>(9 - 17)          |
| Chronic respiratory diseases                  | 61<br>(50 - 75)      | 1<br>(1 - 3)          | 1<br>(0 - 1)           | 9<br>(7 - 13)           | 15<br>(12 - 19)         | 34<br>(29 - 42)         |

Web Table 31- Belize deaths with 95% UI by age, sex, and cause in 2013

| Cause                                               | Both Sexes, All Ages | Both Sexes, 0-4 Years | Both Sexes, 5-14 Years | Both Sexes, 15-49 Years | Both Sexes, 50-69 Years | Both Sexes, 70-80 Years |
|-----------------------------------------------------|----------------------|-----------------------|------------------------|-------------------------|-------------------------|-------------------------|
| Chronic obstructive pulmonary disease               | 41<br>(34 - 51)      | 1<br>(0 - 1)          | 0<br>(0 - 0)           | 4<br>(3 - 5)            | 9<br>(7 - 12)           | 27<br>(23 - 33)         |
| Pneumoconiosis                                      | 2<br>(1 - 3)         | 0<br>(0 - 0)          | 0<br>(0 - 0)           | 0<br>(0 - 1)            | 1<br>(0 - 1)            | 1<br>(0 - 1)            |
| Silicosis                                           | 0<br>(0 - 0)         | 0<br>(0 - 0)          | 0<br>(0 - 0)           | 0<br>(0 - 0)            | 0<br>(0 - 0)            | 0<br>(0 - 0)            |
| Asbestosis                                          | 0<br>(0 - 0)         | 0<br>(0 - 0)          | 0<br>(0 - 0)           | 0<br>(0 - 0)            | 0<br>(0 - 0)            | 0<br>(0 - 0)            |
| Coal workers pneumoconiosis                         | 0<br>(0 - 1)         | 0<br>(0 - 0)          | 0<br>(0 - 0)           | 0<br>(0 - 0)            | 0<br>(0 - 0)            | 0<br>(0 - 0)            |
| Other pneumoconiosis                                | 1<br>(1 - 1)         | 0<br>(0 - 0)          | 0<br>(0 - 0)           | 0<br>(0 - 0)            | 0<br>(0 - 0)            | 1<br>(0 - 1)            |
| Asthma                                              | 12<br>(9 - 15)       | 0<br>(0 - 1)          | 0<br>(0 - 0)           | 4<br>(3 - 5)            | 3<br>(2 - 4)            | 4<br>(3 - 5)            |
| Interstitial lung disease and pulmonary sarcoidosis | 4<br>(3 - 6)         | 0<br>(0 - 0)          | 0<br>(0 - 0)           | 1<br>(1 - 1)            | 1<br>(1 - 2)            | 2<br>(1 - 3)            |
| Other chronic respiratory diseases                  | 2<br>(2 - 3)         | 0<br>(0 - 1)          | 0<br>(0 - 0)           | 1<br>(0 - 1)            | 0<br>(0 - 1)            | 1<br>(0 - 1)            |
| Cirrhosis                                           | 43<br>(34 - 52)      | 0<br>(0 - 0)          | 0<br>(0 - 0)           | 16<br>(12 - 21)         | 19<br>(14 - 23)         | 8<br>(6 - 9)            |
| Cirrhosis due to hepatitis B                        | 4<br>(2 - 6)         | 0<br>(0 - 0)          | 0<br>(0 - 0)           | 2<br>(1 - 2)            | 2<br>(1 - 3)            | 1<br>(0 - 1)            |
| Cirrhosis due to hepatitis C                        | 12<br>(8 - 20)       | 0<br>(0 - 0)          | 0<br>(0 - 0)           | 4<br>(2 - 7)            | 5<br>(3 - 9)            | 3<br>(2 - 4)            |
| Cirrhosis due to alcohol use                        | 19<br>(13 - 26)      | --                    | --                     | 6<br>(4 - 9)            | 9<br>(6 - 12)           | 3<br>(2 - 4)            |
| Cirrhosis due to other causes                       | 9<br>(6 - 12)        | 0<br>(0 - 0)          | 0<br>(0 - 0)           | 5<br>(3 - 7)            | 3<br>(2 - 5)            | 1<br>(0 - 1)            |
| Digestive diseases                                  | 42<br>(35 - 50)      | 0<br>(0 - 1)          | 1<br>(0 - 1)           | 12<br>(9 - 15)          | 12<br>(10 - 15)         | 17<br>(15 - 20)         |
| Peptic ulcer disease                                | 11<br>(8 - 14)       | 0<br>(0 - 0)          | 0<br>(0 - 0)           | 3<br>(2 - 4)            | 4<br>(3 - 5)            | 4<br>(3 - 6)            |
| Gastritis and duodenitis                            | 3<br>(2 - 4)         | 0<br>(0 - 0)          | 0<br>(0 - 0)           | 1<br>(0 - 1)            | 1<br>(0 - 1)            | 1<br>(1 - 2)            |
| Appendicitis                                        | 2<br>(2 - 3)         | 0<br>(0 - 0)          | 0<br>(0 - 0)           | 1<br>(1 - 1)            | 1<br>(0 - 1)            | 1<br>(0 - 1)            |
| Paralytic ileus and intestinal obstruction          | 5<br>(2 - 7)         | 0<br>(0 - 0)          | 0<br>(0 - 0)           | 1<br>(0 - 2)            | 1<br>(0 - 2)            | 2<br>(1 - 4)            |
| Inguinal, femoral, and abdominal hernia             | 2<br>(1 - 5)         | 0<br>(0 - 0)          | 0<br>(0 - 0)           | 1<br>(0 - 1)            | 1<br>(0 - 1)            | 1<br>(1 - 2)            |
| Inflammatory bowel disease                          | 4<br>(3 - 6)         | 0<br>(0 - 0)          | 0<br>(0 - 0)           | 1<br>(1 - 2)            | 1<br>(1 - 1)            | 2<br>(1 - 3)            |
| Vascular intestinal disorders                       | 2<br>(1 - 4)         | 0<br>(0 - 0)          | 0<br>(0 - 0)           | 0<br>(0 - 1)            | 1<br>(0 - 1)            | 1<br>(1 - 2)            |
| Gallbladder and biliary diseases                    | 3<br>(2 - 4)         | 0<br>(0 - 0)          | 0<br>(0 - 0)           | 1<br>(1 - 1)            | 1<br>(1 - 1)            | 1<br>(1 - 2)            |
| Pancreatitis                                        | 3<br>(2 - 5)         | 0<br>(0 - 0)          | 0<br>(0 - 0)           | 2<br>(1 - 3)            | 1<br>(1 - 1)            | 1<br>(0 - 1)            |
| Other digestive diseases                            | 7<br>(5 - 9)         | 0<br>(0 - 0)          | 0<br>(0 - 0)           | 2<br>(1 - 2)            | 2<br>(1 - 2)            | 3<br>(2 - 4)            |
| Neurological disorders                              | 68<br>(58 - 80)      | 1<br>(0 - 1)          | 1<br>(0 - 1)           | 7<br>(5 - 10)           | 7<br>(6 - 9)            | 52<br>(43 - 62)         |
| Alzheimer disease and other dementias               | 51<br>(41 - 60)      | --                    | --                     | 0<br>(0 - 0)            | 4<br>(3 - 5)            | 47<br>(38 - 56)         |
| Parkinson disease                                   | 5<br>(4 - 6)         | --                    | --                     | 0<br>(0 - 0)            | 1<br>(1 - 1)            | 4<br>(3 - 5)            |
| Epilepsy                                            | 9<br>(6 - 12)        | 0<br>(0 - 1)          | 1<br>(0 - 1)           | 6<br>(4 - 8)            | 1<br>(1 - 2)            | 1<br>(1 - 1)            |
| Multiple sclerosis                                  | 0<br>(0 - 1)         | --                    | --                     | 0<br>(0 - 0)            | 0<br>(0 - 0)            | 0<br>(0 - 0)            |
| Other neurological disorders                        | 4<br>(3 - 5)         | 0<br>(0 - 0)          | 0<br>(0 - 0)           | 2<br>(1 - 2)            | 1<br>(1 - 2)            | 1<br>(1 - 1)            |
| Mental and substance use disorders                  | 9<br>(6 - 12)        | 0<br>(0 - 0)          | 0<br>(0 - 0)           | 4<br>(3 - 6)            | 3<br>(2 - 4)            | 1<br>(1 - 2)            |
| Schizophrenia                                       | 0<br>(0 - 1)         | --                    | --                     | 0<br>(0 - 0)            | 0<br>(0 - 0)            | 0<br>(0 - 0)            |
| Alcohol use disorders                               | 5<br>(3 - 7)         | --                    | --                     | 2<br>(1 - 3)            | 2<br>(1 - 3)            | 1<br>(0 - 1)            |
| Drug use disorders                                  | 3<br>(2 - 4)         | 0<br>(0 - 0)          | --                     | 2<br>(1 - 3)            | 1<br>(0 - 1)            | 1<br>(0 - 1)            |
| Opioid use disorders                                | 1<br>(1 - 1)         | 0<br>(0 - 0)          | --                     | 1<br>(0 - 1)            | 0<br>(0 - 0)            | 0<br>(0 - 0)            |
| Cocaine use disorders                               | 0<br>(0 - 0)         | 0<br>(0 - 0)          | --                     | 0<br>(0 - 0)            | 0<br>(0 - 0)            | 0<br>(0 - 0)            |
| Amphetamine use disorders                           | 0<br>(0 - 0)         | 0<br>(0 - 0)          | --                     | 0<br>(0 - 0)            | 0<br>(0 - 0)            | 0<br>(0 - 0)            |
| Other drug use disorders                            | 2<br>(1 - 3)         | 0<br>(0 - 0)          | --                     | 1<br>(1 - 2)            | 0<br>(0 - 1)            | 0<br>(0 - 0)            |
| Eating disorders                                    | 0<br>(0 - 0)         | --                    | 0<br>(0 - 0)           | 0<br>(0 - 0)            | --                      | --                      |

Web Table 31- Belize deaths with 95% UI by age, sex, and cause in 2013

| Cause                                               | Both Sexes, All Ages | Both Sexes, 0-4 Years | Both Sexes, 5-14 Years | Both Sexes, 15-49 Years | Both Sexes, 50-69 Years | Both Sexes, 70-80 Years |
|-----------------------------------------------------|----------------------|-----------------------|------------------------|-------------------------|-------------------------|-------------------------|
| Anorexia nervosa                                    | 0<br>(0 - 0)         | --                    | 0<br>(0 - 0)           | 0<br>(0 - 0)            | --                      | --                      |
| Diabetes, urogenital, blood, and endocrine diseases | 268<br>(226 - 313)   | 3<br>(2 - 7)          | 2<br>(1 - 3)           | 46<br>(36 - 58)         | 98<br>(79 - 119)        | 119<br>(100 - 136)      |
| Diabetes mellitus                                   | 171<br>(142 - 203)   | 0<br>(0 - 0)          | 0<br>(0 - 0)           | 20<br>(15 - 26)         | 70<br>(56 - 86)         | 80<br>(66 - 94)         |
| Acute glomerulonephritis                            | 0<br>(0 - 0)         | 0<br>(0 - 0)          | 0<br>(0 - 0)           | 0<br>(0 - 0)            | 0<br>(0 - 0)            | 0<br>(0 - 0)            |
| Chronic kidney disease                              | 61<br>(48 - 76)      | 1<br>(0 - 1)          | 1<br>(0 - 1)           | 14<br>(11 - 19)         | 19<br>(14 - 25)         | 26<br>(20 - 33)         |
| Chronic kidney disease due to diabetes mellitus     | 10<br>(6 - 13)       | 0<br>(0 - 0)          | 0<br>(0 - 0)           | 2<br>(1 - 3)            | 5<br>(3 - 7)            | 3<br>(2 - 5)            |
| Chronic kidney disease due to hypertension          | 31<br>(23 - 40)      | 0<br>(0 - 0)          | 0<br>(0 - 0)           | 7<br>(5 - 9)            | 10<br>(6 - 13)          | 15<br>(11 - 19)         |
| Chronic kidney disease due to glomerulonephritis    | 2<br>(2 - 3)         | 0<br>(0 - 0)          | 0<br>(0 - 0)           | 1<br>(1 - 1)            | 0<br>(0 - 1)            | 1<br>(0 - 1)            |
| Chronic kidney disease due to other causes          | 18<br>(12 - 27)      | 0<br>(0 - 1)          | 0<br>(0 - 0)           | 5<br>(3 - 8)            | 5<br>(3 - 7)            | 8<br>(5 - 12)           |
| Urinary diseases and male infertility               | 12<br>(8 - 14)       | 0<br>(0 - 0)          | 0<br>(0 - 0)           | 2<br>(1 - 3)            | 3<br>(2 - 4)            | 7<br>(5 - 8)            |
| Interstitial nephritis and urinary tract infections | 8<br>(6 - 11)        | 0<br>(0 - 0)          | 0<br>(0 - 0)           | 1<br>(1 - 2)            | 2<br>(1 - 3)            | 5<br>(3 - 7)            |
| Urolithiasis                                        | 1<br>(0 - 1)         | --                    | 0<br>(0 - 0)           | 0<br>(0 - 0)            | 0<br>(0 - 0)            | 0<br>(0 - 0)            |
| Other urinary diseases                              | 3<br>(2 - 4)         | 0<br>(0 - 0)          | 0<br>(0 - 0)           | 0<br>(0 - 1)            | 1<br>(1 - 1)            | 1<br>(1 - 2)            |
| Gynecological diseases                              | 0<br>(0 - 0)         | --                    | --                     | 0<br>(0 - 0)            | 0<br>(0 - 0)            | 0<br>(0 - 0)            |
| Uterine fibroids                                    | 0<br>(0 - 0)         | --                    | --                     | 0<br>(0 - 0)            | 0<br>(0 - 0)            | 0<br>(0 - 0)            |
| Polycystic ovarian syndrome                         | 0<br>(0 - 0)         | --                    | --                     | 0<br>(0 - 0)            | 0<br>(0 - 0)            | --                      |
| Endometriosis                                       | 0<br>(0 - 0)         | --                    | --                     | 0<br>(0 - 0)            | 0<br>(0 - 0)            | --                      |
| Genital prolapse                                    | 0<br>(0 - 0)         | --                    | --                     | 0<br>(0 - 0)            | 0<br>(0 - 0)            | 0<br>(0 - 0)            |
| Other gynecological diseases                        | 0<br>(0 - 0)         | --                    | --                     | 0<br>(0 - 0)            | 0<br>(0 - 0)            | 0<br>(0 - 0)            |
| Hemoglobinopathies and hemolytic anemias            | 6<br>(4 - 8)         | 1<br>(0 - 2)          | 1<br>(0 - 1)           | 3<br>(2 - 4)            | 1<br>(0 - 1)            | 1<br>(0 - 1)            |
| Thalassemias                                        | 0<br>(0 - 0)         | 0<br>(0 - 0)          | 0<br>(0 - 0)           | 0<br>(0 - 0)            | 0<br>(0 - 0)            | 0<br>(0 - 0)            |
| Sickle cell disorders                               | 5<br>(3 - 7)         | 1<br>(0 - 2)          | 1<br>(0 - 1)           | 3<br>(2 - 4)            | 1<br>(0 - 1)            | 0<br>(0 - 0)            |
| G6PD deficiency                                     | 0<br>(0 - 0)         | 0<br>(0 - 0)          | 0<br>(0 - 0)           | 0<br>(0 - 0)            | 0<br>(0 - 0)            | 0<br>(0 - 0)            |
| Other hemoglobinopathies and hemolytic anemias      | 1<br>(1 - 1)         | 0<br>(0 - 0)          | 0<br>(0 - 0)           | 0<br>(0 - 0)            | 0<br>(0 - 0)            | 0<br>(0 - 1)            |
| Endocrine, metabolic, blood, and immune disorders   | 18<br>(13 - 30)      | 1<br>(1 - 3)          | 0<br>(0 - 1)           | 6<br>(4 - 10)           | 4<br>(3 - 8)            | 5<br>(4 - 9)            |
| Musculoskeletal disorders                           | 8<br>(3 - 10)        | --                    | 0<br>(0 - 0)           | 4<br>(2 - 6)            | 2<br>(1 - 2)            | 2<br>(1 - 2)            |
| Rheumatoid arthritis                                | 1<br>(0 - 1)         | --                    | 0<br>(0 - 0)           | 0<br>(0 - 0)            | 0<br>(0 - 0)            | 0<br>(0 - 1)            |
| Other musculoskeletal disorders                     | 7<br>(3 - 9)         | --                    | 0<br>(0 - 0)           | 4<br>(2 - 5)            | 1<br>(1 - 2)            | 1<br>(1 - 2)            |
| Other non-communicable diseases                     | 46<br>(30 - 71)      | 27<br>(13 - 52)       | 3<br>(2 - 4)           | 5<br>(3 - 7)            | 3<br>(2 - 4)            | 8<br>(4 - 11)           |
| Congenital anomalies                                | 32<br>(19 - 54)      | 24<br>(12 - 45)       | 2<br>(2 - 4)           | 4<br>(3 - 5)            | 1<br>(1 - 2)            | 1<br>(1 - 1)            |
| Neural tube defects                                 | 1<br>(1 - 3)         | 1<br>(1 - 3)          | 0<br>(0 - 0)           | 0<br>(0 - 0)            | 0<br>(0 - 0)            | 0<br>(0 - 0)            |
| Congenital heart anomalies                          | 17<br>(10 - 29)      | 12<br>(6 - 23)        | 2<br>(1 - 3)           | 2<br>(2 - 3)            | 0<br>(0 - 1)            | 0<br>(0 - 1)            |
| Cleft lip and cleft palate                          | 0<br>(0 - 0)         | 0<br>(0 - 0)          | --                     | --                      | --                      | --                      |
| Down syndrome                                       | 1<br>(1 - 2)         | 1<br>(0 - 1)          | 0<br>(0 - 0)           | 0<br>(0 - 1)            | 0<br>(0 - 0)            | 0<br>(0 - 0)            |
| Chromosomal unbalanced rearrangements               | 1<br>(0 - 2)         | 1<br>(0 - 1)          | 0<br>(0 - 0)           | 0<br>(0 - 0)            | 0<br>(0 - 0)            | 0<br>(0 - 0)            |
| Other congenital anomalies                          | 12<br>(6 - 21)       | 9<br>(4 - 18)         | 1<br>(0 - 1)           | 1<br>(1 - 1)            | 0<br>(0 - 1)            | 0<br>(0 - 1)            |
| Skin and subcutaneous diseases                      | 11<br>(5 - 14)       | 0<br>(0 - 1)          | 0<br>(0 - 0)           | 1<br>(1 - 2)            | 2<br>(1 - 3)            | 7<br>(3 - 10)           |
| Cellulitis                                          | 1<br>(0 - 1)         | 0<br>(0 - 0)          | 0<br>(0 - 0)           | 0<br>(0 - 0)            | 0<br>(0 - 0)            | 0<br>(0 - 1)            |
| Pyoderma                                            | 3<br>(1 - 4)         | 0<br>(0 - 0)          | 0<br>(0 - 0)           | 0<br>(0 - 1)            | 1<br>(0 - 1)            | 1<br>(1 - 2)            |
| Decubitus ulcer                                     | 7<br>(3 - 10)        | 0<br>(0 - 0)          | 0<br>(0 - 0)           | 1<br>(0 - 1)            | 1<br>(0 - 1)            | 5<br>(2 - 8)            |

Web Table 31- Belize deaths with 95% UI by age, sex, and cause in 2013

| Cause                                           | Both Sexes, All Ages | Both Sexes, 0-4 Years | Both Sexes, 5-14 Years | Both Sexes, 15-49 Years | Both Sexes, 50-69 Years | Both Sexes, 70-80 Years |
|-------------------------------------------------|----------------------|-----------------------|------------------------|-------------------------|-------------------------|-------------------------|
| Other skin and subcutaneous diseases            | 0<br>(0 - 1)         | 0<br>(0 - 0)          | 0<br>(0 - 0)           | 0<br>(0 - 0)            | 0<br>(0 - 0)            | 0<br>(0 - 0)            |
| Sudden infant death syndrome                    | 3<br>(1 - 7)         | 3<br>(1 - 7)          | --                     | --                      | --                      | --                      |
| Injuries                                        | 241<br>(190 - 296)   | 10<br>(5 - 20)        | 11<br>(7 - 16)         | 162<br>(127 - 202)      | 34<br>(25 - 43)         | 24<br>(20 - 28)         |
| Transport injuries                              | 64<br>(50 - 80)      | 2<br>(1 - 3)          | 4<br>(3 - 6)           | 42<br>(33 - 54)         | 11<br>(8 - 14)          | 6<br>(5 - 7)            |
| Road injuries                                   | 60<br>(47 - 74)      | 1<br>(1 - 3)          | 4<br>(2 - 6)           | 40<br>(30 - 50)         | 10<br>(7 - 13)          | 5<br>(4 - 6)            |
| Pedestrian road injuries                        | 15<br>(11 - 20)      | 0<br>(0 - 1)          | 1<br>(1 - 2)           | 8<br>(5 - 11)           | 3<br>(2 - 4)            | 2<br>(1 - 2)            |
| Cyclist road injuries                           | 3<br>(2 - 4)         | 0<br>(0 - 0)          | 0<br>(0 - 1)           | 2<br>(1 - 3)            | 1<br>(0 - 1)            | 0<br>(0 - 0)            |
| Motorcyclist road injuries                      | 5<br>(4 - 7)         | 0<br>(0 - 0)          | 0<br>(0 - 0)           | 4<br>(3 - 6)            | 0<br>(0 - 1)            | 0<br>(0 - 0)            |
| Motor vehicle road injuries                     | 36<br>(28 - 45)      | 1<br>(0 - 2)          | 2<br>(1 - 3)           | 26<br>(19 - 33)         | 6<br>(4 - 7)            | 3<br>(2 - 3)            |
| Other road injuries                             | 1<br>(0 - 1)         | 0<br>(0 - 0)          | 0<br>(0 - 0)           | 0<br>(0 - 1)            | 0<br>(0 - 0)            | 0<br>(0 - 0)            |
| Other transport injuries                        | 5<br>(3 - 6)         | 0<br>(0 - 0)          | 0<br>(0 - 0)           | 3<br>(2 - 4)            | 1<br>(0 - 1)            | 0<br>(0 - 1)            |
| Unintentional injuries                          | 73<br>(57 - 89)      | 7<br>(4 - 15)         | 5<br>(3 - 7)           | 35<br>(27 - 44)         | 11<br>(8 - 14)          | 15<br>(11 - 18)         |
| Falls                                           | 12<br>(9 - 15)       | 0<br>(0 - 1)          | 0<br>(0 - 0)           | 4<br>(3 - 6)            | 2<br>(2 - 3)            | 5<br>(4 - 7)            |
| Drowning                                        | 19<br>(13 - 26)      | 1<br>(1 - 3)          | 2<br>(1 - 3)           | 12<br>(8 - 17)          | 2<br>(1 - 3)            | 1<br>(1 - 1)            |
| Fire, heat, and hot substances                  | 7<br>(4 - 9)         | 1<br>(0 - 2)          | 0<br>(0 - 1)           | 2<br>(1 - 3)            | 1<br>(1 - 2)            | 2<br>(1 - 3)            |
| Poisonings                                      | 2<br>(1 - 3)         | 0<br>(0 - 0)          | 0<br>(0 - 0)           | 1<br>(1 - 2)            | 0<br>(0 - 0)            | 0<br>(0 - 0)            |
| Exposure to mechanical forces                   | 11<br>(8 - 15)       | 0<br>(0 - 1)          | 1<br>(0 - 1)           | 8<br>(6 - 12)           | 2<br>(1 - 2)            | 0<br>(0 - 1)            |
| Unintentional firearm injuries                  | 6<br>(4 - 9)         | 0<br>(0 - 0)          | 0<br>(0 - 0)           | 5<br>(3 - 8)            | 1<br>(0 - 1)            | 0<br>(0 - 0)            |
| Unintentional suffocation                       | 1<br>(1 - 1)         | 0<br>(0 - 0)          | 0<br>(0 - 0)           | 0<br>(0 - 1)            | 0<br>(0 - 0)            | 0<br>(0 - 0)            |
| Other exposure to mechanical forces             | 4<br>(3 - 6)         | 0<br>(0 - 0)          | 0<br>(0 - 1)           | 3<br>(2 - 5)            | 1<br>(0 - 1)            | 0<br>(0 - 0)            |
| Adverse effects of medical treatment            | 8<br>(5 - 11)        | 1<br>(0 - 2)          | 0<br>(0 - 0)           | 2<br>(1 - 3)            | 2<br>(1 - 2)            | 3<br>(2 - 4)            |
| Animal contact                                  | 1<br>(0 - 2)         | 0<br>(0 - 0)          | 0<br>(0 - 0)           | 1<br>(0 - 1)            | 0<br>(0 - 1)            | 0<br>(0 - 1)            |
| Venomous animal contact                         | 1<br>(0 - 1)         | 0<br>(0 - 0)          | 0<br>(0 - 0)           | 0<br>(0 - 1)            | 0<br>(0 - 0)            | 0<br>(0 - 0)            |
| Non-venomous animal contact                     | 0<br>(0 - 1)         | 0<br>(0 - 0)          | 0<br>(0 - 0)           | 0<br>(0 - 0)            | 0<br>(0 - 0)            | 0<br>(0 - 0)            |
| Foreign body                                    | 10<br>(7 - 15)       | 3<br>(1 - 7)          | 0<br>(0 - 1)           | 3<br>(2 - 4)            | 1<br>(1 - 2)            | 3<br>(2 - 4)            |
| Pulmonary aspiration and foreign body in airway | 10<br>(7 - 15)       | 3<br>(1 - 7)          | 0<br>(0 - 1)           | 3<br>(2 - 4)            | 1<br>(1 - 2)            | 3<br>(2 - 4)            |
| Foreign body in other body part                 | 0<br>(0 - 0)         | 0<br>(0 - 0)          | 0<br>(0 - 0)           | 0<br>(0 - 0)            | 0<br>(0 - 0)            | 0<br>(0 - 0)            |
| Other unintentional injuries                    | 2<br>(2 - 3)         | 0<br>(0 - 0)          | 0<br>(0 - 0)           | 1<br>(1 - 2)            | 0<br>(0 - 1)            | 0<br>(0 - 1)            |
| Self-harm and interpersonal violence            | 104<br>(71 - 134)    | 1<br>(1 - 3)          | 2<br>(1 - 3)           | 85<br>(56 - 110)        | 13<br>(9 - 17)          | 4<br>(3 - 5)            |
| Self-harm                                       | 34<br>(27 - 43)      | --                    | 1<br>(0 - 1)           | 26<br>(20 - 33)         | 6<br>(4 - 8)            | 2<br>(2 - 3)            |
| Interpersonal violence                          | 70<br>(40 - 95)      | 1<br>(1 - 3)          | 1<br>(1 - 2)           | 59<br>(33 - 81)         | 7<br>(4 - 10)           | 1<br>(1 - 2)            |
| Assault by firearm                              | 38<br>(18 - 56)      | 0<br>(0 - 1)          | 0<br>(0 - 1)           | 34<br>(17 - 51)         | 3<br>(1 - 4)            | 0<br>(0 - 0)            |
| Assault by sharp object                         | 18<br>(9 - 27)       | 0<br>(0 - 1)          | 0<br>(0 - 1)           | 15<br>(8 - 24)          | 2<br>(1 - 3)            | 0<br>(0 - 1)            |
| Assault by other means                          | 14<br>(8 - 20)       | 1<br>(0 - 2)          | 1<br>(0 - 1)           | 9<br>(5 - 14)           | 2<br>(1 - 4)            | 1<br>(0 - 1)            |

Web Table 31- Belize deaths with 95% UI by age, sex, and cause in 2013

| Cause                                                             | Males, All Ages        | Males, 0-4 Years | Males, 5-14 Years | Males, 15-49 Years | Males, 50-69 Years | Males, 70-80 Years |
|-------------------------------------------------------------------|------------------------|------------------|-------------------|--------------------|--------------------|--------------------|
| All causes                                                        | 1,069<br>(884 - 1,277) | 81<br>(38 - 155) | 16<br>(11 - 24)   | 307<br>(246 - 382) | 286<br>(219 - 358) | 379<br>(323 - 424) |
| Communicable, maternal, neonatal, and nutritional diseases        | 163<br>(126 - 214)     | 55<br>(25 - 102) | 3<br>(2 - 4)      | 50<br>(40 - 61)    | 21<br>(16 - 26)    | 34<br>(27 - 43)    |
| HIV/AIDS and tuberculosis                                         | 44<br>(31 - 57)        | 0<br>(0 - 0)     | 0<br>(0 - 0)      | 34<br>(24 - 43)    | 8<br>(5 - 12)      | 2<br>(2 - 3)       |
| Tuberculosis                                                      | 7<br>(5 - 10)          | 0<br>(0 - 0)     | 0<br>(0 - 0)      | 3<br>(2 - 4)       | 2<br>(1 - 3)       | 2<br>(1 - 2)       |
| HIV/AIDS                                                          | 37<br>(24 - 50)        | 0<br>(0 - 0)     | 0<br>(0 - 0)      | 30<br>(21 - 40)    | 5<br>(3 - 9)       | 1<br>(0 - 1)       |
| HIV/AIDS resulting in mycobacterial infection                     | 2<br>(1 - 3)           | 0<br>(0 - 0)     | 0<br>(0 - 0)      | 2<br>(1 - 3)       | 0<br>(0 - 1)       | 0<br>(0 - 0)       |
| HIV/AIDS resulting in other diseases                              | 34<br>(22 - 46)        | 0<br>(0 - 0)     | 0<br>(0 - 0)      | 28<br>(19 - 38)    | 5<br>(2 - 9)       | 1<br>(0 - 1)       |
| Diarrhea, lower respiratory, and other common infectious diseases | 59<br>(46 - 77)        | 11<br>(6 - 23)   | 2<br>(1 - 3)      | 11<br>(8 - 15)     | 9<br>(7 - 13)      | 25<br>(19 - 33)    |
| Diarrheal diseases                                                | 7<br>(5 - 11)          | 4<br>(2 - 8)     | 0<br>(0 - 0)      | 1<br>(1 - 1)       | 1<br>(0 - 1)       | 1<br>(1 - 2)       |
| Intestinal infectious diseases                                    | 1<br>(1 - 3)           | 1<br>(0 - 1)     | 0<br>(0 - 1)      | 0<br>(0 - 1)       | 0<br>(0 - 0)       | 0<br>(0 - 0)       |
| Typhoid fever                                                     | 1<br>(0 - 2)           | 0<br>(0 - 1)     | 0<br>(0 - 1)      | 0<br>(0 - 1)       | 0<br>(0 - 0)       | 0<br>(0 - 0)       |
| Paratyphoid fever                                                 | 0<br>(0 - 1)           | 0<br>(0 - 0)     | 0<br>(0 - 0)      | 0<br>(0 - 0)       | 0<br>(0 - 0)       | 0<br>(0 - 0)       |
| Other intestinal infectious diseases                              | 0<br>(0 - 0)           | 0<br>(0 - 0)     | 0<br>(0 - 0)      | 0<br>(0 - 0)       | 0<br>(0 - 0)       | 0<br>(0 - 0)       |
| Lower respiratory infections                                      | 46<br>(35 - 59)        | 6<br>(3 - 12)    | 1<br>(0 - 1)      | 8<br>(5 - 11)      | 8<br>(5 - 11)      | 23<br>(17 - 31)    |
| Upper respiratory infections                                      | 0<br>(0 - 0)           | 0<br>(0 - 0)     | 0<br>(0 - 0)      | 0<br>(0 - 0)       | 0<br>(0 - 0)       | 0<br>(0 - 0)       |
| Otitis media                                                      | 0<br>(0 - 0)           | 0<br>(0 - 0)     | 0<br>(0 - 0)      | 0<br>(0 - 0)       | 0<br>(0 - 0)       | 0<br>(0 - 0)       |
| Meningitis                                                        | 3<br>(2 - 4)           | 1<br>(0 - 1)     | 0<br>(0 - 0)      | 1<br>(1 - 1)       | 1<br>(0 - 1)       | 0<br>(0 - 1)       |
| Pneumococcal meningitis                                           | 1<br>(1 - 1)           | 0<br>(0 - 0)     | 0<br>(0 - 0)      | 0<br>(0 - 1)       | 0<br>(0 - 0)       | 0<br>(0 - 0)       |
| H influenzae type B meningitis                                    | 0<br>(0 - 1)           | 0<br>(0 - 1)     | 0<br>(0 - 0)      | 0<br>(0 - 0)       | 0<br>(0 - 0)       | 0<br>(0 - 0)       |
| Meningococcal meningitis                                          | 0<br>(0 - 0)           | 0<br>(0 - 0)     | 0<br>(0 - 0)      | 0<br>(0 - 0)       | 0<br>(0 - 0)       | 0<br>(0 - 0)       |
| Other meningitis                                                  | 1<br>(1 - 2)           | 0<br>(0 - 0)     | 0<br>(0 - 0)      | 0<br>(0 - 1)       | 0<br>(0 - 0)       | 0<br>(0 - 0)       |
| Encephalitis                                                      | 2<br>(1 - 3)           | 1<br>(0 - 1)     | 0<br>(0 - 1)      | 1<br>(0 - 1)       | 0<br>(0 - 0)       | 0<br>(0 - 0)       |
| Diphtheria                                                        | 0<br>(0 - 0)           | 0<br>(0 - 0)     | 0<br>(0 - 0)      | 0<br>(0 - 0)       | 0<br>(0 - 0)       | 0<br>(0 - 0)       |
| Whooping cough                                                    | 0<br>(0 - 0)           | 0<br>(0 - 0)     | 0<br>(0 - 0)      | 0<br>(0 - 0)       | 0<br>(0 - 0)       | 0<br>(0 - 0)       |
| Tetanus                                                           | 0<br>(0 - 0)           | 0<br>(0 - 0)     | 0<br>(0 - 0)      | 0<br>(0 - 0)       | 0<br>(0 - 0)       | 0<br>(0 - 0)       |
| Measles                                                           | 0<br>(0 - 0)           | 0<br>(0 - 0)     | 0<br>(0 - 0)      | 0<br>(0 - 0)       | 0<br>(0 - 0)       | 0<br>(0 - 0)       |
| Varicella and herpes zoster                                       | 0<br>(0 - 0)           | 0<br>(0 - 0)     | 0<br>(0 - 0)      | 0<br>(0 - 0)       | 0<br>(0 - 0)       | 0<br>(0 - 0)       |
| Neglected tropical diseases and malaria                           | 2<br>(2 - 4)           | 0<br>(0 - 1)     | 0<br>(0 - 0)      | 1<br>(1 - 2)       | 0<br>(0 - 1)       | 0<br>(0 - 0)       |
| Malaria                                                           | 1<br>(1 - 2)           | 0<br>(0 - 0)     | 0<br>(0 - 0)      | 1<br>(0 - 1)       | 0<br>(0 - 0)       | 0<br>(0 - 0)       |
| Chagas disease                                                    | 0<br>(0 - 0)           | 0<br>(0 - 0)     | 0<br>(0 - 0)      | 0<br>(0 - 0)       | 0<br>(0 - 0)       | 0<br>(0 - 0)       |
| Leishmaniasis                                                     | 0<br>(0 - 0)           | 0<br>(0 - 0)     | 0<br>(0 - 0)      | 0<br>(0 - 0)       | 0<br>(0 - 0)       | 0<br>(0 - 0)       |
| Visceral leishmaniasis                                            | 0<br>(0 - 0)           | 0<br>(0 - 0)     | 0<br>(0 - 0)      | 0<br>(0 - 0)       | 0<br>(0 - 0)       | 0<br>(0 - 0)       |
| Cysticercosis                                                     | 0<br>(0 - 0)           | 0<br>(0 - 0)     | 0<br>(0 - 0)      | 0<br>(0 - 0)       | 0<br>(0 - 0)       | 0<br>(0 - 0)       |
| Cystic echinococcosis                                             | 0<br>(0 - 0)           | 0<br>(0 - 0)     | 0<br>(0 - 0)      | 0<br>(0 - 0)       | 0<br>(0 - 0)       | 0<br>(0 - 0)       |
| Dengue                                                            | 1<br>(0 - 1)           | 0<br>(0 - 0)     | 0<br>(0 - 0)      | 0<br>(0 - 0)       | 0<br>(0 - 0)       | 0<br>(0 - 0)       |
| Rabies                                                            | 0<br>(0 - 0)           | 0<br>(0 - 0)     | 0<br>(0 - 0)      | 0<br>(0 - 0)       | 0<br>(0 - 0)       | 0<br>(0 - 0)       |
| Intestinal nematode infections                                    | 0<br>(0 - 1)           | 0<br>(0 - 0)     | 0<br>(0 - 0)      | 0<br>(0 - 0)       | 0<br>(0 - 0)       | 0<br>(0 - 0)       |
| Ascariasis                                                        | 0<br>(0 - 1)           | 0<br>(0 - 0)     | 0<br>(0 - 0)      | 0<br>(0 - 0)       | 0<br>(0 - 0)       | 0<br>(0 - 0)       |
| Other neglected tropical diseases                                 | 0<br>(0 - 1)           | 0<br>(0 - 0)     | 0<br>(0 - 0)      | 0<br>(0 - 0)       | 0<br>(0 - 0)       | 0<br>(0 - 0)       |
| Maternal disorders                                                | --                     | --               | --                | --                 | --                 | --                 |

Web Table 31- Belize deaths with 95% UI by age, sex, and cause in 2013

| Cause                                                            | Males, All Ages    | Males, 0-4 Years | Males, 5-14 Years | Males, 15-49 Years | Males, 50-69 Years | Males, 70-80 Years |
|------------------------------------------------------------------|--------------------|------------------|-------------------|--------------------|--------------------|--------------------|
| Maternal hemorrhage                                              | --                 | --               | --                | --                 | --                 | --                 |
| Maternal sepsis and other maternal infections                    | --                 | --               | --                | --                 | --                 | --                 |
| Maternal hypertensive disorders                                  | --                 | --               | --                | --                 | --                 | --                 |
| Maternal obstructed labor                                        | --                 | --               | --                | --                 | --                 | --                 |
| Maternal abortive outcome                                        | --                 | --               | --                | --                 | --                 | --                 |
| Indirect maternal deaths                                         | --                 | --               | --                | --                 | --                 | --                 |
| Late maternal deaths                                             | --                 | --               | --                | --                 | --                 | --                 |
| Maternal deaths aggravated by HIV/AIDS                           | --                 | --               | --                | --                 | --                 | --                 |
| Other maternal disorders                                         | --                 | --               | --                | --                 | --                 | --                 |
| Neonatal disorders                                               | 40<br>(17 - 73)    | 40<br>(17 - 73)  | --                | --                 | --                 | --                 |
| Neonatal preterm birth complications                             | 18<br>(7 - 35)     | 18<br>(7 - 35)   | --                | --                 | --                 | --                 |
| Neonatal encephalopathy due to birth asphyxia and trauma         | 9<br>(4 - 19)      | 9<br>(4 - 19)    | --                | --                 | --                 | --                 |
| Neonatal sepsis and other neonatal infections                    | 6<br>(2 - 13)      | 6<br>(2 - 13)    | --                | --                 | --                 | --                 |
| Hemolytic disease and other neonatal jaundice                    | 1<br>(0 - 2)       | 1<br>(0 - 2)     | --                | --                 | --                 | --                 |
| Other neonatal disorders                                         | 5<br>(2 - 9)       | 5<br>(2 - 9)     | --                | --                 | --                 | --                 |
| Nutritional deficiencies                                         | 13<br>(9 - 21)     | 3<br>(1 - 6)     | 0<br>(0 - 1)      | 2<br>(2 - 4)       | 2<br>(1 - 4)       | 6<br>(4 - 9)       |
| Protein-energy malnutrition                                      | 6<br>(4 - 11)      | 2<br>(1 - 5)     | 0<br>(0 - 0)      | 1<br>(0 - 2)       | 1<br>(0 - 2)       | 2<br>(1 - 4)       |
| Iodine deficiency                                                | 0<br>(0 - 0)       | 0<br>(0 - 0)     | 0<br>(0 - 0)      | 0<br>(0 - 0)       | 0<br>(0 - 0)       | 0<br>(0 - 0)       |
| Iron-deficiency anemia                                           | 6<br>(3 - 10)      | 0<br>(0 - 1)     | 0<br>(0 - 0)      | 1<br>(1 - 2)       | 1<br>(1 - 2)       | 3<br>(1 - 5)       |
| Other nutritional deficiencies                                   | 1<br>(0 - 1)       | 0<br>(0 - 0)     | 0<br>(0 - 0)      | 0<br>(0 - 0)       | 0<br>(0 - 0)       | 0<br>(0 - 1)       |
| Other communicable, maternal, neonatal, and nutritional diseases | 4<br>(3 - 6)       | 1<br>(0 - 2)     | 0<br>(0 - 0)      | 2<br>(1 - 3)       | 1<br>(0 - 1)       | 1<br>(0 - 1)       |
| Sexually transmitted diseases excluding HIV                      | 1<br>(0 - 2)       | 0<br>(0 - 1)     | 0<br>(0 - 0)      | 0<br>(0 - 0)       | 0<br>(0 - 0)       | 0<br>(0 - 0)       |
| Syphilis                                                         | 1<br>(0 - 2)       | 0<br>(0 - 1)     | 0<br>(0 - 0)      | 0<br>(0 - 0)       | 0<br>(0 - 0)       | 0<br>(0 - 0)       |
| Chlamydial infection                                             | --                 | --               | --                | --                 | --                 | --                 |
| Gonococcal infection                                             | 0<br>(0 - 0)       | --               | 0<br>(0 - 0)      | 0<br>(0 - 0)       | 0<br>(0 - 0)       | 0<br>(0 - 0)       |
| Other sexually transmitted diseases                              | 0<br>(0 - 0)       | --               | 0<br>(0 - 0)      | 0<br>(0 - 0)       | 0<br>(0 - 0)       | 0<br>(0 - 0)       |
| Hepatitis                                                        | 0<br>(0 - 1)       | 0<br>(0 - 0)     | 0<br>(0 - 0)      | 0<br>(0 - 0)       | 0<br>(0 - 0)       | 0<br>(0 - 0)       |
| Acute hepatitis A                                                | 0<br>(0 - 0)       | 0<br>(0 - 0)     | 0<br>(0 - 0)      | 0<br>(0 - 0)       | 0<br>(0 - 0)       | 0<br>(0 - 0)       |
| Acute hepatitis B                                                | 0<br>(0 - 0)       | 0<br>(0 - 0)     | 0<br>(0 - 0)      | 0<br>(0 - 0)       | 0<br>(0 - 0)       | 0<br>(0 - 0)       |
| Acute hepatitis C                                                | 0<br>(0 - 0)       | --               | 0<br>(0 - 0)      | 0<br>(0 - 0)       | 0<br>(0 - 0)       | 0<br>(0 - 0)       |
| Other infectious diseases                                        | 3<br>(2 - 5)       | 0<br>(0 - 0)     | 0<br>(0 - 0)      | 2<br>(1 - 2)       | 1<br>(0 - 1)       | 1<br>(0 - 1)       |
| Non-communicable diseases                                        | 719<br>(581 - 860) | 20<br>(10 - 40)  | 6<br>(4 - 9)      | 123<br>(92 - 161)  | 238<br>(182 - 298) | 332<br>(284 - 372) |
| Neoplasms                                                        | 153<br>(121 - 189) | 1<br>(0 - 2)     | 2<br>(1 - 3)      | 25<br>(18 - 33)    | 55<br>(42 - 72)    | 70<br>(54 - 83)    |
| Esophageal cancer                                                | 5<br>(4 - 7)       | --               | --                | 1<br>(0 - 1)       | 2<br>(2 - 4)       | 2<br>(1 - 3)       |
| Stomach cancer                                                   | 11<br>(9 - 14)     | --               | --                | 2<br>(1 - 2)       | 5<br>(3 - 6)       | 5<br>(4 - 6)       |
| Liver cancer                                                     | 6<br>(5 - 8)       | --               | 0<br>(0 - 0)      | 1<br>(1 - 2)       | 3<br>(2 - 3)       | 2<br>(2 - 3)       |
| Liver cancer due to hepatitis B                                  | 2<br>(1 - 3)       | --               | 0<br>(0 - 0)      | 1<br>(0 - 1)       | 1<br>(0 - 1)       | 0<br>(0 - 1)       |
| Liver cancer due to hepatitis C                                  | 3<br>(2 - 4)       | --               | 0<br>(0 - 0)      | 0<br>(0 - 1)       | 1<br>(1 - 2)       | 1<br>(1 - 2)       |
| Liver cancer due to alcohol use                                  | 1<br>(1 - 2)       | --               | --                | 0<br>(0 - 0)       | 0<br>(0 - 1)       | 1<br>(0 - 1)       |
| Liver cancer due to other causes                                 | 0<br>(0 - 1)       | --               | 0<br>(0 - 0)      | 0<br>(0 - 0)       | 0<br>(0 - 0)       | 0<br>(0 - 0)       |

Web Table 31- Belize deaths with 95% UI by age, sex, and cause in 2013

| Cause                                         | Males, All Ages    | Males, 0-4 Years | Males, 5-14 Years | Males, 15-49 Years | Males, 50-69 Years | Males, 70-80 Years |
|-----------------------------------------------|--------------------|------------------|-------------------|--------------------|--------------------|--------------------|
| Larynx cancer                                 | 3<br>(2 - 4)       | --               | --                | 0<br>(0 - 1)       | 1<br>(1 - 2)       | 1<br>(1 - 1)       |
| Tracheal, bronchus and lung cancer            | 24<br>(18 - 29)    | --               | --                | 4<br>(3 - 5)       | 12<br>(9 - 16)     | 8<br>(6 - 10)      |
| Breast cancer                                 | 1<br>(0 - 1)       | --               | --                | 0<br>(0 - 0)       | 0<br>(0 - 1)       | 0<br>(0 - 1)       |
| Cervical cancer                               | --                 | --               | --                | --                 | --                 | --                 |
| Uterine cancer                                | --                 | --               | --                | --                 | --                 | --                 |
| Prostate cancer                               | 41<br>(23 - 56)    | --               | --                | 0<br>(0 - 1)       | 10<br>(5 - 15)     | 31<br>(16 - 42)    |
| Colon and rectum cancer                       | 15<br>(12 - 18)    | --               | --                | 2<br>(2 - 3)       | 6<br>(4 - 8)       | 7<br>(5 - 8)       |
| Lip and oral cavity cancer                    | 3<br>(2 - 4)       | --               | --                | 1<br>(0 - 1)       | 1<br>(1 - 2)       | 1<br>(1 - 1)       |
| Nasopharynx cancer                            | 1<br>(1 - 1)       | --               | 0<br>(0 - 0)      | 0<br>(0 - 1)       | 0<br>(0 - 0)       | 0<br>(0 - 0)       |
| Other pharynx cancer                          | 2<br>(1 - 2)       | --               | --                | 0<br>(0 - 1)       | 1<br>(1 - 1)       | 0<br>(0 - 0)       |
| Gallbladder and biliary tract cancer          | 1<br>(1 - 3)       | --               | --                | 0<br>(0 - 0)       | 1<br>(0 - 1)       | 1<br>(0 - 1)       |
| Pancreatic cancer                             | 6<br>(4 - 7)       | --               | --                | 1<br>(1 - 1)       | 2<br>(2 - 3)       | 2<br>(2 - 3)       |
| Malignant skin melanoma                       | 1<br>(0 - 1)       | --               | --                | 0<br>(0 - 0)       | 0<br>(0 - 0)       | 0<br>(0 - 0)       |
| Non-melanoma skin cancer                      | 1<br>(0 - 1)       | --               | --                | 0<br>(0 - 0)       | 0<br>(0 - 0)       | 0<br>(0 - 0)       |
| Ovarian cancer                                | --                 | --               | --                | --                 | --                 | --                 |
| Testicular cancer                             | 0<br>(0 - 0)       | --               | --                | 0<br>(0 - 0)       | 0<br>(0 - 0)       | 0<br>(0 - 0)       |
| Kidney cancer                                 | 2<br>(2 - 3)       | 0<br>(0 - 0)     | 0<br>(0 - 0)      | 1<br>(0 - 1)       | 1<br>(1 - 2)       | 1<br>(1 - 1)       |
| Bladder cancer                                | 3<br>(2 - 4)       | --               | --                | 0<br>(0 - 0)       | 1<br>(1 - 1)       | 2<br>(1 - 2)       |
| Brain and nervous system cancer               | 2<br>(1 - 3)       | 0<br>(0 - 0)     | 0<br>(0 - 0)      | 1<br>(0 - 1)       | 1<br>(0 - 1)       | 0<br>(0 - 1)       |
| Thyroid cancer                                | 0<br>(0 - 1)       | --               | 0<br>(0 - 0)      | 0<br>(0 - 0)       | 0<br>(0 - 0)       | 0<br>(0 - 0)       |
| Mesothelioma                                  | 1<br>(0 - 1)       | --               | --                | 0<br>(0 - 0)       | 0<br>(0 - 0)       | 0<br>(0 - 0)       |
| Hodgkin lymphoma                              | 1<br>(0 - 1)       | 0<br>(0 - 0)     | 0<br>(0 - 0)      | 0<br>(0 - 1)       | 0<br>(0 - 0)       | 0<br>(0 - 0)       |
| Non-Hodgkin lymphoma                          | 7<br>(5 - 12)      | 0<br>(0 - 0)     | 0<br>(0 - 0)      | 3<br>(2 - 5)       | 2<br>(1 - 4)       | 2<br>(1 - 3)       |
| Multiple myeloma                              | 2<br>(1 - 3)       | --               | --                | 0<br>(0 - 1)       | 1<br>(1 - 2)       | 1<br>(1 - 1)       |
| Leukemia                                      | 6<br>(4 - 7)       | 0<br>(0 - 1)     | 1<br>(0 - 1)      | 2<br>(2 - 3)       | 1<br>(1 - 2)       | 1<br>(1 - 1)       |
| Other neoplasms                               | 9<br>(7 - 11)      | 1<br>(0 - 1)     | 1<br>(0 - 1)      | 3<br>(2 - 4)       | 3<br>(2 - 4)       | 2<br>(1 - 3)       |
| Cardiovascular diseases                       | 274<br>(222 - 325) | 1<br>(1 - 2)     | 1<br>(1 - 2)      | 37<br>(28 - 50)    | 93<br>(70 - 115)   | 142<br>(120 - 161) |
| Rheumatic heart disease                       | 2<br>(1 - 3)       | 0<br>(0 - 0)     | 0<br>(0 - 0)      | 1<br>(1 - 1)       | 0<br>(0 - 1)       | 0<br>(0 - 1)       |
| Ischemic heart disease                        | 135<br>(106 - 167) | 0<br>(0 - 0)     | 0<br>(0 - 0)      | 17<br>(12 - 24)    | 49<br>(36 - 64)    | 69<br>(56 - 82)    |
| Cerebrovascular disease                       | 83<br>(64 - 103)   | 0<br>(0 - 1)     | 0<br>(0 - 1)      | 10<br>(7 - 14)     | 26<br>(19 - 34)    | 46<br>(36 - 57)    |
| Ischemic stroke                               | 51<br>(39 - 65)    | 0<br>(0 - 0)     | 0<br>(0 - 0)      | 3<br>(2 - 5)       | 15<br>(10 - 20)    | 33<br>(25 - 42)    |
| Hemorrhagic stroke                            | 32<br>(20 - 41)    | 0<br>(0 - 1)     | 0<br>(0 - 0)      | 7<br>(4 - 10)      | 11<br>(7 - 16)     | 13<br>(8 - 17)     |
| Hypertensive heart disease                    | 23<br>(14 - 33)    | 0<br>(0 - 0)     | 0<br>(0 - 0)      | 3<br>(1 - 4)       | 8<br>(4 - 12)      | 13<br>(8 - 19)     |
| Cardiomyopathy and myocarditis                | 10<br>(7 - 14)     | 0<br>(0 - 1)     | 0<br>(0 - 0)      | 3<br>(2 - 4)       | 4<br>(2 - 5)       | 3<br>(2 - 5)       |
| Atrial fibrillation and flutter               | 3<br>(2 - 4)       | --               | --                | 0<br>(0 - 0)       | 1<br>(1 - 3)       | 2<br>(1 - 3)       |
| Aortic aneurysm                               | 4<br>(3 - 5)       | --               | --                | 0<br>(0 - 1)       | 2<br>(1 - 2)       | 2<br>(2 - 3)       |
| Peripheral vascular disease                   | 2<br>(1 - 2)       | --               | --                | 0<br>(0 - 0)       | 0<br>(0 - 0)       | 1<br>(1 - 2)       |
| Endocarditis                                  | 1<br>(1 - 2)       | 0<br>(0 - 0)     | 0<br>(0 - 0)      | 0<br>(0 - 1)       | 0<br>(0 - 1)       | 0<br>(0 - 1)       |
| Other cardiovascular and circulatory diseases | 12<br>(8 - 15)     | 0<br>(0 - 0)     | 0<br>(0 - 0)      | 3<br>(2 - 4)       | 3<br>(2 - 5)       | 5<br>(3 - 7)       |
| Chronic respiratory diseases                  | 43<br>(34 - 53)    | 1<br>(0 - 2)     | 0<br>(0 - 0)      | 6<br>(4 - 8)       | 11<br>(8 - 15)     | 25<br>(20 - 30)    |



Web Table 31- Belize deaths with 95% UI by age, sex, and cause in 2013

| Cause                                               | Males, All Ages | Males, 0-4 Years | Males, 5-14 Years | Males, 15-49 Years | Males, 50-69 Years | Males, 70-80 Years |
|-----------------------------------------------------|-----------------|------------------|-------------------|--------------------|--------------------|--------------------|
| Chronic obstructive pulmonary disease               | 30<br>(24 - 38) | 0<br>(0 - 1)     | 0<br>(0 - 0)      | 2<br>(2 - 3)       | 7<br>(5 - 10)      | 20<br>(16 - 25)    |
| Pneumoconiosis                                      | 2<br>(1 - 2)    | 0<br>(0 - 0)     | 0<br>(0 - 0)      | 0<br>(0 - 1)       | 1<br>(0 - 1)       | 1<br>(0 - 1)       |
| Silicosis                                           | 0<br>(0 - 0)    | 0<br>(0 - 0)     | 0<br>(0 - 0)      | 0<br>(0 - 0)       | 0<br>(0 - 0)       | 0<br>(0 - 0)       |
| Asbestosis                                          | 0<br>(0 - 0)    | 0<br>(0 - 0)     | 0<br>(0 - 0)      | 0<br>(0 - 0)       | 0<br>(0 - 0)       | 0<br>(0 - 0)       |
| Coal workers pneumoconiosis                         | 0<br>(0 - 1)    | 0<br>(0 - 0)     | 0<br>(0 - 0)      | 0<br>(0 - 0)       | 0<br>(0 - 0)       | 0<br>(0 - 0)       |
| Other pneumoconiosis                                | 1<br>(1 - 1)    | 0<br>(0 - 0)     | 0<br>(0 - 0)      | 0<br>(0 - 0)       | 0<br>(0 - 0)       | 0<br>(0 - 1)       |
| Asthma                                              | 7<br>(5 - 9)    | 0<br>(0 - 0)     | 0<br>(0 - 0)      | 2<br>(2 - 3)       | 2<br>(1 - 3)       | 2<br>(2 - 3)       |
| Interstitial lung disease and pulmonary sarcoidosis | 3<br>(2 - 4)    | 0<br>(0 - 0)     | 0<br>(0 - 0)      | 0<br>(0 - 1)       | 1<br>(1 - 1)       | 1<br>(1 - 2)       |
| Other chronic respiratory diseases                  | 1<br>(1 - 2)    | 0<br>(0 - 1)     | 0<br>(0 - 0)      | 0<br>(0 - 1)       | 0<br>(0 - 0)       | 0<br>(0 - 0)       |
| Cirrhosis                                           | 30<br>(22 - 38) | 0<br>(0 - 0)     | 0<br>(0 - 0)      | 12<br>(8 - 16)     | 14<br>(10 - 18)    | 5<br>(4 - 6)       |
| Cirrhosis due to hepatitis B                        | 2<br>(1 - 4)    | 0<br>(0 - 0)     | 0<br>(0 - 0)      | 1<br>(0 - 2)       | 1<br>(1 - 2)       | 0<br>(0 - 1)       |
| Cirrhosis due to hepatitis C                        | 6<br>(3 - 12)   | 0<br>(0 - 0)     | 0<br>(0 - 0)      | 2<br>(1 - 4)       | 3<br>(1 - 6)       | 1<br>(1 - 2)       |
| Cirrhosis due to alcohol use                        | 16<br>(10 - 23) | --               | --                | 6<br>(3 - 9)       | 8<br>(5 - 11)      | 2<br>(2 - 4)       |
| Cirrhosis due to other causes                       | 5<br>(3 - 8)    | 0<br>(0 - 0)     | 0<br>(0 - 0)      | 3<br>(2 - 5)       | 2<br>(1 - 3)       | 0<br>(0 - 1)       |
| Digestive diseases                                  | 24<br>(19 - 31) | 0<br>(0 - 1)     | 0<br>(0 - 0)      | 8<br>(5 - 11)      | 8<br>(6 - 10)      | 8<br>(6 - 10)      |
| Peptic ulcer disease                                | 7<br>(5 - 10)   | 0<br>(0 - 0)     | 0<br>(0 - 0)      | 2<br>(1 - 3)       | 2<br>(2 - 4)       | 2<br>(2 - 3)       |
| Gastritis and duodenitis                            | 2<br>(1 - 3)    | 0<br>(0 - 0)     | 0<br>(0 - 0)      | 1<br>(0 - 1)       | 1<br>(0 - 1)       | 1<br>(0 - 1)       |
| Appendicitis                                        | 1<br>(1 - 2)    | 0<br>(0 - 0)     | 0<br>(0 - 0)      | 1<br>(0 - 1)       | 0<br>(0 - 1)       | 0<br>(0 - 0)       |
| Paralytic ileus and intestinal obstruction          | 3<br>(1 - 4)    | 0<br>(0 - 0)     | 0<br>(0 - 0)      | 1<br>(0 - 1)       | 1<br>(0 - 1)       | 1<br>(0 - 2)       |
| Inguinal, femoral, and abdominal hernia             | 1<br>(1 - 3)    | 0<br>(0 - 0)     | 0<br>(0 - 0)      | 0<br>(0 - 1)       | 0<br>(0 - 1)       | 1<br>(0 - 1)       |
| Inflammatory bowel disease                          | 2<br>(1 - 3)    | 0<br>(0 - 0)     | 0<br>(0 - 0)      | 1<br>(0 - 1)       | 0<br>(0 - 1)       | 1<br>(1 - 1)       |
| Vascular intestinal disorders                       | 1<br>(0 - 2)    | 0<br>(0 - 0)     | 0<br>(0 - 0)      | 0<br>(0 - 0)       | 0<br>(0 - 1)       | 0<br>(0 - 1)       |
| Gallbladder and biliary diseases                    | 1<br>(1 - 2)    | 0<br>(0 - 0)     | 0<br>(0 - 0)      | 0<br>(0 - 0)       | 0<br>(0 - 1)       | 0<br>(0 - 1)       |
| Pancreatitis                                        | 2<br>(2 - 4)    | 0<br>(0 - 0)     | 0<br>(0 - 0)      | 1<br>(1 - 2)       | 1<br>(0 - 1)       | 0<br>(0 - 0)       |
| Other digestive diseases                            | 3<br>(2 - 4)    | 0<br>(0 - 0)     | 0<br>(0 - 0)      | 1<br>(1 - 1)       | 1<br>(1 - 1)       | 1<br>(1 - 2)       |
| Neurological disorders                              | 38<br>(31 - 47) | 0<br>(0 - 1)     | 0<br>(0 - 1)      | 5<br>(3 - 7)       | 5<br>(3 - 6)       | 28<br>(21 - 35)    |
| Alzheimer disease and other dementias               | 27<br>(21 - 35) | --               | --                | 0<br>(0 - 0)       | 2<br>(1 - 3)       | 25<br>(19 - 32)    |
| Parkinson disease                                   | 3<br>(2 - 4)    | --               | --                | 0<br>(0 - 0)       | 1<br>(0 - 1)       | 2<br>(1 - 3)       |
| Epilepsy                                            | 6<br>(4 - 8)    | 0<br>(0 - 0)     | 0<br>(0 - 1)      | 4<br>(2 - 5)       | 1<br>(1 - 2)       | 1<br>(0 - 1)       |
| Multiple sclerosis                                  | 0<br>(0 - 0)    | --               | --                | 0<br>(0 - 0)       | 0<br>(0 - 0)       | 0<br>(0 - 0)       |
| Other neurological disorders                        | 2<br>(2 - 3)    | 0<br>(0 - 0)     | 0<br>(0 - 0)      | 1<br>(1 - 1)       | 1<br>(1 - 1)       | 0<br>(0 - 1)       |
| Mental and substance use disorders                  | 7<br>(5 - 10)   | 0<br>(0 - 0)     | 0<br>(0 - 0)      | 4<br>(2 - 5)       | 3<br>(1 - 4)       | 1<br>(1 - 1)       |
| Schizophrenia                                       | 0<br>(0 - 1)    | --               | --                | 0<br>(0 - 0)       | 0<br>(0 - 0)       | 0<br>(0 - 0)       |
| Alcohol use disorders                               | 4<br>(3 - 7)    | --               | --                | 2<br>(1 - 3)       | 2<br>(1 - 3)       | 1<br>(0 - 1)       |
| Drug use disorders                                  | 3<br>(1 - 4)    | 0<br>(0 - 0)     | --                | 2<br>(1 - 2)       | 1<br>(0 - 1)       | 0<br>(0 - 1)       |
| Opioid use disorders                                | 1<br>(0 - 1)    | 0<br>(0 - 0)     | --                | 0<br>(0 - 1)       | 0<br>(0 - 0)       | 0<br>(0 - 0)       |
| Cocaine use disorders                               | 0<br>(0 - 0)    | 0<br>(0 - 0)     | --                | 0<br>(0 - 0)       | 0<br>(0 - 0)       | 0<br>(0 - 0)       |
| Amphetamine use disorders                           | 0<br>(0 - 0)    | 0<br>(0 - 0)     | --                | 0<br>(0 - 0)       | 0<br>(0 - 0)       | 0<br>(0 - 0)       |
| Other drug use disorders                            | 2<br>(1 - 2)    | 0<br>(0 - 0)     | --                | 1<br>(1 - 1)       | 0<br>(0 - 1)       | 0<br>(0 - 0)       |
| Eating disorders                                    | 0<br>(0 - 0)    | --               | 0<br>(0 - 0)      | 0<br>(0 - 0)       | --                 | --                 |

Web Table 31- Belize deaths with 95% UI by age, sex, and cause in 2013

| Cause                                               | Males, All Ages   | Males, 0-4 Years | Males, 5-14 Years | Males, 15-49 Years | Males, 50-69 Years | Males, 70-80 Years |
|-----------------------------------------------------|-------------------|------------------|-------------------|--------------------|--------------------|--------------------|
| Anorexia nervosa                                    | 0<br>(0 - 0)      | --               | 0<br>(0 - 0)      | 0<br>(0 - 0)       | --                 | --                 |
| Diabetes, urogenital, blood, and endocrine diseases | 124<br>(99 - 149) | 2<br>(1 - 4)     | 1<br>(1 - 2)      | 23<br>(17 - 31)    | 48<br>(36 - 62)    | 50<br>(41 - 59)    |
| Diabetes mellitus                                   | 73<br>(59 - 89)   | 0<br>(0 - 0)     | 0<br>(0 - 0)      | 10<br>(7 - 14)     | 33<br>(24 - 42)    | 30<br>(24 - 37)    |
| Acute glomerulonephritis                            | 0<br>(0 - 0)      | 0<br>(0 - 0)     | 0<br>(0 - 0)      | 0<br>(0 - 0)       | 0<br>(0 - 0)       | 0<br>(0 - 0)       |
| Chronic kidney disease                              | 32<br>(24 - 40)   | 0<br>(0 - 1)     | 0<br>(0 - 0)      | 7<br>(5 - 10)      | 10<br>(7 - 14)     | 13<br>(10 - 16)    |
| Chronic kidney disease due to diabetes mellitus     | 5<br>(2 - 8)      | 0<br>(0 - 0)     | 0<br>(0 - 0)      | 1<br>(0 - 2)       | 2<br>(1 - 4)       | 1<br>(1 - 2)       |
| Chronic kidney disease due to hypertension          | 17<br>(11 - 22)   | 0<br>(0 - 0)     | 0<br>(0 - 0)      | 4<br>(2 - 5)       | 6<br>(3 - 8)       | 7<br>(5 - 10)      |
| Chronic kidney disease due to glomerulonephritis    | 1<br>(1 - 2)      | 0<br>(0 - 0)     | 0<br>(0 - 0)      | 1<br>(0 - 1)       | 0<br>(0 - 0)       | 0<br>(0 - 1)       |
| Chronic kidney disease due to other causes          | 9<br>(5 - 13)     | 0<br>(0 - 0)     | 0<br>(0 - 0)      | 2<br>(1 - 4)       | 2<br>(1 - 4)       | 4<br>(2 - 6)       |
| Urinary diseases and male infertility               | 7<br>(5 - 9)      | 0<br>(0 - 0)     | 0<br>(0 - 0)      | 1<br>(1 - 1)       | 2<br>(1 - 3)       | 4<br>(3 - 6)       |
| Interstitial nephritis and urinary tract infections | 5<br>(3 - 7)      | 0<br>(0 - 0)     | 0<br>(0 - 0)      | 1<br>(0 - 1)       | 1<br>(1 - 2)       | 3<br>(2 - 4)       |
| Urolithiasis                                        | 0<br>(0 - 1)      | --               | 0<br>(0 - 0)      | 0<br>(0 - 0)       | 0<br>(0 - 0)       | 0<br>(0 - 0)       |
| Other urinary diseases                              | 2<br>(1 - 3)      | 0<br>(0 - 0)     | 0<br>(0 - 0)      | 0<br>(0 - 1)       | 1<br>(0 - 1)       | 1<br>(1 - 2)       |
| Gynecological diseases                              | --                | --               | --                | --                 | --                 | --                 |
| Uterine fibroids                                    | --                | --               | --                | --                 | --                 | --                 |
| Polycystic ovarian syndrome                         | --                | --               | --                | --                 | --                 | --                 |
| Endometriosis                                       | --                | --               | --                | --                 | --                 | --                 |
| Genital prolapse                                    | --                | --               | --                | --                 | --                 | --                 |
| Other gynecological diseases                        | --                | --               | --                | --                 | --                 | --                 |
| Hemoglobinopathies and hemolytic anemias            | 3<br>(2 - 5)      | 0<br>(0 - 1)     | 0<br>(0 - 1)      | 2<br>(1 - 2)       | 0<br>(0 - 1)       | 0<br>(0 - 0)       |
| Thalassemias                                        | 0<br>(0 - 0)      | 0<br>(0 - 0)     | 0<br>(0 - 0)      | 0<br>(0 - 0)       | 0<br>(0 - 0)       | 0<br>(0 - 0)       |
| Sickle cell disorders                               | 2<br>(1 - 4)      | 0<br>(0 - 1)     | 0<br>(0 - 1)      | 1<br>(1 - 2)       | 0<br>(0 - 0)       | 0<br>(0 - 0)       |
| G6PD deficiency                                     | 0<br>(0 - 0)      | 0<br>(0 - 0)     | 0<br>(0 - 0)      | 0<br>(0 - 0)       | 0<br>(0 - 0)       | 0<br>(0 - 0)       |
| Other hemoglobinopathies and hemolytic anemias      | 0<br>(0 - 1)      | 0<br>(0 - 0)     | 0<br>(0 - 0)      | 0<br>(0 - 0)       | 0<br>(0 - 0)       | 0<br>(0 - 0)       |
| Endocrine, metabolic, blood, and immune disorders   | 8<br>(6 - 17)     | 1<br>(0 - 2)     | 0<br>(0 - 0)      | 3<br>(2 - 6)       | 2<br>(1 - 5)       | 2<br>(1 - 4)       |
| Musculoskeletal disorders                           | 2<br>(1 - 3)      | --               | 0<br>(0 - 0)      | 1<br>(1 - 2)       | 1<br>(0 - 1)       | 1<br>(0 - 1)       |
| Rheumatoid arthritis                                | 0<br>(0 - 0)      | --               | 0<br>(0 - 0)      | 0<br>(0 - 0)       | 0<br>(0 - 0)       | 0<br>(0 - 0)       |
| Other musculoskeletal disorders                     | 2<br>(1 - 3)      | --               | 0<br>(0 - 0)      | 1<br>(1 - 2)       | 0<br>(0 - 1)       | 0<br>(0 - 1)       |
| Other non-communicable diseases                     | 24<br>(15 - 39)   | 15<br>(7 - 29)   | 1<br>(1 - 2)      | 3<br>(2 - 4)       | 2<br>(1 - 2)       | 3<br>(1 - 4)       |
| Congenital anomalies                                | 17<br>(10 - 30)   | 13<br>(6 - 25)   | 1<br>(1 - 2)      | 2<br>(1 - 3)       | 1<br>(0 - 1)       | 0<br>(0 - 1)       |
| Neural tube defects                                 | 1<br>(0 - 2)      | 1<br>(0 - 1)     | 0<br>(0 - 0)      | 0<br>(0 - 0)       | 0<br>(0 - 0)       | 0<br>(0 - 0)       |
| Congenital heart anomalies                          | 9<br>(5 - 16)     | 6<br>(3 - 13)    | 1<br>(0 - 1)      | 1<br>(1 - 2)       | 0<br>(0 - 0)       | 0<br>(0 - 0)       |
| Cleft lip and cleft palate                          | 0<br>(0 - 0)      | 0<br>(0 - 0)     | --                | --                 | --                 | --                 |
| Down syndrome                                       | 1<br>(0 - 1)      | 0<br>(0 - 1)     | 0<br>(0 - 0)      | 0<br>(0 - 0)       | 0<br>(0 - 0)       | 0<br>(0 - 0)       |
| Chromosomal unbalanced rearrangements               | 0<br>(0 - 1)      | 0<br>(0 - 1)     | 0<br>(0 - 0)      | 0<br>(0 - 0)       | 0<br>(0 - 0)       | 0<br>(0 - 0)       |
| Other congenital anomalies                          | 6<br>(3 - 12)     | 5<br>(2 - 11)    | 0<br>(0 - 1)      | 0<br>(0 - 1)       | 0<br>(0 - 0)       | 0<br>(0 - 0)       |
| Skin and subcutaneous diseases                      | 5<br>(2 - 6)      | 0<br>(0 - 0)     | 0<br>(0 - 0)      | 1<br>(0 - 1)       | 1<br>(0 - 2)       | 3<br>(1 - 4)       |
| Cellulitis                                          | 0<br>(0 - 1)      | 0<br>(0 - 0)     | 0<br>(0 - 0)      | 0<br>(0 - 0)       | 0<br>(0 - 0)       | 0<br>(0 - 0)       |
| Pyoderma                                            | 1<br>(1 - 2)      | 0<br>(0 - 0)     | 0<br>(0 - 0)      | 0<br>(0 - 0)       | 0<br>(0 - 1)       | 1<br>(0 - 1)       |
| Decubitus ulcer                                     | 3<br>(1 - 4)      | 0<br>(0 - 0)     | 0<br>(0 - 0)      | 0<br>(0 - 1)       | 1<br>(0 - 1)       | 2<br>(1 - 3)       |

Web Table 31- Belize deaths with 95% UI by age, sex, and cause in 2013

| Cause                                           | Males, All Ages    | Males, 0-4 Years | Males, 5-14 Years | Males, 15-49 Years | Males, 50-69 Years | Males, 70-80 Years |
|-------------------------------------------------|--------------------|------------------|-------------------|--------------------|--------------------|--------------------|
| Other skin and subcutaneous diseases            | 0<br>(0 - 0)       | 0<br>(0 - 0)     | 0<br>(0 - 0)      | 0<br>(0 - 0)       | 0<br>(0 - 0)       | 0<br>(0 - 0)       |
| Sudden infant death syndrome                    | 2<br>(0 - 4)       | 2<br>(0 - 4)     | --                | --                 | --                 | --                 |
| Injuries                                        | 186<br>(142 - 236) | 6<br>(3 - 12)    | 7<br>(5 - 10)     | 134<br>(100 - 173) | 27<br>(19 - 35)    | 13<br>(10 - 15)    |
| Transport injuries                              | 50<br>(38 - 65)    | 1<br>(0 - 2)     | 3<br>(2 - 4)      | 35<br>(26 - 46)    | 8<br>(6 - 11)      | 3<br>(3 - 4)       |
| Road injuries                                   | 47<br>(35 - 61)    | 1<br>(0 - 2)     | 2<br>(1 - 4)      | 33<br>(25 - 44)    | 8<br>(5 - 10)      | 3<br>(2 - 4)       |
| Pedestrian road injuries                        | 11<br>(7 - 16)     | 0<br>(0 - 1)     | 1<br>(1 - 2)      | 6<br>(4 - 9)       | 2<br>(1 - 3)       | 1<br>(1 - 2)       |
| Cyclist road injuries                           | 3<br>(2 - 4)       | 0<br>(0 - 0)     | 0<br>(0 - 0)      | 2<br>(1 - 2)       | 1<br>(0 - 1)       | 0<br>(0 - 0)       |
| Motorcyclist road injuries                      | 5<br>(3 - 7)       | 0<br>(0 - 0)     | 0<br>(0 - 0)      | 4<br>(2 - 6)       | 0<br>(0 - 1)       | 0<br>(0 - 0)       |
| Motor vehicle road injuries                     | 28<br>(21 - 37)    | 0<br>(0 - 1)     | 1<br>(1 - 2)      | 21<br>(15 - 28)    | 4<br>(3 - 6)       | 1<br>(1 - 2)       |
| Other road injuries                             | 0<br>(0 - 1)       | 0<br>(0 - 0)     | 0<br>(0 - 0)      | 0<br>(0 - 0)       | 0<br>(0 - 0)       | 0<br>(0 - 0)       |
| Other transport injuries                        | 3<br>(2 - 5)       | 0<br>(0 - 0)     | 0<br>(0 - 0)      | 2<br>(1 - 3)       | 1<br>(0 - 1)       | 0<br>(0 - 0)       |
| Unintentional injuries                          | 51<br>(39 - 66)    | 4<br>(2 - 8)     | 3<br>(2 - 5)      | 29<br>(21 - 37)    | 8<br>(6 - 11)      | 7<br>(5 - 8)       |
| Falls                                           | 7<br>(5 - 10)      | 0<br>(0 - 0)     | 0<br>(0 - 0)      | 3<br>(2 - 5)       | 2<br>(1 - 2)       | 2<br>(1 - 3)       |
| Drowning                                        | 16<br>(11 - 22)    | 1<br>(0 - 2)     | 2<br>(1 - 3)      | 11<br>(7 - 15)     | 2<br>(1 - 3)       | 1<br>(0 - 1)       |
| Fire, heat, and hot substances                  | 4<br>(2 - 5)       | 0<br>(0 - 1)     | 0<br>(0 - 0)      | 1<br>(1 - 2)       | 1<br>(0 - 1)       | 1<br>(1 - 1)       |
| Poisonings                                      | 1<br>(1 - 2)       | 0<br>(0 - 0)     | 0<br>(0 - 0)      | 1<br>(0 - 1)       | 0<br>(0 - 0)       | 0<br>(0 - 0)       |
| Exposure to mechanical forces                   | 10<br>(7 - 14)     | 0<br>(0 - 0)     | 0<br>(0 - 1)      | 8<br>(5 - 11)      | 1<br>(1 - 2)       | 0<br>(0 - 0)       |
| Unintentional firearm injuries                  | 6<br>(4 - 8)       | 0<br>(0 - 0)     | 0<br>(0 - 0)      | 5<br>(3 - 7)       | 1<br>(0 - 1)       | 0<br>(0 - 0)       |
| Unintentional suffocation                       | 1<br>(0 - 1)       | 0<br>(0 - 0)     | 0<br>(0 - 0)      | 0<br>(0 - 1)       | 0<br>(0 - 0)       | 0<br>(0 - 0)       |
| Other exposure to mechanical forces             | 3<br>(2 - 6)       | 0<br>(0 - 0)     | 0<br>(0 - 0)      | 2<br>(2 - 4)       | 0<br>(0 - 1)       | 0<br>(0 - 0)       |
| Adverse effects of medical treatment            | 4<br>(2 - 5)       | 0<br>(0 - 1)     | 0<br>(0 - 0)      | 1<br>(1 - 2)       | 1<br>(0 - 1)       | 1<br>(1 - 2)       |
| Animal contact                                  | 1<br>(0 - 1)       | 0<br>(0 - 0)     | 0<br>(0 - 0)      | 0<br>(0 - 1)       | 0<br>(0 - 0)       | 0<br>(0 - 0)       |
| Venomous animal contact                         | 1<br>(0 - 1)       | 0<br>(0 - 0)     | 0<br>(0 - 0)      | 0<br>(0 - 0)       | 0<br>(0 - 0)       | 0<br>(0 - 0)       |
| Non-venomous animal contact                     | 0<br>(0 - 0)       | 0<br>(0 - 0)     | 0<br>(0 - 0)      | 0<br>(0 - 0)       | 0<br>(0 - 0)       | 0<br>(0 - 0)       |
| Foreign body                                    | 6<br>(3 - 10)      | 2<br>(1 - 4)     | 0<br>(0 - 0)      | 2<br>(1 - 3)       | 1<br>(1 - 2)       | 1<br>(1 - 2)       |
| Pulmonary aspiration and foreign body in airway | 6<br>(3 - 10)      | 2<br>(1 - 4)     | 0<br>(0 - 0)      | 2<br>(1 - 3)       | 1<br>(1 - 2)       | 1<br>(1 - 2)       |
| Foreign body in other body part                 | 0<br>(0 - 0)       | 0<br>(0 - 0)     | 0<br>(0 - 0)      | 0<br>(0 - 0)       | 0<br>(0 - 0)       | 0<br>(0 - 0)       |
| Other unintentional injuries                    | 2<br>(1 - 3)       | 0<br>(0 - 0)     | 0<br>(0 - 0)      | 1<br>(1 - 2)       | 0<br>(0 - 1)       | 0<br>(0 - 0)       |
| Self-harm and interpersonal violence            | 85<br>(54 - 115)   | 1<br>(0 - 2)     | 1<br>(1 - 2)      | 70<br>(43 - 96)    | 10<br>(6 - 15)     | 3<br>(2 - 3)       |
| Self-harm                                       | 26<br>(19 - 34)    | --               | 0<br>(0 - 1)      | 19<br>(14 - 26)    | 5<br>(3 - 7)       | 2<br>(1 - 2)       |
| Interpersonal violence                          | 59<br>(30 - 83)    | 1<br>(0 - 2)     | 1<br>(0 - 2)      | 51<br>(25 - 72)    | 6<br>(3 - 9)       | 1<br>(0 - 2)       |
| Assault by firearm                              | 35<br>(16 - 53)    | 0<br>(0 - 0)     | 0<br>(0 - 1)      | 32<br>(15 - 48)    | 2<br>(1 - 4)       | 0<br>(0 - 0)       |
| Assault by sharp object                         | 14<br>(6 - 24)     | 0<br>(0 - 0)     | 0<br>(0 - 0)      | 12<br>(5 - 21)     | 1<br>(1 - 3)       | 0<br>(0 - 1)       |
| Assault by other means                          | 10<br>(4 - 15)     | 0<br>(0 - 1)     | 0<br>(0 - 1)      | 6<br>(3 - 10)      | 2<br>(1 - 3)       | 1<br>(0 - 1)       |

Web Table 31- Belize deaths with 95% UI by age, sex, and cause in 2013

| Cause                                                             | Females, All Ages    | Females, 0-4 Years | Females, 5-14 Years | Females, 15-49 Years | Females, 50-69 Years | Females, 70-80 Years |
|-------------------------------------------------------------------|----------------------|--------------------|---------------------|----------------------|----------------------|----------------------|
| All causes                                                        | 849<br>(709 - 1,022) | 63<br>(31 - 120)   | 12<br>(8 - 17)      | 161<br>(120 - 213)   | 202<br>(153 - 262)   | 412<br>(371 - 474)   |
| Communicable, maternal, neonatal, and nutritional diseases        | 114<br>(86 - 153)    | 41<br>(20 - 79)    | 2<br>(2 - 3)        | 26<br>(21 - 31)      | 9<br>(6 - 11)        | 36<br>(27 - 47)      |
| HIV/AIDS and tuberculosis                                         | 14<br>(10 - 19)      | 0<br>(0 - 0)       | 0<br>(0 - 0)        | 12<br>(8 - 16)       | 2<br>(1 - 2)         | 1<br>(0 - 1)         |
| Tuberculosis                                                      | 2<br>(1 - 3)         | 0<br>(0 - 0)       | 0<br>(0 - 0)        | 1<br>(1 - 2)         | 1<br>(0 - 1)         | 1<br>(0 - 1)         |
| HIV/AIDS                                                          | 12<br>(7 - 17)       | 0<br>(0 - 0)       | 0<br>(0 - 0)        | 11<br>(7 - 15)       | 1<br>(0 - 2)         | 0<br>(0 - 0)         |
| HIV/AIDS resulting in mycobacterial infection                     | 1<br>(0 - 1)         | 0<br>(0 - 0)       | 0<br>(0 - 0)        | 0<br>(0 - 1)         | 0<br>(0 - 0)         | 0<br>(0 - 0)         |
| HIV/AIDS resulting in other diseases                              | 11<br>(7 - 16)       | 0<br>(0 - 0)       | 0<br>(0 - 0)        | 10<br>(6 - 14)       | 1<br>(0 - 2)         | 0<br>(0 - 0)         |
| Diarrhea, lower respiratory, and other common infectious diseases | 51<br>(38 - 66)      | 9<br>(4 - 18)      | 2<br>(1 - 2)        | 6<br>(4 - 9)         | 5<br>(4 - 7)         | 29<br>(21 - 40)      |
| Diarrheal diseases                                                | 6<br>(4 - 9)         | 3<br>(1 - 6)       | 0<br>(0 - 0)        | 1<br>(0 - 1)         | 0<br>(0 - 1)         | 2<br>(1 - 3)         |
| Intestinal infectious diseases                                    | 1<br>(1 - 3)         | 0<br>(0 - 1)       | 0<br>(0 - 1)        | 0<br>(0 - 1)         | 0<br>(0 - 0)         | 0<br>(0 - 0)         |
| Typhoid fever                                                     | 1<br>(0 - 2)         | 0<br>(0 - 1)       | 0<br>(0 - 1)        | 0<br>(0 - 1)         | 0<br>(0 - 0)         | 0<br>(0 - 0)         |
| Paratyphoid fever                                                 | 0<br>(0 - 1)         | 0<br>(0 - 0)       | 0<br>(0 - 0)        | 0<br>(0 - 0)         | 0<br>(0 - 0)         | 0<br>(0 - 0)         |
| Other intestinal infectious diseases                              | 0<br>(0 - 0)         | 0<br>(0 - 0)       | 0<br>(0 - 0)        | 0<br>(0 - 0)         | 0<br>(0 - 0)         | 0<br>(0 - 0)         |
| Lower respiratory infections                                      | 40<br>(30 - 53)      | 4<br>(2 - 9)       | 1<br>(0 - 1)        | 4<br>(3 - 6)         | 4<br>(3 - 6)         | 27<br>(19 - 37)      |
| Upper respiratory infections                                      | 0<br>(0 - 0)         | 0<br>(0 - 0)       | 0<br>(0 - 0)        | 0<br>(0 - 0)         | 0<br>(0 - 0)         | 0<br>(0 - 0)         |
| Otitis media                                                      | 0<br>(0 - 0)         | 0<br>(0 - 0)       | 0<br>(0 - 0)        | 0<br>(0 - 0)         | 0<br>(0 - 0)         | 0<br>(0 - 0)         |
| Meningitis                                                        | 2<br>(1 - 3)         | 1<br>(0 - 1)       | 0<br>(0 - 0)        | 1<br>(0 - 1)         | 0<br>(0 - 0)         | 0<br>(0 - 1)         |
| Pneumococcal meningitis                                           | 1<br>(0 - 1)         | 0<br>(0 - 0)       | 0<br>(0 - 0)        | 0<br>(0 - 0)         | 0<br>(0 - 0)         | 0<br>(0 - 0)         |
| H influenzae type B meningitis                                    | 0<br>(0 - 1)         | 0<br>(0 - 0)       | 0<br>(0 - 0)        | 0<br>(0 - 0)         | 0<br>(0 - 0)         | 0<br>(0 - 0)         |
| Meningococcal meningitis                                          | 0<br>(0 - 0)         | 0<br>(0 - 0)       | 0<br>(0 - 0)        | 0<br>(0 - 0)         | 0<br>(0 - 0)         | 0<br>(0 - 0)         |
| Other meningitis                                                  | 1<br>(0 - 1)         | 0<br>(0 - 0)       | 0<br>(0 - 0)        | 0<br>(0 - 0)         | 0<br>(0 - 0)         | 0<br>(0 - 0)         |
| Encephalitis                                                      | 1<br>(1 - 2)         | 0<br>(0 - 1)       | 0<br>(0 - 0)        | 0<br>(0 - 1)         | 0<br>(0 - 0)         | 0<br>(0 - 0)         |
| Diphtheria                                                        | 0<br>(0 - 0)         | 0<br>(0 - 0)       | 0<br>(0 - 0)        | 0<br>(0 - 0)         | 0<br>(0 - 0)         | --                   |
| Whooping cough                                                    | 0<br>(0 - 0)         | 0<br>(0 - 0)       | 0<br>(0 - 0)        | 0<br>(0 - 0)         | 0<br>(0 - 0)         | --                   |
| Tetanus                                                           | 0<br>(0 - 0)         | 0<br>(0 - 0)       | 0<br>(0 - 0)        | 0<br>(0 - 0)         | 0<br>(0 - 0)         | 0<br>(0 - 0)         |
| Measles                                                           | 0<br>(0 - 0)         | 0<br>(0 - 0)       | 0<br>(0 - 0)        | 0<br>(0 - 0)         | 0<br>(0 - 0)         | --                   |
| Varicella and herpes zoster                                       | 0<br>(0 - 0)         | 0<br>(0 - 0)       | 0<br>(0 - 0)        | 0<br>(0 - 0)         | 0<br>(0 - 0)         | 0<br>(0 - 0)         |
| Neglected tropical diseases and malaria                           | 1<br>(1 - 2)         | 0<br>(0 - 0)       | 0<br>(0 - 0)        | 0<br>(0 - 1)         | 0<br>(0 - 0)         | 0<br>(0 - 0)         |
| Malaria                                                           | 0<br>(0 - 1)         | 0<br>(0 - 0)       | 0<br>(0 - 0)        | 0<br>(0 - 0)         | 0<br>(0 - 0)         | 0<br>(0 - 0)         |
| Chagas disease                                                    | 0<br>(0 - 0)         | 0<br>(0 - 0)       | 0<br>(0 - 0)        | 0<br>(0 - 0)         | 0<br>(0 - 0)         | 0<br>(0 - 0)         |
| Leishmaniasis                                                     | 0<br>(0 - 0)         | 0<br>(0 - 0)       | 0<br>(0 - 0)        | 0<br>(0 - 0)         | 0<br>(0 - 0)         | 0<br>(0 - 0)         |
| Visceral leishmaniasis                                            | 0<br>(0 - 0)         | 0<br>(0 - 0)       | 0<br>(0 - 0)        | 0<br>(0 - 0)         | 0<br>(0 - 0)         | 0<br>(0 - 0)         |
| Cysticercosis                                                     | 0<br>(0 - 0)         | 0<br>(0 - 0)       | 0<br>(0 - 0)        | 0<br>(0 - 0)         | 0<br>(0 - 0)         | 0<br>(0 - 0)         |
| Cystic echinococcosis                                             | 0<br>(0 - 0)         | 0<br>(0 - 0)       | 0<br>(0 - 0)        | 0<br>(0 - 0)         | 0<br>(0 - 0)         | 0<br>(0 - 0)         |
| Dengue                                                            | 0<br>(0 - 1)         | 0<br>(0 - 0)       | 0<br>(0 - 0)        | 0<br>(0 - 0)         | 0<br>(0 - 0)         | 0<br>(0 - 0)         |
| Rabies                                                            | 0<br>(0 - 0)         | 0<br>(0 - 0)       | 0<br>(0 - 0)        | 0<br>(0 - 0)         | 0<br>(0 - 0)         | 0<br>(0 - 0)         |
| Intestinal nematode infections                                    | 0<br>(0 - 1)         | 0<br>(0 - 0)       | 0<br>(0 - 0)        | 0<br>(0 - 0)         | 0<br>(0 - 0)         | 0<br>(0 - 0)         |
| Ascariasis                                                        | 0<br>(0 - 1)         | 0<br>(0 - 0)       | 0<br>(0 - 0)        | 0<br>(0 - 0)         | 0<br>(0 - 0)         | 0<br>(0 - 0)         |
| Other neglected tropical diseases                                 | 0<br>(0 - 0)         | 0<br>(0 - 0)       | 0<br>(0 - 0)        | 0<br>(0 - 0)         | 0<br>(0 - 0)         | 0<br>(0 - 0)         |
| Maternal disorders                                                | 4<br>(3 - 6)         | --                 | 0<br>(0 - 0)        | 4<br>(3 - 6)         | --                   | --                   |

Web Table 31- Belize deaths with 95% UI by age, sex, and cause in 2013

| Cause                                                            | Females, All Ages  | Females, 0-4 Years | Females, 5-14 Years | Females, 15-49 Years | Females, 50-69 Years | Females, 70-80 Years |
|------------------------------------------------------------------|--------------------|--------------------|---------------------|----------------------|----------------------|----------------------|
| Maternal hemorrhage                                              | 1<br>(0 - 1)       | --                 | 0<br>(0 - 0)        | 1<br>(0 - 1)         | --                   | --                   |
| Maternal sepsis and other maternal infections                    | 0<br>(0 - 1)       | --                 | 0<br>(0 - 0)        | 0<br>(0 - 1)         | --                   | --                   |
| Maternal hypertensive disorders                                  | 1<br>(0 - 1)       | --                 | 0<br>(0 - 0)        | 1<br>(0 - 1)         | --                   | --                   |
| Maternal obstructed labor                                        | 0<br>(0 - 1)       | --                 | 0<br>(0 - 0)        | 0<br>(0 - 1)         | --                   | --                   |
| Maternal abortive outcome                                        | 1<br>(0 - 1)       | --                 | 0<br>(0 - 0)        | 1<br>(0 - 1)         | --                   | --                   |
| Indirect maternal deaths                                         | 0<br>(0 - 1)       | --                 | 0<br>(0 - 0)        | 0<br>(0 - 1)         | --                   | --                   |
| Late maternal deaths                                             | 0<br>(0 - 1)       | --                 | 0<br>(0 - 0)        | 0<br>(0 - 1)         | --                   | --                   |
| Maternal deaths aggravated by HIV/AIDS                           | 0<br>(0 - 0)       | --                 | --                  | 0<br>(0 - 0)         | --                   | --                   |
| Other maternal disorders                                         | 1<br>(0 - 1)       | --                 | 0<br>(0 - 0)        | 1<br>(0 - 1)         | --                   | --                   |
| Neonatal disorders                                               | 30<br>(13 - 56)    | 30<br>(13 - 56)    | --                  | --                   | --                   | --                   |
| Neonatal preterm birth complications                             | 14<br>(6 - 27)     | 14<br>(6 - 27)     | --                  | --                   | --                   | --                   |
| Neonatal encephalopathy due to birth asphyxia and trauma         | 7<br>(3 - 14)      | 7<br>(3 - 14)      | --                  | --                   | --                   | --                   |
| Neonatal sepsis and other neonatal infections                    | 5<br>(2 - 11)      | 5<br>(2 - 11)      | --                  | --                   | --                   | --                   |
| Hemolytic disease and other neonatal jaundice                    | 0<br>(0 - 1)       | 0<br>(0 - 1)       | --                  | --                   | --                   | --                   |
| Other neonatal disorders                                         | 3<br>(1 - 7)       | 3<br>(1 - 7)       | --                  | --                   | --                   | --                   |
| Nutritional deficiencies                                         | 11<br>(9 - 16)     | 2<br>(1 - 5)       | 0<br>(0 - 0)        | 2<br>(2 - 4)         | 1<br>(1 - 2)         | 5<br>(4 - 8)         |
| Protein-energy malnutrition                                      | 5<br>(3 - 8)       | 2<br>(1 - 4)       | 0<br>(0 - 0)        | 0<br>(0 - 1)         | 0<br>(0 - 1)         | 2<br>(1 - 4)         |
| Iodine deficiency                                                | 0<br>(0 - 0)       | 0<br>(0 - 0)       | 0<br>(0 - 0)        | 0<br>(0 - 0)         | 0<br>(0 - 0)         | 0<br>(0 - 0)         |
| Iron-deficiency anemia                                           | 6<br>(4 - 9)       | 0<br>(0 - 1)       | 0<br>(0 - 0)        | 2<br>(1 - 3)         | 1<br>(0 - 1)         | 3<br>(2 - 5)         |
| Other nutritional deficiencies                                   | 1<br>(0 - 1)       | 0<br>(0 - 0)       | 0<br>(0 - 0)        | 0<br>(0 - 0)         | 0<br>(0 - 0)         | 0<br>(0 - 1)         |
| Other communicable, maternal, neonatal, and nutritional diseases | 3<br>(2 - 4)       | 1<br>(0 - 2)       | 0<br>(0 - 0)        | 1<br>(1 - 1)         | 1<br>(0 - 1)         | 1<br>(0 - 1)         |
| Sexually transmitted diseases excluding HIV                      | 1<br>(0 - 2)       | 0<br>(0 - 1)       | 0<br>(0 - 0)        | 0<br>(0 - 0)         | 0<br>(0 - 0)         | 0<br>(0 - 0)         |
| Syphilis                                                         | 1<br>(0 - 2)       | 0<br>(0 - 1)       | 0<br>(0 - 0)        | 0<br>(0 - 0)         | 0<br>(0 - 0)         | 0<br>(0 - 0)         |
| Chlamydial infection                                             | 0<br>(0 - 0)       | --                 | 0<br>(0 - 0)        | 0<br>(0 - 0)         | 0<br>(0 - 0)         | 0<br>(0 - 0)         |
| Gonococcal infection                                             | 0<br>(0 - 0)       | --                 | 0<br>(0 - 0)        | 0<br>(0 - 0)         | 0<br>(0 - 0)         | 0<br>(0 - 0)         |
| Other sexually transmitted diseases                              | 0<br>(0 - 0)       | --                 | 0<br>(0 - 0)        | 0<br>(0 - 0)         | 0<br>(0 - 0)         | 0<br>(0 - 0)         |
| Hepatitis                                                        | 0<br>(0 - 0)       | 0<br>(0 - 0)       | 0<br>(0 - 0)        | 0<br>(0 - 0)         | 0<br>(0 - 0)         | 0<br>(0 - 0)         |
| Acute hepatitis A                                                | 0<br>(0 - 0)       | 0<br>(0 - 0)       | 0<br>(0 - 0)        | 0<br>(0 - 0)         | 0<br>(0 - 0)         | 0<br>(0 - 0)         |
| Acute hepatitis B                                                | 0<br>(0 - 0)       | 0<br>(0 - 0)       | 0<br>(0 - 0)        | 0<br>(0 - 0)         | 0<br>(0 - 0)         | 0<br>(0 - 0)         |
| Acute hepatitis C                                                | 0<br>(0 - 0)       | --                 | 0<br>(0 - 0)        | 0<br>(0 - 0)         | 0<br>(0 - 0)         | 0<br>(0 - 0)         |
| Other infectious diseases                                        | 2<br>(1 - 2)       | 0<br>(0 - 0)       | 0<br>(0 - 0)        | 1<br>(0 - 1)         | 0<br>(0 - 1)         | 1<br>(0 - 1)         |
| Non-communicable diseases                                        | 680<br>(566 - 828) | 17<br>(8 - 34)     | 6<br>(4 - 8)        | 107<br>(76 - 146)    | 186<br>(140 - 241)   | 364<br>(325 - 420)   |
| Neoplasms                                                        | 136<br>(107 - 175) | 1<br>(0 - 2)       | 1<br>(1 - 2)        | 35<br>(25 - 49)      | 47<br>(36 - 63)      | 51<br>(43 - 61)      |
| Esophageal cancer                                                | 2<br>(1 - 2)       | --                 | --                  | 0<br>(0 - 0)         | 1<br>(0 - 1)         | 1<br>(1 - 1)         |
| Stomach cancer                                                   | 8<br>(6 - 10)      | --                 | --                  | 1<br>(1 - 2)         | 2<br>(2 - 3)         | 4<br>(3 - 6)         |
| Liver cancer                                                     | 4<br>(3 - 6)       | --                 | 0<br>(0 - 0)        | 1<br>(1 - 1)         | 2<br>(1 - 2)         | 2<br>(1 - 3)         |
| Liver cancer due to hepatitis B                                  | 1<br>(1 - 2)       | --                 | 0<br>(0 - 0)        | 0<br>(0 - 1)         | 0<br>(0 - 1)         | 0<br>(0 - 1)         |
| Liver cancer due to hepatitis C                                  | 2<br>(1 - 3)       | --                 | 0<br>(0 - 0)        | 0<br>(0 - 0)         | 1<br>(0 - 1)         | 1<br>(1 - 2)         |
| Liver cancer due to alcohol use                                  | 1<br>(0 - 1)       | --                 | --                  | 0<br>(0 - 0)         | 0<br>(0 - 0)         | 0<br>(0 - 1)         |
| Liver cancer due to other causes                                 | 1<br>(0 - 1)       | --                 | 0<br>(0 - 0)        | 0<br>(0 - 0)         | 0<br>(0 - 1)         | 0<br>(0 - 0)         |

Web Table 31- Belize deaths with 95% UI by age, sex, and cause in 2013

| Cause                                         | Females, All Ages  | Females, 0-4 Years | Females, 5-14 Years | Females, 15-49 Years | Females, 50-69 Years | Females, 70-80 Years |
|-----------------------------------------------|--------------------|--------------------|---------------------|----------------------|----------------------|----------------------|
| Larynx cancer                                 | 0<br>(0 - 1)       | --                 | --                  | 0<br>(0 - 0)         | 0<br>(0 - 0)         | 0<br>(0 - 0)         |
| Tracheal, bronchus and lung cancer            | 8<br>(6 - 11)      | --                 | --                  | 2<br>(1 - 2)         | 3<br>(2 - 5)         | 3<br>(2 - 4)         |
| Breast cancer                                 | 26<br>(20 - 35)    | --                 | --                  | 9<br>(6 - 13)        | 10<br>(7 - 13)       | 8<br>(6 - 10)        |
| Cervical cancer                               | 21<br>(15 - 30)    | --                 | --                  | 8<br>(5 - 12)        | 7<br>(5 - 11)        | 5<br>(4 - 8)         |
| Uterine cancer                                | 6<br>(3 - 8)       | --                 | --                  | 0<br>(0 - 1)         | 2<br>(1 - 4)         | 3<br>(1 - 4)         |
| Prostate cancer                               | --                 | --                 | --                  | --                   | --                   | --                   |
| Colon and rectum cancer                       | 15<br>(12 - 19)    | --                 | --                  | 2<br>(1 - 3)         | 5<br>(3 - 6)         | 8<br>(6 - 10)        |
| Lip and oral cavity cancer                    | 1<br>(1 - 1)       | --                 | --                  | 0<br>(0 - 0)         | 0<br>(0 - 1)         | 1<br>(0 - 1)         |
| Nasopharynx cancer                            | 0<br>(0 - 1)       | --                 | 0<br>(0 - 0)        | 0<br>(0 - 0)         | 0<br>(0 - 0)         | 0<br>(0 - 0)         |
| Other pharynx cancer                          | 0<br>(0 - 0)       | --                 | --                  | 0<br>(0 - 0)         | 0<br>(0 - 0)         | 0<br>(0 - 0)         |
| Gallbladder and biliary tract cancer          | 2<br>(1 - 4)       | --                 | --                  | 0<br>(0 - 0)         | 1<br>(0 - 1)         | 1<br>(1 - 2)         |
| Pancreatic cancer                             | 6<br>(4 - 7)       | --                 | --                  | 0<br>(0 - 1)         | 2<br>(1 - 3)         | 3<br>(2 - 4)         |
| Malignant skin melanoma                       | 0<br>(0 - 1)       | --                 | --                  | 0<br>(0 - 0)         | 0<br>(0 - 0)         | 0<br>(0 - 0)         |
| Non-melanoma skin cancer                      | 0<br>(0 - 1)       | --                 | --                  | 0<br>(0 - 0)         | 0<br>(0 - 0)         | 0<br>(0 - 1)         |
| Ovarian cancer                                | 8<br>(6 - 11)      | --                 | --                  | 2<br>(1 - 3)         | 3<br>(2 - 5)         | 3<br>(2 - 3)         |
| Testicular cancer                             | --                 | --                 | --                  | --                   | --                   | --                   |
| Kidney cancer                                 | 2<br>(1 - 2)       | 0<br>(0 - 0)       | 0<br>(0 - 0)        | 0<br>(0 - 1)         | 1<br>(0 - 1)         | 1<br>(0 - 1)         |
| Bladder cancer                                | 1<br>(1 - 2)       | --                 | --                  | 0<br>(0 - 0)         | 0<br>(0 - 1)         | 1<br>(1 - 2)         |
| Brain and nervous system cancer               | 2<br>(1 - 3)       | 0<br>(0 - 0)       | 0<br>(0 - 0)        | 1<br>(0 - 1)         | 1<br>(0 - 1)         | 0<br>(0 - 1)         |
| Thyroid cancer                                | 1<br>(1 - 1)       | --                 | 0<br>(0 - 0)        | 0<br>(0 - 0)         | 0<br>(0 - 0)         | 0<br>(0 - 0)         |
| Mesothelioma                                  | 0<br>(0 - 0)       | --                 | --                  | 0<br>(0 - 0)         | 0<br>(0 - 0)         | 0<br>(0 - 0)         |
| Hodgkin lymphoma                              | 0<br>(0 - 1)       | 0<br>(0 - 0)       | 0<br>(0 - 0)        | 0<br>(0 - 0)         | 0<br>(0 - 0)         | 0<br>(0 - 0)         |
| Non-Hodgkin lymphoma                          | 6<br>(3 - 8)       | 0<br>(0 - 0)       | 0<br>(0 - 0)        | 2<br>(1 - 3)         | 2<br>(1 - 3)         | 1<br>(1 - 2)         |
| Multiple myeloma                              | 2<br>(1 - 3)       | --                 | --                  | 0<br>(0 - 0)         | 1<br>(1 - 1)         | 1<br>(0 - 1)         |
| Leukemia                                      | 5<br>(3 - 6)       | 0<br>(0 - 1)       | 0<br>(0 - 1)        | 2<br>(1 - 3)         | 1<br>(1 - 1)         | 1<br>(1 - 1)         |
| Other neoplasms                               | 9<br>(6 - 12)      | 0<br>(0 - 1)       | 1<br>(0 - 1)        | 3<br>(2 - 4)         | 2<br>(2 - 4)         | 2<br>(2 - 3)         |
| Cardiovascular diseases                       | 292<br>(241 - 363) | 1<br>(1 - 3)       | 1<br>(1 - 2)        | 28<br>(18 - 42)      | 70<br>(51 - 95)      | 192<br>(166 - 228)   |
| Rheumatic heart disease                       | 2<br>(2 - 3)       | 0<br>(0 - 0)       | 0<br>(0 - 0)        | 1<br>(1 - 2)         | 0<br>(0 - 1)         | 0<br>(0 - 1)         |
| Ischemic heart disease                        | 123<br>(98 - 168)  | 0<br>(0 - 0)       | 0<br>(0 - 0)        | 10<br>(6 - 16)       | 28<br>(20 - 41)      | 85<br>(69 - 113)     |
| Cerebrovascular disease                       | 100<br>(77 - 129)  | 0<br>(0 - 1)       | 0<br>(0 - 1)        | 9<br>(6 - 14)        | 25<br>(18 - 35)      | 65<br>(51 - 80)      |
| Ischemic stroke                               | 60<br>(45 - 79)    | 0<br>(0 - 0)       | 0<br>(0 - 0)        | 2<br>(1 - 4)         | 13<br>(8 - 19)       | 45<br>(34 - 58)      |
| Hemorrhagic stroke                            | 40<br>(28 - 53)    | 0<br>(0 - 1)       | 0<br>(0 - 0)        | 7<br>(4 - 10)        | 13<br>(9 - 18)       | 20<br>(13 - 26)      |
| Hypertensive heart disease                    | 35<br>(22 - 48)    | 0<br>(0 - 0)       | 0<br>(0 - 0)        | 3<br>(1 - 4)         | 8<br>(5 - 12)        | 24<br>(14 - 34)      |
| Cardiomyopathy and myocarditis                | 8<br>(5 - 12)      | 0<br>(0 - 1)       | 0<br>(0 - 0)        | 2<br>(1 - 3)         | 2<br>(1 - 3)         | 3<br>(2 - 5)         |
| Atrial fibrillation and flutter               | 4<br>(3 - 6)       | --                 | --                  | 0<br>(0 - 0)         | 1<br>(0 - 1)         | 3<br>(2 - 5)         |
| Aortic aneurysm                               | 3<br>(2 - 4)       | --                 | --                  | 0<br>(0 - 0)         | 1<br>(0 - 1)         | 2<br>(1 - 3)         |
| Peripheral vascular disease                   | 2<br>(1 - 3)       | --                 | --                  | 0<br>(0 - 0)         | 0<br>(0 - 0)         | 2<br>(1 - 3)         |
| Endocarditis                                  | 1<br>(1 - 2)       | 0<br>(0 - 0)       | 0<br>(0 - 0)        | 0<br>(0 - 1)         | 0<br>(0 - 0)         | 1<br>(0 - 1)         |
| Other cardiovascular and circulatory diseases | 15<br>(9 - 20)     | 0<br>(0 - 1)       | 0<br>(0 - 0)        | 3<br>(2 - 4)         | 4<br>(2 - 6)         | 7<br>(4 - 11)        |
| Chronic respiratory diseases                  | 18<br>(14 - 26)    | 1<br>(0 - 1)       | 0<br>(0 - 0)        | 4<br>(2 - 6)         | 4<br>(3 - 6)         | 10<br>(8 - 14)       |

Web Table 31- Belize deaths with 95% UI by age, sex, and cause in 2013

| Cause                                               | Females, All Ages | Females, 0-4 Years | Females, 5-14 Years | Females, 15-49 Years | Females, 50-69 Years | Females, 70-80 Years |
|-----------------------------------------------------|-------------------|--------------------|---------------------|----------------------|----------------------|----------------------|
| Chronic obstructive pulmonary disease               | 11<br>(8 - 16)    | 0<br>(0 - 0)       | 0<br>(0 - 0)        | 1<br>(1 - 2)         | 2<br>(1 - 3)         | 7<br>(5 - 10)        |
| Pneumoconiosis                                      | 0<br>(0 - 0)      | 0<br>(0 - 0)       | 0<br>(0 - 0)        | 0<br>(0 - 0)         | 0<br>(0 - 0)         | 0<br>(0 - 0)         |
| Silicosis                                           | 0<br>(0 - 0)      | 0<br>(0 - 0)       | 0<br>(0 - 0)        | 0<br>(0 - 0)         | 0<br>(0 - 0)         | 0<br>(0 - 0)         |
| Asbestosis                                          | 0<br>(0 - 0)      | 0<br>(0 - 0)       | 0<br>(0 - 0)        | 0<br>(0 - 0)         | 0<br>(0 - 0)         | 0<br>(0 - 0)         |
| Coal workers pneumoconiosis                         | 0<br>(0 - 0)      | 0<br>(0 - 0)       | 0<br>(0 - 0)        | 0<br>(0 - 0)         | 0<br>(0 - 0)         | 0<br>(0 - 0)         |
| Other pneumoconiosis                                | 0<br>(0 - 0)      | 0<br>(0 - 0)       | 0<br>(0 - 0)        | 0<br>(0 - 0)         | 0<br>(0 - 0)         | 0<br>(0 - 0)         |
| Asthma                                              | 5<br>(3 - 8)      | 0<br>(0 - 0)       | 0<br>(0 - 0)        | 2<br>(1 - 3)         | 1<br>(1 - 2)         | 2<br>(1 - 3)         |
| Interstitial lung disease and pulmonary sarcoidosis | 2<br>(1 - 3)      | 0<br>(0 - 0)       | 0<br>(0 - 0)        | 0<br>(0 - 1)         | 0<br>(0 - 1)         | 1<br>(0 - 1)         |
| Other chronic respiratory diseases                  | 1<br>(1 - 1)      | 0<br>(0 - 0)       | 0<br>(0 - 0)        | 0<br>(0 - 0)         | 0<br>(0 - 0)         | 0<br>(0 - 0)         |
| Cirrhosis                                           | 13<br>(10 - 17)   | 0<br>(0 - 0)       | 0<br>(0 - 0)        | 5<br>(3 - 7)         | 5<br>(4 - 7)         | 3<br>(2 - 4)         |
| Cirrhosis due to hepatitis B                        | 2<br>(1 - 3)      | 0<br>(0 - 0)       | 0<br>(0 - 0)        | 1<br>(0 - 1)         | 1<br>(0 - 1)         | 0<br>(0 - 1)         |
| Cirrhosis due to hepatitis C                        | 6<br>(3 - 9)      | 0<br>(0 - 0)       | 0<br>(0 - 0)        | 2<br>(1 - 3)         | 2<br>(1 - 4)         | 1<br>(1 - 2)         |
| Cirrhosis due to alcohol use                        | 3<br>(1 - 4)      | --                 | --                  | 1<br>(0 - 1)         | 1<br>(0 - 2)         | 1<br>(0 - 1)         |
| Cirrhosis due to other causes                       | 3<br>(2 - 5)      | 0<br>(0 - 0)       | 0<br>(0 - 0)        | 2<br>(1 - 3)         | 1<br>(0 - 2)         | 0<br>(0 - 1)         |
| Digestive diseases                                  | 18<br>(14 - 23)   | 0<br>(0 - 0)       | 0<br>(0 - 0)        | 4<br>(3 - 6)         | 4<br>(3 - 6)         | 9<br>(7 - 12)        |
| Peptic ulcer disease                                | 4<br>(3 - 5)      | 0<br>(0 - 0)       | 0<br>(0 - 0)        | 1<br>(0 - 1)         | 1<br>(1 - 2)         | 2<br>(1 - 3)         |
| Gastritis and duodenitis                            | 1<br>(0 - 1)      | 0<br>(0 - 0)       | 0<br>(0 - 0)        | 0<br>(0 - 0)         | 0<br>(0 - 0)         | 0<br>(0 - 1)         |
| Appendicitis                                        | 1<br>(1 - 2)      | 0<br>(0 - 0)       | 0<br>(0 - 0)        | 0<br>(0 - 1)         | 0<br>(0 - 0)         | 0<br>(0 - 0)         |
| Paralytic ileus and intestinal obstruction          | 2<br>(1 - 4)      | 0<br>(0 - 0)       | 0<br>(0 - 0)        | 0<br>(0 - 1)         | 0<br>(0 - 1)         | 1<br>(0 - 2)         |
| Inguinal, femoral, and abdominal hernia             | 1<br>(0 - 2)      | 0<br>(0 - 0)       | 0<br>(0 - 0)        | 0<br>(0 - 0)         | 0<br>(0 - 0)         | 0<br>(0 - 1)         |
| Inflammatory bowel disease                          | 2<br>(1 - 3)      | 0<br>(0 - 0)       | 0<br>(0 - 0)        | 0<br>(0 - 1)         | 0<br>(0 - 1)         | 1<br>(1 - 2)         |
| Vascular intestinal disorders                       | 1<br>(1 - 2)      | 0<br>(0 - 0)       | 0<br>(0 - 0)        | 0<br>(0 - 0)         | 0<br>(0 - 1)         | 1<br>(0 - 1)         |
| Gallbladder and biliary diseases                    | 2<br>(1 - 2)      | 0<br>(0 - 0)       | 0<br>(0 - 0)        | 0<br>(0 - 1)         | 1<br>(0 - 1)         | 1<br>(1 - 1)         |
| Pancreatitis                                        | 1<br>(1 - 2)      | 0<br>(0 - 0)       | 0<br>(0 - 0)        | 0<br>(0 - 1)         | 0<br>(0 - 0)         | 0<br>(0 - 1)         |
| Other digestive diseases                            | 4<br>(3 - 5)      | 0<br>(0 - 0)       | 0<br>(0 - 0)        | 1<br>(0 - 1)         | 1<br>(1 - 1)         | 2<br>(1 - 3)         |
| Neurological disorders                              | 30<br>(23 - 39)   | 0<br>(0 - 1)       | 0<br>(0 - 0)        | 3<br>(2 - 4)         | 3<br>(2 - 4)         | 24<br>(18 - 31)      |
| Alzheimer disease and other dementias               | 23<br>(17 - 30)   | --                 | --                  | 0<br>(0 - 0)         | 1<br>(1 - 2)         | 22<br>(16 - 29)      |
| Parkinson disease                                   | 2<br>(1 - 3)      | --                 | --                  | 0<br>(0 - 0)         | 0<br>(0 - 1)         | 2<br>(1 - 3)         |
| Epilepsy                                            | 3<br>(2 - 5)      | 0<br>(0 - 0)       | 0<br>(0 - 0)        | 2<br>(1 - 3)         | 0<br>(0 - 1)         | 0<br>(0 - 1)         |
| Multiple sclerosis                                  | 0<br>(0 - 0)      | --                 | --                  | 0<br>(0 - 0)         | 0<br>(0 - 0)         | 0<br>(0 - 0)         |
| Other neurological disorders                        | 2<br>(1 - 2)      | 0<br>(0 - 0)       | 0<br>(0 - 0)        | 1<br>(0 - 1)         | 0<br>(0 - 1)         | 0<br>(0 - 1)         |
| Mental and substance use disorders                  | 1<br>(1 - 2)      | 0<br>(0 - 0)       | 0<br>(0 - 0)        | 1<br>(0 - 1)         | 0<br>(0 - 1)         | 0<br>(0 - 0)         |
| Schizophrenia                                       | 0<br>(0 - 0)      | --                 | --                  | 0<br>(0 - 0)         | 0<br>(0 - 0)         | 0<br>(0 - 0)         |
| Alcohol use disorders                               | 1<br>(0 - 1)      | --                 | --                  | 0<br>(0 - 1)         | 0<br>(0 - 0)         | 0<br>(0 - 0)         |
| Drug use disorders                                  | 1<br>(0 - 1)      | 0<br>(0 - 0)       | --                  | 0<br>(0 - 0)         | 0<br>(0 - 0)         | 0<br>(0 - 0)         |
| Opioid use disorders                                | 0<br>(0 - 0)      | 0<br>(0 - 0)       | --                  | 0<br>(0 - 0)         | 0<br>(0 - 0)         | 0<br>(0 - 0)         |
| Cocaine use disorders                               | 0<br>(0 - 0)      | 0<br>(0 - 0)       | --                  | 0<br>(0 - 0)         | 0<br>(0 - 0)         | 0<br>(0 - 0)         |
| Amphetamine use disorders                           | 0<br>(0 - 0)      | 0<br>(0 - 0)       | --                  | 0<br>(0 - 0)         | 0<br>(0 - 0)         | 0<br>(0 - 0)         |
| Other drug use disorders                            | 0<br>(0 - 1)      | 0<br>(0 - 0)       | --                  | 0<br>(0 - 0)         | 0<br>(0 - 0)         | 0<br>(0 - 0)         |
| Eating disorders                                    | 0<br>(0 - 0)      | --                 | --                  | 0<br>(0 - 0)         | --                   | --                   |

Web Table 31- Belize deaths with 95% UI by age, sex, and cause in 2013

| Cause                                               | Females, All Ages  | Females, 0-4 Years | Females, 5-14 Years | Females, 15-49 Years | Females, 50-69 Years | Females, 70-80 Years |
|-----------------------------------------------------|--------------------|--------------------|---------------------|----------------------|----------------------|----------------------|
| Anorexia nervosa                                    | 0<br>(0 - 0)       | --                 | 0<br>(0 - 0)        | 0<br>(0 - 0)         | --                   | --                   |
| Diabetes, urogenital, blood, and endocrine diseases | 144<br>(113 - 182) | 2<br>(1 - 3)       | 1<br>(1 - 1)        | 23<br>(15 - 32)      | 50<br>(36 - 67)      | 69<br>(54 - 84)      |
| Diabetes mellitus                                   | 98<br>(75 - 126)   | 0<br>(0 - 0)       | 0<br>(0 - 0)        | 10<br>(7 - 15)       | 38<br>(27 - 51)      | 50<br>(36 - 63)      |
| Acute glomerulonephritis                            | 0<br>(0 - 0)       | 0<br>(0 - 0)       | 0<br>(0 - 0)        | 0<br>(0 - 0)         | 0<br>(0 - 0)         | 0<br>(0 - 0)         |
| Chronic kidney disease                              | 29<br>(20 - 42)    | 0<br>(0 - 1)       | 0<br>(0 - 0)        | 7<br>(4 - 11)        | 9<br>(5 - 13)        | 13<br>(9 - 18)       |
| Chronic kidney disease due to diabetes mellitus     | 5<br>(3 - 8)       | 0<br>(0 - 0)       | 0<br>(0 - 0)        | 1<br>(0 - 2)         | 2<br>(1 - 4)         | 2<br>(1 - 3)         |
| Chronic kidney disease due to hypertension          | 14<br>(9 - 22)     | 0<br>(0 - 0)       | 0<br>(0 - 0)        | 3<br>(2 - 5)         | 4<br>(2 - 6)         | 7<br>(5 - 11)        |
| Chronic kidney disease due to glomerulonephritis    | 1<br>(1 - 1)       | 0<br>(0 - 0)       | 0<br>(0 - 0)        | 0<br>(0 - 1)         | 0<br>(0 - 0)         | 0<br>(0 - 0)         |
| Chronic kidney disease due to other causes          | 9<br>(5 - 15)      | 0<br>(0 - 0)       | 0<br>(0 - 0)        | 3<br>(1 - 5)         | 2<br>(1 - 4)         | 4<br>(1 - 7)         |
| Urinary diseases and male infertility               | 4<br>(3 - 6)       | 0<br>(0 - 0)       | 0<br>(0 - 0)        | 1<br>(1 - 1)         | 1<br>(1 - 1)         | 2<br>(1 - 3)         |
| Interstitial nephritis and urinary tract infections | 4<br>(2 - 5)       | 0<br>(0 - 0)       | 0<br>(0 - 0)        | 1<br>(0 - 1)         | 1<br>(0 - 1)         | 2<br>(1 - 3)         |
| Urolithiasis                                        | 0<br>(0 - 0)       | --                 | 0<br>(0 - 0)        | 0<br>(0 - 0)         | 0<br>(0 - 0)         | 0<br>(0 - 0)         |
| Other urinary diseases                              | 1<br>(0 - 1)       | 0<br>(0 - 0)       | 0<br>(0 - 0)        | 0<br>(0 - 0)         | 0<br>(0 - 0)         | 0<br>(0 - 1)         |
| Gynecological diseases                              | 0<br>(0 - 0)       | --                 | --                  | 0<br>(0 - 0)         | 0<br>(0 - 0)         | 0<br>(0 - 0)         |
| Uterine fibroids                                    | 0<br>(0 - 0)       | --                 | --                  | 0<br>(0 - 0)         | 0<br>(0 - 0)         | 0<br>(0 - 0)         |
| Polycystic ovarian syndrome                         | 0<br>(0 - 0)       | --                 | --                  | 0<br>(0 - 0)         | 0<br>(0 - 0)         | --                   |
| Endometriosis                                       | 0<br>(0 - 0)       | --                 | --                  | 0<br>(0 - 0)         | 0<br>(0 - 0)         | --                   |
| Genital prolapse                                    | 0<br>(0 - 0)       | --                 | --                  | 0<br>(0 - 0)         | 0<br>(0 - 0)         | 0<br>(0 - 0)         |
| Other gynecological diseases                        | 0<br>(0 - 0)       | --                 | --                  | 0<br>(0 - 0)         | 0<br>(0 - 0)         | 0<br>(0 - 0)         |
| Hemoglobinopathies and hemolytic anemias            | 3<br>(2 - 4)       | 0<br>(0 - 1)       | 0<br>(0 - 1)        | 1<br>(1 - 2)         | 0<br>(0 - 1)         | 0<br>(0 - 0)         |
| Thalassemias                                        | 0<br>(0 - 0)       | 0<br>(0 - 0)       | 0<br>(0 - 0)        | 0<br>(0 - 0)         | 0<br>(0 - 0)         | 0<br>(0 - 0)         |
| Sickle cell disorders                               | 2<br>(1 - 3)       | 0<br>(0 - 1)       | 0<br>(0 - 1)        | 1<br>(1 - 2)         | 0<br>(0 - 1)         | 0<br>(0 - 0)         |
| G6PD deficiency                                     | 0<br>(0 - 0)       | 0<br>(0 - 0)       | 0<br>(0 - 0)        | 0<br>(0 - 0)         | 0<br>(0 - 0)         | 0<br>(0 - 0)         |
| Other hemoglobinopathies and hemolytic anemias      | 0<br>(0 - 1)       | 0<br>(0 - 0)       | 0<br>(0 - 0)        | 0<br>(0 - 0)         | 0<br>(0 - 0)         | 0<br>(0 - 0)         |
| Endocrine, metabolic, blood, and immune disorders   | 9<br>(7 - 16)      | 1<br>(0 - 1)       | 0<br>(0 - 0)        | 3<br>(2 - 5)         | 2<br>(1 - 4)         | 4<br>(2 - 6)         |
| Musculoskeletal disorders                           | 5<br>(2 - 8)       | --                 | 0<br>(0 - 0)        | 3<br>(1 - 5)         | 1<br>(0 - 2)         | 1<br>(0 - 2)         |
| Rheumatoid arthritis                                | 1<br>(0 - 1)       | --                 | 0<br>(0 - 0)        | 0<br>(0 - 0)         | 0<br>(0 - 0)         | 0<br>(0 - 1)         |
| Other musculoskeletal disorders                     | 5<br>(2 - 7)       | --                 | 0<br>(0 - 0)        | 3<br>(1 - 4)         | 1<br>(0 - 1)         | 1<br>(0 - 1)         |
| Other non-communicable diseases                     | 22<br>(14 - 35)    | 12<br>(6 - 24)     | 1<br>(1 - 2)        | 2<br>(1 - 4)         | 1<br>(1 - 2)         | 5<br>(2 - 7)         |
| Congenital anomalies                                | 15<br>(8 - 26)     | 11<br>(5 - 21)     | 1<br>(1 - 2)        | 2<br>(1 - 3)         | 0<br>(0 - 1)         | 0<br>(0 - 1)         |
| Neural tube defects                                 | 1<br>(0 - 2)       | 1<br>(0 - 2)       | 0<br>(0 - 0)        | 0<br>(0 - 0)         | 0<br>(0 - 0)         | 0<br>(0 - 0)         |
| Congenital heart anomalies                          | 8<br>(4 - 14)      | 6<br>(3 - 11)      | 1<br>(0 - 1)        | 1<br>(1 - 2)         | 0<br>(0 - 0)         | 0<br>(0 - 0)         |
| Cleft lip and cleft palate                          | 0<br>(0 - 0)       | 0<br>(0 - 0)       | --                  | --                   | --                   | --                   |
| Down syndrome                                       | 1<br>(0 - 1)       | 0<br>(0 - 1)       | 0<br>(0 - 0)        | 0<br>(0 - 0)         | 0<br>(0 - 0)         | 0<br>(0 - 0)         |
| Chromosomal unbalanced rearrangements               | 0<br>(0 - 1)       | 0<br>(0 - 1)       | 0<br>(0 - 0)        | 0<br>(0 - 0)         | 0<br>(0 - 0)         | 0<br>(0 - 0)         |
| Other congenital anomalies                          | 5<br>(3 - 10)      | 4<br>(2 - 8)       | 0<br>(0 - 1)        | 0<br>(0 - 1)         | 0<br>(0 - 0)         | 0<br>(0 - 0)         |
| Skin and subcutaneous diseases                      | 6<br>(2 - 9)       | 0<br>(0 - 0)       | 0<br>(0 - 0)        | 0<br>(0 - 1)         | 1<br>(0 - 1)         | 5<br>(2 - 7)         |
| Cellulitis                                          | 0<br>(0 - 1)       | 0<br>(0 - 0)       | 0<br>(0 - 0)        | 0<br>(0 - 0)         | 0<br>(0 - 0)         | 0<br>(0 - 0)         |
| Pyoderma                                            | 1<br>(0 - 2)       | 0<br>(0 - 0)       | 0<br>(0 - 0)        | 0<br>(0 - 0)         | 0<br>(0 - 0)         | 1<br>(0 - 1)         |
| Decubitus ulcer                                     | 4<br>(2 - 6)       | 0<br>(0 - 0)       | 0<br>(0 - 0)        | 0<br>(0 - 0)         | 1<br>(0 - 1)         | 3<br>(1 - 5)         |



Web Table 31- Belize deaths with 95% UI by age, sex, and cause in 2013

| Cause                                           | Females, All Ages | Females, 0-4 Years | Females, 5-14 Years | Females, 15-49 Years | Females, 50-69 Years | Females, 70-80 Years |
|-------------------------------------------------|-------------------|--------------------|---------------------|----------------------|----------------------|----------------------|
| Other skin and subcutaneous diseases            | 0<br>(0 - 0)      | 0<br>(0 - 0)       | 0<br>(0 - 0)        | 0<br>(0 - 0)         | 0<br>(0 - 0)         | 0<br>(0 - 0)         |
| Sudden infant death syndrome                    | 1<br>(0 - 4)      | 1<br>(0 - 4)       | --                  | --                   | --                   | --                   |
| Injuries                                        | 55<br>(41 - 72)   | 4<br>(2 - 9)       | 4<br>(3 - 6)        | 28<br>(19 - 38)      | 7<br>(5 - 10)        | 12<br>(8 - 15)       |
| Transport injuries                              | 14<br>(10 - 19)   | 1<br>(0 - 1)       | 1<br>(1 - 2)        | 7<br>(5 - 11)        | 2<br>(2 - 3)         | 2<br>(2 - 3)         |
| Road injuries                                   | 13<br>(9 - 17)    | 1<br>(0 - 1)       | 1<br>(1 - 2)        | 7<br>(5 - 10)        | 2<br>(1 - 3)         | 2<br>(1 - 3)         |
| Pedestrian road injuries                        | 4<br>(3 - 5)      | 0<br>(0 - 0)       | 1<br>(0 - 1)        | 2<br>(1 - 3)         | 1<br>(0 - 1)         | 1<br>(0 - 1)         |
| Cyclist road injuries                           | 0<br>(0 - 1)      | 0<br>(0 - 0)       | 0<br>(0 - 0)        | 0<br>(0 - 0)         | 0<br>(0 - 0)         | 0<br>(0 - 0)         |
| Motorcyclist road injuries                      | 1<br>(0 - 1)      | 0<br>(0 - 0)       | 0<br>(0 - 0)        | 0<br>(0 - 1)         | 0<br>(0 - 0)         | 0<br>(0 - 0)         |
| Motor vehicle road injuries                     | 8<br>(6 - 11)     | 0<br>(0 - 1)       | 1<br>(0 - 1)        | 4<br>(3 - 6)         | 1<br>(1 - 2)         | 1<br>(1 - 2)         |
| Other road injuries                             | 0<br>(0 - 0)      | 0<br>(0 - 0)       | 0<br>(0 - 0)        | 0<br>(0 - 0)         | 0<br>(0 - 0)         | 0<br>(0 - 0)         |
| Other transport injuries                        | 1<br>(1 - 2)      | 0<br>(0 - 0)       | 0<br>(0 - 0)        | 1<br>(0 - 1)         | 0<br>(0 - 0)         | 0<br>(0 - 0)         |
| Unintentional injuries                          | 21<br>(15 - 29)   | 3<br>(2 - 7)       | 2<br>(1 - 2)        | 6<br>(4 - 8)         | 3<br>(2 - 4)         | 8<br>(6 - 11)        |
| Falls                                           | 4<br>(3 - 6)      | 0<br>(0 - 0)       | 0<br>(0 - 0)        | 0<br>(0 - 1)         | 0<br>(0 - 1)         | 3<br>(2 - 5)         |
| Drowning                                        | 3<br>(2 - 4)      | 1<br>(0 - 1)       | 1<br>(0 - 1)        | 1<br>(1 - 2)         | 0<br>(0 - 1)         | 0<br>(0 - 0)         |
| Fire, heat, and hot substances                  | 3<br>(2 - 5)      | 0<br>(0 - 1)       | 0<br>(0 - 0)        | 1<br>(0 - 1)         | 0<br>(0 - 1)         | 1<br>(1 - 2)         |
| Poisonings                                      | 1<br>(0 - 1)      | 0<br>(0 - 0)       | 0<br>(0 - 0)        | 0<br>(0 - 0)         | 0<br>(0 - 0)         | 0<br>(0 - 0)         |
| Exposure to mechanical forces                   | 2<br>(1 - 2)      | 0<br>(0 - 0)       | 0<br>(0 - 0)        | 1<br>(1 - 1)         | 0<br>(0 - 0)         | 0<br>(0 - 0)         |
| Unintentional firearm injuries                  | 1<br>(0 - 1)      | 0<br>(0 - 0)       | 0<br>(0 - 0)        | 0<br>(0 - 1)         | 0<br>(0 - 0)         | 0<br>(0 - 0)         |
| Unintentional suffocation                       | 0<br>(0 - 0)      | 0<br>(0 - 0)       | 0<br>(0 - 0)        | 0<br>(0 - 0)         | 0<br>(0 - 0)         | 0<br>(0 - 0)         |
| Other exposure to mechanical forces             | 1<br>(1 - 1)      | 0<br>(0 - 0)       | 0<br>(0 - 0)        | 0<br>(0 - 1)         | 0<br>(0 - 0)         | 0<br>(0 - 0)         |
| Adverse effects of medical treatment            | 4<br>(2 - 6)      | 0<br>(0 - 1)       | 0<br>(0 - 0)        | 1<br>(0 - 2)         | 1<br>(0 - 1)         | 2<br>(1 - 3)         |
| Animal contact                                  | 0<br>(0 - 1)      | 0<br>(0 - 0)       | 0<br>(0 - 0)        | 0<br>(0 - 0)         | 0<br>(0 - 0)         | 0<br>(0 - 0)         |
| Venomous animal contact                         | 0<br>(0 - 0)      | 0<br>(0 - 0)       | 0<br>(0 - 0)        | 0<br>(0 - 0)         | 0<br>(0 - 0)         | 0<br>(0 - 0)         |
| Non-venomous animal contact                     | 0<br>(0 - 0)      | 0<br>(0 - 0)       | 0<br>(0 - 0)        | 0<br>(0 - 0)         | 0<br>(0 - 0)         | 0<br>(0 - 0)         |
| Foreign body                                    | 4<br>(2 - 6)      | 1<br>(1 - 3)       | 0<br>(0 - 0)        | 1<br>(0 - 1)         | 0<br>(0 - 1)         | 1<br>(1 - 2)         |
| Pulmonary aspiration and foreign body in airway | 4<br>(2 - 6)      | 1<br>(1 - 3)       | 0<br>(0 - 0)        | 1<br>(0 - 1)         | 0<br>(0 - 1)         | 1<br>(1 - 2)         |
| Foreign body in other body part                 | 0<br>(0 - 0)      | 0<br>(0 - 0)       | 0<br>(0 - 0)        | 0<br>(0 - 0)         | 0<br>(0 - 0)         | 0<br>(0 - 0)         |
| Other unintentional injuries                    | 0<br>(0 - 1)      | 0<br>(0 - 0)       | 0<br>(0 - 0)        | 0<br>(0 - 0)         | 0<br>(0 - 0)         | 0<br>(0 - 0)         |
| Self-harm and interpersonal violence            | 19<br>(13 - 26)   | 1<br>(0 - 1)       | 1<br>(1 - 1)        | 15<br>(10 - 21)      | 2<br>(1 - 3)         | 1<br>(1 - 2)         |
| Self-harm                                       | 8<br>(6 - 11)     | --                 | 0<br>(0 - 1)        | 6<br>(4 - 9)         | 1<br>(1 - 2)         | 1<br>(0 - 1)         |
| Interpersonal violence                          | 11<br>(7 - 16)    | 1<br>(0 - 1)       | 1<br>(0 - 1)        | 8<br>(5 - 13)        | 1<br>(1 - 2)         | 0<br>(0 - 1)         |
| Assault by firearm                              | 3<br>(1 - 5)      | 0<br>(0 - 0)       | 0<br>(0 - 0)        | 2<br>(1 - 4)         | 0<br>(0 - 1)         | 0<br>(0 - 0)         |
| Assault by sharp object                         | 4<br>(2 - 6)      | 0<br>(0 - 0)       | 0<br>(0 - 0)        | 3<br>(2 - 5)         | 0<br>(0 - 1)         | 0<br>(0 - 0)         |
| Assault by other means                          | 4<br>(3 - 7)      | 0<br>(0 - 1)       | 0<br>(0 - 1)        | 3<br>(2 - 4)         | 1<br>(0 - 1)         | 0<br>(0 - 1)         |

Web Table 31- Benin deaths with 95% UI by age, sex, and cause in 2013

| Cause                                                              | Both Sexes, All Ages        | Both Sexes, 0-4 Years       | Both Sexes, 5-14 Years   | Both Sexes, 15-49 Years     | Both Sexes, 50-69 Years     | Both Sexes, 70-80 Years     |
|--------------------------------------------------------------------|-----------------------------|-----------------------------|--------------------------|-----------------------------|-----------------------------|-----------------------------|
| All causes                                                         | 69,327<br>(63,349 - 75,777) | 22,278<br>(20,048 - 24,888) | 2,470<br>(2,209 - 2,811) | 16,667<br>(14,596 - 18,251) | 15,220<br>(13,013 - 18,122) | 12,691<br>(11,325 - 14,210) |
| Communicable, maternal, neonatal, and nutritional diseases         | 37,415<br>(33,987 - 41,236) | 19,237<br>(16,930 - 21,909) | 1,597<br>(1,302 - 2,101) | 8,485<br>(7,558 - 9,490)    | 4,427<br>(3,711 - 5,313)    | 3,668<br>(2,856 - 4,447)    |
| HIV/AIDS and tuberculosis                                          | 6,191<br>(5,127 - 7,622)    | 303<br>(217 - 395)          | 251<br>(200 - 304)       | 3,894<br>(3,065 - 5,135)    | 1,302<br>(1,064 - 1,598)    | 441<br>(329 - 548)          |
| Tuberculosis                                                       | 2,181<br>(1,687 - 2,775)    | 56<br>(30 - 92)             | 31<br>(20 - 45)          | 913<br>(668 - 1,209)        | 787<br>(591 - 1,070)        | 394<br>(279 - 504)          |
| HIV/AIDS                                                           | 4,010<br>(3,091 - 5,459)    | 247<br>(164 - 333)          | 219<br>(170 - 273)       | 2,981<br>(2,174 - 4,258)    | 515<br>(375 - 677)          | 47<br>(30 - 68)             |
| HIV/AIDS resulting in mycobacterial infection                      | 241<br>(171 - 335)          | 14<br>(9 - 20)              | 12<br>(8 - 16)           | 179<br>(121 - 261)          | 33<br>(22 - 47)             | 3<br>(2 - 5)                |
| HIV/AIDS resulting in other diseases                               | 3,769<br>(2,896 - 5,141)    | 233<br>(155 - 315)          | 208<br>(161 - 259)       | 2,802<br>(2,039 - 4,018)    | 482<br>(353 - 632)          | 44<br>(28 - 64)             |
| Diarrrhea, lower respiratory, and other common infectious diseases | 12,850<br>(9,754 - 16,187)  | 5,953<br>(3,963 - 8,504)    | 715<br>(481 - 1,205)     | 1,970<br>(1,532 - 2,413)    | 1,973<br>(1,430 - 2,568)    | 2,239<br>(1,597 - 2,844)    |
| Diarrheal diseases                                                 | 3,261<br>(2,319 - 4,506)    | 1,431<br>(619 - 2,557)      | 126<br>(62 - 208)        | 607<br>(449 - 787)          | 555<br>(367 - 793)          | 543<br>(376 - 770)          |
| Intestinal infectious diseases                                     | 468<br>(231 - 827)          | 138<br>(51 - 275)           | 136<br>(64 - 247)        | 163<br>(80 - 300)           | 23<br>(11 - 43)             | 8<br>(4 - 14)               |
| Typhoid fever                                                      | 320<br>(152 - 592)          | 89<br>(30 - 186)            | 95<br>(43 - 169)         | 115<br>(54 - 213)           | 16<br>(7 - 30)              | 5<br>(2 - 10)               |
| Paratyphoid fever                                                  | 122<br>(55 - 226)           | 36<br>(12 - 79)             | 38<br>(14 - 73)          | 41<br>(17 - 84)             | 5<br>(2 - 11)               | 1<br>(0 - 4)                |
| Other intestinal infectious diseases                               | 26<br>(13 - 42)             | 13<br>(5 - 27)              | 3<br>(0 - 7)             | 7<br>(2 - 15)               | 2<br>(0 - 7)                | 1<br>(0 - 5)                |
| Lower respiratory infections                                       | 6,249<br>(4,328 - 7,951)    | 2,716<br>(1,607 - 3,929)    | 155<br>(91 - 228)        | 664<br>(477 - 870)          | 1,147<br>(708 - 1,592)      | 1,567<br>(974 - 2,082)      |
| Upper respiratory infections                                       | 9<br>(5 - 16)               | 3<br>(0 - 8)                | 0<br>(0 - 1)             | 3<br>(1 - 6)                | 2<br>(1 - 5)                | 1<br>(0 - 4)                |
| Otitis media                                                       | 4<br>(3 - 5)                | 1<br>(0 - 1)                | 0<br>(0 - 0)             | 1<br>(1 - 1)                | 1<br>(1 - 2)                | 1<br>(1 - 2)                |
| Meningitis                                                         | 1,474<br>(1,012 - 1,930)    | 582<br>(301 - 948)          | 126<br>(70 - 192)        | 443<br>(290 - 597)          | 217<br>(126 - 311)          | 106<br>(57 - 155)           |
| Pneumococcal meningitis                                            | 387<br>(245 - 531)          | 119<br>(55 - 210)           | 34<br>(18 - 58)          | 136<br>(77 - 203)           | 64<br>(32 - 109)            | 33<br>(16 - 57)             |
| H influenzae type B meningitis                                     | 250<br>(152 - 387)          | 151<br>(70 - 281)           | 21<br>(10 - 40)          | 50<br>(23 - 81)             | 20<br>(7 - 37)              | 8<br>(3 - 13)               |
| Meningococcal meningitis                                           | 654<br>(446 - 853)          | 259<br>(127 - 423)          | 58<br>(31 - 90)          | 193<br>(122 - 266)          | 97<br>(56 - 147)            | 47<br>(25 - 74)             |
| Other meningitis                                                   | 183<br>(136 - 241)          | 52<br>(26 - 88)             | 13<br>(6 - 21)           | 63<br>(42 - 90)             | 37<br>(21 - 56)             | 18<br>(10 - 28)             |
| Encephalitis                                                       | 91<br>(62 - 125)            | 29<br>(12 - 53)             | 10<br>(5 - 17)           | 28<br>(19 - 41)             | 15<br>(9 - 21)              | 8<br>(4 - 13)               |
| Diphtheria                                                         | 5<br>(0 - 21)               | 4<br>(0 - 19)               | 1<br>(0 - 5)             | 1<br>(0 - 2)                | 0<br>(0 - 1)                | --                          |
| Whooping cough                                                     | 105<br>(0 - 508)            | 98<br>(0 - 476)             | 6<br>(0 - 26)            | 1<br>(0 - 6)                | 0<br>(0 - 1)                | --                          |
| Tetanus                                                            | 114<br>(49 - 197)           | 65<br>(13 - 141)            | 6<br>(2 - 15)            | 27<br>(15 - 52)             | 12<br>(7 - 21)              | 3<br>(2 - 5)                |
| Measles                                                            | 1,062<br>(32 - 5,248)       | 885<br>(28 - 4,418)         | 147<br>(4 - 787)         | 29<br>(1 - 192)             | 1<br>(0 - 5)                | --                          |
| Varicella and herpes zoster                                        | 7<br>(3 - 14)               | 3<br>(0 - 8)                | 1<br>(0 - 2)             | 2<br>(0 - 4)                | 1<br>(0 - 2)                | 2<br>(0 - 5)                |
| Neglected tropical diseases and malaria                            | 7,816<br>(4,788 - 11,193)   | 5,468<br>(2,945 - 8,585)    | 484<br>(239 - 783)       | 810<br>(419 - 1,486)        | 596<br>(246 - 1,209)        | 458<br>(164 - 944)          |
| Malaria                                                            | 7,689<br>(4,649 - 11,064)   | 5,446<br>(2,916 - 8,576)    | 465<br>(220 - 767)       | 762<br>(375 - 1,433)        | 570<br>(222 - 1,185)        | 447<br>(154 - 933)          |
| Leishmaniasis                                                      | 0<br>(0 - 0)                | 0<br>(0 - 0)                | 0<br>(0 - 0)             | 0<br>(0 - 0)                | 0<br>(0 - 0)                | 0<br>(0 - 0)                |
| Visceral leishmaniasis                                             | 0<br>(0 - 0)                | 0<br>(0 - 0)                | 0<br>(0 - 0)             | 0<br>(0 - 0)                | 0<br>(0 - 0)                | 0<br>(0 - 0)                |
| Schistosomiasis                                                    | 39<br>(28 - 53)             | 0<br>(0 - 1)                | 1<br>(0 - 2)             | 16<br>(11 - 23)             | 15<br>(10 - 23)             | 6<br>(4 - 10)               |
| Cysticercosis                                                      | 1<br>(0 - 4)                | 0<br>(0 - 0)                | 0<br>(0 - 0)             | 1<br>(0 - 2)                | 0<br>(0 - 1)                | 0<br>(0 - 0)                |
| Cystic echinococcosis                                              | 4<br>(3 - 5)                | 0<br>(0 - 1)                | 1<br>(0 - 1)             | 2<br>(2 - 2)                | 1<br>(1 - 1)                | 0<br>(0 - 0)                |
| Dengue                                                             | 6<br>(4 - 10)               | 2<br>(1 - 3)                | 1<br>(1 - 2)             | 2<br>(1 - 4)                | 0<br>(0 - 1)                | 0<br>(0 - 0)                |
| Yellow fever                                                       | 6<br>(4 - 10)               | 0<br>(0 - 1)                | 1<br>(0 - 3)             | 4<br>(2 - 7)                | 1<br>(0 - 1)                | 0<br>(0 - 1)                |
| Rabies                                                             | 46<br>(17 - 74)             | 7<br>(2 - 17)               | 12<br>(4 - 26)           | 18<br>(8 - 27)              | 6<br>(2 - 10)               | 2<br>(0 - 4)                |
| Intestinal nematode infections                                     | 13<br>(4 - 28)              | 9<br>(2 - 22)               | 2<br>(0 - 8)             | 1<br>(0 - 7)                | 1<br>(0 - 4)                | 0<br>(0 - 3)                |
| Ascariasis                                                         | 13<br>(4 - 28)              | 9<br>(2 - 22)               | 2<br>(0 - 8)             | 1<br>(0 - 7)                | 1<br>(0 - 4)                | 0<br>(0 - 3)                |
| Other neglected tropical diseases                                  | 11<br>(8 - 18)              | 3<br>(1 - 6)                | 1<br>(0 - 2)             | 4<br>(2 - 6)                | 2<br>(1 - 3)                | 2<br>(1 - 3)                |

Web Table 31- Benin deaths with 95% UI by age, sex, and cause in 2013

| Cause                                                            | Both Sexes, All Ages        | Both Sexes, 0-4 Years    | Both Sexes, 5-14 Years | Both Sexes, 15-49 Years  | Both Sexes, 50-69 Years   | Both Sexes, 70-80 Years  |
|------------------------------------------------------------------|-----------------------------|--------------------------|------------------------|--------------------------|---------------------------|--------------------------|
| Maternal disorders                                               | 1,246<br>(869 - 1,674)      | --                       | 7<br>(2 - 15)          | 1,240<br>(862 - 1,667)   | --                        | --                       |
| Maternal hemorrhage                                              | 241<br>(156 - 357)          | --                       | 1<br>(0 - 2)           | 241<br>(155 - 356)       | --                        | --                       |
| Maternal sepsis and other maternal infections                    | 70<br>(43 - 104)            | --                       | 0<br>(0 - 1)           | 70<br>(42 - 104)         | --                        | --                       |
| Maternal hypertensive disorders                                  | 95<br>(52 - 147)            | --                       | 0<br>(0 - 1)           | 95<br>(52 - 147)         | --                        | --                       |
| Maternal obstructed labor                                        | 58<br>(35 - 87)             | --                       | 0<br>(0 - 1)           | 58<br>(34 - 87)          | --                        | --                       |
| Maternal abortive outcome                                        | 225<br>(139 - 339)          | --                       | 1<br>(0 - 3)           | 224<br>(138 - 338)       | --                        | --                       |
| Indirect maternal deaths                                         | 124<br>(75 - 181)           | --                       | 1<br>(0 - 1)           | 123<br>(74 - 181)        | --                        | --                       |
| Late maternal deaths                                             | 195<br>(118 - 294)          | --                       | 2<br>(1 - 4)           | 194<br>(117 - 292)       | --                        | --                       |
| Maternal deaths aggravated by HIV/AIDS                           | 5<br>(3 - 8)                | --                       | --                     | 5<br>(3 - 8)             | --                        | --                       |
| Other maternal disorders                                         | 229<br>(148 - 331)          | --                       | 1<br>(0 - 3)           | 227<br>(145 - 329)       | --                        | --                       |
| Neonatal disorders                                               | 6,175<br>(5,181 - 7,138)    | 6,175<br>(5,181 - 7,138) | --                     | --                       | --                        | --                       |
| Neonatal preterm birth complications                             | 2,240<br>(1,138 - 3,701)    | 2,240<br>(1,138 - 3,701) | --                     | --                       | --                        | --                       |
| Neonatal encephalopathy due to birth asphyxia and trauma         | 1,902<br>(872 - 3,183)      | 1,902<br>(872 - 3,183)   | --                     | --                       | --                        | --                       |
| Neonatal sepsis and other neonatal infections                    | 1,547<br>(717 - 2,645)      | 1,547<br>(717 - 2,645)   | --                     | --                       | --                        | --                       |
| Hemolytic disease and other neonatal jaundice                    | 29<br>(11 - 69)             | 29<br>(11 - 69)          | --                     | --                       | --                        | --                       |
| Other neonatal disorders                                         | 458<br>(248 - 767)          | 458<br>(248 - 767)       | --                     | --                       | --                        | --                       |
| Nutritional deficiencies                                         | 2,504<br>(1,779 - 3,344)    | 1,060<br>(510 - 1,706)   | 110<br>(66 - 157)      | 452<br>(323 - 630)       | 438<br>(314 - 608)        | 443<br>(324 - 627)       |
| Protein-energy malnutrition                                      | 1,736<br>(1,114 - 2,483)    | 994<br>(469 - 1,619)     | 82<br>(44 - 124)       | 188<br>(112 - 350)       | 234<br>(144 - 380)        | 238<br>(143 - 398)       |
| Iodine deficiency                                                | 4<br>(1 - 11)               | 1<br>(0 - 5)             | 0<br>(0 - 2)           | 1<br>(0 - 4)             | 1<br>(0 - 4)              | 1<br>(0 - 4)             |
| Iron-deficiency anemia                                           | 749<br>(419 - 1,033)        | 64<br>(8 - 166)          | 28<br>(11 - 49)        | 258<br>(143 - 352)       | 197<br>(100 - 294)        | 202<br>(108 - 316)       |
| Other nutritional deficiencies                                   | 14<br>(5 - 23)              | 1<br>(0 - 3)             | 0<br>(0 - 1)           | 4<br>(2 - 7)             | 5<br>(1 - 11)             | 3<br>(1 - 5)             |
| Other communicable, maternal, neonatal, and nutritional diseases | 633<br>(412 - 913)          | 279<br>(90 - 515)        | 31<br>(14 - 52)        | 120<br>(82 - 164)        | 117<br>(72 - 167)         | 87<br>(52 - 128)         |
| Sexually transmitted diseases excluding HIV                      | 265<br>(77 - 515)           | 213<br>(38 - 441)        | 18<br>(4 - 39)         | 16<br>(10 - 28)          | 10<br>(5 - 21)            | 7<br>(3 - 15)            |
| Syphilis                                                         | 251<br>(61 - 500)           | 213<br>(38 - 441)        | 18<br>(3 - 38)         | 8<br>(5 - 14)            | 7<br>(3 - 14)             | 6<br>(3 - 12)            |
| Chlamydial infection                                             | 2<br>(1 - 3)                | --                       | 0<br>(0 - 0)           | 1<br>(1 - 2)             | 1<br>(0 - 2)              | 0<br>(0 - 1)             |
| Gonococcal infection                                             | 7<br>(5 - 12)               | --                       | 0<br>(0 - 1)           | 4<br>(2 - 7)             | 2<br>(1 - 4)              | 1<br>(0 - 2)             |
| Other sexually transmitted diseases                              | 5<br>(3 - 9)                | --                       | 0<br>(0 - 1)           | 3<br>(2 - 6)             | 1<br>(1 - 3)              | 0<br>(0 - 1)             |
| Hepatitis                                                        | 202<br>(122 - 279)          | 16<br>(6 - 30)           | 6<br>(3 - 10)          | 69<br>(41 - 100)         | 65<br>(36 - 97)           | 46<br>(25 - 70)          |
| Acute hepatitis A                                                | 10<br>(3 - 21)              | 5<br>(1 - 11)            | 2<br>(0 - 3)           | 3<br>(1 - 7)             | 1<br>(0 - 2)              | 0<br>(0 - 0)             |
| Acute hepatitis B                                                | 137<br>(76 - 201)           | 12<br>(4 - 22)           | 3<br>(1 - 5)           | 30<br>(14 - 51)          | 52<br>(27 - 81)           | 41<br>(22 - 63)          |
| Acute hepatitis C                                                | 7<br>(1 - 19)               | --                       | 0<br>(0 - 1)           | 2<br>(0 - 7)             | 2<br>(0 - 7)              | 2<br>(0 - 6)             |
| Acute hepatitis E                                                | 48<br>(25 - 79)             | 0<br>(0 - 1)             | 1<br>(1 - 3)           | 34<br>(18 - 54)          | 10<br>(4 - 20)            | 3<br>(1 - 9)             |
| Other infectious diseases                                        | 166<br>(114 - 249)          | 49<br>(21 - 100)         | 6<br>(3 - 12)          | 35<br>(19 - 64)          | 42<br>(21 - 81)           | 33<br>(15 - 64)          |
| Non-communicable diseases                                        | 26,850<br>(22,855 - 31,154) | 2,471<br>(1,382 - 3,929) | 505<br>(325 - 748)     | 5,497<br>(4,465 - 6,455) | 9,892<br>(8,191 - 12,033) | 8,485<br>(7,313 - 9,839) |
| Neoplasms                                                        | 4,219<br>(3,547 - 5,025)    | 73<br>(32 - 125)         | 77<br>(45 - 114)       | 1,227<br>(997 - 1,481)   | 1,931<br>(1,565 - 2,381)  | 913<br>(766 - 1,097)     |
| Esophageal cancer                                                | 116<br>(83 - 170)           | --                       | --                     | 23<br>(15 - 31)          | 65<br>(44 - 98)           | 28<br>(19 - 44)          |
| Stomach cancer                                                   | 416<br>(344 - 512)          | --                       | --                     | 96<br>(73 - 122)         | 231<br>(182 - 295)        | 90<br>(69 - 116)         |
| Liver cancer                                                     | 1,213<br>(961 - 1,508)      | --                       | 4<br>(2 - 7)           | 460<br>(328 - 613)       | 544<br>(412 - 699)        | 205<br>(154 - 272)       |
| Liver cancer due to hepatitis B                                  | 547<br>(310 - 783)          | --                       | 2<br>(1 - 4)           | 258<br>(153 - 364)       | 227<br>(109 - 342)        | 60<br>(28 - 96)          |
| Liver cancer due to hepatitis C                                  | 348<br>(183 - 508)          | --                       | 0<br>(0 - 1)           | 85<br>(38 - 140)         | 176<br>(89 - 272)         | 86<br>(51 - 128)         |

Web Table 31- Benin deaths with 95% UI by age, sex, and cause in 2013

| Cause                                | Both Sexes, All Ages       | Both Sexes, 0-4 Years | Both Sexes, 5-14 Years | Both Sexes, 15-49 Years  | Both Sexes, 50-69 Years  | Both Sexes, 70-80 Years  |
|--------------------------------------|----------------------------|-----------------------|------------------------|--------------------------|--------------------------|--------------------------|
| Liver cancer due to alcohol use      | 134<br>(81 - 201)          | --                    | --                     | 34<br>(14 - 59)          | 66<br>(35 - 105)         | 35<br>(21 - 52)          |
| Liver cancer due to other causes     | 185<br>(108 - 279)         | --                    | 2<br>(1 - 4)           | 83<br>(48 - 133)         | 76<br>(38 - 128)         | 24<br>(13 - 39)          |
| Larynx cancer                        | 15<br>(10 - 37)            | --                    | --                     | 3<br>(2 - 6)             | 8<br>(5 - 21)            | 4<br>(3 - 9)             |
| Tracheal, bronchus and lung cancer   | 184<br>(152 - 227)         | --                    | --                     | 22<br>(17 - 28)          | 108<br>(86 - 138)        | 54<br>(43 - 67)          |
| Breast cancer                        | 256<br>(194 - 333)         | --                    | --                     | 96<br>(67 - 129)         | 119<br>(84 - 164)        | 41<br>(30 - 58)          |
| Cervical cancer                      | 539<br>(367 - 740)         | --                    | --                     | 135<br>(90 - 200)        | 307<br>(192 - 438)       | 97<br>(63 - 143)         |
| Uterine cancer                       | 47<br>(29 - 69)            | --                    | --                     | 7<br>(4 - 12)            | 25<br>(14 - 38)          | 15<br>(9 - 24)           |
| Prostate cancer                      | 139<br>(92 - 230)          | --                    | --                     | 4<br>(2 - 6)             | 47<br>(28 - 82)          | 89<br>(57 - 149)         |
| Colon and rectum cancer              | 209<br>(175 - 248)         | --                    | --                     | 63<br>(49 - 76)          | 81<br>(64 - 103)         | 65<br>(52 - 81)          |
| Lip and oral cavity cancer           | 28<br>(21 - 37)            | --                    | --                     | 8<br>(6 - 11)            | 12<br>(9 - 17)           | 7<br>(5 - 11)            |
| Nasopharynx cancer                   | 9<br>(6 - 11)              | --                    | 0<br>(0 - 1)           | 4<br>(3 - 5)             | 3<br>(2 - 5)             | 1<br>(1 - 1)             |
| Other pharynx cancer                 | 10<br>(8 - 14)             | --                    | --                     | 3<br>(2 - 4)             | 5<br>(3 - 7)             | 2<br>(2 - 3)             |
| Gallbladder and biliary tract cancer | 47<br>(31 - 67)            | --                    | --                     | 9<br>(5 - 13)            | 25<br>(16 - 38)          | 13<br>(8 - 20)           |
| Pancreatic cancer                    | 96<br>(77 - 118)           | --                    | --                     | 20<br>(15 - 26)          | 54<br>(42 - 69)          | 22<br>(17 - 28)          |
| Malignant skin melanoma              | 12<br>(9 - 18)             | --                    | --                     | 4<br>(2 - 6)             | 6<br>(4 - 8)             | 2<br>(2 - 4)             |
| Non-melanoma skin cancer             | 10<br>(7 - 15)             | --                    | --                     | 2<br>(1 - 3)             | 3<br>(2 - 6)             | 5<br>(3 - 7)             |
| Ovarian cancer                       | 68<br>(47 - 97)            | --                    | --                     | 17<br>(10 - 25)          | 41<br>(27 - 62)          | 10<br>(6 - 16)           |
| Testicular cancer                    | 4<br>(3 - 7)               | --                    | --                     | 3<br>(2 - 5)             | 1<br>(0 - 1)             | 0<br>(0 - 1)             |
| Kidney cancer                        | 34<br>(27 - 42)            | 3<br>(1 - 7)          | 2<br>(1 - 3)           | 7<br>(5 - 9)             | 17<br>(12 - 22)          | 6<br>(4 - 8)             |
| Bladder cancer                       | 85<br>(66 - 117)           | --                    | --                     | 18<br>(11 - 26)          | 34<br>(24 - 51)          | 34<br>(24 - 51)          |
| Brain and nervous system cancer      | 48<br>(32 - 60)            | 2<br>(1 - 4)          | 5<br>(2 - 7)           | 23<br>(14 - 30)          | 13<br>(9 - 17)           | 5<br>(4 - 7)             |
| Thyroid cancer                       | 11<br>(8 - 17)             | --                    | 0<br>(0 - 0)           | 2<br>(1 - 2)             | 6<br>(4 - 9)             | 4<br>(2 - 6)             |
| Mesothelioma                         | 5<br>(4 - 7)               | --                    | --                     | 1<br>(1 - 1)             | 2<br>(2 - 3)             | 2<br>(1 - 3)             |
| Hodgkin lymphoma                     | 20<br>(13 - 27)            | 1<br>(1 - 3)          | 2<br>(1 - 4)           | 8<br>(6 - 11)            | 4<br>(3 - 7)             | 4<br>(2 - 8)             |
| Non-Hodgkin lymphoma                 | 173<br>(132 - 224)         | 16<br>(5 - 36)        | 24<br>(11 - 42)        | 67<br>(50 - 86)          | 46<br>(33 - 68)          | 21<br>(14 - 32)          |
| Multiple myeloma                     | 22<br>(16 - 29)            | --                    | --                     | 4<br>(3 - 5)             | 11<br>(8 - 16)           | 6<br>(4 - 9)             |
| Leukemia                             | 74<br>(59 - 89)            | 5<br>(2 - 10)         | 11<br>(6 - 15)         | 33<br>(25 - 41)          | 14<br>(11 - 19)          | 11<br>(8 - 14)           |
| Other neoplasms                      | 330<br>(229 - 450)         | 45<br>(20 - 84)       | 30<br>(16 - 48)        | 85<br>(56 - 120)         | 100<br>(64 - 163)        | 70<br>(47 - 106)         |
| Cardiovascular diseases              | 10,953<br>(9,186 - 13,352) | 146<br>(82 - 228)     | 59<br>(37 - 86)        | 1,498<br>(1,191 - 1,847) | 4,558<br>(3,709 - 5,705) | 4,691<br>(3,905 - 5,731) |
| Rheumatic heart disease              | 134<br>(76 - 331)          | 3<br>(1 - 5)          | 4<br>(2 - 8)           | 36<br>(17 - 99)          | 46<br>(21 - 130)         | 45<br>(28 - 97)          |
| Ischemic heart disease               | 3,429<br>(2,699 - 4,595)   | 6<br>(2 - 12)         | 8<br>(4 - 13)          | 450<br>(336 - 590)       | 1,476<br>(1,139 - 1,971) | 1,490<br>(1,147 - 2,101) |
| Cerebrovascular disease              | 4,458<br>(3,619 - 5,464)   | 34<br>(19 - 52)       | 14<br>(9 - 21)         | 484<br>(365 - 623)       | 1,819<br>(1,415 - 2,338) | 2,106<br>(1,722 - 2,573) |
| Ischemic stroke                      | 2,525<br>(1,202 - 3,445)   | 3<br>(1 - 8)          | 2<br>(1 - 3)           | 99<br>(28 - 160)         | 949<br>(324 - 1,377)     | 1,472<br>(735 - 1,966)   |
| Hemorrhagic stroke                   | 1,932<br>(1,212 - 3,387)   | 30<br>(17 - 47)       | 12<br>(8 - 19)         | 385<br>(287 - 503)       | 870<br>(525 - 1,553)     | 634<br>(314 - 1,396)     |
| Hypertensive heart disease           | 799<br>(434 - 1,145)       | 2<br>(1 - 4)          | 1<br>(0 - 2)           | 90<br>(34 - 155)         | 304<br>(145 - 475)       | 403<br>(228 - 572)       |
| Cardiomyopathy and myocarditis       | 567<br>(383 - 743)         | 29<br>(13 - 60)       | 11<br>(6 - 19)         | 135<br>(91 - 194)        | 215<br>(131 - 307)       | 177<br>(96 - 258)        |
| Atrial fibrillation and flutter      | 1<br>(0 - 1)               | --                    | --                     | 0<br>(0 - 0)             | 0<br>(0 - 0)             | 0<br>(0 - 1)             |
| Aortic aneurysm                      | 123<br>(81 - 218)          | --                    | --                     | 16<br>(10 - 29)          | 57<br>(37 - 97)          | 49<br>(31 - 95)          |
| Peripheral vascular disease          | 3<br>(2 - 6)               | --                    | --                     | 0<br>(0 - 0)             | 1<br>(1 - 3)             | 2<br>(1 - 3)             |
| Endocarditis                         | 208<br>(148 - 302)         | 26<br>(10 - 50)       | 5<br>(3 - 8)           | 52<br>(34 - 77)          | 65<br>(41 - 106)         | 60<br>(40 - 97)          |

Web Table 31- Benin deaths with 95% UI by age, sex, and cause in 2013

| Cause                                               | Both Sexes, All Ages     | Both Sexes, 0-4 Years | Both Sexes, 5-14 Years | Both Sexes, 15-49 Years | Both Sexes, 50-69 Years | Both Sexes, 70-80 Years |
|-----------------------------------------------------|--------------------------|-----------------------|------------------------|-------------------------|-------------------------|-------------------------|
| Other cardiovascular and circulatory diseases       | 1,231<br>(890 - 2,152)   | 47<br>(25 - 88)       | 16<br>(9 - 28)         | 235<br>(166 - 385)      | 574<br>(386 - 989)      | 359<br>(240 - 761)      |
| Chronic respiratory diseases                        | 1,847<br>(1,432 - 2,760) | 46<br>(21 - 89)       | 15<br>(10 - 21)        | 239<br>(175 - 357)      | 730<br>(549 - 1,126)    | 817<br>(635 - 1,199)    |
| Chronic obstructive pulmonary disease               | 1,152<br>(880 - 1,801)   | 22<br>(10 - 44)       | 6<br>(4 - 9)           | 85<br>(60 - 133)        | 459<br>(330 - 758)      | 580<br>(437 - 902)      |
| Pneumoconiosis                                      | 92<br>(55 - 160)         | 0<br>(0 - 1)          | 1<br>(0 - 1)           | 22<br>(13 - 37)         | 51<br>(28 - 87)         | 18<br>(10 - 35)         |
| Silicosis                                           | 15<br>(8 - 28)           | 0<br>(0 - 0)          | 0<br>(0 - 0)           | 4<br>(2 - 7)            | 5<br>(2 - 8)            | 6<br>(3 - 13)           |
| Asbestosis                                          | 7<br>(4 - 12)            | 0<br>(0 - 0)          | 0<br>(0 - 0)           | 2<br>(1 - 3)            | 4<br>(2 - 8)            | 1<br>(0 - 1)            |
| Coal workers pneumoconiosis                         | 25<br>(14 - 42)          | 0<br>(0 - 0)          | 0<br>(0 - 0)           | 2<br>(1 - 3)            | 21<br>(11 - 36)         | 2<br>(1 - 5)            |
| Other pneumoconiosis                                | 45<br>(27 - 78)          | 0<br>(0 - 0)          | 0<br>(0 - 0)           | 15<br>(9 - 25)          | 21<br>(11 - 37)         | 9<br>(4 - 17)           |
| Asthma                                              | 329<br>(247 - 447)       | 13<br>(5 - 27)        | 4<br>(3 - 7)           | 79<br>(57 - 114)        | 130<br>(91 - 186)       | 103<br>(71 - 146)       |
| Interstitial lung disease and pulmonary sarcoidosis | 152<br>(55 - 242)        | 1<br>(0 - 2)          | 1<br>(0 - 1)           | 9<br>(5 - 15)           | 60<br>(23 - 99)         | 82<br>(25 - 142)        |
| Other chronic respiratory diseases                  | 123<br>(89 - 211)        | 10<br>(4 - 20)        | 3<br>(2 - 5)           | 44<br>(30 - 73)         | 31<br>(20 - 57)         | 35<br>(22 - 64)         |
| Cirrhosis                                           | 1,491<br>(1,187 - 1,836) | 16<br>(5 - 34)        | 12<br>(8 - 16)         | 480<br>(353 - 625)      | 707<br>(545 - 913)      | 275<br>(211 - 350)      |
| Cirrhosis due to hepatitis B                        | 450<br>(209 - 675)       | 1<br>(0 - 3)          | 2<br>(1 - 4)           | 140<br>(65 - 232)       | 219<br>(99 - 346)       | 87<br>(36 - 138)        |
| Cirrhosis due to hepatitis C                        | 390<br>(186 - 631)       | 1<br>(0 - 3)          | 2<br>(0 - 4)           | 115<br>(63 - 194)       | 193<br>(67 - 330)       | 79<br>(35 - 122)        |
| Cirrhosis due to alcohol use                        | 459<br>(296 - 722)       | --                    | --                     | 135<br>(73 - 231)       | 231<br>(143 - 373)      | 92<br>(54 - 138)        |
| Cirrhosis due to other causes                       | 193<br>(118 - 310)       | 15<br>(5 - 30)        | 8<br>(5 - 12)          | 89<br>(53 - 158)        | 63<br>(30 - 109)        | 17<br>(8 - 28)          |
| Digestive diseases                                  | 1,586<br>(1,271 - 1,923) | 43<br>(14 - 80)       | 39<br>(26 - 53)        | 473<br>(349 - 594)      | 579<br>(440 - 745)      | 451<br>(358 - 555)      |
| Peptic ulcer disease                                | 368<br>(268 - 499)       | 3<br>(1 - 8)          | 4<br>(2 - 8)           | 103<br>(65 - 148)       | 146<br>(97 - 211)       | 111<br>(76 - 154)       |
| Gastritis and duodenitis                            | 68<br>(37 - 150)         | 3<br>(1 - 6)          | 2<br>(1 - 5)           | 19<br>(10 - 38)         | 23<br>(11 - 52)         | 22<br>(10 - 56)         |
| Appendicitis                                        | 101<br>(63 - 144)        | 5<br>(1 - 11)         | 6<br>(3 - 11)          | 32<br>(21 - 47)         | 32<br>(17 - 49)         | 26<br>(11 - 48)         |
| Paralytic ileus and intestinal obstruction          | 513<br>(305 - 690)       | 16<br>(5 - 34)        | 16<br>(8 - 24)         | 132<br>(68 - 191)       | 194<br>(106 - 281)      | 155<br>(100 - 224)      |
| Inguinal, femoral, and abdominal hernia             | 33<br>(21 - 54)          | 0<br>(0 - 1)          | 1<br>(0 - 1)           | 9<br>(5 - 15)           | 12<br>(7 - 21)          | 11<br>(6 - 18)          |
| Inflammatory bowel disease                          | 80<br>(32 - 115)         | 7<br>(2 - 14)         | 2<br>(1 - 3)           | 26<br>(10 - 38)         | 26<br>(8 - 41)          | 20<br>(6 - 31)          |
| Vascular intestinal disorders                       | 7<br>(3 - 17)            | 0<br>(0 - 1)          | 0<br>(0 - 1)           | 2<br>(1 - 4)            | 2<br>(1 - 6)            | 2<br>(1 - 7)            |
| Gallbladder and biliary diseases                    | 116<br>(77 - 155)        | 1<br>(0 - 2)          | 3<br>(1 - 5)           | 27<br>(15 - 40)         | 42<br>(27 - 61)         | 43<br>(26 - 63)         |
| Pancreatitis                                        | 122<br>(71 - 176)        | 1<br>(0 - 1)          | 1<br>(1 - 2)           | 61<br>(32 - 95)         | 39<br>(23 - 61)         | 20<br>(10 - 33)         |
| Other digestive diseases                            | 179<br>(133 - 236)       | 6<br>(2 - 16)         | 5<br>(3 - 8)           | 63<br>(43 - 88)         | 63<br>(42 - 90)         | 42<br>(27 - 61)         |
| Neurological disorders                              | 658<br>(547 - 792)       | 48<br>(20 - 98)       | 25<br>(14 - 43)        | 147<br>(106 - 199)      | 85<br>(67 - 108)        | 353<br>(286 - 427)      |
| Alzheimer disease and other dementias               | 366<br>(298 - 442)       | --                    | --                     | 0<br>(0 - 1)            | 43<br>(33 - 57)         | 323<br>(259 - 393)      |
| Parkinson disease                                   | 4<br>(2 - 8)             | --                    | --                     | 1<br>(0 - 1)            | 1<br>(0 - 2)            | 3<br>(1 - 6)            |
| Epilepsy                                            | 209<br>(151 - 295)       | 36<br>(13 - 82)       | 20<br>(10 - 37)        | 119<br>(82 - 171)       | 18<br>(12 - 28)         | 16<br>(10 - 28)         |
| Multiple sclerosis                                  | 1<br>(0 - 4)             | --                    | --                     | 0<br>(0 - 2)            | 0<br>(0 - 2)            | 0<br>(0 - 1)            |
| Other neurological disorders                        | 77<br>(60 - 93)          | 12<br>(6 - 20)        | 5<br>(4 - 7)           | 26<br>(19 - 33)         | 22<br>(17 - 28)         | 11<br>(8 - 14)          |
| Mental and substance use disorders                  | 663<br>(419 - 876)       | 13<br>(2 - 31)        | 0<br>(0 - 0)           | 471<br>(285 - 631)      | 141<br>(84 - 202)       | 37<br>(20 - 53)         |
| Schizophrenia                                       | 2<br>(1 - 3)             | --                    | --                     | 1<br>(1 - 1)            | 1<br>(0 - 1)            | 0<br>(0 - 0)            |
| Alcohol use disorders                               | 269<br>(132 - 379)       | --                    | --                     | 143<br>(75 - 209)       | 102<br>(46 - 159)       | 24<br>(8 - 38)          |
| Drug use disorders                                  | 391<br>(227 - 529)       | 13<br>(2 - 31)        | --                     | 327<br>(171 - 446)      | 38<br>(27 - 52)         | 13<br>(9 - 17)          |
| Opioid use disorders                                | 42<br>(24 - 58)          | 1<br>(0 - 4)          | --                     | 35<br>(19 - 50)         | 4<br>(2 - 5)            | 1<br>(1 - 2)            |
| Cocaine use disorders                               | 2<br>(1 - 2)             | 0<br>(0 - 0)          | --                     | 1<br>(1 - 2)            | 0<br>(0 - 0)            | 0<br>(0 - 0)            |
| Amphetamine use disorders                           | 1<br>(1 - 1)             | 0<br>(0 - 0)          | --                     | 1<br>(0 - 1)            | 0<br>(0 - 0)            | 0<br>(0 - 0)            |

Web Table 31- Benin deaths with 95% UI by age, sex, and cause in 2013

| Cause                                               | Both Sexes, All Ages     | Both Sexes, 0-4 Years  | Both Sexes, 5-14 Years | Both Sexes, 15-49 Years | Both Sexes, 50-69 Years | Both Sexes, 70-80 Years |
|-----------------------------------------------------|--------------------------|------------------------|------------------------|-------------------------|-------------------------|-------------------------|
| Other drug use disorders                            | 347<br>(201 - 468)       | 12<br>(2 - 27)         | --                     | 289<br>(151 - 395)      | 34<br>(24 - 46)         | 12<br>(8 - 15)          |
| Eating disorders                                    | 0<br>(0 - 0)             | --                     | 0<br>(0 - 0)           | 0<br>(0 - 0)            | --                      | --                      |
| Anorexia nervosa                                    | 0<br>(0 - 0)             | --                     | 0<br>(0 - 0)           | 0<br>(0 - 0)            | --                      | --                      |
| Diabetes, urogenital, blood, and endocrine diseases | 3,366<br>(2,534 - 4,541) | 511<br>(197 - 1,040)   | 191<br>(78 - 415)      | 789<br>(564 - 1,123)    | 1,040<br>(813 - 1,317)  | 835<br>(658 - 1,010)    |
| Diabetes mellitus                                   | 1,170<br>(922 - 1,446)   | 9<br>(5 - 13)          | 4<br>(2 - 6)           | 151<br>(112 - 198)      | 558<br>(420 - 726)      | 449<br>(336 - 566)      |
| Acute glomerulonephritis                            | 10<br>(7 - 14)           | 1<br>(0 - 2)           | 1<br>(0 - 2)           | 4<br>(3 - 5)            | 3<br>(2 - 5)            | 1<br>(1 - 2)            |
| Chronic kidney disease                              | 497<br>(340 - 634)       | 23<br>(9 - 42)         | 15<br>(6 - 25)         | 169<br>(95 - 233)       | 158<br>(110 - 209)      | 132<br>(93 - 171)       |
| Chronic kidney disease due to diabetes mellitus     | 5<br>(2 - 9)             | 0<br>(0 - 0)           | 0<br>(0 - 0)           | 1<br>(0 - 1)            | 4<br>(1 - 8)            | 0<br>(0 - 0)            |
| Chronic kidney disease due to hypertension          | 192<br>(140 - 259)       | 3<br>(1 - 6)           | 2<br>(1 - 3)           | 46<br>(28 - 68)         | 73<br>(48 - 103)        | 68<br>(47 - 94)         |
| Chronic kidney disease due to glomerulonephritis    | 187<br>(115 - 248)       | 13<br>(5 - 23)         | 9<br>(4 - 14)          | 87<br>(49 - 116)        | 46<br>(29 - 68)         | 32<br>(18 - 46)         |
| Chronic kidney disease due to other causes          | 113<br>(51 - 174)        | 7<br>(2 - 16)          | 4<br>(1 - 9)           | 36<br>(12 - 70)         | 35<br>(16 - 58)         | 31<br>(14 - 55)         |
| Urinary diseases and male infertility               | 480<br>(330 - 604)       | 31<br>(12 - 61)        | 7<br>(4 - 12)          | 127<br>(69 - 173)       | 167<br>(112 - 226)      | 148<br>(109 - 200)      |
| Interstitial nephritis and urinary tract infections | 413<br>(281 - 526)       | 29<br>(11 - 58)        | 5<br>(3 - 9)           | 105<br>(54 - 147)       | 142<br>(92 - 195)       | 131<br>(96 - 175)       |
| Urolithiasis                                        | 6<br>(2 - 16)            | --                     | 0<br>(0 - 1)           | 2<br>(1 - 5)            | 2<br>(1 - 7)            | 1<br>(0 - 5)            |
| Other urinary diseases                              | 61<br>(33 - 87)          | 2<br>(1 - 6)           | 1<br>(0 - 2)           | 19<br>(9 - 31)          | 23<br>(11 - 36)         | 16<br>(8 - 26)          |
| Gynecological diseases                              | 6<br>(2 - 15)            | --                     | --                     | 3<br>(1 - 9)            | 2<br>(1 - 4)            | 1<br>(0 - 2)            |
| Uterine fibroids                                    | 1<br>(0 - 3)             | --                     | --                     | 0<br>(0 - 1)            | 0<br>(0 - 1)            | 0<br>(0 - 1)            |
| Polycystic ovarian syndrome                         | 0<br>(0 - 1)             | --                     | --                     | 0<br>(0 - 1)            | 0<br>(0 - 0)            | --                      |
| Endometriosis                                       | 0<br>(0 - 2)             | --                     | --                     | 0<br>(0 - 1)            | 0<br>(0 - 0)            | --                      |
| Genital prolapse                                    | 1<br>(0 - 2)             | --                     | --                     | 0<br>(0 - 1)            | 0<br>(0 - 1)            | 0<br>(0 - 1)            |
| Other gynecological diseases                        | 3<br>(1 - 7)             | --                     | --                     | 1<br>(0 - 4)            | 1<br>(0 - 2)            | 0<br>(0 - 1)            |
| Hemoglobinopathies and hemolytic anemias            | 854<br>(282 - 1,927)     | 379<br>(93 - 896)      | 150<br>(42 - 382)      | 243<br>(84 - 600)       | 58<br>(27 - 132)        | 24<br>(11 - 45)         |
| Thalassemias                                        | 6<br>(2 - 14)            | 4<br>(1 - 10)          | 1<br>(0 - 2)           | 1<br>(0 - 3)            | 0<br>(0 - 0)            | 0<br>(0 - 0)            |
| Sickle cell disorders                               | 817<br>(265 - 1,861)     | 367<br>(89 - 866)      | 148<br>(41 - 377)      | 238<br>(83 - 587)       | 55<br>(25 - 125)        | 10<br>(4 - 18)          |
| G6PD deficiency                                     | 5<br>(2 - 12)            | 2<br>(0 - 5)           | 1<br>(0 - 2)           | 1<br>(0 - 4)            | 1<br>(0 - 1)            | 1<br>(0 - 1)            |
| Other hemoglobinopathies and hemolytic anemias      | 25<br>(12 - 50)          | 6<br>(2 - 14)          | 1<br>(0 - 2)           | 2<br>(1 - 6)            | 3<br>(1 - 6)            | 14<br>(7 - 26)          |
| Endocrine, metabolic, blood, and immune disorders   | 350<br>(213 - 454)       | 68<br>(34 - 113)       | 14<br>(7 - 24)         | 94<br>(56 - 129)        | 94<br>(55 - 133)        | 79<br>(39 - 115)        |
| Musculoskeletal disorders                           | 93<br>(68 - 130)         | --                     | 6<br>(4 - 10)          | 34<br>(23 - 50)         | 32<br>(22 - 44)         | 21<br>(14 - 31)         |
| Rheumatoid arthritis                                | 11<br>(7 - 17)           | --                     | 1<br>(0 - 1)           | 2<br>(1 - 3)            | 3<br>(2 - 6)            | 5<br>(3 - 9)            |
| Other musculoskeletal disorders                     | 81<br>(60 - 115)         | --                     | 6<br>(3 - 9)           | 32<br>(22 - 47)         | 28<br>(20 - 39)         | 16<br>(11 - 24)         |
| Other non-communicable diseases                     | 1,973<br>(1,238 - 3,100) | 1,574<br>(876 - 2,657) | 80<br>(45 - 129)       | 139<br>(103 - 187)      | 88<br>(62 - 118)        | 92<br>(64 - 128)        |
| Congenital anomalies                                | 1,705<br>(973 - 2,833)   | 1,520<br>(837 - 2,588) | 75<br>(41 - 123)       | 80<br>(53 - 123)        | 19<br>(13 - 28)         | 12<br>(8 - 18)          |
| Neural tube defects                                 | 381<br>(118 - 856)       | 356<br>(108 - 822)     | 11<br>(3 - 24)         | 13<br>(4 - 30)          | 1<br>(0 - 4)            | 1<br>(0 - 2)            |
| Congenital heart anomalies                          | 710<br>(411 - 1,201)     | 625<br>(348 - 1,091)   | 35<br>(19 - 60)        | 35<br>(22 - 54)         | 9<br>(6 - 14)           | 5<br>(3 - 8)            |
| Cleft lip and cleft palate                          | 6<br>(1 - 20)            | 6<br>(1 - 20)          | --                     | --                      | --                      | --                      |
| Down syndrome                                       | 202<br>(68 - 433)        | 173<br>(50 - 391)      | 12<br>(5 - 24)         | 13<br>(7 - 24)          | 3<br>(2 - 6)            | 0<br>(0 - 1)            |
| Chromosomal unbalanced rearrangements               | 69<br>(24 - 161)         | 62<br>(20 - 149)       | 2<br>(1 - 5)           | 3<br>(2 - 6)            | 0<br>(0 - 1)            | 0<br>(0 - 1)            |
| Other congenital anomalies                          | 337<br>(115 - 1,027)     | 298<br>(89 - 953)      | 14<br>(5 - 38)         | 15<br>(8 - 33)          | 5<br>(3 - 8)            | 5<br>(3 - 9)            |
| Skin and subcutaneous diseases                      | 252<br>(165 - 334)       | 38<br>(15 - 77)        | 6<br>(3 - 10)          | 59<br>(32 - 84)         | 69<br>(45 - 97)         | 80<br>(53 - 115)        |
| Cellulitis                                          | 71<br>(41 - 107)         | 9<br>(2 - 19)          | 2<br>(1 - 4)           | 15<br>(8 - 24)          | 20<br>(10 - 32)         | 26<br>(12 - 46)         |

Web Table 31- Benin deaths with 95% UI by age, sex, and cause in 2013

| Cause                                           | Both Sexes, All Ages     | Both Sexes, 0-4 Years | Both Sexes, 5-14 Years | Both Sexes, 15-49 Years  | Both Sexes, 50-69 Years | Both Sexes, 70-80 Years |
|-------------------------------------------------|--------------------------|-----------------------|------------------------|--------------------------|-------------------------|-------------------------|
| Pyoderma                                        | 169<br>(105 - 239)       | 28<br>(11 - 58)       | 3<br>(1 - 5)           | 40<br>(21 - 60)          | 48<br>(29 - 71)         | 50<br>(28 - 78)         |
| Decubitus ulcer                                 | 5<br>(3 - 7)             | 0<br>(0 - 0)          | 0<br>(0 - 0)           | 1<br>(1 - 2)             | 1<br>(0 - 1)            | 3<br>(1 - 5)            |
| Other skin and subcutaneous diseases            | 7<br>(3 - 12)            | 2<br>(0 - 4)          | 0<br>(0 - 1)           | 3<br>(1 - 5)             | 1<br>(0 - 1)            | 1<br>(0 - 3)            |
| Sudden infant death syndrome                    | 16<br>(5 - 43)           | 16<br>(5 - 43)        | --                     | --                       | --                      | --                      |
| Injuries                                        | 5,062<br>(4,068 - 6,223) | 570<br>(273 - 1,028)  | 368<br>(240 - 512)     | 2,685<br>(2,057 - 3,292) | 901<br>(698 - 1,141)    | 538<br>(377 - 681)      |
| Transport injuries                              | 2,404<br>(1,778 - 3,065) | 137<br>(55 - 250)     | 161<br>(104 - 232)     | 1,496<br>(1,082 - 1,920) | 435<br>(301 - 587)      | 175<br>(112 - 235)      |
| Road injuries                                   | 2,326<br>(1,731 - 2,957) | 123<br>(48 - 226)     | 152<br>(98 - 220)      | 1,469<br>(1,059 - 1,887) | 418<br>(292 - 563)      | 164<br>(108 - 219)      |
| Pedestrian road injuries                        | 572<br>(372 - 781)       | 39<br>(14 - 80)       | 51<br>(29 - 80)        | 305<br>(183 - 443)       | 119<br>(75 - 171)       | 58<br>(37 - 82)         |
| Cyclist road injuries                           | 112<br>(74 - 162)        | 8<br>(2 - 18)         | 14<br>(7 - 24)         | 52<br>(34 - 77)          | 29<br>(15 - 42)         | 9<br>(5 - 14)           |
| Motorcyclist road injuries                      | 288<br>(183 - 437)       | 9<br>(3 - 17)         | 10<br>(5 - 17)         | 219<br>(131 - 340)       | 40<br>(24 - 62)         | 11<br>(6 - 16)          |
| Motor vehicle road injuries                     | 1,323<br>(974 - 1,707)   | 63<br>(26 - 116)      | 73<br>(45 - 110)       | 881<br>(624 - 1,140)     | 223<br>(152 - 313)      | 83<br>(54 - 115)        |
| Other road injuries                             | 31<br>(18 - 47)          | 5<br>(1 - 10)         | 5<br>(2 - 10)          | 11<br>(7 - 21)           | 6<br>(3 - 11)           | 3<br>(2 - 6)            |
| Other transport injuries                        | 78<br>(42 - 108)         | 14<br>(4 - 27)        | 9<br>(4 - 15)          | 28<br>(18 - 43)          | 17<br>(7 - 26)          | 11<br>(2 - 18)          |
| Unintentional injuries                          | 1,920<br>(1,464 - 2,480) | 422<br>(197 - 800)    | 191<br>(117 - 287)     | 673<br>(516 - 888)       | 331<br>(237 - 436)      | 303<br>(194 - 411)      |
| Falls                                           | 496<br>(384 - 645)       | 51<br>(22 - 99)       | 27<br>(15 - 49)        | 167<br>(113 - 263)       | 106<br>(71 - 161)       | 145<br>(95 - 208)       |
| Drowning                                        | 420<br>(273 - 662)       | 126<br>(41 - 309)     | 78<br>(39 - 134)       | 162<br>(99 - 274)        | 39<br>(26 - 55)         | 15<br>(9 - 21)          |
| Fire, heat, and hot substances                  | 177<br>(97 - 276)        | 51<br>(19 - 116)      | 15<br>(7 - 31)         | 55<br>(33 - 79)          | 31<br>(16 - 50)         | 25<br>(13 - 41)         |
| Poisonings                                      | 84<br>(52 - 127)         | 15<br>(6 - 33)        | 6<br>(3 - 9)           | 41<br>(26 - 82)          | 17<br>(8 - 26)          | 5<br>(3 - 8)            |
| Exposure to mechanical forces                   | 272<br>(182 - 449)       | 62<br>(23 - 165)      | 28<br>(14 - 52)        | 120<br>(77 - 204)        | 46<br>(26 - 67)         | 17<br>(7 - 23)          |
| Unintentional firearm injuries                  | 83<br>(56 - 119)         | 9<br>(4 - 19)         | 5<br>(3 - 8)           | 52<br>(31 - 80)          | 13<br>(7 - 19)          | 4<br>(3 - 6)            |
| Unintentional suffocation                       | 56<br>(18 - 293)         | 27<br>(5 - 114)       | 7<br>(2 - 29)          | 16<br>(5 - 99)           | 5<br>(2 - 27)           | 2<br>(1 - 7)            |
| Other exposure to mechanical forces             | 133<br>(59 - 188)        | 26<br>(6 - 53)        | 17<br>(6 - 32)         | 52<br>(30 - 77)          | 28<br>(8 - 44)          | 11<br>(2 - 16)          |
| Adverse effects of medical treatment            | 184<br>(69 - 307)        | 36<br>(10 - 93)       | 8<br>(3 - 16)          | 45<br>(19 - 74)          | 47<br>(17 - 86)         | 47<br>(13 - 92)         |
| Animal contact                                  | 55<br>(29 - 81)          | 8<br>(3 - 16)         | 8<br>(4 - 15)          | 17<br>(9 - 27)           | 13<br>(5 - 20)          | 9<br>(3 - 15)           |
| Venomous animal contact                         | 26<br>(13 - 46)          | 5<br>(2 - 10)         | 4<br>(1 - 8)           | 9<br>(4 - 16)            | 5<br>(2 - 10)           | 4<br>(1 - 7)            |
| Non-venomous animal contact                     | 29<br>(14 - 43)          | 4<br>(1 - 7)          | 4<br>(2 - 8)           | 8<br>(4 - 14)            | 7<br>(3 - 12)           | 5<br>(2 - 9)            |
| Foreign body                                    | 124<br>(82 - 183)        | 58<br>(28 - 102)      | 9<br>(5 - 14)          | 19<br>(13 - 28)          | 15<br>(9 - 20)          | 24<br>(13 - 35)         |
| Pulmonary aspiration and foreign body in airway | 116<br>(75 - 177)        | 56<br>(27 - 99)       | 8<br>(4 - 13)          | 17<br>(11 - 26)          | 13<br>(8 - 18)          | 23<br>(12 - 34)         |
| Foreign body in other body part                 | 8<br>(5 - 13)            | 2<br>(1 - 4)          | 1<br>(0 - 2)           | 2<br>(1 - 4)             | 2<br>(1 - 3)            | 1<br>(1 - 2)            |
| Other unintentional injuries                    | 108<br>(81 - 138)        | 14<br>(7 - 25)        | 13<br>(8 - 20)         | 47<br>(33 - 64)          | 18<br>(13 - 26)         | 15<br>(9 - 21)          |
| Self-harm and interpersonal violence            | 738<br>(541 - 1,196)     | 11<br>(5 - 23)        | 16<br>(8 - 29)         | 516<br>(360 - 901)       | 136<br>(95 - 214)       | 59<br>(35 - 82)         |
| Self-harm                                       | 517<br>(365 - 963)       | --                    | 9<br>(4 - 20)          | 329<br>(212 - 689)       | 122<br>(83 - 197)       | 57<br>(33 - 80)         |
| Interpersonal violence                          | 221<br>(143 - 300)       | 11<br>(5 - 23)        | 7<br>(4 - 13)          | 187<br>(116 - 263)       | 14<br>(8 - 23)          | 2<br>(1 - 3)            |
| Assault by firearm                              | 121<br>(65 - 177)        | 3<br>(1 - 6)          | 2<br>(1 - 4)           | 109<br>(56 - 164)        | 6<br>(3 - 10)           | 1<br>(0 - 1)            |
| Assault by sharp object                         | 42<br>(25 - 76)          | 2<br>(1 - 5)          | 1<br>(1 - 3)           | 34<br>(19 - 66)          | 4<br>(2 - 7)            | 0<br>(0 - 1)            |
| Assault by other means                          | 58<br>(36 - 94)          | 6<br>(2 - 12)         | 4<br>(2 - 7)           | 43<br>(25 - 73)          | 4<br>(2 - 7)            | 1<br>(0 - 1)            |
| Forces of nature, war, and legal intervention   | 0<br>(0 - 0)             | 0<br>(0 - 0)          | --                     | --                       | --                      | --                      |
| Exposure to forces of nature                    | 0<br>(0 - 0)             | 0<br>(0 - 0)          | --                     | --                       | --                      | --                      |

Web Table 31- Benin deaths with 95% UI by age, sex, and cause in 2013

| Cause                                                             | Males, All Ages             | Males, 0-4 Years            | Males, 5-14 Years        | Males, 15-49 Years         | Males, 50-69 Years        | Males, 70-80 Years       |
|-------------------------------------------------------------------|-----------------------------|-----------------------------|--------------------------|----------------------------|---------------------------|--------------------------|
| All causes                                                        | 37,840<br>(33,595 - 43,282) | 12,001<br>(10,553 - 13,667) | 1,350<br>(1,206 - 1,530) | 10,244<br>(8,334 - 11,667) | 8,618<br>(7,265 - 10,822) | 5,627<br>(5,098 - 6,700) |
| Communicable, maternal, neonatal, and nutritional diseases        | 19,596<br>(17,339 - 22,157) | 10,334<br>(8,777 - 12,050)  | 816<br>(640 - 1,084)     | 4,228<br>(3,557 - 4,923)   | 2,531<br>(1,991 - 3,179)  | 1,686<br>(1,274 - 2,131) |
| HIV/AIDS and tuberculosis                                         | 3,571<br>(2,934 - 4,378)    | 172<br>(123 - 227)          | 138<br>(110 - 168)       | 2,132<br>(1,642 - 2,788)   | 850<br>(653 - 1,131)      | 279<br>(199 - 373)       |
| Tuberculosis                                                      | 1,521<br>(1,102 - 2,066)    | 37<br>(18 - 65)             | 20<br>(11 - 31)          | 650<br>(425 - 939)         | 562<br>(378 - 815)        | 252<br>(171 - 343)       |
| HIV/AIDS                                                          | 2,050<br>(1,541 - 2,757)    | 135<br>(90 - 182)           | 118<br>(92 - 148)        | 1,482<br>(1,052 - 2,086)   | 288<br>(196 - 410)        | 27<br>(16 - 40)          |
| HIV/AIDS resulting in mycobacterial infection                     | 139<br>(98 - 196)           | 9<br>(5 - 12)               | 7<br>(5 - 9)             | 101<br>(68 - 147)          | 21<br>(13 - 31)           | 2<br>(1 - 3)             |
| HIV/AIDS resulting in other diseases                              | 1,911<br>(1,442 - 2,572)    | 127<br>(84 - 170)           | 111<br>(86 - 139)        | 1,381<br>(980 - 1,952)     | 267<br>(181 - 380)        | 25<br>(15 - 37)          |
| Diarrhea, lower respiratory, and other common infectious diseases | 7,156<br>(5,307 - 9,090)    | 3,276<br>(2,046 - 4,769)    | 393<br>(249 - 651)       | 1,282<br>(915 - 1,627)     | 1,141<br>(778 - 1,599)    | 1,064<br>(740 - 1,438)   |
| Diarrheal diseases                                                | 1,807<br>(1,180 - 2,667)    | 811<br>(309 - 1,597)        | 71<br>(30 - 135)         | 380<br>(251 - 535)         | 308<br>(181 - 493)        | 238<br>(140 - 379)       |
| Intestinal infectious diseases                                    | 257<br>(124 - 467)          | 70<br>(26 - 148)            | 73<br>(33 - 134)         | 100<br>(44 - 198)          | 11<br>(5 - 21)            | 3<br>(1 - 6)             |
| Typhoid fever                                                     | 173<br>(78 - 326)           | 44<br>(13 - 101)            | 51<br>(22 - 95)          | 69<br>(28 - 141)           | 7<br>(3 - 15)             | 2<br>(1 - 3)             |
| Paratyphoid fever                                                 | 68<br>(27 - 131)            | 18<br>(6 - 41)              | 21<br>(8 - 43)           | 26<br>(8 - 60)             | 3<br>(1 - 6)              | 1<br>(0 - 2)             |
| Other intestinal infectious diseases                              | 16<br>(7 - 30)              | 8<br>(2 - 19)               | 2<br>(0 - 6)             | 4<br>(1 - 12)              | 1<br>(0 - 5)              | 0<br>(0 - 3)             |
| Lower respiratory infections                                      | 3,504<br>(2,349 - 4,575)    | 1,493<br>(817 - 2,292)      | 90<br>(47 - 148)         | 461<br>(303 - 649)         | 684<br>(395 - 1,013)      | 776<br>(461 - 1,107)     |
| Upper respiratory infections                                      | 5<br>(2 - 11)               | 1<br>(0 - 5)                | 0<br>(0 - 1)             | 2<br>(0 - 5)               | 1<br>(0 - 4)              | 1<br>(0 - 2)             |
| Otitis media                                                      | 2<br>(1 - 2)                | 0<br>(0 - 1)                | 0<br>(0 - 0)             | 1<br>(0 - 1)               | 1<br>(0 - 1)              | 0<br>(0 - 1)             |
| Meningitis                                                        | 838<br>(557 - 1,185)        | 319<br>(142 - 592)          | 72<br>(35 - 129)         | 285<br>(174 - 416)         | 121<br>(67 - 194)         | 41<br>(22 - 68)          |
| Pneumococcal meningitis                                           | 222<br>(130 - 336)          | 68<br>(26 - 137)            | 21<br>(8 - 40)           | 88<br>(43 - 148)           | 35<br>(14 - 67)           | 11<br>(4 - 21)           |
| H influenzae type B meningitis                                    | 147<br>(71 - 259)           | 82<br>(27 - 178)            | 13<br>(4 - 27)           | 35<br>(13 - 62)            | 14<br>(3 - 32)            | 3<br>(1 - 7)             |
| Meningococcal meningitis                                          | 366<br>(237 - 526)          | 141<br>(56 - 266)           | 32<br>(15 - 60)          | 122<br>(71 - 183)          | 52<br>(28 - 88)           | 19<br>(10 - 31)          |
| Other meningitis                                                  | 102<br>(66 - 146)           | 28<br>(10 - 56)             | 7<br>(3 - 13)            | 40<br>(20 - 64)            | 21<br>(9 - 35)            | 8<br>(4 - 15)            |
| Encephalitis                                                      | 53<br>(35 - 79)             | 17<br>(6 - 34)              | 6<br>(3 - 12)            | 19<br>(12 - 31)            | 7<br>(4 - 11)             | 3<br>(2 - 5)             |
| Diphtheria                                                        | 3<br>(0 - 14)               | 2<br>(0 - 13)               | 0<br>(0 - 4)             | 0<br>(0 - 1)               | 0<br>(0 - 1)              | --                       |
| Whooping cough                                                    | 50<br>(0 - 254)             | 47<br>(0 - 238)             | 3<br>(0 - 13)            | 1<br>(0 - 3)               | 0<br>(0 - 0)              | --                       |
| Tetanus                                                           | 73<br>(28 - 148)            | 44<br>(7 - 114)             | 3<br>(1 - 9)             | 18<br>(9 - 40)             | 7<br>(3 - 16)             | 1<br>(0 - 3)             |
| Measles                                                           | 560<br>(17 - 2,843)         | 471<br>(13 - 2,442)         | 74<br>(2 - 413)          | 14<br>(0 - 92)             | 0<br>(0 - 3)              | --                       |
| Varicella and herpes zoster                                       | 4<br>(1 - 8)                | 1<br>(0 - 5)                | 0<br>(0 - 2)             | 1<br>(0 - 3)               | 0<br>(0 - 1)              | 1<br>(0 - 2)             |
| Neglected tropical diseases and malaria                           | 3,676<br>(1,848 - 6,081)    | 2,640<br>(1,156 - 4,481)    | 207<br>(75 - 485)        | 443<br>(160 - 1,100)       | 255<br>(84 - 656)         | 131<br>(37 - 368)        |
| Malaria                                                           | 3,604<br>(1,769 - 6,020)    | 2,628<br>(1,141 - 4,474)    | 196<br>(57 - 479)        | 413<br>(129 - 1,076)       | 241<br>(69 - 646)         | 126<br>(33 - 365)        |
| Leishmaniasis                                                     | 0<br>(0 - 0)                | 0<br>(0 - 0)                | 0<br>(0 - 0)             | 0<br>(0 - 0)               | 0<br>(0 - 0)              | 0<br>(0 - 0)             |
| Visceral leishmaniasis                                            | 0<br>(0 - 0)                | 0<br>(0 - 0)                | 0<br>(0 - 0)             | 0<br>(0 - 0)               | 0<br>(0 - 0)              | 0<br>(0 - 0)             |
| Schistosomiasis                                                   | 24<br>(16 - 33)             | 0<br>(0 - 0)                | 1<br>(0 - 1)             | 11<br>(7 - 18)             | 9<br>(5 - 14)             | 3<br>(1 - 5)             |
| Cysticercosis                                                     | 1<br>(0 - 2)                | 0<br>(0 - 0)                | 0<br>(0 - 0)             | 0<br>(0 - 1)               | 0<br>(0 - 0)              | 0<br>(0 - 0)             |
| Cystic echinococcosis                                             | 2<br>(2 - 3)                | 0<br>(0 - 0)                | 0<br>(0 - 0)             | 1<br>(1 - 1)               | 0<br>(0 - 0)              | 0<br>(0 - 0)             |
| Dengue                                                            | 4<br>(2 - 6)                | 1<br>(0 - 3)                | 1<br>(0 - 1)             | 2<br>(1 - 3)               | 0<br>(0 - 1)              | 0<br>(0 - 0)             |
| Yellow fever                                                      | 5<br>(3 - 8)                | 0<br>(0 - 1)                | 1<br>(0 - 2)             | 3<br>(1 - 6)               | 0<br>(0 - 1)              | 0<br>(0 - 1)             |
| Rabies                                                            | 24<br>(7 - 44)              | 4<br>(1 - 13)               | 8<br>(2 - 19)            | 9<br>(3 - 15)              | 2<br>(1 - 5)              | 0<br>(0 - 0)             |
| Intestinal nematode infections                                    | 6<br>(1 - 18)               | 4<br>(1 - 14)               | 1<br>(0 - 5)             | 1<br>(0 - 5)               | 0<br>(0 - 2)              | 0<br>(0 - 1)             |
| Ascariasis                                                        | 6<br>(1 - 18)               | 4<br>(1 - 14)               | 1<br>(0 - 5)             | 1<br>(0 - 5)               | 0<br>(0 - 2)              | 0<br>(0 - 1)             |
| Other neglected tropical diseases                                 | 6<br>(4 - 11)               | 1<br>(1 - 4)                | 0<br>(0 - 1)             | 2<br>(1 - 4)               | 1<br>(1 - 2)              | 1<br>(0 - 1)             |



Web Table 31- Benin deaths with 95% UI by age, sex, and cause in 2013

| Cause                                                            | Males, All Ages             | Males, 0-4 Years         | Males, 5-14 Years  | Males, 15-49 Years       | Males, 50-69 Years       | Males, 70-80 Years       |
|------------------------------------------------------------------|-----------------------------|--------------------------|--------------------|--------------------------|--------------------------|--------------------------|
| Maternal disorders                                               | --                          | --                       | --                 | --                       | --                       | --                       |
| Maternal hemorrhage                                              | --                          | --                       | --                 | --                       | --                       | --                       |
| Maternal sepsis and other maternal infections                    | --                          | --                       | --                 | --                       | --                       | --                       |
| Maternal hypertensive disorders                                  | --                          | --                       | --                 | --                       | --                       | --                       |
| Maternal obstructed labor                                        | --                          | --                       | --                 | --                       | --                       | --                       |
| Maternal abortive outcome                                        | --                          | --                       | --                 | --                       | --                       | --                       |
| Indirect maternal deaths                                         | --                          | --                       | --                 | --                       | --                       | --                       |
| Late maternal deaths                                             | --                          | --                       | --                 | --                       | --                       | --                       |
| Maternal deaths aggravated by HIV/AIDS                           | --                          | --                       | --                 | --                       | --                       | --                       |
| Other maternal disorders                                         | --                          | --                       | --                 | --                       | --                       | --                       |
| Neonatal disorders                                               | 3,522<br>(2,913 - 4,141)    | 3,522<br>(2,913 - 4,141) | --                 | --                       | --                       | --                       |
| Neonatal preterm birth complications                             | 1,241<br>(487 - 2,214)      | 1,241<br>(487 - 2,214)   | --                 | --                       | --                       | --                       |
| Neonatal encephalopathy due to birth asphyxia and trauma         | 996<br>(389 - 1,932)        | 996<br>(389 - 1,932)     | --                 | --                       | --                       | --                       |
| Neonatal sepsis and other neonatal infections                    | 1,006<br>(362 - 1,913)      | 1,006<br>(362 - 1,913)   | --                 | --                       | --                       | --                       |
| Hemolytic disease and other neonatal jaundice                    | 20<br>(5 - 57)              | 20<br>(5 - 57)           | --                 | --                       | --                       | --                       |
| Other neonatal disorders                                         | 259<br>(102 - 520)          | 259<br>(102 - 520)       | --                 | --                       | --                       | --                       |
| Nutritional deficiencies                                         | 1,339<br>(798 - 1,962)      | 579<br>(238 - 1,068)     | 61<br>(32 - 99)    | 287<br>(180 - 450)       | 229<br>(139 - 374)       | 184<br>(111 - 301)       |
| Protein-energy malnutrition                                      | 959<br>(539 - 1,497)        | 537<br>(228 - 965)       | 44<br>(22 - 76)    | 146<br>(74 - 273)        | 133<br>(70 - 239)        | 100<br>(51 - 187)        |
| Iodine deficiency                                                | 2<br>(0 - 7)                | 0<br>(0 - 3)             | 0<br>(0 - 1)       | 1<br>(0 - 3)             | 0<br>(0 - 3)             | 0<br>(0 - 2)             |
| Iron-deficiency anemia                                           | 371<br>(140 - 588)          | 42<br>(3 - 128)          | 16<br>(4 - 33)     | 137<br>(53 - 224)        | 94<br>(36 - 164)         | 83<br>(33 - 149)         |
| Other nutritional deficiencies                                   | 7<br>(2 - 12)               | 0<br>(0 - 1)             | 0<br>(0 - 1)       | 3<br>(1 - 6)             | 2<br>(0 - 3)             | 1<br>(0 - 2)             |
| Other communicable, maternal, neonatal, and nutritional diseases | 332<br>(204 - 495)          | 143<br>(50 - 270)        | 17<br>(8 - 28)     | 84<br>(53 - 128)         | 57<br>(33 - 99)          | 30<br>(17 - 50)          |
| Sexually transmitted diseases excluding HIV                      | 137<br>(42 - 266)           | 107<br>(18 - 225)        | 9<br>(2 - 19)      | 11<br>(6 - 23)           | 6<br>(3 - 14)            | 4<br>(1 - 9)             |
| Syphilis                                                         | 129<br>(35 - 258)           | 107<br>(18 - 225)        | 9<br>(2 - 18)      | 6<br>(3 - 12)            | 4<br>(2 - 10)            | 3<br>(1 - 8)             |
| Chlamydial infection                                             | --                          | --                       | --                 | --                       | --                       | --                       |
| Gonococcal infection                                             | 5<br>(3 - 10)               | --                       | 0<br>(0 - 1)       | 3<br>(2 - 6)             | 1<br>(0 - 2)             | 0<br>(0 - 1)             |
| Other sexually transmitted diseases                              | 3<br>(2 - 7)                | --                       | 0<br>(0 - 1)       | 2<br>(1 - 5)             | 1<br>(0 - 1)             | 0<br>(0 - 0)             |
| Hepatitis                                                        | 96<br>(56 - 145)            | 9<br>(3 - 21)            | 4<br>(2 - 8)       | 47<br>(25 - 72)          | 25<br>(14 - 41)          | 10<br>(6 - 17)           |
| Acute hepatitis A                                                | 5<br>(1 - 13)               | 2<br>(0 - 6)             | 1<br>(0 - 2)       | 2<br>(0 - 5)             | 0<br>(0 - 1)             | 0<br>(0 - 0)             |
| Acute hepatitis B                                                | 61<br>(33 - 96)             | 7<br>(2 - 16)            | 2<br>(1 - 4)       | 22<br>(9 - 40)           | 21<br>(11 - 34)          | 9<br>(5 - 15)            |
| Acute hepatitis C                                                | 3<br>(1 - 9)                | --                       | 0<br>(0 - 1)       | 2<br>(0 - 5)             | 1<br>(0 - 3)             | 0<br>(0 - 1)             |
| Acute hepatitis E                                                | 26<br>(12 - 48)             | 0<br>(0 - 0)             | 1<br>(0 - 2)       | 21<br>(10 - 38)          | 3<br>(1 - 9)             | 1<br>(0 - 2)             |
| Other infectious diseases                                        | 99<br>(57 - 178)            | 27<br>(9 - 61)           | 4<br>(1 - 9)       | 27<br>(12 - 55)          | 25<br>(10 - 60)          | 16<br>(6 - 35)           |
| Non-communicable diseases                                        | 14,606<br>(12,011 - 17,966) | 1,318<br>(690 - 2,305)   | 288<br>(158 - 478) | 3,793<br>(2,798 - 4,634) | 5,502<br>(4,458 - 7,245) | 3,705<br>(3,191 - 4,506) |
| Neoplasms                                                        | 2,141<br>(1,723 - 2,697)    | 49<br>(20 - 90)          | 45<br>(24 - 68)    | 723<br>(524 - 911)       | 884<br>(701 - 1,171)     | 439<br>(355 - 548)       |
| Esophageal cancer                                                | 83<br>(55 - 136)            | --                       | --                 | 19<br>(12 - 27)          | 47<br>(29 - 79)          | 18<br>(10 - 31)          |
| Stomach cancer                                                   | 245<br>(190 - 316)          | --                       | --                 | 69<br>(47 - 93)          | 127<br>(94 - 175)        | 48<br>(35 - 65)          |
| Liver cancer                                                     | 881<br>(644 - 1,162)        | --                       | 3<br>(1 - 7)       | 387<br>(256 - 527)       | 366<br>(257 - 515)       | 125<br>(85 - 177)        |
| Liver cancer due to hepatitis B                                  | 450<br>(251 - 658)          | --                       | 2<br>(1 - 3)       | 230<br>(134 - 330)       | 174<br>(79 - 278)        | 44<br>(18 - 73)          |
| Liver cancer due to hepatitis C                                  | 232<br>(100 - 386)          | --                       | 0<br>(0 - 1)       | 69<br>(23 - 126)         | 114<br>(45 - 199)        | 49<br>(23 - 82)          |

Web Table 31- Benin deaths with 95% UI by age, sex, and cause in 2013

| Cause                                | Males, All Ages          | Males, 0-4 Years | Males, 5-14 Years | Males, 15-49 Years     | Males, 50-69 Years       | Males, 70-80 Years       |
|--------------------------------------|--------------------------|------------------|-------------------|------------------------|--------------------------|--------------------------|
| Liver cancer due to alcohol use      | 101<br>(55 - 167)        | --               | --                | 30<br>(11 - 55)        | 48<br>(23 - 85)          | 24<br>(12 - 40)          |
| Liver cancer due to other causes     | 98<br>(54 - 172)         | --               | 1<br>(0 - 3)      | 58<br>(32 - 103)       | 30<br>(14 - 58)          | 8<br>(3 - 15)            |
| Larynx cancer                        | 14<br>(9 - 35)           | --               | --                | 3<br>(2 - 6)           | 7<br>(4 - 20)            | 4<br>(2 - 9)             |
| Tracheal, bronchus and lung cancer   | 124<br>(98 - 162)        | --               | --                | 16<br>(11 - 21)        | 75<br>(56 - 102)         | 34<br>(26 - 44)          |
| Breast cancer                        | 4<br>(3 - 7)             | --               | --                | 2<br>(1 - 3)           | 2<br>(1 - 4)             | 1<br>(0 - 1)             |
| Cervical cancer                      | --                       | --               | --                | --                     | --                       | --                       |
| Uterine cancer                       | --                       | --               | --                | --                     | --                       | --                       |
| Prostate cancer                      | 139<br>(92 - 230)        | --               | --                | 4<br>(2 - 6)           | 47<br>(28 - 82)          | 89<br>(57 - 149)         |
| Colon and rectum cancer              | 101<br>(80 - 128)        | --               | --                | 36<br>(25 - 46)        | 39<br>(29 - 54)          | 26<br>(20 - 34)          |
| Lip and oral cavity cancer           | 14<br>(10 - 21)          | --               | --                | 4<br>(3 - 6)           | 7<br>(4 - 11)            | 3<br>(2 - 5)             |
| Nasopharynx cancer                   | 5<br>(4 - 7)             | --               | 0<br>(0 - 1)      | 3<br>(2 - 4)           | 2<br>(1 - 3)             | 0<br>(0 - 1)             |
| Other pharynx cancer                 | 6<br>(5 - 10)            | --               | --                | 2<br>(2 - 3)           | 2<br>(2 - 5)             | 2<br>(1 - 2)             |
| Gallbladder and biliary tract cancer | 9<br>(5 - 13)            | --               | --                | 3<br>(2 - 4)           | 4<br>(2 - 6)             | 2<br>(1 - 4)             |
| Pancreatic cancer                    | 49<br>(37 - 64)          | --               | --                | 14<br>(10 - 20)        | 27<br>(20 - 37)          | 8<br>(6 - 10)            |
| Malignant skin melanoma              | 6<br>(3 - 10)            | --               | --                | 2<br>(1 - 4)           | 2<br>(1 - 4)             | 1<br>(1 - 2)             |
| Non-melanoma skin cancer             | 5<br>(4 - 9)             | --               | --                | 1<br>(1 - 2)           | 2<br>(1 - 4)             | 2<br>(1 - 3)             |
| Ovarian cancer                       | --                       | --               | --                | --                     | --                       | --                       |
| Testicular cancer                    | 4<br>(3 - 7)             | --               | --                | 3<br>(2 - 5)           | 1<br>(0 - 1)             | 0<br>(0 - 1)             |
| Kidney cancer                        | 18<br>(14 - 25)          | 2<br>(0 - 5)     | 1<br>(0 - 2)      | 4<br>(3 - 5)           | 9<br>(6 - 13)            | 3<br>(2 - 5)             |
| Bladder cancer                       | 55<br>(41 - 78)          | --               | --                | 13<br>(8 - 20)         | 21<br>(14 - 36)          | 21<br>(15 - 34)          |
| Brain and nervous system cancer      | 22<br>(10 - 31)          | 0<br>(0 - 1)     | 3<br>(1 - 5)      | 11<br>(5 - 15)         | 6<br>(3 - 9)             | 2<br>(1 - 3)             |
| Thyroid cancer                       | 2<br>(1 - 3)             | --               | 0<br>(0 - 0)      | 1<br>(0 - 1)           | 1<br>(0 - 2)             | 0<br>(0 - 1)             |
| Mesothelioma                         | 3<br>(2 - 5)             | --               | --                | 1<br>(0 - 1)           | 1<br>(1 - 2)             | 1<br>(1 - 2)             |
| Hodgkin lymphoma                     | 11<br>(7 - 16)           | 1<br>(0 - 2)     | 1<br>(0 - 3)      | 6<br>(4 - 9)           | 3<br>(1 - 4)             | 1<br>(0 - 1)             |
| Non-Hodgkin lymphoma                 | 114<br>(83 - 151)        | 10<br>(3 - 26)   | 15<br>(6 - 29)    | 47<br>(33 - 62)        | 28<br>(19 - 44)          | 13<br>(8 - 21)           |
| Multiple myeloma                     | 7<br>(5 - 9)             | --               | --                | 2<br>(1 - 3)           | 4<br>(2 - 5)             | 1<br>(1 - 2)             |
| Leukemia                             | 40<br>(30 - 51)          | 4<br>(1 - 8)     | 6<br>(3 - 9)      | 21<br>(14 - 27)        | 5<br>(4 - 8)             | 4<br>(3 - 6)             |
| Other neoplasms                      | 176<br>(117 - 263)       | 32<br>(14 - 62)  | 15<br>(7 - 25)    | 50<br>(32 - 80)        | 49<br>(28 - 91)          | 29<br>(17 - 53)          |
| Cardiovascular diseases              | 5,474<br>(4,490 - 6,946) | 74<br>(38 - 125) | 33<br>(19 - 51)   | 1,003<br>(715 - 1,278) | 2,506<br>(1,985 - 3,349) | 1,858<br>(1,568 - 2,290) |
| Rheumatic heart disease              | 58<br>(30 - 151)         | 2<br>(0 - 4)     | 2<br>(1 - 4)      | 20<br>(8 - 58)         | 21<br>(9 - 60)           | 14<br>(8 - 33)           |
| Ischemic heart disease               | 1,898<br>(1,452 - 2,525) | 4<br>(1 - 10)    | 5<br>(3 - 10)     | 333<br>(226 - 447)     | 939<br>(699 - 1,289)     | 617<br>(473 - 824)       |
| Cerebrovascular disease              | 2,199<br>(1,693 - 2,899) | 19<br>(9 - 36)   | 9<br>(5 - 14)     | 317<br>(214 - 438)     | 983<br>(725 - 1,368)     | 870<br>(674 - 1,117)     |
| Ischemic stroke                      | 1,204<br>(886 - 1,779)   | 1<br>(0 - 3)     | 1<br>(0 - 2)      | 72<br>(14 - 121)       | 527<br>(138 - 823)       | 603<br>(234 - 866)       |
| Hemorrhagic stroke                   | 994<br>(570 - 1,829)     | 18<br>(9 - 34)   | 8<br>(4 - 13)     | 246<br>(167 - 351)     | 456<br>(239 - 887)       | 267<br>(114 - 627)       |
| Hypertensive heart disease           | 244<br>(88 - 433)        | 1<br>(0 - 2)     | 0<br>(0 - 1)      | 49<br>(11 - 104)       | 107<br>(38 - 201)        | 87<br>(36 - 153)         |
| Cardiomyopathy and myocarditis       | 322<br>(171 - 462)       | 11<br>(4 - 25)   | 5<br>(3 - 10)     | 87<br>(47 - 129)       | 147<br>(66 - 238)        | 72<br>(33 - 117)         |
| Atrial fibrillation and flutter      | 0<br>(0 - 0)             | --               | --                | 0<br>(0 - 0)           | 0<br>(0 - 0)             | 0<br>(0 - 0)             |
| Aortic aneurysm                      | 69<br>(45 - 107)         | --               | --                | 10<br>(6 - 17)         | 37<br>(23 - 58)          | 21<br>(13 - 36)          |
| Peripheral vascular disease          | 2<br>(1 - 3)             | --               | --                | 0<br>(0 - 0)           | 1<br>(0 - 1)             | 1<br>(1 - 2)             |
| Endocarditis                         | 137<br>(85 - 217)        | 14<br>(4 - 32)   | 3<br>(1 - 5)      | 36<br>(21 - 58)        | 50<br>(28 - 85)          | 34<br>(20 - 60)          |

Web Table 31- Benin deaths with 95% UI by age, sex, and cause in 2013

| Cause                                               | Males, All Ages        | Males, 0-4 Years | Males, 5-14 Years | Males, 15-49 Years | Males, 50-69 Years | Males, 70-80 Years |
|-----------------------------------------------------|------------------------|------------------|-------------------|--------------------|--------------------|--------------------|
| Other cardiovascular and circulatory diseases       | 544<br>(372 - 978)     | 23<br>(10 - 44)  | 9<br>(4 - 15)     | 151<br>(93 - 238)  | 221<br>(141 - 412) | 141<br>(90 - 292)  |
| Chronic respiratory diseases                        | 1,139<br>(845 - 1,867) | 26<br>(11 - 55)  | 8<br>(5 - 13)     | 168<br>(112 - 269) | 466<br>(329 - 783) | 470<br>(342 - 773) |
| Chronic obstructive pulmonary disease               | 727<br>(534 - 1,221)   | 13<br>(5 - 29)   | 3<br>(2 - 6)      | 61<br>(39 - 103)   | 292<br>(197 - 501) | 356<br>(255 - 590) |
| Pneumoconiosis                                      | 90<br>(54 - 158)       | 0<br>(0 - 1)     | 0<br>(0 - 1)      | 22<br>(12 - 36)    | 50<br>(27 - 86)    | 18<br>(9 - 35)     |
| Silicosis                                           | 15<br>(8 - 28)         | 0<br>(0 - 0)     | 0<br>(0 - 0)      | 4<br>(2 - 7)       | 4<br>(2 - 8)       | 6<br>(3 - 13)      |
| Asbestosis                                          | 7<br>(4 - 12)          | 0<br>(0 - 0)     | 0<br>(0 - 0)      | 2<br>(1 - 3)       | 4<br>(2 - 8)       | 1<br>(0 - 1)       |
| Coal workers pneumoconiosis                         | 25<br>(14 - 42)        | 0<br>(0 - 0)     | 0<br>(0 - 0)      | 2<br>(1 - 3)       | 21<br>(11 - 36)    | 2<br>(1 - 5)       |
| Other pneumoconiosis                                | 43<br>(26 - 77)        | 0<br>(0 - 0)     | 0<br>(0 - 0)      | 14<br>(8 - 24)     | 20<br>(11 - 36)    | 8<br>(4 - 17)      |
| Asthma                                              | 160<br>(113 - 263)     | 6<br>(2 - 15)    | 2<br>(1 - 3)      | 52<br>(34 - 83)    | 62<br>(39 - 110)   | 39<br>(23 - 69)    |
| Interstitial lung disease and pulmonary sarcoidosis | 94<br>(30 - 161)       | 0<br>(0 - 1)     | 0<br>(0 - 1)      | 4<br>(2 - 8)       | 43<br>(13 - 78)    | 46<br>(12 - 88)    |
| Other chronic respiratory diseases                  | 68<br>(45 - 126)       | 6<br>(2 - 13)    | 2<br>(1 - 4)      | 29<br>(18 - 52)    | 19<br>(11 - 39)    | 12<br>(6 - 25)     |
| Cirrhosis                                           | 1,049<br>(800 - 1,349) | 10<br>(2 - 22)   | 7<br>(4 - 10)     | 389<br>(268 - 521) | 500<br>(367 - 688) | 143<br>(106 - 193) |
| Cirrhosis due to hepatitis B                        | 315<br>(135 - 521)     | 0<br>(0 - 2)     | 1<br>(0 - 3)      | 112<br>(42 - 201)  | 154<br>(65 - 264)  | 47<br>(21 - 78)    |
| Cirrhosis due to hepatitis C                        | 219<br>(70 - 438)      | 0<br>(0 - 1)     | 1<br>(0 - 2)      | 79<br>(33 - 154)   | 110<br>(23 - 228)  | 29<br>(6 - 59)     |
| Cirrhosis due to alcohol use                        | 374<br>(227 - 615)     | --               | --                | 125<br>(64 - 218)  | 191<br>(114 - 321) | 58<br>(35 - 94)    |
| Cirrhosis due to other causes                       | 141<br>(81 - 243)      | 9<br>(2 - 20)    | 5<br>(3 - 8)      | 73<br>(41 - 135)   | 44<br>(20 - 80)    | 9<br>(4 - 16)      |
| Digestive diseases                                  | 995<br>(745 - 1,305)   | 24<br>(8 - 51)   | 24<br>(14 - 35)   | 365<br>(246 - 481) | 372<br>(262 - 522) | 210<br>(157 - 278) |
| Peptic ulcer disease                                | 257<br>(172 - 376)     | 2<br>(0 - 7)     | 3<br>(1 - 6)      | 86<br>(49 - 132)   | 106<br>(63 - 164)  | 60<br>(37 - 93)    |
| Gastritis and duodenitis                            | 35<br>(17 - 86)        | 1<br>(0 - 3)     | 1<br>(0 - 3)      | 12<br>(5 - 29)     | 13<br>(6 - 33)     | 8<br>(3 - 24)      |
| Appendicitis                                        | 47<br>(25 - 72)        | 2<br>(0 - 5)     | 3<br>(1 - 5)      | 18<br>(10 - 28)    | 15<br>(7 - 27)     | 9<br>(4 - 18)      |
| Paralytic ileus and intestinal obstruction          | 313<br>(165 - 451)     | 9<br>(3 - 22)    | 10<br>(5 - 17)    | 102<br>(45 - 158)  | 123<br>(62 - 194)  | 68<br>(40 - 111)   |
| Inguinal, femoral, and abdominal hernia             | 27<br>(16 - 49)        | 0<br>(0 - 1)     | 0<br>(0 - 1)      | 8<br>(4 - 14)      | 11<br>(5 - 20)     | 8<br>(4 - 16)      |
| Inflammatory bowel disease                          | 46<br>(12 - 74)        | 4<br>(1 - 10)    | 1<br>(0 - 2)      | 17<br>(4 - 30)     | 16<br>(3 - 29)     | 9<br>(2 - 15)      |
| Vascular intestinal disorders                       | 4<br>(1 - 9)           | 0<br>(0 - 1)     | 0<br>(0 - 0)      | 1<br>(0 - 3)       | 1<br>(0 - 3)       | 1<br>(0 - 3)       |
| Gallbladder and biliary diseases                    | 58<br>(31 - 85)        | 0<br>(0 - 1)     | 2<br>(0 - 3)      | 19<br>(8 - 30)     | 19<br>(10 - 30)    | 18<br>(9 - 31)     |
| Pancreatitis                                        | 90<br>(48 - 136)       | 0<br>(0 - 1)     | 1<br>(0 - 1)      | 55<br>(27 - 89)    | 25<br>(13 - 41)    | 10<br>(4 - 18)     |
| Other digestive diseases                            | 117<br>(79 - 166)      | 4<br>(1 - 12)    | 3<br>(2 - 6)      | 48<br>(30 - 73)    | 43<br>(26 - 68)    | 17<br>(9 - 30)     |
| Neurological disorders                              | 337<br>(267 - 426)     | 25<br>(9 - 59)   | 13<br>(7 - 26)    | 94<br>(61 - 133)   | 44<br>(33 - 61)    | 160<br>(121 - 206) |
| Alzheimer disease and other dementias               | 171<br>(131 - 220)     | --               | --                | 0<br>(0 - 1)       | 24<br>(17 - 34)    | 147<br>(109 - 190) |
| Parkinson disease                                   | 3<br>(1 - 5)           | --               | --                | 0<br>(0 - 1)       | 0<br>(0 - 1)       | 2<br>(1 - 5)       |
| Epilepsy                                            | 119<br>(80 - 177)      | 18<br>(5 - 51)   | 10<br>(4 - 23)    | 74<br>(46 - 112)   | 10<br>(6 - 15)     | 6<br>(4 - 10)      |
| Multiple sclerosis                                  | 0<br>(0 - 1)           | --               | --                | 0<br>(0 - 0)       | 0<br>(0 - 0)       | 0<br>(0 - 0)       |
| Other neurological disorders                        | 44<br>(29 - 57)        | 7<br>(3 - 13)    | 3<br>(2 - 4)      | 19<br>(12 - 25)    | 11<br>(6 - 16)     | 5<br>(3 - 7)       |
| Mental and substance use disorders                  | 600<br>(364 - 811)     | 11<br>(1 - 27)   | 0<br>(0 - 0)      | 444<br>(260 - 601) | 117<br>(65 - 180)  | 28<br>(12 - 44)    |
| Schizophrenia                                       | 0<br>(0 - 1)           | --               | --                | 0<br>(0 - 0)       | 0<br>(0 - 0)       | 0<br>(0 - 0)       |
| Alcohol use disorders                               | 243<br>(121 - 357)     | --               | --                | 130<br>(71 - 199)  | 91<br>(42 - 147)   | 22<br>(7 - 36)     |
| Drug use disorders                                  | 356<br>(188 - 487)     | 11<br>(1 - 27)   | --                | 314<br>(154 - 432) | 26<br>(15 - 38)    | 6<br>(4 - 9)       |
| Opioid use disorders                                | 38<br>(20 - 54)        | 1<br>(0 - 3)     | --                | 34<br>(17 - 48)    | 2<br>(1 - 4)       | 1<br>(0 - 1)       |
| Cocaine use disorders                               | 1<br>(1 - 2)           | 0<br>(0 - 0)     | --                | 1<br>(1 - 2)       | 0<br>(0 - 0)       | 0<br>(0 - 0)       |
| Amphetamine use disorders                           | 1<br>(0 - 1)           | 0<br>(0 - 0)     | --                | 1<br>(0 - 1)       | 0<br>(0 - 0)       | 0<br>(0 - 0)       |

Web Table 31- Benin deaths with 95% UI by age, sex, and cause in 2013

| Cause                                               | Males, All Ages          | Males, 0-4 Years     | Males, 5-14 Years | Males, 15-49 Years | Males, 50-69 Years | Males, 70-80 Years |
|-----------------------------------------------------|--------------------------|----------------------|-------------------|--------------------|--------------------|--------------------|
| Other drug use disorders                            | 316<br>(166 - 432)       | 9<br>(1 - 24)        | --                | 278<br>(137 - 383) | 23<br>(14 - 34)    | 5<br>(3 - 8)       |
| Eating disorders                                    | 0<br>(0 - 0)             | --                   | 0<br>(0 - 0)      | 0<br>(0 - 0)       | --                 | --                 |
| Anorexia nervosa                                    | 0<br>(0 - 0)             | --                   | 0<br>(0 - 0)      | 0<br>(0 - 0)       | --                 | --                 |
| Diabetes, urogenital, blood, and endocrine diseases | 1,869<br>(1,228 - 2,913) | 311<br>(79 - 815)    | 115<br>(30 - 319) | 519<br>(308 - 840) | 563<br>(424 - 765) | 361<br>(284 - 458) |
| Diabetes mellitus                                   | 571<br>(428 - 764)       | 7<br>(4 - 11)        | 2<br>(1 - 3)      | 93<br>(61 - 133)   | 295<br>(206 - 417) | 174<br>(126 - 239) |
| Acute glomerulonephritis                            | 5<br>(3 - 10)            | 1<br>(0 - 1)         | 0<br>(0 - 1)      | 2<br>(1 - 4)       | 2<br>(1 - 3)       | 0<br>(0 - 1)       |
| Chronic kidney disease                              | 284<br>(194 - 385)       | 12<br>(4 - 24)       | 9<br>(4 - 16)     | 118<br>(66 - 167)  | 84<br>(58 - 125)   | 62<br>(43 - 90)    |
| Chronic kidney disease due to diabetes mellitus     | 2<br>(0 - 5)             | 0<br>(0 - 0)         | 0<br>(0 - 0)      | 0<br>(0 - 1)       | 2<br>(0 - 4)       | 0<br>(0 - 0)       |
| Chronic kidney disease due to hypertension          | 82<br>(52 - 134)         | 2<br>(0 - 3)         | 1<br>(0 - 1)      | 26<br>(13 - 42)    | 30<br>(17 - 52)    | 23<br>(13 - 43)    |
| Chronic kidney disease due to glomerulonephritis    | 139<br>(85 - 191)        | 7<br>(2 - 15)        | 6<br>(3 - 11)     | 66<br>(37 - 93)    | 34<br>(20 - 54)    | 25<br>(13 - 38)    |
| Chronic kidney disease due to other causes          | 61<br>(27 - 109)         | 3<br>(1 - 8)         | 2<br>(0 - 4)      | 25<br>(7 - 50)     | 18<br>(8 - 34)     | 13<br>(5 - 26)     |
| Urinary diseases and male infertility               | 310<br>(189 - 417)       | 21<br>(7 - 47)       | 3<br>(2 - 6)      | 93<br>(45 - 132)   | 104<br>(62 - 151)  | 89<br>(58 - 132)   |
| Interstitial nephritis and urinary tract infections | 262<br>(160 - 352)       | 19<br>(7 - 46)       | 3<br>(2 - 5)      | 75<br>(35 - 109)   | 87<br>(52 - 129)   | 77<br>(50 - 114)   |
| Urolithiasis                                        | 2<br>(1 - 3)             | --                   | 0<br>(0 - 0)      | 1<br>(0 - 2)       | 0<br>(0 - 1)       | 0<br>(0 - 1)       |
| Other urinary diseases                              | 46<br>(20 - 73)          | 1<br>(0 - 4)         | 0<br>(0 - 1)      | 17<br>(6 - 28)     | 16<br>(7 - 28)     | 12<br>(5 - 22)     |
| Gynecological diseases                              | --                       | --                   | --                | --                 | --                 | --                 |
| Uterine fibroids                                    | --                       | --                   | --                | --                 | --                 | --                 |
| Polycystic ovarian syndrome                         | --                       | --                   | --                | --                 | --                 | --                 |
| Endometriosis                                       | --                       | --                   | --                | --                 | --                 | --                 |
| Genital prolapse                                    | --                       | --                   | --                | --                 | --                 | --                 |
| Other gynecological diseases                        | --                       | --                   | --                | --                 | --                 | --                 |
| Hemoglobinopathies and hemolytic anemias            | 526<br>(66 - 1,529)      | 238<br>(23 - 734)    | 92<br>(9 - 301)   | 156<br>(21 - 510)  | 30<br>(6 - 106)    | 10<br>(4 - 29)     |
| Thalassemias                                        | 4<br>(0 - 12)            | 3<br>(0 - 8)         | 1<br>(0 - 2)      | 1<br>(0 - 3)       | 0<br>(0 - 0)       | 0<br>(0 - 0)       |
| Sickle cell disorders                               | 507<br>(61 - 1,474)      | 232<br>(22 - 713)    | 90<br>(9 - 297)   | 153<br>(21 - 499)  | 29<br>(6 - 101)    | 4<br>(1 - 11)      |
| G6PD deficiency                                     | 3<br>(1 - 10)            | 1<br>(0 - 5)         | 0<br>(0 - 1)      | 1<br>(0 - 3)       | 0<br>(0 - 1)       | 0<br>(0 - 1)       |
| Other hemoglobinopathies and hemolytic anemias      | 12<br>(3 - 36)           | 3<br>(0 - 9)         | 0<br>(0 - 1)      | 2<br>(0 - 6)       | 1<br>(0 - 4)       | 6<br>(2 - 17)      |
| Endocrine, metabolic, blood, and immune disorders   | 175<br>(82 - 239)        | 34<br>(14 - 62)      | 8<br>(3 - 15)     | 58<br>(25 - 84)    | 49<br>(20 - 75)    | 26<br>(11 - 40)    |
| Musculoskeletal disorders                           | 49<br>(34 - 70)          | --                   | 4<br>(2 - 6)      | 21<br>(13 - 30)    | 16<br>(10 - 25)    | 9<br>(6 - 14)      |
| Rheumatoid arthritis                                | 4<br>(2 - 6)             | --                   | 0<br>(0 - 1)      | 1<br>(1 - 2)       | 1<br>(1 - 2)       | 1<br>(0 - 2)       |
| Other musculoskeletal disorders                     | 46<br>(32 - 66)          | --                   | 3<br>(2 - 6)      | 20<br>(13 - 29)    | 15<br>(10 - 23)    | 8<br>(5 - 12)      |
| Other non-communicable diseases                     | 954<br>(553 - 1,679)     | 789<br>(411 - 1,489) | 39<br>(20 - 71)   | 66<br>(43 - 97)    | 32<br>(17 - 45)    | 27<br>(11 - 39)    |
| Congenital anomalies                                | 863<br>(467 - 1,600)     | 767<br>(397 - 1,469) | 37<br>(19 - 69)   | 45<br>(27 - 72)    | 8<br>(5 - 14)      | 5<br>(3 - 8)       |
| Neural tube defects                                 | 200<br>(43 - 491)        | 185<br>(38 - 467)    | 6<br>(1 - 14)     | 8<br>(2 - 21)      | 1<br>(0 - 2)       | 0<br>(0 - 1)       |
| Congenital heart anomalies                          | 371<br>(179 - 670)       | 321<br>(144 - 607)   | 21<br>(9 - 39)    | 22<br>(12 - 37)    | 4<br>(2 - 8)       | 2<br>(1 - 4)       |
| Cleft lip and cleft palate                          | 3<br>(0 - 14)            | 3<br>(0 - 14)        | --                | --                 | --                 | --                 |
| Down syndrome                                       | 71<br>(19 - 187)         | 63<br>(14 - 178)     | 3<br>(1 - 6)      | 4<br>(2 - 9)       | 1<br>(0 - 2)       | 0<br>(0 - 0)       |
| Chromosomal unbalanced rearrangements               | 31<br>(9 - 83)           | 28<br>(7 - 77)       | 1<br>(0 - 3)      | 2<br>(1 - 3)       | 0<br>(0 - 0)       | 0<br>(0 - 0)       |
| Other congenital anomalies                          | 186<br>(47 - 674)        | 165<br>(36 - 627)    | 7<br>(2 - 23)     | 9<br>(4 - 20)      | 2<br>(1 - 4)       | 2<br>(1 - 4)       |
| Skin and subcutaneous diseases                      | 80<br>(27 - 110)         | 12<br>(3 - 25)       | 2<br>(1 - 4)      | 21<br>(8 - 30)     | 23<br>(8 - 34)     | 22<br>(7 - 34)     |
| Cellulitis                                          | 26<br>(8 - 40)           | 4<br>(1 - 10)        | 1<br>(0 - 2)      | 5<br>(2 - 9)       | 10<br>(3 - 17)     | 6<br>(2 - 11)      |

Web Table 31- Benin deaths with 95% UI by age, sex, and cause in 2013

| Cause                                           | Males, All Ages          | Males, 0-4 Years   | Males, 5-14 Years  | Males, 15-49 Years       | Males, 50-69 Years | Males, 70-80 Years |
|-------------------------------------------------|--------------------------|--------------------|--------------------|--------------------------|--------------------|--------------------|
| Pyoderma                                        | 52<br>(19 - 74)          | 8<br>(2 - 17)      | 1<br>(0 - 2)       | 15<br>(6 - 23)           | 13<br>(5 - 21)     | 14<br>(4 - 23)     |
| Decubitus ulcer                                 | 2<br>(1 - 4)             | 0<br>(0 - 0)       | 0<br>(0 - 0)       | 0<br>(0 - 1)             | 0<br>(0 - 0)       | 2<br>(0 - 4)       |
| Other skin and subcutaneous diseases            | 0<br>(0 - 1)             | 0<br>(0 - 0)       | 0<br>(0 - 0)       | 0<br>(0 - 0)             | 0<br>(0 - 0)       | 0<br>(0 - 0)       |
| Sudden infant death syndrome                    | 11<br>(3 - 33)           | 11<br>(3 - 33)     | --                 | --                       | --                 | --                 |
| Injuries                                        | 3,638<br>(2,779 - 4,589) | 349<br>(157 - 679) | 246<br>(152 - 358) | 2,223<br>(1,617 - 2,779) | 585<br>(436 - 788) | 235<br>(173 - 312) |
| Transport injuries                              | 1,809<br>(1,308 - 2,395) | 85<br>(33 - 174)   | 108<br>(63 - 171)  | 1,244<br>(849 - 1,649)   | 282<br>(191 - 416) | 90<br>(58 - 130)   |
| Road injuries                                   | 1,756<br>(1,270 - 2,322) | 76<br>(28 - 154)   | 102<br>(60 - 161)  | 1,222<br>(831 - 1,624)   | 272<br>(184 - 398) | 84<br>(55 - 122)   |
| Pedestrian road injuries                        | 407<br>(237 - 604)       | 26<br>(8 - 59)     | 34<br>(17 - 59)    | 251<br>(137 - 389)       | 71<br>(38 - 114)   | 26<br>(15 - 41)    |
| Cyclist road injuries                           | 86<br>(54 - 132)         | 5<br>(1 - 13)      | 10<br>(5 - 20)     | 46<br>(29 - 72)          | 18<br>(10 - 29)    | 6<br>(3 - 11)      |
| Motorcyclist road injuries                      | 246<br>(146 - 391)       | 6<br>(2 - 14)      | 8<br>(4 - 16)      | 193<br>(107 - 313)       | 32<br>(18 - 53)    | 7<br>(4 - 12)      |
| Motor vehicle road injuries                     | 994<br>(682 - 1,339)     | 35<br>(13 - 71)    | 46<br>(26 - 75)    | 724<br>(478 - 961)       | 147<br>(90 - 224)  | 43<br>(25 - 68)    |
| Other road injuries                             | 22<br>(11 - 36)          | 3<br>(1 - 8)       | 4<br>(1 - 8)       | 9<br>(4 - 18)            | 4<br>(2 - 8)       | 2<br>(1 - 4)       |
| Other transport injuries                        | 53<br>(33 - 77)          | 9<br>(2 - 21)      | 6<br>(3 - 11)      | 22<br>(13 - 38)          | 10<br>(5 - 17)     | 6<br>(2 - 11)      |
| Unintentional injuries                          | 1,249<br>(935 - 1,659)   | 258<br>(112 - 524) | 126<br>(74 - 199)  | 544<br>(390 - 752)       | 208<br>(145 - 293) | 112<br>(73 - 158)  |
| Falls                                           | 324<br>(227 - 501)       | 36<br>(14 - 80)    | 19<br>(9 - 38)     | 143<br>(91 - 245)        | 76<br>(46 - 130)   | 49<br>(28 - 88)    |
| Drowning                                        | 318<br>(195 - 518)       | 86<br>(24 - 230)   | 57<br>(24 - 104)   | 141<br>(82 - 249)        | 27<br>(16 - 43)    | 8<br>(5 - 13)      |
| Fire, heat, and hot substances                  | 98<br>(49 - 156)         | 27<br>(8 - 64)     | 8<br>(3 - 18)      | 37<br>(19 - 55)          | 17<br>(8 - 30)     | 10<br>(4 - 17)     |
| Poisonings                                      | 66<br>(41 - 116)         | 10<br>(3 - 26)     | 4<br>(2 - 8)       | 36<br>(21 - 77)          | 12<br>(6 - 20)     | 3<br>(2 - 5)       |
| Exposure to mechanical forces                   | 198<br>(125 - 368)       | 38<br>(13 - 102)   | 19<br>(9 - 40)     | 102<br>(62 - 193)        | 31<br>(18 - 49)    | 8<br>(4 - 11)      |
| Unintentional firearm injuries                  | 66<br>(40 - 100)         | 6<br>(2 - 14)      | 3<br>(1 - 6)       | 45<br>(25 - 72)          | 9<br>(5 - 15)      | 2<br>(1 - 4)       |
| Unintentional suffocation                       | 44<br>(13 - 256)         | 19<br>(3 - 91)     | 5<br>(1 - 26)      | 14<br>(4 - 97)           | 4<br>(1 - 26)      | 1<br>(0 - 7)       |
| Other exposure to mechanical forces             | 89<br>(46 - 131)         | 13<br>(2 - 29)     | 11<br>(4 - 21)     | 43<br>(24 - 66)          | 18<br>(6 - 30)     | 4<br>(1 - 7)       |
| Adverse effects of medical treatment            | 89<br>(32 - 165)         | 21<br>(5 - 59)     | 4<br>(1 - 9)       | 26<br>(10 - 45)          | 21<br>(7 - 45)     | 17<br>(4 - 38)     |
| Animal contact                                  | 25<br>(11 - 35)          | 4<br>(1 - 8)       | 4<br>(1 - 7)       | 8<br>(4 - 12)            | 6<br>(2 - 9)       | 4<br>(1 - 6)       |
| Venomous animal contact                         | 10<br>(4 - 15)           | 1<br>(0 - 3)       | 1<br>(0 - 2)       | 4<br>(2 - 6)             | 2<br>(1 - 4)       | 2<br>(0 - 3)       |
| Non-venomous animal contact                     | 15<br>(6 - 22)           | 3<br>(1 - 6)       | 3<br>(1 - 5)       | 4<br>(2 - 7)             | 3<br>(1 - 6)       | 2<br>(1 - 4)       |
| Foreign body                                    | 58<br>(31 - 96)          | 28<br>(12 - 56)    | 4<br>(2 - 8)       | 13<br>(7 - 20)           | 7<br>(4 - 11)      | 6<br>(3 - 9)       |
| Pulmonary aspiration and foreign body in airway | 53<br>(25 - 91)          | 27<br>(11 - 55)    | 4<br>(1 - 7)       | 12<br>(6 - 19)           | 6<br>(2 - 9)       | 6<br>(2 - 9)       |
| Foreign body in other body part                 | 5<br>(3 - 10)            | 1<br>(1 - 3)       | 1<br>(0 - 2)       | 1<br>(1 - 3)             | 1<br>(1 - 2)       | 0<br>(0 - 1)       |
| Other unintentional injuries                    | 71<br>(50 - 97)          | 8<br>(4 - 14)      | 8<br>(4 - 13)      | 38<br>(25 - 54)          | 11<br>(7 - 17)     | 6<br>(4 - 9)       |
| Self-harm and interpersonal violence            | 580<br>(393 - 940)       | 6<br>(2 - 13)      | 11<br>(5 - 22)     | 435<br>(288 - 720)       | 95<br>(60 - 154)   | 33<br>(16 - 53)    |
| Self-harm                                       | 398<br>(252 - 740)       | --                 | 7<br>(2 - 17)      | 275<br>(163 - 570)       | 84<br>(51 - 144)   | 32<br>(16 - 52)    |
| Interpersonal violence                          | 182<br>(109 - 261)       | 6<br>(2 - 13)      | 4<br>(2 - 8)       | 160<br>(93 - 237)        | 11<br>(6 - 19)     | 1<br>(0 - 2)       |
| Assault by firearm                              | 109<br>(54 - 166)        | 1<br>(0 - 4)       | 1<br>(0 - 3)       | 101<br>(49 - 157)        | 5<br>(2 - 9)       | 0<br>(0 - 1)       |
| Assault by sharp object                         | 30<br>(14 - 62)          | 1<br>(0 - 3)       | 1<br>(0 - 2)       | 25<br>(10 - 54)          | 3<br>(1 - 6)       | 0<br>(0 - 0)       |
| Assault by other means                          | 42<br>(22 - 79)          | 3<br>(1 - 8)       | 2<br>(1 - 4)       | 34<br>(15 - 64)          | 3<br>(1 - 6)       | 0<br>(0 - 1)       |
| Forces of nature, war, and legal intervention   | 0<br>(0 - 0)             | 0<br>(0 - 0)       | --                 | --                       | --                 | --                 |
| Exposure to forces of nature                    | 0<br>(0 - 0)             | 0<br>(0 - 0)       | --                 | --                       | --                 | --                 |

Web Table 31- Benin deaths with 95% UI by age, sex, and cause in 2013

| Cause                                                             | Females, All Ages           | Females, 0-4 Years         | Females, 5-14 Years    | Females, 15-49 Years     | Females, 50-69 Years     | Females, 70-80 Years     |
|-------------------------------------------------------------------|-----------------------------|----------------------------|------------------------|--------------------------|--------------------------|--------------------------|
| All causes                                                        | 31,487<br>(27,818 - 35,376) | 10,277<br>(8,833 - 11,875) | 1,120<br>(952 - 1,348) | 6,423<br>(5,665 - 7,201) | 6,602<br>(5,130 - 8,324) | 7,064<br>(5,923 - 8,173) |
| Communicable, maternal, neonatal, and nutritional diseases        | 17,819<br>(15,759 - 20,129) | 8,903<br>(7,540 - 10,423)  | 781<br>(598 - 1,057)   | 4,257<br>(3,678 - 4,870) | 1,896<br>(1,445 - 2,489) | 1,982<br>(1,415 - 2,593) |
| HIV/AIDS and tuberculosis                                         | 2,621<br>(2,011 - 3,436)    | 131<br>(92 - 173)          | 112<br>(89 - 138)      | 1,762<br>(1,261 - 2,482) | 453<br>(336 - 579)       | 163<br>(110 - 231)       |
| Tuberculosis                                                      | 661<br>(455 - 855)          | 19<br>(9 - 34)             | 12<br>(6 - 19)         | 262<br>(174 - 359)       | 226<br>(145 - 317)       | 142<br>(90 - 206)        |
| HIV/AIDS                                                          | 1,960<br>(1,356 - 2,827)    | 112<br>(75 - 150)          | 101<br>(78 - 125)      | 1,499<br>(999 - 2,245)   | 227<br>(144 - 326)       | 20<br>(10 - 36)          |
| HIV/AIDS resulting in mycobacterial infection                     | 102<br>(66 - 153)           | 5<br>(3 - 8)               | 5<br>(3 - 6)           | 78<br>(49 - 122)         | 12<br>(7 - 19)           | 1<br>(1 - 2)             |
| HIV/AIDS resulting in other diseases                              | 1,858<br>(1,289 - 2,672)    | 107<br>(71 - 143)          | 96<br>(75 - 120)       | 1,421<br>(946 - 2,130)   | 215<br>(136 - 309)       | 19<br>(9 - 34)           |
| Diarrhea, lower respiratory, and other common infectious diseases | 5,693<br>(4,115 - 7,577)    | 2,677<br>(1,681 - 3,952)   | 321<br>(183 - 589)     | 688<br>(493 - 910)       | 832<br>(542 - 1,214)     | 1,175<br>(763 - 1,616)   |
| Diarrheal diseases                                                | 1,454<br>(948 - 2,149)      | 620<br>(224 - 1,275)       | 55<br>(24 - 106)       | 227<br>(145 - 343)       | 247<br>(133 - 410)       | 305<br>(173 - 502)       |
| Intestinal infectious diseases                                    | 211<br>(103 - 378)          | 68<br>(24 - 135)           | 63<br>(24 - 119)       | 64<br>(25 - 122)         | 12<br>(5 - 25)           | 5<br>(2 - 9)             |
| Typhoid fever                                                     | 147<br>(69 - 268)           | 45<br>(15 - 95)            | 44<br>(17 - 86)        | 46<br>(17 - 88)          | 9<br>(3 - 18)            | 3<br>(1 - 7)             |
| Paratyphoid fever                                                 | 54<br>(22 - 109)            | 18<br>(5 - 42)             | 17<br>(5 - 40)         | 15<br>(5 - 33)           | 2<br>(1 - 6)             | 1<br>(0 - 2)             |
| Other intestinal infectious diseases                              | 10<br>(4 - 20)              | 5<br>(1 - 12)              | 1<br>(0 - 5)           | 2<br>(0 - 8)             | 1<br>(0 - 5)             | 1<br>(0 - 4)             |
| Lower respiratory infections                                      | 2,745<br>(1,834 - 3,826)    | 1,223<br>(645 - 2,010)     | 66<br>(32 - 113)       | 203<br>(135 - 290)       | 463<br>(267 - 732)       | 791<br>(473 - 1,191)     |
| Upper respiratory infections                                      | 4<br>(1 - 8)                | 1<br>(0 - 5)               | 0<br>(0 - 1)           | 1<br>(0 - 2)             | 1<br>(0 - 3)             | 1<br>(0 - 3)             |
| Otitis media                                                      | 2<br>(2 - 3)                | 0<br>(0 - 1)               | 0<br>(0 - 0)           | 0<br>(0 - 0)             | 1<br>(0 - 1)             | 1<br>(1 - 1)             |
| Meningitis                                                        | 636<br>(406 - 929)          | 263<br>(118 - 513)         | 54<br>(26 - 96)        | 158<br>(92 - 230)        | 96<br>(47 - 157)         | 65<br>(29 - 112)         |
| Pneumococcal meningitis                                           | 164<br>(90 - 262)           | 51<br>(20 - 123)           | 14<br>(5 - 27)         | 48<br>(24 - 81)          | 29<br>(11 - 58)          | 23<br>(9 - 45)           |
| H influenzae type B meningitis                                    | 103<br>(55 - 180)           | 69<br>(28 - 146)           | 9<br>(4 - 18)          | 15<br>(6 - 27)           | 6<br>(2 - 13)            | 4<br>(1 - 10)            |
| Meningococcal meningitis                                          | 288<br>(183 - 423)          | 118<br>(53 - 226)          | 26<br>(11 - 51)        | 71<br>(42 - 112)         | 44<br>(20 - 79)          | 28<br>(11 - 51)          |
| Other meningitis                                                  | 81<br>(49 - 119)            | 25<br>(11 - 48)            | 6<br>(2 - 12)          | 24<br>(13 - 40)          | 16<br>(7 - 29)           | 10<br>(4 - 20)           |
| Encephalitis                                                      | 38<br>(23 - 55)             | 12<br>(4 - 25)             | 4<br>(2 - 7)           | 9<br>(5 - 14)            | 7<br>(3 - 12)            | 5<br>(2 - 9)             |
| Diphtheria                                                        | 2<br>(0 - 12)               | 2<br>(0 - 12)              | 0<br>(0 - 3)           | 0<br>(0 - 1)             | 0<br>(0 - 0)             | --                       |
| Whooping cough                                                    | 54<br>(0 - 265)             | 51<br>(0 - 250)            | 3<br>(0 - 14)          | 1<br>(0 - 3)             | 0<br>(0 - 0)             | --                       |
| Tetanus                                                           | 41<br>(14 - 86)             | 22<br>(2 - 60)             | 3<br>(1 - 8)           | 10<br>(4 - 18)           | 5<br>(2 - 11)            | 2<br>(1 - 4)             |
| Measles                                                           | 502<br>(15 - 2,421)         | 414<br>(13 - 1,981)        | 73<br>(2 - 389)        | 15<br>(0 - 103)          | 0<br>(0 - 2)             | --                       |
| Varicella and herpes zoster                                       | 4<br>(1 - 9)                | 1<br>(0 - 5)               | 0<br>(0 - 1)           | 1<br>(0 - 2)             | 0<br>(0 - 1)             | 1<br>(0 - 4)             |
| Neglected tropical diseases and malaria                           | 4,140<br>(2,492 - 6,018)    | 2,827<br>(1,369 - 4,305)   | 277<br>(70 - 527)      | 367<br>(86 - 799)        | 341<br>(68 - 811)        | 328<br>(65 - 783)        |
| Malaria                                                           | 4,085<br>(2,429 - 5,968)    | 2,817<br>(1,354 - 4,297)   | 269<br>(61 - 523)      | 349<br>(64 - 783)        | 329<br>(56 - 799)        | 321<br>(56 - 774)        |
| Leishmaniasis                                                     | 0<br>(0 - 0)                | 0<br>(0 - 0)               | 0<br>(0 - 0)           | 0<br>(0 - 0)             | 0<br>(0 - 0)             | 0<br>(0 - 0)             |
| Visceral leishmaniasis                                            | 0<br>(0 - 0)                | 0<br>(0 - 0)               | 0<br>(0 - 0)           | 0<br>(0 - 0)             | 0<br>(0 - 0)             | 0<br>(0 - 0)             |
| Schistosomiasis                                                   | 16<br>(10 - 23)             | 0<br>(0 - 0)               | 0<br>(0 - 1)           | 5<br>(3 - 8)             | 6<br>(3 - 11)            | 4<br>(2 - 6)             |
| Cysticercosis                                                     | 1<br>(0 - 2)                | 0<br>(0 - 0)               | 0<br>(0 - 0)           | 0<br>(0 - 1)             | 0<br>(0 - 0)             | 0<br>(0 - 0)             |
| Cystic echinococcosis                                             | 2<br>(2 - 2)                | 0<br>(0 - 0)               | 0<br>(0 - 0)           | 1<br>(1 - 1)             | 0<br>(0 - 1)             | 0<br>(0 - 0)             |
| Dengue                                                            | 2<br>(1 - 5)                | 1<br>(0 - 1)               | 1<br>(0 - 1)           | 1<br>(0 - 2)             | 0<br>(0 - 1)             | 0<br>(0 - 0)             |
| Yellow fever                                                      | 2<br>(1 - 3)                | 0<br>(0 - 0)               | 0<br>(0 - 1)           | 1<br>(0 - 2)             | 0<br>(0 - 1)             | 0<br>(0 - 0)             |
| Rabies                                                            | 22<br>(8 - 37)              | 3<br>(1 - 8)               | 4<br>(2 - 10)          | 9<br>(3 - 14)            | 4<br>(1 - 7)             | 2<br>(0 - 4)             |
| Intestinal nematode infections                                    | 6<br>(1 - 16)               | 4<br>(1 - 13)              | 1<br>(0 - 5)           | 0<br>(0 - 3)             | 0<br>(0 - 3)             | 0<br>(0 - 3)             |
| Ascariasis                                                        | 6<br>(1 - 16)               | 4<br>(1 - 13)              | 1<br>(0 - 5)           | 0<br>(0 - 3)             | 0<br>(0 - 3)             | 0<br>(0 - 3)             |
| Other neglected tropical diseases                                 | 5<br>(3 - 8)                | 1<br>(1 - 3)               | 0<br>(0 - 1)           | 1<br>(1 - 2)             | 1<br>(0 - 2)             | 1<br>(0 - 2)             |

Web Table 31- Benin deaths with 95% UI by age, sex, and cause in 2013

| Cause                                                            | Females, All Ages          | Females, 0-4 Years       | Females, 5-14 Years | Females, 15-49 Years     | Females, 50-69 Years     | Females, 70-80 Years     |
|------------------------------------------------------------------|----------------------------|--------------------------|---------------------|--------------------------|--------------------------|--------------------------|
| Maternal disorders                                               | 1,246<br>(869 - 1,674)     | --                       | 7<br>(2 - 15)       | 1,240<br>(862 - 1,667)   | --                       | --                       |
| Maternal hemorrhage                                              | 241<br>(156 - 357)         | --                       | 1<br>(0 - 2)        | 241<br>(155 - 356)       | --                       | --                       |
| Maternal sepsis and other maternal infections                    | 70<br>(43 - 104)           | --                       | 0<br>(0 - 1)        | 70<br>(42 - 104)         | --                       | --                       |
| Maternal hypertensive disorders                                  | 95<br>(52 - 147)           | --                       | 0<br>(0 - 1)        | 95<br>(52 - 147)         | --                       | --                       |
| Maternal obstructed labor                                        | 58<br>(35 - 87)            | --                       | 0<br>(0 - 1)        | 58<br>(34 - 87)          | --                       | --                       |
| Maternal abortive outcome                                        | 225<br>(139 - 339)         | --                       | 1<br>(0 - 3)        | 224<br>(138 - 338)       | --                       | --                       |
| Indirect maternal deaths                                         | 124<br>(75 - 181)          | --                       | 1<br>(0 - 1)        | 123<br>(74 - 181)        | --                       | --                       |
| Late maternal deaths                                             | 195<br>(118 - 294)         | --                       | 2<br>(1 - 4)        | 194<br>(117 - 292)       | --                       | --                       |
| Maternal deaths aggravated by HIV/AIDS                           | 5<br>(3 - 8)               | --                       | --                  | 5<br>(3 - 8)             | --                       | --                       |
| Other maternal disorders                                         | 229<br>(148 - 331)         | --                       | 1<br>(0 - 3)        | 227<br>(145 - 329)       | --                       | --                       |
| Neonatal disorders                                               | 2,653<br>(2,117 - 3,249)   | 2,653<br>(2,117 - 3,249) | --                  | --                       | --                       | --                       |
| Neonatal preterm birth complications                             | 999<br>(445 - 1,785)       | 999<br>(445 - 1,785)     | --                  | --                       | --                       | --                       |
| Neonatal encephalopathy due to birth asphyxia and trauma         | 905<br>(363 - 1,636)       | 905<br>(363 - 1,636)     | --                  | --                       | --                       | --                       |
| Neonatal sepsis and other neonatal infections                    | 540<br>(188 - 1,136)       | 540<br>(188 - 1,136)     | --                  | --                       | --                       | --                       |
| Hemolytic disease and other neonatal jaundice                    | 9<br>(2 - 26)              | 9<br>(2 - 26)            | --                  | --                       | --                       | --                       |
| Other neonatal disorders                                         | 199<br>(85 - 378)          | 199<br>(85 - 378)        | --                  | --                       | --                       | --                       |
| Nutritional deficiencies                                         | 1,164<br>(796 - 1,634)     | 480<br>(203 - 856)       | 50<br>(24 - 83)     | 165<br>(115 - 256)       | 209<br>(139 - 321)       | 259<br>(171 - 401)       |
| Protein-energy malnutrition                                      | 777<br>(420 - 1,238)       | 457<br>(181 - 827)       | 37<br>(16 - 68)     | 43<br>(16 - 109)         | 102<br>(47 - 190)        | 138<br>(60 - 260)        |
| Iodine deficiency                                                | 2<br>(0 - 8)               | 0<br>(0 - 3)             | 0<br>(0 - 1)        | 0<br>(0 - 2)             | 1<br>(0 - 4)             | 0<br>(0 - 3)             |
| Iron-deficiency anemia                                           | 378<br>(171 - 573)         | 22<br>(3 - 80)           | 12<br>(4 - 25)      | 122<br>(63 - 184)        | 103<br>(39 - 178)        | 119<br>(50 - 205)        |
| Other nutritional deficiencies                                   | 7<br>(2 - 15)              | 1<br>(0 - 3)             | 0<br>(0 - 0)        | 1<br>(0 - 2)             | 4<br>(1 - 9)             | 2<br>(0 - 4)             |
| Other communicable, maternal, neonatal, and nutritional diseases | 302<br>(172 - 459)         | 135<br>(42 - 254)        | 14<br>(5 - 28)      | 36<br>(23 - 53)          | 60<br>(32 - 97)          | 57<br>(28 - 96)          |
| Sexually transmitted diseases excluding HIV                      | 129<br>(33 - 255)          | 106<br>(19 - 222)        | 9<br>(2 - 21)       | 6<br>(3 - 10)            | 4<br>(1 - 11)            | 3<br>(1 - 9)             |
| Syphilis                                                         | 122<br>(27 - 250)          | 106<br>(19 - 222)        | 9<br>(2 - 21)       | 2<br>(1 - 4)             | 2<br>(1 - 6)             | 3<br>(1 - 6)             |
| Chlamydial infection                                             | 2<br>(1 - 3)               | --                       | 0<br>(0 - 0)        | 1<br>(1 - 2)             | 1<br>(0 - 2)             | 0<br>(0 - 1)             |
| Gonococcal infection                                             | 2<br>(1 - 4)               | --                       | 0<br>(0 - 0)        | 1<br>(1 - 2)             | 1<br>(0 - 2)             | 0<br>(0 - 1)             |
| Other sexually transmitted diseases                              | 2<br>(1 - 3)               | --                       | 0<br>(0 - 0)        | 1<br>(1 - 2)             | 1<br>(0 - 1)             | 0<br>(0 - 1)             |
| Hepatitis                                                        | 107<br>(56 - 166)          | 7<br>(2 - 16)            | 2<br>(1 - 4)        | 22<br>(11 - 36)          | 39<br>(18 - 69)          | 36<br>(17 - 59)          |
| Acute hepatitis A                                                | 4<br>(1 - 10)              | 2<br>(0 - 6)             | 1<br>(0 - 2)        | 1<br>(0 - 2)             | 0<br>(0 - 1)             | 0<br>(0 - 0)             |
| Acute hepatitis B                                                | 76<br>(38 - 121)           | 4<br>(1 - 11)            | 1<br>(0 - 2)        | 8<br>(3 - 15)            | 31<br>(13 - 55)          | 32<br>(14 - 53)          |
| Acute hepatitis C                                                | 4<br>(1 - 12)              | --                       | 0<br>(0 - 0)        | 1<br>(0 - 2)             | 1<br>(0 - 5)             | 2<br>(0 - 5)             |
| Acute hepatitis E                                                | 22<br>(10 - 41)            | 0<br>(0 - 0)             | 0<br>(0 - 1)        | 13<br>(6 - 23)           | 6<br>(2 - 15)            | 3<br>(1 - 8)             |
| Other infectious diseases                                        | 67<br>(34 - 119)           | 22<br>(8 - 58)           | 2<br>(1 - 6)        | 8<br>(4 - 14)            | 16<br>(6 - 35)           | 17<br>(5 - 43)           |
| Non-communicable diseases                                        | 12,244<br>(9,770 - 15,074) | 1,152<br>(598 - 1,987)   | 217<br>(129 - 316)  | 1,704<br>(1,320 - 2,145) | 4,390<br>(3,250 - 5,701) | 4,780<br>(3,877 - 5,824) |
| Neoplasms                                                        | 2,079<br>(1,573 - 2,708)   | 23<br>(10 - 44)          | 32<br>(17 - 52)     | 504<br>(384 - 644)       | 1,046<br>(746 - 1,431)   | 473<br>(365 - 617)       |
| Esophageal cancer                                                | 32<br>(21 - 50)            | --                       | --                  | 4<br>(2 - 6)             | 18<br>(11 - 29)          | 10<br>(6 - 19)           |
| Stomach cancer                                                   | 172<br>(125 - 236)         | --                       | --                  | 26<br>(18 - 38)          | 104<br>(70 - 148)        | 42<br>(27 - 61)          |
| Liver cancer                                                     | 332<br>(214 - 466)         | --                       | 1<br>(0 - 2)        | 73<br>(41 - 113)         | 178<br>(110 - 269)       | 80<br>(49 - 126)         |
| Liver cancer due to hepatitis B                                  | 97<br>(33 - 165)           | --                       | 0<br>(0 - 1)        | 28<br>(11 - 47)          | 52<br>(15 - 98)          | 17<br>(4 - 33)           |
| Liver cancer due to hepatitis C                                  | 116<br>(61 - 197)          | --                       | 0<br>(0 - 0)        | 16<br>(6 - 32)           | 62<br>(29 - 112)         | 37<br>(19 - 67)          |

Web Table 31- Benin deaths with 95% UI by age, sex, and cause in 2013

| Cause                                | Females, All Ages        | Females, 0-4 Years | Females, 5-14 Years | Females, 15-49 Years | Females, 50-69 Years     | Females, 70-80 Years     |
|--------------------------------------|--------------------------|--------------------|---------------------|----------------------|--------------------------|--------------------------|
| Liver cancer due to alcohol use      | 32<br>(14 - 62)          | --                 | --                  | 4<br>(1 - 9)         | 18<br>(7 - 37)           | 11<br>(5 - 21)           |
| Liver cancer due to other causes     | 86<br>(34 - 174)         | --                 | 1<br>(0 - 1)        | 25<br>(10 - 51)      | 45<br>(15 - 101)         | 16<br>(6 - 32)           |
| Larynx cancer                        | 2<br>(1 - 3)             | --                 | --                  | 0<br>(0 - 1)         | 1<br>(0 - 2)             | 0<br>(0 - 1)             |
| Tracheal, bronchus and lung cancer   | 60<br>(44 - 84)          | --                 | --                  | 7<br>(4 - 10)        | 33<br>(23 - 50)          | 20<br>(14 - 29)          |
| Breast cancer                        | 251<br>(189 - 327)       | --                 | --                  | 94<br>(66 - 128)     | 117<br>(82 - 163)        | 40<br>(29 - 57)          |
| Cervical cancer                      | 539<br>(367 - 740)       | --                 | --                  | 135<br>(90 - 200)    | 307<br>(192 - 438)       | 97<br>(63 - 143)         |
| Uterine cancer                       | 47<br>(29 - 69)          | --                 | --                  | 7<br>(4 - 12)        | 25<br>(14 - 38)          | 15<br>(9 - 24)           |
| Prostate cancer                      | --                       | --                 | --                  | --                   | --                       | --                       |
| Colon and rectum cancer              | 108<br>(81 - 142)        | --                 | --                  | 27<br>(20 - 37)      | 42<br>(29 - 60)          | 39<br>(27 - 53)          |
| Lip and oral cavity cancer           | 13<br>(9 - 19)           | --                 | --                  | 4<br>(2 - 7)         | 5<br>(3 - 8)             | 4<br>(2 - 7)             |
| Nasopharynx cancer                   | 3<br>(2 - 5)             | --                 | 0<br>(0 - 0)        | 1<br>(1 - 2)         | 1<br>(1 - 2)             | 1<br>(0 - 1)             |
| Other pharynx cancer                 | 4<br>(2 - 5)             | --                 | --                  | 1<br>(0 - 1)         | 2<br>(1 - 3)             | 1<br>(0 - 1)             |
| Gallbladder and biliary tract cancer | 38<br>(23 - 57)          | --                 | --                  | 6<br>(3 - 10)        | 21<br>(13 - 34)          | 10<br>(6 - 17)           |
| Pancreatic cancer                    | 47<br>(34 - 64)          | --                 | --                  | 6<br>(4 - 8)         | 27<br>(18 - 38)          | 14<br>(10 - 20)          |
| Malignant skin melanoma              | 6<br>(4 - 8)             | --                 | --                  | 1<br>(1 - 2)         | 4<br>(2 - 5)             | 1<br>(1 - 2)             |
| Non-melanoma skin cancer             | 5<br>(3 - 7)             | --                 | --                  | 1<br>(0 - 2)         | 1<br>(1 - 2)             | 3<br>(1 - 4)             |
| Ovarian cancer                       | 68<br>(47 - 97)          | --                 | --                  | 17<br>(10 - 25)      | 41<br>(27 - 62)          | 10<br>(6 - 16)           |
| Testicular cancer                    | --                       | --                 | --                  | --                   | --                       | --                       |
| Kidney cancer                        | 15<br>(11 - 22)          | 1<br>(0 - 3)       | 1<br>(0 - 2)        | 3<br>(2 - 4)         | 8<br>(5 - 13)            | 3<br>(2 - 4)             |
| Bladder cancer                       | 31<br>(20 - 50)          | --                 | --                  | 5<br>(3 - 10)        | 13<br>(8 - 22)           | 12<br>(7 - 23)           |
| Brain and nervous system cancer      | 26<br>(16 - 33)          | 1<br>(0 - 3)       | 2<br>(1 - 3)        | 13<br>(6 - 17)       | 7<br>(4 - 10)            | 3<br>(2 - 5)             |
| Thyroid cancer                       | 9<br>(6 - 15)            | --                 | 0<br>(0 - 0)        | 1<br>(0 - 1)         | 5<br>(3 - 8)             | 3<br>(2 - 6)             |
| Mesothelioma                         | 2<br>(1 - 3)             | --                 | --                  | 1<br>(0 - 1)         | 1<br>(1 - 2)             | 0<br>(0 - 1)             |
| Hodgkin lymphoma                     | 9<br>(5 - 14)            | 1<br>(0 - 1)       | 1<br>(0 - 2)        | 2<br>(1 - 4)         | 2<br>(1 - 3)             | 3<br>(1 - 7)             |
| Non-Hodgkin lymphoma                 | 59<br>(37 - 88)          | 6<br>(1 - 15)      | 8<br>(3 - 19)       | 20<br>(11 - 32)      | 17<br>(11 - 30)          | 8<br>(4 - 15)            |
| Multiple myeloma                     | 15<br>(10 - 22)          | --                 | --                  | 2<br>(1 - 3)         | 8<br>(5 - 12)            | 5<br>(3 - 8)             |
| Leukemia                             | 34<br>(24 - 44)          | 1<br>(0 - 3)       | 5<br>(2 - 8)        | 12<br>(8 - 17)       | 9<br>(6 - 13)            | 6<br>(4 - 9)             |
| Other neoplasms                      | 154<br>(98 - 215)        | 13<br>(5 - 25)     | 15<br>(6 - 30)      | 35<br>(20 - 51)      | 50<br>(30 - 82)          | 40<br>(26 - 62)          |
| Cardiovascular diseases              | 5,479<br>(4,175 - 7,371) | 72<br>(34 - 142)   | 26<br>(14 - 54)     | 495<br>(351 - 720)   | 2,052<br>(1,453 - 2,834) | 2,833<br>(2,182 - 3,802) |
| Rheumatic heart disease              | 75<br>(40 - 200)         | 1<br>(0 - 3)       | 2<br>(1 - 5)        | 16<br>(7 - 53)       | 25<br>(9 - 80)           | 31<br>(18 - 70)          |
| Ischemic heart disease               | 1,531<br>(1,064 - 2,425) | 2<br>(0 - 5)       | 2<br>(1 - 7)        | 117<br>(72 - 204)    | 537<br>(335 - 856)       | 873<br>(598 - 1,407)     |
| Cerebrovascular disease              | 2,259<br>(1,658 - 3,043) | 15<br>(7 - 28)     | 5<br>(3 - 11)       | 167<br>(102 - 245)   | 836<br>(559 - 1,185)     | 1,236<br>(924 - 1,676)   |
| Ischemic stroke                      | 1,321<br>(412 - 1,918)   | 2<br>(0 - 6)       | 1<br>(0 - 2)        | 28<br>(5 - 60)       | 422<br>(93 - 686)        | 868<br>(319 - 1,229)     |
| Hemorrhagic stroke                   | 938<br>(557 - 1,852)     | 12<br>(6 - 24)     | 5<br>(2 - 10)       | 139<br>(79 - 200)    | 414<br>(237 - 762)       | 367<br>(178 - 916)       |
| Hypertensive heart disease           | 555<br>(286 - 882)       | 1<br>(0 - 2)       | 1<br>(0 - 1)        | 40<br>(17 - 82)      | 197<br>(85 - 343)        | 316<br>(163 - 489)       |
| Cardiomyopathy and myocarditis       | 244<br>(142 - 425)       | 19<br>(7 - 42)     | 5<br>(2 - 14)       | 48<br>(26 - 100)     | 67<br>(38 - 118)         | 105<br>(50 - 184)        |
| Atrial fibrillation and flutter      | 0<br>(0 - 1)             | --                 | --                  | 0<br>(0 - 0)         | 0<br>(0 - 0)             | 0<br>(0 - 1)             |
| Aortic aneurysm                      | 54<br>(25 - 133)         | --                 | --                  | 6<br>(3 - 15)        | 20<br>(8 - 51)           | 28<br>(13 - 71)          |
| Peripheral vascular disease          | 1<br>(1 - 3)             | --                 | --                  | 0<br>(0 - 0)         | 1<br>(0 - 2)             | 0<br>(0 - 1)             |
| Endocarditis                         | 71<br>(43 - 125)         | 11<br>(3 - 24)     | 2<br>(1 - 4)        | 16<br>(9 - 28)       | 16<br>(8 - 33)           | 26<br>(14 - 54)          |



Web Table 31- Benin deaths with 95% UI by age, sex, and cause in 2013

| Cause                                               | Females, All Ages    | Females, 0-4 Years | Females, 5-14 Years | Females, 15-49 Years | Females, 50-69 Years | Females, 70-80 Years |
|-----------------------------------------------------|----------------------|--------------------|---------------------|----------------------|----------------------|----------------------|
| Other cardiovascular and circulatory diseases       | 687<br>(446 - 1,305) | 25<br>(11 - 58)    | 8<br>(4 - 18)       | 84<br>(51 - 175)     | 353<br>(211 - 660)   | 218<br>(133 - 471)   |
| Chronic respiratory diseases                        | 709<br>(510 - 1,106) | 20<br>(9 - 42)     | 7<br>(4 - 11)       | 70<br>(49 - 109)     | 264<br>(172 - 429)   | 347<br>(242 - 547)   |
| Chronic obstructive pulmonary disease               | 426<br>(287 - 743)   | 9<br>(4 - 19)      | 3<br>(1 - 5)        | 24<br>(14 - 40)      | 166<br>(102 - 296)   | 223<br>(146 - 386)   |
| Pneumoconiosis                                      | 2<br>(1 - 3)         | 0<br>(0 - 0)       | 0<br>(0 - 0)        | 1<br>(0 - 1)         | 1<br>(0 - 1)         | 0<br>(0 - 0)         |
| Silicosis                                           | 0<br>(0 - 0)         | 0<br>(0 - 0)       | 0<br>(0 - 0)        | 0<br>(0 - 0)         | 0<br>(0 - 0)         | 0<br>(0 - 0)         |
| Asbestosis                                          | 0<br>(0 - 0)         | 0<br>(0 - 0)       | 0<br>(0 - 0)        | 0<br>(0 - 0)         | 0<br>(0 - 0)         | 0<br>(0 - 0)         |
| Coal workers pneumoconiosis                         | 0<br>(0 - 0)         | 0<br>(0 - 0)       | 0<br>(0 - 0)        | 0<br>(0 - 0)         | 0<br>(0 - 0)         | 0<br>(0 - 0)         |
| Other pneumoconiosis                                | 1<br>(1 - 2)         | 0<br>(0 - 0)       | 0<br>(0 - 0)        | 0<br>(0 - 1)         | 1<br>(0 - 1)         | 0<br>(0 - 0)         |
| Asthma                                              | 168<br>(98 - 256)    | 7<br>(2 - 16)      | 2<br>(1 - 5)        | 27<br>(17 - 42)      | 68<br>(35 - 112)     | 64<br>(32 - 103)     |
| Interstitial lung disease and pulmonary sarcoidosis | 58<br>(18 - 111)     | 0<br>(0 - 1)       | 0<br>(0 - 1)        | 4<br>(2 - 8)         | 17<br>(6 - 36)       | 36<br>(9 - 73)       |
| Other chronic respiratory diseases                  | 55<br>(36 - 97)      | 4<br>(2 - 9)       | 1<br>(0 - 2)        | 15<br>(9 - 25)       | 13<br>(7 - 25)       | 23<br>(13 - 45)      |
| Cirrhosis                                           | 442<br>(307 - 616)   | 7<br>(2 - 18)      | 5<br>(2 - 8)        | 91<br>(60 - 132)     | 208<br>(137 - 312)   | 132<br>(84 - 195)    |
| Cirrhosis due to hepatitis B                        | 135<br>(51 - 258)    | 0<br>(0 - 2)       | 1<br>(0 - 2)        | 28<br>(11 - 54)      | 65<br>(24 - 135)     | 40<br>(13 - 80)      |
| Cirrhosis due to hepatitis C                        | 171<br>(78 - 265)    | 1<br>(0 - 2)       | 1<br>(0 - 2)        | 36<br>(20 - 60)      | 83<br>(31 - 145)     | 50<br>(21 - 80)      |
| Cirrhosis due to alcohol use                        | 85<br>(35 - 142)     | --                 | --                  | 11<br>(5 - 21)       | 40<br>(16 - 73)      | 34<br>(12 - 60)      |
| Cirrhosis due to other causes                       | 52<br>(27 - 86)      | 6<br>(2 - 15)      | 3<br>(1 - 5)        | 16<br>(7 - 28)       | 19<br>(8 - 36)       | 9<br>(4 - 16)        |
| Digestive diseases                                  | 591<br>(432 - 769)   | 19<br>(6 - 37)     | 16<br>(8 - 24)      | 109<br>(77 - 144)    | 207<br>(137 - 301)   | 242<br>(172 - 323)   |
| Peptic ulcer disease                                | 111<br>(64 - 168)    | 1<br>(0 - 3)       | 1<br>(0 - 3)        | 17<br>(9 - 28)       | 40<br>(22 - 66)      | 51<br>(28 - 81)      |
| Gastritis and duodenitis                            | 33<br>(12 - 88)      | 1<br>(0 - 4)       | 1<br>(0 - 3)        | 7<br>(3 - 17)        | 10<br>(3 - 29)       | 14<br>(4 - 43)       |
| Appendicitis                                        | 54<br>(29 - 88)      | 3<br>(1 - 7)       | 3<br>(1 - 7)        | 14<br>(8 - 23)       | 16<br>(8 - 31)       | 17<br>(6 - 35)       |
| Paralytic ileus and intestinal obstruction          | 200<br>(119 - 305)   | 7<br>(2 - 16)      | 6<br>(2 - 10)       | 30<br>(16 - 47)      | 71<br>(36 - 112)     | 86<br>(49 - 146)     |
| Inguinal, femoral, and abdominal hernia             | 5<br>(2 - 9)         | 0<br>(0 - 1)       | 0<br>(0 - 0)        | 1<br>(0 - 2)         | 1<br>(1 - 3)         | 2<br>(1 - 5)         |
| Inflammatory bowel disease                          | 33<br>(7 - 53)       | 3<br>(1 - 7)       | 1<br>(0 - 2)        | 9<br>(2 - 15)        | 10<br>(2 - 18)       | 11<br>(2 - 20)       |
| Vascular intestinal disorders                       | 3<br>(1 - 12)        | 0<br>(0 - 0)       | 0<br>(0 - 0)        | 1<br>(0 - 2)         | 1<br>(0 - 4)         | 1<br>(0 - 5)         |
| Gallbladder and biliary diseases                    | 58<br>(35 - 88)      | 1<br>(0 - 2)       | 1<br>(0 - 2)        | 9<br>(5 - 13)        | 23<br>(12 - 40)      | 25<br>(13 - 41)      |
| Pancreatitis                                        | 31<br>(15 - 56)      | 0<br>(0 - 1)       | 0<br>(0 - 1)        | 6<br>(3 - 10)        | 14<br>(6 - 30)       | 10<br>(4 - 21)       |
| Other digestive diseases                            | 62<br>(39 - 97)      | 2<br>(1 - 5)       | 2<br>(1 - 3)        | 14<br>(8 - 23)       | 20<br>(11 - 35)      | 24<br>(13 - 41)      |
| Neurological disorders                              | 321<br>(244 - 412)   | 24<br>(9 - 53)     | 12<br>(6 - 23)      | 53<br>(32 - 86)      | 40<br>(28 - 56)      | 193<br>(143 - 253)   |
| Alzheimer disease and other dementias               | 195<br>(143 - 261)   | --                 | --                  | 0<br>(0 - 0)         | 19<br>(12 - 28)      | 175<br>(128 - 237)   |
| Parkinson disease                                   | 1<br>(1 - 4)         | --                 | --                  | 0<br>(0 - 0)         | 0<br>(0 - 1)         | 1<br>(0 - 2)         |
| Epilepsy                                            | 91<br>(56 - 147)     | 18<br>(5 - 44)     | 9<br>(4 - 20)       | 45<br>(24 - 77)      | 9<br>(4 - 17)        | 10<br>(5 - 20)       |
| Multiple sclerosis                                  | 1<br>(0 - 3)         | --                 | --                  | 0<br>(0 - 1)         | 0<br>(0 - 1)         | 0<br>(0 - 1)         |
| Other neurological disorders                        | 33<br>(25 - 42)      | 6<br>(3 - 9)       | 2<br>(1 - 4)        | 7<br>(5 - 10)        | 11<br>(8 - 16)       | 7<br>(5 - 9)         |
| Mental and substance use disorders                  | 63<br>(40 - 92)      | 3<br>(0 - 6)       | 0<br>(0 - 0)        | 27<br>(16 - 42)      | 24<br>(13 - 38)      | 9<br>(6 - 13)        |
| Schizophrenia                                       | 1<br>(1 - 2)         | --                 | --                  | 1<br>(0 - 1)         | 1<br>(0 - 1)         | 0<br>(0 - 0)         |
| Alcohol use disorders                               | 26<br>(5 - 49)       | --                 | --                  | 13<br>(2 - 26)       | 11<br>(2 - 22)       | 2<br>(0 - 4)         |
| Drug use disorders                                  | 35<br>(22 - 49)      | 3<br>(0 - 6)       | --                  | 13<br>(7 - 20)       | 12<br>(8 - 19)       | 7<br>(4 - 10)        |
| Opioid use disorders                                | 3<br>(2 - 5)         | 0<br>(0 - 1)       | --                  | 1<br>(1 - 2)         | 1<br>(1 - 2)         | 1<br>(0 - 1)         |
| Cocaine use disorders                               | 0<br>(0 - 0)         | 0<br>(0 - 0)       | --                  | 0<br>(0 - 0)         | 0<br>(0 - 0)         | 0<br>(0 - 0)         |
| Amphetamine use disorders                           | 0<br>(0 - 0)         | 0<br>(0 - 0)       | --                  | 0<br>(0 - 0)         | 0<br>(0 - 0)         | 0<br>(0 - 0)         |

Web Table 31- Benin deaths with 95% UI by age, sex, and cause in 2013

| Cause                                               | Females, All Ages        | Females, 0-4 Years   | Females, 5-14 Years | Females, 15-49 Years | Females, 50-69 Years | Females, 70-80 Years |
|-----------------------------------------------------|--------------------------|----------------------|---------------------|----------------------|----------------------|----------------------|
| Other drug use disorders                            | 32<br>(20 - 44)          | 3<br>(0 - 5)         | --                  | 12<br>(6 - 18)       | 11<br>(7 - 17)       | 6<br>(4 - 9)         |
| Eating disorders                                    | 0<br>(0 - 0)             | --                   | 0<br>(0 - 0)        | 0<br>(0 - 0)         | --                   | --                   |
| Anorexia nervosa                                    | 0<br>(0 - 0)             | --                   | 0<br>(0 - 0)        | 0<br>(0 - 0)         | --                   | --                   |
| Diabetes, urogenital, blood, and endocrine diseases | 1,497<br>(1,138 - 1,913) | 199<br>(91 - 369)    | 77<br>(40 - 140)    | 270<br>(201 - 364)   | 477<br>(333 - 658)   | 474<br>(336 - 623)   |
| Diabetes mellitus                                   | 600<br>(415 - 814)       | 2<br>(1 - 3)         | 2<br>(1 - 4)        | 59<br>(40 - 82)      | 262<br>(174 - 382)   | 275<br>(184 - 376)   |
| Acute glomerulonephritis                            | 5<br>(3 - 7)             | 0<br>(0 - 1)         | 0<br>(0 - 1)        | 2<br>(1 - 3)         | 2<br>(1 - 3)         | 0<br>(0 - 1)         |
| Chronic kidney disease                              | 213<br>(124 - 299)       | 12<br>(4 - 24)       | 7<br>(3 - 12)       | 51<br>(27 - 81)      | 73<br>(41 - 112)     | 71<br>(40 - 104)     |
| Chronic kidney disease due to diabetes mellitus     | 3<br>(1 - 5)             | 0<br>(0 - 0)         | 0<br>(0 - 0)        | 0<br>(0 - 0)         | 2<br>(1 - 5)         | 0<br>(0 - 0)         |
| Chronic kidney disease due to hypertension          | 111<br>(67 - 159)        | 2<br>(0 - 4)         | 1<br>(0 - 2)        | 20<br>(9 - 33)       | 43<br>(23 - 67)      | 45<br>(27 - 67)      |
| Chronic kidney disease due to glomerulonephritis    | 48<br>(23 - 76)          | 6<br>(2 - 13)        | 3<br>(1 - 5)        | 20<br>(9 - 33)       | 11<br>(5 - 20)       | 7<br>(3 - 14)        |
| Chronic kidney disease due to other causes          | 52<br>(18 - 88)          | 4<br>(1 - 11)        | 3<br>(1 - 7)        | 10<br>(3 - 25)       | 17<br>(5 - 34)       | 18<br>(5 - 38)       |
| Urinary diseases and male infertility               | 170<br>(111 - 234)       | 10<br>(3 - 24)       | 3<br>(1 - 8)        | 34<br>(20 - 54)      | 64<br>(38 - 97)      | 59<br>(37 - 91)      |
| Interstitial nephritis and urinary tract infections | 151<br>(94 - 213)        | 9<br>(3 - 22)        | 3<br>(1 - 6)        | 30<br>(15 - 49)      | 56<br>(31 - 85)      | 54<br>(33 - 84)      |
| Urolithiasis                                        | 4<br>(1 - 14)            | --                   | 0<br>(0 - 1)        | 1<br>(0 - 4)         | 2<br>(0 - 6)         | 1<br>(0 - 5)         |
| Other urinary diseases                              | 14<br>(8 - 23)           | 1<br>(0 - 3)         | 0<br>(0 - 1)        | 3<br>(1 - 7)         | 6<br>(2 - 12)        | 4<br>(2 - 8)         |
| Gynecological diseases                              | 6<br>(2 - 15)            | --                   | --                  | 3<br>(1 - 9)         | 2<br>(1 - 4)         | 1<br>(0 - 2)         |
| Uterine fibroids                                    | 1<br>(0 - 3)             | --                   | --                  | 0<br>(0 - 1)         | 0<br>(0 - 1)         | 0<br>(0 - 1)         |
| Polycystic ovarian syndrome                         | 0<br>(0 - 1)             | --                   | --                  | 0<br>(0 - 1)         | 0<br>(0 - 0)         | --                   |
| Endometriosis                                       | 0<br>(0 - 2)             | --                   | --                  | 0<br>(0 - 1)         | 0<br>(0 - 0)         | --                   |
| Genital prolapse                                    | 1<br>(0 - 2)             | --                   | --                  | 0<br>(0 - 1)         | 0<br>(0 - 1)         | 0<br>(0 - 1)         |
| Other gynecological diseases                        | 3<br>(1 - 7)             | --                   | --                  | 1<br>(0 - 4)         | 1<br>(0 - 2)         | 0<br>(0 - 1)         |
| Hemoglobinopathies and hemolytic anemias            | 328<br>(169 - 577)       | 141<br>(52 - 289)    | 59<br>(25 - 119)    | 87<br>(50 - 152)     | 28<br>(14 - 47)      | 14<br>(4 - 29)       |
| Thalassemias                                        | 2<br>(1 - 4)             | 2<br>(1 - 3)         | 0<br>(0 - 1)        | 0<br>(0 - 1)         | 0<br>(0 - 0)         | 0<br>(0 - 0)         |
| Sickle cell disorders                               | 310<br>(158 - 552)       | 135<br>(49 - 279)    | 58<br>(25 - 117)    | 85<br>(49 - 149)     | 26<br>(13 - 44)      | 6<br>(2 - 13)        |
| G6PD deficiency                                     | 2<br>(1 - 3)             | 1<br>(0 - 1)         | 0<br>(0 - 0)        | 0<br>(0 - 1)         | 0<br>(0 - 0)         | 0<br>(0 - 1)         |
| Other hemoglobinopathies and hemolytic anemias      | 14<br>(7 - 22)           | 3<br>(1 - 7)         | 0<br>(0 - 0)        | 1<br>(0 - 1)         | 2<br>(1 - 3)         | 8<br>(3 - 15)        |
| Endocrine, metabolic, blood, and immune disorders   | 175<br>(105 - 245)       | 35<br>(16 - 62)      | 6<br>(2 - 12)       | 36<br>(22 - 55)      | 46<br>(27 - 74)      | 53<br>(23 - 86)      |
| Musculoskeletal disorders                           | 43<br>(27 - 69)          | --                   | 3<br>(1 - 5)        | 13<br>(7 - 23)       | 15<br>(9 - 25)       | 12<br>(7 - 21)       |
| Rheumatoid arthritis                                | 8<br>(4 - 13)            | --                   | 0<br>(0 - 1)        | 1<br>(0 - 2)         | 2<br>(1 - 5)         | 4<br>(2 - 7)         |
| Other musculoskeletal disorders                     | 35<br>(22 - 59)          | --                   | 2<br>(1 - 4)        | 12<br>(7 - 21)       | 13<br>(7 - 21)       | 8<br>(4 - 14)        |
| Other non-communicable diseases                     | 1,019<br>(572 - 1,780)   | 785<br>(357 - 1,509) | 41<br>(19 - 73)     | 72<br>(48 - 105)     | 56<br>(37 - 82)      | 65<br>(43 - 98)      |
| Congenital anomalies                                | 842<br>(395 - 1,612)     | 753<br>(331 - 1,469) | 37<br>(16 - 69)     | 35<br>(18 - 65)      | 10<br>(6 - 17)       | 7<br>(4 - 12)        |
| Neural tube defects                                 | 181<br>(39 - 509)        | 170<br>(33 - 482)    | 5<br>(2 - 15)       | 5<br>(2 - 13)        | 1<br>(0 - 2)         | 0<br>(0 - 1)         |
| Congenital heart anomalies                          | 339<br>(167 - 704)       | 304<br>(140 - 653)   | 15<br>(6 - 29)      | 13<br>(7 - 24)       | 5<br>(2 - 8)         | 3<br>(2 - 6)         |
| Cleft lip and cleft palate                          | 3<br>(0 - 9)             | 3<br>(0 - 9)         | --                  | --                   | --                   | --                   |
| Down syndrome                                       | 131<br>(33 - 321)        | 110<br>(23 - 285)    | 9<br>(3 - 22)       | 9<br>(4 - 19)        | 2<br>(1 - 5)         | 0<br>(0 - 1)         |
| Chromosomal unbalanced rearrangements               | 38<br>(10 - 95)          | 34<br>(8 - 90)       | 1<br>(0 - 3)        | 2<br>(1 - 4)         | 0<br>(0 - 0)         | 0<br>(0 - 0)         |
| Other congenital anomalies                          | 151<br>(48 - 431)        | 132<br>(37 - 394)    | 7<br>(2 - 20)       | 6<br>(2 - 15)        | 2<br>(1 - 5)         | 3<br>(2 - 5)         |
| Skin and subcutaneous diseases                      | 172<br>(113 - 245)       | 27<br>(10 - 62)      | 4<br>(2 - 7)        | 38<br>(20 - 60)      | 46<br>(28 - 70)      | 58<br>(37 - 89)      |
| Cellulitis                                          | 45<br>(22 - 72)          | 5<br>(1 - 13)        | 1<br>(0 - 3)        | 9<br>(4 - 17)        | 10<br>(4 - 19)       | 20<br>(8 - 37)       |

Web Table 31- Benin deaths with 95% UI by age, sex, and cause in 2013

| Cause                                           | Females, All Ages        | Females, 0-4 Years | Females, 5-14 Years | Females, 15-49 Years | Females, 50-69 Years | Females, 70-80 Years |
|-------------------------------------------------|--------------------------|--------------------|---------------------|----------------------|----------------------|----------------------|
| Pyoderma                                        | 117<br>(71 - 179)        | 20<br>(7 - 47)     | 2<br>(1 - 4)        | 25<br>(13 - 42)      | 35<br>(20 - 56)      | 35<br>(19 - 62)      |
| Decubitus ulcer                                 | 3<br>(1 - 4)             | 0<br>(0 - 0)       | 0<br>(0 - 0)        | 1<br>(0 - 1)         | 0<br>(0 - 1)         | 1<br>(0 - 2)         |
| Other skin and subcutaneous diseases            | 6<br>(3 - 11)            | 2<br>(0 - 4)       | 0<br>(0 - 1)        | 3<br>(1 - 5)         | 1<br>(0 - 1)         | 1<br>(0 - 3)         |
| Sudden infant death syndrome                    | 6<br>(1 - 19)            | 6<br>(1 - 19)      | --                  | --                   | --                   | --                   |
| Injuries                                        | 1,424<br>(1,008 - 1,813) | 221<br>(101 - 394) | 122<br>(69 - 181)   | 462<br>(342 - 598)   | 316<br>(196 - 449)   | 302<br>(166 - 421)   |
| Transport injuries                              | 595<br>(397 - 803)       | 52<br>(19 - 110)   | 53<br>(28 - 89)     | 252<br>(172 - 350)   | 152<br>(90 - 226)    | 85<br>(46 - 127)     |
| Road injuries                                   | 570<br>(389 - 771)       | 47<br>(17 - 101)   | 51<br>(27 - 86)     | 246<br>(167 - 343)   | 146<br>(87 - 216)    | 80<br>(46 - 118)     |
| Pedestrian road injuries                        | 165<br>(94 - 235)        | 13<br>(4 - 31)     | 16<br>(7 - 30)      | 55<br>(31 - 85)      | 49<br>(24 - 77)      | 32<br>(16 - 52)      |
| Cyclist road injuries                           | 26<br>(12 - 39)          | 3<br>(1 - 7)       | 3<br>(1 - 7)        | 6<br>(3 - 10)        | 11<br>(4 - 18)       | 3<br>(1 - 6)         |
| Motorcyclist road injuries                      | 42<br>(22 - 67)          | 2<br>(1 - 5)       | 2<br>(1 - 5)        | 26<br>(13 - 46)      | 8<br>(3 - 14)        | 4<br>(1 - 7)         |
| Motor vehicle road injuries                     | 329<br>(222 - 449)       | 28<br>(9 - 58)     | 28<br>(14 - 48)     | 157<br>(103 - 225)   | 77<br>(47 - 116)     | 40<br>(22 - 60)      |
| Other road injuries                             | 9<br>(5 - 17)            | 1<br>(0 - 4)       | 1<br>(0 - 3)        | 3<br>(1 - 5)         | 2<br>(1 - 5)         | 1<br>(0 - 3)         |
| Other transport injuries                        | 25<br>(6 - 38)           | 5<br>(1 - 11)      | 2<br>(1 - 5)        | 6<br>(2 - 10)        | 6<br>(1 - 12)        | 5<br>(1 - 10)        |
| Unintentional injuries                          | 671<br>(433 - 918)       | 164<br>(77 - 301)  | 65<br>(35 - 103)    | 128<br>(90 - 177)    | 123<br>(69 - 183)    | 191<br>(99 - 280)    |
| Falls                                           | 172<br>(97 - 246)        | 15<br>(6 - 30)     | 8<br>(3 - 16)       | 23<br>(13 - 37)      | 30<br>(18 - 44)      | 96<br>(47 - 155)     |
| Drowning                                        | 102<br>(59 - 189)        | 41<br>(13 - 105)   | 21<br>(9 - 44)      | 22<br>(13 - 34)      | 12<br>(6 - 18)       | 6<br>(3 - 10)        |
| Fire, heat, and hot substances                  | 79<br>(41 - 130)         | 24<br>(8 - 58)     | 7<br>(3 - 15)       | 18<br>(10 - 31)      | 14<br>(7 - 26)       | 16<br>(7 - 27)       |
| Poisonings                                      | 18<br>(5 - 31)           | 5<br>(1 - 13)      | 2<br>(0 - 3)        | 5<br>(2 - 8)         | 5<br>(1 - 9)         | 2<br>(0 - 4)         |
| Exposure to mechanical forces                   | 74<br>(34 - 135)         | 23<br>(8 - 62)     | 9<br>(4 - 19)       | 17<br>(10 - 31)      | 15<br>(5 - 23)       | 9<br>(3 - 14)        |
| Unintentional firearm injuries                  | 17<br>(11 - 27)          | 3<br>(1 - 7)       | 1<br>(1 - 3)        | 7<br>(4 - 12)        | 4<br>(2 - 7)         | 2<br>(1 - 3)         |
| Unintentional suffocation                       | 11<br>(3 - 60)           | 7<br>(1 - 37)      | 1<br>(0 - 6)        | 1<br>(0 - 10)        | 1<br>(0 - 4)         | 1<br>(0 - 2)         |
| Other exposure to mechanical forces             | 45<br>(12 - 73)          | 13<br>(3 - 29)     | 6<br>(2 - 14)       | 9<br>(4 - 16)        | 10<br>(2 - 16)       | 7<br>(1 - 10)        |
| Adverse effects of medical treatment            | 94<br>(30 - 169)         | 15<br>(4 - 39)     | 4<br>(1 - 8)        | 19<br>(7 - 37)       | 26<br>(7 - 54)       | 30<br>(7 - 63)       |
| Animal contact                                  | 30<br>(8 - 52)           | 5<br>(2 - 11)      | 4<br>(1 - 9)        | 9<br>(2 - 18)        | 7<br>(1 - 13)        | 5<br>(1 - 10)        |
| Venomous animal contact                         | 16<br>(4 - 32)           | 3<br>(1 - 9)       | 3<br>(1 - 6)        | 5<br>(1 - 12)        | 3<br>(1 - 7)         | 2<br>(0 - 5)         |
| Non-venomous animal contact                     | 14<br>(3 - 27)           | 1<br>(0 - 3)       | 2<br>(0 - 4)        | 4<br>(1 - 9)         | 4<br>(1 - 8)         | 3<br>(1 - 6)         |
| Foreign body                                    | 66<br>(39 - 107)         | 30<br>(13 - 60)    | 4<br>(2 - 9)        | 6<br>(3 - 10)        | 8<br>(4 - 12)        | 18<br>(8 - 28)       |
| Pulmonary aspiration and foreign body in airway | 63<br>(36 - 104)         | 29<br>(12 - 59)    | 4<br>(2 - 8)        | 5<br>(3 - 9)         | 7<br>(3 - 11)        | 17<br>(7 - 27)       |
| Foreign body in other body part                 | 3<br>(2 - 5)             | 0<br>(0 - 1)       | 0<br>(0 - 1)        | 1<br>(0 - 1)         | 1<br>(0 - 1)         | 1<br>(0 - 2)         |
| Other unintentional injuries                    | 37<br>(21 - 58)          | 6<br>(3 - 14)      | 5<br>(2 - 12)       | 9<br>(5 - 16)        | 7<br>(4 - 12)        | 9<br>(3 - 14)        |
| Self-harm and interpersonal violence            | 159<br>(105 - 238)       | 5<br>(2 - 12)      | 5<br>(2 - 9)        | 81<br>(51 - 143)     | 41<br>(23 - 69)      | 26<br>(11 - 42)      |
| Self-harm                                       | 119<br>(77 - 196)        | --                 | 2<br>(1 - 5)        | 54<br>(32 - 117)     | 38<br>(20 - 65)      | 25<br>(10 - 41)      |
| Interpersonal violence                          | 39<br>(23 - 66)          | 5<br>(2 - 12)      | 3<br>(1 - 6)        | 27<br>(15 - 49)      | 3<br>(2 - 5)         | 1<br>(0 - 1)         |
| Assault by firearm                              | 12<br>(5 - 23)           | 1<br>(0 - 4)       | 1<br>(0 - 2)        | 8<br>(4 - 17)        | 1<br>(1 - 2)         | 0<br>(0 - 0)         |
| Assault by sharp object                         | 12<br>(7 - 22)           | 1<br>(0 - 3)       | 1<br>(0 - 1)        | 10<br>(5 - 18)       | 1<br>(0 - 1)         | 0<br>(0 - 0)         |
| Assault by other means                          | 15<br>(9 - 28)           | 3<br>(1 - 7)       | 1<br>(1 - 3)        | 9<br>(5 - 18)        | 1<br>(1 - 2)         | 0<br>(0 - 1)         |
| Forces of nature, war, and legal intervention   | 0<br>(0 - 0)             | 0<br>(0 - 0)       | --                  | --                   | --                   | --                   |
| Exposure to forces of nature                    | 0<br>(0 - 0)             | 0<br>(0 - 0)       | --                  | --                   | --                   | --                   |

Web Table 31- Bhutan deaths with 95% UI by age, sex, and cause in 2013

| Cause                                                              | Both Sexes, All Ages     | Both Sexes, 0-4 Years | Both Sexes, 5-14 Years | Both Sexes, 15-49 Years | Both Sexes, 50-69 Years | Both Sexes, 70-80 Years  |
|--------------------------------------------------------------------|--------------------------|-----------------------|------------------------|-------------------------|-------------------------|--------------------------|
| All causes                                                         | 4,653<br>(3,252 - 6,749) | 700<br>(588 - 840)    | 95<br>(77 - 122)       | 960<br>(529 - 1,604)    | 1,126<br>(677 - 1,867)  | 1,771<br>(1,383 - 2,319) |
| Communicable, maternal, neonatal, and nutritional diseases         | 1,036<br>(769 - 1,405)   | 546<br>(452 - 657)    | 36<br>(26 - 51)        | 198<br>(106 - 353)      | 97<br>(56 - 161)        | 159<br>(117 - 215)       |
| HIV/AIDS and tuberculosis                                          | 128<br>(64 - 268)        | 3<br>(1 - 11)         | 2<br>(1 - 6)           | 65<br>(27 - 168)        | 34<br>(17 - 67)         | 23<br>(12 - 36)          |
| Tuberculosis                                                       | 87<br>(42 - 139)         | 2<br>(1 - 3)          | 1<br>(1 - 2)           | 34<br>(15 - 59)         | 28<br>(13 - 47)         | 22<br>(12 - 35)          |
| HIV/AIDS                                                           | 40<br>(5 - 199)          | 1<br>(0 - 9)          | 1<br>(0 - 5)           | 31<br>(4 - 146)         | 6<br>(1 - 30)           | 1<br>(0 - 4)             |
| HIV/AIDS resulting in mycobacterial infection                      | 2<br>(0 - 11)            | 0<br>(0 - 1)          | 0<br>(0 - 0)           | 2<br>(0 - 8)            | 0<br>(0 - 2)            | 0<br>(0 - 0)             |
| HIV/AIDS resulting in other diseases                               | 38<br>(4 - 187)          | 1<br>(0 - 9)          | 1<br>(0 - 5)           | 30<br>(3 - 138)         | 5<br>(1 - 28)           | 1<br>(0 - 4)             |
| Diarrrhea, lower respiratory, and other common infectious diseases | 413<br>(293 - 580)       | 180<br>(122 - 249)    | 27<br>(18 - 40)        | 61<br>(30 - 107)        | 44<br>(25 - 75)         | 102<br>(72 - 141)        |
| Diarrrheal diseases                                                | 101<br>(67 - 148)        | 35<br>(16 - 64)       | 4<br>(2 - 6)           | 10<br>(5 - 18)          | 15<br>(8 - 27)          | 37<br>(22 - 59)          |
| Intestinal infectious diseases                                     | 66<br>(31 - 122)         | 17<br>(7 - 31)        | 16<br>(8 - 28)         | 29<br>(11 - 60)         | 3<br>(1 - 7)            | 1<br>(1 - 3)             |
| Typhoid fever                                                      | 51<br>(23 - 97)          | 13<br>(6 - 24)        | 12<br>(6 - 22)         | 22<br>(8 - 47)          | 2<br>(1 - 6)            | 1<br>(0 - 2)             |
| Paratyphoid fever                                                  | 15<br>(7 - 29)           | 4<br>(2 - 8)          | 3<br>(1 - 7)           | 6<br>(2 - 14)           | 1<br>(0 - 2)            | 0<br>(0 - 1)             |
| Other intestinal infectious diseases                               | 0<br>(0 - 2)             | 0<br>(0 - 1)          | 0<br>(0 - 0)           | 0<br>(0 - 1)            | 0<br>(0 - 0)            | 0<br>(0 - 0)             |
| Lower respiratory infections                                       | 210<br>(141 - 290)       | 108<br>(67 - 162)     | 4<br>(2 - 6)           | 15<br>(8 - 27)          | 22<br>(13 - 38)         | 60<br>(40 - 87)          |
| Upper respiratory infections                                       | 0<br>(0 - 1)             | 0<br>(0 - 0)          | 0<br>(0 - 0)           | 0<br>(0 - 0)            | 0<br>(0 - 0)            | 0<br>(0 - 0)             |
| Otitis media                                                       | 0<br>(0 - 0)             | 0<br>(0 - 0)          | 0<br>(0 - 0)           | 0<br>(0 - 0)            | 0<br>(0 - 0)            | 0<br>(0 - 0)             |
| Meningitis                                                         | 18<br>(11 - 26)          | 9<br>(5 - 14)         | 1<br>(1 - 2)           | 4<br>(2 - 7)            | 2<br>(1 - 3)            | 2<br>(1 - 4)             |
| Pneumococcal meningitis                                            | 5<br>(3 - 8)             | 2<br>(1 - 3)          | 0<br>(0 - 1)           | 1<br>(1 - 2)            | 1<br>(0 - 1)            | 1<br>(0 - 1)             |
| H influenzae type B meningitis                                     | 5<br>(3 - 7)             | 3<br>(2 - 6)          | 0<br>(0 - 1)           | 1<br>(0 - 1)            | 0<br>(0 - 0)            | 0<br>(0 - 0)             |
| Meningococcal meningitis                                           | 2<br>(1 - 3)             | 1<br>(0 - 1)          | 0<br>(0 - 0)           | 1<br>(0 - 1)            | 0<br>(0 - 0)            | 0<br>(0 - 1)             |
| Other meningitis                                                   | 6<br>(4 - 9)             | 3<br>(1 - 4)          | 0<br>(0 - 1)           | 2<br>(1 - 3)            | 1<br>(0 - 1)            | 1<br>(0 - 2)             |
| Encephalitis                                                       | 8<br>(4 - 13)            | 3<br>(1 - 6)          | 1<br>(0 - 2)           | 3<br>(1 - 5)            | 1<br>(0 - 2)            | 0<br>(0 - 1)             |
| Diphtheria                                                         | 0<br>(0 - 1)             | 0<br>(0 - 0)          | 0<br>(0 - 0)           | 0<br>(0 - 0)            | 0<br>(0 - 0)            | --                       |
| Whooping cough                                                     | 0<br>(0 - 0)             | 0<br>(0 - 0)          | 0<br>(0 - 0)           | 0<br>(0 - 0)            | 0<br>(0 - 0)            | --                       |
| Tetanus                                                            | 2<br>(1 - 4)             | 2<br>(1 - 3)          | 0<br>(0 - 0)           | 0<br>(0 - 0)            | 0<br>(0 - 0)            | 0<br>(0 - 0)             |
| Measles                                                            | 8<br>(0 - 45)            | 7<br>(0 - 39)         | 1<br>(0 - 5)           | 0<br>(0 - 1)            | 0<br>(0 - 0)            | --                       |
| Varicella and herpes zoster                                        | 1<br>(0 - 1)             | 0<br>(0 - 0)          | 0<br>(0 - 0)           | 0<br>(0 - 0)            | 0<br>(0 - 0)            | 0<br>(0 - 1)             |
| Neglected tropical diseases and malaria                            | 16<br>(9 - 28)           | 3<br>(1 - 8)          | 2<br>(1 - 4)           | 6<br>(3 - 12)           | 3<br>(1 - 5)            | 2<br>(1 - 4)             |
| Malaria                                                            | 9<br>(4 - 18)            | 1<br>(0 - 4)          | 1<br>(0 - 2)           | 4<br>(1 - 9)            | 2<br>(1 - 4)            | 1<br>(1 - 3)             |
| Leishmaniasis                                                      | 1<br>(0 - 1)             | 0<br>(0 - 1)          | 0<br>(0 - 0)           | 0<br>(0 - 1)            | 0<br>(0 - 0)            | 0<br>(0 - 0)             |
| Visceral leishmaniasis                                             | 1<br>(0 - 1)             | 0<br>(0 - 1)          | 0<br>(0 - 0)           | 0<br>(0 - 1)            | 0<br>(0 - 0)            | 0<br>(0 - 0)             |
| Cysticercosis                                                      | 0<br>(0 - 0)             | 0<br>(0 - 0)          | 0<br>(0 - 0)           | 0<br>(0 - 0)            | 0<br>(0 - 0)            | 0<br>(0 - 0)             |
| Cystic echinococcosis                                              | 0<br>(0 - 0)             | 0<br>(0 - 0)          | 0<br>(0 - 0)           | 0<br>(0 - 0)            | 0<br>(0 - 0)            | 0<br>(0 - 0)             |
| Dengue                                                             | 0<br>(0 - 1)             | 0<br>(0 - 0)          | 0<br>(0 - 0)           | 0<br>(0 - 0)            | 0<br>(0 - 0)            | 0<br>(0 - 0)             |
| Rabies                                                             | 3<br>(1 - 7)             | 0<br>(0 - 1)          | 1<br>(0 - 2)           | 1<br>(0 - 3)            | 0<br>(0 - 1)            | 0<br>(0 - 0)             |
| Intestinal nematode infections                                     | 1<br>(0 - 7)             | 1<br>(0 - 5)          | 0<br>(0 - 2)           | 0<br>(0 - 1)            | 0<br>(0 - 0)            | 0<br>(0 - 1)             |
| Ascariasis                                                         | 1<br>(0 - 7)             | 1<br>(0 - 5)          | 0<br>(0 - 2)           | 0<br>(0 - 1)            | 0<br>(0 - 0)            | 0<br>(0 - 1)             |
| Other neglected tropical diseases                                  | 2<br>(1 - 3)             | 1<br>(0 - 1)          | 0<br>(0 - 0)           | 0<br>(0 - 1)            | 0<br>(0 - 0)            | 0<br>(0 - 1)             |
| Maternal disorders                                                 | 40<br>(20 - 68)          | --                    | 0<br>(0 - 0)           | 40<br>(20 - 68)         | --                      | --                       |
| Maternal hemorrhage                                                | 5<br>(2 - 10)            | --                    | 0<br>(0 - 0)           | 5<br>(2 - 10)           | --                      | --                       |

Web Table 31- Bhutan deaths with 95% UI by age, sex, and cause in 2013

| Cause                                                            | Both Sexes, All Ages     | Both Sexes, 0-4 Years | Both Sexes, 5-14 Years | Both Sexes, 15-49 Years | Both Sexes, 50-69 Years | Both Sexes, 70-80 Years  |
|------------------------------------------------------------------|--------------------------|-----------------------|------------------------|-------------------------|-------------------------|--------------------------|
| Maternal sepsis and other maternal infections                    | 2<br>(1 - 4)             | --                    | 0<br>(0 - 0)           | 2<br>(1 - 4)            | --                      | --                       |
| Maternal hypertensive disorders                                  | 5<br>(2 - 9)             | --                    | 0<br>(0 - 0)           | 5<br>(2 - 9)            | --                      | --                       |
| Maternal obstructed labor                                        | 2<br>(1 - 4)             | --                    | 0<br>(0 - 0)           | 2<br>(1 - 4)            | --                      | --                       |
| Maternal abortive outcome                                        | 5<br>(2 - 9)             | --                    | 0<br>(0 - 0)           | 5<br>(2 - 9)            | --                      | --                       |
| Indirect maternal deaths                                         | 5<br>(2 - 9)             | --                    | 0<br>(0 - 0)           | 5<br>(2 - 9)            | --                      | --                       |
| Late maternal deaths                                             | 7<br>(3 - 12)            | --                    | 0<br>(0 - 0)           | 7<br>(3 - 12)           | --                      | --                       |
| Maternal deaths aggravated by HIV/AIDS                           | 0<br>(0 - 0)             | --                    | --                     | 0<br>(0 - 0)            | --                      | --                       |
| Other maternal disorders                                         | 10<br>(4 - 17)           | --                    | 0<br>(0 - 0)           | 10<br>(4 - 17)          | --                      | --                       |
| Neonatal disorders                                               | 321<br>(252 - 398)       | 321<br>(252 - 398)    | --                     | --                      | --                      | --                       |
| Neonatal preterm birth complications                             | 94<br>(47 - 150)         | 94<br>(47 - 150)      | --                     | --                      | --                      | --                       |
| Neonatal encephalopathy due to birth asphyxia and trauma         | 133<br>(78 - 210)        | 133<br>(78 - 210)     | --                     | --                      | --                      | --                       |
| Neonatal sepsis and other neonatal infections                    | 58<br>(30 - 107)         | 58<br>(30 - 107)      | --                     | --                      | --                      | --                       |
| Hemolytic disease and other neonatal jaundice                    | 3<br>(1 - 5)             | 3<br>(1 - 5)          | --                     | --                      | --                      | --                       |
| Other neonatal disorders                                         | 33<br>(5 - 73)           | 33<br>(5 - 73)        | --                     | --                      | --                      | --                       |
| Nutritional deficiencies                                         | 56<br>(34 - 87)          | 17<br>(9 - 27)        | 2<br>(1 - 3)           | 7<br>(3 - 12)           | 7<br>(3 - 12)           | 24<br>(13 - 39)          |
| Protein-energy malnutrition                                      | 47<br>(25 - 77)          | 15<br>(8 - 24)        | 2<br>(1 - 3)           | 5<br>(2 - 9)            | 5<br>(3 - 10)           | 21<br>(10 - 36)          |
| Iodine deficiency                                                | 0<br>(0 - 1)             | 0<br>(0 - 0)          | 0<br>(0 - 0)           | 0<br>(0 - 0)            | 0<br>(0 - 0)            | 0<br>(0 - 0)             |
| Iron-deficiency anemia                                           | 6<br>(2 - 14)            | 2<br>(0 - 5)          | 0<br>(0 - 1)           | 1<br>(0 - 3)            | 1<br>(0 - 2)            | 2<br>(0 - 6)             |
| Other nutritional deficiencies                                   | 3<br>(1 - 6)             | 0<br>(0 - 2)          | 0<br>(0 - 0)           | 0<br>(0 - 1)            | 0<br>(0 - 1)            | 1<br>(0 - 3)             |
| Other communicable, maternal, neonatal, and nutritional diseases | 63<br>(39 - 98)          | 21<br>(9 - 40)        | 4<br>(2 - 6)           | 20<br>(10 - 35)         | 10<br>(5 - 17)          | 8<br>(5 - 13)            |
| Sexually transmitted diseases excluding HIV                      | 14<br>(3 - 31)           | 11<br>(0 - 26)        | 1<br>(0 - 2)           | 1<br>(0 - 2)            | 1<br>(0 - 2)            | 1<br>(0 - 2)             |
| Syphilis                                                         | 13<br>(2 - 29)           | 11<br>(0 - 26)        | 1<br>(0 - 2)           | 0<br>(0 - 1)            | 0<br>(0 - 1)            | 1<br>(0 - 2)             |
| Chlamydial infection                                             | 0<br>(0 - 0)             | --                    | 0<br>(0 - 0)           | 0<br>(0 - 0)            | 0<br>(0 - 0)            | 0<br>(0 - 0)             |
| Gonococcal infection                                             | 0<br>(0 - 1)             | --                    | 0<br>(0 - 0)           | 0<br>(0 - 0)            | 0<br>(0 - 0)            | 0<br>(0 - 0)             |
| Other sexually transmitted diseases                              | 0<br>(0 - 1)             | --                    | 0<br>(0 - 0)           | 0<br>(0 - 0)            | 0<br>(0 - 0)            | 0<br>(0 - 0)             |
| Hepatitis                                                        | 35<br>(21 - 57)          | 5<br>(3 - 9)          | 2<br>(1 - 3)           | 17<br>(9 - 31)          | 7<br>(4 - 12)           | 4<br>(3 - 6)             |
| Acute hepatitis A                                                | 7<br>(2 - 15)            | 2<br>(1 - 5)          | 1<br>(0 - 2)           | 3<br>(1 - 8)            | 0<br>(0 - 1)            | 0<br>(0 - 0)             |
| Acute hepatitis B                                                | 20<br>(11 - 33)          | 2<br>(1 - 5)          | 1<br>(0 - 1)           | 8<br>(3 - 15)           | 6<br>(3 - 10)           | 4<br>(2 - 6)             |
| Acute hepatitis C                                                | 1<br>(0 - 2)             | --                    | 0<br>(0 - 0)           | 0<br>(0 - 1)            | 0<br>(0 - 0)            | 0<br>(0 - 0)             |
| Acute hepatitis E                                                | 7<br>(3 - 13)            | 0<br>(0 - 0)          | 0<br>(0 - 1)           | 5<br>(2 - 11)           | 1<br>(0 - 1)            | 0<br>(0 - 0)             |
| Other infectious diseases                                        | 14<br>(4 - 27)           | 5<br>(1 - 14)         | 1<br>(0 - 2)           | 3<br>(1 - 5)            | 3<br>(1 - 5)            | 3<br>(1 - 8)             |
| Non-communicable diseases                                        | 3,051<br>(2,097 - 4,525) | 93<br>(62 - 133)      | 26<br>(19 - 35)        | 487<br>(260 - 865)      | 932<br>(562 - 1,545)    | 1,512<br>(1,198 - 1,973) |
| Neoplasms                                                        | 377<br>(239 - 607)       | 5<br>(3 - 8)          | 6<br>(4 - 8)           | 92<br>(50 - 164)        | 163<br>(99 - 283)       | 111<br>(82 - 154)        |
| Esophageal cancer                                                | 37<br>(22 - 62)          | --                    | --                     | 6<br>(3 - 11)           | 18<br>(10 - 32)         | 13<br>(8 - 21)           |
| Stomach cancer                                                   | 27<br>(17 - 44)          | --                    | --                     | 6<br>(3 - 10)           | 13<br>(8 - 21)          | 9<br>(6 - 12)            |
| Liver cancer                                                     | 26<br>(15 - 42)          | --                    | 0<br>(0 - 0)           | 5<br>(2 - 9)            | 12<br>(7 - 22)          | 8<br>(5 - 12)            |
| Liver cancer due to hepatitis B                                  | 9<br>(4 - 15)            | --                    | 0<br>(0 - 0)           | 2<br>(1 - 4)            | 4<br>(2 - 8)            | 2<br>(1 - 4)             |
| Liver cancer due to hepatitis C                                  | 10<br>(5 - 20)           | --                    | 0<br>(0 - 0)           | 1<br>(1 - 3)            | 5<br>(2 - 10)           | 4<br>(2 - 6)             |
| Liver cancer due to alcohol use                                  | 3<br>(2 - 6)             | --                    | --                     | 0<br>(0 - 1)            | 1<br>(1 - 3)            | 2<br>(1 - 3)             |
| Liver cancer due to other causes                                 | 3<br>(2 - 6)             | --                    | 0<br>(0 - 0)           | 1<br>(0 - 2)            | 2<br>(1 - 3)            | 1<br>(1 - 2)             |

Web Table 31- Bhutan deaths with 95% UI by age, sex, and cause in 2013

| Cause                                         | Both Sexes, All Ages   | Both Sexes, 0-4 Years | Both Sexes, 5-14 Years | Both Sexes, 15-49 Years | Both Sexes, 50-69 Years | Both Sexes, 70-80 Years |
|-----------------------------------------------|------------------------|-----------------------|------------------------|-------------------------|-------------------------|-------------------------|
| Larynx cancer                                 | 10<br>(6 - 18)         | --                    | --                     | 2<br>(1 - 3)            | 5<br>(3 - 9)            | 4<br>(3 - 6)            |
| Tracheal, bronchus and lung cancer            | 38<br>(23 - 64)        | --                    | --                     | 6<br>(3 - 11)           | 20<br>(11 - 35)         | 13<br>(9 - 19)          |
| Breast cancer                                 | 26<br>(15 - 45)        | --                    | --                     | 9<br>(4 - 16)           | 12<br>(7 - 22)          | 6<br>(4 - 8)            |
| Cervical cancer                               | 17<br>(9 - 29)         | --                    | --                     | 5<br>(2 - 8)            | 8<br>(4 - 15)           | 4<br>(2 - 6)            |
| Uterine cancer                                | 2<br>(1 - 3)           | --                    | --                     | 0<br>(0 - 1)            | 1<br>(0 - 2)            | 1<br>(0 - 1)            |
| Prostate cancer                               | 5<br>(3 - 10)          | --                    | --                     | 0<br>(0 - 0)            | 1<br>(0 - 2)            | 4<br>(2 - 8)            |
| Colon and rectum cancer                       | 25<br>(16 - 41)        | --                    | --                     | 6<br>(3 - 11)           | 11<br>(6 - 18)          | 8<br>(6 - 12)           |
| Lip and oral cavity cancer                    | 18<br>(11 - 29)        | --                    | --                     | 4<br>(2 - 8)            | 8<br>(4 - 13)           | 6<br>(4 - 9)            |
| Nasopharynx cancer                            | 6<br>(3 - 10)          | --                    | 0<br>(0 - 0)           | 2<br>(1 - 4)            | 3<br>(1 - 5)            | 1<br>(1 - 2)            |
| Other pharynx cancer                          | 14<br>(7 - 24)         | --                    | --                     | 3<br>(1 - 5)            | 8<br>(4 - 14)           | 4<br>(2 - 6)            |
| Gallbladder and biliary tract cancer          | 8<br>(4 - 13)          | --                    | --                     | 2<br>(1 - 4)            | 4<br>(2 - 7)            | 2<br>(1 - 3)            |
| Pancreatic cancer                             | 9<br>(6 - 14)          | --                    | --                     | 2<br>(1 - 4)            | 4<br>(2 - 7)            | 3<br>(2 - 4)            |
| Malignant skin melanoma                       | 1<br>(0 - 2)           | --                    | --                     | 0<br>(0 - 0)            | 0<br>(0 - 1)            | 0<br>(0 - 1)            |
| Non-melanoma skin cancer                      | 1<br>(1 - 1)           | --                    | --                     | 0<br>(0 - 0)            | 0<br>(0 - 0)            | 0<br>(0 - 1)            |
| Ovarian cancer                                | 13<br>(8 - 23)         | --                    | --                     | 4<br>(2 - 7)            | 7<br>(4 - 13)           | 3<br>(2 - 4)            |
| Testicular cancer                             | 1<br>(1 - 2)           | --                    | --                     | 1<br>(0 - 1)            | 0<br>(0 - 0)            | 0<br>(0 - 0)            |
| Kidney cancer                                 | 5<br>(3 - 8)           | 0<br>(0 - 0)          | 0<br>(0 - 0)           | 1<br>(0 - 2)            | 3<br>(2 - 5)            | 2<br>(1 - 2)            |
| Bladder cancer                                | 7<br>(5 - 12)          | --                    | --                     | 1<br>(0 - 1)            | 3<br>(2 - 5)            | 4<br>(3 - 6)            |
| Brain and nervous system cancer               | 11<br>(6 - 21)         | 0<br>(0 - 0)          | 1<br>(0 - 1)           | 5<br>(2 - 10)           | 4<br>(2 - 9)            | 2<br>(1 - 3)            |
| Thyroid cancer                                | 2<br>(1 - 4)           | --                    | 0<br>(0 - 0)           | 0<br>(0 - 1)            | 1<br>(0 - 2)            | 1<br>(1 - 1)            |
| Mesothelioma                                  | 0<br>(0 - 1)           | --                    | --                     | 0<br>(0 - 0)            | 0<br>(0 - 0)            | 0<br>(0 - 0)            |
| Hodgkin lymphoma                              | 2<br>(1 - 3)           | 0<br>(0 - 0)          | 0<br>(0 - 0)           | 1<br>(0 - 1)            | 0<br>(0 - 1)            | 0<br>(0 - 1)            |
| Non-Hodgkin lymphoma                          | 18<br>(11 - 30)        | 0<br>(0 - 1)          | 1<br>(0 - 1)           | 6<br>(3 - 11)           | 6<br>(4 - 11)           | 5<br>(3 - 7)            |
| Multiple myeloma                              | 3<br>(2 - 5)           | --                    | --                     | 1<br>(0 - 1)            | 2<br>(1 - 3)            | 1<br>(1 - 2)            |
| Leukemia                                      | 19<br>(12 - 30)        | 1<br>(0 - 1)          | 2<br>(1 - 3)           | 9<br>(5 - 15)           | 4<br>(3 - 7)            | 3<br>(2 - 4)            |
| Other neoplasms                               | 26<br>(15 - 46)        | 4<br>(2 - 6)          | 2<br>(1 - 3)           | 7<br>(4 - 14)           | 7<br>(3 - 14)           | 6<br>(4 - 11)           |
| Cardiovascular diseases                       | 1,457<br>(977 - 2,111) | 5<br>(3 - 8)          | 4<br>(3 - 6)           | 178<br>(90 - 311)       | 447<br>(261 - 728)      | 823<br>(613 - 1,074)    |
| Rheumatic heart disease                       | 39<br>(22 - 72)        | 0<br>(0 - 1)          | 1<br>(1 - 2)           | 14<br>(7 - 26)          | 12<br>(6 - 24)          | 12<br>(7 - 23)          |
| Ischemic heart disease                        | 672<br>(450 - 990)     | 1<br>(0 - 2)          | 1<br>(1 - 2)           | 92<br>(45 - 161)        | 226<br>(131 - 371)      | 353<br>(261 - 471)      |
| Cerebrovascular disease                       | 543<br>(335 - 797)     | 1<br>(1 - 2)          | 1<br>(1 - 2)           | 45<br>(21 - 80)         | 149<br>(79 - 243)       | 347<br>(223 - 465)      |
| Ischemic stroke                               | 276<br>(161 - 392)     | 0<br>(0 - 0)          | 0<br>(0 - 0)           | 7<br>(3 - 13)           | 53<br>(27 - 87)         | 215<br>(128 - 295)      |
| Hemorrhagic stroke                            | 267<br>(157 - 419)     | 1<br>(1 - 2)          | 1<br>(1 - 1)           | 38<br>(18 - 67)         | 96<br>(50 - 163)        | 132<br>(84 - 192)       |
| Hypertensive heart disease                    | 141<br>(92 - 226)      | 0<br>(0 - 1)          | 0<br>(0 - 0)           | 14<br>(7 - 25)          | 42<br>(23 - 74)         | 84<br>(56 - 131)        |
| Cardiomyopathy and myocarditis                | 30<br>(17 - 48)        | 2<br>(1 - 3)          | 1<br>(0 - 1)           | 8<br>(4 - 15)           | 9<br>(4 - 15)           | 11<br>(6 - 17)          |
| Atrial fibrillation and flutter               | 1<br>(1 - 2)           | --                    | --                     | 0<br>(0 - 0)            | 0<br>(0 - 0)            | 1<br>(0 - 1)            |
| Aortic aneurysm                               | 11<br>(7 - 17)         | --                    | --                     | 1<br>(1 - 2)            | 3<br>(2 - 6)            | 6<br>(4 - 10)           |
| Peripheral vascular disease                   | 1<br>(0 - 1)           | --                    | --                     | 0<br>(0 - 0)            | 0<br>(0 - 0)            | 1<br>(0 - 1)            |
| Endocarditis                                  | 6<br>(3 - 11)          | 0<br>(0 - 1)          | 0<br>(0 - 0)           | 2<br>(1 - 3)            | 2<br>(1 - 3)            | 2<br>(1 - 4)            |
| Other cardiovascular and circulatory diseases | 13<br>(8 - 21)         | 0<br>(0 - 0)          | 0<br>(0 - 0)           | 2<br>(1 - 4)            | 4<br>(2 - 7)            | 7<br>(4 - 11)           |
| Chronic respiratory diseases                  | 427<br>(280 - 657)     | 11<br>(6 - 16)        | 3<br>(2 - 4)           | 44<br>(22 - 79)         | 118<br>(66 - 195)       | 253<br>(176 - 359)      |

Web Table 31- Bhutan deaths with 95% UI by age, sex, and cause in 2013

| Cause                                               | Both Sexes, All Ages | Both Sexes, 0-4 Years | Both Sexes, 5-14 Years | Both Sexes, 15-49 Years | Both Sexes, 50-69 Years | Both Sexes, 70-80 Years |
|-----------------------------------------------------|----------------------|-----------------------|------------------------|-------------------------|-------------------------|-------------------------|
| Chronic obstructive pulmonary disease               | 257<br>(165 - 395)   | 3<br>(2 - 6)          | 1<br>(0 - 1)           | 17<br>(8 - 32)          | 67<br>(37 - 116)        | 170<br>(116 - 251)      |
| Pneumoconiosis                                      | 56<br>(33 - 92)      | 0<br>(0 - 0)          | 0<br>(0 - 0)           | 7<br>(3 - 13)           | 18<br>(10 - 33)         | 31<br>(18 - 48)         |
| Silicosis                                           | 9<br>(5 - 19)        | 0<br>(0 - 0)          | 0<br>(0 - 0)           | 1<br>(1 - 3)            | 3<br>(1 - 7)            | 5<br>(2 - 9)            |
| Asbestosis                                          | 5<br>(3 - 9)         | 0<br>(0 - 0)          | 0<br>(0 - 0)           | 1<br>(0 - 2)            | 2<br>(1 - 4)            | 2<br>(1 - 4)            |
| Coal workers pneumoconiosis                         | 5<br>(3 - 9)         | 0<br>(0 - 0)          | 0<br>(0 - 0)           | 1<br>(0 - 2)            | 2<br>(1 - 4)            | 2<br>(1 - 4)            |
| Other pneumoconiosis                                | 36<br>(21 - 59)      | 0<br>(0 - 0)          | 0<br>(0 - 0)           | 4<br>(2 - 7)            | 11<br>(6 - 19)          | 21<br>(12 - 36)         |
| Asthma                                              | 61<br>(36 - 103)     | 2<br>(1 - 4)          | 1<br>(1 - 2)           | 13<br>(6 - 24)          | 17<br>(9 - 31)          | 27<br>(16 - 47)         |
| Interstitial lung disease and pulmonary sarcoidosis | 42<br>(6 - 85)       | 0<br>(0 - 0)          | 0<br>(0 - 0)           | 5<br>(0 - 13)           | 14<br>(2 - 32)          | 23<br>(4 - 45)          |
| Other chronic respiratory diseases                  | 11<br>(7 - 18)       | 5<br>(3 - 8)          | 0<br>(0 - 1)           | 2<br>(1 - 3)            | 2<br>(1 - 3)            | 3<br>(1 - 4)            |
| Cirrhosis                                           | 137<br>(85 - 223)    | 2<br>(1 - 4)          | 3<br>(2 - 4)           | 55<br>(29 - 96)         | 47<br>(28 - 80)         | 31<br>(22 - 43)         |
| Cirrhosis due to hepatitis B                        | 39<br>(22 - 65)      | 0<br>(0 - 0)          | 0<br>(0 - 1)           | 15<br>(7 - 29)          | 14<br>(7 - 24)          | 9<br>(5 - 15)           |
| Cirrhosis due to hepatitis C                        | 26<br>(12 - 47)      | 0<br>(0 - 0)          | 0<br>(0 - 0)           | 9<br>(3 - 18)           | 10<br>(4 - 19)          | 7<br>(3 - 12)           |
| Cirrhosis due to alcohol use                        | 41<br>(22 - 70)      | --                    | --                     | 14<br>(5 - 27)          | 16<br>(8 - 28)          | 11<br>(7 - 17)          |
| Cirrhosis due to other causes                       | 32<br>(16 - 55)      | 2<br>(1 - 4)          | 2<br>(1 - 3)           | 17<br>(7 - 31)          | 7<br>(3 - 14)           | 3<br>(1 - 6)            |
| Digestive diseases                                  | 117<br>(61 - 209)    | 1<br>(0 - 2)          | 2<br>(1 - 3)           | 31<br>(14 - 59)         | 37<br>(18 - 71)         | 45<br>(25 - 82)         |
| Peptic ulcer disease                                | 26<br>(13 - 47)      | 0<br>(0 - 0)          | 0<br>(0 - 0)           | 5<br>(2 - 10)           | 9<br>(4 - 19)           | 12<br>(6 - 20)          |
| Gastritis and duodenitis                            | 7<br>(3 - 16)        | 0<br>(0 - 0)          | 0<br>(0 - 0)           | 2<br>(1 - 4)            | 2<br>(1 - 5)            | 3<br>(1 - 7)            |
| Appendicitis                                        | 5<br>(3 - 10)        | 0<br>(0 - 0)          | 0<br>(0 - 0)           | 2<br>(1 - 5)            | 1<br>(1 - 3)            | 1<br>(1 - 3)            |
| Paralytic ileus and intestinal obstruction          | 40<br>(19 - 76)      | 1<br>(0 - 1)          | 1<br>(1 - 2)           | 10<br>(4 - 20)          | 13<br>(6 - 26)          | 15<br>(6 - 34)          |
| Inguinal, femoral, and abdominal hernia             | 2<br>(1 - 4)         | 0<br>(0 - 0)          | 0<br>(0 - 0)           | 0<br>(0 - 1)            | 0<br>(0 - 1)            | 1<br>(0 - 2)            |
| Inflammatory bowel disease                          | 5<br>(2 - 8)         | 0<br>(0 - 0)          | 0<br>(0 - 0)           | 1<br>(1 - 3)            | 1<br>(1 - 2)            | 2<br>(1 - 3)            |
| Vascular intestinal disorders                       | 4<br>(1 - 8)         | 0<br>(0 - 0)          | 0<br>(0 - 0)           | 1<br>(0 - 1)            | 1<br>(0 - 2)            | 2<br>(1 - 4)            |
| Gallbladder and biliary diseases                    | 5<br>(2 - 10)        | 0<br>(0 - 0)          | 0<br>(0 - 0)           | 1<br>(0 - 2)            | 2<br>(1 - 3)            | 2<br>(1 - 5)            |
| Pancreatitis                                        | 18<br>(9 - 36)       | 0<br>(0 - 0)          | 0<br>(0 - 0)           | 7<br>(3 - 15)           | 6<br>(3 - 12)           | 5<br>(2 - 10)           |
| Other digestive diseases                            | 5<br>(2 - 9)         | 0<br>(0 - 0)          | 0<br>(0 - 0)           | 1<br>(0 - 3)            | 2<br>(1 - 3)            | 2<br>(1 - 3)            |
| Neurological disorders                              | 101<br>(73 - 137)    | 2<br>(1 - 4)          | 2<br>(1 - 3)           | 9<br>(5 - 16)           | 9<br>(5 - 15)           | 79<br>(59 - 102)        |
| Alzheimer disease and other dementias               | 81<br>(60 - 106)     | --                    | --                     | 0<br>(0 - 0)            | 6<br>(3 - 9)            | 75<br>(56 - 98)         |
| Parkinson disease                                   | 0<br>(0 - 0)         | --                    | --                     | 0<br>(0 - 0)            | 0<br>(0 - 0)            | 0<br>(0 - 0)            |
| Epilepsy                                            | 12<br>(7 - 20)       | 1<br>(1 - 3)          | 1<br>(1 - 2)           | 7<br>(3 - 12)           | 1<br>(1 - 2)            | 2<br>(1 - 2)            |
| Multiple sclerosis                                  | 1<br>(1 - 3)         | --                    | --                     | 1<br>(0 - 1)            | 0<br>(0 - 1)            | 0<br>(0 - 1)            |
| Other neurological disorders                        | 6<br>(4 - 9)         | 1<br>(1 - 1)          | 0<br>(0 - 0)           | 2<br>(1 - 3)            | 2<br>(1 - 3)            | 1<br>(1 - 2)            |
| Mental and substance use disorders                  | 6<br>(3 - 10)        | 0<br>(0 - 0)          | 0<br>(0 - 0)           | 3<br>(1 - 5)            | 2<br>(1 - 4)            | 1<br>(1 - 1)            |
| Schizophrenia                                       | 1<br>(0 - 2)         | --                    | --                     | 0<br>(0 - 1)            | 0<br>(0 - 1)            | 0<br>(0 - 0)            |
| Alcohol use disorders                               | 1<br>(1 - 2)         | --                    | --                     | 1<br>(0 - 1)            | 0<br>(0 - 1)            | 0<br>(0 - 0)            |
| Drug use disorders                                  | 4<br>(2 - 7)         | 0<br>(0 - 0)          | --                     | 2<br>(1 - 3)            | 2<br>(1 - 3)            | 0<br>(0 - 1)            |
| Opioid use disorders                                | 2<br>(1 - 4)         | 0<br>(0 - 0)          | --                     | 1<br>(0 - 2)            | 1<br>(0 - 1)            | 0<br>(0 - 0)            |
| Cocaine use disorders                               | 0<br>(0 - 0)         | 0<br>(0 - 0)          | --                     | 0<br>(0 - 0)            | 0<br>(0 - 0)            | 0<br>(0 - 0)            |
| Amphetamine use disorders                           | 0<br>(0 - 0)         | 0<br>(0 - 0)          | --                     | 0<br>(0 - 0)            | 0<br>(0 - 0)            | 0<br>(0 - 0)            |
| Other drug use disorders                            | 2<br>(1 - 3)         | 0<br>(0 - 0)          | --                     | 1<br>(0 - 1)            | 1<br>(0 - 1)            | 0<br>(0 - 0)            |
| Eating disorders                                    | 0<br>(0 - 0)         | --                    | --                     | 0<br>(0 - 0)            | --                      | --                      |

Web Table 31- Bhutan deaths with 95% UI by age, sex, and cause in 2013

| Cause                                               | Both Sexes, All Ages | Both Sexes, 0-4 Years | Both Sexes, 5-14 Years | Both Sexes, 15-49 Years | Both Sexes, 50-69 Years | Both Sexes, 70-80 Years |
|-----------------------------------------------------|----------------------|-----------------------|------------------------|-------------------------|-------------------------|-------------------------|
| Anorexia nervosa                                    | 0<br>(0 - 0)         | --                    | 0<br>(0 - 0)           | 0<br>(0 - 0)            | --                      | --                      |
| Diabetes, urogenital, blood, and endocrine diseases | 336<br>(221 - 506)   | 9<br>(6 - 13)         | 3<br>(2 - 5)           | 65<br>(33 - 115)        | 100<br>(60 - 170)       | 158<br>(114 - 211)      |
| Diabetes mellitus                                   | 180<br>(115 - 272)   | 1<br>(0 - 1)          | 0<br>(0 - 1)           | 23<br>(12 - 40)         | 57<br>(33 - 98)         | 98<br>(67 - 139)        |
| Acute glomerulonephritis                            | 2<br>(1 - 4)         | 1<br>(0 - 1)          | 0<br>(0 - 0)           | 1<br>(0 - 1)            | 0<br>(0 - 1)            | 0<br>(0 - 1)            |
| Chronic kidney disease                              | 98<br>(54 - 155)     | 1<br>(1 - 2)          | 1<br>(0 - 1)           | 26<br>(12 - 48)         | 30<br>(16 - 52)         | 39<br>(24 - 57)         |
| Chronic kidney disease due to diabetes mellitus     | 8<br>(3 - 14)        | 0<br>(0 - 0)          | 0<br>(0 - 0)           | 2<br>(1 - 4)            | 3<br>(1 - 6)            | 3<br>(1 - 5)            |
| Chronic kidney disease due to hypertension          | 28<br>(15 - 45)      | 0<br>(0 - 0)          | 0<br>(0 - 0)           | 5<br>(2 - 9)            | 9<br>(4 - 15)           | 14<br>(9 - 22)          |
| Chronic kidney disease due to glomerulonephritis    | 13<br>(8 - 23)       | 0<br>(0 - 1)          | 0<br>(0 - 0)           | 5<br>(2 - 9)            | 4<br>(2 - 7)            | 4<br>(2 - 7)            |
| Chronic kidney disease due to other causes          | 48<br>(21 - 82)      | 0<br>(0 - 1)          | 0<br>(0 - 0)           | 14<br>(5 - 28)          | 15<br>(6 - 28)          | 18<br>(9 - 29)          |
| Urinary diseases and male infertility               | 24<br>(15 - 38)      | 1<br>(0 - 1)          | 0<br>(0 - 1)           | 5<br>(3 - 10)           | 6<br>(4 - 11)           | 11<br>(7 - 17)          |
| Interstitial nephritis and urinary tract infections | 16<br>(10 - 27)      | 1<br>(0 - 1)          | 0<br>(0 - 0)           | 4<br>(2 - 6)            | 4<br>(2 - 8)            | 7<br>(4 - 13)           |
| Urolithiasis                                        | 2<br>(1 - 3)         | --                    | 0<br>(0 - 0)           | 0<br>(0 - 1)            | 1<br>(0 - 1)            | 1<br>(0 - 1)            |
| Other urinary diseases                              | 6<br>(3 - 11)        | 0<br>(0 - 0)          | 0<br>(0 - 0)           | 1<br>(1 - 3)            | 2<br>(1 - 3)            | 3<br>(2 - 5)            |
| Gynecological diseases                              | 0<br>(0 - 1)         | --                    | --                     | 0<br>(0 - 0)            | 0<br>(0 - 0)            | 0<br>(0 - 0)            |
| Uterine fibroids                                    | 0<br>(0 - 0)         | --                    | --                     | 0<br>(0 - 0)            | 0<br>(0 - 0)            | 0<br>(0 - 0)            |
| Polycystic ovarian syndrome                         | 0<br>(0 - 0)         | --                    | --                     | 0<br>(0 - 0)            | 0<br>(0 - 0)            | --                      |
| Endometriosis                                       | 0<br>(0 - 0)         | --                    | --                     | 0<br>(0 - 0)            | 0<br>(0 - 0)            | --                      |
| Genital prolapse                                    | 0<br>(0 - 0)         | --                    | --                     | 0<br>(0 - 0)            | 0<br>(0 - 0)            | 0<br>(0 - 0)            |
| Other gynecological diseases                        | 0<br>(0 - 0)         | --                    | --                     | 0<br>(0 - 0)            | 0<br>(0 - 0)            | 0<br>(0 - 0)            |
| Hemoglobinopathies and hemolytic anemias            | 10<br>(6 - 17)       | 3<br>(2 - 5)          | 1<br>(1 - 2)           | 3<br>(2 - 6)            | 1<br>(1 - 2)            | 2<br>(1 - 3)            |
| Thalassemias                                        | 5<br>(3 - 9)         | 2<br>(1 - 4)          | 1<br>(0 - 1)           | 2<br>(1 - 4)            | 0<br>(0 - 0)            | 0<br>(0 - 0)            |
| Sickle cell disorders                               | 1<br>(1 - 2)         | 0<br>(0 - 0)          | 0<br>(0 - 0)           | 1<br>(0 - 1)            | 0<br>(0 - 0)            | 0<br>(0 - 0)            |
| G6PD deficiency                                     | 0<br>(0 - 1)         | 0<br>(0 - 0)          | 0<br>(0 - 0)           | 0<br>(0 - 0)            | 0<br>(0 - 0)            | 0<br>(0 - 0)            |
| Other hemoglobinopathies and hemolytic anemias      | 4<br>(2 - 6)         | 0<br>(0 - 1)          | 0<br>(0 - 0)           | 1<br>(0 - 2)            | 1<br>(0 - 1)            | 2<br>(1 - 3)            |
| Endocrine, metabolic, blood, and immune disorders   | 21<br>(14 - 33)      | 3<br>(2 - 5)          | 1<br>(0 - 1)           | 5<br>(3 - 10)           | 5<br>(3 - 9)            | 7<br>(4 - 11)           |
| Musculoskeletal disorders                           | 11<br>(6 - 18)       | --                    | 1<br>(0 - 1)           | 3<br>(1 - 6)            | 4<br>(2 - 7)            | 3<br>(2 - 5)            |
| Rheumatoid arthritis                                | 4<br>(2 - 6)         | --                    | 0<br>(0 - 0)           | 0<br>(0 - 1)            | 1<br>(1 - 3)            | 2<br>(1 - 3)            |
| Other musculoskeletal disorders                     | 8<br>(4 - 13)        | --                    | 0<br>(0 - 1)           | 3<br>(1 - 5)            | 3<br>(1 - 5)            | 1<br>(1 - 2)            |
| Other non-communicable diseases                     | 82<br>(54 - 121)     | 57<br>(34 - 91)       | 4<br>(2 - 7)           | 8<br>(4 - 14)           | 5<br>(3 - 8)            | 8<br>(5 - 12)           |
| Congenital anomalies                                | 69<br>(41 - 104)     | 54<br>(31 - 87)       | 4<br>(2 - 6)           | 6<br>(3 - 10)           | 2<br>(1 - 3)            | 3<br>(1 - 4)            |
| Neural tube defects                                 | 2<br>(1 - 5)         | 2<br>(1 - 5)          | 0<br>(0 - 0)           | 0<br>(0 - 0)            | 0<br>(0 - 0)            | 0<br>(0 - 0)            |
| Congenital heart anomalies                          | 38<br>(18 - 61)      | 30<br>(12 - 51)       | 2<br>(1 - 4)           | 2<br>(1 - 4)            | 1<br>(1 - 2)            | 2<br>(1 - 3)            |
| Cleft lip and cleft palate                          | 0<br>(0 - 1)         | 0<br>(0 - 1)          | --                     | --                      | --                      | --                      |
| Down syndrome                                       | 4<br>(2 - 7)         | 2<br>(1 - 5)          | 0<br>(0 - 1)           | 1<br>(0 - 2)            | 0<br>(0 - 0)            | 0<br>(0 - 0)            |
| Chromosomal unbalanced rearrangements               | 2<br>(1 - 5)         | 2<br>(1 - 4)          | 0<br>(0 - 0)           | 0<br>(0 - 0)            | 0<br>(0 - 0)            | 0<br>(0 - 0)            |
| Other congenital anomalies                          | 22<br>(13 - 37)      | 17<br>(9 - 32)        | 1<br>(1 - 2)           | 2<br>(1 - 4)            | 1<br>(0 - 1)            | 1<br>(0 - 1)            |
| Skin and subcutaneous diseases                      | 11<br>(7 - 17)       | 1<br>(0 - 1)          | 0<br>(0 - 0)           | 2<br>(1 - 4)            | 3<br>(1 - 4)            | 5<br>(3 - 9)            |
| Cellulitis                                          | 3<br>(1 - 5)         | 0<br>(0 - 1)          | 0<br>(0 - 0)           | 1<br>(0 - 1)            | 1<br>(0 - 1)            | 1<br>(0 - 2)            |
| Pyoderma                                            | 6<br>(3 - 13)        | 0<br>(0 - 1)          | 0<br>(0 - 0)           | 1<br>(0 - 2)            | 1<br>(1 - 3)            | 3<br>(1 - 7)            |
| Decubitus ulcer                                     | 2<br>(1 - 4)         | 0<br>(0 - 0)          | 0<br>(0 - 0)           | 0<br>(0 - 1)            | 0<br>(0 - 1)            | 1<br>(0 - 3)            |



Web Table 31- Bhutan deaths with 95% UI by age, sex, and cause in 2013

| Cause                                           | Both Sexes, All Ages | Both Sexes, 0-4 Years | Both Sexes, 5-14 Years | Both Sexes, 15-49 Years | Both Sexes, 50-69 Years | Both Sexes, 70-80 Years |
|-------------------------------------------------|----------------------|-----------------------|------------------------|-------------------------|-------------------------|-------------------------|
| Other skin and subcutaneous diseases            | 0<br>(0 - 1)         | 0<br>(0 - 0)          | 0<br>(0 - 0)           | 0<br>(0 - 0)            | 0<br>(0 - 0)            | 0<br>(0 - 0)            |
| Sudden infant death syndrome                    | 3<br>(1 - 7)         | 3<br>(1 - 7)          | --                     | --                      | --                      | --                      |
| Injuries                                        | 565<br>(353 - 875)   | 61<br>(40 - 86)       | 32<br>(24 - 43)        | 274<br>(146 - 463)      | 97<br>(56 - 163)        | 100<br>(70 - 136)       |
| Transport injuries                              | 131<br>(77 - 211)    | 5<br>(3 - 8)          | 9<br>(6 - 13)          | 84<br>(45 - 144)        | 20<br>(11 - 34)         | 12<br>(8 - 17)          |
| Road injuries                                   | 117<br>(69 - 186)    | 4<br>(3 - 7)          | 9<br>(6 - 12)          | 76<br>(42 - 129)        | 17<br>(10 - 30)         | 11<br>(7 - 15)          |
| Pedestrian road injuries                        | 50<br>(28 - 85)      | 3<br>(1 - 4)          | 6<br>(3 - 8)           | 26<br>(12 - 50)         | 9<br>(5 - 16)           | 6<br>(4 - 10)           |
| Cyclist road injuries                           | 8<br>(4 - 14)        | 0<br>(0 - 0)          | 1<br>(0 - 1)           | 5<br>(2 - 9)            | 1<br>(1 - 2)            | 1<br>(0 - 1)            |
| Motorcyclist road injuries                      | 17<br>(8 - 31)       | 0<br>(0 - 0)          | 0<br>(0 - 1)           | 14<br>(7 - 27)          | 1<br>(1 - 3)            | 1<br>(0 - 1)            |
| Motor vehicle road injuries                     | 42<br>(22 - 71)      | 1<br>(1 - 2)          | 2<br>(1 - 3)           | 31<br>(16 - 54)         | 5<br>(3 - 10)           | 3<br>(1 - 4)            |
| Other road injuries                             | 1<br>(0 - 2)         | 0<br>(0 - 0)          | 0<br>(0 - 0)           | 0<br>(0 - 1)            | 0<br>(0 - 0)            | 0<br>(0 - 0)            |
| Other transport injuries                        | 14<br>(8 - 25)       | 1<br>(1 - 2)          | 1<br>(0 - 1)           | 8<br>(4 - 16)           | 3<br>(1 - 5)            | 2<br>(1 - 3)            |
| Unintentional injuries                          | 340<br>(215 - 515)   | 55<br>(36 - 79)       | 22<br>(16 - 29)        | 125<br>(64 - 216)       | 58<br>(33 - 96)         | 80<br>(53 - 110)        |
| Falls                                           | 61<br>(36 - 97)      | 4<br>(2 - 8)          | 2<br>(1 - 3)           | 13<br>(6 - 27)          | 12<br>(6 - 20)          | 30<br>(16 - 45)         |
| Drowning                                        | 35<br>(20 - 58)      | 8<br>(4 - 16)         | 5<br>(3 - 8)           | 16<br>(8 - 29)          | 4<br>(2 - 7)            | 2<br>(1 - 3)            |
| Fire, heat, and hot substances                  | 55<br>(34 - 84)      | 11<br>(6 - 19)        | 4<br>(3 - 6)           | 21<br>(11 - 37)         | 9<br>(5 - 14)           | 10<br>(7 - 15)          |
| Poisonings                                      | 60<br>(4 - 110)      | 5<br>(0 - 11)         | 2<br>(0 - 4)           | 34<br>(2 - 67)          | 12<br>(1 - 22)          | 7<br>(0 - 14)           |
| Exposure to mechanical forces                   | 15<br>(9 - 28)       | 3<br>(2 - 6)          | 1<br>(1 - 3)           | 7<br>(3 - 14)           | 3<br>(1 - 6)            | 2<br>(1 - 3)            |
| Unintentional firearm injuries                  | 3<br>(1 - 5)         | 0<br>(0 - 1)          | 0<br>(0 - 0)           | 1<br>(1 - 3)            | 0<br>(0 - 1)            | 0<br>(0 - 1)            |
| Unintentional suffocation                       | 1<br>(0 - 2)         | 0<br>(0 - 1)          | 0<br>(0 - 0)           | 0<br>(0 - 0)            | 0<br>(0 - 0)            | 0<br>(0 - 0)            |
| Other exposure to mechanical forces             | 12<br>(7 - 23)       | 2<br>(1 - 5)          | 1<br>(0 - 2)           | 5<br>(2 - 11)           | 2<br>(1 - 5)            | 1<br>(1 - 2)            |
| Adverse effects of medical treatment            | 27<br>(17 - 45)      | 3<br>(1 - 5)          | 1<br>(0 - 1)           | 7<br>(4 - 13)           | 7<br>(4 - 12)           | 10<br>(6 - 17)          |
| Animal contact                                  | 36<br>(22 - 64)      | 10<br>(5 - 21)        | 5<br>(3 - 8)           | 11<br>(5 - 21)          | 6<br>(3 - 12)           | 4<br>(2 - 7)            |
| Venomous animal contact                         | 28<br>(16 - 52)      | 7<br>(3 - 16)         | 4<br>(3 - 8)           | 10<br>(5 - 19)          | 5<br>(2 - 10)           | 2<br>(1 - 5)            |
| Non-venomous animal contact                     | 9<br>(2 - 16)        | 4<br>(1 - 7)          | 1<br>(0 - 1)           | 2<br>(0 - 3)            | 1<br>(0 - 3)            | 2<br>(0 - 3)            |
| Foreign body                                    | 15<br>(8 - 25)       | 8<br>(4 - 14)         | 0<br>(0 - 0)           | 1<br>(1 - 3)            | 1<br>(0 - 1)            | 4<br>(2 - 7)            |
| Pulmonary aspiration and foreign body in airway | 15<br>(8 - 24)       | 8<br>(4 - 14)         | 0<br>(0 - 0)           | 1<br>(0 - 3)            | 1<br>(0 - 1)            | 4<br>(2 - 7)            |
| Foreign body in other body part                 | 0<br>(0 - 1)         | 0<br>(0 - 0)          | 0<br>(0 - 0)           | 0<br>(0 - 0)            | 0<br>(0 - 0)            | 0<br>(0 - 0)            |
| Other unintentional injuries                    | 35<br>(17 - 66)      | 2<br>(1 - 4)          | 2<br>(1 - 3)           | 15<br>(6 - 32)          | 7<br>(3 - 13)           | 9<br>(5 - 17)           |
| Self-harm and interpersonal violence            | 94<br>(52 - 158)     | 0<br>(0 - 1)          | 1<br>(1 - 2)           | 65<br>(34 - 114)        | 19<br>(10 - 33)         | 8<br>(5 - 13)           |
| Self-harm                                       | 81<br>(44 - 137)     | --                    | 1<br>(0 - 2)           | 54<br>(28 - 96)         | 18<br>(10 - 32)         | 8<br>(5 - 13)           |
| Interpersonal violence                          | 13<br>(7 - 24)       | 0<br>(0 - 1)          | 0<br>(0 - 1)           | 11<br>(5 - 21)          | 1<br>(0 - 2)            | 0<br>(0 - 0)            |
| Assault by firearm                              | 4<br>(2 - 10)        | 0<br>(0 - 0)          | 0<br>(0 - 0)           | 4<br>(2 - 9)            | 0<br>(0 - 1)            | 0<br>(0 - 0)            |
| Assault by sharp object                         | 5<br>(2 - 9)         | 0<br>(0 - 0)          | 0<br>(0 - 0)           | 4<br>(2 - 8)            | 0<br>(0 - 1)            | 0<br>(0 - 0)            |
| Assault by other means                          | 4<br>(2 - 8)         | 0<br>(0 - 1)          | 0<br>(0 - 0)           | 3<br>(1 - 7)            | 0<br>(0 - 0)            | 0<br>(0 - 0)            |

Web Table 31- Bhutan deaths with 95% UI by age, sex, and cause in 2013

| Cause                                                             | Males, All Ages          | Males, 0-4 Years   | Males, 5-14 Years | Males, 15-49 Years   | Males, 50-69 Years   | Males, 70-80 Years     |
|-------------------------------------------------------------------|--------------------------|--------------------|-------------------|----------------------|----------------------|------------------------|
| All causes                                                        | 2,788<br>(1,919 - 4,055) | 363<br>(302 - 446) | 52<br>(42 - 66)   | 629<br>(354 - 1,067) | 719<br>(430 - 1,171) | 1,024<br>(781 - 1,323) |
| Communicable, maternal, neonatal, and nutritional diseases        | 553<br>(411 - 737)       | 286<br>(237 - 345) | 18<br>(12 - 25)   | 95<br>(51 - 170)     | 63<br>(35 - 101)     | 92<br>(62 - 125)       |
| HIV/AIDS and tuberculosis                                         | 88<br>(44 - 170)         | 2<br>(1 - 6)       | 1<br>(0 - 3)      | 40<br>(18 - 92)      | 26<br>(12 - 47)      | 19<br>(9 - 30)         |
| Tuberculosis                                                      | 68<br>(31 - 109)         | 1<br>(1 - 3)       | 1<br>(0 - 1)      | 25<br>(11 - 45)      | 23<br>(10 - 39)      | 18<br>(9 - 29)         |
| HIV/AIDS                                                          | 20<br>(3 - 94)           | 1<br>(0 - 5)       | 0<br>(0 - 2)      | 15<br>(2 - 69)       | 3<br>(0 - 16)        | 1<br>(0 - 3)           |
| HIV/AIDS resulting in mycobacterial infection                     | 1<br>(0 - 7)             | 0<br>(0 - 0)       | 0<br>(0 - 0)      | 1<br>(0 - 5)         | 0<br>(0 - 1)         | 0<br>(0 - 0)           |
| HIV/AIDS resulting in other diseases                              | 19<br>(2 - 88)           | 1<br>(0 - 4)       | 0<br>(0 - 2)      | 14<br>(2 - 65)       | 3<br>(0 - 15)        | 1<br>(0 - 3)           |
| Diarrhea, lower respiratory, and other common infectious diseases | 212<br>(142 - 300)       | 84<br>(54 - 125)   | 13<br>(8 - 20)    | 34<br>(18 - 64)      | 25<br>(14 - 42)      | 55<br>(36 - 81)        |
| Diarrheal diseases                                                | 45<br>(27 - 74)          | 15<br>(4 - 35)     | 2<br>(1 - 3)      | 5<br>(3 - 10)        | 7<br>(3 - 13)        | 16<br>(9 - 29)         |
| Intestinal infectious diseases                                    | 34<br>(14 - 64)          | 8<br>(3 - 16)      | 8<br>(3 - 14)     | 15<br>(5 - 36)       | 2<br>(1 - 4)         | 1<br>(0 - 2)           |
| Typhoid fever                                                     | 26<br>(11 - 51)          | 6<br>(2 - 13)      | 6<br>(2 - 11)     | 12<br>(4 - 28)       | 1<br>(0 - 3)         | 1<br>(0 - 1)           |
| Paratyphoid fever                                                 | 8<br>(3 - 15)            | 2<br>(1 - 5)       | 2<br>(1 - 3)      | 3<br>(1 - 8)         | 0<br>(0 - 1)         | 0<br>(0 - 0)           |
| Other intestinal infectious diseases                              | 0<br>(0 - 2)             | 0<br>(0 - 1)       | 0<br>(0 - 0)      | 0<br>(0 - 1)         | 0<br>(0 - 0)         | 0<br>(0 - 0)           |
| Lower respiratory infections                                      | 113<br>(71 - 168)        | 51<br>(27 - 84)    | 2<br>(1 - 3)      | 9<br>(4 - 17)        | 15<br>(7 - 25)       | 36<br>(21 - 57)        |
| Upper respiratory infections                                      | 0<br>(0 - 0)             | 0<br>(0 - 0)       | 0<br>(0 - 0)      | 0<br>(0 - 0)         | 0<br>(0 - 0)         | 0<br>(0 - 0)           |
| Otitis media                                                      | 0<br>(0 - 0)             | 0<br>(0 - 0)       | 0<br>(0 - 0)      | 0<br>(0 - 0)         | 0<br>(0 - 0)         | 0<br>(0 - 0)           |
| Meningitis                                                        | 9<br>(6 - 14)            | 4<br>(2 - 7)       | 1<br>(0 - 1)      | 3<br>(1 - 4)         | 1<br>(0 - 2)         | 1<br>(1 - 2)           |
| Pneumococcal meningitis                                           | 3<br>(2 - 4)             | 1<br>(0 - 2)       | 0<br>(0 - 0)      | 1<br>(0 - 2)         | 0<br>(0 - 1)         | 0<br>(0 - 1)           |
| H influenzae type B meningitis                                    | 2<br>(1 - 4)             | 2<br>(1 - 3)       | 0<br>(0 - 0)      | 0<br>(0 - 1)         | 0<br>(0 - 0)         | 0<br>(0 - 0)           |
| Meningococcal meningitis                                          | 1<br>(1 - 2)             | 0<br>(0 - 1)       | 0<br>(0 - 0)      | 0<br>(0 - 1)         | 0<br>(0 - 0)         | 0<br>(0 - 0)           |
| Other meningitis                                                  | 3<br>(2 - 5)             | 1<br>(0 - 2)       | 0<br>(0 - 0)      | 1<br>(0 - 2)         | 0<br>(0 - 1)         | 1<br>(0 - 1)           |
| Encephalitis                                                      | 5<br>(3 - 9)             | 2<br>(0 - 4)       | 1<br>(0 - 1)      | 2<br>(1 - 4)         | 0<br>(0 - 1)         | 0<br>(0 - 1)           |
| Diphtheria                                                        | 0<br>(0 - 0)             | 0<br>(0 - 0)       | 0<br>(0 - 0)      | 0<br>(0 - 0)         | 0<br>(0 - 0)         | --                     |
| Whooping cough                                                    | 0<br>(0 - 0)             | 0<br>(0 - 0)       | 0<br>(0 - 0)      | 0<br>(0 - 0)         | 0<br>(0 - 0)         | --                     |
| Tetanus                                                           | 1<br>(0 - 2)             | 1<br>(0 - 2)       | 0<br>(0 - 0)      | 0<br>(0 - 0)         | 0<br>(0 - 0)         | 0<br>(0 - 0)           |
| Measles                                                           | 4<br>(0 - 22)            | 3<br>(0 - 19)      | 0<br>(0 - 2)      | 0<br>(0 - 1)         | 0<br>(0 - 0)         | --                     |
| Varicella and herpes zoster                                       | 0<br>(0 - 1)             | 0<br>(0 - 0)       | 0<br>(0 - 0)      | 0<br>(0 - 0)         | 0<br>(0 - 0)         | 0<br>(0 - 1)           |
| Neglected tropical diseases and malaria                           | 9<br>(4 - 17)            | 1<br>(1 - 5)       | 1<br>(0 - 2)      | 4<br>(2 - 8)         | 2<br>(1 - 3)         | 1<br>(1 - 3)           |
| Malaria                                                           | 5<br>(2 - 12)            | 0<br>(0 - 2)       | 0<br>(0 - 1)      | 3<br>(1 - 7)         | 1<br>(0 - 3)         | 1<br>(0 - 2)           |
| Leishmaniasis                                                     | 1<br>(0 - 1)             | 0<br>(0 - 0)       | 0<br>(0 - 0)      | 0<br>(0 - 0)         | 0<br>(0 - 0)         | 0<br>(0 - 0)           |
| Visceral leishmaniasis                                            | 1<br>(0 - 1)             | 0<br>(0 - 0)       | 0<br>(0 - 0)      | 0<br>(0 - 0)         | 0<br>(0 - 0)         | 0<br>(0 - 0)           |
| Cysticercosis                                                     | 0<br>(0 - 0)             | 0<br>(0 - 0)       | 0<br>(0 - 0)      | 0<br>(0 - 0)         | 0<br>(0 - 0)         | 0<br>(0 - 0)           |
| Cystic echinococcosis                                             | 0<br>(0 - 0)             | 0<br>(0 - 0)       | 0<br>(0 - 0)      | 0<br>(0 - 0)         | 0<br>(0 - 0)         | 0<br>(0 - 0)           |
| Dengue                                                            | 0<br>(0 - 0)             | 0<br>(0 - 0)       | 0<br>(0 - 0)      | 0<br>(0 - 0)         | 0<br>(0 - 0)         | 0<br>(0 - 0)           |
| Rabies                                                            | 2<br>(1 - 6)             | 0<br>(0 - 1)       | 1<br>(0 - 1)      | 1<br>(0 - 3)         | 0<br>(0 - 1)         | 0<br>(0 - 0)           |
| Intestinal nematode infections                                    | 0<br>(0 - 4)             | 0<br>(0 - 3)       | 0<br>(0 - 1)      | 0<br>(0 - 1)         | 0<br>(0 - 0)         | 0<br>(0 - 0)           |
| Ascariasis                                                        | 0<br>(0 - 4)             | 0<br>(0 - 3)       | 0<br>(0 - 1)      | 0<br>(0 - 1)         | 0<br>(0 - 0)         | 0<br>(0 - 0)           |
| Other neglected tropical diseases                                 | 1<br>(0 - 1)             | 0<br>(0 - 1)       | 0<br>(0 - 0)      | 0<br>(0 - 0)         | 0<br>(0 - 0)         | 0<br>(0 - 0)           |
| Maternal disorders                                                | --                       | --                 | --                | --                   | --                   | --                     |
| Maternal hemorrhage                                               | --                       | --                 | --                | --                   | --                   | --                     |

Web Table 31- Bhutan deaths with 95% UI by age, sex, and cause in 2013

| Cause                                                            | Males, All Ages          | Males, 0-4 Years   | Males, 5-14 Years | Males, 15-49 Years | Males, 50-69 Years | Males, 70-80 Years   |
|------------------------------------------------------------------|--------------------------|--------------------|-------------------|--------------------|--------------------|----------------------|
| Maternal sepsis and other maternal infections                    | --                       | --                 | --                | --                 | --                 | --                   |
| Maternal hypertensive disorders                                  | --                       | --                 | --                | --                 | --                 | --                   |
| Maternal obstructed labor                                        | --                       | --                 | --                | --                 | --                 | --                   |
| Maternal abortive outcome                                        | --                       | --                 | --                | --                 | --                 | --                   |
| Indirect maternal deaths                                         | --                       | --                 | --                | --                 | --                 | --                   |
| Late maternal deaths                                             | --                       | --                 | --                | --                 | --                 | --                   |
| Maternal deaths aggravated by HIV/AIDS                           | --                       | --                 | --                | --                 | --                 | --                   |
| Other maternal disorders                                         | --                       | --                 | --                | --                 | --                 | --                   |
| Neonatal disorders                                               | 182<br>(146 - 220)       | 182<br>(146 - 220) | --                | --                 | --                 | --                   |
| Neonatal preterm birth complications                             | 52<br>(19 - 93)          | 52<br>(19 - 93)    | --                | --                 | --                 | --                   |
| Neonatal encephalopathy due to birth asphyxia and trauma         | 75<br>(36 - 119)         | 75<br>(36 - 119)   | --                | --                 | --                 | --                   |
| Neonatal sepsis and other neonatal infections                    | 37<br>(14 - 80)          | 37<br>(14 - 80)    | --                | --                 | --                 | --                   |
| Hemolytic disease and other neonatal jaundice                    | 2<br>(0 - 4)             | 2<br>(0 - 4)       | --                | --                 | --                 | --                   |
| Other neonatal disorders                                         | 16<br>(2 - 44)           | 16<br>(2 - 44)     | --                | --                 | --                 | --                   |
| Nutritional deficiencies                                         | 27<br>(14 - 45)          | 7<br>(3 - 13)      | 1<br>(0 - 1)      | 4<br>(2 - 8)       | 4<br>(2 - 8)       | 12<br>(5 - 20)       |
| Protein-energy malnutrition                                      | 22<br>(10 - 40)          | 6<br>(2 - 11)      | 1<br>(0 - 1)      | 3<br>(1 - 6)       | 3<br>(1 - 7)       | 10<br>(4 - 19)       |
| Iodine deficiency                                                | 0<br>(0 - 0)             | 0<br>(0 - 0)       | 0<br>(0 - 0)      | 0<br>(0 - 0)       | 0<br>(0 - 0)       | 0<br>(0 - 0)         |
| Iron-deficiency anemia                                           | 3<br>(1 - 9)             | 1<br>(0 - 3)       | 0<br>(0 - 0)      | 1<br>(0 - 2)       | 0<br>(0 - 2)       | 1<br>(0 - 4)         |
| Other nutritional deficiencies                                   | 1<br>(0 - 3)             | 0<br>(0 - 0)       | 0<br>(0 - 0)      | 0<br>(0 - 0)       | 0<br>(0 - 0)       | 1<br>(0 - 2)         |
| Other communicable, maternal, neonatal, and nutritional diseases | 35<br>(21 - 54)          | 10<br>(4 - 18)     | 2<br>(1 - 3)      | 12<br>(6 - 22)     | 6<br>(3 - 10)      | 5<br>(2 - 9)         |
| Sexually transmitted diseases excluding HIV                      | 6<br>(1 - 13)            | 5<br>(0 - 11)      | 0<br>(0 - 1)      | 0<br>(0 - 1)       | 0<br>(0 - 0)       | 0<br>(0 - 1)         |
| Syphilis                                                         | 5<br>(1 - 13)            | 5<br>(0 - 11)      | 0<br>(0 - 1)      | 0<br>(0 - 0)       | 0<br>(0 - 0)       | 0<br>(0 - 0)         |
| Chlamydial infection                                             | --                       | --                 | --                | --                 | --                 | --                   |
| Gonococcal infection                                             | 0<br>(0 - 0)             | --                 | 0<br>(0 - 0)      | 0<br>(0 - 0)       | 0<br>(0 - 0)       | 0<br>(0 - 0)         |
| Other sexually transmitted diseases                              | 0<br>(0 - 0)             | --                 | 0<br>(0 - 0)      | 0<br>(0 - 0)       | 0<br>(0 - 0)       | 0<br>(0 - 0)         |
| Hepatitis                                                        | 21<br>(12 - 35)          | 2<br>(1 - 5)       | 1<br>(1 - 2)      | 10<br>(5 - 19)     | 4<br>(2 - 7)       | 3<br>(1 - 4)         |
| Acute hepatitis A                                                | 4<br>(1 - 9)             | 1<br>(0 - 3)       | 0<br>(0 - 1)      | 2<br>(1 - 5)       | 0<br>(0 - 1)       | 0<br>(0 - 0)         |
| Acute hepatitis B                                                | 13<br>(7 - 22)           | 1<br>(0 - 3)       | 0<br>(0 - 1)      | 5<br>(2 - 10)      | 4<br>(2 - 6)       | 2<br>(1 - 4)         |
| Acute hepatitis C                                                | 0<br>(0 - 1)             | --                 | 0<br>(0 - 0)      | 0<br>(0 - 1)       | 0<br>(0 - 0)       | 0<br>(0 - 0)         |
| Acute hepatitis E                                                | 3<br>(1 - 7)             | 0<br>(0 - 0)       | 0<br>(0 - 0)      | 3<br>(1 - 6)       | 0<br>(0 - 1)       | 0<br>(0 - 0)         |
| Other infectious diseases                                        | 8<br>(1 - 17)            | 2<br>(0 - 7)       | 0<br>(0 - 1)      | 2<br>(0 - 4)       | 2<br>(0 - 4)       | 2<br>(0 - 5)         |
| Non-communicable diseases                                        | 1,822<br>(1,234 - 2,688) | 44<br>(28 - 66)    | 14<br>(10 - 19)   | 311<br>(168 - 553) | 583<br>(353 - 947) | 871<br>(674 - 1,125) |
| Neoplasms                                                        | 220<br>(142 - 347)       | 3<br>(1 - 4)       | 3<br>(2 - 5)      | 49<br>(27 - 87)    | 96<br>(58 - 158)   | 70<br>(51 - 95)      |
| Esophageal cancer                                                | 24<br>(14 - 41)          | --                 | --                | 4<br>(2 - 7)       | 12<br>(6 - 22)     | 9<br>(5 - 14)        |
| Stomach cancer                                                   | 18<br>(11 - 28)          | --                 | --                | 3<br>(2 - 6)       | 9<br>(5 - 14)      | 6<br>(4 - 9)         |
| Liver cancer                                                     | 19<br>(11 - 29)          | --                 | 0<br>(0 - 0)      | 3<br>(2 - 6)       | 9<br>(5 - 15)      | 6<br>(4 - 9)         |
| Liver cancer due to hepatitis B                                  | 7<br>(3 - 13)            | --                 | 0<br>(0 - 0)      | 2<br>(1 - 4)       | 4<br>(1 - 7)       | 2<br>(1 - 3)         |
| Liver cancer due to hepatitis C                                  | 7<br>(2 - 14)            | --                 | 0<br>(0 - 0)      | 1<br>(0 - 3)       | 3<br>(1 - 8)       | 2<br>(1 - 5)         |
| Liver cancer due to alcohol use                                  | 3<br>(1 - 6)             | --                 | --                | 0<br>(0 - 1)       | 1<br>(1 - 3)       | 1<br>(1 - 3)         |
| Liver cancer due to other causes                                 | 2<br>(1 - 3)             | --                 | 0<br>(0 - 0)      | 0<br>(0 - 1)       | 1<br>(0 - 2)       | 0<br>(0 - 1)         |

Web Table 31- Bhutan deaths with 95% UI by age, sex, and cause in 2013

| Cause                                         | Males, All Ages      | Males, 0-4 Years | Males, 5-14 Years | Males, 15-49 Years | Males, 50-69 Years | Males, 70-80 Years |
|-----------------------------------------------|----------------------|------------------|-------------------|--------------------|--------------------|--------------------|
| Larynx cancer                                 | 9<br>(5 - 14)        | --               | --                | 1<br>(1 - 2)       | 4<br>(2 - 7)       | 3<br>(2 - 5)       |
| Tracheal, bronchus and lung cancer            | 29<br>(17 - 49)      | --               | --                | 4<br>(2 - 8)       | 15<br>(8 - 27)     | 10<br>(7 - 15)     |
| Breast cancer                                 | 1<br>(0 - 1)         | --               | --                | 0<br>(0 - 0)       | 0<br>(0 - 0)       | 0<br>(0 - 0)       |
| Cervical cancer                               | --                   | --               | --                | --                 | --                 | --                 |
| Uterine cancer                                | --                   | --               | --                | --                 | --                 | --                 |
| Prostate cancer                               | 5<br>(3 - 10)        | --               | --                | 0<br>(0 - 0)       | 1<br>(0 - 2)       | 4<br>(2 - 8)       |
| Colon and rectum cancer                       | 16<br>(10 - 25)      | --               | --                | 4<br>(2 - 7)       | 7<br>(4 - 11)      | 5<br>(4 - 7)       |
| Lip and oral cavity cancer                    | 11<br>(6 - 18)       | --               | --                | 3<br>(1 - 5)       | 5<br>(3 - 8)       | 3<br>(2 - 5)       |
| Nasopharynx cancer                            | 4<br>(2 - 8)         | --               | 0<br>(0 - 0)      | 2<br>(1 - 3)       | 2<br>(1 - 4)       | 1<br>(0 - 1)       |
| Other pharynx cancer                          | 11<br>(6 - 19)       | --               | --                | 2<br>(1 - 4)       | 6<br>(3 - 11)      | 3<br>(2 - 5)       |
| Gallbladder and biliary tract cancer          | 3<br>(2 - 5)         | --               | --                | 1<br>(0 - 1)       | 2<br>(1 - 3)       | 1<br>(1 - 1)       |
| Pancreatic cancer                             | 6<br>(3 - 9)         | --               | --                | 1<br>(1 - 3)       | 3<br>(2 - 4)       | 2<br>(1 - 2)       |
| Malignant skin melanoma                       | 1<br>(0 - 1)         | --               | --                | 0<br>(0 - 0)       | 0<br>(0 - 0)       | 0<br>(0 - 0)       |
| Non-melanoma skin cancer                      | 1<br>(0 - 1)         | --               | --                | 0<br>(0 - 0)       | 0<br>(0 - 0)       | 0<br>(0 - 1)       |
| Ovarian cancer                                | --                   | --               | --                | --                 | --                 | --                 |
| Testicular cancer                             | 1<br>(1 - 2)         | --               | --                | 1<br>(0 - 1)       | 0<br>(0 - 0)       | 0<br>(0 - 0)       |
| Kidney cancer                                 | 4<br>(2 - 6)         | 0<br>(0 - 0)     | 0<br>(0 - 0)      | 1<br>(0 - 1)       | 2<br>(1 - 4)       | 1<br>(1 - 2)       |
| Bladder cancer                                | 6<br>(4 - 10)        | --               | --                | 1<br>(0 - 1)       | 2<br>(1 - 4)       | 3<br>(2 - 5)       |
| Brain and nervous system cancer               | 8<br>(4 - 17)        | 0<br>(0 - 0)     | 0<br>(0 - 1)      | 3<br>(1 - 8)       | 3<br>(1 - 6)       | 1<br>(1 - 2)       |
| Thyroid cancer                                | 1<br>(1 - 2)         | --               | 0<br>(0 - 0)      | 0<br>(0 - 0)       | 0<br>(0 - 1)       | 0<br>(0 - 1)       |
| Mesothelioma                                  | 0<br>(0 - 0)         | --               | --                | 0<br>(0 - 0)       | 0<br>(0 - 0)       | 0<br>(0 - 0)       |
| Hodgkin lymphoma                              | 1<br>(1 - 2)         | 0<br>(0 - 0)     | 0<br>(0 - 0)      | 0<br>(0 - 1)       | 0<br>(0 - 1)       | 0<br>(0 - 0)       |
| Non-Hodgkin lymphoma                          | 13<br>(8 - 23)       | 0<br>(0 - 1)     | 0<br>(0 - 1)      | 4<br>(2 - 8)       | 5<br>(3 - 8)       | 3<br>(2 - 5)       |
| Multiple myeloma                              | 2<br>(1 - 3)         | --               | --                | 0<br>(0 - 1)       | 1<br>(1 - 2)       | 1<br>(0 - 1)       |
| Leukemia                                      | 11<br>(7 - 18)       | 0<br>(0 - 1)     | 1<br>(1 - 2)      | 5<br>(3 - 9)       | 3<br>(1 - 4)       | 2<br>(1 - 2)       |
| Other neoplasms                               | 16<br>(9 - 28)       | 2<br>(1 - 3)     | 1<br>(1 - 2)      | 5<br>(2 - 10)      | 5<br>(2 - 10)      | 4<br>(2 - 6)       |
| Cardiovascular diseases                       | 855<br>(569 - 1,254) | 2<br>(1 - 4)     | 2<br>(1 - 3)      | 118<br>(62 - 209)  | 284<br>(167 - 465) | 449<br>(332 - 586) |
| Rheumatic heart disease                       | 17<br>(7 - 32)       | 0<br>(0 - 0)     | 0<br>(0 - 1)      | 6<br>(2 - 13)      | 5<br>(2 - 9)       | 6<br>(2 - 11)      |
| Ischemic heart disease                        | 423<br>(271 - 632)   | 0<br>(0 - 1)     | 0<br>(0 - 1)      | 66<br>(33 - 117)   | 156<br>(89 - 256)  | 199<br>(141 - 264) |
| Cerebrovascular disease                       | 291<br>(188 - 415)   | 1<br>(0 - 1)     | 0<br>(0 - 1)      | 27<br>(13 - 50)    | 83<br>(46 - 134)   | 179<br>(123 - 240) |
| Ischemic stroke                               | 147<br>(88 - 209)    | 0<br>(0 - 0)     | 0<br>(0 - 0)      | 4<br>(2 - 8)       | 31<br>(15 - 53)    | 111<br>(70 - 154)  |
| Hemorrhagic stroke                            | 144<br>(83 - 232)    | 1<br>(0 - 1)     | 0<br>(0 - 1)      | 23<br>(11 - 43)    | 52<br>(27 - 89)    | 69<br>(42 - 106)   |
| Hypertensive heart disease                    | 85<br>(49 - 149)     | 0<br>(0 - 1)     | 0<br>(0 - 0)      | 9<br>(4 - 19)      | 27<br>(13 - 51)    | 48<br>(28 - 84)    |
| Cardiomyopathy and myocarditis                | 19<br>(10 - 31)      | 1<br>(0 - 2)     | 0<br>(0 - 0)      | 6<br>(3 - 11)      | 6<br>(3 - 11)      | 6<br>(3 - 10)      |
| Atrial fibrillation and flutter               | 1<br>(0 - 1)         | --               | --                | 0<br>(0 - 0)       | 0<br>(0 - 0)       | 0<br>(0 - 1)       |
| Aortic aneurysm                               | 8<br>(4 - 12)        | --               | --                | 1<br>(0 - 2)       | 2<br>(1 - 4)       | 4<br>(2 - 7)       |
| Peripheral vascular disease                   | 0<br>(0 - 1)         | --               | --                | 0<br>(0 - 0)       | 0<br>(0 - 0)       | 0<br>(0 - 1)       |
| Endocarditis                                  | 4<br>(2 - 7)         | 0<br>(0 - 0)     | 0<br>(0 - 0)      | 1<br>(1 - 3)       | 1<br>(1 - 2)       | 1<br>(1 - 2)       |
| Other cardiovascular and circulatory diseases | 8<br>(4 - 13)        | 0<br>(0 - 0)     | 0<br>(0 - 0)      | 1<br>(0 - 2)       | 2<br>(1 - 4)       | 4<br>(2 - 7)       |
| Chronic respiratory diseases                  | 264<br>(171 - 412)   | 5<br>(2 - 9)     | 1<br>(1 - 2)      | 27<br>(13 - 50)    | 74<br>(41 - 126)   | 158<br>(109 - 238) |

Web Table 31- Bhutan deaths with 95% UI by age, sex, and cause in 2013

| Cause                                               | Males, All Ages    | Males, 0-4 Years | Males, 5-14 Years | Males, 15-49 Years | Males, 50-69 Years | Males, 70-80 Years |
|-----------------------------------------------------|--------------------|------------------|-------------------|--------------------|--------------------|--------------------|
| Chronic obstructive pulmonary disease               | 172<br>(106 - 277) | 1<br>(0 - 3)     | 0<br>(0 - 1)      | 11<br>(5 - 22)     | 45<br>(23 - 82)    | 114<br>(76 - 183)  |
| Pneumoconiosis                                      | 28<br>(15 - 50)    | 0<br>(0 - 0)     | 0<br>(0 - 0)      | 4<br>(2 - 8)       | 10<br>(5 - 19)     | 14<br>(8 - 25)     |
| Silicosis                                           | 8<br>(4 - 17)      | 0<br>(0 - 0)     | 0<br>(0 - 0)      | 1<br>(0 - 2)       | 3<br>(1 - 6)       | 4<br>(2 - 8)       |
| Asbestosis                                          | 4<br>(2 - 8)       | 0<br>(0 - 0)     | 0<br>(0 - 0)      | 1<br>(0 - 1)       | 2<br>(1 - 3)       | 2<br>(1 - 3)       |
| Coal workers pneumoconiosis                         | 4<br>(2 - 8)       | 0<br>(0 - 0)     | 0<br>(0 - 0)      | 1<br>(0 - 1)       | 2<br>(1 - 3)       | 2<br>(1 - 3)       |
| Other pneumoconiosis                                | 12<br>(6 - 21)     | 0<br>(0 - 0)     | 0<br>(0 - 0)      | 2<br>(1 - 4)       | 4<br>(2 - 8)       | 6<br>(3 - 12)      |
| Asthma                                              | 34<br>(19 - 58)    | 1<br>(0 - 3)     | 1<br>(0 - 1)      | 7<br>(3 - 15)      | 10<br>(5 - 18)     | 15<br>(8 - 25)     |
| Interstitial lung disease and pulmonary sarcoidosis | 24<br>(4 - 51)     | 0<br>(0 - 0)     | 0<br>(0 - 0)      | 3<br>(0 - 8)       | 9<br>(1 - 21)      | 13<br>(2 - 26)     |
| Other chronic respiratory diseases                  | 6<br>(3 - 11)      | 3<br>(1 - 5)     | 0<br>(0 - 0)      | 1<br>(0 - 2)       | 1<br>(0 - 2)       | 1<br>(1 - 3)       |
| Cirrhosis                                           | 99<br>(60 - 160)   | 1<br>(0 - 3)     | 1<br>(1 - 2)      | 42<br>(23 - 75)    | 34<br>(19 - 56)    | 20<br>(13 - 29)    |
| Cirrhosis due to hepatitis B                        | 27<br>(14 - 47)    | 0<br>(0 - 0)     | 0<br>(0 - 0)      | 12<br>(5 - 24)     | 9<br>(4 - 17)      | 5<br>(3 - 9)       |
| Cirrhosis due to hepatitis C                        | 15<br>(6 - 31)     | 0<br>(0 - 0)     | 0<br>(0 - 0)      | 6<br>(1 - 12)      | 6<br>(2 - 12)      | 4<br>(2 - 7)       |
| Cirrhosis due to alcohol use                        | 36<br>(18 - 62)    | --               | --                | 13<br>(5 - 25)     | 14<br>(7 - 25)     | 9<br>(5 - 14)      |
| Cirrhosis due to other causes                       | 21<br>(9 - 39)     | 1<br>(0 - 3)     | 1<br>(1 - 2)      | 12<br>(5 - 24)     | 5<br>(1 - 10)      | 2<br>(1 - 4)       |
| Digestive diseases                                  | 72<br>(33 - 135)   | 1<br>(0 - 2)     | 1<br>(0 - 2)      | 20<br>(8 - 42)     | 24<br>(10 - 47)    | 26<br>(13 - 47)    |
| Peptic ulcer disease                                | 17<br>(7 - 35)     | 0<br>(0 - 0)     | 0<br>(0 - 0)      | 4<br>(1 - 8)       | 6<br>(2 - 14)      | 7<br>(3 - 14)      |
| Gastritis and duodenitis                            | 4<br>(1 - 9)       | 0<br>(0 - 0)     | 0<br>(0 - 0)      | 1<br>(0 - 3)       | 1<br>(0 - 3)       | 2<br>(1 - 4)       |
| Appendicitis                                        | 3<br>(1 - 7)       | 0<br>(0 - 0)     | 0<br>(0 - 0)      | 2<br>(1 - 4)       | 1<br>(0 - 2)       | 1<br>(0 - 2)       |
| Paralytic ileus and intestinal obstruction          | 24<br>(10 - 49)    | 0<br>(0 - 1)     | 1<br>(0 - 1)      | 6<br>(2 - 13)      | 8<br>(3 - 17)      | 9<br>(4 - 21)      |
| Inguinal, femoral, and abdominal hernia             | 1<br>(0 - 3)       | 0<br>(0 - 0)     | 0<br>(0 - 0)      | 0<br>(0 - 1)       | 0<br>(0 - 1)       | 1<br>(0 - 2)       |
| Inflammatory bowel disease                          | 3<br>(1 - 5)       | 0<br>(0 - 0)     | 0<br>(0 - 0)      | 1<br>(0 - 2)       | 1<br>(0 - 1)       | 1<br>(0 - 2)       |
| Vascular intestinal disorders                       | 2<br>(0 - 5)       | 0<br>(0 - 0)     | 0<br>(0 - 0)      | 0<br>(0 - 1)       | 1<br>(0 - 2)       | 1<br>(0 - 3)       |
| Gallbladder and biliary diseases                    | 2<br>(1 - 6)       | 0<br>(0 - 0)     | 0<br>(0 - 0)      | 0<br>(0 - 1)       | 1<br>(0 - 2)       | 1<br>(0 - 3)       |
| Pancreatitis                                        | 13<br>(5 - 27)     | 0<br>(0 - 0)     | 0<br>(0 - 0)      | 5<br>(2 - 12)      | 4<br>(1 - 9)       | 3<br>(1 - 7)       |
| Other digestive diseases                            | 2<br>(0 - 5)       | 0<br>(0 - 0)     | 0<br>(0 - 0)      | 1<br>(0 - 2)       | 1<br>(0 - 2)       | 1<br>(0 - 2)       |
| Neurological disorders                              | 59<br>(40 - 80)    | 1<br>(1 - 2)     | 1<br>(0 - 2)      | 6<br>(3 - 11)      | 6<br>(3 - 9)       | 45<br>(31 - 61)    |
| Alzheimer disease and other dementias               | 47<br>(31 - 62)    | --               | --                | 0<br>(0 - 0)       | 4<br>(2 - 6)       | 43<br>(29 - 58)    |
| Parkinson disease                                   | 0<br>(0 - 0)       | --               | --                | 0<br>(0 - 0)       | 0<br>(0 - 0)       | 0<br>(0 - 0)       |
| Epilepsy                                            | 8<br>(4 - 13)      | 1<br>(0 - 2)     | 1<br>(0 - 1)      | 4<br>(2 - 8)       | 1<br>(0 - 2)       | 1<br>(1 - 2)       |
| Multiple sclerosis                                  | 1<br>(0 - 2)       | --               | --                | 0<br>(0 - 1)       | 0<br>(0 - 1)       | 0<br>(0 - 0)       |
| Other neurological disorders                        | 4<br>(2 - 6)       | 0<br>(0 - 1)     | 0<br>(0 - 0)      | 1<br>(1 - 3)       | 1<br>(1 - 2)       | 1<br>(0 - 1)       |
| Mental and substance use disorders                  | 5<br>(3 - 8)       | 0<br>(0 - 0)     | 0<br>(0 - 0)      | 2<br>(1 - 4)       | 2<br>(1 - 3)       | 1<br>(0 - 1)       |
| Schizophrenia                                       | 0<br>(0 - 1)       | --               | --                | 0<br>(0 - 1)       | 0<br>(0 - 0)       | 0<br>(0 - 0)       |
| Alcohol use disorders                               | 1<br>(0 - 2)       | --               | --                | 0<br>(0 - 1)       | 0<br>(0 - 1)       | 0<br>(0 - 0)       |
| Drug use disorders                                  | 4<br>(2 - 6)       | 0<br>(0 - 0)     | --                | 2<br>(1 - 3)       | 1<br>(0 - 2)       | 0<br>(0 - 1)       |
| Opioid use disorders                                | 2<br>(1 - 3)       | 0<br>(0 - 0)     | --                | 1<br>(0 - 2)       | 1<br>(0 - 1)       | 0<br>(0 - 0)       |
| Cocaine use disorders                               | 0<br>(0 - 0)       | 0<br>(0 - 0)     | --                | 0<br>(0 - 0)       | 0<br>(0 - 0)       | 0<br>(0 - 0)       |
| Amphetamine use disorders                           | 0<br>(0 - 0)       | 0<br>(0 - 0)     | --                | 0<br>(0 - 0)       | 0<br>(0 - 0)       | 0<br>(0 - 0)       |
| Other drug use disorders                            | 2<br>(1 - 3)       | 0<br>(0 - 0)     | --                | 1<br>(0 - 1)       | 1<br>(0 - 1)       | 0<br>(0 - 0)       |
| Eating disorders                                    | 0<br>(0 - 0)       | --               | --                | 0<br>(0 - 0)       | --                 | --                 |

Web Table 31- Bhutan deaths with 95% UI by age, sex, and cause in 2013

| Cause                                               | Males, All Ages    | Males, 0-4 Years | Males, 5-14 Years | Males, 15-49 Years | Males, 50-69 Years | Males, 70-80 Years |
|-----------------------------------------------------|--------------------|------------------|-------------------|--------------------|--------------------|--------------------|
| Anorexia nervosa                                    | 0<br>(0 - 0)       | --               | 0<br>(0 - 0)      | 0<br>(0 - 0)       | --                 | --                 |
| Diabetes, urogenital, blood, and endocrine diseases | 202<br>(132 - 301) | 4<br>(3 - 7)     | 2<br>(1 - 3)      | 40<br>(21 - 72)    | 60<br>(36 - 102)   | 95<br>(67 - 126)   |
| Diabetes mellitus                                   | 108<br>(69 - 162)  | 0<br>(0 - 1)     | 0<br>(0 - 0)      | 14<br>(7 - 25)     | 34<br>(19 - 58)    | 59<br>(40 - 85)    |
| Acute glomerulonephritis                            | 1<br>(1 - 2)       | 0<br>(0 - 1)     | 0<br>(0 - 0)      | 0<br>(0 - 1)       | 0<br>(0 - 0)       | 0<br>(0 - 0)       |
| Chronic kidney disease                              | 62<br>(35 - 98)    | 1<br>(0 - 1)     | 0<br>(0 - 0)      | 18<br>(8 - 33)     | 19<br>(9 - 32)     | 25<br>(15 - 36)    |
| Chronic kidney disease due to diabetes mellitus     | 5<br>(1 - 9)       | 0<br>(0 - 0)     | 0<br>(0 - 0)      | 1<br>(0 - 2)       | 2<br>(0 - 4)       | 2<br>(0 - 3)       |
| Chronic kidney disease due to hypertension          | 19<br>(9 - 31)     | 0<br>(0 - 0)     | 0<br>(0 - 0)      | 4<br>(1 - 7)       | 6<br>(3 - 11)      | 9<br>(5 - 15)      |
| Chronic kidney disease due to glomerulonephritis    | 7<br>(4 - 12)      | 0<br>(0 - 0)     | 0<br>(0 - 0)      | 3<br>(1 - 5)       | 2<br>(1 - 3)       | 2<br>(1 - 4)       |
| Chronic kidney disease due to other causes          | 31<br>(13 - 53)    | 0<br>(0 - 0)     | 0<br>(0 - 0)      | 10<br>(3 - 20)     | 9<br>(3 - 17)      | 12<br>(5 - 20)     |
| Urinary diseases and male infertility               | 13<br>(8 - 21)     | 0<br>(0 - 1)     | 0<br>(0 - 0)      | 3<br>(1 - 5)       | 4<br>(2 - 6)       | 6<br>(4 - 10)      |
| Interstitial nephritis and urinary tract infections | 8<br>(5 - 13)      | 0<br>(0 - 1)     | 0<br>(0 - 0)      | 2<br>(1 - 3)       | 2<br>(1 - 4)       | 4<br>(2 - 7)       |
| Urolithiasis                                        | 1<br>(1 - 2)       | --               | 0<br>(0 - 0)      | 0<br>(0 - 1)       | 0<br>(0 - 1)       | 1<br>(0 - 1)       |
| Other urinary diseases                              | 4<br>(2 - 6)       | 0<br>(0 - 0)     | 0<br>(0 - 0)      | 1<br>(0 - 1)       | 1<br>(0 - 2)       | 2<br>(1 - 4)       |
| Gynecological diseases                              | --                 | --               | --                | --                 | --                 | --                 |
| Uterine fibroids                                    | --                 | --               | --                | --                 | --                 | --                 |
| Polycystic ovarian syndrome                         | --                 | --               | --                | --                 | --                 | --                 |
| Endometriosis                                       | --                 | --               | --                | --                 | --                 | --                 |
| Genital prolapse                                    | --                 | --               | --                | --                 | --                 | --                 |
| Other gynecological diseases                        | --                 | --               | --                | --                 | --                 | --                 |
| Hemoglobinopathies and hemolytic anemias            | 7<br>(4 - 12)      | 2<br>(1 - 3)     | 1<br>(0 - 1)      | 2<br>(1 - 4)       | 1<br>(0 - 2)       | 1<br>(1 - 2)       |
| Thalassemias                                        | 3<br>(2 - 6)       | 1<br>(1 - 3)     | 1<br>(0 - 1)      | 1<br>(1 - 2)       | 0<br>(0 - 0)       | 0<br>(0 - 0)       |
| Sickle cell disorders                               | 1<br>(0 - 1)       | 0<br>(0 - 0)     | 0<br>(0 - 0)      | 0<br>(0 - 1)       | 0<br>(0 - 0)       | 0<br>(0 - 0)       |
| G6PD deficiency                                     | 0<br>(0 - 0)       | 0<br>(0 - 0)     | 0<br>(0 - 0)      | 0<br>(0 - 0)       | 0<br>(0 - 0)       | 0<br>(0 - 0)       |
| Other hemoglobinopathies and hemolytic anemias      | 2<br>(1 - 4)       | 0<br>(0 - 0)     | 0<br>(0 - 0)      | 1<br>(0 - 1)       | 1<br>(0 - 1)       | 1<br>(1 - 2)       |
| Endocrine, metabolic, blood, and immune disorders   | 10<br>(6 - 18)     | 1<br>(0 - 2)     | 0<br>(0 - 1)      | 3<br>(1 - 6)       | 3<br>(1 - 5)       | 3<br>(2 - 5)       |
| Musculoskeletal disorders                           | 6<br>(3 - 10)      | --               | 0<br>(0 - 0)      | 2<br>(1 - 4)       | 2<br>(1 - 4)       | 1<br>(1 - 2)       |
| Rheumatoid arthritis                                | 1<br>(1 - 2)       | --               | 0<br>(0 - 0)      | 0<br>(0 - 1)       | 1<br>(0 - 1)       | 0<br>(0 - 1)       |
| Other musculoskeletal disorders                     | 4<br>(2 - 7)       | --               | 0<br>(0 - 0)      | 2<br>(1 - 4)       | 2<br>(1 - 3)       | 1<br>(0 - 1)       |
| Other non-communicable diseases                     | 41<br>(26 - 60)    | 27<br>(16 - 44)  | 2<br>(1 - 4)      | 5<br>(2 - 8)       | 3<br>(2 - 5)       | 5<br>(3 - 7)       |
| Congenital anomalies                                | 33<br>(20 - 52)    | 25<br>(14 - 41)  | 2<br>(1 - 3)      | 3<br>(2 - 6)       | 1<br>(1 - 2)       | 2<br>(1 - 3)       |
| Neural tube defects                                 | 1<br>(0 - 3)       | 1<br>(0 - 3)     | 0<br>(0 - 0)      | 0<br>(0 - 0)       | 0<br>(0 - 0)       | 0<br>(0 - 0)       |
| Congenital heart anomalies                          | 17<br>(8 - 29)     | 13<br>(5 - 23)   | 1<br>(0 - 2)      | 1<br>(1 - 2)       | 1<br>(0 - 1)       | 1<br>(0 - 2)       |
| Cleft lip and cleft palate                          | 0<br>(0 - 0)       | 0<br>(0 - 0)     | --                | --                 | --                 | --                 |
| Down syndrome                                       | 2<br>(1 - 3)       | 1<br>(0 - 3)     | 0<br>(0 - 0)      | 0<br>(0 - 1)       | 0<br>(0 - 0)       | 0<br>(0 - 0)       |
| Chromosomal unbalanced rearrangements               | 1<br>(0 - 2)       | 1<br>(0 - 2)     | 0<br>(0 - 0)      | 0<br>(0 - 0)       | 0<br>(0 - 0)       | 0<br>(0 - 0)       |
| Other congenital anomalies                          | 12<br>(7 - 21)     | 9<br>(5 - 17)    | 1<br>(0 - 1)      | 1<br>(1 - 2)       | 0<br>(0 - 1)       | 0<br>(0 - 1)       |
| Skin and subcutaneous diseases                      | 6<br>(4 - 10)      | 0<br>(0 - 1)     | 0<br>(0 - 0)      | 1<br>(1 - 2)       | 2<br>(1 - 3)       | 3<br>(2 - 5)       |
| Cellulitis                                          | 1<br>(0 - 3)       | 0<br>(0 - 0)     | 0<br>(0 - 0)      | 0<br>(0 - 1)       | 0<br>(0 - 1)       | 1<br>(0 - 1)       |
| Pyoderma                                            | 4<br>(2 - 7)       | 0<br>(0 - 0)     | 0<br>(0 - 0)      | 1<br>(0 - 2)       | 1<br>(0 - 2)       | 2<br>(1 - 4)       |
| Decubitus ulcer                                     | 1<br>(0 - 2)       | 0<br>(0 - 0)     | 0<br>(0 - 0)      | 0<br>(0 - 0)       | 0<br>(0 - 0)       | 1<br>(0 - 2)       |

Web Table 31- Bhutan deaths with 95% UI by age, sex, and cause in 2013

| Cause                                           | Males, All Ages    | Males, 0-4 Years | Males, 5-14 Years | Males, 15-49 Years | Males, 50-69 Years | Males, 70-80 Years |
|-------------------------------------------------|--------------------|------------------|-------------------|--------------------|--------------------|--------------------|
| Other skin and subcutaneous diseases            | 0<br>(0 - 0)       | 0<br>(0 - 0)     | 0<br>(0 - 0)      | 0<br>(0 - 0)       | 0<br>(0 - 0)       | 0<br>(0 - 0)       |
| Sudden infant death syndrome                    | 1<br>(0 - 4)       | 1<br>(0 - 4)     | --                | --                 | --                 | --                 |
| Injuries                                        | 412<br>(253 - 650) | 33<br>(19 - 50)  | 21<br>(15 - 27)   | 224<br>(123 - 380) | 73<br>(42 - 121)   | 62<br>(40 - 85)    |
| Transport injuries                              | 100<br>(58 - 164)  | 3<br>(1 - 5)     | 5<br>(3 - 8)      | 68<br>(38 - 118)   | 15<br>(8 - 25)     | 8<br>(5 - 12)      |
| Road injuries                                   | 88<br>(51 - 145)   | 2<br>(1 - 4)     | 5<br>(3 - 7)      | 62<br>(34 - 106)   | 12<br>(7 - 21)     | 7<br>(5 - 10)      |
| Pedestrian road injuries                        | 37<br>(19 - 66)    | 1<br>(1 - 3)     | 3<br>(2 - 5)      | 21<br>(9 - 43)     | 6<br>(3 - 11)      | 4<br>(2 - 7)       |
| Cyclist road injuries                           | 6<br>(3 - 11)      | 0<br>(0 - 0)     | 0<br>(0 - 1)      | 4<br>(2 - 7)       | 1<br>(0 - 2)       | 1<br>(0 - 1)       |
| Motorcyclist road injuries                      | 14<br>(7 - 27)     | 0<br>(0 - 0)     | 0<br>(0 - 1)      | 12<br>(6 - 24)     | 1<br>(0 - 2)       | 0<br>(0 - 1)       |
| Motor vehicle road injuries                     | 31<br>(15 - 56)    | 1<br>(0 - 1)     | 1<br>(0 - 2)      | 24<br>(11 - 44)    | 4<br>(2 - 7)       | 2<br>(1 - 3)       |
| Other road injuries                             | 1<br>(0 - 2)       | 0<br>(0 - 0)     | 0<br>(0 - 0)      | 0<br>(0 - 1)       | 0<br>(0 - 0)       | 0<br>(0 - 0)       |
| Other transport injuries                        | 11<br>(6 - 21)     | 1<br>(0 - 1)     | 0<br>(0 - 1)      | 7<br>(3 - 14)      | 2<br>(1 - 4)       | 1<br>(1 - 2)       |
| Unintentional injuries                          | 239<br>(141 - 372) | 30<br>(17 - 47)  | 15<br>(10 - 20)   | 104<br>(52 - 185)  | 44<br>(23 - 71)    | 47<br>(27 - 67)    |
| Falls                                           | 38<br>(21 - 62)    | 2<br>(1 - 5)     | 1<br>(1 - 2)      | 11<br>(5 - 23)     | 8<br>(4 - 15)      | 15<br>(7 - 26)     |
| Drowning                                        | 25<br>(14 - 43)    | 4<br>(2 - 10)    | 3<br>(2 - 5)      | 14<br>(7 - 25)     | 3<br>(1 - 5)       | 1<br>(1 - 2)       |
| Fire, heat, and hot substances                  | 34<br>(20 - 54)    | 5<br>(3 - 11)    | 2<br>(1 - 3)      | 14<br>(7 - 26)     | 6<br>(3 - 10)      | 6<br>(3 - 10)      |
| Poisonings                                      | 58<br>(3 - 107)    | 5<br>(0 - 11)    | 2<br>(0 - 4)      | 33<br>(1 - 66)     | 11<br>(1 - 22)     | 7<br>(0 - 14)      |
| Exposure to mechanical forces                   | 11<br>(6 - 20)     | 1<br>(1 - 3)     | 1<br>(0 - 1)      | 6<br>(3 - 11)      | 2<br>(1 - 4)       | 1<br>(1 - 2)       |
| Unintentional firearm injuries                  | 2<br>(1 - 4)       | 0<br>(0 - 0)     | 0<br>(0 - 0)      | 1<br>(0 - 3)       | 0<br>(0 - 1)       | 0<br>(0 - 1)       |
| Unintentional suffocation                       | 0<br>(0 - 1)       | 0<br>(0 - 1)     | 0<br>(0 - 0)      | 0<br>(0 - 0)       | 0<br>(0 - 0)       | 0<br>(0 - 0)       |
| Other exposure to mechanical forces             | 9<br>(4 - 16)      | 1<br>(0 - 2)     | 1<br>(0 - 1)      | 4<br>(2 - 9)       | 2<br>(1 - 4)       | 1<br>(0 - 2)       |
| Adverse effects of medical treatment            | 16<br>(10 - 27)    | 1<br>(1 - 3)     | 0<br>(0 - 1)      | 4<br>(2 - 8)       | 4<br>(2 - 8)       | 6<br>(3 - 11)      |
| Animal contact                                  | 26<br>(15 - 44)    | 5<br>(2 - 11)    | 3<br>(2 - 6)      | 9<br>(4 - 17)      | 5<br>(2 - 9)       | 3<br>(2 - 5)       |
| Venomous animal contact                         | 19<br>(11 - 34)    | 3<br>(1 - 7)     | 3<br>(2 - 5)      | 8<br>(4 - 15)      | 4<br>(2 - 8)       | 2<br>(1 - 4)       |
| Non-venomous animal contact                     | 6<br>(1 - 12)      | 2<br>(0 - 5)     | 0<br>(0 - 1)      | 1<br>(0 - 3)       | 1<br>(0 - 2)       | 1<br>(0 - 2)       |
| Foreign body                                    | 6<br>(2 - 12)      | 4<br>(1 - 7)     | 0<br>(0 - 0)      | 0<br>(0 - 1)       | 0<br>(0 - 1)       | 2<br>(1 - 3)       |
| Pulmonary aspiration and foreign body in airway | 6<br>(2 - 11)      | 4<br>(1 - 7)     | 0<br>(0 - 0)      | 0<br>(0 - 1)       | 0<br>(0 - 1)       | 2<br>(1 - 3)       |
| Foreign body in other body part                 | 0<br>(0 - 0)       | 0<br>(0 - 0)     | 0<br>(0 - 0)      | 0<br>(0 - 0)       | 0<br>(0 - 0)       | 0<br>(0 - 0)       |
| Other unintentional injuries                    | 25<br>(10 - 52)    | 1<br>(0 - 3)     | 1<br>(1 - 3)      | 13<br>(5 - 29)     | 4<br>(2 - 9)       | 5<br>(2 - 11)      |
| Self-harm and interpersonal violence            | 74<br>(40 - 125)   | 0<br>(0 - 0)     | 1<br>(0 - 2)      | 51<br>(27 - 91)    | 15<br>(8 - 26)     | 7<br>(4 - 11)      |
| Self-harm                                       | 63<br>(34 - 107)   | --               | 1<br>(0 - 2)      | 42<br>(22 - 75)    | 14<br>(7 - 25)     | 6<br>(4 - 11)      |
| Interpersonal violence                          | 11<br>(5 - 20)     | 0<br>(0 - 0)     | 0<br>(0 - 0)      | 9<br>(5 - 18)      | 1<br>(0 - 1)       | 0<br>(0 - 0)       |
| Assault by firearm                              | 4<br>(2 - 9)       | 0<br>(0 - 0)     | 0<br>(0 - 0)      | 3<br>(1 - 9)       | 0<br>(0 - 1)       | 0<br>(0 - 0)       |
| Assault by sharp object                         | 4<br>(1 - 8)       | 0<br>(0 - 0)     | 0<br>(0 - 0)      | 3<br>(1 - 7)       | 0<br>(0 - 0)       | 0<br>(0 - 0)       |
| Assault by other means                          | 3<br>(1 - 6)       | 0<br>(0 - 0)     | 0<br>(0 - 0)      | 3<br>(1 - 5)       | 0<br>(0 - 0)       | 0<br>(0 - 0)       |

Web Table 31- Bhutan deaths with 95% UI by age, sex, and cause in 2013

| Cause                                                             | Females, All Ages        | Females, 0-4 Years | Females, 5-14 Years | Females, 15-49 Years | Females, 50-69 Years | Females, 70-80 Years |
|-------------------------------------------------------------------|--------------------------|--------------------|---------------------|----------------------|----------------------|----------------------|
| All causes                                                        | 1,865<br>(1,333 - 2,691) | 337<br>(274 - 411) | 43<br>(33 - 57)     | 331<br>(176 - 538)   | 407<br>(246 - 696)   | 747<br>(601 - 993)   |
| Communicable, maternal, neonatal, and nutritional diseases        | 483<br>(355 - 668)       | 260<br>(206 - 319) | 19<br>(12 - 27)     | 104<br>(54 - 186)    | 34<br>(20 - 62)      | 67<br>(46 - 99)      |
| HIV/AIDS and tuberculosis                                         | 40<br>(16 - 115)         | 1<br>(0 - 5)       | 1<br>(0 - 3)        | 25<br>(8 - 82)       | 8<br>(4 - 20)        | 4<br>(2 - 8)         |
| Tuberculosis                                                      | 19<br>(9 - 33)           | 1<br>(0 - 1)       | 0<br>(0 - 1)        | 9<br>(3 - 15)        | 6<br>(2 - 10)        | 4<br>(2 - 7)         |
| HIV/AIDS                                                          | 20<br>(2 - 101)          | 1<br>(0 - 5)       | 0<br>(0 - 2)        | 16<br>(2 - 77)       | 3<br>(0 - 14)        | 0<br>(0 - 1)         |
| HIV/AIDS resulting in mycobacterial infection                     | 1<br>(0 - 5)             | 0<br>(0 - 0)       | 0<br>(0 - 0)        | 1<br>(0 - 4)         | 0<br>(0 - 1)         | 0<br>(0 - 0)         |
| HIV/AIDS resulting in other diseases                              | 19<br>(2 - 96)           | 1<br>(0 - 5)       | 0<br>(0 - 2)        | 15<br>(1 - 73)       | 3<br>(0 - 13)        | 0<br>(0 - 1)         |
| Diarrhea, lower respiratory, and other common infectious diseases | 201<br>(140 - 286)       | 96<br>(63 - 136)   | 14<br>(9 - 22)      | 26<br>(13 - 48)      | 18<br>(10 - 34)      | 46<br>(29 - 72)      |
| Diarrheal diseases                                                | 55<br>(32 - 90)          | 20<br>(7 - 44)     | 2<br>(1 - 4)        | 5<br>(2 - 9)         | 8<br>(3 - 16)        | 20<br>(10 - 39)      |
| Intestinal infectious diseases                                    | 32<br>(14 - 63)          | 9<br>(4 - 17)      | 8<br>(4 - 15)       | 13<br>(4 - 29)       | 1<br>(0 - 3)         | 1<br>(0 - 1)         |
| Typhoid fever                                                     | 25<br>(11 - 49)          | 7<br>(3 - 13)      | 6<br>(3 - 12)       | 10<br>(3 - 23)       | 1<br>(0 - 2)         | 1<br>(0 - 1)         |
| Paratyphoid fever                                                 | 7<br>(3 - 15)            | 2<br>(1 - 4)       | 2<br>(1 - 4)        | 3<br>(1 - 8)         | 0<br>(0 - 1)         | 0<br>(0 - 0)         |
| Other intestinal infectious diseases                              | 0<br>(0 - 1)             | 0<br>(0 - 0)       | 0<br>(0 - 0)        | 0<br>(0 - 0)         | 0<br>(0 - 0)         | 0<br>(0 - 0)         |
| Lower respiratory infections                                      | 97<br>(62 - 142)         | 57<br>(30 - 90)    | 2<br>(1 - 4)        | 6<br>(3 - 10)        | 8<br>(4 - 15)        | 24<br>(14 - 39)      |
| Upper respiratory infections                                      | 0<br>(0 - 0)             | 0<br>(0 - 0)       | 0<br>(0 - 0)        | 0<br>(0 - 0)         | 0<br>(0 - 0)         | 0<br>(0 - 0)         |
| Otitis media                                                      | 0<br>(0 - 0)             | 0<br>(0 - 0)       | 0<br>(0 - 0)        | 0<br>(0 - 0)         | 0<br>(0 - 0)         | 0<br>(0 - 0)         |
| Meningitis                                                        | 9<br>(5 - 14)            | 5<br>(2 - 9)       | 1<br>(0 - 1)        | 1<br>(1 - 3)         | 1<br>(0 - 2)         | 1<br>(0 - 2)         |
| Pneumococcal meningitis                                           | 3<br>(1 - 4)             | 1<br>(1 - 2)       | 0<br>(0 - 1)        | 0<br>(0 - 1)         | 0<br>(0 - 1)         | 0<br>(0 - 1)         |
| H influenzae type B meningitis                                    | 2<br>(1 - 4)             | 2<br>(1 - 4)       | 0<br>(0 - 0)        | 0<br>(0 - 0)         | 0<br>(0 - 0)         | 0<br>(0 - 0)         |
| Meningococcal meningitis                                          | 1<br>(1 - 1)             | 0<br>(0 - 1)       | 0<br>(0 - 0)        | 0<br>(0 - 0)         | 0<br>(0 - 0)         | 0<br>(0 - 0)         |
| Other meningitis                                                  | 3<br>(2 - 5)             | 1<br>(1 - 3)       | 0<br>(0 - 0)        | 1<br>(0 - 1)         | 0<br>(0 - 1)         | 0<br>(0 - 1)         |
| Encephalitis                                                      | 2<br>(1 - 5)             | 1<br>(0 - 2)       | 0<br>(0 - 1)        | 1<br>(0 - 2)         | 0<br>(0 - 1)         | 0<br>(0 - 0)         |
| Diphtheria                                                        | 0<br>(0 - 0)             | 0<br>(0 - 0)       | 0<br>(0 - 0)        | 0<br>(0 - 0)         | 0<br>(0 - 0)         | --<br>(0 - 0)        |
| Whooping cough                                                    | 0<br>(0 - 0)             | 0<br>(0 - 0)       | 0<br>(0 - 0)        | 0<br>(0 - 0)         | 0<br>(0 - 0)         | --<br>(0 - 0)        |
| Tetanus                                                           | 1<br>(0 - 2)             | 1<br>(0 - 2)       | 0<br>(0 - 0)        | 0<br>(0 - 0)         | 0<br>(0 - 0)         | 0<br>(0 - 0)         |
| Measles                                                           | 4<br>(0 - 25)            | 4<br>(0 - 21)      | 0<br>(0 - 3)        | 0<br>(0 - 1)         | 0<br>(0 - 0)         | --<br>(0 - 0)        |
| Varicella and herpes zoster                                       | 0<br>(0 - 1)             | 0<br>(0 - 0)       | 0<br>(0 - 0)        | 0<br>(0 - 0)         | 0<br>(0 - 0)         | 0<br>(0 - 0)         |
| Neglected tropical diseases and malaria                           | 6<br>(3 - 14)            | 2<br>(1 - 6)       | 1<br>(0 - 2)        | 2<br>(1 - 5)         | 1<br>(0 - 2)         | 1<br>(0 - 2)         |
| Malaria                                                           | 4<br>(2 - 9)             | 1<br>(0 - 2)       | 0<br>(0 - 1)        | 1<br>(0 - 4)         | 1<br>(0 - 2)         | 0<br>(0 - 1)         |
| Leishmaniasis                                                     | 0<br>(0 - 0)             | 0<br>(0 - 0)       | 0<br>(0 - 0)        | 0<br>(0 - 0)         | 0<br>(0 - 0)         | 0<br>(0 - 0)         |
| Visceral leishmaniasis                                            | 0<br>(0 - 0)             | 0<br>(0 - 0)       | 0<br>(0 - 0)        | 0<br>(0 - 0)         | 0<br>(0 - 0)         | 0<br>(0 - 0)         |
| Cysticercosis                                                     | 0<br>(0 - 0)             | 0<br>(0 - 0)       | 0<br>(0 - 0)        | 0<br>(0 - 0)         | 0<br>(0 - 0)         | 0<br>(0 - 0)         |
| Cystic echinococcosis                                             | 0<br>(0 - 0)             | 0<br>(0 - 0)       | 0<br>(0 - 0)        | 0<br>(0 - 0)         | 0<br>(0 - 0)         | 0<br>(0 - 0)         |
| Dengue                                                            | 0<br>(0 - 0)             | 0<br>(0 - 0)       | 0<br>(0 - 0)        | 0<br>(0 - 0)         | 0<br>(0 - 0)         | 0<br>(0 - 0)         |
| Rabies                                                            | 1<br>(0 - 3)             | 0<br>(0 - 0)       | 0<br>(0 - 1)        | 0<br>(0 - 1)         | 0<br>(0 - 0)         | 0<br>(0 - 0)         |
| Intestinal nematode infections                                    | 1<br>(0 - 5)             | 0<br>(0 - 4)       | 0<br>(0 - 1)        | 0<br>(0 - 0)         | 0<br>(0 - 0)         | 0<br>(0 - 0)         |
| Ascariasis                                                        | 1<br>(0 - 5)             | 0<br>(0 - 4)       | 0<br>(0 - 1)        | 0<br>(0 - 0)         | 0<br>(0 - 0)         | 0<br>(0 - 0)         |
| Other neglected tropical diseases                                 | 0<br>(0 - 1)             | 0<br>(0 - 1)       | 0<br>(0 - 0)        | 0<br>(0 - 0)         | 0<br>(0 - 0)         | 0<br>(0 - 0)         |
| Maternal disorders                                                | 40<br>(20 - 68)          | --                 | 0<br>(0 - 0)        | 40<br>(20 - 68)      | --                   | --                   |
| Maternal hemorrhage                                               | 5<br>(2 - 10)            | --                 | 0<br>(0 - 0)        | 5<br>(2 - 10)        | --                   | --                   |



Web Table 31- Bhutan deaths with 95% UI by age, sex, and cause in 2013

| Cause                                                            | Females, All Ages      | Females, 0-4 Years | Females, 5-14 Years | Females, 15-49 Years | Females, 50-69 Years | Females, 70-80 Years |
|------------------------------------------------------------------|------------------------|--------------------|---------------------|----------------------|----------------------|----------------------|
| Maternal sepsis and other maternal infections                    | 2<br>(1 - 4)           | --                 | 0<br>(0 - 0)        | 2<br>(1 - 4)         | --                   | --                   |
| Maternal hypertensive disorders                                  | 5<br>(2 - 9)           | --                 | 0<br>(0 - 0)        | 5<br>(2 - 9)         | --                   | --                   |
| Maternal obstructed labor                                        | 2<br>(1 - 4)           | --                 | 0<br>(0 - 0)        | 2<br>(1 - 4)         | --                   | --                   |
| Maternal abortive outcome                                        | 5<br>(2 - 9)           | --                 | 0<br>(0 - 0)        | 5<br>(2 - 9)         | --                   | --                   |
| Indirect maternal deaths                                         | 5<br>(2 - 9)           | --                 | 0<br>(0 - 0)        | 5<br>(2 - 9)         | --                   | --                   |
| Late maternal deaths                                             | 7<br>(3 - 12)          | --                 | 0<br>(0 - 0)        | 7<br>(3 - 12)        | --                   | --                   |
| Maternal deaths aggravated by HIV/AIDS                           | 0<br>(0 - 0)           | --                 | --                  | 0<br>(0 - 0)         | --                   | --                   |
| Other maternal disorders                                         | 10<br>(4 - 17)         | --                 | 0<br>(0 - 0)        | 10<br>(4 - 17)       | --                   | --                   |
| Neonatal disorders                                               | 139<br>(94 - 187)      | 139<br>(94 - 187)  | --                  | --                   | --                   | --                   |
| Neonatal preterm birth complications                             | 42<br>(11 - 77)        | 42<br>(11 - 77)    | --                  | --                   | --                   | --                   |
| Neonatal encephalopathy due to birth asphyxia and trauma         | 59<br>(28 - 104)       | 59<br>(28 - 104)   | --                  | --                   | --                   | --                   |
| Neonatal sepsis and other neonatal infections                    | 21<br>(8 - 43)         | 21<br>(8 - 43)     | --                  | --                   | --                   | --                   |
| Hemolytic disease and other neonatal jaundice                    | 1<br>(0 - 3)           | 1<br>(0 - 3)       | --                  | --                   | --                   | --                   |
| Other neonatal disorders                                         | 17<br>(1 - 39)         | 17<br>(1 - 39)     | --                  | --                   | --                   | --                   |
| Nutritional deficiencies                                         | 29<br>(16 - 46)        | 10<br>(5 - 18)     | 1<br>(1 - 2)        | 3<br>(1 - 5)         | 3<br>(1 - 5)         | 12<br>(6 - 21)       |
| Protein-energy malnutrition                                      | 25<br>(10 - 42)        | 9<br>(3 - 17)      | 1<br>(0 - 2)        | 2<br>(1 - 4)         | 2<br>(1 - 4)         | 11<br>(4 - 19)       |
| Iodine deficiency                                                | 0<br>(0 - 0)           | 0<br>(0 - 0)       | 0<br>(0 - 0)        | 0<br>(0 - 0)         | 0<br>(0 - 0)         | 0<br>(0 - 0)         |
| Iron-deficiency anemia                                           | 2<br>(0 - 10)          | 1<br>(0 - 3)       | 0<br>(0 - 1)        | 0<br>(0 - 2)         | 0<br>(0 - 2)         | 1<br>(0 - 3)         |
| Other nutritional deficiencies                                   | 1<br>(0 - 4)           | 0<br>(0 - 1)       | 0<br>(0 - 0)        | 0<br>(0 - 1)         | 0<br>(0 - 1)         | 1<br>(0 - 2)         |
| Other communicable, maternal, neonatal, and nutritional diseases | 28<br>(16 - 46)        | 11<br>(4 - 23)     | 2<br>(1 - 3)        | 8<br>(4 - 14)        | 4<br>(2 - 7)         | 3<br>(2 - 7)         |
| Sexually transmitted diseases excluding HIV                      | 8<br>(2 - 18)          | 6<br>(0 - 15)      | 0<br>(0 - 1)        | 1<br>(0 - 1)         | 0<br>(0 - 1)         | 1<br>(0 - 2)         |
| Syphilis                                                         | 7<br>(1 - 17)          | 6<br>(0 - 15)      | 0<br>(0 - 1)        | 0<br>(0 - 0)         | 0<br>(0 - 1)         | 1<br>(0 - 2)         |
| Chlamydial infection                                             | 0<br>(0 - 0)           | --                 | 0<br>(0 - 0)        | 0<br>(0 - 0)         | 0<br>(0 - 0)         | 0<br>(0 - 0)         |
| Gonococcal infection                                             | 0<br>(0 - 1)           | --                 | 0<br>(0 - 0)        | 0<br>(0 - 0)         | 0<br>(0 - 0)         | 0<br>(0 - 0)         |
| Other sexually transmitted diseases                              | 0<br>(0 - 0)           | --                 | 0<br>(0 - 0)        | 0<br>(0 - 0)         | 0<br>(0 - 0)         | 0<br>(0 - 0)         |
| Hepatitis                                                        | 14<br>(8 - 23)         | 2<br>(1 - 5)       | 1<br>(1 - 2)        | 6<br>(3 - 12)        | 2<br>(1 - 5)         | 2<br>(1 - 2)         |
| Acute hepatitis A                                                | 3<br>(1 - 7)           | 1<br>(0 - 3)       | 1<br>(0 - 1)        | 1<br>(0 - 3)         | 0<br>(0 - 0)         | 0<br>(0 - 0)         |
| Acute hepatitis B                                                | 7<br>(4 - 12)          | 1<br>(0 - 2)       | 0<br>(0 - 1)        | 2<br>(1 - 5)         | 2<br>(1 - 4)         | 1<br>(1 - 2)         |
| Acute hepatitis C                                                | 0<br>(0 - 1)           | --                 | 0<br>(0 - 0)        | 0<br>(0 - 0)         | 0<br>(0 - 0)         | 0<br>(0 - 0)         |
| Acute hepatitis E                                                | 3<br>(1 - 7)           | 0<br>(0 - 0)       | 0<br>(0 - 1)        | 3<br>(1 - 6)         | 0<br>(0 - 1)         | 0<br>(0 - 0)         |
| Other infectious diseases                                        | 6<br>(2 - 13)          | 3<br>(1 - 9)       | 0<br>(0 - 1)        | 1<br>(0 - 2)         | 1<br>(0 - 3)         | 1<br>(0 - 4)         |
| Non-communicable diseases                                        | 1,229<br>(866 - 1,825) | 49<br>(30 - 79)    | 13<br>(9 - 18)      | 177<br>(90 - 300)    | 349<br>(209 - 597)   | 641<br>(515 - 856)   |
| Neoplasms                                                        | 157<br>(99 - 262)      | 3<br>(2 - 5)       | 2<br>(1 - 4)        | 44<br>(23 - 77)      | 68<br>(40 - 122)     | 41<br>(30 - 60)      |
| Esophageal cancer                                                | 13<br>(8 - 23)         | --                 | --                  | 2<br>(1 - 5)         | 6<br>(3 - 11)        | 4<br>(3 - 8)         |
| Stomach cancer                                                   | 9<br>(6 - 15)          | --                 | --                  | 2<br>(1 - 4)         | 4<br>(2 - 7)         | 3<br>(2 - 4)         |
| Liver cancer                                                     | 7<br>(4 - 13)          | --                 | 0<br>(0 - 0)        | 2<br>(1 - 3)         | 3<br>(2 - 6)         | 2<br>(1 - 4)         |
| Liver cancer due to hepatitis B                                  | 2<br>(1 - 4)           | --                 | 0<br>(0 - 0)        | 1<br>(0 - 1)         | 1<br>(0 - 2)         | 0<br>(0 - 1)         |
| Liver cancer due to hepatitis C                                  | 3<br>(1 - 6)           | --                 | 0<br>(0 - 0)        | 1<br>(0 - 1)         | 1<br>(0 - 3)         | 1<br>(1 - 2)         |
| Liver cancer due to alcohol use                                  | 0<br>(0 - 1)           | --                 | --                  | 0<br>(0 - 0)         | 0<br>(0 - 0)         | 0<br>(0 - 0)         |
| Liver cancer due to other causes                                 | 2<br>(1 - 4)           | --                 | 0<br>(0 - 0)        | 1<br>(0 - 1)         | 1<br>(0 - 2)         | 0<br>(0 - 1)         |

Web Table 31- Bhutan deaths with 95% UI by age, sex, and cause in 2013

| Cause                                         | Females, All Ages  | Females, 0-4 Years | Females, 5-14 Years | Females, 15-49 Years | Females, 50-69 Years | Females, 70-80 Years |
|-----------------------------------------------|--------------------|--------------------|---------------------|----------------------|----------------------|----------------------|
| Larynx cancer                                 | 2<br>(1 - 4)       | --                 | --                  | 0<br>(0 - 1)         | 1<br>(0 - 2)         | 1<br>(0 - 1)         |
| Tracheal, bronchus and lung cancer            | 9<br>(5 - 16)      | --                 | --                  | 2<br>(1 - 4)         | 5<br>(2 - 9)         | 3<br>(2 - 4)         |
| Breast cancer                                 | 25<br>(15 - 44)    | --                 | --                  | 9<br>(4 - 16)        | 11<br>(6 - 21)       | 5<br>(4 - 8)         |
| Cervical cancer                               | 17<br>(9 - 29)     | --                 | --                  | 5<br>(2 - 8)         | 8<br>(4 - 15)        | 4<br>(2 - 6)         |
| Uterine cancer                                | 2<br>(1 - 3)       | --                 | --                  | 0<br>(0 - 1)         | 1<br>(0 - 2)         | 1<br>(0 - 1)         |
| Prostate cancer                               | --                 | --                 | --                  | --                   | --                   | --                   |
| Colon and rectum cancer                       | 9<br>(6 - 16)      | --                 | --                  | 2<br>(1 - 4)         | 4<br>(2 - 7)         | 3<br>(2 - 5)         |
| Lip and oral cavity cancer                    | 7<br>(4 - 12)      | --                 | --                  | 2<br>(1 - 3)         | 3<br>(1 - 6)         | 2<br>(1 - 4)         |
| Nasopharynx cancer                            | 1<br>(1 - 3)       | --                 | 0<br>(0 - 0)        | 1<br>(0 - 1)         | 1<br>(0 - 1)         | 0<br>(0 - 0)         |
| Other pharynx cancer                          | 2<br>(1 - 4)       | --                 | --                  | 1<br>(0 - 1)         | 1<br>(1 - 3)         | 1<br>(0 - 1)         |
| Gallbladder and biliary tract cancer          | 5<br>(3 - 8)       | --                 | --                  | 1<br>(1 - 2)         | 2<br>(1 - 4)         | 1<br>(1 - 2)         |
| Pancreatic cancer                             | 3<br>(2 - 5)       | --                 | --                  | 1<br>(0 - 1)         | 1<br>(1 - 2)         | 1<br>(1 - 2)         |
| Malignant skin melanoma                       | 0<br>(0 - 0)       | --                 | --                  | 0<br>(0 - 0)         | 0<br>(0 - 0)         | 0<br>(0 - 0)         |
| Non-melanoma skin cancer                      | 0<br>(0 - 1)       | --                 | --                  | 0<br>(0 - 0)         | 0<br>(0 - 0)         | 0<br>(0 - 0)         |
| Ovarian cancer                                | 13<br>(8 - 23)     | --                 | --                  | 4<br>(2 - 7)         | 7<br>(4 - 13)        | 3<br>(2 - 4)         |
| Testicular cancer                             | --                 | --                 | --                  | --                   | --                   | --                   |
| Kidney cancer                                 | 1<br>(1 - 2)       | 0<br>(0 - 0)       | 0<br>(0 - 0)        | 0<br>(0 - 0)         | 1<br>(0 - 1)         | 0<br>(0 - 1)         |
| Bladder cancer                                | 1<br>(1 - 2)       | --                 | --                  | 0<br>(0 - 0)         | 0<br>(0 - 1)         | 1<br>(0 - 1)         |
| Brain and nervous system cancer               | 4<br>(2 - 6)       | 0<br>(0 - 0)       | 0<br>(0 - 0)        | 2<br>(1 - 3)         | 1<br>(1 - 2)         | 0<br>(0 - 1)         |
| Thyroid cancer                                | 1<br>(0 - 2)       | --                 | 0<br>(0 - 0)        | 0<br>(0 - 0)         | 0<br>(0 - 1)         | 0<br>(0 - 1)         |
| Mesothelioma                                  | 0<br>(0 - 0)       | --                 | --                  | 0<br>(0 - 0)         | 0<br>(0 - 0)         | 0<br>(0 - 0)         |
| Hodgkin lymphoma                              | 1<br>(0 - 1)       | 0<br>(0 - 0)       | 0<br>(0 - 0)        | 0<br>(0 - 0)         | 0<br>(0 - 0)         | 0<br>(0 - 0)         |
| Non-Hodgkin lymphoma                          | 4<br>(2 - 8)       | 0<br>(0 - 0)       | 0<br>(0 - 0)        | 1<br>(1 - 3)         | 2<br>(1 - 3)         | 1<br>(1 - 2)         |
| Multiple myeloma                              | 1<br>(1 - 2)       | --                 | --                  | 0<br>(0 - 0)         | 1<br>(0 - 1)         | 0<br>(0 - 1)         |
| Leukemia                                      | 8<br>(5 - 13)      | 0<br>(0 - 1)       | 1<br>(0 - 1)        | 4<br>(2 - 7)         | 2<br>(1 - 3)         | 1<br>(1 - 1)         |
| Other neoplasms                               | 10<br>(6 - 18)     | 2<br>(1 - 4)       | 1<br>(0 - 2)        | 3<br>(1 - 5)         | 2<br>(1 - 5)         | 2<br>(1 - 5)         |
| Cardiovascular diseases                       | 602<br>(381 - 883) | 3<br>(1 - 5)       | 2<br>(1 - 4)        | 60<br>(25 - 107)     | 163<br>(86 - 281)    | 374<br>(266 - 506)   |
| Rheumatic heart disease                       | 21<br>(9 - 46)     | 0<br>(0 - 1)       | 1<br>(0 - 1)        | 7<br>(3 - 15)        | 7<br>(3 - 16)        | 6<br>(3 - 16)        |
| Ischemic heart disease                        | 249<br>(162 - 380) | 0<br>(0 - 1)       | 0<br>(0 - 1)        | 26<br>(10 - 48)      | 70<br>(37 - 126)     | 153<br>(112 - 215)   |
| Cerebrovascular disease                       | 252<br>(129 - 388) | 0<br>(0 - 1)       | 1<br>(0 - 1)        | 18<br>(7 - 32)       | 66<br>(29 - 120)     | 167<br>(90 - 244)    |
| Ischemic stroke                               | 129<br>(61 - 196)  | 0<br>(0 - 0)       | 0<br>(0 - 0)        | 3<br>(1 - 6)         | 22<br>(8 - 41)       | 104<br>(52 - 154)    |
| Hemorrhagic stroke                            | 123<br>(59 - 206)  | 0<br>(0 - 1)       | 0<br>(0 - 1)        | 15<br>(6 - 27)       | 44<br>(19 - 82)      | 63<br>(29 - 99)      |
| Hypertensive heart disease                    | 56<br>(32 - 89)    | 0<br>(0 - 1)       | 0<br>(0 - 0)        | 4<br>(2 - 9)         | 15<br>(6 - 29)       | 36<br>(22 - 58)      |
| Cardiomyopathy and myocarditis                | 11<br>(5 - 20)     | 1<br>(0 - 2)       | 0<br>(0 - 1)        | 3<br>(1 - 6)         | 3<br>(1 - 5)         | 5<br>(2 - 9)         |
| Atrial fibrillation and flutter               | 1<br>(0 - 1)       | --                 | --                  | 0<br>(0 - 0)         | 0<br>(0 - 0)         | 0<br>(0 - 1)         |
| Aortic aneurysm                               | 3<br>(2 - 6)       | --                 | --                  | 0<br>(0 - 1)         | 1<br>(0 - 2)         | 2<br>(1 - 4)         |
| Peripheral vascular disease                   | 0<br>(0 - 1)       | --                 | --                  | 0<br>(0 - 0)         | 0<br>(0 - 0)         | 0<br>(0 - 0)         |
| Endocarditis                                  | 2<br>(1 - 4)       | 0<br>(0 - 1)       | 0<br>(0 - 0)        | 1<br>(0 - 1)         | 0<br>(0 - 1)         | 1<br>(0 - 2)         |
| Other cardiovascular and circulatory diseases | 5<br>(3 - 9)       | 0<br>(0 - 0)       | 0<br>(0 - 0)        | 1<br>(0 - 2)         | 1<br>(1 - 3)         | 3<br>(2 - 5)         |
| Chronic respiratory diseases                  | 163<br>(102 - 257) | 6<br>(3 - 10)      | 1<br>(1 - 2)        | 17<br>(8 - 30)       | 44<br>(24 - 81)      | 95<br>(61 - 149)     |

Web Table 31- Bhutan deaths with 95% UI by age, sex, and cause in 2013

| Cause                                               | Females, All Ages | Females, 0-4 Years | Females, 5-14 Years | Females, 15-49 Years | Females, 50-69 Years | Females, 70-80 Years |
|-----------------------------------------------------|-------------------|--------------------|---------------------|----------------------|----------------------|----------------------|
| Chronic obstructive pulmonary disease               | 86<br>(46 - 143)  | 2<br>(1 - 5)       | 0<br>(0 - 1)        | 6<br>(2 - 12)        | 22<br>(10 - 43)      | 55<br>(30 - 91)      |
| Pneumoconiosis                                      | 28<br>(14 - 51)   | 0<br>(0 - 0)       | 0<br>(0 - 0)        | 3<br>(1 - 5)         | 9<br>(4 - 17)        | 16<br>(7 - 32)       |
| Silicosis                                           | 2<br>(1 - 3)      | 0<br>(0 - 0)       | 0<br>(0 - 0)        | 0<br>(0 - 1)         | 1<br>(0 - 1)         | 1<br>(0 - 2)         |
| Asbestosis                                          | 1<br>(1 - 3)      | 0<br>(0 - 0)       | 0<br>(0 - 0)        | 0<br>(0 - 1)         | 1<br>(0 - 1)         | 1<br>(0 - 1)         |
| Coal workers pneumoconiosis                         | 1<br>(0 - 2)      | 0<br>(0 - 0)       | 0<br>(0 - 0)        | 0<br>(0 - 1)         | 0<br>(0 - 1)         | 0<br>(0 - 1)         |
| Other pneumoconiosis                                | 24<br>(12 - 44)   | 0<br>(0 - 0)       | 0<br>(0 - 0)        | 2<br>(1 - 4)         | 7<br>(3 - 14)        | 15<br>(7 - 29)       |
| Asthma                                              | 27<br>(13 - 55)   | 1<br>(1 - 3)       | 1<br>(0 - 1)        | 6<br>(2 - 11)        | 7<br>(3 - 16)        | 12<br>(5 - 27)       |
| Interstitial lung disease and pulmonary sarcoidosis | 18<br>(1 - 40)    | 0<br>(0 - 0)       | 0<br>(0 - 0)        | 2<br>(0 - 5)         | 5<br>(0 - 14)        | 10<br>(1 - 23)       |
| Other chronic respiratory diseases                  | 5<br>(3 - 9)      | 2<br>(1 - 4)       | 0<br>(0 - 0)        | 1<br>(0 - 1)         | 1<br>(0 - 2)         | 1<br>(1 - 2)         |
| Cirrhosis                                           | 38<br>(24 - 64)   | 1<br>(0 - 2)       | 1<br>(1 - 2)        | 12<br>(6 - 21)       | 13<br>(7 - 24)       | 11<br>(7 - 17)       |
| Cirrhosis due to hepatitis B                        | 12<br>(6 - 23)    | 0<br>(0 - 0)       | 0<br>(0 - 0)        | 4<br>(1 - 7)         | 4<br>(2 - 9)         | 4<br>(2 - 8)         |
| Cirrhosis due to hepatitis C                        | 10<br>(3 - 22)    | 0<br>(0 - 0)       | 0<br>(0 - 0)        | 3<br>(1 - 7)         | 4<br>(1 - 9)         | 3<br>(1 - 7)         |
| Cirrhosis due to alcohol use                        | 5<br>(2 - 10)     | --                 | --                  | 1<br>(0 - 2)         | 2<br>(1 - 4)         | 2<br>(1 - 5)         |
| Cirrhosis due to other causes                       | 11<br>(5 - 21)    | 1<br>(0 - 2)       | 1<br>(0 - 1)        | 5<br>(2 - 9)         | 3<br>(1 - 6)         | 1<br>(0 - 3)         |
| Digestive diseases                                  | 45<br>(22 - 92)   | 1<br>(0 - 1)       | 1<br>(1 - 2)        | 11<br>(5 - 22)       | 13<br>(6 - 29)       | 19<br>(10 - 42)      |
| Peptic ulcer disease                                | 9<br>(3 - 16)     | 0<br>(0 - 0)       | 0<br>(0 - 0)        | 1<br>(0 - 3)         | 3<br>(1 - 6)         | 4<br>(2 - 9)         |
| Gastritis and duodenitis                            | 3<br>(1 - 9)      | 0<br>(0 - 0)       | 0<br>(0 - 0)        | 1<br>(0 - 2)         | 1<br>(0 - 3)         | 2<br>(0 - 5)         |
| Appendicitis                                        | 2<br>(1 - 4)      | 0<br>(0 - 0)       | 0<br>(0 - 0)        | 1<br>(0 - 2)         | 0<br>(0 - 1)         | 1<br>(0 - 1)         |
| Paralytic ileus and intestinal obstruction          | 16<br>(6 - 39)    | 0<br>(0 - 1)       | 1<br>(0 - 1)        | 5<br>(2 - 9)         | 5<br>(2 - 11)        | 6<br>(2 - 19)        |
| Inguinal, femoral, and abdominal hernia             | 0<br>(0 - 1)      | 0<br>(0 - 0)       | 0<br>(0 - 0)        | 0<br>(0 - 0)         | 0<br>(0 - 0)         | 0<br>(0 - 1)         |
| Inflammatory bowel disease                          | 2<br>(1 - 4)      | 0<br>(0 - 0)       | 0<br>(0 - 0)        | 1<br>(0 - 1)         | 1<br>(0 - 1)         | 1<br>(0 - 2)         |
| Vascular intestinal disorders                       | 2<br>(1 - 4)      | 0<br>(0 - 0)       | 0<br>(0 - 0)        | 0<br>(0 - 1)         | 0<br>(0 - 1)         | 1<br>(0 - 3)         |
| Gallbladder and biliary diseases                    | 3<br>(1 - 5)      | 0<br>(0 - 0)       | 0<br>(0 - 0)        | 0<br>(0 - 1)         | 1<br>(0 - 2)         | 1<br>(0 - 3)         |
| Pancreatitis                                        | 6<br>(2 - 13)     | 0<br>(0 - 0)       | 0<br>(0 - 0)        | 2<br>(1 - 3)         | 2<br>(1 - 5)         | 2<br>(1 - 5)         |
| Other digestive diseases                            | 2<br>(1 - 5)      | 0<br>(0 - 0)       | 0<br>(0 - 0)        | 1<br>(0 - 1)         | 1<br>(0 - 2)         | 1<br>(0 - 2)         |
| Neurological disorders                              | 42<br>(30 - 60)   | 1<br>(1 - 2)       | 1<br>(0 - 1)        | 3<br>(1 - 6)         | 3<br>(2 - 6)         | 33<br>(24 - 48)      |
| Alzheimer disease and other dementias               | 34<br>(24 - 50)   | --                 | --                  | 0<br>(0 - 0)         | 2<br>(1 - 4)         | 32<br>(22 - 47)      |
| Parkinson disease                                   | 0<br>(0 - 0)      | --                 | --                  | 0<br>(0 - 0)         | 0<br>(0 - 0)         | 0<br>(0 - 0)         |
| Epilepsy                                            | 4<br>(2 - 8)      | 1<br>(0 - 2)       | 1<br>(0 - 1)        | 2<br>(1 - 5)         | 0<br>(0 - 1)         | 0<br>(0 - 1)         |
| Multiple sclerosis                                  | 1<br>(0 - 1)      | --                 | --                  | 0<br>(0 - 1)         | 0<br>(0 - 0)         | 0<br>(0 - 0)         |
| Other neurological disorders                        | 2<br>(1 - 3)      | 0<br>(0 - 1)       | 0<br>(0 - 0)        | 1<br>(0 - 1)         | 1<br>(0 - 1)         | 0<br>(0 - 1)         |
| Mental and substance use disorders                  | 1<br>(0 - 2)      | 0<br>(0 - 0)       | 0<br>(0 - 0)        | 0<br>(0 - 1)         | 0<br>(0 - 1)         | 0<br>(0 - 0)         |
| Schizophrenia                                       | 0<br>(0 - 1)      | --                 | --                  | 0<br>(0 - 0)         | 0<br>(0 - 0)         | 0<br>(0 - 0)         |
| Alcohol use disorders                               | 0<br>(0 - 0)      | --                 | --                  | 0<br>(0 - 0)         | 0<br>(0 - 0)         | 0<br>(0 - 0)         |
| Drug use disorders                                  | 0<br>(0 - 1)      | 0<br>(0 - 0)       | --                  | 0<br>(0 - 0)         | 0<br>(0 - 0)         | 0<br>(0 - 0)         |
| Opioid use disorders                                | 0<br>(0 - 0)      | 0<br>(0 - 0)       | --                  | 0<br>(0 - 0)         | 0<br>(0 - 0)         | 0<br>(0 - 0)         |
| Cocaine use disorders                               | 0<br>(0 - 0)      | 0<br>(0 - 0)       | --                  | 0<br>(0 - 0)         | 0<br>(0 - 0)         | 0<br>(0 - 0)         |
| Amphetamine use disorders                           | 0<br>(0 - 0)      | 0<br>(0 - 0)       | --                  | 0<br>(0 - 0)         | 0<br>(0 - 0)         | 0<br>(0 - 0)         |
| Other drug use disorders                            | 0<br>(0 - 0)      | 0<br>(0 - 0)       | --                  | 0<br>(0 - 0)         | 0<br>(0 - 0)         | 0<br>(0 - 0)         |
| Eating disorders                                    | 0<br>(0 - 0)      | --                 | 0<br>(0 - 0)        | 0<br>(0 - 0)         | --                   | --                   |

Web Table 31- Bhutan deaths with 95% UI by age, sex, and cause in 2013

| Cause                                               | Females, All Ages | Females, 0-4 Years | Females, 5-14 Years | Females, 15-49 Years | Females, 50-69 Years | Females, 70-80 Years |
|-----------------------------------------------------|-------------------|--------------------|---------------------|----------------------|----------------------|----------------------|
| Anorexia nervosa                                    | 0<br>(0 - 0)      | --                 | 0<br>(0 - 0)        | 0<br>(0 - 0)         | --                   | --                   |
| Diabetes, urogenital, blood, and endocrine diseases | 134<br>(87 - 208) | 5<br>(3 - 8)       | 1<br>(1 - 2)        | 25<br>(12 - 43)      | 40<br>(23 - 72)      | 63<br>(42 - 92)      |
| Diabetes mellitus                                   | 72<br>(42 - 118)  | 0<br>(0 - 1)       | 0<br>(0 - 0)        | 9<br>(4 - 16)        | 24<br>(13 - 43)      | 39<br>(23 - 61)      |
| Acute glomerulonephritis                            | 1<br>(0 - 2)      | 0<br>(0 - 0)       | 0<br>(0 - 0)        | 0<br>(0 - 1)         | 0<br>(0 - 0)         | 0<br>(0 - 0)         |
| Chronic kidney disease                              | 35<br>(18 - 60)   | 1<br>(0 - 1)       | 0<br>(0 - 0)        | 9<br>(3 - 16)        | 11<br>(5 - 22)       | 15<br>(8 - 23)       |
| Chronic kidney disease due to diabetes mellitus     | 3<br>(1 - 6)      | 0<br>(0 - 0)       | 0<br>(0 - 0)        | 1<br>(0 - 2)         | 1<br>(0 - 3)         | 1<br>(0 - 2)         |
| Chronic kidney disease due to hypertension          | 9<br>(4 - 18)     | 0<br>(0 - 0)       | 0<br>(0 - 0)        | 2<br>(0 - 3)         | 3<br>(1 - 6)         | 5<br>(2 - 9)         |
| Chronic kidney disease due to glomerulonephritis    | 6<br>(3 - 12)     | 0<br>(0 - 0)       | 0<br>(0 - 0)        | 2<br>(1 - 4)         | 2<br>(1 - 4)         | 2<br>(1 - 4)         |
| Chronic kidney disease due to other causes          | 17<br>(6 - 33)    | 0<br>(0 - 0)       | 0<br>(0 - 0)        | 4<br>(1 - 9)         | 6<br>(2 - 13)        | 7<br>(2 - 12)        |
| Urinary diseases and male infertility               | 11<br>(6 - 19)    | 1<br>(0 - 1)       | 0<br>(0 - 0)        | 3<br>(1 - 5)         | 3<br>(1 - 5)         | 5<br>(2 - 9)         |
| Interstitial nephritis and urinary tract infections | 8<br>(4 - 14)     | 0<br>(0 - 1)       | 0<br>(0 - 0)        | 2<br>(1 - 3)         | 2<br>(1 - 4)         | 3<br>(1 - 7)         |
| Urolithiasis                                        | 1<br>(0 - 1)      | --                 | 0<br>(0 - 0)        | 0<br>(0 - 0)         | 0<br>(0 - 0)         | 0<br>(0 - 0)         |
| Other urinary diseases                              | 3<br>(1 - 5)      | 0<br>(0 - 0)       | 0<br>(0 - 0)        | 1<br>(0 - 1)         | 1<br>(0 - 1)         | 1<br>(0 - 2)         |
| Gynecological diseases                              | 0<br>(0 - 1)      | --                 | --                  | 0<br>(0 - 0)         | 0<br>(0 - 0)         | 0<br>(0 - 0)         |
| Uterine fibroids                                    | 0<br>(0 - 0)      | --                 | --                  | 0<br>(0 - 0)         | 0<br>(0 - 0)         | 0<br>(0 - 0)         |
| Polycystic ovarian syndrome                         | 0<br>(0 - 0)      | --                 | --                  | 0<br>(0 - 0)         | 0<br>(0 - 0)         | --                   |
| Endometriosis                                       | 0<br>(0 - 0)      | --                 | --                  | 0<br>(0 - 0)         | 0<br>(0 - 0)         | --                   |
| Genital prolapse                                    | 0<br>(0 - 0)      | --                 | --                  | 0<br>(0 - 0)         | 0<br>(0 - 0)         | 0<br>(0 - 0)         |
| Other gynecological diseases                        | 0<br>(0 - 0)      | --                 | --                  | 0<br>(0 - 0)         | 0<br>(0 - 0)         | 0<br>(0 - 0)         |
| Hemoglobinopathies and hemolytic anemias            | 4<br>(2 - 8)      | 1<br>(1 - 3)       | 0<br>(0 - 1)        | 1<br>(0 - 3)         | 0<br>(0 - 1)         | 1<br>(0 - 1)         |
| Thalassemias                                        | 2<br>(1 - 4)      | 1<br>(0 - 2)       | 0<br>(0 - 1)        | 1<br>(0 - 2)         | 0<br>(0 - 0)         | 0<br>(0 - 0)         |
| Sickle cell disorders                               | 0<br>(0 - 1)      | 0<br>(0 - 0)       | 0<br>(0 - 0)        | 0<br>(0 - 0)         | 0<br>(0 - 0)         | 0<br>(0 - 0)         |
| G6PD deficiency                                     | 0<br>(0 - 0)      | 0<br>(0 - 0)       | 0<br>(0 - 0)        | 0<br>(0 - 0)         | 0<br>(0 - 0)         | 0<br>(0 - 0)         |
| Other hemoglobinopathies and hemolytic anemias      | 1<br>(0 - 3)      | 0<br>(0 - 0)       | 0<br>(0 - 0)        | 0<br>(0 - 1)         | 0<br>(0 - 0)         | 1<br>(0 - 1)         |
| Endocrine, metabolic, blood, and immune disorders   | 11<br>(6 - 18)    | 2<br>(1 - 3)       | 0<br>(0 - 1)        | 2<br>(1 - 4)         | 2<br>(1 - 4)         | 4<br>(2 - 7)         |
| Musculoskeletal disorders                           | 5<br>(2 - 9)      | --                 | 0<br>(0 - 1)        | 1<br>(1 - 2)         | 2<br>(1 - 4)         | 2<br>(1 - 3)         |
| Rheumatoid arthritis                                | 2<br>(1 - 4)      | --                 | 0<br>(0 - 0)        | 0<br>(0 - 0)         | 1<br>(0 - 2)         | 1<br>(0 - 2)         |
| Other musculoskeletal disorders                     | 3<br>(1 - 5)      | --                 | 0<br>(0 - 1)        | 1<br>(0 - 2)         | 1<br>(0 - 2)         | 1<br>(0 - 1)         |
| Other non-communicable diseases                     | 41<br>(24 - 68)   | 30<br>(15 - 55)    | 2<br>(1 - 4)        | 4<br>(2 - 6)         | 2<br>(1 - 3)         | 3<br>(2 - 6)         |
| Congenital anomalies                                | 35<br>(19 - 61)   | 29<br>(14 - 52)    | 2<br>(1 - 4)        | 3<br>(1 - 5)         | 1<br>(0 - 2)         | 1<br>(0 - 2)         |
| Neural tube defects                                 | 1<br>(0 - 4)      | 1<br>(0 - 4)       | 0<br>(0 - 0)        | 0<br>(0 - 0)         | 0<br>(0 - 0)         | 0<br>(0 - 0)         |
| Congenital heart anomalies                          | 21<br>(9 - 37)    | 17<br>(7 - 32)     | 1<br>(0 - 2)        | 1<br>(1 - 2)         | 1<br>(0 - 1)         | 1<br>(0 - 1)         |
| Cleft lip and cleft palate                          | 0<br>(0 - 0)      | 0<br>(0 - 0)       | --                  | --                   | --                   | --                   |
| Down syndrome                                       | 2<br>(1 - 4)      | 1<br>(0 - 3)       | 0<br>(0 - 0)        | 0<br>(0 - 1)         | 0<br>(0 - 0)         | 0<br>(0 - 0)         |
| Chromosomal unbalanced rearrangements               | 1<br>(0 - 4)      | 1<br>(0 - 3)       | 0<br>(0 - 0)        | 0<br>(0 - 0)         | 0<br>(0 - 0)         | 0<br>(0 - 0)         |
| Other congenital anomalies                          | 10<br>(4 - 21)    | 8<br>(3 - 18)      | 1<br>(0 - 1)        | 1<br>(0 - 2)         | 0<br>(0 - 0)         | 0<br>(0 - 1)         |
| Skin and subcutaneous diseases                      | 5<br>(3 - 8)      | 0<br>(0 - 1)       | 0<br>(0 - 0)        | 1<br>(0 - 1)         | 1<br>(0 - 2)         | 2<br>(1 - 4)         |
| Cellulitis                                          | 1<br>(0 - 3)      | 0<br>(0 - 0)       | 0<br>(0 - 0)        | 0<br>(0 - 0)         | 0<br>(0 - 1)         | 1<br>(0 - 1)         |
| Pyoderma                                            | 2<br>(1 - 5)      | 0<br>(0 - 0)       | 0<br>(0 - 0)        | 0<br>(0 - 1)         | 1<br>(0 - 1)         | 1<br>(0 - 3)         |
| Decubitus ulcer                                     | 1<br>(0 - 2)      | 0<br>(0 - 0)       | 0<br>(0 - 0)        | 0<br>(0 - 0)         | 0<br>(0 - 0)         | 1<br>(0 - 2)         |

Web Table 31- Bhutan deaths with 95% UI by age, sex, and cause in 2013

| Cause                                           | Females, All Ages | Females, 0-4 Years | Females, 5-14 Years | Females, 15-49 Years | Females, 50-69 Years | Females, 70-80 Years |
|-------------------------------------------------|-------------------|--------------------|---------------------|----------------------|----------------------|----------------------|
| Other skin and subcutaneous diseases            | 0<br>(0 - 0)      | 0<br>(0 - 0)       | 0<br>(0 - 0)        | 0<br>(0 - 0)         | 0<br>(0 - 0)         | 0<br>(0 - 0)         |
| Sudden infant death syndrome                    | 1<br>(0 - 4)      | 1<br>(0 - 4)       | --                  | --                   | --                   | --                   |
| Injuries                                        | 153<br>(98 - 234) | 28<br>(17 - 44)    | 12<br>(8 - 17)      | 50<br>(24 - 88)      | 24<br>(14 - 43)      | 38<br>(26 - 55)      |
| Transport injuries                              | 31<br>(18 - 52)   | 3<br>(1 - 4)       | 4<br>(2 - 6)        | 16<br>(7 - 29)       | 5<br>(3 - 10)        | 4<br>(2 - 6)         |
| Road injuries                                   | 29<br>(16 - 48)   | 2<br>(1 - 3)       | 4<br>(2 - 5)        | 15<br>(7 - 27)       | 5<br>(3 - 9)         | 3<br>(2 - 6)         |
| Pedestrian road injuries                        | 13<br>(7 - 24)    | 1<br>(1 - 2)       | 2<br>(1 - 4)        | 5<br>(2 - 11)        | 3<br>(1 - 5)         | 2<br>(1 - 4)         |
| Cyclist road injuries                           | 2<br>(1 - 3)      | 0<br>(0 - 0)       | 0<br>(0 - 0)        | 1<br>(0 - 2)         | 0<br>(0 - 0)         | 0<br>(0 - 0)         |
| Motorcyclist road injuries                      | 3<br>(1 - 6)      | 0<br>(0 - 0)       | 0<br>(0 - 0)        | 2<br>(1 - 5)         | 0<br>(0 - 1)         | 0<br>(0 - 0)         |
| Motor vehicle road injuries                     | 11<br>(6 - 19)    | 1<br>(0 - 1)       | 1<br>(0 - 2)        | 7<br>(3 - 13)        | 2<br>(1 - 3)         | 1<br>(0 - 1)         |
| Other road injuries                             | 0<br>(0 - 1)      | 0<br>(0 - 0)       | 0<br>(0 - 0)        | 0<br>(0 - 0)         | 0<br>(0 - 0)         | 0<br>(0 - 0)         |
| Other transport injuries                        | 3<br>(1 - 5)      | 1<br>(0 - 1)       | 0<br>(0 - 0)        | 1<br>(0 - 2)         | 0<br>(0 - 1)         | 0<br>(0 - 1)         |
| Unintentional injuries                          | 101<br>(67 - 148) | 26<br>(15 - 40)    | 7<br>(5 - 11)       | 21<br>(10 - 37)      | 15<br>(8 - 26)       | 33<br>(22 - 48)      |
| Falls                                           | 23<br>(12 - 38)   | 2<br>(1 - 4)       | 1<br>(0 - 1)        | 2<br>(1 - 5)         | 3<br>(2 - 6)         | 15<br>(7 - 25)       |
| Drowning                                        | 10<br>(5 - 18)    | 4<br>(2 - 8)       | 2<br>(1 - 3)        | 3<br>(1 - 5)         | 1<br>(0 - 2)         | 1<br>(0 - 1)         |
| Fire, heat, and hot substances                  | 21<br>(12 - 34)   | 5<br>(3 - 10)      | 2<br>(1 - 4)        | 7<br>(3 - 12)        | 3<br>(1 - 5)         | 4<br>(2 - 7)         |
| Poisonings                                      | 2<br>(1 - 4)      | 0<br>(0 - 1)       | 0<br>(0 - 0)        | 1<br>(0 - 2)         | 0<br>(0 - 1)         | 0<br>(0 - 1)         |
| Exposure to mechanical forces                   | 4<br>(2 - 10)     | 2<br>(1 - 4)       | 0<br>(0 - 1)        | 1<br>(0 - 3)         | 1<br>(0 - 1)         | 1<br>(0 - 1)         |
| Unintentional firearm injuries                  | 1<br>(0 - 1)      | 0<br>(0 - 0)       | 0<br>(0 - 0)        | 0<br>(0 - 1)         | 0<br>(0 - 0)         | 0<br>(0 - 0)         |
| Unintentional suffocation                       | 0<br>(0 - 1)      | 0<br>(0 - 1)       | 0<br>(0 - 0)        | 0<br>(0 - 0)         | 0<br>(0 - 0)         | 0<br>(0 - 0)         |
| Other exposure to mechanical forces             | 3<br>(1 - 8)      | 1<br>(0 - 3)       | 0<br>(0 - 1)        | 1<br>(0 - 2)         | 0<br>(0 - 1)         | 1<br>(0 - 1)         |
| Adverse effects of medical treatment            | 11<br>(7 - 19)    | 1<br>(1 - 3)       | 0<br>(0 - 0)        | 3<br>(1 - 5)         | 2<br>(1 - 5)         | 4<br>(2 - 8)         |
| Animal contact                                  | 11<br>(5 - 24)    | 5<br>(2 - 12)      | 2<br>(1 - 4)        | 2<br>(1 - 5)         | 1<br>(1 - 3)         | 1<br>(0 - 2)         |
| Venomous animal contact                         | 8<br>(4 - 22)     | 4<br>(1 - 11)      | 1<br>(1 - 3)        | 2<br>(1 - 4)         | 1<br>(0 - 3)         | 0<br>(0 - 1)         |
| Non-venomous animal contact                     | 2<br>(1 - 6)      | 1<br>(0 - 3)       | 0<br>(0 - 1)        | 0<br>(0 - 1)         | 0<br>(0 - 1)         | 0<br>(0 - 1)         |
| Foreign body                                    | 9<br>(4 - 18)     | 5<br>(2 - 11)      | 0<br>(0 - 0)        | 1<br>(0 - 2)         | 0<br>(0 - 1)         | 3<br>(1 - 5)         |
| Pulmonary aspiration and foreign body in airway | 8<br>(4 - 18)     | 5<br>(2 - 11)      | 0<br>(0 - 0)        | 1<br>(0 - 2)         | 0<br>(0 - 1)         | 3<br>(1 - 5)         |
| Foreign body in other body part                 | 0<br>(0 - 0)      | 0<br>(0 - 0)       | 0<br>(0 - 0)        | 0<br>(0 - 0)         | 0<br>(0 - 0)         | 0<br>(0 - 0)         |
| Other unintentional injuries                    | 10<br>(4 - 22)    | 1<br>(1 - 3)       | 0<br>(0 - 1)        | 2<br>(1 - 4)         | 2<br>(1 - 6)         | 4<br>(1 - 10)        |
| Self-harm and interpersonal violence            | 20<br>(11 - 35)   | 0<br>(0 - 1)       | 0<br>(0 - 1)        | 14<br>(6 - 25)       | 4<br>(2 - 8)         | 2<br>(1 - 3)         |
| Self-harm                                       | 18<br>(9 - 32)    | --                 | 0<br>(0 - 1)        | 12<br>(5 - 22)       | 4<br>(2 - 8)         | 2<br>(1 - 3)         |
| Interpersonal violence                          | 2<br>(1 - 4)      | 0<br>(0 - 1)       | 0<br>(0 - 0)        | 2<br>(1 - 3)         | 0<br>(0 - 0)         | 0<br>(0 - 0)         |
| Assault by firearm                              | 0<br>(0 - 1)      | 0<br>(0 - 0)       | 0<br>(0 - 0)        | 0<br>(0 - 1)         | 0<br>(0 - 0)         | 0<br>(0 - 0)         |
| Assault by sharp object                         | 1<br>(0 - 2)      | 0<br>(0 - 0)       | 0<br>(0 - 0)        | 1<br>(0 - 1)         | 0<br>(0 - 0)         | 0<br>(0 - 0)         |
| Assault by other means                          | 1<br>(1 - 2)      | 0<br>(0 - 0)       | 0<br>(0 - 0)        | 1<br>(0 - 2)         | 0<br>(0 - 0)         | 0<br>(0 - 0)         |

Web Table 31- Bolivia deaths with 95% UI by age, sex, and cause in 2013

| Cause                                                              | Both Sexes, All Ages        | Both Sexes, 0-4 Years       | Both Sexes, 5-14 Years   | Both Sexes, 15-49 Years   | Both Sexes, 50-69 Years     | Both Sexes, 70-80 Years     |
|--------------------------------------------------------------------|-----------------------------|-----------------------------|--------------------------|---------------------------|-----------------------------|-----------------------------|
| All causes                                                         | 57,536<br>(49,615 - 67,495) | 11,445<br>(10,656 - 12,335) | 1,424<br>(1,318 - 1,564) | 9,891<br>(7,677 - 12,621) | 13,714<br>(10,815 - 17,316) | 21,063<br>(18,334 - 24,351) |
| Communicable, maternal, neonatal, and nutritional diseases         | 14,198<br>(12,475 - 16,633) | 6,830<br>(6,116 - 7,613)    | 291<br>(235 - 370)       | 1,841<br>(1,286 - 3,682)  | 1,537<br>(1,150 - 2,105)    | 3,699<br>(2,963 - 4,524)    |
| HIV/AIDS and tuberculosis                                          | 1,343<br>(735 - 3,991)      | 39<br>(22 - 109)            | 24<br>(8 - 92)           | 648<br>(227 - 2,650)      | 333<br>(197 - 867)          | 300<br>(229 - 401)          |
| Tuberculosis                                                       | 726<br>(565 - 923)          | 30<br>(21 - 41)             | 8<br>(6 - 11)            | 188<br>(125 - 269)        | 216<br>(160 - 291)          | 284<br>(219 - 362)          |
| HIV/AIDS                                                           | 617<br>(59 - 3,398)         | 9<br>(0 - 77)               | 16<br>(0 - 85)           | 459<br>(46 - 2,516)       | 117<br>(10 - 670)           | 15<br>(1 - 89)              |
| HIV/AIDS resulting in mycobacterial infection                      | 37<br>(3 - 212)             | 1<br>(0 - 4)                | 1<br>(0 - 4)             | 27<br>(3 - 158)           | 7<br>(1 - 43)               | 1<br>(0 - 6)                |
| HIV/AIDS resulting in other diseases                               | 580<br>(55 - 3,199)         | 9<br>(0 - 73)               | 15<br>(0 - 81)           | 432<br>(43 - 2,358)       | 110<br>(10 - 627)           | 14<br>(1 - 83)              |
| Diarrrhea, lower respiratory, and other common infectious diseases | 6,440<br>(5,339 - 7,683)    | 2,424<br>(1,919 - 3,044)    | 208<br>(161 - 266)       | 468<br>(308 - 645)        | 796<br>(578 - 1,098)        | 2,544<br>(1,925 - 3,262)    |
| Diarrrheal diseases                                                | 916<br>(566 - 1,373)        | 726<br>(394 - 1,170)        | 30<br>(17 - 49)          | 31<br>(20 - 45)           | 30<br>(19 - 45)             | 98<br>(64 - 142)            |
| Intestinal infectious diseases                                     | 168<br>(87 - 304)           | 56<br>(28 - 102)            | 48<br>(24 - 85)          | 55<br>(25 - 108)          | 7<br>(3 - 14)               | 3<br>(1 - 5)                |
| Typhoid fever                                                      | 125<br>(63 - 229)           | 39<br>(19 - 74)             | 37<br>(19 - 67)          | 42<br>(18 - 85)           | 5<br>(2 - 10)               | 2<br>(1 - 3)                |
| Paratyphoid fever                                                  | 33<br>(16 - 59)             | 12<br>(5 - 22)              | 10<br>(5 - 18)           | 11<br>(4 - 22)            | 1<br>(0 - 2)                | 0<br>(0 - 1)                |
| Other intestinal infectious diseases                               | 10<br>(4 - 20)              | 5<br>(1 - 12)               | 1<br>(0 - 4)             | 3<br>(0 - 8)              | 1<br>(0 - 4)                | 1<br>(0 - 3)                |
| Lower respiratory infections                                       | 4,905<br>(3,983 - 5,953)    | 1,416<br>(1,050 - 1,839)    | 86<br>(59 - 122)         | 300<br>(192 - 429)        | 718<br>(510 - 1,000)        | 2,386<br>(1,778 - 3,099)    |
| Upper respiratory infections                                       | 4<br>(2 - 6)                | 1<br>(0 - 2)                | 0<br>(0 - 0)             | 1<br>(0 - 2)              | 1<br>(0 - 2)                | 1<br>(0 - 3)                |
| Otitis media                                                       | 9<br>(7 - 11)               | 2<br>(1 - 2)                | 0<br>(0 - 1)             | 1<br>(1 - 1)              | 3<br>(2 - 4)                | 3<br>(2 - 4)                |
| Meningitis                                                         | 297<br>(229 - 378)          | 142<br>(96 - 208)           | 28<br>(19 - 41)          | 55<br>(36 - 78)           | 26<br>(17 - 39)             | 45<br>(30 - 65)             |
| Pneumococcal meningitis                                            | 74<br>(54 - 97)             | 30<br>(18 - 46)             | 8<br>(5 - 13)            | 15<br>(9 - 25)            | 7<br>(4 - 13)               | 13<br>(8 - 22)              |
| H influenzae type B meningitis                                     | 65<br>(44 - 94)             | 47<br>(29 - 74)             | 6<br>(3 - 11)            | 6<br>(3 - 9)              | 2<br>(1 - 4)                | 4<br>(2 - 7)                |
| Meningococcal meningitis                                           | 49<br>(36 - 64)             | 21<br>(13 - 32)             | 5<br>(3 - 9)             | 10<br>(5 - 16)            | 4<br>(2 - 7)                | 8<br>(5 - 13)               |
| Other meningitis                                                   | 110<br>(77 - 143)           | 45<br>(24 - 71)             | 9<br>(5 - 14)            | 24<br>(15 - 36)           | 12<br>(8 - 19)              | 20<br>(12 - 31)             |
| Encephalitis                                                       | 93<br>(69 - 132)            | 44<br>(28 - 68)             | 13<br>(8 - 22)           | 20<br>(12 - 35)           | 10<br>(7 - 16)              | 6<br>(4 - 8)                |
| Diphtheria                                                         | 3<br>(0 - 13)               | 2<br>(0 - 12)               | 0<br>(0 - 3)             | 0<br>(0 - 1)              | 0<br>(0 - 0)                | --<br>(0 - 0)               |
| Whooping cough                                                     | 35<br>(14 - 76)             | 33<br>(12 - 74)             | 1<br>(1 - 1)             | 1<br>(1 - 1)              | 0<br>(0 - 0)                | --<br>(0 - 0)               |
| Tetanus                                                            | 1<br>(1 - 3)                | 0<br>(0 - 0)                | 0<br>(0 - 0)             | 1<br>(0 - 1)              | 0<br>(0 - 1)                | 0<br>(0 - 0)                |
| Measles                                                            | 0<br>(0 - 0)                | 0<br>(0 - 0)                | 0<br>(0 - 0)             | 0<br>(0 - 0)              | 0<br>(0 - 0)                | --<br>(0 - 0)               |
| Varicella and herpes zoster                                        | 8<br>(4 - 17)               | 2<br>(0 - 7)                | 1<br>(0 - 2)             | 2<br>(1 - 4)              | 1<br>(0 - 2)                | 3<br>(0 - 9)                |
| Neglected tropical diseases and malaria                            | 324<br>(135 - 779)          | 15<br>(8 - 26)              | 6<br>(4 - 12)            | 35<br>(18 - 77)           | 136<br>(42 - 348)           | 133<br>(41 - 343)           |
| Malaria                                                            | 2<br>(2 - 3)                | 0<br>(0 - 1)                | 0<br>(0 - 1)             | 1<br>(1 - 1)              | 0<br>(0 - 0)                | 0<br>(0 - 0)                |
| Chagas disease                                                     | 280<br>(88 - 734)           | 0<br>(0 - 1)                | 0<br>(0 - 1)             | 21<br>(7 - 62)            | 130<br>(37 - 342)           | 128<br>(37 - 338)           |
| Leishmaniasis                                                      | 3<br>(2 - 6)                | 1<br>(0 - 3)                | 0<br>(0 - 1)             | 1<br>(0 - 3)              | 0<br>(0 - 1)                | 0<br>(0 - 0)                |
| Visceral leishmaniasis                                             | 3<br>(2 - 6)                | 1<br>(0 - 3)                | 0<br>(0 - 1)             | 1<br>(0 - 3)              | 0<br>(0 - 1)                | 0<br>(0 - 0)                |
| Cysticercosis                                                      | 6<br>(4 - 8)                | 0<br>(0 - 0)                | 0<br>(0 - 0)             | 3<br>(2 - 4)              | 2<br>(1 - 2)                | 1<br>(0 - 1)                |
| Cystic echinococcosis                                              | 2<br>(1 - 2)                | 0<br>(0 - 0)                | 0<br>(0 - 0)             | 1<br>(1 - 1)              | 0<br>(0 - 1)                | 0<br>(0 - 0)                |
| Dengue                                                             | 2<br>(1 - 4)                | 0<br>(0 - 0)                | 0<br>(0 - 0)             | 1<br>(1 - 3)              | 0<br>(0 - 0)                | 0<br>(0 - 1)                |
| Yellow fever                                                       | 7<br>(5 - 10)               | 1<br>(0 - 1)                | 1<br>(1 - 3)             | 4<br>(2 - 6)              | 1<br>(0 - 1)                | 0<br>(0 - 1)                |
| Rabies                                                             | 1<br>(1 - 2)                | 0<br>(0 - 0)                | 0<br>(0 - 1)             | 1<br>(0 - 1)              | 0<br>(0 - 0)                | 0<br>(0 - 0)                |
| Intestinal nematode infections                                     | 10<br>(3 - 22)              | 7<br>(1 - 17)               | 2<br>(0 - 7)             | 1<br>(0 - 5)              | 1<br>(0 - 3)                | 1<br>(0 - 4)                |
| Ascariasis                                                         | 10<br>(3 - 22)              | 7<br>(1 - 17)               | 2<br>(0 - 7)             | 1<br>(0 - 5)              | 1<br>(0 - 3)                | 1<br>(0 - 4)                |
| Other neglected tropical diseases                                  | 11<br>(8 - 16)              | 5<br>(3 - 9)                | 1<br>(0 - 1)             | 2<br>(1 - 3)              | 2<br>(1 - 3)                | 2<br>(1 - 3)                |

Web Table 31- Bolivia deaths with 95% UI by age, sex, and cause in 2013

| Cause                                                            | Both Sexes, All Ages        | Both Sexes, 0-4 Years    | Both Sexes, 5-14 Years | Both Sexes, 15-49 Years  | Both Sexes, 50-69 Years    | Both Sexes, 70-80 Years     |
|------------------------------------------------------------------|-----------------------------|--------------------------|------------------------|--------------------------|----------------------------|-----------------------------|
| Maternal disorders                                               | 499<br>(307 - 715)          | --                       | 2<br>(1 - 5)           | 497<br>(306 - 712)       | --                         | --                          |
| Maternal hemorrhage                                              | 67<br>(38 - 106)            | --                       | 0<br>(0 - 0)           | 67<br>(37 - 106)         | --                         | --                          |
| Maternal sepsis and other maternal infections                    | 50<br>(28 - 78)             | --                       | 0<br>(0 - 1)           | 50<br>(28 - 78)          | --                         | --                          |
| Maternal hypertensive disorders                                  | 61<br>(35 - 96)             | --                       | 0<br>(0 - 1)           | 61<br>(34 - 96)          | --                         | --                          |
| Maternal obstructed labor                                        | 34<br>(20 - 53)             | --                       | 0<br>(0 - 0)           | 34<br>(20 - 53)          | --                         | --                          |
| Maternal abortive outcome                                        | 92<br>(52 - 143)            | --                       | 0<br>(0 - 1)           | 92<br>(51 - 142)         | --                         | --                          |
| Indirect maternal deaths                                         | 33<br>(19 - 50)             | --                       | 0<br>(0 - 0)           | 33<br>(18 - 50)          | --                         | --                          |
| Late maternal deaths                                             | 108<br>(62 - 168)           | --                       | 0<br>(0 - 1)           | 107<br>(61 - 167)        | --                         | --                          |
| Maternal deaths aggravated by HIV/AIDS                           | 0<br>(0 - 0)                | --                       | --                     | 0<br>(0 - 0)             | --                         | --                          |
| Other maternal disorders                                         | 52<br>(29 - 83)             | --                       | 0<br>(0 - 1)           | 52<br>(28 - 83)          | --                         | --                          |
| Neonatal disorders                                               | 3,804<br>(3,313 - 4,458)    | 3,804<br>(3,313 - 4,458) | --                     | --                       | --                         | --                          |
| Neonatal preterm birth complications                             | 1,506<br>(997 - 2,043)      | 1,506<br>(997 - 2,043)   | --                     | --                       | --                         | --                          |
| Neonatal encephalopathy due to birth asphyxia and trauma         | 1,168<br>(739 - 1,644)      | 1,168<br>(739 - 1,644)   | --                     | --                       | --                         | --                          |
| Neonatal sepsis and other neonatal infections                    | 803<br>(473 - 1,261)        | 803<br>(473 - 1,261)     | --                     | --                       | --                         | --                          |
| Hemolytic disease and other neonatal jaundice                    | 30<br>(15 - 56)             | 30<br>(15 - 56)          | --                     | --                       | --                         | --                          |
| Other neonatal disorders                                         | 296<br>(177 - 481)          | 296<br>(177 - 481)       | --                     | --                       | --                         | --                          |
| Nutritional deficiencies                                         | 1,236<br>(935 - 1,620)      | 202<br>(131 - 313)       | 18<br>(13 - 25)        | 142<br>(92 - 204)        | 218<br>(147 - 305)         | 655<br>(462 - 918)          |
| Protein-energy malnutrition                                      | 816<br>(593 - 1,119)        | 163<br>(99 - 264)        | 9<br>(5 - 14)          | 42<br>(21 - 70)          | 120<br>(73 - 180)          | 482<br>(322 - 680)          |
| Iodine deficiency                                                | 1<br>(0 - 3)                | 0<br>(0 - 2)             | 0<br>(0 - 0)           | 0<br>(0 - 1)             | 0<br>(0 - 1)               | 0<br>(0 - 1)                |
| Iron-deficiency anemia                                           | 404<br>(231 - 624)          | 37<br>(16 - 76)          | 9<br>(5 - 13)          | 97<br>(58 - 141)         | 92<br>(51 - 144)           | 168<br>(82 - 288)           |
| Other nutritional deficiencies                                   | 15<br>(9 - 27)              | 1<br>(1 - 3)             | 1<br>(0 - 1)           | 3<br>(2 - 6)             | 5<br>(3 - 10)              | 5<br>(2 - 9)                |
| Other communicable, maternal, neonatal, and nutritional diseases | 552<br>(324 - 855)          | 346<br>(141 - 631)       | 33<br>(18 - 55)        | 51<br>(33 - 71)          | 54<br>(34 - 89)            | 67<br>(36 - 119)            |
| Sexually transmitted diseases excluding HIV                      | 337<br>(115 - 624)          | 296<br>(93 - 566)        | 23<br>(8 - 43)         | 9<br>(5 - 15)            | 4<br>(2 - 8)               | 5<br>(2 - 10)               |
| Syphilis                                                         | 329<br>(108 - 617)          | 296<br>(93 - 566)        | 23<br>(8 - 43)         | 4<br>(2 - 6)             | 2<br>(1 - 5)               | 4<br>(2 - 8)                |
| Chlamydial infection                                             | 2<br>(1 - 4)                | --                       | 0<br>(0 - 0)           | 2<br>(1 - 3)             | 0<br>(0 - 1)               | 0<br>(0 - 1)                |
| Gonococcal infection                                             | 3<br>(2 - 5)                | --                       | 0<br>(0 - 0)           | 2<br>(1 - 3)             | 1<br>(0 - 1)               | 1<br>(0 - 1)                |
| Other sexually transmitted diseases                              | 3<br>(2 - 4)                | --                       | 0<br>(0 - 0)           | 2<br>(1 - 3)             | 0<br>(0 - 1)               | 0<br>(0 - 1)                |
| Hepatitis                                                        | 41<br>(31 - 51)             | 4<br>(3 - 6)             | 3<br>(2 - 4)           | 15<br>(10 - 20)          | 11<br>(8 - 16)             | 7<br>(5 - 10)               |
| Acute hepatitis A                                                | 13<br>(6 - 21)              | 3<br>(1 - 5)             | 2<br>(1 - 3)           | 7<br>(3 - 11)            | 1<br>(0 - 3)               | 0<br>(0 - 1)                |
| Acute hepatitis B                                                | 25<br>(16 - 35)             | 1<br>(0 - 3)             | 1<br>(0 - 1)           | 7<br>(3 - 12)            | 9<br>(6 - 14)              | 6<br>(4 - 9)                |
| Acute hepatitis C                                                | 3<br>(1 - 7)                | --                       | 0<br>(0 - 0)           | 1<br>(0 - 3)             | 1<br>(0 - 2)               | 1<br>(0 - 2)                |
| Other infectious diseases                                        | 174<br>(115 - 267)          | 46<br>(23 - 106)         | 7<br>(4 - 13)          | 27<br>(16 - 43)          | 39<br>(21 - 72)            | 55<br>(25 - 107)            |
| Non-communicable diseases                                        | 33,574<br>(27,784 - 40,436) | 2,055<br>(1,676 - 2,458) | 366<br>(312 - 424)     | 4,194<br>(2,801 - 5,440) | 10,876<br>(8,490 - 13,917) | 16,084<br>(13,894 - 18,790) |
| Neoplasms                                                        | 7,662<br>(6,143 - 9,506)    | 135<br>(93 - 181)        | 82<br>(65 - 102)       | 1,093<br>(735 - 1,435)   | 3,046<br>(2,327 - 3,994)   | 3,306<br>(2,761 - 3,980)    |
| Esophageal cancer                                                | 63<br>(47 - 85)             | --                       | --                     | 7<br>(4 - 12)            | 36<br>(25 - 52)            | 20<br>(15 - 27)             |
| Stomach cancer                                                   | 1,856<br>(1,450 - 2,342)    | --                       | --                     | 214<br>(134 - 291)       | 738<br>(548 - 982)         | 904<br>(692 - 1,154)        |
| Liver cancer                                                     | 424<br>(328 - 552)          | --                       | 2<br>(1 - 3)           | 44<br>(28 - 63)          | 198<br>(138 - 277)         | 181<br>(133 - 241)          |
| Liver cancer due to hepatitis B                                  | 175<br>(118 - 245)          | --                       | 1<br>(0 - 1)           | 26<br>(16 - 38)          | 89<br>(54 - 130)           | 60<br>(39 - 85)             |
| Liver cancer due to hepatitis C                                  | 67<br>(39 - 104)            | --                       | 0<br>(0 - 0)           | 4<br>(2 - 6)             | 29<br>(16 - 48)            | 34<br>(19 - 53)             |
| Liver cancer due to alcohol use                                  | 122<br>(83 - 174)           | --                       | --                     | 6<br>(3 - 10)            | 50<br>(32 - 78)            | 65<br>(43 - 97)             |

Web Table 31- Bolivia deaths with 95% UI by age, sex, and cause in 2013

| Cause                                         | Both Sexes, All Ages       | Both Sexes, 0-4 Years | Both Sexes, 5-14 Years | Both Sexes, 15-49 Years | Both Sexes, 50-69 Years  | Both Sexes, 70-80 Years  |
|-----------------------------------------------|----------------------------|-----------------------|------------------------|-------------------------|--------------------------|--------------------------|
| Liver cancer due to other causes              | 60<br>(37 - 94)            | --                    | 1<br>(0 - 1)           | 8<br>(4 - 14)           | 30<br>(16 - 50)          | 21<br>(12 - 35)          |
| Larynx cancer                                 | 16<br>(11 - 28)            | --                    | --                     | 3<br>(2 - 6)            | 3<br>(2 - 6)             | 9<br>(6 - 17)            |
| Tracheal, bronchus and lung cancer            | 662<br>(526 - 846)         | --                    | --                     | 50<br>(32 - 68)         | 295<br>(222 - 394)       | 318<br>(252 - 399)       |
| Breast cancer                                 | 376<br>(256 - 524)         | --                    | --                     | 129<br>(77 - 185)       | 157<br>(106 - 231)       | 90<br>(63 - 123)         |
| Cervical cancer                               | 544<br>(341 - 773)         | --                    | --                     | 173<br>(97 - 264)       | 227<br>(136 - 349)       | 144<br>(93 - 206)        |
| Uterine cancer                                | 104<br>(65 - 161)          | --                    | --                     | 17<br>(9 - 30)          | 46<br>(26 - 75)          | 41<br>(24 - 65)          |
| Prostate cancer                               | 313<br>(202 - 492)         | --                    | --                     | 2<br>(1 - 4)            | 65<br>(37 - 105)         | 246<br>(163 - 393)       |
| Colon and rectum cancer                       | 544<br>(428 - 696)         | --                    | --                     | 61<br>(39 - 82)         | 235<br>(174 - 304)       | 249<br>(198 - 319)       |
| Lip and oral cavity cancer                    | 30<br>(21 - 44)            | --                    | --                     | 6<br>(3 - 10)           | 8<br>(5 - 12)            | 16<br>(11 - 24)          |
| Nasopharynx cancer                            | 2<br>(1 - 3)               | --                    | 0<br>(0 - 0)           | 1<br>(0 - 1)            | 1<br>(0 - 1)             | 0<br>(0 - 1)             |
| Other pharynx cancer                          | 24<br>(17 - 34)            | --                    | --                     | 4<br>(2 - 6)            | 14<br>(9 - 20)           | 6<br>(4 - 9)             |
| Gallbladder and biliary tract cancer          | 705<br>(493 - 972)         | --                    | --                     | 31<br>(19 - 47)         | 296<br>(195 - 432)       | 379<br>(261 - 528)       |
| Pancreatic cancer                             | 250<br>(196 - 319)         | --                    | --                     | 20<br>(13 - 28)         | 109<br>(81 - 146)        | 120<br>(93 - 153)        |
| Malignant skin melanoma                       | 65<br>(46 - 88)            | --                    | --                     | 19<br>(12 - 27)         | 31<br>(21 - 44)          | 15<br>(11 - 21)          |
| Non-melanoma skin cancer                      | 50<br>(35 - 75)            | --                    | --                     | 4<br>(2 - 6)            | 11<br>(7 - 18)           | 36<br>(24 - 56)          |
| Ovarian cancer                                | 110<br>(74 - 159)          | --                    | --                     | 24<br>(14 - 39)         | 64<br>(41 - 99)          | 21<br>(14 - 32)          |
| Testicular cancer                             | 5<br>(3 - 8)               | --                    | --                     | 3<br>(2 - 6)            | 1<br>(0 - 2)             | 0<br>(0 - 0)             |
| Kidney cancer                                 | 135<br>(103 - 177)         | 1<br>(0 - 2)          | 0<br>(0 - 1)           | 14<br>(9 - 19)          | 53<br>(37 - 74)          | 68<br>(50 - 91)          |
| Bladder cancer                                | 126<br>(95 - 165)          | --                    | --                     | 8<br>(5 - 12)           | 45<br>(32 - 64)          | 72<br>(54 - 96)          |
| Brain and nervous system cancer               | 138<br>(100 - 184)         | 5<br>(2 - 9)          | 8<br>(6 - 13)          | 37<br>(23 - 53)         | 54<br>(36 - 76)          | 34<br>(24 - 47)          |
| Thyroid cancer                                | 28<br>(18 - 45)            | --                    | 0<br>(0 - 0)           | 3<br>(2 - 6)            | 14<br>(8 - 24)           | 11<br>(7 - 16)           |
| Mesothelioma                                  | 10<br>(7 - 13)             | --                    | --                     | 1<br>(1 - 2)            | 5<br>(3 - 8)             | 3<br>(2 - 5)             |
| Hodgkin lymphoma                              | 26<br>(19 - 36)            | 4<br>(2 - 7)          | 3<br>(1 - 6)           | 8<br>(5 - 12)           | 6<br>(4 - 9)             | 6<br>(4 - 9)             |
| Non-Hodgkin lymphoma                          | 153<br>(116 - 209)         | 12<br>(7 - 19)        | 7<br>(5 - 10)          | 36<br>(23 - 51)         | 55<br>(39 - 80)          | 42<br>(30 - 60)          |
| Multiple myeloma                              | 81<br>(59 - 108)           | --                    | --                     | 10<br>(6 - 14)          | 40<br>(28 - 55)          | 31<br>(22 - 42)          |
| Leukemia                                      | 247<br>(197 - 298)         | 46<br>(28 - 72)       | 37<br>(26 - 48)        | 74<br>(51 - 101)        | 41<br>(30 - 54)          | 50<br>(39 - 64)          |
| Other neoplasms                               | 575<br>(439 - 741)         | 68<br>(40 - 96)       | 25<br>(16 - 34)        | 91<br>(59 - 125)        | 198<br>(139 - 273)       | 195<br>(143 - 266)       |
| Cardiovascular diseases                       | 11,246<br>(9,261 - 13,902) | 328<br>(238 - 478)    | 81<br>(60 - 110)       | 1,094<br>(728 - 1,489)  | 3,387<br>(2,612 - 4,454) | 6,355<br>(5,326 - 7,574) |
| Rheumatic heart disease                       | 137<br>(93 - 193)          | 4<br>(2 - 7)          | 5<br>(3 - 8)           | 32<br>(19 - 47)         | 58<br>(37 - 88)          | 39<br>(26 - 52)          |
| Ischemic heart disease                        | 5,665<br>(4,500 - 7,217)   | 42<br>(21 - 83)       | 23<br>(15 - 36)        | 496<br>(314 - 719)      | 1,771<br>(1,320 - 2,386) | 3,332<br>(2,696 - 4,093) |
| Cerebrovascular disease                       | 3,728<br>(2,898 - 4,738)   | 79<br>(51 - 122)      | 27<br>(18 - 37)        | 406<br>(264 - 560)      | 1,145<br>(854 - 1,529)   | 2,072<br>(1,639 - 2,564) |
| Ischemic stroke                               | 1,872<br>(1,465 - 2,386)   | 7<br>(3 - 14)         | 4<br>(3 - 8)           | 93<br>(57 - 131)        | 449<br>(321 - 624)       | 1,320<br>(1,042 - 1,661) |
| Hemorrhagic stroke                            | 1,856<br>(1,404 - 2,356)   | 72<br>(47 - 110)      | 22<br>(15 - 31)        | 313<br>(199 - 427)      | 696<br>(503 - 936)       | 752<br>(555 - 973)       |
| Hypertensive heart disease                    | 140<br>(101 - 201)         | 1<br>(0 - 2)          | 0<br>(0 - 1)           | 13<br>(7 - 19)          | 31<br>(21 - 44)          | 95<br>(67 - 142)         |
| Cardiomyopathy and myocarditis                | 397<br>(293 - 515)         | 71<br>(43 - 114)      | 7<br>(4 - 13)          | 26<br>(16 - 38)         | 99<br>(67 - 143)         | 193<br>(130 - 279)       |
| Atrial fibrillation and flutter               | 103<br>(68 - 148)          | --                    | --                     | 3<br>(1 - 5)            | 12<br>(8 - 18)           | 88<br>(55 - 132)         |
| Aortic aneurysm                               | 48<br>(34 - 67)            | --                    | --                     | 4<br>(2 - 6)            | 14<br>(9 - 20)           | 30<br>(21 - 43)          |
| Peripheral vascular disease                   | 17<br>(13 - 23)            | --                    | --                     | 2<br>(1 - 2)            | 6<br>(4 - 8)             | 10<br>(7 - 13)           |
| Endocarditis                                  | 209<br>(151 - 281)         | 43<br>(25 - 66)       | 7<br>(4 - 12)          | 29<br>(18 - 45)         | 51<br>(33 - 74)          | 79<br>(52 - 110)         |
| Other cardiovascular and circulatory diseases | 802<br>(620 - 1,025)       | 89<br>(54 - 139)      | 11<br>(7 - 17)         | 85<br>(53 - 122)        | 201<br>(141 - 287)       | 417<br>(301 - 562)       |



Web Table 31- Bolivia deaths with 95% UI by age, sex, and cause in 2013

| Cause                                               | Both Sexes, All Ages     | Both Sexes, 0-4 Years | Both Sexes, 5-14 Years | Both Sexes, 15-49 Years | Both Sexes, 50-69 Years  | Both Sexes, 70-80 Years  |
|-----------------------------------------------------|--------------------------|-----------------------|------------------------|-------------------------|--------------------------|--------------------------|
| Chronic respiratory diseases                        | 2,286<br>(1,859 - 2,778) | 105<br>(73 - 152)     | 18<br>(15 - 23)        | 148<br>(96 - 199)       | 495<br>(354 - 675)       | 1,519<br>(1,245 - 1,842) |
| Chronic obstructive pulmonary disease               | 1,740<br>(1,414 - 2,118) | 80<br>(54 - 117)      | 13<br>(10 - 16)        | 104<br>(68 - 143)       | 356<br>(255 - 480)       | 1,188<br>(961 - 1,455)   |
| Pneumoconiosis                                      | 148<br>(102 - 215)       | 1<br>(0 - 2)          | 0<br>(0 - 1)           | 17<br>(10 - 26)         | 58<br>(38 - 87)          | 73<br>(49 - 105)         |
| Silicosis                                           | 45<br>(30 - 66)          | 0<br>(0 - 0)          | 0<br>(0 - 0)           | 7<br>(4 - 13)           | 21<br>(13 - 33)          | 16<br>(11 - 24)          |
| Asbestosis                                          | 19<br>(12 - 28)          | 0<br>(0 - 0)          | 0<br>(0 - 0)           | 2<br>(1 - 3)            | 6<br>(4 - 10)            | 11<br>(7 - 16)           |
| Coal workers pneumoconiosis                         | 5<br>(3 - 8)             | 0<br>(0 - 0)          | 0<br>(0 - 0)           | 0<br>(0 - 1)            | 0<br>(0 - 1)             | 4<br>(3 - 6)             |
| Other pneumoconiosis                                | 79<br>(55 - 115)         | 0<br>(0 - 0)          | 0<br>(0 - 0)           | 7<br>(4 - 11)           | 30<br>(20 - 46)          | 42<br>(27 - 61)          |
| Asthma                                              | 70<br>(49 - 99)          | 1<br>(1 - 3)          | 1<br>(0 - 1)           | 6<br>(4 - 9)            | 15<br>(10 - 21)          | 47<br>(30 - 72)          |
| Interstitial lung disease and pulmonary sarcoidosis | 284<br>(186 - 398)       | 1<br>(0 - 2)          | 1<br>(0 - 1)           | 15<br>(8 - 27)          | 62<br>(39 - 94)          | 205<br>(127 - 297)       |
| Other chronic respiratory diseases                  | 43<br>(32 - 58)          | 21<br>(14 - 34)       | 4<br>(2 - 6)           | 6<br>(4 - 9)            | 4<br>(2 - 6)             | 8<br>(5 - 12)            |
| Cirrhosis                                           | 3,027<br>(2,349 - 3,800) | 13<br>(7 - 22)        | 10<br>(8 - 13)         | 599<br>(390 - 814)      | 1,476<br>(1,112 - 1,910) | 929<br>(739 - 1,150)     |
| Cirrhosis due to hepatitis B                        | 513<br>(284 - 797)       | 0<br>(0 - 1)          | 1<br>(0 - 1)           | 96<br>(52 - 153)        | 249<br>(134 - 406)       | 167<br>(83 - 270)        |
| Cirrhosis due to hepatitis C                        | 1,072<br>(654 - 1,522)   | 0<br>(0 - 2)          | 1<br>(0 - 2)           | 183<br>(92 - 307)       | 541<br>(312 - 800)       | 347<br>(216 - 489)       |
| Cirrhosis due to alcohol use                        | 895<br>(609 - 1,258)     | --                    | --                     | 149<br>(77 - 242)       | 440<br>(281 - 652)       | 306<br>(208 - 428)       |
| Cirrhosis due to other causes                       | 547<br>(372 - 781)       | 12<br>(7 - 21)        | 8<br>(6 - 11)          | 171<br>(103 - 261)      | 246<br>(153 - 370)       | 110<br>(73 - 160)        |
| Digestive diseases                                  | 1,737<br>(1,354 - 2,167) | 28<br>(18 - 43)       | 19<br>(14 - 24)        | 272<br>(179 - 371)      | 548<br>(396 - 727)       | 870<br>(693 - 1,083)     |
| Peptic ulcer disease                                | 300<br>(214 - 398)       | 4<br>(1 - 7)          | 4<br>(3 - 6)           | 53<br>(33 - 79)         | 85<br>(54 - 126)         | 153<br>(106 - 213)       |
| Gastritis and duodenitis                            | 20<br>(13 - 36)          | 0<br>(0 - 1)          | 0<br>(0 - 0)           | 3<br>(2 - 5)            | 7<br>(4 - 13)            | 10<br>(6 - 18)           |
| Appendicitis                                        | 77<br>(54 - 107)         | 3<br>(2 - 6)          | 3<br>(2 - 4)           | 14<br>(9 - 21)          | 21<br>(13 - 32)          | 36<br>(23 - 52)          |
| Paralytic ileus and intestinal obstruction          | 499<br>(316 - 692)       | 10<br>(5 - 17)        | 4<br>(2 - 6)           | 53<br>(29 - 84)         | 138<br>(83 - 203)        | 294<br>(187 - 409)       |
| Inguinal, femoral, and abdominal hernia             | 46<br>(31 - 81)          | 3<br>(1 - 5)          | 1<br>(0 - 1)           | 7<br>(4 - 14)           | 8<br>(5 - 13)            | 27<br>(16 - 50)          |
| Inflammatory bowel disease                          | 26<br>(18 - 37)          | 2<br>(1 - 5)          | 1<br>(1 - 1)           | 6<br>(4 - 9)            | 7<br>(4 - 10)            | 10<br>(6 - 16)           |
| Vascular intestinal disorders                       | 165<br>(96 - 270)        | 0<br>(0 - 0)          | 0<br>(0 - 0)           | 12<br>(5 - 24)          | 54<br>(28 - 94)          | 99<br>(58 - 162)         |
| Gallbladder and biliary diseases                    | 185<br>(131 - 255)       | 1<br>(1 - 2)          | 2<br>(1 - 2)           | 26<br>(17 - 38)         | 58<br>(38 - 87)          | 98<br>(64 - 142)         |
| Pancreatitis                                        | 262<br>(181 - 352)       | 1<br>(0 - 2)          | 1<br>(1 - 2)           | 75<br>(47 - 110)        | 115<br>(76 - 164)        | 70<br>(46 - 101)         |
| Other digestive diseases                            | 156<br>(110 - 207)       | 4<br>(2 - 7)          | 3<br>(2 - 4)           | 22<br>(13 - 31)         | 54<br>(36 - 79)          | 72<br>(48 - 104)         |
| Neurological disorders                              | 1,068<br>(859 - 1,318)   | 26<br>(16 - 42)       | 25<br>(18 - 36)        | 86<br>(57 - 116)        | 107<br>(79 - 147)        | 823<br>(644 - 1,034)     |
| Alzheimer disease and other dementias               | 842<br>(661 - 1,058)     | --                    | --                     | 0<br>(0 - 1)            | 72<br>(49 - 100)         | 770<br>(596 - 977)       |
| Parkinson disease                                   | 15<br>(10 - 24)          | --                    | --                     | 1<br>(0 - 1)            | 2<br>(1 - 3)             | 13<br>(8 - 21)           |
| Epilepsy                                            | 123<br>(90 - 165)        | 18<br>(8 - 33)        | 14<br>(8 - 21)         | 56<br>(35 - 79)         | 15<br>(10 - 22)          | 20<br>(13 - 31)          |
| Multiple sclerosis                                  | 15<br>(4 - 24)           | --                    | --                     | 1<br>(1 - 3)            | 5<br>(1 - 8)             | 9<br>(2 - 17)            |
| Other neurological disorders                        | 73<br>(57 - 95)          | 8<br>(6 - 11)         | 11<br>(8 - 18)         | 28<br>(19 - 38)         | 15<br>(11 - 20)          | 11<br>(9 - 15)           |
| Mental and substance use disorders                  | 655<br>(410 - 960)       | 1<br>(1 - 2)          | 0<br>(0 - 0)           | 307<br>(179 - 461)      | 255<br>(148 - 381)       | 92<br>(60 - 139)         |
| Schizophrenia                                       | 2<br>(2 - 3)             | --                    | --                     | 1<br>(0 - 1)            | 1<br>(1 - 1)             | 1<br>(1 - 1)             |
| Alcohol use disorders                               | 586<br>(354 - 873)       | --                    | --                     | 261<br>(144 - 406)      | 239<br>(134 - 361)       | 86<br>(55 - 133)         |
| Drug use disorders                                  | 66<br>(45 - 94)          | 1<br>(1 - 2)          | --                     | 45<br>(28 - 67)         | 15<br>(10 - 21)          | 5<br>(3 - 6)             |
| Opioid use disorders                                | 10<br>(7 - 15)           | 0<br>(0 - 0)          | --                     | 7<br>(5 - 11)           | 2<br>(1 - 3)             | 1<br>(1 - 1)             |
| Cocaine use disorders                               | 2<br>(1 - 2)             | 0<br>(0 - 0)          | --                     | 1<br>(1 - 2)            | 0<br>(0 - 0)             | 0<br>(0 - 0)             |
| Amphetamine use disorders                           | 1<br>(1 - 2)             | 0<br>(0 - 0)          | --                     | 1<br>(1 - 1)            | 0<br>(0 - 0)             | 0<br>(0 - 0)             |
| Other drug use disorders                            | 53<br>(36 - 75)          | 1<br>(1 - 1)          | --                     | 36<br>(23 - 54)         | 13<br>(8 - 18)           | 4<br>(3 - 5)             |

Web Table 31- Bolivia deaths with 95% UI by age, sex, and cause in 2013

| Cause                                               | Both Sexes, All Ages          | Both Sexes, 0-4 Years  | Both Sexes, 5-14 Years | Both Sexes, 15-49 Years | Both Sexes, 50-69 Years  | Both Sexes, 70-80 Years  |
|-----------------------------------------------------|-------------------------------|------------------------|------------------------|-------------------------|--------------------------|--------------------------|
| Eating disorders                                    | 1<br>(0 - 1)                  | --                     | 0<br>(0 - 0)           | 0<br>(0 - 1)            | --                       | --                       |
| Anorexia nervosa                                    | 1<br>4,233<br>(3,460 - 5,267) | --                     | 0<br>60<br>(47 - 77)   | 0<br>469<br>(317 - 636) | --                       | --                       |
| Diabetes, urogenital, blood, and endocrine diseases | 1,081<br>(856 - 1,339)        | 278<br>(214 - 364)     | 7<br>(5 - 10)          | 103<br>(67 - 139)       | 1,420<br>(1,078 - 1,887) | 2,006<br>(1,644 - 2,516) |
| Diabetes mellitus                                   | 9<br>(7 - 12)                 | 1<br>(1 - 2)           | 1<br>(0 - 1)           | 1<br>(1 - 2)            | 3<br>(2 - 4)             | 4<br>(2 - 5)             |
| Acute glomerulonephritis                            | 2,343<br>(1,837 - 3,073)      | 39<br>(26 - 59)        | 13<br>(9 - 18)         | 237<br>(159 - 331)      | 862<br>(626 - 1,188)     | 1,193<br>(939 - 1,560)   |
| Chronic kidney disease                              | 601<br>(410 - 823)            | 4<br>(3 - 8)           | 2<br>(1 - 3)           | 47<br>(26 - 76)         | 295<br>(195 - 419)       | 253<br>(172 - 361)       |
| Chronic kidney disease due to diabetes mellitus     | 515<br>(355 - 740)            | 11<br>(7 - 17)         | 4<br>(2 - 6)           | 66<br>(39 - 102)        | 126<br>(72 - 210)        | 307<br>(203 - 441)       |
| Chronic kidney disease due to hypertension          | 145<br>(100 - 194)            | 6<br>(4 - 9)           | 2<br>(1 - 2)           | 25<br>(15 - 37)         | 53<br>(34 - 79)          | 59<br>(39 - 84)          |
| Chronic kidney disease due to glomerulonephritis    | 1,083<br>(754 - 1,532)        | 17<br>(9 - 33)         | 6<br>(4 - 9)           | 99<br>(60 - 151)        | 387<br>(248 - 589)       | 574<br>(383 - 826)       |
| Chronic kidney disease due to other causes          | 373<br>(288 - 474)            | 50<br>(29 - 88)        | 9<br>(6 - 12)          | 62<br>(40 - 85)         | 86<br>(61 - 121)         | 165<br>(119 - 221)       |
| Urinary diseases and male infertility               | 223<br>(167 - 293)            | 44<br>(25 - 78)        | 7<br>(5 - 9)           | 39<br>(25 - 56)         | 39<br>(25 - 60)          | 94<br>(62 - 136)         |
| Interstitial nephritis and urinary tract infections | 14<br>(9 - 20)                | --                     | 0<br>(0 - 1)           | 2<br>(1 - 4)            | 5<br>(3 - 8)             | 7<br>(4 - 11)            |
| Urolithiasis                                        | 136<br>(97 - 182)             | 6<br>(3 - 12)          | 2<br>(1 - 3)           | 20<br>(12 - 30)         | 43<br>(29 - 62)          | 65<br>(43 - 93)          |
| Other urinary diseases                              | 2<br>(1 - 3)                  | --                     | --                     | 1<br>(0 - 2)            | 0<br>(0 - 1)             | 1<br>(0 - 1)             |
| Gynecological diseases                              | 0<br>(0 - 1)                  | --                     | --                     | 0<br>(0 - 0)            | 0<br>(0 - 0)             | 0<br>(0 - 0)             |
| Uterine fibroids                                    | 0<br>(0 - 0)                  | --                     | --                     | 0<br>(0 - 0)            | 0<br>(0 - 0)             | --                       |
| Polycystic ovarian syndrome                         | 0<br>(0 - 0)                  | --                     | --                     | 0<br>(0 - 0)            | 0<br>(0 - 0)             | --                       |
| Endometriosis                                       | 0<br>(0 - 1)                  | --                     | --                     | 0<br>(0 - 0)            | 0<br>(0 - 0)             | 0<br>(0 - 0)             |
| Genital prolapse                                    | 1<br>(1 - 1)                  | --                     | --                     | 0<br>(0 - 1)            | 0<br>(0 - 0)             | 0<br>(0 - 0)             |
| Other gynecological diseases                        | 112<br>(80 - 164)             | 34<br>(21 - 55)        | 14<br>(9 - 22)         | 21<br>(13 - 32)         | 22<br>(14 - 34)          | 21<br>(14 - 33)          |
| Hemoglobinopathies and hemolytic anemias            | 37<br>(24 - 56)               | 20<br>(12 - 34)        | 9<br>(6 - 13)          | 8<br>(5 - 14)           | 0<br>(0 - 0)             | 0<br>(0 - 0)             |
| Thalassemias                                        | 11<br>(7 - 16)                | 2<br>(1 - 4)           | 2<br>(1 - 3)           | 3<br>(2 - 4)            | 4<br>(2 - 6)             | 0<br>(0 - 0)             |
| Sickle cell disorders                               | 2<br>(2 - 3)                  | 1<br>(0 - 1)           | 0<br>(0 - 1)           | 1<br>(0 - 1)            | 1<br>(0 - 1)             | 0<br>(0 - 0)             |
| G6PD deficiency                                     | 63<br>(46 - 92)               | 11<br>(7 - 18)         | 4<br>(2 - 5)           | 9<br>(6 - 14)           | 18<br>(12 - 27)          | 21<br>(14 - 33)          |
| Other hemoglobinopathies and hemolytic anemias      | 312<br>(237 - 416)            | 109<br>(67 - 163)      | 16<br>(10 - 25)        | 44<br>(28 - 64)         | 72<br>(49 - 109)         | 72<br>(51 - 104)         |
| Endocrine, metabolic, blood, and immune disorders   | 225<br>(164 - 293)            | --                     | 17<br>(12 - 24)        | 58<br>(37 - 84)         | 73<br>(50 - 101)         | 78<br>(52 - 106)         |
| Musculoskeletal disorders                           | 49<br>(34 - 68)               | --                     | 2<br>(1 - 3)           | 8<br>(5 - 13)           | 21<br>(13 - 32)          | 18<br>(11 - 27)          |
| Rheumatoid arthritis                                | 176<br>(127 - 231)            | --                     | 15<br>(11 - 22)        | 50<br>(32 - 70)         | 52<br>(34 - 73)          | 59<br>(38 - 82)          |
| Other musculoskeletal disorders                     | 1,436<br>(1,144 - 1,793)      | 1,139<br>(850 - 1,465) | 55<br>(39 - 74)        | 68<br>(44 - 91)         | 69<br>(51 - 93)          | 106<br>(81 - 136)        |
| Other non-communicable diseases                     | 1,272<br>(985 - 1,618)        | 1,099<br>(807 - 1,424) | 49<br>(34 - 68)        | 47<br>(31 - 66)         | 36<br>(26 - 50)          | 40<br>(29 - 54)          |
| Congenital anomalies                                | 42<br>(15 - 96)               | 41<br>(14 - 95)        | 0<br>(0 - 0)           | 1<br>(0 - 1)            | 0<br>(0 - 0)             | 0<br>(0 - 0)             |
| Neural tube defects                                 | 506<br>(348 - 696)            | 464<br>(314 - 653)     | 21<br>(14 - 30)        | 14<br>(9 - 20)          | 4<br>(3 - 6)             | 3<br>(2 - 4)             |
| Congenital heart anomalies                          | 9<br>(4 - 18)                 | 9<br>(4 - 18)          | --                     | --                      | --                       | --                       |
| Cleft lip and cleft palate                          | 104<br>(60 - 169)             | 94<br>(49 - 162)       | 8<br>(4 - 15)          | 1<br>(1 - 2)            | 1<br>(0 - 1)             | 0<br>(0 - 0)             |
| Down syndrome                                       | 39<br>(24 - 63)               | 34<br>(19 - 58)        | 1<br>(1 - 2)           | 2<br>(1 - 3)            | 1<br>(1 - 2)             | 1<br>(1 - 1)             |
| Chromosomal unbalanced rearrangements               | 571<br>(422 - 758)            | 455<br>(313 - 632)     | 19<br>(12 - 28)        | 30<br>(19 - 43)         | 30<br>(21 - 42)          | 36<br>(27 - 48)          |
| Other congenital anomalies                          | 149<br>(112 - 194)            | 25<br>(13 - 43)        | 5<br>(3 - 7)           | 20<br>(13 - 29)         | 33<br>(22 - 47)          | 66<br>(46 - 91)          |
| Skin and subcutaneous diseases                      | 21<br>(12 - 29)               | 5<br>(2 - 9)           | 1<br>(0 - 1)           | 2<br>(1 - 3)            | 5<br>(3 - 8)             | 8<br>(4 - 13)            |
| Cellulitis                                          | 80<br>(57 - 108)              | 17<br>(9 - 32)         | 3<br>(2 - 4)           | 12<br>(7 - 17)          | 18<br>(12 - 26)          | 29<br>(19 - 42)          |
| Pyoderma                                            |                               |                        |                        |                         |                          |                          |

Web Table 31- Bolivia deaths with 95% UI by age, sex, and cause in 2013

| Cause                                           | Both Sexes, All Ages      | Both Sexes, 0-4 Years    | Both Sexes, 5-14 Years | Both Sexes, 15-49 Years  | Both Sexes, 50-69 Years | Both Sexes, 70-80 Years  |
|-------------------------------------------------|---------------------------|--------------------------|------------------------|--------------------------|-------------------------|--------------------------|
| Decubitus ulcer                                 | 43<br>(31 - 59)           | 1<br>(1 - 3)             | 1<br>(1 - 2)           | 4<br>(3 - 7)             | 9<br>(6 - 13)           | 27<br>(19 - 40)          |
| Other skin and subcutaneous diseases            | 5<br>(3 - 8)              | 1<br>(0 - 3)             | 0<br>(0 - 1)           | 2<br>(1 - 3)             | 1<br>(1 - 2)            | 1<br>(1 - 2)             |
| Sudden infant death syndrome                    | 15<br>(4 - 42)            | 15<br>(4 - 42)           | --                     | --                       | --                      | --                       |
| Injuries                                        | 9,764<br>(7,981 - 11,769) | 2,561<br>(1,986 - 3,231) | 767<br>(672 - 869)     | 3,856<br>(2,647 - 5,031) | 1,301<br>(973 - 1,719)  | 1,280<br>(1,045 - 1,565) |
| Transport injuries                              | 3,019<br>(2,331 - 3,901)  | 435<br>(305 - 623)       | 294<br>(235 - 360)     | 1,466<br>(962 - 1,976)   | 547<br>(392 - 738)      | 277<br>(211 - 365)       |
| Road injuries                                   | 2,858<br>(2,185 - 3,719)  | 351<br>(235 - 512)       | 284<br>(226 - 348)     | 1,438<br>(942 - 1,945)   | 529<br>(379 - 713)      | 257<br>(196 - 338)       |
| Pedestrian road injuries                        | 1,553<br>(1,122 - 2,135)  | 204<br>(125 - 319)       | 177<br>(131 - 225)     | 921<br>(575 - 1,374)     | 154<br>(92 - 235)       | 97<br>(67 - 137)         |
| Cyclist road injuries                           | 194<br>(115 - 332)        | 5<br>(2 - 10)            | 7<br>(4 - 10)          | 153<br>(82 - 279)        | 21<br>(12 - 38)         | 8<br>(5 - 12)            |
| Motorcyclist road injuries                      | 78<br>(49 - 118)          | 6<br>(3 - 9)             | 4<br>(2 - 6)           | 40<br>(23 - 63)          | 24<br>(13 - 42)         | 5<br>(3 - 8)             |
| Motor vehicle road injuries                     | 1,014<br>(716 - 1,326)    | 133<br>(84 - 196)        | 94<br>(65 - 130)       | 319<br>(166 - 490)       | 323<br>(227 - 444)      | 144<br>(105 - 195)       |
| Other road injuries                             | 19<br>(13 - 29)           | 3<br>(1 - 5)             | 2<br>(1 - 3)           | 4<br>(2 - 7)             | 7<br>(4 - 14)           | 3<br>(2 - 5)             |
| Other transport injuries                        | 161<br>(122 - 215)        | 84<br>(53 - 126)         | 10<br>(7 - 15)         | 28<br>(18 - 40)          | 18<br>(12 - 27)         | 20<br>(13 - 29)          |
| Unintentional injuries                          | 5,662<br>(4,560 - 6,875)  | 2,076<br>(1,538 - 2,674) | 440<br>(366 - 540)     | 1,695<br>(1,187 - 2,274) | 551<br>(397 - 730)      | 900<br>(709 - 1,127)     |
| Falls                                           | 353<br>(209 - 490)        | 19<br>(11 - 32)          | 15<br>(9 - 23)         | 100<br>(56 - 152)        | 76<br>(41 - 117)        | 142<br>(75 - 216)        |
| Drowning                                        | 792<br>(576 - 1,196)      | 383<br>(240 - 623)       | 121<br>(83 - 184)      | 159<br>(104 - 247)       | 48<br>(31 - 72)         | 80<br>(54 - 123)         |
| Fire, heat, and hot substances                  | 235<br>(174 - 308)        | 78<br>(49 - 129)         | 12<br>(8 - 17)         | 30<br>(19 - 45)          | 23<br>(15 - 32)         | 93<br>(63 - 128)         |
| Poisonings                                      | 467<br>(290 - 646)        | 43<br>(26 - 69)          | 12<br>(7 - 19)         | 337<br>(186 - 493)       | 43<br>(24 - 66)         | 31<br>(20 - 46)          |
| Exposure to mechanical forces                   | 370<br>(275 - 497)        | 126<br>(73 - 217)        | 37<br>(23 - 58)        | 150<br>(98 - 214)        | 33<br>(23 - 48)         | 24<br>(17 - 34)          |
| Unintentional firearm injuries                  | 101<br>(66 - 150)         | 5<br>(3 - 8)             | 3<br>(2 - 5)           | 77<br>(46 - 124)         | 13<br>(7 - 20)          | 3<br>(2 - 4)             |
| Unintentional suffocation                       | 44<br>(21 - 95)           | 31<br>(10 - 78)          | 6<br>(3 - 11)          | 5<br>(3 - 10)            | 2<br>(1 - 4)            | 1<br>(0 - 1)             |
| Other exposure to mechanical forces             | 225<br>(160 - 313)        | 90<br>(46 - 158)         | 28<br>(14 - 48)        | 68<br>(43 - 102)         | 19<br>(12 - 28)         | 21<br>(14 - 31)          |
| Adverse effects of medical treatment            | 519<br>(368 - 697)        | 121<br>(69 - 225)        | 15<br>(10 - 23)        | 73<br>(46 - 106)         | 92<br>(59 - 135)        | 218<br>(135 - 317)       |
| Animal contact                                  | 44<br>(31 - 67)           | 14<br>(9 - 23)           | 3<br>(2 - 6)           | 8<br>(5 - 13)            | 10<br>(6 - 15)          | 9<br>(6 - 15)            |
| Venomous animal contact                         | 12<br>(8 - 21)            | 3<br>(2 - 6)             | 1<br>(0 - 2)           | 2<br>(1 - 4)             | 4<br>(2 - 6)            | 2<br>(1 - 5)             |
| Non-venomous animal contact                     | 31<br>(22 - 49)           | 10<br>(6 - 18)           | 2<br>(1 - 4)           | 6<br>(3 - 9)             | 6<br>(3 - 9)            | 7<br>(4 - 11)            |
| Foreign body                                    | 2,654<br>(1,836 - 3,617)  | 1,210<br>(787 - 1,706)   | 195<br>(136 - 271)     | 758<br>(462 - 1,111)     | 206<br>(132 - 315)      | 285<br>(198 - 449)       |
| Pulmonary aspiration and foreign body in airway | 2,649<br>(1,830 - 3,612)  | 1,208<br>(786 - 1,704)   | 195<br>(136 - 271)     | 757<br>(461 - 1,110)     | 205<br>(132 - 314)      | 284<br>(196 - 448)       |
| Foreign body in other body part                 | 5<br>(4 - 8)              | 2<br>(1 - 3)             | 0<br>(0 - 0)           | 1<br>(1 - 1)             | 1<br>(1 - 1)            | 2<br>(1 - 3)             |
| Other unintentional injuries                    | 228<br>(171 - 304)        | 81<br>(52 - 128)         | 29<br>(20 - 41)        | 81<br>(54 - 114)         | 20<br>(14 - 29)         | 17<br>(11 - 23)          |
| Self-harm and interpersonal violence            | 1,062<br>(746 - 1,397)    | 50<br>(29 - 90)          | 32<br>(21 - 44)        | 686<br>(426 - 956)       | 196<br>(133 - 276)      | 99<br>(69 - 145)         |
| Self-harm                                       | 529<br>(366 - 756)        | --                       | 5<br>(3 - 10)          | 290<br>(184 - 431)       | 147<br>(99 - 212)       | 86<br>(58 - 127)         |
| Interpersonal violence                          | 534<br>(289 - 758)        | 50<br>(29 - 90)          | 26<br>(16 - 39)        | 396<br>(170 - 599)       | 49<br>(29 - 76)         | 13<br>(8 - 25)           |
| Assault by firearm                              | 209<br>(87 - 341)         | 6<br>(3 - 13)            | 5<br>(2 - 10)          | 183<br>(69 - 305)        | 13<br>(7 - 24)          | 2<br>(1 - 4)             |
| Assault by sharp object                         | 26<br>(15 - 42)           | 4<br>(2 - 9)             | 2<br>(1 - 4)           | 12<br>(5 - 22)           | 7<br>(4 - 14)           | 1<br>(0 - 2)             |
| Assault by other means                          | 299<br>(168 - 425)        | 39<br>(22 - 71)          | 20<br>(12 - 29)        | 201<br>(88 - 316)        | 28<br>(16 - 45)         | 11<br>(6 - 19)           |
| Forces of nature, war, and legal intervention   | 20<br>(12 - 37)           | 0<br>(0 - 0)             | 1<br>(0 - 1)           | 9<br>(6 - 17)            | 7<br>(4 - 12)           | 3<br>(2 - 6)             |
| Exposure to forces of nature                    | 20<br>(12 - 37)           | 0<br>(0 - 0)             | 1<br>(0 - 1)           | 9<br>(6 - 17)            | 7<br>(4 - 12)           | 3<br>(2 - 6)             |

Web Table 31- Bolivia deaths with 95% UI by age, sex, and cause in 2013

| Cause                                                             | Males, All Ages             | Males, 0-4 Years         | Males, 5-14 Years  | Males, 15-49 Years       | Males, 50-69 Years       | Males, 70-80 Years        |
|-------------------------------------------------------------------|-----------------------------|--------------------------|--------------------|--------------------------|--------------------------|---------------------------|
| All causes                                                        | 29,244<br>(24,199 - 36,170) | 6,297<br>(5,680 - 6,994) | 822<br>(748 - 905) | 5,804<br>(4,111 - 8,058) | 7,121<br>(5,290 - 9,724) | 9,201<br>(7,853 - 11,127) |
| Communicable, maternal, neonatal, and nutritional diseases        | 7,283<br>(6,181 - 9,368)    | 3,820<br>(3,346 - 4,365) | 160<br>(122 - 212) | 859<br>(494 - 2,143)     | 864<br>(605 - 1,386)     | 1,581<br>(1,212 - 2,045)  |
| HIV/AIDS and tuberculosis                                         | 856<br>(412 - 2,658)        | 25<br>(14 - 60)          | 12<br>(4 - 46)     | 451<br>(141 - 1,838)     | 221<br>(115 - 586)       | 148<br>(104 - 216)        |
| Tuberculosis                                                      | 410<br>(293 - 571)          | 20<br>(12 - 31)          | 4<br>(3 - 6)       | 119<br>(67 - 184)        | 131<br>(86 - 194)        | 136<br>(98 - 184)         |
| HIV/AIDS                                                          | 446<br>(46 - 2,345)         | 5<br>(0 - 38)            | 8<br>(0 - 42)      | 332<br>(36 - 1,767)      | 90<br>(9 - 478)          | 12<br>(1 - 66)            |
| HIV/AIDS resulting in mycobacterial infection                     | 29<br>(3 - 162)             | 0<br>(0 - 2)             | 0<br>(0 - 2)       | 21<br>(2 - 120)          | 6<br>(1 - 33)            | 1<br>(0 - 5)              |
| HIV/AIDS resulting in other diseases                              | 417<br>(43 - 2,189)         | 4<br>(0 - 36)            | 7<br>(0 - 39)      | 310<br>(34 - 1,650)      | 84<br>(8 - 445)          | 11<br>(1 - 61)            |
| Diarrhea, lower respiratory, and other common infectious diseases | 3,197<br>(2,511 - 4,031)    | 1,261<br>(893 - 1,711)   | 118<br>(86 - 159)  | 287<br>(172 - 448)       | 424<br>(282 - 644)       | 1,107<br>(799 - 1,505)    |
| Diarrheal diseases                                                | 492<br>(248 - 839)          | 392<br>(162 - 734)       | 19<br>(9 - 37)     | 19<br>(11 - 31)          | 17<br>(10 - 30)          | 44<br>(25 - 73)           |
| Intestinal infectious diseases                                    | 90<br>(44 - 168)            | 30<br>(13 - 57)          | 27<br>(12 - 49)    | 30<br>(11 - 65)          | 3<br>(1 - 7)             | 1<br>(0 - 3)              |
| Typhoid fever                                                     | 67<br>(31 - 127)            | 21<br>(9 - 41)           | 21<br>(9 - 38)     | 23<br>(8 - 50)           | 2<br>(1 - 4)             | 1<br>(0 - 1)              |
| Paratyphoid fever                                                 | 17<br>(8 - 34)              | 6<br>(2 - 13)            | 5<br>(2 - 11)      | 5<br>(2 - 13)            | 0<br>(0 - 1)             | 0<br>(0 - 0)              |
| Other intestinal infectious diseases                              | 6<br>(2 - 14)               | 3<br>(0 - 9)             | 1<br>(0 - 4)       | 2<br>(0 - 6)             | 1<br>(0 - 3)             | 0<br>(0 - 2)              |
| Lower respiratory infections                                      | 2,406<br>(1,826 - 3,063)    | 735<br>(474 - 1,073)     | 51<br>(31 - 81)    | 194<br>(108 - 301)       | 384<br>(250 - 589)       | 1,041<br>(736 - 1,441)    |
| Upper respiratory infections                                      | 2<br>(1 - 4)                | 1<br>(0 - 2)             | 0<br>(0 - 0)       | 0<br>(0 - 1)             | 0<br>(0 - 1)             | 0<br>(0 - 1)              |
| Otitis media                                                      | 4<br>(3 - 5)                | 1<br>(1 - 1)             | 0<br>(0 - 0)       | 1<br>(0 - 1)             | 1<br>(1 - 2)             | 1<br>(1 - 2)              |
| Meningitis                                                        | 145<br>(99 - 212)           | 72<br>(37 - 126)         | 16<br>(8 - 26)     | 31<br>(17 - 50)          | 12<br>(7 - 20)           | 15<br>(8 - 24)            |
| Pneumococcal meningitis                                           | 34<br>(22 - 49)             | 15<br>(7 - 28)           | 4<br>(2 - 7)       | 7<br>(4 - 14)            | 3<br>(1 - 6)             | 4<br>(2 - 8)              |
| H influenzae type B meningitis                                    | 32<br>(19 - 52)             | 24<br>(11 - 43)          | 3<br>(2 - 6)       | 3<br>(1 - 6)             | 1<br>(0 - 2)             | 1<br>(1 - 3)              |
| Meningococcal meningitis                                          | 24<br>(15 - 37)             | 11<br>(5 - 20)           | 3<br>(1 - 6)       | 6<br>(3 - 11)            | 2<br>(1 - 4)             | 3<br>(1 - 5)              |
| Other meningitis                                                  | 56<br>(36 - 82)             | 22<br>(10 - 43)          | 5<br>(2 - 10)      | 15<br>(8 - 25)           | 6<br>(3 - 11)            | 7<br>(3 - 12)             |
| Encephalitis                                                      | 35<br>(24 - 54)             | 13<br>(7 - 24)           | 4<br>(2 - 8)       | 11<br>(6 - 20)           | 5<br>(3 - 8)             | 2<br>(1 - 3)              |
| Diphtheria                                                        | 2<br>(0 - 9)                | 1<br>(0 - 8)             | 0<br>(0 - 2)       | 0<br>(0 - 1)             | 0<br>(0 - 0)             | --                        |
| Whooping cough                                                    | 16<br>(5 - 41)              | 15<br>(4 - 39)           | 0<br>(0 - 1)       | 1<br>(0 - 1)             | 0<br>(0 - 0)             | --                        |
| Tetanus                                                           | 1<br>(1 - 2)                | 0<br>(0 - 0)             | 0<br>(0 - 0)       | 0<br>(0 - 1)             | 0<br>(0 - 1)             | 0<br>(0 - 0)              |
| Measles                                                           | 0<br>(0 - 0)                | 0<br>(0 - 0)             | 0<br>(0 - 0)       | 0<br>(0 - 0)             | 0<br>(0 - 0)             | --                        |
| Varicella and herpes zoster                                       | 4<br>(1 - 10)               | 1<br>(0 - 5)             | 0<br>(0 - 1)       | 1<br>(0 - 3)             | 0<br>(0 - 1)             | 1<br>(0 - 5)              |
| Neglected tropical diseases and malaria                           | 160<br>(46 - 400)           | 8<br>(4 - 17)            | 4<br>(2 - 7)       | 20<br>(9 - 44)           | 86<br>(14 - 236)         | 42<br>(8 - 119)           |
| Malaria                                                           | 1<br>(1 - 2)                | 0<br>(0 - 0)             | 0<br>(0 - 0)       | 0<br>(0 - 1)             | 0<br>(0 - 0)             | 0<br>(0 - 0)              |
| Chagas disease                                                    | 134<br>(21 - 375)           | 0<br>(0 - 1)             | 0<br>(0 - 0)       | 11<br>(2 - 33)           | 83<br>(11 - 233)         | 40<br>(6 - 117)           |
| Leishmaniasis                                                     | 3<br>(2 - 6)                | 1<br>(0 - 3)             | 0<br>(0 - 1)       | 1<br>(0 - 3)             | 0<br>(0 - 1)             | 0<br>(0 - 0)              |
| Visceral leishmaniasis                                            | 3<br>(2 - 6)                | 1<br>(0 - 3)             | 0<br>(0 - 1)       | 1<br>(0 - 3)             | 0<br>(0 - 1)             | 0<br>(0 - 0)              |
| Cysticercosis                                                     | 3<br>(2 - 4)                | 0<br>(0 - 0)             | 0<br>(0 - 0)       | 2<br>(1 - 2)             | 1<br>(1 - 1)             | 0<br>(0 - 0)              |
| Cystic echinococcosis                                             | 1<br>(1 - 1)                | 0<br>(0 - 0)             | 0<br>(0 - 0)       | 0<br>(0 - 1)             | 0<br>(0 - 0)             | 0<br>(0 - 0)              |
| Dengue                                                            | 1<br>(1 - 3)                | 0<br>(0 - 0)             | 0<br>(0 - 0)       | 1<br>(0 - 2)             | 0<br>(0 - 0)             | 0<br>(0 - 1)              |
| Yellow fever                                                      | 5<br>(3 - 7)                | 0<br>(0 - 1)             | 1<br>(0 - 2)       | 3<br>(1 - 5)             | 0<br>(0 - 1)             | 0<br>(0 - 0)              |
| Rabies                                                            | 1<br>(0 - 1)                | 0<br>(0 - 0)             | 0<br>(0 - 0)       | 0<br>(0 - 1)             | 0<br>(0 - 0)             | 0<br>(0 - 0)              |
| Intestinal nematode infections                                    | 5<br>(1 - 14)               | 3<br>(0 - 11)            | 1<br>(0 - 4)       | 0<br>(0 - 4)             | 0<br>(0 - 2)             | 0<br>(0 - 2)              |
| Ascariasis                                                        | 5<br>(1 - 14)               | 3<br>(0 - 11)            | 1<br>(0 - 4)       | 0<br>(0 - 4)             | 0<br>(0 - 2)             | 0<br>(0 - 2)              |
| Other neglected tropical diseases                                 | 5<br>(4 - 8)                | 2<br>(1 - 4)             | 0<br>(0 - 1)       | 1<br>(1 - 2)             | 1<br>(0 - 1)             | 1<br>(0 - 1)              |

Web Table 31- Bolivia deaths with 95% UI by age, sex, and cause in 2013

| Cause                                                            | Males, All Ages             | Males, 0-4 Years         | Males, 5-14 Years  | Males, 15-49 Years       | Males, 50-69 Years       | Males, 70-80 Years       |
|------------------------------------------------------------------|-----------------------------|--------------------------|--------------------|--------------------------|--------------------------|--------------------------|
| Maternal disorders                                               | --                          | --                       | --                 | --                       | --                       | --                       |
| Maternal hemorrhage                                              | --                          | --                       | --                 | --                       | --                       | --                       |
| Maternal sepsis and other maternal infections                    | --                          | --                       | --                 | --                       | --                       | --                       |
| Maternal hypertensive disorders                                  | --                          | --                       | --                 | --                       | --                       | --                       |
| Maternal obstructed labor                                        | --                          | --                       | --                 | --                       | --                       | --                       |
| Maternal abortive outcome                                        | --                          | --                       | --                 | --                       | --                       | --                       |
| Indirect maternal deaths                                         | --                          | --                       | --                 | --                       | --                       | --                       |
| Late maternal deaths                                             | --                          | --                       | --                 | --                       | --                       | --                       |
| Maternal deaths aggravated by HIV/AIDS                           | --                          | --                       | --                 | --                       | --                       | --                       |
| Other maternal disorders                                         | --                          | --                       | --                 | --                       | --                       | --                       |
| Neonatal disorders                                               | 2,241<br>(1,948 - 2,688)    | 2,241<br>(1,948 - 2,688) | --                 | --                       | --                       | --                       |
| Neonatal preterm birth complications                             | 861<br>(461 - 1,287)        | 861<br>(461 - 1,287)     | --                 | --                       | --                       | --                       |
| Neonatal encephalopathy due to birth asphyxia and trauma         | 668<br>(340 - 1,049)        | 668<br>(340 - 1,049)     | --                 | --                       | --                       | --                       |
| Neonatal sepsis and other neonatal infections                    | 495<br>(215 - 924)          | 495<br>(215 - 924)       | --                 | --                       | --                       | --                       |
| Hemolytic disease and other neonatal jaundice                    | 19<br>(7 - 43)              | 19<br>(7 - 43)           | --                 | --                       | --                       | --                       |
| Other neonatal disorders                                         | 198<br>(97 - 370)           | 198<br>(97 - 370)        | --                 | --                       | --                       | --                       |
| Nutritional deficiencies                                         | 548<br>(343 - 840)          | 106<br>(56 - 204)        | 10<br>(5 - 15)     | 72<br>(38 - 124)         | 106<br>(60 - 168)        | 254<br>(145 - 390)       |
| Protein-energy malnutrition                                      | 376<br>(223 - 594)          | 90<br>(46 - 172)         | 6<br>(3 - 10)      | 25<br>(10 - 49)          | 60<br>(26 - 106)         | 196<br>(108 - 312)       |
| Iodine deficiency                                                | 0<br>(0 - 2)                | 0<br>(0 - 1)             | 0<br>(0 - 0)       | 0<br>(0 - 1)             | 0<br>(0 - 0)             | 0<br>(0 - 0)             |
| Iron-deficiency anemia                                           | 164<br>(74 - 296)           | 15<br>(4 - 41)           | 4<br>(1 - 7)       | 46<br>(21 - 81)          | 43<br>(19 - 80)          | 55<br>(19 - 114)         |
| Other nutritional deficiencies                                   | 8<br>(3 - 17)               | 1<br>(0 - 2)             | 0<br>(0 - 1)       | 2<br>(1 - 4)             | 2<br>(1 - 6)             | 3<br>(1 - 6)             |
| Other communicable, maternal, neonatal, and nutritional diseases | 282<br>(158 - 433)          | 178<br>(70 - 321)        | 17<br>(9 - 28)     | 29<br>(16 - 48)          | 28<br>(14 - 53)          | 30<br>(13 - 64)          |
| Sexually transmitted diseases excluding HIV                      | 166<br>(53 - 317)           | 151<br>(46 - 294)        | 11<br>(4 - 22)     | 1<br>(1 - 2)             | 1<br>(1 - 3)             | 1<br>(1 - 4)             |
| Syphilis                                                         | 165<br>(52 - 316)           | 151<br>(46 - 294)        | 11<br>(4 - 22)     | 1<br>(0 - 1)             | 1<br>(0 - 2)             | 1<br>(0 - 3)             |
| Chlamydial infection                                             | --                          | --                       | --                 | --                       | --                       | --                       |
| Gonococcal infection                                             | 1<br>(0 - 1)                | --                       | 0<br>(0 - 0)       | 0<br>(0 - 1)             | 0<br>(0 - 0)             | 0<br>(0 - 0)             |
| Other sexually transmitted diseases                              | 1<br>(0 - 1)                | --                       | 0<br>(0 - 0)       | 0<br>(0 - 0)             | 0<br>(0 - 0)             | 0<br>(0 - 0)             |
| Hepatitis                                                        | 23<br>(17 - 32)             | 2<br>(1 - 5)             | 2<br>(1 - 3)       | 9<br>(5 - 13)            | 7<br>(4 - 10)            | 3<br>(2 - 5)             |
| Acute hepatitis A                                                | 7<br>(3 - 12)               | 2<br>(1 - 3)             | 1<br>(1 - 2)       | 4<br>(1 - 7)             | 1<br>(0 - 2)             | 0<br>(0 - 0)             |
| Acute hepatitis B                                                | 14<br>(9 - 22)              | 1<br>(0 - 2)             | 0<br>(0 - 1)       | 4<br>(2 - 8)             | 6<br>(3 - 9)             | 3<br>(2 - 5)             |
| Acute hepatitis C                                                | 2<br>(0 - 4)                | --                       | 0<br>(0 - 0)       | 1<br>(0 - 2)             | 1<br>(0 - 1)             | 0<br>(0 - 1)             |
| Other infectious diseases                                        | 92<br>(53 - 159)            | 25<br>(9 - 69)           | 4<br>(2 - 9)       | 19<br>(9 - 34)           | 20<br>(8 - 43)           | 25<br>(8 - 60)           |
| Non-communicable diseases                                        | 16,045<br>(12,738 - 20,549) | 1,107<br>(845 - 1,404)   | 205<br>(168 - 244) | 2,290<br>(1,416 - 3,292) | 5,442<br>(3,941 - 7,558) | 7,001<br>(5,910 - 8,580) |
| Neoplasms                                                        | 3,347<br>(2,553 - 4,401)    | 75<br>(48 - 111)         | 49<br>(37 - 63)    | 411<br>(257 - 581)       | 1,314<br>(919 - 1,850)   | 1,498<br>(1,197 - 1,911) |
| Esophageal cancer                                                | 47<br>(32 - 70)             | --                       | --                 | 7<br>(4 - 12)            | 28<br>(17 - 44)          | 12<br>(8 - 17)           |
| Stomach cancer                                                   | 922<br>(679 - 1,257)        | --                       | --                 | 104<br>(59 - 157)        | 398<br>(272 - 579)       | 419<br>(307 - 573)       |
| Liver cancer                                                     | 171<br>(123 - 237)          | --                       | 1<br>(1 - 2)       | 22<br>(12 - 34)          | 75<br>(49 - 111)         | 72<br>(49 - 102)         |
| Liver cancer due to hepatitis B                                  | 84<br>(48 - 129)            | --                       | 1<br>(0 - 1)       | 15<br>(8 - 24)           | 40<br>(20 - 66)          | 28<br>(15 - 45)          |
| Liver cancer due to hepatitis C                                  | 25<br>(10 - 43)             | --                       | 0<br>(0 - 0)       | 1<br>(0 - 3)             | 10<br>(3 - 19)           | 14<br>(6 - 24)           |
| Liver cancer due to alcohol use                                  | 49<br>(29 - 82)             | --                       | --                 | 3<br>(1 - 6)             | 20<br>(10 - 37)          | 26<br>(15 - 41)          |

Web Table 31- Bolivia deaths with 95% UI by age, sex, and cause in 2013

| Cause                                         | Males, All Ages          | Males, 0-4 Years   | Males, 5-14 Years | Males, 15-49 Years | Males, 50-69 Years       | Males, 70-80 Years       |
|-----------------------------------------------|--------------------------|--------------------|-------------------|--------------------|--------------------------|--------------------------|
| Liver cancer due to other causes              | 13<br>(7 - 22)           | --                 | 1<br>(0 - 1)      | 3<br>(1 - 5)       | 5<br>(2 - 11)            | 4<br>(2 - 8)             |
| Larynx cancer                                 | 14<br>(9 - 25)           | --                 | --                | 3<br>(1 - 5)       | 3<br>(2 - 6)             | 8<br>(5 - 16)            |
| Tracheal, bronchus and lung cancer            | 368<br>(278 - 498)       | --                 | --                | 26<br>(15 - 40)    | 164<br>(113 - 233)       | 178<br>(134 - 239)       |
| Breast cancer                                 | 4<br>(3 - 7)             | --                 | --                | 2<br>(1 - 3)       | 2<br>(1 - 4)             | 1<br>(0 - 2)             |
| Cervical cancer                               | --                       | --                 | --                | --                 | --                       | --                       |
| Uterine cancer                                | --                       | --                 | --                | --                 | --                       | --                       |
| Prostate cancer                               | 313<br>(202 - 492)       | --                 | --                | 2<br>(1 - 4)       | 65<br>(37 - 105)         | 246<br>(163 - 393)       |
| Colon and rectum cancer                       | 263<br>(193 - 360)       | --                 | --                | 33<br>(19 - 49)    | 116<br>(80 - 165)        | 114<br>(87 - 155)        |
| Lip and oral cavity cancer                    | 21<br>(14 - 32)          | --                 | --                | 4<br>(2 - 8)       | 7<br>(4 - 11)            | 10<br>(6 - 16)           |
| Nasopharynx cancer                            | 1<br>(1 - 2)             | --                 | 0<br>(0 - 0)      | 0<br>(0 - 1)       | 1<br>(0 - 1)             | 0<br>(0 - 0)             |
| Other pharynx cancer                          | 19<br>(12 - 29)          | --                 | --                | 3<br>(2 - 6)       | 11<br>(7 - 17)           | 5<br>(3 - 7)             |
| Gallbladder and biliary tract cancer          | 255<br>(157 - 375)       | --                 | --                | 14<br>(7 - 24)     | 109<br>(61 - 172)        | 133<br>(81 - 199)        |
| Pancreatic cancer                             | 113<br>(83 - 157)        | --                 | --                | 14<br>(8 - 22)     | 52<br>(36 - 76)          | 47<br>(34 - 65)          |
| Malignant skin melanoma                       | 26<br>(13 - 45)          | --                 | --                | 8<br>(4 - 15)      | 12<br>(6 - 21)           | 5<br>(3 - 9)             |
| Non-melanoma skin cancer                      | 21<br>(13 - 35)          | --                 | --                | 1<br>(1 - 2)       | 7<br>(4 - 14)            | 12<br>(7 - 19)           |
| Ovarian cancer                                | --                       | --                 | --                | --                 | --                       | --                       |
| Testicular cancer                             | 5<br>(3 - 8)             | --                 | --                | 3<br>(2 - 6)       | 1<br>(0 - 2)             | 0<br>(0 - 0)             |
| Kidney cancer                                 | 69<br>(48 - 96)          | 1<br>(0 - 1)       | 0<br>(0 - 0)      | 9<br>(5 - 14)      | 29<br>(18 - 43)          | 30<br>(20 - 44)          |
| Bladder cancer                                | 79<br>(56 - 112)         | --                 | --                | 4<br>(2 - 7)       | 29<br>(19 - 44)          | 46<br>(32 - 66)          |
| Brain and nervous system cancer               | 68<br>(41 - 103)         | 1<br>(0 - 1)       | 5<br>(3 - 9)      | 21<br>(11 - 36)    | 28<br>(15 - 45)          | 13<br>(8 - 20)           |
| Thyroid cancer                                | 5<br>(3 - 13)            | --                 | 0<br>(0 - 0)      | 1<br>(1 - 3)       | 1<br>(0 - 3)             | 3<br>(1 - 6)             |
| Mesothelioma                                  | 5<br>(3 - 7)             | --                 | --                | 1<br>(0 - 1)       | 2<br>(1 - 4)             | 2<br>(1 - 3)             |
| Hodgkin lymphoma                              | 14<br>(9 - 22)           | 2<br>(1 - 3)       | 3<br>(1 - 6)      | 5<br>(2 - 8)       | 3<br>(2 - 6)             | 2<br>(1 - 4)             |
| Non-Hodgkin lymphoma                          | 83<br>(58 - 122)         | 5<br>(3 - 9)       | 5<br>(3 - 7)      | 25<br>(15 - 39)    | 30<br>(20 - 48)          | 18<br>(12 - 28)          |
| Multiple myeloma                              | 45<br>(29 - 66)          | --                 | --                | 6<br>(3 - 10)      | 22<br>(13 - 34)          | 17<br>(11 - 25)          |
| Leukemia                                      | 148<br>(109 - 191)       | 27<br>(14 - 50)    | 22<br>(15 - 32)   | 51<br>(32 - 74)    | 24<br>(16 - 35)          | 23<br>(17 - 32)          |
| Other neoplasms                               | 269<br>(188 - 364)       | 40<br>(22 - 61)    | 13<br>(8 - 20)    | 41<br>(23 - 61)    | 94<br>(59 - 143)         | 81<br>(56 - 115)         |
| Cardiovascular diseases                       | 5,000<br>(3,906 - 6,415) | 182<br>(118 - 267) | 46<br>(31 - 65)   | 608<br>(375 - 865) | 1,630<br>(1,176 - 2,268) | 2,534<br>(2,106 - 3,087) |
| Rheumatic heart disease                       | 43<br>(27 - 62)          | 2<br>(1 - 4)       | 2<br>(1 - 4)      | 13<br>(7 - 21)     | 14<br>(8 - 21)           | 12<br>(7 - 19)           |
| Ischemic heart disease                        | 2,534<br>(1,928 - 3,401) | 26<br>(10 - 55)    | 13<br>(8 - 21)    | 300<br>(180 - 450) | 899<br>(629 - 1,290)     | 1,296<br>(1,026 - 1,674) |
| Cerebrovascular disease                       | 1,617<br>(1,202 - 2,158) | 41<br>(24 - 65)    | 14<br>(9 - 22)    | 202<br>(116 - 308) | 540<br>(366 - 766)       | 820<br>(631 - 1,066)     |
| Ischemic stroke                               | 784<br>(564 - 1,044)     | 4<br>(1 - 9)       | 2<br>(1 - 4)      | 50<br>(26 - 78)    | 215<br>(136 - 316)       | 513<br>(376 - 688)       |
| Hemorrhagic stroke                            | 833<br>(567 - 1,151)     | 37<br>(23 - 58)    | 12<br>(7 - 18)    | 152<br>(86 - 235)  | 325<br>(208 - 473)       | 307<br>(206 - 422)       |
| Hypertensive heart disease                    | 56<br>(36 - 88)          | 1<br>(0 - 1)       | 0<br>(0 - 0)      | 6<br>(3 - 11)      | 16<br>(9 - 26)           | 34<br>(21 - 56)          |
| Cardiomyopathy and myocarditis                | 183<br>(120 - 261)       | 38<br>(20 - 66)    | 4<br>(2 - 7)      | 13<br>(7 - 21)     | 40<br>(24 - 63)          | 89<br>(53 - 146)         |
| Atrial fibrillation and flutter               | 40<br>(25 - 63)          | --                 | --                | 3<br>(1 - 4)       | 6<br>(4 - 10)            | 31<br>(17 - 53)          |
| Aortic aneurysm                               | 22<br>(15 - 32)          | --                 | --                | 2<br>(1 - 3)       | 7<br>(4 - 10)            | 14<br>(9 - 20)           |
| Peripheral vascular disease                   | 8<br>(5 - 11)            | --                 | --                | 1<br>(0 - 2)       | 3<br>(2 - 5)             | 4<br>(3 - 6)             |
| Endocarditis                                  | 118<br>(74 - 182)        | 26<br>(12 - 47)    | 5<br>(3 - 10)     | 19<br>(10 - 33)    | 28<br>(15 - 46)          | 40<br>(23 - 63)          |
| Other cardiovascular and circulatory diseases | 378<br>(267 - 509)       | 48<br>(25 - 82)    | 6<br>(4 - 10)     | 50<br>(27 - 77)    | 79<br>(48 - 120)         | 194<br>(128 - 271)       |

Web Table 31- Bolivia deaths with 95% UI by age, sex, and cause in 2013

| Cause                                               | Males, All Ages          | Males, 0-4 Years | Males, 5-14 Years | Males, 15-49 Years | Males, 50-69 Years   | Males, 70-80 Years   |
|-----------------------------------------------------|--------------------------|------------------|-------------------|--------------------|----------------------|----------------------|
| Chronic respiratory diseases                        | 1,242<br>(956 - 1,628)   | 54<br>(30 - 90)  | 10<br>(7 - 13)    | 81<br>(49 - 125)   | 318<br>(217 - 463)   | 778<br>(601 - 1,019) |
| Chronic obstructive pulmonary disease               | 890<br>(674 - 1,175)     | 39<br>(20 - 67)  | 7<br>(5 - 9)      | 51<br>(30 - 77)    | 220<br>(146 - 321)   | 574<br>(437 - 746)   |
| Pneumoconiosis                                      | 122<br>(78 - 188)        | 0<br>(0 - 1)     | 0<br>(0 - 0)      | 14<br>(7 - 24)     | 48<br>(29 - 76)      | 59<br>(38 - 91)      |
| Silicosis                                           | 38<br>(24 - 58)          | 0<br>(0 - 0)     | 0<br>(0 - 0)      | 7<br>(4 - 12)      | 19<br>(11 - 30)      | 12<br>(7 - 19)       |
| Asbestosis                                          | 18<br>(11 - 27)          | 0<br>(0 - 0)     | 0<br>(0 - 0)      | 2<br>(1 - 3)       | 6<br>(3 - 10)        | 10<br>(6 - 16)       |
| Coal workers pneumoconiosis                         | 4<br>(3 - 6)             | 0<br>(0 - 0)     | 0<br>(0 - 0)      | 0<br>(0 - 0)       | 0<br>(0 - 0)         | 3<br>(2 - 5)         |
| Other pneumoconiosis                                | 62<br>(39 - 95)          | 0<br>(0 - 0)     | 0<br>(0 - 0)      | 5<br>(3 - 9)       | 23<br>(13 - 37)      | 34<br>(21 - 53)      |
| Asthma                                              | 31<br>(20 - 44)          | 1<br>(0 - 2)     | 0<br>(0 - 1)      | 3<br>(2 - 5)       | 9<br>(5 - 14)        | 17<br>(11 - 26)      |
| Interstitial lung disease and pulmonary sarcoidosis | 176<br>(106 - 266)       | 1<br>(0 - 2)     | 0<br>(0 - 0)      | 9<br>(4 - 19)      | 40<br>(22 - 71)      | 125<br>(73 - 196)    |
| Other chronic respiratory diseases                  | 23<br>(15 - 35)          | 13<br>(6 - 23)   | 2<br>(1 - 4)      | 4<br>(2 - 7)       | 1<br>(1 - 2)         | 3<br>(2 - 4)         |
| Cirrhosis                                           | 1,745<br>(1,255 - 2,365) | 6<br>(2 - 12)    | 5<br>(4 - 7)      | 395<br>(228 - 596) | 872<br>(606 - 1,229) | 467<br>(352 - 628)   |
| Cirrhosis due to hepatitis B                        | 212<br>(56 - 410)        | 0<br>(0 - 0)     | 0<br>(0 - 1)      | 51<br>(15 - 103)   | 108<br>(28 - 209)    | 53<br>(11 - 103)     |
| Cirrhosis due to hepatitis C                        | 622<br>(342 - 994)       | 0<br>(0 - 2)     | 1<br>(0 - 2)      | 119<br>(47 - 227)  | 314<br>(162 - 531)   | 188<br>(104 - 275)   |
| Cirrhosis due to alcohol use                        | 647<br>(395 - 980)       | --               | --                | 127<br>(59 - 216)  | 333<br>(198 - 523)   | 187<br>(123 - 277)   |
| Cirrhosis due to other causes                       | 264<br>(141 - 466)       | 6<br>(2 - 11)    | 4<br>(3 - 6)      | 99<br>(48 - 178)   | 117<br>(57 - 223)    | 38<br>(18 - 65)      |
| Digestive diseases                                  | 820<br>(598 - 1,118)     | 14<br>(7 - 25)   | 11<br>(7 - 15)    | 172<br>(103 - 255) | 284<br>(190 - 408)   | 339<br>(254 - 452)   |
| Peptic ulcer disease                                | 149<br>(94 - 211)        | 2<br>(0 - 4)     | 2<br>(1 - 4)      | 38<br>(21 - 61)    | 48<br>(26 - 77)      | 58<br>(36 - 91)      |
| Gastritis and duodenitis                            | 11<br>(6 - 21)           | 0<br>(0 - 0)     | 0<br>(0 - 0)      | 1<br>(0 - 2)       | 4<br>(2 - 9)         | 5<br>(2 - 11)        |
| Appendicitis                                        | 35<br>(22 - 54)          | 1<br>(0 - 3)     | 1<br>(1 - 2)      | 8<br>(4 - 13)      | 9<br>(5 - 15)        | 15<br>(9 - 26)       |
| Paralytic ileus and intestinal obstruction          | 270<br>(156 - 401)       | 5<br>(2 - 11)    | 3<br>(2 - 5)      | 36<br>(16 - 62)    | 86<br>(45 - 138)     | 140<br>(78 - 207)    |
| Inguinal, femoral, and abdominal hernia             | 19<br>(11 - 35)          | 1<br>(0 - 3)     | 0<br>(0 - 1)      | 5<br>(2 - 9)       | 3<br>(2 - 6)         | 9<br>(5 - 19)        |
| Inflammatory bowel disease                          | 13<br>(8 - 18)           | 2<br>(1 - 3)     | 1<br>(0 - 1)      | 3<br>(2 - 6)       | 4<br>(2 - 6)         | 3<br>(2 - 5)         |
| Vascular intestinal disorders                       | 62<br>(24 - 129)         | 0<br>(0 - 0)     | 0<br>(0 - 0)      | 9<br>(3 - 20)      | 27<br>(10 - 56)      | 26<br>(10 - 58)      |
| Gallbladder and biliary diseases                    | 60<br>(39 - 91)          | 1<br>(0 - 1)     | 1<br>(1 - 1)      | 9<br>(5 - 14)      | 17<br>(10 - 29)      | 32<br>(18 - 57)      |
| Pancreatitis                                        | 135<br>(83 - 210)        | 0<br>(0 - 1)     | 0<br>(0 - 1)      | 50<br>(28 - 82)    | 58<br>(33 - 94)      | 26<br>(15 - 43)      |
| Other digestive diseases                            | 68<br>(44 - 98)          | 2<br>(1 - 4)     | 13<br>(1 - 3)     | 13<br>(7 - 22)     | 27<br>(15 - 42)      | 24<br>(13 - 39)      |
| Neurological disorders                              | 490<br>(387 - 628)       | 17<br>(8 - 31)   | 13<br>(8 - 23)    | 47<br>(28 - 71)    | 57<br>(39 - 82)      | 356<br>(277 - 460)   |
| Alzheimer disease and other dementias               | 363<br>(282 - 471)       | --               | --                | 0<br>(0 - 0)       | 36<br>(25 - 55)      | 327<br>(251 - 425)   |
| Parkinson disease                                   | 10<br>(5 - 18)           | --               | --                | 0<br>(0 - 1)       | 1<br>(0 - 3)         | 8<br>(4 - 16)        |
| Epilepsy                                            | 69<br>(46 - 103)         | 13<br>(4 - 27)   | 8<br>(4 - 13)     | 29<br>(17 - 46)    | 9<br>(5 - 14)        | 10<br>(6 - 17)       |
| Multiple sclerosis                                  | 5<br>(1 - 11)            | --               | --                | 0<br>(0 - 1)       | 1<br>(0 - 2)         | 4<br>(1 - 10)        |
| Other neurological disorders                        | 43<br>(30 - 65)          | 4<br>(2 - 6)     | 6<br>(3 - 12)     | 17<br>(10 - 27)    | 9<br>(6 - 14)        | 7<br>(5 - 11)        |
| Mental and substance use disorders                  | 541<br>(307 - 825)       | 1<br>(0 - 1)     | 0<br>(0 - 0)      | 259<br>(139 - 418) | 209<br>(107 - 329)   | 72<br>(45 - 118)     |
| Schizophrenia                                       | 1<br>(1 - 2)             | --               | --                | 0<br>(0 - 1)       | 0<br>(0 - 1)         | 0<br>(0 - 1)         |
| Alcohol use disorders                               | 485<br>(254 - 744)       | --               | --                | 220<br>(107 - 363) | 196<br>(98 - 315)    | 69<br>(41 - 114)     |
| Drug use disorders                                  | 56<br>(36 - 83)          | 1<br>(0 - 1)     | --                | 39<br>(23 - 62)    | 13<br>(8 - 19)       | 3<br>(2 - 5)         |
| Opioid use disorders                                | 9<br>(5 - 13)            | 0<br>(0 - 0)     | --                | 6<br>(4 - 10)      | 2<br>(1 - 3)         | 1<br>(0 - 1)         |
| Cocaine use disorders                               | 1<br>(1 - 2)             | 0<br>(0 - 0)     | --                | 1<br>(1 - 1)       | 0<br>(0 - 0)         | 0<br>(0 - 0)         |
| Amphetamine use disorders                           | 1<br>(1 - 1)             | 0<br>(0 - 0)     | --                | 1<br>(0 - 1)       | 0<br>(0 - 0)         | 0<br>(0 - 0)         |
| Other drug use disorders                            | 45<br>(29 - 67)          | 1<br>(0 - 1)     | --                | 31<br>(18 - 50)    | 11<br>(6 - 16)       | 3<br>(2 - 4)         |

Web Table 31- Bolivia deaths with 95% UI by age, sex, and cause in 2013

| Cause                                               | Males, All Ages          | Males, 0-4 Years   | Males, 5-14 Years | Males, 15-49 Years | Males, 50-69 Years | Males, 70-80 Years   |
|-----------------------------------------------------|--------------------------|--------------------|-------------------|--------------------|--------------------|----------------------|
| Eating disorders                                    | 0<br>(0 - 0)             | --                 | 0<br>(0 - 0)      | 0<br>(0 - 0)       | --                 | --                   |
| Anorexia nervosa                                    | 0<br>(0 - 0)             | --                 | 0<br>(0 - 0)      | 0<br>(0 - 0)       | --                 | --                   |
| Diabetes, urogenital, blood, and endocrine diseases | 2,013<br>(1,564 - 2,647) | 151<br>(101 - 217) | 32<br>(24 - 42)   | 251<br>(159 - 373) | 694<br>(486 - 994) | 885<br>(686 - 1,144) |
| Diabetes mellitus                                   | 504<br>(372 - 670)       | 27<br>(16 - 45)    | 3<br>(2 - 5)      | 62<br>(37 - 93)    | 190<br>(127 - 275) | 221<br>(165 - 297)   |
| Acute glomerulonephritis                            | 4<br>(3 - 7)             | 1<br>(0 - 1)       | 0<br>(0 - 1)      | 1<br>(0 - 1)       | 1<br>(1 - 2)       | 2<br>(1 - 2)         |
| Chronic kidney disease                              | 1,122<br>(830 - 1,550)   | 19<br>(12 - 31)    | 6<br>(4 - 8)      | 131<br>(80 - 206)  | 422<br>(282 - 632) | 544<br>(398 - 750)   |
| Chronic kidney disease due to diabetes mellitus     | 301<br>(164 - 493)       | 2<br>(1 - 5)       | 1<br>(0 - 2)      | 30<br>(11 - 54)    | 149<br>(80 - 246)  | 119<br>(65 - 205)    |
| Chronic kidney disease due to hypertension          | 223<br>(137 - 340)       | 5<br>(2 - 10)      | 2<br>(1 - 3)      | 37<br>(18 - 65)    | 48<br>(23 - 86)    | 131<br>(74 - 208)    |
| Chronic kidney disease due to glomerulonephritis    | 74<br>(42 - 110)         | 3<br>(2 - 5)       | 1<br>(0 - 1)      | 13<br>(7 - 23)     | 26<br>(14 - 45)    | 31<br>(16 - 49)      |
| Chronic kidney disease due to other causes          | 523<br>(325 - 800)       | 8<br>(4 - 18)      | 3<br>(1 - 5)      | 52<br>(27 - 90)    | 198<br>(111 - 329) | 263<br>(153 - 415)   |
| Urinary diseases and male infertility               | 175<br>(126 - 239)       | 26<br>(13 - 53)    | 4<br>(3 - 6)      | 23<br>(14 - 36)    | 39<br>(25 - 59)    | 81<br>(55 - 119)     |
| Interstitial nephritis and urinary tract infections | 73<br>(48 - 108)         | 23<br>(11 - 46)    | 3<br>(2 - 5)      | 9<br>(5 - 14)      | 9<br>(5 - 17)      | 28<br>(15 - 49)      |
| Urolithiasis                                        | 7<br>(4 - 11)            | --                 | 0<br>(0 - 0)      | 1<br>(1 - 2)       | 2<br>(1 - 4)       | 3<br>(1 - 6)         |
| Other urinary diseases                              | 96<br>(64 - 135)         | 3<br>(1 - 7)       | 1<br>(1 - 2)      | 13<br>(7 - 21)     | 27<br>(17 - 42)    | 50<br>(31 - 78)      |
| Gynecological diseases                              | --                       | --                 | --                | --                 | --                 | --                   |
| Uterine fibroids                                    | --                       | --                 | --                | --                 | --                 | --                   |
| Polycystic ovarian syndrome                         | --                       | --                 | --                | --                 | --                 | --                   |
| Endometriosis                                       | --                       | --                 | --                | --                 | --                 | --                   |
| Genital prolapse                                    | --                       | --                 | --                | --                 | --                 | --                   |
| Other gynecological diseases                        | --                       | --                 | --                | --                 | --                 | --                   |
| Hemoglobinopathies and hemolytic anemias            | 57<br>(34 - 93)          | 18<br>(9 - 33)     | 11<br>(6 - 18)    | 11<br>(6 - 19)     | 9<br>(5 - 16)      | 9<br>(5 - 18)        |
| Thalassemias                                        | 22<br>(12 - 38)          | 11<br>(6 - 22)     | 6<br>(4 - 10)     | 4<br>(2 - 7)       | 0<br>(0 - 0)       | 0<br>(0 - 0)         |
| Sickle cell disorders                               | 6<br>(4 - 10)            | 2<br>(1 - 3)       | 1<br>(1 - 2)      | 1<br>(1 - 2)       | 2<br>(1 - 3)       | 0<br>(0 - 0)         |
| G6PD deficiency                                     | 1<br>(1 - 2)             | 0<br>(0 - 1)       | 0<br>(0 - 0)      | 0<br>(0 - 1)       | 0<br>(0 - 1)       | 0<br>(0 - 0)         |
| Other hemoglobinopathies and hemolytic anemias      | 28<br>(17 - 46)          | 4<br>(2 - 8)       | 3<br>(2 - 5)      | 5<br>(3 - 9)       | 6<br>(4 - 12)      | 9<br>(4 - 18)        |
| Endocrine, metabolic, blood, and immune disorders   | 151<br>(99 - 214)        | 60<br>(31 - 102)   | 7<br>(4 - 12)     | 22<br>(12 - 36)    | 33<br>(20 - 57)    | 28<br>(17 - 44)      |
| Musculoskeletal disorders                           | 95<br>(57 - 134)         | --                 | 9<br>(6 - 14)     | 30<br>(17 - 49)    | 30<br>(18 - 46)    | 26<br>(12 - 38)      |
| Rheumatoid arthritis                                | 18<br>(9 - 28)           | --                 | 1<br>(1 - 2)      | 5<br>(2 - 8)       | 7<br>(4 - 13)      | 5<br>(2 - 8)         |
| Other musculoskeletal disorders                     | 77<br>(48 - 111)         | --                 | 8<br>(5 - 13)     | 26<br>(15 - 41)    | 22<br>(13 - 35)    | 21<br>(10 - 31)      |
| Other non-communicable diseases                     | 752<br>(556 - 998)       | 608<br>(415 - 849) | 30<br>(19 - 44)   | 35<br>(21 - 51)    | 35<br>(24 - 51)    | 45<br>(32 - 62)      |
| Congenital anomalies                                | 678<br>(486 - 925)       | 591<br>(403 - 830) | 27<br>(17 - 42)   | 23<br>(14 - 35)    | 19<br>(12 - 27)    | 18<br>(12 - 25)      |
| Neural tube defects                                 | 22<br>(6 - 63)           | 22<br>(5 - 62)     | 0<br>(0 - 0)      | 0<br>(0 - 0)       | 0<br>(0 - 0)       | 0<br>(0 - 0)         |
| Congenital heart anomalies                          | 275<br>(170 - 422)       | 248<br>(145 - 395) | 13<br>(8 - 21)    | 9<br>(5 - 14)      | 3<br>(2 - 4)       | 1<br>(1 - 2)         |
| Cleft lip and cleft palate                          | 5<br>(2 - 13)            | 5<br>(2 - 13)      | --                | --                 | --                 | --                   |
| Down syndrome                                       | 54<br>(25 - 109)         | 47<br>(19 - 101)   | 5<br>(2 - 11)     | 1<br>(0 - 2)       | 0<br>(0 - 1)       | 0<br>(0 - 0)         |
| Chromosomal unbalanced rearrangements               | 14<br>(8 - 25)           | 12<br>(6 - 23)     | 1<br>(0 - 1)      | 1<br>(0 - 1)       | 1<br>(0 - 1)       | 0<br>(0 - 1)         |
| Other congenital anomalies                          | 308<br>(210 - 438)       | 256<br>(156 - 382) | 8<br>(4 - 14)     | 12<br>(7 - 20)     | 15<br>(10 - 22)    | 16<br>(11 - 23)      |
| Skin and subcutaneous diseases                      | 67<br>(47 - 95)          | 10<br>(5 - 19)     | 2<br>(1 - 4)      | 12<br>(7 - 18)     | 16<br>(10 - 25)    | 27<br>(17 - 41)      |
| Cellulitis                                          | 9<br>(5 - 14)            | 2<br>(1 - 4)       | 0<br>(0 - 0)      | 1<br>(0 - 2)       | 2<br>(1 - 4)       | 4<br>(2 - 7)         |
| Pyoderma                                            | 37<br>(25 - 54)          | 7<br>(3 - 15)      | 1<br>(1 - 2)      | 7<br>(4 - 12)      | 9<br>(6 - 15)      | 12<br>(7 - 19)       |



Web Table 31- Bolivia deaths with 95% UI by age, sex, and cause in 2013

| Cause                                           | Males, All Ages          | Males, 0-4 Years       | Males, 5-14 Years  | Males, 15-49 Years       | Males, 50-69 Years   | Males, 70-80 Years |
|-------------------------------------------------|--------------------------|------------------------|--------------------|--------------------------|----------------------|--------------------|
| Decubitus ulcer                                 | 18<br>(12 - 27)          | 0<br>(0 - 1)           | 0<br>(0 - 1)       | 2<br>(1 - 4)             | 4<br>(2 - 7)         | 11<br>(6 - 17)     |
| Other skin and subcutaneous diseases            | 3<br>(2 - 5)             | 0<br>(0 - 1)           | 0<br>(0 - 0)       | 1<br>(1 - 2)             | 0<br>(0 - 1)         | 0<br>(0 - 1)       |
| Sudden infant death syndrome                    | 7<br>(2 - 20)            | 7<br>(2 - 20)          | --                 | --                       | --                   | --                 |
| Injuries                                        | 5,916<br>(4,537 - 7,560) | 1,370<br>(963 - 1,821) | 457<br>(392 - 524) | 2,654<br>(1,721 - 3,649) | 815<br>(564 - 1,151) | 619<br>(488 - 805) |
| Transport injuries                              | 2,064<br>(1,482 - 2,757) | 248<br>(148 - 393)     | 186<br>(138 - 234) | 1,115<br>(697 - 1,610)   | 355<br>(235 - 508)   | 160<br>(114 - 218) |
| Road injuries                                   | 1,985<br>(1,421 - 2,669) | 208<br>(122 - 334)     | 181<br>(134 - 228) | 1,097<br>(688 - 1,585)   | 346<br>(229 - 495)   | 152<br>(108 - 207) |
| Pedestrian road injuries                        | 1,299<br>(886 - 1,871)   | 148<br>(82 - 252)      | 136<br>(96 - 177)  | 877<br>(536 - 1,340)     | 84<br>(39 - 148)     | 55<br>(33 - 85)    |
| Cyclist road injuries                           | 39<br>(23 - 66)          | 4<br>(1 - 9)           | 5<br>(2 - 9)       | 7<br>(4 - 12)            | 19<br>(9 - 36)       | 5<br>(3 - 8)       |
| Motorcyclist road injuries                      | 60<br>(33 - 100)         | 4<br>(2 - 8)           | 3<br>(1 - 5)       | 29<br>(13 - 52)          | 22<br>(12 - 41)      | 3<br>(1 - 4)       |
| Motor vehicle road injuries                     | 574<br>(361 - 813)       | 51<br>(25 - 93)        | 36<br>(19 - 61)    | 184<br>(78 - 321)        | 215<br>(140 - 315)   | 88<br>(59 - 122)   |
| Other road injuries                             | 13<br>(8 - 23)           | 2<br>(1 - 4)           | 1<br>(1 - 2)       | 1<br>(1 - 3)             | 7<br>(3 - 14)        | 2<br>(1 - 3)       |
| Other transport injuries                        | 79<br>(54 - 115)         | 40<br>(21 - 69)        | 5<br>(3 - 8)       | 17<br>(10 - 29)          | 9<br>(5 - 15)        | 8<br>(5 - 13)      |
| Unintentional injuries                          | 3,107<br>(2,284 - 4,008) | 1,095<br>(713 - 1,526) | 252<br>(197 - 316) | 1,029<br>(649 - 1,502)   | 330<br>(220 - 489)   | 400<br>(301 - 534) |
| Falls                                           | 233<br>(134 - 336)       | 13<br>(6 - 24)         | 11<br>(6 - 19)     | 88<br>(46 - 140)         | 56<br>(29 - 92)      | 65<br>(31 - 108)   |
| Drowning                                        | 403<br>(269 - 634)       | 142<br>(73 - 289)      | 50<br>(31 - 81)    | 128<br>(79 - 210)        | 34<br>(20 - 57)      | 50<br>(30 - 82)    |
| Fire, heat, and hot substances                  | 121<br>(82 - 166)        | 42<br>(22 - 77)        | 7<br>(4 - 11)      | 17<br>(10 - 28)          | 11<br>(7 - 17)       | 44<br>(26 - 67)    |
| Poisonings                                      | 123<br>(70 - 181)        | 24<br>(12 - 43)        | 6<br>(3 - 10)      | 56<br>(28 - 98)          | 21<br>(11 - 35)      | 16<br>(9 - 26)     |
| Exposure to mechanical forces                   | 199<br>(137 - 284)       | 44<br>(23 - 91)        | 13<br>(8 - 19)     | 108<br>(65 - 174)        | 22<br>(14 - 35)      | 12<br>(8 - 19)     |
| Unintentional firearm injuries                  | 75<br>(42 - 125)         | 2<br>(1 - 5)           | 2<br>(1 - 4)       | 59<br>(30 - 103)         | 10<br>(5 - 18)       | 1<br>(0 - 1)       |
| Unintentional suffocation                       | 27<br>(10 - 67)          | 18<br>(4 - 57)         | 5<br>(2 - 9)       | 3<br>(1 - 6)             | 1<br>(0 - 1)         | 0<br>(0 - 1)       |
| Other exposure to mechanical forces             | 98<br>(68 - 137)         | 23<br>(12 - 41)        | 6<br>(3 - 10)      | 47<br>(27 - 73)          | 11<br>(6 - 17)       | 11<br>(7 - 18)     |
| Adverse effects of medical treatment            | 239<br>(154 - 358)       | 55<br>(28 - 123)       | 8<br>(5 - 14)      | 39<br>(21 - 65)          | 46<br>(25 - 77)      | 91<br>(49 - 148)   |
| Animal contact                                  | 23<br>(16 - 35)          | 7<br>(4 - 13)          | 2<br>(1 - 3)       | 4<br>(2 - 7)             | 6<br>(3 - 9)         | 5<br>(3 - 7)       |
| Venomous animal contact                         | 7<br>(5 - 12)            | 1<br>(1 - 3)           | 0<br>(0 - 1)       | 1<br>(1 - 3)             | 2<br>(1 - 5)         | 2<br>(1 - 3)       |
| Non-venomous animal contact                     | 16<br>(10 - 24)          | 6<br>(3 - 10)          | 1<br>(1 - 2)       | 3<br>(2 - 5)             | 3<br>(2 - 5)         | 3<br>(2 - 5)       |
| Foreign body                                    | 1,632<br>(930 - 2,352)   | 732<br>(402 - 1,105)   | 139<br>(86 - 203)  | 529<br>(264 - 831)       | 120<br>(63 - 211)    | 112<br>(64 - 178)  |
| Pulmonary aspiration and foreign body in airway | 1,630<br>(928 - 2,350)   | 732<br>(402 - 1,104)   | 139<br>(86 - 203)  | 529<br>(263 - 830)       | 119<br>(63 - 211)    | 111<br>(64 - 178)  |
| Foreign body in other body part                 | 2<br>(1 - 4)             | 1<br>(0 - 1)           | 0<br>(0 - 0)       | 0<br>(0 - 1)             | 0<br>(0 - 1)         | 0<br>(0 - 1)       |
| Other unintentional injuries                    | 133<br>(98 - 183)        | 36<br>(24 - 61)        | 16<br>(11 - 24)    | 59<br>(36 - 88)          | 14<br>(9 - 21)       | 7<br>(5 - 11)      |
| Self-harm and interpersonal violence            | 733<br>(450 - 1,046)     | 27<br>(13 - 58)        | 19<br>(10 - 29)    | 505<br>(264 - 744)       | 125<br>(80 - 190)    | 57<br>(36 - 90)    |
| Self-harm                                       | 325<br>(202 - 485)       | --                     | 3<br>(1 - 7)       | 184<br>(104 - 295)       | 90<br>(54 - 142)     | 49<br>(29 - 78)    |
| Interpersonal violence                          | 407<br>(176 - 610)       | 27<br>(13 - 58)        | 16<br>(7 - 26)     | 321<br>(118 - 506)       | 36<br>(18 - 62)      | 8<br>(4 - 17)      |
| Assault by firearm                              | 189<br>(72 - 314)        | 3<br>(1 - 8)           | 3<br>(1 - 7)       | 173<br>(63 - 292)        | 9<br>(3 - 19)        | 1<br>(0 - 2)       |
| Assault by sharp object                         | 18<br>(8 - 33)           | 1<br>(0 - 3)           | 1<br>(0 - 2)       | 9<br>(3 - 19)            | 6<br>(2 - 12)        | 1<br>(0 - 1)       |
| Assault by other means                          | 200<br>(84 - 315)        | 23<br>(11 - 48)        | 11<br>(5 - 19)     | 139<br>(44 - 244)        | 21<br>(9 - 38)       | 6<br>(3 - 13)      |
| Forces of nature, war, and legal intervention   | 12<br>(7 - 29)           | 0<br>(0 - 0)           | 1<br>(0 - 1)       | 6<br>(3 - 13)            | 4<br>(2 - 9)         | 2<br>(1 - 4)       |
| Exposure to forces of nature                    | 12<br>(7 - 29)           | 0<br>(0 - 0)           | 1<br>(0 - 1)       | 6<br>(3 - 13)            | 4<br>(2 - 9)         | 2<br>(1 - 4)       |

Web Table 31- Bolivia deaths with 95% UI by age, sex, and cause in 2013

| Cause                                                             | Females, All Ages           | Females, 0-4 Years       | Females, 5-14 Years | Females, 15-49 Years     | Females, 50-69 Years     | Females, 70-80 Years       |
|-------------------------------------------------------------------|-----------------------------|--------------------------|---------------------|--------------------------|--------------------------|----------------------------|
| All causes                                                        | 28,292<br>(23,222 - 34,765) | 5,148<br>(4,646 - 5,771) | 602<br>(521 - 712)  | 4,087<br>(2,878 - 5,329) | 6,593<br>(4,723 - 9,278) | 11,862<br>(9,891 - 14,420) |
| Communicable, maternal, neonatal, and nutritional diseases        | 6,915<br>(5,783 - 8,297)    | 3,010<br>(2,525 - 3,521) | 131<br>(99 - 174)   | 981<br>(698 - 1,515)     | 673<br>(459 - 980)       | 2,118<br>(1,550 - 2,827)   |
| HIV/AIDS and tuberculosis                                         | 487<br>(270 - 1,304)        | 14<br>(6 - 48)           | 12<br>(4 - 47)      | 197<br>(68 - 809)        | 112<br>(63 - 270)        | 151<br>(102 - 218)         |
| Tuberculosis                                                      | 316<br>(223 - 447)          | 10<br>(6 - 15)           | 4<br>(3 - 7)        | 69<br>(39 - 109)         | 85<br>(54 - 132)         | 148<br>(101 - 212)         |
| HIV/AIDS                                                          | 171<br>(12 - 1,043)         | 5<br>(0 - 39)            | 8<br>(0 - 43)       | 128<br>(11 - 762)        | 27<br>(1 - 187)          | 3<br>(0 - 22)              |
| HIV/AIDS resulting in mycobacterial infection                     | 8<br>(1 - 50)               | 0<br>(0 - 2)             | 0<br>(0 - 2)        | 6<br>(1 - 36)            | 1<br>(0 - 10)            | 0<br>(0 - 1)               |
| HIV/AIDS resulting in other diseases                              | 163<br>(12 - 995)           | 4<br>(0 - 37)            | 8<br>(0 - 41)       | 122<br>(10 - 729)        | 26<br>(1 - 178)          | 3<br>(0 - 20)              |
| Diarrhea, lower respiratory, and other common infectious diseases | 3,242<br>(2,470 - 4,158)    | 1,162<br>(810 - 1,538)   | 90<br>(65 - 122)    | 180<br>(107 - 260)       | 373<br>(234 - 583)       | 1,437<br>(953 - 2,033)     |
| Diarrheal diseases                                                | 424<br>(224 - 759)          | 334<br>(138 - 661)       | 11<br>(5 - 21)      | 12<br>(7 - 20)           | 13<br>(7 - 22)           | 54<br>(29 - 92)            |
| Intestinal infectious diseases                                    | 78<br>(39 - 142)            | 26<br>(13 - 48)          | 21<br>(9 - 40)      | 25<br>(10 - 52)          | 4<br>(1 - 9)             | 1<br>(0 - 4)               |
| Typhoid fever                                                     | 58<br>(28 - 111)            | 18<br>(8 - 36)           | 17<br>(7 - 33)      | 19<br>(7 - 40)           | 3<br>(1 - 6)             | 1<br>(0 - 2)               |
| Paratyphoid fever                                                 | 16<br>(7 - 30)              | 6<br>(2 - 11)            | 4<br>(2 - 9)        | 5<br>(2 - 11)            | 1<br>(0 - 2)             | 0<br>(0 - 0)               |
| Other intestinal infectious diseases                              | 4<br>(1 - 10)               | 2<br>(0 - 6)             | 0<br>(0 - 2)        | 1<br>(0 - 5)             | 0<br>(0 - 3)             | 0<br>(0 - 2)               |
| Lower respiratory infections                                      | 2,499<br>(1,856 - 3,267)    | 681<br>(441 - 1,011)     | 34<br>(21 - 53)     | 106<br>(60 - 159)        | 333<br>(207 - 533)       | 1,345<br>(886 - 1,918)     |
| Upper respiratory infections                                      | 2<br>(1 - 3)                | 0<br>(0 - 1)             | 0<br>(0 - 0)        | 0<br>(0 - 1)             | 0<br>(0 - 1)             | 1<br>(0 - 2)               |
| Otitis media                                                      | 5<br>(4 - 6)                | 1<br>(1 - 1)             | 0<br>(0 - 0)        | 0<br>(0 - 1)             | 2<br>(1 - 2)             | 2<br>(1 - 3)               |
| Meningitis                                                        | 152<br>(110 - 198)          | 71<br>(43 - 106)         | 13<br>(7 - 21)      | 24<br>(14 - 38)          | 14<br>(8 - 23)           | 30<br>(18 - 47)            |
| Pneumococcal meningitis                                           | 40<br>(26 - 58)             | 15<br>(8 - 25)           | 4<br>(2 - 7)        | 8<br>(4 - 14)            | 4<br>(2 - 8)             | 9<br>(4 - 16)              |
| H influenzae type B meningitis                                    | 32<br>(21 - 49)             | 23<br>(13 - 38)          | 3<br>(1 - 6)        | 3<br>(1 - 5)             | 1<br>(1 - 2)             | 3<br>(1 - 5)               |
| Meningococcal meningitis                                          | 25<br>(17 - 34)             | 10<br>(5 - 16)           | 2<br>(1 - 4)        | 5<br>(2 - 8)             | 2<br>(1 - 4)             | 5<br>(3 - 10)              |
| Other meningitis                                                  | 55<br>(34 - 77)             | 23<br>(10 - 41)          | 4<br>(1 - 7)        | 9<br>(5 - 16)            | 6<br>(3 - 11)            | 13<br>(7 - 22)             |
| Encephalitis                                                      | 8<br>(39 - 87)              | 30<br>(16 - 52)          | 9<br>(5 - 18)       | 10<br>(5 - 18)           | 6<br>(3 - 10)            | 3<br>(2 - 6)               |
| Diphtheria                                                        | 1<br>(0 - 7)                | 1<br>(0 - 6)             | 0<br>(0 - 1)        | 0<br>(0 - 0)             | 0<br>(0 - 0)             | --                         |
| Whooping cough                                                    | 19<br>(5 - 56)              | 18<br>(4 - 55)           | 0<br>(0 - 1)        | 1<br>(0 - 1)             | 0<br>(0 - 0)             | --                         |
| Tetanus                                                           | 0<br>(0 - 1)                | 0<br>(0 - 0)             | 0<br>(0 - 0)        | 0<br>(0 - 0)             | 0<br>(0 - 0)             | 0<br>(0 - 0)               |
| Measles                                                           | 0<br>(0 - 0)                | 0<br>(0 - 0)             | 0<br>(0 - 0)        | 0<br>(0 - 0)             | 0<br>(0 - 0)             | --                         |
| Varicella and herpes zoster                                       | 4<br>(1 - 11)               | 1<br>(0 - 4)             | 0<br>(0 - 1)        | 1<br>(0 - 2)             | 0<br>(0 - 1)             | 2<br>(0 - 8)               |
| Neglected tropical diseases and malaria                           | 165<br>(42 - 412)           | 7<br>(3 - 15)            | 2<br>(1 - 6)        | 15<br>(6 - 39)           | 50<br>(8 - 119)          | 91<br>(15 - 246)           |
| Malaria                                                           | 1<br>(1 - 2)                | 0<br>(0 - 0)             | 0<br>(0 - 0)        | 0<br>(0 - 1)             | 0<br>(0 - 0)             | 0<br>(0 - 0)               |
| Chagas disease                                                    | 145<br>(21 - 393)           | 0<br>(0 - 1)             | 0<br>(0 - 0)        | 10<br>(2 - 33)           | 47<br>(5 - 116)          | 89<br>(13 - 242)           |
| Leishmaniasis                                                     | 0                           | 0                        | 0                   | 0                        | 0                        | 0                          |
| Visceral leishmaniasis                                            | 0<br>(0 - 0)                | 0<br>(0 - 0)             | 0<br>(0 - 0)        | 0<br>(0 - 0)             | 0<br>(0 - 0)             | 0<br>(0 - 0)               |
| Cysticercosis                                                     | 3<br>(2 - 4)                | 0<br>(0 - 0)             | 0<br>(0 - 0)        | 1<br>(1 - 2)             | 1<br>(1 - 1)             | 0<br>(0 - 0)               |
| Cystic echinococcosis                                             | 1<br>(1 - 1)                | 0<br>(0 - 0)             | 0<br>(0 - 0)        | 0<br>(0 - 0)             | 0<br>(0 - 0)             | 0<br>(0 - 0)               |
| Dengue                                                            | 1<br>(0 - 2)                | 0<br>(0 - 0)             | 0<br>(0 - 0)        | 0<br>(0 - 1)             | 0<br>(0 - 0)             | 0<br>(0 - 0)               |
| Yellow fever                                                      | 2<br>(1 - 3)                | 0<br>(0 - 1)             | 0<br>(0 - 1)        | 1<br>(0 - 2)             | 0<br>(0 - 1)             | 0<br>(0 - 0)               |
| Rabies                                                            | 1<br>(0 - 1)                | 0<br>(0 - 0)             | 0<br>(0 - 0)        | 0<br>(0 - 1)             | 0<br>(0 - 0)             | 0<br>(0 - 0)               |
| Intestinal nematode infections                                    | 5<br>(1 - 13)               | 3<br>(0 - 11)            | 1<br>(0 - 4)        | 0<br>(0 - 2)             | 0<br>(0 - 3)             | 0<br>(0 - 3)               |
| Ascariasis                                                        | 5<br>(1 - 13)               | 3<br>(0 - 11)            | 1<br>(0 - 4)        | 0<br>(0 - 2)             | 0<br>(0 - 3)             | 0<br>(0 - 3)               |
| Other neglected tropical diseases                                 | 6<br>(4 - 9)                | 3<br>(1 - 6)             | 0<br>(0 - 1)        | 1<br>(0 - 1)             | 1<br>(0 - 2)             | 1<br>(1 - 2)               |

Web Table 31- Bolivia deaths with 95% UI by age, sex, and cause in 2013

| Cause                                                            | Females, All Ages           | Females, 0-4 Years       | Females, 5-14 Years | Females, 15-49 Years     | Females, 50-69 Years     | Females, 70-80 Years      |
|------------------------------------------------------------------|-----------------------------|--------------------------|---------------------|--------------------------|--------------------------|---------------------------|
| Maternal disorders                                               | 499<br>(307 - 715)          | --                       | 2<br>(1 - 5)        | 497<br>(306 - 712)       | --                       | --                        |
| Maternal hemorrhage                                              | 67<br>(38 - 106)            | --                       | 0<br>(0 - 0)        | 67<br>(37 - 106)         | --                       | --                        |
| Maternal sepsis and other maternal infections                    | 50<br>(28 - 78)             | --                       | 0<br>(0 - 1)        | 50<br>(28 - 78)          | --                       | --                        |
| Maternal hypertensive disorders                                  | 61<br>(35 - 96)             | --                       | 0<br>(0 - 1)        | 61<br>(34 - 96)          | --                       | --                        |
| Maternal obstructed labor                                        | 34<br>(20 - 53)             | --                       | 0<br>(0 - 0)        | 34<br>(20 - 53)          | --                       | --                        |
| Maternal abortive outcome                                        | 92<br>(52 - 143)            | --                       | 0<br>(0 - 1)        | 92<br>(51 - 142)         | --                       | --                        |
| Indirect maternal deaths                                         | 33<br>(19 - 50)             | --                       | 0<br>(0 - 0)        | 33<br>(18 - 50)          | --                       | --                        |
| Late maternal deaths                                             | 108<br>(62 - 168)           | --                       | 0<br>(0 - 1)        | 107<br>(61 - 167)        | --                       | --                        |
| Maternal deaths aggravated by HIV/AIDS                           | 0<br>(0 - 0)                | --                       | --                  | 0<br>(0 - 0)             | --                       | --                        |
| Other maternal disorders                                         | 52<br>(29 - 83)             | --                       | 0<br>(0 - 1)        | 52<br>(28 - 83)          | --                       | --                        |
| Neonatal disorders                                               | 1,563<br>(1,259 - 2,020)    | 1,563<br>(1,259 - 2,020) | --                  | --                       | --                       | --                        |
| Neonatal preterm birth complications                             | 645<br>(348 - 975)          | 645<br>(348 - 975)       | --                  | --                       | --                       | --                        |
| Neonatal encephalopathy due to birth asphyxia and trauma         | 500<br>(267 - 800)          | 500<br>(267 - 800)       | --                  | --                       | --                       | --                        |
| Neonatal sepsis and other neonatal infections                    | 309<br>(149 - 569)          | 309<br>(149 - 569)       | --                  | --                       | --                       | --                        |
| Hemolytic disease and other neonatal jaundice                    | 11<br>(4 - 24)              | 11<br>(4 - 24)           | --                  | --                       | --                       | --                        |
| Other neonatal disorders                                         | 98<br>(50 - 173)            | 98<br>(50 - 173)         | --                  | --                       | --                       | --                        |
| Nutritional deficiencies                                         | 688<br>(491 - 950)          | 96<br>(57 - 151)         | 9<br>(5 - 13)       | 70<br>(41 - 104)         | 112<br>(69 - 175)        | 401<br>(259 - 598)        |
| Protein-energy malnutrition                                      | 440<br>(267 - 645)          | 73<br>(38 - 123)         | 3<br>(1 - 6)        | 17<br>(7 - 34)           | 60<br>(29 - 101)         | 286<br>(160 - 448)        |
| Iodine deficiency                                                | 1<br>(0 - 2)                | 0<br>(0 - 1)             | 0<br>(0 - 0)        | 0<br>(0 - 0)             | 0<br>(0 - 1)             | 0<br>(0 - 1)              |
| Iron-deficiency anemia                                           | 240<br>(113 - 402)          | 22<br>(6 - 51)           | 5<br>(3 - 9)        | 51<br>(27 - 78)          | 49<br>(21 - 89)          | 113<br>(44 - 215)         |
| Other nutritional deficiencies                                   | 7<br>(3 - 14)               | 1<br>(0 - 1)             | 0<br>(0 - 1)        | 2<br>(1 - 3)             | 3<br>(1 - 6)             | 2<br>(1 - 4)              |
| Other communicable, maternal, neonatal, and nutritional diseases | 270<br>(152 - 448)          | 168<br>(69 - 322)        | 16<br>(8 - 28)      | 22<br>(13 - 34)          | 26<br>(13 - 49)          | 38<br>(16 - 82)           |
| Sexually transmitted diseases excluding HIV                      | 171<br>(64 - 320)           | 145<br>(47 - 285)        | 12<br>(4 - 23)      | 8<br>(4 - 14)            | 2<br>(1 - 6)             | 3<br>(1 - 8)              |
| Syphilis                                                         | 164<br>(58 - 314)           | 145<br>(47 - 285)        | 12<br>(4 - 23)      | 3<br>(2 - 6)             | 1<br>(0 - 3)             | 3<br>(1 - 6)              |
| Chlamydial infection                                             | 2<br>(1 - 4)                | --                       | 0<br>(0 - 0)        | 2<br>(1 - 3)             | 0<br>(0 - 1)             | 0<br>(0 - 1)              |
| Gonococcal infection                                             | 2<br>(1 - 4)                | --                       | 0<br>(0 - 0)        | 2<br>(1 - 3)             | 0<br>(0 - 1)             | 0<br>(0 - 1)              |
| Other sexually transmitted diseases                              | 2<br>(1 - 4)                | --                       | 0<br>(0 - 0)        | 1<br>(1 - 3)             | 0<br>(0 - 1)             | 0<br>(0 - 1)              |
| Hepatitis                                                        | 17<br>(12 - 24)             | 2<br>(1 - 3)             | 1<br>(1 - 2)        | 6<br>(4 - 9)             | 5<br>(3 - 8)             | 4<br>(2 - 6)              |
| Acute hepatitis A                                                | 6<br>(3 - 10)               | 1<br>(1 - 2)             | 1<br>(0 - 1)        | 3<br>(1 - 5)             | 1<br>(0 - 1)             | 0<br>(0 - 1)              |
| Acute hepatitis B                                                | 10<br>(6 - 16)              | 0<br>(0 - 1)             | 0<br>(0 - 1)        | 3<br>(1 - 5)             | 4<br>(2 - 6)             | 3<br>(2 - 5)              |
| Acute hepatitis C                                                | 1<br>(0 - 3)                | --                       | 0<br>(0 - 0)        | 1<br>(0 - 2)             | 0<br>(0 - 1)             | 0<br>(0 - 1)              |
| Other infectious diseases                                        | 82<br>(44 - 144)            | 21<br>(8 - 50)           | 3<br>(1 - 7)        | 8<br>(4 - 15)            | 19<br>(7 - 40)           | 30<br>(10 - 75)           |
| Non-communicable diseases                                        | 17,529<br>(13,733 - 22,461) | 948<br>(720 - 1,230)     | 162<br>(127 - 202)  | 1,903<br>(1,180 - 2,611) | 5,434<br>(3,849 - 7,689) | 9,082<br>(7,427 - 11,241) |
| Neoplasms                                                        | 4,315<br>(3,179 - 5,771)    | 60<br>(40 - 85)          | 33<br>(24 - 45)     | 682<br>(416 - 954)       | 1,732<br>(1,196 - 2,481) | 1,807<br>(1,392 - 2,303)  |
| Esophageal cancer                                                | 17<br>(11 - 23)             | --                       | --                  | 0<br>(0 - 1)             | 8<br>(5 - 12)            | 9<br>(6 - 12)             |
| Stomach cancer                                                   | 934<br>(655 - 1,288)        | --                       | --                  | 110<br>(63 - 164)        | 340<br>(217 - 513)       | 484<br>(323 - 689)        |
| Liver cancer                                                     | 253<br>(173 - 360)          | --                       | 0<br>(0 - 0)        | 22<br>(12 - 36)          | 122<br>(74 - 192)        | 109<br>(68 - 166)         |
| Liver cancer due to hepatitis B                                  | 92<br>(39 - 148)            | --                       | 0<br>(0 - 0)        | 11<br>(6 - 19)           | 49<br>(17 - 84)          | 32<br>(15 - 55)           |
| Liver cancer due to hepatitis C                                  | 42<br>(21 - 76)             | --                       | 0<br>(0 - 0)        | 2<br>(1 - 5)             | 19<br>(9 - 36)           | 21<br>(10 - 38)           |
| Liver cancer due to alcohol use                                  | 72<br>(36 - 120)            | --                       | --                  | 3<br>(1 - 6)             | 30<br>(12 - 55)          | 39<br>(19 - 67)           |

Web Table 31- Bolivia deaths with 95% UI by age, sex, and cause in 2013

| Cause                                         | Females, All Ages        | Females, 0-4 Years | Females, 5-14 Years | Females, 15-49 Years | Females, 50-69 Years     | Females, 70-80 Years     |
|-----------------------------------------------|--------------------------|--------------------|---------------------|----------------------|--------------------------|--------------------------|
| Liver cancer due to other causes              | 47<br>(26 - 82)          | --                 | 0<br>(0 - 0)        | 6<br>(3 - 10)        | 24<br>(11 - 45)          | 17<br>(9 - 30)           |
| Larynx cancer                                 | 2<br>(1 - 4)             | --                 | --                  | 1<br>(0 - 2)         | 0<br>(0 - 1)             | 1<br>(0 - 2)             |
| Tracheal, bronchus and lung cancer            | 294<br>(203 - 414)       | --                 | --                  | 24<br>(13 - 38)      | 131<br>(85 - 197)        | 140<br>(97 - 194)        |
| Breast cancer                                 | 372<br>(252 - 518)       | --                 | --                  | 127<br>(75 - 184)    | 155<br>(104 - 230)       | 89<br>(62 - 122)         |
| Cervical cancer                               | 544<br>(341 - 773)       | --                 | --                  | 173<br>(97 - 264)    | 227<br>(136 - 349)       | 144<br>(93 - 206)        |
| Uterine cancer                                | 104<br>(65 - 161)        | --                 | --                  | 17<br>(9 - 30)       | 46<br>(26 - 75)          | 41<br>(24 - 65)          |
| Prostate cancer                               | --                       | --                 | --                  | --                   | --                       | --                       |
| Colon and rectum cancer                       | 281<br>(202 - 391)       | --                 | --                  | 28<br>(17 - 41)      | 119<br>(80 - 176)        | 134<br>(95 - 190)        |
| Lip and oral cavity cancer                    | 9<br>(5 - 15)            | --                 | --                  | 1<br>(1 - 3)         | 1<br>(1 - 2)             | 6<br>(3 - 10)            |
| Nasopharynx cancer                            | 1<br>(0 - 1)             | --                 | 0<br>(0 - 0)        | 0<br>(0 - 1)         | 0<br>(0 - 0)             | 0<br>(0 - 0)             |
| Other pharynx cancer                          | 4<br>(3 - 7)             | --                 | --                  | 0<br>(0 - 1)         | 3<br>(1 - 5)             | 1<br>(1 - 2)             |
| Gallbladder and biliary tract cancer          | 450<br>(284 - 664)       | --                 | --                  | 17<br>(9 - 28)       | 187<br>(110 - 303)       | 246<br>(148 - 371)       |
| Pancreatic cancer                             | 136<br>(95 - 190)        | --                 | --                  | 6<br>(3 - 9)         | 57<br>(37 - 86)          | 73<br>(50 - 102)         |
| Malignant skin melanoma                       | 39<br>(26 - 56)          | --                 | --                  | 11<br>(6 - 17)       | 19<br>(12 - 29)          | 10<br>(6 - 14)           |
| Non-melanoma skin cancer                      | 30<br>(16 - 52)          | --                 | --                  | 2<br>(1 - 4)         | 3<br>(2 - 7)             | 24<br>(12 - 43)          |
| Ovarian cancer                                | 110<br>(74 - 159)        | --                 | --                  | 24<br>(14 - 39)      | 64<br>(41 - 99)          | 21<br>(14 - 32)          |
| Testicular cancer                             | --                       | --                 | --                  | --                   | --                       | --                       |
| Kidney cancer                                 | 67<br>(44 - 99)          | 0<br>(0 - 1)       | 0<br>(0 - 0)        | 5<br>(3 - 8)         | 24<br>(15 - 40)          | 37<br>(23 - 59)          |
| Bladder cancer                                | 47<br>(28 - 71)          | --                 | --                  | 4<br>(2 - 8)         | 16<br>(9 - 27)           | 26<br>(16 - 40)          |
| Brain and nervous system cancer               | 70<br>(48 - 98)          | 4<br>(2 - 9)       | 3<br>(2 - 5)        | 15<br>(9 - 23)       | 26<br>(16 - 41)          | 21<br>(13 - 31)          |
| Thyroid cancer                                | 23<br>(15 - 36)          | --                 | 0<br>(0 - 0)        | 2<br>(1 - 3)         | 13<br>(7 - 22)           | 8<br>(5 - 12)            |
| Mesothelioma                                  | 5<br>(3 - 8)             | --                 | --                  | 0<br>(0 - 1)         | 3<br>(2 - 5)             | 1<br>(1 - 3)             |
| Hodgkin lymphoma                              | 12<br>(8 - 17)           | 2<br>(1 - 5)       | 1<br>(0 - 1)        | 4<br>(2 - 6)         | 2<br>(1 - 4)             | 3<br>(2 - 6)             |
| Non-Hodgkin lymphoma                          | 69<br>(45 - 102)         | 7<br>(3 - 12)      | 3<br>(1 - 5)        | 11<br>(6 - 16)       | 25<br>(15 - 41)          | 24<br>(14 - 36)          |
| Multiple myeloma                              | 36<br>(23 - 51)          | --                 | --                  | 4<br>(2 - 6)         | 18<br>(11 - 28)          | 14<br>(9 - 21)           |
| Leukemia                                      | 99<br>(74 - 130)         | 19<br>(10 - 33)    | 14<br>(9 - 21)      | 22<br>(14 - 32)      | 17<br>(11 - 26)          | 27<br>(18 - 38)          |
| Other neoplasms                               | 306<br>(214 - 440)       | 28<br>(14 - 44)    | 11<br>(6 - 18)      | 50<br>(28 - 77)      | 103<br>(62 - 163)        | 114<br>(75 - 176)        |
| Cardiovascular diseases                       | 6,246<br>(4,741 - 8,453) | 147<br>(93 - 269)  | 35<br>(23 - 59)     | 486<br>(285 - 742)   | 1,757<br>(1,170 - 2,629) | 3,821<br>(2,998 - 4,949) |
| Rheumatic heart disease                       | 94<br>(56 - 146)         | 2<br>(1 - 4)       | 3<br>(1 - 5)        | 19<br>(9 - 32)       | 44<br>(25 - 74)          | 27<br>(16 - 39)          |
| Ischemic heart disease                        | 3,130<br>(2,265 - 4,382) | 16<br>(6 - 47)     | 10<br>(6 - 22)      | 196<br>(109 - 325)   | 872<br>(561 - 1,333)     | 2,036<br>(1,540 - 2,695) |
| Cerebrovascular disease                       | 2,111<br>(1,498 - 2,922) | 38<br>(21 - 73)    | 12<br>(7 - 20)      | 204<br>(119 - 300)   | 605<br>(392 - 920)       | 1,252<br>(886 - 1,714)   |
| Ischemic stroke                               | 1,088<br>(762 - 1,539)   | 3<br>(1 - 7)       | 2<br>(1 - 5)        | 43<br>(21 - 74)      | 234<br>(143 - 371)       | 807<br>(564 - 1,111)     |
| Hemorrhagic stroke                            | 1,023<br>(661 - 1,413)   | 35<br>(19 - 68)    | 10<br>(6 - 16)      | 161<br>(90 - 237)    | 371<br>(230 - 568)       | 445<br>(281 - 639)       |
| Hypertensive heart disease                    | 84<br>(52 - 138)         | 0<br>(0 - 1)       | 0<br>(0 - 0)        | 7<br>(3 - 11)        | 15<br>(9 - 25)           | 62<br>(37 - 106)         |
| Cardiomyopathy and myocarditis                | 213<br>(142 - 318)       | 33<br>(16 - 74)    | 3<br>(2 - 7)        | 13<br>(7 - 21)       | 60<br>(34 - 96)          | 104<br>(56 - 173)        |
| Atrial fibrillation and flutter               | 63<br>(33 - 102)         | --                 | --                  | 0<br>(0 - 0)         | 6<br>(3 - 11)            | 57<br>(29 - 95)          |
| Aortic aneurysm                               | 25<br>(15 - 42)          | --                 | --                  | 2<br>(1 - 3)         | 7<br>(4 - 12)            | 16<br>(9 - 27)           |
| Peripheral vascular disease                   | 10<br>(6 - 14)           | --                 | --                  | 1<br>(0 - 1)         | 3<br>(2 - 5)             | 6<br>(4 - 9)             |
| Endocarditis                                  | 91<br>(53 - 142)         | 17<br>(8 - 32)     | 2<br>(1 - 4)        | 10<br>(5 - 17)       | 23<br>(12 - 41)          | 39<br>(19 - 63)          |
| Other cardiovascular and circulatory diseases | 425<br>(288 - 595)       | 41<br>(22 - 72)    | 5<br>(3 - 8)        | 35<br>(19 - 55)      | 122<br>(74 - 197)        | 223<br>(140 - 326)       |

Web Table 31- Bolivia deaths with 95% UI by age, sex, and cause in 2013

| Cause                                               | Females, All Ages      | Females, 0-4 Years | Females, 5-14 Years | Females, 15-49 Years | Females, 50-69 Years | Females, 70-80 Years |
|-----------------------------------------------------|------------------------|--------------------|---------------------|----------------------|----------------------|----------------------|
| Chronic respiratory diseases                        | 1,044<br>(788 - 1,384) | 51<br>(31 - 81)    | 9<br>(6 - 12)       | 67<br>(40 - 97)      | 177<br>(111 - 264)   | 741<br>(551 - 978)   |
| Chronic obstructive pulmonary disease               | 850<br>(624 - 1,129)   | 41<br>(24 - 67)    | 6<br>(4 - 9)        | 53<br>(31 - 78)      | 136<br>(85 - 204)    | 614<br>(439 - 822)   |
| Pneumoconiosis                                      | 26<br>(14 - 44)        | 0<br>(0 - 1)       | 0<br>(0 - 0)        | 3<br>(1 - 4)         | 10<br>(5 - 18)       | 13<br>(6 - 24)       |
| Silicosis                                           | 7<br>(3 - 13)          | 0<br>(0 - 0)       | 0<br>(0 - 0)        | 0<br>(0 - 1)         | 2<br>(1 - 5)         | 4<br>(2 - 8)         |
| Asbestosis                                          | 1<br>(1 - 2)           | 0<br>(0 - 0)       | 0<br>(0 - 0)        | 0<br>(0 - 0)         | 0<br>(0 - 0)         | 1<br>(0 - 1)         |
| Coal workers pneumoconiosis                         | 1<br>(0 - 2)           | 0<br>(0 - 0)       | 0<br>(0 - 0)        | 0<br>(0 - 0)         | 0<br>(0 - 0)         | 1<br>(0 - 2)         |
| Other pneumoconiosis                                | 17<br>(9 - 29)         | 0<br>(0 - 0)       | 0<br>(0 - 0)        | 2<br>(1 - 3)         | 7<br>(4 - 13)        | 8<br>(4 - 14)        |
| Asthma                                              | 39<br>(21 - 67)        | 0<br>(0 - 1)       | 0<br>(0 - 0)        | 3<br>(1 - 6)         | 6<br>(3 - 10)        | 29<br>(15 - 53)      |
| Interstitial lung disease and pulmonary sarcoidosis | 108<br>(55 - 186)      | 0<br>(0 - 1)       | 0<br>(0 - 1)        | 6<br>(2 - 12)        | 22<br>(10 - 41)      | 79<br>(38 - 143)     |
| Other chronic respiratory diseases                  | 20<br>(13 - 30)        | 9<br>(5 - 15)      | 2<br>(1 - 3)        | 2<br>(1 - 4)         | 2<br>(1 - 4)         | 5<br>(2 - 9)         |
| Cirrhosis                                           | 1,282<br>(905 - 1,772) | 7<br>(3 - 13)      | 5<br>(3 - 7)        | 204<br>(123 - 297)   | 604<br>(395 - 898)   | 462<br>(327 - 644)   |
| Cirrhosis due to hepatitis B                        | 301<br>(144 - 515)     | 0<br>(0 - 0)       | 0<br>(0 - 1)        | 45<br>(20 - 78)      | 142<br>(64 - 254)    | 114<br>(48 - 203)    |
| Cirrhosis due to hepatitis C                        | 450<br>(195 - 743)     | 0<br>(0 - 0)       | 0<br>(0 - 1)        | 65<br>(27 - 115)     | 227<br>(89 - 394)    | 159<br>(68 - 270)    |
| Cirrhosis due to alcohol use                        | 248<br>(132 - 438)     | --                 | --                  | 23<br>(10 - 47)      | 107<br>(53 - 202)    | 118<br>(60 - 206)    |
| Cirrhosis due to other causes                       | 283<br>(169 - 447)     | 7<br>(3 - 13)      | 4<br>(2 - 6)        | 72<br>(40 - 116)     | 129<br>(70 - 217)    | 71<br>(40 - 123)     |
| Digestive diseases                                  | 917<br>(659 - 1,227)   | 14<br>(8 - 23)     | 8<br>(6 - 11)       | 99<br>(61 - 142)     | 531<br>(173 - 398)   | 531<br>(384 - 715)   |
| Peptic ulcer disease                                | 152<br>(92 - 222)      | 2<br>(1 - 4)       | 2<br>(1 - 3)        | 15<br>(7 - 25)       | 37<br>(19 - 65)      | 95<br>(55 - 149)     |
| Gastritis and duodenitis                            | 10<br>(5 - 21)         | 0<br>(0 - 0)       | 0<br>(0 - 0)        | 2<br>(1 - 4)         | 3<br>(1 - 6)         | 5<br>(2 - 10)        |
| Appendicitis                                        | 42<br>(27 - 64)        | 2<br>(1 - 4)       | 2<br>(1 - 3)        | 6<br>(3 - 9)         | 12<br>(6 - 22)       | 20<br>(11 - 33)      |
| Paralytic ileus and intestinal obstruction          | 229<br>(116 - 354)     | 4<br>(2 - 9)       | 1<br>(0 - 2)        | 17<br>(8 - 31)       | 52<br>(22 - 91)      | 155<br>(78 - 248)    |
| Inguinal, femoral, and abdominal hernia             | 27<br>(15 - 52)        | 1<br>(0 - 3)       | 0<br>(0 - 0)        | 2<br>(1 - 6)         | 5<br>(2 - 9)         | 19<br>(9 - 37)       |
| Inflammatory bowel disease                          | 14<br>(8 - 22)         | 1<br>(0 - 2)       | 0<br>(0 - 1)        | 3<br>(1 - 5)         | 3<br>(1 - 5)         | 7<br>(3 - 12)        |
| Vascular intestinal disorders                       | 102<br>(55 - 194)      | 0<br>(0 - 0)       | 0<br>(0 - 0)        | 3<br>(1 - 8)         | 26<br>(12 - 55)      | 73<br>(36 - 135)     |
| Gallbladder and biliary diseases                    | 126<br>(75 - 188)      | 1<br>(0 - 1)       | 1<br>(0 - 1)        | 18<br>(10 - 28)      | 41<br>(22 - 68)      | 66<br>(35 - 104)     |
| Pancreatitis                                        | 127<br>(78 - 197)      | 0<br>(0 - 1)       | 1<br>(0 - 1)        | 25<br>(14 - 38)      | 57<br>(32 - 94)      | 44<br>(26 - 71)      |
| Other digestive diseases                            | 88<br>(56 - 132)       | 2<br>(1 - 5)       | 1<br>(1 - 2)        | 8<br>(5 - 13)        | 28<br>(15 - 46)      | 48<br>(27 - 78)      |
| Neurological disorders                              | 578<br>(436 - 751)     | 9<br>(6 - 15)      | 11<br>(8 - 16)      | 39<br>(23 - 59)      | 51<br>(33 - 76)      | 467<br>(348 - 614)   |
| Alzheimer disease and other dementias               | 479<br>(358 - 635)     | --                 | --                  | 0<br>(0 - 0)         | 35<br>(22 - 54)      | 443<br>(327 - 586)   |
| Parkinson disease                                   | 5<br>(3 - 9)           | --                 | --                  | 0<br>(0 - 0)         | 0<br>(0 - 1)         | 5<br>(2 - 8)         |
| Epilepsy                                            | 54<br>(34 - 79)        | 5<br>(2 - 11)      | 6<br>(3 - 10)       | 26<br>(14 - 43)      | 6<br>(3 - 11)        | 10<br>(5 - 18)       |
| Multiple sclerosis                                  | 9<br>(2 - 17)          | --                 | --                  | 1<br>(0 - 2)         | 3<br>(1 - 7)         | 5<br>(1 - 10)        |
| Other neurological disorders                        | 30<br>(23 - 39)        | 4<br>(3 - 6)       | 5<br>(4 - 7)        | 11<br>(7 - 15)       | 5<br>(3 - 8)         | 5<br>(3 - 6)         |
| Mental and substance use disorders                  | 113<br>(50 - 196)      | 1<br>(0 - 1)       | 0<br>(0 - 0)        | 47<br>(22 - 81)      | 46<br>(19 - 80)      | 19<br>(9 - 33)       |
| Schizophrenia                                       | 1<br>(1 - 2)           | --                 | --                  | 0<br>(0 - 0)         | 0<br>(0 - 1)         | 1<br>(0 - 1)         |
| Alcohol use disorders                               | 101<br>(40 - 181)      | --                 | --                  | 40<br>(16 - 73)      | 43<br>(16 - 77)      | 17<br>(7 - 31)       |
| Drug use disorders                                  | 11<br>(7 - 15)         | 1<br>(0 - 1)       | --                  | 6<br>(4 - 9)         | 2<br>(1 - 4)         | 2<br>(1 - 2)         |
| Opioid use disorders                                | 2<br>(1 - 2)           | 0<br>(0 - 0)       | --                  | 1<br>(1 - 1)         | 0<br>(0 - 1)         | 0<br>(0 - 0)         |
| Cocaine use disorders                               | 0<br>(0 - 1)           | 0<br>(0 - 0)       | --                  | 0<br>(0 - 0)         | 0<br>(0 - 0)         | 0<br>(0 - 0)         |
| Amphetamine use disorders                           | 0<br>(0 - 0)           | 0<br>(0 - 0)       | --                  | 0<br>(0 - 0)         | 0<br>(0 - 0)         | 0<br>(0 - 0)         |
| Other drug use disorders                            | 9<br>(6 - 12)          | 1<br>(0 - 1)       | --                  | 5<br>(3 - 7)         | 2<br>(1 - 3)         | 1<br>(1 - 2)         |

Web Table 31- Bolivia deaths with 95% UI by age, sex, and cause in 2013

| Cause                                               | Females, All Ages        | Females, 0-4 Years | Females, 5-14 Years | Females, 15-49 Years | Females, 50-69 Years | Females, 70-80 Years   |
|-----------------------------------------------------|--------------------------|--------------------|---------------------|----------------------|----------------------|------------------------|
| Eating disorders                                    | 0<br>(0 - 1)             | --                 | 0<br>(0 - 0)        | 0<br>(0 - 1)         | --                   | --                     |
| Anorexia nervosa                                    | 0<br>(0 - 1)             | --                 | 0<br>(0 - 0)        | 0<br>(0 - 1)         | --                   | --                     |
| Diabetes, urogenital, blood, and endocrine diseases | 2,220<br>(1,659 - 2,976) | 127<br>(89 - 179)  | 28<br>(20 - 38)     | 218<br>(133 - 319)   | 726<br>(481 - 1,068) | 1,121<br>(830 - 1,467) |
| Diabetes mellitus                                   | 577<br>(416 - 783)       | 19<br>(11 - 31)    | 4<br>(2 - 7)        | 40<br>(24 - 60)      | 185<br>(121 - 274)   | 330<br>(234 - 457)     |
| Acute glomerulonephritis                            | 5<br>(3 - 7)             | 0<br>(0 - 1)       | 0<br>(0 - 0)        | 1<br>(0 - 1)         | 1<br>(1 - 2)         | 2<br>(1 - 3)           |
| Chronic kidney disease                              | 1,222<br>(857 - 1,725)   | 19<br>(11 - 35)    | 7<br>(5 - 11)       | 106<br>(62 - 166)    | 440<br>(277 - 687)   | 649<br>(443 - 922)     |
| Chronic kidney disease due to diabetes mellitus     | 300<br>(183 - 458)       | 2<br>(1 - 4)       | 1<br>(0 - 1)        | 18<br>(10 - 28)      | 146<br>(85 - 239)    | 133<br>(80 - 212)      |
| Chronic kidney disease due to hypertension          | 291<br>(163 - 474)       | 6<br>(3 - 10)      | 2<br>(1 - 4)        | 29<br>(14 - 52)      | 78<br>(35 - 146)     | 176<br>(94 - 284)      |
| Chronic kidney disease due to glomerulonephritis    | 71<br>(42 - 106)         | 3<br>(2 - 5)       | 1<br>(0 - 1)        | 12<br>(6 - 20)       | 27<br>(15 - 48)      | 28<br>(16 - 46)        |
| Chronic kidney disease due to other causes          | 560<br>(332 - 876)       | 9<br>(3 - 21)      | 3<br>(2 - 6)        | 47<br>(23 - 85)      | 190<br>(96 - 328)    | 311<br>(167 - 529)     |
| Urinary diseases and male infertility               | 198<br>(135 - 280)       | 24<br>(12 - 48)    | 4<br>(3 - 7)        | 38<br>(23 - 59)      | 48<br>(28 - 78)      | 84<br>(50 - 130)       |
| Interstitial nephritis and urinary tract infections | 150<br>(102 - 213)       | 21<br>(10 - 44)    | 4<br>(2 - 6)        | 30<br>(17 - 46)      | 29<br>(16 - 49)      | 66<br>(38 - 106)       |
| Urolithiasis                                        | 7<br>(4 - 13)            | --                 | 0<br>(0 - 0)        | 1<br>(0 - 2)         | 3<br>(1 - 5)         | 4<br>(1 - 8)           |
| Other urinary diseases                              | 40<br>(24 - 67)          | 3<br>(1 - 6)       | 1<br>(0 - 1)        | 7<br>(3 - 13)        | 16<br>(8 - 30)       | 14<br>(7 - 26)         |
| Gynecological diseases                              | 2<br>(1 - 3)             | --                 | --                  | 1<br>(0 - 2)         | 0<br>(0 - 1)         | 1<br>(0 - 1)           |
| Uterine fibroids                                    | 0<br>(0 - 1)             | --                 | --                  | 0<br>(0 - 0)         | 0<br>(0 - 0)         | 0<br>(0 - 0)           |
| Polycystic ovarian syndrome                         | 0<br>(0 - 0)             | --                 | --                  | 0<br>(0 - 0)         | 0<br>(0 - 0)         | --                     |
| Endometriosis                                       | 0<br>(0 - 0)             | --                 | --                  | 0<br>(0 - 0)         | 0<br>(0 - 0)         | --                     |
| Genital prolapse                                    | 0<br>(0 - 1)             | --                 | --                  | 0<br>(0 - 0)         | 0<br>(0 - 0)         | 0<br>(0 - 0)           |
| Other gynecological diseases                        | 1<br>(1 - 1)             | --                 | --                  | 0<br>(0 - 1)         | 0<br>(0 - 0)         | 0<br>(0 - 0)           |
| Hemoglobinopathies and hemolytic anemias            | 55<br>(34 - 87)          | 16<br>(9 - 28)     | 3<br>(2 - 6)        | 10<br>(5 - 18)       | 14<br>(7 - 23)       | 12<br>(7 - 20)         |
| Thalassemias                                        | 15<br>(9 - 24)           | 8<br>(4 - 15)      | 2<br>(1 - 4)        | 4<br>(2 - 8)         | 0<br>(0 - 0)         | 0<br>(0 - 0)           |
| Sickle cell disorders                               | 4<br>(3 - 7)             | 1<br>(0 - 2)       | 0<br>(0 - 1)        | 1<br>(1 - 2)         | 2<br>(1 - 3)         | 0<br>(0 - 0)           |
| G6PD deficiency                                     | 1<br>(1 - 2)             | 0<br>(0 - 1)       | 0<br>(0 - 0)        | 0<br>(0 - 1)         | 0<br>(0 - 1)         | 0<br>(0 - 0)           |
| Other hemoglobinopathies and hemolytic anemias      | 35<br>(22 - 55)          | 7<br>(4 - 11)      | 1<br>(0 - 1)        | 4<br>(2 - 8)         | 11<br>(6 - 19)       | 12<br>(7 - 19)         |
| Endocrine, metabolic, blood, and immune disorders   | 162<br>(107 - 235)       | 49<br>(25 - 87)    | 9<br>(4 - 16)       | 22<br>(12 - 35)      | 39<br>(22 - 67)      | 43<br>(27 - 71)        |
| Musculoskeletal disorders                           | 130<br>(84 - 187)        | --                 | 8<br>(5 - 12)       | 28<br>(15 - 42)      | 43<br>(25 - 70)      | 52<br>(30 - 77)        |
| Rheumatoid arthritis                                | 31<br>(18 - 48)          | --                 | 1<br>(0 - 1)        | 3<br>(2 - 6)         | 14<br>(7 - 24)       | 14<br>(7 - 22)         |
| Other musculoskeletal disorders                     | 99<br>(64 - 142)         | --                 | 7<br>(5 - 11)       | 24<br>(13 - 37)      | 30<br>(17 - 48)      | 38<br>(21 - 57)        |
| Other non-communicable diseases                     | 684<br>(492 - 938)       | 531<br>(356 - 772) | 25<br>(15 - 38)     | 33<br>(19 - 49)      | 34<br>(22 - 52)      | 61<br>(41 - 85)        |
| Congenital anomalies                                | 594<br>(417 - 841)       | 508<br>(337 - 746) | 22<br>(13 - 35)     | 24<br>(13 - 38)      | 18<br>(11 - 27)      | 22<br>(14 - 33)        |
| Neural tube defects                                 | 20<br>(5 - 57)           | 19<br>(4 - 56)     | 0<br>(0 - 0)        | 0<br>(0 - 1)         | 0<br>(0 - 0)         | 0<br>(0 - 0)           |
| Congenital heart anomalies                          | 231<br>(136 - 366)       | 216<br>(123 - 351) | 7<br>(4 - 13)       | 4<br>(2 - 7)         | 1<br>(1 - 3)         | 2<br>(1 - 3)           |
| Cleft lip and cleft palate                          | 4<br>(1 - 9)             | 4<br>(1 - 9)       | --                  | --                   | --                   | --                     |
| Down syndrome                                       | 51<br>(22 - 90)          | 47<br>(19 - 86)    | 3<br>(1 - 7)        | 1<br>(0 - 1)         | 0<br>(0 - 0)         | 0<br>(0 - 0)           |
| Chromosomal unbalanced rearrangements               | 25<br>(13 - 47)          | 22<br>(10 - 42)    | 0<br>(0 - 1)        | 1<br>(1 - 2)         | 1<br>(0 - 1)         | 0<br>(0 - 1)           |
| Other congenital anomalies                          | 263<br>(175 - 391)       | 199<br>(118 - 323) | 11<br>(6 - 17)      | 18<br>(10 - 27)      | 15<br>(10 - 24)      | 20<br>(13 - 29)        |
| Skin and subcutaneous diseases                      | 82<br>(56 - 114)         | 15<br>(7 - 28)     | 3<br>(2 - 5)        | 8<br>(5 - 14)        | 17<br>(10 - 27)      | 39<br>(24 - 59)        |
| Cellulitis                                          | 12<br>(6 - 18)           | 3<br>(1 - 7)       | 0<br>(0 - 1)        | 1<br>(0 - 2)         | 3<br>(1 - 5)         | 4<br>(2 - 8)           |
| Pyoderma                                            | 42<br>(27 - 61)          | 10<br>(4 - 21)     | 2<br>(1 - 3)        | 5<br>(2 - 7)         | 9<br>(5 - 14)        | 17<br>(10 - 28)        |

Web Table 31- Bolivia deaths with 95% UI by age, sex, and cause in 2013

| Cause                                           | Females, All Ages        | Females, 0-4 Years     | Females, 5-14 Years | Females, 15-49 Years   | Females, 50-69 Years | Females, 70-80 Years |
|-------------------------------------------------|--------------------------|------------------------|---------------------|------------------------|----------------------|----------------------|
| Decubitus ulcer                                 | 25<br>(16 - 38)          | 1<br>(0 - 2)           | 1<br>(0 - 1)        | 2<br>(1 - 4)           | 5<br>(3 - 8)         | 17<br>(10 - 27)      |
| Other skin and subcutaneous diseases            | 3<br>(1 - 5)             | 1<br>(0 - 2)           | 0<br>(0 - 0)        | 1<br>(0 - 1)           | 1<br>(0 - 1)         | 1<br>(0 - 1)         |
| Sudden infant death syndrome                    | 8<br>(1 - 32)            | 8<br>(1 - 32)          | --                  | --                     | --                   | --                   |
| Injuries                                        | 3,848<br>(3,006 - 4,866) | 1,190<br>(900 - 1,571) | 309<br>(252 - 385)  | 1,202<br>(758 - 1,655) | 486<br>(327 - 717)   | 661<br>(482 - 873)   |
| Transport injuries                              | 955<br>(702 - 1,298)     | 187<br>(120 - 285)     | 108<br>(76 - 147)   | 351<br>(214 - 503)     | 191<br>(122 - 293)   | 117<br>(75 - 181)    |
| Road injuries                                   | 873<br>(635 - 1,198)     | 143<br>(86 - 217)      | 103<br>(72 - 139)   | 340<br>(207 - 492)     | 182<br>(116 - 280)   | 105<br>(67 - 164)    |
| Pedestrian road injuries                        | 254<br>(164 - 361)       | 56<br>(28 - 97)        | 42<br>(24 - 62)     | 45<br>(16 - 75)        | 70<br>(38 - 118)     | 42<br>(24 - 66)      |
| Cyclist road injuries                           | 155<br>(85 - 285)        | 1<br>(1 - 3)           | 2<br>(1 - 3)        | 146<br>(77 - 272)      | 2<br>(1 - 4)         | 3<br>(2 - 6)         |
| Motorcyclist road injuries                      | 18<br>(10 - 30)          | 2<br>(1 - 3)           | 1<br>(0 - 2)        | 11<br>(5 - 20)         | 1<br>(1 - 3)         | 3<br>(1 - 5)         |
| Motor vehicle road injuries                     | 441<br>(300 - 611)       | 83<br>(48 - 129)       | 58<br>(37 - 85)     | 135<br>(64 - 213)      | 108<br>(63 - 170)    | 57<br>(35 - 90)      |
| Other road injuries                             | 6<br>(4 - 10)            | 1<br>(0 - 2)           | 1<br>(0 - 1)        | 3<br>(1 - 5)           | 1<br>(0 - 1)         | 1<br>(0 - 2)         |
| Other transport injuries                        | 82<br>(58 - 120)         | 45<br>(25 - 72)        | 5<br>(3 - 9)        | 11<br>(6 - 17)         | 9<br>(5 - 15)        | 12<br>(6 - 20)       |
| Unintentional injuries                          | 2,555<br>(1,940 - 3,298) | 980<br>(714 - 1,355)   | 188<br>(142 - 247)  | 667<br>(409 - 951)     | 221<br>(139 - 339)   | 500<br>(352 - 673)   |
| Falls                                           | 120<br>(60 - 190)        | 6<br>(3 - 11)          | 4<br>(2 - 6)        | 12<br>(6 - 20)         | 20<br>(9 - 35)       | 78<br>(36 - 135)     |
| Drowning                                        | 390<br>(259 - 628)       | 241<br>(138 - 439)     | 71<br>(43 - 125)    | 32<br>(18 - 52)        | 14<br>(8 - 26)       | 30<br>(18 - 52)      |
| Fire, heat, and hot substances                  | 114<br>(77 - 165)        | 36<br>(19 - 65)        | 5<br>(3 - 9)        | 13<br>(7 - 22)         | 11<br>(6 - 18)       | 49<br>(28 - 78)      |
| Poisonings                                      | 344<br>(184 - 520)       | 20<br>(9 - 36)         | 6<br>(3 - 11)       | 280<br>(144 - 438)     | 22<br>(9 - 40)       | 15<br>(8 - 24)       |
| Exposure to mechanical forces                   | 171<br>(113 - 253)       | 82<br>(43 - 145)       | 24<br>(13 - 41)     | 42<br>(25 - 62)        | 11<br>(7 - 18)       | 12<br>(8 - 18)       |
| Unintentional firearm injuries                  | 26<br>(16 - 39)          | 3<br>(1 - 5)           | 1<br>(0 - 2)        | 19<br>(10 - 31)        | 2<br>(1 - 4)         | 2<br>(1 - 3)         |
| Unintentional suffocation                       | 17<br>(7 - 46)           | 12<br>(3 - 39)         | 1<br>(1 - 2)        | 2<br>(1 - 5)           | 1<br>(1 - 3)         | 0<br>(0 - 1)         |
| Other exposure to mechanical forces             | 128<br>(80 - 199)        | 68<br>(32 - 123)       | 22<br>(11 - 38)     | 21<br>(12 - 33)        | 8<br>(4 - 13)        | 10<br>(6 - 15)       |
| Adverse effects of medical treatment            | 280<br>(168 - 414)       | 66<br>(32 - 139)       | 7<br>(4 - 12)       | 33<br>(18 - 53)        | 46<br>(24 - 80)      | 127<br>(68 - 214)    |
| Animal contact                                  | 21<br>(9 - 39)           | 7<br>(3 - 13)          | 2<br>(1 - 3)        | 4<br>(1 - 7)           | 4<br>(2 - 8)         | 5<br>(2 - 9)         |
| Venomous animal contact                         | 5<br>(2 - 11)            | 2<br>(1 - 4)           | 0<br>(0 - 1)        | 1<br>(0 - 2)           | 1<br>(0 - 2)         | 1<br>(0 - 2)         |
| Non-venomous animal contact                     | 15<br>(7 - 31)           | 5<br>(2 - 10)          | 1<br>(0 - 2)        | 3<br>(1 - 5)           | 3<br>(1 - 6)         | 4<br>(2 - 8)         |
| Foreign body                                    | 1,022<br>(635 - 1,527)   | 478<br>(277 - 797)     | 56<br>(30 - 89)     | 229<br>(129 - 379)     | 86<br>(46 - 144)     | 174<br>(103 - 313)   |
| Pulmonary aspiration and foreign body in airway | 1,018<br>(631 - 1,523)   | 476<br>(275 - 795)     | 56<br>(30 - 89)     | 228<br>(129 - 379)     | 86<br>(46 - 143)     | 172<br>(102 - 312)   |
| Foreign body in other body part                 | 3<br>(2 - 5)             | 1<br>(1 - 2)           | 0<br>(0 - 0)        | 0<br>(0 - 1)           | 0<br>(0 - 1)         | 1<br>(1 - 2)         |
| Other unintentional injuries                    | 95<br>(38 - 156)         | 44<br>(14 - 91)        | 13<br>(5 - 23)      | 22<br>(9 - 36)         | 6<br>(3 - 10)        | 10<br>(4 - 15)       |
| Self-harm and interpersonal violence            | 330<br>(217 - 483)       | 22<br>(11 - 47)        | 13<br>(7 - 21)      | 181<br>(105 - 272)     | 70<br>(40 - 116)     | 43<br>(25 - 74)      |
| Self-harm                                       | 203<br>(119 - 325)       | --                     | 2<br>(1 - 5)        | 106<br>(55 - 177)      | 57<br>(31 - 100)     | 37<br>(21 - 67)      |
| Interpersonal violence                          | 126<br>(79 - 186)        | 22<br>(11 - 47)        | 11<br>(5 - 18)      | 75<br>(37 - 122)       | 13<br>(7 - 22)       | 6<br>(3 - 13)        |
| Assault by firearm                              | 20<br>(11 - 35)          | 3<br>(1 - 7)           | 2<br>(1 - 4)        | 10<br>(4 - 19)         | 4<br>(2 - 8)         | 1<br>(0 - 3)         |
| Assault by sharp object                         | 8<br>(4 - 15)            | 3<br>(1 - 7)           | 1<br>(0 - 2)        | 2<br>(1 - 5)           | 2<br>(1 - 4)         | 0<br>(0 - 1)         |
| Assault by other means                          | 98<br>(60 - 147)         | 16<br>(8 - 35)         | 8<br>(4 - 14)       | 62<br>(31 - 100)       | 7<br>(4 - 12)        | 4<br>(2 - 9)         |
| Forces of nature, war, and legal intervention   | 8<br>(4 - 18)            | 0<br>(0 - 0)           | 0<br>(0 - 1)        | 3<br>(2 - 7)           | 3<br>(2 - 6)         | 2<br>(1 - 3)         |
| Exposure to forces of nature                    | 8<br>(4 - 18)            | 0<br>(0 - 0)           | 0<br>(0 - 1)        | 3<br>(2 - 7)           | 3<br>(2 - 6)         | 2<br>(1 - 3)         |

Web Table 31- Bosnia and Herzegovina deaths with 95% UI by age, sex, and cause in 2013

| Cause                                                             | Both Sexes, All Ages        | Both Sexes, 0-4 Years | Both Sexes, 5-14 Years | Both Sexes, 15-49 Years  | Both Sexes, 50-69 Years  | Both Sexes, 70-80 Years     |
|-------------------------------------------------------------------|-----------------------------|-----------------------|------------------------|--------------------------|--------------------------|-----------------------------|
| All causes                                                        | 36,320<br>(34,468 - 38,350) | 185<br>(124 - 269)    | 58<br>(46 - 76)        | 2,323<br>(2,171 - 2,486) | 8,910<br>(8,336 - 9,580) | 24,844<br>(23,670 - 26,110) |
| Communicable, maternal, neonatal, and nutritional diseases        | 820<br>(707 - 1,072)        | 112<br>(73 - 163)     | 6<br>(4 - 8)           | 69<br>(60 - 78)          | 155<br>(135 - 178)       | 478<br>(390 - 704)          |
| HIV/AIDS and tuberculosis                                         | 179<br>(115 - 207)          | 0<br>(0 - 0)          | 0<br>(0 - 0)           | 17<br>(9 - 21)           | 53<br>(29 - 64)          | 109<br>(76 - 132)           |
| Tuberculosis                                                      | 178<br>(114 - 206)          | 0<br>(0 - 0)          | 0<br>(0 - 0)           | 16<br>(8 - 21)           | 53<br>(29 - 64)          | 109<br>(76 - 132)           |
| HIV/AIDS                                                          | 1<br>(1 - 1)                | 0<br>(0 - 0)          | 0<br>(0 - 0)           | 0<br>(0 - 1)             | 0<br>(0 - 0)             | 0<br>(0 - 0)                |
| HIV/AIDS resulting in mycobacterial infection                     | 0<br>(0 - 0)                | 0<br>(0 - 0)          | 0<br>(0 - 0)           | 0<br>(0 - 0)             | 0<br>(0 - 0)             | 0<br>(0 - 0)                |
| HIV/AIDS resulting in other diseases                              | 1<br>(1 - 1)                | 0<br>(0 - 0)          | 0<br>(0 - 0)           | 0<br>(0 - 1)             | 0<br>(0 - 0)             | 0<br>(0 - 0)                |
| Diarrhea, lower respiratory, and other common infectious diseases | 438<br>(343 - 700)          | 11<br>(7 - 18)        | 4<br>(3 - 6)           | 36<br>(30 - 45)          | 76<br>(61 - 97)          | 310<br>(224 - 557)          |
| Diarrheal diseases                                                | 4<br>(2 - 6)                | 2<br>(1 - 4)          | 0<br>(0 - 0)           | 0<br>(0 - 0)             | 0<br>(0 - 1)             | 1<br>(1 - 1)                |
| Intestinal infectious diseases                                    | 9<br>(4 - 17)               | 1<br>(0 - 2)          | 1<br>(1 - 2)           | 4<br>(2 - 8)             | 2<br>(1 - 4)             | 1<br>(0 - 3)                |
| Typhoid fever                                                     | 6<br>(3 - 12)               | 1<br>(0 - 1)          | 1<br>(0 - 2)           | 3<br>(1 - 6)             | 1<br>(0 - 3)             | 1<br>(0 - 2)                |
| Paratyphoid fever                                                 | 2<br>(1 - 4)                | 0<br>(0 - 0)          | 0<br>(0 - 1)           | 1<br>(0 - 2)             | 0<br>(0 - 1)             | 0<br>(0 - 0)                |
| Other intestinal infectious diseases                              | 0<br>(0 - 3)                | 0<br>(0 - 1)          | 0<br>(0 - 0)           | 0<br>(0 - 1)             | 0<br>(0 - 1)             | 0<br>(0 - 1)                |
| Lower respiratory infections                                      | 393<br>(302 - 655)          | 6<br>(4 - 10)         | 2<br>(1 - 3)           | 24<br>(19 - 31)          | 63<br>(49 - 83)          | 297<br>(212 - 543)          |
| Upper respiratory infections                                      | 1<br>(1 - 3)                | 0<br>(0 - 0)          | 0<br>(0 - 0)           | 0<br>(0 - 0)             | 0<br>(0 - 1)             | 1<br>(0 - 2)                |
| Otitis media                                                      | 1<br>(1 - 1)                | 0<br>(0 - 0)          | 0<br>(0 - 0)           | 0<br>(0 - 0)             | 0<br>(0 - 0)             | 0<br>(0 - 0)                |
| Meningitis                                                        | 9<br>(7 - 12)               | 1<br>(1 - 2)          | 0<br>(0 - 0)           | 2<br>(2 - 3)             | 3<br>(2 - 4)             | 3<br>(2 - 4)                |
| Pneumococcal meningitis                                           | 2<br>(2 - 3)                | 0<br>(0 - 0)          | 0<br>(0 - 0)           | 1<br>(0 - 1)             | 1<br>(0 - 1)             | 1<br>(0 - 1)                |
| H influenzae type B meningitis                                    | 1<br>(1 - 2)                | 0<br>(0 - 1)          | 0<br>(0 - 0)           | 0<br>(0 - 0)             | 0<br>(0 - 0)             | 0<br>(0 - 0)                |
| Meningococcal meningitis                                          | 2<br>(1 - 3)                | 0<br>(0 - 1)          | 0<br>(0 - 0)           | 0<br>(0 - 1)             | 1<br>(0 - 1)             | 1<br>(0 - 1)                |
| Other meningitis                                                  | 4<br>(3 - 5)                | 0<br>(0 - 1)          | 0<br>(0 - 0)           | 1<br>(1 - 1)             | 1<br>(1 - 2)             | 1<br>(1 - 2)                |
| Encephalitis                                                      | 18<br>(14 - 29)             | 1<br>(0 - 1)          | 0<br>(0 - 1)           | 4<br>(3 - 7)             | 7<br>(5 - 13)            | 6<br>(4 - 9)                |
| Diphtheria                                                        | 0<br>(0 - 0)                | 0<br>(0 - 0)          | 0<br>(0 - 0)           | 0<br>(0 - 0)             | 0<br>(0 - 0)             | --                          |
| Whooping cough                                                    | 0<br>(0 - 1)                | 0<br>(0 - 0)          | 0<br>(0 - 0)           | 0<br>(0 - 0)             | 0<br>(0 - 0)             | --                          |
| Tetanus                                                           | 0<br>(0 - 0)                | 0<br>(0 - 0)          | 0<br>(0 - 0)           | 0<br>(0 - 0)             | 0<br>(0 - 0)             | 0<br>(0 - 0)                |
| Measles                                                           | 0<br>(0 - 0)                | 0<br>(0 - 0)          | 0<br>(0 - 0)           | 0<br>(0 - 0)             | 0<br>(0 - 0)             | --                          |
| Varicella and herpes zoster                                       | 3<br>(1 - 7)                | 0<br>(0 - 1)          | 0<br>(0 - 0)           | 0<br>(0 - 1)             | 0<br>(0 - 1)             | 2<br>(0 - 6)                |
| Neglected tropical diseases and malaria                           | 5<br>(4 - 6)                | 0<br>(0 - 0)          | 0<br>(0 - 0)           | 2<br>(1 - 2)             | 2<br>(1 - 2)             | 1<br>(1 - 2)                |
| Leishmaniasis                                                     | 0<br>(0 - 0)                | 0<br>(0 - 0)          | 0<br>(0 - 0)           | 0<br>(0 - 0)             | 0<br>(0 - 0)             | 0<br>(0 - 0)                |
| Visceral leishmaniasis                                            | 0<br>(0 - 0)                | 0<br>(0 - 0)          | 0<br>(0 - 0)           | 0<br>(0 - 0)             | 0<br>(0 - 0)             | 0<br>(0 - 0)                |
| Cysticercosis                                                     | 0<br>(0 - 0)                | 0<br>(0 - 0)          | 0<br>(0 - 0)           | 0<br>(0 - 0)             | 0<br>(0 - 0)             | 0<br>(0 - 0)                |
| Cystic echinococcosis                                             | 3<br>(3 - 3)                | 0<br>(0 - 0)          | 0<br>(0 - 0)           | 1<br>(1 - 1)             | 1<br>(1 - 1)             | 1<br>(1 - 1)                |
| Dengue                                                            | 1<br>(0 - 1)                | 0<br>(0 - 0)          | 0<br>(0 - 0)           | 0<br>(0 - 0)             | 0<br>(0 - 0)             | 0<br>(0 - 0)                |
| Rabies                                                            | 0<br>(0 - 1)                | 0<br>(0 - 0)          | 0<br>(0 - 0)           | 0<br>(0 - 0)             | 0<br>(0 - 0)             | 0<br>(0 - 0)                |
| Other neglected tropical diseases                                 | 1<br>(1 - 1)                | 0<br>(0 - 0)          | 0<br>(0 - 0)           | 0<br>(0 - 0)             | 0<br>(0 - 0)             | 0<br>(0 - 0)                |
| Maternal disorders                                                | 4<br>(3 - 5)                | --                    | 0<br>(0 - 0)           | 4<br>(3 - 5)             | --                       | --                          |
| Maternal hemorrhage                                               | 1<br>(0 - 1)                | --                    | 0<br>(0 - 0)           | 0<br>(0 - 1)             | --                       | --                          |
| Maternal sepsis and other maternal infections                     | 0<br>(0 - 1)                | --                    | 0<br>(0 - 0)           | 0<br>(0 - 1)             | --                       | --                          |
| Maternal hypertensive disorders                                   | 0<br>(0 - 1)                | --                    | 0<br>(0 - 0)           | 0<br>(0 - 1)             | --                       | --                          |
| Maternal obstructed labor                                         | 0<br>(0 - 1)                | --                    | 0<br>(0 - 0)           | 0<br>(0 - 1)             | --                       | --                          |



Web Table 31- Bosnia and Herzegovina deaths with 95% UI by age, sex, and cause in 2013

| Cause                                                            | Both Sexes, All Ages        | Both Sexes, 0-4 Years | Both Sexes, 5-14 Years | Both Sexes, 15-49 Years  | Both Sexes, 50-69 Years  | Both Sexes, 70-80 Years     |
|------------------------------------------------------------------|-----------------------------|-----------------------|------------------------|--------------------------|--------------------------|-----------------------------|
| Maternal abortive outcome                                        | 1<br>(1 - 1)                | --                    | 0<br>(0 - 0)           | 1<br>(1 - 1)             | --                       | --                          |
| Indirect maternal deaths                                         | 0<br>(0 - 1)                | --                    | 0<br>(0 - 0)           | 0<br>(0 - 1)             | --                       | --                          |
| Late maternal deaths                                             | 0<br>(0 - 1)                | --                    | 0<br>(0 - 0)           | 0<br>(0 - 1)             | --                       | --                          |
| Maternal deaths aggravated by HIV/AIDS                           | 0<br>(0 - 0)                | --                    | --                     | 0<br>(0 - 0)             | --                       | --                          |
| Other maternal disorders                                         | 1<br>(0 - 1)                | --                    | 0<br>(0 - 0)           | 1<br>(0 - 1)             | --                       | --                          |
| Neonatal disorders                                               | 97<br>(63 - 143)            | 97<br>(63 - 143)      | --                     | --                       | --                       | --                          |
| Neonatal preterm birth complications                             | 51<br>(29 - 85)             | 51<br>(29 - 85)       | --                     | --                       | --                       | --                          |
| Neonatal encephalopathy due to birth asphyxia and trauma         | 25<br>(12 - 46)             | 25<br>(12 - 46)       | --                     | --                       | --                       | --                          |
| Neonatal sepsis and other neonatal infections                    | 6<br>(2 - 12)               | 6<br>(2 - 12)         | --                     | --                       | --                       | --                          |
| Hemolytic disease and other neonatal jaundice                    | 0<br>(0 - 1)                | 0<br>(0 - 1)          | --                     | --                       | --                       | --                          |
| Other neonatal disorders                                         | 15<br>(8 - 25)              | 15<br>(8 - 25)        | --                     | --                       | --                       | --                          |
| Nutritional deficiencies                                         | 56<br>(39 - 69)             | 0<br>(0 - 0)          | 0<br>(0 - 0)           | 6<br>(4 - 8)             | 11<br>(7 - 14)           | 39<br>(26 - 51)             |
| Protein-energy malnutrition                                      | 3<br>(0 - 6)                | 0<br>(0 - 0)          | 0<br>(0 - 0)           | 1<br>(0 - 1)             | 1<br>(0 - 3)             | 1<br>(0 - 3)                |
| Iodine deficiency                                                | 1<br>(0 - 3)                | 0<br>(0 - 0)          | 0<br>(0 - 0)           | 0<br>(0 - 0)             | 0<br>(0 - 1)             | 0<br>(0 - 2)                |
| Iron-deficiency anemia                                           | 50<br>(35 - 63)             | 0<br>(0 - 0)          | 0<br>(0 - 0)           | 5<br>(3 - 6)             | 9<br>(6 - 11)            | 37<br>(25 - 48)             |
| Other nutritional deficiencies                                   | 2<br>(1 - 4)                | 0<br>(0 - 0)          | 0<br>(0 - 0)           | 0<br>(0 - 1)             | 1<br>(0 - 1)             | 1<br>(0 - 2)                |
| Other communicable, maternal, neonatal, and nutritional diseases | 41<br>(31 - 58)             | 3<br>(1 - 7)          | 1<br>(0 - 1)           | 5<br>(4 - 6)             | 14<br>(10 - 21)          | 18<br>(10 - 30)             |
| Sexually transmitted diseases excluding HIV                      | 4<br>(1 - 8)                | 3<br>(0 - 7)          | 0<br>(0 - 1)           | 0<br>(0 - 0)             | 0<br>(0 - 0)             | 0<br>(0 - 0)                |
| Syphilis                                                         | 4<br>(1 - 8)                | 3<br>(0 - 7)          | 0<br>(0 - 1)           | 0<br>(0 - 0)             | 0<br>(0 - 0)             | 0<br>(0 - 0)                |
| Chlamydial infection                                             | 0<br>(0 - 0)                | --                    | 0<br>(0 - 0)           | 0<br>(0 - 0)             | 0<br>(0 - 0)             | 0<br>(0 - 0)                |
| Gonococcal infection                                             | 0<br>(0 - 0)                | --                    | 0<br>(0 - 0)           | 0<br>(0 - 0)             | 0<br>(0 - 0)             | 0<br>(0 - 0)                |
| Other sexually transmitted diseases                              | 0<br>(0 - 0)                | --                    | 0<br>(0 - 0)           | 0<br>(0 - 0)             | 0<br>(0 - 0)             | 0<br>(0 - 0)                |
| Hepatitis                                                        | 13<br>(11 - 15)             | 0<br>(0 - 0)          | 0<br>(0 - 0)           | 3<br>(3 - 4)             | 5<br>(4 - 6)             | 4<br>(3 - 5)                |
| Acute hepatitis A                                                | 3<br>(1 - 4)                | 0<br>(0 - 0)          | 0<br>(0 - 0)           | 1<br>(1 - 2)             | 1<br>(0 - 1)             | 0<br>(0 - 1)                |
| Acute hepatitis B                                                | 9<br>(7 - 12)               | 0<br>(0 - 0)          | 0<br>(0 - 0)           | 2<br>(1 - 3)             | 4<br>(3 - 5)             | 3<br>(2 - 5)                |
| Acute hepatitis C                                                | 1<br>(0 - 3)                | --                    | 0<br>(0 - 0)           | 0<br>(0 - 1)             | 0<br>(0 - 1)             | 0<br>(0 - 1)                |
| Other infectious diseases                                        | 24<br>(15 - 41)             | 0<br>(0 - 0)          | 0<br>(0 - 0)           | 2<br>(1 - 2)             | 9<br>(5 - 16)            | 14<br>(6 - 26)              |
| Non-communicable diseases                                        | 34,297<br>(32,534 - 36,196) | 67<br>(43 - 101)      | 35<br>(27 - 45)        | 1,791<br>(1,656 - 1,921) | 8,415<br>(7,861 - 9,052) | 23,990<br>(22,822 - 25,223) |
| Neoplasms                                                        | 8,143<br>(7,398 - 8,780)    | 6<br>(4 - 10)         | 18<br>(14 - 24)        | 765<br>(684 - 830)       | 3,299<br>(2,991 - 3,616) | 4,054<br>(3,631 - 4,421)    |
| Esophageal cancer                                                | 121<br>(98 - 138)           | --                    | --                     | 9<br>(7 - 12)            | 56<br>(41 - 67)          | 56<br>(46 - 66)             |
| Stomach cancer                                                   | 577<br>(500 - 665)          | --                    | --                     | 43<br>(34 - 53)          | 205<br>(176 - 236)       | 330<br>(277 - 392)          |
| Liver cancer                                                     | 227<br>(1 - 374)            | --                    | 0<br>(0 - 0)           | 7<br>(0 - 14)            | 85<br>(0 - 151)          | 134<br>(0 - 225)            |
| Liver cancer due to hepatitis B                                  | 41<br>(0 - 91)              | --                    | 0<br>(0 - 0)           | 2<br>(0 - 5)             | 20<br>(0 - 45)           | 19<br>(0 - 43)              |
| Liver cancer due to hepatitis C                                  | 104<br>(0 - 185)            | --                    | 0<br>(0 - 0)           | 3<br>(0 - 6)             | 39<br>(0 - 72)           | 63<br>(0 - 111)             |
| Liver cancer due to alcohol use                                  | 54<br>(0 - 108)             | --                    | --                     | 1<br>(0 - 2)             | 17<br>(0 - 35)           | 37<br>(0 - 71)              |
| Liver cancer due to other causes                                 | 27<br>(0 - 49)              | --                    | 0<br>(0 - 0)           | 1<br>(0 - 2)             | 11<br>(0 - 20)           | 15<br>(0 - 29)              |
| Larynx cancer                                                    | 149<br>(120 - 218)          | --                    | --                     | 9<br>(6 - 15)            | 71<br>(56 - 102)         | 69<br>(52 - 104)            |
| Tracheal, bronchus and lung cancer                               | 2,159<br>(1,972 - 2,379)    | --                    | --                     | 153<br>(129 - 180)       | 1,052<br>(944 - 1,179)   | 954<br>(851 - 1,070)        |
| Breast cancer                                                    | 482<br>(281 - 567)          | --                    | --                     | 79<br>(62 - 98)          | 211<br>(122 - 258)       | 191<br>(95 - 237)           |
| Cervical cancer                                                  | 139<br>(111 - 171)          | --                    | --                     | 32<br>(21 - 43)          | 65<br>(49 - 82)          | 43<br>(30 - 64)             |

Web Table 31- Bosnia and Herzegovina deaths with 95% UI by age, sex, and cause in 2013

| Cause                                         | Both Sexes, All Ages        | Both Sexes, 0-4 Years | Both Sexes, 5-14 Years | Both Sexes, 15-49 Years | Both Sexes, 50-69 Years  | Both Sexes, 70-80 Years     |
|-----------------------------------------------|-----------------------------|-----------------------|------------------------|-------------------------|--------------------------|-----------------------------|
| Uterine cancer                                | 86<br>(36 - 110)            | --                    | --                     | 6<br>(3 - 9)            | 38<br>(17 - 52)          | 41<br>(17 - 56)             |
| Prostate cancer                               | 427<br>(287 - 727)          | --                    | --                     | 2<br>(1 - 3)            | 75<br>(48 - 125)         | 350<br>(236 - 607)          |
| Colon and rectum cancer                       | 1,030<br>(943 - 1,133)      | --                    | --                     | 79<br>(69 - 91)         | 360<br>(323 - 400)       | 590<br>(523 - 665)          |
| Lip and oral cavity cancer                    | 102<br>(84 - 119)           | --                    | --                     | 11<br>(8 - 14)          | 43<br>(32 - 53)          | 49<br>(39 - 60)             |
| Nasopharynx cancer                            | 21<br>(15 - 27)             | --                    | 0<br>(0 - 0)           | 4<br>(3 - 6)            | 8<br>(6 - 11)            | 8<br>(6 - 11)               |
| Other pharynx cancer                          | 55<br>(39 - 67)             | --                    | --                     | 7<br>(5 - 10)           | 31<br>(21 - 40)          | 16<br>(12 - 21)             |
| Gallbladder and biliary tract cancer          | 211<br>(150 - 408)          | --                    | --                     | 7<br>(5 - 13)           | 70<br>(49 - 137)         | 133<br>(90 - 263)           |
| Pancreatic cancer                             | 466<br>(421 - 514)          | --                    | --                     | 33<br>(27 - 39)         | 191<br>(170 - 216)       | 242<br>(212 - 275)          |
| Malignant skin melanoma                       | 92<br>(68 - 150)            | --                    | --                     | 22<br>(15 - 35)         | 30<br>(20 - 44)          | 40<br>(27 - 72)             |
| Non-melanoma skin cancer                      | 41<br>(29 - 59)             | --                    | --                     | 2<br>(1 - 4)            | 7<br>(4 - 12)            | 32<br>(21 - 47)             |
| Ovarian cancer                                | 164<br>(138 - 194)          | --                    | --                     | 22<br>(18 - 29)         | 81<br>(64 - 100)         | 61<br>(46 - 78)             |
| Testicular cancer                             | 11<br>(4 - 18)              | --                    | --                     | 7<br>(2 - 12)           | 2<br>(1 - 4)             | 2<br>(1 - 3)                |
| Kidney cancer                                 | 182<br>(155 - 213)          | 0<br>(0 - 0)          | 0<br>(0 - 0)           | 10<br>(8 - 14)          | 85<br>(69 - 104)         | 86<br>(69 - 109)            |
| Bladder cancer                                | 217<br>(178 - 254)          | --                    | --                     | 5<br>(4 - 6)            | 62<br>(49 - 75)          | 150<br>(122 - 181)          |
| Brain and nervous system cancer               | 359<br>(268 - 417)          | 2<br>(1 - 4)          | 7<br>(5 - 10)          | 80<br>(66 - 98)         | 164<br>(129 - 192)       | 106<br>(60 - 141)           |
| Thyroid cancer                                | 28<br>(18 - 36)             | --                    | 0<br>(0 - 0)           | 2<br>(2 - 3)            | 8<br>(6 - 11)            | 17<br>(10 - 23)             |
| Mesothelioma                                  | 19<br>(13 - 40)             | --                    | --                     | 1<br>(1 - 2)            | 10<br>(6 - 21)           | 8<br>(5 - 18)               |
| Hodgkin lymphoma                              | 33<br>(18 - 40)             | 0<br>(0 - 0)          | 0<br>(0 - 1)           | 11<br>(6 - 15)          | 12<br>(6 - 16)           | 10<br>(5 - 13)              |
| Non-Hodgkin lymphoma                          | 158<br>(71 - 221)           | 1<br>(0 - 2)          | 2<br>(1 - 5)           | 30<br>(15 - 42)         | 61<br>(28 - 87)          | 64<br>(24 - 97)             |
| Multiple myeloma                              | 48<br>(25 - 72)             | --                    | --                     | 4<br>(2 - 6)            | 23<br>(12 - 34)          | 21<br>(10 - 34)             |
| Leukemia                                      | 188<br>(167 - 211)          | 2<br>(1 - 3)          | 6<br>(4 - 8)           | 35<br>(29 - 40)         | 62<br>(54 - 72)          | 85<br>(72 - 99)             |
| Other neoplasms                               | 353<br>(292 - 470)          | 2<br>(1 - 3)          | 3<br>(1 - 4)           | 52<br>(41 - 72)         | 129<br>(98 - 181)        | 168<br>(135 - 223)          |
| Cardiovascular diseases                       | 17,814<br>(16,561 - 18,924) | 1<br>(1 - 2)          | 3<br>(2 - 4)           | 610<br>(539 - 681)      | 3,448<br>(3,157 - 3,777) | 13,752<br>(12,756 - 14,584) |
| Rheumatic heart disease                       | 46<br>(12 - 63)             | 0<br>(0 - 0)          | 0<br>(0 - 1)           | 9<br>(2 - 13)           | 13<br>(5 - 18)           | 24<br>(4 - 36)              |
| Ischemic heart disease                        | 6,756<br>(5,722 - 9,059)    | 0<br>(0 - 0)          | 0<br>(0 - 0)           | 310<br>(264 - 369)      | 1,652<br>(1,422 - 2,090) | 4,793<br>(3,939 - 6,697)    |
| Cerebrovascular disease                       | 6,559<br>(5,583 - 7,501)    | 1<br>(0 - 1)          | 2<br>(1 - 2)           | 152<br>(120 - 183)      | 1,055<br>(893 - 1,231)   | 5,351<br>(4,511 - 6,173)    |
| Ischemic stroke                               | 5,158<br>(3,522 - 6,256)    | 0<br>(0 - 0)          | 0<br>(0 - 0)           | 54<br>(22 - 82)         | 659<br>(371 - 869)       | 4,444<br>(3,108 - 5,350)    |
| Hemorrhagic stroke                            | 1,402<br>(762 - 2,654)      | 1<br>(0 - 1)          | 1<br>(1 - 2)           | 97<br>(71 - 138)        | 395<br>(241 - 669)       | 907<br>(430 - 1,862)        |
| Hypertensive heart disease                    | 467<br>(127 - 837)          | 0<br>(0 - 0)          | 0<br>(0 - 0)           | 17<br>(10 - 27)         | 71<br>(36 - 111)         | 378<br>(78 - 717)           |
| Cardiomyopathy and myocarditis                | 3,145<br>(1,691 - 4,223)    | 0<br>(0 - 1)          | 1<br>(0 - 1)           | 78<br>(51 - 101)        | 424<br>(239 - 552)       | 2,642<br>(1,405 - 3,648)    |
| Atrial fibrillation and flutter               | 117<br>(81 - 156)           | --                    | --                     | 1<br>(1 - 2)            | 13<br>(9 - 18)           | 102<br>(68 - 143)           |
| Aortic aneurysm                               | 168<br>(134 - 206)          | --                    | --                     | 14<br>(10 - 19)         | 56<br>(42 - 70)          | 98<br>(75 - 126)            |
| Peripheral vascular disease                   | 5<br>(4 - 7)                | --                    | --                     | 0<br>(0 - 0)            | 2<br>(2 - 3)             | 3<br>(2 - 3)                |
| Endocarditis                                  | 17<br>(12 - 25)             | 0<br>(0 - 0)          | 0<br>(0 - 0)           | 4<br>(2 - 6)            | 7<br>(5 - 11)            | 6<br>(4 - 9)                |
| Other cardiovascular and circulatory diseases | 535<br>(428 - 695)          | 0<br>(0 - 0)          | 0<br>(0 - 0)           | 25<br>(17 - 32)         | 155<br>(114 - 193)       | 354<br>(268 - 507)          |
| Chronic respiratory diseases                  | 2,184<br>(1,918 - 2,740)    | 0<br>(0 - 0)          | 0<br>(0 - 0)           | 30<br>(24 - 36)         | 324<br>(274 - 414)       | 1,830<br>(1,596 - 2,351)    |
| Chronic obstructive pulmonary disease         | 1,875<br>(1,629 - 2,389)    | 0<br>(0 - 0)          | 0<br>(0 - 0)           | 20<br>(15 - 24)         | 262<br>(221 - 334)       | 1,593<br>(1,369 - 2,053)    |
| Pneumoconiosis                                | 41<br>(28 - 60)             | 0<br>(0 - 0)          | 0<br>(0 - 0)           | 3<br>(2 - 4)            | 16<br>(10 - 23)          | 23<br>(15 - 36)             |
| Silicosis                                     | 16<br>(10 - 23)             | 0<br>(0 - 0)          | 0<br>(0 - 0)           | 1<br>(0 - 1)            | 3<br>(2 - 5)             | 12<br>(7 - 18)              |
| Asbestosis                                    | 4<br>(3 - 6)                | 0<br>(0 - 0)          | 0<br>(0 - 0)           | 1<br>(0 - 1)            | 2<br>(1 - 3)             | 2<br>(1 - 3)                |

Web Table 31- Bosnia and Herzegovina deaths with 95% UI by age, sex, and cause in 2013

| Cause                                               | Both Sexes, All Ages     | Both Sexes, 0-4 Years | Both Sexes, 5-14 Years | Both Sexes, 15-49 Years | Both Sexes, 50-69 Years | Both Sexes, 70-80 Years  |
|-----------------------------------------------------|--------------------------|-----------------------|------------------------|-------------------------|-------------------------|--------------------------|
| Coal workers pneumoconiosis                         | 5<br>(4 - 8)             | 0<br>(0 - 0)          | 0<br>(0 - 0)           | 0<br>(0 - 0)            | 3<br>(2 - 4)            | 2<br>(1 - 4)             |
| Other pneumoconiosis                                | 16<br>(11 - 23)          | 0<br>(0 - 0)          | 0<br>(0 - 0)           | 1<br>(1 - 2)            | 7<br>(5 - 11)           | 7<br>(4 - 12)            |
| Asthma                                              | 74<br>(54 - 108)         | 0<br>(0 - 0)          | 0<br>(0 - 0)           | 1<br>(1 - 1)            | 13<br>(9 - 21)          | 60<br>(43 - 91)          |
| Interstitial lung disease and pulmonary sarcoidosis | 168<br>(117 - 254)       | 0<br>(0 - 0)          | 0<br>(0 - 0)           | 3<br>(2 - 6)            | 30<br>(20 - 45)         | 135<br>(88 - 208)        |
| Other chronic respiratory diseases                  | 26<br>(17 - 43)          | 0<br>(0 - 0)          | 0<br>(0 - 0)           | 4<br>(3 - 5)            | 3<br>(2 - 4)            | 19<br>(11 - 34)          |
| Cirrhosis                                           | 472<br>(426 - 526)       | 0<br>(0 - 0)          | 0<br>(0 - 0)           | 81<br>(67 - 98)         | 223<br>(192 - 258)      | 168<br>(142 - 198)       |
| Cirrhosis due to hepatitis B                        | 130<br>(91 - 178)        | 0<br>(0 - 0)          | 0<br>(0 - 0)           | 21<br>(13 - 31)         | 60<br>(41 - 86)         | 48<br>(32 - 68)          |
| Cirrhosis due to hepatitis C                        | 135<br>(83 - 199)        | 0<br>(0 - 0)          | 0<br>(0 - 0)           | 19<br>(9 - 33)          | 63<br>(36 - 97)         | 53<br>(31 - 80)          |
| Cirrhosis due to alcohol use                        | 123<br>(77 - 180)        | --                    | --                     | 16<br>(8 - 26)          | 60<br>(37 - 89)         | 47<br>(26 - 73)          |
| Cirrhosis due to other causes                       | 84<br>(50 - 123)         | 0<br>(0 - 0)          | 0<br>(0 - 0)           | 24<br>(15 - 35)         | 40<br>(21 - 63)         | 20<br>(11 - 31)          |
| Digestive diseases                                  | 547<br>(462 - 790)       | 1<br>(0 - 1)          | 1<br>(1 - 1)           | 38<br>(32 - 47)         | 139<br>(114 - 203)      | 368<br>(299 - 543)       |
| Peptic ulcer disease                                | 143<br>(98 - 251)        | 0<br>(0 - 0)          | 0<br>(0 - 0)           | 7<br>(5 - 11)           | 41<br>(27 - 72)         | 95<br>(60 - 172)         |
| Gastritis and duodenitis                            | 3<br>(1 - 9)             | 0<br>(0 - 0)          | 0<br>(0 - 0)           | 0<br>(0 - 0)            | 1<br>(0 - 3)            | 2<br>(1 - 6)             |
| Appendicitis                                        | 8<br>(5 - 15)            | 0<br>(0 - 0)          | 0<br>(0 - 0)           | 1<br>(1 - 2)            | 2<br>(1 - 4)            | 4<br>(2 - 9)             |
| Paralytic ileus and intestinal obstruction          | 121<br>(77 - 185)        | 0<br>(0 - 1)          | 0<br>(0 - 1)           | 8<br>(5 - 12)           | 27<br>(17 - 48)         | 85<br>(51 - 128)         |
| Inguinal, femoral, and abdominal hernia             | 19<br>(13 - 34)          | 0<br>(0 - 0)          | 0<br>(0 - 0)           | 1<br>(0 - 1)            | 4<br>(2 - 7)            | 15<br>(9 - 26)           |
| Inflammatory bowel disease                          | 17<br>(12 - 27)          | 0<br>(0 - 0)          | 0<br>(0 - 0)           | 2<br>(1 - 3)            | 5<br>(3 - 9)            | 10<br>(6 - 15)           |
| Vascular intestinal disorders                       | 54<br>(29 - 101)         | 0<br>(0 - 0)          | 0<br>(0 - 0)           | 2<br>(1 - 5)            | 7<br>(3 - 13)           | 45<br>(24 - 85)          |
| Gallbladder and biliary diseases                    | 57<br>(36 - 74)          | 0<br>(0 - 0)          | 0<br>(0 - 0)           | 3<br>(2 - 5)            | 15<br>(10 - 21)         | 38<br>(23 - 53)          |
| Pancreatitis                                        | 94<br>(68 - 147)         | 0<br>(0 - 0)          | 0<br>(0 - 0)           | 10<br>(7 - 14)          | 25<br>(17 - 37)         | 59<br>(39 - 100)         |
| Other digestive diseases                            | 31<br>(22 - 40)          | 0<br>(0 - 0)          | 0<br>(0 - 0)           | 3<br>(2 - 4)            | 11<br>(8 - 15)          | 16<br>(11 - 23)          |
| Neurological disorders                              | 2,076<br>(1,780 - 2,499) | 1<br>(1 - 2)          | 4<br>(2 - 6)           | 53<br>(42 - 69)         | 155<br>(130 - 200)      | 1,863<br>(1,578 - 2,258) |
| Alzheimer disease and other dementias               | 1,748<br>(1,471 - 2,115) | --                    | --                     | 0<br>(0 - 1)            | 94<br>(75 - 114)        | 1,654<br>(1,377 - 2,006) |
| Parkinson disease                                   | 215<br>(157 - 368)       | --                    | --                     | 1<br>(0 - 1)            | 31<br>(21 - 60)         | 183<br>(130 - 304)       |
| Epilepsy                                            | 72<br>(54 - 89)          | 1<br>(1 - 2)          | 4<br>(2 - 6)           | 36<br>(27 - 48)         | 16<br>(11 - 22)         | 15<br>(10 - 21)          |
| Multiple sclerosis                                  | 28<br>(19 - 58)          | --                    | --                     | 11<br>(7 - 22)          | 10<br>(7 - 20)          | 7<br>(4 - 16)            |
| Other neurological disorders                        | 14<br>(10 - 27)          | 0<br>(0 - 0)          | 0<br>(0 - 0)           | 5<br>(3 - 12)           | 4<br>(3 - 9)            | 5<br>(4 - 7)             |
| Mental and substance use disorders                  | 194<br>(150 - 353)       | 0<br>(0 - 0)          | 0<br>(0 - 0)           | 64<br>(48 - 106)        | 87<br>(61 - 173)        | 43<br>(31 - 80)          |
| Schizophrenia                                       | 18<br>(9 - 25)           | --                    | --                     | 5<br>(2 - 8)            | 7<br>(4 - 10)           | 7<br>(3 - 10)            |
| Alcohol use disorders                               | 138<br>(99 - 300)        | --                    | --                     | 31<br>(20 - 75)         | 74<br>(50 - 161)        | 33<br>(21 - 72)          |
| Drug use disorders                                  | 38<br>(26 - 47)          | 0<br>(0 - 0)          | --                     | 28<br>(18 - 36)         | 7<br>(4 - 9)            | 4<br>(2 - 5)             |
| Opioid use disorders                                | 15<br>(10 - 18)          | 0<br>(0 - 0)          | --                     | 11<br>(7 - 14)          | 2<br>(1 - 3)            | 1<br>(1 - 2)             |
| Cocaine use disorders                               | 2<br>(1 - 3)             | 0<br>(0 - 0)          | --                     | 2<br>(1 - 2)            | 0<br>(0 - 0)            | 0<br>(0 - 0)             |
| Amphetamine use disorders                           | 2<br>(1 - 2)             | 0<br>(0 - 0)          | --                     | 1<br>(1 - 2)            | 0<br>(0 - 0)            | 0<br>(0 - 0)             |
| Other drug use disorders                            | 19<br>(13 - 24)          | 0<br>(0 - 0)          | --                     | 14<br>(9 - 18)          | 4<br>(2 - 5)            | 2<br>(1 - 2)             |
| Eating disorders                                    | 0<br>(0 - 0)             | --                    | 0<br>(0 - 0)           | 0<br>(0 - 0)            | --                      | --                       |
| Anorexia nervosa                                    | 0<br>(0 - 0)             | --                    | 0<br>(0 - 0)           | 0<br>(0 - 0)            | --                      | --                       |
| Diabetes, urogenital, blood, and endocrine diseases | 2,737<br>(2,421 - 3,046) | 2<br>(1 - 4)          | 128<br>(2 - 3)         | 721<br>(112 - 146)      | 1,884<br>(638 - 817)    | 1,446<br>(1,145 - 1,652) |
| Diabetes mellitus                                   | 2,025<br>(1,664 - 2,266) | 0<br>(0 - 1)          | 0<br>(0 - 1)           | 66<br>(55 - 78)         | 512<br>(428 - 585)      | 1,446<br>(1,145 - 1,652) |
| Acute glomerulonephritis                            | 1<br>(1 - 1)             | 0<br>(0 - 0)          | 0<br>(0 - 0)           | 0<br>(0 - 0)            | 0<br>(0 - 0)            | 0<br>(0 - 0)             |

Web Table 31- Bosnia and Herzegovina deaths with 95% UI by age, sex, and cause in 2013

| Cause                                               | Both Sexes, All Ages     | Both Sexes, 0-4 Years | Both Sexes, 5-14 Years | Both Sexes, 15-49 Years | Both Sexes, 50-69 Years | Both Sexes, 70-80 Years |
|-----------------------------------------------------|--------------------------|-----------------------|------------------------|-------------------------|-------------------------|-------------------------|
| Chronic kidney disease                              | 571<br>(492 - 656)       | 0<br>(0 - 1)          | 1<br>(1 - 1)           | 43<br>(35 - 54)         | 165<br>(139 - 206)      | 362<br>(294 - 429)      |
| Chronic kidney disease due to diabetes mellitus     | 2<br>(1 - 4)             | 0<br>(0 - 0)          | 0<br>(0 - 0)           | 1<br>(1 - 2)            | 1<br>(0 - 1)            | 0<br>(0 - 1)            |
| Chronic kidney disease due to hypertension          | 119<br>(87 - 159)        | 0<br>(0 - 0)          | 0<br>(0 - 0)           | 7<br>(4 - 10)           | 27<br>(18 - 39)         | 85<br>(59 - 117)        |
| Chronic kidney disease due to glomerulonephritis    | 12<br>(9 - 17)           | 0<br>(0 - 0)          | 0<br>(0 - 0)           | 1<br>(1 - 2)            | 4<br>(3 - 7)            | 6<br>(5 - 9)            |
| Chronic kidney disease due to other causes          | 438<br>(356 - 518)       | 0<br>(0 - 0)          | 1<br>(0 - 1)           | 34<br>(27 - 44)         | 133<br>(107 - 172)      | 270<br>(198 - 330)      |
| Urinary diseases and male infertility               | 62<br>(26 - 189)         | 0<br>(0 - 0)          | 0<br>(0 - 0)           | 3<br>(1 - 7)            | 14<br>(6 - 43)          | 45<br>(18 - 139)        |
| Interstitial nephritis and urinary tract infections | 54<br>(19 - 175)         | 0<br>(0 - 0)          | 0<br>(0 - 0)           | 2<br>(1 - 6)            | 12<br>(5 - 39)          | 39<br>(13 - 130)        |
| Urolithiasis                                        | 1<br>(0 - 4)             | --                    | 0<br>(0 - 0)           | 0<br>(0 - 1)            | 0<br>(0 - 2)            | 0<br>(0 - 2)            |
| Other urinary diseases                              | 7<br>(2 - 13)            | 0<br>(0 - 0)          | 0<br>(0 - 0)           | 0<br>(0 - 1)            | 1<br>(0 - 3)            | 5<br>(1 - 10)           |
| Gynecological diseases                              | 1<br>(1 - 1)             | --                    | --                     | 0<br>(0 - 0)            | 0<br>(0 - 0)            | 1<br>(0 - 1)            |
| Uterine fibroids                                    | 0<br>(0 - 0)             | --                    | --                     | 0<br>(0 - 0)            | 0<br>(0 - 0)            | 0<br>(0 - 0)            |
| Polycystic ovarian syndrome                         | 0<br>(0 - 0)             | --                    | --                     | 0<br>(0 - 0)            | 0<br>(0 - 0)            | --                      |
| Endometriosis                                       | 0<br>(0 - 0)             | --                    | --                     | 0<br>(0 - 0)            | 0<br>(0 - 0)            | --                      |
| Genital prolapse                                    | 0<br>(0 - 0)             | --                    | --                     | 0<br>(0 - 0)            | 0<br>(0 - 0)            | 0<br>(0 - 0)            |
| Other gynecological diseases                        | 0<br>(0 - 1)             | --                    | --                     | 0<br>(0 - 0)            | 0<br>(0 - 0)            | 0<br>(0 - 0)            |
| Hemoglobinopathies and hemolytic anemias            | 18<br>(12 - 27)          | 1<br>(0 - 1)          | 1<br>(0 - 1)           | 4<br>(3 - 6)            | 7<br>(5 - 12)           | 6<br>(3 - 8)            |
| Thalassemias                                        | 2<br>(1 - 3)             | 0<br>(0 - 1)          | 0<br>(0 - 1)           | 1<br>(1 - 2)            | 0<br>(0 - 0)            | 0<br>(0 - 0)            |
| Sickle cell disorders                               | 1<br>(1 - 2)             | 0<br>(0 - 0)          | 0<br>(0 - 0)           | 1<br>(0 - 1)            | 1<br>(0 - 1)            | 0<br>(0 - 0)            |
| G6PD deficiency                                     | 0<br>(0 - 1)             | 0<br>(0 - 0)          | 0<br>(0 - 0)           | 0<br>(0 - 0)            | 0<br>(0 - 0)            | 0<br>(0 - 0)            |
| Other hemoglobinopathies and hemolytic anemias      | 15<br>(10 - 22)          | 0<br>(0 - 0)          | 0<br>(0 - 0)           | 3<br>(1 - 4)            | 6<br>(4 - 11)           | 6<br>(3 - 8)            |
| Endocrine, metabolic, blood, and immune disorders   | 59<br>(48 - 84)          | 1<br>(0 - 2)          | 0<br>(0 - 1)           | 11<br>(9 - 16)          | 22<br>(17 - 36)         | 24<br>(18 - 33)         |
| Musculoskeletal disorders                           | 32<br>(7 - 39)           | --                    | 0<br>(0 - 0)           | 7<br>(2 - 9)            | 9<br>(2 - 11)           | 16<br>(3 - 21)          |
| Rheumatoid arthritis                                | 12<br>(3 - 16)           | --                    | 0<br>(0 - 0)           | 2<br>(0 - 2)            | 2<br>(0 - 2)            | 8<br>(2 - 12)           |
| Other musculoskeletal disorders                     | 20<br>(5 - 25)           | --                    | 0<br>(0 - 0)           | 6<br>(1 - 7)            | 7<br>(2 - 9)            | 7<br>(2 - 10)           |
| Other non-communicable diseases                     | 100<br>(77 - 134)        | 55<br>(35 - 85)       | 6<br>(4 - 8)           | 16<br>(13 - 20)         | 10<br>(8 - 12)          | 13<br>(8 - 16)          |
| Congenital anomalies                                | 86<br>(64 - 117)         | 51<br>(32 - 80)       | 6<br>(4 - 8)           | 15<br>(12 - 18)         | 7<br>(6 - 9)            | 7<br>(6 - 9)            |
| Neural tube defects                                 | 2<br>(1 - 5)             | 2<br>(1 - 4)          | 0<br>(0 - 0)           | 0<br>(0 - 0)            | 0<br>(0 - 0)            | 0<br>(0 - 0)            |
| Congenital heart anomalies                          | 47<br>(34 - 65)          | 24<br>(14 - 39)       | 4<br>(3 - 6)           | 10<br>(8 - 13)          | 4<br>(3 - 6)            | 4<br>(3 - 6)            |
| Cleft lip and cleft palate                          | 0<br>(0 - 0)             | 0<br>(0 - 0)          | --                     | --                      | --                      | --                      |
| Down syndrome                                       | 6<br>(3 - 9)             | 2<br>(1 - 4)          | 1<br>(0 - 2)           | 2<br>(1 - 3)            | 1<br>(1 - 2)            | 0<br>(0 - 0)            |
| Chromosomal unbalanced rearrangements               | 4<br>(2 - 7)             | 3<br>(1 - 6)          | 0<br>(0 - 1)           | 1<br>(0 - 1)            | 0<br>(0 - 0)            | 0<br>(0 - 0)            |
| Other congenital anomalies                          | 25<br>(17 - 38)          | 20<br>(12 - 32)       | 0<br>(0 - 0)           | 1<br>(1 - 2)            | 1<br>(1 - 2)            | 3<br>(2 - 3)            |
| Skin and subcutaneous diseases                      | 10<br>(4 - 14)           | 0<br>(0 - 0)          | 0<br>(0 - 0)           | 1<br>(1 - 2)            | 3<br>(1 - 4)            | 6<br>(2 - 9)            |
| Cellulitis                                          | 2<br>(1 - 3)             | 0<br>(0 - 0)          | 0<br>(0 - 0)           | 0<br>(0 - 0)            | 0<br>(0 - 1)            | 2<br>(0 - 3)            |
| Pyoderma                                            | 6<br>(2 - 8)             | 0<br>(0 - 0)          | 0<br>(0 - 0)           | 1<br>(0 - 1)            | 2<br>(1 - 3)            | 3<br>(1 - 5)            |
| Decubitus ulcer                                     | 2<br>(1 - 2)             | 0<br>(0 - 0)          | 0<br>(0 - 0)           | 0<br>(0 - 1)            | 0<br>(0 - 0)            | 1<br>(0 - 1)            |
| Other skin and subcutaneous diseases                | 1<br>(0 - 1)             | 0<br>(0 - 0)          | 0<br>(0 - 0)           | 0<br>(0 - 0)            | 0<br>(0 - 0)            | 0<br>(0 - 1)            |
| Sudden infant death syndrome                        | 4<br>(1 - 9)             | 4<br>(1 - 9)          | --                     | --                      | --                      | --                      |
| Injuries                                            | 1,203<br>(1,032 - 1,336) | 6<br>(3 - 10)         | 18<br>(13 - 24)        | 463<br>(405 - 562)      | 340<br>(265 - 397)      | 375<br>(279 - 442)      |
| Transport injuries                                  | 242<br>(194 - 270)       | 1<br>(0 - 1)          | 4<br>(3 - 6)           | 99<br>(74 - 117)        | 59<br>(47 - 69)         | 79<br>(65 - 96)         |

Web Table 31- Bosnia and Herzegovina deaths with 95% UI by age, sex, and cause in 2013

| Cause                                           | Both Sexes, All Ages | Both Sexes, 0-4 Years | Both Sexes, 5-14 Years | Both Sexes, 15-49 Years | Both Sexes, 50-69 Years | Both Sexes, 70-80 Years |
|-------------------------------------------------|----------------------|-----------------------|------------------------|-------------------------|-------------------------|-------------------------|
| Road injuries                                   | 185<br>(102 - 237)   | 1<br>(0 - 1)          | 3<br>(1 - 4)           | 78<br>(40 - 105)        | 47<br>(27 - 60)         | 57<br>(30 - 76)         |
| Pedestrian road injuries                        | 70<br>(34 - 95)      | 0<br>(0 - 1)          | 1<br>(0 - 2)           | 14<br>(5 - 22)          | 21<br>(10 - 29)         | 34<br>(17 - 47)         |
| Cyclist road injuries                           | 14<br>(6 - 19)       | 0<br>(0 - 0)          | 0<br>(0 - 1)           | 4<br>(2 - 6)            | 5<br>(2 - 7)            | 4<br>(2 - 7)            |
| Motorcyclist road injuries                      | 26<br>(11 - 37)      | 0<br>(0 - 0)          | 0<br>(0 - 0)           | 19<br>(7 - 29)          | 5<br>(2 - 7)            | 2<br>(1 - 3)            |
| Motor vehicle road injuries                     | 74<br>(33 - 98)      | 0<br>(0 - 0)          | 1<br>(0 - 1)           | 40<br>(18 - 56)         | 17<br>(8 - 23)          | 16<br>(7 - 24)          |
| Other road injuries                             | 1<br>(1 - 3)         | 0<br>(0 - 0)          | 0<br>(0 - 0)           | 1<br>(0 - 1)            | 0<br>(0 - 1)            | 0<br>(0 - 1)            |
| Other transport injuries                        | 57<br>(24 - 111)     | 0<br>(0 - 1)          | 2<br>(1 - 3)           | 21<br>(7 - 46)          | 12<br>(4 - 24)          | 22<br>(9 - 49)          |
| Unintentional injuries                          | 406<br>(322 - 545)   | 5<br>(3 - 8)          | 9<br>(5 - 13)          | 132<br>(103 - 237)      | 106<br>(83 - 139)       | 154<br>(110 - 192)      |
| Falls                                           | 49<br>(1 - 72)       | 0<br>(0 - 1)          | 1<br>(0 - 2)           | 12<br>(0 - 19)          | 15<br>(0 - 23)          | 21<br>(1 - 35)          |
| Drowning                                        | 21<br>(1 - 43)       | 1<br>(0 - 2)          | 2<br>(0 - 5)           | 6<br>(0 - 14)           | 6<br>(0 - 14)           | 5<br>(0 - 12)           |
| Fire, heat, and hot substances                  | 19<br>(2 - 35)       | 0<br>(0 - 1)          | 0<br>(0 - 1)           | 5<br>(1 - 10)           | 5<br>(1 - 10)           | 8<br>(1 - 17)           |
| Poisonings                                      | 76<br>(31 - 289)     | 0<br>(0 - 1)          | 2<br>(1 - 6)           | 35<br>(14 - 146)        | 19<br>(7 - 73)          | 19<br>(7 - 69)          |
| Exposure to mechanical forces                   | 49<br>(18 - 59)      | 0<br>(0 - 1)          | 1<br>(0 - 2)           | 25<br>(10 - 31)         | 14<br>(5 - 18)          | 8<br>(2 - 11)           |
| Unintentional firearm injuries                  | 21<br>(1 - 27)       | 0<br>(0 - 0)          | 0<br>(0 - 1)           | 9<br>(0 - 12)           | 6<br>(0 - 9)            | 5<br>(0 - 8)            |
| Unintentional suffocation                       | 5<br>(3 - 6)         | 0<br>(0 - 1)          | 0<br>(0 - 1)           | 2<br>(1 - 2)            | 2<br>(1 - 3)            | 1<br>(0 - 1)            |
| Other exposure to mechanical forces             | 23<br>(9 - 29)       | 0<br>(0 - 0)          | 0<br>(0 - 1)           | 14<br>(6 - 19)          | 6<br>(2 - 8)            | 2<br>(1 - 3)            |
| Adverse effects of medical treatment            | 128<br>(97 - 170)    | 2<br>(1 - 5)          | 2<br>(1 - 3)           | 37<br>(23 - 66)         | 28<br>(19 - 42)         | 59<br>(30 - 86)         |
| Animal contact                                  | 7<br>(5 - 10)        | 0<br>(0 - 0)          | 0<br>(0 - 1)           | 1<br>(1 - 2)            | 1<br>(1 - 2)            | 4<br>(3 - 6)            |
| Venomous animal contact                         | 4<br>(3 - 6)         | 0<br>(0 - 0)          | 0<br>(0 - 0)           | 1<br>(0 - 1)            | 1<br>(1 - 1)            | 2<br>(1 - 3)            |
| Non-venomous animal contact                     | 3<br>(2 - 5)         | 0<br>(0 - 0)          | 0<br>(0 - 0)           | 1<br>(0 - 1)            | 1<br>(0 - 1)            | 2<br>(1 - 3)            |
| Foreign body                                    | 12<br>(9 - 18)       | 0<br>(0 - 1)          | 0<br>(0 - 1)           | 2<br>(1 - 3)            | 4<br>(3 - 6)            | 6<br>(4 - 8)            |
| Pulmonary aspiration and foreign body in airway | 11<br>(8 - 17)       | 0<br>(0 - 0)          | 0<br>(0 - 1)           | 2<br>(1 - 2)            | 3<br>(2 - 6)            | 5<br>(4 - 8)            |
| Foreign body in other body part                 | 1<br>(1 - 1)         | 0<br>(0 - 0)          | 0<br>(0 - 0)           | 0<br>(0 - 0)            | 0<br>(0 - 1)            | 0<br>(0 - 0)            |
| Other unintentional injuries                    | 46<br>(36 - 53)      | 0<br>(0 - 0)          | 0<br>(0 - 1)           | 8<br>(6 - 10)           | 14<br>(10 - 18)         | 23<br>(16 - 30)         |
| Self-harm and interpersonal violence            | 554<br>(385 - 656)   | 0<br>(0 - 1)          | 5<br>(3 - 8)           | 232<br>(170 - 289)      | 174<br>(96 - 224)       | 142<br>(76 - 188)       |
| Self-harm                                       | 479<br>(378 - 575)   | --                    | 4<br>(2 - 8)           | 188<br>(149 - 280)      | 154<br>(94 - 197)       | 132<br>(75 - 178)       |
| Interpersonal violence                          | 75<br>(4 - 122)      | 0<br>(0 - 1)          | 1<br>(0 - 1)           | 44<br>(3 - 74)          | 20<br>(1 - 36)          | 10<br>(1 - 21)          |
| Assault by firearm                              | 35<br>(2 - 63)       | 0<br>(0 - 0)          | 0<br>(0 - 0)           | 21<br>(1 - 38)          | 10<br>(0 - 20)          | 4<br>(0 - 10)           |
| Assault by sharp object                         | 29<br>(2 - 51)       | 0<br>(0 - 0)          | 0<br>(0 - 0)           | 16<br>(1 - 30)          | 9<br>(0 - 20)           | 3<br>(0 - 6)            |
| Assault by other means                          | 12<br>(1 - 22)       | 0<br>(0 - 0)          | 0<br>(0 - 1)           | 7<br>(0 - 15)           | 1<br>(0 - 1)            | 3<br>(0 - 7)            |

Web Table 31- Bosnia and Herzegovina deaths with 95% UI by age, sex, and cause in 2013

| Cause                                                             | Males, All Ages             | Males, 0-4 Years  | Males, 5-14 Years | Males, 15-49 Years       | Males, 50-69 Years       | Males, 70-80 Years          |
|-------------------------------------------------------------------|-----------------------------|-------------------|-------------------|--------------------------|--------------------------|-----------------------------|
| All causes                                                        | 19,773<br>(18,537 - 21,126) | 105<br>(70 - 157) | 34<br>(26 - 48)   | 1,626<br>(1,494 - 1,755) | 5,764<br>(5,294 - 6,283) | 12,243<br>(11,580 - 13,134) |
| Communicable, maternal, neonatal, and nutritional diseases        | 474<br>(407 - 618)          | 64<br>(41 - 95)   | 3<br>(2 - 5)      | 47<br>(38 - 56)          | 109<br>(88 - 129)        | 252<br>(199 - 378)          |
| HIV/AIDS and tuberculosis                                         | 134<br>(73 - 160)           | 0<br>(0 - 0)      | 0<br>(0 - 0)      | 15<br>(7 - 19)           | 45<br>(21 - 56)          | 75<br>(45 - 93)             |
| Tuberculosis                                                      | 134<br>(73 - 160)           | 0<br>(0 - 0)      | 0<br>(0 - 0)      | 15<br>(7 - 19)           | 45<br>(21 - 56)          | 75<br>(45 - 93)             |
| HIV/AIDS                                                          | 0<br>(0 - 1)                | 0<br>(0 - 0)      | 0<br>(0 - 0)      | 0<br>(0 - 0)             | 0<br>(0 - 0)             | 0<br>(0 - 0)                |
| HIV/AIDS resulting in mycobacterial infection                     | 0<br>(0 - 0)                | 0<br>(0 - 0)      | 0<br>(0 - 0)      | 0<br>(0 - 0)             | 0<br>(0 - 0)             | 0<br>(0 - 0)                |
| HIV/AIDS resulting in other diseases                              | 0<br>(0 - 1)                | 0<br>(0 - 0)      | 0<br>(0 - 0)      | 0<br>(0 - 0)             | 0<br>(0 - 0)             | 0<br>(0 - 0)                |
| Diarrhea, lower respiratory, and other common infectious diseases | 236<br>(179 - 379)          | 6<br>(4 - 10)     | 3<br>(2 - 4)      | 24<br>(19 - 32)          | 49<br>(37 - 68)          | 153<br>(102 - 283)          |
| Diarrheal diseases                                                | 2<br>(1 - 4)                | 1<br>(0 - 2)      | 0<br>(0 - 0)      | 0<br>(0 - 0)             | 0<br>(0 - 0)             | 1<br>(0 - 1)                |
| Intestinal infectious diseases                                    | 6<br>(2 - 11)               | 0<br>(0 - 1)      | 1<br>(0 - 2)      | 3<br>(1 - 6)             | 1<br>(0 - 2)             | 1<br>(0 - 1)                |
| Typhoid fever                                                     | 4<br>(2 - 8)                | 0<br>(0 - 1)      | 1<br>(0 - 1)      | 2<br>(1 - 5)             | 1<br>(0 - 2)             | 0<br>(0 - 1)                |
| Paratyphoid fever                                                 | 1<br>(0 - 3)                | 0<br>(0 - 0)      | 0<br>(0 - 0)      | 1<br>(0 - 1)             | 0<br>(0 - 1)             | 0<br>(0 - 0)                |
| Other intestinal infectious diseases                              | 0<br>(0 - 2)                | 0<br>(0 - 0)      | 0<br>(0 - 0)      | 0<br>(0 - 1)             | 0<br>(0 - 0)             | 0<br>(0 - 0)                |
| Lower respiratory infections                                      | 211<br>(155 - 352)          | 3<br>(2 - 6)      | 1<br>(1 - 2)      | 17<br>(12 - 23)          | 42<br>(30 - 58)          | 147<br>(96 - 275)           |
| Upper respiratory infections                                      | 1<br>(0 - 2)                | 0<br>(0 - 0)      | 0<br>(0 - 0)      | 0<br>(0 - 0)             | 0<br>(0 - 1)             | 0<br>(0 - 1)                |
| Otitis media                                                      | 0<br>(0 - 1)                | 0<br>(0 - 0)      | 0<br>(0 - 0)      | 0<br>(0 - 0)             | 0<br>(0 - 0)             | 0<br>(0 - 0)                |
| Meningitis                                                        | 4<br>(3 - 6)                | 1<br>(0 - 1)      | 0<br>(0 - 0)      | 1<br>(1 - 2)             | 2<br>(1 - 3)             | 1<br>(0 - 1)                |
| Pneumococcal meningitis                                           | 1<br>(1 - 2)                | 0<br>(0 - 0)      | 0<br>(0 - 0)      | 0<br>(0 - 1)             | 0<br>(0 - 1)             | 0<br>(0 - 0)                |
| H influenzae type B meningitis                                    | 1<br>(0 - 1)                | 0<br>(0 - 0)      | 0<br>(0 - 0)      | 0<br>(0 - 0)             | 0<br>(0 - 0)             | 0<br>(0 - 0)                |
| Meningococcal meningitis                                          | 1<br>(0 - 2)                | 0<br>(0 - 0)      | 0<br>(0 - 0)      | 0<br>(0 - 0)             | 0<br>(0 - 1)             | 0<br>(0 - 0)                |
| Other meningitis                                                  | 2<br>(1 - 2)                | 0<br>(0 - 0)      | 0<br>(0 - 0)      | 0<br>(0 - 1)             | 1<br>(0 - 1)             | 0<br>(0 - 0)                |
| Encephalitis                                                      | 10<br>(8 - 19)              | 0<br>(0 - 1)      | 0<br>(0 - 1)      | 2<br>(2 - 5)             | 4<br>(3 - 8)             | 3<br>(2 - 5)                |
| Diphtheria                                                        | 0<br>(0 - 0)                | 0<br>(0 - 0)      | 0<br>(0 - 0)      | 0<br>(0 - 0)             | 0<br>(0 - 0)             | --                          |
| Whooping cough                                                    | 0<br>(0 - 0)                | 0<br>(0 - 0)      | 0<br>(0 - 0)      | 0<br>(0 - 0)             | 0<br>(0 - 0)             | --                          |
| Tetanus                                                           | 0<br>(0 - 0)                | 0<br>(0 - 0)      | 0<br>(0 - 0)      | 0<br>(0 - 0)             | 0<br>(0 - 0)             | 0<br>(0 - 0)                |
| Measles                                                           | 0<br>(0 - 0)                | 0<br>(0 - 0)      | 0<br>(0 - 0)      | 0<br>(0 - 0)             | 0<br>(0 - 0)             | --                          |
| Varicella and herpes zoster                                       | 1<br>(0 - 4)                | 0<br>(0 - 0)      | 0<br>(0 - 0)      | 0<br>(0 - 1)             | 0<br>(0 - 1)             | 1<br>(0 - 4)                |
| Neglected tropical diseases and malaria                           | 3<br>(2 - 3)                | 0<br>(0 - 0)      | 0<br>(0 - 0)      | 1<br>(1 - 1)             | 1<br>(1 - 1)             | 1<br>(1 - 1)                |
| Leishmaniasis                                                     | 0<br>(0 - 0)                | 0<br>(0 - 0)      | 0<br>(0 - 0)      | 0<br>(0 - 0)             | 0<br>(0 - 0)             | 0<br>(0 - 0)                |
| Visceral leishmaniasis                                            | 0<br>(0 - 0)                | 0<br>(0 - 0)      | 0<br>(0 - 0)      | 0<br>(0 - 0)             | 0<br>(0 - 0)             | 0<br>(0 - 0)                |
| Cysticercosis                                                     | 0<br>(0 - 0)                | 0<br>(0 - 0)      | 0<br>(0 - 0)      | 0<br>(0 - 0)             | 0<br>(0 - 0)             | 0<br>(0 - 0)                |
| Cystic echinococcosis                                             | 1<br>(1 - 2)                | 0<br>(0 - 0)      | 0<br>(0 - 0)      | 0<br>(0 - 1)             | 1<br>(0 - 1)             | 0<br>(0 - 0)                |
| Dengue                                                            | 0<br>(0 - 0)                | 0<br>(0 - 0)      | 0<br>(0 - 0)      | 0<br>(0 - 0)             | 0<br>(0 - 0)             | 0<br>(0 - 0)                |
| Rabies                                                            | 0<br>(0 - 0)                | 0<br>(0 - 0)      | 0<br>(0 - 0)      | 0<br>(0 - 0)             | 0<br>(0 - 0)             | 0<br>(0 - 0)                |
| Other neglected tropical diseases                                 | 0<br>(0 - 0)                | 0<br>(0 - 0)      | 0<br>(0 - 0)      | 0<br>(0 - 0)             | 0<br>(0 - 0)             | 0<br>(0 - 0)                |
| Maternal disorders                                                | --                          | --                | --                | --                       | --                       | --                          |
| Maternal hemorrhage                                               | --                          | --                | --                | --                       | --                       | --                          |
| Maternal sepsis and other maternal infections                     | --                          | --                | --                | --                       | --                       | --                          |
| Maternal hypertensive disorders                                   | --                          | --                | --                | --                       | --                       | --                          |
| Maternal obstructed labor                                         | --                          | --                | --                | --                       | --                       | --                          |

Web Table 31- Bosnia and Herzegovina deaths with 95% UI by age, sex, and cause in 2013

| Cause                                                            | Males, All Ages             | Males, 0-4 Years | Males, 5-14 Years | Males, 15-49 Years       | Males, 50-69 Years       | Males, 70-80 Years          |
|------------------------------------------------------------------|-----------------------------|------------------|-------------------|--------------------------|--------------------------|-----------------------------|
| Maternal abortive outcome                                        | --                          | --               | --                | --                       | --                       | --                          |
| Indirect maternal deaths                                         | --                          | --               | --                | --                       | --                       | --                          |
| Late maternal deaths                                             | --                          | --               | --                | --                       | --                       | --                          |
| Maternal deaths aggravated by HIV/AIDS                           | --                          | --               | --                | --                       | --                       | --                          |
| Other maternal disorders                                         | --                          | --               | --                | --                       | --                       | --                          |
| Neonatal disorders                                               | 55<br>(35 - 83)             | 55<br>(35 - 83)  | --                | --                       | --                       | --                          |
| Neonatal preterm birth complications                             | 24<br>(8 - 46)              | 24<br>(8 - 46)   | --                | --                       | --                       | --                          |
| Neonatal encephalopathy due to birth asphyxia and trauma         | 18<br>(7 - 37)              | 18<br>(7 - 37)   | --                | --                       | --                       | --                          |
| Neonatal sepsis and other neonatal infections                    | 4<br>(1 - 11)               | 4<br>(1 - 11)    | --                | --                       | --                       | --                          |
| Hemolytic disease and other neonatal jaundice                    | 0<br>(0 - 1)                | 0<br>(0 - 1)     | --                | --                       | --                       | --                          |
| Other neonatal disorders                                         | 9<br>(4 - 17)               | 9<br>(4 - 17)    | --                | --                       | --                       | --                          |
| Nutritional deficiencies                                         | 22<br>(9 - 31)              | 0<br>(0 - 0)     | 0<br>(0 - 0)      | 3<br>(1 - 4)             | 5<br>(3 - 8)             | 14<br>(5 - 20)              |
| Protein-energy malnutrition                                      | 3<br>(0 - 5)                | 0<br>(0 - 0)     | 0<br>(0 - 0)      | 0<br>(0 - 1)             | 1<br>(0 - 3)             | 1<br>(0 - 2)                |
| Iodine deficiency                                                | 0<br>(0 - 1)                | 0<br>(0 - 0)     | 0<br>(0 - 0)      | 0<br>(0 - 0)             | 0<br>(0 - 1)             | 0<br>(0 - 1)                |
| Iron-deficiency anemia                                           | 18<br>(8 - 26)              | 0<br>(0 - 0)     | 0<br>(0 - 0)      | 2<br>(1 - 4)             | 4<br>(2 - 6)             | 12<br>(5 - 18)              |
| Other nutritional deficiencies                                   | 1<br>(0 - 3)                | 0<br>(0 - 0)     | 0<br>(0 - 0)      | 0<br>(0 - 0)             | 0<br>(0 - 0)             | 1<br>(0 - 2)                |
| Other communicable, maternal, neonatal, and nutritional diseases | 24<br>(17 - 34)             | 2<br>(0 - 4)     | 0<br>(0 - 1)      | 4<br>(3 - 5)             | 8<br>(5 - 13)            | 9<br>(5 - 17)               |
| Sexually transmitted diseases excluding HIV                      | 2<br>(0 - 4)                | 2<br>(0 - 4)     | 0<br>(0 - 0)      | 0<br>(0 - 0)             | 0<br>(0 - 0)             | 0<br>(0 - 0)                |
| Syphilis                                                         | 2<br>(0 - 4)                | 2<br>(0 - 4)     | 0<br>(0 - 0)      | 0<br>(0 - 0)             | 0<br>(0 - 0)             | 0<br>(0 - 0)                |
| Chlamydial infection                                             | --                          | --               | --                | --                       | --                       | --                          |
| Gonococcal infection                                             | 0<br>(0 - 0)                | --               | 0<br>(0 - 0)      | 0<br>(0 - 0)             | 0<br>(0 - 0)             | 0<br>(0 - 0)                |
| Other sexually transmitted diseases                              | 0<br>(0 - 0)                | --               | 0<br>(0 - 0)      | 0<br>(0 - 0)             | 0<br>(0 - 0)             | 0<br>(0 - 0)                |
| Hepatitis                                                        | 10<br>(8 - 12)              | 0<br>(0 - 0)     | 0<br>(0 - 0)      | 3<br>(2 - 3)             | 4<br>(3 - 5)             | 3<br>(2 - 4)                |
| Acute hepatitis A                                                | 2<br>(1 - 3)                | 0<br>(0 - 0)     | 0<br>(0 - 0)      | 1<br>(0 - 2)             | 0<br>(0 - 1)             | 0<br>(0 - 0)                |
| Acute hepatitis B                                                | 7<br>(5 - 9)                | 0<br>(0 - 0)     | 0<br>(0 - 0)      | 1<br>(1 - 2)             | 3<br>(2 - 4)             | 3<br>(2 - 4)                |
| Acute hepatitis C                                                | 1<br>(0 - 2)                | --               | 0<br>(0 - 0)      | 0<br>(0 - 1)             | 0<br>(0 - 1)             | 0<br>(0 - 1)                |
| Other infectious diseases                                        | 12<br>(6 - 21)              | 0<br>(0 - 0)     | 0<br>(0 - 0)      | 1<br>(1 - 2)             | 4<br>(2 - 9)             | 6<br>(2 - 14)               |
| Non-communicable diseases                                        | 18,397<br>(17,231 - 19,618) | 38<br>(24 - 57)  | 19<br>(14 - 27)   | 1,204<br>(1,085 - 1,314) | 5,388<br>(4,930 - 5,869) | 11,748<br>(11,114 - 12,581) |
| Neoplasms                                                        | 5,155<br>(4,695 - 5,604)    | 4<br>(2 - 7)     | 11<br>(8 - 16)    | 443<br>(386 - 498)       | 2,148<br>(1,939 - 2,372) | 2,550<br>(2,275 - 2,814)    |
| Esophageal cancer                                                | 88<br>(65 - 104)            | --               | --                | 7<br>(5 - 10)            | 46<br>(32 - 57)          | 35<br>(27 - 43)             |
| Stomach cancer                                                   | 408<br>(359 - 466)          | --               | --                | 29<br>(23 - 37)          | 154<br>(131 - 180)       | 224<br>(186 - 270)          |
| Liver cancer                                                     | 93<br>(1 - 215)             | --               | 0<br>(0 - 0)      | 4<br>(0 - 9)             | 38<br>(0 - 92)           | 51<br>(0 - 124)             |
| Liver cancer due to hepatitis B                                  | 20<br>(0 - 64)              | --               | 0<br>(0 - 0)      | 1<br>(0 - 4)             | 10<br>(0 - 32)           | 9<br>(0 - 29)               |
| Liver cancer due to hepatitis C                                  | 44<br>(0 - 113)             | --               | 0<br>(0 - 0)      | 1<br>(0 - 4)             | 17<br>(0 - 47)           | 25<br>(0 - 66)              |
| Liver cancer due to alcohol use                                  | 25<br>(0 - 68)              | --               | --                | 1<br>(0 - 2)             | 9<br>(0 - 25)            | 15<br>(0 - 43)              |
| Liver cancer due to other causes                                 | 4<br>(0 - 12)               | --               | 0<br>(0 - 0)      | 0<br>(0 - 1)             | 2<br>(0 - 6)             | 2<br>(0 - 6)                |
| Larynx cancer                                                    | 132<br>(106 - 203)          | --               | --                | 8<br>(5 - 14)            | 65<br>(50 - 96)          | 59<br>(43 - 95)             |
| Tracheal, bronchus and lung cancer                               | 1,762<br>(1,586 - 1,952)    | --               | --                | 124<br>(101 - 150)       | 881<br>(784 - 1,003)     | 757<br>(666 - 851)          |
| Breast cancer                                                    | 17<br>(5 - 27)              | --               | --                | 2<br>(1 - 4)             | 6<br>(2 - 10)            | 9<br>(2 - 16)               |
| Cervical cancer                                                  | --                          | --               | --                | --                       | --                       | --                          |

Web Table 31- Bosnia and Herzegovina deaths with 95% UI by age, sex, and cause in 2013

| Cause                                         | Males, All Ages          | Males, 0-4 Years | Males, 5-14 Years | Males, 15-49 Years | Males, 50-69 Years       | Males, 70-80 Years       |
|-----------------------------------------------|--------------------------|------------------|-------------------|--------------------|--------------------------|--------------------------|
| Uterine cancer                                | --                       | --               | --                | --                 | --                       | --                       |
| Prostate cancer                               | 427<br>(287 - 727)       | --               | --                | 2<br>(1 - 3)       | 75<br>(48 - 125)         | 350<br>(236 - 607)       |
| Colon and rectum cancer                       | 662<br>(591 - 737)       | --               | --                | 55<br>(44 - 65)    | 244<br>(215 - 276)       | 363<br>(311 - 418)       |
| Lip and oral cavity cancer                    | 77<br>(60 - 92)          | --               | --                | 9<br>(6 - 12)      | 37<br>(27 - 46)          | 31<br>(24 - 41)          |
| Nasopharynx cancer                            | 14<br>(11 - 21)          | --               | 0<br>(0 - 0)      | 3<br>(2 - 5)       | 6<br>(4 - 9)             | 5<br>(3 - 8)             |
| Other pharynx cancer                          | 49<br>(35 - 61)          | --               | --                | 7<br>(4 - 10)      | 29<br>(19 - 38)          | 13<br>(9 - 18)           |
| Gallbladder and biliary tract cancer          | 87<br>(56 - 214)         | --               | --                | 3<br>(2 - 8)       | 31<br>(18 - 81)          | 53<br>(32 - 130)         |
| Pancreatic cancer                             | 269<br>(237 - 304)       | --               | --                | 24<br>(18 - 30)    | 116<br>(98 - 135)        | 129<br>(108 - 153)       |
| Malignant skin melanoma                       | 52<br>(31 - 103)         | --               | --                | 13<br>(8 - 25)     | 18<br>(9 - 31)           | 21<br>(11 - 47)          |
| Non-melanoma skin cancer                      | 23<br>(13 - 39)          | --               | --                | 2<br>(1 - 3)       | 5<br>(3 - 10)            | 16<br>(8 - 29)           |
| Ovarian cancer                                | --                       | --               | --                | --                 | --                       | --                       |
| Testicular cancer                             | 11<br>(4 - 18)           | --               | --                | 7<br>(2 - 12)      | 2<br>(1 - 4)             | 2<br>(1 - 3)             |
| Kidney cancer                                 | 137<br>(115 - 163)       | 0<br>(0 - 0)     | 0<br>(0 - 0)      | 8<br>(6 - 12)      | 69<br>(54 - 86)          | 60<br>(45 - 77)          |
| Bladder cancer                                | 172<br>(135 - 203)       | --               | --                | 4<br>(3 - 6)       | 52<br>(39 - 64)          | 116<br>(89 - 142)        |
| Brain and nervous system cancer               | 201<br>(146 - 244)       | 1<br>(0 - 2)     | 4<br>(2 - 6)      | 48<br>(37 - 66)    | 94<br>(70 - 120)         | 54<br>(29 - 80)          |
| Thyroid cancer                                | 9<br>(7 - 11)            | --               | 0<br>(0 - 0)      | 1<br>(1 - 1)       | 3<br>(2 - 4)             | 5<br>(3 - 6)             |
| Mesothelioma                                  | 16<br>(10 - 35)          | --               | --                | 1<br>(1 - 2)       | 8<br>(5 - 19)            | 7<br>(3 - 16)            |
| Hodgkin lymphoma                              | 24<br>(10 - 31)          | 0<br>(0 - 0)     | 0<br>(0 - 0)      | 8<br>(3 - 11)      | 9<br>(4 - 13)            | 7<br>(3 - 10)            |
| Non-Hodgkin lymphoma                          | 98<br>(38 - 141)         | 1<br>(0 - 1)     | 2<br>(1 - 4)      | 21<br>(9 - 30)     | 36<br>(16 - 53)          | 39<br>(13 - 62)          |
| Multiple myeloma                              | 26<br>(11 - 39)          | --               | --                | 2<br>(1 - 4)       | 13<br>(6 - 20)           | 11<br>(4 - 19)           |
| Leukemia                                      | 115<br>(101 - 131)       | 1<br>(0 - 2)     | 3<br>(2 - 5)      | 21<br>(17 - 25)    | 39<br>(32 - 46)          | 50<br>(41 - 61)          |
| Other neoplasms                               | 184<br>(141 - 274)       | 1<br>(0 - 2)     | 1<br>(1 - 3)      | 30<br>(22 - 48)    | 69<br>(48 - 112)         | 83<br>(58 - 121)         |
| Cardiovascular diseases                       | 8,638<br>(8,014 - 9,310) | 1<br>(0 - 1)     | 2<br>(1 - 2)      | 453<br>(388 - 511) | 2,170<br>(1,952 - 2,400) | 6,013<br>(5,589 - 6,498) |
| Rheumatic heart disease                       | 18<br>(3 - 27)           | 0<br>(0 - 0)     | 0<br>(0 - 1)      | 5<br>(1 - 8)       | 4<br>(1 - 7)             | 8<br>(1 - 13)            |
| Ischemic heart disease                        | 3,536<br>(2,932 - 4,906) | 0<br>(0 - 0)     | 0<br>(0 - 0)      | 254<br>(212 - 300) | 1,140<br>(963 - 1,413)   | 2,142<br>(1,691 - 3,220) |
| Cerebrovascular disease                       | 3,083<br>(2,354 - 3,734) | 0<br>(0 - 1)     | 1<br>(1 - 1)      | 96<br>(67 - 124)   | 597<br>(450 - 734)       | 2,389<br>(1,844 - 2,930) |
| Ischemic stroke                               | 2,406<br>(1,616 - 2,976) | 0<br>(0 - 0)     | 0<br>(0 - 0)      | 33<br>(12 - 53)    | 389<br>(214 - 535)       | 1,984<br>(1,370 - 2,427) |
| Hemorrhagic stroke                            | 677<br>(341 - 1,258)     | 0<br>(0 - 1)     | 1<br>(0 - 1)      | 63<br>(43 - 95)    | 208<br>(112 - 374)       | 405<br>(170 - 828)       |
| Hypertensive heart disease                    | 129<br>(49 - 234)        | 0<br>(0 - 0)     | 0<br>(0 - 0)      | 11<br>(5 - 19)     | 37<br>(16 - 62)          | 81<br>(26 - 162)         |
| Cardiomyopathy and myocarditis                | 1,395<br>(671 - 2,066)   | 0<br>(0 - 1)     | 0<br>(0 - 0)      | 57<br>(34 - 78)    | 255<br>(124 - 361)       | 1,082<br>(487 - 1,711)   |
| Atrial fibrillation and flutter               | 70<br>(44 - 103)         | --               | --                | 1<br>(1 - 2)       | 9<br>(5 - 15)            | 59<br>(34 - 92)          |
| Aortic aneurysm                               | 127<br>(95 - 159)        | --               | --                | 11<br>(8 - 15)     | 43<br>(30 - 56)          | 73<br>(52 - 100)         |
| Peripheral vascular disease                   | 4<br>(3 - 5)             | --               | --                | 0<br>(0 - 0)       | 2<br>(1 - 3)             | 1<br>(1 - 2)             |
| Endocarditis                                  | 12<br>(8 - 19)           | 0<br>(0 - 0)     | 0<br>(0 - 0)      | 3<br>(2 - 5)       | 5<br>(3 - 8)             | 4<br>(2 - 6)             |
| Other cardiovascular and circulatory diseases | 266<br>(202 - 350)       | 0<br>(0 - 0)     | 0<br>(0 - 0)      | 15<br>(10 - 20)    | 78<br>(54 - 103)         | 173<br>(125 - 248)       |
| Chronic respiratory diseases                  | 1,439<br>(1,240 - 1,778) | 0<br>(0 - 0)     | 0<br>(0 - 0)      | 21<br>(15 - 25)    | 239<br>(196 - 313)       | 1,179<br>(1,003 - 1,438) |
| Chronic obstructive pulmonary disease         | 1,231<br>(1,055 - 1,530) | 0<br>(0 - 0)     | 0<br>(0 - 0)      | 15<br>(11 - 19)    | 186<br>(151 - 246)       | 1,030<br>(871 - 1,275)   |
| Pneumoconiosis                                | 41<br>(28 - 60)          | 0<br>(0 - 0)     | 0<br>(0 - 0)      | 3<br>(2 - 4)       | 15<br>(10 - 23)          | 23<br>(15 - 36)          |
| Silicosis                                     | 16<br>(10 - 23)          | 0<br>(0 - 0)     | 0<br>(0 - 0)      | 1<br>(0 - 1)       | 3<br>(2 - 5)             | 12<br>(7 - 18)           |
| Asbestosis                                    | 4<br>(3 - 6)             | 0<br>(0 - 0)     | 0<br>(0 - 0)      | 0<br>(0 - 1)       | 2<br>(1 - 3)             | 2<br>(1 - 3)             |



Web Table 31- Bosnia and Herzegovina deaths with 95% UI by age, sex, and cause in 2013

| Cause                                               | Males, All Ages          | Males, 0-4 Years | Males, 5-14 Years | Males, 15-49 Years | Males, 50-69 Years | Males, 70-80 Years   |
|-----------------------------------------------------|--------------------------|------------------|-------------------|--------------------|--------------------|----------------------|
| Coal workers pneumoconiosis                         | 5<br>(4 - 8)             | 0<br>(0 - 0)     | 0<br>(0 - 0)      | 0<br>(0 - 0)       | 3<br>(2 - 4)       | 2<br>(1 - 4)         |
| Other pneumoconiosis                                | 16<br>(11 - 23)          | 0<br>(0 - 0)     | 0<br>(0 - 0)      | 1<br>(1 - 2)       | 7<br>(5 - 11)      | 7<br>(4 - 12)        |
| Asthma                                              | 59<br>(43 - 82)          | 0<br>(0 - 0)     | 0<br>(0 - 0)      | 0<br>(0 - 0)       | 12<br>(8 - 18)     | 48<br>(33 - 68)      |
| Interstitial lung disease and pulmonary sarcoidosis | 100<br>(64 - 149)        | 0<br>(0 - 0)     | 0<br>(0 - 0)      | 1<br>(1 - 2)       | 24<br>(14 - 37)    | 74<br>(45 - 114)     |
| Other chronic respiratory diseases                  | 7<br>(5 - 10)            | 0<br>(0 - 0)     | 0<br>(0 - 0)      | 2<br>(1 - 2)       | 2<br>(1 - 3)       | 4<br>(2 - 6)         |
| Cirrhosis                                           | 349<br>(307 - 398)       | 0<br>(0 - 0)     | 0<br>(0 - 0)      | 71<br>(57 - 87)    | 176<br>(147 - 210) | 102<br>(81 - 125)    |
| Cirrhosis due to hepatitis B                        | 80<br>(47 - 120)         | 0<br>(0 - 0)     | 0<br>(0 - 0)      | 18<br>(10 - 27)    | 42<br>(24 - 66)    | 20<br>(11 - 34)      |
| Cirrhosis due to hepatitis C                        | 99<br>(49 - 158)         | 0<br>(0 - 0)     | 0<br>(0 - 0)      | 16<br>(6 - 31)     | 48<br>(22 - 80)    | 35<br>(15 - 57)      |
| Cirrhosis due to alcohol use                        | 105<br>(66 - 155)        | --               | --                | 16<br>(7 - 25)     | 54<br>(34 - 82)    | 36<br>(20 - 57)      |
| Cirrhosis due to other causes                       | 64<br>(33 - 103)         | 0<br>(0 - 0)     | 0<br>(0 - 0)      | 21<br>(12 - 33)    | 32<br>(14 - 54)    | 11<br>(5 - 21)       |
| Digestive diseases                                  | 305<br>(255 - 421)       | 1<br>(0 - 1)     | 1<br>(0 - 1)      | 28<br>(23 - 36)    | 91<br>(73 - 128)   | 185<br>(148 - 258)   |
| Peptic ulcer disease                                | 83<br>(56 - 144)         | 0<br>(0 - 0)     | 0<br>(0 - 0)      | 6<br>(4 - 9)       | 28<br>(18 - 49)    | 49<br>(28 - 91)      |
| Gastritis and duodenitis                            | 1<br>(1 - 4)             | 0<br>(0 - 0)     | 0<br>(0 - 0)      | 0<br>(0 - 0)       | 0<br>(0 - 1)       | 1<br>(0 - 3)         |
| Appendicitis                                        | 5<br>(3 - 7)             | 0<br>(0 - 0)     | 0<br>(0 - 0)      | 1<br>(1 - 1)       | 2<br>(1 - 2)       | 2<br>(1 - 3)         |
| Paralytic ileus and intestinal obstruction          | 62<br>(36 - 107)         | 0<br>(0 - 0)     | 0<br>(0 - 0)      | 5<br>(3 - 9)       | 14<br>(8 - 28)     | 43<br>(23 - 73)      |
| Inguinal, femoral, and abdominal hernia             | 11<br>(6 - 18)           | 0<br>(0 - 0)     | 0<br>(0 - 0)      | 0<br>(0 - 0)       | 2<br>(1 - 3)       | 9<br>(5 - 15)        |
| Inflammatory bowel disease                          | 11<br>(8 - 18)           | 0<br>(0 - 0)     | 0<br>(0 - 0)      | 1<br>(1 - 1)       | 4<br>(3 - 8)       | 6<br>(4 - 9)         |
| Vascular intestinal disorders                       | 30<br>(12 - 59)          | 0<br>(0 - 0)     | 0<br>(0 - 0)      | 2<br>(1 - 5)       | 5<br>(2 - 11)      | 22<br>(9 - 45)       |
| Gallbladder and biliary diseases                    | 27<br>(12 - 40)          | 0<br>(0 - 0)     | 0<br>(0 - 0)      | 3<br>(1 - 4)       | 8<br>(3 - 13)      | 17<br>(7 - 28)       |
| Pancreatitis                                        | 56<br>(38 - 85)          | 0<br>(0 - 0)     | 0<br>(0 - 0)      | 9<br>(6 - 12)      | 20<br>(13 - 30)    | 27<br>(17 - 45)      |
| Other digestive diseases                            | 18<br>(11 - 25)          | 0<br>(0 - 0)     | 0<br>(0 - 0)      | 2<br>(1 - 3)       | 8<br>(4 - 12)      | 8<br>(5 - 12)        |
| Neurological disorders                              | 1,017<br>(829 - 1,221)   | 1<br>(0 - 2)     | 2<br>(1 - 4)      | 36<br>(27 - 48)    | 89<br>(71 - 114)   | 890<br>(704 - 1,087) |
| Alzheimer disease and other dementias               | 825<br>(654 - 1,015)     | --               | --                | 0<br>(0 - 0)       | 50<br>(37 - 64)    | 775<br>(603 - 963)   |
| Parkinson disease                                   | 118<br>(78 - 191)        | --               | --                | 1<br>(0 - 1)       | 19<br>(12 - 35)    | 99<br>(61 - 157)     |
| Epilepsy                                            | 49<br>(33 - 64)          | 1<br>(0 - 2)     | 2<br>(1 - 4)      | 26<br>(18 - 36)    | 10<br>(6 - 16)     | 9<br>(6 - 15)        |
| Multiple sclerosis                                  | 13<br>(7 - 28)           | --               | --                | 5<br>(2 - 9)       | 5<br>(3 - 11)      | 3<br>(2 - 7)         |
| Other neurological disorders                        | 11<br>(8 - 25)           | 0<br>(0 - 0)     | 0<br>(0 - 0)      | 4<br>(2 - 11)      | 3<br>(2 - 8)       | 4<br>(3 - 6)         |
| Mental and substance use disorders                  | 164<br>(123 - 319)       | 0<br>(0 - 0)     | 0<br>(0 - 0)      | 57<br>(42 - 97)    | 31<br>(51 - 157)   | 31<br>(21 - 66)      |
| Schizophrenia                                       | 11<br>(6 - 19)           | --               | --                | 4<br>(2 - 7)       | 5<br>(2 - 8)       | 3<br>(1 - 4)         |
| Alcohol use disorders                               | 120<br>(86 - 275)        | --               | --                | 28<br>(18 - 71)    | 65<br>(43 - 146)   | 26<br>(16 - 61)      |
| Drug use disorders                                  | 33<br>(21 - 41)          | 0<br>(0 - 0)     | --                | 25<br>(16 - 33)    | 5<br>(3 - 7)       | 2<br>(1 - 3)         |
| Opioid use disorders                                | 13<br>(8 - 16)           | 0<br>(0 - 0)     | --                | 10<br>(6 - 13)     | 2<br>(1 - 3)       | 1<br>(1 - 1)         |
| Cocaine use disorders                               | 2<br>(1 - 2)             | 0<br>(0 - 0)     | --                | 1<br>(1 - 2)       | 0<br>(0 - 0)       | 0<br>(0 - 0)         |
| Amphetamine use disorders                           | 1<br>(1 - 2)             | 0<br>(0 - 0)     | --                | 1<br>(1 - 1)       | 0<br>(0 - 0)       | 0<br>(0 - 0)         |
| Other drug use disorders                            | 17<br>(11 - 21)          | 0<br>(0 - 0)     | --                | 13<br>(8 - 16)     | 3<br>(2 - 4)       | 1<br>(1 - 2)         |
| Eating disorders                                    | 0<br>(0 - 0)             | --               | 0<br>(0 - 0)      | 0<br>(0 - 0)       | --                 | --                   |
| Anorexia nervosa                                    | 0<br>(0 - 0)             | --               | 0<br>(0 - 0)      | 0<br>(0 - 0)       | --                 | --                   |
| Diabetes, urogenital, blood, and endocrine diseases | 1,265<br>(1,119 - 1,426) | 1<br>(1 - 2)     | 1<br>(1 - 2)      | 84<br>(71 - 98)    | 390<br>(334 - 455) | 789<br>(679 - 918)   |
| Diabetes mellitus                                   | 881<br>(760 - 1,017)     | 0<br>(0 - 0)     | 0<br>(0 - 0)      | 45<br>(36 - 56)    | 275<br>(229 - 326) | 561<br>(463 - 670)   |
| Acute glomerulonephritis                            | 0<br>(0 - 1)             | 0<br>(0 - 0)     | 0<br>(0 - 0)      | 0<br>(0 - 0)       | 0<br>(0 - 0)       | 0<br>(0 - 0)         |

Web Table 31- Bosnia and Herzegovina deaths with 95% UI by age, sex, and cause in 2013

| Cause                                               | Males, All Ages      | Males, 0-4 Years | Males, 5-14 Years | Males, 15-49 Years | Males, 50-69 Years | Males, 70-80 Years |
|-----------------------------------------------------|----------------------|------------------|-------------------|--------------------|--------------------|--------------------|
| Chronic kidney disease                              | 323<br>(259 - 376)   | 0<br>(0 - 0)     | 0<br>(0 - 1)      | 28<br>(22 - 34)    | 97<br>(78 - 123)   | 197<br>(139 - 243) |
| Chronic kidney disease due to diabetes mellitus     | 1<br>(1 - 3)         | 0<br>(0 - 0)     | 0<br>(0 - 0)      | 1<br>(0 - 1)       | 0<br>(0 - 1)       | 0<br>(0 - 1)       |
| Chronic kidney disease due to hypertension          | 61<br>(38 - 91)      | 0<br>(0 - 0)     | 0<br>(0 - 0)      | 4<br>(2 - 6)       | 16<br>(10 - 26)    | 41<br>(23 - 62)    |
| Chronic kidney disease due to glomerulonephritis    | 8<br>(5 - 12)        | 0<br>(0 - 0)     | 0<br>(0 - 0)      | 1<br>(1 - 1)       | 4<br>(2 - 6)       | 3<br>(2 - 5)       |
| Chronic kidney disease due to other causes          | 253<br>(189 - 305)   | 0<br>(0 - 0)     | 0<br>(0 - 0)      | 23<br>(17 - 29)    | 77<br>(57 - 102)   | 153<br>(99 - 198)  |
| Urinary diseases and male infertility               | 25<br>(12 - 84)      | 0<br>(0 - 0)     | 0<br>(0 - 0)      | 1<br>(1 - 3)       | 6<br>(3 - 21)      | 18<br>(8 - 62)     |
| Interstitial nephritis and urinary tract infections | 21<br>(8 - 76)       | 0<br>(0 - 0)     | 0<br>(0 - 0)      | 1<br>(0 - 3)       | 5<br>(2 - 18)      | 15<br>(6 - 56)     |
| Urolithiasis                                        | 0<br>(0 - 3)         | --               | 0<br>(0 - 0)      | 0<br>(0 - 0)       | 0<br>(0 - 1)       | 0<br>(0 - 1)       |
| Other urinary diseases                              | 4<br>(1 - 8)         | 0<br>(0 - 0)     | 0<br>(0 - 0)      | 0<br>(0 - 0)       | 1<br>(0 - 2)       | 3<br>(0 - 6)       |
| Gynecological diseases                              | --                   | --               | --                | --                 | --                 | --                 |
| Uterine fibroids                                    | --                   | --               | --                | --                 | --                 | --                 |
| Polycystic ovarian syndrome                         | --                   | --               | --                | --                 | --                 | --                 |
| Endometriosis                                       | --                   | --               | --                | --                 | --                 | --                 |
| Genital prolapse                                    | --                   | --               | --                | --                 | --                 | --                 |
| Other gynecological diseases                        | --                   | --               | --                | --                 | --                 | --                 |
| Hemoglobinopathies and hemolytic anemias            | 10<br>(6 - 17)       | 0<br>(0 - 1)     | 0<br>(0 - 0)      | 3<br>(2 - 5)       | 3<br>(1 - 4)       | 4<br>(2 - 7)       |
| Thalassemias                                        | 1<br>(1 - 2)         | 0<br>(0 - 0)     | 0<br>(0 - 0)      | 1<br>(0 - 1)       | 0<br>(0 - 0)       | 0<br>(0 - 0)       |
| Sickle cell disorders                               | 1<br>(0 - 1)         | 0<br>(0 - 0)     | 0<br>(0 - 0)      | 0<br>(0 - 1)       | 0<br>(0 - 0)       | 0<br>(0 - 0)       |
| G6PD deficiency                                     | 0<br>(0 - 0)         | 0<br>(0 - 0)     | 0<br>(0 - 0)      | 0<br>(0 - 0)       | 0<br>(0 - 0)       | 0<br>(0 - 0)       |
| Other hemoglobinopathies and hemolytic anemias      | 8<br>(5 - 13)        | 0<br>(0 - 0)     | 0<br>(0 - 0)      | 2<br>(1 - 3)       | 2<br>(1 - 4)       | 4<br>(2 - 7)       |
| Endocrine, metabolic, blood, and immune disorders   | 26<br>(19 - 37)      | 1<br>(0 - 1)     | 0<br>(0 - 0)      | 7<br>(5 - 10)      | 10<br>(7 - 15)     | 8<br>(5 - 13)      |
| Musculoskeletal disorders                           | 10<br>(2 - 14)       | --               | 0<br>(0 - 0)      | 2<br>(0 - 3)       | 3<br>(1 - 4)       | 5<br>(1 - 8)       |
| Rheumatoid arthritis                                | 3<br>(1 - 4)         | --               | 0<br>(0 - 0)      | 1<br>(0 - 1)       | 0<br>(0 - 0)       | 2<br>(0 - 3)       |
| Other musculoskeletal disorders                     | 8<br>(2 - 11)        | --               | 0<br>(0 - 0)      | 1<br>(0 - 2)       | 3<br>(1 - 4)       | 3<br>(1 - 6)       |
| Other non-communicable diseases                     | 53<br>(39 - 73)      | 30<br>(18 - 47)  | 3<br>(1 - 4)      | 10<br>(8 - 13)     | 6<br>(5 - 7)       | 4<br>(3 - 6)       |
| Congenital anomalies                                | 48<br>(34 - 67)      | 28<br>(17 - 45)  | 3<br>(1 - 4)      | 9<br>(7 - 12)      | 4<br>(3 - 6)       | 3<br>(2 - 4)       |
| Neural tube defects                                 | 1<br>(0 - 2)         | 1<br>(0 - 2)     | 0<br>(0 - 0)      | 0<br>(0 - 0)       | 0<br>(0 - 0)       | 0<br>(0 - 0)       |
| Congenital heart anomalies                          | 29<br>(21 - 40)      | 14<br>(8 - 23)   | 2<br>(1 - 3)      | 7<br>(5 - 10)      | 3<br>(3 - 5)       | 2<br>(1 - 2)       |
| Cleft lip and cleft palate                          | 0<br>(0 - 0)         | 0<br>(0 - 0)     | --                | --                 | --                 | --                 |
| Down syndrome                                       | 3<br>(1 - 4)         | 1<br>(0 - 2)     | 0<br>(0 - 0)      | 1<br>(0 - 1)       | 0<br>(0 - 1)       | 0<br>(0 - 0)       |
| Chromosomal unbalanced rearrangements               | 1<br>(1 - 3)         | 1<br>(0 - 2)     | 0<br>(0 - 0)      | 0<br>(0 - 0)       | 0<br>(0 - 0)       | 0<br>(0 - 0)       |
| Other congenital anomalies                          | 14<br>(8 - 22)       | 11<br>(6 - 20)   | 0<br>(0 - 0)      | 1<br>(0 - 1)       | 1<br>(0 - 1)       | 1<br>(1 - 2)       |
| Skin and subcutaneous diseases                      | 4<br>(2 - 4)         | 0<br>(0 - 0)     | 0<br>(0 - 0)      | 1<br>(1 - 1)       | 1<br>(1 - 2)       | 1<br>(1 - 2)       |
| Cellulitis                                          | 1<br>(0 - 1)         | 0<br>(0 - 0)     | 0<br>(0 - 0)      | 0<br>(0 - 0)       | 0<br>(0 - 0)       | 0<br>(0 - 1)       |
| Pyoderma                                            | 2<br>(1 - 2)         | 0<br>(0 - 0)     | 0<br>(0 - 0)      | 0<br>(0 - 1)       | 1<br>(0 - 1)       | 0<br>(0 - 1)       |
| Decubitus ulcer                                     | 1<br>(0 - 1)         | 0<br>(0 - 0)     | 0<br>(0 - 0)      | 0<br>(0 - 0)       | 0<br>(0 - 0)       | 0<br>(0 - 1)       |
| Other skin and subcutaneous diseases                | 0<br>(0 - 0)         | 0<br>(0 - 0)     | 0<br>(0 - 0)      | 0<br>(0 - 0)       | 0<br>(0 - 0)       | 0<br>(0 - 0)       |
| Sudden infant death syndrome                        | 2<br>(0 - 5)         | 2<br>(0 - 5)     | --                | --                 | --                 | --                 |
| Injuries                                            | 902<br>(758 - 1,023) | 4<br>(2 - 7)     | 12<br>(8 - 17)    | 374<br>(317 - 474) | 268<br>(198 - 320) | 244<br>(168 - 301) |
| Transport injuries                                  | 160<br>(134 - 181)   | 1<br>(0 - 1)     | 2<br>(1 - 3)      | 77<br>(60 - 93)    | 40<br>(33 - 47)    | 40<br>(32 - 49)    |

Web Table 31- Bosnia and Herzegovina deaths with 95% UI by age, sex, and cause in 2013

| Cause                                           | Males, All Ages    | Males, 0-4 Years | Males, 5-14 Years | Males, 15-49 Years | Males, 50-69 Years | Males, 70-80 Years |
|-------------------------------------------------|--------------------|------------------|-------------------|--------------------|--------------------|--------------------|
| Road injuries                                   | 131<br>(82 - 173)  | 0<br>(0 - 1)     | 2<br>(1 - 3)      | 63<br>(35 - 88)    | 34<br>(22 - 44)    | 32<br>(19 - 46)    |
| Pedestrian road injuries                        | 49<br>(23 - 71)    | 0<br>(0 - 0)     | 1<br>(0 - 1)      | 11<br>(4 - 18)     | 16<br>(8 - 23)     | 22<br>(11 - 32)    |
| Cyclist road injuries                           | 11<br>(5 - 16)     | 0<br>(0 - 0)     | 0<br>(0 - 0)      | 3<br>(1 - 5)       | 3<br>(1 - 5)       | 4<br>(1 - 6)       |
| Motorcyclist road injuries                      | 23<br>(9 - 34)     | 0<br>(0 - 0)     | 0<br>(0 - 0)      | 17<br>(6 - 27)     | 4<br>(2 - 6)       | 1<br>(0 - 3)       |
| Motor vehicle road injuries                     | 48<br>(22 - 67)    | 0<br>(0 - 0)     | 0<br>(0 - 1)      | 31<br>(14 - 45)    | 11<br>(5 - 16)     | 6<br>(2 - 10)      |
| Other road injuries                             | 1<br>(0 - 2)       | 0<br>(0 - 0)     | 0<br>(0 - 0)      | 0<br>(0 - 1)       | 0<br>(0 - 0)       | 0<br>(0 - 1)       |
| Other transport injuries                        | 28<br>(4 - 74)     | 0<br>(0 - 0)     | 0<br>(0 - 1)      | 14<br>(2 - 38)     | 6<br>(1 - 18)      | 7<br>(1 - 21)      |
| Unintentional injuries                          | 288<br>(229 - 427) | 3<br>(2 - 6)     | 6<br>(3 - 10)     | 106<br>(80 - 205)  | 81<br>(64 - 114)   | 91<br>(60 - 120)   |
| Falls                                           | 41<br>(1 - 60)     | 0<br>(0 - 1)     | 1<br>(0 - 1)      | 10<br>(0 - 16)     | 12<br>(0 - 21)     | 17<br>(0 - 29)     |
| Drowning                                        | 15<br>(0 - 34)     | 1<br>(0 - 2)     | 2<br>(0 - 4)      | 5<br>(0 - 12)      | 5<br>(0 - 11)      | 3<br>(0 - 8)       |
| Fire, heat, and hot substances                  | 13<br>(2 - 25)     | 0<br>(0 - 0)     | 0<br>(0 - 1)      | 4<br>(0 - 8)       | 3<br>(0 - 7)       | 6<br>(1 - 12)      |
| Poisonings                                      | 52<br>(21 - 236)   | 0<br>(0 - 1)     | 1<br>(0 - 4)      | 28<br>(10 - 128)   | 13<br>(5 - 59)     | 10<br>(4 - 46)     |
| Exposure to mechanical forces                   | 40<br>(14 - 49)    | 0<br>(0 - 1)     | 1<br>(0 - 1)      | 21<br>(8 - 27)     | 12<br>(4 - 16)     | 6<br>(1 - 9)       |
| Unintentional firearm injuries                  | 17<br>(0 - 22)     | 0<br>(0 - 0)     | 0<br>(0 - 1)      | 7<br>(0 - 10)      | 5<br>(0 - 8)       | 4<br>(0 - 7)       |
| Unintentional suffocation                       | 3<br>(2 - 5)       | 0<br>(0 - 1)     | 0<br>(0 - 1)      | 1<br>(0 - 2)       | 1<br>(1 - 2)       | 1<br>(0 - 1)       |
| Other exposure to mechanical forces             | 20<br>(7 - 25)     | 0<br>(0 - 0)     | 0<br>(0 - 1)      | 13<br>(5 - 17)     | 5<br>(2 - 7)       | 2<br>(0 - 2)       |
| Adverse effects of medical treatment            | 82<br>(60 - 128)   | 1<br>(1 - 3)     | 1<br>(1 - 2)      | 30<br>(15 - 60)    | 20<br>(13 - 35)    | 30<br>(14 - 47)    |
| Animal contact                                  | 5<br>(3 - 6)       | 0<br>(0 - 0)     | 0<br>(0 - 0)      | 1<br>(1 - 1)       | 1<br>(0 - 1)       | 3<br>(2 - 4)       |
| Venomous animal contact                         | 3<br>(2 - 4)       | 0<br>(0 - 0)     | 0<br>(0 - 0)      | 1<br>(0 - 1)       | 0<br>(0 - 1)       | 2<br>(1 - 3)       |
| Non-venomous animal contact                     | 2<br>(1 - 3)       | 0<br>(0 - 0)     | 0<br>(0 - 0)      | 0<br>(0 - 1)       | 0<br>(0 - 0)       | 1<br>(1 - 2)       |
| Foreign body                                    | 7<br>(5 - 12)      | 0<br>(0 - 0)     | 0<br>(0 - 1)      | 1<br>(0 - 1)       | 3<br>(2 - 6)       | 3<br>(2 - 5)       |
| Pulmonary aspiration and foreign body in airway | 7<br>(4 - 11)      | 0<br>(0 - 0)     | 0<br>(0 - 1)      | 1<br>(0 - 1)       | 3<br>(2 - 5)       | 3<br>(2 - 4)       |
| Foreign body in other body part                 | 1<br>(0 - 1)       | 0<br>(0 - 0)     | 0<br>(0 - 0)      | 0<br>(0 - 0)       | 0<br>(0 - 1)       | 0<br>(0 - 0)       |
| Other unintentional injuries                    | 33<br>(27 - 39)    | 0<br>(0 - 0)     | 0<br>(0 - 1)      | 7<br>(5 - 9)       | 12<br>(9 - 16)     | 13<br>(10 - 18)    |
| Self-harm and interpersonal violence            | 454<br>(290 - 551) | 0<br>(0 - 1)     | 4<br>(2 - 7)      | 191<br>(132 - 245) | 147<br>(70 - 195)  | 112<br>(52 - 158)  |
| Self-harm                                       | 387<br>(286 - 487) | --               | 3<br>(1 - 6)      | 151<br>(115 - 242) | 128<br>(68 - 169)  | 104<br>(51 - 147)  |
| Interpersonal violence                          | 67<br>(3 - 111)    | 0<br>(0 - 1)     | 0<br>(0 - 1)      | 39<br>(2 - 68)     | 18<br>(1 - 34)     | 9<br>(0 - 18)      |
| Assault by firearm                              | 33<br>(1 - 60)     | 0<br>(0 - 0)     | 0<br>(0 - 0)      | 20<br>(1 - 37)     | 9<br>(0 - 19)      | 4<br>(0 - 9)       |
| Assault by sharp object                         | 24<br>(1 - 45)     | 0<br>(0 - 0)     | 0<br>(0 - 0)      | 13<br>(0 - 25)     | 9<br>(0 - 19)      | 2<br>(0 - 5)       |
| Assault by other means                          | 10<br>(0 - 20)     | 0<br>(0 - 0)     | 0<br>(0 - 0)      | 7<br>(0 - 14)      | 0<br>(0 - 1)       | 2<br>(0 - 6)       |

Web Table 31- Bosnia and Herzegovina deaths with 95% UI by age, sex, and cause in 2013

| Cause                                                             | Females, All Ages           | Females, 0-4 Years | Females, 5-14 Years | Females, 15-49 Years | Females, 50-69 Years     | Females, 70-80 Years        |
|-------------------------------------------------------------------|-----------------------------|--------------------|---------------------|----------------------|--------------------------|-----------------------------|
| All causes                                                        | 16,547<br>(15,250 - 17,894) | 80<br>(53 - 116)   | 23<br>(19 - 29)     | 698<br>(636 - 761)   | 3,145<br>(2,820 - 3,528) | 12,601<br>(11,686 - 13,507) |
| Communicable, maternal, neonatal, and nutritional diseases        | 346<br>(277 - 491)          | 49<br>(30 - 72)    | 2<br>(2 - 3)        | 22<br>(19 - 26)      | 46<br>(37 - 59)          | 227<br>(168 - 363)          |
| HIV/AIDS and tuberculosis                                         | 45<br>(34 - 56)             | 0<br>(0 - 0)       | 0<br>(0 - 0)        | 2<br>(2 - 3)         | 8<br>(6 - 10)            | 35<br>(25 - 45)             |
| Tuberculosis                                                      | 44<br>(34 - 56)             | 0<br>(0 - 0)       | 0<br>(0 - 0)        | 2<br>(1 - 2)         | 8<br>(6 - 10)            | 35<br>(25 - 45)             |
| HIV/AIDS                                                          | 0<br>(0 - 0)                | 0<br>(0 - 0)       | 0<br>(0 - 0)        | 0<br>(0 - 0)         | 0<br>(0 - 0)             | 0<br>(0 - 0)                |
| HIV/AIDS resulting in mycobacterial infection                     | 0<br>(0 - 0)                | 0<br>(0 - 0)       | 0<br>(0 - 0)        | 0<br>(0 - 0)         | 0<br>(0 - 0)             | 0<br>(0 - 0)                |
| HIV/AIDS resulting in other diseases                              | 0<br>(0 - 0)                | 0<br>(0 - 0)       | 0<br>(0 - 0)        | 0<br>(0 - 0)         | 0<br>(0 - 0)             | 0<br>(0 - 0)                |
| Diarrhea, lower respiratory, and other common infectious diseases | 202<br>(142 - 349)          | 5<br>(3 - 9)       | 2<br>(1 - 3)        | 11<br>(9 - 15)       | 27<br>(20 - 37)          | 157<br>(102 - 299)          |
| Diarrheal diseases                                                | 2<br>(1 - 3)                | 1<br>(0 - 2)       | 0<br>(0 - 0)        | 0<br>(0 - 0)         | 0<br>(0 - 0)             | 0<br>(0 - 0)                |
| Intestinal infectious diseases                                    | 3<br>(1 - 6)                | 0<br>(0 - 1)       | 0<br>(0 - 1)        | 1<br>(0 - 3)         | 1<br>(0 - 2)             | 1<br>(0 - 1)                |
| Typhoid fever                                                     | 2<br>(1 - 4)                | 0<br>(0 - 1)       | 0<br>(0 - 1)        | 1<br>(0 - 2)         | 0<br>(0 - 1)             | 0<br>(0 - 1)                |
| Paratyphoid fever                                                 | 1<br>(0 - 1)                | 0<br>(0 - 0)       | 0<br>(0 - 0)        | 0<br>(0 - 1)         | 0<br>(0 - 0)             | 0<br>(0 - 0)                |
| Other intestinal infectious diseases                              | 0<br>(0 - 2)                | 0<br>(0 - 0)       | 0<br>(0 - 0)        | 0<br>(0 - 0)         | 0<br>(0 - 0)             | 0<br>(0 - 1)                |
| Lower respiratory infections                                      | 182<br>(123 - 328)          | 3<br>(1 - 5)       | 1<br>(1 - 1)        | 7<br>(5 - 10)        | 22<br>(15 - 31)          | 150<br>(95 - 291)           |
| Upper respiratory infections                                      | 1<br>(0 - 2)                | 0<br>(0 - 0)       | 0<br>(0 - 0)        | 0<br>(0 - 0)         | 0<br>(0 - 0)             | 0<br>(0 - 2)                |
| Otitis media                                                      | 0<br>(0 - 0)                | 0<br>(0 - 0)       | 0<br>(0 - 0)        | 0<br>(0 - 0)         | 0<br>(0 - 0)             | 0<br>(0 - 0)                |
| Meningitis                                                        | 5<br>(4 - 7)                | 1<br>(0 - 1)       | 0<br>(0 - 0)        | 1<br>(1 - 1)         | 1<br>(1 - 1)             | 2<br>(1 - 3)                |
| Pneumococcal meningitis                                           | 1<br>(1 - 2)                | 0<br>(0 - 0)       | 0<br>(0 - 0)        | 0<br>(0 - 0)         | 0<br>(0 - 0)             | 1<br>(0 - 1)                |
| H influenzae type B meningitis                                    | 1<br>(0 - 1)                | 0<br>(0 - 0)       | 0<br>(0 - 0)        | 0<br>(0 - 0)         | 0<br>(0 - 0)             | 0<br>(0 - 0)                |
| Meningococcal meningitis                                          | 1<br>(1 - 2)                | 0<br>(0 - 0)       | 0<br>(0 - 0)        | 0<br>(0 - 0)         | 0<br>(0 - 0)             | 1<br>(0 - 1)                |
| Other meningitis                                                  | 2<br>(1 - 3)                | 0<br>(0 - 0)       | 0<br>(0 - 0)        | 0<br>(0 - 1)         | 0<br>(0 - 1)             | 1<br>(1 - 2)                |
| Encephalitis                                                      | 8<br>(5 - 13)               | 0<br>(0 - 1)       | 0<br>(0 - 0)        | 2<br>(1 - 3)         | 3<br>(2 - 5)             | 3<br>(2 - 5)                |
| Diphtheria                                                        | 0<br>(0 - 0)                | 0<br>(0 - 0)       | 0<br>(0 - 0)        | 0<br>(0 - 0)         | 0<br>(0 - 0)             | --                          |
| Whooping cough                                                    | 0<br>(0 - 0)                | 0<br>(0 - 0)       | 0<br>(0 - 0)        | 0<br>(0 - 0)         | 0<br>(0 - 0)             | --                          |
| Tetanus                                                           | 0<br>(0 - 0)                | 0<br>(0 - 0)       | 0<br>(0 - 0)        | 0<br>(0 - 0)         | 0<br>(0 - 0)             | 0<br>(0 - 0)                |
| Measles                                                           | 0<br>(0 - 0)                | 0<br>(0 - 0)       | 0<br>(0 - 0)        | 0<br>(0 - 0)         | 0<br>(0 - 0)             | --                          |
| Varicella and herpes zoster                                       | 2<br>(0 - 6)                | 0<br>(0 - 0)       | 0<br>(0 - 0)        | 0<br>(0 - 1)         | 0<br>(0 - 1)             | 1<br>(0 - 5)                |
| Neglected tropical diseases and malaria                           | 2<br>(2 - 3)                | 0<br>(0 - 0)       | 0<br>(0 - 0)        | 1<br>(1 - 1)         | 1<br>(1 - 1)             | 1<br>(1 - 1)                |
| Leishmaniasis                                                     | 0<br>(0 - 0)                | 0<br>(0 - 0)       | 0<br>(0 - 0)        | 0<br>(0 - 0)         | 0<br>(0 - 0)             | 0<br>(0 - 0)                |
| Visceral leishmaniasis                                            | 0<br>(0 - 0)                | 0<br>(0 - 0)       | 0<br>(0 - 0)        | 0<br>(0 - 0)         | 0<br>(0 - 0)             | 0<br>(0 - 0)                |
| Cysticercosis                                                     | 0<br>(0 - 0)                | 0<br>(0 - 0)       | 0<br>(0 - 0)        | 0<br>(0 - 0)         | 0<br>(0 - 0)             | 0<br>(0 - 0)                |
| Cystic echinococcosis                                             | 1<br>(1 - 1)                | 0<br>(0 - 0)       | 0<br>(0 - 0)        | 0<br>(0 - 0)         | 0<br>(0 - 0)             | 1<br>(1 - 1)                |
| Dengue                                                            | 0<br>(0 - 1)                | 0<br>(0 - 0)       | 0<br>(0 - 0)        | 0<br>(0 - 0)         | 0<br>(0 - 0)             | 0<br>(0 - 0)                |
| Rabies                                                            | 0<br>(0 - 0)                | 0<br>(0 - 0)       | 0<br>(0 - 0)        | 0<br>(0 - 0)         | 0<br>(0 - 0)             | 0<br>(0 - 0)                |
| Other neglected tropical diseases                                 | 0<br>(0 - 0)                | 0<br>(0 - 0)       | 0<br>(0 - 0)        | 0<br>(0 - 0)         | 0<br>(0 - 0)             | 0<br>(0 - 0)                |
| Maternal disorders                                                | 4<br>(3 - 5)                | --                 | 0<br>(0 - 0)        | 4<br>(3 - 5)         | --                       | --                          |
| Maternal hemorrhage                                               | 1<br>(0 - 1)                | --                 | 0<br>(0 - 0)        | 0<br>(0 - 1)         | --                       | --                          |
| Maternal sepsis and other maternal infections                     | 0<br>(0 - 1)                | --                 | 0<br>(0 - 0)        | 0<br>(0 - 1)         | --                       | --                          |
| Maternal hypertensive disorders                                   | 0<br>(0 - 1)                | --                 | 0<br>(0 - 0)        | 0<br>(0 - 1)         | --                       | --                          |
| Maternal obstructed labor                                         | 0<br>(0 - 1)                | --                 | 0<br>(0 - 0)        | 0<br>(0 - 1)         | --                       | --                          |

Web Table 31- Bosnia and Herzegovina deaths with 95% UI by age, sex, and cause in 2013

| Cause                                                            | Females, All Ages           | Females, 0-4 Years | Females, 5-14 Years | Females, 15-49 Years | Females, 50-69 Years     | Females, 70-80 Years        |
|------------------------------------------------------------------|-----------------------------|--------------------|---------------------|----------------------|--------------------------|-----------------------------|
| Maternal abortive outcome                                        | 1<br>(1 - 1)                | --                 | 0<br>(0 - 0)        | 1<br>(1 - 1)         | --                       | --                          |
| Indirect maternal deaths                                         | 0<br>(0 - 1)                | --                 | 0<br>(0 - 0)        | 0<br>(0 - 1)         | --                       | --                          |
| Late maternal deaths                                             | 0<br>(0 - 1)                | --                 | 0<br>(0 - 0)        | 0<br>(0 - 1)         | --                       | --                          |
| Maternal deaths aggravated by HIV/AIDS                           | 0<br>(0 - 0)                | --                 | --                  | 0<br>(0 - 0)         | --                       | --                          |
| Other maternal disorders                                         | 1<br>(0 - 1)                | --                 | 0<br>(0 - 0)        | 1<br>(0 - 1)         | --                       | --                          |
| Neonatal disorders                                               | 42<br>(26 - 62)             | 42<br>(26 - 62)    | --                  | --                   | --                       | --                          |
| Neonatal preterm birth complications                             | 27<br>(15 - 44)             | 27<br>(15 - 44)    | --                  | --                   | --                       | --                          |
| Neonatal encephalopathy due to birth asphyxia and trauma         | 7<br>(3 - 14)               | 7<br>(3 - 14)      | --                  | --                   | --                       | --                          |
| Neonatal sepsis and other neonatal infections                    | 1<br>(0 - 3)                | 1<br>(0 - 3)       | --                  | --                   | --                       | --                          |
| Hemolytic disease and other neonatal jaundice                    | 0<br>(0 - 0)                | 0<br>(0 - 0)       | --                  | --                   | --                       | --                          |
| Other neonatal disorders                                         | 6<br>(3 - 12)               | 6<br>(3 - 12)      | --                  | --                   | --                       | --                          |
| Nutritional deficiencies                                         | 34<br>(25 - 46)             | 0<br>(0 - 0)       | 0<br>(0 - 0)        | 3<br>(2 - 4)         | 5<br>(4 - 8)             | 25<br>(17 - 36)             |
| Protein-energy malnutrition                                      | 1<br>(0 - 2)                | 0<br>(0 - 0)       | 0<br>(0 - 0)        | 0<br>(0 - 0)         | 0<br>(0 - 0)             | 0<br>(0 - 1)                |
| Iodine deficiency                                                | 0<br>(0 - 2)                | 0<br>(0 - 0)       | 0<br>(0 - 0)        | 0<br>(0 - 0)         | 0<br>(0 - 1)             | 0<br>(0 - 2)                |
| Iron-deficiency anemia                                           | 32<br>(23 - 43)             | 0<br>(0 - 0)       | 0<br>(0 - 0)        | 3<br>(2 - 3)         | 5<br>(3 - 7)             | 25<br>(17 - 35)             |
| Other nutritional deficiencies                                   | 1<br>(0 - 2)                | 0<br>(0 - 0)       | 0<br>(0 - 0)        | 0<br>(0 - 0)         | 0<br>(0 - 1)             | 0<br>(0 - 0)                |
| Other communicable, maternal, neonatal, and nutritional diseases | 17<br>(11 - 30)             | 2<br>(0 - 3)       | 0<br>(0 - 0)        | 1<br>(1 - 2)         | 6<br>(3 - 12)            | 9<br>(4 - 19)               |
| Sexually transmitted diseases excluding HIV                      | 2<br>(1 - 4)                | 2<br>(0 - 3)       | 0<br>(0 - 0)        | 0<br>(0 - 0)         | 0<br>(0 - 0)             | 0<br>(0 - 0)                |
| Syphilis                                                         | 2<br>(0 - 4)                | 2<br>(0 - 3)       | 0<br>(0 - 0)        | 0<br>(0 - 0)         | 0<br>(0 - 0)             | 0<br>(0 - 0)                |
| Chlamydial infection                                             | 0<br>(0 - 0)                | --                 | 0<br>(0 - 0)        | 0<br>(0 - 0)         | 0<br>(0 - 0)             | 0<br>(0 - 0)                |
| Gonococcal infection                                             | 0<br>(0 - 0)                | --                 | 0<br>(0 - 0)        | 0<br>(0 - 0)         | 0<br>(0 - 0)             | 0<br>(0 - 0)                |
| Other sexually transmitted diseases                              | 0<br>(0 - 0)                | --                 | 0<br>(0 - 0)        | 0<br>(0 - 0)         | 0<br>(0 - 0)             | 0<br>(0 - 0)                |
| Hepatitis                                                        | 3<br>(2 - 3)                | 0<br>(0 - 0)       | 0<br>(0 - 0)        | 1<br>(0 - 1)         | 1<br>(1 - 1)             | 1<br>(1 - 1)                |
| Acute hepatitis A                                                | 1<br>(0 - 1)                | 0<br>(0 - 0)       | 0<br>(0 - 0)        | 0<br>(0 - 0)         | 0<br>(0 - 0)             | 0<br>(0 - 0)                |
| Acute hepatitis B                                                | 2<br>(1 - 3)                | 0<br>(0 - 0)       | 0<br>(0 - 0)        | 0<br>(0 - 0)         | 1<br>(1 - 1)             | 1<br>(1 - 1)                |
| Acute hepatitis C                                                | 0<br>(0 - 1)                | --                 | 0<br>(0 - 0)        | 0<br>(0 - 0)         | 0<br>(0 - 0)             | 0<br>(0 - 0)                |
| Other infectious diseases                                        | 13<br>(6 - 25)              | 0<br>(0 - 0)       | 0<br>(0 - 0)        | 0<br>(0 - 1)         | 4<br>(2 - 11)            | 8<br>(3 - 18)               |
| Non-communicable diseases                                        | 15,901<br>(14,619 - 17,237) | 30<br>(19 - 45)    | 15<br>(13 - 19)     | 587<br>(533 - 643)   | 3,027<br>(2,714 - 3,394) | 12,242<br>(11,350 - 13,147) |
| Neoplasms                                                        | 2,987<br>(2,500 - 3,366)    | 3<br>(2 - 4)       | 7<br>(5 - 9)        | 322<br>(282 - 358)   | 1,151<br>(942 - 1,324)   | 1,504<br>(1,249 - 1,710)    |
| Esophageal cancer                                                | 33<br>(27 - 40)             | --                 | --                  | 2<br>(1 - 3)         | 10<br>(7 - 12)           | 21<br>(16 - 27)             |
| Stomach cancer                                                   | 168<br>(118 - 240)          | --                 | --                  | 13<br>(9 - 19)       | 50<br>(34 - 75)          | 105<br>(71 - 154)           |
| Liver cancer                                                     | 134<br>(0 - 182)            | --                 | 0<br>(0 - 0)        | 4<br>(0 - 6)         | 47<br>(0 - 67)           | 83<br>(0 - 120)             |
| Liver cancer due to hepatitis B                                  | 21<br>(0 - 42)              | --                 | 0<br>(0 - 0)        | 1<br>(0 - 2)         | 9<br>(0 - 20)            | 10<br>(0 - 22)              |
| Liver cancer due to hepatitis C                                  | 61<br>(0 - 93)              | --                 | 0<br>(0 - 0)        | 2<br>(0 - 3)         | 21<br>(0 - 33)           | 38<br>(0 - 62)              |
| Liver cancer due to alcohol use                                  | 30<br>(0 - 54)              | --                 | --                  | 0<br>(0 - 1)         | 8<br>(0 - 15)            | 21<br>(0 - 40)              |
| Liver cancer due to other causes                                 | 23<br>(0 - 40)              | --                 | 0<br>(0 - 0)        | 1<br>(0 - 2)         | 9<br>(0 - 15)            | 13<br>(0 - 25)              |
| Larynx cancer                                                    | 17<br>(11 - 28)             | --                 | --                  | 1<br>(1 - 2)         | 6<br>(4 - 11)            | 10<br>(6 - 16)              |
| Tracheal, bronchus and lung cancer                               | 397<br>(320 - 477)          | --                 | --                  | 29<br>(23 - 36)      | 171<br>(132 - 209)       | 197<br>(149 - 249)          |
| Breast cancer                                                    | 464<br>(262 - 547)          | --                 | --                  | 77<br>(60 - 96)      | 205<br>(113 - 252)       | 182<br>(87 - 225)           |
| Cervical cancer                                                  | 139<br>(111 - 171)          | --                 | --                  | 32<br>(21 - 43)      | 65<br>(49 - 82)          | 43<br>(30 - 64)             |

Web Table 31- Bosnia and Herzegovina deaths with 95% UI by age, sex, and cause in 2013

| Cause                                         | Females, All Ages        | Females, 0-4 Years | Females, 5-14 Years | Females, 15-49 Years | Females, 50-69 Years     | Females, 70-80 Years     |
|-----------------------------------------------|--------------------------|--------------------|---------------------|----------------------|--------------------------|--------------------------|
| Uterine cancer                                | 86<br>(36 - 110)         | --                 | --                  | 6<br>(3 - 9)         | 38<br>(17 - 52)          | 41<br>(17 - 56)          |
| Prostate cancer                               | --                       | --                 | --                  | --                   | --                       | --                       |
| Colon and rectum cancer                       | 367<br>(310 - 438)       | --                 | --                  | 25<br>(20 - 30)      | 116<br>(97 - 139)        | 226<br>(183 - 282)       |
| Lip and oral cavity cancer                    | 26<br>(16 - 33)          | --                 | --                  | 2<br>(1 - 3)         | 6<br>(4 - 8)             | 17<br>(10 - 23)          |
| Nasopharynx cancer                            | 6<br>(2 - 10)            | --                 | 0<br>(0 - 0)        | 1<br>(0 - 2)         | 2<br>(1 - 4)             | 3<br>(1 - 5)             |
| Other pharynx cancer                          | 5<br>(4 - 8)             | --                 | --                  | 1<br>(0 - 1)         | 2<br>(1 - 3)             | 3<br>(2 - 4)             |
| Gallbladder and biliary tract cancer          | 124<br>(88 - 239)        | --                 | --                  | 4<br>(3 - 7)         | 39<br>(27 - 67)          | 81<br>(53 - 161)         |
| Pancreatic cancer                             | 197<br>(167 - 235)       | --                 | --                  | 9<br>(7 - 12)        | 75<br>(62 - 91)          | 113<br>(93 - 139)        |
| Malignant skin melanoma                       | 40<br>(31 - 65)          | --                 | --                  | 8<br>(6 - 13)        | 12<br>(8 - 17)           | 19<br>(13 - 33)          |
| Non-melanoma skin cancer                      | 18<br>(11 - 29)          | --                 | --                  | 1<br>(0 - 2)         | 1<br>(1 - 2)             | 16<br>(9 - 26)           |
| Ovarian cancer                                | 164<br>(138 - 194)       | --                 | --                  | 22<br>(18 - 29)      | 81<br>(64 - 100)         | 61<br>(46 - 78)          |
| Testicular cancer                             | --                       | --                 | --                  | --                   | --                       | --                       |
| Kidney cancer                                 | 45<br>(31 - 60)          | 0<br>(0 - 0)       | 0<br>(0 - 0)        | 2<br>(1 - 3)         | 16<br>(11 - 22)          | 27<br>(17 - 40)          |
| Bladder cancer                                | 45<br>(29 - 68)          | --                 | --                  | 1<br>(0 - 1)         | 10<br>(7 - 16)           | 34<br>(22 - 51)          |
| Brain and nervous system cancer               | 157<br>(98 - 190)        | 1<br>(0 - 2)       | 3<br>(2 - 4)        | 32<br>(23 - 39)      | 70<br>(47 - 88)          | 52<br>(23 - 71)          |
| Thyroid cancer                                | 19<br>(9 - 26)           | --                 | 0<br>(0 - 0)        | 1<br>(1 - 2)         | 5<br>(2 - 8)             | 12<br>(6 - 18)           |
| Mesothelioma                                  | 4<br>(2 - 7)             | --                 | --                  | 0<br>(0 - 1)         | 2<br>(1 - 4)             | 2<br>(1 - 3)             |
| Hodgkin lymphoma                              | 9<br>(6 - 12)            | 0<br>(0 - 0)       | 0<br>(0 - 0)        | 3<br>(2 - 4)         | 3<br>(2 - 4)             | 3<br>(2 - 5)             |
| Non-Hodgkin lymphoma                          | 60<br>(13 - 88)          | 0<br>(0 - 1)       | 1<br>(0 - 1)        | 9<br>(2 - 13)        | 25<br>(6 - 39)           | 25<br>(5 - 40)           |
| Multiple myeloma                              | 21<br>(10 - 37)          | --                 | --                  | 2<br>(1 - 3)         | 10<br>(5 - 17)           | 10<br>(5 - 19)           |
| Leukemia                                      | 73<br>(58 - 87)          | 0<br>(0 - 1)       | 2<br>(1 - 3)        | 13<br>(11 - 16)      | 23<br>(18 - 28)          | 35<br>(25 - 43)          |
| Other neoplasms                               | 169<br>(136 - 227)       | 1<br>(0 - 2)       | 1<br>(1 - 2)        | 22<br>(16 - 31)      | 60<br>(45 - 84)          | 85<br>(65 - 117)         |
| Cardiovascular diseases                       | 9,176<br>(8,258 - 9,998) | 1<br>(0 - 1)       | 1<br>(1 - 2)        | 157<br>(131 - 186)   | 1,278<br>(1,112 - 1,519) | 7,739<br>(6,909 - 8,399) |
| Rheumatic heart disease                       | 28<br>(8 - 39)           | 0<br>(0 - 0)       | 0<br>(0 - 0)        | 3<br>(1 - 5)         | 9<br>(4 - 12)            | 16<br>(3 - 24)           |
| Ischemic heart disease                        | 3,220<br>(2,551 - 4,615) | 0<br>(0 - 0)       | 0<br>(0 - 0)        | 57<br>(43 - 84)      | 512<br>(402 - 742)       | 2,651<br>(2,057 - 3,804) |
| Cerebrovascular disease                       | 3,476<br>(2,660 - 4,116) | 0<br>(0 - 1)       | 1<br>(0 - 1)        | 55<br>(41 - 70)      | 458<br>(355 - 555)       | 2,962<br>(2,249 - 3,553) |
| Ischemic stroke                               | 2,751<br>(1,546 - 3,483) | 0<br>(0 - 0)       | 0<br>(0 - 0)        | 21<br>(6 - 33)       | 270<br>(106 - 371)       | 2,460<br>(1,421 - 3,130) |
| Hemorrhagic stroke                            | 725<br>(385 - 1,598)     | 0<br>(0 - 1)       | 1<br>(0 - 1)        | 34<br>(24 - 54)      | 188<br>(114 - 370)       | 502<br>(231 - 1,200)     |
| Hypertensive heart disease                    | 337<br>(59 - 639)        | 0<br>(0 - 0)       | 0<br>(0 - 0)        | 7<br>(3 - 10)        | 34<br>(14 - 55)          | 297<br>(41 - 583)        |
| Cardiomyopathy and myocarditis                | 1,750<br>(950 - 2,505)   | 0<br>(0 - 0)       | 0<br>(0 - 1)        | 21<br>(13 - 29)      | 168<br>(93 - 234)        | 1,560<br>(844 - 2,289)   |
| Atrial fibrillation and flutter               | 47<br>(28 - 74)          | --                 | --                  | 0<br>(0 - 0)         | 4<br>(2 - 6)             | 43<br>(25 - 70)          |
| Aortic aneurysm                               | 41<br>(26 - 64)          | --                 | --                  | 3<br>(2 - 6)         | 13<br>(8 - 21)           | 25<br>(15 - 38)          |
| Peripheral vascular disease                   | 2<br>(1 - 2)             | --                 | --                  | 0<br>(0 - 0)         | 0<br>(0 - 1)             | 1<br>(1 - 2)             |
| Endocarditis                                  | 5<br>(4 - 9)             | 0<br>(0 - 0)       | 0<br>(0 - 0)        | 1<br>(0 - 1)         | 2<br>(1 - 5)             | 2<br>(1 - 4)             |
| Other cardiovascular and circulatory diseases | 268<br>(195 - 357)       | 0<br>(0 - 0)       | 0<br>(0 - 0)        | 10<br>(6 - 14)       | 77<br>(47 - 100)         | 181<br>(128 - 277)       |
| Chronic respiratory diseases                  | 745<br>(592 - 1,190)     | 0<br>(0 - 0)       | 0<br>(0 - 0)        | 10<br>(8 - 14)       | 84<br>(65 - 127)         | 651<br>(508 - 1,067)     |
| Chronic obstructive pulmonary disease         | 644<br>(508 - 1,019)     | 0<br>(0 - 0)       | 0<br>(0 - 0)        | 5<br>(3 - 7)         | 76<br>(59 - 112)         | 562<br>(434 - 919)       |
| Pneumoconiosis                                | 0<br>(0 - 0)             | 0<br>(0 - 0)       | 0<br>(0 - 0)        | 0<br>(0 - 0)         | 0<br>(0 - 0)             | 0<br>(0 - 0)             |
| Silicosis                                     | 0<br>(0 - 0)             | 0<br>(0 - 0)       | 0<br>(0 - 0)        | 0<br>(0 - 0)         | 0<br>(0 - 0)             | 0<br>(0 - 0)             |
| Asbestosis                                    | 0<br>(0 - 0)             | 0<br>(0 - 0)       | 0<br>(0 - 0)        | 0<br>(0 - 0)         | 0<br>(0 - 0)             | 0<br>(0 - 0)             |

Web Table 31- Bosnia and Herzegovina deaths with 95% UI by age, sex, and cause in 2013

| Cause                                               | Females, All Ages        | Females, 0-4 Years | Females, 5-14 Years | Females, 15-49 Years | Females, 50-69 Years | Females, 70-80 Years   |
|-----------------------------------------------------|--------------------------|--------------------|---------------------|----------------------|----------------------|------------------------|
| Coal workers pneumoconiosis                         | 0<br>(0 - 0)             | 0<br>(0 - 0)       | 0<br>(0 - 0)        | 0<br>(0 - 0)         | 0<br>(0 - 0)         | 0<br>(0 - 0)           |
| Other pneumoconiosis                                | 0<br>(0 - 0)             | 0<br>(0 - 0)       | 0<br>(0 - 0)        | 0<br>(0 - 0)         | 0<br>(0 - 0)         | 0<br>(0 - 0)           |
| Asthma                                              | 15<br>(7 - 43)           | 0<br>(0 - 0)       | 0<br>(0 - 0)        | 0<br>(0 - 1)         | 1<br>(1 - 5)         | 13<br>(6 - 36)         |
| Interstitial lung disease and pulmonary sarcoidosis | 68<br>(33 - 134)         | 0<br>(0 - 0)       | 0<br>(0 - 0)        | 2<br>(1 - 4)         | 6<br>(3 - 12)        | 60<br>(27 - 123)       |
| Other chronic respiratory diseases                  | 18<br>(10 - 35)          | 0<br>(0 - 0)       | 0<br>(0 - 0)        | 2<br>(2 - 3)         | 1<br>(0 - 1)         | 15<br>(7 - 31)         |
| Cirrhosis                                           | 123<br>(101 - 147)       | 0<br>(0 - 0)       | 0<br>(0 - 0)        | 10<br>(8 - 13)       | 46<br>(37 - 58)      | 66<br>(52 - 85)        |
| Cirrhosis due to hepatitis B                        | 49<br>(31 - 69)          | 0<br>(0 - 0)       | 0<br>(0 - 0)        | 4<br>(2 - 6)         | 18<br>(10 - 26)      | 28<br>(17 - 41)        |
| Cirrhosis due to hepatitis C                        | 36<br>(19 - 54)          | 0<br>(0 - 0)       | 0<br>(0 - 0)        | 3<br>(1 - 4)         | 15<br>(7 - 22)       | 18<br>(9 - 30)         |
| Cirrhosis due to alcohol use                        | 17<br>(9 - 29)           | --                 | --                  | 1<br>(0 - 1)         | 5<br>(3 - 9)         | 11<br>(5 - 19)         |
| Cirrhosis due to other causes                       | 20<br>(12 - 31)          | 0<br>(0 - 0)       | 0<br>(0 - 0)        | 3<br>(2 - 4)         | 8<br>(5 - 14)        | 9<br>(4 - 14)          |
| Digestive diseases                                  | 242<br>(185 - 395)       | 0<br>(0 - 0)       | 0<br>(0 - 1)        | 10<br>(7 - 13)       | 48<br>(34 - 82)      | 183<br>(136 - 301)     |
| Peptic ulcer disease                                | 60<br>(35 - 120)         | 0<br>(0 - 0)       | 0<br>(0 - 0)        | 1<br>(1 - 2)         | 13<br>(7 - 28)       | 46<br>(25 - 91)        |
| Gastritis and duodenitis                            | 2<br>(1 - 5)             | 0<br>(0 - 0)       | 0<br>(0 - 0)        | 0<br>(0 - 0)         | 0<br>(0 - 2)         | 1<br>(0 - 3)           |
| Appendicitis                                        | 3<br>(1 - 9)             | 0<br>(0 - 0)       | 0<br>(0 - 0)        | 0<br>(0 - 1)         | 1<br>(0 - 2)         | 2<br>(1 - 6)           |
| Paralytic ileus and intestinal obstruction          | 59<br>(29 - 97)          | 0<br>(0 - 0)       | 0<br>(0 - 0)        | 3<br>(2 - 5)         | 13<br>(7 - 24)       | 42<br>(20 - 69)        |
| Inguinal, femoral, and abdominal hernia             | 8<br>(4 - 20)            | 0<br>(0 - 0)       | 0<br>(0 - 0)        | 0<br>(0 - 1)         | 2<br>(1 - 5)         | 6<br>(2 - 15)          |
| Inflammatory bowel disease                          | 6<br>(3 - 12)            | 0<br>(0 - 0)       | 0<br>(0 - 0)        | 1<br>(0 - 1)         | 1<br>(1 - 2)         | 4<br>(2 - 8)           |
| Vascular intestinal disorders                       | 24<br>(12 - 61)          | 0<br>(0 - 0)       | 0<br>(0 - 0)        | 0<br>(0 - 0)         | 2<br>(1 - 5)         | 23<br>(11 - 55)        |
| Gallbladder and biliary diseases                    | 29<br>(19 - 44)          | 0<br>(0 - 0)       | 0<br>(0 - 0)        | 1<br>(0 - 1)         | 8<br>(4 - 12)        | 21<br>(12 - 33)        |
| Pancreatitis                                        | 37<br>(22 - 72)          | 0<br>(0 - 0)       | 0<br>(0 - 0)        | 2<br>(1 - 3)         | 5<br>(3 - 8)         | 31<br>(17 - 63)        |
| Other digestive diseases                            | 13<br>(8 - 20)           | 0<br>(0 - 0)       | 0<br>(0 - 0)        | 1<br>(1 - 2)         | 3<br>(2 - 5)         | 8<br>(4 - 14)          |
| Neurological disorders                              | 1,059<br>(843 - 1,442)   | 1<br>(0 - 1)       | 2<br>(1 - 3)        | 17<br>(13 - 25)      | 67<br>(50 - 89)      | 974<br>(762 - 1,345)   |
| Alzheimer disease and other dementias               | 923<br>(716 - 1,240)     | --                 | --                  | 0<br>(0 - 0)         | 44<br>(31 - 58)      | 879<br>(674 - 1,190)   |
| Parkinson disease                                   | 97<br>(64 - 187)         | --                 | --                  | 0<br>(0 - 0)         | 12<br>(7 - 29)       | 85<br>(54 - 158)       |
| Epilepsy                                            | 23<br>(16 - 31)          | 1<br>(0 - 1)       | 2<br>(1 - 3)        | 10<br>(7 - 14)       | 5<br>(3 - 8)         | 5<br>(3 - 8)           |
| Multiple sclerosis                                  | 15<br>(9 - 33)           | --                 | --                  | 6<br>(3 - 14)        | 5<br>(3 - 9)         | 3<br>(2 - 10)          |
| Other neurological disorders                        | 3<br>(2 - 3)             | 0<br>(0 - 0)       | 0<br>(0 - 0)        | 1<br>(0 - 1)         | 1<br>(1 - 1)         | 1<br>(1 - 1)           |
| Mental and substance use disorders                  | 30<br>(20 - 57)          | 0<br>(0 - 0)       | 0<br>(0 - 0)        | 6<br>(5 - 11)        | 12<br>(7 - 25)       | 12<br>(7 - 22)         |
| Schizophrenia                                       | 7<br>(2 - 11)            | --                 | --                  | 1<br>(0 - 1)         | 2<br>(1 - 4)         | 4<br>(1 - 7)           |
| Alcohol use disorders                               | 18<br>(10 - 46)          | --                 | --                  | 3<br>(2 - 8)         | 8<br>(4 - 22)        | 7<br>(3 - 17)          |
| Drug use disorders                                  | 5<br>(4 - 8)             | 0<br>(0 - 0)       | --                  | 3<br>(2 - 4)         | 1<br>(1 - 2)         | 1<br>(1 - 2)           |
| Opioid use disorders                                | 2<br>(1 - 3)             | 0<br>(0 - 0)       | --                  | 1<br>(1 - 1)         | 0<br>(0 - 1)         | 0<br>(0 - 1)           |
| Cocaine use disorders                               | 0<br>(0 - 1)             | 0<br>(0 - 0)       | --                  | 0<br>(0 - 0)         | 0<br>(0 - 0)         | 0<br>(0 - 0)           |
| Amphetamine use disorders                           | 0<br>(0 - 1)             | 0<br>(0 - 0)       | --                  | 0<br>(0 - 0)         | 0<br>(0 - 0)         | 0<br>(0 - 0)           |
| Other drug use disorders                            | 3<br>(2 - 4)             | 0<br>(0 - 0)       | --                  | 1<br>(1 - 2)         | 1<br>(0 - 1)         | 1<br>(0 - 1)           |
| Eating disorders                                    | 0<br>(0 - 0)             | --                 | 0<br>(0 - 0)        | 0<br>(0 - 0)         | --                   | --                     |
| Anorexia nervosa                                    | 0<br>(0 - 0)             | --                 | 0<br>(0 - 0)        | 0<br>(0 - 0)         | --                   | --                     |
| Diabetes, urogenital, blood, and endocrine diseases | 1,471<br>(1,175 - 1,712) | 1<br>(0 - 1)       | 1<br>(1 - 2)        | 44<br>(36 - 56)      | 330<br>(270 - 392)   | 1,095<br>(813 - 1,293) |
| Diabetes mellitus                                   | 1,144<br>(765 - 1,344)   | 0<br>(0 - 0)       | 0<br>(0 - 0)        | 21<br>(17 - 26)      | 237<br>(173 - 291)   | 885<br>(560 - 1,064)   |
| Acute glomerulonephritis                            | 0<br>(0 - 1)             | 0<br>(0 - 0)       | 0<br>(0 - 0)        | 0<br>(0 - 0)         | 0<br>(0 - 0)         | 0<br>(0 - 0)           |

Web Table 31- Bosnia and Herzegovina deaths with 95% UI by age, sex, and cause in 2013

| Cause                                               | Females, All Ages  | Females, 0-4 Years | Females, 5-14 Years | Females, 15-49 Years | Females, 50-69 Years | Females, 70-80 Years |
|-----------------------------------------------------|--------------------|--------------------|---------------------|----------------------|----------------------|----------------------|
| Chronic kidney disease                              | 248<br>(202 - 313) | 0<br>(0 - 0)       | 0<br>(0 - 1)        | 15<br>(12 - 23)      | 67<br>(51 - 94)      | 165<br>(123 - 214)   |
| Chronic kidney disease due to diabetes mellitus     | 1<br>(1 - 1)       | 0<br>(0 - 0)       | 0<br>(0 - 0)        | 0<br>(0 - 0)         | 0<br>(0 - 0)         | 0<br>(0 - 0)         |
| Chronic kidney disease due to hypertension          | 58<br>(35 - 89)    | 0<br>(0 - 0)       | 0<br>(0 - 0)        | 3<br>(2 - 6)         | 11<br>(6 - 18)       | 44<br>(25 - 68)      |
| Chronic kidney disease due to glomerulonephritis    | 4<br>(3 - 7)       | 0<br>(0 - 0)       | 0<br>(0 - 0)        | 0<br>(0 - 1)         | 1<br>(1 - 1)         | 3<br>(2 - 5)         |
| Chronic kidney disease due to other causes          | 185<br>(134 - 248) | 0<br>(0 - 0)       | 0<br>(0 - 1)        | 11<br>(8 - 17)       | 56<br>(39 - 82)      | 118<br>(76 - 161)    |
| Urinary diseases and male infertility               | 37<br>(12 - 115)   | 0<br>(0 - 0)       | 0<br>(0 - 0)        | 2<br>(1 - 5)         | 8<br>(3 - 25)        | 27<br>(8 - 88)       |
| Interstitial nephritis and urinary tract infections | 33<br>(9 - 109)    | 0<br>(0 - 0)       | 0<br>(0 - 0)        | 1<br>(0 - 4)         | 8<br>(2 - 24)        | 24<br>(6 - 84)       |
| Urolithiasis                                        | 1<br>(0 - 2)       | --                 | 0<br>(0 - 0)        | 0<br>(0 - 0)         | 0<br>(0 - 1)         | 0<br>(0 - 1)         |
| Other urinary diseases                              | 4<br>(1 - 7)       | 0<br>(0 - 0)       | 0<br>(0 - 0)        | 0<br>(0 - 0)         | 1<br>(0 - 1)         | 3<br>(0 - 5)         |
| Gynecological diseases                              | 1<br>(1 - 1)       | --                 | --                  | 0<br>(0 - 0)         | 0<br>(0 - 0)         | 1<br>(0 - 1)         |
| Uterine fibroids                                    | 0<br>(0 - 0)       | --                 | --                  | 0<br>(0 - 0)         | 0<br>(0 - 0)         | 0<br>(0 - 0)         |
| Polycystic ovarian syndrome                         | 0<br>(0 - 0)       | --                 | --                  | 0<br>(0 - 0)         | 0<br>(0 - 0)         | --                   |
| Endometriosis                                       | 0<br>(0 - 0)       | --                 | --                  | 0<br>(0 - 0)         | 0<br>(0 - 0)         | --                   |
| Genital prolapse                                    | 0<br>(0 - 0)       | --                 | --                  | 0<br>(0 - 0)         | 0<br>(0 - 0)         | 0<br>(0 - 0)         |
| Other gynecological diseases                        | 0<br>(0 - 1)       | --                 | --                  | 0<br>(0 - 0)         | 0<br>(0 - 0)         | 0<br>(0 - 0)         |
| Hemoglobinopathies and hemolytic anemias            | 8<br>(5 - 13)      | 0<br>(0 - 1)       | 0<br>(0 - 1)        | 1<br>(1 - 2)         | 5<br>(3 - 9)         | 1<br>(1 - 3)         |
| Thalassemias                                        | 1<br>(0 - 1)       | 0<br>(0 - 0)       | 0<br>(0 - 0)        | 0<br>(0 - 1)         | 0<br>(0 - 0)         | 0<br>(0 - 0)         |
| Sickle cell disorders                               | 1<br>(0 - 1)       | 0<br>(0 - 0)       | 0<br>(0 - 0)        | 0<br>(0 - 0)         | 0<br>(0 - 1)         | 0<br>(0 - 0)         |
| G6PD deficiency                                     | 0<br>(0 - 0)       | 0<br>(0 - 0)       | 0<br>(0 - 0)        | 0<br>(0 - 0)         | 0<br>(0 - 0)         | 0<br>(0 - 0)         |
| Other hemoglobinopathies and hemolytic anemias      | 7<br>(4 - 11)      | 0<br>(0 - 0)       | 0<br>(0 - 0)        | 1<br>(0 - 1)         | 4<br>(2 - 8)         | 1<br>(1 - 2)         |
| Endocrine, metabolic, blood, and immune disorders   | 33<br>(24 - 54)    | 0<br>(0 - 1)       | 0<br>(0 - 0)        | 4<br>(3 - 7)         | 12<br>(8 - 24)       | 16<br>(10 - 24)      |
| Musculoskeletal disorders                           | 22<br>(4 - 27)     | --                 | 0<br>(0 - 0)        | 5<br>(1 - 7)         | 6<br>(1 - 8)         | 10<br>(2 - 15)       |
| Rheumatoid arthritis                                | 9<br>(2 - 13)      | --                 | 0<br>(0 - 0)        | 1<br>(0 - 1)         | 1<br>(0 - 2)         | 7<br>(1 - 10)        |
| Other musculoskeletal disorders                     | 13<br>(2 - 16)     | --                 | 0<br>(0 - 0)        | 4<br>(1 - 5)         | 4<br>(1 - 6)         | 4<br>(0 - 6)         |
| Other non-communicable diseases                     | 47<br>(35 - 61)    | 25<br>(15 - 38)    | 3<br>(2 - 5)        | 6<br>(4 - 8)         | 4<br>(3 - 5)         | 9<br>(5 - 12)        |
| Congenital anomalies                                | 38<br>(28 - 52)    | 23<br>(14 - 35)    | 3<br>(2 - 5)        | 5<br>(4 - 7)         | 3<br>(2 - 3)         | 4<br>(3 - 6)         |
| Neural tube defects                                 | 1<br>(1 - 4)       | 1<br>(0 - 3)       | 0<br>(0 - 0)        | 0<br>(0 - 0)         | 0<br>(0 - 0)         | 0<br>(0 - 0)         |
| Congenital heart anomalies                          | 18<br>(13 - 27)    | 10<br>(5 - 17)     | 2<br>(1 - 3)        | 3<br>(2 - 4)         | 1<br>(1 - 1)         | 3<br>(2 - 4)         |
| Cleft lip and cleft palate                          | 0<br>(0 - 0)       | 0<br>(0 - 0)       | --                  | --                   | --                   | --                   |
| Down syndrome                                       | 4<br>(2 - 6)       | 1<br>(0 - 2)       | 1<br>(0 - 1)        | 1<br>(0 - 2)         | 1<br>(0 - 1)         | 0<br>(0 - 0)         |
| Chromosomal unbalanced rearrangements               | 3<br>(1 - 5)       | 2<br>(1 - 4)       | 0<br>(0 - 0)        | 0<br>(0 - 1)         | 0<br>(0 - 0)         | 0<br>(0 - 0)         |
| Other congenital anomalies                          | 12<br>(8 - 18)     | 9<br>(5 - 15)      | 0<br>(0 - 0)        | 1<br>(0 - 1)         | 1<br>(0 - 1)         | 1<br>(1 - 2)         |
| Skin and subcutaneous diseases                      | 7<br>(2 - 10)      | 0<br>(0 - 0)       | 0<br>(0 - 0)        | 0<br>(0 - 1)         | 2<br>(0 - 2)         | 5<br>(1 - 7)         |
| Cellulitis                                          | 1<br>(0 - 2)       | 0<br>(0 - 0)       | 0<br>(0 - 0)        | 0<br>(0 - 0)         | 0<br>(0 - 0)         | 1<br>(0 - 2)         |
| Pyoderma                                            | 4<br>(1 - 6)       | 0<br>(0 - 0)       | 0<br>(0 - 0)        | 0<br>(0 - 0)         | 1<br>(0 - 2)         | 3<br>(1 - 4)         |
| Decubitus ulcer                                     | 1<br>(0 - 1)       | 0<br>(0 - 0)       | 0<br>(0 - 0)        | 0<br>(0 - 0)         | 0<br>(0 - 0)         | 0<br>(0 - 1)         |
| Other skin and subcutaneous diseases                | 1<br>(0 - 1)       | 0<br>(0 - 0)       | 0<br>(0 - 0)        | 0<br>(0 - 0)         | 0<br>(0 - 0)         | 0<br>(0 - 1)         |
| Sudden infant death syndrome                        | 2<br>(0 - 5)       | 2<br>(0 - 5)       | --                  | --                   | --                   | --                   |
| Injuries                                            | 301<br>(240 - 348) | 2<br>(1 - 3)       | 6<br>(4 - 8)        | 89<br>(74 - 106)     | 72<br>(54 - 89)      | 132<br>(98 - 162)    |
| Transport injuries                                  | 83<br>(50 - 100)   | 0<br>(0 - 0)       | 2<br>(1 - 3)        | 22<br>(11 - 28)      | 19<br>(9 - 25)       | 39<br>(28 - 53)      |



Web Table 31- Bosnia and Herzegovina deaths with 95% UI by age, sex, and cause in 2013

| Cause                                           | Females, All Ages | Females, 0-4 Years | Females, 5-14 Years | Females, 15-49 Years | Females, 50-69 Years | Females, 70-80 Years |
|-------------------------------------------------|-------------------|--------------------|---------------------|----------------------|----------------------|----------------------|
| Road injuries                                   | 54<br>(16 - 73)   | 0<br>(0 - 0)       | 1<br>(0 - 2)        | 15<br>(4 - 21)       | 14<br>(3 - 19)       | 24<br>(8 - 37)       |
| Pedestrian road injuries                        | 22<br>(7 - 32)    | 0<br>(0 - 0)       | 0<br>(0 - 1)        | 3<br>(1 - 5)         | 5<br>(1 - 8)         | 13<br>(4 - 21)       |
| Cyclist road injuries                           | 3<br>(1 - 5)      | 0<br>(0 - 0)       | 0<br>(0 - 0)        | 1<br>(0 - 1)         | 2<br>(0 - 3)         | 1<br>(0 - 1)         |
| Motorcyclist road injuries                      | 3<br>(1 - 5)      | 0<br>(0 - 0)       | 0<br>(0 - 0)        | 2<br>(0 - 4)         | 1<br>(0 - 1)         | 0<br>(0 - 1)         |
| Motor vehicle road injuries                     | 26<br>(7 - 38)    | 0<br>(0 - 0)       | 0<br>(0 - 1)        | 9<br>(2 - 13)        | 6<br>(1 - 9)         | 11<br>(3 - 18)       |
| Other road injuries                             | 0<br>(0 - 1)      | 0<br>(0 - 0)       | 0<br>(0 - 0)        | 0<br>(0 - 0)         | 0<br>(0 - 0)         | 0<br>(0 - 0)         |
| Other transport injuries                        | 29<br>(18 - 56)   | 0<br>(0 - 0)       | 1<br>(1 - 2)        | 7<br>(4 - 13)        | 5<br>(3 - 10)        | 15<br>(7 - 33)       |
| Unintentional injuries                          | 117<br>(79 - 151) | 2<br>(1 - 3)       | 3<br>(1 - 4)        | 25<br>(17 - 38)      | 25<br>(15 - 34)      | 63<br>(39 - 86)      |
| Falls                                           | 8<br>(0 - 14)     | 0<br>(0 - 0)       | 0<br>(0 - 0)        | 2<br>(0 - 3)         | 2<br>(0 - 4)         | 4<br>(0 - 8)         |
| Drowning                                        | 5<br>(0 - 10)     | 0<br>(0 - 0)       | 0<br>(0 - 1)        | 1<br>(0 - 2)         | 2<br>(0 - 4)         | 2<br>(0 - 5)         |
| Fire, heat, and hot substances                  | 5<br>(0 - 12)     | 0<br>(0 - 0)       | 0<br>(0 - 0)        | 1<br>(0 - 2)         | 1<br>(0 - 3)         | 3<br>(0 - 7)         |
| Poisonings                                      | 24<br>(8 - 75)    | 0<br>(0 - 1)       | 1<br>(0 - 3)        | 8<br>(3 - 23)        | 6<br>(2 - 20)        | 9<br>(3 - 32)        |
| Exposure to mechanical forces                   | 8<br>(4 - 10)     | 0<br>(0 - 0)       | 0<br>(0 - 0)        | 4<br>(2 - 5)         | 2<br>(1 - 3)         | 2<br>(1 - 3)         |
| Unintentional firearm injuries                  | 4<br>(0 - 6)      | 0<br>(0 - 0)       | 0<br>(0 - 0)        | 2<br>(0 - 3)         | 1<br>(0 - 2)         | 1<br>(0 - 1)         |
| Unintentional suffocation                       | 1<br>(1 - 2)      | 0<br>(0 - 0)       | 0<br>(0 - 0)        | 1<br>(0 - 1)         | 0<br>(0 - 1)         | 0<br>(0 - 0)         |
| Other exposure to mechanical forces             | 3<br>(1 - 4)      | 0<br>(0 - 0)       | 0<br>(0 - 0)        | 1<br>(0 - 2)         | 1<br>(0 - 1)         | 1<br>(0 - 1)         |
| Adverse effects of medical treatment            | 46<br>(22 - 68)   | 1<br>(0 - 2)       | 1<br>(0 - 1)        | 7<br>(4 - 10)        | 8<br>(3 - 14)        | 29<br>(12 - 49)      |
| Animal contact                                  | 2<br>(1 - 5)      | 0<br>(0 - 0)       | 0<br>(0 - 0)        | 0<br>(0 - 1)         | 1<br>(0 - 1)         | 1<br>(0 - 3)         |
| Venomous animal contact                         | 1<br>(0 - 2)      | 0<br>(0 - 0)       | 0<br>(0 - 0)        | 0<br>(0 - 0)         | 0<br>(0 - 1)         | 0<br>(0 - 1)         |
| Non-venomous animal contact                     | 1<br>(0 - 3)      | 0<br>(0 - 0)       | 0<br>(0 - 0)        | 0<br>(0 - 0)         | 0<br>(0 - 1)         | 1<br>(0 - 2)         |
| Foreign body                                    | 5<br>(3 - 7)      | 0<br>(0 - 0)       | 0<br>(0 - 0)        | 1<br>(1 - 2)         | 1<br>(0 - 1)         | 3<br>(2 - 5)         |
| Pulmonary aspiration and foreign body in airway | 4<br>(3 - 7)      | 0<br>(0 - 0)       | 0<br>(0 - 0)        | 1<br>(1 - 1)         | 1<br>(0 - 1)         | 3<br>(2 - 5)         |
| Foreign body in other body part                 | 0<br>(0 - 1)      | 0<br>(0 - 0)       | 0<br>(0 - 0)        | 0<br>(0 - 0)         | 0<br>(0 - 0)         | 0<br>(0 - 0)         |
| Other unintentional injuries                    | 13<br>(6 - 18)    | 0<br>(0 - 0)       | 0<br>(0 - 0)        | 1<br>(1 - 2)         | 2<br>(1 - 3)         | 10<br>(3 - 14)       |
| Self-harm and interpersonal violence            | 101<br>(72 - 124) | 0<br>(0 - 0)       | 1<br>(1 - 2)        | 42<br>(30 - 55)      | 28<br>(18 - 38)      | 30<br>(17 - 42)      |
| Self-harm                                       | 92<br>(70 - 114)  | --                 | 1<br>(0 - 2)        | 37<br>(27 - 50)      | 26<br>(18 - 36)      | 28<br>(16 - 41)      |
| Interpersonal violence                          | 8<br>(1 - 13)     | 0<br>(0 - 0)       | 0<br>(0 - 0)        | 5<br>(1 - 8)         | 2<br>(0 - 3)         | 2<br>(0 - 4)         |
| Assault by firearm                              | 2<br>(0 - 3)      | 0<br>(0 - 0)       | 0<br>(0 - 0)        | 1<br>(0 - 1)         | 1<br>(0 - 2)         | 0<br>(0 - 1)         |
| Assault by sharp object                         | 5<br>(1 - 8)      | 0<br>(0 - 0)       | 0<br>(0 - 0)        | 4<br>(1 - 6)         | 0<br>(0 - 0)         | 1<br>(0 - 1)         |
| Assault by other means                          | 2<br>(0 - 3)      | 0<br>(0 - 0)       | 0<br>(0 - 0)        | 0<br>(0 - 1)         | 0<br>(0 - 1)         | 1<br>(0 - 2)         |

Web Table 31- Botswana deaths with 95% UI by age, sex, and cause in 2013

| Cause                                                             | Both Sexes, All Ages        | Both Sexes, 0-4 Years    | Both Sexes, 5-14 Years | Both Sexes, 15-49 Years  | Both Sexes, 50-69 Years  | Both Sexes, 70-80 Years  |
|-------------------------------------------------------------------|-----------------------------|--------------------------|------------------------|--------------------------|--------------------------|--------------------------|
| All causes                                                        | 14,376<br>(12,661 - 16,795) | 1,474<br>(1,065 - 1,999) | 203<br>(164 - 266)     | 8,274<br>(7,176 - 9,360) | 2,211<br>(1,703 - 2,918) | 2,215<br>(1,748 - 3,325) |
| Communicable, maternal, neonatal, and nutritional diseases        | 9,136<br>(8,039 - 10,294)   | 1,197<br>(865 - 1,585)   | 95<br>(65 - 126)       | 6,268<br>(5,397 - 7,165) | 1,148<br>(868 - 1,464)   | 429<br>(332 - 574)       |
| HIV/AIDS and tuberculosis                                         | 6,544<br>(5,574 - 7,701)    | 57<br>(27 - 111)         | 30<br>(8 - 52)         | 5,297<br>(4,539 - 6,213) | 997<br>(732 - 1,323)     | 163<br>(107 - 237)       |
| Tuberculosis                                                      | 956<br>(588 - 1,428)        | 16<br>(7 - 28)           | 9<br>(4 - 15)          | 690<br>(421 - 996)       | 155<br>(78 - 280)        | 86<br>(46 - 147)         |
| HIV/AIDS                                                          | 5,588<br>(4,576 - 6,765)    | 42<br>(13 - 102)         | 21<br>(0 - 44)         | 4,607<br>(3,839 - 5,587) | 842<br>(574 - 1,191)     | 77<br>(44 - 131)         |
| HIV/AIDS resulting in mycobacterial infection                     | 367<br>(273 - 477)          | 2<br>(1 - 5)             | 1<br>(0 - 3)           | 303<br>(228 - 398)       | 55<br>(35 - 81)          | 5<br>(3 - 9)             |
| HIV/AIDS resulting in other diseases                              | 5,221<br>(4,283 - 6,371)    | 39<br>(12 - 96)          | 19<br>(0 - 41)         | 4,304<br>(3,597 - 5,249) | 787<br>(536 - 1,114)     | 72<br>(41 - 122)         |
| Diarrhea, lower respiratory, and other common infectious diseases | 1,348<br>(1,050 - 1,730)    | 387<br>(235 - 601)       | 39<br>(26 - 58)        | 566<br>(386 - 797)       | 121<br>(73 - 205)        | 235<br>(163 - 356)       |
| Diarrheal diseases                                                | 476<br>(325 - 667)          | 200<br>(113 - 331)       | 11<br>(5 - 20)         | 163<br>(85 - 269)        | 32<br>(15 - 62)          | 70<br>(35 - 132)         |
| Intestinal infectious diseases                                    | 35<br>(15 - 65)             | 11<br>(4 - 22)           | 10<br>(4 - 20)         | 12<br>(4 - 23)           | 1<br>(0 - 3)             | 1<br>(0 - 2)             |
| Typhoid fever                                                     | 26<br>(11 - 49)             | 8<br>(3 - 17)            | 8<br>(3 - 15)          | 9<br>(3 - 18)            | 1<br>(0 - 2)             | 1<br>(0 - 1)             |
| Paratyphoid fever                                                 | 9<br>(4 - 16)               | 3<br>(1 - 6)             | 3<br>(1 - 5)           | 3<br>(1 - 6)             | 0<br>(0 - 1)             | 0<br>(0 - 0)             |
| Other intestinal infectious diseases                              | 0<br>(0 - 2)                | 0<br>(0 - 1)             | 0<br>(0 - 0)           | 0<br>(0 - 1)             | 0<br>(0 - 0)             | 0<br>(0 - 0)             |
| Lower respiratory infections                                      | 737<br>(553 - 992)          | 152<br>(81 - 280)        | 11<br>(7 - 19)         | 333<br>(225 - 482)       | 81<br>(48 - 136)         | 159<br>(106 - 240)       |
| Upper respiratory infections                                      | 0<br>(0 - 1)                | 0<br>(0 - 0)             | 0<br>(0 - 0)           | 0<br>(0 - 1)             | 0<br>(0 - 0)             | 0<br>(0 - 0)             |
| Otitis media                                                      | 0<br>(0 - 0)                | 0<br>(0 - 0)             | 0<br>(0 - 0)           | 0<br>(0 - 0)             | 0<br>(0 - 0)             | 0<br>(0 - 0)             |
| Meningitis                                                        | 84<br>(59 - 116)            | 18<br>(9 - 35)           | 5<br>(3 - 8)           | 52<br>(33 - 79)          | 5<br>(3 - 8)             | 4<br>(2 - 7)             |
| Pneumococcal meningitis                                           | 12<br>(8 - 19)              | 2<br>(1 - 4)             | 1<br>(0 - 1)           | 8<br>(5 - 14)            | 1<br>(0 - 2)             | 1<br>(0 - 1)             |
| H influenzae type B meningitis                                    | 16<br>(10 - 23)             | 7<br>(3 - 13)            | 1<br>(1 - 2)           | 7<br>(4 - 12)            | 1<br>(0 - 1)             | 0<br>(0 - 1)             |
| Meningococcal meningitis                                          | 29<br>(20 - 40)             | 6<br>(3 - 12)            | 2<br>(1 - 3)           | 18<br>(11 - 29)          | 2<br>(1 - 3)             | 1<br>(1 - 3)             |
| Other meningitis                                                  | 26<br>(17 - 39)             | 4<br>(2 - 8)             | 1<br>(0 - 2)           | 18<br>(10 - 30)          | 2<br>(1 - 3)             | 1<br>(1 - 3)             |
| Encephalitis                                                      | 11<br>(5 - 18)              | 2<br>(1 - 4)             | 1<br>(0 - 3)           | 6<br>(2 - 9)             | 1<br>(0 - 2)             | 1<br>(0 - 2)             |
| Diphtheria                                                        | 0<br>(0 - 1)                | 0<br>(0 - 1)             | 0<br>(0 - 0)           | 0<br>(0 - 0)             | 0<br>(0 - 0)             | --                       |
| Whooping cough                                                    | 0<br>(0 - 1)                | 0<br>(0 - 1)             | 0<br>(0 - 0)           | 0<br>(0 - 0)             | 0<br>(0 - 0)             | --                       |
| Tetanus                                                           | 1<br>(0 - 2)                | 0<br>(0 - 0)             | 0<br>(0 - 0)           | 0<br>(0 - 1)             | 0<br>(0 - 0)             | 0<br>(0 - 0)             |
| Measles                                                           | 4<br>(0 - 23)               | 3<br>(0 - 19)            | 0<br>(0 - 3)           | 0<br>(0 - 0)             | 0<br>(0 - 0)             | --                       |
| Varicella and herpes zoster                                       | 1<br>(0 - 1)                | 0<br>(0 - 1)             | 0<br>(0 - 0)           | 0<br>(0 - 0)             | 0<br>(0 - 0)             | 0<br>(0 - 1)             |
| Neglected tropical diseases and malaria                           | 176<br>(105 - 297)          | 35<br>(8 - 104)          | 20<br>(8 - 41)         | 96<br>(57 - 171)         | 15<br>(7 - 31)           | 9<br>(5 - 17)            |
| Malaria                                                           | 147<br>(79 - 264)           | 31<br>(6 - 98)           | 19<br>(7 - 40)         | 77<br>(39 - 144)         | 13<br>(5 - 28)           | 7<br>(3 - 15)            |
| Leishmaniasis                                                     | 0<br>(0 - 1)                | 0<br>(0 - 0)             | 0<br>(0 - 0)           | 0<br>(0 - 0)             | 0<br>(0 - 0)             | 0<br>(0 - 0)             |
| Visceral leishmaniasis                                            | 0<br>(0 - 1)                | 0<br>(0 - 0)             | 0<br>(0 - 0)           | 0<br>(0 - 0)             | 0<br>(0 - 0)             | 0<br>(0 - 0)             |
| Schistosomiasis                                                   | 4<br>(3 - 6)                | 0<br>(0 - 0)             | 0<br>(0 - 0)           | 3<br>(2 - 5)             | 1<br>(0 - 2)             | 1<br>(0 - 1)             |
| Cysticercosis                                                     | 0<br>(0 - 0)                | 0<br>(0 - 0)             | 0<br>(0 - 0)           | 0<br>(0 - 0)             | 0<br>(0 - 0)             | 0<br>(0 - 0)             |
| Cystic echinococcosis                                             | 0<br>(0 - 1)                | 0<br>(0 - 0)             | 0<br>(0 - 0)           | 0<br>(0 - 1)             | 0<br>(0 - 0)             | 0<br>(0 - 0)             |
| Dengue                                                            | 0<br>(0 - 0)                | 0<br>(0 - 0)             | 0<br>(0 - 0)           | 0<br>(0 - 0)             | 0<br>(0 - 0)             | 0<br>(0 - 0)             |
| Rabies                                                            | 0<br>(0 - 1)                | 0<br>(0 - 0)             | 0<br>(0 - 0)           | 0<br>(0 - 0)             | 0<br>(0 - 0)             | 0<br>(0 - 0)             |
| Intestinal nematode infections                                    | 1<br>(0 - 5)                | 1<br>(0 - 3)             | 0<br>(0 - 2)           | 0<br>(0 - 3)             | 0<br>(0 - 1)             | 0<br>(0 - 1)             |
| Ascariasis                                                        | 1<br>(0 - 5)                | 1<br>(0 - 3)             | 0<br>(0 - 2)           | 0<br>(0 - 3)             | 0<br>(0 - 1)             | 0<br>(0 - 1)             |
| Other neglected tropical diseases                                 | 22<br>(13 - 40)             | 3<br>(1 - 9)             | 1<br>(0 - 2)           | 15<br>(8 - 27)           | 1<br>(1 - 4)             | 1<br>(1 - 3)             |
| Maternal disorders                                                | 228<br>(100 - 393)          | 0                        | 0<br>(0 - 1)           | 228<br>(100 - 392)       | --                       | --                       |

Web Table 31- Botswana deaths with 95% UI by age, sex, and cause in 2013

| Cause                                                            | Both Sexes, All Ages     | Both Sexes, 0-4 Years | Both Sexes, 5-14 Years | Both Sexes, 15-49 Years | Both Sexes, 50-69 Years | Both Sexes, 70-80 Years  |
|------------------------------------------------------------------|--------------------------|-----------------------|------------------------|-------------------------|-------------------------|--------------------------|
| Maternal hemorrhage                                              | 25<br>(10 - 46)          | --                    | 0<br>(0 - 0)           | 25<br>(10 - 46)         | --                      | --                       |
| Maternal sepsis and other maternal infections                    | 23<br>(10 - 42)          | --                    | 0<br>(0 - 0)           | 23<br>(10 - 42)         | --                      | --                       |
| Maternal hypertensive disorders                                  | 33<br>(13 - 59)          | --                    | 0<br>(0 - 0)           | 33<br>(13 - 59)         | --                      | --                       |
| Maternal obstructed labor                                        | 13<br>(5 - 25)           | --                    | 0<br>(0 - 0)           | 13<br>(5 - 25)          | --                      | --                       |
| Maternal abortive outcome                                        | 37<br>(15 - 66)          | --                    | 0<br>(0 - 0)           | 37<br>(15 - 66)         | --                      | --                       |
| Indirect maternal deaths                                         | 26<br>(11 - 49)          | --                    | 0<br>(0 - 0)           | 26<br>(11 - 49)         | --                      | --                       |
| Late maternal deaths                                             | 27<br>(10 - 50)          | --                    | 0<br>(0 - 0)           | 27<br>(10 - 50)         | --                      | --                       |
| Maternal deaths aggravated by HIV/AIDS                           | 20<br>(9 - 35)           | --                    | --                     | 20<br>(9 - 35)          | --                      | --                       |
| Other maternal disorders                                         | 24<br>(10 - 46)          | --                    | 0<br>(0 - 0)           | 24<br>(10 - 46)         | --                      | --                       |
| Neonatal disorders                                               | 653<br>(489 - 839)       | 653<br>(489 - 839)    | --                     | --                      | --                      | --                       |
| Neonatal preterm birth complications                             | 200<br>(115 - 322)       | 200<br>(115 - 322)    | --                     | --                      | --                      | --                       |
| Neonatal encephalopathy due to birth asphyxia and trauma         | 172<br>(91 - 281)        | 172<br>(91 - 281)     | --                     | --                      | --                      | --                       |
| Neonatal sepsis and other neonatal infections                    | 73<br>(34 - 125)         | 73<br>(34 - 125)      | --                     | --                      | --                      | --                       |
| Hemolytic disease and other neonatal jaundice                    | 2<br>(1 - 5)             | 2<br>(1 - 5)          | --                     | --                      | --                      | --                       |
| Other neonatal disorders                                         | 206<br>(79 - 340)        | 206<br>(79 - 340)     | --                     | --                      | --                      | --                       |
| Nutritional deficiencies                                         | 96<br>(60 - 153)         | 40<br>(18 - 75)       | 2<br>(1 - 4)           | 29<br>(18 - 48)         | 8<br>(4 - 17)           | 17<br>(9 - 30)           |
| Protein-energy malnutrition                                      | 59<br>(31 - 103)         | 38<br>(17 - 73)       | 2<br>(1 - 3)           | 8<br>(4 - 16)           | 3<br>(1 - 8)            | 7<br>(3 - 15)            |
| Iodine deficiency                                                | 0<br>(0 - 1)             | 0<br>(0 - 0)          | 0<br>(0 - 0)           | 0<br>(0 - 1)            | 0<br>(0 - 1)            | 0<br>(0 - 0)             |
| Iron-deficiency anemia                                           | 33<br>(19 - 56)          | 1<br>(0 - 3)          | 1<br>(0 - 1)           | 19<br>(11 - 33)         | 4<br>(2 - 9)            | 8<br>(4 - 17)            |
| Other nutritional deficiencies                                   | 4<br>(2 - 8)             | 0<br>(0 - 1)          | 0<br>(0 - 0)           | 2<br>(1 - 3)            | 1<br>(0 - 1)            | 1<br>(1 - 3)             |
| Other communicable, maternal, neonatal, and nutritional diseases | 92<br>(61 - 133)         | 25<br>(11 - 48)       | 3<br>(1 - 6)           | 51<br>(30 - 80)         | 6<br>(3 - 13)           | 6<br>(3 - 13)            |
| Sexually transmitted diseases excluding HIV                      | 22<br>(10 - 43)          | 16<br>(4 - 35)        | 1<br>(0 - 2)           | 4<br>(2 - 8)            | 0<br>(0 - 1)            | 1<br>(0 - 1)             |
| Syphilis                                                         | 20<br>(7 - 40)           | 16<br>(4 - 35)        | 1<br>(0 - 2)           | 2<br>(1 - 3)            | 0<br>(0 - 1)            | 0<br>(0 - 1)             |
| Chlamydial infection                                             | 1<br>(0 - 2)             | --                    | 0<br>(0 - 0)           | 1<br>(0 - 1)            | 0<br>(0 - 0)            | 0<br>(0 - 0)             |
| Gonococcal infection                                             | 1<br>(1 - 2)             | --                    | 0<br>(0 - 0)           | 1<br>(0 - 2)            | 0<br>(0 - 0)            | 0<br>(0 - 0)             |
| Other sexually transmitted diseases                              | 1<br>(0 - 2)             | --                    | 0<br>(0 - 0)           | 1<br>(0 - 1)            | 0<br>(0 - 0)            | 0<br>(0 - 0)             |
| Hepatitis                                                        | 8<br>(5 - 14)            | 1<br>(0 - 2)          | 0<br>(0 - 1)           | 4<br>(3 - 6)            | 1<br>(1 - 3)            | 1<br>(1 - 2)             |
| Acute hepatitis A                                                | 1<br>(0 - 2)             | 0<br>(0 - 1)          | 0<br>(0 - 0)           | 0<br>(0 - 1)            | 0<br>(0 - 0)            | 0<br>(0 - 0)             |
| Acute hepatitis B                                                | 4<br>(2 - 8)             | 1<br>(0 - 2)          | 0<br>(0 - 0)           | 2<br>(1 - 3)            | 1<br>(0 - 2)            | 1<br>(0 - 2)             |
| Acute hepatitis C                                                | 0<br>(0 - 0)             | --                    | 0<br>(0 - 0)           | 0<br>(0 - 0)            | 0<br>(0 - 0)            | 0<br>(0 - 0)             |
| Acute hepatitis E                                                | 2<br>(1 - 4)             | 0<br>(0 - 0)          | 0<br>(0 - 0)           | 2<br>(1 - 4)            | 0<br>(0 - 0)            | 0<br>(0 - 0)             |
| Other infectious diseases                                        | 62<br>(39 - 97)          | 8<br>(4 - 20)         | 2<br>(1 - 4)           | 43<br>(23 - 70)         | 5<br>(2 - 11)           | 4<br>(2 - 11)            |
| Non-communicable diseases                                        | 3,790<br>(2,856 - 5,461) | 188<br>(105 - 294)    | 44<br>(30 - 65)        | 976<br>(716 - 1,282)    | 921<br>(580 - 1,516)    | 1,660<br>(1,267 - 2,631) |
| Neoplasms                                                        | 676<br>(474 - 1,048)     | 9<br>(4 - 16)         | 11<br>(6 - 17)         | 113<br>(85 - 149)       | 241<br>(146 - 405)      | 302<br>(210 - 495)       |
| Esophageal cancer                                                | 65<br>(39 - 107)         | --                    | --                     | 7<br>(5 - 11)           | 31<br>(16 - 54)         | 27<br>(16 - 46)          |
| Stomach cancer                                                   | 28<br>(19 - 40)          | --                    | --                     | 4<br>(3 - 6)            | 9<br>(5 - 14)           | 15<br>(10 - 23)          |
| Liver cancer                                                     | 46<br>(24 - 76)          | --                    | 0<br>(0 - 1)           | 11<br>(6 - 16)          | 18<br>(8 - 34)          | 17<br>(9 - 31)           |
| Liver cancer due to hepatitis B                                  | 15<br>(8 - 27)           | --                    | 0<br>(0 - 0)           | 5<br>(2 - 7)            | 6<br>(3 - 13)           | 4<br>(2 - 9)             |
| Liver cancer due to hepatitis C                                  | 17<br>(8 - 31)           | --                    | 0<br>(0 - 0)           | 3<br>(1 - 7)            | 7<br>(2 - 15)           | 7<br>(3 - 12)            |
| Liver cancer due to alcohol use                                  | 8<br>(4 - 15)            | --                    | --                     | 1<br>(0 - 2)            | 3<br>(1 - 6)            | 4<br>(2 - 8)             |

Web Table 31- Botswana deaths with 95% UI by age, sex, and cause in 2013

| Cause                                         | Both Sexes, All Ages   | Both Sexes, 0-4 Years | Both Sexes, 5-14 Years | Both Sexes, 15-49 Years | Both Sexes, 50-69 Years | Both Sexes, 70-80 Years |
|-----------------------------------------------|------------------------|-----------------------|------------------------|-------------------------|-------------------------|-------------------------|
| Liver cancer due to other causes              | 6<br>(3 - 11)          | --                    | 0<br>(0 - 0)           | 2<br>(1 - 3)            | 2<br>(1 - 4)            | 2<br>(1 - 4)            |
| Larynx cancer                                 | 8<br>(5 - 14)          | --                    | --                     | 1<br>(1 - 2)            | 4<br>(2 - 8)            | 3<br>(2 - 5)            |
| Tracheal, bronchus and lung cancer            | 72<br>(46 - 133)       | --                    | --                     | 7<br>(5 - 11)           | 34<br>(19 - 70)         | 31<br>(20 - 55)         |
| Breast cancer                                 | 46<br>(18 - 120)       | --                    | --                     | 10<br>(6 - 15)          | 15<br>(3 - 52)          | 21<br>(7 - 54)          |
| Cervical cancer                               | 25<br>(13 - 56)        | --                    | --                     | 10<br>(6 - 15)          | 7<br>(2 - 23)           | 8<br>(3 - 20)           |
| Uterine cancer                                | 4<br>(1 - 11)          | --                    | --                     | 0<br>(0 - 1)            | 1<br>(0 - 4)            | 2<br>(1 - 7)            |
| Prostate cancer                               | 64<br>(35 - 109)       | --                    | --                     | 1<br>(0 - 1)            | 16<br>(7 - 30)          | 48<br>(27 - 79)         |
| Colon and rectum cancer                       | 78<br>(52 - 138)       | --                    | --                     | 7<br>(5 - 9)            | 26<br>(15 - 47)         | 45<br>(29 - 81)         |
| Lip and oral cavity cancer                    | 15<br>(9 - 27)         | --                    | --                     | 3<br>(2 - 4)            | 7<br>(4 - 14)           | 6<br>(3 - 10)           |
| Nasopharynx cancer                            | 3<br>(2 - 4)           | --                    | 0<br>(0 - 0)           | 1<br>(1 - 2)            | 1<br>(1 - 2)            | 1<br>(0 - 1)            |
| Other pharynx cancer                          | 9<br>(4 - 16)          | --                    | --                     | 1<br>(1 - 1)            | 6<br>(3 - 13)           | 1<br>(1 - 2)            |
| Gallbladder and biliary tract cancer          | 8<br>(4 - 16)          | --                    | --                     | 1<br>(0 - 1)            | 3<br>(1 - 6)            | 4<br>(2 - 8)            |
| Pancreatic cancer                             | 31<br>(20 - 56)        | --                    | --                     | 3<br>(2 - 3)            | 13<br>(7 - 23)          | 16<br>(10 - 31)         |
| Malignant skin melanoma                       | 7<br>(4 - 12)          | --                    | --                     | 1<br>(1 - 2)            | 2<br>(1 - 4)            | 3<br>(1 - 5)            |
| Non-melanoma skin cancer                      | 4<br>(3 - 7)           | --                    | --                     | 1<br>(1 - 2)            | 1<br>(1 - 2)            | 2<br>(1 - 3)            |
| Ovarian cancer                                | 8<br>(3 - 22)          | --                    | --                     | 2<br>(1 - 3)            | 3<br>(1 - 10)           | 3<br>(1 - 10)           |
| Testicular cancer                             | 2<br>(1 - 3)           | --                    | --                     | 1<br>(0 - 1)            | 1<br>(0 - 1)            | 0<br>(0 - 1)            |
| Kidney cancer                                 | 7<br>(4 - 12)          | 0<br>(0 - 1)          | 0<br>(0 - 1)           | 1<br>(1 - 2)            | 3<br>(1 - 5)            | 2<br>(1 - 4)            |
| Bladder cancer                                | 9<br>(6 - 13)          | --                    | --                     | 1<br>(1 - 1)            | 2<br>(1 - 4)            | 6<br>(4 - 8)            |
| Brain and nervous system cancer               | 10<br>(6 - 16)         | 1<br>(0 - 1)          | 1<br>(1 - 2)           | 3<br>(2 - 4)            | 3<br>(2 - 6)            | 2<br>(1 - 4)            |
| Thyroid cancer                                | 3<br>(1 - 6)           | --                    | 0<br>(0 - 0)           | 0<br>(0 - 1)            | 1<br>(0 - 2)            | 1<br>(1 - 3)            |
| Mesothelioma                                  | 3<br>(2 - 6)           | --                    | --                     | 0<br>(0 - 1)            | 2<br>(1 - 3)            | 1<br>(1 - 2)            |
| Hodgkin lymphoma                              | 2<br>(1 - 4)           | 0<br>(0 - 0)          | 0<br>(0 - 1)           | 1<br>(1 - 2)            | 0<br>(0 - 1)            | 0<br>(0 - 1)            |
| Non-Hodgkin lymphoma                          | 33<br>(20 - 54)        | 1<br>(0 - 2)          | 1<br>(0 - 2)           | 9<br>(6 - 13)           | 11<br>(5 - 20)          | 12<br>(6 - 22)          |
| Multiple myeloma                              | 9<br>(4 - 16)          | --                    | --                     | 1<br>(1 - 1)            | 4<br>(2 - 7)            | 4<br>(2 - 8)            |
| Leukemia                                      | 22<br>(16 - 32)        | 1<br>(1 - 3)          | 3<br>(1 - 4)           | 7<br>(5 - 9)            | 5<br>(3 - 9)            | 7<br>(4 - 12)           |
| Other neoplasms                               | 55<br>(33 - 84)        | 6<br>(2 - 11)         | 5<br>(2 - 9)           | 17<br>(11 - 24)         | 13<br>(6 - 25)          | 14<br>(8 - 26)          |
| Cardiovascular diseases                       | 1,281<br>(952 - 1,957) | 6<br>(3 - 12)         | 5<br>(3 - 10)          | 220<br>(160 - 294)      | 323<br>(201 - 557)      | 727<br>(539 - 1,174)    |
| Rheumatic heart disease                       | 22<br>(14 - 39)        | 0<br>(0 - 0)          | 1<br>(0 - 1)           | 10<br>(5 - 20)          | 2<br>(1 - 5)            | 9<br>(5 - 17)           |
| Ischemic heart disease                        | 421<br>(294 - 681)     | 0<br>(0 - 1)          | 0<br>(0 - 1)           | 52<br>(35 - 71)         | 113<br>(68 - 197)       | 256<br>(177 - 432)      |
| Cerebrovascular disease                       | 468<br>(332 - 737)     | 1<br>(1 - 2)          | 1<br>(1 - 2)           | 74<br>(53 - 100)        | 115<br>(68 - 200)       | 277<br>(195 - 454)      |
| Ischemic stroke                               | 240<br>(156 - 404)     | 0<br>(0 - 0)          | 0<br>(0 - 0)           | 12<br>(8 - 20)          | 53<br>(28 - 105)        | 174<br>(114 - 295)      |
| Hemorrhagic stroke                            | 228<br>(155 - 348)     | 1<br>(1 - 2)          | 1<br>(1 - 2)           | 61<br>(44 - 84)         | 62<br>(33 - 109)        | 102<br>(65 - 168)       |
| Hypertensive heart disease                    | 157<br>(74 - 300)      | 0<br>(0 - 0)          | 0<br>(0 - 0)           | 18<br>(11 - 27)         | 39<br>(14 - 84)         | 99<br>(46 - 204)        |
| Cardiomyopathy and myocarditis                | 115<br>(75 - 196)      | 3<br>(1 - 8)          | 1<br>(1 - 4)           | 42<br>(27 - 65)         | 28<br>(14 - 61)         | 41<br>(21 - 82)         |
| Atrial fibrillation and flutter               | 4<br>(1 - 8)           | --                    | --                     | 0<br>(0 - 0)            | 1<br>(0 - 2)            | 3<br>(1 - 6)            |
| Aortic aneurysm                               | 15<br>(10 - 25)        | --                    | --                     | 2<br>(1 - 3)            | 4<br>(2 - 8)            | 9<br>(6 - 16)           |
| Peripheral vascular disease                   | 5<br>(2 - 9)           | --                    | --                     | 0<br>(0 - 0)            | 2<br>(1 - 4)            | 3<br>(2 - 6)            |
| Endocarditis                                  | 10<br>(6 - 16)         | 1<br>(0 - 2)          | 0<br>(0 - 1)           | 3<br>(2 - 5)            | 2<br>(1 - 4)            | 3<br>(2 - 6)            |
| Other cardiovascular and circulatory diseases | 64<br>(39 - 124)       | 1<br>(0 - 2)          | 1<br>(0 - 1)           | 18<br>(11 - 30)         | 18<br>(8 - 44)          | 27<br>(15 - 53)         |

Web Table 31- Botswana deaths with 95% UI by age, sex, and cause in 2013

| Cause                                               | Both Sexes, All Ages | Both Sexes, 0-4 Years | Both Sexes, 5-14 Years | Both Sexes, 15-49 Years | Both Sexes, 50-69 Years | Both Sexes, 70-80 Years |
|-----------------------------------------------------|----------------------|-----------------------|------------------------|-------------------------|-------------------------|-------------------------|
| Chronic respiratory diseases                        | 424<br>(298 - 630)   | 5<br>(2 - 10)         | 3<br>(2 - 4)           | 93<br>(64 - 140)        | 115<br>(70 - 194)       | 208<br>(145 - 316)      |
| Chronic obstructive pulmonary disease               | 262<br>(178 - 399)   | 2<br>(1 - 4)          | 1<br>(0 - 1)           | 37<br>(24 - 62)         | 74<br>(44 - 128)        | 149<br>(103 - 225)      |
| Pneumoconiosis                                      | 19<br>(10 - 34)      | 0<br>(0 - 0)          | 0<br>(0 - 0)           | 4<br>(2 - 7)            | 6<br>(3 - 12)           | 9<br>(5 - 16)           |
| Silicosis                                           | 3<br>(2 - 8)         | 0<br>(0 - 0)          | 0<br>(0 - 0)           | 1<br>(0 - 1)            | 1<br>(0 - 2)            | 2<br>(1 - 4)            |
| Asbestosis                                          | 5<br>(2 - 10)        | 0<br>(0 - 0)          | 0<br>(0 - 0)           | 1<br>(0 - 2)            | 2<br>(1 - 4)            | 3<br>(1 - 5)            |
| Coal workers pneumoconiosis                         | 4<br>(2 - 8)         | 0<br>(0 - 0)          | 0<br>(0 - 0)           | 1<br>(0 - 1)            | 2<br>(1 - 4)            | 2<br>(1 - 4)            |
| Other pneumoconiosis                                | 6<br>(3 - 10)        | 0<br>(0 - 0)          | 0<br>(0 - 0)           | 2<br>(1 - 3)            | 2<br>(1 - 4)            | 3<br>(1 - 5)            |
| Asthma                                              | 111<br>(75 - 168)    | 2<br>(1 - 4)          | 1<br>(1 - 2)           | 43<br>(28 - 69)         | 28<br>(15 - 49)         | 37<br>(22 - 63)         |
| Interstitial lung disease and pulmonary sarcoidosis | 24<br>(2 - 51)       | 1<br>(0 - 2)          | 0<br>(0 - 1)           | 7<br>(1 - 15)           | 6<br>(0 - 15)           | 10<br>(1 - 23)          |
| Other chronic respiratory diseases                  | 8<br>(5 - 17)        | 1<br>(0 - 2)          | 0<br>(0 - 1)           | 3<br>(1 - 6)            | 1<br>(1 - 3)            | 3<br>(2 - 7)            |
| Cirrhosis                                           | 94<br>(68 - 131)     | 1<br>(0 - 2)          | 1<br>(1 - 1)           | 41<br>(29 - 54)         | 31<br>(19 - 51)         | 21<br>(14 - 30)         |
| Cirrhosis due to hepatitis B                        | 15<br>(9 - 24)       | 0<br>(0 - 0)          | 0<br>(0 - 0)           | 7<br>(4 - 10)           | 5<br>(2 - 9)            | 3<br>(2 - 6)            |
| Cirrhosis due to hepatitis C                        | 12<br>(8 - 20)       | 0<br>(0 - 0)          | 0<br>(0 - 0)           | 5<br>(2 - 8)            | 4<br>(2 - 7)            | 4<br>(2 - 7)            |
| Cirrhosis due to alcohol use                        | 50<br>(34 - 73)      | --                    | --                     | 19<br>(12 - 28)         | 19<br>(11 - 34)         | 12<br>(8 - 18)          |
| Cirrhosis due to other causes                       | 17<br>(10 - 25)      | 1<br>(0 - 2)          | 1<br>(0 - 1)           | 10<br>(6 - 16)          | 3<br>(1 - 7)            | 1<br>(1 - 3)            |
| Digestive diseases                                  | 173<br>(124 - 239)   | 3<br>(2 - 6)          | 3<br>(2 - 4)           | 86<br>(59 - 122)        | 30<br>(18 - 50)         | 51<br>(34 - 79)         |
| Peptic ulcer disease                                | 32<br>(19 - 51)      | 0<br>(0 - 0)          | 0<br>(0 - 0)           | 14<br>(8 - 24)          | 6<br>(3 - 12)           | 11<br>(6 - 19)          |
| Gastritis and duodenitis                            | 10<br>(4 - 18)       | 0<br>(0 - 0)          | 0<br>(0 - 0)           | 4<br>(2 - 7)            | 2<br>(1 - 5)            | 4<br>(1 - 7)            |
| Appendicitis                                        | 5<br>(3 - 8)         | 0<br>(0 - 0)          | 0<br>(0 - 1)           | 3<br>(2 - 5)            | 1<br>(0 - 1)            | 1<br>(1 - 2)            |
| Paralytic ileus and intestinal obstruction          | 33<br>(19 - 53)      | 1<br>(0 - 2)          | 1<br>(1 - 2)           | 10<br>(5 - 16)          | 7<br>(4 - 13)           | 14<br>(7 - 25)          |
| Inguinal, femoral, and abdominal hernia             | 3<br>(1 - 6)         | 0<br>(0 - 0)          | 0<br>(0 - 0)           | 1<br>(0 - 2)            | 1<br>(0 - 1)            | 1<br>(1 - 3)            |
| Inflammatory bowel disease                          | 40<br>(27 - 58)      | 1<br>(1 - 2)          | 0<br>(0 - 1)           | 29<br>(18 - 43)         | 4<br>(2 - 7)            | 5<br>(3 - 9)            |
| Vascular intestinal disorders                       | 2<br>(1 - 5)         | 0<br>(0 - 0)          | 0<br>(0 - 0)           | 1<br>(0 - 1)            | 1<br>(0 - 1)            | 1<br>(0 - 3)            |
| Gallbladder and biliary diseases                    | 10<br>(6 - 16)       | 0<br>(0 - 0)          | 0<br>(0 - 0)           | 3<br>(2 - 4)            | 2<br>(1 - 4)            | 5<br>(3 - 9)            |
| Pancreatitis                                        | 17<br>(9 - 27)       | 0<br>(0 - 0)          | 0<br>(0 - 0)           | 11<br>(6 - 18)          | 3<br>(1 - 7)            | 2<br>(1 - 5)            |
| Other digestive diseases                            | 21<br>(14 - 31)      | 0<br>(0 - 1)          | 0<br>(0 - 0)           | 11<br>(7 - 16)          | 3<br>(2 - 6)            | 6<br>(3 - 10)           |
| Neurological disorders                              | 188<br>(139 - 272)   | 5<br>(2 - 11)         | 5<br>(2 - 10)          | 54<br>(35 - 81)         | 23<br>(13 - 40)         | 102<br>(73 - 162)       |
| Alzheimer disease and other dementias               | 90<br>(63 - 146)     | --                    | --                     | 0<br>(0 - 0)            | 6<br>(3 - 12)           | 84<br>(59 - 134)        |
| Parkinson disease                                   | 7<br>(4 - 12)        | --                    | --                     | 0<br>(0 - 0)            | 1<br>(0 - 2)            | 6<br>(3 - 10)           |
| Epilepsy                                            | 81<br>(55 - 117)     | 4<br>(1 - 9)          | 4<br>(2 - 9)           | 51<br>(32 - 76)         | 13<br>(7 - 26)          | 10<br>(5 - 17)          |
| Multiple sclerosis                                  | 0<br>(0 - 1)         | --                    | --                     | 0<br>(0 - 0)            | 0<br>(0 - 0)            | 0<br>(0 - 0)            |
| Other neurological disorders                        | 10<br>(7 - 15)       | 1<br>(1 - 2)          | 1<br>(0 - 1)           | 3<br>(2 - 4)            | 3<br>(1 - 5)            | 3<br>(2 - 5)            |
| Mental and substance use disorders                  | 163<br>(104 - 238)   | 3<br>(2 - 6)          | 0<br>(0 - 0)           | 139<br>(84 - 206)       | 12<br>(7 - 21)          | 8<br>(5 - 12)           |
| Schizophrenia                                       | 5<br>(3 - 8)         | --                    | --                     | 3<br>(2 - 5)            | 1<br>(1 - 3)            | 1<br>(0 - 2)            |
| Alcohol use disorders                               | 37<br>(21 - 55)      | --                    | --                     | 28<br>(16 - 44)         | 7<br>(4 - 12)           | 2<br>(1 - 3)            |
| Drug use disorders                                  | 120<br>(71 - 184)    | 3<br>(2 - 6)          | --                     | 107<br>(61 - 166)       | 4<br>(2 - 8)            | 5<br>(3 - 8)            |
| Opioid use disorders                                | 13<br>(7 - 20)       | 0<br>(0 - 1)          | --                     | 12<br>(6 - 19)          | 0<br>(0 - 1)            | 1<br>(0 - 1)            |
| Cocaine use disorders                               | 0<br>(0 - 1)         | 0<br>(0 - 0)          | --                     | 0<br>(0 - 1)            | 0<br>(0 - 0)            | 0<br>(0 - 0)            |
| Amphetamine use disorders                           | 0<br>(0 - 1)         | 0<br>(0 - 0)          | --                     | 0<br>(0 - 0)            | 0<br>(0 - 0)            | 0<br>(0 - 0)            |
| Other drug use disorders                            | 106<br>(63 - 162)    | 3<br>(1 - 5)          | --                     | 95<br>(54 - 147)        | 4<br>(2 - 7)            | 5<br>(2 - 7)            |

Web Table 31- Botswana deaths with 95% UI by age, sex, and cause in 2013

| Cause                                               | Both Sexes, All Ages | Both Sexes, 0-4 Years | Both Sexes, 5-14 Years | Both Sexes, 15-49 Years | Both Sexes, 50-69 Years | Both Sexes, 70-80 Years |
|-----------------------------------------------------|----------------------|-----------------------|------------------------|-------------------------|-------------------------|-------------------------|
| Eating disorders                                    | 1<br>(0 - 2)         | --                    | 0<br>(0 - 0)           | 1<br>(0 - 2)            | --                      | --                      |
| Anorexia nervosa                                    | 1<br>(0 - 2)         | --                    | 0<br>(0 - 0)           | 1<br>(0 - 2)            | --                      | --                      |
| Diabetes, urogenital, blood, and endocrine diseases | 590<br>(431 - 846)   | 36<br>(15 - 68)       | 11<br>(6 - 18)         | 201<br>(135 - 278)      | 134<br>(81 - 222)       | 208<br>(145 - 345)      |
| Diabetes mellitus                                   | 232<br>(160 - 373)   | 0<br>(0 - 1)          | 0<br>(0 - 1)           | 35<br>(26 - 45)         | 76<br>(44 - 131)        | 121<br>(81 - 212)       |
| Acute glomerulonephritis                            | 1<br>(0 - 1)         | 0<br>(0 - 0)          | 0<br>(0 - 0)           | 0<br>(0 - 0)            | 0<br>(0 - 0)            | 0<br>(0 - 0)            |
| Chronic kidney disease                              | 99<br>(66 - 152)     | 1<br>(1 - 4)          | 1<br>(1 - 2)           | 33<br>(22 - 48)         | 21<br>(11 - 41)         | 43<br>(26 - 71)         |
| Chronic kidney disease due to diabetes mellitus     | 0<br>(0 - 1)         | 0<br>(0 - 0)          | 0<br>(0 - 0)           | 0<br>(0 - 0)            | 0<br>(0 - 0)            | 0<br>(0 - 0)            |
| Chronic kidney disease due to hypertension          | 56<br>(39 - 84)      | 0<br>(0 - 1)          | 0<br>(0 - 0)           | 15<br>(10 - 23)         | 14<br>(8 - 24)          | 27<br>(17 - 42)         |
| Chronic kidney disease due to glomerulonephritis    | 12<br>(7 - 19)       | 1<br>(0 - 1)          | 0<br>(0 - 1)           | 7<br>(4 - 11)           | 1<br>(1 - 3)            | 3<br>(1 - 6)            |
| Chronic kidney disease due to other causes          | 31<br>(13 - 62)      | 1<br>(0 - 2)          | 0<br>(0 - 1)           | 10<br>(5 - 17)          | 6<br>(2 - 18)           | 13<br>(4 - 30)          |
| Urinary diseases and male infertility               | 29<br>(21 - 43)      | 1<br>(0 - 2)          | 0<br>(0 - 1)           | 10<br>(7 - 14)          | 5<br>(3 - 10)           | 13<br>(8 - 20)          |
| Interstitial nephritis and urinary tract infections | 14<br>(9 - 23)       | 1<br>(0 - 1)          | 0<br>(0 - 0)           | 5<br>(3 - 8)            | 3<br>(1 - 5)            | 6<br>(3 - 11)           |
| Urolithiasis                                        | 0<br>(0 - 1)         | --                    | 0<br>(0 - 0)           | 0<br>(0 - 0)            | 0<br>(0 - 0)            | 0<br>(0 - 0)            |
| Other urinary diseases                              | 15<br>(10 - 21)      | 0<br>(0 - 1)          | 0<br>(0 - 0)           | 5<br>(3 - 7)            | 3<br>(2 - 5)            | 7<br>(4 - 11)           |
| Gynecological diseases                              | 0<br>(0 - 1)         | --                    | --                     | 0<br>(0 - 1)            | 0<br>(0 - 0)            | 0<br>(0 - 0)            |
| Uterine fibroids                                    | 0<br>(0 - 0)         | --                    | --                     | 0<br>(0 - 0)            | 0<br>(0 - 0)            | 0<br>(0 - 0)            |
| Polycystic ovarian syndrome                         | 0<br>(0 - 0)         | --                    | --                     | 0<br>(0 - 0)            | 0<br>(0 - 0)            | --                      |
| Endometriosis                                       | 0<br>(0 - 0)         | --                    | --                     | 0<br>(0 - 0)            | 0<br>(0 - 0)            | --                      |
| Genital prolapse                                    | 0<br>(0 - 0)         | --                    | --                     | 0<br>(0 - 0)            | 0<br>(0 - 0)            | 0<br>(0 - 0)            |
| Other gynecological diseases                        | 0<br>(0 - 0)         | --                    | --                     | 0<br>(0 - 0)            | 0<br>(0 - 0)            | 0<br>(0 - 0)            |
| Hemoglobinopathies and hemolytic anemias            | 29<br>(18 - 46)      | 4<br>(1 - 8)          | 2<br>(1 - 4)           | 16<br>(9 - 27)          | 3<br>(1 - 6)            | 5<br>(2 - 12)           |
| Thalassemias                                        | 2<br>(1 - 4)         | 1<br>(0 - 3)          | 0<br>(0 - 1)           | 1<br>(0 - 2)            | 0<br>(0 - 0)            | 0<br>(0 - 0)            |
| Sickle cell disorders                               | 4<br>(2 - 6)         | 0<br>(0 - 1)          | 0<br>(0 - 1)           | 3<br>(2 - 5)            | 0<br>(0 - 1)            | 0<br>(0 - 0)            |
| G6PD deficiency                                     | 2<br>(1 - 3)         | 0<br>(0 - 0)          | 0<br>(0 - 0)           | 1<br>(1 - 2)            | 0<br>(0 - 0)            | 0<br>(0 - 0)            |
| Other hemoglobinopathies and hemolytic anemias      | 21<br>(13 - 34)      | 2<br>(1 - 4)          | 1<br>(0 - 2)           | 11<br>(6 - 18)          | 2<br>(1 - 6)            | 5<br>(2 - 12)           |
| Endocrine, metabolic, blood, and immune disorders   | 199<br>(96 - 299)    | 29<br>(10 - 61)       | 7<br>(2 - 14)          | 108<br>(54 - 162)       | 29<br>(10 - 60)         | 26<br>(10 - 53)         |
| Musculoskeletal disorders                           | 18<br>(12 - 30)      | --                    | 1<br>(0 - 1)           | 8<br>(5 - 12)           | 3<br>(2 - 7)            | 7<br>(4 - 13)           |
| Rheumatoid arthritis                                | 6<br>(3 - 10)        | --                    | 0<br>(0 - 0)           | 1<br>(1 - 2)            | 1<br>(1 - 3)            | 3<br>(1 - 6)            |
| Other musculoskeletal disorders                     | 13<br>(8 - 21)       | --                    | 0<br>(0 - 1)           | 7<br>(4 - 10)           | 2<br>(1 - 5)            | 4<br>(2 - 8)            |
| Other non-communicable diseases                     | 182<br>(111 - 267)   | 119<br>(60 - 197)     | 6<br>(3 - 11)          | 20<br>(14 - 28)         | 10<br>(5 - 19)          | 26<br>(15 - 50)         |
| Congenital anomalies                                | 129<br>(67 - 208)    | 106<br>(52 - 184)     | 6<br>(2 - 10)          | 9<br>(6 - 13)           | 3<br>(1 - 6)            | 6<br>(4 - 11)           |
| Neural tube defects                                 | 8<br>(3 - 19)        | 7<br>(2 - 18)         | 0<br>(0 - 0)           | 0<br>(0 - 1)            | 0<br>(0 - 0)            | 0<br>(0 - 0)            |
| Congenital heart anomalies                          | 43<br>(18 - 76)      | 33<br>(11 - 64)       | 3<br>(1 - 5)           | 4<br>(2 - 5)            | 1<br>(0 - 2)            | 3<br>(2 - 6)            |
| Cleft lip and cleft palate                          | 0<br>(0 - 1)         | 0<br>(0 - 1)          | --                     | --                      | --                      | --                      |
| Down syndrome                                       | 9<br>(4 - 18)        | 7<br>(3 - 16)         | 1<br>(0 - 1)           | 1<br>(1 - 1)            | 0<br>(0 - 1)            | 0<br>(0 - 0)            |
| Chromosomal unbalanced rearrangements               | 7<br>(3 - 14)        | 6<br>(3 - 13)         | 0<br>(0 - 0)           | 0<br>(0 - 1)            | 0<br>(0 - 0)            | 0<br>(0 - 0)            |
| Other congenital anomalies                          | 62<br>(32 - 105)     | 53<br>(25 - 95)       | 2<br>(1 - 4)           | 4<br>(2 - 5)            | 2<br>(1 - 3)            | 2<br>(1 - 4)            |
| Skin and subcutaneous diseases                      | 42<br>(26 - 71)      | 3<br>(1 - 7)          | 1<br>(0 - 1)           | 11<br>(8 - 16)          | 7<br>(3 - 14)           | 20<br>(11 - 40)         |
| Cellulitis                                          | 4<br>(2 - 8)         | 0<br>(0 - 1)          | 0<br>(0 - 0)           | 1<br>(1 - 2)            | 1<br>(0 - 2)            | 2<br>(1 - 4)            |
| Pyoderma                                            | 15<br>(10 - 23)      | 2<br>(1 - 4)          | 0<br>(0 - 1)           | 6<br>(4 - 9)            | 2<br>(1 - 5)            | 4<br>(2 - 8)            |

Web Table 31- Botswana deaths with 95% UI by age, sex, and cause in 2013

| Cause                                           | Both Sexes, All Ages     | Both Sexes, 0-4 Years | Both Sexes, 5-14 Years | Both Sexes, 15-49 Years | Both Sexes, 50-69 Years | Both Sexes, 70-80 Years |
|-------------------------------------------------|--------------------------|-----------------------|------------------------|-------------------------|-------------------------|-------------------------|
| Decubitus ulcer                                 | 20<br>(10 - 41)          | 0<br>(0 - 1)          | 0<br>(0 - 0)           | 3<br>(2 - 4)            | 3<br>(1 - 7)            | 13<br>(6 - 29)          |
| Other skin and subcutaneous diseases            | 3<br>(1 - 5)             | 0<br>(0 - 1)          | 0<br>(0 - 0)           | 1<br>(1 - 2)            | 0<br>(0 - 1)            | 1<br>(0 - 2)            |
| Sudden infant death syndrome                    | 11<br>(2 - 30)           | 11<br>(2 - 30)        | --                     | --                      | --                      | --                      |
| Injuries                                        | 1,450<br>(1,015 - 1,919) | 89<br>(51 - 152)      | 64<br>(43 - 91)        | 1,030<br>(668 - 1,431)  | 142<br>(84 - 237)       | 126<br>(76 - 204)       |
| Transport injuries                              | 340<br>(248 - 453)       | 21<br>(12 - 36)       | 23<br>(15 - 35)        | 256<br>(177 - 362)      | 27<br>(16 - 44)         | 14<br>(9 - 20)          |
| Road injuries                                   | 330<br>(241 - 439)       | 20<br>(11 - 34)       | 22<br>(14 - 33)        | 251<br>(173 - 354)      | 25<br>(15 - 43)         | 13<br>(9 - 19)          |
| Pedestrian road injuries                        | 53<br>(36 - 76)          | 8<br>(4 - 15)         | 9<br>(5 - 14)          | 24<br>(14 - 41)         | 6<br>(3 - 11)           | 6<br>(4 - 9)            |
| Cyclist road injuries                           | 30<br>(20 - 43)          | 2<br>(1 - 3)          | 3<br>(2 - 5)           | 18<br>(11 - 28)         | 5<br>(3 - 9)            | 2<br>(1 - 4)            |
| Motorcyclist road injuries                      | 60<br>(35 - 92)          | 1<br>(0 - 1)          | 1<br>(0 - 1)           | 55<br>(32 - 85)         | 3<br>(1 - 5)            | 1<br>(0 - 1)            |
| Motor vehicle road injuries                     | 184<br>(130 - 259)       | 9<br>(5 - 16)         | 9<br>(5 - 14)          | 152<br>(102 - 221)      | 10<br>(6 - 17)          | 4<br>(2 - 6)            |
| Other road injuries                             | 4<br>(2 - 8)             | 0<br>(0 - 1)          | 0<br>(0 - 1)           | 2<br>(1 - 4)            | 1<br>(0 - 2)            | 0<br>(0 - 1)            |
| Other transport injuries                        | 10<br>(7 - 17)           | 1<br>(1 - 2)          | 1<br>(1 - 2)           | 5<br>(3 - 11)           | 1<br>(1 - 2)            | 1<br>(0 - 1)            |
| Unintentional injuries                          | 497<br>(337 - 686)       | 64<br>(34 - 121)      | 35<br>(22 - 57)        | 238<br>(158 - 343)      | 67<br>(33 - 121)        | 92<br>(47 - 161)        |
| Falls                                           | 70<br>(45 - 103)         | 2<br>(1 - 5)          | 2<br>(1 - 4)           | 35<br>(20 - 58)         | 9<br>(5 - 19)           | 21<br>(12 - 38)         |
| Drowning                                        | 60<br>(35 - 108)         | 14<br>(5 - 35)        | 15<br>(7 - 30)         | 24<br>(13 - 45)         | 4<br>(2 - 9)            | 3<br>(2 - 6)            |
| Fire, heat, and hot substances                  | 58<br>(34 - 117)         | 8<br>(3 - 24)         | 3<br>(2 - 9)           | 29<br>(16 - 50)         | 6<br>(2 - 14)           | 12<br>(5 - 30)          |
| Poisonings                                      | 19<br>(11 - 38)          | 2<br>(1 - 4)          | 1<br>(0 - 1)           | 12<br>(6 - 29)          | 2<br>(1 - 5)            | 2<br>(1 - 4)            |
| Exposure to mechanical forces                   | 77<br>(45 - 139)         | 5<br>(2 - 11)         | 5<br>(3 - 10)          | 57<br>(30 - 107)        | 7<br>(4 - 14)           | 3<br>(2 - 6)            |
| Unintentional firearm injuries                  | 42<br>(21 - 81)          | 1<br>(0 - 2)          | 1<br>(0 - 2)           | 36<br>(17 - 71)         | 3<br>(1 - 6)            | 2<br>(1 - 4)            |
| Unintentional suffocation                       | 4<br>(1 - 8)             | 1<br>(0 - 3)          | 0<br>(0 - 1)           | 2<br>(0 - 5)            | 0<br>(0 - 1)            | 0<br>(0 - 1)            |
| Other exposure to mechanical forces             | 31<br>(16 - 67)          | 3<br>(1 - 8)          | 4<br>(2 - 8)           | 19<br>(8 - 43)          | 4<br>(2 - 8)            | 1<br>(1 - 2)            |
| Adverse effects of medical treatment            | 141<br>(52 - 262)        | 20<br>(8 - 39)        | 4<br>(1 - 10)          | 47<br>(16 - 98)         | 29<br>(6 - 70)          | 41<br>(9 - 93)          |
| Animal contact                                  | 10<br>(6 - 24)           | 2<br>(1 - 5)          | 2<br>(1 - 4)           | 5<br>(2 - 12)           | 1<br>(1 - 3)            | 1<br>(1 - 2)            |
| Venomous animal contact                         | 8<br>(4 - 20)            | 1<br>(0 - 4)          | 1<br>(0 - 3)           | 3<br>(2 - 10)           | 1<br>(0 - 2)            | 1<br>(0 - 2)            |
| Non-venomous animal contact                     | 3<br>(1 - 6)             | 0<br>(0 - 1)          | 0<br>(0 - 1)           | 1<br>(0 - 3)            | 0<br>(0 - 1)            | 0<br>(0 - 1)            |
| Foreign body                                    | 40<br>(22 - 66)          | 11<br>(5 - 24)        | 2<br>(1 - 4)           | 17<br>(9 - 28)          | 4<br>(2 - 8)            | 5<br>(3 - 10)           |
| Pulmonary aspiration and foreign body in airway | 39<br>(21 - 65)          | 11<br>(5 - 24)        | 2<br>(1 - 4)           | 17<br>(8 - 27)          | 4<br>(2 - 8)            | 5<br>(3 - 10)           |
| Foreign body in other body part                 | 1<br>(0 - 2)             | 0<br>(0 - 1)          | 0<br>(0 - 0)           | 1<br>(0 - 1)            | 0<br>(0 - 0)            | 0<br>(0 - 0)            |
| Other unintentional injuries                    | 21<br>(15 - 32)          | 1<br>(0 - 2)          | 1<br>(0 - 2)           | 12<br>(8 - 17)          | 5<br>(2 - 8)            | 3<br>(2 - 6)            |
| Self-harm and interpersonal violence            | 613<br>(207 - 978)       | 4<br>(1 - 7)          | 5<br>(2 - 11)          | 536<br>(177 - 840)      | 48<br>(12 - 101)        | 20<br>(5 - 35)          |
| Self-harm                                       | 379<br>(125 - 593)       | --                    | 3<br>(1 - 7)           | 314<br>(106 - 498)      | 43<br>(10 - 94)         | 19<br>(5 - 34)          |
| Interpersonal violence                          | 234<br>(54 - 414)        | 4<br>(1 - 7)          | 3<br>(1 - 6)           | 222<br>(51 - 394)       | 5<br>(1 - 12)           | 1<br>(0 - 2)            |
| Assault by firearm                              | 57<br>(11 - 119)         | 0<br>(0 - 1)          | 0<br>(0 - 1)           | 55<br>(10 - 115)        | 1<br>(0 - 3)            | 0<br>(0 - 0)            |
| Assault by sharp object                         | 99<br>(20 - 182)         | 1<br>(0 - 2)          | 1<br>(0 - 1)           | 96<br>(19 - 177)        | 2<br>(0 - 4)            | 0<br>(0 - 1)            |
| Assault by other means                          | 78<br>(19 - 150)         | 2<br>(1 - 5)          | 2<br>(0 - 4)           | 72<br>(17 - 138)        | 2<br>(0 - 5)            | 0<br>(0 - 1)            |

Web Table 31- Botswana deaths with 95% UI by age, sex, and cause in 2013

| Cause                                                             | Males, All Ages          | Males, 0-4 Years     | Males, 5-14 Years  | Males, 15-49 Years       | Males, 50-69 Years       | Males, 70-80 Years     |
|-------------------------------------------------------------------|--------------------------|----------------------|--------------------|--------------------------|--------------------------|------------------------|
| All causes                                                        | 8,192<br>(6,846 - 9,644) | 828<br>(580 - 1,123) | 131<br>(105 - 167) | 4,439<br>(3,547 - 5,165) | 1,563<br>(1,178 - 2,177) | 1,232<br>(993 - 1,666) |
| Communicable, maternal, neonatal, and nutritional diseases        | 4,813<br>(4,100 - 5,624) | 668<br>(482 - 879)   | 59<br>(41 - 81)    | 3,076<br>(2,541 - 3,728) | 745<br>(558 - 960)       | 265<br>(200 - 347)     |
| HIV/AIDS and tuberculosis                                         | 3,494<br>(2,842 - 4,315) | 31<br>(15 - 59)      | 16<br>(5 - 29)     | 2,713<br>(2,201 - 3,397) | 621<br>(439 - 845)       | 113<br>(71 - 169)      |
| Tuberculosis                                                      | 636<br>(351 - 996)       | 10<br>(4 - 19)       | 6<br>(3 - 10)      | 413<br>(218 - 646)       | 139<br>(69 - 263)        | 69<br>(34 - 120)       |
| HIV/AIDS                                                          | 2,858<br>(2,225 - 3,707) | 22<br>(7 - 54)       | 11<br>(0 - 23)     | 2,300<br>(1,780 - 3,019) | 482<br>(309 - 713)       | 44<br>(22 - 71)        |
| HIV/AIDS resulting in mycobacterial infection                     | 213<br>(155 - 292)       | 1<br>(0 - 3)         | 1<br>(0 - 2)       | 172<br>(125 - 238)       | 36<br>(22 - 54)          | 3<br>(2 - 6)           |
| HIV/AIDS resulting in other diseases                              | 2,645<br>(2,063 - 3,455) | 20<br>(6 - 50)       | 10<br>(0 - 21)     | 2,128<br>(1,655 - 2,795) | 446<br>(285 - 661)       | 41<br>(20 - 67)        |
| Diarrhea, lower respiratory, and other common infectious diseases | 720<br>(514 - 990)       | 209<br>(123 - 340)   | 23<br>(15 - 35)    | 257<br>(137 - 380)       | 98<br>(58 - 177)         | 133<br>(87 - 204)      |
| Diarrheal diseases                                                | 244<br>(150 - 368)       | 112<br>(54 - 210)    | 6<br>(3 - 13)      | 66<br>(30 - 117)         | 25<br>(10 - 51)          | 35<br>(17 - 66)        |
| Intestinal infectious diseases                                    | 18<br>(8 - 35)           | 5<br>(2 - 11)        | 5<br>(2 - 11)      | 6<br>(2 - 14)            | 1<br>(0 - 2)             | 0<br>(0 - 1)           |
| Typhoid fever                                                     | 13<br>(5 - 26)           | 4<br>(1 - 8)         | 4<br>(2 - 8)       | 5<br>(2 - 11)            | 1<br>(0 - 1)             | 0<br>(0 - 0)           |
| Paratyphoid fever                                                 | 5<br>(2 - 10)            | 1<br>(0 - 3)         | 1<br>(1 - 3)       | 2<br>(1 - 4)             | 0<br>(0 - 0)             | 0<br>(0 - 0)           |
| Other intestinal infectious diseases                              | 0<br>(0 - 2)             | 0<br>(0 - 1)         | 0<br>(0 - 0)       | 0<br>(0 - 1)             | 0<br>(0 - 0)             | 0<br>(0 - 0)           |
| Lower respiratory infections                                      | 404<br>(275 - 567)       | 79<br>(37 - 164)     | 7<br>(4 - 12)      | 156<br>(82 - 245)        | 68<br>(39 - 121)         | 94<br>(60 - 145)       |
| Upper respiratory infections                                      | 0<br>(0 - 1)             | 0<br>(0 - 0)         | 0<br>(0 - 0)       | 0<br>(0 - 0)             | 0<br>(0 - 0)             | 0<br>(0 - 0)           |
| Otitis media                                                      | 0<br>(0 - 0)             | 0<br>(0 - 0)         | 0<br>(0 - 0)       | 0<br>(0 - 0)             | 0<br>(0 - 0)             | 0<br>(0 - 0)           |
| Meningitis                                                        | 45<br>(29 - 67)          | 10<br>(4 - 20)       | 3<br>(1 - 5)       | 25<br>(13 - 43)          | 4<br>(2 - 7)             | 3<br>(1 - 4)           |
| Pneumococcal meningitis                                           | 7<br>(4 - 10)            | 1<br>(0 - 2)         | 0<br>(0 - 1)       | 4<br>(2 - 8)             | 1<br>(0 - 1)             | 0<br>(0 - 1)           |
| H influenzae type B meningitis                                    | 9<br>(5 - 14)            | 4<br>(2 - 8)         | 1<br>(0 - 1)       | 3<br>(2 - 7)             | 0<br>(0 - 1)             | 0<br>(0 - 1)           |
| Meningococcal meningitis                                          | 16<br>(10 - 23)          | 3<br>(1 - 6)         | 1<br>(1 - 2)       | 9<br>(5 - 15)            | 1<br>(1 - 3)             | 1<br>(0 - 2)           |
| Other meningitis                                                  | 14<br>(8 - 23)           | 2<br>(1 - 5)         | 1<br>(0 - 1)       | 9<br>(4 - 17)            | 1<br>(1 - 3)             | 1<br>(0 - 2)           |
| Encephalitis                                                      | 6<br>(3 - 10)            | 1<br>(0 - 3)         | 1<br>(0 - 2)       | 3<br>(1 - 5)             | 1<br>(0 - 2)             | 1<br>(0 - 1)           |
| Diphtheria                                                        | 0<br>(0 - 1)             | 0<br>(0 - 1)         | 0<br>(0 - 0)       | 0<br>(0 - 0)             | 0<br>(0 - 0)             | --                     |
| Whooping cough                                                    | 0<br>(0 - 0)             | 0<br>(0 - 0)         | 0<br>(0 - 0)       | 0<br>(0 - 0)             | 0<br>(0 - 0)             | --                     |
| Tetanus                                                           | 1<br>(0 - 1)             | 0<br>(0 - 0)         | 0<br>(0 - 0)       | 0<br>(0 - 1)             | 0<br>(0 - 0)             | 0<br>(0 - 0)           |
| Measles                                                           | 2<br>(0 - 12)            | 2<br>(0 - 10)        | 0<br>(0 - 1)       | 0<br>(0 - 0)             | 0<br>(0 - 0)             | --                     |
| Varicella and herpes zoster                                       | 0<br>(0 - 1)             | 0<br>(0 - 0)         | 0<br>(0 - 0)       | 0<br>(0 - 0)             | 0<br>(0 - 0)             | 0<br>(0 - 0)           |
| Neglected tropical diseases and malaria                           | 128<br>(69 - 240)        | 20<br>(4 - 69)       | 17<br>(6 - 37)     | 71<br>(34 - 130)         | 14<br>(6 - 28)           | 7<br>(3 - 14)          |
| Malaria                                                           | 112<br>(53 - 223)        | 18<br>(2 - 66)       | 16<br>(5 - 37)     | 61<br>(26 - 117)         | 12<br>(5 - 25)           | 5<br>(2 - 12)          |
| Leishmaniasis                                                     | 0<br>(0 - 0)             | 0<br>(0 - 0)         | 0<br>(0 - 0)       | 0<br>(0 - 0)             | 0<br>(0 - 0)             | 0<br>(0 - 0)           |
| Visceral leishmaniasis                                            | 0<br>(0 - 0)             | 0<br>(0 - 0)         | 0<br>(0 - 0)       | 0<br>(0 - 0)             | 0<br>(0 - 0)             | 0<br>(0 - 0)           |
| Schistosomiasis                                                   | 3<br>(2 - 5)             | 0<br>(0 - 0)         | 0<br>(0 - 0)       | 2<br>(1 - 3)             | 1<br>(0 - 1)             | 0<br>(0 - 1)           |
| Cysticercosis                                                     | 0<br>(0 - 0)             | 0<br>(0 - 0)         | 0<br>(0 - 0)       | 0<br>(0 - 0)             | 0<br>(0 - 0)             | 0<br>(0 - 0)           |
| Cystic echinococcosis                                             | 0<br>(0 - 0)             | 0<br>(0 - 0)         | 0<br>(0 - 0)       | 0<br>(0 - 0)             | 0<br>(0 - 0)             | 0<br>(0 - 0)           |
| Dengue                                                            | 0<br>(0 - 0)             | 0<br>(0 - 0)         | 0<br>(0 - 0)       | 0<br>(0 - 0)             | 0<br>(0 - 0)             | 0<br>(0 - 0)           |
| Rabies                                                            | 0<br>(0 - 0)             | 0<br>(0 - 0)         | 0<br>(0 - 0)       | 0<br>(0 - 0)             | 0<br>(0 - 0)             | 0<br>(0 - 0)           |
| Intestinal nematode infections                                    | 1<br>(0 - 4)             | 0<br>(0 - 2)         | 0<br>(0 - 1)       | 0<br>(0 - 2)             | 0<br>(0 - 2)             | 0<br>(0 - 0)           |
| Ascariasis                                                        | 1<br>(0 - 4)             | 0<br>(0 - 2)         | 0<br>(0 - 1)       | 0<br>(0 - 2)             | 0<br>(0 - 2)             | 0<br>(0 - 0)           |
| Other neglected tropical diseases                                 | 12<br>(6 - 27)           | 2<br>(1 - 7)         | 0<br>(0 - 1)       | 8<br>(3 - 16)            | 1<br>(0 - 3)             | 1<br>(0 - 2)           |
| Maternal disorders                                                | --                       | --                   | --                 | --                       | --                       | --                     |



Web Table 31- Botswana deaths with 95% UI by age, sex, and cause in 2013

| Cause                                                            | Males, All Ages          | Males, 0-4 Years   | Males, 5-14 Years | Males, 15-49 Years | Males, 50-69 Years   | Males, 70-80 Years   |
|------------------------------------------------------------------|--------------------------|--------------------|-------------------|--------------------|----------------------|----------------------|
| Maternal hemorrhage                                              | --                       | --                 | --                | --                 | --                   | --                   |
| Maternal sepsis and other maternal infections                    | --                       | --                 | --                | --                 | --                   | --                   |
| Maternal hypertensive disorders                                  | --                       | --                 | --                | --                 | --                   | --                   |
| Maternal obstructed labor                                        | --                       | --                 | --                | --                 | --                   | --                   |
| Maternal abortive outcome                                        | --                       | --                 | --                | --                 | --                   | --                   |
| Indirect maternal deaths                                         | --                       | --                 | --                | --                 | --                   | --                   |
| Late maternal deaths                                             | --                       | --                 | --                | --                 | --                   | --                   |
| Maternal deaths aggravated by HIV/AIDS                           | --                       | --                 | --                | --                 | --                   | --                   |
| Other maternal disorders                                         | --                       | --                 | --                | --                 | --                   | --                   |
| Neonatal disorders                                               | 372<br>(277 - 478)       | 372<br>(277 - 478) | --                | --                 | --                   | --                   |
| Neonatal preterm birth complications                             | 119<br>(54 - 211)        | 119<br>(54 - 211)  | --                | --                 | --                   | --                   |
| Neonatal encephalopathy due to birth asphyxia and trauma         | 97<br>(41 - 174)         | 97<br>(41 - 174)   | --                | --                 | --                   | --                   |
| Neonatal sepsis and other neonatal infections                    | 40<br>(13 - 87)          | 40<br>(13 - 87)    | --                | --                 | --                   | --                   |
| Hemolytic disease and other neonatal jaundice                    | 1<br>(0 - 3)             | 1<br>(0 - 3)       | --                | --                 | --                   | --                   |
| Other neonatal disorders                                         | 115<br>(38 - 204)        | 115<br>(38 - 204)  | --                | --                 | --                   | --                   |
| Nutritional deficiencies                                         | 53<br>(27 - 106)         | 23<br>(9 - 50)     | 1<br>(1 - 3)      | 12<br>(5 - 29)     | 6<br>(3 - 14)        | 10<br>(5 - 22)       |
| Protein-energy malnutrition                                      | 35<br>(15 - 72)          | 22<br>(8 - 49)     | 1<br>(0 - 2)      | 5<br>(1 - 11)      | 3<br>(1 - 7)         | 4<br>(1 - 11)        |
| Iodine deficiency                                                | 0<br>(0 - 0)             | 0<br>(0 - 0)       | 0<br>(0 - 0)      | 0<br>(0 - 0)       | 0<br>(0 - 0)         | 0<br>(0 - 0)         |
| Iron-deficiency anemia                                           | 16<br>(6 - 40)           | 1<br>(0 - 2)       | 0<br>(0 - 1)      | 7<br>(3 - 18)      | 3<br>(1 - 8)         | 5<br>(2 - 12)        |
| Other nutritional deficiencies                                   | 2<br>(1 - 5)             | 0<br>(0 - 0)       | 0<br>(0 - 0)      | 1<br>(0 - 2)       | 0<br>(0 - 1)         | 1<br>(0 - 2)         |
| Other communicable, maternal, neonatal, and nutritional diseases | 45<br>(27 - 73)          | 13<br>(5 - 27)     | 2<br>(1 - 3)      | 22<br>(11 - 41)    | 5<br>(2 - 11)        | 3<br>(1 - 7)         |
| Sexually transmitted diseases excluding HIV                      | 9                        | 8                  | 0                 | 0                  | 0                    | 0                    |
| Syphilis                                                         | 9<br>(3 - 19)            | 8<br>(2 - 18)      | 0<br>(0 - 1)      | 0<br>(0 - 0)       | 0<br>(0 - 0)         | 0<br>(0 - 0)         |
| Chlamydial infection                                             | --                       | --                 | --                | --                 | --                   | --                   |
| Gonococcal infection                                             | 0<br>(0 - 0)             | --                 | 0<br>(0 - 0)      | 0<br>(0 - 0)       | 0<br>(0 - 0)         | 0<br>(0 - 0)         |
| Other sexually transmitted diseases                              | 0<br>(0 - 0)             | --                 | 0<br>(0 - 0)      | 0<br>(0 - 0)       | 0<br>(0 - 0)         | 0<br>(0 - 0)         |
| Hepatitis                                                        | 5<br>(3 - 9)             | 1<br>(0 - 2)       | 0<br>(0 - 0)      | 3<br>(1 - 4)       | 1<br>(1 - 2)         | 1<br>(0 - 1)         |
| Acute hepatitis A                                                | 1<br>(0 - 1)             | 0<br>(0 - 1)       | 0<br>(0 - 0)      | 0<br>(0 - 1)       | 0<br>(0 - 0)         | 0<br>(0 - 0)         |
| Acute hepatitis B                                                | 3<br>(2 - 6)             | 0<br>(0 - 1)       | 0<br>(0 - 0)      | 1<br>(1 - 2)       | 1<br>(0 - 2)         | 1<br>(0 - 1)         |
| Acute hepatitis C                                                | 0<br>(0 - 0)             | --                 | 0<br>(0 - 0)      | 0<br>(0 - 0)       | 0<br>(0 - 0)         | 0<br>(0 - 0)         |
| Acute hepatitis E                                                | 1<br>(1 - 2)             | 0<br>(0 - 0)       | 0<br>(0 - 0)      | 1<br>(0 - 2)       | 0<br>(0 - 2)         | 0<br>(0 - 0)         |
| Other infectious diseases                                        | 31<br>(16 - 55)          | 4<br>(1 - 12)      | 1<br>(0 - 2)      | 19<br>(9 - 37)     | 4<br>(1 - 9)         | 2<br>(1 - 6)         |
| Non-communicable diseases                                        | 2,299<br>(1,639 - 3,270) | 108<br>(55 - 177)  | 27<br>(19 - 40)   | 576<br>(323 - 801) | 696<br>(439 - 1,169) | 892<br>(684 - 1,250) |
| Neoplasms                                                        | 418<br>(289 - 632)       | 5<br>(2 - 11)      | 6<br>(4 - 10)     | 60<br>(34 - 84)    | 168<br>(103 - 288)   | 178<br>(130 - 257)   |
| Esophageal cancer                                                | 44<br>(25 - 75)          | --                 | --                | 6<br>(3 - 9)       | 22<br>(11 - 42)      | 16<br>(9 - 28)       |
| Stomach cancer                                                   | 19<br>(13 - 30)          | --                 | --                | 3<br>(2 - 4)       | 7<br>(4 - 12)        | 9<br>(6 - 14)        |
| Liver cancer                                                     | 34<br>(18 - 56)          | --                 | 0<br>(0 - 0)      | 8<br>(4 - 13)      | 15<br>(7 - 28)       | 11<br>(5 - 18)       |
| Liver cancer due to hepatitis B                                  | 12<br>(6 - 22)           | --                 | 0<br>(0 - 0)      | 4<br>(2 - 6)       | 5<br>(2 - 12)        | 3<br>(1 - 6)         |
| Liver cancer due to hepatitis C                                  | 13<br>(6 - 25)           | --                 | 0<br>(0 - 0)      | 3<br>(1 - 6)       | 6<br>(2 - 13)        | 4<br>(2 - 8)         |
| Liver cancer due to alcohol use                                  | 6<br>(2 - 12)            | --                 | --                | 1<br>(0 - 2)       | 3<br>(1 - 6)         | 3<br>(1 - 5)         |

Web Table 31- Botswana deaths with 95% UI by age, sex, and cause in 2013

| Cause                                         | Males, All Ages      | Males, 0-4 Years | Males, 5-14 Years | Males, 15-49 Years | Males, 50-69 Years | Males, 70-80 Years |
|-----------------------------------------------|----------------------|------------------|-------------------|--------------------|--------------------|--------------------|
| Liver cancer due to other causes              | 3<br>(1 - 6)         | --               | 0<br>(0 - 0)      | 1<br>(0 - 2)       | 1<br>(0 - 3)       | 1<br>(0 - 1)       |
| Larynx cancer                                 | 7<br>(5 - 13)        | --               | --                | 1<br>(1 - 2)       | 4<br>(2 - 7)       | 3<br>(2 - 4)       |
| Tracheal, bronchus and lung cancer            | 58<br>(36 - 107)     | --               | --                | 6<br>(3 - 9)       | 29<br>(16 - 62)    | 23<br>(15 - 39)    |
| Breast cancer                                 | 2<br>(1 - 3)         | --               | --                | 0<br>(0 - 1)       | 1<br>(0 - 2)       | 1<br>(0 - 2)       |
| Cervical cancer                               | --                   | --               | --                | --                 | --                 | --                 |
| Uterine cancer                                | --                   | --               | --                | --                 | --                 | --                 |
| Prostate cancer                               | 64<br>(35 - 109)     | --               | --                | 1<br>(0 - 1)       | 16<br>(7 - 30)     | 48<br>(27 - 79)    |
| Colon and rectum cancer                       | 43<br>(29 - 65)      | --               | --                | 5<br>(3 - 6)       | 16<br>(10 - 28)    | 22<br>(15 - 33)    |
| Lip and oral cavity cancer                    | 11<br>(6 - 22)       | --               | --                | 2<br>(1 - 3)       | 6<br>(3 - 12)      | 4<br>(2 - 7)       |
| Nasopharynx cancer                            | 2<br>(1 - 4)         | --               | 0<br>(0 - 0)      | 1<br>(0 - 1)       | 1<br>(1 - 2)       | 0<br>(0 - 1)       |
| Other pharynx cancer                          | 8<br>(4 - 16)        | --               | --                | 1<br>(0 - 1)       | 6<br>(2 - 13)      | 1<br>(1 - 2)       |
| Gallbladder and biliary tract cancer          | 3<br>(2 - 6)         | --               | --                | 0<br>(0 - 1)       | 2<br>(1 - 3)       | 1<br>(1 - 2)       |
| Pancreatic cancer                             | 17<br>(11 - 27)      | --               | --                | 2<br>(1 - 3)       | 8<br>(5 - 14)      | 7<br>(4 - 10)      |
| Malignant skin melanoma                       | 4<br>(2 - 7)         | --               | --                | 1<br>(0 - 2)       | 2<br>(1 - 3)       | 2<br>(1 - 3)       |
| Non-melanoma skin cancer                      | 3<br>(2 - 5)         | --               | --                | 1<br>(0 - 1)       | 1<br>(0 - 2)       | 1<br>(1 - 2)       |
| Ovarian cancer                                | --                   | --               | --                | --                 | --                 | --                 |
| Testicular cancer                             | 2<br>(1 - 3)         | --               | --                | 1<br>(0 - 1)       | 1<br>(0 - 1)       | 0<br>(0 - 1)       |
| Kidney cancer                                 | 5<br>(3 - 9)         | 0<br>(0 - 1)     | 0<br>(0 - 0)      | 1<br>(0 - 1)       | 2<br>(1 - 5)       | 2<br>(1 - 3)       |
| Bladder cancer                                | 7<br>(5 - 11)        | --               | --                | 1<br>(0 - 1)       | 2<br>(1 - 4)       | 4<br>(3 - 7)       |
| Brain and nervous system cancer               | 6<br>(3 - 10)        | 0<br>(0 - 1)     | 1<br>(0 - 1)      | 2<br>(1 - 3)       | 2<br>(1 - 4)       | 1<br>(1 - 2)       |
| Thyroid cancer                                | 1<br>(1 - 2)         | --               | 0<br>(0 - 0)      | 0<br>(0 - 0)       | 1<br>(0 - 1)       | 0<br>(0 - 1)       |
| Mesothelioma                                  | 3<br>(2 - 5)         | --               | --                | 0<br>(0 - 1)       | 2<br>(1 - 3)       | 1<br>(1 - 2)       |
| Hodgkin lymphoma                              | 2<br>(1 - 3)         | 0<br>(0 - 0)     | 0<br>(0 - 0)      | 1<br>(0 - 1)       | 0<br>(0 - 1)       | 0<br>(0 - 0)       |
| Non-Hodgkin lymphoma                          | 23<br>(14 - 36)      | 1<br>(0 - 1)     | 1<br>(0 - 1)      | 6<br>(3 - 9)       | 8<br>(4 - 15)      | 7<br>(4 - 13)      |
| Multiple myeloma                              | 5<br>(2 - 8)         | --               | --                | 1<br>(0 - 1)       | 2<br>(1 - 4)       | 2<br>(1 - 3)       |
| Leukemia                                      | 14<br>(9 - 20)       | 1<br>(0 - 2)     | 2<br>(1 - 3)      | 4<br>(2 - 6)       | 3<br>(2 - 6)       | 4<br>(3 - 6)       |
| Other neoplasms                               | 31<br>(18 - 47)      | 3<br>(1 - 7)     | 3<br>(1 - 5)      | 8<br>(5 - 13)      | 9<br>(5 - 16)      | 7<br>(4 - 12)      |
| Cardiovascular diseases                       | 720<br>(511 - 1,063) | 3<br>(1 - 5)     | 3<br>(2 - 5)      | 120<br>(71 - 168)  | 244<br>(154 - 413) | 350<br>(266 - 493) |
| Rheumatic heart disease                       | 9<br>(5 - 18)        | 0<br>(0 - 0)     | 0<br>(0 - 1)      | 4<br>(2 - 9)       | 2<br>(1 - 4)       | 3<br>(2 - 5)       |
| Ischemic heart disease                        | 265<br>(179 - 402)   | 0<br>(0 - 0)     | 0<br>(0 - 0)      | 38<br>(22 - 55)    | 94<br>(57 - 162)   | 133<br>(91 - 193)  |
| Cerebrovascular disease                       | 265<br>(177 - 401)   | 1<br>(0 - 2)     | 1<br>(0 - 2)      | 44<br>(26 - 64)    | 86<br>(51 - 152)   | 134<br>(93 - 194)  |
| Ischemic stroke                               | 131<br>(77 - 215)    | 0<br>(0 - 0)     | 0<br>(0 - 0)      | 8<br>(4 - 14)      | 40<br>(20 - 77)    | 82<br>(51 - 129)   |
| Hemorrhagic stroke                            | 134<br>(83 - 208)    | 1<br>(0 - 1)     | 1<br>(0 - 2)      | 36<br>(21 - 53)    | 46<br>(24 - 81)    | 51<br>(31 - 79)    |
| Hypertensive heart disease                    | 74<br>(31 - 153)     | 0<br>(0 - 0)     | 0<br>(0 - 0)      | 10<br>(4 - 17)     | 27<br>(9 - 64)     | 38<br>(15 - 74)    |
| Cardiomyopathy and myocarditis                | 54<br>(31 - 97)      | 1<br>(0 - 2)     | 1<br>(0 - 1)      | 14<br>(7 - 22)     | 20<br>(10 - 40)    | 18<br>(9 - 35)     |
| Atrial fibrillation and flutter               | 1<br>(0 - 2)         | --               | --                | 0<br>(0 - 0)       | 0<br>(0 - 1)       | 1<br>(0 - 1)       |
| Aortic aneurysm                               | 11<br>(6 - 18)       | --               | --                | 1<br>(1 - 2)       | 4<br>(2 - 7)       | 7<br>(4 - 11)      |
| Peripheral vascular disease                   | 4<br>(2 - 7)         | --               | --                | 0<br>(0 - 0)       | 1<br>(1 - 3)       | 2<br>(1 - 4)       |
| Endocarditis                                  | 7<br>(4 - 11)        | 0<br>(0 - 1)     | 0<br>(0 - 1)      | 2<br>(1 - 4)       | 2<br>(1 - 4)       | 2<br>(1 - 3)       |
| Other cardiovascular and circulatory diseases | 30<br>(17 - 49)      | 0<br>(0 - 1)     | 0<br>(0 - 1)      | 8<br>(4 - 13)      | 9<br>(4 - 16)      | 13<br>(7 - 21)     |

Web Table 31- Botswana deaths with 95% UI by age, sex, and cause in 2013

| Cause                                               | Males, All Ages    | Males, 0-4 Years | Males, 5-14 Years | Males, 15-49 Years | Males, 50-69 Years | Males, 70-80 Years |
|-----------------------------------------------------|--------------------|------------------|-------------------|--------------------|--------------------|--------------------|
| Chronic respiratory diseases                        | 307<br>(203 - 481) | 3<br>(1 - 7)     | 2<br>(1 - 3)      | 50<br>(28 - 87)    | 100<br>(59 - 181)  | 151<br>(101 - 235) |
| Chronic obstructive pulmonary disease               | 204<br>(128 - 330) | 1<br>(0 - 3)     | 0<br>(0 - 1)      | 23<br>(12 - 42)    | 66<br>(38 - 123)   | 113<br>(74 - 177)  |
| Pneumoconiosis                                      | 18<br>(9 - 33)     | 0<br>(0 - 0)     | 0<br>(0 - 0)      | 3<br>(2 - 7)       | 6<br>(3 - 12)      | 9<br>(4 - 16)      |
| Silicosis                                           | 3<br>(1 - 8)       | 0<br>(0 - 0)     | 0<br>(0 - 0)      | 1<br>(0 - 1)       | 1<br>(0 - 2)       | 2<br>(1 - 4)       |
| Asbestosis                                          | 5<br>(2 - 10)      | 0<br>(0 - 0)     | 0<br>(0 - 0)      | 1<br>(0 - 2)       | 2<br>(1 - 4)       | 3<br>(1 - 5)       |
| Coal workers pneumoconiosis                         | 4<br>(2 - 8)       | 0<br>(0 - 0)     | 0<br>(0 - 0)      | 1<br>(0 - 1)       | 2<br>(1 - 4)       | 2<br>(1 - 4)       |
| Other pneumoconiosis                                | 6<br>(3 - 10)      | 0<br>(0 - 0)     | 0<br>(0 - 0)      | 1<br>(1 - 3)       | 2<br>(1 - 4)       | 2<br>(1 - 4)       |
| Asthma                                              | 66<br>(39 - 110)   | 1<br>(0 - 2)     | 1<br>(1 - 2)      | 20<br>(10 - 34)    | 22<br>(12 - 42)    | 22<br>(12 - 37)    |
| Interstitial lung disease and pulmonary sarcoidosis | 14<br>(1 - 34)     | 0<br>(0 - 2)     | 0<br>(0 - 0)      | 3<br>(0 - 8)       | 5<br>(0 - 13)      | 6<br>(1 - 14)      |
| Other chronic respiratory diseases                  | 5<br>(2 - 11)      | 1<br>(0 - 2)     | 0<br>(0 - 0)      | 1<br>(0 - 3)       | 1<br>(0 - 3)       | 2<br>(1 - 5)       |
| Cirrhosis                                           | 71<br>(46 - 105)   | 0<br>(0 - 1)     | 1<br>(0 - 1)      | 28<br>(16 - 40)    | 27<br>(16 - 47)    | 15<br>(10 - 23)    |
| Cirrhosis due to hepatitis B                        | 10<br>(5 - 18)     | 0<br>(0 - 0)     | 0<br>(0 - 0)      | 4<br>(2 - 7)       | 4<br>(2 - 8)       | 2<br>(1 - 4)       |
| Cirrhosis due to hepatitis C                        | 6<br>(3 - 11)      | 0<br>(0 - 0)     | 0<br>(0 - 0)      | 2<br>(1 - 4)       | 2<br>(1 - 5)       | 2<br>(1 - 4)       |
| Cirrhosis due to alcohol use                        | 43<br>(28 - 68)    | --               | --                | 16<br>(9 - 24)     | 18<br>(10 - 32)    | 10<br>(6 - 15)     |
| Cirrhosis due to other causes                       | 11<br>(6 - 19)     | 0<br>(0 - 1)     | 0<br>(0 - 1)      | 6<br>(3 - 10)      | 3<br>(1 - 6)       | 1<br>(0 - 2)       |
| Digestive diseases                                  | 106<br>(66 - 160)  | 2<br>(1 - 4)     | 2<br>(1 - 3)      | 49<br>(27 - 76)    | 25<br>(14 - 46)    | 28<br>(18 - 44)    |
| Peptic ulcer disease                                | 21<br>(11 - 39)    | 0<br>(0 - 0)     | 0<br>(0 - 0)      | 9<br>(4 - 17)      | 5<br>(2 - 11)      | 7<br>(3 - 13)      |
| Gastritis and duodenitis                            | 6<br>(2 - 14)      | 0<br>(0 - 0)     | 0<br>(0 - 0)      | 3<br>(1 - 5)       | 2<br>(1 - 4)       | 2<br>(1 - 5)       |
| Appendicitis                                        | 4<br>(2 - 6)       | 0<br>(0 - 0)     | 0<br>(0 - 1)      | 2<br>(1 - 3)       | 1<br>(0 - 1)       | 1<br>(0 - 2)       |
| Paralytic ileus and intestinal obstruction          | 19<br>(10 - 32)    | 1<br>(0 - 1)     | 1<br>(0 - 1)      | 6<br>(3 - 12)      | 5<br>(2 - 11)      | 6<br>(3 - 12)      |
| Inguinal, femoral, and abdominal hernia             | 2<br>(1 - 4)       | 0<br>(0 - 0)     | 0<br>(0 - 0)      | 1<br>(0 - 1)       | 0<br>(0 - 1)       | 1<br>(0 - 2)       |
| Inflammatory bowel disease                          | 19<br>(11 - 32)    | 1<br>(0 - 2)     | 0<br>(0 - 1)      | 12<br>(6 - 20)     | 3<br>(2 - 7)       | 3<br>(2 - 6)       |
| Vascular intestinal disorders                       | 2<br>(0 - 4)       | 0<br>(0 - 0)     | 0<br>(0 - 0)      | 1<br>(0 - 1)       | 0<br>(0 - 1)       | 1<br>(0 - 2)       |
| Gallbladder and biliary diseases                    | 6<br>(3 - 11)      | 0<br>(0 - 0)     | 0<br>(0 - 0)      | 2<br>(1 - 3)       | 2<br>(1 - 4)       | 3<br>(1 - 5)       |
| Pancreatitis                                        | 14<br>(7 - 24)     | 0<br>(0 - 0)     | 0<br>(0 - 0)      | 9<br>(4 - 15)      | 3<br>(1 - 7)       | 2<br>(1 - 3)       |
| Other digestive diseases                            | 13<br>(7 - 22)     | 0<br>(0 - 1)     | 0<br>(0 - 0)      | 6<br>(3 - 10)      | 3<br>(1 - 6)       | 3<br>(2 - 6)       |
| Neurological disorders                              | 105<br>(74 - 147)  | 3<br>(1 - 7)     | 3<br>(1 - 6)      | 34<br>(18 - 52)    | 17<br>(10 - 32)    | 48<br>(36 - 67)    |
| Alzheimer disease and other dementias               | 40<br>(28 - 57)    | --               | --                | 0<br>(0 - 0)       | 3<br>(2 - 6)       | 37<br>(26 - 52)    |
| Parkinson disease                                   | 4<br>(2 - 8)       | --               | --                | 0<br>(0 - 0)       | 1<br>(0 - 2)       | 4<br>(2 - 7)       |
| Epilepsy                                            | 54<br>(33 - 85)    | 2<br>(1 - 7)     | 3<br>(1 - 6)      | 32<br>(17 - 49)    | 11<br>(6 - 23)     | 6<br>(4 - 11)      |
| Multiple sclerosis                                  | 0<br>(0 - 0)       | --               | --                | 0<br>(0 - 0)       | 0<br>(0 - 0)       | 0<br>(0 - 0)       |
| Other neurological disorders                        | 6<br>(3 - 9)       | 1<br>(0 - 1)     | 0<br>(0 - 1)      | 2<br>(1 - 3)       | 2<br>(1 - 3)       | 1<br>(1 - 2)       |
| Mental and substance use disorders                  | 142<br>(81 - 220)  | 3<br>(1 - 5)     | 0<br>(0 - 0)      | 122<br>(66 - 190)  | 10<br>(6 - 18)     | 7<br>(4 - 11)      |
| Schizophrenia                                       | 4<br>(2 - 6)       | --               | --                | 2<br>(1 - 3)       | 1<br>(0 - 2)       | 1<br>(0 - 2)       |
| Alcohol use disorders                               | 32<br>(17 - 51)    | --               | --                | 24<br>(12 - 39)    | 6<br>(3 - 12)      | 1<br>(1 - 3)       |
| Drug use disorders                                  | 106<br>(58 - 169)  | 3<br>(1 - 5)     | --                | 96<br>(51 - 155)   | 3<br>(1 - 5)       | 5<br>(2 - 8)       |
| Opioid use disorders                                | 12<br>(6 - 19)     | 0<br>(0 - 1)     | --                | 10<br>(5 - 18)     | 0<br>(0 - 0)       | 0<br>(0 - 1)       |
| Cocaine use disorders                               | 0<br>(0 - 1)       | 0<br>(0 - 0)     | --                | 0<br>(0 - 1)       | 0<br>(0 - 0)       | 0<br>(0 - 0)       |
| Amphetamine use disorders                           | 0<br>(0 - 0)       | 0<br>(0 - 0)     | --                | 0<br>(0 - 0)       | 0<br>(0 - 0)       | 0<br>(0 - 0)       |
| Other drug use disorders                            | 94<br>(51 - 150)   | 2<br>(1 - 4)     | --                | 85<br>(45 - 137)   | 2<br>(1 - 5)       | 4<br>(2 - 7)       |

Web Table 31- Botswana deaths with 95% UI by age, sex, and cause in 2013

| Cause                                               | Males, All Ages    | Males, 0-4 Years | Males, 5-14 Years | Males, 15-49 Years | Males, 50-69 Years | Males, 70-80 Years |
|-----------------------------------------------------|--------------------|------------------|-------------------|--------------------|--------------------|--------------------|
| Eating disorders                                    | 0<br>(0 - 0)       | --               | 0<br>(0 - 0)      | 0<br>(0 - 0)       | --                 | --                 |
| Anorexia nervosa                                    | 0<br>(0 - 0)       | --               | 0<br>(0 - 0)      | 0<br>(0 - 0)       | --                 | --                 |
| Diabetes, urogenital, blood, and endocrine diseases | 322<br>(222 - 460) | 18<br>(6 - 36)   | 6<br>(3 - 10)     | 98<br>(51 - 144)   | 97<br>(59 - 162)   | 103<br>(74 - 148)  |
| Diabetes mellitus                                   | 130<br>(89 - 198)  | 0<br>(0 - 0)     | 0<br>(0 - 0)      | 19<br>(11 - 27)    | 53<br>(31 - 92)    | 58<br>(39 - 86)    |
| Acute glomerulonephritis                            | 0<br>(0 - 1)       | 0<br>(0 - 0)     | 0<br>(0 - 0)      | 0<br>(0 - 0)       | 0<br>(0 - 0)       | 0<br>(0 - 0)       |
| Chronic kidney disease                              | 59<br>(37 - 93)    | 1<br>(0 - 2)     | 1<br>(0 - 1)      | 18<br>(10 - 28)    | 16<br>(9 - 31)     | 24<br>(15 - 38)    |
| Chronic kidney disease due to diabetes mellitus     | 0<br>(0 - 0)       | 0<br>(0 - 0)     | 0<br>(0 - 0)      | 0<br>(0 - 0)       | 0<br>(0 - 0)       | 0<br>(0 - 0)       |
| Chronic kidney disease due to hypertension          | 35<br>(21 - 56)    | 0<br>(0 - 0)     | 0<br>(0 - 0)      | 9<br>(5 - 15)      | 11<br>(6 - 19)     | 15<br>(9 - 24)     |
| Chronic kidney disease due to glomerulonephritis    | 7<br>(4 - 13)      | 0<br>(0 - 1)     | 0<br>(0 - 1)      | 4<br>(2 - 6)       | 1<br>(0 - 3)       | 2<br>(1 - 4)       |
| Chronic kidney disease due to other causes          | 17<br>(7 - 34)     | 0<br>(0 - 2)     | 0<br>(0 - 1)      | 5<br>(2 - 10)      | 4<br>(1 - 12)      | 7<br>(2 - 15)      |
| Urinary diseases and male infertility               | 17<br>(12 - 27)    | 1<br>(0 - 1)     | 0<br>(0 - 0)      | 5<br>(3 - 8)       | 4<br>(2 - 8)       | 7<br>(4 - 11)      |
| Interstitial nephritis and urinary tract infections | 7<br>(4 - 11)      | 0<br>(0 - 1)     | 0<br>(0 - 0)      | 2<br>(1 - 3)       | 2<br>(1 - 4)       | 3<br>(1 - 5)       |
| Urolithiasis                                        | 0<br>(0 - 1)       | --               | 0<br>(0 - 0)      | 0<br>(0 - 0)       | 0<br>(0 - 0)       | 0<br>(0 - 0)       |
| Other urinary diseases                              | 10<br>(7 - 16)     | 0<br>(0 - 1)     | 0<br>(0 - 0)      | 3<br>(2 - 5)       | 3<br>(1 - 5)       | 5<br>(2 - 7)       |
| Gynecological diseases                              | --                 | --               | --                | --                 | --                 | --                 |
| Uterine fibroids                                    | --                 | --               | --                | --                 | --                 | --                 |
| Polycystic ovarian syndrome                         | --                 | --               | --                | --                 | --                 | --                 |
| Endometriosis                                       | --                 | --               | --                | --                 | --                 | --                 |
| Genital prolapse                                    | --                 | --               | --                | --                 | --                 | --                 |
| Other gynecological diseases                        | --                 | --               | --                | --                 | --                 | --                 |
| Hemoglobinopathies and hemolytic anemias            | 12<br>(7 - 21)     | 2<br>(1 - 4)     | 1<br>(0 - 2)      | 6<br>(3 - 10)      | 2<br>(1 - 3)       | 2<br>(1 - 4)       |
| Thalassemias                                        | 1<br>(0 - 2)       | 1<br>(0 - 1)     | 0<br>(0 - 0)      | 0<br>(0 - 0)       | 0<br>(0 - 0)       | 0<br>(0 - 0)       |
| Sickle cell disorders                               | 2<br>(1 - 3)       | 0<br>(0 - 1)     | 0<br>(0 - 0)      | 1<br>(0 - 2)       | 0<br>(0 - 0)       | 0<br>(0 - 0)       |
| G6PD deficiency                                     | 1<br>(0 - 2)       | 0<br>(0 - 0)     | 0<br>(0 - 0)      | 1<br>(0 - 1)       | 0<br>(0 - 0)       | 0<br>(0 - 0)       |
| Other hemoglobinopathies and hemolytic anemias      | 9<br>(5 - 15)      | 1<br>(0 - 2)     | 0<br>(0 - 1)      | 4<br>(2 - 7)       | 1<br>(1 - 3)       | 2<br>(1 - 4)       |
| Endocrine, metabolic, blood, and immune disorders   | 102<br>(38 - 157)  | 15<br>(4 - 33)   | 4<br>(1 - 8)      | 51<br>(17 - 85)    | 21<br>(7 - 40)     | 12<br>(5 - 21)     |
| Musculoskeletal disorders                           | 8<br>(5 - 13)      | --               | 0<br>(0 - 1)      | 3<br>(2 - 5)       | 2<br>(1 - 4)       | 3<br>(1 - 4)       |
| Rheumatoid arthritis                                | 3<br>(1 - 5)       | --               | 0<br>(0 - 0)      | 1<br>(0 - 1)       | 1<br>(0 - 2)       | 1<br>(0 - 2)       |
| Other musculoskeletal disorders                     | 5<br>(3 - 9)       | --               | 0<br>(0 - 0)      | 2<br>(1 - 4)       | 1<br>(1 - 3)       | 1<br>(1 - 3)       |
| Other non-communicable diseases                     | 101<br>(57 - 156)  | 70<br>(33 - 124) | 4<br>(2 - 6)      | 10<br>(6 - 15)     | 6<br>(4 - 12)      | 10<br>(6 - 16)     |
| Congenital anomalies                                | 76<br>(36 - 127)   | 63<br>(27 - 113) | 3<br>(1 - 6)      | 4<br>(2 - 7)       | 2<br>(1 - 4)       | 3<br>(2 - 4)       |
| Neural tube defects                                 | 4<br>(1 - 14)      | 4<br>(1 - 13)    | 0<br>(0 - 0)      | 0<br>(0 - 0)       | 0<br>(0 - 0)       | 0<br>(0 - 0)       |
| Congenital heart anomalies                          | 26<br>(10 - 50)    | 20<br>(6 - 43)   | 2<br>(1 - 4)      | 2<br>(1 - 3)       | 1<br>(0 - 2)       | 1<br>(1 - 2)       |
| Cleft lip and cleft palate                          | 0<br>(0 - 0)       | 0<br>(0 - 0)     | --                | --                 | --                 | --                 |
| Down syndrome                                       | 6<br>(2 - 14)      | 5<br>(1 - 12)    | 0<br>(0 - 1)      | 1<br>(0 - 1)       | 0<br>(0 - 1)       | 0<br>(0 - 0)       |
| Chromosomal unbalanced rearrangements               | 3<br>(1 - 7)       | 3<br>(1 - 7)     | 0<br>(0 - 0)      | 0<br>(0 - 0)       | 0<br>(0 - 0)       | 0<br>(0 - 0)       |
| Other congenital anomalies                          | 36<br>(16 - 73)    | 31<br>(12 - 65)  | 1<br>(0 - 2)      | 2<br>(1 - 3)       | 1<br>(1 - 2)       | 1<br>(1 - 2)       |
| Skin and subcutaneous diseases                      | 19<br>(12 - 28)    | 1<br>(0 - 3)     | 0<br>(0 - 1)      | 6<br>(3 - 8)       | 4<br>(2 - 8)       | 7<br>(4 - 12)      |
| Cellulitis                                          | 2<br>(1 - 4)       | 0<br>(0 - 0)     | 0<br>(0 - 0)      | 1<br>(0 - 1)       | 1<br>(0 - 1)       | 1<br>(0 - 2)       |
| Pyoderma                                            | 8<br>(5 - 13)      | 1<br>(0 - 2)     | 0<br>(0 - 0)      | 3<br>(2 - 5)       | 2<br>(1 - 4)       | 2<br>(1 - 4)       |

Web Table 31- Botswana deaths with 95% UI by age, sex, and cause in 2013

| Cause                                           | Males, All Ages        | Males, 0-4 Years | Males, 5-14 Years | Males, 15-49 Years   | Males, 50-69 Years | Males, 70-80 Years |
|-------------------------------------------------|------------------------|------------------|-------------------|----------------------|--------------------|--------------------|
| Decubitus ulcer                                 | 7<br>(4 - 12)          | 0<br>(0 - 0)     | 0<br>(0 - 0)      | 1<br>(1 - 2)         | 1<br>(1 - 3)       | 4<br>(2 - 7)       |
| Other skin and subcutaneous diseases            | 1<br>(1 - 2)           | 0<br>(0 - 1)     | 0<br>(0 - 0)      | 0<br>(0 - 1)         | 0<br>(0 - 1)       | 0<br>(0 - 0)       |
| Sudden infant death syndrome                    | 6<br>(1 - 19)          | 6<br>(1 - 19)    | --                | --                   | --                 | --                 |
| Injuries                                        | 1,081<br>(675 - 1,485) | 52<br>(27 - 89)  | 45<br>(29 - 66)   | 787<br>(438 - 1,129) | 122<br>(71 - 214)  | 75<br>(47 - 116)   |
| Transport injuries                              | 242<br>(154 - 337)     | 13<br>(7 - 24)   | 16<br>(10 - 26)   | 180<br>(102 - 261)   | 23<br>(13 - 41)    | 10<br>(7 - 16)     |
| Road injuries                                   | 235<br>(149 - 328)     | 12<br>(6 - 23)   | 16<br>(9 - 25)    | 176<br>(99 - 255)    | 22<br>(13 - 39)    | 9<br>(6 - 15)      |
| Pedestrian road injuries                        | 36<br>(21 - 58)        | 5<br>(2 - 11)    | 6<br>(3 - 11)     | 15<br>(7 - 28)       | 5<br>(3 - 10)      | 4<br>(2 - 7)       |
| Cyclist road injuries                           | 25<br>(15 - 38)        | 1<br>(0 - 3)     | 3<br>(1 - 5)      | 14<br>(8 - 23)       | 5<br>(2 - 9)       | 2<br>(1 - 3)       |
| Motorcyclist road injuries                      | 53<br>(28 - 84)        | 1<br>(0 - 1)     | 1<br>(0 - 1)      | 48<br>(25 - 77)      | 3<br>(1 - 5)       | 1<br>(0 - 1)       |
| Motor vehicle road injuries                     | 118<br>(69 - 174)      | 5<br>(2 - 9)     | 6<br>(3 - 9)      | 96<br>(53 - 145)     | 8<br>(5 - 15)      | 2<br>(1 - 4)       |
| Other road injuries                             | 4<br>(2 - 7)           | 0<br>(0 - 1)     | 0<br>(0 - 0)      | 2<br>(1 - 4)         | 1<br>(0 - 2)       | 0<br>(0 - 1)       |
| Other transport injuries                        | 7<br>(4 - 12)          | 1<br>(0 - 1)     | 1<br>(0 - 2)      | 4<br>(2 - 8)         | 1<br>(0 - 2)       | 1<br>(0 - 1)       |
| Unintentional injuries                          | 339<br>(221 - 492)     | 37<br>(17 - 71)  | 24<br>(14 - 40)   | 175<br>(96 - 272)    | 54<br>(26 - 100)   | 50<br>(26 - 84)    |
| Falls                                           | 52<br>(30 - 81)        | 2<br>(0 - 4)     | 2<br>(1 - 3)      | 30<br>(16 - 52)      | 8<br>(4 - 18)      | 10<br>(5 - 17)     |
| Drowning                                        | 46<br>(25 - 85)        | 9<br>(3 - 25)    | 11<br>(5 - 24)    | 21<br>(10 - 40)      | 3<br>(1 - 8)       | 2<br>(1 - 4)       |
| Fire, heat, and hot substances                  | 32<br>(18 - 62)        | 4<br>(2 - 13)    | 2<br>(1 - 5)      | 16<br>(8 - 29)       | 4<br>(2 - 9)       | 6<br>(3 - 11)      |
| Poisonings                                      | 11<br>(6 - 23)         | 1<br>(0 - 2)     | 0<br>(0 - 1)      | 6<br>(3 - 16)        | 2<br>(1 - 4)       | 1<br>(1 - 3)       |
| Exposure to mechanical forces                   | 64<br>(33 - 121)       | 3<br>(1 - 7)     | 4<br>(2 - 7)      | 49<br>(23 - 97)      | 6<br>(3 - 13)      | 2<br>(1 - 5)       |
| Unintentional firearm injuries                  | 35<br>(14 - 75)        | 0<br>(0 - 1)     | 1<br>(0 - 2)      | 30<br>(11 - 66)      | 2<br>(1 - 5)       | 1<br>(0 - 3)       |
| Unintentional suffocation                       | 3<br>(0 - 6)           | 0<br>(0 - 2)     | 0<br>(0 - 1)      | 2<br>(0 - 4)         | 0<br>(0 - 1)       | 0<br>(0 - 0)       |
| Other exposure to mechanical forces             | 27<br>(12 - 53)        | 2<br>(1 - 5)     | 3<br>(1 - 6)      | 17<br>(7 - 36)       | 3<br>(1 - 8)       | 1<br>(0 - 2)       |
| Adverse effects of medical treatment            | 85<br>(27 - 172)       | 11<br>(4 - 23)   | 2<br>(1 - 5)      | 28<br>(8 - 66)       | 22<br>(5 - 52)     | 22<br>(5 - 51)     |
| Animal contact                                  | 6<br>(3 - 12)          | 1<br>(0 - 3)     | 1<br>(0 - 2)      | 3<br>(1 - 5)         | 1<br>(0 - 2)       | 1<br>(0 - 1)       |
| Venomous animal contact                         | 4<br>(2 - 9)           | 1<br>(0 - 2)     | 1<br>(0 - 2)      | 2<br>(1 - 4)         | 1<br>(0 - 2)       | 0<br>(0 - 1)       |
| Non-venomous animal contact                     | 2<br>(0 - 5)           | 0<br>(0 - 1)     | 0<br>(0 - 1)      | 1<br>(0 - 2)         | 0<br>(0 - 1)       | 0<br>(0 - 1)       |
| Foreign body                                    | 28<br>(11 - 51)        | 6<br>(2 - 16)    | 1<br>(0 - 3)      | 14<br>(5 - 24)       | 3<br>(1 - 7)       | 4<br>(2 - 7)       |
| Pulmonary aspiration and foreign body in airway | 27<br>(11 - 50)        | 6<br>(2 - 16)    | 1<br>(0 - 3)      | 13<br>(5 - 24)       | 3<br>(1 - 7)       | 4<br>(1 - 7)       |
| Foreign body in other body part                 | 1<br>(0 - 2)           | 0<br>(0 - 0)     | 0<br>(0 - 0)      | 0<br>(0 - 1)         | 0<br>(0 - 0)       | 0<br>(0 - 0)       |
| Other unintentional injuries                    | 15<br>(9 - 24)         | 0<br>(0 - 1)     | 0<br>(0 - 1)      | 8<br>(4 - 13)        | 4<br>(2 - 8)       | 2<br>(1 - 3)       |
| Self-harm and interpersonal violence            | 500<br>(157 - 826)     | 2<br>(0 - 5)     | 4<br>(1 - 9)      | 433<br>(136 - 716)   | 46<br>(11 - 97)    | 15<br>(3 - 31)     |
| Self-harm                                       | 325<br>(95 - 534)      | --               | 2<br>(0 - 6)      | 268<br>(79 - 443)    | 41<br>(8 - 91)     | 14<br>(3 - 30)     |
| Interpersonal violence                          | 174<br>(36 - 320)      | 2<br>(0 - 5)     | 2<br>(0 - 4)      | 165<br>(34 - 303)    | 5<br>(1 - 11)      | 1<br>(0 - 1)       |
| Assault by firearm                              | 39<br>(6 - 89)         | 0<br>(0 - 1)     | 0<br>(0 - 1)      | 37<br>(5 - 86)       | 1<br>(0 - 3)       | 0<br>(0 - 0)       |
| Assault by sharp object                         | 78<br>(13 - 149)       | 0<br>(0 - 1)     | 0<br>(0 - 1)      | 75<br>(13 - 145)     | 2<br>(0 - 4)       | 0<br>(0 - 0)       |
| Assault by other means                          | 58<br>(12 - 118)       | 1<br>(0 - 3)     | 1<br>(0 - 3)      | 53<br>(11 - 110)     | 2<br>(0 - 4)       | 0<br>(0 - 1)       |

Web Table 31- Botswana deaths with 95% UI by age, sex, and cause in 2013

| Cause                                                             | Females, All Ages        | Females, 0-4 Years | Females, 5-14 Years | Females, 15-49 Years     | Females, 50-69 Years | Females, 70-80 Years |
|-------------------------------------------------------------------|--------------------------|--------------------|---------------------|--------------------------|----------------------|----------------------|
| All causes                                                        | 6,184<br>(4,961 - 8,406) | 646<br>(474 - 877) | 72<br>(53 - 102)    | 3,835<br>(3,072 - 4,501) | 648<br>(390 - 1,204) | 983<br>(643 - 2,090) |
| Communicable, maternal, neonatal, and nutritional diseases        | 4,324<br>(3,564 - 5,111) | 529<br>(386 - 712) | 36<br>(21 - 51)     | 3,192<br>(2,583 - 3,778) | 403<br>(256 - 592)   | 164<br>(101 - 296)   |
| HIV/AIDS and tuberculosis                                         | 3,049<br>(2,367 - 3,819) | 26<br>(12 - 52)    | 13<br>(3 - 24)      | 2,584<br>(2,059 - 3,172) | 375<br>(229 - 575)   | 50<br>(25 - 88)      |
| Tuberculosis                                                      | 319<br>(167 - 509)       | 6<br>(3 - 12)      | 3<br>(1 - 6)        | 277<br>(139 - 440)       | 15<br>(4 - 49)       | 17<br>(7 - 44)       |
| HIV/AIDS                                                          | 2,730<br>(2,035 - 3,583) | 20<br>(6 - 48)     | 10<br>(0 - 21)      | 2,307<br>(1,790 - 2,898) | 360<br>(211 - 553)   | 33<br>(11 - 60)      |
| HIV/AIDS resulting in mycobacterial infection                     | 154<br>(105 - 213)       | 1<br>(0 - 2)       | 0<br>(0 - 1)        | 132<br>(91 - 178)        | 19<br>(11 - 30)      | 2<br>(1 - 3)         |
| HIV/AIDS resulting in other diseases                              | 2,576<br>(1,921 - 3,358) | 19<br>(6 - 46)     | 9<br>(0 - 20)       | 2,175<br>(1,683 - 2,725) | 341<br>(200 - 525)   | 31<br>(10 - 57)      |
| Diarrhea, lower respiratory, and other common infectious diseases | 628<br>(399 - 942)       | 178<br>(100 - 293) | 16<br>(9 - 27)      | 309<br>(158 - 489)       | 23<br>(6 - 73)       | 102<br>(50 - 216)    |
| Diarrheal diseases                                                | 232<br>(136 - 374)       | 88<br>(39 - 163)   | 5<br>(2 - 10)       | 97<br>(37 - 187)         | 8<br>(2 - 27)        | 35<br>(12 - 87)      |
| Intestinal infectious diseases                                    | 17<br>(7 - 32)           | 6<br>(2 - 12)      | 5<br>(2 - 10)       | 5<br>(2 - 12)            | 1<br>(0 - 2)         | 0<br>(0 - 1)         |
| Typhoid fever                                                     | 13<br>(5 - 25)           | 4<br>(2 - 9)       | 4<br>(1 - 8)        | 4<br>(1 - 9)             | 0<br>(0 - 2)         | 0<br>(0 - 1)         |
| Paratyphoid fever                                                 | 4<br>(1 - 8)             | 1<br>(0 - 3)       | 1<br>(0 - 3)        | 1<br>(0 - 3)             | 0<br>(0 - 0)         | 0<br>(0 - 0)         |
| Other intestinal infectious diseases                              | 0<br>(0 - 1)             | 0<br>(0 - 0)       | 0<br>(0 - 0)        | 0<br>(0 - 0)             | 0<br>(0 - 0)         | 0<br>(0 - 0)         |
| Lower respiratory infections                                      | 333<br>(201 - 538)       | 73<br>(33 - 140)   | 4<br>(2 - 8)        | 178<br>(87 - 301)        | 13<br>(4 - 42)       | 65<br>(30 - 138)     |
| Upper respiratory infections                                      | 0<br>(0 - 0)             | 0<br>(0 - 0)       | 0<br>(0 - 0)        | 0<br>(0 - 0)             | 0<br>(0 - 0)         | 0<br>(0 - 0)         |
| Otitis media                                                      | 0<br>(0 - 0)             | 0<br>(0 - 0)       | 0<br>(0 - 0)        | 0<br>(0 - 0)             | 0<br>(0 - 0)         | 0<br>(0 - 0)         |
| Meningitis                                                        | 39<br>(23 - 61)          | 8<br>(4 - 20)      | 2<br>(1 - 3)        | 27<br>(13 - 48)          | 1<br>(0 - 3)         | 2<br>(1 - 4)         |
| Pneumococcal meningitis                                           | 6<br>(2 - 11)            | 1<br>(0 - 2)       | 0<br>(0 - 0)        | 4<br>(1 - 9)             | 0<br>(0 - 0)         | 0<br>(0 - 1)         |
| H influenzae type B meningitis                                    | 7<br>(4 - 12)            | 3<br>(1 - 7)       | 0<br>(0 - 1)        | 4<br>(2 - 7)             | 0<br>(0 - 0)         | 0<br>(0 - 0)         |
| Meningococcal meningitis                                          | 14<br>(8 - 23)           | 3<br>(1 - 7)       | 1<br>(0 - 1)        | 9<br>(4 - 17)            | 0<br>(0 - 1)         | 1<br>(0 - 1)         |
| Other meningitis                                                  | 12<br>(6 - 21)           | 2<br>(1 - 4)       | 0<br>(0 - 1)        | 9<br>(4 - 18)            | 0<br>(0 - 1)         | 1<br>(0 - 1)         |
| Encephalitis                                                      | 5<br>(2 - 10)            | 1<br>(0 - 2)       | 0<br>(0 - 1)        | 3<br>(1 - 5)             | 0<br>(0 - 1)         | 0<br>(0 - 1)         |
| Diphtheria                                                        | 0<br>(0 - 0)             | 0<br>(0 - 0)       | 0<br>(0 - 0)        | 0<br>(0 - 0)             | 0<br>(0 - 0)         | --<br>(0 - 0)        |
| Whooping cough                                                    | 0<br>(0 - 0)             | 0<br>(0 - 0)       | 0<br>(0 - 0)        | 0<br>(0 - 0)             | 0<br>(0 - 0)         | --<br>(0 - 0)        |
| Tetanus                                                           | 0<br>(0 - 1)             | 0<br>(0 - 0)       | 0<br>(0 - 0)        | 0<br>(0 - 0)             | 0<br>(0 - 0)         | 0<br>(0 - 0)         |
| Measles                                                           | 2<br>(0 - 11)            | 2<br>(0 - 9)       | 0<br>(0 - 1)        | 0<br>(0 - 0)             | 0<br>(0 - 0)         | --<br>(0 - 0)        |
| Varicella and herpes zoster                                       | 0<br>(0 - 1)             | 0<br>(0 - 0)       | 0<br>(0 - 0)        | 0<br>(0 - 0)             | 0<br>(0 - 0)         | 0<br>(0 - 1)         |
| Neglected tropical diseases and malaria                           | 48<br>(20 - 108)         | 15<br>(3 - 52)     | 4<br>(1 - 12)       | 25<br>(8 - 72)           | 2<br>(0 - 8)         | 2<br>(1 - 7)         |
| Malaria                                                           | 35<br>(10 - 91)          | 13<br>(1 - 49)     | 3<br>(0 - 12)       | 16<br>(1 - 61)           | 1<br>(0 - 7)         | 1<br>(0 - 6)         |
| Leishmaniasis                                                     | 0<br>(0 - 0)             | 0<br>(0 - 0)       | 0<br>(0 - 0)        | 0<br>(0 - 0)             | 0<br>(0 - 0)         | 0<br>(0 - 0)         |
| Visceral leishmaniasis                                            | 0<br>(0 - 0)             | 0<br>(0 - 0)       | 0<br>(0 - 0)        | 0<br>(0 - 0)             | 0<br>(0 - 0)         | 0<br>(0 - 0)         |
| Schistosomiasis                                                   | 2<br>(1 - 3)             | 0<br>(0 - 0)       | 0<br>(0 - 0)        | 1<br>(1 - 2)             | 0<br>(0 - 0)         | 0<br>(0 - 1)         |
| Cysticercosis                                                     | 0<br>(0 - 0)             | 0<br>(0 - 0)       | 0<br>(0 - 0)        | 0<br>(0 - 0)             | 0<br>(0 - 0)         | 0<br>(0 - 0)         |
| Cystic echinococcosis                                             | 0<br>(0 - 0)             | 0<br>(0 - 0)       | 0<br>(0 - 0)        | 0<br>(0 - 0)             | 0<br>(0 - 0)         | 0<br>(0 - 0)         |
| Dengue                                                            | 0<br>(0 - 0)             | 0<br>(0 - 0)       | 0<br>(0 - 0)        | 0<br>(0 - 0)             | 0<br>(0 - 0)         | 0<br>(0 - 0)         |
| Rabies                                                            | 0<br>(0 - 0)             | 0<br>(0 - 0)       | 0<br>(0 - 0)        | 0<br>(0 - 0)             | 0<br>(0 - 0)         | 0<br>(0 - 0)         |
| Intestinal nematode infections                                    | 1<br>(0 - 4)             | 0<br>(0 - 2)       | 0<br>(0 - 1)        | 0<br>(0 - 2)             | 0<br>(0 - 0)         | 0<br>(0 - 0)         |
| Ascariasis                                                        | 1<br>(0 - 4)             | 0<br>(0 - 2)       | 0<br>(0 - 1)        | 0<br>(0 - 2)             | 0<br>(0 - 0)         | 0<br>(0 - 0)         |
| Other neglected tropical diseases                                 | 10<br>(5 - 20)           | 1<br>(0 - 4)       | 0<br>(0 - 1)        | 8<br>(3 - 15)            | 0<br>(0 - 1)         | 0<br>(0 - 2)         |
| Maternal disorders                                                | 228<br>(100 - 393)       | --                 | 0<br>(0 - 1)        | 228<br>(100 - 392)       | --                   | --                   |

Web Table 31- Botswana deaths with 95% UI by age, sex, and cause in 2013

| Cause                                                            | Females, All Ages      | Females, 0-4 Years | Females, 5-14 Years | Females, 15-49 Years | Females, 50-69 Years | Females, 70-80 Years |
|------------------------------------------------------------------|------------------------|--------------------|---------------------|----------------------|----------------------|----------------------|
| Maternal hemorrhage                                              | 25<br>(10 - 46)        | --                 | 0<br>(0 - 0)        | 25<br>(10 - 46)      | --                   | --                   |
| Maternal sepsis and other maternal infections                    | 23<br>(10 - 42)        | --                 | 0<br>(0 - 0)        | 23<br>(10 - 42)      | --                   | --                   |
| Maternal hypertensive disorders                                  | 33<br>(13 - 59)        | --                 | 0<br>(0 - 0)        | 33<br>(13 - 59)      | --                   | --                   |
| Maternal obstructed labor                                        | 13<br>(5 - 25)         | --                 | 0<br>(0 - 0)        | 13<br>(5 - 25)       | --                   | --                   |
| Maternal abortive outcome                                        | 37<br>(15 - 66)        | --                 | 0<br>(0 - 0)        | 37<br>(15 - 66)      | --                   | --                   |
| Indirect maternal deaths                                         | 26<br>(11 - 49)        | --                 | 0<br>(0 - 0)        | 26<br>(11 - 49)      | --                   | --                   |
| Late maternal deaths                                             | 27<br>(10 - 50)        | --                 | 0<br>(0 - 0)        | 27<br>(10 - 50)      | --                   | --                   |
| Maternal deaths aggravated by HIV/AIDS                           | 20<br>(9 - 35)         | --                 | --                  | 20<br>(9 - 35)       | --                   | --                   |
| Other maternal disorders                                         | 24<br>(10 - 46)        | --                 | 0<br>(0 - 0)        | 24<br>(10 - 46)      | --                   | --                   |
| Neonatal disorders                                               | 281<br>(207 - 377)     | 281<br>(207 - 377) | --                  | --                   | --                   | --                   |
| Neonatal preterm birth complications                             | 81<br>(35 - 144)       | 81<br>(35 - 144)   | --                  | --                   | --                   | --                   |
| Neonatal encephalopathy due to birth asphyxia and trauma         | 75<br>(33 - 137)       | 75<br>(33 - 137)   | --                  | --                   | --                   | --                   |
| Neonatal sepsis and other neonatal infections                    | 33<br>(12 - 65)        | 33<br>(12 - 65)    | --                  | --                   | --                   | --                   |
| Hemolytic disease and other neonatal jaundice                    | 1<br>(0 - 3)           | 1<br>(0 - 3)       | --                  | --                   | --                   | --                   |
| Other neonatal disorders                                         | 91<br>(31 - 166)       | 91<br>(31 - 166)   | --                  | --                   | --                   | --                   |
| Nutritional deficiencies                                         | 43<br>(25 - 68)        | 17<br>(8 - 31)     | 1<br>(0 - 2)        | 17<br>(9 - 28)       | 2<br>(0 - 5)         | 7<br>(3 - 16)        |
| Protein-energy malnutrition                                      | 24<br>(13 - 40)        | 16<br>(7 - 30)     | 1<br>(0 - 1)        | 4<br>(1 - 8)         | 1<br>(0 - 2)         | 3<br>(1 - 7)         |
| Iodine deficiency                                                | 0<br>(0 - 1)           | 0<br>(0 - 0)       | 0<br>(0 - 0)        | 0<br>(0 - 1)         | 0<br>(0 - 0)         | 0<br>(0 - 0)         |
| Iron-deficiency anemia                                           | 17<br>(8 - 30)         | 0<br>(0 - 2)       | 0<br>(0 - 1)        | 12<br>(6 - 21)       | 1<br>(0 - 3)         | 3<br>(1 - 8)         |
| Other nutritional deficiencies                                   | 2<br>(1 - 5)           | 0<br>(0 - 0)       | 0<br>(0 - 0)        | 1<br>(0 - 2)         | 0<br>(0 - 1)         | 1<br>(0 - 2)         |
| Other communicable, maternal, neonatal, and nutritional diseases | 46<br>(26 - 77)        | 12<br>(5 - 25)     | 1<br>(1 - 3)        | 29<br>(13 - 53)      | 1<br>(0 - 6)         | 3<br>(1 - 8)         |
| Sexually transmitted diseases excluding HIV                      | 13<br>(6 - 25)         | 8<br>(2 - 19)      | 1<br>(0 - 1)        | 4<br>(1 - 7)         | 0<br>(0 - 1)         | 0<br>(0 - 1)         |
| Syphilis                                                         | 11<br>(4 - 22)         | 8<br>(2 - 19)      | 1<br>(0 - 1)        | 2<br>(1 - 3)         | 0<br>(0 - 1)         | 0<br>(0 - 1)         |
| Chlamydial infection                                             | 1<br>(0 - 2)           | --                 | 0<br>(0 - 0)        | 1<br>(0 - 1)         | 0<br>(0 - 0)         | 0<br>(0 - 0)         |
| Gonococcal infection                                             | 1<br>(0 - 2)           | --                 | 0<br>(0 - 0)        | 1<br>(0 - 1)         | 0<br>(0 - 0)         | 0<br>(0 - 0)         |
| Other sexually transmitted diseases                              | 1<br>(0 - 1)           | --                 | 0<br>(0 - 0)        | 1<br>(0 - 1)         | 0<br>(0 - 0)         | 0<br>(0 - 0)         |
| Hepatitis                                                        | 3<br>(1 - 5)           | 0<br>(0 - 1)       | 0<br>(0 - 0)        | 2<br>(1 - 3)         | 0<br>(0 - 1)         | 0<br>(0 - 1)         |
| Acute hepatitis A                                                | 0<br>(0 - 1)           | 0<br>(0 - 0)       | 0<br>(0 - 0)        | 0<br>(0 - 0)         | 0<br>(0 - 0)         | 0<br>(0 - 0)         |
| Acute hepatitis B                                                | 1<br>(0 - 3)           | 0<br>(0 - 1)       | 0<br>(0 - 0)        | 0<br>(0 - 1)         | 0<br>(0 - 1)         | 0<br>(0 - 1)         |
| Acute hepatitis C                                                | 0<br>(0 - 0)           | --                 | 0<br>(0 - 0)        | 0<br>(0 - 0)         | 0<br>(0 - 0)         | 0<br>(0 - 0)         |
| Acute hepatitis E                                                | 1<br>(0 - 2)           | 0<br>(0 - 0)       | 0<br>(0 - 0)        | 1<br>(0 - 2)         | 0<br>(0 - 0)         | 0<br>(0 - 0)         |
| Other infectious diseases                                        | 31<br>(15 - 58)        | 4<br>(1 - 10)      | 1<br>(0 - 2)        | 23<br>(10 - 46)      | 1<br>(0 - 5)         | 2<br>(0 - 7)         |
| Non-communicable diseases                                        | 1,491<br>(916 - 3,017) | 80<br>(42 - 139)   | 18<br>(10 - 29)     | 400<br>(236 - 576)   | 225<br>(69 - 703)    | 768<br>(480 - 1,683) |
| Neoplasms                                                        | 258<br>(131 - 619)     | 4<br>(1 - 7)       | 4<br>(2 - 9)        | 53<br>(34 - 76)      | 73<br>(21 - 234)     | 124<br>(61 - 313)    |
| Esophageal cancer                                                | 21<br>(8 - 58)         | --                 | --                  | 2<br>(1 - 3)         | 8<br>(2 - 28)        | 11<br>(4 - 28)       |
| Stomach cancer                                                   | 8<br>(4 - 19)          | --                 | --                  | 1<br>(1 - 2)         | 1<br>(0 - 5)         | 5<br>(2 - 13)        |
| Liver cancer                                                     | 12<br>(4 - 33)         | --                 | 0<br>(0 - 0)        | 3<br>(1 - 4)         | 3<br>(0 - 12)        | 6<br>(2 - 18)        |
| Liver cancer due to hepatitis B                                  | 3<br>(1 - 10)          | --                 | 0<br>(0 - 0)        | 1<br>(0 - 2)         | 1<br>(0 - 4)         | 1<br>(0 - 5)         |
| Liver cancer due to hepatitis C                                  | 4<br>(1 - 13)          | --                 | 0<br>(0 - 0)        | 1<br>(0 - 1)         | 1<br>(0 - 5)         | 2<br>(1 - 8)         |
| Liver cancer due to alcohol use                                  | 2<br>(1 - 6)           | --                 | --                  | 0<br>(0 - 0)         | 0<br>(0 - 2)         | 1<br>(0 - 4)         |

Web Table 31- Botswana deaths with 95% UI by age, sex, and cause in 2013

| Cause                                         | Females, All Ages    | Females, 0-4 Years | Females, 5-14 Years | Females, 15-49 Years | Females, 50-69 Years | Females, 70-80 Years |
|-----------------------------------------------|----------------------|--------------------|---------------------|----------------------|----------------------|----------------------|
| Liver cancer due to other causes              | 3<br>(1 - 7)         | --                 | 0<br>(0 - 0)        | 1<br>(0 - 2)         | 1<br>(0 - 3)         | 1<br>(0 - 4)         |
| Larynx cancer                                 | 1<br>(0 - 3)         | --                 | --                  | 0<br>(0 - 1)         | 0<br>(0 - 1)         | 0<br>(0 - 1)         |
| Tracheal, bronchus and lung cancer            | 14<br>(5 - 45)       | --                 | --                  | 2<br>(1 - 3)         | 4<br>(1 - 19)        | 8<br>(3 - 24)        |
| Breast cancer                                 | 45<br>(17 - 118)     | --                 | --                  | 10<br>(6 - 15)       | 15<br>(3 - 52)       | 20<br>(7 - 53)       |
| Cervical cancer                               | 25<br>(13 - 56)      | --                 | --                  | 10<br>(6 - 15)       | 7<br>(2 - 23)        | 8<br>(3 - 20)        |
| Uterine cancer                                | 4<br>(1 - 11)        | --                 | --                  | 0<br>(0 - 1)         | 1<br>(0 - 4)         | 2<br>(1 - 7)         |
| Prostate cancer                               | --                   | --                 | --                  | --                   | --                   | --                   |
| Colon and rectum cancer                       | 35<br>(15 - 94)      | --                 | --                  | 3<br>(2 - 4)         | 9<br>(3 - 32)        | 23<br>(10 - 57)      |
| Lip and oral cavity cancer                    | 4<br>(1 - 11)        | --                 | --                  | 1<br>(0 - 1)         | 1<br>(0 - 5)         | 2<br>(1 - 6)         |
| Nasopharynx cancer                            | 1<br>(0 - 1)         | --                 | 0<br>(0 - 0)        | 0<br>(0 - 1)         | 0<br>(0 - 0)         | 0<br>(0 - 0)         |
| Other pharynx cancer                          | 1<br>(0 - 1)         | --                 | --                  | 0<br>(0 - 0)         | 0<br>(0 - 1)         | 0<br>(0 - 0)         |
| Gallbladder and biliary tract cancer          | 4<br>(2 - 12)        | --                 | --                  | 0<br>(0 - 1)         | 1<br>(0 - 5)         | 2<br>(1 - 7)         |
| Pancreatic cancer                             | 14<br>(6 - 40)       | --                 | --                  | 1<br>(0 - 1)         | 4<br>(1 - 14)        | 9<br>(4 - 24)        |
| Malignant skin melanoma                       | 3<br>(1 - 7)         | --                 | --                  | 1<br>(0 - 1)         | 1<br>(0 - 3)         | 1<br>(0 - 4)         |
| Non-melanoma skin cancer                      | 1<br>(1 - 3)         | --                 | --                  | 0<br>(0 - 1)         | 0<br>(0 - 1)         | 1<br>(0 - 2)         |
| Ovarian cancer                                | 8<br>(3 - 22)        | --                 | --                  | 2<br>(1 - 3)         | 3<br>(1 - 10)        | 3<br>(1 - 10)        |
| Testicular cancer                             | --                   | --                 | --                  | --                   | --                   | --                   |
| Kidney cancer                                 | 2<br>(1 - 5)         | 0<br>(0 - 1)       | 0<br>(0 - 0)        | 0<br>(0 - 1)         | 0<br>(0 - 2)         | 1<br>(0 - 2)         |
| Bladder cancer                                | 2<br>(1 - 4)         | --                 | --                  | 0<br>(0 - 1)         | 0<br>(0 - 1)         | 1<br>(0 - 3)         |
| Brain and nervous system cancer               | 4<br>(2 - 9)         | 0<br>(0 - 1)       | 1<br>(0 - 1)        | 1<br>(1 - 2)         | 1<br>(0 - 3)         | 1<br>(0 - 3)         |
| Thyroid cancer                                | 2<br>(0 - 4)         | --                 | 0<br>(0 - 0)        | 0<br>(0 - 0)         | 0<br>(0 - 2)         | 1<br>(0 - 3)         |
| Mesothelioma                                  | 0<br>(0 - 1)         | --                 | --                  | 0<br>(0 - 0)         | 0<br>(0 - 0)         | 0<br>(0 - 1)         |
| Hodgkin lymphoma                              | 1<br>(0 - 2)         | 0<br>(0 - 0)       | 0<br>(0 - 0)        | 1<br>(0 - 1)         | 0<br>(0 - 0)         | 0<br>(0 - 0)         |
| Non-Hodgkin lymphoma                          | 10<br>(4 - 28)       | 0<br>(0 - 1)       | 0<br>(0 - 1)        | 3<br>(2 - 5)         | 2<br>(0 - 9)         | 4<br>(1 - 14)        |
| Multiple myeloma                              | 4<br>(1 - 11)        | --                 | --                  | 0<br>(0 - 1)         | 1<br>(0 - 5)         | 2<br>(1 - 6)         |
| Leukemia                                      | 9<br>(4 - 19)        | 1<br>(0 - 1)       | 1<br>(0 - 2)        | 3<br>(1 - 4)         | 1<br>(0 - 5)         | 3<br>(1 - 8)         |
| Other neoplasms                               | 24<br>(10 - 52)      | 2<br>(1 - 5)       | 2<br>(1 - 5)        | 8<br>(4 - 14)        | 4<br>(1 - 15)        | 7<br>(2 - 19)        |
| Cardiovascular diseases                       | 561<br>(325 - 1,194) | 3<br>(2 - 9)       | 2<br>(1 - 7)        | 99<br>(57 - 161)     | 79<br>(21 - 276)     | 377<br>(227 - 806)   |
| Rheumatic heart disease                       | 13<br>(7 - 27)       | 0<br>(0 - 0)       | 0<br>(0 - 1)        | 6<br>(3 - 14)        | 1<br>(0 - 2)         | 6<br>(3 - 15)        |
| Ischemic heart disease                        | 156<br>(74 - 435)    | 0<br>(0 - 1)       | 0<br>(0 - 1)        | 14<br>(7 - 25)       | 19<br>(4 - 88)       | 122<br>(59 - 314)    |
| Cerebrovascular disease                       | 203<br>(110 - 451)   | 1<br>(0 - 1)       | 1<br>(0 - 1)        | 30<br>(17 - 50)      | 29<br>(8 - 101)      | 143<br>(76 - 317)    |
| Ischemic stroke                               | 109<br>(51 - 262)    | 0<br>(0 - 0)       | 0<br>(0 - 0)        | 4<br>(2 - 9)         | 13<br>(2 - 49)       | 92<br>(44 - 206)     |
| Hemorrhagic stroke                            | 94<br>(50 - 201)     | 0<br>(0 - 1)       | 0<br>(0 - 1)        | 26<br>(15 - 43)      | 16<br>(4 - 52)       | 51<br>(23 - 115)     |
| Hypertensive heart disease                    | 83<br>(29 - 227)     | 0<br>(0 - 0)       | 0<br>(0 - 0)        | 9<br>(4 - 16)        | 12<br>(2 - 47)       | 62<br>(20 - 169)     |
| Cardiomyopathy and myocarditis                | 61<br>(29 - 144)     | 2<br>(1 - 6)       | 1<br>(0 - 4)        | 28<br>(15 - 50)      | 8<br>(1 - 37)        | 22<br>(7 - 64)       |
| Atrial fibrillation and flutter               | 3<br>(1 - 7)         | --                 | --                  | 0<br>(0 - 0)         | 0<br>(0 - 1)         | 2<br>(1 - 6)         |
| Aortic aneurysm                               | 4<br>(2 - 12)        | --                 | --                  | 1<br>(0 - 1)         | 1<br>(0 - 3)         | 3<br>(1 - 9)         |
| Peripheral vascular disease                   | 1<br>(0 - 4)         | --                 | --                  | 0<br>(0 - 0)         | 0<br>(0 - 1)         | 1<br>(0 - 3)         |
| Endocarditis                                  | 3<br>(1 - 9)         | 0<br>(0 - 1)       | 0<br>(0 - 1)        | 1<br>(0 - 2)         | 0<br>(0 - 1)         | 1<br>(0 - 4)         |
| Other cardiovascular and circulatory diseases | 34<br>(14 - 85)      | 0<br>(0 - 1)       | 0<br>(0 - 1)        | 10<br>(4 - 20)       | 9<br>(2 - 35)        | 14<br>(5 - 36)       |



Web Table 31- Botswana deaths with 95% UI by age, sex, and cause in 2013

| Cause                                               | Females, All Ages | Females, 0-4 Years | Females, 5-14 Years | Females, 15-49 Years | Females, 50-69 Years | Females, 70-80 Years |
|-----------------------------------------------------|-------------------|--------------------|---------------------|----------------------|----------------------|----------------------|
| Chronic respiratory diseases                        | 117<br>(65 - 239) | 2<br>(1 - 4)       | 1<br>(0 - 2)        | 43<br>(23 - 68)      | 14<br>(4 - 47)       | 57<br>(28 - 130)     |
| Chronic obstructive pulmonary disease               | 58<br>(28 - 128)  | 1<br>(0 - 2)       | 0<br>(0 - 0)        | 14<br>(6 - 24)       | 7<br>(2 - 25)        | 36<br>(17 - 81)      |
| Pneumoconiosis                                      | 1<br>(0 - 2)      | 0<br>(0 - 0)       | 0<br>(0 - 0)        | 0<br>(0 - 0)         | 0<br>(0 - 0)         | 0<br>(0 - 1)         |
| Silicosis                                           | 0<br>(0 - 0)      | 0<br>(0 - 0)       | 0<br>(0 - 0)        | 0<br>(0 - 0)         | 0<br>(0 - 0)         | 0<br>(0 - 0)         |
| Asbestosis                                          | 0<br>(0 - 0)      | 0<br>(0 - 0)       | 0<br>(0 - 0)        | 0<br>(0 - 0)         | 0<br>(0 - 0)         | 0<br>(0 - 0)         |
| Coal workers pneumoconiosis                         | 0<br>(0 - 0)      | 0<br>(0 - 0)       | 0<br>(0 - 0)        | 0<br>(0 - 0)         | 0<br>(0 - 0)         | 0<br>(0 - 0)         |
| Other pneumoconiosis                                | 1<br>(0 - 1)      | 0<br>(0 - 0)       | 0<br>(0 - 0)        | 0<br>(0 - 0)         | 0<br>(0 - 0)         | 0<br>(0 - 1)         |
| Asthma                                              | 45<br>(23 - 95)   | 1<br>(0 - 2)       | 1<br>(0 - 1)        | 23<br>(12 - 44)      | 5<br>(1 - 18)        | 15<br>(5 - 40)       |
| Interstitial lung disease and pulmonary sarcoidosis | 9<br>(0 - 28)     | 0<br>(0 - 1)       | 0<br>(0 - 0)        | 4<br>(0 - 9)         | 1<br>(0 - 6)         | 4<br>(0 - 14)        |
| Other chronic respiratory diseases                  | 4<br>(2 - 8)      | 0<br>(0 - 1)       | 0<br>(0 - 0)        | 2<br>(1 - 4)         | 0<br>(0 - 1)         | 1<br>(0 - 4)         |
| Cirrhosis                                           | 23<br>(14 - 44)   | 0<br>(0 - 1)       | 0<br>(0 - 1)        | 13<br>(7 - 20)       | 4<br>(1 - 12)        | 6<br>(3 - 14)        |
| Cirrhosis due to hepatitis B                        | 5<br>(2 - 10)     | 0<br>(0 - 0)       | 0<br>(0 - 0)        | 3<br>(1 - 5)         | 1<br>(0 - 3)         | 1<br>(0 - 3)         |
| Cirrhosis due to hepatitis C                        | 6<br>(3 - 13)     | 0<br>(0 - 0)       | 0<br>(0 - 0)        | 3<br>(1 - 6)         | 1<br>(0 - 4)         | 2<br>(1 - 5)         |
| Cirrhosis due to alcohol use                        | 7<br>(3 - 14)     | --                 | --                  | 3<br>(1 - 5)         | 1<br>(0 - 5)         | 2<br>(1 - 6)         |
| Cirrhosis due to other causes                       | 6<br>(3 - 10)     | 0<br>(0 - 1)       | 0<br>(0 - 0)        | 4<br>(2 - 7)         | 1<br>(0 - 2)         | 0<br>(0 - 1)         |
| Digestive diseases                                  | 67<br>(39 - 118)  | 1<br>(1 - 3)       | 1<br>(0 - 2)        | 37<br>(20 - 59)      | 5<br>(1 - 16)        | 23<br>(12 - 48)      |
| Peptic ulcer disease                                | 11<br>(5 - 23)    | 0<br>(0 - 0)       | 0<br>(0 - 0)        | 6<br>(3 - 11)        | 1<br>(0 - 3)         | 5<br>(2 - 11)        |
| Gastritis and duodenitis                            | 4<br>(1 - 8)      | 0<br>(0 - 0)       | 0<br>(0 - 0)        | 2<br>(1 - 3)         | 0<br>(0 - 1)         | 2<br>(0 - 4)         |
| Appendicitis                                        | 2<br>(1 - 3)      | 0<br>(0 - 0)       | 0<br>(0 - 0)        | 1<br>(1 - 2)         | 0<br>(0 - 0)         | 0<br>(0 - 1)         |
| Paralytic ileus and intestinal obstruction          | 14<br>(6 - 29)    | 0<br>(0 - 1)       | 0<br>(0 - 1)        | 4<br>(1 - 7)         | 2<br>(0 - 6)         | 7<br>(3 - 18)        |
| Inguinal, femoral, and abdominal hernia             | 1<br>(0 - 3)      | 0<br>(0 - 0)       | 0<br>(0 - 0)        | 0<br>(0 - 0)         | 0<br>(0 - 1)         | 1<br>(0 - 2)         |
| Inflammatory bowel disease                          | 21<br>(11 - 35)   | 1<br>(0 - 1)       | 0<br>(0 - 0)        | 17<br>(8 - 29)       | 1<br>(0 - 2)         | 2<br>(1 - 6)         |
| Vascular intestinal disorders                       | 1<br>(0 - 2)      | 0<br>(0 - 0)       | 0<br>(0 - 0)        | 0<br>(0 - 0)         | 0<br>(0 - 0)         | 0<br>(0 - 1)         |
| Gallbladder and biliary diseases                    | 4<br>(2 - 8)      | 0<br>(0 - 0)       | 0<br>(0 - 0)        | 1<br>(1 - 2)         | 0<br>(0 - 1)         | 2<br>(1 - 5)         |
| Pancreatitis                                        | 3<br>(1 - 6)      | 0<br>(0 - 0)       | 0<br>(0 - 0)        | 2<br>(1 - 3)         | 0<br>(0 - 1)         | 1<br>(0 - 2)         |
| Other digestive diseases                            | 8<br>(4 - 14)     | 0<br>(0 - 0)       | 0<br>(0 - 0)        | 5<br>(2 - 8)         | 0<br>(0 - 1)         | 3<br>(1 - 6)         |
| Neurological disorders                              | 84<br>(49 - 162)  | 2<br>(1 - 5)       | 2<br>(1 - 4)        | 20<br>(10 - 36)      | 5<br>(2 - 18)        | 54<br>(30 - 113)     |
| Alzheimer disease and other dementias               | 50<br>(27 - 104)  | --                 | --                  | 0<br>(0 - 0)         | 2<br>(1 - 8)         | 48<br>(26 - 95)      |
| Parkinson disease                                   | 2<br>(1 - 7)      | --                 | --                  | 0<br>(0 - 0)         | 0<br>(0 - 1)         | 2<br>(1 - 6)         |
| Epilepsy                                            | 27<br>(14 - 47)   | 1<br>(0 - 4)       | 1<br>(0 - 4)        | 19<br>(9 - 34)       | 2<br>(0 - 7)         | 3<br>(1 - 10)        |
| Multiple sclerosis                                  | 0<br>(0 - 0)      | --                 | --                  | 0<br>(0 - 0)         | 0<br>(0 - 0)         | 0<br>(0 - 0)         |
| Other neurological disorders                        | 4<br>(2 - 9)      | 0<br>(0 - 1)       | 0<br>(0 - 0)        | 1<br>(1 - 2)         | 1<br>(0 - 3)         | 1<br>(1 - 3)         |
| Mental and substance use disorders                  | 21<br>(12 - 34)   | 1<br>(0 - 1)       | 0<br>(0 - 0)        | 17<br>(9 - 27)       | 2<br>(1 - 6)         | 1<br>(1 - 3)         |
| Schizophrenia                                       | 2<br>(1 - 3)      | --                 | --                  | 1<br>(0 - 2)         | 0<br>(0 - 1)         | 0<br>(0 - 1)         |
| Alcohol use disorders                               | 5<br>(2 - 11)     | --                 | --                  | 4<br>(1 - 8)         | 1<br>(0 - 3)         | 0<br>(0 - 1)         |
| Drug use disorders                                  | 13<br>(7 - 22)    | 1<br>(0 - 1)       | --                  | 11<br>(5 - 18)       | 1<br>(0 - 4)         | 1<br>(0 - 2)         |
| Opioid use disorders                                | 1<br>(1 - 2)      | 0<br>(0 - 0)       | --                  | 1<br>(1 - 2)         | 0<br>(0 - 0)         | 0<br>(0 - 0)         |
| Cocaine use disorders                               | 0<br>(0 - 0)      | 0<br>(0 - 0)       | --                  | 0<br>(0 - 0)         | 0<br>(0 - 0)         | 0<br>(0 - 0)         |
| Amphetamine use disorders                           | 0<br>(0 - 0)      | 0<br>(0 - 0)       | --                  | 0<br>(0 - 0)         | 0<br>(0 - 0)         | 0<br>(0 - 0)         |
| Other drug use disorders                            | 12<br>(6 - 20)    | 1<br>(0 - 1)       | --                  | 10<br>(5 - 15)       | 1<br>(0 - 4)         | 1<br>(0 - 2)         |

Web Table 31- Botswana deaths with 95% UI by age, sex, and cause in 2013

| Cause                                               | Females, All Ages  | Females, 0-4 Years | Females, 5-14 Years | Females, 15-49 Years | Females, 50-69 Years | Females, 70-80 Years |
|-----------------------------------------------------|--------------------|--------------------|---------------------|----------------------|----------------------|----------------------|
| Eating disorders                                    | 1<br>(0 - 2)       | --                 | 0<br>(0 - 0)        | 1<br>(0 - 2)         | --                   | --                   |
| Anorexia nervosa                                    | 1<br>(0 - 2)       | --                 | 0<br>(0 - 0)        | 1<br>(0 - 2)         | --                   | --                   |
| Diabetes, urogenital, blood, and endocrine diseases | 268<br>(151 - 508) | 18<br>(6 - 41)     | 4<br>(2 - 9)        | 103<br>(55 - 160)    | 38<br>(11 - 117)     | 105<br>(54 - 238)    |
| Diabetes mellitus                                   | 102<br>(50 - 240)  | 0<br>(0 - 0)       | 0<br>(0 - 0)        | 16<br>(9 - 23)       | 23<br>(6 - 74)       | 63<br>(29 - 150)     |
| Acute glomerulonephritis                            | 0<br>(0 - 1)       | 0<br>(0 - 0)       | 0<br>(0 - 0)        | 0<br>(0 - 0)         | 0<br>(0 - 0)         | 0<br>(0 - 0)         |
| Chronic kidney disease                              | 40<br>(21 - 84)    | 1<br>(0 - 2)       | 0<br>(0 - 1)        | 15<br>(8 - 24)       | 5<br>(1 - 18)        | 19<br>(8 - 46)       |
| Chronic kidney disease due to diabetes mellitus     | 0<br>(0 - 0)       | 0<br>(0 - 0)       | 0<br>(0 - 0)        | 0<br>(0 - 0)         | 0<br>(0 - 0)         | 0<br>(0 - 0)         |
| Chronic kidney disease due to hypertension          | 21<br>(10 - 44)    | 0<br>(0 - 0)       | 0<br>(0 - 0)        | 6<br>(3 - 11)        | 3<br>(1 - 10)        | 12<br>(5 - 27)       |
| Chronic kidney disease due to glomerulonephritis    | 5<br>(2 - 9)       | 0<br>(0 - 0)       | 0<br>(0 - 0)        | 3<br>(1 - 6)         | 0<br>(0 - 1)         | 1<br>(0 - 3)         |
| Chronic kidney disease due to other causes          | 13<br>(5 - 39)     | 0<br>(0 - 1)       | 0<br>(0 - 1)        | 5<br>(2 - 9)         | 2<br>(0 - 10)        | 6<br>(1 - 22)        |
| Urinary diseases and male infertility               | 12<br>(6 - 24)     | 0<br>(0 - 1)       | 0<br>(0 - 0)        | 5<br>(2 - 8)         | 1<br>(0 - 5)         | 6<br>(2 - 13)        |
| Interstitial nephritis and urinary tract infections | 8<br>(4 - 16)      | 0<br>(0 - 1)       | 0<br>(0 - 0)        | 3<br>(1 - 5)         | 1<br>(0 - 3)         | 3<br>(1 - 9)         |
| Urolithiasis                                        | 0<br>(0 - 0)       | --                 | 0<br>(0 - 0)        | 0<br>(0 - 0)         | 0<br>(0 - 0)         | 0<br>(0 - 0)         |
| Other urinary diseases                              | 4<br>(2 - 9)       | 0<br>(0 - 0)       | 0<br>(0 - 0)        | 2<br>(1 - 3)         | 0<br>(0 - 1)         | 2<br>(1 - 6)         |
| Gynecological diseases                              | 0<br>(0 - 1)       | --                 | --                  | 0<br>(0 - 1)         | 0<br>(0 - 0)         | 0<br>(0 - 0)         |
| Uterine fibroids                                    | 0<br>(0 - 0)       | --                 | --                  | 0<br>(0 - 0)         | 0<br>(0 - 0)         | 0<br>(0 - 0)         |
| Polycystic ovarian syndrome                         | 0<br>(0 - 0)       | --                 | --                  | 0<br>(0 - 0)         | 0<br>(0 - 0)         | --                   |
| Endometriosis                                       | 0<br>(0 - 0)       | --                 | --                  | 0<br>(0 - 0)         | 0<br>(0 - 0)         | --                   |
| Genital prolapse                                    | 0<br>(0 - 0)       | --                 | --                  | 0<br>(0 - 0)         | 0<br>(0 - 0)         | 0<br>(0 - 0)         |
| Other gynecological diseases                        | 0<br>(0 - 0)       | --                 | --                  | 0<br>(0 - 0)         | 0<br>(0 - 0)         | 0<br>(0 - 0)         |
| Hemoglobinopathies and hemolytic anemias            | 17<br>(9 - 32)     | 2<br>(1 - 5)       | 1<br>(0 - 2)        | 10<br>(5 - 20)       | 1<br>(0 - 4)         | 3<br>(1 - 9)         |
| Thalassemias                                        | 2<br>(1 - 3)       | 1<br>(0 - 2)       | 0<br>(0 - 1)        | 1<br>(0 - 1)         | 0<br>(0 - 0)         | 0<br>(0 - 0)         |
| Sickle cell disorders                               | 2<br>(1 - 4)       | 0<br>(0 - 0)       | 0<br>(0 - 0)        | 2<br>(1 - 4)         | 0<br>(0 - 0)         | 0<br>(0 - 0)         |
| G6PD deficiency                                     | 1<br>(0 - 2)       | 0<br>(0 - 0)       | 0<br>(0 - 0)        | 1<br>(0 - 2)         | 0<br>(0 - 0)         | 0<br>(0 - 0)         |
| Other hemoglobinopathies and hemolytic anemias      | 12<br>(6 - 24)     | 1<br>(0 - 2)       | 0<br>(0 - 1)        | 7<br>(3 - 13)        | 1<br>(0 - 4)         | 3<br>(1 - 9)         |
| Endocrine, metabolic, blood, and immune disorders   | 96<br>(39 - 179)   | 15<br>(4 - 37)     | 3<br>(1 - 7)        | 57<br>(25 - 100)     | 8<br>(1 - 34)        | 14<br>(4 - 39)       |
| Musculoskeletal disorders                           | 10<br>(5 - 22)     | --                 | 0<br>(0 - 1)        | 5<br>(2 - 8)         | 1<br>(0 - 5)         | 4<br>(1 - 11)        |
| Rheumatoid arthritis                                | 3<br>(1 - 7)       | --                 | 0<br>(0 - 0)        | 1<br>(0 - 1)         | 0<br>(0 - 1)         | 2<br>(0 - 5)         |
| Other musculoskeletal disorders                     | 7<br>(4 - 16)      | --                 | 0<br>(0 - 1)        | 4<br>(2 - 7)         | 1<br>(0 - 4)         | 2<br>(1 - 6)         |
| Other non-communicable diseases                     | 81<br>(46 - 132)   | 49<br>(22 - 93)    | 3<br>(1 - 6)        | 10<br>(5 - 16)       | 3<br>(1 - 12)        | 16<br>(7 - 39)       |
| Congenital anomalies                                | 54<br>(25 - 98)    | 43<br>(18 - 88)    | 2<br>(1 - 5)        | 4<br>(2 - 8)         | 1<br>(0 - 3)         | 3<br>(1 - 8)         |
| Neural tube defects                                 | 3<br>(1 - 10)      | 3<br>(1 - 9)       | 0<br>(0 - 0)        | 0<br>(0 - 0)         | 0<br>(0 - 0)         | 0<br>(0 - 0)         |
| Congenital heart anomalies                          | 18<br>(6 - 35)     | 13<br>(3 - 29)     | 1<br>(0 - 2)        | 2<br>(1 - 3)         | 0<br>(0 - 1)         | 2<br>(1 - 5)         |
| Cleft lip and cleft palate                          | 0<br>(0 - 0)       | 0<br>(0 - 0)       | --                  | --                   | --                   | --                   |
| Down syndrome                                       | 3<br>(1 - 7)       | 2<br>(1 - 6)       | 0<br>(0 - 1)        | 0<br>(0 - 1)         | 0<br>(0 - 0)         | 0<br>(0 - 0)         |
| Chromosomal unbalanced rearrangements               | 4<br>(1 - 10)      | 3<br>(1 - 9)       | 0<br>(0 - 0)        | 0<br>(0 - 1)         | 0<br>(0 - 0)         | 0<br>(0 - 0)         |
| Other congenital anomalies                          | 26<br>(12 - 48)    | 22<br>(9 - 44)     | 1<br>(0 - 2)        | 2<br>(1 - 3)         | 0<br>(0 - 2)         | 1<br>(0 - 3)         |
| Skin and subcutaneous diseases                      | 23<br>(11 - 53)    | 2<br>(0 - 4)       | 0<br>(0 - 1)        | 6<br>(3 - 9)         | 2<br>(0 - 9)         | 13<br>(5 - 33)       |
| Cellulitis                                          | 2<br>(1 - 6)       | 0<br>(0 - 0)       | 0<br>(0 - 0)        | 1<br>(0 - 1)         | 0<br>(0 - 1)         | 1<br>(0 - 3)         |
| Pyoderma                                            | 7<br>(3 - 13)      | 1<br>(0 - 3)       | 0<br>(0 - 0)        | 3<br>(1 - 5)         | 1<br>(0 - 2)         | 2<br>(1 - 6)         |

Web Table 31- Botswana deaths with 95% UI by age, sex, and cause in 2013

| Cause                                           | Females, All Ages  | Females, 0-4 Years | Females, 5-14 Years | Females, 15-49 Years | Females, 50-69 Years | Females, 70-80 Years |
|-------------------------------------------------|--------------------|--------------------|---------------------|----------------------|----------------------|----------------------|
| Decubitus ulcer                                 | 12<br>(5 - 33)     | 0<br>(0 - 0)       | 0<br>(0 - 0)        | 1<br>(1 - 2)         | 1<br>(0 - 5)         | 9<br>(3 - 24)        |
| Other skin and subcutaneous diseases            | 2<br>(1 - 4)       | 0<br>(0 - 1)       | 0<br>(0 - 0)        | 1<br>(0 - 1)         | 0<br>(0 - 1)         | 0<br>(0 - 1)         |
| Sudden infant death syndrome                    | 4<br>(0 - 17)      | 4<br>(0 - 17)      | --                  | --                   | --                   | --                   |
| Injuries                                        | 369<br>(218 - 576) | 37<br>(20 - 65)    | 19<br>(11 - 31)     | 242<br>(121 - 381)   | 20<br>(5 - 67)       | 51<br>(22 - 118)     |
| Transport injuries                              | 98<br>(56 - 153)   | 8<br>(4 - 15)      | 6<br>(3 - 11)       | 76<br>(38 - 127)     | 4<br>(1 - 12)        | 4<br>(2 - 9)         |
| Road injuries                                   | 95<br>(55 - 149)   | 8<br>(4 - 14)      | 6<br>(3 - 11)       | 74<br>(37 - 123)     | 4<br>(1 - 11)        | 3<br>(1 - 9)         |
| Pedestrian road injuries                        | 17<br>(9 - 29)     | 3<br>(1 - 6)       | 2<br>(1 - 5)        | 8<br>(3 - 18)        | 1<br>(0 - 3)         | 2<br>(1 - 5)         |
| Cyclist road injuries                           | 5<br>(3 - 9)       | 0<br>(0 - 1)       | 0<br>(0 - 1)        | 4<br>(1 - 7)         | 1<br>(0 - 2)         | 0<br>(0 - 1)         |
| Motorcyclist road injuries                      | 7<br>(3 - 14)      | 0<br>(0 - 0)       | 0<br>(0 - 0)        | 7<br>(3 - 13)        | 0<br>(0 - 0)         | 0<br>(0 - 0)         |
| Motor vehicle road injuries                     | 66<br>(37 - 106)   | 4<br>(2 - 8)       | 3<br>(1 - 6)        | 56<br>(27 - 93)      | 2<br>(0 - 6)         | 1<br>(0 - 3)         |
| Other road injuries                             | 0<br>(0 - 1)       | 0<br>(0 - 0)       | 0<br>(0 - 0)        | 0<br>(0 - 0)         | 0<br>(0 - 0)         | 0<br>(0 - 0)         |
| Other transport injuries                        | 3<br>(2 - 6)       | 0<br>(0 - 1)       | 0<br>(0 - 1)        | 2<br>(1 - 4)         | 0<br>(0 - 1)         | 0<br>(0 - 1)         |
| Unintentional injuries                          | 157<br>(92 - 271)  | 27<br>(13 - 53)    | 11<br>(6 - 22)      | 63<br>(34 - 101)     | 13<br>(3 - 49)       | 43<br>(16 - 99)      |
| Falls                                           | 18<br>(9 - 38)     | 1<br>(0 - 2)       | 0<br>(0 - 1)        | 5<br>(2 - 9)         | 1<br>(0 - 3)         | 11<br>(4 - 28)       |
| Drowning                                        | 14<br>(7 - 31)     | 5<br>(2 - 14)      | 4<br>(1 - 9)        | 4<br>(2 - 7)         | 1<br>(0 - 3)         | 1<br>(0 - 3)         |
| Fire, heat, and hot substances                  | 26<br>(12 - 66)    | 4<br>(1 - 13)      | 1<br>(0 - 5)        | 13<br>(5 - 27)       | 1<br>(0 - 6)         | 7<br>(2 - 21)        |
| Poisonings                                      | 8<br>(4 - 23)      | 1<br>(0 - 2)       | 0<br>(0 - 1)        | 6<br>(2 - 18)        | 0<br>(0 - 2)         | 1<br>(0 - 2)         |
| Exposure to mechanical forces                   | 13<br>(7 - 26)     | 2<br>(1 - 5)       | 2<br>(1 - 4)        | 8<br>(4 - 17)        | 1<br>(0 - 3)         | 1<br>(0 - 2)         |
| Unintentional firearm injuries                  | 7<br>(3 - 15)      | 0<br>(0 - 1)       | 0<br>(0 - 1)        | 6<br>(2 - 12)        | 1<br>(0 - 2)         | 0<br>(0 - 1)         |
| Unintentional suffocation                       | 1<br>(0 - 4)       | 0<br>(0 - 1)       | 0<br>(0 - 1)        | 1<br>(0 - 2)         | 0<br>(0 - 0)         | 0<br>(0 - 0)         |
| Other exposure to mechanical forces             | 4<br>(2 - 11)      | 1<br>(0 - 3)       | 1<br>(0 - 3)        | 1<br>(0 - 6)         | 0<br>(0 - 1)         | 0<br>(0 - 1)         |
| Adverse effects of medical treatment            | 56<br>(18 - 129)   | 9<br>(3 - 20)      | 2<br>(0 - 6)        | 19<br>(6 - 42)       | 8<br>(1 - 33)        | 19<br>(3 - 58)       |
| Animal contact                                  | 4<br>(1 - 14)      | 1<br>(0 - 3)       | 1<br>(0 - 2)        | 2<br>(1 - 8)         | 0<br>(0 - 2)         | 0<br>(0 - 1)         |
| Venomous animal contact                         | 3<br>(1 - 12)      | 1<br>(0 - 2)       | 0<br>(0 - 1)        | 2<br>(1 - 8)         | 0<br>(0 - 1)         | 0<br>(0 - 1)         |
| Non-venomous animal contact                     | 0<br>(0 - 2)       | 0<br>(0 - 0)       | 0<br>(0 - 0)        | 0<br>(0 - 1)         | 0<br>(0 - 0)         | 0<br>(0 - 0)         |
| Foreign body                                    | 11<br>(5 - 24)     | 5<br>(2 - 12)      | 1<br>(0 - 2)        | 4<br>(1 - 7)         | 1<br>(0 - 3)         | 2<br>(0 - 5)         |
| Pulmonary aspiration and foreign body in airway | 11<br>(4 - 24)     | 5<br>(1 - 12)      | 1<br>(0 - 2)        | 3<br>(1 - 7)         | 1<br>(0 - 3)         | 2<br>(0 - 5)         |
| Foreign body in other body part                 | 0<br>(0 - 0)       | 0<br>(0 - 0)       | 0<br>(0 - 0)        | 0<br>(0 - 0)         | 0<br>(0 - 0)         | 0<br>(0 - 0)         |
| Other unintentional injuries                    | 7<br>(4 - 14)      | 1<br>(0 - 2)       | 0<br>(0 - 1)        | 4<br>(2 - 7)         | 1<br>(0 - 2)         | 1<br>(0 - 4)         |
| Self-harm and interpersonal violence            | 114<br>(28 - 205)  | 2<br>(0 - 4)       | 1<br>(0 - 3)        | 104<br>(25 - 191)    | 3<br>(0 - 9)         | 5<br>(1 - 14)        |
| Self-harm                                       | 54<br>(12 - 99)    | --                 | 0<br>(0 - 2)        | 46<br>(11 - 84)      | 2<br>(0 - 8)         | 5<br>(0 - 14)        |
| Interpersonal violence                          | 60<br>(9 - 135)    | 2<br>(0 - 4)       | 1<br>(0 - 2)        | 57<br>(8 - 130)      | 0<br>(0 - 1)         | 0<br>(0 - 1)         |
| Assault by firearm                              | 18<br>(3 - 44)     | 0<br>(0 - 1)       | 0<br>(0 - 0)        | 18<br>(2 - 43)       | 0<br>(0 - 1)         | 0<br>(0 - 0)         |
| Assault by sharp object                         | 21<br>(3 - 50)     | 0<br>(0 - 1)       | 0<br>(0 - 0)        | 21<br>(3 - 49)       | 0<br>(0 - 0)         | 0<br>(0 - 0)         |
| Assault by other means                          | 21<br>(3 - 47)     | 1<br>(0 - 3)       | 1<br>(0 - 1)        | 19<br>(2 - 44)       | 0<br>(0 - 1)         | 0<br>(0 - 0)         |

Web Table 31- Brazil deaths with 95% UI by age, sex, and cause in 2013

| Cause                                                             | Both Sexes, All Ages                 | Both Sexes, 0-4 Years       | Both Sexes, 5-14 Years    | Both Sexes, 15-49 Years        | Both Sexes, 50-69 Years        | Both Sexes, 70-80 Years        |
|-------------------------------------------------------------------|--------------------------------------|-----------------------------|---------------------------|--------------------------------|--------------------------------|--------------------------------|
| All causes                                                        | 1,255,377<br>(1,200,745 - 1,311,152) | 54,076<br>(49,757 - 59,029) | 9,727<br>(9,240 - 10,301) | 217,520<br>(202,182 - 232,473) | 348,513<br>(326,845 - 369,362) | 625,541<br>(605,160 - 647,070) |
| Communicable, maternal, neonatal, and nutritional diseases        | 150,884<br>(127,635 - 166,278)       | 36,078<br>(32,642 - 39,972) | 1,745<br>(1,446 - 2,091)  | 23,209<br>(20,838 - 26,189)    | 25,833<br>(20,139 - 31,849)    | 64,019<br>(48,464 - 75,133)    |
| HIV/AIDS and tuberculosis                                         | 16,006<br>(13,530 - 18,781)          | 57<br>(39 - 78)             | 40<br>(26 - 62)           | 9,102<br>(7,829 - 10,501)      | 4,924<br>(3,591 - 6,480)       | 1,882<br>(1,332 - 2,258)       |
| Tuberculosis                                                      | 5,788<br>(4,226 - 6,524)             | 38<br>(26 - 51)             | 30<br>(22 - 38)           | 2,007<br>(1,496 - 2,338)       | 2,155<br>(1,541 - 2,549)       | 1,558<br>(1,043 - 1,829)       |
| HIV/AIDS                                                          | 10,217<br>(8,168 - 12,829)           | 19<br>(7 - 35)              | 10<br>(0 - 30)            | 7,095<br>(5,946 - 8,468)       | 2,769<br>(1,624 - 4,271)       | 325<br>(172 - 530)             |
| HIV/AIDS resulting in mycobacterial infection                     | 613<br>(453 - 836)                   | 1<br>(0 - 2)                | 0<br>(0 - 1)              | 416<br>(323 - 542)             | 174<br>(97 - 280)              | 22<br>(11 - 37)                |
| HIV/AIDS resulting in other diseases                              | 9,604<br>(7,693 - 12,041)            | 18<br>(7 - 34)              | 10<br>(0 - 29)            | 6,679<br>(5,600 - 7,970)       | 2,595<br>(1,513 - 3,989)       | 303<br>(161 - 499)             |
| Diarrhea, lower respiratory, and other common infectious diseases | 81,989<br>(62,841 - 94,554)          | 7,744<br>(5,925 - 9,566)    | 1,408<br>(1,133 - 1,751)  | 8,573<br>(7,060 - 9,933)       | 14,073<br>(9,994 - 16,723)     | 50,191<br>(36,479 - 61,068)    |
| Diarrheal diseases                                                | 6,489<br>(5,034 - 8,190)             | 1,919<br>(1,035 - 3,188)    | 81<br>(58 - 110)          | 485<br>(394 - 585)             | 848<br>(679 - 1,075)           | 3,156<br>(2,275 - 4,337)       |
| Intestinal infectious diseases                                    | 1,643<br>(804 - 3,019)               | 393<br>(193 - 744)          | 446<br>(222 - 793)        | 664<br>(295 - 1,293)           | 101<br>(45 - 195)              | 40<br>(18 - 76)                |
| Typhoid fever                                                     | 1,268<br>(608 - 2,335)               | 294<br>(140 - 533)          | 350<br>(172 - 626)        | 518<br>(227 - 1,030)           | 77<br>(32 - 153)               | 29<br>(11 - 58)                |
| Paratyphoid fever                                                 | 337<br>(153 - 635)                   | 86<br>(39 - 172)            | 93<br>(42 - 176)          | 133<br>(56 - 272)              | 19<br>(7 - 38)                 | 6<br>(2 - 13)                  |
| Other intestinal infectious diseases                              | 38<br>(25 - 54)                      | 13<br>(6 - 24)              | 3<br>(1 - 8)              | 12<br>(5 - 21)                 | 5<br>(1 - 11)                  | 5<br>(1 - 11)                  |
| Lower respiratory infections                                      | 70,074<br>(51,642 - 82,269)          | 4,255<br>(3,046 - 5,645)    | 526<br>(407 - 656)        | 6,283<br>(4,942 - 7,410)       | 12,503<br>(8,525 - 15,099)     | 46,507<br>(32,641 - 57,541)    |
| Upper respiratory infections                                      | 47<br>(21 - 89)                      | 2<br>(0 - 7)                | 1<br>(0 - 2)              | 12<br>(4 - 25)                 | 14<br>(3 - 34)                 | 19<br>(3 - 58)                 |
| Otitis media                                                      | 47<br>(41 - 53)                      | 8<br>(5 - 11)               | 3<br>(3 - 4)              | 12<br>(11 - 14)                | 9<br>(7 - 11)                  | 14<br>(10 - 19)                |
| Meningitis                                                        | 2,404<br>(1,938 - 2,816)             | 816<br>(517 - 1,168)        | 238<br>(176 - 290)        | 688<br>(569 - 789)             | 382<br>(304 - 439)             | 280<br>(230 - 328)             |
| Pneumococcal meningitis                                           | 390<br>(296 - 481)                   | 129<br>(76 - 192)           | 36<br>(24 - 54)           | 117<br>(81 - 156)              | 62<br>(40 - 89)                | 45<br>(29 - 62)                |
| H influenzae type B meningitis                                    | 429<br>(300 - 582)                   | 290<br>(178 - 436)          | 44<br>(27 - 60)           | 53<br>(37 - 77)                | 23<br>(15 - 33)                | 19<br>(13 - 26)                |
| Meningococcal meningitis                                          | 649<br>(520 - 796)                   | 213<br>(135 - 307)          | 97<br>(67 - 127)          | 179<br>(135 - 250)             | 88<br>(60 - 120)               | 71<br>(51 - 98)                |
| Other meningitis                                                  | 936<br>(745 - 1,095)                 | 182<br>(105 - 276)          | 62<br>(42 - 85)           | 340<br>(250 - 411)             | 209<br>(155 - 257)             | 144<br>(109 - 177)             |
| Encephalitis                                                      | 971<br>(766 - 1,467)                 | 264<br>(158 - 474)          | 98<br>(67 - 159)          | 356<br>(278 - 566)             | 158<br>(114 - 249)             | 97<br>(72 - 154)               |
| Diphtheria                                                        | 8<br>(1 - 26)                        | 3<br>(0 - 19)               | 1<br>(0 - 8)              | 3<br>(0 - 9)                   | 1<br>(0 - 6)                   | -                              |
| Whooping cough                                                    | 77<br>(38 - 188)                     | 61<br>(23 - 173)            | 3<br>(2 - 4)              | 10<br>(8 - 12)                 | 2<br>(1 - 2)                   | -                              |
| Tetanus                                                           | 140<br>(96 - 203)                    | 10<br>(7 - 16)              | 7<br>(4 - 10)             | 43<br>(25 - 57)                | 46<br>(28 - 66)                | 35<br>(20 - 69)                |
| Measles                                                           | 2<br>(1 - 4)                         | 2<br>(1 - 3)                | 0<br>(0 - 1)              | 0<br>(0 - 0)                   | 0<br>(0 - 0)                   | -                              |
| Varicella and herpes zoster                                       | 86<br>(34 - 201)                     | 12<br>(1 - 39)              | 3<br>(0 - 12)             | 17<br>(5 - 36)                 | 10<br>(2 - 25)                 | 44<br>(3 - 153)                |
| Neglected tropical diseases and malaria                           | 9,031<br>(4,210 - 23,934)            | 163<br>(116 - 208)          | 83<br>(49 - 104)          | 1,551<br>(826 - 4,321)         | 3,807<br>(1,533 - 10,663)      | 3,427<br>(1,205 - 10,565)      |
| Malaria                                                           | 71<br>(50 - 99)                      | 9<br>(5 - 17)               | 5<br>(3 - 9)              | 36<br>(23 - 56)                | 14<br>(8 - 25)                 | 6<br>(3 - 12)                  |
| Chagas disease                                                    | 7,707<br>(2,888 - 22,823)            | 2<br>(1 - 7)                | 5<br>(2 - 14)             | 1,102<br>(413 - 3,867)         | 3,446<br>(1,199 - 10,294)      | 3,152<br>(953 - 10,322)        |
| Leishmaniasis                                                     | 209<br>(185 - 236)                   | 71<br>(54 - 89)             | 12<br>(10 - 15)           | 68<br>(58 - 78)                | 41<br>(35 - 48)                | 17<br>(15 - 20)                |
| Visceral leishmaniasis                                            | 209<br>(185 - 236)                   | 71<br>(54 - 89)             | 12<br>(10 - 15)           | 68<br>(58 - 78)                | 41<br>(35 - 48)                | 17<br>(15 - 20)                |
| Schistosomiasis                                                   | 435<br>(351 - 540)                   | 0<br>(0 - 1)                | 3<br>(2 - 5)              | 126<br>(88 - 171)              | 175<br>(121 - 241)             | 130<br>(83 - 187)              |
| Cysticercosis                                                     | 67<br>(60 - 74)                      | 0<br>(0 - 0)                | 1<br>(1 - 1)              | 35<br>(31 - 40)                | 21<br>(19 - 24)                | 9<br>(8 - 10)                  |
| Cystic echinococcosis                                             | 21<br>(20 - 23)                      | 0<br>(0 - 0)                | 1<br>(1 - 1)              | 10<br>(9 - 11)                 | 6<br>(6 - 7)                   | 4<br>(4 - 4)                   |
| Dengue                                                            | 256<br>(34 - 317)                    | 21<br>(1 - 34)              | 30<br>(4 - 40)            | 82<br>(16 - 101)               | 56<br>(7 - 71)                 | 66<br>(4 - 97)                 |
| Yellow fever                                                      | 5<br>(4 - 7)                         | 1<br>(0 - 1)                | 1<br>(1 - 2)              | 3<br>(2 - 5)                   | 1<br>(0 - 1)                   | 0<br>(0 - 0)                   |
| Rabies                                                            | 18<br>(11 - 21)                      | 1<br>(1 - 2)                | 3<br>(2 - 4)              | 9<br>(5 - 11)                  | 3<br>(2 - 4)                   | 1<br>(1 - 1)                   |
| Intestinal nematode infections                                    | 87<br>(62 - 118)                     | 21<br>(10 - 38)             | 12<br>(4 - 23)            | 20<br>(9 - 36)                 | 14<br>(6 - 27)                 | 20<br>(9 - 33)                 |
| Ascariasis                                                        | 87<br>(62 - 118)                     | 21<br>(10 - 38)             | 12<br>(4 - 23)            | 20<br>(9 - 36)                 | 14<br>(6 - 27)                 | 20<br>(9 - 33)                 |

Web Table 31- Brazil deaths with 95% UI by age, sex, and cause in 2013

| Cause                                                            | Both Sexes, All Ages           | Both Sexes, 0-4 Years       | Both Sexes, 5-14 Years   | Both Sexes, 15-49 Years      | Both Sexes, 50-69 Years        | Both Sexes, 70-80 Years        |
|------------------------------------------------------------------|--------------------------------|-----------------------------|--------------------------|------------------------------|--------------------------------|--------------------------------|
| Other neglected tropical diseases                                | 155<br>(106 - 187)             | 35<br>(20 - 55)             | 8<br>(5 - 11)            | 60<br>(34 - 74)              | 30<br>(19 - 38)                | 22<br>(13 - 30)                |
| Maternal disorders                                               | 1,813<br>(1,414 - 2,267)       | --                          | 12<br>(7 - 19)           | 1,801<br>(1,404 - 2,259)     | --                             | --                             |
| Maternal hemorrhage                                              | 169<br>(126 - 221)             | --                          | 1<br>(0 - 1)             | 168<br>(126 - 220)           | --                             | --                             |
| Maternal sepsis and other maternal infections                    | 231<br>(177 - 298)             | --                          | 2<br>(1 - 3)             | 229<br>(175 - 295)           | --                             | --                             |
| Maternal hypertensive disorders                                  | 320<br>(242 - 411)             | --                          | 3<br>(2 - 5)             | 317<br>(239 - 407)           | --                             | --                             |
| Maternal obstructed labor                                        | 62<br>(44 - 84)                | --                          | 0<br>(0 - 1)             | 61<br>(44 - 84)              | --                             | --                             |
| Maternal abortive outcome                                        | 194<br>(146 - 250)             | --                          | 1<br>(1 - 2)             | 193<br>(145 - 249)           | --                             | --                             |
| Indirect maternal deaths                                         | 312<br>(236 - 401)             | --                          | 2<br>(1 - 3)             | 310<br>(234 - 400)           | --                             | --                             |
| Late maternal deaths                                             | 253<br>(162 - 355)             | --                          | 2<br>(1 - 4)             | 251<br>(160 - 353)           | --                             | --                             |
| Maternal deaths aggravated by HIV/AIDS                           | 1<br>(1 - 2)                   | --                          | --                       | 1<br>(1 - 2)                 | --                             | --                             |
| Other maternal disorders                                         | 268<br>(205 - 342)             | --                          | 2<br>(1 - 3)             | 266<br>(203 - 341)           | --                             | --                             |
| Neonatal disorders                                               | 26,352<br>(23,241 - 29,777)    | 26,352<br>(23,241 - 29,777) | --                       | --                           | --                             | --                             |
| Neonatal preterm birth complications                             | 11,257<br>(8,185 - 15,345)     | 11,257<br>(8,185 - 15,345)  | --                       | --                           | --                             | --                             |
| Neonatal encephalopathy due to birth asphyxia and trauma         | 5,364<br>(3,568 - 7,601)       | 5,364<br>(3,568 - 7,601)    | --                       | --                           | --                             | --                             |
| Neonatal sepsis and other neonatal infections                    | 5,730<br>(3,643 - 8,802)       | 5,730<br>(3,643 - 8,802)    | --                       | --                           | --                             | --                             |
| Hemolytic disease and other neonatal jaundice                    | 211<br>(104 - 417)             | 211<br>(104 - 417)          | --                       | --                           | --                             | --                             |
| Other neonatal disorders                                         | 3,790<br>(1,754 - 5,524)       | 3,790<br>(1,754 - 5,524)    | --                       | --                           | --                             | --                             |
| Nutritional deficiencies                                         | 12,398<br>(8,845 - 14,801)     | 1,081<br>(714 - 1,685)      | 106<br>(73 - 134)        | 1,331<br>(935 - 1,611)       | 2,008<br>(1,350 - 2,446)       | 7,871<br>(5,344 - 9,855)       |
| Protein-energy malnutrition                                      | 8,442<br>(5,833 - 10,486)      | 919<br>(582 - 1,493)        | 70<br>(46 - 93)          | 579<br>(356 - 831)           | 1,204<br>(759 - 1,602)         | 5,670<br>(3,580 - 7,368)       |
| Iodine deficiency                                                | 12<br>(2 - 37)                 | 1<br>(0 - 5)                | 0<br>(0 - 2)             | 3<br>(0 - 9)                 | 3<br>(0 - 12)                  | 5<br>(0 - 28)                  |
| Iron-deficiency anemia                                           | 3,328<br>(1,687 - 4,713)       | 111<br>(31 - 217)           | 25<br>(12 - 37)          | 670<br>(392 - 884)           | 684<br>(376 - 1,002)           | 1,838<br>(805 - 2,892)         |
| Other nutritional deficiencies                                   | 616<br>(255 - 935)             | 50<br>(16 - 108)            | 11<br>(4 - 17)           | 80<br>(35 - 114)             | 117<br>(50 - 177)              | 358<br>(125 - 608)             |
| Other communicable, maternal, neonatal, and nutritional diseases | 3,295<br>(2,510 - 4,121)       | 682<br>(166 - 1,372)        | 95<br>(55 - 150)         | 851<br>(681 - 994)           | 1,020<br>(805 - 1,215)         | 648<br>(469 - 785)             |
| Sexually transmitted diseases excluding HIV                      | 736<br>(185 - 1,509)           | 521<br>(0 - 1,218)          | 40<br>(2 - 92)           | 86<br>(60 - 117)             | 41<br>(26 - 62)                | 47<br>(28 - 75)                |
| Syphilis                                                         | 658<br>(108 - 1,405)           | 521<br>(0 - 1,218)          | 39<br>(1 - 91)           | 36<br>(25 - 50)              | 24<br>(15 - 36)                | 37<br>(22 - 59)                |
| Chlamydial infection                                             | 22<br>(15 - 30)                | --                          | 0<br>(0 - 0)             | 15<br>(11 - 21)              | 4<br>(3 - 7)                   | 2<br>(1 - 4)                   |
| Gonococcal infection                                             | 31<br>(22 - 42)                | --                          | 0<br>(0 - 1)             | 18<br>(13 - 25)              | 7<br>(5 - 11)                  | 5<br>(3 - 9)                   |
| Other sexually transmitted diseases                              | 24<br>(17 - 33)                | --                          | 0<br>(0 - 1)             | 16<br>(12 - 22)              | 5<br>(3 - 8)                   | 2<br>(1 - 4)                   |
| Hepatitis                                                        | 1,015<br>(871 - 1,184)         | 12<br>(8 - 18)              | 14<br>(10 - 19)          | 280<br>(215 - 351)           | 475<br>(373 - 610)             | 234<br>(174 - 314)             |
| Acute hepatitis A                                                | 194<br>(72 - 356)              | 8<br>(3 - 14)               | 10<br>(5 - 14)           | 104<br>(39 - 184)            | 61<br>(17 - 131)               | 11<br>(2 - 29)                 |
| Acute hepatitis B                                                | 739<br>(547 - 942)             | 5<br>(2 - 9)                | 3<br>(1 - 7)             | 145<br>(76 - 230)            | 378<br>(268 - 504)             | 209<br>(151 - 284)             |
| Acute hepatitis C                                                | 82<br>(17 - 198)               | --                          | 1<br>(0 - 2)             | 30<br>(6 - 76)               | 37<br>(7 - 91)                 | 14<br>(3 - 38)                 |
| Other infectious diseases                                        | 1,544<br>(1,068 - 1,793)       | 148<br>(87 - 212)           | 42<br>(29 - 55)          | 485<br>(345 - 605)           | 503<br>(352 - 616)             | 366<br>(216 - 465)             |
| Non-communicable diseases                                        | 952,692<br>(909,005 - 996,755) | 14,671<br>(12,261 - 17,391) | 3,581<br>(3,130 - 3,911) | 99,232<br>(91,424 - 106,892) | 296,509<br>(277,909 - 315,192) | 538,698<br>(517,167 - 560,823) |
| Neoplasms                                                        | 215,260<br>(200,473 - 230,803) | 690<br>(486 - 915)          | 1,433<br>(1,217 - 1,625) | 28,547<br>(25,769 - 31,122)  | 88,053<br>(81,393 - 94,868)    | 96,537<br>(89,102 - 104,560)   |
| Esophageal cancer                                                | 9,314<br>(7,538 - 11,074)      | --                          | --                       | 1,071<br>(801 - 1,381)       | 4,925<br>(3,830 - 6,044)       | 3,318<br>(2,698 - 4,063)       |
| Stomach cancer                                                   | 19,839<br>(17,553 - 22,255)    | --                          | --                       | 2,067<br>(1,747 - 2,430)     | 7,511<br>(6,564 - 8,526)       | 10,260<br>(8,620 - 12,174)     |
| Liver cancer                                                     | 8,771<br>(7,662 - 9,951)       | --                          | 15<br>(10 - 22)          | 971<br>(796 - 1,176)         | 3,965<br>(3,369 - 4,636)       | 3,819<br>(3,068 - 4,680)       |
| Liver cancer due to hepatitis B                                  | 1,577<br>(1,146 - 2,031)       | --                          | 7<br>(4 - 11)            | 317<br>(235 - 410)           | 781<br>(539 - 1,063)           | 472<br>(325 - 641)             |
| Liver cancer due to hepatitis C                                  | 4,938<br>(4,130 - 5,843)       | --                          | 2<br>(1 - 3)             | 413<br>(311 - 539)           | 2,190<br>(1,737 - 2,682)       | 2,333<br>(1,824 - 2,978)       |

Web Table 31- Brazil deaths with 95% UI by age, sex, and cause in 2013

| Cause                                | Both Sexes, All Ages           | Both Sexes, 0-4 Years | Both Sexes, 5-14 Years | Both Sexes, 15-49 Years     | Both Sexes, 50-69 Years        | Both Sexes, 70-80 Years        |
|--------------------------------------|--------------------------------|-----------------------|------------------------|-----------------------------|--------------------------------|--------------------------------|
| Liver cancer due to alcohol use      | 1,526<br>(1,170 - 1,913)       | --                    | --                     | 111<br>(77 - 155)           | 671<br>(493 - 870)             | 745<br>(522 - 1,015)           |
| Liver cancer due to other causes     | 730<br>(531 - 986)             | --                    | 7<br>(4 - 10)          | 130<br>(92 - 178)           | 324<br>(224 - 453)             | 269<br>(178 - 398)             |
| Larynx cancer                        | 4,023<br>(2,900 - 4,906)       | --                    | --                     | 436<br>(292 - 566)          | 2,228<br>(1,536 - 2,802)       | 1,359<br>(1,013 - 1,793)       |
| Tracheal, bronchus and lung cancer   | 29,043<br>(26,484 - 31,973)    | --                    | --                     | 2,125<br>(1,821 - 2,451)    | 14,178<br>(12,462 - 15,966)    | 12,741<br>(11,266 - 14,473)    |
| Breast cancer                        | 16,402<br>(14,259 - 18,467)    | --                    | --                     | 3,761<br>(3,097 - 4,416)    | 7,458<br>(6,263 - 8,652)       | 5,183<br>(4,319 - 6,153)       |
| Cervical cancer                      | 8,644<br>(7,058 - 11,462)      | --                    | --                     | 2,474<br>(1,859 - 3,082)    | 3,688<br>(2,890 - 5,094)       | 2,482<br>(1,844 - 3,640)       |
| Uterine cancer                       | 2,314<br>(1,536 - 3,092)       | --                    | --                     | 148<br>(91 - 205)           | 993<br>(606 - 1,371)           | 1,174<br>(756 - 1,720)         |
| Prostate cancer                      | 17,680<br>(11,467 - 25,089)    | --                    | --                     | 107<br>(68 - 171)           | 3,494<br>(2,219 - 5,099)       | 14,079<br>(8,939 - 20,322)     |
| Colon and rectum cancer              | 21,959<br>(19,855 - 24,307)    | --                    | --                     | 2,427<br>(2,126 - 2,735)    | 8,346<br>(7,440 - 9,287)       | 11,186<br>(9,617 - 12,946)     |
| Lip and oral cavity cancer           | 4,367<br>(3,195 - 5,228)       | --                    | --                     | 702<br>(529 - 937)          | 2,197<br>(1,503 - 2,743)       | 1,467<br>(1,087 - 1,843)       |
| Nasopharynx cancer                   | 672<br>(556 - 846)             | --                    | 8<br>(4 - 15)          | 178<br>(136 - 234)          | 329<br>(255 - 432)             | 157<br>(121 - 218)             |
| Other pharynx cancer                 | 3,130<br>(2,106 - 3,758)       | --                    | --                     | 478<br>(312 - 642)          | 1,885<br>(1,197 - 2,377)       | 767<br>(558 - 957)             |
| Gallbladder and biliary tract cancer | 3,950<br>(3,011 - 4,876)       | --                    | --                     | 258<br>(187 - 326)          | 1,575<br>(1,170 - 2,001)       | 2,117<br>(1,490 - 2,798)       |
| Pancreatic cancer                    | 10,501<br>(9,450 - 11,578)     | --                    | --                     | 877<br>(740 - 1,022)        | 4,565<br>(3,997 - 5,201)       | 5,059<br>(4,327 - 5,886)       |
| Malignant skin melanoma              | 2,293<br>(1,673 - 3,108)       | --                    | --                     | 520<br>(374 - 691)          | 924<br>(643 - 1,261)           | 849<br>(621 - 1,144)           |
| Non-melanoma skin cancer             | 1,828<br>(1,240 - 2,309)       | --                    | --                     | 162<br>(115 - 212)          | 487<br>(336 - 626)             | 1,179<br>(772 - 1,515)         |
| Ovarian cancer                       | 4,518<br>(3,882 - 5,250)       | --                    | --                     | 813<br>(649 - 1,013)        | 2,194<br>(1,777 - 2,676)       | 1,511<br>(1,185 - 1,881)       |
| Testicular cancer                    | 301<br>(191 - 401)             | --                    | --                     | 208<br>(120 - 289)          | 48<br>(32 - 71)                | 45<br>(28 - 72)                |
| Kidney cancer                        | 3,992<br>(3,530 - 4,472)       | 29<br>(17 - 45)       | 41<br>(30 - 55)        | 442<br>(368 - 528)          | 1,868<br>(1,577 - 2,183)       | 1,612<br>(1,332 - 1,968)       |
| Bladder cancer                       | 5,218<br>(4,391 - 7,042)       | --                    | --                     | 221<br>(169 - 321)          | 1,767<br>(1,430 - 2,467)       | 3,230<br>(2,625 - 4,319)       |
| Brain and nervous system cancer      | 8,363<br>(6,304 - 9,557)       | 100<br>(51 - 170)     | 331<br>(233 - 420)     | 2,230<br>(1,687 - 2,640)    | 3,528<br>(2,611 - 4,205)       | 2,173<br>(1,586 - 2,656)       |
| Thyroid cancer                       | 846<br>(698 - 1,067)           | --                    | 2<br>(1 - 3)           | 80<br>(64 - 101)            | 326<br>(260 - 422)             | 439<br>(341 - 577)             |
| Mesothelioma                         | 470<br>(393 - 571)             | --                    | --                     | 49<br>(37 - 66)             | 230<br>(178 - 294)             | 192<br>(144 - 255)             |
| Hodgkin lymphoma                     | 791<br>(619 - 1,212)           | 2<br>(1 - 4)          | 24<br>(13 - 43)        | 323<br>(248 - 470)          | 245<br>(169 - 419)             | 197<br>(136 - 339)             |
| Non-Hodgkin lymphoma                 | 5,499<br>(4,659 - 6,714)       | 40<br>(23 - 66)       | 116<br>(83 - 167)      | 1,116<br>(920 - 1,392)      | 2,078<br>(1,703 - 2,584)       | 2,147<br>(1,702 - 2,662)       |
| Multiple myeloma                     | 2,889<br>(2,307 - 3,459)       | --                    | --                     | 256<br>(197 - 326)          | 1,411<br>(1,123 - 1,741)       | 1,222<br>(915 - 1,519)         |
| Leukemia                             | 6,825<br>(6,211 - 7,451)       | 180<br>(109 - 275)    | 511<br>(414 - 623)     | 1,780<br>(1,554 - 2,015)    | 1,860<br>(1,615 - 2,120)       | 2,495<br>(2,152 - 2,878)       |
| Other neoplasms                      | 10,818<br>(8,600 - 12,156)     | 338<br>(173 - 475)    | 385<br>(272 - 472)     | 2,264<br>(1,845 - 2,713)    | 3,754<br>(2,922 - 4,349)       | 4,077<br>(2,971 - 4,852)       |
| Cardiovascular diseases              | 402,521<br>(376,223 - 438,333) | 681<br>(533 - 859)    | 506<br>(432 - 594)     | 33,429<br>(30,073 - 37,677) | 121,014<br>(112,082 - 131,933) | 246,891<br>(230,165 - 271,799) |
| Rheumatic heart disease              | 2,542<br>(1,365 - 3,087)       | 3<br>(1 - 6)          | 54<br>(39 - 71)        | 772<br>(480 - 941)          | 960<br>(482 - 1,216)           | 754<br>(334 - 1,002)           |
| Ischemic heart disease               | 182,560<br>(164,180 - 219,398) | 22<br>(8 - 33)        | 54<br>(35 - 67)        | 14,007<br>(12,206 - 16,986) | 58,734<br>(52,405 - 67,755)    | 109,743<br>(96,877 - 136,277)  |
| Cerebrovascular disease              | 143,771<br>(129,079 - 162,465) | 91<br>(65 - 122)      | 174<br>(141 - 214)     | 11,507<br>(9,748 - 13,575)  | 40,136<br>(34,952 - 46,018)    | 91,863<br>(81,785 - 105,079)   |
| Ischemic stroke                      | 74,818<br>(64,648 - 88,800)    | 9<br>(4 - 16)         | 13<br>(10 - 18)        | 1,232<br>(852 - 1,682)      | 13,797<br>(10,968 - 17,436)    | 59,767<br>(51,649 - 70,859)    |
| Hemorrhagic stroke                   | 68,953<br>(58,774 - 79,266)    | 83<br>(59 - 109)      | 160<br>(130 - 200)     | 10,275<br>(8,724 - 12,056)  | 26,339<br>(22,312 - 30,183)    | 32,096<br>(25,751 - 38,629)    |
| Hypertensive heart disease           | 22,530<br>(17,116 - 27,883)    | 3<br>(1 - 4)          | 4<br>(3 - 5)           | 1,296<br>(989 - 1,893)      | 6,084<br>(4,795 - 7,982)       | 15,144<br>(10,533 - 19,115)    |
| Cardiomyopathy and myocarditis       | 19,094<br>(16,152 - 23,685)    | 342<br>(255 - 486)    | 109<br>(86 - 144)      | 2,623<br>(2,143 - 3,297)    | 5,903<br>(4,821 - 7,655)       | 10,117<br>(8,226 - 13,053)     |
| Atrial fibrillation and flutter      | 3,558<br>(2,794 - 4,376)       | --                    | --                     | 86<br>(69 - 106)            | 607<br>(496 - 733)             | 2,865<br>(2,157 - 3,651)       |
| Aortic aneurysm                      | 7,694<br>(5,957 - 9,119)       | --                    | --                     | 701<br>(544 - 861)          | 2,951<br>(2,311 - 3,532)       | 4,042<br>(2,934 - 4,938)       |
| Peripheral vascular disease          | 2,433<br>(1,995 - 2,905)       | --                    | --                     | 66<br>(51 - 83)             | 567<br>(465 - 687)             | 1,800<br>(1,435 - 2,226)       |
| Endocarditis                         | 1,883<br>(1,162 - 2,381)       | 85<br>(45 - 128)      | 35<br>(24 - 48)        | 405<br>(287 - 548)          | 526<br>(324 - 683)             | 831<br>(442 - 1,144)           |

Web Table 31- Brazil deaths with 95% UI by age, sex, and cause in 2013

| Cause                                               | Both Sexes, All Ages        | Both Sexes, 0-4 Years | Both Sexes, 5-14 Years | Both Sexes, 15-49 Years   | Both Sexes, 50-69 Years     | Both Sexes, 70-80 Years     |
|-----------------------------------------------------|-----------------------------|-----------------------|------------------------|---------------------------|-----------------------------|-----------------------------|
| Other cardiovascular and circulatory diseases       | 16,456<br>(11,629 - 19,702) | 135<br>(91 - 184)     | 77<br>(56 - 101)       | 1,966<br>(1,433 - 2,362)  | 4,545<br>(3,117 - 5,515)    | 9,733<br>(6,728 - 12,412)   |
| Chronic respiratory diseases                        | 73,287<br>(64,302 - 80,229) | 415<br>(267 - 551)    | 146<br>(103 - 173)     | 3,629<br>(2,756 - 4,146)  | 17,042<br>(14,225 - 18,986) | 52,055<br>(46,280 - 58,087) |
| Chronic obstructive pulmonary disease               | 62,961<br>(55,421 - 69,406) | 243<br>(140 - 343)    | 60<br>(41 - 75)        | 2,296<br>(1,782 - 2,655)  | 14,424<br>(12,219 - 16,171) | 45,938<br>(40,663 - 51,527) |
| Pneumoconiosis                                      | 1,449<br>(1,063 - 2,072)    | 1<br>(1 - 2)          | 3<br>(2 - 4)           | 181<br>(119 - 253)        | 458<br>(321 - 661)          | 806<br>(552 - 1,244)        |
| Silicosis                                           | 279<br>(197 - 396)          | 0<br>(0 - 1)          | 1<br>(1 - 1)           | 82<br>(52 - 118)          | 103<br>(67 - 156)           | 94<br>(62 - 144)            |
| Asbestosis                                          | 325<br>(224 - 485)          | 0<br>(0 - 1)          | 1<br>(1 - 1)           | 25<br>(16 - 36)           | 99<br>(64 - 149)            | 200<br>(129 - 322)          |
| Coal workers pneumoconiosis                         | 135<br>(95 - 201)           | 0<br>(0 - 1)          | 1<br>(1 - 1)           | 9<br>(6 - 13)             | 19<br>(13 - 28)             | 106<br>(71 - 164)           |
| Other pneumoconiosis                                | 710<br>(517 - 1,000)        | 0<br>(0 - 1)          | 1<br>(0 - 1)           | 65<br>(43 - 89)           | 238<br>(165 - 343)          | 407<br>(278 - 613)          |
| Asthma                                              | 4,147<br>(2,576 - 5,447)    | 92<br>(54 - 140)      | 61<br>(36 - 76)        | 726<br>(419 - 910)        | 1,238<br>(714 - 1,650)      | 2,031<br>(1,261 - 2,844)    |
| Interstitial lung disease and pulmonary sarcoidosis | 3,907<br>(2,775 - 5,538)    | 11<br>(5 - 20)        | 11<br>(7 - 15)         | 257<br>(187 - 347)        | 723<br>(435 - 968)          | 2,905<br>(2,079 - 4,380)    |
| Other chronic respiratory diseases                  | 822<br>(651 - 1,004)        | 67<br>(45 - 97)       | 11<br>(7 - 16)         | 169<br>(124 - 211)        | 200<br>(150 - 259)          | 375<br>(278 - 513)          |
| Cirrhosis                                           | 33,445<br>(30,561 - 36,574) | 40<br>(27 - 58)       | 92<br>(78 - 106)       | 9,925<br>(8,706 - 11,288) | 15,131<br>(13,456 - 16,944) | 8,258<br>(7,398 - 9,208)    |
| Cirrhosis due to hepatitis B                        | 2,583<br>(1,394 - 4,277)    | 1<br>(0 - 1)          | 5<br>(1 - 9)           | 738<br>(359 - 1,363)      | 1,166<br>(617 - 2,051)      | 674<br>(304 - 1,154)        |
| Cirrhosis due to hepatitis C                        | 11,886<br>(8,338 - 15,803)  | 2<br>(1 - 5)          | 18<br>(9 - 30)         | 3,236<br>(2,224 - 4,574)  | 5,353<br>(3,539 - 7,436)    | 3,277<br>(1,797 - 4,452)    |
| Cirrhosis due to alcohol use                        | 13,955<br>(10,364 - 17,523) | --                    | --                     | 3,731<br>(2,645 - 4,905)  | 6,641<br>(4,781 - 8,397)    | 3,583<br>(2,592 - 4,888)    |
| Cirrhosis due to other causes                       | 5,021<br>(3,055 - 8,037)    | 37<br>(25 - 54)       | 69<br>(52 - 85)        | 2,221<br>(1,396 - 3,269)  | 1,970<br>(959 - 3,539)      | 724<br>(413 - 1,210)        |
| Digestive diseases                                  | 30,174<br>(23,943 - 33,513) | 78<br>(46 - 114)      | 137<br>(92 - 162)      | 4,006<br>(3,091 - 4,566)  | 8,748<br>(6,786 - 9,875)    | 17,204<br>(13,598 - 19,570) |
| Peptic ulcer disease                                | 4,417<br>(3,455 - 5,372)    | 2<br>(1 - 3)          | 8<br>(5 - 12)          | 535<br>(383 - 668)        | 1,387<br>(1,041 - 1,734)    | 2,484<br>(1,897 - 3,199)    |
| Gastritis and duodenitis                            | 585<br>(289 - 775)          | 1<br>(0 - 2)          | 3<br>(1 - 4)           | 83<br>(40 - 113)          | 158<br>(76 - 210)           | 339<br>(160 - 484)          |
| Appendicitis                                        | 867<br>(548 - 1,172)        | 6<br>(2 - 12)         | 35<br>(18 - 52)        | 232<br>(142 - 325)        | 257<br>(156 - 366)          | 337<br>(207 - 482)          |
| Paralytic ileus and intestinal obstruction          | 4,909<br>(3,261 - 6,791)    | 38<br>(21 - 63)       | 37<br>(24 - 56)        | 477<br>(342 - 735)        | 1,247<br>(791 - 1,838)      | 3,110<br>(1,929 - 4,262)    |
| Inguinal, femoral, and abdominal hernia             | 1,157<br>(559 - 1,572)      | 2<br>(0 - 3)          | 2<br>(1 - 4)           | 74<br>(33 - 104)          | 336<br>(159 - 462)          | 743<br>(333 - 1,065)        |
| Inflammatory bowel disease                          | 840<br>(669 - 1,169)        | 4<br>(2 - 6)          | 4<br>(3 - 6)           | 183<br>(142 - 249)        | 276<br>(219 - 402)          | 373<br>(270 - 569)          |
| Vascular intestinal disorders                       | 4,494<br>(2,901 - 6,774)    | 3<br>(1 - 7)          | 5<br>(1 - 10)          | 336<br>(187 - 563)        | 1,288<br>(775 - 1,999)      | 2,863<br>(1,821 - 4,478)    |
| Gallbladder and biliary diseases                    | 5,007<br>(3,075 - 6,143)    | 3<br>(1 - 6)          | 8<br>(4 - 10)          | 441<br>(237 - 549)        | 1,349<br>(800 - 1,659)      | 3,207<br>(1,993 - 4,050)    |
| Pancreatitis                                        | 3,796<br>(2,608 - 4,666)    | 2<br>(1 - 3)          | 8<br>(5 - 12)          | 1,197<br>(853 - 1,479)    | 1,311<br>(870 - 1,649)      | 1,278<br>(818 - 1,690)      |
| Other digestive diseases                            | 4,102<br>(3,091 - 4,926)    | 18<br>(7 - 31)        | 27<br>(16 - 35)        | 447<br>(314 - 543)        | 1,140<br>(847 - 1,383)      | 2,470<br>(1,813 - 3,111)    |
| Neurological disorders                              | 56,204<br>(47,283 - 65,554) | 227<br>(173 - 318)    | 168<br>(134 - 199)     | 2,063<br>(1,711 - 2,354)  | 5,103<br>(4,293 - 5,880)    | 48,643<br>(39,916 - 57,770) |
| Alzheimer disease and other dementias               | 47,776<br>(39,018 - 56,876) | --                    | --                     | 10<br>(1 - 24)            | 2,969<br>(2,319 - 3,634)    | 44,797<br>(36,179 - 53,835) |
| Parkinson disease                                   | 3,329<br>(1,860 - 4,035)    | --                    | --                     | 39<br>(27 - 47)           | 545<br>(330 - 647)          | 2,745<br>(1,501 - 3,399)    |
| Epilepsy                                            | 2,133<br>(1,627 - 2,452)    | 81<br>(54 - 149)      | 86<br>(60 - 110)       | 1,170<br>(918 - 1,394)    | 476<br>(339 - 591)          | 319<br>(217 - 417)          |
| Multiple sclerosis                                  | 579<br>(356 - 784)          | --                    | --                     | 224<br>(139 - 324)        | 224<br>(111 - 294)          | 130<br>(83 - 194)           |
| Other neurological disorders                        | 2,387<br>(1,968 - 2,640)    | 146<br>(109 - 199)    | 82<br>(64 - 99)        | 618<br>(458 - 715)        | 889<br>(699 - 1,019)        | 652<br>(557 - 775)          |
| Mental and substance use disorders                  | 9,139<br>(5,517 - 11,041)   | 8<br>(5 - 13)         | 1<br>(0 - 2)           | 4,645<br>(2,887 - 5,788)  | 3,644<br>(1,970 - 4,639)    | 841<br>(473 - 1,052)        |
| Schizophrenia                                       | 251<br>(171 - 313)          | --                    | --                     | 91<br>(61 - 120)          | 101<br>(67 - 134)           | 58<br>(34 - 83)             |
| Alcohol use disorders                               | 7,923<br>(4,273 - 9,744)    | --                    | --                     | 3,873<br>(2,112 - 4,971)  | 3,385<br>(1,714 - 4,366)    | 666<br>(304 - 868)          |
| Drug use disorders                                  | 947<br>(806 - 1,230)        | 8<br>(5 - 13)         | --                     | 664<br>(541 - 880)        | 157<br>(129 - 192)          | 117<br>(93 - 155)           |
| Opioid use disorders                                | 358<br>(302 - 474)          | 3<br>(2 - 5)          | --                     | 255<br>(205 - 351)        | 55<br>(44 - 68)             | 46<br>(36 - 60)             |
| Cocaine use disorders                               | 61<br>(50 - 75)             | 1<br>(0 - 1)          | --                     | 45<br>(36 - 57)           | 8<br>(7 - 10)               | 6<br>(5 - 8)                |
| Amphetamine use disorders                           | 34<br>(29 - 43)             | 0<br>(0 - 1)          | --                     | 24<br>(19 - 31)           | 6<br>(5 - 8)                | 4<br>(3 - 6)                |

Web Table 31- Brazil deaths with 95% UI by age, sex, and cause in 2013

| Cause                                               | Both Sexes, All Ages          | Both Sexes, 0-4 Years      | Both Sexes, 5-14 Years | Both Sexes, 15-49 Years    | Both Sexes, 50-69 Years     | Both Sexes, 70-80 Years     |
|-----------------------------------------------------|-------------------------------|----------------------------|------------------------|----------------------------|-----------------------------|-----------------------------|
| Other drug use disorders                            | 493<br>(418 - 637)            | 4<br>(2 - 6)               | --                     | 340<br>(276 - 449)         | 88<br>(72 - 107)            | 61<br>(48 - 83)             |
| Eating disorders                                    | 19<br>(13 - 26)               | --                         | 1<br>(0 - 2)           | 17<br>(12 - 25)            | --                          | --                          |
| Anorexia nervosa                                    | 19<br>(13 - 26)               | --                         | 1<br>(0 - 2)           | 17<br>(12 - 25)            | --                          | --                          |
| Diabetes, urogenital, blood, and endocrine diseases | 110,122<br>(98,787 - 120,594) | 927<br>(722 - 1,198)       | 478<br>(401 - 554)     | 10,472<br>(9,254 - 12,679) | 35,047<br>(30,980 - 38,837) | 63,198<br>(55,562 - 70,252) |
| Diabetes mellitus                                   | 56,018<br>(50,010 - 61,756)   | 89<br>(68 - 114)           | 69<br>(48 - 98)        | 3,599<br>(3,138 - 4,120)   | 18,687<br>(16,297 - 21,082) | 33,575<br>(29,061 - 38,391) |
| Acute glomerulonephritis                            | 66<br>(49 - 107)              | 7<br>(4 - 17)              | 9<br>(6 - 16)          | 15<br>(12 - 23)            | 12<br>(8 - 20)              | 23<br>(14 - 40)             |
| Chronic kidney disease                              | 31,873<br>(27,234 - 44,438)   | 94<br>(70 - 130)           | 90<br>(70 - 157)       | 3,557<br>(2,894 - 6,329)   | 10,935<br>(9,164 - 14,822)  | 17,198<br>(14,390 - 23,981) |
| Chronic kidney disease due to diabetes mellitus     | 13,701<br>(10,523 - 20,932)   | 13<br>(7 - 26)             | 9<br>(6 - 19)          | 1,243<br>(850 - 2,220)     | 5,284<br>(3,969 - 7,274)    | 7,153<br>(5,354 - 11,262)   |
| Chronic kidney disease due to hypertension          | 8,995<br>(6,592 - 13,486)     | 21<br>(14 - 38)            | 22<br>(15 - 35)        | 1,261<br>(904 - 2,217)     | 2,669<br>(1,912 - 4,141)    | 5,022<br>(3,422 - 7,309)    |
| Chronic kidney disease due to glomerulonephritis    | 431<br>(295 - 587)            | 13<br>(7 - 19)             | 19<br>(13 - 24)        | 113<br>(70 - 151)          | 119<br>(78 - 166)           | 168<br>(111 - 262)          |
| Chronic kidney disease due to other causes          | 8,746<br>(6,439 - 15,029)     | 47<br>(31 - 67)            | 41<br>(26 - 89)        | 940<br>(574 - 2,159)       | 2,864<br>(1,991 - 4,929)    | 4,854<br>(3,303 - 7,984)    |
| Urinary diseases and male infertility               | 12,246<br>(7,736 - 15,104)    | 183<br>(119 - 247)         | 45<br>(28 - 57)        | 1,071<br>(718 - 1,271)     | 2,414<br>(1,596 - 2,881)    | 8,534<br>(5,080 - 11,053)   |
| Interstitial nephritis and urinary tract infections | 10,877<br>(6,607 - 13,579)    | 170<br>(111 - 231)         | 34<br>(20 - 44)        | 847<br>(563 - 1,005)       | 1,997<br>(1,297 - 2,416)    | 7,828<br>(4,306 - 10,234)   |
| Urolithiasis                                        | 350<br>(185 - 604)            | --                         | 3<br>(2 - 6)           | 72<br>(37 - 118)           | 113<br>(57 - 195)           | 161<br>(75 - 315)           |
| Other urinary diseases                              | 1,020<br>(682 - 1,585)        | 12<br>(6 - 20)             | 7<br>(5 - 11)          | 151<br>(89 - 207)          | 304<br>(188 - 454)          | 545<br>(333 - 999)          |
| Gynecological diseases                              | 42<br>(24 - 55)               | --                         | --                     | 14<br>(10 - 20)            | 9<br>(6 - 12)               | 19<br>(8 - 29)              |
| Uterine fibroids                                    | 11<br>(6 - 15)                | --                         | --                     | 3<br>(2 - 4)               | 3<br>(2 - 3)                | 6<br>(2 - 9)                |
| Polycystic ovarian syndrome                         | 1<br>(1 - 1)                  | --                         | --                     | 1<br>(1 - 1)               | 0<br>(0 - 0)                | --                          |
| Endometriosis                                       | 2<br>(2 - 3)                  | --                         | --                     | 2<br>(1 - 3)               | 0<br>(0 - 0)                | --                          |
| Genital prolapse                                    | 8<br>(4 - 11)                 | --                         | --                     | 2<br>(1 - 2)               | 2<br>(1 - 2)                | 5<br>(2 - 8)                |
| Other gynecological diseases                        | 20<br>(11 - 25)               | --                         | --                     | 7<br>(5 - 9)               | 5<br>(3 - 6)                | 8<br>(3 - 13)               |
| Hemoglobinopathies and hemolytic anemias            | 1,536<br>(1,005 - 1,957)      | 121<br>(67 - 213)          | 116<br>(71 - 162)      | 498<br>(317 - 647)         | 390<br>(261 - 514)          | 412<br>(260 - 546)          |
| Thalassemias                                        | 52<br>(33 - 72)               | 19<br>(10 - 34)            | 13<br>(8 - 18)         | 20<br>(12 - 27)            | 0<br>(0 - 0)                | 0<br>(0 - 0)                |
| Sickle cell disorders                               | 904<br>(592 - 1,175)          | 73<br>(40 - 130)           | 88<br>(54 - 123)       | 419<br>(266 - 545)         | 292<br>(194 - 385)          | 32<br>(20 - 43)             |
| G6PD deficiency                                     | 29<br>(19 - 38)               | 4<br>(2 - 8)               | 4<br>(2 - 5)           | 10<br>(6 - 13)             | 6<br>(4 - 8)                | 5<br>(3 - 7)                |
| Other hemoglobinopathies and hemolytic anemias      | 550<br>(357 - 712)            | 24<br>(14 - 42)            | 11<br>(7 - 15)         | 49<br>(31 - 64)            | 92<br>(61 - 124)            | 375<br>(238 - 497)          |
| Endocrine, metabolic, blood, and immune disorders   | 8,340<br>(5,426 - 9,668)      | 433<br>(299 - 616)         | 151<br>(110 - 191)     | 1,719<br>(1,140 - 2,009)   | 2,598<br>(1,597 - 3,108)    | 3,438<br>(1,944 - 4,384)    |
| Musculoskeletal disorders                           | 3,915<br>(2,915 - 4,488)      | --                         | 96<br>(75 - 118)       | 1,153<br>(929 - 1,358)     | 1,133<br>(810 - 1,343)      | 1,533<br>(1,020 - 1,883)    |
| Rheumatoid arthritis                                | 536<br>(338 - 667)            | --                         | 5<br>(3 - 7)           | 56<br>(35 - 74)            | 198<br>(115 - 254)          | 277<br>(178 - 380)          |
| Other musculoskeletal disorders                     | 3,379<br>(2,504 - 3,884)      | --                         | 91<br>(71 - 112)       | 1,097<br>(894 - 1,293)     | 935<br>(674 - 1,110)        | 1,256<br>(834 - 1,558)      |
| Other non-communicable diseases                     | 18,626<br>(15,625 - 21,484)   | 11,605<br>(9,369 - 14,097) | 525<br>(421 - 628)     | 1,363<br>(1,130 - 1,562)   | 1,594<br>(1,154 - 1,821)    | 3,538<br>(2,388 - 4,555)    |
| Congenital anomalies                                | 13,604<br>(11,165 - 16,186)   | 11,246<br>(9,036 - 13,750) | 493<br>(390 - 594)     | 896<br>(722 - 1,064)       | 502<br>(398 - 593)          | 468<br>(326 - 571)          |
| Neural tube defects                                 | 823<br>(384 - 1,162)          | 779<br>(362 - 1,113)       | 12<br>(4 - 17)         | 19<br>(8 - 24)             | 9<br>(4 - 11)               | 5<br>(2 - 8)                |
| Congenital heart anomalies                          | 5,822<br>(4,585 - 7,240)      | 4,751<br>(3,623 - 6,091)   | 256<br>(192 - 326)     | 453<br>(362 - 545)         | 208<br>(161 - 257)          | 154<br>(102 - 200)          |
| Cleft lip and cleft palate                          | 52<br>(13 - 159)              | 52<br>(13 - 159)           | --                     | --                         | --                          | --                          |
| Down syndrome                                       | 487<br>(259 - 710)            | 302<br>(144 - 531)         | 32<br>(17 - 47)        | 95<br>(50 - 138)           | 49<br>(22 - 76)             | 9<br>(4 - 15)               |
| Chromosomal unbalanced rearrangements               | 331<br>(158 - 534)            | 296<br>(134 - 492)         | 6<br>(3 - 10)          | 16<br>(10 - 21)            | 9<br>(5 - 12)               | 4<br>(2 - 7)                |
| Other congenital anomalies                          | 6,090<br>(4,790 - 7,529)      | 5,066<br>(3,888 - 6,550)   | 187<br>(135 - 243)     | 314<br>(248 - 383)         | 227<br>(175 - 278)          | 295<br>(209 - 368)          |
| Skin and subcutaneous diseases                      | 4,783<br>(3,318 - 5,787)      | 121<br>(77 - 189)          | 32<br>(23 - 41)        | 467<br>(343 - 556)         | 1,092<br>(720 - 1,283)      | 3,071<br>(1,911 - 4,045)    |
| Cellulitis                                          | 484<br>(189 - 780)            | 14<br>(6 - 27)             | 7<br>(3 - 11)          | 72<br>(33 - 112)           | 144<br>(52 - 239)           | 247<br>(73 - 473)           |



Web Table 31- Brazil deaths with 95% UI by age, sex, and cause in 2013

| Cause                                           | Both Sexes, All Ages           | Both Sexes, 0-4 Years    | Both Sexes, 5-14 Years   | Both Sexes, 15-49 Years      | Both Sexes, 50-69 Years     | Both Sexes, 70-80 Years     |
|-------------------------------------------------|--------------------------------|--------------------------|--------------------------|------------------------------|-----------------------------|-----------------------------|
| Pyoderma                                        | 2,528<br>(1,858 - 3,129)       | 96<br>(58 - 155)         | 17<br>(12 - 23)          | 272<br>(208 - 338)           | 670<br>(468 - 818)          | 1,473<br>(977 - 1,976)      |
| Decubitus ulcer                                 | 1,543<br>(1,021 - 2,116)       | 1<br>(1 - 3)             | 3<br>(2 - 5)             | 76<br>(49 - 100)             | 212<br>(132 - 278)          | 1,250<br>(776 - 1,788)      |
| Other skin and subcutaneous diseases            | 228<br>(156 - 346)             | 9<br>(3 - 21)            | 5<br>(3 - 7)             | 48<br>(34 - 68)              | 66<br>(41 - 102)            | 101<br>(49 - 191)           |
| Sudden infant death syndrome                    | 238<br>(107 - 446)             | 238<br>(107 - 446)       | --                       | --                           | --                          | --                          |
| Injuries                                        | 151,802<br>(139,632 - 165,299) | 3,327<br>(2,498 - 4,338) | 4,400<br>(4,014 - 5,045) | 95,079<br>(86,056 - 103,782) | 26,171<br>(23,535 - 29,842) | 22,824<br>(20,275 - 26,207) |
| Transport injuries                              | 47,482<br>(42,444 - 54,243)    | 762<br>(584 - 969)       | 1,823<br>(1,548 - 2,266) | 29,945<br>(25,919 - 34,472)  | 10,000<br>(8,678 - 11,762)  | 4,952<br>(4,268 - 6,552)    |
| Road injuries                                   | 46,311<br>(41,387 - 53,041)    | 739<br>(566 - 943)       | 1,773<br>(1,507 - 2,214) | 29,249<br>(25,338 - 33,733)  | 9,704<br>(8,445 - 11,503)   | 4,846<br>(4,182 - 6,423)    |
| Pedestrian road injuries                        | 15,964<br>(12,769 - 21,201)    | 333<br>(227 - 458)       | 989<br>(762 - 1,344)     | 6,714<br>(4,952 - 9,265)     | 4,679<br>(3,629 - 6,434)    | 3,249<br>(2,640 - 4,678)    |
| Cyclist road injuries                           | 2,187<br>(1,494 - 3,041)       | 21<br>(11 - 38)          | 134<br>(83 - 206)        | 1,198<br>(839 - 1,582)       | 549<br>(299 - 957)          | 285<br>(180 - 416)          |
| Motorcyclist road injuries                      | 9,064<br>(6,214 - 12,088)      | 40<br>(24 - 59)          | 100<br>(59 - 158)        | 8,137<br>(5,652 - 10,680)    | 624<br>(284 - 1,223)        | 162<br>(95 - 236)           |
| Motor vehicle road injuries                     | 18,702<br>(15,625 - 22,721)    | 331<br>(249 - 427)       | 527<br>(400 - 692)       | 13,076<br>(10,741 - 16,337)  | 3,683<br>(2,774 - 4,647)    | 1,085<br>(772 - 1,393)      |
| Other road injuries                             | 394<br>(199 - 557)             | 13<br>(6 - 24)           | 23<br>(10 - 38)          | 124<br>(47 - 192)            | 169<br>(92 - 268)           | 66<br>(30 - 108)            |
| Other transport injuries                        | 1,171<br>(808 - 1,393)         | 23<br>(14 - 34)          | 50<br>(33 - 68)          | 696<br>(475 - 858)           | 296<br>(174 - 394)          | 106<br>(74 - 140)           |
| Unintentional injuries                          | 37,352<br>(33,386 - 42,936)    | 2,268<br>(1,537 - 3,257) | 1,693<br>(1,411 - 2,330) | 11,263<br>(9,662 - 15,022)   | 7,231<br>(6,371 - 8,329)    | 14,896<br>(12,467 - 17,602) |
| Falls                                           | 14,831<br>(11,537 - 17,192)    | 149<br>(83 - 229)        | 151<br>(118 - 190)       | 2,421<br>(1,828 - 2,900)     | 3,152<br>(2,434 - 3,749)    | 8,957<br>(6,698 - 10,999)   |
| Drowning                                        | 7,079<br>(5,665 - 12,267)      | 485<br>(247 - 1,097)     | 1,013<br>(774 - 1,669)   | 4,352<br>(3,421 - 7,778)     | 945<br>(672 - 1,477)        | 284<br>(225 - 415)          |
| Fire, heat, and hot substances                  | 1,898<br>(1,605 - 2,477)       | 159<br>(106 - 298)       | 83<br>(62 - 118)         | 539<br>(444 - 719)           | 384<br>(310 - 495)          | 732<br>(569 - 1,022)        |
| Poisonings                                      | 527<br>(393 - 647)             | 21<br>(14 - 29)          | 13<br>(9 - 17)           | 177<br>(138 - 261)           | 114<br>(81 - 143)           | 202<br>(126 - 261)          |
| Exposure to mechanical forces                   | 1,869<br>(1,378 - 2,129)       | 131<br>(87 - 181)        | 131<br>(100 - 159)       | 1,057<br>(788 - 1,258)       | 376<br>(239 - 450)          | 175<br>(111 - 206)          |
| Unintentional firearm injuries                  | 402<br>(315 - 504)             | 10<br>(6 - 15)           | 39<br>(26 - 56)          | 281<br>(205 - 374)           | 50<br>(36 - 68)             | 22<br>(15 - 31)             |
| Unintentional suffocation                       | 157<br>(89 - 205)              | 55<br>(29 - 87)          | 18<br>(10 - 28)          | 42<br>(23 - 58)              | 20<br>(11 - 30)             | 23<br>(10 - 34)             |
| Other exposure to mechanical forces             | 1,310<br>(850 - 1,505)         | 66<br>(42 - 95)          | 74<br>(52 - 96)          | 733<br>(491 - 892)           | 306<br>(170 - 371)          | 131<br>(76 - 156)           |
| Adverse effects of medical treatment            | 3,646<br>(3,028 - 4,889)       | 132<br>(72 - 252)        | 34<br>(26 - 46)          | 597<br>(476 - 872)           | 1,056<br>(845 - 1,503)      | 1,827<br>(1,387 - 2,590)    |
| Animal contact                                  | 450<br>(357 - 705)             | 21<br>(12 - 35)          | 39<br>(28 - 65)          | 137<br>(105 - 230)           | 141<br>(105 - 236)          | 112<br>(80 - 173)           |
| Venomous animal contact                         | 289<br>(228 - 535)             | 13<br>(7 - 23)           | 29<br>(20 - 50)          | 92<br>(68 - 182)             | 91<br>(65 - 179)            | 65<br>(45 - 113)            |
| Non-venomous animal contact                     | 161<br>(82 - 201)              | 8<br>(4 - 14)            | 10<br>(5 - 16)           | 45<br>(23 - 61)              | 50<br>(24 - 70)             | 48<br>(23 - 67)             |
| Foreign body                                    | 4,860<br>(3,330 - 6,797)       | 1,095<br>(610 - 1,748)   | 98<br>(68 - 148)         | 615<br>(409 - 889)           | 699<br>(462 - 1,012)        | 2,352<br>(1,553 - 3,543)    |
| Pulmonary aspiration and foreign body in airway | 4,805<br>(3,279 - 6,756)       | 1,092<br>(606 - 1,745)   | 94<br>(65 - 145)         | 599<br>(392 - 875)           | 689<br>(455 - 1,002)        | 2,331<br>(1,539 - 3,528)    |
| Foreign body in other body part                 | 55<br>(32 - 79)                | 3<br>(2 - 5)             | 3<br>(2 - 5)             | 16<br>(11 - 22)              | 11<br>(6 - 16)              | 21<br>(9 - 41)              |
| Other unintentional injuries                    | 2,192<br>(1,780 - 2,740)       | 76<br>(44 - 124)         | 131<br>(77 - 209)        | 1,368<br>(1,008 - 1,834)     | 364<br>(235 - 559)          | 254<br>(178 - 352)          |
| Self-harm and interpersonal violence            | 66,968<br>(54,241 - 75,900)    | 297<br>(179 - 438)       | 884<br>(560 - 1,091)     | 53,871<br>(43,075 - 60,826)  | 8,940<br>(7,169 - 11,554)   | 2,976<br>(2,479 - 3,862)    |
| Self-harm                                       | 16,661<br>(14,284 - 23,427)    | --                       | 132<br>(97 - 176)        | 10,747<br>(8,974 - 15,357)   | 3,906<br>(3,305 - 5,534)    | 1,876<br>(1,545 - 2,724)    |
| Interpersonal violence                          | 50,306<br>(36,218 - 58,158)    | 297<br>(179 - 438)       | 752<br>(448 - 958)       | 43,124<br>(31,263 - 50,192)  | 5,033<br>(3,380 - 7,238)    | 1,100<br>(735 - 1,498)      |
| Assault by firearm                              | 34,039<br>(21,304 - 41,486)    | 105<br>(49 - 167)        | 469<br>(238 - 640)       | 30,378<br>(18,892 - 37,221)  | 2,699<br>(1,571 - 4,119)    | 387<br>(209 - 601)          |
| Assault by sharp object                         | 8,813<br>(4,858 - 13,163)      | 45<br>(23 - 86)          | 90<br>(48 - 142)         | 7,290<br>(3,947 - 11,088)    | 1,143<br>(622 - 1,756)      | 244<br>(133 - 370)          |
| Assault by other means                          | 7,455<br>(5,230 - 12,584)      | 147<br>(77 - 240)        | 193<br>(119 - 324)       | 5,456<br>(3,553 - 9,795)     | 1,191<br>(738 - 1,964)      | 468<br>(302 - 691)          |
| Forces of nature, war, and legal intervention   | 0<br>(0 - 0)                   | 0<br>(0 - 0)             | --                       | --                           | --                          | --                          |
| Exposure to forces of nature                    | 0<br>(0 - 0)                   | 0<br>(0 - 0)             | --                       | --                           | --                          | --                          |

Web Table 31- Brazil deaths with 95% UI by age, sex, and cause in 2013

| Cause                                                             | Males, All Ages                | Males, 0-4 Years            | Males, 5-14 Years        | Males, 15-49 Years             | Males, 50-69 Years             | Males, 70-80 Years             |
|-------------------------------------------------------------------|--------------------------------|-----------------------------|--------------------------|--------------------------------|--------------------------------|--------------------------------|
| All causes                                                        | 698,699<br>(652,711 - 745,512) | 31,264<br>(28,058 - 34,859) | 5,875<br>(5,487 - 6,320) | 156,571<br>(142,647 - 170,916) | 210,577<br>(193,021 - 228,715) | 294,412<br>(280,523 - 308,372) |
| Communicable, maternal, neonatal, and nutritional diseases        | 82,116<br>(69,253 - 94,199)    | 21,013<br>(18,496 - 23,830) | 953<br>(764 - 1,188)     | 14,897<br>(12,965 - 17,379)    | 16,836<br>(12,618 - 21,966)    | 28,418<br>(20,942 - 35,632)    |
| HIV/AIDS and tuberculosis                                         | 12,096<br>(10,054 - 14,432)    | 33<br>(22 - 47)             | 20<br>(13 - 30)          | 6,779<br>(5,853 - 7,943)       | 3,954<br>(2,788 - 5,263)       | 1,310<br>(966 - 1,615)         |
| Tuberculosis                                                      | 4,184<br>(3,070 - 4,864)       | 23<br>(15 - 34)             | 15<br>(11 - 19)          | 1,482<br>(1,107 - 1,784)       | 1,642<br>(1,173 - 2,004)       | 1,022<br>(705 - 1,254)         |
| HIV/AIDS                                                          | 7,912<br>(6,086 - 10,130)      | 10<br>(3 - 18)              | 5<br>(0 - 15)            | 5,298<br>(4,421 - 6,396)       | 2,311<br>(1,311 - 3,564)       | 288<br>(152 - 472)             |
| HIV/AIDS resulting in mycobacterial infection                     | 505<br>(362 - 693)             | 1<br>(0 - 1)                | 0<br>(0 - 1)             | 333<br>(256 - 438)             | 152<br>(82 - 243)              | 20<br>(10 - 34)                |
| HIV/AIDS resulting in other diseases                              | 7,407<br>(5,695 - 9,462)       | 9<br>(3 - 17)               | 5<br>(0 - 15)            | 4,965<br>(4,133 - 5,983)       | 2,159<br>(1,226 - 3,325)       | 269<br>(143 - 441)             |
| Diarrhea, lower respiratory, and other common infectious diseases | 41,185<br>(31,314 - 49,062)    | 4,562<br>(3,261 - 6,066)    | 777<br>(595 - 1,011)     | 5,626<br>(4,426 - 6,802)       | 8,556<br>(6,077 - 10,734)      | 21,664<br>(15,360 - 27,923)    |
| Diarrheal diseases                                                | 3,193<br>(2,326 - 4,447)       | 1,157<br>(483 - 2,307)      | 43<br>(27 - 66)          | 304<br>(229 - 394)             | 452<br>(328 - 610)             | 1,237<br>(788 - 1,854)         |
| Intestinal infectious diseases                                    | 856<br>(414 - 1,600)           | 207<br>(97 - 413)           | 249<br>(115 - 454)       | 343<br>(142 - 715)             | 42<br>(18 - 83)                | 16<br>(7 - 31)                 |
| Typhoid fever                                                     | 660<br>(312 - 1,238)           | 154<br>(67 - 311)           | 195<br>(90 - 360)        | 268<br>(108 - 565)             | 32<br>(13 - 64)                | 11<br>(4 - 24)                 |
| Paratyphoid fever                                                 | 174<br>(78 - 345)              | 45<br>(18 - 95)             | 52<br>(22 - 111)         | 68<br>(25 - 147)               | 7<br>(2 - 17)                  | 2<br>(1 - 6)                   |
| Other intestinal infectious diseases                              | 22<br>(13 - 34)                | 8<br>(3 - 16)               | 2<br>(0 - 6)             | 7<br>(2 - 14)                  | 3<br>(0 - 8)                   | 2<br>(0 - 7)                   |
| Lower respiratory infections                                      | 34,953<br>(25,194 - 42,383)    | 2,538<br>(1,585 - 3,746)    | 286<br>(194 - 406)       | 4,257<br>(3,165 - 5,292)       | 7,694<br>(5,203 - 9,731)       | 20,177<br>(13,960 - 26,293)    |
| Upper respiratory infections                                      | 28<br>(10 - 56)                | 1<br>(0 - 5)                | 0<br>(0 - 1)             | 8<br>(2 - 21)                  | 8<br>(1 - 27)                  | 9<br>(0 - 32)                  |
| Otitis media                                                      | 23<br>(19 - 28)                | 4<br>(2 - 8)                | 2<br>(1 - 2)             | 7<br>(6 - 8)                   | 5<br>(3 - 6)                   | 6<br>(4 - 9)                   |
| Meningitis                                                        | 1,397<br>(1,092 - 1,747)       | 465<br>(232 - 799)          | 134<br>(94 - 175)        | 440<br>(355 - 523)             | 223<br>(175 - 270)             | 135<br>(106 - 168)             |
| Pneumococcal meningitis                                           | 229<br>(165 - 307)             | 71<br>(33 - 127)            | 20<br>(11 - 34)          | 78<br>(48 - 119)               | 37<br>(17 - 62)                | 21<br>(11 - 33)                |
| H influenzae type B meningitis                                    | 242<br>(155 - 372)             | 161<br>(74 - 285)           | 24<br>(14 - 37)          | 34<br>(22 - 51)                | 13<br>(8 - 21)                 | 9<br>(5 - 15)                  |
| Meningococcal meningitis                                          | 376<br>(282 - 512)             | 124<br>(60 - 209)           | 56<br>(34 - 78)          | 111<br>(76 - 174)              | 51<br>(32 - 76)                | 34<br>(21 - 52)                |
| Other meningitis                                                  | 551<br>(421 - 671)             | 109<br>(50 - 192)           | 34<br>(18 - 53)          | 216<br>(146 - 280)             | 122<br>(82 - 159)              | 71<br>(45 - 96)                |
| Encephalitis                                                      | 547<br>(416 - 890)             | 144<br>(76 - 295)           | 53<br>(33 - 100)         | 214<br>(156 - 371)             | 89<br>(60 - 153)               | 47<br>(31 - 80)                |
| Diphtheria                                                        | 6<br>(0 - 21)                  | 2<br>(0 - 15)               | 1<br>(0 - 7)             | 2<br>(0 - 8)                   | 1<br>(0 - 5)                   | --                             |
| Whooping cough                                                    | 38<br>(15 - 95)                | 30<br>(8 - 87)              | 2<br>(1 - 2)             | 5<br>(4 - 6)                   | 1<br>(1 - 1)                   | --                             |
| Tetanus                                                           | 105<br>(61 - 144)              | 6<br>(3 - 10)               | 5<br>(3 - 8)             | 37<br>(20 - 51)                | 36<br>(17 - 54)                | 21<br>(9 - 46)                 |
| Measles                                                           | 1<br>(1 - 2)                   | 1<br>(1 - 2)                | 0<br>(0 - 0)             | 0<br>(0 - 0)                   | 0<br>(0 - 0)                   | --                             |
| Varicella and herpes zoster                                       | 38<br>(12 - 107)               | 6<br>(0 - 26)               | 2<br>(0 - 9)             | 8<br>(2 - 23)                  | 5<br>(0 - 15)                  | 17<br>(0 - 85)                 |
| Neglected tropical diseases and malaria                           | 5,467<br>(1,733 - 17,742)      | 86<br>(58 - 116)            | 47<br>(26 - 61)          | 1,098<br>(465 - 3,453)         | 2,458<br>(634 - 8,395)         | 1,779<br>(406 - 6,002)         |
| Malaria                                                           | 46<br>(30 - 68)                | 5<br>(2 - 12)               | 2<br>(1 - 5)             | 25<br>(14 - 41)                | 10<br>(5 - 19)                 | 3<br>(1 - 8)                   |
| Chagas disease                                                    | 4,653<br>(936 - 16,948)        | 1<br>(0 - 5)                | 3<br>(1 - 10)            | 789<br>(183 - 3,132)           | 2,225<br>(401 - 8,176)         | 1,634<br>(235 - 5,892)         |
| Leishmaniasis                                                     | 142<br>(123 - 164)             | 36<br>(26 - 48)             | 7<br>(5 - 9)             | 54<br>(45 - 63)                | 33<br>(28 - 40)                | 12<br>(10 - 15)                |
| Visceral leishmaniasis                                            | 142<br>(123 - 164)             | 36<br>(26 - 48)             | 7<br>(5 - 9)             | 54<br>(45 - 63)                | 33<br>(28 - 40)                | 12<br>(10 - 15)                |
| Schistosomiasis                                                   | 273<br>(206 - 360)             | 0<br>(0 - 0)                | 2<br>(1 - 4)             | 92<br>(59 - 134)               | 111<br>(67 - 174)              | 67<br>(38 - 107)               |
| Cysticercosis                                                     | 38<br>(34 - 43)                | 0<br>(0 - 0)                | 1<br>(1 - 1)             | 23<br>(20 - 26)                | 11<br>(10 - 13)                | 3<br>(3 - 4)                   |
| Cystic echinococcosis                                             | 12<br>(11 - 13)                | 0<br>(0 - 0)                | 1<br>(1 - 1)             | 6<br>(6 - 7)                   | 3<br>(3 - 4)                   | 2<br>(1 - 2)                   |
| Dengue                                                            | 140<br>(16 - 177)              | 9<br>(1 - 17)               | 17<br>(2 - 22)           | 44<br>(8 - 55)                 | 33<br>(3 - 43)                 | 37<br>(2 - 60)                 |
| Yellow fever                                                      | 4<br>(2 - 6)                   | 0<br>(0 - 1)                | 1<br>(0 - 2)             | 2<br>(1 - 4)                   | 0<br>(0 - 1)                   | 0<br>(0 - 0)                   |
| Rabies                                                            | 9<br>(5 - 12)                  | 1<br>(0 - 1)                | 2<br>(1 - 3)             | 5<br>(3 - 6)                   | 2<br>(1 - 2)                   | 0<br>(0 - 1)                   |
| Intestinal nematode infections                                    | 50<br>(31 - 74)                | 12<br>(4 - 25)              | 7<br>(2 - 15)            | 15<br>(5 - 28)                 | 8<br>(2 - 19)                  | 9<br>(3 - 19)                  |
| Ascariasis                                                        | 50<br>(31 - 74)                | 12<br>(4 - 25)              | 7<br>(2 - 15)            | 15<br>(5 - 28)                 | 8<br>(2 - 19)                  | 9<br>(3 - 19)                  |

Web Table 31- Brazil deaths with 95% UI by age, sex, and cause in 2013

| Cause                                                            | Males, All Ages                | Males, 0-4 Years            | Males, 5-14 Years        | Males, 15-49 Years          | Males, 50-69 Years             | Males, 70-80 Years             |
|------------------------------------------------------------------|--------------------------------|-----------------------------|--------------------------|-----------------------------|--------------------------------|--------------------------------|
| Other neglected tropical diseases                                | 101<br>(62 - 127)              | 21<br>(10 - 38)             | 5<br>(3 - 7)             | 44<br>(26 - 57)             | 20<br>(12 - 27)                | 11<br>(6 - 16)                 |
| Maternal disorders                                               | --                             | --                          | --                       | --                          | --                             | --                             |
| Maternal hemorrhage                                              | --                             | --                          | --                       | --                          | --                             | --                             |
| Maternal sepsis and other maternal infections                    | --                             | --                          | --                       | --                          | --                             | --                             |
| Maternal hypertensive disorders                                  | --                             | --                          | --                       | --                          | --                             | --                             |
| Maternal obstructed labor                                        | --                             | --                          | --                       | --                          | --                             | --                             |
| Maternal abortive outcome                                        | --                             | --                          | --                       | --                          | --                             | --                             |
| Indirect maternal deaths                                         | --                             | --                          | --                       | --                          | --                             | --                             |
| Late maternal deaths                                             | --                             | --                          | --                       | --                          | --                             | --                             |
| Maternal deaths aggravated by HIV/AIDS                           | --                             | --                          | --                       | --                          | --                             | --                             |
| Other maternal disorders                                         | --                             | --                          | --                       | --                          | --                             | --                             |
| Neonatal disorders                                               | 15,343<br>(13,399 - 17,984)    | 15,343<br>(13,399 - 17,984) | --                       | --                          | --                             | --                             |
| Neonatal preterm birth complications                             | 6,662<br>(4,161 - 9,503)       | 6,662<br>(4,161 - 9,503)    | --                       | --                          | --                             | --                             |
| Neonatal encephalopathy due to birth asphyxia and trauma         | 3,104<br>(1,722 - 4,966)       | 3,104<br>(1,722 - 4,966)    | --                       | --                          | --                             | --                             |
| Neonatal sepsis and other neonatal infections                    | 3,253<br>(1,526 - 5,876)       | 3,253<br>(1,526 - 5,876)    | --                       | --                          | --                             | --                             |
| Hemolytic disease and other neonatal jaundice                    | 134<br>(51 - 304)              | 134<br>(51 - 304)           | --                       | --                          | --                             | --                             |
| Other neonatal disorders                                         | 2,189<br>(913 - 3,484)         | 2,189<br>(913 - 3,484)      | --                       | --                          | --                             | --                             |
| Nutritional deficiencies                                         | 6,088<br>(3,331 - 7,704)       | 638<br>(333 - 1,129)        | 56<br>(28 - 79)          | 816<br>(432 - 1,083)        | 1,225<br>(645 - 1,648)         | 3,353<br>(1,579 - 4,500)       |
| Protein-energy malnutrition                                      | 4,328<br>(2,340 - 5,743)       | 537<br>(268 - 1,022)        | 38<br>(18 - 55)          | 404<br>(203 - 627)          | 808<br>(414 - 1,160)           | 2,542<br>(1,145 - 3,562)       |
| Iodine deficiency                                                | 5<br>(0 - 17)                  | 0<br>(0 - 3)                | 0<br>(0 - 2)             | 2<br>(0 - 8)                | 1<br>(0 - 7)                   | 2<br>(0 - 12)                  |
| Iron-deficiency anemia                                           | 1,441<br>(481 - 2,272)         | 65<br>(12 - 157)            | 12<br>(3 - 22)           | 361<br>(139 - 549)          | 347<br>(114 - 597)             | 655<br>(177 - 1,157)           |
| Other nutritional deficiencies                                   | 314<br>(99 - 501)              | 35<br>(7 - 91)              | 6<br>(1 - 11)            | 50<br>(16 - 81)             | 69<br>(19 - 118)               | 155<br>(36 - 297)              |
| Other communicable, maternal, neonatal, and nutritional diseases | 1,938<br>(1,456 - 2,455)       | 353<br>(90 - 709)           | 52<br>(30 - 81)          | 578<br>(445 - 739)          | 643<br>(483 - 809)             | 312<br>(216 - 392)             |
| Sexually transmitted diseases excluding HIV                      | 302<br>(26 - 673)              | 259<br>(0 - 613)            | 19<br>(1 - 44)           | 7<br>(4 - 12)               | 9<br>(4 - 17)                  | 9<br>(4 - 17)                  |
| Syphilis                                                         | 295<br>(18 - 668)              | 259<br>(0 - 613)            | 18<br>(0 - 43)           | 4<br>(2 - 7)                | 6<br>(3 - 12)                  | 7<br>(3 - 14)                  |
| Chlamydial infection                                             | --                             | --                          | --                       | --                          | --                             | --                             |
| Gonococcal infection                                             | 4<br>(2 - 7)                   | --                          | 0<br>(0 - 0)             | 2<br>(1 - 3)                | 1<br>(1 - 3)                   | 1<br>(0 - 2)                   |
| Other sexually transmitted diseases                              | 3<br>(2 - 5)                   | --                          | 0<br>(0 - 0)             | 1<br>(1 - 2)                | 1<br>(0 - 2)                   | 0<br>(0 - 1)                   |
| Hepatitis                                                        | 652<br>(529 - 791)             | 6<br>(4 - 11)               | 8<br>(5 - 12)            | 210<br>(149 - 277)          | 315<br>(229 - 425)             | 113<br>(80 - 156)              |
| Acute hepatitis A                                                | 124<br>(41 - 236)              | 4<br>(1 - 8)                | 5<br>(3 - 9)             | 72<br>(24 - 135)            | 39<br>(10 - 91)                | 4<br>(1 - 13)                  |
| Acute hepatitis B                                                | 474<br>(330 - 632)             | 3<br>(1 - 6)                | 2<br>(1 - 5)             | 115<br>(55 - 187)           | 253<br>(164 - 356)             | 101<br>(69 - 142)              |
| Acute hepatitis C                                                | 53<br>(11 - 135)               | --                          | 0<br>(0 - 2)             | 22<br>(4 - 61)              | 24<br>(4 - 62)                 | 7<br>(1 - 19)                  |
| Other infectious diseases                                        | 984<br>(620 - 1,256)           | 87<br>(44 - 135)            | 26<br>(14 - 38)          | 361<br>(240 - 502)          | 320<br>(192 - 425)             | 191<br>(99 - 258)              |
| Non-communicable diseases                                        | 495,550<br>(463,690 - 530,826) | 8,277<br>(6,534 - 10,250)   | 1,944<br>(1,640 - 2,191) | 57,916<br>(51,641 - 64,652) | 173,076<br>(158,005 - 189,116) | 254,337<br>(241,066 - 267,824) |
| Neoplasms                                                        | 115,638<br>(105,896 - 126,752) | 398<br>(268 - 553)          | 827<br>(674 - 980)       | 12,994<br>(11,469 - 14,661) | 48,334<br>(43,695 - 53,475)    | 53,084<br>(47,139 - 59,325)    |
| Esophageal cancer                                                | 7,168<br>(5,382 - 9,022)       | --                          | --                       | 915<br>(657 - 1,234)        | 4,015<br>(2,953 - 5,144)       | 2,239<br>(1,671 - 2,961)       |
| Stomach cancer                                                   | 12,349<br>(10,624 - 14,172)    | --                          | --                       | 1,207<br>(978 - 1,484)      | 5,201<br>(4,394 - 6,126)       | 5,942<br>(4,864 - 7,209)       |
| Liver cancer                                                     | 4,931<br>(4,156 - 5,776)       | --                          | 10<br>(6 - 16)           | 585<br>(448 - 759)          | 2,481<br>(2,031 - 3,033)       | 1,854<br>(1,438 - 2,347)       |
| Liver cancer due to hepatitis B                                  | 1,058<br>(728 - 1,437)         | --                          | 5<br>(3 - 9)             | 214<br>(143 - 301)          | 567<br>(360 - 814)             | 272<br>(166 - 393)             |
| Liver cancer due to hepatitis C                                  | 2,557<br>(1,922 - 3,239)       | --                          | 1<br>(0 - 3)             | 233<br>(146 - 341)          | 1,275<br>(913 - 1,691)         | 1,047<br>(726 - 1,409)         |

Web Table 31- Brazil deaths with 95% UI by age, sex, and cause in 2013

| Cause                                | Males, All Ages                | Males, 0-4 Years   | Males, 5-14 Years  | Males, 15-49 Years          | Males, 50-69 Years          | Males, 70-80 Years             |
|--------------------------------------|--------------------------------|--------------------|--------------------|-----------------------------|-----------------------------|--------------------------------|
| Liver cancer due to alcohol use      | 1,085<br>(760 - 1,462)         | --                 | --                 | 87<br>(55 - 129)            | 524<br>(355 - 722)          | 473<br>(302 - 727)             |
| Liver cancer due to other causes     | 231<br>(144 - 336)             | --                 | 4<br>(2 - 7)       | 50<br>(30 - 80)             | 115<br>(66 - 179)           | 61<br>(35 - 98)                |
| Larynx cancer                        | 3,465<br>(2,372 - 4,341)       | --                 | --                 | 372<br>(230 - 505)          | 1,965<br>(1,280 - 2,531)    | 1,128<br>(812 - 1,503)         |
| Tracheal, bronchus and lung cancer   | 18,675<br>(16,645 - 21,076)    | --                 | --                 | 1,189<br>(949 - 1,450)      | 9,366<br>(8,077 - 10,901)   | 8,120<br>(6,975 - 9,353)       |
| Breast cancer                        | 168<br>(114 - 226)             | --                 | --                 | 23<br>(15 - 35)             | 70<br>(42 - 107)            | 75<br>(46 - 120)               |
| Cervical cancer                      | --                             | --                 | --                 | --                          | --                          | --                             |
| Uterine cancer                       | --                             | --                 | --                 | --                          | --                          | --                             |
| Prostate cancer                      | 17,680<br>(11,467 - 25,089)    | --                 | --                 | 107<br>(68 - 171)           | 3,494<br>(2,219 - 5,099)    | 14,079<br>(8,939 - 20,322)     |
| Colon and rectum cancer              | 10,397<br>(9,183 - 11,632)     | --                 | --                 | 1,203<br>(1,005 - 1,434)    | 4,257<br>(3,717 - 4,921)    | 4,938<br>(4,171 - 5,792)       |
| Lip and oral cavity cancer           | 3,221<br>(2,096 - 3,975)       | --                 | --                 | 550<br>(376 - 752)          | 1,798<br>(1,117 - 2,318)    | 872<br>(547 - 1,149)           |
| Nasopharynx cancer                   | 497<br>(401 - 609)             | --                 | 5<br>(2 - 13)      | 135<br>(97 - 183)           | 257<br>(189 - 344)          | 100<br>(72 - 138)              |
| Other pharynx cancer                 | 2,682<br>(1,592 - 3,296)       | --                 | --                 | 418<br>(255 - 579)          | 1,683<br>(963 - 2,167)      | 581<br>(378 - 764)             |
| Gallbladder and biliary tract cancer | 1,254<br>(882 - 1,559)         | --                 | --                 | 100<br>(69 - 134)           | 522<br>(363 - 704)          | 632<br>(419 - 857)             |
| Pancreatic cancer                    | 5,167<br>(4,496 - 5,885)       | --                 | --                 | 530<br>(432 - 657)          | 2,476<br>(2,088 - 2,923)    | 2,161<br>(1,779 - 2,582)       |
| Malignant skin melanoma              | 1,259<br>(678 - 2,066)         | --                 | --                 | 299<br>(163 - 473)          | 521<br>(269 - 880)          | 439<br>(235 - 762)             |
| Non-melanoma skin cancer             | 1,040<br>(651 - 1,385)         | --                 | --                 | 109<br>(71 - 158)           | 340<br>(212 - 481)          | 591<br>(350 - 813)             |
| Ovarian cancer                       | --                             | --                 | --                 | --                          | --                          | --                             |
| Testicular cancer                    | 301<br>(191 - 401)             | --                 | --                 | 208<br>(120 - 289)          | 48<br>(32 - 71)             | 45<br>(28 - 72)                |
| Kidney cancer                        | 2,527<br>(2,170 - 2,933)       | 16<br>(8 - 29)     | 21<br>(14 - 32)    | 288<br>(225 - 366)          | 1,268<br>(1,017 - 1,551)    | 934<br>(738 - 1,169)           |
| Bladder cancer                       | 3,599<br>(2,976 - 5,216)       | --                 | --                 | 112<br>(83 - 157)           | 1,267<br>(981 - 1,921)      | 2,220<br>(1,738 - 3,204)       |
| Brain and nervous system cancer      | 4,418<br>(2,693 - 5,579)       | 55<br>(17 - 110)   | 173<br>(91 - 240)  | 1,256<br>(758 - 1,621)      | 1,944<br>(1,202 - 2,559)    | 991<br>(571 - 1,346)           |
| Thyroid cancer                       | 283<br>(227 - 352)             | --                 | 1<br>(1 - 1)       | 39<br>(28 - 53)             | 120<br>(90 - 163)           | 124<br>(89 - 162)              |
| Mesothelioma                         | 270<br>(211 - 340)             | --                 | --                 | 28<br>(19 - 40)             | 124<br>(88 - 170)           | 118<br>(80 - 170)              |
| Hodgkin lymphoma                     | 457<br>(326 - 790)             | 1<br>(0 - 2)       | 15<br>(6 - 30)     | 194<br>(136 - 332)          | 145<br>(89 - 285)           | 102<br>(61 - 205)              |
| Non-Hodgkin lymphoma                 | 3,165<br>(2,527 - 4,154)       | 29<br>(15 - 51)    | 85<br>(55 - 134)   | 718<br>(564 - 987)          | 1,241<br>(955 - 1,656)      | 1,092<br>(813 - 1,484)         |
| Multiple myeloma                     | 1,450<br>(1,002 - 1,913)       | --                 | --                 | 144<br>(96 - 200)           | 736<br>(496 - 991)          | 570<br>(374 - 764)             |
| Leukemia                             | 3,712<br>(3,317 - 4,169)       | 103<br>(53 - 176)  | 311<br>(230 - 405) | 1,001<br>(833 - 1,189)      | 999<br>(838 - 1,185)        | 1,298<br>(1,059 - 1,563)       |
| Other neoplasms                      | 5,502<br>(4,477 - 6,467)       | 196<br>(91 - 290)  | 206<br>(134 - 263) | 1,264<br>(1,017 - 1,582)    | 1,996<br>(1,541 - 2,494)    | 1,840<br>(1,287 - 2,290)       |
| Cardiovascular diseases              | 200,452<br>(186,283 - 216,368) | 389<br>(282 - 502) | 271<br>(220 - 329) | 19,907<br>(17,311 - 22,811) | 71,906<br>(65,076 - 79,426) | 107,979<br>(100,291 - 116,231) |
| Rheumatic heart disease              | 830<br>(407 - 1,067)           | 2<br>(1 - 4)       | 25<br>(15 - 39)    | 291<br>(157 - 393)          | 274<br>(121 - 393)          | 238<br>(91 - 357)              |
| Ischemic heart disease               | 91,537<br>(80,597 - 108,702)   | 14<br>(4 - 21)     | 30<br>(18 - 41)    | 9,195<br>(7,712 - 11,423)   | 35,985<br>(31,294 - 41,994) | 46,313<br>(39,535 - 57,454)    |
| Cerebrovascular disease              | 72,206<br>(57,918 - 83,513)    | 55<br>(33 - 81)    | 94<br>(69 - 122)   | 6,192<br>(4,585 - 7,768)    | 23,563<br>(18,919 - 28,249) | 42,302<br>(34,143 - 49,867)    |
| Ischemic stroke                      | 36,981<br>(29,151 - 44,078)    | 6<br>(2 - 11)      | 7<br>(4 - 11)      | 710<br>(429 - 1,040)        | 8,779<br>(6,482 - 11,265)   | 27,479<br>(21,728 - 33,018)    |
| Hemorrhagic stroke                   | 35,225<br>(26,486 - 42,497)    | 49<br>(30 - 72)    | 87<br>(64 - 112)   | 5,482<br>(3,949 - 6,871)    | 14,784<br>(11,184 - 18,027) | 14,822<br>(10,573 - 18,771)    |
| Hypertensive heart disease           | 9,706<br>(6,554 - 13,262)      | 2<br>(1 - 3)       | 2<br>(1 - 3)       | 690<br>(480 - 1,098)        | 3,186<br>(2,124 - 4,666)    | 5,827<br>(3,501 - 8,179)       |
| Cardiomyopathy and myocarditis       | 10,294<br>(7,764 - 13,765)     | 187<br>(128 - 275) | 60<br>(41 - 81)    | 1,776<br>(1,300 - 2,402)    | 3,651<br>(2,739 - 5,064)    | 4,621<br>(3,256 - 6,546)       |
| Atrial fibrillation and flutter      | 1,389<br>(1,041 - 1,830)       | --                 | --                 | 40<br>(28 - 54)             | 319<br>(241 - 415)          | 1,030<br>(726 - 1,434)         |
| Aortic aneurysm                      | 4,989<br>(3,859 - 5,863)       | --                 | --                 | 457<br>(341 - 574)          | 2,025<br>(1,585 - 2,440)    | 2,506<br>(1,809 - 3,064)       |
| Peripheral vascular disease          | 1,222<br>(967 - 1,567)         | --                 | --                 | 37<br>(27 - 52)             | 340<br>(263 - 436)          | 845<br>(623 - 1,150)           |
| Endocarditis                         | 1,029<br>(600 - 1,422)         | 55<br>(24 - 91)    | 20<br>(12 - 33)    | 250<br>(153 - 390)          | 310<br>(170 - 437)          | 393<br>(204 - 569)             |

Web Table 31- Brazil deaths with 95% UI by age, sex, and cause in 2013

| Cause                                               | Males, All Ages             | Males, 0-4 Years   | Males, 5-14 Years | Males, 15-49 Years       | Males, 50-69 Years          | Males, 70-80 Years          |
|-----------------------------------------------------|-----------------------------|--------------------|-------------------|--------------------------|-----------------------------|-----------------------------|
| Other cardiovascular and circulatory diseases       | 7,251<br>(4,619 - 8,724)    | 75<br>(40 - 111)   | 40<br>(28 - 53)   | 979<br>(603 - 1,205)     | 2,251<br>(1,286 - 2,797)    | 3,906<br>(2,507 - 4,988)    |
| Chronic respiratory diseases                        | 42,585<br>(36,605 - 49,372) | 242<br>(142 - 347) | 75<br>(47 - 95)   | 2,086<br>(1,513 - 2,490) | 10,677<br>(8,952 - 12,421)  | 29,505<br>(25,553 - 35,530) |
| Chronic obstructive pulmonary disease               | 36,734<br>(31,416 - 43,060) | 149<br>(77 - 232)  | 34<br>(20 - 44)   | 1,325<br>(932 - 1,594)   | 9,298<br>(7,848 - 10,922)   | 25,929<br>(21,945 - 31,018) |
| Pneumoconiosis                                      | 1,279<br>(884 - 1,900)      | 0<br>(0 - 1)       | 1<br>(1 - 2)      | 168<br>(105 - 240)       | 416<br>(279 - 616)          | 693<br>(455 - 1,111)        |
| Silicosis                                           | 270<br>(186 - 388)          | 0<br>(0 - 0)       | 0<br>(0 - 1)      | 81<br>(51 - 117)         | 101<br>(66 - 154)           | 87<br>(56 - 138)            |
| Asbestosis                                          | 316<br>(216 - 477)          | 0<br>(0 - 0)       | 0<br>(0 - 1)      | 24<br>(15 - 36)          | 97<br>(63 - 147)            | 194<br>(124 - 315)          |
| Coal workers pneumoconiosis                         | 112<br>(75 - 171)           | 0<br>(0 - 0)       | 0<br>(0 - 1)      | 8<br>(5 - 12)            | 17<br>(11 - 26)             | 87<br>(55 - 141)            |
| Other pneumoconiosis                                | 581<br>(395 - 863)          | 0<br>(0 - 0)       | 0<br>(0 - 1)      | 55<br>(34 - 80)          | 201<br>(130 - 305)          | 324<br>(204 - 526)          |
| Asthma                                              | 1,513<br>(1,162 - 1,817)    | 49<br>(26 - 80)    | 28<br>(17 - 38)   | 312<br>(222 - 382)       | 458<br>(344 - 582)          | 665<br>(493 - 880)          |
| Interstitial lung disease and pulmonary sarcoidosis | 2,571<br>(1,840 - 4,191)    | 5<br>(2 - 11)      | 5<br>(3 - 8)      | 148<br>(101 - 222)       | 387<br>(217 - 546)          | 2,026<br>(1,376 - 3,515)    |
| Other chronic respiratory diseases                  | 488<br>(372 - 604)          | 39<br>(23 - 62)    | 7<br>(4 - 11)     | 133<br>(92 - 172)        | 118<br>(83 - 161)           | 192<br>(132 - 268)          |
| Cirrhosis                                           | 25,021<br>(22,247 - 28,001) | 23<br>(13 - 35)    | 47<br>(38 - 57)   | 8,273<br>(7,065 - 9,651) | 11,909<br>(10,352 - 13,666) | 4,769<br>(4,126 - 5,494)    |
| Cirrhosis due to hepatitis B                        | 1,639<br>(587 - 3,331)      | 0<br>(0 - 1)       | 2<br>(0 - 4)      | 538<br>(153 - 1,143)     | 787<br>(276 - 1,641)        | 312<br>(84 - 678)           |
| Cirrhosis due to hepatitis C                        | 7,989<br>(5,283 - 11,332)   | 1<br>(0 - 4)       | 9<br>(3 - 18)     | 2,542<br>(1,586 - 3,678) | 3,857<br>(2,438 - 5,601)    | 1,579<br>(822 - 2,336)      |
| Cirrhosis due to alcohol use                        | 11,925<br>(8,763 - 15,103)  | --                 | --                | 3,476<br>(2,413 - 4,622) | 5,897<br>(4,173 - 7,574)    | 2,553<br>(1,821 - 3,403)    |
| Cirrhosis due to other causes                       | 3,467<br>(1,969 - 5,566)    | 21<br>(12 - 33)    | 36<br>(25 - 47)   | 1,717<br>(1,050 - 2,637) | 325<br>(618 - 2,503)        | 325<br>(164 - 568)          |
| Digestive diseases                                  | 15,120<br>(11,785 - 17,037) | 48<br>(25 - 77)    | 73<br>(48 - 89)   | 2,614<br>(2,061 - 3,093) | 5,072<br>(3,855 - 5,877)    | 7,313<br>(5,694 - 8,434)    |
| Peptic ulcer disease                                | 2,554<br>(1,913 - 3,310)    | 1<br>(0 - 2)       | 4<br>(3 - 6)      | 398<br>(273 - 520)       | 933<br>(651 - 1,237)        | 1,217<br>(853 - 1,689)      |
| Gastritis and duodenitis                            | 319<br>(126 - 445)          | 0<br>(0 - 1)       | 1<br>(0 - 2)      | 60<br>(24 - 86)          | 102<br>(40 - 147)           | 155<br>(59 - 244)           |
| Appendicitis                                        | 470<br>(281 - 659)          | 4<br>(1 - 7)       | 17<br>(8 - 26)    | 135<br>(78 - 195)        | 148<br>(84 - 221)           | 167<br>(91 - 250)           |
| Paralytic ileus and intestinal obstruction          | 2,247<br>(1,296 - 3,491)    | 23<br>(11 - 41)    | 23<br>(14 - 37)   | 274<br>(165 - 492)       | 682<br>(398 - 1,135)        | 1,244<br>(670 - 1,910)      |
| Inguinal, femoral, and abdominal hernia             | 601<br>(251 - 858)          | 1<br>(0 - 2)       | 1<br>(0 - 2)      | 50<br>(20 - 75)          | 184<br>(74 - 272)           | 364<br>(132 - 557)          |
| Inflammatory bowel disease                          | 396<br>(295 - 634)          | 2<br>(1 - 4)       | 2<br>(1 - 3)      | 96<br>(68 - 148)         | 144<br>(100 - 247)          | 152<br>(99 - 262)           |
| Vascular intestinal disorders                       | 2,163<br>(988 - 4,022)      | 2<br>(0 - 6)       | 4<br>(1 - 8)      | 201<br>(76 - 425)        | 750<br>(327 - 1,427)        | 1,206<br>(529 - 2,302)      |
| Gallbladder and biliary diseases                    | 1,981<br>(1,176 - 2,566)    | 2<br>(1 - 4)       | 4<br>(2 - 5)      | 183<br>(92 - 243)        | 585<br>(320 - 775)          | 1,208<br>(718 - 1,631)      |
| Pancreatitis                                        | 2,442<br>(1,537 - 3,165)    | 1<br>(0 - 2)       | 4<br>(2 - 6)      | 938<br>(636 - 1,228)     | 879<br>(528 - 1,193)        | 621<br>(335 - 880)          |
| Other digestive diseases                            | 1,947<br>(1,243 - 2,504)    | 11<br>(3 - 21)     | 12<br>(6 - 17)    | 279<br>(186 - 364)       | 665<br>(421 - 866)          | 980<br>(612 - 1,355)        |
| Neurological disorders                              | 28,345<br>(23,915 - 33,098) | 136<br>(92 - 217)  | 101<br>(76 - 126) | 1,333<br>(1,054 - 1,592) | 2,973<br>(2,480 - 3,496)    | 23,802<br>(19,521 - 28,568) |
| Alzheimer disease and other dementias               | 23,556<br>(19,282 - 28,296) | --                 | --                | 4<br>(0 - 12)            | 1,702<br>(1,317 - 2,119)    | 21,850<br>(17,594 - 26,599) |
| Parkinson disease                                   | 1,796<br>(969 - 2,231)      | --                 | --                | 28<br>(16 - 36)          | 349<br>(198 - 432)          | 1,419<br>(752 - 1,835)      |
| Epilepsy                                            | 1,405<br>(1,037 - 1,711)    | 48<br>(28 - 91)    | 51<br>(33 - 71)   | 808<br>(603 - 1,031)     | 328<br>(221 - 425)          | 170<br>(111 - 225)          |
| Multiple sclerosis                                  | 240<br>(98 - 361)           | --                 | --                | 98<br>(38 - 155)         | 95<br>(33 - 148)            | 47<br>(19 - 78)             |
| Other neurological disorders                        | 1,348<br>(1,005 - 1,593)    | 88<br>(58 - 145)   | 50<br>(35 - 66)   | 395<br>(245 - 483)       | 499<br>(338 - 611)          | 316<br>(251 - 434)          |
| Mental and substance use disorders                  | 8,074<br>(4,671 - 10,047)   | 4<br>(2 - 8)       | 0<br>(0 - 0)      | 4,115<br>(2,431 - 5,218) | 3,269<br>(1,767 - 4,252)    | 686<br>(363 - 895)          |
| Schizophrenia                                       | 143<br>(84 - 192)           | --                 | --                | 57<br>(31 - 84)          | 58<br>(32 - 87)             | 28<br>(13 - 43)             |
| Alcohol use disorders                               | 7,222<br>(3,744 - 9,048)    | --                 | --                | 3,514<br>(1,794 - 4,547) | 3,116<br>(1,574 - 4,091)    | 592<br>(257 - 794)          |
| Drug use disorders                                  | 705<br>(570 - 998)          | 4<br>(2 - 8)       | --                | 540<br>(422 - 774)       | 95<br>(73 - 127)            | 66<br>(47 - 98)             |
| Opioid use disorders                                | 272<br>(217 - 395)          | 2<br>(1 - 3)       | --                | 210<br>(161 - 310)       | 34<br>(25 - 46)             | 26<br>(18 - 39)             |
| Cocaine use disorders                               | 41<br>(32 - 56)             | 0<br>(0 - 1)       | --                | 34<br>(25 - 46)          | 4<br>(3 - 6)                | 3<br>(2 - 4)                |
| Amphetamine use disorders                           | 22<br>(17 - 32)             | 0<br>(0 - 0)       | --                | 17<br>(13 - 26)          | 3<br>(2 - 4)                | 2<br>(1 - 3)                |

Web Table 31- Brazil deaths with 95% UI by age, sex, and cause in 2013

| Cause                                               | Males, All Ages             | Males, 0-4 Years         | Males, 5-14 Years  | Males, 15-49 Years       | Males, 50-69 Years          | Males, 70-80 Years          |
|-----------------------------------------------------|-----------------------------|--------------------------|--------------------|--------------------------|-----------------------------|-----------------------------|
| Other drug use disorders                            | 370<br>(298 - 523)          | 2<br>(1 - 4)             | --                 | 279<br>(215 - 397)       | 54<br>(41 - 72)             | 35<br>(25 - 53)             |
| Eating disorders                                    | 5<br>(3 - 7)                | --                       | 0<br>(0 - 0)       | 5<br>(3 - 7)             | --                          | --                          |
| Anorexia nervosa                                    | 5<br>(3 - 7)                | --                       | 0<br>(0 - 0)       | 5<br>(3 - 7)             | --                          | --                          |
| Diabetes, urogenital, blood, and endocrine diseases | 49,379<br>(44,382 - 55,651) | 542<br>(383 - 762)       | 235<br>(184 - 287) | 5,554<br>(4,757 - 7,069) | 17,656<br>(15,381 - 20,304) | 25,392<br>(22,442 - 28,781) |
| Diabetes mellitus                                   | 23,169<br>(20,536 - 26,089) | 54<br>(42 - 67)          | 24<br>(20 - 30)    | 1,957<br>(1,630 - 2,348) | 8,984<br>(7,639 - 10,463)   | 12,150<br>(10,308 - 14,223) |
| Acute glomerulonephritis                            | 35<br>(24 - 62)             | 5<br>(2 - 11)            | 5<br>(3 - 9)       | 8<br>(6 - 14)            | 7<br>(4 - 13)               | 10<br>(5 - 21)              |
| Chronic kidney disease                              | 16,366<br>(13,709 - 23,694) | 57<br>(38 - 83)          | 43<br>(32 - 78)    | 1,931<br>(1,501 - 3,653) | 6,000<br>(4,803 - 8,304)    | 8,336<br>(6,807 - 11,782)   |
| Chronic kidney disease due to diabetes mellitus     | 6,998<br>(4,919 - 12,399)   | 8<br>(4 - 19)            | 5<br>(3 - 14)      | 731<br>(473 - 1,446)     | 2,850<br>(1,790 - 4,412)    | 3,406<br>(2,331 - 6,448)    |
| Chronic kidney disease due to hypertension          | 4,521<br>(2,835 - 7,405)    | 13<br>(6 - 26)           | 9<br>(6 - 17)      | 621<br>(427 - 1,243)     | 1,478<br>(891 - 2,697)      | 2,400<br>(1,283 - 3,679)    |
| Chronic kidney disease due to glomerulonephritis    | 237<br>(130 - 351)          | 8<br>(4 - 13)            | 10<br>(6 - 14)     | 69<br>(35 - 99)          | 70<br>(36 - 103)            | 80<br>(41 - 140)            |
| Chronic kidney disease due to other causes          | 4,610<br>(2,670 - 7,942)    | 28<br>(16 - 42)          | 19<br>(12 - 44)    | 512<br>(258 - 1,321)     | 1,602<br>(900 - 2,983)      | 2,450<br>(1,205 - 3,935)    |
| Urinary diseases and male infertility               | 5,212<br>(3,145 - 6,384)    | 103<br>(58 - 157)        | 20<br>(11 - 27)    | 484<br>(287 - 587)       | 1,225<br>(733 - 1,529)      | 3,379<br>(1,938 - 4,448)    |
| Interstitial nephritis and urinary tract infections | 4,306<br>(2,496 - 5,449)    | 96<br>(54 - 150)         | 16<br>(8 - 22)     | 361<br>(207 - 446)       | 941<br>(529 - 1,201)        | 2,892<br>(1,523 - 3,911)    |
| Urolithiasis                                        | 163<br>(82 - 281)           | --                       | 2<br>(1 - 3)       | 28<br>(14 - 49)          | 56<br>(28 - 106)            | 78<br>(33 - 146)            |
| Other urinary diseases                              | 743<br>(436 - 1,278)        | 7<br>(2 - 13)            | 3<br>(1 - 5)       | 95<br>(44 - 137)         | 228<br>(122 - 355)          | 410<br>(232 - 809)          |
| Gynecological diseases                              | --                          | --                       | --                 | --                       | --                          | --                          |
| Uterine fibroids                                    | --                          | --                       | --                 | --                       | --                          | --                          |
| Polycystic ovarian syndrome                         | --                          | --                       | --                 | --                       | --                          | --                          |
| Endometriosis                                       | --                          | --                       | --                 | --                       | --                          | --                          |
| Genital prolapse                                    | --                          | --                       | --                 | --                       | --                          | --                          |
| Other gynecological diseases                        | --                          | --                       | --                 | --                       | --                          | --                          |
| Hemoglobinopathies and hemolytic anemias            | 777<br>(459 - 1,085)        | 64<br>(31 - 122)         | 59<br>(30 - 89)    | 289<br>(169 - 415)       | 159<br>(93 - 231)           | 206<br>(117 - 303)          |
| Thalassemias                                        | 27<br>(15 - 39)             | 11<br>(5 - 21)           | 6<br>(3 - 9)       | 10<br>(5 - 14)           | 0<br>(0 - 0)                | 0<br>(0 - 0)                |
| Sickle cell disorders                               | 456<br>(265 - 644)          | 41<br>(19 - 77)          | 46<br>(24 - 70)    | 243<br>(142 - 350)       | 112<br>(65 - 162)           | 14<br>(8 - 20)              |
| G6PD deficiency                                     | 16<br>(9 - 22)              | 3<br>(1 - 5)             | 2<br>(1 - 3)       | 5<br>(3 - 8)             | 3<br>(2 - 5)                | 3<br>(2 - 4)                |
| Other hemoglobinopathies and hemolytic anemias      | 278<br>(164 - 399)          | 10<br>(5 - 18)           | 5<br>(2 - 7)       | 31<br>(18 - 44)          | 43<br>(25 - 64)             | 189<br>(108 - 279)          |
| Endocrine, metabolic, blood, and immune disorders   | 3,821<br>(2,330 - 4,650)    | 259<br>(158 - 445)       | 84<br>(53 - 115)   | 884<br>(540 - 1,142)     | 1,282<br>(728 - 1,622)      | 1,311<br>(647 - 1,797)      |
| Musculoskeletal disorders                           | 1,213<br>(741 - 1,447)      | --                       | 37<br>(26 - 52)    | 271<br>(170 - 331)       | 400<br>(245 - 489)          | 505<br>(276 - 668)          |
| Rheumatoid arthritis                                | 131<br>(74 - 185)           | --                       | 2<br>(1 - 4)       | 16<br>(9 - 25)           | 51<br>(27 - 81)             | 62<br>(30 - 99)             |
| Other musculoskeletal disorders                     | 1,082<br>(660 - 1,304)      | --                       | 35<br>(24 - 48)    | 254<br>(161 - 311)       | 350<br>(213 - 434)          | 443<br>(237 - 590)          |
| Other non-communicable diseases                     | 9,722<br>(7,911 - 11,682)   | 6,495<br>(4,925 - 8,329) | 276<br>(208 - 350) | 768<br>(595 - 916)       | 880<br>(567 - 1,058)        | 1,301<br>(849 - 1,666)      |
| Congenital anomalies                                | 7,532<br>(5,913 - 9,368)    | 6,299<br>(4,801 - 8,115) | 258<br>(192 - 329) | 470<br>(375 - 576)       | 284<br>(225 - 345)          | 221<br>(162 - 284)          |
| Neural tube defects                                 | 404<br>(166 - 660)          | 383<br>(153 - 636)       | 5<br>(2 - 8)       | 10<br>(4 - 13)           | 4<br>(2 - 6)                | 3<br>(1 - 4)                |
| Congenital heart anomalies                          | 3,244<br>(2,339 - 4,302)    | 2,680<br>(1,838 - 3,715) | 136<br>(90 - 188)  | 235<br>(181 - 302)       | 128<br>(96 - 169)           | 65<br>(41 - 94)             |
| Cleft lip and cleft palate                          | 30<br>(4 - 109)             | 30<br>(4 - 109)          | --                 | --                       | --                          | --                          |
| Down syndrome                                       | 254<br>(109 - 404)          | 158<br>(57 - 306)        | 15<br>(5 - 27)     | 50<br>(22 - 75)          | 25<br>(9 - 41)              | 6<br>(3 - 10)               |
| Chromosomal unbalanced rearrangements               | 164<br>(54 - 278)           | 147<br>(43 - 259)        | 3<br>(1 - 6)       | 6<br>(4 - 8)             | 6<br>(3 - 8)                | 2<br>(1 - 4)                |
| Other congenital anomalies                          | 3,436<br>(2,478 - 4,582)    | 2,901<br>(2,013 - 4,028) | 99<br>(59 - 146)   | 170<br>(122 - 227)       | 121<br>(86 - 163)           | 145<br>(100 - 193)          |
| Skin and subcutaneous diseases                      | 2,052<br>(1,320 - 2,500)    | 59<br>(34 - 99)          | 18<br>(12 - 26)    | 298<br>(194 - 373)       | 597<br>(331 - 750)          | 1,080<br>(678 - 1,436)      |
| Cellulitis                                          | 230<br>(79 - 381)           | 7<br>(2 - 17)            | 4<br>(2 - 7)       | 44<br>(17 - 74)          | 76<br>(22 - 137)            | 99<br>(26 - 196)            |

Web Table 31- Brazil deaths with 95% UI by age, sex, and cause in 2013

| Cause                                           | Males, All Ages                | Males, 0-4 Years         | Males, 5-14 Years        | Males, 15-49 Years          | Males, 50-69 Years          | Males, 70-80 Years          |
|-------------------------------------------------|--------------------------------|--------------------------|--------------------------|-----------------------------|-----------------------------|-----------------------------|
| Pyoderma                                        | 1,169<br>(832 - 1,492)         | 46<br>(25 - 82)          | 10<br>(7 - 15)           | 183<br>(130 - 236)          | 372<br>(222 - 490)          | 558<br>(346 - 785)          |
| Decubitus ulcer                                 | 568<br>(321 - 786)             | 1<br>(0 - 1)             | 2<br>(1 - 3)             | 52<br>(26 - 74)             | 120<br>(55 - 175)           | 393<br>(235 - 589)          |
| Other skin and subcutaneous diseases            | 85<br>(55 - 132)               | 4<br>(1 - 11)            | 2<br>(1 - 4)             | 19<br>(12 - 31)             | 28<br>(16 - 45)             | 31<br>(14 - 58)             |
| Sudden infant death syndrome                    | 138<br>(38 - 258)              | 138<br>(38 - 258)        | --                       | --                          | --                          | --                          |
| Injuries                                        | 121,033<br>(109,869 - 133,794) | 1,975<br>(1,387 - 2,699) | 2,978<br>(2,663 - 3,398) | 83,759<br>(75,147 - 92,142) | 20,664<br>(18,079 - 24,064) | 11,657<br>(10,413 - 13,723) |
| Transport injuries                              | 37,882<br>(33,089 - 43,793)    | 467<br>(329 - 645)       | 1,160<br>(925 - 1,489)   | 25,369<br>(21,537 - 29,672) | 7,689<br>(6,445 - 9,287)    | 3,197<br>(2,641 - 4,450)    |
| Road injuries                                   | 36,889<br>(32,169 - 42,926)    | 451<br>(315 - 628)       | 1,125<br>(895 - 1,450)   | 24,752<br>(21,017 - 29,063) | 7,435<br>(6,196 - 9,018)    | 3,125<br>(2,588 - 4,373)    |
| Pedestrian road injuries                        | 11,716<br>(8,848 - 16,026)     | 204<br>(123 - 305)       | 642<br>(459 - 874)       | 5,408<br>(3,784 - 7,697)    | 3,469<br>(2,470 - 4,972)    | 1,992<br>(1,529 - 3,036)    |
| Cyclist road injuries                           | 1,845<br>(1,205 - 2,659)       | 16<br>(8 - 31)           | 102<br>(57 - 173)        | 1,032<br>(710 - 1,407)      | 465<br>(228 - 859)          | 230<br>(126 - 362)          |
| Motorcyclist road injuries                      | 8,178<br>(5,374 - 11,127)      | 24<br>(12 - 39)          | 64<br>(34 - 112)         | 7,405<br>(4,989 - 9,896)    | 555<br>(225 - 1,137)        | 131<br>(68 - 206)           |
| Motor vehicle road injuries                     | 14,798<br>(11,714 - 18,805)    | 197<br>(133 - 276)       | 298<br>(197 - 431)       | 10,799<br>(8,490 - 14,123)  | 2,786<br>(1,966 - 3,720)    | 717<br>(475 - 1,015)        |
| Other road injuries                             | 352<br>(164 - 516)             | 10<br>(4 - 19)           | 19<br>(7 - 33)           | 108<br>(36 - 173)           | 159<br>(83 - 257)           | 56<br>(21 - 96)             |
| Other transport injuries                        | 993<br>(647 - 1,217)           | 15<br>(8 - 25)           | 35<br>(21 - 53)          | 617<br>(405 - 779)          | 254<br>(136 - 346)          | 72<br>(43 - 100)            |
| Unintentional injuries                          | 23,983<br>(20,903 - 29,053)    | 1,335<br>(824 - 1,969)   | 1,206<br>(961 - 1,686)   | 9,776<br>(8,248 - 13,186)   | 5,414<br>(4,612 - 6,372)    | 6,252<br>(5,023 - 7,549)    |
| Falls                                           | 8,568<br>(6,631 - 10,205)      | 102<br>(54 - 164)        | 116<br>(86 - 157)        | 2,237<br>(1,692 - 2,735)    | 2,550<br>(1,927 - 3,131)    | 3,563<br>(2,633 - 4,491)    |
| Drowning                                        | 6,052<br>(4,691 - 10,530)      | 329<br>(147 - 827)       | 739<br>(528 - 1,222)     | 3,958<br>(3,053 - 7,089)    | 822<br>(558 - 1,292)        | 203<br>(149 - 305)          |
| Fire, heat, and hot substances                  | 1,139<br>(920 - 1,531)         | 95<br>(56 - 174)         | 48<br>(31 - 74)          | 382<br>(295 - 529)          | 249<br>(176 - 334)          | 364<br>(267 - 532)          |
| Poisonings                                      | 309<br>(218 - 419)             | 11<br>(6 - 17)           | 7<br>(5 - 11)            | 130<br>(97 - 206)           | 71<br>(45 - 100)            | 89<br>(50 - 123)            |
| Exposure to mechanical forces                   | 1,567<br>(1,111 - 1,824)       | 71<br>(40 - 108)         | 91<br>(63 - 115)         | 971<br>(709 - 1,169)        | 317<br>(195 - 388)          | 117<br>(70 - 144)           |
| Unintentional firearm injuries                  | 353<br>(268 - 457)             | 7<br>(4 - 11)            | 29<br>(17 - 45)          | 258<br>(183 - 348)          | 43<br>(29 - 61)             | 17<br>(11 - 25)             |
| Unintentional suffocation                       | 107<br>(60 - 151)              | 32<br>(14 - 62)          | 14<br>(7 - 24)           | 34<br>(18 - 49)             | 16<br>(8 - 25)              | 11<br>(5 - 19)              |
| Other exposure to mechanical forces             | 1,107<br>(666 - 1,299)         | 33<br>(16 - 49)          | 48<br>(27 - 63)          | 679<br>(440 - 830)          | 258<br>(136 - 319)          | 89<br>(45 - 112)            |
| Adverse effects of medical treatment            | 1,720<br>(1,355 - 2,529)       | 76<br>(39 - 155)         | 19<br>(14 - 29)          | 321<br>(242 - 510)          | 566<br>(412 - 917)          | 737<br>(507 - 1,143)        |
| Animal contact                                  | 345<br>(275 - 553)             | 12<br>(6 - 23)           | 27<br>(18 - 44)          | 114<br>(85 - 193)           | 108<br>(78 - 173)           | 84<br>(57 - 126)            |
| Venomous animal contact                         | 215<br>(170 - 412)             | 7<br>(3 - 14)            | 19<br>(13 - 34)          | 75<br>(53 - 154)            | 66<br>(46 - 132)            | 48<br>(31 - 86)             |
| Non-venomous animal contact                     | 130<br>(57 - 161)              | 5<br>(2 - 10)            | 8<br>(3 - 12)            | 39<br>(17 - 52)             | 41<br>(18 - 59)             | 36<br>(16 - 53)             |
| Foreign body                                    | 2,486<br>(1,359 - 3,651)       | 589<br>(229 - 1,030)     | 64<br>(36 - 111)         | 431<br>(235 - 666)          | 422<br>(226 - 655)          | 980<br>(528 - 1,612)        |
| Pulmonary aspiration and foreign body in airway | 2,460<br>(1,328 - 3,630)       | 587<br>(228 - 1,028)     | 62<br>(34 - 109)         | 420<br>(228 - 655)          | 415<br>(219 - 649)          | 976<br>(524 - 1,609)        |
| Foreign body in other body part                 | 25<br>(13 - 36)                | 2<br>(1 - 3)             | 2<br>(1 - 3)             | 11<br>(6 - 15)              | 7<br>(3 - 12)               | 4<br>(2 - 8)                |
| Other unintentional injuries                    | 1,797<br>(1,387 - 2,338)       | 49<br>(23 - 93)          | 94<br>(47 - 164)         | 1,232<br>(877 - 1,701)      | 307<br>(187 - 503)          | 115<br>(75 - 171)           |
| Self-harm and interpersonal violence            | 59,168<br>(46,882 - 67,541)    | 173<br>(90 - 270)        | 612<br>(333 - 805)       | 48,614<br>(38,074 - 55,619) | 7,561<br>(5,905 - 9,958)    | 2,208<br>(1,740 - 3,069)    |
| Self-harm                                       | 13,335<br>(11,107 - 19,939)    | --                       | 71<br>(42 - 111)         | 8,841<br>(7,207 - 13,061)   | 3,064<br>(2,483 - 4,432)    | 1,359<br>(1,062 - 2,105)    |
| Interpersonal violence                          | 45,833<br>(32,568 - 53,489)    | 173<br>(90 - 270)        | 541<br>(264 - 726)       | 39,773<br>(28,214 - 46,508) | 4,498<br>(2,835 - 6,674)    | 849<br>(483 - 1,255)        |
| Assault by firearm                              | 31,920<br>(19,394 - 39,225)    | 76<br>(31 - 125)         | 371<br>(160 - 535)       | 28,655<br>(17,490 - 35,264) | 2,488<br>(1,413 - 3,949)    | 330<br>(162 - 541)          |
| Assault by sharp object                         | 7,667<br>(3,769 - 11,977)      | 27<br>(10 - 59)          | 56<br>(20 - 105)         | 6,398<br>(3,103 - 10,107)   | 997<br>(478 - 1,624)        | 189<br>(83 - 314)           |
| Assault by other means                          | 6,246<br>(4,062 - 11,361)      | 70<br>(29 - 126)         | 114<br>(50 - 220)        | 4,720<br>(2,888 - 9,130)    | 1,012<br>(571 - 1,764)      | 329<br>(165 - 522)          |
| Forces of nature, war, and legal intervention   | 0<br>(0 - 0)                   | 0<br>(0 - 0)             | --                       | --                          | --                          | --                          |
| Exposure to forces of nature                    | 0<br>(0 - 0)                   | 0<br>(0 - 0)             | --                       | --                          | --                          | --                          |

Web Table 31- Brazil deaths with 95% UI by age, sex, and cause in 2013

| Cause                                                             | Females, All Ages              | Females, 0-4 Years          | Females, 5-14 Years      | Females, 15-49 Years        | Females, 50-69 Years           | Females, 70-80 Years           |
|-------------------------------------------------------------------|--------------------------------|-----------------------------|--------------------------|-----------------------------|--------------------------------|--------------------------------|
| All causes                                                        | 556,679<br>(522,453 - 590,285) | 22,812<br>(20,164 - 25,748) | 3,852<br>(3,568 - 4,149) | 60,949<br>(55,100 - 67,047) | 137,936<br>(126,258 - 149,886) | 331,129<br>(315,006 - 346,781) |
| Communicable, maternal, neonatal, and nutritional diseases        | 68,767<br>(56,013 - 79,631)    | 15,065<br>(12,927 - 17,441) | 793<br>(643 - 946)       | 8,312<br>(7,191 - 9,246)    | 8,997<br>(6,476 - 11,212)      | 35,601<br>(25,072 - 44,591)    |
| HIV/AIDS and tuberculosis                                         | 3,910<br>(3,108 - 4,745)       | 24<br>(15 - 35)             | 20<br>(12 - 32)          | 2,323<br>(1,814 - 2,872)    | 970<br>(680 - 1,369)           | 572<br>(327 - 761)             |
| Tuberculosis                                                      | 1,604<br>(954 - 1,934)         | 14<br>(8 - 22)              | 15<br>(9 - 21)           | 525<br>(338 - 661)          | 513<br>(315 - 666)             | 536<br>(293 - 723)             |
| HIV/AIDS                                                          | 2,305<br>(1,628 - 3,122)       | 10<br>(4 - 18)              | 5<br>(0 - 15)            | 1,797<br>(1,319 - 2,360)    | 457<br>(246 - 860)             | 36<br>(8 - 92)                 |
| HIV/AIDS resulting in mycobacterial infection                     | 108<br>(71 - 157)              | 0<br>(0 - 1)                | 0<br>(0 - 1)             | 83<br>(57 - 116)            | 22<br>(11 - 42)                | 2<br>(0 - 5)                   |
| HIV/AIDS resulting in other diseases                              | 2,198<br>(1,547 - 2,971)       | 9<br>(3 - 17)               | 5<br>(0 - 14)            | 1,714<br>(1,258 - 2,253)    | 435<br>(234 - 820)             | 34<br>(8 - 87)                 |
| Diarrhea, lower respiratory, and other common infectious diseases | 40,805<br>(28,622 - 50,083)    | 3,182<br>(2,337 - 4,259)    | 631<br>(501 - 785)       | 2,947<br>(2,258 - 3,566)    | 5,517<br>(3,647 - 6,929)       | 28,527<br>(18,874 - 37,123)    |
| Diarrheal diseases                                                | 3,296<br>(2,342 - 4,624)       | 763<br>(330 - 1,504)        | 38<br>(24 - 59)          | 180<br>(138 - 232)          | 396<br>(290 - 539)             | 1,920<br>(1,216 - 3,010)       |
| Intestinal infectious diseases                                    | 787<br>(376 - 1,435)           | 186<br>(87 - 347)           | 197<br>(95 - 351)        | 321<br>(121 - 646)          | 59<br>(22 - 120)               | 24<br>(9 - 50)                 |
| Typhoid fever                                                     | 608<br>(278 - 1,134)           | 140<br>(61 - 268)           | 155<br>(72 - 285)        | 251<br>(90 - 512)           | 45<br>(15 - 94)                | 18<br>(6 - 40)                 |
| Paratyphoid fever                                                 | 163<br>(73 - 303)              | 41<br>(17 - 82)             | 41<br>(17 - 80)          | 66<br>(22 - 139)            | 11<br>(3 - 26)                 | 4<br>(1 - 9)                   |
| Other intestinal infectious diseases                              | 16<br>(8 - 26)                 | 5<br>(1 - 12)               | 1<br>(0 - 4)             | 5<br>(1 - 12)               | 2<br>(0 - 6)                   | 2<br>(0 - 7)                   |
| Lower respiratory infections                                      | 35,122<br>(23,202 - 44,334)    | 1,717<br>(1,103 - 2,512)    | 240<br>(179 - 314)       | 2,026<br>(1,471 - 2,490)    | 4,808<br>(2,999 - 6,160)       | 26,330<br>(16,778 - 35,282)    |
| Upper respiratory infections                                      | 20<br>(6 - 50)                 | 1<br>(0 - 3)                | 0<br>(0 - 1)             | 3<br>(1 - 9)                | 5<br>(0 - 16)                  | 10<br>(0 - 40)                 |
| Otitis media                                                      | 23<br>(19 - 28)                | 3<br>(2 - 5)                | 2<br>(1 - 2)             | 5<br>(4 - 6)                | 5<br>(3 - 6)                   | 8<br>(5 - 12)                  |
| Meningitis                                                        | 1,006<br>(793 - 1,216)         | 350<br>(218 - 547)          | 104<br>(72 - 132)        | 249<br>(178 - 301)          | 159<br>(112 - 196)             | 145<br>(111 - 182)             |
| Pneumococcal meningitis                                           | 161<br>(106 - 218)             | 58<br>(32 - 95)             | 16<br>(9 - 24)           | 39<br>(21 - 58)             | 25<br>(12 - 40)                | 24<br>(13 - 37)                |
| H influenzae type B meningitis                                    | 187<br>(125 - 270)             | 130<br>(74 - 212)           | 19<br>(10 - 30)          | 19<br>(10 - 31)             | 9<br>(4 - 16)                  | 10<br>(6 - 15)                 |
| Meningococcal meningitis                                          | 273<br>(203 - 346)             | 89<br>(55 - 144)            | 41<br>(26 - 58)          | 67<br>(45 - 95)             | 37<br>(20 - 55)                | 38<br>(22 - 58)                |
| Other meningitis                                                  | 385<br>(282 - 471)             | 73<br>(15 - 138)            | 28<br>(16 - 41)          | 124<br>(90 - 159)           | 87<br>(58 - 112)               | 73<br>(50 - 100)               |
| Encephalitis                                                      | 424<br>(330 - 690)             | 120<br>(65 - 252)           | 44<br>(27 - 76)          | 141<br>(100 - 240)          | 69<br>(44 - 115)               | 50<br>(32 - 87)                |
| Diphtheria                                                        | 3<br>(0 - 11)                  | 1<br>(0 - 8)                | 1<br>(0 - 4)             | 1<br>(0 - 3)                | 0<br>(0 - 3)                   | --                             |
| Whooping cough                                                    | 39<br>(14 - 119)               | 31<br>(7 - 111)             | 2<br>(1 - 2)             | 5<br>(4 - 6)                | 1<br>(1 - 1)                   | --                             |
| Tetanus                                                           | 36<br>(25 - 53)                | 4<br>(2 - 7)                | 1<br>(1 - 2)             | 6<br>(4 - 9)                | 10<br>(6 - 17)                 | 13<br>(7 - 24)                 |
| Measles                                                           | 1<br>(1 - 2)                   | 1<br>(1 - 2)                | 0<br>(0 - 0)             | 0<br>(0 - 0)                | 0<br>(0 - 0)                   | --                             |
| Varicella and herpes zoster                                       | 47<br>(12 - 153)               | 6<br>(0 - 23)               | 2<br>(0 - 7)             | 8<br>(1 - 22)               | 5<br>(0 - 16)                  | 27<br>(0 - 131)                |
| Neglected tropical diseases and malaria                           | 3,563<br>(1,099 - 10,245)      | 77<br>(51 - 103)            | 36<br>(20 - 48)          | 453<br>(182 - 1,341)        | 1,350<br>(340 - 4,029)         | 1,648<br>(355 - 4,634)         |
| Malaria                                                           | 24<br>(17 - 35)                | 4<br>(1 - 9)                | 3<br>(1 - 5)             | 11<br>(7 - 17)              | 4<br>(2 - 7)                   | 3<br>(1 - 5)                   |
| Chagas disease                                                    | 3,054<br>(627 - 9,834)         | 1<br>(0 - 3)                | 2<br>(0 - 6)             | 313<br>(69 - 1,215)         | 1,221<br>(220 - 3,930)         | 1,518<br>(235 - 4,480)         |
| Leishmaniasis                                                     | 67<br>(55 - 82)                | 35<br>(25 - 48)             | 6<br>(4 - 7)             | 14<br>(11 - 17)             | 7<br>(6 - 9)                   | 5<br>(4 - 6)                   |
| Visceral leishmaniasis                                            | 67<br>(55 - 82)                | 35<br>(25 - 48)             | 6<br>(4 - 7)             | 14<br>(11 - 17)             | 7<br>(6 - 9)                   | 5<br>(4 - 6)                   |
| Schistosomiasis                                                   | 162<br>(115 - 221)             | 0<br>(0 - 0)                | 1<br>(1 - 2)             | 34<br>(21 - 51)             | 64<br>(37 - 97)                | 63<br>(33 - 106)               |
| Cysticercosis                                                     | 28<br>(25 - 32)                | 0<br>(0 - 0)                | 1<br>(0 - 1)             | 13<br>(11 - 14)             | 10<br>(9 - 11)                 | 5<br>(5 - 6)                   |
| Cystic echinococcosis                                             | 10<br>(8 - 11)                 | 0<br>(0 - 0)                | 1<br>(0 - 1)             | 3<br>(3 - 4)                | 3<br>(3 - 3)                   | 3<br>(2 - 3)                   |
| Dengue                                                            | 116<br>(14 - 154)              | 12<br>(1 - 20)              | 13<br>(2 - 19)           | 38<br>(6 - 50)              | 23<br>(3 - 32)                 | 29<br>(1 - 50)                 |
| Yellow fever                                                      | 2<br>(1 - 3)                   | 0<br>(0 - 0)                | 0<br>(0 - 1)             | 1<br>(0 - 2)                | 0<br>(0 - 0)                   | 0<br>(0 - 0)                   |
| Rabies                                                            | 9<br>(4 - 11)                  | 1<br>(0 - 1)                | 1<br>(1 - 2)             | 5<br>(2 - 6)                | 2<br>(1 - 2)                   | 1<br>(0 - 1)                   |
| Intestinal nematode infections                                    | 37<br>(22 - 57)                | 9<br>(3 - 21)               | 5<br>(1 - 13)            | 6<br>(1 - 14)               | 6<br>(1 - 14)                  | 11<br>(4 - 21)                 |
| Ascariasis                                                        | 37<br>(22 - 57)                | 9<br>(3 - 21)               | 5<br>(1 - 13)            | 6<br>(1 - 14)               | 6<br>(1 - 14)                  | 11<br>(4 - 21)                 |



Web Table 31- Brazil deaths with 95% UI by age, sex, and cause in 2013

| Cause                                                            | Females, All Ages              | Females, 0-4 Years         | Females, 5-14 Years      | Females, 15-49 Years        | Females, 50-69 Years           | Females, 70-80 Years           |
|------------------------------------------------------------------|--------------------------------|----------------------------|--------------------------|-----------------------------|--------------------------------|--------------------------------|
| Other neglected tropical diseases                                | 54<br>(22 - 71)                | 15<br>(5 - 28)             | 3<br>(1 - 4)             | 16<br>(5 - 21)              | 10<br>(4 - 15)                 | 11<br>(5 - 17)                 |
| Maternal disorders                                               | 1,813<br>(1,414 - 2,267)       | --                         | 12<br>(7 - 19)           | 1,801<br>(1,404 - 2,259)    | --                             | --                             |
| Maternal hemorrhage                                              | 169<br>(126 - 221)             | --                         | 1<br>(0 - 1)             | 168<br>(126 - 220)          | --                             | --                             |
| Maternal sepsis and other maternal infections                    | 231<br>(177 - 298)             | --                         | 2<br>(1 - 3)             | 229<br>(175 - 295)          | --                             | --                             |
| Maternal hypertensive disorders                                  | 320<br>(242 - 411)             | --                         | 3<br>(2 - 5)             | 317<br>(239 - 407)          | --                             | --                             |
| Maternal obstructed labor                                        | 62<br>(44 - 84)                | --                         | 0<br>(0 - 1)             | 61<br>(44 - 84)             | --                             | --                             |
| Maternal abortive outcome                                        | 194<br>(146 - 250)             | --                         | 1<br>(1 - 2)             | 193<br>(145 - 249)          | --                             | --                             |
| Indirect maternal deaths                                         | 312<br>(236 - 401)             | --                         | 2<br>(1 - 3)             | 310<br>(234 - 400)          | --                             | --                             |
| Late maternal deaths                                             | 253<br>(162 - 355)             | --                         | 2<br>(1 - 4)             | 251<br>(160 - 353)          | --                             | --                             |
| Maternal deaths aggravated by HIV/AIDS                           | 1<br>(1 - 2)                   | --                         | --                       | 1<br>(1 - 2)                | --                             | --                             |
| Other maternal disorders                                         | 268<br>(205 - 342)             | --                         | 2<br>(1 - 3)             | 266<br>(203 - 341)          | --                             | --                             |
| Neonatal disorders                                               | 11,009<br>(9,113 - 13,091)     | 11,009<br>(9,113 - 13,091) | --                       | --                          | --                             | --                             |
| Neonatal preterm birth complications                             | 4,595<br>(3,056 - 6,766)       | 4,595<br>(3,056 - 6,766)   | --                       | --                          | --                             | --                             |
| Neonatal encephalopathy due to birth asphyxia and trauma         | 2,260<br>(1,293 - 3,549)       | 2,260<br>(1,293 - 3,549)   | --                       | --                          | --                             | --                             |
| Neonatal sepsis and other neonatal infections                    | 2,476<br>(1,338 - 4,289)       | 2,476<br>(1,338 - 4,289)   | --                       | --                          | --                             | --                             |
| Hemolytic disease and other neonatal jaundice                    | 77<br>(25 - 211)               | 77<br>(25 - 211)           | --                       | --                          | --                             | --                             |
| Other neonatal disorders                                         | 1,601<br>(649 - 2,511)         | 1,601<br>(649 - 2,511)     | --                       | --                          | --                             | --                             |
| Nutritional deficiencies                                         | 6,310<br>(4,413 - 7,973)       | 443<br>(271 - 708)         | 50<br>(37 - 64)          | 516<br>(414 - 618)          | 783<br>(613 - 954)             | 4,518<br>(2,899 - 6,105)       |
| Protein-energy malnutrition                                      | 4,114<br>(2,536 - 5,518)       | 382<br>(223 - 612)         | 32<br>(21 - 44)          | 175<br>(86 - 290)           | 396<br>(231 - 570)             | 3,128<br>(1,803 - 4,469)       |
| Iodine deficiency                                                | 7<br>(0 - 29)                  | 0<br>(0 - 3)               | 0<br>(0 - 2)             | 1<br>(0 - 4)                | 1<br>(0 - 8)                   | 4<br>(0 - 25)                  |
| Iron-deficiency anemia                                           | 1,887<br>(799 - 2,944)         | 45<br>(8 - 110)            | 13<br>(5 - 22)           | 309<br>(179 - 415)          | 337<br>(156 - 509)             | 1,184<br>(440 - 2,083)         |
| Other nutritional deficiencies                                   | 302<br>(94 - 526)              | 15<br>(4 - 36)             | 5<br>(1 - 8)             | 30<br>(10 - 48)             | 48<br>(16 - 75)                | 203<br>(54 - 400)              |
| Other communicable, maternal, neonatal, and nutritional diseases | 1,357<br>(951 - 1,818)         | 329<br>(74 - 675)          | 43<br>(22 - 72)          | 273<br>(204 - 333)          | 377<br>(280 - 476)             | 336<br>(218 - 444)             |
| Sexually transmitted diseases excluding HIV                      | 433<br>(150 - 826)             | 262<br>(0 - 623)           | 21<br>(1 - 49)           | 79<br>(55 - 108)            | 33<br>(20 - 50)                | 39<br>(22 - 64)                |
| Syphilis                                                         | 363<br>(83 - 749)              | 262<br>(0 - 623)           | 20<br>(0 - 49)           | 32<br>(22 - 44)             | 18<br>(11 - 28)                | 30<br>(17 - 50)                |
| Chlamydial infection                                             | 22<br>(15 - 30)                | --                         | 0<br>(0 - 0)             | 15<br>(11 - 21)             | 4<br>(3 - 7)                   | 2<br>(1 - 4)                   |
| Gonococcal infection                                             | 27<br>(18 - 37)                | --                         | 0<br>(0 - 0)             | 16<br>(11 - 22)             | 6<br>(4 - 9)                   | 4<br>(3 - 7)                   |
| Other sexually transmitted diseases                              | 22<br>(15 - 29)                | --                         | 0<br>(0 - 0)             | 15<br>(10 - 20)             | 4<br>(3 - 7)                   | 2<br>(1 - 3)                   |
| Hepatitis                                                        | 364<br>(283 - 467)             | 6<br>(3 - 10)              | 6<br>(3 - 9)             | 70<br>(51 - 95)             | 160<br>(109 - 234)             | 122<br>(78 - 184)              |
| Acute hepatitis A                                                | 70<br>(25 - 125)               | 4<br>(2 - 7)               | 4<br>(2 - 7)             | 32<br>(13 - 54)             | 22<br>(6 - 50)                 | 7<br>(1 - 19)                  |
| Acute hepatitis B                                                | 265<br>(186 - 361)             | 2<br>(1 - 5)               | 1<br>(0 - 3)             | 30<br>(13 - 54)             | 125<br>(78 - 188)              | 107<br>(67 - 165)              |
| Acute hepatitis C                                                | 29<br>(6 - 69)                 | --                         | 0<br>(0 - 1)             | 8<br>(1 - 20)               | 13<br>(3 - 33)                 | 8<br>(1 - 24)                  |
| Other infectious diseases                                        | 560<br>(355 - 695)             | 61<br>(32 - 96)            | 16<br>(10 - 23)          | 124<br>(77 - 157)           | 184<br>(122 - 241)             | 175<br>(86 - 245)              |
| Non-communicable diseases                                        | 457,142<br>(426,785 - 488,050) | 6,394<br>(4,928 - 7,901)   | 1,637<br>(1,412 - 1,832) | 41,317<br>(36,856 - 45,923) | 123,433<br>(112,455 - 134,019) | 284,361<br>(268,682 - 301,491) |
| Neoplasms                                                        | 99,622<br>(88,521 - 109,046)   | 291<br>(197 - 403)         | 606<br>(495 - 713)       | 15,553<br>(13,412 - 17,574) | 39,720<br>(34,639 - 43,921)    | 43,453<br>(38,779 - 48,149)    |
| Esophageal cancer                                                | 2,145<br>(1,713 - 2,635)       | --                         | --                       | 156<br>(112 - 207)          | 910<br>(679 - 1,152)           | 1,080<br>(811 - 1,372)         |
| Stomach cancer                                                   | 7,489<br>(6,019 - 9,129)       | --                         | --                       | 860<br>(642 - 1,071)        | 2,311<br>(1,847 - 2,820)       | 4,318<br>(3,181 - 5,774)       |
| Liver cancer                                                     | 3,840<br>(3,068 - 4,691)       | --                         | 5<br>(3 - 8)             | 386<br>(289 - 504)          | 1,484<br>(1,141 - 1,886)       | 1,965<br>(1,424 - 2,677)       |
| Liver cancer due to hepatitis B                                  | 518<br>(332 - 790)             | --                         | 2<br>(1 - 3)             | 103<br>(66 - 155)           | 214<br>(121 - 353)             | 200<br>(109 - 318)             |
| Liver cancer due to hepatitis C                                  | 2,382<br>(1,871 - 3,000)       | --                         | 1<br>(0 - 1)             | 180<br>(124 - 251)          | 915<br>(684 - 1,189)           | 1,286<br>(890 - 1,827)         |

Web Table 31- Brazil deaths with 95% UI by age, sex, and cause in 2013

| Cause                                | Females, All Ages              | Females, 0-4 Years | Females, 5-14 Years | Females, 15-49 Years        | Females, 50-69 Years        | Females, 70-80 Years           |
|--------------------------------------|--------------------------------|--------------------|---------------------|-----------------------------|-----------------------------|--------------------------------|
| Liver cancer due to alcohol use      | 441<br>(255 - 656)             | --                 | --                  | 23<br>(13 - 37)             | 146<br>(90 - 220)           | 272<br>(137 - 451)             |
| Liver cancer due to other causes     | 499<br>(340 - 738)             | --                 | 3<br>(2 - 5)        | 80<br>(51 - 120)            | 209<br>(130 - 314)          | 207<br>(124 - 331)             |
| Larynx cancer                        | 558<br>(284 - 975)             | --                 | --                  | 64<br>(32 - 117)            | 263<br>(131 - 459)          | 231<br>(117 - 399)             |
| Tracheal, bronchus and lung cancer   | 10,369<br>(8,841 - 11,868)     | --                 | --                  | 936<br>(747 - 1,150)        | 4,811<br>(3,929 - 5,739)    | 4,621<br>(3,687 - 5,680)       |
| Breast cancer                        | 16,234<br>(14,102 - 18,291)    | --                 | --                  | 3,739<br>(3,074 - 4,396)    | 7,387<br>(6,193 - 8,569)    | 5,108<br>(4,242 - 6,066)       |
| Cervical cancer                      | 8,644<br>(7,058 - 11,462)      | --                 | --                  | 2,474<br>(1,859 - 3,082)    | 3,688<br>(2,890 - 5,094)    | 2,482<br>(1,844 - 3,640)       |
| Uterine cancer                       | 2,314<br>(1,536 - 3,092)       | --                 | --                  | 148<br>(91 - 205)           | 993<br>(606 - 1,371)        | 1,174<br>(756 - 1,720)         |
| Prostate cancer                      | --                             | --                 | --                  | --                          | --                          | --                             |
| Colon and rectum cancer              | 11,562<br>(9,809 - 13,387)     | --                 | --                  | 1,225<br>(1,005 - 1,471)    | 4,089<br>(3,430 - 4,807)    | 6,248<br>(4,864 - 7,759)       |
| Lip and oral cavity cancer           | 1,146<br>(832 - 1,526)         | --                 | --                  | 152<br>(102 - 235)          | 399<br>(283 - 536)          | 595<br>(396 - 823)             |
| Nasopharynx cancer                   | 175<br>(125 - 304)             | --                 | 2<br>(1 - 5)        | 44<br>(28 - 73)             | 72<br>(45 - 132)            | 57<br>(37 - 99)                |
| Other pharynx cancer                 | 448<br>(341 - 550)             | --                 | --                  | 59<br>(39 - 90)             | 202<br>(145 - 267)          | 186<br>(131 - 253)             |
| Gallbladder and biliary tract cancer | 2,696<br>(1,826 - 3,526)       | --                 | --                  | 158<br>(99 - 217)           | 1,485<br>(712 - 1,401)      | 1,485<br>(944 - 2,151)         |
| Pancreatic cancer                    | 5,334<br>(4,460 - 6,227)       | --                 | --                  | 347<br>(273 - 430)          | 2,089<br>(1,705 - 2,537)    | 2,898<br>(2,296 - 3,632)       |
| Malignant skin melanoma              | 1,034<br>(854 - 1,231)         | --                 | --                  | 221<br>(171 - 281)          | 403<br>(311 - 497)          | 410<br>(306 - 551)             |
| Non-melanoma skin cancer             | 788<br>(462 - 1,059)           | --                 | --                  | 53<br>(31 - 71)             | 147<br>(88 - 205)           | 589<br>(332 - 819)             |
| Ovarian cancer                       | 4,518<br>(3,882 - 5,250)       | --                 | --                  | 813<br>(649 - 1,013)        | 2,194<br>(1,777 - 2,676)    | 1,511<br>(1,185 - 1,881)       |
| Testicular cancer                    | --                             | --                 | --                  | --                          | --                          | --                             |
| Kidney cancer                        | 1,464<br>(1,183 - 1,802)       | 13<br>(7 - 23)     | 20<br>(12 - 30)     | 154<br>(114 - 202)          | 600<br>(461 - 770)          | 678<br>(472 - 939)             |
| Bladder cancer                       | 1,618<br>(1,182 - 2,501)       | --                 | --                  | 109<br>(70 - 194)           | 499<br>(344 - 815)          | 1,010<br>(686 - 1,537)         |
| Brain and nervous system cancer      | 3,945<br>(2,825 - 4,593)       | 45<br>(24 - 79)    | 159<br>(111 - 213)  | 974<br>(764 - 1,187)        | 1,584<br>(1,094 - 1,958)    | 1,183<br>(772 - 1,543)         |
| Thyroid cancer                       | 563<br>(425 - 771)             | --                 | 1<br>(0 - 2)        | 41<br>(29 - 58)             | 206<br>(149 - 286)          | 315<br>(222 - 442)             |
| Mesothelioma                         | 201<br>(151 - 260)             | --                 | --                  | 21<br>(14 - 31)             | 106<br>(72 - 152)           | 74<br>(48 - 114)               |
| Hodgkin lymphoma                     | 334<br>(257 - 511)             | 1<br>(1 - 2)       | 9<br>(4 - 20)       | 129<br>(96 - 180)           | 100<br>(63 - 176)           | 95<br>(62 - 159)               |
| Non-Hodgkin lymphoma                 | 2,334<br>(1,511 - 2,883)       | 12<br>(6 - 21)     | 31<br>(19 - 46)     | 398<br>(239 - 505)          | 837<br>(540 - 1,091)        | 1,056<br>(645 - 1,418)         |
| Multiple myeloma                     | 1,438<br>(1,073 - 1,858)       | --                 | --                  | 112<br>(82 - 154)           | 675<br>(504 - 924)          | 652<br>(448 - 871)             |
| Leukemia                             | 3,114<br>(2,619 - 3,542)       | 77<br>(41 - 124)   | 200<br>(153 - 258)  | 779<br>(642 - 930)          | 861<br>(694 - 1,039)        | 1,197<br>(933 - 1,478)         |
| Other neoplasms                      | 5,316<br>(3,626 - 6,361)       | 143<br>(63 - 222)  | 179<br>(101 - 234)  | 1,000<br>(710 - 1,265)      | 1,757<br>(1,144 - 2,190)    | 2,237<br>(1,383 - 2,876)       |
| Cardiovascular diseases              | 202,068<br>(182,800 - 235,374) | 292<br>(186 - 450) | 235<br>(183 - 311)  | 13,522<br>(11,597 - 17,035) | 49,109<br>(43,457 - 58,203) | 138,911<br>(125,352 - 161,364) |
| Rheumatic heart disease              | 1,712<br>(829 - 2,122)         | 1<br>(1 - 3)       | 29<br>(18 - 40)     | 481<br>(264 - 615)          | 685<br>(311 - 882)          | 516<br>(206 - 693)             |
| Ischemic heart disease               | 91,023<br>(77,502 - 118,486)   | 8<br>(2 - 15)      | 23<br>(13 - 32)     | 4,812<br>(3,859 - 6,602)    | 22,749<br>(18,940 - 29,071) | 63,430<br>(53,251 - 84,012)    |
| Cerebrovascular disease              | 17,565<br>(6,021 - 90,258)     | 36<br>(22 - 53)    | 79<br>(61 - 116)    | 5,315<br>(4,293 - 7,112)    | 16,573<br>(13,952 - 21,676) | 49,561<br>(41,742 - 62,150)    |
| Ischemic stroke                      | 37,837<br>(30,797 - 50,377)    | 3<br>(1 - 6)       | 6<br>(4 - 9)        | 522<br>(354 - 840)          | 5,018<br>(3,759 - 7,459)    | 32,287<br>(26,391 - 41,900)    |
| Hemorrhagic stroke                   | 33,728<br>(27,983 - 43,770)    | 33<br>(20 - 47)    | 73<br>(56 - 107)    | 4,793<br>(3,906 - 6,370)    | 11,555<br>(9,599 - 14,861)  | 17,274<br>(13,104 - 22,912)    |
| Hypertensive heart disease           | 12,824<br>(9,046 - 17,296)     | 1<br>(0 - 2)       | 2<br>(1 - 2)        | 607<br>(430 - 970)          | 2,897<br>(2,071 - 4,148)    | 9,317<br>(5,868 - 12,957)      |
| Cardiomyopathy and myocarditis       | 8,800<br>(6,688 - 12,412)      | 155<br>(95 - 279)  | 50<br>(35 - 77)     | 847<br>(634 - 1,343)        | 2,253<br>(1,684 - 3,371)    | 5,496<br>(3,954 - 7,702)       |
| Atrial fibrillation and flutter      | 2,169<br>(1,532 - 2,910)       | --                 | --                  | 46<br>(34 - 61)             | 288<br>(214 - 362)          | 1,835<br>(1,244 - 2,554)       |
| Aortic aneurysm                      | 2,705<br>(1,552 - 3,794)       | --                 | --                  | 244<br>(145 - 363)          | 926<br>(512 - 1,326)        | 1,535<br>(818 - 2,225)         |
| Peripheral vascular disease          | 1,211<br>(869 - 1,598)         | --                 | --                  | 29<br>(20 - 39)             | 227<br>(163 - 295)          | 955<br>(660 - 1,328)           |
| Endocarditis                         | 854<br>(420 - 1,159)           | 31<br>(12 - 59)    | 14<br>(9 - 22)      | 155<br>(93 - 218)           | 216<br>(97 - 304)           | 438<br>(181 - 648)             |

Web Table 31- Brazil deaths with 95% UI by age, sex, and cause in 2013

| Cause                                               | Females, All Ages           | Females, 0-4 Years | Females, 5-14 Years | Females, 15-49 Years     | Females, 50-69 Years     | Females, 70-80 Years        |
|-----------------------------------------------------|-----------------------------|--------------------|---------------------|--------------------------|--------------------------|-----------------------------|
| Other cardiovascular and circulatory diseases       | 9,205<br>(5,991 - 11,497)   | 60<br>(34 - 93)    | 37<br>(24 - 55)     | 987<br>(630 - 1,272)     | 2,293<br>(1,480 - 2,958) | 5,828<br>(3,660 - 7,820)    |
| Chronic respiratory diseases                        | 30,701<br>(24,773 - 35,599) | 173<br>(110 - 237) | 70<br>(49 - 87)     | 1,543<br>(1,092 - 1,835) | 6,365<br>(4,581 - 7,471) | 22,550<br>(18,168 - 26,814) |
| Chronic obstructive pulmonary disease               | 26,227<br>(21,246 - 30,900) | 95<br>(53 - 149)   | 27<br>(18 - 37)     | 971<br>(733 - 1,214)     | 5,126<br>(3,817 - 6,137) | 20,009<br>(16,217 - 24,004) |
| Pneumoconiosis                                      | 171<br>(97 - 271)           | 1<br>(0 - 2)       | 2<br>(1 - 3)        | 13<br>(8 - 18)           | 42<br>(22 - 68)          | 113<br>(58 - 198)           |
| Silicosis                                           | 9<br>(4 - 16)               | 0<br>(0 - 0)       | 0<br>(0 - 1)        | 1<br>(1 - 2)             | 1<br>(0 - 2)             | 6<br>(2 - 12)               |
| Asbestosis                                          | 9<br>(5 - 15)               | 0<br>(0 - 0)       | 0<br>(0 - 1)        | 1<br>(1 - 2)             | 2<br>(1 - 3)             | 5<br>(2 - 10)               |
| Coal workers pneumoconiosis                         | 23<br>(9 - 46)              | 0<br>(0 - 0)       | 0<br>(0 - 1)        | 1<br>(1 - 2)             | 2<br>(1 - 3)             | 19<br>(6 - 41)              |
| Other pneumoconiosis                                | 130<br>(76 - 209)           | 0<br>(0 - 0)       | 0<br>(0 - 1)        | 10<br>(6 - 14)           | 37<br>(20 - 60)          | 82<br>(42 - 148)            |
| Asthma                                              | 2,635<br>(1,142 - 3,855)    | 43<br>(21 - 68)    | 32<br>(14 - 44)     | 413<br>(155 - 585)       | 780<br>(321 - 1,179)     | 1,366<br>(578 - 2,174)      |
| Interstitial lung disease and pulmonary sarcoidosis | 1,335<br>(571 - 2,224)      | 6<br>(2 - 13)      | 6<br>(3 - 9)        | 109<br>(59 - 166)        | 336<br>(147 - 544)       | 879<br>(323 - 1,574)        |
| Other chronic respiratory diseases                  | 333<br>(212 - 492)          | 28<br>(16 - 46)    | 4<br>(2 - 6)        | 37<br>(23 - 52)          | 81<br>(47 - 125)         | 184<br>(104 - 307)          |
| Cirrhosis                                           | 8,425<br>(7,295 - 9,471)    | 17<br>(12 - 25)    | 45<br>(36 - 53)     | 1,652<br>(1,349 - 1,963) | 3,221<br>(2,718 - 3,735) | 3,489<br>(2,886 - 4,131)    |
| Cirrhosis due to hepatitis B                        | 944<br>(319 - 1,600)        | 0<br>(0 - 1)       | 3<br>(1 - 6)        | 199<br>(73 - 386)        | 380<br>(126 - 686)       | 361<br>(97 - 693)           |
| Cirrhosis due to hepatitis C                        | 3,897<br>(1,536 - 5,854)    | 1<br>(0 - 2)       | 9<br>(4 - 16)       | 694<br>(261 - 1,106)     | 1,496<br>(544 - 2,342)   | 1,698<br>(571 - 2,553)      |
| Cirrhosis due to alcohol use                        | 2,030<br>(954 - 3,283)      | --                 | --                  | 255<br>(127 - 451)       | 745<br>(358 - 1,254)     | 1,030<br>(452 - 1,801)      |
| Cirrhosis due to other causes                       | 1,554<br>(901 - 2,703)      | 16<br>(11 - 23)    | 33<br>(23 - 42)     | 504<br>(291 - 844)       | 601<br>(284 - 1,194)     | 400<br>(216 - 690)          |
| Digestive diseases                                  | 15,054<br>(10,909 - 17,307) | 30<br>(18 - 43)    | 65<br>(41 - 79)     | 1,392<br>(983 - 1,668)   | 3,677<br>(2,630 - 4,320) | 9,891<br>(7,173 - 11,707)   |
| Peptic ulcer disease                                | 1,863<br>(1,257 - 2,492)    | 1<br>(0 - 2)       | 4<br>(2 - 7)        | 137<br>(88 - 184)        | 453<br>(300 - 603)       | 1,267<br>(828 - 1,806)      |
| Gastritis and duodenitis                            | 266<br>(101 - 421)          | 0<br>(0 - 1)       | 1<br>(0 - 2)        | 23<br>(9 - 37)           | 57<br>(22 - 87)          | 184<br>(67 - 307)           |
| Appendicitis                                        | 397<br>(212 - 593)          | 3<br>(1 - 6)       | 18<br>(8 - 30)      | 97<br>(48 - 152)         | 110<br>(51 - 175)        | 170<br>(84 - 283)           |
| Paralytic ileus and intestinal obstruction          | 2,662<br>(1,379 - 4,122)    | 15<br>(8 - 26)     | 14<br>(8 - 25)      | 203<br>(113 - 356)       | 564<br>(285 - 892)       | 1,866<br>(925 - 2,881)      |
| Inguinal, femoral, and abdominal hernia             | 556<br>(203 - 832)          | 0<br>(0 - 1)       | 1<br>(0 - 2)        | 23<br>(8 - 37)           | 152<br>(56 - 220)        | 378<br>(124 - 597)          |
| Inflammatory bowel disease                          | 444<br>(279 - 690)          | 2<br>(1 - 3)       | 2<br>(1 - 3)        | 87<br>(53 - 128)         | 132<br>(83 - 210)        | 221<br>(129 - 379)          |
| Vascular intestinal disorders                       | 2,332<br>(1,272 - 4,148)    | 1<br>(0 - 3)       | 1<br>(0 - 4)        | 135<br>(69 - 244)        | 537<br>(290 - 949)       | 1,658<br>(883 - 2,997)      |
| Gallbladder and biliary diseases                    | 3,026<br>(1,630 - 3,880)    | 1<br>(0 - 2)       | 4<br>(2 - 6)        | 258<br>(127 - 339)       | 764<br>(402 - 988)       | 1,999<br>(1,082 - 2,691)    |
| Pancreatitis                                        | 1,354<br>(778 - 1,879)      | 1<br>(0 - 1)       | 4<br>(2 - 7)        | 259<br>(156 - 351)       | 432<br>(250 - 598)       | 658<br>(348 - 992)          |
| Other digestive diseases                            | 2,155<br>(1,489 - 2,762)    | 7<br>(3 - 12)      | 14<br>(8 - 21)      | 168<br>(114 - 217)       | 475<br>(328 - 615)       | 1,491<br>(1,011 - 2,002)    |
| Neurological disorders                              | 27,859<br>(22,323 - 33,384) | 91<br>(68 - 127)   | 66<br>(50 - 82)     | 729<br>(576 - 858)       | 2,130<br>(1,719 - 2,533) | 24,842<br>(19,593 - 30,159) |
| Alzheimer disease and other dementias               | 24,220<br>(19,121 - 29,443) | --                 | --                  | 6<br>(1 - 13)            | 1,267<br>(969 - 1,592)   | 22,946<br>(17,927 - 28,085) |
| Parkinson disease                                   | 1,533<br>(569 - 2,058)      | --                 | --                  | 11<br>(6 - 14)           | 196<br>(83 - 258)        | 1,326<br>(463 - 1,835)      |
| Epilepsy                                            | 728<br>(485 - 898)          | 33<br>(19 - 64)    | 35<br>(22 - 48)     | 362<br>(245 - 459)       | 148<br>(89 - 198)        | 149<br>(82 - 219)           |
| Multiple sclerosis                                  | 338<br>(170 - 477)          | --                 | --                  | 127<br>(69 - 192)        | 129<br>(52 - 180)        | 83<br>(46 - 134)            |
| Other neurological disorders                        | 1,040<br>(898 - 1,162)      | 58<br>(42 - 78)    | 32<br>(24 - 40)     | 224<br>(185 - 264)       | 390<br>(322 - 455)       | 336<br>(275 - 407)          |
| Mental and substance use disorders                  | 1,065<br>(573 - 1,395)      | 4<br>(2 - 7)       | 1<br>(0 - 2)        | 530<br>(289 - 722)       | 375<br>(178 - 525)       | 155<br>(91 - 208)           |
| Schizophrenia                                       | 108<br>(63 - 142)           | --                 | --                  | 34<br>(19 - 48)          | 43<br>(25 - 60)          | 30<br>(15 - 48)             |
| Alcohol use disorders                               | 702<br>(235 - 1,019)        | --                 | --                  | 359<br>(123 - 547)       | 269<br>(83 - 418)        | 74<br>(22 - 114)            |
| Drug use disorders                                  | 241<br>(201 - 284)          | 4<br>(2 - 7)       | --                  | 124<br>(97 - 155)        | 62<br>(48 - 77)          | 51<br>(37 - 69)             |
| Opioid use disorders                                | 87<br>(72 - 103)            | 2<br>(1 - 3)       | --                  | 45<br>(35 - 56)          | 21<br>(16 - 26)          | 20<br>(14 - 27)             |
| Cocaine use disorders                               | 20<br>(16 - 24)             | 0<br>(0 - 1)       | --                  | 12<br>(9 - 15)           | 4<br>(3 - 6)             | 3<br>(2 - 5)                |
| Amphetamine use disorders                           | 12<br>(10 - 15)             | 0<br>(0 - 1)       | --                  | 6<br>(5 - 8)             | 3<br>(2 - 4)             | 2<br>(2 - 3)                |

Web Table 31- Brazil deaths with 95% UI by age, sex, and cause in 2013

| Cause                                               | Females, All Ages           | Females, 0-4 Years       | Females, 5-14 Years | Females, 15-49 Years     | Females, 50-69 Years        | Females, 70-80 Years        |
|-----------------------------------------------------|-----------------------------|--------------------------|---------------------|--------------------------|-----------------------------|-----------------------------|
| Other drug use disorders                            | 123<br>(102 - 145)          | 2<br>(1 - 3)             | --                  | 61<br>(48 - 77)          | 34<br>(26 - 43)             | 26<br>(19 - 35)             |
| Eating disorders                                    | 14<br>(8 - 21)              | --                       | 1<br>(0 - 2)        | 13<br>(7 - 20)           | --                          | --                          |
| Anorexia nervosa                                    | 14<br>(8 - 21)              | --                       | 1<br>(0 - 2)        | 13<br>(7 - 20)           | --                          | --                          |
| Diabetes, urogenital, blood, and endocrine diseases | 60,743<br>(51,339 - 68,460) | 385<br>(296 - 499)       | 243<br>(196 - 291)  | 4,919<br>(4,105 - 5,864) | 17,390<br>(14,379 - 19,891) | 37,805<br>(31,214 - 43,516) |
| Diabetes mellitus                                   | 32,850<br>(27,465 - 38,070) | 35<br>(20 - 55)          | 44<br>(26 - 74)     | 1,642<br>(1,332 - 2,019) | 9,703<br>(7,785 - 11,473)   | 21,425<br>(17,459 - 25,671) |
| Acute glomerulonephritis                            | 31<br>(23 - 54)             | 3<br>(1 - 6)             | 4<br>(3 - 8)        | 7<br>(5 - 11)            | 5<br>(3 - 10)               | 12<br>(6 - 23)              |
| Chronic kidney disease                              | 15,507<br>(12,521 - 22,659) | 37<br>(26 - 55)          | 47<br>(34 - 85)     | 1,625<br>(1,254 - 2,793) | 4,936<br>(3,948 - 6,691)    | 8,862<br>(6,879 - 13,240)   |
| Chronic kidney disease due to diabetes mellitus     | 6,703<br>(4,617 - 9,211)    | 5<br>(3 - 9)             | 4<br>(2 - 6)        | 512<br>(306 - 784)       | 2,435<br>(1,666 - 3,355)    | 3,747<br>(2,511 - 5,491)    |
| Chronic kidney disease due to hypertension          | 4,474<br>(2,573 - 7,231)    | 9<br>(4 - 16)            | 12<br>(7 - 21)      | 641<br>(392 - 1,170)     | 1,191<br>(655 - 2,075)      | 2,622<br>(1,408 - 4,243)    |
| Chronic kidney disease due to glomerulonephritis    | 195<br>(124 - 294)          | 5<br>(2 - 7)             | 9<br>(5 - 13)       | 44<br>(26 - 67)          | 49<br>(29 - 74)             | 88<br>(50 - 154)            |
| Chronic kidney disease due to other causes          | 4,135<br>(2,597 - 7,698)    | 19<br>(10 - 33)          | 22<br>(11 - 52)     | 428<br>(223 - 1,025)     | 1,261<br>(733 - 2,125)      | 2,405<br>(1,331 - 4,615)    |
| Urinary diseases and male infertility               | 7,035<br>(3,908 - 9,341)    | 80<br>(48 - 122)         | 24<br>(14 - 33)     | 586<br>(368 - 723)       | 1,189<br>(729 - 1,504)      | 5,155<br>(2,513 - 7,258)    |
| Interstitial nephritis and urinary tract infections | 6,571<br>(3,618 - 8,794)    | 74<br>(44 - 115)         | 18<br>(10 - 26)     | 486<br>(302 - 605)       | 1,056<br>(625 - 1,331)      | 4,936<br>(2,428 - 6,978)    |
| Urolithiasis                                        | 187<br>(75 - 366)           | --                       | 2<br>(1 - 3)        | 44<br>(17 - 78)          | 57<br>(22 - 107)            | 84<br>(29 - 193)            |
| Other urinary diseases                              | 277<br>(162 - 540)          | 5<br>(2 - 10)            | 4<br>(3 - 7)        | 56<br>(32 - 91)          | 76<br>(41 - 136)            | 135<br>(58 - 324)           |
| Gynecological diseases                              | 42<br>(24 - 55)             | --                       | --                  | 14<br>(10 - 20)          | 9<br>(6 - 12)               | 19<br>(8 - 29)              |
| Uterine fibroids                                    | 11<br>(6 - 15)              | --                       | --                  | 3<br>(2 - 4)             | 3<br>(2 - 3)                | 6<br>(2 - 9)                |
| Polycystic ovarian syndrome                         | 1<br>(1 - 1)                | --                       | --                  | 1<br>(1 - 1)             | 0<br>(0 - 0)                | --                          |
| Endometriosis                                       | 2<br>(2 - 3)                | --                       | --                  | 2<br>(1 - 3)             | 0<br>(0 - 0)                | --                          |
| Genital prolapse                                    | 8<br>(4 - 11)               | --                       | --                  | 2<br>(1 - 2)             | 2<br>(1 - 2)                | 5<br>(2 - 8)                |
| Other gynecological diseases                        | 20<br>(11 - 25)             | --                       | --                  | 7<br>(5 - 9)             | 5<br>(3 - 6)                | 8<br>(3 - 13)               |
| Hemoglobinopathies and hemolytic anemias            | 759<br>(435 - 1,035)        | 56<br>(28 - 111)         | 57<br>(30 - 83)     | 209<br>(113 - 300)       | 231<br>(134 - 342)          | 206<br>(110 - 295)          |
| Thalassemias                                        | 26<br>(14 - 38)             | 8<br>(4 - 17)            | 7<br>(4 - 11)       | 10<br>(5 - 15)           | 0<br>(0 - 0)                | 0<br>(0 - 0)                |
| Sickle cell disorders                               | 448<br>(257 - 620)          | 33<br>(16 - 66)          | 42<br>(22 - 61)     | 176<br>(95 - 252)        | 180<br>(104 - 267)          | 18<br>(10 - 27)             |
| G6PD deficiency                                     | 13<br>(7 - 18)              | 2<br>(1 - 4)             | 2<br>(1 - 3)        | 5<br>(2 - 7)             | 3<br>(2 - 4)                | 2<br>(1 - 3)                |
| Other hemoglobinopathies and hemolytic anemias      | 273<br>(155 - 380)          | 14<br>(7 - 27)           | 6<br>(3 - 9)        | 19<br>(10 - 27)          | 48<br>(28 - 72)             | 186<br>(98 - 271)           |
| Endocrine, metabolic, blood, and immune disorders   | 4,519<br>(2,537 - 5,552)    | 174<br>(105 - 259)       | 66<br>(46 - 89)     | 835<br>(442 - 1,046)     | 1,317<br>(674 - 1,694)      | 2,127<br>(1,059 - 2,939)    |
| Musculoskeletal disorders                           | 2,701<br>(2,009 - 3,180)    | --                       | 58<br>(42 - 76)     | 882<br>(697 - 1,075)     | 733<br>(505 - 907)          | 1,028<br>(614 - 1,340)      |
| Rheumatoid arthritis                                | 405<br>(242 - 525)          | --                       | 3<br>(1 - 4)        | 40<br>(21 - 55)          | 147<br>(76 - 198)           | 215<br>(135 - 309)          |
| Other musculoskeletal disorders                     | 2,296<br>(1,694 - 2,729)    | --                       | 56<br>(40 - 72)     | 843<br>(667 - 1,032)     | 586<br>(411 - 731)          | 813<br>(488 - 1,074)        |
| Other non-communicable diseases                     | 8,904<br>(6,981 - 10,656)   | 5,110<br>(3,675 - 6,613) | 249<br>(185 - 318)  | 595<br>(471 - 713)       | 714<br>(541 - 849)          | 2,237<br>(1,408 - 3,082)    |
| Congenital anomalies                                | 6,072<br>(4,538 - 7,561)    | 4,947<br>(3,543 - 6,437) | 235<br>(171 - 302)  | 425<br>(315 - 531)       | 218<br>(156 - 282)          | 247<br>(154 - 331)          |
| Neural tube defects                                 | 419<br>(188 - 679)          | 396<br>(175 - 655)       | 7<br>(2 - 11)       | 9<br>(3 - 12)            | 5<br>(2 - 6)                | 3<br>(1 - 4)                |
| Congenital heart anomalies                          | 2,578<br>(1,857 - 3,356)    | 2,071<br>(1,403 - 2,854) | 120<br>(82 - 163)   | 218<br>(159 - 274)       | 80<br>(54 - 105)            | 88<br>(54 - 123)            |
| Cleft lip and cleft palate                          | 22<br>(3 - 90)              | 22<br>(3 - 90)           | --                  | --                       | --                          | --                          |
| Down syndrome                                       | 233<br>(104 - 382)          | 144<br>(58 - 290)        | 17<br>(8 - 28)      | 45<br>(19 - 71)          | 24<br>(9 - 41)              | 3<br>(1 - 6)                |
| Chromosomal unbalanced rearrangements               | 166<br>(47 - 305)           | 149<br>(36 - 284)        | 3<br>(1 - 5)        | 10<br>(5 - 14)           | 3<br>(1 - 5)                | 2<br>(1 - 4)                |
| Other congenital anomalies                          | 2,654<br>(1,955 - 3,466)    | 2,165<br>(1,506 - 2,948) | 88<br>(61 - 119)    | 144<br>(106 - 183)       | 107<br>(78 - 139)           | 150<br>(93 - 209)           |
| Skin and subcutaneous diseases                      | 2,731<br>(1,839 - 3,654)    | 62<br>(34 - 110)         | 14<br>(10 - 18)     | 169<br>(127 - 208)       | 495<br>(365 - 609)          | 1,990<br>(1,200 - 2,822)    |
| Cellulitis                                          | 254<br>(77 - 468)           | 7<br>(2 - 16)            | 3<br>(1 - 5)        | 28<br>(11 - 46)          | 67<br>(21 - 118)            | 149<br>(33 - 327)           |

Web Table 31- Brazil deaths with 95% UI by age, sex, and cause in 2013

| Cause                                           | Females, All Ages           | Females, 0-4 Years       | Females, 5-14 Years      | Females, 15-49 Years       | Females, 50-69 Years     | Females, 70-80 Years       |
|-------------------------------------------------|-----------------------------|--------------------------|--------------------------|----------------------------|--------------------------|----------------------------|
| Pyoderma                                        | 1,358<br>(963 - 1,825)      | 50<br>(26 - 91)          | 7<br>(5 - 10)            | 88<br>(64 - 115)           | 298<br>(212 - 388)       | 915<br>(567 - 1,364)       |
| Decubitus ulcer                                 | 975<br>(559 - 1,474)        | 1<br>(0 - 1)             | 2<br>(1 - 2)             | 24<br>(17 - 34)            | 92<br>(63 - 126)         | 857<br>(475 - 1,363)       |
| Other skin and subcutaneous diseases            | 144<br>(82 - 249)           | 5<br>(1 - 15)            | 2<br>(1 - 4)             | 29<br>(18 - 44)            | 38<br>(20 - 67)          | 70<br>(25 - 160)           |
| Sudden infant death syndrome                    | 100<br>(25 - 269)           | 100<br>(25 - 269)        | --                       | --                         | --                       | --                         |
| Injuries                                        | 30,769<br>(26,931 - 34,783) | 1,353<br>(1,002 - 2,051) | 1,422<br>(1,236 - 1,684) | 11,321<br>(9,720 - 12,849) | 5,506<br>(4,759 - 6,364) | 11,167<br>(9,083 - 13,488) |
| Transport injuries                              | 9,600<br>(8,416 - 11,446)   | 295<br>(225 - 388)       | 663<br>(538 - 888)       | 4,576<br>(3,816 - 5,319)   | 2,310<br>(1,915 - 2,933) | 1,755<br>(1,426 - 2,352)   |
| Road injuries                                   | 9,422<br>(8,281 - 11,255)   | 287<br>(220 - 378)       | 648<br>(526 - 871)       | 4,497<br>(3,748 - 5,237)   | 2,269<br>(1,883 - 2,891) | 1,720<br>(1,398 - 2,308)   |
| Pedestrian road injuries                        | 4,249<br>(3,484 - 5,974)    | 129<br>(86 - 183)        | 347<br>(245 - 528)       | 1,306<br>(977 - 1,977)     | 1,210<br>(948 - 1,701)   | 1,257<br>(973 - 1,828)     |
| Cyclist road injuries                           | 342<br>(146 - 439)          | 5<br>(1 - 9)             | 32<br>(11 - 49)          | 166<br>(65 - 221)          | 84<br>(32 - 118)         | 55<br>(28 - 80)            |
| Motorcyclist road injuries                      | 885<br>(373 - 1,211)        | 16<br>(8 - 26)           | 37<br>(15 - 61)          | 732<br>(311 - 1,025)       | 69<br>(20 - 110)         | 31<br>(15 - 47)            |
| Motor vehicle road injuries                     | 3,904<br>(3,026 - 4,741)    | 134<br>(92 - 181)        | 229<br>(162 - 305)       | 2,277<br>(1,763 - 2,788)   | 896<br>(643 - 1,177)     | 368<br>(234 - 506)         |
| Other road injuries                             | 42<br>(22 - 87)             | 3<br>(1 - 8)             | 4<br>(2 - 8)             | 16<br>(7 - 24)             | 10<br>(4 - 18)           | 9<br>(5 - 22)              |
| Other transport injuries                        | 178<br>(120 - 216)          | 8<br>(4 - 13)            | 15<br>(9 - 22)           | 79<br>(50 - 103)           | 41<br>(26 - 57)          | 34<br>(21 - 51)            |
| Unintentional injuries                          | 13,369<br>(11,154 - 16,001) | 933<br>(621 - 1,588)     | 487<br>(391 - 666)       | 1,487<br>(1,224 - 1,941)   | 1,817<br>(1,451 - 2,257) | 8,645<br>(6,564 - 10,828)  |
| Falls                                           | 6,263<br>(4,061 - 8,203)    | 47<br>(24 - 79)          | 35<br>(22 - 47)          | 184<br>(118 - 229)         | 603<br>(380 - 764)       | 5,394<br>(3,463 - 7,257)   |
| Drowning                                        | 1,027<br>(805 - 1,818)      | 155<br>(80 - 321)        | 274<br>(195 - 470)       | 394<br>(290 - 738)         | 123<br>(95 - 189)        | 80<br>(59 - 121)           |
| Fire, heat, and hot substances                  | 760<br>(604 - 1,129)        | 64<br>(41 - 131)         | 35<br>(25 - 53)          | 157<br>(121 - 232)         | 135<br>(102 - 197)       | 368<br>(253 - 593)         |
| Poisonings                                      | 217<br>(125 - 286)          | 10<br>(5 - 14)           | 6<br>(3 - 8)             | 47<br>(31 - 72)            | 42<br>(22 - 57)          | 113<br>(54 - 167)          |
| Exposure to mechanical forces                   | 302<br>(231 - 348)          | 60<br>(39 - 87)          | 40<br>(30 - 51)          | 86<br>(66 - 104)           | 58<br>(35 - 72)          | 59<br>(38 - 76)            |
| Unintentional firearm injuries                  | 48<br>(39 - 59)             | 3<br>(2 - 5)             | 10<br>(6 - 15)           | 24<br>(18 - 31)            | 7<br>(5 - 9)             | 5<br>(3 - 8)               |
| Unintentional suffocation                       | 51<br>(21 - 78)             | 23<br>(8 - 44)           | 4<br>(2 - 7)             | 8<br>(4 - 14)              | 4<br>(2 - 6)             | 12<br>(3 - 21)             |
| Other exposure to mechanical forces             | 203<br>(152 - 237)          | 34<br>(21 - 52)          | 26<br>(18 - 37)          | 54<br>(39 - 67)            | 47<br>(26 - 61)          | 42<br>(26 - 55)            |
| Adverse effects of medical treatment            | 1,927<br>(1,418 - 2,831)    | 56<br>(28 - 122)         | 15<br>(10 - 22)          | 277<br>(207 - 441)         | 489<br>(331 - 737)       | 1,090<br>(723 - 1,728)     |
| Animal contact                                  | 106<br>(51 - 234)           | 9<br>(3 - 19)            | 12<br>(5 - 29)           | 23<br>(10 - 52)            | 33<br>(15 - 74)          | 29<br>(11 - 63)            |
| Venomous animal contact                         | 74<br>(37 - 169)            | 6<br>(2 - 14)            | 10<br>(4 - 22)           | 17<br>(7 - 38)             | 25<br>(12 - 59)          | 17<br>(8 - 44)             |
| Non-venomous animal contact                     | 31<br>(11 - 64)             | 2<br>(1 - 6)             | 2<br>(1 - 6)             | 7<br>(3 - 16)              | 9<br>(2 - 18)            | 11<br>(3 - 23)             |
| Foreign body                                    | 2,374<br>(1,472 - 3,793)    | 506<br>(243 - 1,063)     | 34<br>(21 - 56)          | 185<br>(121 - 314)         | 277<br>(175 - 496)       | 1,372<br>(799 - 2,465)     |
| Pulmonary aspiration and foreign body in airway | 2,345<br>(1,444 - 3,773)    | 505<br>(242 - 1,062)     | 32<br>(19 - 55)          | 179<br>(116 - 308)         | 274<br>(172 - 492)       | 1,355<br>(784 - 2,436)     |
| Foreign body in other body part                 | 29<br>(14 - 50)             | 1<br>(1 - 2)             | 2<br>(1 - 2)             | 6<br>(4 - 9)               | 4<br>(2 - 5)             | 17<br>(6 - 36)             |
| Other unintentional injuries                    | 395<br>(299 - 519)          | 27<br>(13 - 53)          | 36<br>(19 - 64)          | 136<br>(93 - 203)          | 56<br>(35 - 91)          | 140<br>(78 - 224)          |
| Self-harm and interpersonal violence            | 7,800<br>(6,112 - 9,209)    | 125<br>(67 - 202)        | 272<br>(192 - 345)       | 5,257<br>(3,958 - 6,319)   | 1,379<br>(1,090 - 1,731) | 768<br>(617 - 965)         |
| Self-harm                                       | 3,327<br>(2,818 - 4,316)    | --                       | 61<br>(42 - 85)          | 1,906<br>(1,564 - 2,551)   | 843<br>(672 - 1,133)     | 517<br>(395 - 667)         |
| Interpersonal violence                          | 4,473<br>(2,934 - 5,569)    | 125<br>(67 - 202)        | 211<br>(131 - 281)       | 3,351<br>(2,127 - 4,218)   | 536<br>(345 - 702)       | 251<br>(179 - 355)         |
| Assault by firearm                              | 2,119<br>(1,165 - 2,874)    | 29<br>(10 - 55)          | 98<br>(49 - 145)         | 1,723<br>(946 - 2,334)     | 211<br>(108 - 311)       | 57<br>(30 - 98)            |
| Assault by sharp object                         | 1,145<br>(654 - 1,751)      | 19<br>(9 - 37)           | 34<br>(18 - 56)          | 892<br>(496 - 1,361)       | 145<br>(79 - 221)        | 55<br>(30 - 86)            |
| Assault by other means                          | 1,209<br>(751 - 1,885)      | 76<br>(39 - 133)         | 79<br>(46 - 127)         | 735<br>(444 - 1,243)       | 179<br>(106 - 271)       | 139<br>(94 - 208)          |
| Forces of nature, war, and legal intervention   | 0<br>(0 - 0)                | 0<br>(0 - 0)             | --                       | --                         | --                       | --                         |
| Exposure to forces of nature                    | 0<br>(0 - 0)                | 0<br>(0 - 0)             | --                       | --                         | --                       | --                         |

Web Table 31- Brunei deaths with 95% UI by age, sex, and cause in 2013

| Cause                                                             | Both Sexes, All Ages     | Both Sexes, 0-4 Years | Both Sexes, 5-14 Years | Both Sexes, 15-49 Years | Both Sexes, 50-69 Years | Both Sexes, 70-80 Years |
|-------------------------------------------------------------------|--------------------------|-----------------------|------------------------|-------------------------|-------------------------|-------------------------|
| All causes                                                        | 1,357<br>(1,195 - 1,546) | 54<br>(44 - 66)       | 11<br>(10 - 13)        | 246<br>(215 - 281)      | 463<br>(390 - 551)      | 582<br>(527 - 652)      |
| Communicable, maternal, neonatal, and nutritional diseases        | 139<br>(123 - 156)       | 22<br>(17 - 28)       | 1<br>(1 - 2)           | 42<br>(37 - 49)         | 32<br>(27 - 38)         | 42<br>(30 - 52)         |
| HIV/AIDS and tuberculosis                                         | 45<br>(39 - 55)          | 0<br>(0 - 0)          | 0<br>(0 - 0)           | 27<br>(23 - 33)         | 13<br>(10 - 17)         | 5<br>(4 - 6)            |
| Tuberculosis                                                      | 11<br>(9 - 13)           | 0<br>(0 - 0)          | 0<br>(0 - 0)           | 2<br>(2 - 3)            | 4<br>(3 - 6)            | 4<br>(3 - 6)            |
| HIV/AIDS                                                          | 35<br>(29 - 44)          | 0<br>(0 - 0)          | 0<br>(0 - 0)           | 25<br>(21 - 31)         | 9<br>(6 - 12)           | 1<br>(0 - 1)            |
| HIV/AIDS resulting in mycobacterial infection                     | 2<br>(1 - 3)             | 0<br>(0 - 0)          | 0<br>(0 - 0)           | 1<br>(1 - 2)            | 1<br>(0 - 1)            | 0<br>(0 - 0)            |
| HIV/AIDS resulting in other diseases                              | 33<br>(27 - 41)          | 0<br>(0 - 0)          | 0<br>(0 - 0)           | 24<br>(20 - 29)         | 8<br>(6 - 12)           | 1<br>(0 - 1)            |
| Diarrhea, lower respiratory, and other common infectious diseases | 66<br>(51 - 79)          | 5<br>(4 - 7)          | 1<br>(1 - 2)           | 11<br>(9 - 14)          | 15<br>(11 - 20)         | 33<br>(22 - 43)         |
| Diarrheal diseases                                                | 2<br>(1 - 2)             | 0<br>(0 - 1)          | 0<br>(0 - 0)           | 0<br>(0 - 0)            | 0<br>(0 - 0)            | 1<br>(1 - 1)            |
| Intestinal infectious diseases                                    | 0<br>(0 - 1)             | 0<br>(0 - 0)          | 0<br>(0 - 0)           | 0<br>(0 - 0)            | 0<br>(0 - 0)            | 0<br>(0 - 0)            |
| Typhoid fever                                                     | 0<br>(0 - 1)             | 0<br>(0 - 0)          | 0<br>(0 - 0)           | 0<br>(0 - 0)            | 0<br>(0 - 0)            | 0<br>(0 - 0)            |
| Paratyphoid fever                                                 | 0<br>(0 - 0)             | 0<br>(0 - 0)          | 0<br>(0 - 0)           | 0<br>(0 - 0)            | 0<br>(0 - 0)            | 0<br>(0 - 0)            |
| Other intestinal infectious diseases                              | 0<br>(0 - 0)             | 0<br>(0 - 0)          | 0<br>(0 - 0)           | 0<br>(0 - 0)            | 0<br>(0 - 0)            | 0<br>(0 - 0)            |
| Lower respiratory infections                                      | 59<br>(44 - 72)          | 3<br>(2 - 4)          | 1<br>(1 - 1)           | 10<br>(8 - 12)          | 13<br>(10 - 18)         | 32<br>(21 - 42)         |
| Upper respiratory infections                                      | 0<br>(0 - 0)             | 0<br>(0 - 0)          | 0<br>(0 - 0)           | 0<br>(0 - 0)            | 0<br>(0 - 0)            | 0<br>(0 - 0)            |
| Otitis media                                                      | 0<br>(0 - 0)             | 0<br>(0 - 0)          | 0<br>(0 - 0)           | 0<br>(0 - 0)            | 0<br>(0 - 0)            | 0<br>(0 - 0)            |
| Meningitis                                                        | 3<br>(2 - 3)             | 1<br>(1 - 1)          | 0<br>(0 - 0)           | 0<br>(0 - 1)            | 1<br>(0 - 1)            | 0<br>(0 - 1)            |
| Pneumococcal meningitis                                           | 1<br>(0 - 1)             | 0<br>(0 - 0)          | 0<br>(0 - 0)           | 0<br>(0 - 0)            | 0<br>(0 - 0)            | 0<br>(0 - 0)            |
| H influenzae type B meningitis                                    | 0<br>(0 - 1)             | 0<br>(0 - 0)          | 0<br>(0 - 0)           | 0<br>(0 - 0)            | 0<br>(0 - 0)            | 0<br>(0 - 0)            |
| Meningococcal meningitis                                          | 0<br>(0 - 1)             | 0<br>(0 - 0)          | 0<br>(0 - 0)           | 0<br>(0 - 0)            | 0<br>(0 - 0)            | 0<br>(0 - 0)            |
| Other meningitis                                                  | 1<br>(1 - 1)             | 0<br>(0 - 1)          | 0<br>(0 - 0)           | 0<br>(0 - 0)            | 0<br>(0 - 0)            | 0<br>(0 - 0)            |
| Encephalitis                                                      | 2<br>(1 - 2)             | 0<br>(0 - 0)          | 0<br>(0 - 0)           | 0<br>(0 - 1)            | 1<br>(0 - 1)            | 0<br>(0 - 0)            |
| Diphtheria                                                        | 0<br>(0 - 0)             | 0<br>(0 - 0)          | 0<br>(0 - 0)           | 0<br>(0 - 0)            | 0<br>(0 - 0)            | --                      |
| Whooping cough                                                    | 0<br>(0 - 0)             | 0<br>(0 - 0)          | 0<br>(0 - 0)           | 0<br>(0 - 0)            | 0<br>(0 - 0)            | --                      |
| Tetanus                                                           | 0<br>(0 - 0)             | 0<br>(0 - 0)          | 0<br>(0 - 0)           | 0<br>(0 - 0)            | 0<br>(0 - 0)            | 0<br>(0 - 0)            |
| Measles                                                           | 0<br>(0 - 0)             | 0<br>(0 - 0)          | 0<br>(0 - 0)           | 0<br>(0 - 0)            | 0<br>(0 - 0)            | --                      |
| Varicella and herpes zoster                                       | 0<br>(0 - 0)             | 0<br>(0 - 0)          | 0<br>(0 - 0)           | 0<br>(0 - 0)            | 0<br>(0 - 0)            | 0<br>(0 - 0)            |
| Neglected tropical diseases and malaria                           | 0<br>(0 - 1)             | 0<br>(0 - 0)          | 0<br>(0 - 0)           | 0<br>(0 - 0)            | 0<br>(0 - 0)            | 0<br>(0 - 0)            |
| Cysticercosis                                                     | 0<br>(0 - 0)             | 0<br>(0 - 0)          | 0<br>(0 - 0)           | 0<br>(0 - 0)            | 0<br>(0 - 0)            | 0<br>(0 - 0)            |
| Cystic echinococcosis                                             | 0<br>(0 - 0)             | 0<br>(0 - 0)          | 0<br>(0 - 0)           | 0<br>(0 - 0)            | 0<br>(0 - 0)            | 0<br>(0 - 0)            |
| Dengue                                                            | 0<br>(0 - 0)             | 0<br>(0 - 0)          | 0<br>(0 - 0)           | 0<br>(0 - 0)            | 0<br>(0 - 0)            | 0<br>(0 - 0)            |
| Rabies                                                            | 0<br>(0 - 0)             | 0<br>(0 - 0)          | 0<br>(0 - 0)           | 0<br>(0 - 0)            | 0<br>(0 - 0)            | 0<br>(0 - 0)            |
| Other neglected tropical diseases                                 | 0<br>(0 - 0)             | 0<br>(0 - 0)          | 0<br>(0 - 0)           | 0<br>(0 - 0)            | 0<br>(0 - 0)            | 0<br>(0 - 0)            |
| Maternal disorders                                                | 1<br>(1 - 1)             | --                    | 0<br>(0 - 0)           | 1<br>(1 - 1)            | --                      | --                      |
| Maternal hemorrhage                                               | 0<br>(0 - 0)             | --                    | 0<br>(0 - 0)           | 0<br>(0 - 0)            | --                      | --                      |
| Maternal sepsis and other maternal infections                     | 0<br>(0 - 0)             | --                    | 0<br>(0 - 0)           | 0<br>(0 - 0)            | --                      | --                      |
| Maternal hypertensive disorders                                   | 0<br>(0 - 0)             | --                    | 0<br>(0 - 0)           | 0<br>(0 - 0)            | --                      | --                      |
| Maternal obstructed labor                                         | 0<br>(0 - 0)             | --                    | 0<br>(0 - 0)           | 0<br>(0 - 0)            | --                      | --                      |
| Maternal abortive outcome                                         | 0<br>(0 - 0)             | --                    | 0<br>(0 - 0)           | 0<br>(0 - 0)            | --                      | --                      |
| Indirect maternal deaths                                          | 0<br>(0 - 0)             | --                    | 0<br>(0 - 0)           | 0<br>(0 - 0)            | --                      | --                      |

Web Table 31- Brunei deaths with 95% UI by age, sex, and cause in 2013

| Cause                                                            | Both Sexes, All Ages   | Both Sexes, 0-4 Years | Both Sexes, 5-14 Years | Both Sexes, 15-49 Years | Both Sexes, 50-69 Years | Both Sexes, 70-80 Years |
|------------------------------------------------------------------|------------------------|-----------------------|------------------------|-------------------------|-------------------------|-------------------------|
| Late maternal deaths                                             | 0<br>(0 - 0)           | --                    | 0<br>(0 - 0)           | 0<br>(0 - 0)            | --                      | --                      |
| Maternal deaths aggravated by HIV/AIDS                           | 0<br>(0 - 0)           | --                    | --                     | 0<br>(0 - 0)            | --                      | --                      |
| Other maternal disorders                                         | 0<br>(0 - 0)           | --                    | 0<br>(0 - 0)           | 0<br>(0 - 0)            | --                      | --                      |
| Neonatal disorders                                               | 17<br>(13 - 21)        | 17<br>(13 - 21)       | --                     | --                      | --                      | --                      |
| Neonatal preterm birth complications                             | 6<br>(3 - 10)          | 6<br>(3 - 10)         | --                     | --                      | --                      | --                      |
| Neonatal encephalopathy due to birth asphyxia and trauma         | 5<br>(3 - 8)           | 5<br>(3 - 8)          | --                     | --                      | --                      | --                      |
| Neonatal sepsis and other neonatal infections                    | 2<br>(0 - 5)           | 2<br>(0 - 5)          | --                     | --                      | --                      | --                      |
| Hemolytic disease and other neonatal jaundice                    | 0<br>(0 - 0)           | 0<br>(0 - 0)          | --                     | --                      | --                      | --                      |
| Other neonatal disorders                                         | 3<br>(2 - 5)           | 3<br>(2 - 5)          | --                     | --                      | --                      | --                      |
| Nutritional deficiencies                                         | 2<br>(2 - 3)           | 0<br>(0 - 0)          | 0<br>(0 - 0)           | 1<br>(1 - 1)            | 0<br>(0 - 1)            | 1<br>(1 - 2)            |
| Protein-energy malnutrition                                      | 0<br>(0 - 1)           | 0<br>(0 - 0)          | 0<br>(0 - 0)           | 0<br>(0 - 0)            | 0<br>(0 - 0)            | 0<br>(0 - 0)            |
| Iodine deficiency                                                | 0<br>(0 - 0)           | 0<br>(0 - 0)          | 0<br>(0 - 0)           | 0<br>(0 - 0)            | 0<br>(0 - 0)            | 0<br>(0 - 0)            |
| Iron-deficiency anemia                                           | 0<br>(0 - 1)           | 0<br>(0 - 0)          | 0<br>(0 - 0)           | 0<br>(0 - 0)            | 0<br>(0 - 0)            | 0<br>(0 - 0)            |
| Other nutritional deficiencies                                   | 1<br>(1 - 2)           | 0<br>(0 - 0)          | 0<br>(0 - 0)           | 0<br>(0 - 0)            | 0<br>(0 - 0)            | 1<br>(0 - 1)            |
| Other communicable, maternal, neonatal, and nutritional diseases | 8<br>(5 - 11)          | 0<br>(0 - 1)          | 0<br>(0 - 0)           | 2<br>(1 - 3)            | 3<br>(2 - 4)            | 2<br>(1 - 4)            |
| Sexually transmitted diseases excluding HIV                      | 0<br>(0 - 0)           | 0<br>(0 - 0)          | 0<br>(0 - 0)           | 0<br>(0 - 0)            | 0<br>(0 - 0)            | 0<br>(0 - 0)            |
| Syphilis                                                         | 0<br>(0 - 0)           | 0<br>(0 - 0)          | 0<br>(0 - 0)           | 0<br>(0 - 0)            | 0<br>(0 - 0)            | 0<br>(0 - 0)            |
| Chlamydial infection                                             | 0<br>(0 - 0)           | --                    | 0<br>(0 - 0)           | 0<br>(0 - 0)            | 0<br>(0 - 0)            | 0<br>(0 - 0)            |
| Gonococcal infection                                             | 0<br>(0 - 0)           | --                    | 0<br>(0 - 0)           | 0<br>(0 - 0)            | 0<br>(0 - 0)            | 0<br>(0 - 0)            |
| Other sexually transmitted diseases                              | 0<br>(0 - 0)           | --                    | 0<br>(0 - 0)           | 0<br>(0 - 0)            | 0<br>(0 - 0)            | 0<br>(0 - 0)            |
| Hepatitis                                                        | 2<br>(1 - 2)           | 0<br>(0 - 0)          | 0<br>(0 - 0)           | 0<br>(0 - 1)            | 1<br>(1 - 2)            | 0<br>(0 - 0)            |
| Acute hepatitis A                                                | 0<br>(0 - 0)           | 0<br>(0 - 0)          | 0<br>(0 - 0)           | 0<br>(0 - 0)            | 0<br>(0 - 0)            | 0<br>(0 - 0)            |
| Acute hepatitis B                                                | 1<br>(1 - 2)           | 0<br>(0 - 0)          | 0<br>(0 - 0)           | 0<br>(0 - 1)            | 1<br>(1 - 1)            | 0<br>(0 - 0)            |
| Acute hepatitis C                                                | 0<br>(0 - 0)           | --                    | 0<br>(0 - 0)           | 0<br>(0 - 0)            | 0<br>(0 - 0)            | 0<br>(0 - 0)            |
| Other infectious diseases                                        | 6<br>(3 - 9)           | 0<br>(0 - 1)          | 0<br>(0 - 0)           | 1<br>(1 - 2)            | 2<br>(1 - 3)            | 2<br>(1 - 4)            |
| Non-communicable diseases                                        | 1,112<br>(971 - 1,279) | 25<br>(19 - 31)       | 6<br>(5 - 7)           | 142<br>(122 - 164)      | 414<br>(345 - 495)      | 527<br>(474 - 593)      |
| Neoplasms                                                        | 282<br>(242 - 329)     | 1<br>(1 - 2)          | 2<br>(2 - 3)           | 45<br>(38 - 53)         | 131<br>(108 - 159)      | 102<br>(89 - 118)       |
| Esophageal cancer                                                | 1<br>(1 - 3)           | --                    | --                     | 0<br>(0 - 0)            | 1<br>(0 - 1)            | 0<br>(0 - 1)            |
| Stomach cancer                                                   | 24<br>(19 - 29)        | --                    | --                     | 3<br>(2 - 4)            | 10<br>(8 - 12)          | 11<br>(9 - 14)          |
| Liver cancer                                                     | 21<br>(15 - 30)        | --                    | 0<br>(0 - 0)           | 2<br>(1 - 4)            | 6<br>(9 - 19)           | 6<br>(4 - 8)            |
| Liver cancer due to hepatitis B                                  | 6<br>(2 - 11)          | --                    | 0<br>(0 - 0)           | 1<br>(0 - 2)            | 4<br>(1 - 8)            | 1<br>(1 - 2)            |
| Liver cancer due to hepatitis C                                  | 11<br>(7 - 17)         | --                    | 0<br>(0 - 0)           | 1<br>(0 - 2)            | 7<br>(4 - 10)           | 3<br>(2 - 5)            |
| Liver cancer due to alcohol use                                  | 3<br>(1 - 6)           | --                    | --                     | 0<br>(0 - 1)            | 2<br>(1 - 4)            | 1<br>(0 - 2)            |
| Liver cancer due to other causes                                 | 0<br>(0 - 1)           | --                    | 0<br>(0 - 0)           | 0<br>(0 - 0)            | 0<br>(0 - 1)            | 0<br>(0 - 0)            |
| Larynx cancer                                                    | 1<br>(1 - 2)           | --                    | --                     | 0<br>(0 - 0)            | 0<br>(0 - 1)            | 1<br>(0 - 1)            |
| Tracheal, bronchus and lung cancer                               | 69<br>(57 - 82)        | --                    | --                     | 5<br>(4 - 6)            | 34<br>(27 - 42)         | 30<br>(25 - 36)         |
| Breast cancer                                                    | 20<br>(14 - 27)        | --                    | --                     | 8<br>(6 - 11)           | 10<br>(7 - 14)          | 2<br>(2 - 3)            |
| Cervical cancer                                                  | 11<br>(7 - 15)         | --                    | --                     | 4<br>(3 - 6)            | 5<br>(3 - 7)            | 2<br>(1 - 3)            |
| Uterine cancer                                                   | 1<br>(0 - 1)           | --                    | --                     | 0<br>(0 - 0)            | 0<br>(0 - 0)            | 0<br>(0 - 0)            |
| Prostate cancer                                                  | 9<br>(5 - 13)          | --                    | --                     | 0<br>(0 - 0)            | 2<br>(1 - 3)            | 7<br>(4 - 10)           |

Web Table 31- Brunei deaths with 95% UI by age, sex, and cause in 2013

| Cause                                         | Both Sexes, All Ages | Both Sexes, 0-4 Years | Both Sexes, 5-14 Years | Both Sexes, 15-49 Years | Both Sexes, 50-69 Years | Both Sexes, 70-80 Years |
|-----------------------------------------------|----------------------|-----------------------|------------------------|-------------------------|-------------------------|-------------------------|
| Colon and rectum cancer                       | 39<br>(33 - 47)      | --                    | --                     | 5<br>(4 - 6)            | 18<br>(15 - 22)         | 16<br>(13 - 20)         |
| Lip and oral cavity cancer                    | 4<br>(2 - 6)         | --                    | --                     | 1<br>(1 - 2)            | 2<br>(1 - 3)            | 1<br>(1 - 2)            |
| Nasopharynx cancer                            | 2<br>(1 - 2)         | --                    | 0<br>(0 - 0)           | 0<br>(0 - 1)            | 1<br>(1 - 2)            | 0<br>(0 - 1)            |
| Other pharynx cancer                          | 1<br>(1 - 3)         | --                    | --                     | 0<br>(0 - 1)            | 1<br>(0 - 2)            | 0<br>(0 - 0)            |
| Gallbladder and biliary tract cancer          | 6<br>(4 - 7)         | --                    | --                     | 1<br>(0 - 1)            | 3<br>(2 - 4)            | 2<br>(2 - 3)            |
| Pancreatic cancer                             | 8<br>(7 - 10)        | --                    | --                     | 1<br>(1 - 1)            | 5<br>(4 - 6)            | 3<br>(2 - 3)            |
| Malignant skin melanoma                       | 2<br>(1 - 3)         | --                    | --                     | 0<br>(0 - 0)            | 1<br>(0 - 1)            | 1<br>(0 - 1)            |
| Non-melanoma skin cancer                      | 1<br>(1 - 1)         | --                    | --                     | 0<br>(0 - 0)            | 0<br>(0 - 1)            | 0<br>(0 - 1)            |
| Ovarian cancer                                | 7<br>(6 - 10)        | --                    | --                     | 2<br>(2 - 3)            | 3<br>(2 - 4)            | 2<br>(2 - 3)            |
| Testicular cancer                             | 0<br>(0 - 0)         | --                    | --                     | 0<br>(0 - 0)            | 0<br>(0 - 0)            | 0<br>(0 - 0)            |
| Kidney cancer                                 | 10<br>(7 - 12)       | 0<br>(0 - 0)          | 0<br>(0 - 0)           | 1<br>(1 - 2)            | 4<br>(3 - 6)            | 4<br>(3 - 5)            |
| Bladder cancer                                | 3<br>(2 - 4)         | --                    | --                     | 0<br>(0 - 0)            | 1<br>(1 - 2)            | 1<br>(1 - 2)            |
| Brain and nervous system cancer               | 5<br>(4 - 7)         | 0<br>(0 - 0)          | 1<br>(0 - 1)           | 2<br>(1 - 3)            | 2<br>(1 - 2)            | 1<br>(0 - 1)            |
| Thyroid cancer                                | 2<br>(2 - 3)         | --                    | 0<br>(0 - 0)           | 0<br>(0 - 0)            | 1<br>(1 - 1)            | 1<br>(1 - 1)            |
| Mesothelioma                                  | 0<br>(0 - 0)         | --                    | --                     | 0<br>(0 - 0)            | 0<br>(0 - 0)            | 0<br>(0 - 0)            |
| Hodgkin lymphoma                              | 0<br>(0 - 0)         | 0<br>(0 - 0)          | 0<br>(0 - 0)           | 0<br>(0 - 0)            | 0<br>(0 - 0)            | 0<br>(0 - 0)            |
| Non-Hodgkin lymphoma                          | 16<br>(11 - 21)      | 0<br>(0 - 0)          | 0<br>(0 - 0)           | 2<br>(1 - 3)            | 8<br>(5 - 11)           | 5<br>(4 - 8)            |
| Multiple myeloma                              | 2<br>(1 - 3)         | --                    | --                     | 0<br>(0 - 1)            | 1<br>(0 - 1)            | 1<br>(0 - 1)            |
| Leukemia                                      | 9<br>(7 - 10)        | 0<br>(0 - 1)          | 1<br>(1 - 1)           | 3<br>(3 - 4)            | 3<br>(2 - 4)            | 1<br>(1 - 2)            |
| Other neoplasms                               | 9<br>(6 - 11)        | 0<br>(0 - 1)          | 0<br>(0 - 1)           | 2<br>(2 - 3)            | 3<br>(2 - 3)            | 3<br>(2 - 4)            |
| Cardiovascular diseases                       | 454<br>(392 - 529)   | 1<br>(1 - 1)          | 1<br>(1 - 1)           | 59<br>(49 - 69)         | 161<br>(133 - 194)      | 233<br>(205 - 269)      |
| Rheumatic heart disease                       | 2<br>(2 - 3)         | 0<br>(0 - 0)          | 0<br>(0 - 0)           | 1<br>(1 - 2)            | 0<br>(0 - 0)            | 0<br>(0 - 1)            |
| Ischemic heart disease                        | 242<br>(200 - 289)   | 0<br>(0 - 0)          | 0<br>(0 - 0)           | 34<br>(27 - 42)         | 94<br>(75 - 117)        | 114<br>(94 - 134)       |
| Cerebrovascular disease                       | 172<br>(144 - 205)   | 0<br>(0 - 0)          | 0<br>(0 - 1)           | 19<br>(14 - 23)         | 57<br>(45 - 70)         | 96<br>(82 - 116)        |
| Ischemic stroke                               | 80<br>(66 - 99)      | 0<br>(0 - 0)          | 0<br>(0 - 0)           | 4<br>(3 - 6)            | 14<br>(11 - 19)         | 61<br>(51 - 75)         |
| Hemorrhagic stroke                            | 92<br>(72 - 113)     | 0<br>(0 - 0)          | 0<br>(0 - 0)           | 14<br>(10 - 18)         | 42<br>(32 - 53)         | 35<br>(28 - 44)         |
| Hypertensive heart disease                    | 12<br>(7 - 20)       | 0<br>(0 - 0)          | 0<br>(0 - 0)           | 1<br>(1 - 2)            | 4<br>(1 - 7)            | 7<br>(4 - 12)           |
| Cardiomyopathy and myocarditis                | 5<br>(3 - 9)         | 1<br>(0 - 1)          | 0<br>(0 - 0)           | 2<br>(1 - 4)            | 1<br>(0 - 2)            | 1<br>(0 - 3)            |
| Atrial fibrillation and flutter               | 0<br>(0 - 1)         | --                    | --                     | 0<br>(0 - 0)            | 0<br>(0 - 0)            | 0<br>(0 - 1)            |
| Aortic aneurysm                               | 11<br>(7 - 17)       | --                    | --                     | 0<br>(0 - 0)            | 3<br>(1 - 5)            | 8<br>(5 - 12)           |
| Peripheral vascular disease                   | 1<br>(0 - 1)         | --                    | --                     | 0<br>(0 - 0)            | 0<br>(0 - 0)            | 0<br>(0 - 0)            |
| Endocarditis                                  | 2<br>(1 - 2)         | 0<br>(0 - 0)          | 0<br>(0 - 0)           | 0<br>(0 - 0)            | 0<br>(0 - 1)            | 1<br>(1 - 2)            |
| Other cardiovascular and circulatory diseases | 8<br>(6 - 14)        | 0<br>(0 - 0)          | 0<br>(0 - 0)           | 1<br>(1 - 2)            | 2<br>(2 - 4)            | 5<br>(3 - 7)            |
| Chronic respiratory diseases                  | 97<br>(83 - 118)     | 0<br>(0 - 0)          | 0<br>(0 - 0)           | 6<br>(5 - 8)            | 21<br>(17 - 27)         | 70<br>(59 - 84)         |
| Chronic obstructive pulmonary disease         | 82<br>(69 - 98)      | 0<br>(0 - 0)          | 0<br>(0 - 0)           | 2<br>(1 - 2)            | 16<br>(13 - 21)         | 64<br>(54 - 77)         |
| Pneumoconiosis                                | 1<br>(0 - 1)         | 0<br>(0 - 0)          | 0<br>(0 - 0)           | 0<br>(0 - 0)            | 0<br>(0 - 1)            | 0<br>(0 - 0)            |
| Silicosis                                     | 0<br>(0 - 0)         | 0<br>(0 - 0)          | 0<br>(0 - 0)           | 0<br>(0 - 0)            | 0<br>(0 - 0)            | 0<br>(0 - 0)            |
| Asbestosis                                    | 0<br>(0 - 0)         | 0<br>(0 - 0)          | 0<br>(0 - 0)           | 0<br>(0 - 0)            | 0<br>(0 - 0)            | 0<br>(0 - 0)            |
| Coal workers pneumoconiosis                   | 0<br>(0 - 0)         | 0<br>(0 - 0)          | 0<br>(0 - 0)           | 0<br>(0 - 0)            | 0<br>(0 - 0)            | 0<br>(0 - 0)            |
| Other pneumoconiosis                          | 0<br>(0 - 0)         | 0<br>(0 - 0)          | 0<br>(0 - 0)           | 0<br>(0 - 0)            | 0<br>(0 - 0)            | 0<br>(0 - 0)            |



Web Table 31- Brunei deaths with 95% UI by age, sex, and cause in 2013

| Cause                                               | Both Sexes, All Ages | Both Sexes, 0-4 Years | Both Sexes, 5-14 Years | Both Sexes, 15-49 Years | Both Sexes, 50-69 Years | Both Sexes, 70-80 Years |
|-----------------------------------------------------|----------------------|-----------------------|------------------------|-------------------------|-------------------------|-------------------------|
| Asthma                                              | 9<br>(7 - 14)        | 0<br>(0 - 0)          | 0<br>(0 - 0)           | 2<br>(1 - 3)            | 3<br>(2 - 4)            | 5<br>(3 - 8)            |
| Interstitial lung disease and pulmonary sarcoidosis | 3<br>(2 - 5)         | 0<br>(0 - 0)          | 0<br>(0 - 0)           | 1<br>(1 - 2)            | 1<br>(1 - 2)            | 1<br>(0 - 2)            |
| Other chronic respiratory diseases                  | 2<br>(2 - 3)         | 0<br>(0 - 0)          | 0<br>(0 - 0)           | 1<br>(1 - 2)            | 0<br>(0 - 1)            | 0<br>(0 - 0)            |
| Cirrhosis                                           | 15<br>(12 - 18)      | 0<br>(0 - 0)          | 0<br>(0 - 0)           | 2<br>(2 - 3)            | 9<br>(7 - 11)           | 4<br>(3 - 5)            |
| Cirrhosis due to hepatitis B                        | 5<br>(3 - 7)         | 0<br>(0 - 0)          | 0<br>(0 - 0)           | 1<br>(0 - 1)            | 3<br>(2 - 4)            | 1<br>(1 - 2)            |
| Cirrhosis due to hepatitis C                        | 5<br>(3 - 9)         | 0<br>(0 - 0)          | 0<br>(0 - 0)           | 1<br>(0 - 1)            | 3<br>(2 - 5)            | 1<br>(1 - 2)            |
| Cirrhosis due to alcohol use                        | 3<br>(1 - 5)         | --                    | --                     | 0<br>(0 - 1)            | 2<br>(1 - 3)            | 1<br>(0 - 1)            |
| Cirrhosis due to other causes                       | 2<br>(1 - 3)         | 0<br>(0 - 0)          | 0<br>(0 - 0)           | 0<br>(0 - 1)            | 1<br>(0 - 2)            | 0<br>(0 - 0)            |
| Digestive diseases                                  | 20<br>(16 - 24)      | 0<br>(0 - 0)          | 0<br>(0 - 0)           | 2<br>(2 - 3)            | 6<br>(5 - 8)            | 11<br>(8 - 13)          |
| Peptic ulcer disease                                | 5<br>(4 - 7)         | 0<br>(0 - 0)          | 0<br>(0 - 0)           | 0<br>(0 - 0)            | 2<br>(1 - 3)            | 3<br>(2 - 4)            |
| Gastritis and duodenitis                            | 0<br>(0 - 0)         | 0<br>(0 - 0)          | 0<br>(0 - 0)           | 0<br>(0 - 0)            | 0<br>(0 - 0)            | 0<br>(0 - 0)            |
| Appendicitis                                        | 2<br>(1 - 3)         | 0<br>(0 - 0)          | 0<br>(0 - 0)           | 0<br>(0 - 1)            | 1<br>(0 - 1)            | 1<br>(0 - 1)            |
| Paralytic ileus and intestinal obstruction          | 5<br>(3 - 6)         | 0<br>(0 - 0)          | 0<br>(0 - 0)           | 0<br>(0 - 1)            | 2<br>(1 - 2)            | 3<br>(2 - 4)            |
| Inguinal, femoral, and abdominal hernia             | 0<br>(0 - 0)         | 0<br>(0 - 0)          | 0<br>(0 - 0)           | 0<br>(0 - 0)            | 0<br>(0 - 0)            | 0<br>(0 - 0)            |
| Inflammatory bowel disease                          | 2<br>(2 - 4)         | 0<br>(0 - 0)          | 0<br>(0 - 0)           | 0<br>(0 - 0)            | 0<br>(0 - 1)            | 2<br>(1 - 3)            |
| Vascular intestinal disorders                       | 0<br>(0 - 1)         | 0<br>(0 - 0)          | 0<br>(0 - 0)           | 0<br>(0 - 1)            | 0<br>(0 - 0)            | 0<br>(0 - 0)            |
| Gallbladder and biliary diseases                    | 2<br>(1 - 3)         | 0<br>(0 - 0)          | 0<br>(0 - 0)           | 0<br>(0 - 1)            | 1<br>(0 - 1)            | 1<br>(0 - 1)            |
| Pancreatitis                                        | 1<br>(0 - 1)         | 0<br>(0 - 0)          | 0<br>(0 - 0)           | 0<br>(0 - 0)            | 1<br>(0 - 1)            | 0<br>(0 - 0)            |
| Other digestive diseases                            | 2<br>(1 - 3)         | 0<br>(0 - 0)          | 0<br>(0 - 0)           | 0<br>(0 - 0)            | 0<br>(0 - 1)            | 2<br>(1 - 3)            |
| Neurological disorders                              | 23<br>(19 - 28)      | 0<br>(0 - 1)          | 0<br>(0 - 0)           | 1<br>(1 - 3)            | 3<br>(2 - 4)            | 18<br>(15 - 22)         |
| Alzheimer disease and other dementias               | 17<br>(14 - 21)      | --                    | --                     | 0<br>(0 - 0)            | 1<br>(1 - 2)            | 15<br>(12 - 19)         |
| Parkinson disease                                   | 3<br>(2 - 4)         | --                    | --                     | 0<br>(0 - 0)            | 1<br>(0 - 1)            | 2<br>(1 - 3)            |
| Epilepsy                                            | 2<br>(1 - 4)         | 0<br>(0 - 0)          | 0<br>(0 - 0)           | 1<br>(0 - 2)            | 0<br>(0 - 1)            | 1<br>(0 - 1)            |
| Multiple sclerosis                                  | 0<br>(0 - 0)         | --                    | --                     | 0<br>(0 - 0)            | 0<br>(0 - 0)            | 0<br>(0 - 0)            |
| Other neurological disorders                        | 2<br>(1 - 2)         | 0<br>(0 - 1)          | 0<br>(0 - 0)           | 0<br>(0 - 0)            | 1<br>(0 - 1)            | 0<br>(0 - 0)            |
| Mental and substance use disorders                  | 3<br>(2 - 3)         | 0<br>(0 - 0)          | 0<br>(0 - 0)           | 2<br>(1 - 2)            | 1<br>(0 - 1)            | 0<br>(0 - 1)            |
| Schizophrenia                                       | 0<br>(0 - 0)         | --                    | --                     | 0<br>(0 - 0)            | 0<br>(0 - 0)            | 0<br>(0 - 0)            |
| Alcohol use disorders                               | 0<br>(0 - 1)         | --                    | --                     | 0<br>(0 - 0)            | 0<br>(0 - 0)            | 0<br>(0 - 0)            |
| Drug use disorders                                  | 2<br>(1 - 2)         | 0<br>(0 - 0)          | --                     | 1<br>(1 - 1)            | 0<br>(0 - 0)            | 0<br>(0 - 0)            |
| Opioid use disorders                                | 1<br>(0 - 1)         | 0<br>(0 - 0)          | --                     | 0<br>(0 - 0)            | 0<br>(0 - 0)            | 0<br>(0 - 0)            |
| Cocaine use disorders                               | 0<br>(0 - 0)         | 0<br>(0 - 0)          | --                     | 0<br>(0 - 0)            | 0<br>(0 - 0)            | 0<br>(0 - 0)            |
| Amphetamine use disorders                           | 0<br>(0 - 0)         | 0<br>(0 - 0)          | --                     | 0<br>(0 - 0)            | 0<br>(0 - 0)            | 0<br>(0 - 0)            |
| Other drug use disorders                            | 1<br>(1 - 1)         | 0<br>(0 - 0)          | --                     | 1<br>(0 - 1)            | 0<br>(0 - 0)            | 0<br>(0 - 0)            |
| Eating disorders                                    | 0<br>(0 - 0)         | --                    | 0<br>(0 - 0)           | 0<br>(0 - 0)            | --                      | --                      |
| Anorexia nervosa                                    | 0<br>(0 - 0)         | --                    | 0<br>(0 - 0)           | 0<br>(0 - 0)            | --                      | --                      |
| Diabetes, urogenital, blood, and endocrine diseases | 192<br>(162 - 225)   | 1<br>(1 - 1)          | 1<br>(0 - 1)           | 22<br>(18 - 26)         | 81<br>(65 - 98)         | 88<br>(75 - 103)        |
| Diabetes mellitus                                   | 146<br>(122 - 172)   | 0<br>(0 - 0)          | 0<br>(0 - 0)           | 12<br>(10 - 15)         | 61<br>(49 - 74)         | 73<br>(61 - 86)         |
| Acute glomerulonephritis                            | 0<br>(0 - 0)         | 0<br>(0 - 0)          | 0<br>(0 - 0)           | 0<br>(0 - 0)            | 0<br>(0 - 0)            | 0<br>(0 - 0)            |
| Chronic kidney disease                              | 22<br>(15 - 27)      | 0<br>(0 - 0)          | 0<br>(0 - 0)           | 4<br>(3 - 5)            | 10<br>(7 - 13)          | 7<br>(5 - 9)            |
| Chronic kidney disease due to diabetes mellitus     | 0<br>(0 - 1)         | 0<br>(0 - 0)          | 0<br>(0 - 0)           | 0<br>(0 - 0)            | 0<br>(0 - 0)            | 0<br>(0 - 0)            |

Web Table 31- Brunei deaths with 95% UI by age, sex, and cause in 2013

| Cause                                               | Both Sexes, All Ages | Both Sexes, 0-4 Years | Both Sexes, 5-14 Years | Both Sexes, 15-49 Years | Both Sexes, 50-69 Years | Both Sexes, 70-80 Years |
|-----------------------------------------------------|----------------------|-----------------------|------------------------|-------------------------|-------------------------|-------------------------|
| Chronic kidney disease due to hypertension          | 8<br>(6 - 10)        | 0<br>(0 - 0)          | 0<br>(0 - 0)           | 2<br>(1 - 3)            | 2<br>(1 - 3)            | 4<br>(3 - 5)            |
| Chronic kidney disease due to glomerulonephritis    | 1<br>(0 - 1)         | 0<br>(0 - 0)          | 0<br>(0 - 0)           | 0<br>(0 - 0)            | 0<br>(0 - 1)            | 0<br>(0 - 0)            |
| Chronic kidney disease due to other causes          | 13<br>(8 - 17)       | 0<br>(0 - 0)          | 0<br>(0 - 0)           | 2<br>(1 - 3)            | 8<br>(4 - 10)           | 3<br>(2 - 5)            |
| Urinary diseases and male infertility               | 12<br>(8 - 26)       | 0<br>(0 - 0)          | 0<br>(0 - 0)           | 1<br>(1 - 2)            | 5<br>(3 - 12)           | 6<br>(3 - 12)           |
| Interstitial nephritis and urinary tract infections | 10<br>(5 - 22)       | 0<br>(0 - 0)          | 0<br>(0 - 0)           | 1<br>(0 - 2)            | 5<br>(2 - 11)           | 4<br>(2 - 10)           |
| Urolithiasis                                        | 0<br>(0 - 0)         | --                    | 0<br>(0 - 0)           | 0<br>(0 - 0)            | 0<br>(0 - 0)            | 0<br>(0 - 0)            |
| Other urinary diseases                              | 3<br>(1 - 4)         | 0<br>(0 - 0)          | 0<br>(0 - 0)           | 0<br>(0 - 0)            | 1<br>(0 - 1)            | 2<br>(1 - 3)            |
| Gynecological diseases                              | 0<br>(0 - 0)         | --                    | --                     | 0<br>(0 - 0)            | 0<br>(0 - 0)            | 0<br>(0 - 0)            |
| Uterine fibroids                                    | 0<br>(0 - 0)         | --                    | --                     | 0<br>(0 - 0)            | 0<br>(0 - 0)            | 0<br>(0 - 0)            |
| Polycystic ovarian syndrome                         | 0<br>(0 - 0)         | --                    | --                     | 0<br>(0 - 0)            | 0<br>(0 - 0)            | --                      |
| Endometriosis                                       | 0<br>(0 - 0)         | --                    | --                     | 0<br>(0 - 0)            | 0<br>(0 - 0)            | --                      |
| Genital prolapse                                    | 0<br>(0 - 0)         | --                    | --                     | 0<br>(0 - 0)            | 0<br>(0 - 0)            | 0<br>(0 - 0)            |
| Other gynecological diseases                        | 0<br>(0 - 0)         | --                    | --                     | 0<br>(0 - 0)            | 0<br>(0 - 0)            | 0<br>(0 - 0)            |
| Hemoglobinopathies and hemolytic anemias            | 2<br>(1 - 2)         | 0<br>(0 - 0)          | 0<br>(0 - 0)           | 1<br>(0 - 1)            | 0<br>(0 - 1)            | 0<br>(0 - 0)            |
| Thalassemias                                        | 1<br>(0 - 1)         | 0<br>(0 - 0)          | 0<br>(0 - 0)           | 0<br>(0 - 1)            | 0<br>(0 - 0)            | 0<br>(0 - 0)            |
| Sickle cell disorders                               | 0<br>(0 - 0)         | 0<br>(0 - 0)          | 0<br>(0 - 0)           | 0<br>(0 - 0)            | 0<br>(0 - 0)            | 0<br>(0 - 0)            |
| G6PD deficiency                                     | 0<br>(0 - 0)         | 0<br>(0 - 0)          | 0<br>(0 - 0)           | 0<br>(0 - 0)            | 0<br>(0 - 0)            | 0<br>(0 - 0)            |
| Other hemoglobinopathies and hemolytic anemias      | 1<br>(0 - 1)         | 0<br>(0 - 0)          | 0<br>(0 - 0)           | 0<br>(0 - 0)            | 0<br>(0 - 0)            | 0<br>(0 - 0)            |
| Endocrine, metabolic, blood, and immune disorders   | 10<br>(5 - 12)       | 1<br>(0 - 1)          | 0<br>(0 - 0)           | 3<br>(1 - 4)            | 4<br>(2 - 6)            | 2<br>(1 - 3)            |
| Musculoskeletal disorders                           | 0<br>(0 - 0)         | --                    | 0<br>(0 - 0)           | 0<br>(0 - 0)            | 0<br>(0 - 0)            | 0<br>(0 - 0)            |
| Rheumatoid arthritis                                | 0<br>(0 - 0)         | --                    | 0<br>(0 - 0)           | 0<br>(0 - 0)            | 0<br>(0 - 0)            | 0<br>(0 - 0)            |
| Other musculoskeletal disorders                     | 0<br>(0 - 0)         | --                    | 0<br>(0 - 0)           | 0<br>(0 - 0)            | 0<br>(0 - 0)            | 0<br>(0 - 0)            |
| Other non-communicable diseases                     | 26<br>(21 - 32)      | 20<br>(16 - 26)       | 2<br>(1 - 2)           | 3<br>(2 - 3)            | 1<br>(1 - 1)            | 1<br>(1 - 1)            |
| Congenital anomalies                                | 24<br>(19 - 29)      | 19<br>(14 - 24)       | 2<br>(1 - 2)           | 3<br>(2 - 3)            | 1<br>(0 - 1)            | 0<br>(0 - 0)            |
| Neural tube defects                                 | 0<br>(0 - 0)         | 0<br>(0 - 0)          | 0<br>(0 - 0)           | 0<br>(0 - 0)            | 0<br>(0 - 0)            | 0<br>(0 - 0)            |
| Congenital heart anomalies                          | 9<br>(7 - 12)        | 8<br>(6 - 11)         | 1<br>(0 - 1)           | 0<br>(0 - 1)            | 0<br>(0 - 0)            | 0<br>(0 - 0)            |
| Cleft lip and cleft palate                          | 0<br>(0 - 0)         | 0<br>(0 - 0)          | --                     | --                      | --                      | --                      |
| Down syndrome                                       | 2<br>(1 - 3)         | 1<br>(0 - 2)          | 0<br>(0 - 1)           | 1<br>(0 - 1)            | 0<br>(0 - 0)            | 0<br>(0 - 0)            |
| Chromosomal unbalanced rearrangements               | 3<br>(2 - 4)         | 3<br>(2 - 4)          | 0<br>(0 - 0)           | 0<br>(0 - 0)            | 0<br>(0 - 0)            | 0<br>(0 - 0)            |
| Other congenital anomalies                          | 9<br>(7 - 12)        | 7<br>(5 - 9)          | 1<br>(0 - 1)           | 1<br>(1 - 2)            | 1<br>(0 - 1)            | 0<br>(0 - 0)            |
| Skin and subcutaneous diseases                      | 1<br>(1 - 1)         | 0<br>(0 - 0)          | 0<br>(0 - 0)           | 0<br>(0 - 0)            | 0<br>(0 - 0)            | 1<br>(0 - 1)            |
| Cellulitis                                          | 0<br>(0 - 0)         | 0<br>(0 - 0)          | 0<br>(0 - 0)           | 0<br>(0 - 0)            | 0<br>(0 - 0)            | 0<br>(0 - 0)            |
| Pyoderma                                            | 1<br>(0 - 1)         | 0<br>(0 - 0)          | 0<br>(0 - 0)           | 0<br>(0 - 0)            | 0<br>(0 - 0)            | 0<br>(0 - 1)            |
| Decubitus ulcer                                     | 0<br>(0 - 1)         | 0<br>(0 - 0)          | 0<br>(0 - 0)           | 0<br>(0 - 0)            | 0<br>(0 - 0)            | 0<br>(0 - 0)            |
| Other skin and subcutaneous diseases                | 0<br>(0 - 0)         | 0<br>(0 - 0)          | 0<br>(0 - 0)           | 0<br>(0 - 0)            | 0<br>(0 - 0)            | 0<br>(0 - 0)            |
| Sudden infant death syndrome                        | 2<br>(1 - 3)         | 2<br>(1 - 3)          | --                     | --                      | --                      | --                      |
| Injuries                                            | 106<br>(90 - 124)    | 7<br>(5 - 10)         | 4<br>(4 - 5)           | 62<br>(52 - 73)         | 18<br>(14 - 23)         | 14<br>(12 - 17)         |
| Transport injuries                                  | 52<br>(43 - 62)      | 1<br>(1 - 2)          | 2<br>(2 - 3)           | 36<br>(30 - 43)         | 9<br>(8 - 12)           | 3<br>(2 - 4)            |
| Road injuries                                       | 49<br>(40 - 58)      | 1<br>(0 - 1)          | 2<br>(2 - 3)           | 35<br>(28 - 41)         | 9<br>(7 - 11)           | 3<br>(2 - 3)            |
| Pedestrian road injuries                            | 7<br>(4 - 11)        | 0<br>(0 - 0)          | 0<br>(0 - 1)           | 4<br>(3 - 7)            | 1<br>(1 - 2)            | 1<br>(0 - 1)            |

Web Table 31- Brunei deaths with 95% UI by age, sex, and cause in 2013

| Cause                                           | Both Sexes, All Ages | Both Sexes, 0-4 Years | Both Sexes, 5-14 Years | Both Sexes, 15-49 Years | Both Sexes, 50-69 Years | Both Sexes, 70-80 Years |
|-------------------------------------------------|----------------------|-----------------------|------------------------|-------------------------|-------------------------|-------------------------|
| Cyclist road injuries                           | 2<br>(2 - 3)         | 0<br>(0 - 0)          | 0<br>(0 - 0)           | 1<br>(1 - 2)            | 1<br>(0 - 1)            | 0<br>(0 - 0)            |
| Motorcyclist road injuries                      | 8<br>(5 - 11)        | 0<br>(0 - 0)          | 0<br>(0 - 0)           | 7<br>(4 - 9)            | 1<br>(1 - 2)            | 0<br>(0 - 1)            |
| Motor vehicle road injuries                     | 31<br>(24 - 38)      | 1<br>(0 - 1)          | 1<br>(1 - 2)           | 22<br>(17 - 27)         | 5<br>(4 - 7)            | 1<br>(1 - 2)            |
| Other road injuries                             | 0<br>(0 - 1)         | 0<br>(0 - 0)          | 0<br>(0 - 0)           | 0<br>(0 - 0)            | 0<br>(0 - 0)            | 0<br>(0 - 0)            |
| Other transport injuries                        | 3<br>(2 - 4)         | 0<br>(0 - 0)          | 0<br>(0 - 0)           | 2<br>(1 - 2)            | 1<br>(0 - 1)            | 0<br>(0 - 1)            |
| Unintentional injuries                          | 42<br>(35 - 52)      | 6<br>(4 - 8)          | 2<br>(2 - 3)           | 17<br>(13 - 21)         | 7<br>(5 - 10)           | 10<br>(8 - 13)          |
| Falls                                           | 9<br>(7 - 13)        | 0<br>(0 - 0)          | 0<br>(0 - 0)           | 4<br>(3 - 6)            | 2<br>(1 - 2)            | 3<br>(2 - 5)            |
| Drowning                                        | 13<br>(10 - 17)      | 3<br>(2 - 5)          | 2<br>(1 - 2)           | 6<br>(5 - 9)            | 1<br>(1 - 2)            | 1<br>(0 - 1)            |
| Fire, heat, and hot substances                  | 3<br>(2 - 5)         | 0<br>(0 - 0)          | 0<br>(0 - 0)           | 2<br>(1 - 3)            | 1<br>(0 - 1)            | 1<br>(0 - 1)            |
| Poisonings                                      | 0<br>(0 - 1)         | 0<br>(0 - 0)          | 0<br>(0 - 0)           | 0<br>(0 - 0)            | 0<br>(0 - 0)            | 0<br>(0 - 0)            |
| Exposure to mechanical forces                   | 6<br>(4 - 7)         | 1<br>(0 - 1)          | 0<br>(0 - 0)           | 3<br>(2 - 5)            | 1<br>(1 - 2)            | 1<br>(0 - 1)            |
| Unintentional firearm injuries                  | 1<br>(0 - 1)         | 0<br>(0 - 0)          | 0<br>(0 - 0)           | 0<br>(0 - 0)            | 0<br>(0 - 0)            | 0<br>(0 - 0)            |
| Unintentional suffocation                       | 0<br>(0 - 0)         | 0<br>(0 - 0)          | 0<br>(0 - 0)           | 0<br>(0 - 0)            | 0<br>(0 - 0)            | 0<br>(0 - 0)            |
| Other exposure to mechanical forces             | 5<br>(3 - 6)         | 0<br>(0 - 1)          | 0<br>(0 - 0)           | 3<br>(2 - 4)            | 1<br>(1 - 2)            | 0<br>(0 - 1)            |
| Adverse effects of medical treatment            | 1<br>(1 - 2)         | 0<br>(0 - 0)          | 0<br>(0 - 0)           | 0<br>(0 - 0)            | 0<br>(0 - 1)            | 1<br>(0 - 1)            |
| Animal contact                                  | 0<br>(0 - 0)         | 0<br>(0 - 0)          | 0<br>(0 - 0)           | 0<br>(0 - 0)            | 0<br>(0 - 0)            | 0<br>(0 - 0)            |
| Venomous animal contact                         | 0<br>(0 - 0)         | 0<br>(0 - 0)          | 0<br>(0 - 0)           | 0<br>(0 - 0)            | 0<br>(0 - 0)            | 0<br>(0 - 0)            |
| Non-venomous animal contact                     | 0<br>(0 - 0)         | 0<br>(0 - 0)          | 0<br>(0 - 0)           | 0<br>(0 - 0)            | 0<br>(0 - 0)            | 0<br>(0 - 0)            |
| Foreign body                                    | 7<br>(5 - 13)        | 2<br>(1 - 2)          | 0<br>(0 - 0)           | 1<br>(0 - 1)            | 1<br>(1 - 4)            | 4<br>(3 - 7)            |
| Pulmonary aspiration and foreign body in airway | 7<br>(5 - 13)        | 2<br>(1 - 2)          | 0<br>(0 - 0)           | 1<br>(0 - 1)            | 1<br>(1 - 3)            | 4<br>(2 - 7)            |
| Foreign body in other body part                 | 0<br>(0 - 0)         | 0<br>(0 - 0)          | 0<br>(0 - 0)           | 0<br>(0 - 0)            | 0<br>(0 - 0)            | 0<br>(0 - 0)            |
| Other unintentional injuries                    | 1<br>(1 - 2)         | 0<br>(0 - 0)          | 0<br>(0 - 0)           | 1<br>(0 - 1)            | 0<br>(0 - 0)            | 0<br>(0 - 0)            |
| Self-harm and interpersonal violence            | 13<br>(10 - 16)      | 0<br>(0 - 0)          | 0<br>(0 - 0)           | 9<br>(7 - 11)           | 2<br>(2 - 3)            | 1<br>(1 - 2)            |
| Self-harm                                       | 9<br>(7 - 11)        | --                    | 0<br>(0 - 0)           | 7<br>(5 - 8)            | 1<br>(1 - 2)            | 1<br>(1 - 1)            |
| Interpersonal violence                          | 4<br>(3 - 6)         | 0<br>(0 - 0)          | 0<br>(0 - 0)           | 2<br>(2 - 4)            | 1<br>(0 - 1)            | 0<br>(0 - 0)            |
| Assault by firearm                              | 1<br>(0 - 1)         | 0<br>(0 - 0)          | 0<br>(0 - 0)           | 0<br>(0 - 1)            | 0<br>(0 - 0)            | 0<br>(0 - 0)            |
| Assault by sharp object                         | 1<br>(1 - 1)         | 0<br>(0 - 0)          | 0<br>(0 - 0)           | 1<br>(0 - 1)            | 0<br>(0 - 0)            | 0<br>(0 - 0)            |
| Assault by other means                          | 2<br>(1 - 3)         | 0<br>(0 - 0)          | 0<br>(0 - 0)           | 1<br>(1 - 2)            | 0<br>(0 - 1)            | 0<br>(0 - 0)            |

Web Table 31- Brunei deaths with 95% UI by age, sex, and cause in 2013

| Cause                                                             | Males, All Ages    | Males, 0-4 Years | Males, 5-14 Years | Males, 15-49 Years | Males, 50-69 Years | Males, 70-80 Years |
|-------------------------------------------------------------------|--------------------|------------------|-------------------|--------------------|--------------------|--------------------|
| All causes                                                        | 773<br>(641 - 930) | 30<br>(24 - 37)  | 6<br>(5 - 8)      | 156<br>(128 - 183) | 288<br>(225 - 361) | 293<br>(249 - 349) |
| Communicable, maternal, neonatal, and nutritional diseases        | 95<br>(83 - 108)   | 12<br>(10 - 16)  | 1<br>(0 - 1)      | 34<br>(29 - 39)    | 25<br>(20 - 30)    | 23<br>(16 - 31)    |
| HIV/AIDS and tuberculosis                                         | 40<br>(34 - 48)    | 0<br>(0 - 0)     | 0<br>(0 - 0)      | 24<br>(20 - 29)    | 12<br>(9 - 15)     | 4<br>(3 - 6)       |
| Tuberculosis                                                      | 8<br>(6 - 10)      | 0<br>(0 - 0)     | 0<br>(0 - 0)      | 1<br>(1 - 1)       | 3<br>(2 - 4)       | 4<br>(3 - 5)       |
| HIV/AIDS                                                          | 32<br>(27 - 40)    | 0<br>(0 - 0)     | 0<br>(0 - 0)      | 23<br>(19 - 29)    | 9<br>(6 - 12)      | 1<br>(0 - 1)       |
| HIV/AIDS resulting in mycobacterial infection                     | 2<br>(1 - 2)       | 0<br>(0 - 0)     | 0<br>(0 - 0)      | 1<br>(1 - 2)       | 1<br>(0 - 1)       | 0<br>(0 - 0)       |
| HIV/AIDS resulting in other diseases                              | 30<br>(26 - 38)    | 0<br>(0 - 0)     | 0<br>(0 - 0)      | 22<br>(18 - 27)    | 8<br>(6 - 11)      | 1<br>(0 - 1)       |
| Diarrhea, lower respiratory, and other common infectious diseases | 39<br>(29 - 49)    | 2<br>(2 - 3)     | 1<br>(0 - 1)      | 8<br>(6 - 11)      | 10<br>(7 - 14)     | 18<br>(11 - 24)    |
| Diarrheal diseases                                                | 1<br>(1 - 1)       | 0<br>(0 - 1)     | 0<br>(0 - 0)      | 0<br>(0 - 0)       | 0<br>(0 - 0)       | 0<br>(0 - 1)       |
| Intestinal infectious diseases                                    | 0<br>(0 - 1)       | 0<br>(0 - 0)     | 0<br>(0 - 0)      | 0<br>(0 - 0)       | 0<br>(0 - 0)       | 0<br>(0 - 0)       |
| Typhoid fever                                                     | 0<br>(0 - 0)       | 0<br>(0 - 0)     | 0<br>(0 - 0)      | 0<br>(0 - 0)       | 0<br>(0 - 0)       | 0<br>(0 - 0)       |
| Paratyphoid fever                                                 | 0<br>(0 - 0)       | 0<br>(0 - 0)     | 0<br>(0 - 0)      | 0<br>(0 - 0)       | 0<br>(0 - 0)       | 0<br>(0 - 0)       |
| Other intestinal infectious diseases                              | 0<br>(0 - 0)       | 0<br>(0 - 0)     | 0<br>(0 - 0)      | 0<br>(0 - 0)       | 0<br>(0 - 0)       | 0<br>(0 - 0)       |
| Lower respiratory infections                                      | 35<br>(25 - 45)    | 1<br>(1 - 2)     | 0<br>(0 - 1)      | 7<br>(5 - 10)      | 9<br>(6 - 13)      | 17<br>(11 - 24)    |
| Upper respiratory infections                                      | 0<br>(0 - 0)       | 0<br>(0 - 0)     | 0<br>(0 - 0)      | 0<br>(0 - 0)       | 0<br>(0 - 0)       | 0<br>(0 - 0)       |
| Otitis media                                                      | 0<br>(0 - 0)       | 0<br>(0 - 0)     | 0<br>(0 - 0)      | 0<br>(0 - 0)       | 0<br>(0 - 0)       | 0<br>(0 - 0)       |
| Meningitis                                                        | 1<br>(1 - 2)       | 0<br>(0 - 1)     | 0<br>(0 - 0)      | 0<br>(0 - 0)       | 0<br>(0 - 1)       | 0<br>(0 - 0)       |
| Pneumococcal meningitis                                           | 0<br>(0 - 0)       | 0<br>(0 - 0)     | 0<br>(0 - 0)      | 0<br>(0 - 0)       | 0<br>(0 - 0)       | 0<br>(0 - 0)       |
| H influenzae type B meningitis                                    | 0<br>(0 - 0)       | 0<br>(0 - 0)     | 0<br>(0 - 0)      | 0<br>(0 - 0)       | 0<br>(0 - 0)       | 0<br>(0 - 0)       |
| Meningococcal meningitis                                          | 0<br>(0 - 0)       | 0<br>(0 - 0)     | 0<br>(0 - 0)      | 0<br>(0 - 0)       | 0<br>(0 - 0)       | 0<br>(0 - 0)       |
| Other meningitis                                                  | 1<br>(0 - 1)       | 0<br>(0 - 0)     | 0<br>(0 - 0)      | 0<br>(0 - 0)       | 0<br>(0 - 0)       | 0<br>(0 - 0)       |
| Encephalitis                                                      | 1<br>(1 - 1)       | 0<br>(0 - 0)     | 0<br>(0 - 0)      | 0<br>(0 - 0)       | 0<br>(0 - 1)       | 0<br>(0 - 0)       |
| Diphtheria                                                        | 0<br>(0 - 0)       | 0<br>(0 - 0)     | 0<br>(0 - 0)      | 0<br>(0 - 0)       | 0<br>(0 - 0)       | --                 |
| Whooping cough                                                    | 0<br>(0 - 0)       | 0<br>(0 - 0)     | 0<br>(0 - 0)      | 0<br>(0 - 0)       | 0<br>(0 - 0)       | --                 |
| Tetanus                                                           | 0<br>(0 - 0)       | 0<br>(0 - 0)     | 0<br>(0 - 0)      | 0<br>(0 - 0)       | 0<br>(0 - 0)       | 0<br>(0 - 0)       |
| Measles                                                           | 0<br>(0 - 0)       | 0<br>(0 - 0)     | 0<br>(0 - 0)      | 0<br>(0 - 0)       | 0<br>(0 - 0)       | --                 |
| Varicella and herpes zoster                                       | 0<br>(0 - 0)       | 0<br>(0 - 0)     | 0<br>(0 - 0)      | 0<br>(0 - 0)       | 0<br>(0 - 0)       | 0<br>(0 - 0)       |
| Neglected tropical diseases and malaria                           | 0<br>(0 - 0)       | 0<br>(0 - 0)     | 0<br>(0 - 0)      | 0<br>(0 - 0)       | 0<br>(0 - 0)       | 0<br>(0 - 0)       |
| Cysticercosis                                                     | 0<br>(0 - 0)       | 0<br>(0 - 0)     | 0<br>(0 - 0)      | 0<br>(0 - 0)       | 0<br>(0 - 0)       | 0<br>(0 - 0)       |
| Cystic echinococcosis                                             | 0<br>(0 - 0)       | 0<br>(0 - 0)     | 0<br>(0 - 0)      | 0<br>(0 - 0)       | 0<br>(0 - 0)       | 0<br>(0 - 0)       |
| Dengue                                                            | 0<br>(0 - 0)       | 0<br>(0 - 0)     | 0<br>(0 - 0)      | 0<br>(0 - 0)       | 0<br>(0 - 0)       | 0<br>(0 - 0)       |
| Rabies                                                            | 0<br>(0 - 0)       | 0<br>(0 - 0)     | 0<br>(0 - 0)      | 0<br>(0 - 0)       | 0<br>(0 - 0)       | 0<br>(0 - 0)       |
| Other neglected tropical diseases                                 | 0<br>(0 - 0)       | 0<br>(0 - 0)     | 0<br>(0 - 0)      | 0<br>(0 - 0)       | 0<br>(0 - 0)       | 0<br>(0 - 0)       |
| Maternal disorders                                                | --                 | --               | --                | --                 | --                 | --                 |
| Maternal hemorrhage                                               | --                 | --               | --                | --                 | --                 | --                 |
| Maternal sepsis and other maternal infections                     | --                 | --               | --                | --                 | --                 | --                 |
| Maternal hypertensive disorders                                   | --                 | --               | --                | --                 | --                 | --                 |
| Maternal obstructed labor                                         | --                 | --               | --                | --                 | --                 | --                 |
| Maternal abortive outcome                                         | --                 | --               | --                | --                 | --                 | --                 |
| Indirect maternal deaths                                          | --                 | --               | --                | --                 | --                 | --                 |

Web Table 31- Brunei deaths with 95% UI by age, sex, and cause in 2013

| Cause                                                            | Males, All Ages    | Males, 0-4 Years | Males, 5-14 Years | Males, 15-49 Years | Males, 50-69 Years | Males, 70-80 Years |
|------------------------------------------------------------------|--------------------|------------------|-------------------|--------------------|--------------------|--------------------|
| Late maternal deaths                                             | --                 | --               | --                | --                 | --                 | --                 |
| Maternal deaths aggravated by HIV/AIDS                           | --                 | --               | --                | --                 | --                 | --                 |
| Other maternal disorders                                         | --                 | --               | --                | --                 | --                 | --                 |
| Neonatal disorders                                               | 10<br>(7 - 13)     | 10<br>(7 - 13)   | --                | --                 | --                 | --                 |
| Neonatal preterm birth complications                             | 4<br>(2 - 7)       | 4<br>(2 - 7)     | --                | --                 | --                 | --                 |
| Neonatal encephalopathy due to birth asphyxia and trauma         | 2<br>(1 - 4)       | 2<br>(1 - 4)     | --                | --                 | --                 | --                 |
| Neonatal sepsis and other neonatal infections                    | 1<br>(0 - 3)       | 1<br>(0 - 3)     | --                | --                 | --                 | --                 |
| Hemolytic disease and other neonatal jaundice                    | 0<br>(0 - 0)       | 0<br>(0 - 0)     | --                | --                 | --                 | --                 |
| Other neonatal disorders                                         | 2<br>(1 - 4)       | 2<br>(1 - 4)     | --                | --                 | --                 | --                 |
| Nutritional deficiencies                                         | 1<br>(0 - 1)       | 0<br>(0 - 0)     | 0<br>(0 - 0)      | 0<br>(0 - 0)       | 0<br>(0 - 0)       | 0<br>(0 - 0)       |
| Protein-energy malnutrition                                      | 0<br>(0 - 0)       | 0<br>(0 - 0)     | 0<br>(0 - 0)      | 0<br>(0 - 0)       | 0<br>(0 - 0)       | 0<br>(0 - 0)       |
| Iodine deficiency                                                | 0<br>(0 - 0)       | 0<br>(0 - 0)     | 0<br>(0 - 0)      | 0<br>(0 - 0)       | 0<br>(0 - 0)       | 0<br>(0 - 0)       |
| Iron-deficiency anemia                                           | 0<br>(0 - 0)       | 0<br>(0 - 0)     | 0<br>(0 - 0)      | 0<br>(0 - 0)       | 0<br>(0 - 0)       | 0<br>(0 - 0)       |
| Other nutritional deficiencies                                   | 0<br>(0 - 1)       | 0<br>(0 - 0)     | 0<br>(0 - 0)      | 0<br>(0 - 0)       | 0<br>(0 - 0)       | 0<br>(0 - 0)       |
| Other communicable, maternal, neonatal, and nutritional diseases | 5<br>(3 - 8)       | 0<br>(0 - 1)     | 0<br>(0 - 0)      | 1<br>(1 - 2)       | 2<br>(1 - 4)       | 1<br>(0 - 3)       |
| Sexually transmitted diseases excluding HIV                      | 0<br>(0 - 0)       | 0<br>(0 - 0)     | 0<br>(0 - 0)      | 0<br>(0 - 0)       | 0<br>(0 - 0)       | 0<br>(0 - 0)       |
| Syphilis                                                         | 0<br>(0 - 0)       | 0<br>(0 - 0)     | 0<br>(0 - 0)      | 0<br>(0 - 0)       | 0<br>(0 - 0)       | 0<br>(0 - 0)       |
| Chlamydial infection                                             | --                 | --               | --                | --                 | --                 | --                 |
| Gonococcal infection                                             | 0<br>(0 - 0)       | --               | 0<br>(0 - 0)      | 0<br>(0 - 0)       | 0<br>(0 - 0)       | 0<br>(0 - 0)       |
| Other sexually transmitted diseases                              | 0<br>(0 - 0)       | --               | 0<br>(0 - 0)      | 0<br>(0 - 0)       | 0<br>(0 - 0)       | 0<br>(0 - 0)       |
| Hepatitis                                                        | 2<br>(1 - 2)       | 0<br>(0 - 0)     | 0<br>(0 - 0)      | 0<br>(0 - 1)       | 1<br>(1 - 2)       | 0<br>(0 - 0)       |
| Acute hepatitis A                                                | 0<br>(0 - 0)       | 0<br>(0 - 0)     | 0<br>(0 - 0)      | 0<br>(0 - 0)       | 0<br>(0 - 0)       | 0<br>(0 - 0)       |
| Acute hepatitis B                                                | 1<br>(1 - 2)       | 0<br>(0 - 0)     | 0<br>(0 - 0)      | 0<br>(0 - 1)       | 1<br>(1 - 1)       | 0<br>(0 - 0)       |
| Acute hepatitis C                                                | 0<br>(0 - 0)       | --               | 0<br>(0 - 0)      | 0<br>(0 - 0)       | 0<br>(0 - 0)       | 0<br>(0 - 0)       |
| Other infectious diseases                                        | 4<br>(1 - 6)       | 0<br>(0 - 1)     | 0<br>(0 - 0)      | 1<br>(0 - 1)       | 1<br>(0 - 3)       | 1<br>(0 - 3)       |
| Non-communicable diseases                                        | 602<br>(485 - 734) | 13<br>(9 - 16)   | 3<br>(2 - 4)      | 76<br>(59 - 92)    | 249<br>(192 - 315) | 261<br>(221 - 312) |
| Neoplasms                                                        | 153<br>(121 - 190) | 1<br>(0 - 1)     | 1<br>(1 - 2)      | 17<br>(13 - 20)    | 75<br>(58 - 97)    | 59<br>(48 - 72)    |
| Esophageal cancer                                                | 1<br>(0 - 2)       | --               | --                | 0<br>(0 - 0)       | 0<br>(0 - 1)       | 0<br>(0 - 1)       |
| Stomach cancer                                                   | 15<br>(11 - 19)    | --               | --                | 1<br>(1 - 2)       | 7<br>(5 - 9)       | 6<br>(5 - 9)       |
| Liver cancer                                                     | 18<br>(12 - 26)    | --               | 0<br>(0 - 0)      | 2<br>(1 - 3)       | 11<br>(8 - 17)     | 5<br>(3 - 7)       |
| Liver cancer due to hepatitis B                                  | 5<br>(2 - 10)      | --               | 0<br>(0 - 0)      | 1<br>(0 - 2)       | 4<br>(1 - 7)       | 1<br>(0 - 2)       |
| Liver cancer due to hepatitis C                                  | 9<br>(5 - 15)      | --               | 0<br>(0 - 0)      | 1<br>(0 - 1)       | 5<br>(3 - 9)       | 3<br>(2 - 4)       |
| Liver cancer due to alcohol use                                  | 3<br>(1 - 6)       | --               | --                | 0<br>(0 - 1)       | 2<br>(1 - 4)       | 1<br>(0 - 2)       |
| Liver cancer due to other causes                                 | 0<br>(0 - 1)       | --               | 0<br>(0 - 0)      | 0<br>(0 - 0)       | 0<br>(0 - 0)       | 0<br>(0 - 0)       |
| Larynx cancer                                                    | 1<br>(1 - 2)       | --               | --                | 0<br>(0 - 0)       | 0<br>(0 - 1)       | 1<br>(0 - 1)       |
| Tracheal, bronchus and lung cancer                               | 40<br>(32 - 51)    | --               | --                | 3<br>(2 - 3)       | 21<br>(16 - 27)    | 17<br>(13 - 21)    |
| Breast cancer                                                    | 0<br>(0 - 0)       | --               | --                | 0<br>(0 - 0)       | 0<br>(0 - 0)       | 0<br>(0 - 0)       |
| Cervical cancer                                                  | --                 | --               | --                | --                 | --                 | --                 |
| Uterine cancer                                                   | --                 | --               | --                | --                 | --                 | --                 |
| Prostate cancer                                                  | 9<br>(5 - 13)      | --               | --                | 0<br>(0 - 0)       | 2<br>(1 - 3)       | 7<br>(4 - 10)      |

Web Table 31- Brunei deaths with 95% UI by age, sex, and cause in 2013

| Cause                                         | Males, All Ages    | Males, 0-4 Years | Males, 5-14 Years | Males, 15-49 Years | Males, 50-69 Years | Males, 70-80 Years |
|-----------------------------------------------|--------------------|------------------|-------------------|--------------------|--------------------|--------------------|
| Colon and rectum cancer                       | 22<br>(18 - 28)    | --               | --                | 2<br>(1 - 2)       | 11<br>(9 - 15)     | 9<br>(7 - 12)      |
| Lip and oral cavity cancer                    | 2<br>(1 - 4)       | --               | --                | 0<br>(0 - 1)       | 1<br>(1 - 2)       | 0<br>(0 - 1)       |
| Nasopharynx cancer                            | 1<br>(1 - 2)       | --               | 0<br>(0 - 0)      | 0<br>(0 - 0)       | 1<br>(1 - 1)       | 0<br>(0 - 0)       |
| Other pharynx cancer                          | 1<br>(1 - 3)       | --               | --                | 0<br>(0 - 1)       | 1<br>(0 - 2)       | 0<br>(0 - 0)       |
| Gallbladder and biliary tract cancer          | 2<br>(1 - 3)       | --               | --                | 0<br>(0 - 0)       | 1<br>(1 - 1)       | 1<br>(0 - 1)       |
| Pancreatic cancer                             | 5<br>(4 - 6)       | --               | --                | 1<br>(0 - 1)       | 3<br>(2 - 4)       | 2<br>(1 - 2)       |
| Malignant skin melanoma                       | 1<br>(1 - 2)       | --               | --                | 0<br>(0 - 0)       | 0<br>(0 - 1)       | 1<br>(0 - 1)       |
| Non-melanoma skin cancer                      | 1<br>(0 - 1)       | --               | --                | 0<br>(0 - 0)       | 0<br>(0 - 0)       | 0<br>(0 - 1)       |
| Ovarian cancer                                | --                 | --               | --                | --                 | --                 | --                 |
| Testicular cancer                             | 0<br>(0 - 0)       | --               | --                | 0<br>(0 - 0)       | 0<br>(0 - 0)       | 0<br>(0 - 0)       |
| Kidney cancer                                 | 5<br>(4 - 6)       | 0<br>(0 - 0)     | 0<br>(0 - 0)      | 1<br>(0 - 1)       | 2<br>(2 - 3)       | 2<br>(1 - 2)       |
| Bladder cancer                                | 3<br>(2 - 3)       | --               | --                | 0<br>(0 - 0)       | 1<br>(1 - 2)       | 1<br>(1 - 2)       |
| Brain and nervous system cancer               | 4<br>(3 - 6)       | 0<br>(0 - 0)     | 0<br>(0 - 1)      | 2<br>(1 - 3)       | 1<br>(1 - 2)       | 1<br>(0 - 1)       |
| Thyroid cancer                                | 1<br>(1 - 1)       | --               | 0<br>(0 - 0)      | 0<br>(0 - 0)       | 0<br>(0 - 0)       | 0<br>(0 - 0)       |
| Mesothelioma                                  | 0<br>(0 - 0)       | --               | --                | 0<br>(0 - 0)       | 0<br>(0 - 0)       | 0<br>(0 - 0)       |
| Hodgkin lymphoma                              | 0<br>(0 - 0)       | 0<br>(0 - 0)     | 0<br>(0 - 0)      | 0<br>(0 - 0)       | 0<br>(0 - 0)       | 0<br>(0 - 0)       |
| Non-Hodgkin lymphoma                          | 10<br>(6 - 14)     | 0<br>(0 - 0)     | 0<br>(0 - 0)      | 1<br>(1 - 2)       | 5<br>(3 - 8)       | 3<br>(2 - 5)       |
| Multiple myeloma                              | 2<br>(1 - 3)       | --               | --                | 0<br>(0 - 0)       | 1<br>(0 - 1)       | 1<br>(0 - 1)       |
| Leukemia                                      | 5<br>(4 - 6)       | 0<br>(0 - 0)     | 0<br>(0 - 1)      | 2<br>(1 - 2)       | 2<br>(2 - 3)       | 1<br>(1 - 1)       |
| Other neoplasms                               | 5<br>(3 - 7)       | 0<br>(0 - 0)     | 0<br>(0 - 1)      | 1<br>(1 - 2)       | 1<br>(1 - 2)       | 2<br>(1 - 3)       |
| Cardiovascular diseases                       | 249<br>(199 - 305) | 0<br>(0 - 0)     | 0<br>(0 - 0)      | 39<br>(30 - 48)    | 103<br>(78 - 131)  | 106<br>(89 - 128)  |
| Rheumatic heart disease                       | 0<br>(0 - 1)       | 0<br>(0 - 0)     | 0<br>(0 - 0)      | 0<br>(0 - 0)       | 0<br>(0 - 0)       | 0<br>(0 - 0)       |
| Ischemic heart disease                        | 142<br>(111 - 178) | 0<br>(0 - 0)     | 0<br>(0 - 0)      | 26<br>(19 - 33)    | 63<br>(47 - 83)    | 53<br>(41 - 66)    |
| Cerebrovascular disease                       | 85<br>(63 - 108)   | 0<br>(0 - 0)     | 0<br>(0 - 0)      | 10<br>(7 - 13)     | 33<br>(23 - 43)    | 42<br>(32 - 54)    |
| Ischemic stroke                               | 35<br>(26 - 46)    | 0<br>(0 - 0)     | 0<br>(0 - 0)      | 1<br>(1 - 3)       | 7<br>(5 - 11)      | 26<br>(19 - 34)    |
| Hemorrhagic stroke                            | 50<br>(34 - 66)    | 0<br>(0 - 0)     | 0<br>(0 - 0)      | 8<br>(5 - 12)      | 26<br>(17 - 35)    | 16<br>(11 - 22)    |
| Hypertensive heart disease                    | 7<br>(4 - 13)      | 0<br>(0 - 0)     | 0<br>(0 - 0)      | 1<br>(0 - 1)       | 3<br>(1 - 6)       | 4<br>(2 - 7)       |
| Cardiomyopathy and myocarditis                | 3<br>(2 - 6)       | 0<br>(0 - 0)     | 0<br>(0 - 0)      | 2<br>(1 - 3)       | 0<br>(0 - 0)       | 1<br>(0 - 3)       |
| Atrial fibrillation and flutter               | 0<br>(0 - 0)       | --               | --                | 0<br>(0 - 0)       | 0<br>(0 - 0)       | 0<br>(0 - 0)       |
| Aortic aneurysm                               | 5<br>(3 - 8)       | --               | --                | 0<br>(0 - 0)       | 1<br>(1 - 3)       | 4<br>(2 - 5)       |
| Peripheral vascular disease                   | 0<br>(0 - 0)       | --               | --                | 0<br>(0 - 0)       | 0<br>(0 - 0)       | 0<br>(0 - 0)       |
| Endocarditis                                  | 1<br>(1 - 2)       | 0<br>(0 - 0)     | 0<br>(0 - 0)      | 0<br>(0 - 0)       | 0<br>(0 - 1)       | 0<br>(0 - 1)       |
| Other cardiovascular and circulatory diseases | 5<br>(4 - 7)       | 0<br>(0 - 0)     | 0<br>(0 - 0)      | 1<br>(1 - 2)       | 2<br>(1 - 3)       | 3<br>(2 - 4)       |
| Chronic respiratory diseases                  | 55<br>(44 - 74)    | 0<br>(0 - 0)     | 0<br>(0 - 0)      | 3<br>(2 - 4)       | 13<br>(10 - 19)    | 39<br>(31 - 52)    |
| Chronic obstructive pulmonary disease         | 49<br>(38 - 65)    | 0<br>(0 - 0)     | 0<br>(0 - 0)      | 1<br>(1 - 1)       | 10<br>(7 - 14)     | 38<br>(30 - 50)    |
| Pneumoconiosis                                | 0<br>(0 - 1)       | 0<br>(0 - 0)     | 0<br>(0 - 0)      | 0<br>(0 - 0)       | 0<br>(0 - 1)       | 0<br>(0 - 0)       |
| Silicosis                                     | 0<br>(0 - 0)       | 0<br>(0 - 0)     | 0<br>(0 - 0)      | 0<br>(0 - 0)       | 0<br>(0 - 0)       | 0<br>(0 - 0)       |
| Asbestosis                                    | 0<br>(0 - 0)       | 0<br>(0 - 0)     | 0<br>(0 - 0)      | 0<br>(0 - 0)       | 0<br>(0 - 0)       | 0<br>(0 - 0)       |
| Coal workers pneumoconiosis                   | 0<br>(0 - 0)       | 0<br>(0 - 0)     | 0<br>(0 - 0)      | 0<br>(0 - 0)       | 0<br>(0 - 0)       | 0<br>(0 - 0)       |
| Other pneumoconiosis                          | 0<br>(0 - 0)       | 0<br>(0 - 0)     | 0<br>(0 - 0)      | 0<br>(0 - 0)       | 0<br>(0 - 0)       | 0<br>(0 - 0)       |

Web Table 31- Brunei deaths with 95% UI by age, sex, and cause in 2013

| Cause                                               | Males, All Ages  | Males, 0-4 Years | Males, 5-14 Years | Males, 15-49 Years | Males, 50-69 Years | Males, 70-80 Years |
|-----------------------------------------------------|------------------|------------------|-------------------|--------------------|--------------------|--------------------|
| Asthma                                              | 4<br>(3 - 5)     | 0<br>(0 - 0)     | 0<br>(0 - 0)      | 1<br>(0 - 1)       | 3<br>(2 - 4)       | 0<br>(0 - 1)       |
| Interstitial lung disease and pulmonary sarcoidosis | 2<br>(1 - 4)     | 0<br>(0 - 0)     | 0<br>(0 - 0)      | 1<br>(1 - 2)       | 0<br>(0 - 1)       | 1<br>(0 - 2)       |
| Other chronic respiratory diseases                  | 1<br>(0 - 1)     | 0<br>(0 - 0)     | 0<br>(0 - 0)      | 0<br>(0 - 0)       | 0<br>(0 - 0)       | 0<br>(0 - 0)       |
| Cirrhosis                                           | 10<br>(7 - 13)   | 0<br>(0 - 0)     | 0<br>(0 - 0)      | 2<br>(2 - 3)       | 6<br>(4 - 8)       | 1<br>(1 - 2)       |
| Cirrhosis due to hepatitis B                        | 3<br>(1 - 5)     | 0<br>(0 - 0)     | 0<br>(0 - 0)      | 1<br>(0 - 1)       | 2<br>(1 - 3)       | 0<br>(0 - 1)       |
| Cirrhosis due to hepatitis C                        | 3<br>(2 - 6)     | 0<br>(0 - 0)     | 0<br>(0 - 0)      | 1<br>(0 - 1)       | 2<br>(1 - 4)       | 1<br>(0 - 1)       |
| Cirrhosis due to alcohol use                        | 2<br>(1 - 4)     | --               | --                | 0<br>(0 - 1)       | 2<br>(1 - 3)       | 0<br>(0 - 1)       |
| Cirrhosis due to other causes                       | 1<br>(1 - 3)     | 0<br>(0 - 0)     | 0<br>(0 - 0)      | 0<br>(0 - 1)       | 1<br>(0 - 2)       | 0<br>(0 - 0)       |
| Digestive diseases                                  | 10<br>(8 - 14)   | 0<br>(0 - 0)     | 0<br>(0 - 0)      | 1<br>(1 - 1)       | 4<br>(3 - 6)       | 5<br>(4 - 6)       |
| Peptic ulcer disease                                | 4<br>(3 - 6)     | 0<br>(0 - 0)     | 0<br>(0 - 0)      | 0<br>(0 - 0)       | 2<br>(1 - 3)       | 2<br>(1 - 3)       |
| Gastritis and duodenitis                            | 0<br>(0 - 0)     | 0<br>(0 - 0)     | 0<br>(0 - 0)      | 0<br>(0 - 0)       | 0<br>(0 - 0)       | 0<br>(0 - 0)       |
| Appendicitis                                        | 1<br>(1 - 2)     | 0<br>(0 - 0)     | 0<br>(0 - 0)      | 0<br>(0 - 0)       | 0<br>(0 - 1)       | 0<br>(0 - 1)       |
| Paralytic ileus and intestinal obstruction          | 2<br>(1 - 4)     | 0<br>(0 - 0)     | 0<br>(0 - 0)      | 0<br>(0 - 0)       | 1<br>(0 - 2)       | 1<br>(1 - 2)       |
| Inguinal, femoral, and abdominal hernia             | 0<br>(0 - 0)     | 0<br>(0 - 0)     | 0<br>(0 - 0)      | 0<br>(0 - 0)       | 0<br>(0 - 0)       | 0<br>(0 - 0)       |
| Inflammatory bowel disease                          | 1<br>(0 - 1)     | 0<br>(0 - 0)     | 0<br>(0 - 0)      | 0<br>(0 - 0)       | 0<br>(0 - 0)       | 0<br>(0 - 1)       |
| Vascular intestinal disorders                       | 0<br>(0 - 0)     | 0<br>(0 - 0)     | 0<br>(0 - 0)      | 0<br>(0 - 0)       | 0<br>(0 - 0)       | 0<br>(0 - 0)       |
| Gallbladder and biliary diseases                    | 1<br>(0 - 1)     | 0<br>(0 - 0)     | 0<br>(0 - 0)      | 0<br>(0 - 0)       | 0<br>(0 - 0)       | 0<br>(0 - 1)       |
| Pancreatitis                                        | 1<br>(0 - 1)     | 0<br>(0 - 0)     | 0<br>(0 - 0)      | 0<br>(0 - 0)       | 0<br>(0 - 1)       | 0<br>(0 - 0)       |
| Other digestive diseases                            | 1<br>(1 - 2)     | 0<br>(0 - 0)     | 0<br>(0 - 0)      | 0<br>(0 - 0)       | 0<br>(0 - 1)       | 1<br>(0 - 1)       |
| Neurological disorders                              | 12<br>(9 - 15)   | 0<br>(0 - 1)     | 0<br>(0 - 0)      | 1<br>(0 - 2)       | 1<br>(1 - 2)       | 9<br>(7 - 12)      |
| Alzheimer disease and other dementias               | 9<br>(7 - 11)    | --               | --                | 0<br>(0 - 0)       | 1<br>(1 - 1)       | 8<br>(6 - 10)      |
| Parkinson disease                                   | 1<br>(1 - 2)     | --               | --                | 0<br>(0 - 0)       | 0<br>(0 - 1)       | 1<br>(0 - 2)       |
| Epilepsy                                            | 1<br>(0 - 2)     | 0<br>(0 - 0)     | 0<br>(0 - 0)      | 1<br>(0 - 2)       | 0<br>(0 - 0)       | 0<br>(0 - 0)       |
| Multiple sclerosis                                  | 0<br>(0 - 0)     | --               | --                | 0<br>(0 - 0)       | 0<br>(0 - 0)       | 0<br>(0 - 0)       |
| Other neurological disorders                        | 1<br>(0 - 1)     | 0<br>(0 - 1)     | 0<br>(0 - 0)      | 0<br>(0 - 0)       | 0<br>(0 - 0)       | 0<br>(0 - 0)       |
| Mental and substance use disorders                  | 1<br>(1 - 2)     | 0<br>(0 - 0)     | 0<br>(0 - 0)      | 1<br>(1 - 1)       | 0<br>(0 - 0)       | 0<br>(0 - 0)       |
| Schizophrenia                                       | 0<br>(0 - 0)     | --               | --                | 0<br>(0 - 0)       | 0<br>(0 - 0)       | 0<br>(0 - 0)       |
| Alcohol use disorders                               | 0<br>(0 - 0)     | --               | --                | 0<br>(0 - 0)       | 0<br>(0 - 0)       | 0<br>(0 - 0)       |
| Drug use disorders                                  | 1<br>(1 - 1)     | 0<br>(0 - 0)     | --                | 1<br>(1 - 1)       | 0<br>(0 - 0)       | 0<br>(0 - 0)       |
| Opioid use disorders                                | 0<br>(0 - 0)     | 0<br>(0 - 0)     | --                | 0<br>(0 - 0)       | 0<br>(0 - 0)       | 0<br>(0 - 0)       |
| Cocaine use disorders                               | 0<br>(0 - 0)     | 0<br>(0 - 0)     | --                | 0<br>(0 - 0)       | 0<br>(0 - 0)       | 0<br>(0 - 0)       |
| Amphetamine use disorders                           | 0<br>(0 - 0)     | 0<br>(0 - 0)     | --                | 0<br>(0 - 0)       | 0<br>(0 - 0)       | 0<br>(0 - 0)       |
| Other drug use disorders                            | 1<br>(0 - 1)     | 0<br>(0 - 0)     | --                | 0<br>(0 - 1)       | 0<br>(0 - 0)       | 0<br>(0 - 0)       |
| Eating disorders                                    | 0<br>(0 - 0)     | --               | 0<br>(0 - 0)      | 0<br>(0 - 0)       | --                 | --                 |
| Anorexia nervosa                                    | 0<br>(0 - 0)     | --               | 0<br>(0 - 0)      | 0<br>(0 - 0)       | --                 | --                 |
| Diabetes, urogenital, blood, and endocrine diseases | 98<br>(78 - 121) | 1<br>(0 - 1)     | 0<br>(0 - 0)      | 11<br>(8 - 14)     | 45<br>(34 - 58)    | 41<br>(32 - 51)    |
| Diabetes mellitus                                   | 76<br>(60 - 96)  | 0<br>(0 - 0)     | 0<br>(0 - 0)      | 7<br>(5 - 9)       | 35<br>(26 - 46)    | 33<br>(26 - 43)    |
| Acute glomerulonephritis                            | 0<br>(0 - 0)     | 0<br>(0 - 0)     | 0<br>(0 - 0)      | 0<br>(0 - 0)       | 0<br>(0 - 0)       | 0<br>(0 - 0)       |
| Chronic kidney disease                              | 12<br>(8 - 15)   | 0<br>(0 - 0)     | 0<br>(0 - 0)      | 2<br>(2 - 3)       | 5<br>(4 - 8)       | 4<br>(3 - 5)       |
| Chronic kidney disease due to diabetes mellitus     | 0<br>(0 - 0)     | 0<br>(0 - 0)     | 0<br>(0 - 0)      | 0<br>(0 - 0)       | 0<br>(0 - 0)       | 0<br>(0 - 0)       |

Web Table 31- Brunei deaths with 95% UI by age, sex, and cause in 2013

| Cause                                               | Males, All Ages | Males, 0-4 Years | Males, 5-14 Years | Males, 15-49 Years | Males, 50-69 Years | Males, 70-80 Years |
|-----------------------------------------------------|-----------------|------------------|-------------------|--------------------|--------------------|--------------------|
| Chronic kidney disease due to hypertension          | 4<br>(3 - 6)    | 0<br>(0 - 0)     | 0<br>(0 - 0)      | 1<br>(0 - 1)       | 1<br>(1 - 2)       | 2<br>(1 - 3)       |
| Chronic kidney disease due to glomerulonephritis    | 0               | 0                | 0                 | 0                  | 0                  | 0                  |
| Chronic kidney disease due to other causes          | 7<br>(4 - 10)   | 0<br>(0 - 0)     | 0<br>(0 - 0)      | 1<br>(1 - 2)       | 4<br>(2 - 6)       | 2<br>(1 - 3)       |
| Urinary diseases and male infertility               | 5<br>(3 - 11)   | 0<br>(0 - 0)     | 0<br>(0 - 0)      | 0<br>(0 - 1)       | 2<br>(1 - 5)       | 2<br>(1 - 5)       |
| Interstitial nephritis and urinary tract infections | 3               | 0                | 0                 | 0                  | 2                  | 1                  |
| Urolithiasis                                        | 0<br>(2 - 9)    | --<br>(0 - 0)    | 0<br>(0 - 0)      | 0<br>(0 - 1)       | 0<br>(1 - 5)       | 0<br>(1 - 4)       |
| Other urinary diseases                              | 2<br>(1 - 2)    | 0<br>(0 - 0)     | 0<br>(0 - 0)      | 0<br>(0 - 0)       | 1<br>(0 - 1)       | 1<br>(0 - 2)       |
| Gynecological diseases                              | --              | --               | --                | --                 | --                 | --                 |
| Uterine fibroids                                    | --              | --               | --                | --                 | --                 | --                 |
| Polycystic ovarian syndrome                         | --              | --               | --                | --                 | --                 | --                 |
| Endometriosis                                       | --              | --               | --                | --                 | --                 | --                 |
| Genital prolapse                                    | --              | --               | --                | --                 | --                 | --                 |
| Other gynecological diseases                        | --              | --               | --                | --                 | --                 | --                 |
| Hemoglobinopathies and hemolytic anemias            | 1<br>(0 - 1)    | 0<br>(0 - 0)     | 0<br>(0 - 0)      | 0<br>(0 - 0)       | 0<br>(0 - 0)       | 0<br>(0 - 0)       |
| Thalassemias                                        | 0<br>(0 - 1)    | 0<br>(0 - 0)     | 0<br>(0 - 0)      | 0<br>(0 - 0)       | 0<br>(0 - 0)       | 0<br>(0 - 0)       |
| Sickle cell disorders                               | 0<br>(0 - 0)    | 0<br>(0 - 0)     | 0<br>(0 - 0)      | 0<br>(0 - 0)       | 0<br>(0 - 0)       | 0<br>(0 - 0)       |
| G6PD deficiency                                     | 0<br>(0 - 0)    | 0<br>(0 - 0)     | 0<br>(0 - 0)      | 0<br>(0 - 0)       | 0<br>(0 - 0)       | 0<br>(0 - 0)       |
| Other hemoglobinopathies and hemolytic anemias      | 0<br>(0 - 0)    | 0<br>(0 - 0)     | 0<br>(0 - 0)      | 0<br>(0 - 0)       | 0<br>(0 - 0)       | 0<br>(0 - 0)       |
| Endocrine, metabolic, blood, and immune disorders   | 5<br>(3 - 6)    | 0<br>(0 - 1)     | 0<br>(0 - 0)      | 1<br>(0 - 1)       | 2<br>(1 - 3)       | 1<br>(0 - 1)       |
| Musculoskeletal disorders                           | 0<br>(0 - 0)    | --               | 0<br>(0 - 0)      | 0<br>(0 - 0)       | 0<br>(0 - 0)       | 0<br>(0 - 0)       |
| Rheumatoid arthritis                                | 0<br>(0 - 0)    | --               | 0<br>(0 - 0)      | 0<br>(0 - 0)       | 0<br>(0 - 0)       | 0<br>(0 - 0)       |
| Other musculoskeletal disorders                     | 0<br>(0 - 0)    | --               | 0<br>(0 - 0)      | 0<br>(0 - 0)       | 0<br>(0 - 0)       | 0<br>(0 - 0)       |
| Other non-communicable diseases                     | 14<br>(11 - 18) | 10<br>(8 - 14)   | 1<br>(0 - 1)      | 2<br>(1 - 2)       | 1<br>(1 - 1)       | 1<br>(0 - 1)       |
| Congenital anomalies                                | 12<br>(10 - 16) | 10<br>(7 - 13)   | 1<br>(0 - 1)      | 2<br>(1 - 2)       | 1<br>(0 - 1)       | 0<br>(0 - 0)       |
| Neural tube defects                                 | 0<br>(0 - 0)    | 0<br>(0 - 0)     | 0<br>(0 - 0)      | 0<br>(0 - 0)       | 0<br>(0 - 0)       | 0<br>(0 - 0)       |
| Congenital heart anomalies                          | 6<br>(4 - 8)    | 5<br>(3 - 7)     | 0<br>(0 - 1)      | 0<br>(0 - 0)       | 0<br>(0 - 0)       | 0<br>(0 - 0)       |
| Cleft lip and cleft palate                          | 0<br>(0 - 0)    | 0<br>(0 - 0)     | --                | --                 | --                 | --                 |
| Down syndrome                                       | 1<br>(0 - 1)    | 0<br>(0 - 0)     | 0<br>(0 - 0)      | 0<br>(0 - 0)       | 0<br>(0 - 0)       | 0<br>(0 - 0)       |
| Chromosomal unbalanced rearrangements               | 2               | 2                | 0                 | 0                  | 0                  | 0                  |
| Other congenital anomalies                          | 4<br>(3 - 6)    | 3<br>(2 - 4)     | 0<br>(0 - 0)      | 1<br>(1 - 2)       | 0<br>(0 - 1)       | 0<br>(0 - 0)       |
| Skin and subcutaneous diseases                      | 1<br>(0 - 1)    | 0<br>(0 - 0)     | 0<br>(0 - 0)      | 0<br>(0 - 0)       | 0<br>(0 - 0)       | 1<br>(0 - 1)       |
| Cellulitis                                          | 0<br>(0 - 0)    | 0<br>(0 - 0)     | 0<br>(0 - 0)      | 0<br>(0 - 0)       | 0<br>(0 - 0)       | 0<br>(0 - 0)       |
| Pyoderma                                            | 0<br>(0 - 1)    | 0<br>(0 - 0)     | 0<br>(0 - 0)      | 0<br>(0 - 0)       | 0<br>(0 - 0)       | 0<br>(0 - 0)       |
| Decubitus ulcer                                     | 0<br>(0 - 0)    | 0<br>(0 - 0)     | 0<br>(0 - 0)      | 0<br>(0 - 0)       | 0<br>(0 - 0)       | 0<br>(0 - 0)       |
| Other skin and subcutaneous diseases                | 0<br>(0 - 0)    | 0<br>(0 - 0)     | 0<br>(0 - 0)      | 0<br>(0 - 0)       | 0<br>(0 - 0)       | 0<br>(0 - 0)       |
| Sudden infant death syndrome                        | 1<br>(0 - 2)    | 1<br>(0 - 2)     | --                | --                 | --                 | --                 |
| Injuries                                            | 77<br>(63 - 95) | 5<br>(3 - 7)     | 3<br>(2 - 3)      | 46<br>(36 - 57)    | 14<br>(10 - 19)    | 9<br>(7 - 12)      |
| Transport injuries                                  | 38<br>(30 - 47) | 1<br>(0 - 1)     | 1<br>(1 - 2)      | 27<br>(21 - 33)    | 7<br>(5 - 9)       | 2<br>(2 - 3)       |
| Road injuries                                       | 35<br>(27 - 44) | 1<br>(0 - 1)     | 1<br>(1 - 2)      | 25<br>(19 - 32)    | 6<br>(5 - 8)       | 2<br>(1 - 3)       |
| Pedestrian road injuries                            | 5<br>(2 - 8)    | 0<br>(0 - 0)     | 0<br>(0 - 1)      | 3<br>(1 - 5)       | 1<br>(1 - 2)       | 0<br>(0 - 1)       |



Web Table 31- Brunei deaths with 95% UI by age, sex, and cause in 2013

| Cause                                           | Males, All Ages | Males, 0-4 Years | Males, 5-14 Years | Males, 15-49 Years | Males, 50-69 Years | Males, 70-80 Years |
|-------------------------------------------------|-----------------|------------------|-------------------|--------------------|--------------------|--------------------|
| Cyclist road injuries                           | 2<br>(1 - 2)    | 0<br>(0 - 0)     | 0<br>(0 - 0)      | 1<br>(0 - 1)       | 0<br>(0 - 1)       | 0<br>(0 - 0)       |
| Motorcyclist road injuries                      | 7<br>(4 - 10)   | 0<br>(0 - 0)     | 0<br>(0 - 0)      | 5<br>(3 - 8)       | 1<br>(0 - 1)       | 0<br>(0 - 0)       |
| Motor vehicle road injuries                     | 22<br>(15 - 28) | 0<br>(0 - 1)     | 1<br>(0 - 1)      | 16<br>(11 - 21)    | 4<br>(2 - 5)       | 1<br>(1 - 1)       |
| Other road injuries                             | 0<br>(0 - 1)    | 0<br>(0 - 0)     | 0<br>(0 - 0)      | 0<br>(0 - 0)       | 0<br>(0 - 0)       | 0<br>(0 - 0)       |
| Other transport injuries                        | 3<br>(2 - 4)    | 0<br>(0 - 0)     | 0<br>(0 - 0)      | 1<br>(1 - 2)       | 1<br>(0 - 1)       | 0<br>(0 - 1)       |
| Unintentional injuries                          | 30<br>(24 - 40) | 4<br>(3 - 6)     | 1<br>(1 - 2)      | 13<br>(10 - 18)    | 5<br>(3 - 8)       | 6<br>(5 - 9)       |
| Falls                                           | 8<br>(5 - 12)   | 0<br>(0 - 0)     | 0<br>(0 - 0)      | 4<br>(3 - 6)       | 1<br>(1 - 2)       | 2<br>(1 - 4)       |
| Drowning                                        | 9<br>(7 - 13)   | 2<br>(1 - 3)     | 1<br>(1 - 2)      | 5<br>(3 - 7)       | 1<br>(1 - 2)       | 0<br>(0 - 1)       |
| Fire, heat, and hot substances                  | 1<br>(1 - 2)    | 0<br>(0 - 0)     | 0<br>(0 - 0)      | 1<br>(1 - 1)       | 0<br>(0 - 0)       | 0<br>(0 - 0)       |
| Poisonings                                      | 0<br>(0 - 1)    | 0<br>(0 - 0)     | 0<br>(0 - 0)      | 0<br>(0 - 0)       | 0<br>(0 - 0)       | 0<br>(0 - 0)       |
| Exposure to mechanical forces                   | 5<br>(3 - 6)    | 0<br>(0 - 0)     | 0<br>(0 - 0)      | 3<br>(2 - 4)       | 1<br>(1 - 2)       | 0<br>(0 - 0)       |
| Unintentional firearm injuries                  | 0<br>(0 - 0)    | 0<br>(0 - 0)     | 0<br>(0 - 0)      | 0<br>(0 - 0)       | 0<br>(0 - 0)       | 0<br>(0 - 0)       |
| Unintentional suffocation                       | 0<br>(0 - 0)    | 0<br>(0 - 0)     | 0<br>(0 - 0)      | 0<br>(0 - 0)       | 0<br>(0 - 0)       | 0<br>(0 - 0)       |
| Other exposure to mechanical forces             | 4<br>(3 - 6)    | 0<br>(0 - 0)     | 0<br>(0 - 0)      | 3<br>(2 - 4)       | 1<br>(1 - 1)       | 0<br>(0 - 0)       |
| Adverse effects of medical treatment            | 1<br>(0 - 1)    | 0<br>(0 - 0)     | 0<br>(0 - 0)      | 0<br>(0 - 0)       | 0<br>(0 - 0)       | 0<br>(0 - 1)       |
| Animal contact                                  | 0<br>(0 - 0)    | 0<br>(0 - 0)     | 0<br>(0 - 0)      | 0<br>(0 - 0)       | 0<br>(0 - 0)       | 0<br>(0 - 0)       |
| Venomous animal contact                         | 0<br>(0 - 0)    | 0<br>(0 - 0)     | 0<br>(0 - 0)      | 0<br>(0 - 0)       | 0<br>(0 - 0)       | 0<br>(0 - 0)       |
| Non-venomous animal contact                     | 0<br>(0 - 0)    | 0<br>(0 - 0)     | 0<br>(0 - 0)      | 0<br>(0 - 0)       | 0<br>(0 - 0)       | 0<br>(0 - 0)       |
| Foreign body                                    | 5<br>(3 - 10)   | 1<br>(1 - 2)     | 0<br>(0 - 0)      | 0<br>(0 - 0)       | 1<br>(0 - 3)       | 3<br>(2 - 5)       |
| Pulmonary aspiration and foreign body in airway | 5<br>(3 - 10)   | 1<br>(1 - 2)     | 0<br>(0 - 0)      | 0<br>(0 - 0)       | 1<br>(0 - 3)       | 3<br>(2 - 5)       |
| Foreign body in other body part                 | 0<br>(0 - 0)    | 0<br>(0 - 0)     | 0<br>(0 - 0)      | 0<br>(0 - 0)       | 0<br>(0 - 0)       | 0<br>(0 - 0)       |
| Other unintentional injuries                    | 1<br>(1 - 1)    | 0<br>(0 - 0)     | 0<br>(0 - 0)      | 1<br>(0 - 1)       | 0<br>(0 - 0)       | 0<br>(0 - 0)       |
| Self-harm and interpersonal violence            | 9<br>(7 - 13)   | 0<br>(0 - 0)     | 0<br>(0 - 0)      | 6<br>(4 - 9)       | 2<br>(1 - 3)       | 1<br>(0 - 1)       |
| Self-harm                                       | 6<br>(4 - 8)    | --               | 0<br>(0 - 0)      | 4<br>(3 - 6)       | 1<br>(1 - 2)       | 1<br>(0 - 1)       |
| Interpersonal violence                          | 3<br>(2 - 5)    | 0<br>(0 - 0)     | 0<br>(0 - 0)      | 2<br>(1 - 3)       | 1<br>(0 - 1)       | 0<br>(0 - 0)       |
| Assault by firearm                              | 1<br>(0 - 1)    | 0<br>(0 - 0)     | 0<br>(0 - 0)      | 0<br>(0 - 1)       | 0<br>(0 - 0)       | 0<br>(0 - 0)       |
| Assault by sharp object                         | 0<br>(0 - 1)    | 0<br>(0 - 0)     | 0<br>(0 - 0)      | 0<br>(0 - 1)       | 0<br>(0 - 0)       | 0<br>(0 - 0)       |
| Assault by other means                          | 1<br>(1 - 3)    | 0<br>(0 - 0)     | 0<br>(0 - 0)      | 1<br>(1 - 2)       | 0<br>(0 - 1)       | 0<br>(0 - 0)       |

Web Table 31- Brunei deaths with 95% UI by age, sex, and cause in 2013

| Cause                                                             | Females, All Ages  | Females, 0-4 Years | Females, 5-14 Years | Females, 15-49 Years | Females, 50-69 Years | Females, 70-80 Years |
|-------------------------------------------------------------------|--------------------|--------------------|---------------------|----------------------|----------------------|----------------------|
| All causes                                                        | 584<br>(492 - 693) | 24<br>(19 - 29)    | 5<br>(4 - 6)        | 91<br>(74 - 108)     | 176<br>(134 - 225)   | 289<br>(258 - 331)   |
| Communicable, maternal, neonatal, and nutritional diseases        | 44<br>(36 - 53)    | 10<br>(7 - 13)     | 1<br>(1 - 1)        | 9<br>(7 - 10)        | 7<br>(5 - 9)         | 18<br>(12 - 26)      |
| HIV/AIDS and tuberculosis                                         | 5<br>(4 - 7)       | 0<br>(0 - 0)       | 0<br>(0 - 0)        | 3<br>(2 - 4)         | 2<br>(1 - 2)         | 1<br>(0 - 1)         |
| Tuberculosis                                                      | 3<br>(2 - 4)       | 0<br>(0 - 0)       | 0<br>(0 - 0)        | 1<br>(1 - 2)         | 1<br>(1 - 2)         | 1<br>(0 - 1)         |
| HIV/AIDS                                                          | 2<br>(1 - 4)       | 0<br>(0 - 0)       | 0<br>(0 - 0)        | 2<br>(1 - 3)         | 0<br>(0 - 1)         | 0<br>(0 - 0)         |
| HIV/AIDS resulting in mycobacterial infection                     | 0<br>(0 - 0)       | 0<br>(0 - 0)       | 0<br>(0 - 0)        | 0<br>(0 - 0)         | 0<br>(0 - 0)         | 0<br>(0 - 0)         |
| HIV/AIDS resulting in other diseases                              | 2<br>(1 - 4)       | 0<br>(0 - 0)       | 0<br>(0 - 0)        | 2<br>(1 - 3)         | 0<br>(0 - 1)         | 0<br>(0 - 0)         |
| Diarrhea, lower respiratory, and other common infectious diseases | 27<br>(19 - 35)    | 2<br>(2 - 4)       | 1<br>(0 - 1)        | 3<br>(2 - 4)         | 4<br>(3 - 7)         | 16<br>(10 - 23)      |
| Diarrheal diseases                                                | 1<br>(1 - 1)       | 0<br>(0 - 0)       | 0<br>(0 - 0)        | 0<br>(0 - 0)         | 0<br>(0 - 0)         | 0<br>(0 - 1)         |
| Intestinal infectious diseases                                    | 0<br>(0 - 1)       | 0<br>(0 - 0)       | 0<br>(0 - 0)        | 0<br>(0 - 0)         | 0<br>(0 - 0)         | 0<br>(0 - 0)         |
| Typhoid fever                                                     | 0<br>(0 - 0)       | 0<br>(0 - 0)       | 0<br>(0 - 0)        | 0<br>(0 - 0)         | 0<br>(0 - 0)         | 0<br>(0 - 0)         |
| Paratyphoid fever                                                 | 0<br>(0 - 0)       | 0<br>(0 - 0)       | 0<br>(0 - 0)        | 0<br>(0 - 0)         | 0<br>(0 - 0)         | 0<br>(0 - 0)         |
| Other intestinal infectious diseases                              | 0<br>(0 - 0)       | 0<br>(0 - 0)       | 0<br>(0 - 0)        | 0<br>(0 - 0)         | 0<br>(0 - 0)         | 0<br>(0 - 0)         |
| Lower respiratory infections                                      | 24<br>(17 - 31)    | 2<br>(1 - 3)       | 0<br>(0 - 1)        | 2<br>(2 - 3)         | 4<br>(3 - 6)         | 15<br>(9 - 22)       |
| Upper respiratory infections                                      | 0<br>(0 - 0)       | 0<br>(0 - 0)       | 0<br>(0 - 0)        | 0<br>(0 - 0)         | 0<br>(0 - 0)         | 0<br>(0 - 0)         |
| Otitis media                                                      | 0<br>(0 - 0)       | 0<br>(0 - 0)       | 0<br>(0 - 0)        | 0<br>(0 - 0)         | 0<br>(0 - 0)         | 0<br>(0 - 0)         |
| Meningitis                                                        | 1<br>(1 - 2)       | 0<br>(0 - 1)       | 0<br>(0 - 0)        | 0<br>(0 - 1)         | 0<br>(0 - 0)         | 0<br>(0 - 0)         |
| Pneumococcal meningitis                                           | 0<br>(0 - 0)       | 0<br>(0 - 0)       | 0<br>(0 - 0)        | 0<br>(0 - 0)         | 0<br>(0 - 0)         | 0<br>(0 - 0)         |
| H influenzae type B meningitis                                    | 0<br>(0 - 0)       | 0<br>(0 - 0)       | 0<br>(0 - 0)        | 0<br>(0 - 0)         | 0<br>(0 - 0)         | 0<br>(0 - 0)         |
| Meningococcal meningitis                                          | 0<br>(0 - 0)       | 0<br>(0 - 0)       | 0<br>(0 - 0)        | 0<br>(0 - 0)         | 0<br>(0 - 0)         | 0<br>(0 - 0)         |
| Other meningitis                                                  | 1<br>(0 - 1)       | 0<br>(0 - 0)       | 0<br>(0 - 0)        | 0<br>(0 - 0)         | 0<br>(0 - 0)         | 0<br>(0 - 0)         |
| Encephalitis                                                      | 0<br>(0 - 1)       | 0<br>(0 - 0)       | 0<br>(0 - 0)        | 0<br>(0 - 0)         | 0<br>(0 - 0)         | 0<br>(0 - 0)         |
| Diphtheria                                                        | 0<br>(0 - 0)       | 0<br>(0 - 0)       | 0<br>(0 - 0)        | 0<br>(0 - 0)         | 0<br>(0 - 0)         | --                   |
| Whooping cough                                                    | 0<br>(0 - 0)       | 0<br>(0 - 0)       | 0<br>(0 - 0)        | 0<br>(0 - 0)         | 0<br>(0 - 0)         | --                   |
| Tetanus                                                           | 0<br>(0 - 0)       | 0<br>(0 - 0)       | 0<br>(0 - 0)        | 0<br>(0 - 0)         | 0<br>(0 - 0)         | 0<br>(0 - 0)         |
| Measles                                                           | 0<br>(0 - 0)       | 0<br>(0 - 0)       | 0<br>(0 - 0)        | 0<br>(0 - 0)         | 0<br>(0 - 0)         | --                   |
| Varicella and herpes zoster                                       | 0<br>(0 - 0)       | 0<br>(0 - 0)       | 0<br>(0 - 0)        | 0<br>(0 - 0)         | 0<br>(0 - 0)         | 0<br>(0 - 0)         |
| Neglected tropical diseases and malaria                           | 0<br>(0 - 0)       | 0<br>(0 - 0)       | 0<br>(0 - 0)        | 0<br>(0 - 0)         | 0<br>(0 - 0)         | 0<br>(0 - 0)         |
| Cysticercosis                                                     | 0<br>(0 - 0)       | 0<br>(0 - 0)       | 0<br>(0 - 0)        | 0<br>(0 - 0)         | 0<br>(0 - 0)         | 0<br>(0 - 0)         |
| Cystic echinococcosis                                             | 0<br>(0 - 0)       | 0<br>(0 - 0)       | 0<br>(0 - 0)        | 0<br>(0 - 0)         | 0<br>(0 - 0)         | 0<br>(0 - 0)         |
| Dengue                                                            | 0<br>(0 - 0)       | 0<br>(0 - 0)       | 0<br>(0 - 0)        | 0<br>(0 - 0)         | 0<br>(0 - 0)         | 0<br>(0 - 0)         |
| Rabies                                                            | 0<br>(0 - 0)       | 0<br>(0 - 0)       | 0<br>(0 - 0)        | 0<br>(0 - 0)         | 0<br>(0 - 0)         | 0<br>(0 - 0)         |
| Other neglected tropical diseases                                 | 0<br>(0 - 0)       | 0<br>(0 - 0)       | 0<br>(0 - 0)        | 0<br>(0 - 0)         | 0<br>(0 - 0)         | 0<br>(0 - 0)         |
| Maternal disorders                                                | 1<br>(1 - 1)       | --                 | 0<br>(0 - 0)        | 1<br>(1 - 1)         | --                   | --                   |
| Maternal hemorrhage                                               | 0<br>(0 - 0)       | --                 | 0<br>(0 - 0)        | 0<br>(0 - 0)         | --                   | --                   |
| Maternal sepsis and other maternal infections                     | 0<br>(0 - 0)       | --                 | 0<br>(0 - 0)        | 0<br>(0 - 0)         | --                   | --                   |
| Maternal hypertensive disorders                                   | 0<br>(0 - 0)       | --                 | 0<br>(0 - 0)        | 0<br>(0 - 0)         | --                   | --                   |
| Maternal obstructed labor                                         | 0<br>(0 - 0)       | --                 | 0<br>(0 - 0)        | 0<br>(0 - 0)         | --                   | --                   |
| Maternal abortive outcome                                         | 0<br>(0 - 0)       | --                 | 0<br>(0 - 0)        | 0<br>(0 - 0)         | --                   | --                   |
| Indirect maternal deaths                                          | 0<br>(0 - 0)       | --                 | 0<br>(0 - 0)        | 0<br>(0 - 0)         | --                   | --                   |

Web Table 31- Brunei deaths with 95% UI by age, sex, and cause in 2013

| Cause                                                            | Females, All Ages  | Females, 0-4 Years | Females, 5-14 Years | Females, 15-49 Years | Females, 50-69 Years | Females, 70-80 Years |
|------------------------------------------------------------------|--------------------|--------------------|---------------------|----------------------|----------------------|----------------------|
| Late maternal deaths                                             | 0<br>(0 - 0)       | --                 | 0<br>(0 - 0)        | 0<br>(0 - 0)         | --                   | --                   |
| Maternal deaths aggravated by HIV/AIDS                           | 0<br>(0 - 0)       | --                 | --                  | 0<br>(0 - 0)         | --                   | --                   |
| Other maternal disorders                                         | 0<br>(0 - 0)       | --                 | 0<br>(0 - 0)        | 0<br>(0 - 0)         | --                   | --                   |
| Neonatal disorders                                               | 7<br>(5 - 9)       | 7<br>(5 - 9)       | --                  | --                   | --                   | --                   |
| Neonatal preterm birth complications                             | 2<br>(1 - 4)       | 2<br>(1 - 4)       | --                  | --                   | --                   | --                   |
| Neonatal encephalopathy due to birth asphyxia and trauma         | 3<br>(1 - 5)       | 3<br>(1 - 5)       | --                  | --                   | --                   | --                   |
| Neonatal sepsis and other neonatal infections                    | 1<br>(0 - 3)       | 1<br>(0 - 3)       | --                  | --                   | --                   | --                   |
| Hemolytic disease and other neonatal jaundice                    | 0<br>(0 - 0)       | 0<br>(0 - 0)       | --                  | --                   | --                   | --                   |
| Other neonatal disorders                                         | 1<br>(0 - 2)       | 1<br>(0 - 2)       | --                  | --                   | --                   | --                   |
| Nutritional deficiencies                                         | 2<br>(1 - 2)       | 0<br>(0 - 0)       | 0<br>(0 - 0)        | 0<br>(0 - 1)         | 0<br>(0 - 0)         | 1<br>(1 - 2)         |
| Protein-energy malnutrition                                      | 0<br>(0 - 1)       | 0<br>(0 - 0)       | 0<br>(0 - 0)        | 0<br>(0 - 0)         | 0<br>(0 - 0)         | 0<br>(0 - 0)         |
| Iodine deficiency                                                | 0<br>(0 - 0)       | 0<br>(0 - 0)       | 0<br>(0 - 0)        | 0<br>(0 - 0)         | 0<br>(0 - 0)         | 0<br>(0 - 0)         |
| Iron-deficiency anemia                                           | 0<br>(0 - 1)       | 0<br>(0 - 0)       | 0<br>(0 - 0)        | 0<br>(0 - 0)         | 0<br>(0 - 0)         | 0<br>(0 - 0)         |
| Other nutritional deficiencies                                   | 1<br>(1 - 2)       | 0<br>(0 - 0)       | 0<br>(0 - 0)        | 0<br>(0 - 0)         | 0<br>(0 - 0)         | 1<br>(0 - 1)         |
| Other communicable, maternal, neonatal, and nutritional diseases | 2<br>(1 - 4)       | 0<br>(0 - 0)       | 0<br>(0 - 0)        | 1<br>(0 - 1)         | 1<br>(0 - 1)         | 1<br>(0 - 2)         |
| Sexually transmitted diseases excluding HIV                      | 0<br>(0 - 0)       | 0<br>(0 - 0)       | 0<br>(0 - 0)        | 0<br>(0 - 0)         | 0<br>(0 - 0)         | 0<br>(0 - 0)         |
| Syphilis                                                         | 0<br>(0 - 0)       | 0<br>(0 - 0)       | 0<br>(0 - 0)        | 0<br>(0 - 0)         | 0<br>(0 - 0)         | 0<br>(0 - 0)         |
| Chlamydial infection                                             | 0<br>(0 - 0)       | --                 | 0<br>(0 - 0)        | 0<br>(0 - 0)         | 0<br>(0 - 0)         | 0<br>(0 - 0)         |
| Gonococcal infection                                             | 0<br>(0 - 0)       | --                 | 0<br>(0 - 0)        | 0<br>(0 - 0)         | 0<br>(0 - 0)         | 0<br>(0 - 0)         |
| Other sexually transmitted diseases                              | 0<br>(0 - 0)       | --                 | 0<br>(0 - 0)        | 0<br>(0 - 0)         | 0<br>(0 - 0)         | 0<br>(0 - 0)         |
| Hepatitis                                                        | 0<br>(0 - 0)       | 0<br>(0 - 0)       | 0<br>(0 - 0)        | 0<br>(0 - 0)         | 0<br>(0 - 0)         | 0<br>(0 - 0)         |
| Acute hepatitis A                                                | 0<br>(0 - 0)       | 0<br>(0 - 0)       | 0<br>(0 - 0)        | 0<br>(0 - 0)         | 0<br>(0 - 0)         | 0<br>(0 - 0)         |
| Acute hepatitis B                                                | 0<br>(0 - 0)       | 0<br>(0 - 0)       | 0<br>(0 - 0)        | 0<br>(0 - 0)         | 0<br>(0 - 0)         | 0<br>(0 - 0)         |
| Acute hepatitis C                                                | 0<br>(0 - 0)       | --                 | 0<br>(0 - 0)        | 0<br>(0 - 0)         | 0<br>(0 - 0)         | 0<br>(0 - 0)         |
| Other infectious diseases                                        | 2<br>(1 - 4)       | 0<br>(0 - 0)       | 0<br>(0 - 0)        | 1<br>(0 - 1)         | 1<br>(0 - 1)         | 1<br>(0 - 2)         |
| Non-communicable diseases                                        | 511<br>(430 - 615) | 12<br>(9 - 15)     | 3<br>(2 - 4)        | 66<br>(53 - 81)      | 164<br>(125 - 211)   | 266<br>(236 - 308)   |
| Neoplasms                                                        | 129<br>(102 - 162) | 1<br>(1 - 1)       | 1<br>(1 - 1)        | 29<br>(22 - 36)      | 56<br>(40 - 73)      | 43<br>(36 - 53)      |
| Esophageal cancer                                                | 0<br>(0 - 1)       | --                 | --                  | 0<br>(0 - 0)         | 0<br>(0 - 0)         | 0<br>(0 - 0)         |
| Stomach cancer                                                   | 9<br>(6 - 13)      | --                 | --                  | 2<br>(1 - 3)         | 3<br>(2 - 4)         | 5<br>(3 - 6)         |
| Liver cancer                                                     | 3<br>(2 - 6)       | --                 | 0<br>(0 - 0)        | 0<br>(0 - 1)         | 2<br>(1 - 3)         | 1<br>(1 - 2)         |
| Liver cancer due to hepatitis B                                  | 1<br>(0 - 2)       | --                 | 0<br>(0 - 0)        | 0<br>(0 - 0)         | 1<br>(0 - 1)         | 0<br>(0 - 0)         |
| Liver cancer due to hepatitis C                                  | 2<br>(1 - 4)       | --                 | 0<br>(0 - 0)        | 0<br>(0 - 0)         | 1<br>(0 - 2)         | 1<br>(0 - 1)         |
| Liver cancer due to alcohol use                                  | 0<br>(0 - 1)       | --                 | --                  | 0<br>(0 - 0)         | 0<br>(0 - 0)         | 0<br>(0 - 0)         |
| Liver cancer due to other causes                                 | 0<br>(0 - 0)       | --                 | 0<br>(0 - 0)        | 0<br>(0 - 0)         | 0<br>(0 - 0)         | 0<br>(0 - 0)         |
| Larynx cancer                                                    | 0<br>(0 - 0)       | --                 | --                  | 0<br>(0 - 0)         | 0<br>(0 - 0)         | 0<br>(0 - 0)         |
| Tracheal, bronchus and lung cancer                               | 28<br>(21 - 37)    | --                 | --                  | 2<br>(2 - 4)         | 13<br>(9 - 18)       | 13<br>(9 - 17)       |
| Breast cancer                                                    | 20<br>(14 - 27)    | --                 | --                  | 8<br>(5 - 11)        | 10<br>(7 - 14)       | 2<br>(1 - 3)         |
| Cervical cancer                                                  | 11<br>(7 - 15)     | --                 | --                  | 4<br>(3 - 6)         | 5<br>(3 - 7)         | 2<br>(1 - 3)         |
| Uterine cancer                                                   | 1<br>(0 - 1)       | --                 | --                  | 0<br>(0 - 0)         | 0<br>(0 - 0)         | 0<br>(0 - 0)         |
| Prostate cancer                                                  | --                 | --                 | --                  | --                   | --                   | --                   |

Web Table 31- Brunei deaths with 95% UI by age, sex, and cause in 2013

| Cause                                         | Females, All Ages  | Females, 0-4 Years | Females, 5-14 Years | Females, 15-49 Years | Females, 50-69 Years | Females, 70-80 Years |
|-----------------------------------------------|--------------------|--------------------|---------------------|----------------------|----------------------|----------------------|
| Colon and rectum cancer                       | 17<br>(13 - 22)    | --                 | --                  | 3<br>(2 - 4)         | 7<br>(5 - 9)         | 7<br>(5 - 10)        |
| Lip and oral cavity cancer                    | 2<br>(1 - 3)       | --                 | --                  | 1<br>(0 - 1)         | 1<br>(0 - 1)         | 1<br>(0 - 1)         |
| Nasopharynx cancer                            | 0<br>(0 - 1)       | --                 | 0<br>(0 - 0)        | 0<br>(0 - 0)         | 0<br>(0 - 0)         | 0<br>(0 - 0)         |
| Other pharynx cancer                          | 0<br>(0 - 1)       | --                 | --                  | 0<br>(0 - 0)         | 0<br>(0 - 0)         | 0<br>(0 - 0)         |
| Gallbladder and biliary tract cancer          | 4<br>(3 - 6)       | --                 | --                  | 0<br>(0 - 1)         | 2<br>(1 - 3)         | 2<br>(1 - 2)         |
| Pancreatic cancer                             | 3<br>(2 - 4)       | --                 | --                  | 1<br>(0 - 1)         | 2<br>(1 - 2)         | 1<br>(1 - 1)         |
| Malignant skin melanoma                       | 0<br>(0 - 1)       | --                 | --                  | 0<br>(0 - 0)         | 0<br>(0 - 0)         | 0<br>(0 - 0)         |
| Non-melanoma skin cancer                      | 0<br>(0 - 0)       | --                 | --                  | 0<br>(0 - 0)         | 0<br>(0 - 0)         | 0<br>(0 - 0)         |
| Ovarian cancer                                | 7<br>(6 - 10)      | --                 | --                  | 2<br>(2 - 3)         | 3<br>(2 - 4)         | 2<br>(2 - 3)         |
| Testicular cancer                             | --                 | --                 | --                  | --                   | --                   | --                   |
| Kidney cancer                                 | 5<br>(3 - 7)       | 0<br>(0 - 0)       | 0<br>(0 - 0)        | 1<br>(0 - 1)         | 2<br>(1 - 3)         | 2<br>(1 - 3)         |
| Bladder cancer                                | 0<br>(0 - 0)       | --                 | --                  | 0<br>(0 - 0)         | 0<br>(0 - 0)         | 0<br>(0 - 0)         |
| Brain and nervous system cancer               | 1<br>(1 - 1)       | 0<br>(0 - 0)       | 0<br>(0 - 0)        | 0<br>(0 - 0)         | 0<br>(0 - 1)         | 0<br>(0 - 0)         |
| Thyroid cancer                                | 2<br>(1 - 2)       | --                 | 0<br>(0 - 0)        | 0<br>(0 - 0)         | 1<br>(0 - 1)         | 1<br>(0 - 1)         |
| Mesothelioma                                  | 0<br>(0 - 0)       | --                 | --                  | 0<br>(0 - 0)         | 0<br>(0 - 0)         | 0<br>(0 - 0)         |
| Hodgkin lymphoma                              | 0<br>(0 - 0)       | 0<br>(0 - 0)       | 0<br>(0 - 0)        | 0<br>(0 - 0)         | 0<br>(0 - 0)         | 0<br>(0 - 0)         |
| Non-Hodgkin lymphoma                          | 6<br>(3 - 9)       | 0<br>(0 - 0)       | 0<br>(0 - 0)        | 1<br>(0 - 1)         | 3<br>(1 - 4)         | 2<br>(1 - 3)         |
| Multiple myeloma                              | 0<br>(0 - 0)       | --                 | --                  | 0<br>(0 - 0)         | 0<br>(0 - 0)         | 0<br>(0 - 0)         |
| Leukemia                                      | 4<br>(3 - 5)       | 0<br>(0 - 0)       | 0<br>(0 - 1)        | 2<br>(1 - 2)         | 1<br>(1 - 1)         | 1<br>(0 - 1)         |
| Other neoplasms                               | 4<br>(3 - 5)       | 0<br>(0 - 0)       | 0<br>(0 - 0)        | 1<br>(1 - 2)         | 1<br>(1 - 2)         | 1<br>(1 - 2)         |
| Cardiovascular diseases                       | 205<br>(166 - 256) | 0<br>(0 - 1)       | 0<br>(0 - 1)        | 20<br>(15 - 25)      | 58<br>(42 - 79)      | 126<br>(107 - 153)   |
| Rheumatic heart disease                       | 2<br>(1 - 2)       | 0<br>(0 - 0)       | 0<br>(0 - 0)        | 1<br>(1 - 2)         | 0<br>(0 - 0)         | 0<br>(0 - 1)         |
| Ischemic heart disease                        | 100<br>(73 - 127)  | 0<br>(0 - 0)       | 0<br>(0 - 0)        | 8<br>(6 - 11)        | 31<br>(20 - 44)      | 61<br>(47 - 76)      |
| Cerebrovascular disease                       | 87<br>(68 - 111)   | 0<br>(0 - 0)       | 0<br>(0 - 0)        | 9<br>(6 - 12)        | 24<br>(17 - 33)      | 54<br>(43 - 70)      |
| Ischemic stroke                               | 45<br>(36 - 60)    | 0<br>(0 - 0)       | 0<br>(0 - 0)        | 3<br>(2 - 4)         | 7<br>(5 - 11)        | 35<br>(27 - 47)      |
| Hemorrhagic stroke                            | 42<br>(31 - 55)    | 0<br>(0 - 0)       | 0<br>(0 - 0)        | 6<br>(4 - 8)         | 17<br>(11 - 23)      | 19<br>(14 - 26)      |
| Hypertensive heart disease                    | 5<br>(2 - 9)       | 0<br>(0 - 0)       | 0<br>(0 - 0)        | 1<br>(0 - 1)         | 1<br>(0 - 2)         | 3<br>(1 - 6)         |
| Cardiomyopathy and myocarditis                | 2<br>(1 - 4)       | 0<br>(0 - 1)       | 0<br>(0 - 0)        | 0<br>(0 - 1)         | 1<br>(0 - 2)         | 0<br>(0 - 0)         |
| Atrial fibrillation and flutter               | 0<br>(0 - 0)       | --                 | --                  | 0<br>(0 - 0)         | 0<br>(0 - 0)         | 0<br>(0 - 0)         |
| Aortic aneurysm                               | 6<br>(3 - 11)      | --                 | --                  | 0<br>(0 - 0)         | 2<br>(0 - 4)         | 4<br>(2 - 8)         |
| Peripheral vascular disease                   | 0<br>(0 - 0)       | --                 | --                  | 0<br>(0 - 0)         | 0<br>(0 - 0)         | 0<br>(0 - 0)         |
| Endocarditis                                  | 1<br>(0 - 1)       | 0<br>(0 - 0)       | 0<br>(0 - 0)        | 0<br>(0 - 0)         | 0<br>(0 - 0)         | 0<br>(0 - 1)         |
| Other cardiovascular and circulatory diseases | 3<br>(2 - 7)       | 0<br>(0 - 0)       | 0<br>(0 - 0)        | 0<br>(0 - 1)         | 1<br>(0 - 2)         | 2<br>(1 - 4)         |
| Chronic respiratory diseases                  | 42<br>(34 - 53)    | 0<br>(0 - 0)       | 0<br>(0 - 0)        | 3<br>(2 - 4)         | 8<br>(6 - 11)        | 31<br>(25 - 40)      |
| Chronic obstructive pulmonary disease         | 33<br>(26 - 42)    | 0<br>(0 - 0)       | 0<br>(0 - 0)        | 1<br>(0 - 1)         | 6<br>(4 - 9)         | 26<br>(20 - 33)      |
| Pneumoconiosis                                | 0<br>(0 - 0)       | 0<br>(0 - 0)       | 0<br>(0 - 0)        | 0<br>(0 - 0)         | 0<br>(0 - 0)         | 0<br>(0 - 0)         |
| Silicosis                                     | 0<br>(0 - 0)       | 0<br>(0 - 0)       | 0<br>(0 - 0)        | 0<br>(0 - 0)         | 0<br>(0 - 0)         | 0<br>(0 - 0)         |
| Asbestosis                                    | 0<br>(0 - 0)       | 0<br>(0 - 0)       | 0<br>(0 - 0)        | 0<br>(0 - 0)         | 0<br>(0 - 0)         | 0<br>(0 - 0)         |
| Coal workers pneumoconiosis                   | 0<br>(0 - 0)       | 0<br>(0 - 0)       | 0<br>(0 - 0)        | 0<br>(0 - 0)         | 0<br>(0 - 0)         | 0<br>(0 - 0)         |
| Other pneumoconiosis                          | 0<br>(0 - 0)       | 0<br>(0 - 0)       | 0<br>(0 - 0)        | 0<br>(0 - 0)         | 0<br>(0 - 0)         | 0<br>(0 - 0)         |

Web Table 31- Brunei deaths with 95% UI by age, sex, and cause in 2013

| Cause                                               | Females, All Ages | Females, 0-4 Years | Females, 5-14 Years | Females, 15-49 Years | Females, 50-69 Years | Females, 70-80 Years |
|-----------------------------------------------------|-------------------|--------------------|---------------------|----------------------|----------------------|----------------------|
| Asthma                                              | 6<br>(3 - 10)     | 0<br>(0 - 0)       | 0<br>(0 - 0)        | 1<br>(1 - 2)         | 0<br>(0 - 1)         | 5<br>(3 - 8)         |
| Interstitial lung disease and pulmonary sarcoidosis | 2<br>(1 - 2)      | 0<br>(0 - 0)       | 0<br>(0 - 0)        | 0<br>(0 - 0)         | 1<br>(1 - 1)         | 0<br>(0 - 1)         |
| Other chronic respiratory diseases                  | 2<br>(1 - 2)      | 0<br>(0 - 0)       | 0<br>(0 - 0)        | 1<br>(1 - 2)         | 0<br>(0 - 0)         | 0<br>(0 - 0)         |
| Cirrhosis                                           | 5<br>(4 - 7)      | 0<br>(0 - 0)       | 0<br>(0 - 0)        | 0<br>(0 - 0)         | 2<br>(2 - 3)         | 2<br>(2 - 3)         |
| Cirrhosis due to hepatitis B                        | 2<br>(1 - 3)      | 0<br>(0 - 0)       | 0<br>(0 - 0)        | 0<br>(0 - 0)         | 1<br>(0 - 2)         | 1<br>(0 - 2)         |
| Cirrhosis due to hepatitis C                        | 2<br>(1 - 4)      | 0<br>(0 - 0)       | 0<br>(0 - 0)        | 0<br>(0 - 0)         | 1<br>(0 - 2)         | 1<br>(0 - 2)         |
| Cirrhosis due to alcohol use                        | 0<br>(0 - 1)      | --                 | --                  | 0<br>(0 - 0)         | 0<br>(0 - 0)         | 0<br>(0 - 1)         |
| Cirrhosis due to other causes                       | 1<br>(0 - 1)      | 0<br>(0 - 0)       | 0<br>(0 - 0)        | 0<br>(0 - 0)         | 0<br>(0 - 1)         | 0<br>(0 - 0)         |
| Digestive diseases                                  | 9<br>(6 - 12)     | 0<br>(0 - 0)       | 0<br>(0 - 0)        | 1<br>(1 - 2)         | 2<br>(1 - 3)         | 6<br>(4 - 8)         |
| Peptic ulcer disease                                | 1<br>(1 - 2)      | 0<br>(0 - 0)       | 0<br>(0 - 0)        | 0<br>(0 - 0)         | 0<br>(0 - 1)         | 1<br>(0 - 1)         |
| Gastritis and duodenitis                            | 0<br>(0 - 0)      | 0<br>(0 - 0)       | 0<br>(0 - 0)        | 0<br>(0 - 0)         | 0<br>(0 - 0)         | 0<br>(0 - 0)         |
| Appendicitis                                        | 1<br>(0 - 1)      | 0<br>(0 - 0)       | 0<br>(0 - 0)        | 0<br>(0 - 0)         | 0<br>(0 - 0)         | 0<br>(0 - 1)         |
| Paralytic ileus and intestinal obstruction          | 2<br>(1 - 4)      | 0<br>(0 - 0)       | 0<br>(0 - 0)        | 0<br>(0 - 0)         | 1<br>(0 - 1)         | 1<br>(1 - 3)         |
| Inguinal, femoral, and abdominal hernia             | 0<br>(0 - 0)      | 0<br>(0 - 0)       | 0<br>(0 - 0)        | 0<br>(0 - 0)         | 0<br>(0 - 0)         | 0<br>(0 - 0)         |
| Inflammatory bowel disease                          | 2<br>(1 - 3)      | 0<br>(0 - 0)       | 0<br>(0 - 0)        | 0<br>(0 - 0)         | 0<br>(0 - 1)         | 1<br>(1 - 2)         |
| Vascular intestinal disorders                       | 0<br>(0 - 1)      | 0<br>(0 - 0)       | 0<br>(0 - 0)        | 0<br>(0 - 0)         | 0<br>(0 - 0)         | 0<br>(0 - 0)         |
| Gallbladder and biliary diseases                    | 1<br>(1 - 2)      | 0<br>(0 - 0)       | 0<br>(0 - 0)        | 0<br>(0 - 0)         | 1<br>(0 - 1)         | 0<br>(0 - 1)         |
| Pancreatitis                                        | 0<br>(0 - 0)      | 0<br>(0 - 0)       | 0<br>(0 - 0)        | 0<br>(0 - 0)         | 0<br>(0 - 0)         | 0<br>(0 - 0)         |
| Other digestive diseases                            | 1<br>(1 - 2)      | 0<br>(0 - 0)       | 0<br>(0 - 0)        | 0<br>(0 - 0)         | 0<br>(0 - 0)         | 1<br>(1 - 2)         |
| Neurological disorders                              | 11<br>(8 - 14)    | 0<br>(0 - 0)       | 0<br>(0 - 0)        | 0<br>(0 - 1)         | 2<br>(1 - 2)         | 9<br>(6 - 12)        |
| Alzheimer disease and other dementias               | 8<br>(6 - 11)     | --                 | --                  | 0<br>(0 - 0)         | 0<br>(0 - 1)         | 7<br>(5 - 10)        |
| Parkinson disease                                   | 1<br>(1 - 2)      | --                 | --                  | 0<br>(0 - 0)         | 0<br>(0 - 1)         | 1<br>(0 - 1)         |
| Epilepsy                                            | 1<br>(0 - 2)      | 0<br>(0 - 0)       | 0<br>(0 - 0)        | 0<br>(0 - 0)         | 0<br>(0 - 1)         | 0<br>(0 - 1)         |
| Multiple sclerosis                                  | 0<br>(0 - 0)      | --                 | --                  | 0<br>(0 - 0)         | 0<br>(0 - 0)         | 0<br>(0 - 0)         |
| Other neurological disorders                        | 1<br>(1 - 1)      | 0<br>(0 - 0)       | 0<br>(0 - 0)        | 0<br>(0 - 0)         | 1<br>(0 - 1)         | 0<br>(0 - 0)         |
| Mental and substance use disorders                  | 1<br>(1 - 2)      | 0<br>(0 - 0)       | 0<br>(0 - 0)        | 1<br>(0 - 1)         | 0<br>(0 - 0)         | 0<br>(0 - 0)         |
| Schizophrenia                                       | 0<br>(0 - 0)      | --                 | --                  | 0<br>(0 - 0)         | 0<br>(0 - 0)         | 0<br>(0 - 0)         |
| Alcohol use disorders                               | 0<br>(0 - 0)      | --                 | --                  | 0<br>(0 - 0)         | 0<br>(0 - 0)         | 0<br>(0 - 0)         |
| Drug use disorders                                  | 1<br>(1 - 1)      | 0<br>(0 - 0)       | --                  | 0<br>(0 - 0)         | 0<br>(0 - 0)         | 0<br>(0 - 0)         |
| Opioid use disorders                                | 0<br>(0 - 0)      | 0<br>(0 - 0)       | --                  | 0<br>(0 - 0)         | 0<br>(0 - 0)         | 0<br>(0 - 0)         |
| Cocaine use disorders                               | 0<br>(0 - 0)      | 0<br>(0 - 0)       | --                  | 0<br>(0 - 0)         | 0<br>(0 - 0)         | 0<br>(0 - 0)         |
| Amphetamine use disorders                           | 0<br>(0 - 0)      | 0<br>(0 - 0)       | --                  | 0<br>(0 - 0)         | 0<br>(0 - 0)         | 0<br>(0 - 0)         |
| Other drug use disorders                            | 0<br>(0 - 1)      | 0<br>(0 - 0)       | --                  | 0<br>(0 - 0)         | 0<br>(0 - 0)         | 0<br>(0 - 0)         |
| Eating disorders                                    | 0<br>(0 - 0)      | --                 | 0<br>(0 - 0)        | 0<br>(0 - 0)         | --                   | --                   |
| Anorexia nervosa                                    | 0<br>(0 - 0)      | --                 | 0<br>(0 - 0)        | 0<br>(0 - 0)         | --                   | --                   |
| Diabetes, urogenital, blood, and endocrine diseases | 94<br>(74 - 118)  | 0<br>(0 - 0)       | 0<br>(0 - 0)        | 11<br>(8 - 14)       | 36<br>(26 - 47)      | 47<br>(38 - 58)      |
| Diabetes mellitus                                   | 70<br>(54 - 89)   | 0<br>(0 - 0)       | 0<br>(0 - 0)        | 5<br>(4 - 7)         | 26<br>(18 - 35)      | 39<br>(30 - 50)      |
| Acute glomerulonephritis                            | 0<br>(0 - 0)      | 0<br>(0 - 0)       | 0<br>(0 - 0)        | 0<br>(0 - 0)         | 0<br>(0 - 0)         | 0<br>(0 - 0)         |
| Chronic kidney disease                              | 10<br>(5 - 14)    | 0<br>(0 - 0)       | 0<br>(0 - 0)        | 2<br>(1 - 3)         | 5<br>(2 - 7)         | 3<br>(2 - 5)         |
| Chronic kidney disease due to diabetes mellitus     | 0<br>(0 - 0)      | 0<br>(0 - 0)       | 0<br>(0 - 0)        | 0<br>(0 - 0)         | 0<br>(0 - 0)         | 0<br>(0 - 0)         |

Web Table 31- Brunei deaths with 95% UI by age, sex, and cause in 2013

| Cause                                               | Females, All Ages | Females, 0-4 Years | Females, 5-14 Years | Females, 15-49 Years | Females, 50-69 Years | Females, 70-80 Years |
|-----------------------------------------------------|-------------------|--------------------|---------------------|----------------------|----------------------|----------------------|
| Chronic kidney disease due to hypertension          | 4<br>(2 - 6)      | 0<br>(0 - 0)       | 0<br>(0 - 0)        | 1<br>(1 - 2)         | 1<br>(0 - 1)         | 2<br>(1 - 3)         |
| Chronic kidney disease due to glomerulonephritis    | 0                 | 0                  | 0                   | 0                    | 0                    | 0                    |
| Chronic kidney disease due to other causes          | 6<br>(3 - 9)      | 0<br>(0 - 0)       | 0<br>(0 - 0)        | 1<br>(0 - 2)         | 4<br>(2 - 6)         | 2<br>(0 - 3)         |
| Urinary diseases and male infertility               | 7<br>(4 - 16)     | 0<br>(0 - 0)       | 0<br>(0 - 0)        | 1<br>(0 - 1)         | 3<br>(1 - 7)         | 4<br>(2 - 8)         |
| Interstitial nephritis and urinary tract infections | 6                 | 0                  | 0                   | 0                    | 3                    | 3                    |
| Urolithiasis                                        | 0<br>(0 - 0)      | --                 | 0<br>(0 - 0)        | 0<br>(0 - 0)         | 0<br>(0 - 0)         | 0<br>(0 - 0)         |
| Other urinary diseases                              | 1<br>(0 - 2)      | 0<br>(0 - 0)       | 0<br>(0 - 0)        | 0<br>(0 - 0)         | 0<br>(0 - 1)         | 1<br>(0 - 1)         |
| Gynecological diseases                              | 0                 | --                 | --                  | 0                    | 0                    | 0                    |
| Uterine fibroids                                    | 0<br>(0 - 0)      | --                 | --                  | 0<br>(0 - 0)         | 0<br>(0 - 0)         | 0<br>(0 - 0)         |
| Polycystic ovarian syndrome                         | 0<br>(0 - 0)      | --                 | --                  | 0<br>(0 - 0)         | 0<br>(0 - 0)         | --                   |
| Endometriosis                                       | 0<br>(0 - 0)      | --                 | --                  | 0<br>(0 - 0)         | 0<br>(0 - 0)         | --                   |
| Genital prolapse                                    | 0<br>(0 - 0)      | --                 | --                  | 0<br>(0 - 0)         | 0<br>(0 - 0)         | 0<br>(0 - 0)         |
| Other gynecological diseases                        | 0<br>(0 - 0)      | --                 | --                  | 0<br>(0 - 0)         | 0<br>(0 - 0)         | 0<br>(0 - 0)         |
| Hemoglobinopathies and hemolytic anemias            | 1<br>(1 - 2)      | 0<br>(0 - 0)       | 0<br>(0 - 0)        | 0<br>(0 - 1)         | 0<br>(0 - 0)         | 0<br>(0 - 0)         |
| Thalassemias                                        | 0<br>(0 - 1)      | 0<br>(0 - 0)       | 0<br>(0 - 0)        | 0<br>(0 - 0)         | 0<br>(0 - 0)         | 0<br>(0 - 0)         |
| Sickle cell disorders                               | 0<br>(0 - 0)      | 0<br>(0 - 0)       | 0<br>(0 - 0)        | 0<br>(0 - 0)         | 0<br>(0 - 0)         | 0<br>(0 - 0)         |
| G6PD deficiency                                     | 0<br>(0 - 0)      | 0<br>(0 - 0)       | 0<br>(0 - 0)        | 0<br>(0 - 0)         | 0<br>(0 - 0)         | 0<br>(0 - 0)         |
| Other hemoglobinopathies and hemolytic anemias      | 1<br>(0 - 1)      | 0<br>(0 - 0)       | 0<br>(0 - 0)        | 0<br>(0 - 0)         | 0<br>(0 - 0)         | 0<br>(0 - 0)         |
| Endocrine, metabolic, blood, and immune disorders   | 5<br>(2 - 7)      | 0<br>(0 - 0)       | 0<br>(0 - 0)        | 2<br>(1 - 3)         | 2<br>(1 - 3)         | 1<br>(0 - 2)         |
| Musculoskeletal disorders                           | 0                 | --                 | 0                   | 0                    | 0                    | 0                    |
| Rheumatoid arthritis                                | 0<br>(0 - 0)      | --                 | 0<br>(0 - 0)        | 0<br>(0 - 0)         | 0<br>(0 - 0)         | 0<br>(0 - 0)         |
| Other musculoskeletal disorders                     | 0<br>(0 - 0)      | --                 | 0<br>(0 - 0)        | 0<br>(0 - 0)         | 0<br>(0 - 0)         | 0<br>(0 - 0)         |
| Other non-communicable diseases                     | 12<br>(9 - 16)    | 10<br>(7 - 13)     | 1<br>(1 - 1)        | 1<br>(1 - 2)         | 0<br>(0 - 0)         | 0<br>(0 - 0)         |
| Congenital anomalies                                | 11<br>(8 - 15)    | 9<br>(7 - 12)      | 1<br>(1 - 1)        | 1<br>(1 - 2)         | 0<br>(0 - 0)         | 0<br>(0 - 0)         |
| Neural tube defects                                 | 0<br>(0 - 0)      | 0<br>(0 - 0)       | 0<br>(0 - 0)        | 0<br>(0 - 0)         | 0<br>(0 - 0)         | 0<br>(0 - 0)         |
| Congenital heart anomalies                          | 3<br>(2 - 5)      | 3<br>(2 - 4)       | 0<br>(0 - 0)        | 0<br>(0 - 0)         | 0<br>(0 - 0)         | 0<br>(0 - 0)         |
| Cleft lip and cleft palate                          | 0<br>(0 - 0)      | 0<br>(0 - 0)       | --                  | --                   | --                   | --                   |
| Down syndrome                                       | 2<br>(1 - 2)      | 1<br>(0 - 2)       | 0<br>(0 - 1)        | 0<br>(0 - 1)         | 0<br>(0 - 0)         | 0<br>(0 - 0)         |
| Chromosomal unbalanced rearrangements               | 1                 | 1                  | 0                   | 0                    | 0                    | 0                    |
| Other congenital anomalies                          | 5<br>(3 - 7)      | 4<br>(3 - 6)       | 0<br>(0 - 1)        | 0<br>(0 - 1)         | 0<br>(0 - 0)         | 0<br>(0 - 0)         |
| Skin and subcutaneous diseases                      | 0                 | 0                  | 0                   | 0                    | 0                    | 0                    |
| Cellulitis                                          | 0<br>(0 - 0)      | 0<br>(0 - 0)       | 0<br>(0 - 0)        | 0<br>(0 - 0)         | 0<br>(0 - 0)         | 0<br>(0 - 0)         |
| Pyoderma                                            | 0<br>(0 - 0)      | 0<br>(0 - 0)       | 0<br>(0 - 0)        | 0<br>(0 - 0)         | 0<br>(0 - 0)         | 0<br>(0 - 0)         |
| Decubitus ulcer                                     | 0<br>(0 - 0)      | 0<br>(0 - 0)       | 0<br>(0 - 0)        | 0<br>(0 - 0)         | 0<br>(0 - 0)         | 0<br>(0 - 0)         |
| Other skin and subcutaneous diseases                | 0<br>(0 - 0)      | 0<br>(0 - 0)       | 0<br>(0 - 0)        | 0<br>(0 - 0)         | 0<br>(0 - 0)         | 0<br>(0 - 0)         |
| Sudden infant death syndrome                        | 1<br>(0 - 2)      | 1<br>(0 - 2)       | --                  | --                   | --                   | --                   |
| Injuries                                            | 29<br>(24 - 35)   | 2<br>(1 - 3)       | 2<br>(1 - 2)        | 16<br>(13 - 20)      | 5<br>(3 - 6)         | 5<br>(3 - 6)         |
| Transport injuries                                  | 14<br>(11 - 18)   | 0<br>(0 - 0)       | 1<br>(0 - 1)        | 10<br>(7 - 12)       | 3<br>(2 - 4)         | 1<br>(1 - 1)         |
| Road injuries                                       | 13<br>(11 - 17)   | 0<br>(0 - 0)       | 1<br>(0 - 1)        | 9<br>(7 - 12)        | 3<br>(2 - 4)         | 1<br>(1 - 1)         |
| Pedestrian road injuries                            | 2<br>(1 - 3)      | 0<br>(0 - 0)       | 0<br>(0 - 0)        | 1<br>(1 - 2)         | 0<br>(0 - 1)         | 0<br>(0 - 0)         |

Web Table 31- Brunei deaths with 95% UI by age, sex, and cause in 2013

| Cause                                           | Females, All Ages | Females, 0-4 Years | Females, 5-14 Years | Females, 15-49 Years | Females, 50-69 Years | Females, 70-80 Years |
|-------------------------------------------------|-------------------|--------------------|---------------------|----------------------|----------------------|----------------------|
| Cyclist road injuries                           | 1<br>(0 - 1)      | 0<br>(0 - 0)       | 0<br>(0 - 0)        | 0<br>(0 - 1)         | 0<br>(0 - 0)         | 0<br>(0 - 0)         |
| Motorcyclist road injuries                      | 2<br>(1 - 3)      | 0<br>(0 - 0)       | 0<br>(0 - 0)        | 1<br>(1 - 2)         | 0<br>(0 - 1)         | 0<br>(0 - 0)         |
| Motor vehicle road injuries                     | 9<br>(6 - 11)     | 0<br>(0 - 0)       | 0<br>(0 - 1)        | 6<br>(5 - 8)         | 2<br>(1 - 2)         | 0<br>(0 - 1)         |
| Other road injuries                             | 0<br>(0 - 0)      | 0<br>(0 - 0)       | 0<br>(0 - 0)        | 0<br>(0 - 0)         | 0<br>(0 - 0)         | 0<br>(0 - 0)         |
| Other transport injuries                        | 1<br>(0 - 1)      | 0<br>(0 - 0)       | 0<br>(0 - 0)        | 0<br>(0 - 1)         | 0<br>(0 - 0)         | 0<br>(0 - 0)         |
| Unintentional injuries                          | 11<br>(9 - 14)    | 2<br>(1 - 3)       | 1<br>(1 - 1)        | 4<br>(3 - 5)         | 2<br>(1 - 2)         | 3<br>(2 - 5)         |
| Falls                                           | 2<br>(1 - 3)      | 0<br>(0 - 0)       | 0<br>(0 - 0)        | 0<br>(0 - 0)         | 0<br>(0 - 1)         | 1<br>(0 - 2)         |
| Drowning                                        | 4<br>(3 - 5)      | 1<br>(1 - 2)       | 1<br>(0 - 1)        | 1<br>(1 - 2)         | 0<br>(0 - 0)         | 0<br>(0 - 0)         |
| Fire, heat, and hot substances                  | 2<br>(1 - 3)      | 0<br>(0 - 0)       | 0<br>(0 - 0)        | 1<br>(1 - 2)         | 0<br>(0 - 1)         | 0<br>(0 - 1)         |
| Poisonings                                      | 0<br>(0 - 0)      | 0<br>(0 - 0)       | 0<br>(0 - 0)        | 0<br>(0 - 0)         | 0<br>(0 - 0)         | 0<br>(0 - 0)         |
| Exposure to mechanical forces                   | 1<br>(1 - 1)      | 0<br>(0 - 0)       | 0<br>(0 - 0)        | 0<br>(0 - 0)         | 0<br>(0 - 0)         | 0<br>(0 - 0)         |
| Unintentional firearm injuries                  | 0<br>(0 - 0)      | 0<br>(0 - 0)       | 0<br>(0 - 0)        | 0<br>(0 - 0)         | 0<br>(0 - 0)         | 0<br>(0 - 0)         |
| Unintentional suffocation                       | 0<br>(0 - 0)      | 0<br>(0 - 0)       | 0<br>(0 - 0)        | 0<br>(0 - 0)         | 0<br>(0 - 0)         | 0<br>(0 - 0)         |
| Other exposure to mechanical forces             | 1<br>(0 - 1)      | 0<br>(0 - 0)       | 0<br>(0 - 0)        | 0<br>(0 - 0)         | 0<br>(0 - 0)         | 0<br>(0 - 0)         |
| Adverse effects of medical treatment            | 1<br>(0 - 1)      | 0<br>(0 - 0)       | 0<br>(0 - 0)        | 0<br>(0 - 0)         | 0<br>(0 - 0)         | 0<br>(0 - 1)         |
| Animal contact                                  | 0<br>(0 - 0)      | 0<br>(0 - 0)       | 0<br>(0 - 0)        | 0<br>(0 - 0)         | 0<br>(0 - 0)         | 0<br>(0 - 0)         |
| Venomous animal contact                         | 0<br>(0 - 0)      | 0<br>(0 - 0)       | 0<br>(0 - 0)        | 0<br>(0 - 0)         | 0<br>(0 - 0)         | 0<br>(0 - 0)         |
| Non-venomous animal contact                     | 0<br>(0 - 0)      | 0<br>(0 - 0)       | 0<br>(0 - 0)        | 0<br>(0 - 0)         | 0<br>(0 - 0)         | 0<br>(0 - 0)         |
| Foreign body                                    | 2<br>(1 - 5)      | 0<br>(0 - 0)       | 0<br>(0 - 0)        | 0<br>(0 - 1)         | 0<br>(0 - 1)         | 1<br>(0 - 2)         |
| Pulmonary aspiration and foreign body in airway | 2<br>(1 - 5)      | 0<br>(0 - 0)       | 0<br>(0 - 0)        | 0<br>(0 - 1)         | 0<br>(0 - 1)         | 1<br>(0 - 2)         |
| Foreign body in other body part                 | 0<br>(0 - 0)      | 0<br>(0 - 0)       | 0<br>(0 - 0)        | 0<br>(0 - 0)         | 0<br>(0 - 0)         | 0<br>(0 - 0)         |
| Other unintentional injuries                    | 0<br>(0 - 0)      | 0<br>(0 - 0)       | 0<br>(0 - 0)        | 0<br>(0 - 0)         | 0<br>(0 - 0)         | 0<br>(0 - 0)         |
| Self-harm and interpersonal violence            | 4<br>(2 - 5)      | 0<br>(0 - 0)       | 0<br>(0 - 0)        | 3<br>(2 - 4)         | 0<br>(0 - 1)         | 0<br>(0 - 1)         |
| Self-harm                                       | 3<br>(1 - 4)      | --                 | 0<br>(0 - 0)        | 2<br>(1 - 3)         | 0<br>(0 - 0)         | 0<br>(0 - 1)         |
| Interpersonal violence                          | 1<br>(1 - 1)      | 0<br>(0 - 0)       | 0<br>(0 - 0)        | 1<br>(0 - 1)         | 0<br>(0 - 0)         | 0<br>(0 - 0)         |
| Assault by firearm                              | 0<br>(0 - 0)      | 0<br>(0 - 0)       | 0<br>(0 - 0)        | 0<br>(0 - 0)         | 0<br>(0 - 0)         | 0<br>(0 - 0)         |
| Assault by sharp object                         | 0<br>(0 - 1)      | 0<br>(0 - 0)       | 0<br>(0 - 0)        | 0<br>(0 - 1)         | 0<br>(0 - 0)         | 0<br>(0 - 0)         |
| Assault by other means                          | 1<br>(0 - 1)      | 0<br>(0 - 0)       | 0<br>(0 - 0)        | 0<br>(0 - 1)         | 0<br>(0 - 0)         | 0<br>(0 - 0)         |

Web Table 31- Bulgaria deaths with 95% UI by age, sex, and cause in 2013

| Cause                                                             | Both Sexes, All Ages           | Both Sexes, 0-4 Years | Both Sexes, 5-14 Years | Both Sexes, 15-49 Years  | Both Sexes, 50-69 Years     | Both Sexes, 70-80 Years     |
|-------------------------------------------------------------------|--------------------------------|-----------------------|------------------------|--------------------------|-----------------------------|-----------------------------|
| All causes                                                        | 110,311<br>(107,979 - 112,787) | 676<br>(471 - 962)    | 139<br>(113 - 174)     | 5,505<br>(5,333 - 5,688) | 27,558<br>(26,811 - 28,397) | 76,433<br>(74,725 - 78,092) |
| Communicable, maternal, neonatal, and nutritional diseases        | 2,858<br>(2,500 - 3,808)       | 351<br>(242 - 507)    | 18<br>(14 - 23)        | 292<br>(250 - 339)       | 651<br>(564 - 828)          | 1,546<br>(1,269 - 2,326)    |
| HIV/AIDS and tuberculosis                                         | 272<br>(215 - 344)             | 0<br>(0 - 1)          | 1<br>(0 - 1)           | 98<br>(65 - 133)         | 108<br>(86 - 140)           | 65<br>(54 - 86)             |
| Tuberculosis                                                      | 148<br>(131 - 195)             | 0<br>(0 - 0)          | 0<br>(0 - 0)           | 18<br>(15 - 22)          | 73<br>(62 - 98)             | 57<br>(47 - 77)             |
| HIV/AIDS                                                          | 124<br>(71 - 188)              | 0<br>(0 - 1)          | 0<br>(0 - 1)           | 79<br>(47 - 115)         | 35<br>(17 - 61)             | 9<br>(4 - 16)               |
| HIV/AIDS resulting in mycobacterial infection                     | 7<br>(4 - 11)                  | 0<br>(0 - 0)          | 0<br>(0 - 0)           | 4<br>(3 - 7)             | 2<br>(1 - 4)                | 1<br>(0 - 1)                |
| HIV/AIDS resulting in other diseases                              | 117<br>(66 - 177)              | 0<br>(0 - 1)          | 0<br>(0 - 1)           | 75<br>(44 - 109)         | 33<br>(16 - 57)             | 8<br>(4 - 15)               |
| Diarrhea, lower respiratory, and other common infectious diseases | 2,068<br>(1,750 - 3,030)       | 135<br>(91 - 190)     | 14<br>(10 - 19)        | 145<br>(123 - 187)       | 482<br>(404 - 662)          | 1,292<br>(1,021 - 2,082)    |
| Diarrheal diseases                                                | 25<br>(20 - 32)                | 10<br>(6 - 16)        | 0<br>(0 - 0)           | 2<br>(2 - 3)             | 5<br>(4 - 6)                | 8<br>(6 - 11)               |
| Intestinal infectious diseases                                    | 14<br>(6 - 26)                 | 2<br>(1 - 4)          | 2<br>(1 - 3)           | 5<br>(2 - 10)            | 3<br>(1 - 6)                | 3<br>(1 - 5)                |
| Typhoid fever                                                     | 10<br>(4 - 19)                 | 1<br>(1 - 3)          | 1<br>(0 - 2)           | 3<br>(1 - 7)             | 2<br>(1 - 5)                | 2<br>(1 - 4)                |
| Paratyphoid fever                                                 | 3<br>(1 - 6)                   | 0<br>(0 - 1)          | 0<br>(0 - 1)           | 1<br>(0 - 2)             | 1<br>(0 - 1)                | 0<br>(0 - 1)                |
| Other intestinal infectious diseases                              | 1<br>(0 - 5)                   | 0<br>(0 - 2)          | 0<br>(0 - 1)           | 0<br>(0 - 2)             | 0<br>(0 - 2)                | 0<br>(0 - 2)                |
| Lower respiratory infections                                      | 1,922<br>(1,605 - 2,894)       | 102<br>(68 - 146)     | 8<br>(6 - 12)          | 116<br>(94 - 161)        | 442<br>(365 - 626)          | 1,254<br>(982 - 2,045)      |
| Upper respiratory infections                                      | 3<br>(1 - 8)                   | 0<br>(0 - 0)          | 0<br>(0 - 0)           | 0<br>(0 - 1)             | 1<br>(0 - 2)                | 2<br>(0 - 6)                |
| Otitis media                                                      | 1<br>(1 - 1)                   | 0<br>(0 - 0)          | 0<br>(0 - 0)           | 0<br>(0 - 0)             | 0<br>(0 - 0)                | 0<br>(0 - 0)                |
| Meningitis                                                        | 49<br>(43 - 56)                | 11<br>(7 - 16)        | 2<br>(1 - 2)           | 10<br>(9 - 12)           | 16<br>(14 - 19)             | 10<br>(9 - 12)              |
| Pneumococcal meningitis                                           | 14<br>(11 - 17)                | 2<br>(1 - 3)          | 0<br>(0 - 1)           | 3<br>(2 - 4)             | 5<br>(3 - 8)                | 3<br>(2 - 4)                |
| H influenzae type B meningitis                                    | 6<br>(4 - 8)                   | 3<br>(2 - 5)          | 0<br>(0 - 0)           | 1<br>(1 - 1)             | 1<br>(1 - 2)                | 1<br>(1 - 1)                |
| Meningococcal meningitis                                          | 12<br>(8 - 15)                 | 3<br>(2 - 5)          | 0<br>(0 - 1)           | 2<br>(1 - 4)             | 3<br>(2 - 5)                | 2<br>(1 - 3)                |
| Other meningitis                                                  | 18<br>(13 - 21)                | 3<br>(2 - 5)          | 0<br>(0 - 1)           | 4<br>(2 - 5)             | 6<br>(4 - 9)                | 4<br>(3 - 5)                |
| Encephalitis                                                      | 45<br>(26 - 57)                | 8<br>(4 - 13)         | 3<br>(1 - 4)           | 11<br>(6 - 14)           | 13<br>(6 - 18)              | 10<br>(5 - 14)              |
| Diphtheria                                                        | 0<br>(0 - 1)                   | 0<br>(0 - 0)          | 0<br>(0 - 0)           | 0<br>(0 - 0)             | 0<br>(0 - 0)                | --<br>(0 - 0)               |
| Whooping cough                                                    | 1<br>(0 - 3)                   | 1<br>(0 - 2)          | 0<br>(0 - 0)           | 0<br>(0 - 0)             | 0<br>(0 - 0)                | --<br>(0 - 0)               |
| Tetanus                                                           | 1<br>(1 - 3)                   | 0<br>(0 - 0)          | 0<br>(0 - 0)           | 0<br>(0 - 0)             | 0<br>(0 - 1)                | 0<br>(0 - 1)                |
| Measles                                                           | 0<br>(0 - 0)                   | 0<br>(0 - 0)          | 0<br>(0 - 0)           | 0<br>(0 - 0)             | 0<br>(0 - 0)                | --<br>(0 - 0)               |
| Varicella and herpes zoster                                       | 7<br>(2 - 20)                  | 0<br>(0 - 1)          | 0<br>(0 - 0)           | 1<br>(0 - 1)             | 1<br>(0 - 2)                | 5<br>(0 - 18)               |
| Neglected tropical diseases and malaria                           | 18<br>(16 - 20)                | 0<br>(0 - 1)          | 0<br>(0 - 0)           | 3<br>(3 - 4)             | 7<br>(6 - 8)                | 7<br>(6 - 9)                |
| Cysticercosis                                                     | 0<br>(0 - 0)                   | 0<br>(0 - 0)          | 0<br>(0 - 0)           | 0<br>(0 - 0)             | 0<br>(0 - 0)                | 0<br>(0 - 0)                |
| Cystic echinococcosis                                             | 7<br>(7 - 8)                   | 0<br>(0 - 0)          | 0<br>(0 - 0)           | 1<br>(1 - 1)             | 3<br>(3 - 3)                | 3<br>(3 - 3)                |
| Dengue                                                            | 1<br>(1 - 1)                   | 0<br>(0 - 0)          | 0<br>(0 - 0)           | 0<br>(0 - 0)             | 0<br>(0 - 0)                | 0<br>(0 - 0)                |
| Rabies                                                            | 1<br>(1 - 1)                   | 0<br>(0 - 0)          | 0<br>(0 - 0)           | 0<br>(0 - 0)             | 0<br>(0 - 0)                | 0<br>(0 - 0)                |
| Other neglected tropical diseases                                 | 9<br>(6 - 11)                  | 0<br>(0 - 0)          | 0<br>(0 - 0)           | 1<br>(1 - 2)             | 3<br>(2 - 4)                | 4<br>(3 - 5)                |
| Maternal disorders                                                | 11<br>(9 - 13)                 | --                    | 0<br>(0 - 0)           | 10<br>(8 - 13)           | --                          | --                          |
| Maternal hemorrhage                                               | 1<br>(1 - 2)                   | --                    | 0<br>(0 - 0)           | 1<br>(1 - 2)             | --                          | --                          |
| Maternal sepsis and other maternal infections                     | 1<br>(1 - 1)                   | --                    | 0<br>(0 - 0)           | 1<br>(1 - 1)             | --                          | --                          |
| Maternal hypertensive disorders                                   | 1<br>(1 - 2)                   | --                    | 0<br>(0 - 0)           | 1<br>(1 - 2)             | --                          | --                          |
| Maternal obstructed labor                                         | 1<br>(1 - 2)                   | --                    | 0<br>(0 - 0)           | 1<br>(1 - 2)             | --                          | --                          |
| Maternal abortive outcome                                         | 3<br>(2 - 4)                   | --                    | 0<br>(0 - 0)           | 3<br>(2 - 4)             | --                          | --                          |
| Indirect maternal deaths                                          | 1<br>(0 - 1)                   | --                    | 0<br>(0 - 0)           | 1<br>(0 - 1)             | --                          | --                          |



Web Table 31- Bulgaria deaths with 95% UI by age, sex, and cause in 2013

| Cause                                                            | Both Sexes, All Ages           | Both Sexes, 0-4 Years | Both Sexes, 5-14 Years | Both Sexes, 15-49 Years  | Both Sexes, 50-69 Years     | Both Sexes, 70-80 Years     |
|------------------------------------------------------------------|--------------------------------|-----------------------|------------------------|--------------------------|-----------------------------|-----------------------------|
| Late maternal deaths                                             | 1<br>(1 - 2)                   | --                    | 0<br>(0 - 0)           | 1<br>(0 - 2)             | --                          | --                          |
| Maternal deaths aggravated by HIV/AIDS                           | 0<br>(0 - 0)                   | --                    | --                     | 0<br>(0 - 0)             | --                          | --                          |
| Other maternal disorders                                         | 2<br>(1 - 2)                   | --                    | 0<br>(0 - 0)           | 2<br>(1 - 2)             | --                          | --                          |
| Neonatal disorders                                               | 203<br>(142 - 306)             | 203<br>(142 - 306)    | --                     | --                       | --                          | --                          |
| Neonatal preterm birth complications                             | 108<br>(58 - 170)              | 108<br>(58 - 170)     | --                     | --                       | --                          | --                          |
| Neonatal encephalopathy due to birth asphyxia and trauma         | 48<br>(28 - 80)                | 48<br>(28 - 80)       | --                     | --                       | --                          | --                          |
| Neonatal sepsis and other neonatal infections                    | 10<br>(4 - 19)                 | 10<br>(4 - 19)        | --                     | --                       | --                          | --                          |
| Hemolytic disease and other neonatal jaundice                    | 0<br>(0 - 1)                   | 0<br>(0 - 1)          | --                     | --                       | --                          | --                          |
| Other neonatal disorders                                         | 36<br>(18 - 81)                | 36<br>(18 - 81)       | --                     | --                       | --                          | --                          |
| Nutritional deficiencies                                         | 217<br>(118 - 258)             | 3<br>(2 - 5)          | 1<br>(1 - 2)           | 25<br>(16 - 30)          | 36<br>(21 - 44)             | 152<br>(78 - 187)           |
| Protein-energy malnutrition                                      | 5<br>(1 - 10)                  | 0<br>(0 - 1)          | 0<br>(0 - 0)           | 1<br>(0 - 1)             | 1<br>(0 - 2)                | 3<br>(1 - 6)                |
| Iodine deficiency                                                | 1<br>(0 - 5)                   | 0<br>(0 - 0)          | 0<br>(0 - 0)           | 0<br>(0 - 0)             | 0<br>(0 - 1)                | 1<br>(0 - 4)                |
| Iron-deficiency anemia                                           | 206<br>(114 - 244)             | 2<br>(1 - 4)          | 1<br>(1 - 1)           | 23<br>(15 - 28)          | 34<br>(20 - 42)             | 146<br>(76 - 179)           |
| Other nutritional deficiencies                                   | 5<br>(2 - 12)                  | 0<br>(0 - 1)          | 0<br>(0 - 0)           | 1<br>(0 - 2)             | 1<br>(0 - 2)                | 3<br>(1 - 8)                |
| Other communicable, maternal, neonatal, and nutritional diseases | 69<br>(53 - 81)                | 8<br>(4 - 15)         | 1<br>(1 - 2)           | 11<br>(9 - 13)           | 19<br>(15 - 23)             | 29<br>(19 - 36)             |
| Sexually transmitted diseases excluding HIV                      | 6<br>(2 - 12)                  | 4<br>(0 - 9)          | 0<br>(0 - 1)           | 0<br>(0 - 1)             | 1<br>(0 - 1)                | 1<br>(0 - 1)                |
| Syphilis                                                         | 5<br>(1 - 11)                  | 4<br>(0 - 9)          | 0<br>(0 - 1)           | 0<br>(0 - 0)             | 0<br>(0 - 1)                | 0<br>(0 - 1)                |
| Chlamydial infection                                             | 0<br>(0 - 0)                   | --                    | 0<br>(0 - 0)           | 0<br>(0 - 0)             | 0<br>(0 - 0)                | 0<br>(0 - 0)                |
| Gonococcal infection                                             | 0<br>(0 - 0)                   | --                    | 0<br>(0 - 0)           | 0<br>(0 - 0)             | 0<br>(0 - 0)                | 0<br>(0 - 0)                |
| Other sexually transmitted diseases                              | 0<br>(0 - 0)                   | --                    | 0<br>(0 - 0)           | 0<br>(0 - 0)             | 0<br>(0 - 0)                | 0<br>(0 - 0)                |
| Hepatitis                                                        | 17<br>(15 - 20)                | 1<br>(0 - 1)          | 0<br>(0 - 0)           | 4<br>(4 - 5)             | 7<br>(5 - 9)                | 5<br>(3 - 6)                |
| Acute hepatitis A                                                | 4<br>(2 - 7)                   | 1<br>(0 - 1)          | 0<br>(0 - 0)           | 2<br>(1 - 3)             | 1<br>(0 - 2)                | 0<br>(0 - 1)                |
| Acute hepatitis B                                                | 12<br>(9 - 16)                 | 0<br>(0 - 1)          | 0<br>(0 - 0)           | 2<br>(1 - 4)             | 6<br>(4 - 8)                | 4<br>(3 - 5)                |
| Acute hepatitis C                                                | 1<br>(0 - 2)                   | --                    | 0<br>(0 - 0)           | 0<br>(0 - 1)             | 0<br>(0 - 1)                | 0<br>(0 - 1)                |
| Other infectious diseases                                        | 45<br>(31 - 55)                | 3<br>(2 - 5)          | 1<br>(1 - 1)           | 6<br>(4 - 7)             | 11<br>(8 - 14)              | 24<br>(14 - 31)             |
| Non-communicable diseases                                        | 104,005<br>(101,575 - 106,559) | 263<br>(181 - 366)    | 68<br>(54 - 85)        | 4,018<br>(3,855 - 4,166) | 25,789<br>(25,066 - 26,610) | 73,867<br>(72,197 - 75,591) |
| Neoplasms                                                        | 17,440<br>(16,030 - 18,214)    | 19<br>(12 - 27)       | 29<br>(23 - 37)        | 1,383<br>(1,270 - 1,456) | 7,935<br>(7,382 - 8,320)    | 8,074<br>(7,382 - 8,527)    |
| Esophageal cancer                                                | 228<br>(199 - 268)             | --                    | --                     | 18<br>(14 - 23)          | 121<br>(101 - 144)          | 88<br>(76 - 108)            |
| Stomach cancer                                                   | 1,621<br>(1,412 - 1,895)       | --                    | --                     | 84<br>(71 - 99)          | 633<br>(562 - 747)          | 904<br>(756 - 1,089)        |
| Liver cancer                                                     | 833<br>(666 - 1,055)           | --                    | 0<br>(0 - 1)           | 50<br>(37 - 67)          | 372<br>(281 - 489)          | 410<br>(327 - 518)          |
| Liver cancer due to hepatitis B                                  | 183<br>(93 - 266)              | --                    | 0<br>(0 - 0)           | 17<br>(10 - 25)          | 99<br>(46 - 147)            | 67<br>(34 - 101)            |
| Liver cancer due to hepatitis C                                  | 363<br>(256 - 501)             | --                    | 0<br>(0 - 0)           | 19<br>(12 - 28)          | 157<br>(103 - 229)          | 187<br>(133 - 253)          |
| Liver cancer due to alcohol use                                  | 209<br>(146 - 295)             | --                    | --                     | 8<br>(4 - 13)            | 83<br>(55 - 128)            | 118<br>(82 - 167)           |
| Liver cancer due to other causes                                 | 79<br>(52 - 110)               | --                    | 0<br>(0 - 0)           | 7<br>(5 - 9)             | 34<br>(22 - 49)             | 38<br>(24 - 57)             |
| Larynx cancer                                                    | 331<br>(220 - 391)             | --                    | --                     | 28<br>(21 - 38)          | 92<br>(138 - 256)           | 211<br>(59 - 112)           |
| Tracheal, bronchus and lung cancer                               | 3,419<br>(3,183 - 3,632)       | --                    | --                     | 229<br>(200 - 260)       | 2,039<br>(1,876 - 2,203)    | 1,151<br>(1,049 - 1,257)    |
| Breast cancer                                                    | 1,296<br>(830 - 1,471)         | --                    | --                     | 140<br>(116 - 176)       | 583<br>(385 - 670)          | 573<br>(317 - 676)          |
| Cervical cancer                                                  | 467<br>(361 - 539)             | --                    | --                     | 109<br>(81 - 132)        | 210<br>(158 - 251)          | 148<br>(116 - 183)          |
| Uterine cancer                                                   | 284<br>(144 - 341)             | --                    | --                     | 22<br>(11 - 28)          | 126<br>(65 - 160)           | 136<br>(65 - 171)           |
| Prostate cancer                                                  | 911<br>(653 - 1,170)           | --                    | --                     | 5<br>(3 - 7)             | 220<br>(157 - 295)          | 686<br>(466 - 890)          |

Web Table 31- Bulgaria deaths with 95% UI by age, sex, and cause in 2013

| Cause                                         | Both Sexes, All Ages        | Both Sexes, 0-4 Years | Both Sexes, 5-14 Years | Both Sexes, 15-49 Years  | Both Sexes, 50-69 Years     | Both Sexes, 70-80 Years     |
|-----------------------------------------------|-----------------------------|-----------------------|------------------------|--------------------------|-----------------------------|-----------------------------|
| Colon and rectum cancer                       | 2,643<br>(2,475 - 2,845)    | --                    | --                     | 114<br>(103 - 127)       | 987<br>(920 - 1,055)        | 1,542<br>(1,405 - 1,705)    |
| Lip and oral cavity cancer                    | 232<br>(186 - 257)          | --                    | --                     | 28<br>(20 - 34)          | 131<br>(102 - 151)          | 73<br>(61 - 86)             |
| Nasopharynx cancer                            | 43<br>(34 - 57)             | --                    | 0<br>(0 - 0)           | 9<br>(7 - 13)            | 24<br>(18 - 32)             | 10<br>(7 - 14)              |
| Other pharynx cancer                          | 138<br>(79 - 165)           | --                    | --                     | 19<br>(11 - 25)          | 88<br>(47 - 111)            | 31<br>(20 - 39)             |
| Gallbladder and biliary tract cancer          | 222<br>(152 - 271)          | --                    | --                     | 9<br>(6 - 12)            | 91<br>(62 - 112)            | 123<br>(81 - 158)           |
| Pancreatic cancer                             | 1,068<br>(999 - 1,143)      | --                    | --                     | 62<br>(54 - 71)          | 483<br>(439 - 526)          | 523<br>(476 - 573)          |
| Malignant skin melanoma                       | 155<br>(95 - 198)           | --                    | --                     | 21<br>(13 - 29)          | 55<br>(31 - 73)             | 79<br>(49 - 104)            |
| Non-melanoma skin cancer                      | 132<br>(93 - 166)           | --                    | --                     | 5<br>(4 - 7)             | 25<br>(16 - 33)             | 102<br>(71 - 131)           |
| Ovarian cancer                                | 458<br>(351 - 517)          | --                    | --                     | 53<br>(43 - 63)          | 228<br>(178 - 266)          | 177<br>(118 - 212)          |
| Testicular cancer                             | 39<br>(28 - 54)             | --                    | --                     | 23<br>(16 - 32)          | 10<br>(7 - 14)              | 7<br>(4 - 9)                |
| Kidney cancer                                 | 318<br>(272 - 364)          | 0<br>(0 - 0)          | 0<br>(0 - 0)           | 23<br>(18 - 29)          | 165<br>(140 - 191)          | 129<br>(102 - 161)          |
| Bladder cancer                                | 535<br>(419 - 605)          | --                    | --                     | 14<br>(12 - 18)          | 197<br>(156 - 226)          | 324<br>(241 - 376)          |
| Brain and nervous system cancer               | 608<br>(427 - 712)          | 5<br>(3 - 8)          | 9<br>(7 - 13)          | 108<br>(88 - 126)        | 320<br>(233 - 378)          | 165<br>(87 - 216)           |
| Thyroid cancer                                | 60<br>(39 - 75)             | --                    | 0<br>(0 - 0)           | 4<br>(3 - 5)             | 26<br>(18 - 33)             | 30<br>(19 - 39)             |
| Mesothelioma                                  | 22<br>(15 - 46)             | --                    | --                     | 3<br>(2 - 6)             | 11<br>(7 - 25)              | 7<br>(5 - 18)               |
| Hodgkin lymphoma                              | 61<br>(48 - 86)             | 0<br>(0 - 0)          | 1<br>(0 - 1)           | 21<br>(16 - 28)          | 25<br>(19 - 37)             | 14<br>(11 - 20)             |
| Non-Hodgkin lymphoma                          | 253<br>(147 - 318)          | 1<br>(1 - 2)          | 3<br>(2 - 4)           | 36<br>(22 - 46)          | 114<br>(67 - 146)           | 98<br>(50 - 131)            |
| Multiple myeloma                              | 77<br>(46 - 104)            | --                    | --                     | 6<br>(4 - 8)             | 42<br>(25 - 56)             | 29<br>(17 - 43)             |
| Leukemia                                      | 442<br>(395 - 482)          | 5<br>(3 - 8)          | 9<br>(7 - 13)          | 63<br>(55 - 71)          | 170<br>(150 - 189)          | 194<br>(167 - 218)          |
| Other neoplasms                               | 546<br>(370 - 661)          | 7<br>(4 - 10)         | 6<br>(4 - 8)           | 76<br>(53 - 92)          | 228<br>(156 - 280)          | 228<br>(139 - 291)          |
| Cardiovascular diseases                       | 64,420<br>(62,151 - 68,932) | 12<br>(8 - 17)        | 8<br>(6 - 11)          | 1,718<br>(1,611 - 1,839) | 13,345<br>(12,766 - 14,332) | 49,337<br>(47,522 - 52,924) |
| Rheumatic heart disease                       | 337<br>(204 - 412)          | 0<br>(0 - 0)          | 0<br>(0 - 1)           | 39<br>(30 - 63)          | 83<br>(63 - 139)            | 214<br>(74 - 293)           |
| Ischemic heart disease                        | 25,887<br>(22,814 - 33,618) | 0<br>(0 - 0)          | 1<br>(0 - 1)           | 855<br>(764 - 988)       | 5,875<br>(5,249 - 7,158)    | 19,157<br>(16,630 - 25,540) |
| Cerebrovascular disease                       | 26,248<br>(23,811 - 29,709) | 3<br>(2 - 5)          | 3<br>(2 - 3)           | 416<br>(352 - 503)       | 4,555<br>(3,986 - 5,342)    | 21,270<br>(19,255 - 24,118) |
| Ischemic stroke                               | 18,785<br>(15,321 - 20,809) | 0<br>(0 - 1)          | 0<br>(0 - 1)           | 94<br>(63 - 120)         | 2,145<br>(1,710 - 2,537)    | 16,545<br>(13,381 - 18,373) |
| Hemorrhagic stroke                            | 7,463<br>(5,549 - 11,182)   | 3<br>(2 - 4)          | 2<br>(2 - 3)           | 322<br>(264 - 411)       | 2,411<br>(1,906 - 3,243)    | 4,725<br>(3,283 - 7,617)    |
| Hypertensive heart disease                    | 7,625<br>(4,175 - 10,564)   | 0<br>(0 - 0)          | 0<br>(0 - 0)           | 130<br>(74 - 184)        | 1,258<br>(724 - 1,726)      | 6,237<br>(3,236 - 8,748)    |
| Cardiomyopathy and myocarditis                | 577<br>(431 - 675)          | 6<br>(4 - 8)          | 2<br>(1 - 3)           | 82<br>(59 - 101)         | 164<br>(119 - 199)          | 323<br>(238 - 385)          |
| Atrial fibrillation and flutter               | 377<br>(285 - 464)          | --                    | --                     | 4<br>(3 - 5)             | 61<br>(37 - 75)             | 312<br>(238 - 392)          |
| Aortic aneurysm                               | 256<br>(191 - 299)          | --                    | --                     | 24<br>(19 - 29)          | 113<br>(87 - 134)           | 118<br>(84 - 144)           |
| Peripheral vascular disease                   | 19<br>(15 - 23)             | --                    | --                     | 1<br>(1 - 1)             | 6<br>(5 - 8)                | 12<br>(9 - 15)              |
| Endocarditis                                  | 135<br>(101 - 198)          | 0<br>(0 - 1)          | 0<br>(0 - 0)           | 18<br>(13 - 28)          | 41<br>(30 - 61)             | 75<br>(52 - 117)            |
| Other cardiovascular and circulatory diseases | 2,959<br>(1,848 - 3,504)    | 2<br>(1 - 3)          | 2<br>(1 - 2)           | 149<br>(92 - 182)        | 1,188<br>(650 - 1,427)      | 1,618<br>(1,068 - 1,996)    |
| Chronic respiratory diseases                  | 9,425<br>(5,408 - 10,570)   | 4<br>(2 - 6)          | 1<br>(1 - 2)           | 121<br>(80 - 140)        | 1,622<br>(1,022 - 1,827)    | 7,677<br>(4,267 - 8,694)    |
| Chronic obstructive pulmonary disease         | 7,985<br>(4,461 - 9,167)    | 2<br>(1 - 3)          | 1<br>(0 - 1)           | 76<br>(48 - 91)          | 1,227<br>(746 - 1,441)      | 6,679<br>(3,645 - 7,712)    |
| Pneumoconiosis                                | 280<br>(148 - 390)          | 0<br>(0 - 0)          | 0<br>(0 - 0)           | 15<br>(8 - 20)           | 129<br>(69 - 183)           | 136<br>(68 - 206)           |
| Silicosis                                     | 93<br>(46 - 135)            | 0<br>(0 - 0)          | 0<br>(0 - 0)           | 4<br>(2 - 5)             | 27<br>(15 - 39)             | 62<br>(27 - 97)             |
| Asbestosis                                    | 27<br>(14 - 37)             | 0<br>(0 - 0)          | 0<br>(0 - 0)           | 2<br>(1 - 3)             | 15<br>(8 - 21)              | 10<br>(4 - 15)              |
| Coal workers pneumoconiosis                   | 36<br>(18 - 50)             | 0<br>(0 - 0)          | 0<br>(0 - 0)           | 1<br>(1 - 1)             | 24<br>(12 - 35)             | 11<br>(5 - 18)              |
| Other pneumoconiosis                          | 124<br>(69 - 174)           | 0<br>(0 - 0)          | 0<br>(0 - 0)           | 8<br>(4 - 11)            | 64<br>(34 - 92)             | 53<br>(28 - 82)             |

Web Table 31- Bulgaria deaths with 95% UI by age, sex, and cause in 2013

| Cause                                               | Both Sexes, All Ages     | Both Sexes, 0-4 Years | Both Sexes, 5-14 Years | Both Sexes, 15-49 Years | Both Sexes, 50-69 Years | Both Sexes, 70-80 Years  |
|-----------------------------------------------------|--------------------------|-----------------------|------------------------|-------------------------|-------------------------|--------------------------|
| Asthma                                              | 70<br>(50 - 95)          | 0<br>(0 - 0)          | 0<br>(0 - 0)           | 4<br>(3 - 5)            | 21<br>(15 - 28)         | 46<br>(31 - 65)          |
| Interstitial lung disease and pulmonary sarcoidosis | 872<br>(429 - 1,246)     | 0<br>(0 - 0)          | 0<br>(0 - 0)           | 6<br>(3 - 9)            | 213<br>(111 - 289)      | 653<br>(297 - 967)       |
| Other chronic respiratory diseases                  | 217<br>(127 - 298)       | 2<br>(1 - 3)          | 0<br>(0 - 1)           | 20<br>(13 - 25)         | 32<br>(21 - 41)         | 163<br>(86 - 239)        |
| Cirrhosis                                           | 1,747<br>(1,643 - 1,858) | 1<br>(1 - 2)          | 1<br>(1 - 2)           | 283<br>(254 - 313)      | 1,012<br>(927 - 1,095)  | 450<br>(411 - 497)       |
| Cirrhosis due to hepatitis B                        | 431<br>(247 - 585)       | 0<br>(0 - 0)          | 0<br>(0 - 0)           | 70<br>(45 - 105)        | 247<br>(146 - 348)      | 113<br>(49 - 154)        |
| Cirrhosis due to hepatitis C                        | 480<br>(311 - 702)       | 0<br>(0 - 0)          | 0<br>(0 - 0)           | 68<br>(37 - 115)        | 276<br>(171 - 420)      | 135<br>(80 - 189)        |
| Cirrhosis due to alcohol use                        | 558<br>(357 - 768)       | --                    | --                     | 68<br>(32 - 113)        | 335<br>(208 - 474)      | 155<br>(98 - 205)        |
| Cirrhosis due to other causes                       | 279<br>(200 - 376)       | 1<br>(1 - 1)          | 1<br>(1 - 1)           | 75<br>(55 - 105)        | 155<br>(104 - 215)      | 47<br>(32 - 66)          |
| Digestive diseases                                  | 1,333<br>(1,088 - 1,453) | 2<br>(1 - 4)          | 2<br>(1 - 2)           | 82<br>(69 - 92)         | 388<br>(337 - 431)      | 860<br>(663 - 958)       |
| Peptic ulcer disease                                | 323<br>(266 - 403)       | 0<br>(0 - 0)          | 0<br>(0 - 0)           | 17<br>(13 - 23)         | 104<br>(85 - 137)       | 202<br>(154 - 249)       |
| Gastritis and duodenitis                            | 39<br>(16 - 55)          | 0<br>(0 - 0)          | 0<br>(0 - 0)           | 2<br>(1 - 3)            | 11<br>(5 - 16)          | 26<br>(10 - 39)          |
| Appendicitis                                        | 49<br>(28 - 70)          | 0<br>(0 - 1)          | 0<br>(0 - 1)           | 6<br>(4 - 8)            | 16<br>(10 - 22)         | 27<br>(13 - 43)          |
| Paralytic ileus and intestinal obstruction          | 275<br>(170 - 373)       | 1<br>(0 - 1)          | 1<br>(0 - 1)           | 12<br>(7 - 16)          | 65<br>(43 - 88)         | 197<br>(117 - 266)       |
| Inguinal, femoral, and abdominal hernia             | 60<br>(43 - 101)         | 0<br>(0 - 0)          | 0<br>(0 - 0)           | 1<br>(1 - 2)            | 16<br>(11 - 27)         | 42<br>(28 - 74)          |
| Inflammatory bowel disease                          | 28<br>(16 - 38)          | 1<br>(0 - 1)          | 0<br>(0 - 0)           | 3<br>(2 - 4)            | 8<br>(4 - 11)           | 16<br>(9 - 23)           |
| Vascular intestinal disorders                       | 177<br>(106 - 265)       | 0<br>(0 - 0)          | 0<br>(0 - 0)           | 3<br>(2 - 6)            | 42<br>(24 - 70)         | 131<br>(75 - 195)        |
| Gallbladder and biliary diseases                    | 96<br>(74 - 124)         | 0<br>(0 - 0)          | 0<br>(0 - 0)           | 3<br>(2 - 4)            | 23<br>(18 - 31)         | 70<br>(51 - 94)          |
| Pancreatitis                                        | 214<br>(144 - 261)       | 0<br>(0 - 0)          | 0<br>(0 - 0)           | 29<br>(21 - 36)         | 78<br>(53 - 98)         | 107<br>(67 - 138)        |
| Other digestive diseases                            | 72<br>(51 - 91)          | 0<br>(0 - 0)          | 0<br>(0 - 0)           | 6<br>(5 - 8)            | 24<br>(17 - 30)         | 41<br>(29 - 55)          |
| Neurological disorders                              | 5,644<br>(4,784 - 6,511) | 5<br>(3 - 7)          | 5<br>(3 - 6)           | 78<br>(63 - 89)         | 356<br>(301 - 408)      | 5,201<br>(4,344 - 6,074) |
| Alzheimer disease and other dementias               | 5,027<br>(4,194 - 5,906) | --                    | --                     | 1<br>(0 - 1)            | 232<br>(185 - 276)      | 4,794<br>(3,957 - 5,667) |
| Parkinson disease                                   | 399<br>(237 - 466)       | --                    | --                     | 1<br>(1 - 1)            | 44<br>(32 - 53)         | 353<br>(198 - 420)       |
| Epilepsy                                            | 99<br>(73 - 115)         | 2<br>(1 - 3)          | 3<br>(2 - 4)           | 43<br>(33 - 52)         | 35<br>(25 - 43)         | 16<br>(11 - 20)          |
| Multiple sclerosis                                  | 64<br>(47 - 100)         | --                    | --                     | 17<br>(11 - 24)         | 23<br>(13 - 31)         | 24<br>(16 - 50)          |
| Other neurological disorders                        | 56<br>(46 - 63)          | 3<br>(2 - 5)          | 2<br>(1 - 2)           | 16<br>(13 - 18)         | 21<br>(17 - 25)         | 15<br>(12 - 17)          |
| Mental and substance use disorders                  | 191<br>(163 - 310)       | 0<br>(0 - 1)          | 0<br>(0 - 0)           | 94<br>(77 - 140)        | 75<br>(60 - 148)        | 21<br>(18 - 29)          |
| Schizophrenia                                       | 25<br>(18 - 33)          | --                    | --                     | 7<br>(5 - 10)           | 12<br>(9 - 17)          | 6<br>(4 - 8)             |
| Alcohol use disorders                               | 94<br>(71 - 216)         | --                    | --                     | 37<br>(27 - 88)         | 50<br>(36 - 122)        | 7<br>(5 - 14)            |
| Drug use disorders                                  | 71<br>(36 - 82)          | 0<br>(0 - 1)          | --                     | 49<br>(22 - 59)         | 13<br>(8 - 16)          | 9<br>(6 - 11)            |
| Opioid use disorders                                | 28<br>(14 - 32)          | 0<br>(0 - 0)          | --                     | 19<br>(9 - 24)          | 5<br>(3 - 6)            | 3<br>(2 - 4)             |
| Cocaine use disorders                               | 4<br>(2 - 5)             | 0<br>(0 - 0)          | --                     | 3<br>(1 - 4)            | 1<br>(0 - 1)            | 0<br>(0 - 1)             |
| Amphetamine use disorders                           | 3<br>(2 - 4)             | 0<br>(0 - 0)          | --                     | 2<br>(1 - 3)            | 1<br>(0 - 1)            | 0<br>(0 - 1)             |
| Other drug use disorders                            | 36<br>(18 - 42)          | 0<br>(0 - 0)          | --                     | 24<br>(11 - 30)         | 7<br>(4 - 9)            | 5<br>(3 - 6)             |
| Eating disorders                                    | 1<br>(0 - 1)             | --                    | 0<br>(0 - 0)           | 0<br>(0 - 1)            | --                      | --                       |
| Anorexia nervosa                                    | 1<br>(0 - 1)             | --                    | 0<br>(0 - 0)           | 0<br>(0 - 1)            | --                      | --                       |
| Diabetes, urogenital, blood, and endocrine diseases | 3,469<br>(3,209 - 3,727) | 22<br>(12 - 37)       | 8<br>(5 - 12)          | 227<br>(194 - 258)      | 1,020<br>(937 - 1,129)  | 2,192<br>(1,977 - 2,386) |
| Diabetes mellitus                                   | 1,902<br>(1,725 - 2,064) | 0<br>(0 - 0)          | 1<br>(0 - 1)           | 65<br>(58 - 73)         | 553<br>(495 - 619)      | 1,283<br>(1,121 - 1,423) |
| Acute glomerulonephritis                            | 4<br>(3 - 6)             | 0<br>(0 - 0)          | 0<br>(0 - 0)           | 1<br>(1 - 2)            | 1<br>(1 - 2)            | 2<br>(1 - 3)             |
| Chronic kidney disease                              | 1,117<br>(835 - 1,230)   | 1<br>(1 - 2)          | 1<br>(1 - 2)           | 82<br>(64 - 92)         | 335<br>(259 - 380)      | 697<br>(498 - 791)       |
| Chronic kidney disease due to diabetes mellitus     | 2<br>(1 - 2)             | 0<br>(0 - 0)          | 0<br>(0 - 0)           | 1<br>(0 - 1)            | 0<br>(0 - 0)            | 0<br>(0 - 0)             |

Web Table 31- Bulgaria deaths with 95% UI by age, sex, and cause in 2013

| Cause                                               | Both Sexes, All Ages     | Both Sexes, 0-4 Years | Both Sexes, 5-14 Years | Both Sexes, 15-49 Years  | Both Sexes, 50-69 Years  | Both Sexes, 70-80 Years |
|-----------------------------------------------------|--------------------------|-----------------------|------------------------|--------------------------|--------------------------|-------------------------|
| Chronic kidney disease due to hypertension          | 437<br>(350 - 588)       | 0<br>(0 - 0)          | 0<br>(0 - 0)           | 30<br>(23 - 42)          | 127<br>(98 - 182)        | 279<br>(216 - 372)      |
| Chronic kidney disease due to glomerulonephritis    | 92<br>(67 - 125)         | 0<br>(0 - 0)          | 0<br>(0 - 0)           | 10<br>(7 - 14)           | 33<br>(22 - 46)          | 49<br>(33 - 70)         |
| Chronic kidney disease due to other causes          | 586<br>(292 - 719)       | 1<br>(0 - 1)          | 1<br>(0 - 1)           | 41<br>(21 - 51)          | 175<br>(95 - 222)        | 369<br>(174 - 468)      |
| Urinary diseases and male infertility               | 226<br>(159 - 486)       | 0<br>(0 - 1)          | 0<br>(0 - 0)           | 15<br>(11 - 29)          | 71<br>(48 - 155)         | 140<br>(95 - 313)       |
| Interstitial nephritis and urinary tract infections | 188<br>(125 - 404)       | 0<br>(0 - 0)          | 0<br>(0 - 0)           | 12<br>(8 - 25)           | 59<br>(38 - 133)         | 116<br>(75 - 260)       |
| Urolithiasis                                        | 11<br>(4 - 32)           | --                    | 0<br>(0 - 0)           | 1<br>(0 - 2)             | 4<br>(1 - 12)            | 6<br>(2 - 18)           |
| Other urinary diseases                              | 28<br>(13 - 56)          | 0<br>(0 - 0)          | 0<br>(0 - 0)           | 2<br>(1 - 3)             | 8<br>(4 - 15)            | 18<br>(8 - 38)          |
| Gynecological diseases                              | 1<br>(0 - 1)             | --                    | --                     | 0<br>(0 - 0)             | 0<br>(0 - 0)             | 0<br>(0 - 0)            |
| Uterine fibroids                                    | 0<br>(0 - 0)             | --                    | --                     | 0<br>(0 - 0)             | 0<br>(0 - 0)             | 0<br>(0 - 0)            |
| Polycystic ovarian syndrome                         | 0<br>(0 - 0)             | --                    | --                     | 0<br>(0 - 0)             | 0<br>(0 - 0)             | --                      |
| Endometriosis                                       | 0<br>(0 - 0)             | --                    | --                     | 0<br>(0 - 0)             | 0<br>(0 - 0)             | --                      |
| Genital prolapse                                    | 0<br>(0 - 0)             | --                    | --                     | 0<br>(0 - 0)             | 0<br>(0 - 0)             | 0<br>(0 - 0)            |
| Other gynecological diseases                        | 0<br>(0 - 0)             | --                    | --                     | 0<br>(0 - 0)             | 0<br>(0 - 0)             | 0<br>(0 - 0)            |
| Hemoglobinopathies and hemolytic anemias            | 90<br>(41 - 154)         | 11<br>(4 - 22)        | 3<br>(1 - 6)           | 39<br>(18 - 67)          | 12<br>(6 - 20)           | 25<br>(11 - 46)         |
| Thalassemias                                        | 20<br>(9 - 36)           | 7<br>(3 - 15)         | 3<br>(1 - 5)           | 10<br>(5 - 17)           | 0<br>(0 - 0)             | 0<br>(0 - 0)            |
| Sickle cell disorders                               | 8<br>(4 - 14)            | 1<br>(0 - 2)          | 0<br>(0 - 1)           | 6<br>(3 - 10)            | 1<br>(1 - 2)             | 0<br>(0 - 0)            |
| G6PD deficiency                                     | 3<br>(1 - 5)             | 0<br>(0 - 0)          | 0<br>(0 - 0)           | 2<br>(1 - 3)             | 1<br>(0 - 1)             | 0<br>(0 - 0)            |
| Other hemoglobinopathies and hemolytic anemias      | 59<br>(27 - 100)         | 2<br>(1 - 5)          | 0<br>(0 - 1)           | 21<br>(10 - 38)          | 10<br>(5 - 17)           | 25<br>(10 - 45)         |
| Endocrine, metabolic, blood, and immune disorders   | 130<br>(68 - 152)        | 9<br>(5 - 15)         | 2<br>(1 - 4)           | 25<br>(13 - 30)          | 49<br>(25 - 60)          | 44<br>(21 - 56)         |
| Musculoskeletal disorders                           | 41<br>(32 - 48)          | --                    | 0<br>(0 - 1)           | 7<br>(5 - 8)             | 16<br>(12 - 19)          | 18<br>(13 - 22)         |
| Rheumatoid arthritis                                | 12<br>(9 - 15)           | --                    | 0<br>(0 - 0)           | 1<br>(1 - 1)             | 5<br>(3 - 6)             | 6<br>(4 - 9)            |
| Other musculoskeletal disorders                     | 29<br>(22 - 34)          | --                    | 0<br>(0 - 0)           | 6<br>(5 - 7)             | 11<br>(8 - 14)           | 11<br>(8 - 14)          |
| Other non-communicable diseases                     | 295<br>(228 - 381)       | 199<br>(132 - 282)    | 13<br>(9 - 17)         | 27<br>(23 - 30)          | 20<br>(16 - 23)          | 37<br>(26 - 44)         |
| Congenital anomalies                                | 255<br>(189 - 338)       | 190<br>(126 - 270)    | 13<br>(9 - 17)         | 22<br>(19 - 26)          | 9<br>(7 - 10)            | 21<br>(14 - 26)         |
| Neural tube defects                                 | 5<br>(3 - 12)            | 4<br>(2 - 11)         | 0<br>(0 - 0)           | 0<br>(0 - 0)             | 0<br>(0 - 0)             | 0<br>(0 - 0)            |
| Congenital heart anomalies                          | 140<br>(105 - 182)       | 93<br>(61 - 132)      | 8<br>(6 - 10)          | 17<br>(15 - 20)          | 5<br>(4 - 7)             | 17<br>(11 - 22)         |
| Cleft lip and cleft palate                          | 1<br>(0 - 2)             | 1<br>(0 - 2)          | --                     | --                       | --                       | --                      |
| Down syndrome                                       | 8<br>(4 - 12)            | 5<br>(2 - 9)          | 1<br>(1 - 1)           | 1<br>(0 - 1)             | 1<br>(0 - 1)             | 0<br>(0 - 0)            |
| Chromosomal unbalanced rearrangements               | 8<br>(5 - 13)            | 6<br>(3 - 11)         | 1<br>(0 - 1)           | 1<br>(1 - 2)             | 0<br>(0 - 0)             | 0<br>(0 - 0)            |
| Other congenital anomalies                          | 93<br>(64 - 134)         | 81<br>(53 - 121)      | 3<br>(2 - 5)           | 3<br>(2 - 4)             | 2<br>(2 - 3)             | 3<br>(2 - 4)            |
| Skin and subcutaneous diseases                      | 32<br>(26 - 38)          | 1<br>(1 - 2)          | 0<br>(0 - 0)           | 5<br>(4 - 5)             | 11<br>(8 - 13)           | 16<br>(11 - 20)         |
| Cellulitis                                          | 5<br>(3 - 8)             | 0<br>(0 - 0)          | 0<br>(0 - 0)           | 1<br>(0 - 1)             | 2<br>(1 - 4)             | 2<br>(1 - 4)            |
| Pyoderma                                            | 22<br>(17 - 27)          | 1<br>(0 - 1)          | 0<br>(0 - 0)           | 2<br>(2 - 3)             | 7<br>(5 - 9)             | 12<br>(8 - 15)          |
| Decubitus ulcer                                     | 2<br>(1 - 3)             | 0<br>(0 - 0)          | 0<br>(0 - 0)           | 0<br>(0 - 1)             | 1<br>(0 - 1)             | 1<br>(0 - 2)            |
| Other skin and subcutaneous diseases                | 3<br>(2 - 6)             | 0<br>(0 - 0)          | 0<br>(0 - 0)           | 1<br>(1 - 1)             | 1<br>(1 - 2)             | 1<br>(0 - 2)            |
| Sudden infant death syndrome                        | 8<br>(3 - 15)            | 8<br>(3 - 15)         | --                     | --                       | --                       | --                      |
| Injuries                                            | 3,447<br>(3,246 - 3,937) | 61<br>(40 - 89)       | 53<br>(42 - 69)        | 1,194<br>(1,118 - 1,312) | 1,118<br>(1,040 - 1,269) | 1,021<br>(905 - 1,253)  |
| Transport injuries                                  | 836<br>(773 - 921)       | 8<br>(5 - 13)         | 17<br>(13 - 23)        | 366<br>(332 - 399)       | 249<br>(224 - 278)       | 196<br>(169 - 237)      |
| Road injuries                                       | 729<br>(653 - 793)       | 8<br>(5 - 12)         | 16<br>(11 - 21)        | 325<br>(290 - 356)       | 215<br>(189 - 242)       | 166<br>(141 - 196)      |
| Pedestrian road injuries                            | 195<br>(117 - 254)       | 2<br>(1 - 4)          | 5<br>(3 - 7)           | 59<br>(36 - 90)          | 62<br>(35 - 83)          | 67<br>(38 - 87)         |

Web Table 31- Bulgaria deaths with 95% UI by age, sex, and cause in 2013

| Cause                                           | Both Sexes, All Ages     | Both Sexes, 0-4 Years | Both Sexes, 5-14 Years | Both Sexes, 15-49 Years | Both Sexes, 50-69 Years | Both Sexes, 70-80 Years |
|-------------------------------------------------|--------------------------|-----------------------|------------------------|-------------------------|-------------------------|-------------------------|
| Cyclist road injuries                           | 51<br>(38 - 87)          | 0<br>(0 - 1)          | 1<br>(1 - 2)           | 19<br>(13 - 35)         | 18<br>(13 - 31)         | 12<br>(8 - 21)          |
| Motorcyclist road injuries                      | 96<br>(63 - 181)         | 1<br>(0 - 2)          | 2<br>(1 - 4)           | 51<br>(33 - 93)         | 24<br>(15 - 50)         | 18<br>(11 - 38)         |
| Motor vehicle road injuries                     | 350<br>(224 - 426)       | 4<br>(2 - 6)          | 7<br>(4 - 11)          | 181<br>(113 - 227)      | 99<br>(61 - 127)        | 59<br>(39 - 77)         |
| Other road injuries                             | 37<br>(15 - 124)         | 0<br>(0 - 1)          | 1<br>(0 - 2)           | 15<br>(6 - 55)          | 11<br>(4 - 39)          | 9<br>(3 - 34)           |
| Other transport injuries                        | 107<br>(85 - 148)        | 1<br>(0 - 2)          | 1<br>(1 - 2)           | 41<br>(31 - 56)         | 34<br>(25 - 50)         | 30<br>(21 - 46)         |
| Unintentional injuries                          | 1,374<br>(1,217 - 1,540) | 50<br>(32 - 74)       | 31<br>(24 - 41)        | 395<br>(353 - 455)      | 429<br>(377 - 494)      | 469<br>(390 - 531)      |
| Falls                                           | 416<br>(353 - 609)       | 3<br>(2 - 5)          | 3<br>(2 - 4)           | 82<br>(67 - 119)        | 138<br>(113 - 208)      | 191<br>(155 - 286)      |
| Drowning                                        | 199<br>(142 - 261)       | 6<br>(3 - 11)         | 15<br>(11 - 24)        | 92<br>(61 - 119)        | 51<br>(34 - 68)         | 34<br>(24 - 47)         |
| Fire, heat, and hot substances                  | 124<br>(96 - 147)        | 6<br>(3 - 9)          | 2<br>(1 - 3)           | 24<br>(18 - 31)         | 34<br>(25 - 43)         | 59<br>(43 - 72)         |
| Poisonings                                      | 79<br>(63 - 108)         | 2<br>(1 - 4)          | 1<br>(1 - 2)           | 21<br>(17 - 33)         | 27<br>(21 - 37)         | 27<br>(19 - 37)         |
| Exposure to mechanical forces                   | 177<br>(151 - 198)       | 6<br>(4 - 9)          | 5<br>(3 - 7)           | 78<br>(67 - 93)         | 59<br>(48 - 69)         | 29<br>(18 - 34)         |
| Unintentional firearm injuries                  | 18<br>(14 - 21)          | 0<br>(0 - 0)          | 1<br>(0 - 1)           | 11<br>(8 - 14)          | 4<br>(3 - 6)            | 2<br>(1 - 2)            |
| Unintentional suffocation                       | 17<br>(13 - 28)          | 2<br>(1 - 4)          | 1<br>(0 - 1)           | 6<br>(4 - 10)           | 5<br>(3 - 9)            | 3<br>(2 - 5)            |
| Other exposure to mechanical forces             | 142<br>(111 - 161)       | 3<br>(2 - 6)          | 4<br>(2 - 5)           | 61<br>(51 - 73)         | 50<br>(37 - 59)         | 24<br>(13 - 29)         |
| Adverse effects of medical treatment            | 126<br>(44 - 196)        | 3<br>(1 - 5)          | 1<br>(0 - 1)           | 15<br>(6 - 22)          | 35<br>(12 - 57)         | 73<br>(22 - 119)        |
| Animal contact                                  | 15<br>(11 - 22)          | 0<br>(0 - 0)          | 0<br>(0 - 0)           | 3<br>(2 - 4)            | 6<br>(4 - 9)            | 5<br>(3 - 8)            |
| Venomous animal contact                         | 5<br>(4 - 9)             | 0<br>(0 - 0)          | 0<br>(0 - 0)           | 2<br>(1 - 3)            | 2<br>(2 - 4)            | 1<br>(1 - 2)            |
| Non-venomous animal contact                     | 9<br>(6 - 13)            | 0<br>(0 - 0)          | 0<br>(0 - 0)           | 1<br>(1 - 2)            | 4<br>(2 - 5)            | 4<br>(3 - 6)            |
| Foreign body                                    | 93<br>(68 - 151)         | 18<br>(10 - 32)       | 1<br>(1 - 2)           | 28<br>(19 - 46)         | 32<br>(22 - 55)         | 14<br>(10 - 21)         |
| Pulmonary aspiration and foreign body in airway | 91<br>(67 - 149)         | 18<br>(10 - 32)       | 1<br>(1 - 2)           | 27<br>(19 - 45)         | 31<br>(21 - 55)         | 14<br>(9 - 21)          |
| Foreign body in other body part                 | 2<br>(1 - 3)             | 0<br>(0 - 0)          | 0<br>(0 - 0)           | 1<br>(1 - 1)            | 1<br>(0 - 1)            | 0<br>(0 - 1)            |
| Other unintentional injuries                    | 146<br>(121 - 172)       | 5<br>(3 - 8)          | 3<br>(2 - 5)           | 53<br>(42 - 70)         | 48<br>(34 - 67)         | 37<br>(26 - 48)         |
| Self-harm and interpersonal violence            | 1,238<br>(1,111 - 1,645) | 3<br>(2 - 5)          | 5<br>(4 - 8)           | 434<br>(382 - 536)      | 439<br>(384 - 562)      | 356<br>(302 - 557)      |
| Self-harm                                       | 1,046<br>(943 - 1,395)   | -                     | 4<br>(2 - 6)           | 336<br>(293 - 396)      | 387<br>(334 - 490)      | 321<br>(268 - 512)      |
| Interpersonal violence                          | 191<br>(158 - 314)       | 3<br>(2 - 5)          | 2<br>(1 - 3)           | 98<br>(78 - 161)        | 53<br>(40 - 92)         | 36<br>(29 - 58)         |
| Assault by firearm                              | 47<br>(27 - 85)          | 0<br>(0 - 1)          | 0<br>(0 - 0)           | 33<br>(19 - 59)         | 10<br>(6 - 20)          | 3<br>(2 - 6)            |
| Assault by sharp object                         | 57<br>(41 - 104)         | 0<br>(0 - 1)          | 0<br>(0 - 1)           | 32<br>(21 - 59)         | 16<br>(11 - 31)         | 8<br>(5 - 14)           |
| Assault by other means                          | 88<br>(67 - 144)         | 2<br>(1 - 3)          | 1<br>(1 - 2)           | 33<br>(23 - 59)         | 26<br>(18 - 48)         | 25<br>(19 - 39)         |

Web Table 31- Bulgaria deaths with 95% UI by age, sex, and cause in 2013

| Cause                                                              | Males, All Ages             | Males, 0-4 Years   | Males, 5-14 Years | Males, 15-49 Years       | Males, 50-69 Years          | Males, 70-80 Years          |
|--------------------------------------------------------------------|-----------------------------|--------------------|-------------------|--------------------------|-----------------------------|-----------------------------|
| All causes                                                         | 55,972<br>(54,343 - 57,623) | 384<br>(264 - 556) | 82<br>(65 - 105)  | 3,878<br>(3,716 - 4,042) | 18,416<br>(17,751 - 19,115) | 33,212<br>(32,428 - 34,006) |
| Communicable, maternal, neonatal, and nutritional diseases         | 1,672<br>(1,425 - 2,285)    | 205<br>(140 - 301) | 10<br>(7 - 13)    | 208<br>(173 - 250)       | 483<br>(406 - 639)          | 766<br>(588 - 1,220)        |
| HIV/AIDS and tuberculosis                                          | 218<br>(171 - 279)          | 0<br>(0 - 0)       | 0<br>(0 - 0)      | 81<br>(55 - 111)         | 92<br>(72 - 120)            | 45<br>(36 - 61)             |
| Tuberculosis                                                       | 113<br>(98 - 150)           | 0<br>(0 - 0)       | 0<br>(0 - 0)      | 14<br>(11 - 17)          | 61<br>(51 - 85)             | 37<br>(30 - 53)             |
| HIV/AIDS                                                           | 105<br>(61 - 157)           | 0<br>(0 - 0)       | 0<br>(0 - 0)      | 67<br>(40 - 97)          | 30<br>(15 - 52)             | 8<br>(4 - 14)               |
| HIV/AIDS resulting in mycobacterial infection                      | 6<br>(4 - 10)               | 0<br>(0 - 0)       | 0<br>(0 - 0)      | 4<br>(2 - 6)             | 2<br>(1 - 3)                | 1<br>(0 - 1)                |
| HIV/AIDS resulting in other diseases                               | 99<br>(57 - 148)            | 0<br>(0 - 0)       | 0<br>(0 - 0)      | 63<br>(38 - 91)          | 28<br>(14 - 48)             | 7<br>(3 - 13)               |
| Diarrrhea, lower respiratory, and other common infectious diseases | 1,212<br>(986 - 1,853)      | 79<br>(51 - 111)   | 8<br>(5 - 11)     | 107<br>(87 - 143)        | 354<br>(285 - 507)          | 664<br>(485 - 1,114)        |
| Diarrrheal diseases                                                | 14<br>(11 - 18)             | 6<br>(3 - 10)      | 0<br>(0 - 0)      | 1<br>(1 - 2)             | 3<br>(2 - 4)                | 3<br>(2 - 5)                |
| Intestinal infectious diseases                                     | 8<br>(3 - 15)               | 1<br>(0 - 3)       | 1<br>(0 - 2)      | 3<br>(1 - 7)             | 2<br>(0 - 4)                | 1<br>(0 - 3)                |
| Typhoid fever                                                      | 5<br>(2 - 11)               | 1<br>(0 - 2)       | 1<br>(0 - 2)      | 2<br>(1 - 5)             | 1<br>(0 - 3)                | 1<br>(0 - 2)                |
| Paratyphoid fever                                                  | 2<br>(1 - 3)                | 0<br>(0 - 1)       | 0<br>(0 - 1)      | 1<br>(0 - 1)             | 0<br>(0 - 1)                | 0<br>(0 - 1)                |
| Other intestinal infectious diseases                               | 1<br>(0 - 3)                | 0<br>(0 - 1)       | 0<br>(0 - 0)      | 0<br>(0 - 1)             | 0<br>(0 - 1)                | 0<br>(0 - 1)                |
| Lower respiratory infections                                       | 1,127<br>(905 - 1,783)      | 60<br>(39 - 89)    | 5<br>(3 - 7)      | 88<br>(69 - 125)         | 329<br>(261 - 483)          | 646<br>(469 - 1,095)        |
| Upper respiratory infections                                       | 2<br>(0 - 5)                | 0<br>(0 - 0)       | 0<br>(0 - 0)      | 0<br>(0 - 1)             | 1<br>(0 - 2)                | 1<br>(0 - 3)                |
| Otitis media                                                       | 1<br>(0 - 1)                | 0<br>(0 - 0)       | 0<br>(0 - 0)      | 0<br>(0 - 0)             | 0<br>(0 - 0)                | 0<br>(0 - 0)                |
| Meningitis                                                         | 31<br>(26 - 37)             | 6<br>(4 - 11)      | 1<br>(1 - 1)      | 7<br>(6 - 8)             | 11<br>(9 - 13)              | 6<br>(4 - 7)                |
| Pneumococcal meningitis                                            | 9<br>(6 - 12)               | 1<br>(1 - 2)       | 0<br>(0 - 0)      | 2<br>(1 - 3)             | 4<br>(2 - 6)                | 2<br>(1 - 3)                |
| H influenzae type B meningitis                                     | 4<br>(2 - 6)                | 2<br>(1 - 3)       | 0<br>(0 - 0)      | 1<br>(0 - 1)             | 1<br>(0 - 2)                | 0<br>(0 - 1)                |
| Meningococcal meningitis                                           | 7<br>(5 - 10)               | 2<br>(1 - 3)       | 0<br>(0 - 0)      | 1<br>(1 - 2)             | 2<br>(1 - 4)                | 1<br>(1 - 2)                |
| Other meningitis                                                   | 11<br>(8 - 14)              | 2<br>(1 - 3)       | 0<br>(0 - 0)      | 3<br>(2 - 4)             | 4<br>(3 - 6)                | 2<br>(1 - 3)                |
| Encephalitis                                                       | 26<br>(14 - 33)             | 4<br>(2 - 8)       | 1<br>(1 - 2)      | 7<br>(4 - 9)             | 8<br>(4 - 11)               | 5<br>(2 - 7)                |
| Diphtheria                                                         | 0<br>(0 - 1)                | 0<br>(0 - 0)       | 0<br>(0 - 0)      | 0<br>(0 - 0)             | 0<br>(0 - 0)                | --<br>(0 - 0)               |
| Whooping cough                                                     | 1<br>(0 - 2)                | 0<br>(0 - 1)       | 0<br>(0 - 0)      | 0<br>(0 - 0)             | 0<br>(0 - 0)                | --<br>(0 - 0)               |
| Tetanus                                                            | 1<br>(0 - 1)                | 0<br>(0 - 0)       | 0<br>(0 - 0)      | 0<br>(0 - 0)             | 0<br>(0 - 0)                | 0<br>(0 - 1)                |
| Measles                                                            | 0<br>(0 - 0)                | 0<br>(0 - 0)       | 0<br>(0 - 0)      | 0<br>(0 - 0)             | 0<br>(0 - 0)                | --<br>(0 - 0)               |
| Varicella and herpes zoster                                        | 3<br>(1 - 10)               | 0<br>(0 - 1)       | 0<br>(0 - 0)      | 0<br>(0 - 1)             | 0<br>(0 - 1)                | 2<br>(0 - 9)                |
| Neglected tropical diseases and malaria                            | 10<br>(8 - 11)              | 0<br>(0 - 0)       | 0<br>(0 - 0)      | 2<br>(2 - 2)             | 4<br>(3 - 5)                | 3<br>(2 - 4)                |
| Cysticercosis                                                      | 0<br>(0 - 0)                | 0<br>(0 - 0)       | 0<br>(0 - 0)      | 0<br>(0 - 0)             | 0<br>(0 - 0)                | 0<br>(0 - 0)                |
| Cystic echinococcosis                                              | 4<br>(3 - 4)                | 0<br>(0 - 0)       | 0<br>(0 - 0)      | 1<br>(1 - 1)             | 2<br>(2 - 2)                | 1<br>(1 - 1)                |
| Dengue                                                             | 1<br>(0 - 1)                | 0<br>(0 - 0)       | 0<br>(0 - 0)      | 0<br>(0 - 0)             | 0<br>(0 - 0)                | 0<br>(0 - 0)                |
| Rabies                                                             | 0<br>(0 - 0)                | 0<br>(0 - 0)       | 0<br>(0 - 0)      | 0<br>(0 - 0)             | 0<br>(0 - 0)                | 0<br>(0 - 0)                |
| Other neglected tropical diseases                                  | 5<br>(4 - 6)                | 0<br>(0 - 0)       | 0<br>(0 - 0)      | 1<br>(1 - 1)             | 2<br>(1 - 3)                | 2<br>(1 - 3)                |
| Maternal disorders                                                 | --                          | --                 | --                | --                       | --                          | --                          |
| Maternal hemorrhage                                                | --                          | --                 | --                | --                       | --                          | --                          |
| Maternal sepsis and other maternal infections                      | --                          | --                 | --                | --                       | --                          | --                          |
| Maternal hypertensive disorders                                    | --                          | --                 | --                | --                       | --                          | --                          |
| Maternal obstructed labor                                          | --                          | --                 | --                | --                       | --                          | --                          |
| Maternal abortive outcome                                          | --                          | --                 | --                | --                       | --                          | --                          |
| Indirect maternal deaths                                           | --                          | --                 | --                | --                       | --                          | --                          |

Web Table 31- Bulgaria deaths with 95% UI by age, sex, and cause in 2013

| Cause                                                            | Males, All Ages             | Males, 0-4 Years  | Males, 5-14 Years | Males, 15-49 Years       | Males, 50-69 Years          | Males, 70-80 Years          |
|------------------------------------------------------------------|-----------------------------|-------------------|-------------------|--------------------------|-----------------------------|-----------------------------|
| Late maternal deaths                                             | --                          | --                | --                | --                       | --                          | --                          |
| Maternal deaths aggravated by HIV/AIDS                           | --                          | --                | --                | --                       | --                          | --                          |
| Other maternal disorders                                         | --                          | --                | --                | --                       | --                          | --                          |
| Neonatal disorders                                               | 120<br>(82 - 184)           | 120<br>(82 - 184) | --                | --                       | --                          | --                          |
| Neonatal preterm birth complications                             | 65<br>(32 - 103)            | 65<br>(32 - 103)  | --                | --                       | --                          | --                          |
| Neonatal encephalopathy due to birth asphyxia and trauma         | 27<br>(14 - 48)             | 27<br>(14 - 48)   | --                | --                       | --                          | --                          |
| Neonatal sepsis and other neonatal infections                    | 6<br>(2 - 13)               | 6<br>(2 - 13)     | --                | --                       | --                          | --                          |
| Hemolytic disease and other neonatal jaundice                    | 0<br>(0 - 1)                | 0<br>(0 - 1)      | --                | --                       | --                          | --                          |
| Other neonatal disorders                                         | 21<br>(10 - 52)             | 21<br>(10 - 52)   | --                | --                       | --                          | --                          |
| Nutritional deficiencies                                         | 80<br>(35 - 100)            | 2<br>(1 - 3)      | 1<br>(0 - 1)      | 12<br>(5 - 15)           | 22<br>(10 - 29)             | 44<br>(19 - 59)             |
| Protein-energy malnutrition                                      | 3<br>(1 - 6)                | 0<br>(0 - 1)      | 0<br>(0 - 1)      | 0<br>(0 - 1)             | 1<br>(0 - 2)                | 1<br>(0 - 3)                |
| Iodine deficiency                                                | 0<br>(0 - 2)                | 0<br>(0 - 0)      | 0<br>(0 - 0)      | 0<br>(0 - 0)             | 0<br>(0 - 1)                | 0<br>(0 - 1)                |
| Iron-deficiency anemia                                           | 75<br>(33 - 94)             | 1<br>(1 - 3)      | 1<br>(0 - 1)      | 11<br>(5 - 14)           | 20<br>(9 - 27)              | 42<br>(18 - 55)             |
| Other nutritional deficiencies                                   | 2<br>(1 - 5)                | 0<br>(0 - 0)      | 0<br>(0 - 0)      | 0<br>(0 - 1)             | 1<br>(0 - 1)                | 1<br>(0 - 2)                |
| Other communicable, maternal, neonatal, and nutritional diseases | 33<br>(27 - 42)             | 4<br>(2 - 7)      | 1<br>(0 - 1)      | 6<br>(5 - 8)             | 11<br>(8 - 14)              | 11<br>(8 - 16)              |
| Sexually transmitted diseases excluding HIV                      | 3<br>(1 - 6)                | 2<br>(0 - 5)      | 0<br>(0 - 0)      | 0<br>(0 - 0)             | 0<br>(0 - 1)                | 0<br>(0 - 0)                |
| Syphilis                                                         | 3<br>(1 - 6)                | 2<br>(0 - 5)      | 0<br>(0 - 0)      | 0<br>(0 - 0)             | 0<br>(0 - 1)                | 0<br>(0 - 0)                |
| Chlamydial infection                                             | --                          | --                | --                | --                       | --                          | --                          |
| Gonococcal infection                                             | 0<br>(0 - 0)                | --                | 0<br>(0 - 0)      | 0<br>(0 - 0)             | 0<br>(0 - 0)                | 0<br>(0 - 0)                |
| Other sexually transmitted diseases                              | 0<br>(0 - 0)                | --                | 0<br>(0 - 0)      | 0<br>(0 - 0)             | 0<br>(0 - 0)                | 0<br>(0 - 0)                |
| Hepatitis                                                        | 11<br>(9 - 13)              | 0<br>(0 - 1)      | 0<br>(0 - 0)      | 2<br>(2 - 3)             | 5<br>(3 - 7)                | 3<br>(2 - 4)                |
| Acute hepatitis A                                                | 2<br>(1 - 4)                | 0<br>(0 - 1)      | 0<br>(0 - 0)      | 1<br>(0 - 2)             | 1<br>(0 - 1)                | 0<br>(0 - 0)                |
| Acute hepatitis B                                                | 8<br>(6 - 11)               | 0<br>(0 - 0)      | 0<br>(0 - 0)      | 1<br>(1 - 2)             | 4<br>(3 - 6)                | 2<br>(2 - 4)                |
| Acute hepatitis C                                                | 1<br>(0 - 2)                | --                | 0<br>(0 - 0)      | 0<br>(0 - 0)             | 0<br>(0 - 1)                | 0<br>(0 - 1)                |
| Other infectious diseases                                        | 19<br>(14 - 27)             | 2<br>(1 - 2)      | 0<br>(0 - 1)      | 4<br>(3 - 5)             | 6<br>(4 - 8)                | 8<br>(5 - 13)               |
| Non-communicable diseases                                        | 51,773<br>(50,158 - 53,415) | 144<br>(95 - 205) | 38<br>(29 - 49)   | 2,688<br>(2,549 - 2,819) | 17,051<br>(16,380 - 17,717) | 31,852<br>(30,948 - 32,723) |
| Neoplasms                                                        | 10,095<br>(9,508 - 10,632)  | 10<br>(6 - 16)    | 16<br>(12 - 21)   | 732<br>(679 - 789)       | 5,018<br>(4,736 - 5,296)    | 4,319<br>(3,975 - 4,665)    |
| Esophageal cancer                                                | 173<br>(146 - 210)          | --                | --                | 15<br>(11 - 20)          | 103<br>(82 - 125)           | 55<br>(45 - 72)             |
| Stomach cancer                                                   | 944<br>(846 - 1,114)        | --                | --                | 52<br>(43 - 62)          | 429<br>(380 - 513)          | 464<br>(396 - 564)          |
| Liver cancer                                                     | 517<br>(348 - 728)          | --                | 0<br>(0 - 0)      | 35<br>(23 - 51)          | 266<br>(181 - 378)          | 216<br>(138 - 317)          |
| Liver cancer due to hepatitis B                                  | 130<br>(58 - 200)           | --                | 0<br>(0 - 0)      | 13<br>(7 - 20)           | 75<br>(32 - 117)            | 42<br>(18 - 68)             |
| Liver cancer due to hepatitis C                                  | 225<br>(133 - 345)          | --                | 0<br>(0 - 0)      | 14<br>(8 - 23)           | 115<br>(68 - 184)           | 96<br>(55 - 153)            |
| Liver cancer due to alcohol use                                  | 139<br>(81 - 223)           | --                | --                | 6<br>(3 - 11)            | 64<br>(36 - 110)            | 69<br>(38 - 113)            |
| Liver cancer due to other causes                                 | 24<br>(12 - 39)             | --                | 0<br>(0 - 0)      | 3<br>(1 - 4)             | 13<br>(7 - 22)              | 8<br>(4 - 14)               |
| Larynx cancer                                                    | 310<br>(200 - 370)          | --                | --                | 26<br>(19 - 36)          | 82<br>(130 - 247)           | 82<br>(49 - 101)            |
| Tracheal, bronchus and lung cancer                               | 2,738<br>(2,542 - 2,949)    | --                | --                | 174<br>(151 - 202)       | 1,717<br>(1,579 - 1,865)    | 847<br>(763 - 945)          |
| Breast cancer                                                    | 24<br>(6 - 36)              | --                | --                | 2<br>(1 - 4)             | 10<br>(3 - 17)              | 11<br>(3 - 18)              |
| Cervical cancer                                                  | --                          | --                | --                | --                       | --                          | --                          |
| Uterine cancer                                                   | --                          | --                | --                | --                       | --                          | --                          |
| Prostate cancer                                                  | 911<br>(653 - 1,170)        | --                | --                | 5<br>(3 - 7)             | 220<br>(157 - 295)          | 686<br>(466 - 890)          |

Web Table 31- Bulgaria deaths with 95% UI by age, sex, and cause in 2013

| Cause                                         | Males, All Ages             | Males, 0-4 Years | Males, 5-14 Years | Males, 15-49 Years       | Males, 50-69 Years       | Males, 70-80 Years          |
|-----------------------------------------------|-----------------------------|------------------|-------------------|--------------------------|--------------------------|-----------------------------|
| Colon and rectum cancer                       | 1,505<br>(1,391 - 1,645)    | --               | --                | 68<br>(59 - 78)          | 614<br>(565 - 676)       | 823<br>(730 - 936)          |
| Lip and oral cavity cancer                    | 187<br>(142 - 212)          | --               | --                | 23<br>(16 - 30)          | 117<br>(89 - 137)        | 47<br>(36 - 58)             |
| Nasopharynx cancer                            | 33<br>(26 - 43)             | --               | 0<br>(0 - 0)      | 7<br>(5 - 11)            | 20<br>(14 - 28)          | 6<br>(4 - 8)                |
| Other pharynx cancer                          | 118<br>(60 - 145)           | --               | --                | 16<br>(8 - 22)           | 80<br>(39 - 103)         | 22<br>(11 - 29)             |
| Gallbladder and biliary tract cancer          | 79<br>(44 - 104)            | --               | --                | 4<br>(2 - 6)             | 35<br>(19 - 48)          | 40<br>(22 - 53)             |
| Pancreatic cancer                             | 588<br>(539 - 648)          | --               | --                | 45<br>(38 - 54)          | 303<br>(269 - 341)       | 240<br>(212 - 275)          |
| Malignant skin melanoma                       | 84<br>(36 - 124)            | --               | --                | 13<br>(5 - 20)           | 34<br>(14 - 50)          | 38<br>(15 - 58)             |
| Non-melanoma skin cancer                      | 72<br>(41 - 100)            | --               | --                | 3<br>(2 - 5)             | 18<br>(9 - 26)           | 51<br>(27 - 72)             |
| Ovarian cancer                                | --                          | --               | --                | --                       | --                       | --                          |
| Testicular cancer                             | 39<br>(28 - 54)             | --               | --                | 23<br>(16 - 32)          | 10<br>(7 - 14)           | 7<br>(4 - 9)                |
| Kidney cancer                                 | 237<br>(205 - 272)          | 0<br>(0 - 0)     | 0<br>(0 - 0)      | 19<br>(14 - 24)          | 128<br>(106 - 152)       | 89<br>(71 - 110)            |
| Bladder cancer                                | 420<br>(309 - 479)          | --               | --                | 10<br>(8 - 13)           | 167<br>(129 - 196)       | 243<br>(170 - 290)          |
| Brain and nervous system cancer               | 326<br>(222 - 396)          | 3<br>(1 - 5)     | 5<br>(3 - 7)      | 65<br>(48 - 80)          | 181<br>(125 - 226)       | 73<br>(38 - 104)            |
| Thyroid cancer                                | 22<br>(15 - 29)             | --               | 0<br>(0 - 0)      | 2<br>(1 - 3)             | 12<br>(8 - 16)           | 8<br>(5 - 11)               |
| Mesothelioma                                  | 14<br>(9 - 34)              | --               | --                | 2<br>(1 - 5)             | 8<br>(4 - 20)            | 4<br>(2 - 12)               |
| Hodgkin lymphoma                              | 40<br>(29 - 62)             | 0<br>(0 - 0)     | 0<br>(0 - 1)      | 14<br>(10 - 20)          | 17<br>(12 - 28)          | 8<br>(5 - 13)               |
| Non-Hodgkin lymphoma                          | 147<br>(68 - 190)           | 1<br>(0 - 2)     | 2<br>(1 - 3)      | 24<br>(11 - 31)          | 73<br>(35 - 95)          | 48<br>(20 - 67)             |
| Multiple myeloma                              | 41<br>(19 - 55)             | --               | --                | 4<br>(2 - 6)             | 22<br>(11 - 32)          | 15<br>(7 - 22)              |
| Leukemia                                      | 248<br>(224 - 272)          | 3<br>(1 - 5)     | 5<br>(4 - 8)      | 37<br>(32 - 43)          | 101<br>(88 - 115)        | 101<br>(88 - 118)           |
| Other neoplasms                               | 278<br>(170 - 334)          | 4<br>(2 - 6)     | 3<br>(2 - 4)      | 44<br>(27 - 55)          | 131<br>(80 - 162)        | 97<br>(53 - 123)            |
| Cardiovascular diseases                       | 28,616<br>(27,384 - 30,670) | 6<br>(4 - 9)     | 5<br>(3 - 6)      | 1,284<br>(1,195 - 1,365) | 8,750<br>(8,345 - 9,185) | 18,570<br>(17,661 - 20,329) |
| Rheumatic heart disease                       | 118<br>(76 - 162)           | 0<br>(0 - 0)     | 0<br>(0 - 0)      | 23<br>(17 - 37)          | 48<br>(33 - 85)          | 46<br>(18 - 66)             |
| Ischemic heart disease                        | 11,736<br>(10,180 - 15,507) | 0<br>(0 - 0)     | 0<br>(0 - 0)      | 684<br>(601 - 779)       | 4,211<br>(3,712 - 4,938) | 6,841<br>(5,710 - 9,903)    |
| Cerebrovascular disease                       | 12,233<br>(10,598 - 13,906) | 2<br>(1 - 3)     | 1<br>(1 - 2)      | 287<br>(228 - 356)       | 2,977<br>(2,520 - 3,481) | 8,966<br>(7,701 - 10,228)   |
| Ischemic stroke                               | 8,541<br>(6,811 - 9,937)    | 0<br>(0 - 0)     | 0<br>(0 - 0)      | 66<br>(39 - 92)          | 1,485<br>(1,091 - 1,821) | 6,990<br>(5,535 - 8,133)    |
| Hemorrhagic stroke                            | 3,692<br>(2,656 - 5,403)    | 2<br>(1 - 3)     | 1<br>(1 - 2)      | 221<br>(172 - 281)       | 1,492<br>(1,138 - 2,042) | 1,976<br>(1,267 - 3,214)    |
| Hypertensive heart disease                    | 2,533<br>(1,275 - 3,776)    | 0<br>(0 - 0)     | 0<br>(0 - 0)      | 99<br>(50 - 148)         | 760<br>(402 - 1,093)     | 1,675<br>(779 - 2,627)      |
| Cardiomyopathy and myocarditis                | 296<br>(188 - 371)          | 3<br>(2 - 4)     | 1<br>(1 - 2)      | 57<br>(35 - 75)          | 106<br>(65 - 136)        | 129<br>(81 - 171)           |
| Atrial fibrillation and flutter               | 171<br>(64 - 216)           | --               | --                | 2<br>(1 - 3)             | 42<br>(15 - 53)          | 126<br>(46 - 164)           |
| Aortic aneurysm                               | 186<br>(122 - 220)          | --               | --                | 19<br>(14 - 23)          | 91<br>(62 - 111)         | 77<br>(45 - 93)             |
| Peripheral vascular disease                   | 10<br>(8 - 13)              | --               | --                | 1<br>(0 - 1)             | 5<br>(3 - 6)             | 5<br>(4 - 7)                |
| Endocarditis                                  | 85<br>(58 - 139)            | 0<br>(0 - 0)     | 0<br>(0 - 0)      | 16<br>(10 - 25)          | 29<br>(19 - 46)          | 41<br>(27 - 70)             |
| Other cardiovascular and circulatory diseases | 1,246<br>(762 - 1,481)      | 1<br>(1 - 2)     | 1<br>(1 - 1)      | 97<br>(53 - 118)         | 483<br>(291 - 583)       | 664<br>(414 - 827)          |
| Chronic respiratory diseases                  | 6,336<br>(3,347 - 7,238)    | 3<br>(1 - 4)     | 1<br>(0 - 1)      | 88<br>(54 - 106)         | 1,307<br>(779 - 1,504)   | 4,938<br>(2,504 - 5,697)    |
| Chronic obstructive pulmonary disease         | 5,465<br>(2,806 - 6,384)    | 1<br>(0 - 2)     | 0<br>(0 - 0)      | 58<br>(33 - 72)          | 956<br>(562 - 1,156)     | 4,449<br>(2,208 - 5,224)    |
| Pneumoconiosis                                | 264<br>(134 - 373)          | 0<br>(0 - 0)     | 0<br>(0 - 0)      | 14<br>(8 - 20)           | 126<br>(67 - 180)        | 123<br>(55 - 191)           |
| Silicosis                                     | 93<br>(46 - 135)            | 0<br>(0 - 0)     | 0<br>(0 - 0)      | 4<br>(2 - 5)             | 27<br>(15 - 39)          | 62<br>(27 - 97)             |
| Asbestosis                                    | 26<br>(14 - 37)             | 0<br>(0 - 0)     | 0<br>(0 - 0)      | 2<br>(1 - 3)             | 14<br>(8 - 21)           | 9<br>(4 - 15)               |
| Coal workers pneumoconiosis                   | 36<br>(18 - 50)             | 0<br>(0 - 0)     | 0<br>(0 - 0)      | 1<br>(1 - 1)             | 24<br>(12 - 35)          | 11<br>(5 - 18)              |
| Other pneumoconiosis                          | 109<br>(55 - 156)           | 0<br>(0 - 0)     | 0<br>(0 - 0)      | 7<br>(4 - 11)            | 61<br>(31 - 89)          | 40<br>(17 - 68)             |



Web Table 31- Bulgaria deaths with 95% UI by age, sex, and cause in 2013

| Cause                                               | Males, All Ages          | Males, 0-4 Years | Males, 5-14 Years | Males, 15-49 Years | Males, 50-69 Years | Males, 70-80 Years       |
|-----------------------------------------------------|--------------------------|------------------|-------------------|--------------------|--------------------|--------------------------|
| Asthma                                              | 30<br>(18 - 38)          | 0<br>(0 - 0)     | 0<br>(0 - 0)      | 2<br>(1 - 2)       | 11<br>(7 - 15)     | 18<br>(10 - 24)          |
| Interstitial lung disease and pulmonary sarcoidosis | 506<br>(226 - 693)       | 0<br>(0 - 0)     | 0<br>(0 - 0)      | 3<br>(1 - 5)       | 190<br>(91 - 261)  | 313<br>(123 - 452)       |
| Other chronic respiratory diseases                  | 71<br>(43 - 89)          | 1<br>(1 - 2)     | 0<br>(0 - 0)      | 11<br>(6 - 15)     | 23<br>(15 - 32)    | 35<br>(19 - 48)          |
| Cirrhosis                                           | 1,350<br>(1,249 - 1,452) | 1<br>(0 - 1)     | 1<br>(1 - 1)      | 239<br>(212 - 270) | 836<br>(757 - 917) | 273<br>(241 - 315)       |
| Cirrhosis due to hepatitis B                        | 292<br>(159 - 444)       | 0<br>(0 - 0)     | 0<br>(0 - 0)      | 55<br>(30 - 92)    | 185<br>(99 - 283)  | 52<br>(20 - 83)          |
| Cirrhosis due to hepatitis C                        | 364<br>(201 - 581)       | 0<br>(0 - 0)     | 0<br>(0 - 0)      | 58<br>(26 - 102)   | 223<br>(121 - 364) | 82<br>(36 - 129)         |
| Cirrhosis due to alcohol use                        | 483<br>(294 - 689)       | --               | --                | 64<br>(28 - 108)   | 305<br>(182 - 443) | 114<br>(59 - 163)        |
| Cirrhosis due to other causes                       | 211<br>(140 - 303)       | 1<br>(0 - 1)     | 1<br>(0 - 1)      | 62<br>(43 - 90)    | 123<br>(77 - 184)  | 24<br>(14 - 38)          |
| Digestive diseases                                  | 730<br>(621 - 815)       | 1<br>(1 - 2)     | 1<br>(1 - 1)      | 60<br>(50 - 70)    | 264<br>(230 - 310) | 403<br>(324 - 459)       |
| Peptic ulcer disease                                | 203<br>(160 - 275)       | 0<br>(0 - 0)     | 0<br>(0 - 0)      | 14<br>(10 - 19)    | 81<br>(62 - 113)   | 109<br>(81 - 147)        |
| Gastritis and duodenitis                            | 23<br>(8 - 33)           | 0<br>(0 - 0)     | 0<br>(0 - 0)      | 1<br>(1 - 2)       | 9<br>(3 - 13)      | 13<br>(4 - 20)           |
| Appendicitis                                        | 25<br>(15 - 35)          | 0<br>(0 - 0)     | 0<br>(0 - 0)      | 4<br>(2 - 5)       | 10<br>(6 - 15)     | 11<br>(6 - 16)           |
| Paralytic ileus and intestinal obstruction          | 140<br>(77 - 208)        | 1<br>(0 - 1)     | 0<br>(0 - 1)      | 8<br>(4 - 12)      | 40<br>(23 - 61)    | 92<br>(46 - 132)         |
| Inguinal, femoral, and abdominal hernia             | 31<br>(20 - 62)          | 0<br>(0 - 0)     | 0<br>(0 - 0)      | 1<br>(0 - 1)       | 10<br>(6 - 18)     | 20<br>(12 - 42)          |
| Inflammatory bowel disease                          | 15<br>(9 - 20)           | 0<br>(0 - 1)     | 0<br>(0 - 0)      | 2<br>(1 - 2)       | 5<br>(3 - 7)       | 8<br>(4 - 11)            |
| Vascular intestinal disorders                       | 79<br>(32 - 154)         | 0<br>(0 - 0)     | 0<br>(0 - 0)      | 2<br>(1 - 5)       | 28<br>(12 - 55)    | 49<br>(20 - 96)          |
| Gallbladder and biliary diseases                    | 45<br>(33 - 63)          | 0<br>(0 - 0)     | 0<br>(0 - 0)      | 2<br>(1 - 2)       | 12<br>(9 - 19)     | 31<br>(22 - 43)          |
| Pancreatitis                                        | 128<br>(77 - 165)        | 0<br>(0 - 0)     | 0<br>(0 - 0)      | 24<br>(16 - 31)    | 53<br>(33 - 71)    | 51<br>(26 - 70)          |
| Other digestive diseases                            | 40<br>(24 - 53)          | 0<br>(0 - 0)     | 0<br>(0 - 0)      | 4<br>(2 - 6)       | 16<br>(10 - 21)    | 20<br>(11 - 29)          |
| Neurological disorders                              | 2,638<br>(2,132 - 3,149) | 3<br>(2 - 5)     | 3<br>(2 - 4)      | 50<br>(39 - 59)    | 201<br>(163 - 240) | 2,382<br>(1,898 - 2,887) |
| Alzheimer disease and other dementias               | 2,280<br>(1,788 - 2,783) | --               | --                | 0<br>(0 - 1)       | 123<br>(86 - 157)  | 2,157<br>(1,676 - 2,651) |
| Parkinson disease                                   | 227<br>(134 - 275)       | --               | --                | 1<br>(0 - 1)       | 28<br>(21 - 35)    | 198<br>(115 - 244)       |
| Epilepsy                                            | 70<br>(49 - 85)          | 1<br>(1 - 2)     | 2<br>(1 - 2)      | 31<br>(22 - 39)    | 27<br>(18 - 34)    | 9<br>(6 - 12)            |
| Multiple sclerosis                                  | 27<br>(16 - 55)          | --               | --                | 6<br>(3 - 11)      | 11<br>(5 - 18)     | 10<br>(5 - 26)           |
| Other neurological disorders                        | 33<br>(23 - 38)          | 2<br>(1 - 3)     | 1<br>(1 - 2)      | 11<br>(8 - 14)     | 12<br>(8 - 14)     | 7<br>(5 - 9)             |
| Mental and substance use disorders                  | 156<br>(129 - 270)       | 0<br>(0 - 1)     | 0<br>(0 - 0)      | 82<br>(66 - 126)   | 62<br>(47 - 133)   | 12<br>(9 - 20)           |
| Schizophrenia                                       | 13<br>(9 - 20)           | --               | --                | 4<br>(3 - 7)       | 7<br>(4 - 11)      | 2<br>(1 - 4)             |
| Alcohol use disorders                               | 84<br>(62 - 199)         | --               | --                | 33<br>(23 - 82)    | 45<br>(31 - 116)   | 6<br>(4 - 13)            |
| Drug use disorders                                  | 59<br>(24 - 70)          | 0<br>(0 - 1)     | --                | 45<br>(17 - 54)    | 10<br>(5 - 13)     | 4<br>(2 - 6)             |
| Opioid use disorders                                | 23<br>(9 - 28)           | 0<br>(0 - 0)     | --                | 18<br>(7 - 22)     | 4<br>(2 - 5)       | 2<br>(1 - 2)             |
| Cocaine use disorders                               | 3<br>(1 - 4)             | 0<br>(0 - 0)     | --                | 3<br>(1 - 3)       | 0<br>(0 - 1)       | 0<br>(0 - 0)             |
| Amphetamine use disorders                           | 3<br>(1 - 3)             | 0<br>(0 - 0)     | --                | 2<br>(1 - 3)       | 0<br>(0 - 1)       | 0<br>(0 - 0)             |
| Other drug use disorders                            | 30<br>(13 - 36)          | 0<br>(0 - 0)     | --                | 22<br>(9 - 27)     | 6<br>(3 - 7)       | 2<br>(1 - 3)             |
| Eating disorders                                    | 0<br>(0 - 0)             | --               | 0<br>(0 - 0)      | 0<br>(0 - 0)       | --                 | --                       |
| Anorexia nervosa                                    | 0<br>(0 - 0)             | --               | 0<br>(0 - 0)      | 0<br>(0 - 0)       | --                 | --                       |
| Diabetes, urogenital, blood, and endocrine diseases | 1,685<br>(1,559 - 1,922) | 13<br>(6 - 21)   | 5<br>(3 - 7)      | 134<br>(115 - 153) | 596<br>(536 - 677) | 939<br>(841 - 1,113)     |
| Diabetes mellitus                                   | 830<br>(756 - 916)       | 0<br>(0 - 0)     | 0<br>(0 - 0)      | 41<br>(35 - 47)    | 308<br>(271 - 347) | 481<br>(422 - 549)       |
| Acute glomerulonephritis                            | 3<br>(2 - 4)             | 0<br>(0 - 0)     | 0<br>(0 - 0)      | 1<br>(1 - 1)       | 1<br>(0 - 1)       | 1<br>(1 - 2)             |
| Chronic kidney disease                              | 617<br>(478 - 697)       | 1<br>(0 - 1)     | 1<br>(1 - 1)      | 52<br>(40 - 61)    | 208<br>(164 - 243) | 356<br>(258 - 418)       |
| Chronic kidney disease due to diabetes mellitus     | 1<br>(0 - 1)             | 0<br>(0 - 0)     | 0<br>(0 - 0)      | 0<br>(0 - 1)       | 0<br>(0 - 0)       | 0<br>(0 - 0)             |

Web Table 31- Bulgaria deaths with 95% UI by age, sex, and cause in 2013

| Cause                                               | Males, All Ages          | Males, 0-4 Years  | Males, 5-14 Years | Males, 15-49 Years   | Males, 50-69 Years   | Males, 70-80 Years |
|-----------------------------------------------------|--------------------------|-------------------|-------------------|----------------------|----------------------|--------------------|
| Chronic kidney disease due to hypertension          | 222<br>(176 - 349)       | 0<br>(0 - 0)      | 0<br>(0 - 0)      | 18<br>(13 - 29)      | 77<br>(57 - 124)     | 127<br>(96 - 207)  |
| Chronic kidney disease due to glomerulonephritis    | 54<br>(35 - 81)          | 0<br>(0 - 0)      | 0<br>(0 - 0)      | 6<br>(4 - 9)         | 19<br>(11 - 31)      | 28<br>(17 - 45)    |
| Chronic kidney disease due to other causes          | 340<br>(162 - 418)       | 0<br>(0 - 1)      | 0<br>(0 - 1)      | 27<br>(13 - 36)      | 111<br>(52 - 145)    | 200<br>(92 - 257)  |
| Urinary diseases and male infertility               | 125<br>(87 - 297)        | 0<br>(0 - 0)      | 0<br>(0 - 0)      | 8<br>(6 - 18)        | 42<br>(28 - 99)      | 75<br>(49 - 192)   |
| Interstitial nephritis and urinary tract infections | 100<br>(65 - 246)        | 0<br>(0 - 0)      | 0<br>(0 - 0)      | 7<br>(5 - 15)        | 34<br>(21 - 85)      | 59<br>(36 - 155)   |
| Urolithiasis                                        | 5<br>(2 - 20)            | --                | 0<br>(0 - 0)      | 0<br>(0 - 1)         | 2<br>(1 - 9)         | 3<br>(1 - 11)      |
| Other urinary diseases                              | 20<br>(8 - 47)           | 0<br>(0 - 0)      | 0<br>(0 - 0)      | 1<br>(0 - 2)         | 6<br>(2 - 13)        | 13<br>(5 - 32)     |
| Gynecological diseases                              | --                       | --                | --                | --                   | --                   | --                 |
| Uterine fibroids                                    | --                       | --                | --                | --                   | --                   | --                 |
| Polycystic ovarian syndrome                         | --                       | --                | --                | --                   | --                   | --                 |
| Endometriosis                                       | --                       | --                | --                | --                   | --                   | --                 |
| Genital prolapse                                    | --                       | --                | --                | --                   | --                   | --                 |
| Other gynecological diseases                        | --                       | --                | --                | --                   | --                   | --                 |
| Hemoglobinopathies and hemolytic anemias            | 43<br>(18 - 73)          | 5<br>(2 - 12)     | 2<br>(1 - 4)      | 19<br>(8 - 34)       | 6<br>(3 - 10)        | 10<br>(4 - 16)     |
| Thalassemias                                        | 10<br>(4 - 19)           | 4<br>(1 - 9)      | 1<br>(1 - 3)      | 4<br>(2 - 8)         | 0<br>(0 - 0)         | 0<br>(0 - 0)       |
| Sickle cell disorders                               | 4<br>(2 - 7)             | 1<br>(0 - 1)      | 0<br>(0 - 0)      | 3<br>(1 - 5)         | 1<br>(0 - 1)         | 0<br>(0 - 0)       |
| G6PD deficiency                                     | 1<br>(1 - 2)             | 0<br>(0 - 0)      | 0<br>(0 - 0)      | 1<br>(0 - 1)         | 0<br>(0 - 0)         | 0<br>(0 - 0)       |
| Other hemoglobinopathies and hemolytic anemias      | 28<br>(12 - 46)          | 1<br>(0 - 2)      | 0<br>(0 - 0)      | 12<br>(5 - 21)       | 5<br>(2 - 9)         | 10<br>(4 - 16)     |
| Endocrine, metabolic, blood, and immune disorders   | 69<br>(33 - 84)          | 6<br>(3 - 10)     | 1<br>(1 - 2)      | 13<br>(7 - 17)       | 31<br>(14 - 41)      | 17<br>(7 - 23)     |
| Musculoskeletal disorders                           | 14<br>(7 - 18)           | --                | 0<br>(0 - 0)      | 3<br>(1 - 3)         | 6<br>(3 - 8)         | 5<br>(3 - 7)       |
| Rheumatoid arthritis                                | 3<br>(1 - 5)             | --                | 0<br>(0 - 0)      | 0<br>(0 - 1)         | 1<br>(1 - 2)         | 1<br>(1 - 2)       |
| Other musculoskeletal disorders                     | 11<br>(6 - 14)           | --                | 0<br>(0 - 0)      | 2<br>(1 - 3)         | 5<br>(2 - 6)         | 4<br>(2 - 6)       |
| Other non-communicable diseases                     | 153<br>(113 - 204)       | 107<br>(69 - 155) | 7<br>(5 - 10)     | 16<br>(13 - 18)      | 12<br>(10 - 15)      | 12<br>(9 - 14)     |
| Congenital anomalies                                | 134<br>(96 - 183)        | 103<br>(66 - 150) | 7<br>(5 - 10)     | 13<br>(11 - 16)      | 6<br>(5 - 8)         | 5<br>(4 - 7)       |
| Neural tube defects                                 | 2<br>(1 - 5)             | 2<br>(1 - 5)      | 0<br>(0 - 0)      | 0<br>(0 - 0)         | 0<br>(0 - 0)         | 0<br>(0 - 0)       |
| Congenital heart anomalies                          | 74<br>(53 - 100)         | 51<br>(32 - 76)   | 4<br>(3 - 6)      | 11<br>(9 - 13)       | 4<br>(3 - 6)         | 3<br>(2 - 4)       |
| Cleft lip and cleft palate                          | 1<br>(0 - 2)             | 1<br>(0 - 2)      | --                | --                   | --                   | --                 |
| Down syndrome                                       | 3<br>(1 - 6)             | 2<br>(1 - 4)      | 0<br>(0 - 1)      | 0<br>(0 - 0)         | 0<br>(0 - 1)         | 0<br>(0 - 0)       |
| Chromosomal unbalanced rearrangements               | 4<br>(2 - 7)             | 3<br>(1 - 6)      | 0<br>(0 - 1)      | 0<br>(0 - 0)         | 0<br>(0 - 0)         | 0<br>(0 - 0)       |
| Other congenital anomalies                          | 50<br>(33 - 76)          | 44<br>(27 - 69)   | 2<br>(1 - 3)      | 2<br>(1 - 2)         | 1<br>(1 - 2)         | 2<br>(1 - 2)       |
| Skin and subcutaneous diseases                      | 15<br>(13 - 18)          | 0<br>(0 - 1)      | 0<br>(0 - 0)      | 2<br>(2 - 3)         | 6<br>(5 - 8)         | 6<br>(5 - 9)       |
| Cellulitis                                          | 3<br>(1 - 5)             | 0<br>(0 - 0)      | 0<br>(0 - 0)      | 0<br>(0 - 1)         | 1<br>(1 - 3)         | 1<br>(0 - 2)       |
| Pyoderma                                            | 11<br>(8 - 13)           | 0<br>(0 - 1)      | 0<br>(0 - 0)      | 1<br>(1 - 2)         | 4<br>(3 - 6)         | 5<br>(3 - 7)       |
| Decubitus ulcer                                     | 1<br>(0 - 1)             | 0<br>(0 - 0)      | 0<br>(0 - 0)      | 0<br>(0 - 0)         | 0<br>(0 - 0)         | 1<br>(0 - 1)       |
| Other skin and subcutaneous diseases                | 1<br>(1 - 1)             | 0<br>(0 - 0)      | 0<br>(0 - 0)      | 0<br>(0 - 0)         | 0<br>(0 - 1)         | 0<br>(0 - 1)       |
| Sudden infant death syndrome                        | 4<br>(1 - 9)             | 4<br>(1 - 9)      | --                | --                   | --                   | --                 |
| Injuries                                            | 2,527<br>(2,354 - 2,933) | 35<br>(21 - 53)   | 35<br>(27 - 47)   | 982<br>(911 - 1,097) | 882<br>(807 - 1,016) | 593<br>(516 - 787) |
| Transport injuries                                  | 595<br>(551 - 643)       | 5<br>(3 - 8)      | 10<br>(7 - 14)    | 289<br>(261 - 320)   | 185<br>(165 - 206)   | 106<br>(91 - 125)  |
| Road injuries                                       | 518<br>(472 - 559)       | 4<br>(2 - 7)      | 9<br>(6 - 13)     | 256<br>(226 - 285)   | 160<br>(140 - 179)   | 89<br>(74 - 105)   |
| Pedestrian road injuries                            | 119<br>(59 - 180)        | 1<br>(0 - 2)      | 2<br>(1 - 4)      | 43<br>(20 - 74)      | 43<br>(19 - 63)      | 30<br>(13 - 44)    |

Web Table 31- Bulgaria deaths with 95% UI by age, sex, and cause in 2013

| Cause                                           | Males, All Ages      | Males, 0-4 Years | Males, 5-14 Years | Males, 15-49 Years | Males, 50-69 Years | Males, 70-80 Years |
|-------------------------------------------------|----------------------|------------------|-------------------|--------------------|--------------------|--------------------|
| Cyclist road injuries                           | 41<br>(29 - 73)      | 0<br>(0 - 1)     | 1<br>(0 - 2)      | 16<br>(10 - 31)    | 15<br>(10 - 27)    | 9<br>(5 - 15)      |
| Motorcyclist road injuries                      | 81<br>(56 - 150)     | 1<br>(0 - 1)     | 1<br>(1 - 3)      | 46<br>(30 - 83)    | 21<br>(13 - 42)    | 13<br>(8 - 25)     |
| Motor vehicle road injuries                     | 250<br>(147 - 315)   | 2<br>(1 - 4)     | 4<br>(2 - 6)      | 140<br>(80 - 180)  | 73<br>(39 - 98)    | 32<br>(17 - 45)    |
| Other road injuries                             | 27<br>(12 - 96)      | 0<br>(0 - 1)     | 0<br>(0 - 2)      | 12<br>(5 - 48)     | 8<br>(3 - 33)      | 6<br>(2 - 23)      |
| Other transport injuries                        | 78<br>(60 - 112)     | 1<br>(0 - 1)     | 1<br>(0 - 1)      | 33<br>(24 - 48)    | 26<br>(18 - 40)    | 18<br>(12 - 29)    |
| Unintentional injuries                          | 993<br>(874 - 1,178) | 29<br>(17 - 45)  | 22<br>(16 - 30)   | 339<br>(301 - 398) | 352<br>(305 - 424) | 251<br>(205 - 308) |
| Falls                                           | 298<br>(249 - 460)   | 2<br>(1 - 4)     | 2<br>(1 - 3)      | 72<br>(58 - 105)   | 116<br>(92 - 184)  | 106<br>(84 - 173)  |
| Drowning                                        | 163<br>(113 - 217)   | 4<br>(2 - 8)     | 12<br>(8 - 19)    | 84<br>(54 - 110)   | 42<br>(27 - 57)    | 22<br>(15 - 32)    |
| Fire, heat, and hot substances                  | 77<br>(55 - 99)      | 3<br>(2 - 6)     | 1<br>(1 - 2)      | 19<br>(14 - 26)    | 25<br>(17 - 34)    | 29<br>(19 - 38)    |
| Poisonings                                      | 51<br>(41 - 77)      | 1<br>(0 - 2)     | 0<br>(0 - 1)      | 16<br>(12 - 27)    | 21<br>(16 - 30)    | 12<br>(9 - 19)     |
| Exposure to mechanical forces                   | 138<br>(120 - 159)   | 3<br>(2 - 5)     | 3<br>(2 - 4)      | 67<br>(57 - 81)    | 51<br>(41 - 60)    | 14<br>(11 - 17)    |
| Unintentional firearm injuries                  | 15<br>(12 - 19)      | 0<br>(0 - 0)     | 1<br>(0 - 1)      | 9<br>(7 - 12)      | 4<br>(3 - 6)       | 1<br>(1 - 2)       |
| Unintentional suffocation                       | 13<br>(10 - 23)      | 1<br>(1 - 3)     | 0<br>(0 - 1)      | 5<br>(3 - 9)       | 5<br>(3 - 9)       | 2<br>(1 - 3)       |
| Other exposure to mechanical forces             | 110<br>(92 - 127)    | 2<br>(1 - 3)     | 2<br>(2 - 3)      | 53<br>(44 - 66)    | 42<br>(31 - 51)    | 11<br>(7 - 14)     |
| Adverse effects of medical treatment            | 70<br>(23 - 112)     | 2<br>(0 - 3)     | 0<br>(0 - 1)      | 10<br>(4 - 16)     | 25<br>(7 - 41)     | 34<br>(9 - 58)     |
| Animal contact                                  | 11<br>(8 - 17)       | 0<br>(0 - 0)     | 0<br>(0 - 0)      | 2<br>(2 - 4)       | 5<br>(3 - 8)       | 4<br>(2 - 6)       |
| Venomous animal contact                         | 4<br>(3 - 7)         | 0<br>(0 - 0)     | 0<br>(0 - 0)      | 2<br>(1 - 2)       | 2<br>(1 - 3)       | 1<br>(0 - 1)       |
| Non-venomous animal contact                     | 7<br>(5 - 11)        | 0<br>(0 - 0)     | 0<br>(0 - 0)      | 1<br>(1 - 1)       | 3<br>(2 - 4)       | 3<br>(2 - 5)       |
| Foreign body                                    | 72<br>(45 - 124)     | 11<br>(5 - 20)   | 1<br>(0 - 1)      | 24<br>(15 - 41)    | 28<br>(17 - 51)    | 9<br>(5 - 15)      |
| Pulmonary aspiration and foreign body in airway | 70<br>(43 - 122)     | 11<br>(5 - 20)   | 1<br>(0 - 1)      | 23<br>(14 - 40)    | 27<br>(17 - 51)    | 9<br>(5 - 15)      |
| Foreign body in other body part                 | 1<br>(1 - 2)         | 0<br>(0 - 0)     | 0<br>(0 - 0)      | 1<br>(0 - 1)       | 0<br>(0 - 1)       | 0<br>(0 - 0)       |
| Other unintentional injuries                    | 113<br>(92 - 138)    | 3<br>(1 - 5)     | 2<br>(1 - 4)      | 46<br>(35 - 62)    | 40<br>(26 - 59)    | 21<br>(14 - 31)    |
| Self-harm and interpersonal violence            | 939<br>(821 - 1,271) | 1<br>(1 - 3)     | 4<br>(2 - 6)      | 353<br>(302 - 451) | 345<br>(289 - 441) | 236<br>(191 - 387) |
| Self-harm                                       | 796<br>(699 - 1,077) | -                | 3<br>(1 - 4)      | 274<br>(225 - 333) | 303<br>(243 - 395) | 216<br>(173 - 364) |
| Interpersonal violence                          | 143<br>(112 - 258)   | 1<br>(1 - 3)     | 1<br>(1 - 2)      | 79<br>(59 - 137)   | 42<br>(30 - 80)    | 20<br>(14 - 36)    |
| Assault by firearm                              | 40<br>(22 - 79)      | 0<br>(0 - 0)     | 0<br>(0 - 0)      | 29<br>(15 - 54)    | 9<br>(4 - 18)      | 2<br>(1 - 5)       |
| Assault by sharp object                         | 43<br>(28 - 87)      | 0<br>(0 - 0)     | 0<br>(0 - 0)      | 25<br>(15 - 52)    | 13<br>(8 - 26)     | 4<br>(2 - 9)       |
| Assault by other means                          | 60<br>(40 - 114)     | 1<br>(1 - 2)     | 1<br>(0 - 1)      | 26<br>(15 - 50)    | 20<br>(12 - 42)    | 13<br>(9 - 24)     |

Web Table 31- Bulgaria deaths with 95% UI by age, sex, and cause in 2013

| Cause                                                             | Females, All Ages           | Females, 0-4 Years | Females, 5-14 Years | Females, 15-49 Years     | Females, 50-69 Years     | Females, 70-80 Years        |
|-------------------------------------------------------------------|-----------------------------|--------------------|---------------------|--------------------------|--------------------------|-----------------------------|
| All causes                                                        | 54,339<br>(52,404 - 56,425) | 292<br>(200 - 405) | 57<br>(47 - 69)     | 1,627<br>(1,535 - 1,721) | 9,142<br>(8,723 - 9,592) | 43,221<br>(41,813 - 44,825) |
| Communicable, maternal, neonatal, and nutritional diseases        | 1,186<br>(998 - 1,660)      | 146<br>(100 - 210) | 8<br>(6 - 11)       | 84<br>(73 - 98)          | 169<br>(139 - 221)       | 779<br>(616 - 1,210)        |
| HIV/AIDS and tuberculosis                                         | 54<br>(40 - 73)             | 0<br>(0 - 0)       | 0<br>(0 - 0)        | 17<br>(9 - 25)           | 16<br>(11 - 24)          | 21<br>(15 - 29)             |
| Tuberculosis                                                      | 35<br>(28 - 47)             | 0<br>(0 - 0)       | 0<br>(0 - 0)        | 4<br>(3 - 5)             | 11<br>(9 - 16)           | 20<br>(14 - 28)             |
| HIV/AIDS                                                          | 19<br>(7 - 34)              | 0<br>(0 - 0)       | 0<br>(0 - 0)        | 12<br>(5 - 21)           | 5<br>(1 - 11)            | 1<br>(0 - 3)                |
| HIV/AIDS resulting in mycobacterial infection                     | 1<br>(0 - 2)                | 0<br>(0 - 0)       | 0<br>(0 - 0)        | 1<br>(0 - 1)             | 0<br>(0 - 1)             | 0<br>(0 - 0)                |
| HIV/AIDS resulting in other diseases                              | 18<br>(7 - 33)              | 0<br>(0 - 0)       | 0<br>(0 - 0)        | 12<br>(5 - 20)           | 5<br>(1 - 10)            | 1<br>(0 - 3)                |
| Diarrhea, lower respiratory, and other common infectious diseases | 857<br>(688 - 1,363)        | 56<br>(37 - 80)    | 6<br>(5 - 9)        | 38<br>(32 - 51)          | 128<br>(101 - 179)       | 628<br>(467 - 1,082)        |
| Diarrheal diseases                                                | 11<br>(8 - 15)              | 4<br>(2 - 8)       | 0<br>(0 - 0)        | 1<br>(1 - 1)             | 2<br>(1 - 2)             | 4<br>(3 - 7)                |
| Intestinal infectious diseases                                    | 6<br>(3 - 12)               | 1<br>(0 - 2)       | 1<br>(0 - 1)        | 2<br>(1 - 4)             | 1<br>(0 - 3)             | 1<br>(0 - 3)                |
| Typhoid fever                                                     | 4<br>(2 - 9)                | 1<br>(0 - 1)       | 0<br>(0 - 1)        | 1<br>(1 - 3)             | 1<br>(0 - 3)             | 1<br>(0 - 2)                |
| Paratyphoid fever                                                 | 1<br>(1 - 3)                | 0<br>(0 - 0)       | 0<br>(0 - 0)        | 0<br>(0 - 1)             | 0<br>(0 - 1)             | 0<br>(0 - 1)                |
| Other intestinal infectious diseases                              | 0<br>(0 - 3)                | 0<br>(0 - 1)       | 0<br>(0 - 0)        | 0<br>(0 - 1)             | 0<br>(0 - 1)             | 0<br>(0 - 1)                |
| Lower respiratory infections                                      | 795<br>(629 - 1,298)        | 42<br>(27 - 62)    | 3<br>(2 - 6)        | 28<br>(22 - 41)          | 113<br>(89 - 164)        | 608<br>(448 - 1,066)        |
| Upper respiratory infections                                      | 2<br>(0 - 5)                | 0<br>(0 - 0)       | 0<br>(0 - 0)        | 0<br>(0 - 0)             | 0<br>(0 - 1)             | 1<br>(0 - 5)                |
| Otitis media                                                      | 1<br>(1 - 1)                | 0<br>(0 - 0)       | 0<br>(0 - 0)        | 0<br>(0 - 0)             | 0<br>(0 - 0)             | 0<br>(0 - 0)                |
| Meningitis                                                        | 18<br>(16 - 22)             | 5<br>(3 - 7)       | 1<br>(1 - 1)        | 3<br>(3 - 4)             | 5<br>(4 - 6)             | 5<br>(3 - 6)                |
| Pneumococcal meningitis                                           | 5<br>(3 - 7)                | 1<br>(0 - 2)       | 0<br>(0 - 0)        | 1<br>(1 - 1)             | 2<br>(1 - 3)             | 1<br>(1 - 2)                |
| H influenzae type B meningitis                                    | 2<br>(2 - 3)                | 1<br>(1 - 2)       | 0<br>(0 - 0)        | 0<br>(0 - 0)             | 0<br>(0 - 1)             | 0<br>(0 - 1)                |
| Meningococcal meningitis                                          | 5<br>(3 - 7)                | 1<br>(1 - 2)       | 0<br>(0 - 0)        | 1<br>(0 - 1)             | 1<br>(1 - 2)             | 1<br>(1 - 2)                |
| Other meningitis                                                  | 7<br>(4 - 9)                | 1<br>(1 - 2)       | 0<br>(0 - 0)        | 1<br>(1 - 2)             | 2<br>(1 - 3)             | 2<br>(1 - 3)                |
| Encephalitis                                                      | 19<br>(10 - 26)             | 4<br>(2 - 7)       | 1<br>(1 - 2)        | 4<br>(2 - 5)             | 5<br>(2 - 7)             | 5<br>(2 - 7)                |
| Diphtheria                                                        | 0<br>(0 - 0)                | 0<br>(0 - 0)       | 0<br>(0 - 0)        | 0<br>(0 - 0)             | 0<br>(0 - 0)             | --<br>(0 - 0)               |
| Whooping cough                                                    | 0<br>(0 - 1)                | 0<br>(0 - 1)       | 0<br>(0 - 0)        | 0<br>(0 - 0)             | 0<br>(0 - 0)             | --<br>(0 - 0)               |
| Tetanus                                                           | 1<br>(0 - 2)                | 0<br>(0 - 0)       | 0<br>(0 - 0)        | 0<br>(0 - 0)             | 0<br>(0 - 0)             | 0<br>(0 - 1)                |
| Measles                                                           | 0<br>(0 - 0)                | 0<br>(0 - 0)       | 0<br>(0 - 0)        | 0<br>(0 - 0)             | 0<br>(0 - 0)             | --<br>(0 - 0)               |
| Varicella and herpes zoster                                       | 4<br>(1 - 15)               | 0<br>(0 - 1)       | 0<br>(0 - 0)        | 0<br>(0 - 1)             | 0<br>(0 - 1)             | 3<br>(0 - 14)               |
| Neglected tropical diseases and malaria                           | 8<br>(6 - 10)               | 0<br>(0 - 0)       | 0<br>(0 - 0)        | 1<br>(1 - 1)             | 2<br>(2 - 3)             | 4<br>(3 - 5)                |
| Cysticercosis                                                     | 0<br>(0 - 0)                | 0<br>(0 - 0)       | 0<br>(0 - 0)        | 0<br>(0 - 0)             | 0<br>(0 - 0)             | 0<br>(0 - 0)                |
| Cystic echinococcosis                                             | 4<br>(3 - 4)                | 0<br>(0 - 0)       | 0<br>(0 - 0)        | 1<br>(0 - 1)             | 1<br>(1 - 1)             | 2<br>(2 - 2)                |
| Dengue                                                            | 1<br>(0 - 1)                | 0<br>(0 - 0)       | 0<br>(0 - 0)        | 0<br>(0 - 0)             | 0<br>(0 - 0)             | 0<br>(0 - 0)                |
| Rabies                                                            | 0<br>(0 - 0)                | 0<br>(0 - 0)       | 0<br>(0 - 0)        | 0<br>(0 - 0)             | 0<br>(0 - 0)             | 0<br>(0 - 0)                |
| Other neglected tropical diseases                                 | 4<br>(2 - 5)                | 0<br>(0 - 0)       | 0<br>(0 - 0)        | 0<br>(0 - 1)             | 1<br>(1 - 2)             | 2<br>(1 - 3)                |
| Maternal disorders                                                | 11<br>(9 - 13)              | --                 | 0<br>(0 - 0)        | 10<br>(8 - 13)           | --                       | --                          |
| Maternal hemorrhage                                               | 1<br>(1 - 2)                | --                 | 0<br>(0 - 0)        | 1<br>(1 - 2)             | --                       | --                          |
| Maternal sepsis and other maternal infections                     | 1<br>(1 - 1)                | --                 | 0<br>(0 - 0)        | 1<br>(1 - 1)             | --                       | --                          |
| Maternal hypertensive disorders                                   | 1<br>(1 - 2)                | --                 | 0<br>(0 - 0)        | 1<br>(1 - 2)             | --                       | --                          |
| Maternal obstructed labor                                         | 1<br>(1 - 2)                | --                 | 0<br>(0 - 0)        | 1<br>(1 - 2)             | --                       | --                          |
| Maternal abortive outcome                                         | 3<br>(2 - 4)                | --                 | 0<br>(0 - 0)        | 3<br>(2 - 4)             | --                       | --                          |
| Indirect maternal deaths                                          | 1<br>(0 - 1)                | --                 | 0<br>(0 - 0)        | 1<br>(0 - 1)             | --                       | --                          |

Web Table 31- Bulgaria deaths with 95% UI by age, sex, and cause in 2013

| Cause                                                            | Females, All Ages           | Females, 0-4 Years | Females, 5-14 Years | Females, 15-49 Years     | Females, 50-69 Years     | Females, 70-80 Years        |
|------------------------------------------------------------------|-----------------------------|--------------------|---------------------|--------------------------|--------------------------|-----------------------------|
| Late maternal deaths                                             | 1<br>(1 - 2)                | --                 | 0<br>(0 - 0)        | 1<br>(0 - 2)             | --                       | --                          |
| Maternal deaths aggravated by HIV/AIDS                           | 0<br>(0 - 0)                | --                 | --                  | 0<br>(0 - 0)             | --                       | --                          |
| Other maternal disorders                                         | 2<br>(1 - 2)                | --                 | 0<br>(0 - 0)        | 2<br>(1 - 2)             | --                       | --                          |
| Neonatal disorders                                               | 83<br>(58 - 126)            | 83<br>(58 - 126)   | --                  | --                       | --                       | --                          |
| Neonatal preterm birth complications                             | 44<br>(23 - 69)             | 44<br>(23 - 69)    | --                  | --                       | --                       | --                          |
| Neonatal encephalopathy due to birth asphyxia and trauma         | 21<br>(11 - 35)             | 21<br>(11 - 35)    | --                  | --                       | --                       | --                          |
| Neonatal sepsis and other neonatal infections                    | 4<br>(1 - 7)                | 4<br>(1 - 7)       | --                  | --                       | --                       | --                          |
| Hemolytic disease and other neonatal jaundice                    | 0<br>(0 - 0)                | 0<br>(0 - 0)       | --                  | --                       | --                       | --                          |
| Other neonatal disorders                                         | 15<br>(7 - 34)              | 15<br>(7 - 34)     | --                  | --                       | --                       | --                          |
| Nutritional deficiencies                                         | 137<br>(62 - 167)           | 1<br>(1 - 2)       | 1<br>(0 - 1)        | 13<br>(7 - 16)           | 14<br>(8 - 18)           | 108<br>(46 - 136)           |
| Protein-energy malnutrition                                      | 2<br>(1 - 6)                | 0<br>(0 - 1)       | 0<br>(0 - 0)        | 0<br>(0 - 1)             | 0<br>(0 - 1)             | 2<br>(0 - 4)                |
| Iodine deficiency                                                | 1<br>(0 - 4)                | 0<br>(0 - 0)       | 0<br>(0 - 0)        | 0<br>(0 - 0)             | 0<br>(0 - 1)             | 0<br>(0 - 3)                |
| Iron-deficiency anemia                                           | 131<br>(60 - 160)           | 1<br>(0 - 2)       | 0<br>(0 - 1)        | 12<br>(7 - 15)           | 13<br>(7 - 17)           | 104<br>(45 - 132)           |
| Other nutritional deficiencies                                   | 3<br>(1 - 9)                | 0<br>(0 - 1)       | 0<br>(0 - 0)        | 0<br>(0 - 1)             | 1<br>(0 - 1)             | 2<br>(0 - 7)                |
| Other communicable, maternal, neonatal, and nutritional diseases | 36<br>(24 - 46)             | 4<br>(2 - 7)       | 1<br>(1 - 1)        | 5<br>(4 - 6)             | 8<br>(5 - 10)            | 18<br>(10 - 25)             |
| Sexually transmitted diseases excluding HIV                      | 3<br>(1 - 6)                | 2<br>(0 - 5)       | 0<br>(0 - 0)        | 0<br>(0 - 0)             | 0<br>(0 - 0)             | 0<br>(0 - 0)                |
| Syphilis                                                         | 3<br>(1 - 6)                | 2<br>(0 - 5)       | 0<br>(0 - 0)        | 0<br>(0 - 0)             | 0<br>(0 - 0)             | 0<br>(0 - 0)                |
| Chlamydial infection                                             | 0<br>(0 - 0)                | --                 | 0<br>(0 - 0)        | 0<br>(0 - 0)             | 0<br>(0 - 0)             | 0<br>(0 - 0)                |
| Gonococcal infection                                             | 0<br>(0 - 0)                | --                 | 0<br>(0 - 0)        | 0<br>(0 - 0)             | 0<br>(0 - 0)             | 0<br>(0 - 0)                |
| Other sexually transmitted diseases                              | 0<br>(0 - 0)                | --                 | 0<br>(0 - 0)        | 0<br>(0 - 0)             | 0<br>(0 - 0)             | 0<br>(0 - 0)                |
| Hepatitis                                                        | 6<br>(5 - 8)                | 0<br>(0 - 1)       | 0<br>(0 - 0)        | 2<br>(2 - 3)             | 2<br>(1 - 3)             | 2<br>(1 - 3)                |
| Acute hepatitis A                                                | 2<br>(1 - 3)                | 0<br>(0 - 0)       | 0<br>(0 - 0)        | 1<br>(0 - 2)             | 0<br>(0 - 1)             | 0<br>(0 - 0)                |
| Acute hepatitis B                                                | 4<br>(3 - 6)                | 0<br>(0 - 0)       | 0<br>(0 - 0)        | 1<br>(0 - 2)             | 2<br>(1 - 2)             | 1<br>(1 - 2)                |
| Acute hepatitis C                                                | 0<br>(0 - 1)                | --                 | 0<br>(0 - 0)        | 0<br>(0 - 0)             | 0<br>(0 - 0)             | 0<br>(0 - 0)                |
| Other infectious diseases                                        | 27<br>(15 - 35)             | 2<br>(1 - 3)       | 0<br>(0 - 1)        | 2<br>(1 - 3)             | 5<br>(3 - 7)             | 16<br>(8 - 23)              |
| Non-communicable diseases                                        | 52,232<br>(50,279 - 54,252) | 120<br>(82 - 167)  | 30<br>(25 - 37)     | 1,330<br>(1,247 - 1,412) | 8,738<br>(8,328 - 9,164) | 42,015<br>(40,522 - 43,581) |
| Neoplasms                                                        | 7,345<br>(6,175 - 7,948)    | 8<br>(5 - 12)      | 13<br>(10 - 17)     | 651<br>(565 - 706)       | 2,918<br>(2,425 - 3,175) | 3,755<br>(3,163 - 4,106)    |
| Esophageal cancer                                                | 54<br>(46 - 64)             | --                 | --                  | 4<br>(3 - 5)             | 18<br>(14 - 22)          | 33<br>(27 - 40)             |
| Stomach cancer                                                   | 676<br>(496 - 897)          | --                 | --                  | 32<br>(23 - 44)          | 204<br>(146 - 276)       | 440<br>(311 - 599)          |
| Liver cancer                                                     | 316<br>(261 - 387)          | --                 | 0<br>(0 - 0)        | 15<br>(11 - 20)          | 106<br>(84 - 143)        | 195<br>(149 - 246)          |
| Liver cancer due to hepatitis B                                  | 53<br>(16 - 93)             | --                 | 0<br>(0 - 0)        | 4<br>(1 - 8)             | 24<br>(6 - 45)           | 25<br>(9 - 44)              |
| Liver cancer due to hepatitis C                                  | 138<br>(85 - 198)           | --                 | 0<br>(0 - 0)        | 5<br>(2 - 8)             | 42<br>(19 - 67)          | 91<br>(56 - 132)            |
| Liver cancer due to alcohol use                                  | 71<br>(37 - 107)            | --                 | --                  | 2<br>(1 - 3)             | 20<br>(11 - 31)          | 49<br>(25 - 76)             |
| Liver cancer due to other causes                                 | 55<br>(30 - 85)             | --                 | 0<br>(0 - 0)        | 4<br>(2 - 7)             | 21<br>(11 - 33)          | 30<br>(16 - 49)             |
| Larynx cancer                                                    | 21<br>(14 - 30)             | --                 | --                  | 2<br>(1 - 3)             | 9<br>(6 - 13)            | 10<br>(6 - 15)              |
| Tracheal, bronchus and lung cancer                               | 681<br>(506 - 773)          | --                 | --                  | 55<br>(38 - 67)          | 322<br>(220 - 376)       | 305<br>(225 - 361)          |
| Breast cancer                                                    | 1,272<br>(801 - 1,442)      | --                 | --                  | 138<br>(114 - 174)       | 573<br>(375 - 659)       | 562<br>(310 - 664)          |
| Cervical cancer                                                  | 467<br>(361 - 539)          | --                 | --                  | 109<br>(81 - 132)        | 210<br>(158 - 251)       | 148<br>(116 - 183)          |
| Uterine cancer                                                   | 284<br>(144 - 341)          | --                 | --                  | 22<br>(11 - 28)          | 126<br>(65 - 160)        | 136<br>(65 - 171)           |
| Prostate cancer                                                  | --                          | --                 | --                  | --                       | --                       | --                          |

Web Table 31- Bulgaria deaths with 95% UI by age, sex, and cause in 2013

| Cause                                         | Females, All Ages           | Females, 0-4 Years | Females, 5-14 Years | Females, 15-49 Years | Females, 50-69 Years     | Females, 70-80 Years        |
|-----------------------------------------------|-----------------------------|--------------------|---------------------|----------------------|--------------------------|-----------------------------|
| Colon and rectum cancer                       | 1,138<br>(997 - 1,269)      | --                 | --                  | 46<br>(39 - 54)      | 373<br>(320 - 414)       | 719<br>(617 - 833)          |
| Lip and oral cavity cancer                    | 45<br>(35 - 55)             | --                 | --                  | 4<br>(3 - 6)         | 14<br>(11 - 18)          | 27<br>(20 - 34)             |
| Nasopharynx cancer                            | 10<br>(4 - 17)              | --                 | 0<br>(0 - 0)        | 2<br>(1 - 4)         | 4<br>(1 - 6)             | 4<br>(2 - 8)                |
| Other pharynx cancer                          | 20<br>(15 - 25)             | --                 | --                  | 3<br>(2 - 4)         | 8<br>(6 - 11)            | 9<br>(6 - 12)               |
| Gallbladder and biliary tract cancer          | 144<br>(89 - 181)           | --                 | --                  | 5<br>(3 - 6)         | 55<br>(35 - 71)          | 84<br>(49 - 113)            |
| Pancreatic cancer                             | 480<br>(416 - 529)          | --                 | --                  | 17<br>(14 - 21)      | 180<br>(150 - 205)       | 283<br>(242 - 321)          |
| Malignant skin melanoma                       | 70<br>(39 - 88)             | --                 | --                  | 8<br>(5 - 11)        | 21<br>(10 - 27)          | 41<br>(24 - 54)             |
| Non-melanoma skin cancer                      | 60<br>(40 - 79)             | --                 | --                  | 2<br>(1 - 2)         | 7<br>(5 - 10)            | 52<br>(33 - 68)             |
| Ovarian cancer                                | 458<br>(351 - 517)          | --                 | --                  | 53<br>(43 - 63)      | 228<br>(178 - 266)       | 177<br>(118 - 212)          |
| Testicular cancer                             | --                          | --                 | --                  | --                   | --                       | --                          |
| Kidney cancer                                 | 82<br>(50 - 125)            | 0<br>(0 - 0)       | 0<br>(0 - 0)        | 5<br>(3 - 7)         | 37<br>(23 - 55)          | 40<br>(21 - 68)             |
| Bladder cancer                                | 116<br>(73 - 153)           | --                 | --                  | 4<br>(3 - 6)         | 31<br>(19 - 43)          | 81<br>(51 - 108)            |
| Brain and nervous system cancer               | 282<br>(162 - 331)          | 2<br>(1 - 4)       | 5<br>(3 - 7)        | 43<br>(32 - 52)      | 139<br>(87 - 169)        | 93<br>(37 - 122)            |
| Thyroid cancer                                | 38<br>(22 - 51)             | --                 | 0<br>(0 - 0)        | 2<br>(1 - 3)         | 14<br>(8 - 20)           | 22<br>(12 - 31)             |
| Mesothelioma                                  | 8<br>(5 - 17)               | --                 | --                  | 1<br>(1 - 2)         | 4<br>(2 - 8)             | 3<br>(2 - 7)                |
| Hodgkin lymphoma                              | 20<br>(14 - 27)             | 0<br>(0 - 0)       | 0<br>(0 - 0)        | 7<br>(5 - 9)         | 7<br>(5 - 11)            | 6<br>(4 - 9)                |
| Non-Hodgkin lymphoma                          | 105<br>(39 - 141)           | 0<br>(0 - 1)       | 1<br>(0 - 1)        | 13<br>(5 - 17)       | 42<br>(16 - 57)          | 50<br>(16 - 70)             |
| Multiple myeloma                              | 36<br>(20 - 55)             | --                 | --                  | 2<br>(1 - 3)         | 19<br>(11 - 30)          | 15<br>(8 - 24)              |
| Leukemia                                      | 194<br>(138 - 220)          | 2<br>(1 - 4)       | 4<br>(3 - 6)        | 26<br>(21 - 30)      | 69<br>(50 - 83)          | 93<br>(57 - 109)            |
| Other neoplasms                               | 267<br>(162 - 343)          | 3<br>(2 - 5)       | 3<br>(2 - 4)        | 32<br>(22 - 42)      | 98<br>(59 - 128)         | 131<br>(70 - 180)           |
| Cardiovascular diseases                       | 35,804<br>(34,100 - 38,580) | 6<br>(4 - 9)       | 4<br>(3 - 5)        | 433<br>(383 - 546)   | 4,594<br>(4,248 - 5,278) | 30,767<br>(29,368 - 32,848) |
| Rheumatic heart disease                       | 219<br>(101 - 283)          | 0<br>(0 - 0)       | 0<br>(0 - 0)        | 15<br>(11 - 31)      | 35<br>(24 - 69)          | 168<br>(45 - 239)           |
| Ischemic heart disease                        | 14,151<br>(12,053 - 18,997) | 0<br>(0 - 0)       | 0<br>(0 - 1)        | 171<br>(138 - 244)   | 1,664<br>(1,404 - 2,390) | 12,316<br>(10,438 - 16,658) |
| Cerebrovascular disease                       | 14,015<br>(12,356 - 16,740) | 1<br>(1 - 2)       | 1<br>(1 - 2)        | 130<br>(107 - 184)   | 1,578<br>(1,347 - 2,135) | 12,305<br>(10,752 - 14,552) |
| Ischemic stroke                               | 10,244<br>(7,710 - 11,774)  | 0<br>(0 - 0)       | 0<br>(0 - 0)        | 28<br>(17 - 37)      | 660<br>(449 - 849)       | 9,555<br>(7,132 - 11,066)   |
| Hemorrhagic stroke                            | 3,771<br>(2,741 - 6,452)    | 1<br>(1 - 2)       | 1<br>(1 - 1)        | 101<br>(81 - 154)    | 918<br>(710 - 1,437)     | 2,750<br>(1,869 - 4,905)    |
| Hypertensive heart disease                    | 5,092<br>(2,322 - 7,234)    | 0<br>(0 - 0)       | 0<br>(0 - 0)        | 31<br>(16 - 43)      | 499<br>(234 - 697)       | 4,562<br>(2,049 - 6,564)    |
| Cardiomyopathy and myocarditis                | 280<br>(197 - 348)          | 3<br>(2 - 5)       | 1<br>(1 - 2)        | 25<br>(18 - 33)      | 58<br>(43 - 74)          | 194<br>(129 - 252)          |
| Atrial fibrillation and flutter               | 207<br>(157 - 273)          | --                 | --                  | 1<br>(1 - 2)         | 20<br>(15 - 25)          | 186<br>(137 - 249)          |
| Aortic aneurysm                               | 69<br>(42 - 100)            | --                 | --                  | 5<br>(3 - 8)         | 22<br>(13 - 32)          | 42<br>(24 - 61)             |
| Peripheral vascular disease                   | 8<br>(6 - 11)               | --                 | --                  | 0<br>(0 - 0)         | 1<br>(1 - 2)             | 7<br>(5 - 9)                |
| Endocarditis                                  | 50<br>(33 - 88)             | 0<br>(0 - 0)       | 0<br>(0 - 0)        | 3<br>(2 - 5)         | 13<br>(8 - 21)           | 34<br>(21 - 64)             |
| Other cardiovascular and circulatory diseases | 1,713<br>(917 - 2,096)      | 1<br>(1 - 2)       | 1<br>(1 - 1)        | 52<br>(30 - 69)      | 704<br>(301 - 881)       | 954<br>(561 - 1,231)        |
| Chronic respiratory diseases                  | 3,088<br>(1,624 - 3,595)    | 1<br>(1 - 2)       | 0<br>(0 - 1)        | 32<br>(22 - 38)      | 314<br>(178 - 368)       | 2,740<br>(1,410 - 3,223)    |
| Chronic obstructive pulmonary disease         | 2,521<br>(1,339 - 3,014)    | 1<br>(0 - 1)       | 0<br>(0 - 0)        | 18<br>(12 - 23)      | 271<br>(154 - 322)       | 2,231<br>(1,163 - 2,700)    |
| Pneumoconiosis                                | 16<br>(7 - 27)              | 0<br>(0 - 0)       | 0<br>(0 - 0)        | 0<br>(0 - 1)         | 3<br>(1 - 5)             | 13<br>(5 - 23)              |
| Silicosis                                     | 0<br>(0 - 0)                | 0<br>(0 - 0)       | 0<br>(0 - 0)        | 0<br>(0 - 0)         | 0<br>(0 - 0)             | 0<br>(0 - 0)                |
| Asbestosis                                    | 1<br>(0 - 1)                | 0<br>(0 - 0)       | 0<br>(0 - 0)        | 0<br>(0 - 0)         | 0<br>(0 - 0)             | 0<br>(0 - 0)                |
| Coal workers pneumoconiosis                   | 0<br>(0 - 0)                | 0<br>(0 - 0)       | 0<br>(0 - 0)        | 0<br>(0 - 0)         | 0<br>(0 - 0)             | 0<br>(0 - 0)                |
| Other pneumoconiosis                          | 16<br>(7 - 26)              | 0<br>(0 - 0)       | 0<br>(0 - 0)        | 0<br>(0 - 1)         | 3<br>(1 - 4)             | 13<br>(5 - 23)              |

Web Table 31- Bulgaria deaths with 95% UI by age, sex, and cause in 2013

| Cause                                               | Females, All Ages        | Females, 0-4 Years | Females, 5-14 Years | Females, 15-49 Years | Females, 50-69 Years | Females, 70-80 Years     |
|-----------------------------------------------------|--------------------------|--------------------|---------------------|----------------------|----------------------|--------------------------|
| Asthma                                              | 40<br>(24 - 66)          | 0<br>(0 - 0)       | 0<br>(0 - 0)        | 2<br>(1 - 3)         | 10<br>(6 - 17)       | 28<br>(16 - 47)          |
| Interstitial lung disease and pulmonary sarcoidosis | 366<br>(123 - 627)       | 0<br>(0 - 0)       | 0<br>(0 - 0)        | 3<br>(1 - 5)         | 22<br>(8 - 38)       | 340<br>(110 - 588)       |
| Other chronic respiratory diseases                  | 146<br>(64 - 226)        | 1<br>(0 - 1)       | 0<br>(0 - 0)        | 9<br>(5 - 13)        | 8<br>(4 - 13)        | 128<br>(56 - 206)        |
| Cirrhosis                                           | 398<br>(351 - 440)       | 0<br>(0 - 1)       | 1<br>(0 - 1)        | 43<br>(37 - 50)      | 177<br>(150 - 203)   | 177<br>(153 - 202)       |
| Cirrhosis due to hepatitis B                        | 139<br>(65 - 199)        | 0<br>(0 - 0)       | 0<br>(0 - 0)        | 16<br>(9 - 23)       | 62<br>(32 - 92)      | 61<br>(21 - 92)          |
| Cirrhosis due to hepatitis C                        | 116<br>(64 - 194)        | 0<br>(0 - 0)       | 0<br>(0 - 0)        | 10<br>(4 - 18)       | 53<br>(26 - 92)      | 53<br>(28 - 91)          |
| Cirrhosis due to alcohol use                        | 74<br>(46 - 105)         | --                 | --                  | 5<br>(2 - 7)         | 29<br>(17 - 44)      | 40<br>(22 - 57)          |
| Cirrhosis due to other causes                       | 68<br>(35 - 101)         | 0<br>(0 - 1)       | 0<br>(0 - 1)        | 13<br>(8 - 19)       | 32<br>(15 - 49)      | 23<br>(10 - 36)          |
| Digestive diseases                                  | 604<br>(411 - 693)       | 1<br>(1 - 1)       | 1<br>(1 - 1)        | 21<br>(16 - 25)      | 124<br>(89 - 144)    | 457<br>(298 - 536)       |
| Peptic ulcer disease                                | 120<br>(74 - 161)        | 0<br>(0 - 0)       | 0<br>(0 - 0)        | 3<br>(2 - 4)         | 24<br>(15 - 32)      | 93<br>(55 - 128)         |
| Gastritis and duodenitis                            | 17<br>(5 - 26)           | 0<br>(0 - 0)       | 0<br>(0 - 0)        | 1<br>(0 - 1)         | 2<br>(1 - 4)         | 13<br>(3 - 22)           |
| Appendicitis                                        | 25<br>(10 - 42)          | 0<br>(0 - 0)       | 0<br>(0 - 0)        | 2<br>(1 - 3)         | 6<br>(3 - 10)        | 16<br>(5 - 30)           |
| Paralytic ileus and intestinal obstruction          | 135<br>(65 - 198)        | 0<br>(0 - 0)       | 0<br>(0 - 0)        | 4<br>(2 - 6)         | 25<br>(12 - 39)      | 105<br>(50 - 158)        |
| Inguinal, femoral, and abdominal hernia             | 29<br>(14 - 54)          | 0<br>(0 - 0)       | 0<br>(0 - 0)        | 0<br>(0 - 1)         | 6<br>(3 - 11)        | 22<br>(10 - 43)          |
| Inflammatory bowel disease                          | 13<br>(5 - 20)           | 0<br>(0 - 0)       | 0<br>(0 - 0)        | 1<br>(1 - 2)         | 3<br>(1 - 4)         | 9<br>(3 - 15)            |
| Vascular intestinal disorders                       | 98<br>(43 - 148)         | 0<br>(0 - 0)       | 0<br>(0 - 0)        | 1<br>(0 - 2)         | 14<br>(7 - 24)       | 82<br>(35 - 123)         |
| Gallbladder and biliary diseases                    | 50<br>(33 - 73)          | 0<br>(0 - 0)       | 0<br>(0 - 0)        | 1<br>(1 - 2)         | 10<br>(7 - 15)       | 39<br>(24 - 57)          |
| Pancreatitis                                        | 86<br>(47 - 119)         | 0<br>(0 - 0)       | 0<br>(0 - 0)        | 5<br>(3 - 7)         | 25<br>(15 - 35)      | 56<br>(29 - 81)          |
| Other digestive diseases                            | 32<br>(22 - 45)          | 0<br>(0 - 0)       | 0<br>(0 - 0)        | 2<br>(2 - 3)         | 8<br>(6 - 11)        | 21<br>(14 - 32)          |
| Neurological disorders                              | 3,007<br>(2,331 - 3,631) | 2<br>(1 - 3)       | 2<br>(1 - 2)        | 28<br>(21 - 35)      | 155<br>(116 - 190)   | 2,819<br>(2,157 - 3,433) |
| Alzheimer disease and other dementias               | 2,746<br>(2,111 - 3,355) | --                 | --                  | 0<br>(0 - 1)         | 109<br>(79 - 141)    | 2,637<br>(2,016 - 3,240) |
| Parkinson disease                                   | 171<br>(62 - 221)        | --                 | --                  | 0<br>(0 - 1)         | 16<br>(7 - 21)       | 155<br>(52 - 204)        |
| Epilepsy                                            | 29<br>(20 - 35)          | 1<br>(0 - 1)       | 1<br>(1 - 2)        | 12<br>(9 - 16)       | 8<br>(5 - 11)        | 6<br>(4 - 9)             |
| Multiple sclerosis                                  | 37<br>(22 - 60)          | --                 | --                  | 11<br>(5 - 16)       | 12<br>(5 - 17)       | 14<br>(8 - 32)           |
| Other neurological disorders                        | 24<br>(20 - 27)          | 1<br>(1 - 2)       | 1<br>(0 - 1)        | 5<br>(4 - 5)         | 10<br>(8 - 12)       | 7<br>(6 - 9)             |
| Mental and substance use disorders                  | 35<br>(27 - 45)          | 0<br>(0 - 0)       | 0<br>(0 - 0)        | 12<br>(9 - 16)       | 13<br>(9 - 18)       | 10<br>(7 - 12)           |
| Schizophrenia                                       | 12<br>(7 - 16)           | --                 | --                  | 3<br>(2 - 4)         | 6<br>(3 - 8)         | 4<br>(2 - 5)             |
| Alcohol use disorders                               | 10<br>(5 - 20)           | --                 | --                  | 4<br>(2 - 8)         | 5<br>(2 - 9)         | 1<br>(1 - 3)             |
| Drug use disorders                                  | 12<br>(10 - 14)          | 0<br>(0 - 0)       | --                  | 4<br>(4 - 5)         | 3<br>(2 - 4)         | 5<br>(3 - 6)             |
| Opioid use disorders                                | 4<br>(4 - 5)             | 0<br>(0 - 0)       | --                  | 2<br>(1 - 2)         | 1<br>(1 - 1)         | 2<br>(1 - 2)             |
| Cocaine use disorders                               | 1<br>(1 - 1)             | 0<br>(0 - 0)       | --                  | 0<br>(0 - 0)         | 0<br>(0 - 0)         | 0<br>(0 - 0)             |
| Amphetamine use disorders                           | 1<br>(1 - 1)             | 0<br>(0 - 0)       | --                  | 0<br>(0 - 0)         | 0<br>(0 - 0)         | 0<br>(0 - 0)             |
| Other drug use disorders                            | 6<br>(5 - 7)             | 0<br>(0 - 0)       | --                  | 2<br>(2 - 3)         | 2<br>(1 - 2)         | 2<br>(2 - 3)             |
| Eating disorders                                    | 0<br>(0 - 1)             | --                 | 0<br>(0 - 0)        | 0<br>(0 - 1)         | --                   | --                       |
| Anorexia nervosa                                    | 0<br>(0 - 1)             | --                 | 0<br>(0 - 0)        | 0<br>(0 - 1)         | --                   | --                       |
| Diabetes, urogenital, blood, and endocrine diseases | 1,784<br>(1,475 - 1,961) | 9<br>(5 - 16)      | 4<br>(2 - 5)        | 93<br>(72 - 110)     | 425<br>(364 - 490)   | 1,253<br>(991 - 1,400)   |
| Diabetes mellitus                                   | 1,072<br>(899 - 1,201)   | 0<br>(0 - 0)       | 0<br>(0 - 0)        | 24<br>(20 - 29)      | 245<br>(203 - 288)   | 802<br>(624 - 929)       |
| Acute glomerulonephritis                            | 2<br>(1 - 2)             | 0<br>(0 - 0)       | 0<br>(0 - 0)        | 0<br>(0 - 0)         | 1<br>(0 - 1)         | 1<br>(0 - 1)             |
| Chronic kidney disease                              | 500<br>(297 - 580)       | 1<br>(0 - 1)       | 1<br>(0 - 1)        | 30<br>(20 - 37)      | 127<br>(83 - 153)    | 342<br>(186 - 409)       |
| Chronic kidney disease due to diabetes mellitus     | 1<br>(0 - 1)             | 0<br>(0 - 0)       | 0<br>(0 - 0)        | 0<br>(0 - 0)         | 0<br>(0 - 0)         | 0<br>(0 - 0)             |

Web Table 31- Bulgaria deaths with 95% UI by age, sex, and cause in 2013

| Cause                                               | Females, All Ages    | Females, 0-4 Years | Females, 5-14 Years | Females, 15-49 Years | Females, 50-69 Years | Females, 70-80 Years |
|-----------------------------------------------------|----------------------|--------------------|---------------------|----------------------|----------------------|----------------------|
| Chronic kidney disease due to hypertension          | 215<br>(149 - 315)   | 0<br>(0 - 0)       | 0<br>(0 - 0)        | 12<br>(8 - 18)       | 50<br>(33 - 79)      | 153<br>(103 - 227)   |
| Chronic kidney disease due to glomerulonephritis    | 38<br>(22 - 57)      | 0<br>(0 - 0)       | 0<br>(0 - 0)        | 4<br>(3 - 6)         | 13<br>(8 - 20)       | 20<br>(11 - 33)      |
| Chronic kidney disease due to other causes          | 246<br>(89 - 335)    | 0<br>(0 - 0)       | 0<br>(0 - 1)        | 14<br>(7 - 20)       | 63<br>(27 - 94)      | 169<br>(52 - 239)    |
| Urinary diseases and male infertility               | 102<br>(66 - 215)    | 0<br>(0 - 0)       | 0<br>(0 - 0)        | 7<br>(4 - 14)        | 29<br>(18 - 64)      | 65<br>(41 - 141)     |
| Interstitial nephritis and urinary tract infections | 88<br>(56 - 189)     | 0<br>(0 - 0)       | 0<br>(0 - 0)        | 6<br>(3 - 12)        | 25<br>(14 - 57)      | 58<br>(35 - 125)     |
| Urolithiasis                                        | 6<br>(2 - 15)        | --                 | 0<br>(0 - 0)        | 0<br>(0 - 1)         | 2<br>(0 - 5)         | 3<br>(1 - 10)        |
| Other urinary diseases                              | 7<br>(3 - 12)        | 0<br>(0 - 0)       | 0<br>(0 - 0)        | 1<br>(0 - 1)         | 2<br>(1 - 4)         | 4<br>(2 - 8)         |
| Gynecological diseases                              | 1<br>(0 - 1)         | --                 | --                  | 0<br>(0 - 0)         | 0<br>(0 - 0)         | 0<br>(0 - 0)         |
| Uterine fibroids                                    | 0<br>(0 - 0)         | --                 | --                  | 0<br>(0 - 0)         | 0<br>(0 - 0)         | 0<br>(0 - 0)         |
| Polycystic ovarian syndrome                         | 0<br>(0 - 0)         | --                 | --                  | 0<br>(0 - 0)         | 0<br>(0 - 0)         | --                   |
| Endometriosis                                       | 0<br>(0 - 0)         | --                 | --                  | 0<br>(0 - 0)         | 0<br>(0 - 0)         | --                   |
| Genital prolapse                                    | 0<br>(0 - 0)         | --                 | --                  | 0<br>(0 - 0)         | 0<br>(0 - 0)         | 0<br>(0 - 0)         |
| Other gynecological diseases                        | 0<br>(0 - 0)         | --                 | --                  | 0<br>(0 - 0)         | 0<br>(0 - 0)         | 0<br>(0 - 0)         |
| Hemoglobinopathies and hemolytic anemias            | 47<br>(18 - 83)      | 5<br>(2 - 11)      | 2<br>(1 - 3)        | 19<br>(8 - 34)       | 6<br>(2 - 10)        | 15<br>(5 - 31)       |
| Thalassemias                                        | 10<br>(4 - 18)       | 3<br>(1 - 7)       | 1<br>(0 - 2)        | 5<br>(2 - 9)         | 0<br>(0 - 0)         | 0<br>(0 - 0)         |
| Sickle cell disorders                               | 4<br>(2 - 7)         | 0<br>(0 - 1)       | 0<br>(0 - 0)        | 3<br>(1 - 5)         | 1<br>(0 - 1)         | 0<br>(0 - 0)         |
| G6PD deficiency                                     | 2<br>(1 - 3)         | 0<br>(0 - 0)       | 0<br>(0 - 0)        | 1<br>(0 - 2)         | 0<br>(0 - 0)         | 0<br>(0 - 0)         |
| Other hemoglobinopathies and hemolytic anemias      | 31<br>(12 - 57)      | 1<br>(0 - 3)       | 0<br>(0 - 0)        | 10<br>(4 - 18)       | 5<br>(2 - 9)         | 15<br>(5 - 31)       |
| Endocrine, metabolic, blood, and immune disorders   | 61<br>(26 - 75)      | 4<br>(1 - 6)       | 1<br>(0 - 2)        | 12<br>(5 - 16)       | 17<br>(8 - 23)       | 27<br>(11 - 37)      |
| Musculoskeletal disorders                           | 27<br>(19 - 33)      | --                 | 0<br>(0 - 0)        | 5<br>(3 - 6)         | 10<br>(7 - 13)       | 12<br>(8 - 16)       |
| Rheumatoid arthritis                                | 9<br>(6 - 12)        | --                 | 0<br>(0 - 0)        | 1<br>(0 - 1)         | 4<br>(2 - 5)         | 5<br>(3 - 7)         |
| Other musculoskeletal disorders                     | 18<br>(12 - 22)      | --                 | 0<br>(0 - 0)        | 4<br>(3 - 5)         | 7<br>(4 - 8)         | 7<br>(5 - 10)        |
| Other non-communicable diseases                     | 141<br>(109 - 182)   | 92<br>(61 - 130)   | 6<br>(4 - 8)        | 11<br>(9 - 14)       | 7<br>(5 - 9)         | 25<br>(15 - 31)      |
| Congenital anomalies                                | 120<br>(89 - 161)    | 87<br>(58 - 126)   | 6<br>(4 - 8)        | 9<br>(7 - 11)        | 3<br>(1 - 3)         | 16<br>(8 - 21)       |
| Neural tube defects                                 | 3<br>(2 - 7)         | 2<br>(1 - 7)       | 0<br>(0 - 0)        | 0<br>(0 - 0)         | 0<br>(0 - 0)         | 0<br>(0 - 0)         |
| Congenital heart anomalies                          | 66<br>(50 - 87)      | 41<br>(27 - 61)    | 4<br>(2 - 5)        | 6<br>(5 - 8)         | 1<br>(1 - 1)         | 14<br>(8 - 19)       |
| Cleft lip and cleft palate                          | 1<br>(0 - 1)         | 1<br>(0 - 1)       | --                  | --                   | --                   | --                   |
| Down syndrome                                       | 4<br>(2 - 7)         | 3<br>(1 - 5)       | 1<br>(0 - 1)        | 0<br>(0 - 1)         | 0<br>(0 - 1)         | 0<br>(0 - 0)         |
| Chromosomal unbalanced rearrangements               | 4<br>(2 - 7)         | 3<br>(1 - 6)       | 0<br>(0 - 1)        | 1<br>(0 - 1)         | 0<br>(0 - 0)         | 0<br>(0 - 0)         |
| Other congenital anomalies                          | 42<br>(29 - 62)      | 37<br>(24 - 57)    | 1<br>(1 - 2)        | 1<br>(1 - 2)         | 1<br>(1 - 1)         | 2<br>(1 - 2)         |
| Skin and subcutaneous diseases                      | 17<br>(11 - 21)      | 0<br>(0 - 1)       | 0<br>(0 - 0)        | 2<br>(2 - 3)         | 5<br>(3 - 6)         | 9<br>(6 - 13)        |
| Cellulitis                                          | 2<br>(1 - 4)         | 0<br>(0 - 0)       | 0<br>(0 - 0)        | 0<br>(0 - 0)         | 1<br>(0 - 1)         | 1<br>(0 - 2)         |
| Pyoderma                                            | 12<br>(6 - 15)       | 0<br>(0 - 1)       | 0<br>(0 - 0)        | 1<br>(1 - 2)         | 3<br>(2 - 4)         | 7<br>(4 - 10)        |
| Decubitus ulcer                                     | 1<br>(1 - 2)         | 0<br>(0 - 0)       | 0<br>(0 - 0)        | 0<br>(0 - 0)         | 0<br>(0 - 0)         | 1<br>(0 - 1)         |
| Other skin and subcutaneous diseases                | 2<br>(1 - 4)         | 0<br>(0 - 0)       | 0<br>(0 - 0)        | 1<br>(0 - 1)         | 1<br>(0 - 2)         | 1<br>(0 - 2)         |
| Sudden infant death syndrome                        | 4<br>(1 - 9)         | 4<br>(1 - 9)       | --                  | --                   | --                   | --                   |
| Injuries                                            | 920<br>(815 - 1,084) | 26<br>(17 - 38)    | 18<br>(14 - 22)     | 212<br>(191 - 247)   | 235<br>(203 - 282)   | 427<br>(361 - 516)   |
| Transport injuries                                  | 240<br>(187 - 305)   | 4<br>(2 - 6)       | 7<br>(5 - 10)       | 76<br>(60 - 94)      | 64<br>(46 - 84)      | 90<br>(68 - 121)     |
| Road injuries                                       | 211<br>(159 - 268)   | 4<br>(2 - 6)       | 6<br>(4 - 9)        | 69<br>(53 - 85)      | 55<br>(40 - 73)      | 77<br>(57 - 104)     |
| Pedestrian road injuries                            | 76<br>(40 - 100)     | 1<br>(0 - 2)       | 2<br>(1 - 3)        | 16<br>(9 - 22)       | 19<br>(10 - 27)      | 38<br>(17 - 53)      |



Web Table 31- Bulgaria deaths with 95% UI by age, sex, and cause in 2013

| Cause                                           | Females, All Ages  | Females, 0-4 Years | Females, 5-14 Years | Females, 15-49 Years | Females, 50-69 Years | Females, 70-80 Years |
|-------------------------------------------------|--------------------|--------------------|---------------------|----------------------|----------------------|----------------------|
| Cyclist road injuries                           | 10<br>(7 - 23)     | 0<br>(0 - 0)       | 0<br>(0 - 1)        | 3<br>(2 - 7)         | 3<br>(2 - 7)         | 4<br>(2 - 9)         |
| Motorcyclist road injuries                      | 15<br>(6 - 46)     | 0<br>(0 - 1)       | 0<br>(0 - 1)        | 5<br>(2 - 16)        | 4<br>(1 - 11)        | 5<br>(2 - 17)        |
| Motor vehicle road injuries                     | 100<br>(59 - 126)  | 2<br>(1 - 3)       | 3<br>(2 - 5)        | 41<br>(24 - 53)      | 26<br>(15 - 35)      | 27<br>(16 - 40)      |
| Other road injuries                             | 10<br>(3 - 30)     | 0<br>(0 - 1)       | 0<br>(0 - 1)        | 3<br>(1 - 9)         | 3<br>(1 - 9)         | 4<br>(1 - 13)        |
| Other transport injuries                        | 29<br>(19 - 47)    | 0<br>(0 - 1)       | 1<br>(0 - 1)        | 8<br>(5 - 12)        | 8<br>(5 - 14)        | 12<br>(7 - 21)       |
| Unintentional injuries                          | 381<br>(306 - 433) | 21<br>(14 - 31)    | 9<br>(7 - 12)       | 55<br>(47 - 63)      | 77<br>(60 - 90)      | 218<br>(165 - 257)   |
| Falls                                           | 118<br>(94 - 176)  | 1<br>(1 - 2)       | 1<br>(0 - 1)        | 10<br>(8 - 14)       | 22<br>(17 - 32)      | 84<br>(63 - 132)     |
| Drowning                                        | 36<br>(25 - 50)    | 2<br>(1 - 4)       | 4<br>(3 - 6)        | 8<br>(6 - 11)        | 9<br>(6 - 13)        | 12<br>(8 - 18)       |
| Fire, heat, and hot substances                  | 47<br>(33 - 60)    | 3<br>(1 - 4)       | 1<br>(0 - 1)        | 5<br>(3 - 6)         | 9<br>(6 - 12)        | 30<br>(20 - 39)      |
| Poisonings                                      | 28<br>(16 - 37)    | 2<br>(1 - 3)       | 1<br>(0 - 1)        | 5<br>(3 - 7)         | 6<br>(3 - 8)         | 15<br>(8 - 21)       |
| Exposure to mechanical forces                   | 38<br>(24 - 45)    | 3<br>(2 - 5)       | 2<br>(1 - 2)        | 11<br>(8 - 13)       | 9<br>(5 - 11)        | 14<br>(7 - 19)       |
| Unintentional firearm injuries                  | 2<br>(2 - 3)       | 0<br>(0 - 0)       | 0<br>(0 - 0)        | 1<br>(1 - 2)         | 0<br>(0 - 0)         | 0<br>(0 - 0)         |
| Unintentional suffocation                       | 4<br>(3 - 7)       | 1<br>(0 - 2)       | 0<br>(0 - 0)        | 1<br>(1 - 2)         | 1<br>(0 - 1)         | 1<br>(1 - 3)         |
| Other exposure to mechanical forces             | 32<br>(17 - 38)    | 2<br>(1 - 3)       | 1<br>(1 - 2)        | 8<br>(5 - 11)        | 8<br>(4 - 10)        | 13<br>(5 - 17)       |
| Adverse effects of medical treatment            | 56<br>(17 - 90)    | 1<br>(0 - 2)       | 0<br>(0 - 1)        | 5<br>(2 - 8)         | 10<br>(3 - 17)       | 39<br>(10 - 66)      |
| Animal contact                                  | 3<br>(1 - 7)       | 0<br>(0 - 0)       | 0<br>(0 - 0)        | 0<br>(0 - 1)         | 1<br>(0 - 2)         | 2<br>(1 - 3)         |
| Venomous animal contact                         | 1<br>(0 - 2)       | 0<br>(0 - 0)       | 0<br>(0 - 0)        | 0<br>(0 - 0)         | 0<br>(0 - 1)         | 0<br>(0 - 1)         |
| Non-venomous animal contact                     | 2<br>(1 - 4)       | 0<br>(0 - 0)       | 0<br>(0 - 0)        | 0<br>(0 - 1)         | 1<br>(0 - 1)         | 1<br>(0 - 2)         |
| Foreign body                                    | 22<br>(14 - 36)    | 8<br>(4 - 15)      | 0<br>(0 - 1)        | 4<br>(3 - 7)         | 4<br>(3 - 7)         | 5<br>(3 - 8)         |
| Pulmonary aspiration and foreign body in airway | 21<br>(13 - 35)    | 8<br>(4 - 15)      | 0<br>(0 - 1)        | 4<br>(3 - 7)         | 4<br>(2 - 6)         | 5<br>(3 - 8)         |
| Foreign body in other body part                 | 1<br>(1 - 1)       | 0<br>(0 - 0)       | 0<br>(0 - 0)        | 0<br>(0 - 0)         | 0<br>(0 - 0)         | 0<br>(0 - 0)         |
| Other unintentional injuries                    | 32<br>(13 - 42)    | 2<br>(0 - 3)       | 1<br>(0 - 1)        | 7<br>(3 - 10)        | 7<br>(2 - 12)        | 15<br>(4 - 23)       |
| Self-harm and interpersonal violence            | 298<br>(262 - 446) | 1<br>(1 - 2)       | 2<br>(1 - 3)        | 80<br>(69 - 106)     | 94<br>(79 - 137)     | 120<br>(99 - 198)    |
| Self-harm                                       | 250<br>(218 - 387) | -                  | 1<br>(1 - 2)        | 62<br>(52 - 83)      | 83<br>(68 - 124)     | 104<br>(83 - 181)    |
| Interpersonal violence                          | 48<br>(38 - 75)    | 1<br>(1 - 2)       | 1<br>(1 - 1)        | 19<br>(14 - 29)      | 11<br>(8 - 17)       | 16<br>(12 - 25)      |
| Assault by firearm                              | 7<br>(3 - 11)      | 0<br>(0 - 0)       | 0<br>(0 - 0)        | 4<br>(2 - 7)         | 1<br>(1 - 3)         | 1<br>(0 - 1)         |
| Assault by sharp object                         | 14<br>(10 - 24)    | 0<br>(0 - 0)       | 0<br>(0 - 0)        | 7<br>(5 - 12)        | 3<br>(2 - 6)         | 4<br>(2 - 7)         |
| Assault by other means                          | 28<br>(20 - 43)    | 1<br>(1 - 2)       | 1<br>(0 - 1)        | 8<br>(5 - 13)        | 6<br>(4 - 10)        | 12<br>(8 - 19)       |

Web Table 31- Burkina Faso deaths with 95% UI by age, sex, and cause in 2013

| Cause                                                             | Both Sexes, All Ages           | Both Sexes, 0-4 Years       | Both Sexes, 5-14 Years   | Both Sexes, 15-49 Years     | Both Sexes, 50-69 Years     | Both Sexes, 70-80 Years     |
|-------------------------------------------------------------------|--------------------------------|-----------------------------|--------------------------|-----------------------------|-----------------------------|-----------------------------|
| All causes                                                        | 140,894<br>(130,511 - 151,729) | 70,622<br>(63,122 - 79,432) | 7,190<br>(6,419 - 8,013) | 26,039<br>(23,692 - 28,568) | 19,964<br>(17,698 - 22,575) | 17,078<br>(15,732 - 18,690) |
| Communicable, maternal, neonatal, and nutritional diseases        | 93,637<br>(84,784 - 103,548)   | 60,694<br>(52,267 - 69,653) | 4,626<br>(3,928 - 5,350) | 14,656<br>(13,122 - 16,317) | 7,480<br>(6,451 - 8,806)    | 6,180<br>(5,334 - 7,246)    |
| HIV/AIDS and tuberculosis                                         | 10,065<br>(8,632 - 11,582)     | 661<br>(492 - 863)          | 502<br>(398 - 621)       | 5,781<br>(4,762 - 7,093)    | 2,255<br>(1,862 - 2,790)    | 866<br>(679 - 1,063)        |
| Tuberculosis                                                      | 4,938<br>(3,773 - 5,839)       | 416<br>(269 - 615)          | 139<br>(93 - 194)        | 2,070<br>(1,505 - 2,566)    | 1,501<br>(1,083 - 1,866)    | 812<br>(629 - 1,000)        |
| HIV/AIDS                                                          | 5,127<br>(3,737 - 6,724)       | 245<br>(136 - 384)          | 363<br>(266 - 479)       | 3,711<br>(2,652 - 5,089)    | 754<br>(476 - 1,315)        | 53<br>(31 - 91)             |
| HIV/AIDS resulting in mycobacterial infection                     | 312<br>(215 - 438)             | 14<br>(8 - 24)              | 20<br>(14 - 28)          | 224<br>(152 - 331)          | 49<br>(29 - 89)             | 4<br>(2 - 6)                |
| HIV/AIDS resulting in other diseases                              | 4,815<br>(3,513 - 6,284)       | 231<br>(128 - 361)          | 344<br>(252 - 454)       | 3,486<br>(2,491 - 4,762)    | 705<br>(447 - 1,226)        | 50<br>(29 - 85)             |
| Diarrhea, lower respiratory, and other common infectious diseases | 35,615<br>(29,665 - 41,654)    | 24,721<br>(19,234 - 30,566) | 1,663<br>(1,260 - 2,138) | 2,991<br>(2,407 - 3,670)    | 2,916<br>(2,299 - 3,656)    | 3,324<br>(2,728 - 4,027)    |
| Diarrheal diseases                                                | 13,033<br>(9,686 - 17,181)     | 9,247<br>(6,005 - 13,161)   | 469<br>(283 - 715)       | 1,131<br>(865 - 1,472)      | 1,107<br>(775 - 1,547)      | 1,079<br>(768 - 1,486)      |
| Intestinal infectious diseases                                    | 833<br>(429 - 1,400)           | 299<br>(138 - 543)          | 261<br>(129 - 463)       | 237<br>(117 - 414)          | 28<br>(14 - 51)             | 8<br>(4 - 15)               |
| Typhoid fever                                                     | 537<br>(267 - 929)             | 178<br>(77 - 327)           | 172<br>(81 - 307)        | 162<br>(77 - 286)           | 19<br>(8 - 37)              | 5<br>(2 - 10)               |
| Paratyphoid fever                                                 | 250<br>(122 - 465)             | 94<br>(38 - 188)            | 83<br>(37 - 161)         | 66<br>(29 - 130)            | 7<br>(3 - 14)               | 2<br>(1 - 4)                |
| Other intestinal infectious diseases                              | 46<br>(29 - 71)                | 28<br>(14 - 47)             | 5<br>(1 - 12)            | 10<br>(4 - 20)              | 2<br>(0 - 8)                | 1<br>(0 - 5)                |
| Lower respiratory infections                                      | 17,074<br>(13,440 - 20,941)    | 12,033<br>(8,757 - 15,837)  | 489<br>(324 - 702)       | 957<br>(719 - 1,266)        | 1,485<br>(1,100 - 1,934)    | 2,109<br>(1,646 - 2,636)    |
| Upper respiratory infections                                      | 23<br>(10 - 46)                | 12<br>(2 - 34)              | 1<br>(0 - 4)             | 5<br>(2 - 10)               | 3<br>(1 - 7)                | 2<br>(0 - 5)                |
| Otitis media                                                      | 10<br>(8 - 13)                 | 5<br>(3 - 7)                | 1<br>(0 - 1)             | 1<br>(1 - 1)                | 1<br>(1 - 2)                | 2<br>(2 - 3)                |
| Meningitis                                                        | 4,058<br>(3,002 - 5,463)       | 2,684<br>(1,664 - 4,040)    | 397<br>(253 - 588)       | 599<br>(423 - 791)          | 267<br>(189 - 365)          | 113<br>(76 - 156)           |
| Pneumococcal meningitis                                           | 1,345<br>(959 - 1,866)         | 797<br>(463 - 1,268)        | 155<br>(87 - 241)        | 251<br>(159 - 360)          | 99<br>(61 - 146)            | 43<br>(27 - 65)             |
| H influenzae type B meningitis                                    | 475<br>(279 - 745)             | 377<br>(182 - 648)          | 39<br>(19 - 71)          | 39<br>(23 - 62)             | 15<br>(8 - 26)              | 5<br>(3 - 9)                |
| Meningococcal meningitis                                          | 1,958<br>(1,387 - 2,677)       | 1,337<br>(790 - 2,073)      | 179<br>(101 - 292)       | 262<br>(177 - 362)          | 127<br>(80 - 185)           | 54<br>(33 - 80)             |
| Other meningitis                                                  | 279<br>(180 - 441)             | 173<br>(92 - 309)           | 23<br>(10 - 42)          | 47<br>(27 - 75)             | 26<br>(13 - 49)             | 10<br>(5 - 18)              |
| Encephalitis                                                      | 123<br>(80 - 175)              | 73<br>(43 - 116)            | 11<br>(5 - 18)           | 21<br>(11 - 38)             | 11<br>(7 - 17)              | 7<br>(4 - 10)               |
| Diphtheria                                                        | 13<br>(1 - 70)                 | 10<br>(0 - 66)              | 2<br>(0 - 10)            | 1<br>(0 - 2)                | 0<br>(0 - 0)                | --                          |
| Whooping cough                                                    | 49<br>(0 - 271)                | 46<br>(0 - 255)             | 2<br>(0 - 13)            | 0<br>(0 - 2)                | 0<br>(0 - 0)                | --                          |
| Tetanus                                                           | 202<br>(101 - 327)             | 146<br>(58 - 273)           | 8<br>(4 - 14)            | 33<br>(18 - 53)             | 12<br>(7 - 19)              | 2<br>(1 - 4)                |
| Measles                                                           | 184<br>(53 - 460)              | 160<br>(45 - 402)           | 21<br>(6 - 54)           | 3<br>(1 - 7)                | 0<br>(0 - 0)                | --                          |
| Varicella and herpes zoster                                       | 14<br>(6 - 27)                 | 6<br>(1 - 18)               | 1<br>(0 - 5)             | 3<br>(1 - 7)                | 1<br>(0 - 3)                | 2<br>(0 - 7)                |
| Neglected tropical diseases and malaria                           | 27,570<br>(19,965 - 36,594)    | 19,674<br>(12,655 - 28,205) | 2,095<br>(1,374 - 2,965) | 2,982<br>(1,889 - 4,561)    | 1,600<br>(903 - 2,617)      | 1,220<br>(685 - 2,054)      |
| Malaria                                                           | 27,261<br>(19,599 - 36,230)    | 19,574<br>(12,524 - 28,119) | 2,036<br>(1,316 - 2,907) | 2,884<br>(1,794 - 4,473)    | 1,563<br>(864 - 2,581)      | 1,203<br>(669 - 2,038)      |
| Leishmaniasis                                                     | 1<br>(0 - 1)                   | 0<br>(0 - 0)                | 0<br>(0 - 0)             | 0<br>(0 - 0)                | 0<br>(0 - 0)                | 0<br>(0 - 0)                |
| Visceral leishmaniasis                                            | 1<br>(0 - 1)                   | 0<br>(0 - 0)                | 0<br>(0 - 0)             | 0<br>(0 - 0)                | 0<br>(0 - 0)                | 0<br>(0 - 0)                |
| Schistosomiasis                                                   | 54<br>(41 - 69)                | 2<br>(1 - 3)                | 3<br>(2 - 5)             | 24<br>(17 - 34)             | 17<br>(11 - 25)             | 7<br>(4 - 11)               |
| Cysticercosis                                                     | 3<br>(1 - 10)                  | 0<br>(0 - 1)                | 0<br>(0 - 1)             | 2<br>(0 - 6)                | 1<br>(0 - 2)                | 0<br>(0 - 0)                |
| Cystic echinococcosis                                             | 9<br>(8 - 11)                  | 2<br>(1 - 3)                | 2<br>(2 - 3)             | 4<br>(3 - 4)                | 1<br>(1 - 1)                | 0<br>(0 - 0)                |
| Dengue                                                            | 9<br>(6 - 13)                  | 4<br>(2 - 8)                | 2<br>(1 - 3)             | 2<br>(1 - 4)                | 0<br>(0 - 1)                | 0<br>(0 - 0)                |
| Yellow fever                                                      | 49<br>(34 - 70)                | 5<br>(1 - 11)               | 10<br>(4 - 22)           | 27<br>(16 - 45)             | 5<br>(2 - 10)               | 2<br>(0 - 5)                |
| Rabies                                                            | 94<br>(65 - 135)               | 25<br>(12 - 49)             | 32<br>(18 - 54)          | 31<br>(21 - 41)             | 6<br>(4 - 8)                | 1<br>(0 - 2)                |
| Intestinal nematode infections                                    | 62<br>(34 - 103)               | 51<br>(26 - 90)             | 8<br>(2 - 20)            | 2<br>(0 - 8)                | 1<br>(0 - 4)                | 0<br>(0 - 3)                |
| Ascariasis                                                        | 62<br>(34 - 103)               | 51<br>(26 - 90)             | 8<br>(2 - 20)            | 2<br>(0 - 8)                | 1<br>(0 - 4)                | 0<br>(0 - 3)                |
| Other neglected tropical diseases                                 | 29<br>(21 - 51)                | 11<br>(7 - 21)              | 1<br>(1 - 3)             | 6<br>(4 - 10)               | 5<br>(3 - 10)               | 5<br>(3 - 11)               |

Web Table 31- Burkina Faso deaths with 95% UI by age, sex, and cause in 2013

| Cause                                                            | Both Sexes, All Ages        | Both Sexes, 0-4 Years      | Both Sexes, 5-14 Years | Both Sexes, 15-49 Years  | Both Sexes, 50-69 Years    | Both Sexes, 70-80 Years    |
|------------------------------------------------------------------|-----------------------------|----------------------------|------------------------|--------------------------|----------------------------|----------------------------|
| Maternal disorders                                               | 2,185<br>(1,570 - 2,858)    | --                         | 22<br>(8 - 50)         | 2,163<br>(1,545 - 2,844) | --                         | --                         |
| Maternal hemorrhage                                              | 555<br>(370 - 774)          | --                         | 3<br>(1 - 8)           | 552<br>(368 - 768)       | --                         | --                         |
| Maternal sepsis and other maternal infections                    | 140<br>(87 - 201)           | --                         | 2<br>(0 - 4)           | 138<br>(85 - 199)        | --                         | --                         |
| Maternal hypertensive disorders                                  | 183<br>(107 - 274)          | --                         | 2<br>(1 - 5)           | 181<br>(106 - 272)       | --                         | --                         |
| Maternal obstructed labor                                        | 76<br>(38 - 132)            | --                         | 1<br>(0 - 2)           | 75<br>(37 - 131)         | --                         | --                         |
| Maternal abortive outcome                                        | 402<br>(255 - 570)          | --                         | 4<br>(1 - 11)          | 398<br>(251 - 565)       | --                         | --                         |
| Indirect maternal deaths                                         | 232<br>(136 - 347)          | --                         | 2<br>(1 - 5)           | 230<br>(135 - 344)       | --                         | --                         |
| Late maternal deaths                                             | 244<br>(137 - 380)          | --                         | 4<br>(1 - 11)          | 240<br>(135 - 374)       | --                         | --                         |
| Maternal deaths aggravated by HIV/AIDS                           | 8<br>(4 - 13)               | --                         | --                     | 8<br>(4 - 13)            | --                         | --                         |
| Other maternal disorders                                         | 340<br>(214 - 493)          | --                         | 4<br>(1 - 10)          | 337<br>(211 - 488)       | --                         | --                         |
| Neonatal disorders                                               | 12,189<br>(9,995 - 14,448)  | 12,189<br>(9,995 - 14,448) | --                     | --                       | --                         | --                         |
| Neonatal preterm birth complications                             | 3,879<br>(2,336 - 5,667)    | 3,879<br>(2,336 - 5,667)   | --                     | --                       | --                         | --                         |
| Neonatal encephalopathy due to birth asphyxia and trauma         | 3,510<br>(1,830 - 5,667)    | 3,510<br>(1,830 - 5,667)   | --                     | --                       | --                         | --                         |
| Neonatal sepsis and other neonatal infections                    | 3,267<br>(1,706 - 5,115)    | 3,267<br>(1,706 - 5,115)   | --                     | --                       | --                         | --                         |
| Hemolytic disease and other neonatal jaundice                    | 67<br>(25 - 152)            | 67<br>(25 - 152)           | --                     | --                       | --                         | --                         |
| Other neonatal disorders                                         | 1,465<br>(805 - 2,328)      | 1,465<br>(805 - 2,328)     | --                     | --                       | --                         | --                         |
| Nutritional deficiencies                                         | 4,730<br>(3,520 - 6,356)    | 2,701<br>(1,657 - 4,040)   | 270<br>(183 - 390)     | 563<br>(428 - 713)       | 552<br>(414 - 733)         | 645<br>(487 - 862)         |
| Protein-energy malnutrition                                      | 3,274<br>(2,209 - 4,605)    | 2,307<br>(1,371 - 3,518)   | 180<br>(105 - 275)     | 170<br>(83 - 274)        | 279<br>(145 - 411)         | 337<br>(174 - 507)         |
| Iodine deficiency                                                | 16<br>(2 - 60)              | 8<br>(0 - 53)              | 1<br>(0 - 8)           | 2<br>(0 - 8)             | 2<br>(0 - 10)              | 1<br>(0 - 7)               |
| Iron-deficiency anemia                                           | 1,419<br>(950 - 2,154)      | 380<br>(98 - 872)          | 87<br>(44 - 159)       | 387<br>(269 - 513)       | 265<br>(158 - 421)         | 300<br>(166 - 510)         |
| Other nutritional deficiencies                                   | 22<br>(10 - 36)             | 5<br>(1 - 13)              | 1<br>(0 - 2)           | 4<br>(1 - 7)             | 5<br>(2 - 10)              | 7<br>(3 - 14)              |
| Other communicable, maternal, neonatal, and nutritional diseases | 1,283<br>(937 - 1,756)      | 748<br>(460 - 1,154)       | 74<br>(49 - 110)       | 177<br>(125 - 234)       | 158<br>(97 - 233)          | 126<br>(70 - 207)          |
| Sexually transmitted diseases excluding HIV                      | 563<br>(307 - 937)          | 486<br>(250 - 828)         | 39<br>(20 - 68)        | 20<br>(13 - 29)          | 11<br>(6 - 19)             | 6<br>(3 - 13)              |
| Syphilis                                                         | 546<br>(292 - 919)          | 486<br>(250 - 828)         | 38<br>(19 - 66)        | 10<br>(6 - 14)           | 7<br>(4 - 12)              | 5<br>(3 - 10)              |
| Chlamydial infection                                             | 3<br>(1 - 5)                | --                         | 0<br>(0 - 0)           | 2<br>(1 - 3)             | 1<br>(0 - 2)               | 0<br>(0 - 1)               |
| Gonococcal infection                                             | 8<br>(6 - 11)               | --                         | 1<br>(0 - 1)           | 5<br>(3 - 7)             | 2<br>(1 - 3)               | 1<br>(0 - 2)               |
| Other sexually transmitted diseases                              | 6<br>(4 - 8)                | --                         | 1<br>(0 - 1)           | 4<br>(3 - 6)             | 1<br>(1 - 2)               | 0<br>(0 - 1)               |
| Hepatitis                                                        | 325<br>(201 - 449)          | 67<br>(29 - 114)           | 19<br>(10 - 30)        | 106<br>(64 - 151)        | 80<br>(47 - 120)           | 54<br>(29 - 86)            |
| Acute hepatitis A                                                | 28<br>(8 - 60)              | 19<br>(5 - 45)             | 5<br>(1 - 11)          | 3<br>(1 - 7)             | 1<br>(0 - 2)               | 0<br>(0 - 0)               |
| Acute hepatitis B                                                | 199<br>(118 - 290)          | 47<br>(19 - 86)            | 9<br>(4 - 16)          | 36<br>(19 - 61)          | 60<br>(35 - 93)            | 47<br>(25 - 75)            |
| Acute hepatitis C                                                | 8<br>(2 - 20)               | --                         | 1<br>(0 - 3)           | 3<br>(0 - 8)             | 2<br>(0 - 7)               | 2<br>(0 - 5)               |
| Acute hepatitis E                                                | 90<br>(47 - 146)            | 1<br>(0 - 3)               | 4<br>(2 - 8)           | 64<br>(34 - 101)         | 16<br>(6 - 32)             | 5<br>(2 - 13)              |
| Other infectious diseases                                        | 395<br>(267 - 578)          | 195<br>(106 - 366)         | 15<br>(8 - 28)         | 51<br>(33 - 79)          | 67<br>(32 - 128)           | 66<br>(27 - 135)           |
| Non-communicable diseases                                        | 37,101<br>(32,042 - 43,155) | 7,509<br>(4,429 - 12,146)  | 1,268<br>(948 - 1,704) | 7,096<br>(5,992 - 8,411) | 11,172<br>(9,503 - 13,102) | 10,054<br>(8,939 - 11,266) |
| Neoplasms                                                        | 6,585<br>(5,646 - 7,606)    | 447<br>(275 - 688)         | 225<br>(146 - 326)     | 1,987<br>(1,611 - 2,385) | 2,507<br>(2,098 - 2,992)   | 1,419<br>(1,237 - 1,642)   |
| Esophageal cancer                                                | 167<br>(137 - 211)          | --                         | --                     | 20<br>(15 - 27)          | 79<br>(60 - 105)           | 68<br>(53 - 89)            |
| Stomach cancer                                                   | 383<br>(320 - 457)          | --                         | --                     | 67<br>(52 - 85)          | 200<br>(160 - 249)         | 117<br>(92 - 146)          |
| Liver cancer                                                     | 1,574<br>(1,250 - 1,995)    | --                         | 8<br>(5 - 13)          | 669<br>(496 - 900)       | 654<br>(496 - 855)         | 242<br>(186 - 330)         |
| Liver cancer due to hepatitis B                                  | 680<br>(362 - 962)          | --                         | 4<br>(2 - 7)           | 362<br>(187 - 520)       | 248<br>(122 - 368)         | 66<br>(40 - 103)           |
| Liver cancer due to hepatitis C                                  | 462<br>(281 - 700)          | --                         | 1<br>(0 - 1)           | 128<br>(58 - 228)        | 229<br>(133 - 357)         | 104<br>(67 - 158)          |

Web Table 31- Burkina Faso deaths with 95% UI by age, sex, and cause in 2013

| Cause                                | Both Sexes, All Ages        | Both Sexes, 0-4 Years | Both Sexes, 5-14 Years | Both Sexes, 15-49 Years  | Both Sexes, 50-69 Years  | Both Sexes, 70-80 Years  |
|--------------------------------------|-----------------------------|-----------------------|------------------------|--------------------------|--------------------------|--------------------------|
| Liver cancer due to alcohol use      | 194<br>(121 - 278)          | --                    | --                     | 58<br>(34 - 91)          | 90<br>(51 - 136)         | 46<br>(25 - 70)          |
| Liver cancer due to other causes     | 239<br>(158 - 344)          | --                    | 4<br>(2 - 6)           | 121<br>(74 - 178)        | 87<br>(52 - 146)         | 26<br>(16 - 42)          |
| Larynx cancer                        | 25<br>(19 - 36)             | --                    | --                     | 5<br>(3 - 7)             | 11<br>(8 - 17)           | 9<br>(7 - 14)            |
| Tracheal, bronchus and lung cancer   | 256<br>(217 - 305)          | --                    | --                     | 25<br>(18 - 37)          | 144<br>(118 - 178)       | 88<br>(72 - 106)         |
| Breast cancer                        | 524<br>(408 - 644)          | --                    | --                     | 269<br>(183 - 345)       | 192<br>(146 - 256)       | 63<br>(47 - 87)          |
| Cervical cancer                      | 590<br>(440 - 787)          | --                    | --                     | 156<br>(109 - 217)       | 317<br>(222 - 451)       | 117<br>(79 - 171)        |
| Uterine cancer                       | 148<br>(72 - 211)           | --                    | --                     | 35<br>(14 - 61)          | 68<br>(30 - 109)         | 45<br>(22 - 71)          |
| Prostate cancer                      | 176<br>(116 - 260)          | --                    | --                     | 5<br>(2 - 9)             | 60<br>(36 - 89)          | 111<br>(71 - 173)        |
| Colon and rectum cancer              | 526<br>(449 - 608)          | --                    | --                     | 168<br>(133 - 206)       | 189<br>(154 - 225)       | 169<br>(134 - 212)       |
| Lip and oral cavity cancer           | 66<br>(51 - 84)             | --                    | --                     | 20<br>(14 - 28)          | 29<br>(22 - 39)          | 17<br>(12 - 22)          |
| Nasopharynx cancer                   | 14<br>(11 - 20)             | --                    | 1<br>(0 - 1)           | 8<br>(5 - 11)            | 4<br>(3 - 6)             | 2<br>(1 - 2)             |
| Other pharynx cancer                 | 30<br>(23 - 37)             | --                    | --                     | 9<br>(6 - 12)            | 14<br>(10 - 19)          | 7<br>(5 - 9)             |
| Gallbladder and biliary tract cancer | 99<br>(71 - 128)            | --                    | --                     | 38<br>(21 - 52)          | 44<br>(30 - 62)          | 16<br>(11 - 25)          |
| Pancreatic cancer                    | 120<br>(102 - 142)          | --                    | --                     | 38<br>(30 - 48)          | 59<br>(48 - 74)          | 22<br>(18 - 28)          |
| Malignant skin melanoma              | 20<br>(14 - 26)             | --                    | --                     | 8<br>(5 - 12)            | 8<br>(6 - 11)            | 3<br>(2 - 5)             |
| Non-melanoma skin cancer             | 18<br>(13 - 26)             | --                    | --                     | 3<br>(2 - 5)             | 8<br>(5 - 12)            | 8<br>(5 - 11)            |
| Ovarian cancer                       | 73<br>(55 - 96)             | --                    | --                     | 23<br>(15 - 34)          | 38<br>(27 - 53)          | 12<br>(7 - 17)           |
| Testicular cancer                    | 13<br>(6 - 20)              | --                    | --                     | 10<br>(5 - 16)           | 2<br>(1 - 4)             | 1<br>(0 - 1)             |
| Kidney cancer                        | 132<br>(103 - 171)          | 34<br>(16 - 68)       | 8<br>(5 - 13)          | 20<br>(15 - 28)          | 42<br>(31 - 54)          | 28<br>(21 - 37)          |
| Bladder cancer                       | 62<br>(48 - 88)             | --                    | --                     | 12<br>(9 - 16)           | 20<br>(14 - 28)          | 30<br>(21 - 46)          |
| Brain and nervous system cancer      | 131<br>(85 - 169)           | 15<br>(6 - 30)        | 21<br>(10 - 36)        | 67<br>(38 - 90)          | 19<br>(12 - 24)          | 9<br>(7 - 12)            |
| Thyroid cancer                       | 14<br>(9 - 22)              | --                    | 0<br>(0 - 0)           | 1<br>(1 - 2)             | 8<br>(5 - 14)            | 4<br>(3 - 6)             |
| Mesothelioma                         | 9<br>(7 - 13)               | --                    | --                     | 1<br>(1 - 2)             | 5<br>(3 - 7)             | 3<br>(2 - 5)             |
| Hodgkin lymphoma                     | 78<br>(33 - 118)            | 26<br>(6 - 51)        | 8<br>(3 - 17)          | 18<br>(10 - 28)          | 12<br>(6 - 19)           | 14<br>(5 - 24)           |
| Non-Hodgkin lymphoma                 | 320<br>(233 - 425)          | 83<br>(41 - 152)      | 39<br>(22 - 67)        | 82<br>(57 - 110)         | 63<br>(47 - 81)          | 52<br>(35 - 68)          |
| Multiple myeloma                     | 47<br>(35 - 60)             | --                    | --                     | 14<br>(9 - 20)           | 16<br>(11 - 23)          | 17<br>(12 - 22)          |
| Leukemia                             | 133<br>(106 - 158)          | 24<br>(13 - 40)       | 23<br>(14 - 32)        | 48<br>(36 - 60)          | 20<br>(16 - 24)          | 19<br>(15 - 24)          |
| Other neoplasms                      | 838<br>(590 - 1,069)        | 265<br>(140 - 441)    | 117<br>(65 - 185)      | 147<br>(94 - 193)        | 181<br>(138 - 229)       | 128<br>(98 - 167)        |
| Cardiovascular diseases              | 13,335<br>(11,463 - 15,594) | 379<br>(262 - 565)    | 127<br>(87 - 188)      | 1,697<br>(1,381 - 2,178) | 5,329<br>(4,467 - 6,464) | 5,803<br>(4,910 - 6,718) |
| Rheumatic heart disease              | 274<br>(163 - 637)          | 14<br>(6 - 29)        | 13<br>(7 - 26)         | 68<br>(33 - 186)         | 87<br>(42 - 243)         | 91<br>(59 - 176)         |
| Ischemic heart disease               | 3,372<br>(2,740 - 4,315)    | 4<br>(1 - 10)         | 10<br>(6 - 18)         | 326<br>(235 - 516)       | 1,279<br>(1,006 - 1,678) | 1,753<br>(1,393 - 2,203) |
| Cerebrovascular disease              | 4,016<br>(3,163 - 4,835)    | 35<br>(21 - 55)       | 13<br>(8 - 19)         | 402<br>(285 - 519)       | 1,710<br>(1,321 - 2,134) | 1,855<br>(1,427 - 2,257) |
| Ischemic stroke                      | 2,315<br>(982 - 3,180)      | 3<br>(1 - 7)          | 1<br>(0 - 3)           | 85<br>(26 - 170)         | 907<br>(319 - 1,338)     | 1,319<br>(606 - 1,736)   |
| Hemorrhagic stroke                   | 1,701<br>(1,135 - 2,940)    | 32<br>(20 - 50)       | 12<br>(7 - 18)         | 318<br>(226 - 409)       | 803<br>(505 - 1,457)     | 536<br>(299 - 1,100)     |
| Hypertensive heart disease           | 1,681<br>(862 - 2,503)      | 7<br>(2 - 14)         | 3<br>(1 - 5)           | 176<br>(67 - 297)        | 631<br>(305 - 1,001)     | 865<br>(460 - 1,320)     |
| Cardiomyopathy and myocarditis       | 1,081<br>(716 - 1,418)      | 99<br>(54 - 168)      | 31<br>(19 - 46)        | 229<br>(154 - 317)       | 369<br>(233 - 527)       | 354<br>(183 - 510)       |
| Atrial fibrillation and flutter      | 2<br>(1 - 3)                | --                    | --                     | 0<br>(0 - 1)             | 0<br>(0 - 1)             | 1<br>(0 - 2)             |
| Aortic aneurysm                      | 188<br>(104 - 362)          | --                    | --                     | 24<br>(12 - 47)          | 83<br>(46 - 149)         | 82<br>(46 - 164)         |
| Peripheral vascular disease          | 5<br>(3 - 9)                | --                    | --                     | 0<br>(0 - 1)             | 2<br>(1 - 4)             | 3<br>(1 - 5)             |
| Endocarditis                         | 382<br>(266 - 531)          | 54<br>(21 - 104)      | 10<br>(6 - 16)         | 87<br>(58 - 128)         | 113<br>(73 - 179)        | 117<br>(80 - 178)        |

Web Table 31- Burkina Faso deaths with 95% UI by age, sex, and cause in 2013

| Cause                                               | Both Sexes, All Ages     | Both Sexes, 0-4 Years | Both Sexes, 5-14 Years | Both Sexes, 15-49 Years | Both Sexes, 50-69 Years | Both Sexes, 70-80 Years |
|-----------------------------------------------------|--------------------------|-----------------------|------------------------|-------------------------|-------------------------|-------------------------|
| Other cardiovascular and circulatory diseases       | 2,333<br>(1,647 - 4,283) | 165<br>(98 - 312)     | 48<br>(27 - 87)        | 384<br>(266 - 711)      | 1,054<br>(715 - 1,827)  | 683<br>(440 - 1,358)    |
| Chronic respiratory diseases                        | 1,460<br>(1,205 - 1,768) | 136<br>(84 - 208)     | 35<br>(25 - 48)        | 219<br>(171 - 267)      | 539<br>(425 - 689)      | 531<br>(427 - 671)      |
| Chronic obstructive pulmonary disease               | 801<br>(641 - 1,050)     | 49<br>(27 - 80)       | 19<br>(13 - 27)        | 78<br>(58 - 101)        | 325<br>(245 - 441)      | 330<br>(251 - 454)      |
| Pneumoconiosis                                      | 92<br>(61 - 132)         | 2<br>(0 - 5)          | 1<br>(1 - 2)           | 25<br>(15 - 36)         | 46<br>(26 - 69)         | 18<br>(10 - 31)         |
| Silicosis                                           | 19<br>(11 - 30)          | 1<br>(0 - 2)          | 0<br>(0 - 1)           | 5<br>(3 - 9)            | 5<br>(3 - 8)            | 7<br>(4 - 14)           |
| Asbestosis                                          | 7<br>(4 - 11)            | 0<br>(0 - 1)          | 0<br>(0 - 0)           | 2<br>(1 - 3)            | 4<br>(2 - 6)            | 1<br>(0 - 1)            |
| Coal workers pneumoconiosis                         | 24<br>(15 - 37)          | 0<br>(0 - 1)          | 0<br>(0 - 0)           | 2<br>(1 - 3)            | 20<br>(12 - 30)         | 2<br>(1 - 4)            |
| Other pneumoconiosis                                | 42<br>(27 - 60)          | 1<br>(0 - 1)          | 0<br>(0 - 1)           | 16<br>(10 - 23)         | 17<br>(10 - 27)         | 8<br>(4 - 14)           |
| Asthma                                              | 287<br>(194 - 376)       | 47<br>(22 - 87)       | 7<br>(4 - 12)          | 46<br>(29 - 62)         | 96<br>(60 - 137)        | 90<br>(58 - 128)        |
| Interstitial lung disease and pulmonary sarcoidosis | 115<br>(27 - 198)        | 1<br>(0 - 4)          | 1<br>(0 - 1)           | 10<br>(4 - 17)          | 43<br>(9 - 80)          | 61<br>(11 - 111)        |
| Other chronic respiratory diseases                  | 165<br>(126 - 218)       | 37<br>(23 - 61)       | 7<br>(5 - 10)          | 60<br>(44 - 81)         | 30<br>(20 - 45)         | 32<br>(21 - 50)         |
| Cirrhosis                                           | 1,711<br>(1,469 - 1,998) | 64<br>(32 - 116)      | 36<br>(26 - 49)        | 509<br>(405 - 642)      | 752<br>(611 - 917)      | 350<br>(277 - 441)      |
| Cirrhosis due to hepatitis B                        | 481<br>(277 - 719)       | 4<br>(1 - 10)         | 7<br>(3 - 12)          | 149<br>(86 - 222)       | 224<br>(126 - 339)      | 97<br>(45 - 160)        |
| Cirrhosis due to hepatitis C                        | 395<br>(234 - 579)       | 5<br>(1 - 10)         | 7<br>(3 - 12)          | 110<br>(67 - 172)       | 175<br>(95 - 285)       | 98<br>(55 - 148)        |
| Cirrhosis due to alcohol use                        | 581<br>(428 - 792)       | --                    | --                     | 161<br>(106 - 234)      | 287<br>(202 - 393)      | 133<br>(91 - 190)       |
| Cirrhosis due to other causes                       | 255<br>(183 - 340)       | 56<br>(27 - 99)       | 22<br>(15 - 32)        | 89<br>(54 - 129)        | 66<br>(41 - 101)        | 22<br>(12 - 35)         |
| Digestive diseases                                  | 1,938<br>(1,659 - 2,270) | 162<br>(91 - 264)     | 109<br>(77 - 144)      | 551<br>(441 - 682)      | 603<br>(485 - 737)      | 513<br>(415 - 644)      |
| Peptic ulcer disease                                | 460<br>(342 - 624)       | 18<br>(7 - 39)        | 14<br>(7 - 25)         | 123<br>(82 - 184)       | 160<br>(109 - 231)      | 145<br>(99 - 200)       |
| Gastritis and duodenitis                            | 77<br>(31 - 163)         | 9<br>(2 - 19)         | 5<br>(3 - 9)           | 19<br>(8 - 40)          | 21<br>(7 - 50)          | 23<br>(7 - 67)          |
| Appendicitis                                        | 157<br>(117 - 206)       | 13<br>(5 - 29)        | 14<br>(7 - 25)         | 46<br>(31 - 68)         | 45<br>(29 - 65)         | 39<br>(22 - 60)         |
| Paralytic ileus and intestinal obstruction          | 595<br>(394 - 776)       | 47<br>(22 - 85)       | 39<br>(26 - 57)        | 162<br>(88 - 228)       | 196<br>(123 - 271)      | 150<br>(100 - 225)      |
| Inguinal, femoral, and abdominal hernia             | 29<br>(18 - 60)          | 2<br>(1 - 6)          | 1<br>(0 - 3)           | 8<br>(5 - 16)           | 8<br>(4 - 21)           | 10<br>(5 - 19)          |
| Inflammatory bowel disease                          | 103<br>(37 - 148)        | 28<br>(10 - 55)       | 5<br>(2 - 9)           | 28<br>(9 - 44)          | 23<br>(6 - 37)          | 20<br>(5 - 31)          |
| Vascular intestinal disorders                       | 8<br>(3 - 19)            | 1<br>(0 - 3)          | 1<br>(0 - 1)           | 2<br>(1 - 4)            | 2<br>(1 - 6)            | 2<br>(1 - 8)            |
| Gallbladder and biliary diseases                    | 127<br>(93 - 171)        | 5<br>(2 - 10)         | 7<br>(2 - 12)          | 29<br>(18 - 44)         | 40<br>(27 - 61)         | 45<br>(30 - 65)         |
| Pancreatitis                                        | 112<br>(59 - 174)        | 2<br>(1 - 4)          | 2<br>(1 - 4)           | 51<br>(25 - 86)         | 35<br>(18 - 60)         | 21<br>(10 - 37)         |
| Other digestive diseases                            | 270<br>(192 - 382)       | 36<br>(17 - 70)       | 19<br>(11 - 31)        | 83<br>(55 - 126)        | 73<br>(48 - 112)        | 58<br>(38 - 88)         |
| Neurological disorders                              | 1,128<br>(918 - 1,438)   | 206<br>(112 - 364)    | 108<br>(61 - 171)      | 293<br>(212 - 434)      | 105<br>(83 - 133)       | 415<br>(337 - 516)      |
| Alzheimer disease and other dementias               | 414<br>(335 - 509)       | --                    | --                     | 1<br>(0 - 1)            | 47<br>(37 - 60)         | 367<br>(293 - 456)      |
| Parkinson disease                                   | 4<br>(3 - 9)             | --                    | --                     | 1<br>(1 - 1)            | 1<br>(0 - 2)            | 3<br>(1 - 6)            |
| Epilepsy                                            | 589<br>(423 - 855)       | 177<br>(88 - 332)     | 98<br>(51 - 159)       | 252<br>(176 - 384)      | 30<br>(19 - 44)         | 32<br>(21 - 48)         |
| Multiple sclerosis                                  | 1<br>(1 - 5)             | --                    | --                     | 1<br>(0 - 3)            | 0<br>(0 - 2)            | 0<br>(0 - 1)            |
| Other neurological disorders                        | 120<br>(95 - 157)        | 29<br>(18 - 68)       | 11<br>(8 - 15)         | 39<br>(29 - 51)         | 28<br>(20 - 36)         | 13<br>(10 - 18)         |
| Mental and substance use disorders                  | 726<br>(464 - 984)       | 32<br>(6 - 69)        | 0<br>(0 - 0)           | 527<br>(304 - 738)      | 121<br>(83 - 164)       | 46<br>(32 - 62)         |
| Schizophrenia                                       | 4<br>(2 - 8)             | --                    | --                     | 3<br>(1 - 5)            | 1<br>(1 - 3)            | 0<br>(0 - 1)            |
| Alcohol use disorders                               | 186<br>(92 - 271)        | --                    | --                     | 101<br>(47 - 153)       | 64<br>(32 - 97)         | 21<br>(10 - 30)         |
| Drug use disorders                                  | 536<br>(281 - 768)       | 32<br>(6 - 69)        | --                     | 423<br>(205 - 620)      | 55<br>(35 - 78)         | 25<br>(15 - 37)         |
| Opioid use disorders                                | 57<br>(29 - 83)          | 4<br>(1 - 8)          | --                     | 46<br>(21 - 69)         | 5<br>(3 - 7)            | 3<br>(2 - 4)            |
| Cocaine use disorders                               | 2<br>(1 - 3)             | 0<br>(0 - 0)          | --                     | 2<br>(1 - 3)            | 0<br>(0 - 0)            | 0<br>(0 - 0)            |
| Amphetamine use disorders                           | 2<br>(1 - 2)             | 0<br>(0 - 0)          | --                     | 1<br>(1 - 2)            | 0<br>(0 - 0)            | 0<br>(0 - 0)            |

Web Table 31- Burkina Faso deaths with 95% UI by age, sex, and cause in 2013

| Cause                                               | Both Sexes, All Ages     | Both Sexes, 0-4 Years    | Both Sexes, 5-14 Years | Both Sexes, 15-49 Years | Both Sexes, 50-69 Years | Both Sexes, 70-80 Years |
|-----------------------------------------------------|--------------------------|--------------------------|------------------------|-------------------------|-------------------------|-------------------------|
| Other drug use disorders                            | 475<br>(249 - 684)       | 28<br>(5 - 62)           | --                     | 375<br>(182 - 551)      | 50<br>(32 - 70)         | 22<br>(14 - 33)         |
| Eating disorders                                    | 1<br>(0 - 1)             | --                       | 0<br>(0 - 0)           | 0<br>(0 - 1)            | --                      | --                      |
| Anorexia nervosa                                    | 1<br>(0 - 1)             | --                       | 0<br>(0 - 0)           | 0<br>(0 - 1)            | --                      | --                      |
| Diabetes, urogenital, blood, and endocrine diseases | 5,117<br>(3,828 - 7,270) | 1,706<br>(800 - 3,376)   | 412<br>(223 - 737)     | 1,066<br>(818 - 1,531)  | 1,087<br>(903 - 1,305)  | 847<br>(714 - 1,010)    |
| Diabetes mellitus                                   | 1,260<br>(1,069 - 1,480) | 24<br>(16 - 36)          | 11<br>(7 - 16)         | 202<br>(162 - 250)      | 587<br>(476 - 725)      | 437<br>(348 - 542)      |
| Acute glomerulonephritis                            | 25<br>(15 - 38)          | 5<br>(3 - 11)            | 3<br>(2 - 5)           | 9<br>(5 - 15)           | 5<br>(2 - 10)           | 2<br>(1 - 3)            |
| Chronic kidney disease                              | 727<br>(605 - 902)       | 110<br>(66 - 175)        | 47<br>(32 - 66)        | 220<br>(169 - 293)      | 173<br>(136 - 225)      | 177<br>(138 - 236)      |
| Chronic kidney disease due to diabetes mellitus     | 7<br>(3 - 12)            | 0<br>(0 - 1)             | 0<br>(0 - 1)           | 1<br>(0 - 1)            | 5<br>(2 - 10)           | 0<br>(0 - 1)            |
| Chronic kidney disease due to hypertension          | 225<br>(159 - 309)       | 11<br>(3 - 25)           | 4<br>(2 - 7)           | 49<br>(29 - 72)         | 77<br>(52 - 112)        | 84<br>(58 - 129)        |
| Chronic kidney disease due to glomerulonephritis    | 324<br>(254 - 425)       | 69<br>(40 - 114)         | 31<br>(21 - 43)        | 128<br>(94 - 173)       | 53<br>(35 - 77)         | 44<br>(28 - 63)         |
| Chronic kidney disease due to other causes          | 171<br>(111 - 244)       | 29<br>(11 - 58)          | 12<br>(6 - 20)         | 43<br>(24 - 81)         | 38<br>(21 - 62)         | 49<br>(25 - 83)         |
| Urinary diseases and male infertility               | 544<br>(446 - 655)       | 72<br>(41 - 123)         | 19<br>(13 - 28)        | 160<br>(118 - 209)      | 169<br>(128 - 219)      | 123<br>(90 - 165)       |
| Interstitial nephritis and urinary tract infections | 469<br>(376 - 571)       | 63<br>(34 - 113)         | 15<br>(9 - 22)         | 136<br>(97 - 179)       | 146<br>(108 - 190)      | 110<br>(81 - 147)       |
| Urolithiasis                                        | 9<br>(3 - 27)            | --                       | 1<br>(1 - 4)           | 4<br>(1 - 10)           | 3<br>(1 - 10)           | 1<br>(0 - 5)            |
| Other urinary diseases                              | 65<br>(45 - 93)          | 9<br>(2 - 22)            | 3<br>(1 - 6)           | 21<br>(12 - 34)         | 20<br>(10 - 31)         | 12<br>(6 - 20)          |
| Gynecological diseases                              | 8<br>(5 - 19)            | --                       | --                     | 3<br>(2 - 9)            | 3<br>(2 - 7)            | 2<br>(1 - 4)            |
| Uterine fibroids                                    | 2<br>(1 - 4)             | --                       | --                     | 1<br>(0 - 1)            | 1<br>(0 - 2)            | 1<br>(0 - 1)            |
| Polycystic ovarian syndrome                         | 0<br>(0 - 1)             | --                       | --                     | 0<br>(0 - 1)            | 0<br>(0 - 0)            | --                      |
| Endometriosis                                       | 1<br>(0 - 2)             | --                       | --                     | 1<br>(0 - 1)            | 0<br>(0 - 0)            | --                      |
| Genital prolapse                                    | 1<br>(1 - 3)             | --                       | --                     | 0<br>(0 - 1)            | 1<br>(0 - 1)            | 0<br>(0 - 1)            |
| Other gynecological diseases                        | 4<br>(2 - 9)             | --                       | --                     | 1<br>(1 - 4)            | 2<br>(1 - 4)            | 1<br>(0 - 2)            |
| Hemoglobinopathies and hemolytic anemias            | 2,010<br>(755 - 4,106)   | 1,298<br>(423 - 2,939)   | 298<br>(110 - 627)     | 332<br>(135 - 802)      | 53<br>(27 - 118)        | 28<br>(13 - 58)         |
| Thalassemias                                        | 22<br>(8 - 46)           | 17<br>(6 - 38)           | 3<br>(1 - 5)           | 2<br>(1 - 6)            | 0<br>(0 - 0)            | 0<br>(0 - 0)            |
| Sickle cell disorders                               | 1,924<br>(715 - 3,944)   | 1,250<br>(407 - 2,845)   | 291<br>(108 - 613)     | 323<br>(131 - 779)      | 48<br>(24 - 108)        | 12<br>(5 - 23)          |
| G6PD deficiency                                     | 23<br>(9 - 46)           | 13<br>(4 - 30)           | 3<br>(1 - 6)           | 4<br>(2 - 10)           | 1<br>(1 - 3)            | 1<br>(1 - 3)            |
| Other hemoglobinopathies and hemolytic anemias      | 41<br>(18 - 81)          | 18<br>(7 - 36)           | 1<br>(1 - 3)           | 3<br>(1 - 8)            | 4<br>(2 - 8)            | 15<br>(7 - 31)          |
| Endocrine, metabolic, blood, and immune disorders   | 543<br>(386 - 695)       | 196<br>(117 - 301)       | 34<br>(19 - 53)        | 140<br>(95 - 194)       | 96<br>(65 - 133)        | 78<br>(49 - 113)        |
| Musculoskeletal disorders                           | 113<br>(74 - 159)        | --                       | 16<br>(8 - 23)         | 45<br>(28 - 64)         | 32<br>(20 - 45)         | 20<br>(13 - 33)         |
| Rheumatoid arthritis                                | 18<br>(10 - 26)          | --                       | 2<br>(1 - 4)           | 4<br>(2 - 7)            | 5<br>(3 - 8)            | 6<br>(3 - 12)           |
| Other musculoskeletal disorders                     | 95<br>(62 - 134)         | --                       | 14<br>(6 - 20)         | 41<br>(25 - 58)         | 27<br>(17 - 38)         | 14<br>(9 - 22)          |
| Other non-communicable diseases                     | 4,987<br>(2,682 - 8,524) | 4,377<br>(2,163 - 7,794) | 200<br>(105 - 369)     | 201<br>(150 - 275)      | 98<br>(74 - 127)        | 111<br>(82 - 147)       |
| Congenital anomalies                                | 4,564<br>(2,263 - 8,115) | 4,214<br>(2,011 - 7,651) | 187<br>(92 - 357)      | 127<br>(81 - 192)       | 22<br>(15 - 33)         | 14<br>(10 - 21)         |
| Neural tube defects                                 | 1,202<br>(370 - 2,988)   | 1,141<br>(342 - 2,859)   | 36<br>(10 - 90)        | 22<br>(6 - 58)          | 2<br>(0 - 5)            | 1<br>(0 - 3)            |
| Congenital heart anomalies                          | 1,787<br>(870 - 3,092)   | 1,630<br>(764 - 2,872)   | 84<br>(39 - 175)       | 55<br>(34 - 82)         | 11<br>(7 - 16)          | 6<br>(4 - 10)           |
| Cleft lip and cleft palate                          | 22<br>(3 - 59)           | 22<br>(3 - 59)           | --                     | --                      | --                      | --                      |
| Down syndrome                                       | 536<br>(154 - 1,223)     | 481<br>(121 - 1,150)     | 29<br>(11 - 61)        | 22<br>(12 - 38)         | 4<br>(2 - 7)            | 1<br>(0 - 1)            |
| Chromosomal unbalanced rearrangements               | 152<br>(38 - 392)        | 142<br>(34 - 374)        | 5<br>(1 - 12)          | 5<br>(2 - 9)            | 0<br>(0 - 1)            | 0<br>(0 - 1)            |
| Other congenital anomalies                          | 866<br>(235 - 3,094)     | 799<br>(200 - 2,959)     | 32<br>(10 - 111)       | 23<br>(13 - 47)         | 5<br>(3 - 9)            | 6<br>(3 - 9)            |
| Skin and subcutaneous diseases                      | 384<br>(296 - 496)       | 124<br>(68 - 210)        | 13<br>(8 - 20)         | 74<br>(49 - 104)        | 75<br>(54 - 100)        | 97<br>(70 - 131)        |
| Cellulitis                                          | 125<br>(44 - 219)        | 34<br>(9 - 73)           | 6<br>(3 - 11)          | 23<br>(8 - 42)          | 26<br>(8 - 53)          | 37<br>(11 - 72)         |

Web Table 31- Burkina Faso deaths with 95% UI by age, sex, and cause in 2013

| Cause                                           | Both Sexes, All Ages       | Both Sexes, 0-4 Years    | Both Sexes, 5-14 Years | Both Sexes, 15-49 Years  | Both Sexes, 50-69 Years  | Both Sexes, 70-80 Years |
|-------------------------------------------------|----------------------------|--------------------------|------------------------|--------------------------|--------------------------|-------------------------|
| Pyoderma                                        | 248<br>(129 - 370)         | 88<br>(41 - 163)         | 7<br>(3 - 12)          | 48<br>(24 - 77)          | 49<br>(24 - 76)          | 56<br>(24 - 93)         |
| Decubitus ulcer                                 | 6<br>(3 - 10)              | 0<br>(0 - 1)             | 0<br>(0 - 1)           | 1<br>(1 - 2)             | 0<br>(0 - 1)             | 3<br>(2 - 7)            |
| Other skin and subcutaneous diseases            | 6<br>(3 - 10)              | 2<br>(0 - 7)             | 0<br>(0 - 1)           | 2<br>(1 - 3)             | 0<br>(0 - 1)             | 1<br>(0 - 2)            |
| Sudden infant death syndrome                    | 39<br>(13 - 97)            | 39<br>(13 - 97)          | --                     | --                       | --                       | --                      |
| Injuries                                        | 10,157<br>(8,539 - 12,086) | 2,419<br>(1,607 - 3,574) | 1,297<br>(962 - 1,676) | 4,286<br>(3,445 - 5,285) | 1,312<br>(1,056 - 1,567) | 844<br>(674 - 1,020)    |
| Transport injuries                              | 4,700<br>(3,832 - 5,583)   | 706<br>(411 - 1,150)     | 613<br>(432 - 824)     | 2,501<br>(1,893 - 3,123) | 621<br>(490 - 763)       | 259<br>(206 - 319)      |
| Road injuries                                   | 4,534<br>(3,688 - 5,384)   | 646<br>(376 - 1,048)     | 580<br>(410 - 781)     | 2,466<br>(1,860 - 3,083) | 600<br>(472 - 738)       | 243<br>(192 - 302)      |
| Pedestrian road injuries                        | 1,670<br>(1,266 - 2,123)   | 256<br>(139 - 436)       | 244<br>(157 - 363)     | 826<br>(586 - 1,117)     | 240<br>(177 - 317)       | 104<br>(75 - 146)       |
| Cyclist road injuries                           | 158<br>(111 - 227)         | 28<br>(12 - 57)          | 31<br>(17 - 50)        | 56<br>(36 - 85)          | 31<br>(21 - 45)          | 12<br>(8 - 18)          |
| Motorcyclist road injuries                      | 190<br>(108 - 336)         | 20<br>(10 - 39)          | 10<br>(5 - 19)         | 133<br>(69 - 243)        | 18<br>(10 - 34)          | 8<br>(5 - 15)           |
| Motor vehicle road injuries                     | 2,322<br>(1,665 - 2,926)   | 300<br>(164 - 506)       | 258<br>(171 - 372)     | 1,377<br>(922 - 1,818)   | 281<br>(198 - 365)       | 107<br>(75 - 137)       |
| Other road injuries                             | 195<br>(62 - 320)          | 42<br>(14 - 92)          | 37<br>(12 - 72)        | 74<br>(16 - 136)         | 30<br>(9 - 52)           | 12<br>(4 - 22)          |
| Other transport injuries                        | 165<br>(126 - 220)         | 60<br>(35 - 106)         | 33<br>(21 - 50)        | 35<br>(25 - 51)          | 21<br>(14 - 29)          | 16<br>(9 - 24)          |
| Unintentional injuries                          | 4,299<br>(3,506 - 5,442)   | 1,700<br>(1,118 - 2,553) | 646<br>(451 - 880)     | 985<br>(774 - 1,258)     | 483<br>(369 - 601)       | 484<br>(369 - 630)      |
| Falls                                           | 819<br>(639 - 1,009)       | 154<br>(87 - 261)        | 88<br>(53 - 139)       | 205<br>(143 - 293)       | 148<br>(103 - 201)       | 223<br>(146 - 315)      |
| Drowning                                        | 1,166<br>(772 - 1,934)     | 527<br>(264 - 1,088)     | 271<br>(154 - 445)     | 284<br>(186 - 431)       | 59<br>(44 - 81)          | 25<br>(18 - 34)         |
| Fire, heat, and hot substances                  | 528<br>(326 - 802)         | 255<br>(122 - 470)       | 72<br>(40 - 121)       | 99<br>(65 - 141)         | 58<br>(34 - 89)          | 45<br>(25 - 71)         |
| Poisonings                                      | 161<br>(108 - 238)         | 60<br>(30 - 116)         | 14<br>(8 - 22)         | 55<br>(37 - 82)          | 24<br>(15 - 34)          | 7<br>(4 - 10)           |
| Exposure to mechanical forces                   | 492<br>(346 - 688)         | 229<br>(117 - 388)       | 69<br>(40 - 116)       | 120<br>(87 - 167)        | 54<br>(38 - 75)          | 21<br>(14 - 28)         |
| Unintentional firearm injuries                  | 84<br>(62 - 115)           | 17<br>(10 - 29)          | 7<br>(4 - 12)          | 47<br>(31 - 73)          | 9<br>(6 - 13)            | 4<br>(3 - 6)            |
| Unintentional suffocation                       | 125<br>(53 - 277)          | 99<br>(36 - 235)         | 12<br>(5 - 25)         | 8<br>(4 - 15)            | 5<br>(3 - 12)            | 1<br>(1 - 3)            |
| Other exposure to mechanical forces             | 283<br>(193 - 386)         | 112<br>(54 - 195)        | 50<br>(26 - 92)        | 65<br>(45 - 95)          | 40<br>(26 - 59)          | 16<br>(9 - 22)          |
| Adverse effects of medical treatment            | 481<br>(261 - 740)         | 199<br>(91 - 388)        | 26<br>(13 - 41)        | 75<br>(45 - 104)         | 81<br>(41 - 141)         | 101<br>(47 - 186)       |
| Animal contact                                  | 204<br>(123 - 307)         | 51<br>(27 - 92)          | 42<br>(23 - 76)        | 59<br>(33 - 93)          | 32<br>(18 - 49)          | 19<br>(10 - 29)         |
| Venomous animal contact                         | 114<br>(63 - 186)          | 34<br>(15 - 68)          | 19<br>(8 - 37)         | 32<br>(16 - 56)          | 16<br>(8 - 25)           | 13<br>(7 - 20)          |
| Non-venomous animal contact                     | 89<br>(54 - 143)           | 17<br>(8 - 37)           | 23<br>(11 - 45)        | 26<br>(15 - 45)          | 16<br>(8 - 26)           | 7<br>(3 - 11)           |
| Foreign body                                    | 235<br>(156 - 360)         | 164<br>(98 - 265)        | 18<br>(11 - 29)        | 13<br>(9 - 22)           | 9<br>(7 - 12)            | 31<br>(21 - 51)         |
| Pulmonary aspiration and foreign body in airway | 223<br>(145 - 347)         | 159<br>(94 - 261)        | 16<br>(10 - 27)        | 12<br>(8 - 20)           | 7<br>(5 - 10)            | 30<br>(19 - 50)         |
| Foreign body in other body part                 | 12<br>(8 - 17)             | 5<br>(3 - 8)             | 2<br>(1 - 3)           | 1<br>(1 - 2)             | 2<br>(1 - 3)             | 1<br>(1 - 2)            |
| Other unintentional injuries                    | 215<br>(171 - 283)         | 62<br>(36 - 103)         | 47<br>(32 - 70)        | 76<br>(57 - 105)         | 18<br>(14 - 24)          | 11<br>(8 - 15)          |
| Self-harm and interpersonal violence            | 1,159<br>(843 - 1,588)     | 13<br>(7 - 24)           | 38<br>(19 - 76)        | 801<br>(539 - 1,176)     | 207<br>(151 - 273)       | 100<br>(69 - 140)       |
| Self-harm                                       | 1,045<br>(738 - 1,439)     | --                       | 32<br>(14 - 68)        | 711<br>(467 - 1,076)     | 203<br>(147 - 269)       | 100<br>(68 - 140)       |
| Interpersonal violence                          | 113<br>(80 - 178)          | 13<br>(7 - 24)           | 6<br>(4 - 11)          | 89<br>(60 - 147)         | 4<br>(3 - 8)             | 1<br>(0 - 1)            |
| Assault by firearm                              | 47<br>(28 - 82)            | 4<br>(2 - 8)             | 2<br>(1 - 3)           | 40<br>(23 - 70)          | 2<br>(1 - 3)             | 0<br>(0 - 0)            |
| Assault by sharp object                         | 25<br>(16 - 43)            | 3<br>(1 - 6)             | 1<br>(1 - 2)           | 19<br>(12 - 34)          | 1<br>(1 - 2)             | 0<br>(0 - 0)            |
| Assault by other means                          | 41<br>(28 - 68)            | 6<br>(3 - 13)            | 3<br>(2 - 6)           | 30<br>(19 - 50)          | 1<br>(1 - 3)             | 0<br>(0 - 0)            |

Web Table 31- Burkina Faso deaths with 95% UI by age, sex, and cause in 2013

| Cause                                                             | Males, All Ages             | Males, 0-4 Years            | Males, 5-14 Years        | Males, 15-49 Years          | Males, 50-69 Years        | Males, 70-80 Years       |
|-------------------------------------------------------------------|-----------------------------|-----------------------------|--------------------------|-----------------------------|---------------------------|--------------------------|
| All causes                                                        | 71,013<br>(64,863 - 77,927) | 37,599<br>(32,705 - 42,704) | 3,714<br>(3,197 - 4,225) | 13,426<br>(11,624 - 15,705) | 9,445<br>(8,044 - 10,903) | 6,828<br>(6,145 - 7,359) |
| Communicable, maternal, neonatal, and nutritional diseases        | 46,859<br>(40,845 - 52,986) | 32,317<br>(26,852 - 37,953) | 2,238<br>(1,769 - 2,822) | 6,263<br>(5,192 - 7,784)    | 3,569<br>(2,933 - 4,323)  | 2,473<br>(2,056 - 2,947) |
| HIV/AIDS and tuberculosis                                         | 5,134<br>(4,364 - 5,958)    | 362<br>(252 - 509)          | 253<br>(200 - 317)       | 2,850<br>(2,350 - 3,462)    | 1,229<br>(948 - 1,574)    | 440<br>(329 - 566)       |
| Tuberculosis                                                      | 2,690<br>(1,939 - 3,409)    | 242<br>(135 - 376)          | 77<br>(45 - 121)         | 1,133<br>(764 - 1,555)      | 826<br>(568 - 1,094)      | 412<br>(297 - 536)       |
| HIV/AIDS                                                          | 2,444<br>(1,808 - 3,188)    | 120<br>(66 - 188)           | 176<br>(129 - 232)       | 1,717<br>(1,271 - 2,334)    | 403<br>(234 - 750)        | 28<br>(15 - 49)          |
| HIV/AIDS resulting in mycobacterial infection                     | 169<br>(118 - 234)          | 8<br>(4 - 13)               | 11<br>(8 - 15)           | 118<br>(81 - 168)           | 30<br>(16 - 57)           | 2<br>(1 - 4)             |
| HIV/AIDS resulting in other diseases                              | 2,276<br>(1,675 - 2,980)    | 112<br>(62 - 175)           | 165<br>(121 - 219)       | 1,599<br>(1,177 - 2,182)    | 374<br>(217 - 695)        | 26<br>(14 - 45)          |
| Diarrhea, lower respiratory, and other common infectious diseases | 18,791<br>(15,055 - 22,899) | 13,755<br>(10,282 - 17,653) | 891<br>(601 - 1,225)     | 1,483<br>(1,093 - 1,961)    | 1,297<br>(971 - 1,687)    | 1,365<br>(1,087 - 1,657) |
| Diarrheal diseases                                                | 7,029<br>(4,535 - 10,358)   | 5,420<br>(3,073 - 8,505)    | 254<br>(122 - 458)       | 518<br>(348 - 740)          | 445<br>(271 - 692)        | 392<br>(252 - 576)       |
| Intestinal infectious diseases                                    | 427<br>(212 - 764)          | 148<br>(65 - 304)           | 137<br>(61 - 254)        | 127<br>(57 - 239)           | 12<br>(5 - 23)            | 3<br>(1 - 6)             |
| Typhoid fever                                                     | 266<br>(124 - 489)          | 84<br>(33 - 176)            | 88<br>(35 - 171)         | 85<br>(36 - 169)            | 8<br>(3 - 15)             | 2<br>(1 - 4)             |
| Paratyphoid fever                                                 | 133<br>(57 - 258)           | 48<br>(17 - 102)            | 46<br>(19 - 97)          | 36<br>(12 - 78)             | 3<br>(1 - 7)              | 1<br>(0 - 2)             |
| Other intestinal infectious diseases                              | 27<br>(14 - 46)             | 17<br>(7 - 32)              | 3<br>(0 - 9)             | 6<br>(1 - 14)               | 1<br>(0 - 6)              | 0<br>(0 - 3)             |
| Lower respiratory infections                                      | 8,864<br>(6,573 - 11,620)   | 6,469<br>(4,278 - 9,020)    | 262<br>(148 - 419)       | 498<br>(337 - 702)          | 710<br>(485 - 978)        | 925<br>(686 - 1,182)     |
| Upper respiratory infections                                      | 12<br>(4 - 31)              | 7<br>(0 - 27)               | 1<br>(0 - 3)             | 3<br>(1 - 6)                | 1<br>(0 - 4)              | 1<br>(0 - 2)             |
| Otitis media                                                      | 3<br>(2 - 5)                | 2<br>(1 - 3)                | 0<br>(0 - 0)             | 1<br>(0 - 1)                | 0<br>(0 - 0)              | 0<br>(0 - 1)             |
| Meningitis                                                        | 2,131<br>(1,326 - 3,282)    | 1,458<br>(726 - 2,508)      | 213<br>(114 - 366)       | 303<br>(197 - 449)          | 118<br>(75 - 175)         | 40<br>(25 - 61)          |
| Pneumococcal meningitis                                           | 716<br>(411 - 1,164)        | 444<br>(193 - 852)          | 85<br>(39 - 153)         | 128<br>(68 - 203)           | 44<br>(22 - 75)           | 14<br>(8 - 25)           |
| H influenzae type B meningitis                                    | 255<br>(120 - 502)          | 203<br>(69 - 448)           | 21<br>(7 - 49)           | 21<br>(8 - 41)              | 8<br>(3 - 15)             | 2<br>(1 - 5)             |
| Meningococcal meningitis                                          | 1,017<br>(615 - 1,584)      | 715<br>(331 - 1,271)        | 95<br>(43 - 179)         | 132<br>(78 - 206)           | 56<br>(32 - 88)           | 19<br>(11 - 30)          |
| Other meningitis                                                  | 144<br>(77 - 262)           | 95<br>(34 - 207)            | 12<br>(3 - 30)           | 22<br>(7 - 55)              | 10<br>(3 - 25)            | 4<br>(1 - 8)             |
| Encephalitis                                                      | 72<br>(42 - 115)            | 46<br>(22 - 84)             | 6<br>(3 - 12)            | 13<br>(6 - 25)              | 4<br>(3 - 8)              | 3<br>(2 - 4)             |
| Diphtheria                                                        | 7<br>(0 - 48)               | 6<br>(0 - 47)               | 1<br>(0 - 7)             | 0<br>(0 - 1)                | 0<br>(0 - 0)              | --                       |
| Whooping cough                                                    | 23<br>(0 - 126)             | 22<br>(0 - 120)             | 1<br>(0 - 6)             | 0<br>(0 - 1)                | 0<br>(0 - 0)              | --                       |
| Tetanus                                                           | 121<br>(57 - 217)           | 91<br>(29 - 180)            | 5<br>(2 - 9)             | 19<br>(9 - 34)              | 6<br>(3 - 12)             | 1<br>(0 - 2)             |
| Measles                                                           | 95<br>(26 - 230)            | 83<br>(22 - 204)            | 11<br>(3 - 27)           | 1<br>(0 - 3)                | 0<br>(0 - 0)              | --                       |
| Varicella and herpes zoster                                       | 7<br>(2 - 17)               | 3<br>(0 - 12)               | 1<br>(0 - 4)             | 2<br>(0 - 5)                | 0<br>(0 - 1)              | 1<br>(0 - 3)             |
| Neglected tropical diseases and malaria                           | 13,108<br>(8,319 - 19,434)  | 9,549<br>(5,410 - 14,899)   | 908<br>(456 - 1,639)     | 1,548<br>(682 - 3,261)      | 726<br>(343 - 1,392)      | 376<br>(164 - 792)       |
| Malaria                                                           | 12,942<br>(8,142 - 19,266)  | 9,495<br>(5,370 - 14,865)   | 873<br>(413 - 1,614)     | 1,496<br>(629 - 3,223)      | 710<br>(326 - 1,375)      | 369<br>(157 - 786)       |
| Leishmaniasis                                                     | 0<br>(0 - 1)                | 0<br>(0 - 0)                | 0<br>(0 - 0)             | 0<br>(0 - 0)                | 0<br>(0 - 0)              | 0<br>(0 - 0)             |
| Visceral leishmaniasis                                            | 0<br>(0 - 1)                | 0<br>(0 - 0)                | 0<br>(0 - 0)             | 0<br>(0 - 0)                | 0<br>(0 - 0)              | 0<br>(0 - 0)             |
| Schistosomiasis                                                   | 27<br>(19 - 38)             | 1<br>(0 - 2)                | 2<br>(1 - 3)             | 13<br>(8 - 21)              | 8<br>(5 - 13)             | 3<br>(2 - 5)             |
| Cysticercosis                                                     | 1<br>(0 - 4)                | 0<br>(0 - 0)                | 0<br>(0 - 0)             | 1<br>(0 - 2)                | 0<br>(0 - 1)              | 0<br>(0 - 0)             |
| Cystic echinococcosis                                             | 4<br>(3 - 5)                | 1<br>(0 - 2)                | 1<br>(1 - 1)             | 2<br>(1 - 2)                | 0<br>(0 - 0)              | 0<br>(0 - 0)             |
| Dengue                                                            | 6<br>(3 - 10)               | 3<br>(1 - 7)                | 1<br>(1 - 2)             | 1<br>(1 - 3)                | 0<br>(0 - 0)              | 0<br>(0 - 0)             |
| Yellow fever                                                      | 34<br>(21 - 53)             | 3<br>(1 - 9)                | 7<br>(2 - 18)            | 19<br>(9 - 35)              | 3<br>(1 - 8)              | 1<br>(0 - 4)             |
| Rabies                                                            | 47<br>(24 - 80)             | 14<br>(5 - 32)              | 19<br>(9 - 38)           | 12<br>(6 - 18)              | 2<br>(1 - 2)              | 0<br>(0 - 0)             |
| Intestinal nematode infections                                    | 31<br>(13 - 60)             | 25<br>(10 - 52)             | 4<br>(0 - 13)            | 1<br>(0 - 6)                | 0<br>(0 - 3)              | 0<br>(0 - 2)             |
| Ascariasis                                                        | 31<br>(13 - 60)             | 25<br>(10 - 52)             | 4<br>(0 - 13)            | 1<br>(0 - 6)                | 0<br>(0 - 3)              | 0<br>(0 - 2)             |
| Other neglected tropical diseases                                 | 16<br>(10 - 31)             | 7<br>(3 - 14)               | 1<br>(0 - 2)             | 3<br>(2 - 7)                | 3<br>(1 - 5)              | 2<br>(1 - 4)             |



Web Table 31- Burkina Faso deaths with 95% UI by age, sex, and cause in 2013

| Cause                                                            | Males, All Ages             | Males, 0-4 Years         | Males, 5-14 Years    | Males, 15-49 Years       | Males, 50-69 Years       | Males, 70-80 Years       |
|------------------------------------------------------------------|-----------------------------|--------------------------|----------------------|--------------------------|--------------------------|--------------------------|
| Maternal disorders                                               | --                          | --                       | --                   | --                       | --                       | --                       |
| Maternal hemorrhage                                              | --                          | --                       | --                   | --                       | --                       | --                       |
| Maternal sepsis and other maternal infections                    | --                          | --                       | --                   | --                       | --                       | --                       |
| Maternal hypertensive disorders                                  | --                          | --                       | --                   | --                       | --                       | --                       |
| Maternal obstructed labor                                        | --                          | --                       | --                   | --                       | --                       | --                       |
| Maternal abortive outcome                                        | --                          | --                       | --                   | --                       | --                       | --                       |
| Indirect maternal deaths                                         | --                          | --                       | --                   | --                       | --                       | --                       |
| Late maternal deaths                                             | --                          | --                       | --                   | --                       | --                       | --                       |
| Maternal deaths aggravated by HIV/AIDS                           | --                          | --                       | --                   | --                       | --                       | --                       |
| Other maternal disorders                                         | --                          | --                       | --                   | --                       | --                       | --                       |
| Neonatal disorders                                               | 6,811<br>(5,375 - 8,257)    | 6,811<br>(5,375 - 8,257) | --                   | --                       | --                       | --                       |
| Neonatal preterm birth complications                             | 2,233<br>(1,018 - 3,674)    | 2,233<br>(1,018 - 3,674) | --                   | --                       | --                       | --                       |
| Neonatal encephalopathy due to birth asphyxia and trauma         | 1,582<br>(618 - 2,944)      | 1,582<br>(618 - 2,944)   | --                   | --                       | --                       | --                       |
| Neonatal sepsis and other neonatal infections                    | 2,152<br>(958 - 3,784)      | 2,152<br>(958 - 3,784)   | --                   | --                       | --                       | --                       |
| Hemolytic disease and other neonatal jaundice                    | 50<br>(14 - 127)            | 50<br>(14 - 127)         | --                   | --                       | --                       | --                       |
| Other neonatal disorders                                         | 794<br>(334 - 1,516)        | 794<br>(334 - 1,516)     | --                   | --                       | --                       | --                       |
| Nutritional deficiencies                                         | 2,394<br>(1,451 - 3,724)    | 1,463<br>(694 - 2,579)   | 146<br>(81 - 243)    | 279<br>(174 - 425)       | 250<br>(150 - 375)       | 255<br>(158 - 385)       |
| Protein-energy malnutrition                                      | 1,792<br>(1,014 - 2,976)    | 1,262<br>(581 - 2,312)   | 98<br>(50 - 180)     | 126<br>(57 - 222)        | 151<br>(75 - 243)        | 155<br>(71 - 251)        |
| Iodine deficiency                                                | 6<br>(0 - 27)               | 3<br>(0 - 23)            | 1<br>(0 - 6)         | 1<br>(0 - 5)             | 1<br>(0 - 3)             | 0<br>(0 - 3)             |
| Iron-deficiency anemia                                           | 589<br>(230 - 1,083)        | 198<br>(24 - 544)        | 46<br>(16 - 97)      | 149<br>(67 - 245)        | 97<br>(42 - 178)         | 98<br>(39 - 190)         |
| Other nutritional deficiencies                                   | 7<br>(3 - 16)               | 0<br>(0 - 1)             | 1<br>(0 - 1)         | 3<br>(1 - 7)             | 2<br>(1 - 3)             | 2<br>(1 - 4)             |
| Other communicable, maternal, neonatal, and nutritional diseases | 621<br>(437 - 910)          | 377<br>(219 - 615)       | 39<br>(25 - 60)      | 102<br>(66 - 155)        | 66<br>(38 - 111)         | 37<br>(19 - 69)          |
| Sexually transmitted diseases excluding HIV                      | 282<br>(153 - 481)          | 243<br>(122 - 432)       | 19<br>(10 - 34)      | 11<br>(6 - 17)           | 6<br>(3 - 11)            | 3<br>(1 - 7)             |
| Syphilis                                                         | 274<br>(144 - 471)          | 243<br>(122 - 432)       | 18<br>(9 - 33)       | 6<br>(3 - 9)             | 4<br>(2 - 8)             | 3<br>(1 - 6)             |
| Chlamydial infection                                             | --                          | --                       | --                   | --                       | --                       | --                       |
| Gonococcal infection                                             | 5<br>(3 - 7)                | --                       | 0<br>(0 - 1)         | 3<br>(2 - 4)             | 1<br>(0 - 2)             | 0<br>(0 - 1)             |
| Other sexually transmitted diseases                              | 3<br>(2 - 5)                | --                       | 0<br>(0 - 1)         | 2<br>(1 - 4)             | 1<br>(0 - 1)             | 0<br>(0 - 0)             |
| Hepatitis                                                        | 141<br>(84 - 213)           | 37<br>(14 - 74)          | 12<br>(6 - 19)       | 57<br>(32 - 98)          | 25<br>(14 - 42)          | 10<br>(6 - 18)           |
| Acute hepatitis A                                                | 14<br>(3 - 32)              | 9<br>(2 - 24)            | 3<br>(1 - 6)         | 2<br>(0 - 5)             | 0<br>(0 - 1)             | 0<br>(0 - 0)             |
| Acute hepatitis B                                                | 82<br>(45 - 130)            | 27<br>(10 - 58)          | 6<br>(3 - 10)        | 22<br>(10 - 41)          | 19<br>(10 - 31)          | 9<br>(5 - 15)            |
| Acute hepatitis C                                                | 3<br>(1 - 9)                | --                       | 1<br>(0 - 2)         | 1<br>(0 - 5)             | 1<br>(0 - 3)             | 0<br>(0 - 1)             |
| Acute hepatitis E                                                | 41<br>(20 - 77)             | 1<br>(0 - 2)             | 3<br>(1 - 6)         | 32<br>(16 - 60)          | 5<br>(2 - 12)            | 1<br>(0 - 3)             |
| Other infectious diseases                                        | 198<br>(122 - 337)          | 97<br>(42 - 211)         | 9<br>(3 - 19)        | 34<br>(19 - 61)          | 35<br>(14 - 76)          | 23<br>(7 - 56)           |
| Non-communicable diseases                                        | 17,817<br>(14,318 - 22,041) | 3,905<br>(2,034 - 7,639) | 690<br>(430 - 1,045) | 4,043<br>(3,024 - 5,194) | 5,164<br>(4,086 - 6,246) | 4,015<br>(3,486 - 4,535) |
| Neoplasms                                                        | 3,059<br>(2,414 - 3,731)    | 243<br>(129 - 423)       | 119<br>(69 - 183)    | 1,011<br>(747 - 1,340)   | 1,050<br>(805 - 1,306)   | 635<br>(540 - 747)       |
| Esophageal cancer                                                | 96<br>(70 - 131)            | --                       | --                   | 15<br>(10 - 22)          | 51<br>(35 - 73)          | 30<br>(21 - 42)          |
| Stomach cancer                                                   | 201<br>(161 - 246)          | --                       | --                   | 45<br>(32 - 62)          | 93<br>(70 - 121)         | 62<br>(46 - 82)          |
| Liver cancer                                                     | 1,068<br>(775 - 1,428)      | --                       | 6<br>(3 - 11)        | 522<br>(360 - 749)       | 398<br>(270 - 561)       | 142<br>(98 - 203)        |
| Liver cancer due to hepatitis B                                  | 530<br>(220 - 787)          | --                       | 3<br>(1 - 6)         | 309<br>(142 - 461)       | 174<br>(42 - 279)        | 44<br>(22 - 76)          |
| Liver cancer due to hepatitis C                                  | 279<br>(146 - 486)          | --                       | 0<br>(0 - 1)         | 89<br>(28 - 181)         | 131<br>(68 - 234)        | 58<br>(29 - 96)          |

Web Table 31- Burkina Faso deaths with 95% UI by age, sex, and cause in 2013

| Cause                                | Males, All Ages          | Males, 0-4 Years   | Males, 5-14 Years | Males, 15-49 Years   | Males, 50-69 Years       | Males, 70-80 Years       |
|--------------------------------------|--------------------------|--------------------|-------------------|----------------------|--------------------------|--------------------------|
| Liver cancer due to alcohol use      | 142<br>(77 - 220)        | --                 | --                | 49<br>(25 - 82)      | 61<br>(29 - 102)         | 31<br>(14 - 51)          |
| Liver cancer due to other causes     | 117<br>(65 - 188)        | --                 | 2<br>(1 - 5)      | 75<br>(37 - 124)     | 32<br>(15 - 60)          | 9<br>(4 - 16)            |
| Larynx cancer                        | 21<br>(15 - 31)          | --                 | --                | 4<br>(3 - 7)         | 8<br>(5 - 12)            | 9<br>(6 - 13)            |
| Tracheal, bronchus and lung cancer   | 167<br>(133 - 205)       | --                 | --                | 18<br>(12 - 27)      | 96<br>(73 - 122)         | 54<br>(42 - 66)          |
| Breast cancer                        | 10<br>(5 - 16)           | --                 | --                | 2<br>(1 - 4)         | 5<br>(2 - 9)             | 3<br>(1 - 6)             |
| Cervical cancer                      | --                       | --                 | --                | --                   | --                       | --                       |
| Uterine cancer                       | --                       | --                 | --                | --                   | --                       | --                       |
| Prostate cancer                      | 176<br>(116 - 260)       | --                 | --                | 5<br>(2 - 9)         | 60<br>(36 - 89)          | 111<br>(71 - 173)        |
| Colon and rectum cancer              | 256<br>(202 - 314)       | --                 | --                | 106<br>(76 - 141)    | 87<br>(66 - 110)         | 63<br>(49 - 78)          |
| Lip and oral cavity cancer           | 33<br>(20 - 44)          | --                 | --                | 7<br>(4 - 12)        | 15<br>(9 - 21)           | 11<br>(6 - 16)           |
| Nasopharynx cancer                   | 7<br>(5 - 9)             | --                 | 0<br>(0 - 1)      | 4<br>(2 - 6)         | 2<br>(1 - 4)             | 0<br>(0 - 1)             |
| Other pharynx cancer                 | 18<br>(12 - 24)          | --                 | --                | 6<br>(3 - 9)         | 6<br>(4 - 10)            | 5<br>(3 - 8)             |
| Gallbladder and biliary tract cancer | 33<br>(20 - 46)          | --                 | --                | 20<br>(9 - 29)       | 9<br>(5 - 13)            | 5<br>(3 - 7)             |
| Pancreatic cancer                    | 58<br>(46 - 73)          | --                 | --                | 24<br>(17 - 33)      | 27<br>(20 - 35)          | 8<br>(6 - 10)            |
| Malignant skin melanoma              | 11<br>(5 - 15)           | --                 | --                | 6<br>(2 - 9)         | 3<br>(2 - 5)             | 2<br>(1 - 3)             |
| Non-melanoma skin cancer             | 12<br>(8 - 18)           | --                 | --                | 1<br>(1 - 2)         | 6<br>(3 - 10)            | 5<br>(3 - 7)             |
| Ovarian cancer                       | --                       | --                 | --                | --                   | --                       | --                       |
| Testicular cancer                    | 13<br>(6 - 20)           | --                 | --                | 10<br>(5 - 16)       | 2<br>(1 - 4)             | 1<br>(0 - 1)             |
| Kidney cancer                        | 75<br>(54 - 107)         | 19<br>(7 - 45)     | 4<br>(2 - 8)      | 12<br>(8 - 19)       | 27<br>(19 - 36)          | 13<br>(9 - 18)           |
| Bladder cancer                       | 48<br>(37 - 63)          | --                 | --                | 8<br>(5 - 11)        | 16<br>(11 - 22)          | 24<br>(18 - 35)          |
| Brain and nervous system cancer      | 62<br>(27 - 91)          | 1<br>(0 - 3)       | 17<br>(6 - 31)    | 28<br>(11 - 45)      | 12<br>(6 - 17)           | 4<br>(2 - 6)             |
| Thyroid cancer                       | 3<br>(2 - 3)             | --                 | 0<br>(0 - 0)      | 1<br>(0 - 1)         | 1<br>(1 - 1)             | 1<br>(1 - 1)             |
| Mesothelioma                         | 7<br>(5 - 10)            | --                 | --                | 1<br>(0 - 1)         | 4<br>(2 - 6)             | 3<br>(2 - 5)             |
| Hodgkin lymphoma                     | 38<br>(14 - 70)          | 14<br>(3 - 34)     | 4<br>(1 - 12)     | 11<br>(5 - 20)       | 6<br>(2 - 10)            | 4<br>(1 - 7)             |
| Non-Hodgkin lymphoma                 | 177<br>(112 - 261)       | 51<br>(20 - 105)   | 24<br>(11 - 42)   | 49<br>(29 - 70)      | 32<br>(22 - 44)          | 22<br>(15 - 32)          |
| Multiple myeloma                     | 18<br>(11 - 24)          | --                 | --                | 6<br>(4 - 10)        | 6<br>(4 - 10)            | 5<br>(3 - 7)             |
| Leukemia                             | 70<br>(50 - 90)          | 14<br>(6 - 28)     | 12<br>(7 - 19)    | 30<br>(21 - 40)      | 8<br>(5 - 10)            | 6<br>(5 - 8)             |
| Other neoplasms                      | 383<br>(237 - 519)       | 145<br>(70 - 263)  | 51<br>(23 - 90)   | 71<br>(40 - 98)      | 72<br>(49 - 100)         | 44<br>(31 - 60)          |
| Cardiovascular diseases              | 5,660<br>(4,675 - 6,575) | 185<br>(113 - 297) | 68<br>(42 - 105)  | 880<br>(657 - 1,126) | 2,390<br>(1,876 - 2,929) | 2,137<br>(1,831 - 2,439) |
| Rheumatic heart disease              | 114<br>(57 - 296)        | 10<br>(3 - 23)     | 6<br>(2 - 15)     | 31<br>(13 - 88)      | 36<br>(15 - 110)         | 31<br>(15 - 76)          |
| Ischemic heart disease               | 1,537<br>(1,203 - 1,951) | 3<br>(1 - 9)       | 7<br>(3 - 12)     | 189<br>(129 - 264)   | 668<br>(498 - 878)       | 671<br>(518 - 858)       |
| Cerebrovascular disease              | 1,861<br>(1,407 - 2,337) | 19<br>(9 - 33)     | 8<br>(4 - 14)     | 210<br>(134 - 293)   | 859<br>(621 - 1,119)     | 766<br>(581 - 949)       |
| Ischemic stroke                      | 1,057<br>(270 - 1,505)   | 1<br>(0 - 3)       | 1<br>(0 - 2)      | 50<br>(7 - 95)       | 470<br>(92 - 716)        | 536<br>(168 - 730)       |
| Hemorrhagic stroke                   | 804<br>(448 - 1,517)     | 18<br>(9 - 31)     | 7<br>(4 - 13)     | 160<br>(94 - 235)    | 389<br>(197 - 770)       | 230<br>(100 - 552)       |
| Hypertensive heart disease           | 446<br>(196 - 813)       | 4<br>(0 - 10)      | 1<br>(0 - 3)      | 76<br>(22 - 172)     | 177<br>(73 - 336)        | 187<br>(84 - 325)        |
| Cardiomyopathy and myocarditis       | 538<br>(321 - 795)       | 42<br>(15 - 98)    | 17<br>(7 - 29)    | 120<br>(68 - 191)    | 222<br>(109 - 357)       | 137<br>(68 - 234)        |
| Atrial fibrillation and flutter      | 0<br>(0 - 1)             | --                 | --                | 0<br>(0 - 0)         | 0<br>(0 - 0)             | 0<br>(0 - 0)             |
| Aortic aneurysm                      | 90<br>(52 - 129)         | --                 | --                | 11<br>(5 - 18)       | 45<br>(25 - 69)          | 33<br>(19 - 52)          |
| Peripheral vascular disease          | 3<br>(1 - 6)             | --                 | --                | 0<br>(0 - 0)         | 1<br>(0 - 2)             | 2<br>(1 - 4)             |
| Endocarditis                         | 238<br>(144 - 363)       | 28<br>(9 - 59)     | 6<br>(3 - 10)     | 55<br>(31 - 91)      | 82<br>(46 - 142)         | 68<br>(40 - 112)         |

Web Table 31- Burkina Faso deaths with 95% UI by age, sex, and cause in 2013

| Cause                                               | Males, All Ages        | Males, 0-4 Years  | Males, 5-14 Years | Males, 15-49 Years | Males, 50-69 Years | Males, 70-80 Years |
|-----------------------------------------------------|------------------------|-------------------|-------------------|--------------------|--------------------|--------------------|
| Other cardiovascular and circulatory diseases       | 832<br>(584 - 1,460)   | 79<br>(42 - 142)  | 24<br>(13 - 40)   | 186<br>(122 - 306) | 299<br>(186 - 585) | 244<br>(154 - 468) |
| Chronic respiratory diseases                        | 712<br>(560 - 904)     | 64<br>(34 - 116)  | 15<br>(10 - 22)   | 110<br>(78 - 150)  | 266<br>(198 - 376) | 257<br>(198 - 334) |
| Chronic obstructive pulmonary disease               | 374<br>(277 - 514)     | 29<br>(14 - 56)   | 8<br>(5 - 12)     | 38<br>(26 - 55)    | 142<br>(95 - 215)  | 156<br>(111 - 227) |
| Pneumoconiosis                                      | 89<br>(58 - 130)       | 2<br>(0 - 4)      | 1<br>(0 - 2)      | 24<br>(14 - 35)    | 45<br>(26 - 69)    | 18<br>(10 - 31)    |
| Silicosis                                           | 19<br>(11 - 30)        | 1<br>(0 - 2)      | 0<br>(0 - 1)      | 5<br>(3 - 9)       | 5<br>(3 - 8)       | 7<br>(4 - 14)      |
| Asbestosis                                          | 7<br>(4 - 10)          | 0<br>(0 - 1)      | 0<br>(0 - 0)      | 2<br>(1 - 3)       | 4<br>(2 - 6)       | 1<br>(0 - 1)       |
| Coal workers pneumoconiosis                         | 24<br>(15 - 36)        | 0<br>(0 - 1)      | 0<br>(0 - 0)      | 2<br>(1 - 3)       | 20<br>(11 - 30)    | 2<br>(1 - 4)       |
| Other pneumoconiosis                                | 40<br>(25 - 58)        | 0<br>(0 - 1)      | 0<br>(0 - 0)      | 15<br>(9 - 23)     | 17<br>(9 - 27)     | 8<br>(4 - 14)      |
| Asthma                                              | 102<br>(56 - 148)      | 10<br>(3 - 24)    | 1<br>(1 - 2)      | 17<br>(9 - 25)     | 36<br>(20 - 58)    | 39<br>(20 - 59)    |
| Interstitial lung disease and pulmonary sarcoidosis | 65<br>(14 - 125)       | 1<br>(0 - 3)      | 0<br>(0 - 1)      | 3<br>(1 - 6)       | 28<br>(5 - 58)     | 33<br>(5 - 68)     |
| Other chronic respiratory diseases                  | 81<br>(56 - 119)       | 23<br>(11 - 43)   | 5<br>(3 - 8)      | 28<br>(18 - 43)    | 15<br>(9 - 26)     | 11<br>(6 - 19)     |
| Cirrhosis                                           | 914<br>(728 - 1,128)   | 34<br>(11 - 76)   | 18<br>(12 - 28)   | 318<br>(228 - 433) | 408<br>(303 - 538) | 136<br>(104 - 176) |
| Cirrhosis due to hepatitis B                        | 263<br>(143 - 401)     | 2<br>(0 - 6)      | 3<br>(1 - 8)      | 91<br>(42 - 154)   | 124<br>(65 - 194)  | 43<br>(22 - 67)    |
| Cirrhosis due to hepatitis C                        | 113<br>(35 - 210)      | 2<br>(0 - 5)      | 2<br>(0 - 5)      | 38<br>(11 - 84)    | 53<br>(10 - 101)   | 19<br>(3 - 42)     |
| Cirrhosis due to alcohol use                        | 395<br>(277 - 559)     | --                | --                | 132<br>(80 - 202)  | 197<br>(133 - 289) | 65<br>(46 - 96)    |
| Cirrhosis due to other causes                       | 143<br>(93 - 205)      | 30<br>(10 - 67)   | 13<br>(8 - 21)    | 58<br>(29 - 90)    | 34<br>(17 - 61)    | 8<br>(4 - 13)      |
| Digestive diseases                                  | 1,051<br>(829 - 1,301) | 86<br>(38 - 158)  | 63<br>(40 - 92)   | 355<br>(254 - 478) | 331<br>(247 - 433) | 216<br>(165 - 278) |
| Peptic ulcer disease                                | 286<br>(190 - 440)     | 12<br>(4 - 30)    | 10<br>(4 - 20)    | 90<br>(53 - 153)   | 100<br>(58 - 169)  | 74<br>(45 - 114)   |
| Gastritis and duodenitis                            | 35<br>(12 - 91)        | 5<br>(1 - 12)     | 3<br>(1 - 5)      | 9<br>(3 - 28)      | 10<br>(3 - 31)     | 8<br>(2 - 27)      |
| Appendicitis                                        | 66<br>(44 - 95)        | 4<br>(1 - 10)     | 6<br>(3 - 12)     | 23<br>(13 - 37)    | 20<br>(12 - 32)    | 12<br>(6 - 20)     |
| Paralytic ileus and intestinal obstruction          | 318<br>(171 - 439)     | 21<br>(7 - 46)    | 23<br>(12 - 38)   | 105<br>(47 - 164)  | 109<br>(53 - 158)  | 60<br>(32 - 93)    |
| Inguinal, femoral, and abdominal hernia             | 17<br>(8 - 47)         | 0<br>(0 - 0)      | 1<br>(0 - 2)      | 5<br>(2 - 13)      | 7<br>(2 - 19)      | 6<br>(2 - 14)      |
| Inflammatory bowel disease                          | 49<br>(11 - 82)        | 15<br>(4 - 38)    | 3<br>(1 - 6)      | 12<br>(2 - 27)     | 11<br>(2 - 21)     | 8<br>(1 - 14)      |
| Vascular intestinal disorders                       | 4<br>(1 - 9)           | 1<br>(0 - 3)      | 0<br>(0 - 1)      | 1<br>(0 - 2)       | 1<br>(0 - 2)       | 1<br>(0 - 2)       |
| Gallbladder and biliary diseases                    | 50<br>(28 - 74)        | 2<br>(1 - 4)      | 3<br>(1 - 6)      | 15<br>(6 - 28)     | 14<br>(8 - 23)     | 16<br>(9 - 27)     |
| Pancreatitis                                        | 71<br>(33 - 126)       | 1<br>(0 - 3)      | 1<br>(1 - 2)      | 42<br>(18 - 77)    | 18<br>(9 - 35)     | 10<br>(4 - 19)     |
| Other digestive diseases                            | 154<br>(95 - 256)      | 24<br>(8 - 56)    | 13<br>(6 - 24)    | 53<br>(26 - 95)    | 42<br>(23 - 77)    | 22<br>(12 - 39)    |
| Neurological disorders                              | 567<br>(423 - 766)     | 101<br>(40 - 225) | 63<br>(28 - 112)  | 176<br>(113 - 283) | 45<br>(33 - 62)    | 181<br>(141 - 228) |
| Alzheimer disease and other dementias               | 183<br>(142 - 230)     | --                | --                | 0<br>(0 - 1)       | 23<br>(16 - 31)    | 160<br>(122 - 204) |
| Parkinson disease                                   | 3<br>(1 - 5)           | --                | --                | 0<br>(0 - 1)       | 0<br>(0 - 0)       | 2<br>(1 - 5)       |
| Epilepsy                                            | 316<br>(199 - 501)     | 85<br>(30 - 208)  | 57<br>(23 - 106)  | 149<br>(90 - 250)  | 11<br>(6 - 18)     | 14<br>(8 - 24)     |
| Multiple sclerosis                                  | 0<br>(0 - 1)           | --                | --                | 0<br>(0 - 0)       | 0<br>(0 - 0)       | 0<br>(0 - 0)       |
| Other neurological disorders                        | 65<br>(45 - 101)       | 16<br>(8 - 54)    | 6<br>(4 - 11)     | 26<br>(17 - 38)    | 12<br>(7 - 17)     | 5<br>(3 - 7)       |
| Mental and substance use disorders                  | 565<br>(302 - 820)     | 25<br>(4 - 60)    | 0<br>(0 - 0)      | 444<br>(222 - 655) | 72<br>(45 - 100)   | 24<br>(14 - 33)    |
| Schizophrenia                                       | 1<br>(0 - 1)           | --                | --                | 0<br>(0 - 1)       | 0<br>(0 - 0)       | 0<br>(0 - 0)       |
| Alcohol use disorders                               | 139<br>(75 - 198)      | --                | --                | 73<br>(38 - 113)   | 48<br>(26 - 71)    | 18<br>(8 - 27)     |
| Drug use disorders                                  | 425<br>(180 - 641)     | 25<br>(4 - 60)    | --                | 371<br>(151 - 561) | 24<br>(11 - 35)    | 6<br>(3 - 9)       |
| Opioid use disorders                                | 46<br>(19 - 70)        | 3<br>(0 - 7)      | --                | 40<br>(16 - 63)    | 2<br>(1 - 4)       | 1<br>(0 - 1)       |
| Cocaine use disorders                               | 2<br>(1 - 3)           | 0<br>(0 - 0)      | --                | 1<br>(1 - 2)       | 0<br>(0 - 0)       | 0<br>(0 - 0)       |
| Amphetamine use disorders                           | 1<br>(0 - 2)           | 0<br>(0 - 0)      | --                | 1<br>(0 - 1)       | 0<br>(0 - 0)       | 0<br>(0 - 0)       |

Web Table 31- Burkina Faso deaths with 95% UI by age, sex, and cause in 2013

| Cause                                               | Males, All Ages          | Males, 0-4 Years       | Males, 5-14 Years | Males, 15-49 Years   | Males, 50-69 Years | Males, 70-80 Years |
|-----------------------------------------------------|--------------------------|------------------------|-------------------|----------------------|--------------------|--------------------|
| Other drug use disorders                            | 377<br>(159 - 570)       | 22<br>(3 - 53)         | --                | 328<br>(133 - 498)   | 21<br>(10 - 32)    | 5<br>(3 - 8)       |
| Eating disorders                                    | 0<br>(0 - 0)             | --                     | 0<br>(0 - 0)      | 0<br>(0 - 0)         | --                 | --                 |
| Anorexia nervosa                                    | 0<br>(0 - 0)             | --                     | 0<br>(0 - 0)      | 0<br>(0 - 0)         | --                 | --                 |
| Diabetes, urogenital, blood, and endocrine diseases | 2,855<br>(1,745 - 4,974) | 1,051<br>(313 - 2,787) | 240<br>(89 - 564) | 630<br>(401 - 1,119) | 551<br>(427 - 695) | 383<br>(313 - 474) |
| Diabetes mellitus                                   | 644<br>(523 - 787)       | 20<br>(13 - 32)        | 6<br>(4 - 10)     | 118<br>(85 - 160)    | 307<br>(236 - 399) | 194<br>(149 - 249) |
| Acute glomerulonephritis                            | 9<br>(5 - 19)            | 3<br>(1 - 8)           | 1<br>(1 - 3)      | 3<br>(1 - 6)         | 2<br>(1 - 3)       | 1<br>(0 - 2)       |
| Chronic kidney disease                              | 372<br>(287 - 502)       | 64<br>(33 - 122)       | 24<br>(14 - 39)   | 141<br>(99 - 206)    | 72<br>(52 - 101)   | 71<br>(52 - 97)    |
| Chronic kidney disease due to diabetes mellitus     | 3<br>(1 - 6)             | 0<br>(0 - 0)           | 0<br>(0 - 0)      | 0<br>(0 - 1)         | 2<br>(0 - 5)       | 0<br>(0 - 0)       |
| Chronic kidney disease due to hypertension          | 83<br>(46 - 132)         | 7<br>(1 - 18)          | 1<br>(0 - 3)      | 23<br>(9 - 43)       | 26<br>(13 - 45)    | 26<br>(14 - 45)    |
| Chronic kidney disease due to glomerulonephritis    | 209<br>(158 - 293)       | 40<br>(17 - 79)        | 19<br>(12 - 29)   | 87<br>(58 - 127)     | 32<br>(19 - 51)    | 31<br>(18 - 45)    |
| Chronic kidney disease due to other causes          | 77<br>(44 - 126)         | 17<br>(4 - 40)         | 4<br>(1 - 9)      | 30<br>(14 - 60)      | 12<br>(5 - 21)     | 14<br>(7 - 25)     |
| Urinary diseases and male infertility               | 341<br>(258 - 445)       | 45<br>(21 - 91)        | 11<br>(7 - 17)    | 111<br>(72 - 160)    | 100<br>(68 - 138)  | 74<br>(48 - 107)   |
| Interstitial nephritis and urinary tract infections | 292<br>(219 - 382)       | 41<br>(18 - 86)        | 9<br>(6 - 14)     | 93<br>(60 - 133)     | 85<br>(58 - 121)   | 65<br>(41 - 96)    |
| Urolithiasis                                        | 2<br>(1 - 5)             | --                     | 0<br>(0 - 1)      | 1<br>(0 - 3)         | 0<br>(0 - 1)       | 0<br>(0 - 1)       |
| Other urinary diseases                              | 46<br>(25 - 69)          | 5<br>(1 - 13)          | 2<br>(1 - 4)      | 17<br>(7 - 29)       | 14<br>(6 - 23)     | 9<br>(4 - 17)      |
| Gynecological diseases                              | --                       | --                     | --                | --                   | --                 | --                 |
| Uterine fibroids                                    | --                       | --                     | --                | --                   | --                 | --                 |
| Polycystic ovarian syndrome                         | --                       | --                     | --                | --                   | --                 | --                 |
| Endometriosis                                       | --                       | --                     | --                | --                   | --                 | --                 |
| Genital prolapse                                    | --                       | --                     | --                | --                   | --                 | --                 |
| Other gynecological diseases                        | --                       | --                     | --                | --                   | --                 | --                 |
| Hemoglobinopathies and hemolytic anemias            | 1,205<br>(160 - 3,417)   | 812<br>(92 - 2,509)    | 178<br>(27 - 508) | 180<br>(25 - 651)    | 24<br>(6 - 94)     | 11<br>(4 - 36)     |
| Thalassemias                                        | 13<br>(2 - 38)           | 11<br>(1 - 32)         | 2<br>(0 - 4)      | 1<br>(0 - 5)         | 0<br>(0 - 0)       | 0<br>(0 - 0)       |
| Sickle cell disorders                               | 1,159<br>(153 - 3,286)   | 785<br>(89 - 2,430)    | 174<br>(26 - 496) | 174<br>(25 - 631)    | 22<br>(5 - 86)     | 4<br>(1 - 14)      |
| G6PD deficiency                                     | 14<br>(2 - 38)           | 9<br>(1 - 26)          | 2<br>(0 - 5)      | 2<br>(0 - 8)         | 1<br>(0 - 3)       | 1<br>(0 - 2)       |
| Other hemoglobinopathies and hemolytic anemias      | 18<br>(4 - 57)           | 8<br>(1 - 24)          | 1<br>(0 - 2)      | 2<br>(0 - 7)         | 2<br>(0 - 6)       | 6<br>(2 - 20)      |
| Endocrine, metabolic, blood, and immune disorders   | 284<br>(179 - 390)       | 107<br>(52 - 186)      | 20<br>(9 - 35)    | 79<br>(43 - 122)     | 46<br>(28 - 67)    | 32<br>(20 - 49)    |
| Musculoskeletal disorders                           | 60<br>(27 - 80)          | --                     | 10<br>(4 - 16)    | 25<br>(11 - 35)      | 16<br>(6 - 23)     | 9<br>(4 - 14)      |
| Rheumatoid arthritis                                | 6<br>(2 - 9)             | --                     | 1<br>(0 - 2)      | 2<br>(0 - 3)         | 2<br>(0 - 3)       | 1<br>(0 - 3)       |
| Other musculoskeletal disorders                     | 54<br>(26 - 73)          | --                     | 9<br>(4 - 15)     | 23<br>(11 - 33)      | 14<br>(6 - 21)     | 8<br>(3 - 12)      |
| Other non-communicable diseases                     | 2,375<br>(1,201 - 4,840) | 2,117<br>(989 - 4,510) | 93<br>(45 - 182)  | 93<br>(59 - 148)     | 35<br>(20 - 48)    | 37<br>(19 - 52)    |
| Congenital anomalies                                | 2,204<br>(1,025 - 4,682) | 2,040<br>(911 - 4,457) | 86<br>(40 - 177)  | 63<br>(37 - 106)     | 9<br>(5 - 15)      | 6<br>(3 - 9)       |
| Neural tube defects                                 | 558<br>(111 - 1,422)     | 529<br>(101 - 1,352)   | 15<br>(3 - 38)    | 12<br>(2 - 33)       | 1<br>(0 - 3)       | 0<br>(0 - 2)       |
| Congenital heart anomalies                          | 892<br>(386 - 1,781)     | 807<br>(321 - 1,688)   | 46<br>(18 - 96)   | 31<br>(17 - 55)      | 5<br>(3 - 8)       | 2<br>(1 - 4)       |
| Cleft lip and cleft palate                          | 13<br>(2 - 46)           | 13<br>(2 - 46)         | --                | --                   | --                 | --                 |
| Down syndrome                                       | 172<br>(33 - 538)        | 160<br>(26 - 527)      | 5<br>(2 - 12)     | 5<br>(2 - 11)        | 1<br>(0 - 2)       | 0<br>(0 - 0)       |
| Chromosomal unbalanced rearrangements               | 62<br>(13 - 183)         | 58<br>(11 - 176)       | 2<br>(0 - 6)      | 2<br>(1 - 4)         | 0<br>(0 - 0)       | 0<br>(0 - 0)       |
| Other congenital anomalies                          | 507<br>(97 - 2,134)      | 472<br>(81 - 2,044)    | 17<br>(3 - 67)    | 13<br>(6 - 24)       | 2<br>(1 - 4)       | 3<br>(1 - 5)       |
| Skin and subcutaneous diseases                      | 142<br>(69 - 199)        | 49<br>(20 - 91)        | 6<br>(3 - 11)     | 30<br>(16 - 50)      | 26<br>(11 - 36)    | 31<br>(14 - 45)    |
| Cellulitis                                          | 46<br>(12 - 96)          | 16<br>(3 - 42)         | 3<br>(1 - 7)      | 8<br>(2 - 19)        | 11<br>(2 - 21)     | 9<br>(2 - 21)      |

Web Table 31- Burkina Faso deaths with 95% UI by age, sex, and cause in 2013

| Cause                                           | Males, All Ages          | Males, 0-4 Years       | Males, 5-14 Years    | Males, 15-49 Years       | Males, 50-69 Years | Males, 70-80 Years |
|-------------------------------------------------|--------------------------|------------------------|----------------------|--------------------------|--------------------|--------------------|
| Pyoderma                                        | 92<br>(40 - 142)         | 33<br>(11 - 63)        | 3<br>(1 - 6)         | 22<br>(10 - 37)          | 15<br>(5 - 26)     | 20<br>(8 - 33)     |
| Decubitus ulcer                                 | 3<br>(1 - 6)             | 0<br>(0 - 0)           | 0<br>(0 - 0)         | 0<br>(0 - 1)             | 0<br>(0 - 0)       | 2<br>(1 - 5)       |
| Other skin and subcutaneous diseases            | 1<br>(0 - 1)             | 0<br>(0 - 0)           | 0<br>(0 - 0)         | 0<br>(0 - 0)             | 0<br>(0 - 0)       | 0<br>(0 - 0)       |
| Sudden infant death syndrome                    | 29<br>(7 - 82)           | 29<br>(7 - 82)         | --                   | --                       | --                 | --                 |
| Injuries                                        | 6,337<br>(4,952 - 7,972) | 1,376<br>(797 - 2,291) | 786<br>(527 - 1,085) | 3,121<br>(2,361 - 4,047) | 713<br>(549 - 894) | 341<br>(268 - 417) |
| Transport injuries                              | 3,090<br>(2,380 - 3,831) | 438<br>(206 - 830)     | 379<br>(241 - 555)   | 1,820<br>(1,309 - 2,387) | 334<br>(245 - 430) | 119<br>(89 - 155)  |
| Road injuries                                   | 2,997<br>(2,313 - 3,714) | 404<br>(187 - 774)     | 358<br>(223 - 527)   | 1,800<br>(1,297 - 2,363) | 323<br>(237 - 416) | 112<br>(83 - 145)  |
| Pedestrian road injuries                        | 1,022<br>(677 - 1,418)   | 158<br>(67 - 317)      | 138<br>(78 - 223)    | 573<br>(356 - 828)       | 112<br>(73 - 160)  | 41<br>(25 - 62)    |
| Cyclist road injuries                           | 126<br>(81 - 192)        | 21<br>(7 - 50)         | 25<br>(12 - 42)      | 51<br>(31 - 80)          | 20<br>(12 - 32)    | 9<br>(5 - 15)      |
| Motorcyclist road injuries                      | 150<br>(77 - 271)        | 15<br>(7 - 32)         | 9<br>(4 - 16)        | 109<br>(51 - 199)        | 12<br>(6 - 23)     | 5<br>(3 - 10)      |
| Motor vehicle road injuries                     | 1,561<br>(1,054 - 2,133) | 179<br>(80 - 352)      | 159<br>(94 - 260)    | 1,010<br>(643 - 1,428)   | 162<br>(105 - 225) | 51<br>(31 - 74)    |
| Other road injuries                             | 138<br>(40 - 238)        | 30<br>(8 - 76)         | 28<br>(8 - 58)       | 56<br>(12 - 109)         | 17<br>(5 - 32)     | 7<br>(2 - 14)      |
| Other transport injuries                        | 93<br>(63 - 144)         | 34<br>(15 - 71)        | 21<br>(11 - 36)      | 20<br>(12 - 37)          | 10<br>(7 - 16)     | 7<br>(4 - 11)      |
| Unintentional injuries                          | 2,391<br>(1,798 - 3,237) | 931<br>(526 - 1,590)   | 378<br>(235 - 552)   | 667<br>(481 - 914)       | 249<br>(183 - 317) | 167<br>(118 - 226) |
| Falls                                           | 444<br>(315 - 611)       | 81<br>(35 - 163)       | 52<br>(24 - 97)      | 151<br>(93 - 232)        | 89<br>(56 - 131)   | 71<br>(41 - 124)   |
| Drowning                                        | 740<br>(438 - 1,278)     | 307<br>(122 - 742)     | 170<br>(83 - 304)    | 218<br>(132 - 351)       | 32<br>(20 - 49)    | 13<br>(9 - 19)     |
| Fire, heat, and hot substances                  | 260<br>(137 - 445)       | 132<br>(51 - 291)      | 35<br>(17 - 70)      | 51<br>(30 - 82)          | 26<br>(14 - 42)    | 16<br>(8 - 28)     |
| Poisonings                                      | 106<br>(68 - 169)        | 39<br>(16 - 87)        | 9<br>(4 - 17)        | 44<br>(26 - 71)          | 12<br>(7 - 19)     | 3<br>(2 - 5)       |
| Exposure to mechanical forces                   | 305<br>(207 - 472)       | 131<br>(60 - 264)      | 45<br>(25 - 79)      | 87<br>(60 - 131)         | 34<br>(22 - 50)    | 8<br>(5 - 11)      |
| Unintentional firearm injuries                  | 51<br>(34 - 78)          | 9<br>(4 - 18)          | 4<br>(2 - 7)         | 33<br>(19 - 55)          | 4<br>(2 - 6)       | 2<br>(1 - 3)       |
| Unintentional suffocation                       | 86<br>(29 - 223)         | 66<br>(17 - 181)       | 8<br>(2 - 19)        | 7<br>(3 - 14)            | 4<br>(2 - 11)      | 1<br>(0 - 2)       |
| Other exposure to mechanical forces             | 168<br>(108 - 234)       | 56<br>(24 - 106)       | 33<br>(16 - 61)      | 47<br>(30 - 75)          | 26<br>(15 - 41)    | 6<br>(3 - 9)       |
| Adverse effects of medical treatment            | 227<br>(117 - 387)       | 118<br>(48 - 257)      | 12<br>(6 - 21)       | 33<br>(18 - 50)          | 30<br>(14 - 52)    | 35<br>(14 - 67)    |
| Animal contact                                  | 82<br>(44 - 130)         | 20<br>(8 - 46)         | 20<br>(9 - 40)       | 22<br>(11 - 37)          | 12<br>(6 - 19)     | 9<br>(3 - 13)      |
| Venomous animal contact                         | 31<br>(17 - 48)          | 6<br>(2 - 13)          | 4<br>(1 - 9)         | 9<br>(5 - 16)            | 7<br>(3 - 11)      | 6<br>(2 - 10)      |
| Non-venomous animal contact                     | 51<br>(24 - 87)          | 14<br>(6 - 33)         | 16<br>(7 - 32)       | 13<br>(6 - 24)           | 5<br>(2 - 9)       | 3<br>(1 - 5)       |
| Foreign body                                    | 101<br>(56 - 167)        | 75<br>(37 - 133)       | 9<br>(5 - 15)        | 8<br>(5 - 15)            | 4<br>(3 - 6)       | 6<br>(3 - 10)      |
| Pulmonary aspiration and foreign body in airway | 93<br>(48 - 159)         | 71<br>(34 - 128)       | 7<br>(3 - 13)        | 7<br>(4 - 14)            | 3<br>(1 - 4)       | 5<br>(3 - 9)       |
| Foreign body in other body part                 | 8<br>(4 - 12)            | 4<br>(2 - 7)           | 1<br>(1 - 3)         | 1<br>(0 - 2)             | 1<br>(1 - 2)       | 0<br>(0 - 1)       |
| Other unintentional injuries                    | 126<br>(96 - 179)        | 31<br>(16 - 54)        | 26<br>(16 - 41)      | 54<br>(37 - 82)          | 10<br>(7 - 15)     | 5<br>(4 - 7)       |
| Self-harm and interpersonal violence            | 855<br>(554 - 1,256)     | 7<br>(3 - 16)          | 29<br>(11 - 66)      | 634<br>(383 - 995)       | 131<br>(82 - 191)  | 55<br>(33 - 84)    |
| Self-harm                                       | 772<br>(488 - 1,157)     | --                     | 26<br>(9 - 61)       | 565<br>(324 - 905)       | 128<br>(80 - 187)  | 54<br>(33 - 84)    |
| Interpersonal violence                          | 83<br>(54 - 140)         | 7<br>(3 - 16)          | 3<br>(2 - 6)         | 69<br>(43 - 121)         | 3<br>(2 - 6)       | 0<br>(0 - 1)       |
| Assault by firearm                              | 39<br>(20 - 71)          | 2<br>(1 - 5)           | 1<br>(0 - 2)         | 35<br>(18 - 63)          | 1<br>(1 - 2)       | 0<br>(0 - 0)       |
| Assault by sharp object                         | 17<br>(9 - 31)           | 2<br>(1 - 4)           | 1<br>(0 - 2)         | 13<br>(7 - 26)           | 1<br>(1 - 2)       | 0<br>(0 - 0)       |
| Assault by other means                          | 28<br>(16 - 51)          | 4<br>(1 - 9)           | 2<br>(1 - 3)         | 21<br>(11 - 42)          | 1<br>(0 - 2)       | 0<br>(0 - 0)       |

Web Table 31- Burkina Faso deaths with 95% UI by age, sex, and cause in 2013

| Cause                                                             | Females, All Ages           | Females, 0-4 Years          | Females, 5-14 Years      | Females, 15-49 Years        | Females, 50-69 Years       | Females, 70-80 Years       |
|-------------------------------------------------------------------|-----------------------------|-----------------------------|--------------------------|-----------------------------|----------------------------|----------------------------|
| All causes                                                        | 69,881<br>(63,271 - 76,565) | 33,024<br>(28,435 - 38,370) | 3,476<br>(2,945 - 4,031) | 12,612<br>(11,109 - 13,963) | 10,519<br>(8,848 - 12,906) | 10,250<br>(9,086 - 11,736) |
| Communicable, maternal, neonatal, and nutritional diseases        | 46,777<br>(41,216 - 52,487) | 28,377<br>(23,838 - 33,394) | 2,388<br>(1,880 - 2,957) | 8,393<br>(7,317 - 9,525)    | 3,912<br>(3,165 - 4,950)   | 3,708<br>(3,014 - 4,634)   |
| HIV/AIDS and tuberculosis                                         | 4,931<br>(3,920 - 6,132)    | 299<br>(204 - 421)          | 249<br>(189 - 318)       | 2,931<br>(2,235 - 3,847)    | 1,026<br>(773 - 1,350)     | 426<br>(288 - 599)         |
| Tuberculosis                                                      | 2,248<br>(1,603 - 2,909)    | 174<br>(97 - 296)           | 61<br>(35 - 102)         | 937<br>(607 - 1,259)        | 675<br>(445 - 958)         | 400<br>(265 - 560)         |
| HIV/AIDS                                                          | 2,683<br>(1,828 - 3,826)    | 125<br>(69 - 196)           | 187<br>(137 - 247)       | 1,994<br>(1,335 - 2,940)    | 351<br>(211 - 592)         | 25<br>(12 - 46)            |
| HIV/AIDS resulting in mycobacterial infection                     | 143<br>(91 - 219)           | 6<br>(4 - 11)               | 9<br>(6 - 13)            | 106<br>(66 - 170)           | 20<br>(11 - 34)            | 2<br>(1 - 3)               |
| HIV/AIDS resulting in other diseases                              | 2,539<br>(1,742 - 3,606)    | 119<br>(66 - 186)           | 178<br>(130 - 235)       | 1,887<br>(1,262 - 2,781)    | 332<br>(201 - 558)         | 24<br>(11 - 44)            |
| Diarrhea, lower respiratory, and other common infectious diseases | 16,824<br>(13,217 - 20,560) | 10,967<br>(7,765 - 14,381)  | 772<br>(490 - 1,114)     | 1,508<br>(1,115 - 1,965)    | 1,619<br>(1,164 - 2,247)   | 1,959<br>(1,440 - 2,566)   |
| Diarrheal diseases                                                | 6,004<br>(4,012 - 8,631)    | 3,827<br>(2,083 - 6,456)    | 215<br>(103 - 399)       | 613<br>(407 - 901)          | 662<br>(405 - 1,064)       | 687<br>(416 - 1,058)       |
| Intestinal infectious diseases                                    | 406<br>(202 - 729)          | 151<br>(63 - 301)           | 123<br>(54 - 240)        | 110<br>(49 - 207)           | 16<br>(7 - 31)             | 5<br>(2 - 10)              |
| Typhoid fever                                                     | 270<br>(130 - 493)          | 94<br>(37 - 191)            | 84<br>(35 - 161)         | 77<br>(33 - 150)            | 11<br>(4 - 23)             | 4<br>(1 - 8)               |
| Paratyphoid fever                                                 | 117<br>(52 - 218)           | 46<br>(17 - 99)             | 37<br>(14 - 82)          | 30<br>(11 - 63)             | 4<br>(1 - 8)               | 1<br>(0 - 3)               |
| Other intestinal infectious diseases                              | 19<br>(9 - 33)              | 11<br>(4 - 23)              | 2<br>(0 - 7)             | 4<br>(1 - 10)               | 1<br>(0 - 5)               | 1<br>(0 - 4)               |
| Lower respiratory infections                                      | 8,210<br>(6,176 - 10,696)   | 5,563<br>(3,723 - 7,941)    | 227<br>(120 - 384)       | 460<br>(309 - 646)          | 776<br>(518 - 1,127)       | 1,184<br>(826 - 1,639)     |
| Upper respiratory infections                                      | 11<br>(4 - 27)              | 5<br>(0 - 20)               | 1<br>(0 - 3)             | 2<br>(0 - 6)                | 2<br>(0 - 5)               | 1<br>(0 - 3)               |
| Otitis media                                                      | 6<br>(5 - 9)                | 3<br>(2 - 5)                | 0<br>(0 - 0)             | 0<br>(0 - 0)                | 1<br>(1 - 1)               | 2<br>(1 - 2)               |
| Meningitis                                                        | 1,927<br>(1,346 - 2,735)    | 1,225<br>(707 - 1,976)      | 184<br>(100 - 306)       | 295<br>(186 - 421)          | 149<br>(94 - 232)          | 73<br>(43 - 113)           |
| Pneumococcal meningitis                                           | 629<br>(422 - 902)          | 353<br>(180 - 597)          | 70<br>(29 - 131)         | 123<br>(68 - 195)           | 55<br>(31 - 91)            | 29<br>(16 - 50)            |
| H influenzae type B meningitis                                    | 221<br>(124 - 388)          | 173<br>(81 - 340)           | 19<br>(7 - 43)           | 18<br>(8 - 34)              | 8<br>(3 - 16)              | 3<br>(1 - 6)               |
| Meningococcal meningitis                                          | 942<br>(629 - 1,382)        | 622<br>(339 - 1,046)        | 85<br>(38 - 159)         | 129<br>(73 - 206)           | 71<br>(39 - 117)           | 35<br>(17 - 58)            |
| Other meningitis                                                  | 135<br>(78 - 236)           | 78<br>(28 - 173)            | 10<br>(4 - 23)           | 25<br>(12 - 45)             | 15<br>(7 - 29)             | 6<br>(2 - 13)              |
| Encephalitis                                                      | 51<br>(33 - 74)             | 27<br>(14 - 47)             | 5<br>(3 - 9)             | 8<br>(4 - 15)               | 6<br>(4 - 11)              | 4<br>(2 - 7)               |
| Diphtheria                                                        | 6<br>(0 - 37)               | 5<br>(0 - 34)               | 1<br>(0 - 8)             | 0<br>(0 - 1)                | 0<br>(0 - 0)               | --<br>(0 - 0)              |
| Whooping cough                                                    | 26<br>(0 - 139)             | 25<br>(0 - 132)             | 1<br>(0 - 7)             | 0<br>(0 - 1)                | 0<br>(0 - 0)               | --<br>(0 - 0)              |
| Tetanus                                                           | 81<br>(33 - 160)            | 55<br>(15 - 134)            | 4<br>(1 - 7)             | 14<br>(7 - 24)              | 6<br>(3 - 12)              | 1<br>(1 - 3)               |
| Measles                                                           | 89<br>(25 - 228)            | 77<br>(21 - 202)            | 11<br>(3 - 29)           | 1<br>(0 - 4)                | 0<br>(0 - 0)               | --<br>(0 - 0)              |
| Varicella and herpes zoster                                       | 7<br>(2 - 18)               | 3<br>(0 - 13)               | 1<br>(0 - 4)             | 2<br>(0 - 4)                | 1<br>(0 - 2)               | 1<br>(0 - 6)               |
| Neglected tropical diseases and malaria                           | 14,462<br>(10,051 - 19,773) | 10,125<br>(6,175 - 14,744)  | 1,187<br>(497 - 1,869)   | 1,433<br>(496 - 2,517)      | 873<br>(272 - 1,673)       | 844<br>(313 - 1,609)       |
| Malaria                                                           | 14,319<br>(9,910 - 19,631)  | 10,079<br>(6,095 - 14,704)  | 1,163<br>(462 - 1,841)   | 1,388<br>(446 - 2,472)      | 854<br>(254 - 1,650)       | 834<br>(304 - 1,598)       |
| Leishmaniasis                                                     | 0<br>(0 - 0)                | 0<br>(0 - 0)                | 0<br>(0 - 0)             | 0<br>(0 - 0)                | 0<br>(0 - 0)               | 0<br>(0 - 0)               |
| Visceral leishmaniasis                                            | 0<br>(0 - 0)                | 0<br>(0 - 0)                | 0<br>(0 - 0)             | 0<br>(0 - 0)                | 0<br>(0 - 0)               | 0<br>(0 - 0)               |
| Schistosomiasis                                                   | 26<br>(18 - 37)             | 1<br>(0 - 2)                | 1<br>(1 - 3)             | 11<br>(6 - 16)              | 9<br>(5 - 14)              | 4<br>(2 - 7)               |
| Cysticercosis                                                     | 2<br>(0 - 6)                | 0<br>(0 - 1)                | 0<br>(0 - 1)             | 1<br>(0 - 3)                | 0<br>(0 - 1)               | 0<br>(0 - 0)               |
| Cystic echinococcosis                                             | 5<br>(4 - 7)                | 1<br>(1 - 2)                | 1<br>(1 - 2)             | 2<br>(2 - 3)                | 1<br>(1 - 1)               | 0<br>(0 - 0)               |
| Dengue                                                            | 3<br>(2 - 6)                | 1<br>(1 - 2)                | 1<br>(0 - 2)             | 1<br>(0 - 2)                | 0<br>(0 - 1)               | 0<br>(0 - 0)               |
| Yellow fever                                                      | 15<br>(8 - 25)              | 1<br>(0 - 4)                | 3<br>(1 - 9)             | 8<br>(4 - 16)               | 2<br>(0 - 5)               | 1<br>(0 - 2)               |
| Rabies                                                            | 48<br>(29 - 72)             | 11<br>(4 - 25)              | 13<br>(6 - 23)           | 19<br>(11 - 27)             | 4<br>(3 - 6)               | 1<br>(0 - 1)               |
| Intestinal nematode infections                                    | 31<br>(15 - 57)             | 26<br>(11 - 49)             | 4<br>(0 - 12)            | 1<br>(0 - 6)                | 0<br>(0 - 3)               | 0<br>(0 - 3)               |
| Ascariasis                                                        | 31<br>(15 - 57)             | 26<br>(11 - 49)             | 4<br>(0 - 12)            | 1<br>(0 - 6)                | 0<br>(0 - 3)               | 0<br>(0 - 3)               |
| Other neglected tropical diseases                                 | 14<br>(9 - 26)              | 5<br>(2 - 10)               | 1<br>(0 - 1)             | 2<br>(1 - 5)                | 3<br>(1 - 6)               | 3<br>(2 - 7)               |

Web Table 31- Burkina Faso deaths with 95% UI by age, sex, and cause in 2013

| Cause                                                            | Females, All Ages           | Females, 0-4 Years       | Females, 5-14 Years | Females, 15-49 Years     | Females, 50-69 Years     | Females, 70-80 Years     |
|------------------------------------------------------------------|-----------------------------|--------------------------|---------------------|--------------------------|--------------------------|--------------------------|
| Maternal disorders                                               | 2,185<br>(1,570 - 2,858)    | --                       | 22<br>(8 - 50)      | 2,163<br>(1,545 - 2,844) | --                       | --                       |
| Maternal hemorrhage                                              | 555<br>(370 - 774)          | --                       | 3<br>(1 - 8)        | 552<br>(368 - 768)       | --                       | --                       |
| Maternal sepsis and other maternal infections                    | 140<br>(87 - 201)           | --                       | 2<br>(0 - 4)        | 138<br>(85 - 199)        | --                       | --                       |
| Maternal hypertensive disorders                                  | 183<br>(107 - 274)          | --                       | 2<br>(1 - 5)        | 181<br>(106 - 272)       | --                       | --                       |
| Maternal obstructed labor                                        | 76<br>(38 - 132)            | --                       | 1<br>(0 - 2)        | 75<br>(37 - 131)         | --                       | --                       |
| Maternal abortive outcome                                        | 402<br>(255 - 570)          | --                       | 4<br>(1 - 11)       | 398<br>(251 - 565)       | --                       | --                       |
| Indirect maternal deaths                                         | 232<br>(136 - 347)          | --                       | 2<br>(1 - 5)        | 230<br>(135 - 344)       | --                       | --                       |
| Late maternal deaths                                             | 244<br>(137 - 380)          | --                       | 4<br>(1 - 11)       | 240<br>(135 - 374)       | --                       | --                       |
| Maternal deaths aggravated by HIV/AIDS                           | 8<br>(4 - 13)               | --                       | --                  | 8<br>(4 - 13)            | --                       | --                       |
| Other maternal disorders                                         | 340<br>(214 - 493)          | --                       | 4<br>(1 - 10)       | 337<br>(211 - 488)       | --                       | --                       |
| Neonatal disorders                                               | 5,377<br>(4,203 - 6,787)    | 5,377<br>(4,203 - 6,787) | --                  | --                       | --                       | --                       |
| Neonatal preterm birth complications                             | 1,646<br>(793 - 2,760)      | 1,646<br>(793 - 2,760)   | --                  | --                       | --                       | --                       |
| Neonatal encephalopathy due to birth asphyxia and trauma         | 1,927<br>(856 - 3,479)      | 1,927<br>(856 - 3,479)   | --                  | --                       | --                       | --                       |
| Neonatal sepsis and other neonatal infections                    | 1,116<br>(408 - 2,107)      | 1,116<br>(408 - 2,107)   | --                  | --                       | --                       | --                       |
| Hemolytic disease and other neonatal jaundice                    | 17<br>(5 - 41)              | 17<br>(5 - 41)           | --                  | --                       | --                       | --                       |
| Other neonatal disorders                                         | 671<br>(307 - 1,211)        | 671<br>(307 - 1,211)     | --                  | --                       | --                       | --                       |
| Nutritional deficiencies                                         | 2,337<br>(1,676 - 3,219)    | 1,237<br>(660 - 2,066)   | 124<br>(71 - 200)   | 284<br>(203 - 368)       | 302<br>(208 - 431)       | 390<br>(269 - 554)       |
| Protein-energy malnutrition                                      | 1,481<br>(774 - 2,308)      | 1,045<br>(524 - 1,771)   | 81<br>(32 - 150)    | 45<br>(11 - 97)          | 128<br>(40 - 226)        | 182<br>(60 - 316)        |
| Iodine deficiency                                                | 10<br>(1 - 54)              | 6<br>(0 - 49)            | 1<br>(0 - 5)        | 1<br>(0 - 5)             | 1<br>(0 - 9)             | 1<br>(0 - 5)             |
| Iron-deficiency anemia                                           | 830<br>(512 - 1,332)        | 182<br>(39 - 499)        | 42<br>(16 - 89)     | 237<br>(161 - 316)       | 168<br>(81 - 288)        | 202<br>(90 - 377)        |
| Other nutritional deficiencies                                   | 15<br>(4 - 28)              | 4<br>(1 - 13)            | 0<br>(0 - 1)        | 1<br>(0 - 2)             | 4<br>(1 - 8)             | 5<br>(2 - 12)            |
| Other communicable, maternal, neonatal, and nutritional diseases | 662<br>(434 - 921)          | 371<br>(212 - 588)       | 35<br>(18 - 58)     | 75<br>(45 - 112)         | 92<br>(49 - 153)         | 89<br>(42 - 160)         |
| Sexually transmitted diseases excluding HIV                      | 281<br>(147 - 473)          | 243<br>(120 - 430)       | 20<br>(9 - 37)      | 10<br>(4 - 16)           | 5<br>(2 - 12)            | 3<br>(1 - 9)             |
| Syphilis                                                         | 271<br>(141 - 465)          | 243<br>(120 - 430)       | 20<br>(9 - 37)      | 4<br>(2 - 6)             | 3<br>(1 - 7)             | 2<br>(1 - 7)             |
| Chlamydial infection                                             | 3<br>(1 - 5)                | --                       | 0<br>(0 - 0)        | 2<br>(1 - 3)             | 1<br>(0 - 2)             | 0<br>(0 - 1)             |
| Gonococcal infection                                             | 3<br>(2 - 6)                | --                       | 0<br>(0 - 0)        | 2<br>(1 - 3)             | 1<br>(0 - 2)             | 0<br>(0 - 1)             |
| Other sexually transmitted diseases                              | 3<br>(1 - 5)                | --                       | 0<br>(0 - 0)        | 2<br>(1 - 3)             | 1<br>(0 - 2)             | 0<br>(0 - 1)             |
| Hepatitis                                                        | 184<br>(101 - 278)          | 30<br>(10 - 61)          | 7<br>(3 - 14)       | 48<br>(25 - 78)          | 55<br>(27 - 93)          | 44<br>(21 - 75)          |
| Acute hepatitis A                                                | 14<br>(3 - 35)              | 10<br>(2 - 27)           | 2<br>(1 - 6)        | 1<br>(0 - 3)             | 1<br>(0 - 1)             | 0<br>(0 - 0)             |
| Acute hepatitis B                                                | 116<br>(60 - 188)           | 20<br>(6 - 41)           | 3<br>(1 - 8)        | 14<br>(6 - 27)           | 42<br>(20 - 71)          | 38<br>(18 - 65)          |
| Acute hepatitis C                                                | 5<br>(1 - 13)               | --                       | 0<br>(0 - 1)        | 1<br>(0 - 4)             | 2<br>(0 - 5)             | 1<br>(0 - 5)             |
| Acute hepatitis E                                                | 49<br>(22 - 85)             | 0<br>(0 - 2)             | 1<br>(0 - 3)        | 32<br>(15 - 55)          | 11<br>(3 - 25)           | 4<br>(1 - 12)            |
| Other infectious diseases                                        | 197<br>(109 - 332)          | 98<br>(43 - 212)         | 7<br>(2 - 17)       | 17<br>(9 - 30)           | 32<br>(11 - 80)          | 43<br>(13 - 106)         |
| Non-communicable diseases                                        | 19,284<br>(15,894 - 22,868) | 3,604<br>(1,910 - 5,936) | 578<br>(380 - 835)  | 3,054<br>(2,363 - 3,782) | 6,009<br>(4,778 - 7,630) | 6,039<br>(5,064 - 7,173) |
| Neoplasms                                                        | 3,527<br>(2,857 - 4,187)    | 204<br>(114 - 329)       | 106<br>(62 - 173)   | 976<br>(752 - 1,185)     | 1,457<br>(1,144 - 1,850) | 784<br>(639 - 974)       |
| Esophageal cancer                                                | 71<br>(54 - 95)             | --                       | --                  | 5<br>(3 - 7)             | 28<br>(19 - 41)          | 38<br>(27 - 54)          |
| Stomach cancer                                                   | 182<br>(141 - 241)          | --                       | --                  | 22<br>(16 - 30)          | 106<br>(77 - 145)        | 54<br>(37 - 78)          |
| Liver cancer                                                     | 506<br>(366 - 682)          | --                       | 2<br>(1 - 4)        | 147<br>(100 - 209)       | 256<br>(168 - 374)       | 101<br>(64 - 152)        |
| Liver cancer due to hepatitis B                                  | 150<br>(52 - 257)           | --                       | 1<br>(0 - 1)        | 53<br>(25 - 87)          | 74<br>(11 - 149)         | 22<br>(6 - 44)           |
| Liver cancer due to hepatitis C                                  | 183<br>(99 - 295)           | --                       | 0<br>(0 - 1)        | 39<br>(15 - 69)          | 98<br>(46 - 171)         | 46<br>(24 - 75)          |

Web Table 31- Burkina Faso deaths with 95% UI by age, sex, and cause in 2013

| Cause                                | Females, All Ages         | Females, 0-4 Years | Females, 5-14 Years | Females, 15-49 Years | Females, 50-69 Years     | Females, 70-80 Years     |
|--------------------------------------|---------------------------|--------------------|---------------------|----------------------|--------------------------|--------------------------|
| Liver cancer due to alcohol use      | 52<br>(27 - 89)           | --                 | --                  | 9<br>(4 - 17)        | 28<br>(13 - 51)          | 15<br>(7 - 29)           |
| Liver cancer due to other causes     | 122<br>(63 - 201)         | --                 | 1<br>(1 - 2)        | 47<br>(25 - 77)      | 56<br>(24 - 105)         | 18<br>(8 - 34)           |
| Larynx cancer                        | 5<br>(2 - 8)              | --                 | --                  | 0<br>(0 - 1)         | 4<br>(2 - 7)             | 0<br>(0 - 1)             |
| Tracheal, bronchus and lung cancer   | 89<br>(68 - 115)          | --                 | --                  | 7<br>(5 - 12)        | 48<br>(35 - 65)          | 34<br>(24 - 47)          |
| Breast cancer                        | 514<br>(398 - 634)        | --                 | --                  | 266<br>(181 - 343)   | 187<br>(141 - 251)       | 60<br>(44 - 84)          |
| Cervical cancer                      | 590<br>(440 - 787)        | --                 | --                  | 156<br>(109 - 217)   | 317<br>(222 - 451)       | 117<br>(79 - 171)        |
| Uterine cancer                       | 148<br>(72 - 211)         | --                 | --                  | 35<br>(14 - 61)      | 68<br>(30 - 109)         | 45<br>(22 - 71)          |
| Prostate cancer                      | --                        | --                 | --                  | --                   | --                       | --                       |
| Colon and rectum cancer              | 270<br>(216 - 331)        | --                 | --                  | 62<br>(46 - 79)      | 102<br>(76 - 133)        | 106<br>(77 - 143)        |
| Lip and oral cavity cancer           | 33<br>(21 - 48)           | --                 | --                  | 13<br>(7 - 21)       | 14<br>(9 - 22)           | 6<br>(4 - 9)             |
| Nasopharynx cancer                   | 7<br>(5 - 12)             | --                 | 0<br>(0 - 0)        | 4<br>(2 - 7)         | 2<br>(1 - 4)             | 1<br>(1 - 2)             |
| Other pharynx cancer                 | 12<br>(8 - 17)            | --                 | --                  | 3<br>(2 - 5)         | 8<br>(5 - 11)            | 2<br>(1 - 2)             |
| Gallbladder and biliary tract cancer | 66<br>(44 - 89)           | --                 | --                  | 18<br>(9 - 27)       | 36<br>(22 - 52)          | 12<br>(7 - 19)           |
| Pancreatic cancer                    | 62<br>(49 - 79)           | --                 | --                  | 15<br>(11 - 19)      | 33<br>(24 - 45)          | 14<br>(11 - 20)          |
| Malignant skin melanoma              | 9<br>(7 - 12)             | --                 | --                  | 3<br>(2 - 3)         | 5<br>(3 - 7)             | 2<br>(1 - 2)             |
| Non-melanoma skin cancer             | 6<br>(4 - 11)             | --                 | --                  | 2<br>(1 - 3)         | 1<br>(1 - 3)             | 3<br>(1 - 6)             |
| Ovarian cancer                       | 73<br>(55 - 96)           | --                 | --                  | 23<br>(15 - 34)      | 38<br>(27 - 53)          | 12<br>(7 - 17)           |
| Testicular cancer                    | --                        | --                 | --                  | --                   | --                       | --                       |
| Kidney cancer                        | 57<br>(39 - 83)           | 16<br>(6 - 35)     | 4<br>(2 - 8)        | 8<br>(5 - 12)        | 15<br>(10 - 22)          | 15<br>(9 - 24)           |
| Bladder cancer                       | 15<br>(8 - 30)            | --                 | --                  | 4<br>(3 - 7)         | 4<br>(2 - 9)             | 6<br>(2 - 14)            |
| Brain and nervous system cancer      | 69<br>(42 - 90)           | 14<br>(5 - 28)     | 4<br>(2 - 7)        | 38<br>(20 - 52)      | 7<br>(5 - 10)            | 6<br>(4 - 8)             |
| Thyroid cancer                       | 11<br>(7 - 19)            | --                 | 0<br>(0 - 0)        | 1<br>(1 - 1)         | 7<br>(4 - 13)            | 3<br>(2 - 5)             |
| Mesothelioma                         | 2<br>(2 - 3)              | --                 | --                  | 1<br>(1 - 1)         | 1<br>(1 - 2)             | 0<br>(0 - 1)             |
| Hodgkin lymphoma                     | 40<br>(15 - 63)           | 12<br>(3 - 28)     | 4<br>(1 - 9)        | 7<br>(4 - 12)        | 6<br>(3 - 12)            | 10<br>(3 - 19)           |
| Non-Hodgkin lymphoma                 | 143<br>(82 - 198)         | 33<br>(13 - 66)    | 15<br>(7 - 30)      | 33<br>(18 - 49)      | 32<br>(20 - 45)          | 29<br>(16 - 44)          |
| Multiple myeloma                     | 29<br>(20 - 39)           | --                 | --                  | 7<br>(5 - 12)        | 10<br>(6 - 15)           | 12<br>(8 - 17)           |
| Leukemia                             | 63<br>(48 - 79)           | 10<br>(4 - 19)     | 11<br>(6 - 17)      | 18<br>(12 - 25)      | 12<br>(9 - 16)           | 12<br>(9 - 17)           |
| Other neoplasms                      | 456<br>(298 - 616)        | 120<br>(55 - 222)  | 65<br>(32 - 123)    | 76<br>(46 - 110)     | 109<br>(73 - 152)        | 85<br>(57 - 117)         |
| Cardiovascular diseases              | 7,675<br>(5,960 - 10,038) | 194<br>(114 - 346) | 59<br>(34 - 120)    | 817<br>(562 - 1,312) | 2,939<br>(2,219 - 3,946) | 3,666<br>(2,752 - 4,545) |
| Rheumatic heart disease              | 160<br>(92 - 379)         | 4<br>(1 - 11)      | 7<br>(3 - 14)       | 37<br>(17 - 109)     | 51<br>(22 - 152)         | 61<br>(37 - 111)         |
| Ischemic heart disease               | 1,835<br>(1,303 - 2,729)  | 1<br>(0 - 2)       | 3<br>(1 - 10)       | 137<br>(73 - 327)    | 611<br>(396 - 937)       | 1,083<br>(764 - 1,488)   |
| Cerebrovascular disease              | 2,154<br>(1,539 - 2,859)  | 17<br>(8 - 31)     | 5<br>(2 - 9)        | 193<br>(120 - 286)   | 851<br>(582 - 1,202)     | 1,089<br>(718 - 1,431)   |
| Ischemic stroke                      | 1,258<br>(327 - 1,861)    | 2<br>(0 - 6)       | 1<br>(0 - 2)        | 35<br>(6 - 89)       | 438<br>(90 - 714)        | 783<br>(229 - 1,112)     |
| Hemorrhagic stroke                   | 896<br>(577 - 1,695)      | 15<br>(7 - 27)     | 4<br>(2 - 8)        | 158<br>(90 - 227)    | 413<br>(252 - 792)       | 306<br>(165 - 738)       |
| Hypertensive heart disease           | 1,235<br>(555 - 2,184)    | 3<br>(1 - 7)       | 1<br>(1 - 3)        | 100<br>(34 - 199)    | 453<br>(185 - 836)       | 678<br>(304 - 1,190)     |
| Cardiomyopathy and myocarditis       | 543<br>(319 - 767)        | 57<br>(26 - 106)   | 14<br>(7 - 25)      | 109<br>(62 - 174)    | 147<br>(86 - 237)        | 217<br>(87 - 352)        |
| Atrial fibrillation and flutter      | 1<br>(0 - 3)              | --                 | --                  | 0<br>(0 - 0)         | 0<br>(0 - 1)             | 1<br>(0 - 2)             |
| Aortic aneurysm                      | 98<br>(36 - 274)          | --                 | --                  | 13<br>(4 - 36)       | 37<br>(13 - 103)         | 48<br>(18 - 136)         |
| Peripheral vascular disease          | 3<br>(2 - 5)              | --                 | --                  | 0<br>(0 - 0)         | 2<br>(1 - 3)             | 1<br>(0 - 2)             |
| Endocarditis                         | 144<br>(86 - 223)         | 26<br>(7 - 57)     | 4<br>(2 - 9)        | 32<br>(16 - 53)      | 32<br>(18 - 61)          | 50<br>(27 - 86)          |



Web Table 31- Burkina Faso deaths with 95% UI by age, sex, and cause in 2013

| Cause                                               | Females, All Ages      | Females, 0-4 Years | Females, 5-14 Years | Females, 15-49 Years | Females, 50-69 Years | Females, 70-80 Years |
|-----------------------------------------------------|------------------------|--------------------|---------------------|----------------------|----------------------|----------------------|
| Other cardiovascular and circulatory diseases       | 1,501<br>(956 - 2,832) | 86<br>(40 - 196)   | 24<br>(11 - 59)     | 197<br>(118 - 457)   | 755<br>(460 - 1,387) | 439<br>(260 - 846)   |
| Chronic respiratory diseases                        | 748<br>(571 - 986)     | 72<br>(38 - 120)   | 20<br>(12 - 30)     | 109<br>(79 - 140)    | 274<br>(193 - 380)   | 274<br>(200 - 383)   |
| Chronic obstructive pulmonary disease               | 428<br>(316 - 584)     | 20<br>(9 - 40)     | 11<br>(6 - 18)      | 40<br>(26 - 56)      | 182<br>(125 - 262)   | 174<br>(118 - 253)   |
| Pneumoconiosis                                      | 3<br>(2 - 4)           | 0<br>(0 - 1)       | 0<br>(0 - 1)        | 1<br>(1 - 1)         | 1<br>(0 - 1)         | 0<br>(0 - 0)         |
| Silicosis                                           | 0<br>(0 - 0)           | 0<br>(0 - 0)       | 0<br>(0 - 0)        | 0<br>(0 - 0)         | 0<br>(0 - 0)         | 0<br>(0 - 0)         |
| Asbestosis                                          | 0<br>(0 - 0)           | 0<br>(0 - 0)       | 0<br>(0 - 0)        | 0<br>(0 - 0)         | 0<br>(0 - 0)         | 0<br>(0 - 0)         |
| Coal workers pneumoconiosis                         | 0<br>(0 - 0)           | 0<br>(0 - 0)       | 0<br>(0 - 0)        | 0<br>(0 - 0)         | 0<br>(0 - 0)         | 0<br>(0 - 0)         |
| Other pneumoconiosis                                | 2<br>(1 - 3)           | 0<br>(0 - 0)       | 0<br>(0 - 0)        | 1<br>(1 - 1)         | 1<br>(0 - 1)         | 0<br>(0 - 0)         |
| Asthma                                              | 184<br>(102 - 273)     | 37<br>(14 - 72)    | 6<br>(3 - 10)       | 29<br>(16 - 43)      | 61<br>(29 - 100)     | 51<br>(24 - 86)      |
| Interstitial lung disease and pulmonary sarcoidosis | 50<br>(10 - 91)        | 1<br>(0 - 2)       | 0<br>(0 - 1)        | 7<br>(2 - 12)        | 15<br>(3 - 29)       | 28<br>(4 - 55)       |
| Other chronic respiratory diseases                  | 84<br>(57 - 120)       | 14<br>(7 - 26)     | 2<br>(1 - 4)        | 32<br>(21 - 46)      | 15<br>(8 - 25)       | 21<br>(12 - 36)      |
| Cirrhosis                                           | 798<br>(632 - 1,004)   | 31<br>(12 - 63)    | 18<br>(10 - 26)     | 191<br>(139 - 249)   | 344<br>(249 - 472)   | 214<br>(152 - 295)   |
| Cirrhosis due to hepatitis B                        | 218<br>(86 - 390)      | 2<br>(0 - 7)       | 3<br>(1 - 7)        | 58<br>(20 - 104)     | 100<br>(38 - 189)    | 53<br>(16 - 107)     |
| Cirrhosis due to hepatitis C                        | 282<br>(157 - 439)     | 3<br>(1 - 8)       | 5<br>(2 - 10)       | 73<br>(35 - 120)     | 122<br>(59 - 215)    | 79<br>(42 - 124)     |
| Cirrhosis due to alcohol use                        | 186<br>(105 - 292)     | --                 | --                  | 29<br>(15 - 50)      | 89<br>(48 - 150)     | 68<br>(35 - 116)     |
| Cirrhosis due to other causes                       | 112<br>(68 - 169)      | 25<br>(10 - 52)    | 9<br>(5 - 15)       | 31<br>(16 - 52)      | 32<br>(13 - 59)      | 14<br>(6 - 25)       |
| Digestive diseases                                  | 887<br>(708 - 1,097)   | 76<br>(35 - 139)   | 46<br>(29 - 69)     | 196<br>(143 - 251)   | 272<br>(195 - 364)   | 297<br>(221 - 402)   |
| Peptic ulcer disease                                | 174<br>(110 - 256)     | 6<br>(2 - 15)      | 4<br>(2 - 10)       | 33<br>(18 - 55)      | 59<br>(36 - 94)      | 71<br>(41 - 112)     |
| Gastritis and duodenitis                            | 43<br>(13 - 111)       | 4<br>(1 - 11)      | 3<br>(1 - 6)        | 9<br>(3 - 21)        | 11<br>(3 - 33)       | 15<br>(3 - 53)       |
| Appendicitis                                        | 92<br>(60 - 132)       | 9<br>(2 - 24)      | 8<br>(3 - 16)       | 24<br>(14 - 40)      | 25<br>(13 - 41)      | 26<br>(12 - 46)      |
| Paralytic ileus and intestinal obstruction          | 277<br>(175 - 419)     | 26<br>(10 - 53)    | 17<br>(9 - 28)      | 57<br>(30 - 86)      | 87<br>(50 - 143)     | 91<br>(51 - 159)     |
| Inguinal, femoral, and abdominal hernia             | 11<br>(6 - 18)         | 2<br>(1 - 6)       | 0<br>(0 - 1)        | 3<br>(1 - 6)         | 1<br>(1 - 2)         | 4<br>(2 - 8)         |
| Inflammatory bowel disease                          | 54<br>(10 - 84)        | 12<br>(2 - 29)     | 3<br>(1 - 5)        | 15<br>(3 - 25)       | 12<br>(2 - 21)       | 12<br>(2 - 22)       |
| Vascular intestinal disorders                       | 4<br>(1 - 14)          | 0<br>(0 - 0)       | 0<br>(0 - 0)        | 1<br>(0 - 3)         | 1<br>(0 - 4)         | 1<br>(0 - 6)         |
| Gallbladder and biliary diseases                    | 76<br>(52 - 113)       | 4<br>(1 - 8)       | 4<br>(1 - 7)        | 14<br>(9 - 22)       | 27<br>(15 - 45)      | 28<br>(16 - 48)      |
| Pancreatitis                                        | 41<br>(18 - 80)        | 1<br>(0 - 3)       | 1<br>(0 - 2)        | 9<br>(5 - 16)        | 18<br>(6 - 41)       | 12<br>(4 - 25)       |
| Other digestive diseases                            | 116<br>(80 - 170)      | 12<br>(4 - 26)     | 6<br>(3 - 12)       | 30<br>(19 - 45)      | 31<br>(19 - 51)      | 36<br>(21 - 60)      |
| Neurological disorders                              | 561<br>(429 - 750)     | 105<br>(48 - 210)  | 45<br>(23 - 78)     | 117<br>(74 - 188)    | 60<br>(43 - 82)      | 233<br>(172 - 315)   |
| Alzheimer disease and other dementias               | 231<br>(169 - 310)     | --                 | --                  | 0<br>(0 - 0)         | 24<br>(16 - 33)      | 207<br>(149 - 284)   |
| Parkinson disease                                   | 2<br>(1 - 5)           | --                 | --                  | 0<br>(0 - 1)         | 1<br>(0 - 2)         | 1<br>(0 - 2)         |
| Epilepsy                                            | 273<br>(178 - 431)     | 92<br>(37 - 195)   | 41<br>(19 - 73)     | 103<br>(61 - 174)    | 19<br>(11 - 32)      | 18<br>(10 - 32)      |
| Multiple sclerosis                                  | 1<br>(0 - 4)           | --                 | --                  | 1<br>(0 - 2)         | 0<br>(0 - 1)         | 0<br>(0 - 1)         |
| Other neurological disorders                        | 55<br>(41 - 72)        | 13<br>(8 - 21)     | 5<br>(3 - 7)        | 13<br>(9 - 17)       | 16<br>(11 - 22)      | 8<br>(6 - 12)        |
| Mental and substance use disorders                  | 161<br>(106 - 240)     | 7<br>(1 - 13)      | 0<br>(0 - 0)        | 84<br>(52 - 123)     | 49<br>(27 - 81)      | 21<br>(13 - 34)      |
| Schizophrenia                                       | 4<br>(1 - 8)           | --                 | --                  | 2<br>(1 - 5)         | 1<br>(0 - 2)         | 0<br>(0 - 1)         |
| Alcohol use disorders                               | 47<br>(6 - 111)        | --                 | --                  | 28<br>(3 - 69)       | 16<br>(2 - 39)       | 2<br>(0 - 6)         |
| Drug use disorders                                  | 110<br>(66 - 158)      | 7<br>(1 - 13)      | --                  | 53<br>(30 - 81)      | 32<br>(18 - 49)      | 19<br>(10 - 31)      |
| Opioid use disorders                                | 11<br>(6 - 16)         | 1<br>(0 - 2)       | --                  | 5<br>(3 - 8)         | 3<br>(2 - 5)         | 2<br>(1 - 3)         |
| Cocaine use disorders                               | 1<br>(0 - 1)           | 0<br>(0 - 0)       | --                  | 0<br>(0 - 0)         | 0<br>(0 - 0)         | 0<br>(0 - 0)         |
| Amphetamine use disorders                           | 0<br>(0 - 1)           | 0<br>(0 - 0)       | --                  | 0<br>(0 - 0)         | 0<br>(0 - 0)         | 0<br>(0 - 0)         |

Web Table 31- Burkina Faso deaths with 95% UI by age, sex, and cause in 2013

| Cause                                               | Females, All Ages        | Females, 0-4 Years     | Females, 5-14 Years | Females, 15-49 Years | Females, 50-69 Years | Females, 70-80 Years |
|-----------------------------------------------------|--------------------------|------------------------|---------------------|----------------------|----------------------|----------------------|
| Other drug use disorders                            | 98<br>(59 - 140)         | 6<br>(1 - 12)          | --                  | 47<br>(27 - 72)      | 29<br>(16 - 45)      | 17<br>(9 - 27)       |
| Eating disorders                                    | 0<br>(0 - 1)             | --                     | 0<br>(0 - 0)        | 0<br>(0 - 1)         | --                   | --                   |
| Anorexia nervosa                                    | 0<br>(0 - 1)             | --                     | 0<br>(0 - 0)        | 0<br>(0 - 1)         | --                   | --                   |
| Diabetes, urogenital, blood, and endocrine diseases | 2,262<br>(1,737 - 3,137) | 655<br>(348 - 1,242)   | 171<br>(100 - 309)  | 436<br>(317 - 598)   | 536<br>(410 - 699)   | 464<br>(361 - 596)   |
| Diabetes mellitus                                   | 616<br>(477 - 797)       | 4<br>(2 - 6)           | 5<br>(3 - 9)        | 84<br>(60 - 109)     | 280<br>(200 - 375)   | 244<br>(175 - 329)   |
| Acute glomerulonephritis                            | 16<br>(7 - 27)           | 2<br>(1 - 5)           | 2<br>(1 - 3)        | 7<br>(2 - 13)        | 4<br>(1 - 8)         | 1<br>(0 - 2)         |
| Chronic kidney disease                              | 355<br>(275 - 453)       | 46<br>(23 - 81)        | 22<br>(14 - 35)     | 80<br>(57 - 111)     | 101<br>(71 - 141)    | 106<br>(76 - 153)    |
| Chronic kidney disease due to diabetes mellitus     | 4<br>(2 - 7)             | 0<br>(0 - 0)           | 0<br>(0 - 1)        | 0<br>(0 - 1)         | 3<br>(1 - 6)         | 0<br>(0 - 0)         |
| Chronic kidney disease due to hypertension          | 141<br>(92 - 203)        | 5<br>(1 - 11)          | 2<br>(1 - 5)        | 25<br>(13 - 41)      | 51<br>(31 - 78)      | 58<br>(36 - 92)      |
| Chronic kidney disease due to glomerulonephritis    | 116<br>(74 - 169)        | 29<br>(15 - 50)        | 12<br>(6 - 20)      | 41<br>(24 - 63)      | 20<br>(9 - 34)       | 13<br>(5 - 26)       |
| Chronic kidney disease due to other causes          | 94<br>(51 - 142)         | 12<br>(4 - 29)         | 8<br>(3 - 15)       | 13<br>(6 - 25)       | 26<br>(11 - 48)      | 35<br>(13 - 64)      |
| Urinary diseases and male infertility               | 203<br>(153 - 261)       | 27<br>(14 - 51)        | 8<br>(4 - 15)       | 50<br>(34 - 70)      | 70<br>(45 - 104)     | 49<br>(27 - 75)      |
| Interstitial nephritis and urinary tract infections | 177<br>(129 - 230)       | 23<br>(10 - 46)        | 6<br>(2 - 11)       | 43<br>(28 - 62)      | 61<br>(38 - 91)      | 44<br>(25 - 68)      |
| Urolithiasis                                        | 7<br>(2 - 24)            | --                     | 1<br>(0 - 3)        | 2<br>(0 - 8)         | 3<br>(1 - 10)        | 1<br>(0 - 5)         |
| Other urinary diseases                              | 19<br>(11 - 34)          | 4<br>(1 - 13)          | 1<br>(0 - 4)        | 4<br>(2 - 10)        | 6<br>(2 - 12)        | 3<br>(1 - 6)         |
| Gynecological diseases                              | 8<br>(5 - 19)            | --                     | --                  | 3<br>(2 - 9)         | 3<br>(2 - 7)         | 2<br>(1 - 4)         |
| Uterine fibroids                                    | 2<br>(1 - 4)             | --                     | --                  | 1<br>(0 - 1)         | 1<br>(0 - 2)         | 1<br>(0 - 1)         |
| Polycystic ovarian syndrome                         | 0<br>(0 - 1)             | --                     | --                  | 0<br>(0 - 1)         | 0<br>(0 - 0)         | --                   |
| Endometriosis                                       | 1<br>(0 - 2)             | --                     | --                  | 1<br>(0 - 1)         | 0<br>(0 - 0)         | --                   |
| Genital prolapse                                    | 1<br>(1 - 3)             | --                     | --                  | 0<br>(0 - 1)         | 1<br>(0 - 1)         | 0<br>(0 - 1)         |
| Other gynecological diseases                        | 4<br>(2 - 9)             | --                     | --                  | 1<br>(1 - 4)         | 2<br>(1 - 4)         | 1<br>(0 - 2)         |
| Hemoglobinopathies and hemolytic anemias            | 805<br>(444 - 1,533)     | 486<br>(224 - 1,034)   | 120<br>(59 - 249)   | 152<br>(81 - 276)    | 29<br>(15 - 46)      | 17<br>(7 - 34)       |
| Thalassemias                                        | 9<br>(4 - 17)            | 7<br>(3 - 14)          | 1<br>(1 - 2)        | 1<br>(0 - 2)         | 0<br>(0 - 0)         | 0<br>(0 - 0)         |
| Sickle cell disorders                               | 765<br>(417 - 1,469)     | 465<br>(214 - 995)     | 117<br>(58 - 243)   | 149<br>(80 - 269)    | 26<br>(14 - 42)      | 8<br>(3 - 16)        |
| G6PD deficiency                                     | 9<br>(5 - 16)            | 5<br>(2 - 10)          | 1<br>(1 - 2)        | 2<br>(1 - 3)         | 1<br>(0 - 1)         | 1<br>(0 - 2)         |
| Other hemoglobinopathies and hemolytic anemias      | 23<br>(12 - 36)          | 10<br>(5 - 21)         | 1<br>(0 - 1)        | 1<br>(1 - 2)         | 2<br>(1 - 4)         | 9<br>(4 - 17)        |
| Endocrine, metabolic, blood, and immune disorders   | 259<br>(168 - 372)       | 89<br>(43 - 173)       | 14<br>(7 - 27)      | 61<br>(38 - 91)      | 50<br>(27 - 80)      | 45<br>(21 - 77)      |
| Musculoskeletal disorders                           | 53<br>(31 - 88)          | --                     | 6<br>(2 - 10)       | 20<br>(11 - 35)      | 16<br>(8 - 28)       | 11<br>(6 - 23)       |
| Rheumatoid arthritis                                | 12<br>(7 - 21)           | --                     | 1<br>(0 - 2)        | 3<br>(1 - 5)         | 3<br>(2 - 7)         | 5<br>(2 - 11)        |
| Other musculoskeletal disorders                     | 41<br>(21 - 69)          | --                     | 5<br>(2 - 8)        | 17<br>(10 - 30)      | 12<br>(5 - 22)       | 6<br>(3 - 13)        |
| Other non-communicable diseases                     | 2,612<br>(1,170 - 4,826) | 2,260<br>(889 - 4,381) | 107<br>(41 - 228)   | 108<br>(73 - 161)    | 63<br>(42 - 89)      | 74<br>(51 - 110)     |
| Congenital anomalies                                | 2,360<br>(925 - 4,544)   | 2,175<br>(810 - 4,286) | 100<br>(35 - 221)   | 64<br>(33 - 114)     | 13<br>(8 - 22)       | 8<br>(5 - 14)        |
| Neural tube defects                                 | 645<br>(142 - 1,973)     | 612<br>(126 - 1,865)   | 21<br>(5 - 64)      | 11<br>(3 - 32)       | 1<br>(0 - 2)         | 0<br>(0 - 1)         |
| Congenital heart anomalies                          | 895<br>(322 - 1,950)     | 823<br>(284 - 1,849)   | 38<br>(11 - 96)     | 24<br>(10 - 46)      | 6<br>(3 - 10)        | 4<br>(2 - 6)         |
| Cleft lip and cleft palate                          | 9<br>(0 - 30)            | 9<br>(0 - 30)          | --                  | --                   | --                   | --                   |
| Down syndrome                                       | 364<br>(88 - 939)        | 321<br>(66 - 877)      | 24<br>(7 - 53)      | 16<br>(7 - 31)       | 3<br>(1 - 6)         | 0<br>(0 - 1)         |
| Chromosomal unbalanced rearrangements               | 90<br>(16 - 253)         | 84<br>(14 - 244)       | 3<br>(0 - 7)        | 3<br>(1 - 6)         | 0<br>(0 - 1)         | 0<br>(0 - 0)         |
| Other congenital anomalies                          | 359<br>(90 - 1,282)      | 327<br>(72 - 1,197)    | 15<br>(4 - 56)      | 11<br>(4 - 26)       | 3<br>(1 - 6)         | 3<br>(2 - 6)         |
| Skin and subcutaneous diseases                      | 242<br>(177 - 339)       | 75<br>(37 - 148)       | 7<br>(4 - 12)       | 44<br>(26 - 67)      | 50<br>(33 - 72)      | 66<br>(43 - 99)      |
| Cellulitis                                          | 79<br>(16 - 144)         | 18<br>(2 - 47)         | 3<br>(1 - 6)        | 15<br>(3 - 30)       | 15<br>(2 - 35)       | 28<br>(5 - 58)       |

Web Table 31- Burkina Faso deaths with 95% UI by age, sex, and cause in 2013

| Cause                                           | Females, All Ages        | Females, 0-4 Years     | Females, 5-14 Years | Females, 15-49 Years   | Females, 50-69 Years | Females, 70-80 Years |
|-------------------------------------------------|--------------------------|------------------------|---------------------|------------------------|----------------------|----------------------|
| Pyoderma                                        | 155<br>(74 - 258)        | 55<br>(21 - 123)       | 4<br>(1 - 7)        | 27<br>(11 - 46)        | 34<br>(16 - 60)      | 36<br>(13 - 71)      |
| Decubitus ulcer                                 | 3<br>(1 - 6)             | 0<br>(0 - 0)           | 0<br>(0 - 0)        | 1<br>(0 - 2)           | 0<br>(0 - 1)         | 1<br>(0 - 3)         |
| Other skin and subcutaneous diseases            | 5<br>(2 - 10)            | 2<br>(0 - 6)           | 0<br>(0 - 0)        | 2<br>(1 - 3)           | 0<br>(0 - 1)         | 1<br>(0 - 2)         |
| Sudden infant death syndrome                    | 10<br>(2 - 33)           | 10<br>(2 - 33)         | --                  | --                     | --                   | --                   |
| Injuries                                        | 3,820<br>(2,987 - 4,672) | 1,043<br>(657 - 1,600) | 511<br>(331 - 741)  | 1,165<br>(881 - 1,485) | 599<br>(438 - 792)   | 503<br>(369 - 653)   |
| Transport injuries                              | 1,610<br>(1,193 - 2,040) | 267<br>(137 - 472)     | 234<br>(130 - 369)  | 681<br>(459 - 921)     | 288<br>(202 - 390)   | 140<br>(99 - 193)    |
| Road injuries                                   | 1,537<br>(1,144 - 1,958) | 242<br>(120 - 425)     | 222<br>(122 - 347)  | 666<br>(449 - 902)     | 277<br>(195 - 376)   | 130<br>(92 - 182)    |
| Pedestrian road injuries                        | 648<br>(462 - 869)       | 98<br>(45 - 184)       | 105<br>(52 - 185)   | 253<br>(157 - 366)     | 128<br>(86 - 188)    | 63<br>(41 - 98)      |
| Cyclist road injuries                           | 32<br>(19 - 51)          | 7<br>(2 - 15)          | 6<br>(3 - 12)       | 5<br>(3 - 9)           | 11<br>(6 - 20)       | 3<br>(1 - 5)         |
| Motorcyclist road injuries                      | 39<br>(21 - 96)          | 4<br>(2 - 11)          | 2<br>(1 - 5)        | 24<br>(11 - 64)        | 6<br>(3 - 13)        | 3<br>(1 - 6)         |
| Motor vehicle road injuries                     | 761<br>(505 - 998)       | 121<br>(55 - 223)      | 99<br>(53 - 166)    | 367<br>(232 - 514)     | 119<br>(73 - 179)    | 56<br>(36 - 80)      |
| Other road injuries                             | 57<br>(16 - 114)         | 12<br>(3 - 32)         | 10<br>(2 - 24)      | 17<br>(3 - 40)         | 13<br>(3 - 29)       | 6<br>(1 - 13)        |
| Other transport injuries                        | 73<br>(41 - 105)         | 26<br>(12 - 49)        | 12<br>(5 - 23)      | 14<br>(8 - 22)         | 11<br>(5 - 17)       | 9<br>(4 - 15)        |
| Unintentional injuries                          | 1,907<br>(1,444 - 2,485) | 770<br>(468 - 1,235)   | 268<br>(167 - 395)  | 318<br>(232 - 412)     | 235<br>(157 - 329)   | 318<br>(215 - 438)   |
| Falls                                           | 375<br>(250 - 496)       | 73<br>(36 - 141)       | 36<br>(19 - 63)     | 54<br>(34 - 79)        | 60<br>(36 - 91)      | 152<br>(90 - 227)    |
| Drowning                                        | 426<br>(257 - 748)       | 220<br>(100 - 478)     | 101<br>(50 - 191)   | 65<br>(40 - 112)       | 27<br>(17 - 42)      | 12<br>(7 - 18)       |
| Fire, heat, and hot substances                  | 268<br>(150 - 433)       | 123<br>(52 - 270)      | 37<br>(17 - 69)     | 48<br>(26 - 74)        | 32<br>(17 - 54)      | 29<br>(14 - 47)      |
| Poisonings                                      | 54<br>(25 - 90)          | 22<br>(8 - 52)         | 5<br>(2 - 9)        | 11<br>(6 - 17)         | 12<br>(5 - 20)       | 4<br>(2 - 7)         |
| Exposure to mechanical forces                   | 187<br>(122 - 289)       | 98<br>(47 - 186)       | 24<br>(12 - 45)     | 33<br>(22 - 47)        | 20<br>(13 - 28)      | 13<br>(8 - 18)       |
| Unintentional firearm injuries                  | 33<br>(23 - 47)          | 8<br>(4 - 17)          | 3<br>(1 - 6)        | 15<br>(9 - 24)         | 5<br>(3 - 8)         | 2<br>(1 - 4)         |
| Unintentional suffocation                       | 39<br>(13 - 110)         | 33<br>(9 - 98)         | 4<br>(1 - 9)        | 1<br>(0 - 2)           | 1<br>(1 - 3)         | 1<br>(0 - 1)         |
| Other exposure to mechanical forces             | 115<br>(67 - 177)        | 57<br>(24 - 108)       | 17<br>(7 - 36)      | 18<br>(11 - 28)        | 14<br>(8 - 21)       | 10<br>(6 - 14)       |
| Adverse effects of medical treatment            | 253<br>(117 - 415)       | 81<br>(31 - 182)       | 13<br>(5 - 26)      | 42<br>(20 - 64)        | 51<br>(21 - 99)      | 66<br>(25 - 133)     |
| Animal contact                                  | 121<br>(48 - 209)        | 31<br>(12 - 67)        | 22<br>(8 - 46)      | 37<br>(12 - 68)        | 20<br>(7 - 35)       | 11<br>(4 - 20)       |
| Venomous animal contact                         | 83<br>(32 - 152)         | 28<br>(11 - 61)        | 15<br>(4 - 32)      | 24<br>(8 - 46)         | 10<br>(3 - 18)       | 7<br>(2 - 13)        |
| Non-venomous animal contact                     | 38<br>(12 - 71)          | 3<br>(1 - 8)           | 7<br>(2 - 18)       | 13<br>(4 - 26)         | 11<br>(3 - 21)       | 4<br>(1 - 8)         |
| Foreign body                                    | 134<br>(77 - 226)        | 89<br>(43 - 166)       | 9<br>(5 - 17)       | 6<br>(3 - 11)          | 5<br>(3 - 8)         | 25<br>(16 - 46)      |
| Pulmonary aspiration and foreign body in airway | 130<br>(74 - 222)        | 87<br>(42 - 164)       | 9<br>(4 - 17)       | 5<br>(3 - 10)          | 4<br>(2 - 7)         | 24<br>(15 - 45)      |
| Foreign body in other body part                 | 4<br>(3 - 6)             | 1<br>(1 - 3)           | 0<br>(0 - 1)        | 1<br>(0 - 1)           | 1<br>(0 - 1)         | 1<br>(1 - 2)         |
| Other unintentional injuries                    | 88<br>(60 - 145)         | 32<br>(15 - 63)        | 21<br>(10 - 43)     | 22<br>(14 - 37)        | 8<br>(5 - 12)        | 6<br>(4 - 9)         |
| Self-harm and interpersonal violence            | 304<br>(221 - 407)       | 6<br>(2 - 12)          | 9<br>(4 - 17)       | 167<br>(111 - 247)     | 76<br>(50 - 115)     | 46<br>(28 - 72)      |
| Self-harm                                       | 273<br>(197 - 373)       | --                     | 6<br>(2 - 14)       | 147<br>(95 - 222)      | 75<br>(48 - 114)     | 45<br>(28 - 72)      |
| Interpersonal violence                          | 30<br>(19 - 49)          | 6<br>(2 - 12)          | 3<br>(1 - 5)        | 20<br>(11 - 35)        | 1<br>(1 - 2)         | 0<br>(0 - 1)         |
| Assault by firearm                              | 8<br>(4 - 15)            | 2<br>(1 - 4)           | 1<br>(0 - 1)        | 5<br>(2 - 10)          | 0<br>(0 - 1)         | 0<br>(0 - 0)         |
| Assault by sharp object                         | 8<br>(4 - 16)            | 2<br>(1 - 4)           | 1<br>(0 - 1)        | 6<br>(3 - 11)          | 0<br>(0 - 1)         | 0<br>(0 - 0)         |
| Assault by other means                          | 14<br>(8 - 22)           | 3<br>(1 - 6)           | 1<br>(1 - 3)        | 9<br>(5 - 16)          | 1<br>(0 - 1)         | 0<br>(0 - 0)         |

Web Table 31- Burundi deaths with 95% UI by age, sex, and cause in 2013

| Cause                                                             | Both Sexes, All Ages         | Both Sexes, 0-4 Years       | Both Sexes, 5-14 Years   | Both Sexes, 15-49 Years     | Both Sexes, 50-69 Years     | Both Sexes, 70-80 Years     |
|-------------------------------------------------------------------|------------------------------|-----------------------------|--------------------------|-----------------------------|-----------------------------|-----------------------------|
| All causes                                                        | 94,534<br>(86,406 - 103,271) | 39,138<br>(33,189 - 46,308) | 3,349<br>(2,863 - 3,980) | 20,083<br>(18,248 - 21,828) | 17,339<br>(15,608 - 19,155) | 14,625<br>(13,546 - 15,778) |
| Communicable, maternal, neonatal, and nutritional diseases        | 62,019<br>(54,990 - 69,023)  | 34,882<br>(28,712 - 41,512) | 2,375<br>(2,009 - 2,829) | 13,002<br>(11,719 - 14,400) | 6,902<br>(5,977 - 7,964)    | 4,858<br>(4,179 - 5,721)    |
| HIV/AIDS and tuberculosis                                         | 13,084<br>(10,770 - 15,694)  | 866<br>(605 - 1,219)        | 529<br>(418 - 663)       | 7,155<br>(5,924 - 8,682)    | 3,391<br>(2,602 - 4,309)    | 1,144<br>(837 - 1,569)      |
| Tuberculosis                                                      | 7,572<br>(5,442 - 10,002)    | 532<br>(277 - 882)          | 114<br>(72 - 178)        | 3,301<br>(2,218 - 4,589)    | 2,544<br>(1,815 - 3,449)    | 1,080<br>(770 - 1,499)      |
| HIV/AIDS                                                          | 5,513<br>(3,966 - 7,471)     | 334<br>(172 - 543)          | 415<br>(303 - 537)       | 3,853<br>(2,696 - 5,513)    | 847<br>(542 - 1,435)        | 64<br>(38 - 106)            |
| HIV/AIDS resulting in mycobacterial infection                     | 359<br>(242 - 506)           | 21<br>(10 - 33)             | 24<br>(16 - 32)          | 250<br>(166 - 365)          | 60<br>(36 - 104)            | 5<br>(3 - 8)                |
| HIV/AIDS resulting in other diseases                              | 5,154<br>(3,718 - 6,994)     | 313<br>(162 - 508)          | 392<br>(287 - 508)       | 3,603<br>(2,522 - 5,167)    | 787<br>(502 - 1,335)        | 59<br>(35 - 98)             |
| Diarrhea, lower respiratory, and other common infectious diseases | 18,994<br>(14,277 - 24,006)  | 10,299<br>(6,735 - 14,364)  | 867<br>(632 - 1,168)     | 2,446<br>(1,774 - 3,162)    | 2,525<br>(1,872 - 3,258)    | 2,857<br>(2,183 - 3,605)    |
| Diarrheal diseases                                                | 7,382<br>(5,152 - 10,458)    | 3,712<br>(1,926 - 6,125)    | 306<br>(164 - 502)       | 1,099<br>(705 - 1,606)      | 1,122<br>(719 - 1,683)      | 1,143<br>(709 - 1,701)      |
| Intestinal infectious diseases                                    | 476<br>(253 - 850)           | 192<br>(91 - 373)           | 126<br>(61 - 230)        | 137<br>(68 - 246)           | 17<br>(7 - 32)              | 5<br>(2 - 10)               |
| Typhoid fever                                                     | 355<br>(175 - 643)           | 134<br>(59 - 268)           | 99<br>(47 - 184)         | 106<br>(51 - 192)           | 12<br>(5 - 25)              | 4<br>(2 - 7)                |
| Paratyphoid fever                                                 | 91<br>(42 - 173)             | 38<br>(15 - 89)             | 25<br>(11 - 50)          | 24<br>(10 - 47)             | 3<br>(1 - 5)                | 1<br>(0 - 1)                |
| Other intestinal infectious diseases                              | 31<br>(17 - 51)              | 19<br>(8 - 35)              | 3<br>(0 - 8)             | 7<br>(2 - 14)               | 2<br>(0 - 6)                | 1<br>(0 - 4)                |
| Lower respiratory infections                                      | 8,601<br>(5,864 - 11,507)    | 4,827<br>(2,862 - 7,099)    | 249<br>(158 - 391)       | 757<br>(511 - 1,049)        | 1,155<br>(788 - 1,547)      | 1,613<br>(1,183 - 2,134)    |
| Upper respiratory infections                                      | 20<br>(9 - 38)               | 9<br>(1 - 26)               | 1<br>(0 - 2)             | 5<br>(2 - 10)               | 3<br>(1 - 7)                | 2<br>(0 - 5)                |
| Otitis media                                                      | 13<br>(8 - 21)               | 6<br>(3 - 12)               | 1<br>(0 - 1)             | 2<br>(1 - 3)                | 2<br>(1 - 3)                | 2<br>(1 - 3)                |
| Meningitis                                                        | 2,031<br>(1,459 - 2,829)     | 1,172<br>(687 - 1,951)      | 159<br>(97 - 256)        | 405<br>(274 - 579)          | 210<br>(137 - 295)          | 84<br>(55 - 124)            |
| Pneumococcal meningitis                                           | 470<br>(323 - 670)           | 218<br>(116 - 386)          | 49<br>(27 - 82)          | 119<br>(74 - 182)           | 61<br>(37 - 97)             | 23<br>(13 - 36)             |
| H influenzae type B meningitis                                    | 478<br>(293 - 761)           | 364<br>(193 - 636)          | 37<br>(17 - 73)          | 50<br>(23 - 81)             | 19<br>(9 - 35)              | 7<br>(4 - 13)               |
| Meningococcal meningitis                                          | 278<br>(190 - 387)           | 120<br>(62 - 225)           | 18<br>(10 - 33)          | 71<br>(43 - 108)            | 46<br>(26 - 75)             | 22<br>(12 - 36)             |
| Other meningitis                                                  | 805<br>(569 - 1,147)         | 470<br>(249 - 803)          | 54<br>(27 - 94)          | 165<br>(105 - 251)          | 84<br>(51 - 126)            | 33<br>(18 - 53)             |
| Encephalitis                                                      | 69<br>(46 - 102)             | 41<br>(21 - 73)             | 4<br>(3 - 7)             | 13<br>(9 - 19)              | 7<br>(3 - 10)               | 4<br>(2 - 6)                |
| Diphtheria                                                        | 6<br>(0 - 35)                | 5<br>(0 - 33)               | 1<br>(0 - 4)             | 0<br>(0 - 1)                | 0<br>(0 - 0)                | --<br>(0 - 0)               |
| Whooping cough                                                    | 19<br>(0 - 109)              | 18<br>(0 - 104)             | 1<br>(0 - 4)             | 0<br>(0 - 1)                | 0<br>(0 - 0)                | --<br>(0 - 0)               |
| Tetanus                                                           | 219<br>(83 - 419)            | 179<br>(49 - 379)           | 5<br>(2 - 9)             | 24<br>(11 - 41)             | 9<br>(4 - 15)               | 2<br>(1 - 3)                |
| Measles                                                           | 150<br>(25 - 474)            | 134<br>(22 - 424)           | 14<br>(2 - 43)           | 2<br>(0 - 6)                | 0<br>(0 - 0)                | --<br>(0 - 0)               |
| Varicella and herpes zoster                                       | 8<br>(3 - 16)                | 3<br>(0 - 11)               | 1<br>(0 - 2)             | 2<br>(0 - 4)                | 1<br>(0 - 1)                | 1<br>(0 - 5)                |
| Neglected tropical diseases and malaria                           | 12,553<br>(7,509 - 18,648)   | 10,330<br>(5,449 - 16,322)  | 691<br>(425 - 1,009)     | 1,043<br>(691 - 1,726)      | 334<br>(185 - 747)          | 156<br>(69 - 381)           |
| Malaria                                                           | 11,282<br>(6,353 - 17,300)   | 9,953<br>(5,125 - 16,029)   | 398<br>(202 - 731)       | 544<br>(314 - 1,233)        | 253<br>(122 - 651)          | 133<br>(48 - 358)           |
| Leishmaniasis                                                     | 1,102<br>(647 - 1,708)       | 321<br>(132 - 666)          | 271<br>(107 - 453)       | 445<br>(243 - 724)          | 54<br>(30 - 90)             | 11<br>(6 - 19)              |
| Visceral leishmaniasis                                            | 1,102<br>(647 - 1,708)       | 321<br>(132 - 666)          | 271<br>(107 - 453)       | 445<br>(243 - 724)          | 54<br>(30 - 90)             | 11<br>(6 - 19)              |
| Schistosomiasis                                                   | 40<br>(29 - 51)              | 1<br>(0 - 2)                | 1<br>(1 - 2)             | 18<br>(12 - 25)             | 14<br>(9 - 21)              | 5<br>(3 - 8)                |
| Cysticercosis                                                     | 5<br>(4 - 6)                 | 0<br>(0 - 1)                | 0<br>(0 - 0)             | 3<br>(2 - 4)                | 1<br>(1 - 1)                | 0<br>(0 - 0)                |
| Cystic echinococcosis                                             | 5<br>(4 - 6)                 | 1<br>(0 - 1)                | 1<br>(1 - 1)             | 2<br>(2 - 3)                | 1<br>(1 - 1)                | 0<br>(0 - 0)                |
| Dengue                                                            | 2<br>(1 - 3)                 | 0<br>(0 - 1)                | 0<br>(0 - 0)             | 1<br>(0 - 1)                | 0<br>(0 - 1)                | 0<br>(0 - 0)                |
| Yellow fever                                                      | 7<br>(5 - 12)                | 1<br>(0 - 2)                | 1<br>(0 - 4)             | 4<br>(2 - 8)                | 1<br>(0 - 2)                | 0<br>(0 - 1)                |
| Rabies                                                            | 52<br>(18 - 80)              | 13<br>(3 - 29)              | 14<br>(4 - 24)           | 20<br>(7 - 31)              | 5<br>(2 - 7)                | 1<br>(0 - 2)                |
| Intestinal nematode infections                                    | 38<br>(18 - 68)              | 31<br>(13 - 62)             | 4<br>(0 - 12)            | 2<br>(0 - 7)                | 1<br>(0 - 5)                | 0<br>(0 - 3)                |
| Ascariasis                                                        | 38<br>(18 - 68)              | 31<br>(13 - 62)             | 4<br>(0 - 12)            | 2<br>(0 - 7)                | 1<br>(0 - 5)                | 0<br>(0 - 3)                |
| Other neglected tropical diseases                                 | 20<br>(12 - 41)              | 8<br>(4 - 15)               | 1<br>(0 - 2)             | 4<br>(2 - 9)                | 4<br>(2 - 9)                | 4<br>(2 - 9)                |

Web Table 31- Burundi deaths with 95% UI by age, sex, and cause in 2013

| Cause                                                            | Both Sexes, All Ages        | Both Sexes, 0-4 Years     | Both Sexes, 5-14 Years | Both Sexes, 15-49 Years  | Both Sexes, 50-69 Years   | Both Sexes, 70-80 Years   |
|------------------------------------------------------------------|-----------------------------|---------------------------|------------------------|--------------------------|---------------------------|---------------------------|
| Maternal disorders                                               | 1,683<br>(1,091 - 2,289)    | --                        | 5<br>(2 - 12)          | 1,678<br>(1,087 - 2,283) | --                        | --                        |
| Maternal hemorrhage                                              | 204<br>(113 - 312)          | --                        | 0<br>(0 - 1)           | 203<br>(113 - 312)       | --                        | --                        |
| Maternal sepsis and other maternal infections                    | 166<br>(92 - 246)           | --                        | 1<br>(0 - 2)           | 165<br>(91 - 245)        | --                        | --                        |
| Maternal hypertensive disorders                                  | 171<br>(99 - 257)           | --                        | 1<br>(0 - 1)           | 170<br>(99 - 256)        | --                        | --                        |
| Maternal obstructed labor                                        | 90<br>(55 - 131)            | --                        | 0<br>(0 - 0)           | 89<br>(54 - 131)         | --                        | --                        |
| Maternal abortive outcome                                        | 327<br>(191 - 473)          | --                        | 1<br>(0 - 2)           | 326<br>(190 - 472)       | --                        | --                        |
| Indirect maternal deaths                                         | 135<br>(70 - 211)           | --                        | 0<br>(0 - 1)           | 135<br>(70 - 210)        | --                        | --                        |
| Late maternal deaths                                             | 152<br>(80 - 241)           | --                        | 1<br>(0 - 2)           | 151<br>(80 - 240)        | --                        | --                        |
| Maternal deaths aggravated by HIV/AIDS                           | 9<br>(4 - 14)               | --                        | --                     | 9<br>(4 - 14)            | --                        | --                        |
| Other maternal disorders                                         | 427<br>(280 - 615)          | --                        | 1<br>(0 - 3)           | 426<br>(279 - 614)       | --                        | --                        |
| Neonatal disorders                                               | 9,455<br>(7,110 - 12,388)   | 9,455<br>(7,110 - 12,388) | --                     | --                       | --                        | --                        |
| Neonatal preterm birth complications                             | 3,330<br>(1,654 - 5,405)    | 3,330<br>(1,654 - 5,405)  | --                     | --                       | --                        | --                        |
| Neonatal encephalopathy due to birth asphyxia and trauma         | 2,467<br>(1,086 - 4,267)    | 2,467<br>(1,086 - 4,267)  | --                     | --                       | --                        | --                        |
| Neonatal sepsis and other neonatal infections                    | 2,048<br>(872 - 3,616)      | 2,048<br>(872 - 3,616)    | --                     | --                       | --                        | --                        |
| Hemolytic disease and other neonatal jaundice                    | 49<br>(16 - 120)            | 49<br>(16 - 120)          | --                     | --                       | --                        | --                        |
| Other neonatal disorders                                         | 1,561<br>(569 - 3,730)      | 1,561<br>(569 - 3,730)    | --                     | --                       | --                        | --                        |
| Nutritional deficiencies                                         | 4,982<br>(3,378 - 6,916)    | 3,069<br>(1,709 - 4,835)  | 205<br>(135 - 296)     | 537<br>(379 - 741)       | 542<br>(396 - 735)        | 630<br>(446 - 848)        |
| Protein-energy malnutrition                                      | 3,481<br>(1,931 - 5,340)    | 2,531<br>(1,245 - 4,091)  | 144<br>(80 - 240)      | 197<br>(88 - 361)        | 275<br>(149 - 454)        | 335<br>(166 - 555)        |
| Iodine deficiency                                                | 3<br>(0 - 12)               | 2<br>(0 - 11)             | 0<br>(0 - 1)           | 1<br>(0 - 2)             | 0<br>(0 - 1)              | 0<br>(0 - 1)              |
| Iron-deficiency anemia                                           | 1,477<br>(711 - 2,416)      | 531<br>(123 - 1,238)      | 60<br>(22 - 111)       | 336<br>(188 - 489)       | 262<br>(136 - 417)        | 287<br>(117 - 495)        |
| Other nutritional deficiencies                                   | 21<br>(8 - 43)              | 5<br>(1 - 15)             | 1<br>(0 - 2)           | 4<br>(1 - 9)             | 4<br>(1 - 8)              | 7<br>(2 - 20)             |
| Other communicable, maternal, neonatal, and nutritional diseases | 1,267<br>(821 - 1,895)      | 864<br>(497 - 1,412)      | 78<br>(48 - 125)       | 143<br>(97 - 214)        | 111<br>(63 - 182)         | 71<br>(33 - 129)          |
| Sexually transmitted diseases excluding HIV                      | 749<br>(403 - 1,251)        | 657<br>(339 - 1,109)      | 54<br>(29 - 95)        | 20<br>(10 - 32)          | 12<br>(4 - 29)            | 7<br>(3 - 16)             |
| Syphilis                                                         | 731<br>(391 - 1,229)        | 657<br>(339 - 1,109)      | 53<br>(28 - 95)        | 9<br>(4 - 14)            | 7<br>(3 - 17)             | 5<br>(2 - 13)             |
| Chlamydial infection                                             | 4<br>(2 - 8)                | --                        | 0<br>(0 - 0)           | 3<br>(1 - 5)             | 1<br>(0 - 3)              | 0<br>(0 - 1)              |
| Gonococcal infection                                             | 8<br>(4 - 12)               | --                        | 0<br>(0 - 0)           | 4<br>(2 - 7)             | 2<br>(1 - 5)              | 1<br>(0 - 2)              |
| Other sexually transmitted diseases                              | 6<br>(3 - 10)               | --                        | 0<br>(0 - 0)           | 4<br>(2 - 6)             | 2<br>(1 - 4)              | 0<br>(0 - 1)              |
| Hepatitis                                                        | 109<br>(87 - 137)           | 21<br>(11 - 37)           | 6<br>(4 - 9)           | 49<br>(36 - 70)          | 26<br>(19 - 35)           | 7<br>(5 - 10)             |
| Acute hepatitis A                                                | 14<br>(4 - 27)              | 8<br>(2 - 18)             | 2<br>(1 - 4)           | 3<br>(1 - 7)             | 0<br>(0 - 1)              | 0<br>(0 - 0)              |
| Acute hepatitis B                                                | 61<br>(42 - 83)             | 12<br>(6 - 24)            | 3<br>(1 - 5)           | 19<br>(10 - 32)          | 20<br>(14 - 28)           | 6<br>(5 - 9)              |
| Acute hepatitis C                                                | 1<br>(0 - 3)                | --                        | 0<br>(0 - 0)           | 1<br>(0 - 2)             | 0<br>(0 - 1)              | 0<br>(0 - 0)              |
| Acute hepatitis E                                                | 33<br>(20 - 50)             | 0<br>(0 - 1)              | 1<br>(0 - 2)           | 26<br>(16 - 40)          | 5<br>(2 - 9)              | 1<br>(0 - 2)              |
| Other infectious diseases                                        | 408<br>(228 - 740)          | 185<br>(85 - 424)         | 18<br>(8 - 42)         | 75<br>(39 - 140)         | 73<br>(29 - 141)          | 57<br>(21 - 114)          |
| Non-communicable diseases                                        | 27,159<br>(24,197 - 30,087) | 2,951<br>(1,777 - 4,878)  | 499<br>(382 - 651)     | 4,824<br>(4,008 - 5,709) | 9,617<br>(8,380 - 11,089) | 9,268<br>(8,316 - 10,351) |
| Neoplasms                                                        | 4,524<br>(3,795 - 5,175)    | 179<br>(91 - 291)         | 112<br>(77 - 159)      | 1,036<br>(836 - 1,243)   | 2,206<br>(1,792 - 2,593)  | 991<br>(843 - 1,132)      |
| Esophageal cancer                                                | 428<br>(273 - 601)          | --                        | --                     | 60<br>(39 - 88)          | 258<br>(165 - 372)        | 110<br>(67 - 167)         |
| Stomach cancer                                                   | 333<br>(278 - 393)          | --                        | --                     | 49<br>(36 - 62)          | 188<br>(149 - 230)        | 96<br>(76 - 120)          |
| Liver cancer                                                     | 382<br>(296 - 488)          | --                        | 5<br>(2 - 8)           | 121<br>(66 - 174)        | 184<br>(138 - 238)        | 73<br>(55 - 100)          |
| Liver cancer due to hepatitis B                                  | 97<br>(52 - 154)            | --                        | 1<br>(1 - 3)           | 41<br>(18 - 66)          | 42<br>(22 - 73)           | 13<br>(6 - 22)            |
| Liver cancer due to hepatitis C                                  | 168<br>(96 - 233)           | --                        | 1<br>(0 - 2)           | 46<br>(26 - 76)          | 88<br>(43 - 129)          | 34<br>(17 - 53)           |

Web Table 31- Burundi deaths with 95% UI by age, sex, and cause in 2013

| Cause                                | Both Sexes, All Ages        | Both Sexes, 0-4 Years | Both Sexes, 5-14 Years | Both Sexes, 15-49 Years  | Both Sexes, 50-69 Years  | Both Sexes, 70-80 Years  |
|--------------------------------------|-----------------------------|-----------------------|------------------------|--------------------------|--------------------------|--------------------------|
| Liver cancer due to alcohol use      | 52<br>(31 - 83)             | --                    | --                     | 9<br>(4 - 18)            | 26<br>(15 - 46)          | 16<br>(10 - 25)          |
| Liver cancer due to other causes     | 65<br>(40 - 99)             | --                    | 2<br>(1 - 4)           | 24<br>(11 - 39)          | 28<br>(15 - 49)          | 11<br>(6 - 17)           |
| Larynx cancer                        | 31<br>(20 - 41)             | --                    | --                     | 4<br>(3 - 6)             | 17<br>(11 - 24)          | 9<br>(6 - 13)            |
| Tracheal, bronchus and lung cancer   | 223<br>(185 - 267)          | --                    | --                     | 18<br>(14 - 26)          | 148<br>(118 - 183)       | 57<br>(45 - 69)          |
| Breast cancer                        | 389<br>(290 - 491)          | --                    | --                     | 150<br>(94 - 208)        | 185<br>(133 - 251)       | 54<br>(39 - 77)          |
| Cervical cancer                      | 698<br>(417 - 935)          | --                    | --                     | 137<br>(77 - 206)        | 463<br>(263 - 648)       | 99<br>(54 - 151)         |
| Uterine cancer                       | 28<br>(16 - 40)             | --                    | --                     | 3<br>(2 - 6)             | 17<br>(9 - 27)           | 8<br>(4 - 12)            |
| Prostate cancer                      | 138<br>(84 - 194)           | --                    | --                     | 3<br>(1 - 6)             | 45<br>(26 - 69)          | 90<br>(56 - 132)         |
| Colon and rectum cancer              | 335<br>(272 - 397)          | --                    | --                     | 93<br>(71 - 114)         | 153<br>(122 - 187)       | 89<br>(70 - 113)         |
| Lip and oral cavity cancer           | 61<br>(43 - 77)             | --                    | --                     | 15<br>(10 - 22)          | 33<br>(22 - 44)          | 14<br>(10 - 19)          |
| Nasopharynx cancer                   | 20<br>(14 - 27)             | --                    | 1<br>(0 - 2)           | 10<br>(7 - 14)           | 7<br>(5 - 10)            | 2<br>(1 - 3)             |
| Other pharynx cancer                 | 29<br>(21 - 38)             | --                    | --                     | 7<br>(5 - 11)            | 17<br>(11 - 23)          | 5<br>(3 - 7)             |
| Gallbladder and biliary tract cancer | 52<br>(38 - 68)             | --                    | --                     | 16<br>(9 - 22)           | 25<br>(17 - 36)          | 10<br>(7 - 15)           |
| Pancreatic cancer                    | 83<br>(69 - 99)             | --                    | --                     | 18<br>(14 - 22)          | 48<br>(39 - 60)          | 17<br>(13 - 21)          |
| Malignant skin melanoma              | 21<br>(16 - 27)             | --                    | --                     | 5<br>(3 - 7)             | 10<br>(8 - 14)           | 5<br>(4 - 7)             |
| Non-melanoma skin cancer             | 23<br>(14 - 39)             | --                    | --                     | 4<br>(2 - 7)             | 8<br>(5 - 13)            | 11<br>(6 - 22)           |
| Ovarian cancer                       | 86<br>(57 - 129)            | --                    | --                     | 20<br>(14 - 29)          | 53<br>(30 - 88)          | 13<br>(7 - 20)           |
| Testicular cancer                    | 10<br>(6 - 14)              | --                    | --                     | 6<br>(3 - 9)             | 3<br>(2 - 6)             | 1<br>(1 - 2)             |
| Kidney cancer                        | 61<br>(45 - 80)             | 13<br>(6 - 23)        | 4<br>(2 - 7)           | 9<br>(6 - 13)            | 26<br>(19 - 36)          | 10<br>(7 - 14)           |
| Bladder cancer                       | 78<br>(62 - 99)             | --                    | --                     | 10<br>(7 - 14)           | 36<br>(27 - 48)          | 33<br>(24 - 43)          |
| Brain and nervous system cancer      | 63<br>(42 - 78)             | 4<br>(1 - 8)          | 6<br>(4 - 10)          | 29<br>(19 - 37)          | 17<br>(10 - 23)          | 7<br>(4 - 11)            |
| Thyroid cancer                       | 15<br>(10 - 21)             | --                    | 0<br>(0 - 0)           | 2<br>(1 - 2)             | 9<br>(5 - 15)            | 4<br>(3 - 5)             |
| Mesothelioma                         | 11<br>(6 - 17)              | --                    | --                     | 2<br>(1 - 3)             | 6<br>(3 - 11)            | 3<br>(1 - 5)             |
| Hodgkin lymphoma                     | 34<br>(24 - 43)             | 2<br>(1 - 4)          | 2<br>(1 - 4)           | 10<br>(7 - 16)           | 12<br>(7 - 17)           | 8<br>(4 - 13)            |
| Non-Hodgkin lymphoma                 | 290<br>(179 - 385)          | 59<br>(21 - 113)      | 39<br>(19 - 65)        | 80<br>(56 - 109)         | 72<br>(49 - 104)         | 40<br>(24 - 57)          |
| Multiple myeloma                     | 35<br>(26 - 44)             | --                    | --                     | 8<br>(5 - 12)            | 17<br>(13 - 22)          | 10<br>(7 - 14)           |
| Leukemia                             | 99<br>(80 - 119)            | 8<br>(4 - 15)         | 13<br>(8 - 19)         | 42<br>(30 - 53)          | 20<br>(16 - 26)          | 15<br>(12 - 19)          |
| Other neoplasms                      | 466<br>(303 - 583)          | 93<br>(46 - 154)      | 42<br>(25 - 65)        | 105<br>(68 - 143)        | 128<br>(81 - 169)        | 98<br>(62 - 133)         |
| Cardiovascular diseases              | 11,887<br>(10,433 - 13,785) | 205<br>(128 - 304)    | 67<br>(46 - 92)        | 1,496<br>(1,202 - 1,909) | 4,593<br>(3,912 - 5,476) | 5,526<br>(4,859 - 6,388) |
| Rheumatic heart disease              | 471<br>(329 - 748)          | 9<br>(4 - 22)         | 15<br>(9 - 24)         | 171<br>(116 - 268)       | 171<br>(113 - 288)       | 104<br>(68 - 178)        |
| Ischemic heart disease               | 3,074<br>(2,273 - 3,908)    | 1<br>(0 - 3)          | 3<br>(1 - 4)           | 299<br>(204 - 453)       | 1,257<br>(922 - 1,595)   | 1,514<br>(1,111 - 1,973) |
| Cerebrovascular disease              | 4,868<br>(4,070 - 5,983)    | 26<br>(15 - 41)       | 9<br>(6 - 14)          | 441<br>(329 - 575)       | 1,901<br>(1,540 - 2,359) | 2,490<br>(2,043 - 3,095) |
| Ischemic stroke                      | 1,830<br>(728 - 2,586)      | 2<br>(0 - 5)          | 1<br>(0 - 2)           | 53<br>(13 - 88)          | 518<br>(170 - 788)       | 1,255<br>(543 - 1,770)   |
| Hemorrhagic stroke                   | 3,038<br>(2,216 - 4,632)    | 24<br>(14 - 38)       | 8<br>(5 - 13)          | 388<br>(286 - 512)       | 1,383<br>(1,033 - 2,030) | 1,236<br>(783 - 2,170)   |
| Hypertensive heart disease           | 1,196<br>(743 - 2,145)      | 4<br>(1 - 8)          | 2<br>(1 - 3)           | 102<br>(61 - 160)        | 410<br>(245 - 681)       | 679<br>(391 - 1,348)     |
| Cardiomyopathy and myocarditis       | 617<br>(442 - 794)          | 88<br>(39 - 152)      | 19<br>(10 - 29)        | 161<br>(104 - 219)       | 198<br>(141 - 267)       | 151<br>(100 - 248)       |
| Atrial fibrillation and flutter      | 2<br>(1 - 4)                | --                    | --                     | 0<br>(0 - 0)             | 0<br>(0 - 1)             | 1<br>(0 - 2)             |
| Aortic aneurysm                      | 105<br>(51 - 234)           | --                    | --                     | 15<br>(6 - 32)           | 42<br>(19 - 90)          | 48<br>(23 - 114)         |
| Peripheral vascular disease          | 2<br>(1 - 6)                | --                    | --                     | 0<br>(0 - 0)             | 1<br>(0 - 2)             | 2<br>(1 - 4)             |
| Endocarditis                         | 140<br>(97 - 196)           | 11<br>(4 - 24)        | 3<br>(2 - 5)           | 37<br>(22 - 56)          | 44<br>(28 - 66)          | 46<br>(30 - 70)          |

Web Table 31- Burundi deaths with 95% UI by age, sex, and cause in 2013

| Cause                                               | Both Sexes, All Ages     | Both Sexes, 0-4 Years | Both Sexes, 5-14 Years | Both Sexes, 15-49 Years | Both Sexes, 50-69 Years | Both Sexes, 70-80 Years |
|-----------------------------------------------------|--------------------------|-----------------------|------------------------|-------------------------|-------------------------|-------------------------|
| Other cardiovascular and circulatory diseases       | 1,412<br>(968 - 2,027)   | 66<br>(33 - 115)      | 17<br>(9 - 27)         | 270<br>(172 - 413)      | 569<br>(367 - 859)      | 491<br>(304 - 834)      |
| Chronic respiratory diseases                        | 1,721<br>(1,423 - 2,007) | 124<br>(69 - 199)     | 23<br>(16 - 33)        | 220<br>(168 - 276)      | 607<br>(478 - 741)      | 746<br>(617 - 887)      |
| Chronic obstructive pulmonary disease               | 948<br>(784 - 1,176)     | 24<br>(12 - 43)       | 8<br>(5 - 12)          | 79<br>(59 - 103)        | 360<br>(283 - 458)      | 477<br>(383 - 601)      |
| Pneumoconiosis                                      | 97<br>(68 - 141)         | 3<br>(1 - 6)          | 1<br>(1 - 2)           | 23<br>(15 - 35)         | 40<br>(25 - 63)         | 30<br>(19 - 45)         |
| Silicosis                                           | 31<br>(18 - 54)          | 1<br>(0 - 2)          | 0<br>(0 - 1)           | 6<br>(3 - 11)           | 13<br>(7 - 25)          | 11<br>(6 - 19)          |
| Asbestosis                                          | 11<br>(6 - 17)           | 0<br>(0 - 1)          | 0<br>(0 - 0)           | 3<br>(2 - 5)            | 5<br>(2 - 9)            | 2<br>(1 - 4)            |
| Coal workers pneumoconiosis                         | 12<br>(7 - 20)           | 0<br>(0 - 1)          | 0<br>(0 - 0)           | 3<br>(2 - 4)            | 5<br>(3 - 9)            | 4<br>(2 - 7)            |
| Other pneumoconiosis                                | 43<br>(27 - 70)          | 1<br>(1 - 3)          | 0<br>(0 - 1)           | 11<br>(7 - 18)          | 17<br>(10 - 30)         | 13<br>(7 - 22)          |
| Asthma                                              | 329<br>(187 - 427)       | 24<br>(8 - 50)        | 6<br>(3 - 9)           | 50<br>(33 - 68)         | 122<br>(63 - 170)       | 127<br>(66 - 177)       |
| Interstitial lung disease and pulmonary sarcoidosis | 158<br>(50 - 268)        | 4<br>(1 - 13)         | 1<br>(0 - 3)           | 20<br>(7 - 39)          | 55<br>(18 - 96)         | 77<br>(20 - 141)        |
| Other chronic respiratory diseases                  | 189<br>(138 - 264)       | 70<br>(40 - 115)      | 7<br>(4 - 11)          | 48<br>(33 - 65)         | 29<br>(19 - 43)         | 35<br>(22 - 52)         |
| Cirrhosis                                           | 1,021<br>(704 - 1,389)   | 23<br>(10 - 49)       | 14<br>(9 - 20)         | 284<br>(191 - 397)      | 487<br>(326 - 677)      | 213<br>(139 - 296)      |
| Cirrhosis due to hepatitis B                        | 260<br>(166 - 437)       | 1<br>(0 - 2)          | 2<br>(1 - 3)           | 69<br>(43 - 111)        | 131<br>(80 - 224)       | 57<br>(30 - 102)        |
| Cirrhosis due to hepatitis C                        | 212<br>(112 - 330)       | 1<br>(0 - 2)          | 2<br>(1 - 3)           | 50<br>(19 - 83)         | 105<br>(55 - 174)       | 55<br>(30 - 83)         |
| Cirrhosis due to alcohol use                        | 391<br>(244 - 563)       | --                    | --                     | 103<br>(59 - 163)       | 201<br>(120 - 292)      | 87<br>(51 - 128)        |
| Cirrhosis due to other causes                       | 159<br>(105 - 226)       | 22<br>(9 - 46)        | 10<br>(6 - 15)         | 62<br>(38 - 91)         | 51<br>(30 - 77)         | 15<br>(9 - 23)          |
| Digestive diseases                                  | 1,765<br>(1,348 - 2,317) | 109<br>(51 - 218)     | 60<br>(39 - 87)        | 498<br>(368 - 668)      | 576<br>(424 - 771)      | 522<br>(386 - 687)      |
| Peptic ulcer disease                                | 520<br>(331 - 781)       | 11<br>(4 - 26)        | 6<br>(3 - 12)          | 129<br>(73 - 214)       | 199<br>(122 - 309)      | 176<br>(107 - 271)      |
| Gastritis and duodenitis                            | 65<br>(23 - 137)         | 6<br>(2 - 15)         | 4<br>(1 - 7)           | 17<br>(7 - 32)          | 18<br>(6 - 40)          | 20<br>(5 - 57)          |
| Appendicitis                                        | 134<br>(83 - 190)        | 12<br>(4 - 30)        | 11<br>(6 - 17)         | 46<br>(29 - 69)         | 36<br>(19 - 58)         | 30<br>(13 - 56)         |
| Paralytic ileus and intestinal obstruction          | 495<br>(316 - 732)       | 20<br>(8 - 44)        | 21<br>(12 - 34)        | 150<br>(80 - 223)       | 157<br>(95 - 242)       | 146<br>(86 - 252)       |
| Inguinal, femoral, and abdominal hernia             | 25<br>(15 - 37)          | 2<br>(1 - 5)          | 1<br>(0 - 1)           | 9<br>(5 - 14)           | 5<br>(3 - 9)            | 8<br>(5 - 14)           |
| Inflammatory bowel disease                          | 115<br>(73 - 179)        | 27<br>(11 - 60)       | 5<br>(3 - 9)           | 33<br>(20 - 54)         | 26<br>(15 - 45)         | 23<br>(14 - 41)         |
| Vascular intestinal disorders                       | 11<br>(5 - 20)           | 0<br>(0 - 1)          | 0<br>(0 - 1)           | 2<br>(1 - 4)            | 4<br>(2 - 7)            | 5<br>(2 - 9)            |
| Gallbladder and biliary diseases                    | 105<br>(66 - 148)        | 3<br>(1 - 6)          | 2<br>(1 - 3)           | 21<br>(13 - 30)         | 38<br>(23 - 58)         | 41<br>(23 - 66)         |
| Pancreatitis                                        | 78<br>(28 - 138)         | 2<br>(0 - 4)          | 1<br>(0 - 2)           | 35<br>(12 - 62)         | 26<br>(9 - 48)          | 15<br>(5 - 32)          |
| Other digestive diseases                            | 217<br>(134 - 356)       | 26<br>(9 - 56)        | 9<br>(5 - 16)          | 57<br>(32 - 102)        | 68<br>(39 - 121)        | 57<br>(32 - 97)         |
| Neurological disorders                              | 832<br>(680 - 1,020)     | 107<br>(54 - 204)     | 55<br>(35 - 91)        | 217<br>(149 - 329)      | 82<br>(65 - 102)        | 372<br>(309 - 452)      |
| Alzheimer disease and other dementias               | 360<br>(297 - 443)       | --                    | --                     | 0<br>(0 - 1)            | 35<br>(27 - 44)         | 325<br>(267 - 405)      |
| Parkinson disease                                   | 5<br>(3 - 9)             | --                    | --                     | 1<br>(0 - 1)            | 1<br>(0 - 2)            | 4<br>(2 - 7)            |
| Epilepsy                                            | 404<br>(283 - 565)       | 92<br>(43 - 185)      | 50<br>(31 - 87)        | 196<br>(130 - 306)      | 31<br>(22 - 45)         | 35<br>(21 - 58)         |
| Multiple sclerosis                                  | 2<br>(1 - 4)             | --                    | --                     | 1<br>(0 - 2)            | 1<br>(0 - 1)            | 0<br>(0 - 0)            |
| Other neurological disorders                        | 60<br>(39 - 84)          | 15<br>(8 - 35)        | 4<br>(3 - 6)           | 19<br>(11 - 26)         | 14<br>(10 - 19)         | 7<br>(5 - 10)           |
| Mental and substance use disorders                  | 484<br>(324 - 705)       | 20<br>(4 - 45)        | 0<br>(0 - 0)           | 325<br>(214 - 465)      | 117<br>(71 - 193)       | 21<br>(11 - 36)         |
| Schizophrenia                                       | 35<br>(9 - 76)           | --                    | --                     | 18<br>(5 - 42)          | 12<br>(3 - 25)          | 5<br>(1 - 10)           |
| Alcohol use disorders                               | 289<br>(162 - 471)       | --                    | --                     | 187<br>(98 - 299)       | 90<br>(52 - 160)        | 12<br>(7 - 22)          |
| Drug use disorders                                  | 160<br>(84 - 231)        | 20<br>(4 - 45)        | --                     | 120<br>(69 - 169)       | 16<br>(7 - 28)          | 4<br>(1 - 9)            |
| Opioid use disorders                                | 17<br>(9 - 25)           | 2<br>(0 - 5)          | --                     | 13<br>(7 - 18)          | 1<br>(1 - 3)            | 0<br>(0 - 1)            |
| Cocaine use disorders                               | 1<br>(0 - 1)             | 0<br>(0 - 0)          | --                     | 1<br>(0 - 1)            | 0<br>(0 - 0)            | 0<br>(0 - 0)            |
| Amphetamine use disorders                           | 0<br>(0 - 1)             | 0<br>(0 - 0)          | --                     | 0<br>(0 - 1)            | 0<br>(0 - 0)            | 0<br>(0 - 0)            |

Web Table 31- Burundi deaths with 95% UI by age, sex, and cause in 2013

| Cause                                               | Both Sexes, All Ages     | Both Sexes, 0-4 Years  | Both Sexes, 5-14 Years | Both Sexes, 15-49 Years | Both Sexes, 50-69 Years | Both Sexes, 70-80 Years |
|-----------------------------------------------------|--------------------------|------------------------|------------------------|-------------------------|-------------------------|-------------------------|
| Other drug use disorders                            | 142<br>(74 - 205)        | 17<br>(4 - 40)         | --                     | 106<br>(61 - 150)       | 14<br>(6 - 25)          | 4<br>(1 - 8)            |
| Eating disorders                                    | 0<br>(0 - 0)             | --                     | 0<br>(0 - 0)           | 0<br>(0 - 0)            | --                      | --                      |
| Anorexia nervosa                                    | 0<br>(0 - 0)             | --                     | 0<br>(0 - 0)           | 0<br>(0 - 0)            | --                      | --                      |
| Diabetes, urogenital, blood, and endocrine diseases | 2,614<br>(2,144 - 3,034) | 340<br>(192 - 532)     | 84<br>(55 - 120)       | 584<br>(444 - 710)      | 849<br>(695 - 1,018)    | 758<br>(635 - 883)      |
| Diabetes mellitus                                   | 1,106<br>(921 - 1,316)   | 11<br>(7 - 17)         | 4<br>(3 - 6)           | 140<br>(106 - 177)      | 503<br>(404 - 626)      | 447<br>(360 - 546)      |
| Acute glomerulonephritis                            | 33<br>(15 - 53)          | 4<br>(2 - 8)           | 1<br>(1 - 3)           | 9<br>(5 - 15)           | 12<br>(4 - 24)          | 6<br>(2 - 12)           |
| Chronic kidney disease                              | 413<br>(297 - 518)       | 39<br>(20 - 62)        | 14<br>(8 - 21)         | 131<br>(82 - 182)       | 109<br>(80 - 144)       | 120<br>(79 - 157)       |
| Chronic kidney disease due to diabetes mellitus     | 2<br>(1 - 4)             | 0<br>(0 - 0)           | 0<br>(0 - 0)           | 1<br>(0 - 1)            | 1<br>(0 - 1)            | 0<br>(0 - 1)            |
| Chronic kidney disease due to hypertension          | 142<br>(91 - 199)        | 4<br>(1 - 9)           | 1<br>(1 - 3)           | 29<br>(17 - 46)         | 49<br>(30 - 72)         | 59<br>(34 - 84)         |
| Chronic kidney disease due to glomerulonephritis    | 155<br>(104 - 210)       | 25<br>(14 - 41)        | 9<br>(6 - 14)          | 57<br>(38 - 86)         | 35<br>(21 - 50)         | 28<br>(14 - 42)         |
| Chronic kidney disease due to other causes          | 114<br>(47 - 180)        | 9<br>(3 - 19)          | 4<br>(1 - 7)           | 44<br>(14 - 74)         | 25<br>(12 - 44)         | 33<br>(12 - 59)         |
| Urinary diseases and male infertility               | 375<br>(260 - 473)       | 34<br>(18 - 60)        | 8<br>(5 - 12)          | 110<br>(62 - 154)       | 125<br>(79 - 171)       | 98<br>(68 - 131)        |
| Interstitial nephritis and urinary tract infections | 265<br>(172 - 347)       | 23<br>(11 - 44)        | 4<br>(2 - 7)           | 74<br>(38 - 109)        | 89<br>(53 - 127)        | 75<br>(51 - 104)        |
| Urolithiasis                                        | 15<br>(8 - 26)           | --                     | 1<br>(0 - 1)           | 5<br>(3 - 10)           | 6<br>(3 - 11)           | 3<br>(1 - 7)            |
| Other urinary diseases                              | 95<br>(59 - 141)         | 12<br>(5 - 24)         | 3<br>(1 - 4)           | 31<br>(16 - 48)         | 31<br>(17 - 52)         | 20<br>(9 - 37)          |
| Gynecological diseases                              | 4<br>(2 - 8)             | --                     | --                     | 1<br>(1 - 4)            | 2<br>(1 - 4)            | 1<br>(0 - 2)            |
| Uterine fibroids                                    | 1<br>(0 - 2)             | --                     | --                     | 0<br>(0 - 1)            | 0<br>(0 - 1)            | 0<br>(0 - 1)            |
| Polycystic ovarian syndrome                         | 0<br>(0 - 0)             | --                     | --                     | 0<br>(0 - 0)            | 0<br>(0 - 0)            | --                      |
| Endometriosis                                       | 0<br>(0 - 1)             | --                     | --                     | 0<br>(0 - 1)            | 0<br>(0 - 0)            | --                      |
| Genital prolapse                                    | 1<br>(0 - 1)             | --                     | --                     | 0<br>(0 - 1)            | 0<br>(0 - 1)            | 0<br>(0 - 0)            |
| Other gynecological diseases                        | 2<br>(1 - 4)             | --                     | --                     | 1<br>(0 - 2)            | 1<br>(0 - 2)            | 0<br>(0 - 1)            |
| Hemoglobinopathies and hemolytic anemias            | 367<br>(170 - 568)       | 177<br>(64 - 325)      | 45<br>(21 - 74)        | 98<br>(45 - 174)        | 30<br>(13 - 63)         | 18<br>(7 - 44)          |
| Thalassemias                                        | 7<br>(3 - 11)            | 5<br>(2 - 9)           | 1<br>(0 - 1)           | 1<br>(0 - 2)            | 0<br>(0 - 0)            | 0<br>(0 - 0)            |
| Sickle cell disorders                               | 307<br>(141 - 480)       | 150<br>(52 - 285)      | 42<br>(20 - 69)        | 89<br>(41 - 158)        | 24<br>(11 - 49)         | 1<br>(0 - 2)            |
| G6PD deficiency                                     | 12<br>(5 - 18)           | 7<br>(3 - 13)          | 1<br>(0 - 2)           | 2<br>(1 - 4)            | 1<br>(0 - 2)            | 0<br>(0 - 1)            |
| Other hemoglobinopathies and hemolytic anemias      | 42<br>(19 - 79)          | 14<br>(6 - 22)         | 2<br>(1 - 3)           | 5<br>(2 - 11)           | 5<br>(2 - 12)           | 16<br>(7 - 41)          |
| Endocrine, metabolic, blood, and immune disorders   | 317<br>(174 - 421)       | 75<br>(46 - 114)       | 11<br>(7 - 19)         | 95<br>(46 - 142)        | 67<br>(33 - 93)         | 68<br>(25 - 98)         |
| Musculoskeletal disorders                           | 82<br>(46 - 115)         | --                     | 7<br>(3 - 11)          | 37<br>(18 - 55)         | 24<br>(14 - 35)         | 14<br>(9 - 24)          |
| Rheumatoid arthritis                                | 27<br>(14 - 44)          | --                     | 2<br>(1 - 4)           | 8<br>(4 - 12)           | 10<br>(5 - 16)          | 7<br>(4 - 15)           |
| Other musculoskeletal disorders                     | 55<br>(27 - 79)          | --                     | 5<br>(2 - 8)           | 29<br>(14 - 44)         | 14<br>(7 - 21)          | 7<br>(4 - 11)           |
| Other non-communicable diseases                     | 2,230<br>(1,325 - 3,994) | 1,844<br>(974 - 3,562) | 77<br>(45 - 139)       | 128<br>(95 - 159)       | 76<br>(58 - 97)         | 105<br>(71 - 145)       |
| Congenital anomalies                                | 1,904<br>(1,023 - 3,674) | 1,738<br>(885 - 3,469) | 72<br>(39 - 133)       | 69<br>(47 - 96)         | 13<br>(9 - 19)          | 12<br>(8 - 17)          |
| Neural tube defects                                 | 578<br>(198 - 1,214)     | 546<br>(183 - 1,169)   | 15<br>(4 - 34)         | 14<br>(4 - 28)          | 2<br>(0 - 4)            | 1<br>(0 - 2)            |
| Congenital heart anomalies                          | 750<br>(290 - 1,858)     | 672<br>(238 - 1,743)   | 35<br>(16 - 74)        | 33<br>(17 - 51)         | 5<br>(3 - 8)            | 5<br>(3 - 8)            |
| Cleft lip and cleft palate                          | 12<br>(1 - 32)           | 12<br>(1 - 32)         | --                     | --                      | --                      | --                      |
| Down syndrome                                       | 129<br>(28 - 359)        | 110<br>(21 - 328)      | 8<br>(2 - 18)          | 9<br>(3 - 17)           | 2<br>(1 - 4)            | 0<br>(0 - 1)            |
| Chromosomal unbalanced rearrangements               | 65<br>(12 - 208)         | 60<br>(10 - 200)       | 2<br>(0 - 5)           | 2<br>(1 - 5)            | 0<br>(0 - 1)            | 0<br>(0 - 1)            |
| Other congenital anomalies                          | 370<br>(103 - 1,201)     | 338<br>(85 - 1,143)    | 12<br>(4 - 33)         | 11<br>(5 - 25)          | 4<br>(2 - 8)            | 5<br>(3 - 9)            |
| Skin and subcutaneous diseases                      | 302<br>(213 - 413)       | 82<br>(42 - 149)       | 6<br>(4 - 8)           | 58<br>(38 - 84)         | 63<br>(44 - 84)         | 93<br>(60 - 133)        |
| Cellulitis                                          | 124<br>(30 - 225)        | 32<br>(7 - 71)         | 2<br>(1 - 5)           | 24<br>(7 - 50)          | 28<br>(7 - 54)          | 37<br>(7 - 77)          |



Web Table 31- Burundi deaths with 95% UI by age, sex, and cause in 2013

| Cause                                           | Both Sexes, All Ages     | Both Sexes, 0-4 Years  | Both Sexes, 5-14 Years | Both Sexes, 15-49 Years  | Both Sexes, 50-69 Years | Both Sexes, 70-80 Years |
|-------------------------------------------------|--------------------------|------------------------|------------------------|--------------------------|-------------------------|-------------------------|
| Pyoderma                                        | 151<br>(54 - 266)        | 48<br>(13 - 106)       | 3<br>(1 - 5)           | 29<br>(9 - 53)           | 31<br>(10 - 53)         | 41<br>(15 - 73)         |
| Decubitus ulcer                                 | 22<br>(8 - 44)           | 1<br>(0 - 2)           | 0<br>(0 - 1)           | 3<br>(1 - 6)             | 4<br>(1 - 7)            | 14<br>(4 - 31)          |
| Other skin and subcutaneous diseases            | 4<br>(1 - 9)             | 1<br>(0 - 3)           | 0<br>(0 - 0)           | 1<br>(0 - 3)             | 1<br>(0 - 2)            | 1<br>(0 - 2)            |
| Sudden infant death syndrome                    | 24<br>(6 - 73)           | 24<br>(6 - 73)         | --                     | --                       | --                      | --                      |
| Injuries                                        | 5,357<br>(4,373 - 8,807) | 1,304<br>(761 - 3,214) | 475<br>(339 - 821)     | 2,257<br>(1,738 - 3,442) | 820<br>(635 - 1,098)    | 500<br>(366 - 613)      |
| Transport injuries                              | 1,862<br>(1,461 - 2,358) | 231<br>(127 - 374)     | 174<br>(122 - 250)     | 942<br>(695 - 1,232)     | 349<br>(257 - 470)      | 165<br>(115 - 225)      |
| Road injuries                                   | 1,778<br>(1,394 - 2,250) | 209<br>(115 - 340)     | 162<br>(113 - 233)     | 919<br>(678 - 1,204)     | 335<br>(247 - 451)      | 154<br>(109 - 212)      |
| Pedestrian road injuries                        | 835<br>(555 - 1,131)     | 114<br>(58 - 194)      | 89<br>(55 - 134)       | 379<br>(224 - 561)       | 168<br>(111 - 236)      | 85<br>(55 - 126)        |
| Cyclist road injuries                           | 95<br>(54 - 158)         | 10<br>(4 - 24)         | 11<br>(5 - 20)         | 43<br>(21 - 76)          | 22<br>(13 - 37)         | 9<br>(5 - 16)           |
| Motorcyclist road injuries                      | 144<br>(82 - 267)        | 10<br>(5 - 21)         | 7<br>(3 - 14)          | 99<br>(52 - 187)         | 20<br>(10 - 38)         | 9<br>(5 - 16)           |
| Motor vehicle road injuries                     | 696<br>(498 - 953)       | 72<br>(37 - 127)       | 55<br>(33 - 86)        | 395<br>(275 - 550)       | 124<br>(82 - 179)       | 50<br>(32 - 75)         |
| Other road injuries                             | 8<br>(4 - 19)            | 2<br>(1 - 6)           | 1<br>(1 - 3)           | 2<br>(1 - 6)             | 2<br>(1 - 4)            | 1<br>(0 - 2)            |
| Other transport injuries                        | 83<br>(48 - 116)         | 23<br>(11 - 42)        | 12<br>(6 - 20)         | 23<br>(15 - 35)          | 14<br>(7 - 22)          | 11<br>(3 - 18)          |
| Unintentional injuries                          | 2,754<br>(1,997 - 6,158) | 1,063<br>(588 - 2,978) | 286<br>(181 - 626)     | 781<br>(556 - 1,559)     | 347<br>(240 - 579)      | 278<br>(179 - 383)      |
| Falls                                           | 223<br>(118 - 290)       | 30<br>(15 - 50)        | 18<br>(8 - 29)         | 70<br>(37 - 104)         | 40<br>(20 - 59)         | 65<br>(30 - 101)        |
| Drowning                                        | 668<br>(433 - 1,147)     | 251<br>(125 - 459)     | 116<br>(63 - 220)      | 235<br>(143 - 460)       | 48<br>(30 - 79)         | 18<br>(10 - 30)         |
| Fire, heat, and hot substances                  | 422<br>(260 - 650)       | 214<br>(94 - 406)      | 37<br>(21 - 63)        | 85<br>(57 - 135)         | 49<br>(28 - 77)         | 37<br>(21 - 58)         |
| Poisonings                                      | 114<br>(66 - 168)        | 37<br>(14 - 74)        | 5<br>(3 - 9)           | 50<br>(30 - 76)          | 17<br>(7 - 26)          | 5<br>(2 - 7)            |
| Exposure to mechanical forces                   | 616<br>(188 - 4,103)     | 298<br>(48 - 2,382)    | 54<br>(15 - 388)       | 165<br>(66 - 854)        | 74<br>(20 - 325)        | 25<br>(6 - 103)         |
| Unintentional firearm injuries                  | 53<br>(36 - 78)          | 8<br>(4 - 16)          | 3<br>(1 - 5)           | 34<br>(21 - 56)          | 5<br>(3 - 8)            | 3<br>(2 - 4)            |
| Unintentional suffocation                       | 410<br>(27 - 3,873)      | 239<br>(18 - 2,332)    | 35<br>(3 - 368)        | 86<br>(6 - 784)          | 39<br>(2 - 293)         | 12<br>(1 - 93)          |
| Other exposure to mechanical forces             | 153<br>(54 - 222)        | 50<br>(14 - 99)        | 17<br>(6 - 30)         | 45<br>(24 - 71)          | 29<br>(7 - 47)          | 11<br>(2 - 17)          |
| Adverse effects of medical treatment            | 348<br>(217 - 512)       | 112<br>(49 - 206)      | 12<br>(7 - 18)         | 67<br>(46 - 93)          | 70<br>(41 - 119)        | 87<br>(41 - 155)        |
| Animal contact                                  | 158<br>(90 - 239)        | 40<br>(18 - 85)        | 22<br>(12 - 41)        | 50<br>(26 - 82)          | 29<br>(14 - 45)         | 17<br>(7 - 25)          |
| Venomous animal contact                         | 87<br>(40 - 138)         | 27<br>(10 - 64)        | 10<br>(4 - 21)         | 26<br>(11 - 46)          | 14<br>(5 - 23)          | 10<br>(2 - 17)          |
| Non-venomous animal contact                     | 71<br>(38 - 125)         | 13<br>(5 - 31)         | 12<br>(6 - 26)         | 23<br>(11 - 45)          | 16<br>(6 - 26)          | 6<br>(3 - 13)           |
| Foreign body                                    | 87<br>(44 - 138)         | 53<br>(25 - 91)        | 5<br>(3 - 9)           | 9<br>(5 - 15)            | 5<br>(3 - 10)           | 14<br>(5 - 24)          |
| Pulmonary aspiration and foreign body in airway | 77<br>(36 - 124)         | 50<br>(23 - 86)        | 4<br>(2 - 6)           | 7<br>(3 - 11)            | 3<br>(2 - 5)            | 13<br>(4 - 22)          |
| Foreign body in other body part                 | 9<br>(4 - 36)            | 3<br>(1 - 12)          | 1<br>(0 - 5)           | 2<br>(1 - 7)             | 2<br>(1 - 6)            | 1<br>(1 - 5)            |
| Other unintentional injuries                    | 119<br>(72 - 218)        | 29<br>(13 - 58)        | 16<br>(8 - 30)         | 51<br>(28 - 102)         | 14<br>(8 - 26)          | 9<br>(5 - 17)           |
| Self-harm and interpersonal violence            | 740<br>(480 - 1,229)     | 10<br>(5 - 18)         | 15<br>(8 - 30)         | 534<br>(338 - 913)       | 125<br>(74 - 213)       | 57<br>(30 - 94)         |
| Self-harm                                       | 611<br>(372 - 1,041)     | --                     | 11<br>(5 - 26)         | 425<br>(248 - 723)       | 118<br>(68 - 208)       | 57<br>(29 - 94)         |
| Interpersonal violence                          | 129<br>(89 - 199)        | 10<br>(5 - 18)         | 4<br>(2 - 7)           | 109<br>(71 - 174)        | 6<br>(4 - 11)           | 1<br>(0 - 1)            |
| Assault by firearm                              | 47<br>(26 - 86)          | 2<br>(1 - 4)           | 1<br>(0 - 2)           | 42<br>(23 - 78)          | 2<br>(1 - 4)            | 0<br>(0 - 0)            |
| Assault by sharp object                         | 26<br>(15 - 47)          | 2<br>(1 - 3)           | 1<br>(0 - 1)           | 23<br>(12 - 42)          | 1<br>(1 - 3)            | 0<br>(0 - 0)            |
| Assault by other means                          | 56<br>(34 - 88)          | 6<br>(3 - 12)          | 3<br>(1 - 5)           | 44<br>(23 - 70)          | 3<br>(2 - 5)            | 0<br>(0 - 1)            |

Web Table 31- Burundi deaths with 95% UI by age, sex, and cause in 2013

| Cause                                                             | Males, All Ages             | Males, 0-4 Years            | Males, 5-14 Years        | Males, 15-49 Years         | Males, 50-69 Years        | Males, 70-80 Years       |
|-------------------------------------------------------------------|-----------------------------|-----------------------------|--------------------------|----------------------------|---------------------------|--------------------------|
| All causes                                                        | 49,465<br>(44,431 - 55,573) | 20,875<br>(17,505 - 25,127) | 1,686<br>(1,456 - 2,063) | 11,228<br>(9,945 - 12,513) | 9,187<br>(7,897 - 10,711) | 6,489<br>(5,867 - 7,263) |
| Communicable, maternal, neonatal, and nutritional diseases        | 32,720<br>(28,630 - 37,169) | 18,636<br>(15,167 - 22,608) | 1,150<br>(950 - 1,421)   | 6,656<br>(5,734 - 7,584)   | 3,963<br>(3,216 - 4,726)  | 2,316<br>(1,910 - 2,801) |
| HIV/AIDS and tuberculosis                                         | 8,137<br>(6,281 - 10,134)   | 515<br>(315 - 818)          | 274<br>(216 - 347)       | 4,365<br>(3,428 - 5,367)   | 2,259<br>(1,578 - 3,032)  | 724<br>(446 - 1,040)     |
| Tuberculosis                                                      | 5,140<br>(3,037 - 7,242)    | 344<br>(136 - 673)          | 65<br>(31 - 116)         | 2,328<br>(1,290 - 3,408)   | 1,720<br>(1,010 - 2,527)  | 683<br>(406 - 998)       |
| HIV/AIDS                                                          | 2,997<br>(2,222 - 4,069)    | 171<br>(87 - 274)           | 209<br>(153 - 271)       | 2,038<br>(1,437 - 2,894)   | 539<br>(350 - 885)        | 41<br>(24 - 64)          |
| HIV/AIDS resulting in mycobacterial infection                     | 220<br>(152 - 307)          | 12<br>(6 - 19)              | 13<br>(9 - 18)           | 149<br>(99 - 219)          | 42<br>(25 - 71)           | 3<br>(2 - 5)             |
| HIV/AIDS resulting in other diseases                              | 2,778<br>(2,057 - 3,788)    | 159<br>(82 - 255)           | 196<br>(144 - 254)       | 1,889<br>(1,333 - 2,694)   | 497<br>(323 - 822)        | 37<br>(22 - 59)          |
| Diarrhea, lower respiratory, and other common infectious diseases | 9,908<br>(7,178 - 12,603)   | 5,641<br>(3,367 - 8,059)    | 430<br>(285 - 607)       | 1,371<br>(941 - 1,798)     | 1,229<br>(820 - 1,691)    | 1,237<br>(877 - 1,625)   |
| Diarrheal diseases                                                | 3,890<br>(2,366 - 5,858)    | 2,092<br>(861 - 4,006)      | 161<br>(69 - 293)        | 617<br>(348 - 920)         | 541<br>(274 - 880)        | 479<br>(259 - 755)       |
| Intestinal infectious diseases                                    | 232<br>(114 - 429)          | 89<br>(35 - 194)            | 59<br>(26 - 108)         | 74<br>(34 - 141)           | 8<br>(3 - 17)             | 2<br>(1 - 5)             |
| Typhoid fever                                                     | 166<br>(78 - 315)           | 59<br>(21 - 130)            | 44<br>(20 - 86)          | 56<br>(24 - 108)           | 6<br>(2 - 12)             | 2<br>(1 - 3)             |
| Paratyphoid fever                                                 | 47<br>(21 - 90)             | 19<br>(6 - 46)              | 12<br>(5 - 27)           | 14<br>(6 - 30)             | 1<br>(0 - 3)              | 0<br>(0 - 1)             |
| Other intestinal infectious diseases                              | 18<br>(8 - 32)              | 11<br>(3 - 23)              | 2<br>(0 - 6)             | 4<br>(1 - 12)              | 1<br>(0 - 4)              | 0<br>(0 - 3)             |
| Lower respiratory infections                                      | 4,421<br>(2,845 - 6,156)    | 2,575<br>(1,345 - 4,070)    | 122<br>(66 - 199)        | 433<br>(269 - 636)         | 572<br>(354 - 834)        | 719<br>(470 - 1,005)     |
| Upper respiratory infections                                      | 10<br>(4 - 25)              | 5<br>(0 - 18)               | 0<br>(0 - 1)             | 3<br>(1 - 8)               | 2<br>(0 - 5)              | 1<br>(0 - 3)             |
| Otitis media                                                      | 7<br>(3 - 12)               | 3<br>(1 - 8)                | 0<br>(0 - 1)             | 1<br>(1 - 2)               | 1<br>(0 - 1)              | 1<br>(0 - 1)             |
| Meningitis                                                        | 1,074<br>(679 - 1,686)      | 653<br>(310 - 1,286)        | 76<br>(36 - 145)         | 216<br>(129 - 350)         | 97<br>(56 - 157)          | 32<br>(18 - 55)          |
| Pneumococcal meningitis                                           | 244<br>(143 - 396)          | 115<br>(44 - 244)           | 24<br>(10 - 47)          | 65<br>(32 - 107)           | 30<br>(13 - 59)           | 10<br>(4 - 19)           |
| H influenzae type B meningitis                                    | 259<br>(138 - 481)          | 204<br>(91 - 420)           | 17<br>(7 - 34)           | 27<br>(11 - 47)            | 9<br>(4 - 18)             | 3<br>(1 - 6)             |
| Meningococcal meningitis                                          | 139<br>(80 - 231)           | 69<br>(26 - 153)            | 8<br>(3 - 17)            | 35<br>(17 - 69)            | 20<br>(9 - 36)            | 7<br>(2 - 15)            |
| Other meningitis                                                  | 432<br>(264 - 706)          | 265<br>(121 - 523)          | 26<br>(9 - 53)           | 89<br>(41 - 153)           | 39<br>(21 - 67)           | 13<br>(6 - 23)           |
| Encephalitis                                                      | 39<br>(22 - 64)             | 24<br>(10 - 50)             | 2<br>(1 - 4)             | 8<br>(4 - 12)              | 3<br>(1 - 5)              | 1<br>(1 - 2)             |
| Diphtheria                                                        | 3<br>(0 - 21)               | 3<br>(0 - 20)               | 0<br>(0 - 3)             | 0<br>(0 - 1)               | 0<br>(0 - 0)              | --<br>(0 - 0)            |
| Whooping cough                                                    | 8<br>(0 - 46)               | 8<br>(0 - 44)               | 0<br>(0 - 2)             | 0<br>(0 - 0)               | 0<br>(0 - 0)              | --<br>(0 - 0)            |
| Tetanus                                                           | 147<br>(50 - 322)           | 122<br>(27 - 299)           | 3<br>(1 - 5)             | 16<br>(6 - 28)             | 5<br>(2 - 10)             | 1<br>(0 - 2)             |
| Measles                                                           | 73<br>(12 - 252)            | 66<br>(11 - 230)            | 6<br>(1 - 19)            | 1<br>(0 - 3)               | 0<br>(0 - 0)              | --<br>(0 - 0)            |
| Varicella and herpes zoster                                       | 4<br>(1 - 10)               | 2<br>(0 - 8)                | 0<br>(0 - 1)             | 1<br>(0 - 3)               | 0<br>(0 - 1)              | 1<br>(0 - 3)             |
| Neglected tropical diseases and malaria                           | 6,095<br>(3,610 - 9,636)    | 5,061<br>(2,621 - 8,616)    | 309<br>(159 - 477)       | 535<br>(335 - 839)         | 138<br>(75 - 257)         | 52<br>(24 - 120)         |
| Malaria                                                           | 5,362<br>(2,862 - 8,974)    | 4,835<br>(2,367 - 8,467)    | 144<br>(66 - 304)        | 252<br>(126 - 505)         | 91<br>(37 - 207)          | 39<br>(13 - 107)         |
| Leishmaniasis                                                     | 648<br>(347 - 1,103)        | 199<br>(52 - 483)           | 154<br>(50 - 292)        | 255<br>(109 - 451)         | 33<br>(14 - 69)           | 7<br>(3 - 17)            |
| Visceral leishmaniasis                                            | 648<br>(347 - 1,103)        | 199<br>(52 - 483)           | 154<br>(50 - 292)        | 255<br>(109 - 451)         | 33<br>(14 - 69)           | 7<br>(3 - 17)            |
| Schistosomiasis                                                   | 22<br>(15 - 31)             | 0<br>(0 - 1)                | 1<br>(0 - 1)             | 11<br>(6 - 16)             | 8<br>(4 - 12)             | 2<br>(1 - 4)             |
| Cysticercosis                                                     | 2<br>(2 - 3)                | 0<br>(0 - 0)                | 0<br>(0 - 0)             | 1<br>(1 - 2)               | 0<br>(0 - 1)              | 0<br>(0 - 0)             |
| Cystic echinococcosis                                             | 2<br>(2 - 3)                | 0<br>(0 - 1)                | 0<br>(0 - 0)             | 1<br>(1 - 1)               | 0<br>(0 - 0)              | 0<br>(0 - 0)             |
| Dengue                                                            | 2<br>(1 - 2)                | 0<br>(0 - 1)                | 0<br>(0 - 0)             | 1<br>(0 - 1)               | 0<br>(0 - 0)              | 0<br>(0 - 0)             |
| Yellow fever                                                      | 5<br>(3 - 9)                | 0<br>(0 - 2)                | 1<br>(0 - 3)             | 3<br>(1 - 6)               | 1<br>(0 - 1)              | 0<br>(0 - 1)             |
| Rabies                                                            | 23<br>(6 - 41)              | 6<br>(1 - 18)               | 7<br>(2 - 14)            | 8<br>(2 - 12)              | 2<br>(0 - 4)              | 0<br>(0 - 1)             |
| Intestinal nematode infections                                    | 17<br>(6 - 38)              | 14<br>(4 - 34)              | 2<br>(0 - 7)             | 1<br>(0 - 5)               | 0<br>(0 - 3)              | 0<br>(0 - 2)             |
| Ascariasis                                                        | 17<br>(6 - 38)              | 14<br>(4 - 34)              | 2<br>(0 - 7)             | 1<br>(0 - 5)               | 0<br>(0 - 3)              | 0<br>(0 - 2)             |
| Other neglected tropical diseases                                 | 11<br>(6 - 23)              | 5<br>(2 - 10)               | 0<br>(0 - 1)             | 3<br>(1 - 6)               | 2<br>(1 - 5)              | 2<br>(1 - 4)             |

Web Table 31- Burundi deaths with 95% UI by age, sex, and cause in 2013

| Cause                                                            | Males, All Ages             | Males, 0-4 Years         | Males, 5-14 Years  | Males, 15-49 Years       | Males, 50-69 Years       | Males, 70-80 Years       |
|------------------------------------------------------------------|-----------------------------|--------------------------|--------------------|--------------------------|--------------------------|--------------------------|
| Maternal disorders                                               | --                          | --                       | --                 | --                       | --                       | --                       |
| Maternal hemorrhage                                              | --                          | --                       | --                 | --                       | --                       | --                       |
| Maternal sepsis and other maternal infections                    | --                          | --                       | --                 | --                       | --                       | --                       |
| Maternal hypertensive disorders                                  | --                          | --                       | --                 | --                       | --                       | --                       |
| Maternal obstructed labor                                        | --                          | --                       | --                 | --                       | --                       | --                       |
| Maternal abortive outcome                                        | --                          | --                       | --                 | --                       | --                       | --                       |
| Indirect maternal deaths                                         | --                          | --                       | --                 | --                       | --                       | --                       |
| Late maternal deaths                                             | --                          | --                       | --                 | --                       | --                       | --                       |
| Maternal deaths aggravated by HIV/AIDS                           | --                          | --                       | --                 | --                       | --                       | --                       |
| Other maternal disorders                                         | --                          | --                       | --                 | --                       | --                       | --                       |
| Neonatal disorders                                               | 5,407<br>(3,966 - 7,062)    | 5,407<br>(3,966 - 7,062) | --                 | --                       | --                       | --                       |
| Neonatal preterm birth complications                             | 1,843<br>(768 - 3,302)      | 1,843<br>(768 - 3,302)   | --                 | --                       | --                       | --                       |
| Neonatal encephalopathy due to birth asphyxia and trauma         | 1,303<br>(496 - 2,453)      | 1,303<br>(496 - 2,453)   | --                 | --                       | --                       | --                       |
| Neonatal sepsis and other neonatal infections                    | 1,230<br>(406 - 2,610)      | 1,230<br>(406 - 2,610)   | --                 | --                       | --                       | --                       |
| Hemolytic disease and other neonatal jaundice                    | 35<br>(8 - 93)              | 35<br>(8 - 93)           | --                 | --                       | --                       | --                       |
| Other neonatal disorders                                         | 995<br>(275 - 2,513)        | 995<br>(275 - 2,513)     | --                 | --                       | --                       | --                       |
| Nutritional deficiencies                                         | 2,531<br>(1,490 - 3,928)    | 1,585<br>(752 - 2,701)   | 101<br>(54 - 166)  | 298<br>(179 - 499)       | 274<br>(163 - 457)       | 273<br>(156 - 453)       |
| Protein-energy malnutrition                                      | 2,026<br>(1,096 - 3,238)    | 1,414<br>(640 - 2,501)   | 82<br>(40 - 141)   | 162<br>(70 - 317)        | 185<br>(89 - 324)        | 182<br>(85 - 329)        |
| Iodine deficiency                                                | 1<br>(0 - 7)                | 1<br>(0 - 6)             | 0<br>(0 - 0)       | 0<br>(0 - 2)             | 0<br>(0 - 1)             | 0<br>(0 - 1)             |
| Iron-deficiency anemia                                           | 495<br>(186 - 1,052)        | 169<br>(27 - 500)        | 19<br>(5 - 45)     | 132<br>(51 - 252)        | 86<br>(29 - 192)         | 89<br>(28 - 202)         |
| Other nutritional deficiencies                                   | 9<br>(3 - 22)               | 1<br>(0 - 4)             | 0<br>(0 - 1)       | 4<br>(1 - 8)             | 2<br>(1 - 5)             | 2<br>(1 - 5)             |
| Other communicable, maternal, neonatal, and nutritional diseases | 643<br>(405 - 954)          | 427<br>(227 - 694)       | 36<br>(22 - 59)    | 86<br>(53 - 140)         | 64<br>(33 - 120)         | 30<br>(13 - 66)          |
| Sexually transmitted diseases excluding HIV                      | 361<br>(190 - 602)          | 325<br>(164 - 547)       | 24<br>(13 - 42)    | 5<br>(3 - 8)             | 5<br>(1 - 10)            | 2<br>(1 - 4)             |
| Syphilis                                                         | 357<br>(186 - 596)          | 325<br>(164 - 547)       | 24<br>(13 - 42)    | 3<br>(1 - 4)             | 3<br>(1 - 7)             | 2<br>(1 - 4)             |
| Chlamydial infection                                             | --                          | --                       | --                 | --                       | --                       | --                       |
| Gonococcal infection                                             | 3<br>(1 - 4)                | --                       | 0<br>(0 - 0)       | 1<br>(1 - 2)             | 1<br>(0 - 2)             | 0<br>(0 - 1)             |
| Other sexually transmitted diseases                              | 2<br>(1 - 3)                | --                       | 0<br>(0 - 0)       | 1<br>(1 - 2)             | 0<br>(0 - 1)             | 0<br>(0 - 0)             |
| Hepatitis                                                        | 67<br>(50 - 88)             | 11<br>(5 - 22)           | 4<br>(2 - 6)       | 31<br>(21 - 45)          | 17<br>(11 - 24)          | 4<br>(3 - 7)             |
| Acute hepatitis A                                                | 7<br>(2 - 15)               | 4<br>(1 - 10)            | 1<br>(0 - 2)       | 2<br>(0 - 4)             | 0<br>(0 - 0)             | 0<br>(0 - 0)             |
| Acute hepatitis B                                                | 40<br>(26 - 57)             | 7<br>(3 - 15)            | 2<br>(1 - 3)       | 14<br>(7 - 24)           | 13<br>(8 - 19)           | 4<br>(2 - 6)             |
| Acute hepatitis C                                                | 1<br>(0 - 2)                | --                       | 0<br>(0 - 0)       | 0<br>(0 - 1)             | 0<br>(0 - 1)             | 0<br>(0 - 0)             |
| Acute hepatitis E                                                | 19<br>(10 - 32)             | 0<br>(0 - 1)             | 1<br>(0 - 1)       | 15<br>(8 - 24)           | 3<br>(1 - 7)             | 0<br>(0 - 1)             |
| Other infectious diseases                                        | 215<br>(106 - 456)          | 91<br>(35 - 255)         | 8<br>(3 - 21)      | 50<br>(23 - 104)         | 42<br>(14 - 96)          | 24<br>(7 - 58)           |
| Non-communicable diseases                                        | 13,220<br>(11,095 - 15,593) | 1,533<br>(835 - 2,955)   | 255<br>(189 - 346) | 2,794<br>(2,119 - 3,456) | 4,714<br>(3,764 - 5,878) | 3,925<br>(3,400 - 4,574) |
| Neoplasms                                                        | 1,856<br>(1,482 - 2,249)    | 87<br>(37 - 152)         | 57<br>(36 - 82)    | 420<br>(307 - 539)       | 824<br>(632 - 1,038)     | 469<br>(386 - 565)       |
| Esophageal cancer                                                | 221<br>(121 - 357)          | --                       | --                 | 25<br>(15 - 39)          | 137<br>(70 - 228)        | 59<br>(32 - 99)          |
| Stomach cancer                                                   | 180<br>(142 - 227)          | --                       | --                 | 35<br>(24 - 47)          | 90<br>(67 - 120)         | 55<br>(40 - 73)          |
| Liver cancer                                                     | 220<br>(155 - 309)          | --                       | 3<br>(1 - 5)       | 82<br>(42 - 124)         | 100<br>(68 - 145)        | 35<br>(24 - 50)          |
| Liver cancer due to hepatitis B                                  | 71<br>(34 - 120)            | --                       | 1<br>(0 - 2)       | 33<br>(14 - 55)          | 30<br>(13 - 58)          | 8<br>(3 - 15)            |
| Liver cancer due to hepatitis C                                  | 88<br>(38 - 154)            | --                       | 1<br>(0 - 2)       | 30<br>(15 - 57)          | 43<br>(12 - 80)          | 15<br>(5 - 28)           |

Web Table 31- Burundi deaths with 95% UI by age, sex, and cause in 2013

| Cause                                | Males, All Ages          | Males, 0-4 Years | Males, 5-14 Years | Males, 15-49 Years   | Males, 50-69 Years       | Males, 70-80 Years       |
|--------------------------------------|--------------------------|------------------|-------------------|----------------------|--------------------------|--------------------------|
| Liver cancer due to alcohol use      | 34<br>(16 - 62)          | --               | --                | 7<br>(3 - 15)        | 18<br>(8 - 35)           | 9<br>(4 - 16)            |
| Liver cancer due to other causes     | 26<br>(14 - 46)          | --               | 1<br>(0 - 3)      | 12<br>(4 - 23)       | 10<br>(4 - 20)           | 3<br>(1 - 5)             |
| Larynx cancer                        | 27<br>(18 - 36)          | --               | --                | 4<br>(2 - 6)         | 14<br>(9 - 20)           | 9<br>(6 - 12)            |
| Tracheal, bronchus and lung cancer   | 147<br>(114 - 186)       | --               | --                | 12<br>(8 - 18)       | 99<br>(74 - 131)         | 35<br>(27 - 45)          |
| Breast cancer                        | 13<br>(8 - 20)           | --               | --                | 3<br>(2 - 5)         | 7<br>(4 - 12)            | 3<br>(2 - 6)             |
| Cervical cancer                      | --                       | --               | --                | --                   | --                       | --                       |
| Uterine cancer                       | --                       | --               | --                | --                   | --                       | --                       |
| Prostate cancer                      | 138<br>(84 - 194)        | --               | --                | 3<br>(1 - 6)         | 45<br>(26 - 69)          | 90<br>(56 - 132)         |
| Colon and rectum cancer              | 168<br>(129 - 212)       | --               | --                | 53<br>(37 - 70)      | 75<br>(55 - 100)         | 40<br>(30 - 52)          |
| Lip and oral cavity cancer           | 32<br>(19 - 43)          | --               | --                | 7<br>(4 - 11)        | 17<br>(10 - 24)          | 8<br>(5 - 12)            |
| Nasopharynx cancer                   | 11<br>(8 - 16)           | --               | 0<br>(0 - 1)      | 6<br>(4 - 9)         | 4<br>(2 - 6)             | 1<br>(1 - 1)             |
| Other pharynx cancer                 | 18<br>(9 - 26)           | --               | --                | 5<br>(2 - 7)         | 10<br>(5 - 15)           | 4<br>(2 - 5)             |
| Gallbladder and biliary tract cancer | 17<br>(11 - 24)          | --               | --                | 7<br>(3 - 10)        | 7<br>(4 - 11)            | 4<br>(2 - 6)             |
| Pancreatic cancer                    | 45<br>(34 - 58)          | --               | --                | 11<br>(7 - 14)       | 26<br>(19 - 36)          | 8<br>(6 - 11)            |
| Malignant skin melanoma              | 9<br>(4 - 15)            | --               | --                | 4<br>(2 - 6)         | 3<br>(2 - 6)             | 2<br>(1 - 3)             |
| Non-melanoma skin cancer             | 9<br>(5 - 14)            | --               | --                | 1<br>(1 - 2)         | 4<br>(2 - 7)             | 4<br>(2 - 6)             |
| Ovarian cancer                       | --                       | --               | --                | --                   | --                       | --                       |
| Testicular cancer                    | 10<br>(6 - 14)           | --               | --                | 6<br>(3 - 9)         | 3<br>(2 - 6)             | 1<br>(1 - 2)             |
| Kidney cancer                        | 34<br>(24 - 48)          | 7<br>(2 - 14)    | 2<br>(1 - 4)      | 4<br>(3 - 6)         | 16<br>(11 - 24)          | 5<br>(3 - 8)             |
| Bladder cancer                       | 58<br>(43 - 77)          | --               | --                | 6<br>(4 - 9)         | 26<br>(18 - 37)          | 25<br>(18 - 36)          |
| Brain and nervous system cancer      | 35<br>(17 - 47)          | 0<br>(0 - 1)     | 5<br>(2 - 7)      | 14<br>(8 - 21)       | 12<br>(5 - 17)           | 5<br>(2 - 7)             |
| Thyroid cancer                       | 4<br>(3 - 5)             | --               | 0<br>(0 - 0)      | 1<br>(0 - 1)         | 2<br>(1 - 3)             | 1<br>(1 - 2)             |
| Mesothelioma                         | 8<br>(3 - 13)            | --               | --                | 1<br>(0 - 1)         | 5<br>(2 - 9)             | 2<br>(1 - 4)             |
| Hodgkin lymphoma                     | 16<br>(11 - 23)          | 1<br>(1 - 3)     | 1<br>(0 - 3)      | 6<br>(4 - 11)        | 5<br>(3 - 8)             | 3<br>(1 - 4)             |
| Non-Hodgkin lymphoma                 | 160<br>(94 - 216)        | 31<br>(9 - 65)   | 23<br>(11 - 41)   | 49<br>(32 - 69)      | 39<br>(24 - 61)          | 19<br>(11 - 29)          |
| Multiple myeloma                     | 17<br>(11 - 24)          | --               | --                | 4<br>(2 - 6)         | 8<br>(5 - 12)            | 5<br>(3 - 8)             |
| Leukemia                             | 52<br>(39 - 66)          | 4<br>(2 - 8)     | 6<br>(3 - 9)      | 26<br>(18 - 35)      | 9<br>(6 - 13)            | 7<br>(5 - 9)             |
| Other neoplasms                      | 208<br>(122 - 274)       | 44<br>(21 - 76)  | 17<br>(9 - 27)    | 46<br>(29 - 65)      | 61<br>(31 - 88)          | 40<br>(21 - 60)          |
| Cardiovascular diseases              | 5,304<br>(4,387 - 6,463) | 94<br>(51 - 170) | 32<br>(20 - 49)   | 829<br>(605 - 1,068) | 2,266<br>(1,783 - 2,903) | 2,083<br>(1,762 - 2,476) |
| Rheumatic heart disease              | 195<br>(112 - 384)       | 5<br>(1 - 14)    | 7<br>(4 - 14)     | 77<br>(43 - 141)     | 69<br>(35 - 147)         | 37<br>(19 - 79)          |
| Ischemic heart disease               | 1,419<br>(995 - 1,905)   | 1<br>(0 - 2)     | 2<br>(1 - 3)      | 183<br>(111 - 262)   | 685<br>(466 - 947)       | 549<br>(377 - 739)       |
| Cerebrovascular disease              | 2,254<br>(1,654 - 2,862) | 13<br>(6 - 25)   | 6<br>(3 - 10)     | 257<br>(152 - 360)   | 963<br>(686 - 1,278)     | 1,014<br>(752 - 1,297)   |
| Ischemic stroke                      | 817<br>(175 - 1,313)     | 1<br>(0 - 3)     | 1<br>(0 - 1)      | 32<br>(4 - 64)       | 278<br>(49 - 479)        | 505<br>(115 - 797)       |
| Hemorrhagic stroke                   | 1,437<br>(976 - 2,197)   | 12<br>(6 - 23)   | 5<br>(3 - 9)      | 225<br>(145 - 310)   | 685<br>(470 - 1,016)     | 509<br>(289 - 891)       |
| Hypertensive heart disease           | 410<br>(175 - 824)       | 1<br>(0 - 3)     | 1<br>(0 - 1)      | 49<br>(21 - 92)      | 168<br>(67 - 346)        | 192<br>(71 - 418)        |
| Cardiomyopathy and myocarditis       | 286<br>(173 - 405)       | 37<br>(9 - 74)   | 7<br>(3 - 14)     | 87<br>(45 - 136)     | 101<br>(60 - 154)        | 53<br>(31 - 87)          |
| Atrial fibrillation and flutter      | 0<br>(0 - 1)             | --               | --                | 0<br>(0 - 0)         | 0<br>(0 - 0)             | 0<br>(0 - 1)             |
| Aortic aneurysm                      | 47<br>(18 - 91)          | --               | --                | 7<br>(2 - 14)        | 21<br>(8 - 41)           | 19<br>(7 - 38)           |
| Peripheral vascular disease          | 1<br>(0 - 3)             | --               | --                | 0<br>(0 - 0)         | 0<br>(0 - 1)             | 1<br>(0 - 2)             |
| Endocarditis                         | 74<br>(40 - 127)         | 4<br>(1 - 10)    | 1<br>(1 - 3)      | 22<br>(11 - 39)      | 27<br>(14 - 49)          | 21<br>(11 - 38)          |

Web Table 31- Burundi deaths with 95% UI by age, sex, and cause in 2013

| Cause                                               | Males, All Ages      | Males, 0-4 Years | Males, 5-14 Years | Males, 15-49 Years | Males, 50-69 Years | Males, 70-80 Years |
|-----------------------------------------------------|----------------------|------------------|-------------------|--------------------|--------------------|--------------------|
| Other cardiovascular and circulatory diseases       | 617<br>(348 - 1,049) | 32<br>(13 - 63)  | 8<br>(4 - 15)     | 147<br>(78 - 231)  | 233<br>(121 - 423) | 197<br>(104 - 347) |
| Chronic respiratory diseases                        | 913<br>(715 - 1,131) | 53<br>(26 - 99)  | 9<br>(6 - 13)     | 123<br>(88 - 158)  | 330<br>(242 - 446) | 398<br>(310 - 505) |
| Chronic obstructive pulmonary disease               | 517<br>(404 - 680)   | 12<br>(4 - 26)   | 4<br>(2 - 6)      | 50<br>(35 - 69)    | 195<br>(139 - 270) | 257<br>(192 - 346) |
| Pneumoconiosis                                      | 92<br>(63 - 135)     | 2<br>(1 - 5)     | 1<br>(0 - 1)      | 21<br>(13 - 33)    | 39<br>(24 - 62)    | 29<br>(19 - 44)    |
| Silicosis                                           | 31<br>(18 - 53)      | 1<br>(0 - 2)     | 0<br>(0 - 0)      | 6<br>(3 - 11)      | 13<br>(7 - 25)     | 11<br>(6 - 19)     |
| Asbestosis                                          | 10<br>(6 - 17)       | 0<br>(0 - 1)     | 0<br>(0 - 0)      | 3<br>(1 - 5)       | 5<br>(2 - 8)       | 2<br>(1 - 4)       |
| Coal workers pneumoconiosis                         | 12<br>(7 - 19)       | 0<br>(0 - 0)     | 0<br>(0 - 0)      | 3<br>(2 - 4)       | 5<br>(3 - 9)       | 4<br>(2 - 6)       |
| Other pneumoconiosis                                | 40<br>(23 - 66)      | 1<br>(0 - 2)     | 0<br>(0 - 0)      | 10<br>(6 - 17)     | 16<br>(9 - 29)     | 12<br>(7 - 21)     |
| Asthma                                              | 151<br>(64 - 214)    | 3<br>(1 - 7)     | 1<br>(1 - 2)      | 24<br>(11 - 35)    | 56<br>(22 - 87)    | 67<br>(28 - 103)   |
| Interstitial lung disease and pulmonary sarcoidosis | 68<br>(24 - 120)     | 1<br>(0 - 5)     | 0<br>(0 - 1)      | 8<br>(3 - 17)      | 26<br>(9 - 52)     | 32<br>(10 - 63)    |
| Other chronic respiratory diseases                  | 85<br>(53 - 124)     | 35<br>(17 - 67)  | 3<br>(2 - 5)      | 20<br>(12 - 31)    | 14<br>(7 - 22)     | 13<br>(7 - 21)     |
| Cirrhosis                                           | 633<br>(391 - 925)   | 13<br>(4 - 31)   | 7<br>(4 - 11)     | 206<br>(125 - 308) | 302<br>(179 - 462) | 106<br>(62 - 160)  |
| Cirrhosis due to hepatitis B                        | 131<br>(55 - 231)    | 0<br>(0 - 1)     | 1<br>(0 - 2)      | 42<br>(17 - 72)    | 65<br>(26 - 121)   | 23<br>(9 - 44)     |
| Cirrhosis due to hepatitis C                        | 139<br>(63 - 236)    | 1<br>(0 - 1)     | 1<br>(0 - 2)      | 39<br>(13 - 72)    | 69<br>(30 - 124)   | 29<br>(13 - 52)    |
| Cirrhosis due to alcohol use                        | 276<br>(153 - 441)   | --               | --                | 87<br>(46 - 147)   | 141<br>(75 - 230)  | 48<br>(24 - 75)    |
| Cirrhosis due to other causes                       | 87<br>(48 - 142)     | 12<br>(4 - 29)   | 5<br>(3 - 8)      | 39<br>(20 - 65)    | 25<br>(11 - 49)    | 6<br>(2 - 11)      |
| Digestive diseases                                  | 975<br>(683 - 1,431) | 53<br>(21 - 128) | 33<br>(20 - 52)   | 342<br>(227 - 501) | 321<br>(211 - 476) | 226<br>(156 - 335) |
| Peptic ulcer disease                                | 309<br>(177 - 523)   | 6<br>(1 - 18)    | 4<br>(1 - 9)      | 95<br>(47 - 177)   | 121<br>(65 - 209)  | 84<br>(45 - 143)   |
| Gastritis and duodenitis                            | 30<br>(8 - 87)       | 3<br>(0 - 8)     | 2<br>(0 - 3)      | 10<br>(3 - 27)     | 9<br>(2 - 27)      | 7<br>(1 - 28)      |
| Appendicitis                                        | 60<br>(33 - 98)      | 4<br>(1 - 13)    | 5<br>(2 - 10)     | 27<br>(14 - 49)    | 15<br>(7 - 27)     | 9<br>(4 - 16)      |
| Paralytic ileus and intestinal obstruction          | 286<br>(147 - 446)   | 9<br>(3 - 26)    | 12<br>(6 - 21)    | 109<br>(49 - 174)  | 91<br>(44 - 151)   | 64<br>(31 - 122)   |
| Inguinal, femoral, and abdominal hernia             | 12<br>(6 - 21)       | 0<br>(0 - 0)     | 0<br>(0 - 1)      | 4<br>(2 - 8)       | 4<br>(2 - 7)       | 4<br>(2 - 6)       |
| Inflammatory bowel disease                          | 53<br>(26 - 105)     | 13<br>(3 - 36)   | 3<br>(1 - 5)      | 17<br>(8 - 36)     | 11<br>(5 - 26)     | 9<br>(3 - 22)      |
| Vascular intestinal disorders                       | 6<br>(2 - 13)        | 0<br>(0 - 1)     | 0<br>(0 - 1)      | 1<br>(0 - 3)       | 2<br>(1 - 5)       | 2<br>(1 - 4)       |
| Gallbladder and biliary diseases                    | 37<br>(21 - 59)      | 1<br>(0 - 3)     | 1<br>(0 - 1)      | 9<br>(5 - 15)      | 13<br>(6 - 22)     | 14<br>(6 - 24)     |
| Pancreatitis                                        | 47<br>(12 - 101)     | 1<br>(0 - 2)     | 1<br>(0 - 1)      | 25<br>(7 - 51)     | 14<br>(3 - 33)     | 6<br>(1 - 17)      |
| Other digestive diseases                            | 135<br>(65 - 261)    | 16<br>(5 - 41)   | 6<br>(2 - 13)     | 42<br>(19 - 83)    | 42<br>(18 - 91)    | 29<br>(12 - 65)    |
| Neurological disorders                              | 436<br>(332 - 570)   | 45<br>(17 - 95)  | 32<br>(18 - 63)   | 141<br>(89 - 226)  | 39<br>(29 - 52)    | 179<br>(139 - 232) |
| Alzheimer disease and other dementias               | 170<br>(129 - 222)   | --               | --                | 0<br>(0 - 0)       | 18<br>(12 - 26)    | 151<br>(114 - 200) |
| Parkinson disease                                   | 3<br>(1 - 7)         | --               | --                | 0<br>(0 - 0)       | 0<br>(0 - 0)       | 3<br>(1 - 6)       |
| Epilepsy                                            | 229<br>(151 - 347)   | 36<br>(13 - 87)  | 30<br>(16 - 61)   | 127<br>(78 - 209)  | 14<br>(9 - 22)     | 22<br>(11 - 38)    |
| Multiple sclerosis                                  | 1<br>(0 - 1)         | --               | --                | 0<br>(0 - 1)       | 0<br>(0 - 0)       | 0<br>(0 - 0)       |
| Other neurological disorders                        | 33<br>(16 - 54)      | 8<br>(2 - 27)    | 2<br>(1 - 4)      | 13<br>(6 - 19)     | 7<br>(4 - 10)      | 3<br>(2 - 5)       |
| Mental and substance use disorders                  | 361<br>(228 - 586)   | 15<br>(3 - 38)   | 0<br>(0 - 0)      | 252<br>(151 - 387) | 82<br>(48 - 158)   | 12<br>(7 - 21)     |
| Schizophrenia                                       | 10<br>(2 - 41)       | --               | --                | 6<br>(1 - 25)      | 3<br>(1 - 12)      | 1<br>(0 - 4)       |
| Alcohol use disorders                               | 232<br>(121 - 434)   | --               | --                | 154<br>(77 - 275)  | 69<br>(38 - 145)   | 9<br>(5 - 17)      |
| Drug use disorders                                  | 119<br>(61 - 166)    | 15<br>(3 - 38)   | --                | 92<br>(49 - 126)   | 10<br>(5 - 14)     | 2<br>(1 - 3)       |
| Opioid use disorders                                | 13<br>(6 - 18)       | 2<br>(0 - 5)     | --                | 10<br>(5 - 14)     | 1<br>(0 - 1)       | 0<br>(0 - 0)       |
| Cocaine use disorders                               | 0<br>(0 - 1)         | 0<br>(0 - 0)     | --                | 0<br>(0 - 1)       | 0<br>(0 - 0)       | 0<br>(0 - 0)       |
| Amphetamine use disorders                           | 0<br>(0 - 0)         | 0<br>(0 - 0)     | --                | 0<br>(0 - 0)       | 0<br>(0 - 0)       | 0<br>(0 - 0)       |

Web Table 31- Burundi deaths with 95% UI by age, sex, and cause in 2013

| Cause                                               | Males, All Ages          | Males, 0-4 Years     | Males, 5-14 Years | Males, 15-49 Years | Males, 50-69 Years | Males, 70-80 Years |
|-----------------------------------------------------|--------------------------|----------------------|-------------------|--------------------|--------------------|--------------------|
| Other drug use disorders                            | 105<br>(54 - 146)        | 13<br>(3 - 34)       | --                | 81<br>(44 - 112)   | 9<br>(4 - 13)      | 2<br>(1 - 3)       |
| Eating disorders                                    | 0<br>(0 - 0)             | --                   | 0<br>(0 - 0)      | 0<br>(0 - 0)       | --                 | --                 |
| Anorexia nervosa                                    | 0<br>(0 - 0)             | --                   | 0<br>(0 - 0)      | 0<br>(0 - 0)       | --                 | --                 |
| Diabetes, urogenital, blood, and endocrine diseases | 1,545<br>(1,249 - 1,869) | 194<br>(109 - 325)   | 46<br>(28 - 75)   | 393<br>(291 - 500) | 502<br>(384 - 644) | 410<br>(326 - 510) |
| Diabetes mellitus                                   | 658<br>(502 - 831)       | 10<br>(5 - 16)       | 3<br>(2 - 5)      | 101<br>(71 - 136)  | 303<br>(218 - 412) | 241<br>(176 - 322) |
| Acute glomerulonephritis                            | 14<br>(4 - 26)           | 2<br>(1 - 6)         | 1<br>(0 - 1)      | 1<br>(0 - 2)       | 7<br>(1 - 15)      | 3<br>(1 - 7)       |
| Chronic kidney disease                              | 238<br>(158 - 318)       | 24<br>(12 - 43)      | 6<br>(3 - 10)     | 94<br>(53 - 134)   | 56<br>(37 - 85)    | 57<br>(39 - 83)    |
| Chronic kidney disease due to diabetes mellitus     | 1<br>(0 - 3)             | 0<br>(0 - 0)         | 0<br>(0 - 0)      | 0<br>(0 - 1)       | 0<br>(0 - 1)       | 0<br>(0 - 1)       |
| Chronic kidney disease due to hypertension          | 80<br>(45 - 124)         | 3<br>(1 - 7)         | 1<br>(0 - 1)      | 20<br>(10 - 33)    | 28<br>(14 - 46)    | 30<br>(15 - 48)    |
| Chronic kidney disease due to glomerulonephritis    | 82<br>(52 - 122)         | 15<br>(8 - 26)       | 4<br>(2 - 6)      | 36<br>(22 - 55)    | 15<br>(8 - 26)     | 12<br>(5 - 21)     |
| Chronic kidney disease due to other causes          | 75<br>(29 - 129)         | 6<br>(2 - 14)        | 2<br>(1 - 3)      | 38<br>(11 - 66)    | 13<br>(5 - 29)     | 16<br>(4 - 34)     |
| Urinary diseases and male infertility               | 268<br>(174 - 366)       | 23<br>(9 - 46)       | 5<br>(3 - 8)      | 83<br>(45 - 123)   | 87<br>(50 - 131)   | 70<br>(44 - 103)   |
| Interstitial nephritis and urinary tract infections | 184<br>(112 - 259)       | 16<br>(6 - 36)       | 3<br>(2 - 5)      | 55<br>(26 - 85)    | 59<br>(32 - 91)    | 51<br>(31 - 80)    |
| Urolithiasis                                        | 7<br>(3 - 18)            | --                   | 0<br>(0 - 1)      | 3<br>(1 - 7)       | 3<br>(1 - 7)       | 1<br>(0 - 5)       |
| Other urinary diseases                              | 77<br>(42 - 123)         | 7<br>(2 - 18)        | 2<br>(1 - 3)      | 26<br>(12 - 41)    | 25<br>(12 - 48)    | 17<br>(7 - 34)     |
| Gynecological diseases                              | --                       | --                   | --                | --                 | --                 | --                 |
| Uterine fibroids                                    | --                       | --                   | --                | --                 | --                 | --                 |
| Polycystic ovarian syndrome                         | --                       | --                   | --                | --                 | --                 | --                 |
| Endometriosis                                       | --                       | --                   | --                | --                 | --                 | --                 |
| Genital prolapse                                    | --                       | --                   | --                | --                 | --                 | --                 |
| Other gynecological diseases                        | --                       | --                   | --                | --                 | --                 | --                 |
| Hemoglobinopathies and hemolytic anemias            | 194<br>(79 - 385)        | 95<br>(31 - 194)     | 23<br>(9 - 53)    | 52<br>(19 - 137)   | 14<br>(5 - 50)     | 9<br>(3 - 34)      |
| Thalassemias                                        | 3<br>(1 - 6)             | 2<br>(1 - 5)         | 0<br>(0 - 1)      | 0<br>(0 - 1)       | 0<br>(0 - 0)       | 0<br>(0 - 0)       |
| Sickle cell disorders                               | 162<br>(66 - 313)        | 82<br>(26 - 170)     | 22<br>(8 - 50)    | 47<br>(17 - 123)   | 11<br>(4 - 40)     | 1<br>(0 - 2)       |
| G6PD deficiency                                     | 7<br>(3 - 14)            | 5<br>(2 - 9)         | 1<br>(0 - 1)      | 1<br>(0 - 3)       | 0<br>(0 - 1)       | 0<br>(0 - 1)       |
| Other hemoglobinopathies and hemolytic anemias      | 21<br>(8 - 60)           | 6<br>(2 - 12)        | 1<br>(0 - 2)      | 3<br>(1 - 9)       | 3<br>(1 - 9)       | 8<br>(3 - 31)      |
| Endocrine, metabolic, blood, and immune disorders   | 173<br>(100 - 238)       | 40<br>(22 - 69)      | 7<br>(4 - 13)     | 61<br>(27 - 94)    | 35<br>(18 - 54)    | 29<br>(11 - 48)    |
| Musculoskeletal disorders                           | 55<br>(19 - 76)          | --                   | 6<br>(2 - 9)      | 25<br>(8 - 34)     | 16<br>(6 - 25)     | 9<br>(3 - 16)      |
| Rheumatoid arthritis                                | 14<br>(4 - 22)           | --                   | 1<br>(0 - 3)      | 4<br>(1 - 7)       | 5<br>(1 - 9)       | 4<br>(1 - 7)       |
| Other musculoskeletal disorders                     | 41<br>(15 - 59)          | --                   | 4<br>(1 - 7)      | 20<br>(7 - 29)     | 11<br>(4 - 18)     | 6<br>(2 - 10)      |
| Other non-communicable diseases                     | 1,142<br>(575 - 2,495)   | 979<br>(434 - 2,288) | 34<br>(18 - 67)   | 64<br>(45 - 86)    | 31<br>(21 - 44)    | 33<br>(20 - 48)    |
| Congenital anomalies                                | 1,006<br>(457 - 2,366)   | 929<br>(395 - 2,240) | 32<br>(15 - 65)   | 36<br>(23 - 52)    | 5<br>(3 - 9)       | 4<br>(2 - 6)       |
| Neural tube defects                                 | 294<br>(78 - 635)        | 279<br>(71 - 625)    | 7<br>(1 - 16)     | 7<br>(1 - 16)      | 1<br>(0 - 2)       | 0<br>(0 - 1)       |
| Congenital heart anomalies                          | 404<br>(128 - 1,196)     | 366<br>(104 - 1,130) | 16<br>(6 - 36)    | 17<br>(8 - 29)     | 2<br>(1 - 4)       | 1<br>(1 - 3)       |
| Cleft lip and cleft palate                          | 8<br>(1 - 27)            | 8<br>(1 - 27)        | --                | --                 | --                 | --                 |
| Down syndrome                                       | 63<br>(9 - 234)          | 56<br>(6 - 223)      | 3<br>(1 - 7)      | 4<br>(1 - 8)       | 1<br>(0 - 1)       | 0<br>(0 - 0)       |
| Chromosomal unbalanced rearrangements               | 20<br>(3 - 92)           | 19<br>(3 - 88)       | 1<br>(0 - 2)      | 1<br>(0 - 1)       | 0<br>(0 - 0)       | 0<br>(0 - 0)       |
| Other congenital anomalies                          | 216<br>(35 - 924)        | 201<br>(30 - 877)    | 6<br>(1 - 21)     | 6<br>(2 - 16)      | 2<br>(1 - 4)       | 2<br>(1 - 4)       |
| Skin and subcutaneous diseases                      | 117<br>(78 - 161)        | 32<br>(15 - 60)      | 2<br>(2 - 4)      | 28<br>(18 - 42)    | 26<br>(16 - 37)    | 29<br>(17 - 44)    |
| Cellulitis                                          | 39<br>(7 - 99)           | 10<br>(1 - 34)       | 1<br>(0 - 2)      | 10<br>(2 - 25)     | 9<br>(1 - 25)      | 9<br>(1 - 26)      |

Web Table 31- Burundi deaths with 95% UI by age, sex, and cause in 2013

| Cause                                           | Males, All Ages          | Males, 0-4 Years     | Males, 5-14 Years | Males, 15-49 Years   | Males, 50-69 Years | Males, 70-80 Years |
|-------------------------------------------------|--------------------------|----------------------|-------------------|----------------------|--------------------|--------------------|
| Pyoderma                                        | 68<br>(22 - 115)         | 20<br>(6 - 44)       | 1<br>(0 - 2)      | 16<br>(4 - 27)       | 15<br>(4 - 27)     | 16<br>(4 - 30)     |
| Decubitus ulcer                                 | 8<br>(2 - 20)            | 1<br>(0 - 2)         | 0<br>(0 - 0)      | 2<br>(0 - 5)         | 2<br>(0 - 4)       | 4<br>(1 - 10)      |
| Other skin and subcutaneous diseases            | 2<br>(0 - 6)             | 1<br>(0 - 2)         | 0<br>(0 - 0)      | 1<br>(0 - 2)         | 0<br>(0 - 1)       | 0<br>(0 - 1)       |
| Sudden infant death syndrome                    | 19<br>(3 - 63)           | 19<br>(3 - 63)       | --                | --                   | --                 | --                 |
|                                                 | 3,525                    | 706                  | 281               | 1,778                | 511                | 249                |
| Injuries                                        | (2,770 - 5,798)          | (355 - 1,605)        | (193 - 479)       | (1,325 - 2,784)      | (363 - 720)        | (177 - 318)        |
| Transport injuries                              | 1,354<br>(997 - 1,758)   | 141<br>(68 - 262)    | 109<br>(69 - 171) | 782<br>(550 - 1,056) | 224<br>(142 - 324) | 98<br>(60 - 143)   |
| Road injuries                                   | 1,310<br>(962 - 1,705)   | 129<br>(61 - 243)    | 103<br>(64 - 162) | 767<br>(540 - 1,040) | 217<br>(140 - 315) | 93<br>(58 - 138)   |
| Pedestrian road injuries                        | 576<br>(325 - 851)       | 70<br>(30 - 141)     | 53<br>(28 - 91)   | 311<br>(168 - 482)   | 97<br>(50 - 155)   | 45<br>(23 - 75)    |
| Cyclist road injuries                           | 81<br>(42 - 143)         | 8<br>(2 - 22)        | 9<br>(3 - 18)     | 41<br>(19 - 75)      | 16<br>(8 - 31)     | 8<br>(4 - 14)      |
| Motorcyclist road injuries                      | 120<br>(63 - 234)        | 7<br>(3 - 17)        | 5<br>(2 - 11)     | 86<br>(42 - 174)     | 15<br>(7 - 30)     | 6<br>(3 - 13)      |
| Motor vehicle road injuries                     | 525<br>(351 - 749)       | 42<br>(17 - 89)      | 35<br>(19 - 63)   | 328<br>(217 - 476)   | 87<br>(50 - 134)   | 33<br>(17 - 55)    |
| Other road injuries                             | 6<br>(3 - 16)            | 2<br>(1 - 5)         | 1<br>(0 - 3)      | 2<br>(0 - 6)         | 1<br>(0 - 3)       | 1<br>(0 - 2)       |
| Other transport injuries                        | 45<br>(18 - 65)          | 12<br>(3 - 26)       | 6<br>(2 - 12)     | 15<br>(8 - 25)       | 7<br>(2 - 12)      | 5<br>(1 - 9)       |
| Unintentional injuries                          | 1,573<br>(1,087 - 3,429) | 560<br>(262 - 1,432) | 161<br>(97 - 354) | 547<br>(373 - 1,159) | 192<br>(129 - 350) | 112<br>(73 - 161)  |
| Falls                                           | 126<br>(61 - 176)        | 16<br>(6 - 31)       | 12<br>(5 - 22)    | 55<br>(27 - 85)      | 24<br>(10 - 38)    | 20<br>(8 - 32)     |
| Drowning                                        | 415<br>(250 - 747)       | 127<br>(45 - 279)    | 70<br>(34 - 145)  | 183<br>(105 - 365)   | 26<br>(14 - 47)    | 9<br>(4 - 16)      |
| Fire, heat, and hot substances                  | 208<br>(114 - 354)       | 104<br>(38 - 227)    | 16<br>(8 - 30)    | 47<br>(29 - 77)      | 25<br>(13 - 43)    | 16<br>(8 - 26)     |
| Poisonings                                      | 70<br>(37 - 120)         | 18<br>(6 - 45)       | 3<br>(1 - 5)      | 39<br>(20 - 65)      | 8<br>(4 - 13)      | 2<br>(1 - 4)       |
| Exposure to mechanical forces                   | 386<br>(121 - 2,253)     | 169<br>(27 - 1,115)  | 31<br>(9 - 179)   | 120<br>(45 - 665)    | 53<br>(14 - 226)   | 13<br>(3 - 57)     |
| Unintentional firearm injuries                  | 32<br>(18 - 55)          | 4<br>(1 - 9)         | 1<br>(1 - 3)      | 23<br>(12 - 42)      | 3<br>(1 - 5)       | 1<br>(0 - 2)       |
| Unintentional suffocation                       | 260<br>(18 - 2,135)      | 140<br>(8 - 1,101)   | 19<br>(1 - 168)   | 63<br>(4 - 552)      | 30<br>(1 - 205)    | 7<br>(0 - 53)      |
| Other exposure to mechanical forces             | 94<br>(39 - 143)         | 25<br>(8 - 51)       | 11<br>(4 - 20)    | 34<br>(19 - 56)      | 21<br>(5 - 36)     | 4<br>(1 - 6)       |
| Adverse effects of medical treatment            | 172<br>(96 - 274)        | 66<br>(22 - 143)     | 5<br>(3 - 9)      | 33<br>(20 - 53)      | 32<br>(17 - 56)    | 35<br>(14 - 66)    |
| Animal contact                                  | 71<br>(32 - 109)         | 14<br>(5 - 33)       | 10<br>(4 - 21)    | 24<br>(10 - 41)      | 13<br>(5 - 22)     | 9<br>(2 - 16)      |
| Venomous animal contact                         | 31<br>(11 - 50)          | 4<br>(1 - 12)        | 2<br>(1 - 6)      | 11<br>(4 - 20)       | 7<br>(2 - 12)      | 6<br>(1 - 11)      |
| Non-venomous animal contact                     | 40<br>(18 - 65)          | 10<br>(4 - 22)       | 8<br>(3 - 17)     | 13<br>(5 - 23)       | 6<br>(3 - 11)      | 3<br>(1 - 6)       |
| Foreign body                                    | 43<br>(19 - 75)          | 27<br>(10 - 52)      | 3<br>(1 - 5)      | 6<br>(3 - 10)        | 3<br>(2 - 7)       | 4<br>(1 - 7)       |
| Pulmonary aspiration and foreign body in airway | 38<br>(14 - 66)          | 26<br>(9 - 50)       | 2<br>(1 - 3)      | 5<br>(2 - 8)         | 2<br>(1 - 3)       | 4<br>(1 - 6)       |
| Foreign body in other body part                 | 5<br>(2 - 19)            | 2<br>(1 - 7)         | 1<br>(0 - 3)      | 1<br>(0 - 4)         | 1<br>(1 - 4)       | 0<br>(0 - 1)       |
| Other unintentional injuries                    | 82<br>(45 - 163)         | 18<br>(7 - 41)       | 11<br>(5 - 24)    | 41<br>(21 - 85)      | 9<br>(4 - 19)      | 4<br>(2 - 9)       |
| Self-harm and interpersonal violence            | 598<br>(331 - 878)       | 5<br>(2 - 11)        | 11<br>(5 - 25)    | 449<br>(248 - 702)   | 94<br>(47 - 151)   | 38<br>(15 - 65)    |
| Self-harm                                       | 496<br>(240 - 756)       | --                   | 9<br>(3 - 23)     | 360<br>(176 - 590)   | 90<br>(43 - 145)   | 38<br>(15 - 65)    |
| Interpersonal violence                          | 101<br>(60 - 173)        | 5<br>(2 - 11)        | 2<br>(1 - 4)      | 89<br>(51 - 156)     | 5<br>(3 - 9)       | 0<br>(0 - 1)       |
| Assault by firearm                              | 41<br>(21 - 81)          | 1<br>(0 - 3)         | 1<br>(0 - 1)      | 38<br>(19 - 73)      | 2<br>(1 - 4)       | 0<br>(0 - 0)       |
| Assault by sharp object                         | 20<br>(9 - 40)           | 1<br>(0 - 2)         | 0<br>(0 - 1)      | 18<br>(8 - 35)       | 1<br>(1 - 2)       | 0<br>(0 - 0)       |
| Assault by other means                          | 40<br>(19 - 71)          | 3<br>(1 - 8)         | 1<br>(1 - 3)      | 34<br>(14 - 60)      | 2<br>(1 - 4)       | 0<br>(0 - 0)       |

Web Table 31- Burundi deaths with 95% UI by age, sex, and cause in 2013

| Cause                                                             | Females, All Ages           | Females, 0-4 Years          | Females, 5-14 Years      | Females, 15-49 Years      | Females, 50-69 Years     | Females, 70-80 Years     |
|-------------------------------------------------------------------|-----------------------------|-----------------------------|--------------------------|---------------------------|--------------------------|--------------------------|
| All causes                                                        | 45,069<br>(40,276 - 49,726) | 18,263<br>(14,715 - 21,768) | 1,663<br>(1,357 - 2,010) | 8,855<br>(7,704 - 10,016) | 8,152<br>(6,956 - 9,281) | 8,137<br>(7,281 - 8,947) |
| Communicable, maternal, neonatal, and nutritional diseases        | 29,298<br>(25,389 - 33,196) | 16,246<br>(12,916 - 19,860) | 1,224<br>(973 - 1,515)   | 6,346<br>(5,531 - 7,117)  | 2,940<br>(2,428 - 3,514) | 2,542<br>(2,025 - 3,172) |
| HIV/AIDS and tuberculosis                                         | 4,947<br>(3,423 - 6,500)    | 351<br>(215 - 553)          | 255<br>(192 - 327)       | 2,789<br>(1,973 - 3,691)  | 1,132<br>(711 - 1,606)   | 420<br>(235 - 662)       |
| Tuberculosis                                                      | 2,432<br>(1,539 - 3,512)    | 188<br>(89 - 362)           | 50<br>(24 - 88)          | 974<br>(600 - 1,480)      | 824<br>(494 - 1,246)     | 397<br>(215 - 631)       |
| HIV/AIDS                                                          | 2,515<br>(1,648 - 3,596)    | 163<br>(84 - 267)           | 206<br>(150 - 266)       | 1,815<br>(1,166 - 2,672)  | 308<br>(163 - 582)       | 23<br>(10 - 48)          |
| HIV/AIDS resulting in mycobacterial infection                     | 139<br>(84 - 206)           | 9<br>(4 - 14)               | 10<br>(7 - 14)           | 101<br>(62 - 151)         | 18<br>(9 - 35)           | 1<br>(1 - 3)             |
| HIV/AIDS resulting in other diseases                              | 2,376<br>(1,554 - 3,391)    | 154<br>(80 - 252)           | 196<br>(144 - 253)       | 1,715<br>(1,108 - 2,526)  | 290<br>(154 - 545)       | 22<br>(9 - 45)           |
| Diarrhea, lower respiratory, and other common infectious diseases | 9,086<br>(6,445 - 12,412)   | 4,658<br>(2,652 - 7,150)    | 437<br>(279 - 637)       | 1,075<br>(734 - 1,570)    | 1,296<br>(896 - 1,845)   | 1,620<br>(1,130 - 2,232) |
| Diarrheal diseases                                                | 3,492<br>(2,158 - 5,449)    | 1,621<br>(655 - 3,261)      | 145<br>(61 - 283)        | 481<br>(253 - 819)        | 582<br>(305 - 1,006)     | 664<br>(341 - 1,098)     |
| Intestinal infectious diseases                                    | 245<br>(116 - 452)          | 103<br>(40 - 213)           | 68<br>(29 - 133)         | 63<br>(27 - 126)          | 8<br>(3 - 18)            | 3<br>(1 - 6)             |
| Typhoid fever                                                     | 188<br>(84 - 358)           | 75<br>(27 - 164)            | 54<br>(23 - 103)         | 51<br>(20 - 101)          | 7<br>(2 - 14)            | 2<br>(1 - 4)             |
| Paratyphoid fever                                                 | 44<br>(18 - 88)             | 20<br>(6 - 46)              | 12<br>(5 - 28)           | 10<br>(3 - 23)            | 1<br>(0 - 3)             | 0<br>(0 - 1)             |
| Other intestinal infectious diseases                              | 13<br>(5 - 25)              | 8<br>(2 - 18)               | 1<br>(0 - 5)             | 2<br>(0 - 8)              | 1<br>(0 - 4)             | 0<br>(0 - 3)             |
| Lower respiratory infections                                      | 4,180<br>(2,644 - 5,992)    | 2,252<br>(1,082 - 3,746)    | 127<br>(66 - 225)        | 324<br>(200 - 500)        | 583<br>(371 - 856)       | 894<br>(576 - 1,296)     |
| Upper respiratory infections                                      | 9<br>(3 - 22)               | 4<br>(0 - 17)               | 0<br>(0 - 2)             | 2<br>(0 - 5)              | 2<br>(0 - 5)             | 1<br>(0 - 4)             |
| Otitis media                                                      | 6<br>(4 - 11)               | 3<br>(1 - 7)                | 0<br>(0 - 0)             | 0<br>(0 - 1)              | 1<br>(1 - 2)             | 1<br>(1 - 2)             |
| Meningitis                                                        | 957<br>(631 - 1,471)        | 520<br>(239 - 1,039)        | 84<br>(43 - 151)         | 188<br>(117 - 289)        | 113<br>(66 - 173)        | 52<br>(30 - 85)          |
| Pneumococcal meningitis                                           | 226<br>(139 - 359)          | 103<br>(36 - 227)           | 25<br>(12 - 49)          | 54<br>(29 - 94)           | 31<br>(15 - 53)          | 13<br>(6 - 24)           |
| H influenzae type B meningitis                                    | 219<br>(113 - 394)          | 160<br>(65 - 324)           | 20<br>(7 - 45)           | 23<br>(10 - 41)           | 11<br>(4 - 19)           | 4<br>(2 - 9)             |
| Meningococcal meningitis                                          | 138<br>(90 - 222)           | 52<br>(22 - 109)            | 10<br>(4 - 24)           | 35<br>(18 - 64)           | 27<br>(11 - 47)          | 15<br>(7 - 27)           |
| Other meningitis                                                  | 373<br>(236 - 609)          | 205<br>(85 - 433)           | 28<br>(12 - 53)          | 76<br>(42 - 126)          | 45<br>(22 - 76)          | 20<br>(9 - 37)           |
| Encephalitis                                                      | 30<br>(19 - 47)             | 16<br>(7 - 33)              | 2<br>(1 - 4)             | 5<br>(3 - 8)              | 4<br>(2 - 7)             | 2<br>(1 - 4)             |
| Diphtheria                                                        | 3<br>(0 - 21)               | 3<br>(0 - 21)               | 0<br>(0 - 3)             | 0<br>(0 - 1)              | 0<br>(0 - 0)             | --<br>(0 - 0)            |
| Whooping cough                                                    | 11<br>(0 - 60)              | 10<br>(0 - 56)              | 0<br>(0 - 3)             | 0<br>(0 - 0)              | 0<br>(0 - 0)             | --<br>(0 - 0)            |
| Tetanus                                                           | 71<br>(21 - 166)            | 57<br>(12 - 148)            | 2<br>(1 - 4)             | 8<br>(3 - 17)             | 4<br>(1 - 9)             | 1<br>(0 - 2)             |
| Measles                                                           | 77<br>(13 - 243)            | 68<br>(11 - 219)            | 7<br>(1 - 23)            | 1<br>(0 - 4)              | 0<br>(0 - 0)             | --<br>(0 - 0)            |
| Varicella and herpes zoster                                       | 4<br>(1 - 10)               | 2<br>(0 - 7)                | 0<br>(0 - 2)             | 1<br>(0 - 2)              | 0<br>(0 - 1)             | 1<br>(0 - 4)             |
| Neglected tropical diseases and malaria                           | 6,459<br>(3,522 - 10,030)   | 5,268<br>(2,521 - 8,583)    | 382<br>(184 - 681)       | 508<br>(254 - 1,034)      | 196<br>(76 - 544)        | 104<br>(31 - 304)        |
| Malaria                                                           | 5,920<br>(3,022 - 9,518)    | 5,118<br>(2,366 - 8,427)    | 254<br>(76 - 552)        | 292<br>(86 - 828)         | 162<br>(46 - 500)        | 94<br>(22 - 296)         |
| Leishmaniasis                                                     | 454<br>(234 - 768)          | 122<br>(38 - 254)           | 117<br>(29 - 254)        | 190<br>(70 - 361)         | 21<br>(8 - 37)           | 4<br>(2 - 8)             |
| Visceral leishmaniasis                                            | 454<br>(234 - 768)          | 122<br>(38 - 254)           | 117<br>(29 - 254)        | 190<br>(70 - 361)         | 21<br>(8 - 37)           | 4<br>(2 - 8)             |
| Schistosomiasis                                                   | 18<br>(12 - 24)             | 0<br>(0 - 1)                | 1<br>(0 - 1)             | 7<br>(4 - 11)             | 7<br>(4 - 10)            | 3<br>(2 - 5)             |
| Cysticercosis                                                     | 2<br>(2 - 3)                | 0<br>(0 - 0)                | 0<br>(0 - 0)             | 1<br>(1 - 2)              | 1<br>(0 - 1)             | 0<br>(0 - 0)             |
| Cystic echinococcosis                                             | 3<br>(2 - 3)                | 1<br>(0 - 1)                | 0<br>(0 - 1)             | 1<br>(1 - 1)              | 0<br>(0 - 1)             | 0<br>(0 - 0)             |
| Dengue                                                            | 0<br>(0 - 1)                | 0<br>(0 - 0)                | 0<br>(0 - 0)             | 0<br>(0 - 0)              | 0<br>(0 - 0)             | 0<br>(0 - 0)             |
| Yellow fever                                                      | 2<br>(1 - 4)                | 0<br>(0 - 1)                | 0<br>(0 - 1)             | 1<br>(0 - 3)              | 0<br>(0 - 1)             | 0<br>(0 - 0)             |
| Rabies                                                            | 29<br>(9 - 49)              | 7<br>(2 - 16)               | 7<br>(2 - 14)            | 13<br>(4 - 22)            | 3<br>(1 - 5)             | 1<br>(0 - 1)             |
| Intestinal nematode infections                                    | 20<br>(8 - 43)              | 17<br>(6 - 38)              | 2<br>(0 - 7)             | 1<br>(0 - 4)              | 0<br>(0 - 3)             | 0<br>(0 - 2)             |
| Ascariasis                                                        | 20<br>(8 - 43)              | 17<br>(6 - 38)              | 2<br>(0 - 7)             | 1<br>(0 - 4)              | 0<br>(0 - 3)             | 0<br>(0 - 2)             |
| Other neglected tropical diseases                                 | 9<br>(4 - 21)               | 3<br>(1 - 7)                | 0<br>(0 - 1)             | 1<br>(1 - 4)              | 2<br>(1 - 5)             | 2<br>(1 - 6)             |



Web Table 31- Burundi deaths with 95% UI by age, sex, and cause in 2013

| Cause                                                            | Females, All Ages           | Females, 0-4 Years       | Females, 5-14 Years | Females, 15-49 Years     | Females, 50-69 Years     | Females, 70-80 Years     |
|------------------------------------------------------------------|-----------------------------|--------------------------|---------------------|--------------------------|--------------------------|--------------------------|
| Maternal disorders                                               | 1,683<br>(1,091 - 2,289)    | --                       | 5<br>(2 - 12)       | 1,678<br>(1,087 - 2,283) | --                       | --                       |
| Maternal hemorrhage                                              | 204<br>(113 - 312)          | --                       | 0<br>(0 - 1)        | 203<br>(113 - 312)       | --                       | --                       |
| Maternal sepsis and other maternal infections                    | 166<br>(92 - 246)           | --                       | 1<br>(0 - 2)        | 165<br>(91 - 245)        | --                       | --                       |
| Maternal hypertensive disorders                                  | 171<br>(99 - 257)           | --                       | 1<br>(0 - 1)        | 170<br>(99 - 256)        | --                       | --                       |
| Maternal obstructed labor                                        | 90<br>(55 - 131)            | --                       | 0<br>(0 - 0)        | 89<br>(54 - 131)         | --                       | --                       |
| Maternal abortive outcome                                        | 327<br>(191 - 473)          | --                       | 1<br>(0 - 2)        | 326<br>(190 - 472)       | --                       | --                       |
| Indirect maternal deaths                                         | 135<br>(70 - 211)           | --                       | 0<br>(0 - 1)        | 135<br>(70 - 210)        | --                       | --                       |
| Late maternal deaths                                             | 152<br>(80 - 241)           | --                       | 1<br>(0 - 2)        | 151<br>(80 - 240)        | --                       | --                       |
| Maternal deaths aggravated by HIV/AIDS                           | 9<br>(4 - 14)               | --                       | --                  | 9<br>(4 - 14)            | --                       | --                       |
| Other maternal disorders                                         | 427<br>(280 - 615)          | --                       | 1<br>(0 - 3)        | 426<br>(279 - 614)       | --                       | --                       |
| Neonatal disorders                                               | 4,048<br>(2,922 - 5,534)    | 4,048<br>(2,922 - 5,534) | --                  | --                       | --                       | --                       |
| Neonatal preterm birth complications                             | 1,486<br>(603 - 2,604)      | 1,486<br>(603 - 2,604)   | --                  | --                       | --                       | --                       |
| Neonatal encephalopathy due to birth asphyxia and trauma         | 1,164<br>(411 - 2,287)      | 1,164<br>(411 - 2,287)   | --                  | --                       | --                       | --                       |
| Neonatal sepsis and other neonatal infections                    | 818<br>(261 - 1,583)        | 818<br>(261 - 1,583)     | --                  | --                       | --                       | --                       |
| Hemolytic disease and other neonatal jaundice                    | 14<br>(4 - 39)              | 14<br>(4 - 39)           | --                  | --                       | --                       | --                       |
| Other neonatal disorders                                         | 566<br>(199 - 1,781)        | 566<br>(199 - 1,781)     | --                  | --                       | --                       | --                       |
| Nutritional deficiencies                                         | 2,451<br>(1,598 - 3,619)    | 1,484<br>(727 - 2,544)   | 104<br>(58 - 174)   | 239<br>(158 - 341)       | 268<br>(171 - 380)       | 357<br>(229 - 524)       |
| Protein-energy malnutrition                                      | 1,456<br>(592 - 2,685)      | 1,117<br>(390 - 2,217)   | 62<br>(20 - 127)    | 34<br>(7 - 111)          | 90<br>(29 - 222)         | 153<br>(41 - 357)        |
| Iodine deficiency                                                | 2<br>(0 - 9)                | 1<br>(0 - 8)             | 0<br>(0 - 1)        | 0<br>(0 - 1)             | 0<br>(0 - 1)             | 0<br>(0 - 1)             |
| Iron-deficiency anemia                                           | 982<br>(398 - 1,726)        | 362<br>(43 - 1,022)      | 41<br>(10 - 82)     | 204<br>(120 - 299)       | 176<br>(84 - 278)        | 198<br>(67 - 337)        |
| Other nutritional deficiencies                                   | 12<br>(3 - 33)              | 4<br>(1 - 14)            | 0<br>(0 - 1)        | 1<br>(0 - 2)             | 2<br>(1 - 6)             | 5<br>(1 - 18)            |
| Other communicable, maternal, neonatal, and nutritional diseases | 624<br>(374 - 1,007)        | 437<br>(232 - 775)       | 42<br>(22 - 72)     | 57<br>(34 - 84)          | 48<br>(21 - 89)          | 41<br>(14 - 91)          |
| Sexually transmitted diseases excluding HIV                      | 388<br>(205 - 702)          | 332<br>(165 - 617)       | 29<br>(14 - 53)     | 14<br>(5 - 26)           | 8<br>(2 - 23)            | 5<br>(1 - 14)            |
| Syphilis                                                         | 375<br>(194 - 689)          | 332<br>(165 - 617)       | 29<br>(14 - 52)     | 6<br>(2 - 11)            | 4<br>(1 - 12)            | 4<br>(1 - 11)            |
| Chlamydial infection                                             | 4<br>(2 - 8)                | --                       | 0<br>(0 - 0)        | 3<br>(1 - 5)             | 1<br>(0 - 3)             | 0<br>(0 - 1)             |
| Gonococcal infection                                             | 5<br>(2 - 9)                | --                       | 0<br>(0 - 0)        | 3<br>(1 - 5)             | 1<br>(0 - 4)             | 1<br>(0 - 2)             |
| Other sexually transmitted diseases                              | 4<br>(2 - 8)                | --                       | 0<br>(0 - 0)        | 3<br>(1 - 5)             | 1<br>(0 - 3)             | 0<br>(0 - 1)             |
| Hepatitis                                                        | 42<br>(32 - 58)             | 10<br>(5 - 18)           | 3<br>(2 - 4)        | 18<br>(12 - 30)          | 9<br>(6 - 13)            | 3<br>(2 - 4)             |
| Acute hepatitis A                                                | 7<br>(2 - 14)               | 4<br>(1 - 10)            | 1<br>(0 - 2)        | 1<br>(0 - 3)             | 0<br>(0 - 0)             | 0<br>(0 - 0)             |
| Acute hepatitis B                                                | 21<br>(14 - 31)             | 5<br>(2 - 11)            | 1<br>(0 - 2)        | 5<br>(2 - 9)             | 7<br>(4 - 11)            | 3<br>(2 - 4)             |
| Acute hepatitis C                                                | 0<br>(0 - 1)                | --                       | 0<br>(0 - 0)        | 0<br>(0 - 1)             | 0<br>(0 - 0)             | 0<br>(0 - 0)             |
| Acute hepatitis E                                                | 14<br>(8 - 22)              | 0<br>(0 - 0)             | 0<br>(0 - 1)        | 11<br>(7 - 20)           | 1<br>(0 - 3)             | 0<br>(0 - 1)             |
| Other infectious diseases                                        | 194<br>(72 - 394)           | 94<br>(33 - 263)         | 10<br>(3 - 28)      | 25<br>(9 - 48)           | 31<br>(8 - 67)           | 34<br>(8 - 82)           |
| Non-communicable diseases                                        | 13,939<br>(11,972 - 16,030) | 1,418<br>(774 - 2,348)   | 245<br>(168 - 343)  | 2,030<br>(1,607 - 2,556) | 4,903<br>(4,031 - 5,753) | 5,343<br>(4,623 - 6,155) |
| Neoplasms                                                        | 2,667<br>(2,162 - 3,199)    | 92<br>(44 - 163)         | 55<br>(34 - 87)     | 615<br>(472 - 782)       | 1,382<br>(1,067 - 1,709) | 522<br>(427 - 632)       |
| Esophageal cancer                                                | 207<br>(117 - 347)          | --                       | --                  | 34<br>(17 - 60)          | 121<br>(65 - 210)        | 51<br>(26 - 105)         |
| Stomach cancer                                                   | 153<br>(115 - 194)          | --                       | --                  | 14<br>(10 - 20)          | 97<br>(70 - 128)         | 42<br>(29 - 59)          |
| Liver cancer                                                     | 162<br>(121 - 219)          | --                       | 2<br>(1 - 3)        | 38<br>(19 - 63)          | 83<br>(56 - 124)         | 39<br>(24 - 60)          |
| Liver cancer due to hepatitis B                                  | 26<br>(8 - 51)              | --                       | 0<br>(0 - 1)        | 9<br>(2 - 17)            | 12<br>(3 - 27)           | 5<br>(1 - 11)            |
| Liver cancer due to hepatitis C                                  | 80<br>(43 - 118)            | --                       | 0<br>(0 - 1)        | 16<br>(8 - 27)           | 45<br>(19 - 74)          | 19<br>(9 - 34)           |

Web Table 31- Burundi deaths with 95% UI by age, sex, and cause in 2013

| Cause                                | Females, All Ages        | Females, 0-4 Years | Females, 5-14 Years | Females, 15-49 Years | Females, 50-69 Years     | Females, 70-80 Years     |
|--------------------------------------|--------------------------|--------------------|---------------------|----------------------|--------------------------|--------------------------|
| Liver cancer due to alcohol use      | 18<br>(9 - 30)           | --                 | --                  | 2<br>(1 - 4)         | 9<br>(4 - 16)            | 7<br>(3 - 13)            |
| Liver cancer due to other causes     | 39<br>(22 - 62)          | --                 | 1<br>(0 - 2)        | 12<br>(5 - 21)       | 18<br>(8 - 34)           | 8<br>(4 - 14)            |
| Larynx cancer                        | 4<br>(1 - 9)             | --                 | --                  | 0<br>(0 - 1)         | 3<br>(1 - 8)             | 1<br>(0 - 1)             |
| Tracheal, bronchus and lung cancer   | 76<br>(57 - 97)          | --                 | --                  | 6<br>(4 - 10)        | 49<br>(34 - 64)          | 22<br>(15 - 30)          |
| Breast cancer                        | 375<br>(278 - 478)       | --                 | --                  | 147<br>(92 - 205)    | 177<br>(127 - 242)       | 51<br>(35 - 72)          |
| Cervical cancer                      | 698<br>(417 - 935)       | --                 | --                  | 137<br>(77 - 206)    | 463<br>(263 - 648)       | 99<br>(54 - 151)         |
| Uterine cancer                       | 28<br>(16 - 40)          | --                 | --                  | 3<br>(2 - 6)         | 17<br>(9 - 27)           | 8<br>(4 - 12)            |
| Prostate cancer                      | --                       | --                 | --                  | --                   | --                       | --                       |
| Colon and rectum cancer              | 166<br>(129 - 208)       | --                 | --                  | 40<br>(28 - 53)      | 78<br>(59 - 102)         | 49<br>(36 - 67)          |
| Lip and oral cavity cancer           | 29<br>(19 - 42)          | --                 | --                  | 8<br>(4 - 14)        | 16<br>(9 - 26)           | 6<br>(3 - 9)             |
| Nasopharynx cancer                   | 9<br>(5 - 14)            | --                 | 0<br>(0 - 1)        | 4<br>(2 - 7)         | 3<br>(2 - 6)             | 1<br>(1 - 2)             |
| Other pharynx cancer                 | 11<br>(7 - 16)           | --                 | --                  | 3<br>(1 - 5)         | 7<br>(4 - 11)            | 2<br>(1 - 2)             |
| Gallbladder and biliary tract cancer | 34<br>(23 - 49)          | --                 | --                  | 10<br>(5 - 15)       | 18<br>(12 - 27)          | 6<br>(4 - 10)            |
| Pancreatic cancer                    | 38<br>(30 - 49)          | --                 | --                  | 7<br>(5 - 10)        | 22<br>(16 - 30)          | 9<br>(6 - 12)            |
| Malignant skin melanoma              | 12<br>(9 - 15)           | --                 | --                  | 2<br>(1 - 2)         | 7<br>(5 - 10)            | 3<br>(2 - 4)             |
| Non-melanoma skin cancer             | 14<br>(6 - 30)           | --                 | --                  | 3<br>(1 - 5)         | 4<br>(2 - 9)             | 7<br>(3 - 18)            |
| Ovarian cancer                       | 86<br>(57 - 129)         | --                 | --                  | 20<br>(14 - 29)      | 53<br>(30 - 88)          | 13<br>(7 - 20)           |
| Testicular cancer                    | --                       | --                 | --                  | --                   | --                       | --                       |
| Kidney cancer                        | 27<br>(17 - 39)          | 6<br>(2 - 13)      | 2<br>(1 - 4)        | 4<br>(2 - 7)         | 10<br>(6 - 16)           | 5<br>(3 - 8)             |
| Bladder cancer                       | 21<br>(14 - 29)          | --                 | --                  | 4<br>(2 - 7)         | 10<br>(6 - 15)           | 7<br>(5 - 12)            |
| Brain and nervous system cancer      | 28<br>(19 - 36)          | 3<br>(1 - 7)       | 2<br>(1 - 3)        | 15<br>(8 - 20)       | 6<br>(4 - 8)             | 3<br>(2 - 4)             |
| Thyroid cancer                       | 11<br>(6 - 17)           | --                 | 0<br>(0 - 0)        | 1<br>(1 - 1)         | 8<br>(3 - 13)            | 3<br>(2 - 4)             |
| Mesothelioma                         | 3<br>(1 - 5)             | --                 | --                  | 1<br>(0 - 2)         | 1<br>(0 - 3)             | 1<br>(0 - 1)             |
| Hodgkin lymphoma                     | 18<br>(12 - 24)          | 1<br>(0 - 1)       | 1<br>(0 - 2)        | 4<br>(2 - 7)         | 7<br>(4 - 12)            | 6<br>(3 - 9)             |
| Non-Hodgkin lymphoma                 | 130<br>(55 - 189)        | 29<br>(8 - 64)     | 16<br>(5 - 33)      | 31<br>(14 - 47)      | 34<br>(18 - 55)          | 21<br>(9 - 33)           |
| Multiple myeloma                     | 18<br>(12 - 24)          | --                 | --                  | 4<br>(2 - 7)         | 9<br>(6 - 12)            | 5<br>(3 - 8)             |
| Leukemia                             | 47<br>(34 - 61)          | 5<br>(2 - 10)      | 7<br>(4 - 11)       | 16<br>(9 - 23)       | 11<br>(8 - 16)           | 8<br>(6 - 11)            |
| Other neoplasms                      | 258<br>(162 - 350)       | 49<br>(21 - 98)    | 25<br>(13 - 44)     | 59<br>(32 - 92)      | 67<br>(41 - 101)         | 58<br>(35 - 86)          |
| Cardiovascular diseases              | 6,583<br>(5,416 - 8,184) | 110<br>(59 - 190)  | 35<br>(21 - 55)     | 668<br>(481 - 1,051) | 2,327<br>(1,808 - 2,976) | 3,443<br>(2,834 - 4,210) |
| Rheumatic heart disease              | 276<br>(173 - 485)       | 4<br>(1 - 13)      | 7<br>(4 - 14)       | 95<br>(56 - 165)     | 103<br>(58 - 189)        | 67<br>(35 - 130)         |
| Ischemic heart disease               | 1,654<br>(1,090 - 2,347) | 0<br>(0 - 2)       | 1<br>(0 - 3)        | 116<br>(62 - 268)    | 572<br>(354 - 834)       | 965<br>(630 - 1,353)     |
| Cerebrovascular disease              | 2,615<br>(1,964 - 3,636) | 12<br>(5 - 26)     | 3<br>(2 - 7)        | 185<br>(115 - 296)   | 938<br>(668 - 1,324)     | 1,476<br>(1,091 - 2,006) |
| Ischemic stroke                      | 1,013<br>(390 - 1,655)   | 1<br>(0 - 3)       | 0<br>(0 - 1)        | 21<br>(5 - 44)       | 240<br>(71 - 440)        | 750<br>(298 - 1,192)     |
| Hemorrhagic stroke                   | 1,602<br>(1,023 - 2,899) | 11<br>(5 - 24)     | 3<br>(1 - 6)        | 163<br>(102 - 274)   | 698<br>(451 - 1,173)     | 727<br>(401 - 1,492)     |
| Hypertensive heart disease           | 786<br>(461 - 1,754)     | 2<br>(1 - 6)       | 1<br>(1 - 2)        | 53<br>(29 - 105)     | 242<br>(138 - 512)       | 487<br>(261 - 1,167)     |
| Cardiomyopathy and myocarditis       | 331<br>(219 - 515)       | 51<br>(17 - 101)   | 11<br>(5 - 20)      | 74<br>(39 - 121)     | 97<br>(55 - 157)         | 98<br>(52 - 200)         |
| Atrial fibrillation and flutter      | 1<br>(0 - 3)             | --                 | --                  | 0<br>(0 - 0)         | 0<br>(0 - 1)             | 1<br>(0 - 2)             |
| Aortic aneurysm                      | 57<br>(22 - 182)         | --                 | --                  | 8<br>(2 - 23)        | 21<br>(7 - 66)           | 29<br>(11 - 95)          |
| Peripheral vascular disease          | 1<br>(1 - 4)             | --                 | --                  | 0<br>(0 - 0)         | 0<br>(0 - 1)             | 1<br>(0 - 3)             |
| Endocarditis                         | 66<br>(41 - 105)         | 7<br>(2 - 19)      | 2<br>(1 - 3)        | 15<br>(8 - 28)       | 17<br>(10 - 30)          | 26<br>(12 - 48)          |

Web Table 31- Burundi deaths with 95% UI by age, sex, and cause in 2013

| Cause                                               | Females, All Ages    | Females, 0-4 Years | Females, 5-14 Years | Females, 15-49 Years | Females, 50-69 Years | Females, 70-80 Years |
|-----------------------------------------------------|----------------------|--------------------|---------------------|----------------------|----------------------|----------------------|
| Other cardiovascular and circulatory diseases       | 795<br>(518 - 1,323) | 33<br>(14 - 75)    | 9<br>(4 - 16)       | 123<br>(73 - 217)    | 336<br>(213 - 548)   | 294<br>(167 - 556)   |
| Chronic respiratory diseases                        | 808<br>(609 - 1,022) | 71<br>(34 - 125)   | 14<br>(9 - 22)      | 97<br>(66 - 135)     | 277<br>(197 - 365)   | 348<br>(260 - 463)   |
| Chronic obstructive pulmonary disease               | 430<br>(301 - 587)   | 11<br>(4 - 25)     | 4<br>(2 - 7)        | 30<br>(17 - 47)      | 165<br>(109 - 233)   | 220<br>(151 - 309)   |
| Pneumoconiosis                                      | 5<br>(3 - 7)         | 1<br>(0 - 2)       | 0<br>(0 - 1)        | 2<br>(1 - 3)         | 1<br>(1 - 2)         | 1<br>(0 - 1)         |
| Silicosis                                           | 0<br>(0 - 1)         | 0<br>(0 - 0)       | 0<br>(0 - 0)        | 0<br>(0 - 0)         | 0<br>(0 - 0)         | 0<br>(0 - 0)         |
| Asbestosis                                          | 0<br>(0 - 0)         | 0<br>(0 - 0)       | 0<br>(0 - 0)        | 0<br>(0 - 0)         | 0<br>(0 - 0)         | 0<br>(0 - 0)         |
| Coal workers pneumoconiosis                         | 0<br>(0 - 0)         | 0<br>(0 - 0)       | 0<br>(0 - 0)        | 0<br>(0 - 0)         | 0<br>(0 - 0)         | 0<br>(0 - 0)         |
| Other pneumoconiosis                                | 4<br>(3 - 6)         | 1<br>(0 - 2)       | 0<br>(0 - 0)        | 1<br>(1 - 2)         | 1<br>(1 - 1)         | 1<br>(0 - 1)         |
| Asthma                                              | 178<br>(83 - 265)    | 21<br>(6 - 47)     | 5<br>(2 - 8)        | 26<br>(12 - 45)      | 66<br>(27 - 108)     | 60<br>(26 - 99)      |
| Interstitial lung disease and pulmonary sarcoidosis | 90<br>(19 - 165)     | 3<br>(0 - 9)       | 1<br>(0 - 2)        | 13<br>(3 - 26)       | 29<br>(6 - 57)       | 45<br>(8 - 94)       |
| Other chronic respiratory diseases                  | 104<br>(66 - 159)    | 35<br>(17 - 63)    | 4<br>(2 - 7)        | 27<br>(16 - 41)      | 15<br>(8 - 27)       | 22<br>(11 - 39)      |
| Cirrhosis                                           | 388<br>(261 - 606)   | 11<br>(4 - 25)     | 7<br>(4 - 13)       | 77<br>(50 - 130)     | 186<br>(115 - 299)   | 107<br>(66 - 171)    |
| Cirrhosis due to hepatitis B                        | 129<br>(59 - 251)    | 0<br>(0 - 1)       | 1<br>(0 - 2)        | 28<br>(13 - 55)      | 65<br>(28 - 128)     | 34<br>(13 - 69)      |
| Cirrhosis due to hepatitis C                        | 73<br>(22 - 136)     | 0<br>(0 - 1)       | 1<br>(0 - 2)        | 11<br>(1 - 24)       | 35<br>(10 - 71)      | 25<br>(9 - 52)       |
| Cirrhosis due to alcohol use                        | 115<br>(58 - 204)    | --                 | --                  | 16<br>(7 - 33)       | 60<br>(29 - 111)     | 39<br>(19 - 68)      |
| Cirrhosis due to other causes                       | 72<br>(42 - 116)     | 10<br>(3 - 23)     | 5<br>(3 - 9)        | 23<br>(13 - 38)      | 25<br>(12 - 43)      | 9<br>(4 - 16)        |
| Digestive diseases                                  | 790<br>(553 - 1,091) | 56<br>(23 - 116)   | 27<br>(15 - 43)     | 156<br>(103 - 225)   | 255<br>(169 - 365)   | 296<br>(197 - 423)   |
| Peptic ulcer disease                                | 211<br>(119 - 348)   | 5<br>(1 - 13)      | 3<br>(1 - 6)        | 34<br>(18 - 61)      | 78<br>(42 - 133)     | 92<br>(48 - 160)     |
| Gastritis and duodenitis                            | 35<br>(8 - 94)       | 4<br>(1 - 10)      | 2<br>(0 - 4)        | 7<br>(2 - 17)        | 9<br>(2 - 24)        | 13<br>(2 - 44)       |
| Appendicitis                                        | 74<br>(40 - 117)     | 8<br>(2 - 21)      | 6<br>(3 - 11)       | 18<br>(11 - 32)      | 21<br>(9 - 38)       | 21<br>(7 - 45)       |
| Paralytic ileus and intestinal obstruction          | 209<br>(114 - 368)   | 11<br>(3 - 26)     | 9<br>(4 - 16)       | 41<br>(19 - 70)      | 66<br>(32 - 122)     | 82<br>(40 - 165)     |
| Inguinal, femoral, and abdominal hernia             | 13<br>(6 - 21)       | 2<br>(1 - 5)       | 0<br>(0 - 0)        | 5<br>(2 - 9)         | 1<br>(1 - 2)         | 5<br>(2 - 9)         |
| Inflammatory bowel disease                          | 62<br>(36 - 108)     | 14<br>(4 - 34)     | 3<br>(1 - 5)        | 15<br>(8 - 27)       | 15<br>(7 - 28)       | 15<br>(7 - 28)       |
| Vascular intestinal disorders                       | 5<br>(2 - 10)        | 0<br>(0 - 0)       | 0<br>(0 - 0)        | 1<br>(0 - 1)         | 2<br>(1 - 3)         | 3<br>(1 - 5)         |
| Gallbladder and biliary diseases                    | 67<br>(35 - 103)     | 2<br>(1 - 4)       | 1<br>(0 - 2)        | 12<br>(6 - 18)       | 25<br>(13 - 43)      | 28<br>(13 - 50)      |
| Pancreatitis                                        | 32<br>(11 - 65)      | 1<br>(0 - 2)       | 1<br>(0 - 1)        | 9<br>(3 - 18)        | 12<br>(4 - 25)       | 9<br>(3 - 24)        |
| Other digestive diseases                            | 82<br>(46 - 131)     | 9<br>(2 - 23)      | 3<br>(1 - 6)        | 15<br>(8 - 25)       | 26<br>(14 - 46)      | 28<br>(13 - 54)      |
| Neurological disorders                              | 396<br>(302 - 505)   | 63<br>(25 - 138)   | 23<br>(12 - 38)     | 76<br>(46 - 137)     | 42<br>(31 - 56)      | 193<br>(142 - 253)   |
| Alzheimer disease and other dementias               | 191<br>(141 - 251)   | --                 | --                  | 0<br>(0 - 0)         | 17<br>(12 - 22)      | 174<br>(127 - 231)   |
| Parkinson disease                                   | 2<br>(1 - 3)         | --                 | --                  | 0<br>(0 - 0)         | 1<br>(0 - 2)         | 1<br>(0 - 2)         |
| Epilepsy                                            | 176<br>(109 - 267)   | 55<br>(20 - 131)   | 20<br>(10 - 36)     | 69<br>(39 - 129)     | 17<br>(10 - 28)      | 14<br>(7 - 26)       |
| Multiple sclerosis                                  | 2<br>(0 - 3)         | --                 | --                  | 1<br>(0 - 2)         | 1<br>(0 - 1)         | 0<br>(0 - 0)         |
| Other neurological disorders                        | 26<br>(18 - 36)      | 7<br>(3 - 12)      | 2<br>(1 - 3)        | 6<br>(4 - 9)         | 7<br>(5 - 10)        | 4<br>(3 - 6)         |
| Mental and substance use disorders                  | 122<br>(61 - 235)    | 5<br>(1 - 10)      | 0<br>(0 - 0)        | 73<br>(37 - 139)     | 35<br>(17 - 73)      | 9<br>(3 - 20)        |
| Schizophrenia                                       | 25<br>(4 - 51)       | --                 | --                  | 12<br>(2 - 26)       | 8<br>(1 - 19)        | 4<br>(1 - 9)         |
| Alcohol use disorders                               | 57<br>(12 - 138)     | --                 | --                  | 33<br>(7 - 74)       | 21<br>(4 - 54)       | 3<br>(1 - 10)        |
| Drug use disorders                                  | 41<br>(14 - 97)      | 5<br>(1 - 10)      | --                  | 28<br>(9 - 69)       | 6<br>(2 - 17)        | 2<br>(0 - 6)         |
| Opioid use disorders                                | 4<br>(1 - 10)        | 1<br>(0 - 1)       | --                  | 3<br>(1 - 7)         | 1<br>(0 - 1)         | 0<br>(0 - 1)         |
| Cocaine use disorders                               | 0<br>(0 - 1)         | 0<br>(0 - 0)       | --                  | 0<br>(0 - 0)         | 0<br>(0 - 0)         | 0<br>(0 - 0)         |
| Amphetamine use disorders                           | 0<br>(0 - 0)         | 0<br>(0 - 0)       | --                  | 0<br>(0 - 0)         | 0<br>(0 - 0)         | 0<br>(0 - 0)         |

Web Table 31- Burundi deaths with 95% UI by age, sex, and cause in 2013

| Cause                                               | Females, All Ages      | Females, 0-4 Years   | Females, 5-14 Years | Females, 15-49 Years | Females, 50-69 Years | Females, 70-80 Years |
|-----------------------------------------------------|------------------------|----------------------|---------------------|----------------------|----------------------|----------------------|
| Other drug use disorders                            | 36<br>(12 - 87)        | 4<br>(1 - 9)         | --                  | 25<br>(8 - 61)       | 5<br>(2 - 15)        | 2<br>(0 - 6)         |
| Eating disorders                                    | 0<br>(0 - 0)           | --                   | 0<br>(0 - 0)        | 0<br>(0 - 0)         | --                   | --                   |
| Anorexia nervosa                                    | 0<br>(0 - 0)           | --                   | 0<br>(0 - 0)        | 0<br>(0 - 0)         | --                   | --                   |
| Diabetes, urogenital, blood, and endocrine diseases | 1,070<br>(762 - 1,318) | 145<br>(59 - 271)    | 39<br>(20 - 63)     | 191<br>(123 - 254)   | 346<br>(256 - 429)   | 348<br>(257 - 433)   |
| Diabetes mellitus                                   | 448<br>(341 - 556)     | 1<br>(1 - 3)         | 1<br>(1 - 2)        | 39<br>(28 - 54)      | 200<br>(145 - 263)   | 206<br>(149 - 270)   |
| Acute glomerulonephritis                            | 19<br>(9 - 32)         | 2<br>(1 - 4)         | 1<br>(0 - 2)        | 8<br>(3 - 14)        | 6<br>(2 - 11)        | 3<br>(1 - 6)         |
| Chronic kidney disease                              | 174<br>(102 - 241)     | 15<br>(6 - 27)       | 8<br>(3 - 13)       | 36<br>(21 - 66)      | 53<br>(32 - 74)      | 63<br>(32 - 90)      |
| Chronic kidney disease due to diabetes mellitus     | 1<br>(0 - 2)           | 0<br>(0 - 0)         | 0<br>(0 - 0)        | 0<br>(0 - 0)         | 0<br>(0 - 1)         | 0<br>(0 - 1)         |
| Chronic kidney disease due to hypertension          | 62<br>(29 - 107)       | 1<br>(0 - 4)         | 1<br>(0 - 2)        | 9<br>(3 - 19)        | 21<br>(10 - 39)      | 29<br>(13 - 52)      |
| Chronic kidney disease due to glomerulonephritis    | 73<br>(39 - 108)       | 10<br>(4 - 19)       | 5<br>(2 - 8)        | 21<br>(12 - 38)      | 20<br>(9 - 32)       | 16<br>(6 - 27)       |
| Chronic kidney disease due to other causes          | 39<br>(12 - 72)        | 3<br>(1 - 7)         | 2<br>(0 - 5)        | 6<br>(2 - 16)        | 12<br>(4 - 23)       | 17<br>(3 - 35)       |
| Urinary diseases and male infertility               | 107<br>(70 - 144)      | 11<br>(5 - 21)       | 3<br>(1 - 5)        | 27<br>(16 - 43)      | 39<br>(22 - 60)      | 27<br>(16 - 44)      |
| Interstitial nephritis and urinary tract infections | 81<br>(47 - 112)       | 6<br>(2 - 13)        | 1<br>(1 - 3)        | 19<br>(10 - 33)      | 30<br>(15 - 48)      | 23<br>(14 - 38)      |
| Urolithiasis                                        | 8<br>(3 - 15)          | --                   | 0<br>(0 - 1)        | 3<br>(1 - 5)         | 3<br>(1 - 7)         | 1<br>(0 - 4)         |
| Other urinary diseases                              | 18<br>(9 - 29)         | 5<br>(2 - 10)        | 1<br>(0 - 2)        | 5<br>(2 - 8)         | 5<br>(2 - 10)        | 3<br>(1 - 5)         |
| Gynecological diseases                              | 4<br>(2 - 8)           | --                   | --                  | 1<br>(1 - 4)         | 2<br>(1 - 4)         | 1<br>(0 - 2)         |
| Uterine fibroids                                    | 1<br>(0 - 2)           | --                   | --                  | 0<br>(0 - 1)         | 0<br>(0 - 1)         | 0<br>(0 - 1)         |
| Polycystic ovarian syndrome                         | 0<br>(0 - 0)           | --                   | --                  | 0<br>(0 - 0)         | 0<br>(0 - 0)         | --                   |
| Endometriosis                                       | 0<br>(0 - 1)           | --                   | --                  | 0<br>(0 - 1)         | 0<br>(0 - 0)         | --                   |
| Genital prolapse                                    | 1<br>(0 - 1)           | --                   | --                  | 0<br>(0 - 1)         | 0<br>(0 - 1)         | 0<br>(0 - 0)         |
| Other gynecological diseases                        | 2<br>(1 - 4)           | --                   | --                  | 1<br>(0 - 2)         | 1<br>(0 - 2)         | 0<br>(0 - 1)         |
| Hemoglobinopathies and hemolytic anemias            | 173<br>(63 - 319)      | 82<br>(19 - 183)     | 22<br>(8 - 41)      | 46<br>(19 - 81)      | 15<br>(7 - 27)       | 9<br>(4 - 19)        |
| Thalassemias                                        | 3<br>(1 - 7)           | 3<br>(1 - 6)         | 0<br>(0 - 1)        | 0<br>(0 - 1)         | 0<br>(0 - 0)         | 0<br>(0 - 0)         |
| Sickle cell disorders                               | 144<br>(51 - 270)      | 69<br>(15 - 157)     | 20<br>(7 - 38)      | 43<br>(17 - 75)      | 12<br>(5 - 21)       | 1<br>(0 - 1)         |
| G6PD deficiency                                     | 4<br>(2 - 8)           | 3<br>(1 - 5)         | 0<br>(0 - 1)        | 1<br>(0 - 2)         | 0<br>(0 - 1)         | 0<br>(0 - 0)         |
| Other hemoglobinopathies and hemolytic anemias      | 21<br>(9 - 36)         | 8<br>(3 - 15)        | 1<br>(0 - 1)        | 2<br>(1 - 4)         | 3<br>(1 - 5)         | 8<br>(3 - 17)        |
| Endocrine, metabolic, blood, and immune disorders   | 144<br>(57 - 205)      | 35<br>(16 - 62)      | 4<br>(2 - 8)        | 34<br>(13 - 58)      | 32<br>(12 - 50)      | 39<br>(10 - 63)      |
| Musculoskeletal disorders                           | 27<br>(15 - 50)        | --                   | 2<br>(1 - 4)        | 13<br>(7 - 25)       | 8<br>(4 - 15)        | 5<br>(2 - 12)        |
| Rheumatoid arthritis                                | 13<br>(7 - 26)         | --                   | 1<br>(0 - 1)        | 4<br>(2 - 8)         | 5<br>(3 - 10)        | 4<br>(2 - 9)         |
| Other musculoskeletal disorders                     | 13<br>(7 - 27)         | --                   | 1<br>(0 - 2)        | 9<br>(4 - 18)        | 3<br>(1 - 6)         | 1<br>(0 - 4)         |
| Other non-communicable diseases                     | 1,089<br>(595 - 1,940) | 865<br>(400 - 1,686) | 43<br>(20 - 87)     | 63<br>(42 - 90)      | 45<br>(30 - 62)      | 72<br>(44 - 108)     |
| Congenital anomalies                                | 898<br>(422 - 1,749)   | 809<br>(363 - 1,612) | 40<br>(17 - 83)     | 34<br>(19 - 55)      | 8<br>(4 - 13)        | 8<br>(4 - 12)        |
| Neural tube defects                                 | 284<br>(70 - 747)      | 267<br>(62 - 715)    | 9<br>(2 - 26)       | 6<br>(2 - 15)        | 1<br>(0 - 2)         | 1<br>(0 - 1)         |
| Congenital heart anomalies                          | 346<br>(108 - 798)     | 305<br>(86 - 737)    | 19<br>(6 - 45)      | 15<br>(6 - 29)       | 3<br>(1 - 5)         | 4<br>(2 - 7)         |
| Cleft lip and cleft palate                          | 4<br>(0 - 16)          | 4<br>(0 - 16)        | --                  | --                   | --                   | --                   |
| Down syndrome                                       | 66<br>(13 - 162)       | 54<br>(9 - 142)      | 5<br>(1 - 13)       | 5<br>(1 - 10)        | 2<br>(1 - 3)         | 0<br>(0 - 0)         |
| Chromosomal unbalanced rearrangements               | 44<br>(6 - 129)        | 41<br>(6 - 123)      | 1<br>(0 - 3)        | 2<br>(0 - 4)         | 0<br>(0 - 1)         | 0<br>(0 - 0)         |
| Other congenital anomalies                          | 154<br>(45 - 465)      | 137<br>(36 - 416)    | 6<br>(2 - 18)       | 5<br>(2 - 12)        | 2<br>(1 - 5)         | 3<br>(1 - 7)         |
| Skin and subcutaneous diseases                      | 185<br>(119 - 272)     | 50<br>(22 - 106)     | 3<br>(2 - 5)        | 30<br>(16 - 48)      | 37<br>(24 - 53)      | 64<br>(38 - 100)     |
| Cellulitis                                          | 85<br>(8 - 163)        | 22<br>(1 - 54)       | 2<br>(0 - 3)        | 15<br>(1 - 33)       | 19<br>(2 - 36)       | 28<br>(2 - 58)       |

Web Table 31- Burundi deaths with 95% UI by age, sex, and cause in 2013

| Cause                                           | Females, All Ages        | Females, 0-4 Years   | Females, 5-14 Years | Females, 15-49 Years | Females, 50-69 Years | Females, 70-80 Years |
|-------------------------------------------------|--------------------------|----------------------|---------------------|----------------------|----------------------|----------------------|
| Pyoderma                                        | 84<br>(25 - 180)         | 27<br>(5 - 75)       | 1<br>(0 - 3)        | 13<br>(3 - 33)       | 16<br>(4 - 36)       | 26<br>(8 - 54)       |
| Decubitus ulcer                                 | 14<br>(4 - 33)           | 0<br>(0 - 1)         | 0<br>(0 - 0)        | 1<br>(0 - 4)         | 2<br>(0 - 5)         | 10<br>(3 - 25)       |
| Other skin and subcutaneous diseases            | 2<br>(1 - 5)             | 0<br>(0 - 2)         | 0<br>(0 - 0)        | 1<br>(0 - 2)         | 0<br>(0 - 1)         | 1<br>(0 - 1)         |
| Sudden infant death syndrome                    | 6<br>(1 - 20)            | 6<br>(1 - 20)        | --                  | --                   | --                   | --                   |
| Injuries                                        | 1,832<br>(1,366 - 3,410) | 598<br>(320 - 1,701) | 194<br>(125 - 357)  | 478<br>(335 - 860)   | 310<br>(218 - 413)   | 252<br>(167 - 346)   |
| Transport injuries                              | 508<br>(357 - 709)       | 91<br>(41 - 173)     | 65<br>(37 - 108)    | 160<br>(106 - 243)   | 125<br>(79 - 178)    | 67<br>(40 - 98)      |
| Road injuries                                   | 469<br>(330 - 659)       | 79<br>(35 - 149)     | 59<br>(34 - 99)     | 152<br>(100 - 231)   | 118<br>(75 - 168)    | 61<br>(38 - 88)      |
| Pedestrian road injuries                        | 259<br>(154 - 374)       | 44<br>(18 - 89)      | 36<br>(19 - 62)     | 69<br>(37 - 110)     | 70<br>(36 - 108)     | 39<br>(19 - 61)      |
| Cyclist road injuries                           | 14<br>(7 - 29)           | 2<br>(1 - 6)         | 2<br>(1 - 5)        | 3<br>(1 - 8)         | 5<br>(3 - 11)        | 2<br>(1 - 3)         |
| Motorcyclist road injuries                      | 24<br>(9 - 62)           | 3<br>(1 - 8)         | 2<br>(0 - 5)        | 12<br>(4 - 33)       | 5<br>(2 - 11)        | 2<br>(1 - 5)         |
| Motor vehicle road injuries                     | 170<br>(107 - 263)       | 29<br>(12 - 61)      | 19<br>(9 - 35)      | 68<br>(39 - 109)     | 37<br>(21 - 60)      | 17<br>(9 - 30)       |
| Other road injuries                             | 2<br>(1 - 6)             | 0<br>(0 - 1)         | 0<br>(0 - 1)        | 0<br>(0 - 1)         | 1<br>(0 - 2)         | 0<br>(0 - 1)         |
| Other transport injuries                        | 39<br>(22 - 62)          | 11<br>(4 - 24)       | 6<br>(3 - 11)       | 8<br>(4 - 15)        | 7<br>(3 - 13)        | 6<br>(2 - 11)        |
| Unintentional injuries                          | 1,181<br>(809 - 2,730)   | 503<br>(258 - 1,643) | 125<br>(73 - 293)   | 234<br>(157 - 505)   | 154<br>(95 - 233)    | 165<br>(94 - 248)    |
| Falls                                           | 96<br>(47 - 142)         | 14<br>(6 - 29)       | 6<br>(2 - 11)       | 15<br>(7 - 26)       | 16<br>(8 - 26)       | 45<br>(18 - 77)      |
| Drowning                                        | 253<br>(154 - 430)       | 124<br>(57 - 233)    | 46<br>(22 - 93)     | 52<br>(27 - 109)     | 22<br>(13 - 36)      | 9<br>(5 - 16)        |
| Fire, heat, and hot substances                  | 215<br>(115 - 366)       | 110<br>(43 - 245)    | 21<br>(10 - 41)     | 38<br>(22 - 71)      | 24<br>(11 - 41)      | 21<br>(10 - 37)      |
| Poisonings                                      | 44<br>(16 - 73)          | 18<br>(5 - 41)       | 3<br>(1 - 5)        | 11<br>(5 - 21)       | 9<br>(2 - 17)        | 3<br>(1 - 4)         |
| Exposure to mechanical forces                   | 230<br>(35 - 1,922)      | 129<br>(12 - 1,318)  | 23<br>(4 - 184)     | 45<br>(13 - 305)     | 21<br>(4 - 113)      | 13<br>(2 - 56)       |
| Unintentional firearm injuries                  | 20<br>(13 - 32)          | 4<br>(2 - 9)         | 1<br>(1 - 3)        | 10<br>(6 - 20)       | 3<br>(1 - 5)         | 1<br>(1 - 3)         |
| Unintentional suffocation                       | 151<br>(5 - 1,867)       | 99<br>(3 - 1,295)    | 15<br>(1 - 174)     | 23<br>(1 - 285)      | 10<br>(0 - 101)      | 4<br>(0 - 47)        |
| Other exposure to mechanical forces             | 59<br>(10 - 94)          | 26<br>(4 - 55)       | 6<br>(2 - 13)       | 12<br>(3 - 21)       | 8<br>(1 - 13)        | 7<br>(1 - 11)        |
| Adverse effects of medical treatment            | 176<br>(98 - 273)        | 46<br>(17 - 99)      | 7<br>(3 - 11)       | 33<br>(20 - 50)      | 38<br>(18 - 74)      | 52<br>(21 - 101)     |
| Animal contact                                  | 88<br>(25 - 155)         | 26<br>(8 - 66)       | 12<br>(3 - 27)      | 26<br>(6 - 51)       | 16<br>(3 - 29)       | 8<br>(1 - 13)        |
| Venomous animal contact                         | 56<br>(13 - 104)         | 22<br>(6 - 56)       | 8<br>(2 - 18)       | 15<br>(3 - 33)       | 7<br>(1 - 15)        | 4<br>(0 - 9)         |
| Non-venomous animal contact                     | 32<br>(7 - 75)           | 3<br>(1 - 14)        | 5<br>(1 - 14)       | 10<br>(2 - 28)       | 10<br>(1 - 19)       | 4<br>(1 - 8)         |
| Foreign body                                    | 44<br>(18 - 84)          | 26<br>(10 - 54)      | 2<br>(1 - 6)        | 3<br>(1 - 8)         | 2<br>(1 - 5)         | 10<br>(3 - 19)       |
| Pulmonary aspiration and foreign body in airway | 40<br>(15 - 77)          | 25<br>(10 - 52)      | 2<br>(1 - 4)        | 2<br>(1 - 5)         | 2<br>(1 - 3)         | 9<br>(2 - 18)        |
| Foreign body in other body part                 | 4<br>(1 - 31)            | 1<br>(0 - 9)         | 0<br>(0 - 5)        | 1<br>(0 - 7)         | 1<br>(0 - 4)         | 1<br>(0 - 5)         |
| Other unintentional injuries                    | 36<br>(18 - 76)          | 11<br>(4 - 24)       | 5<br>(2 - 12)       | 10<br>(4 - 28)       | 5<br>(2 - 10)        | 5<br>(2 - 11)        |
| Self-harm and interpersonal violence            | 143<br>(89 - 246)        | 5<br>(2 - 11)        | 4<br>(2 - 8)        | 85<br>(46 - 171)     | 30<br>(19 - 49)      | 19<br>(10 - 33)      |
| Self-harm                                       | 115<br>(67 - 216)        | --                   | 2<br>(1 - 6)        | 65<br>(32 - 147)     | 29<br>(17 - 47)      | 19<br>(10 - 33)      |
| Interpersonal violence                          | 28<br>(16 - 47)          | 5<br>(2 - 11)        | 2<br>(1 - 4)        | 20<br>(11 - 35)      | 1<br>(1 - 3)         | 0<br>(0 - 0)         |
| Assault by firearm                              | 6<br>(2 - 11)            | 1<br>(0 - 2)         | 0<br>(0 - 1)        | 4<br>(2 - 9)         | 0<br>(0 - 1)         | 0<br>(0 - 0)         |
| Assault by sharp object                         | 6<br>(3 - 12)            | 1<br>(0 - 2)         | 0<br>(0 - 0)        | 5<br>(2 - 10)        | 0<br>(0 - 0)         | 0<br>(0 - 0)         |
| Assault by other means                          | 16<br>(9 - 28)           | 3<br>(1 - 7)         | 1<br>(1 - 3)        | 11<br>(5 - 20)       | 1<br>(0 - 2)         | 0<br>(0 - 0)         |

Web Table 31- Cambodia deaths with 95% UI by age, sex, and cause in 2013

| Cause                                                             | Both Sexes, All Ages           | Both Sexes, 0-4 Years       | Both Sexes, 5-14 Years   | Both Sexes, 15-49 Years     | Both Sexes, 50-69 Years     | Both Sexes, 70-80 Years     |
|-------------------------------------------------------------------|--------------------------------|-----------------------------|--------------------------|-----------------------------|-----------------------------|-----------------------------|
| All causes                                                        | 120,020<br>(111,394 - 129,869) | 16,704<br>(14,432 - 19,136) | 2,004<br>(1,784 - 2,257) | 22,681<br>(19,897 - 25,119) | 28,422<br>(25,176 - 32,264) | 50,209<br>(46,771 - 53,807) |
| Communicable, maternal, neonatal, and nutritional diseases        | 29,187<br>(25,644 - 34,075)    | 12,673<br>(10,446 - 15,085) | 785<br>(648 - 959)       | 5,544<br>(4,422 - 8,829)    | 3,497<br>(2,855 - 4,577)    | 6,688<br>(5,555 - 8,075)    |
| HIV/AIDS and tuberculosis                                         | 5,161<br>(3,475 - 10,463)      | 34<br>(11 - 139)            | 50<br>(21 - 170)         | 2,185<br>(1,220 - 5,962)    | 1,399<br>(937 - 2,650)      | 1,493<br>(1,115 - 1,969)    |
| Tuberculosis                                                      | 3,758<br>(2,878 - 4,773)       | 9<br>(5 - 14)               | 22<br>(12 - 34)          | 1,201<br>(807 - 1,591)      | 1,069<br>(781 - 1,400)      | 1,458<br>(1,090 - 1,913)    |
| HIV/AIDS                                                          | 1,403<br>(168 - 7,430)         | 25<br>(3 - 131)             | 29<br>(4 - 155)          | 984<br>(114 - 5,154)        | 330<br>(33 - 1,590)         | 35<br>(3 - 195)             |
| HIV/AIDS resulting in mycobacterial infection                     | 90<br>(10 - 489)               | 1<br>(0 - 6)                | 1<br>(0 - 7)             | 63<br>(7 - 337)             | 22<br>(2 - 106)             | 3<br>(0 - 15)               |
| HIV/AIDS resulting in other diseases                              | 1,312<br>(156 - 6,929)         | 24<br>(3 - 125)             | 27<br>(3 - 148)          | 921<br>(108 - 4,808)        | 308<br>(31 - 1,486)         | 33<br>(3 - 179)             |
| Diarrhea, lower respiratory, and other common infectious diseases | 13,158<br>(11,173 - 15,404)    | 5,027<br>(3,811 - 6,412)    | 485<br>(372 - 609)       | 1,564<br>(1,180 - 1,958)    | 1,654<br>(1,270 - 2,122)    | 4,427<br>(3,396 - 5,733)    |
| Diarrheal diseases                                                | 1,978<br>(1,338 - 2,813)       | 915<br>(419 - 1,664)        | 70<br>(39 - 117)         | 157<br>(101 - 217)          | 225<br>(147 - 344)          | 612<br>(376 - 1,012)        |
| Intestinal infectious diseases                                    | 487<br>(254 - 814)             | 202<br>(100 - 371)          | 127<br>(57 - 222)        | 128<br>(60 - 236)           | 20<br>(8 - 39)              | 10<br>(4 - 19)              |
| Typhoid fever                                                     | 329<br>(157 - 585)             | 127<br>(54 - 251)           | 94<br>(39 - 171)         | 90<br>(39 - 176)            | 13<br>(4 - 29)              | 6<br>(2 - 12)               |
| Paratyphoid fever                                                 | 101<br>(47 - 180)              | 46<br>(19 - 90)             | 28<br>(11 - 50)          | 23<br>(9 - 45)              | 2<br>(1 - 5)                | 1<br>(0 - 2)                |
| Other intestinal infectious diseases                              | 57<br>(35 - 86)                | 29<br>(14 - 52)             | 5<br>(1 - 12)            | 15<br>(6 - 27)              | 4<br>(1 - 11)               | 4<br>(1 - 10)               |
| Lower respiratory infections                                      | 9,065<br>(7,528 - 11,106)      | 2,991<br>(2,032 - 4,165)    | 167<br>(111 - 235)       | 957<br>(676 - 1,298)        | 1,273<br>(947 - 1,722)      | 3,677<br>(2,708 - 4,946)    |
| Upper respiratory infections                                      | 12<br>(6 - 22)                 | 2<br>(0 - 6)                | 0<br>(0 - 1)             | 3<br>(1 - 6)                | 3<br>(1 - 7)                | 4<br>(1 - 10)               |
| Otitis media                                                      | 13<br>(11 - 16)                | 2<br>(1 - 3)                | 1<br>(1 - 1)             | 3<br>(2 - 4)                | 3<br>(2 - 4)                | 4<br>(3 - 5)                |
| Meningitis                                                        | 961<br>(696 - 1,326)           | 498<br>(279 - 844)          | 63<br>(38 - 95)          | 221<br>(143 - 310)          | 94<br>(63 - 130)            | 86<br>(55 - 129)            |
| Pneumococcal meningitis                                           | 281<br>(198 - 396)             | 115<br>(57 - 223)           | 23<br>(12 - 37)          | 84<br>(50 - 128)            | 31<br>(17 - 49)             | 30<br>(17 - 48)             |
| H influenzae type B meningitis                                    | 263<br>(166 - 423)             | 192<br>(105 - 354)          | 17<br>(10 - 28)          | 31<br>(16 - 49)             | 11<br>(6 - 17)              | 11<br>(6 - 18)              |
| Meningococcal meningitis                                          | 97<br>(66 - 136)               | 33<br>(18 - 59)             | 6<br>(3 - 9)             | 29<br>(15 - 47)             | 14<br>(8 - 23)              | 15<br>(8 - 23)              |
| Other meningitis                                                  | 320<br>(223 - 454)             | 158<br>(86 - 279)           | 17<br>(9 - 29)           | 76<br>(46 - 112)            | 38<br>(24 - 55)             | 31<br>(18 - 47)             |
| Encephalitis                                                      | 205<br>(154 - 263)             | 79<br>(47 - 123)            | 23<br>(15 - 35)          | 62<br>(39 - 83)             | 23<br>(15 - 31)             | 19<br>(12 - 28)             |
| Diphtheria                                                        | 4<br>(0 - 17)                  | 3<br>(0 - 15)               | 1<br>(0 - 5)             | 1<br>(0 - 2)                | 0<br>(0 - 1)                | --                          |
| Whooping cough                                                    | 136<br>(0 - 624)               | 128<br>(0 - 590)            | 6<br>(0 - 29)            | 2<br>(0 - 8)                | 0<br>(0 - 1)                | --                          |
| Tetanus                                                           | 85<br>(50 - 149)               | 33<br>(16 - 61)             | 7<br>(3 - 14)            | 24<br>(12 - 50)             | 12<br>(6 - 25)              | 9<br>(5 - 17)               |
| Measles                                                           | 194<br>(38 - 569)              | 170<br>(33 - 499)           | 20<br>(4 - 60)           | 4<br>(1 - 12)               | 0<br>(0 - 0)                | --                          |
| Varicella and herpes zoster                                       | 17<br>(7 - 38)                 | 4<br>(1 - 13)               | 1<br>(0 - 3)             | 3<br>(1 - 8)                | 1<br>(0 - 3)                | 6<br>(0 - 26)               |
| Neglected tropical diseases and malaria                           | 1,312<br>(877 - 1,848)         | 280<br>(132 - 511)          | 198<br>(123 - 307)       | 598<br>(342 - 950)          | 164<br>(103 - 242)          | 73<br>(49 - 106)            |
| Malaria                                                           | 1,043<br>(644 - 1,568)         | 203<br>(60 - 436)           | 146<br>(73 - 260)        | 523<br>(276 - 878)          | 127<br>(69 - 207)           | 43<br>(21 - 75)             |
| Leishmaniasis                                                     | 0<br>(0 - 0)                   | 0<br>(0 - 0)                | 0<br>(0 - 0)             | 0<br>(0 - 0)                | 0<br>(0 - 0)                | 0<br>(0 - 0)                |
| Visceral leishmaniasis                                            | 0<br>(0 - 0)                   | 0<br>(0 - 0)                | 0<br>(0 - 0)             | 0<br>(0 - 0)                | 0<br>(0 - 0)                | 0<br>(0 - 0)                |
| Schistosomiasis                                                   | 44<br>(33 - 55)                | 0<br>(0 - 0)                | 1<br>(0 - 1)             | 15<br>(10 - 21)             | 16<br>(11 - 22)             | 12<br>(7 - 16)              |
| Cysticercosis                                                     | 1<br>(0 - 1)                   | 0<br>(0 - 0)                | 0<br>(0 - 0)             | 0<br>(0 - 0)                | 0<br>(0 - 0)                | 0<br>(0 - 0)                |
| Cystic echinococcosis                                             | 4<br>(3 - 5)                   | 0<br>(0 - 0)                | 0<br>(0 - 1)             | 2<br>(1 - 2)                | 1<br>(1 - 1)                | 1<br>(0 - 1)                |
| Dengue                                                            | 112<br>(67 - 146)              | 46<br>(25 - 71)             | 35<br>(17 - 47)          | 22<br>(15 - 27)             | 5<br>(4 - 6)                | 5<br>(3 - 6)                |
| Rabies                                                            | 42<br>(25 - 73)                | 4<br>(1 - 7)                | 8<br>(4 - 16)            | 20<br>(11 - 37)             | 7<br>(4 - 11)               | 4<br>(2 - 6)                |
| Intestinal nematode infections                                    | 10<br>(2 - 24)                 | 5<br>(1 - 18)               | 2<br>(0 - 8)             | 1<br>(0 - 6)                | 1<br>(0 - 5)                | 1<br>(0 - 4)                |
| Ascariasis                                                        | 10<br>(2 - 24)                 | 5<br>(1 - 18)               | 2<br>(0 - 8)             | 1<br>(0 - 6)                | 1<br>(0 - 5)                | 1<br>(0 - 4)                |
| Other neglected tropical diseases                                 | 57<br>(34 - 83)                | 20<br>(9 - 37)              | 7<br>(4 - 11)            | 14<br>(8 - 22)              | 7<br>(4 - 11)               | 9<br>(5 - 15)               |
| Maternal disorders                                                | 862<br>(607 - 1,118)           | --                          | 1<br>(0 - 3)             | 861<br>(606 - 1,117)        | --                          | --                          |

Web Table 31- Cambodia deaths with 95% UI by age, sex, and cause in 2013

| Cause                                                            | Both Sexes, All Ages        | Both Sexes, 0-4 Years    | Both Sexes, 5-14 Years | Both Sexes, 15-49 Years    | Both Sexes, 50-69 Years     | Both Sexes, 70-80 Years     |
|------------------------------------------------------------------|-----------------------------|--------------------------|------------------------|----------------------------|-----------------------------|-----------------------------|
| Maternal hemorrhage                                              | 116<br>(68 - 178)           | --                       | 0<br>(0 - 0)           | 116<br>(68 - 178)          | --                          | --                          |
| Maternal sepsis and other maternal infections                    | 98<br>(59 - 145)            | --                       | 0<br>(0 - 0)           | 98<br>(59 - 145)           | --                          | --                          |
| Maternal hypertensive disorders                                  | 84<br>(32 - 146)            | --                       | 0<br>(0 - 0)           | 84<br>(32 - 146)           | --                          | --                          |
| Maternal obstructed labor                                        | 67<br>(37 - 103)            | --                       | 0<br>(0 - 0)           | 67<br>(37 - 103)           | --                          | --                          |
| Maternal abortive outcome                                        | 152<br>(90 - 228)           | --                       | 0<br>(0 - 1)           | 152<br>(90 - 228)          | --                          | --                          |
| Indirect maternal deaths                                         | 83<br>(46 - 129)            | --                       | 0<br>(0 - 0)           | 83<br>(46 - 129)           | --                          | --                          |
| Late maternal deaths                                             | 110<br>(65 - 163)           | --                       | 0<br>(0 - 1)           | 110<br>(64 - 163)          | --                          | --                          |
| Maternal deaths aggravated by HIV/AIDS                           | 0<br>(0 - 1)                | --                       | --                     | 0<br>(0 - 1)               | --                          | --                          |
| Other maternal disorders                                         | 149<br>(72 - 231)           | --                       | 0<br>(0 - 1)           | 149<br>(72 - 231)          | --                          | --                          |
| Neonatal disorders                                               | 6,873<br>(5,694 - 8,200)    | 6,873<br>(5,694 - 8,200) | --                     | --                         | --                          | --                          |
| Neonatal preterm birth complications                             | 4,007<br>(2,875 - 5,138)    | 4,007<br>(2,875 - 5,138) | --                     | --                         | --                          | --                          |
| Neonatal encephalopathy due to birth asphyxia and trauma         | 1,508<br>(842 - 2,335)      | 1,508<br>(842 - 2,335)   | --                     | --                         | --                          | --                          |
| Neonatal sepsis and other neonatal infections                    | 377<br>(161 - 758)          | 377<br>(161 - 758)       | --                     | --                         | --                          | --                          |
| Hemolytic disease and other neonatal jaundice                    | 34<br>(14 - 71)             | 34<br>(14 - 71)          | --                     | --                         | --                          | --                          |
| Other neonatal disorders                                         | 947<br>(471 - 1,625)        | 947<br>(471 - 1,625)     | --                     | --                         | --                          | --                          |
| Nutritional deficiencies                                         | 1,094<br>(814 - 1,430)      | 228<br>(127 - 380)       | 23<br>(15 - 33)        | 166<br>(113 - 220)         | 143<br>(102 - 191)          | 534<br>(363 - 750)          |
| Protein-energy malnutrition                                      | 336<br>(192 - 558)          | 115<br>(44 - 230)        | 7<br>(3 - 13)          | 36<br>(18 - 67)            | 37<br>(17 - 67)             | 141<br>(62 - 250)           |
| Iodine deficiency                                                | 4<br>(1 - 13)               | 1<br>(0 - 8)             | 0<br>(0 - 1)           | 1<br>(0 - 3)               | 1<br>(0 - 3)                | 1<br>(0 - 6)                |
| Iron-deficiency anemia                                           | 691<br>(455 - 941)          | 93<br>(38 - 176)         | 13<br>(8 - 20)         | 118<br>(71 - 159)          | 99<br>(64 - 137)            | 367<br>(225 - 552)          |
| Other nutritional deficiencies                                   | 63<br>(34 - 123)            | 18<br>(6 - 44)           | 3<br>(1 - 6)           | 10<br>(5 - 22)             | 7<br>(3 - 15)               | 25<br>(12 - 51)             |
| Other communicable, maternal, neonatal, and nutritional diseases | 727<br>(532 - 1,049)        | 232<br>(126 - 379)       | 27<br>(17 - 42)        | 170<br>(106 - 259)         | 138<br>(86 - 229)           | 161<br>(85 - 328)           |
| Sexually transmitted diseases excluding HIV                      | 180<br>(86 - 299)           | 145<br>(59 - 257)        | 11<br>(5 - 20)         | 10<br>(6 - 16)             | 6<br>(3 - 14)               | 8<br>(3 - 16)               |
| Syphilis                                                         | 170<br>(76 - 289)           | 145<br>(59 - 257)        | 11<br>(5 - 19)         | 5<br>(3 - 7)               | 3<br>(2 - 8)                | 6<br>(3 - 12)               |
| Chlamydial infection                                             | 3<br>(1 - 4)                | --                       | 0<br>(0 - 0)           | 1<br>(1 - 3)               | 1<br>(0 - 2)                | 0<br>(0 - 1)                |
| Gonococcal infection                                             | 4<br>(3 - 6)                | --                       | 0<br>(0 - 0)           | 2<br>(1 - 3)               | 1<br>(0 - 2)                | 1<br>(0 - 2)                |
| Other sexually transmitted diseases                              | 3<br>(2 - 5)                | --                       | 0<br>(0 - 0)           | 2<br>(1 - 3)               | 1<br>(0 - 2)                | 0<br>(0 - 1)                |
| Hepatitis                                                        | 99<br>(79 - 121)            | 9<br>(4 - 17)            | 2<br>(1 - 2)           | 34<br>(23 - 45)            | 29<br>(21 - 40)             | 25<br>(19 - 34)             |
| Acute hepatitis A                                                | 9<br>(3 - 17)               | 5<br>(2 - 11)            | 1<br>(0 - 1)           | 2<br>(0 - 5)               | 1<br>(0 - 2)                | 0<br>(0 - 1)                |
| Acute hepatitis B                                                | 56<br>(38 - 76)             | 4<br>(1 - 9)             | 0<br>(0 - 1)           | 12<br>(6 - 21)             | 20<br>(12 - 28)             | 20<br>(13 - 28)             |
| Acute hepatitis C                                                | 2<br>(0 - 5)                | --                       | 0<br>(0 - 0)           | 1<br>(0 - 2)               | 1<br>(0 - 2)                | 1<br>(0 - 2)                |
| Acute hepatitis E                                                | 32<br>(19 - 47)             | 0<br>(0 - 0)             | 1<br>(0 - 1)           | 19<br>(11 - 27)            | 8<br>(4 - 15)               | 4<br>(2 - 9)                |
| Other infectious diseases                                        | 448<br>(287 - 753)          | 77<br>(28 - 164)         | 14<br>(7 - 26)         | 125<br>(71 - 211)          | 103<br>(53 - 194)           | 128<br>(53 - 293)           |
| Non-communicable diseases                                        | 80,870<br>(72,383 - 88,797) | 3,255<br>(2,157 - 5,043) | 604<br>(483 - 723)     | 11,193<br>(8,451 - 12,853) | 23,422<br>(20,261 - 26,889) | 42,396<br>(39,019 - 45,558) |
| Neoplasms                                                        | 11,011<br>(9,374 - 12,660)  | 98<br>(63 - 159)         | 121<br>(91 - 155)      | 2,099<br>(1,629 - 2,479)   | 4,570<br>(3,780 - 5,438)    | 4,123<br>(3,571 - 4,625)    |
| Esophageal cancer                                                | 252<br>(184 - 329)          | --                       | --                     | 33<br>(21 - 45)            | 103<br>(73 - 139)           | 116<br>(83 - 160)           |
| Stomach cancer                                                   | 1,102<br>(890 - 1,331)      | --                       | --                     | 173<br>(126 - 220)         | 444<br>(344 - 555)          | 485<br>(370 - 619)          |
| Liver cancer                                                     | 704<br>(551 - 900)          | --                       | 2<br>(1 - 4)           | 134<br>(88 - 181)          | 320<br>(239 - 424)          | 248<br>(181 - 333)          |
| Liver cancer due to hepatitis B                                  | 262<br>(159 - 372)          | --                       | 1<br>(0 - 1)           | 55<br>(30 - 86)            | 126<br>(73 - 188)           | 80<br>(47 - 122)            |
| Liver cancer due to hepatitis C                                  | 311<br>(171 - 427)          | --                       | 0<br>(0 - 1)           | 53<br>(28 - 80)            | 140<br>(76 - 202)           | 118<br>(56 - 178)           |
| Liver cancer due to alcohol use                                  | 51<br>(33 - 82)             | --                       | --                     | 6<br>(3 - 10)              | 20<br>(12 - 32)             | 26<br>(14 - 44)             |

Web Table 31- Cambodia deaths with 95% UI by age, sex, and cause in 2013

| Cause                                         | Both Sexes, All Ages        | Both Sexes, 0-4 Years | Both Sexes, 5-14 Years | Both Sexes, 15-49 Years  | Both Sexes, 50-69 Years     | Both Sexes, 70-80 Years     |
|-----------------------------------------------|-----------------------------|-----------------------|------------------------|--------------------------|-----------------------------|-----------------------------|
| Liver cancer due to other causes              | 80<br>(53 - 115)            | --                    | 1<br>(1 - 2)           | 20<br>(12 - 30)          | 34<br>(20 - 51)             | 24<br>(14 - 41)             |
| Larynx cancer                                 | 111<br>(75 - 145)           | --                    | --                     | 15<br>(9 - 21)           | 47<br>(32 - 63)             | 50<br>(31 - 69)             |
| Tracheal, bronchus and lung cancer            | 2,237<br>(1,697 - 2,652)    | --                    | --                     | 269<br>(177 - 345)       | 1,079<br>(786 - 1,322)      | 889<br>(685 - 1,069)        |
| Breast cancer                                 | 778<br>(584 - 1,048)        | --                    | --                     | 248<br>(176 - 355)       | 361<br>(253 - 525)          | 168<br>(124 - 230)          |
| Cervical cancer                               | 732<br>(516 - 948)          | --                    | --                     | 192<br>(126 - 267)       | 375<br>(246 - 507)          | 166<br>(107 - 239)          |
| Uterine cancer                                | 99<br>(63 - 143)            | --                    | --                     | 12<br>(6 - 18)           | 55<br>(31 - 84)             | 33<br>(20 - 50)             |
| Prostate cancer                               | 205<br>(114 - 295)          | --                    | --                     | 2<br>(1 - 3)             | 27<br>(15 - 39)             | 177<br>(97 - 262)           |
| Colon and rectum cancer                       | 1,029<br>(864 - 1,228)      | --                    | --                     | 142<br>(106 - 178)       | 376<br>(306 - 472)          | 511<br>(409 - 632)          |
| Lip and oral cavity cancer                    | 329<br>(230 - 437)          | --                    | --                     | 56<br>(35 - 81)          | 134<br>(93 - 183)           | 139<br>(91 - 198)           |
| Nasopharynx cancer                            | 151<br>(112 - 203)          | --                    | 2<br>(1 - 4)           | 52<br>(34 - 74)          | 65<br>(45 - 96)             | 32<br>(22 - 47)             |
| Other pharynx cancer                          | 151<br>(119 - 194)          | --                    | --                     | 27<br>(17 - 38)          | 75<br>(55 - 101)            | 49<br>(36 - 66)             |
| Gallbladder and biliary tract cancer          | 301<br>(180 - 422)          | --                    | --                     | 32<br>(17 - 50)          | 129<br>(71 - 189)           | 140<br>(86 - 207)           |
| Pancreatic cancer                             | 293<br>(241 - 348)          | --                    | --                     | 37<br>(26 - 48)          | 132<br>(103 - 162)          | 124<br>(100 - 155)          |
| Malignant skin melanoma                       | 50<br>(38 - 64)             | --                    | --                     | 15<br>(10 - 20)          | 19<br>(13 - 25)             | 16<br>(12 - 23)             |
| Non-melanoma skin cancer                      | 52<br>(35 - 76)             | --                    | --                     | 8<br>(5 - 11)            | 13<br>(9 - 20)              | 31<br>(19 - 47)             |
| Ovarian cancer                                | 248<br>(171 - 344)          | --                    | --                     | 62<br>(41 - 88)          | 138<br>(86 - 201)           | 48<br>(32 - 69)             |
| Testicular cancer                             | 10<br>(6 - 13)              | --                    | --                     | 6<br>(4 - 9)             | 1<br>(1 - 2)                | 2<br>(1 - 3)                |
| Kidney cancer                                 | 127<br>(102 - 154)          | 4<br>(2 - 7)          | 1<br>(1 - 2)           | 18<br>(13 - 24)          | 59<br>(45 - 76)             | 45<br>(33 - 60)             |
| Bladder cancer                                | 216<br>(166 - 266)          | --                    | --                     | 14<br>(9 - 18)           | 69<br>(51 - 90)             | 133<br>(99 - 172)           |
| Brain and nervous system cancer               | 216<br>(143 - 273)          | 6<br>(3 - 12)         | 13<br>(8 - 18)         | 81<br>(52 - 107)         | 73<br>(46 - 98)             | 43<br>(25 - 58)             |
| Thyroid cancer                                | 78<br>(57 - 106)            | --                    | 0<br>(0 - 1)           | 9<br>(7 - 13)            | 29<br>(21 - 43)             | 39<br>(26 - 54)             |
| Mesothelioma                                  | 14<br>(11 - 19)             | --                    | --                     | 3<br>(2 - 4)             | 7<br>(5 - 11)               | 4<br>(3 - 6)                |
| Hodgkin lymphoma                              | 29<br>(21 - 38)             | 2<br>(1 - 3)          | 2<br>(1 - 3)           | 12<br>(8 - 17)           | 8<br>(5 - 11)               | 5<br>(4 - 8)                |
| Non-Hodgkin lymphoma                          | 301<br>(218 - 383)          | 8<br>(4 - 14)         | 13<br>(8 - 20)         | 84<br>(55 - 110)         | 103<br>(71 - 139)           | 94<br>(66 - 126)            |
| Multiple myeloma                              | 37<br>(26 - 49)             | --                    | --                     | 7<br>(4 - 10)            | 17<br>(11 - 23)             | 14<br>(10 - 18)             |
| Leukemia                                      | 483<br>(392 - 566)          | 35<br>(17 - 62)       | 59<br>(42 - 81)        | 186<br>(142 - 227)       | 103<br>(80 - 130)           | 99<br>(77 - 124)            |
| Other neoplasms                               | 677<br>(509 - 891)          | 43<br>(25 - 86)       | 28<br>(18 - 44)        | 169<br>(119 - 240)       | 211<br>(147 - 288)          | 225<br>(154 - 297)          |
| Cardiovascular diseases                       | 42,534<br>(37,688 - 47,792) | 355<br>(237 - 536)    | 145<br>(104 - 189)     | 5,063<br>(3,853 - 5,951) | 12,029<br>(10,131 - 14,113) | 24,942<br>(22,579 - 27,720) |
| Rheumatic heart disease                       | 586<br>(422 - 808)          | 9<br>(4 - 17)         | 31<br>(17 - 47)        | 233<br>(151 - 327)       | 127<br>(85 - 208)           | 186<br>(129 - 266)          |
| Ischemic heart disease                        | 20,106<br>(16,976 - 23,310) | 46<br>(18 - 91)       | 20<br>(12 - 31)        | 2,370<br>(1,542 - 2,882) | 6,059<br>(4,909 - 7,249)    | 11,610<br>(9,838 - 13,532)  |
| Cerebrovascular disease                       | 16,596<br>(14,179 - 19,460) | 97<br>(58 - 158)      | 38<br>(25 - 52)        | 1,565<br>(1,132 - 1,951) | 4,403<br>(3,554 - 5,425)    | 10,493<br>(8,940 - 12,126)  |
| Ischemic stroke                               | 9,129<br>(6,804 - 10,696)   | 14<br>(5 - 31)        | 5<br>(3 - 8)           | 252<br>(147 - 368)       | 1,641<br>(1,159 - 2,109)    | 7,218<br>(5,449 - 8,516)    |
| Hemorrhagic stroke                            | 7,467<br>(5,864 - 10,474)   | 83<br>(49 - 135)      | 33<br>(22 - 46)        | 1,313<br>(944 - 1,669)   | 2,762<br>(2,136 - 3,650)    | 3,275<br>(2,420 - 5,214)    |
| Hypertensive heart disease                    | 1,837<br>(1,332 - 2,783)    | 6<br>(3 - 12)         | 2<br>(1 - 4)           | 175<br>(104 - 245)       | 484<br>(326 - 711)          | 1,169<br>(829 - 1,874)      |
| Cardiomyopathy and myocarditis                | 538<br>(387 - 698)          | 66<br>(28 - 118)      | 17<br>(10 - 27)        | 143<br>(89 - 190)        | 113<br>(80 - 160)           | 198<br>(133 - 293)          |
| Atrial fibrillation and flutter               | 16<br>(10 - 25)             | --                    | --                     | 2<br>(1 - 3)             | 5<br>(3 - 7)                | 9<br>(6 - 16)               |
| Aortic aneurysm                               | 160<br>(115 - 212)          | --                    | --                     | 18<br>(12 - 25)          | 28<br>(19 - 40)             | 114<br>(78 - 153)           |
| Peripheral vascular disease                   | 9<br>(7 - 13)               | --                    | --                     | 1<br>(0 - 1)             | 2<br>(1 - 3)                | 7<br>(5 - 10)               |
| Endocarditis                                  | 238<br>(158 - 366)          | 24<br>(12 - 46)       | 7<br>(4 - 12)          | 68<br>(42 - 101)         | 58<br>(37 - 92)             | 81<br>(48 - 140)            |
| Other cardiovascular and circulatory diseases | 2,447<br>(1,242 - 4,551)    | 107<br>(41 - 207)     | 29<br>(12 - 47)        | 487<br>(230 - 888)       | 750<br>(349 - 1,457)        | 1,075<br>(514 - 2,065)      |



Web Table 31- Cambodia deaths with 95% UI by age, sex, and cause in 2013

| Cause                                               | Both Sexes, All Ages      | Both Sexes, 0-4 Years | Both Sexes, 5-14 Years | Both Sexes, 15-49 Years | Both Sexes, 50-69 Years  | Both Sexes, 70-80 Years  |
|-----------------------------------------------------|---------------------------|-----------------------|------------------------|-------------------------|--------------------------|--------------------------|
| Chronic respiratory diseases                        | 8,844<br>(7,258 - 11,361) | 292<br>(186 - 442)    | 60<br>(44 - 79)        | 786<br>(566 - 1,047)    | 2,130<br>(1,648 - 2,852) | 5,576<br>(4,568 - 7,180) |
| Chronic obstructive pulmonary disease               | 4,904<br>(3,885 - 6,477)  | 131<br>(71 - 220)     | 10<br>(6 - 16)         | 236<br>(151 - 341)      | 1,074<br>(789 - 1,502)   | 3,452<br>(2,719 - 4,543) |
| Pneumoconiosis                                      | 251<br>(149 - 411)        | 1<br>(1 - 3)          | 1<br>(1 - 2)           | 35<br>(19 - 59)         | 94<br>(51 - 164)         | 119<br>(67 - 199)        |
| Silicosis                                           | 131<br>(75 - 210)         | 0<br>(0 - 1)          | 0<br>(0 - 1)           | 2<br>(1 - 4)            | 30<br>(14 - 53)          | 99<br>(55 - 165)         |
| Asbestosis                                          | 20<br>(11 - 36)           | 0<br>(0 - 1)          | 0<br>(0 - 0)           | 5<br>(3 - 9)            | 14<br>(7 - 27)           | 0<br>(0 - 0)             |
| Coal workers pneumoconiosis                         | 54<br>(30 - 98)           | 0<br>(0 - 1)          | 0<br>(0 - 0)           | 17<br>(9 - 30)          | 34<br>(18 - 65)          | 3<br>(1 - 6)             |
| Other pneumoconiosis                                | 44<br>(26 - 77)           | 1<br>(0 - 1)          | 0<br>(0 - 1)           | 11<br>(6 - 18)          | 16<br>(8 - 31)           | 16<br>(8 - 32)           |
| Asthma                                              | 3,068<br>(1,804 - 4,724)  | 110<br>(60 - 185)     | 43<br>(28 - 59)        | 455<br>(286 - 642)      | 849<br>(482 - 1,293)     | 1,610<br>(878 - 2,715)   |
| Interstitial lung disease and pulmonary sarcoidosis | 303<br>(38 - 668)         | 1<br>(0 - 2)          | 0<br>(0 - 1)           | 7<br>(2 - 18)           | 76<br>(9 - 180)          | 219<br>(26 - 490)        |
| Other chronic respiratory diseases                  | 319<br>(213 - 481)        | 48<br>(28 - 87)       | 5<br>(3 - 9)           | 52<br>(31 - 85)         | 38<br>(22 - 60)          | 176<br>(107 - 289)       |
| Cirrhosis                                           | 2,351<br>(1,910 - 2,781)  | 11<br>(6 - 20)        | 12<br>(9 - 17)         | 811<br>(540 - 1,033)    | 968<br>(772 - 1,192)     | 548<br>(439 - 670)       |
| Cirrhosis due to hepatitis B                        | 752<br>(405 - 1,152)      | 1<br>(0 - 1)          | 2<br>(1 - 3)           | 257<br>(122 - 411)      | 309<br>(161 - 505)       | 184<br>(99 - 286)        |
| Cirrhosis due to hepatitis C                        | 645<br>(363 - 937)        | 1<br>(0 - 1)          | 2<br>(1 - 4)           | 207<br>(95 - 345)       | 277<br>(141 - 416)       | 157<br>(98 - 225)        |
| Cirrhosis due to alcohol use                        | 717<br>(447 - 1,007)      | --                    | --                     | 224<br>(117 - 361)      | 311<br>(189 - 452)       | 182<br>(115 - 264)       |
| Cirrhosis due to other causes                       | 237<br>(158 - 329)        | 10<br>(5 - 18)        | 8<br>(6 - 12)          | 122<br>(74 - 183)       | 71<br>(42 - 108)         | 25<br>(15 - 41)          |
| Digestive diseases                                  | 3,047<br>(2,452 - 3,738)  | 62<br>(36 - 98)       | 39<br>(28 - 53)        | 709<br>(480 - 900)      | 822<br>(629 - 1,075)     | 1,415<br>(1,124 - 1,749) |
| Peptic ulcer disease                                | 1,178<br>(878 - 1,542)    | 5<br>(2 - 9)          | 5<br>(3 - 8)           | 221<br>(137 - 331)      | 353<br>(245 - 497)       | 594<br>(423 - 787)       |
| Gastritis and duodenitis                            | 99<br>(46 - 179)          | 3<br>(1 - 6)          | 2<br>(1 - 4)           | 20<br>(10 - 36)         | 23<br>(11 - 41)          | 51<br>(20 - 98)          |
| Appendicitis                                        | 212<br>(145 - 307)        | 8<br>(3 - 16)         | 10<br>(5 - 15)         | 76<br>(46 - 111)        | 55<br>(34 - 85)          | 64<br>(38 - 103)         |
| Paralytic ileus and intestinal obstruction          | 355<br>(233 - 534)        | 16<br>(8 - 29)        | 6<br>(3 - 10)          | 52<br>(30 - 85)         | 80<br>(49 - 128)         | 202<br>(118 - 311)       |
| Inguinal, femoral, and abdominal hernia             | 60<br>(39 - 98)           | 3<br>(1 - 6)          | 2<br>(1 - 3)           | 12<br>(7 - 23)          | 14<br>(9 - 22)           | 30<br>(18 - 48)          |
| Inflammatory bowel disease                          | 88<br>(58 - 125)          | 4<br>(2 - 9)          | 2<br>(1 - 3)           | 24<br>(15 - 36)         | 20<br>(13 - 31)          | 37<br>(22 - 60)          |
| Vascular intestinal disorders                       | 26<br>(14 - 50)           | 1<br>(0 - 2)          | 1<br>(0 - 2)           | 7<br>(3 - 14)           | 5<br>(3 - 10)            | 12<br>(6 - 24)           |
| Gallbladder and biliary diseases                    | 324<br>(212 - 453)        | 4<br>(3 - 8)          | 3<br>(2 - 4)           | 61<br>(36 - 89)         | 85<br>(54 - 125)         | 170<br>(102 - 262)       |
| Pancreatitis                                        | 279<br>(152 - 419)        | 2<br>(1 - 4)          | 2<br>(1 - 4)           | 133<br>(64 - 220)       | 72<br>(41 - 110)         | 70<br>(40 - 113)         |
| Other digestive diseases                            | 426<br>(299 - 580)        | 16<br>(8 - 29)        | 7<br>(5 - 11)          | 103<br>(64 - 150)       | 114<br>(77 - 165)        | 186<br>(120 - 275)       |
| Neurological disorders                              | 2,984<br>(2,506 - 3,525)  | 39<br>(19 - 83)       | 35<br>(22 - 52)        | 201<br>(139 - 269)      | 264<br>(205 - 325)       | 2,445<br>(2,025 - 2,951) |
| Alzheimer disease and other dementias               | 2,558<br>(2,126 - 3,083)  | --                    | --                     | 2<br>(0 - 3)            | 192<br>(140 - 245)       | 2,365<br>(1,949 - 2,871) |
| Parkinson disease                                   | 28<br>(18 - 41)           | --                    | --                     | 2<br>(1 - 2)            | 7<br>(4 - 10)            | 20<br>(11 - 31)          |
| Epilepsy                                            | 302<br>(203 - 408)        | 27<br>(10 - 70)       | 28<br>(16 - 44)        | 166<br>(107 - 231)      | 45<br>(31 - 64)          | 35<br>(22 - 57)          |
| Multiple sclerosis                                  | 7<br>(4 - 10)             | --                    | --                     | 3<br>(2 - 5)            | 2<br>(1 - 4)             | 1<br>(1 - 2)             |
| Other neurological disorders                        | 89<br>(72 - 115)          | 12<br>(8 - 22)        | 7<br>(5 - 10)          | 29<br>(21 - 40)         | 18<br>(14 - 25)          | 24<br>(19 - 31)          |
| Mental and substance use disorders                  | 455<br>(261 - 587)        | 3<br>(1 - 5)          | 0<br>(0 - 0)           | 278<br>(157 - 369)      | 140<br>(72 - 201)        | 33<br>(19 - 46)          |
| Schizophrenia                                       | 14<br>(8 - 21)            | --                    | --                     | 6<br>(3 - 9)            | 4<br>(2 - 7)             | 4<br>(2 - 6)             |
| Alcohol use disorders                               | 315<br>(160 - 439)        | --                    | --                     | 167<br>(74 - 247)       | 121<br>(57 - 181)        | 27<br>(13 - 39)          |
| Drug use disorders                                  | 125<br>(81 - 165)         | 3<br>(1 - 5)          | --                     | 105<br>(66 - 144)       | 15<br>(10 - 19)          | 2<br>(2 - 4)             |
| Opioid use disorders                                | 81<br>(53 - 109)          | 2<br>(1 - 3)          | --                     | 68<br>(43 - 95)         | 9<br>(6 - 12)            | 2<br>(1 - 2)             |
| Cocaine use disorders                               | 2<br>(1 - 3)              | 0<br>(0 - 0)          | --                     | 2<br>(1 - 2)            | 0<br>(0 - 0)             | 0<br>(0 - 0)             |
| Amphetamine use disorders                           | 2<br>(1 - 3)              | 0<br>(0 - 0)          | --                     | 2<br>(1 - 2)            | 0<br>(0 - 0)             | 0<br>(0 - 0)             |
| Other drug use disorders                            | 41<br>(27 - 55)           | 1<br>(0 - 2)          | --                     | 34<br>(21 - 47)         | 5<br>(4 - 7)             | 1<br>(1 - 1)             |

Web Table 31- Cambodia deaths with 95% UI by age, sex, and cause in 2013

| Cause                                               | Both Sexes, All Ages     | Both Sexes, 0-4 Years    | Both Sexes, 5-14 Years | Both Sexes, 15-49 Years | Both Sexes, 50-69 Years  | Both Sexes, 70-80 Years  |
|-----------------------------------------------------|--------------------------|--------------------------|------------------------|-------------------------|--------------------------|--------------------------|
| Eating disorders                                    | 1<br>(0 - 1)             | --                       | 0<br>(0 - 0)           | 1<br>(0 - 1)            | --                       | --                       |
| Anorexia nervosa                                    | 1<br>(0 - 1)             | --                       | 0<br>(0 - 0)           | 1<br>(0 - 1)            | --                       | --                       |
| Diabetes, urogenital, blood, and endocrine diseases | 6,798<br>(4,989 - 8,660) | 188<br>(121 - 268)       | 74<br>(51 - 98)        | 1,012<br>(683 - 1,318)  | 2,384<br>(1,715 - 3,047) | 3,139<br>(2,234 - 4,024) |
| Diabetes mellitus                                   | 3,416<br>(2,521 - 4,357) | 6<br>(4 - 8)             | 5<br>(3 - 7)           | 308<br>(203 - 402)      | 1,327<br>(947 - 1,746)   | 1,771<br>(1,268 - 2,360) |
| Acute glomerulonephritis                            | 17<br>(11 - 26)          | 2<br>(1 - 4)             | 2<br>(1 - 3)           | 6<br>(4 - 10)           | 3<br>(2 - 5)             | 4<br>(2 - 7)             |
| Chronic kidney disease                              | 2,268<br>(1,318 - 3,142) | 30<br>(14 - 52)          | 19<br>(10 - 29)        | 436<br>(242 - 634)      | 798<br>(443 - 1,107)     | 984<br>(558 - 1,403)     |
| Chronic kidney disease due to diabetes mellitus     | 122<br>(58 - 188)        | 1<br>(0 - 1)             | 0<br>(0 - 1)           | 16<br>(6 - 27)          | 44<br>(20 - 70)          | 60<br>(27 - 104)         |
| Chronic kidney disease due to hypertension          | 577<br>(315 - 917)       | 3<br>(1 - 7)             | 1<br>(1 - 2)           | 88<br>(40 - 155)        | 217<br>(109 - 365)       | 268<br>(151 - 419)       |
| Chronic kidney disease due to glomerulonephritis    | 290<br>(196 - 403)       | 12<br>(7 - 19)           | 9<br>(6 - 12)          | 85<br>(55 - 121)        | 79<br>(47 - 120)         | 106<br>(66 - 153)        |
| Chronic kidney disease due to other causes          | 1,278<br>(607 - 1,940)   | 15<br>(4 - 29)           | 9<br>(3 - 16)          | 247<br>(115 - 392)      | 458<br>(210 - 704)       | 550<br>(250 - 912)       |
| Urinary diseases and male infertility               | 465<br>(333 - 585)       | 17<br>(8 - 35)           | 4<br>(2 - 5)           | 82<br>(53 - 110)        | 134<br>(92 - 176)        | 228<br>(157 - 322)       |
| Interstitial nephritis and urinary tract infections | 221<br>(130 - 310)       | 8<br>(4 - 18)            | 1<br>(1 - 2)           | 37<br>(19 - 54)         | 58<br>(31 - 85)          | 116<br>(63 - 184)        |
| Urolithiasis                                        | 33<br>(20 - 47)          | --                       | 1<br>(0 - 1)           | 7<br>(4 - 11)           | 11<br>(6 - 17)           | 14<br>(7 - 25)           |
| Other urinary diseases                              | 211<br>(156 - 284)       | 9<br>(4 - 20)            | 2<br>(1 - 3)           | 38<br>(24 - 52)         | 65<br>(45 - 91)          | 97<br>(62 - 147)         |
| Gynecological diseases                              | 9<br>(5 - 16)            | --                       | --                     | 5<br>(3 - 9)            | 2<br>(1 - 4)             | 2<br>(1 - 4)             |
| Uterine fibroids                                    | 2<br>(1 - 3)             | --                       | --                     | 1<br>(0 - 1)            | 1<br>(0 - 1)             | 1<br>(0 - 1)             |
| Polycystic ovarian syndrome                         | 0<br>(0 - 1)             | --                       | --                     | 0<br>(0 - 1)            | 0<br>(0 - 0)             | --                       |
| Endometriosis                                       | 1<br>(0 - 2)             | --                       | --                     | 1<br>(0 - 1)            | 0<br>(0 - 0)             | --                       |
| Genital prolapse                                    | 2<br>(1 - 3)             | --                       | --                     | 1<br>(0 - 1)            | 0<br>(0 - 1)             | 1<br>(0 - 1)             |
| Other gynecological diseases                        | 4<br>(2 - 8)             | --                       | --                     | 2<br>(1 - 4)            | 1<br>(0 - 2)             | 1<br>(0 - 2)             |
| Hemoglobinopathies and hemolytic anemias            | 320<br>(197 - 440)       | 100<br>(50 - 154)        | 36<br>(21 - 52)        | 104<br>(59 - 143)       | 37<br>(22 - 53)          | 43<br>(26 - 63)          |
| Thalassemias                                        | 236<br>(144 - 329)       | 92<br>(46 - 142)         | 35<br>(20 - 50)        | 90<br>(52 - 124)        | 16<br>(10 - 23)          | 3<br>(2 - 5)             |
| Sickle cell disorders                               | 0<br>(0 - 0)             | 0<br>(0 - 0)             | 0<br>(0 - 0)           | 0<br>(0 - 0)            | 0<br>(0 - 0)             | 0<br>(0 - 0)             |
| G6PD deficiency                                     | 16<br>(10 - 22)          | 3<br>(2 - 5)             | 1<br>(0 - 1)           | 5<br>(3 - 8)            | 5<br>(3 - 6)             | 2<br>(1 - 3)             |
| Other hemoglobinopathies and hemolytic anemias      | 68<br>(42 - 95)          | 4<br>(2 - 7)             | 1<br>(0 - 1)           | 9<br>(5 - 13)           | 16<br>(10 - 23)          | 37<br>(23 - 55)          |
| Endocrine, metabolic, blood, and immune disorders   | 303<br>(202 - 386)       | 33<br>(17 - 67)          | 9<br>(5 - 14)          | 71<br>(45 - 95)         | 83<br>(50 - 113)         | 108<br>(60 - 157)        |
| Musculoskeletal disorders                           | 98<br>(68 - 127)         | --                       | 5<br>(3 - 7)           | 41<br>(24 - 55)         | 29<br>(20 - 39)          | 23<br>(17 - 33)          |
| Rheumatoid arthritis                                | 20<br>(14 - 27)          | --                       | 1<br>(1 - 2)           | 5<br>(2 - 7)            | 7<br>(4 - 10)            | 8<br>(5 - 12)            |
| Other musculoskeletal disorders                     | 78<br>(53 - 101)         | --                       | 4<br>(2 - 6)           | 37<br>(20 - 49)         | 22<br>(15 - 31)          | 15<br>(11 - 22)          |
| Other non-communicable diseases                     | 2,748<br>(1,687 - 4,516) | 2,207<br>(1,213 - 3,883) | 113<br>(69 - 179)      | 193<br>(134 - 259)      | 84<br>(64 - 108)         | 151<br>(111 - 203)       |
| Congenital anomalies                                | 2,500<br>(1,446 - 4,252) | 2,175<br>(1,184 - 3,851) | 109<br>(65 - 175)      | 150<br>(99 - 214)       | 30<br>(20 - 44)          | 36<br>(26 - 48)          |
| Neural tube defects                                 | 492<br>(165 - 1,152)     | 462<br>(148 - 1,074)     | 9<br>(2 - 22)          | 17<br>(6 - 44)          | 3<br>(1 - 10)            | 1<br>(0 - 3)             |
| Congenital heart anomalies                          | 1,382<br>(654 - 2,674)   | 1,185<br>(503 - 2,437)   | 73<br>(40 - 121)       | 88<br>(51 - 131)        | 12<br>(8 - 18)           | 24<br>(16 - 34)          |
| Cleft lip and cleft palate                          | 9<br>(1 - 23)            | 9<br>(1 - 23)            | --                     | --                      | --                       | --                       |
| Down syndrome                                       | 50<br>(17 - 119)         | 38<br>(10 - 99)          | 5<br>(2 - 11)          | 6<br>(3 - 11)           | 2<br>(1 - 3)             | 0<br>(0 - 0)             |
| Chromosomal unbalanced rearrangements               | 54<br>(16 - 140)         | 46<br>(12 - 124)         | 1<br>(1 - 3)           | 6<br>(2 - 12)           | 1<br>(0 - 2)             | 1<br>(0 - 1)             |
| Other congenital anomalies                          | 512<br>(212 - 1,276)     | 435<br>(158 - 1,158)     | 21<br>(9 - 43)         | 33<br>(17 - 59)         | 13<br>(8 - 20)           | 10<br>(6 - 16)           |
| Skin and subcutaneous diseases                      | 231<br>(177 - 288)       | 16<br>(8 - 29)           | 4<br>(2 - 5)           | 43<br>(28 - 55)         | 54<br>(38 - 72)          | 115<br>(77 - 162)        |
| Cellulitis                                          | 82<br>(48 - 125)         | 7<br>(3 - 14)            | 1<br>(1 - 2)           | 16<br>(9 - 25)          | 22<br>(12 - 36)          | 35<br>(17 - 60)          |
| Pyoderma                                            | 90<br>(60 - 125)         | 9<br>(4 - 17)            | 2<br>(1 - 3)           | 20<br>(12 - 29)         | 23<br>(13 - 33)          | 37<br>(21 - 57)          |

Web Table 31- Cambodia deaths with 95% UI by age, sex, and cause in 2013

| Cause                                           | Both Sexes, All Ages      | Both Sexes, 0-4 Years | Both Sexes, 5-14 Years | Both Sexes, 15-49 Years  | Both Sexes, 50-69 Years  | Both Sexes, 70-80 Years |
|-------------------------------------------------|---------------------------|-----------------------|------------------------|--------------------------|--------------------------|-------------------------|
| Decubitus ulcer                                 | 55<br>(30 - 85)           | 0<br>(0 - 0)          | 0<br>(0 - 1)           | 5<br>(3 - 8)             | 7<br>(3 - 11)            | 42<br>(22 - 68)         |
| Other skin and subcutaneous diseases            | 4<br>(2 - 8)              | 0<br>(0 - 1)          | 0<br>(0 - 1)           | 2<br>(1 - 3)             | 1<br>(0 - 2)             | 1<br>(1 - 2)            |
| Sudden infant death syndrome                    | 16<br>(5 - 58)            | 16<br>(5 - 58)        | --                     | --                       | --                       | --                      |
| Injuries                                        | 9,962<br>(7,997 - 11,548) | 776<br>(538 - 1,077)  | 615<br>(469 - 765)     | 5,944<br>(4,523 - 7,044) | 1,503<br>(1,196 - 1,814) | 1,125<br>(929 - 1,325)  |
| Transport injuries                              | 3,876<br>(2,919 - 4,913)  | 188<br>(118 - 294)    | 246<br>(174 - 333)     | 2,430<br>(1,741 - 3,155) | 632<br>(454 - 843)       | 380<br>(263 - 520)      |
| Road injuries                                   | 3,657<br>(2,741 - 4,629)  | 167<br>(105 - 263)    | 235<br>(166 - 316)     | 2,315<br>(1,651 - 2,997) | 593<br>(423 - 786)       | 347<br>(240 - 477)      |
| Pedestrian road injuries                        | 850<br>(545 - 1,210)      | 65<br>(36 - 112)      | 93<br>(59 - 137)       | 388<br>(222 - 581)       | 173<br>(108 - 261)       | 132<br>(85 - 205)       |
| Cyclist road injuries                           | 260<br>(179 - 376)        | 10<br>(4 - 19)        | 27<br>(16 - 44)        | 133<br>(85 - 197)        | 57<br>(37 - 90)          | 33<br>(21 - 49)         |
| Motorcyclist road injuries                      | 1,075<br>(702 - 1,665)    | 28<br>(14 - 53)       | 39<br>(22 - 62)        | 829<br>(513 - 1,299)     | 123<br>(77 - 197)        | 56<br>(33 - 85)         |
| Motor vehicle road injuries                     | 1,402<br>(931 - 1,865)    | 59<br>(35 - 95)       | 69<br>(41 - 104)       | 929<br>(608 - 1,250)     | 228<br>(142 - 314)       | 116<br>(66 - 162)       |
| Other road injuries                             | 70<br>(37 - 120)          | 5<br>(2 - 10)         | 6<br>(3 - 12)          | 37<br>(18 - 66)          | 12<br>(6 - 21)           | 10<br>(5 - 20)          |
| Other transport injuries                        | 218<br>(154 - 296)        | 21<br>(11 - 34)       | 12<br>(7 - 18)         | 114<br>(73 - 171)        | 39<br>(25 - 59)          | 33<br>(17 - 53)         |
| Unintentional injuries                          | 3,290<br>(2,672 - 3,986)  | 563<br>(368 - 800)    | 328<br>(229 - 440)     | 1,375<br>(1,029 - 1,808) | 494<br>(388 - 607)       | 531<br>(421 - 655)      |
| Falls                                           | 544<br>(409 - 728)        | 29<br>(13 - 54)       | 19<br>(11 - 33)        | 180<br>(111 - 272)       | 128<br>(91 - 175)        | 187<br>(127 - 282)      |
| Drowning                                        | 1,356<br>(887 - 1,912)    | 261<br>(119 - 446)    | 233<br>(134 - 346)     | 644<br>(405 - 951)       | 141<br>(91 - 206)        | 76<br>(49 - 110)        |
| Fire, heat, and hot substances                  | 339<br>(227 - 461)        | 69<br>(32 - 121)      | 22<br>(13 - 34)        | 126<br>(77 - 182)        | 54<br>(35 - 81)          | 68<br>(38 - 116)        |
| Poisonings                                      | 111<br>(79 - 151)         | 9<br>(5 - 17)         | 5<br>(3 - 8)           | 64<br>(42 - 97)          | 19<br>(13 - 27)          | 13<br>(8 - 18)          |
| Exposure to mechanical forces                   | 306<br>(226 - 419)        | 26<br>(15 - 44)       | 21<br>(14 - 32)        | 186<br>(121 - 275)       | 45<br>(32 - 64)          | 27<br>(19 - 38)         |
| Unintentional firearm injuries                  | 127<br>(75 - 200)         | 6<br>(3 - 13)         | 4<br>(2 - 7)           | 85<br>(45 - 144)         | 19<br>(11 - 31)          | 13<br>(7 - 21)          |
| Unintentional suffocation                       | 18<br>(4 - 33)            | 6<br>(1 - 17)         | 1<br>(0 - 3)           | 7<br>(1 - 12)            | 2<br>(0 - 4)             | 2<br>(0 - 3)            |
| Other exposure to mechanical forces             | 161<br>(119 - 222)        | 14<br>(7 - 26)        | 16<br>(9 - 26)         | 95<br>(63 - 147)         | 24<br>(16 - 35)          | 12<br>(7 - 18)          |
| Adverse effects of medical treatment            | 273<br>(161 - 375)        | 40<br>(17 - 80)       | 7<br>(4 - 11)          | 68<br>(37 - 98)          | 60<br>(34 - 90)          | 99<br>(51 - 159)        |
| Animal contact                                  | 41<br>(26 - 60)           | 8<br>(3 - 14)         | 6<br>(3 - 9)           | 14<br>(8 - 21)           | 8<br>(5 - 13)            | 6<br>(4 - 9)            |
| Venomous animal contact                         | 26<br>(16 - 43)           | 5<br>(2 - 10)         | 4<br>(2 - 7)           | 9<br>(5 - 14)            | 5<br>(3 - 9)             | 3<br>(2 - 6)            |
| Non-venomous animal contact                     | 15<br>(6 - 24)            | 2<br>(1 - 5)          | 1<br>(0 - 3)           | 5<br>(2 - 9)             | 3<br>(1 - 6)             | 3<br>(1 - 5)            |
| Foreign body                                    | 210<br>(94 - 363)         | 110<br>(43 - 212)     | 8<br>(3 - 14)          | 30<br>(13 - 52)          | 21<br>(8 - 34)           | 42<br>(18 - 69)         |
| Pulmonary aspiration and foreign body in airway | 205<br>(90 - 355)         | 109<br>(42 - 210)     | 7<br>(3 - 13)          | 28<br>(11 - 49)          | 19<br>(8 - 33)           | 41<br>(17 - 68)         |
| Foreign body in other body part                 | 6<br>(3 - 9)              | 1<br>(1 - 3)          | 1<br>(0 - 1)           | 2<br>(1 - 3)             | 1<br>(1 - 2)             | 1<br>(0 - 1)            |
| Other unintentional injuries                    | 110<br>(67 - 152)         | 10<br>(5 - 17)        | 7<br>(4 - 10)          | 63<br>(36 - 93)          | 17<br>(10 - 25)          | 12<br>(7 - 18)          |
| Self-harm and interpersonal violence            | 2,778<br>(1,982 - 3,431)  | 25<br>(13 - 47)       | 40<br>(25 - 62)        | 2,130<br>(1,477 - 2,684) | 371<br>(258 - 491)       | 212<br>(138 - 298)      |
| Self-harm                                       | 1,993<br>(1,339 - 2,564)  | --                    | 19<br>(9 - 35)         | 1,445<br>(907 - 1,930)   | 326<br>(216 - 442)       | 203<br>(128 - 290)      |
| Interpersonal violence                          | 784<br>(490 - 1,109)      | 25<br>(13 - 47)       | 20<br>(12 - 34)        | 685<br>(409 - 980)       | 45<br>(29 - 67)          | 9<br>(5 - 15)           |
| Assault by firearm                              | 241<br>(121 - 387)        | 3<br>(1 - 7)          | 3<br>(1 - 6)           | 220<br>(108 - 359)       | 13<br>(7 - 22)           | 1<br>(1 - 3)            |
| Assault by sharp object                         | 265<br>(145 - 440)        | 2<br>(1 - 5)          | 3<br>(1 - 5)           | 245<br>(131 - 413)       | 13<br>(7 - 22)           | 2<br>(1 - 4)            |
| Assault by other means                          | 278<br>(178 - 425)        | 20<br>(10 - 39)       | 15<br>(8 - 25)         | 219<br>(132 - 344)       | 19<br>(12 - 29)          | 6<br>(3 - 9)            |
| Forces of nature, war, and legal intervention   | 19<br>(9 - 39)            | 0<br>(0 - 0)          | 1<br>(0 - 1)           | 9<br>(5 - 20)            | 6<br>(3 - 13)            | 2<br>(1 - 4)            |
| Exposure to forces of nature                    | 19<br>(9 - 39)            | 0<br>(0 - 0)          | 1<br>(0 - 1)           | 9<br>(5 - 20)            | 6<br>(3 - 13)            | 2<br>(1 - 4)            |

Web Table 31- Cambodia deaths with 95% UI by age, sex, and cause in 2013

| Cause                                                             | Males, All Ages             | Males, 0-4 Years          | Males, 5-14 Years        | Males, 15-49 Years          | Males, 50-69 Years          | Males, 70-80 Years          |
|-------------------------------------------------------------------|-----------------------------|---------------------------|--------------------------|-----------------------------|-----------------------------|-----------------------------|
| All causes                                                        | 62,429<br>(56,968 - 70,106) | 9,393<br>(8,015 - 10,876) | 1,170<br>(1,045 - 1,323) | 14,985<br>(12,469 - 17,069) | 14,683<br>(13,051 - 17,688) | 22,199<br>(21,040 - 24,716) |
| Communicable, maternal, neonatal, and nutritional diseases        | 15,849<br>(13,384 - 20,250) | 7,219<br>(5,930 - 8,604)  | 432<br>(342 - 544)       | 3,186<br>(2,194 - 6,115)    | 1,972<br>(1,461 - 2,948)    | 3,040<br>(2,379 - 3,852)    |
| HIV/AIDS and tuberculosis                                         | 3,618<br>(2,139 - 8,169)    | 19<br>(7 - 67)            | 34<br>(17 - 89)          | 1,608<br>(803 - 4,879)      | 960<br>(543 - 2,055)        | 997<br>(641 - 1,469)        |
| Tuberculosis                                                      | 2,545<br>(1,709 - 3,420)    | 7<br>(4 - 12)             | 21<br>(11 - 33)          | 861<br>(504 - 1,213)        | 689<br>(426 - 963)          | 967<br>(624 - 1,363)        |
| HIV/AIDS                                                          | 1,073<br>(125 - 6,154)      | 12<br>(1 - 61)            | 14<br>(2 - 74)           | 747<br>(86 - 4,292)         | 271<br>(27 - 1,306)         | 30<br>(3 - 172)             |
| HIV/AIDS resulting in mycobacterial infection                     | 74<br>(8 - 420)             | 1<br>(0 - 3)              | 1<br>(0 - 4)             | 51<br>(6 - 290)             | 19<br>(2 - 97)              | 2<br>(0 - 14)               |
| HIV/AIDS resulting in other diseases                              | 999<br>(116 - 5,729)        | 11<br>(1 - 57)            | 13<br>(2 - 70)           | 696<br>(80 - 3,999)         | 252<br>(25 - 1,214)         | 27<br>(3 - 159)             |
| Diarrhea, lower respiratory, and other common infectious diseases | 6,694<br>(5,444 - 8,011)    | 2,907<br>(2,116 - 3,819)  | 264<br>(192 - 346)       | 977<br>(655 - 1,273)        | 807<br>(577 - 1,111)        | 1,739<br>(1,221 - 2,458)    |
| Diarrheal diseases                                                | 1,108<br>(645 - 1,813)      | 702<br>(273 - 1,423)      | 40<br>(18 - 79)          | 97<br>(56 - 152)            | 98<br>(55 - 155)            | 172<br>(93 - 297)           |
| Intestinal infectious diseases                                    | 264<br>(134 - 453)          | 107<br>(46 - 208)         | 68<br>(30 - 129)         | 74<br>(32 - 140)            | 9<br>(3 - 20)               | 5<br>(2 - 11)               |
| Typhoid fever                                                     | 178<br>(80 - 318)           | 66<br>(24 - 139)          | 51<br>(21 - 102)         | 52<br>(20 - 105)            | 6<br>(2 - 15)               | 3<br>(1 - 7)                |
| Paratyphoid fever                                                 | 54<br>(24 - 99)             | 24<br>(8 - 53)            | 15<br>(6 - 30)           | 13<br>(5 - 28)              | 1<br>(0 - 3)                | 0<br>(0 - 1)                |
| Other intestinal infectious diseases                              | 32<br>(18 - 53)             | 17<br>(7 - 33)            | 3<br>(0 - 8)             | 8<br>(2 - 18)               | 2<br>(0 - 7)                | 2<br>(0 - 6)                |
| Lower respiratory infections                                      | 4,435<br>(3,371 - 5,661)    | 1,601<br>(968 - 2,438)    | 90<br>(52 - 144)         | 607<br>(372 - 869)          | 630<br>(425 - 908)          | 1,508<br>(1,005 - 2,252)    |
| Upper respiratory infections                                      | 6<br>(3 - 12)               | 1<br>(0 - 4)              | 0<br>(0 - 1)             | 2<br>(0 - 5)                | 1<br>(0 - 4)                | 1<br>(0 - 5)                |
| Otitis media                                                      | 7<br>(5 - 10)               | 1<br>(1 - 2)              | 0<br>(0 - 1)             | 2<br>(1 - 3)                | 2<br>(1 - 2)                | 2<br>(1 - 3)                |
| Meningitis                                                        | 546<br>(360 - 829)          | 291<br>(134 - 553)        | 34<br>(17 - 61)          | 138<br>(80 - 209)           | 48<br>(27 - 75)             | 35<br>(19 - 61)             |
| Pneumococcal meningitis                                           | 155<br>(97 - 238)           | 64<br>(25 - 139)          | 12<br>(5 - 24)           | 52<br>(26 - 94)             | 15<br>(6 - 28)              | 12<br>(5 - 21)              |
| H influenzae type B meningitis                                    | 155<br>(88 - 275)           | 115<br>(52 - 234)         | 9<br>(4 - 17)            | 20<br>(9 - 36)              | 6<br>(2 - 10)               | 5<br>(2 - 9)                |
| Meningococcal meningitis                                          | 54<br>(33 - 80)             | 19<br>(8 - 37)            | 3<br>(1 - 6)             | 19<br>(8 - 33)              | 8<br>(4 - 13)               | 6<br>(3 - 11)               |
| Other meningitis                                                  | 182<br>(118 - 276)          | 93<br>(39 - 181)          | 10<br>(4 - 19)           | 47<br>(23 - 76)             | 20<br>(10 - 32)             | 13<br>(6 - 23)              |
| Encephalitis                                                      | 115<br>(79 - 158)           | 43<br>(19 - 78)           | 13<br>(7 - 21)           | 38<br>(21 - 54)             | 11<br>(7 - 17)              | 9<br>(5 - 14)               |
| Diphtheria                                                        | 2<br>(0 - 10)               | 1<br>(0 - 9)              | 0<br>(0 - 3)             | 0<br>(0 - 2)                | 0<br>(0 - 1)                | --                          |
| Whooping cough                                                    | 60<br>(0 - 282)             | 57<br>(0 - 269)           | 3<br>(0 - 12)            | 1<br>(0 - 3)                | 0<br>(0 - 0)                | --                          |
| Tetanus                                                           | 48<br>(24 - 93)             | 18<br>(7 - 36)            | 4<br>(1 - 10)            | 15<br>(5 - 34)              | 6<br>(2 - 15)               | 4<br>(2 - 8)                |
| Measles                                                           | 94<br>(18 - 282)            | 83<br>(16 - 252)          | 10<br>(2 - 29)           | 2<br>(0 - 5)                | 0<br>(0 - 0)                | --                          |
| Varicella and herpes zoster                                       | 8<br>(2 - 20)               | 2<br>(0 - 9)              | 0<br>(0 - 2)             | 2<br>(0 - 5)                | 1<br>(0 - 2)                | 3<br>(0 - 13)               |
| Neglected tropical diseases and malaria                           | 759<br>(449 - 1,170)        | 116<br>(52 - 224)         | 108<br>(56 - 174)        | 410<br>(201 - 710)          | 87<br>(45 - 154)            | 37<br>(22 - 63)             |
| Malaria                                                           | 616<br>(320 - 1,034)        | 79<br>(23 - 177)          | 82<br>(32 - 150)         | 363<br>(160 - 669)          | 69<br>(29 - 138)            | 24<br>(9 - 50)              |
| Leishmaniasis                                                     | 0<br>(0 - 0)                | 0<br>(0 - 0)              | 0<br>(0 - 0)             | 0<br>(0 - 0)                | 0<br>(0 - 0)                | 0<br>(0 - 0)                |
| Visceral leishmaniasis                                            | 0<br>(0 - 0)                | 0<br>(0 - 0)              | 0<br>(0 - 0)             | 0<br>(0 - 0)                | 0<br>(0 - 0)                | 0<br>(0 - 0)                |
| Schistosomiasis                                                   | 25<br>(18 - 33)             | 0<br>(0 - 0)              | 0<br>(0 - 1)             | 10<br>(6 - 15)              | 8<br>(5 - 13)               | 5<br>(3 - 9)                |
| Cysticercosis                                                     | 0<br>(0 - 0)                | 0<br>(0 - 0)              | 0<br>(0 - 0)             | 0<br>(0 - 0)                | 0<br>(0 - 0)                | 0<br>(0 - 0)                |
| Cystic echinococcosis                                             | 2<br>(2 - 2)                | 0<br>(0 - 0)              | 0<br>(0 - 0)             | 1<br>(1 - 1)                | 0<br>(0 - 0)                | 0<br>(0 - 0)                |
| Dengue                                                            | 56<br>(32 - 78)             | 23<br>(10 - 38)           | 16<br>(7 - 22)           | 13<br>(8 - 17)              | 2<br>(2 - 3)                | 2<br>(2 - 3)                |
| Rabies                                                            | 26<br>(14 - 55)             | 2<br>(1 - 5)              | 5<br>(2 - 12)            | 14<br>(7 - 28)              | 4<br>(2 - 7)                | 2<br>(1 - 3)                |
| Intestinal nematode infections                                    | 5<br>(0 - 15)               | 3<br>(0 - 10)             | 1<br>(0 - 6)             | 1<br>(0 - 5)                | 0<br>(0 - 3)                | 0<br>(0 - 2)                |
| Ascariasis                                                        | 5<br>(0 - 15)               | 3<br>(0 - 10)             | 1<br>(0 - 6)             | 1<br>(0 - 5)                | 0<br>(0 - 3)                | 0<br>(0 - 2)                |
| Other neglected tropical diseases                                 | 29<br>(15 - 49)             | 10<br>(3 - 22)            | 4<br>(2 - 8)             | 8<br>(4 - 14)               | 3<br>(2 - 5)                | 4<br>(2 - 8)                |
| Maternal disorders                                                | --                          | --                        | --                       | --                          | --                          | --                          |

Web Table 31- Cambodia deaths with 95% UI by age, sex, and cause in 2013

| Cause                                                            | Males, All Ages             | Males, 0-4 Years         | Males, 5-14 Years  | Males, 15-49 Years       | Males, 50-69 Years          | Males, 70-80 Years          |
|------------------------------------------------------------------|-----------------------------|--------------------------|--------------------|--------------------------|-----------------------------|-----------------------------|
| Maternal hemorrhage                                              | --                          | --                       | --                 | --                       | --                          | --                          |
| Maternal sepsis and other maternal infections                    | --                          | --                       | --                 | --                       | --                          | --                          |
| Maternal hypertensive disorders                                  | --                          | --                       | --                 | --                       | --                          | --                          |
| Maternal obstructed labor                                        | --                          | --                       | --                 | --                       | --                          | --                          |
| Maternal abortive outcome                                        | --                          | --                       | --                 | --                       | --                          | --                          |
| Indirect maternal deaths                                         | --                          | --                       | --                 | --                       | --                          | --                          |
| Late maternal deaths                                             | --                          | --                       | --                 | --                       | --                          | --                          |
| Maternal deaths aggravated by HIV/AIDS                           | --                          | --                       | --                 | --                       | --                          | --                          |
| Other maternal disorders                                         | --                          | --                       | --                 | --                       | --                          | --                          |
| Neonatal disorders                                               | 3,955<br>(3,214 - 4,754)    | 3,955<br>(3,214 - 4,754) | --                 | --                       | --                          | --                          |
| Neonatal preterm birth complications                             | 2,320<br>(1,448 - 3,218)    | 2,320<br>(1,448 - 3,218) | --                 | --                       | --                          | --                          |
| Neonatal encephalopathy due to birth asphyxia and trauma         | 871<br>(382 - 1,531)        | 871<br>(382 - 1,531)     | --                 | --                       | --                          | --                          |
| Neonatal sepsis and other neonatal infections                    | 220<br>(64 - 522)           | 220<br>(64 - 522)        | --                 | --                       | --                          | --                          |
| Hemolytic disease and other neonatal jaundice                    | 21<br>(6 - 52)              | 21<br>(6 - 52)           | --                 | --                       | --                          | --                          |
| Other neonatal disorders                                         | 523<br>(228 - 1,014)        | 523<br>(228 - 1,014)     | --                 | --                       | --                          | --                          |
| Nutritional deficiencies                                         | 458<br>(272 - 716)          | 107<br>(48 - 215)        | 11<br>(6 - 19)     | 80<br>(41 - 124)         | 58<br>(33 - 90)             | 202<br>(112 - 336)          |
| Protein-energy malnutrition                                      | 193<br>(94 - 377)           | 70<br>(21 - 161)         | 4<br>(2 - 9)       | 26<br>(11 - 54)          | 21<br>(8 - 40)              | 72<br>(25 - 152)            |
| Iodine deficiency                                                | 2<br>(0 - 7)                | 0<br>(0 - 4)             | 0<br>(0 - 1)       | 1<br>(0 - 2)             | 0<br>(0 - 2)                | 0<br>(0 - 3)                |
| Iron-deficiency anemia                                           | 230<br>(110 - 378)          | 29<br>(5 - 73)           | 5<br>(2 - 9)       | 45<br>(20 - 75)          | 33<br>(14 - 57)             | 118<br>(53 - 209)           |
| Other nutritional deficiencies                                   | 34<br>(14 - 77)             | 8<br>(1 - 24)            | 2<br>(1 - 4)       | 7<br>(3 - 17)            | 4<br>(1 - 10)               | 13<br>(4 - 35)              |
| Other communicable, maternal, neonatal, and nutritional diseases | 366<br>(244 - 558)          | 115<br>(56 - 207)        | 14<br>(8 - 23)     | 112<br>(63 - 188)        | 61<br>(33 - 116)            | 63<br>(30 - 145)            |
| Sexually transmitted diseases excluding HIV                      | 81<br>(36 - 137)            | 70<br>(28 - 123)         | 5<br>(2 - 9)       | 3<br>(2 - 5)             | 1<br>(1 - 3)                | 2<br>(1 - 5)                |
| Syphilis                                                         | 79<br>(34 - 135)            | 70<br>(28 - 123)         | 5<br>(2 - 9)       | 1<br>(1 - 2)             | 1<br>(0 - 2)                | 2<br>(1 - 4)                |
| Chlamydial infection                                             | --                          | --                       | --                 | --                       | --                          | --                          |
| Gonococcal infection                                             | 1<br>(1 - 2)                | --                       | 0<br>(0 - 0)       | 1<br>(0 - 1)             | 0<br>(0 - 0)                | 0<br>(0 - 1)                |
| Other sexually transmitted diseases                              | 1<br>(1 - 1)                | --                       | 0<br>(0 - 0)       | 1<br>(0 - 1)             | 0<br>(0 - 0)                | 0<br>(0 - 0)                |
| Hepatitis                                                        | 54<br>(37 - 72)             | 4<br>(1 - 11)            | 1<br>(0 - 1)       | 24<br>(14 - 35)          | 14<br>(9 - 20)              | 11<br>(7 - 17)              |
| Acute hepatitis A                                                | 4<br>(1 - 10)               | 2<br>(0 - 7)             | 0<br>(0 - 1)       | 1<br>(0 - 3)             | 0<br>(0 - 1)                | 0<br>(0 - 0)                |
| Acute hepatitis B                                                | 30<br>(19 - 44)             | 2<br>(0 - 6)             | 0<br>(0 - 1)       | 9<br>(4 - 16)            | 10<br>(6 - 15)              | 9<br>(5 - 14)               |
| Acute hepatitis C                                                | 1<br>(0 - 3)                | --                       | 0<br>(0 - 0)       | 0<br>(0 - 1)             | 0<br>(0 - 1)                | 0<br>(0 - 1)                |
| Acute hepatitis E                                                | 19<br>(9 - 29)              | 0<br>(0 - 0)             | 0<br>(0 - 1)       | 13<br>(6 - 21)           | 4<br>(1 - 7)                | 2<br>(0 - 4)                |
| Other infectious diseases                                        | 231<br>(131 - 401)          | 41<br>(10 - 113)         | 8<br>(3 - 17)      | 86<br>(42 - 157)         | 46<br>(19 - 99)             | 51<br>(17 - 134)            |
| Non-communicable diseases                                        | 39,274<br>(34,442 - 45,071) | 1,690<br>(1,077 - 2,801) | 321<br>(253 - 403) | 6,975<br>(4,626 - 8,350) | 11,742<br>(10,032 - 14,197) | 18,545<br>(17,252 - 20,880) |
| Neoplasms                                                        | 5,157<br>(4,272 - 6,072)    | 54<br>(32 - 96)          | 65<br>(47 - 88)    | 941<br>(632 - 1,160)     | 2,023<br>(1,634 - 2,454)    | 2,074<br>(1,793 - 2,430)    |
| Esophageal cancer                                                | 145<br>(95 - 196)           | --                       | --                 | 23<br>(12 - 34)          | 62<br>(40 - 88)             | 59<br>(38 - 87)             |
| Stomach cancer                                                   | 586<br>(472 - 724)          | --                       | --                 | 98<br>(62 - 130)         | 234<br>(176 - 301)          | 255<br>(192 - 340)          |
| Liver cancer                                                     | 425<br>(323 - 555)          | --                       | 1<br>(1 - 2)       | 93<br>(54 - 130)         | 193<br>(135 - 264)          | 138<br>(96 - 200)           |
| Liver cancer due to hepatitis B                                  | 169<br>(80 - 266)           | --                       | 0<br>(0 - 1)       | 38<br>(15 - 65)          | 81<br>(38 - 132)            | 49<br>(21 - 83)             |
| Liver cancer due to hepatitis C                                  | 192<br>(110 - 290)          | --                       | 0<br>(0 - 1)       | 39<br>(21 - 64)          | 87<br>(47 - 146)            | 65<br>(33 - 108)            |
| Liver cancer due to alcohol use                                  | 35<br>(20 - 62)             | --                       | --                 | 5<br>(2 - 9)             | 14<br>(7 - 25)              | 17<br>(8 - 32)              |

Web Table 31- Cambodia deaths with 95% UI by age, sex, and cause in 2013

| Cause                                         | Males, All Ages             | Males, 0-4 Years   | Males, 5-14 Years | Males, 15-49 Years       | Males, 50-69 Years       | Males, 70-80 Years         |
|-----------------------------------------------|-----------------------------|--------------------|-------------------|--------------------------|--------------------------|----------------------------|
| Liver cancer due to other causes              | 29<br>(16 - 52)             | --                 | 1<br>(0 - 2)      | 10<br>(5 - 19)           | 11<br>(5 - 21)           | 7<br>(3 - 14)              |
| Larynx cancer                                 | 94<br>(60 - 123)            | --                 | --                | 12<br>(6 - 17)           | 39<br>(24 - 54)          | 43<br>(26 - 61)            |
| Tracheal, bronchus and lung cancer            | 1,398<br>(1,100 - 1,698)    | --                 | --                | 160<br>(99 - 216)        | 669<br>(507 - 846)       | 570<br>(452 - 704)         |
| Breast cancer                                 | 6<br>(3 - 8)                | --                 | --                | 2<br>(1 - 3)             | 2<br>(1 - 3)             | 2<br>(1 - 4)               |
| Cervical cancer                               | --                          | --                 | --                | --                       | --                       | --                         |
| Uterine cancer                                | --                          | --                 | --                | --                       | --                       | --                         |
| Prostate cancer                               | 205<br>(114 - 295)          | --                 | --                | 2<br>(1 - 3)             | 27<br>(15 - 39)          | 177<br>(97 - 262)          |
| Colon and rectum cancer                       | 471<br>(382 - 575)          | --                 | --                | 78<br>(52 - 102)         | 168<br>(132 - 216)       | 225<br>(176 - 285)         |
| Lip and oral cavity cancer                    | 192<br>(132 - 268)          | --                 | --                | 40<br>(22 - 63)          | 79<br>(51 - 116)         | 73<br>(48 - 105)           |
| Nasopharynx cancer                            | 88<br>(63 - 121)            | --                 | 1<br>(0 - 3)      | 35<br>(19 - 52)          | 36<br>(22 - 54)          | 17<br>(11 - 25)            |
| Other pharynx cancer                          | 105<br>(76 - 147)           | --                 | --                | 21<br>(12 - 32)          | 51<br>(35 - 76)          | 33<br>(22 - 48)            |
| Gallbladder and biliary tract cancer          | 98<br>(56 - 136)            | --                 | --                | 11<br>(6 - 17)           | 40<br>(20 - 61)          | 46<br>(29 - 69)            |
| Pancreatic cancer                             | 155<br>(123 - 194)          | --                 | --                | 24<br>(14 - 32)          | 70<br>(52 - 92)          | 61<br>(46 - 80)            |
| Malignant skin melanoma                       | 19<br>(10 - 29)             | --                 | --                | 6<br>(3 - 10)            | 6<br>(3 - 9)             | 6<br>(3 - 11)              |
| Non-melanoma skin cancer                      | 25<br>(15 - 39)             | --                 | --                | 4<br>(2 - 7)             | 7<br>(4 - 11)            | 14<br>(8 - 23)             |
| Ovarian cancer                                | --                          | --                 | --                | --                       | --                       | --                         |
| Testicular cancer                             | 10<br>(6 - 13)              | --                 | --                | 6<br>(4 - 9)             | 1<br>(1 - 2)             | 2<br>(1 - 3)               |
| Kidney cancer                                 | 69<br>(53 - 89)             | 2<br>(1 - 4)       | 0<br>(0 - 1)      | 11<br>(7 - 16)           | 33<br>(23 - 46)          | 23<br>(16 - 35)            |
| Bladder cancer                                | 157<br>(118 - 205)          | --                 | --                | 9<br>(5 - 13)            | 49<br>(34 - 68)          | 99<br>(70 - 136)           |
| Brain and nervous system cancer               | 121<br>(58 - 166)           | 3<br>(1 - 9)       | 7<br>(4 - 12)     | 48<br>(24 - 70)          | 40<br>(18 - 59)          | 22<br>(7 - 34)             |
| Thyroid cancer                                | 23<br>(16 - 31)             | --                 | 0<br>(0 - 0)      | 4<br>(2 - 6)             | 10<br>(6 - 15)           | 9<br>(6 - 13)              |
| Mesothelioma                                  | 6<br>(4 - 9)                | --                 | --                | 1<br>(1 - 2)             | 3<br>(2 - 4)             | 2<br>(1 - 4)               |
| Hodgkin lymphoma                              | 14<br>(9 - 21)              | 1<br>(0 - 2)       | 1<br>(0 - 2)      | 7<br>(4 - 11)            | 3<br>(2 - 5)             | 2<br>(1 - 4)               |
| Non-Hodgkin lymphoma                          | 171<br>(117 - 223)          | 4<br>(2 - 9)       | 8<br>(4 - 13)     | 54<br>(32 - 75)          | 55<br>(36 - 77)          | 50<br>(34 - 70)            |
| Multiple myeloma                              | 19<br>(12 - 27)             | --                 | --                | 4<br>(2 - 6)             | 8<br>(5 - 13)            | 7<br>(4 - 10)              |
| Leukemia                                      | 239<br>(182 - 290)          | 18<br>(8 - 37)     | 31<br>(20 - 45)   | 100<br>(70 - 132)        | 44<br>(32 - 56)          | 46<br>(33 - 61)            |
| Other neoplasms                               | 317<br>(230 - 429)          | 26<br>(13 - 56)    | 16<br>(9 - 26)    | 89<br>(58 - 128)         | 96<br>(57 - 139)         | 90<br>(47 - 136)           |
| Cardiovascular diseases                       | 20,026<br>(17,311 - 23,330) | 247<br>(148 - 400) | 69<br>(45 - 98)   | 3,351<br>(2,174 - 4,120) | 6,186<br>(5,198 - 7,624) | 10,173<br>(9,188 - 11,640) |
| Rheumatic heart disease                       | 242<br>(156 - 365)          | 6<br>(2 - 14)      | 14<br>(7 - 23)    | 105<br>(61 - 168)        | 50<br>(29 - 87)          | 67<br>(42 - 103)           |
| Ischemic heart disease                        | 10,350<br>(8,223 - 12,471)  | 32<br>(10 - 76)    | 11<br>(5 - 18)    | 1,771<br>(1,075 - 2,238) | 3,478<br>(2,714 - 4,361) | 5,059<br>(4,044 - 6,025)   |
| Cerebrovascular disease                       | 7,154<br>(5,757 - 8,890)    | 70<br>(37 - 125)   | 18<br>(11 - 28)   | 939<br>(569 - 1,278)     | 2,072<br>(1,603 - 2,732) | 4,055<br>(3,278 - 5,042)   |
| Ischemic stroke                               | 3,738<br>(2,650 - 4,710)    | 9<br>(3 - 25)      | 2<br>(1 - 4)      | 156<br>(80 - 247)        | 807<br>(531 - 1,147)     | 2,764<br>(1,930 - 3,479)   |
| Hemorrhagic stroke                            | 3,416<br>(2,461 - 4,746)    | 61<br>(31 - 108)   | 16<br>(9 - 24)    | 783<br>(482 - 1,077)     | 1,265<br>(906 - 1,759)   | 1,291<br>(867 - 2,061)     |
| Hypertensive heart disease                    | 674<br>(325 - 999)          | 4<br>(1 - 9)       | 1<br>(0 - 2)      | 97<br>(36 - 157)         | 198<br>(98 - 319)        | 374<br>(174 - 608)         |
| Cardiomyopathy and myocarditis                | 282<br>(193 - 403)          | 47<br>(17 - 92)    | 8<br>(4 - 14)     | 87<br>(52 - 128)         | 55<br>(35 - 88)          | 85<br>(51 - 141)           |
| Atrial fibrillation and flutter               | 5<br>(3 - 11)               | --                 | --                | 1<br>(0 - 2)             | 2<br>(1 - 3)             | 3<br>(1 - 6)               |
| Aortic aneurysm                               | 95<br>(58 - 133)            | --                 | --                | 12<br>(6 - 16)           | 13<br>(9 - 19)           | 70<br>(40 - 102)           |
| Peripheral vascular disease                   | 4<br>(3 - 6)                | --                 | --                | 0<br>(0 - 1)             | 1<br>(1 - 2)             | 3<br>(2 - 5)               |
| Endocarditis                                  | 107<br>(58 - 173)           | 13<br>(5 - 29)     | 2<br>(1 - 4)      | 36<br>(17 - 59)          | 26<br>(13 - 45)          | 30<br>(15 - 53)            |
| Other cardiovascular and circulatory diseases | 1,111<br>(515 - 2,643)      | 75<br>(26 - 159)   | 15<br>(6 - 26)    | 303<br>(130 - 663)       | 292<br>(123 - 743)       | 427<br>(185 - 1,039)       |

Web Table 31- Cambodia deaths with 95% UI by age, sex, and cause in 2013

| Cause                                               | Males, All Ages          | Males, 0-4 Years  | Males, 5-14 Years | Males, 15-49 Years | Males, 50-69 Years     | Males, 70-80 Years       |
|-----------------------------------------------------|--------------------------|-------------------|-------------------|--------------------|------------------------|--------------------------|
| Chronic respiratory diseases                        | 4,872<br>(3,710 - 6,667) | 163<br>(86 - 278) | 34<br>(24 - 48)   | 469<br>(301 - 682) | 1,185<br>(831 - 1,681) | 3,020<br>(2,306 - 4,095) |
| Chronic obstructive pulmonary disease               | 2,665<br>(1,933 - 4,023) | 80<br>(35 - 151)  | 7<br>(4 - 12)     | 153<br>(87 - 246)  | 558<br>(361 - 942)     | 1,867<br>(1,320 - 2,765) |
| Pneumoconiosis                                      | 244<br>(143 - 405)       | 1<br>(0 - 3)      | 1<br>(0 - 2)      | 33<br>(17 - 57)    | 93<br>(50 - 163)       | 117<br>(65 - 198)        |
| Silicosis                                           | 131<br>(74 - 209)        | 0<br>(0 - 1)      | 0<br>(0 - 0)      | 2<br>(1 - 4)       | 30<br>(14 - 53)        | 99<br>(55 - 165)         |
| Asbestosis                                          | 20<br>(11 - 36)          | 0<br>(0 - 1)      | 0<br>(0 - 0)      | 5<br>(3 - 9)       | 14<br>(7 - 27)         | 0<br>(0 - 0)             |
| Coal workers pneumoconiosis                         | 54<br>(30 - 98)          | 0<br>(0 - 0)      | 0<br>(0 - 0)      | 17<br>(9 - 30)     | 34<br>(18 - 65)        | 3<br>(1 - 6)             |
| Other pneumoconiosis                                | 39<br>(21 - 74)          | 0<br>(0 - 1)      | 0<br>(0 - 1)      | 9<br>(5 - 16)      | 15<br>(7 - 30)         | 15<br>(6 - 31)           |
| Asthma                                              | 1,658<br>(897 - 2,547)   | 54<br>(20 - 106)  | 23<br>(14 - 34)   | 245<br>(129 - 373) | 469<br>(236 - 756)     | 868<br>(410 - 1,429)     |
| Interstitial lung disease and pulmonary sarcoidosis | 148<br>(19 - 329)        | 0<br>(0 - 1)      | 0<br>(0 - 1)      | 4<br>(1 - 10)      | 44<br>(5 - 108)        | 100<br>(13 - 229)        |
| Other chronic respiratory diseases                  | 156<br>(95 - 275)        | 29<br>(13 - 61)   | 4<br>(2 - 8)      | 34<br>(17 - 65)    | 22<br>(11 - 42)        | 68<br>(35 - 126)         |
| Cirrhosis                                           | 1,591<br>(1,228 - 1,959) | 6<br>(2 - 12)     | 4<br>(3 - 6)      | 633<br>(398 - 841) | 651<br>(495 - 832)     | 297<br>(226 - 379)       |
| Cirrhosis due to hepatitis B                        | 465<br>(180 - 779)       | 0<br>(0 - 1)      | 1<br>(0 - 2)      | 198<br>(76 - 347)  | 188<br>(70 - 323)      | 77<br>(26 - 135)         |
| Cirrhosis due to hepatitis C                        | 376<br>(163 - 626)       | 0<br>(0 - 1)      | 1<br>(0 - 1)      | 139<br>(42 - 265)  | 158<br>(57 - 276)      | 78<br>(38 - 128)         |
| Cirrhosis due to alcohol use                        | 597<br>(321 - 886)       | --                | --                | 205<br>(94 - 344)  | 262<br>(136 - 397)     | 131<br>(72 - 194)        |
| Cirrhosis due to other causes                       | 153<br>(87 - 234)        | 5<br>(2 - 11)     | 3<br>(2 - 4)      | 91<br>(48 - 146)   | 43<br>(19 - 73)        | 11<br>(5 - 19)           |
| Digestive diseases                                  | 1,668<br>(1,230 - 2,167) | 38<br>(18 - 66)   | 24<br>(15 - 34)   | 519<br>(317 - 696) | 632<br>(325 - 630)     | 632<br>(441 - 863)       |
| Peptic ulcer disease                                | 691<br>(471 - 956)       | 3<br>(1 - 7)      | 3<br>(2 - 6)      | 176<br>(98 - 274)  | 220<br>(137 - 323)     | 289<br>(176 - 421)       |
| Gastritis and duodenitis                            | 50<br>(20 - 110)         | 1<br>(0 - 4)      | 1<br>(0 - 2)      | 13<br>(5 - 28)     | 13<br>(5 - 28)         | 22<br>(7 - 49)           |
| Appendicitis                                        | 97<br>(59 - 151)         | 4<br>(1 - 9)      | 5<br>(2 - 9)      | 47<br>(25 - 76)    | 21<br>(12 - 36)        | 20<br>(9 - 37)           |
| Paralytic ileus and intestinal obstruction          | 187<br>(102 - 309)       | 9<br>(3 - 20)     | 4<br>(2 - 7)      | 37<br>(17 - 68)    | 43<br>(21 - 79)        | 94<br>(48 - 163)         |
| Inguinal, femoral, and abdominal hernia             | 37<br>(20 - 67)          | 2<br>(1 - 5)      | 1<br>(0 - 3)      | 9<br>(4 - 20)      | 8<br>(4 - 15)          | 16<br>(8 - 30)           |
| Inflammatory bowel disease                          | 43<br>(25 - 66)          | 3<br>(1 - 6)      | 1<br>(1 - 2)      | 15<br>(8 - 25)     | 9<br>(5 - 14)          | 15<br>(8 - 27)           |
| Vascular intestinal disorders                       | 13<br>(4 - 31)           | 1<br>(0 - 2)      | 1<br>(0 - 1)      | 4<br>(1 - 11)      | 3<br>(1 - 7)           | 5<br>(1 - 13)            |
| Gallbladder and biliary diseases                    | 122<br>(76 - 180)        | 2<br>(1 - 4)      | 1<br>(1 - 2)      | 35<br>(19 - 58)    | 33<br>(18 - 53)        | 51<br>(27 - 88)          |
| Pancreatitis                                        | 177<br>(77 - 294)        | 1<br>(0 - 3)      | 1<br>(0 - 2)      | 106<br>(43 - 187)  | 41<br>(18 - 70)        | 28<br>(12 - 49)          |
| Other digestive diseases                            | 250<br>(142 - 369)       | 12<br>(5 - 24)    | 5<br>(2 - 8)      | 76<br>(38 - 119)   | 65<br>(35 - 104)       | 92<br>(48 - 158)         |
| Neurological disorders                              | 1,366<br>(1,100 - 1,677) | 26<br>(11 - 67)   | 23<br>(13 - 38)   | 131<br>(80 - 188)  | 124<br>(87 - 164)      | 1,061<br>(837 - 1,324)   |
| Alzheimer disease and other dementias               | 1,116<br>(882 - 1,389)   | --                | --                | 1<br>(0 - 2)       | 90<br>(57 - 123)       | 1,025<br>(800 - 1,285)   |
| Parkinson disease                                   | 14<br>(8 - 24)           | --                | --                | 1<br>(0 - 1)       | 3<br>(2 - 5)           | 10<br>(5 - 20)           |
| Epilepsy                                            | 186<br>(114 - 267)       | 19<br>(6 - 58)    | 19<br>(9 - 33)    | 109<br>(62 - 162)  | 23<br>(14 - 36)        | 17<br>(10 - 26)          |
| Multiple sclerosis                                  | 3<br>(1 - 4)             | --                | --                | 1<br>(0 - 2)       | 1<br>(0 - 1)           | 1<br>(0 - 1)             |
| Other neurological disorders                        | 46<br>(32 - 74)          | 7<br>(4 - 18)     | 4<br>(3 - 8)      | 19<br>(12 - 31)    | 7<br>(5 - 11)          | 8<br>(6 - 12)            |
| Mental and substance use disorders                  | 393<br>(216 - 526)       | 2<br>(1 - 3)      | 0<br>(0 - 0)      | 250<br>(134 - 339) | 116<br>(58 - 170)      | 25<br>(12 - 37)          |
| Schizophrenia                                       | 6<br>(3 - 11)            | --                | --                | 3<br>(1 - 6)       | 1<br>(1 - 3)           | 1<br>(1 - 2)             |
| Alcohol use disorders                               | 276<br>(126 - 394)       | --                | --                | 152<br>(64 - 234)  | 102<br>(45 - 155)      | 23<br>(9 - 34)           |
| Drug use disorders                                  | 110<br>(68 - 153)        | 2<br>(1 - 3)      | --                | 95<br>(57 - 136)   | 12<br>(8 - 17)         | 1<br>(1 - 2)             |
| Opioid use disorders                                | 71<br>(44 - 100)         | 1<br>(1 - 2)      | --                | 62<br>(36 - 90)    | 7<br>(5 - 10)          | 1<br>(1 - 1)             |
| Cocaine use disorders                               | 2<br>(1 - 2)             | 0<br>(0 - 0)      | --                | 1<br>(1 - 2)       | 0<br>(0 - 0)           | 0<br>(0 - 0)             |
| Amphetamine use disorders                           | 2<br>(1 - 2)             | 0<br>(0 - 0)      | --                | 1<br>(1 - 2)       | 0<br>(0 - 0)           | 0<br>(0 - 0)             |
| Other drug use disorders                            | 36<br>(22 - 50)          | 1<br>(0 - 1)      | --                | 31<br>(18 - 44)    | 4<br>(3 - 6)           | 0<br>(0 - 1)             |

Web Table 31- Cambodia deaths with 95% UI by age, sex, and cause in 2013

| Cause                                               | Males, All Ages          | Males, 0-4 Years       | Males, 5-14 Years | Males, 15-49 Years | Males, 50-69 Years   | Males, 70-80 Years     |
|-----------------------------------------------------|--------------------------|------------------------|-------------------|--------------------|----------------------|------------------------|
| Eating disorders                                    | 0<br>(0 - 0)             | --                     | 0<br>(0 - 0)      | 0<br>(0 - 0)       | --                   | --                     |
| Anorexia nervosa                                    | 0<br>(0 - 0)             | --                     | 0<br>(0 - 0)      | 0<br>(0 - 0)       | --                   | --                     |
| Diabetes, urogenital, blood, and endocrine diseases | 2,832<br>(2,020 - 3,707) | 105<br>(62 - 165)      | 42<br>(26 - 60)   | 554<br>(339 - 769) | 943<br>(635 - 1,286) | 1,188<br>(855 - 1,569) |
| Diabetes mellitus                                   | 1,257<br>(858 - 1,651)   | 3<br>(2 - 5)           | 3<br>(2 - 4)      | 172<br>(99 - 245)  | 493<br>(326 - 685)   | 586<br>(381 - 797)     |
| Acute glomerulonephritis                            | 9<br>(5 - 14)            | 1<br>(0 - 2)           | 1<br>(0 - 1)      | 3<br>(2 - 6)       | 1<br>(1 - 2)         | 2<br>(1 - 4)           |
| Chronic kidney disease                              | 1,034<br>(621 - 1,623)   | 18<br>(7 - 36)         | 12<br>(6 - 21)    | 241<br>(130 - 401) | 336<br>(185 - 554)   | 427<br>(242 - 696)     |
| Chronic kidney disease due to diabetes mellitus     | 39<br>(8 - 80)           | 0<br>(0 - 1)           | 0<br>(0 - 0)      | 8<br>(2 - 17)      | 11<br>(2 - 25)       | 20<br>(4 - 44)         |
| Chronic kidney disease due to hypertension          | 278<br>(123 - 449)       | 2<br>(0 - 4)           | 1<br>(0 - 1)      | 55<br>(19 - 99)    | 103<br>(39 - 175)    | 118<br>(56 - 209)      |
| Chronic kidney disease due to glomerulonephritis    | 127<br>(82 - 195)        | 7<br>(4 - 13)          | 6<br>(3 - 8)      | 41<br>(25 - 65)    | 31<br>(18 - 51)      | 42<br>(23 - 69)        |
| Chronic kidney disease due to other causes          | 590<br>(283 - 1,067)     | 9<br>(2 - 22)          | 5<br>(2 - 13)     | 138<br>(62 - 269)  | 191<br>(72 - 370)    | 247<br>(102 - 470)     |
| Urinary diseases and male infertility               | 233<br>(159 - 308)       | 12<br>(5 - 29)         | 2<br>(1 - 3)      | 44<br>(25 - 62)    | 64<br>(41 - 87)      | 111<br>(73 - 168)      |
| Interstitial nephritis and urinary tract infections | 79<br>(40 - 117)         | 6<br>(2 - 16)          | 1<br>(0 - 1)      | 13<br>(6 - 21)     | 20<br>(10 - 32)      | 39<br>(17 - 69)        |
| Urolithiasis                                        | 16<br>(8 - 25)           | --                     | 0<br>(0 - 0)      | 4<br>(2 - 6)       | 5<br>(2 - 8)         | 7<br>(3 - 13)          |
| Other urinary diseases                              | 138<br>(94 - 193)        | 6<br>(2 - 16)          | 1<br>(1 - 2)      | 27<br>(15 - 40)    | 39<br>(25 - 58)      | 65<br>(37 - 106)       |
| Gynecological diseases                              | --                       | --                     | --                | --                 | --                   | --                     |
| Uterine fibroids                                    | --                       | --                     | --                | --                 | --                   | --                     |
| Polycystic ovarian syndrome                         | --                       | --                     | --                | --                 | --                   | --                     |
| Endometriosis                                       | --                       | --                     | --                | --                 | --                   | --                     |
| Genital prolapse                                    | --                       | --                     | --                | --                 | --                   | --                     |
| Other gynecological diseases                        | --                       | --                     | --                | --                 | --                   | --                     |
| Hemoglobinopathies and hemolytic anemias            | 165<br>(87 - 254)        | 53<br>(25 - 91)        | 19<br>(9 - 31)    | 56<br>(27 - 86)    | 16<br>(9 - 26)       | 21<br>(12 - 35)        |
| Thalassemias                                        | 122<br>(62 - 188)        | 48<br>(23 - 83)        | 18<br>(9 - 30)    | 47<br>(23 - 73)    | 7<br>(4 - 11)        | 2<br>(1 - 3)           |
| Sickle cell disorders                               | 0<br>(0 - 0)             | 0<br>(0 - 0)           | 0<br>(0 - 0)      | 0<br>(0 - 0)       | 0<br>(0 - 0)         | 0<br>(0 - 0)           |
| G6PD deficiency                                     | 10<br>(6 - 16)           | 3<br>(1 - 5)           | 0<br>(0 - 1)      | 3<br>(2 - 5)       | 3<br>(1 - 4)         | 1<br>(1 - 2)           |
| Other hemoglobinopathies and hemolytic anemias      | 32<br>(18 - 51)          | 2<br>(1 - 3)           | 0<br>(0 - 1)      | 5<br>(3 - 8)       | 7<br>(4 - 11)        | 18<br>(10 - 30)        |
| Endocrine, metabolic, blood, and immune disorders   | 135<br>(75 - 187)        | 17<br>(7 - 46)         | 5<br>(2 - 10)     | 38<br>(19 - 58)    | 32<br>(15 - 46)      | 42<br>(19 - 69)        |
| Musculoskeletal disorders                           | 50<br>(26 - 66)          | --                     | 3<br>(1 - 4)      | 23<br>(10 - 33)    | 14<br>(7 - 19)       | 11<br>(7 - 16)         |
| Rheumatoid arthritis                                | 9<br>(4 - 13)            | --                     | 1<br>(0 - 1)      | 3<br>(1 - 5)       | 3<br>(1 - 5)         | 2<br>(1 - 4)           |
| Other musculoskeletal disorders                     | 42<br>(22 - 54)          | --                     | 2<br>(1 - 3)      | 21<br>(9 - 29)     | 11<br>(5 - 15)       | 8<br>(5 - 12)          |
| Other non-communicable diseases                     | 1,319<br>(785 - 2,433)   | 1,049<br>(551 - 2,118) | 58<br>(33 - 103)  | 104<br>(67 - 149)  | 44<br>(32 - 59)      | 64<br>(43 - 94)        |
| Congenital anomalies                                | 1,192<br>(668 - 2,307)   | 1,031<br>(535 - 2,098) | 55<br>(31 - 100)  | 76<br>(46 - 119)   | 14<br>(10 - 21)      | 15<br>(10 - 21)        |
| Neural tube defects                                 | 261<br>(53 - 622)        | 247<br>(47 - 599)      | 5<br>(1 - 11)     | 8<br>(2 - 26)      | 1<br>(0 - 4)         | 0<br>(0 - 2)           |
| Congenital heart anomalies                          | 658<br>(284 - 1,493)     | 553<br>(212 - 1,336)   | 39<br>(20 - 75)   | 50<br>(25 - 81)    | 7<br>(4 - 11)        | 10<br>(6 - 14)         |
| Cleft lip and cleft palate                          | 4<br>(1 - 11)            | 4<br>(1 - 11)          | --                | --                 | --                   | --                     |
| Down syndrome                                       | 19<br>(5 - 59)           | 15<br>(2 - 51)         | 2<br>(0 - 4)      | 2<br>(1 - 5)       | 0<br>(0 - 1)         | 0<br>(0 - 0)           |
| Chromosomal unbalanced rearrangements               | 17<br>(5 - 52)           | 14<br>(3 - 47)         | 1<br>(0 - 2)      | 2<br>(1 - 4)       | 0<br>(0 - 1)         | 0<br>(0 - 0)           |
| Other congenital anomalies                          | 232<br>(75 - 737)        | 198<br>(54 - 661)      | 10<br>(3 - 25)    | 15<br>(6 - 33)     | 5<br>(3 - 10)        | 5<br>(2 - 8)           |
| Skin and subcutaneous diseases                      | 118<br>(82 - 158)        | 10<br>(3 - 20)         | 2<br>(1 - 3)      | 27<br>(16 - 38)    | 30<br>(19 - 42)      | 49<br>(29 - 78)        |
| Cellulitis                                          | 42<br>(19 - 76)          | 4<br>(1 - 9)           | 1<br>(0 - 2)      | 9<br>(4 - 17)      | 12<br>(5 - 21)       | 17<br>(6 - 34)         |
| Pyoderma                                            | 52<br>(28 - 77)          | 6<br>(1 - 13)          | 1<br>(0 - 2)      | 14<br>(7 - 21)     | 14<br>(7 - 22)       | 18<br>(9 - 31)         |



Web Table 31- Cambodia deaths with 95% UI by age, sex, and cause in 2013

| Cause                                           | Males, All Ages          | Males, 0-4 Years   | Males, 5-14 Years  | Males, 15-49 Years       | Males, 50-69 Years   | Males, 70-80 Years |
|-------------------------------------------------|--------------------------|--------------------|--------------------|--------------------------|----------------------|--------------------|
| Decubitus ulcer                                 | 22<br>(10 - 37)          | 0<br>(0 - 0)       | 0<br>(0 - 0)       | 3<br>(2 - 5)             | 4<br>(2 - 7)         | 14<br>(6 - 27)     |
| Other skin and subcutaneous diseases            | 2<br>(1 - 4)             | 0<br>(0 - 1)       | 0<br>(0 - 0)       | 1<br>(0 - 2)             | 0<br>(0 - 1)         | 1<br>(0 - 1)       |
| Sudden infant death syndrome                    | 9<br>(2 - 32)            | 9<br>(2 - 32)      | --                 | --                       | --                   | --                 |
| Injuries                                        | 7,307<br>(5,661 - 8,694) | 484<br>(306 - 707) | 417<br>(307 - 526) | 4,823<br>(3,484 - 5,903) | 969<br>(737 - 1,234) | 614<br>(482 - 770) |
| Transport injuries                              | 2,978<br>(2,089 - 3,887) | 121<br>(65 - 206)  | 172<br>(116 - 241) | 2,056<br>(1,371 - 2,755) | 409<br>(268 - 584)   | 220<br>(140 - 322) |
| Road injuries                                   | 2,835<br>(1,990 - 3,728) | 109<br>(56 - 187)  | 165<br>(110 - 230) | 1,963<br>(1,314 - 2,626) | 389<br>(253 - 558)   | 209<br>(133 - 306) |
| Pedestrian road injuries                        | 623<br>(354 - 927)       | 43<br>(20 - 77)    | 67<br>(39 - 103)   | 322<br>(163 - 503)       | 112<br>(57 - 182)    | 78<br>(41 - 133)   |
| Cyclist road injuries                           | 199<br>(125 - 306)       | 7<br>(3 - 16)      | 21<br>(10 - 37)    | 107<br>(64 - 167)        | 40<br>(22 - 69)      | 23<br>(13 - 38)    |
| Motorcyclist road injuries                      | 864<br>(510 - 1,411)     | 16<br>(6 - 33)     | 24<br>(12 - 44)    | 706<br>(410 - 1,151)     | 82<br>(42 - 145)     | 35<br>(18 - 60)    |
| Motor vehicle road injuries                     | 1,095<br>(709 - 1,489)   | 40<br>(20 - 74)    | 48<br>(26 - 79)    | 797<br>(504 - 1,095)     | 146<br>(85 - 220)    | 65<br>(36 - 99)    |
| Other road injuries                             | 54<br>(24 - 105)         | 3<br>(1 - 8)       | 4<br>(2 - 10)      | 31<br>(12 - 61)          | 8<br>(4 - 19)        | 7<br>(3 - 15)      |
| Other transport injuries                        | 144<br>(90 - 211)        | 12<br>(6 - 22)     | 7<br>(4 - 12)      | 93<br>(54 - 149)         | 20<br>(11 - 33)      | 12<br>(6 - 20)     |
| Unintentional injuries                          | 2,249<br>(1,759 - 2,834) | 349<br>(211 - 539) | 222<br>(146 - 313) | 1,112<br>(799 - 1,524)   | 312<br>(234 - 415)   | 254<br>(195 - 332) |
| Falls                                           | 377<br>(269 - 520)       | 18<br>(6 - 39)     | 16<br>(9 - 30)     | 159<br>(95 - 251)        | 95<br>(58 - 141)     | 89<br>(52 - 148)   |
| Drowning                                        | 1,012<br>(632 - 1,496)   | 170<br>(61 - 317)  | 163<br>(87 - 255)  | 542<br>(328 - 836)       | 92<br>(54 - 149)     | 45<br>(27 - 70)    |
| Fire, heat, and hot substances                  | 166<br>(106 - 236)       | 31<br>(13 - 58)    | 10<br>(5 - 16)     | 74<br>(42 - 112)         | 23<br>(14 - 34)      | 28<br>(16 - 45)    |
| Poisonings                                      | 70<br>(45 - 108)         | 5<br>(2 - 11)      | 3<br>(1 - 5)       | 45<br>(26 - 76)          | 12<br>(7 - 19)       | 5<br>(3 - 9)       |
| Exposure to mechanical forces                   | 240<br>(164 - 356)       | 16<br>(8 - 30)     | 14<br>(9 - 22)     | 164<br>(102 - 259)       | 30<br>(20 - 47)      | 16<br>(10 - 25)    |
| Unintentional firearm injuries                  | 105<br>(55 - 177)        | 4<br>(1 - 10)      | 3<br>(1 - 6)       | 76<br>(36 - 135)         | 13<br>(6 - 23)       | 9<br>(4 - 17)      |
| Unintentional suffocation                       | 14<br>(1 - 27)           | 5<br>(1 - 15)      | 1<br>(0 - 2)       | 5<br>(1 - 10)            | 2<br>(0 - 3)         | 1<br>(0 - 2)       |
| Other exposure to mechanical forces             | 121<br>(83 - 193)        | 7<br>(3 - 15)      | 10<br>(5 - 16)     | 83<br>(53 - 136)         | 16<br>(10 - 25)      | 6<br>(3 - 9)       |
| Adverse effects of medical treatment            | 146<br>(77 - 216)        | 23<br>(9 - 58)     | 4<br>(2 - 7)       | 43<br>(21 - 66)          | 32<br>(15 - 55)      | 44<br>(18 - 81)    |
| Animal contact                                  | 23<br>(13 - 35)          | 4<br>(1 - 8)       | 3<br>(1 - 6)       | 10<br>(5 - 15)           | 4<br>(2 - 7)         | 3<br>(1 - 5)       |
| Venomous animal contact                         | 14<br>(7 - 23)           | 2<br>(1 - 6)       | 2<br>(1 - 5)       | 6<br>(3 - 10)            | 2<br>(1 - 4)         | 1<br>(1 - 3)       |
| Non-venomous animal contact                     | 9<br>(3 - 15)            | 1<br>(0 - 3)       | 1<br>(0 - 2)       | 4<br>(1 - 7)             | 2<br>(1 - 3)         | 1<br>(1 - 2)       |
| Foreign body                                    | 136<br>(46 - 265)        | 77<br>(23 - 170)   | 5<br>(2 - 11)      | 22<br>(7 - 40)           | 13<br>(4 - 24)       | 19<br>(6 - 34)     |
| Pulmonary aspiration and foreign body in airway | 133<br>(43 - 261)        | 76<br>(23 - 169)   | 5<br>(1 - 10)      | 21<br>(6 - 39)           | 12<br>(4 - 23)       | 18<br>(6 - 34)     |
| Foreign body in other body part                 | 3<br>(2 - 5)             | 1<br>(0 - 1)       | 0<br>(0 - 1)       | 1<br>(1 - 2)             | 1<br>(0 - 1)         | 0<br>(0 - 0)       |
| Other unintentional injuries                    | 79<br>(45 - 117)         | 6<br>(2 - 10)      | 4<br>(2 - 7)       | 53<br>(29 - 83)          | 10<br>(5 - 17)       | 5<br>(3 - 8)       |
| Self-harm and interpersonal violence            | 2,068<br>(1,381 - 2,690) | 13<br>(6 - 26)     | 22<br>(13 - 37)    | 1,649<br>(1,086 - 2,175) | 245<br>(152 - 344)   | 139<br>(75 - 220)  |
| Self-harm                                       | 1,421<br>(849 - 1,924)   | --                 | 10<br>(4 - 22)     | 1,065<br>(624 - 1,510)   | 212<br>(121 - 316)   | 133<br>(69 - 215)  |
| Interpersonal violence                          | 648<br>(375 - 940)       | 13<br>(6 - 26)     | 12<br>(6 - 22)     | 585<br>(325 - 858)       | 33<br>(18 - 52)      | 5<br>(3 - 10)      |
| Assault by firearm                              | 214<br>(94 - 362)        | 2<br>(0 - 4)       | 2<br>(1 - 4)       | 199<br>(85 - 339)        | 11<br>(5 - 19)       | 1<br>(0 - 2)       |
| Assault by sharp object                         | 230<br>(113 - 405)       | 1<br>(0 - 3)       | 1<br>(0 - 3)       | 216<br>(106 - 376)       | 10<br>(4 - 18)       | 1<br>(1 - 3)       |
| Assault by other means                          | 204<br>(107 - 335)       | 10<br>(4 - 21)     | 9<br>(4 - 17)      | 170<br>(84 - 291)        | 12<br>(6 - 21)       | 3<br>(1 - 6)       |
| Forces of nature, war, and legal intervention   | 11<br>(5 - 29)           | 0<br>(0 - 0)       | 0<br>(0 - 1)       | 6<br>(3 - 15)            | 3<br>(1 - 8)         | 1<br>(0 - 2)       |
| Exposure to forces of nature                    | 11<br>(5 - 29)           | 0<br>(0 - 0)       | 0<br>(0 - 1)       | 6<br>(3 - 15)            | 3<br>(1 - 8)         | 1<br>(0 - 2)       |

Web Table 31- Cambodia deaths with 95% UI by age, sex, and cause in 2013

| Cause                                                             | Females, All Ages           | Females, 0-4 Years       | Females, 5-14 Years | Females, 15-49 Years     | Females, 50-69 Years        | Females, 70-80 Years        |
|-------------------------------------------------------------------|-----------------------------|--------------------------|---------------------|--------------------------|-----------------------------|-----------------------------|
| All causes                                                        | 57,590<br>(51,379 - 63,568) | 7,311<br>(6,038 - 8,595) | 834<br>(704 - 965)  | 7,696<br>(6,712 - 8,754) | 13,740<br>(10,948 - 16,471) | 28,010<br>(25,003 - 30,279) |
| Communicable, maternal, neonatal, and nutritional diseases        | 13,338<br>(11,185 - 16,154) | 5,454<br>(4,228 - 6,808) | 353<br>(271 - 456)  | 2,357<br>(1,901 - 2,830) | 1,525<br>(1,149 - 2,126)    | 3,648<br>(2,737 - 5,034)    |
| HIV/AIDS and tuberculosis                                         | 1,543<br>(987 - 2,534)      | 15<br>(2 - 71)           | 16<br>(3 - 82)      | 577<br>(309 - 1,232)     | 439<br>(270 - 677)          | 496<br>(317 - 761)          |
| Tuberculosis                                                      | 1,213<br>(867 - 1,704)      | 1<br>(1 - 5)             | 1<br>(1 - 3)        | 340<br>(226 - 490)       | 380<br>(250 - 573)          | 490<br>(316 - 719)          |
| HIV/AIDS                                                          | 330<br>(40 - 1,330)         | 13<br>(1 - 70)           | 15<br>(2 - 81)      | 237<br>(29 - 943)        | 59<br>(6 - 213)             | 5<br>(0 - 21)               |
| HIV/AIDS resulting in mycobacterial infection                     | 17<br>(2 - 66)              | 1<br>(0 - 3)             | 1<br>(0 - 3)        | 12<br>(1 - 49)           | 3<br>(0 - 11)               | 0<br>(0 - 1)                |
| HIV/AIDS resulting in other diseases                              | 313<br>(38 - 1,266)         | 13<br>(1 - 67)           | 14<br>(2 - 78)      | 225<br>(28 - 894)        | 56<br>(6 - 202)             | 5<br>(0 - 19)               |
| Diarrhea, lower respiratory, and other common infectious diseases | 6,464<br>(5,098 - 8,299)    | 2,120<br>(1,452 - 2,869) | 221<br>(161 - 294)  | 588<br>(432 - 811)       | 847<br>(570 - 1,272)        | 2,688<br>(1,843 - 3,976)    |
| Diarrheal diseases                                                | 869<br>(549 - 1,357)        | 213<br>(73 - 522)        | 30<br>(14 - 56)     | 60<br>(36 - 90)          | 127<br>(68 - 224)           | 439<br>(227 - 792)          |
| Intestinal infectious diseases                                    | 223<br>(111 - 396)          | 95<br>(44 - 182)         | 58<br>(21 - 113)    | 54<br>(21 - 107)         | 10<br>(3 - 23)              | 5<br>(2 - 11)               |
| Typhoid fever                                                     | 152<br>(66 - 278)           | 61<br>(24 - 128)         | 43<br>(15 - 86)     | 38<br>(12 - 79)          | 7<br>(1 - 17)               | 3<br>(1 - 6)                |
| Paratyphoid fever                                                 | 47<br>(20 - 90)             | 22<br>(8 - 46)           | 13<br>(4 - 28)      | 10<br>(3 - 21)           | 1<br>(0 - 3)                | 0<br>(0 - 1)                |
| Other intestinal infectious diseases                              | 25<br>(12 - 43)             | 12<br>(4 - 26)           | 2<br>(0 - 7)        | 6<br>(1 - 15)            | 2<br>(0 - 8)                | 2<br>(0 - 6)                |
| Lower respiratory infections                                      | 4,629<br>(3,452 - 6,371)    | 1,390<br>(841 - 2,095)   | 77<br>(43 - 126)    | 351<br>(237 - 541)       | 642<br>(408 - 1,032)        | 2,169<br>(1,383 - 3,400)    |
| Upper respiratory infections                                      | 6<br>(2 - 13)               | 1<br>(0 - 5)             | 0<br>(0 - 1)        | 1<br>(0 - 3)             | 1<br>(0 - 5)                | 2<br>(0 - 8)                |
| Otitis media                                                      | 6<br>(4 - 8)                | 1<br>(1 - 2)             | 0<br>(0 - 1)        | 1<br>(1 - 2)             | 1<br>(1 - 2)                | 2<br>(1 - 2)                |
| Meningitis                                                        | 415<br>(279 - 621)          | 207<br>(102 - 406)       | 28<br>(15 - 47)     | 83<br>(48 - 123)         | 46<br>(27 - 74)             | 51<br>(27 - 88)             |
| Pneumococcal meningitis                                           | 126<br>(83 - 190)           | 50<br>(19 - 110)         | 10<br>(5 - 19)      | 31<br>(16 - 52)          | 16<br>(7 - 29)              | 18<br>(8 - 33)              |
| H influenzae type B meningitis                                    | 108<br>(62 - 195)           | 77<br>(33 - 162)         | 8<br>(3 - 15)       | 12<br>(6 - 19)           | 5<br>(2 - 10)               | 6<br>(3 - 12)               |
| Meningococcal meningitis                                          | 43<br>(25 - 68)             | 14<br>(6 - 31)           | 3<br>(1 - 5)        | 10<br>(4 - 20)           | 7<br>(3 - 12)               | 9<br>(3 - 20)               |
| Other meningitis                                                  | 138<br>(85 - 217)           | 65<br>(28 - 131)         | 8<br>(3 - 15)       | 30<br>(15 - 50)          | 18<br>(9 - 32)              | 18<br>(8 - 33)              |
| Encephalitis                                                      | 90<br>(64 - 129)            | 36<br>(18 - 67)          | 10<br>(6 - 16)      | 23<br>(13 - 35)          | 11<br>(6 - 17)              | 10<br>(6 - 16)              |
| Diphtheria                                                        | 2<br>(0 - 11)               | 1<br>(0 - 10)            | 0<br>(0 - 3)        | 0<br>(0 - 1)             | 0<br>(0 - 1)                | --                          |
| Whooping cough                                                    | 76<br>(0 - 347)             | 72<br>(0 - 328)          | 3<br>(0 - 17)       | 1<br>(0 - 4)             | 0<br>(0 - 1)                | --                          |
| Tetanus                                                           | 37<br>(16 - 70)             | 14<br>(3 - 35)           | 3<br>(1 - 5)        | 9<br>(3 - 19)            | 6<br>(2 - 12)               | 5<br>(2 - 12)               |
| Measles                                                           | 100<br>(19 - 285)           | 87<br>(16 - 249)         | 11<br>(2 - 32)      | 2<br>(0 - 7)             | 0<br>(0 - 0)                | --                          |
| Varicella and herpes zoster                                       | 9<br>(3 - 25)               | 2<br>(0 - 9)             | 0<br>(0 - 2)        | 2<br>(0 - 5)             | 1<br>(0 - 3)                | 4<br>(0 - 19)               |
| Neglected tropical diseases and malaria                           | 554<br>(364 - 855)          | 163<br>(58 - 364)        | 90<br>(52 - 160)    | 188<br>(102 - 348)       | 77<br>(44 - 127)            | 36<br>(24 - 54)             |
| Malaria                                                           | 426<br>(232 - 731)          | 124<br>(20 - 318)        | 64<br>(27 - 137)    | 160<br>(75 - 322)        | 58<br>(28 - 111)            | 19<br>(9 - 38)              |
| Leishmaniasis                                                     | 0<br>(0 - 0)                | 0<br>(0 - 0)             | 0<br>(0 - 0)        | 0<br>(0 - 0)             | 0<br>(0 - 0)                | 0<br>(0 - 0)                |
| Visceral leishmaniasis                                            | 0<br>(0 - 0)                | 0<br>(0 - 0)             | 0<br>(0 - 0)        | 0<br>(0 - 0)             | 0<br>(0 - 0)                | 0<br>(0 - 0)                |
| Schistosomiasis                                                   | 19<br>(14 - 27)             | 0<br>(0 - 0)             | 0<br>(0 - 1)        | 5<br>(3 - 7)             | 8<br>(4 - 12)               | 6<br>(3 - 10)               |
| Cysticercosis                                                     | 0<br>(0 - 0)                | 0<br>(0 - 0)             | 0<br>(0 - 0)        | 0<br>(0 - 0)             | 0<br>(0 - 0)                | 0<br>(0 - 0)                |
| Cystic echinococcosis                                             | 2<br>(2 - 2)                | 0<br>(0 - 0)             | 0<br>(0 - 0)        | 1<br>(1 - 1)             | 1<br>(0 - 1)                | 0<br>(0 - 0)                |
| Dengue                                                            | 56<br>(28 - 79)             | 24<br>(10 - 38)          | 19<br>(7 - 29)      | 9<br>(5 - 12)            | 2<br>(2 - 4)                | 2<br>(1 - 4)                |
| Rabies                                                            | 16<br>(9 - 27)              | 1<br>(1 - 3)             | 3<br>(1 - 5)        | 6<br>(3 - 11)            | 4<br>(2 - 6)                | 2<br>(1 - 4)                |
| Intestinal nematode infections                                    | 5<br>(0 - 15)               | 3<br>(0 - 12)            | 1<br>(0 - 6)        | 0<br>(0 - 3)             | 0<br>(0 - 3)                | 0<br>(0 - 4)                |
| Ascariasis                                                        | 5<br>(0 - 15)               | 3<br>(0 - 12)            | 1<br>(0 - 6)        | 0<br>(0 - 3)             | 0<br>(0 - 3)                | 0<br>(0 - 4)                |
| Other neglected tropical diseases                                 | 28<br>(15 - 50)             | 11<br>(4 - 23)           | 3<br>(1 - 5)        | 6<br>(3 - 12)            | 4<br>(2 - 7)                | 5<br>(2 - 10)               |
| Maternal disorders                                                | 862<br>(607 - 1,118)        | --                       | 1<br>(0 - 3)        | 861<br>(606 - 1,117)     | --                          | --                          |

Web Table 31- Cambodia deaths with 95% UI by age, sex, and cause in 2013

| Cause                                                            | Females, All Ages           | Females, 0-4 Years       | Females, 5-14 Years | Females, 15-49 Years     | Females, 50-69 Years       | Females, 70-80 Years        |
|------------------------------------------------------------------|-----------------------------|--------------------------|---------------------|--------------------------|----------------------------|-----------------------------|
| Maternal hemorrhage                                              | 116<br>(68 - 178)           | --                       | 0<br>(0 - 0)        | 116<br>(68 - 178)        | --                         | --                          |
| Maternal sepsis and other maternal infections                    | 98<br>(59 - 145)            | --                       | 0<br>(0 - 0)        | 98<br>(59 - 145)         | --                         | --                          |
| Maternal hypertensive disorders                                  | 84<br>(32 - 146)            | --                       | 0<br>(0 - 0)        | 84<br>(32 - 146)         | --                         | --                          |
| Maternal obstructed labor                                        | 67<br>(37 - 103)            | --                       | 0<br>(0 - 0)        | 67<br>(37 - 103)         | --                         | --                          |
| Maternal abortive outcome                                        | 152<br>(90 - 228)           | --                       | 0<br>(0 - 1)        | 152<br>(90 - 228)        | --                         | --                          |
| Indirect maternal deaths                                         | 83<br>(46 - 129)            | --                       | 0<br>(0 - 0)        | 83<br>(46 - 129)         | --                         | --                          |
| Late maternal deaths                                             | 110<br>(65 - 163)           | --                       | 0<br>(0 - 1)        | 110<br>(64 - 163)        | --                         | --                          |
| Maternal deaths aggravated by HIV/AIDS                           | 0<br>(0 - 1)                | --                       | --                  | 0<br>(0 - 1)             | --                         | --                          |
| Other maternal disorders                                         | 149<br>(72 - 231)           | --                       | 0<br>(0 - 1)        | 149<br>(72 - 231)        | --                         | --                          |
| Neonatal disorders                                               | 2,919<br>(2,287 - 3,759)    | 2,919<br>(2,287 - 3,759) | --                  | --                       | --                         | --                          |
| Neonatal preterm birth complications                             | 1,687<br>(1,084 - 2,319)    | 1,687<br>(1,084 - 2,319) | --                  | --                       | --                         | --                          |
| Neonatal encephalopathy due to birth asphyxia and trauma         | 637<br>(299 - 1,103)        | 637<br>(299 - 1,103)     | --                  | --                       | --                         | --                          |
| Neonatal sepsis and other neonatal infections                    | 157<br>(56 - 353)           | 157<br>(56 - 353)        | --                  | --                       | --                         | --                          |
| Hemolytic disease and other neonatal jaundice                    | 13<br>(4 - 33)              | 13<br>(4 - 33)           | --                  | --                       | --                         | --                          |
| Other neonatal disorders                                         | 425<br>(159 - 874)          | 425<br>(159 - 874)       | --                  | --                       | --                         | --                          |
| Nutritional deficiencies                                         | 636<br>(435 - 874)          | 121<br>(56 - 233)        | 12<br>(7 - 19)      | 86<br>(55 - 122)         | 85<br>(55 - 123)           | 331<br>(195 - 526)          |
| Protein-energy malnutrition                                      | 144<br>(62 - 287)           | 45<br>(12 - 117)         | 3<br>(1 - 6)        | 10<br>(3 - 25)           | 16<br>(5 - 38)             | 69<br>(19 - 160)            |
| Iodine deficiency                                                | 2<br>(0 - 10)               | 1<br>(0 - 6)             | 0<br>(0 - 1)        | 0<br>(0 - 1)             | 0<br>(0 - 2)               | 1<br>(0 - 5)                |
| Iron-deficiency anemia                                           | 460<br>(268 - 675)          | 64<br>(23 - 145)         | 8<br>(4 - 14)       | 73<br>(42 - 106)         | 65<br>(38 - 97)            | 249<br>(125 - 409)          |
| Other nutritional deficiencies                                   | 29<br>(12 - 66)             | 10<br>(3 - 31)           | 1<br>(0 - 2)        | 3<br>(1 - 8)             | 3<br>(1 - 8)               | 12<br>(4 - 27)              |
| Other communicable, maternal, neonatal, and nutritional diseases | 362<br>(239 - 594)          | 117<br>(56 - 196)        | 13<br>(7 - 24)      | 57<br>(35 - 95)          | 77<br>(39 - 150)           | 98<br>(41 - 264)            |
| Sexually transmitted diseases excluding HIV                      | 100<br>(50 - 162)           | 75<br>(31 - 134)         | 6<br>(3 - 11)       | 8<br>(4 - 13)            | 5<br>(1 - 12)              | 6<br>(2 - 13)               |
| Syphilis                                                         | 91<br>(42 - 154)            | 75<br>(31 - 134)         | 6<br>(3 - 11)       | 3<br>(2 - 5)             | 3<br>(1 - 6)               | 4<br>(1 - 10)               |
| Chlamydial infection                                             | 3<br>(1 - 4)                | --                       | 0<br>(0 - 0)        | 1<br>(1 - 3)             | 1<br>(0 - 2)               | 0<br>(0 - 1)                |
| Gonococcal infection                                             | 3<br>(2 - 5)                | --                       | 0<br>(0 - 0)        | 2<br>(1 - 3)             | 1<br>(0 - 2)               | 1<br>(0 - 1)                |
| Other sexually transmitted diseases                              | 2<br>(1 - 4)                | --                       | 0<br>(0 - 0)        | 1<br>(1 - 2)             | 1<br>(0 - 2)               | 0<br>(0 - 1)                |
| Hepatitis                                                        | 45<br>(33 - 58)             | 5<br>(2 - 10)            | 1<br>(0 - 1)        | 10<br>(7 - 14)           | 15<br>(10 - 22)            | 14<br>(9 - 22)              |
| Acute hepatitis A                                                | 4<br>(2 - 8)                | 3<br>(1 - 6)             | 0<br>(0 - 1)        | 1<br>(0 - 1)             | 0<br>(0 - 1)               | 0<br>(0 - 0)                |
| Acute hepatitis B                                                | 26<br>(15 - 38)             | 2<br>(0 - 5)             | 0<br>(0 - 0)        | 3<br>(1 - 6)             | 10<br>(5 - 16)             | 11<br>(6 - 18)              |
| Acute hepatitis C                                                | 1<br>(0 - 3)                | --                       | 0<br>(0 - 0)        | 0<br>(0 - 1)             | 0<br>(0 - 1)               | 0<br>(0 - 1)                |
| Acute hepatitis E                                                | 13<br>(7 - 23)              | 0<br>(0 - 0)             | 0<br>(0 - 1)        | 6<br>(4 - 9)             | 5<br>(2 - 9)               | 2<br>(1 - 6)                |
| Other infectious diseases                                        | 217<br>(117 - 446)          | 37<br>(11 - 91)          | 6<br>(2 - 15)       | 40<br>(20 - 77)          | 57<br>(21 - 127)           | 78<br>(23 - 245)            |
| Non-communicable diseases                                        | 41,596<br>(35,621 - 47,193) | 1,565<br>(868 - 2,528)   | 282<br>(214 - 354)  | 4,218<br>(3,341 - 5,043) | 11,680<br>(9,219 - 14,151) | 23,851<br>(20,996 - 26,162) |
| Neoplasms                                                        | 5,853<br>(4,717 - 7,066)    | 43<br>(24 - 76)          | 56<br>(39 - 78)     | 1,158<br>(908 - 1,426)   | 2,547<br>(1,639 - 3,262)   | 2,049<br>(1,639 - 2,446)    |
| Esophageal cancer                                                | 107<br>(69 - 175)           | --                       | --                  | 10<br>(6 - 16)           | 41<br>(25 - 69)            | 56<br>(33 - 91)             |
| Stomach cancer                                                   | 516<br>(360 - 708)          | --                       | --                  | 76<br>(49 - 107)         | 210<br>(141 - 297)         | 230<br>(146 - 345)          |
| Liver cancer                                                     | 279<br>(192 - 404)          | --                       | 1<br>(1 - 2)        | 42<br>(26 - 65)          | 127<br>(80 - 199)          | 110<br>(64 - 175)           |
| Liver cancer due to hepatitis B                                  | 94<br>(42 - 168)            | --                       | 0<br>(0 - 1)        | 17<br>(8 - 31)           | 45<br>(17 - 88)            | 31<br>(12 - 62)             |
| Liver cancer due to hepatitis C                                  | 119<br>(41 - 209)           | --                       | 0<br>(0 - 0)        | 13<br>(5 - 26)           | 53<br>(18 - 104)           | 53<br>(16 - 95)             |
| Liver cancer due to alcohol use                                  | 16<br>(7 - 31)              | --                       | --                  | 1<br>(0 - 3)             | 6<br>(2 - 12)              | 9<br>(4 - 18)               |

Web Table 31- Cambodia deaths with 95% UI by age, sex, and cause in 2013

| Cause                                         | Females, All Ages           | Females, 0-4 Years | Females, 5-14 Years | Females, 15-49 Years     | Females, 50-69 Years     | Females, 70-80 Years        |
|-----------------------------------------------|-----------------------------|--------------------|---------------------|--------------------------|--------------------------|-----------------------------|
| Liver cancer due to other causes              | 50<br>(29 - 82)             | --                 | 1<br>(0 - 1)        | 10<br>(5 - 17)           | 23<br>(11 - 40)          | 17<br>(8 - 31)              |
| Larynx cancer                                 | 17<br>(8 - 29)              | --                 | --                  | 3<br>(1 - 5)             | 8<br>(3 - 14)            | 7<br>(3 - 12)               |
| Tracheal, bronchus and lung cancer            | 839<br>(498 - 1,105)        | --                 | --                  | 109<br>(62 - 155)        | 411<br>(232 - 575)       | 319<br>(198 - 437)          |
| Breast cancer                                 | 772<br>(578 - 1,043)        | --                 | --                  | 246<br>(174 - 353)       | 359<br>(251 - 522)       | 166<br>(122 - 228)          |
| Cervical cancer                               | 732<br>(516 - 948)          | --                 | --                  | 192<br>(126 - 267)       | 375<br>(246 - 507)       | 166<br>(107 - 239)          |
| Uterine cancer                                | 99<br>(63 - 143)            | --                 | --                  | 12<br>(6 - 18)           | 55<br>(31 - 84)          | 33<br>(20 - 50)             |
| Prostate cancer                               | --                          | --                 | --                  | --                       | --                       | --                          |
| Colon and rectum cancer                       | 558<br>(433 - 723)          | --                 | --                  | 64<br>(46 - 85)          | 208<br>(152 - 280)       | 286<br>(204 - 400)          |
| Lip and oral cavity cancer                    | 137<br>(77 - 214)           | --                 | --                  | 16<br>(9 - 25)           | 55<br>(31 - 91)          | 66<br>(34 - 114)            |
| Nasopharynx cancer                            | 63<br>(39 - 100)            | --                 | 1<br>(0 - 2)        | 17<br>(9 - 29)           | 29<br>(15 - 51)          | 15<br>(9 - 26)              |
| Other pharynx cancer                          | 46<br>(32 - 64)             | --                 | --                  | 6<br>(3 - 11)            | 24<br>(15 - 36)          | 16<br>(10 - 24)             |
| Gallbladder and biliary tract cancer          | 203<br>(101 - 314)          | --                 | --                  | 21<br>(9 - 37)           | 88<br>(40 - 142)         | 93<br>(48 - 156)            |
| Pancreatic cancer                             | 138<br>(103 - 178)          | --                 | --                  | 14<br>(9 - 19)           | 62<br>(44 - 85)          | 62<br>(44 - 89)             |
| Malignant skin melanoma                       | 31<br>(22 - 43)             | --                 | --                  | 8<br>(5 - 12)            | 13<br>(8 - 19)           | 10<br>(6 - 15)              |
| Non-melanoma skin cancer                      | 26<br>(15 - 46)             | --                 | --                  | 3<br>(2 - 6)             | 6<br>(3 - 12)            | 17<br>(8 - 32)              |
| Ovarian cancer                                | 248<br>(171 - 344)          | --                 | --                  | 62<br>(41 - 88)          | 138<br>(86 - 201)        | 48<br>(32 - 69)             |
| Testicular cancer                             | --                          | --                 | --                  | --                       | --                       | --                          |
| Kidney cancer                                 | 58<br>(41 - 77)             | 2<br>(1 - 5)       | 1<br>(0 - 1)        | 7<br>(5 - 11)            | 26<br>(17 - 38)          | 21<br>(14 - 33)             |
| Bladder cancer                                | 59<br>(36 - 85)             | --                 | --                  | 5<br>(3 - 7)             | 20<br>(11 - 30)          | 34<br>(20 - 52)             |
| Brain and nervous system cancer               | 95<br>(69 - 122)            | 3<br>(1 - 6)       | 6<br>(3 - 9)        | 33<br>(21 - 45)          | 33<br>(23 - 47)          | 21<br>(13 - 31)             |
| Thyroid cancer                                | 55<br>(36 - 81)             | --                 | 0<br>(0 - 0)        | 6<br>(3 - 9)             | 19<br>(11 - 32)          | 30<br>(18 - 45)             |
| Mesothelioma                                  | 8<br>(5 - 12)               | --                 | --                  | 2<br>(1 - 3)             | 5<br>(3 - 8)             | 2<br>(1 - 3)                |
| Hodgkin lymphoma                              | 15<br>(10 - 21)             | 1<br>(0 - 2)       | 1<br>(0 - 2)        | 6<br>(3 - 8)             | 5<br>(3 - 8)             | 3<br>(2 - 5)                |
| Non-Hodgkin lymphoma                          | 130<br>(83 - 183)           | 4<br>(2 - 8)       | 6<br>(3 - 10)       | 29<br>(18 - 44)          | 47<br>(28 - 74)          | 44<br>(26 - 67)             |
| Multiple myeloma                              | 18<br>(12 - 25)             | --                 | --                  | 3<br>(2 - 5)             | 8<br>(5 - 12)            | 7<br>(4 - 10)               |
| Leukemia                                      | 244<br>(182 - 306)          | 17<br>(7 - 34)     | 28<br>(17 - 42)     | 86<br>(60 - 112)         | 59<br>(41 - 83)          | 54<br>(37 - 73)             |
| Other neoplasms                               | 360<br>(243 - 514)          | 17<br>(8 - 38)     | 13<br>(7 - 22)      | 80<br>(52 - 123)         | 116<br>(72 - 188)        | 134<br>(85 - 197)           |
| Cardiovascular diseases                       | 22,508<br>(18,600 - 26,862) | 108<br>(55 - 190)  | 76<br>(49 - 107)    | 1,712<br>(1,168 - 2,199) | 5,844<br>(4,355 - 7,513) | 14,769<br>(12,667 - 17,102) |
| Rheumatic heart disease                       | 344<br>(220 - 522)          | 3<br>(1 - 5)       | 17<br>(8 - 29)      | 128<br>(71 - 195)        | 77<br>(46 - 139)         | 119<br>(71 - 192)           |
| Ischemic heart disease                        | 9,756<br>(7,470 - 12,511)   | 14<br>(4 - 33)     | 10<br>(4 - 17)      | 599<br>(347 - 827)       | 2,582<br>(1,708 - 3,464) | 6,552<br>(5,087 - 8,216)    |
| Cerebrovascular disease                       | 9,442<br>(7,450 - 11,657)   | 27<br>(12 - 49)    | 20<br>(11 - 32)     | 626<br>(398 - 839)       | 2,331<br>(1,679 - 3,145) | 6,438<br>(5,092 - 7,863)    |
| Ischemic stroke                               | 5,391<br>(3,659 - 6,743)    | 4<br>(1 - 12)      | 3<br>(1 - 5)        | 96<br>(46 - 153)         | 834<br>(516 - 1,175)     | 4,454<br>(3,052 - 5,536)    |
| Hemorrhagic stroke                            | 4,051<br>(2,879 - 6,382)    | 22<br>(11 - 40)    | 18<br>(10 - 27)     | 530<br>(335 - 722)       | 1,497<br>(1,011 - 2,228) | 1,984<br>(1,356 - 3,528)    |
| Hypertensive heart disease                    | 1,162<br>(764 - 2,013)      | 2<br>(1 - 6)       | 1<br>(1 - 2)        | 78<br>(45 - 128)         | 286<br>(173 - 488)       | 795<br>(499 - 1,470)        |
| Cardiomyopathy and myocarditis                | 256<br>(144 - 393)          | 19<br>(4 - 40)     | 9<br>(4 - 17)       | 56<br>(25 - 89)          | 58<br>(30 - 94)          | 113<br>(61 - 193)           |
| Atrial fibrillation and flutter               | 11<br>(6 - 20)              | --                 | --                  | 1<br>(1 - 2)             | 3<br>(1 - 6)             | 6<br>(3 - 13)               |
| Aortic aneurysm                               | 65<br>(36 - 104)            | --                 | --                  | 7<br>(3 - 11)            | 15<br>(8 - 26)           | 43<br>(24 - 70)             |
| Peripheral vascular disease                   | 5<br>(3 - 8)                | --                 | --                  | 0<br>(0 - 0)             | 1<br>(1 - 1)             | 4<br>(2 - 7)                |
| Endocarditis                                  | 131<br>(66 - 272)           | 11<br>(4 - 26)     | 4<br>(2 - 10)       | 32<br>(16 - 64)          | 33<br>(16 - 69)          | 51<br>(22 - 119)            |
| Other cardiovascular and circulatory diseases | 1,336<br>(668 - 2,418)      | 32<br>(13 - 68)    | 14<br>(6 - 25)      | 184<br>(88 - 326)        | 458<br>(213 - 850)       | 648<br>(304 - 1,221)        |

Web Table 31- Cambodia deaths with 95% UI by age, sex, and cause in 2013

| Cause                                               | Females, All Ages        | Females, 0-4 Years | Females, 5-14 Years | Females, 15-49 Years | Females, 50-69 Years | Females, 70-80 Years     |
|-----------------------------------------------------|--------------------------|--------------------|---------------------|----------------------|----------------------|--------------------------|
| Chronic respiratory diseases                        | 3,973<br>(3,113 - 5,390) | 128<br>(74 - 207)  | 26<br>(16 - 37)     | 317<br>(228 - 440)   | 945<br>(675 - 1,375) | 2,556<br>(1,957 - 3,477) |
| Chronic obstructive pulmonary disease               | 2,239<br>(1,361 - 3,072) | 51<br>(21 - 105)   | 3<br>(1 - 6)        | 82<br>(27 - 138)     | 516<br>(265 - 753)   | 1,586<br>(952 - 2,183)   |
| Pneumoconiosis                                      | 6<br>(3 - 9)             | 1<br>(0 - 1)       | 1<br>(0 - 1)        | 2<br>(1 - 4)         | 1<br>(1 - 2)         | 2<br>(1 - 3)             |
| Silicosis                                           | 0<br>(0 - 1)             | 0<br>(0 - 0)       | 0<br>(0 - 0)        | 0<br>(0 - 0)         | 0<br>(0 - 0)         | 0<br>(0 - 0)             |
| Asbestosis                                          | 0<br>(0 - 1)             | 0<br>(0 - 0)       | 0<br>(0 - 0)        | 0<br>(0 - 0)         | 0<br>(0 - 0)         | 0<br>(0 - 0)             |
| Coal workers pneumoconiosis                         | 0<br>(0 - 1)             | 0<br>(0 - 0)       | 0<br>(0 - 0)        | 0<br>(0 - 0)         | 0<br>(0 - 0)         | 0<br>(0 - 0)             |
| Other pneumoconiosis                                | 5<br>(2 - 8)             | 0<br>(0 - 1)       | 0<br>(0 - 0)        | 2<br>(0 - 3)         | 1<br>(0 - 2)         | 2<br>(1 - 3)             |
| Asthma                                              | 1,410<br>(742 - 3,033)   | 57<br>(28 - 104)   | 20<br>(12 - 31)     | 211<br>(130 - 342)   | 380<br>(184 - 887)   | 742<br>(340 - 1,795)     |
| Interstitial lung disease and pulmonary sarcoidosis | 155<br>(13 - 379)        | 0<br>(0 - 1)       | 0<br>(0 - 0)        | 3<br>(0 - 9)         | 32<br>(3 - 85)       | 119<br>(9 - 294)         |
| Other chronic respiratory diseases                  | 163<br>(90 - 278)        | 20<br>(11 - 36)    | 1<br>(0 - 2)        | 18<br>(6 - 35)       | 16<br>(7 - 29)       | 108<br>(52 - 202)        |
| Cirrhosis                                           | 760<br>(576 - 975)       | 5<br>(2 - 11)      | 8<br>(5 - 12)       | 179<br>(127 - 245)   | 317<br>(225 - 430)   | 251<br>(173 - 356)       |
| Cirrhosis due to hepatitis B                        | 288<br>(129 - 468)       | 0<br>(0 - 1)       | 1<br>(0 - 2)        | 59<br>(28 - 97)      | 121<br>(50 - 210)    | 106<br>(39 - 183)        |
| Cirrhosis due to hepatitis C                        | 269<br>(165 - 414)       | 0<br>(0 - 1)       | 1<br>(0 - 3)        | 69<br>(37 - 106)     | 119<br>(66 - 188)    | 80<br>(42 - 134)         |
| Cirrhosis due to alcohol use                        | 120<br>(63 - 190)        | --                 | --                  | 19<br>(9 - 31)       | 49<br>(26 - 80)      | 51<br>(23 - 96)          |
| Cirrhosis due to other causes                       | 84<br>(54 - 129)         | 5<br>(2 - 10)      | 5<br>(3 - 9)        | 31<br>(19 - 49)      | 28<br>(14 - 49)      | 14<br>(6 - 27)           |
| Digestive diseases                                  | 1,379<br>(1,033 - 1,791) | 25<br>(13 - 40)    | 15<br>(10 - 22)     | 190<br>(133 - 255)   | 366<br>(251 - 513)   | 783<br>(574 - 1,031)     |
| Peptic ulcer disease                                | 487<br>(325 - 705)       | 2<br>(1 - 4)       | 2<br>(1 - 3)        | 45<br>(26 - 69)      | 134<br>(81 - 212)    | 305<br>(190 - 457)       |
| Gastritis and duodenitis                            | 48<br>(17 - 93)          | 1<br>(0 - 3)       | 1<br>(0 - 2)        | 6<br>(3 - 13)        | 11<br>(4 - 21)       | 29<br>(9 - 64)           |
| Appendicitis                                        | 115<br>(66 - 199)        | 4<br>(1 - 9)       | 4<br>(2 - 8)        | 29<br>(15 - 51)      | 34<br>(17 - 61)      | 44<br>(21 - 81)          |
| Paralytic ileus and intestinal obstruction          | 168<br>(89 - 281)        | 7<br>(2 - 14)      | 2<br>(1 - 3)        | 15<br>(8 - 27)       | 37<br>(19 - 70)      | 108<br>(50 - 196)        |
| Inguinal, femoral, and abdominal hernia             | 23<br>(11 - 44)          | 1<br>(0 - 2)       | 0<br>(0 - 1)        | 3<br>(1 - 6)         | 6<br>(2 - 11)        | 13<br>(6 - 26)           |
| Inflammatory bowel disease                          | 45<br>(23 - 78)          | 2<br>(1 - 4)       | 1<br>(0 - 2)        | 9<br>(5 - 15)        | 11<br>(6 - 21)       | 22<br>(10 - 42)          |
| Vascular intestinal disorders                       | 13<br>(7 - 27)           | 0<br>(0 - 1)       | 0<br>(0 - 1)        | 3<br>(1 - 5)         | 2<br>(1 - 5)         | 8<br>(3 - 16)            |
| Gallbladder and biliary diseases                    | 202<br>(112 - 296)       | 3<br>(1 - 5)       | 1<br>(1 - 2)        | 26<br>(15 - 40)      | 52<br>(28 - 85)      | 120<br>(58 - 199)        |
| Pancreatitis                                        | 102<br>(57 - 165)        | 1<br>(0 - 2)       | 1<br>(0 - 2)        | 27<br>(14 - 44)      | 31<br>(16 - 52)      | 42<br>(21 - 77)          |
| Other digestive diseases                            | 176<br>(113 - 267)       | 4<br>(2 - 8)       | 3<br>(1 - 5)        | 26<br>(15 - 42)      | 49<br>(28 - 79)      | 94<br>(51 - 159)         |
| Neurological disorders                              | 1,619<br>(1,239 - 2,052) | 13<br>(7 - 27)     | 12<br>(6 - 20)      | 70<br>(42 - 107)     | 140<br>(93 - 189)    | 1,384<br>(1,040 - 1,797) |
| Alzheimer disease and other dementias               | 1,442<br>(1,087 - 1,861) | --                 | --                  | 1<br>(0 - 2)         | 102<br>(63 - 148)    | 1,340<br>(999 - 1,747)   |
| Parkinson disease                                   | 14<br>(8 - 23)           | --                 | --                  | 1<br>(0 - 1)         | 4<br>(2 - 6)         | 10<br>(5 - 17)           |
| Epilepsy                                            | 115<br>(61 - 172)        | 9<br>(3 - 22)      | 9<br>(4 - 18)       | 57<br>(30 - 93)      | 22<br>(12 - 37)      | 18<br>(9 - 38)           |
| Multiple sclerosis                                  | 4<br>(2 - 7)             | --                 | --                  | 2<br>(1 - 3)         | 1<br>(1 - 3)         | 1<br>(0 - 2)             |
| Other neurological disorders                        | 43<br>(33 - 54)          | 4<br>(3 - 7)       | 2<br>(2 - 3)        | 9<br>(7 - 12)        | 11<br>(8 - 15)       | 16<br>(11 - 22)          |
| Mental and substance use disorders                  | 62<br>(33 - 99)          | 1<br>(0 - 3)       | 0<br>(0 - 0)        | 28<br>(16 - 44)      | 25<br>(11 - 44)      | 8<br>(5 - 13)            |
| Schizophrenia                                       | 8<br>(4 - 13)            | --                 | --                  | 3<br>(1 - 5)         | 3<br>(1 - 5)         | 3<br>(1 - 4)             |
| Alcohol use disorders                               | 39<br>(12 - 70)          | --                 | --                  | 15<br>(5 - 28)       | 19<br>(5 - 38)       | 5<br>(2 - 9)             |
| Drug use disorders                                  | 15<br>(10 - 22)          | 1<br>(0 - 3)       | --                  | 10<br>(6 - 16)       | 3<br>(2 - 4)         | 1<br>(1 - 2)             |
| Opioid use disorders                                | 9<br>(6 - 14)            | 1<br>(0 - 2)       | --                  | 6<br>(4 - 10)        | 2<br>(1 - 2)         | 1<br>(0 - 1)             |
| Cocaine use disorders                               | 0<br>(0 - 1)             | 0<br>(0 - 0)       | --                  | 0<br>(0 - 0)         | 0<br>(0 - 0)         | 0<br>(0 - 0)             |
| Amphetamine use disorders                           | 0<br>(0 - 1)             | 0<br>(0 - 0)       | --                  | 0<br>(0 - 0)         | 0<br>(0 - 0)         | 0<br>(0 - 0)             |
| Other drug use disorders                            | 5<br>(3 - 7)             | 0<br>(0 - 1)       | --                  | 3<br>(2 - 5)         | 1<br>(1 - 1)         | 0<br>(0 - 1)             |

Web Table 31- Cambodia deaths with 95% UI by age, sex, and cause in 2013

| Cause                                               | Females, All Ages        | Females, 0-4 Years     | Females, 5-14 Years | Females, 15-49 Years | Females, 50-69 Years   | Females, 70-80 Years     |
|-----------------------------------------------------|--------------------------|------------------------|---------------------|----------------------|------------------------|--------------------------|
| Eating disorders                                    | 0<br>(0 - 1)             | --                     | 0<br>(0 - 0)        | 0<br>(0 - 1)         | --                     | --                       |
| Anorexia nervosa                                    | 0<br>(0 - 1)             | --                     | 0<br>(0 - 0)        | 0<br>(0 - 1)         | --                     | --                       |
| Diabetes, urogenital, blood, and endocrine diseases | 3,965<br>(2,844 - 5,145) | 83<br>(48 - 128)       | 33<br>(21 - 46)     | 458<br>(308 - 598)   | 1,442<br>(985 - 1,949) | 1,951<br>(1,369 - 2,593) |
| Diabetes mellitus                                   | 2,159<br>(1,490 - 2,920) | 2<br>(1 - 4)           | 2<br>(1 - 4)        | 136<br>(87 - 191)    | 833<br>(534 - 1,201)   | 1,185<br>(780 - 1,672)   |
| Acute glomerulonephritis                            | 8<br>(5 - 13)            | 1<br>(0 - 2)           | 1<br>(0 - 2)        | 3<br>(2 - 5)         | 1<br>(1 - 3)           | 2<br>(1 - 4)             |
| Chronic kidney disease                              | 1,233<br>(625 - 1,675)   | 12<br>(5 - 23)         | 8<br>(4 - 12)       | 195<br>(95 - 271)    | 462<br>(232 - 675)     | 557<br>(267 - 806)       |
| Chronic kidney disease due to diabetes mellitus     | 82<br>(31 - 135)         | 0<br>(0 - 1)           | 0<br>(0 - 0)        | 9<br>(3 - 13)        | 32<br>(13 - 58)        | 41<br>(15 - 71)          |
| Chronic kidney disease due to hypertension          | 299<br>(129 - 511)       | 1<br>(0 - 3)           | 1<br>(0 - 1)        | 33<br>(12 - 62)      | 115<br>(47 - 213)      | 150<br>(66 - 255)        |
| Chronic kidney disease due to glomerulonephritis    | 164<br>(83 - 255)        | 5<br>(2 - 8)           | 3<br>(2 - 5)        | 44<br>(22 - 67)      | 48<br>(21 - 86)        | 63<br>(29 - 105)         |
| Chronic kidney disease due to other causes          | 688<br>(256 - 1,078)     | 6<br>(1 - 15)          | 3<br>(1 - 7)        | 109<br>(37 - 177)    | 267<br>(99 - 430)      | 303<br>(95 - 520)        |
| Urinary diseases and male infertility               | 232<br>(141 - 332)       | 5<br>(2 - 10)          | 1<br>(1 - 2)        | 38<br>(21 - 58)      | 70<br>(41 - 104)       | 117<br>(63 - 197)        |
| Interstitial nephritis and urinary tract infections | 142<br>(72 - 218)        | 2<br>(1 - 5)           | 1<br>(0 - 1)        | 24<br>(11 - 39)      | 38<br>(18 - 62)        | 77<br>(37 - 136)         |
| Urolithiasis                                        | 17<br>(9 - 29)           | --                     | 0<br>(0 - 0)        | 4<br>(2 - 7)         | 6<br>(3 - 11)          | 7<br>(3 - 16)            |
| Other urinary diseases                              | 73<br>(45 - 119)         | 2<br>(1 - 5)           | 1<br>(0 - 1)        | 11<br>(6 - 17)       | 26<br>(14 - 44)        | 33<br>(15 - 65)          |
| Gynecological diseases                              | 9<br>(5 - 16)            | --                     | --                  | 5<br>(3 - 9)         | 2<br>(1 - 4)           | 2<br>(1 - 4)             |
| Uterine fibroids                                    | 2<br>(1 - 3)             | --                     | --                  | 1<br>(0 - 1)         | 1<br>(0 - 1)           | 1<br>(0 - 1)             |
| Polycystic ovarian syndrome                         | 0<br>(0 - 1)             | --                     | --                  | 0<br>(0 - 1)         | 0<br>(0 - 0)           | --                       |
| Endometriosis                                       | 1<br>(0 - 2)             | --                     | --                  | 1<br>(0 - 1)         | 0<br>(0 - 0)           | --                       |
| Genital prolapse                                    | 2<br>(1 - 3)             | --                     | --                  | 1<br>(0 - 1)         | 0<br>(0 - 1)           | 1<br>(0 - 1)             |
| Other gynecological diseases                        | 4<br>(2 - 8)             | --                     | --                  | 2<br>(1 - 4)         | 1<br>(0 - 2)           | 1<br>(0 - 2)             |
| Hemoglobinopathies and hemolytic anemias            | 155<br>(81 - 236)        | 47<br>(18 - 84)        | 17<br>(8 - 28)      | 48<br>(23 - 74)      | 21<br>(10 - 33)        | 22<br>(11 - 37)          |
| Thalassemias                                        | 114<br>(59 - 179)        | 44<br>(16 - 79)        | 17<br>(8 - 28)      | 43<br>(21 - 65)      | 10<br>(5 - 15)         | 2<br>(1 - 3)             |
| Sickle cell disorders                               | 0<br>(0 - 0)             | 0<br>(0 - 0)           | 0<br>(0 - 0)        | 0<br>(0 - 0)         | 0<br>(0 - 0)           | 0<br>(0 - 0)             |
| G6PD deficiency                                     | 6<br>(3 - 9)             | 1<br>(0 - 1)           | 0<br>(0 - 0)        | 2<br>(1 - 3)         | 2<br>(1 - 3)           | 1<br>(0 - 1)             |
| Other hemoglobinopathies and hemolytic anemias      | 35<br>(18 - 55)          | 2<br>(1 - 4)           | 0<br>(0 - 0)        | 4<br>(2 - 6)         | 9<br>(5 - 15)          | 19<br>(10 - 32)          |
| Endocrine, metabolic, blood, and immune disorders   | 168<br>(105 - 230)       | 15<br>(6 - 32)         | 4<br>(2 - 6)        | 32<br>(20 - 47)      | 51<br>(28 - 77)        | 66<br>(32 - 109)         |
| Musculoskeletal disorders                           | 48<br>(33 - 70)          | --                     | 2<br>(1 - 3)        | 18<br>(10 - 27)      | 16<br>(10 - 24)        | 12<br>(8 - 20)           |
| Rheumatoid arthritis                                | 11<br>(8 - 18)           | --                     | 0<br>(0 - 1)        | 2<br>(1 - 3)         | 4<br>(2 - 6)           | 5<br>(3 - 9)             |
| Other musculoskeletal disorders                     | 36<br>(24 - 54)          | --                     | 2<br>(1 - 3)        | 16<br>(9 - 25)       | 12<br>(7 - 18)         | 7<br>(4 - 12)            |
| Other non-communicable diseases                     | 1,429<br>(735 - 2,417)   | 1,158<br>(513 - 2,121) | 55<br>(27 - 93)     | 89<br>(54 - 134)     | 40<br>(26 - 57)        | 86<br>(58 - 125)         |
| Congenital anomalies                                | 1,308<br>(620 - 2,299)   | 1,144<br>(502 - 2,104) | 54<br>(26 - 92)     | 74<br>(41 - 117)     | 16<br>(9 - 27)         | 21<br>(13 - 31)          |
| Neural tube defects                                 | 231<br>(51 - 687)        | 215<br>(43 - 647)      | 4<br>(1 - 13)       | 9<br>(3 - 25)        | 2<br>(0 - 6)           | 1<br>(0 - 2)             |
| Congenital heart anomalies                          | 723<br>(276 - 1,449)     | 632<br>(211 - 1,319)   | 34<br>(15 - 62)     | 38<br>(20 - 65)      | 5<br>(2 - 10)          | 14<br>(8 - 23)           |
| Cleft lip and cleft palate                          | 5<br>(0 - 18)            | 5<br>(0 - 18)          | --                  | --                   | --                     | --                       |
| Down syndrome                                       | 31<br>(9 - 67)           | 23<br>(5 - 55)         | 3<br>(1 - 7)        | 4<br>(2 - 7)         | 1<br>(0 - 3)           | 0<br>(0 - 0)             |
| Chromosomal unbalanced rearrangements               | 38<br>(6 - 100)          | 32<br>(5 - 92)         | 1<br>(0 - 2)        | 4<br>(1 - 9)         | 1<br>(0 - 1)           | 0<br>(0 - 1)             |
| Other congenital anomalies                          | 280<br>(103 - 659)       | 237<br>(76 - 592)      | 11<br>(4 - 23)      | 18<br>(9 - 33)       | 7<br>(4 - 12)          | 6<br>(3 - 10)            |
| Skin and subcutaneous diseases                      | 113<br>(79 - 158)        | 6<br>(3 - 13)          | 2<br>(1 - 2)        | 15<br>(10 - 22)      | 24<br>(15 - 35)        | 66<br>(41 - 100)         |
| Cellulitis                                          | 39<br>(17 - 71)          | 3<br>(1 - 7)           | 1<br>(0 - 1)        | 7<br>(3 - 12)        | 11<br>(5 - 20)         | 18<br>(6 - 36)           |
| Pyoderma                                            | 38<br>(20 - 60)          | 3<br>(1 - 8)           | 1<br>(0 - 1)        | 6<br>(3 - 10)        | 10<br>(4 - 16)         | 19<br>(9 - 34)           |

Web Table 31- Cambodia deaths with 95% UI by age, sex, and cause in 2013

| Cause                                           | Females, All Ages        | Females, 0-4 Years | Females, 5-14 Years | Females, 15-49 Years   | Females, 50-69 Years | Females, 70-80 Years |
|-------------------------------------------------|--------------------------|--------------------|---------------------|------------------------|----------------------|----------------------|
| Decubitus ulcer                                 | 33<br>(16 - 56)          | 0<br>(0 - 0)       | 0<br>(0 - 0)        | 2<br>(1 - 4)           | 3<br>(1 - 6)         | 28<br>(13 - 49)      |
| Other skin and subcutaneous diseases            | 2<br>(1 - 4)             | 0<br>(0 - 0)       | 0<br>(0 - 0)        | 1<br>(0 - 1)           | 0<br>(0 - 1)         | 1<br>(0 - 1)         |
| Sudden infant death syndrome                    | 8<br>(1 - 32)            | 8<br>(1 - 32)      | --                  | --                     | --                   | --                   |
| Injuries                                        | 2,656<br>(2,030 - 3,265) | 292<br>(182 - 433) | 198<br>(133 - 267)  | 1,120<br>(808 - 1,435) | 534<br>(373 - 707)   | 511<br>(375 - 641)   |
| Transport injuries                              | 897<br>(567 - 1,203)     | 66<br>(33 - 117)   | 74<br>(43 - 117)    | 374<br>(237 - 508)     | 223<br>(129 - 327)   | 160<br>(85 - 239)    |
| Road injuries                                   | 823<br>(530 - 1,096)     | 58<br>(29 - 104)   | 70<br>(41 - 110)    | 352<br>(223 - 482)     | 204<br>(120 - 298)   | 139<br>(77 - 205)    |
| Pedestrian road injuries                        | 227<br>(125 - 358)       | 22<br>(9 - 44)     | 25<br>(12 - 45)     | 65<br>(32 - 107)       | 60<br>(31 - 100)     | 54<br>(28 - 92)      |
| Cyclist road injuries                           | 62<br>(35 - 99)          | 2<br>(1 - 6)       | 6<br>(3 - 11)       | 25<br>(13 - 44)        | 18<br>(9 - 31)       | 10<br>(5 - 18)       |
| Motorcyclist road injuries                      | 211<br>(122 - 371)       | 12<br>(5 - 26)     | 15<br>(6 - 28)      | 123<br>(67 - 216)      | 41<br>(20 - 77)      | 20<br>(9 - 39)       |
| Motor vehicle road injuries                     | 307<br>(162 - 444)       | 20<br>(9 - 38)     | 22<br>(10 - 37)     | 133<br>(69 - 201)      | 82<br>(39 - 131)     | 50<br>(22 - 83)      |
| Other road injuries                             | 16<br>(7 - 28)           | 2<br>(0 - 4)       | 2<br>(1 - 4)        | 6<br>(2 - 10)          | 3<br>(1 - 6)         | 4<br>(1 - 8)         |
| Other transport injuries                        | 75<br>(34 - 114)         | 9<br>(3 - 17)      | 4<br>(2 - 8)        | 22<br>(11 - 34)        | 19<br>(8 - 31)       | 21<br>(7 - 38)       |
| Unintentional injuries                          | 1,041<br>(804 - 1,279)   | 213<br>(122 - 323) | 106<br>(66 - 151)   | 263<br>(186 - 344)     | 182<br>(127 - 238)   | 277<br>(199 - 368)   |
| Falls                                           | 167<br>(111 - 256)       | 12<br>(5 - 23)     | 3<br>(2 - 5)        | 21<br>(13 - 31)        | 33<br>(21 - 52)      | 99<br>(57 - 165)     |
| Drowning                                        | 344<br>(184 - 494)       | 91<br>(33 - 169)   | 70<br>(33 - 114)    | 102<br>(51 - 158)      | 49<br>(25 - 78)      | 31<br>(17 - 53)      |
| Fire, heat, and hot substances                  | 173<br>(102 - 270)       | 38<br>(14 - 82)    | 12<br>(6 - 21)      | 52<br>(26 - 87)        | 31<br>(17 - 54)      | 41<br>(17 - 78)      |
| Poisonings                                      | 41<br>(25 - 57)          | 4<br>(2 - 9)       | 3<br>(1 - 4)        | 19<br>(10 - 29)        | 7<br>(4 - 12)        | 8<br>(4 - 13)        |
| Exposure to mechanical forces                   | 66<br>(42 - 85)          | 10<br>(5 - 19)     | 8<br>(3 - 12)       | 22<br>(14 - 31)        | 15<br>(9 - 22)       | 11<br>(6 - 16)       |
| Unintentional firearm injuries                  | 22<br>(14 - 31)          | 2<br>(1 - 5)       | 1<br>(0 - 2)        | 9<br>(5 - 14)          | 6<br>(3 - 11)        | 4<br>(2 - 7)         |
| Unintentional suffocation                       | 5<br>(0 - 9)             | 1<br>(0 - 4)       | 1<br>(0 - 1)        | 1<br>(0 - 3)           | 1<br>(0 - 2)         | 1<br>(0 - 1)         |
| Other exposure to mechanical forces             | 40<br>(17 - 53)          | 7<br>(3 - 15)      | 6<br>(2 - 10)       | 12<br>(5 - 18)         | 8<br>(3 - 12)        | 7<br>(2 - 11)        |
| Adverse effects of medical treatment            | 127<br>(67 - 189)        | 17<br>(6 - 40)     | 3<br>(1 - 5)        | 25<br>(12 - 39)        | 28<br>(14 - 47)      | 55<br>(24 - 98)      |
| Animal contact                                  | 18<br>(7 - 33)           | 4<br>(1 - 8)       | 2<br>(1 - 5)        | 4<br>(1 - 8)           | 4<br>(1 - 8)         | 3<br>(1 - 6)         |
| Venomous animal contact                         | 12<br>(5 - 24)           | 3<br>(1 - 6)       | 2<br>(1 - 4)        | 3<br>(1 - 6)           | 3<br>(1 - 6)         | 2<br>(1 - 4)         |
| Non-venomous animal contact                     | 6<br>(1 - 12)            | 1<br>(0 - 3)       | 0<br>(0 - 1)        | 1<br>(0 - 3)           | 2<br>(0 - 3)         | 1<br>(0 - 3)         |
| Foreign body                                    | 74<br>(36 - 137)         | 33<br>(14 - 67)    | 2<br>(1 - 5)        | 8<br>(4 - 15)          | 7<br>(3 - 14)        | 23<br>(9 - 45)       |
| Pulmonary aspiration and foreign body in airway | 72<br>(34 - 134)         | 33<br>(14 - 66)    | 2<br>(1 - 5)        | 8<br>(3 - 14)          | 7<br>(3 - 14)        | 22<br>(8 - 44)       |
| Foreign body in other body part                 | 2<br>(1 - 4)             | 0<br>(0 - 1)       | 0<br>(0 - 0)        | 1<br>(0 - 1)           | 0<br>(0 - 1)         | 1<br>(0 - 1)         |
| Other unintentional injuries                    | 31<br>(15 - 45)          | 5<br>(2 - 9)       | 2<br>(1 - 4)        | 10<br>(5 - 15)         | 7<br>(3 - 11)        | 7<br>(2 - 12)        |
| Self-harm and interpersonal violence            | 709<br>(493 - 974)       | 12<br>(5 - 28)     | 17<br>(9 - 33)      | 480<br>(311 - 675)     | 126<br>(78 - 187)    | 73<br>(43 - 114)     |
| Self-harm                                       | 572<br>(383 - 794)       | --                 | 9<br>(3 - 20)       | 380<br>(232 - 550)     | 114<br>(68 - 173)    | 69<br>(39 - 110)     |
| Interpersonal violence                          | 137<br>(84 - 226)        | 12<br>(5 - 28)     | 8<br>(4 - 17)       | 100<br>(57 - 171)      | 12<br>(7 - 21)       | 4<br>(2 - 7)         |
| Assault by firearm                              | 27<br>(12 - 48)          | 1<br>(0 - 4)       | 1<br>(0 - 2)        | 21<br>(9 - 40)         | 2<br>(1 - 5)         | 0<br>(0 - 1)         |
| Assault by sharp object                         | 36<br>(18 - 66)          | 1<br>(0 - 3)       | 1<br>(0 - 3)        | 30<br>(14 - 56)        | 3<br>(1 - 6)         | 1<br>(0 - 1)         |
| Assault by other means                          | 75<br>(45 - 133)         | 10<br>(4 - 22)     | 6<br>(3 - 13)       | 49<br>(27 - 93)        | 7<br>(4 - 13)        | 3<br>(1 - 5)         |
| Forces of nature, war, and legal intervention   | 8<br>(3 - 19)            | 0<br>(0 - 0)       | 0<br>(0 - 0)        | 3<br>(1 - 8)           | 3<br>(1 - 7)         | 1<br>(1 - 3)         |
| Exposure to forces of nature                    | 8<br>(3 - 19)            | 0<br>(0 - 0)       | 0<br>(0 - 0)        | 3<br>(1 - 8)           | 3<br>(1 - 7)         | 1<br>(1 - 3)         |

Web Table 31- Cameroon deaths with 95% UI by age, sex, and cause in 2013

| Cause                                                             | Both Sexes, All Ages           | Both Sexes, 0-4 Years       | Both Sexes, 5-14 Years    | Both Sexes, 15-49 Years     | Both Sexes, 50-69 Years     | Both Sexes, 70-80 Years     |
|-------------------------------------------------------------------|--------------------------------|-----------------------------|---------------------------|-----------------------------|-----------------------------|-----------------------------|
| All causes                                                        | 220,144<br>(206,479 - 236,559) | 82,515<br>(75,081 - 93,167) | 8,760<br>(7,732 - 10,520) | 60,139<br>(54,257 - 65,290) | 33,317<br>(29,418 - 37,900) | 35,413<br>(32,676 - 39,114) |
| Communicable, maternal, neonatal, and nutritional diseases        | 133,790<br>(124,212 - 145,229) | 69,378<br>(61,705 - 78,867) | 5,736<br>(4,885 - 7,076)  | 37,558<br>(33,098 - 42,403) | 11,325<br>(9,608 - 12,931)  | 9,793<br>(7,558 - 11,663)   |
| HIV/AIDS and tuberculosis                                         | 35,907<br>(30,802 - 41,498)    | 1,740<br>(1,147 - 2,414)    | 1,837<br>(1,542 - 2,127)  | 24,835<br>(20,018 - 29,991) | 5,970<br>(5,002 - 6,923)    | 1,524<br>(1,133 - 1,866)    |
| Tuberculosis                                                      | 4,585<br>(3,672 - 5,728)       | 232<br>(139 - 374)          | 85<br>(56 - 125)          | 2,055<br>(1,559 - 2,709)    | 1,261<br>(940 - 1,681)      | 951<br>(598 - 1,238)        |
| HIV/AIDS                                                          | 31,322<br>(26,088 - 36,873)    | 1,508<br>(944 - 2,181)      | 1,752<br>(1,460 - 2,050)  | 22,780<br>(17,921 - 28,338) | 4,709<br>(3,739 - 5,660)    | 573<br>(395 - 768)          |
| HIV/AIDS resulting in mycobacterial infection                     | 1,902<br>(1,421 - 2,436)       | 86<br>(51 - 130)            | 93<br>(72 - 118)          | 1,384<br>(979 - 1,833)      | 301<br>(226 - 391)          | 39<br>(26 - 53)             |
| HIV/AIDS resulting in other diseases                              | 29,420<br>(24,528 - 34,708)    | 1,423<br>(890 - 2,054)      | 1,659<br>(1,378 - 1,937)  | 21,396<br>(16,764 - 26,532) | 4,408<br>(3,493 - 5,290)    | 534<br>(366 - 719)          |
| Diarrhea, lower respiratory, and other common infectious diseases | 43,038<br>(35,139 - 52,231)    | 26,596<br>(19,869 - 35,402) | 1,981<br>(1,449 - 2,824)  | 4,851<br>(3,766 - 5,973)    | 3,567<br>(2,563 - 4,633)    | 6,043<br>(4,280 - 7,579)    |
| Diarrheal diseases                                                | 11,044<br>(7,539 - 15,778)     | 7,160<br>(3,886 - 11,853)   | 384<br>(207 - 653)        | 1,388<br>(994 - 1,892)      | 863<br>(540 - 1,280)        | 1,249<br>(805 - 1,882)      |
| Intestinal infectious diseases                                    | 1,156<br>(611 - 2,054)         | 474<br>(228 - 879)          | 314<br>(154 - 578)        | 311<br>(151 - 553)          | 39<br>(19 - 73)             | 19<br>(10 - 32)             |
| Typhoid fever                                                     | 743<br>(367 - 1,333)           | 286<br>(126 - 564)          | 209<br>(100 - 389)        | 210<br>(99 - 387)           | 26<br>(11 - 51)             | 12<br>(6 - 22)              |
| Paratyphoid fever                                                 | 338<br>(164 - 621)             | 139<br>(58 - 279)           | 98<br>(45 - 186)          | 88<br>(38 - 172)            | 9<br>(4 - 19)               | 4<br>(2 - 8)                |
| Other intestinal infectious diseases                              | 75<br>(48 - 112)               | 49<br>(25 - 81)             | 7<br>(2 - 15)             | 13<br>(6 - 25)              | 4<br>(1 - 10)               | 3<br>(0 - 10)               |
| Lower respiratory infections                                      | 23,164<br>(17,932 - 29,546)    | 13,981<br>(9,581 - 19,879)  | 628<br>(404 - 896)        | 1,834<br>(1,405 - 2,380)    | 2,243<br>(1,511 - 3,064)    | 4,477<br>(3,001 - 5,876)    |
| Upper respiratory infections                                      | 29<br>(15 - 56)                | 14<br>(2 - 38)              | 1<br>(0 - 4)              | 7<br>(3 - 13)               | 4<br>(1 - 9)                | 3<br>(1 - 9)                |
| Otitis media                                                      | 12<br>(9 - 15)                 | 4<br>(2 - 6)                | 1<br>(1 - 1)              | 2<br>(1 - 2)                | 2<br>(1 - 3)                | 3<br>(2 - 4)                |
| Meningitis                                                        | 4,899<br>(3,278 - 6,653)       | 2,675<br>(1,424 - 4,321)    | 422<br>(264 - 638)        | 1,173<br>(738 - 1,589)      | 370<br>(196 - 536)          | 258<br>(138 - 383)          |
| Pneumococcal meningitis                                           | 1,225<br>(753 - 1,736)         | 593<br>(286 - 1,003)        | 127<br>(65 - 216)         | 326<br>(157 - 531)          | 105<br>(58 - 170)           | 75<br>(41 - 131)            |
| H influenzae type B meningitis                                    | 898<br>(539 - 1,479)           | 639<br>(318 - 1,180)        | 69<br>(34 - 118)          | 136<br>(75 - 221)           | 34<br>(15 - 58)             | 20<br>(7 - 43)              |
| Meningococcal meningitis                                          | 2,149<br>(1,461 - 2,993)       | 1,177<br>(628 - 1,979)      | 182<br>(103 - 284)        | 509<br>(324 - 729)          | 167<br>(83 - 254)           | 115<br>(62 - 169)           |
| Other meningitis                                                  | 627<br>(402 - 939)             | 266<br>(123 - 518)          | 45<br>(25 - 72)           | 202<br>(115 - 322)          | 66<br>(29 - 119)            | 48<br>(17 - 89)             |
| Encephalitis                                                      | 227<br>(163 - 349)             | 100<br>(49 - 206)           | 27<br>(16 - 45)           | 55<br>(36 - 84)             | 25<br>(15 - 36)             | 21<br>(9 - 31)              |
| Diphtheria                                                        | 49<br>(2 - 231)                | 40<br>(0 - 228)             | 6<br>(0 - 38)             | 2<br>(0 - 7)                | 0<br>(0 - 2)                | --<br>(0 - 2)               |
| Whooping cough                                                    | 627<br>(2 - 3,168)             | 597<br>(2 - 3,027)          | 25<br>(0 - 126)           | 4<br>(0 - 21)               | 0<br>(0 - 2)                | --<br>(0 - 2)               |
| Tetanus                                                           | 194<br>(60 - 400)              | 109<br>(21 - 293)           | 13<br>(6 - 33)            | 48<br>(16 - 136)            | 18<br>(7 - 44)              | 7<br>(3 - 14)               |
| Measles                                                           | 1,613<br>(35 - 8,874)          | 1,431<br>(31 - 7,672)       | 158<br>(3 - 895)          | 23<br>(0 - 122)             | 0<br>(0 - 3)                | --<br>(0 - 3)               |
| Varicella and herpes zoster                                       | 25<br>(11 - 53)                | 11<br>(1 - 36)              | 2<br>(0 - 7)              | 4<br>(1 - 9)                | 2<br>(0 - 5)                | 6<br>(1 - 24)               |
| Neglected tropical diseases and malaria                           | 19,823<br>(12,114 - 29,745)    | 14,833<br>(8,056 - 24,271)  | 1,372<br>(707 - 2,277)    | 1,754<br>(984 - 3,311)      | 884<br>(450 - 1,826)        | 979<br>(416 - 2,139)        |
| Malaria                                                           | 19,336<br>(11,574 - 29,258)    | 14,638<br>(7,795 - 24,083)  | 1,299<br>(624 - 2,206)    | 1,620<br>(857 - 3,168)      | 832<br>(405 - 1,772)        | 948<br>(383 - 2,106)        |
| Leishmaniasis                                                     | 1<br>(0 - 1)                   | 0<br>(0 - 0)                | 0<br>(0 - 0)              | 0<br>(0 - 0)                | 0<br>(0 - 0)                | 0<br>(0 - 0)                |
| Visceral leishmaniasis                                            | 1<br>(0 - 1)                   | 0<br>(0 - 0)                | 0<br>(0 - 0)              | 0<br>(0 - 0)                | 0<br>(0 - 0)                | 0<br>(0 - 0)                |
| African trypanosomiasis                                           | 13<br>(6 - 22)                 | 1<br>(0 - 2)                | 2<br>(1 - 3)              | 8<br>(4 - 14)               | 2<br>(1 - 3)                | 1<br>(0 - 1)                |
| Schistosomiasis                                                   | 93<br>(71 - 121)               | 2<br>(1 - 5)                | 3<br>(2 - 6)              | 43<br>(30 - 61)             | 28<br>(18 - 40)             | 16<br>(10 - 24)             |
| Cysticercosis                                                     | 12<br>(10 - 14)                | 1<br>(1 - 2)                | 1<br>(1 - 1)              | 8<br>(6 - 9)                | 2<br>(1 - 2)                | 1<br>(0 - 1)                |
| Cystic echinococcosis                                             | 11<br>(9 - 13)                 | 2<br>(1 - 3)                | 2<br>(1 - 2)              | 5<br>(4 - 6)                | 1<br>(1 - 2)                | 1<br>(1 - 1)                |
| Dengue                                                            | 19<br>(12 - 29)                | 9<br>(3 - 18)               | 4<br>(3 - 6)              | 5<br>(3 - 7)                | 1<br>(0 - 1)                | 0<br>(0 - 1)                |
| Yellow fever                                                      | 6<br>(4 - 8)                   | 1<br>(0 - 2)                | 1<br>(0 - 3)              | 3<br>(2 - 5)                | 1<br>(0 - 1)                | 0<br>(0 - 1)                |
| Rabies                                                            | 154<br>(70 - 234)              | 42<br>(14 - 87)             | 43<br>(19 - 76)           | 49<br>(25 - 72)             | 13<br>(6 - 21)              | 7<br>(1 - 14)               |
| Intestinal nematode infections                                    | 150<br>(85 - 233)              | 125<br>(64 - 203)           | 15<br>(5 - 30)            | 6<br>(1 - 17)               | 2<br>(0 - 8)                | 2<br>(0 - 9)                |
| Ascariasis                                                        | 150<br>(85 - 233)              | 125<br>(64 - 203)           | 15<br>(5 - 30)            | 6<br>(1 - 17)               | 2<br>(0 - 8)                | 2<br>(0 - 9)                |



Web Table 31- Cameroon deaths with 95% UI by age, sex, and cause in 2013

| Cause                                                            | Both Sexes, All Ages        | Both Sexes, 0-4 Years       | Both Sexes, 5-14 Years   | Both Sexes, 15-49 Years     | Both Sexes, 50-69 Years     | Both Sexes, 70-80 Years     |
|------------------------------------------------------------------|-----------------------------|-----------------------------|--------------------------|-----------------------------|-----------------------------|-----------------------------|
| Other neglected tropical diseases                                | 27<br>(18 - 44)             | 11<br>(6 - 21)              | 2<br>(1 - 4)             | 7<br>(4 - 11)               | 3<br>(2 - 5)                | 4<br>(3 - 7)                |
| Maternal disorders                                               | 4,772<br>(3,499 - 6,285)    | --                          | 26<br>(9 - 57)           | 4,747<br>(3,486 - 6,259)    | --                          | --                          |
| Maternal hemorrhage                                              | 830<br>(543 - 1,216)        | --                          | 3<br>(1 - 6)             | 828<br>(541 - 1,214)        | --                          | --                          |
| Maternal sepsis and other maternal infections                    | 264<br>(151 - 403)          | --                          | 1<br>(0 - 4)             | 262<br>(149 - 400)          | --                          | --                          |
| Maternal hypertensive disorders                                  | 361<br>(223 - 530)          | --                          | 2<br>(1 - 5)             | 359<br>(221 - 527)          | --                          | --                          |
| Maternal obstructed labor                                        | 254<br>(156 - 383)          | --                          | 1<br>(0 - 2)             | 253<br>(155 - 382)          | --                          | --                          |
| Maternal abortive outcome                                        | 841<br>(539 - 1,193)        | --                          | 5<br>(2 - 11)            | 836<br>(534 - 1,186)        | --                          | --                          |
| Indirect maternal deaths                                         | 535<br>(317 - 792)          | --                          | 2<br>(1 - 6)             | 533<br>(315 - 788)          | --                          | --                          |
| Late maternal deaths                                             | 747<br>(423 - 1,138)        | --                          | 7<br>(2 - 16)            | 740<br>(419 - 1,131)        | --                          | --                          |
| Maternal deaths aggravated by HIV/AIDS                           | 73<br>(40 - 115)            | --                          | --                       | 73<br>(40 - 115)            | --                          | --                          |
| Other maternal disorders                                         | 858<br>(569 - 1,209)        | --                          | 5<br>(2 - 11)            | 853<br>(564 - 1,205)        | --                          | --                          |
| Neonatal disorders                                               | 18,636<br>(13,657 - 24,099) | 18,636<br>(13,657 - 24,099) | --                       | --                          | --                          | --                          |
| Neonatal preterm birth complications                             | 6,130<br>(3,360 - 9,521)    | 6,130<br>(3,360 - 9,521)    | --                       | --                          | --                          | --                          |
| Neonatal encephalopathy due to birth asphyxia and trauma         | 5,709<br>(3,246 - 9,093)    | 5,709<br>(3,246 - 9,093)    | --                       | --                          | --                          | --                          |
| Neonatal sepsis and other neonatal infections                    | 5,079<br>(2,603 - 8,629)    | 5,079<br>(2,603 - 8,629)    | --                       | --                          | --                          | --                          |
| Hemolytic disease and other neonatal jaundice                    | 113<br>(47 - 240)           | 113<br>(47 - 240)           | --                       | --                          | --                          | --                          |
| Other neonatal disorders                                         | 1,605<br>(738 - 3,176)      | 1,605<br>(738 - 3,176)      | --                       | --                          | --                          | --                          |
| Nutritional deficiencies                                         | 8,233<br>(5,656 - 11,610)   | 5,213<br>(3,106 - 8,173)    | 344<br>(216 - 513)       | 1,019<br>(730 - 1,425)      | 660<br>(461 - 905)          | 996<br>(715 - 1,364)        |
| Protein-energy malnutrition                                      | 5,976<br>(3,753 - 8,866)    | 4,376<br>(2,388 - 7,116)    | 261<br>(154 - 400)       | 392<br>(223 - 716)          | 371<br>(234 - 556)          | 577<br>(364 - 875)          |
| Iodine deficiency                                                | 33<br>(4 - 138)             | 18<br>(0 - 126)             | 2<br>(0 - 12)            | 6<br>(0 - 22)               | 3<br>(0 - 15)               | 3<br>(0 - 15)               |
| Iron-deficiency anemia                                           | 2,185<br>(1,238 - 3,935)    | 806<br>(230 - 2,132)        | 80<br>(35 - 152)         | 612<br>(343 - 908)          | 278<br>(126 - 456)          | 409<br>(216 - 656)          |
| Other nutritional deficiencies                                   | 39<br>(21 - 73)             | 14<br>(4 - 39)              | 2<br>(1 - 4)             | 9<br>(4 - 16)               | 8<br>(3 - 14)               | 6<br>(3 - 12)               |
| Other communicable, maternal, neonatal, and nutritional diseases | 3,381<br>(1,794 - 5,692)    | 2,360<br>(877 - 4,580)      | 176<br>(82 - 313)        | 352<br>(195 - 533)          | 243<br>(138 - 361)          | 250<br>(140 - 385)          |
| Sexually transmitted diseases excluding HIV                      | 2,222<br>(660 - 4,542)      | 1,988<br>(525 - 4,184)      | 128<br>(39 - 259)        | 55<br>(28 - 122)            | 25<br>(12 - 60)             | 26<br>(11 - 61)             |
| Syphilis                                                         | 2,177<br>(611 - 4,486)      | 1,988<br>(525 - 4,184)      | 125<br>(37 - 257)        | 26<br>(13 - 61)             | 17<br>(8 - 42)              | 21<br>(9 - 50)              |
| Chlamydial infection                                             | 7<br>(4 - 11)               | --                          | 0<br>(0 - 0)             | 5<br>(2 - 8)                | 1<br>(0 - 3)                | 1<br>(0 - 2)                |
| Gonococcal infection                                             | 22<br>(13 - 48)             | --                          | 1<br>(1 - 3)             | 13<br>(7 - 30)              | 4<br>(2 - 10)               | 3<br>(1 - 7)                |
| Other sexually transmitted diseases                              | 17<br>(10 - 36)             | --                          | 1<br>(1 - 3)             | 11<br>(6 - 25)              | 3<br>(1 - 6)                | 1<br>(1 - 3)                |
| Hepatitis                                                        | 598<br>(232 - 950)          | 108<br>(34 - 221)           | 25<br>(10 - 48)          | 203<br>(70 - 355)           | 134<br>(61 - 216)           | 127<br>(59 - 196)           |
| Acute hepatitis A                                                | 45<br>(10 - 105)            | 28<br>(6 - 67)              | 6<br>(1 - 16)            | 9<br>(2 - 23)               | 1<br>(0 - 3)                | 0<br>(0 - 1)                |
| Acute hepatitis B                                                | 393<br>(168 - 643)          | 79<br>(24 - 172)            | 13<br>(5 - 27)           | 83<br>(29 - 163)            | 107<br>(51 - 176)           | 110<br>(52 - 171)           |
| Acute hepatitis C                                                | 17<br>(3 - 48)              | --                          | 2<br>(0 - 5)             | 7<br>(1 - 19)               | 5<br>(1 - 14)               | 4<br>(0 - 16)               |
| Acute hepatitis E                                                | 143<br>(52 - 263)           | 1<br>(0 - 4)                | 4<br>(1 - 9)             | 105<br>(34 - 190)           | 20<br>(6 - 46)              | 12<br>(4 - 31)              |
| Other infectious diseases                                        | 561<br>(299 - 888)          | 264<br>(115 - 498)          | 23<br>(9 - 45)           | 93<br>(38 - 180)            | 84<br>(38 - 163)            | 97<br>(38 - 191)            |
| Non-communicable diseases                                        | 68,221<br>(60,082 - 78,470) | 9,527<br>(6,188 - 14,213)   | 1,438<br>(1,083 - 1,934) | 13,657<br>(11,185 - 16,455) | 19,812<br>(16,767 - 23,598) | 23,787<br>(21,008 - 27,612) |
| Neoplasms                                                        | 9,807<br>(8,274 - 12,045)   | 275<br>(164 - 423)          | 192<br>(135 - 266)       | 2,780<br>(2,137 - 3,935)    | 3,854<br>(3,145 - 4,880)    | 2,706<br>(2,281 - 3,323)    |
| Esophageal cancer                                                | 257<br>(183 - 372)          | --                          | --                       | 49<br>(33 - 71)             | 128<br>(87 - 189)           | 79<br>(53 - 130)            |
| Stomach cancer                                                   | 833<br>(684 - 1,041)        | --                          | --                       | 198<br>(150 - 261)          | 404<br>(316 - 526)          | 231<br>(178 - 301)          |
| Liver cancer                                                     | 3,019<br>(1,979 - 4,709)    | --                          | 12<br>(6 - 21)           | 1,063<br>(599 - 1,945)      | 1,231<br>(797 - 1,863)      | 713<br>(460 - 1,070)        |
| Liver cancer due to hepatitis B                                  | 1,157<br>(680 - 2,025)      | --                          | 5<br>(2 - 11)            | 538<br>(258 - 1,070)        | 440<br>(263 - 745)          | 175<br>(98 - 286)           |

Web Table 31- Cameroon deaths with 95% UI by age, sex, and cause in 2013

| Cause                                | Both Sexes, All Ages        | Both Sexes, 0-4 Years | Both Sexes, 5-14 Years | Both Sexes, 15-49 Years  | Both Sexes, 50-69 Years   | Both Sexes, 70-80 Years     |
|--------------------------------------|-----------------------------|-----------------------|------------------------|--------------------------|---------------------------|-----------------------------|
| Liver cancer due to hepatitis C      | 1,094<br>(656 - 1,813)      | -                     | 1<br>(0 - 2)           | 262<br>(136 - 554)       | 496<br>(277 - 821)        | 335<br>(195 - 516)          |
| Liver cancer due to alcohol use      | 395<br>(225 - 644)          | -                     | -                      | 91<br>(44 - 179)         | 166<br>(90 - 275)         | 138<br>(76 - 258)           |
| Liver cancer due to other causes     | 373<br>(225 - 609)          | -                     | 5<br>(3 - 10)          | 173<br>(94 - 291)        | 130<br>(70 - 227)         | 65<br>(35 - 121)            |
| Larynx cancer                        | 35<br>(24 - 75)             | -                     | -                      | 7<br>(5 - 12)            | 16<br>(9 - 37)            | 12<br>(8 - 25)              |
| Tracheal, bronchus and lung cancer   | 400<br>(332 - 477)          | -                     | -                      | 53<br>(37 - 70)          | 202<br>(161 - 253)        | 144<br>(118 - 177)          |
| Breast cancer                        | 580<br>(421 - 908)          | -                     | -                      | 213<br>(147 - 388)       | 243<br>(169 - 381)        | 124<br>(86 - 192)           |
| Cervical cancer                      | 1,215<br>(892 - 1,697)      | -                     | -                      | 400<br>(282 - 588)       | 570<br>(380 - 842)        | 245<br>(160 - 356)          |
| Uterine cancer                       | 111<br>(66 - 173)           | -                     | -                      | 22<br>(9 - 37)           | 48<br>(27 - 81)           | 41<br>(24 - 70)             |
| Prostate cancer                      | 421<br>(255 - 782)          | -                     | -                      | 8<br>(3 - 17)            | 107<br>(57 - 216)         | 307<br>(183 - 563)          |
| Colon and rectum cancer              | 459<br>(380 - 554)          | -                     | -                      | 112<br>(89 - 137)        | 152<br>(121 - 193)        | 195<br>(155 - 249)          |
| Lip and oral cavity cancer           | 59<br>(44 - 76)             | -                     | -                      | 17<br>(10 - 25)          | 22<br>(16 - 30)           | 20<br>(14 - 29)             |
| Nasopharynx cancer                   | 17<br>(13 - 22)             | -                     | 1<br>(0 - 2)           | 8<br>(5 - 11)            | 6<br>(4 - 8)              | 3<br>(2 - 4)                |
| Other pharynx cancer                 | 23<br>(18 - 29)             | -                     | -                      | 7<br>(5 - 9)             | 9<br>(6 - 12)             | 7<br>(5 - 10)               |
| Gallbladder and biliary tract cancer | 91<br>(66 - 123)            | -                     | -                      | 14<br>(8 - 19)           | 44<br>(29 - 63)           | 34<br>(23 - 51)             |
| Pancreatic cancer                    | 214<br>(173 - 268)          | -                     | -                      | 37<br>(28 - 48)          | 108<br>(83 - 141)         | 68<br>(52 - 91)             |
| Malignant skin melanoma              | 25<br>(18 - 48)             | -                     | -                      | 7<br>(4 - 16)            | 11<br>(7 - 18)            | 7<br>(5 - 14)               |
| Non-melanoma skin cancer             | 22<br>(16 - 30)             | -                     | -                      | 5<br>(3 - 7)             | 5<br>(3 - 9)              | 12<br>(8 - 17)              |
| Ovarian cancer                       | 180<br>(114 - 269)          | -                     | -                      | 54<br>(30 - 88)          | 96<br>(59 - 150)          | 31<br>(18 - 49)             |
| Testicular cancer                    | 7<br>(4 - 11)               | -                     | -                      | 5<br>(3 - 8)             | 1<br>(1 - 2)              | 1<br>(0 - 1)                |
| Kidney cancer                        | 103<br>(77 - 134)           | 18<br>(8 - 37)        | 7<br>(4 - 11)          | 19<br>(12 - 27)          | 38<br>(25 - 55)           | 21<br>(14 - 30)             |
| Bladder cancer                       | 208<br>(163 - 279)          | -                     | -                      | 44<br>(27 - 62)          | 67<br>(48 - 98)           | 96<br>(70 - 143)            |
| Brain and nervous system cancer      | 96<br>(64 - 117)            | 7<br>(3 - 13)         | 10<br>(6 - 15)         | 42<br>(24 - 57)          | 22<br>(15 - 30)           | 14<br>(9 - 19)              |
| Thyroid cancer                       | 22<br>(16 - 32)             | -                     | 0<br>(0 - 1)           | 3<br>(2 - 5)             | 10<br>(6 - 15)            | 9<br>(6 - 14)               |
| Mesothelioma                         | 14<br>(10 - 19)             | -                     | -                      | 3<br>(2 - 5)             | 6<br>(4 - 9)              | 5<br>(3 - 8)                |
| Hodgkin lymphoma                     | 52<br>(34 - 67)             | 7<br>(3 - 12)         | 5<br>(2 - 11)          | 21<br>(13 - 30)          | 8<br>(5 - 12)             | 10<br>(5 - 18)              |
| Non-Hodgkin lymphoma                 | 434<br>(308 - 591)          | 71<br>(35 - 134)      | 64<br>(34 - 105)       | 150<br>(95 - 236)        | 86<br>(60 - 133)          | 62<br>(43 - 91)             |
| Multiple myeloma                     | 50<br>(35 - 78)             | -                     | -                      | 8<br>(6 - 14)            | 24<br>(17 - 37)           | 18<br>(10 - 30)             |
| Leukemia                             | 155<br>(130 - 190)          | 18<br>(10 - 32)       | 24<br>(17 - 35)        | 61<br>(46 - 85)          | 25<br>(19 - 35)           | 28<br>(22 - 37)             |
| Other neoplasms                      | 708<br>(547 - 1,079)        | 154<br>(86 - 257)     | 69<br>(43 - 105)       | 151<br>(104 - 279)       | 165<br>(111 - 262)        | 169<br>(120 - 254)          |
| Cardiovascular diseases              | 25,447<br>(20,451 - 31,414) | 803<br>(522 - 1,239)  | 204<br>(140 - 303)     | 3,528<br>(2,628 - 4,671) | 8,474<br>(6,783 - 10,425) | 12,438<br>(10,130 - 15,193) |
| Rheumatic heart disease              | 278<br>(168 - 673)          | 16<br>(6 - 36)        | 12<br>(6 - 26)         | 83<br>(39 - 254)         | 69<br>(35 - 184)          | 98<br>(63 - 193)            |
| Ischemic heart disease               | 6,973<br>(5,307 - 9,482)    | 34<br>(13 - 76)       | 26<br>(15 - 40)        | 946<br>(652 - 1,350)     | 2,456<br>(1,842 - 3,247)  | 3,511<br>(2,623 - 4,879)    |
| Cerebrovascular disease              | 12,032<br>(9,982 - 15,109)  | 244<br>(142 - 411)    | 63<br>(39 - 99)        | 1,353<br>(1,002 - 1,862) | 3,987<br>(3,180 - 5,098)  | 6,385<br>(5,262 - 7,973)    |
| Ischemic stroke                      | 7,169<br>(4,600 - 9,022)    | 28<br>(11 - 63)       | 7<br>(4 - 16)          | 294<br>(142 - 456)       | 2,200<br>(1,163 - 2,949)  | 4,639<br>(3,204 - 5,785)    |
| Hemorrhagic stroke                   | 4,863<br>(3,189 - 8,777)    | 216<br>(124 - 353)    | 56<br>(35 - 89)        | 1,059<br>(775 - 1,589)   | 1,787<br>(1,126 - 3,257)  | 1,746<br>(954 - 3,757)      |
| Hypertensive heart disease           | 1,741<br>(917 - 2,524)      | 10<br>(4 - 19)        | 3<br>(2 - 5)           | 192<br>(67 - 318)        | 539<br>(251 - 864)        | 997<br>(543 - 1,450)        |
| Cardiomyopathy and myocarditis       | 1,535<br>(1,013 - 2,008)    | 188<br>(89 - 369)     | 43<br>(24 - 69)        | 369<br>(206 - 515)       | 424<br>(255 - 593)        | 511<br>(290 - 763)          |
| Atrial fibrillation and flutter      | 2<br>(1 - 3)                | -                     | -                      | 0<br>(0 - 0)             | 0<br>(0 - 1)              | 1<br>(0 - 2)                |
| Aortic aneurysm                      | 222<br>(148 - 338)          | -                     | -                      | 33<br>(19 - 53)          | 85<br>(56 - 125)          | 104<br>(65 - 165)           |
| Peripheral vascular disease          | 7<br>(5 - 13)               | -                     | -                      | 0<br>(0 - 1)             | 3<br>(2 - 5)              | 4<br>(2 - 8)                |

Web Table 31- Cameroon deaths with 95% UI by age, sex, and cause in 2013

| Cause                                               | Both Sexes, All Ages     | Both Sexes, 0-4 Years | Both Sexes, 5-14 Years | Both Sexes, 15-49 Years | Both Sexes, 50-69 Years | Both Sexes, 70-80 Years  |
|-----------------------------------------------------|--------------------------|-----------------------|------------------------|-------------------------|-------------------------|--------------------------|
| Endocarditis                                        | 433<br>(314 - 586)       | 93<br>(40 - 166)      | 12<br>(7 - 18)         | 88<br>(55 - 130)        | 98<br>(65 - 155)        | 143<br>(99 - 224)        |
| Other cardiovascular and circulatory diseases       | 2,223<br>(1,702 - 3,409) | 217<br>(122 - 363)    | 46<br>(29 - 74)        | 464<br>(328 - 766)      | 812<br>(572 - 1,201)    | 684<br>(459 - 1,215)     |
| Chronic respiratory diseases                        | 4,283<br>(3,430 - 6,559) | 263<br>(145 - 495)    | 50<br>(34 - 79)        | 557<br>(419 - 837)      | 1,301<br>(969 - 2,003)  | 2,113<br>(1,649 - 3,263) |
| Chronic obstructive pulmonary disease               | 2,670<br>(2,006 - 4,296) | 117<br>(60 - 224)     | 22<br>(14 - 33)        | 191<br>(131 - 306)      | 827<br>(582 - 1,354)    | 1,513<br>(1,118 - 2,448) |
| Pneumoconiosis                                      | 200<br>(124 - 336)       | 3<br>(1 - 7)          | 2<br>(1 - 3)           | 45<br>(27 - 72)         | 98<br>(54 - 163)        | 53<br>(28 - 102)         |
| Silicosis                                           | 38<br>(24 - 66)          | 1<br>(0 - 2)          | 1<br>(0 - 1)           | 8<br>(4 - 12)           | 10<br>(5 - 15)          | 19<br>(10 - 39)          |
| Asbestosis                                          | 14<br>(9 - 23)           | 1<br>(0 - 2)          | 0<br>(0 - 1)           | 3<br>(2 - 5)            | 8<br>(4 - 14)           | 2<br>(1 - 4)             |
| Coal workers pneumoconiosis                         | 47<br>(26 - 78)          | 1<br>(0 - 1)          | 0<br>(0 - 1)           | 2<br>(1 - 4)            | 38<br>(20 - 64)         | 6<br>(3 - 11)            |
| Other pneumoconiosis                                | 101<br>(62 - 174)        | 1<br>(0 - 2)          | 1<br>(0 - 1)           | 32<br>(19 - 55)         | 43<br>(23 - 75)         | 25<br>(13 - 51)          |
| Asthma                                              | 766<br>(575 - 1,141)     | 83<br>(38 - 163)      | 14<br>(9 - 24)         | 184<br>(135 - 269)      | 227<br>(158 - 336)      | 258<br>(175 - 392)       |
| Interstitial lung disease and pulmonary sarcoidosis | 289<br>(54 - 505)        | 2<br>(1 - 4)          | 1<br>(1 - 2)           | 14<br>(6 - 22)          | 86<br>(17 - 156)        | 187<br>(28 - 349)        |
| Other chronic respiratory diseases                  | 356<br>(252 - 617)       | 58<br>(30 - 119)      | 12<br>(7 - 19)         | 122<br>(85 - 205)       | 63<br>(39 - 110)        | 101<br>(61 - 193)        |
| Cirrhosis                                           | 5,325<br>(2,078 - 7,830) | 185<br>(48 - 412)     | 69<br>(23 - 117)       | 1,843<br>(669 - 2,846)  | 2,122<br>(824 - 3,211)  | 1,106<br>(431 - 1,665)   |
| Cirrhosis due to hepatitis B                        | 1,400<br>(603 - 2,431)   | 12<br>(3 - 31)        | 15<br>(5 - 30)         | 514<br>(207 - 910)      | 567<br>(240 - 1,041)    | 292<br>(123 - 543)       |
| Cirrhosis due to hepatitis C                        | 1,137<br>(219 - 1,994)   | 16<br>(3 - 46)        | 7<br>(4 - 28)          | 379<br>(74 - 695)       | 466<br>(69 - 842)       | 264<br>(61 - 477)        |
| Cirrhosis due to alcohol use                        | 2,054<br>(750 - 3,150)   | -                     | -                      | 648<br>(193 - 1,060)    | 919<br>(337 - 1,460)    | 487<br>(175 - 774)       |
| Cirrhosis due to other causes                       | 734<br>(284 - 1,156)     | 157<br>(41 - 346)     | 42<br>(14 - 72)        | 302<br>(113 - 495)      | 170<br>(66 - 298)       | 63<br>(23 - 114)         |
| Digestive diseases                                  | 3,400<br>(2,705 - 4,193) | 251<br>(128 - 464)    | 119<br>(82 - 169)      | 1,015<br>(730 - 1,327)  | 928<br>(682 - 1,224)    | 1,086<br>(830 - 1,409)   |
| Peptic ulcer disease                                | 740<br>(520 - 999)       | 22<br>(8 - 49)        | 14<br>(7 - 26)         | 216<br>(146 - 318)      | 225<br>(150 - 322)      | 264<br>(170 - 372)       |
| Gastritis and duodenitis                            | 136<br>(68 - 232)        | 15<br>(4 - 33)        | 7<br>(3 - 12)          | 37<br>(20 - 60)         | 31<br>(15 - 59)         | 46<br>(17 - 107)         |
| Appendicitis                                        | 215<br>(137 - 291)       | 26<br>(9 - 56)        | 16<br>(9 - 26)         | 76<br>(50 - 110)        | 43<br>(21 - 72)         | 54<br>(21 - 102)         |
| Paralytic ileus and intestinal obstruction          | 915<br>(644 - 1,309)     | 59<br>(25 - 115)      | 34<br>(20 - 53)        | 187<br>(116 - 282)      | 283<br>(187 - 420)      | 352<br>(230 - 582)       |
| Inguinal, femoral, and abdominal hernia             | 68<br>(35 - 112)         | 3<br>(1 - 6)          | 1<br>(1 - 3)           | 17<br>(6 - 31)          | 21<br>(9 - 36)          | 27<br>(15 - 45)          |
| Inflammatory bowel disease                          | 214<br>(157 - 299)       | 51<br>(18 - 134)      | 7<br>(4 - 13)          | 70<br>(48 - 99)         | 42<br>(23 - 62)         | 44<br>(25 - 66)          |
| Vascular intestinal disorders                       | 14<br>(6 - 28)           | 2<br>(0 - 5)          | 1<br>(0 - 2)           | 4<br>(2 - 8)            | 3<br>(1 - 7)            | 5<br>(2 - 10)            |
| Gallbladder and biliary diseases                    | 252<br>(163 - 347)       | 9<br>(4 - 17)         | 9<br>(3 - 15)          | 67<br>(39 - 93)         | 69<br>(42 - 104)        | 98<br>(59 - 147)         |
| Pancreatitis                                        | 263<br>(149 - 375)       | 4<br>(1 - 10)         | 4<br>(2 - 6)           | 130<br>(59 - 200)       | 70<br>(41 - 110)        | 55<br>(27 - 96)          |
| Other digestive diseases                            | 580<br>(395 - 800)       | 61<br>(27 - 121)      | 25<br>(15 - 41)        | 211<br>(127 - 310)      | 141<br>(84 - 211)       | 141<br>(86 - 208)        |
| Neurological disorders                              | 1,907<br>(1,547 - 2,312) | 238<br>(113 - 423)    | 78<br>(44 - 128)       | 368<br>(228 - 552)      | 150<br>(120 - 186)      | 1,074<br>(865 - 1,313)   |
| Alzheimer disease and other dementias               | 1,072<br>(866 - 1,320)   | -                     | -                      | 0<br>(0 - 1)            | 78<br>(58 - 102)        | 994<br>(792 - 1,236)     |
| Parkinson disease                                   | 9<br>(5 - 16)            | -                     | -                      | 1<br>(1 - 2)            | 1<br>(1 - 2)            | 7<br>(4 - 14)            |
| Epilepsy                                            | 660<br>(418 - 959)       | 195<br>(84 - 353)     | 65<br>(32 - 116)       | 320<br>(183 - 499)      | 34<br>(21 - 50)         | 46<br>(29 - 73)          |
| Multiple sclerosis                                  | 2<br>(1 - 7)             | -                     | -                      | 1<br>(0 - 4)            | 1<br>(0 - 2)            | 0<br>(0 - 1)             |
| Other neurological disorders                        | 163<br>(115 - 286)       | 43<br>(24 - 130)      | 12<br>(8 - 22)         | 46<br>(30 - 68)         | 36<br>(26 - 48)         | 27<br>(19 - 35)          |
| Mental and substance use disorders                  | 1,291<br>(786 - 1,713)   | 53<br>(15 - 101)      | 0<br>(0 - 1)           | 899<br>(528 - 1,293)    | 243<br>(134 - 339)      | 95<br>(50 - 130)         |
| Schizophrenia                                       | 3<br>(2 - 5)             | -                     | -                      | 2<br>(1 - 3)            | 1<br>(1 - 1)            | 1<br>(0 - 1)             |
| Alcohol use disorders                               | 542<br>(255 - 752)       | -                     | -                      | 307<br>(143 - 446)      | 174<br>(73 - 263)       | 61<br>(18 - 94)          |
| Drug use disorders                                  | 743<br>(446 - 1,062)     | 53<br>(15 - 101)      | -                      | 588<br>(326 - 917)      | 68<br>(52 - 88)         | 34<br>(26 - 43)          |
| Opioid use disorders                                | 79<br>(47 - 116)         | 6<br>(2 - 12)         | -                      | 64<br>(34 - 100)        | 6<br>(5 - 8)            | 4<br>(3 - 5)             |
| Cocaine use disorders                               | 3<br>(2 - 4)             | 0<br>(0 - 0)          | -                      | 2<br>(1 - 4)            | 0<br>(0 - 0)            | 0<br>(0 - 0)             |

Web Table 31- Cameroon deaths with 95% UI by age, sex, and cause in 2013

| Cause                                               | Both Sexes, All Ages      | Both Sexes, 0-4 Years    | Both Sexes, 5-14 Years | Both Sexes, 15-49 Years  | Both Sexes, 50-69 Years  | Both Sexes, 70-80 Years  |
|-----------------------------------------------------|---------------------------|--------------------------|------------------------|--------------------------|--------------------------|--------------------------|
| Amphetamine use disorders                           | 2<br>(1 - 3)              | 0<br>(0 - 0)             | --                     | 2<br>(1 - 2)             | 0<br>(0 - 0)             | 0<br>(0 - 0)             |
| Other drug use disorders                            | 659<br>(397 - 942)        | 47<br>(14 - 89)          | --                     | 521<br>(288 - 812)       | 61<br>(47 - 80)          | 30<br>(23 - 38)          |
| Eating disorders                                    | 2<br>(1 - 3)              | --                       | 0<br>(0 - 1)           | 2<br>(1 - 3)             | --                       | --                       |
| Anorexia nervosa                                    | 2<br>(1 - 3)              | --                       | 0<br>(0 - 1)           | 2<br>(1 - 3)             | --                       | --                       |
| Diabetes, urogenital, blood, and endocrine diseases | 9,881<br>(8,215 - 11,854) | 1,810<br>(1,099 - 2,707) | 479<br>(292 - 781)     | 2,229<br>(1,732 - 2,782) | 2,509<br>(1,996 - 3,105) | 2,853<br>(2,326 - 3,453) |
| Diabetes mellitus                                   | 3,428<br>(2,635 - 4,216)  | 66<br>(38 - 111)         | 17<br>(11 - 26)        | 482<br>(373 - 604)       | 1,365<br>(1,012 - 1,776) | 1,499<br>(1,110 - 1,919) |
| Acute glomerulonephritis                            | 25<br>(15 - 50)           | 5<br>(1 - 16)            | 2<br>(1 - 6)           | 9<br>(5 - 17)            | 6<br>(4 - 8)             | 2<br>(1 - 5)             |
| Chronic kidney disease                              | 1,829<br>(1,240 - 2,749)  | 197<br>(107 - 318)       | 75<br>(45 - 109)       | 622<br>(400 - 849)       | 424<br>(274 - 716)       | 512<br>(329 - 853)       |
| Chronic kidney disease due to diabetes mellitus     | 24<br>(11 - 45)           | 1<br>(0 - 2)             | 1<br>(0 - 2)           | 3<br>(1 - 11)            | 18<br>(7 - 31)           | 1<br>(1 - 6)             |
| Chronic kidney disease due to hypertension          | 615<br>(403 - 1,028)      | 25<br>(9 - 60)           | 8<br>(3 - 16)          | 153<br>(94 - 251)        | 184<br>(114 - 319)       | 246<br>(151 - 440)       |
| Chronic kidney disease due to glomerulonephritis    | 640<br>(395 - 838)        | 98<br>(53 - 157)         | 40<br>(26 - 58)        | 286<br>(159 - 402)       | 103<br>(55 - 153)        | 113<br>(57 - 165)        |
| Chronic kidney disease due to other causes          | 551<br>(268 - 973)        | 74<br>(28 - 145)         | 27<br>(11 - 46)        | 180<br>(87 - 322)        | 120<br>(50 - 247)        | 151<br>(59 - 278)        |
| Urinary diseases and male infertility               | 1,445<br>(1,089 - 1,812)  | 191<br>(101 - 342)       | 28<br>(18 - 43)        | 363<br>(224 - 485)       | 370<br>(252 - 494)       | 492<br>(357 - 669)       |
| Interstitial nephritis and urinary tract infections | 1,228<br>(871 - 1,551)    | 169<br>(78 - 307)        | 22<br>(11 - 36)        | 285<br>(160 - 394)       | 316<br>(210 - 428)       | 436<br>(317 - 595)       |
| Urolithiasis                                        | 17<br>(7 - 57)            | --                       | 2<br>(1 - 5)           | 7<br>(2 - 30)            | 5<br>(1 - 16)            | 3<br>(1 - 13)            |
| Other urinary diseases                              | 200<br>(130 - 285)        | 23<br>(7 - 54)           | 5<br>(2 - 10)          | 70<br>(40 - 110)         | 50<br>(26 - 81)          | 53<br>(27 - 89)          |
| Gynecological diseases                              | 10<br>(6 - 23)            | --                       | --                     | 6<br>(4 - 17)            | 2<br>(1 - 4)             | 2<br>(1 - 3)             |
| Uterine fibroids                                    | 2<br>(1 - 4)              | --                       | --                     | 1<br>(1 - 2)             | 1<br>(0 - 1)             | 0<br>(0 - 1)             |
| Polycystic ovarian syndrome                         | 0<br>(0 - 1)              | --                       | --                     | 0<br>(0 - 1)             | 0<br>(0 - 0)             | --                       |
| Endometriosis                                       | 1<br>(1 - 3)              | --                       | --                     | 1<br>(1 - 3)             | 0<br>(0 - 0)             | --                       |
| Genital prolapse                                    | 2<br>(1 - 4)              | --                       | --                     | 1<br>(1 - 2)             | 0<br>(0 - 1)             | 0<br>(0 - 1)             |
| Other gynecological diseases                        | 5<br>(3 - 11)             | --                       | --                     | 3<br>(2 - 9)             | 1<br>(1 - 2)             | 1<br>(0 - 1)             |
| Hemoglobinopathies and hemolytic anemias            | 1,885<br>(882 - 3,111)    | 953<br>(383 - 1,791)     | 300<br>(128 - 595)     | 465<br>(195 - 772)       | 109<br>(50 - 229)        | 59<br>(29 - 105)         |
| Thalassemias                                        | 17<br>(7 - 32)            | 13<br>(5 - 25)           | 2<br>(1 - 4)           | 2<br>(1 - 4)             | 0<br>(0 - 0)             | 0<br>(0 - 0)             |
| Sickle cell disorders                               | 1,787<br>(819 - 2,979)    | 919<br>(368 - 1,741)     | 296<br>(126 - 587)     | 456<br>(192 - 758)       | 103<br>(47 - 218)        | 13<br>(6 - 24)           |
| G6PD deficiency                                     | 7<br>(4 - 12)             | 4<br>(2 - 7)             | 1<br>(0 - 1)           | 1<br>(1 - 2)             | 0<br>(0 - 1)             | 1<br>(0 - 2)             |
| Other hemoglobinopathies and hemolytic anemias      | 74<br>(39 - 121)          | 17<br>(8 - 31)           | 2<br>(1 - 3)           | 5<br>(2 - 9)             | 6<br>(3 - 10)            | 45<br>(23 - 82)          |
| Endocrine, metabolic, blood, and immune disorders   | 1,258<br>(892 - 2,031)    | 398<br>(223 - 924)       | 56<br>(32 - 117)       | 283<br>(175 - 497)       | 234<br>(155 - 348)       | 288<br>(167 - 414)       |
| Musculoskeletal disorders                           | 311<br>(201 - 408)        | --                       | 31<br>(16 - 48)        | 131<br>(76 - 181)        | 80<br>(46 - 109)         | 70<br>(45 - 105)         |
| Rheumatoid arthritis                                | 26<br>(17 - 37)           | --                       | 2<br>(1 - 3)           | 5<br>(3 - 8)             | 6<br>(4 - 10)            | 13<br>(7 - 21)           |
| Other musculoskeletal disorders                     | 286<br>(178 - 376)        | --                       | 29<br>(14 - 45)        | 126<br>(72 - 171)        | 74<br>(41 - 101)         | 57<br>(37 - 88)          |
| Other non-communicable diseases                     | 6,570<br>(3,600 - 10,920) | 5,649<br>(2,818 - 9,822) | 216<br>(111 - 434)     | 306<br>(196 - 474)       | 152<br>(109 - 204)       | 246<br>(170 - 328)       |
| Congenital anomalies                                | 5,841<br>(2,910 - 10,156) | 5,411<br>(2,601 - 9,573) | 200<br>(97 - 415)      | 173<br>(96 - 316)        | 29<br>(21 - 39)          | 28<br>(21 - 37)          |
| Neural tube defects                                 | 1,048<br>(305 - 2,571)    | 1,001<br>(282 - 2,473)   | 23<br>(7 - 56)         | 22<br>(7 - 56)           | 1<br>(0 - 2)             | 1<br>(0 - 2)             |
| Congenital heart anomalies                          | 2,841<br>(1,518 - 5,380)  | 2,614<br>(1,360 - 5,004) | 109<br>(50 - 242)      | 88<br>(43 - 183)         | 16<br>(11 - 24)          | 14<br>(9 - 21)           |
| Cleft lip and cleft palate                          | 29<br>(5 - 76)            | 29<br>(5 - 76)           | --                     | --                       | --                       | --                       |
| Down syndrome                                       | 588<br>(187 - 1,331)      | 530<br>(153 - 1,230)     | 27<br>(11 - 64)        | 26<br>(13 - 55)          | 4<br>(2 - 7)             | 1<br>(0 - 1)             |
| Chromosomal unbalanced rearrangements               | 181<br>(67 - 371)         | 169<br>(60 - 356)        | 5<br>(2 - 9)           | 6<br>(3 - 13)            | 1<br>(0 - 1)             | 1<br>(0 - 1)             |
| Other congenital anomalies                          | 1,154<br>(400 - 3,481)    | 1,068<br>(340 - 3,326)   | 36<br>(12 - 106)       | 31<br>(16 - 68)          | 7<br>(5 - 11)            | 12<br>(8 - 17)           |
| Skin and subcutaneous diseases                      | 660<br>(438 - 836)        | 169<br>(86 - 273)        | 17<br>(11 - 24)        | 133<br>(74 - 191)        | 124<br>(79 - 171)        | 217<br>(144 - 297)       |

Web Table 31- Cameroon deaths with 95% UI by age, sex, and cause in 2013

| Cause                                           | Both Sexes, All Ages        | Both Sexes, 0-4 Years    | Both Sexes, 5-14 Years   | Both Sexes, 15-49 Years   | Both Sexes, 50-69 Years  | Both Sexes, 70-80 Years  |
|-------------------------------------------------|-----------------------------|--------------------------|--------------------------|---------------------------|--------------------------|--------------------------|
| Cellulitis                                      | 170<br>(85 - 263)           | 35<br>(13 - 65)          | 6<br>(3 - 9)             | 30<br>(12 - 51)           | 34<br>(14 - 60)          | 65<br>(26 - 117)         |
| Pyoderma                                        | 446<br>(298 - 572)          | 124<br>(62 - 207)        | 9<br>(6 - 14)            | 93<br>(54 - 129)          | 86<br>(53 - 125)         | 134<br>(82 - 195)        |
| Decubitus ulcer                                 | 17<br>(11 - 27)             | 1<br>(0 - 1)             | 1<br>(0 - 1)             | 3<br>(1 - 4)              | 1<br>(1 - 2)             | 12<br>(6 - 22)           |
| Other skin and subcutaneous diseases            | 26<br>(13 - 44)             | 9<br>(2 - 21)            | 1<br>(1 - 2)             | 8<br>(3 - 14)             | 2<br>(1 - 4)             | 6<br>(2 - 16)            |
| Sudden infant death syndrome                    | 68<br>(23 - 167)            | 68<br>(23 - 167)         | --                       | --                        | --                       | --                       |
| Injuries                                        | 18,133<br>(15,324 - 21,201) | 3,610<br>(2,171 - 5,383) | 1,586<br>(1,206 - 2,125) | 8,925<br>(6,954 - 11,049) | 2,180<br>(1,746 - 2,685) | 1,832<br>(1,393 - 2,250) |
| Transport injuries                              | 9,652<br>(8,019 - 11,554)   | 1,158<br>(625 - 1,936)   | 878<br>(629 - 1,240)     | 5,638<br>(4,332 - 7,065)  | 1,251<br>(968 - 1,583)   | 728<br>(572 - 911)       |
| Road injuries                                   | 9,391<br>(7,825 - 11,233)   | 1,076<br>(576 - 1,825)   | 844<br>(603 - 1,187)     | 5,559<br>(4,268 - 6,972)  | 1,216<br>(940 - 1,540)   | 696<br>(552 - 871)       |
| Pedestrian road injuries                        | 1,285<br>(929 - 1,881)      | 158<br>(71 - 298)        | 129<br>(76 - 201)        | 722<br>(476 - 1,072)      | 171<br>(112 - 258)       | 104<br>(66 - 163)        |
| Cyclist road injuries                           | 398<br>(294 - 526)          | 76<br>(33 - 155)         | 64<br>(38 - 102)         | 160<br>(106 - 227)        | 67<br>(41 - 96)          | 30<br>(18 - 45)          |
| Motorcyclist road injuries                      | 1,673<br>(1,221 - 2,155)    | 167<br>(78 - 306)        | 122<br>(78 - 181)        | 1,066<br>(735 - 1,475)    | 203<br>(135 - 278)       | 115<br>(74 - 164)        |
| Motor vehicle road injuries                     | 5,908<br>(4,866 - 7,110)    | 637<br>(334 - 1,088)     | 506<br>(356 - 719)       | 3,573<br>(2,702 - 4,534)  | 758<br>(576 - 969)       | 435<br>(328 - 555)       |
| Other road injuries                             | 126<br>(79 - 200)           | 37<br>(14 - 81)          | 23<br>(11 - 41)          | 38<br>(20 - 82)           | 16<br>(9 - 26)           | 12<br>(6 - 19)           |
| Other transport injuries                        | 261<br>(183 - 339)          | 82<br>(39 - 146)         | 33<br>(20 - 53)          | 79<br>(53 - 129)          | 35<br>(18 - 50)          | 32<br>(9 - 50)           |
| Unintentional injuries                          | 6,311<br>(4,623 - 7,799)    | 2,365<br>(1,190 - 3,575) | 651<br>(457 - 909)       | 1,706<br>(1,256 - 2,326)  | 657<br>(489 - 871)       | 932<br>(622 - 1,238)     |
| Falls                                           | 1,422<br>(1,044 - 2,205)    | 274<br>(132 - 497)       | 89<br>(54 - 141)         | 403<br>(244 - 810)        | 213<br>(141 - 346)       | 443<br>(288 - 624)       |
| Drowning                                        | 1,363<br>(755 - 2,213)      | 645<br>(238 - 1,217)     | 238<br>(133 - 412)       | 369<br>(190 - 678)        | 69<br>(45 - 104)         | 42<br>(28 - 62)          |
| Fire, heat, and hot substances                  | 744<br>(296 - 1,113)        | 344<br>(104 - 606)       | 63<br>(27 - 98)          | 179<br>(79 - 258)         | 72<br>(37 - 116)         | 87<br>(42 - 142)         |
| Poisonings                                      | 231<br>(151 - 352)          | 84<br>(37 - 177)         | 17<br>(9 - 28)           | 88<br>(56 - 164)          | 27<br>(14 - 40)          | 14<br>(7 - 20)           |
| Exposure to mechanical forces                   | 744<br>(540 - 1,002)        | 255<br>(134 - 451)       | 84<br>(52 - 128)         | 278<br>(195 - 409)        | 81<br>(49 - 111)         | 46<br>(20 - 62)          |
| Unintentional firearm injuries                  | 243<br>(172 - 343)          | 53<br>(26 - 99)          | 17<br>(10 - 31)          | 136<br>(85 - 218)         | 24<br>(15 - 37)          | 13<br>(8 - 19)           |
| Unintentional suffocation                       | 101<br>(45 - 269)           | 65<br>(19 - 195)         | 11<br>(5 - 24)           | 17<br>(8 - 39)            | 5<br>(3 - 10)            | 3<br>(1 - 5)             |
| Other exposure to mechanical forces             | 400<br>(253 - 559)          | 136<br>(59 - 258)        | 56<br>(30 - 95)          | 126<br>(76 - 190)         | 52<br>(20 - 78)          | 30<br>(7 - 46)           |
| Adverse effects of medical treatment            | 476<br>(168 - 793)          | 152<br>(41 - 293)        | 22<br>(8 - 39)           | 99<br>(36 - 173)          | 82<br>(29 - 156)         | 121<br>(36 - 241)        |
| Animal contact                                  | 193<br>(126 - 314)          | 55<br>(25 - 126)         | 30<br>(17 - 58)          | 53<br>(29 - 82)           | 27<br>(14 - 38)          | 29<br>(10 - 44)          |
| Venomous animal contact                         | 105<br>(63 - 210)           | 34<br>(13 - 96)          | 16<br>(8 - 35)           | 31<br>(15 - 54)           | 12<br>(7 - 20)           | 13<br>(4 - 21)           |
| Non-venomous animal contact                     | 87<br>(47 - 132)            | 21<br>(10 - 42)          | 15<br>(7 - 26)           | 22<br>(10 - 35)           | 14<br>(6 - 23)           | 16<br>(6 - 26)           |
| Foreign body                                    | 678<br>(334 - 1,161)        | 437<br>(187 - 850)       | 42<br>(19 - 68)          | 67<br>(32 - 104)          | 38<br>(20 - 54)          | 93<br>(44 - 147)         |
| Pulmonary aspiration and foreign body in airway | 658<br>(319 - 1,129)        | 430<br>(184 - 845)       | 40<br>(17 - 64)          | 64<br>(29 - 100)          | 34<br>(17 - 50)          | 90<br>(42 - 143)         |
| Foreign body in other body part                 | 19<br>(12 - 35)             | 7<br>(4 - 15)            | 2<br>(1 - 5)             | 3<br>(2 - 8)              | 3<br>(2 - 5)             | 3<br>(2 - 5)             |
| Other unintentional injuries                    | 461<br>(311 - 664)          | 120<br>(64 - 208)        | 65<br>(38 - 104)         | 170<br>(104 - 263)        | 49<br>(32 - 74)          | 57<br>(36 - 85)          |
| Self-harm and interpersonal violence            | 2,170<br>(1,696 - 2,787)    | 87<br>(44 - 157)         | 58<br>(36 - 89)          | 1,580<br>(1,172 - 2,210)  | 272<br>(181 - 366)       | 173<br>(84 - 250)        |
| Self-harm                                       | 1,220<br>(914 - 1,733)      | --                       | 24<br>(11 - 47)          | 791<br>(543 - 1,294)      | 237<br>(150 - 327)       | 168<br>(79 - 244)        |
| Interpersonal violence                          | 950<br>(669 - 1,327)        | 87<br>(44 - 157)         | 34<br>(20 - 54)          | 789<br>(535 - 1,116)      | 34<br>(21 - 56)          | 6<br>(3 - 9)             |
| Assault by firearm                              | 465<br>(278 - 728)          | 21<br>(9 - 44)           | 9<br>(4 - 18)            | 419<br>(241 - 659)        | 14<br>(8 - 27)           | 2<br>(1 - 3)             |
| Assault by sharp object                         | 177<br>(98 - 317)           | 15<br>(5 - 34)           | 6<br>(3 - 10)            | 145<br>(78 - 269)         | 9<br>(4 - 16)            | 1<br>(1 - 2)             |
| Assault by other means                          | 309<br>(195 - 485)          | 51<br>(24 - 100)         | 19<br>(11 - 31)          | 225<br>(125 - 372)        | 11<br>(6 - 20)           | 3<br>(2 - 5)             |

Web Table 31- Cameroon deaths with 95% UI by age, sex, and cause in 2013

| Cause                                                             | Males, All Ages                | Males, 0-4 Years            | Males, 5-14 Years        | Males, 15-49 Years          | Males, 50-69 Years          | Males, 70-80 Years          |
|-------------------------------------------------------------------|--------------------------------|-----------------------------|--------------------------|-----------------------------|-----------------------------|-----------------------------|
| All causes                                                        | 116,265<br>(107,251 - 128,034) | 44,451<br>(39,476 - 51,149) | 4,521<br>(3,874 - 5,579) | 31,235<br>(26,676 - 35,149) | 19,106<br>(16,616 - 22,259) | 16,952<br>(15,890 - 18,921) |
| Communicable, maternal, neonatal, and nutritional diseases        | 67,895<br>(61,308 - 75,267)    | 37,528<br>(32,586 - 43,350) | 2,776<br>(2,285 - 3,550) | 16,284<br>(13,145 - 19,562) | 6,419<br>(5,229 - 7,636)    | 4,889<br>(3,722 - 6,030)    |
| HIV/AIDS and tuberculosis                                         | 18,490<br>(15,120 - 22,300)    | 910<br>(601 - 1,261)        | 932<br>(783 - 1,084)     | 12,232<br>(9,274 - 15,773)  | 3,474<br>(2,752 - 4,184)    | 942<br>(686 - 1,197)        |
| Tuberculosis                                                      | 2,837<br>(2,162 - 3,887)       | 144<br>(76 - 250)           | 48<br>(27 - 84)          | 1,169<br>(784 - 1,825)      | 872<br>(623 - 1,219)        | 604<br>(405 - 846)          |
| HIV/AIDS                                                          | 15,653<br>(12,216 - 19,636)    | 766<br>(479 - 1,099)        | 884<br>(736 - 1,034)     | 11,063<br>(7,966 - 14,799)  | 2,602<br>(1,939 - 3,259)    | 338<br>(220 - 449)          |
| HIV/AIDS resulting in mycobacterial infection                     | 1,078<br>(774 - 1,437)         | 49<br>(29 - 74)             | 53<br>(41 - 68)          | 763<br>(510 - 1,061)        | 187<br>(131 - 250)          | 25<br>(16 - 37)             |
| HIV/AIDS resulting in other diseases                              | 14,575<br>(11,432 - 18,213)    | 717<br>(446 - 1,026)        | 831<br>(690 - 972)       | 10,300<br>(7,438 - 13,730)  | 2,414<br>(1,802 - 3,018)    | 312<br>(203 - 417)          |
| Diarrhea, lower respiratory, and other common infectious diseases | 23,604<br>(18,277 - 29,606)    | 14,789<br>(10,229 - 20,337) | 1,057<br>(709 - 1,532)   | 2,570<br>(1,885 - 3,423)    | 2,091<br>(1,443 - 2,847)    | 3,097<br>(2,131 - 4,045)    |
| Diarrheal diseases                                                | 6,242<br>(3,627 - 9,913)       | 4,315<br>(1,785 - 7,999)    | 204<br>(86 - 419)        | 673<br>(425 - 1,021)        | 475<br>(262 - 785)          | 574<br>(332 - 929)          |
| Intestinal infectious diseases                                    | 587<br>(295 - 1,056)           | 231<br>(103 - 461)          | 162<br>(72 - 307)        | 167<br>(74 - 315)           | 18<br>(9 - 35)              | 8<br>(3 - 15)               |
| Typhoid fever                                                     | 360<br>(169 - 699)             | 132<br>(52 - 286)           | 104<br>(43 - 204)        | 109<br>(44 - 217)           | 11<br>(5 - 24)              | 5<br>(2 - 10)               |
| Paratyphoid fever                                                 | 182<br>(84 - 360)              | 70<br>(24 - 163)            | 54<br>(21 - 114)         | 51<br>(19 - 104)            | 5<br>(2 - 11)               | 2<br>(1 - 5)                |
| Other intestinal infectious diseases                              | 45<br>(26 - 73)                | 29<br>(13 - 54)             | 4<br>(1 - 11)            | 8<br>(2 - 17)               | 2<br>(0 - 7)                | 2<br>(0 - 7)                |
| Lower respiratory infections                                      | 12,805<br>(9,241 - 17,062)     | 7,681<br>(4,721 - 11,673)   | 341<br>(191 - 554)       | 1,035<br>(711 - 1,468)      | 1,360<br>(857 - 2,004)      | 2,387<br>(1,474 - 3,315)    |
| Upper respiratory infections                                      | 15<br>(6 - 36)                 | 7<br>(1 - 27)               | 1<br>(0 - 3)             | 4<br>(1 - 9)                | 2<br>(0 - 7)                | 2<br>(0 - 5)                |
| Otitis media                                                      | 5<br>(4 - 7)                   | 2<br>(1 - 3)                | 0<br>(0 - 1)             | 1<br>(1 - 2)                | 1<br>(1 - 1)                | 1<br>(1 - 2)                |
| Meningitis                                                        | 2,537<br>(1,541 - 3,934)       | 1,371<br>(546 - 2,646)      | 234<br>(118 - 419)       | 612<br>(342 - 906)          | 210<br>(96 - 336)           | 110<br>(57 - 180)           |
| Pneumococcal meningitis                                           | 661<br>(377 - 1,086)           | 338<br>(125 - 724)          | 74<br>(30 - 148)         | 165<br>(72 - 319)           | 56<br>(23 - 105)            | 29<br>(12 - 53)             |
| H influenzae type B meningitis                                    | 459<br>(221 - 912)             | 317<br>(102 - 743)          | 37<br>(14 - 78)          | 75<br>(31 - 131)            | 21<br>(6 - 42)              | 9<br>(2 - 18)               |
| Meningococcal meningitis                                          | 1,092<br>(641 - 1,771)         | 578<br>(223 - 1,196)        | 100<br>(43 - 182)        | 269<br>(133 - 449)          | 94<br>(47 - 158)            | 51<br>(26 - 89)             |
| Other meningitis                                                  | 325<br>(170 - 586)             | 138<br>(44 - 360)           | 23<br>(8 - 46)           | 103<br>(37 - 212)           | 40<br>(13 - 85)             | 22<br>(6 - 47)              |
| Encephalitis                                                      | 139<br>(87 - 255)              | 67<br>(26 - 171)            | 16<br>(9 - 32)           | 33<br>(20 - 57)             | 12<br>(8 - 18)              | 9<br>(4 - 14)               |
| Diphtheria                                                        | 24<br>(0 - 145)                | 20<br>(0 - 144)             | 3<br>(0 - 24)            | 1<br>(0 - 5)                | 0<br>(0 - 1)                | --<br>(0 - 1)               |
| Whooping cough                                                    | 293<br>(1 - 1,456)             | 280<br>(1 - 1,395)          | 11<br>(0 - 56)           | 2<br>(0 - 11)               | 0<br>(0 - 1)                | --<br>(0 - 1)               |
| Tetanus                                                           | 120<br>(31 - 314)              | 71<br>(13 - 219)            | 7<br>(3 - 26)            | 29<br>(7 - 121)             | 10<br>(3 - 38)              | 3<br>(1 - 8)                |
| Measles                                                           | 826<br>(16 - 4,234)            | 738<br>(15 - 3,737)         | 78<br>(1 - 459)          | 10<br>(0 - 56)              | 0<br>(0 - 1)                | --<br>(0 - 1)               |
| Varicella and herpes zoster                                       | 12<br>(4 - 31)                 | 5<br>(0 - 22)               | 1<br>(0 - 4)             | 2<br>(0 - 6)                | 1<br>(0 - 3)                | 2<br>(0 - 11)               |
| Neglected tropical diseases and malaria                           | 8,887<br>(4,551 - 14,787)      | 6,925<br>(3,199 - 12,417)   | 515<br>(171 - 1,206)     | 752<br>(274 - 1,941)        | 382<br>(126 - 1,069)        | 313<br>(77 - 954)           |
| Malaria                                                           | 8,634<br>(4,332 - 14,541)      | 6,823<br>(3,125 - 12,328)   | 472<br>(127 - 1,161)     | 683<br>(214 - 1,879)        | 354<br>(97 - 1,039)         | 301<br>(66 - 939)           |
| Leishmaniasis                                                     | 0<br>(0 - 1)                   | 0<br>(0 - 0)                | 0<br>(0 - 0)             | 0<br>(0 - 0)                | 0<br>(0 - 0)                | 0<br>(0 - 0)                |
| Visceral leishmaniasis                                            | 0<br>(0 - 1)                   | 0<br>(0 - 0)                | 0<br>(0 - 0)             | 0<br>(0 - 0)                | 0<br>(0 - 0)                | 0<br>(0 - 0)                |
| African trypanosomiasis                                           | 7<br>(3 - 11)                  | 1<br>(0 - 1)                | 1<br>(0 - 1)             | 4<br>(2 - 8)                | 1<br>(0 - 1)                | 0<br>(0 - 1)                |
| Schistosomiasis                                                   | 52<br>(36 - 71)                | 1<br>(0 - 3)                | 2<br>(1 - 3)             | 25<br>(15 - 37)             | 16<br>(9 - 25)              | 8<br>(4 - 13)               |
| Cysticercosis                                                     | 5<br>(4 - 7)                   | 0<br>(0 - 1)                | 0<br>(0 - 0)             | 3<br>(3 - 4)                | 1<br>(1 - 1)                | 0<br>(0 - 0)                |
| Cystic echinococcosis                                             | 5<br>(4 - 6)                   | 1<br>(0 - 2)                | 1<br>(1 - 1)             | 2<br>(2 - 3)                | 1<br>(0 - 1)                | 0<br>(0 - 1)                |
| Dengue                                                            | 12<br>(5 - 21)                 | 6<br>(2 - 14)               | 3<br>(1 - 4)             | 3<br>(2 - 5)                | 0<br>(0 - 1)                | 0<br>(0 - 0)                |
| Yellow fever                                                      | 4<br>(2 - 6)                   | 0<br>(0 - 1)                | 1<br>(0 - 2)             | 2<br>(1 - 4)                | 0<br>(0 - 1)                | 0<br>(0 - 0)                |
| Rabies                                                            | 81<br>(28 - 143)               | 25<br>(5 - 67)              | 27<br>(8 - 58)           | 23<br>(10 - 36)             | 6<br>(2 - 10)               | 1<br>(0 - 1)                |
| Intestinal nematode infections                                    | 74<br>(35 - 131)               | 62<br>(26 - 113)            | 7<br>(1 - 19)            | 3<br>(0 - 11)               | 1<br>(0 - 5)                | 1<br>(0 - 5)                |
| Ascariasis                                                        | 74<br>(35 - 131)               | 62<br>(26 - 113)            | 7<br>(1 - 19)            | 3<br>(0 - 11)               | 1<br>(0 - 5)                | 1<br>(0 - 5)                |

Web Table 31- Cameroon deaths with 95% UI by age, sex, and cause in 2013

| Cause                                                            | Males, All Ages             | Males, 0-4 Years           | Males, 5-14 Years    | Males, 15-49 Years        | Males, 50-69 Years         | Males, 70-80 Years         |
|------------------------------------------------------------------|-----------------------------|----------------------------|----------------------|---------------------------|----------------------------|----------------------------|
| Other neglected tropical diseases                                | 13<br>(8 - 20)              | 5<br>(2 - 10)              | 1<br>(0 - 2)         | 4<br>(2 - 6)              | 2<br>(1 - 3)               | 2<br>(1 - 3)               |
| Maternal disorders                                               | --                          | --                         | --                   | --                        | --                         | --                         |
| Maternal hemorrhage                                              | --                          | --                         | --                   | --                        | --                         | --                         |
| Maternal sepsis and other maternal infections                    | --                          | --                         | --                   | --                        | --                         | --                         |
| Maternal hypertensive disorders                                  | --                          | --                         | --                   | --                        | --                         | --                         |
| Maternal obstructed labor                                        | --                          | --                         | --                   | --                        | --                         | --                         |
| Maternal abortive outcome                                        | --                          | --                         | --                   | --                        | --                         | --                         |
| Indirect maternal deaths                                         | --                          | --                         | --                   | --                        | --                         | --                         |
| Late maternal deaths                                             | --                          | --                         | --                   | --                        | --                         | --                         |
| Maternal deaths aggravated by HIV/AIDS                           | --                          | --                         | --                   | --                        | --                         | --                         |
| Other maternal disorders                                         | --                          | --                         | --                   | --                        | --                         | --                         |
| Neonatal disorders                                               | 10,900<br>(8,072 - 13,953)  | 10,900<br>(8,072 - 13,953) | --                   | --                        | --                         | --                         |
| Neonatal preterm birth complications                             | 3,480<br>(1,473 - 5,997)    | 3,480<br>(1,473 - 5,997)   | --                   | --                        | --                         | --                         |
| Neonatal encephalopathy due to birth asphyxia and trauma         | 3,144<br>(1,411 - 5,625)    | 3,144<br>(1,411 - 5,625)   | --                   | --                        | --                         | --                         |
| Neonatal sepsis and other neonatal infections                    | 3,325<br>(1,347 - 6,169)    | 3,325<br>(1,347 - 6,169)   | --                   | --                        | --                         | --                         |
| Hemolytic disease and other neonatal jaundice                    | 72<br>(20 - 181)            | 72<br>(20 - 181)           | --                   | --                        | --                         | --                         |
| Other neonatal disorders                                         | 879<br>(327 - 2,082)        | 879<br>(327 - 2,082)       | --                   | --                        | --                         | --                         |
| Nutritional deficiencies                                         | 4,270<br>(2,404 - 6,997)    | 2,795<br>(1,334 - 5,086)   | 180<br>(92 - 305)    | 510<br>(289 - 832)        | 346<br>(187 - 553)         | 439<br>(255 - 751)         |
| Protein-energy malnutrition                                      | 2,988<br>(1,417 - 5,377)    | 2,160<br>(846 - 4,304)     | 132<br>(59 - 238)    | 254<br>(120 - 466)        | 200<br>(92 - 347)          | 242<br>(103 - 467)         |
| Iodine deficiency                                                | 16<br>(1 - 93)              | 10<br>(0 - 87)             | 1<br>(0 - 8)         | 3<br>(0 - 14)             | 1<br>(0 - 7)               | 1<br>(0 - 6)               |
| Iron-deficiency anemia                                           | 1,248<br>(462 - 2,657)      | 620<br>(103 - 1,793)       | 46<br>(11 - 104)     | 247<br>(78 - 468)         | 141<br>(39 - 280)          | 193<br>(64 - 362)          |
| Other nutritional deficiencies                                   | 18<br>(7 - 44)              | 5<br>(0 - 25)              | 1<br>(0 - 2)         | 7<br>(2 - 13)             | 3<br>(1 - 5)               | 3<br>(1 - 6)               |
| Other communicable, maternal, neonatal, and nutritional diseases | 1,744<br>(905 - 2,991)      | 1,209<br>(432 - 2,371)     | 91<br>(42 - 160)     | 219<br>(108 - 386)        | 127<br>(63 - 227)          | 98<br>(51 - 170)           |
| Sexually transmitted diseases excluding HIV                      | 1,126<br>(327 - 2,353)      | 1,002<br>(258 - 2,152)     | 61<br>(18 - 124)     | 31<br>(14 - 93)           | 16<br>(6 - 49)             | 15<br>(5 - 48)             |
| Syphilis                                                         | 1,102<br>(308 - 2,322)      | 1,002<br>(258 - 2,152)     | 59<br>(17 - 122)     | 16<br>(7 - 50)            | 12<br>(4 - 36)             | 13<br>(4 - 40)             |
| Chlamydial infection                                             | --                          | --                         | --                   | --                        | --                         | --                         |
| Gonococcal infection                                             | 14<br>(7 - 40)              | --                         | 1<br>(0 - 3)         | 8<br>(4 - 24)             | 3<br>(1 - 8)               | 2<br>(1 - 6)               |
| Other sexually transmitted diseases                              | 10<br>(5 - 29)              | --                         | 1<br>(0 - 3)         | 7<br>(3 - 20)             | 2<br>(1 - 5)               | 1<br>(0 - 2)               |
| Hepatitis                                                        | 302<br>(117 - 592)          | 66<br>(19 - 165)           | 17<br>(7 - 36)       | 125<br>(48 - 263)         | 60<br>(24 - 125)           | 35<br>(16 - 67)            |
| Acute hepatitis A                                                | 25<br>(5 - 66)              | 14<br>(3 - 43)             | 4<br>(1 - 11)        | 6<br>(1 - 18)             | 0<br>(0 - 2)               | 0<br>(0 - 0)               |
| Acute hepatitis B                                                | 198<br>(82 - 400)           | 51<br>(13 - 133)           | 9<br>(3 - 21)        | 59<br>(20 - 133)          | 49<br>(20 - 99)            | 31<br>(15 - 61)            |
| Acute hepatitis C                                                | 9<br>(1 - 29)               | --                         | 1<br>(0 - 4)         | 4<br>(1 - 15)             | 2<br>(0 - 8)               | 2<br>(0 - 5)               |
| Acute hepatitis E                                                | 70<br>(21 - 164)            | 1<br>(0 - 2)               | 3<br>(1 - 7)         | 56<br>(17 - 134)          | 8<br>(1 - 22)              | 2<br>(0 - 7)               |
| Other infectious diseases                                        | 316<br>(143 - 612)          | 141<br>(42 - 331)          | 13<br>(4 - 32)       | 62<br>(19 - 141)          | 51<br>(17 - 121)           | 48<br>(15 - 127)           |
| Non-communicable diseases                                        | 36,400<br>(31,147 - 42,317) | 4,823<br>(2,950 - 8,097)   | 772<br>(529 - 1,142) | 8,319<br>(6,398 - 10,465) | 11,289<br>(9,159 - 13,922) | 11,198<br>(9,723 - 13,080) |
| Neoplasms                                                        | 5,036<br>(4,050 - 6,643)    | 175<br>(94 - 289)          | 106<br>(73 - 151)    | 1,475<br>(1,001 - 2,368)  | 1,835<br>(1,420 - 2,476)   | 1,445<br>(1,165 - 1,817)   |
| Esophageal cancer                                                | 211<br>(147 - 316)          | --                         | --                   | 45<br>(29 - 67)           | 105<br>(69 - 166)          | 61<br>(39 - 96)            |
| Stomach cancer                                                   | 476<br>(367 - 614)          | --                         | --                   | 130<br>(91 - 182)         | 219<br>(160 - 300)         | 127<br>(94 - 170)          |
| Liver cancer                                                     | 2,163<br>(1,307 - 3,648)    | --                         | 9<br>(4 - 17)        | 853<br>(457 - 1,651)      | 834<br>(495 - 1,375)       | 468<br>(277 - 750)         |
| Liver cancer due to hepatitis B                                  | 918<br>(468 - 1,788)        | --                         | 4<br>(1 - 9)         | 464<br>(207 - 966)        | 328<br>(161 - 641)         | 121<br>(54 - 222)          |

Web Table 31- Cameroon deaths with 95% UI by age, sex, and cause in 2013

| Cause                                | Males, All Ages             | Males, 0-4 Years   | Males, 5-14 Years | Males, 15-49 Years       | Males, 50-69 Years       | Males, 70-80 Years       |
|--------------------------------------|-----------------------------|--------------------|-------------------|--------------------------|--------------------------|--------------------------|
| Liver cancer due to hepatitis C      | 749<br>(391 - 1,479)        | -                  | 0<br>(0 - 1)      | 196<br>(66 - 496)        | 330<br>(163 - 660)       | 222<br>(108 - 384)       |
| Liver cancer due to alcohol use      | 299<br>(153 - 533)          | -                  | -                 | 78<br>(34 - 165)         | 121<br>(57 - 223)        | 100<br>(49 - 208)        |
| Liver cancer due to other causes     | 197<br>(101 - 350)          | -                  | 4<br>(1 - 8)      | 115<br>(56 - 218)        | 55<br>(24 - 107)         | 24<br>(10 - 47)          |
| Larynx cancer                        | 32<br>(21 - 72)             | -                  | -                 | 6<br>(4 - 12)            | 14<br>(8 - 36)           | 11<br>(7 - 24)           |
| Tracheal, bronchus and lung cancer   | 268<br>(210 - 332)          | -                  | -                 | 33<br>(21 - 45)          | 141<br>(107 - 183)       | 94<br>(76 - 118)         |
| Breast cancer                        | 9<br>(6 - 14)               | -                  | -                 | 3<br>(2 - 5)             | 4<br>(2 - 7)             | 2<br>(1 - 4)             |
| Cervical cancer                      | -                           | -                  | -                 | -                        | -                        | -                        |
| Uterine cancer                       | -                           | -                  | -                 | -                        | -                        | -                        |
| Prostate cancer                      | 421<br>(255 - 782)          | -                  | -                 | 8<br>(3 - 17)            | 107<br>(57 - 216)        | 307<br>(183 - 563)       |
| Colon and rectum cancer              | 237<br>(189 - 292)          | -                  | -                 | 63<br>(46 - 84)          | 81<br>(62 - 107)         | 93<br>(70 - 119)         |
| Lip and oral cavity cancer           | 31<br>(20 - 43)             | -                  | -                 | 8<br>(5 - 12)            | 13<br>(8 - 19)           | 10<br>(6 - 15)           |
| Nasopharynx cancer                   | 9<br>(6 - 12)               | -                  | 0<br>(0 - 1)      | 4<br>(3 - 6)             | 3<br>(2 - 5)             | 1<br>(1 - 2)             |
| Other pharynx cancer                 | 14<br>(10 - 19)             | -                  | -                 | 4<br>(3 - 7)             | 5<br>(3 - 8)             | 5<br>(3 - 7)             |
| Gallbladder and biliary tract cancer | 17<br>(12 - 23)             | -                  | -                 | 4<br>(2 - 6)             | 6<br>(4 - 10)            | 7<br>(4 - 10)            |
| Pancreatic cancer                    | 109<br>(84 - 140)           | -                  | -                 | 26<br>(17 - 36)          | 57<br>(41 - 79)          | 26<br>(19 - 36)          |
| Malignant skin melanoma              | 13<br>(7 - 35)              | -                  | -                 | 4<br>(2 - 14)            | 5<br>(2 - 11)            | 4<br>(2 - 10)            |
| Non-melanoma skin cancer             | 12<br>(8 - 19)              | -                  | -                 | 2<br>(1 - 4)             | 4<br>(2 - 7)             | 6<br>(3 - 9)             |
| Ovarian cancer                       | -                           | -                  | -                 | -                        | -                        | -                        |
| Testicular cancer                    | 7<br>(4 - 11)               | -                  | -                 | 5<br>(3 - 8)             | 1<br>(1 - 2)             | 1<br>(0 - 1)             |
| Kidney cancer                        | 56<br>(35 - 84)             | 10<br>(3 - 25)     | 3<br>(2 - 5)      | 9<br>(5 - 16)            | 21<br>(12 - 34)          | 13<br>(7 - 21)           |
| Bladder cancer                       | 135<br>(102 - 192)          | -                  | -                 | 27<br>(16 - 41)          | 42<br>(28 - 70)          | 66<br>(45 - 104)         |
| Brain and nervous system cancer      | 44<br>(21 - 60)             | 2<br>(1 - 4)       | 7<br>(3 - 11)     | 18<br>(8 - 28)           | 11<br>(5 - 17)           | 6<br>(3 - 10)            |
| Thyroid cancer                       | 4<br>(3 - 7)                | -                  | 0<br>(0 - 0)      | 1<br>(1 - 2)             | 1<br>(1 - 3)             | 1<br>(1 - 2)             |
| Mesothelioma                         | 9<br>(5 - 13)               | -                  | -                 | 1<br>(1 - 2)             | 3<br>(2 - 6)             | 4<br>(2 - 7)             |
| Hodgkin lymphoma                     | 28<br>(17 - 40)             | 4<br>(2 - 8)       | 3<br>(1 - 8)      | 13<br>(7 - 23)           | 5<br>(3 - 8)             | 3<br>(1 - 4)             |
| Non-Hodgkin lymphoma                 | 263<br>(171 - 381)          | 42<br>(17 - 90)    | 38<br>(19 - 68)   | 89<br>(53 - 156)         | 53<br>(34 - 93)          | 41<br>(26 - 64)          |
| Multiple myeloma                     | 17<br>(10 - 35)             | -                  | -                 | 4<br>(2 - 10)            | 9<br>(5 - 16)            | 4<br>(2 - 8)             |
| Leukemia                             | 83<br>(65 - 107)            | 13<br>(6 - 26)     | 13<br>(8 - 20)    | 35<br>(25 - 51)          | 10<br>(7 - 13)           | 12<br>(9 - 16)           |
| Other neoplasms                      | 369<br>(262 - 579)          | 104<br>(51 - 182)  | 33<br>(18 - 51)   | 77<br>(48 - 150)         | 81<br>(46 - 150)         | 73<br>(44 - 127)         |
| Cardiovascular diseases              | 12,249<br>(10,409 - 14,828) | 393<br>(226 - 646) | 109<br>(68 - 171) | 1,971<br>(1,500 - 2,587) | 4,604<br>(3,719 - 5,845) | 5,171<br>(4,429 - 6,112) |
| Rheumatic heart disease              | 101<br>(58 - 240)           | 9<br>(3 - 22)      | 4<br>(2 - 11)     | 31<br>(14 - 88)          | 28<br>(14 - 76)          | 29<br>(16 - 62)          |
| Ischemic heart disease               | 3,549<br>(2,742 - 4,687)    | 23<br>(7 - 55)     | 17<br>(9 - 28)    | 577<br>(407 - 835)       | 1,486<br>(1,094 - 1,978) | 1,446<br>(1,083 - 1,953) |
| Cerebrovascular disease              | 6,162<br>(4,807 - 7,620)    | 148<br>(79 - 258)  | 39<br>(23 - 63)   | 816<br>(575 - 1,106)     | 2,248<br>(1,664 - 2,900) | 2,910<br>(2,318 - 3,555) |
| Ischemic stroke                      | 3,586<br>(1,987 - 4,792)    | 13<br>(4 - 31)     | 5<br>(2 - 9)      | 198<br>(81 - 332)        | 1,274<br>(594 - 1,807)   | 2,096<br>(1,300 - 2,749) |
| Hemorrhagic stroke                   | 2,576<br>(1,499 - 4,302)    | 135<br>(68 - 239)  | 35<br>(20 - 56)   | 618<br>(398 - 889)       | 974<br>(512 - 1,792)     | 814<br>(378 - 1,622)     |
| Hypertensive heart disease           | 441<br>(179 - 782)          | 4<br>(1 - 10)      | 1<br>(0 - 2)      | 76<br>(16 - 169)         | 161<br>(61 - 319)        | 199<br>(87 - 347)        |
| Cardiomyopathy and myocarditis       | 746<br>(470 - 1,044)        | 70<br>(23 - 171)   | 20<br>(10 - 37)   | 180<br>(106 - 269)       | 276<br>(138 - 432)       | 201<br>(98 - 342)        |
| Atrial fibrillation and flutter      | 0<br>(0 - 1)                | -                  | -                 | 0<br>(0 - 0)             | 0<br>(0 - 0)             | 0<br>(0 - 0)             |
| Aortic aneurysm                      | 105<br>(67 - 169)           | -                  | -                 | 15<br>(8 - 25)           | 50<br>(29 - 79)          | 41<br>(25 - 74)          |
| Peripheral vascular disease          | 4<br>(2 - 9)                | -                  | -                 | 0<br>(0 - 0)             | 1<br>(0 - 2)             | 3<br>(1 - 6)             |



Web Table 31- Cameroon deaths with 95% UI by age, sex, and cause in 2013

| Cause                                               | Males, All Ages          | Males, 0-4 Years  | Males, 5-14 Years | Males, 15-49 Years     | Males, 50-69 Years     | Males, 70-80 Years     |
|-----------------------------------------------------|--------------------------|-------------------|-------------------|------------------------|------------------------|------------------------|
| Endocarditis                                        | 238<br>(154 - 367)       | 41<br>(14 - 84)   | 5<br>(3 - 9)      | 45<br>(27 - 75)        | 69<br>(41 - 120)       | 77<br>(47 - 126)       |
| Other cardiovascular and circulatory diseases       | 902<br>(596 - 1,552)     | 98<br>(47 - 185)  | 22<br>(12 - 39)   | 231<br>(143 - 359)     | 286<br>(173 - 502)     | 265<br>(157 - 508)     |
| Chronic respiratory diseases                        | 2,555<br>(1,918 - 4,148) | 140<br>(65 - 290) | 24<br>(14 - 42)   | 322<br>(221 - 520)     | 820<br>(572 - 1,339)   | 1,250<br>(930 - 2,002) |
| Chronic obstructive pulmonary disease               | 1,674<br>(1,187 - 2,821) | 66<br>(27 - 143)  | 10<br>(5 - 18)    | 115<br>(71 - 194)      | 521<br>(339 - 902)     | 961<br>(678 - 1,597)   |
| Pneumoconiosis                                      | 195<br>(121 - 328)       | 2<br>(0 - 6)      | 1<br>(0 - 3)      | 43<br>(26 - 69)        | 97<br>(53 - 163)       | 52<br>(27 - 101)       |
| Silicosis                                           | 37<br>(23 - 65)          | 1<br>(0 - 2)      | 0<br>(0 - 1)      | 8<br>(4 - 12)          | 9<br>(5 - 15)          | 19<br>(10 - 39)        |
| Asbestosis                                          | 14<br>(8 - 23)           | 0<br>(0 - 1)      | 0<br>(0 - 1)      | 3<br>(2 - 5)           | 8<br>(4 - 14)          | 2<br>(1 - 4)           |
| Coal workers pneumoconiosis                         | 47<br>(26 - 78)          | 0<br>(0 - 1)      | 0<br>(0 - 1)      | 2<br>(1 - 4)           | 38<br>(20 - 64)        | 6<br>(3 - 11)          |
| Other pneumoconiosis                                | 98<br>(59 - 169)         | 1<br>(0 - 2)      | 0<br>(0 - 1)      | 30<br>(18 - 53)        | 42<br>(22 - 74)        | 25<br>(13 - 50)        |
| Asthma                                              | 343<br>(238 - 557)       | 38<br>(12 - 88)   | 5<br>(3 - 9)      | 96<br>(63 - 153)       | 105<br>(65 - 186)      | 99<br>(60 - 173)       |
| Interstitial lung disease and pulmonary sarcoidosis | 168<br>(29 - 323)        | 1<br>(0 - 3)      | 0<br>(0 - 1)      | 5<br>(2 - 10)          | 59<br>(10 - 121)       | 102<br>(13 - 214)      |
| Other chronic respiratory diseases                  | 175<br>(117 - 313)       | 33<br>(14 - 77)   | 7<br>(4 - 14)     | 63<br>(39 - 106)       | 37<br>(21 - 67)        | 35<br>(19 - 67)        |
| Cirrhosis                                           | 4,026<br>(1,376 - 6,286) | 127<br>(25 - 338) | 46<br>(12 - 85)   | 1,468<br>(465 - 2,385) | 1,661<br>(562 - 2,661) | 725<br>(235 - 1,160)   |
| Cirrhosis due to hepatitis B                        | 1,013<br>(316 - 1,961)   | 7<br>(1 - 24)     | 9<br>(2 - 23)     | 388<br>(129 - 760)     | 425<br>(125 - 856)     | 184<br>(45 - 412)      |
| Cirrhosis due to hepatitis C                        | 733<br>(79 - 1,536)      | 12<br>(1 - 42)    | 8<br>(1 - 20)     | 261<br>(23 - 577)      | 309<br>(28 - 674)      | 143<br>(22 - 322)      |
| Cirrhosis due to alcohol use                        | 1,753<br>(566 - 2,794)   | —                 | —                 | 592<br>(166 - 998)     | 800<br>(259 - 1,319)   | 360<br>(106 - 590)     |
| Cirrhosis due to other causes                       | 528<br>(179 - 928)       | 107<br>(21 - 268) | 29<br>(8 - 53)    | 228<br>(79 - 428)      | 127<br>(40 - 251)      | 38<br>(11 - 72)        |
| Digestive diseases                                  | 1,917<br>(1,396 - 2,544) | 132<br>(54 - 279) | 63<br>(39 - 102)  | 644<br>(405 - 924)     | 571<br>(384 - 811)     | 506<br>(362 - 684)     |
| Peptic ulcer disease                                | 471<br>(321 - 685)       | 14<br>(4 - 39)    | 9<br>(4 - 19)     | 152<br>(94 - 246)      | 155<br>(95 - 246)      | 141<br>(83 - 219)      |
| Gastritis and duodenitis                            | 60<br>(25 - 109)         | 7<br>(1 - 19)     | 3<br>(1 - 5)      | 17<br>(7 - 29)         | 16<br>(6 - 35)         | 17<br>(5 - 42)         |
| Appendicitis                                        | 74<br>(42 - 116)         | 8<br>(2 - 20)     | 6<br>(3 - 11)     | 25<br>(14 - 40)        | 18<br>(8 - 36)         | 17<br>(7 - 36)         |
| Paralytic ileus and intestinal obstruction          | 514<br>(335 - 819)       | 31<br>(9 - 79)    | 20<br>(10 - 37)   | 129<br>(74 - 219)      | 173<br>(103 - 279)     | 159<br>(92 - 275)      |
| Inguinal, femoral, and abdominal hernia             | 55<br>(27 - 102)         | 1<br>(0 - 3)      | 1<br>(0 - 2)      | 14<br>(5 - 28)         | 18<br>(7 - 33)         | 21<br>(11 - 40)        |
| Inflammatory bowel disease                          | 109<br>(71 - 164)        | 29<br>(6 - 82)    | 3<br>(1 - 7)      | 32<br>(19 - 48)        | 25<br>(11 - 42)        | 20<br>(10 - 34)        |
| Vascular intestinal disorders                       | 9<br>(3 - 21)            | 1<br>(0 - 5)      | 1<br>(0 - 1)      | 2<br>(1 - 5)           | 2<br>(1 - 5)           | 3<br>(1 - 7)           |
| Gallbladder and biliary diseases                    | 115<br>(54 - 167)        | 3<br>(1 - 7)      | 4<br>(1 - 8)      | 35<br>(12 - 58)        | 30<br>(14 - 50)        | 43<br>(20 - 71)        |
| Pancreatitis                                        | 189<br>(92 - 293)        | 2<br>(0 - 7)      | 2<br>(1 - 4)      | 112<br>(46 - 180)      | 43<br>(23 - 77)        | 30<br>(13 - 54)        |
| Other digestive diseases                            | 321<br>(172 - 496)       | 36<br>(12 - 81)   | 15<br>(7 - 27)    | 126<br>(57 - 210)      | 90<br>(43 - 149)       | 55<br>(28 - 96)        |
| Neurological disorders                              | 966<br>(733 - 1,239)     | 126<br>(48 - 269) | 41<br>(19 - 78)   | 200<br>(117 - 314)     | 82<br>(60 - 109)       | 517<br>(381 - 688)     |
| Alzheimer disease and other dementias               | 522<br>(382 - 700)       | —                 | —                 | 0<br>(0 - 1)           | 43<br>(28 - 63)        | 479<br>(348 - 647)     |
| Parkinson disease                                   | 7<br>(3 - 12)            | —                 | —                 | 1<br>(0 - 1)           | 0<br>(0 - 1)           | 6<br>(3 - 11)          |
| Epilepsy                                            | 335<br>(194 - 547)       | 100<br>(36 - 221) | 33<br>(13 - 70)   | 164<br>(85 - 278)      | 19<br>(11 - 31)        | 19<br>(11 - 28)        |
| Multiple sclerosis                                  | 0<br>(0 - 1)             | —                 | —                 | 0<br>(0 - 1)           | 0<br>(0 - 0)           | 0<br>(0 - 0)           |
| Other neurological disorders                        | 101<br>(54 - 220)        | 26<br>(10 - 113)  | 8<br>(4 - 17)     | 34<br>(18 - 56)        | 20<br>(11 - 28)        | 13<br>(7 - 19)         |
| Mental and substance use disorders                  | 1,098<br>(660 - 1,494)   | 42<br>(8 - 89)    | 0<br>(0 - 0)      | 792<br>(470 - 1,154)   | 193<br>(101 - 280)     | 72<br>(30 - 104)       |
| Schizophrenia                                       | 1<br>(0 - 1)             | —                 | —                 | 0<br>(0 - 1)           | 0<br>(0 - 0)           | 0<br>(0 - 0)           |
| Alcohol use disorders                               | 465<br>(228 - 657)       | —                 | —                 | 259<br>(128 - 389)     | 151<br>(67 - 230)      | 55<br>(16 - 87)        |
| Drug use disorders                                  | 632<br>(352 - 949)       | 42<br>(8 - 89)    | —                 | 533<br>(278 - 852)     | 41<br>(27 - 57)        | 16<br>(11 - 22)        |
| Opioid use disorders                                | 68<br>(37 - 103)         | 5<br>(1 - 10)     | —                 | 58<br>(30 - 93)        | 4<br>(2 - 6)           | 2<br>(1 - 2)           |
| Cocaine use disorders                               | 2<br>(1 - 4)             | 0<br>(0 - 0)      | —                 | 2<br>(1 - 3)           | 0<br>(0 - 0)           | 0<br>(0 - 0)           |

Web Table 31- Cameroon deaths with 95% UI by age, sex, and cause in 2013

| Cause                                               | Males, All Ages          | Males, 0-4 Years         | Males, 5-14 Years  | Males, 15-49 Years     | Males, 50-69 Years       | Males, 70-80 Years       |
|-----------------------------------------------------|--------------------------|--------------------------|--------------------|------------------------|--------------------------|--------------------------|
| Amphetamine use disorders                           | 2<br>(1 - 2)             | 0<br>(0 - 0)             | --                 | 1<br>(1 - 2)           | 0<br>(0 - 0)             | 0<br>(0 - 0)             |
| Other drug use disorders                            | 560<br>(314 - 837)       | 37<br>(7 - 78)           | --                 | 471<br>(245 - 752)     | 37<br>(24 - 52)          | 14<br>(9 - 20)           |
| Eating disorders                                    | 0<br>(0 - 0)             | --                       | 0<br>(0 - 0)       | 0<br>(0 - 0)           | --                       | --                       |
| Anorexia nervosa                                    | 0<br>(0 - 0)             | --                       | 0<br>(0 - 0)       | 0<br>(0 - 0)           | --                       | --                       |
| Diabetes, urogenital, blood, and endocrine diseases | 5,441<br>(4,186 - 7,057) | 1,076<br>(544 - 2,018)   | 274<br>(122 - 567) | 1,269<br>(855 - 1,707) | 1,423<br>(1,076 - 1,848) | 1,399<br>(1,104 - 1,743) |
| Diabetes mellitus                                   | 1,796<br>(1,301 - 2,301) | 56<br>(29 - 100)         | 11<br>(6 - 17)     | 265<br>(176 - 365)     | 775<br>(527 - 1,048)     | 689<br>(482 - 918)       |
| Acute glomerulonephritis                            | 11<br>(6 - 32)           | 3<br>(1 - 12)            | 1<br>(0 - 4)       | 3<br>(1 - 9)           | 3<br>(2 - 5)             | 1<br>(1 - 4)             |
| Chronic kidney disease                              | 1,034<br>(698 - 1,504)   | 105<br>(51 - 199)        | 42<br>(24 - 64)    | 386<br>(240 - 554)     | 238<br>(144 - 402)       | 263<br>(170 - 420)       |
| Chronic kidney disease due to diabetes mellitus     | 13<br>(4 - 29)           | 0<br>(0 - 1)             | 0<br>(0 - 1)       | 2<br>(1 - 7)           | 10<br>(2 - 20)           | 1<br>(0 - 4)             |
| Chronic kidney disease due to hypertension          | 249<br>(160 - 418)       | 10<br>(3 - 26)           | 2<br>(1 - 5)       | 69<br>(37 - 112)       | 76<br>(43 - 139)         | 92<br>(50 - 176)         |
| Chronic kidney disease due to glomerulonephritis    | 459<br>(267 - 635)       | 57<br>(25 - 109)         | 28<br>(17 - 43)    | 200<br>(105 - 292)     | 82<br>(39 - 127)         | 93<br>(40 - 141)         |
| Chronic kidney disease due to other causes          | 311<br>(137 - 546)       | 38<br>(11 - 85)          | 11<br>(4 - 22)     | 116<br>(53 - 216)      | 69<br>(19 - 150)         | 77<br>(26 - 153)         |
| Urinary diseases and male infertility               | 888<br>(558 - 1,243)     | 124<br>(52 - 263)        | 13<br>(7 - 22)     | 227<br>(116 - 350)     | 223<br>(133 - 332)       | 302<br>(195 - 467)       |
| Interstitial nephritis and urinary tract infections | 746<br>(454 - 1,065)     | 111<br>(43 - 247)        | 11<br>(5 - 18)     | 176<br>(83 - 288)      | 188<br>(112 - 286)       | 261<br>(165 - 398)       |
| Urolithiasis                                        | 4<br>(2 - 6)             | --                       | 1<br>(0 - 1)       | 2<br>(1 - 4)           | 1<br>(0 - 1)             | 1<br>(0 - 1)             |
| Other urinary diseases                              | 139<br>(73 - 228)        | 13<br>(3 - 33)           | 2<br>(1 - 5)       | 49<br>(22 - 92)        | 34<br>(15 - 61)          | 40<br>(16 - 77)          |
| Gynecological diseases                              | --                       | --                       | --                 | --                     | --                       | --                       |
| Uterine fibroids                                    | --                       | --                       | --                 | --                     | --                       | --                       |
| Polycystic ovarian syndrome                         | --                       | --                       | --                 | --                     | --                       | --                       |
| Endometriosis                                       | --                       | --                       | --                 | --                     | --                       | --                       |
| Genital prolapse                                    | --                       | --                       | --                 | --                     | --                       | --                       |
| Other gynecological diseases                        | --                       | --                       | --                 | --                     | --                       | --                       |
| Hemoglobinopathies and hemolytic anemias            | 1,082<br>(280 - 2,479)   | 591<br>(149 - 1,568)     | 175<br>(33 - 462)  | 235<br>(50 - 628)      | 54<br>(12 - 186)         | 26<br>(11 - 72)          |
| Thalassemias                                        | 12<br>(3 - 28)           | 9<br>(2 - 23)            | 1<br>(0 - 3)       | 1<br>(0 - 4)           | 0<br>(0 - 0)             | 0<br>(0 - 0)             |
| Sickle cell disorders                               | 1,031<br>(260 - 2,377)   | 572<br>(143 - 1,530)     | 173<br>(32 - 456)  | 230<br>(49 - 614)      | 51<br>(12 - 178)         | 5<br>(2 - 14)            |
| G6PD deficiency                                     | 4<br>(1 - 9)             | 2<br>(1 - 6)             | 0<br>(0 - 1)       | 1<br>(0 - 2)           | 0<br>(0 - 1)             | 0<br>(0 - 1)             |
| Other hemoglobinopathies and hemolytic anemias      | 35<br>(13 - 90)          | 8<br>(2 - 18)            | 1<br>(0 - 2)       | 3<br>(1 - 8)           | 3<br>(1 - 8)             | 21<br>(9 - 57)           |
| Endocrine, metabolic, blood, and immune disorders   | 630<br>(395 - 1,150)     | 197<br>(93 - 525)        | 32<br>(16 - 68)    | 152<br>(87 - 268)      | 130<br>(76 - 211)        | 118<br>(68 - 186)        |
| Musculoskeletal disorders                           | 153<br>(81 - 273)        | --                       | 17<br>(6 - 35)     | 62<br>(27 - 119)       | 41<br>(22 - 66)          | 33<br>(19 - 55)          |
| Rheumatoid arthritis                                | 8<br>(3 - 14)            | --                       | 1<br>(0 - 2)       | 2<br>(1 - 4)           | 2<br>(1 - 4)             | 3<br>(1 - 5)             |
| Other musculoskeletal disorders                     | 145<br>(78 - 261)        | --                       | 16<br>(6 - 34)     | 60<br>(27 - 116)       | 39<br>(21 - 62)          | 30<br>(17 - 51)          |
| Other non-communicable diseases                     | 2,960<br>(1,558 - 5,806) | 2,612<br>(1,253 - 5,402) | 92<br>(47 - 210)   | 115<br>(79 - 163)      | 58<br>(29 - 82)          | 82<br>(32 - 119)         |
| Congenital anomalies                                | 2,688<br>(1,324 - 5,535) | 2,506<br>(1,172 - 5,281) | 86<br>(40 - 203)   | 71<br>(45 - 116)       | 12<br>(9 - 18)           | 12<br>(9 - 17)           |
| Neural tube defects                                 | 490<br>(82 - 1,273)      | 470<br>(73 - 1,238)      | 9<br>(2 - 22)      | 9<br>(2 - 20)          | 1<br>(0 - 2)             | 0<br>(0 - 1)             |
| Congenital heart anomalies                          | 1,317<br>(671 - 2,746)   | 1,211<br>(589 - 2,583)   | 53<br>(25 - 122)   | 41<br>(24 - 70)        | 7<br>(5 - 12)            | 6<br>(4 - 8)             |
| Cleft lip and cleft palate                          | 15<br>(2 - 46)           | 15<br>(2 - 46)           | --                 | --                     | --                       | --                       |
| Down syndrome                                       | 175<br>(40 - 498)        | 165<br>(32 - 480)        | 4<br>(2 - 10)      | 5<br>(3 - 11)          | 1<br>(0 - 2)             | 0<br>(0 - 0)             |
| Chromosomal unbalanced rearrangements               | 69<br>(23 - 179)         | 64<br>(19 - 173)         | 2<br>(1 - 5)       | 2<br>(1 - 3)           | 0<br>(0 - 0)             | 0<br>(0 - 0)             |
| Other congenital anomalies                          | 622<br>(165 - 2,213)     | 581<br>(136 - 2,129)     | 17<br>(5 - 67)     | 15<br>(8 - 28)         | 3<br>(2 - 5)             | 6<br>(4 - 9)             |
| Skin and subcutaneous diseases                      | 227<br>(80 - 307)        | 61<br>(21 - 107)         | 7<br>(3 - 10)      | 44<br>(17 - 64)        | 46<br>(14 - 68)          | 70<br>(19 - 107)         |

Web Table 31- Cameroon deaths with 95% UI by age, sex, and cause in 2013

| Cause                                           | Males, All Ages            | Males, 0-4 Years         | Males, 5-14 Years    | Males, 15-49 Years       | Males, 50-69 Years       | Males, 70-80 Years   |
|-------------------------------------------------|----------------------------|--------------------------|----------------------|--------------------------|--------------------------|----------------------|
| Cellulitis                                      | 74<br>(22 - 113)           | 20<br>(6 - 42)           | 3<br>(1 - 5)         | 12<br>(4 - 20)           | 20<br>(4 - 34)           | 19<br>(5 - 35)       |
| Pyoderma                                        | 142<br>(51 - 207)          | 40<br>(14 - 72)          | 3<br>(1 - 5)         | 31<br>(12 - 46)          | 25<br>(9 - 44)           | 43<br>(13 - 68)      |
| Decubitus ulcer                                 | 10<br>(2 - 18)             | 0<br>(0 - 1)             | 0<br>(0 - 0)         | 1<br>(0 - 2)             | 0<br>(0 - 1)             | 8<br>(1 - 16)        |
| Other skin and subcutaneous diseases            | 2<br>(1 - 3)               | 0<br>(0 - 1)             | 0<br>(0 - 1)         | 1<br>(0 - 1)             | 0<br>(0 - 1)             | 0<br>(0 - 1)         |
| Sudden infant death syndrome                    | 45<br>(12 - 127)           | 45<br>(12 - 127)         | --                   | --                       | --                       | --                   |
| Injuries                                        | 11,969<br>(9,612 - 14,636) | 2,100<br>(1,161 - 3,477) | 974<br>(669 - 1,376) | 6,632<br>(5,006 - 8,510) | 1,399<br>(1,071 - 1,804) | 865<br>(682 - 1,075) |
| Transport injuries                              | 6,657<br>(5,179 - 8,285)   | 699<br>(323 - 1,335)     | 537<br>(355 - 792)   | 4,217<br>(3,035 - 5,488) | 803<br>(575 - 1,091)     | 401<br>(289 - 533)   |
| Road injuries                                   | 6,495<br>(5,041 - 8,071)   | 648<br>(293 - 1,242)     | 515<br>(338 - 755)   | 4,166<br>(3,008 - 5,426) | 782<br>(560 - 1,065)     | 383<br>(277 - 512)   |
| Pedestrian road injuries                        | 874<br>(571 - 1,316)       | 101<br>(34 - 219)        | 77<br>(40 - 138)     | 535<br>(322 - 840)       | 107<br>(61 - 177)        | 55<br>(31 - 91)      |
| Cyclist road injuries                           | 287<br>(192 - 414)         | 52<br>(16 - 120)         | 46<br>(22 - 79)      | 130<br>(80 - 194)        | 39<br>(24 - 62)          | 20<br>(11 - 33)      |
| Motorcyclist road injuries                      | 1,195<br>(783 - 1,643)     | 107<br>(39 - 225)        | 79<br>(42 - 130)     | 810<br>(505 - 1,180)     | 137<br>(83 - 208)        | 62<br>(35 - 97)      |
| Motor vehicle road injuries                     | 4,055<br>(3,135 - 5,112)   | 363<br>(159 - 719)       | 297<br>(187 - 458)   | 2,666<br>(1,905 - 3,523) | 490<br>(344 - 672)       | 240<br>(166 - 324)   |
| Other road injuries                             | 84<br>(43 - 151)           | 26<br>(6 - 68)           | 17<br>(6 - 32)       | 25<br>(11 - 60)          | 10<br>(5 - 18)           | 6<br>(3 - 11)        |
| Other transport injuries                        | 162<br>(115 - 238)         | 51<br>(22 - 104)         | 22<br>(12 - 37)      | 51<br>(28 - 105)         | 21<br>(12 - 31)          | 18<br>(6 - 30)       |
| Unintentional injuries                          | 3,768<br>(2,809 - 5,091)   | 1,352<br>(659 - 2,189)   | 400<br>(263 - 615)   | 1,242<br>(857 - 1,860)   | 409<br>(295 - 574)       | 364<br>(245 - 513)   |
| Falls                                           | 874<br>(579 - 1,697)       | 182<br>(76 - 391)        | 60<br>(31 - 110)     | 319<br>(178 - 714)       | 153<br>(87 - 279)        | 160<br>(91 - 323)    |
| Drowning                                        | 926<br>(500 - 1,652)       | 408<br>(126 - 870)       | 160<br>(79 - 295)    | 289<br>(139 - 574)       | 46<br>(27 - 78)          | 23<br>(14 - 37)      |
| Fire, heat, and hot substances                  | 384<br>(155 - 629)         | 179<br>(49 - 371)        | 30<br>(13 - 53)      | 100<br>(45 - 156)        | 39<br>(19 - 66)          | 37<br>(17 - 63)      |
| Poisonings                                      | 168<br>(107 - 299)         | 56<br>(21 - 136)         | 12<br>(6 - 22)       | 72<br>(42 - 151)         | 19<br>(11 - 31)          | 8<br>(5 - 14)        |
| Exposure to mechanical forces                   | 519<br>(359 - 741)         | 158<br>(74 - 296)        | 57<br>(33 - 95)      | 227<br>(151 - 362)       | 55<br>(33 - 78)          | 22<br>(11 - 30)      |
| Unintentional firearm injuries                  | 182<br>(115 - 282)         | 36<br>(13 - 84)          | 12<br>(5 - 22)       | 110<br>(63 - 191)        | 17<br>(9 - 29)           | 7<br>(4 - 12)        |
| Unintentional suffocation                       | 74<br>(28 - 211)           | 45<br>(9 - 157)          | 8<br>(3 - 20)        | 15<br>(7 - 36)           | 4<br>(2 - 9)             | 2<br>(1 - 4)         |
| Other exposure to mechanical forces             | 263<br>(156 - 385)         | 77<br>(25 - 157)         | 37<br>(18 - 65)      | 102<br>(58 - 162)        | 34<br>(15 - 53)          | 13<br>(3 - 20)       |
| Adverse effects of medical treatment            | 231<br>(75 - 421)          | 89<br>(18 - 208)         | 11<br>(3 - 21)       | 47<br>(16 - 86)          | 37<br>(12 - 74)          | 48<br>(13 - 106)     |
| Animal contact                                  | 84<br>(47 - 120)           | 24<br>(10 - 48)          | 14<br>(6 - 25)       | 19<br>(11 - 29)          | 13<br>(6 - 20)           | 15<br>(3 - 24)       |
| Venomous animal contact                         | 38<br>(21 - 61)            | 10<br>(3 - 25)           | 5<br>(2 - 12)        | 10<br>(5 - 16)           | 6<br>(2 - 10)            | 7<br>(1 - 13)        |
| Non-venomous animal contact                     | 46<br>(20 - 67)            | 14<br>(5 - 29)           | 9<br>(3 - 16)        | 9<br>(4 - 15)            | 7<br>(2 - 11)            | 7<br>(2 - 13)        |
| Foreign body                                    | 278<br>(116 - 457)         | 182<br>(67 - 337)        | 17<br>(7 - 31)       | 37<br>(15 - 62)          | 17<br>(7 - 28)           | 24<br>(8 - 41)       |
| Pulmonary aspiration and foreign body in airway | 265<br>(102 - 445)         | 177<br>(64 - 331)        | 16<br>(6 - 29)       | 35<br>(12 - 60)          | 15<br>(5 - 25)           | 23<br>(7 - 40)       |
| Foreign body in other body part                 | 12<br>(7 - 23)             | 5<br>(2 - 11)            | 2<br>(1 - 4)         | 2<br>(1 - 4)             | 2<br>(1 - 4)             | 1<br>(1 - 2)         |
| Other unintentional injuries                    | 304<br>(186 - 495)         | 74<br>(33 - 147)         | 40<br>(20 - 72)      | 131<br>(74 - 219)        | 32<br>(18 - 53)          | 27<br>(16 - 45)      |
| Self-harm and interpersonal violence            | 1,545<br>(1,111 - 2,083)   | 49<br>(20 - 111)         | 36<br>(19 - 66)      | 1,173<br>(796 - 1,675)   | 186<br>(115 - 269)       | 100<br>(46 - 162)    |
| Self-harm                                       | 835<br>(554 - 1,281)       | --                       | 17<br>(6 - 40)       | 562<br>(349 - 965)       | 159<br>(90 - 237)        | 97<br>(43 - 158)     |
| Interpersonal violence                          | 710<br>(455 - 1,085)       | 49<br>(20 - 111)         | 19<br>(9 - 35)       | 611<br>(378 - 930)       | 27<br>(15 - 48)          | 3<br>(2 - 6)         |
| Assault by firearm                              | 395<br>(203 - 646)         | 11<br>(3 - 30)           | 5<br>(1 - 12)        | 367<br>(187 - 601)       | 12<br>(6 - 25)           | 1<br>(0 - 2)         |
| Assault by sharp object                         | 100<br>(44 - 215)          | 7<br>(1 - 20)            | 3<br>(1 - 7)         | 81<br>(31 - 191)         | 7<br>(3 - 14)            | 1<br>(0 - 2)         |
| Assault by other means                          | 215<br>(106 - 385)         | 31<br>(12 - 77)          | 11<br>(5 - 21)       | 163<br>(71 - 309)        | 8<br>(4 - 17)            | 2<br>(1 - 3)         |

Web Table 31- Cameroon deaths with 95% UI by age, sex, and cause in 2013

| Cause                                                             | Females, All Ages             | Females, 0-4 Years          | Females, 5-14 Years      | Females, 15-49 Years        | Females, 50-69 Years        | Females, 70-80 Years        |
|-------------------------------------------------------------------|-------------------------------|-----------------------------|--------------------------|-----------------------------|-----------------------------|-----------------------------|
| All causes                                                        | 103,879<br>(94,670 - 113,900) | 38,064<br>(33,695 - 43,936) | 4,239<br>(3,639 - 5,058) | 28,905<br>(26,063 - 31,712) | 14,211<br>(11,965 - 17,702) | 18,460<br>(16,270 - 21,573) |
| Communicable, maternal, neonatal, and nutritional diseases        | 68,895<br>(59,848 - 73,028)   | 31,850<br>(26,896 - 37,928) | 2,961<br>(2,402 - 3,710) | 21,274<br>(18,801 - 23,759) | 4,906<br>(4,034 - 5,956)    | 4,904<br>(3,625 - 6,179)    |
| HIV/AIDS and tuberculosis                                         | 17,417<br>(14,543 - 20,420)   | 830<br>(541 - 1,165)        | 905<br>(759 - 1,053)     | 12,603<br>(10,196 - 15,067) | 2,497<br>(1,883 - 3,182)    | 582<br>(361 - 798)          |
| Tuberculosis                                                      | 1,748<br>(1,132 - 2,228)      | 88<br>(43 - 159)            | 37<br>(21 - 62)          | 886<br>(571 - 1,229)        | 389<br>(210 - 560)          | 348<br>(157 - 531)          |
| HIV/AIDS                                                          | 15,669<br>(12,898 - 18,786)   | 742<br>(464 - 1,083)        | 868<br>(723 - 1,016)     | 11,717<br>(9,182 - 14,229)  | 2,108<br>(1,487 - 2,750)    | 235<br>(118 - 366)          |
| HIV/AIDS resulting in mycobacterial infection                     | 824<br>(619 - 1,061)          | 37<br>(22 - 55)             | 40<br>(31 - 51)          | 621<br>(445 - 813)          | 113<br>(78 - 156)           | 13<br>(7 - 22)              |
| HIV/AIDS resulting in other diseases                              | 14,845<br>(12,206 - 17,753)   | 706<br>(441 - 1,025)        | 828<br>(688 - 967)       | 11,096<br>(8,684 - 13,517)  | 1,994<br>(1,403 - 2,601)    | 221<br>(111 - 346)          |
| Diarrhea, lower respiratory, and other common infectious diseases | 19,433<br>(15,402 - 24,389)   | 11,806<br>(8,154 - 16,329)  | 924<br>(611 - 1,378)     | 2,280<br>(1,670 - 2,922)    | 1,476<br>(997 - 2,110)      | 2,947<br>(1,984 - 4,119)    |
| Diarrheal diseases                                                | 4,802<br>(2,882 - 7,731)      | 2,844<br>(1,170 - 5,603)    | 179<br>(71 - 351)        | 715<br>(447 - 1,067)        | 388<br>(194 - 680)          | 675<br>(357 - 1,172)        |
| Intestinal infectious diseases                                    | 569<br>(287 - 1,023)          | 243<br>(105 - 473)          | 152<br>(71 - 289)        | 144<br>(64 - 274)           | 21<br>(8 - 41)              | 11<br>(5 - 20)              |
| Typhoid fever                                                     | 382<br>(185 - 720)            | 154<br>(60 - 307)           | 105<br>(47 - 203)        | 101<br>(42 - 203)           | 14<br>(5 - 31)              | 7<br>(3 - 14)               |
| Paratyphoid fever                                                 | 156<br>(69 - 305)             | 70<br>(26 - 151)            | 43<br>(16 - 93)          | 37<br>(13 - 82)             | 4<br>(1 - 11)               | 2<br>(1 - 4)                |
| Other intestinal infectious diseases                              | 31<br>(16 - 50)               | 19<br>(7 - 36)              | 3<br>(0 - 9)             | 5<br>(1 - 12)               | 2<br>(0 - 7)                | 2<br>(0 - 7)                |
| Lower respiratory infections                                      | 10,359<br>(7,523 - 13,906)    | 6,300<br>(3,831 - 9,546)    | 288<br>(156 - 479)       | 799<br>(546 - 1,114)        | 883<br>(555 - 1,313)        | 2,090<br>(1,302 - 3,061)    |
| Upper respiratory infections                                      | 13<br>(5 - 31)                | 6<br>(0 - 23)               | 1<br>(0 - 3)             | 3<br>(1 - 8)                | 2<br>(0 - 5)                | 2<br>(0 - 6)                |
| Otitis media                                                      | 7<br>(5 - 9)                  | 2<br>(1 - 4)                | 0<br>(0 - 1)             | 1<br>(1 - 1)                | 1<br>(1 - 2)                | 2<br>(1 - 3)                |
| Meningitis                                                        | 2,362<br>(1,423 - 3,326)      | 1,304<br>(613 - 2,136)      | 189<br>(98 - 307)        | 561<br>(316 - 827)          | 160<br>(80 - 254)           | 148<br>(68 - 240)           |
| Pneumococcal meningitis                                           | 564<br>(307 - 845)            | 254<br>(103 - 460)          | 53<br>(23 - 105)         | 161<br>(65 - 296)           | 49<br>(24 - 92)             | 47<br>(22 - 92)             |
| H influenzae type B meningitis                                    | 439<br>(218 - 734)            | 322<br>(135 - 587)          | 32<br>(11 - 66)          | 61<br>(25 - 125)            | 13<br>(5 - 27)              | 11<br>(3 - 31)              |
| Meningococcal meningitis                                          | 1,056<br>(653 - 1,596)        | 599<br>(273 - 1,081)        | 81<br>(35 - 147)         | 240<br>(128 - 376)          | 73<br>(29 - 135)            | 64<br>(23 - 114)            |
| Other meningitis                                                  | 302<br>(164 - 449)            | 128<br>(49 - 238)           | 22<br>(8 - 49)           | 100<br>(45 - 170)           | 26<br>(10 - 57)             | 27<br>(7 - 55)              |
| Encephalitis                                                      | 88<br>(63 - 123)              | 33<br>(16 - 64)             | 10<br>(6 - 18)           | 21<br>(13 - 34)             | 12<br>(5 - 20)              | 11<br>(3 - 19)              |
| Diphtheria                                                        | 25<br>(0 - 183)               | 21<br>(0 - 171)             | 3<br>(0 - 26)            | 1<br>(0 - 4)                | 0<br>(0 - 1)                | 0<br>--                     |
| Whooping cough                                                    | 333<br>(1 - 1,704)            | 317<br>(1 - 1,626)          | 14<br>(0 - 72)           | 2<br>(0 - 11)               | 0<br>(0 - 1)                | 0<br>--                     |
| Tetanus                                                           | 74<br>(23 - 151)              | 37<br>(6 - 100)             | 6<br>(2 - 14)            | 18<br>(7 - 40)              | 8<br>(3 - 17)               | 4<br>(2 - 9)                |
| Measles                                                           | 787<br>(18 - 4,109)           | 693<br>(16 - 3,666)         | 81<br>(2 - 458)          | 13<br>(0 - 69)              | 0<br>(0 - 1)                | 0<br>--                     |
| Varicella and herpes zoster                                       | 13<br>(4 - 37)                | 6<br>(0 - 23)               | 1<br>(0 - 5)             | 2<br>(0 - 5)                | 1<br>(0 - 3)                | 4<br>(0 - 18)               |
| Neglected tropical diseases and malaria                           | 10,936<br>(6,378 - 17,234)    | 7,908<br>(3,641 - 13,626)   | 857<br>(200 - 1,683)     | 1,002<br>(210 - 1,954)      | 503<br>(94 - 1,109)         | 666<br>(116 - 1,661)        |
| Malaria                                                           | 10,703<br>(6,168 - 17,005)    | 7,815<br>(3,547 - 13,565)   | 827<br>(163 - 1,656)     | 937<br>(142 - 1,885)        | 477<br>(69 - 1,085)         | 647<br>(90 - 1,642)         |
| Leishmaniasis                                                     | 0<br>(0 - 0)                  | 0<br>(0 - 0)                | 0<br>(0 - 0)             | 0<br>(0 - 0)                | 0<br>(0 - 0)                | 0<br>(0 - 0)                |
| Visceral leishmaniasis                                            | 0<br>(0 - 0)                  | 0<br>(0 - 0)                | 0<br>(0 - 0)             | 0<br>(0 - 0)                | 0<br>(0 - 0)                | 0<br>(0 - 0)                |
| African trypanosomiasis                                           | 6<br>(3 - 11)                 | 0<br>(0 - 1)                | 1<br>(0 - 1)             | 4<br>(2 - 7)                | 1<br>(0 - 2)                | 0<br>(0 - 1)                |
| Schistosomiasis                                                   | 41<br>(29 - 57)               | 1<br>(0 - 2)                | 2<br>(1 - 3)             | 18<br>(11 - 28)             | 12<br>(6 - 20)              | 8<br>(4 - 14)               |
| Cysticercosis                                                     | 7<br>(5 - 8)                  | 1<br>(0 - 1)                | 0<br>(0 - 1)             | 4<br>(3 - 5)                | 1<br>(1 - 1)                | 0<br>(0 - 0)                |
| Cystic echinococcosis                                             | 6<br>(5 - 8)                  | 1<br>(1 - 2)                | 1<br>(1 - 1)             | 3<br>(2 - 4)                | 1<br>(1 - 1)                | 0<br>(0 - 1)                |
| Dengue                                                            | 7<br>(4 - 11)                 | 3<br>(1 - 6)                | 1<br>(1 - 3)             | 2<br>(1 - 3)                | 0<br>(0 - 1)                | 0<br>(0 - 0)                |
| Yellow fever                                                      | 2<br>(1 - 3)                  | 0<br>(0 - 1)                | 0<br>(0 - 1)             | 1<br>(0 - 2)                | 0<br>(0 - 1)                | 0<br>(0 - 0)                |
| Rabies                                                            | 73<br>(36 - 110)              | 17<br>(6 - 38)              | 16<br>(8 - 27)           | 26<br>(13 - 42)             | 8<br>(3 - 13)               | 6<br>(1 - 13)               |
| Intestinal nematode infections                                    | 77<br>(38 - 125)              | 64<br>(30 - 112)            | 8<br>(2 - 19)            | 3<br>(0 - 11)               | 1<br>(0 - 6)                | 1<br>(0 - 6)                |
| Ascariasis                                                        | 77<br>(38 - 125)              | 64<br>(30 - 112)            | 8<br>(2 - 19)            | 3<br>(0 - 11)               | 1<br>(0 - 6)                | 1<br>(0 - 6)                |

Web Table 31- Cameroon deaths with 95% UI by age, sex, and cause in 2013

| Cause                                                            | Females, All Ages           | Females, 0-4 Years        | Females, 5-14 Years | Females, 15-49 Years     | Females, 50-69 Years      | Females, 70-80 Years        |
|------------------------------------------------------------------|-----------------------------|---------------------------|---------------------|--------------------------|---------------------------|-----------------------------|
| Other neglected tropical diseases                                | 14<br>(8 - 30)              | 6<br>(3 - 15)             | 1<br>(0 - 3)        | 3<br>(2 - 8)             | 2<br>(1 - 3)              | 3<br>(1 - 5)                |
| Maternal disorders                                               | 4,772<br>(3,499 - 6,285)    | --                        | 26<br>(9 - 57)      | 4,747<br>(3,486 - 6,259) | --                        | --                          |
| Maternal hemorrhage                                              | 830<br>(543 - 1,216)        | --                        | 3<br>(1 - 6)        | 828<br>(541 - 1,214)     | --                        | --                          |
| Maternal sepsis and other maternal infections                    | 264<br>(151 - 403)          | --                        | 1<br>(0 - 4)        | 262<br>(149 - 400)       | --                        | --                          |
| Maternal hypertensive disorders                                  | 361<br>(223 - 530)          | --                        | 2<br>(1 - 5)        | 359<br>(221 - 527)       | --                        | --                          |
| Maternal obstructed labor                                        | 254<br>(156 - 383)          | --                        | 1<br>(0 - 2)        | 253<br>(155 - 382)       | --                        | --                          |
| Maternal abortive outcome                                        | 841<br>(539 - 1,193)        | --                        | 5<br>(2 - 11)       | 836<br>(534 - 1,186)     | --                        | --                          |
| Indirect maternal deaths                                         | 535<br>(317 - 792)          | --                        | 2<br>(1 - 6)        | 533<br>(315 - 788)       | --                        | --                          |
| Late maternal deaths                                             | 747<br>(423 - 1,138)        | --                        | 7<br>(2 - 16)       | 740<br>(419 - 1,131)     | --                        | --                          |
| Maternal deaths aggravated by HIV/AIDS                           | 73<br>(40 - 115)            | --                        | --                  | 73<br>(40 - 115)         | --                        | --                          |
| Other maternal disorders                                         | 858<br>(569 - 1,209)        | --                        | 5<br>(2 - 11)       | 853<br>(564 - 1,205)     | --                        | --                          |
| Neonatal disorders                                               | 7,736<br>(5,107 - 10,304)   | 7,736<br>(5,107 - 10,304) | --                  | --                       | --                        | --                          |
| Neonatal preterm birth complications                             | 2,650<br>(1,162 - 4,510)    | 2,650<br>(1,162 - 4,510)  | --                  | --                       | --                        | --                          |
| Neonatal encephalopathy due to birth asphyxia and trauma         | 2,565<br>(1,257 - 4,454)    | 2,565<br>(1,257 - 4,454)  | --                  | --                       | --                        | --                          |
| Neonatal sepsis and other neonatal infections                    | 1,754<br>(732 - 3,322)      | 1,754<br>(732 - 3,322)    | --                  | --                       | --                        | --                          |
| Hemolytic disease and other neonatal jaundice                    | 41<br>(13 - 113)            | 41<br>(13 - 113)          | --                  | --                       | --                        | --                          |
| Other neonatal disorders                                         | 726<br>(281 - 1,485)        | 726<br>(281 - 1,485)      | --                  | --                       | --                        | --                          |
| Nutritional deficiencies                                         | 3,963<br>(2,544 - 5,587)    | 2,418<br>(1,204 - 3,946)  | 164<br>(91 - 275)   | 509<br>(342 - 747)       | 315<br>(209 - 469)        | 557<br>(364 - 830)          |
| Protein-energy malnutrition                                      | 2,988<br>(1,672 - 4,449)    | 2,216<br>(1,042 - 3,633)  | 129<br>(68 - 216)   | 138<br>(61 - 304)        | 170<br>(90 - 294)         | 335<br>(168 - 561)          |
| Iodine deficiency                                                | 17<br>(1 - 75)              | 8<br>(0 - 64)             | 1<br>(0 - 10)       | 3<br>(0 - 18)            | 2<br>(0 - 12)             | 2<br>(0 - 13)               |
| Iron-deficiency anemia                                           | 938<br>(523 - 1,603)        | 186<br>(34 - 631)         | 33<br>(11 - 82)     | 365<br>(201 - 554)       | 137<br>(56 - 242)         | 216<br>(91 - 408)           |
| Other nutritional deficiencies                                   | 20<br>(8 - 46)              | 8<br>(1 - 28)             | 1<br>(0 - 2)        | 3<br>(1 - 7)             | 5<br>(1 - 11)             | 3<br>(1 - 8)                |
| Other communicable, maternal, neonatal, and nutritional diseases | 1,637<br>(837 - 2,880)      | 1,151<br>(424 - 2,274)    | 85<br>(33 - 167)    | 133<br>(68 - 197)        | 116<br>(59 - 197)         | 152<br>(71 - 260)           |
| Sexually transmitted diseases excluding HIV                      | 1,097<br>(327 - 2,243)      | 987<br>(261 - 2,071)      | 66<br>(19 - 141)    | 24<br>(10 - 39)          | 9<br>(3 - 23)             | 11<br>(3 - 28)              |
| Syphilis                                                         | 1,075<br>(302 - 2,219)      | 987<br>(261 - 2,071)      | 66<br>(18 - 140)    | 9<br>(4 - 16)            | 5<br>(2 - 13)             | 8<br>(3 - 21)               |
| Chlamydial infection                                             | 7<br>(4 - 11)               | --                        | 0<br>(0 - 0)        | 5<br>(2 - 8)             | 1<br>(0 - 3)              | 1<br>(0 - 2)                |
| Gonococcal infection                                             | 8<br>(4 - 13)               | --                        | 0<br>(0 - 0)        | 5<br>(2 - 8)             | 2<br>(1 - 4)              | 1<br>(0 - 3)                |
| Other sexually transmitted diseases                              | 7<br>(3 - 11)               | --                        | 0<br>(0 - 0)        | 5<br>(2 - 8)             | 1<br>(0 - 3)              | 1<br>(0 - 2)                |
| Hepatitis                                                        | 296<br>(112 - 474)          | 42<br>(12 - 85)           | 8<br>(3 - 16)       | 78<br>(22 - 131)         | 74<br>(31 - 132)          | 93<br>(39 - 161)            |
| Acute hepatitis A                                                | 20<br>(4 - 47)              | 13<br>(3 - 34)            | 2<br>(1 - 6)        | 3<br>(1 - 8)             | 1<br>(0 - 2)              | 0<br>(0 - 1)                |
| Acute hepatitis B                                                | 195<br>(77 - 322)           | 28<br>(8 - 60)            | 4<br>(1 - 8)        | 24<br>(7 - 49)           | 59<br>(24 - 106)          | 79<br>(31 - 137)            |
| Acute hepatitis C                                                | 8<br>(1 - 25)               | --                        | 1<br>(0 - 2)        | 2<br>(0 - 7)             | 2<br>(0 - 7)              | 3<br>(0 - 12)               |
| Acute hepatitis E                                                | 74<br>(24 - 136)            | 1<br>(0 - 3)              | 2<br>(0 - 4)        | 48<br>(13 - 87)          | 13<br>(4 - 29)            | 10<br>(2 - 28)              |
| Other infectious diseases                                        | 245<br>(124 - 457)          | 122<br>(43 - 316)         | 10<br>(3 - 25)      | 31<br>(12 - 56)          | 33<br>(12 - 77)           | 49<br>(14 - 125)            |
| Non-communicable diseases                                        | 31,821<br>(25,981 - 38,763) | 4,705<br>(2,634 - 8,273)  | 666<br>(464 - 932)  | 5,338<br>(4,059 - 6,609) | 8,523<br>(6,758 - 11,295) | 12,589<br>(10,427 - 15,376) |
| Neoplasms                                                        | 4,771<br>(3,761 - 6,118)    | 101<br>(52 - 173)         | 87<br>(52 - 135)    | 1,305<br>(988 - 1,692)   | 2,019<br>(1,528 - 2,769)  | 1,261<br>(971 - 1,716)      |
| Esophageal cancer                                                | 45<br>(26 - 90)             | --                        | --                  | 4<br>(3 - 8)             | 23<br>(13 - 41)           | 18<br>(9 - 48)              |
| Stomach cancer                                                   | 357<br>(263 - 499)          | --                        | --                  | 68<br>(48 - 100)         | 185<br>(127 - 275)        | 104<br>(69 - 160)           |
| Liver cancer                                                     | 855<br>(562 - 1,350)        | --                        | 3<br>(1 - 6)        | 210<br>(114 - 379)       | 397<br>(246 - 636)        | 246<br>(141 - 412)          |
| Liver cancer due to hepatitis B                                  | 239<br>(126 - 383)          | --                        | 1<br>(0 - 2)        | 73<br>(29 - 141)         | 112<br>(50 - 200)         | 53<br>(24 - 99)             |

Web Table 31- Cameroon deaths with 95% UI by age, sex, and cause in 2013

| Cause                                | Females, All Ages          | Females, 0-4 Years | Females, 5-14 Years | Females, 15-49 Years   | Females, 50-69 Years     | Females, 70-80 Years     |
|--------------------------------------|----------------------------|--------------------|---------------------|------------------------|--------------------------|--------------------------|
| Liver cancer due to hepatitis C      | 345<br>(163 - 635)         | --                 | 0<br>(0 - 1)        | 66<br>(24 - 137)       | 165<br>(68 - 313)        | 114<br>(48 - 215)        |
| Liver cancer due to alcohol use      | 96<br>(50 - 169)           | --                 | --                  | 13<br>(5 - 25)         | 45<br>(22 - 79)          | 38<br>(17 - 76)          |
| Liver cancer due to other causes     | 176<br>(90 - 309)          | --                 | 2<br>(1 - 3)        | 58<br>(26 - 111)       | 75<br>(34 - 140)         | 41<br>(18 - 83)          |
| Larynx cancer                        | 3<br>(2 - 6)               | --                 | --                  | 1<br>(0 - 2)           | 2<br>(1 - 3)             | 1<br>(0 - 2)             |
| Tracheal, bronchus and lung cancer   | 132<br>(98 - 179)          | --                 | --                  | 21<br>(14 - 29)        | 60<br>(43 - 91)          | 50<br>(34 - 74)          |
| Breast cancer                        | 570<br>(410 - 901)         | --                 | --                  | 210<br>(144 - 386)     | 239<br>(164 - 378)       | 122<br>(84 - 189)        |
| Cervical cancer                      | 1,215<br>(892 - 1,697)     | --                 | --                  | 400<br>(282 - 588)     | 570<br>(380 - 842)       | 245<br>(160 - 356)       |
| Uterine cancer                       | 111<br>(66 - 173)          | --                 | --                  | 22<br>(9 - 37)         | 48<br>(27 - 81)          | 41<br>(24 - 70)          |
| Prostate cancer                      | --                         | --                 | --                  | --                     | --                       | --                       |
| Colon and rectum cancer              | 222<br>(170 - 290)         | --                 | --                  | 48<br>(36 - 61)        | 72<br>(52 - 101)         | 102<br>(72 - 147)        |
| Lip and oral cavity cancer           | 29<br>(19 - 42)            | --                 | --                  | 9<br>(4 - 16)          | 10<br>(6 - 15)           | 11<br>(6 - 18)           |
| Nasopharynx cancer                   | 8<br>(5 - 12)              | --                 | 0<br>(0 - 1)        | 4<br>(2 - 6)           | 3<br>(1 - 5)             | 2<br>(1 - 3)             |
| Other pharynx cancer                 | 8<br>(5 - 12)              | --                 | --                  | 2<br>(1 - 4)           | 4<br>(2 - 6)             | 2<br>(1 - 3)             |
| Gallbladder and biliary tract cancer | 74<br>(49 - 105)           | --                 | --                  | 9<br>(5 - 14)          | 38<br>(23 - 57)          | 27<br>(16 - 43)          |
| Pancreatic cancer                    | 105<br>(76 - 143)          | --                 | --                  | 11<br>(8 - 15)         | 51<br>(34 - 76)          | 42<br>(28 - 61)          |
| Malignant skin melanoma              | 12<br>(9 - 17)             | --                 | --                  | 3<br>(2 - 4)           | 6<br>(4 - 9)             | 3<br>(2 - 5)             |
| Non-melanoma skin cancer             | 10<br>(6 - 16)             | --                 | --                  | 2<br>(1 - 4)           | 2<br>(1 - 3)             | 6<br>(3 - 10)            |
| Ovarian cancer                       | 180<br>(114 - 269)         | --                 | --                  | 54<br>(30 - 88)        | 96<br>(59 - 150)         | 31<br>(18 - 49)          |
| Testicular cancer                    | --                         | --                 | --                  | --                     | --                       | --                       |
| Kidney cancer                        | 47<br>(32 - 67)            | 8<br>(3 - 20)      | 4<br>(2 - 7)        | 10<br>(6 - 14)         | 17<br>(10 - 28)          | 8<br>(5 - 14)            |
| Bladder cancer                       | 73<br>(49 - 113)           | --                 | --                  | 18<br>(8 - 29)         | 25<br>(15 - 40)          | 31<br>(18 - 57)          |
| Brain and nervous system cancer      | 52<br>(36 - 66)            | 5<br>(2 - 11)      | 3<br>(2 - 5)        | 24<br>(12 - 34)        | 11<br>(8 - 16)           | 8<br>(5 - 12)            |
| Thyroid cancer                       | 18<br>(12 - 27)            | --                 | 0<br>(0 - 0)        | 2<br>(1 - 4)           | 9<br>(5 - 14)            | 7<br>(5 - 12)            |
| Mesothelioma                         | 5<br>(3 - 8)               | --                 | --                  | 2<br>(1 - 3)           | 2<br>(1 - 4)             | 1<br>(0 - 2)             |
| Hodgkin lymphoma                     | 24<br>(14 - 34)            | 3<br>(1 - 6)       | 2<br>(1 - 5)        | 7<br>(4 - 11)          | 3<br>(2 - 6)             | 8<br>(3 - 15)            |
| Non-Hodgkin lymphoma                 | 170<br>(93 - 248)          | 29<br>(11 - 55)    | 26<br>(9 - 50)      | 61<br>(31 - 99)        | 33<br>(19 - 54)          | 21<br>(12 - 38)          |
| Multiple myeloma                     | 33<br>(21 - 52)            | --                 | --                  | 4<br>(3 - 5)           | 16<br>(10 - 25)          | 14<br>(7 - 24)           |
| Leukemia                             | 72<br>(55 - 98)            | 5<br>(2 - 10)      | 11<br>(7 - 17)      | 25<br>(18 - 41)        | 15<br>(10 - 24)          | 16<br>(10 - 23)          |
| Other neoplasms                      | 339<br>(227 - 536)         | 50<br>(24 - 103)   | 37<br>(18 - 67)     | 73<br>(43 - 143)       | 83<br>(52 - 136)         | 96<br>(61 - 147)         |
| Cardiovascular diseases              | 13,198<br>(8,672 - 17,988) | 410<br>(212 - 770) | 95<br>(53 - 170)    | 1,557<br>(767 - 2,491) | 3,870<br>(2,481 - 5,444) | 7,266<br>(5,015 - 9,719) |
| Rheumatic heart disease              | 177<br>(96 - 492)          | 7<br>(2 - 21)      | 8<br>(3 - 18)       | 52<br>(20 - 189)       | 41<br>(17 - 129)         | 69<br>(41 - 150)         |
| Ischemic heart disease               | 3,424<br>(1,929 - 5,379)   | 11<br>(2 - 41)     | 9<br>(4 - 19)       | 369<br>(132 - 655)     | 970<br>(524 - 1,530)     | 2,065<br>(1,241 - 3,232) |
| Cerebrovascular disease              | 5,871<br>(4,114 - 8,601)   | 96<br>(40 - 240)   | 24<br>(10 - 53)     | 537<br>(297 - 964)     | 1,739<br>(1,185 - 2,618) | 3,475<br>(2,460 - 4,939) |
| Ischemic stroke                      | 3,583<br>(2,131 - 4,876)   | 15<br>(5 - 43)     | 3<br>(1 - 9)        | 96<br>(34 - 205)       | 926<br>(429 - 1,375)     | 2,543<br>(1,592 - 3,434) |
| Hemorrhagic stroke                   | 2,288<br>(1,363 - 4,860)   | 81<br>(32 - 211)   | 21<br>(10 - 47)     | 441<br>(256 - 787)     | 813<br>(473 - 1,716)     | 932<br>(471 - 2,365)     |
| Hypertensive heart disease           | 1,300<br>(649 - 1,945)     | 6<br>(2 - 15)      | 2<br>(1 - 3)        | 116<br>(39 - 180)      | 378<br>(163 - 627)       | 797<br>(409 - 1,240)     |
| Cardiomyopathy and myocarditis       | 789<br>(425 - 1,210)       | 118<br>(43 - 271)  | 22<br>(9 - 44)      | 190<br>(64 - 330)      | 148<br>(78 - 244)        | 310<br>(137 - 550)       |
| Atrial fibrillation and flutter      | 1<br>(1 - 3)               | --                 | --                  | 0<br>(0 - 0)           | 0<br>(0 - 0)             | 1<br>(0 - 2)             |
| Aortic aneurysm                      | 116<br>(62 - 199)          | --                 | --                  | 18<br>(6 - 36)         | 36<br>(17 - 64)          | 63<br>(33 - 108)         |
| Peripheral vascular disease          | 3<br>(2 - 6)               | --                 | --                  | 0<br>(0 - 0)           | 2<br>(1 - 3)             | 1<br>(1 - 2)             |

Web Table 31- Cameroon deaths with 95% UI by age, sex, and cause in 2013

| Cause                                               | Females, All Ages        | Females, 0-4 Years | Females, 5-14 Years | Females, 15-49 Years | Females, 50-69 Years | Females, 70-80 Years |
|-----------------------------------------------------|--------------------------|--------------------|---------------------|----------------------|----------------------|----------------------|
| Endocarditis                                        | 196<br>(119 - 305)       | 52<br>(17 - 105)   | 6<br>(3 - 11)       | 43<br>(19 - 74)      | 28<br>(16 - 54)      | 66<br>(34 - 125)     |
| Other cardiovascular and circulatory diseases       | 1,321<br>(894 - 2,085)   | 119<br>(54 - 235)  | 24<br>(12 - 45)     | 233<br>(134 - 450)   | 526<br>(333 - 817)   | 418<br>(257 - 767)   |
| Chronic respiratory diseases                        | 1,728<br>(1,261 - 3,042) | 123<br>(59 - 245)  | 26<br>(16 - 43)     | 235<br>(162 - 373)   | 481<br>(326 - 823)   | 863<br>(599 - 1,565) |
| Chronic obstructive pulmonary disease               | 996<br>(673 - 1,878)     | 51<br>(23 - 106)   | 12<br>(6 - 19)      | 76<br>(47 - 135)     | 306<br>(190 - 586)   | 552<br>(359 - 1,037) |
| Pneumoconiosis                                      | 5<br>(3 - 10)            | 1<br>(0 - 2)       | 1<br>(0 - 1)        | 2<br>(1 - 3)         | 1<br>(1 - 3)         | 0<br>(0 - 1)         |
| Silicosis                                           | 0<br>(0 - 1)             | 0<br>(0 - 0)       | 0<br>(0 - 0)        | 0<br>(0 - 0)         | 0<br>(0 - 0)         | 0<br>(0 - 0)         |
| Asbestosis                                          | 1<br>(0 - 1)             | 0<br>(0 - 1)       | 0<br>(0 - 0)        | 0<br>(0 - 0)         | 0<br>(0 - 0)         | 0<br>(0 - 0)         |
| Coal workers pneumoconiosis                         | 0<br>(0 - 1)             | 0<br>(0 - 0)       | 0<br>(0 - 0)        | 0<br>(0 - 0)         | 0<br>(0 - 0)         | 0<br>(0 - 0)         |
| Other pneumoconiosis                                | 4<br>(2 - 7)             | 0<br>(0 - 1)       | 0<br>(0 - 0)        | 2<br>(1 - 3)         | 1<br>(1 - 2)         | 0<br>(0 - 1)         |
| Asthma                                              | 423<br>(243 - 652)       | 46<br>(17 - 98)    | 8<br>(5 - 17)       | 89<br>(53 - 146)     | 121<br>(60 - 201)    | 159<br>(71 - 264)    |
| Interstitial lung disease and pulmonary sarcoidosis | 122<br>(17 - 236)        | 1<br>(0 - 3)       | 1<br>(0 - 1)        | 8<br>(3 - 15)        | 26<br>(5 - 56)       | 86<br>(9 - 179)      |
| Other chronic respiratory diseases                  | 181<br>(116 - 362)       | 25<br>(11 - 56)    | 5<br>(2 - 9)        | 60<br>(37 - 112)     | 27<br>(14 - 56)      | 66<br>(34 - 136)     |
| Cirrhosis                                           | 1,298<br>(612 - 2,371)   | 58<br>(15 - 158)   | 23<br>(9 - 45)      | 375<br>(164 - 715)   | 461<br>(212 - 867)   | 382<br>(168 - 736)   |
| Cirrhosis due to hepatitis B                        | 387<br>(82 - 859)        | 5<br>(1 - 16)      | 5<br>(1 - 14)       | 126<br>(30 - 296)    | 142<br>(25 - 341)    | 108<br>(17 - 260)    |
| Cirrhosis due to hepatitis C                        | 404<br>(118 - 848)       | 3<br>(0 - 12)      | 4<br>(0 - 12)       | 119<br>(35 - 290)    | 157<br>(34 - 330)    | 122<br>(22 - 257)    |
| Cirrhosis due to alcohol use                        | 301<br>(122 - 600)       | -                  | -                   | 56<br>(21 - 121)     | 119<br>(48 - 250)    | 127<br>(47 - 278)    |
| Cirrhosis due to other causes                       | 206<br>(75 - 415)        | 50<br>(12 - 136)   | 13<br>(4 - 28)      | 74<br>(25 - 163)     | 43<br>(13 - 99)      | 25<br>(7 - 62)       |
| Digestive diseases                                  | 1,483<br>(1,112 - 1,953) | 119<br>(53 - 222)  | 55<br>(34 - 83)     | 371<br>(263 - 495)   | 357<br>(237 - 522)   | 581<br>(399 - 832)   |
| Peptic ulcer disease                                | 269<br>(159 - 415)       | 8<br>(2 - 20)      | 5<br>(2 - 11)       | 63<br>(36 - 100)     | 70<br>(38 - 118)     | 123<br>(63 - 208)    |
| Gastritis and duodenitis                            | 76<br>(26 - 167)         | 8<br>(2 - 19)      | 4<br>(1 - 9)        | 20<br>(8 - 40)       | 14<br>(4 - 39)       | 29<br>(7 - 89)       |
| Appendicitis                                        | 142<br>(82 - 210)        | 18<br>(6 - 43)     | 11<br>(5 - 19)      | 51<br>(30 - 79)      | 25<br>(11 - 46)      | 37<br>(11 - 76)      |
| Paralytic ileus and intestinal obstruction          | 402<br>(237 - 645)       | 28<br>(9 - 66)     | 14<br>(6 - 24)      | 57<br>(28 - 92)      | 110<br>(59 - 186)    | 193<br>(106 - 343)   |
| Inguinal, femoral, and abdominal hernia             | 14<br>(4 - 22)           | 2<br>(0 - 4)       | 0<br>(0 - 1)        | 3<br>(1 - 5)         | 3<br>(1 - 5)         | 6<br>(2 - 11)        |
| Inflammatory bowel disease                          | 105<br>(68 - 165)        | 22<br>(7 - 56)     | 4<br>(2 - 8)        | 38<br>(23 - 60)      | 17<br>(8 - 28)       | 24<br>(12 - 42)      |
| Vascular intestinal disorders                       | 5<br>(2 - 14)            | 0<br>(0 - 1)       | 0<br>(0 - 0)        | 2<br>(1 - 4)         | 1<br>(1 - 4)         | 2<br>(0 - 6)         |
| Gallbladder and biliary diseases                    | 137<br>(84 - 204)        | 6<br>(2 - 12)      | 5<br>(1 - 9)        | 32<br>(20 - 47)      | 39<br>(20 - 67)      | 56<br>(28 - 95)      |
| Pancreatitis                                        | 75<br>(36 - 137)         | 2<br>(1 - 6)       | 2<br>(1 - 3)        | 19<br>(9 - 33)       | 26<br>(10 - 60)      | 26<br>(9 - 60)       |
| Other digestive diseases                            | 259<br>(172 - 372)       | 25<br>(9 - 58)     | 11<br>(5 - 18)      | 85<br>(50 - 130)     | 51<br>(28 - 84)      | 86<br>(45 - 145)     |
| Neurological disorders                              | 942<br>(710 - 1,235)     | 111<br>(46 - 214)  | 37<br>(18 - 66)     | 169<br>(86 - 284)    | 68<br>(48 - 97)      | 557<br>(406 - 752)   |
| Alzheimer disease and other dementias               | 550<br>(398 - 757)       | -                  | -                   | 0<br>(0 - 0)         | 35<br>(24 - 50)      | 515<br>(366 - 711)   |
| Parkinson disease                                   | 3<br>(2 - 7)             | -                  | -                   | 0<br>(0 - 1)         | 1<br>(0 - 2)         | 1<br>(1 - 4)         |
| Epilepsy                                            | 326<br>(175 - 502)       | 95<br>(33 - 195)   | 32<br>(14 - 60)     | 156<br>(75 - 270)    | 15<br>(7 - 27)       | 28<br>(14 - 53)      |
| Multiple sclerosis                                  | 1<br>(0 - 7)             | -                  | -                   | 1<br>(0 - 4)         | 0<br>(0 - 2)         | 0<br>(0 - 1)         |
| Other neurological disorders                        | 62<br>(46 - 83)          | 17<br>(9 - 27)     | 5<br>(3 - 7)        | 11<br>(8 - 15)       | 16<br>(11 - 24)      | 13<br>(9 - 19)       |
| Mental and substance use disorders                  | 192<br>(103 - 285)       | 12<br>(5 - 20)     | 0<br>(0 - 0)        | 107<br>(47 - 174)    | 50<br>(25 - 81)      | 24<br>(15 - 33)      |
| Schizophrenia                                       | 3<br>(2 - 4)             | -                  | -                   | 2<br>(1 - 2)         | 1<br>(0 - 1)         | 0<br>(0 - 1)         |
| Alcohol use disorders                               | 77<br>(12 - 146)         | -                  | -                   | 48<br>(7 - 97)       | 23<br>(4 - 47)       | 6<br>(1 - 11)        |
| Drug use disorders                                  | 111<br>(80 - 144)        | 12<br>(5 - 20)     | -                   | 56<br>(33 - 81)      | 27<br>(18 - 38)      | 18<br>(12 - 25)      |
| Opioid use disorders                                | 11<br>(8 - 15)           | 1<br>(0 - 2)       | -                   | 6<br>(3 - 9)         | 2<br>(2 - 3)         | 2<br>(1 - 3)         |
| Cocaine use disorders                               | 1<br>(0 - 1)             | 0<br>(0 - 0)       | -                   | 0<br>(0 - 1)         | 0<br>(0 - 0)         | 0<br>(0 - 0)         |

Web Table 31- Cameroon deaths with 95% UI by age, sex, and cause in 2013

| Cause                                               | Females, All Ages        | Females, 0-4 Years       | Females, 5-14 Years | Females, 15-49 Years | Females, 50-69 Years   | Females, 70-80 Years     |
|-----------------------------------------------------|--------------------------|--------------------------|---------------------|----------------------|------------------------|--------------------------|
| Amphetamine use disorders                           | 0<br>(0 - 1)             | 0<br>(0 - 0)             | --                  | 0<br>(0 - 0)         | 0<br>(0 - 0)           | 0<br>(0 - 0)             |
| Other drug use disorders                            | 99<br>(71 - 128)         | 10<br>(4 - 17)           | --                  | 49<br>(30 - 73)      | 24<br>(16 - 34)        | 16<br>(11 - 23)          |
| Eating disorders                                    | 2<br>(1 - 3)             | --                       | 0<br>(0 - 0)        | 1<br>(1 - 3)         | --                     | --                       |
| Anorexia nervosa                                    | 2<br>(1 - 3)             | --                       | 0<br>(0 - 0)        | 1<br>(1 - 3)         | --                     | --                       |
| Diabetes, urogenital, blood, and endocrine diseases | 4,440<br>(3,411 - 5,634) | 734<br>(385 - 1,303)     | 205<br>(125 - 343)  | 961<br>(707 - 1,260) | 1,086<br>(758 - 1,509) | 1,454<br>(1,055 - 1,933) |
| Diabetes mellitus                                   | 1,632<br>(1,102 - 2,221) | 10<br>(4 - 17)           | 7<br>(3 - 13)       | 217<br>(148 - 290)   | 589<br>(363 - 869)     | 810<br>(504 - 1,165)     |
| Acute glomerulonephritis                            | 13<br>(8 - 20)           | 2<br>(1 - 6)             | 1<br>(0 - 3)        | 6<br>(3 - 9)         | 3<br>(1 - 5)           | 1<br>(1 - 2)             |
| Chronic kidney disease                              | 796<br>(441 - 1,330)     | 92<br>(38 - 167)         | 33<br>(16 - 55)     | 235<br>(115 - 395)   | 186<br>(97 - 348)      | 249<br>(130 - 433)       |
| Chronic kidney disease due to diabetes mellitus     | 10<br>(3 - 21)           | 1<br>(0 - 1)             | 1<br>(0 - 1)        | 1<br>(0 - 2)         | 8<br>(2 - 16)          | 1<br>(0 - 2)             |
| Chronic kidney disease due to hypertension          | 366<br>(200 - 668)       | 15<br>(4 - 40)           | 5<br>(2 - 12)       | 84<br>(39 - 168)     | 107<br>(55 - 211)      | 154<br>(85 - 294)        |
| Chronic kidney disease due to glomerulonephritis    | 180<br>(79 - 284)        | 41<br>(16 - 77)          | 12<br>(6 - 20)      | 86<br>(30 - 149)     | 21<br>(8 - 43)         | 20<br>(7 - 43)           |
| Chronic kidney disease due to other causes          | 239<br>(71 - 471)        | 36<br>(8 - 83)           | 16<br>(5 - 31)      | 64<br>(14 - 152)     | 50<br>(12 - 118)       | 74<br>(14 - 170)         |
| Urinary diseases and male infertility               | 556<br>(367 - 747)       | 67<br>(25 - 133)         | 15<br>(7 - 28)      | 136<br>(62 - 198)    | 147<br>(85 - 228)      | 191<br>(116 - 292)       |
| Interstitial nephritis and urinary tract infections | 482<br>(306 - 663)       | 58<br>(18 - 124)         | 11<br>(4 - 24)      | 110<br>(49 - 172)    | 128<br>(72 - 198)      | 175<br>(106 - 272)       |
| Urolithiasis                                        | 14<br>(3 - 52)           | --                       | 1<br>(0 - 4)        | 6<br>(1 - 28)        | 4<br>(1 - 15)          | 3<br>(1 - 12)            |
| Other urinary diseases                              | 61<br>(31 - 104)         | 10<br>(2 - 29)           | 3<br>(1 - 7)        | 21<br>(6 - 41)       | 16<br>(6 - 30)         | 12<br>(5 - 25)           |
| Gynecological diseases                              | 10<br>(6 - 23)           | --                       | --                  | 6<br>(4 - 17)        | 2<br>(1 - 4)           | 2<br>(1 - 3)             |
| Uterine fibroids                                    | 2<br>(1 - 4)             | --                       | --                  | 1<br>(1 - 2)         | 1<br>(0 - 1)           | 0<br>(0 - 1)             |
| Polycystic ovarian syndrome                         | 0<br>(0 - 1)             | --                       | --                  | 0<br>(0 - 1)         | 0<br>(0 - 0)           | --                       |
| Endometriosis                                       | 1<br>(1 - 3)             | --                       | --                  | 1<br>(1 - 3)         | 0<br>(0 - 0)           | --                       |
| Genital prolapse                                    | 2<br>(1 - 4)             | --                       | --                  | 1<br>(1 - 2)         | 0<br>(0 - 1)           | 0<br>(0 - 1)             |
| Other gynecological diseases                        | 5<br>(3 - 11)            | --                       | --                  | 3<br>(2 - 9)         | 1<br>(1 - 2)           | 1<br>(0 - 1)             |
| Hemoglobinopathies and hemolytic anemias            | 804<br>(360 - 1,646)     | 362<br>(126 - 876)       | 125<br>(58 - 258)   | 230<br>(79 - 481)    | 55<br>(27 - 92)        | 32<br>(10 - 61)          |
| Thalassemias                                        | 6<br>(2 - 13)            | 4<br>(2 - 10)            | 1<br>(0 - 2)        | 1<br>(0 - 2)         | 0<br>(0 - 0)           | 0<br>(0 - 0)             |
| Sickle cell disorders                               | 756<br>(329 - 1,569)     | 346<br>(121 - 838)       | 123<br>(57 - 255)   | 227<br>(78 - 474)    | 51<br>(26 - 86)        | 8<br>(2 - 17)            |
| G6PD deficiency                                     | 3<br>(1 - 6)             | 1<br>(1 - 4)             | 0<br>(0 - 1)        | 1<br>(0 - 1)         | 0<br>(0 - 0)           | 1<br>(0 - 1)             |
| Other hemoglobinopathies and hemolytic anemias      | 39<br>(16 - 64)          | 10<br>(3 - 22)           | 1<br>(0 - 1)        | 2<br>(1 - 4)         | 3<br>(1 - 6)           | 24<br>(8 - 46)           |
| Endocrine, metabolic, blood, and immune disorders   | 629<br>(377 - 989)       | 201<br>(89 - 424)        | 24<br>(10 - 53)     | 130<br>(61 - 285)    | 104<br>(60 - 171)      | 170<br>(73 - 281)        |
| Musculoskeletal disorders                           | 158<br>(108 - 214)       | --                       | 15<br>(7 - 23)      | 68<br>(36 - 105)     | 38<br>(22 - 59)        | 37<br>(19 - 58)          |
| Rheumatoid arthritis                                | 18<br>(11 - 28)          | --                       | 1<br>(0 - 2)        | 3<br>(1 - 6)         | 4<br>(2 - 7)           | 10<br>(5 - 17)           |
| Other musculoskeletal disorders                     | 141<br>(91 - 190)        | --                       | 14<br>(7 - 21)      | 65<br>(34 - 100)     | 35<br>(19 - 53)        | 27<br>(13 - 43)          |
| Other non-communicable diseases                     | 3,610<br>(1,687 - 7,140) | 3,037<br>(1,255 - 6,341) | 124<br>(48 - 282)   | 191<br>(99 - 338)    | 94<br>(61 - 143)       | 164<br>(103 - 244)       |
| Congenital anomalies                                | 3,153<br>(1,282 - 6,655) | 2,905<br>(1,147 - 6,204) | 114<br>(40 - 269)   | 102<br>(38 - 225)    | 16<br>(11 - 24)        | 16<br>(10 - 23)          |
| Neural tube defects                                 | 559<br>(108 - 1,642)     | 531<br>(97 - 1,597)      | 14<br>(3 - 43)      | 13<br>(3 - 41)       | 1<br>(0 - 1)           | 0<br>(0 - 1)             |
| Congenital heart anomalies                          | 1,524<br>(593 - 3,350)   | 1,403<br>(528 - 3,174)   | 56<br>(16 - 147)    | 47<br>(12 - 122)     | 9<br>(5 - 15)          | 8<br>(5 - 14)            |
| Cleft lip and cleft palate                          | 13<br>(1 - 51)           | 13<br>(1 - 51)           | --                  | --                   | --                     | --                       |
| Down syndrome                                       | 413<br>(114 - 1,074)     | 366<br>(88 - 985)        | 23<br>(8 - 59)      | 21<br>(9 - 48)       | 3<br>(1 - 6)           | 1<br>(0 - 1)             |
| Chromosomal unbalanced rearrangements               | 112<br>(31 - 275)        | 105<br>(28 - 263)        | 3<br>(1 - 7)        | 4<br>(1 - 11)        | 0<br>(0 - 1)           | 0<br>(0 - 1)             |
| Other congenital anomalies                          | 532<br>(148 - 1,637)     | 487<br>(126 - 1,554)     | 19<br>(5 - 58)      | 16<br>(5 - 48)       | 4<br>(2 - 7)           | 6<br>(3 - 11)            |
| Skin and subcutaneous diseases                      | 434<br>(293 - 605)       | 109<br>(45 - 200)        | 10<br>(6 - 16)      | 89<br>(47 - 142)     | 78<br>(46 - 123)       | 147<br>(89 - 227)        |



Web Table 31- Cameroon deaths with 95% UI by age, sex, and cause in 2013

| Cause                                           | Females, All Ages        | Females, 0-4 Years     | Females, 5-14 Years | Females, 15-49 Years     | Females, 50-69 Years | Females, 70-80 Years |
|-------------------------------------------------|--------------------------|------------------------|---------------------|--------------------------|----------------------|----------------------|
| Cellulitis                                      | 97<br>(40 - 173)         | 15<br>(4 - 38)         | 3<br>(1 - 4)        | 18<br>(7 - 36)           | 15<br>(4 - 31)       | 46<br>(14 - 96)      |
| Pyoderma                                        | 305<br>(196 - 429)       | 85<br>(35 - 161)       | 6<br>(3 - 11)       | 62<br>(33 - 95)          | 61<br>(34 - 94)      | 91<br>(48 - 148)     |
| Decubitus ulcer                                 | 8<br>(4 - 14)            | 0<br>(0 - 1)           | 0<br>(0 - 1)        | 2<br>(1 - 3)             | 1<br>(0 - 2)         | 4<br>(2 - 11)        |
| Other skin and subcutaneous diseases            | 25<br>(12 - 42)          | 9<br>(2 - 21)          | 1<br>(0 - 2)        | 7<br>(3 - 14)            | 2<br>(1 - 4)         | 6<br>(2 - 16)        |
| Sudden infant death syndrome                    | 23<br>(5 - 74)           | 23<br>(5 - 74)         | --                  | --                       | --                   | --                   |
| Injuries                                        | 6,164<br>(4,899 - 7,584) | 1,510<br>(839 - 2,312) | 612<br>(424 - 858)  | 2,293<br>(1,693 - 2,998) | 782<br>(560 - 1,082) | 967<br>(600 - 1,320) |
| Transport injuries                              | 2,995<br>(2,284 - 3,880) | 459<br>(212 - 845)     | 340<br>(202 - 522)  | 1,421<br>(976 - 1,983)   | 448<br>(313 - 635)   | 327<br>(212 - 472)   |
| Road injuries                                   | 2,897<br>(2,211 - 3,800) | 428<br>(198 - 792)     | 329<br>(195 - 508)  | 1,394<br>(956 - 1,940)   | 434<br>(302 - 617)   | 313<br>(209 - 460)   |
| Pedestrian road injuries                        | 411<br>(276 - 692)       | 58<br>(20 - 133)       | 52<br>(24 - 96)     | 188<br>(109 - 329)       | 65<br>(37 - 117)     | 49<br>(27 - 90)      |
| Cyclist road injuries                           | 111<br>(70 - 156)        | 24<br>(8 - 55)         | 19<br>(10 - 34)     | 30<br>(18 - 49)          | 28<br>(10 - 47)      | 11<br>(4 - 19)       |
| Motorcyclist road injuries                      | 479<br>(272 - 661)       | 60<br>(24 - 124)       | 43<br>(21 - 77)     | 256<br>(134 - 378)       | 66<br>(33 - 105)     | 53<br>(22 - 90)      |
| Motor vehicle road injuries                     | 1,853<br>(1,395 - 2,426) | 274<br>(119 - 518)     | 209<br>(121 - 331)  | 907<br>(618 - 1,273)     | 269<br>(182 - 388)   | 195<br>(128 - 289)   |
| Other road injuries                             | 43<br>(24 - 77)          | 12<br>(4 - 28)         | 6<br>(3 - 14)       | 13<br>(6 - 30)           | 7<br>(3 - 13)        | 5<br>(2 - 11)        |
| Other transport injuries                        | 99<br>(41 - 147)         | 31<br>(12 - 63)        | 11<br>(4 - 23)      | 28<br>(14 - 43)          | 14<br>(3 - 24)       | 14<br>(3 - 26)       |
| Unintentional injuries                          | 2,543<br>(1,569 - 3,298) | 1,013<br>(501 - 1,647) | 251<br>(153 - 358)  | 464<br>(287 - 619)       | 248<br>(152 - 366)   | 567<br>(306 - 826)   |
| Falls                                           | 548<br>(322 - 762)       | 91<br>(39 - 162)       | 30<br>(14 - 50)     | 84<br>(39 - 129)         | 60<br>(35 - 94)      | 283<br>(141 - 456)   |
| Drowning                                        | 437<br>(217 - 742)       | 236<br>(90 - 460)      | 79<br>(38 - 142)    | 79<br>(39 - 141)         | 24<br>(14 - 37)      | 19<br>(11 - 31)      |
| Fire, heat, and hot substances                  | 360<br>(131 - 578)       | 165<br>(44 - 316)      | 32<br>(12 - 58)     | 79<br>(29 - 128)         | 33<br>(14 - 60)      | 50<br>(19 - 90)      |
| Poisonings                                      | 63<br>(22 - 116)         | 28<br>(8 - 71)         | 6<br>(2 - 12)       | 16<br>(7 - 27)           | 8<br>(2 - 15)        | 5<br>(1 - 10)        |
| Exposure to mechanical forces                   | 224<br>(139 - 322)       | 97<br>(44 - 174)       | 27<br>(15 - 45)     | 52<br>(31 - 76)          | 26<br>(11 - 41)      | 24<br>(8 - 36)       |
| Unintentional firearm injuries                  | 61<br>(38 - 89)          | 17<br>(7 - 34)         | 6<br>(3 - 12)       | 26<br>(13 - 44)          | 7<br>(4 - 12)        | 5<br>(3 - 9)         |
| Unintentional suffocation                       | 26<br>(7 - 85)           | 20<br>(4 - 71)         | 3<br>(1 - 7)        | 2<br>(1 - 9)             | 1<br>(0 - 2)         | 1<br>(0 - 2)         |
| Other exposure to mechanical forces             | 137<br>(72 - 198)        | 60<br>(26 - 114)       | 18<br>(8 - 34)      | 24<br>(13 - 38)          | 18<br>(5 - 29)       | 17<br>(3 - 27)       |
| Adverse effects of medical treatment            | 244<br>(75 - 421)        | 63<br>(16 - 136)       | 11<br>(3 - 21)      | 52<br>(15 - 96)          | 45<br>(14 - 95)      | 73<br>(18 - 159)     |
| Animal contact                                  | 109<br>(49 - 223)        | 31<br>(11 - 96)        | 17<br>(6 - 43)      | 33<br>(12 - 59)          | 14<br>(4 - 24)       | 14<br>(3 - 26)       |
| Venomous animal contact                         | 68<br>(29 - 164)         | 24<br>(7 - 81)         | 11<br>(4 - 30)      | 20<br>(7 - 42)           | 7<br>(2 - 14)        | 6<br>(1 - 12)        |
| Non-venomous animal contact                     | 41<br>(13 - 77)          | 7<br>(2 - 22)          | 6<br>(2 - 15)       | 13<br>(4 - 24)           | 7<br>(2 - 14)        | 9<br>(2 - 17)        |
| Foreign body                                    | 400<br>(175 - 821)       | 255<br>(94 - 611)      | 25<br>(10 - 46)     | 30<br>(12 - 65)          | 21<br>(10 - 34)      | 69<br>(29 - 115)     |
| Pulmonary aspiration and foreign body in airway | 393<br>(170 - 815)       | 253<br>(92 - 608)      | 24<br>(9 - 45)      | 29<br>(11 - 63)          | 20<br>(9 - 33)       | 67<br>(28 - 112)     |
| Foreign body in other body part                 | 7<br>(4 - 16)            | 2<br>(1 - 7)           | 1<br>(0 - 2)        | 1<br>(1 - 4)             | 1<br>(1 - 2)         | 2<br>(1 - 4)         |
| Other unintentional injuries                    | 157<br>(95 - 238)        | 46<br>(21 - 88)        | 25<br>(12 - 47)     | 39<br>(22 - 64)          | 18<br>(8 - 30)       | 29<br>(10 - 52)      |
| Self-harm and interpersonal violence            | 625<br>(449 - 843)       | 38<br>(16 - 85)        | 21<br>(12 - 37)     | 407<br>(258 - 625)       | 86<br>(52 - 135)     | 73<br>(30 - 119)     |
| Self-harm                                       | 385<br>(262 - 576)       | --                     | 7<br>(2 - 17)       | 229<br>(131 - 464)       | 78<br>(45 - 127)     | 71<br>(27 - 117)     |
| Interpersonal violence                          | 240<br>(151 - 359)       | 38<br>(16 - 85)        | 14<br>(7 - 27)      | 178<br>(107 - 279)       | 7<br>(4 - 13)        | 2<br>(1 - 4)         |
| Assault by firearm                              | 69<br>(34 - 129)         | 11<br>(4 - 26)         | 4<br>(1 - 8)        | 52<br>(22 - 101)         | 3<br>(1 - 5)         | 0<br>(0 - 1)         |
| Assault by sharp object                         | 77<br>(34 - 133)         | 8<br>(3 - 21)          | 3<br>(1 - 6)        | 64<br>(26 - 115)         | 1<br>(1 - 3)         | 1<br>(0 - 1)         |
| Assault by other means                          | 94<br>(50 - 149)         | 20<br>(8 - 44)         | 7<br>(3 - 15)       | 62<br>(28 - 109)         | 3<br>(1 - 6)         | 1<br>(1 - 2)         |

Web Table 31- Canada deaths with 95% UI by age, sex, and cause in 2013

| Cause                                                              | Both Sexes, All Ages           | Both Sexes, 0-4 Years    | Both Sexes, 5-14 Years | Both Sexes, 15-49 Years     | Both Sexes, 50-69 Years     | Both Sexes, 70-80 Years        |
|--------------------------------------------------------------------|--------------------------------|--------------------------|------------------------|-----------------------------|-----------------------------|--------------------------------|
| All causes                                                         | 273,244<br>(263,147 - 283,058) | 2,120<br>(1,742 - 2,593) | 385<br>(343 - 435)     | 14,629<br>(13,817 - 15,391) | 58,233<br>(55,230 - 61,107) | 197,877<br>(191,412 - 204,562) |
| Communicable, maternal, neonatal, and nutritional diseases         | 12,652<br>(10,794 - 15,050)    | 1,042<br>(814 - 1,302)   | 23<br>(19 - 28)        | 561<br>(477 - 651)          | 1,348<br>(1,135 - 1,550)    | 9,677<br>(7,847 - 12,085)      |
| HIV/AIDS and tuberculosis                                          | 463<br>(353 - 604)             | 1<br>(0 - 1)             | 0<br>(0 - 1)           | 213<br>(144 - 293)          | 138<br>(96 - 210)           | 112<br>(91 - 141)              |
| Tuberculosis                                                       | 144<br>(121 - 173)             | 0<br>(0 - 0)             | 0<br>(0 - 0)           | 8<br>(7 - 10)               | 33<br>(28 - 40)             | 102<br>(81 - 129)              |
| HIV/AIDS                                                           | 319<br>(215 - 458)             | 0<br>(0 - 1)             | 0<br>(0 - 0)           | 205<br>(136 - 285)          | 104<br>(63 - 176)           | 10<br>(4 - 22)                 |
| HIV/AIDS resulting in mycobacterial infection                      | 16<br>(11 - 25)                | 0<br>(0 - 0)             | 0<br>(0 - 0)           | 10<br>(7 - 15)              | 6<br>(3 - 10)               | 1<br>(0 - 1)                   |
| HIV/AIDS resulting in other diseases                               | 303<br>(203 - 435)             | 0<br>(0 - 1)             | 0<br>(0 - 0)           | 194<br>(129 - 269)          | 99<br>(60 - 166)            | 9<br>(4 - 20)                  |
| Diarrrhea, lower respiratory, and other common infectious diseases | 9,939<br>(8,157 - 12,257)      | 90<br>(65 - 121)         | 17<br>(13 - 21)        | 238<br>(188 - 280)          | 997<br>(822 - 1,175)        | 8,597<br>(6,820 - 10,964)      |
| Diarrrheal diseases                                                | 992<br>(694 - 1,387)           | 11<br>(7 - 17)           | 1<br>(1 - 2)           | 15<br>(12 - 19)             | 87<br>(66 - 113)            | 878<br>(584 - 1,268)           |
| Intestinal infectious diseases                                     | 13<br>(5 - 25)                 | 2<br>(1 - 6)             | 2<br>(1 - 4)           | 5<br>(2 - 11)               | 2<br>(1 - 5)                | 2<br>(0 - 5)                   |
| Typhoid fever                                                      | 7<br>(2 - 15)                  | 1<br>(0 - 2)             | 1<br>(0 - 2)           | 3<br>(1 - 7)                | 1<br>(0 - 2)                | 1<br>(0 - 2)                   |
| Paratyphoid fever                                                  | 2<br>(1 - 5)                   | 0<br>(0 - 1)             | 0<br>(0 - 1)           | 1<br>(0 - 2)                | 0<br>(0 - 1)                | 0<br>(0 - 1)                   |
| Other intestinal infectious diseases                               | 3<br>(1 - 8)                   | 1<br>(0 - 3)             | 0<br>(0 - 1)           | 1<br>(0 - 4)                | 1<br>(0 - 3)                | 1<br>(0 - 4)                   |
| Lower respiratory infections                                       | 8,686<br>(6,930 - 10,974)      | 47<br>(32 - 67)          | 7<br>(5 - 9)           | 179<br>(134 - 218)          | 852<br>(683 - 1,023)        | 7,600<br>(5,861 - 9,860)       |
| Upper respiratory infections                                       | 5<br>(2 - 13)                  | 0<br>(0 - 0)             | 0<br>(0 - 0)           | 0<br>(0 - 1)                | 1<br>(0 - 3)                | 4<br>(0 - 11)                  |
| Otitis media                                                       | 9<br>(8 - 11)                  | 1<br>(1 - 2)             | 0<br>(0 - 0)           | 2<br>(2 - 2)                | 2<br>(1 - 2)                | 5<br>(3 - 6)                   |
| Meningitis                                                         | 123<br>(104 - 139)             | 20<br>(13 - 29)          | 3<br>(2 - 4)           | 18<br>(14 - 20)             | 29<br>(23 - 34)             | 53<br>(43 - 65)                |
| Pneumococcal meningitis                                            | 56<br>(45 - 66)                | 7<br>(5 - 11)            | 1<br>(1 - 2)           | 8<br>(6 - 10)               | 14<br>(10 - 18)             | 25<br>(19 - 33)                |
| H influenzae type B meningitis                                     | 9<br>(7 - 12)                  | 4<br>(2 - 6)             | 0<br>(0 - 0)           | 1<br>(1 - 1)                | 1<br>(1 - 2)                | 3<br>(2 - 4)                   |
| Meningococcal meningitis                                           | 22<br>(17 - 27)                | 4<br>(2 - 5)             | 1<br>(0 - 1)           | 3<br>(2 - 4)                | 5<br>(3 - 7)                | 10<br>(7 - 14)                 |
| Other meningitis                                                   | 36<br>(27 - 44)                | 5<br>(3 - 8)             | 1<br>(0 - 1)           | 5<br>(4 - 7)                | 10<br>(6 - 13)              | 15<br>(10 - 21)                |
| Encephalitis                                                       | 73<br>(55 - 91)                | 6<br>(4 - 9)             | 2<br>(2 - 4)           | 13<br>(10 - 17)             | 19<br>(14 - 26)             | 32<br>(22 - 45)                |
| Diphtheria                                                         | 1<br>(0 - 2)                   | 0<br>(0 - 1)             | 0<br>(0 - 0)           | 0<br>(0 - 1)                | 0<br>(0 - 1)                | --                             |
| Whooping cough                                                     | 3<br>(2 - 7)                   | 1<br>(0 - 4)             | 0<br>(0 - 0)           | 2<br>(1 - 2)                | 0<br>(0 - 1)                | --                             |
| Tetanus                                                            | 3<br>(2 - 4)                   | 0<br>(0 - 0)             | 0<br>(0 - 0)           | 2<br>(1 - 2)                | 1<br>(0 - 1)                | 0<br>(0 - 1)                   |
| Measles                                                            | 0<br>(0 - 0)                   | 0<br>(0 - 0)             | 0<br>(0 - 0)           | 0<br>(0 - 0)                | 0<br>(0 - 0)                | --                             |
| Varicella and herpes zoster                                        | 31<br>(8 - 97)                 | 2<br>(0 - 5)             | 0<br>(0 - 2)           | 3<br>(1 - 7)                | 3<br>(1 - 8)                | 22<br>(2 - 89)                 |
| Neglected tropical diseases and malaria                            | 27<br>(19 - 31)                | 1<br>(1 - 2)             | 1<br>(1 - 1)           | 7<br>(5 - 8)                | 9<br>(6 - 11)               | 9<br>(5 - 12)                  |
| Cysticercosis                                                      | 0<br>(0 - 0)                   | 0<br>(0 - 0)             | 0<br>(0 - 0)           | 0<br>(0 - 0)                | 0<br>(0 - 0)                | 0<br>(0 - 0)                   |
| Cystic echinococcosis                                              | 3<br>(3 - 3)                   | 0<br>(0 - 0)             | 0<br>(0 - 0)           | 1<br>(1 - 1)                | 1<br>(1 - 1)                | 1<br>(1 - 1)                   |
| Dengue                                                             | 3<br>(2 - 4)                   | 0<br>(0 - 0)             | 0<br>(0 - 0)           | 2<br>(1 - 2)                | 1<br>(1 - 1)                | 0<br>(0 - 1)                   |
| Rabies                                                             | 3<br>(2 - 4)                   | 0<br>(0 - 0)             | 0<br>(0 - 0)           | 1<br>(1 - 2)                | 1<br>(0 - 1)                | 0<br>(0 - 0)                   |
| Other neglected tropical diseases                                  | 18<br>(11 - 22)                | 1<br>(0 - 1)             | 0<br>(0 - 1)           | 3<br>(3 - 4)                | 6<br>(4 - 8)                | 7<br>(3 - 10)                  |
| Maternal disorders                                                 | 33<br>(25 - 42)                | --                       | 0<br>(0 - 0)           | 33<br>(25 - 42)             | --                          | --                             |
| Maternal hemorrhage                                                | 3<br>(2 - 4)                   | --                       | 0<br>(0 - 0)           | 3<br>(2 - 4)                | --                          | --                             |
| Maternal sepsis and other maternal infections                      | 2<br>(2 - 3)                   | --                       | 0<br>(0 - 0)           | 2<br>(2 - 3)                | --                          | --                             |
| Maternal hypertensive disorders                                    | 4<br>(3 - 5)                   | --                       | 0<br>(0 - 0)           | 4<br>(3 - 5)                | --                          | --                             |
| Maternal obstructed labor                                          | 2<br>(1 - 3)                   | --                       | 0<br>(0 - 0)           | 2<br>(1 - 3)                | --                          | --                             |
| Maternal abortive outcome                                          | 5<br>(3 - 7)                   | --                       | 0<br>(0 - 0)           | 5<br>(3 - 7)                | --                          | --                             |
| Indirect maternal deaths                                           | 4<br>(3 - 6)                   | --                       | 0<br>(0 - 0)           | 4<br>(3 - 5)                | --                          | --                             |

Web Table 31- Canada deaths with 95% UI by age, sex, and cause in 2013

| Cause                                                            | Both Sexes, All Ages           | Both Sexes, 0-4 Years | Both Sexes, 5-14 Years | Both Sexes, 15-49 Years  | Both Sexes, 50-69 Years     | Both Sexes, 70-80 Years        |
|------------------------------------------------------------------|--------------------------------|-----------------------|------------------------|--------------------------|-----------------------------|--------------------------------|
| Late maternal deaths                                             | 5<br>(4 - 7)                   | --                    | 0<br>(0 - 0)           | 5<br>(4 - 7)             | --                          | --                             |
| Maternal deaths aggravated by HIV/AIDS                           | 0<br>(0 - 0)                   | --                    | --                     | 0<br>(0 - 0)             | --                          | --                             |
| Other maternal disorders                                         | 7<br>(5 - 9)                   | --                    | 0<br>(0 - 0)           | 7<br>(5 - 9)             | --                          | --                             |
| Neonatal disorders                                               | 933<br>(719 - 1,171)           | 933<br>(719 - 1,171)  | --                     | --                       | --                          | --                             |
| Neonatal preterm birth complications                             | 457<br>(332 - 600)             | 457<br>(332 - 600)    | --                     | --                       | --                          | --                             |
| Neonatal encephalopathy due to birth asphyxia and trauma         | 206<br>(132 - 281)             | 206<br>(132 - 281)    | --                     | --                       | --                          | --                             |
| Neonatal sepsis and other neonatal infections                    | 49<br>(28 - 91)                | 49<br>(28 - 91)       | --                     | --                       | --                          | --                             |
| Hemolytic disease and other neonatal jaundice                    | 1<br>(0 - 2)                   | 1<br>(0 - 2)          | --                     | --                       | --                          | --                             |
| Other neonatal disorders                                         | 219<br>(124 - 309)             | 219<br>(124 - 309)    | --                     | --                       | --                          | --                             |
| Nutritional deficiencies                                         | 801<br>(601 - 1,025)           | 2<br>(1 - 3)          | 1<br>(1 - 1)           | 16<br>(12 - 20)          | 55<br>(41 - 70)             | 726<br>(536 - 949)             |
| Protein-energy malnutrition                                      | 312<br>(185 - 485)             | 1<br>(1 - 2)          | 0<br>(0 - 0)           | 5<br>(3 - 8)             | 23<br>(14 - 32)             | 282<br>(165 - 445)             |
| Iodine deficiency                                                | 2<br>(0 - 11)                  | 0<br>(0 - 0)          | 0<br>(0 - 0)           | 0<br>(0 - 1)             | 0<br>(0 - 2)                | 1<br>(0 - 10)                  |
| Iron-deficiency anemia                                           | 419<br>(258 - 585)             | 1<br>(0 - 1)          | 0<br>(0 - 0)           | 8<br>(5 - 11)            | 28<br>(18 - 39)             | 382<br>(232 - 545)             |
| Other nutritional deficiencies                                   | 68<br>(32 - 124)               | 1<br>(0 - 1)          | 0<br>(0 - 0)           | 2<br>(1 - 3)             | 5<br>(2 - 8)                | 60<br>(28 - 115)               |
| Other communicable, maternal, neonatal, and nutritional diseases | 455<br>(344 - 532)             | 15<br>(9 - 22)        | 4<br>(3 - 5)           | 53<br>(42 - 66)          | 149<br>(112 - 180)          | 234<br>(160 - 289)             |
| Sexually transmitted diseases excluding HIV                      | 20<br>(14 - 28)                | 2<br>(0 - 6)          | 0<br>(0 - 1)           | 2<br>(2 - 3)             | 4<br>(3 - 6)                | 11<br>(7 - 17)                 |
| Syphilis                                                         | 15<br>(10 - 21)                | 2<br>(0 - 6)          | 0<br>(0 - 1)           | 1<br>(1 - 1)             | 2<br>(2 - 3)                | 9<br>(5 - 14)                  |
| Chlamydial infection                                             | 1<br>(1 - 2)                   | --                    | 0<br>(0 - 0)           | 0<br>(0 - 0)             | 0<br>(0 - 1)                | 0<br>(0 - 1)                   |
| Gonococcal infection                                             | 2<br>(2 - 3)                   | --                    | 0<br>(0 - 0)           | 1<br>(0 - 1)             | 1<br>(0 - 1)                | 1<br>(1 - 2)                   |
| Other sexually transmitted diseases                              | 1<br>(1 - 2)                   | --                    | 0<br>(0 - 0)           | 0<br>(0 - 1)             | 0<br>(0 - 1)                | 1<br>(0 - 1)                   |
| Hepatitis                                                        | 114<br>(94 - 141)              | 1<br>(0 - 1)          | 1<br>(0 - 1)           | 24<br>(18 - 33)          | 51<br>(39 - 66)             | 38<br>(26 - 54)                |
| Acute hepatitis A                                                | 45<br>(18 - 74)                | 1<br>(0 - 1)          | 1<br>(0 - 1)           | 14<br>(7 - 22)           | 19<br>(7 - 34)              | 11<br>(3 - 21)                 |
| Acute hepatitis B                                                | 66<br>(38 - 96)                | 0<br>(0 - 0)          | 0<br>(0 - 0)           | 10<br>(4 - 18)           | 30<br>(16 - 47)             | 25<br>(14 - 40)                |
| Acute hepatitis C                                                | 4<br>(1 - 11)                  | --                    | 0<br>(0 - 0)           | 1<br>(0 - 2)             | 2<br>(0 - 5)                | 2<br>(0 - 5)                   |
| Other infectious diseases                                        | 321<br>(211 - 393)             | 12<br>(7 - 17)        | 3<br>(2 - 4)           | 27<br>(18 - 34)          | 94<br>(60 - 120)            | 185<br>(115 - 238)             |
| Non-communicable diseases                                        | 244,472<br>(234,973 - 254,092) | 899<br>(720 - 1,154)  | 195<br>(170 - 224)     | 8,876<br>(8,265 - 9,436) | 53,502<br>(50,732 - 56,203) | 181,000<br>(174,638 - 187,518) |
| Neoplasms                                                        | 78,983<br>(73,217 - 83,903)    | 65<br>(46 - 90)       | 97<br>(82 - 116)       | 4,048<br>(3,760 - 4,384) | 28,331<br>(26,723 - 30,067) | 46,442<br>(41,852 - 50,282)    |
| Esophageal cancer                                                | 1,769<br>(1,409 - 2,043)       | --                    | --                     | 76<br>(55 - 98)          | 783<br>(622 - 934)          | 910<br>(705 - 1,084)           |
| Stomach cancer                                                   | 3,044<br>(2,566 - 3,591)       | --                    | --                     | 121<br>(99 - 146)        | 837<br>(720 - 961)          | 2,086<br>(1,679 - 2,580)       |
| Liver cancer                                                     | 1,758<br>(1,185 - 2,258)       | --                    | 2<br>(1 - 3)           | 100<br>(69 - 133)        | 715<br>(484 - 935)          | 941<br>(593 - 1,266)           |
| Liver cancer due to hepatitis B                                  | 198<br>(126 - 281)             | --                    | 1<br>(0 - 1)           | 21<br>(14 - 31)          | 101<br>(63 - 149)           | 75<br>(45 - 111)               |
| Liver cancer due to hepatitis C                                  | 941<br>(612 - 1,249)           | --                    | 0<br>(0 - 1)           | 45<br>(30 - 64)          | 375<br>(250 - 511)          | 521<br>(310 - 725)             |
| Liver cancer due to alcohol use                                  | 380<br>(237 - 547)             | --                    | --                     | 16<br>(10 - 24)          | 143<br>(88 - 207)           | 222<br>(130 - 341)             |
| Liver cancer due to other causes                                 | 240<br>(149 - 324)             | --                    | 1<br>(1 - 2)           | 19<br>(13 - 25)          | 96<br>(61 - 133)            | 124<br>(69 - 182)              |
| Larynx cancer                                                    | 472<br>(354 - 590)             | --                    | --                     | 19<br>(14 - 27)          | 218<br>(173 - 285)          | 235<br>(162 - 301)             |
| Tracheal, bronchus and lung cancer                               | 21,004<br>(18,595 - 23,201)    | --                    | --                     | 666<br>(553 - 803)       | 9,025<br>(8,022 - 10,001)   | 11,313<br>(9,362 - 12,921)     |
| Breast cancer                                                    | 5,966<br>(4,846 - 7,295)       | --                    | --                     | 616<br>(502 - 763)       | 2,416<br>(2,033 - 3,086)    | 2,934<br>(2,194 - 3,696)       |
| Cervical cancer                                                  | 637<br>(513 - 771)             | --                    | --                     | 118<br>(85 - 150)        | 248<br>(184 - 310)          | 272<br>(199 - 363)             |
| Uterine cancer                                                   | 759<br>(607 - 941)             | --                    | --                     | 19<br>(13 - 26)          | 280<br>(214 - 362)          | 460<br>(342 - 624)             |
| Prostate cancer                                                  | 5,302<br>(4,067 - 7,924)       | --                    | --                     | 13<br>(8 - 20)           | 875<br>(621 - 1,369)        | 4,413<br>(3,303 - 6,717)       |

Web Table 31- Canada deaths with 95% UI by age, sex, and cause in 2013

| Cause                                         | Both Sexes, All Ages        | Both Sexes, 0-4 Years | Both Sexes, 5-14 Years | Both Sexes, 15-49 Years  | Both Sexes, 50-69 Years     | Both Sexes, 70-80 Years     |
|-----------------------------------------------|-----------------------------|-----------------------|------------------------|--------------------------|-----------------------------|-----------------------------|
| Colon and rectum cancer                       | 10,267<br>(9,137 - 11,534)  | --                    | --                     | 367<br>(323 - 421)       | 3,155<br>(2,862 - 3,476)    | 6,744<br>(5,765 - 7,973)    |
| Lip and oral cavity cancer                    | 783<br>(679 - 886)          | --                    | --                     | 53<br>(43 - 65)          | 337<br>(277 - 396)          | 392<br>(325 - 474)          |
| Nasopharynx cancer                            | 168<br>(130 - 258)          | --                    | 0<br>(0 - 1)           | 29<br>(20 - 47)          | 85<br>(61 - 137)            | 54<br>(38 - 83)             |
| Other pharynx cancer                          | 408<br>(338 - 528)          | --                    | --                     | 26<br>(19 - 36)          | 227<br>(179 - 306)          | 155<br>(122 - 198)          |
| Gallbladder and biliary tract cancer          | 842<br>(658 - 1,199)        | --                    | --                     | 20<br>(15 - 29)          | 232<br>(179 - 355)          | 590<br>(433 - 843)          |
| Pancreatic cancer                             | 4,908<br>(4,440 - 5,397)    | --                    | --                     | 177<br>(149 - 212)       | 1,805<br>(1,616 - 2,009)    | 2,926<br>(2,541 - 3,350)    |
| Malignant skin melanoma                       | 1,071<br>(657 - 1,538)      | --                    | --                     | 173<br>(114 - 264)       | 446<br>(274 - 661)          | 452<br>(264 - 619)          |
| Non-melanoma skin cancer                      | 376<br>(262 - 501)          | --                    | --                     | 11<br>(8 - 15)           | 70<br>(46 - 96)             | 295<br>(205 - 399)          |
| Ovarian cancer                                | 1,958<br>(1,589 - 2,347)    | --                    | --                     | 135<br>(105 - 170)       | 830<br>(677 - 994)          | 992<br>(723 - 1,328)        |
| Testicular cancer                             | 38<br>(26 - 51)             | --                    | --                     | 24<br>(16 - 34)          | 8<br>(5 - 12)               | 6<br>(4 - 10)               |
| Kidney cancer                                 | 1,756<br>(1,467 - 2,155)    | 1<br>(1 - 2)          | 2<br>(1 - 3)           | 83<br>(64 - 106)         | 697<br>(580 - 836)          | 972<br>(734 - 1,305)        |
| Bladder cancer                                | 1,988<br>(1,579 - 2,363)    | --                    | --                     | 30<br>(24 - 38)          | 442<br>(363 - 522)          | 1,515<br>(1,142 - 1,854)    |
| Brain and nervous system cancer               | 2,004<br>(1,670 - 2,369)    | 13<br>(8 - 21)        | 28<br>(21 - 37)        | 318<br>(260 - 383)       | 947<br>(789 - 1,163)        | 698<br>(529 - 862)          |
| Thyroid cancer                                | 183<br>(139 - 224)          | --                    | 0<br>(0 - 0)           | 10<br>(8 - 12)           | 59<br>(47 - 71)             | 115<br>(81 - 151)           |
| Mesothelioma                                  | 505<br>(285 - 674)          | --                    | --                     | 17<br>(12 - 25)          | 210<br>(129 - 297)          | 278<br>(127 - 417)          |
| Hodgkin lymphoma                              | 151<br>(121 - 217)          | 0<br>(0 - 0)          | 1<br>(0 - 2)           | 45<br>(35 - 65)          | 47<br>(35 - 72)             | 58<br>(42 - 79)             |
| Non-Hodgkin lymphoma                          | 3,572<br>(2,189 - 4,449)    | 3<br>(2 - 4)          | 7<br>(4 - 10)          | 228<br>(143 - 315)       | 1,184<br>(710 - 1,468)      | 2,151<br>(1,228 - 2,864)    |
| Multiple myeloma                              | 1,592<br>(1,097 - 2,306)    | --                    | --                     | 47<br>(32 - 72)          | 547<br>(369 - 808)          | 999<br>(679 - 1,453)        |
| Leukemia                                      | 2,714<br>(2,416 - 3,036)    | 18<br>(10 - 28)       | 28<br>(21 - 36)        | 211<br>(184 - 239)       | 751<br>(655 - 855)          | 1,706<br>(1,462 - 2,002)    |
| Other neoplasms                               | 2,989<br>(2,378 - 3,474)    | 29<br>(20 - 40)       | 30<br>(22 - 38)        | 297<br>(257 - 356)       | 855<br>(731 - 1,019)        | 1,779<br>(1,239 - 2,230)    |
| Cardiovascular diseases                       | 82,889<br>(76,449 - 93,275) | 19<br>(14 - 24)       | 9<br>(7 - 11)          | 1,837<br>(1,616 - 2,043) | 13,326<br>(12,201 - 14,739) | 67,698<br>(61,844 - 77,021) |
| Rheumatic heart disease                       | 544<br>(353 - 674)          | 0<br>(0 - 0)          | 0<br>(0 - 0)           | 26<br>(17 - 32)          | 128<br>(87 - 171)           | 390<br>(238 - 513)          |
| Ischemic heart disease                        | 52,732<br>(47,284 - 62,570) | 1<br>(1 - 1)          | 1<br>(1 - 1)           | 1,140<br>(996 - 1,299)   | 9,467<br>(8,594 - 10,811)   | 42,122<br>(37,061 - 50,782) |
| Cerebrovascular disease                       | 17,528<br>(14,129 - 20,918) | 3<br>(2 - 4)          | 2<br>(2 - 3)           | 294<br>(217 - 361)       | 1,841<br>(1,422 - 2,191)    | 15,388<br>(12,433 - 18,589) |
| Ischemic stroke                               | 9,693<br>(7,664 - 12,282)   | 0<br>(0 - 1)          | 0<br>(0 - 0)           | 30<br>(17 - 40)          | 495<br>(346 - 638)          | 9,168<br>(7,231 - 11,707)   |
| Hemorrhagic stroke                            | 7,835<br>(5,781 - 9,439)    | 2<br>(1 - 3)          | 2<br>(1 - 2)           | 264<br>(198 - 324)       | 1,346<br>(1,027 - 1,603)    | 6,220<br>(4,458 - 7,749)    |
| Hypertensive heart disease                    | 1,010<br>(735 - 1,481)      | 0<br>(0 - 0)          | 0<br>(0 - 0)           | 23<br>(16 - 32)          | 143<br>(101 - 189)          | 843<br>(585 - 1,293)        |
| Cardiomyopathy and myocarditis                | 1,517<br>(1,172 - 1,849)    | 12<br>(9 - 16)        | 5<br>(3 - 6)           | 154<br>(110 - 189)       | 452<br>(349 - 591)          | 895<br>(659 - 1,134)        |
| Atrial fibrillation and flutter               | 2,565<br>(1,761 - 3,542)    | --                    | --                     | 4<br>(3 - 5)             | 120<br>(91 - 154)           | 2,441<br>(1,660 - 3,399)    |
| Aortic aneurysm                               | 2,305<br>(1,844 - 3,083)    | --                    | --                     | 43<br>(34 - 54)          | 421<br>(339 - 554)          | 1,840<br>(1,427 - 2,530)    |
| Peripheral vascular disease                   | 869<br>(668 - 1,152)        | --                    | --                     | 4<br>(3 - 6)             | 97<br>(75 - 126)            | 768<br>(574 - 1,049)        |
| Endocarditis                                  | 365<br>(264 - 545)          | 1<br>(0 - 1)          | 0<br>(0 - 0)           | 23<br>(16 - 32)          | 85<br>(60 - 128)            | 256<br>(179 - 402)          |
| Other cardiovascular and circulatory diseases | 3,456<br>(2,447 - 4,451)    | 2<br>(1 - 3)          | 1<br>(0 - 1)           | 126<br>(74 - 160)        | 572<br>(405 - 709)          | 2,755<br>(1,885 - 3,699)    |
| Chronic respiratory diseases                  | 15,540<br>(11,813 - 17,526) | 12<br>(7 - 16)        | 6<br>(4 - 7)           | 168<br>(137 - 193)       | 2,341<br>(1,791 - 2,655)    | 13,013<br>(9,868 - 14,938)  |
| Chronic obstructive pulmonary disease         | 12,622<br>(9,504 - 14,462)  | 4<br>(2 - 7)          | 1<br>(1 - 1)           | 72<br>(52 - 90)          | 1,781<br>(1,299 - 2,086)    | 10,763<br>(8,042 - 12,460)  |
| Pneumoconiosis                                | 173<br>(98 - 247)           | 0<br>(0 - 0)          | 0<br>(0 - 1)           | 5<br>(3 - 7)             | 26<br>(15 - 39)             | 141<br>(77 - 207)           |
| Silicosis                                     | 20<br>(12 - 30)             | 0<br>(0 - 0)          | 0<br>(0 - 0)           | 2<br>(1 - 3)             | 4<br>(2 - 6)                | 14<br>(7 - 22)              |
| Asbestosis                                    | 81<br>(45 - 119)            | 0<br>(0 - 0)          | 0<br>(0 - 0)           | 1<br>(1 - 1)             | 13<br>(7 - 19)              | 68<br>(37 - 102)            |
| Coal workers pneumoconiosis                   | 13<br>(7 - 20)              | 0<br>(0 - 0)          | 0<br>(0 - 0)           | 1<br>(1 - 1)             | 1<br>(1 - 2)                | 11<br>(6 - 17)              |
| Other pneumoconiosis                          | 58<br>(33 - 86)             | 0<br>(0 - 0)          | 0<br>(0 - 0)           | 1<br>(1 - 2)             | 8<br>(5 - 13)               | 48<br>(26 - 73)             |

Web Table 31- Canada deaths with 95% UI by age, sex, and cause in 2013

| Cause                                               | Both Sexes, All Ages        | Both Sexes, 0-4 Years | Both Sexes, 5-14 Years | Both Sexes, 15-49 Years | Both Sexes, 50-69 Years  | Both Sexes, 70-80 Years     |
|-----------------------------------------------------|-----------------------------|-----------------------|------------------------|-------------------------|--------------------------|-----------------------------|
| Asthma                                              | 318<br>(212 - 442)          | 1<br>(0 - 1)          | 2<br>(2 - 3)           | 34<br>(25 - 43)         | 66<br>(45 - 90)          | 214<br>(129 - 323)          |
| Interstitial lung disease and pulmonary sarcoidosis | 2,304<br>(1,584 - 3,372)    | 2<br>(1 - 3)          | 1<br>(1 - 2)           | 49<br>(37 - 65)         | 443<br>(324 - 622)       | 1,809<br>(1,175 - 2,718)    |
| Other chronic respiratory diseases                  | 124<br>(84 - 166)           | 4<br>(3 - 7)          | 1<br>(0 - 1)           | 8<br>(5 - 10)           | 25<br>(18 - 34)          | 86<br>(54 - 123)            |
| Cirrhosis                                           | 4,144<br>(3,779 - 4,549)    | 2<br>(2 - 4)          | 1<br>(1 - 1)           | 431<br>(372 - 493)      | 1,951<br>(1,743 - 2,185) | 1,758<br>(1,527 - 2,015)    |
| Cirrhosis due to hepatitis B                        | 346<br>(230 - 513)          | 0<br>(0 - 0)          | 0<br>(0 - 0)           | 40<br>(26 - 59)         | 157<br>(106 - 230)       | 148<br>(91 - 243)           |
| Cirrhosis due to hepatitis C                        | 2,043<br>(1,544 - 2,504)    | 1<br>(0 - 1)          | 0<br>(0 - 1)           | 218<br>(147 - 281)      | 972<br>(709 - 1,225)     | 852<br>(597 - 1,077)        |
| Cirrhosis due to alcohol use                        | 1,586<br>(1,202 - 2,079)    | --                    | --                     | 138<br>(90 - 205)       | 738<br>(541 - 993)       | 711<br>(528 - 933)          |
| Cirrhosis due to other causes                       | 168<br>(109 - 250)          | 2<br>(1 - 3)          | 1<br>(0 - 1)           | 35<br>(23 - 53)         | 84<br>(51 - 129)         | 46<br>(28 - 74)             |
| Digestive diseases                                  | 6,075<br>(5,244 - 6,922)    | 5<br>(4 - 8)          | 4<br>(3 - 5)           | 171<br>(142 - 197)      | 947<br>(794 - 1,076)     | 4,947<br>(4,250 - 5,773)    |
| Peptic ulcer disease                                | 630<br>(485 - 841)          | 0<br>(0 - 0)          | 0<br>(0 - 0)           | 18<br>(14 - 24)         | 113<br>(87 - 141)        | 498<br>(367 - 691)          |
| Gastritis and duodenitis                            | 84<br>(55 - 151)            | 0<br>(0 - 0)          | 0<br>(0 - 0)           | 6<br>(4 - 9)            | 18<br>(11 - 30)          | 60<br>(35 - 114)            |
| Appendicitis                                        | 73<br>(44 - 109)            | 0<br>(0 - 0)          | 0<br>(0 - 1)           | 6<br>(4 - 8)            | 16<br>(10 - 24)          | 50<br>(28 - 81)             |
| Paralytic ileus and intestinal obstruction          | 1,125<br>(722 - 1,675)      | 1<br>(1 - 2)          | 1<br>(1 - 1)           | 26<br>(16 - 36)         | 124<br>(77 - 182)        | 973<br>(618 - 1,471)        |
| Inguinal, femoral, and abdominal hernia             | 175<br>(84 - 255)           | 0<br>(0 - 0)          | 0<br>(0 - 0)           | 4<br>(2 - 5)            | 23<br>(12 - 32)          | 148<br>(68 - 225)           |
| Inflammatory bowel disease                          | 496<br>(366 - 775)          | 1<br>(1 - 2)          | 0<br>(0 - 1)           | 20<br>(15 - 26)         | 82<br>(61 - 109)         | 392<br>(272 - 649)          |
| Vascular intestinal disorders                       | 1,206<br>(729 - 1,788)      | 0<br>(0 - 1)          | 0<br>(0 - 0)           | 20<br>(12 - 31)         | 207<br>(132 - 307)       | 978<br>(576 - 1,470)        |
| Gallbladder and biliary diseases                    | 632<br>(459 - 820)          | 0<br>(0 - 0)          | 0<br>(0 - 0)           | 12<br>(9 - 15)          | 79<br>(55 - 98)          | 540<br>(392 - 719)          |
| Pancreatitis                                        | 447<br>(325 - 586)          | 0<br>(0 - 0)          | 0<br>(0 - 0)           | 35<br>(23 - 45)         | 123<br>(84 - 161)        | 289<br>(201 - 397)          |
| Other digestive diseases                            | 1,207<br>(898 - 1,559)      | 1<br>(1 - 2)          | 1<br>(0 - 1)           | 25<br>(18 - 31)         | 160<br>(121 - 195)       | 1,020<br>(737 - 1,355)      |
| Neurological disorders                              | 34,236<br>(28,417 - 39,143) | 40<br>(29 - 53)       | 16<br>(13 - 20)        | 379<br>(323 - 452)      | 1,968<br>(1,688 - 2,226) | 31,833<br>(26,029 - 36,736) |
| Alzheimer disease and other dementias               | 29,372<br>(23,461 - 34,426) | --                    | --                     | 1<br>(0 - 2)            | 746<br>(557 - 941)       | 28,625<br>(22,719 - 33,638) |
| Parkinson disease                                   | 2,267<br>(1,623 - 2,878)    | --                    | --                     | 3<br>(3 - 4)            | 153<br>(118 - 197)       | 2,111<br>(1,488 - 2,704)    |
| Epilepsy                                            | 314<br>(262 - 378)          | 5<br>(3 - 7)          | 5<br>(3 - 6)           | 104<br>(85 - 133)       | 81<br>(66 - 102)         | 119<br>(90 - 152)           |
| Multiple sclerosis                                  | 576<br>(337 - 741)          | --                    | --                     | 109<br>(70 - 158)       | 310<br>(171 - 417)       | 157<br>(82 - 221)           |
| Other neurological disorders                        | 1,706<br>(1,490 - 1,944)    | 35<br>(25 - 48)       | 11<br>(9 - 14)         | 161<br>(131 - 190)      | 678<br>(573 - 789)       | 820<br>(691 - 981)          |
| Mental and substance use disorders                  | 2,190<br>(1,676 - 2,541)    | 1<br>(0 - 1)          | 0<br>(0 - 0)           | 972<br>(656 - 1,146)    | 835<br>(622 - 1,020)     | 382<br>(279 - 478)          |
| Schizophrenia                                       | 117<br>(66 - 166)           | --                    | --                     | 7<br>(4 - 10)           | 24<br>(13 - 33)          | 87<br>(45 - 132)            |
| Alcohol use disorders                               | 854<br>(551 - 1,108)        | --                    | --                     | 194<br>(115 - 257)      | 450<br>(287 - 597)       | 211<br>(135 - 299)          |
| Drug use disorders                                  | 1,212<br>(823 - 1,399)      | 1<br>(0 - 1)          | --                     | 765<br>(494 - 913)      | 361<br>(245 - 439)       | 85<br>(65 - 106)            |
| Opioid use disorders                                | 497<br>(332 - 581)          | 0<br>(0 - 0)          | --                     | 321<br>(202 - 386)      | 140<br>(93 - 173)        | 36<br>(28 - 46)             |
| Cocaine use disorders                               | 60<br>(42 - 71)             | 0<br>(0 - 0)          | --                     | 41<br>(28 - 52)         | 15<br>(11 - 19)          | 4<br>(3 - 5)                |
| Amphetamine use disorders                           | 37<br>(27 - 43)             | 0<br>(0 - 0)          | --                     | 23<br>(15 - 27)         | 12<br>(8 - 15)           | 3<br>(2 - 3)                |
| Other drug use disorders                            | 618<br>(420 - 714)          | 0<br>(0 - 0)          | --                     | 380<br>(248 - 460)      | 195<br>(135 - 237)       | 42<br>(32 - 55)             |
| Eating disorders                                    | 6<br>(4 - 9)                | --                    | 0<br>(0 - 0)           | 6<br>(4 - 9)            | --                       | --                          |
| Anorexia nervosa                                    | 6<br>(4 - 9)                | --                    | 0<br>(0 - 0)           | 6<br>(4 - 9)            | --                       | --                          |
| Diabetes, urogenital, blood, and endocrine diseases | 17,723<br>(15,504 - 20,289) | 67<br>(48 - 89)       | 26<br>(20 - 33)        | 609<br>(538 - 681)      | 3,290<br>(2,950 - 3,692) | 13,731<br>(11,783 - 15,880) |
| Diabetes mellitus                                   | 8,128<br>(7,146 - 9,339)    | 3<br>(2 - 4)          | 1<br>(1 - 2)           | 244<br>(210 - 282)      | 1,836<br>(1,608 - 2,070) | 6,044<br>(5,137 - 7,135)    |
| Acute glomerulonephritis                            | 5<br>(4 - 7)                | 0<br>(0 - 0)          | 0<br>(0 - 0)           | 2<br>(1 - 2)            | 1<br>(1 - 1)             | 2<br>(1 - 4)                |
| Chronic kidney disease                              | 5,590<br>(4,412 - 8,041)    | 5<br>(3 - 7)          | 2<br>(1 - 3)           | 97<br>(77 - 141)        | 673<br>(542 - 972)       | 4,814<br>(3,732 - 7,000)    |
| Chronic kidney disease due to diabetes mellitus     | 1,027<br>(672 - 2,107)      | 1<br>(1 - 2)          | 0<br>(0 - 1)           | 34<br>(23 - 58)         | 235<br>(158 - 383)       | 757<br>(464 - 1,674)        |

Web Table 31- Canada deaths with 95% UI by age, sex, and cause in 2013

| Cause                                               | Both Sexes, All Ages        | Both Sexes, 0-4 Years | Both Sexes, 5-14 Years | Both Sexes, 15-49 Years  | Both Sexes, 50-69 Years  | Both Sexes, 70-80 Years  |
|-----------------------------------------------------|-----------------------------|-----------------------|------------------------|--------------------------|--------------------------|--------------------------|
| Chronic kidney disease due to hypertension          | 2,182<br>(1,540 - 3,055)    | 0<br>(0 - 1)          | 0<br>(0 - 0)           | 24<br>(15 - 34)          | 229<br>(163 - 338)       | 1,929<br>(1,339 - 2,732) |
| Chronic kidney disease due to glomerulonephritis    | 103<br>(57 - 143)           | 1<br>(0 - 1)          | 0<br>(0 - 0)           | 6<br>(4 - 8)             | 19<br>(11 - 26)          | 78<br>(40 - 115)         |
| Chronic kidney disease due to other causes          | 2,278<br>(1,478 - 3,807)    | 3<br>(2 - 4)          | 1<br>(1 - 2)           | 34<br>(21 - 59)          | 190<br>(111 - 366)       | 2,050<br>(1,306 - 3,396) |
| Urinary diseases and male infertility               | 1,699<br>(1,051 - 2,207)    | 3<br>(2 - 4)          | 1<br>(0 - 1)           | 29<br>(18 - 36)          | 160<br>(98 - 196)        | 1,506<br>(916 - 2,004)   |
| Interstitial nephritis and urinary tract infections | 1,487<br>(874 - 1,993)      | 2<br>(1 - 2)          | 0<br>(0 - 0)           | 21<br>(12 - 27)          | 119<br>(69 - 149)        | 1,345<br>(777 - 1,839)   |
| Urolithiasis                                        | 51<br>(31 - 85)             | --                    | 0<br>(0 - 0)           | 2<br>(1 - 4)             | 9<br>(5 - 15)            | 39<br>(23 - 67)          |
| Other urinary diseases                              | 161<br>(102 - 272)          | 1<br>(1 - 2)          | 0<br>(0 - 0)           | 5<br>(3 - 8)             | 32<br>(19 - 48)          | 122<br>(72 - 224)        |
| Gynecological diseases                              | 12<br>(8 - 20)              | --                    | --                     | 1<br>(1 - 2)             | 2<br>(1 - 3)             | 9<br>(5 - 16)            |
| Uterine fibroids                                    | 3<br>(2 - 6)                | --                    | --                     | 0<br>(0 - 0)             | 0<br>(0 - 1)             | 3<br>(1 - 5)             |
| Polycystic ovarian syndrome                         | 0<br>(0 - 0)                | --                    | --                     | 0<br>(0 - 0)             | 0<br>(0 - 0)             | --                       |
| Endometriosis                                       | 0<br>(0 - 0)                | --                    | --                     | 0<br>(0 - 0)             | 0<br>(0 - 0)             | --                       |
| Genital prolapse                                    | 3<br>(2 - 5)                | --                    | --                     | 0<br>(0 - 0)             | 0<br>(0 - 1)             | 2<br>(1 - 4)             |
| Other gynecological diseases                        | 5<br>(4 - 9)                | --                    | --                     | 1<br>(0 - 1)             | 1<br>(1 - 1)             | 4<br>(2 - 7)             |
| Hemoglobinopathies and hemolytic anemias            | 180<br>(122 - 240)          | 4<br>(2 - 6)          | 3<br>(2 - 4)           | 15<br>(10 - 20)          | 31<br>(22 - 43)          | 128<br>(85 - 175)        |
| Thalassemias                                        | 9<br>(6 - 12)               | 1<br>(1 - 2)          | 1<br>(1 - 2)           | 4<br>(3 - 5)             | 2<br>(1 - 2)             | 1<br>(1 - 1)             |
| Sickle cell disorders                               | 27<br>(19 - 37)             | 2<br>(1 - 2)          | 1<br>(1 - 2)           | 7<br>(5 - 9)             | 13<br>(9 - 18)           | 5<br>(3 - 7)             |
| G6PD deficiency                                     | 1<br>(1 - 1)                | 0<br>(0 - 0)          | 0<br>(0 - 0)           | 0<br>(0 - 0)             | 0<br>(0 - 0)             | 0<br>(0 - 0)             |
| Other hemoglobinopathies and hemolytic anemias      | 143<br>(96 - 195)           | 1<br>(0 - 1)          | 0<br>(0 - 0)           | 4<br>(3 - 5)             | 16<br>(11 - 23)          | 122<br>(81 - 168)        |
| Endocrine, metabolic, blood, and immune disorders   | 2,108<br>(1,567 - 2,587)    | 53<br>(36 - 72)       | 19<br>(14 - 25)        | 221<br>(169 - 272)       | 586<br>(411 - 734)       | 1,228<br>(872 - 1,601)   |
| Musculoskeletal disorders                           | 1,074<br>(836 - 1,309)      | --                    | 2<br>(1 - 2)           | 73<br>(55 - 87)          | 287<br>(228 - 340)       | 713<br>(529 - 921)       |
| Rheumatoid arthritis                                | 336<br>(243 - 452)          | --                    | 0<br>(0 - 0)           | 5<br>(4 - 8)             | 69<br>(51 - 93)          | 261<br>(177 - 375)       |
| Other musculoskeletal disorders                     | 738<br>(558 - 905)          | --                    | 1<br>(1 - 2)           | 67<br>(50 - 80)          | 217<br>(165 - 259)       | 452<br>(315 - 610)       |
| Other non-communicable diseases                     | 1,618<br>(1,407 - 1,901)    | 688<br>(536 - 938)    | 35<br>(27 - 43)        | 188<br>(161 - 220)       | 226<br>(192 - 265)       | 482<br>(373 - 622)       |
| Congenital anomalies                                | 1,076<br>(917 - 1,302)      | 544<br>(421 - 725)    | 34<br>(26 - 43)        | 177<br>(151 - 211)       | 176<br>(147 - 213)       | 144<br>(114 - 191)       |
| Neural tube defects                                 | 32<br>(23 - 46)             | 25<br>(16 - 37)       | 1<br>(1 - 2)           | 4<br>(3 - 5)             | 1<br>(1 - 2)             | 1<br>(0 - 1)             |
| Congenital heart anomalies                          | 351<br>(287 - 446)          | 176<br>(129 - 252)    | 14<br>(10 - 19)        | 78<br>(64 - 96)          | 50<br>(39 - 65)          | 33<br>(23 - 51)          |
| Cleft lip and cleft palate                          | 0<br>(0 - 1)                | 0<br>(0 - 1)          | --                     | --                       | --                       | --                       |
| Down syndrome                                       | 116<br>(78 - 148)           | 19<br>(11 - 29)       | 1<br>(1 - 2)           | 27<br>(16 - 36)          | 65<br>(42 - 88)          | 4<br>(2 - 6)             |
| Chromosomal unbalanced rearrangements               | 77<br>(53 - 112)            | 68<br>(45 - 101)      | 2<br>(1 - 3)           | 4<br>(3 - 5)             | 3<br>(2 - 4)             | 0<br>(0 - 1)             |
| Other congenital anomalies                          | 499<br>(407 - 625)          | 256<br>(188 - 359)    | 16<br>(12 - 22)        | 65<br>(51 - 84)          | 56<br>(41 - 74)          | 106<br>(82 - 140)        |
| Skin and subcutaneous diseases                      | 400<br>(291 - 530)          | 2<br>(1 - 3)          | 0<br>(0 - 1)           | 10<br>(7 - 13)           | 50<br>(35 - 62)          | 338<br>(237 - 465)       |
| Cellulitis                                          | 143<br>(78 - 222)           | 0<br>(0 - 1)          | 0<br>(0 - 0)           | 4<br>(2 - 5)             | 20<br>(12 - 27)          | 119<br>(59 - 196)        |
| Pyoderma                                            | 146<br>(89 - 209)           | 1<br>(0 - 1)          | 0<br>(0 - 0)           | 4<br>(2 - 5)             | 20<br>(12 - 26)          | 121<br>(73 - 181)        |
| Decubitus ulcer                                     | 73<br>(47 - 113)            | 0<br>(0 - 0)          | 0<br>(0 - 0)           | 1<br>(1 - 2)             | 5<br>(4 - 8)             | 66<br>(41 - 108)         |
| Other skin and subcutaneous diseases                | 38<br>(19 - 77)             | 0<br>(0 - 1)          | 0<br>(0 - 0)           | 2<br>(1 - 2)             | 5<br>(3 - 8)             | 31<br>(12 - 69)          |
| Sudden infant death syndrome                        | 142<br>(82 - 252)           | 142<br>(82 - 252)     | --                     | --                       | --                       | --                       |
| Injuries                                            | 16,121<br>(14,527 - 17,699) | 179<br>(132 - 243)    | 166<br>(144 - 191)     | 5,193<br>(4,813 - 5,677) | 3,382<br>(3,076 - 3,786) | 7,200<br>(5,779 - 8,537) |
| Transport injuries                                  | 3,239<br>(2,943 - 3,622)    | 49<br>(32 - 70)       | 79<br>(64 - 95)        | 1,687<br>(1,507 - 1,879) | 800<br>(704 - 917)       | 624<br>(523 - 750)       |
| Road injuries                                       | 2,944<br>(2,682 - 3,319)    | 44<br>(29 - 64)       | 70<br>(57 - 85)        | 1,516<br>(1,368 - 1,686) | 719<br>(637 - 831)       | 594<br>(494 - 716)       |
| Pedestrian road injuries                            | 614<br>(405 - 820)          | 18<br>(10 - 28)       | 23<br>(16 - 32)        | 171<br>(105 - 245)       | 171<br>(110 - 239)       | 230<br>(150 - 319)       |

Web Table 31- Canada deaths with 95% UI by age, sex, and cause in 2013

| Cause                                           | Both Sexes, All Ages     | Both Sexes, 0-4 Years | Both Sexes, 5-14 Years | Both Sexes, 15-49 Years  | Both Sexes, 50-69 Years  | Both Sexes, 70-80 Years  |
|-------------------------------------------------|--------------------------|-----------------------|------------------------|--------------------------|--------------------------|--------------------------|
| Cyclist road injuries                           | 155<br>(88 - 199)        | 2<br>(1 - 5)          | 11<br>(7 - 17)         | 59<br>(32 - 77)          | 49<br>(25 - 67)          | 34<br>(16 - 53)          |
| Motorcyclist road injuries                      | 318<br>(172 - 417)       | 1<br>(0 - 1)          | 3<br>(2 - 6)           | 226<br>(126 - 304)       | 75<br>(36 - 109)         | 12<br>(6 - 19)           |
| Motor vehicle road injuries                     | 1,839<br>(1,604 - 2,286) | 23<br>(14 - 35)       | 31<br>(23 - 43)        | 1,055<br>(923 - 1,247)   | 416<br>(339 - 562)       | 313<br>(238 - 425)       |
| Other road injuries                             | 18<br>(11 - 27)          | 1<br>(0 - 1)          | 1<br>(0 - 1)           | 5<br>(3 - 7)             | 7<br>(4 - 12)            | 5<br>(2 - 8)             |
| Other transport injuries                        | 295<br>(199 - 369)       | 4<br>(2 - 7)          | 8<br>(5 - 13)          | 171<br>(112 - 223)       | 81<br>(49 - 112)         | 30<br>(17 - 46)          |
| Unintentional injuries                          | 8,084<br>(6,615 - 9,468) | 123<br>(90 - 169)     | 59<br>(49 - 77)        | 761<br>(672 - 952)       | 1,093<br>(953 - 1,229)   | 6,047<br>(4,640 - 7,395) |
| Falls                                           | 5,064<br>(3,563 - 6,323) | 9<br>(6 - 14)         | 5<br>(3 - 7)           | 157<br>(121 - 188)       | 435<br>(295 - 528)       | 4,458<br>(3,082 - 5,680) |
| Drowning                                        | 383<br>(297 - 589)       | 32<br>(20 - 54)       | 21<br>(15 - 34)        | 181<br>(138 - 283)       | 98<br>(71 - 146)         | 51<br>(38 - 74)          |
| Fire, heat, and hot substances                  | 373<br>(310 - 486)       | 20<br>(12 - 31)       | 11<br>(8 - 16)         | 88<br>(70 - 121)         | 93<br>(74 - 123)         | 161<br>(125 - 213)       |
| Poisonings                                      | 138<br>(111 - 230)       | 1<br>(1 - 2)          | 1<br>(1 - 1)           | 55<br>(40 - 104)         | 52<br>(40 - 79)          | 29<br>(21 - 45)          |
| Exposure to mechanical forces                   | 308<br>(266 - 363)       | 25<br>(15 - 39)       | 11<br>(8 - 14)         | 119<br>(99 - 151)        | 89<br>(72 - 110)         | 64<br>(48 - 84)          |
| Unintentional firearm injuries                  | 20<br>(16 - 25)          | 0<br>(0 - 1)          | 2<br>(1 - 3)           | 11<br>(8 - 15)           | 5<br>(3 - 7)             | 2<br>(1 - 2)             |
| Unintentional suffocation                       | 65<br>(36 - 93)          | 19<br>(9 - 32)        | 4<br>(2 - 6)           | 17<br>(9 - 24)           | 7<br>(4 - 10)            | 19<br>(8 - 32)           |
| Other exposure to mechanical forces             | 224<br>(191 - 269)       | 6<br>(4 - 10)         | 5<br>(4 - 7)           | 91<br>(73 - 118)         | 78<br>(62 - 98)          | 44<br>(33 - 57)          |
| Adverse effects of medical treatment            | 532<br>(385 - 672)       | 6<br>(4 - 9)          | 2<br>(1 - 2)           | 48<br>(37 - 69)          | 115<br>(80 - 157)        | 362<br>(245 - 473)       |
| Animal contact                                  | 26<br>(17 - 35)          | 1<br>(1 - 2)          | 1<br>(1 - 2)           | 5<br>(3 - 7)             | 10<br>(6 - 14)           | 8<br>(5 - 13)            |
| Venomous animal contact                         | 7<br>(4 - 10)            | 0<br>(0 - 0)          | 0<br>(0 - 0)           | 2<br>(1 - 3)             | 4<br>(2 - 6)             | 1<br>(0 - 1)             |
| Non-venomous animal contact                     | 19<br>(13 - 26)          | 1<br>(1 - 2)          | 1<br>(0 - 1)           | 3<br>(2 - 5)             | 7<br>(4 - 9)             | 7<br>(4 - 11)            |
| Foreign body                                    | 1,190<br>(796 - 1,681)   | 25<br>(16 - 38)       | 7<br>(5 - 11)          | 86<br>(62 - 126)         | 180<br>(126 - 257)       | 892<br>(564 - 1,283)     |
| Pulmonary aspiration and foreign body in airway | 1,183<br>(790 - 1,675)   | 25<br>(16 - 38)       | 7<br>(5 - 11)          | 84<br>(60 - 124)         | 178<br>(125 - 256)       | 889<br>(562 - 1,281)     |
| Foreign body in other body part                 | 7<br>(4 - 11)            | 0<br>(0 - 0)          | 0<br>(0 - 0)           | 2<br>(1 - 3)             | 1<br>(1 - 2)             | 3<br>(1 - 7)             |
| Other unintentional injuries                    | 70<br>(55 - 88)          | 3<br>(2 - 5)          | 1<br>(1 - 2)           | 24<br>(16 - 34)          | 19<br>(12 - 30)          | 22<br>(14 - 33)          |
| Self-harm and interpersonal violence            | 4,798<br>(4,130 - 5,648) | 7<br>(4 - 13)         | 28<br>(21 - 36)        | 2,744<br>(2,358 - 3,196) | 1,490<br>(1,218 - 1,829) | 529<br>(437 - 686)       |
| Self-harm                                       | 4,317<br>(3,674 - 5,141) | --                    | 22<br>(15 - 29)        | 2,414<br>(2,049 - 2,843) | 1,392<br>(1,123 - 1,729) | 489<br>(399 - 648)       |
| Interpersonal violence                          | 481<br>(341 - 624)       | 7<br>(4 - 13)         | 6<br>(4 - 9)           | 330<br>(222 - 422)       | 97<br>(65 - 147)         | 40<br>(24 - 65)          |
| Assault by firearm                              | 172<br>(92 - 250)        | 1<br>(0 - 2)          | 2<br>(1 - 3)           | 136<br>(71 - 193)        | 27<br>(15 - 46)          | 7<br>(3 - 13)            |
| Assault by sharp object                         | 158<br>(99 - 234)        | 1<br>(0 - 2)          | 1<br>(1 - 2)           | 113<br>(68 - 170)        | 31<br>(19 - 51)          | 11<br>(6 - 20)           |
| Assault by other means                          | 151<br>(102 - 216)       | 6<br>(3 - 10)         | 3<br>(2 - 5)           | 81<br>(54 - 121)         | 39<br>(25 - 59)          | 22<br>(13 - 37)          |
| Forces of nature, war, and legal intervention   | 0<br>(0 - 0)             | 0<br>(0 - 0)          | --                     | --                       | --                       | 0<br>(0 - 0)             |
| Exposure to forces of nature                    | 0<br>(0 - 0)             | 0<br>(0 - 0)          | --                     | --                       | --                       | 0<br>(0 - 0)             |

Web Table 31- Canada deaths with 95% UI by age, sex, and cause in 2013

| Cause                                                              | Males, All Ages                | Males, 0-4 Years       | Males, 5-14 Years  | Males, 15-49 Years       | Males, 50-69 Years          | Males, 70-80 Years          |
|--------------------------------------------------------------------|--------------------------------|------------------------|--------------------|--------------------------|-----------------------------|-----------------------------|
| All causes                                                         | 135,960<br>(129,305 - 142,962) | 1,184<br>(948 - 1,483) | 226<br>(197 - 259) | 9,207<br>(8,570 - 9,886) | 34,588<br>(32,404 - 36,882) | 90,755<br>(86,932 - 94,733) |
| Communicable, maternal, neonatal, and nutritional diseases         | 5,818<br>(4,885 - 7,200)       | 583<br>(448 - 729)     | 12<br>(9 - 15)     | 345<br>(280 - 421)       | 796<br>(645 - 954)          | 4,083<br>(3,158 - 5,456)    |
| HIV/AIDS and tuberculosis                                          | 339<br>(247 - 472)             | 0<br>(0 - 1)           | 0<br>(0 - 0)       | 171<br>(116 - 248)       | 107<br>(70 - 172)           | 60<br>(45 - 79)             |
| Tuberculosis                                                       | 76<br>(62 - 95)                | 0<br>(0 - 0)           | 0<br>(0 - 0)       | 5<br>(3 - 6)             | 20<br>(16 - 25)             | 52<br>(39 - 70)             |
| HIV/AIDS                                                           | 263<br>(173 - 392)             | 0<br>(0 - 1)           | 0<br>(0 - 0)       | 167<br>(112 - 243)       | 88<br>(50 - 153)            | 8<br>(3 - 19)               |
| HIV/AIDS resulting in mycobacterial infection                      | 14<br>(9 - 22)                 | 0<br>(0 - 0)           | 0<br>(0 - 0)       | 9<br>(5 - 13)            | 5<br>(3 - 9)                | 1<br>(0 - 1)                |
| HIV/AIDS resulting in other diseases                               | 249<br>(164 - 371)             | 0<br>(0 - 0)           | 0<br>(0 - 0)       | 158<br>(106 - 229)       | 83<br>(47 - 143)            | 8<br>(3 - 18)               |
| Diarrrhea, lower respiratory, and other common infectious diseases | 4,421<br>(3,508 - 5,824)       | 51<br>(34 - 73)        | 9<br>(6 - 11)      | 130<br>(99 - 164)        | 570<br>(448 - 712)          | 3,661<br>(2,753 - 5,055)    |
| Diarrrheal diseases                                                | 381<br>(255 - 558)             | 7<br>(4 - 11)          | 1<br>(0 - 1)       | 7<br>(5 - 10)            | 42<br>(29 - 61)             | 325<br>(201 - 508)          |
| Intestinal infectious diseases                                     | 5<br>(2 - 11)                  | 1<br>(0 - 3)           | 2<br>(0 - 2)       | 2<br>(1 - 5)             | 1<br>(0 - 3)                | 1<br>(0 - 3)                |
| Typhoid fever                                                      | 2<br>(1 - 5)                   | 0<br>(0 - 1)           | 0<br>(0 - 1)       | 1<br>(0 - 3)             | 0<br>(0 - 1)                | 0<br>(0 - 0)                |
| Paratyphoid fever                                                  | 1<br>(0 - 2)                   | 0<br>(0 - 0)           | 0<br>(0 - 0)       | 0<br>(0 - 1)             | 0<br>(0 - 0)                | 0<br>(0 - 0)                |
| Other intestinal infectious diseases                               | 2<br>(0 - 6)                   | 0<br>(0 - 3)           | 0<br>(0 - 1)       | 0<br>(0 - 2)             | 0<br>(0 - 2)                | 0<br>(0 - 2)                |
| Lower respiratory infections                                       | 3,911<br>(3,001 - 5,330)       | 27<br>(16 - 43)        | 4<br>(2 - 5)       | 100<br>(72 - 131)        | 496<br>(380 - 632)          | 3,284<br>(2,371 - 4,668)    |
| Upper respiratory infections                                       | 3<br>(1 - 8)                   | 0<br>(0 - 0)           | 0<br>(0 - 0)       | 0<br>(0 - 1)             | 1<br>(0 - 2)                | 2<br>(0 - 6)                |
| Otitis media                                                       | 4<br>(3 - 6)                   | 0<br>(0 - 1)           | 0<br>(0 - 0)       | 1<br>(1 - 1)             | 1<br>(1 - 1)                | 2<br>(1 - 3)                |
| Meningitis                                                         | 62<br>(49 - 74)                | 11<br>(6 - 18)         | 2<br>(1 - 2)       | 10<br>(7 - 12)           | 16<br>(12 - 20)             | 24<br>(18 - 31)             |
| Pneumococcal meningitis                                            | 28<br>(21 - 35)                | 4<br>(2 - 7)           | 1<br>(0 - 1)       | 4<br>(3 - 6)             | 7<br>(5 - 10)               | 11<br>(8 - 15)              |
| H influenzae type B meningitis                                     | 5<br>(3 - 7)                   | 2<br>(1 - 4)           | 0<br>(0 - 0)       | 1<br>(0 - 1)             | 1<br>(0 - 1)                | 1<br>(1 - 2)                |
| Meningococcal meningitis                                           | 11<br>(8 - 14)                 | 2<br>(1 - 3)           | 0<br>(0 - 1)       | 2<br>(1 - 3)             | 3<br>(1 - 4)                | 4<br>(2 - 7)                |
| Other meningitis                                                   | 19<br>(13 - 24)                | 3<br>(1 - 5)           | 0<br>(0 - 0)       | 3<br>(2 - 4)             | 5<br>(3 - 8)                | 7<br>(4 - 11)               |
| Encephalitis                                                       | 38<br>(25 - 51)                | 3<br>(2 - 5)           | 1<br>(1 - 2)       | 7<br>(4 - 10)            | 11<br>(6 - 16)              | 16<br>(9 - 23)              |
| Diphtheria                                                         | 0<br>(0 - 2)                   | 0<br>(0 - 1)           | 0<br>(0 - 0)       | 0<br>(0 - 1)             | 0<br>(0 - 1)                | --                          |
| Whooping cough                                                     | 1<br>(1 - 2)                   | 0<br>(0 - 1)           | 0<br>(0 - 0)       | 1<br>(0 - 1)             | 0<br>(0 - 0)                | --                          |
| Tetanus                                                            | 2<br>(1 - 2)                   | 0<br>(0 - 0)           | 0<br>(0 - 0)       | 1<br>(0 - 1)             | 0<br>(0 - 1)                | 0<br>(0 - 0)                |
| Measles                                                            | 0<br>(0 - 0)                   | 0<br>(0 - 0)           | 0<br>(0 - 0)       | 0<br>(0 - 0)             | 0<br>(0 - 0)                | --                          |
| Varicella and herpes zoster                                        | 13<br>(3 - 43)                 | 1<br>(0 - 4)           | 0<br>(0 - 1)       | 2<br>(0 - 4)             | 2<br>(0 - 5)                | 8<br>(0 - 39)               |
| Neglected tropical diseases and malaria                            | 15<br>(9 - 18)                 | 0<br>(0 - 1)           | 1<br>(0 - 1)       | 4<br>(3 - 5)             | 5<br>(3 - 7)                | 4<br>(2 - 6)                |
| Cysticercosis                                                      | 0<br>(0 - 0)                   | 0<br>(0 - 0)           | 0<br>(0 - 0)       | 0<br>(0 - 0)             | 0<br>(0 - 0)                | 0<br>(0 - 0)                |
| Cystic echinococcosis                                              | 1<br>(1 - 1)                   | 0<br>(0 - 0)           | 0<br>(0 - 0)       | 0<br>(0 - 0)             | 0<br>(0 - 1)                | 0<br>(0 - 0)                |
| Dengue                                                             | 2<br>(1 - 2)                   | 0<br>(0 - 0)           | 0<br>(0 - 0)       | 1<br>(1 - 1)             | 0<br>(0 - 1)                | 0<br>(0 - 0)                |
| Rabies                                                             | 1<br>(1 - 2)                   | 0<br>(0 - 0)           | 0<br>(0 - 0)       | 1<br>(0 - 1)             | 0<br>(0 - 1)                | 0<br>(0 - 0)                |
| Other neglected tropical diseases                                  | 10<br>(5 - 13)                 | 0<br>(0 - 0)           | 0<br>(0 - 0)       | 2<br>(2 - 3)             | 4<br>(2 - 6)                | 4<br>(1 - 5)                |
| Maternal disorders                                                 | --                             | --                     | --                 | --                       | --                          | --                          |
| Maternal hemorrhage                                                | --                             | --                     | --                 | --                       | --                          | --                          |
| Maternal sepsis and other maternal infections                      | --                             | --                     | --                 | --                       | --                          | --                          |
| Maternal hypertensive disorders                                    | --                             | --                     | --                 | --                       | --                          | --                          |
| Maternal obstructed labor                                          | --                             | --                     | --                 | --                       | --                          | --                          |
| Maternal abortive outcome                                          | --                             | --                     | --                 | --                       | --                          | --                          |
| Indirect maternal deaths                                           | --                             | --                     | --                 | --                       | --                          | --                          |



Web Table 31- Canada deaths with 95% UI by age, sex, and cause in 2013

| Cause                                                            | Males, All Ages                | Males, 0-4 Years   | Males, 5-14 Years | Males, 15-49 Years       | Males, 50-69 Years          | Males, 70-80 Years          |
|------------------------------------------------------------------|--------------------------------|--------------------|-------------------|--------------------------|-----------------------------|-----------------------------|
| Late maternal deaths                                             | --                             | --                 | --                | --                       | --                          | --                          |
| Maternal deaths aggravated by HIV/AIDS                           | --                             | --                 | --                | --                       | --                          | --                          |
| Other maternal disorders                                         | --                             | --                 | --                | --                       | --                          | --                          |
| Neonatal disorders                                               | 520<br>(399 - 651)             | 520<br>(399 - 651) | --                | --                       | --                          | --                          |
| Neonatal preterm birth complications                             | 260<br>(177 - 361)             | 260<br>(177 - 361) | --                | --                       | --                          | --                          |
| Neonatal encephalopathy due to birth asphyxia and trauma         | 108<br>(57 - 156)              | 108<br>(57 - 156)  | --                | --                       | --                          | --                          |
| Neonatal sepsis and other neonatal infections                    | 29<br>(12 - 63)                | 29<br>(12 - 63)    | --                | --                       | --                          | --                          |
| Hemolytic disease and other neonatal jaundice                    | 0<br>(0 - 1)                   | 0<br>(0 - 1)       | --                | --                       | --                          | --                          |
| Other neonatal disorders                                         | 123<br>(66 - 185)              | 123<br>(66 - 185)  | --                | --                       | --                          | --                          |
| Nutritional deficiencies                                         | 289<br>(176 - 443)             | 1<br>(1 - 2)       | 0<br>(0 - 0)      | 7<br>(4 - 10)            | 28<br>(16 - 41)             | 252<br>(153 - 394)          |
| Protein-energy malnutrition                                      | 142<br>(76 - 257)              | 1<br>(0 - 1)       | 0<br>(0 - 0)      | 2<br>(1 - 4)             | 12<br>(5 - 19)              | 128<br>(65 - 233)           |
| Iodine deficiency                                                | 1<br>(0 - 4)                   | 0<br>(0 - 0)       | 0<br>(0 - 0)      | 0<br>(0 - 0)             | 0<br>(0 - 1)                | 1<br>(0 - 4)                |
| Iron-deficiency anemia                                           | 111<br>(41 - 183)              | 0<br>(0 - 0)       | 0<br>(0 - 0)      | 4<br>(2 - 6)             | 13<br>(6 - 21)              | 95<br>(32 - 161)            |
| Other nutritional deficiencies                                   | 35<br>(12 - 82)                | 0<br>(0 - 1)       | 0<br>(0 - 0)      | 1<br>(0 - 2)             | 3<br>(1 - 6)                | 30<br>(10 - 73)             |
| Other communicable, maternal, neonatal, and nutritional diseases | 235<br>(164 - 283)             | 9<br>(5 - 13)      | 2<br>(1 - 3)      | 32<br>(23 - 42)          | 86<br>(60 - 111)            | 106<br>(63 - 139)           |
| Sexually transmitted diseases excluding HIV                      | 4                              | 1                  | 0                 | 1                        | 1                           | 2                           |
| Syphilis                                                         | 4<br>(2 - 7)                   | 1<br>(0 - 3)       | 0<br>(0 - 0)      | 0<br>(0 - 1)             | 1<br>(0 - 1)                | 1<br>(1 - 3)                |
| Chlamydial infection                                             | --                             | --                 | --                | --                       | --                          | --                          |
| Gonococcal infection                                             | 1<br>(0 - 1)                   | --                 | 0<br>(0 - 0)      | 0<br>(0 - 0)             | 0<br>(0 - 0)                | 0<br>(0 - 0)                |
| Other sexually transmitted diseases                              | 0<br>(0 - 1)                   | --                 | 0<br>(0 - 0)      | 0<br>(0 - 0)             | 0<br>(0 - 0)                | 0<br>(0 - 0)                |
| Hepatitis                                                        | 71<br>(55 - 91)                | 0<br>(0 - 1)       | 0<br>(0 - 1)      | 17<br>(11 - 25)          | 36<br>(25 - 50)             | 17<br>(11 - 26)             |
| Acute hepatitis A                                                | 27<br>(10 - 48)                | 0<br>(0 - 1)       | 0<br>(0 - 1)      | 9<br>(4 - 16)            | 13<br>(4 - 25)              | 4<br>(1 - 10)               |
| Acute hepatitis B                                                | 41<br>(24 - 62)                | 0<br>(0 - 0)       | 0<br>(0 - 0)      | 7<br>(3 - 14)            | 22<br>(11 - 35)             | 12<br>(6 - 20)              |
| Acute hepatitis C                                                | 3<br>(0 - 7)                   | --                 | 0<br>(0 - 0)      | 1<br>(0 - 2)             | 1<br>(0 - 4)                | 1<br>(0 - 2)                |
| Other infectious diseases                                        | 159<br>(91 - 205)              | 7<br>(4 - 11)      | 1<br>(1 - 2)      | 15<br>(8 - 20)           | 49<br>(27 - 66)             | 87<br>(45 - 121)            |
| Non-communicable diseases                                        | 120,390<br>(114,400 - 126,883) | 497<br>(385 - 651) | 109<br>(91 - 129) | 4,957<br>(4,497 - 5,387) | 31,415<br>(29,382 - 33,577) | 83,412<br>(79,754 - 87,422) |
| Neoplasms                                                        | 42,005<br>(38,905 - 45,377)    | 36<br>(23 - 52)    | 56<br>(44 - 69)   | 1,828<br>(1,643 - 2,068) | 15,294<br>(14,062 - 16,688) | 24,791<br>(22,651 - 27,192) |
| Esophageal cancer                                                | 1,335<br>(978 - 1,590)         | --                 | --                | 65<br>(44 - 88)          | 649<br>(486 - 797)          | 621<br>(433 - 772)          |
| Stomach cancer                                                   | 1,783<br>(1,502 - 2,118)       | --                 | --                | 69<br>(55 - 87)          | 568<br>(486 - 666)          | 1,146<br>(902 - 1,457)      |
| Liver cancer                                                     | 1,085<br>(619 - 1,481)         | --                 | 1<br>(1 - 2)      | 69<br>(42 - 101)         | 502<br>(291 - 702)          | 512<br>(264 - 764)          |
| Liver cancer due to hepatitis B                                  | 144<br>(75 - 220)              | --                 | 0<br>(0 - 1)      | 16<br>(9 - 25)           | 78<br>(40 - 123)            | 50<br>(23 - 81)             |
| Liver cancer due to hepatitis C                                  | 571<br>(316 - 837)             | --                 | 0<br>(0 - 0)      | 31<br>(19 - 49)          | 264<br>(150 - 389)          | 276<br>(138 - 438)          |
| Liver cancer due to alcohol use                                  | 276<br>(142 - 436)             | --                 | --                | 13<br>(7 - 22)           | 115<br>(62 - 178)           | 148<br>(68 - 246)           |
| Liver cancer due to other causes                                 | 93<br>(48 - 149)               | --                 | 1<br>(0 - 1)      | 9<br>(5 - 14)            | 45<br>(22 - 73)             | 39<br>(17 - 67)             |
| Larynx cancer                                                    | 383<br>(269 - 504)             | --                 | --                | 15<br>(10 - 23)          | 175<br>(131 - 245)          | 193<br>(123 - 256)          |
| Tracheal, bronchus and lung cancer                               | 12,090<br>(10,573 - 13,687)    | --                 | --                | 291<br>(224 - 370)       | 5,085<br>(4,340 - 5,856)    | 6,713<br>(5,762 - 7,790)    |
| Breast cancer                                                    | 59<br>(28 - 144)               | --                 | --                | 4<br>(2 - 10)            | 22<br>(10 - 51)             | 34<br>(15 - 78)             |
| Cervical cancer                                                  | --                             | --                 | --                | --                       | --                          | --                          |
| Uterine cancer                                                   | --                             | --                 | --                | --                       | --                          | --                          |
| Prostate cancer                                                  | 5,302<br>(4,067 - 7,924)       | --                 | --                | 13<br>(8 - 20)           | 875<br>(621 - 1,369)        | 4,413<br>(3,303 - 6,717)    |

Web Table 31- Canada deaths with 95% UI by age, sex, and cause in 2013

| Cause                                         | Males, All Ages             | Males, 0-4 Years | Males, 5-14 Years | Males, 15-49 Years       | Males, 50-69 Years        | Males, 70-80 Years          |
|-----------------------------------------------|-----------------------------|------------------|-------------------|--------------------------|---------------------------|-----------------------------|
| Colon and rectum cancer                       | 5,317<br>(4,660 - 6,028)    | --               | --                | 202<br>(166 - 246)       | 1,915<br>(1,671 - 2,160)  | 3,200<br>(2,682 - 3,853)    |
| Lip and oral cavity cancer                    | 508<br>(408 - 603)          | --               | --                | 36<br>(27 - 49)          | 241<br>(183 - 298)        | 230<br>(174 - 301)          |
| Nasopharynx cancer                            | 110<br>(84 - 172)           | --               | 0<br>(0 - 1)      | 20<br>(13 - 33)          | 58<br>(40 - 95)           | 33<br>(23 - 47)             |
| Other pharynx cancer                          | 320<br>(256 - 436)          | --               | --                | 20<br>(14 - 30)          | 185<br>(139 - 267)        | 114<br>(83 - 154)           |
| Gallbladder and biliary tract cancer          | 282<br>(204 - 479)          | --               | --                | 9<br>(6 - 14)            | 91<br>(62 - 163)          | 182<br>(128 - 314)          |
| Pancreatic cancer                             | 2,386<br>(2,127 - 2,707)    | --               | --                | 103<br>(81 - 128)        | 1,029<br>(894 - 1,188)    | 1,255<br>(1,051 - 1,480)    |
| Malignant skin melanoma                       | 660<br>(311 - 1,075)        | --               | --                | 106<br>(55 - 190)        | 289<br>(140 - 492)        | 265<br>(113 - 411)          |
| Non-melanoma skin cancer                      | 229<br>(136 - 344)          | --               | --                | 7<br>(4 - 11)            | 51<br>(27 - 76)           | 171<br>(102 - 265)          |
| Ovarian cancer                                | --                          | --               | --                | --                       | --                        | --                          |
| Testicular cancer                             | 38<br>(26 - 51)             | --               | --                | 24<br>(16 - 34)          | 8<br>(5 - 12)             | 6<br>(4 - 10)               |
| Kidney cancer                                 | 1,173<br>(967 - 1,420)      | 1<br>(0 - 1)     | 1<br>(0 - 2)      | 60<br>(43 - 81)          | 499<br>(394 - 621)        | 613<br>(463 - 826)          |
| Bladder cancer                                | 1,396<br>(1,053 - 1,692)    | --               | --                | 19<br>(14 - 25)          | 331<br>(259 - 401)        | 1,046<br>(779 - 1,330)      |
| Brain and nervous system cancer               | 1,166<br>(901 - 1,486)      | 8<br>(4 - 14)    | 16<br>(11 - 23)   | 200<br>(153 - 255)       | 580<br>(454 - 751)        | 361<br>(242 - 478)          |
| Thyroid cancer                                | 76<br>(58 - 94)             | --               | 0<br>(0 - 0)      | 6<br>(4 - 7)             | 30<br>(23 - 39)           | 40<br>(28 - 54)             |
| Mesothelioma                                  | 409<br>(195 - 578)          | --               | --                | 11<br>(6 - 19)           | 168<br>(87 - 254)         | 229<br>(81 - 365)           |
| Hodgkin lymphoma                              | 85<br>(60 - 136)            | 0<br>(0 - 0)     | 0<br>(0 - 1)      | 27<br>(19 - 44)          | 28<br>(19 - 49)           | 29<br>(18 - 46)             |
| Non-Hodgkin lymphoma                          | 1,953<br>(805 - 2,543)      | 2<br>(1 - 3)     | 5<br>(2 - 8)      | 141<br>(65 - 205)        | 696<br>(296 - 904)        | 1,109<br>(441 - 1,633)      |
| Multiple myeloma                              | 852<br>(495 - 1,413)        | --               | --                | 27<br>(15 - 49)          | 314<br>(169 - 533)        | 511<br>(297 - 850)          |
| Leukemia                                      | 1,566<br>(1,360 - 1,792)    | 11<br>(6 - 19)   | 17<br>(12 - 23)   | 120<br>(100 - 143)       | 468<br>(386 - 552)        | 951<br>(789 - 1,145)        |
| Other neoplasms                               | 1,444<br>(1,087 - 1,796)    | 15<br>(9 - 23)   | 15<br>(8 - 22)    | 164<br>(131 - 218)       | 438<br>(345 - 596)        | 812<br>(486 - 1,100)        |
| Cardiovascular diseases                       | 38,552<br>(35,315 - 41,893) | 10<br>(7 - 14)   | 5<br>(4 - 6)      | 1,292<br>(1,120 - 1,479) | 9,136<br>(8,326 - 10,018) | 28,108<br>(25,326 - 30,800) |
| Rheumatic heart disease                       | 162<br>(86 - 228)           | 0<br>(0 - 0)     | 0<br>(0 - 0)      | 11<br>(6 - 16)           | 44<br>(24 - 65)           | 107<br>(52 - 164)           |
| Ischemic heart disease                        | 26,175<br>(23,536 - 29,512) | 1<br>(0 - 1)     | 1<br>(0 - 1)      | 901<br>(765 - 1,054)     | 6,913<br>(6,237 - 7,694)  | 18,360<br>(16,143 - 21,243) |
| Cerebrovascular disease                       | 6,721<br>(4,714 - 8,384)    | 1<br>(1 - 2)     | 1<br>(1 - 1)      | 139<br>(94 - 189)        | 982<br>(663 - 1,251)      | 5,598<br>(3,896 - 7,048)    |
| Ischemic stroke                               | 3,595<br>(2,494 - 4,636)    | 0<br>(0 - 0)     | 0<br>(0 - 0)      | 16<br>(8 - 24)           | 300<br>(184 - 406)        | 3,279<br>(2,264 - 4,243)    |
| Hemorrhagic stroke                            | 3,126<br>(1,951 - 4,087)    | 1<br>(1 - 2)     | 1<br>(1 - 1)      | 123<br>(83 - 167)        | 682<br>(456 - 888)        | 2,319<br>(1,357 - 3,128)    |
| Hypertensive heart disease                    | 362<br>(223 - 528)          | 0<br>(0 - 0)     | 0<br>(0 - 0)      | 16<br>(9 - 24)           | 93<br>(57 - 133)          | 252<br>(149 - 391)          |
| Cardiomyopathy and myocarditis                | 879<br>(599 - 1,243)        | 7<br>(5 - 9)     | 3<br>(2 - 3)      | 108<br>(68 - 144)        | 315<br>(213 - 454)        | 448<br>(279 - 652)          |
| Atrial fibrillation and flutter               | 958<br>(602 - 1,362)        | --               | --                | 3<br>(2 - 4)             | 73<br>(47 - 99)           | 883<br>(542 - 1,278)        |
| Aortic aneurysm                               | 1,257<br>(1,018 - 1,621)    | --               | --                | 32<br>(24 - 42)          | 291<br>(229 - 380)        | 933<br>(736 - 1,230)        |
| Peripheral vascular disease                   | 371<br>(259 - 541)          | --               | --                | 2<br>(1 - 3)             | 58<br>(42 - 80)           | 311<br>(204 - 484)          |
| Endocarditis                                  | 187<br>(109 - 300)          | 0<br>(0 - 1)     | 0<br>(0 - 0)      | 15<br>(9 - 23)           | 52<br>(30 - 84)           | 119<br>(67 - 201)           |
| Other cardiovascular and circulatory diseases | 1,480<br>(868 - 1,872)      | 1<br>(1 - 2)     | 0<br>(0 - 1)      | 65<br>(36 - 83)          | 316<br>(180 - 394)        | 1,098<br>(652 - 1,464)      |
| Chronic respiratory diseases                  | 8,351<br>(6,107 - 9,623)    | 6<br>(4 - 10)    | 3<br>(2 - 4)      | 83<br>(63 - 100)         | 1,295<br>(922 - 1,530)    | 6,964<br>(5,128 - 8,132)    |
| Chronic obstructive pulmonary disease         | 6,723<br>(4,851 - 7,809)    | 3<br>(1 - 4)     | 0<br>(0 - 1)      | 35<br>(24 - 46)          | 971<br>(668 - 1,169)      | 5,714<br>(4,144 - 6,716)    |
| Pneumoconiosis                                | 159<br>(86 - 233)           | 0<br>(0 - 0)     | 0<br>(0 - 0)      | 2<br>(1 - 4)             | 24<br>(13 - 37)           | 132<br>(69 - 199)           |
| Silicosis                                     | 19<br>(10 - 28)             | 0<br>(0 - 0)     | 0<br>(0 - 0)      | 1<br>(0 - 1)             | 4<br>(2 - 6)              | 14<br>(7 - 22)              |
| Asbestosis                                    | 80<br>(44 - 117)            | 0<br>(0 - 0)     | 0<br>(0 - 0)      | 1<br>(0 - 1)             | 13<br>(7 - 19)            | 67<br>(35 - 101)            |
| Coal workers pneumoconiosis                   | 12<br>(7 - 19)              | 0<br>(0 - 0)     | 0<br>(0 - 0)      | 0<br>(0 - 1)             | 1<br>(0 - 1)              | 11<br>(6 - 17)              |
| Other pneumoconiosis                          | 49<br>(25 - 75)             | 0<br>(0 - 0)     | 0<br>(0 - 0)      | 1<br>(0 - 1)             | 7<br>(4 - 11)             | 41<br>(20 - 66)             |

Web Table 31- Canada deaths with 95% UI by age, sex, and cause in 2013

| Cause                                               | Males, All Ages             | Males, 0-4 Years | Males, 5-14 Years | Males, 15-49 Years | Males, 50-69 Years       | Males, 70-80 Years          |
|-----------------------------------------------------|-----------------------------|------------------|-------------------|--------------------|--------------------------|-----------------------------|
| Asthma                                              | 95<br>(65 - 122)            | 0<br>(0 - 1)     | 1<br>(1 - 2)      | 14<br>(10 - 18)    | 23<br>(15 - 31)          | 56<br>(36 - 79)             |
| Interstitial lung disease and pulmonary sarcoidosis | 1,309<br>(839 - 2,024)      | 1<br>(0 - 2)     | 1<br>(0 - 1)      | 26<br>(19 - 37)    | 262<br>(176 - 387)       | 1,019<br>(634 - 1,633)      |
| Other chronic respiratory diseases                  | 65<br>(43 - 89)             | 2<br>(1 - 4)     | 1<br>(0 - 1)      | 5<br>(3 - 7)       | 15<br>(10 - 21)          | 42<br>(26 - 62)             |
| Cirrhosis                                           | 2,494<br>(2,225 - 2,781)    | 1<br>(1 - 2)     | 1<br>(0 - 1)      | 266<br>(217 - 316) | 1,330<br>(1,160 - 1,533) | 897<br>(758 - 1,044)        |
| Cirrhosis due to hepatitis B                        | 153<br>(93 - 222)           | 0<br>(0 - 0)     | 0<br>(0 - 0)      | 18<br>(11 - 29)    | 83<br>(50 - 125)         | 52<br>(27 - 76)             |
| Cirrhosis due to hepatitis C                        | 1,148<br>(777 - 1,509)      | 0<br>(0 - 1)     | 0<br>(0 - 0)      | 127<br>(70 - 181)  | 620<br>(380 - 849)       | 401<br>(286 - 532)          |
| Cirrhosis due to alcohol use                        | 1,113<br>(790 - 1,439)      | --               | --                | 105<br>(59 - 158)  | 581<br>(391 - 799)       | 426<br>(307 - 549)          |
| Cirrhosis due to other causes                       | 80<br>(41 - 130)            | 1<br>(0 - 1)     | 0<br>(0 - 0)      | 16<br>(8 - 26)     | 46<br>(20 - 79)          | 17<br>(9 - 27)              |
| Digestive diseases                                  | 2,409<br>(1,956 - 2,831)    | 3<br>(2 - 5)     | 2<br>(1 - 2)      | 99<br>(79 - 120)   | 506<br>(401 - 600)       | 1,799<br>(1,439 - 2,186)    |
| Peptic ulcer disease                                | 282<br>(201 - 383)          | 0<br>(0 - 0)     | 0<br>(0 - 0)      | 12<br>(8 - 17)     | 69<br>(48 - 94)          | 201<br>(136 - 291)          |
| Gastritis and duodenitis                            | 40<br>(22 - 76)             | 0<br>(0 - 0)     | 0<br>(0 - 0)      | 4<br>(2 - 7)       | 12<br>(7 - 22)           | 23<br>(12 - 48)             |
| Appendicitis                                        | 34<br>(19 - 52)             | 0<br>(0 - 0)     | 0<br>(0 - 0)      | 3<br>(2 - 5)       | 9<br>(5 - 14)            | 21<br>(11 - 35)             |
| Paralytic ileus and intestinal obstruction          | 429<br>(244 - 667)          | 1<br>(0 - 1)     | 1<br>(0 - 1)      | 13<br>(7 - 21)     | 62<br>(33 - 98)          | 352<br>(191 - 570)          |
| Inguinal, femoral, and abdominal hernia             | 80<br>(32 - 124)            | 0<br>(0 - 0)     | 0<br>(0 - 0)      | 2<br>(1 - 3)       | 13<br>(6 - 20)           | 64<br>(23 - 107)            |
| Inflammatory bowel disease                          | 174<br>(116 - 274)          | 1<br>(0 - 1)     | 0<br>(0 - 0)      | 10<br>(7 - 14)     | 37<br>(24 - 51)          | 126<br>(79 - 213)           |
| Vascular intestinal disorders                       | 447<br>(201 - 833)          | 0<br>(0 - 1)     | 0<br>(0 - 0)      | 11<br>(4 - 22)     | 95<br>(42 - 179)         | 341<br>(149 - 647)          |
| Gallbladder and biliary diseases                    | 276<br>(175 - 381)          | 0<br>(0 - 0)     | 0<br>(0 - 0)      | 6<br>(4 - 8)       | 43<br>(27 - 58)          | 227<br>(140 - 325)          |
| Pancreatitis                                        | 225<br>(138 - 313)          | 0<br>(0 - 0)     | 0<br>(0 - 0)      | 24<br>(14 - 34)    | 82<br>(48 - 116)         | 118<br>(70 - 175)           |
| Other digestive diseases                            | 422<br>(287 - 570)          | 1<br>(0 - 1)     | 0<br>(0 - 0)      | 14<br>(8 - 19)     | 82<br>(53 - 110)         | 325<br>(204 - 463)          |
| Neurological disorders                              | 15,392<br>(12,235 - 19,151) | 23<br>(15 - 34)  | 9<br>(7 - 12)     | 216<br>(175 - 272) | 1,070<br>(887 - 1,288)   | 14,073<br>(10,837 - 17,859) |
| Alzheimer disease and other dementias               | 12,761<br>(9,546 - 16,531)  | --               | --                | 0<br>(0 - 1)       | 415<br>(283 - 576)       | 12,346<br>(9,133 - 16,113)  |
| Parkinson disease                                   | 1,310<br>(968 - 1,705)      | --               | --                | 2<br>(1 - 3)       | 99<br>(72 - 130)         | 1,209<br>(873 - 1,596)      |
| Epilepsy                                            | 168<br>(136 - 226)          | 2<br>(1 - 4)     | 2<br>(2 - 4)      | 63<br>(49 - 89)    | 48<br>(36 - 66)          | 52<br>(38 - 72)             |
| Multiple sclerosis                                  | 215<br>(86 - 327)           | --               | --                | 43<br>(17 - 73)    | 122<br>(47 - 188)        | 51<br>(17 - 81)             |
| Other neurological disorders                        | 937<br>(751 - 1,196)        | 21<br>(13 - 31)  | 6<br>(5 - 9)      | 108<br>(82 - 136)  | 386<br>(298 - 493)       | 416<br>(320 - 561)          |
| Mental and substance use disorders                  | 1,502<br>(1,023 - 1,779)    | 0<br>(0 - 1)     | 0<br>(0 - 0)      | 689<br>(410 - 832) | 586<br>(368 - 748)       | 226<br>(152 - 302)          |
| Schizophrenia                                       | 45<br>(24 - 68)             | --               | --                | 5<br>(3 - 8)       | 12<br>(5 - 19)           | 28<br>(13 - 46)             |
| Alcohol use disorders                               | 652<br>(376 - 846)          | --               | --                | 145<br>(75 - 194)  | 348<br>(196 - 478)       | 160<br>(91 - 237)           |
| Drug use disorders                                  | 804<br>(418 - 976)          | 0<br>(0 - 1)     | --                | 539<br>(285 - 669) | 227<br>(107 - 300)       | 38<br>(25 - 51)             |
| Opioid use disorders                                | 336<br>(174 - 412)          | 0<br>(0 - 0)     | --                | 229<br>(120 - 290) | 90<br>(44 - 121)         | 16<br>(11 - 23)             |
| Cocaine use disorders                               | 34<br>(17 - 43)             | 0<br>(0 - 0)     | --                | 25<br>(13 - 33)    | 8<br>(4 - 11)            | 1<br>(1 - 2)                |
| Amphetamine use disorders                           | 20<br>(10 - 25)             | 0<br>(0 - 0)     | --                | 13<br>(7 - 18)     | 6<br>(3 - 8)             | 1<br>(1 - 1)                |
| Other drug use disorders                            | 414<br>(214 - 503)          | 0<br>(0 - 0)     | --                | 271<br>(142 - 343) | 123<br>(58 - 163)        | 19<br>(12 - 26)             |
| Eating disorders                                    | 1<br>(1 - 2)                | --               | 0<br>(0 - 0)      | 1<br>(1 - 2)       | --                       | --                          |
| Anorexia nervosa                                    | 1<br>(1 - 2)                | --               | 0<br>(0 - 0)      | 1<br>(1 - 2)       | --                       | --                          |
| Diabetes, urogenital, blood, and endocrine diseases | 8,574<br>(7,473 - 10,064)   | 40<br>(26 - 56)  | 14<br>(10 - 19)   | 363<br>(308 - 432) | 1,993<br>(1,744 - 2,279) | 6,164<br>(5,241 - 7,367)    |
| Diabetes mellitus                                   | 4,068<br>(3,494 - 4,740)    | 2<br>(1 - 2)     | 1<br>(0 - 1)      | 157<br>(130 - 188) | 1,154<br>(980 - 1,353)   | 2,755<br>(2,265 - 3,326)    |
| Acute glomerulonephritis                            | 3<br>(1 - 4)                | 0<br>(0 - 0)     | 0<br>(0 - 0)      | 1<br>(0 - 1)       | 0<br>(0 - 1)             | 1<br>(1 - 2)                |
| Chronic kidney disease                              | 2,721<br>(2,047 - 3,967)    | 3<br>(2 - 4)     | 1<br>(1 - 1)      | 55<br>(39 - 87)    | 392<br>(297 - 590)       | 2,271<br>(1,663 - 3,323)    |
| Chronic kidney disease due to diabetes mellitus     | 616<br>(355 - 1,572)        | 1<br>(0 - 1)     | 0<br>(0 - 0)      | 19<br>(10 - 42)    | 146<br>(84 - 301)        | 450<br>(242 - 1,209)        |

Web Table 31- Canada deaths with 95% UI by age, sex, and cause in 2013

| Cause                                               | Males, All Ages           | Males, 0-4 Years   | Males, 5-14 Years | Males, 15-49 Years       | Males, 50-69 Years       | Males, 70-80 Years       |
|-----------------------------------------------------|---------------------------|--------------------|-------------------|--------------------------|--------------------------|--------------------------|
| Chronic kidney disease due to hypertension          | 969<br>(463 - 1,390)      | 0<br>(0 - 0)       | 0<br>(0 - 0)      | 14<br>(5 - 23)           | 126<br>(60 - 211)        | 829<br>(391 - 1,187)     |
| Chronic kidney disease due to glomerulonephritis    | 54<br>(23 - 83)           | 0<br>(0 - 1)       | 0<br>(0 - 0)      | 4<br>(2 - 5)             | 11<br>(5 - 18)           | 39<br>(14 - 64)          |
| Chronic kidney disease due to other causes          | 1,083<br>(625 - 1,796)    | 2<br>(1 - 3)       | 0<br>(0 - 1)      | 18<br>(8 - 37)           | 109<br>(47 - 199)        | 954<br>(526 - 1,549)     |
| Urinary diseases and male infertility               | 651<br>(354 - 848)        | 1<br>(1 - 2)       | 0<br>(0 - 0)      | 11<br>(6 - 14)           | 75<br>(39 - 96)          | 563<br>(301 - 753)       |
| Interstitial nephritis and urinary tract infections | 515<br>(262 - 696)        | 1<br>(0 - 1)       | 0<br>(0 - 0)      | 7<br>(4 - 9)             | 48<br>(23 - 65)          | 460<br>(226 - 634)       |
| Urolithiasis                                        | 25<br>(12 - 45)           | --                 | 0<br>(0 - 0)      | 1<br>(0 - 2)             | 4<br>(2 - 8)             | 19<br>(9 - 37)           |
| Other urinary diseases                              | 111<br>(62 - 194)         | 1<br>(0 - 1)       | 0<br>(0 - 0)      | 3<br>(2 - 5)             | 23<br>(11 - 36)          | 84<br>(44 - 163)         |
| Gynecological diseases                              | --                        | --                 | --                | --                       | --                       | --                       |
| Uterine fibroids                                    | --                        | --                 | --                | --                       | --                       | --                       |
| Polycystic ovarian syndrome                         | --                        | --                 | --                | --                       | --                       | --                       |
| Endometriosis                                       | --                        | --                 | --                | --                       | --                       | --                       |
| Genital prolapse                                    | --                        | --                 | --                | --                       | --                       | --                       |
| Other gynecological diseases                        | --                        | --                 | --                | --                       | --                       | --                       |
| Hemoglobinopathies and hemolytic anemias            | 84<br>(53 - 129)          | 2<br>(1 - 3)       | 1<br>(1 - 2)      | 8<br>(5 - 12)            | 15<br>(9 - 23)           | 58<br>(34 - 89)          |
| Thalassemias                                        | 4<br>(3 - 6)              | 1<br>(0 - 1)       | 1<br>(0 - 1)      | 2<br>(1 - 3)             | 1<br>(0 - 1)             | 0<br>(0 - 1)             |
| Sickle cell disorders                               | 13<br>(8 - 20)            | 1<br>(0 - 2)       | 1<br>(0 - 1)      | 4<br>(2 - 5)             | 6<br>(4 - 9)             | 2<br>(1 - 3)             |
| G6PD deficiency                                     | 0<br>(0 - 1)              | 0<br>(0 - 0)       | 0<br>(0 - 0)      | 0<br>(0 - 0)             | 0<br>(0 - 0)             | 0<br>(0 - 0)             |
| Other hemoglobinopathies and hemolytic anemias      | 66<br>(40 - 102)          | 0<br>(0 - 0)       | 0<br>(0 - 0)      | 2<br>(1 - 4)             | 8<br>(5 - 12)            | 55<br>(33 - 84)          |
| Endocrine, metabolic, blood, and immune disorders   | 1,046<br>(662 - 1,427)    | 32<br>(19 - 46)    | 11<br>(7 - 16)    | 132<br>(91 - 176)        | 356<br>(211 - 481)       | 516<br>(298 - 798)       |
| Musculoskeletal disorders                           | 318<br>(190 - 408)        | --                 | 1<br>(0 - 1)      | 20<br>(11 - 27)          | 93<br>(55 - 121)         | 204<br>(111 - 282)       |
| Rheumatoid arthritis                                | 80<br>(46 - 125)          | --                 | 0<br>(0 - 0)      | 2<br>(1 - 4)             | 22<br>(11 - 36)          | 56<br>(29 - 92)          |
| Other musculoskeletal disorders                     | 238<br>(134 - 308)        | --                 | 0<br>(0 - 1)      | 18<br>(10 - 24)          | 71<br>(40 - 93)          | 148<br>(76 - 207)        |
| Other non-communicable diseases                     | 794<br>(681 - 951)        | 377<br>(286 - 521) | 18<br>(13 - 24)   | 100<br>(84 - 120)        | 111<br>(92 - 133)        | 187<br>(142 - 240)       |
| Congenital anomalies                                | 553<br>(460 - 674)        | 294<br>(218 - 406) | 18<br>(13 - 24)   | 94<br>(78 - 114)         | 84<br>(68 - 104)         | 62<br>(48 - 82)          |
| Neural tube defects                                 | 16<br>(10 - 25)           | 12<br>(7 - 21)     | 0<br>(0 - 1)      | 2<br>(1 - 3)             | 1<br>(0 - 1)             | 0<br>(0 - 1)             |
| Congenital heart anomalies                          | 189<br>(147 - 264)        | 100<br>(66 - 152)  | 8<br>(5 - 12)     | 44<br>(34 - 58)          | 26<br>(18 - 37)          | 12<br>(7 - 20)           |
| Cleft lip and cleft palate                          | 0<br>(0 - 1)              | 0<br>(0 - 1)       | --                | --                       | --                       | --                       |
| Down syndrome                                       | 53<br>(27 - 73)           | 10<br>(4 - 18)     | 1<br>(0 - 1)      | 13<br>(6 - 19)           | 27<br>(13 - 40)          | 2<br>(1 - 3)             |
| Chromosomal unbalanced rearrangements               | 32<br>(19 - 51)           | 28<br>(16 - 46)    | 1<br>(1 - 2)      | 2<br>(1 - 2)             | 1<br>(1 - 2)             | 0<br>(0 - 0)             |
| Other congenital anomalies                          | 263<br>(205 - 332)        | 144<br>(99 - 203)  | 8<br>(5 - 13)     | 34<br>(24 - 47)          | 29<br>(19 - 42)          | 47<br>(34 - 65)          |
| Skin and subcutaneous diseases                      | 159<br>(109 - 211)        | 1<br>(0 - 1)       | 0<br>(0 - 0)      | 6<br>(4 - 8)             | 27<br>(17 - 36)          | 125<br>(82 - 176)        |
| Cellulitis                                          | 61<br>(31 - 99)           | 0<br>(0 - 0)       | 0<br>(0 - 0)      | 2<br>(1 - 3)             | 11<br>(6 - 17)           | 48<br>(22 - 85)          |
| Pyoderma                                            | 60<br>(36 - 89)           | 0<br>(0 - 1)       | 0<br>(0 - 0)      | 2<br>(1 - 3)             | 11<br>(6 - 17)           | 46<br>(25 - 74)          |
| Decubitus ulcer                                     | 24<br>(14 - 41)           | 0<br>(0 - 0)       | 0<br>(0 - 0)      | 1<br>(0 - 1)             | 2<br>(1 - 5)             | 20<br>(11 - 38)          |
| Other skin and subcutaneous diseases                | 15<br>(6 - 29)            | 0<br>(0 - 0)       | 0<br>(0 - 0)      | 1<br>(1 - 1)             | 2<br>(1 - 4)             | 11<br>(4 - 25)           |
| Sudden infant death syndrome                        | 82<br>(42 - 155)          | 82<br>(42 - 155)   | --                | --                       | --                       | --                       |
| Injuries                                            | 9,751<br>(8,762 - 10,745) | 104<br>(71 - 148)  | 105<br>(88 - 124) | 3,906<br>(3,557 - 4,328) | 2,377<br>(2,077 - 2,746) | 3,260<br>(2,547 - 3,872) |
| Transport injuries                                  | 2,197<br>(1,957 - 2,460)  | 26<br>(16 - 41)    | 47<br>(37 - 59)   | 1,221<br>(1,050 - 1,394) | 537<br>(462 - 621)       | 366<br>(289 - 446)       |
| Road injuries                                       | 1,942<br>(1,736 - 2,170)  | 24<br>(14 - 37)    | 41<br>(32 - 51)   | 1,071<br>(925 - 1,223)   | 466<br>(394 - 538)       | 341<br>(270 - 418)       |
| Pedestrian road injuries                            | 344<br>(174 - 550)        | 10<br>(4 - 17)     | 13<br>(7 - 21)    | 107<br>(48 - 184)        | 97<br>(45 - 154)         | 118<br>(58 - 189)        |

Web Table 31- Canada deaths with 95% UI by age, sex, and cause in 2013

| Cause                                           | Males, All Ages          | Males, 0-4 Years | Males, 5-14 Years | Males, 15-49 Years       | Males, 50-69 Years     | Males, 70-80 Years       |
|-------------------------------------------------|--------------------------|------------------|-------------------|--------------------------|------------------------|--------------------------|
| Cyclist road injuries                           | 110<br>(50 - 154)        | 1<br>(0 - 3)     | 8<br>(4 - 13)     | 40<br>(17 - 57)          | 35<br>(14 - 53)        | 26<br>(10 - 44)          |
| Motorcyclist road injuries                      | 276<br>(146 - 372)       | 0<br>(0 - 1)     | 3<br>(1 - 5)      | 197<br>(107 - 276)       | 66<br>(30 - 97)        | 10<br>(4 - 17)           |
| Motor vehicle road injuries                     | 1,200<br>(995 - 1,477)   | 12<br>(6 - 21)   | 17<br>(11 - 26)   | 724<br>(602 - 863)       | 263<br>(201 - 357)     | 184<br>(127 - 260)       |
| Other road injuries                             | 11<br>(5 - 19)           | 0<br>(0 - 1)     | 0<br>(0 - 1)      | 2<br>(1 - 3)             | 5<br>(2 - 9)           | 4<br>(1 - 7)             |
| Other transport injuries                        | 255<br>(160 - 326)       | 3<br>(1 - 5)     | 6<br>(3 - 10)     | 150<br>(94 - 200)        | 72<br>(40 - 104)       | 24<br>(12 - 40)          |
| Unintentional injuries                          | 3,951<br>(3,219 - 4,600) | 74<br>(50 - 106) | 40<br>(32 - 53)   | 592<br>(512 - 762)       | 746<br>(628 - 863)     | 2,500<br>(1,811 - 3,087) |
| Falls                                           | 2,214<br>(1,520 - 2,819) | 6<br>(4 - 10)    | 3<br>(2 - 5)      | 128<br>(94 - 160)        | 312<br>(201 - 392)     | 1,764<br>(1,140 - 2,326) |
| Drowning                                        | 311<br>(229 - 478)       | 21<br>(12 - 38)  | 16<br>(10 - 26)   | 157<br>(114 - 254)       | 81<br>(55 - 122)       | 35<br>(24 - 53)          |
| Fire, heat, and hot substances                  | 205<br>(160 - 297)       | 11<br>(6 - 20)   | 6<br>(4 - 10)     | 59<br>(44 - 90)          | 55<br>(40 - 82)        | 74<br>(52 - 108)         |
| Poisonings                                      | 79<br>(62 - 149)         | 1<br>(0 - 2)     | 1<br>(0 - 1)      | 34<br>(24 - 76)          | 31<br>(22 - 52)        | 13<br>(9 - 21)           |
| Exposure to mechanical forces                   | 248<br>(213 - 291)       | 14<br>(7 - 24)   | 8<br>(5 - 11)     | 107<br>(88 - 135)        | 80<br>(64 - 99)        | 39<br>(30 - 50)          |
| Unintentional firearm injuries                  | 17<br>(13 - 22)          | 0<br>(0 - 0)     | 1<br>(1 - 2)      | 10<br>(7 - 14)           | 4<br>(3 - 7)           | 1<br>(1 - 2)             |
| Unintentional suffocation                       | 42<br>(20 - 57)          | 11<br>(4 - 20)   | 3<br>(1 - 5)      | 15<br>(7 - 21)           | 5<br>(2 - 8)           | 8<br>(3 - 15)            |
| Other exposure to mechanical forces             | 189<br>(160 - 229)       | 3<br>(2 - 5)     | 3<br>(2 - 5)      | 82<br>(66 - 109)         | 70<br>(55 - 89)        | 30<br>(22 - 38)          |
| Adverse effects of medical treatment            | 244<br>(155 - 340)       | 4<br>(2 - 6)     | 1<br>(0 - 1)      | 27<br>(19 - 44)          | 61<br>(38 - 93)        | 151<br>(86 - 214)        |
| Animal contact                                  | 17<br>(10 - 22)          | 1<br>(0 - 2)     | 1<br>(0 - 1)      | 4<br>(2 - 5)             | 7<br>(4 - 10)          | 5<br>(3 - 7)             |
| Venomous animal contact                         | 4<br>(2 - 5)             | 0<br>(0 - 0)     | 0<br>(0 - 0)      | 1<br>(1 - 2)             | 2<br>(1 - 3)           | 0<br>(0 - 1)             |
| Non-venomous animal contact                     | 13<br>(8 - 17)           | 1<br>(0 - 1)     | 0<br>(0 - 1)      | 2<br>(1 - 3)             | 5<br>(3 - 7)           | 4<br>(3 - 6)             |
| Foreign body                                    | 585<br>(298 - 886)       | 13<br>(6 - 21)   | 4<br>(3 - 7)      | 57<br>(34 - 92)          | 103<br>(56 - 170)      | 408<br>(191 - 633)       |
| Pulmonary aspiration and foreign body in airway | 582<br>(296 - 884)       | 13<br>(6 - 21)   | 4<br>(2 - 7)      | 55<br>(32 - 91)          | 102<br>(55 - 169)      | 407<br>(190 - 632)       |
| Foreign body in other body part                 | 3<br>(2 - 4)             | 0<br>(0 - 0)     | 0<br>(0 - 0)      | 1<br>(1 - 2)             | 1<br>(0 - 1)           | 1<br>(0 - 2)             |
| Other unintentional injuries                    | 50<br>(38 - 66)          | 2<br>(1 - 4)     | 1<br>(0 - 2)      | 21<br>(13 - 31)          | 15<br>(9 - 26)         | 11<br>(6 - 18)           |
| Self-harm and interpersonal violence            | 3,603<br>(2,851 - 4,394) | 4<br>(2 - 9)     | 18<br>(12 - 26)   | 2,093<br>(1,719 - 2,508) | 1,094<br>(821 - 1,376) | 394<br>(307 - 522)       |
| Self-harm                                       | 3,233<br>(2,600 - 3,993) | --               | 15<br>(9 - 22)    | 1,828<br>(1,504 - 2,259) | 1,020<br>(761 - 1,317) | 370<br>(281 - 494)       |
| Interpersonal violence                          | 370<br>(222 - 503)       | 4<br>(2 - 9)     | 4<br>(2 - 6)      | 264<br>(152 - 350)       | 73<br>(42 - 124)       | 24<br>(12 - 48)          |
| Assault by firearm                              | 143<br>(66 - 215)        | 0<br>(0 - 1)     | 1<br>(0 - 2)      | 117<br>(51 - 174)        | 20<br>(9 - 38)         | 4<br>(1 - 8)             |
| Assault by sharp object                         | 123<br>(66 - 199)        | 0<br>(0 - 1)     | 1<br>(0 - 1)      | 91<br>(46 - 147)         | 24<br>(11 - 43)        | 7<br>(3 - 15)            |
| Assault by other means                          | 104<br>(55 - 162)        | 4<br>(2 - 7)     | 2<br>(1 - 3)      | 56<br>(28 - 93)          | 30<br>(14 - 49)        | 13<br>(6 - 25)           |
| Forces of nature, war, and legal intervention   | 0<br>(0 - 0)             | 0<br>(0 - 0)     | --                | --                       | --                     | 0<br>(0 - 0)             |
| Exposure to forces of nature                    | 0<br>(0 - 0)             | 0<br>(0 - 0)     | --                | --                       | --                     | 0<br>(0 - 0)             |

Web Table 31- Canada deaths with 95% UI by age, sex, and cause in 2013

| Cause                                                              | Females, All Ages              | Females, 0-4 Years   | Females, 5-14 Years | Females, 15-49 Years     | Females, 50-69 Years        | Females, 70-80 Years           |
|--------------------------------------------------------------------|--------------------------------|----------------------|---------------------|--------------------------|-----------------------------|--------------------------------|
| All causes                                                         | 137,284<br>(130,832 - 145,038) | 936<br>(760 - 1,148) | 159<br>(143 - 180)  | 5,422<br>(5,024 - 5,894) | 23,645<br>(22,171 - 25,434) | 107,122<br>(102,457 - 112,553) |
| Communicable, maternal, neonatal, and nutritional diseases         | 6,833<br>(5,343 - 8,632)       | 460<br>(344 - 589)   | 12<br>(9 - 14)      | 216<br>(180 - 252)       | 552<br>(437 - 657)          | 5,594<br>(4,140 - 7,387)       |
| HIV/AIDS and tuberculosis                                          | 124<br>(95 - 170)              | 0<br>(0 - 1)         | 0<br>(0 - 0)        | 42<br>(26 - 68)          | 30<br>(21 - 44)             | 52<br>(36 - 73)                |
| Tuberculosis                                                       | 68<br>(51 - 89)                | 0<br>(0 - 0)         | 0<br>(0 - 0)        | 4<br>(3 - 5)             | 14<br>(10 - 18)             | 50<br>(35 - 72)                |
| HIV/AIDS                                                           | 57<br>(33 - 95)                | 0<br>(0 - 0)         | 0<br>(0 - 0)        | 38<br>(22 - 65)          | 17<br>(9 - 31)              | 2<br>(0 - 4)                   |
| HIV/AIDS resulting in mycobacterial infection                      | 2<br>(1 - 4)                   | 0<br>(0 - 0)         | 0<br>(0 - 0)        | 1<br>(1 - 3)             | 1<br>(0 - 1)                | 0<br>(0 - 0)                   |
| HIV/AIDS resulting in other diseases                               | 54<br>(31 - 91)                | 0<br>(0 - 0)         | 0<br>(0 - 0)        | 36<br>(21 - 62)          | 16<br>(9 - 29)              | 1<br>(0 - 4)                   |
| Diarrrhea, lower respiratory, and other common infectious diseases | 5,518<br>(4,066 - 7,322)       | 39<br>(28 - 53)      | 9<br>(7 - 11)       | 108<br>(80 - 132)        | 427<br>(324 - 526)          | 4,936<br>(3,511 - 6,738)       |
| Diarrrheal diseases                                                | 611<br>(365 - 967)             | 5<br>(3 - 7)         | 1<br>(0 - 1)        | 8<br>(6 - 10)            | 44<br>(30 - 62)             | 554<br>(309 - 915)             |
| Intestinal infectious diseases                                     | 7<br>(3 - 16)                  | 1<br>(0 - 3)         | 1<br>(0 - 2)        | 3<br>(1 - 7)             | 1<br>(0 - 3)                | 1<br>(0 - 3)                   |
| Typhoid fever                                                      | 5<br>(1 - 10)                  | 1<br>(0 - 2)         | 1<br>(0 - 2)        | 2<br>(1 - 5)             | 1<br>(0 - 2)                | 0<br>(0 - 1)                   |
| Paratyphoid fever                                                  | 1<br>(0 - 3)                   | 0<br>(0 - 1)         | 0<br>(0 - 1)        | 1<br>(0 - 1)             | 0<br>(0 - 0)                | 0<br>(0 - 0)                   |
| Other intestinal infectious diseases                               | 1<br>(0 - 5)                   | 0<br>(0 - 2)         | 0<br>(0 - 1)        | 0<br>(0 - 2)             | 0<br>(0 - 2)                | 0<br>(0 - 3)                   |
| Lower respiratory infections                                       | 4,775<br>(3,438 - 6,574)       | 20<br>(13 - 30)      | 4<br>(2 - 5)        | 79<br>(54 - 101)         | 356<br>(259 - 452)          | 4,316<br>(2,970 - 6,134)       |
| Upper respiratory infections                                       | 3<br>(0 - 10)                  | 0<br>(0 - 0)         | 0<br>(0 - 0)        | 0<br>(0 - 0)             | 1<br>(0 - 2)                | 2<br>(0 - 9)                   |
| Otitis media                                                       | 5<br>(4 - 6)                   | 0<br>(0 - 1)         | 0<br>(0 - 0)        | 1<br>(1 - 1)             | 1<br>(1 - 1)                | 3<br>(1 - 4)                   |
| Meningitis                                                         | 60<br>(50 - 72)                | 8<br>(5 - 12)        | 1<br>(1 - 2)        | 8<br>(6 - 10)            | 13<br>(10 - 16)             | 30<br>(22 - 39)                |
| Pneumococcal meningitis                                            | 28<br>(21 - 35)                | 3<br>(2 - 5)         | 1<br>(0 - 1)        | 4<br>(3 - 5)             | 6<br>(4 - 9)                | 14<br>(9 - 21)                 |
| H influenzae type B meningitis                                     | 4<br>(3 - 6)                   | 2<br>(1 - 2)         | 0<br>(0 - 0)        | 0<br>(0 - 1)             | 1<br>(0 - 1)                | 2<br>(1 - 3)                   |
| Meningococcal meningitis                                           | 11<br>(8 - 15)                 | 2<br>(1 - 2)         | 0<br>(0 - 0)        | 1<br>(1 - 2)             | 2<br>(1 - 3)                | 6<br>(3 - 9)                   |
| Other meningitis                                                   | 17<br>(12 - 23)                | 2<br>(1 - 3)         | 0<br>(0 - 0)        | 2<br>(2 - 3)             | 4<br>(2 - 7)                | 8<br>(5 - 13)                  |
| Encephalitis                                                       | 35<br>(23 - 48)                | 3<br>(1 - 4)         | 1<br>(1 - 2)        | 6<br>(4 - 8)             | 9<br>(6 - 13)               | 16<br>(9 - 27)                 |
| Diphtheria                                                         | 0<br>(0 - 1)                   | 0<br>(0 - 1)         | 0<br>(0 - 0)        | 0<br>(0 - 1)             | 0<br>(0 - 1)                | --<br>(0 - 1)                  |
| Whooping cough                                                     | 2<br>(1 - 5)                   | 1<br>(0 - 4)         | 0<br>(0 - 0)        | 1<br>(1 - 1)             | 0<br>(0 - 0)                | --<br>(0 - 0)                  |
| Tetanus                                                            | 2<br>(1 - 2)                   | 0<br>(0 - 0)         | 0<br>(0 - 0)        | 1<br>(0 - 1)             | 0<br>(0 - 1)                | 0<br>(0 - 1)                   |
| Measles                                                            | 0<br>(0 - 0)                   | 0<br>(0 - 0)         | 0<br>(0 - 0)        | 0<br>(0 - 0)             | 0<br>(0 - 0)                | --<br>(0 - 0)                  |
| Varicella and herpes zoster                                        | 18<br>(3 - 76)                 | 1<br>(0 - 3)         | 0<br>(0 - 1)        | 2<br>(0 - 4)             | 2<br>(0 - 6)                | 14<br>(0 - 72)                 |
| Neglected tropical diseases and malaria                            | 13<br>(8 - 16)                 | 1<br>(0 - 1)         | 1<br>(0 - 1)        | 3<br>(2 - 4)             | 4<br>(2 - 5)                | 5<br>(2 - 7)                   |
| Cysticercosis                                                      | 0<br>(0 - 0)                   | 0<br>(0 - 0)         | 0<br>(0 - 0)        | 0<br>(0 - 0)             | 0<br>(0 - 0)                | 0<br>(0 - 0)                   |
| Cystic echinococcosis                                              | 2<br>(1 - 2)                   | 0<br>(0 - 0)         | 0<br>(0 - 0)        | 0<br>(0 - 0)             | 0<br>(0 - 1)                | 1<br>(1 - 1)                   |
| Dengue                                                             | 2<br>(1 - 2)                   | 0<br>(0 - 0)         | 0<br>(0 - 0)        | 1<br>(0 - 1)             | 0<br>(0 - 1)                | 0<br>(0 - 0)                   |
| Rabies                                                             | 2<br>(1 - 2)                   | 0<br>(0 - 0)         | 0<br>(0 - 0)        | 1<br>(0 - 1)             | 0<br>(0 - 1)                | 0<br>(0 - 0)                   |
| Other neglected tropical diseases                                  | 8<br>(3 - 10)                  | 0<br>(0 - 1)         | 0<br>(0 - 0)        | 1<br>(1 - 1)             | 3<br>(1 - 4)                | 3<br>(1 - 6)                   |
| Maternal disorders                                                 | 33<br>(25 - 42)                | --                   | 0<br>(0 - 0)        | 33<br>(25 - 42)          | --                          | --                             |
| Maternal hemorrhage                                                | 3<br>(2 - 4)                   | --                   | 0<br>(0 - 0)        | 3<br>(2 - 4)             | --                          | --                             |
| Maternal sepsis and other maternal infections                      | 2<br>(2 - 3)                   | --                   | 0<br>(0 - 0)        | 2<br>(2 - 3)             | --                          | --                             |
| Maternal hypertensive disorders                                    | 4<br>(3 - 5)                   | --                   | 0<br>(0 - 0)        | 4<br>(3 - 5)             | --                          | --                             |
| Maternal obstructed labor                                          | 2<br>(1 - 3)                   | --                   | 0<br>(0 - 0)        | 2<br>(1 - 3)             | --                          | --                             |
| Maternal abortive outcome                                          | 5<br>(3 - 7)                   | --                   | 0<br>(0 - 0)        | 5<br>(3 - 7)             | --                          | --                             |
| Indirect maternal deaths                                           | 4<br>(3 - 6)                   | --                   | 0<br>(0 - 0)        | 4<br>(3 - 5)             | --                          | --                             |

Web Table 31- Canada deaths with 95% UI by age, sex, and cause in 2013

| Cause                                                            | Females, All Ages              | Females, 0-4 Years | Females, 5-14 Years | Females, 15-49 Years     | Females, 50-69 Years        | Females, 70-80 Years         |
|------------------------------------------------------------------|--------------------------------|--------------------|---------------------|--------------------------|-----------------------------|------------------------------|
| Late maternal deaths                                             | 5<br>(4 - 7)                   | --                 | 0<br>(0 - 0)        | 5<br>(4 - 7)             | --                          | --                           |
| Maternal deaths aggravated by HIV/AIDS                           | 0<br>(0 - 0)                   | --                 | --                  | 0<br>(0 - 0)             | --                          | --                           |
| Other maternal disorders                                         | 7<br>(5 - 9)                   | --                 | 0<br>(0 - 0)        | 7<br>(5 - 9)             | --                          | --                           |
| Neonatal disorders                                               | 412<br>(307 - 529)             | 412<br>(307 - 529) | --                  | --                       | --                          | --                           |
| Neonatal preterm birth complications                             | 197<br>(126 - 268)             | 197<br>(126 - 268) | --                  | --                       | --                          | --                           |
| Neonatal encephalopathy due to birth asphyxia and trauma         | 98<br>(61 - 143)               | 98<br>(61 - 143)   | --                  | --                       | --                          | --                           |
| Neonatal sepsis and other neonatal infections                    | 20<br>(10 - 41)                | 20<br>(10 - 41)    | --                  | --                       | --                          | --                           |
| Hemolytic disease and other neonatal jaundice                    | 0<br>(0 - 1)                   | 0<br>(0 - 1)       | --                  | --                       | --                          | --                           |
| Other neonatal disorders                                         | 96<br>(51 - 145)               | 96<br>(51 - 145)   | --                  | --                       | --                          | --                           |
| Nutritional deficiencies                                         | 512<br>(368 - 695)             | 1<br>(1 - 2)       | 0<br>(0 - 1)        | 9<br>(7 - 11)            | 27<br>(21 - 34)             | 474<br>(330 - 652)           |
| Protein-energy malnutrition                                      | 169<br>(74 - 286)              | 0<br>(0 - 1)       | 0<br>(0 - 0)        | 3<br>(2 - 5)             | 11<br>(6 - 17)              | 155<br>(65 - 270)            |
| Iodine deficiency                                                | 1<br>(0 - 9)                   | 0<br>(0 - 0)       | 0<br>(0 - 0)        | 0<br>(0 - 0)             | 0<br>(0 - 1)                | 1<br>(0 - 9)                 |
| Iron-deficiency anemia                                           | 308<br>(177 - 459)             | 0<br>(0 - 1)       | 0<br>(0 - 0)        | 5<br>(3 - 7)             | 15<br>(8 - 22)              | 288<br>(162 - 438)           |
| Other nutritional deficiencies                                   | 33<br>(11 - 69)                | 0<br>(0 - 0)       | 0<br>(0 - 0)        | 1<br>(0 - 2)             | 1<br>(1 - 3)                | 30<br>(10 - 65)              |
| Other communicable, maternal, neonatal, and nutritional diseases | 221<br>(154 - 274)             | 6<br>(4 - 9)       | 2<br>(1 - 2)        | 21<br>(16 - 27)          | 64<br>(43 - 82)             | 128<br>(82 - 168)            |
| Sexually transmitted diseases excluding HIV                      | 15<br>(11 - 22)                | 1<br>(0 - 3)       | 0<br>(0 - 0)        | 2<br>(1 - 2)             | 3<br>(2 - 5)                | 9<br>(6 - 15)                |
| Syphilis                                                         | 11<br>(7 - 16)                 | 1<br>(0 - 3)       | 0<br>(0 - 0)        | 1<br>(0 - 1)             | 2<br>(1 - 3)                | 7<br>(4 - 12)                |
| Chlamydial infection                                             | 1<br>(1 - 2)                   | --                 | 0<br>(0 - 0)        | 0<br>(0 - 0)             | 0<br>(0 - 1)                | 0<br>(0 - 1)                 |
| Gonococcal infection                                             | 2<br>(1 - 3)                   | --                 | 0<br>(0 - 0)        | 0<br>(0 - 0)             | 1<br>(0 - 1)                | 1<br>(1 - 2)                 |
| Other sexually transmitted diseases                              | 1<br>(1 - 2)                   | --                 | 0<br>(0 - 0)        | 0<br>(0 - 0)             | 0<br>(0 - 1)                | 0<br>(0 - 1)                 |
| Hepatitis                                                        | 44<br>(32 - 59)                | 0<br>(0 - 1)       | 0<br>(0 - 0)        | 7<br>(5 - 11)            | 15<br>(10 - 23)             | 20<br>(12 - 34)              |
| Acute hepatitis A                                                | 18<br>(7 - 30)                 | 0<br>(0 - 1)       | 0<br>(0 - 0)        | 5<br>(2 - 8)             | 6<br>(2 - 12)               | 6<br>(2 - 14)                |
| Acute hepatitis B                                                | 24<br>(12 - 40)                | 0<br>(0 - 0)       | 0<br>(0 - 0)        | 3<br>(1 - 5)             | 9<br>(4 - 15)               | 13<br>(6 - 24)               |
| Acute hepatitis C                                                | 2<br>(0 - 4)                   | --                 | 0<br>(0 - 0)        | 0<br>(0 - 1)             | 0<br>(0 - 1)                | 1<br>(0 - 3)                 |
| Other infectious diseases                                        | 162<br>(97 - 210)              | 5<br>(2 - 7)       | 1<br>(1 - 2)        | 12<br>(8 - 16)           | 46<br>(26 - 61)             | 98<br>(56 - 138)             |
| Non-communicable diseases                                        | 124,082<br>(117,924 - 131,305) | 401<br>(310 - 532) | 87<br>(75 - 100)    | 3,919<br>(3,593 - 4,291) | 22,087<br>(20,696 - 23,712) | 97,588<br>(92,713 - 103,036) |
| Neoplasms                                                        | 36,978<br>(31,870 - 40,736)    | 29<br>(20 - 40)    | 41<br>(34 - 49)     | 2,220<br>(2,011 - 2,457) | 13,036<br>(11,762 - 14,170) | 21,651<br>(17,705 - 24,527)  |
| Esophageal cancer                                                | 434<br>(357 - 517)             | --                 | --                  | 10<br>(7 - 14)           | 134<br>(105 - 167)          | 289<br>(224 - 363)           |
| Stomach cancer                                                   | 1,261<br>(895 - 1,755)         | --                 | --                  | 52<br>(37 - 70)          | 269<br>(200 - 355)          | 941<br>(633 - 1,384)         |
| Liver cancer                                                     | 674<br>(374 - 888)             | --                 | 1<br>(0 - 1)        | 31<br>(19 - 42)          | 213<br>(125 - 276)          | 429<br>(220 - 618)           |
| Liver cancer due to hepatitis B                                  | 54<br>(27 - 77)                | --                 | 0<br>(0 - 0)        | 5<br>(3 - 7)             | 24<br>(13 - 34)             | 25<br>(10 - 40)              |
| Liver cancer due to hepatitis C                                  | 370<br>(207 - 506)             | --                 | 0<br>(0 - 0)        | 13<br>(8 - 19)           | 111<br>(62 - 151)           | 245<br>(127 - 362)           |
| Liver cancer due to alcohol use                                  | 104<br>(50 - 155)              | --                 | --                  | 3<br>(1 - 4)             | 28<br>(15 - 41)             | 74<br>(33 - 117)             |
| Liver cancer due to other causes                                 | 146<br>(79 - 219)              | --                 | 0<br>(0 - 1)        | 10<br>(6 - 15)           | 51<br>(29 - 77)             | 86<br>(43 - 136)             |
| Larynx cancer                                                    | 89<br>(60 - 125)               | --                 | --                  | 4<br>(2 - 6)             | 43<br>(29 - 62)             | 42<br>(26 - 62)              |
| Tracheal, bronchus and lung cancer                               | 8,914<br>(6,267 - 10,542)      | --                 | --                  | 375<br>(291 - 483)       | 3,939<br>(2,987 - 4,555)    | 4,600<br>(2,651 - 5,884)     |
| Breast cancer                                                    | 5,907<br>(4,787 - 7,258)       | --                 | --                  | 612<br>(499 - 756)       | 2,394<br>(2,012 - 3,057)    | 2,900<br>(2,163 - 3,669)     |
| Cervical cancer                                                  | 637<br>(513 - 771)             | --                 | --                  | 118<br>(85 - 150)        | 248<br>(184 - 310)          | 272<br>(199 - 363)           |
| Uterine cancer                                                   | 759<br>(607 - 941)             | --                 | --                  | 19<br>(13 - 26)          | 280<br>(214 - 362)          | 460<br>(342 - 624)           |
| Prostate cancer                                                  | --                             | --                 | --                  | --                       | --                          | --                           |

Web Table 31- Canada deaths with 95% UI by age, sex, and cause in 2013

| Cause                                         | Females, All Ages           | Females, 0-4 Years | Females, 5-14 Years | Females, 15-49 Years | Females, 50-69 Years     | Females, 70-80 Years        |
|-----------------------------------------------|-----------------------------|--------------------|---------------------|----------------------|--------------------------|-----------------------------|
| Colon and rectum cancer                       | 4,950<br>(4,030 - 6,051)    | --                 | --                  | 165<br>(136 - 196)   | 1,240<br>(1,063 - 1,409) | 3,545<br>(2,686 - 4,595)    |
| Lip and oral cavity cancer                    | 275<br>(224 - 329)          | --                 | --                  | 17<br>(12 - 21)      | 96<br>(73 - 118)         | 162<br>(124 - 206)          |
| Nasopharynx cancer                            | 57<br>(31 - 126)            | --                 | 0<br>(0 - 0)        | 9<br>(5 - 19)        | 27<br>(14 - 60)          | 21<br>(11 - 46)             |
| Other pharynx cancer                          | 88<br>(69 - 113)            | --                 | --                  | 5<br>(3 - 8)         | 42<br>(32 - 55)          | 41<br>(29 - 55)             |
| Gallbladder and biliary tract cancer          | 561<br>(402 - 832)          | --                 | --                  | 11<br>(8 - 18)       | 141<br>(106 - 218)       | 408<br>(266 - 620)          |
| Pancreatic cancer                             | 2,522<br>(2,141 - 2,925)    | --                 | --                  | 75<br>(58 - 93)      | 776<br>(655 - 895)       | 1,671<br>(1,338 - 2,035)    |
| Malignant skin melanoma                       | 411<br>(253 - 534)          | --                 | --                  | 67<br>(47 - 96)      | 157<br>(97 - 206)        | 187<br>(109 - 271)          |
| Non-melanoma skin cancer                      | 147<br>(95 - 199)           | --                 | --                  | 4<br>(3 - 5)         | 19<br>(14 - 25)          | 124<br>(78 - 173)           |
| Ovarian cancer                                | 1,958<br>(1,589 - 2,347)    | --                 | --                  | 135<br>(105 - 170)   | 830<br>(677 - 994)       | 992<br>(723 - 1,328)        |
| Testicular cancer                             | --                          | --                 | --                  | --                   | --                       | --                          |
| Kidney cancer                                 | 583<br>(384 - 885)          | 1<br>(0 - 1)       | 1<br>(1 - 2)        | 24<br>(17 - 32)      | 199<br>(144 - 270)       | 359<br>(202 - 626)          |
| Bladder cancer                                | 591<br>(390 - 821)          | --                 | --                  | 11<br>(7 - 17)       | 111<br>(78 - 156)        | 469<br>(297 - 673)          |
| Brain and nervous system cancer               | 838<br>(668 - 1,051)        | 6<br>(3 - 10)      | 12<br>(8 - 17)      | 118<br>(91 - 148)    | 367<br>(289 - 481)       | 336<br>(233 - 456)          |
| Thyroid cancer                                | 108<br>(75 - 143)           | --                 | 0<br>(0 - 0)        | 4<br>(3 - 6)         | 29<br>(21 - 38)          | 75<br>(48 - 107)            |
| Mesothelioma                                  | 96<br>(62 - 133)            | --                 | --                  | 6<br>(4 - 9)         | 41<br>(26 - 63)          | 49<br>(28 - 73)             |
| Hodgkin lymphoma                              | 66<br>(49 - 99)             | 0<br>(0 - 0)       | 0<br>(0 - 1)        | 19<br>(13 - 27)      | 19<br>(12 - 29)          | 28<br>(18 - 43)             |
| Non-Hodgkin lymphoma                          | 1,619<br>(768 - 2,212)      | 1<br>(1 - 2)       | 2<br>(1 - 3)        | 87<br>(47 - 140)     | 488<br>(237 - 666)       | 1,042<br>(457 - 1,525)      |
| Multiple myeloma                              | 740<br>(462 - 1,170)        | --                 | --                  | 20<br>(12 - 34)      | 233<br>(141 - 374)       | 487<br>(289 - 804)          |
| Leukemia                                      | 1,147<br>(947 - 1,400)      | 7<br>(4 - 13)      | 11<br>(7 - 15)      | 91<br>(76 - 111)     | 283<br>(232 - 343)       | 756<br>(573 - 989)          |
| Other neoplasms                               | 1,545<br>(1,103 - 1,885)    | 14<br>(10 - 20)    | 14<br>(11 - 19)     | 133<br>(105 - 164)   | 417<br>(325 - 509)       | 967<br>(609 - 1,270)        |
| Cardiovascular diseases                       | 44,338<br>(38,662 - 54,321) | 8<br>(6 - 12)      | 4<br>(3 - 6)        | 545<br>(409 - 661)   | 4,190<br>(3,594 - 5,551) | 39,590<br>(34,218 - 48,297) |
| Rheumatic heart disease                       | 381<br>(229 - 511)          | 0<br>(0 - 0)       | 0<br>(0 - 0)        | 15<br>(9 - 20)       | 84<br>(55 - 126)         | 283<br>(159 - 393)          |
| Ischemic heart disease                        | 26,557<br>(22,223 - 35,162) | 0<br>(0 - 1)       | 0<br>(0 - 1)        | 239<br>(172 - 309)   | 2,554<br>(2,106 - 3,694) | 23,763<br>(19,577 - 31,505) |
| Cerebrovascular disease                       | 10,807<br>(8,165 - 13,993)  | 1<br>(1 - 2)       | 1<br>(1 - 2)        | 155<br>(105 - 200)   | 859<br>(614 - 1,124)     | 9,791<br>(7,443 - 12,842)   |
| Ischemic stroke                               | 6,098<br>(4,499 - 8,498)    | 0<br>(0 - 0)       | 0<br>(0 - 0)        | 14<br>(7 - 20)       | 194<br>(124 - 292)       | 5,889<br>(4,352 - 8,213)    |
| Hemorrhagic stroke                            | 4,709<br>(3,195 - 6,134)    | 1<br>(0 - 1)       | 1<br>(1 - 1)        | 141<br>(97 - 182)    | 665<br>(459 - 883)       | 3,901<br>(2,509 - 5,249)    |
| Hypertensive heart disease                    | 648<br>(427 - 1,082)        | 0<br>(0 - 0)       | 0<br>(0 - 0)        | 7<br>(5 - 10)        | 50<br>(34 - 76)          | 591<br>(377 - 1,001)        |
| Cardiomyopathy and myocarditis                | 638<br>(410 - 882)          | 6<br>(4 - 8)       | 2<br>(1 - 3)        | 46<br>(27 - 61)      | 137<br>(91 - 191)        | 447<br>(278 - 650)          |
| Atrial fibrillation and flutter               | 1,607<br>(978 - 2,430)      | --                 | --                  | 1<br>(1 - 1)         | 48<br>(32 - 72)          | 1,558<br>(932 - 2,366)      |
| Aortic aneurysm                               | 1,049<br>(636 - 1,761)      | --                 | --                  | 11<br>(7 - 17)       | 130<br>(80 - 231)        | 907<br>(538 - 1,542)        |
| Peripheral vascular disease                   | 498<br>(336 - 732)          | --                 | --                  | 3<br>(2 - 4)         | 39<br>(27 - 58)          | 457<br>(300 - 690)          |
| Endocarditis                                  | 178<br>(108 - 321)          | 0<br>(0 - 0)       | 0<br>(0 - 0)        | 7<br>(5 - 12)        | 33<br>(20 - 60)          | 137<br>(79 - 253)           |
| Other cardiovascular and circulatory diseases | 1,976<br>(1,231 - 2,770)    | 1<br>(0 - 2)       | 0<br>(0 - 1)        | 61<br>(33 - 81)      | 257<br>(168 - 350)       | 1,657<br>(1,029 - 2,406)    |
| Chronic respiratory diseases                  | 7,189<br>(4,594 - 8,744)    | 5<br>(3 - 8)       | 3<br>(2 - 4)        | 85<br>(64 - 103)     | 1,046<br>(704 - 1,240)   | 6,049<br>(3,851 - 7,525)    |
| Chronic obstructive pulmonary disease         | 5,899<br>(3,725 - 7,287)    | 2<br>(1 - 4)       | 1<br>(0 - 1)        | 37<br>(25 - 52)      | 811<br>(526 - 1,003)     | 5,049<br>(3,144 - 6,358)    |
| Pneumoconiosis                                | 14<br>(7 - 23)              | 0<br>(0 - 0)       | 0<br>(0 - 0)        | 3<br>(2 - 4)         | 2<br>(1 - 3)             | 9<br>(4 - 17)               |
| Silicosis                                     | 2<br>(1 - 2)                | 0<br>(0 - 0)       | 0<br>(0 - 0)        | 1<br>(1 - 2)         | 0<br>(0 - 0)             | 0<br>(0 - 0)                |
| Asbestosis                                    | 2<br>(1 - 3)                | 0<br>(0 - 0)       | 0<br>(0 - 0)        | 0<br>(0 - 1)         | 0<br>(0 - 0)             | 1<br>(0 - 2)                |
| Coal workers pneumoconiosis                   | 1<br>(0 - 1)                | 0<br>(0 - 0)       | 0<br>(0 - 0)        | 0<br>(0 - 1)         | 0<br>(0 - 0)             | 0<br>(0 - 0)                |
| Other pneumoconiosis                          | 9<br>(4 - 17)               | 0<br>(0 - 0)       | 0<br>(0 - 0)        | 1<br>(0 - 1)         | 1<br>(1 - 2)             | 7<br>(3 - 15)               |



Web Table 31- Canada deaths with 95% UI by age, sex, and cause in 2013

| Cause                                               | Females, All Ages           | Females, 0-4 Years | Females, 5-14 Years | Females, 15-49 Years | Females, 50-69 Years     | Females, 70-80 Years        |
|-----------------------------------------------------|-----------------------------|--------------------|---------------------|----------------------|--------------------------|-----------------------------|
| Asthma                                              | 223<br>(124 - 347)          | 0<br>(0 - 1)       | 1<br>(1 - 2)        | 20<br>(13 - 27)      | 43<br>(24 - 66)          | 158<br>(78 - 265)           |
| Interstitial lung disease and pulmonary sarcoidosis | 995<br>(490 - 1,765)        | 1<br>(0 - 1)       | 1<br>(0 - 1)        | 23<br>(14 - 36)      | 180<br>(95 - 316)        | 790<br>(367 - 1,428)        |
| Other chronic respiratory diseases                  | 58<br>(29 - 93)             | 2<br>(1 - 3)       | 0<br>(0 - 1)        | 3<br>(2 - 4)         | 10<br>(5 - 16)           | 43<br>(19 - 74)             |
| Cirrhosis                                           | 1,650<br>(1,419 - 1,898)    | 1<br>(1 - 2)       | 1<br>(0 - 1)        | 166<br>(137 - 198)   | 621<br>(525 - 723)       | 861<br>(689 - 1,071)        |
| Cirrhosis due to hepatitis B                        | 194<br>(99 - 337)           | 0<br>(0 - 0)       | 0<br>(0 - 0)        | 22<br>(11 - 40)      | 75<br>(39 - 128)         | 97<br>(45 - 184)            |
| Cirrhosis due to hepatitis C                        | 895<br>(478 - 1,178)        | 0<br>(0 - 1)       | 0<br>(0 - 0)        | 91<br>(41 - 129)     | 352<br>(184 - 473)       | 451<br>(225 - 648)          |
| Cirrhosis due to alcohol use                        | 474<br>(280 - 808)          | --                 | --                  | 33<br>(14 - 64)      | 157<br>(89 - 280)        | 285<br>(150 - 477)          |
| Cirrhosis due to other causes                       | 88<br>(44 - 158)            | 1<br>(1 - 1)       | 0<br>(0 - 1)        | 20<br>(10 - 34)      | 38<br>(18 - 71)          | 29<br>(13 - 55)             |
| Digestive diseases                                  | 3,666<br>(2,960 - 4,414)    | 2<br>(2 - 3)       | 2<br>(1 - 2)        | 72<br>(58 - 85)      | 441<br>(351 - 522)       | 3,148<br>(2,507 - 3,879)    |
| Peptic ulcer disease                                | 348<br>(229 - 533)          | 0<br>(0 - 0)       | 0<br>(0 - 0)        | 7<br>(5 - 9)         | 44<br>(30 - 62)          | 297<br>(187 - 469)          |
| Gastritis and duodenitis                            | 44<br>(23 - 95)             | 0<br>(0 - 0)       | 0<br>(0 - 0)        | 2<br>(1 - 4)         | 6<br>(3 - 11)            | 37<br>(17 - 82)             |
| Appendicitis                                        | 39<br>(19 - 70)             | 0<br>(0 - 0)       | 0<br>(0 - 0)        | 3<br>(2 - 4)         | 7<br>(4 - 12)            | 29<br>(13 - 56)             |
| Paralytic ileus and intestinal obstruction          | 696<br>(352 - 1,138)        | 1<br>(0 - 1)       | 0<br>(0 - 1)        | 12<br>(6 - 20)       | 62<br>(30 - 104)         | 621<br>(313 - 1,031)        |
| Inguinal, femoral, and abdominal hernia             | 96<br>(36 - 157)            | 0<br>(0 - 0)       | 0<br>(0 - 0)        | 1<br>(1 - 2)         | 10<br>(4 - 16)           | 84<br>(29 - 144)            |
| Inflammatory bowel disease                          | 322<br>(203 - 567)          | 1<br>(0 - 1)       | 0<br>(0 - 0)        | 10<br>(7 - 14)       | 45<br>(27 - 69)          | 266<br>(157 - 499)          |
| Vascular intestinal disorders                       | 759<br>(391 - 1,319)        | 0<br>(0 - 0)       | 0<br>(0 - 0)        | 9<br>(5 - 16)        | 112<br>(62 - 168)        | 637<br>(316 - 1,136)        |
| Gallbladder and biliary diseases                    | 356<br>(224 - 510)          | 0<br>(0 - 0)       | 0<br>(0 - 0)        | 6<br>(4 - 8)         | 36<br>(23 - 49)          | 313<br>(194 - 459)          |
| Pancreatitis                                        | 222<br>(136 - 334)          | 0<br>(0 - 0)       | 0<br>(0 - 0)        | 10<br>(6 - 15)       | 41<br>(25 - 59)          | 171<br>(100 - 262)          |
| Other digestive diseases                            | 785<br>(519 - 1,086)        | 0<br>(0 - 1)       | 0<br>(0 - 0)        | 11<br>(8 - 15)       | 78<br>(53 - 102)         | 695<br>(447 - 983)          |
| Neurological disorders                              | 18,844<br>(13,992 - 23,469) | 17<br>(12 - 24)    | 7<br>(5 - 9)        | 162<br>(129 - 202)   | 898<br>(730 - 1,052)     | 17,760<br>(12,964 - 22,378) |
| Alzheimer disease and other dementias               | 16,611<br>(11,827 - 21,229) | --                 | --                  | 1<br>(0 - 2)         | 331<br>(231 - 445)       | 16,279<br>(11,504 - 20,883) |
| Parkinson disease                                   | 957<br>(552 - 1,383)        | --                 | --                  | 1<br>(1 - 2)         | 53<br>(34 - 76)          | 903<br>(508 - 1,327)        |
| Epilepsy                                            | 146<br>(103 - 191)          | 2<br>(1 - 3)       | 2<br>(2 - 3)        | 41<br>(30 - 55)      | 33<br>(24 - 44)          | 68<br>(41 - 96)             |
| Multiple sclerosis                                  | 361<br>(174 - 480)          | --                 | --                  | 66<br>(39 - 101)     | 189<br>(89 - 263)        | 106<br>(46 - 161)           |
| Other neurological disorders                        | 768<br>(663 - 889)          | 15<br>(10 - 21)    | 5<br>(3 - 6)        | 53<br>(44 - 65)      | 292<br>(248 - 345)       | 404<br>(318 - 508)          |
| Mental and substance use disorders                  | 688<br>(545 - 844)          | 0<br>(0 - 1)       | 0<br>(0 - 0)        | 282<br>(232 - 354)   | 249<br>(183 - 339)       | 156<br>(104 - 217)          |
| Schizophrenia                                       | 72<br>(34 - 121)            | --                 | --                  | 2<br>(1 - 3)         | 12<br>(6 - 18)           | 58<br>(26 - 105)            |
| Alcohol use disorders                               | 202<br>(89 - 350)           | --                 | --                  | 49<br>(20 - 82)      | 102<br>(44 - 191)        | 51<br>(22 - 88)             |
| Drug use disorders                                  | 408<br>(344 - 486)          | 0<br>(0 - 1)       | --                  | 226<br>(184 - 285)   | 135<br>(105 - 170)       | 47<br>(33 - 65)             |
| Opioid use disorders                                | 162<br>(134 - 195)          | 0<br>(0 - 0)       | --                  | 91<br>(72 - 117)     | 51<br>(39 - 66)          | 20<br>(14 - 28)             |
| Cocaine use disorders                               | 26<br>(21 - 32)             | 0<br>(0 - 0)       | --                  | 16<br>(12 - 21)      | 7<br>(5 - 9)             | 2<br>(2 - 4)                |
| Amphetamine use disorders                           | 17<br>(14 - 21)             | 0<br>(0 - 0)       | --                  | 9<br>(7 - 12)        | 6<br>(4 - 8)             | 2<br>(1 - 3)                |
| Other drug use disorders                            | 204<br>(172 - 243)          | 0<br>(0 - 0)       | --                  | 109<br>(87 - 138)    | 72<br>(55 - 92)          | 23<br>(16 - 33)             |
| Eating disorders                                    | 5<br>(3 - 8)                | --                 | 0<br>(0 - 0)        | 5<br>(3 - 8)         | --                       | --                          |
| Anorexia nervosa                                    | 5<br>(3 - 8)                | --                 | 0<br>(0 - 0)        | 5<br>(3 - 8)         | --                       | --                          |
| Diabetes, urogenital, blood, and endocrine diseases | 9,150<br>(7,463 - 10,899)   | 27<br>(19 - 38)    | 12<br>(9 - 15)      | 246<br>(205 - 286)   | 1,297<br>(1,115 - 1,540) | 7,567<br>(6,020 - 9,270)    |
| Diabetes mellitus                                   | 4,060<br>(3,222 - 5,069)    | 1<br>(1 - 2)       | 1<br>(0 - 1)        | 87<br>(70 - 106)     | 682<br>(559 - 838)       | 3,289<br>(2,500 - 4,243)    |
| Acute glomerulonephritis                            | 3<br>(2 - 4)                | 0<br>(0 - 0)       | 0<br>(0 - 0)        | 1<br>(0 - 1)         | 1<br>(0 - 1)             | 1<br>(1 - 2)                |
| Chronic kidney disease                              | 2,869<br>(2,135 - 4,416)    | 2<br>(1 - 3)       | 1<br>(1 - 2)        | 42<br>(33 - 60)      | 281<br>(217 - 445)       | 2,542<br>(1,822 - 3,876)    |
| Chronic kidney disease due to diabetes mellitus     | 411<br>(234 - 661)          | 0<br>(0 - 1)       | 0<br>(0 - 0)        | 14<br>(10 - 21)      | 89<br>(52 - 133)         | 307<br>(154 - 526)          |

Web Table 31- Canada deaths with 95% UI by age, sex, and cause in 2013

| Cause                                               | Females, All Ages        | Females, 0-4 Years | Females, 5-14 Years | Females, 15-49 Years     | Females, 50-69 Years   | Females, 70-80 Years     |
|-----------------------------------------------------|--------------------------|--------------------|---------------------|--------------------------|------------------------|--------------------------|
| Chronic kidney disease due to hypertension          | 1,213<br>(755 - 1,900)   | 0<br>(0 - 0)       | 0<br>(0 - 0)        | 9<br>(5 - 16)            | 104<br>(63 - 167)      | 1,100<br>(681 - 1,727)   |
| Chronic kidney disease due to glomerulonephritis    | 49<br>(26 - 80)          | 0<br>(0 - 1)       | 0<br>(0 - 0)        | 2<br>(1 - 3)             | 8<br>(4 - 12)          | 39<br>(18 - 68)          |
| Chronic kidney disease due to other causes          | 1,195<br>(618 - 2,335)   | 1<br>(1 - 2)       | 1<br>(0 - 1)        | 16<br>(9 - 30)           | 81<br>(38 - 188)       | 1,096<br>(551 - 2,123)   |
| Urinary diseases and male infertility               | 1,048<br>(541 - 1,483)   | 1<br>(1 - 2)       | 0<br>(0 - 0)        | 18<br>(10 - 24)          | 85<br>(49 - 112)       | 943<br>(477 - 1,369)     |
| Interstitial nephritis and urinary tract infections | 971<br>(491 - 1,397)     | 1<br>(0 - 1)       | 0<br>(0 - 0)        | 15<br>(8 - 20)           | 71<br>(38 - 94)        | 884<br>(429 - 1,299)     |
| Urolithiasis                                        | 26<br>(14 - 47)          | --                 | 0<br>(0 - 0)        | 1<br>(1 - 2)             | 5<br>(2 - 8)           | 20<br>(10 - 38)          |
| Other urinary diseases                              | 50<br>(28 - 107)         | 0<br>(0 - 1)       | 0<br>(0 - 0)        | 2<br>(1 - 4)             | 9<br>(5 - 17)          | 38<br>(17 - 92)          |
| Gynecological diseases                              | 12<br>(8 - 20)           | --                 | --                  | 1<br>(1 - 2)             | 2<br>(1 - 3)           | 9<br>(5 - 16)            |
| Uterine fibroids                                    | 3<br>(2 - 6)             | --                 | --                  | 0<br>(0 - 0)             | 0<br>(0 - 1)           | 3<br>(1 - 5)             |
| Polycystic ovarian syndrome                         | 0<br>(0 - 0)             | --                 | --                  | 0<br>(0 - 0)             | 0<br>(0 - 0)           | --                       |
| Endometriosis                                       | 0<br>(0 - 0)             | --                 | --                  | 0<br>(0 - 0)             | 0<br>(0 - 0)           | --                       |
| Genital prolapse                                    | 3<br>(2 - 5)             | --                 | --                  | 0<br>(0 - 0)             | 0<br>(0 - 1)           | 2<br>(1 - 4)             |
| Other gynecological diseases                        | 5<br>(4 - 9)             | --                 | --                  | 1<br>(0 - 1)             | 1<br>(1 - 1)           | 4<br>(2 - 7)             |
| Hemoglobinopathies and hemolytic anemias            | 96<br>(55 - 143)         | 2<br>(1 - 3)       | 1<br>(1 - 2)        | 7<br>(4 - 10)            | 16<br>(10 - 24)        | 70<br>(37 - 112)         |
| Thalassemias                                        | 4<br>(3 - 6)             | 1<br>(0 - 1)       | 1<br>(0 - 1)        | 2<br>(1 - 3)             | 1<br>(1 - 1)           | 0<br>(0 - 1)             |
| Sickle cell disorders                               | 14<br>(9 - 21)           | 1<br>(0 - 1)       | 1<br>(0 - 1)        | 3<br>(2 - 5)             | 7<br>(4 - 10)          | 3<br>(2 - 4)             |
| G6PD deficiency                                     | 0<br>(0 - 0)             | 0<br>(0 - 0)       | 0<br>(0 - 0)        | 0<br>(0 - 0)             | 0<br>(0 - 0)           | 0<br>(0 - 0)             |
| Other hemoglobinopathies and hemolytic anemias      | 77<br>(42 - 120)         | 0<br>(0 - 1)       | 0<br>(0 - 0)        | 2<br>(1 - 2)             | 8<br>(5 - 12)          | 67<br>(35 - 106)         |
| Endocrine, metabolic, blood, and immune disorders   | 1,062<br>(735 - 1,393)   | 21<br>(13 - 30)    | 8<br>(5 - 11)       | 89<br>(62 - 112)         | 231<br>(152 - 295)     | 713<br>(457 - 1,001)     |
| Musculoskeletal disorders                           | 756<br>(586 - 964)       | --                 | 1<br>(1 - 1)        | 53<br>(37 - 64)          | 194<br>(153 - 240)     | 509<br>(358 - 701)       |
| Rheumatoid arthritis                                | 256<br>(173 - 374)       | --                 | 0<br>(0 - 0)        | 4<br>(2 - 5)             | 47<br>(33 - 67)        | 205<br>(126 - 315)       |
| Other musculoskeletal disorders                     | 501<br>(373 - 646)       | --                 | 1<br>(1 - 1)        | 49<br>(34 - 60)          | 146<br>(112 - 184)     | 304<br>(200 - 445)       |
| Other non-communicable diseases                     | 824<br>(686 - 1,015)     | 311<br>(227 - 443) | 16<br>(12 - 21)     | 88<br>(70 - 111)         | 114<br>(91 - 144)      | 295<br>(200 - 405)       |
| Congenital anomalies                                | 523<br>(421 - 662)       | 250<br>(179 - 340) | 16<br>(12 - 21)     | 83<br>(66 - 106)         | 91<br>(70 - 120)       | 83<br>(56 - 120)         |
| Neural tube defects                                 | 16<br>(11 - 26)          | 12<br>(7 - 21)     | 1<br>(0 - 1)        | 2<br>(1 - 3)             | 1<br>(0 - 1)           | 0<br>(0 - 1)             |
| Congenital heart anomalies                          | 162<br>(123 - 216)       | 76<br>(52 - 111)   | 6<br>(4 - 9)        | 34<br>(25 - 45)          | 24<br>(17 - 34)        | 21<br>(13 - 35)          |
| Cleft lip and cleft palate                          | 0<br>(0 - 1)             | 0<br>(0 - 1)       | --                  | --                       | --                     | --                       |
| Down syndrome                                       | 63<br>(36 - 86)          | 9<br>(4 - 14)      | 1<br>(0 - 1)        | 14<br>(7 - 20)           | 38<br>(21 - 54)        | 2<br>(1 - 4)             |
| Chromosomal unbalanced rearrangements               | 45<br>(28 - 71)          | 40<br>(24 - 64)    | 1<br>(1 - 2)        | 2<br>(1 - 3)             | 2<br>(1 - 3)           | 0<br>(0 - 0)             |
| Other congenital anomalies                          | 237<br>(176 - 315)       | 112<br>(73 - 170)  | 8<br>(5 - 11)       | 31<br>(22 - 43)          | 27<br>(17 - 40)        | 59<br>(39 - 88)          |
| Skin and subcutaneous diseases                      | 241<br>(158 - 342)       | 1<br>(0 - 1)       | 0<br>(0 - 0)        | 4<br>(3 - 6)             | 23<br>(16 - 30)        | 213<br>(131 - 314)       |
| Cellulitis                                          | 82<br>(35 - 148)         | 0<br>(0 - 0)       | 0<br>(0 - 0)        | 2<br>(1 - 2)             | 9<br>(5 - 13)          | 71<br>(27 - 138)         |
| Pyoderma                                            | 86<br>(44 - 139)         | 0<br>(0 - 1)       | 0<br>(0 - 0)        | 2<br>(1 - 2)             | 8<br>(5 - 12)          | 76<br>(36 - 128)         |
| Decubitus ulcer                                     | 50<br>(26 - 90)          | 0<br>(0 - 0)       | 0<br>(0 - 0)        | 1<br>(0 - 1)             | 3<br>(2 - 5)           | 46<br>(23 - 87)          |
| Other skin and subcutaneous diseases                | 24<br>(9 - 61)           | 0<br>(0 - 0)       | 0<br>(0 - 0)        | 1<br>(0 - 1)             | 3<br>(1 - 5)           | 20<br>(5 - 56)           |
| Sudden infant death syndrome                        | 60<br>(25 - 140)         | 60<br>(25 - 140)   | --                  | --                       | --                     | --                       |
| Injuries                                            | 6,369<br>(5,258 - 7,573) | 75<br>(56 - 98)    | 61<br>(52 - 72)     | 1,288<br>(1,161 - 1,476) | 1,006<br>(882 - 1,181) | 3,940<br>(2,849 - 5,082) |
| Transport injuries                                  | 1,042<br>(889 - 1,365)   | 22<br>(14 - 32)    | 32<br>(24 - 42)     | 467<br>(395 - 599)       | 262<br>(206 - 346)     | 258<br>(194 - 377)       |
| Road injuries                                       | 1,002<br>(855 - 1,330)   | 20<br>(13 - 30)    | 29<br>(22 - 39)     | 446<br>(376 - 571)       | 253<br>(199 - 337)     | 253<br>(189 - 372)       |
| Pedestrian road injuries                            | 269<br>(159 - 364)       | 8<br>(4 - 14)      | 10<br>(6 - 15)      | 64<br>(34 - 92)          | 75<br>(40 - 106)       | 112<br>(63 - 169)        |

Web Table 31- Canada deaths with 95% UI by age, sex, and cause in 2013

| Cause                                           | Females, All Ages        | Females, 0-4 Years | Females, 5-14 Years | Females, 15-49 Years | Females, 50-69 Years | Females, 70-80 Years     |
|-------------------------------------------------|--------------------------|--------------------|---------------------|----------------------|----------------------|--------------------------|
| Cyclist road injuries                           | 45<br>(27 - 63)          | 1<br>(0 - 2)       | 4<br>(2 - 6)        | 18<br>(10 - 26)      | 14<br>(7 - 22)       | 8<br>(4 - 15)            |
| Motorcyclist road injuries                      | 42<br>(13 - 66)          | 0<br>(0 - 1)       | 1<br>(0 - 2)        | 29<br>(9 - 48)       | 9<br>(2 - 17)        | 2<br>(1 - 5)             |
| Motor vehicle road injuries                     | 639<br>(535 - 906)       | 11<br>(6 - 18)     | 14<br>(9 - 22)      | 332<br>(276 - 451)   | 153<br>(114 - 227)   | 129<br>(86 - 208)        |
| Other road injuries                             | 7<br>(4 - 12)            | 0<br>(0 - 1)       | 0<br>(0 - 1)        | 3<br>(1 - 5)         | 2<br>(1 - 5)         | 1<br>(0 - 3)             |
| Other transport injuries                        | 40<br>(25 - 63)          | 2<br>(1 - 4)       | 2<br>(1 - 4)        | 21<br>(13 - 33)      | 9<br>(5 - 16)        | 6<br>(3 - 11)            |
| Unintentional injuries                          | 4,132<br>(3,009 - 5,297) | 49<br>(36 - 67)    | 19<br>(16 - 25)     | 169<br>(145 - 209)   | 347<br>(286 - 414)   | 3,547<br>(2,455 - 4,692) |
| Falls                                           | 2,851<br>(1,850 - 3,967) | 3<br>(2 - 5)       | 1<br>(1 - 2)        | 29<br>(20 - 36)      | 123<br>(77 - 157)    | 2,694<br>(1,722 - 3,796) |
| Drowning                                        | 72<br>(58 - 109)         | 10<br>(6 - 19)     | 5<br>(3 - 8)        | 23<br>(18 - 36)      | 17<br>(13 - 28)      | 16<br>(12 - 24)          |
| Fire, heat, and hot substances                  | 168<br>(125 - 232)       | 9<br>(5 - 14)      | 5<br>(4 - 8)        | 30<br>(22 - 41)      | 38<br>(28 - 52)      | 87<br>(59 - 130)         |
| Poisonings                                      | 59<br>(43 - 98)          | 1<br>(0 - 1)       | 0<br>(0 - 1)        | 20<br>(14 - 38)      | 21<br>(14 - 35)      | 16<br>(10 - 28)          |
| Exposure to mechanical forces                   | 60<br>(45 - 82)          | 11<br>(6 - 19)     | 3<br>(2 - 4)        | 12<br>(10 - 15)      | 10<br>(7 - 13)       | 25<br>(14 - 38)          |
| Unintentional firearm injuries                  | 2<br>(2 - 3)             | 0<br>(0 - 0)       | 0<br>(0 - 1)        | 1<br>(1 - 2)         | 0<br>(0 - 1)         | 0<br>(0 - 1)             |
| Unintentional suffocation                       | 23<br>(11 - 42)          | 8<br>(3 - 16)      | 1<br>(0 - 1)        | 2<br>(1 - 4)         | 2<br>(1 - 3)         | 10<br>(3 - 22)           |
| Other exposure to mechanical forces             | 35<br>(28 - 43)          | 3<br>(2 - 5)       | 2<br>(1 - 3)        | 9<br>(7 - 11)        | 7<br>(6 - 10)        | 14<br>(9 - 21)           |
| Adverse effects of medical treatment            | 288<br>(180 - 404)       | 2<br>(1 - 4)       | 1<br>(0 - 1)        | 21<br>(15 - 32)      | 54<br>(34 - 76)      | 211<br>(123 - 312)       |
| Animal contact                                  | 9<br>(4 - 17)            | 0<br>(0 - 1)       | 0<br>(0 - 1)        | 2<br>(1 - 3)         | 3<br>(1 - 6)         | 3<br>(1 - 7)             |
| Venomous animal contact                         | 3<br>(1 - 5)             | 0<br>(0 - 0)       | 0<br>(0 - 0)        | 1<br>(0 - 1)         | 2<br>(1 - 4)         | 0<br>(0 - 1)             |
| Non-venomous animal contact                     | 6<br>(3 - 11)            | 0<br>(0 - 1)       | 0<br>(0 - 1)        | 1<br>(0 - 2)         | 2<br>(0 - 3)         | 3<br>(1 - 6)             |
| Foreign body                                    | 605<br>(354 - 987)       | 12<br>(7 - 20)     | 3<br>(2 - 5)        | 30<br>(19 - 46)      | 77<br>(50 - 123)     | 484<br>(261 - 811)       |
| Pulmonary aspiration and foreign body in airway | 601<br>(350 - 984)       | 12<br>(7 - 20)     | 3<br>(2 - 5)        | 29<br>(18 - 45)      | 76<br>(50 - 122)     | 482<br>(260 - 808)       |
| Foreign body in other body part                 | 4<br>(2 - 7)             | 0<br>(0 - 0)       | 0<br>(0 - 0)        | 1<br>(1 - 1)         | 1<br>(0 - 1)         | 2<br>(1 - 5)             |
| Other unintentional injuries                    | 19<br>(11 - 29)          | 1<br>(0 - 2)       | 0<br>(0 - 0)        | 3<br>(2 - 5)         | 4<br>(2 - 6)         | 12<br>(5 - 21)           |
| Self-harm and interpersonal violence            | 1,195<br>(1,039 - 1,411) | 3<br>(1 - 6)       | 10<br>(6 - 13)      | 652<br>(557 - 769)   | 396<br>(324 - 498)   | 134<br>(103 - 185)       |
| Self-harm                                       | 1,084<br>(941 - 1,298)   | --                 | 7<br>(4 - 10)       | 586<br>(486 - 691)   | 372<br>(303 - 479)   | 119<br>(90 - 166)        |
| Interpersonal violence                          | 111<br>(83 - 165)        | 3<br>(1 - 6)       | 2<br>(1 - 4)        | 66<br>(45 - 99)      | 24<br>(15 - 39)      | 16<br>(8 - 32)           |
| Assault by firearm                              | 29<br>(17 - 50)          | 0<br>(0 - 1)       | 1<br>(0 - 1)        | 19<br>(11 - 33)      | 7<br>(4 - 13)        | 3<br>(1 - 7)             |
| Assault by sharp object                         | 35<br>(23 - 57)          | 0<br>(0 - 1)       | 1<br>(0 - 1)        | 22<br>(14 - 36)      | 8<br>(4 - 14)        | 4<br>(2 - 9)             |
| Assault by other means                          | 47<br>(32 - 72)          | 2<br>(1 - 4)       | 1<br>(1 - 2)        | 25<br>(16 - 38)      | 10<br>(6 - 16)       | 9<br>(4 - 18)            |
| Forces of nature, war, and legal intervention   | 0<br>(0 - 0)             | 0<br>(0 - 0)       | --                  | --                   | --                   | 0<br>(0 - 0)             |
| Exposure to forces of nature                    | 0<br>(0 - 0)             | 0<br>(0 - 0)       | --                  | --                   | --                   | 0<br>(0 - 0)             |

Web Table 31- Cape Verde deaths with 95% UI by age, sex, and cause in 2013

| Cause                                                             | Both Sexes, All Ages     | Both Sexes, 0-4 Years | Both Sexes, 5-14 Years | Both Sexes, 15-49 Years | Both Sexes, 50-69 Years | Both Sexes, 70-80 Years  |
|-------------------------------------------------------------------|--------------------------|-----------------------|------------------------|-------------------------|-------------------------|--------------------------|
| All causes                                                        | 2,723<br>(2,296 - 3,233) | 244<br>(202 - 296)    | 39<br>(35 - 44)        | 449<br>(343 - 588)      | 487<br>(357 - 634)      | 1,503<br>(1,305 - 1,770) |
| Communicable, maternal, neonatal, and nutritional diseases        | 452<br>(365 - 578)       | 153<br>(119 - 198)    | 16<br>(11 - 21)        | 88<br>(68 - 112)        | 48<br>(33 - 66)         | 147<br>(99 - 218)        |
| HIV/AIDS and tuberculosis                                         | 68<br>(45 - 91)          | 1<br>(0 - 1)          | 1<br>(0 - 1)           | 39<br>(27 - 55)         | 17<br>(10 - 24)         | 11<br>(6 - 16)           |
| Tuberculosis                                                      | 41<br>(23 - 63)          | 0<br>(0 - 1)          | 0<br>(0 - 1)           | 18<br>(10 - 29)         | 12<br>(6 - 19)          | 10<br>(6 - 16)           |
| HIV/AIDS                                                          | 26<br>(15 - 42)          | 0<br>(0 - 0)          | 0<br>(0 - 0)           | 21<br>(13 - 34)         | 4<br>(2 - 9)            | 1<br>(0 - 1)             |
| HIV/AIDS resulting in mycobacterial infection                     | 2<br>(1 - 3)             | 0<br>(0 - 0)          | 0<br>(0 - 0)           | 1<br>(1 - 2)            | 0<br>(0 - 1)            | 0<br>(0 - 0)             |
| HIV/AIDS resulting in other diseases                              | 25<br>(15 - 39)          | 0<br>(0 - 0)          | 0<br>(0 - 0)           | 20<br>(12 - 32)         | 4<br>(2 - 8)            | 1<br>(0 - 1)             |
| Diarrhea, lower respiratory, and other common infectious diseases | 223<br>(158 - 312)       | 63<br>(39 - 94)       | 13<br>(9 - 18)         | 30<br>(20 - 44)         | 21<br>(13 - 32)         | 97<br>(61 - 156)         |
| Diarrheal diseases                                                | 28<br>(17 - 44)          | 16<br>(6 - 30)        | 1<br>(0 - 2)           | 3<br>(1 - 6)            | 2<br>(1 - 4)            | 7<br>(3 - 14)            |
| Intestinal infectious diseases                                    | 24<br>(12 - 41)          | 8<br>(3 - 14)         | 6<br>(3 - 10)          | 9<br>(4 - 16)           | 1<br>(0 - 3)            | 1<br>(0 - 2)             |
| Typhoid fever                                                     | 16<br>(8 - 28)           | 5<br>(2 - 9)          | 4<br>(2 - 7)           | 6<br>(3 - 11)           | 1<br>(0 - 2)            | 1<br>(0 - 1)             |
| Paratyphoid fever                                                 | 7<br>(4 - 13)            | 2<br>(1 - 5)          | 2<br>(1 - 4)           | 2<br>(1 - 5)            | 0<br>(0 - 1)            | 0<br>(0 - 0)             |
| Other intestinal infectious diseases                              | 1<br>(0 - 4)             | 0<br>(0 - 3)          | 0<br>(0 - 1)           | 0<br>(0 - 1)            | 0<br>(0 - 1)            | 0<br>(0 - 1)             |
| Lower respiratory infections                                      | 142<br>(92 - 219)        | 27<br>(13 - 45)       | 3<br>(2 - 5)           | 11<br>(7 - 19)          | 15<br>(9 - 25)          | 86<br>(52 - 141)         |
| Upper respiratory infections                                      | 0<br>(0 - 0)             | 0<br>(0 - 0)          | 0<br>(0 - 0)           | 0<br>(0 - 0)            | 0<br>(0 - 0)            | 0<br>(0 - 0)             |
| Otitis media                                                      | 0<br>(0 - 0)             | 0<br>(0 - 0)          | 0<br>(0 - 0)           | 0<br>(0 - 0)            | 0<br>(0 - 0)            | 0<br>(0 - 0)             |
| Meningitis                                                        | 17<br>(10 - 27)          | 5<br>(3 - 11)         | 1<br>(1 - 3)           | 5<br>(3 - 10)           | 2<br>(1 - 4)            | 3<br>(1 - 5)             |
| Pneumococcal meningitis                                           | 4<br>(3 - 7)             | 1<br>(1 - 3)          | 0<br>(0 - 1)           | 1<br>(1 - 3)            | 1<br>(0 - 1)            | 1<br>(0 - 1)             |
| H influenzae type B meningitis                                    | 3<br>(1 - 5)             | 1<br>(1 - 2)          | 0<br>(0 - 1)           | 1<br>(0 - 1)            | 0<br>(0 - 0)            | 0<br>(0 - 0)             |
| Meningococcal meningitis                                          | 8<br>(5 - 12)            | 2<br>(1 - 5)          | 1<br>(0 - 1)           | 2<br>(1 - 5)            | 1<br>(0 - 2)            | 1<br>(1 - 2)             |
| Other meningitis                                                  | 2<br>(1 - 4)             | 1<br>(0 - 1)          | 0<br>(0 - 0)           | 1<br>(0 - 2)            | 0<br>(0 - 1)            | 1<br>(0 - 1)             |
| Encephalitis                                                      | 4<br>(2 - 5)             | 1<br>(0 - 1)          | 0<br>(0 - 1)           | 1<br>(1 - 2)            | 0<br>(0 - 1)            | 1<br>(0 - 1)             |
| Diphtheria                                                        | 0<br>(0 - 0)             | 0<br>(0 - 0)          | 0<br>(0 - 0)           | 0<br>(0 - 0)            | 0<br>(0 - 0)            | --<br>(0 - 0)            |
| Whooping cough                                                    | 0<br>(0 - 1)             | 0<br>(0 - 0)          | 0<br>(0 - 0)           | 0<br>(0 - 0)            | 0<br>(0 - 0)            | --<br>(0 - 0)            |
| Tetanus                                                           | 1<br>(0 - 1)             | 0<br>(0 - 0)          | 0<br>(0 - 0)           | 0<br>(0 - 1)            | 0<br>(0 - 0)            | 0<br>(0 - 0)             |
| Measles                                                           | 7<br>(0 - 39)            | 6<br>(0 - 33)         | 1<br>(0 - 4)           | 0<br>(0 - 1)            | 0<br>(0 - 0)            | --<br>(0 - 0)            |
| Varicella and herpes zoster                                       | 0<br>(0 - 1)             | 0<br>(0 - 0)          | 0<br>(0 - 0)           | 0<br>(0 - 0)            | 0<br>(0 - 0)            | 0<br>(0 - 1)             |
| Neglected tropical diseases and malaria                           | 3<br>(1 - 6)             | 1<br>(0 - 2)          | 0<br>(0 - 1)           | 1<br>(0 - 2)            | 0<br>(0 - 1)            | 1<br>(0 - 2)             |
| Malaria                                                           | 1<br>(0 - 1)             | 0<br>(0 - 1)          | 0<br>(0 - 0)           | 0<br>(0 - 0)            | 0<br>(0 - 0)            | 0<br>(0 - 0)             |
| Leishmaniasis                                                     | 0<br>(0 - 0)             | 0<br>(0 - 0)          | 0<br>(0 - 0)           | 0<br>(0 - 0)            | 0<br>(0 - 0)            | 0<br>(0 - 0)             |
| Visceral leishmaniasis                                            | 0<br>(0 - 0)             | 0<br>(0 - 0)          | 0<br>(0 - 0)           | 0<br>(0 - 0)            | 0<br>(0 - 0)            | 0<br>(0 - 0)             |
| Cysticercosis                                                     | 0<br>(0 - 0)             | 0<br>(0 - 0)          | 0<br>(0 - 0)           | 0<br>(0 - 0)            | 0<br>(0 - 0)            | 0<br>(0 - 0)             |
| Cystic echinococcosis                                             | 0<br>(0 - 0)             | 0<br>(0 - 0)          | 0<br>(0 - 0)           | 0<br>(0 - 0)            | 0<br>(0 - 0)            | 0<br>(0 - 0)             |
| Dengue                                                            | 0<br>(0 - 0)             | 0<br>(0 - 0)          | 0<br>(0 - 0)           | 0<br>(0 - 0)            | 0<br>(0 - 0)            | 0<br>(0 - 0)             |
| Rabies                                                            | 2<br>(0 - 5)             | 0<br>(0 - 1)          | 0<br>(0 - 1)           | 1<br>(0 - 2)            | 0<br>(0 - 1)            | 0<br>(0 - 1)             |
| Intestinal nematode infections                                    | 0<br>(0 - 2)             | 0<br>(0 - 2)          | 0<br>(0 - 0)           | 0<br>(0 - 0)            | 0<br>(0 - 0)            | 0<br>(0 - 0)             |
| Ascariasis                                                        | 0<br>(0 - 2)             | 0<br>(0 - 2)          | 0<br>(0 - 0)           | 0<br>(0 - 0)            | 0<br>(0 - 0)            | 0<br>(0 - 0)             |
| Other neglected tropical diseases                                 | 0<br>(0 - 0)             | 0<br>(0 - 0)          | 0<br>(0 - 0)           | 0<br>(0 - 0)            | 0<br>(0 - 0)            | 0<br>(0 - 0)             |
| Maternal disorders                                                | 5<br>(3 - 8)             | --                    | 0<br>(0 - 0)           | 5<br>(3 - 8)            | --                      | --                       |
| Maternal hemorrhage                                               | 1<br>(0 - 1)             | --                    | 0<br>(0 - 0)           | 1<br>(0 - 1)            | --                      | --                       |

Web Table 31- Cape Verde deaths with 95% UI by age, sex, and cause in 2013

| Cause                                                            | Both Sexes, All Ages     | Both Sexes, 0-4 Years | Both Sexes, 5-14 Years | Both Sexes, 15-49 Years | Both Sexes, 50-69 Years | Both Sexes, 70-80 Years  |
|------------------------------------------------------------------|--------------------------|-----------------------|------------------------|-------------------------|-------------------------|--------------------------|
| Maternal sepsis and other maternal infections                    | 0<br>(0 - 0)             | --                    | 0<br>(0 - 0)           | 0<br>(0 - 0)            | --                      | --                       |
| Maternal hypertensive disorders                                  | 0<br>(0 - 1)             | --                    | 0<br>(0 - 0)           | 0<br>(0 - 1)            | --                      | --                       |
| Maternal obstructed labor                                        | 0<br>(0 - 0)             | --                    | 0<br>(0 - 0)           | 0<br>(0 - 0)            | --                      | --                       |
| Maternal abortive outcome                                        | 1<br>(0 - 1)             | --                    | 0<br>(0 - 0)           | 1<br>(0 - 1)            | --                      | --                       |
| Indirect maternal deaths                                         | 1<br>(0 - 1)             | --                    | 0<br>(0 - 0)           | 1<br>(0 - 1)            | --                      | --                       |
| Late maternal deaths                                             | 1<br>(0 - 1)             | --                    | 0<br>(0 - 0)           | 1<br>(0 - 1)            | --                      | --                       |
| Maternal deaths aggravated by HIV/AIDS                           | 0<br>(0 - 0)             | --                    | --                     | 0<br>(0 - 0)            | --                      | --                       |
| Other maternal disorders                                         | 1<br>(1 - 1)             | --                    | 0<br>(0 - 0)           | 1<br>(1 - 1)            | --                      | --                       |
| Neonatal disorders                                               | 76<br>(56 - 100)         | 76<br>(56 - 100)      | --                     | --                      | --                      | --                       |
| Neonatal preterm birth complications                             | 23<br>(11 - 41)          | 23<br>(11 - 41)       | --                     | --                      | --                      | --                       |
| Neonatal encephalopathy due to birth asphyxia and trauma         | 26<br>(15 - 40)          | 26<br>(15 - 40)       | --                     | --                      | --                      | --                       |
| Neonatal sepsis and other neonatal infections                    | 20<br>(10 - 33)          | 20<br>(10 - 33)       | --                     | --                      | --                      | --                       |
| Hemolytic disease and other neonatal jaundice                    | 0<br>(0 - 1)             | 0<br>(0 - 1)          | --                     | --                      | --                      | --                       |
| Other neonatal disorders                                         | 7<br>(3 - 14)            | 7<br>(3 - 14)         | --                     | --                      | --                      | --                       |
| Nutritional deficiencies                                         | 50<br>(33 - 71)          | 8<br>(5 - 14)         | 1<br>(1 - 2)           | 5<br>(3 - 8)            | 5<br>(3 - 8)            | 30<br>(18 - 47)          |
| Protein-energy malnutrition                                      | 33<br>(20 - 51)          | 8<br>(4 - 12)         | 1<br>(1 - 1)           | 2<br>(1 - 5)            | 3<br>(2 - 5)            | 19<br>(10 - 33)          |
| Iodine deficiency                                                | 0<br>(0 - 1)             | 0<br>(0 - 0)          | 0<br>(0 - 0)           | 0<br>(0 - 0)            | 0<br>(0 - 0)            | 0<br>(0 - 1)             |
| Iron-deficiency anemia                                           | 16<br>(7 - 28)           | 1<br>(0 - 2)          | 0<br>(0 - 0)           | 3<br>(1 - 4)            | 2<br>(1 - 3)            | 11<br>(5 - 20)           |
| Other nutritional deficiencies                                   | 0<br>(0 - 1)             | 0<br>(0 - 0)          | 0<br>(0 - 0)           | 0<br>(0 - 0)            | 0<br>(0 - 0)            | 0<br>(0 - 0)             |
| Other communicable, maternal, neonatal, and nutritional diseases | 27<br>(15 - 40)          | 5<br>(1 - 9)          | 1<br>(0 - 1)           | 8<br>(4 - 13)           | 5<br>(3 - 10)           | 8<br>(4 - 15)            |
| Sexually transmitted diseases excluding HIV                      | 4<br>(1 - 8)             | 3<br>(0 - 7)          | 0<br>(0 - 0)           | 0<br>(0 - 1)            | 0<br>(0 - 1)            | 1<br>(0 - 1)             |
| Syphilis                                                         | 4<br>(1 - 8)             | 3<br>(0 - 7)          | 0<br>(0 - 0)           | 0<br>(0 - 0)            | 0<br>(0 - 0)            | 0<br>(0 - 1)             |
| Chlamydial infection                                             | 0<br>(0 - 0)             | --                    | 0<br>(0 - 0)           | 0<br>(0 - 0)            | 0<br>(0 - 0)            | 0<br>(0 - 0)             |
| Gonococcal infection                                             | 0<br>(0 - 0)             | --                    | 0<br>(0 - 0)           | 0<br>(0 - 0)            | 0<br>(0 - 0)            | 0<br>(0 - 0)             |
| Other sexually transmitted diseases                              | 0<br>(0 - 0)             | --                    | 0<br>(0 - 0)           | 0<br>(0 - 0)            | 0<br>(0 - 0)            | 0<br>(0 - 0)             |
| Hepatitis                                                        | 9<br>(5 - 14)            | 0<br>(0 - 1)          | 0<br>(0 - 0)           | 3<br>(2 - 6)            | 3<br>(1 - 5)            | 2<br>(1 - 3)             |
| Acute hepatitis A                                                | 0<br>(0 - 1)             | 0<br>(0 - 0)          | 0<br>(0 - 0)           | 0<br>(0 - 0)            | 0<br>(0 - 0)            | 0<br>(0 - 0)             |
| Acute hepatitis B                                                | 6<br>(4 - 10)            | 0<br>(0 - 1)          | 0<br>(0 - 0)           | 2<br>(1 - 3)            | 2<br>(1 - 4)            | 2<br>(1 - 3)             |
| Acute hepatitis C                                                | 0<br>(0 - 1)             | --                    | 0<br>(0 - 0)           | 0<br>(0 - 0)            | 0<br>(0 - 0)            | 0<br>(0 - 0)             |
| Acute hepatitis E                                                | 2<br>(1 - 3)             | 0<br>(0 - 0)          | 0<br>(0 - 0)           | 1<br>(1 - 2)            | 0<br>(0 - 1)            | 0<br>(0 - 0)             |
| Other infectious diseases                                        | 14<br>(6 - 25)           | 2<br>(1 - 4)          | 0<br>(0 - 1)           | 4<br>(1 - 8)            | 3<br>(1 - 6)            | 6<br>(2 - 13)            |
| Non-communicable diseases                                        | 1,980<br>(1,602 - 2,380) | 75<br>(49 - 103)      | 14<br>(10 - 17)        | 242<br>(171 - 331)      | 398<br>(284 - 522)      | 1,252<br>(1,070 - 1,486) |
| Neoplasms                                                        | 463<br>(355 - 589)       | 3<br>(1 - 5)          | 3<br>(2 - 4)           | 71<br>(51 - 94)         | 138<br>(100 - 185)      | 247<br>(188 - 314)       |
| Esophageal cancer                                                | 39<br>(25 - 57)          | --                    | --                     | 3<br>(2 - 5)            | 15<br>(9 - 22)          | 21<br>(14 - 30)          |
| Stomach cancer                                                   | 126<br>(90 - 171)        | --                    | --                     | 11<br>(8 - 17)          | 35<br>(23 - 49)         | 80<br>(56 - 114)         |
| Liver cancer                                                     | 70<br>(42 - 97)          | --                    | 0<br>(0 - 0)           | 21<br>(10 - 34)         | 24<br>(13 - 36)         | 25<br>(16 - 35)          |
| Liver cancer due to hepatitis B                                  | 27<br>(14 - 41)          | --                    | 0<br>(0 - 0)           | 11<br>(5 - 18)          | 9<br>(4 - 16)           | 6<br>(3 - 10)            |
| Liver cancer due to hepatitis C                                  | 24<br>(14 - 37)          | --                    | 0<br>(0 - 0)           | 4<br>(2 - 8)            | 8<br>(4 - 13)           | 11<br>(7 - 17)           |
| Liver cancer due to alcohol use                                  | 10<br>(6 - 16)           | --                    | --                     | 2<br>(1 - 4)            | 3<br>(2 - 6)            | 5<br>(3 - 9)             |
| Liver cancer due to other causes                                 | 9<br>(5 - 14)            | --                    | 0<br>(0 - 0)           | 4<br>(1 - 6)            | 3<br>(1 - 5)            | 2<br>(1 - 4)             |

Web Table 31- Cape Verde deaths with 95% UI by age, sex, and cause in 2013

| Cause                                         | Both Sexes, All Ages | Both Sexes, 0-4 Years | Both Sexes, 5-14 Years | Both Sexes, 15-49 Years | Both Sexes, 50-69 Years | Both Sexes, 70-80 Years |
|-----------------------------------------------|----------------------|-----------------------|------------------------|-------------------------|-------------------------|-------------------------|
| Larynx cancer                                 | 6<br>(3 - 8)         | --                    | --                     | 1<br>(0 - 1)            | 2<br>(1 - 4)            | 2<br>(1 - 4)            |
| Tracheal, bronchus and lung cancer            | 34<br>(26 - 45)      | --                    | --                     | 2<br>(1 - 4)            | 13<br>(9 - 18)          | 19<br>(15 - 26)         |
| Breast cancer                                 | 15<br>(9 - 27)       | --                    | --                     | 4<br>(2 - 6)            | 4<br>(3 - 8)            | 7<br>(4 - 14)           |
| Cervical cancer                               | 36<br>(18 - 57)      | --                    | --                     | 9<br>(4 - 15)           | 13<br>(6 - 21)          | 14<br>(7 - 23)          |
| Uterine cancer                                | 3<br>(2 - 5)         | --                    | --                     | 0<br>(0 - 1)            | 1<br>(0 - 2)            | 2<br>(1 - 3)            |
| Prostate cancer                               | 21<br>(11 - 36)      | --                    | --                     | 0<br>(0 - 0)            | 3<br>(1 - 5)            | 18<br>(10 - 31)         |
| Colon and rectum cancer                       | 39<br>(29 - 52)      | --                    | --                     | 3<br>(2 - 5)            | 10<br>(7 - 13)          | 26<br>(19 - 35)         |
| Lip and oral cavity cancer                    | 2<br>(1 - 3)         | --                    | --                     | 0<br>(0 - 1)            | 0<br>(0 - 1)            | 1<br>(1 - 2)            |
| Nasopharynx cancer                            | 0<br>(0 - 1)         | --                    | 0<br>(0 - 0)           | 0<br>(0 - 0)            | 0<br>(0 - 0)            | 0<br>(0 - 0)            |
| Other pharynx cancer                          | 1<br>(0 - 1)         | --                    | --                     | 0<br>(0 - 0)            | 0<br>(0 - 0)            | 0<br>(0 - 0)            |
| Gallbladder and biliary tract cancer          | 3<br>(2 - 5)         | --                    | --                     | 0<br>(0 - 1)            | 1<br>(1 - 2)            | 2<br>(1 - 3)            |
| Pancreatic cancer                             | 9<br>(6 - 13)        | --                    | --                     | 1<br>(1 - 2)            | 3<br>(2 - 5)            | 4<br>(3 - 6)            |
| Malignant skin melanoma                       | 1<br>(0 - 1)         | --                    | --                     | 0<br>(0 - 0)            | 0<br>(0 - 0)            | 0<br>(0 - 0)            |
| Non-melanoma skin cancer                      | 1<br>(0 - 1)         | --                    | --                     | 0<br>(0 - 0)            | 0<br>(0 - 0)            | 1<br>(0 - 1)            |
| Ovarian cancer                                | 6<br>(4 - 9)         | --                    | --                     | 1<br>(1 - 3)            | 3<br>(2 - 5)            | 2<br>(1 - 3)            |
| Testicular cancer                             | 0<br>(0 - 0)         | --                    | --                     | 0<br>(0 - 0)            | 0<br>(0 - 0)            | 0<br>(0 - 0)            |
| Kidney cancer                                 | 2<br>(1 - 3)         | 0<br>(0 - 0)          | 0<br>(0 - 0)           | 0<br>(0 - 1)            | 1<br>(0 - 1)            | 1<br>(1 - 1)            |
| Bladder cancer                                | 5<br>(3 - 7)         | --                    | --                     | 0<br>(0 - 1)            | 1<br>(1 - 2)            | 3<br>(2 - 5)            |
| Brain and nervous system cancer               | 3<br>(2 - 4)         | 0<br>(0 - 0)          | 0<br>(0 - 0)           | 1<br>(1 - 2)            | 1<br>(0 - 1)            | 1<br>(0 - 1)            |
| Thyroid cancer                                | 1<br>(0 - 1)         | --                    | 0<br>(0 - 0)           | 0<br>(0 - 0)            | 0<br>(0 - 0)            | 0<br>(0 - 1)            |
| Mesothelioma                                  | 0<br>(0 - 0)         | --                    | --                     | 0<br>(0 - 0)            | 0<br>(0 - 0)            | 0<br>(0 - 0)            |
| Hodgkin lymphoma                              | 1<br>(0 - 2)         | 0<br>(0 - 0)          | 0<br>(0 - 0)           | 0<br>(0 - 1)            | 0<br>(0 - 0)            | 0<br>(0 - 1)            |
| Non-Hodgkin lymphoma                          | 11<br>(7 - 16)       | 1<br>(0 - 2)          | 1<br>(1 - 2)           | 3<br>(2 - 5)            | 2<br>(1 - 4)            | 3<br>(2 - 6)            |
| Multiple myeloma                              | 2<br>(1 - 3)         | --                    | --                     | 0<br>(0 - 0)            | 1<br>(0 - 1)            | 1<br>(1 - 2)            |
| Leukemia                                      | 7<br>(6 - 10)        | 0<br>(0 - 1)          | 1<br>(0 - 1)           | 2<br>(1 - 3)            | 1<br>(1 - 2)            | 3<br>(2 - 5)            |
| Other neoplasms                               | 19<br>(14 - 25)      | 2<br>(0 - 3)          | 1<br>(0 - 1)           | 4<br>(2 - 6)            | 4<br>(3 - 6)            | 9<br>(7 - 12)           |
| Cardiovascular diseases                       | 899<br>(706 - 1,169) | 7<br>(4 - 12)         | 3<br>(2 - 5)           | 84<br>(58 - 122)        | 159<br>(110 - 227)      | 644<br>(517 - 820)      |
| Rheumatic heart disease                       | 10<br>(5 - 16)       | 0<br>(0 - 0)          | 0<br>(0 - 0)           | 1<br>(1 - 2)            | 2<br>(1 - 3)            | 7<br>(3 - 11)           |
| Ischemic heart disease                        | 281<br>(200 - 361)   | 1<br>(0 - 2)          | 1<br>(1 - 1)           | 31<br>(20 - 45)         | 51<br>(35 - 71)         | 197<br>(133 - 254)      |
| Cerebrovascular disease                       | 425<br>(298 - 673)   | 2<br>(1 - 3)          | 1<br>(1 - 2)           | 30<br>(19 - 46)         | 74<br>(45 - 123)        | 319<br>(227 - 503)      |
| Ischemic stroke                               | 300<br>(218 - 441)   | 0<br>(0 - 1)          | 0<br>(0 - 0)           | 8<br>(4 - 16)           | 45<br>(27 - 69)         | 247<br>(181 - 365)      |
| Hemorrhagic stroke                            | 125<br>(67 - 253)    | 2<br>(1 - 3)          | 1<br>(0 - 1)           | 21<br>(13 - 34)         | 29<br>(14 - 60)         | 72<br>(35 - 162)        |
| Hypertensive heart disease                    | 47<br>(19 - 84)      | 0<br>(0 - 0)          | 0<br>(0 - 0)           | 2<br>(1 - 6)            | 7<br>(2 - 14)           | 38<br>(16 - 68)         |
| Cardiomyopathy and myocarditis                | 41<br>(27 - 61)      | 1<br>(0 - 3)          | 0<br>(0 - 1)           | 6<br>(3 - 12)           | 8<br>(5 - 13)           | 25<br>(14 - 39)         |
| Atrial fibrillation and flutter               | 0<br>(0 - 0)         | --                    | --                     | 0<br>(0 - 0)            | 0<br>(0 - 0)            | 0<br>(0 - 0)            |
| Aortic aneurysm                               | 7<br>(5 - 11)        | --                    | --                     | 1<br>(0 - 1)            | 2<br>(1 - 3)            | 5<br>(3 - 8)            |
| Peripheral vascular disease                   | 0<br>(0 - 1)         | --                    | --                     | 0<br>(0 - 0)            | 0<br>(0 - 0)            | 0<br>(0 - 1)            |
| Endocarditis                                  | 10<br>(6 - 16)       | 1<br>(0 - 2)          | 0<br>(0 - 0)           | 2<br>(1 - 4)            | 2<br>(1 - 3)            | 5<br>(3 - 8)            |
| Other cardiovascular and circulatory diseases | 77<br>(45 - 119)     | 3<br>(1 - 5)          | 1<br>(0 - 1)           | 11<br>(7 - 18)          | 13<br>(8 - 22)          | 49<br>(26 - 77)         |
| Chronic respiratory diseases                  | 180<br>(122 - 241)   | 2<br>(1 - 3)          | 1<br>(0 - 1)           | 14<br>(9 - 20)          | 31<br>(19 - 45)         | 132<br>(91 - 179)       |

Web Table 31- Cape Verde deaths with 95% UI by age, sex, and cause in 2013

| Cause                                               | Both Sexes, All Ages | Both Sexes, 0-4 Years | Both Sexes, 5-14 Years | Both Sexes, 15-49 Years | Both Sexes, 50-69 Years | Both Sexes, 70-80 Years |
|-----------------------------------------------------|----------------------|-----------------------|------------------------|-------------------------|-------------------------|-------------------------|
| Chronic obstructive pulmonary disease               | 120<br>(85 - 167)    | 1<br>(0 - 2)          | 0<br>(0 - 0)           | 5<br>(3 - 8)            | 20<br>(12 - 30)         | 94<br>(66 - 132)        |
| Pneumoconiosis                                      | 8<br>(4 - 13)        | 0<br>(0 - 0)          | 0<br>(0 - 0)           | 2<br>(1 - 3)            | 3<br>(1 - 5)            | 3<br>(2 - 6)            |
| Silicosis                                           | 2<br>(1 - 3)         | 0<br>(0 - 0)          | 0<br>(0 - 0)           | 0<br>(0 - 1)            | 0<br>(0 - 0)            | 1<br>(1 - 2)            |
| Asbestosis                                          | 1<br>(0 - 1)         | 0<br>(0 - 0)          | 0<br>(0 - 0)           | 0<br>(0 - 0)            | 0<br>(0 - 0)            | 0<br>(0 - 0)            |
| Coal workers pneumoconiosis                         | 2<br>(1 - 3)         | 0<br>(0 - 0)          | 0<br>(0 - 0)           | 0<br>(0 - 0)            | 1<br>(0 - 2)            | 0<br>(0 - 1)            |
| Other pneumoconiosis                                | 4<br>(2 - 6)         | 0<br>(0 - 0)          | 0<br>(0 - 0)           | 1<br>(0 - 2)            | 1<br>(1 - 2)            | 2<br>(1 - 3)            |
| Asthma                                              | 21<br>(11 - 36)      | 0<br>(0 - 1)          | 0<br>(0 - 0)           | 3<br>(2 - 6)            | 4<br>(2 - 7)            | 13<br>(6 - 23)          |
| Interstitial lung disease and pulmonary sarcoidosis | 19<br>(2 - 40)       | 0<br>(0 - 0)          | 0<br>(0 - 0)           | 1<br>(0 - 1)            | 3<br>(0 - 8)            | 15<br>(2 - 31)          |
| Other chronic respiratory diseases                  | 12<br>(7 - 22)       | 1<br>(0 - 1)          | 0<br>(0 - 0)           | 3<br>(2 - 5)            | 2<br>(1 - 3)            | 7<br>(4 - 15)           |
| Cirrhosis                                           | 36<br>(25 - 52)      | 0<br>(0 - 0)          | 0<br>(0 - 0)           | 11<br>(7 - 17)          | 14<br>(9 - 22)          | 11<br>(8 - 15)          |
| Cirrhosis due to hepatitis B                        | 10<br>(5 - 16)       | 0<br>(0 - 0)          | 0<br>(0 - 0)           | 3<br>(1 - 5)            | 4<br>(2 - 7)            | 3<br>(2 - 5)            |
| Cirrhosis due to hepatitis C                        | 7<br>(3 - 14)        | 0<br>(0 - 0)          | 0<br>(0 - 0)           | 2<br>(1 - 4)            | 3<br>(1 - 6)            | 2<br>(1 - 4)            |
| Cirrhosis due to alcohol use                        | 16<br>(10 - 25)      | --                    | --                     | 4<br>(2 - 8)            | 7<br>(4 - 11)           | 5<br>(3 - 7)            |
| Cirrhosis due to other causes                       | 4<br>(2 - 6)         | 0<br>(0 - 0)          | 0<br>(0 - 0)           | 2<br>(1 - 3)            | 1<br>(1 - 2)            | 1<br>(0 - 1)            |
| Digestive diseases                                  | 61<br>(40 - 84)      | 1<br>(0 - 1)          | 1<br>(0 - 1)           | 9<br>(6 - 13)           | 13<br>(8 - 18)          | 39<br>(25 - 54)         |
| Peptic ulcer disease                                | 10<br>(6 - 16)       | 0<br>(0 - 0)          | 0<br>(0 - 0)           | 1<br>(1 - 2)            | 2<br>(1 - 4)            | 7<br>(4 - 11)           |
| Gastritis and duodenitis                            | 2<br>(1 - 6)         | 0<br>(0 - 0)          | 0<br>(0 - 0)           | 0<br>(0 - 1)            | 0<br>(0 - 1)            | 2<br>(1 - 4)            |
| Appendicitis                                        | 2<br>(1 - 4)         | 0<br>(0 - 0)          | 0<br>(0 - 0)           | 0<br>(0 - 1)            | 0<br>(0 - 1)            | 1<br>(0 - 3)            |
| Paralytic ileus and intestinal obstruction          | 24<br>(14 - 36)      | 0<br>(0 - 1)          | 0<br>(0 - 1)           | 4<br>(2 - 6)            | 5<br>(3 - 8)            | 15<br>(9 - 24)          |
| Inguinal, femoral, and abdominal hernia             | 1<br>(1 - 2)         | 0<br>(0 - 0)          | 0<br>(0 - 0)           | 0<br>(0 - 0)            | 0<br>(0 - 0)            | 1<br>(0 - 1)            |
| Inflammatory bowel disease                          | 2<br>(1 - 4)         | 0<br>(0 - 0)          | 0<br>(0 - 0)           | 0<br>(0 - 1)            | 0<br>(0 - 1)            | 1<br>(0 - 2)            |
| Vascular intestinal disorders                       | 0<br>(0 - 1)         | 0<br>(0 - 0)          | 0<br>(0 - 0)           | 0<br>(0 - 0)            | 0<br>(0 - 0)            | 0<br>(0 - 0)            |
| Gallbladder and biliary diseases                    | 6<br>(3 - 10)        | 0<br>(0 - 0)          | 0<br>(0 - 0)           | 0<br>(0 - 1)            | 1<br>(0 - 1)            | 5<br>(2 - 8)            |
| Pancreatitis                                        | 4<br>(2 - 7)         | 0<br>(0 - 0)          | 0<br>(0 - 0)           | 1<br>(1 - 3)            | 1<br>(1 - 2)            | 2<br>(1 - 4)            |
| Other digestive diseases                            | 9<br>(5 - 13)        | 0<br>(0 - 0)          | 0<br>(0 - 0)           | 1<br>(1 - 2)            | 2<br>(1 - 3)            | 5<br>(3 - 9)            |
| Neurological disorders                              | 71<br>(54 - 92)      | 2<br>(1 - 4)          | 1<br>(0 - 1)           | 5<br>(3 - 9)            | 3<br>(2 - 4)            | 60<br>(45 - 81)         |
| Alzheimer disease and other dementias               | 58<br>(43 - 78)      | --                    | --                     | 0<br>(0 - 0)            | 2<br>(1 - 2)            | 56<br>(42 - 76)         |
| Parkinson disease                                   | 0<br>(0 - 1)         | --                    | --                     | 0<br>(0 - 0)            | 0<br>(0 - 0)            | 0<br>(0 - 1)            |
| Epilepsy                                            | 7<br>(4 - 13)        | 1<br>(0 - 3)          | 1<br>(0 - 1)           | 3<br>(2 - 7)            | 1<br>(0 - 1)            | 2<br>(1 - 4)            |
| Multiple sclerosis                                  | 0<br>(0 - 0)         | --                    | --                     | 0<br>(0 - 0)            | 0<br>(0 - 0)            | 0<br>(0 - 0)            |
| Other neurological disorders                        | 5<br>(4 - 7)         | 1<br>(0 - 1)          | 0<br>(0 - 0)           | 1<br>(1 - 2)            | 1<br>(1 - 2)            | 2<br>(1 - 2)            |
| Mental and substance use disorders                  | 30<br>(16 - 45)      | 1<br>(0 - 1)          | 0<br>(0 - 0)           | 21<br>(10 - 33)         | 5<br>(3 - 7)            | 4<br>(2 - 5)            |
| Schizophrenia                                       | 0<br>(0 - 0)         | --                    | --                     | 0<br>(0 - 0)            | 0<br>(0 - 0)            | 0<br>(0 - 0)            |
| Alcohol use disorders                               | 8<br>(3 - 12)        | --                    | --                     | 3<br>(2 - 5)            | 3<br>(1 - 4)            | 2<br>(0 - 3)            |
| Drug use disorders                                  | 22<br>(10 - 35)      | 1<br>(0 - 1)          | --                     | 18<br>(8 - 29)          | 2<br>(1 - 3)            | 2<br>(1 - 3)            |
| Opioid use disorders                                | 2<br>(1 - 4)         | 0<br>(0 - 0)          | --                     | 2<br>(1 - 3)            | 0<br>(0 - 0)            | 0<br>(0 - 0)            |
| Cocaine use disorders                               | 0<br>(0 - 0)         | 0<br>(0 - 0)          | --                     | 0<br>(0 - 0)            | 0<br>(0 - 0)            | 0<br>(0 - 0)            |
| Amphetamine use disorders                           | 0<br>(0 - 0)         | 0<br>(0 - 0)          | --                     | 0<br>(0 - 0)            | 0<br>(0 - 0)            | 0<br>(0 - 0)            |
| Other drug use disorders                            | 20<br>(9 - 31)       | 1<br>(0 - 1)          | --                     | 16<br>(7 - 25)          | 2<br>(1 - 3)            | 2<br>(1 - 3)            |
| Eating disorders                                    | 0<br>(0 - 0)         | --                    | --                     | 0<br>(0 - 0)            | --                      | --                      |

Web Table 31- Cape Verde deaths with 95% UI by age, sex, and cause in 2013

| Cause                                               | Both Sexes, All Ages | Both Sexes, 0-4 Years | Both Sexes, 5-14 Years | Both Sexes, 15-49 Years | Both Sexes, 50-69 Years | Both Sexes, 70-80 Years |
|-----------------------------------------------------|----------------------|-----------------------|------------------------|-------------------------|-------------------------|-------------------------|
| Anorexia nervosa                                    | 0<br>(0 - 0)         | --                    | 0<br>(0 - 0)           | 0<br>(0 - 0)            | --                      | --                      |
| Diabetes, urogenital, blood, and endocrine diseases | 158<br>(114 - 209)   | 5<br>(3 - 9)          | 2<br>(1 - 3)           | 20<br>(12 - 31)         | 30<br>(20 - 44)         | 100<br>(73 - 131)       |
| Diabetes mellitus                                   | 64<br>(47 - 89)      | 0<br>(0 - 0)          | 0<br>(0 - 0)           | 5<br>(3 - 7)            | 15<br>(10 - 21)         | 43<br>(31 - 62)         |
| Acute glomerulonephritis                            | 1<br>(0 - 2)         | 0<br>(0 - 0)          | 0<br>(0 - 0)           | 0<br>(0 - 1)            | 0<br>(0 - 1)            | 0<br>(0 - 1)            |
| Chronic kidney disease                              | 37<br>(19 - 73)      | 1<br>(0 - 2)          | 0<br>(0 - 1)           | 7<br>(3 - 13)           | 7<br>(3 - 15)           | 22<br>(11 - 44)         |
| Chronic kidney disease due to diabetes mellitus     | 1<br>(0 - 2)         | 0<br>(0 - 0)          | 0<br>(0 - 0)           | 0<br>(0 - 0)            | 1<br>(0 - 1)            | 0<br>(0 - 0)            |
| Chronic kidney disease due to hypertension          | 16<br>(8 - 37)       | 0<br>(0 - 0)          | 0<br>(0 - 0)           | 2<br>(1 - 5)            | 3<br>(1 - 7)            | 11<br>(5 - 25)          |
| Chronic kidney disease due to glomerulonephritis    | 8<br>(4 - 13)        | 0<br>(0 - 1)          | 0<br>(0 - 0)           | 2<br>(1 - 4)            | 2<br>(1 - 3)            | 4<br>(1 - 6)            |
| Chronic kidney disease due to other causes          | 12<br>(3 - 26)       | 0<br>(0 - 1)          | 0<br>(0 - 0)           | 2<br>(1 - 5)            | 2<br>(0 - 5)            | 7<br>(1 - 16)           |
| Urinary diseases and male infertility               | 33<br>(22 - 46)      | 0<br>(0 - 1)          | 0<br>(0 - 0)           | 3<br>(2 - 4)            | 5<br>(3 - 7)            | 25<br>(17 - 37)         |
| Interstitial nephritis and urinary tract infections | 30<br>(20 - 42)      | 0<br>(0 - 1)          | 0<br>(0 - 0)           | 2<br>(1 - 3)            | 4<br>(2 - 6)            | 23<br>(15 - 34)         |
| Urolithiasis                                        | 0<br>(0 - 1)         | --                    | 0<br>(0 - 0)           | 0<br>(0 - 0)            | 0<br>(0 - 0)            | 0<br>(0 - 1)            |
| Other urinary diseases                              | 3<br>(1 - 6)         | 0<br>(0 - 0)          | 0<br>(0 - 0)           | 1<br>(0 - 1)            | 1<br>(0 - 1)            | 2<br>(1 - 4)            |
| Gynecological diseases                              | 0<br>(0 - 0)         | --                    | --                     | 0<br>(0 - 0)            | 0<br>(0 - 0)            | 0<br>(0 - 0)            |
| Uterine fibroids                                    | 0<br>(0 - 0)         | --                    | --                     | 0<br>(0 - 0)            | 0<br>(0 - 0)            | 0<br>(0 - 0)            |
| Polycystic ovarian syndrome                         | 0<br>(0 - 0)         | --                    | --                     | 0<br>(0 - 0)            | 0<br>(0 - 0)            | --                      |
| Endometriosis                                       | 0<br>(0 - 0)         | --                    | --                     | 0<br>(0 - 0)            | 0<br>(0 - 0)            | --                      |
| Genital prolapse                                    | 0<br>(0 - 0)         | --                    | --                     | 0<br>(0 - 0)            | 0<br>(0 - 0)            | 0<br>(0 - 0)            |
| Other gynecological diseases                        | 0<br>(0 - 0)         | --                    | --                     | 0<br>(0 - 0)            | 0<br>(0 - 0)            | 0<br>(0 - 0)            |
| Hemoglobinopathies and hemolytic anemias            | 7<br>(4 - 14)        | 2<br>(1 - 4)          | 1<br>(0 - 2)           | 2<br>(1 - 4)            | 1<br>(0 - 1)            | 2<br>(1 - 4)            |
| Thalassemias                                        | 0<br>(0 - 0)         | 0<br>(0 - 0)          | 0<br>(0 - 0)           | 0<br>(0 - 0)            | 0<br>(0 - 0)            | 0<br>(0 - 0)            |
| Sickle cell disorders                               | 5<br>(3 - 9)         | 2<br>(1 - 3)          | 1<br>(0 - 1)           | 2<br>(1 - 4)            | 1<br>(0 - 1)            | 0<br>(0 - 0)            |
| G6PD deficiency                                     | 0<br>(0 - 0)         | 0<br>(0 - 0)          | 0<br>(0 - 0)           | 0<br>(0 - 0)            | 0<br>(0 - 0)            | 0<br>(0 - 0)            |
| Other hemoglobinopathies and hemolytic anemias      | 2<br>(1 - 4)         | 0<br>(0 - 0)          | 0<br>(0 - 0)           | 0<br>(0 - 0)            | 0<br>(0 - 0)            | 2<br>(1 - 3)            |
| Endocrine, metabolic, blood, and immune disorders   | 16<br>(10 - 23)      | 2<br>(1 - 4)          | 1<br>(0 - 1)           | 4<br>(2 - 6)            | 3<br>(2 - 5)            | 7<br>(5 - 10)           |
| Musculoskeletal disorders                           | 6<br>(4 - 11)        | --                    | 0<br>(0 - 1)           | 1<br>(1 - 3)            | 1<br>(1 - 2)            | 3<br>(2 - 5)            |
| Rheumatoid arthritis                                | 1<br>(0 - 2)         | --                    | 0<br>(0 - 0)           | 0<br>(0 - 0)            | 0<br>(0 - 0)            | 1<br>(0 - 1)            |
| Other musculoskeletal disorders                     | 5<br>(3 - 9)         | --                    | 0<br>(0 - 0)           | 1<br>(1 - 3)            | 1<br>(1 - 2)            | 2<br>(1 - 4)            |
| Other non-communicable diseases                     | 78<br>(51 - 105)     | 54<br>(32 - 77)       | 3<br>(2 - 4)           | 6<br>(2 - 10)           | 3<br>(2 - 5)            | 12<br>(7 - 20)          |
| Congenital anomalies                                | 59<br>(36 - 82)      | 52<br>(31 - 74)       | 3<br>(1 - 4)           | 3<br>(1 - 5)            | 1<br>(0 - 1)            | 2<br>(1 - 2)            |
| Neural tube defects                                 | 2<br>(1 - 5)         | 2<br>(1 - 5)          | 0<br>(0 - 0)           | 0<br>(0 - 0)            | 0<br>(0 - 0)            | 0<br>(0 - 0)            |
| Congenital heart anomalies                          | 39<br>(21 - 58)      | 34<br>(18 - 52)       | 2<br>(1 - 3)           | 2<br>(1 - 3)            | 0<br>(0 - 1)            | 1<br>(0 - 1)            |
| Cleft lip and cleft palate                          | 0<br>(0 - 0)         | 0<br>(0 - 0)          | --                     | --                      | --                      | --                      |
| Down syndrome                                       | 3<br>(1 - 8)         | 3<br>(1 - 8)          | 0<br>(0 - 0)           | 0<br>(0 - 1)            | 0<br>(0 - 0)            | 0<br>(0 - 0)            |
| Chromosomal unbalanced rearrangements               | 2<br>(1 - 3)         | 2<br>(1 - 3)          | 0<br>(0 - 0)           | 0<br>(0 - 0)            | 0<br>(0 - 0)            | 0<br>(0 - 0)            |
| Other congenital anomalies                          | 13<br>(7 - 22)       | 11<br>(6 - 19)        | 0<br>(0 - 1)           | 1<br>(0 - 1)            | 0<br>(0 - 0)            | 1<br>(0 - 1)            |
| Skin and subcutaneous diseases                      | 17<br>(9 - 27)       | 1<br>(0 - 3)          | 0<br>(0 - 0)           | 2<br>(1 - 5)            | 2<br>(1 - 4)            | 11<br>(6 - 18)          |
| Cellulitis                                          | 2<br>(0 - 6)         | 0<br>(0 - 0)          | 0<br>(0 - 0)           | 0<br>(0 - 1)            | 0<br>(0 - 1)            | 2<br>(0 - 5)            |
| Pyoderma                                            | 13<br>(7 - 22)       | 1<br>(0 - 3)          | 0<br>(0 - 0)           | 2<br>(0 - 4)            | 2<br>(1 - 4)            | 8<br>(4 - 14)           |
| Decubitus ulcer                                     | 1<br>(0 - 1)         | 0<br>(0 - 0)          | 0<br>(0 - 0)           | 0<br>(0 - 0)            | 0<br>(0 - 0)            | 0<br>(0 - 1)            |



Web Table 31- Cape Verde deaths with 95% UI by age, sex, and cause in 2013

| Cause                                           | Both Sexes, All Ages | Both Sexes, 0-4 Years | Both Sexes, 5-14 Years | Both Sexes, 15-49 Years | Both Sexes, 50-69 Years | Both Sexes, 70-80 Years |
|-------------------------------------------------|----------------------|-----------------------|------------------------|-------------------------|-------------------------|-------------------------|
| Other skin and subcutaneous diseases            | 1<br>(0 - 4)         | 0<br>(0 - 1)          | 0<br>(0 - 0)           | 0<br>(0 - 1)            | 0<br>(0 - 0)            | 1<br>(0 - 2)            |
| Sudden infant death syndrome                    | 1<br>(0 - 3)         | 1<br>(0 - 3)          | --                     | --                      | --                      | --                      |
| Injuries                                        | 290<br>(207 - 385)   | 16<br>(9 - 29)        | 10<br>(7 - 13)         | 119<br>(77 - 168)       | 41<br>(25 - 60)         | 105<br>(71 - 141)       |
| Transport injuries                              | 32<br>(23 - 53)      | 1<br>(0 - 1)          | 2<br>(1 - 3)           | 19<br>(13 - 34)         | 5<br>(3 - 9)            | 6<br>(4 - 8)            |
| Road injuries                                   | 31<br>(22 - 52)      | 1<br>(0 - 1)          | 2<br>(1 - 2)           | 19<br>(13 - 33)         | 5<br>(3 - 9)            | 5<br>(4 - 8)            |
| Pedestrian road injuries                        | 7<br>(4 - 14)        | 0<br>(0 - 0)          | 0<br>(0 - 1)           | 4<br>(2 - 7)            | 1<br>(1 - 2)            | 2<br>(1 - 3)            |
| Cyclist road injuries                           | 1<br>(1 - 2)         | 0<br>(0 - 0)          | 0<br>(0 - 0)           | 1<br>(0 - 1)            | 0<br>(0 - 1)            | 0<br>(0 - 0)            |
| Motorcyclist road injuries                      | 4<br>(2 - 9)         | 0<br>(0 - 0)          | 0<br>(0 - 0)           | 3<br>(1 - 7)            | 0<br>(0 - 1)            | 0<br>(0 - 1)            |
| Motor vehicle road injuries                     | 19<br>(12 - 30)      | 0<br>(0 - 1)          | 1<br>(1 - 1)           | 12<br>(8 - 20)          | 3<br>(2 - 5)            | 3<br>(2 - 4)            |
| Other road injuries                             | 0<br>(0 - 1)         | 0<br>(0 - 0)          | 0<br>(0 - 0)           | 0<br>(0 - 0)            | 0<br>(0 - 0)            | 0<br>(0 - 0)            |
| Other transport injuries                        | 1<br>(1 - 1)         | 0<br>(0 - 0)          | 0<br>(0 - 0)           | 0<br>(0 - 1)            | 0<br>(0 - 0)            | 0<br>(0 - 1)            |
| Unintentional injuries                          | 173<br>(119 - 238)   | 13<br>(7 - 28)        | 6<br>(5 - 10)          | 41<br>(27 - 61)         | 24<br>(14 - 38)         | 88<br>(51 - 125)        |
| Falls                                           | 81<br>(39 - 119)     | 3<br>(1 - 6)          | 1<br>(0 - 2)           | 11<br>(5 - 18)          | 11<br>(4 - 19)          | 56<br>(26 - 87)         |
| Drowning                                        | 20<br>(12 - 39)      | 3<br>(1 - 9)          | 3<br>(1 - 6)           | 11<br>(6 - 20)          | 2<br>(1 - 4)            | 2<br>(1 - 3)            |
| Fire, heat, and hot substances                  | 9<br>(4 - 16)        | 1<br>(0 - 2)          | 1<br>(0 - 1)           | 2<br>(1 - 4)            | 1<br>(0 - 3)            | 4<br>(1 - 8)            |
| Poisonings                                      | 4<br>(1 - 8)         | 0<br>(0 - 0)          | 0<br>(0 - 0)           | 3<br>(1 - 5)            | 1<br>(0 - 1)            | 0<br>(0 - 1)            |
| Exposure to mechanical forces                   | 7<br>(2 - 46)        | 2<br>(0 - 17)         | 1<br>(0 - 4)           | 3<br>(1 - 16)           | 1<br>(0 - 4)            | 1<br>(0 - 4)            |
| Unintentional firearm injuries                  | 2<br>(1 - 3)         | 0<br>(0 - 0)          | 0<br>(0 - 0)           | 1<br>(1 - 2)            | 0<br>(0 - 1)            | 0<br>(0 - 0)            |
| Unintentional suffocation                       | 5<br>(0 - 43)        | 2<br>(0 - 16)         | 0<br>(0 - 4)           | 2<br>(0 - 13)           | 1<br>(0 - 4)            | 1<br>(0 - 3)            |
| Other exposure to mechanical forces             | 0<br>(0 - 2)         | 0<br>(0 - 0)          | 0<br>(0 - 0)           | 0<br>(0 - 2)            | 0<br>(0 - 0)            | 0<br>(0 - 0)            |
| Adverse effects of medical treatment            | 1<br>(0 - 1)         | 0<br>(0 - 0)          | 0<br>(0 - 0)           | 0<br>(0 - 1)            | 0<br>(0 - 0)            | 0<br>(0 - 0)            |
| Animal contact                                  | 2<br>(1 - 5)         | 0<br>(0 - 1)          | 0<br>(0 - 1)           | 0<br>(0 - 1)            | 0<br>(0 - 1)            | 1<br>(0 - 2)            |
| Venomous animal contact                         | 1<br>(0 - 3)         | 0<br>(0 - 0)          | 0<br>(0 - 0)           | 0<br>(0 - 1)            | 0<br>(0 - 0)            | 0<br>(0 - 1)            |
| Non-venomous animal contact                     | 1<br>(1 - 3)         | 0<br>(0 - 0)          | 0<br>(0 - 0)           | 0<br>(0 - 1)            | 0<br>(0 - 0)            | 1<br>(0 - 1)            |
| Foreign body                                    | 8<br>(4 - 13)        | 2<br>(1 - 5)          | 0<br>(0 - 1)           | 1<br>(0 - 1)            | 1<br>(0 - 1)            | 4<br>(2 - 7)            |
| Pulmonary aspiration and foreign body in airway | 8<br>(4 - 13)        | 2<br>(1 - 5)          | 0<br>(0 - 1)           | 1<br>(0 - 1)            | 1<br>(0 - 1)            | 4<br>(2 - 7)            |
| Foreign body in other body part                 | 1<br>(0 - 1)         | 0<br>(0 - 0)          | 0<br>(0 - 0)           | 0<br>(0 - 0)            | 0<br>(0 - 0)            | 0<br>(0 - 0)            |
| Other unintentional injuries                    | 39<br>(26 - 55)      | 2<br>(1 - 4)          | 1<br>(1 - 1)           | 9<br>(5 - 14)           | 7<br>(4 - 12)           | 20<br>(12 - 29)         |
| Self-harm and interpersonal violence            | 85<br>(45 - 129)     | 2<br>(0 - 3)          | 2<br>(1 - 3)           | 59<br>(29 - 91)         | 12<br>(6 - 20)          | 11<br>(6 - 22)          |
| Self-harm                                       | 42<br>(27 - 93)      | --                    | 0<br>(0 - 1)           | 23<br>(14 - 55)         | 8<br>(5 - 18)           | 10<br>(6 - 21)          |
| Interpersonal violence                          | 43<br>(12 - 72)      | 2<br>(0 - 3)          | 1<br>(0 - 2)           | 36<br>(10 - 61)         | 3<br>(1 - 6)            | 1<br>(0 - 2)            |
| Assault by firearm                              | 23<br>(5 - 41)       | 0<br>(0 - 1)          | 0<br>(0 - 1)           | 21<br>(4 - 38)          | 1<br>(0 - 3)            | 0<br>(0 - 1)            |
| Assault by sharp object                         | 9<br>(3 - 18)        | 0<br>(0 - 1)          | 0<br>(0 - 1)           | 7<br>(2 - 15)           | 1<br>(0 - 2)            | 0<br>(0 - 0)            |
| Assault by other means                          | 11<br>(3 - 19)       | 1<br>(0 - 2)          | 1<br>(0 - 1)           | 8<br>(2 - 15)           | 1<br>(0 - 2)            | 1<br>(0 - 1)            |

Web Table 31- Cape Verde deaths with 95% UI by age, sex, and cause in 2013

| Cause                                                             | Males, All Ages          | Males, 0-4 Years   | Males, 5-14 Years | Males, 15-49 Years | Males, 50-69 Years | Males, 70-80 Years |
|-------------------------------------------------------------------|--------------------------|--------------------|-------------------|--------------------|--------------------|--------------------|
| All causes                                                        | 1,523<br>(1,145 - 1,961) | 136<br>(111 - 164) | 24<br>(21 - 27)   | 341<br>(232 - 471) | 316<br>(205 - 449) | 707<br>(553 - 878) |
| Communicable, maternal, neonatal, and nutritional diseases        | 245<br>(195 - 314)       | 83<br>(63 - 107)   | 8<br>(6 - 11)     | 59<br>(43 - 80)    | 32<br>(21 - 46)    | 64<br>(43 - 94)    |
| HIV/AIDS and tuberculosis                                         | 50<br>(33 - 73)          | 0<br>(0 - 1)       | 0<br>(0 - 0)      | 29<br>(19 - 43)    | 12<br>(7 - 18)     | 8<br>(5 - 13)      |
| Tuberculosis                                                      | 30<br>(16 - 48)          | 0<br>(0 - 0)       | 0<br>(0 - 0)      | 13<br>(6 - 23)     | 8<br>(4 - 14)      | 8<br>(4 - 12)      |
| HIV/AIDS                                                          | 21<br>(11 - 35)          | 0<br>(0 - 0)       | 0<br>(0 - 0)      | 17<br>(9 - 28)     | 4<br>(2 - 8)       | 1<br>(0 - 1)       |
| HIV/AIDS resulting in mycobacterial infection                     | 1<br>(1 - 2)             | 0<br>(0 - 0)       | 0<br>(0 - 0)      | 1<br>(1 - 2)       | 0<br>(0 - 1)       | 0<br>(0 - 0)       |
| HIV/AIDS resulting in other diseases                              | 20<br>(11 - 33)          | 0<br>(0 - 0)       | 0<br>(0 - 0)      | 15<br>(8 - 26)     | 3<br>(2 - 7)       | 0<br>(0 - 1)       |
| Diarrhea, lower respiratory, and other common infectious diseases | 110<br>(79 - 155)        | 33<br>(19 - 51)    | 6<br>(4 - 10)     | 18<br>(11 - 29)    | 12<br>(7 - 21)     | 40<br>(23 - 63)    |
| Diarrheal diseases                                                | 14<br>(7 - 27)           | 8<br>(3 - 21)      | 1<br>(0 - 1)      | 2<br>(1 - 5)       | 1<br>(0 - 3)       | 3<br>(1 - 7)       |
| Intestinal infectious diseases                                    | 11<br>(5 - 20)           | 4<br>(1 - 7)       | 3<br>(1 - 5)      | 4<br>(1 - 8)       | 0<br>(0 - 1)       | 0<br>(0 - 1)       |
| Typhoid fever                                                     | 7<br>(3 - 13)            | 2<br>(1 - 4)       | 2<br>(1 - 3)      | 2<br>(1 - 5)       | 0<br>(0 - 1)       | 0<br>(0 - 0)       |
| Paratyphoid fever                                                 | 3<br>(2 - 7)             | 1<br>(0 - 2)       | 1<br>(0 - 2)      | 1<br>(0 - 3)       | 0<br>(0 - 0)       | 0<br>(0 - 0)       |
| Other intestinal infectious diseases                              | 0<br>(0 - 3)             | 0<br>(0 - 2)       | 0<br>(0 - 0)      | 0<br>(0 - 1)       | 0<br>(0 - 0)       | 0<br>(0 - 0)       |
| Lower respiratory infections                                      | 68<br>(43 - 107)         | 14<br>(5 - 25)     | 2<br>(1 - 3)      | 8<br>(4 - 14)      | 9<br>(5 - 16)      | 36<br>(20 - 58)    |
| Upper respiratory infections                                      | 0<br>(0 - 0)             | 0<br>(0 - 0)       | 0<br>(0 - 0)      | 0<br>(0 - 0)       | 0<br>(0 - 0)       | 0<br>(0 - 0)       |
| Otitis media                                                      | 0<br>(0 - 0)             | 0<br>(0 - 0)       | 0<br>(0 - 0)      | 0<br>(0 - 0)       | 0<br>(0 - 0)       | 0<br>(0 - 0)       |
| Meningitis                                                        | 10<br>(6 - 18)           | 3<br>(1 - 7)       | 1<br>(0 - 2)      | 4<br>(2 - 8)       | 1<br>(1 - 3)       | 1<br>(0 - 2)       |
| Pneumococcal meningitis                                           | 3<br>(1 - 5)             | 1<br>(0 - 2)       | 0<br>(0 - 1)      | 1<br>(0 - 2)       | 0<br>(0 - 1)       | 0<br>(0 - 1)       |
| H influenzae type B meningitis                                    | 2<br>(1 - 3)             | 1<br>(0 - 2)       | 0<br>(0 - 0)      | 0<br>(0 - 1)       | 0<br>(0 - 0)       | 0<br>(0 - 0)       |
| Meningococcal meningitis                                          | 4<br>(2 - 8)             | 1<br>(1 - 3)       | 0<br>(0 - 1)      | 2<br>(1 - 4)       | 1<br>(0 - 1)       | 0<br>(0 - 1)       |
| Other meningitis                                                  | 1<br>(1 - 3)             | 0<br>(0 - 1)       | 0<br>(0 - 0)      | 1<br>(0 - 2)       | 0<br>(0 - 1)       | 0<br>(0 - 1)       |
| Encephalitis                                                      | 2<br>(1 - 3)             | 0<br>(0 - 1)       | 0<br>(0 - 1)      | 1<br>(0 - 1)       | 0<br>(0 - 0)       | 0<br>(0 - 0)       |
| Diphtheria                                                        | 0<br>(0 - 0)             | 0<br>(0 - 0)       | 0<br>(0 - 0)      | 0<br>(0 - 0)       | 0<br>(0 - 0)       | --<br>(0 - 0)      |
| Whooping cough                                                    | 0<br>(0 - 0)             | 0<br>(0 - 0)       | 0<br>(0 - 0)      | 0<br>(0 - 0)       | 0<br>(0 - 0)       | --<br>(0 - 0)      |
| Tetanus                                                           | 0<br>(0 - 1)             | 0<br>(0 - 0)       | 0<br>(0 - 0)      | 0<br>(0 - 0)       | 0<br>(0 - 0)       | 0<br>(0 - 0)       |
| Measles                                                           | 3<br>(0 - 20)            | 3<br>(0 - 17)      | 0<br>(0 - 2)      | 0<br>(0 - 0)       | 0<br>(0 - 0)       | --<br>(0 - 0)      |
| Varicella and herpes zoster                                       | 0<br>(0 - 0)             | 0<br>(0 - 0)       | 0<br>(0 - 0)      | 0<br>(0 - 0)       | 0<br>(0 - 0)       | 0<br>(0 - 0)       |
| Neglected tropical diseases and malaria                           | 1<br>(0 - 3)             | 0<br>(0 - 1)       | 0<br>(0 - 1)      | 0<br>(0 - 1)       | 0<br>(0 - 0)       | 0<br>(0 - 0)       |
| Malaria                                                           | 0<br>(0 - 1)             | 0<br>(0 - 1)       | 0<br>(0 - 0)      | 0<br>(0 - 0)       | 0<br>(0 - 0)       | 0<br>(0 - 0)       |
| Leishmaniasis                                                     | 0<br>(0 - 0)             | 0<br>(0 - 0)       | 0<br>(0 - 0)      | 0<br>(0 - 0)       | 0<br>(0 - 0)       | 0<br>(0 - 0)       |
| Visceral leishmaniasis                                            | 0<br>(0 - 0)             | 0<br>(0 - 0)       | 0<br>(0 - 0)      | 0<br>(0 - 0)       | 0<br>(0 - 0)       | 0<br>(0 - 0)       |
| Cysticercosis                                                     | 0<br>(0 - 0)             | 0<br>(0 - 0)       | 0<br>(0 - 0)      | 0<br>(0 - 0)       | 0<br>(0 - 0)       | 0<br>(0 - 0)       |
| Cystic echinococcosis                                             | 0<br>(0 - 0)             | 0<br>(0 - 0)       | 0<br>(0 - 0)      | 0<br>(0 - 0)       | 0<br>(0 - 0)       | 0<br>(0 - 0)       |
| Dengue                                                            | 0<br>(0 - 0)             | 0<br>(0 - 0)       | 0<br>(0 - 0)      | 0<br>(0 - 0)       | 0<br>(0 - 0)       | 0<br>(0 - 0)       |
| Rabies                                                            | 1<br>(0 - 2)             | 0<br>(0 - 1)       | 0<br>(0 - 1)      | 0<br>(0 - 1)       | 0<br>(0 - 0)       | 0<br>(0 - 0)       |
| Intestinal nematode infections                                    | 0<br>(0 - 1)             | 0<br>(0 - 1)       | 0<br>(0 - 0)      | 0<br>(0 - 0)       | 0<br>(0 - 0)       | 0<br>(0 - 0)       |
| Ascariasis                                                        | 0<br>(0 - 1)             | 0<br>(0 - 1)       | 0<br>(0 - 0)      | 0<br>(0 - 0)       | 0<br>(0 - 0)       | 0<br>(0 - 0)       |
| Other neglected tropical diseases                                 | 0<br>(0 - 0)             | 0<br>(0 - 0)       | 0<br>(0 - 0)      | 0<br>(0 - 0)       | 0<br>(0 - 0)       | 0<br>(0 - 0)       |
| Maternal disorders                                                | --                       | --                 | --                | --                 | --                 | --                 |
| Maternal hemorrhage                                               | --                       | --                 | --                | --                 | --                 | --                 |

Web Table 31- Cape Verde deaths with 95% UI by age, sex, and cause in 2013

| Cause                                                            | Males, All Ages        | Males, 0-4 Years | Males, 5-14 Years | Males, 15-49 Years | Males, 50-69 Years | Males, 70-80 Years |
|------------------------------------------------------------------|------------------------|------------------|-------------------|--------------------|--------------------|--------------------|
| Maternal sepsis and other maternal infections                    | --                     | --               | --                | --                 | --                 | --                 |
| Maternal hypertensive disorders                                  | --                     | --               | --                | --                 | --                 | --                 |
| Maternal obstructed labor                                        | --                     | --               | --                | --                 | --                 | --                 |
| Maternal abortive outcome                                        | --                     | --               | --                | --                 | --                 | --                 |
| Indirect maternal deaths                                         | --                     | --               | --                | --                 | --                 | --                 |
| Late maternal deaths                                             | --                     | --               | --                | --                 | --                 | --                 |
| Maternal deaths aggravated by HIV/AIDS                           | --                     | --               | --                | --                 | --                 | --                 |
| Other maternal disorders                                         | --                     | --               | --                | --                 | --                 | --                 |
| Neonatal disorders                                               | 42<br>(30 - 56)        | 42<br>(30 - 56)  | --                | --                 | --                 | --                 |
| Neonatal preterm birth complications                             | 10<br>(3 - 21)         | 10<br>(3 - 21)   | --                | --                 | --                 | --                 |
| Neonatal encephalopathy due to birth asphyxia and trauma         | 11<br>(5 - 21)         | 11<br>(5 - 21)   | --                | --                 | --                 | --                 |
| Neonatal sepsis and other neonatal infections                    | 17<br>(8 - 30)         | 17<br>(8 - 30)   | --                | --                 | --                 | --                 |
| Hemolytic disease and other neonatal jaundice                    | 0<br>(0 - 0)           | 0<br>(0 - 0)     | --                | --                 | --                 | --                 |
| Other neonatal disorders                                         | 3<br>(1 - 7)           | 3<br>(1 - 7)     | --                | --                 | --                 | --                 |
| Nutritional deficiencies                                         | 19<br>(9 - 37)         | 4<br>(2 - 9)     | 1<br>(0 - 1)      | 3<br>(1 - 6)       | 2<br>(1 - 5)       | 9<br>(4 - 17)      |
| Protein-energy malnutrition                                      | 12<br>(6 - 26)         | 3<br>(1 - 8)     | 0<br>(0 - 1)      | 2<br>(1 - 4)       | 2<br>(1 - 4)       | 5<br>(2 - 11)      |
| Iodine deficiency                                                | 0<br>(0 - 0)           | 0<br>(0 - 0)     | 0<br>(0 - 0)      | 0<br>(0 - 0)       | 0<br>(0 - 0)       | 0<br>(0 - 0)       |
| Iron-deficiency anemia                                           | 7<br>(2 - 14)          | 1<br>(0 - 2)     | 0<br>(0 - 0)      | 1<br>(0 - 3)       | 1<br>(0 - 2)       | 4<br>(1 - 8)       |
| Other nutritional deficiencies                                   | 0<br>(0 - 0)           | 0<br>(0 - 0)     | 0<br>(0 - 0)      | 0<br>(0 - 0)       | 0<br>(0 - 0)       | 0<br>(0 - 0)       |
| Other communicable, maternal, neonatal, and nutritional diseases | 22<br>(12 - 35)        | 3<br>(1 - 6)     | 1<br>(0 - 1)      | 7<br>(4 - 13)      | 5<br>(2 - 9)       | 6<br>(3 - 13)      |
| Sexually transmitted diseases excluding HIV                      | 2<br>(0 - 4)           | 1<br>(0 - 3)     | 0<br>(0 - 0)      | 0<br>(0 - 1)       | 0<br>(0 - 0)       | 0<br>(0 - 1)       |
| Syphilis                                                         | 2<br>(0 - 4)           | 1<br>(0 - 3)     | 0<br>(0 - 0)      | 0<br>(0 - 0)       | 0<br>(0 - 0)       | 0<br>(0 - 1)       |
| Chlamydial infection                                             | --                     | --               | --                | --                 | --                 | --                 |
| Gonococcal infection                                             | 0<br>(0 - 0)           | --               | 0<br>(0 - 0)      | 0<br>(0 - 0)       | 0<br>(0 - 0)       | 0<br>(0 - 0)       |
| Other sexually transmitted diseases                              | 0<br>(0 - 0)           | --               | 0<br>(0 - 0)      | 0<br>(0 - 0)       | 0<br>(0 - 0)       | 0<br>(0 - 0)       |
| Hepatitis                                                        | 8<br>(5 - 13)          | 0<br>(0 - 1)     | 0<br>(0 - 0)      | 3<br>(2 - 6)       | 3<br>(1 - 4)       | 2<br>(1 - 3)       |
| Acute hepatitis A                                                | 0<br>(0 - 1)           | 0<br>(0 - 0)     | 0<br>(0 - 0)      | 0<br>(0 - 0)       | 0<br>(0 - 0)       | 0<br>(0 - 0)       |
| Acute hepatitis B                                                | 6<br>(3 - 9)           | 0<br>(0 - 1)     | 0<br>(0 - 0)      | 2<br>(1 - 3)       | 2<br>(1 - 4)       | 1<br>(1 - 2)       |
| Acute hepatitis C                                                | 0<br>(0 - 1)           | --               | 0<br>(0 - 0)      | 0<br>(0 - 0)       | 0<br>(0 - 0)       | 0<br>(0 - 0)       |
| Acute hepatitis E                                                | 2<br>(1 - 3)           | 0<br>(0 - 0)     | 0<br>(0 - 0)      | 1<br>(1 - 2)       | 0<br>(0 - 1)       | 0<br>(0 - 0)       |
| Other infectious diseases                                        | 12<br>(4 - 23)         | 1<br>(0 - 4)     | 0<br>(0 - 1)      | 4<br>(1 - 8)       | 2<br>(1 - 6)       | 4<br>(1 - 11)      |
| Non-communicable diseases                                        | 1,063<br>(777 - 1,401) | 43<br>(28 - 60)  | 9<br>(7 - 11)     | 179<br>(119 - 262) | 581<br>(445 - 724) | 581<br>(445 - 724) |
| Neoplasms                                                        | 220<br>(156 - 298)     | 2<br>(1 - 4)     | 2<br>(1 - 3)      | 38<br>(23 - 58)    | 69<br>(44 - 99)    | 110<br>(82 - 142)  |
| Esophageal cancer                                                | 20<br>(10 - 32)        | --               | --                | 2<br>(1 - 4)       | 9<br>(4 - 14)      | 9<br>(5 - 15)      |
| Stomach cancer                                                   | 57<br>(38 - 82)        | --               | --                | 7<br>(4 - 11)      | 19<br>(12 - 30)    | 32<br>(21 - 45)    |
| Liver cancer                                                     | 46<br>(26 - 68)        | --               | 0<br>(0 - 0)      | 16<br>(8 - 28)     | 15<br>(8 - 24)     | 14<br>(8 - 22)     |
| Liver cancer due to hepatitis B                                  | 19<br>(9 - 31)         | --               | 0<br>(0 - 0)      | 9<br>(4 - 16)      | 6<br>(3 - 12)      | 4<br>(2 - 6)       |
| Liver cancer due to hepatitis C                                  | 15<br>(7 - 26)         | --               | 0<br>(0 - 0)      | 3<br>(1 - 7)       | 5<br>(2 - 10)      | 6<br>(3 - 11)      |
| Liver cancer due to alcohol use                                  | 7<br>(4 - 12)          | --               | --                | 2<br>(1 - 3)       | 2<br>(1 - 4)       | 3<br>(2 - 6)       |
| Liver cancer due to other causes                                 | 4<br>(2 - 8)           | --               | 0<br>(0 - 0)      | 2<br>(1 - 4)       | 1<br>(1 - 2)       | 1<br>(0 - 1)       |

Web Table 31- Cape Verde deaths with 95% UI by age, sex, and cause in 2013

| Cause                                         | Males, All Ages    | Males, 0-4 Years | Males, 5-14 Years | Males, 15-49 Years | Males, 50-69 Years | Males, 70-80 Years |
|-----------------------------------------------|--------------------|------------------|-------------------|--------------------|--------------------|--------------------|
| Larynx cancer                                 | 5<br>(3 - 8)       | --               | --                | 1<br>(0 - 1)       | 2<br>(1 - 4)       | 2<br>(1 - 4)       |
| Tracheal, bronchus and lung cancer            | 19<br>(13 - 27)    | --               | --                | 1<br>(1 - 2)       | 8<br>(5 - 12)      | 10<br>(7 - 14)     |
| Breast cancer                                 | 0<br>(0 - 0)       | --               | --                | 0<br>(0 - 0)       | 0<br>(0 - 0)       | 0<br>(0 - 0)       |
| Cervical cancer                               | --                 | --               | --                | --                 | --                 | --                 |
| Uterine cancer                                | --                 | --               | --                | --                 | --                 | --                 |
| Prostate cancer                               | 21<br>(11 - 36)    | --               | --                | 0<br>(0 - 0)       | 3<br>(1 - 5)       | 18<br>(10 - 31)    |
| Colon and rectum cancer                       | 18<br>(12 - 25)    | --               | --                | 2<br>(1 - 3)       | 5<br>(3 - 7)       | 11<br>(7 - 16)     |
| Lip and oral cavity cancer                    | 1<br>(0 - 1)       | --               | --                | 0<br>(0 - 0)       | 0<br>(0 - 0)       | 0<br>(0 - 1)       |
| Nasopharynx cancer                            | 0<br>(0 - 0)       | --               | 0<br>(0 - 0)      | 0<br>(0 - 0)       | 0<br>(0 - 0)       | 0<br>(0 - 0)       |
| Other pharynx cancer                          | 0<br>(0 - 1)       | --               | --                | 0<br>(0 - 0)       | 0<br>(0 - 0)       | 0<br>(0 - 0)       |
| Gallbladder and biliary tract cancer          | 0<br>(0 - 1)       | --               | --                | 0<br>(0 - 0)       | 0<br>(0 - 0)       | 0<br>(0 - 0)       |
| Pancreatic cancer                             | 3<br>(2 - 5)       | --               | --                | 1<br>(0 - 1)       | 1<br>(1 - 2)       | 1<br>(1 - 2)       |
| Malignant skin melanoma                       | 0<br>(0 - 1)       | --               | --                | 0<br>(0 - 0)       | 0<br>(0 - 0)       | 0<br>(0 - 0)       |
| Non-melanoma skin cancer                      | 0<br>(0 - 1)       | --               | --                | 0<br>(0 - 0)       | 0<br>(0 - 0)       | 0<br>(0 - 0)       |
| Ovarian cancer                                | --                 | --               | --                | --                 | --                 | --                 |
| Testicular cancer                             | 0<br>(0 - 0)       | --               | --                | 0<br>(0 - 0)       | 0<br>(0 - 0)       | 0<br>(0 - 0)       |
| Kidney cancer                                 | 1<br>(1 - 2)       | 0<br>(0 - 0)     | 0<br>(0 - 0)      | 0<br>(0 - 0)       | 0<br>(0 - 1)       | 1<br>(0 - 1)       |
| Bladder cancer                                | 3<br>(2 - 5)       | --               | --                | 0<br>(0 - 1)       | 1<br>(0 - 1)       | 2<br>(1 - 3)       |
| Brain and nervous system cancer               | 1<br>(0 - 1)       | 0<br>(0 - 0)     | 0<br>(0 - 0)      | 0<br>(0 - 1)       | 0<br>(0 - 0)       | 0<br>(0 - 0)       |
| Thyroid cancer                                | 0<br>(0 - 0)       | --               | 0<br>(0 - 0)      | 0<br>(0 - 0)       | 0<br>(0 - 0)       | 0<br>(0 - 0)       |
| Mesothelioma                                  | 0<br>(0 - 0)       | --               | --                | 0<br>(0 - 0)       | 0<br>(0 - 0)       | 0<br>(0 - 0)       |
| Hodgkin lymphoma                              | 1<br>(0 - 1)       | 0<br>(0 - 0)     | 0<br>(0 - 0)      | 0<br>(0 - 0)       | 0<br>(0 - 0)       | 0<br>(0 - 0)       |
| Non-Hodgkin lymphoma                          | 7<br>(4 - 10)      | 1<br>(0 - 1)     | 1<br>(0 - 1)      | 2<br>(1 - 3)       | 1<br>(1 - 3)       | 2<br>(1 - 4)       |
| Multiple myeloma                              | 0<br>(0 - 1)       | --               | --                | 0<br>(0 - 0)       | 0<br>(0 - 0)       | 0<br>(0 - 0)       |
| Leukemia                                      | 3<br>(2 - 5)       | 0<br>(0 - 0)     | 0<br>(0 - 0)      | 1<br>(1 - 2)       | 1<br>(0 - 1)       | 1<br>(1 - 2)       |
| Other neoplasms                               | 12<br>(8 - 16)     | 1<br>(0 - 2)     | 0<br>(0 - 1)      | 3<br>(2 - 4)       | 3<br>(1 - 4)       | 5<br>(3 - 7)       |
| Cardiovascular diseases                       | 482<br>(349 - 643) | 5<br>(3 - 8)     | 3<br>(2 - 4)      | 73<br>(47 - 107)   | 112<br>(71 - 164)  | 290<br>(220 - 371) |
| Rheumatic heart disease                       | 3<br>(2 - 5)       | 0<br>(0 - 0)     | 0<br>(0 - 0)      | 1<br>(0 - 2)       | 1<br>(0 - 1)       | 1<br>(1 - 2)       |
| Ischemic heart disease                        | 146<br>(98 - 205)  | 1<br>(0 - 1)     | 1<br>(0 - 1)      | 26<br>(16 - 40)    | 35<br>(21 - 53)    | 83<br>(57 - 115)   |
| Cerebrovascular disease                       | 253<br>(178 - 350) | 1<br>(1 - 2)     | 1<br>(1 - 1)      | 28<br>(17 - 42)    | 57<br>(35 - 86)    | 166<br>(121 - 221) |
| Ischemic stroke                               | 173<br>(118 - 241) | 0<br>(0 - 0)     | 0<br>(0 - 0)      | 8<br>(4 - 15)      | 36<br>(20 - 55)    | 129<br>(92 - 176)  |
| Hemorrhagic stroke                            | 80<br>(45 - 140)   | 1<br>(1 - 2)     | 1<br>(0 - 1)      | 20<br>(12 - 31)    | 21<br>(11 - 42)    | 37<br>(18 - 71)    |
| Hypertensive heart disease                    | 11<br>(5 - 24)     | 0<br>(0 - 0)     | 0<br>(0 - 0)      | 2<br>(0 - 5)       | 3<br>(1 - 6)       | 7<br>(3 - 13)      |
| Cardiomyopathy and myocarditis                | 21<br>(12 - 33)    | 1<br>(0 - 1)     | 0<br>(0 - 1)      | 5<br>(3 - 8)       | 6<br>(3 - 10)      | 9<br>(5 - 16)      |
| Atrial fibrillation and flutter               | 0<br>(0 - 0)       | --               | --                | 0<br>(0 - 0)       | 0<br>(0 - 0)       | 0<br>(0 - 0)       |
| Aortic aneurysm                               | 4<br>(2 - 7)       | --               | --                | 0<br>(0 - 1)       | 1<br>(1 - 2)       | 2<br>(1 - 4)       |
| Peripheral vascular disease                   | 0<br>(0 - 1)       | --               | --                | 0<br>(0 - 0)       | 0<br>(0 - 0)       | 0<br>(0 - 0)       |
| Endocarditis                                  | 7<br>(4 - 12)      | 1<br>(0 - 2)     | 0<br>(0 - 0)      | 2<br>(1 - 3)       | 1<br>(1 - 3)       | 3<br>(1 - 5)       |
| Other cardiovascular and circulatory diseases | 38<br>(22 - 59)    | 2<br>(1 - 3)     | 1<br>(0 - 1)      | 9<br>(5 - 15)      | 8<br>(4 - 13)      | 19<br>(10 - 30)    |
| Chronic respiratory diseases                  | 131<br>(85 - 180)  | 2<br>(1 - 3)     | 0<br>(0 - 1)      | 13<br>(7 - 19)     | 26<br>(15 - 39)    | 90<br>(59 - 123)   |

Web Table 31- Cape Verde deaths with 95% UI by age, sex, and cause in 2013

| Cause                                               | Males, All Ages  | Males, 0-4 Years | Males, 5-14 Years | Males, 15-49 Years | Males, 50-69 Years | Males, 70-80 Years |
|-----------------------------------------------------|------------------|------------------|-------------------|--------------------|--------------------|--------------------|
| Chronic obstructive pulmonary disease               | 92<br>(60 - 131) | 1<br>(0 - 2)     | 0<br>(0 - 0)      | 5<br>(3 - 8)       | 17<br>(9 - 27)     | 70<br>(47 - 98)    |
| Pneumoconiosis                                      | 8<br>(4 - 13)    | 0<br>(0 - 0)     | 0<br>(0 - 0)      | 2<br>(1 - 3)       | 3<br>(1 - 5)       | 3<br>(2 - 6)       |
| Silicosis                                           | 2<br>(1 - 3)     | 0<br>(0 - 0)     | 0<br>(0 - 0)      | 0<br>(0 - 1)       | 0<br>(0 - 0)       | 1<br>(1 - 2)       |
| Asbestosis                                          | 1<br>(0 - 1)     | 0<br>(0 - 0)     | 0<br>(0 - 0)      | 0<br>(0 - 0)       | 0<br>(0 - 0)       | 0<br>(0 - 0)       |
| Coal workers pneumoconiosis                         | 2<br>(1 - 3)     | 0<br>(0 - 0)     | 0<br>(0 - 0)      | 0<br>(0 - 0)       | 1<br>(0 - 2)       | 0<br>(0 - 1)       |
| Other pneumoconiosis                                | 4<br>(2 - 6)     | 0<br>(0 - 0)     | 0<br>(0 - 0)      | 1<br>(0 - 2)       | 1<br>(1 - 2)       | 2<br>(1 - 3)       |
| Asthma                                              | 12<br>(5 - 22)   | 0<br>(0 - 1)     | 0<br>(0 - 0)      | 3<br>(1 - 6)       | 3<br>(1 - 5)       | 6<br>(3 - 12)      |
| Interstitial lung disease and pulmonary sarcoidosis | 11<br>(1 - 27)   | 0<br>(0 - 0)     | 0<br>(0 - 0)      | 0<br>(0 - 1)       | 3<br>(0 - 7)       | 8<br>(1 - 21)      |
| Other chronic respiratory diseases                  | 7<br>(4 - 12)    | 1<br>(0 - 1)     | 0<br>(0 - 0)      | 3<br>(1 - 4)       | 1<br>(1 - 2)       | 3<br>(1 - 5)       |
| Cirrhosis                                           | 28<br>(18 - 44)  | 0<br>(0 - 0)     | 0<br>(0 - 0)      | 9<br>(6 - 15)      | 12<br>(7 - 19)     | 7<br>(4 - 11)      |
| Cirrhosis due to hepatitis B                        | 7<br>(3 - 13)    | 0<br>(0 - 0)     | 0<br>(0 - 0)      | 2<br>(1 - 4)       | 3<br>(1 - 6)       | 2<br>(1 - 4)       |
| Cirrhosis due to hepatitis C                        | 5<br>(1 - 12)    | 0<br>(0 - 0)     | 0<br>(0 - 0)      | 2<br>(0 - 4)       | 2<br>(0 - 6)       | 1<br>(0 - 3)       |
| Cirrhosis due to alcohol use                        | 14<br>(8 - 23)   | --               | --                | 4<br>(2 - 7)       | 6<br>(3 - 11)      | 3<br>(2 - 6)       |
| Cirrhosis due to other causes                       | 3<br>(1 - 5)     | 0<br>(0 - 0)     | 0<br>(0 - 0)      | 1<br>(1 - 3)       | 1<br>(0 - 2)       | 0<br>(0 - 1)       |
| Digestive diseases                                  | 32<br>(19 - 48)  | 0<br>(0 - 1)     | 0<br>(0 - 1)      | 7<br>(4 - 11)      | 8<br>(5 - 14)      | 16<br>(10 - 23)    |
| Peptic ulcer disease                                | 7<br>(4 - 12)    | 0<br>(0 - 0)     | 0<br>(0 - 0)      | 1<br>(1 - 2)       | 2<br>(1 - 3)       | 4<br>(2 - 7)       |
| Gastritis and duodenitis                            | 1<br>(0 - 3)     | 0<br>(0 - 0)     | 0<br>(0 - 0)      | 0<br>(0 - 1)       | 0<br>(0 - 1)       | 1<br>(0 - 2)       |
| Appendicitis                                        | 1<br>(0 - 2)     | 0<br>(0 - 0)     | 0<br>(0 - 0)      | 0<br>(0 - 0)       | 0<br>(0 - 0)       | 0<br>(0 - 1)       |
| Paralytic ileus and intestinal obstruction          | 11<br>(6 - 19)   | 0<br>(0 - 0)     | 0<br>(0 - 0)      | 3<br>(1 - 4)       | 3<br>(1 - 6)       | 5<br>(3 - 10)      |
| Inguinal, femoral, and abdominal hernia             | 1<br>(0 - 1)     | 0<br>(0 - 0)     | 0<br>(0 - 0)      | 0<br>(0 - 0)       | 0<br>(0 - 0)       | 0<br>(0 - 1)       |
| Inflammatory bowel disease                          | 1<br>(0 - 2)     | 0<br>(0 - 0)     | 0<br>(0 - 0)      | 0<br>(0 - 1)       | 0<br>(0 - 1)       | 1<br>(0 - 1)       |
| Vascular intestinal disorders                       | 0                | 0                | 0                 | 0                  | 0                  | 0                  |
| Gallbladder and biliary diseases                    | 2<br>(1 - 4)     | 0<br>(0 - 0)     | 0<br>(0 - 0)      | 0<br>(0 - 1)       | 0<br>(0 - 1)       | 1<br>(1 - 2)       |
| Pancreatitis                                        | 3<br>(1 - 5)     | 0<br>(0 - 0)     | 0<br>(0 - 0)      | 1<br>(1 - 2)       | 1<br>(0 - 2)       | 1<br>(0 - 2)       |
| Other digestive diseases                            | 4<br>(2 - 7)     | 0<br>(0 - 0)     | 0<br>(0 - 0)      | 1<br>(0 - 2)       | 1<br>(0 - 2)       | 2<br>(1 - 3)       |
| Neurological disorders                              | 27<br>(20 - 37)  | 1<br>(0 - 2)     | 0<br>(0 - 1)      | 3<br>(2 - 5)       | 1<br>(1 - 2)       | 22<br>(16 - 30)    |
| Alzheimer disease and other dementias               | 21<br>(15 - 29)  | --               | --                | 0<br>(0 - 0)       | 1<br>(0 - 1)       | 20<br>(14 - 28)    |
| Parkinson disease                                   | 0<br>(0 - 1)     | --               | --                | 0<br>(0 - 0)       | 0<br>(0 - 0)       | 0<br>(0 - 1)       |
| Epilepsy                                            | 4<br>(2 - 7)     | 1<br>(0 - 2)     | 0<br>(0 - 1)      | 2<br>(1 - 4)       | 0<br>(0 - 0)       | 1<br>(0 - 1)       |
| Multiple sclerosis                                  | 0<br>(0 - 0)     | --               | --                | 0<br>(0 - 0)       | 0<br>(0 - 0)       | 0<br>(0 - 0)       |
| Other neurological disorders                        | 2<br>(1 - 4)     | 0<br>(0 - 1)     | 0<br>(0 - 0)      | 1<br>(0 - 1)       | 0<br>(0 - 1)       | 1<br>(0 - 1)       |
| Mental and substance use disorders                  | 26<br>(13 - 41)  | 0<br>(0 - 1)     | 0<br>(0 - 0)      | 19<br>(9 - 32)     | 4<br>(2 - 6)       | 2<br>(1 - 4)       |
| Schizophrenia                                       | 0<br>(0 - 0)     | --               | --                | 0<br>(0 - 0)       | 0<br>(0 - 0)       | 0<br>(0 - 0)       |
| Alcohol use disorders                               | 7<br>(3 - 11)    | --               | --                | 3<br>(1 - 5)       | 2<br>(1 - 4)       | 2<br>(0 - 3)       |
| Drug use disorders                                  | 19               | 0                | --                | 17                 | 1                  | 1                  |
| Opioid use disorders                                | 2<br>(1 - 3)     | 0<br>(0 - 0)     | --                | 2<br>(1 - 3)       | 0<br>(0 - 0)       | 0<br>(0 - 0)       |
| Cocaine use disorders                               | 0<br>(0 - 0)     | 0<br>(0 - 0)     | --                | 0<br>(0 - 0)       | 0<br>(0 - 0)       | 0<br>(0 - 0)       |
| Amphetamine use disorders                           | 0<br>(0 - 0)     | 0<br>(0 - 0)     | --                | 0<br>(0 - 0)       | 0<br>(0 - 0)       | 0<br>(0 - 0)       |
| Other drug use disorders                            | 17<br>(7 - 28)   | 0<br>(0 - 1)     | --                | 15<br>(6 - 24)     | 1<br>(1 - 2)       | 1<br>(0 - 1)       |
| Eating disorders                                    | 0<br>(0 - 0)     | --               | 0<br>(0 - 0)      | 0<br>(0 - 0)       | --                 | --                 |

Web Table 31- Cape Verde deaths with 95% UI by age, sex, and cause in 2013

| Cause                                               | Males, All Ages | Males, 0-4 Years | Males, 5-14 Years | Males, 15-49 Years | Males, 50-69 Years | Males, 70-80 Years |
|-----------------------------------------------------|-----------------|------------------|-------------------|--------------------|--------------------|--------------------|
| Anorexia nervosa                                    | 0<br>(0-0)      | --               | 0<br>(0-0)        | 0<br>(0-0)         | --                 | --                 |
| Diabetes, urogenital, blood, and endocrine diseases | 82<br>(51-122)  | 4<br>(2-7)       | 1<br>(1-2)        | 15<br>(8-24)       | 18<br>(10-30)      | 43<br>(28-63)      |
| Diabetes mellitus                                   | 25<br>(16-39)   | 0<br>(0-0)       | 0<br>(0-0)        | 3<br>(2-5)         | 8<br>(4-13)        | 14<br>(9-22)       |
| Acute glomerulonephritis                            | 1<br>(0-2)      | 0<br>(0-0)       | 0<br>(0-0)        | 0<br>(0-0)         | 0<br>(0-0)         | 0<br>(0-1)         |
| Chronic kidney disease                              | 25<br>(11-51)   | 1<br>(0-2)       | 0<br>(0-1)        | 6<br>(2-11)        | 5<br>(2-12)        | 13<br>(5-27)       |
| Chronic kidney disease due to diabetes mellitus     | 1<br>(0-1)      | 0<br>(0-0)       | 0<br>(0-0)        | 0<br>(0-0)         | 0<br>(0-1)         | 0<br>(0-0)         |
| Chronic kidney disease due to hypertension          | 8<br>(3-22)     | 0<br>(0-0)       | 0<br>(0-0)        | 2<br>(1-4)         | 2<br>(1-5)         | 5<br>(2-13)        |
| Chronic kidney disease due to glomerulonephritis    | 7<br>(3-12)     | 0<br>(0-0)       | 0<br>(0-0)        | 2<br>(1-4)         | 1<br>(0-3)         | 3<br>(1-6)         |
| Chronic kidney disease due to other causes          | 9<br>(2-20)     | 0<br>(0-1)       | 0<br>(0-0)        | 2<br>(0-4)         | 2<br>(0-4)         | 5<br>(1-12)        |
| Urinary diseases and male infertility               | 17<br>(9-25)    | 0<br>(0-1)       | 0<br>(0-0)        | 2<br>(1-3)         | 3<br>(1-4)         | 12<br>(6-19)       |
| Interstitial nephritis and urinary tract infections | 14<br>(7-22)    | 0<br>(0-0)       | 0<br>(0-0)        | 1<br>(1-2)         | 2<br>(1-4)         | 10<br>(5-17)       |
| Urolithiasis                                        | 0<br>(0-0)      | --               | 0<br>(0-0)        | 0<br>(0-0)         | 0<br>(0-0)         | 0<br>(0-0)         |
| Other urinary diseases                              | 3<br>(1-5)      | 0<br>(0-0)       | 0<br>(0-0)        | 0<br>(0-1)         | 2<br>(0-1)         | 2<br>(1-4)         |
| Gynecological diseases                              | --              | --               | --                | --                 | --                 | --                 |
| Uterine fibroids                                    | --              | --               | --                | --                 | --                 | --                 |
| Polycystic ovarian syndrome                         | --              | --               | --                | --                 | --                 | --                 |
| Endometriosis                                       | --              | --               | --                | --                 | --                 | --                 |
| Genital prolapse                                    | --              | --               | --                | --                 | --                 | --                 |
| Other gynecological diseases                        | --              | --               | --                | --                 | --                 | --                 |
| Hemoglobinopathies and hemolytic anemias            | 4<br>(2-10)     | 1<br>(0-3)       | 0<br>(0-1)        | 1<br>(0-3)         | 0<br>(0-1)         | 1<br>(0-2)         |
| Thalassemias                                        | 0<br>(0-0)      | 0<br>(0-0)       | 0<br>(0-0)        | 0<br>(0-0)         | 0<br>(0-0)         | 0<br>(0-0)         |
| Sickle cell disorders                               | 3<br>(1-8)      | 1<br>(0-3)       | 0<br>(0-1)        | 1<br>(0-3)         | 0<br>(0-1)         | 0<br>(0-0)         |
| G6PD deficiency                                     | 0<br>(0-0)      | 0<br>(0-0)       | 0<br>(0-0)        | 0<br>(0-0)         | 0<br>(0-0)         | 0<br>(0-0)         |
| Other hemoglobinopathies and hemolytic anemias      | 1<br>(0-2)      | 0<br>(0-0)       | 0<br>(0-0)        | 0<br>(0-0)         | 0<br>(0-0)         | 1<br>(0-2)         |
| Endocrine, metabolic, blood, and immune disorders   | 11<br>(6-17)    | 2<br>(0-3)       | 0<br>(0-1)        | 3<br>(1-5)         | 2<br>(1-4)         | 4<br>(2-6)         |
| Musculoskeletal disorders                           | 3<br>(1-4)      | --               | 0<br>(0-0)        | 1<br>(0-2)         | 1<br>(0-1)         | 1<br>(1-2)         |
| Rheumatoid arthritis                                | 0<br>(0-0)      | --               | 0<br>(0-0)        | 0<br>(0-0)         | 0<br>(0-0)         | 0<br>(0-0)         |
| Other musculoskeletal disorders                     | 2<br>(1-4)      | --               | 0<br>(0-0)        | 1<br>(0-1)         | 1<br>(0-1)         | 1<br>(1-2)         |
| Other non-communicable diseases                     | 32<br>(19-47)   | 28<br>(16-42)    | 1<br>(1-2)        | 2<br>(1-3)         | 0<br>(0-1)         | 1<br>(0-1)         |
| Congenital anomalies                                | 31<br>(18-46)   | 27<br>(15-41)    | 1<br>(1-2)        | 2<br>(1-3)         | 0<br>(0-1)         | 1<br>(0-1)         |
| Neural tube defects                                 | 1<br>(0-3)      | 1<br>(0-3)       | 0<br>(0-0)        | 0<br>(0-0)         | 0<br>(0-0)         | 0<br>(0-0)         |
| Congenital heart anomalies                          | 21<br>(9-33)    | 18<br>(8-30)     | 1<br>(0-2)        | 1<br>(0-2)         | 0<br>(0-0)         | 0<br>(0-1)         |
| Cleft lip and cleft palate                          | 0<br>(0-0)      | 0<br>(0-0)       | --                | --                 | --                 | --                 |
| Down syndrome                                       | 1<br>(0-4)      | 1<br>(0-4)       | 0<br>(0-0)        | 0<br>(0-0)         | 0<br>(0-0)         | 0<br>(0-0)         |
| Chromosomal unbalanced rearrangements               | 1<br>(0-2)      | 1<br>(0-1)       | 0<br>(0-0)        | 0<br>(0-0)         | 0<br>(0-0)         | 0<br>(0-0)         |
| Other congenital anomalies                          | 7<br>(3-15)     | 6<br>(2-14)      | 0<br>(0-0)        | 0<br>(0-1)         | 0<br>(0-0)         | 0<br>(0-0)         |
| Skin and subcutaneous diseases                      | 0<br>(0-0)      | 0<br>(0-0)       | 0<br>(0-0)        | 0<br>(0-0)         | 0<br>(0-0)         | 0<br>(0-0)         |
| Cellulitis                                          | 0<br>(0-0)      | 0<br>(0-0)       | 0<br>(0-0)        | 0<br>(0-0)         | 0<br>(0-0)         | 0<br>(0-0)         |
| Pyoderma                                            | 0<br>(0-0)      | 0<br>(0-0)       | 0<br>(0-0)        | 0<br>(0-0)         | 0<br>(0-0)         | 0<br>(0-0)         |
| Decubitus ulcer                                     | 0<br>(0-0)      | 0<br>(0-0)       | 0<br>(0-0)        | 0<br>(0-0)         | 0<br>(0-0)         | 0<br>(0-0)         |

Web Table 31- Cape Verde deaths with 95% UI by age, sex, and cause in 2013

| Cause                                           | Males, All Ages    | Males, 0-4 Years | Males, 5-14 Years | Males, 15-49 Years | Males, 50-69 Years | Males, 70-80 Years |
|-------------------------------------------------|--------------------|------------------|-------------------|--------------------|--------------------|--------------------|
| Other skin and subcutaneous diseases            | 0<br>(0 - 0)       | 0<br>(0 - 0)     | 0<br>(0 - 0)      | 0<br>(0 - 0)       | 0<br>(0 - 0)       | 0<br>(0 - 0)       |
| Sudden infant death syndrome                    | 1<br>(0 - 2)       | 1<br>(0 - 2)     | --                | --                 | --                 | --                 |
| Injuries                                        | 215<br>(146 - 312) | 11<br>(6 - 23)   | 7<br>(5 - 10)     | 103<br>(67 - 153)  | 32<br>(19 - 51)    | 62<br>(39 - 96)    |
| Transport injuries                              | 20<br>(12 - 41)    | 0<br>(0 - 1)     | 1<br>(0 - 1)      | 14<br>(9 - 29)     | 3<br>(1 - 6)       | 2<br>(1 - 4)       |
| Road injuries                                   | 20<br>(12 - 40)    | 0<br>(0 - 1)     | 1<br>(0 - 1)      | 14<br>(9 - 28)     | 3<br>(1 - 6)       | 2<br>(1 - 4)       |
| Pedestrian road injuries                        | 4<br>(1 - 10)      | 0<br>(0 - 0)     | 0<br>(0 - 1)      | 2<br>(1 - 6)       | 1<br>(0 - 2)       | 1<br>(0 - 2)       |
| Cyclist road injuries                           | 1<br>(0 - 2)       | 0<br>(0 - 0)     | 0<br>(0 - 0)      | 0<br>(0 - 1)       | 0<br>(0 - 0)       | 0<br>(0 - 0)       |
| Motorcyclist road injuries                      | 3<br>(1 - 8)       | 0<br>(0 - 0)     | 0<br>(0 - 0)      | 2<br>(1 - 6)       | 0<br>(0 - 1)       | 0<br>(0 - 0)       |
| Motor vehicle road injuries                     | 12<br>(7 - 22)     | 0<br>(0 - 0)     | 0<br>(0 - 1)      | 9<br>(5 - 16)      | 2<br>(1 - 3)       | 1<br>(1 - 2)       |
| Other road injuries                             | 0<br>(0 - 1)       | 0<br>(0 - 0)     | 0<br>(0 - 0)      | 0<br>(0 - 0)       | 0<br>(0 - 0)       | 0<br>(0 - 0)       |
| Other transport injuries                        | 0<br>(0 - 1)       | 0<br>(0 - 0)     | 0<br>(0 - 0)      | 0<br>(0 - 1)       | 0<br>(0 - 0)       | 0<br>(0 - 0)       |
| Unintentional injuries                          | 123<br>(81 - 183)  | 9<br>(5 - 22)    | 5<br>(3 - 8)      | 36<br>(22 - 57)    | 20<br>(11 - 33)    | 53<br>(31 - 85)    |
| Falls                                           | 56<br>(27 - 90)    | 2<br>(1 - 6)     | 1<br>(0 - 2)      | 10<br>(4 - 17)     | 9<br>(3 - 17)      | 33<br>(16 - 60)    |
| Drowning                                        | 18<br>(10 - 34)    | 2<br>(1 - 8)     | 2<br>(1 - 5)      | 11<br>(5 - 20)     | 2<br>(1 - 3)       | 1<br>(1 - 2)       |
| Fire, heat, and hot substances                  | 2<br>(1 - 4)       | 0<br>(0 - 1)     | 0<br>(0 - 0)      | 1<br>(0 - 2)       | 0<br>(0 - 1)       | 1<br>(0 - 1)       |
| Poisonings                                      | 4<br>(1 - 8)       | 0<br>(0 - 0)     | 0<br>(0 - 0)      | 3<br>(1 - 5)       | 1<br>(0 - 1)       | 0<br>(0 - 1)       |
| Exposure to mechanical forces                   | 6<br>(2 - 44)      | 2<br>(0 - 15)    | 0<br>(0 - 4)      | 3<br>(1 - 15)      | 1<br>(0 - 4)       | 0<br>(0 - 3)       |
| Unintentional firearm injuries                  | 2<br>(1 - 3)       | 0<br>(0 - 0)     | 0<br>(0 - 0)      | 1<br>(1 - 2)       | 0<br>(0 - 1)       | 0<br>(0 - 0)       |
| Unintentional suffocation                       | 4<br>(0 - 41)      | 1<br>(0 - 15)    | 0<br>(0 - 4)      | 2<br>(0 - 13)      | 1<br>(0 - 4)       | 0<br>(0 - 3)       |
| Other exposure to mechanical forces             | 0<br>(0 - 2)       | 0<br>(0 - 0)     | 0<br>(0 - 0)      | 0<br>(0 - 1)       | 0<br>(0 - 0)       | 0<br>(0 - 0)       |
| Adverse effects of medical treatment            | 0<br>(0 - 1)       | 0<br>(0 - 0)     | 0<br>(0 - 0)      | 0<br>(0 - 0)       | 0<br>(0 - 0)       | 0<br>(0 - 0)       |
| Animal contact                                  | 1<br>(0 - 2)       | 0<br>(0 - 0)     | 0<br>(0 - 0)      | 0<br>(0 - 0)       | 0<br>(0 - 0)       | 0<br>(0 - 1)       |
| Venomous animal contact                         | 0<br>(0 - 1)       | 0<br>(0 - 0)     | 0<br>(0 - 0)      | 0<br>(0 - 0)       | 0<br>(0 - 0)       | 0<br>(0 - 0)       |
| Non-venomous animal contact                     | 0<br>(0 - 1)       | 0<br>(0 - 0)     | 0<br>(0 - 0)      | 0<br>(0 - 0)       | 0<br>(0 - 0)       | 0<br>(0 - 0)       |
| Foreign body                                    | 3<br>(1 - 5)       | 1<br>(0 - 2)     | 0<br>(0 - 0)      | 0<br>(0 - 1)       | 0<br>(0 - 1)       | 1<br>(0 - 2)       |
| Pulmonary aspiration and foreign body in airway | 3<br>(1 - 4)       | 1<br>(0 - 2)     | 0<br>(0 - 0)      | 0<br>(0 - 1)       | 0<br>(0 - 0)       | 1<br>(0 - 2)       |
| Foreign body in other body part                 | 0<br>(0 - 1)       | 0<br>(0 - 0)     | 0<br>(0 - 0)      | 0<br>(0 - 0)       | 0<br>(0 - 0)       | 0<br>(0 - 0)       |
| Other unintentional injuries                    | 32<br>(21 - 47)    | 2<br>(1 - 3)     | 1<br>(0 - 1)      | 8<br>(5 - 13)      | 6<br>(4 - 11)      | 15<br>(9 - 23)     |
| Self-harm and interpersonal violence            | 72<br>(36 - 114)   | 1<br>(0 - 2)     | 1<br>(0 - 2)      | 53<br>(25 - 85)    | 10<br>(5 - 18)     | 7<br>(4 - 14)      |
| Self-harm                                       | 36<br>(20 - 84)    | --               | 0<br>(0 - 1)      | 21<br>(12 - 51)    | 7<br>(4 - 16)      | 7<br>(3 - 14)      |
| Interpersonal violence                          | 36<br>(9 - 62)     | 1<br>(0 - 2)     | 1<br>(0 - 1)      | 31<br>(7 - 54)     | 3<br>(1 - 5)       | 1<br>(0 - 1)       |
| Assault by firearm                              | 21<br>(4 - 39)     | 0<br>(0 - 1)     | 0<br>(0 - 0)      | 20<br>(4 - 37)     | 1<br>(0 - 3)       | 0<br>(0 - 0)       |
| Assault by sharp object                         | 7<br>(1 - 15)      | 0<br>(0 - 1)     | 0<br>(0 - 0)      | 5<br>(1 - 13)      | 1<br>(0 - 2)       | 0<br>(0 - 0)       |
| Assault by other means                          | 8<br>(2 - 16)      | 0<br>(0 - 1)     | 0<br>(0 - 1)      | 6<br>(1 - 13)      | 1<br>(0 - 1)       | 0<br>(0 - 1)       |

Web Table 31- Cape Verde deaths with 95% UI by age, sex, and cause in 2013

| Cause                                                             | Females, All Ages      | Females, 0-4 Years | Females, 5-14 Years | Females, 15-49 Years | Females, 50-69 Years | Females, 70-80 Years |
|-------------------------------------------------------------------|------------------------|--------------------|---------------------|----------------------|----------------------|----------------------|
| All causes                                                        | 1,199<br>(996 - 1,590) | 108<br>(89 - 134)  | 15<br>(13 - 18)     | 108<br>(75 - 149)    | 171<br>(117 - 257)   | 796<br>(687 - 1,065) |
| Communicable, maternal, neonatal, and nutritional diseases        | 207<br>(145 - 288)     | 71<br>(52 - 94)    | 8<br>(5 - 11)       | 29<br>(21 - 39)      | 16<br>(8 - 25)       | 83<br>(42 - 141)     |
| HIV/AIDS and tuberculosis                                         | 17<br>(10 - 24)        | 0<br>(0 - 0)       | 0<br>(0 - 0)        | 10<br>(6 - 13)       | 5<br>(2 - 7)         | 2<br>(1 - 4)         |
| Tuberculosis                                                      | 12<br>(4 - 19)         | 0<br>(0 - 0)       | 0<br>(0 - 0)        | 5<br>(2 - 8)         | 4<br>(1 - 7)         | 2<br>(1 - 4)         |
| HIV/AIDS                                                          | 5<br>(4 - 8)           | 0<br>(0 - 0)       | 0<br>(0 - 0)        | 4<br>(3 - 7)         | 1<br>(0 - 1)         | 0<br>(0 - 0)         |
| HIV/AIDS resulting in mycobacterial infection                     | 0<br>(0 - 0)           | 0<br>(0 - 0)       | 0<br>(0 - 0)        | 0<br>(0 - 0)         | 0<br>(0 - 0)         | 0<br>(0 - 0)         |
| HIV/AIDS resulting in other diseases                              | 5<br>(3 - 8)           | 0<br>(0 - 0)       | 0<br>(0 - 0)        | 4<br>(3 - 7)         | 1<br>(0 - 1)         | 0<br>(0 - 0)         |
| Diarrhea, lower respiratory, and other common infectious diseases | 114<br>(66 - 180)      | 30<br>(17 - 47)    | 6<br>(4 - 9)        | 12<br>(6 - 19)       | 8<br>(4 - 16)        | 57<br>(26 - 104)     |
| Diarrheal diseases                                                | 14<br>(6 - 27)         | 8<br>(2 - 19)      | 0<br>(0 - 1)        | 1<br>(0 - 2)         | 1<br>(0 - 2)         | 4<br>(1 - 10)        |
| Intestinal infectious diseases                                    | 14<br>(7 - 24)         | 4<br>(2 - 8)       | 3<br>(2 - 6)        | 5<br>(2 - 10)        | 1<br>(0 - 2)         | 1<br>(0 - 1)         |
| Typhoid fever                                                     | 9<br>(5 - 17)          | 3<br>(1 - 5)       | 2<br>(1 - 4)        | 3<br>(1 - 7)         | 1<br>(0 - 1)         | 0<br>(0 - 1)         |
| Paratyphoid fever                                                 | 4<br>(2 - 8)           | 1<br>(0 - 3)       | 1<br>(0 - 2)        | 1<br>(0 - 3)         | 0<br>(0 - 0)         | 0<br>(0 - 0)         |
| Other intestinal infectious diseases                              | 0<br>(0 - 3)           | 0<br>(0 - 2)       | 0<br>(0 - 0)        | 0<br>(0 - 1)         | 0<br>(0 - 0)         | 0<br>(0 - 0)         |
| Lower respiratory infections                                      | 74<br>(36 - 131)       | 13<br>(5 - 23)     | 1<br>(1 - 3)        | 4<br>(2 - 7)         | 6<br>(2 - 12)        | 51<br>(21 - 96)      |
| Upper respiratory infections                                      | 0<br>(0 - 0)           | 0<br>(0 - 0)       | 0<br>(0 - 0)        | 0<br>(0 - 0)         | 0<br>(0 - 0)         | 0<br>(0 - 0)         |
| Otitis media                                                      | 0<br>(0 - 0)           | 0<br>(0 - 0)       | 0<br>(0 - 0)        | 0<br>(0 - 0)         | 0<br>(0 - 0)         | 0<br>(0 - 0)         |
| Meningitis                                                        | 7<br>(4 - 11)          | 2<br>(1 - 5)       | 1<br>(0 - 1)        | 2<br>(1 - 3)         | 1<br>(0 - 2)         | 1<br>(1 - 3)         |
| Pneumococcal meningitis                                           | 2<br>(1 - 3)           | 0<br>(0 - 1)       | 0<br>(0 - 0)        | 0<br>(0 - 1)         | 0<br>(0 - 0)         | 0<br>(0 - 1)         |
| H influenzae type B meningitis                                    | 1<br>(0 - 2)           | 0<br>(0 - 1)       | 0<br>(0 - 0)        | 0<br>(0 - 0)         | 0<br>(0 - 0)         | 0<br>(0 - 0)         |
| Meningococcal meningitis                                          | 3<br>(2 - 6)           | 1<br>(0 - 2)       | 0<br>(0 - 1)        | 1<br>(0 - 2)         | 0<br>(0 - 1)         | 1<br>(0 - 2)         |
| Other meningitis                                                  | 1<br>(0 - 2)           | 0<br>(0 - 0)       | 0<br>(0 - 0)        | 0<br>(0 - 1)         | 0<br>(0 - 0)         | 0<br>(0 - 1)         |
| Encephalitis                                                      | 2<br>(1 - 3)           | 0<br>(0 - 1)       | 0<br>(0 - 0)        | 0<br>(0 - 1)         | 0<br>(0 - 1)         | 1<br>(0 - 1)         |
| Diphtheria                                                        | 0<br>(0 - 0)           | 0<br>(0 - 0)       | 0<br>(0 - 0)        | 0<br>(0 - 0)         | 0<br>(0 - 0)         | --<br>(0 - 0)        |
| Whooping cough                                                    | 0<br>(0 - 0)           | 0<br>(0 - 0)       | 0<br>(0 - 0)        | 0<br>(0 - 0)         | 0<br>(0 - 0)         | --<br>(0 - 0)        |
| Tetanus                                                           | 0<br>(0 - 1)           | 0<br>(0 - 0)       | 0<br>(0 - 0)        | 0<br>(0 - 0)         | 0<br>(0 - 0)         | 0<br>(0 - 0)         |
| Measles                                                           | 3<br>(0 - 20)          | 3<br>(0 - 16)      | 0<br>(0 - 2)        | 0<br>(0 - 1)         | 0<br>(0 - 0)         | --<br>(0 - 0)        |
| Varicella and herpes zoster                                       | 0<br>(0 - 1)           | 0<br>(0 - 0)       | 0<br>(0 - 0)        | 0<br>(0 - 0)         | 0<br>(0 - 0)         | 0<br>(0 - 1)         |
| Neglected tropical diseases and malaria                           | 2<br>(1 - 5)           | 0<br>(0 - 1)       | 0<br>(0 - 1)        | 1<br>(0 - 2)         | 0<br>(0 - 1)         | 1<br>(0 - 1)         |
| Malaria                                                           | 0<br>(0 - 0)           | 0<br>(0 - 0)       | 0<br>(0 - 0)        | 0<br>(0 - 0)         | 0<br>(0 - 0)         | 0<br>(0 - 0)         |
| Leishmaniasis                                                     | 0<br>(0 - 0)           | 0<br>(0 - 0)       | 0<br>(0 - 0)        | 0<br>(0 - 0)         | 0<br>(0 - 0)         | 0<br>(0 - 0)         |
| Visceral leishmaniasis                                            | 0<br>(0 - 0)           | 0<br>(0 - 0)       | 0<br>(0 - 0)        | 0<br>(0 - 0)         | 0<br>(0 - 0)         | 0<br>(0 - 0)         |
| Cysticercosis                                                     | 0<br>(0 - 0)           | 0<br>(0 - 0)       | 0<br>(0 - 0)        | 0<br>(0 - 0)         | 0<br>(0 - 0)         | 0<br>(0 - 0)         |
| Cystic echinococcosis                                             | 0<br>(0 - 0)           | 0<br>(0 - 0)       | 0<br>(0 - 0)        | 0<br>(0 - 0)         | 0<br>(0 - 0)         | 0<br>(0 - 0)         |
| Dengue                                                            | 0<br>(0 - 0)           | 0<br>(0 - 0)       | 0<br>(0 - 0)        | 0<br>(0 - 0)         | 0<br>(0 - 0)         | 0<br>(0 - 0)         |
| Rabies                                                            | 1<br>(0 - 4)           | 0<br>(0 - 1)       | 0<br>(0 - 1)        | 0<br>(0 - 1)         | 0<br>(0 - 1)         | 0<br>(0 - 1)         |
| Intestinal nematode infections                                    | 0<br>(0 - 1)           | 0<br>(0 - 0)       | 0<br>(0 - 0)        | 0<br>(0 - 0)         | 0<br>(0 - 0)         | 0<br>(0 - 0)         |
| Ascariasis                                                        | 0<br>(0 - 1)           | 0<br>(0 - 0)       | 0<br>(0 - 0)        | 0<br>(0 - 0)         | 0<br>(0 - 0)         | 0<br>(0 - 0)         |
| Other neglected tropical diseases                                 | 0<br>(0 - 0)           | 0<br>(0 - 0)       | 0<br>(0 - 0)        | 0<br>(0 - 0)         | 0<br>(0 - 0)         | 0<br>(0 - 0)         |
| Maternal disorders                                                | 5<br>(3 - 8)           | --                 | 0<br>(0 - 0)        | 5<br>(3 - 8)         | --                   | --                   |
| Maternal hemorrhage                                               | 1<br>(0 - 1)           | --                 | 0<br>(0 - 0)        | 1<br>(0 - 1)         | --                   | --                   |



Web Table 31- Cape Verde deaths with 95% UI by age, sex, and cause in 2013

| Cause                                                            | Females, All Ages    | Females, 0-4 Years | Females, 5-14 Years | Females, 15-49 Years | Females, 50-69 Years | Females, 70-80 Years |
|------------------------------------------------------------------|----------------------|--------------------|---------------------|----------------------|----------------------|----------------------|
| Maternal sepsis and other maternal infections                    | 0<br>(0 - 0)         | --                 | 0<br>(0 - 0)        | 0<br>(0 - 0)         | --                   | --                   |
| Maternal hypertensive disorders                                  | 0<br>(0 - 1)         | --                 | 0<br>(0 - 0)        | 0<br>(0 - 1)         | --                   | --                   |
| Maternal obstructed labor                                        | 0<br>(0 - 0)         | --                 | 0<br>(0 - 0)        | 0<br>(0 - 0)         | --                   | --                   |
| Maternal abortive outcome                                        | 1<br>(0 - 1)         | --                 | 0<br>(0 - 0)        | 1<br>(0 - 1)         | --                   | --                   |
| Indirect maternal deaths                                         | 1<br>(0 - 1)         | --                 | 0<br>(0 - 0)        | 1<br>(0 - 1)         | --                   | --                   |
| Late maternal deaths                                             | 1<br>(0 - 1)         | --                 | 0<br>(0 - 0)        | 1<br>(0 - 1)         | --                   | --                   |
| Maternal deaths aggravated by HIV/AIDS                           | 0<br>(0 - 0)         | --                 | --                  | 0<br>(0 - 0)         | --                   | --                   |
| Other maternal disorders                                         | 1<br>(1 - 1)         | --                 | 0<br>(0 - 0)        | 1<br>(1 - 1)         | --                   | --                   |
| Neonatal disorders                                               | 34<br>(24 - 46)      | 34<br>(24 - 46)    | --                  | --                   | --                   | --                   |
| Neonatal preterm birth complications                             | 13<br>(5 - 24)       | 13<br>(5 - 24)     | --                  | --                   | --                   | --                   |
| Neonatal encephalopathy due to birth asphyxia and trauma         | 15<br>(7 - 23)       | 15<br>(7 - 23)     | --                  | --                   | --                   | --                   |
| Neonatal sepsis and other neonatal infections                    | 3<br>(1 - 7)         | 3<br>(1 - 7)       | --                  | --                   | --                   | --                   |
| Hemolytic disease and other neonatal jaundice                    | 0<br>(0 - 0)         | 0<br>(0 - 0)       | --                  | --                   | --                   | --                   |
| Other neonatal disorders                                         | 4<br>(1 - 8)         | 4<br>(1 - 8)       | --                  | --                   | --                   | --                   |
| Nutritional deficiencies                                         | 31<br>(17 - 50)      | 4<br>(2 - 8)       | 1<br>(0 - 1)        | 2<br>(1 - 3)         | 2<br>(1 - 4)         | 21<br>(10 - 37)      |
| Protein-energy malnutrition                                      | 21<br>(10 - 36)      | 4<br>(2 - 7)       | 0<br>(0 - 1)        | 1<br>(0 - 2)         | 1<br>(1 - 3)         | 14<br>(5 - 27)       |
| Iodine deficiency                                                | 0<br>(0 - 1)         | 0<br>(0 - 0)       | 0<br>(0 - 0)        | 0<br>(0 - 0)         | 0<br>(0 - 0)         | 0<br>(0 - 1)         |
| Iron-deficiency anemia                                           | 9<br>(3 - 19)        | 0<br>(0 - 1)       | 0<br>(0 - 0)        | 1<br>(0 - 3)         | 1<br>(0 - 2)         | 7<br>(2 - 16)        |
| Other nutritional deficiencies                                   | 0<br>(0 - 1)         | 0<br>(0 - 0)       | 0<br>(0 - 0)        | 0<br>(0 - 0)         | 0<br>(0 - 0)         | 0<br>(0 - 0)         |
| Other communicable, maternal, neonatal, and nutritional diseases | 4<br>(2 - 7)         | 2<br>(0 - 4)       | 0<br>(0 - 0)        | 0<br>(0 - 1)         | 0<br>(0 - 1)         | 2<br>(1 - 4)         |
| Sexually transmitted diseases excluding HIV                      | 2<br>(0 - 5)         | 1<br>(0 - 4)       | 0<br>(0 - 0)        | 0<br>(0 - 0)         | 0<br>(0 - 0)         | 0<br>(0 - 1)         |
| Syphilis                                                         | 2<br>(0 - 4)         | 1<br>(0 - 4)       | 0<br>(0 - 0)        | 0<br>(0 - 0)         | 0<br>(0 - 0)         | 0<br>(0 - 1)         |
| Chlamydial infection                                             | 0<br>(0 - 0)         | --                 | 0<br>(0 - 0)        | 0<br>(0 - 0)         | 0<br>(0 - 0)         | 0<br>(0 - 0)         |
| Gonococcal infection                                             | 0<br>(0 - 0)         | --                 | 0<br>(0 - 0)        | 0<br>(0 - 0)         | 0<br>(0 - 0)         | 0<br>(0 - 0)         |
| Other sexually transmitted diseases                              | 0<br>(0 - 0)         | --                 | 0<br>(0 - 0)        | 0<br>(0 - 0)         | 0<br>(0 - 0)         | 0<br>(0 - 0)         |
| Hepatitis                                                        | 1<br>(0 - 1)         | 0<br>(0 - 0)       | 0<br>(0 - 0)        | 0<br>(0 - 0)         | 0<br>(0 - 0)         | 0<br>(0 - 0)         |
| Acute hepatitis A                                                | 0<br>(0 - 0)         | 0<br>(0 - 0)       | 0<br>(0 - 0)        | 0<br>(0 - 0)         | 0<br>(0 - 0)         | 0<br>(0 - 0)         |
| Acute hepatitis B                                                | 1<br>(0 - 1)         | 0<br>(0 - 0)       | 0<br>(0 - 0)        | 0<br>(0 - 0)         | 0<br>(0 - 0)         | 0<br>(0 - 0)         |
| Acute hepatitis C                                                | 0<br>(0 - 0)         | --                 | 0<br>(0 - 0)        | 0<br>(0 - 0)         | 0<br>(0 - 0)         | 0<br>(0 - 0)         |
| Acute hepatitis E                                                | 0<br>(0 - 0)         | 0<br>(0 - 0)       | 0<br>(0 - 0)        | 0<br>(0 - 0)         | 0<br>(0 - 0)         | 0<br>(0 - 0)         |
| Other infectious diseases                                        | 2<br>(0 - 4)         | 0<br>(0 - 0)       | 0<br>(0 - 0)        | 0<br>(0 - 0)         | 0<br>(0 - 0)         | 1<br>(0 - 3)         |
| Non-communicable diseases                                        | 917<br>(739 - 1,249) | 32<br>(18 - 49)    | 5<br>(3 - 7)        | 63<br>(39 - 94)      | 147<br>(97 - 227)    | 670<br>(566 - 889)   |
| Neoplasms                                                        | 242<br>(166 - 356)   | 1<br>(0 - 2)       | 1<br>(1 - 2)        | 34<br>(21 - 50)      | 69<br>(43 - 106)     | 137<br>(91 - 199)    |
| Esophageal cancer                                                | 19<br>(11 - 30)      | --                 | --                  | 1<br>(1 - 2)         | 6<br>(3 - 10)        | 12<br>(7 - 19)       |
| Stomach cancer                                                   | 69<br>(40 - 108)     | --                 | --                  | 5<br>(2 - 8)         | 16<br>(8 - 26)       | 49<br>(27 - 79)      |
| Liver cancer                                                     | 24<br>(10 - 40)      | --                 | 0<br>(0 - 0)        | 5<br>(1 - 9)         | 8<br>(3 - 16)        | 11<br>(5 - 19)       |
| Liver cancer due to hepatitis B                                  | 7<br>(3 - 14)        | --                 | 0<br>(0 - 0)        | 2<br>(0 - 4)         | 3<br>(1 - 6)         | 3<br>(1 - 5)         |
| Liver cancer due to hepatitis C                                  | 9<br>(3 - 17)        | --                 | 0<br>(0 - 0)        | 1<br>(0 - 3)         | 3<br>(1 - 6)         | 5<br>(2 - 10)        |
| Liver cancer due to alcohol use                                  | 3<br>(1 - 6)         | --                 | --                  | 0<br>(0 - 1)         | 1<br>(0 - 2)         | 2<br>(1 - 4)         |
| Liver cancer due to other causes                                 | 5<br>(2 - 9)         | --                 | 0<br>(0 - 0)        | 1<br>(0 - 3)         | 2<br>(0 - 4)         | 2<br>(1 - 4)         |

Web Table 31- Cape Verde deaths with 95% UI by age, sex, and cause in 2013

| Cause                                         | Females, All Ages  | Females, 0-4 Years | Females, 5-14 Years | Females, 15-49 Years | Females, 50-69 Years | Females, 70-80 Years |
|-----------------------------------------------|--------------------|--------------------|---------------------|----------------------|----------------------|----------------------|
| Larynx cancer                                 | 0<br>(0 - 0)       | --                 | --                  | 0<br>(0 - 0)         | 0<br>(0 - 0)         | 0<br>(0 - 0)         |
| Tracheal, bronchus and lung cancer            | 15<br>(10 - 23)    | --                 | --                  | 1<br>(0 - 2)         | 5<br>(3 - 8)         | 10<br>(6 - 14)       |
| Breast cancer                                 | 15<br>(9 - 27)     | --                 | --                  | 4<br>(2 - 6)         | 4<br>(2 - 8)         | 7<br>(4 - 14)        |
| Cervical cancer                               | 36<br>(18 - 57)    | --                 | --                  | 9<br>(4 - 15)        | 13<br>(6 - 21)       | 14<br>(7 - 23)       |
| Uterine cancer                                | 3<br>(2 - 5)       | --                 | --                  | 0<br>(0 - 1)         | 1<br>(0 - 2)         | 2<br>(1 - 3)         |
| Prostate cancer                               | --                 | --                 | --                  | --                   | --                   | --                   |
| Colon and rectum cancer                       | 21<br>(13 - 33)    | --                 | --                  | 2<br>(1 - 3)         | 5<br>(3 - 8)         | 15<br>(9 - 24)       |
| Lip and oral cavity cancer                    | 1<br>(0 - 2)       | --                 | --                  | 0<br>(0 - 1)         | 0<br>(0 - 0)         | 1<br>(0 - 1)         |
| Nasopharynx cancer                            | 0<br>(0 - 0)       | --                 | 0<br>(0 - 0)        | 0<br>(0 - 0)         | 0<br>(0 - 0)         | 0<br>(0 - 0)         |
| Other pharynx cancer                          | 0<br>(0 - 0)       | --                 | --                  | 0<br>(0 - 0)         | 0<br>(0 - 0)         | 0<br>(0 - 0)         |
| Gallbladder and biliary tract cancer          | 3<br>(1 - 5)       | --                 | --                  | 0<br>(0 - 1)         | 1<br>(0 - 2)         | 1<br>(1 - 2)         |
| Pancreatic cancer                             | 6<br>(4 - 9)       | --                 | --                  | 1<br>(0 - 1)         | 2<br>(1 - 3)         | 3<br>(2 - 5)         |
| Malignant skin melanoma                       | 0<br>(0 - 1)       | --                 | --                  | 0<br>(0 - 0)         | 0<br>(0 - 0)         | 0<br>(0 - 0)         |
| Non-melanoma skin cancer                      | 0<br>(0 - 1)       | --                 | --                  | 0<br>(0 - 0)         | 0<br>(0 - 0)         | 0<br>(0 - 1)         |
| Ovarian cancer                                | 6<br>(4 - 9)       | --                 | --                  | 1<br>(1 - 3)         | 3<br>(2 - 5)         | 2<br>(1 - 3)         |
| Testicular cancer                             | --                 | --                 | --                  | --                   | --                   | --                   |
| Kidney cancer                                 | 1<br>(0 - 1)       | 0<br>(0 - 0)       | 0<br>(0 - 0)        | 0<br>(0 - 0)         | 0<br>(0 - 1)         | 0<br>(0 - 1)         |
| Bladder cancer                                | 2<br>(1 - 3)       | --                 | --                  | 0<br>(0 - 1)         | 0<br>(0 - 1)         | 1<br>(1 - 2)         |
| Brain and nervous system cancer               | 2<br>(1 - 3)       | 0<br>(0 - 0)       | 0<br>(0 - 0)        | 1<br>(0 - 1)         | 0<br>(0 - 1)         | 0<br>(0 - 1)         |
| Thyroid cancer                                | 1<br>(0 - 1)       | --                 | 0<br>(0 - 0)        | 0<br>(0 - 0)         | 0<br>(0 - 0)         | 0<br>(0 - 1)         |
| Mesothelioma                                  | 0<br>(0 - 0)       | --                 | --                  | 0<br>(0 - 0)         | 0<br>(0 - 0)         | 0<br>(0 - 0)         |
| Hodgkin lymphoma                              | 1<br>(0 - 1)       | 0<br>(0 - 0)       | 0<br>(0 - 0)        | 0<br>(0 - 0)         | 0<br>(0 - 0)         | 0<br>(0 - 1)         |
| Non-Hodgkin lymphoma                          | 4<br>(1 - 7)       | 0<br>(0 - 1)       | 0<br>(0 - 1)        | 1<br>(0 - 3)         | 1<br>(0 - 2)         | 1<br>(0 - 3)         |
| Multiple myeloma                              | 1<br>(1 - 2)       | --                 | --                  | 0<br>(0 - 0)         | 0<br>(0 - 1)         | 1<br>(0 - 1)         |
| Leukemia                                      | 4<br>(2 - 6)       | 0<br>(0 - 0)       | 0<br>(0 - 0)        | 1<br>(1 - 1)         | 1<br>(0 - 1)         | 2<br>(1 - 3)         |
| Other neoplasms                               | 8<br>(5 - 11)      | 0<br>(0 - 1)       | 0<br>(0 - 0)        | 1<br>(0 - 2)         | 1<br>(1 - 3)         | 4<br>(3 - 7)         |
| Cardiovascular diseases                       | 416<br>(291 - 604) | 2<br>(1 - 6)       | 1<br>(0 - 2)        | 12<br>(6 - 23)       | 47<br>(28 - 86)      | 354<br>(240 - 489)   |
| Rheumatic heart disease                       | 7<br>(3 - 12)      | 0<br>(0 - 0)       | 0<br>(0 - 0)        | 1<br>(0 - 1)         | 1<br>(1 - 3)         | 5<br>(2 - 9)         |
| Ischemic heart disease                        | 135<br>(64 - 189)  | 0<br>(0 - 1)       | 0<br>(0 - 1)        | 4<br>(2 - 9)         | 16<br>(9 - 26)       | 114<br>(50 - 162)    |
| Cerebrovascular disease                       | 172<br>(97 - 362)  | 0<br>(0 - 1)       | 0<br>(0 - 1)        | 2<br>(1 - 7)         | 17<br>(6 - 48)       | 153<br>(88 - 309)    |
| Ischemic stroke                               | 127<br>(78 - 260)  | 0<br>(0 - 0)       | 0<br>(0 - 0)        | 1<br>(0 - 2)         | 9<br>(4 - 26)        | 117<br>(71 - 232)    |
| Hemorrhagic stroke                            | 45<br>(18 - 144)   | 0<br>(0 - 1)       | 0<br>(0 - 1)        | 2<br>(1 - 5)         | 8<br>(2 - 27)        | 35<br>(14 - 113)     |
| Hypertensive heart disease                    | 36<br>(12 - 75)    | 0<br>(0 - 0)       | 0<br>(0 - 0)        | 1<br>(0 - 3)         | 4<br>(1 - 11)        | 31<br>(11 - 62)      |
| Cardiomyopathy and myocarditis                | 20<br>(10 - 38)    | 0<br>(0 - 2)       | 0<br>(0 - 1)        | 2<br>(0 - 5)         | 2<br>(1 - 6)         | 16<br>(7 - 29)       |
| Atrial fibrillation and flutter               | 0<br>(0 - 0)       | --                 | --                  | 0<br>(0 - 0)         | 0<br>(0 - 0)         | 0<br>(0 - 0)         |
| Aortic aneurysm                               | 3<br>(1 - 6)       | --                 | --                  | 0<br>(0 - 0)         | 0<br>(0 - 1)         | 3<br>(1 - 5)         |
| Peripheral vascular disease                   | 0<br>(0 - 0)       | --                 | --                  | 0<br>(0 - 0)         | 0<br>(0 - 0)         | 0<br>(0 - 0)         |
| Endocarditis                                  | 3<br>(1 - 7)       | 0<br>(0 - 1)       | 0<br>(0 - 0)        | 0<br>(0 - 1)         | 0<br>(0 - 1)         | 2<br>(1 - 4)         |
| Other cardiovascular and circulatory diseases | 39<br>(17 - 66)    | 1<br>(0 - 2)       | 0<br>(0 - 1)        | 2<br>(1 - 4)         | 6<br>(2 - 10)        | 31<br>(11 - 51)      |
| Chronic respiratory diseases                  | 49<br>(27 - 110)   | 0<br>(0 - 1)       | 0<br>(0 - 0)        | 1<br>(1 - 2)         | 5<br>(3 - 14)        | 42<br>(22 - 94)      |

Web Table 31- Cape Verde deaths with 95% UI by age, sex, and cause in 2013

| Cause                                               | Females, All Ages | Females, 0-4 Years | Females, 5-14 Years | Females, 15-49 Years | Females, 50-69 Years | Females, 70-80 Years |
|-----------------------------------------------------|-------------------|--------------------|---------------------|----------------------|----------------------|----------------------|
| Chronic obstructive pulmonary disease               | 28<br>(14 - 70)   | 0<br>(0 - 1)       | 0<br>(0 - 0)        | 0<br>(0 - 1)         | 3<br>(1 - 9)         | 24<br>(12 - 61)      |
| Pneumoconiosis                                      | 0<br>(0 - 0)      | 0<br>(0 - 0)       | 0<br>(0 - 0)        | 0<br>(0 - 0)         | 0<br>(0 - 0)         | 0<br>(0 - 0)         |
| Silicosis                                           | 0<br>(0 - 0)      | 0<br>(0 - 0)       | 0<br>(0 - 0)        | 0<br>(0 - 0)         | 0<br>(0 - 0)         | 0<br>(0 - 0)         |
| Asbestosis                                          | 0<br>(0 - 0)      | 0<br>(0 - 0)       | 0<br>(0 - 0)        | 0<br>(0 - 0)         | 0<br>(0 - 0)         | 0<br>(0 - 0)         |
| Coal workers pneumoconiosis                         | 0<br>(0 - 0)      | 0<br>(0 - 0)       | 0<br>(0 - 0)        | 0<br>(0 - 0)         | 0<br>(0 - 0)         | 0<br>(0 - 0)         |
| Other pneumoconiosis                                | 0<br>(0 - 0)      | 0<br>(0 - 0)       | 0<br>(0 - 0)        | 0<br>(0 - 0)         | 0<br>(0 - 0)         | 0<br>(0 - 0)         |
| Asthma                                              | 9<br>(3 - 19)     | 0<br>(0 - 0)       | 0<br>(0 - 0)        | 0<br>(0 - 1)         | 1<br>(0 - 3)         | 7<br>(2 - 16)        |
| Interstitial lung disease and pulmonary sarcoidosis | 7<br>(0 - 20)     | 0<br>(0 - 0)       | 0<br>(0 - 0)        | 0<br>(0 - 1)         | 1<br>(0 - 2)         | 7<br>(0 - 18)        |
| Other chronic respiratory diseases                  | 5<br>(2 - 13)     | 0<br>(0 - 0)       | 0<br>(0 - 0)        | 0<br>(0 - 1)         | 0<br>(0 - 1)         | 4<br>(2 - 11)        |
| Cirrhosis                                           | 8<br>(5 - 12)     | 0<br>(0 - 0)       | 0<br>(0 - 0)        | 1<br>(1 - 2)         | 2<br>(1 - 4)         | 4<br>(2 - 7)         |
| Cirrhosis due to hepatitis B                        | 3<br>(1 - 4)      | 0<br>(0 - 0)       | 0<br>(0 - 0)        | 0<br>(0 - 1)         | 1<br>(0 - 1)         | 1<br>(1 - 2)         |
| Cirrhosis due to hepatitis C                        | 2<br>(1 - 4)      | 0<br>(0 - 0)       | 0<br>(0 - 0)        | 0<br>(0 - 1)         | 1<br>(0 - 2)         | 1<br>(0 - 2)         |
| Cirrhosis due to alcohol use                        | 2<br>(1 - 4)      | --                 | --                  | 0<br>(0 - 0)         | 1<br>(0 - 1)         | 1<br>(1 - 2)         |
| Cirrhosis due to other causes                       | 1<br>(0 - 1)      | 0<br>(0 - 0)       | 0<br>(0 - 0)        | 0<br>(0 - 0)         | 0<br>(0 - 0)         | 0<br>(0 - 0)         |
| Digestive diseases                                  | 30<br>(15 - 46)   | 0<br>(0 - 0)       | 0<br>(0 - 0)        | 2<br>(1 - 3)         | 4<br>(2 - 7)         | 23<br>(12 - 36)      |
| Peptic ulcer disease                                | 3<br>(1 - 6)      | 0<br>(0 - 0)       | 0<br>(0 - 0)        | 0<br>(0 - 0)         | 0<br>(0 - 1)         | 3<br>(1 - 5)         |
| Gastritis and duodenitis                            | 1<br>(0 - 4)      | 0<br>(0 - 0)       | 0<br>(0 - 0)        | 0<br>(0 - 0)         | 0<br>(0 - 1)         | 1<br>(0 - 4)         |
| Appendicitis                                        | 1<br>(0 - 3)      | 0<br>(0 - 0)       | 0<br>(0 - 0)        | 0<br>(0 - 0)         | 0<br>(0 - 0)         | 1<br>(0 - 2)         |
| Paralytic ileus and intestinal obstruction          | 13<br>(6 - 22)    | 0<br>(0 - 0)       | 0<br>(0 - 0)        | 1<br>(0 - 2)         | 2<br>(1 - 4)         | 9<br>(4 - 18)        |
| Inguinal, femoral, and abdominal hernia             | 0<br>(0 - 0)      | 0<br>(0 - 0)       | 0<br>(0 - 0)        | 0<br>(0 - 0)         | 0<br>(0 - 0)         | 0<br>(0 - 0)         |
| Inflammatory bowel disease                          | 1<br>(0 - 2)      | 0<br>(0 - 0)       | 0<br>(0 - 0)        | 0<br>(0 - 0)         | 0<br>(0 - 0)         | 1<br>(0 - 2)         |
| Vascular intestinal disorders                       | 0<br>(0 - 1)      | 0<br>(0 - 0)       | 0<br>(0 - 0)        | 0<br>(0 - 0)         | 0<br>(0 - 0)         | 0<br>(0 - 0)         |
| Gallbladder and biliary diseases                    | 4<br>(1 - 8)      | 0<br>(0 - 0)       | 0<br>(0 - 0)        | 0<br>(0 - 0)         | 0<br>(0 - 1)         | 3<br>(1 - 7)         |
| Pancreatitis                                        | 1<br>(0 - 3)      | 0<br>(0 - 0)       | 0<br>(0 - 0)        | 0<br>(0 - 0)         | 0<br>(0 - 1)         | 1<br>(0 - 2)         |
| Other digestive diseases                            | 5<br>(2 - 9)      | 0<br>(0 - 0)       | 0<br>(0 - 0)        | 0<br>(0 - 1)         | 1<br>(0 - 1)         | 4<br>(2 - 8)         |
| Neurological disorders                              | 43<br>(30 - 62)   | 1<br>(0 - 2)       | 0<br>(0 - 1)        | 2<br>(1 - 5)         | 2<br>(1 - 3)         | 38<br>(26 - 55)      |
| Alzheimer disease and other dementias               | 36<br>(25 - 54)   | --                 | --                  | 0<br>(0 - 0)         | 1<br>(0 - 1)         | 36<br>(24 - 52)      |
| Parkinson disease                                   | 0<br>(0 - 0)      | --                 | --                  | 0<br>(0 - 0)         | 0<br>(0 - 0)         | 0<br>(0 - 0)         |
| Epilepsy                                            | 4<br>(1 - 8)      | 1<br>(0 - 2)       | 0<br>(0 - 1)        | 1<br>(0 - 4)         | 0<br>(0 - 1)         | 1<br>(0 - 3)         |
| Multiple sclerosis                                  | 0<br>(0 - 0)      | --                 | --                  | 0<br>(0 - 0)         | 0<br>(0 - 0)         | 0<br>(0 - 0)         |
| Other neurological disorders                        | 3<br>(2 - 4)      | 0<br>(0 - 1)       | 0<br>(0 - 0)        | 1<br>(0 - 1)         | 1<br>(0 - 1)         | 1<br>(1 - 2)         |
| Mental and substance use disorders                  | 4<br>(3 - 6)      | 0<br>(0 - 0)       | 0<br>(0 - 0)        | 1<br>(1 - 3)         | 1<br>(0 - 2)         | 1<br>(1 - 2)         |
| Schizophrenia                                       | 0<br>(0 - 0)      | --                 | --                  | 0<br>(0 - 0)         | 0<br>(0 - 0)         | 0<br>(0 - 0)         |
| Alcohol use disorders                               | 1<br>(0 - 2)      | --                 | --                  | 0<br>(0 - 1)         | 0<br>(0 - 1)         | 0<br>(0 - 1)         |
| Drug use disorders                                  | 3<br>(1 - 5)      | 0<br>(0 - 0)       | --                  | 1<br>(0 - 2)         | 1<br>(0 - 1)         | 1<br>(1 - 2)         |
| Opioid use disorders                                | 0<br>(0 - 1)      | 0<br>(0 - 0)       | --                  | 0<br>(0 - 0)         | 0<br>(0 - 0)         | 0<br>(0 - 0)         |
| Cocaine use disorders                               | 0<br>(0 - 0)      | 0<br>(0 - 0)       | --                  | 0<br>(0 - 0)         | 0<br>(0 - 0)         | 0<br>(0 - 0)         |
| Amphetamine use disorders                           | 0<br>(0 - 0)      | 0<br>(0 - 0)       | --                  | 0<br>(0 - 0)         | 0<br>(0 - 0)         | 0<br>(0 - 0)         |
| Other drug use disorders                            | 2<br>(1 - 5)      | 0<br>(0 - 0)       | --                  | 1<br>(0 - 2)         | 1<br>(0 - 1)         | 1<br>(1 - 2)         |
| Eating disorders                                    | 0<br>(0 - 0)      | --                 | 0<br>(0 - 0)        | 0<br>(0 - 0)         | --                   | --                   |

Web Table 31- Cape Verde deaths with 95% UI by age, sex, and cause in 2013

| Cause                                               | Females, All Ages | Females, 0-4 Years | Females, 5-14 Years | Females, 15-49 Years | Females, 50-69 Years | Females, 70-80 Years |
|-----------------------------------------------------|-------------------|--------------------|---------------------|----------------------|----------------------|----------------------|
| Anorexia nervosa                                    | 0<br>(0 - 0)      | --                 | 0<br>(0 - 0)        | 0<br>(0 - 0)         | --                   | --                   |
| Diabetes, urogenital, blood, and endocrine diseases | 75<br>(52 - 105)  | 1<br>(1 - 3)       | 1<br>(0 - 1)        | 5<br>(3 - 8)         | 12<br>(8 - 18)       | 56<br>(38 - 79)      |
| Diabetes mellitus                                   | 39<br>(25 - 60)   | 0<br>(0 - 0)       | 0<br>(0 - 0)        | 2<br>(1 - 3)         | 7<br>(4 - 12)        | 30<br>(19 - 46)      |
| Acute glomerulonephritis                            | 0<br>(0 - 0)      | 0<br>(0 - 0)       | 0<br>(0 - 0)        | 0<br>(0 - 0)         | 0<br>(0 - 0)         | 0<br>(0 - 0)         |
| Chronic kidney disease                              | 12<br>(6 - 26)    | 0<br>(0 - 1)       | 0<br>(0 - 0)        | 1<br>(0 - 2)         | 2<br>(1 - 4)         | 9<br>(4 - 20)        |
| Chronic kidney disease due to diabetes mellitus     | 0<br>(0 - 1)      | 0<br>(0 - 0)       | 0<br>(0 - 0)        | 0<br>(0 - 0)         | 0<br>(0 - 1)         | 0<br>(0 - 0)         |
| Chronic kidney disease due to hypertension          | 8<br>(4 - 17)     | 0<br>(0 - 0)       | 0<br>(0 - 0)        | 1<br>(0 - 1)         | 1<br>(0 - 2)         | 6<br>(3 - 13)        |
| Chronic kidney disease due to glomerulonephritis    | 1<br>(0 - 2)      | 0<br>(0 - 0)       | 0<br>(0 - 0)        | 0<br>(0 - 0)         | 0<br>(0 - 0)         | 0<br>(0 - 1)         |
| Chronic kidney disease due to other causes          | 3<br>(1 - 9)      | 0<br>(0 - 0)       | 0<br>(0 - 0)        | 0<br>(0 - 1)         | 0<br>(0 - 1)         | 2<br>(0 - 8)         |
| Urinary diseases and male infertility               | 16<br>(9 - 27)    | 0<br>(0 - 0)       | 0<br>(0 - 0)        | 1<br>(0 - 1)         | 2<br>(1 - 3)         | 13<br>(7 - 24)       |
| Interstitial nephritis and urinary tract infections | 15<br>(9 - 26)    | 0<br>(0 - 0)       | 0<br>(0 - 0)        | 1<br>(0 - 1)         | 2<br>(1 - 3)         | 13<br>(7 - 23)       |
| Urolithiasis                                        | 0<br>(0 - 1)      | --                 | 0<br>(0 - 0)        | 0<br>(0 - 0)         | 0<br>(0 - 0)         | 0<br>(0 - 1)         |
| Other urinary diseases                              | 1<br>(0 - 1)      | 0<br>(0 - 0)       | 0<br>(0 - 0)        | 0<br>(0 - 0)         | 0<br>(0 - 0)         | 0<br>(0 - 1)         |
| Gynecological diseases                              | 0<br>(0 - 0)      | --                 | --                  | 0<br>(0 - 0)         | 0<br>(0 - 0)         | 0<br>(0 - 0)         |
| Uterine fibroids                                    | 0<br>(0 - 0)      | --                 | --                  | 0<br>(0 - 0)         | 0<br>(0 - 0)         | 0<br>(0 - 0)         |
| Polycystic ovarian syndrome                         | 0<br>(0 - 0)      | --                 | --                  | 0<br>(0 - 0)         | 0<br>(0 - 0)         | --                   |
| Endometriosis                                       | 0<br>(0 - 0)      | --                 | --                  | 0<br>(0 - 0)         | 0<br>(0 - 0)         | --                   |
| Genital prolapse                                    | 0<br>(0 - 0)      | --                 | --                  | 0<br>(0 - 0)         | 0<br>(0 - 0)         | 0<br>(0 - 0)         |
| Other gynecological diseases                        | 0<br>(0 - 0)      | --                 | --                  | 0<br>(0 - 0)         | 0<br>(0 - 0)         | 0<br>(0 - 0)         |
| Hemoglobinopathies and hemolytic anemias            | 3<br>(1 - 6)      | 1<br>(0 - 1)       | 0<br>(0 - 1)        | 1<br>(0 - 2)         | 0<br>(0 - 1)         | 1<br>(0 - 2)         |
| Thalassemias                                        | 0<br>(0 - 0)      | 0<br>(0 - 0)       | 0<br>(0 - 0)        | 0<br>(0 - 0)         | 0<br>(0 - 0)         | 0<br>(0 - 0)         |
| Sickle cell disorders                               | 2<br>(1 - 4)      | 1<br>(0 - 1)       | 0<br>(0 - 1)        | 1<br>(0 - 1)         | 0<br>(0 - 1)         | 0<br>(0 - 0)         |
| G6PD deficiency                                     | 0<br>(0 - 0)      | 0<br>(0 - 0)       | 0<br>(0 - 0)        | 0<br>(0 - 0)         | 0<br>(0 - 0)         | 0<br>(0 - 0)         |
| Other hemoglobinopathies and hemolytic anemias      | 1<br>(0 - 2)      | 0<br>(0 - 0)       | 0<br>(0 - 0)        | 0<br>(0 - 0)         | 0<br>(0 - 0)         | 1<br>(0 - 2)         |
| Endocrine, metabolic, blood, and immune disorders   | 5<br>(3 - 9)      | 0<br>(0 - 1)       | 0<br>(0 - 0)        | 1<br>(0 - 2)         | 1<br>(0 - 2)         | 3<br>(2 - 6)         |
| Musculoskeletal disorders                           | 3<br>(2 - 8)      | --                 | 0<br>(0 - 0)        | 1<br>(0 - 2)         | 1<br>(0 - 2)         | 2<br>(1 - 4)         |
| Rheumatoid arthritis                                | 1<br>(0 - 2)      | --                 | 0<br>(0 - 0)        | 0<br>(0 - 0)         | 0<br>(0 - 0)         | 1<br>(0 - 1)         |
| Other musculoskeletal disorders                     | 3<br>(1 - 6)      | --                 | 0<br>(0 - 0)        | 1<br>(0 - 2)         | 1<br>(0 - 1)         | 1<br>(0 - 3)         |
| Other non-communicable diseases                     | 46<br>(28 - 65)   | 26<br>(14 - 40)    | 2<br>(1 - 2)        | 4<br>(1 - 7)         | 3<br>(1 - 5)         | 12<br>(6 - 19)       |
| Congenital anomalies                                | 29<br>(15 - 42)   | 24<br>(13 - 38)    | 1<br>(1 - 2)        | 1<br>(0 - 3)         | 0<br>(0 - 1)         | 1<br>(0 - 2)         |
| Neural tube defects                                 | 1<br>(0 - 4)      | 1<br>(0 - 3)       | 0<br>(0 - 0)        | 0<br>(0 - 0)         | 0<br>(0 - 0)         | 0<br>(0 - 0)         |
| Congenital heart anomalies                          | 19<br>(10 - 29)   | 16<br>(8 - 26)     | 1<br>(0 - 2)        | 1<br>(0 - 2)         | 0<br>(0 - 0)         | 1<br>(0 - 1)         |
| Cleft lip and cleft palate                          | 0<br>(0 - 0)      | 0<br>(0 - 0)       | --                  | --                   | --                   | --                   |
| Down syndrome                                       | 2<br>(0 - 6)      | 2<br>(0 - 5)       | 0<br>(0 - 0)        | 0<br>(0 - 1)         | 0<br>(0 - 0)         | 0<br>(0 - 0)         |
| Chromosomal unbalanced rearrangements               | 1<br>(0 - 2)      | 1<br>(0 - 2)       | 0<br>(0 - 0)        | 0<br>(0 - 0)         | 0<br>(0 - 0)         | 0<br>(0 - 0)         |
| Other congenital anomalies                          | 6<br>(2 - 12)     | 5<br>(2 - 10)      | 0<br>(0 - 0)        | 0<br>(0 - 1)         | 0<br>(0 - 0)         | 0<br>(0 - 1)         |
| Skin and subcutaneous diseases                      | 17<br>(9 - 27)    | 1<br>(0 - 3)       | 0<br>(0 - 0)        | 2<br>(1 - 5)         | 2<br>(1 - 4)         | 11<br>(6 - 18)       |
| Cellulitis                                          | 2<br>(0 - 6)      | 0<br>(0 - 0)       | 0<br>(0 - 0)        | 0<br>(0 - 1)         | 0<br>(0 - 1)         | 2<br>(0 - 5)         |
| Pyoderma                                            | 13<br>(6 - 22)    | 1<br>(0 - 3)       | 0<br>(0 - 0)        | 2<br>(0 - 4)         | 2<br>(1 - 4)         | 8<br>(4 - 14)        |
| Decubitus ulcer                                     | 1<br>(0 - 1)      | 0<br>(0 - 0)       | 0<br>(0 - 0)        | 0<br>(0 - 0)         | 0<br>(0 - 0)         | 0<br>(0 - 1)         |

Web Table 31- Cape Verde deaths with 95% UI by age, sex, and cause in 2013

| Cause                                           | Females, All Ages | Females, 0-4 Years | Females, 5-14 Years | Females, 15-49 Years | Females, 50-69 Years | Females, 70-80 Years |
|-------------------------------------------------|-------------------|--------------------|---------------------|----------------------|----------------------|----------------------|
| Other skin and subcutaneous diseases            | 1<br>(0 - 4)      | 0<br>(0 - 1)       | 0<br>(0 - 0)        | 0<br>(0 - 1)         | 0<br>(0 - 0)         | 1<br>(0 - 2)         |
| Sudden infant death syndrome                    | 0<br>(0 - 1)      | 0<br>(0 - 1)       | -                   | -                    | -                    | -                    |
| Injuries                                        | 75<br>(45 - 104)  | 5<br>(3 - 9)       | 3<br>(2 - 4)        | 16<br>(9 - 24)       | 8<br>(5 - 14)        | 43<br>(21 - 65)      |
| Transport injuries                              | 12<br>(8 - 18)    | 0<br>(0 - 1)       | 1<br>(0 - 1)        | 5<br>(3 - 8)         | 2<br>(1 - 4)         | 4<br>(2 - 6)         |
| Road injuries                                   | 12<br>(8 - 17)    | 0<br>(0 - 1)       | 1<br>(0 - 1)        | 5<br>(3 - 8)         | 2<br>(1 - 4)         | 3<br>(2 - 5)         |
| Pedestrian road injuries                        | 4<br>(1 - 6)      | 0<br>(0 - 0)       | 0<br>(0 - 0)        | 1<br>(0 - 2)         | 1<br>(0 - 1)         | 1<br>(1 - 2)         |
| Cyclist road injuries                           | 0<br>(0 - 1)      | 0<br>(0 - 0)       | 0<br>(0 - 0)        | 0<br>(0 - 0)         | 0<br>(0 - 0)         | 0<br>(0 - 0)         |
| Motorcyclist road injuries                      | 1<br>(0 - 2)      | 0<br>(0 - 0)       | 0<br>(0 - 0)        | 0<br>(0 - 1)         | 0<br>(0 - 0)         | 0<br>(0 - 0)         |
| Motor vehicle road injuries                     | 7<br>(4 - 11)     | 0<br>(0 - 0)       | 0<br>(0 - 1)        | 3<br>(2 - 5)         | 1<br>(1 - 2)         | 2<br>(1 - 3)         |
| Other road injuries                             | 0<br>(0 - 1)      | 0<br>(0 - 0)       | 0<br>(0 - 0)        | 0<br>(0 - 0)         | 0<br>(0 - 0)         | 0<br>(0 - 0)         |
| Other transport injuries                        | 0<br>(0 - 1)      | 0<br>(0 - 0)       | 0<br>(0 - 0)        | 0<br>(0 - 0)         | 0<br>(0 - 0)         | 0<br>(0 - 0)         |
| Unintentional injuries                          | 49<br>(27 - 73)   | 4<br>(2 - 8)       | 2<br>(1 - 3)        | 4<br>(3 - 7)         | 4<br>(2 - 7)         | 35<br>(15 - 57)      |
| Falls                                           | 25<br>(11 - 45)   | 0<br>(0 - 1)       | 0<br>(0 - 0)        | 1<br>(0 - 1)         | 2<br>(1 - 3)         | 22<br>(9 - 42)       |
| Drowning                                        | 2<br>(1 - 5)      | 0<br>(0 - 2)       | 0<br>(0 - 1)        | 1<br>(0 - 1)         | 0<br>(0 - 0)         | 1<br>(0 - 1)         |
| Fire, heat, and hot substances                  | 7<br>(2 - 13)     | 1<br>(0 - 2)       | 0<br>(0 - 1)        | 2<br>(1 - 3)         | 1<br>(0 - 2)         | 3<br>(1 - 7)         |
| Poisonings                                      | 0<br>(0 - 0)      | 0<br>(0 - 0)       | 0<br>(0 - 0)        | 0<br>(0 - 0)         | 0<br>(0 - 0)         | 0<br>(0 - 0)         |
| Exposure to mechanical forces                   | 1<br>(0 - 8)      | 1<br>(0 - 4)       | 0<br>(0 - 1)        | 0<br>(0 - 1)         | 0<br>(0 - 1)         | 0<br>(0 - 1)         |
| Unintentional firearm injuries                  | 0<br>(0 - 0)      | 0<br>(0 - 0)       | 0<br>(0 - 0)        | 0<br>(0 - 0)         | 0<br>(0 - 0)         | 0<br>(0 - 0)         |
| Unintentional suffocation                       | 1<br>(0 - 8)      | 1<br>(0 - 4)       | 0<br>(0 - 1)        | 0<br>(0 - 1)         | 0<br>(0 - 0)         | 0<br>(0 - 1)         |
| Other exposure to mechanical forces             | 0<br>(0 - 1)      | 0<br>(0 - 0)       | 0<br>(0 - 0)        | 0<br>(0 - 0)         | 0<br>(0 - 0)         | 0<br>(0 - 0)         |
| Adverse effects of medical treatment            | 0<br>(0 - 1)      | 0<br>(0 - 0)       | 0<br>(0 - 0)        | 0<br>(0 - 0)         | 0<br>(0 - 0)         | 0<br>(0 - 0)         |
| Animal contact                                  | 1<br>(0 - 4)      | 0<br>(0 - 0)       | 0<br>(0 - 0)        | 0<br>(0 - 1)         | 0<br>(0 - 1)         | 1<br>(0 - 1)         |
| Venomous animal contact                         | 1<br>(0 - 2)      | 0<br>(0 - 0)       | 0<br>(0 - 0)        | 0<br>(0 - 1)         | 0<br>(0 - 0)         | 0<br>(0 - 1)         |
| Non-venomous animal contact                     | 1<br>(0 - 2)      | 0<br>(0 - 0)       | 0<br>(0 - 0)        | 0<br>(0 - 0)         | 0<br>(0 - 0)         | 0<br>(0 - 1)         |
| Foreign body                                    | 6<br>(2 - 10)     | 1<br>(0 - 4)       | 0<br>(0 - 1)        | 0<br>(0 - 1)         | 0<br>(0 - 1)         | 3<br>(1 - 6)         |
| Pulmonary aspiration and foreign body in airway | 5<br>(2 - 10)     | 1<br>(0 - 4)       | 0<br>(0 - 0)        | 0<br>(0 - 1)         | 0<br>(0 - 1)         | 3<br>(1 - 6)         |
| Foreign body in other body part                 | 0<br>(0 - 1)      | 0<br>(0 - 0)       | 0<br>(0 - 0)        | 0<br>(0 - 0)         | 0<br>(0 - 0)         | 0<br>(0 - 0)         |
| Other unintentional injuries                    | 7<br>(1 - 13)     | 0<br>(0 - 1)       | 0<br>(0 - 0)        | 1<br>(0 - 2)         | 1<br>(0 - 2)         | 5<br>(1 - 10)        |
| Self-harm and interpersonal violence            | 14<br>(6 - 23)    | 1<br>(0 - 2)       | 1<br>(0 - 1)        | 7<br>(2 - 12)        | 2<br>(1 - 3)         | 4<br>(2 - 7)         |
| Self-harm                                       | 6<br>(3 - 12)     | -                  | 0<br>(0 - 0)        | 2<br>(1 - 4)         | 1<br>(0 - 2)         | 3<br>(1 - 7)         |
| Interpersonal violence                          | 7<br>(2 - 12)     | 1<br>(0 - 2)       | 0<br>(0 - 1)        | 5<br>(1 - 9)         | 1<br>(0 - 1)         | 0<br>(0 - 1)         |
| Assault by firearm                              | 2<br>(0 - 4)      | 0<br>(0 - 1)       | 0<br>(0 - 0)        | 1<br>(0 - 3)         | 0<br>(0 - 1)         | 0<br>(0 - 0)         |
| Assault by sharp object                         | 2<br>(1 - 5)      | 0<br>(0 - 0)       | 0<br>(0 - 0)        | 2<br>(1 - 4)         | 0<br>(0 - 0)         | 0<br>(0 - 0)         |
| Assault by other means                          | 3<br>(0 - 5)      | 0<br>(0 - 1)       | 0<br>(0 - 1)        | 2<br>(0 - 3)         | 0<br>(0 - 1)         | 0<br>(0 - 1)         |

Web Table 31- Central African Republic deaths with 95% UI by age, sex, and cause in 2013

| Cause                                                             | Both Sexes, All Ages        | Both Sexes, 0-4 Years       | Both Sexes, 5-14 Years   | Both Sexes, 15-49 Years     | Both Sexes, 50-69 Years    | Both Sexes, 70-80 Years    |
|-------------------------------------------------------------------|-----------------------------|-----------------------------|--------------------------|-----------------------------|----------------------------|----------------------------|
| All causes                                                        | 61,909<br>(55,004 - 69,840) | 21,489<br>(16,755 - 27,558) | 2,303<br>(1,835 - 2,859) | 16,625<br>(14,701 - 18,509) | 10,749<br>(9,168 - 12,606) | 10,744<br>(9,457 - 12,121) |
| Communicable, maternal, neonatal, and nutritional diseases        | 40,487<br>(35,211 - 46,840) | 18,525<br>(14,711 - 24,076) | 1,682<br>(1,325 - 2,196) | 11,637<br>(10,024 - 13,428) | 4,863<br>(4,060 - 5,718)   | 3,779<br>(2,873 - 4,588)   |
| HIV/AIDS and tuberculosis                                         | 11,893<br>(10,003 - 14,236) | 543<br>(396 - 721)          | 475<br>(400 - 550)       | 7,388<br>(5,680 - 9,445)    | 2,626<br>(2,093 - 3,119)   | 861<br>(551 - 1,086)       |
| Tuberculosis                                                      | 3,873<br>(2,704 - 4,851)    | 254<br>(150 - 416)          | 59<br>(38 - 89)          | 1,595<br>(1,135 - 2,092)    | 1,261<br>(727 - 1,703)     | 704<br>(389 - 922)         |
| HIV/AIDS                                                          | 8,021<br>(6,348 - 10,313)   | 289<br>(197 - 394)          | 416<br>(344 - 489)       | 5,794<br>(3,985 - 8,024)    | 1,365<br>(1,086 - 1,768)   | 157<br>(111 - 209)         |
| HIV/AIDS resulting in mycobacterial infection                     | 517<br>(383 - 698)          | 18<br>(12 - 24)             | 24<br>(18 - 30)          | 371<br>(249 - 534)          | 93<br>(68 - 128)           | 11<br>(7 - 16)             |
| HIV/AIDS resulting in other diseases                              | 7,504<br>(5,926 - 9,652)    | 271<br>(186 - 370)          | 393<br>(324 - 463)       | 5,422<br>(3,723 - 7,531)    | 1,272<br>(1,015 - 1,647)   | 146<br>(103 - 195)         |
| Diarrhea, lower respiratory, and other common infectious diseases | 14,617<br>(11,457 - 18,809) | 8,516<br>(6,013 - 12,046)   | 689<br>(443 - 1,154)     | 1,617<br>(1,148 - 2,156)    | 1,576<br>(1,137 - 2,125)   | 2,219<br>(1,625 - 2,867)   |
| Diarrheal diseases                                                | 5,245<br>(3,616 - 7,303)    | 2,669<br>(1,371 - 4,354)    | 238<br>(120 - 391)       | 725<br>(455 - 1,088)        | 716<br>(444 - 1,045)       | 899<br>(576 - 1,323)       |
| Intestinal infectious diseases                                    | 173<br>(90 - 301)           | 66<br>(29 - 128)            | 45<br>(21 - 83)          | 51<br>(26 - 93)             | 8<br>(3 - 15)              | 4<br>(2 - 7)               |
| Typhoid fever                                                     | 122<br>(59 - 215)           | 43<br>(17 - 87)             | 33<br>(16 - 62)          | 38<br>(18 - 69)             | 6<br>(2 - 11)              | 2<br>(1 - 4)               |
| Paratyphoid fever                                                 | 39<br>(18 - 73)             | 15<br>(6 - 31)              | 11<br>(5 - 21)           | 11<br>(5 - 21)              | 1<br>(1 - 3)               | 1<br>(0 - 1)               |
| Other intestinal infectious diseases                              | 13<br>(5 - 24)              | 8<br>(2 - 17)               | 1<br>(0 - 4)             | 3<br>(0 - 8)                | 1<br>(0 - 4)               | 1<br>(0 - 3)               |
| Lower respiratory infections                                      | 6,332<br>(4,619 - 8,184)    | 3,691<br>(2,229 - 5,379)    | 156<br>(92 - 238)        | 506<br>(356 - 692)          | 728<br>(464 - 1,015)       | 1,250<br>(791 - 1,711)     |
| Upper respiratory infections                                      | 10<br>(5 - 18)              | 4<br>(1 - 13)               | 0<br>(0 - 1)             | 2<br>(1 - 5)                | 2<br>(0 - 4)               | 1<br>(0 - 3)               |
| Otitis media                                                      | 6<br>(4 - 8)                | 3<br>(2 - 5)                | 1<br>(1 - 1)             | 1<br>(1 - 2)                | 0<br>(0 - 1)               | 0<br>(0 - 0)               |
| Meningitis                                                        | 1,264<br>(828 - 1,851)      | 699<br>(347 - 1,237)        | 115<br>(65 - 188)        | 282<br>(190 - 401)          | 111<br>(72 - 170)          | 57<br>(37 - 87)            |
| Pneumococcal meningitis                                           | 408<br>(272 - 592)          | 190<br>(88 - 359)           | 47<br>(26 - 79)          | 108<br>(69 - 163)           | 42<br>(27 - 66)            | 21<br>(12 - 34)            |
| H influenzae type B meningitis                                    | 370<br>(213 - 613)          | 282<br>(140 - 510)          | 31<br>(16 - 53)          | 40<br>(25 - 61)             | 12<br>(7 - 19)             | 6<br>(3 - 9)               |
| Meningococcal meningitis                                          | 168<br>(113 - 244)          | 84<br>(42 - 153)            | 13<br>(6 - 23)           | 42<br>(24 - 70)             | 19<br>(11 - 31)            | 11<br>(6 - 18)             |
| Other meningitis                                                  | 317<br>(209 - 462)          | 143<br>(64 - 261)           | 24<br>(12 - 43)          | 92<br>(55 - 139)            | 38<br>(23 - 61)            | 20<br>(12 - 31)            |
| Encephalitis                                                      | 60<br>(35 - 104)            | 37<br>(17 - 70)             | 6<br>(2 - 12)            | 11<br>(6 - 20)              | 4<br>(2 - 6)               | 2<br>(1 - 3)               |
| Diphtheria                                                        | 17<br>(1 - 77)              | 14<br>(0 - 75)              | 2<br>(0 - 11)            | 1<br>(0 - 3)                | 0<br>(0 - 1)               | --                         |
| Whooping cough                                                    | 268<br>(0 - 1,392)          | 255<br>(0 - 1,318)          | 11<br>(0 - 54)           | 2<br>(0 - 11)               | 0<br>(0 - 1)               | --                         |
| Tetanus                                                           | 131<br>(67 - 231)           | 103<br>(50 - 193)           | 6<br>(2 - 14)            | 13<br>(6 - 32)              | 6<br>(2 - 17)              | 3<br>(1 - 8)               |
| Measles                                                           | 1,104<br>(34 - 6,275)       | 973<br>(31 - 5,509)         | 110<br>(3 - 702)         | 20<br>(0 - 137)             | 1<br>(0 - 4)               | --                         |
| Varicella and herpes zoster                                       | 7<br>(3 - 16)               | 3<br>(0 - 9)                | 1<br>(0 - 2)             | 1<br>(0 - 3)                | 1<br>(0 - 2)               | 2<br>(0 - 7)               |
| Neglected tropical diseases and malaria                           | 4,200<br>(2,636 - 6,366)    | 2,414<br>(1,189 - 4,289)    | 356<br>(201 - 547)       | 834<br>(521 - 1,280)        | 357<br>(198 - 636)         | 240<br>(116 - 482)         |
| Malaria                                                           | 3,575<br>(2,032 - 5,659)    | 2,313<br>(1,091 - 4,193)    | 280<br>(132 - 461)       | 499<br>(265 - 895)          | 271<br>(126 - 555)         | 211<br>(87 - 450)          |
| Leishmaniasis                                                     | 50<br>(31 - 77)             | 18<br>(8 - 33)              | 12<br>(6 - 23)           | 16<br>(9 - 26)              | 2<br>(1 - 4)               | 1<br>(1 - 2)               |
| Visceral leishmaniasis                                            | 50<br>(31 - 77)             | 18<br>(8 - 33)              | 12<br>(6 - 23)           | 16<br>(9 - 26)              | 2<br>(1 - 4)               | 1<br>(1 - 2)               |
| African trypanosomiasis                                           | 456<br>(216 - 758)          | 31<br>(11 - 61)             | 51<br>(24 - 88)          | 286<br>(135 - 481)          | 68<br>(34 - 113)           | 19<br>(10 - 32)            |
| Schistosomiasis                                                   | 21<br>(16 - 28)             | 0<br>(0 - 1)                | 1<br>(0 - 1)             | 9<br>(6 - 13)               | 7<br>(5 - 11)              | 4<br>(2 - 5)               |
| Cysticercosis                                                     | 4<br>(3 - 5)                | 0<br>(0 - 0)                | 0<br>(0 - 0)             | 3<br>(2 - 3)                | 1<br>(1 - 1)               | 0<br>(0 - 0)               |
| Cystic echinococcosis                                             | 3<br>(2 - 4)                | 0<br>(0 - 1)                | 0<br>(0 - 1)             | 1<br>(1 - 2)                | 0<br>(0 - 1)               | 0<br>(0 - 0)               |
| Dengue                                                            | 3<br>(1 - 4)                | 1<br>(0 - 2)                | 0<br>(0 - 1)             | 1<br>(0 - 1)                | 0<br>(0 - 0)               | 0<br>(0 - 0)               |
| Yellow fever                                                      | 1<br>(1 - 2)                | 0<br>(0 - 0)                | 0<br>(0 - 1)             | 1<br>(0 - 1)                | 0<br>(0 - 0)               | 0<br>(0 - 0)               |
| Rabies                                                            | 14<br>(8 - 30)              | 4<br>(1 - 12)               | 4<br>(2 - 7)             | 5<br>(3 - 10)               | 1<br>(1 - 2)               | 0<br>(0 - 1)               |
| Intestinal nematode infections                                    | 20<br>(7 - 39)              | 16<br>(5 - 34)              | 2<br>(0 - 7)             | 1<br>(0 - 6)                | 0<br>(0 - 3)               | 0<br>(0 - 3)               |
| Ascariasis                                                        | 20<br>(7 - 39)              | 16<br>(5 - 34)              | 2<br>(0 - 7)             | 1<br>(0 - 6)                | 0<br>(0 - 3)               | 0<br>(0 - 3)               |

Web Table 31- Central African Republic deaths with 95% UI by age, sex, and cause in 2013

| Cause                                                            | Both Sexes, All Ages        | Both Sexes, 0-4 Years    | Both Sexes, 5-14 Years | Both Sexes, 15-49 Years  | Both Sexes, 50-69 Years  | Both Sexes, 70-80 Years  |
|------------------------------------------------------------------|-----------------------------|--------------------------|------------------------|--------------------------|--------------------------|--------------------------|
| Other neglected tropical diseases                                | 54<br>(23 - 97)             | 28<br>(7 - 63)           | 5<br>(2 - 9)           | 13<br>(6 - 22)           | 5<br>(3 - 8)             | 3<br>(2 - 6)             |
| Maternal disorders                                               | 1,459<br>(926 - 2,072)      | --                       | 4<br>(1 - 9)           | 1,455<br>(922 - 2,069)   | --                       | --                       |
| Maternal hemorrhage                                              | 211<br>(120 - 325)          | --                       | 0<br>(0 - 1)           | 211<br>(120 - 324)       | --                       | --                       |
| Maternal sepsis and other maternal infections                    | 126<br>(76 - 199)           | --                       | 0<br>(0 - 1)           | 126<br>(75 - 198)        | --                       | --                       |
| Maternal hypertensive disorders                                  | 167<br>(95 - 260)           | --                       | 1<br>(0 - 1)           | 166<br>(94 - 259)        | --                       | --                       |
| Maternal obstructed labor                                        | 83<br>(48 - 129)            | --                       | 0<br>(0 - 0)           | 83<br>(48 - 128)         | --                       | --                       |
| Maternal abortive outcome                                        | 247<br>(139 - 373)          | --                       | 1<br>(0 - 1)           | 247<br>(139 - 372)       | --                       | --                       |
| Indirect maternal deaths                                         | 115<br>(67 - 183)           | --                       | 0<br>(0 - 1)           | 115<br>(67 - 183)        | --                       | --                       |
| Late maternal deaths                                             | 219<br>(124 - 358)          | --                       | 1<br>(0 - 2)           | 218<br>(123 - 357)       | --                       | --                       |
| Maternal deaths aggravated by HIV/AIDS                           | 27<br>(13 - 44)             | --                       | --                     | 27<br>(13 - 44)          | --                       | --                       |
| Other maternal disorders                                         | 260<br>(151 - 381)          | --                       | 1<br>(0 - 2)           | 259<br>(151 - 381)       | --                       | --                       |
| Neonatal disorders                                               | 4,149<br>(3,138 - 5,428)    | 4,149<br>(3,138 - 5,428) | --                     | --                       | --                       | --                       |
| Neonatal preterm birth complications                             | 1,752<br>(1,000 - 2,854)    | 1,752<br>(1,000 - 2,854) | --                     | --                       | --                       | --                       |
| Neonatal encephalopathy due to birth asphyxia and trauma         | 1,081<br>(585 - 1,757)      | 1,081<br>(585 - 1,757)   | --                     | --                       | --                       | --                       |
| Neonatal sepsis and other neonatal infections                    | 530<br>(203 - 1,061)        | 530<br>(203 - 1,061)     | --                     | --                       | --                       | --                       |
| Hemolytic disease and other neonatal jaundice                    | 41<br>(16 - 92)             | 41<br>(16 - 92)          | --                     | --                       | --                       | --                       |
| Other neonatal disorders                                         | 745<br>(368 - 1,256)        | 745<br>(368 - 1,256)     | --                     | --                       | --                       | --                       |
| Nutritional deficiencies                                         | 2,745<br>(1,674 - 3,918)    | 1,722<br>(845 - 2,788)   | 85<br>(50 - 130)       | 254<br>(179 - 382)       | 256<br>(159 - 365)       | 429<br>(246 - 597)       |
| Protein-energy malnutrition                                      | 2,024<br>(1,098 - 3,057)    | 1,470<br>(698 - 2,444)   | 63<br>(31 - 100)       | 91<br>(45 - 180)         | 145<br>(68 - 222)        | 254<br>(108 - 387)       |
| Iodine deficiency                                                | 4<br>(1 - 15)               | 2<br>(0 - 13)            | 0<br>(0 - 1)           | 1<br>(0 - 2)             | 1<br>(0 - 2)             | 0<br>(0 - 2)             |
| Iron-deficiency anemia                                           | 688<br>(402 - 1,162)        | 234<br>(62 - 597)        | 21<br>(10 - 39)        | 157<br>(100 - 238)       | 106<br>(58 - 166)        | 169<br>(87 - 277)        |
| Other nutritional deficiencies                                   | 30<br>(15 - 65)             | 15<br>(4 - 43)           | 1<br>(1 - 3)           | 5<br>(3 - 12)            | 4<br>(2 - 7)             | 5<br>(2 - 9)             |
| Other communicable, maternal, neonatal, and nutritional diseases | 1,423<br>(850 - 2,219)      | 1,182<br>(639 - 1,942)   | 73<br>(38 - 122)       | 89<br>(61 - 132)         | 48<br>(29 - 83)          | 31<br>(17 - 55)          |
| Sexually transmitted diseases excluding HIV                      | 1,130<br>(600 - 1,910)      | 1,030<br>(524 - 1,775)   | 57<br>(27 - 102)       | 24<br>(10 - 47)          | 11<br>(5 - 23)           | 8<br>(3 - 17)            |
| Syphilis                                                         | 1,109<br>(576 - 1,882)      | 1,030<br>(524 - 1,775)   | 56<br>(26 - 101)       | 11<br>(5 - 21)           | 7<br>(3 - 13)            | 6<br>(3 - 13)            |
| Chlamydial infection                                             | 5<br>(2 - 10)               | --                       | 0<br>(0 - 0)           | 4<br>(1 - 8)             | 1<br>(0 - 2)             | 0<br>(0 - 1)             |
| Gonococcal infection                                             | 8<br>(5 - 15)               | --                       | 0<br>(0 - 1)           | 5<br>(2 - 10)            | 2<br>(1 - 4)             | 1<br>(0 - 2)             |
| Other sexually transmitted diseases                              | 7<br>(4 - 12)               | --                       | 0<br>(0 - 1)           | 5<br>(2 - 9)             | 1<br>(1 - 3)             | 0<br>(0 - 1)             |
| Hepatitis                                                        | 57<br>(36 - 118)            | 16<br>(8 - 29)           | 4<br>(2 - 7)           | 22<br>(13 - 44)          | 11<br>(6 - 33)           | 4<br>(2 - 17)            |
| Acute hepatitis A                                                | 7<br>(2 - 16)               | 5<br>(1 - 12)            | 1<br>(0 - 2)           | 1<br>(0 - 2)             | 0<br>(0 - 0)             | 0<br>(0 - 0)             |
| Acute hepatitis B                                                | 31<br>(17 - 72)             | 11<br>(4 - 21)           | 2<br>(1 - 3)           | 7<br>(3 - 16)            | 8<br>(4 - 25)            | 4<br>(2 - 14)            |
| Acute hepatitis C                                                | 1<br>(0 - 5)                | --                       | 0<br>(0 - 0)           | 1<br>(0 - 2)             | 0<br>(0 - 2)             | 0<br>(0 - 1)             |
| Acute hepatitis E                                                | 17<br>(9 - 35)              | 0<br>(0 - 1)             | 1<br>(0 - 2)           | 13<br>(7 - 27)           | 2<br>(1 - 8)             | 0<br>(0 - 2)             |
| Other infectious diseases                                        | 237<br>(123 - 433)          | 136<br>(40 - 319)        | 12<br>(5 - 23)         | 43<br>(24 - 69)          | 27<br>(14 - 48)          | 19<br>(8 - 38)           |
| Non-communicable diseases                                        | 17,461<br>(14,421 - 20,648) | 2,004<br>(1,077 - 3,500) | 293<br>(185 - 427)     | 2,941<br>(2,286 - 3,644) | 5,491<br>(4,358 - 6,792) | 6,731<br>(5,702 - 7,990) |
| Neoplasms                                                        | 2,241<br>(1,826 - 2,723)    | 51<br>(20 - 133)         | 35<br>(21 - 57)        | 470<br>(349 - 629)       | 981<br>(774 - 1,225)     | 705<br>(581 - 841)       |
| Esophageal cancer                                                | 122<br>(91 - 166)           | --                       | --                     | 15<br>(10 - 22)          | 63<br>(44 - 90)          | 44<br>(32 - 58)          |
| Stomach cancer                                                   | 269<br>(216 - 329)          | --                       | --                     | 54<br>(41 - 71)          | 124<br>(95 - 160)        | 92<br>(70 - 116)         |
| Liver cancer                                                     | 174<br>(119 - 263)          | --                       | 1<br>(1 - 3)           | 30<br>(16 - 58)          | 84<br>(55 - 131)         | 58<br>(41 - 81)          |
| Liver cancer due to hepatitis B                                  | 82<br>(54 - 140)            | --                       | 1<br>(0 - 1)           | 17<br>(9 - 35)           | 42<br>(27 - 73)          | 23<br>(14 - 34)          |

Web Table 31- Central African Republic deaths with 95% UI by age, sex, and cause in 2013

| Cause                                | Both Sexes, All Ages     | Both Sexes, 0-4 Years | Both Sexes, 5-14 Years | Both Sexes, 15-49 Years | Both Sexes, 50-69 Years  | Both Sexes, 70-80 Years  |
|--------------------------------------|--------------------------|-----------------------|------------------------|-------------------------|--------------------------|--------------------------|
| Liver cancer due to hepatitis C      | 11<br>(6 - 21)           | --                    | 0<br>(0 - 0)           | 1<br>(0 - 2)            | 5<br>(2 - 9)             | 5<br>(2 - 10)            |
| Liver cancer due to alcohol use      | 38<br>(24 - 61)          | --                    | --                     | 3<br>(1 - 6)            | 18<br>(10 - 31)          | 18<br>(11 - 26)          |
| Liver cancer due to other causes     | 42<br>(24 - 72)          | --                    | 1<br>(0 - 2)           | 9<br>(4 - 18)           | 20<br>(10 - 36)          | 13<br>(8 - 20)           |
| Larynx cancer                        | 26<br>(18 - 39)          | --                    | --                     | 4<br>(3 - 7)            | 14<br>(9 - 22)           | 8<br>(5 - 11)            |
| Tracheal, bronchus and lung cancer   | 178<br>(141 - 219)       | --                    | --                     | 22<br>(13 - 29)         | 97<br>(76 - 126)         | 59<br>(45 - 82)          |
| Breast cancer                        | 168<br>(118 - 225)       | --                    | --                     | 42<br>(27 - 78)         | 85<br>(55 - 120)         | 40<br>(24 - 57)          |
| Cervical cancer                      | 272<br>(188 - 370)       | --                    | --                     | 106<br>(70 - 152)       | 120<br>(75 - 175)        | 46<br>(30 - 68)          |
| Uterine cancer                       | 21<br>(12 - 32)          | --                    | --                     | 3<br>(1 - 5)            | 12<br>(6 - 18)           | 7<br>(3 - 12)            |
| Prostate cancer                      | 80<br>(42 - 124)         | --                    | --                     | 1<br>(1 - 2)            | 22<br>(12 - 34)          | 57<br>(28 - 92)          |
| Colon and rectum cancer              | 175<br>(141 - 211)       | --                    | --                     | 21<br>(16 - 26)         | 75<br>(59 - 95)          | 79<br>(61 - 99)          |
| Lip and oral cavity cancer           | 35<br>(23 - 50)          | --                    | --                     | 8<br>(4 - 14)           | 17<br>(11 - 25)          | 10<br>(7 - 14)           |
| Nasopharynx cancer                   | 11<br>(8 - 15)           | --                    | 0<br>(0 - 1)           | 4<br>(3 - 6)            | 5<br>(3 - 7)             | 2<br>(1 - 3)             |
| Other pharynx cancer                 | 16<br>(13 - 22)          | --                    | --                     | 3<br>(2 - 5)            | 10<br>(7 - 13)           | 4<br>(3 - 5)             |
| Gallbladder and biliary tract cancer | 51<br>(35 - 72)          | --                    | --                     | 4<br>(3 - 6)            | 25<br>(16 - 37)          | 22<br>(15 - 33)          |
| Pancreatic cancer                    | 59<br>(47 - 73)          | --                    | --                     | 5<br>(4 - 7)            | 28<br>(21 - 37)          | 25<br>(19 - 32)          |
| Malignant skin melanoma              | 11<br>(8 - 17)           | --                    | --                     | 3<br>(2 - 6)            | 5<br>(3 - 7)             | 4<br>(2 - 5)             |
| Non-melanoma skin cancer             | 14<br>(8 - 23)           | --                    | --                     | 3<br>(2 - 5)            | 4<br>(3 - 7)             | 7<br>(4 - 14)            |
| Ovarian cancer                       | 37<br>(22 - 58)          | --                    | --                     | 9<br>(4 - 17)           | 20<br>(11 - 31)          | 9<br>(5 - 13)            |
| Testicular cancer                    | 4<br>(2 - 5)             | --                    | --                     | 3<br>(2 - 4)            | 1<br>(0 - 1)             | 0<br>(0 - 1)             |
| Kidney cancer                        | 33<br>(26 - 42)          | 3<br>(1 - 7)          | 1<br>(0 - 2)           | 5<br>(3 - 8)            | 15<br>(11 - 21)          | 8<br>(6 - 13)            |
| Bladder cancer                       | 57<br>(43 - 73)          | --                    | --                     | 6<br>(4 - 8)            | 24<br>(17 - 33)          | 27<br>(20 - 36)          |
| Brain and nervous system cancer      | 33<br>(24 - 47)          | 3<br>(1 - 8)          | 3<br>(2 - 5)           | 11<br>(7 - 17)          | 11<br>(8 - 16)           | 5<br>(3 - 7)             |
| Thyroid cancer                       | 9<br>(7 - 12)            | --                    | 0<br>(0 - 0)           | 1<br>(1 - 2)            | 4<br>(3 - 6)             | 4<br>(2 - 6)             |
| Mesothelioma                         | 4<br>(2 - 5)             | --                    | --                     | 1<br>(0 - 1)            | 2<br>(1 - 3)             | 1<br>(1 - 2)             |
| Hodgkin lymphoma                     | 16<br>(8 - 26)           | 2<br>(0 - 4)          | 1<br>(0 - 3)           | 9<br>(3 - 15)           | 3<br>(2 - 5)             | 2<br>(1 - 3)             |
| Non-Hodgkin lymphoma                 | 102<br>(79 - 137)        | 7<br>(2 - 19)         | 6<br>(3 - 10)          | 30<br>(19 - 46)         | 34<br>(26 - 45)          | 25<br>(17 - 34)          |
| Multiple myeloma                     | 18<br>(13 - 25)          | --                    | --                     | 2<br>(1 - 3)            | 9<br>(6 - 13)            | 7<br>(5 - 10)            |
| Leukemia                             | 54<br>(44 - 65)          | 6<br>(2 - 13)         | 7<br>(5 - 11)          | 17<br>(13 - 24)         | 12<br>(9 - 16)           | 11<br>(7 - 14)           |
| Other neoplasms                      | 193<br>(138 - 329)       | 30<br>(11 - 101)      | 15<br>(8 - 29)         | 48<br>(29 - 97)         | 56<br>(39 - 79)          | 44<br>(30 - 62)          |
| Cardiovascular diseases              | 7,834<br>(6,478 - 9,632) | 167<br>(86 - 274)     | 42<br>(26 - 62)        | 1,041<br>(770 - 1,360)  | 2,698<br>(2,118 - 3,460) | 3,885<br>(3,223 - 4,969) |
| Rheumatic heart disease              | 285<br>(190 - 521)       | 8<br>(3 - 22)         | 8<br>(4 - 15)          | 109<br>(65 - 215)       | 91<br>(57 - 168)         | 68<br>(44 - 121)         |
| Ischemic heart disease               | 2,725<br>(2,087 - 3,919) | 8<br>(3 - 19)         | 3<br>(2 - 5)           | 308<br>(212 - 426)      | 1,012<br>(748 - 1,417)   | 1,394<br>(1,036 - 2,173) |
| Cerebrovascular disease              | 2,786<br>(1,672 - 3,707) | 30<br>(13 - 56)       | 11<br>(5 - 17)         | 277<br>(156 - 408)      | 912<br>(520 - 1,269)     | 1,556<br>(927 - 2,069)   |
| Ischemic stroke                      | 1,356<br>(513 - 2,001)   | 6<br>(1 - 16)         | 2<br>(0 - 4)           | 51<br>(14 - 104)        | 334<br>(103 - 556)       | 963<br>(388 - 1,411)     |
| Hemorrhagic stroke                   | 1,430<br>(755 - 2,071)   | 24<br>(9 - 46)        | 9<br>(4 - 15)          | 225<br>(124 - 343)      | 578<br>(304 - 863)       | 593<br>(283 - 905)       |
| Hypertensive heart disease           | 625<br>(402 - 989)       | 3<br>(1 - 6)          | 1<br>(0 - 2)           | 52<br>(27 - 80)         | 200<br>(122 - 302)       | 369<br>(222 - 629)       |
| Cardiomyopathy and myocarditis       | 337<br>(221 - 456)       | 60<br>(17 - 112)      | 9<br>(4 - 14)          | 87<br>(43 - 127)        | 96<br>(60 - 143)         | 86<br>(52 - 158)         |
| Atrial fibrillation and flutter      | 2<br>(1 - 4)             | --                    | --                     | 0<br>(0 - 0)            | 1<br>(0 - 1)             | 2<br>(1 - 3)             |
| Aortic aneurysm                      | 76<br>(47 - 127)         | --                    | --                     | 11<br>(6 - 19)          | 29<br>(17 - 52)          | 36<br>(22 - 60)          |
| Peripheral vascular disease          | 4<br>(3 - 6)             | --                    | --                     | 0<br>(0 - 0)            | 1<br>(1 - 2)             | 3<br>(2 - 4)             |



Web Table 31- Central African Republic deaths with 95% UI by age, sex, and cause in 2013

| Cause                                               | Both Sexes, All Ages     | Both Sexes, 0-4 Years | Both Sexes, 5-14 Years | Both Sexes, 15-49 Years | Both Sexes, 50-69 Years | Both Sexes, 70-80 Years |
|-----------------------------------------------------|--------------------------|-----------------------|------------------------|-------------------------|-------------------------|-------------------------|
| Endocarditis                                        | 78<br>(52 - 122)         | 6<br>(2 - 14)         | 1<br>(1 - 2)           | 17<br>(10 - 27)         | 23<br>(15 - 35)         | 31<br>(19 - 57)         |
| Other cardiovascular and circulatory diseases       | 915<br>(517 - 1,679)     | 53<br>(19 - 105)      | 10<br>(4 - 18)         | 180<br>(92 - 318)       | 333<br>(178 - 614)      | 340<br>(179 - 685)      |
| Chronic respiratory diseases                        | 1,738<br>(1,382 - 2,371) | 157<br>(79 - 276)     | 23<br>(15 - 34)        | 223<br>(161 - 328)      | 529<br>(387 - 753)      | 806<br>(629 - 1,107)    |
| Chronic obstructive pulmonary disease               | 1,144<br>(895 - 1,541)   | 66<br>(33 - 119)      | 6<br>(3 - 9)           | 89<br>(60 - 132)        | 364<br>(261 - 504)      | 619<br>(482 - 839)      |
| Pneumoconiosis                                      | 53<br>(31 - 91)          | 2<br>(1 - 4)          | 1<br>(0 - 1)           | 10<br>(6 - 18)          | 21<br>(11 - 37)         | 20<br>(11 - 34)         |
| Silicosis                                           | 14<br>(5 - 33)           | 0<br>(0 - 1)          | 0<br>(0 - 0)           | 2<br>(1 - 5)            | 5<br>(1 - 13)           | 6<br>(2 - 15)           |
| Asbestosis                                          | 6<br>(3 - 10)            | 0<br>(0 - 1)          | 0<br>(0 - 0)           | 1<br>(1 - 2)            | 3<br>(1 - 5)            | 2<br>(1 - 3)            |
| Coal workers pneumoconiosis                         | 7<br>(3 - 14)            | 0<br>(0 - 0)          | 0<br>(0 - 0)           | 1<br>(1 - 2)            | 3<br>(1 - 6)            | 3<br>(1 - 6)            |
| Other pneumoconiosis                                | 27<br>(15 - 43)          | 1<br>(0 - 2)          | 0<br>(0 - 1)           | 6<br>(3 - 10)           | 10<br>(5 - 17)          | 9<br>(5 - 16)           |
| Asthma                                              | 410<br>(221 - 722)       | 52<br>(18 - 106)      | 13<br>(7 - 21)         | 105<br>(59 - 182)       | 118<br>(59 - 215)       | 122<br>(58 - 249)       |
| Interstitial lung disease and pulmonary sarcoidosis | 60<br>(20 - 114)         | 2<br>(0 - 6)          | 0<br>(0 - 1)           | 6<br>(2 - 15)           | 19<br>(7 - 40)          | 33<br>(9 - 61)          |
| Other chronic respiratory diseases                  | 70<br>(40 - 112)         | 35<br>(16 - 66)       | 3<br>(2 - 5)           | 13<br>(7 - 22)          | 8<br>(4 - 14)           | 12<br>(6 - 20)          |
| Cirrhosis                                           | 603<br>(406 - 840)       | 14<br>(5 - 29)        | 7<br>(4 - 11)          | 177<br>(111 - 261)      | 274<br>(179 - 399)      | 131<br>(87 - 187)       |
| Cirrhosis due to hepatitis B                        | 148<br>(87 - 226)        | 1<br>(0 - 1)          | 1<br>(0 - 2)           | 41<br>(25 - 67)         | 70<br>(38 - 114)        | 35<br>(18 - 56)         |
| Cirrhosis due to hepatitis C                        | 191<br>(113 - 297)       | 1<br>(0 - 4)          | 2<br>(1 - 3)           | 57<br>(29 - 91)         | 89<br>(51 - 141)        | 42<br>(25 - 64)         |
| Cirrhosis due to alcohol use                        | 190<br>(123 - 273)       | --                    | --                     | 50<br>(29 - 77)         | 93<br>(58 - 140)        | 47<br>(29 - 71)         |
| Cirrhosis due to other causes                       | 75<br>(44 - 113)         | 12<br>(4 - 25)        | 4<br>(2 - 7)           | 29<br>(16 - 45)         | 22<br>(11 - 36)         | 8<br>(4 - 13)           |
| Digestive diseases                                  | 1,190<br>(941 - 1,462)   | 127<br>(53 - 219)     | 35<br>(23 - 50)        | 331<br>(246 - 438)      | 347<br>(258 - 459)      | 350<br>(273 - 444)      |
| Peptic ulcer disease                                | 374<br>(267 - 519)       | 13<br>(4 - 29)        | 4<br>(2 - 8)           | 106<br>(70 - 158)       | 133<br>(90 - 189)       | 118<br>(80 - 166)       |
| Gastritis and duodenitis                            | 50<br>(25 - 84)          | 7<br>(2 - 14)         | 2<br>(1 - 4)           | 15<br>(8 - 23)          | 13<br>(5 - 27)          | 13<br>(5 - 33)          |
| Appendicitis                                        | 107<br>(71 - 157)        | 24<br>(8 - 51)        | 10<br>(5 - 15)         | 41<br>(26 - 61)         | 19<br>(12 - 30)         | 13<br>(8 - 21)          |
| Paralytic ileus and intestinal obstruction          | 234<br>(155 - 335)       | 15<br>(5 - 32)        | 6<br>(3 - 11)          | 42<br>(26 - 66)         | 68<br>(41 - 104)        | 103<br>(63 - 149)       |
| Inguinal, femoral, and abdominal hernia             | 28<br>(17 - 46)          | 3<br>(1 - 9)          | 1<br>(0 - 2)           | 5<br>(3 - 9)            | 8<br>(4 - 13)           | 11<br>(5 - 20)          |
| Inflammatory bowel disease                          | 96<br>(53 - 136)         | 30<br>(10 - 59)       | 4<br>(2 - 6)           | 29<br>(16 - 43)         | 17<br>(8 - 26)          | 15<br>(6 - 25)          |
| Vascular intestinal disorders                       | 9<br>(5 - 17)            | 1<br>(0 - 2)          | 0<br>(0 - 0)           | 2<br>(1 - 4)            | 3<br>(1 - 5)            | 4<br>(2 - 8)            |
| Gallbladder and biliary diseases                    | 80<br>(57 - 107)         | 4<br>(1 - 8)          | 1<br>(1 - 2)           | 20<br>(13 - 28)         | 27<br>(17 - 41)         | 28<br>(18 - 42)         |
| Pancreatitis                                        | 59<br>(29 - 96)          | 2<br>(0 - 4)          | 1<br>(0 - 2)           | 29<br>(14 - 51)         | 17<br>(8 - 30)          | 10<br>(4 - 17)          |
| Other digestive diseases                            | 152<br>(107 - 210)       | 28<br>(9 - 56)        | 5<br>(3 - 8)           | 43<br>(28 - 62)         | 42<br>(27 - 64)         | 34<br>(22 - 55)         |
| Neurological disorders                              | 553<br>(435 - 691)       | 55<br>(17 - 118)      | 23<br>(12 - 37)        | 124<br>(77 - 182)       | 57<br>(43 - 73)         | 294<br>(229 - 365)      |
| Alzheimer disease and other dementias               | 308<br>(240 - 383)       | --                    | --                     | 0<br>(0 - 0)            | 31<br>(22 - 41)         | 277<br>(213 - 346)      |
| Parkinson disease                                   | 4<br>(2 - 5)             | --                    | --                     | 0<br>(0 - 0)            | 1<br>(1 - 1)            | 3<br>(1 - 4)            |
| Epilepsy                                            | 211<br>(133 - 304)       | 49<br>(13 - 109)      | 21<br>(11 - 34)        | 115<br>(69 - 172)       | 17<br>(11 - 26)         | 9<br>(5 - 16)           |
| Multiple sclerosis                                  | 1<br>(0 - 3)             | --                    | --                     | 1<br>(0 - 2)            | 0<br>(0 - 1)            | 0<br>(0 - 0)            |
| Other neurological disorders                        | 30<br>(22 - 48)          | 6<br>(3 - 19)         | 2<br>(1 - 3)           | 8<br>(6 - 12)           | 8<br>(6 - 10)           | 5<br>(4 - 7)            |
| Mental and substance use disorders                  | 195<br>(127 - 303)       | 7<br>(2 - 16)         | 0<br>(0 - 0)           | 126<br>(77 - 199)       | 51<br>(32 - 83)         | 10<br>(7 - 16)          |
| Schizophrenia                                       | 6<br>(3 - 10)            | --                    | --                     | 3<br>(1 - 6)            | 2<br>(1 - 3)            | 1<br>(0 - 2)            |
| Alcohol use disorders                               | 150<br>(88 - 250)        | --                    | --                     | 96<br>(51 - 166)        | 46<br>(27 - 77)         | 8<br>(5 - 14)           |
| Drug use disorders                                  | 39<br>(26 - 56)          | 7<br>(2 - 16)         | --                     | 27<br>(17 - 43)         | 3<br>(2 - 5)            | 1<br>(1 - 2)            |
| Opioid use disorders                                | 4<br>(3 - 6)             | 1<br>(0 - 2)          | --                     | 3<br>(2 - 5)            | 0<br>(0 - 0)            | 0<br>(0 - 0)            |
| Cocaine use disorders                               | 0<br>(0 - 0)             | 0<br>(0 - 0)          | --                     | 0<br>(0 - 0)            | 0<br>(0 - 0)            | 0<br>(0 - 0)            |

Web Table 31- Central African Republic deaths with 95% UI by age, sex, and cause in 2013

| Cause                                               | Both Sexes, All Ages     | Both Sexes, 0-4 Years  | Both Sexes, 5-14 Years | Both Sexes, 15-49 Years | Both Sexes, 50-69 Years | Both Sexes, 70-80 Years |
|-----------------------------------------------------|--------------------------|------------------------|------------------------|-------------------------|-------------------------|-------------------------|
| Amphetamine use disorders                           | 0<br>(0 - 0)             | 0<br>(0 - 0)           | --                     | 0<br>(0 - 0)            | 0<br>(0 - 0)            | 0<br>(0 - 0)            |
| Other drug use disorders                            | 34<br>(23 - 50)          | 6<br>(2 - 14)          | --                     | 24<br>(15 - 38)         | 3<br>(2 - 5)            | 1<br>(1 - 2)            |
| Eating disorders                                    | 0<br>(0 - 0)             | --                     | 0<br>(0 - 0)           | 0<br>(0 - 0)            | --                      | --                      |
| Anorexia nervosa                                    | 0<br>(0 - 0)             | --                     | 0<br>(0 - 0)           | 0<br>(0 - 0)            | --                      | --                      |
| Diabetes, urogenital, blood, and endocrine diseases | 1,805<br>(1,425 - 2,245) | 327<br>(157 - 594)     | 87<br>(44 - 146)       | 377<br>(265 - 513)      | 514<br>(395 - 667)      | 500<br>(403 - 609)      |
| Diabetes mellitus                                   | 711<br>(556 - 885)       | 9<br>(5 - 13)          | 3<br>(2 - 4)           | 92<br>(67 - 122)        | 316<br>(231 - 419)      | 292<br>(223 - 372)      |
| Acute glomerulonephritis                            | 12<br>(6 - 20)           | 3<br>(1 - 7)           | 1<br>(1 - 3)           | 4<br>(2 - 7)            | 2<br>(1 - 3)            | 1<br>(1 - 2)            |
| Chronic kidney disease                              | 297<br>(216 - 410)       | 27<br>(14 - 44)        | 9<br>(6 - 14)          | 80<br>(53 - 116)        | 84<br>(56 - 131)        | 98<br>(69 - 131)        |
| Chronic kidney disease due to diabetes mellitus     | 1<br>(1 - 2)             | 0<br>(0 - 0)           | 0<br>(0 - 0)           | 0<br>(0 - 1)            | 1<br>(0 - 1)            | 0<br>(0 - 1)            |
| Chronic kidney disease due to hypertension          | 101<br>(67 - 148)        | 2<br>(1 - 5)           | 1<br>(0 - 1)           | 17<br>(10 - 27)         | 35<br>(21 - 57)         | 46<br>(28 - 67)         |
| Chronic kidney disease due to glomerulonephritis    | 119<br>(82 - 169)        | 18<br>(8 - 30)         | 6<br>(4 - 9)           | 41<br>(27 - 65)         | 28<br>(17 - 44)         | 26<br>(15 - 40)         |
| Chronic kidney disease due to other causes          | 76<br>(45 - 119)         | 7<br>(3 - 14)          | 2<br>(1 - 4)           | 22<br>(10 - 35)         | 19<br>(9 - 39)          | 26<br>(13 - 44)         |
| Urinary diseases and male infertility               | 173<br>(129 - 234)       | 26<br>(12 - 53)        | 3<br>(2 - 5)           | 37<br>(27 - 50)         | 46<br>(31 - 64)         | 60<br>(40 - 96)         |
| Interstitial nephritis and urinary tract infections | 126<br>(91 - 177)        | 18<br>(7 - 37)         | 2<br>(1 - 3)           | 24<br>(16 - 35)         | 34<br>(22 - 48)         | 48<br>(32 - 78)         |
| Urolithiasis                                        | 7<br>(4 - 13)            | --                     | 0<br>(0 - 1)           | 3<br>(1 - 5)            | 2<br>(1 - 5)            | 2<br>(1 - 5)            |
| Other urinary diseases                              | 40<br>(28 - 61)          | 9<br>(3 - 20)          | 1<br>(1 - 2)           | 10<br>(7 - 16)          | 10<br>(5 - 16)          | 10<br>(5 - 20)          |
| Gynecological diseases                              | 6<br>(4 - 9)             | --                     | --                     | 4<br>(2 - 7)            | 1<br>(0 - 2)            | 1<br>(0 - 1)            |
| Uterine fibroids                                    | 1<br>(1 - 1)             | --                     | --                     | 1<br>(0 - 1)            | 0<br>(0 - 0)            | 0<br>(0 - 0)            |
| Polycystic ovarian syndrome                         | 0<br>(0 - 1)             | --                     | --                     | 0<br>(0 - 1)            | 0<br>(0 - 0)            | --                      |
| Endometriosis                                       | 1<br>(0 - 1)             | --                     | --                     | 1<br>(0 - 1)            | 0<br>(0 - 0)            | --                      |
| Genital prolapse                                    | 1<br>(1 - 1)             | --                     | --                     | 1<br>(0 - 1)            | 0<br>(0 - 0)            | 0<br>(0 - 0)            |
| Other gynecological diseases                        | 3<br>(2 - 4)             | --                     | --                     | 2<br>(1 - 3)            | 0<br>(0 - 1)            | 0<br>(0 - 0)            |
| Hemoglobinopathies and hemolytic anemias            | 378<br>(147 - 663)       | 179<br>(53 - 368)      | 58<br>(20 - 111)       | 105<br>(38 - 185)       | 24<br>(9 - 51)          | 12<br>(5 - 28)          |
| Thalassemias                                        | 0<br>(0 - 0)             | 0<br>(0 - 0)           | 0<br>(0 - 0)           | 0<br>(0 - 0)            | 0<br>(0 - 0)            | 0<br>(0 - 0)            |
| Sickle cell disorders                               | 357<br>(136 - 637)       | 173<br>(50 - 357)      | 57<br>(20 - 109)       | 104<br>(38 - 182)       | 22<br>(8 - 46)          | 1<br>(1 - 3)            |
| G6PD deficiency                                     | 3<br>(1 - 5)             | 1<br>(0 - 3)           | 0<br>(0 - 1)           | 1<br>(0 - 1)            | 0<br>(0 - 1)            | 0<br>(0 - 1)            |
| Other hemoglobinopathies and hemolytic anemias      | 19<br>(9 - 37)           | 5<br>(2 - 8)           | 0<br>(0 - 1)           | 1<br>(0 - 3)            | 2<br>(1 - 4)            | 10<br>(5 - 25)          |
| Endocrine, metabolic, blood, and immune disorders   | 229<br>(155 - 361)       | 82<br>(36 - 193)       | 12<br>(6 - 23)         | 55<br>(34 - 84)         | 43<br>(27 - 61)         | 36<br>(18 - 56)         |
| Musculoskeletal disorders                           | 40<br>(26 - 61)          | --                     | 3<br>(1 - 5)           | 17<br>(10 - 28)         | 11<br>(7 - 17)          | 8<br>(5 - 13)           |
| Rheumatoid arthritis                                | 12<br>(7 - 19)           | --                     | 1<br>(0 - 1)           | 3<br>(1 - 5)            | 4<br>(2 - 7)            | 4<br>(2 - 8)            |
| Other musculoskeletal disorders                     | 27<br>(17 - 44)          | --                     | 2<br>(1 - 4)           | 14<br>(8 - 23)          | 7<br>(4 - 11)           | 4<br>(3 - 7)            |
| Other non-communicable diseases                     | 1,263<br>(602 - 2,530)   | 1,099<br>(460 - 2,322) | 39<br>(17 - 82)        | 54<br>(31 - 89)         | 28<br>(20 - 39)         | 42<br>(24 - 67)         |
| Congenital anomalies                                | 1,146<br>(497 - 2,416)   | 1,062<br>(444 - 2,281) | 36<br>(15 - 77)        | 37<br>(19 - 65)         | 7<br>(5 - 10)           | 4<br>(3 - 6)            |
| Neural tube defects                                 | 375<br>(116 - 948)       | 357<br>(110 - 914)     | 8<br>(2 - 23)          | 8<br>(2 - 21)           | 1<br>(0 - 2)            | 0<br>(0 - 1)            |
| Congenital heart anomalies                          | 428<br>(128 - 1,145)     | 390<br>(108 - 1,080)   | 17<br>(5 - 44)         | 16<br>(7 - 34)          | 3<br>(2 - 4)            | 2<br>(1 - 3)            |
| Cleft lip and cleft palate                          | 7<br>(1 - 19)            | 7<br>(1 - 19)          | --                     | --                      | --                      | --                      |
| Down syndrome                                       | 84<br>(12 - 229)         | 73<br>(9 - 211)        | 4<br>(1 - 10)          | 5<br>(2 - 10)           | 1<br>(1 - 2)            | 0<br>(0 - 0)            |
| Chromosomal unbalanced rearrangements               | 38<br>(6 - 126)          | 36<br>(6 - 121)        | 1<br>(0 - 3)           | 1<br>(0 - 3)            | 0<br>(0 - 0)            | 0<br>(0 - 0)            |
| Other congenital anomalies                          | 214<br>(53 - 798)        | 199<br>(44 - 755)      | 6<br>(1 - 20)          | 6<br>(2 - 18)           | 2<br>(1 - 4)            | 2<br>(1 - 3)            |
| Skin and subcutaneous diseases                      | 106<br>(80 - 138)        | 26<br>(9 - 52)         | 3<br>(2 - 5)           | 18<br>(11 - 26)         | 22<br>(14 - 31)         | 37<br>(20 - 62)         |

Web Table 31- Central African Republic deaths with 95% UI by age, sex, and cause in 2013

| Cause                                           | Both Sexes, All Ages     | Both Sexes, 0-4 Years | Both Sexes, 5-14 Years | Both Sexes, 15-49 Years  | Both Sexes, 50-69 Years | Both Sexes, 70-80 Years |
|-------------------------------------------------|--------------------------|-----------------------|------------------------|--------------------------|-------------------------|-------------------------|
| Cellulitis                                      | 59<br>(38 - 87)          | 14<br>(5 - 26)        | 2<br>(1 - 3)           | 10<br>(6 - 15)           | 13<br>(7 - 21)          | 19<br>(8 - 36)          |
| Pyoderma                                        | 35<br>(17 - 57)          | 11<br>(3 - 26)        | 1<br>(0 - 2)           | 6<br>(2 - 11)            | 7<br>(3 - 11)           | 10<br>(5 - 19)          |
| Decubitus ulcer                                 | 10<br>(5 - 19)           | 0<br>(0 - 1)          | 0<br>(0 - 0)           | 1<br>(0 - 2)             | 1<br>(1 - 3)            | 7<br>(3 - 16)           |
| Other skin and subcutaneous diseases            | 3<br>(1 - 6)             | 1<br>(0 - 3)          | 0<br>(0 - 0)           | 1<br>(0 - 2)             | 0<br>(0 - 1)            | 1<br>(0 - 1)            |
| Sudden infant death syndrome                    | 11<br>(3 - 33)           | 11<br>(3 - 33)        | --                     | --                       | --                      | --                      |
| Injuries                                        | 3,961<br>(2,857 - 5,121) | 959<br>(438 - 1,562)  | 328<br>(211 - 466)     | 2,047<br>(1,465 - 2,684) | 394<br>(291 - 515)      | 233<br>(182 - 292)      |
| Transport injuries                              | 1,350<br>(886 - 1,894)   | 225<br>(94 - 407)     | 136<br>(77 - 207)      | 790<br>(500 - 1,155)     | 138<br>(88 - 207)       | 60<br>(37 - 90)         |
| Road injuries                                   | 1,251<br>(818 - 1,737)   | 200<br>(83 - 369)     | 126<br>(70 - 191)      | 740<br>(467 - 1,088)     | 128<br>(81 - 195)       | 57<br>(35 - 84)         |
| Pedestrian road injuries                        | 473<br>(289 - 718)       | 99<br>(40 - 183)      | 60<br>(33 - 98)        | 230<br>(128 - 380)       | 55<br>(32 - 88)         | 29<br>(17 - 46)         |
| Cyclist road injuries                           | 137<br>(77 - 209)        | 25<br>(8 - 53)        | 22<br>(11 - 36)        | 66<br>(36 - 107)         | 18<br>(9 - 29)          | 7<br>(3 - 11)           |
| Motorcyclist road injuries                      | 240<br>(150 - 376)       | 18<br>(7 - 34)        | 10<br>(5 - 17)         | 194<br>(117 - 310)       | 15<br>(8 - 24)          | 4<br>(2 - 6)            |
| Motor vehicle road injuries                     | 388<br>(227 - 572)       | 56<br>(22 - 107)      | 32<br>(17 - 52)        | 245<br>(139 - 383)       | 39<br>(23 - 59)         | 16<br>(9 - 27)          |
| Other road injuries                             | 13<br>(7 - 22)           | 2<br>(1 - 6)          | 2<br>(1 - 3)           | 6<br>(3 - 12)            | 2<br>(1 - 3)            | 1<br>(0 - 2)            |
| Other transport injuries                        | 99<br>(55 - 178)         | 25<br>(9 - 49)        | 10<br>(5 - 20)         | 50<br>(26 - 97)          | 10<br>(5 - 17)          | 4<br>(2 - 6)            |
| Unintentional injuries                          | 1,779<br>(1,220 - 2,417) | 707<br>(300 - 1,232)  | 173<br>(103 - 251)     | 594<br>(416 - 789)       | 164<br>(123 - 217)      | 140<br>(105 - 189)      |
| Falls                                           | 226<br>(130 - 359)       | 42<br>(10 - 102)      | 11<br>(5 - 24)         | 77<br>(40 - 139)         | 38<br>(20 - 63)         | 56<br>(23 - 87)         |
| Drowning                                        | 469<br>(168 - 786)       | 223<br>(39 - 478)     | 75<br>(26 - 125)       | 140<br>(67 - 210)        | 22<br>(13 - 34)         | 9<br>(6 - 17)           |
| Fire, heat, and hot substances                  | 344<br>(166 - 578)       | 174<br>(42 - 359)     | 26<br>(11 - 46)        | 89<br>(46 - 146)         | 28<br>(18 - 48)         | 26<br>(16 - 55)         |
| Poisonings                                      | 131<br>(81 - 249)        | 48<br>(19 - 109)      | 8<br>(4 - 16)          | 58<br>(35 - 114)         | 12<br>(7 - 21)          | 5<br>(3 - 10)           |
| Exposure to mechanical forces                   | 276<br>(184 - 416)       | 72<br>(26 - 143)      | 28<br>(16 - 48)        | 146<br>(91 - 227)        | 23<br>(15 - 37)         | 6<br>(4 - 10)           |
| Unintentional firearm injuries                  | 106<br>(68 - 162)        | 18<br>(7 - 38)        | 10<br>(5 - 18)         | 69<br>(39 - 117)         | 8<br>(4 - 13)           | 2<br>(1 - 4)            |
| Unintentional suffocation                       | 15<br>(2 - 46)           | 10<br>(1 - 37)        | 1<br>(0 - 3)           | 3<br>(0 - 6)             | 1<br>(0 - 1)            | 0<br>(0 - 1)            |
| Other exposure to mechanical forces             | 154<br>(93 - 258)        | 44<br>(13 - 97)       | 17<br>(8 - 34)         | 74<br>(42 - 122)         | 15<br>(8 - 25)          | 4<br>(2 - 7)            |
| Adverse effects of medical treatment            | 116<br>(72 - 165)        | 38<br>(12 - 82)       | 4<br>(2 - 7)           | 26<br>(14 - 40)          | 22<br>(13 - 34)         | 25<br>(12 - 43)         |
| Animal contact                                  | 55<br>(28 - 91)          | 23<br>(6 - 49)        | 8<br>(3 - 14)          | 14<br>(7 - 22)           | 7<br>(4 - 11)           | 4<br>(2 - 6)            |
| Venomous animal contact                         | 38<br>(18 - 69)          | 16<br>(4 - 37)        | 6<br>(2 - 11)          | 10<br>(5 - 17)           | 4<br>(2 - 8)            | 2<br>(1 - 4)            |
| Non-venomous animal contact                     | 17<br>(7 - 30)           | 6<br>(1 - 17)         | 2<br>(1 - 5)           | 4<br>(2 - 7)             | 2<br>(1 - 4)            | 2<br>(1 - 3)            |
| Foreign body                                    | 90<br>(43 - 179)         | 65<br>(22 - 141)      | 4<br>(2 - 7)           | 11<br>(6 - 19)           | 5<br>(3 - 8)            | 6<br>(3 - 10)           |
| Pulmonary aspiration and foreign body in airway | 87<br>(41 - 177)         | 64<br>(21 - 140)      | 3<br>(2 - 6)           | 10<br>(5 - 18)           | 4<br>(2 - 7)            | 5<br>(3 - 10)           |
| Foreign body in other body part                 | 2<br>(1 - 5)             | 1<br>(0 - 2)          | 0<br>(0 - 1)           | 1<br>(0 - 1)             | 0<br>(0 - 1)            | 0<br>(0 - 0)            |
| Other unintentional injuries                    | 73<br>(46 - 102)         | 21<br>(8 - 38)        | 7<br>(4 - 11)          | 35<br>(22 - 51)          | 7<br>(5 - 10)           | 3<br>(2 - 5)            |
| Self-harm and interpersonal violence            | 833<br>(484 - 1,147)     | 27<br>(13 - 51)       | 19<br>(10 - 31)        | 663<br>(374 - 963)       | 92<br>(54 - 128)        | 32<br>(18 - 48)         |
| Self-harm                                       | 535<br>(254 - 763)       | --                    | 9<br>(3 - 19)          | 420<br>(194 - 639)       | 75<br>(37 - 109)        | 29<br>(15 - 44)         |
| Interpersonal violence                          | 298<br>(180 - 425)       | 27<br>(13 - 51)       | 10<br>(6 - 16)         | 242<br>(136 - 351)       | 16<br>(9 - 25)          | 3<br>(2 - 5)            |
| Assault by firearm                              | 111<br>(53 - 177)        | 4<br>(1 - 8)          | 2<br>(1 - 4)           | 99<br>(45 - 162)         | 5<br>(2 - 9)            | 1<br>(0 - 1)            |
| Assault by sharp object                         | 76<br>(31 - 125)         | 2<br>(1 - 6)          | 1<br>(0 - 3)           | 67<br>(26 - 113)         | 4<br>(2 - 8)            | 1<br>(0 - 1)            |
| Assault by other means                          | 112<br>(67 - 176)        | 21<br>(10 - 42)       | 6<br>(4 - 11)          | 76<br>(40 - 122)         | 6<br>(4 - 10)           | 2<br>(1 - 3)            |

Web Table 31- Central African Republic deaths with 95% UI by age, sex, and cause in 2013

| Cause                                                             | Males, All Ages             | Males, 0-4 Years           | Males, 5-14 Years      | Males, 15-49 Years       | Males, 50-69 Years       | Males, 70-80 Years       |
|-------------------------------------------------------------------|-----------------------------|----------------------------|------------------------|--------------------------|--------------------------|--------------------------|
| All causes                                                        | 30,992<br>(26,539 - 35,724) | 11,383<br>(8,807 - 14,676) | 1,167<br>(924 - 1,473) | 8,071<br>(6,890 - 9,249) | 5,674<br>(4,637 - 7,079) | 4,697<br>(4,075 - 5,495) |
| Communicable, maternal, neonatal, and nutritional diseases        | 19,963<br>(16,918 - 23,288) | 9,846<br>(7,600 - 12,745)  | 832<br>(638 - 1,095)   | 4,985<br>(4,144 - 5,922) | 2,569<br>(2,079 - 3,075) | 1,730<br>(1,333 - 2,110) |
| HIV/AIDS and tuberculosis                                         | 6,058<br>(5,040 - 7,228)    | 273<br>(196 - 369)         | 237<br>(199 - 278)     | 3,567<br>(2,752 - 4,525) | 1,493<br>(1,129 - 1,902) | 488<br>(313 - 653)       |
| Tuberculosis                                                      | 2,236<br>(1,447 - 2,967)    | 126<br>(68 - 220)          | 26<br>(15 - 45)        | 907<br>(570 - 1,285)     | 772<br>(423 - 1,090)     | 405<br>(233 - 563)       |
| HIV/AIDS                                                          | 3,822<br>(3,112 - 4,827)    | 147<br>(100 - 200)         | 211<br>(175 - 248)     | 2,659<br>(1,860 - 3,666) | 721<br>(518 - 1,045)     | 83<br>(52 - 119)         |
| HIV/AIDS resulting in mycobacterial infection                     | 280<br>(210 - 375)          | 10<br>(7 - 14)             | 13<br>(10 - 17)        | 194<br>(129 - 282)       | 55<br>(37 - 83)          | 7<br>(4 - 10)            |
| HIV/AIDS resulting in other diseases                              | 3,542<br>(2,885 - 4,457)    | 137<br>(93 - 186)          | 198<br>(163 - 233)     | 2,465<br>(1,726 - 3,396) | 666<br>(476 - 966)       | 77<br>(48 - 110)         |
| Diarrhea, lower respiratory, and other common infectious diseases | 7,406<br>(5,579 - 9,734)    | 4,473<br>(3,053 - 6,560)   | 351<br>(217 - 577)     | 837<br>(563 - 1,194)     | 782<br>(519 - 1,127)     | 962<br>(692 - 1,271)     |
| Diarrheal diseases                                                | 2,565<br>(1,540 - 3,925)    | 1,351<br>(552 - 2,592)     | 125<br>(53 - 228)      | 357<br>(202 - 590)       | 344<br>(177 - 573)       | 388<br>(219 - 625)       |
| Intestinal infectious diseases                                    | 87<br>(44 - 153)            | 31<br>(13 - 61)            | 22<br>(10 - 42)        | 29<br>(13 - 56)          | 4<br>(1 - 7)             | 2<br>(1 - 4)             |
| Typhoid fever                                                     | 59<br>(28 - 107)            | 19<br>(7 - 40)             | 16<br>(7 - 31)         | 21<br>(9 - 42)           | 2<br>(1 - 5)             | 1<br>(0 - 2)             |
| Paratyphoid fever                                                 | 20<br>(9 - 38)              | 7<br>(3 - 15)              | 5<br>(2 - 12)          | 7<br>(3 - 14)            | 1<br>(0 - 2)             | 0<br>(0 - 1)             |
| Other intestinal infectious diseases                              | 7<br>(2 - 16)               | 4<br>(1 - 12)              | 1<br>(0 - 3)           | 2<br>(0 - 6)             | 0<br>(0 - 3)             | 0<br>(0 - 2)             |
| Lower respiratory infections                                      | 3,213<br>(2,280 - 4,425)    | 1,947<br>(1,150 - 3,027)   | 77<br>(40 - 133)       | 275<br>(175 - 396)       | 371<br>(229 - 552)       | 544<br>(339 - 756)       |
| Upper respiratory infections                                      | 5<br>(2 - 11)               | 2<br>(0 - 8)               | 0<br>(0 - 1)           | 1<br>(0 - 3)             | 1<br>(0 - 2)             | 0<br>(0 - 2)             |
| Otitis media                                                      | 3<br>(2 - 5)                | 2<br>(1 - 3)               | 0<br>(0 - 1)           | 1<br>(0 - 1)             | 0<br>(0 - 0)             | 0<br>(0 - 0)             |
| Meningitis                                                        | 742<br>(440 - 1,201)        | 448<br>(196 - 873)         | 62<br>(31 - 116)       | 149<br>(87 - 244)        | 57<br>(31 - 104)         | 25<br>(13 - 46)          |
| Pneumococcal meningitis                                           | 234<br>(140 - 386)          | 121<br>(47 - 256)          | 25<br>(12 - 48)        | 56<br>(32 - 93)          | 21<br>(11 - 38)          | 9<br>(5 - 18)            |
| H influenzae type B meningitis                                    | 229<br>(119 - 431)          | 183<br>(77 - 391)          | 17<br>(8 - 34)         | 21<br>(11 - 35)          | 6<br>(3 - 12)            | 3<br>(1 - 5)             |
| Meningococcal meningitis                                          | 97<br>(57 - 159)            | 55<br>(22 - 113)           | 7<br>(3 - 15)          | 21<br>(10 - 42)          | 9<br>(4 - 20)            | 5<br>(2 - 10)            |
| Other meningitis                                                  | 181<br>(102 - 287)          | 90<br>(33 - 184)           | 13<br>(5 - 26)         | 50<br>(22 - 92)          | 21<br>(9 - 41)           | 8<br>(3 - 16)            |
| Encephalitis                                                      | 34<br>(18 - 62)             | 21<br>(9 - 44)             | 3<br>(1 - 6)           | 6<br>(3 - 10)            | 2<br>(1 - 3)             | 1<br>(1 - 2)             |
| Diphtheria                                                        | 8<br>(0 - 52)               | 7<br>(0 - 52)              | 1<br>(0 - 7)           | 0<br>(0 - 2)             | 0<br>(0 - 1)             | --                       |
| Whooping cough                                                    | 120<br>(0 - 638)            | 115<br>(0 - 604)           | 4<br>(0 - 23)          | 1<br>(0 - 6)             | 0<br>(0 - 1)             | --                       |
| Tetanus                                                           | 75<br>(37 - 149)            | 60<br>(26 - 121)           | 3<br>(1 - 9)           | 7<br>(3 - 19)            | 3<br>(1 - 10)            | 1<br>(0 - 4)             |
| Measles                                                           | 550<br>(17 - 3,121)         | 488<br>(15 - 2,719)        | 52<br>(1 - 330)        | 9<br>(0 - 65)            | 0<br>(0 - 2)             | --                       |
| Varicella and herpes zoster                                       | 3<br>(1 - 8)                | 1<br>(0 - 5)               | 0<br>(0 - 1)           | 1<br>(0 - 2)             | 0<br>(0 - 1)             | 1<br>(0 - 4)             |
| Neglected tropical diseases and malaria                           | 1,936<br>(1,195 - 2,969)    | 1,136<br>(535 - 2,083)     | 165<br>(90 - 290)      | 411<br>(239 - 629)       | 140<br>(76 - 241)        | 83<br>(36 - 181)         |
| Malaria                                                           | 1,611<br>(876 - 2,611)      | 1,084<br>(477 - 2,029)     | 126<br>(53 - 250)      | 228<br>(106 - 413)       | 101<br>(40 - 197)        | 71<br>(24 - 168)         |
| Leishmaniasis                                                     | 33<br>(18 - 52)             | 13<br>(4 - 25)             | 8<br>(3 - 15)          | 10<br>(4 - 17)           | 1<br>(0 - 2)             | 1<br>(0 - 1)             |
| Visceral leishmaniasis                                            | 33<br>(18 - 52)             | 13<br>(4 - 25)             | 8<br>(3 - 15)          | 10<br>(4 - 17)           | 1<br>(0 - 2)             | 1<br>(0 - 1)             |
| African trypanosomiasis                                           | 236<br>(110 - 394)          | 16<br>(5 - 32)             | 25<br>(12 - 44)        | 157<br>(71 - 265)        | 30<br>(14 - 52)          | 8<br>(4 - 13)            |
| Schistosomiasis                                                   | 11<br>(8 - 16)              | 0<br>(0 - 1)               | 0<br>(0 - 1)           | 5<br>(3 - 8)             | 4<br>(2 - 6)             | 2<br>(1 - 3)             |
| Cysticercosis                                                     | 2<br>(1 - 2)                | 0<br>(0 - 0)               | 0<br>(0 - 0)           | 1<br>(1 - 2)             | 0<br>(0 - 0)             | 0<br>(0 - 0)             |
| Cystic echinococcosis                                             | 1<br>(1 - 1)                | 0<br>(0 - 0)               | 0<br>(0 - 0)           | 1<br>(0 - 1)             | 0<br>(0 - 0)             | 0<br>(0 - 0)             |
| Dengue                                                            | 2<br>(1 - 3)                | 1<br>(0 - 2)               | 0<br>(0 - 1)           | 0<br>(0 - 1)             | 0<br>(0 - 0)             | 0<br>(0 - 0)             |
| Yellow fever                                                      | 1<br>(1 - 2)                | 0<br>(0 - 0)               | 0<br>(0 - 1)           | 0<br>(0 - 1)             | 0<br>(0 - 0)             | 0<br>(0 - 0)             |
| Rabies                                                            | 8<br>(4 - 19)               | 2<br>(0 - 8)               | 1<br>(1 - 5)           | 3<br>(2 - 6)             | 1<br>(0 - 1)             | 0<br>(0 - 0)             |
| Intestinal nematode infections                                    | 9<br>(2 - 22)               | 8<br>(2 - 19)              | 1<br>(0 - 4)           | 1<br>(0 - 4)             | 0<br>(0 - 1)             | 0<br>(0 - 1)             |
| Ascariasis                                                        | 9<br>(2 - 22)               | 8<br>(2 - 19)              | 1<br>(0 - 4)           | 1<br>(0 - 4)             | 0<br>(0 - 1)             | 0<br>(0 - 1)             |

Web Table 31- Central African Republic deaths with 95% UI by age, sex, and cause in 2013

| Cause                                                            | Males, All Ages           | Males, 0-4 Years         | Males, 5-14 Years | Males, 15-49 Years       | Males, 50-69 Years       | Males, 70-80 Years       |
|------------------------------------------------------------------|---------------------------|--------------------------|-------------------|--------------------------|--------------------------|--------------------------|
| Other neglected tropical diseases                                | 23<br>(10 - 51)           | 12<br>(2 - 34)           | 2<br>(1 - 5)      | 5<br>(2 - 11)            | 2<br>(1 - 4)             | 2<br>(1 - 3)             |
| Maternal disorders                                               | --                        | --                       | --                | --                       | --                       | --                       |
| Maternal hemorrhage                                              | --                        | --                       | --                | --                       | --                       | --                       |
| Maternal sepsis and other maternal infections                    | --                        | --                       | --                | --                       | --                       | --                       |
| Maternal hypertensive disorders                                  | --                        | --                       | --                | --                       | --                       | --                       |
| Maternal obstructed labor                                        | --                        | --                       | --                | --                       | --                       | --                       |
| Maternal abortive outcome                                        | --                        | --                       | --                | --                       | --                       | --                       |
| Indirect maternal deaths                                         | --                        | --                       | --                | --                       | --                       | --                       |
| Late maternal deaths                                             | --                        | --                       | --                | --                       | --                       | --                       |
| Maternal deaths aggravated by HIV/AIDS                           | --                        | --                       | --                | --                       | --                       | --                       |
| Other maternal disorders                                         | --                        | --                       | --                | --                       | --                       | --                       |
| Neonatal disorders                                               | 2,440<br>(1,831 - 3,176)  | 2,440<br>(1,831 - 3,176) | --                | --                       | --                       | --                       |
| Neonatal preterm birth complications                             | 1,007<br>(466 - 1,713)    | 1,007<br>(466 - 1,713)   | --                | --                       | --                       | --                       |
| Neonatal encephalopathy due to birth asphyxia and trauma         | 624<br>(284 - 1,166)      | 624<br>(284 - 1,166)     | --                | --                       | --                       | --                       |
| Neonatal sepsis and other neonatal infections                    | 337<br>(96 - 730)         | 337<br>(96 - 730)        | --                | --                       | --                       | --                       |
| Hemolytic disease and other neonatal jaundice                    | 28<br>(8 - 77)            | 28<br>(8 - 77)           | --                | --                       | --                       | --                       |
| Other neonatal disorders                                         | 444<br>(189 - 829)        | 444<br>(189 - 829)       | --                | --                       | --                       | --                       |
| Nutritional deficiencies                                         | 1,412<br>(748 - 2,176)    | 927<br>(406 - 1,637)     | 44<br>(22 - 77)   | 128<br>(77 - 241)        | 130<br>(63 - 205)        | 182<br>(87 - 288)        |
| Protein-energy malnutrition                                      | 1,099<br>(528 - 1,789)    | 784<br>(321 - 1,429)     | 35<br>(15 - 63)   | 67<br>(28 - 148)         | 87<br>(35 - 148)         | 125<br>(43 - 206)        |
| Iodine deficiency                                                | 2<br>(0 - 11)             | 1<br>(0 - 10)            | 0<br>(0 - 1)      | 0<br>(0 - 2)             | 0<br>(0 - 1)             | 0<br>(0 - 1)             |
| Iron-deficiency anemia                                           | 293<br>(98 - 673)         | 132<br>(19 - 438)        | 9<br>(2 - 22)     | 57<br>(23 - 114)         | 41<br>(12 - 83)          | 55<br>(16 - 116)         |
| Other nutritional deficiencies                                   | 17<br>(6 - 50)            | 10<br>(1 - 36)           | 1<br>(0 - 2)      | 3<br>(1 - 8)             | 2<br>(1 - 4)             | 2<br>(1 - 6)             |
| Other communicable, maternal, neonatal, and nutritional diseases | 711<br>(417 - 1,142)      | 597<br>(325 - 1,016)     | 34<br>(17 - 57)   | 42<br>(26 - 72)          | 24<br>(12 - 47)          | 14<br>(6 - 30)           |
| Sexually transmitted diseases excluding HIV                      | 550<br>(288 - 955)        | 511<br>(260 - 905)       | 26<br>(12 - 47)   | 6<br>(3 - 18)            | 4<br>(2 - 10)            | 3<br>(1 - 8)             |
| Syphilis                                                         | 545<br>(283 - 952)        | 511<br>(260 - 905)       | 26<br>(12 - 47)   | 3<br>(2 - 10)            | 3<br>(1 - 7)             | 2<br>(1 - 6)             |
| Chlamydial infection                                             | --                        | --                       | --                | --                       | --                       | --                       |
| Gonococcal infection                                             | 3<br>(2 - 8)              | --                       | 0<br>(0 - 1)      | 2<br>(1 - 5)             | 1<br>(0 - 2)             | 0<br>(0 - 1)             |
| Other sexually transmitted diseases                              | 2<br>(1 - 6)              | --                       | 0<br>(0 - 1)      | 1<br>(1 - 4)             | 0<br>(0 - 1)             | 0<br>(0 - 0)             |
| Hepatitis                                                        | 30<br>(17 - 71)           | 9<br>(3 - 19)            | 2<br>(1 - 4)      | 11<br>(6 - 29)           | 6<br>(3 - 20)            | 2<br>(1 - 9)             |
| Acute hepatitis A                                                | 4<br>(1 - 9)              | 3<br>(0 - 7)             | 0<br>(0 - 1)      | 0<br>(0 - 2)             | 0<br>(0 - 0)             | 0<br>(0 - 0)             |
| Acute hepatitis B                                                | 19<br>(10 - 45)           | 6<br>(2 - 14)            | 1<br>(0 - 2)      | 5<br>(2 - 13)            | 5<br>(2 - 16)            | 2<br>(1 - 8)             |
| Acute hepatitis C                                                | 1<br>(0 - 3)              | --                       | 0<br>(0 - 0)      | 0<br>(0 - 2)             | 0<br>(0 - 1)             | 0<br>(0 - 0)             |
| Acute hepatitis E                                                | 7<br>(3 - 19)             | 0<br>(0 - 0)             | 0<br>(0 - 1)      | 6<br>(2 - 15)            | 1<br>(0 - 4)             | 0<br>(0 - 1)             |
| Other infectious diseases                                        | 130<br>(62 - 287)         | 77<br>(17 - 234)         | 6<br>(2 - 13)     | 25<br>(13 - 43)          | 14<br>(6 - 31)           | 9<br>(3 - 22)            |
| Non-communicable diseases                                        | 8,454<br>(6,737 - 10,624) | 1,003<br>(517 - 2,024)   | 139<br>(86 - 211) | 1,608<br>(1,163 - 2,133) | 2,852<br>(2,146 - 3,868) | 2,852<br>(2,334 - 3,508) |
| Neoplasms                                                        | 999<br>(784 - 1,284)      | 24<br>(9 - 71)           | 17<br>(11 - 28)   | 180<br>(130 - 242)       | 439<br>(331 - 602)       | 339<br>(271 - 426)       |
| Esophageal cancer                                                | 79<br>(53 - 121)          | --                       | --                | 12<br>(8 - 19)           | 44<br>(28 - 70)          | 23<br>(15 - 34)          |
| Stomach cancer                                                   | 163<br>(122 - 212)        | --                       | --                | 31<br>(21 - 44)          | 77<br>(55 - 107)         | 55<br>(40 - 74)          |
| Liver cancer                                                     | 88<br>(55 - 142)          | --                       | 1<br>(0 - 2)      | 16<br>(8 - 34)           | 44<br>(26 - 76)          | 26<br>(17 - 41)          |
| Liver cancer due to hepatitis B                                  | 49<br>(28 - 89)           | --                       | 0<br>(0 - 1)      | 11<br>(5 - 23)           | 26<br>(14 - 48)          | 12<br>(7 - 21)           |

Web Table 31- Central African Republic deaths with 95% UI by age, sex, and cause in 2013

| Cause                                | Males, All Ages          | Males, 0-4 Years | Males, 5-14 Years | Males, 15-49 Years | Males, 50-69 Years     | Males, 70-80 Years       |
|--------------------------------------|--------------------------|------------------|-------------------|--------------------|------------------------|--------------------------|
| Liver cancer due to hepatitis C      | 5<br>(2 - 9)             | --               | 0<br>(0 - 0)      | 0<br>(0 - 1)       | 2<br>(1 - 5)           | 2<br>(1 - 4)             |
| Liver cancer due to alcohol use      | 22<br>(12 - 38)          | --               | --                | 2<br>(1 - 5)       | 11<br>(5 - 21)         | 9<br>(5 - 15)            |
| Liver cancer due to other causes     | 12<br>(7 - 23)           | --               | 0<br>(0 - 1)      | 3<br>(1 - 7)       | 6<br>(3 - 12)          | 3<br>(2 - 6)             |
| Larynx cancer                        | 21<br>(14 - 32)          | --               | --                | 3<br>(2 - 5)       | 11<br>(7 - 18)         | 6<br>(4 - 10)            |
| Tracheal, bronchus and lung cancer   | 119<br>(91 - 155)        | --               | --                | 14<br>(8 - 20)     | 67<br>(48 - 92)        | 38<br>(28 - 54)          |
| Breast cancer                        | 3<br>(2 - 5)             | --               | --                | 1<br>(0 - 2)       | 1<br>(1 - 2)           | 1<br>(0 - 2)             |
| Cervical cancer                      | --                       | --               | --                | --                 | --                     | --                       |
| Uterine cancer                       | --                       | --               | --                | --                 | --                     | --                       |
| Prostate cancer                      | 80<br>(42 - 124)         | --               | --                | 1<br>(1 - 2)       | 22<br>(12 - 34)        | 57<br>(28 - 92)          |
| Colon and rectum cancer              | 80<br>(60 - 106)         | --               | --                | 11<br>(8 - 16)     | 35<br>(25 - 49)        | 34<br>(26 - 45)          |
| Lip and oral cavity cancer           | 21<br>(14 - 30)          | --               | --                | 5<br>(3 - 8)       | 11<br>(7 - 16)         | 5<br>(3 - 8)             |
| Nasopharynx cancer                   | 6<br>(4 - 8)             | --               | 0<br>(0 - 0)      | 2<br>(1 - 3)       | 3<br>(2 - 4)           | 1<br>(1 - 2)             |
| Other pharynx cancer                 | 12<br>(8 - 17)           | --               | --                | 2<br>(1 - 4)       | 7<br>(4 - 11)          | 3<br>(2 - 4)             |
| Gallbladder and biliary tract cancer | 13<br>(9 - 19)           | --               | --                | 1<br>(1 - 2)       | 6<br>(4 - 10)          | 6<br>(4 - 9)             |
| Pancreatic cancer                    | 29<br>(22 - 39)          | --               | --                | 4<br>(2 - 5)       | 15<br>(11 - 21)        | 11<br>(8 - 15)           |
| Malignant skin melanoma              | 6<br>(3 - 12)            | --               | --                | 2<br>(1 - 5)       | 2<br>(1 - 4)           | 2<br>(1 - 3)             |
| Non-melanoma skin cancer             | 6<br>(4 - 10)            | --               | --                | 1<br>(1 - 2)       | 2<br>(1 - 4)           | 2<br>(1 - 4)             |
| Ovarian cancer                       | --                       | --               | --                | --                 | --                     | --                       |
| Testicular cancer                    | 4<br>(2 - 5)             | --               | --                | 3<br>(2 - 4)       | 1<br>(0 - 1)           | 0<br>(0 - 1)             |
| Kidney cancer                        | 19<br>(14 - 26)          | 1<br>(0 - 4)     | 0<br>(0 - 1)      | 3<br>(2 - 5)       | 10<br>(6 - 14)         | 5<br>(3 - 8)             |
| Bladder cancer                       | 38<br>(28 - 51)          | --               | --                | 3<br>(2 - 5)       | 16<br>(11 - 25)        | 19<br>(13 - 26)          |
| Brain and nervous system cancer      | 17<br>(10 - 27)          | 1<br>(0 - 6)     | 2<br>(1 - 3)      | 6<br>(4 - 10)      | 6<br>(3 - 9)           | 2<br>(1 - 3)             |
| Thyroid cancer                       | 3<br>(2 - 4)             | --               | 0<br>(0 - 0)      | 1<br>(0 - 1)       | 1<br>(1 - 2)           | 1<br>(1 - 1)             |
| Mesothelioma                         | 2<br>(1 - 3)             | --               | --                | 0<br>(0 - 1)       | 1<br>(1 - 2)           | 1<br>(0 - 1)             |
| Hodgkin lymphoma                     | 8<br>(4 - 17)            | 1<br>(0 - 3)     | 1<br>(0 - 2)      | 4<br>(2 - 10)      | 2<br>(1 - 3)           | 1<br>(0 - 1)             |
| Non-Hodgkin lymphoma                 | 56<br>(40 - 79)          | 3<br>(1 - 12)    | 3<br>(2 - 7)      | 17<br>(11 - 27)    | 19<br>(12 - 28)        | 13<br>(8 - 19)           |
| Multiple myeloma                     | 9<br>(6 - 13)            | --               | --                | 1<br>(1 - 3)       | 5<br>(3 - 7)           | 3<br>(2 - 5)             |
| Leukemia                             | 27<br>(21 - 34)          | 3<br>(1 - 7)     | 4<br>(2 - 6)      | 10<br>(7 - 13)     | 6<br>(4 - 8)           | 5<br>(3 - 7)             |
| Other neoplasms                      | 89<br>(56 - 165)         | 14<br>(5 - 52)   | 6<br>(3 - 14)     | 24<br>(14 - 50)    | 26<br>(16 - 43)        | 18<br>(11 - 28)          |
| Cardiovascular diseases              | 3,405<br>(2,718 - 4,295) | 81<br>(42 - 140) | 18<br>(11 - 28)   | 581<br>(409 - 783) | 1,333<br>(997 - 1,798) | 1,392<br>(1,145 - 1,701) |
| Rheumatic heart disease              | 125<br>(79 - 224)        | 4<br>(1 - 12)    | 4<br>(2 - 7)      | 49<br>(29 - 91)    | 41<br>(23 - 78)        | 27<br>(16 - 50)          |
| Ischemic heart disease               | 1,545<br>(1,137 - 2,033) | 5<br>(1 - 12)    | 1<br>(1 - 3)      | 234<br>(155 - 335) | 666<br>(474 - 935)     | 639<br>(469 - 821)       |
| Cerebrovascular disease              | 788<br>(532 - 1,110)     | 10<br>(5 - 22)   | 3<br>(1 - 5)      | 99<br>(61 - 147)   | 291<br>(186 - 439)     | 385<br>(257 - 528)       |
| Ischemic stroke                      | 360<br>(113 - 565)       | 2<br>(0 - 6)     | 0<br>(0 - 1)      | 18<br>(3 - 42)     | 110<br>(25 - 200)      | 230<br>(78 - 349)        |
| Hemorrhagic stroke                   | 428<br>(221 - 701)       | 8<br>(3 - 19)    | 2<br>(1 - 4)      | 81<br>(41 - 124)   | 180<br>(95 - 294)      | 156<br>(65 - 311)        |
| Hypertensive heart disease           | 234<br>(44 - 450)        | 1<br>(0 - 3)     | 0<br>(0 - 1)      | 28<br>(3 - 48)     | 90<br>(14 - 166)       | 115<br>(25 - 255)        |
| Cardiomyopathy and myocarditis       | 177<br>(80 - 258)        | 29<br>(4 - 61)   | 4<br>(1 - 7)      | 52<br>(18 - 85)    | 56<br>(27 - 85)        | 36<br>(20 - 56)          |
| Atrial fibrillation and flutter      | 1<br>(0 - 2)             | --               | --                | 0<br>(0 - 0)       | 0<br>(0 - 1)           | 1<br>(0 - 1)             |
| Aortic aneurysm                      | 50<br>(26 - 102)         | --               | --                | 7<br>(3 - 16)      | 21<br>(10 - 44)        | 22<br>(12 - 46)          |
| Peripheral vascular disease          | 2<br>(1 - 4)             | --               | --                | 0<br>(0 - 0)       | 1<br>(0 - 1)           | 1<br>(1 - 2)             |

Web Table 31- Central African Republic deaths with 95% UI by age, sex, and cause in 2013

| Cause                                               | Males, All Ages      | Males, 0-4 Years | Males, 5-14 Years | Males, 15-49 Years | Males, 50-69 Years | Males, 70-80 Years |
|-----------------------------------------------------|----------------------|------------------|-------------------|--------------------|--------------------|--------------------|
| Endocarditis                                        | 42<br>(23 - 66)      | 2<br>(1 - 6)     | 0<br>(0 - 1)      | 10<br>(5 - 17)     | 14<br>(7 - 25)     | 14<br>(8 - 24)     |
| Other cardiovascular and circulatory diseases       | 441<br>(238 - 783)   | 29<br>(9 - 62)   | 5<br>(2 - 9)      | 102<br>(46 - 181)  | 153<br>(75 - 291)  | 151<br>(78 - 273)  |
| Chronic respiratory diseases                        | 992<br>(729 - 1,488) | 87<br>(39 - 167) | 11<br>(7 - 18)    | 112<br>(72 - 176)  | 318<br>(213 - 488) | 464<br>(339 - 701) |
| Chronic obstructive pulmonary disease               | 670<br>(483 - 991)   | 37<br>(15 - 75)  | 3<br>(1 - 5)      | 46<br>(27 - 74)    | 220<br>(144 - 342) | 363<br>(260 - 538) |
| Pneumoconiosis                                      | 51<br>(29 - 88)      | 1<br>(0 - 3)     | 0<br>(0 - 1)      | 10<br>(5 - 18)     | 21<br>(10 - 37)    | 19<br>(10 - 33)    |
| Silicosis                                           | 13<br>(5 - 33)       | 0<br>(0 - 1)     | 0<br>(0 - 0)      | 2<br>(1 - 5)       | 5<br>(1 - 13)      | 6<br>(2 - 15)      |
| Asbestosis                                          | 6<br>(3 - 10)        | 0<br>(0 - 1)     | 0<br>(0 - 0)      | 1<br>(1 - 2)       | 3<br>(1 - 5)       | 2<br>(1 - 3)       |
| Coal workers pneumoconiosis                         | 7<br>(3 - 14)        | 0<br>(0 - 0)     | 0<br>(0 - 0)      | 1<br>(1 - 2)       | 3<br>(1 - 6)       | 3<br>(1 - 6)       |
| Other pneumoconiosis                                | 25<br>(13 - 41)      | 1<br>(0 - 2)     | 0<br>(0 - 0)      | 5<br>(3 - 10)      | 10<br>(5 - 17)     | 9<br>(5 - 16)      |
| Asthma                                              | 196<br>(87 - 341)    | 25<br>(7 - 59)   | 6<br>(3 - 11)     | 46<br>(22 - 82)    | 60<br>(23 - 110)   | 58<br>(21 - 106)   |
| Interstitial lung disease and pulmonary sarcoidosis | 33<br>(10 - 66)      | 1<br>(0 - 3)     | 0<br>(0 - 1)      | 3<br>(1 - 7)       | 12<br>(4 - 26)     | 18<br>(5 - 35)     |
| Other chronic respiratory diseases                  | 42<br>(19 - 75)      | 22<br>(8 - 47)   | 2<br>(1 - 3)      | 7<br>(3 - 12)      | 5<br>(2 - 10)      | 6<br>(2 - 12)      |
| Cirrhosis                                           | 393<br>(242 - 580)   | 7<br>(2 - 18)    | 4<br>(2 - 6)      | 128<br>(73 - 199)  | 182<br>(106 - 282) | 72<br>(43 - 111)   |
| Cirrhosis due to hepatitis B                        | 98<br>(44 - 172)     | 0<br>(0 - 1)     | 1<br>(0 - 1)      | 31<br>(14 - 55)    | 47<br>(20 - 85)    | 19<br>(6 - 34)     |
| Cirrhosis due to hepatitis C                        | 116<br>(63 - 190)    | 1<br>(0 - 3)     | 1<br>(0 - 2)      | 37<br>(15 - 66)    | 55<br>(29 - 95)    | 23<br>(14 - 37)    |
| Cirrhosis due to alcohol use                        | 138<br>(83 - 217)    | --               | --                | 43<br>(23 - 70)    | 69<br>(40 - 113)   | 27<br>(16 - 44)    |
| Cirrhosis due to other causes                       | 41<br>(20 - 67)      | 6<br>(2 - 15)    | 2<br>(1 - 4)      | 18<br>(8 - 32)     | 12<br>(4 - 21)     | 3<br>(1 - 6)       |
| Digestive diseases                                  | 646<br>(474 - 860)   | 72<br>(26 - 141) | 19<br>(11 - 28)   | 195<br>(133 - 271) | 195<br>(135 - 283) | 165<br>(116 - 227) |
| Peptic ulcer disease                                | 228<br>(148 - 357)   | 8<br>(2 - 21)    | 3<br>(1 - 5)      | 72<br>(43 - 112)   | 84<br>(51 - 132)   | 63<br>(37 - 100)   |
| Gastritis and duodenitis                            | 24<br>(10 - 50)      | 4<br>(1 - 9)     | 1<br>(0 - 2)      | 8<br>(3 - 14)      | 6<br>(2 - 17)      | 5<br>(2 - 15)      |
| Appendicitis                                        | 46<br>(28 - 72)      | 11<br>(3 - 27)   | 5<br>(2 - 8)      | 17<br>(10 - 26)    | 8<br>(5 - 14)      | 5<br>(3 - 9)       |
| Paralytic ileus and intestinal obstruction          | 124<br>(66 - 201)    | 9<br>(3 - 23)    | 4<br>(2 - 7)      | 28<br>(13 - 49)    | 37<br>(18 - 64)    | 46<br>(23 - 74)    |
| Inguinal, femoral, and abdominal hernia             | 18<br>(10 - 34)      | 2<br>(0 - 8)     | 1<br>(0 - 1)      | 4<br>(2 - 7)       | 5<br>(2 - 9)       | 6<br>(3 - 14)      |
| Inflammatory bowel disease                          | 43<br>(18 - 71)      | 16<br>(3 - 36)   | 2<br>(1 - 3)      | 12<br>(5 - 21)     | 8<br>(2 - 14)      | 6<br>(2 - 15)      |
| Vascular intestinal disorders                       | 5<br>(2 - 11)        | 1<br>(0 - 2)     | 0<br>(0 - 0)      | 1<br>(0 - 3)       | 2<br>(1 - 4)       | 2<br>(0 - 4)       |
| Gallbladder and biliary diseases                    | 31<br>(19 - 46)      | 2<br>(0 - 5)     | 1<br>(0 - 1)      | 7<br>(4 - 12)      | 10<br>(5 - 17)     | 11<br>(6 - 18)     |
| Pancreatitis                                        | 36<br>(12 - 67)      | 1<br>(0 - 3)     | 0<br>(0 - 1)      | 20<br>(7 - 39)     | 10<br>(3 - 20)     | 4<br>(1 - 10)      |
| Other digestive diseases                            | 91<br>(55 - 141)     | 19<br>(5 - 43)   | 3<br>(1 - 5)      | 27<br>(15 - 43)    | 25<br>(14 - 42)    | 17<br>(9 - 32)     |
| Neurological disorders                              | 243<br>(183 - 314)   | 30<br>(7 - 75)   | 12<br>(5 - 21)    | 64<br>(39 - 97)    | 25<br>(17 - 35)    | 113<br>(87 - 144)  |
| Alzheimer disease and other dementias               | 117<br>(90 - 148)    | --               | --                | 0<br>(0 - 0)       | 12<br>(8 - 18)     | 105<br>(80 - 133)  |
| Parkinson disease                                   | 2<br>(1 - 3)         | --               | --                | 0<br>(0 - 0)       | 0<br>(0 - 1)       | 1<br>(1 - 2)       |
| Epilepsy                                            | 107<br>(61 - 163)    | 26<br>(5 - 68)   | 11<br>(4 - 20)    | 58<br>(34 - 89)    | 9<br>(5 - 14)      | 4<br>(2 - 8)       |
| Multiple sclerosis                                  | 0<br>(0 - 1)         | --               | --                | 0<br>(0 - 0)       | 0<br>(0 - 0)       | 0<br>(0 - 0)       |
| Other neurological disorders                        | 17<br>(10 - 34)      | 4<br>(1 - 16)    | 1<br>(1 - 3)      | 6<br>(4 - 10)      | 4<br>(2 - 5)       | 2<br>(2 - 3)       |
| Mental and substance use disorders                  | 151<br>(91 - 227)    | 5<br>(1 - 14)    | 0<br>(0 - 0)      | 100<br>(55 - 155)  | 38<br>(22 - 62)    | 7<br>(4 - 12)      |
| Schizophrenia                                       | 2<br>(1 - 5)         | --               | --                | 1<br>(0 - 3)       | 1<br>(0 - 2)       | 0<br>(0 - 1)       |
| Alcohol use disorders                               | 117<br>(63 - 192)    | --               | --                | 77<br>(37 - 130)   | 35<br>(20 - 59)    | 6<br>(3 - 11)      |
| Drug use disorders                                  | 31<br>(19 - 46)      | 5<br>(1 - 14)    | --                | 22<br>(13 - 39)    | 3<br>(1 - 4)       | 1<br>(0 - 1)       |
| Opioid use disorders                                | 3<br>(2 - 5)         | 1<br>(0 - 2)     | --                | 2<br>(1 - 4)       | 0<br>(0 - 0)       | 0<br>(0 - 0)       |
| Cocaine use disorders                               | 0<br>(0 - 0)         | 0<br>(0 - 0)     | --                | 0<br>(0 - 0)       | 0<br>(0 - 0)       | 0<br>(0 - 0)       |

Web Table 31- Central African Republic deaths with 95% UI by age, sex, and cause in 2013

| Cause                                               | Males, All Ages        | Males, 0-4 Years     | Males, 5-14 Years | Males, 15-49 Years | Males, 50-69 Years | Males, 70-80 Years |
|-----------------------------------------------------|------------------------|----------------------|-------------------|--------------------|--------------------|--------------------|
| Amphetamine use disorders                           | 0<br>(0 - 0)           | 0<br>(0 - 0)         | --                | 0<br>(0 - 0)       | 0<br>(0 - 0)       | 0<br>(0 - 0)       |
| Other drug use disorders                            | 28<br>(17 - 41)        | 5<br>(1 - 12)        | --                | 20<br>(12 - 34)    | 2<br>(1 - 4)       | 1<br>(0 - 1)       |
| Eating disorders                                    | 0<br>(0 - 0)           | --                   | 0<br>(0 - 0)      | 0<br>(0 - 0)       | --                 | --                 |
| Anorexia nervosa                                    | 0<br>(0 - 0)           | --                   | 0<br>(0 - 0)      | 0<br>(0 - 0)       | --                 | --                 |
| Diabetes, urogenital, blood, and endocrine diseases | 1,010<br>(765 - 1,365) | 168<br>(78 - 345)    | 41<br>(17 - 83)   | 213<br>(140 - 333) | 304<br>(216 - 429) | 284<br>(210 - 365) |
| Diabetes mellitus                                   | 447<br>(318 - 593)     | 7<br>(4 - 11)        | 2<br>(1 - 3)      | 64<br>(41 - 92)    | 199<br>(133 - 283) | 175<br>(120 - 236) |
| Acute glomerulonephritis                            | 5<br>(2 - 9)           | 1<br>(0 - 4)         | 1<br>(0 - 1)      | 1<br>(1 - 2)       | 1<br>(0 - 1)       | 1<br>(0 - 1)       |
| Chronic kidney disease                              | 161<br>(104 - 236)     | 16<br>(8 - 29)       | 4<br>(3 - 7)      | 50<br>(29 - 73)    | 42<br>(24 - 78)    | 47<br>(31 - 73)    |
| Chronic kidney disease due to diabetes mellitus     | 1<br>(0 - 2)           | 0<br>(0 - 0)         | 0<br>(0 - 0)      | 0<br>(0 - 0)       | 0<br>(0 - 1)       | 0<br>(0 - 0)       |
| Chronic kidney disease due to hypertension          | 56<br>(32 - 90)        | 2<br>(0 - 4)         | 0<br>(0 - 1)      | 11<br>(6 - 19)     | 19<br>(10 - 32)    | 23<br>(12 - 39)    |
| Chronic kidney disease due to glomerulonephritis    | 58<br>(37 - 91)        | 10<br>(5 - 19)       | 3<br>(2 - 5)      | 22<br>(13 - 36)    | 12<br>(6 - 23)     | 11<br>(5 - 20)     |
| Chronic kidney disease due to other causes          | 46<br>(22 - 79)        | 4<br>(1 - 11)        | 1<br>(0 - 2)      | 17<br>(7 - 28)     | 11<br>(3 - 27)     | 13<br>(5 - 26)     |
| Urinary diseases and male infertility               | 113<br>(78 - 159)      | 20<br>(7 - 47)       | 2<br>(1 - 4)      | 23<br>(15 - 35)    | 29<br>(18 - 43)    | 38<br>(23 - 66)    |
| Interstitial nephritis and urinary tract infections | 79<br>(52 - 113)       | 14<br>(4 - 33)       | 1<br>(1 - 2)      | 15<br>(9 - 23)     | 20<br>(11 - 31)    | 28<br>(17 - 52)    |
| Urolithiasis                                        | 2<br>(1 - 6)           | --                   | 0<br>(0 - 0)      | 1<br>(0 - 2)       | 1<br>(0 - 3)       | 1<br>(0 - 2)       |
| Other urinary diseases                              | 32<br>(20 - 52)        | 6<br>(2 - 17)        | 1<br>(0 - 1)      | 8<br>(5 - 12)      | 8<br>(4 - 15)      | 9<br>(3 - 18)      |
| Gynecological diseases                              | --                     | --                   | --                | --                 | --                 | --                 |
| Uterine fibroids                                    | --                     | --                   | --                | --                 | --                 | --                 |
| Polycystic ovarian syndrome                         | --                     | --                   | --                | --                 | --                 | --                 |
| Endometriosis                                       | --                     | --                   | --                | --                 | --                 | --                 |
| Genital prolapse                                    | --                     | --                   | --                | --                 | --                 | --                 |
| Other gynecological diseases                        | --                     | --                   | --                | --                 | --                 | --                 |
| Hemoglobinopathies and hemolytic anemias            | 169<br>(47 - 379)      | 82<br>(21 - 208)     | 25<br>(5 - 67)    | 45<br>(10 - 137)   | 11<br>(3 - 36)     | 6<br>(2 - 20)      |
| Thalassemias                                        | 0<br>(0 - 0)           | 0<br>(0 - 0)         | 0<br>(0 - 0)      | 0<br>(0 - 0)       | 0<br>(0 - 0)       | 0<br>(0 - 0)       |
| Sickle cell disorders                               | 159<br>(43 - 364)      | 79<br>(20 - 202)     | 25<br>(5 - 66)    | 44<br>(10 - 133)   | 9<br>(2 - 32)      | 1<br>(0 - 2)       |
| G6PD deficiency                                     | 2<br>(1 - 4)           | 1<br>(0 - 2)         | 0<br>(0 - 0)      | 0<br>(0 - 1)       | 0<br>(0 - 1)       | 0<br>(0 - 1)       |
| Other hemoglobinopathies and hemolytic anemias      | 9<br>(3 - 26)          | 2<br>(0 - 4)         | 0<br>(0 - 0)      | 1<br>(0 - 2)       | 1<br>(0 - 3)       | 5<br>(2 - 17)      |
| Endocrine, metabolic, blood, and immune disorders   | 116<br>(70 - 225)      | 41<br>(14 - 130)     | 6<br>(3 - 14)     | 29<br>(17 - 49)    | 23<br>(13 - 37)    | 17<br>(9 - 28)     |
| Musculoskeletal disorders                           | 24<br>(12 - 33)        | --                   | 2<br>(1 - 4)      | 10<br>(4 - 14)     | 7<br>(3 - 10)      | 5<br>(2 - 8)       |
| Rheumatoid arthritis                                | 5<br>(2 - 8)           | --                   | 0<br>(0 - 1)      | 1<br>(0 - 2)       | 2<br>(1 - 3)       | 2<br>(1 - 3)       |
| Other musculoskeletal disorders                     | 19<br>(9 - 27)         | --                   | 2<br>(1 - 3)      | 9<br>(4 - 13)      | 5<br>(2 - 8)       | 3<br>(2 - 5)       |
| Other non-communicable diseases                     | 592<br>(274 - 1,483)   | 529<br>(222 - 1,395) | 17<br>(7 - 42)    | 25<br>(16 - 37)    | 11<br>(7 - 15)     | 11<br>(7 - 18)     |
| Congenital anomalies                                | 545<br>(230 - 1,435)   | 508<br>(204 - 1,376) | 15<br>(7 - 40)    | 16<br>(10 - 28)    | 3<br>(2 - 5)       | 2<br>(1 - 3)       |
| Neural tube defects                                 | 169<br>(34 - 361)      | 161<br>(31 - 356)    | 3<br>(1 - 8)      | 4<br>(1 - 10)      | 0<br>(0 - 2)       | 0<br>(0 - 1)       |
| Congenital heart anomalies                          | 202<br>(52 - 688)      | 185<br>(42 - 660)    | 7<br>(2 - 23)     | 7<br>(4 - 15)      | 1<br>(1 - 2)       | 1<br>(0 - 1)       |
| Cleft lip and cleft palate                          | 4<br>(0 - 12)          | 4<br>(0 - 12)        | --                | --                 | --                 | --                 |
| Down syndrome                                       | 39<br>(4 - 135)        | 34<br>(3 - 128)      | 1<br>(0 - 4)      | 2<br>(1 - 5)       | 0<br>(0 - 1)       | 0<br>(0 - 0)       |
| Chromosomal unbalanced rearrangements               | 12<br>(2 - 56)         | 11<br>(1 - 54)       | 0<br>(0 - 1)      | 0<br>(0 - 1)       | 0<br>(0 - 0)       | 0<br>(0 - 0)       |
| Other congenital anomalies                          | 121<br>(18 - 554)      | 113<br>(14 - 536)    | 3<br>(1 - 13)     | 3<br>(1 - 9)       | 1<br>(1 - 2)       | 1<br>(1 - 2)       |
| Skin and subcutaneous diseases                      | 39<br>(26 - 56)        | 13<br>(3 - 27)       | 1<br>(1 - 2)      | 8<br>(5 - 12)      | 8<br>(5 - 11)      | 9<br>(5 - 16)      |



Web Table 31- Central African Republic deaths with 95% UI by age, sex, and cause in 2013

| Cause                                           | Males, All Ages          | Males, 0-4 Years   | Males, 5-14 Years  | Males, 15-49 Years       | Males, 50-69 Years | Males, 70-80 Years |
|-------------------------------------------------|--------------------------|--------------------|--------------------|--------------------------|--------------------|--------------------|
| Cellulitis                                      | 22<br>(11 - 38)          | 7<br>(2 - 18)      | 1<br>(0 - 2)       | 5<br>(2 - 8)             | 4<br>(2 - 8)       | 5<br>(2 - 10)      |
| Pyoderma                                        | 14<br>(5 - 26)           | 6<br>(1 - 13)      | 0<br>(0 - 1)       | 3<br>(1 - 5)             | 2<br>(1 - 5)       | 3<br>(1 - 5)       |
| Decubitus ulcer                                 | 3<br>(1 - 5)             | 0<br>(0 - 1)       | 0<br>(0 - 0)       | 1<br>(0 - 1)             | 1<br>(0 - 1)       | 1<br>(0 - 3)       |
| Other skin and subcutaneous diseases            | 1<br>(0 - 3)             | 0<br>(0 - 1)       | 0<br>(0 - 0)       | 0<br>(0 - 1)             | 0<br>(0 - 0)       | 0<br>(0 - 0)       |
| Sudden infant death syndrome                    | 8<br>(2 - 29)            | 8<br>(2 - 29)      | --                 | --                       | --                 | --                 |
| Injuries                                        | 2,575<br>(1,848 - 3,416) | 533<br>(237 - 952) | 196<br>(120 - 289) | 1,478<br>(1,015 - 2,019) | 253<br>(175 - 367) | 115<br>(85 - 152)  |
| Transport injuries                              | 894<br>(555 - 1,390)     | 127<br>(43 - 285)  | 79<br>(43 - 132)   | 571<br>(344 - 902)       | 85<br>(50 - 144)   | 32<br>(19 - 52)    |
| Road injuries                                   | 837<br>(517 - 1,294)     | 115<br>(39 - 253)  | 74<br>(40 - 121)   | 539<br>(326 - 837)       | 79<br>(46 - 135)   | 30<br>(18 - 49)    |
| Pedestrian road injuries                        | 303<br>(167 - 509)       | 59<br>(19 - 127)   | 36<br>(18 - 63)    | 161<br>(79 - 301)        | 33<br>(17 - 62)    | 14<br>(8 - 25)     |
| Cyclist road injuries                           | 87<br>(47 - 143)         | 15<br>(4 - 38)     | 14<br>(6 - 25)     | 42<br>(22 - 72)          | 11<br>(6 - 20)     | 4<br>(2 - 8)       |
| Motorcyclist road injuries                      | 181<br>(104 - 309)       | 10<br>(3 - 22)     | 6<br>(3 - 11)      | 152<br>(86 - 263)        | 11<br>(5 - 19)     | 2<br>(1 - 4)       |
| Motor vehicle road injuries                     | 258<br>(135 - 421)       | 30<br>(9 - 69)     | 18<br>(8 - 33)     | 179<br>(91 - 300)        | 24<br>(12 - 42)    | 8<br>(4 - 15)      |
| Other road injuries                             | 8<br>(3 - 15)            | 1<br>(0 - 4)       | 1<br>(0 - 2)       | 5<br>(2 - 10)            | 1<br>(0 - 3)       | 0<br>(0 - 1)       |
| Other transport injuries                        | 57<br>(25 - 119)         | 12<br>(3 - 32)     | 5<br>(2 - 11)      | 32<br>(13 - 70)          | 6<br>(2 - 13)      | 2<br>(1 - 4)       |
| Unintentional injuries                          | 1,092<br>(712 - 1,527)   | 392<br>(160 - 723) | 106<br>(60 - 162)  | 432<br>(298 - 597)       | 102<br>(71 - 145)  | 61<br>(42 - 87)    |
| Falls                                           | 142<br>(78 - 257)        | 23<br>(4 - 71)     | 7<br>(3 - 17)      | 62<br>(32 - 118)         | 27<br>(12 - 49)    | 23<br>(8 - 38)     |
| Drowning                                        | 309<br>(106 - 541)       | 129<br>(17 - 307)  | 50<br>(16 - 89)    | 110<br>(56 - 171)        | 15<br>(8 - 26)     | 5<br>(3 - 11)      |
| Fire, heat, and hot substances                  | 160<br>(76 - 285)        | 81<br>(17 - 194)   | 11<br>(5 - 20)     | 44<br>(25 - 73)          | 13<br>(8 - 22)     | 10<br>(6 - 22)     |
| Poisonings                                      | 76<br>(42 - 158)         | 27<br>(8 - 70)     | 5<br>(2 - 11)      | 35<br>(20 - 77)          | 7<br>(4 - 15)      | 3<br>(1 - 6)       |
| Exposure to mechanical forces                   | 218<br>(142 - 330)       | 47<br>(17 - 97)    | 20<br>(11 - 37)    | 128<br>(76 - 205)        | 19<br>(12 - 32)    | 4<br>(3 - 7)       |
| Unintentional firearm injuries                  | 87<br>(51 - 138)         | 12<br>(4 - 29)     | 7<br>(3 - 15)      | 59<br>(32 - 101)         | 6<br>(3 - 11)      | 2<br>(1 - 3)       |
| Unintentional suffocation                       | 9<br>(0 - 31)            | 6<br>(0 - 25)      | 1<br>(0 - 2)       | 2<br>(0 - 5)             | 0<br>(0 - 1)       | 0<br>(0 - 0)       |
| Other exposure to mechanical forces             | 122<br>(69 - 204)        | 29<br>(7 - 67)     | 12<br>(5 - 25)     | 66<br>(35 - 111)         | 12<br>(7 - 21)     | 2<br>(1 - 4)       |
| Adverse effects of medical treatment            | 56<br>(29 - 89)          | 22<br>(5 - 53)     | 2<br>(1 - 4)       | 13<br>(7 - 20)           | 10<br>(5 - 17)     | 10<br>(4 - 18)     |
| Animal contact                                  | 23<br>(12 - 42)          | 9<br>(2 - 22)      | 3<br>(1 - 7)       | 7<br>(3 - 10)            | 3<br>(1 - 5)       | 2<br>(1 - 3)       |
| Venomous animal contact                         | 12<br>(5 - 24)           | 5<br>(1 - 13)      | 2<br>(1 - 4)       | 4<br>(2 - 6)             | 2<br>(1 - 3)       | 1<br>(0 - 1)       |
| Non-venomous animal contact                     | 11<br>(5 - 21)           | 4<br>(0 - 12)      | 2<br>(0 - 3)       | 3<br>(1 - 5)             | 1<br>(1 - 3)       | 1<br>(0 - 2)       |
| Foreign body                                    | 59<br>(21 - 138)         | 43<br>(10 - 110)   | 2<br>(1 - 5)       | 8<br>(3 - 15)            | 3<br>(1 - 6)       | 3<br>(1 - 6)       |
| Pulmonary aspiration and foreign body in airway | 57<br>(20 - 136)         | 42<br>(10 - 110)   | 7<br>(1 - 5)       | 7<br>(3 - 15)            | 3<br>(1 - 6)       | 3<br>(1 - 6)       |
| Foreign body in other body part                 | 2<br>(1 - 3)             | 1<br>(0 - 2)       | 0<br>(0 - 0)       | 1<br>(0 - 1)             | 0<br>(0 - 0)       | 0<br>(0 - 0)       |
| Other unintentional injuries                    | 48<br>(28 - 71)          | 12<br>(3 - 23)     | 5<br>(2 - 8)       | 26<br>(15 - 40)          | 4<br>(3 - 7)       | 1<br>(1 - 2)       |
| Self-harm and interpersonal violence            | 589<br>(347 - 840)       | 14<br>(6 - 30)     | 11<br>(5 - 19)     | 476<br>(267 - 707)       | 66<br>(35 - 99)    | 22<br>(10 - 36)    |
| Self-harm                                       | 366<br>(162 - 566)       | --                 | 5<br>(2 - 13)      | 286<br>(125 - 470)       | 54<br>(23 - 82)    | 20<br>(9 - 35)     |
| Interpersonal violence                          | 223<br>(120 - 333)       | 14<br>(6 - 30)     | 5<br>(3 - 9)       | 189<br>(98 - 287)        | 12<br>(6 - 20)     | 2<br>(1 - 3)       |
| Assault by firearm                              | 91<br>(39 - 162)         | 2<br>(0 - 5)       | 1<br>(0 - 3)       | 84<br>(36 - 146)         | 4<br>(2 - 8)       | 0<br>(0 - 1)       |
| Assault by sharp object                         | 58<br>(22 - 103)         | 1<br>(0 - 3)       | 1<br>(0 - 2)       | 53<br>(18 - 95)          | 4<br>(1 - 7)       | 0<br>(0 - 1)       |
| Assault by other means                          | 73<br>(36 - 123)         | 12<br>(4 - 26)     | 3<br>(1 - 6)       | 53<br>(23 - 94)          | 4<br>(2 - 8)       | 1<br>(0 - 2)       |

Web Table 31- Central African Republic deaths with 95% UI by age, sex, and cause in 2013

| Cause                                                             | Females, All Ages           | Females, 0-4 Years         | Females, 5-14 Years    | Females, 15-49 Years     | Females, 50-69 Years     | Females, 70-80 Years     |
|-------------------------------------------------------------------|-----------------------------|----------------------------|------------------------|--------------------------|--------------------------|--------------------------|
| All causes                                                        | 30,917<br>(26,937 - 35,558) | 10,106<br>(7,789 - 13,063) | 1,136<br>(903 - 1,426) | 8,554<br>(7,215 - 9,788) | 5,075<br>(3,951 - 6,295) | 6,047<br>(4,956 - 7,235) |
| Communicable, maternal, neonatal, and nutritional diseases        | 20,524<br>(17,627 - 24,309) | 8,679<br>(6,553 - 11,494)  | 850<br>(646 - 1,134)   | 6,652<br>(5,499 - 7,761) | 2,294<br>(1,799 - 2,865) | 2,049<br>(1,373 - 2,665) |
| HIV/AIDS and tuberculosis                                         | 5,835<br>(4,622 - 7,380)    | 270<br>(186 - 382)         | 238<br>(200 - 279)     | 3,822<br>(2,774 - 5,151) | 1,133<br>(877 - 1,424)   | 373<br>(236 - 541)       |
| Tuberculosis                                                      | 1,637<br>(1,103 - 2,296)    | 128<br>(64 - 226)          | 32<br>(18 - 55)        | 688<br>(440 - 1,005)     | 489<br>(274 - 748)       | 299<br>(159 - 462)       |
| HIV/AIDS                                                          | 4,199<br>(3,022 - 5,765)    | 142<br>(96 - 194)          | 205<br>(170 - 241)     | 3,134<br>(1,999 - 4,549) | 644<br>(484 - 821)       | 73<br>(41 - 111)         |
| HIV/AIDS resulting in mycobacterial infection                     | 237<br>(163 - 333)          | 8<br>(5 - 11)              | 10<br>(8 - 13)         | 177<br>(110 - 261)       | 38<br>(27 - 52)          | 4<br>(2 - 7)             |
| HIV/AIDS resulting in other diseases                              | 3,962<br>(2,861 - 5,453)    | 134<br>(91 - 184)          | 195<br>(161 - 230)     | 2,957<br>(1,887 - 4,310) | 607<br>(458 - 774)       | 69<br>(39 - 104)         |
| Diarrhea, lower respiratory, and other common infectious diseases | 7,211<br>(5,473 - 9,495)    | 4,043<br>(2,725 - 5,825)   | 338<br>(199 - 586)     | 780<br>(502 - 1,145)     | 794<br>(491 - 1,171)     | 1,256<br>(792 - 1,794)   |
| Diarrheal diseases                                                | 2,681<br>(1,685 - 3,991)    | 1,318<br>(528 - 2,441)     | 113<br>(46 - 214)      | 367<br>(207 - 616)       | 372<br>(195 - 631)       | 511<br>(275 - 881)       |
| Intestinal infectious diseases                                    | 86<br>(42 - 157)            | 35<br>(14 - 71)            | 23<br>(10 - 45)        | 22<br>(9 - 42)           | 4<br>(2 - 9)             | 2<br>(1 - 5)             |
| Typhoid fever                                                     | 62<br>(29 - 115)            | 24<br>(9 - 49)             | 17<br>(7 - 34)         | 16<br>(7 - 33)           | 3<br>(1 - 7)             | 1<br>(0 - 3)             |
| Paratyphoid fever                                                 | 18<br>(8 - 37)              | 8<br>(3 - 18)              | 5<br>(2 - 11)          | 5<br>(2 - 10)            | 1<br>(0 - 2)             | 0<br>(0 - 1)             |
| Other intestinal infectious diseases                              | 5<br>(1 - 13)               | 3<br>(0 - 10)              | 1<br>(0 - 3)           | 1<br>(0 - 4)             | 0<br>(0 - 3)             | 0<br>(0 - 2)             |
| Lower respiratory infections                                      | 3,118<br>(2,133 - 4,276)    | 1,744<br>(977 - 2,681)     | 79<br>(40 - 135)       | 231<br>(137 - 359)       | 358<br>(184 - 568)       | 707<br>(372 - 1,086)     |
| Upper respiratory infections                                      | 5<br>(2 - 11)               | 2<br>(0 - 8)               | 0<br>(0 - 1)           | 1<br>(0 - 3)             | 1<br>(0 - 2)             | 1<br>(0 - 2)             |
| Otitis media                                                      | 3<br>(2 - 4)                | 2<br>(1 - 3)               | 0<br>(0 - 1)           | 1<br>(0 - 1)             | 0<br>(0 - 0)             | 0<br>(0 - 0)             |
| Meningitis                                                        | 522<br>(344 - 786)          | 250<br>(114 - 481)         | 53<br>(26 - 95)        | 133<br>(77 - 212)        | 54<br>(28 - 93)          | 32<br>(16 - 57)          |
| Pneumococcal meningitis                                           | 174<br>(109 - 263)          | 68<br>(31 - 125)           | 22<br>(10 - 40)        | 51<br>(26 - 87)          | 21<br>(10 - 37)          | 12<br>(5 - 22)           |
| H influenzae type B meningitis                                    | 141<br>(81 - 232)           | 99<br>(46 - 185)           | 14<br>(6 - 27)         | 19<br>(8 - 33)           | 6<br>(3 - 11)            | 3<br>(1 - 6)             |
| Meningococcal meningitis                                          | 71<br>(43 - 105)            | 29<br>(12 - 57)            | 6<br>(2 - 13)          | 21<br>(8 - 37)           | 9<br>(4 - 17)            | 6<br>(3 - 12)            |
| Other meningitis                                                  | 136<br>(83 - 206)           | 54<br>(20 - 110)           | 11<br>(4 - 23)         | 42<br>(22 - 74)          | 17<br>(9 - 32)           | 11<br>(5 - 21)           |
| Encephalitis                                                      | 26<br>(14 - 48)             | 15<br>(6 - 34)             | 3<br>(1 - 6)           | 5<br>(2 - 11)            | 2<br>(1 - 3)             | 1<br>(1 - 2)             |
| Diphtheria                                                        | 9<br>(0 - 53)               | 8<br>(0 - 51)              | 1<br>(0 - 8)           | 0<br>(0 - 2)             | 0<br>(0 - 1)             | --                       |
| Whooping cough                                                    | 147<br>(0 - 729)            | 140<br>(0 - 697)           | 6<br>(0 - 31)          | 1<br>(0 - 5)             | 0<br>(0 - 1)             | --                       |
| Tetanus                                                           | 56<br>(24 - 118)            | 43<br>(15 - 104)           | 2<br>(1 - 5)           | 6<br>(3 - 15)            | 3<br>(1 - 8)             | 2<br>(0 - 5)             |
| Measles                                                           | 554<br>(18 - 3,056)         | 485<br>(16 - 2,607)        | 58<br>(2 - 355)        | 11<br>(0 - 74)           | 0<br>(0 - 2)             | --                       |
| Varicella and herpes zoster                                       | 4<br>(1 - 10)               | 1<br>(0 - 6)               | 0<br>(0 - 1)           | 1<br>(0 - 2)             | 0<br>(0 - 1)             | 1<br>(0 - 5)             |
| Neglected tropical diseases and malaria                           | 2,265<br>(1,190 - 3,860)    | 1,278<br>(540 - 2,600)     | 190<br>(76 - 359)      | 423<br>(194 - 789)       | 217<br>(78 - 484)        | 157<br>(42 - 390)        |
| Malaria                                                           | 1,964<br>(919 - 3,569)      | 1,229<br>(493 - 2,529)     | 154<br>(37 - 321)      | 271<br>(64 - 639)        | 170<br>(36 - 438)        | 140<br>(25 - 372)        |
| Leishmaniasis                                                     | 17<br>(9 - 31)              | 5<br>(2 - 11)              | 4<br>(1 - 9)           | 6<br>(2 - 12)            | 1<br>(0 - 3)             | 0<br>(0 - 1)             |
| Visceral leishmaniasis                                            | 17<br>(9 - 31)              | 5<br>(2 - 11)              | 4<br>(1 - 9)           | 6<br>(2 - 12)            | 1<br>(0 - 3)             | 0<br>(0 - 1)             |
| African trypanosomiasis                                           | 220<br>(104 - 374)          | 16<br>(5 - 31)             | 26<br>(12 - 46)        | 129<br>(58 - 230)        | 38<br>(17 - 66)          | 12<br>(5 - 20)           |
| Schistosomiasis                                                   | 10<br>(7 - 14)              | 0<br>(0 - 0)               | 0<br>(0 - 1)           | 4<br>(2 - 6)             | 3<br>(2 - 6)             | 2<br>(1 - 3)             |
| Cysticercosis                                                     | 2<br>(2 - 3)                | 0<br>(0 - 0)               | 0<br>(0 - 0)           | 1<br>(1 - 2)             | 0<br>(0 - 1)             | 0<br>(0 - 0)             |
| Cystic echinococcosis                                             | 2<br>(1 - 2)                | 0<br>(0 - 0)               | 0<br>(0 - 0)           | 1<br>(1 - 1)             | 0<br>(0 - 0)             | 0<br>(0 - 0)             |
| Dengue                                                            | 1<br>(0 - 2)                | 0<br>(0 - 1)               | 0<br>(0 - 0)           | 0<br>(0 - 1)             | 0<br>(0 - 0)             | 0<br>(0 - 0)             |
| Yellow fever                                                      | 0<br>(0 - 1)                | 0<br>(0 - 0)               | 0<br>(0 - 0)           | 0<br>(0 - 0)             | 0<br>(0 - 0)             | 0<br>(0 - 0)             |
| Rabies                                                            | 7<br>(3 - 14)               | 2<br>(0 - 5)               | 2<br>(1 - 4)           | 2<br>(1 - 5)             | 1<br>(0 - 1)             | 0<br>(0 - 0)             |
| Intestinal nematode infections                                    | 11<br>(3 - 26)              | 9<br>(2 - 23)              | 1<br>(0 - 5)           | 1<br>(0 - 4)             | 0<br>(0 - 2)             | 0<br>(0 - 2)             |
| Ascariasis                                                        | 11<br>(3 - 26)              | 9<br>(2 - 23)              | 1<br>(0 - 5)           | 1<br>(0 - 4)             | 0<br>(0 - 2)             | 0<br>(0 - 2)             |

Web Table 31- Central African Republic deaths with 95% UI by age, sex, and cause in 2013

| Cause                                                            | Females, All Ages         | Females, 0-4 Years       | Females, 5-14 Years | Females, 15-49 Years   | Females, 50-69 Years     | Females, 70-80 Years     |
|------------------------------------------------------------------|---------------------------|--------------------------|---------------------|------------------------|--------------------------|--------------------------|
| Other neglected tropical diseases                                | 31<br>(11 - 65)           | 16<br>(3 - 43)           | 3<br>(1 - 6)        | 7<br>(2 - 16)          | 3<br>(1 - 5)             | 2<br>(1 - 4)             |
| Maternal disorders                                               | 1,459<br>(926 - 2,072)    | --                       | 4<br>(1 - 9)        | 1,455<br>(922 - 2,069) | --                       | --                       |
| Maternal hemorrhage                                              | 211<br>(120 - 325)        | --                       | 0<br>(0 - 1)        | 211<br>(120 - 324)     | --                       | --                       |
| Maternal sepsis and other maternal infections                    | 126<br>(76 - 199)         | --                       | 0<br>(0 - 1)        | 126<br>(75 - 198)      | --                       | --                       |
| Maternal hypertensive disorders                                  | 167<br>(95 - 260)         | --                       | 1<br>(0 - 1)        | 166<br>(94 - 259)      | --                       | --                       |
| Maternal obstructed labor                                        | 83<br>(48 - 129)          | --                       | 0<br>(0 - 0)        | 83<br>(48 - 128)       | --                       | --                       |
| Maternal abortive outcome                                        | 247<br>(139 - 373)        | --                       | 1<br>(0 - 1)        | 247<br>(139 - 372)     | --                       | --                       |
| Indirect maternal deaths                                         | 115<br>(67 - 183)         | --                       | 0<br>(0 - 1)        | 115<br>(67 - 183)      | --                       | --                       |
| Late maternal deaths                                             | 219<br>(124 - 358)        | --                       | 1<br>(0 - 2)        | 218<br>(123 - 357)     | --                       | --                       |
| Maternal deaths aggravated by HIV/AIDS                           | 27<br>(13 - 44)           | --                       | --                  | 27<br>(13 - 44)        | --                       | --                       |
| Other maternal disorders                                         | 260<br>(151 - 381)        | --                       | 1<br>(0 - 2)        | 259<br>(151 - 381)     | --                       | --                       |
| Neonatal disorders                                               | 1,708<br>(1,183 - 2,439)  | 1,708<br>(1,183 - 2,439) | --                  | --                     | --                       | --                       |
| Neonatal preterm birth complications                             | 745<br>(338 - 1,326)      | 745<br>(338 - 1,326)     | --                  | --                     | --                       | --                       |
| Neonatal encephalopathy due to birth asphyxia and trauma         | 457<br>(196 - 869)        | 457<br>(196 - 869)       | --                  | --                     | --                       | --                       |
| Neonatal sepsis and other neonatal infections                    | 193<br>(48 - 474)         | 193<br>(48 - 474)        | --                  | --                     | --                       | --                       |
| Hemolytic disease and other neonatal jaundice                    | 13<br>(4 - 31)            | 13<br>(4 - 31)           | --                  | --                     | --                       | --                       |
| Other neonatal disorders                                         | 301<br>(124 - 604)        | 301<br>(124 - 604)       | --                  | --                     | --                       | --                       |
| Nutritional deficiencies                                         | 1,333<br>(830 - 1,953)    | 795<br>(367 - 1,401)     | 41<br>(22 - 66)     | 126<br>(84 - 190)      | 126<br>(73 - 192)        | 246<br>(127 - 375)       |
| Protein-energy malnutrition                                      | 925<br>(491 - 1,481)      | 686<br>(299 - 1,231)     | 28<br>(13 - 48)     | 23<br>(8 - 53)         | 58<br>(23 - 101)         | 129<br>(42 - 224)        |
| Iodine deficiency                                                | 2<br>(0 - 7)              | 1<br>(0 - 6)             | 0<br>(0 - 1)        | 0<br>(0 - 1)           | 0<br>(0 - 2)             | 0<br>(0 - 2)             |
| Iron-deficiency anemia                                           | 394<br>(212 - 645)        | 102<br>(23 - 276)        | 12<br>(5 - 26)      | 100<br>(62 - 152)      | 65<br>(31 - 108)         | 114<br>(47 - 200)        |
| Other nutritional deficiencies                                   | 13<br>(6 - 28)            | 5<br>(1 - 16)            | 1<br>(0 - 1)        | 2<br>(1 - 5)           | 2<br>(1 - 4)             | 3<br>(1 - 6)             |
| Other communicable, maternal, neonatal, and nutritional diseases | 712<br>(417 - 1,138)      | 585<br>(305 - 983)       | 39<br>(19 - 67)     | 47<br>(27 - 76)        | 24<br>(12 - 45)          | 17<br>(8 - 34)           |
| Sexually transmitted diseases excluding HIV                      | 579<br>(311 - 1,006)      | 519<br>(257 - 926)       | 31<br>(14 - 56)     | 18<br>(5 - 38)         | 7<br>(2 - 16)            | 5<br>(2 - 13)            |
| Syphilis                                                         | 564<br>(293 - 990)        | 519<br>(257 - 926)       | 31<br>(13 - 55)     | 7<br>(2 - 15)          | 4<br>(1 - 9)             | 4<br>(1 - 10)            |
| Chlamydial infection                                             | 5<br>(2 - 10)             | --                       | 0<br>(0 - 0)        | 4<br>(1 - 8)           | 1<br>(0 - 2)             | 0<br>(0 - 1)             |
| Gonococcal infection                                             | 6<br>(2 - 11)             | --                       | 0<br>(0 - 0)        | 4<br>(1 - 8)           | 1<br>(0 - 3)             | 1<br>(0 - 2)             |
| Other sexually transmitted diseases                              | 5<br>(2 - 9)              | --                       | 0<br>(0 - 0)        | 3<br>(1 - 7)           | 1<br>(0 - 2)             | 0<br>(0 - 1)             |
| Hepatitis                                                        | 27<br>(17 - 55)           | 8<br>(3 - 15)            | 2<br>(1 - 4)        | 10<br>(6 - 18)         | 5<br>(2 - 15)            | 2<br>(1 - 8)             |
| Acute hepatitis A                                                | 4<br>(1 - 8)              | 3<br>(1 - 7)             | 1<br>(0 - 1)        | 0<br>(0 - 1)           | 0<br>(0 - 0)             | 0<br>(0 - 0)             |
| Acute hepatitis B                                                | 12<br>(7 - 28)            | 5<br>(1 - 10)            | 1<br>(0 - 1)        | 2<br>(1 - 4)           | 3<br>(2 - 11)            | 2<br>(1 - 7)             |
| Acute hepatitis C                                                | 1<br>(0 - 2)              | --                       | 0<br>(0 - 0)        | 0<br>(0 - 1)           | 0<br>(0 - 1)             | 0<br>(0 - 1)             |
| Acute hepatitis E                                                | 10<br>(5 - 19)            | 0<br>(0 - 1)             | 0<br>(0 - 1)        | 8<br>(4 - 14)          | 1<br>(0 - 4)             | 0<br>(0 - 1)             |
| Other infectious diseases                                        | 106<br>(50 - 228)         | 59<br>(15 - 169)         | 6<br>(2 - 16)       | 19<br>(7 - 35)         | 13<br>(5 - 27)           | 10<br>(3 - 25)           |
| Non-communicable diseases                                        | 9,007<br>(7,019 - 11,336) | 1,001<br>(485 - 1,714)   | 154<br>(93 - 227)   | 1,334<br>(942 - 1,806) | 2,639<br>(1,821 - 3,616) | 3,880<br>(3,031 - 5,024) |
| Neoplasms                                                        | 1,242<br>(911 - 1,637)    | 27<br>(10 - 69)          | 18<br>(10 - 33)     | 290<br>(196 - 411)     | 542<br>(374 - 735)       | 366<br>(273 - 467)       |
| Esophageal cancer                                                | 42<br>(28 - 61)           | --                       | --                  | 3<br>(2 - 4)           | 19<br>(11 - 29)          | 21<br>(13 - 31)          |
| Stomach cancer                                                   | 106<br>(74 - 145)         | --                       | --                  | 23<br>(15 - 33)        | 47<br>(29 - 69)          | 37<br>(23 - 54)          |
| Liver cancer                                                     | 86<br>(51 - 143)          | --                       | 1<br>(0 - 2)        | 13<br>(6 - 29)         | 40<br>(21 - 70)          | 32<br>(19 - 50)          |
| Liver cancer due to hepatitis B                                  | 33<br>(18 - 59)           | --                       | 0<br>(0 - 1)        | 6<br>(3 - 14)          | 16<br>(8 - 30)           | 10<br>(5 - 18)           |

Web Table 31- Central African Republic deaths with 95% UI by age, sex, and cause in 2013

| Cause                                | Females, All Ages        | Females, 0-4 Years | Females, 5-14 Years | Females, 15-49 Years | Females, 50-69 Years   | Females, 70-80 Years     |
|--------------------------------------|--------------------------|--------------------|---------------------|----------------------|------------------------|--------------------------|
| Liver cancer due to hepatitis C      | 6<br>(1 - 15)            | --                 | 0<br>(0 - 0)        | 0<br>(0 - 1)         | 3<br>(1 - 6)           | 3<br>(0 - 8)             |
| Liver cancer due to alcohol use      | 16<br>(8 - 29)           | --                 | --                  | 1<br>(0 - 2)         | 7<br>(3 - 14)          | 8<br>(4 - 15)            |
| Liver cancer due to other causes     | 30<br>(14 - 54)          | --                 | 0<br>(0 - 1)        | 6<br>(2 - 13)        | 14<br>(6 - 28)         | 10<br>(5 - 17)           |
| Larynx cancer                        | 5<br>(2 - 11)            | --                 | --                  | 1<br>(0 - 3)         | 2<br>(1 - 6)           | 1<br>(1 - 3)             |
| Tracheal, bronchus and lung cancer   | 59<br>(40 - 84)          | --                 | --                  | 8<br>(4 - 11)        | 31<br>(20 - 45)        | 21<br>(13 - 35)          |
| Breast cancer                        | 165<br>(115 - 222)       | --                 | --                  | 41<br>(26 - 77)      | 84<br>(54 - 119)       | 40<br>(24 - 57)          |
| Cervical cancer                      | 272<br>(188 - 370)       | --                 | --                  | 106<br>(70 - 152)    | 120<br>(75 - 175)      | 46<br>(30 - 68)          |
| Uterine cancer                       | 21<br>(12 - 32)          | --                 | --                  | 3<br>(1 - 5)         | 12<br>(6 - 18)         | 7<br>(3 - 12)            |
| Prostate cancer                      | --                       | --                 | --                  | --                   | --                     | --                       |
| Colon and rectum cancer              | 94<br>(66 - 125)         | --                 | --                  | 9<br>(7 - 13)        | 40<br>(27 - 56)        | 45<br>(30 - 64)          |
| Lip and oral cavity cancer           | 13<br>(7 - 26)           | --                 | --                  | 3<br>(1 - 8)         | 6<br>(3 - 12)          | 4<br>(3 - 7)             |
| Nasopharynx cancer                   | 5<br>(3 - 8)             | --                 | 0<br>(0 - 0)        | 2<br>(1 - 4)         | 2<br>(1 - 3)           | 1<br>(0 - 1)             |
| Other pharynx cancer                 | 5<br>(3 - 7)             | --                 | --                  | 1<br>(0 - 2)         | 3<br>(1 - 4)           | 1<br>(1 - 2)             |
| Gallbladder and biliary tract cancer | 38<br>(23 - 56)          | --                 | --                  | 3<br>(1 - 4)         | 19<br>(11 - 30)        | 16<br>(9 - 27)           |
| Pancreatic cancer                    | 30<br>(20 - 40)          | --                 | --                  | 2<br>(1 - 3)         | 14<br>(9 - 20)         | 14<br>(10 - 20)          |
| Malignant skin melanoma              | 5<br>(4 - 8)             | --                 | --                  | 1<br>(1 - 3)         | 2<br>(1 - 4)           | 2<br>(1 - 3)             |
| Non-melanoma skin cancer             | 8<br>(4 - 16)            | --                 | --                  | 2<br>(0 - 3)         | 2<br>(1 - 4)           | 4<br>(2 - 11)            |
| Ovarian cancer                       | 37<br>(22 - 58)          | --                 | --                  | 9<br>(4 - 17)        | 20<br>(11 - 31)        | 9<br>(5 - 13)            |
| Testicular cancer                    | --                       | --                 | --                  | --                   | --                     | --                       |
| Kidney cancer                        | 14<br>(10 - 19)          | 2<br>(0 - 4)       | 1<br>(0 - 1)        | 2<br>(1 - 4)         | 6<br>(3 - 9)           | 3<br>(2 - 6)             |
| Bladder cancer                       | 19<br>(11 - 28)          | --                 | --                  | 3<br>(1 - 4)         | 7<br>(4 - 12)          | 9<br>(5 - 13)            |
| Brain and nervous system cancer      | 16<br>(11 - 22)          | 1<br>(0 - 3)       | 2<br>(1 - 3)        | 5<br>(3 - 7)         | 6<br>(3 - 9)           | 3<br>(2 - 5)             |
| Thyroid cancer                       | 6<br>(4 - 9)             | --                 | 0<br>(0 - 0)        | 1<br>(0 - 1)         | 3<br>(2 - 4)           | 3<br>(1 - 4)             |
| Mesothelioma                         | 2<br>(1 - 3)             | --                 | --                  | 0<br>(0 - 1)         | 1<br>(0 - 1)           | 0<br>(0 - 1)             |
| Hodgkin lymphoma                     | 8<br>(3 - 14)            | 1<br>(0 - 2)       | 1<br>(0 - 1)        | 4<br>(1 - 8)         | 1<br>(1 - 3)           | 1<br>(0 - 2)             |
| Non-Hodgkin lymphoma                 | 46<br>(30 - 72)          | 4<br>(1 - 11)      | 2<br>(1 - 5)        | 13<br>(6 - 26)       | 15<br>(10 - 23)        | 12<br>(7 - 19)           |
| Multiple myeloma                     | 9<br>(5 - 14)            | --                 | --                  | 1<br>(0 - 1)         | 5<br>(2 - 7)           | 4<br>(2 - 6)             |
| Leukemia                             | 27<br>(20 - 35)          | 3<br>(1 - 7)       | 4<br>(2 - 6)        | 8<br>(5 - 12)        | 7<br>(4 - 9)           | 6<br>(3 - 8)             |
| Other neoplasms                      | 104<br>(66 - 181)        | 16<br>(5 - 53)     | 8<br>(4 - 19)       | 24<br>(12 - 53)      | 30<br>(18 - 47)        | 26<br>(14 - 41)          |
| Cardiovascular diseases              | 4,429<br>(3,319 - 6,195) | 86<br>(32 - 158)   | 25<br>(13 - 40)     | 460<br>(247 - 714)   | 1,365<br>(918 - 2,081) | 2,494<br>(1,881 - 3,465) |
| Rheumatic heart disease              | 160<br>(87 - 367)        | 4<br>(1 - 13)      | 4<br>(2 - 10)       | 60<br>(23 - 153)     | 50<br>(24 - 116)       | 41<br>(22 - 91)          |
| Ischemic heart disease               | 1,180<br>(734 - 2,283)   | 3<br>(0 - 11)      | 1<br>(1 - 3)        | 74<br>(29 - 163)     | 346<br>(198 - 697)     | 755<br>(455 - 1,494)     |
| Cerebrovascular disease              | 1,998<br>(962 - 2,886)   | 20<br>(6 - 43)     | 8<br>(3 - 14)       | 178<br>(77 - 300)    | 621<br>(275 - 957)     | 1,171<br>(579 - 1,651)   |
| Ischemic stroke                      | 996<br>(329 - 1,667)     | 4<br>(0 - 14)      | 1<br>(0 - 4)        | 34<br>(6 - 88)       | 224<br>(63 - 445)      | 734<br>(244 - 1,169)     |
| Hemorrhagic stroke                   | 1,001<br>(353 - 1,652)   | 16<br>(4 - 34)     | 6<br>(2 - 12)       | 144<br>(53 - 240)    | 398<br>(136 - 690)     | 438<br>(139 - 768)       |
| Hypertensive heart disease           | 391<br>(223 - 757)       | 2<br>(0 - 5)       | 1<br>(0 - 1)        | 24<br>(11 - 57)      | 110<br>(57 - 217)      | 254<br>(136 - 508)       |
| Cardiomyopathy and myocarditis       | 160<br>(98 - 281)        | 30<br>(5 - 68)     | 5<br>(1 - 10)       | 35<br>(10 - 67)      | 40<br>(21 - 84)        | 50<br>(22 - 120)         |
| Atrial fibrillation and flutter      | 1<br>(1 - 3)             | --                 | --                  | 0<br>(0 - 0)         | 0<br>(0 - 1)           | 1<br>(0 - 2)             |
| Aortic aneurysm                      | 26<br>(13 - 48)          | --                 | --                  | 3<br>(1 - 8)         | 9<br>(4 - 17)          | 14<br>(7 - 26)           |
| Peripheral vascular disease          | 2<br>(1 - 4)             | --                 | --                  | 0<br>(0 - 0)         | 0<br>(0 - 1)           | 1<br>(1 - 3)             |

Web Table 31- Central African Republic deaths with 95% UI by age, sex, and cause in 2013

| Cause                                               | Females, All Ages    | Females, 0-4 Years | Females, 5-14 Years | Females, 15-49 Years | Females, 50-69 Years | Females, 70-80 Years |
|-----------------------------------------------------|----------------------|--------------------|---------------------|----------------------|----------------------|----------------------|
| Endocarditis                                        | 36<br>(19 - 85)      | 4<br>(1 - 10)      | 1<br>(0 - 2)        | 7<br>(3 - 15)        | 9<br>(4 - 21)        | 17<br>(6 - 44)       |
| Other cardiovascular and circulatory diseases       | 475<br>(249 - 1,055) | 24<br>(8 - 56)     | 5<br>(2 - 11)       | 78<br>(35 - 167)     | 180<br>(83 - 396)    | 188<br>(91 - 494)    |
| Chronic respiratory diseases                        | 746<br>(556 - 1,025) | 70<br>(31 - 132)   | 11<br>(7 - 18)      | 111<br>(72 - 169)    | 212<br>(137 - 317)   | 342<br>(244 - 495)   |
| Chronic obstructive pulmonary disease               | 474<br>(321 - 660)   | 29<br>(12 - 56)    | 3<br>(1 - 5)        | 43<br>(23 - 73)      | 144<br>(90 - 213)    | 255<br>(173 - 364)   |
| Pneumoconiosis                                      | 2<br>(1 - 4)         | 0<br>(0 - 1)       | 0<br>(0 - 0)        | 1<br>(0 - 1)         | 0<br>(0 - 1)         | 0<br>(0 - 1)         |
| Silicosis                                           | 0<br>(0 - 0)         | 0<br>(0 - 0)       | 0<br>(0 - 0)        | 0<br>(0 - 0)         | 0<br>(0 - 0)         | 0<br>(0 - 0)         |
| Asbestosis                                          | 0<br>(0 - 0)         | 0<br>(0 - 0)       | 0<br>(0 - 0)        | 0<br>(0 - 0)         | 0<br>(0 - 0)         | 0<br>(0 - 0)         |
| Coal workers pneumoconiosis                         | 0<br>(0 - 0)         | 0<br>(0 - 0)       | 0<br>(0 - 0)        | 0<br>(0 - 0)         | 0<br>(0 - 0)         | 0<br>(0 - 0)         |
| Other pneumoconiosis                                | 2<br>(1 - 3)         | 0<br>(0 - 1)       | 0<br>(0 - 0)        | 1<br>(0 - 1)         | 0<br>(0 - 1)         | 0<br>(0 - 1)         |
| Asthma                                              | 214<br>(115 - 415)   | 27<br>(8 - 60)     | 7<br>(4 - 12)       | 58<br>(30 - 113)     | 58<br>(27 - 126)     | 64<br>(29 - 150)     |
| Interstitial lung disease and pulmonary sarcoidosis | 27<br>(7 - 55)       | 1<br>(0 - 4)       | 0<br>(0 - 1)        | 3<br>(1 - 9)         | 7<br>(2 - 16)        | 16<br>(3 - 33)       |
| Other chronic respiratory diseases                  | 29<br>(16 - 49)      | 13<br>(6 - 27)     | 1<br>(1 - 2)        | 6<br>(3 - 12)        | 3<br>(1 - 5)         | 6<br>(3 - 11)        |
| Cirrhosis                                           | 210<br>(126 - 353)   | 6<br>(2 - 15)      | 3<br>(2 - 6)        | 49<br>(28 - 87)      | 92<br>(50 - 162)     | 59<br>(33 - 103)     |
| Cirrhosis due to hepatitis B                        | 51<br>(23 - 95)      | 0<br>(0 - 1)       | 0<br>(0 - 1)        | 11<br>(5 - 21)       | 23<br>(10 - 47)      | 16<br>(6 - 32)       |
| Cirrhosis due to hepatitis C                        | 74<br>(39 - 137)     | 1<br>(0 - 2)       | 1<br>(0 - 2)        | 20<br>(10 - 39)      | 35<br>(16 - 66)      | 18<br>(8 - 35)       |
| Cirrhosis due to alcohol use                        | 52<br>(25 - 90)      | --                 | --                  | 7<br>(3 - 15)        | 24<br>(11 - 44)      | 20<br>(9 - 37)       |
| Cirrhosis due to other causes                       | 34<br>(19 - 59)      | 5<br>(2 - 13)      | 2<br>(1 - 4)        | 11<br>(6 - 21)       | 10<br>(4 - 20)       | 5<br>(2 - 10)        |
| Digestive diseases                                  | 544<br>(408 - 712)   | 54<br>(21 - 102)   | 16<br>(10 - 25)     | 136<br>(91 - 197)    | 151<br>(98 - 220)    | 185<br>(130 - 252)   |
| Peptic ulcer disease                                | 145<br>(90 - 218)    | 5<br>(1 - 12)      | 2<br>(1 - 4)        | 34<br>(19 - 59)      | 49<br>(26 - 79)      | 56<br>(31 - 87)      |
| Gastritis and duodenitis                            | 26<br>(9 - 53)       | 3<br>(1 - 8)       | 1<br>(0 - 3)        | 7<br>(2 - 13)        | 6<br>(2 - 16)        | 8<br>(2 - 25)        |
| Appendicitis                                        | 61<br>(35 - 98)      | 13<br>(3 - 32)     | 5<br>(3 - 9)        | 24<br>(13 - 41)      | 11<br>(5 - 19)       | 8<br>(4 - 14)        |
| Paralytic ileus and intestinal obstruction          | 110<br>(55 - 174)    | 6<br>(2 - 14)      | 2<br>(1 - 4)        | 14<br>(7 - 24)       | 31<br>(14 - 55)      | 57<br>(27 - 93)      |
| Inguinal, femoral, and abdominal hernia             | 10<br>(5 - 17)       | 1<br>(0 - 2)       | 0<br>(0 - 1)        | 2<br>(1 - 3)         | 3<br>(1 - 6)         | 5<br>(2 - 9)         |
| Inflammatory bowel disease                          | 53<br>(25 - 86)      | 14<br>(4 - 32)     | 2<br>(1 - 4)        | 18<br>(8 - 30)       | 10<br>(4 - 17)       | 9<br>(3 - 17)        |
| Vascular intestinal disorders                       | 4<br>(2 - 10)        | 0<br>(0 - 1)       | 0<br>(0 - 0)        | 1<br>(0 - 2)         | 1<br>(1 - 3)         | 2<br>(1 - 6)         |
| Gallbladder and biliary diseases                    | 49<br>(31 - 73)      | 2<br>(1 - 4)       | 1<br>(0 - 1)        | 13<br>(7 - 20)       | 17<br>(8 - 28)       | 18<br>(9 - 29)       |
| Pancreatitis                                        | 23<br>(11 - 38)      | 1<br>(0 - 2)       | 0<br>(0 - 1)        | 9<br>(3 - 16)        | 7<br>(3 - 13)        | 6<br>(2 - 11)        |
| Other digestive diseases                            | 61<br>(38 - 89)      | 9<br>(2 - 20)      | 2<br>(1 - 4)        | 16<br>(9 - 25)       | 17<br>(9 - 29)       | 17<br>(9 - 30)       |
| Neurological disorders                              | 310<br>(220 - 410)   | 26<br>(7 - 60)     | 11<br>(5 - 20)      | 60<br>(27 - 107)     | 32<br>(21 - 45)      | 181<br>(119 - 246)   |
| Alzheimer disease and other dementias               | 191<br>(127 - 261)   | --                 | --                  | 0<br>(0 - 0)         | 19<br>(12 - 28)      | 172<br>(113 - 237)   |
| Parkinson disease                                   | 2<br>(1 - 3)         | --                 | --                  | 0<br>(0 - 0)         | 0<br>(0 - 1)         | 1<br>(1 - 2)         |
| Epilepsy                                            | 103<br>(54 - 164)    | 23<br>(5 - 56)     | 11<br>(5 - 19)      | 57<br>(25 - 103)     | 8<br>(4 - 15)        | 5<br>(2 - 10)        |
| Multiple sclerosis                                  | 1<br>(0 - 2)         | --                 | --                  | 0<br>(0 - 1)         | 0<br>(0 - 1)         | 0<br>(0 - 0)         |
| Other neurological disorders                        | 13<br>(10 - 17)      | 3<br>(1 - 5)       | 1<br>(0 - 1)        | 2<br>(2 - 3)         | 4<br>(3 - 6)         | 3<br>(2 - 4)         |
| Mental and substance use disorders                  | 44<br>(21 - 96)      | 2<br>(0 - 3)       | 0<br>(0 - 0)        | 26<br>(12 - 60)      | 13<br>(5 - 33)       | 3<br>(2 - 8)         |
| Schizophrenia                                       | 4<br>(1 - 7)         | --                 | --                  | 2<br>(1 - 4)         | 1<br>(0 - 2)         | 1<br>(0 - 1)         |
| Alcohol use disorders                               | 33<br>(10 - 86)      | --                 | --                  | 20<br>(6 - 53)       | 11<br>(3 - 30)       | 2<br>(1 - 7)         |
| Drug use disorders                                  | 7<br>(4 - 12)        | 2<br>(0 - 3)       | --                  | 4<br>(2 - 8)         | 1<br>(0 - 2)         | 0<br>(0 - 1)         |
| Opioid use disorders                                | 1<br>(0 - 1)         | 0<br>(0 - 0)       | --                  | 0<br>(0 - 1)         | 0<br>(0 - 0)         | 0<br>(0 - 0)         |
| Cocaine use disorders                               | 0<br>(0 - 0)         | 0<br>(0 - 0)       | --                  | 0<br>(0 - 0)         | 0<br>(0 - 0)         | 0<br>(0 - 0)         |

Web Table 31- Central African Republic deaths with 95% UI by age, sex, and cause in 2013

| Cause                                               | Females, All Ages    | Females, 0-4 Years   | Females, 5-14 Years | Females, 15-49 Years | Females, 50-69 Years | Females, 70-80 Years |
|-----------------------------------------------------|----------------------|----------------------|---------------------|----------------------|----------------------|----------------------|
| Amphetamine use disorders                           | 0<br>(0 - 0)         | 0<br>(0 - 0)         | --                  | 0<br>(0 - 0)         | 0<br>(0 - 0)         | 0<br>(0 - 0)         |
| Other drug use disorders                            | 7<br>(4 - 11)        | 2<br>(0 - 3)         | --                  | 4<br>(2 - 7)         | 1<br>(0 - 2)         | 0<br>(0 - 1)         |
| Eating disorders                                    | 0<br>(0 - 0)         | --                   | 0<br>(0 - 0)        | 0<br>(0 - 0)         | --                   | --                   |
| Anorexia nervosa                                    | 0<br>(0 - 0)         | --                   | 0<br>(0 - 0)        | 0<br>(0 - 0)         | --                   | --                   |
| Diabetes, urogenital, blood, and endocrine diseases | 794<br>(567 - 1,031) | 159<br>(64 - 304)    | 46<br>(21 - 79)     | 164<br>(104 - 234)   | 210<br>(138 - 287)   | 216<br>(154 - 288)   |
| Diabetes mellitus                                   | 264<br>(182 - 351)   | 1<br>(1 - 3)         | 1<br>(0 - 2)        | 28<br>(19 - 41)      | 117<br>(74 - 167)    | 116<br>(76 - 162)    |
| Acute glomerulonephritis                            | 7<br>(3 - 14)        | 2<br>(0 - 5)         | 1<br>(0 - 2)        | 3<br>(1 - 6)         | 1<br>(0 - 2)         | 1<br>(0 - 1)         |
| Chronic kidney disease                              | 136<br>(96 - 199)    | 11<br>(5 - 21)       | 5<br>(3 - 8)        | 29<br>(16 - 51)      | 41<br>(25 - 64)      | 50<br>(30 - 77)      |
| Chronic kidney disease due to diabetes mellitus     | 1<br>(0 - 1)         | 0<br>(0 - 0)         | 0<br>(0 - 0)        | 0<br>(0 - 0)         | 0<br>(0 - 1)         | 0<br>(0 - 1)         |
| Chronic kidney disease due to hypertension          | 46<br>(23 - 81)      | 1<br>(0 - 2)         | 0<br>(0 - 1)        | 6<br>(3 - 12)        | 16<br>(7 - 31)       | 23<br>(11 - 41)      |
| Chronic kidney disease due to glomerulonephritis    | 60<br>(34 - 96)      | 8<br>(3 - 14)        | 3<br>(2 - 6)        | 19<br>(9 - 35)       | 16<br>(7 - 29)       | 15<br>(5 - 26)       |
| Chronic kidney disease due to other causes          | 30<br>(15 - 53)      | 2<br>(1 - 6)         | 1<br>(0 - 2)        | 5<br>(2 - 10)        | 9<br>(4 - 17)        | 13<br>(4 - 26)       |
| Urinary diseases and male infertility               | 60<br>(40 - 89)      | 6<br>(2 - 13)        | 1<br>(1 - 2)        | 14<br>(7 - 22)       | 16<br>(9 - 27)       | 22<br>(12 - 48)      |
| Interstitial nephritis and urinary tract infections | 47<br>(29 - 75)      | 4<br>(1 - 9)         | 1<br>(0 - 1)        | 9<br>(5 - 15)        | 13<br>(7 - 23)       | 20<br>(10 - 43)      |
| Urolithiasis                                        | 4<br>(2 - 9)         | --                   | 0<br>(0 - 1)        | 2<br>(0 - 5)         | 1<br>(1 - 3)         | 1<br>(0 - 3)         |
| Other urinary diseases                              | 8<br>(5 - 13)        | 2<br>(1 - 6)         | 0<br>(0 - 1)        | 3<br>(1 - 5)         | 1<br>(1 - 3)         | 1<br>(0 - 4)         |
| Gynecological diseases                              | 6<br>(4 - 9)         | --                   | --                  | 4<br>(2 - 7)         | 1<br>(0 - 2)         | 1<br>(0 - 1)         |
| Uterine fibroids                                    | 1<br>(1 - 1)         | --                   | --                  | 1<br>(0 - 1)         | 0<br>(0 - 0)         | 0<br>(0 - 0)         |
| Polycystic ovarian syndrome                         | 0<br>(0 - 1)         | --                   | --                  | 0<br>(0 - 1)         | 0<br>(0 - 0)         | --                   |
| Endometriosis                                       | 1<br>(0 - 1)         | --                   | --                  | 1<br>(0 - 1)         | 0<br>(0 - 0)         | --                   |
| Genital prolapse                                    | 1<br>(1 - 1)         | --                   | --                  | 1<br>(0 - 1)         | 0<br>(0 - 0)         | 0<br>(0 - 0)         |
| Other gynecological diseases                        | 3<br>(2 - 4)         | --                   | --                  | 2<br>(1 - 3)         | 0<br>(0 - 1)         | 0<br>(0 - 0)         |
| Hemoglobinopathies and hemolytic anemias            | 209<br>(75 - 401)    | 97<br>(21 - 226)     | 33<br>(11 - 61)     | 60<br>(22 - 115)     | 14<br>(5 - 24)       | 6<br>(3 - 12)        |
| Thalassemias                                        | 0<br>(0 - 0)         | 0<br>(0 - 0)         | 0<br>(0 - 0)        | 0<br>(0 - 0)         | 0<br>(0 - 0)         | 0<br>(0 - 0)         |
| Sickle cell disorders                               | 198<br>(68 - 383)    | 93<br>(20 - 219)     | 32<br>(11 - 61)     | 60<br>(22 - 113)     | 12<br>(4 - 22)       | 1<br>(0 - 1)         |
| G6PD deficiency                                     | 1<br>(0 - 2)         | 1<br>(0 - 1)         | 0<br>(0 - 0)        | 0<br>(0 - 0)         | 0<br>(0 - 0)         | 0<br>(0 - 0)         |
| Other hemoglobinopathies and hemolytic anemias      | 10<br>(5 - 17)       | 3<br>(1 - 6)         | 0<br>(0 - 0)        | 1<br>(0 - 1)         | 1<br>(0 - 2)         | 5<br>(2 - 11)        |
| Endocrine, metabolic, blood, and immune disorders   | 112<br>(66 - 167)    | 41<br>(15 - 88)      | 6<br>(2 - 11)       | 25<br>(13 - 45)      | 20<br>(10 - 34)      | 19<br>(7 - 35)       |
| Musculoskeletal disorders                           | 16<br>(9 - 33)       | --                   | 1<br>(0 - 2)        | 7<br>(4 - 17)        | 4<br>(2 - 9)         | 3<br>(2 - 8)         |
| Rheumatoid arthritis                                | 7<br>(4 - 14)        | --                   | 0<br>(0 - 1)        | 2<br>(1 - 4)         | 3<br>(1 - 6)         | 2<br>(1 - 6)         |
| Other musculoskeletal disorders                     | 8<br>(5 - 18)        | --                   | 1<br>(0 - 1)        | 6<br>(3 - 13)        | 1<br>(1 - 3)         | 1<br>(0 - 3)         |
| Other non-communicable diseases                     | 671<br>(277 - 1,336) | 571<br>(196 - 1,206) | 22<br>(8 - 49)      | 30<br>(13 - 58)      | 18<br>(11 - 27)      | 31<br>(16 - 54)      |
| Congenital anomalies                                | 601<br>(210 - 1,264) | 554<br>(186 - 1,188) | 20<br>(6 - 46)      | 20<br>(7 - 42)       | 3<br>(2 - 6)         | 2<br>(1 - 4)         |
| Neural tube defects                                 | 207<br>(46 - 667)    | 196<br>(42 - 641)    | 5<br>(1 - 16)       | 5<br>(1 - 16)        | 0<br>(0 - 1)         | 0<br>(0 - 0)         |
| Congenital heart anomalies                          | 226<br>(51 - 589)    | 205<br>(42 - 555)    | 9<br>(2 - 26)       | 9<br>(2 - 22)        | 1<br>(1 - 2)         | 1<br>(0 - 2)         |
| Cleft lip and cleft palate                          | 3<br>(0 - 13)        | 3<br>(0 - 13)        | --                  | --                   | --                   | --                   |
| Down syndrome                                       | 45<br>(6 - 119)      | 39<br>(4 - 110)      | 3<br>(0 - 7)        | 3<br>(1 - 7)         | 1<br>(0 - 1)         | 0<br>(0 - 0)         |
| Chromosomal unbalanced rearrangements               | 26<br>(4 - 79)       | 25<br>(3 - 76)       | 1<br>(0 - 2)        | 1<br>(0 - 2)         | 0<br>(0 - 0)         | 0<br>(0 - 0)         |
| Other congenital anomalies                          | 93<br>(22 - 364)     | 85<br>(18 - 341)     | 3<br>(1 - 10)       | 3<br>(1 - 11)        | 1<br>(0 - 2)         | 1<br>(1 - 2)         |
| Skin and subcutaneous diseases                      | 67<br>(46 - 93)      | 13<br>(4 - 30)       | 2<br>(1 - 3)        | 10<br>(5 - 17)       | 14<br>(8 - 23)       | 29<br>(13 - 52)      |

Web Table 31- Central African Republic deaths with 95% UI by age, sex, and cause in 2013

| Cause                                           | Females, All Ages      | Females, 0-4 Years | Females, 5-14 Years | Females, 15-49 Years | Females, 50-69 Years | Females, 70-80 Years |
|-------------------------------------------------|------------------------|--------------------|---------------------|----------------------|----------------------|----------------------|
| Cellulitis                                      | 37<br>(21 - 58)        | 7<br>(1 - 16)      | 1<br>(0 - 2)        | 6<br>(2 - 10)        | 9<br>(4 - 16)        | 15<br>(5 - 30)       |
| Pyoderma                                        | 21<br>(9 - 37)         | 6<br>(1 - 16)      | 1<br>(0 - 1)        | 3<br>(1 - 7)         | 4<br>(2 - 8)         | 8<br>(3 - 16)        |
| Decubitus ulcer                                 | 7<br>(3 - 16)          | 0<br>(0 - 1)       | 0<br>(0 - 0)        | 0<br>(0 - 1)         | 1<br>(0 - 2)         | 6<br>(2 - 14)        |
| Other skin and subcutaneous diseases            | 2<br>(1 - 4)           | 0<br>(0 - 1)       | 0<br>(0 - 0)        | 0<br>(0 - 1)         | 0<br>(0 - 1)         | 1<br>(0 - 1)         |
| Sudden infant death syndrome                    | 3<br>(0 - 11)          | 3<br>(0 - 11)      | --                  | --                   | --                   | --                   |
| Injuries                                        | 1,386<br>(945 - 1,934) | 426<br>(185 - 740) | 132<br>(79 - 204)   | 568<br>(357 - 839)   | 141<br>(86 - 207)    | 118<br>(80 - 170)    |
| Transport injuries                              | 455<br>(232 - 711)     | 98<br>(31 - 198)   | 57<br>(25 - 99)     | 219<br>(100 - 367)   | 53<br>(26 - 92)      | 29<br>(14 - 50)      |
| Road injuries                                   | 414<br>(209 - 642)     | 85<br>(27 - 176)   | 52<br>(22 - 90)     | 201<br>(92 - 337)    | 49<br>(24 - 85)      | 27<br>(13 - 47)      |
| Pedestrian road injuries                        | 170<br>(84 - 289)      | 40<br>(12 - 91)    | 24<br>(9 - 46)      | 68<br>(29 - 125)     | 22<br>(10 - 42)      | 15<br>(7 - 28)       |
| Cyclist road injuries                           | 51<br>(21 - 91)        | 10<br>(2 - 24)     | 8<br>(3 - 17)       | 24<br>(9 - 48)       | 7<br>(3 - 13)        | 2<br>(1 - 4)         |
| Motorcyclist road injuries                      | 58<br>(24 - 108)       | 8<br>(2 - 18)      | 4<br>(1 - 8)        | 41<br>(15 - 80)      | 4<br>(2 - 9)         | 1<br>(0 - 3)         |
| Motor vehicle road injuries                     | 130<br>(61 - 218)      | 26<br>(8 - 60)     | 15<br>(6 - 28)      | 66<br>(26 - 123)     | 15<br>(7 - 28)       | 8<br>(3 - 15)        |
| Other road injuries                             | 5<br>(2 - 10)          | 1<br>(0 - 3)       | 1<br>(0 - 2)        | 2<br>(1 - 4)         | 1<br>(0 - 2)         | 0<br>(0 - 1)         |
| Other transport injuries                        | 42<br>(16 - 75)        | 13<br>(4 - 30)     | 5<br>(2 - 11)       | 18<br>(7 - 35)       | 4<br>(1 - 8)         | 2<br>(0 - 4)         |
| Unintentional injuries                          | 687<br>(429 - 996)     | 315<br>(122 - 579) | 67<br>(37 - 103)    | 162<br>(94 - 246)    | 63<br>(41 - 90)      | 79<br>(52 - 119)     |
| Falls                                           | 84<br>(42 - 138)       | 19<br>(4 - 49)     | 4<br>(2 - 9)        | 15<br>(6 - 31)       | 12<br>(5 - 20)       | 33<br>(13 - 59)      |
| Drowning                                        | 160<br>(45 - 322)      | 94<br>(16 - 216)   | 25<br>(8 - 47)      | 30<br>(9 - 53)       | 7<br>(4 - 12)        | 4<br>(2 - 8)         |
| Fire, heat, and hot substances                  | 184<br>(77 - 353)      | 93<br>(19 - 220)   | 16<br>(5 - 30)      | 44<br>(16 - 88)      | 15<br>(8 - 28)       | 16<br>(8 - 34)       |
| Poisonings                                      | 55<br>(29 - 122)       | 21<br>(6 - 56)     | 4<br>(2 - 8)        | 23<br>(11 - 54)      | 5<br>(2 - 9)         | 2<br>(1 - 5)         |
| Exposure to mechanical forces                   | 58<br>(28 - 101)       | 25<br>(8 - 57)     | 8<br>(4 - 15)       | 18<br>(8 - 30)       | 4<br>(2 - 7)         | 2<br>(1 - 4)         |
| Unintentional firearm injuries                  | 20<br>(9 - 32)         | 5<br>(1 - 14)      | 3<br>(1 - 5)        | 10<br>(4 - 17)       | 1<br>(1 - 3)         | 1<br>(0 - 1)         |
| Unintentional suffocation                       | 6<br>(0 - 22)          | 4<br>(0 - 18)      | 0<br>(0 - 1)        | 1<br>(0 - 3)         | 0<br>(0 - 0)         | 0<br>(0 - 0)         |
| Other exposure to mechanical forces             | 32<br>(15 - 63)        | 15<br>(4 - 39)     | 5<br>(2 - 10)       | 8<br>(3 - 15)        | 3<br>(1 - 4)         | 2<br>(1 - 3)         |
| Adverse effects of medical treatment            | 59<br>(34 - 89)        | 17<br>(5 - 40)     | 2<br>(1 - 4)        | 13<br>(6 - 24)       | 12<br>(6 - 21)       | 15<br>(6 - 30)       |
| Animal contact                                  | 32<br>(11 - 63)        | 14<br>(3 - 36)     | 5<br>(1 - 10)       | 8<br>(3 - 15)        | 4<br>(1 - 8)         | 2<br>(1 - 5)         |
| Venomous animal contact                         | 26<br>(9 - 51)         | 11<br>(2 - 29)     | 4<br>(1 - 9)        | 6<br>(2 - 13)        | 3<br>(1 - 6)         | 1<br>(0 - 3)         |
| Non-venomous animal contact                     | 6<br>(1 - 13)          | 2<br>(0 - 7)       | 1<br>(0 - 2)        | 1<br>(0 - 3)         | 1<br>(0 - 2)         | 1<br>(0 - 2)         |
| Foreign body                                    | 31<br>(14 - 69)        | 23<br>(7 - 55)     | 1<br>(0 - 3)        | 3<br>(1 - 6)         | 2<br>(1 - 3)         | 3<br>(1 - 6)         |
| Pulmonary aspiration and foreign body in airway | 30<br>(13 - 68)        | 22<br>(7 - 55)     | 1<br>(0 - 3)        | 3<br>(1 - 6)         | 2<br>(1 - 3)         | 3<br>(1 - 6)         |
| Foreign body in other body part                 | 1<br>(0 - 2)           | 0<br>(0 - 1)       | 0<br>(0 - 0)        | 0<br>(0 - 0)         | 0<br>(0 - 0)         | 0<br>(0 - 0)         |
| Other unintentional injuries                    | 25<br>(9 - 42)         | 10<br>(2 - 20)     | 3<br>(1 - 5)        | 9<br>(3 - 15)        | 3<br>(1 - 4)         | 2<br>(1 - 3)         |
| Self-harm and interpersonal violence            | 244<br>(128 - 358)     | 13<br>(5 - 28)     | 9<br>(4 - 15)       | 187<br>(85 - 292)    | 26<br>(12 - 41)      | 10<br>(5 - 18)       |
| Self-harm                                       | 168<br>(64 - 258)      | --                 | 4<br>(1 - 9)        | 134<br>(46 - 216)    | 22<br>(8 - 35)       | 9<br>(3 - 17)        |
| Interpersonal violence                          | 76<br>(41 - 126)       | 13<br>(5 - 28)     | 5<br>(2 - 8)        | 53<br>(24 - 96)      | 4<br>(2 - 7)         | 1<br>(1 - 2)         |
| Assault by firearm                              | 19<br>(7 - 37)         | 2<br>(1 - 5)       | 1<br>(0 - 2)        | 15<br>(5 - 31)       | 1<br>(0 - 2)         | 0<br>(0 - 0)         |
| Assault by sharp object                         | 17<br>(6 - 36)         | 1<br>(0 - 4)       | 1<br>(0 - 1)        | 14<br>(5 - 31)       | 1<br>(0 - 2)         | 0<br>(0 - 0)         |
| Assault by other means                          | 39<br>(22 - 72)        | 9<br>(4 - 22)      | 3<br>(1 - 6)        | 23<br>(11 - 49)      | 2<br>(1 - 4)         | 1<br>(0 - 2)         |

Web Table 31- Chad deaths with 95% UI by age, sex, and cause in 2013

| Cause                                                              | Both Sexes, All Ages           | Both Sexes, 0-4 Years       | Both Sexes, 5-14 Years   | Both Sexes, 15-49 Years     | Both Sexes, 50-69 Years     | Both Sexes, 70-80 Years     |
|--------------------------------------------------------------------|--------------------------------|-----------------------------|--------------------------|-----------------------------|-----------------------------|-----------------------------|
| All causes                                                         | 146,928<br>(133,657 - 162,720) | 84,457<br>(74,020 - 98,526) | 7,534<br>(6,453 - 8,665) | 26,390<br>(23,444 - 29,671) | 14,653<br>(12,556 - 18,053) | 13,895<br>(12,583 - 16,209) |
| Communicable, maternal, neonatal, and nutritional diseases         | 111,859<br>(100,399 - 126,033) | 76,287<br>(66,276 - 89,263) | 5,539<br>(4,681 - 6,484) | 18,123<br>(16,100 - 20,168) | 6,439<br>(5,377 - 7,573)    | 5,470<br>(4,367 - 6,571)    |
| HIV/AIDS and tuberculosis                                          | 14,035<br>(12,145 - 15,972)    | 1,429<br>(1,134 - 1,790)    | 842<br>(678 - 1,006)     | 8,193<br>(6,937 - 9,769)    | 2,622<br>(2,141 - 3,126)    | 949<br>(699 - 1,216)        |
| Tuberculosis                                                       | 5,079<br>(3,874 - 6,266)       | 523<br>(317 - 813)          | 199<br>(125 - 290)       | 2,249<br>(1,656 - 2,862)    | 1,292<br>(919 - 1,701)      | 816<br>(568 - 1,071)        |
| HIV/AIDS                                                           | 8,956<br>(7,597 - 10,794)      | 906<br>(679 - 1,171)        | 642<br>(511 - 795)       | 5,944<br>(4,768 - 7,689)    | 1,330<br>(1,075 - 1,680)    | 134<br>(90 - 190)           |
| HIV/AIDS resulting in mycobacterial infection                      | 566<br>(437 - 727)             | 55<br>(41 - 75)             | 37<br>(27 - 48)          | 376<br>(279 - 503)          | 89<br>(64 - 119)            | 9<br>(6 - 14)               |
| HIV/AIDS resulting in other diseases                               | 8,390<br>(7,101 - 10,094)      | 850<br>(633 - 1,101)        | 606<br>(479 - 746)       | 5,568<br>(4,469 - 7,160)    | 1,241<br>(999 - 1,569)      | 125<br>(83 - 177)           |
| Diarrrhea, lower respiratory, and other common infectious diseases | 57,811<br>(46,857 - 69,076)    | 43,467<br>(34,216 - 53,540) | 3,065<br>(2,349 - 3,950) | 4,716<br>(3,601 - 5,952)    | 2,927<br>(2,125 - 3,868)    | 3,636<br>(2,659 - 4,677)    |
| Diarrheal diseases                                                 | 23,450<br>(16,658 - 31,060)    | 17,244<br>(10,701 - 24,317) | 1,120<br>(659 - 1,654)   | 2,212<br>(1,520 - 2,980)    | 1,328<br>(863 - 1,929)      | 1,545<br>(1,047 - 2,185)    |
| Intestinal infectious diseases                                     | 568<br>(308 - 980)             | 229<br>(119 - 411)          | 171<br>(87 - 312)        | 144<br>(71 - 266)           | 17<br>(8 - 32)              | 7<br>(3 - 14)               |
| Typhoid fever                                                      | 353<br>(176 - 631)             | 130<br>(58 - 251)           | 112<br>(55 - 204)        | 96<br>(44 - 186)            | 11<br>(5 - 22)              | 4<br>(2 - 8)                |
| Paratyphoid fever                                                  | 166<br>(80 - 304)              | 68<br>(28 - 133)            | 53<br>(24 - 108)         | 39<br>(16 - 77)             | 4<br>(2 - 8)                | 2<br>(1 - 3)                |
| Other intestinal infectious diseases                               | 49<br>(31 - 73)                | 32<br>(17 - 54)             | 5<br>(1 - 12)            | 8<br>(3 - 16)               | 2<br>(0 - 7)                | 1<br>(0 - 6)                |
| Lower respiratory infections                                       | 20,006<br>(14,484 - 26,370)    | 15,409<br>(10,264 - 21,379) | 621<br>(378 - 936)       | 955<br>(663 - 1,281)        | 1,142<br>(731 - 1,676)      | 1,879<br>(1,235 - 2,596)    |
| Upper respiratory infections                                       | 18<br>(8 - 40)                 | 11<br>(2 - 32)              | 1<br>(0 - 4)             | 3<br>(1 - 6)                | 2<br>(0 - 4)                | 1<br>(0 - 3)                |
| Otitis media                                                       | 11<br>(8 - 15)                 | 5<br>(3 - 9)                | 1<br>(1 - 1)             | 1<br>(1 - 2)                | 1<br>(1 - 2)                | 2<br>(1 - 3)                |
| Meningitis                                                         | 4,906<br>(3,429 - 6,820)       | 3,323<br>(2,016 - 5,174)    | 499<br>(317 - 740)       | 737<br>(513 - 1,039)        | 223<br>(139 - 330)          | 124<br>(69 - 184)           |
| Pneumococcal meningitis                                            | 1,178<br>(786 - 1,739)         | 729<br>(398 - 1,217)        | 141<br>(80 - 232)        | 213<br>(119 - 338)          | 60<br>(35 - 95)             | 34<br>(17 - 57)             |
| H influenzae type B meningitis                                     | 915<br>(557 - 1,404)           | 717<br>(379 - 1,190)        | 85<br>(44 - 147)         | 84<br>(50 - 131)            | 20<br>(9 - 35)              | 9<br>(4 - 14)               |
| Meningococcal meningitis                                           | 2,281<br>(1,531 - 3,372)       | 1,573<br>(899 - 2,618)      | 231<br>(136 - 361)       | 323<br>(199 - 480)          | 99<br>(53 - 154)            | 55<br>(29 - 86)             |
| Other meningitis                                                   | 533<br>(345 - 794)             | 305<br>(161 - 530)          | 42<br>(21 - 72)          | 116<br>(68 - 181)           | 45<br>(23 - 75)             | 26<br>(14 - 42)             |
| Encephalitis                                                       | 130<br>(95 - 184)              | 71<br>(42 - 123)            | 17<br>(10 - 31)          | 24<br>(16 - 33)             | 10<br>(5 - 16)              | 7<br>(3 - 12)               |
| Diphtheria                                                         | 131<br>(5 - 632)               | 111<br>(0 - 616)            | 16<br>(0 - 103)          | 4<br>(0 - 12)               | 1<br>(0 - 4)                | --                          |
| Whooping cough                                                     | 3,287<br>(3 - 15,656)          | 3,098<br>(3 - 14,615)       | 164<br>(0 - 895)         | 23<br>(0 - 132)             | 2<br>(0 - 13)               | --                          |
| Tetanus                                                            | 3,638<br>(2,006 - 6,119)       | 2,517<br>(1,009 - 4,967)    | 281<br>(156 - 541)       | 585<br>(347 - 1,025)        | 195<br>(98 - 402)           | 59<br>(24 - 162)            |
| Measles                                                            | 1,608<br>(605 - 3,465)         | 1,420<br>(530 - 3,064)      | 169<br>(66 - 370)        | 18<br>(7 - 42)              | 0<br>(0 - 1)                | --                          |
| Varicella and herpes zoster                                        | 58<br>(24 - 121)               | 27<br>(4 - 83)              | 5<br>(0 - 18)            | 10<br>(3 - 22)              | 4<br>(1 - 10)               | 12<br>(1 - 42)              |
| Neglected tropical diseases and malaria                            | 10,520<br>(5,701 - 17,472)     | 8,067<br>(3,706 - 14,471)   | 921<br>(489 - 1,582)     | 854<br>(548 - 1,370)        | 375<br>(207 - 653)          | 303<br>(135 - 659)          |
| Malaria                                                            | 9,835<br>(5,004 - 16,673)      | 7,869<br>(3,499 - 14,333)   | 793<br>(366 - 1,453)     | 591<br>(303 - 1,092)        | 306<br>(136 - 582)          | 276<br>(106 - 634)          |
| Leishmaniasis                                                      | 0<br>(0 - 0)                   | 0<br>(0 - 0)                | 0<br>(0 - 0)             | 0<br>(0 - 0)                | 0<br>(0 - 0)                | 0<br>(0 - 0)                |
| Visceral leishmaniasis                                             | 0<br>(0 - 0)                   | 0<br>(0 - 0)                | 0<br>(0 - 0)             | 0<br>(0 - 0)                | 0<br>(0 - 0)                | 0<br>(0 - 0)                |
| African trypanosomiasis                                            | 257<br>(131 - 425)             | 18<br>(8 - 33)              | 32<br>(16 - 54)          | 165<br>(85 - 277)           | 34<br>(16 - 59)             | 8<br>(4 - 14)               |
| Schistosomiasis                                                    | 38<br>(29 - 50)                | 2<br>(1 - 3)                | 2<br>(1 - 4)             | 17<br>(11 - 24)             | 11<br>(7 - 17)              | 5<br>(3 - 8)                |
| Cysticercosis                                                      | 4<br>(1 - 13)                  | 1<br>(0 - 2)                | 0<br>(0 - 1)             | 2<br>(0 - 7)                | 1<br>(0 - 2)                | 0<br>(0 - 0)                |
| Cystic echinococcosis                                              | 9<br>(7 - 11)                  | 3<br>(2 - 4)                | 2<br>(2 - 3)             | 3<br>(2 - 4)                | 1<br>(1 - 1)                | 0<br>(0 - 0)                |
| Dengue                                                             | 6<br>(4 - 10)                  | 3<br>(1 - 7)                | 1<br>(1 - 2)             | 1<br>(1 - 2)                | 0<br>(0 - 0)                | 0<br>(0 - 0)                |
| Yellow fever                                                       | 11<br>(7 - 17)                 | 1<br>(0 - 3)                | 2<br>(1 - 6)             | 6<br>(3 - 11)               | 1<br>(0 - 3)                | 0<br>(0 - 1)                |
| Rabies                                                             | 212<br>(137 - 331)             | 67<br>(26 - 148)            | 72<br>(41 - 121)         | 54<br>(35 - 88)             | 14<br>(7 - 24)              | 5<br>(1 - 11)               |
| Intestinal nematode infections                                     | 80<br>(47 - 123)               | 69<br>(37 - 110)            | 8<br>(2 - 19)            | 2<br>(0 - 7)                | 1<br>(0 - 4)                | 0<br>(0 - 4)                |
| Ascariasis                                                         | 80<br>(47 - 123)               | 69<br>(37 - 110)            | 8<br>(2 - 19)            | 2<br>(0 - 7)                | 1<br>(0 - 4)                | 0<br>(0 - 4)                |



Web Table 31- Chad deaths with 95% UI by age, sex, and cause in 2013

| Cause                                                            | Both Sexes, All Ages        | Both Sexes, 0-4 Years       | Both Sexes, 5-14 Years | Both Sexes, 15-49 Years  | Both Sexes, 50-69 Years  | Both Sexes, 70-80 Years  |
|------------------------------------------------------------------|-----------------------------|-----------------------------|------------------------|--------------------------|--------------------------|--------------------------|
| Other neglected tropical diseases                                | 67<br>(26 - 164)            | 34<br>(13 - 97)             | 7<br>(2 - 20)          | 14<br>(5 - 32)           | 6<br>(2 - 13)            | 6<br>(2 - 13)            |
| Maternal disorders                                               | 3,593<br>(2,456 - 4,868)    | --                          | 47<br>(17 - 97)        | 3,547<br>(2,416 - 4,807) | --                       | --                       |
| Maternal hemorrhage                                              | 637<br>(385 - 933)          | --                          | 4<br>(1 - 10)          | 632<br>(383 - 926)       | --                       | --                       |
| Maternal sepsis and other maternal infections                    | 204<br>(119 - 315)          | --                          | 3<br>(1 - 6)           | 202<br>(117 - 312)       | --                       | --                       |
| Maternal hypertensive disorders                                  | 274<br>(150 - 421)          | --                          | 3<br>(1 - 8)           | 270<br>(148 - 416)       | --                       | --                       |
| Maternal obstructed labor                                        | 180<br>(102 - 275)          | --                          | 2<br>(1 - 4)           | 178<br>(101 - 273)       | --                       | --                       |
| Maternal abortive outcome                                        | 643<br>(405 - 932)          | --                          | 8<br>(3 - 19)          | 634<br>(402 - 925)       | --                       | --                       |
| Indirect maternal deaths                                         | 395<br>(232 - 611)          | --                          | 4<br>(1 - 10)          | 390<br>(229 - 605)       | --                       | --                       |
| Late maternal deaths                                             | 560<br>(301 - 914)          | --                          | 13<br>(4 - 29)         | 547<br>(295 - 887)       | --                       | --                       |
| Maternal deaths aggravated by HIV/AIDS                           | 30<br>(16 - 48)             | --                          | --                     | 30<br>(16 - 48)          | --                       | --                       |
| Other maternal disorders                                         | 664<br>(429 - 956)          | --                          | 9<br>(3 - 20)          | 655<br>(423 - 945)       | --                       | --                       |
| Neonatal disorders                                               | 14,492<br>(11,206 - 18,116) | 14,492<br>(11,206 - 18,116) | --                     | --                       | --                       | --                       |
| Neonatal preterm birth complications                             | 5,020<br>(2,811 - 8,175)    | 5,020<br>(2,811 - 8,175)    | --                     | --                       | --                       | --                       |
| Neonatal encephalopathy due to birth asphyxia and trauma         | 4,475<br>(2,461 - 7,181)    | 4,475<br>(2,461 - 7,181)    | --                     | --                       | --                       | --                       |
| Neonatal sepsis and other neonatal infections                    | 2,676<br>(1,141 - 5,363)    | 2,676<br>(1,141 - 5,363)    | --                     | --                       | --                       | --                       |
| Hemolytic disease and other neonatal jaundice                    | 144<br>(52 - 350)           | 144<br>(52 - 350)           | --                     | --                       | --                       | --                       |
| Other neonatal disorders                                         | 2,178<br>(1,043 - 3,796)    | 2,178<br>(1,043 - 3,796)    | --                     | --                       | --                       | --                       |
| Nutritional deficiencies                                         | 7,888<br>(5,148 - 11,170)   | 5,980<br>(3,506 - 8,950)    | 408<br>(269 - 579)     | 628<br>(434 - 851)       | 396<br>(259 - 546)       | 476<br>(325 - 650)       |
| Protein-energy malnutrition                                      | 5,774<br>(3,564 - 8,615)    | 4,960<br>(2,790 - 7,597)    | 262<br>(151 - 405)     | 184<br>(98 - 331)        | 167<br>(89 - 268)        | 200<br>(103 - 323)       |
| Iodine deficiency                                                | 14<br>(1 - 69)              | 10<br>(0 - 64)              | 1<br>(0 - 7)           | 2<br>(0 - 6)             | 1<br>(0 - 4)             | 1<br>(0 - 3)             |
| Iron-deficiency anemia                                           | 2,068<br>(1,109 - 3,347)    | 995<br>(315 - 2,169)        | 143<br>(67 - 240)      | 435<br>(277 - 605)       | 223<br>(125 - 334)       | 272<br>(161 - 408)       |
| Other nutritional deficiencies                                   | 33<br>(14 - 76)             | 16<br>(4 - 49)              | 2<br>(1 - 5)           | 7<br>(2 - 16)            | 5<br>(2 - 11)            | 3<br>(1 - 7)             |
| Other communicable, maternal, neonatal, and nutritional diseases | 3,519<br>(2,088 - 5,696)    | 2,852<br>(1,530 - 4,876)    | 256<br>(146 - 445)     | 186<br>(128 - 316)       | 120<br>(79 - 197)        | 105<br>(62 - 176)        |
| Sexually transmitted diseases excluding HIV                      | 2,919<br>(1,514 - 5,071)    | 2,577<br>(1,275 - 4,589)    | 220<br>(113 - 400)     | 66<br>(35 - 188)         | 31<br>(12 - 97)          | 25<br>(9 - 75)           |
| Syphilis                                                         | 2,865<br>(1,467 - 5,030)    | 2,577<br>(1,275 - 4,589)    | 214<br>(108 - 395)     | 32<br>(17 - 97)          | 21<br>(8 - 70)           | 20<br>(7 - 61)           |
| Chlamydial infection                                             | 6<br>(3 - 11)               | --                          | 0<br>(0 - 1)           | 4<br>(2 - 7)             | 1<br>(0 - 4)             | 0<br>(0 - 1)             |
| Gonococcal infection                                             | 27<br>(15 - 80)             | --                          | 3<br>(1 - 8)           | 16<br>(8 - 48)           | 5<br>(2 - 17)            | 3<br>(1 - 9)             |
| Other sexually transmitted diseases                              | 21<br>(11 - 61)             | --                          | 3<br>(1 - 8)           | 14<br>(7 - 40)           | 3<br>(1 - 11)            | 1<br>(0 - 4)             |
| Hepatitis                                                        | 250<br>(128 - 374)          | 70<br>(21 - 130)            | 17<br>(7 - 28)         | 74<br>(41 - 111)         | 49<br>(27 - 76)          | 40<br>(22 - 64)          |
| Acute hepatitis A                                                | 28<br>(6 - 64)              | 20<br>(4 - 48)              | 4<br>(1 - 10)          | 3<br>(1 - 7)             | 0<br>(0 - 1)             | 0<br>(0 - 0)             |
| Acute hepatitis B                                                | 153<br>(72 - 241)           | 49<br>(15 - 96)             | 8<br>(3 - 15)          | 26<br>(10 - 47)          | 37<br>(20 - 61)          | 34<br>(18 - 55)          |
| Acute hepatitis C                                                | 6<br>(1 - 16)               | --                          | 1<br>(0 - 3)           | 2<br>(0 - 5)             | 2<br>(0 - 5)             | 1<br>(0 - 5)             |
| Acute hepatitis E                                                | 63<br>(33 - 101)            | 1<br>(0 - 3)                | 3<br>(1 - 7)           | 45<br>(23 - 70)          | 9<br>(4 - 18)            | 4<br>(1 - 11)            |
| Other infectious diseases                                        | 351<br>(202 - 675)          | 205<br>(87 - 437)           | 20<br>(8 - 40)         | 45<br>(23 - 87)          | 40<br>(18 - 92)          | 41<br>(15 - 109)         |
| Non-communicable diseases                                        | 26,676<br>(21,914 - 32,851) | 5,549<br>(3,285 - 9,251)    | 870<br>(664 - 1,129)   | 4,939<br>(4,012 - 5,929) | 7,445<br>(6,021 - 9,627) | 7,873<br>(6,683 - 9,510) |
| Neoplasms                                                        | 3,630<br>(3,030 - 4,454)    | 146<br>(91 - 240)           | 111<br>(78 - 152)      | 1,065<br>(845 - 1,334)   | 1,460<br>(1,165 - 1,890) | 848<br>(713 - 1,047)     |
| Esophageal cancer                                                | 94<br>(66 - 141)            | --                          | --                     | 18<br>(12 - 27)          | 49<br>(33 - 77)          | 27<br>(18 - 41)          |
| Stomach cancer                                                   | 349<br>(283 - 441)          | --                          | --                     | 90<br>(68 - 117)         | 177<br>(135 - 233)       | 82<br>(64 - 106)         |
| Liver cancer                                                     | 1,017<br>(772 - 1,336)      | --                          | 6<br>(3 - 10)          | 385<br>(264 - 573)       | 424<br>(307 - 593)       | 202<br>(147 - 274)       |
| Liver cancer due to hepatitis B                                  | 461<br>(296 - 703)          | --                          | 3<br>(1 - 5)           | 222<br>(139 - 351)       | 177<br>(97 - 286)        | 59<br>(31 - 92)          |

Web Table 31- Chad deaths with 95% UI by age, sex, and cause in 2013

| Cause                                | Both Sexes, All Ages      | Both Sexes, 0-4 Years | Both Sexes, 5-14 Years | Both Sexes, 15-49 Years  | Both Sexes, 50-69 Years  | Both Sexes, 70-80 Years  |
|--------------------------------------|---------------------------|-----------------------|------------------------|--------------------------|--------------------------|--------------------------|
| Liver cancer due to hepatitis C      | 296<br>(176 - 445)        | --                    | 0<br>(0 - 1)           | 68<br>(34 - 118)         | 141<br>(81 - 229)        | 86<br>(48 - 129)         |
| Liver cancer due to alcohol use      | 113<br>(68 - 178)         | --                    | --                     | 28<br>(15 - 49)          | 51<br>(28 - 84)          | 35<br>(18 - 58)          |
| Liver cancer due to other causes     | 147<br>(91 - 229)         | --                    | 3<br>(1 - 5)           | 67<br>(38 - 113)         | 55<br>(31 - 98)          | 22<br>(12 - 39)          |
| Larynx cancer                        | 14<br>(9 - 31)            | --                    | --                     | 3<br>(2 - 6)             | 6<br>(4 - 17)            | 4<br>(3 - 10)            |
| Tracheal, bronchus and lung cancer   | 146<br>(119 - 186)        | --                    | --                     | 20<br>(15 - 26)          | 78<br>(60 - 102)         | 48<br>(38 - 61)          |
| Breast cancer                        | 186<br>(143 - 248)        | --                    | --                     | 70<br>(50 - 93)          | 82<br>(59 - 117)         | 34<br>(24 - 46)          |
| Cervical cancer                      | 475<br>(339 - 659)        | --                    | --                     | 154<br>(105 - 219)       | 238<br>(150 - 361)       | 82<br>(52 - 120)         |
| Uterine cancer                       | 40<br>(23 - 61)           | --                    | --                     | 8<br>(4 - 13)            | 19<br>(10 - 33)          | 13<br>(7 - 21)           |
| Prostate cancer                      | 125<br>(81 - 204)         | --                    | --                     | 3<br>(1 - 4)             | 35<br>(21 - 59)          | 88<br>(56 - 144)         |
| Colon and rectum cancer              | 177<br>(148 - 220)        | --                    | --                     | 48<br>(38 - 60)          | 63<br>(50 - 82)          | 66<br>(51 - 84)          |
| Lip and oral cavity cancer           | 24<br>(18 - 31)           | --                    | --                     | 7<br>(5 - 10)            | 10<br>(7 - 14)           | 7<br>(5 - 11)            |
| Nasopharynx cancer                   | 8<br>(6 - 12)             | --                    | 1<br>(0 - 1)           | 4<br>(3 - 6)             | 3<br>(2 - 4)             | 1<br>(1 - 1)             |
| Other pharynx cancer                 | 9<br>(7 - 12)             | --                    | --                     | 3<br>(2 - 4)             | 4<br>(3 - 6)             | 2<br>(2 - 3)             |
| Gallbladder and biliary tract cancer | 50<br>(35 - 68)           | --                    | --                     | 9<br>(6 - 12)            | 26<br>(17 - 39)          | 15<br>(10 - 23)          |
| Pancreatic cancer                    | 70<br>(57 - 87)           | --                    | --                     | 14<br>(10 - 18)          | 37<br>(28 - 48)          | 20<br>(15 - 25)          |
| Malignant skin melanoma              | 10<br>(7 - 14)            | --                    | --                     | 3<br>(2 - 5)             | 4<br>(3 - 6)             | 2<br>(2 - 3)             |
| Non-melanoma skin cancer             | 8<br>(5 - 11)             | --                    | --                     | 2<br>(1 - 3)             | 2<br>(1 - 3)             | 4<br>(2 - 6)             |
| Ovarian cancer                       | 43<br>(31 - 61)           | --                    | --                     | 12<br>(8 - 17)           | 24<br>(17 - 36)          | 7<br>(4 - 10)            |
| Testicular cancer                    | 4<br>(2 - 6)              | --                    | --                     | 3<br>(2 - 4)             | 1<br>(0 - 1)             | 0<br>(0 - 1)             |
| Kidney cancer                        | 30<br>(23 - 39)           | 8<br>(4 - 15)         | 3<br>(2 - 5)           | 5<br>(4 - 7)             | 10<br>(7 - 14)           | 5<br>(3 - 6)             |
| Bladder cancer                       | 72<br>(56 - 100)          | --                    | --                     | 16<br>(10 - 22)          | 25<br>(18 - 39)          | 31<br>(22 - 46)          |
| Brain and nervous system cancer      | 41<br>(25 - 54)           | 3<br>(2 - 7)          | 6<br>(3 - 9)           | 18<br>(10 - 24)          | 9<br>(6 - 13)            | 5<br>(3 - 7)             |
| Thyroid cancer                       | 9<br>(7 - 14)             | --                    | 0<br>(0 - 0)           | 1<br>(1 - 2)             | 5<br>(3 - 7)             | 3<br>(2 - 5)             |
| Mesothelioma                         | 5<br>(4 - 7)              | --                    | --                     | 1<br>(1 - 2)             | 2<br>(1 - 3)             | 2<br>(1 - 3)             |
| Hodgkin lymphoma                     | 24<br>(16 - 32)           | 4<br>(2 - 8)          | 4<br>(2 - 7)           | 9<br>(6 - 12)            | 3<br>(2 - 5)             | 4<br>(2 - 7)             |
| Non-Hodgkin lymphoma                 | 172<br>(134 - 214)        | 34<br>(18 - 61)       | 33<br>(19 - 52)        | 55<br>(40 - 71)          | 31<br>(22 - 43)          | 18<br>(13 - 28)          |
| Multiple myeloma                     | 16<br>(12 - 21)           | --                    | --                     | 3<br>(2 - 4)             | 8<br>(6 - 11)            | 5<br>(3 - 7)             |
| Leukemia                             | 71<br>(58 - 87)           | 9<br>(5 - 16)         | 14<br>(10 - 20)        | 28<br>(21 - 36)          | 11<br>(8 - 14)           | 10<br>(8 - 13)           |
| Other neoplasms                      | 342<br>(253 - 491)        | 88<br>(50 - 169)      | 45<br>(29 - 73)        | 72<br>(49 - 115)         | 74<br>(49 - 119)         | 63<br>(45 - 91)          |
| Cardiovascular diseases              | 9,911<br>(8,227 - 12,686) | 580<br>(361 - 923)    | 157<br>(105 - 234)     | 1,432<br>(1,109 - 1,892) | 3,419<br>(2,704 - 4,535) | 4,323<br>(3,582 - 5,592) |
| Rheumatic heart disease              | 234<br>(123 - 611)        | 28<br>(10 - 62)       | 18<br>(8 - 43)         | 67<br>(28 - 208)         | 57<br>(25 - 172)         | 64<br>(37 - 140)         |
| Ischemic heart disease               | 3,326<br>(2,561 - 4,941)  | 31<br>(11 - 71)       | 23<br>(14 - 38)        | 454<br>(332 - 644)       | 1,249<br>(905 - 1,781)   | 1,569<br>(1,153 - 2,414) |
| Cerebrovascular disease              | 3,341<br>(2,481 - 4,340)  | 121<br>(72 - 200)     | 32<br>(20 - 49)        | 373<br>(254 - 510)       | 1,151<br>(815 - 1,580)   | 1,664<br>(1,218 - 2,134) |
| Ischemic stroke                      | 1,891<br>(679 - 2,729)    | 16<br>(4 - 41)        | 4<br>(1 - 9)           | 76<br>(20 - 135)         | 614<br>(170 - 973)       | 1,182<br>(452 - 1,690)   |
| Hemorrhagic stroke                   | 1,450<br>(933 - 2,597)    | 105<br>(62 - 176)     | 28<br>(17 - 44)        | 298<br>(200 - 420)       | 537<br>(326 - 969)       | 482<br>(247 - 1,095)     |
| Hypertensive heart disease           | 740<br>(411 - 1,129)      | 9<br>(3 - 17)         | 2<br>(1 - 4)           | 87<br>(37 - 146)         | 250<br>(123 - 409)       | 392<br>(218 - 609)       |
| Cardiomyopathy and myocarditis       | 719<br>(516 - 1,092)      | 129<br>(62 - 252)     | 32<br>(18 - 53)        | 157<br>(107 - 235)       | 199<br>(115 - 304)       | 202<br>(98 - 387)        |
| Atrial fibrillation and flutter      | 0<br>(0 - 1)              | --                    | --                     | 0<br>(0 - 0)             | 0<br>(0 - 0)             | 0<br>(0 - 0)             |
| Aortic aneurysm                      | 94<br>(51 - 173)          | --                    | --                     | 14<br>(7 - 27)           | 39<br>(21 - 69)          | 41<br>(21 - 83)          |
| Peripheral vascular disease          | 1<br>(1 - 3)              | --                    | --                     | 0<br>(0 - 0)             | 1<br>(0 - 1)             | 1<br>(0 - 2)             |

Web Table 31- Chad deaths with 95% UI by age, sex, and cause in 2013

| Cause                                               | Both Sexes, All Ages     | Both Sexes, 0-4 Years | Both Sexes, 5-14 Years | Both Sexes, 15-49 Years | Both Sexes, 50-69 Years | Both Sexes, 70-80 Years |
|-----------------------------------------------------|--------------------------|-----------------------|------------------------|-------------------------|-------------------------|-------------------------|
| Endocarditis                                        | 297<br>(210 - 463)       | 72<br>(35 - 127)      | 10<br>(6 - 16)         | 59<br>(39 - 93)         | 69<br>(41 - 117)        | 86<br>(53 - 160)        |
| Other cardiovascular and circulatory diseases       | 1,157<br>(817 - 2,098)   | 190<br>(107 - 337)    | 40<br>(25 - 67)        | 220<br>(151 - 383)      | 404<br>(258 - 788)      | 303<br>(189 - 622)      |
| Chronic respiratory diseases                        | 1,885<br>(1,438 - 3,046) | 233<br>(121 - 481)    | 44<br>(29 - 78)        | 257<br>(185 - 428)      | 573<br>(402 - 959)      | 778<br>(589 - 1,205)    |
| Chronic obstructive pulmonary disease               | 1,027<br>(766 - 1,631)   | 91<br>(47 - 176)      | 17<br>(10 - 27)        | 74<br>(50 - 116)        | 324<br>(221 - 531)      | 521<br>(375 - 823)      |
| Pneumoconiosis                                      | 131<br>(70 - 241)        | 3<br>(1 - 10)         | 2<br>(1 - 5)           | 29<br>(16 - 52)         | 64<br>(33 - 115)        | 32<br>(13 - 68)         |
| Silicosis                                           | 27<br>(9 - 79)           | 1<br>(0 - 4)          | 1<br>(0 - 2)           | 6<br>(2 - 16)           | 7<br>(2 - 21)           | 13<br>(4 - 40)          |
| Asbestosis                                          | 9<br>(4 - 20)            | 1<br>(0 - 2)          | 0<br>(0 - 1)           | 2<br>(1 - 5)            | 5<br>(2 - 11)           | 1<br>(0 - 3)            |
| Coal workers pneumoconiosis                         | 36<br>(15 - 68)          | 1<br>(0 - 2)          | 0<br>(0 - 1)           | 2<br>(1 - 4)            | 28<br>(12 - 54)         | 5<br>(1 - 10)           |
| Other pneumoconiosis                                | 59<br>(32 - 95)          | 1<br>(0 - 3)          | 1<br>(0 - 1)           | 19<br>(10 - 31)         | 24<br>(12 - 46)         | 14<br>(6 - 23)          |
| Asthma                                              | 442<br>(260 - 980)       | 86<br>(35 - 224)      | 14<br>(7 - 37)         | 94<br>(55 - 217)        | 122<br>(66 - 271)       | 125<br>(68 - 272)       |
| Interstitial lung disease and pulmonary sarcoidosis | 97<br>(15 - 178)         | 1<br>(0 - 2)          | 1<br>(0 - 1)           | 5<br>(2 - 9)            | 31<br>(5 - 61)          | 59<br>(7 - 114)         |
| Other chronic respiratory diseases                  | 189<br>(115 - 289)       | 51<br>(24 - 99)       | 11<br>(6 - 17)         | 55<br>(34 - 84)         | 32<br>(15 - 54)         | 40<br>(23 - 68)         |
| Cirrhosis                                           | 1,286<br>(1,020 - 1,613) | 87<br>(41 - 158)      | 32<br>(22 - 44)        | 435<br>(327 - 555)      | 507<br>(370 - 683)      | 226<br>(170 - 300)      |
| Cirrhosis due to hepatitis B                        | 330<br>(203 - 471)       | 4<br>(1 - 10)         | 5<br>(3 - 9)           | 116<br>(70 - 177)       | 141<br>(82 - 212)       | 63<br>(37 - 99)         |
| Cirrhosis due to hepatitis C                        | 267<br>(114 - 440)       | 7<br>(2 - 18)         | 5<br>(2 - 11)          | 81<br>(34 - 151)        | 115<br>(48 - 198)       | 58<br>(20 - 92)         |
| Cirrhosis due to alcohol use                        | 442<br>(306 - 612)       | --                    | --                     | 149<br>(93 - 215)       | 203<br>(131 - 296)      | 90<br>(58 - 133)        |
| Cirrhosis due to other causes                       | 247<br>(169 - 340)       | 75<br>(34 - 137)      | 22<br>(14 - 31)        | 89<br>(57 - 130)        | 47<br>(23 - 77)         | 15<br>(8 - 25)          |
| Digestive diseases                                  | 2,029<br>(1,631 - 2,518) | 296<br>(155 - 551)    | 133<br>(93 - 185)      | 597<br>(433 - 774)      | 522<br>(372 - 717)      | 480<br>(353 - 616)      |
| Peptic ulcer disease                                | 528<br>(391 - 703)       | 40<br>(15 - 90)       | 23<br>(12 - 39)        | 163<br>(113 - 224)      | 158<br>(105 - 236)      | 144<br>(100 - 204)      |
| Gastritis and duodenitis                            | 89<br>(44 - 167)         | 18<br>(5 - 40)        | 8<br>(4 - 13)          | 22<br>(12 - 43)         | 19<br>(8 - 50)          | 22<br>(6 - 55)          |
| Appendicitis                                        | 205<br>(147 - 290)       | 54<br>(18 - 127)      | 29<br>(14 - 49)        | 61<br>(40 - 91)         | 32<br>(16 - 50)         | 30<br>(11 - 55)         |
| Paralytic ileus and intestinal obstruction          | 476<br>(275 - 664)       | 44<br>(17 - 89)       | 27<br>(14 - 45)        | 112<br>(55 - 175)       | 150<br>(73 - 225)       | 144<br>(85 - 211)       |
| Inguinal, femoral, and abdominal hernia             | 56<br>(36 - 90)          | 4<br>(2 - 10)         | 2<br>(1 - 5)           | 15<br>(9 - 24)          | 17<br>(9 - 28)          | 18<br>(10 - 28)         |
| Inflammatory bowel disease                          | 131<br>(64 - 195)        | 54<br>(21 - 117)      | 7<br>(3 - 13)          | 33<br>(11 - 49)         | 20<br>(5 - 34)          | 17<br>(4 - 29)          |
| Vascular intestinal disorders                       | 8<br>(4 - 16)            | 2<br>(0 - 5)          | 1<br>(0 - 2)           | 2<br>(1 - 4)            | 2<br>(1 - 4)            | 2<br>(1 - 5)            |
| Gallbladder and biliary diseases                    | 126<br>(78 - 169)        | 11<br>(5 - 19)        | 10<br>(3 - 16)         | 34<br>(19 - 51)         | 33<br>(20 - 49)         | 38<br>(21 - 57)         |
| Pancreatitis                                        | 117<br>(68 - 175)        | 4<br>(1 - 9)          | 3<br>(2 - 6)           | 60<br>(33 - 95)         | 31<br>(17 - 49)         | 19<br>(9 - 34)          |
| Other digestive diseases                            | 292<br>(208 - 396)       | 65<br>(29 - 137)      | 24<br>(15 - 37)        | 95<br>(59 - 136)        | 62<br>(38 - 94)         | 47<br>(27 - 70)         |
| Neurological disorders                              | 785<br>(629 - 977)       | 154<br>(71 - 290)     | 54<br>(30 - 85)        | 155<br>(111 - 212)      | 62<br>(48 - 81)         | 360<br>(271 - 451)      |
| Alzheimer disease and other dementias               | 363<br>(275 - 457)       | --                    | --                     | 0<br>(0 - 0)            | 31<br>(23 - 41)         | 332<br>(246 - 419)      |
| Parkinson disease                                   | 3<br>(2 - 6)             | --                    | --                     | 0<br>(0 - 1)            | 0<br>(0 - 1)            | 2<br>(1 - 5)            |
| Epilepsy                                            | 342<br>(237 - 492)       | 133<br>(56 - 259)     | 46<br>(24 - 77)        | 133<br>(92 - 188)       | 14<br>(9 - 24)          | 16<br>(9 - 26)          |
| Multiple sclerosis                                  | 1<br>(0 - 3)             | --                    | --                     | 0<br>(0 - 2)            | 0<br>(0 - 1)            | 0<br>(0 - 0)            |
| Other neurological disorders                        | 77<br>(57 - 129)         | 22<br>(12 - 68)       | 7<br>(5 - 13)          | 22<br>(16 - 29)         | 16<br>(12 - 22)         | 10<br>(8 - 13)          |
| Mental and substance use disorders                  | 257<br>(140 - 470)       | 15<br>(2 - 39)        | 0<br>(0 - 0)           | 170<br>(84 - 353)       | 54<br>(27 - 95)         | 18<br>(8 - 32)          |
| Schizophrenia                                       | 1<br>(0 - 1)             | --                    | --                     | 0<br>(0 - 1)            | 0<br>(0 - 0)            | 0<br>(0 - 0)            |
| Alcohol use disorders                               | 134<br>(55 - 242)        | --                    | --                     | 78<br>(34 - 141)        | 43<br>(17 - 81)         | 12<br>(3 - 25)          |
| Drug use disorders                                  | 122<br>(66 - 292)        | 15<br>(2 - 39)        | --                     | 91<br>(39 - 254)        | 11<br>(6 - 24)          | 5<br>(3 - 11)           |
| Opioid use disorders                                | 13<br>(7 - 31)           | 2<br>(0 - 5)          | --                     | 10<br>(4 - 27)          | 1<br>(1 - 2)            | 1<br>(0 - 1)            |
| Cocaine use disorders                               | 0<br>(0 - 1)             | 0<br>(0 - 0)          | --                     | 0<br>(0 - 1)            | 0<br>(0 - 0)            | 0<br>(0 - 0)            |

Web Table 31- Chad deaths with 95% UI by age, sex, and cause in 2013

| Cause                                               | Both Sexes, All Ages     | Both Sexes, 0-4 Years    | Both Sexes, 5-14 Years | Both Sexes, 15-49 Years | Both Sexes, 50-69 Years | Both Sexes, 70-80 Years |
|-----------------------------------------------------|--------------------------|--------------------------|------------------------|-------------------------|-------------------------|-------------------------|
| Amphetamine use disorders                           | 0<br>(0 - 0)             | 0<br>(0 - 0)             | --                     | 0<br>(0 - 1)            | 0<br>(0 - 0)            | 0<br>(0 - 0)            |
| Other drug use disorders                            | 108<br>(58 - 261)        | 13<br>(2 - 35)           | --                     | 81<br>(35 - 226)        | 10<br>(5 - 21)          | 5<br>(2 - 9)            |
| Eating disorders                                    | 1<br>(0 - 1)             | --                       | 0<br>(0 - 0)           | 0<br>(0 - 1)            | --                      | --                      |
| Anorexia nervosa                                    | 1<br>(0 - 1)             | --                       | 0<br>(0 - 0)           | 0<br>(0 - 1)            | --                      | --                      |
| Diabetes, urogenital, blood, and endocrine diseases | 3,072<br>(2,312 - 3,760) | 730<br>(383 - 1,106)     | 184<br>(121 - 252)     | 665<br>(490 - 841)      | 760<br>(582 - 982)      | 733<br>(581 - 912)      |
| Diabetes mellitus                                   | 962<br>(773 - 1,191)     | 27<br>(17 - 41)          | 9<br>(5 - 13)          | 142<br>(109 - 183)      | 408<br>(312 - 532)      | 376<br>(287 - 473)      |
| Acute glomerulonephritis                            | 22<br>(14 - 43)          | 6<br>(2 - 20)            | 3<br>(1 - 7)           | 7<br>(5 - 12)           | 5<br>(3 - 7)            | 2<br>(1 - 4)            |
| Chronic kidney disease                              | 616<br>(465 - 788)       | 110<br>(64 - 174)        | 43<br>(25 - 61)        | 206<br>(136 - 280)      | 129<br>(93 - 178)       | 128<br>(92 - 170)       |
| Chronic kidney disease due to diabetes mellitus     | 4<br>(1 - 8)             | 0<br>(0 - 0)             | 0<br>(0 - 0)           | 0<br>(0 - 1)            | 3<br>(1 - 7)            | 0<br>(0 - 0)            |
| Chronic kidney disease due to hypertension          | 134<br>(88 - 196)        | 7<br>(1 - 15)            | 2<br>(1 - 4)           | 31<br>(16 - 50)         | 44<br>(27 - 69)         | 50<br>(31 - 76)         |
| Chronic kidney disease due to glomerulonephritis    | 357<br>(263 - 467)       | 80<br>(46 - 127)         | 33<br>(21 - 47)        | 138<br>(92 - 190)       | 56<br>(35 - 84)         | 50<br>(31 - 72)         |
| Chronic kidney disease due to other causes          | 121<br>(64 - 180)        | 23<br>(7 - 49)           | 8<br>(2 - 14)          | 36<br>(17 - 63)         | 25<br>(12 - 42)         | 28<br>(13 - 50)         |
| Urinary diseases and male infertility               | 527<br>(339 - 694)       | 114<br>(59 - 211)        | 17<br>(11 - 26)        | 129<br>(71 - 182)       | 126<br>(75 - 183)       | 141<br>(95 - 202)       |
| Interstitial nephritis and urinary tract infections | 476<br>(298 - 632)       | 104<br>(50 - 197)        | 14<br>(8 - 23)         | 112<br>(60 - 159)       | 114<br>(68 - 169)       | 131<br>(89 - 188)       |
| Urolithiasis                                        | 5<br>(2 - 12)            | --                       | 1<br>(0 - 2)           | 2<br>(1 - 5)            | 1<br>(0 - 4)            | 1<br>(0 - 2)            |
| Other urinary diseases                              | 46<br>(26 - 73)          | 10<br>(3 - 22)           | 2<br>(1 - 4)           | 15<br>(6 - 25)          | 11<br>(3 - 20)          | 10<br>(3 - 20)          |
| Gynecological diseases                              | 8<br>(4 - 14)            | --                       | --                     | 5<br>(3 - 9)            | 2<br>(1 - 4)            | 1<br>(0 - 2)            |
| Uterine fibroids                                    | 2<br>(1 - 3)             | --                       | --                     | 1<br>(0 - 1)            | 0<br>(0 - 1)            | 0<br>(0 - 1)            |
| Polycystic ovarian syndrome                         | 0<br>(0 - 1)             | --                       | --                     | 0<br>(0 - 1)            | 0<br>(0 - 0)            | --                      |
| Endometriosis                                       | 1<br>(0 - 2)             | --                       | --                     | 1<br>(0 - 1)            | 0<br>(0 - 0)            | --                      |
| Genital prolapse                                    | 1<br>(1 - 2)             | --                       | --                     | 1<br>(0 - 1)            | 0<br>(0 - 1)            | 0<br>(0 - 1)            |
| Other gynecological diseases                        | 4<br>(2 - 7)             | --                       | --                     | 2<br>(1 - 4)            | 1<br>(0 - 2)            | 1<br>(0 - 1)            |
| Hemoglobinopathies and hemolytic anemias            | 567<br>(240 - 942)       | 336<br>(90 - 641)        | 89<br>(40 - 142)       | 96<br>(48 - 166)        | 25<br>(13 - 51)         | 20<br>(9 - 44)          |
| Thalassemias                                        | 20<br>(7 - 35)           | 16<br>(4 - 30)           | 2<br>(1 - 4)           | 2<br>(1 - 4)            | 0<br>(0 - 0)            | 0<br>(0 - 0)            |
| Sickle cell disorders                               | 499<br>(199 - 844)       | 302<br>(78 - 576)        | 85<br>(38 - 134)       | 89<br>(45 - 154)        | 20<br>(10 - 41)         | 2<br>(1 - 5)            |
| G6PD deficiency                                     | 12<br>(5 - 19)           | 7<br>(2 - 14)            | 1<br>(1 - 2)           | 2<br>(1 - 3)            | 1<br>(0 - 1)            | 1<br>(0 - 2)            |
| Other hemoglobinopathies and hemolytic anemias      | 36<br>(20 - 59)          | 11<br>(4 - 20)           | 1<br>(1 - 2)           | 3<br>(1 - 5)            | 4<br>(2 - 8)            | 17<br>(8 - 38)          |
| Endocrine, metabolic, blood, and immune disorders   | 370<br>(226 - 492)       | 137<br>(76 - 241)        | 22<br>(13 - 38)        | 80<br>(46 - 109)        | 65<br>(31 - 97)         | 66<br>(24 - 97)         |
| Musculoskeletal disorders                           | 81<br>(53 - 111)         | --                       | 14<br>(7 - 21)         | 31<br>(21 - 45)         | 20<br>(13 - 29)         | 16<br>(10 - 23)         |
| Rheumatoid arthritis                                | 11<br>(7 - 17)           | --                       | 2<br>(1 - 4)           | 3<br>(1 - 4)            | 3<br>(2 - 5)            | 4<br>(2 - 8)            |
| Other musculoskeletal disorders                     | 69<br>(44 - 94)          | --                       | 12<br>(6 - 18)         | 29<br>(18 - 41)         | 18<br>(11 - 25)         | 11<br>(7 - 17)          |
| Other non-communicable diseases                     | 3,740<br>(1,795 - 7,365) | 3,308<br>(1,439 - 6,847) | 141<br>(66 - 279)      | 132<br>(92 - 181)       | 68<br>(43 - 96)         | 91<br>(55 - 126)        |
| Congenital anomalies                                | 3,382<br>(1,435 - 6,991) | 3,157<br>(1,303 - 6,646) | 129<br>(56 - 267)      | 73<br>(43 - 115)        | 12<br>(8 - 19)          | 10<br>(7 - 15)          |
| Neural tube defects                                 | 925<br>(311 - 2,202)     | 884<br>(285 - 2,102)     | 26<br>(9 - 65)         | 14<br>(4 - 31)          | 1<br>(0 - 3)            | 1<br>(0 - 2)            |
| Congenital heart anomalies                          | 1,366<br>(544 - 2,795)   | 1,259<br>(477 - 2,632)   | 61<br>(25 - 136)       | 34<br>(18 - 55)         | 7<br>(4 - 10)           | 5<br>(3 - 7)            |
| Cleft lip and cleft palate                          | 25<br>(5 - 73)           | 25<br>(5 - 73)           | --                     | --                      | --                      | --                      |
| Down syndrome                                       | 361<br>(89 - 964)        | 331<br>(69 - 921)        | 18<br>(6 - 39)         | 10<br>(5 - 18)          | 2<br>(1 - 3)            | 0<br>(0 - 1)            |
| Chromosomal unbalanced rearrangements               | 101<br>(29 - 282)        | 95<br>(26 - 272)         | 3<br>(1 - 8)           | 3<br>(1 - 5)            | 0<br>(0 - 0)            | 0<br>(0 - 0)            |
| Other congenital anomalies                          | 604<br>(137 - 2,424)     | 563<br>(116 - 2,325)     | 21<br>(6 - 79)         | 12<br>(6 - 25)          | 3<br>(2 - 5)            | 4<br>(2 - 7)            |
| Skin and subcutaneous diseases                      | 321<br>(197 - 413)       | 113<br>(56 - 188)        | 12<br>(8 - 18)         | 59<br>(32 - 79)         | 56<br>(31 - 81)         | 81<br>(47 - 115)        |

Web Table 31- Chad deaths with 95% UI by age, sex, and cause in 2013

| Cause                                           | Both Sexes, All Ages      | Both Sexes, 0-4 Years    | Both Sexes, 5-14 Years | Both Sexes, 15-49 Years  | Both Sexes, 50-69 Years | Both Sexes, 70-80 Years |
|-------------------------------------------------|---------------------------|--------------------------|------------------------|--------------------------|-------------------------|-------------------------|
| Cellulitis                                      | 230<br>(146 - 302)        | 74<br>(37 - 121)         | 10<br>(6 - 14)         | 42<br>(24 - 58)          | 41<br>(25 - 61)         | 63<br>(37 - 91)         |
| Pyoderma                                        | 80<br>(42 - 128)          | 35<br>(10 - 76)          | 2<br>(1 - 4)           | 15<br>(7 - 22)           | 14<br>(6 - 24)          | 15<br>(6 - 25)          |
| Decubitus ulcer                                 | 4<br>(1 - 7)              | 0<br>(0 - 1)             | 0<br>(0 - 0)           | 1<br>(0 - 1)             | 0<br>(0 - 1)            | 3<br>(1 - 5)            |
| Other skin and subcutaneous diseases            | 7<br>(1 - 18)             | 3<br>(0 - 13)            | 0<br>(0 - 1)           | 2<br>(0 - 4)             | 0<br>(0 - 1)            | 1<br>(0 - 2)            |
| Sudden infant death syndrome                    | 38<br>(12 - 99)           | 38<br>(12 - 99)          | --                     | --                       | --                      | --                      |
| Injuries                                        | 8,393<br>(6,896 - 10,002) | 2,620<br>(1,645 - 3,821) | 1,126<br>(856 - 1,445) | 3,327<br>(2,610 - 4,164) | 769<br>(586 - 995)      | 551<br>(397 - 713)      |
| Transport injuries                              | 4,102<br>(3,302 - 5,036)  | 871<br>(501 - 1,397)     | 579<br>(416 - 797)     | 2,049<br>(1,563 - 2,601) | 405<br>(291 - 537)      | 197<br>(129 - 257)      |
| Road injuries                                   | 3,941<br>(3,175 - 4,855)  | 800<br>(454 - 1,277)     | 552<br>(398 - 761)     | 2,014<br>(1,536 - 2,559) | 391<br>(283 - 518)      | 186<br>(126 - 240)      |
| Pedestrian road injuries                        | 1,122<br>(757 - 1,526)    | 263<br>(132 - 497)       | 190<br>(120 - 287)     | 488<br>(293 - 705)       | 117<br>(69 - 171)       | 64<br>(36 - 91)         |
| Cyclist road injuries                           | 218<br>(150 - 299)        | 58<br>(26 - 107)         | 49<br>(31 - 73)        | 71<br>(47 - 102)         | 30<br>(14 - 46)         | 11<br>(5 - 17)          |
| Motorcyclist road injuries                      | 535<br>(356 - 795)        | 69<br>(34 - 125)         | 42<br>(23 - 67)        | 365<br>(228 - 568)       | 44<br>(27 - 68)         | 15<br>(9 - 24)          |
| Motor vehicle road injuries                     | 1,727<br>(1,294 - 2,207)  | 298<br>(161 - 505)       | 196<br>(130 - 291)     | 999<br>(718 - 1,344)     | 162<br>(112 - 224)      | 72<br>(43 - 102)        |
| Other road injuries                             | 340<br>(162 - 518)        | 111<br>(40 - 217)        | 75<br>(32 - 128)       | 92<br>(38 - 183)         | 38<br>(15 - 67)         | 24<br>(9 - 45)          |
| Other transport injuries                        | 160<br>(107 - 232)        | 72<br>(33 - 137)         | 28<br>(16 - 47)        | 35<br>(23 - 60)          | 15<br>(7 - 22)          | 11<br>(3 - 18)          |
| Unintentional injuries                          | 3,693<br>(2,888 - 4,712)  | 1,709<br>(1,013 - 2,590) | 521<br>(384 - 696)     | 859<br>(640 - 1,239)     | 290<br>(217 - 395)      | 314<br>(207 - 435)      |
| Falls                                           | 664<br>(507 - 929)        | 175<br>(87 - 325)        | 62<br>(38 - 96)        | 182<br>(122 - 311)       | 89<br>(59 - 149)        | 154<br>(93 - 251)       |
| Drowning                                        | 890<br>(468 - 1,558)      | 487<br>(172 - 964)       | 185<br>(96 - 311)      | 174<br>(102 - 301)       | 30<br>(21 - 43)         | 14<br>(9 - 21)          |
| Fire, heat, and hot substances                  | 617<br>(400 - 897)        | 359<br>(155 - 631)       | 66<br>(40 - 104)       | 108<br>(74 - 156)        | 42<br>(25 - 70)         | 42<br>(23 - 77)         |
| Poisonings                                      | 218<br>(132 - 460)        | 110<br>(47 - 255)        | 23<br>(13 - 43)        | 62<br>(35 - 160)         | 17<br>(10 - 29)         | 6<br>(4 - 10)           |
| Exposure to mechanical forces                   | 585<br>(431 - 875)        | 224<br>(130 - 383)       | 90<br>(54 - 147)       | 201<br>(130 - 367)       | 48<br>(31 - 70)         | 21<br>(11 - 30)         |
| Unintentional firearm injuries                  | 254<br>(167 - 393)        | 77<br>(38 - 155)         | 28<br>(15 - 57)        | 121<br>(71 - 216)        | 19<br>(11 - 32)         | 8<br>(5 - 12)           |
| Unintentional suffocation                       | 31<br>(7 - 66)            | 21<br>(4 - 50)           | 4<br>(1 - 9)           | 4<br>(1 - 8)             | 1<br>(0 - 2)            | 1<br>(0 - 1)            |
| Other exposure to mechanical forces             | 300<br>(203 - 469)        | 126<br>(63 - 252)        | 58<br>(30 - 105)       | 76<br>(48 - 153)         | 28<br>(15 - 44)         | 13<br>(4 - 20)          |
| Adverse effects of medical treatment            | 159<br>(74 - 279)         | 63<br>(21 - 126)         | 10<br>(5 - 20)         | 29<br>(15 - 52)          | 25<br>(7 - 55)          | 31<br>(7 - 73)          |
| Animal contact                                  | 109<br>(67 - 186)         | 40<br>(17 - 87)          | 23<br>(12 - 43)        | 23<br>(13 - 36)          | 12<br>(5 - 18)          | 10<br>(3 - 16)          |
| Venomous animal contact                         | 67<br>(39 - 140)          | 27<br>(10 - 74)          | 14<br>(6 - 31)         | 15<br>(8 - 25)           | 6<br>(3 - 11)           | 5<br>(1 - 9)            |
| Non-venomous animal contact                     | 42<br>(20 - 62)           | 13<br>(5 - 26)           | 10<br>(4 - 17)         | 8<br>(4 - 13)            | 6<br>(2 - 9)            | 5<br>(2 - 8)            |
| Foreign body                                    | 241<br>(131 - 382)        | 176<br>(84 - 310)        | 19<br>(10 - 29)        | 18<br>(11 - 26)          | 10<br>(5 - 15)          | 19<br>(8 - 31)          |
| Pulmonary aspiration and foreign body in airway | 234<br>(127 - 376)        | 173<br>(82 - 307)        | 18<br>(9 - 28)         | 17<br>(10 - 25)          | 9<br>(4 - 13)           | 18<br>(7 - 29)          |
| Foreign body in other body part                 | 7<br>(4 - 11)             | 3<br>(1 - 6)             | 1<br>(1 - 2)           | 1<br>(1 - 2)             | 1<br>(1 - 2)            | 1<br>(0 - 2)            |
| Other unintentional injuries                    | 209<br>(150 - 282)        | 74<br>(42 - 119)         | 41<br>(27 - 62)        | 62<br>(42 - 85)          | 17<br>(11 - 24)         | 16<br>(10 - 23)         |
| Self-harm and interpersonal violence            | 599<br>(371 - 853)        | 40<br>(20 - 73)          | 26<br>(14 - 41)        | 419<br>(268 - 616)       | 74<br>(32 - 118)        | 41<br>(11 - 66)         |
| Self-harm                                       | 338<br>(140 - 544)        | --                       | 11<br>(3 - 24)         | 224<br>(98 - 389)        | 64<br>(22 - 107)        | 39<br>(9 - 64)          |
| Interpersonal violence                          | 261<br>(177 - 361)        | 40<br>(20 - 73)          | 15<br>(9 - 23)         | 194<br>(126 - 278)       | 10<br>(6 - 15)          | 2<br>(1 - 2)            |
| Assault by firearm                              | 115<br>(58 - 173)         | 9<br>(3 - 18)            | 3<br>(2 - 6)           | 98<br>(48 - 153)         | 4<br>(2 - 6)            | 0<br>(0 - 1)            |
| Assault by sharp object                         | 50<br>(29 - 88)           | 6<br>(2 - 14)            | 3<br>(1 - 5)           | 38<br>(20 - 74)          | 3<br>(1 - 5)            | 0<br>(0 - 1)            |
| Assault by other means                          | 96<br>(63 - 156)          | 25<br>(12 - 50)          | 9<br>(6 - 15)          | 58<br>(34 - 100)         | 3<br>(2 - 6)            | 1<br>(0 - 1)            |

Web Table 31- Chad deaths with 95% UI by age, sex, and cause in 2013

| Cause                                                              | Males, All Ages             | Males, 0-4 Years            | Males, 5-14 Years        | Males, 15-49 Years          | Males, 50-69 Years        | Males, 70-80 Years       |
|--------------------------------------------------------------------|-----------------------------|-----------------------------|--------------------------|-----------------------------|---------------------------|--------------------------|
| All causes                                                         | 76,659<br>(68,568 - 86,201) | 44,728<br>(37,838 - 52,189) | 4,101<br>(3,467 - 4,792) | 13,173<br>(10,996 - 15,430) | 8,142<br>(6,348 - 10,227) | 6,515<br>(5,503 - 7,749) |
| Communicable, maternal, neonatal, and nutritional diseases         | 56,954<br>(50,398 - 64,406) | 40,285<br>(34,177 - 47,568) | 2,883<br>(2,391 - 3,430) | 7,554<br>(6,480 - 8,804)    | 3,576<br>(2,847 - 4,364)  | 2,657<br>(2,093 - 3,237) |
| HIV/AIDS and tuberculosis                                          | 7,104<br>(6,001 - 8,460)    | 722<br>(548 - 944)          | 428<br>(345 - 520)       | 4,010<br>(3,244 - 4,922)    | 1,461<br>(1,123 - 1,870)  | 483<br>(340 - 684)       |
| Tuberculosis                                                       | 2,390<br>(1,692 - 3,397)    | 232<br>(119 - 430)          | 85<br>(48 - 142)         | 981<br>(667 - 1,435)        | 690<br>(444 - 1,032)      | 402<br>(264 - 595)       |
| HIV/AIDS                                                           | 4,715<br>(3,913 - 5,774)    | 490<br>(370 - 634)          | 343<br>(273 - 424)       | 3,030<br>(2,324 - 3,963)    | 771<br>(548 - 1,019)      | 81<br>(50 - 118)         |
| HIV/AIDS resulting in mycobacterial infection                      | 333<br>(255 - 436)          | 33<br>(25 - 45)             | 22<br>(16 - 29)          | 215<br>(152 - 293)          | 57<br>(39 - 80)           | 6<br>(4 - 9)             |
| HIV/AIDS resulting in other diseases                               | 4,382<br>(3,628 - 5,370)    | 456<br>(341 - 591)          | 321<br>(254 - 395)       | 2,815<br>(2,153 - 3,681)    | 714<br>(509 - 947)        | 75<br>(46 - 110)         |
| Diarrrhea, lower respiratory, and other common infectious diseases | 30,927<br>(24,076 - 37,699) | 23,273<br>(17,195 - 29,428) | 1,648<br>(1,190 - 2,150) | 2,584<br>(1,881 - 3,396)    | 1,640<br>(1,067 - 2,322)  | 1,781<br>(1,294 - 2,347) |
| Diarrheal diseases                                                 | 12,715<br>(8,286 - 17,606)  | 9,490<br>(5,342 - 14,309)   | 617<br>(305 - 990)       | 1,142<br>(752 - 1,661)      | 732<br>(413 - 1,154)      | 734<br>(456 - 1,096)     |
| Intestinal infectious diseases                                     | 305<br>(161 - 544)          | 116<br>(56 - 218)           | 88<br>(43 - 161)         | 90<br>(42 - 172)            | 9<br>(4 - 17)             | 3<br>(1 - 7)             |
| Typhoid fever                                                      | 182<br>(88 - 341)           | 62<br>(26 - 124)            | 55<br>(24 - 110)         | 58<br>(23 - 115)            | 5<br>(2 - 11)             | 2<br>(1 - 4)             |
| Paratyphoid fever                                                  | 93<br>(44 - 177)            | 35<br>(12 - 77)             | 29<br>(12 - 61)          | 26<br>(9 - 56)              | 2<br>(0 - 6)              | 1<br>(0 - 2)             |
| Other intestinal infectious diseases                               | 30<br>(16 - 48)             | 19<br>(9 - 35)              | 3<br>(1 - 9)             | 5<br>(1 - 13)               | 1<br>(0 - 5)              | 1<br>(0 - 4)             |
| Lower respiratory infections                                       | 10,584<br>(7,105 - 14,838)  | 8,081<br>(4,925 - 12,120)   | 338<br>(190 - 550)       | 551<br>(349 - 788)          | 656<br>(394 - 1,021)      | 958<br>(619 - 1,381)     |
| Upper respiratory infections                                       | 10<br>(3 - 26)              | 6<br>(0 - 22)               | 1<br>(0 - 2)             | 2<br>(0 - 4)                | 1<br>(0 - 3)              | 1<br>(0 - 2)             |
| Otitis media                                                       | 5<br>(3 - 8)                | 2<br>(1 - 4)                | 0<br>(0 - 1)             | 1<br>(1 - 1)                | 1<br>(0 - 1)              | 1<br>(0 - 1)             |
| Meningitis                                                         | 2,701<br>(1,677 - 4,239)    | 1,817<br>(896 - 3,358)      | 287<br>(148 - 481)       | 415<br>(252 - 633)          | 128<br>(67 - 215)         | 55<br>(30 - 93)          |
| Pneumococcal meningitis                                            | 663<br>(389 - 1,074)        | 420<br>(187 - 824)          | 76<br>(32 - 148)         | 116<br>(48 - 215)           | 36<br>(16 - 67)           | 14<br>(6 - 28)           |
| H influenzae type B meningitis                                     | 485<br>(229 - 895)          | 367<br>(123 - 749)          | 50<br>(18 - 104)         | 50<br>(25 - 89)             | 14<br>(5 - 29)            | 5<br>(2 - 9)             |
| Meningococcal meningitis                                           | 1,259<br>(748 - 2,124)      | 867<br>(410 - 1,687)        | 137<br>(60 - 253)        | 181<br>(94 - 296)           | 52<br>(22 - 99)           | 23<br>(12 - 41)          |
| Other meningitis                                                   | 294<br>(158 - 481)          | 163<br>(59 - 333)           | 23<br>(9 - 48)           | 68<br>(34 - 127)            | 26<br>(9 - 52)            | 13<br>(6 - 26)           |
| Encephalitis                                                       | 79<br>(53 - 126)            | 44<br>(21 - 87)             | 10<br>(5 - 23)           | 16<br>(9 - 23)              | 5<br>(3 - 8)              | 3<br>(1 - 6)             |
| Diphtheria                                                         | 69<br>(1 - 478)             | 57<br>(0 - 464)             | 9<br>(0 - 65)            | 2<br>(0 - 10)               | 0<br>(0 - 3)              | --                       |
| Whooping cough                                                     | 1,545<br>(2 - 7,486)        | 1,458<br>(2 - 7,063)        | 73<br>(0 - 399)          | 13<br>(0 - 72)              | 1<br>(0 - 6)              | --                       |
| Tetanus                                                            | 2,070<br>(977 - 4,086)      | 1,464<br>(467 - 3,379)      | 141<br>(62 - 330)        | 337<br>(152 - 659)          | 106<br>(42 - 233)         | 22<br>(8 - 68)           |
| Measles                                                            | 816<br>(296 - 1,845)        | 724<br>(254 - 1,634)        | 82<br>(32 - 183)         | 9<br>(3 - 22)               | 0<br>(0 - 1)              | --                       |
| Varicella and herpes zoster                                        | 29<br>(8 - 78)              | 14<br>(0 - 60)              | 3<br>(0 - 13)            | 6<br>(1 - 16)               | 2<br>(0 - 6)              | 5<br>(0 - 18)            |
| Neglected tropical diseases and malaria                            | 4,750<br>(2,506 - 8,510)    | 3,478<br>(1,485 - 6,801)    | 454<br>(200 - 879)       | 494<br>(288 - 880)          | 200<br>(92 - 406)         | 125<br>(45 - 301)        |
| Malaria                                                            | 4,372<br>(2,095 - 8,178)    | 3,374<br>(1,398 - 6,730)    | 377<br>(138 - 809)       | 340<br>(144 - 705)          | 166<br>(55 - 374)         | 115<br>(33 - 290)        |
| Leishmaniasis                                                      | 0<br>(0 - 0)                | 0<br>(0 - 0)                | 0<br>(0 - 0)             | 0<br>(0 - 0)                | 0<br>(0 - 0)              | 0<br>(0 - 0)             |
| Visceral leishmaniasis                                             | 0<br>(0 - 0)                | 0<br>(0 - 0)                | 0<br>(0 - 0)             | 0<br>(0 - 0)                | 0<br>(0 - 0)              | 0<br>(0 - 0)             |
| African trypanosomiasis                                            | 143<br>(70 - 240)           | 9<br>(4 - 18)               | 16<br>(8 - 27)           | 97<br>(47 - 165)            | 16<br>(8 - 28)            | 4<br>(2 - 6)             |
| Schistosomiasis                                                    | 22<br>(15 - 31)             | 1<br>(0 - 2)                | 1<br>(1 - 3)             | 10<br>(6 - 16)              | 6<br>(4 - 11)             | 3<br>(1 - 4)             |
| Cysticercosis                                                      | 2<br>(0 - 6)                | 0<br>(0 - 1)                | 0<br>(0 - 1)             | 1<br>(0 - 3)                | 0<br>(0 - 1)              | 0<br>(0 - 0)             |
| Cystic echinococcosis                                              | 4<br>(3 - 5)                | 1<br>(1 - 2)                | 1<br>(1 - 1)             | 1<br>(1 - 2)                | 0<br>(0 - 0)              | 0<br>(0 - 0)             |
| Dengue                                                             | 4<br>(2 - 8)                | 2<br>(0 - 5)                | 1<br>(0 - 2)             | 1<br>(0 - 2)                | 0<br>(0 - 0)              | 0<br>(0 - 0)             |
| Yellow fever                                                       | 8<br>(4 - 13)               | 1<br>(0 - 2)                | 2<br>(0 - 5)             | 4<br>(2 - 9)                | 1<br>(0 - 2)              | 0<br>(0 - 1)             |
| Rabies                                                             | 127<br>(61 - 221)           | 43<br>(10 - 110)            | 48<br>(20 - 89)          | 30<br>(16 - 54)             | 6<br>(2 - 12)             | 1<br>(0 - 2)             |
| Intestinal nematode infections                                     | 39<br>(19 - 68)             | 33<br>(15 - 61)             | 4<br>(0 - 12)            | 1<br>(0 - 5)                | 0<br>(0 - 3)              | 0<br>(0 - 2)             |
| Ascariasis                                                         | 39<br>(19 - 68)             | 33<br>(15 - 61)             | 4<br>(0 - 12)            | 1<br>(0 - 5)                | 0<br>(0 - 3)              | 0<br>(0 - 2)             |

Web Table 31- Chad deaths with 95% UI by age, sex, and cause in 2013

| Cause                                                            | Males, All Ages             | Males, 0-4 Years          | Males, 5-14 Years  | Males, 15-49 Years       | Males, 50-69 Years       | Males, 70-80 Years       |
|------------------------------------------------------------------|-----------------------------|---------------------------|--------------------|--------------------------|--------------------------|--------------------------|
| Other neglected tropical diseases                                | 29<br>(11 - 55)             | 13<br>(4 - 32)            | 3<br>(1 - 6)       | 8<br>(2 - 15)            | 3<br>(1 - 7)             | 3<br>(1 - 6)             |
| Maternal disorders                                               | --                          | --                        | --                 | --                       | --                       | --                       |
| Maternal hemorrhage                                              | --                          | --                        | --                 | --                       | --                       | --                       |
| Maternal sepsis and other maternal infections                    | --                          | --                        | --                 | --                       | --                       | --                       |
| Maternal hypertensive disorders                                  | --                          | --                        | --                 | --                       | --                       | --                       |
| Maternal obstructed labor                                        | --                          | --                        | --                 | --                       | --                       | --                       |
| Maternal abortive outcome                                        | --                          | --                        | --                 | --                       | --                       | --                       |
| Indirect maternal deaths                                         | --                          | --                        | --                 | --                       | --                       | --                       |
| Late maternal deaths                                             | --                          | --                        | --                 | --                       | --                       | --                       |
| Maternal deaths aggravated by HIV/AIDS                           | --                          | --                        | --                 | --                       | --                       | --                       |
| Other maternal disorders                                         | --                          | --                        | --                 | --                       | --                       | --                       |
| Neonatal disorders                                               | 8,215<br>(6,120 - 10,412)   | 8,215<br>(6,120 - 10,412) | --                 | --                       | --                       | --                       |
| Neonatal preterm birth complications                             | 2,792<br>(1,249 - 4,759)    | 2,792<br>(1,249 - 4,759)  | --                 | --                       | --                       | --                       |
| Neonatal encephalopathy due to birth asphyxia and trauma         | 2,348<br>(1,067 - 4,193)    | 2,348<br>(1,067 - 4,193)  | --                 | --                       | --                       | --                       |
| Neonatal sepsis and other neonatal infections                    | 1,723<br>(596 - 3,588)      | 1,723<br>(596 - 3,588)    | --                 | --                       | --                       | --                       |
| Hemolytic disease and other neonatal jaundice                    | 82<br>(23 - 218)            | 82<br>(23 - 218)          | --                 | --                       | --                       | --                       |
| Other neonatal disorders                                         | 1,270<br>(486 - 2,545)      | 1,270<br>(486 - 2,545)    | --                 | --                       | --                       | --                       |
| Nutritional deficiencies                                         | 4,159<br>(2,298 - 6,533)    | 3,158<br>(1,522 - 5,496)  | 226<br>(126 - 371) | 343<br>(196 - 527)       | 211<br>(117 - 334)       | 221<br>(133 - 362)       |
| Protein-energy malnutrition                                      | 3,157<br>(1,648 - 5,427)    | 2,656<br>(1,258 - 4,835)  | 149<br>(72 - 267)  | 144<br>(68 - 284)        | 105<br>(45 - 196)        | 103<br>(40 - 205)        |
| Iodine deficiency                                                | 6<br>(0 - 32)               | 4<br>(0 - 31)             | 0<br>(0 - 4)       | 1<br>(0 - 5)             | 0<br>(0 - 2)             | 0<br>(0 - 2)             |
| Iron-deficiency anemia                                           | 981<br>(331 - 1,947)        | 496<br>(63 - 1,340)       | 75<br>(21 - 151)   | 191<br>(78 - 306)        | 103<br>(37 - 187)        | 116<br>(43 - 208)        |
| Other nutritional deficiencies                                   | 14<br>(4 - 35)              | 3<br>(1 - 14)             | 1<br>(0 - 4)       | 6<br>(1 - 15)            | 2<br>(0 - 5)             | 2<br>(0 - 5)             |
| Other communicable, maternal, neonatal, and nutritional diseases | 1,800<br>(1,053 - 2,926)    | 1,439<br>(765 - 2,476)    | 127<br>(73 - 218)  | 123<br>(73 - 264)        | 65<br>(34 - 139)         | 46<br>(22 - 107)         |
| Sexually transmitted diseases excluding HIV                      | 1,492<br>(758 - 2,583)      | 1,298<br>(633 - 2,322)    | 105<br>(54 - 191)  | 48<br>(21 - 172)         | 23<br>(7 - 87)           | 17<br>(5 - 61)           |
| Syphilis                                                         | 1,455<br>(731 - 2,548)      | 1,298<br>(633 - 2,322)    | 101<br>(51 - 186)  | 25<br>(11 - 92)          | 17<br>(5 - 64)           | 14<br>(4 - 51)           |
| Chlamydial infection                                             | --                          | --                        | --                 | --                       | --                       | --                       |
| Gonococcal infection                                             | 21<br>(9 - 72)              | --                        | 2<br>(1 - 8)       | 12<br>(6 - 44)           | 4<br>(1 - 15)            | 2<br>(1 - 7)             |
| Other sexually transmitted diseases                              | 16<br>(7 - 56)              | --                        | 2<br>(1 - 8)       | 10<br>(5 - 36)           | 2<br>(1 - 9)             | 1<br>(0 - 3)             |
| Hepatitis                                                        | 121<br>(61 - 187)           | 37<br>(10 - 80)           | 10<br>(4 - 18)     | 45<br>(23 - 74)          | 19<br>(10 - 32)          | 10<br>(5 - 16)           |
| Acute hepatitis A                                                | 14<br>(3 - 35)              | 9<br>(1 - 27)             | 2<br>(1 - 6)       | 2<br>(0 - 5)             | 0<br>(0 - 0)             | 0<br>(0 - 0)             |
| Acute hepatitis B                                                | 75<br>(34 - 127)            | 28<br>(7 - 61)            | 5<br>(2 - 11)      | 18<br>(7 - 36)           | 15<br>(7 - 26)           | 8<br>(5 - 14)            |
| Acute hepatitis C                                                | 3<br>(0 - 9)                | --                        | 1<br>(0 - 2)       | 1<br>(0 - 4)             | 1<br>(0 - 2)             | 0<br>(0 - 1)             |
| Acute hepatitis E                                                | 30<br>(14 - 56)             | 0<br>(0 - 2)              | 2<br>(1 - 5)       | 24<br>(11 - 44)          | 3<br>(1 - 7)             | 1<br>(0 - 2)             |
| Other infectious diseases                                        | 187<br>(90 - 370)           | 103<br>(31 - 246)         | 11<br>(3 - 27)     | 31<br>(13 - 67)          | 23<br>(8 - 53)           | 19<br>(6 - 55)           |
| Non-communicable diseases                                        | 14,077<br>(11,149 - 18,165) | 2,859<br>(1,627 - 5,455)  | 487<br>(354 - 655) | 3,057<br>(2,264 - 3,942) | 4,076<br>(2,978 - 5,455) | 3,599<br>(2,881 - 4,461) |
| Neoplasms                                                        | 1,861<br>(1,432 - 2,401)    | 89<br>(51 - 160)          | 60<br>(42 - 81)    | 590<br>(424 - 812)       | 674<br>(475 - 928)       | 447<br>(345 - 580)       |
| Esophageal cancer                                                | 68<br>(41 - 113)            | --                        | --                 | 15<br>(10 - 24)          | 35<br>(20 - 61)          | 17<br>(9 - 32)           |
| Stomach cancer                                                   | 205<br>(148 - 272)          | --                        | --                 | 60<br>(40 - 84)          | 97<br>(66 - 135)         | 48<br>(34 - 65)          |
| Liver cancer                                                     | 743<br>(522 - 1,047)        | --                        | 4<br>(2 - 9)       | 317<br>(205 - 493)       | 288<br>(187 - 432)       | 134<br>(88 - 195)        |
| Liver cancer due to hepatitis B                                  | 374<br>(228 - 615)          | --                        | 2<br>(1 - 5)       | 195<br>(115 - 323)       | 134<br>(69 - 235)        | 43<br>(21 - 75)          |

Web Table 31- Chad deaths with 95% UI by age, sex, and cause in 2013

| Cause                                | Males, All Ages          | Males, 0-4 Years   | Males, 5-14 Years | Males, 15-49 Years   | Males, 50-69 Years       | Males, 70-80 Years       |
|--------------------------------------|--------------------------|--------------------|-------------------|----------------------|--------------------------|--------------------------|
| Liver cancer due to hepatitis C      | 207<br>(97 - 356)        | --                 | 0<br>(0 - 0)      | 53<br>(14 - 105)     | 95<br>(39 - 174)         | 58<br>(27 - 96)          |
| Liver cancer due to alcohol use      | 86<br>(45 - 150)         | --                 | --                | 24<br>(11 - 45)      | 36<br>(17 - 68)          | 25<br>(11 - 47)          |
| Liver cancer due to other causes     | 77<br>(38 - 143)         | --                 | 2<br>(1 - 4)      | 45<br>(20 - 85)      | 22<br>(10 - 45)          | 8<br>(4 - 16)            |
| Larynx cancer                        | 12<br>(7 - 29)           | --                 | --                | 3<br>(2 - 5)         | 6<br>(3 - 16)            | 4<br>(2 - 9)             |
| Tracheal, bronchus and lung cancer   | 98<br>(73 - 129)         | --                 | --                | 13<br>(9 - 18)       | 54<br>(37 - 73)          | 31<br>(23 - 41)          |
| Breast cancer                        | 4<br>(2 - 6)             | --                 | --                | 1<br>(1 - 2)         | 2<br>(1 - 3)             | 1<br>(0 - 1)             |
| Cervical cancer                      | --                       | --                 | --                | --                   | --                       | --                       |
| Uterine cancer                       | --                       | --                 | --                | --                   | --                       | --                       |
| Prostate cancer                      | 125<br>(81 - 204)        | --                 | --                | 3<br>(1 - 4)         | 35<br>(21 - 59)          | 88<br>(56 - 144)         |
| Colon and rectum cancer              | 89<br>(67 - 117)         | --                 | --                | 28<br>(20 - 37)      | 31<br>(22 - 44)          | 30<br>(22 - 40)          |
| Lip and oral cavity cancer           | 12<br>(8 - 17)           | --                 | --                | 3<br>(2 - 5)         | 5<br>(3 - 8)             | 3<br>(2 - 5)             |
| Nasopharynx cancer                   | 5<br>(3 - 7)             | --                 | 0<br>(0 - 1)      | 3<br>(2 - 4)         | 2<br>(1 - 3)             | 0<br>(0 - 1)             |
| Other pharynx cancer                 | 6<br>(4 - 9)             | --                 | --                | 2<br>(1 - 3)         | 2<br>(1 - 4)             | 2<br>(1 - 3)             |
| Gallbladder and biliary tract cancer | 9<br>(6 - 15)            | --                 | --                | 3<br>(2 - 4)         | 4<br>(2 - 6)             | 3<br>(2 - 6)             |
| Pancreatic cancer                    | 37<br>(27 - 50)          | --                 | --                | 10<br>(6 - 14)       | 19<br>(13 - 27)          | 8<br>(6 - 11)            |
| Malignant skin melanoma              | 5<br>(3 - 9)             | --                 | --                | 2<br>(1 - 4)         | 2<br>(1 - 3)             | 1<br>(1 - 2)             |
| Non-melanoma skin cancer             | 4<br>(3 - 6)             | --                 | --                | 1<br>(1 - 2)         | 1<br>(1 - 2)             | 2<br>(1 - 3)             |
| Ovarian cancer                       | --                       | --                 | --                | --                   | --                       | --                       |
| Testicular cancer                    | 4<br>(2 - 6)             | --                 | --                | 3<br>(2 - 4)         | 1<br>(0 - 1)             | 0<br>(0 - 1)             |
| Kidney cancer                        | 16<br>(12 - 23)          | 4<br>(1 - 8)       | 1<br>(1 - 2)      | 3<br>(2 - 4)         | 5<br>(3 - 8)             | 3<br>(2 - 4)             |
| Bladder cancer                       | 46<br>(33 - 72)          | --                 | --                | 10<br>(6 - 14)       | 15<br>(10 - 28)          | 21<br>(14 - 35)          |
| Brain and nervous system cancer      | 20<br>(9 - 28)           | 1<br>(0 - 2)       | 4<br>(2 - 7)      | 8<br>(4 - 12)        | 5<br>(2 - 7)             | 2<br>(1 - 4)             |
| Thyroid cancer                       | 2<br>(1 - 3)             | --                 | 0<br>(0 - 0)      | 1<br>(0 - 1)         | 1<br>(0 - 1)             | 0<br>(0 - 1)             |
| Mesothelioma                         | 3<br>(2 - 4)             | --                 | --                | 0<br>(0 - 1)         | 1<br>(1 - 2)             | 1<br>(1 - 2)             |
| Hodgkin lymphoma                     | 13<br>(8 - 20)           | 2<br>(1 - 5)       | 2<br>(1 - 5)      | 6<br>(4 - 9)         | 2<br>(1 - 3)             | 1<br>(0 - 2)             |
| Non-Hodgkin lymphoma                 | 107<br>(73 - 141)        | 19<br>(8 - 38)     | 20<br>(11 - 32)   | 36<br>(24 - 50)      | 19<br>(12 - 30)          | 12<br>(8 - 20)           |
| Multiple myeloma                     | 6<br>(4 - 8)             | --                 | --                | 2<br>(1 - 3)         | 3<br>(2 - 5)             | 1<br>(1 - 2)             |
| Leukemia                             | 39<br>(30 - 49)          | 6<br>(3 - 13)      | 7<br>(4 - 11)     | 17<br>(12 - 23)      | 4<br>(3 - 6)             | 4<br>(3 - 6)             |
| Other neoplasms                      | 184<br>(123 - 294)       | 57<br>(30 - 113)   | 21<br>(11 - 35)   | 41<br>(23 - 73)      | 37<br>(19 - 70)          | 29<br>(16 - 52)          |
| Cardiovascular diseases              | 4,605<br>(3,653 - 5,811) | 270<br>(158 - 431) | 84<br>(54 - 128)  | 804<br>(576 - 1,040) | 1,760<br>(1,278 - 2,354) | 1,687<br>(1,338 - 2,119) |
| Rheumatic heart disease              | 103<br>(49 - 243)        | 16<br>(5 - 39)     | 8<br>(3 - 19)     | 29<br>(11 - 83)      | 27<br>(10 - 76)          | 24<br>(11 - 51)          |
| Ischemic heart disease               | 1,782<br>(1,280 - 2,363) | 21<br>(7 - 49)     | 16<br>(9 - 27)    | 298<br>(203 - 406)   | 772<br>(525 - 1,064)     | 675<br>(494 - 920)       |
| Cerebrovascular disease              | 1,395<br>(984 - 1,930)   | 57<br>(30 - 101)   | 17<br>(9 - 28)    | 184<br>(115 - 267)   | 520<br>(341 - 758)       | 617<br>(430 - 844)       |
| Ischemic stroke                      | 776<br>(211 - 1,254)     | 5<br>(1 - 15)      | 2<br>(0 - 5)      | 43<br>(7 - 88)       | 289<br>(61 - 509)        | 437<br>(139 - 676)       |
| Hemorrhagic stroke                   | 619<br>(343 - 1,151)     | 52<br>(27 - 92)    | 15<br>(7 - 25)    | 140<br>(84 - 214)    | 232<br>(105 - 474)       | 181<br>(74 - 423)        |
| Hypertensive heart disease           | 226<br>(78 - 429)        | 4<br>(0 - 10)      | 1<br>(0 - 2)      | 41<br>(8 - 91)       | 86<br>(28 - 173)         | 94<br>(35 - 177)         |
| Cardiomyopathy and myocarditis       | 378<br>(243 - 521)       | 53<br>(17 - 126)   | 17<br>(8 - 32)    | 88<br>(53 - 129)     | 133<br>(59 - 223)        | 86<br>(38 - 149)         |
| Atrial fibrillation and flutter      | 0<br>(0 - 0)             | --                 | --                | 0<br>(0 - 0)         | 0<br>(0 - 0)             | 0<br>(0 - 0)             |
| Aortic aneurysm                      | 48<br>(22 - 82)          | --                 | --                | 7<br>(3 - 12)        | 23<br>(10 - 42)          | 18<br>(8 - 32)           |
| Peripheral vascular disease          | 1<br>(0 - 2)             | --                 | --                | 0<br>(0 - 0)         | 0<br>(0 - 0)             | 1<br>(0 - 1)             |



Web Table 31- Chad deaths with 95% UI by age, sex, and cause in 2013

| Cause                                               | Males, All Ages        | Males, 0-4 Years  | Males, 5-14 Years | Males, 15-49 Years | Males, 50-69 Years | Males, 70-80 Years |
|-----------------------------------------------------|------------------------|-------------------|-------------------|--------------------|--------------------|--------------------|
| Endocarditis                                        | 169<br>(101 - 256)     | 31<br>(10 - 69)   | 5<br>(2 - 9)      | 35<br>(20 - 59)    | 50<br>(28 - 86)    | 48<br>(28 - 83)    |
| Other cardiovascular and circulatory diseases       | 503<br>(343 - 801)     | 88<br>(44 - 169)  | 21<br>(12 - 35)   | 121<br>(74 - 185)  | 149<br>(86 - 266)  | 125<br>(74 - 237)  |
| Chronic respiratory diseases                        | 1,126<br>(785 - 1,990) | 122<br>(52 - 278) | 22<br>(13 - 45)   | 156<br>(100 - 279) | 360<br>(223 - 650) | 466<br>(318 - 807) |
| Chronic obstructive pulmonary disease               | 633<br>(437 - 1,142)   | 49<br>(18 - 118)  | 8<br>(4 - 16)     | 44<br>(27 - 80)    | 199<br>(122 - 371) | 333<br>(224 - 594) |
| Pneumoconiosis                                      | 128<br>(66 - 238)      | 3<br>(0 - 10)     | 2<br>(0 - 4)      | 28<br>(15 - 51)    | 63<br>(32 - 115)   | 32<br>(13 - 68)    |
| Silicosis                                           | 27<br>(9 - 79)         | 1<br>(0 - 4)      | 1<br>(0 - 2)      | 6<br>(2 - 16)      | 7<br>(2 - 21)      | 13<br>(4 - 40)     |
| Asbestosis                                          | 8<br>(4 - 20)          | 0<br>(0 - 2)      | 0<br>(0 - 1)      | 2<br>(1 - 5)       | 5<br>(2 - 11)      | 1<br>(0 - 3)       |
| Coal workers pneumoconiosis                         | 36<br>(15 - 68)        | 0<br>(0 - 1)      | 0<br>(0 - 1)      | 2<br>(1 - 4)       | 28<br>(12 - 54)    | 5<br>(1 - 10)      |
| Other pneumoconiosis                                | 57<br>(30 - 93)        | 1<br>(0 - 2)      | 0<br>(0 - 1)      | 19<br>(10 - 31)    | 24<br>(11 - 45)    | 13<br>(6 - 23)     |
| Asthma                                              | 190<br>(95 - 606)      | 37<br>(9 - 116)   | 5<br>(2 - 17)     | 46<br>(23 - 133)   | 54<br>(24 - 190)   | 48<br>(21 - 176)   |
| Interstitial lung disease and pulmonary sarcoidosis | 57<br>(6 - 117)        | 0<br>(0 - 1)      | 0<br>(0 - 0)      | 2<br>(0 - 4)       | 21<br>(2 - 48)     | 33<br>(3 - 74)     |
| Other chronic respiratory diseases                  | 118<br>(55 - 201)      | 34<br>(12 - 74)   | 8<br>(4 - 14)     | 35<br>(17 - 63)    | 22<br>(7 - 45)     | 19<br>(7 - 39)     |
| Cirrhosis                                           | 893<br>(667 - 1,160)   | 51<br>(18 - 116)  | 19<br>(12 - 28)   | 329<br>(228 - 444) | 364<br>(242 - 515) | 130<br>(92 - 181)  |
| Cirrhosis due to hepatitis B                        | 239<br>(83 - 375)      | 2<br>(0 - 7)      | 3<br>(1 - 7)      | 92<br>(32 - 151)   | 104<br>(38 - 170)  | 38<br>(14 - 62)    |
| Cirrhosis due to hepatitis C                        | 113<br>(19 - 229)      | 3<br>(0 - 10)     | 1<br>(0 - 3)      | 32<br>(3 - 79)     | 54<br>(8 - 112)    | 23<br>(3 - 43)     |
| Cirrhosis due to alcohol use                        | 369<br>(225 - 534)     | --                | --                | 136<br>(77 - 204)  | 172<br>(99 - 266)  | 61<br>(36 - 94)    |
| Cirrhosis due to other causes                       | 172<br>(105 - 258)     | 45<br>(16 - 103)  | 15<br>(8 - 24)    | 70<br>(38 - 115)   | 34<br>(13 - 60)    | 8<br>(4 - 14)      |
| Digestive diseases                                  | 1,259<br>(922 - 1,635) | 167<br>(70 - 352) | 81<br>(51 - 120)  | 419<br>(267 - 575) | 344<br>(218 - 494) | 248<br>(176 - 343) |
| Peptic ulcer disease                                | 372<br>(257 - 530)     | 28<br>(7 - 73)    | 16<br>(7 - 31)    | 126<br>(81 - 182)  | 116<br>(66 - 186)  | 85<br>(52 - 133)   |
| Gastritis and duodenitis                            | 48<br>(20 - 117)       | 10<br>(2 - 28)    | 4<br>(2 - 8)      | 13<br>(5 - 33)     | 12<br>(4 - 40)     | 10<br>(2 - 35)     |
| Appendicitis                                        | 88<br>(56 - 136)       | 21<br>(5 - 57)    | 14<br>(6 - 27)    | 26<br>(15 - 43)    | 16<br>(7 - 28)     | 11<br>(5 - 22)     |
| Paralytic ileus and intestinal obstruction          | 292<br>(144 - 433)     | 25<br>(7 - 63)    | 18<br>(8 - 32)    | 84<br>(35 - 136)   | 96<br>(39 - 157)   | 69<br>(38 - 112)   |
| Inguinal, femoral, and abdominal hernia             | 45<br>(28 - 80)        | 2<br>(0 - 8)      | 2<br>(1 - 5)      | 13<br>(7 - 22)     | 15<br>(8 - 27)     | 14<br>(7 - 26)     |
| Inflammatory bowel disease                          | 71<br>(22 - 125)       | 31<br>(8 - 84)    | 4<br>(1 - 8)      | 17<br>(3 - 29)     | 12<br>(2 - 24)     | 8<br>(1 - 16)      |
| Vascular intestinal disorders                       | 6<br>(2 - 13)          | 2<br>(0 - 5)      | 1<br>(0 - 2)      | 1<br>(0 - 3)       | 1<br>(0 - 2)       | 1<br>(0 - 3)       |
| Gallbladder and biliary diseases                    | 61<br>(33 - 89)        | 4<br>(1 - 10)     | 5<br>(1 - 9)      | 20<br>(8 - 33)     | 15<br>(7 - 25)     | 17<br>(8 - 31)     |
| Pancreatitis                                        | 86<br>(45 - 133)       | 2<br>(0 - 7)      | 2<br>(1 - 4)      | 53<br>(25 - 88)    | 19<br>(10 - 32)    | 10<br>(4 - 19)     |
| Other digestive diseases                            | 191<br>(117 - 294)     | 43<br>(14 - 114)  | 17<br>(8 - 29)    | 67<br>(32 - 107)   | 43<br>(22 - 71)    | 21<br>(11 - 36)    |
| Neurological disorders                              | 408<br>(308 - 541)     | 79<br>(31 - 194)  | 28<br>(13 - 50)   | 91<br>(61 - 131)   | 33<br>(23 - 46)    | 176<br>(129 - 231) |
| Alzheimer disease and other dementias               | 181<br>(132 - 239)     | --                | --                | 0<br>(0 - 0)       | 18<br>(11 - 26)    | 163<br>(118 - 216) |
| Parkinson disease                                   | 2<br>(1 - 4)           | --                | --                | 0<br>(0 - 0)       | 0<br>(0 - 0)       | 2<br>(1 - 4)       |
| Epilepsy                                            | 180<br>(112 - 292)     | 67<br>(23 - 156)  | 24<br>(9 - 45)    | 75<br>(47 - 113)   | 8<br>(4 - 13)      | 6<br>(4 - 10)      |
| Multiple sclerosis                                  | 0<br>(0 - 1)           | --                | --                | 0<br>(0 - 0)       | 0<br>(0 - 0)       | 0<br>(0 - 0)       |
| Other neurological disorders                        | 45<br>(30 - 92)        | 12<br>(5 - 57)    | 4<br>(2 - 10)     | 16<br>(10 - 23)    | 8<br>(5 - 12)      | 5<br>(3 - 7)       |
| Mental and substance use disorders                  | 207<br>(97 - 407)      | 11<br>(1 - 34)    | 0<br>(0 - 0)      | 145<br>(66 - 318)  | 39<br>(17 - 76)    | 12<br>(4 - 24)     |
| Schizophrenia                                       | 0<br>(0 - 0)           | --                | --                | 0<br>(0 - 0)       | 0<br>(0 - 0)       | 0<br>(0 - 0)       |
| Alcohol use disorders                               | 104<br>(43 - 202)      | --                | --                | 61<br>(26 - 113)   | 33<br>(13 - 69)    | 10<br>(2 - 22)     |
| Drug use disorders                                  | 103<br>(43 - 270)      | 11<br>(1 - 34)    | --                | 84<br>(31 - 245)   | 6<br>(3 - 17)      | 2<br>(1 - 6)       |
| Opioid use disorders                                | 11<br>(5 - 29)         | 1<br>(0 - 4)      | --                | 9<br>(3 - 27)      | 1<br>(0 - 2)       | 0<br>(0 - 1)       |
| Cocaine use disorders                               | 0<br>(0 - 1)           | 0<br>(0 - 0)      | --                | 0<br>(0 - 1)       | 0<br>(0 - 0)       | 0<br>(0 - 0)       |

Web Table 31- Chad deaths with 95% UI by age, sex, and cause in 2013

| Cause                                               | Males, All Ages          | Males, 0-4 Years       | Males, 5-14 Years | Males, 15-49 Years | Males, 50-69 Years | Males, 70-80 Years |
|-----------------------------------------------------|--------------------------|------------------------|-------------------|--------------------|--------------------|--------------------|
| Amphetamine use disorders                           | 0<br>(0 - 1)             | 0<br>(0 - 0)           | --                | 0<br>(0 - 1)       | 0<br>(0 - 0)       | 0<br>(0 - 0)       |
| Other drug use disorders                            | 91<br>(39 - 239)         | 10<br>(1 - 30)         | --                | 74<br>(27 - 218)   | 5<br>(2 - 16)      | 2<br>(1 - 5)       |
| Eating disorders                                    | 0<br>(0 - 0)             | --                     | 0<br>(0 - 0)      | 0<br>(0 - 0)       | --                 | --                 |
| Anorexia nervosa                                    | 0<br>(0 - 0)             | --                     | 0<br>(0 - 0)      | 0<br>(0 - 0)       | --                 | --                 |
| Diabetes, urogenital, blood, and endocrine diseases | 1,893<br>(1,451 - 2,393) | 470<br>(242 - 775)     | 118<br>(74 - 171) | 444<br>(300 - 608) | 465<br>(325 - 639) | 396<br>(303 - 512) |
| Diabetes mellitus                                   | 538<br>(405 - 695)       | 23<br>(13 - 36)        | 6<br>(3 - 9)      | 85<br>(59 - 116)   | 242<br>(165 - 334) | 182<br>(131 - 248) |
| Acute glomerulonephritis                            | 11<br>(5 - 27)           | 3<br>(1 - 14)          | 2<br>(1 - 5)      | 3<br>(1 - 7)       | 2<br>(1 - 4)       | 1<br>(0 - 2)       |
| Chronic kidney disease                              | 417<br>(296 - 557)       | 70<br>(35 - 123)       | 29<br>(16 - 45)   | 155<br>(94 - 224)  | 84<br>(54 - 128)   | 79<br>(54 - 115)   |
| Chronic kidney disease due to diabetes mellitus     | 3<br>(0 - 5)             | 0<br>(0 - 0)           | 0<br>(0 - 0)      | 0<br>(0 - 1)       | 2<br>(0 - 4)       | 0<br>(0 - 0)       |
| Chronic kidney disease due to hypertension          | 74<br>(40 - 126)         | 5<br>(1 - 12)          | 1<br>(0 - 2)      | 21<br>(8 - 39)     | 24<br>(11 - 44)    | 23<br>(11 - 46)    |
| Chronic kidney disease due to glomerulonephritis    | 260<br>(184 - 351)       | 49<br>(22 - 91)        | 24<br>(14 - 36)   | 104<br>(64 - 152)  | 43<br>(25 - 67)    | 40<br>(24 - 62)    |
| Chronic kidney disease due to other causes          | 81<br>(40 - 131)         | 16<br>(3 - 40)         | 4<br>(1 - 9)      | 29<br>(12 - 55)    | 16<br>(6 - 30)     | 16<br>(8 - 30)     |
| Urinary diseases and male infertility               | 360<br>(224 - 520)       | 81<br>(37 - 168)       | 10<br>(6 - 14)    | 92<br>(46 - 142)   | 83<br>(45 - 130)   | 94<br>(59 - 154)   |
| Interstitial nephritis and urinary tract infections | 319<br>(196 - 473)       | 74<br>(31 - 158)       | 8<br>(5 - 12)     | 79<br>(38 - 121)   | 73<br>(41 - 118)   | 85<br>(53 - 143)   |
| Urolithiasis                                        | 1<br>(1 - 3)             | --                     | 0<br>(0 - 1)      | 1<br>(0 - 2)       | 0<br>(0 - 1)       | 0<br>(0 - 1)       |
| Other urinary diseases                              | 40<br>(21 - 65)          | 7<br>(2 - 19)          | 1<br>(1 - 3)      | 13<br>(5 - 23)     | 9<br>(3 - 18)      | 9<br>(3 - 19)      |
| Gynecological diseases                              | --                       | --                     | --                | --                 | --                 | --                 |
| Uterine fibroids                                    | --                       | --                     | --                | --                 | --                 | --                 |
| Polycystic ovarian syndrome                         | --                       | --                     | --                | --                 | --                 | --                 |
| Endometriosis                                       | --                       | --                     | --                | --                 | --                 | --                 |
| Genital prolapse                                    | --                       | --                     | --                | --                 | --                 | --                 |
| Other gynecological diseases                        | --                       | --                     | --                | --                 | --                 | --                 |
| Hemoglobinopathies and hemolytic anemias            | 364<br>(145 - 656)       | 225<br>(55 - 479)      | 59<br>(23 - 106)  | 58<br>(22 - 148)   | 13<br>(4 - 43)     | 9<br>(3 - 30)      |
| Thalassemias                                        | 13<br>(4 - 25)           | 10<br>(3 - 22)         | 1<br>(1 - 3)      | 1<br>(0 - 3)       | 0<br>(0 - 0)       | 0<br>(0 - 0)       |
| Sickle cell disorders                               | 324<br>(127 - 595)       | 204<br>(49 - 436)      | 55<br>(21 - 100)  | 53<br>(20 - 137)   | 11<br>(4 - 36)     | 1<br>(0 - 3)       |
| G6PD deficiency                                     | 8<br>(3 - 14)            | 5<br>(1 - 11)          | 1<br>(0 - 1)      | 1<br>(0 - 3)       | 0<br>(0 - 1)       | 0<br>(0 - 1)       |
| Other hemoglobinopathies and hemolytic anemias      | 19<br>(8 - 44)           | 6<br>(2 - 11)          | 1<br>(0 - 1)      | 2<br>(1 - 5)       | 2<br>(1 - 6)       | 8<br>(3 - 26)      |
| Endocrine, metabolic, blood, and immune disorders   | 203<br>(117 - 294)       | 68<br>(35 - 142)       | 13<br>(7 - 24)    | 52<br>(27 - 74)    | 40<br>(17 - 63)    | 30<br>(12 - 46)    |
| Musculoskeletal disorders                           | 49<br>(27 - 67)          | --                     | 9<br>(4 - 14)     | 20<br>(11 - 28)    | 12<br>(6 - 19)     | 8<br>(4 - 13)      |
| Rheumatoid arthritis                                | 4<br>(1 - 7)             | --                     | 1<br>(0 - 2)      | 1<br>(0 - 2)       | 1<br>(0 - 2)       | 1<br>(0 - 2)       |
| Other musculoskeletal disorders                     | 45<br>(25 - 62)          | --                     | 8<br>(4 - 13)     | 18<br>(10 - 27)    | 11<br>(5 - 17)     | 7<br>(4 - 11)      |
| Other non-communicable diseases                     | 1,775<br>(779 - 4,141)   | 1,598<br>(641 - 3,909) | 65<br>(28 - 157)  | 59<br>(38 - 86)    | 24<br>(13 - 36)    | 29<br>(11 - 42)    |
| Congenital anomalies                                | 1,643<br>(661 - 3,998)   | 1,532<br>(585 - 3,833) | 60<br>(24 - 153)  | 39<br>(23 - 65)    | 6<br>(3 - 10)      | 5<br>(3 - 9)       |
| Neural tube defects                                 | 424<br>(90 - 1,100)      | 405<br>(86 - 1,068)    | 11<br>(2 - 31)    | 7<br>(1 - 19)      | 0<br>(0 - 2)       | 0<br>(0 - 1)       |
| Congenital heart anomalies                          | 676<br>(231 - 1,713)     | 617<br>(190 - 1,616)   | 33<br>(12 - 85)   | 20<br>(11 - 33)    | 3<br>(2 - 6)       | 2<br>(1 - 4)       |
| Cleft lip and cleft palate                          | 11<br>(2 - 40)           | 11<br>(2 - 40)         | --                | --                 | --                 | --                 |
| Down syndrome                                       | 122<br>(19 - 444)        | 115<br>(15 - 434)      | 4<br>(1 - 9)      | 3<br>(1 - 6)       | 1<br>(0 - 1)       | 0<br>(0 - 0)       |
| Chromosomal unbalanced rearrangements               | 42<br>(9 - 138)          | 39<br>(7 - 133)        | 1<br>(0 - 5)      | 1<br>(1 - 2)       | 0<br>(0 - 0)       | 0<br>(0 - 0)       |
| Other congenital anomalies                          | 367<br>(54 - 1,625)      | 345<br>(43 - 1,576)    | 11<br>(2 - 49)    | 7<br>(3 - 14)      | 2<br>(1 - 3)       | 2<br>(1 - 4)       |
| Skin and subcutaneous diseases                      | 108<br>(44 - 148)        | 42<br>(15 - 76)        | 5<br>(3 - 7)      | 20<br>(8 - 28)     | 18<br>(6 - 27)     | 23<br>(7 - 36)     |

Web Table 31- Chad deaths with 95% UI by age, sex, and cause in 2013

| Cause                                           | Males, All Ages          | Males, 0-4 Years       | Males, 5-14 Years  | Males, 15-49 Years       | Males, 50-69 Years | Males, 70-80 Years |
|-------------------------------------------------|--------------------------|------------------------|--------------------|--------------------------|--------------------|--------------------|
| Cellulitis                                      | 84<br>(35 - 118)         | 33<br>(13 - 62)        | 4<br>(2 - 7)       | 15<br>(6 - 21)           | 16<br>(5 - 23)     | 17<br>(5 - 26)     |
| Pyoderma                                        | 21<br>(9 - 37)           | 9<br>(2 - 21)          | 0<br>(0 - 1)       | 5<br>(2 - 8)             | 3<br>(1 - 5)       | 5<br>(1 - 9)       |
| Decubitus ulcer                                 | 2<br>(0 - 4)             | 0<br>(0 - 0)           | 0<br>(0 - 0)       | 0<br>(0 - 0)             | 0<br>(0 - 0)       | 2<br>(0 - 4)       |
| Other skin and subcutaneous diseases            | 0<br>(0 - 1)             | 0<br>(0 - 0)           | 0<br>(0 - 0)       | 0<br>(0 - 0)             | 0<br>(0 - 0)       | 0<br>(0 - 0)       |
| Sudden infant death syndrome                    | 24<br>(6 - 72)           | 24<br>(6 - 72)         | --                 | --                       | --                 | --                 |
| Injuries                                        | 5,628<br>(4,401 - 7,006) | 1,584<br>(914 - 2,482) | 731<br>(529 - 984) | 2,562<br>(1,874 - 3,268) | 491<br>(343 - 668) | 259<br>(188 - 345) |
| Transport injuries                              | 2,811<br>(2,111 - 3,619) | 519<br>(255 - 1,004)   | 373<br>(243 - 546) | 1,559<br>(1,103 - 2,027) | 254<br>(168 - 353) | 106<br>(69 - 146)  |
| Road injuries                                   | 2,706<br>(2,017 - 3,468) | 473<br>(230 - 908)     | 353<br>(232 - 518) | 1,534<br>(1,083 - 2,003) | 245<br>(163 - 341) | 100<br>(65 - 137)  |
| Pedestrian road injuries                        | 828<br>(510 - 1,216)     | 185<br>(76 - 399)      | 134<br>(75 - 226)  | 397<br>(231 - 592)       | 77<br>(43 - 123)   | 35<br>(20 - 53)    |
| Cyclist road injuries                           | 131<br>(82 - 191)        | 30<br>(10 - 70)        | 28<br>(16 - 46)    | 53<br>(32 - 83)          | 15<br>(7 - 27)     | 6<br>(3 - 12)      |
| Motorcyclist road injuries                      | 360<br>(210 - 594)       | 37<br>(15 - 82)        | 26<br>(13 - 47)    | 259<br>(140 - 448)       | 29<br>(15 - 50)    | 8<br>(4 - 14)      |
| Motor vehicle road injuries                     | 1,194<br>(827 - 1,636)   | 160<br>(73 - 319)      | 117<br>(66 - 192)  | 770<br>(512 - 1,095)     | 106<br>(65 - 161)  | 40<br>(23 - 60)    |
| Other road injuries                             | 192<br>(41 - 340)        | 61<br>(10 - 144)       | 46<br>(9 - 93)     | 55<br>(10 - 121)         | 19<br>(3 - 42)     | 10<br>(2 - 23)     |
| Other transport injuries                        | 105<br>(68 - 166)        | 46<br>(18 - 100)       | 20<br>(10 - 34)    | 25<br>(13 - 52)          | 9<br>(5 - 14)      | 6<br>(2 - 11)      |
| Unintentional injuries                          | 2,377<br>(1,753 - 3,270) | 1,044<br>(583 - 1,728) | 342<br>(231 - 485) | 673<br>(456 - 1,054)     | 187<br>(126 - 276) | 130<br>(90 - 199)  |
| Falls                                           | 429<br>(287 - 740)       | 114<br>(47 - 247)      | 42<br>(21 - 72)    | 151<br>(90 - 284)        | 65<br>(37 - 127)   | 57<br>(31 - 118)   |
| Drowning                                        | 631<br>(308 - 1,202)     | 324<br>(91 - 739)      | 132<br>(60 - 245)  | 145<br>(76 - 266)        | 21<br>(13 - 32)    | 8<br>(5 - 13)      |
| Fire, heat, and hot substances                  | 319<br>(186 - 525)       | 184<br>(65 - 379)      | 32<br>(18 - 52)    | 64<br>(39 - 102)         | 22<br>(11 - 38)    | 18<br>(9 - 34)     |
| Poisonings                                      | 158<br>(81 - 410)        | 73<br>(23 - 211)       | 17<br>(7 - 38)     | 52<br>(25 - 150)         | 12<br>(6 - 27)     | 4<br>(2 - 8)       |
| Exposure to mechanical forces                   | 442<br>(304 - 704)       | 152<br>(80 - 283)      | 68<br>(38 - 112)   | 175<br>(105 - 337)       | 35<br>(21 - 53)    | 12<br>(7 - 17)     |
| Unintentional firearm injuries                  | 207<br>(123 - 352)       | 59<br>(23 - 131)       | 21<br>(9 - 51)     | 106<br>(56 - 202)        | 15<br>(8 - 27)     | 5<br>(3 - 9)       |
| Unintentional suffocation                       | 22<br>(2 - 54)           | 14<br>(1 - 39)         | 3<br>(0 - 7)       | 4<br>(0 - 8)             | 1<br>(0 - 2)       | 0<br>(0 - 1)       |
| Other exposure to mechanical forces             | 213<br>(136 - 339)       | 80<br>(35 - 165)       | 43<br>(21 - 79)    | 65<br>(38 - 132)         | 19<br>(10 - 31)    | 6<br>(2 - 10)      |
| Adverse effects of medical treatment            | 79<br>(33 - 149)         | 36<br>(9 - 86)         | 5<br>(2 - 11)      | 15<br>(6 - 30)           | 11<br>(3 - 26)     | 12<br>(2 - 29)     |
| Animal contact                                  | 48<br>(27 - 73)          | 17<br>(6 - 35)         | 11<br>(5 - 19)     | 10<br>(5 - 15)           | 5<br>(2 - 9)       | 5<br>(1 - 9)       |
| Venomous animal contact                         | 20<br>(11 - 35)          | 7<br>(2 - 18)          | 4<br>(1 - 8)       | 5<br>(2 - 8)             | 2<br>(1 - 4)       | 3<br>(0 - 5)       |
| Non-venomous animal contact                     | 28<br>(11 - 44)          | 10<br>(3 - 23)         | 7<br>(2 - 13)      | 5<br>(2 - 8)             | 3<br>(1 - 6)       | 3<br>(1 - 5)       |
| Foreign body                                    | 135<br>(63 - 239)        | 99<br>(39 - 196)       | 10<br>(5 - 17)     | 13<br>(6 - 20)           | 5<br>(2 - 9)       | 6<br>(3 - 10)      |
| Pulmonary aspiration and foreign body in airway | 130<br>(58 - 234)        | 97<br>(38 - 194)       | 9<br>(4 - 16)      | 13<br>(6 - 19)           | 5<br>(2 - 7)       | 6<br>(2 - 10)      |
| Foreign body in other body part                 | 5<br>(2 - 8)             | 2<br>(1 - 5)           | 1<br>(0 - 1)       | 1<br>(0 - 1)             | 1<br>(0 - 1)       | 0<br>(0 - 0)       |
| Other unintentional injuries                    | 137<br>(93 - 193)        | 45<br>(20 - 82)        | 26<br>(14 - 41)    | 48<br>(31 - 69)          | 10<br>(6 - 17)     | 8<br>(5 - 12)      |
| Self-harm and interpersonal violence            | 441<br>(256 - 666)       | 21<br>(9 - 52)         | 16<br>(8 - 31)     | 330<br>(192 - 517)       | 50<br>(21 - 86)    | 23<br>(6 - 42)     |
| Self-harm                                       | 244<br>(101 - 424)       | --                     | 8<br>(2 - 20)      | 172<br>(73 - 324)        | 43<br>(14 - 77)    | 22<br>(5 - 41)     |
| Interpersonal violence                          | 196<br>(118 - 297)       | 21<br>(9 - 52)         | 9<br>(4 - 15)      | 158<br>(90 - 240)        | 8<br>(4 - 12)      | 1<br>(0 - 2)       |
| Assault by firearm                              | 95<br>(40 - 154)         | 4<br>(1 - 9)           | 2<br>(0 - 3)       | 87<br>(36 - 142)         | 3<br>(1 - 5)       | 0<br>(0 - 1)       |
| Assault by sharp object                         | 34<br>(16 - 72)          | 3<br>(0 - 8)           | 1<br>(0 - 3)       | 27<br>(10 - 64)          | 2<br>(1 - 5)       | 0<br>(0 - 1)       |
| Assault by other means                          | 68<br>(37 - 123)         | 15<br>(6 - 37)         | 6<br>(3 - 11)      | 44<br>(22 - 85)          | 2<br>(1 - 4)       | 0<br>(0 - 1)       |

Web Table 31- Chad deaths with 95% UI by age, sex, and cause in 2013

| Cause                                                             | Females, All Ages           | Females, 0-4 Years          | Females, 5-14 Years      | Females, 15-49 Years        | Females, 50-69 Years     | Females, 70-80 Years     |
|-------------------------------------------------------------------|-----------------------------|-----------------------------|--------------------------|-----------------------------|--------------------------|--------------------------|
| All causes                                                        | 70,268<br>(61,837 - 79,328) | 39,728<br>(33,747 - 47,259) | 3,433<br>(2,705 - 4,226) | 13,217<br>(11,167 - 15,222) | 6,510<br>(5,461 - 8,380) | 7,380<br>(6,743 - 8,850) |
| Communicable, maternal, neonatal, and nutritional diseases        | 54,904<br>(48,149 - 63,042) | 36,002<br>(30,232 - 43,287) | 2,656<br>(2,099 - 3,304) | 10,570<br>(9,012 - 12,134)  | 2,864<br>(2,279 - 3,630) | 2,814<br>(2,080 - 3,612) |
| HIV/AIDS and tuberculosis                                         | 6,931<br>(5,744 - 8,260)    | 707<br>(543 - 942)          | 413<br>(331 - 516)       | 4,183<br>(3,370 - 5,085)    | 1,162<br>(868 - 1,548)   | 466<br>(277 - 711)       |
| Tuberculosis                                                      | 2,690<br>(1,739 - 3,764)    | 291<br>(156 - 503)          | 114<br>(60 - 192)        | 1,269<br>(749 - 1,821)      | 603<br>(353 - 960)       | 414<br>(228 - 652)       |
| HIV/AIDS                                                          | 4,241<br>(3,314 - 5,247)    | 416<br>(309 - 538)          | 299<br>(238 - 371)       | 2,914<br>(2,251 - 3,713)    | 559<br>(361 - 718)       | 53<br>(27 - 81)          |
| HIV/AIDS resulting in mycobacterial infection                     | 233<br>(174 - 302)          | 22<br>(16 - 29)             | 15<br>(11 - 19)          | 161<br>(116 - 218)          | 32<br>(20 - 43)          | 3<br>(2 - 5)             |
| HIV/AIDS resulting in other diseases                              | 4,009<br>(3,143 - 4,939)    | 394<br>(292 - 509)          | 284<br>(225 - 350)       | 2,753<br>(2,121 - 3,503)    | 527<br>(345 - 679)       | 49<br>(26 - 76)          |
| Diarrhea, lower respiratory, and other common infectious diseases | 26,885<br>(21,329 - 33,323) | 20,194<br>(15,422 - 26,080) | 1,417<br>(936 - 2,031)   | 2,132<br>(1,331 - 2,940)    | 1,287<br>(840 - 1,899)   | 1,855<br>(1,180 - 2,567) |
| Diarrheal diseases                                                | 10,735<br>(7,001 - 15,979)  | 7,754<br>(4,127 - 12,411)   | 503<br>(241 - 862)       | 1,070<br>(611 - 1,616)      | 597<br>(321 - 980)       | 811<br>(449 - 1,314)     |
| Intestinal infectious diseases                                    | 263<br>(127 - 483)          | 114<br>(53 - 215)           | 83<br>(35 - 168)         | 54<br>(23 - 103)            | 9<br>(3 - 19)            | 4<br>(2 - 8)             |
| Typhoid fever                                                     | 171<br>(77 - 326)           | 68<br>(26 - 141)            | 57<br>(24 - 115)         | 38<br>(15 - 76)             | 6<br>(2 - 13)            | 3<br>(1 - 5)             |
| Paratyphoid fever                                                 | 73<br>(33 - 144)            | 33<br>(13 - 69)             | 24<br>(9 - 53)           | 13<br>(5 - 29)              | 2<br>(1 - 5)             | 1<br>(0 - 2)             |
| Other intestinal infectious diseases                              | 19<br>(9 - 33)              | 13<br>(5 - 25)              | 2<br>(0 - 6)             | 3<br>(0 - 8)                | 1<br>(0 - 4)             | 1<br>(0 - 4)             |
| Lower respiratory infections                                      | 9,422<br>(6,315 - 13,331)   | 7,328<br>(4,262 - 11,147)   | 283<br>(141 - 489)       | 404<br>(243 - 606)          | 486<br>(264 - 788)       | 921<br>(527 - 1,395)     |
| Upper respiratory infections                                      | 8<br>(2 - 24)               | 5<br>(0 - 22)               | 0<br>(0 - 2)             | 1<br>(0 - 3)                | 1<br>(0 - 2)             | 1<br>(0 - 2)             |
| Otitis media                                                      | 6<br>(4 - 8)                | 3<br>(1 - 5)                | 0<br>(0 - 1)             | 0<br>(0 - 1)                | 1<br>(0 - 1)             | 1<br>(1 - 2)             |
| Meningitis                                                        | 2,205<br>(1,404 - 3,449)    | 1,507<br>(801 - 2,688)      | 212<br>(110 - 346)       | 322<br>(188 - 511)          | 95<br>(51 - 154)         | 69<br>(31 - 117)         |
| Pneumococcal meningitis                                           | 515<br>(305 - 823)          | 308<br>(138 - 590)          | 65<br>(25 - 120)         | 98<br>(46 - 179)            | 24<br>(11 - 45)          | 20<br>(8 - 41)           |
| H influenzae type B meningitis                                    | 429<br>(220 - 745)          | 350<br>(155 - 647)          | 35<br>(13 - 79)          | 34<br>(15 - 64)             | 6<br>(3 - 13)            | 4<br>(1 - 8)             |
| Meningococcal meningitis                                          | 1,021<br>(599 - 1,656)      | 707<br>(327 - 1,340)        | 94<br>(45 - 164)         | 142<br>(77 - 235)           | 46<br>(19 - 82)          | 32<br>(11 - 59)          |
| Other meningitis                                                  | 239<br>(138 - 402)          | 142<br>(61 - 279)           | 18<br>(7 - 38)           | 48<br>(20 - 89)             | 18<br>(9 - 37)           | 13<br>(5 - 25)           |
| Encephalitis                                                      | 51<br>(34 - 74)             | 27<br>(14 - 49)             | 6<br>(3 - 11)            | 8<br>(4 - 13)               | 5<br>(2 - 10)            | 4<br>(1 - 8)             |
| Diphtheria                                                        | 63<br>(0 - 386)             | 54<br>(0 - 384)             | 7<br>(0 - 53)            | 2<br>(0 - 6)                | 0<br>(0 - 2)             | --                       |
| Whooping cough                                                    | 1,742<br>(2 - 8,563)        | 1,640<br>(2 - 7,958)        | 91<br>(0 - 517)          | 10<br>(0 - 60)              | 1<br>(0 - 7)             | --                       |
| Tetanus                                                           | 1,567<br>(769 - 2,884)      | 1,053<br>(334 - 2,346)      | 140<br>(48 - 251)        | 248<br>(88 - 499)           | 89<br>(24 - 217)         | 37<br>(9 - 110)          |
| Measles                                                           | 792<br>(297 - 1,739)        | 696<br>(255 - 1,510)        | 87<br>(33 - 194)         | 9<br>(3 - 21)               | 0<br>(0 - 0)             | --                       |
| Varicella and herpes zoster                                       | 29<br>(8 - 77)              | 14<br>(1 - 57)              | 2<br>(0 - 12)            | 4<br>(1 - 11)               | 2<br>(0 - 7)             | 7<br>(0 - 35)            |
| Neglected tropical diseases and malaria                           | 5,769<br>(2,964 - 9,966)    | 4,589<br>(1,980 - 8,538)    | 467<br>(173 - 964)       | 360<br>(162 - 751)          | 175<br>(73 - 415)        | 178<br>(54 - 511)        |
| Malaria                                                           | 5,463<br>(2,674 - 9,708)    | 4,495<br>(1,869 - 8,443)    | 417<br>(121 - 926)       | 250<br>(69 - 633)           | 140<br>(41 - 380)        | 161<br>(37 - 494)        |
| Leishmaniasis                                                     | 0<br>(0 - 0)                | 0<br>(0 - 0)                | 0<br>(0 - 0)             | 0<br>(0 - 0)                | 0<br>(0 - 0)             | 0<br>(0 - 0)             |
| Visceral leishmaniasis                                            | 0<br>(0 - 0)                | 0<br>(0 - 0)                | 0<br>(0 - 0)             | 0<br>(0 - 0)                | 0<br>(0 - 0)             | 0<br>(0 - 0)             |
| African trypanosomiasis                                           | 114<br>(55 - 199)           | 9<br>(4 - 15)               | 15<br>(7 - 28)           | 67<br>(31 - 120)            | 18<br>(8 - 33)           | 5<br>(2 - 8)             |
| Schistosomiasis                                                   | 16<br>(11 - 23)             | 1<br>(0 - 2)                | 1<br>(0 - 2)             | 6<br>(4 - 10)               | 5<br>(3 - 8)             | 3<br>(1 - 5)             |
| Cysticercosis                                                     | 2<br>(0 - 7)                | 0<br>(0 - 1)                | 0<br>(0 - 1)             | 1<br>(0 - 4)                | 0<br>(0 - 1)             | 0<br>(0 - 0)             |
| Cystic echinococcosis                                             | 5<br>(4 - 6)                | 2<br>(1 - 2)                | 1<br>(1 - 2)             | 2<br>(1 - 2)                | 0<br>(0 - 1)             | 0<br>(0 - 0)             |
| Dengue                                                            | 2<br>(1 - 3)                | 1<br>(0 - 2)                | 0<br>(0 - 1)             | 0<br>(0 - 1)                | 0<br>(0 - 0)             | 0<br>(0 - 0)             |
| Yellow fever                                                      | 3<br>(1 - 6)                | 0<br>(0 - 1)                | 1<br>(0 - 3)             | 1<br>(0 - 3)                | 0<br>(0 - 1)             | 0<br>(0 - 1)             |
| Rabies                                                            | 85<br>(50 - 144)            | 24<br>(9 - 52)              | 24<br>(10 - 48)          | 24<br>(13 - 41)             | 8<br>(3 - 15)            | 5<br>(1 - 11)            |
| Intestinal nematode infections                                    | 41<br>(21 - 70)             | 36<br>(17 - 62)             | 4<br>(0 - 13)            | 1<br>(0 - 4)                | 0<br>(0 - 3)             | 0<br>(0 - 3)             |
| Ascariasis                                                        | 41<br>(21 - 70)             | 36<br>(17 - 62)             | 4<br>(0 - 13)            | 1<br>(0 - 4)                | 0<br>(0 - 3)             | 0<br>(0 - 3)             |

Web Table 31- Chad deaths with 95% UI by age, sex, and cause in 2013

| Cause                                                            | Females, All Ages          | Females, 0-4 Years       | Females, 5-14 Years | Females, 15-49 Years     | Females, 50-69 Years     | Females, 70-80 Years     |
|------------------------------------------------------------------|----------------------------|--------------------------|---------------------|--------------------------|--------------------------|--------------------------|
| Other neglected tropical diseases                                | 39<br>(14 - 114)           | 21<br>(7 - 69)           | 4<br>(1 - 14)       | 7<br>(2 - 21)            | 3<br>(1 - 8)             | 4<br>(1 - 9)             |
| Maternal disorders                                               | 3,593<br>(2,456 - 4,868)   | --                       | 47<br>(17 - 97)     | 3,547<br>(2,416 - 4,807) | --                       | --                       |
| Maternal hemorrhage                                              | 637<br>(385 - 933)         | --                       | 4<br>(1 - 10)       | 632<br>(383 - 926)       | --                       | --                       |
| Maternal sepsis and other maternal infections                    | 204<br>(119 - 315)         | --                       | 3<br>(1 - 6)        | 202<br>(117 - 312)       | --                       | --                       |
| Maternal hypertensive disorders                                  | 274<br>(150 - 421)         | --                       | 3<br>(1 - 8)        | 270<br>(148 - 416)       | --                       | --                       |
| Maternal obstructed labor                                        | 180<br>(102 - 275)         | --                       | 2<br>(1 - 4)        | 178<br>(101 - 273)       | --                       | --                       |
| Maternal abortive outcome                                        | 643<br>(405 - 932)         | --                       | 8<br>(3 - 19)       | 634<br>(402 - 925)       | --                       | --                       |
| Indirect maternal deaths                                         | 395<br>(232 - 611)         | --                       | 4<br>(1 - 10)       | 390<br>(229 - 605)       | --                       | --                       |
| Late maternal deaths                                             | 560<br>(301 - 914)         | --                       | 13<br>(4 - 29)      | 547<br>(295 - 887)       | --                       | --                       |
| Maternal deaths aggravated by HIV/AIDS                           | 30<br>(16 - 48)            | --                       | --                  | 30<br>(16 - 48)          | --                       | --                       |
| Other maternal disorders                                         | 664<br>(429 - 956)         | --                       | 9<br>(3 - 20)       | 655<br>(423 - 945)       | --                       | --                       |
| Neonatal disorders                                               | 6,277<br>(4,477 - 8,325)   | 6,277<br>(4,477 - 8,325) | --                  | --                       | --                       | --                       |
| Neonatal preterm birth complications                             | 2,227<br>(937 - 3,923)     | 2,227<br>(937 - 3,923)   | --                  | --                       | --                       | --                       |
| Neonatal encephalopathy due to birth asphyxia and trauma         | 2,127<br>(951 - 3,718)     | 2,127<br>(951 - 3,718)   | --                  | --                       | --                       | --                       |
| Neonatal sepsis and other neonatal infections                    | 953<br>(292 - 2,307)       | 953<br>(292 - 2,307)     | --                  | --                       | --                       | --                       |
| Hemolytic disease and other neonatal jaundice                    | 62<br>(16 - 213)           | 62<br>(16 - 213)         | --                  | --                       | --                       | --                       |
| Other neonatal disorders                                         | 907<br>(391 - 1,753)       | 907<br>(391 - 1,753)     | --                  | --                       | --                       | --                       |
| Nutritional deficiencies                                         | 3,729<br>(2,191 - 5,669)   | 2,822<br>(1,435 - 4,589) | 182<br>(100 - 303)  | 285<br>(182 - 418)       | 185<br>(112 - 279)       | 255<br>(163 - 377)       |
| Protein-energy malnutrition                                      | 2,617<br>(1,229 - 4,303)   | 2,305<br>(1,010 - 3,919) | 113<br>(48 - 202)   | 40<br>(15 - 94)          | 62<br>(25 - 122)         | 97<br>(36 - 177)         |
| Iodine deficiency                                                | 8<br>(0 - 56)              | 6<br>(0 - 54)            | 1<br>(0 - 5)        | 1<br>(0 - 3)             | 0<br>(0 - 3)             | 0<br>(0 - 2)             |
| Iron-deficiency anemia                                           | 1,086<br>(564 - 2,241)     | 499<br>(113 - 1,532)     | 68<br>(28 - 134)    | 244<br>(151 - 358)       | 120<br>(56 - 193)        | 156<br>(75 - 264)        |
| Other nutritional deficiencies                                   | 18<br>(5 - 53)             | 13<br>(2 - 43)           | 1<br>(0 - 2)        | 1<br>(0 - 3)             | 3<br>(1 - 7)             | 1<br>(0 - 3)             |
| Other communicable, maternal, neonatal, and nutritional diseases | 1,720<br>(941 - 2,898)     | 1,413<br>(707 - 2,438)   | 129<br>(65 - 235)   | 63<br>(38 - 94)          | 55<br>(30 - 98)          | 59<br>(26 - 114)         |
| Sexually transmitted diseases excluding HIV                      | 1,427<br>(698 - 2,532)     | 1,279<br>(604 - 2,293)   | 114<br>(54 - 218)   | 19<br>(8 - 36)           | 8<br>(2 - 27)            | 7<br>(2 - 24)            |
| Syphilis                                                         | 1,409<br>(683 - 2,514)     | 1,279<br>(604 - 2,293)   | 113<br>(53 - 217)   | 8<br>(3 - 15)            | 4<br>(1 - 15)            | 6<br>(1 - 19)            |
| Chlamydial infection                                             | 6<br>(3 - 11)              | --                       | 0<br>(0 - 1)        | 4<br>(2 - 7)             | 1<br>(0 - 4)             | 0<br>(0 - 1)             |
| Gonococcal infection                                             | 7<br>(3 - 13)              | --                       | 0<br>(0 - 1)        | 4<br>(2 - 7)             | 1<br>(0 - 5)             | 1<br>(0 - 3)             |
| Other sexually transmitted diseases                              | 6<br>(3 - 11)              | --                       | 0<br>(0 - 1)        | 4<br>(2 - 7)             | 1<br>(0 - 4)             | 0<br>(0 - 1)             |
| Hepatitis                                                        | 129<br>(57 - 207)          | 33<br>(9 - 69)           | 6<br>(2 - 13)       | 30<br>(13 - 49)          | 30<br>(14 - 53)          | 30<br>(14 - 53)          |
| Acute hepatitis A                                                | 14<br>(3 - 34)             | 11<br>(2 - 28)           | 2<br>(0 - 5)        | 1<br>(0 - 2)             | 0<br>(0 - 1)             | 0<br>(0 - 0)             |
| Acute hepatitis B                                                | 79<br>(33 - 133)           | 21<br>(5 - 47)           | 3<br>(1 - 7)        | 7<br>(2 - 14)            | 22<br>(9 - 41)           | 26<br>(10 - 45)          |
| Acute hepatitis C                                                | 3<br>(0 - 9)               | --                       | 0<br>(0 - 1)        | 0<br>(0 - 2)             | 1<br>(0 - 3)             | 1<br>(0 - 4)             |
| Acute hepatitis E                                                | 32<br>(15 - 58)            | 1<br>(0 - 2)             | 1<br>(0 - 3)        | 21<br>(9 - 37)           | 6<br>(2 - 13)            | 4<br>(1 - 9)             |
| Other infectious diseases                                        | 164<br>(78 - 414)          | 102<br>(36 - 295)        | 8<br>(3 - 24)       | 15<br>(6 - 33)           | 17<br>(5 - 50)           | 21<br>(5 - 70)           |
| Non-communicable diseases                                        | 12,598<br>(9,885 - 16,391) | 2,691<br>(1,395 - 4,771) | 383<br>(245 - 551)  | 1,882<br>(1,313 - 2,447) | 3,369<br>(2,597 - 4,625) | 4,274<br>(3,539 - 5,510) |
| Neoplasms                                                        | 1,769<br>(1,380 - 2,324)   | 57<br>(30 - 104)         | 51<br>(29 - 84)     | 474<br>(343 - 615)       | 785<br>(586 - 1,086)     | 401<br>(303 - 523)       |
| Esophageal cancer                                                | 27<br>(19 - 39)            | --                       | --                  | 3<br>(2 - 4)             | 14<br>(9 - 22)           | 9<br>(6 - 14)            |
| Stomach cancer                                                   | 144<br>(107 - 199)         | --                       | --                  | 30<br>(21 - 41)          | 80<br>(55 - 118)         | 34<br>(23 - 52)          |
| Liver cancer                                                     | 274<br>(200 - 368)         | --                       | 1<br>(1 - 3)        | 68<br>(43 - 99)          | 137<br>(87 - 204)        | 68<br>(42 - 101)         |
| Liver cancer due to hepatitis B                                  | 87<br>(37 - 156)           | --                       | 0<br>(0 - 1)        | 27<br>(13 - 44)          | 43<br>(14 - 89)          | 16<br>(5 - 34)           |

Web Table 31- Chad deaths with 95% UI by age, sex, and cause in 2013

| Cause                                | Females, All Ages        | Females, 0-4 Years | Females, 5-14 Years | Females, 15-49 Years | Females, 50-69 Years     | Females, 70-80 Years     |
|--------------------------------------|--------------------------|--------------------|---------------------|----------------------|--------------------------|--------------------------|
| Liver cancer due to hepatitis C      | 89<br>(31 - 153)         | --                 | 0<br>(0 - 0)        | 15<br>(4 - 31)       | 46<br>(15 - 85)          | 28<br>(10 - 50)          |
| Liver cancer due to alcohol use      | 27<br>(13 - 52)          | --                 | --                  | 3<br>(2 - 7)         | 14<br>(6 - 29)           | 10<br>(4 - 19)           |
| Liver cancer due to other causes     | 70<br>(36 - 134)         | --                 | 1<br>(0 - 2)        | 22<br>(12 - 37)      | 34<br>(13 - 74)          | 14<br>(6 - 30)           |
| Larynx cancer                        | 2<br>(1 - 3)             | --                 | --                  | 0<br>(0 - 1)         | 1<br>(0 - 2)             | 0<br>(0 - 1)             |
| Tracheal, bronchus and lung cancer   | 48<br>(36 - 66)          | --                 | --                  | 8<br>(5 - 10)        | 24<br>(17 - 34)          | 17<br>(11 - 24)          |
| Breast cancer                        | 182<br>(139 - 244)       | --                 | --                  | 68<br>(49 - 92)      | 80<br>(58 - 115)         | 33<br>(23 - 45)          |
| Cervical cancer                      | 475<br>(339 - 659)       | --                 | --                  | 154<br>(105 - 219)   | 238<br>(150 - 361)       | 82<br>(52 - 120)         |
| Uterine cancer                       | 40<br>(23 - 61)          | --                 | --                  | 8<br>(4 - 13)        | 19<br>(10 - 33)          | 13<br>(7 - 21)           |
| Prostate cancer                      | --                       | --                 | --                  | --                   | --                       | --                       |
| Colon and rectum cancer              | 88<br>(65 - 118)         | --                 | --                  | 20<br>(14 - 27)      | 32<br>(23 - 46)          | 36<br>(24 - 50)          |
| Lip and oral cavity cancer           | 12<br>(8 - 18)           | --                 | --                  | 4<br>(2 - 6)         | 4<br>(3 - 7)             | 4<br>(2 - 7)             |
| Nasopharynx cancer                   | 4<br>(2 - 6)             | --                 | 0<br>(0 - 1)        | 2<br>(1 - 3)         | 1<br>(1 - 2)             | 1<br>(0 - 1)             |
| Other pharynx cancer                 | 3<br>(2 - 5)             | --                 | --                  | 1<br>(1 - 2)         | 2<br>(1 - 2)             | 1<br>(0 - 1)             |
| Gallbladder and biliary tract cancer | 41<br>(25 - 58)          | --                 | --                  | 6<br>(3 - 9)         | 23<br>(13 - 35)          | 12<br>(7 - 18)           |
| Pancreatic cancer                    | 33<br>(23 - 45)          | --                 | --                  | 4<br>(3 - 5)         | 17<br>(12 - 25)          | 12<br>(8 - 17)           |
| Malignant skin melanoma              | 5<br>(3 - 7)             | --                 | --                  | 1<br>(1 - 2)         | 3<br>(2 - 4)             | 1<br>(1 - 2)             |
| Non-melanoma skin cancer             | 4<br>(2 - 6)             | --                 | --                  | 1<br>(0 - 1)         | 1<br>(0 - 1)             | 2<br>(1 - 4)             |
| Ovarian cancer                       | 43<br>(31 - 61)          | --                 | --                  | 12<br>(8 - 17)       | 24<br>(17 - 36)          | 7<br>(4 - 10)            |
| Testicular cancer                    | --                       | --                 | --                  | --                   | --                       | --                       |
| Kidney cancer                        | 14<br>(9 - 21)           | 4<br>(1 - 9)       | 2<br>(1 - 3)        | 2<br>(1 - 3)         | 4<br>(2 - 8)             | 2<br>(1 - 3)             |
| Bladder cancer                       | 26<br>(17 - 38)          | --                 | --                  | 6<br>(3 - 10)        | 10<br>(6 - 16)           | 10<br>(6 - 17)           |
| Brain and nervous system cancer      | 21<br>(13 - 29)          | 3<br>(1 - 5)       | 2<br>(1 - 3)        | 9<br>(4 - 13)        | 5<br>(3 - 7)             | 3<br>(2 - 4)             |
| Thyroid cancer                       | 8<br>(5 - 12)            | --                 | 0<br>(0 - 0)        | 1<br>(0 - 1)         | 4<br>(2 - 7)             | 3<br>(2 - 5)             |
| Mesothelioma                         | 3<br>(2 - 4)             | --                 | --                  | 1<br>(1 - 2)         | 1<br>(1 - 2)             | 0<br>(0 - 1)             |
| Hodgkin lymphoma                     | 11<br>(6 - 16)           | 2<br>(1 - 4)       | 1<br>(1 - 3)        | 3<br>(2 - 4)         | 1<br>(1 - 3)             | 3<br>(1 - 6)             |
| Non-Hodgkin lymphoma                 | 64<br>(42 - 89)          | 15<br>(6 - 29)     | 14<br>(6 - 25)      | 19<br>(12 - 27)      | 11<br>(7 - 18)           | 6<br>(3 - 11)            |
| Multiple myeloma                     | 10<br>(7 - 15)           | --                 | --                  | 1<br>(1 - 2)         | 5<br>(3 - 8)             | 4<br>(2 - 6)             |
| Leukemia                             | 32<br>(23 - 43)          | 2<br>(1 - 5)       | 7<br>(4 - 11)       | 11<br>(7 - 15)       | 7<br>(5 - 10)            | 5<br>(4 - 8)             |
| Other neoplasms                      | 158<br>(108 - 248)       | 31<br>(13 - 72)    | 24<br>(12 - 47)     | 31<br>(19 - 52)      | 37<br>(24 - 60)          | 35<br>(22 - 53)          |
| Cardiovascular diseases              | 5,306<br>(4,107 - 7,722) | 310<br>(163 - 591) | 72<br>(39 - 136)    | 628<br>(404 - 1,038) | 1,659<br>(1,207 - 2,523) | 2,636<br>(2,062 - 3,776) |
| Rheumatic heart disease              | 131<br>(57 - 414)        | 11<br>(3 - 42)     | 10<br>(4 - 29)      | 38<br>(12 - 150)     | 31<br>(10 - 115)         | 41<br>(20 - 102)         |
| Ischemic heart disease               | 1,544<br>(999 - 2,987)   | 10<br>(2 - 41)     | 7<br>(3 - 17)       | 156<br>(91 - 309)    | 476<br>(291 - 934)       | 894<br>(574 - 1,677)     |
| Cerebrovascular disease              | 1,947<br>(1,252 - 2,795) | 64<br>(31 - 136)   | 15<br>(7 - 30)      | 190<br>(106 - 286)   | 631<br>(354 - 970)       | 1,046<br>(679 - 1,468)   |
| Ischemic stroke                      | 1,116<br>(211 - 1,735)   | 11<br>(2 - 34)     | 2<br>(0 - 6)        | 32<br>(5 - 65)       | 325<br>(42 - 550)        | 745<br>(169 - 1,141)     |
| Hemorrhagic stroke                   | 831<br>(479 - 1,582)     | 53<br>(25 - 111)   | 13<br>(6 - 26)      | 157<br>(80 - 242)    | 306<br>(165 - 561)       | 301<br>(147 - 747)       |
| Hypertensive heart disease           | 515<br>(280 - 901)       | 5<br>(1 - 12)      | 1<br>(1 - 3)        | 46<br>(22 - 80)      | 164<br>(75 - 315)        | 298<br>(159 - 515)       |
| Cardiomyopathy and myocarditis       | 342<br>(204 - 740)       | 76<br>(30 - 163)   | 14<br>(6 - 30)      | 69<br>(35 - 152)     | 66<br>(31 - 172)         | 116<br>(45 - 324)        |
| Atrial fibrillation and flutter      | 0<br>(0 - 1)             | --                 | --                  | 0<br>(0 - 0)         | 0<br>(0 - 0)             | 0<br>(0 - 0)             |
| Aortic aneurysm                      | 46<br>(18 - 120)         | --                 | --                  | 7<br>(2 - 19)        | 16<br>(6 - 40)           | 24<br>(9 - 63)           |
| Peripheral vascular disease          | 1<br>(0 - 2)             | --                 | --                  | 0<br>(0 - 0)         | 0<br>(0 - 1)             | 0<br>(0 - 1)             |

Web Table 31- Chad deaths with 95% UI by age, sex, and cause in 2013

| Cause                                               | Females, All Ages    | Females, 0-4 Years | Females, 5-14 Years | Females, 15-49 Years | Females, 50-69 Years | Females, 70-80 Years |
|-----------------------------------------------------|----------------------|--------------------|---------------------|----------------------|----------------------|----------------------|
| Endocarditis                                        | 128<br>(73 - 267)    | 41<br>(15 - 85)    | 5<br>(2 - 11)       | 24<br>(13 - 51)      | 20<br>(8 - 53)       | 38<br>(13 - 105)     |
| Other cardiovascular and circulatory diseases       | 654<br>(392 - 1,439) | 102<br>(45 - 219)  | 19<br>(9 - 40)      | 99<br>(54 - 233)     | 256<br>(144 - 592)   | 178<br>(96 - 424)    |
| Chronic respiratory diseases                        | 759<br>(549 - 1,259) | 110<br>(53 - 240)  | 22<br>(12 - 36)     | 101<br>(64 - 178)    | 213<br>(141 - 364)   | 313<br>(222 - 501)   |
| Chronic obstructive pulmonary disease               | 394<br>(242 - 691)   | 42<br>(19 - 84)    | 9<br>(5 - 16)       | 30<br>(16 - 57)      | 125<br>(70 - 235)    | 188<br>(111 - 341)   |
| Pneumoconiosis                                      | 3<br>(2 - 5)         | 1<br>(0 - 2)       | 1<br>(0 - 1)        | 1<br>(0 - 1)         | 1<br>(0 - 1)         | 0<br>(0 - 0)         |
| Silicosis                                           | 0<br>(0 - 0)         | 0<br>(0 - 0)       | 0<br>(0 - 0)        | 0<br>(0 - 0)         | 0<br>(0 - 0)         | 0<br>(0 - 0)         |
| Asbestosis                                          | 0<br>(0 - 1)         | 0<br>(0 - 0)       | 0<br>(0 - 0)        | 0<br>(0 - 0)         | 0<br>(0 - 0)         | 0<br>(0 - 0)         |
| Coal workers pneumoconiosis                         | 0<br>(0 - 1)         | 0<br>(0 - 0)       | 0<br>(0 - 0)        | 0<br>(0 - 0)         | 0<br>(0 - 0)         | 0<br>(0 - 0)         |
| Other pneumoconiosis                                | 2<br>(1 - 4)         | 0<br>(0 - 1)       | 0<br>(0 - 0)        | 1<br>(0 - 1)         | 0<br>(0 - 1)         | 0<br>(0 - 0)         |
| Asthma                                              | 252<br>(139 - 499)   | 50<br>(19 - 123)   | 9<br>(4 - 22)       | 48<br>(24 - 97)      | 68<br>(32 - 147)     | 77<br>(36 - 174)     |
| Interstitial lung disease and pulmonary sarcoidosis | 40<br>(5 - 77)       | 1<br>(0 - 2)       | 0<br>(0 - 1)        | 3<br>(1 - 5)         | 10<br>(1 - 20)       | 26<br>(2 - 58)       |
| Other chronic respiratory diseases                  | 71<br>(42 - 131)     | 17<br>(8 - 38)     | 3<br>(1 - 6)        | 20<br>(11 - 38)      | 10<br>(4 - 20)       | 21<br>(10 - 41)      |
| Cirrhosis                                           | 393<br>(281 - 562)   | 36<br>(14 - 74)    | 13<br>(7 - 21)      | 105<br>(70 - 149)    | 143<br>(92 - 222)    | 96<br>(58 - 149)     |
| Cirrhosis due to hepatitis B                        | 91<br>(29 - 160)     | 2<br>(0 - 7)       | 2<br>(0 - 5)        | 24<br>(5 - 51)       | 37<br>(11 - 73)      | 26<br>(5 - 53)       |
| Cirrhosis due to hepatitis C                        | 154<br>(86 - 262)    | 4<br>(1 - 11)      | 4<br>(1 - 9)        | 50<br>(26 - 90)      | 61<br>(26 - 112)     | 35<br>(15 - 60)      |
| Cirrhosis due to alcohol use                        | 73<br>(36 - 129)     | --                 | --                  | 13<br>(6 - 23)       | 31<br>(14 - 58)      | 29<br>(13 - 55)      |
| Cirrhosis due to other causes                       | 75<br>(40 - 127)     | 30<br>(11 - 63)    | 7<br>(3 - 13)       | 18<br>(9 - 34)       | 13<br>(6 - 26)       | 6<br>(3 - 14)        |
| Digestive diseases                                  | 769<br>(561 - 1,011) | 129<br>(60 - 229)  | 52<br>(31 - 82)     | 177<br>(118 - 244)   | 178<br>(113 - 266)   | 232<br>(142 - 329)   |
| Peptic ulcer disease                                | 156<br>(91 - 235)    | 12<br>(4 - 28)     | 6<br>(2 - 14)       | 37<br>(21 - 59)      | 42<br>(23 - 70)      | 59<br>(27 - 101)     |
| Gastritis and duodenitis                            | 41<br>(15 - 85)      | 8<br>(1 - 21)      | 4<br>(1 - 8)        | 9<br>(4 - 19)        | 7<br>(2 - 21)        | 12<br>(3 - 37)       |
| Appendicitis                                        | 117<br>(73 - 182)    | 33<br>(9 - 83)     | 15<br>(6 - 28)      | 35<br>(19 - 58)      | 16<br>(7 - 28)       | 18<br>(5 - 37)       |
| Paralytic ileus and intestinal obstruction          | 184<br>(98 - 290)    | 19<br>(6 - 44)     | 9<br>(3 - 18)       | 27<br>(13 - 46)      | 54<br>(25 - 89)      | 74<br>(37 - 131)     |
| Inguinal, femoral, and abdominal hernia             | 11<br>(4 - 18)       | 2<br>(1 - 5)       | 0<br>(0 - 1)        | 2<br>(1 - 4)         | 2<br>(1 - 4)         | 4<br>(1 - 7)         |
| Inflammatory bowel disease                          | 60<br>(13 - 99)      | 24<br>(6 - 56)     | 3<br>(1 - 7)        | 16<br>(3 - 27)       | 8<br>(1 - 14)        | 9<br>(1 - 17)        |
| Vascular intestinal disorders                       | 3<br>(1 - 9)         | 0<br>(0 - 1)       | 0<br>(0 - 0)        | 1<br>(0 - 2)         | 1<br>(0 - 3)         | 1<br>(0 - 4)         |
| Gallbladder and biliary diseases                    | 65<br>(38 - 93)      | 7<br>(3 - 14)      | 5<br>(1 - 9)        | 15<br>(9 - 23)       | 18<br>(9 - 31)       | 21<br>(10 - 35)      |
| Pancreatitis                                        | 31<br>(16 - 56)      | 2<br>(1 - 5)       | 1<br>(0 - 3)        | 8<br>(4 - 14)        | 11<br>(4 - 25)       | 9<br>(3 - 18)        |
| Other digestive diseases                            | 101<br>(67 - 145)    | 21<br>(8 - 44)     | 7<br>(4 - 13)       | 28<br>(17 - 44)      | 19<br>(10 - 32)      | 25<br>(12 - 43)      |
| Neurological disorders                              | 377<br>(264 - 503)   | 75<br>(30 - 144)   | 26<br>(12 - 45)     | 64<br>(37 - 98)      | 29<br>(20 - 41)      | 184<br>(125 - 256)   |
| Alzheimer disease and other dementias               | 182<br>(120 - 254)   | --                 | --                  | 0<br>(0 - 0)         | 13<br>(8 - 20)       | 169<br>(109 - 234)   |
| Parkinson disease                                   | 1<br>(1 - 2)         | --                 | --                  | 0<br>(0 - 0)         | 0<br>(0 - 1)         | 0<br>(0 - 1)         |
| Epilepsy                                            | 162<br>(99 - 249)    | 65<br>(23 - 133)   | 23<br>(10 - 42)     | 58<br>(32 - 92)      | 7<br>(3 - 13)        | 9<br>(4 - 19)        |
| Multiple sclerosis                                  | 1<br>(0 - 3)         | --                 | --                  | 0<br>(0 - 2)         | 0<br>(0 - 1)         | 0<br>(0 - 0)         |
| Other neurological disorders                        | 32<br>(23 - 43)      | 9<br>(5 - 14)      | 3<br>(2 - 5)        | 6<br>(4 - 8)         | 8<br>(5 - 12)        | 6<br>(4 - 8)         |
| Mental and substance use disorders                  | 50<br>(23 - 89)      | 4<br>(1 - 9)       | 0<br>(0 - 0)        | 26<br>(9 - 47)       | 15<br>(6 - 30)       | 5<br>(3 - 10)        |
| Schizophrenia                                       | 0<br>(0 - 1)         | --                 | --                  | 0<br>(0 - 0)         | 0<br>(0 - 0)         | 0<br>(0 - 0)         |
| Alcohol use disorders                               | 29<br>(5 - 60)       | --                 | --                  | 18<br>(3 - 35)       | 10<br>(2 - 23)       | 2<br>(0 - 5)         |
| Drug use disorders                                  | 20<br>(10 - 35)      | 4<br>(1 - 9)       | --                  | 7<br>(4 - 17)        | 5<br>(2 - 10)        | 3<br>(1 - 7)         |
| Opioid use disorders                                | 2<br>(1 - 4)         | 0<br>(0 - 1)       | --                  | 1<br>(0 - 2)         | 0<br>(0 - 1)         | 0<br>(0 - 1)         |
| Cocaine use disorders                               | 0<br>(0 - 0)         | 0<br>(0 - 0)       | --                  | 0<br>(0 - 0)         | 0<br>(0 - 0)         | 0<br>(0 - 0)         |

Web Table 31- Chad deaths with 95% UI by age, sex, and cause in 2013

| Cause                                               | Females, All Ages      | Females, 0-4 Years     | Females, 5-14 Years | Females, 15-49 Years | Females, 50-69 Years | Females, 70-80 Years |
|-----------------------------------------------------|------------------------|------------------------|---------------------|----------------------|----------------------|----------------------|
| Amphetamine use disorders                           | 0<br>(0 - 0)           | 0<br>(0 - 0)           | --                  | 0<br>(0 - 0)         | 0<br>(0 - 0)         | 0<br>(0 - 0)         |
| Other drug use disorders                            | 17<br>(9 - 32)         | 4<br>(1 - 8)           | --                  | 6<br>(3 - 15)        | 5<br>(2 - 9)         | 3<br>(1 - 6)         |
| Eating disorders                                    | 0<br>(0 - 1)           | --                     | 0<br>(0 - 0)        | 0<br>(0 - 1)         | --                   | --                   |
| Anorexia nervosa                                    | 0<br>(0 - 1)           | --                     | 0<br>(0 - 0)        | 0<br>(0 - 1)         | --                   | --                   |
| Diabetes, urogenital, blood, and endocrine diseases | 1,179<br>(738 - 1,638) | 260<br>(107 - 480)     | 66<br>(31 - 118)    | 221<br>(136 - 317)   | 295<br>(199 - 425)   | 337<br>(227 - 464)   |
| Diabetes mellitus                                   | 424<br>(292 - 589)     | 4<br>(2 - 8)           | 3<br>(1 - 6)        | 57<br>(37 - 79)      | 166<br>(109 - 243)   | 193<br>(115 - 274)   |
| Acute glomerulonephritis                            | 12<br>(7 - 19)         | 3<br>(1 - 7)           | 1<br>(1 - 3)        | 4<br>(3 - 7)         | 2<br>(1 - 5)         | 1<br>(0 - 2)         |
| Chronic kidney disease                              | 199<br>(112 - 276)     | 40<br>(19 - 68)        | 14<br>(7 - 23)      | 51<br>(29 - 75)      | 45<br>(25 - 69)      | 48<br>(25 - 75)      |
| Chronic kidney disease due to diabetes mellitus     | 2<br>(0 - 4)           | 0<br>(0 - 0)           | 0<br>(0 - 0)        | 0<br>(0 - 0)         | 1<br>(0 - 3)         | 0<br>(0 - 0)         |
| Chronic kidney disease due to hypertension          | 60<br>(32 - 100)       | 3<br>(1 - 7)           | 1<br>(0 - 3)        | 10<br>(4 - 20)       | 20<br>(9 - 35)       | 26<br>(13 - 44)      |
| Chronic kidney disease due to glomerulonephritis    | 98<br>(54 - 150)       | 31<br>(15 - 50)        | 9<br>(5 - 16)       | 34<br>(18 - 52)      | 13<br>(5 - 26)       | 10<br>(3 - 21)       |
| Chronic kidney disease due to other causes          | 39<br>(12 - 70)        | 6<br>(1 - 16)          | 4<br>(1 - 8)        | 7<br>(2 - 13)        | 10<br>(3 - 21)       | 13<br>(2 - 27)       |
| Urinary diseases and male infertility               | 167<br>(92 - 277)      | 32<br>(13 - 69)        | 7<br>(3 - 15)       | 37<br>(20 - 62)      | 44<br>(21 - 87)      | 47<br>(25 - 90)      |
| Interstitial nephritis and urinary tract infections | 157<br>(83 - 262)      | 30<br>(11 - 65)        | 6<br>(2 - 13)       | 34<br>(16 - 58)      | 41<br>(19 - 83)      | 45<br>(24 - 87)      |
| Urolithiasis                                        | 3<br>(1 - 10)          | --                     | 1<br>(0 - 2)        | 1<br>(0 - 4)         | 1<br>(0 - 3)         | 1<br>(0 - 2)         |
| Other urinary diseases                              | 7<br>(3 - 16)          | 2<br>(0 - 6)           | 1<br>(0 - 2)        | 2<br>(1 - 4)         | 1<br>(0 - 4)         | 1<br>(0 - 3)         |
| Gynecological diseases                              | 8<br>(4 - 14)          | --                     | --                  | 5<br>(3 - 9)         | 2<br>(1 - 4)         | 1<br>(0 - 2)         |
| Uterine fibroids                                    | 2<br>(1 - 3)           | --                     | --                  | 1<br>(0 - 1)         | 0<br>(0 - 1)         | 0<br>(0 - 1)         |
| Polycystic ovarian syndrome                         | 0<br>(0 - 1)           | --                     | --                  | 0<br>(0 - 1)         | 0<br>(0 - 0)         | --                   |
| Endometriosis                                       | 1<br>(0 - 2)           | --                     | --                  | 1<br>(0 - 1)         | 0<br>(0 - 0)         | --                   |
| Genital prolapse                                    | 1<br>(1 - 2)           | --                     | --                  | 1<br>(0 - 1)         | 0<br>(0 - 1)         | 0<br>(0 - 1)         |
| Other gynecological diseases                        | 4<br>(2 - 7)           | --                     | --                  | 2<br>(1 - 4)         | 1<br>(0 - 2)         | 1<br>(0 - 1)         |
| Hemoglobinopathies and hemolytic anemias            | 203<br>(49 - 479)      | 111<br>(19 - 307)      | 31<br>(8 - 77)      | 38<br>(10 - 89)      | 11<br>(4 - 20)       | 11<br>(3 - 23)       |
| Thalassemias                                        | 7<br>(1 - 18)          | 5<br>(1 - 14)          | 1<br>(0 - 2)        | 1<br>(0 - 2)         | 0<br>(0 - 0)         | 0<br>(0 - 0)         |
| Sickle cell disorders                               | 174<br>(40 - 422)      | 99<br>(16 - 275)       | 29<br>(8 - 72)      | 36<br>(9 - 83)       | 9<br>(3 - 16)        | 1<br>(0 - 3)         |
| G6PD deficiency                                     | 4<br>(1 - 9)           | 2<br>(0 - 6)           | 0<br>(0 - 1)        | 1<br>(0 - 2)         | 0<br>(0 - 1)         | 0<br>(0 - 1)         |
| Other hemoglobinopathies and hemolytic anemias      | 18<br>(6 - 28)         | 5<br>(1 - 13)          | 0<br>(0 - 1)        | 1<br>(0 - 2)         | 2<br>(1 - 4)         | 9<br>(3 - 19)        |
| Endocrine, metabolic, blood, and immune disorders   | 167<br>(93 - 239)      | 69<br>(31 - 134)       | 9<br>(4 - 17)       | 28<br>(15 - 41)      | 25<br>(10 - 45)      | 36<br>(9 - 63)       |
| Musculoskeletal disorders                           | 32<br>(19 - 52)        | --                     | 5<br>(2 - 9)        | 12<br>(6 - 20)       | 8<br>(4 - 15)        | 7<br>(4 - 14)        |
| Rheumatoid arthritis                                | 8<br>(4 - 13)          | --                     | 1<br>(0 - 2)        | 2<br>(1 - 3)         | 2<br>(1 - 4)         | 3<br>(2 - 6)         |
| Other musculoskeletal disorders                     | 25<br>(13 - 40)        | --                     | 4<br>(1 - 7)        | 10<br>(5 - 17)       | 6<br>(3 - 12)        | 4<br>(2 - 8)         |
| Other non-communicable diseases                     | 1,965<br>(781 - 3,979) | 1,710<br>(564 - 3,612) | 76<br>(26 - 174)    | 73<br>(43 - 118)     | 44<br>(27 - 68)      | 63<br>(38 - 94)      |
| Congenital anomalies                                | 1,739<br>(577 - 3,760) | 1,625<br>(510 - 3,549) | 69<br>(20 - 164)    | 34<br>(14 - 70)      | 6<br>(4 - 11)        | 5<br>(3 - 9)         |
| Neural tube defects                                 | 501<br>(102 - 1,540)   | 479<br>(93 - 1,496)    | 15<br>(3 - 47)      | 6<br>(2 - 20)        | 0<br>(0 - 1)         | 0<br>(0 - 1)         |
| Congenital heart anomalies                          | 689<br>(196 - 1,641)   | 642<br>(172 - 1,525)   | 29<br>(8 - 76)      | 13<br>(5 - 30)       | 3<br>(2 - 6)         | 3<br>(1 - 4)         |
| Cleft lip and cleft palate                          | 14<br>(1 - 46)         | 14<br>(1 - 46)         | --                  | --                   | --                   | --                   |
| Down syndrome                                       | 239<br>(48 - 648)      | 216<br>(37 - 622)      | 14<br>(4 - 35)      | 7<br>(3 - 14)        | 1<br>(0 - 2)         | 0<br>(0 - 0)         |
| Chromosomal unbalanced rearrangements               | 59<br>(11 - 172)       | 56<br>(9 - 167)        | 2<br>(0 - 5)        | 1<br>(0 - 3)         | 0<br>(0 - 0)         | 0<br>(0 - 0)         |
| Other congenital anomalies                          | 237<br>(51 - 1,000)    | 219<br>(42 - 945)      | 10<br>(2 - 37)      | 5<br>(2 - 13)        | 1<br>(1 - 3)         | 2<br>(1 - 4)         |
| Skin and subcutaneous diseases                      | 213<br>(142 - 290)     | 71<br>(29 - 133)       | 7<br>(4 - 12)       | 40<br>(23 - 58)      | 38<br>(22 - 59)      | 57<br>(33 - 88)      |



Web Table 31- Chad deaths with 95% UI by age, sex, and cause in 2013

| Cause                                           | Females, All Ages        | Females, 0-4 Years     | Females, 5-14 Years | Females, 15-49 Years | Females, 50-69 Years | Females, 70-80 Years |
|-------------------------------------------------|--------------------------|------------------------|---------------------|----------------------|----------------------|----------------------|
| Cellulitis                                      | 145<br>(95 - 208)        | 41<br>(16 - 77)        | 5<br>(3 - 9)        | 27<br>(16 - 42)      | 26<br>(15 - 44)      | 46<br>(26 - 72)      |
| Pyoderma                                        | 59<br>(29 - 101)         | 27<br>(7 - 62)         | 2<br>(0 - 4)        | 10<br>(4 - 17)       | 11<br>(4 - 20)       | 10<br>(3 - 20)       |
| Decubitus ulcer                                 | 2<br>(1 - 4)             | 0<br>(0 - 1)           | 0<br>(0 - 0)        | 1<br>(0 - 1)         | 0<br>(0 - 1)         | 1<br>(0 - 2)         |
| Other skin and subcutaneous diseases            | 6<br>(1 - 18)            | 3<br>(0 - 13)          | 0<br>(0 - 1)        | 2<br>(0 - 4)         | 0<br>(0 - 1)         | 1<br>(0 - 2)         |
| Sudden infant death syndrome                    | 14<br>(2 - 50)           | 14<br>(2 - 50)         | --                  | --                   | --                   | --                   |
| Injuries                                        | 2,765<br>(2,008 - 3,590) | 1,036<br>(588 - 1,595) | 394<br>(252 - 576)  | 765<br>(505 - 1,032) | 278<br>(183 - 413)   | 292<br>(168 - 419)   |
| Transport injuries                              | 1,291<br>(937 - 1,756)   | 352<br>(182 - 650)     | 206<br>(113 - 331)  | 490<br>(316 - 692)   | 151<br>(90 - 229)    | 90<br>(49 - 135)     |
| Road injuries                                   | 1,236<br>(895 - 1,679)   | 326<br>(164 - 602)     | 198<br>(108 - 316)  | 480<br>(308 - 677)   | 146<br>(88 - 220)    | 85<br>(47 - 128)     |
| Pedestrian road injuries                        | 293<br>(179 - 430)       | 78<br>(33 - 158)       | 55<br>(26 - 103)    | 91<br>(49 - 144)     | 40<br>(19 - 69)      | 29<br>(11 - 48)      |
| Cyclist road injuries                           | 86<br>(47 - 138)         | 28<br>(10 - 67)        | 20<br>(9 - 37)      | 18<br>(10 - 29)      | 15<br>(4 - 26)       | 5<br>(1 - 8)         |
| Motorcyclist road injuries                      | 175<br>(93 - 292)        | 32<br>(11 - 73)        | 16<br>(6 - 35)      | 106<br>(54 - 186)    | 15<br>(7 - 27)       | 7<br>(3 - 14)        |
| Motor vehicle road injuries                     | 533<br>(359 - 763)       | 138<br>(63 - 285)      | 78<br>(40 - 130)    | 228<br>(139 - 337)   | 56<br>(33 - 86)      | 32<br>(17 - 52)      |
| Other road injuries                             | 148<br>(18 - 252)        | 50<br>(4 - 116)        | 29<br>(3 - 59)      | 37<br>(4 - 80)       | 19<br>(2 - 41)       | 13<br>(2 - 29)       |
| Other transport injuries                        | 55<br>(20 - 90)          | 26<br>(8 - 57)         | 8<br>(3 - 16)       | 10<br>(5 - 16)       | 6<br>(1 - 11)        | 5<br>(1 - 9)         |
| Unintentional injuries                          | 1,316<br>(901 - 1,758)   | 665<br>(361 - 1,035)   | 179<br>(109 - 266)  | 186<br>(121 - 249)   | 103<br>(66 - 155)    | 184<br>(97 - 283)    |
| Falls                                           | 235<br>(136 - 341)       | 61<br>(26 - 115)       | 20<br>(9 - 39)      | 31<br>(18 - 47)      | 25<br>(14 - 42)      | 97<br>(42 - 180)     |
| Drowning                                        | 259<br>(111 - 452)       | 163<br>(52 - 346)      | 53<br>(23 - 101)    | 28<br>(15 - 48)      | 9<br>(5 - 15)        | 6<br>(3 - 10)        |
| Fire, heat, and hot substances                  | 298<br>(168 - 495)       | 175<br>(67 - 367)      | 34<br>(16 - 65)     | 44<br>(24 - 75)      | 20<br>(11 - 39)      | 24<br>(11 - 50)      |
| Poisonings                                      | 61<br>(24 - 116)         | 37<br>(12 - 88)        | 7<br>(2 - 14)       | 10<br>(5 - 17)       | 4<br>(1 - 8)         | 2<br>(1 - 4)         |
| Exposure to mechanical forces                   | 143<br>(97 - 215)        | 72<br>(37 - 131)       | 22<br>(12 - 39)     | 26<br>(16 - 42)      | 13<br>(8 - 21)       | 9<br>(4 - 14)        |
| Unintentional firearm injuries                  | 47<br>(29 - 72)          | 18<br>(8 - 38)         | 6<br>(3 - 13)       | 15<br>(8 - 25)       | 4<br>(2 - 8)         | 3<br>(1 - 5)         |
| Unintentional suffocation                       | 9<br>(1 - 23)            | 7<br>(1 - 20)          | 1<br>(0 - 3)        | 0<br>(0 - 1)         | 0<br>(0 - 1)         | 0<br>(0 - 0)         |
| Other exposure to mechanical forces             | 87<br>(53 - 147)         | 47<br>(21 - 99)        | 15<br>(7 - 29)      | 11<br>(6 - 20)       | 8<br>(3 - 14)        | 6<br>(1 - 11)        |
| Adverse effects of medical treatment            | 80<br>(35 - 151)         | 27<br>(9 - 56)         | 5<br>(2 - 11)       | 14<br>(6 - 27)       | 14<br>(3 - 33)       | 20<br>(3 - 50)       |
| Animal contact                                  | 61<br>(30 - 138)         | 24<br>(7 - 71)         | 13<br>(5 - 32)      | 13<br>(5 - 26)       | 6<br>(2 - 12)        | 5<br>(1 - 9)         |
| Venomous animal contact                         | 47<br>(22 - 122)         | 21<br>(5 - 66)         | 10<br>(3 - 27)      | 10<br>(4 - 19)       | 4<br>(1 - 8)         | 2<br>(0 - 6)         |
| Non-venomous animal contact                     | 15<br>(4 - 27)           | 3<br>(1 - 8)           | 3<br>(1 - 7)        | 4<br>(1 - 7)         | 3<br>(1 - 5)         | 3<br>(0 - 5)         |
| Foreign body                                    | 107<br>(49 - 194)        | 77<br>(30 - 159)       | 8<br>(3 - 17)       | 5<br>(3 - 8)         | 4<br>(2 - 8)         | 12<br>(4 - 23)       |
| Pulmonary aspiration and foreign body in airway | 104<br>(47 - 191)        | 76<br>(30 - 158)       | 8<br>(3 - 16)       | 5<br>(2 - 8)         | 4<br>(1 - 7)         | 12<br>(3 - 22)       |
| Foreign body in other body part                 | 2<br>(1 - 4)             | 1<br>(0 - 2)           | 0<br>(0 - 0)        | 0<br>(0 - 1)         | 0<br>(0 - 1)         | 1<br>(0 - 1)         |
| Other unintentional injuries                    | 72<br>(43 - 103)         | 29<br>(12 - 53)        | 16<br>(7 - 27)      | 13<br>(8 - 20)       | 6<br>(3 - 10)        | 8<br>(3 - 13)        |
| Self-harm and interpersonal violence            | 158<br>(87 - 233)        | 19<br>(7 - 41)         | 9<br>(4 - 17)       | 89<br>(50 - 140)     | 24<br>(7 - 41)       | 18<br>(3 - 30)       |
| Self-harm                                       | 94<br>(34 - 149)         | --                     | 3<br>(1 - 7)        | 52<br>(25 - 89)      | 22<br>(5 - 38)       | 17<br>(2 - 30)       |
| Interpersonal violence                          | 64<br>(38 - 101)         | 19<br>(7 - 41)         | 6<br>(3 - 12)       | 36<br>(19 - 59)      | 2<br>(1 - 4)         | 1<br>(0 - 1)         |
| Assault by firearm                              | 20<br>(9 - 34)           | 5<br>(2 - 13)          | 2<br>(1 - 4)        | 11<br>(5 - 22)       | 1<br>(0 - 2)         | 0<br>(0 - 0)         |
| Assault by sharp object                         | 16<br>(7 - 27)           | 3<br>(1 - 8)           | 1<br>(0 - 2)        | 11<br>(5 - 20)       | 0<br>(0 - 1)         | 0<br>(0 - 0)         |
| Assault by other means                          | 28<br>(16 - 47)          | 10<br>(4 - 24)         | 3<br>(1 - 7)        | 14<br>(7 - 24)       | 1<br>(0 - 2)         | 0<br>(0 - 1)         |

Web Table 31- Chile deaths with 95% UI by age, sex, and cause in 2013

| Cause                                                             | Both Sexes, All Ages           | Both Sexes, 0-4 Years    | Both Sexes, 5-14 Years | Both Sexes, 15-49 Years    | Both Sexes, 50-69 Years     | Both Sexes, 70-80 Years     |
|-------------------------------------------------------------------|--------------------------------|--------------------------|------------------------|----------------------------|-----------------------------|-----------------------------|
| All causes                                                        | 108,884<br>(103,297 - 114,653) | 1,828<br>(1,252 - 2,644) | 399<br>(325 - 502)     | 10,761<br>(9,903 - 11,734) | 27,179<br>(25,173 - 29,275) | 68,717<br>(65,943 - 71,641) |
| Communicable, maternal, neonatal, and nutritional diseases        | 8,507<br>(7,223 - 10,863)      | 760<br>(520 - 1,101)     | 41<br>(30 - 55)        | 681<br>(586 - 834)         | 1,174<br>(999 - 1,524)      | 5,850<br>(4,726 - 7,894)    |
| HIV/AIDS and tuberculosis                                         | 845<br>(690 - 1,050)           | 1<br>(1 - 1)             | 2<br>(1 - 2)           | 270<br>(199 - 415)         | 253<br>(200 - 328)          | 319<br>(221 - 389)          |
| Tuberculosis                                                      | 592<br>(462 - 682)             | 1<br>(0 - 1)             | 1<br>(1 - 2)           | 86<br>(72 - 102)           | 190<br>(158 - 225)          | 314<br>(216 - 382)          |
| HIV/AIDS                                                          | 253<br>(154 - 441)             | 0<br>(0 - 0)             | 0<br>(0 - 0)           | 184<br>(115 - 326)         | 63<br>(28 - 129)            | 6<br>(1 - 16)               |
| HIV/AIDS resulting in mycobacterial infection                     | 15<br>(9 - 27)                 | 0<br>(0 - 0)             | 0<br>(0 - 0)           | 11<br>(6 - 19)             | 4<br>(2 - 8)                | 0<br>(0 - 1)                |
| HIV/AIDS resulting in other diseases                              | 238<br>(144 - 417)             | 0<br>(0 - 0)             | 0<br>(0 - 0)           | 174<br>(108 - 310)         | 59<br>(26 - 120)            | 5<br>(1 - 15)               |
| Diarrhea, lower respiratory, and other common infectious diseases | 5,994<br>(4,805 - 8,532)       | 186<br>(114 - 286)       | 32<br>(23 - 44)        | 287<br>(237 - 383)         | 726<br>(577 - 1,046)        | 4,764<br>(3,677 - 6,644)    |
| Diarrheal diseases                                                | 269<br>(198 - 373)             | 14<br>(8 - 23)           | 1<br>(1 - 2)           | 10<br>(8 - 13)             | 33<br>(26 - 42)             | 210<br>(141 - 313)          |
| Intestinal infectious diseases                                    | 28<br>(11 - 59)                | 6<br>(2 - 13)            | 5<br>(2 - 11)          | 12<br>(4 - 26)             | 3<br>(1 - 7)                | 2<br>(1 - 5)                |
| Typhoid fever                                                     | 18<br>(6 - 41)                 | 3<br>(1 - 8)             | 4<br>(1 - 8)           | 8<br>(3 - 19)              | 2<br>(1 - 4)                | 1<br>(0 - 2)                |
| Paratyphoid fever                                                 | 6<br>(2 - 13)                  | 1<br>(0 - 3)             | 1<br>(0 - 3)           | 2<br>(1 - 6)               | 1<br>(0 - 1)                | 0<br>(0 - 1)                |
| Other intestinal infectious diseases                              | 4<br>(1 - 10)                  | 1<br>(0 - 5)             | 0<br>(0 - 2)           | 1<br>(0 - 5)               | 1<br>(0 - 3)                | 1<br>(0 - 3)                |
| Lower respiratory infections                                      | 5,475<br>(4,313 - 7,987)       | 121<br>(72 - 194)        | 12<br>(8 - 19)         | 208<br>(163 - 296)         | 634<br>(486 - 952)          | 4,500<br>(3,433 - 6,664)    |
| Upper respiratory infections                                      | 3<br>(1 - 7)                   | 0<br>(0 - 0)             | 0<br>(0 - 0)           | 0<br>(0 - 1)               | 1<br>(0 - 2)                | 2<br>(0 - 5)                |
| Otitis media                                                      | 3<br>(2 - 3)                   | 0<br>(0 - 0)             | 0<br>(0 - 0)           | 1<br>(1 - 1)               | 1<br>(0 - 1)                | 0<br>(0 - 1)                |
| Meningitis                                                        | 139<br>(118 - 162)             | 26<br>(16 - 41)          | 6<br>(4 - 8)           | 34<br>(28 - 40)            | 39<br>(32 - 47)             | 34<br>(27 - 41)             |
| Pneumococcal meningitis                                           | 29<br>(24 - 37)                | 5<br>(3 - 8)             | 1<br>(1 - 2)           | 7<br>(5 - 10)              | 8<br>(6 - 11)               | 8<br>(6 - 11)               |
| H influenzae type B meningitis                                    | 14<br>(11 - 19)                | 6<br>(4 - 10)            | 1<br>(0 - 1)           | 2<br>(2 - 3)               | 2<br>(2 - 3)                | 2<br>(2 - 3)                |
| Meningococcal meningitis                                          | 51<br>(42 - 63)                | 9<br>(5 - 14)            | 3<br>(2 - 4)           | 13<br>(10 - 17)            | 13<br>(10 - 18)             | 12<br>(9 - 16)              |
| Other meningitis                                                  | 45<br>(35 - 54)                | 6<br>(3 - 10)            | 1<br>(1 - 2)           | 11<br>(8 - 15)             | 15<br>(10 - 20)             | 12<br>(8 - 16)              |
| Encephalitis                                                      | 51<br>(37 - 86)                | 7<br>(4 - 14)            | 5<br>(3 - 11)          | 17<br>(12 - 29)            | 13<br>(9 - 24)              | 9<br>(6 - 16)               |
| Diphtheria                                                        | 0<br>(0 - 1)                   | 0<br>(0 - 1)             | 0<br>(0 - 0)           | 0<br>(0 - 1)               | 0<br>(0 - 0)                | --<br>(0 - 0)               |
| Whooping cough                                                    | 12<br>(3 - 41)                 | 10<br>(2 - 40)           | 0<br>(0 - 0)           | 1<br>(1 - 1)               | 0<br>(0 - 0)                | --<br>(0 - 0)               |
| Tetanus                                                           | 3<br>(2 - 5)                   | 0<br>(0 - 0)             | 0<br>(0 - 0)           | 1<br>(1 - 2)               | 1<br>(1 - 2)                | 1<br>(0 - 1)                |
| Measles                                                           | 0<br>(0 - 0)                   | 0<br>(0 - 0)             | 0<br>(0 - 0)           | 0<br>(0 - 0)               | 0<br>(0 - 0)                | --<br>(0 - 0)               |
| Varicella and herpes zoster                                       | 11<br>(3 - 30)                 | 1<br>(0 - 4)             | 0<br>(0 - 1)           | 2<br>(0 - 4)               | 1<br>(0 - 3)                | 7<br>(0 - 26)               |
| Neglected tropical diseases and malaria                           | 126<br>(60 - 424)              | 1<br>(0 - 3)             | 1<br>(1 - 3)           | 14<br>(9 - 31)             | 42<br>(17 - 136)            | 68<br>(26 - 241)            |
| Chagas disease                                                    | 107<br>(40 - 402)              | 0<br>(0 - 0)             | 0<br>(0 - 1)           | 7<br>(3 - 24)              | 36<br>(12 - 131)            | 63<br>(21 - 236)            |
| Leishmaniasis                                                     | 0<br>(0 - 0)                   | 0<br>(0 - 0)             | 0<br>(0 - 0)           | 0<br>(0 - 0)               | 0<br>(0 - 0)                | 0<br>(0 - 0)                |
| Visceral leishmaniasis                                            | 0<br>(0 - 0)                   | 0<br>(0 - 0)             | 0<br>(0 - 0)           | 0<br>(0 - 0)               | 0<br>(0 - 0)                | 0<br>(0 - 0)                |
| Cysticercosis                                                     | 0<br>(0 - 0)                   | 0<br>(0 - 0)             | 0<br>(0 - 0)           | 0<br>(0 - 0)               | 0<br>(0 - 0)                | 0<br>(0 - 0)                |
| Cystic echinococcosis                                             | 9<br>(8 - 10)                  | 0<br>(0 - 0)             | 0<br>(0 - 0)           | 3<br>(3 - 3)               | 3<br>(3 - 3)                | 3<br>(3 - 3)                |
| Dengue                                                            | 2<br>(2 - 5)                   | 0<br>(0 - 1)             | 0<br>(0 - 1)           | 1<br>(1 - 2)               | 1<br>(0 - 1)                | 0<br>(0 - 1)                |
| Rabies                                                            | 2<br>(1 - 2)                   | 0<br>(0 - 0)             | 0<br>(0 - 0)           | 1<br>(1 - 1)               | 0<br>(0 - 0)                | 0<br>(0 - 0)                |
| Intestinal nematode infections                                    | 1<br>(0 - 6)                   | 0<br>(0 - 2)             | 0<br>(0 - 1)           | 0<br>(0 - 2)               | 0<br>(0 - 2)                | 0<br>(0 - 3)                |
| Ascariasis                                                        | 1<br>(0 - 6)                   | 0<br>(0 - 2)             | 0<br>(0 - 1)           | 0<br>(0 - 2)               | 0<br>(0 - 2)                | 0<br>(0 - 3)                |
| Other neglected tropical diseases                                 | 4<br>(3 - 10)                  | 0<br>(0 - 0)             | 0<br>(0 - 0)           | 2<br>(1 - 3)               | 1<br>(1 - 3)                | 1<br>(1 - 3)                |
| Maternal disorders                                                | 47<br>(37 - 58)                | --                       | 0<br>(0 - 0)           | 47<br>(37 - 58)            | --                          | --                          |
| Maternal hemorrhage                                               | 4<br>(2 - 5)                   | --                       | 0<br>(0 - 0)           | 4<br>(2 - 5)               | --                          | --                          |

Web Table 31- Chile deaths with 95% UI by age, sex, and cause in 2013

| Cause                                                            | Both Sexes, All Ages        | Both Sexes, 0-4 Years | Both Sexes, 5-14 Years | Both Sexes, 15-49 Years  | Both Sexes, 50-69 Years     | Both Sexes, 70-80 Years     |
|------------------------------------------------------------------|-----------------------------|-----------------------|------------------------|--------------------------|-----------------------------|-----------------------------|
| Maternal sepsis and other maternal infections                    | 7<br>(5 - 9)                | --                    | 0<br>(0 - 0)           | 7<br>(5 - 9)             | --                          | --                          |
| Maternal hypertensive disorders                                  | 7<br>(5 - 9)                | --                    | 0<br>(0 - 0)           | 7<br>(5 - 9)             | --                          | --                          |
| Maternal obstructed labor                                        | 3<br>(2 - 5)                | --                    | 0<br>(0 - 0)           | 3<br>(2 - 5)             | --                          | --                          |
| Maternal abortive outcome                                        | 10<br>(7 - 13)              | --                    | 0<br>(0 - 0)           | 10<br>(7 - 13)           | --                          | --                          |
| Indirect maternal deaths                                         | 7<br>(5 - 9)                | --                    | 0<br>(0 - 0)           | 7<br>(5 - 9)             | --                          | --                          |
| Late maternal deaths                                             | 2<br>(1 - 3)                | --                    | 0<br>(0 - 0)           | 2<br>(1 - 3)             | --                          | --                          |
| Maternal deaths aggravated by HIV/AIDS                           | 0<br>(0 - 0)                | --                    | --                     | 0<br>(0 - 0)             | --                          | --                          |
| Other maternal disorders                                         | 7<br>(5 - 9)                | --                    | 0<br>(0 - 0)           | 7<br>(5 - 9)             | --                          | --                          |
| Neonatal disorders                                               | 550<br>(380 - 798)          | 550<br>(380 - 798)    | --                     | --                       | --                          | --                          |
| Neonatal preterm birth complications                             | 326<br>(207 - 496)          | 326<br>(207 - 496)    | --                     | --                       | --                          | --                          |
| Neonatal encephalopathy due to birth asphyxia and trauma         | 79<br>(49 - 120)            | 79<br>(49 - 120)      | --                     | --                       | --                          | --                          |
| Neonatal sepsis and other neonatal infections                    | 59<br>(32 - 105)            | 59<br>(32 - 105)      | --                     | --                       | --                          | --                          |
| Hemolytic disease and other neonatal jaundice                    | 1<br>(1 - 3)                | 1<br>(1 - 3)          | --                     | --                       | --                          | --                          |
| Other neonatal disorders                                         | 85<br>(49 - 134)            | 85<br>(49 - 134)      | --                     | --                       | --                          | --                          |
| Nutritional deficiencies                                         | 786<br>(466 - 996)          | 7<br>(4 - 11)         | 2<br>(1 - 3)           | 34<br>(20 - 43)          | 96<br>(61 - 124)            | 647<br>(370 - 845)          |
| Protein-energy malnutrition                                      | 534<br>(236 - 714)          | 6<br>(4 - 10)         | 1<br>(1 - 2)           | 19<br>(9 - 25)           | 61<br>(29 - 83)             | 446<br>(189 - 620)          |
| Iodine deficiency                                                | 1<br>(0 - 3)                | 0<br>(0 - 0)          | 0<br>(0 - 0)           | 0<br>(0 - 0)             | 0<br>(0 - 1)                | 0<br>(0 - 3)                |
| Iron-deficiency anemia                                           | 223<br>(126 - 357)          | 0<br>(0 - 1)          | 0<br>(0 - 1)           | 12<br>(7 - 19)           | 31<br>(18 - 49)             | 179<br>(94 - 298)           |
| Other nutritional deficiencies                                   | 28<br>(15 - 52)             | 0<br>(0 - 1)          | 0<br>(0 - 1)           | 2<br>(1 - 3)             | 4<br>(2 - 7)                | 22<br>(10 - 40)             |
| Other communicable, maternal, neonatal, and nutritional diseases | 160<br>(126 - 188)          | 15<br>(7 - 28)        | 4<br>(3 - 5)           | 30<br>(23 - 36)          | 58<br>(42 - 70)             | 52<br>(42 - 71)             |
| Sexually transmitted diseases excluding HIV                      | 28<br>(18 - 42)             | 9<br>(2 - 21)         | 1<br>(0 - 2)           | 4<br>(3 - 6)             | 6<br>(4 - 9)                | 7<br>(5 - 10)               |
| Syphilis                                                         | 21<br>(12 - 35)             | 9<br>(2 - 21)         | 1<br>(0 - 2)           | 2<br>(1 - 3)             | 4<br>(3 - 6)                | 6<br>(4 - 8)                |
| Chlamydial infection                                             | 2<br>(1 - 2)                | --                    | 0<br>(0 - 0)           | 1<br>(1 - 1)             | 1<br>(0 - 1)                | 0<br>(0 - 0)                |
| Gonococcal infection                                             | 3<br>(2 - 4)                | --                    | 0<br>(0 - 0)           | 1<br>(1 - 1)             | 1<br>(1 - 2)                | 1<br>(1 - 1)                |
| Other sexually transmitted diseases                              | 2<br>(2 - 3)                | --                    | 0<br>(0 - 0)           | 1<br>(1 - 1)             | 1<br>(1 - 1)                | 0<br>(0 - 1)                |
| Hepatitis                                                        | 15<br>(12 - 17)             | 1<br>(0 - 1)          | 1<br>(0 - 1)           | 4<br>(3 - 5)             | 5<br>(4 - 7)                | 4<br>(3 - 6)                |
| Acute hepatitis A                                                | 7<br>(4 - 11)               | 1<br>(0 - 1)          | 1<br>(0 - 1)           | 3<br>(2 - 4)             | 2<br>(1 - 3)                | 1<br>(0 - 2)                |
| Acute hepatitis B                                                | 7<br>(4 - 11)               | 0<br>(0 - 0)          | 0<br>(0 - 0)           | 1<br>(0 - 2)             | 3<br>(2 - 5)                | 3<br>(2 - 4)                |
| Acute hepatitis C                                                | 1<br>(0 - 2)                | --                    | 0<br>(0 - 0)           | 0<br>(0 - 0)             | 0<br>(0 - 1)                | 0<br>(0 - 1)                |
| Other infectious diseases                                        | 117<br>(87 - 142)           | 5<br>(3 - 8)          | 2<br>(2 - 3)           | 22<br>(15 - 27)          | 47<br>(31 - 58)             | 41<br>(31 - 60)             |
| Non-communicable diseases                                        | 91,588<br>(86,423 - 96,669) | 933<br>(627 - 1,372)  | 194<br>(154 - 245)     | 5,799<br>(5,220 - 6,356) | 23,802<br>(21,889 - 25,648) | 60,860<br>(57,797 - 63,672) |
| Neoplasms                                                        | 26,777<br>(24,727 - 28,806) | 42<br>(25 - 69)       | 94<br>(73 - 122)       | 2,228<br>(2,008 - 2,452) | 9,580<br>(8,793 - 10,356)   | 14,833<br>(13,489 - 16,074) |
| Esophageal cancer                                                | 1,027<br>(859 - 1,308)      | --                    | --                     | 29<br>(23 - 38)          | 307<br>(243 - 420)          | 690<br>(560 - 881)          |
| Stomach cancer                                                   | 4,085<br>(3,565 - 4,683)    | --                    | --                     | 227<br>(186 - 272)       | 1,430<br>(1,231 - 1,645)    | 2,429<br>(2,011 - 2,895)    |
| Liver cancer                                                     | 1,096<br>(941 - 1,270)      | --                    | 1<br>(1 - 2)           | 58<br>(47 - 72)          | 414<br>(342 - 491)          | 622<br>(496 - 764)          |
| Liver cancer due to hepatitis B                                  | 109<br>(47 - 172)           | --                    | 0<br>(0 - 1)           | 12<br>(7 - 19)           | 51<br>(17 - 90)             | 45<br>(21 - 70)             |
| Liver cancer due to hepatitis C                                  | 567<br>(424 - 716)          | --                    | 0<br>(0 - 0)           | 24<br>(16 - 34)          | 211<br>(147 - 277)          | 331<br>(239 - 437)          |
| Liver cancer due to alcohol use                                  | 297<br>(210 - 413)          | --                    | --                     | 10<br>(6 - 17)           | 103<br>(67 - 151)           | 183<br>(124 - 266)          |
| Liver cancer due to other causes                                 | 124<br>(76 - 180)           | --                    | 1<br>(0 - 1)           | 11<br>(8 - 16)           | 49<br>(30 - 72)             | 63<br>(35 - 102)            |
| Larynx cancer                                                    | 181<br>(135 - 231)          | --                    | --                     | 9<br>(7 - 13)            | 75<br>(55 - 99)             | 97<br>(71 - 127)            |

Web Table 31- Chile deaths with 95% UI by age, sex, and cause in 2013

| Cause                                         | Both Sexes, All Ages        | Both Sexes, 0-4 Years | Both Sexes, 5-14 Years | Both Sexes, 15-49 Years  | Both Sexes, 50-69 Years  | Both Sexes, 70-80 Years     |
|-----------------------------------------------|-----------------------------|-----------------------|------------------------|--------------------------|--------------------------|-----------------------------|
| Tracheal, bronchus and lung cancer            | 3,082<br>(2,775 - 3,430)    | -                     | -                      | 142<br>(120 - 167)       | 1,347<br>(1,184 - 1,520) | 1,594<br>(1,392 - 1,838)    |
| Breast cancer                                 | 1,563<br>(1,333 - 1,821)    | -                     | -                      | 251<br>(206 - 303)       | 670<br>(559 - 783)       | 642<br>(503 - 809)          |
| Cervical cancer                               | 916<br>(753 - 1,165)        | -                     | -                      | 204<br>(160 - 266)       | 353<br>(276 - 468)       | 358<br>(269 - 487)          |
| Uterine cancer                                | 189<br>(115 - 250)          | -                     | -                      | 7<br>(4 - 11)            | 76<br>(41 - 105)         | 106<br>(64 - 148)           |
| Prostate cancer                               | 2,164<br>(1,423 - 3,132)    | -                     | -                      | 7<br>(4 - 11)            | 350<br>(234 - 540)       | 1,807<br>(1,152 - 2,643)    |
| Colon and rectum cancer                       | 2,352<br>(2,075 - 2,665)    | -                     | -                      | 142<br>(123 - 164)       | 736<br>(650 - 830)       | 1,473<br>(1,247 - 1,744)    |
| Lip and oral cavity cancer                    | 164<br>(128 - 200)          | -                     | -                      | 16<br>(12 - 21)          | 67<br>(50 - 85)          | 81<br>(60 - 105)            |
| Nasopharynx cancer                            | 30<br>(24 - 40)             | -                     | 0<br>(0 - 0)           | 6<br>(5 - 9)             | 14<br>(11 - 19)          | 9<br>(7 - 14)               |
| Other pharynx cancer                          | 86<br>(71 - 104)            | -                     | -                      | 8<br>(6 - 10)            | 47<br>(36 - 60)          | 31<br>(24 - 40)             |
| Gallbladder and biliary tract cancer          | 2,211<br>(1,641 - 2,782)    | -                     | -                      | 125<br>(88 - 169)        | 904<br>(656 - 1,144)     | 1,183<br>(842 - 1,599)      |
| Pancreatic cancer                             | 1,305<br>(1,152 - 1,480)    | -                     | -                      | 71<br>(59 - 86)          | 523<br>(451 - 599)       | 710<br>(596 - 848)          |
| Malignant skin melanoma                       | 197<br>(149 - 276)          | -                     | -                      | 34<br>(25 - 51)          | 78<br>(56 - 115)         | 85<br>(63 - 118)            |
| Non-melanoma skin cancer                      | 212<br>(145 - 273)          | -                     | -                      | 7<br>(5 - 9)             | 30<br>(21 - 40)          | 175<br>(117 - 230)          |
| Ovarian cancer                                | 495<br>(419 - 586)          | -                     | -                      | 70<br>(54 - 88)          | 234<br>(190 - 287)       | 192<br>(146 - 245)          |
| Testicular cancer                             | 73<br>(23 - 130)            | -                     | -                      | 58<br>(18 - 107)         | 9<br>(3 - 16)            | 7<br>(2 - 13)               |
| Kidney cancer                                 | 803<br>(684 - 926)          | 1<br>(0 - 1)          | 1<br>(1 - 1)           | 59<br>(47 - 73)          | 345<br>(288 - 410)       | 397<br>(317 - 496)          |
| Bladder cancer                                | 485<br>(382 - 579)          | -                     | -                      | 14<br>(10 - 19)          | 127<br>(97 - 154)        | 344<br>(267 - 429)          |
| Brain and nervous system cancer               | 371<br>(183 - 452)          | 5<br>(2 - 9)          | 12<br>(7 - 17)         | 82<br>(45 - 104)         | 165<br>(76 - 212)        | 108<br>(48 - 141)           |
| Thyroid cancer                                | 123<br>(86 - 153)           | -                     | 0<br>(0 - 0)           | 9<br>(7 - 12)            | 41<br>(30 - 52)          | 73<br>(47 - 97)             |
| Mesothelioma                                  | 61<br>(50 - 73)             | -                     | -                      | 8<br>(6 - 11)            | 30<br>(24 - 37)          | 22<br>(16 - 30)             |
| Hodgkin lymphoma                              | 47<br>(18 - 64)             | 0<br>(0 - 1)          | 1<br>(0 - 2)           | 15<br>(6 - 22)           | 14<br>(5 - 22)           | 16<br>(6 - 24)              |
| Non-Hodgkin lymphoma                          | 767<br>(594 - 896)          | 3<br>(2 - 6)          | 7<br>(4 - 10)          | 115<br>(91 - 142)        | 271<br>(214 - 331)       | 371<br>(251 - 471)          |
| Multiple myeloma                              | 438<br>(318 - 540)          | -                     | -                      | 25<br>(18 - 32)          | 189<br>(138 - 237)       | 224<br>(153 - 292)          |
| Leukemia                                      | 728<br>(641 - 809)          | 15<br>(8 - 26)        | 41<br>(30 - 55)        | 166<br>(143 - 191)       | 207<br>(177 - 237)       | 299<br>(249 - 354)          |
| Other neoplasms                               | 1,529<br>(1,284 - 1,969)    | 19<br>(10 - 32)       | 31<br>(21 - 48)        | 264<br>(210 - 365)       | 527<br>(422 - 738)       | 689<br>(540 - 876)          |
| Cardiovascular diseases                       | 29,868<br>(27,444 - 32,911) | 10<br>(6 - 15)        | 13<br>(10 - 17)        | 1,381<br>(1,198 - 1,552) | 6,766<br>(6,124 - 7,457) | 21,699<br>(19,830 - 24,231) |
| Rheumatic heart disease                       | 280<br>(192 - 351)          | 0<br>(0 - 0)          | 1<br>(1 - 2)           | 52<br>(40 - 74)          | 103<br>(72 - 135)        | 124<br>(71 - 167)           |
| Ischemic heart disease                        | 12,278<br>(10,715 - 15,246) | 0<br>(0 - 1)          | 2<br>(1 - 2)           | 573<br>(457 - 671)       | 3,055<br>(2,663 - 3,490) | 8,649<br>(7,310 - 11,283)   |
| Cerebrovascular disease                       | 11,233<br>(9,745 - 13,062)  | 2<br>(1 - 3)          | 5<br>(3 - 6)           | 462<br>(388 - 539)       | 2,399<br>(2,076 - 2,804) | 8,366<br>(7,134 - 9,915)    |
| Ischemic stroke                               | 6,067<br>(5,015 - 8,192)    | 0<br>(0 - 1)          | 1<br>(1 - 1)           | 73<br>(53 - 113)         | 736<br>(548 - 1,162)     | 5,257<br>(4,356 - 6,984)    |
| Hemorrhagic stroke                            | 5,166<br>(3,723 - 6,101)    | 1<br>(1 - 2)          | 4<br>(3 - 5)           | 389<br>(309 - 458)       | 1,663<br>(1,243 - 1,975) | 3,109<br>(2,115 - 3,813)    |
| Hypertensive heart disease                    | 2,367<br>(1,508 - 3,104)    | 0<br>(0 - 0)          | 0<br>(0 - 0)           | 39<br>(24 - 54)          | 303<br>(217 - 390)       | 2,025<br>(1,225 - 2,750)    |
| Cardiomyopathy and myocarditis                | 878<br>(682 - 1,041)        | 6<br>(4 - 9)          | 4<br>(3 - 5)           | 119<br>(89 - 148)        | 280<br>(212 - 342)       | 470<br>(345 - 593)          |
| Atrial fibrillation and flutter               | 983<br>(733 - 1,272)        | -                     | -                      | 8<br>(6 - 11)            | 103<br>(81 - 127)        | 872<br>(634 - 1,158)        |
| Aortic aneurysm                               | 507<br>(387 - 623)          | -                     | -                      | 36<br>(28 - 45)          | 162<br>(128 - 197)       | 309<br>(226 - 398)          |
| Peripheral vascular disease                   | 256<br>(191 - 325)          | -                     | -                      | 1<br>(1 - 1)             | 30<br>(23 - 38)          | 225<br>(162 - 292)          |
| Endocarditis                                  | 110<br>(76 - 146)           | 1<br>(0 - 2)          | 0<br>(0 - 1)           | 20<br>(14 - 27)          | 41<br>(27 - 55)          | 48<br>(31 - 66)             |
| Other cardiovascular and circulatory diseases | 973<br>(685 - 1,194)        | 1<br>(0 - 1)          | 1<br>(1 - 2)           | 71<br>(53 - 88)          | 290<br>(195 - 361)       | 610<br>(410 - 800)          |
| Chronic respiratory diseases                  | 6,434<br>(4,851 - 7,221)    | 16<br>(10 - 25)       | 4<br>(3 - 6)           | 139<br>(117 - 162)       | 1,076<br>(874 - 1,224)   | 5,199<br>(3,757 - 5,928)    |
| Chronic obstructive pulmonary disease         | 4,401<br>(3,160 - 5,091)    | 13<br>(7 - 20)        | 2<br>(2 - 3)           | 71<br>(57 - 85)          | 646<br>(499 - 763)       | 3,669<br>(2,534 - 4,298)    |

Web Table 31- Chile deaths with 95% UI by age, sex, and cause in 2013

| Cause                                               | Both Sexes, All Ages       | Both Sexes, 0-4 Years | Both Sexes, 5-14 Years | Both Sexes, 15-49 Years | Both Sexes, 50-69 Years  | Both Sexes, 70-80 Years   |
|-----------------------------------------------------|----------------------------|-----------------------|------------------------|-------------------------|--------------------------|---------------------------|
| Pneumoconiosis                                      | 166<br>(105 - 246)         | 0<br>(0 - 0)          | 0<br>(0 - 0)           | 7<br>(4 - 10)           | 40<br>(25 - 62)          | 119<br>(73 - 183)         |
| Silicosis                                           | 129<br>(81 - 191)          | 0<br>(0 - 0)          | 0<br>(0 - 0)           | 3<br>(2 - 4)            | 31<br>(19 - 49)          | 95<br>(55 - 146)          |
| Asbestosis                                          | 5<br>(3 - 8)               | 0<br>(0 - 0)          | 0<br>(0 - 0)           | 1<br>(0 - 1)            | 1<br>(1 - 2)             | 3<br>(2 - 6)              |
| Coal workers pneumoconiosis                         | 4<br>(3 - 7)               | 0<br>(0 - 0)          | 0<br>(0 - 0)           | 1<br>(1 - 1)            | 3<br>(2 - 5)             | 0<br>(0 - 1)              |
| Other pneumoconiosis                                | 27<br>(18 - 41)            | 0<br>(0 - 0)          | 0<br>(0 - 0)           | 2<br>(1 - 3)            | 5<br>(3 - 8)             | 20<br>(12 - 31)           |
| Asthma                                              | 268<br>(161 - 348)         | 0<br>(0 - 0)          | 1<br>(0 - 1)           | 24<br>(17 - 30)         | 60<br>(41 - 77)          | 184<br>(101 - 254)        |
| Interstitial lung disease and pulmonary sarcoidosis | 1,535<br>(1,022 - 2,001)   | 1<br>(0 - 1)          | 0<br>(0 - 1)           | 31<br>(23 - 41)         | 320<br>(231 - 403)       | 1,183<br>(736 - 1,597)    |
| Other chronic respiratory diseases                  | 64<br>(44 - 88)            | 2<br>(1 - 4)          | 1<br>(0 - 1)           | 7<br>(6 - 9)            | 9<br>(7 - 12)            | 45<br>(28 - 67)           |
| Cirrhosis                                           | 4,736<br>(4,305 - 5,221)   | 1<br>(0 - 1)          | 2<br>(2 - 2)           | 757<br>(646 - 882)      | 2,468<br>(2,203 - 2,786) | 1,508<br>(1,342 - 1,687)  |
| Cirrhosis due to hepatitis B                        | 586<br>(314 - 898)         | 0<br>(0 - 0)          | 0<br>(0 - 0)           | 88<br>(34 - 148)        | 301<br>(150 - 473)       | 196<br>(101 - 314)        |
| Cirrhosis due to hepatitis C                        | 2,006<br>(1,368 - 2,615)   | 0<br>(0 - 0)          | 1<br>(0 - 1)           | 316<br>(169 - 440)      | 1,038<br>(637 - 1,393)   | 651<br>(449 - 850)        |
| Cirrhosis due to alcohol use                        | 1,738<br>(1,248 - 2,375)   | --                    | --                     | 247<br>(140 - 377)      | 919<br>(639 - 1,331)     | 572<br>(401 - 767)        |
| Cirrhosis due to other causes                       | 407<br>(222 - 708)         | 1<br>(0 - 1)          | 1<br>(1 - 2)           | 106<br>(63 - 188)       | 211<br>(105 - 375)       | 88<br>(43 - 139)          |
| Digestive diseases                                  | 2,827<br>(2,531 - 3,382)   | 3<br>(2 - 5)          | 6<br>(4 - 8)           | 206<br>(178 - 254)      | 656<br>(568 - 812)       | 1,956<br>(1,710 - 2,360)  |
| Peptic ulcer disease                                | 326<br>(249 - 464)         | 0<br>(0 - 0)          | 0<br>(0 - 0)           | 23<br>(17 - 32)         | 90<br>(68 - 130)         | 213<br>(155 - 313)        |
| Gastritis and duodenitis                            | 63<br>(42 - 115)           | 0<br>(0 - 0)          | 0<br>(0 - 0)           | 6<br>(4 - 10)           | 13<br>(8 - 22)           | 44<br>(27 - 88)           |
| Appendicitis                                        | 79<br>(51 - 125)           | 0<br>(0 - 1)          | 1<br>(1 - 2)           | 16<br>(11 - 24)         | 23<br>(15 - 37)          | 38<br>(21 - 66)           |
| Paralytic ileus and intestinal obstruction          | 290<br>(45 - 522)          | 1<br>(0 - 2)          | 2<br>(1 - 3)           | 15<br>(4 - 24)          | 46<br>(8 - 82)           | 226<br>(32 - 418)         |
| Inguinal, femoral, and abdominal hernia             | 184<br>(107 - 370)         | 0<br>(0 - 1)          | 0<br>(0 - 1)           | 7<br>(4 - 13)           | 35<br>(20 - 68)          | 142<br>(77 - 296)         |
| Inflammatory bowel disease                          | 63<br>(47 - 101)           | 0<br>(0 - 0)          | 0<br>(0 - 0)           | 10<br>(7 - 15)          | 15<br>(12 - 23)          | 37<br>(25 - 64)           |
| Vascular intestinal disorders                       | 586<br>(381 - 884)         | 0<br>(0 - 1)          | 0<br>(0 - 1)           | 17<br>(10 - 28)         | 107<br>(65 - 165)        | 461<br>(302 - 704)        |
| Gallbladder and biliary diseases                    | 554<br>(439 - 818)         | 0<br>(0 - 0)          | 0<br>(0 - 0)           | 29<br>(23 - 44)         | 117<br>(93 - 178)        | 407<br>(304 - 605)        |
| Pancreatitis                                        | 368<br>(285 - 498)         | 0<br>(0 - 0)          | 0<br>(0 - 1)           | 61<br>(48 - 81)         | 132<br>(100 - 179)       | 174<br>(127 - 247)        |
| Other digestive diseases                            | 314<br>(240 - 398)         | 0<br>(0 - 1)          | 1<br>(0 - 1)           | 23<br>(18 - 28)         | 78<br>(58 - 98)          | 213<br>(157 - 283)        |
| Neurological disorders                              | 10,042<br>(8,141 - 11,848) | 23<br>(14 - 36)       | 15<br>(11 - 19)        | 205<br>(175 - 239)      | 662<br>(556 - 777)       | 9,138<br>(7,277 - 10,890) |
| Alzheimer disease and other dementias               | 8,862<br>(6,976 - 10,643)  | --                    | --                     | 1<br>(0 - 1)            | 367<br>(287 - 462)       | 8,495<br>(6,636 - 10,282) |
| Parkinson disease                                   | 597<br>(426 - 729)         | --                    | --                     | 4<br>(3 - 5)            | 85<br>(64 - 105)         | 509<br>(352 - 640)        |
| Epilepsy                                            | 218<br>(170 - 257)         | 4<br>(2 - 7)          | 6<br>(4 - 9)           | 111<br>(90 - 136)       | 57<br>(42 - 71)          | 40<br>(27 - 54)           |
| Multiple sclerosis                                  | 43<br>(25 - 57)            | --                    | --                     | 13<br>(7 - 18)          | 20<br>(11 - 29)          | 10<br>(5 - 15)            |
| Other neurological disorders                        | 321<br>(271 - 365)         | 19<br>(12 - 30)       | 9<br>(6 - 11)          | 76<br>(62 - 91)         | 133<br>(111 - 156)       | 84<br>(69 - 99)           |
| Mental and substance use disorders                  | 657<br>(356 - 792)         | 0<br>(0 - 1)          | 0<br>(0 - 0)           | 299<br>(146 - 374)      | 258<br>(139 - 321)       | 100<br>(56 - 125)         |
| Schizophrenia                                       | 33<br>(19 - 43)            | --                    | --                     | 7<br>(4 - 10)           | 13<br>(7 - 19)           | 12<br>(7 - 18)            |
| Alcohol use disorders                               | 457<br>(222 - 562)         | --                    | --                     | 164<br>(71 - 217)       | 218<br>(107 - 282)       | 75<br>(35 - 98)           |
| Drug use disorders                                  | 166<br>(52 - 209)          | 0<br>(0 - 1)          | --                     | 127<br>(29 - 164)       | 26<br>(15 - 32)          | 13<br>(8 - 17)            |
| Opioid use disorders                                | 15<br>(5 - 19)             | 0<br>(0 - 0)          | --                     | 12<br>(3 - 16)          | 2<br>(1 - 3)             | 1<br>(1 - 2)              |
| Cocaine use disorders                               | 4<br>(1 - 5)               | 0<br>(0 - 0)          | --                     | 3<br>(1 - 4)            | 1<br>(0 - 1)             | 0<br>(0 - 0)              |
| Amphetamine use disorders                           | 2<br>(1 - 3)               | 0<br>(0 - 0)          | --                     | 2<br>(0 - 2)            | 0<br>(0 - 1)             | 0<br>(0 - 0)              |
| Other drug use disorders                            | 145<br>(45 - 182)          | 0<br>(0 - 1)          | --                     | 110<br>(25 - 142)       | 23<br>(13 - 29)          | 11<br>(7 - 15)            |
| Eating disorders                                    | 1<br>(1 - 2)               | --                    | 0<br>(0 - 0)           | 1<br>(1 - 2)            | --                       | --                        |
| Anorexia nervosa                                    | 1<br>(1 - 2)               | --                    | 0<br>(0 - 0)           | 1<br>(1 - 2)            | --                       | --                        |

Web Table 31- Chile deaths with 95% UI by age, sex, and cause in 2013

| Cause                                               | Both Sexes, All Ages     | Both Sexes, 0-4 Years | Both Sexes, 5-14 Years | Both Sexes, 15-49 Years | Both Sexes, 50-69 Years  | Both Sexes, 70-80 Years  |
|-----------------------------------------------------|--------------------------|-----------------------|------------------------|-------------------------|--------------------------|--------------------------|
| Diabetes, urogenital, blood, and endocrine diseases | 8,475<br>(7,428 - 9,334) | 36<br>(22 - 59)       | 18<br>(14 - 25)        | 400<br>(352 - 486)      | 2,106<br>(1,855 - 2,372) | 5,915<br>(5,042 - 6,622) |
| Diabetes mellitus                                   | 3,137<br>(2,776 - 3,517) | 1<br>(0 - 1)          | 1<br>(1 - 2)           | 98<br>(83 - 115)        | 877<br>(759 - 1,012)     | 2,160<br>(1,858 - 2,488) |
| Acute glomerulonephritis                            | 3<br>(2 - 3)             | 0<br>(0 - 0)          | 0<br>(0 - 0)           | 1<br>(1 - 1)            | 1<br>(0 - 1)             | 1<br>(0 - 1)             |
| Chronic kidney disease                              | 3,617<br>(3,066 - 4,214) | 5<br>(3 - 8)          | 5<br>(3 - 7)           | 170<br>(142 - 236)      | 903<br>(745 - 1,076)     | 2,534<br>(2,076 - 2,976) |
| Chronic kidney disease due to diabetes mellitus     | 1,210<br>(939 - 1,544)   | 0<br>(0 - 0)          | 0<br>(0 - 1)           | 53<br>(38 - 76)         | 442<br>(334 - 558)       | 714<br>(529 - 973)       |
| Chronic kidney disease due to hypertension          | 812<br>(506 - 1,083)     | 0<br>(0 - 1)          | 1<br>(0 - 1)           | 29<br>(18 - 41)         | 128<br>(78 - 190)        | 654<br>(404 - 880)       |
| Chronic kidney disease due to glomerulonephritis    | 76<br>(56 - 106)         | 1<br>(1 - 2)          | 1<br>(0 - 1)           | 14<br>(11 - 20)         | 19<br>(13 - 28)          | 42<br>(28 - 63)          |
| Chronic kidney disease due to other causes          | 1,520<br>(1,085 - 1,980) | 4<br>(2 - 6)          | 3<br>(2 - 5)           | 74<br>(52 - 124)        | 315<br>(194 - 435)       | 1,124<br>(766 - 1,534)   |
| Urinary diseases and male infertility               | 1,146<br>(685 - 1,479)   | 3<br>(2 - 5)          | 2<br>(1 - 2)           | 38<br>(25 - 46)         | 173<br>(113 - 209)       | 931<br>(522 - 1,249)     |
| Interstitial nephritis and urinary tract infections | 1,068<br>(632 - 1,393)   | 3<br>(2 - 5)          | 1<br>(1 - 2)           | 31<br>(21 - 39)         | 152<br>(99 - 186)        | 881<br>(489 - 1,193)     |
| Urolithiasis                                        | 17<br>(11 - 26)          | --                    | 0<br>(0 - 0)           | 2<br>(1 - 3)            | 6<br>(4 - 9)             | 9<br>(5 - 16)            |
| Other urinary diseases                              | 61<br>(35 - 108)         | 0<br>(0 - 0)          | 0<br>(0 - 0)           | 4<br>(2 - 6)            | 15<br>(8 - 24)           | 41<br>(22 - 78)          |
| Gynecological diseases                              | 4<br>(3 - 8)             | --                    | --                     | 2<br>(1 - 4)            | 1<br>(1 - 1)             | 1<br>(1 - 1)             |
| Uterine fibroids                                    | 1<br>(1 - 2)             | --                    | --                     | 0<br>(0 - 1)            | 0<br>(0 - 0)             | 0<br>(0 - 1)             |
| Polycystic ovarian syndrome                         | 0<br>(0 - 0)             | --                    | --                     | 0<br>(0 - 0)            | 0<br>(0 - 0)             | --                       |
| Endometriosis                                       | 0<br>(0 - 1)             | --                    | --                     | 0<br>(0 - 1)            | 0<br>(0 - 0)             | --                       |
| Genital prolapse                                    | 1<br>(1 - 1)             | --                    | --                     | 0<br>(0 - 1)            | 0<br>(0 - 0)             | 0<br>(0 - 1)             |
| Other gynecological diseases                        | 2<br>(1 - 4)             | --                    | --                     | 1<br>(1 - 2)            | 0<br>(0 - 1)             | 1<br>(0 - 1)             |
| Hemoglobinopathies and hemolytic anemias            | 75<br>(48 - 99)          | 3<br>(2 - 5)          | 3<br>(2 - 4)           | 15<br>(10 - 21)         | 18<br>(12 - 24)          | 36<br>(21 - 54)          |
| Thalassemias                                        | 5<br>(3 - 6)             | 1<br>(0 - 1)          | 1<br>(0 - 1)           | 3<br>(2 - 4)            | 0<br>(0 - 0)             | 0<br>(0 - 0)             |
| Sickle cell disorders                               | 6<br>(4 - 8)             | 1<br>(0 - 2)          | 1<br>(1 - 1)           | 2<br>(2 - 3)            | 1<br>(1 - 1)             | 0<br>(0 - 0)             |
| G6PD deficiency                                     | 2<br>(1 - 2)             | 0<br>(0 - 0)          | 0<br>(0 - 0)           | 1<br>(0 - 1)            | 1<br>(0 - 1)             | 0<br>(0 - 0)             |
| Other hemoglobinopathies and hemolytic anemias      | 64<br>(40 - 85)          | 1<br>(1 - 2)          | 1<br>(1 - 1)           | 9<br>(6 - 12)           | 16<br>(11 - 23)          | 36<br>(21 - 53)          |
| Endocrine, metabolic, blood, and immune disorders   | 493<br>(407 - 720)       | 24<br>(13 - 41)       | 8<br>(5 - 12)          | 75<br>(62 - 106)        | 134<br>(106 - 200)       | 252<br>(190 - 392)       |
| Musculoskeletal disorders                           | 424<br>(236 - 510)       | --                    | 3<br>(2 - 4)           | 72<br>(40 - 87)         | 141<br>(71 - 170)        | 209<br>(116 - 269)       |
| Rheumatoid arthritis                                | 151<br>(77 - 191)        | --                    | 0<br>(0 - 1)           | 9<br>(5 - 12)           | 49<br>(23 - 64)          | 92<br>(48 - 124)         |
| Other musculoskeletal disorders                     | 274<br>(149 - 331)       | --                    | 2<br>(1 - 3)           | 63<br>(34 - 77)         | 92<br>(47 - 116)         | 116<br>(67 - 157)        |
| Other non-communicable diseases                     | 1,347<br>(1,049 - 1,729) | 802<br>(536 - 1,179)  | 40<br>(29 - 53)        | 112<br>(91 - 138)       | 89<br>(68 - 103)         | 305<br>(186 - 397)       |
| Congenital anomalies                                | 906<br>(657 - 1,263)     | 692<br>(454 - 1,041)  | 39<br>(28 - 52)        | 99<br>(80 - 125)        | 47<br>(37 - 59)          | 30<br>(22 - 39)          |
| Neural tube defects                                 | 49<br>(30 - 76)          | 43<br>(25 - 70)       | 2<br>(1 - 3)           | 3<br>(2 - 4)            | 1<br>(0 - 1)             | 0<br>(0 - 0)             |
| Congenital heart anomalies                          | 347<br>(251 - 483)       | 253<br>(163 - 386)    | 16<br>(11 - 22)        | 49<br>(39 - 62)         | 19<br>(15 - 24)          | 10<br>(7 - 14)           |
| Cleft lip and cleft palate                          | 1<br>(0 - 1)             | 1<br>(0 - 1)          | --                     | --                      | --                       | --                       |
| Down syndrome                                       | 59<br>(36 - 84)          | 27<br>(12 - 45)       | 2<br>(1 - 4)           | 17<br>(10 - 23)         | 13<br>(8 - 19)           | 0<br>(0 - 0)             |
| Chromosomal unbalanced rearrangements               | 82<br>(50 - 126)         | 78<br>(46 - 121)      | 1<br>(1 - 2)           | 2<br>(2 - 3)            | 1<br>(0 - 1)             | 0<br>(0 - 0)             |
| Other congenital anomalies                          | 369<br>(252 - 534)       | 290<br>(181 - 450)    | 17<br>(12 - 25)        | 28<br>(22 - 38)         | 14<br>(10 - 18)          | 19<br>(14 - 26)          |
| Skin and subcutaneous diseases                      | 335<br>(200 - 433)       | 4<br>(2 - 8)          | 1<br>(1 - 1)           | 13<br>(8 - 16)          | 41<br>(28 - 50)          | 275<br>(161 - 368)       |
| Cellulitis                                          | 43<br>(26 - 71)          | 1<br>(0 - 2)          | 0<br>(0 - 0)           | 4<br>(2 - 5)            | 11<br>(7 - 16)           | 27<br>(14 - 53)          |
| Pyoderma                                            | 39<br>(26 - 53)          | 2<br>(1 - 3)          | 0<br>(0 - 0)           | 3<br>(2 - 4)            | 9<br>(5 - 12)            | 26<br>(16 - 39)          |
| Decubitus ulcer                                     | 233<br>(125 - 315)       | 0<br>(0 - 0)          | 0<br>(0 - 0)           | 3<br>(2 - 4)            | 16<br>(9 - 21)           | 213<br>(112 - 294)       |
| Other skin and subcutaneous diseases                | 20<br>(13 - 33)          | 1<br>(1 - 3)          | 0<br>(0 - 0)           | 4<br>(3 - 5)            | 5<br>(3 - 8)             | 10<br>(4 - 22)           |

Web Table 31- Chile deaths with 95% UI by age, sex, and cause in 2013

| Cause                                           | Both Sexes, All Ages     | Both Sexes, 0-4 Years | Both Sexes, 5-14 Years | Both Sexes, 15-49 Years  | Both Sexes, 50-69 Years  | Both Sexes, 70-80 Years  |
|-------------------------------------------------|--------------------------|-----------------------|------------------------|--------------------------|--------------------------|--------------------------|
| Sudden infant death syndrome                    | 106<br>(50 - 183)        | 106<br>(50 - 183)     | --                     | --                       | --                       | --                       |
| Injuries                                        | 8,790<br>(7,948 - 9,688) | 134<br>(83 - 208)     | 164<br>(132 - 206)     | 4,281<br>(3,848 - 4,778) | 2,203<br>(1,967 - 2,528) | 2,007<br>(1,660 - 2,529) |
| Transport injuries                              | 2,682<br>(2,125 - 3,051) | 28<br>(16 - 45)       | 76<br>(56 - 100)       | 1,377<br>(1,098 - 1,600) | 775<br>(574 - 910)       | 426<br>(346 - 493)       |
| Road injuries                                   | 2,511<br>(1,981 - 2,854) | 27<br>(16 - 43)       | 72<br>(54 - 95)        | 1,283<br>(1,016 - 1,488) | 725<br>(533 - 851)       | 404<br>(325 - 470)       |
| Pedestrian road injuries                        | 1,224<br>(938 - 1,466)   | 14<br>(8 - 24)        | 38<br>(27 - 52)        | 511<br>(378 - 635)       | 384<br>(272 - 479)       | 278<br>(216 - 328)       |
| Cyclist road injuries                           | 140<br>(95 - 189)        | 1<br>(1 - 3)          | 7<br>(4 - 10)          | 66<br>(46 - 87)          | 48<br>(29 - 69)          | 19<br>(12 - 27)          |
| Motorcyclist road injuries                      | 159<br>(108 - 220)       | 0<br>(0 - 1)          | 1<br>(1 - 2)           | 124<br>(82 - 172)        | 22<br>(14 - 32)          | 12<br>(8 - 18)           |
| Motor vehicle road injuries                     | 958<br>(685 - 1,179)     | 10<br>(6 - 17)        | 25<br>(17 - 35)        | 570<br>(397 - 700)       | 262<br>(180 - 346)       | 91<br>(65 - 122)         |
| Other road injuries                             | 29<br>(19 - 47)          | 0<br>(0 - 1)          | 1<br>(1 - 2)           | 13<br>(8 - 21)           | 10<br>(6 - 17)           | 5<br>(3 - 9)             |
| Other transport injuries                        | 171<br>(119 - 206)       | 1<br>(1 - 3)          | 4<br>(2 - 6)           | 94<br>(65 - 117)         | 50<br>(29 - 67)          | 22<br>(15 - 30)          |
| Unintentional injuries                          | 3,013<br>(2,523 - 3,409) | 92<br>(56 - 145)      | 53<br>(38 - 71)        | 852<br>(722 - 1,008)     | 703<br>(589 - 807)       | 1,313<br>(975 - 1,602)   |
| Falls                                           | 1,119<br>(649 - 1,410)   | 4<br>(2 - 6)          | 6<br>(4 - 8)           | 130<br>(80 - 160)        | 207<br>(114 - 261)       | 773<br>(431 - 1,035)     |
| Drowning                                        | 496<br>(353 - 762)       | 26<br>(13 - 49)       | 22<br>(12 - 35)        | 280<br>(206 - 436)       | 124<br>(83 - 191)        | 43<br>(27 - 60)          |
| Fire, heat, and hot substances                  | 405<br>(316 - 500)       | 21<br>(11 - 37)       | 10<br>(6 - 15)         | 100<br>(75 - 125)        | 107<br>(81 - 138)        | 167<br>(131 - 217)       |
| Poisonings                                      | 61<br>(34 - 76)          | 1<br>(0 - 2)          | 1<br>(1 - 2)           | 28<br>(15 - 35)          | 14<br>(7 - 19)           | 17<br>(8 - 24)           |
| Exposure to mechanical forces                   | 237<br>(200 - 312)       | 4<br>(2 - 6)          | 6<br>(4 - 9)           | 129<br>(104 - 172)       | 70<br>(57 - 91)          | 28<br>(22 - 44)          |
| Unintentional firearm injuries                  | 63<br>(34 - 79)          | 0<br>(0 - 1)          | 1<br>(1 - 2)           | 41<br>(20 - 55)          | 13<br>(7 - 18)           | 8<br>(5 - 11)            |
| Unintentional suffocation                       | 28<br>(20 - 61)          | 1<br>(0 - 1)          | 1<br>(0 - 1)           | 9<br>(6 - 20)            | 8<br>(5 - 18)            | 10<br>(6 - 23)           |
| Other exposure to mechanical forces             | 145<br>(120 - 217)       | 3<br>(1 - 5)          | 4<br>(3 - 6)           | 79<br>(61 - 132)         | 50<br>(39 - 66)          | 10<br>(8 - 14)           |
| Adverse effects of medical treatment            | 263<br>(202 - 402)       | 7<br>(3 - 15)         | 2<br>(1 - 3)           | 37<br>(27 - 62)          | 69<br>(50 - 115)         | 148<br>(110 - 229)       |
| Animal contact                                  | 15<br>(9 - 21)           | 0<br>(0 - 1)          | 0<br>(0 - 1)           | 4<br>(2 - 5)             | 5<br>(3 - 7)             | 5<br>(3 - 8)             |
| Venomous animal contact                         | 7<br>(4 - 11)            | 0<br>(0 - 0)          | 0<br>(0 - 0)           | 2<br>(1 - 2)             | 2<br>(1 - 4)             | 2<br>(1 - 4)             |
| Non-venomous animal contact                     | 8<br>(5 - 11)            | 0<br>(0 - 1)          | 0<br>(0 - 0)           | 2<br>(1 - 3)             | 2<br>(1 - 3)             | 3<br>(2 - 5)             |
| Foreign body                                    | 270<br>(181 - 385)       | 25<br>(13 - 42)       | 2<br>(1 - 3)           | 62<br>(41 - 96)          | 67<br>(43 - 101)         | 115<br>(72 - 160)        |
| Pulmonary aspiration and foreign body in airway | 267<br>(178 - 383)       | 25<br>(13 - 41)       | 2<br>(1 - 3)           | 61<br>(40 - 95)          | 66<br>(42 - 100)         | 114<br>(71 - 160)        |
| Foreign body in other body part                 | 3<br>(2 - 4)             | 0<br>(0 - 0)          | 0<br>(0 - 0)           | 1<br>(1 - 2)             | 1<br>(1 - 1)             | 1<br>(0 - 1)             |
| Other unintentional injuries                    | 147<br>(113 - 189)       | 5<br>(2 - 9)          | 3<br>(1 - 5)           | 83<br>(57 - 117)         | 40<br>(24 - 63)          | 16<br>(10 - 23)          |
| Self-harm and interpersonal violence            | 3,094<br>(2,667 - 4,210) | 14<br>(6 - 38)        | 35<br>(25 - 52)        | 2,053<br>(1,781 - 2,535) | 725<br>(585 - 1,143)     | 267<br>(208 - 520)       |
| Self-harm                                       | 2,238<br>(1,938 - 3,107) | --                    | 23<br>(16 - 33)        | 1,398<br>(1,195 - 1,698) | 586<br>(472 - 955)       | 232<br>(174 - 475)       |
| Interpersonal violence                          | 856<br>(662 - 1,383)     | 14<br>(6 - 38)        | 12<br>(7 - 23)         | 655<br>(499 - 1,021)     | 139<br>(88 - 267)        | 36<br>(22 - 61)          |
| Assault by firearm                              | 278<br>(155 - 488)       | 2<br>(1 - 7)          | 5<br>(3 - 11)          | 221<br>(120 - 380)       | 43<br>(21 - 91)          | 7<br>(3 - 13)            |
| Assault by sharp object                         | 477<br>(326 - 847)       | 3<br>(1 - 9)          | 3<br>(1 - 7)           | 391<br>(264 - 685)       | 68<br>(38 - 136)         | 13<br>(7 - 23)           |
| Assault by other means                          | 101<br>(72 - 170)        | 9<br>(4 - 23)         | 4<br>(2 - 7)           | 43<br>(29 - 73)          | 29<br>(18 - 55)          | 16<br>(9 - 28)           |

Web Table 31- Chile deaths with 95% UI by age, sex, and cause in 2013

| Cause                                                             | Males, All Ages             | Males, 0-4 Years       | Males, 5-14 Years  | Males, 15-49 Years       | Males, 50-69 Years          | Males, 70-80 Years          |
|-------------------------------------------------------------------|-----------------------------|------------------------|--------------------|--------------------------|-----------------------------|-----------------------------|
| All causes                                                        | 56,633<br>(52,562 - 61,053) | 1,011<br>(687 - 1,492) | 234<br>(186 - 301) | 7,548<br>(6,778 - 8,400) | 16,705<br>(15,131 - 18,425) | 31,135<br>(29,491 - 32,955) |
| Communicable, maternal, neonatal, and nutritional diseases        | 4,324<br>(3,590 - 5,807)    | 428<br>(283 - 623)     | 21<br>(15 - 29)    | 466<br>(381 - 597)       | 801<br>(649 - 1,100)        | 2,608<br>(1,982 - 3,706)    |
| HIV/AIDS and tuberculosis                                         | 597<br>(480 - 776)          | 0<br>(0 - 1)           | 1<br>(0 - 1)       | 222<br>(159 - 350)       | 194<br>(147 - 261)          | 181<br>(131 - 223)          |
| Tuberculosis                                                      | 378<br>(307 - 445)          | 0<br>(0 - 1)           | 1<br>(0 - 1)       | 63<br>(50 - 78)          | 139<br>(110 - 172)          | 176<br>(125 - 218)          |
| HIV/AIDS                                                          | 219<br>(132 - 386)          | 0<br>(0 - 0)           | 0<br>(0 - 0)       | 159<br>(99 - 281)        | 55<br>(24 - 113)            | 5<br>(1 - 14)               |
| HIV/AIDS resulting in mycobacterial infection                     | 13<br>(8 - 24)              | 0<br>(0 - 0)           | 0<br>(0 - 0)       | 10<br>(6 - 17)           | 4<br>(2 - 7)                | 0<br>(0 - 1)                |
| HIV/AIDS resulting in other diseases                              | 206<br>(125 - 364)          | 0<br>(0 - 0)           | 0<br>(0 - 0)       | 149<br>(93 - 267)        | 52<br>(23 - 106)            | 5<br>(1 - 13)               |
| Diarrhea, lower respiratory, and other common infectious diseases | 2,903<br>(2,221 - 4,353)    | 105<br>(60 - 167)      | 17<br>(11 - 24)    | 199<br>(155 - 283)       | 487<br>(361 - 740)          | 2,095<br>(1,490 - 3,228)    |
| Diarrheal diseases                                                | 98<br>(70 - 141)            | 8<br>(4 - 13)          | 1<br>(0 - 1)       | 5<br>(4 - 7)             | 15<br>(11 - 21)             | 69<br>(42 - 111)            |
| Intestinal infectious diseases                                    | 15<br>(6 - 30)              | 3<br>(1 - 7)           | 3<br>(1 - 6)       | 6<br>(2 - 13)            | 2<br>(0 - 4)                | 1<br>(0 - 3)                |
| Typhoid fever                                                     | 9<br>(3 - 20)               | 2<br>(0 - 4)           | 2<br>(1 - 4)       | 4<br>(1 - 9)             | 1<br>(0 - 2)                | 0<br>(0 - 1)                |
| Paratyphoid fever                                                 | 3<br>(1 - 7)                | 1<br>(0 - 2)           | 1<br>(0 - 2)       | 1<br>(0 - 4)             | 0<br>(0 - 1)                | 0<br>(0 - 0)                |
| Other intestinal infectious diseases                              | 2<br>(0 - 7)                | 1<br>(0 - 4)           | 0<br>(0 - 1)       | 1<br>(0 - 4)             | 0<br>(0 - 3)                | 0<br>(0 - 2)                |
| Lower respiratory infections                                      | 2,670<br>(2,002 - 4,128)    | 69<br>(37 - 118)       | 7<br>(4 - 11)      | 153<br>(111 - 235)       | 439<br>(315 - 694)          | 2,003<br>(1,397 - 3,143)    |
| Upper respiratory infections                                      | 2<br>(1 - 4)                | 0<br>(0 - 0)           | 0<br>(0 - 0)       | 0<br>(0 - 1)             | 1<br>(0 - 2)                | 1<br>(0 - 3)                |
| Otitis media                                                      | 1<br>(1 - 1)                | 0<br>(0 - 0)           | 0<br>(0 - 0)       | 1<br>(0 - 1)             | 0<br>(0 - 0)                | 0<br>(0 - 0)                |
| Meningitis                                                        | 77<br>(63 - 93)             | 15<br>(8 - 26)         | 3<br>(2 - 5)       | 22<br>(17 - 27)          | 22<br>(18 - 28)             | 14<br>(11 - 19)             |
| Pneumococcal meningitis                                           | 16<br>(12 - 21)             | 3<br>(1 - 5)           | 1<br>(0 - 1)       | 5<br>(3 - 7)             | 5<br>(3 - 7)                | 3<br>(2 - 5)                |
| H influenzae type B meningitis                                    | 8<br>(6 - 12)               | 4<br>(2 - 7)           | 0<br>(0 - 1)       | 2<br>(1 - 2)             | 1<br>(1 - 2)                | 1<br>(1 - 1)                |
| Meningococcal meningitis                                          | 28<br>(21 - 36)             | 5<br>(2 - 9)           | 2<br>(1 - 2)       | 9<br>(6 - 12)            | 8<br>(5 - 11)               | 5<br>(3 - 7)                |
| Other meningitis                                                  | 25<br>(17 - 33)             | 4<br>(2 - 7)           | 1<br>(0 - 1)       | 7<br>(4 - 10)            | 9<br>(5 - 13)               | 5<br>(3 - 8)                |
| Encephalitis                                                      | 28<br>(20 - 49)             | 4<br>(2 - 8)           | 3<br>(1 - 6)       | 10<br>(7 - 19)           | 7<br>(4 - 14)               | 4<br>(3 - 8)                |
| Diphtheria                                                        | 0<br>(0 - 1)                | 0<br>(0 - 1)           | 0<br>(0 - 0)       | 0<br>(0 - 1)             | 0<br>(0 - 0)                | --<br>(0 - 0)               |
| Whooping cough                                                    | 7<br>(1 - 29)               | 6<br>(1 - 28)          | 0<br>(0 - 0)       | 0<br>(0 - 1)             | 0<br>(0 - 0)                | --<br>(0 - 0)               |
| Tetanus                                                           | 2<br>(1 - 3)                | 0<br>(0 - 0)           | 0<br>(0 - 0)       | 1<br>(0 - 1)             | 0<br>(0 - 1)                | 0<br>(0 - 1)                |
| Measles                                                           | 0<br>(0 - 0)                | 0<br>(0 - 0)           | 0<br>(0 - 0)       | 0<br>(0 - 0)             | 0<br>(0 - 0)                | --<br>(0 - 0)               |
| Varicella and herpes zoster                                       | 5<br>(1 - 13)               | 1<br>(0 - 3)           | 0<br>(0 - 1)       | 1<br>(0 - 2)             | 1<br>(0 - 2)                | 2<br>(0 - 11)               |
| Neglected tropical diseases and malaria                           | 77<br>(24 - 244)            | 0<br>(0 - 2)           | 1<br>(0 - 2)       | 9<br>(5 - 21)            | 28<br>(8 - 103)             | 38<br>(9 - 149)             |
| Chagas disease                                                    | 67<br>(15 - 234)            | 0<br>(0 - 0)           | 0<br>(0 - 0)       | 5<br>(1 - 17)            | 26<br>(4 - 101)             | 36<br>(7 - 144)             |
| Leishmaniasis                                                     | 0<br>(0 - 0)                | 0<br>(0 - 0)           | 0<br>(0 - 0)       | 0<br>(0 - 0)             | 0<br>(0 - 0)                | 0<br>(0 - 0)                |
| Visceral leishmaniasis                                            | 0<br>(0 - 0)                | 0<br>(0 - 0)           | 0<br>(0 - 0)       | 0<br>(0 - 0)             | 0<br>(0 - 0)                | 0<br>(0 - 0)                |
| Cysticercosis                                                     | 0<br>(0 - 0)                | 0<br>(0 - 0)           | 0<br>(0 - 0)       | 0<br>(0 - 0)             | 0<br>(0 - 0)                | 0<br>(0 - 0)                |
| Cystic echinococcosis                                             | 5<br>(4 - 5)                | 0<br>(0 - 0)           | 0<br>(0 - 0)       | 2<br>(2 - 2)             | 2<br>(1 - 2)                | 1<br>(1 - 1)                |
| Dengue                                                            | 1<br>(1 - 3)                | 0<br>(0 - 0)           | 0<br>(0 - 0)       | 0<br>(0 - 1)             | 0<br>(0 - 1)                | 0<br>(0 - 0)                |
| Rabies                                                            | 1<br>(0 - 1)                | 0<br>(0 - 0)           | 0<br>(0 - 0)       | 0<br>(0 - 1)             | 0<br>(0 - 0)                | 0<br>(0 - 0)                |
| Intestinal nematode infections                                    | 1<br>(0 - 4)                | 0<br>(0 - 1)           | 0<br>(0 - 1)       | 0<br>(0 - 1)             | 0<br>(0 - 2)                | 0<br>(0 - 2)                |
| Ascariasis                                                        | 1<br>(0 - 4)                | 0<br>(0 - 1)           | 0<br>(0 - 1)       | 0<br>(0 - 1)             | 0<br>(0 - 2)                | 0<br>(0 - 2)                |
| Other neglected tropical diseases                                 | 2<br>(2 - 5)                | 0<br>(0 - 0)           | 0<br>(0 - 0)       | 1<br>(1 - 2)             | 1<br>(0 - 1)                | 0<br>(0 - 1)                |
| Maternal disorders                                                | --                          | --                     | --                 | --                       | --                          | --                          |
| Maternal hemorrhage                                               | --                          | --                     | --                 | --                       | --                          | --                          |



Web Table 31- Chile deaths with 95% UI by age, sex, and cause in 2013

| Cause                                                            | Males, All Ages             | Males, 0-4 Years   | Males, 5-14 Years | Males, 15-49 Years       | Males, 50-69 Years          | Males, 70-80 Years          |
|------------------------------------------------------------------|-----------------------------|--------------------|-------------------|--------------------------|-----------------------------|-----------------------------|
| Maternal sepsis and other maternal infections                    | --                          | --                 | --                | --                       | --                          | --                          |
| Maternal hypertensive disorders                                  | --                          | --                 | --                | --                       | --                          | --                          |
| Maternal obstructed labor                                        | --                          | --                 | --                | --                       | --                          | --                          |
| Maternal abortive outcome                                        | --                          | --                 | --                | --                       | --                          | --                          |
| Indirect maternal deaths                                         | --                          | --                 | --                | --                       | --                          | --                          |
| Late maternal deaths                                             | --                          | --                 | --                | --                       | --                          | --                          |
| Maternal deaths aggravated by HIV/AIDS                           | --                          | --                 | --                | --                       | --                          | --                          |
| Other maternal disorders                                         | --                          | --                 | --                | --                       | --                          | --                          |
| Neonatal disorders                                               | 311<br>(210 - 459)          | 311<br>(210 - 459) | --                | --                       | --                          | --                          |
| Neonatal preterm birth complications                             | 184<br>(111 - 287)          | 184<br>(111 - 287) | --                | --                       | --                          | --                          |
| Neonatal encephalopathy due to birth asphyxia and trauma         | 42<br>(23 - 71)             | 42<br>(23 - 71)    | --                | --                       | --                          | --                          |
| Neonatal sepsis and other neonatal infections                    | 34<br>(14 - 69)             | 34<br>(14 - 69)    | --                | --                       | --                          | --                          |
| Hemolytic disease and other neonatal jaundice                    | 1<br>(0 - 2)                | 1<br>(0 - 2)       | --                | --                       | --                          | --                          |
| Other neonatal disorders                                         | 50<br>(26 - 83)             | 50<br>(26 - 83)    | --                | --                       | --                          | --                          |
| Nutritional deficiencies                                         | 361<br>(156 - 494)          | 3<br>(2 - 6)       | 1<br>(0 - 2)      | 21<br>(10 - 29)          | 64<br>(32 - 89)             | 271<br>(108 - 396)          |
| Protein-energy malnutrition                                      | 257<br>(88 - 375)           | 3<br>(2 - 6)       | 1<br>(0 - 1)      | 13<br>(4 - 19)           | 43<br>(17 - 63)             | 198<br>(60 - 305)           |
| Iodine deficiency                                                | 0<br>(0 - 1)                | 0<br>(0 - 0)       | 0<br>(0 - 0)      | 0<br>(0 - 0)             | 0<br>(0 - 1)                | 0<br>(0 - 1)                |
| Iron-deficiency anemia                                           | 91<br>(34 - 156)            | 0<br>(0 - 0)       | 0<br>(0 - 0)      | 7<br>(3 - 12)            | 19<br>(8 - 35)              | 65<br>(23 - 118)            |
| Other nutritional deficiencies                                   | 11<br>(4 - 22)              | 0<br>(0 - 0)       | 0<br>(0 - 0)      | 1<br>(0 - 2)             | 2<br>(1 - 4)                | 8<br>(2 - 17)               |
| Other communicable, maternal, neonatal, and nutritional diseases | 76<br>(54 - 99)             | 8<br>(4 - 15)      | 2<br>(1 - 3)      | 15<br>(10 - 20)          | 28<br>(17 - 38)             | 22<br>(16 - 36)             |
| Sexually transmitted diseases excluding HIV                      | 9<br>(4 - 17)               | 5<br>(1 - 11)      | 0<br>(0 - 1)      | 1<br>(0 - 1)             | 2<br>(1 - 4)                | 1<br>(1 - 4)                |
| Syphilis                                                         | 8<br>(3 - 15)               | 5<br>(1 - 11)      | 0<br>(0 - 1)      | 0<br>(0 - 1)             | 1<br>(1 - 3)                | 1<br>(0 - 3)                |
| Chlamydial infection                                             | --                          | --                 | --                | --                       | --                          | --                          |
| Gonococcal infection                                             | 1<br>(0 - 1)                | --                 | 0<br>(0 - 0)      | 0<br>(0 - 0)             | 0<br>(0 - 1)                | 0<br>(0 - 0)                |
| Other sexually transmitted diseases                              | 0<br>(0 - 1)                | --                 | 0<br>(0 - 0)      | 0<br>(0 - 0)             | 0<br>(0 - 0)                | 0<br>(0 - 0)                |
| Hepatitis                                                        | 8<br>(6 - 9)                | 0<br>(0 - 1)       | 0<br>(0 - 1)      | 2<br>(2 - 3)             | 3<br>(2 - 4)                | 2<br>(1 - 3)                |
| Acute hepatitis A                                                | 3<br>(2 - 5)                | 0<br>(0 - 1)       | 0<br>(0 - 0)      | 1<br>(1 - 2)             | 1<br>(0 - 2)                | 0<br>(0 - 1)                |
| Acute hepatitis B                                                | 4<br>(2 - 6)                | 0<br>(0 - 0)       | 0<br>(0 - 0)      | 1<br>(0 - 1)             | 2<br>(1 - 3)                | 1<br>(1 - 2)                |
| Acute hepatitis C                                                | 0<br>(0 - 1)                | --                 | 0<br>(0 - 0)      | 0<br>(0 - 0)             | 0<br>(0 - 0)                | 0<br>(0 - 0)                |
| Other infectious diseases                                        | 59<br>(38 - 80)             | 3<br>(1 - 5)       | 1<br>(1 - 2)      | 13<br>(8 - 17)           | 24<br>(12 - 33)             | 19<br>(13 - 32)             |
| Non-communicable diseases                                        | 45,626<br>(42,197 - 49,321) | 504<br>(328 - 753) | 108<br>(83 - 140) | 3,448<br>(3,001 - 3,901) | 14,097<br>(12,739 - 15,636) | 27,469<br>(25,653 - 29,211) |
| Neoplasms                                                        | 13,898<br>(12,590 - 15,344) | 25<br>(14 - 41)    | 56<br>(41 - 75)   | 992<br>(848 - 1,141)     | 5,052<br>(4,518 - 5,623)    | 7,773<br>(6,931 - 8,695)    |
| Esophageal cancer                                                | 650<br>(513 - 920)          | --                 | --                | 20<br>(14 - 28)          | 225<br>(165 - 336)          | 405<br>(306 - 581)          |
| Stomach cancer                                                   | 2,691<br>(2,299 - 3,137)    | --                 | --                | 153<br>(120 - 192)       | 1,058<br>(877 - 1,258)      | 1,480<br>(1,203 - 1,821)    |
| Liver cancer                                                     | 576<br>(480 - 695)          | --                 | 1<br>(1 - 2)      | 31<br>(23 - 41)          | 250<br>(197 - 314)          | 295<br>(224 - 384)          |
| Liver cancer due to hepatitis B                                  | 60<br>(11 - 117)            | --                 | 0<br>(0 - 1)      | 7<br>(3 - 13)            | 30<br>(3 - 67)              | 22<br>(4 - 43)              |
| Liver cancer due to hepatitis C                                  | 299<br>(194 - 406)          | --                 | 0<br>(0 - 0)      | 13<br>(5 - 21)           | 128<br>(71 - 185)           | 158<br>(103 - 221)          |
| Liver cancer due to alcohol use                                  | 186<br>(116 - 272)          | --                 | --                | 7<br>(4 - 14)            | 76<br>(43 - 120)            | 103<br>(63 - 154)           |
| Liver cancer due to other causes                                 | 31<br>(16 - 47)             | --                 | 0<br>(0 - 1)      | 3<br>(2 - 5)             | 15<br>(7 - 24)              | 13<br>(6 - 21)              |
| Larynx cancer                                                    | 157<br>(112 - 203)          | --                 | --                | 8<br>(5 - 11)            | 67<br>(48 - 90)             | 83<br>(57 - 110)            |

Web Table 31- Chile deaths with 95% UI by age, sex, and cause in 2013

| Cause                                         | Males, All Ages             | Males, 0-4 Years | Males, 5-14 Years | Males, 15-49 Years   | Males, 50-69 Years       | Males, 70-80 Years        |
|-----------------------------------------------|-----------------------------|------------------|-------------------|----------------------|--------------------------|---------------------------|
| Tracheal, bronchus and lung cancer            | 1,943<br>(1,726 - 2,201)    | --               | --                | 85<br>(66 - 107)     | 910<br>(781 - 1,050)     | 948<br>(813 - 1,127)      |
| Breast cancer                                 | 17<br>(10 - 44)             | --               | --                | 2<br>(1 - 6)         | 5<br>(3 - 14)            | 9<br>(5 - 26)             |
| Cervical cancer                               | --                          | --               | --                | --                   | --                       | --                        |
| Uterine cancer                                | --                          | --               | --                | --                   | --                       | --                        |
| Prostate cancer                               | 2,164<br>(1,423 - 3,132)    | --               | --                | 7<br>(4 - 11)        | 350<br>(234 - 540)       | 1,807<br>(1,152 - 2,643)  |
| Colon and rectum cancer                       | 1,089<br>(937 - 1,249)      | --               | --                | 70<br>(57 - 86)      | 383<br>(322 - 453)       | 636<br>(521 - 764)        |
| Lip and oral cavity cancer                    | 110<br>(77 - 139)           | --               | --                | 11<br>(7 - 16)       | 52<br>(37 - 69)          | 46<br>(31 - 64)           |
| Nasopharynx cancer                            | 21<br>(17 - 27)             | --               | 0<br>(0 - 0)      | 5<br>(3 - 7)         | 11<br>(8 - 16)           | 5<br>(4 - 8)              |
| Other pharynx cancer                          | 67<br>(52 - 83)             | --               | --                | 6<br>(4 - 9)         | 39<br>(29 - 52)          | 21<br>(14 - 29)           |
| Gallbladder and biliary tract cancer          | 644<br>(463 - 846)          | --               | --                | 32<br>(21 - 47)      | 254<br>(172 - 354)       | 358<br>(246 - 504)        |
| Pancreatic cancer                             | 599<br>(514 - 692)          | --               | --                | 42<br>(32 - 53)      | 276<br>(229 - 331)       | 281<br>(227 - 343)        |
| Malignant skin melanoma                       | 110<br>(68 - 193)           | --               | --                | 21<br>(13 - 37)      | 46<br>(27 - 82)          | 43<br>(26 - 74)           |
| Non-melanoma skin cancer                      | 119<br>(76 - 162)           | --               | --                | 4<br>(3 - 6)         | 22<br>(14 - 31)          | 93<br>(58 - 129)          |
| Ovarian cancer                                | --                          | --               | --                | --                   | --                       | --                        |
| Testicular cancer                             | 73<br>(23 - 130)            | --               | --                | 58<br>(18 - 107)     | 9<br>(3 - 16)            | 7<br>(2 - 13)             |
| Kidney cancer                                 | 507<br>(422 - 602)          | 0<br>(0 - 1)     | 1<br>(0 - 1)      | 39<br>(29 - 51)      | 241<br>(193 - 301)       | 226<br>(172 - 292)        |
| Bladder cancer                                | 315<br>(253 - 380)          | --               | --                | 9<br>(6 - 12)        | 88<br>(66 - 112)         | 218<br>(164 - 277)        |
| Brain and nervous system cancer               | 190<br>(61 - 253)           | 2<br>(1 - 5)     | 6<br>(2 - 9)      | 46<br>(16 - 65)      | 90<br>(28 - 130)         | 45<br>(14 - 67)           |
| Thyroid cancer                                | 37<br>(29 - 46)             | --               | 0<br>(0 - 0)      | 4<br>(3 - 5)         | 16<br>(11 - 21)          | 17<br>(12 - 23)           |
| Mesothelioma                                  | 40<br>(32 - 50)             | --               | --                | 6<br>(4 - 8)         | 20<br>(15 - 26)          | 14<br>(9 - 22)            |
| Hodgkin lymphoma                              | 25<br>(9 - 38)              | 0<br>(0 - 0)     | 1<br>(0 - 1)      | 8<br>(3 - 14)        | 9<br>(3 - 14)            | 8<br>(2 - 14)             |
| Non-Hodgkin lymphoma                          | 420<br>(298 - 523)          | 2<br>(1 - 4)     | 5<br>(3 - 8)      | 73<br>(54 - 97)      | 154<br>(110 - 204)       | 186<br>(118 - 251)        |
| Multiple myeloma                              | 228<br>(140 - 293)          | --               | --                | 15<br>(9 - 21)       | 107<br>(64 - 145)        | 105<br>(60 - 146)         |
| Leukemia                                      | 386<br>(336 - 449)          | 9<br>(4 - 17)    | 25<br>(17 - 35)   | 92<br>(75 - 113)     | 110<br>(88 - 132)        | 150<br>(121 - 185)        |
| Other neoplasms                               | 721<br>(568 - 887)          | 11<br>(5 - 19)   | 18<br>(11 - 27)   | 147<br>(112 - 199)   | 261<br>(194 - 350)       | 284<br>(201 - 355)        |
| Cardiovascular diseases                       | 14,581<br>(13,349 - 15,988) | 5<br>(3 - 9)     | 7<br>(5 - 9)      | 940<br>(798 - 1,087) | 4,405<br>(3,892 - 4,957) | 9,223<br>(8,351 - 10,126) |
| Rheumatic heart disease                       | 86<br>(59 - 127)            | 0<br>(0 - 0)     | 1<br>(0 - 1)      | 22<br>(15 - 36)      | 35<br>(23 - 55)          | 28<br>(16 - 43)           |
| Ischemic heart disease                        | 6,368<br>(5,409 - 7,622)    | 0<br>(0 - 0)     | 1<br>(1 - 1)      | 457<br>(347 - 546)   | 2,166<br>(1,766 - 2,536) | 3,744<br>(3,110 - 4,860)  |
| Cerebrovascular disease                       | 5,455<br>(4,444 - 6,416)    | 1<br>(1 - 2)     | 3<br>(2 - 4)      | 256<br>(200 - 318)   | 1,477<br>(1,182 - 1,780) | 3,718<br>(2,919 - 4,471)  |
| Ischemic stroke                               | 2,891<br>(2,247 - 3,758)    | 0<br>(0 - 1)     | 1<br>(0 - 1)      | 43<br>(28 - 73)      | 485<br>(343 - 776)       | 2,362<br>(1,815 - 3,037)  |
| Hemorrhagic stroke                            | 2,564<br>(1,629 - 3,281)    | 1<br>(0 - 1)     | 2<br>(2 - 3)      | 213<br>(161 - 270)   | 992<br>(653 - 1,269)     | 1,356<br>(737 - 1,838)    |
| Hypertensive heart disease                    | 845<br>(519 - 1,189)        | 0<br>(0 - 0)     | 0<br>(0 - 0)      | 25<br>(13 - 39)      | 173<br>(104 - 253)       | 647<br>(377 - 961)        |
| Cardiomyopathy and myocarditis                | 533<br>(378 - 679)          | 3<br>(2 - 5)     | 2<br>(1 - 3)      | 93<br>(65 - 120)     | 202<br>(145 - 264)       | 234<br>(150 - 319)        |
| Atrial fibrillation and flutter               | 392<br>(273 - 547)          | --               | --                | 5<br>(4 - 8)         | 61<br>(44 - 82)          | 326<br>(211 - 479)        |
| Aortic aneurysm                               | 308<br>(230 - 368)          | --               | --                | 28<br>(21 - 36)      | 118<br>(89 - 147)        | 163<br>(116 - 201)        |
| Peripheral vascular disease                   | 135<br>(95 - 182)           | --               | --                | 1<br>(0 - 1)         | 21<br>(15 - 29)          | 113<br>(75 - 162)         |
| Endocarditis                                  | 65<br>(39 - 93)             | 1<br>(0 - 1)     | 0<br>(0 - 0)      | 13<br>(8 - 20)       | 27<br>(16 - 41)          | 23<br>(13 - 36)           |
| Other cardiovascular and circulatory diseases | 395<br>(277 - 491)          | 0<br>(0 - 1)     | 1<br>(0 - 1)      | 42<br>(30 - 55)      | 124<br>(90 - 156)        | 228<br>(143 - 297)        |
| Chronic respiratory diseases                  | 3,395<br>(2,443 - 3,877)    | 9<br>(5 - 15)    | 2<br>(1 - 3)      | 79<br>(61 - 97)      | 655<br>(507 - 786)       | 2,651<br>(1,844 - 3,080)  |
| Chronic obstructive pulmonary disease         | 2,446<br>(1,715 - 2,841)    | 7<br>(4 - 12)    | 1<br>(1 - 2)      | 42<br>(31 - 52)      | 408<br>(311 - 502)       | 1,988<br>(1,365 - 2,340)  |

Web Table 31- Chile deaths with 95% UI by age, sex, and cause in 2013

| Cause                                               | Males, All Ages          | Males, 0-4 Years | Males, 5-14 Years | Males, 15-49 Years | Males, 50-69 Years       | Males, 70-80 Years       |
|-----------------------------------------------------|--------------------------|------------------|-------------------|--------------------|--------------------------|--------------------------|
| Pneumoconiosis                                      | 160<br>(101 - 240)       | 0<br>(0 - 0)     | 0<br>(0 - 0)      | 6<br>(4 - 9)       | 39<br>(25 - 61)          | 115<br>(68 - 179)        |
| Silicosis                                           | 128<br>(80 - 190)        | 0<br>(0 - 0)     | 0<br>(0 - 0)      | 3<br>(2 - 4)       | 31<br>(19 - 49)          | 94<br>(54 - 145)         |
| Asbestosis                                          | 5<br>(3 - 8)             | 0<br>(0 - 0)     | 0<br>(0 - 0)      | 0<br>(0 - 1)       | 1<br>(1 - 2)             | 3<br>(2 - 6)             |
| Coal workers pneumoconiosis                         | 4<br>(3 - 6)             | 0<br>(0 - 0)     | 0<br>(0 - 0)      | 1<br>(1 - 1)       | 3<br>(2 - 5)             | 0<br>(0 - 1)             |
| Other pneumoconiosis                                | 24<br>(15 - 38)          | 0<br>(0 - 0)     | 0<br>(0 - 0)      | 2<br>(1 - 3)       | 5<br>(3 - 8)             | 17<br>(9 - 28)           |
| Asthma                                              | 103<br>(70 - 131)        | 0<br>(0 - 0)     | 0<br>(0 - 0)      | 10<br>(8 - 14)     | 25<br>(18 - 34)          | 67<br>(43 - 90)          |
| Interstitial lung disease and pulmonary sarcoidosis | 661<br>(406 - 896)       | 1<br>(0 - 1)     | 0<br>(0 - 0)      | 17<br>(11 - 24)    | 178<br>(114 - 242)       | 466<br>(262 - 664)       |
| Other chronic respiratory diseases                  | 25<br>(16 - 34)          | 1<br>(1 - 2)     | 0<br>(0 - 1)      | 4<br>(3 - 5)       | 5<br>(3 - 7)             | 15<br>(9 - 23)           |
| Cirrhosis                                           | 3,329<br>(2,976 - 3,759) | 0<br>(0 - 1)     | 1<br>(1 - 1)      | 617<br>(516 - 735) | 1,832<br>(1,593 - 2,131) | 879<br>(757 - 1,011)     |
| Cirrhosis due to hepatitis B                        | 386<br>(147 - 635)       | 0<br>(0 - 0)     | 0<br>(0 - 0)      | 72<br>(24 - 125)   | 213<br>(79 - 356)        | 101<br>(37 - 172)        |
| Cirrhosis due to hepatitis C                        | 1,255<br>(634 - 1,818)   | 0<br>(0 - 0)     | 0<br>(0 - 0)      | 238<br>(96 - 360)  | 695<br>(294 - 1,029)     | 322<br>(189 - 477)       |
| Cirrhosis due to alcohol use                        | 1,429<br>(986 - 2,065)   | -                | -                 | 226<br>(121 - 357) | 787<br>(516 - 1,176)     | 416<br>(285 - 573)       |
| Cirrhosis due to other causes                       | 258<br>(110 - 528)       | 0<br>(0 - 1)     | 0<br>(0 - 1)      | 80<br>(36 - 164)   | 136<br>(50 - 296)        | 40<br>(14 - 71)          |
| Digestive diseases                                  | 1,293<br>(1,119 - 1,568) | 2<br>(1 - 3)     | 3<br>(2 - 4)      | 123<br>(102 - 156) | 362<br>(302 - 456)       | 804<br>(677 - 989)       |
| Peptic ulcer disease                                | 183<br>(129 - 285)       | 0<br>(0 - 0)     | 0<br>(0 - 0)      | 17<br>(12 - 26)    | 63<br>(42 - 96)          | 103<br>(66 - 169)        |
| Gastritis and duodenitis                            | 30<br>(17 - 54)          | 0<br>(0 - 0)     | 0<br>(0 - 0)      | 5<br>(3 - 9)       | 8<br>(5 - 15)            | 17<br>(9 - 32)           |
| Appendicitis                                        | 45<br>(25 - 78)          | 0<br>(0 - 1)     | 1<br>(0 - 1)      | 10<br>(6 - 16)     | 14<br>(8 - 25)           | 20<br>(10 - 37)          |
| Paralytic ileus and intestinal obstruction          | 132<br>(16 - 240)        | 1<br>(0 - 1)     | 1<br>(0 - 2)      | 9<br>(2 - 15)      | 27<br>(3 - 50)           | 95<br>(10 - 180)         |
| Inguinal, femoral, and abdominal hernia             | 71<br>(39 - 155)         | 0<br>(0 - 1)     | 0<br>(0 - 1)      | 4<br>(2 - 7)       | 16<br>(9 - 35)           | 51<br>(25 - 116)         |
| Inflammatory bowel disease                          | 27<br>(19 - 45)          | 0<br>(0 - 0)     | 0<br>(0 - 0)      | 5<br>(3 - 8)       | 7<br>(5 - 12)            | 14<br>(9 - 25)           |
| Vascular intestinal disorders                       | 242<br>(109 - 434)       | 0<br>(0 - 1)     | 0<br>(0 - 0)      | 9<br>(4 - 19)      | 59<br>(25 - 109)         | 174<br>(76 - 311)        |
| Gallbladder and biliary diseases                    | 236<br>(170 - 355)       | 0<br>(0 - 0)     | 0<br>(0 - 0)      | 12<br>(9 - 19)     | 54<br>(38 - 81)          | 170<br>(117 - 259)       |
| Pancreatitis                                        | 202<br>(135 - 292)       | 0<br>(0 - 0)     | 0<br>(0 - 0)      | 42<br>(30 - 58)    | 78<br>(52 - 114)         | 82<br>(51 - 125)         |
| Other digestive diseases                            | 125<br>(71 - 170)        | 0<br>(0 - 1)     | 0<br>(0 - 0)      | 10<br>(6 - 14)     | 36<br>(20 - 49)          | 78<br>(39 - 114)         |
| Neurological disorders                              | 3,806<br>(2,905 - 4,732) | 12<br>(7 - 20)   | 9<br>(6 - 13)     | 137<br>(110 - 167) | 348<br>(282 - 422)       | 3,299<br>(2,428 - 4,202) |
| Alzheimer disease and other dementias               | 3,150<br>(2,287 - 4,062) | -                | -                 | 0<br>(0 - 1)       | 175<br>(127 - 233)       | 2,974<br>(2,147 - 3,882) |
| Parkinson disease                                   | 314<br>(219 - 391)       | -                | -                 | 3<br>(2 - 3)       | 53<br>(39 - 69)          | 258<br>(176 - 333)       |
| Epilepsy                                            | 147<br>(109 - 183)       | 2<br>(1 - 4)     | 3<br>(2 - 5)      | 77<br>(56 - 99)    | 40<br>(29 - 53)          | 24<br>(16 - 33)          |
| Multiple sclerosis                                  | 19<br>(6 - 28)           | -                | -                 | 6<br>(2 - 10)      | 9<br>(3 - 14)            | 4<br>(1 - 6)             |
| Other neurological disorders                        | 177<br>(131 - 211)       | 9<br>(5 - 17)    | 6<br>(4 - 8)      | 52<br>(39 - 66)    | 71<br>(52 - 90)          | 39<br>(27 - 49)          |
| Mental and substance use disorders                  | 567<br>(287 - 687)       | 0<br>(0 - 0)     | 0<br>(0 - 0)      | 267<br>(119 - 340) | 222<br>(108 - 283)       | 78<br>(39 - 101)         |
| Schizophrenia                                       | 17<br>(8 - 25)           | -                | -                 | 5<br>(2 - 7)       | 8<br>(4 - 12)            | 5<br>(2 - 8)             |
| Alcohol use disorders                               | 411<br>(186 - 508)       | -                | -                 | 145<br>(59 - 195)  | 200<br>(94 - 261)        | 66<br>(29 - 89)          |
| Drug use disorders                                  | 138<br>(27 - 179)        | 0<br>(0 - 0)     | -                 | 117<br>(20 - 153)  | 14<br>(4 - 19)           | 7<br>(2 - 10)            |
| Opioid use disorders                                | 13<br>(2 - 17)           | 0<br>(0 - 0)     | -                 | 11<br>(2 - 15)     | 1<br>(0 - 2)             | 1<br>(0 - 1)             |
| Cocaine use disorders                               | 3<br>(1 - 4)             | 0<br>(0 - 0)     | -                 | 3<br>(0 - 4)       | 0<br>(0 - 0)             | 0<br>(0 - 0)             |
| Amphetamine use disorders                           | 2<br>(0 - 2)             | 0<br>(0 - 0)     | -                 | 2<br>(0 - 2)       | 0<br>(0 - 0)             | 0<br>(0 - 0)             |
| Other drug use disorders                            | 121<br>(23 - 156)        | 0<br>(0 - 0)     | -                 | 102<br>(17 - 134)  | 12<br>(4 - 17)           | 6<br>(2 - 9)             |
| Eating disorders                                    | 0<br>(0 - 1)             | -                | 0<br>(0 - 0)      | 0<br>(0 - 1)       | -                        | -                        |
| Anorexia nervosa                                    | 0<br>(0 - 1)             | -                | 0<br>(0 - 0)      | 0<br>(0 - 1)       | -                        | -                        |

Web Table 31- Chile deaths with 95% UI by age, sex, and cause in 2013

| Cause                                               | Males, All Ages          | Males, 0-4 Years   | Males, 5-14 Years | Males, 15-49 Years | Males, 50-69 Years     | Males, 70-80 Years       |
|-----------------------------------------------------|--------------------------|--------------------|-------------------|--------------------|------------------------|--------------------------|
| Diabetes, urogenital, blood, and endocrine diseases | 4,009<br>(3,484 - 4,554) | 21<br>(12 - 37)    | 10<br>(7 - 14)    | 219<br>(183 - 278) | 1,143<br>(973 - 1,337) | 2,616<br>(2,218 - 3,018) |
| Diabetes mellitus                                   | 1,527<br>(1,317 - 1,762) | 0<br>(0 - 1)       | 1<br>(0 - 1)      | 58<br>(47 - 73)    | 504<br>(421 - 602)     | 963<br>(799 - 1,147)     |
| Acute glomerulonephritis                            | 1<br>(1 - 2)             | 0<br>(0 - 0)       | 0<br>(0 - 0)      | 0<br>(0 - 1)       | 0<br>(0 - 0)           | 0<br>(0 - 0)             |
| Chronic kidney disease                              | 1,803<br>(1,490 - 2,213) | 3<br>(2 - 5)       | 2<br>(1 - 3)      | 96<br>(74 - 139)   | 489<br>(386 - 621)     | 1,214<br>(964 - 1,514)   |
| Chronic kidney disease due to diabetes mellitus     | 614<br>(426 - 1,007)     | 0<br>(0 - 0)       | 0<br>(0 - 0)      | 30<br>(18 - 51)    | 236<br>(163 - 343)     | 348<br>(225 - 608)       |
| Chronic kidney disease due to hypertension          | 399<br>(201 - 552)       | 0<br>(0 - 1)       | 0<br>(0 - 0)      | 17<br>(8 - 25)     | 75<br>(32 - 120)       | 307<br>(150 - 429)       |
| Chronic kidney disease due to glomerulonephritis    | 40<br>(26 - 60)          | 1<br>(0 - 1)       | 0<br>(0 - 1)      | 8<br>(6 - 13)      | 11<br>(7 - 19)         | 20<br>(12 - 31)          |
| Chronic kidney disease due to other causes          | 749<br>(444 - 1,054)     | 2<br>(1 - 4)       | 1<br>(1 - 3)      | 40<br>(24 - 78)    | 167<br>(81 - 253)      | 539<br>(310 - 798)       |
| Urinary diseases and male infertility               | 435<br>(223 - 564)       | 2<br>(1 - 3)       | 1<br>(0 - 1)      | 16<br>(9 - 21)     | 78<br>(41 - 100)       | 338<br>(166 - 458)       |
| Interstitial nephritis and urinary tract infections | 383<br>(190 - 506)       | 2<br>(1 - 3)       | 0<br>(0 - 1)      | 12<br>(7 - 16)     | 63<br>(32 - 85)        | 305<br>(146 - 419)       |
| Urolithiasis                                        | 8<br>(4 - 14)            | --                 | 0<br>(0 - 0)      | 1<br>(0 - 2)       | 3<br>(1 - 5)           | 4<br>(2 - 9)             |
| Other urinary diseases                              | 44<br>(23 - 85)          | 0<br>(0 - 0)       | 0<br>(0 - 0)      | 3<br>(1 - 5)       | 12<br>(5 - 20)         | 29<br>(13 - 62)          |
| Gynecological diseases                              | --                       | --                 | --                | --                 | --                     | --                       |
| Uterine fibroids                                    | --                       | --                 | --                | --                 | --                     | --                       |
| Polycystic ovarian syndrome                         | --                       | --                 | --                | --                 | --                     | --                       |
| Endometriosis                                       | --                       | --                 | --                | --                 | --                     | --                       |
| Genital prolapse                                    | --                       | --                 | --                | --                 | --                     | --                       |
| Other gynecological diseases                        | --                       | --                 | --                | --                 | --                     | --                       |
| Hemoglobinopathies and hemolytic anemias            | 36<br>(21 - 50)          | 1<br>(1 - 3)       | 2<br>(1 - 3)      | 9<br>(5 - 13)      | 8<br>(5 - 12)          | 16<br>(9 - 23)           |
| Thalassemias                                        | 2<br>(1 - 4)             | 0<br>(0 - 1)       | 0<br>(0 - 1)      | 2<br>(1 - 3)       | 0<br>(0 - 0)           | 0<br>(0 - 0)             |
| Sickle cell disorders                               | 3<br>(2 - 4)             | 0<br>(0 - 1)       | 1<br>(0 - 1)      | 1<br>(1 - 2)       | 0<br>(0 - 1)           | 0<br>(0 - 0)             |
| G6PD deficiency                                     | 1<br>(1 - 1)             | 0<br>(0 - 0)       | 0<br>(0 - 0)      | 0<br>(0 - 1)       | 0<br>(0 - 0)           | 0<br>(0 - 0)             |
| Other hemoglobinopathies and hemolytic anemias      | 30<br>(17 - 42)          | 1<br>(0 - 1)       | 1<br>(0 - 1)      | 6<br>(3 - 8)       | 8<br>(4 - 11)          | 15<br>(8 - 22)           |
| Endocrine, metabolic, blood, and immune disorders   | 207<br>(161 - 367)       | 14<br>(7 - 27)     | 5<br>(3 - 8)      | 39<br>(29 - 63)    | 63<br>(46 - 117)       | 86<br>(58 - 166)         |
| Musculoskeletal disorders                           | 90<br>(52 - 112)         | --                 | 1<br>(0 - 1)      | 15<br>(8 - 19)     | 32<br>(17 - 42)        | 42<br>(26 - 57)          |
| Rheumatoid arthritis                                | 23<br>(13 - 33)          | --                 | 0<br>(0 - 0)      | 2<br>(1 - 4)       | 9<br>(4 - 14)          | 12<br>(6 - 19)           |
| Other musculoskeletal disorders                     | 67<br>(37 - 86)          | --                 | 1<br>(0 - 1)      | 12<br>(6 - 16)     | 24<br>(12 - 32)        | 30<br>(18 - 43)          |
| Other non-communicable diseases                     | 659<br>(501 - 880)       | 430<br>(278 - 646) | 20<br>(13 - 28)   | 59<br>(46 - 75)    | 46<br>(35 - 56)        | 104<br>(63 - 139)        |
| Congenital anomalies                                | 477<br>(336 - 687)       | 369<br>(238 - 567) | 19<br>(13 - 27)   | 51<br>(40 - 68)    | 25<br>(19 - 32)        | 12<br>(9 - 17)           |
| Neural tube defects                                 | 23<br>(12 - 39)          | 20<br>(10 - 37)    | 1<br>(0 - 1)      | 1<br>(1 - 2)       | 0<br>(0 - 0)           | 0<br>(0 - 0)             |
| Congenital heart anomalies                          | 188<br>(130 - 270)       | 140<br>(85 - 220)  | 8<br>(5 - 13)     | 25<br>(19 - 34)    | 11<br>(8 - 15)         | 3<br>(2 - 5)             |
| Cleft lip and cleft palate                          | 0<br>(0 - 1)             | 0<br>(0 - 1)       | --                | --                 | --                     | --                       |
| Down syndrome                                       | 29<br>(15 - 44)          | 14<br>(5 - 25)     | 1<br>(0 - 2)      | 9<br>(4 - 13)      | 6<br>(3 - 9)           | 0<br>(0 - 0)             |
| Chromosomal unbalanced rearrangements               | 36<br>(18 - 59)          | 34<br>(17 - 57)    | 1<br>(0 - 1)      | 1<br>(1 - 1)       | 0<br>(0 - 0)           | 0<br>(0 - 0)             |
| Other congenital anomalies                          | 200<br>(130 - 306)       | 160<br>(94 - 263)  | 9<br>(5 - 14)     | 15<br>(10 - 22)    | 7<br>(4 - 11)          | 8<br>(6 - 12)            |
| Skin and subcutaneous diseases                      | 123<br>(71 - 160)        | 2<br>(1 - 4)       | 0<br>(0 - 1)      | 8<br>(4 - 10)      | 21<br>(13 - 28)        | 92<br>(51 - 126)         |
| Cellulitis                                          | 16<br>(9 - 27)           | 0<br>(0 - 1)       | 0<br>(0 - 0)      | 2<br>(1 - 3)       | 5<br>(3 - 9)           | 8<br>(4 - 16)            |
| Pyoderma                                            | 18<br>(12 - 27)          | 1<br>(0 - 2)       | 0<br>(0 - 0)      | 2<br>(1 - 2)       | 5<br>(3 - 7)           | 11<br>(6 - 19)           |
| Decubitus ulcer                                     | 80<br>(42 - 109)         | 0<br>(0 - 0)       | 0<br>(0 - 0)      | 2<br>(1 - 3)       | 8<br>(5 - 12)          | 69<br>(35 - 97)          |
| Other skin and subcutaneous diseases                | 8<br>(5 - 13)            | 1<br>(0 - 1)       | 0<br>(0 - 0)      | 2<br>(1 - 3)       | 3<br>(1 - 4)           | 3<br>(1 - 7)             |

Web Table 31- Chile deaths with 95% UI by age, sex, and cause in 2013

| Cause                                           | Males, All Ages          | Males, 0-4 Years | Males, 5-14 Years | Males, 15-49 Years       | Males, 50-69 Years       | Males, 70-80 Years     |
|-------------------------------------------------|--------------------------|------------------|-------------------|--------------------------|--------------------------|------------------------|
| Sudden infant death syndrome                    | 59<br>(19 - 111)         | 59<br>(19 - 111) | --                | --                       | --                       | --                     |
| Injuries                                        | 6,684<br>(5,964 - 7,602) | 79<br>(47 - 128) | 105<br>(82 - 136) | 3,634<br>(3,212 - 4,137) | 1,807<br>(1,581 - 2,108) | 1,059<br>(877 - 1,215) |
| Transport injuries                              | 2,112<br>(1,624 - 2,450) | 16<br>(9 - 27)   | 46<br>(33 - 64)   | 1,147<br>(901 - 1,350)   | 627<br>(447 - 754)       | 275<br>(212 - 334)     |
| Road injuries                                   | 1,969<br>(1,519 - 2,280) | 15<br>(8 - 26)   | 44<br>(31 - 60)   | 1,066<br>(837 - 1,256)   | 584<br>(413 - 702)       | 260<br>(197 - 313)     |
| Pedestrian road injuries                        | 909<br>(664 - 1,135)     | 8<br>(4 - 15)    | 23<br>(15 - 32)   | 409<br>(285 - 534)       | 296<br>(201 - 386)       | 173<br>(126 - 219)     |
| Cyclist road injuries                           | 121<br>(79 - 171)        | 1<br>(1 - 2)     | 6<br>(3 - 9)      | 57<br>(38 - 78)          | 41<br>(25 - 63)          | 16<br>(10 - 24)        |
| Motorcyclist road injuries                      | 146<br>(94 - 207)        | 0<br>(0 - 1)     | 1<br>(1 - 2)      | 117<br>(73 - 166)        | 20<br>(12 - 31)          | 8<br>(5 - 13)          |
| Motor vehicle road injuries                     | 767<br>(512 - 980)       | 5<br>(3 - 9)     | 14<br>(8 - 21)    | 472<br>(319 - 601)       | 217<br>(140 - 299)       | 58<br>(35 - 85)        |
| Other road injuries                             | 26<br>(17 - 45)          | 0<br>(0 - 0)     | 1<br>(0 - 1)      | 12<br>(7 - 19)           | 9<br>(5 - 16)            | 5<br>(2 - 9)           |
| Other transport injuries                        | 143<br>(96 - 175)        | 1<br>(0 - 2)     | 2<br>(1 - 4)      | 82<br>(55 - 104)         | 43<br>(24 - 58)          | 15<br>(10 - 22)        |
| Unintentional injuries                          | 1,963<br>(1,635 - 2,231) | 55<br>(32 - 91)  | 36<br>(25 - 50)   | 739<br>(619 - 895)       | 568<br>(457 - 666)       | 565<br>(409 - 684)     |
| Falls                                           | 596<br>(310 - 750)       | 2<br>(1 - 4)     | 4<br>(2 - 6)      | 116<br>(69 - 146)        | 182<br>(96 - 234)        | 292<br>(137 - 394)     |
| Drowning                                        | 442<br>(312 - 697)       | 16<br>(7 - 34)   | 17<br>(9 - 28)    | 259<br>(189 - 416)       | 113<br>(74 - 178)        | 36<br>(21 - 51)        |
| Fire, heat, and hot substances                  | 253<br>(178 - 332)       | 13<br>(6 - 24)   | 5<br>(3 - 9)      | 73<br>(49 - 96)          | 75<br>(50 - 106)         | 86<br>(61 - 120)       |
| Poisonings                                      | 38<br>(19 - 48)          | 1<br>(0 - 1)     | 1<br>(0 - 1)      | 21<br>(10 - 27)          | 10<br>(4 - 13)           | 7<br>(3 - 9)           |
| Exposure to mechanical forces                   | 203<br>(168 - 273)       | 2<br>(1 - 4)     | 4<br>(3 - 6)      | 117<br>(93 - 157)        | 63<br>(50 - 82)          | 17<br>(13 - 24)        |
| Unintentional firearm injuries                  | 55<br>(27 - 70)          | 0<br>(0 - 0)     | 1<br>(1 - 2)      | 37<br>(18 - 51)          | 11<br>(6 - 16)           | 6<br>(3 - 8)           |
| Unintentional suffocation                       | 18<br>(13 - 44)          | 0<br>(0 - 1)     | 0<br>(0 - 1)      | 7<br>(5 - 17)            | 6<br>(4 - 16)            | 4<br>(2 - 10)          |
| Other exposure to mechanical forces             | 130<br>(105 - 195)       | 1<br>(1 - 3)     | 3<br>(2 - 4)      | 73<br>(56 - 120)         | 46<br>(36 - 62)          | 7<br>(5 - 10)          |
| Adverse effects of medical treatment            | 111<br>(77 - 199)        | 3<br>(2 - 8)     | 1<br>(0 - 1)      | 19<br>(13 - 36)          | 32<br>(21 - 60)          | 55<br>(36 - 98)        |
| Animal contact                                  | 9<br>(5 - 11)            | 0<br>(0 - 1)     | 0<br>(0 - 1)      | 3<br>(2 - 4)             | 3<br>(1 - 4)             | 2<br>(1 - 4)           |
| Venomous animal contact                         | 3<br>(2 - 4)             | 0<br>(0 - 0)     | 0<br>(0 - 0)      | 1<br>(1 - 2)             | 1<br>(1 - 2)             | 1<br>(0 - 1)           |
| Non-venomous animal contact                     | 5<br>(3 - 7)             | 0<br>(0 - 0)     | 0<br>(0 - 0)      | 2<br>(1 - 2)             | 2<br>(1 - 3)             | 2<br>(1 - 3)           |
| Foreign body                                    | 181<br>(102 - 282)       | 15<br>(7 - 27)   | 2<br>(1 - 2)      | 52<br>(32 - 85)          | 55<br>(30 - 89)          | 58<br>(30 - 92)        |
| Pulmonary aspiration and foreign body in airway | 180<br>(100 - 281)       | 14<br>(7 - 27)   | 1<br>(1 - 2)      | 52<br>(31 - 84)          | 54<br>(30 - 88)          | 58<br>(30 - 92)        |
| Foreign body in other body part                 | 1<br>(1 - 2)             | 0<br>(0 - 0)     | 0<br>(0 - 0)      | 1<br>(0 - 1)             | 1<br>(0 - 1)             | 0<br>(0 - 0)           |
| Other unintentional injuries                    | 130<br>(96 - 172)        | 3<br>(2 - 7)     | 2<br>(1 - 5)      | 78<br>(52 - 112)         | 35<br>(19 - 58)          | 11<br>(6 - 17)         |
| Self-harm and interpersonal violence            | 2,609<br>(2,207 - 3,641) | 8<br>(3 - 23)    | 23<br>(15 - 36)   | 1,749<br>(1,482 - 2,232) | 612<br>(477 - 999)       | 218<br>(164 - 413)     |
| Self-harm                                       | 1,858<br>(1,564 - 2,612) | --               | 15<br>(9 - 23)    | 1,156<br>(960 - 1,439)   | 493<br>(383 - 820)       | 194<br>(142 - 382)     |
| Interpersonal violence                          | 751<br>(562 - 1,262)     | 8<br>(3 - 23)    | 8<br>(4 - 17)     | 593<br>(436 - 950)       | 119<br>(69 - 240)        | 24<br>(13 - 46)        |
| Assault by firearm                              | 246<br>(124 - 437)       | 1<br>(0 - 4)     | 4<br>(2 - 9)      | 200<br>(97 - 348)        | 36<br>(15 - 82)          | 5<br>(2 - 10)          |
| Assault by sharp object                         | 434<br>(284 - 791)       | 2<br>(0 - 6)     | 2<br>(1 - 5)      | 362<br>(236 - 653)       | 60<br>(31 - 127)         | 9<br>(4 - 18)          |
| Assault by other means                          | 71<br>(45 - 133)         | 5<br>(2 - 13)    | 2<br>(1 - 5)      | 31<br>(19 - 58)          | 22<br>(12 - 46)          | 10<br>(5 - 21)         |

Web Table 31- Chile deaths with 95% UI by age, sex, and cause in 2013

| Cause                                                             | Females, All Ages           | Females, 0-4 Years   | Females, 5-14 Years | Females, 15-49 Years     | Females, 50-69 Years       | Females, 70-80 Years        |
|-------------------------------------------------------------------|-----------------------------|----------------------|---------------------|--------------------------|----------------------------|-----------------------------|
| All causes                                                        | 52,251<br>(48,904 - 56,015) | 817<br>(559 - 1,161) | 165<br>(136 - 202)  | 3,213<br>(2,839 - 3,638) | 10,474<br>(9,477 - 11,619) | 37,582<br>(35,716 - 39,678) |
| Communicable, maternal, neonatal, and nutritional diseases        | 4,183<br>(3,340 - 5,580)    | 332<br>(223 - 480)   | 20<br>(15 - 27)     | 216<br>(191 - 251)       | 373<br>(316 - 479)         | 3,242<br>(2,424 - 4,564)    |
| HIV/AIDS and tuberculosis                                         | 247<br>(163 - 314)          | 0<br>(0 - 1)         | 1<br>(1 - 1)        | 49<br>(37 - 67)          | 59<br>(42 - 77)            | 138<br>(68 - 196)           |
| Tuberculosis                                                      | 214<br>(125 - 279)          | 0<br>(0 - 1)         | 1<br>(0 - 1)        | 23<br>(17 - 30)          | 52<br>(35 - 68)            | 138<br>(67 - 195)           |
| HIV/AIDS                                                          | 34<br>(20 - 57)             | 0<br>(0 - 0)         | 0<br>(0 - 0)        | 26<br>(15 - 44)          | 7<br>(3 - 15)              | 1<br>(0 - 2)                |
| HIV/AIDS resulting in mycobacterial infection                     | 2<br>(1 - 3)                | 0<br>(0 - 0)         | 0<br>(0 - 0)        | 1<br>(1 - 2)             | 0<br>(0 - 1)               | 0<br>(0 - 0)                |
| HIV/AIDS resulting in other diseases                              | 32<br>(19 - 55)             | 0<br>(0 - 0)         | 0<br>(0 - 0)        | 24<br>(14 - 42)          | 7<br>(3 - 14)              | 1<br>(0 - 2)                |
| Diarrhea, lower respiratory, and other common infectious diseases | 3,091<br>(2,266 - 4,593)    | 81<br>(48 - 127)     | 15<br>(11 - 21)     | 88<br>(72 - 116)         | 239<br>(189 - 338)         | 2,669<br>(1,852 - 4,079)    |
| Diarrheal diseases                                                | 171<br>(112 - 270)          | 6<br>(3 - 11)        | 1<br>(0 - 1)        | 5<br>(4 - 7)             | 18<br>(12 - 26)            | 140<br>(83 - 238)           |
| Intestinal infectious diseases                                    | 14<br>(5 - 29)              | 3<br>(1 - 6)         | 2<br>(1 - 5)        | 6<br>(2 - 13)            | 2<br>(0 - 4)               | 1<br>(0 - 3)                |
| Typhoid fever                                                     | 9<br>(3 - 21)               | 2<br>(0 - 4)         | 2<br>(1 - 4)        | 4<br>(1 - 10)            | 1<br>(0 - 2)               | 1<br>(0 - 1)                |
| Paratyphoid fever                                                 | 3<br>(1 - 6)                | 1<br>(0 - 2)         | 1<br>(0 - 1)        | 1<br>(0 - 3)             | 0<br>(0 - 1)               | 0<br>(0 - 0)                |
| Other intestinal infectious diseases                              | 2<br>(0 - 5)                | 0<br>(0 - 3)         | 0<br>(0 - 1)        | 1<br>(0 - 3)             | 0<br>(0 - 2)               | 0<br>(0 - 2)                |
| Lower respiratory infections                                      | 2,805<br>(1,999 - 4,259)    | 52<br>(29 - 87)      | 6<br>(4 - 10)       | 55<br>(43 - 80)          | 195<br>(145 - 289)         | 2,497<br>(1,705 - 4,873)    |
| Upper respiratory infections                                      | 2<br>(0 - 5)                | 0<br>(0 - 0)         | 0<br>(0 - 0)        | 0<br>(0 - 0)             | 0<br>(0 - 1)               | 1<br>(0 - 4)                |
| Otitis media                                                      | 2<br>(1 - 2)                | 0<br>(0 - 0)         | 0<br>(0 - 0)        | 1<br>(0 - 1)             | 0<br>(0 - 1)               | 0<br>(0 - 1)                |
| Meningitis                                                        | 62<br>(50 - 74)             | 11<br>(7 - 18)       | 3<br>(2 - 4)        | 12<br>(10 - 15)          | 17<br>(13 - 21)            | 19<br>(14 - 25)             |
| Pneumococcal meningitis                                           | 13<br>(10 - 18)             | 2<br>(1 - 3)         | 1<br>(0 - 1)        | 2<br>(2 - 3)             | 4<br>(2 - 6)               | 5<br>(3 - 7)                |
| H influenzae type B meningitis                                    | 6<br>(5 - 9)                | 3<br>(2 - 5)         | 0<br>(0 - 1)        | 1<br>(0 - 1)             | 1<br>(1 - 2)               | 1<br>(1 - 2)                |
| Meningococcal meningitis                                          | 23<br>(17 - 29)             | 4<br>(2 - 7)         | 1<br>(1 - 2)        | 5<br>(3 - 6)             | 6<br>(4 - 8)               | 7<br>(5 - 10)               |
| Other meningitis                                                  | 20<br>(15 - 25)             | 2<br>(1 - 5)         | 1<br>(0 - 1)        | 4<br>(3 - 6)             | 6<br>(4 - 9)               | 6<br>(4 - 10)               |
| Encephalitis                                                      | 24<br>(16 - 42)             | 3<br>(1 - 7)         | 3<br>(1 - 6)        | 7<br>(5 - 14)            | 6<br>(4 - 13)              | 5<br>(3 - 10)               |
| Diphtheria                                                        | 0<br>(0 - 1)                | 0<br>(0 - 0)         | 0<br>(0 - 0)        | 0<br>(0 - 0)             | 0<br>(0 - 0)               | --<br>(0 - 0)               |
| Whooping cough                                                    | 5<br>(1 - 24)               | 4<br>(0 - 24)        | 0<br>(0 - 0)        | 0<br>(0 - 1)             | 0<br>(0 - 0)               | --<br>(0 - 0)               |
| Tetanus                                                           | 1<br>(1 - 2)                | 0<br>(0 - 0)         | 0<br>(0 - 0)        | 0<br>(0 - 1)             | 0<br>(0 - 1)               | 0<br>(0 - 1)                |
| Measles                                                           | 0<br>(0 - 0)                | 0<br>(0 - 0)         | 0<br>(0 - 0)        | 0<br>(0 - 0)             | 0<br>(0 - 0)               | --<br>(0 - 0)               |
| Varicella and herpes zoster                                       | 6<br>(1 - 24)               | 1<br>(0 - 2)         | 0<br>(0 - 1)        | 1<br>(0 - 2)             | 1<br>(0 - 2)               | 4<br>(0 - 22)               |
| Neglected tropical diseases and malaria                           | 49<br>(18 - 164)            | 0<br>(0 - 1)         | 1<br>(0 - 1)        | 5<br>(3 - 13)            | 13<br>(5 - 47)             | 30<br>(8 - 95)              |
| Chagas disease                                                    | 40<br>(7 - 154)             | 0<br>(0 - 0)         | 0<br>(0 - 0)        | 2<br>(1 - 10)            | 11<br>(2 - 44)             | 27<br>(5 - 93)              |
| Leishmaniasis                                                     | 0<br>(0 - 0)                | 0<br>(0 - 0)         | 0<br>(0 - 0)        | 0<br>(0 - 0)             | 0<br>(0 - 0)               | 0<br>(0 - 0)                |
| Visceral leishmaniasis                                            | 0<br>(0 - 0)                | 0<br>(0 - 0)         | 0<br>(0 - 0)        | 0<br>(0 - 0)             | 0<br>(0 - 0)               | 0<br>(0 - 0)                |
| Cysticercosis                                                     | 0<br>(0 - 0)                | 0<br>(0 - 0)         | 0<br>(0 - 0)        | 0<br>(0 - 0)             | 0<br>(0 - 0)               | 0<br>(0 - 0)                |
| Cystic echinococcosis                                             | 4<br>(4 - 5)                | 0<br>(0 - 0)         | 0<br>(0 - 0)        | 1<br>(1 - 1)             | 1<br>(1 - 2)               | 2<br>(1 - 2)                |
| Dengue                                                            | 1<br>(1 - 3)                | 0<br>(0 - 0)         | 0<br>(0 - 0)        | 1<br>(0 - 1)             | 0<br>(0 - 1)               | 0<br>(0 - 0)                |
| Rabies                                                            | 1<br>(1 - 1)                | 0<br>(0 - 0)         | 0<br>(0 - 0)        | 0<br>(0 - 1)             | 0<br>(0 - 0)               | 0<br>(0 - 0)                |
| Intestinal nematode infections                                    | 1<br>(0 - 3)                | 0<br>(0 - 1)         | 0<br>(0 - 0)        | 0<br>(0 - 1)             | 0<br>(0 - 1)               | 0<br>(0 - 2)                |
| Ascariasis                                                        | 1<br>(0 - 3)                | 0<br>(0 - 1)         | 0<br>(0 - 0)        | 0<br>(0 - 1)             | 0<br>(0 - 1)               | 0<br>(0 - 2)                |
| Other neglected tropical diseases                                 | 2<br>(1 - 5)                | 0<br>(0 - 0)         | 0<br>(0 - 0)        | 1<br>(0 - 1)             | 1<br>(0 - 2)               | 1<br>(0 - 2)                |
| Maternal disorders                                                | 47<br>(37 - 58)             | --                   | 0                   | 47<br>(37 - 58)          | --                         | --                          |
| Maternal hemorrhage                                               | 4<br>(2 - 5)                | --                   | 0<br>(0 - 0)        | 4<br>(2 - 5)             | --                         | --                          |

Web Table 31- Chile deaths with 95% UI by age, sex, and cause in 2013

| Cause                                                            | Females, All Ages           | Females, 0-4 Years | Females, 5-14 Years | Females, 15-49 Years     | Females, 50-69 Years      | Females, 70-80 Years        |
|------------------------------------------------------------------|-----------------------------|--------------------|---------------------|--------------------------|---------------------------|-----------------------------|
| Maternal sepsis and other maternal infections                    | 7<br>(5 - 9)                | --                 | 0<br>(0 - 0)        | 7<br>(5 - 9)             | --                        | --                          |
| Maternal hypertensive disorders                                  | 7<br>(5 - 9)                | --                 | 0<br>(0 - 0)        | 7<br>(5 - 9)             | --                        | --                          |
| Maternal obstructed labor                                        | 3<br>(2 - 5)                | --                 | 0<br>(0 - 0)        | 3<br>(2 - 5)             | --                        | --                          |
| Maternal abortive outcome                                        | 10<br>(7 - 13)              | --                 | 0<br>(0 - 0)        | 10<br>(7 - 13)           | --                        | --                          |
| Indirect maternal deaths                                         | 7<br>(5 - 9)                | --                 | 0<br>(0 - 0)        | 7<br>(5 - 9)             | --                        | --                          |
| Late maternal deaths                                             | 2<br>(1 - 3)                | --                 | 0<br>(0 - 0)        | 2<br>(1 - 3)             | --                        | --                          |
| Maternal deaths aggravated by HIV/AIDS                           | 0<br>(0 - 0)                | --                 | --                  | 0<br>(0 - 0)             | --                        | --                          |
| Other maternal disorders                                         | 7<br>(5 - 9)                | --                 | 0<br>(0 - 0)        | 7<br>(5 - 9)             | --                        | --                          |
| Neonatal disorders                                               | 239<br>(161 - 350)          | 239<br>(161 - 350) | --                  | --                       | --                        | --                          |
| Neonatal preterm birth complications                             | 141<br>(87 - 220)           | 141<br>(87 - 220)  | --                  | --                       | --                        | --                          |
| Neonatal encephalopathy due to birth asphyxia and trauma         | 37<br>(21 - 61)             | 37<br>(21 - 61)    | --                  | --                       | --                        | --                          |
| Neonatal sepsis and other neonatal infections                    | 25<br>(12 - 48)             | 25<br>(12 - 48)    | --                  | --                       | --                        | --                          |
| Hemolytic disease and other neonatal jaundice                    | 0<br>(0 - 2)                | 0<br>(0 - 2)       | --                  | --                       | --                        | --                          |
| Other neonatal disorders                                         | 35<br>(18 - 59)             | 35<br>(18 - 59)    | --                  | --                       | --                        | --                          |
| Nutritional deficiencies                                         | 425<br>(253 - 570)          | 3<br>(2 - 6)       | 1<br>(1 - 2)        | 13<br>(8 - 16)           | 32<br>(21 - 42)           | 376<br>(217 - 516)          |
| Protein-energy malnutrition                                      | 276<br>(115 - 409)          | 3<br>(2 - 5)       | 1<br>(0 - 1)        | 6<br>(3 - 9)             | 18<br>(8 - 26)            | 248<br>(100 - 377)          |
| Iodine deficiency                                                | 1<br>(0 - 2)                | 0<br>(0 - 0)       | 0<br>(0 - 0)        | 0<br>(0 - 0)             | 0<br>(0 - 1)              | 0<br>(0 - 2)                |
| Iron-deficiency anemia                                           | 132<br>(56 - 258)           | 0<br>(0 - 1)       | 0<br>(0 - 0)        | 6<br>(3 - 9)             | 12<br>(6 - 21)            | 114<br>(46 - 226)           |
| Other nutritional deficiencies                                   | 17<br>(7 - 35)              | 0<br>(0 - 0)       | 0<br>(0 - 0)        | 1<br>(0 - 2)             | 2<br>(1 - 3)              | 14<br>(5 - 31)              |
| Other communicable, maternal, neonatal, and nutritional diseases | 84<br>(65 - 100)            | 7<br>(3 - 14)      | 2<br>(1 - 3)        | 15<br>(11 - 18)          | 30<br>(20 - 37)           | 30<br>(22 - 42)             |
| Sexually transmitted diseases excluding HIV                      | 19<br>(13 - 28)             | 5<br>(1 - 11)      | 0<br>(0 - 1)        | 4<br>(3 - 5)             | 5<br>(3 - 7)              | 6<br>(4 - 9)                |
| Syphilis                                                         | 14<br>(8 - 21)              | 5<br>(1 - 11)      | 0<br>(0 - 1)        | 2<br>(1 - 2)             | 2<br>(2 - 4)              | 4<br>(3 - 7)                |
| Chlamydial infection                                             | 2<br>(1 - 2)                | --                 | 0<br>(0 - 0)        | 1<br>(1 - 1)             | 1<br>(0 - 1)              | 0<br>(0 - 0)                |
| Gonococcal infection                                             | 2<br>(2 - 3)                | --                 | 0<br>(0 - 0)        | 1<br>(1 - 1)             | 1<br>(1 - 1)              | 1<br>(0 - 1)                |
| Other sexually transmitted diseases                              | 2<br>(1 - 2)                | --                 | 0<br>(0 - 0)        | 1<br>(0 - 1)             | 1<br>(0 - 1)              | 0<br>(0 - 0)                |
| Hepatitis                                                        | 7<br>(5 - 9)                | 0<br>(0 - 1)       | 0<br>(0 - 0)        | 1<br>(1 - 3)             | 2<br>(1 - 4)              | 2<br>(1 - 4)                |
| Acute hepatitis A                                                | 3<br>(2 - 5)                | 0<br>(0 - 1)       | 0<br>(0 - 0)        | 1<br>(1 - 2)             | 1<br>(0 - 2)              | 1<br>(0 - 2)                |
| Acute hepatitis B                                                | 3<br>(2 - 5)                | 0<br>(0 - 0)       | 0<br>(0 - 0)        | 0<br>(0 - 1)             | 1<br>(1 - 2)              | 1<br>(1 - 3)                |
| Acute hepatitis C                                                | 0<br>(0 - 1)                | --                 | 0<br>(0 - 0)        | 0<br>(0 - 0)             | 0<br>(0 - 0)              | 0<br>(0 - 1)                |
| Other infectious diseases                                        | 58<br>(41 - 71)             | 2<br>(1 - 4)       | 1<br>(1 - 2)        | 9<br>(6 - 12)            | 23<br>(14 - 30)           | 22<br>(15 - 35)             |
| Non-communicable diseases                                        | 45,962<br>(42,586 - 49,565) | 429<br>(284 - 617) | 86<br>(69 - 109)    | 2,351<br>(2,066 - 2,673) | 9,705<br>(8,735 - 10,790) | 33,391<br>(31,245 - 35,619) |
| Neoplasms                                                        | 12,879<br>(11,458 - 14,304) | 18<br>(10 - 28)    | 38<br>(29 - 50)     | 1,236<br>(1,076 - 1,411) | 4,528<br>(4,041 - 5,080)  | 7,060<br>(6,119 - 7,948)    |
| Esophageal cancer                                                | 377<br>(299 - 476)          | --                 | --                  | 10<br>(7 - 13)           | 83<br>(62 - 109)          | 285<br>(211 - 370)          |
| Stomach cancer                                                   | 1,394<br>(1,101 - 1,760)    | --                 | --                  | 74<br>(56 - 96)          | 371<br>(298 - 453)        | 949<br>(682 - 1,285)        |
| Liver cancer                                                     | 519<br>(401 - 680)          | --                 | 0<br>(0 - 1)        | 27<br>(20 - 37)          | 165<br>(123 - 214)        | 327<br>(223 - 463)          |
| Liver cancer due to hepatitis B                                  | 49<br>(23 - 78)             | --                 | 0<br>(0 - 0)        | 5<br>(3 - 8)             | 20<br>(8 - 35)            | 23<br>(11 - 39)             |
| Liver cancer due to hepatitis C                                  | 268<br>(177 - 375)          | --                 | 0<br>(0 - 0)        | 11<br>(7 - 17)           | 83<br>(53 - 118)          | 174<br>(104 - 261)          |
| Liver cancer due to alcohol use                                  | 111<br>(63 - 193)           | --                 | --                  | 3<br>(1 - 5)             | 28<br>(15 - 45)           | 81<br>(40 - 153)            |
| Liver cancer due to other causes                                 | 92<br>(45 - 147)            | --                 | 0<br>(0 - 0)        | 8<br>(5 - 12)            | 34<br>(16 - 55)           | 50<br>(22 - 87)             |
| Larynx cancer                                                    | 24<br>(12 - 41)             | --                 | --                  | 1<br>(1 - 2)             | 8<br>(4 - 14)             | 15<br>(7 - 25)              |

Web Table 31- Chile deaths with 95% UI by age, sex, and cause in 2013

| Cause                                         | Females, All Ages           | Females, 0-4 Years | Females, 5-14 Years | Females, 15-49 Years | Females, 50-69 Years     | Females, 70-80 Years        |
|-----------------------------------------------|-----------------------------|--------------------|---------------------|----------------------|--------------------------|-----------------------------|
| Tracheal, bronchus and lung cancer            | 1,139<br>(929 - 1,358)      | --                 | --                  | 57<br>(44 - 73)      | 437<br>(358 - 536)       | 645<br>(489 - 822)          |
| Breast cancer                                 | 1,546<br>(1,319 - 1,799)    | --                 | --                  | 249<br>(203 - 301)   | 665<br>(555 - 779)       | 633<br>(494 - 794)          |
| Cervical cancer                               | 916<br>(753 - 1,165)        | --                 | --                  | 204<br>(160 - 266)   | 353<br>(276 - 468)       | 358<br>(269 - 487)          |
| Uterine cancer                                | 189<br>(115 - 250)          | --                 | --                  | 7<br>(4 - 11)        | 76<br>(41 - 105)         | 106<br>(64 - 148)           |
| Prostate cancer                               | --                          | --                 | --                  | --                   | --                       | --                          |
| Colon and rectum cancer                       | 1,263<br>(1,052 - 1,525)    | --                 | --                  | 72<br>(58 - 87)      | 354<br>(298 - 416)       | 837<br>(650 - 1,061)        |
| Lip and oral cavity cancer                    | 54<br>(37 - 75)             | --                 | --                  | 5<br>(3 - 7)         | 15<br>(10 - 20)          | 35<br>(22 - 51)             |
| Nasopharynx cancer                            | 9<br>(6 - 16)               | --                 | 0<br>(0 - 0)        | 2<br>(1 - 3)         | 3<br>(2 - 6)             | 4<br>(2 - 8)                |
| Other pharynx cancer                          | 20<br>(14 - 26)             | --                 | --                  | 1<br>(1 - 2)         | 8<br>(5 - 11)            | 10<br>(7 - 15)              |
| Gallbladder and biliary tract cancer          | 1,567<br>(1,028 - 2,078)    | --                 | --                  | 93<br>(58 - 134)     | 650<br>(427 - 852)       | 825<br>(500 - 1,213)        |
| Pancreatic cancer                             | 706<br>(586 - 855)          | --                 | --                  | 30<br>(23 - 38)      | 247<br>(200 - 300)       | 429<br>(336 - 550)          |
| Malignant skin melanoma                       | 86<br>(70 - 107)            | --                 | --                  | 13<br>(10 - 17)      | 32<br>(24 - 41)          | 41<br>(29 - 58)             |
| Non-melanoma skin cancer                      | 93<br>(54 - 137)            | --                 | --                  | 3<br>(2 - 4)         | 8<br>(5 - 12)            | 82<br>(46 - 123)            |
| Ovarian cancer                                | 495<br>(419 - 586)          | --                 | --                  | 70<br>(54 - 88)      | 234<br>(190 - 287)       | 192<br>(146 - 245)          |
| Testicular cancer                             | --                          | --                 | --                  | --                   | --                       | --                          |
| Kidney cancer                                 | 296<br>(227 - 383)          | 0<br>(0 - 1)       | 0<br>(0 - 1)        | 20<br>(15 - 28)      | 104<br>(77 - 138)        | 171<br>(117 - 244)          |
| Bladder cancer                                | 170<br>(103 - 238)          | --                 | --                  | 6<br>(3 - 8)         | 39<br>(23 - 54)          | 126<br>(72 - 184)           |
| Brain and nervous system cancer               | 181<br>(69 - 222)           | 2<br>(1 - 5)       | 6<br>(3 - 10)       | 36<br>(16 - 47)      | 74<br>(27 - 97)          | 63<br>(22 - 87)             |
| Thyroid cancer                                | 86<br>(49 - 113)            | --                 | 0<br>(0 - 0)        | 5<br>(3 - 8)         | 25<br>(15 - 35)          | 55<br>(30 - 79)             |
| Mesothelioma                                  | 20<br>(15 - 27)             | --                 | --                  | 2<br>(2 - 3)         | 10<br>(7 - 15)           | 8<br>(5 - 13)               |
| Hodgkin lymphoma                              | 22<br>(8 - 30)              | 0<br>(0 - 0)       | 0<br>(0 - 1)        | 7<br>(3 - 10)        | 6<br>(2 - 9)             | 8<br>(3 - 12)               |
| Non-Hodgkin lymphoma                          | 347<br>(208 - 435)          | 1<br>(1 - 2)       | 2<br>(1 - 3)        | 42<br>(27 - 55)      | 117<br>(72 - 151)        | 185<br>(101 - 257)          |
| Multiple myeloma                              | 210<br>(146 - 271)          | --                 | --                  | 10<br>(7 - 13)       | 82<br>(58 - 107)         | 118<br>(74 - 167)           |
| Leukemia                                      | 341<br>(287 - 398)          | 6<br>(3 - 11)      | 15<br>(10 - 22)     | 74<br>(59 - 91)      | 97<br>(78 - 119)         | 149<br>(111 - 193)          |
| Other neoplasms                               | 808<br>(638 - 1,177)        | 8<br>(4 - 14)      | 13<br>(8 - 22)      | 116<br>(86 - 184)    | 266<br>(194 - 431)       | 404<br>(292 - 583)          |
| Cardiovascular diseases                       | 15,287<br>(13,471 - 18,106) | 4<br>(3 - 7)       | 6<br>(4 - 8)        | 440<br>(341 - 527)   | 2,361<br>(1,998 - 2,899) | 12,475<br>(10,872 - 14,846) |
| Rheumatic heart disease                       | 194<br>(112 - 255)          | 0<br>(0 - 0)       | 1<br>(0 - 1)        | 30<br>(19 - 42)      | 68<br>(41 - 92)          | 96<br>(48 - 135)            |
| Ischemic heart disease                        | 5,910<br>(4,754 - 8,319)    | 0<br>(0 - 0)       | 1<br>(0 - 1)        | 116<br>(78 - 150)    | 889<br>(678 - 1,155)     | 4,905<br>(3,858 - 7,113)    |
| Cerebrovascular disease                       | 5,779<br>(4,810 - 7,636)    | 1<br>(0 - 1)       | 2<br>(1 - 2)        | 206<br>(156 - 256)   | 922<br>(753 - 1,263)     | 4,648<br>(3,793 - 6,198)    |
| Ischemic stroke                               | 3,176<br>(2,466 - 4,812)    | 0<br>(0 - 0)       | 0<br>(0 - 1)        | 30<br>(20 - 53)      | 251<br>(169 - 469)       | 2,895<br>(2,253 - 4,339)    |
| Hemorrhagic stroke                            | 2,602<br>(1,754 - 3,255)    | 0<br>(0 - 1)       | 1<br>(1 - 2)        | 176<br>(127 - 219)   | 671<br>(506 - 844)       | 1,754<br>(1,068 - 2,275)    |
| Hypertensive heart disease                    | 1,522<br>(777 - 2,172)      | 0<br>(0 - 0)       | 0<br>(0 - 0)        | 14<br>(7 - 20)       | 130<br>(77 - 175)        | 1,377<br>(677 - 2,025)      |
| Cardiomyopathy and myocarditis                | 345<br>(237 - 454)          | 3<br>(2 - 5)       | 2<br>(1 - 3)        | 26<br>(18 - 33)      | 78<br>(52 - 100)         | 237<br>(154 - 332)          |
| Atrial fibrillation and flutter               | 591<br>(396 - 837)          | --                 | --                  | 3<br>(2 - 4)         | 42<br>(30 - 56)          | 546<br>(356 - 791)          |
| Aortic aneurysm                               | 200<br>(119 - 305)          | --                 | --                  | 9<br>(5 - 13)        | 45<br>(25 - 67)          | 146<br>(86 - 233)           |
| Peripheral vascular disease                   | 122<br>(78 - 176)           | --                 | --                  | 0<br>(0 - 1)         | 9<br>(6 - 12)            | 113<br>(70 - 166)           |
| Endocarditis                                  | 46<br>(26 - 64)             | 0<br>(0 - 0)       | 0<br>(0 - 0)        | 7<br>(4 - 10)        | 13<br>(7 - 19)           | 25<br>(14 - 38)             |
| Other cardiovascular and circulatory diseases | 578<br>(375 - 744)          | 0<br>(0 - 1)       | 0<br>(0 - 1)        | 30<br>(18 - 40)      | 166<br>(95 - 222)        | 382<br>(245 - 524)          |
| Chronic respiratory diseases                  | 3,039<br>(2,019 - 3,658)    | 7<br>(4 - 12)      | 2<br>(2 - 3)        | 60<br>(48 - 74)      | 421<br>(316 - 501)       | 2,548<br>(1,645 - 3,138)    |
| Chronic obstructive pulmonary disease         | 1,956<br>(1,257 - 2,512)    | 6<br>(3 - 10)      | 1<br>(1 - 2)        | 29<br>(21 - 39)      | 239<br>(166 - 310)       | 1,681<br>(1,040 - 2,223)    |



Web Table 31- Chile deaths with 95% UI by age, sex, and cause in 2013

| Cause                                               | Females, All Ages        | Females, 0-4 Years | Females, 5-14 Years | Females, 15-49 Years | Females, 50-69 Years | Females, 70-80 Years     |
|-----------------------------------------------------|--------------------------|--------------------|---------------------|----------------------|----------------------|--------------------------|
| Pneumoconiosis                                      | 5<br>(3 - 9)             | 0<br>(0 - 0)       | 0<br>(0 - 0)        | 1<br>(0 - 1)         | 1<br>(0 - 1)         | 4<br>(2 - 8)             |
| Silicosis                                           | 1<br>(1 - 2)             | 0<br>(0 - 0)       | 0<br>(0 - 0)        | 0<br>(0 - 0)         | 0<br>(0 - 0)         | 1<br>(0 - 2)             |
| Asbestosis                                          | 0<br>(0 - 1)             | 0<br>(0 - 0)       | 0<br>(0 - 0)        | 0<br>(0 - 0)         | 0<br>(0 - 0)         | 0<br>(0 - 0)             |
| Coal workers pneumoconiosis                         | 0<br>(0 - 0)             | 0<br>(0 - 0)       | 0<br>(0 - 0)        | 0<br>(0 - 0)         | 0<br>(0 - 0)         | 0<br>(0 - 0)             |
| Other pneumoconiosis                                | 3<br>(2 - 6)             | 0<br>(0 - 0)       | 0<br>(0 - 0)        | 0<br>(0 - 0)         | 0<br>(0 - 1)         | 3<br>(1 - 6)             |
| Asthma                                              | 165<br>(75 - 236)        | 0<br>(0 - 0)       | 0<br>(0 - 1)        | 13<br>(8 - 19)       | 35<br>(17 - 51)      | 116<br>(48 - 180)        |
| Interstitial lung disease and pulmonary sarcoidosis | 874<br>(479 - 1,328)     | 0<br>(0 - 0)       | 0<br>(0 - 0)        | 14<br>(8 - 21)       | 142<br>(84 - 208)    | 717<br>(362 - 1,115)     |
| Other chronic respiratory diseases                  | 39<br>(22 - 61)          | 1<br>(1 - 2)       | 0<br>(0 - 0)        | 4<br>(2 - 5)         | 5<br>(3 - 7)         | 29<br>(15 - 51)          |
| Cirrhosis                                           | 1,407<br>(1,220 - 1,618) | 0<br>(0 - 0)       | 1<br>(1 - 1)        | 140<br>(114 - 169)   | 637<br>(538 - 742)   | 629<br>(521 - 747)       |
| Cirrhosis due to hepatitis B                        | 200<br>(89 - 373)        | 0<br>(0 - 0)       | 0<br>(0 - 0)        | 16<br>(6 - 33)       | 88<br>(36 - 165)     | 96<br>(43 - 186)         |
| Cirrhosis due to hepatitis C                        | 750<br>(451 - 1,016)     | 0<br>(0 - 0)       | 0<br>(0 - 1)        | 78<br>(51 - 106)     | 343<br>(203 - 468)   | 329<br>(176 - 468)       |
| Cirrhosis due to alcohol use                        | 308<br>(146 - 558)       | -                  | -                   | 21<br>(9 - 37)       | 131<br>(61 - 234)    | 156<br>(70 - 302)        |
| Cirrhosis due to other causes                       | 149<br>(73 - 273)        | 0<br>(0 - 0)       | 1<br>(0 - 1)        | 26<br>(14 - 41)      | 75<br>(34 - 148)     | 48<br>(21 - 97)          |
| Digestive diseases                                  | 1,534<br>(1,288 - 1,903) | 1<br>(1 - 2)       | 3<br>(2 - 4)        | 83<br>(69 - 108)     | 294<br>(242 - 387)   | 1,152<br>(944 - 1,441)   |
| Peptic ulcer disease                                | 143<br>(98 - 217)        | 0<br>(0 - 0)       | 0<br>(0 - 0)        | 5<br>(4 - 8)         | 28<br>(19 - 41)      | 110<br>(71 - 173)        |
| Gastritis and duodenitis                            | 33<br>(17 - 75)          | 0<br>(0 - 0)       | 0<br>(0 - 0)        | 1<br>(1 - 2)         | 5<br>(2 - 9)         | 28<br>(13 - 65)          |
| Appendicitis                                        | 34<br>(21 - 59)          | 0<br>(0 - 0)       | 1<br>(0 - 1)        | 7<br>(4 - 11)        | 9<br>(5 - 16)        | 18<br>(8 - 35)           |
| Paralytic ileus and intestinal obstruction          | 157<br>(22 - 314)        | 0<br>(0 - 1)       | 1<br>(0 - 1)        | 6<br>(1 - 10)        | 19<br>(3 - 37)       | 131<br>(16 - 271)        |
| Inguinal, femoral, and abdominal hernia             | 113<br>(58 - 260)        | 0<br>(0 - 0)       | 0<br>(0 - 0)        | 3<br>(2 - 7)         | 19<br>(10 - 44)      | 91<br>(45 - 218)         |
| Inflammatory bowel disease                          | 36<br>(24 - 69)          | 0<br>(0 - 0)       | 0<br>(0 - 0)        | 5<br>(3 - 8)         | 8<br>(5 - 14)        | 23<br>(13 - 47)          |
| Vascular intestinal disorders                       | 344<br>(208 - 592)       | 0<br>(0 - 0)       | 0<br>(0 - 1)        | 8<br>(5 - 15)        | 48<br>(26 - 87)      | 288<br>(171 - 507)       |
| Gallbladder and biliary diseases                    | 318<br>(230 - 512)       | 0<br>(0 - 0)       | 0<br>(0 - 0)        | 17<br>(13 - 28)      | 64<br>(46 - 107)     | 237<br>(159 - 386)       |
| Pancreatitis                                        | 166<br>(111 - 249)       | 0<br>(0 - 0)       | 0<br>(0 - 0)        | 19<br>(14 - 28)      | 54<br>(37 - 81)      | 93<br>(57 - 148)         |
| Other digestive diseases                            | 189<br>(138 - 263)       | 0<br>(0 - 0)       | 0<br>(0 - 1)        | 12<br>(9 - 16)       | 42<br>(31 - 58)      | 134<br>(90 - 196)        |
| Neurological disorders                              | 6,237<br>(4,634 - 7,911) | 11<br>(7 - 18)     | 6<br>(4 - 7)        | 67<br>(54 - 83)      | 314<br>(241 - 393)   | 5,838<br>(4,300 - 7,488) |
| Alzheimer disease and other dementias               | 5,713<br>(4,145 - 7,384) | -                  | -                   | 0<br>(0 - 1)         | 192<br>(131 - 262)   | 5,520<br>(3,964 - 7,171) |
| Parkinson disease                                   | 284<br>(156 - 387)       | -                  | -                   | 1<br>(1 - 2)         | 32<br>(20 - 44)      | 250<br>(128 - 350)       |
| Epilepsy                                            | 71<br>(49 - 92)          | 2<br>(1 - 3)       | 3<br>(2 - 4)        | 35<br>(24 - 46)      | 16<br>(11 - 22)      | 16<br>(9 - 25)           |
| Multiple sclerosis                                  | 25<br>(11 - 35)          | -                  | -                   | 7<br>(3 - 10)        | 12<br>(5 - 17)       | 6<br>(3 - 11)            |
| Other neurological disorders                        | 144<br>(124 - 166)       | 10<br>(5 - 16)     | 3<br>(2 - 4)        | 24<br>(20 - 30)      | 62<br>(50 - 75)      | 45<br>(36 - 56)          |
| Mental and substance use disorders                  | 91<br>(54 - 118)         | 0<br>(0 - 0)       | 0<br>(0 - 0)        | 32<br>(17 - 44)      | 36<br>(22 - 50)      | 22<br>(13 - 31)          |
| Schizophrenia                                       | 15<br>(8 - 22)           | -                  | -                   | 2<br>(1 - 4)         | 6<br>(3 - 8)         | 7<br>(3 - 12)            |
| Alcohol use disorders                               | 46<br>(14 - 69)          | -                  | -                   | 19<br>(5 - 30)       | 18<br>(6 - 32)       | 9<br>(3 - 14)            |
| Drug use disorders                                  | 28<br>(23 - 34)          | 0<br>(0 - 0)       | -                   | 10<br>(8 - 12)       | 12<br>(9 - 16)       | 6<br>(4 - 9)             |
| Opioid use disorders                                | 2<br>(2 - 3)             | 0<br>(0 - 0)       | -                   | 1<br>(1 - 1)         | 1<br>(1 - 1)         | 1<br>(0 - 1)             |
| Cocaine use disorders                               | 1<br>(1 - 1)             | 0<br>(0 - 0)       | -                   | 0<br>(0 - 0)         | 0<br>(0 - 0)         | 0<br>(0 - 0)             |
| Amphetamine use disorders                           | 1<br>(0 - 1)             | 0<br>(0 - 0)       | -                   | 0<br>(0 - 0)         | 0<br>(0 - 0)         | 0<br>(0 - 0)             |
| Other drug use disorders                            | 24<br>(20 - 29)          | 0<br>(0 - 0)       | -                   | 8<br>(6 - 11)        | 11<br>(8 - 14)       | 5<br>(4 - 7)             |
| Eating disorders                                    | 1<br>(1 - 2)             | -                  | 0<br>(0 - 0)        | 1<br>(1 - 2)         | -                    | -                        |
| Anorexia nervosa                                    | 1<br>(1 - 2)             | -                  | 0<br>(0 - 0)        | 1<br>(1 - 2)         | -                    | -                        |

Web Table 31- Chile deaths with 95% UI by age, sex, and cause in 2013

| Cause                                               | Females, All Ages        | Females, 0-4 Years | Females, 5-14 Years | Females, 15-49 Years | Females, 50-69 Years | Females, 70-80 Years     |
|-----------------------------------------------------|--------------------------|--------------------|---------------------|----------------------|----------------------|--------------------------|
| Diabetes, urogenital, blood, and endocrine diseases | 4,466<br>(3,695 - 5,115) | 15<br>(9 - 23)     | 9<br>(7 - 12)       | 181<br>(154 - 221)   | 963<br>(798 - 1,132) | 3,299<br>(2,637 - 3,852) |
| Diabetes mellitus                                   | 1,610<br>(1,339 - 1,922) | 0<br>(0 - 1)       | 1<br>(0 - 1)        | 40<br>(31 - 49)      | 372<br>(302 - 465)   | 1,197<br>(965 - 1,484)   |
| Acute glomerulonephritis                            | 1<br>(1 - 2)             | 0<br>(0 - 0)       | 0<br>(0 - 0)        | 0<br>(0 - 1)         | 0<br>(0 - 0)         | 0<br>(0 - 1)             |
| Chronic kidney disease                              | 1,814<br>(1,363 - 2,224) | 2<br>(1 - 4)       | 2<br>(2 - 4)        | 75<br>(60 - 100)     | 414<br>(297 - 525)   | 1,320<br>(981 - 1,651)   |
| Chronic kidney disease due to diabetes mellitus     | 596<br>(434 - 752)       | 0<br>(0 - 0)       | 0<br>(0 - 0)        | 23<br>(16 - 32)      | 206<br>(142 - 267)   | 366<br>(250 - 483)       |
| Chronic kidney disease due to hypertension          | 413<br>(218 - 607)       | 0<br>(0 - 0)       | 0<br>(0 - 1)        | 12<br>(6 - 20)       | 53<br>(25 - 89)      | 347<br>(175 - 511)       |
| Chronic kidney disease due to glomerulonephritis    | 35<br>(22 - 57)          | 0<br>(0 - 1)       | 0<br>(0 - 0)        | 6<br>(4 - 8)         | 7<br>(4 - 12)        | 22<br>(12 - 39)          |
| Chronic kidney disease due to other causes          | 770<br>(474 - 1,107)     | 2<br>(1 - 3)       | 2<br>(1 - 3)        | 34<br>(23 - 52)      | 148<br>(69 - 226)    | 585<br>(333 - 876)       |
| Urinary diseases and male infertility               | 711<br>(385 - 992)       | 1<br>(0 - 2)       | 1<br>(1 - 1)        | 21<br>(14 - 28)      | 95<br>(61 - 123)     | 593<br>(298 - 872)       |
| Interstitial nephritis and urinary tract infections | 685<br>(366 - 962)       | 1<br>(0 - 2)       | 1<br>(0 - 1)        | 19<br>(12 - 25)      | 88<br>(56 - 115)     | 576<br>(286 - 848)       |
| Urolithiasis                                        | 9<br>(5 - 15)            | --                 | 0<br>(0 - 0)        | 1<br>(1 - 2)         | 3<br>(2 - 6)         | 5<br>(2 - 9)             |
| Other urinary diseases                              | 16<br>(8 - 35)           | 0<br>(0 - 0)       | 0<br>(0 - 0)        | 1<br>(1 - 2)         | 3<br>(1 - 5)         | 12<br>(5 - 29)           |
| Gynecological diseases                              | 4<br>(3 - 8)             | --                 | --                  | 2<br>(1 - 4)         | 1<br>(1 - 1)         | 1<br>(1 - 3)             |
| Uterine fibroids                                    | 1<br>(1 - 2)             | --                 | --                  | 0<br>(0 - 1)         | 0<br>(0 - 0)         | 0<br>(0 - 1)             |
| Polycystic ovarian syndrome                         | 0<br>(0 - 0)             | --                 | --                  | 0<br>(0 - 0)         | 0<br>(0 - 0)         | --                       |
| Endometriosis                                       | 0<br>(0 - 1)             | --                 | --                  | 0<br>(0 - 1)         | 0<br>(0 - 0)         | --                       |
| Genital prolapse                                    | 1<br>(1 - 1)             | --                 | --                  | 0<br>(0 - 1)         | 0<br>(0 - 0)         | 0<br>(0 - 1)             |
| Other gynecological diseases                        | 2<br>(1 - 4)             | --                 | --                  | 1<br>(1 - 2)         | 0<br>(0 - 1)         | 1<br>(0 - 1)             |
| Hemoglobinopathies and hemolytic anemias            | 40<br>(21 - 59)          | 2<br>(1 - 3)       | 1<br>(1 - 2)        | 7<br>(4 - 10)        | 10<br>(5 - 14)       | 21<br>(10 - 35)          |
| Thalassemias                                        | 2<br>(1 - 3)             | 0<br>(0 - 1)       | 0<br>(0 - 0)        | 2<br>(1 - 2)         | 0<br>(0 - 0)         | 0<br>(0 - 0)             |
| Sickle cell disorders                               | 3<br>(2 - 4)             | 0<br>(0 - 1)       | 0<br>(0 - 1)        | 1<br>(1 - 2)         | 1<br>(0 - 1)         | 0<br>(0 - 0)             |
| G6PD deficiency                                     | 1<br>(0 - 1)             | 0<br>(0 - 0)       | 0<br>(0 - 0)        | 0<br>(0 - 0)         | 0<br>(0 - 0)         | 0<br>(0 - 0)             |
| Other hemoglobinopathies and hemolytic anemias      | 34<br>(17 - 52)          | 1<br>(0 - 1)       | 0<br>(0 - 1)        | 4<br>(2 - 5)         | 9<br>(5 - 13)        | 21<br>(10 - 34)          |
| Endocrine, metabolic, blood, and immune disorders   | 286<br>(215 - 427)       | 9<br>(5 - 16)      | 3<br>(2 - 5)        | 36<br>(27 - 53)      | 71<br>(51 - 105)     | 166<br>(111 - 260)       |
| Musculoskeletal disorders                           | 334<br>(147 - 412)       | --                 | 2<br>(1 - 3)        | 57<br>(25 - 73)      | 109<br>(43 - 138)    | 166<br>(77 - 228)        |
| Rheumatoid arthritis                                | 128<br>(57 - 166)        | --                 | 0<br>(0 - 0)        | 7<br>(3 - 10)        | 40<br>(16 - 54)      | 80<br>(36 - 113)         |
| Other musculoskeletal disorders                     | 207<br>(83 - 259)        | --                 | 2<br>(1 - 2)        | 51<br>(22 - 64)      | 69<br>(25 - 89)      | 86<br>(37 - 126)         |
| Other non-communicable diseases                     | 688<br>(517 - 880)       | 372<br>(244 - 542) | 20<br>(14 - 28)     | 53<br>(41 - 69)      | 42<br>(30 - 52)      | 201<br>(104 - 287)       |
| Congenital anomalies                                | 430<br>(301 - 598)       | 323<br>(211 - 480) | 20<br>(14 - 27)     | 47<br>(36 - 63)      | 22<br>(16 - 30)      | 17<br>(12 - 26)          |
| Neural tube defects                                 | 26<br>(15 - 44)          | 23<br>(12 - 40)    | 1<br>(1 - 2)        | 2<br>(1 - 3)         | 0<br>(0 - 0)         | 0<br>(0 - 0)             |
| Congenital heart anomalies                          | 158<br>(109 - 227)       | 113<br>(70 - 180)  | 8<br>(5 - 11)       | 24<br>(17 - 32)      | 8<br>(5 - 11)        | 7<br>(4 - 10)            |
| Cleft lip and cleft palate                          | 0<br>(0 - 1)             | 0<br>(0 - 1)       | --                  | --                   | --                   | --                       |
| Down syndrome                                       | 30<br>(15 - 45)          | 13<br>(5 - 24)     | 1<br>(1 - 3)        | 8<br>(4 - 12)        | 7<br>(4 - 11)        | 0<br>(0 - 0)             |
| Chromosomal unbalanced rearrangements               | 46<br>(25 - 76)          | 44<br>(23 - 73)    | 1<br>(0 - 1)        | 1<br>(1 - 2)         | 0<br>(0 - 1)         | 0<br>(0 - 0)             |
| Other congenital anomalies                          | 169<br>(112 - 247)       | 130<br>(79 - 207)  | 9<br>(6 - 12)       | 13<br>(9 - 18)       | 6<br>(4 - 9)         | 10<br>(7 - 16)           |
| Skin and subcutaneous diseases                      | 212<br>(111 - 299)       | 2<br>(1 - 4)       | 1<br>(0 - 1)        | 6<br>(4 - 7)         | 20<br>(12 - 26)      | 183<br>(91 - 268)        |
| Cellulitis                                          | 26<br>(13 - 50)          | 1<br>(0 - 1)       | 0<br>(0 - 0)        | 1<br>(1 - 2)         | 6<br>(3 - 9)         | 19<br>(7 - 41)           |
| Pyoderma                                            | 21<br>(12 - 32)          | 1<br>(0 - 2)       | 0<br>(0 - 0)        | 1<br>(1 - 2)         | 4<br>(2 - 6)         | 15<br>(7 - 26)           |
| Decubitus ulcer                                     | 153<br>(69 - 230)        | 0<br>(0 - 0)       | 0<br>(0 - 0)        | 1<br>(1 - 2)         | 8<br>(4 - 11)        | 144<br>(64 - 220)        |
| Other skin and subcutaneous diseases                | 12<br>(6 - 24)           | 1<br>(0 - 2)       | 0<br>(0 - 0)        | 2<br>(1 - 3)         | 3<br>(1 - 5)         | 6<br>(2 - 18)            |

Web Table 31- Chile deaths with 95% UI by age, sex, and cause in 2013

| Cause                                           | Females, All Ages        | Females, 0-4 Years | Females, 5-14 Years | Females, 15-49 Years | Females, 50-69 Years | Females, 70-80 Years |
|-------------------------------------------------|--------------------------|--------------------|---------------------|----------------------|----------------------|----------------------|
| Sudden infant death syndrome                    | 47<br>(13 - 101)         | 47<br>(13 - 101)   | --                  | --                   | --                   | --                   |
| Injuries                                        | 2,106<br>(1,760 - 2,439) | 55<br>(35 - 83)    | 59<br>(47 - 74)     | 647<br>(551 - 748)   | 396<br>(336 - 461)   | 948<br>(704 - 1,186) |
| Transport injuries                              | 570<br>(413 - 673)       | 12<br>(6 - 19)     | 30<br>(21 - 39)     | 229<br>(163 - 279)   | 148<br>(100 - 182)   | 151<br>(115 - 184)   |
| Road injuries                                   | 542<br>(396 - 639)       | 11<br>(6 - 18)     | 28<br>(20 - 37)     | 217<br>(154 - 263)   | 141<br>(96 - 172)    | 144<br>(109 - 176)   |
| Pedestrian road injuries                        | 315<br>(218 - 382)       | 6<br>(3 - 10)      | 16<br>(10 - 22)     | 102<br>(67 - 131)    | 87<br>(56 - 110)     | 105<br>(75 - 132)    |
| Cyclist road injuries                           | 19<br>(13 - 26)          | 0<br>(0 - 0)       | 1<br>(1 - 2)        | 9<br>(6 - 13)        | 6<br>(4 - 9)         | 3<br>(2 - 4)         |
| Motorcyclist road injuries                      | 13<br>(9 - 22)           | 0<br>(0 - 0)       | 0<br>(0 - 1)        | 8<br>(5 - 11)        | 2<br>(1 - 3)         | 3<br>(2 - 7)         |
| Motor vehicle road injuries                     | 191<br>(133 - 237)       | 5<br>(3 - 8)       | 11<br>(7 - 16)      | 98<br>(67 - 125)     | 45<br>(27 - 61)      | 33<br>(21 - 47)      |
| Other road injuries                             | 3<br>(2 - 5)             | 0<br>(0 - 0)       | 0<br>(0 - 1)        | 1<br>(1 - 2)         | 1<br>(0 - 1)         | 1<br>(0 - 1)         |
| Other transport injuries                        | 29<br>(17 - 37)          | 1<br>(0 - 1)       | 1<br>(1 - 2)        | 12<br>(7 - 17)       | 8<br>(4 - 11)        | 7<br>(4 - 11)        |
| Unintentional injuries                          | 1,050<br>(789 - 1,290)   | 37<br>(23 - 58)    | 17<br>(12 - 23)     | 113<br>(94 - 136)    | 135<br>(112 - 166)   | 748<br>(507 - 985)   |
| Falls                                           | 523<br>(276 - 745)       | 1<br>(1 - 3)       | 2<br>(1 - 3)        | 13<br>(9 - 17)       | 25<br>(16 - 33)      | 481<br>(248 - 698)   |
| Drowning                                        | 54<br>(33 - 77)          | 9<br>(4 - 18)      | 5<br>(2 - 9)        | 21<br>(13 - 30)      | 11<br>(6 - 15)       | 8<br>(5 - 11)        |
| Fire, heat, and hot substances                  | 153<br>(112 - 215)       | 9<br>(5 - 15)      | 5<br>(3 - 7)        | 27<br>(20 - 37)      | 32<br>(23 - 44)      | 81<br>(55 - 123)     |
| Poisonings                                      | 23<br>(9 - 33)           | 1<br>(0 - 1)       | 1<br>(0 - 1)        | 7<br>(3 - 10)        | 5<br>(2 - 7)         | 10<br>(3 - 16)       |
| Exposure to mechanical forces                   | 34<br>(27 - 51)          | 2<br>(1 - 3)       | 12<br>(1 - 3)       | 12<br>(9 - 17)       | 7<br>(5 - 10)        | 11<br>(7 - 22)       |
| Unintentional firearm injuries                  | 9<br>(6 - 11)            | 0<br>(0 - 0)       | 0<br>(0 - 1)        | 4<br>(3 - 6)         | 2<br>(1 - 3)         | 2<br>(1 - 3)         |
| Unintentional suffocation                       | 10<br>(6 - 23)           | 0<br>(0 - 1)       | 0<br>(0 - 0)        | 2<br>(1 - 5)         | 2<br>(1 - 3)         | 6<br>(3 - 16)        |
| Other exposure to mechanical forces             | 15<br>(12 - 25)          | 1<br>(1 - 2)       | 1<br>(1 - 2)        | 6<br>(4 - 10)        | 3<br>(2 - 6)         | 3<br>(2 - 6)         |
| Adverse effects of medical treatment            | 152<br>(113 - 245)       | 3<br>(2 - 8)       | 1<br>(1 - 2)        | 18<br>(12 - 33)      | 37<br>(26 - 65)      | 93<br>(62 - 151)     |
| Animal contact                                  | 6<br>(3 - 12)            | 0<br>(0 - 0)       | 0<br>(0 - 0)        | 1<br>(0 - 2)         | 2<br>(1 - 4)         | 3<br>(1 - 6)         |
| Venomous animal contact                         | 3<br>(2 - 7)             | 0<br>(0 - 0)       | 0<br>(0 - 0)        | 0<br>(0 - 1)         | 1<br>(1 - 3)         | 1<br>(1 - 3)         |
| Non-venomous animal contact                     | 3<br>(1 - 5)             | 0<br>(0 - 0)       | 0<br>(0 - 0)        | 0<br>(0 - 1)         | 1<br>(0 - 1)         | 1<br>(0 - 3)         |
| Foreign body                                    | 89<br>(50 - 136)         | 10<br>(5 - 19)     | 1<br>(0 - 1)        | 9<br>(6 - 15)        | 12<br>(7 - 18)       | 57<br>(29 - 91)      |
| Pulmonary aspiration and foreign body in airway | 87<br>(48 - 134)         | 10<br>(5 - 19)     | 1<br>(0 - 1)        | 9<br>(5 - 14)        | 12<br>(7 - 18)       | 56<br>(29 - 91)      |
| Foreign body in other body part                 | 1<br>(1 - 2)             | 0<br>(0 - 0)       | 0<br>(0 - 0)        | 1<br>(0 - 1)         | 0<br>(0 - 1)         | 0<br>(0 - 1)         |
| Other unintentional injuries                    | 17<br>(9 - 23)           | 1<br>(1 - 3)       | 1<br>(0 - 1)        | 5<br>(3 - 8)         | 5<br>(2 - 8)         | 5<br>(2 - 9)         |
| Self-harm and interpersonal violence            | 485<br>(406 - 645)       | 7<br>(2 - 17)      | 12<br>(8 - 18)      | 304<br>(252 - 369)   | 113<br>(91 - 161)    | 49<br>(34 - 113)     |
| Self-harm                                       | 381<br>(320 - 502)       | --                 | 8<br>(6 - 12)       | 242<br>(196 - 291)   | 92<br>(74 - 136)     | 38<br>(25 - 101)     |
| Interpersonal violence                          | 105<br>(76 - 171)        | 7<br>(2 - 17)      | 4<br>(2 - 7)        | 62<br>(43 - 105)     | 21<br>(13 - 38)      | 12<br>(6 - 23)       |
| Assault by firearm                              | 31<br>(18 - 58)          | 1<br>(0 - 3)       | 1<br>(1 - 3)        | 21<br>(12 - 38)      | 6<br>(3 - 13)        | 2<br>(1 - 4)         |
| Assault by sharp object                         | 43<br>(29 - 78)          | 1<br>(0 - 4)       | 1<br>(0 - 2)        | 29<br>(19 - 54)      | 8<br>(4 - 15)        | 4<br>(2 - 9)         |
| Assault by other means                          | 30<br>(20 - 52)          | 4<br>(2 - 11)      | 2<br>(1 - 3)        | 12<br>(7 - 20)       | 7<br>(4 - 13)        | 6<br>(3 - 11)        |

Web Table 31- China deaths with 95% UI by age, sex, and cause in 2013

| Cause                                                             | Both Sexes, All Ages                 | Both Sexes, 0-4 Years          | Both Sexes, 5-14 Years      | Both Sexes, 15-49 Years            | Both Sexes, 50-69 Years              | Both Sexes, 70-80 Years              |
|-------------------------------------------------------------------|--------------------------------------|--------------------------------|-----------------------------|------------------------------------|--------------------------------------|--------------------------------------|
| All causes                                                        | 9,144,285<br>(8,307,702 - 9,827,654) | 239,013<br>(221,113 - 256,531) | 47,621<br>(44,147 - 51,576) | 1,013,227<br>(896,199 - 1,154,445) | 2,709,292<br>(2,348,347 - 3,034,446) | 5,135,132<br>(4,762,236 - 5,402,821) |
| Communicable, maternal, neonatal, and nutritional diseases        | 434,408<br>(407,817 - 466,147)       | 121,206<br>(108,363 - 133,109) | 3,973<br>(3,565 - 4,474)    | 44,970<br>(40,478 - 50,372)        | 66,689<br>(59,351 - 74,394)          | 197,570<br>(182,544 - 226,544)       |
| HIV/AIDS and tuberculosis                                         | 57,330<br>(50,548 - 65,163)          | 686<br>(469 - 973)             | 376<br>(279 - 480)          | 17,470<br>(14,848 - 21,408)        | 19,482<br>(16,652 - 22,510)          | 19,316<br>(16,893 - 21,752)          |
| Tuberculosis                                                      | 45,185<br>(39,015 - 50,882)          | 249<br>(185 - 308)             | 182<br>(151 - 210)          | 8,613<br>(7,323 - 10,089)          | 17,171<br>(14,407 - 19,705)          | 18,970<br>(16,562 - 21,460)          |
| HIV/AIDS                                                          | 12,145<br>(9,418 - 16,555)           | 437<br>(222 - 733)             | 194<br>(101 - 297)          | 8,857<br>(6,662 - 12,625)          | 2,312<br>(1,527 - 3,476)             | 346<br>(196 - 571)                   |
| HIV/AIDS resulting in mycobacterial infection                     | 707<br>(505 - 1,001)                 | 22<br>(11 - 37)                | 9<br>(5 - 15)               | 509<br>(351 - 733)                 | 143<br>(88 - 222)                    | 23<br>(13 - 39)                      |
| HIV/AIDS resulting in other diseases                              | 11,438<br>(8,847 - 15,624)           | 415<br>(212 - 695)             | 184<br>(96 - 283)           | 8,348<br>(6,233 - 11,921)          | 2,168<br>(1,439 - 3,261)             | 323<br>(182 - 532)                   |
| Diarrhea, lower respiratory, and other common infectious diseases | 235,398<br>(215,963 - 263,463)       | 35,005<br>(30,823 - 38,597)    | 2,762<br>(2,409 - 3,204)    | 12,488<br>(10,960 - 14,669)        | 29,768<br>(25,340 - 34,423)          | 155,375<br>(141,857 - 183,333)       |
| Diarrheal diseases                                                | 6,743<br>(6,056 - 7,551)             | 2,626<br>(2,115 - 3,155)       | 169<br>(142 - 198)          | 688<br>(591 - 820)                 | 1,137<br>(971 - 1,321)               | 2,122<br>(1,897 - 2,380)             |
| Intestinal infectious diseases                                    | 1,419<br>(854 - 2,273)               | 456<br>(258 - 764)             | 258<br>(135 - 443)          | 452<br>(271 - 738)                 | 163<br>(103 - 255)                   | 90<br>(61 - 131)                     |
| Typhoid fever                                                     | 812<br>(382 - 1,462)                 | 249<br>(116 - 470)             | 172<br>(85 - 309)           | 267<br>(123 - 485)                 | 86<br>(39 - 161)                     | 38<br>(19 - 66)                      |
| Paratyphoid fever                                                 | 255<br>(119 - 463)                   | 97<br>(45 - 182)               | 61<br>(29 - 110)            | 72<br>(33 - 130)                   | 18<br>(8 - 34)                       | 7<br>(4 - 13)                        |
| Other intestinal infectious diseases                              | 352<br>(295 - 410)                   | 110<br>(77 - 150)              | 25<br>(14 - 39)             | 113<br>(89 - 143)                  | 59<br>(42 - 81)                      | 45<br>(31 - 62)                      |
| Lower respiratory infections                                      | 211,029<br>(192,441 - 238,724)       | 26,095<br>(22,721 - 29,075)    | 1,201<br>(1,006 - 1,364)    | 7,892<br>(6,828 - 9,448)           | 25,621<br>(21,651 - 29,771)          | 150,220<br>(136,861 - 177,941)       |
| Upper respiratory infections                                      | 394<br>(321 - 475)                   | 14<br>(10 - 18)                | 4<br>(2 - 5)                | 63<br>(48 - 81)                    | 127<br>(94 - 166)                    | 187<br>(133 - 254)                   |
| Otitis media                                                      | 196<br>(177 - 216)                   | 12<br>(10 - 15)                | 16<br>(14 - 18)             | 76<br>(67 - 86)                    | 41<br>(35 - 48)                      | 51<br>(46 - 57)                      |
| Meningitis                                                        | 7,635<br>(6,149 - 8,631)             | 2,789<br>(1,971 - 3,386)       | 490<br>(379 - 568)          | 1,507<br>(1,247 - 1,770)           | 1,312<br>(1,070 - 1,522)             | 1,536<br>(1,280 - 1,690)             |
| Pneumococcal meningitis                                           | 1,787<br>(1,474 - 2,023)             | 433<br>(294 - 533)             | 92<br>(72 - 111)            | 422<br>(355 - 509)                 | 376<br>(304 - 452)                   | 463<br>(390 - 520)                   |
| H influenzae type B meningitis                                    | 909<br>(744 - 1,051)                 | 473<br>(346 - 583)             | 70<br>(56 - 82)             | 137<br>(114 - 163)                 | 101<br>(81 - 120)                    | 127<br>(99 - 147)                    |
| Meningococcal meningitis                                          | 1,186<br>(971 - 1,340)               | 393<br>(276 - 480)             | 76<br>(58 - 89)             | 233<br>(190 - 277)                 | 213<br>(168 - 253)                   | 271<br>(228 - 301)                   |
| Other meningitis                                                  | 3,754<br>(3,009 - 4,238)             | 1,490<br>(1,027 - 1,817)       | 252<br>(191 - 293)          | 715<br>(575 - 842)                 | 622<br>(504 - 720)                   | 676<br>(566 - 753)                   |
| Encephalitis                                                      | 5,714<br>(4,666 - 8,023)             | 2,169<br>(1,660 - 3,247)       | 548<br>(416 - 891)          | 1,395<br>(1,084 - 2,173)           | 986<br>(768 - 1,515)                 | 617<br>(492 - 933)                   |
| Diphtheria                                                        | 47<br>(33 - 67)                      | 19<br>(9 - 35)                 | 9<br>(4 - 16)               | 13<br>(8 - 20)                     | 7<br>(3 - 13)                        | --                                   |
| Whooping cough                                                    | 332<br>(141 - 672)                   | 304<br>(129 - 621)             | 19<br>(8 - 37)              | 8<br>(3 - 15)                      | 2<br>(1 - 4)                         | --                                   |
| Tetanus                                                           | 1,145<br>(942 - 1,805)               | 384<br>(302 - 573)             | 20<br>(13 - 26)             | 265<br>(207 - 403)                 | 282<br>(212 - 497)                   | 194<br>(145 - 377)                   |
| Measles                                                           | 77<br>(12 - 252)                     | 64<br>(10 - 212)               | 10<br>(2 - 32)              | 2<br>(0 - 7)                       | 0<br>(0 - 0)                         | --                                   |
| Varicella and herpes zoster                                       | 666<br>(531 - 835)                   | 73<br>(49 - 104)               | 19<br>(12 - 27)             | 127<br>(99 - 160)                  | 90<br>(67 - 121)                     | 357<br>(234 - 510)                   |
| Neglected tropical diseases and malaria                           | 4,159<br>(3,529 - 4,902)             | 286<br>(221 - 374)             | 334<br>(271 - 429)          | 1,332<br>(1,096 - 1,611)           | 1,520<br>(1,235 - 1,800)             | 686<br>(597 - 780)                   |
| Malaria                                                           | 144<br>(123 - 168)                   | 11<br>(8 - 15)                 | 13<br>(11 - 16)             | 76<br>(63 - 94)                    | 31<br>(25 - 37)                      | 12<br>(10 - 14)                      |
| Leishmaniasis                                                     | 43<br>(35 - 52)                      | 19<br>(13 - 26)                | 2<br>(2 - 3)                | 9<br>(6 - 12)                      | 7<br>(5 - 10)                        | 7<br>(5 - 9)                         |
| Visceral leishmaniasis                                            | 43<br>(35 - 52)                      | 19<br>(13 - 26)                | 2<br>(2 - 3)                | 9<br>(6 - 12)                      | 7<br>(5 - 10)                        | 7<br>(5 - 9)                         |
| Schistosomiasis                                                   | 327<br>(276 - 386)                   | 0<br>(0 - 0)                   | 2<br>(1 - 2)                | 59<br>(48 - 74)                    | 142<br>(113 - 174)                   | 124<br>(101 - 150)                   |
| Cysticercosis                                                     | 15<br>(12 - 19)                      | 0<br>(0 - 0)                   | 0<br>(0 - 0)                | 6<br>(5 - 8)                       | 6<br>(5 - 7)                         | 3<br>(2 - 3)                         |
| Cystic echinococcosis                                             | 281<br>(249 - 314)                   | 5<br>(3 - 7)                   | 16<br>(14 - 18)             | 93<br>(81 - 107)                   | 98<br>(84 - 113)                     | 69<br>(63 - 76)                      |
| Dengue                                                            | 136<br>(112 - 158)                   | 8<br>(6 - 10)                  | 16<br>(12 - 18)             | 75<br>(61 - 89)                    | 28<br>(23 - 34)                      | 9<br>(8 - 12)                        |
| Rabies                                                            | 2,233<br>(1,657 - 2,898)             | 129<br>(82 - 204)              | 242<br>(185 - 335)          | 755<br>(525 - 1,001)               | 878<br>(634 - 1,119)                 | 230<br>(171 - 292)                   |
| Intestinal nematode infections                                    | 192<br>(149 - 240)                   | 54<br>(32 - 82)                | 22<br>(11 - 38)             | 27<br>(14 - 45)                    | 36<br>(20 - 55)                      | 53<br>(33 - 78)                      |
| Ascariasis                                                        | 192<br>(149 - 240)                   | 54<br>(32 - 82)                | 22<br>(11 - 38)             | 27<br>(14 - 45)                    | 36<br>(20 - 55)                      | 53<br>(33 - 78)                      |
| Other neglected tropical diseases                                 | 788<br>(680 - 928)                   | 60<br>(50 - 74)                | 20<br>(17 - 23)             | 232<br>(193 - 284)                 | 295<br>(242 - 360)                   | 181<br>(153 - 217)                   |
| Maternal disorders                                                | 3,233<br>(2,633 - 3,815)             | --                             | 20<br>(15 - 26)             | 3,213<br>(2,617 - 3,798)           | --                                   | --                                   |

Web Table 31- China deaths with 95% UI by age, sex, and cause in 2013

| Cause                                                            | Both Sexes, All Ages                 | Both Sexes, 0-4 Years       | Both Sexes, 5-14 Years      | Both Sexes, 15-49 Years        | Both Sexes, 50-69 Years              | Both Sexes, 70-80 Years              |
|------------------------------------------------------------------|--------------------------------------|-----------------------------|-----------------------------|--------------------------------|--------------------------------------|--------------------------------------|
| Maternal hemorrhage                                              | 655<br>(532 - 798)                   | --                          | 3<br>(2 - 4)                | 652<br>(529 - 795)             | --                                   | --                                   |
| Maternal sepsis and other maternal infections                    | 268<br>(217 - 326)                   | --                          | 2<br>(2 - 3)                | 266<br>(215 - 323)             | --                                   | --                                   |
| Maternal hypertensive disorders                                  | 296<br>(241 - 353)                   | --                          | 2<br>(1 - 2)                | 294<br>(239 - 352)             | --                                   | --                                   |
| Maternal obstructed labor                                        | 330<br>(264 - 400)                   | --                          | 2<br>(1 - 3)                | 328<br>(262 - 398)             | --                                   | --                                   |
| Maternal abortive outcome                                        | 360<br>(290 - 431)                   | --                          | 2<br>(1 - 3)                | 358<br>(288 - 429)             | --                                   | --                                   |
| Indirect maternal deaths                                         | 479<br>(377 - 580)                   | --                          | 3<br>(2 - 4)                | 477<br>(374 - 577)             | --                                   | --                                   |
| Late maternal deaths                                             | 341<br>(273 - 413)                   | --                          | 4<br>(3 - 5)                | 337<br>(270 - 410)             | --                                   | --                                   |
| Maternal deaths aggravated by HIV/AIDS                           | 0<br>(0 - 0)                         | --                          | --                          | 0<br>(0 - 0)                   | --                                   | --                                   |
| Other maternal disorders                                         | 497<br>(405 - 596)                   | --                          | 3<br>(2 - 4)                | 494<br>(402 - 593)             | --                                   | --                                   |
| Neonatal disorders                                               | 81,885<br>(71,727 - 91,233)          | 81,885<br>(71,727 - 91,233) | --                          | --                             | --                                   | --                                   |
| Neonatal preterm birth complications                             | 37,467<br>(26,968 - 44,188)          | 37,467<br>(26,968 - 44,188) | --                          | --                             | --                                   | --                                   |
| Neonatal encephalopathy due to birth asphyxia and trauma         | 29,759<br>(24,341 - 36,482)          | 29,759<br>(24,341 - 36,482) | --                          | --                             | --                                   | --                                   |
| Neonatal sepsis and other neonatal infections                    | 3,675<br>(2,240 - 6,305)             | 3,675<br>(2,240 - 6,305)    | --                          | --                             | --                                   | --                                   |
| Hemolytic disease and other neonatal jaundice                    | 1,756<br>(1,116 - 2,547)             | 1,756<br>(1,116 - 2,547)    | --                          | --                             | --                                   | --                                   |
| Other neonatal disorders                                         | 9,229<br>(7,434 - 11,486)            | 9,229<br>(7,434 - 11,486)   | --                          | --                             | --                                   | --                                   |
| Nutritional deficiencies                                         | 17,863<br>(14,766 - 23,342)          | 1,726<br>(1,291 - 2,269)    | 195<br>(153 - 254)          | 1,670<br>(1,338 - 2,375)       | 2,457<br>(1,953 - 3,528)             | 11,815<br>(9,834 - 15,123)           |
| Protein-energy malnutrition                                      | 9,293<br>(6,883 - 12,584)            | 1,088<br>(728 - 1,540)      | 75<br>(53 - 113)            | 546<br>(360 - 914)             | 896<br>(586 - 1,495)                 | 6,688<br>(4,937 - 8,845)             |
| Iodine deficiency                                                | 86<br>(51 - 134)                     | 5<br>(2 - 11)               | 2<br>(1 - 4)                | 11<br>(6 - 18)                 | 23<br>(12 - 38)                      | 45<br>(20 - 86)                      |
| Iron-deficiency anemia                                           | 5,825<br>(3,904 - 9,066)             | 262<br>(123 - 427)          | 75<br>(48 - 109)            | 846<br>(575 - 1,212)           | 1,207<br>(787 - 1,812)               | 3,435<br>(2,234 - 5,494)             |
| Other nutritional deficiencies                                   | 2,658<br>(1,607 - 4,073)             | 370<br>(183 - 590)          | 43<br>(24 - 62)             | 267<br>(153 - 421)             | 332<br>(182 - 546)                   | 1,647<br>(1,009 - 2,599)             |
| Other communicable, maternal, neonatal, and nutritional diseases | 34,539<br>(29,547 - 42,370)          | 1,618<br>(1,238 - 2,220)    | 287<br>(241 - 361)          | 8,796<br>(7,158 - 11,854)      | 13,461<br>(10,964 - 16,474)          | 10,378<br>(8,753 - 12,191)           |
| Sexually transmitted diseases excluding HIV                      | 1,097<br>(764 - 1,534)               | 599<br>(313 - 1,008)        | 55<br>(31 - 89)             | 137<br>(109 - 170)             | 165<br>(126 - 214)                   | 141<br>(112 - 171)                   |
| Syphilis                                                         | 925<br>(602 - 1,365)                 | 599<br>(313 - 1,008)        | 50<br>(27 - 84)             | 63<br>(50 - 78)                | 102<br>(79 - 131)                    | 111<br>(89 - 136)                    |
| Chlamydial infection                                             | 37<br>(28 - 49)                      | --                          | 1<br>(1 - 1)                | 17<br>(13 - 23)                | 14<br>(10 - 20)                      | 5<br>(4 - 7)                         |
| Gonococcal infection                                             | 78<br>(62 - 95)                      | --                          | 2<br>(1 - 2)                | 30<br>(24 - 37)                | 29<br>(22 - 38)                      | 17<br>(13 - 20)                      |
| Other sexually transmitted diseases                              | 56<br>(44 - 68)                      | --                          | 2<br>(1 - 2)                | 27<br>(21 - 33)                | 20<br>(15 - 26)                      | 8<br>(6 - 9)                         |
| Hepatitis                                                        | 31,777<br>(26,918 - 39,290)          | 641<br>(483 - 1,198)        | 179<br>(150 - 250)          | 8,353<br>(6,758 - 11,416)      | 12,929<br>(10,515 - 15,833)          | 9,675<br>(8,014 - 11,345)            |
| Acute hepatitis A                                                | 1,240<br>(321 - 2,788)               | 207<br>(65 - 452)           | 50<br>(17 - 92)             | 508<br>(131 - 1,161)           | 340<br>(84 - 807)                    | 135<br>(30 - 324)                    |
| Acute hepatitis B                                                | 23,089<br>(18,025 - 28,705)          | 424<br>(237 - 831)          | 70<br>(40 - 110)            | 4,171<br>(2,603 - 6,215)       | 10,109<br>(7,699 - 12,753)           | 8,315<br>(6,748 - 9,958)             |
| Acute hepatitis C                                                | 737<br>(143 - 1,747)                 | --                          | 6<br>(1 - 16)               | 176<br>(34 - 449)              | 281<br>(53 - 686)                    | 274<br>(53 - 655)                    |
| Acute hepatitis E                                                | 6,711<br>(3,824 - 10,688)            | 9<br>(4 - 19)               | 52<br>(31 - 84)             | 3,498<br>(2,194 - 5,288)       | 2,200<br>(1,109 - 3,752)             | 951<br>(456 - 1,771)                 |
| Other infectious diseases                                        | 1,666<br>(1,399 - 2,345)             | 378<br>(299 - 477)          | 53<br>(43 - 69)             | 306<br>(248 - 415)             | 367<br>(277 - 555)                   | 562<br>(430 - 897)                   |
| Non-communicable diseases                                        | 7,915,844<br>(7,154,229 - 8,521,266) | 71,042<br>(62,657 - 78,268) | 16,647<br>(14,813 - 18,370) | 619,347<br>(545,754 - 702,531) | 2,431,291<br>(2,098,852 - 2,724,268) | 4,777,516<br>(4,422,541 - 5,030,081) |
| Neoplasms                                                        | 2,120,013<br>(1,877,190 - 2,321,922) | 7,544<br>(5,943 - 9,323)    | 7,526<br>(6,644 - 8,404)    | 270,235<br>(238,625 - 307,004) | 974,888<br>(842,575 - 1,090,698)     | 859,820<br>(780,933 - 921,396)       |
| Esophageal cancer                                                | 197,784<br>(162,822 - 253,089)       | --                          | --                          | 10,383<br>(8,206 - 14,291)     | 97,686<br>(77,638 - 126,524)         | 89,715<br>(75,249 - 113,713)         |
| Stomach cancer                                                   | 317,760<br>(279,150 - 351,441)       | --                          | --                          | 24,480<br>(21,186 - 28,228)    | 146,016<br>(124,398 - 165,648)       | 147,264<br>(131,803 - 160,562)       |
| Liver cancer                                                     | 358,111<br>(313,542 - 396,739)       | --                          | 300<br>(249 - 349)          | 70,062<br>(59,530 - 82,057)    | 180,433<br>(153,740 - 203,064)       | 107,316<br>(96,947 - 116,335)        |
| Liver cancer due to hepatitis B                                  | 163,616<br>(137,426 - 190,135)       | --                          | 128<br>(104 - 153)          | 37,448<br>(31,383 - 45,170)    | 85,196<br>(69,729 - 100,799)         | 40,844<br>(34,956 - 46,752)          |
| Liver cancer due to hepatitis C                                  | 134,226<br>(111,932 - 157,786)       | --                          | 36<br>(29 - 45)             | 21,600<br>(16,430 - 26,895)    | 67,167<br>(54,048 - 82,084)          | 45,423<br>(40,187 - 51,159)          |
| Liver cancer due to alcohol use                                  | 25,665<br>(21,358 - 30,338)          | --                          | --                          | 3,015<br>(2,365 - 3,870)       | 11,821<br>(9,522 - 14,393)           | 10,829<br>(9,347 - 12,579)           |

Web Table 31- China deaths with 95% UI by age, sex, and cause in 2013

| Cause                                         | Both Sexes, All Ages                 | Both Sexes, 0-4 Years    | Both Sexes, 5-14 Years   | Both Sexes, 15-49 Years        | Both Sexes, 50-69 Years            | Both Sexes, 70-80 Years              |
|-----------------------------------------------|--------------------------------------|--------------------------|--------------------------|--------------------------------|------------------------------------|--------------------------------------|
| Liver cancer due to other causes              | 34,604<br>(2,854 - 39,624)           | --                       | 136<br>(113 - 162)       | 7,999<br>(6,728 - 9,444)       | 16,249<br>(13,815 - 19,073)        | 10,220<br>(9,161 - 11,544)           |
| Larynx cancer                                 | 14,330<br>(10,569 - 18,197)          | --                       | --                       | 1,258<br>(916 - 1,610)         | 7,078<br>(5,054 - 8,907)           | 5,994<br>(4,582 - 7,666)             |
| Tracheal, bronchus and lung cancer            | 546,259<br>(482,039 - 600,046)       | --                       | --                       | 39,335<br>(33,771 - 46,323)    | 254,346<br>(217,893 - 285,461)     | 252,578<br>(227,648 - 272,560)       |
| Breast cancer                                 | 52,734<br>(41,989 - 63,358)          | --                       | --                       | 15,190<br>(11,810 - 18,497)    | 25,585<br>(19,858 - 31,810)        | 11,959<br>(10,341 - 13,452)          |
| Cervical cancer                               | 28,010<br>(18,711 - 33,877)          | --                       | --                       | 8,311<br>(5,232 - 10,320)      | 12,847<br>(8,131 - 16,088)         | 6,853<br>(5,194 - 7,874)             |
| Uterine cancer                                | 15,360<br>(9,388 - 20,031)           | --                       | --                       | 3,014<br>(1,825 - 4,087)       | 7,872<br>(4,607 - 10,446)          | 4,474<br>(2,886 - 6,006)             |
| Prostate cancer                               | 17,847<br>(10,583 - 24,802)          | --                       | --                       | 218<br>(148 - 308)             | 3,660<br>(2,219 - 4,991)           | 13,969<br>(8,139 - 19,624)           |
| Colon and rectum cancer                       | 147,997<br>(131,970 - 162,537)       | --                       | --                       | 16,048<br>(13,986 - 18,357)    | 61,225<br>(52,999 - 68,942)        | 70,724<br>(64,683 - 76,275)          |
| Lip and oral cavity cancer                    | 11,971<br>(8,814 - 13,943)           | --                       | --                       | 1,878<br>(1,469 - 2,386)       | 5,084<br>(3,759 - 6,053)           | 5,010<br>(3,473 - 5,821)             |
| Nasopharynx cancer                            | 28,548<br>(23,652 - 33,358)          | --                       | 58<br>(44 - 77)          | 8,069<br>(6,584 - 9,834)       | 14,742<br>(12,227 - 17,391)        | 5,679<br>(4,800 - 6,662)             |
| Other pharynx cancer                          | 5,495<br>(4,153 - 6,227)             | --                       | --                       | 843<br>(663 - 1,018)           | 2,551<br>(1,961 - 2,969)           | 2,101<br>(1,499 - 2,361)             |
| Gallbladder and biliary tract cancer          | 24,500<br>(19,541 - 28,045)          | --                       | --                       | 1,763<br>(1,406 - 2,096)       | 10,029<br>(8,005 - 11,828)         | 12,708<br>(10,138 - 14,406)          |
| Pancreatic cancer                             | 59,423<br>(52,918 - 65,360)          | --                       | --                       | 5,588<br>(4,849 - 6,409)       | 27,117<br>(23,503 - 30,571)        | 26,718<br>(24,434 - 28,856)          |
| Malignant skin melanoma                       | 3,708<br>(2,994 - 4,892)             | --                       | --                       | 818<br>(638 - 1,136)           | 1,527<br>(1,223 - 2,019)           | 1,363<br>(1,083 - 1,837)             |
| Non-melanoma skin cancer                      | 8,520<br>(6,475 - 12,214)            | --                       | --                       | 843<br>(637 - 1,200)           | 2,351<br>(1,746 - 3,370)           | 5,325<br>(4,059 - 7,861)             |
| Ovarian cancer                                | 14,547<br>(11,910 - 17,610)          | --                       | --                       | 3,265<br>(2,583 - 4,077)       | 7,696<br>(6,171 - 9,606)           | 3,586<br>(3,160 - 4,100)             |
| Testicular cancer                             | 979<br>(734 - 1,497)                 | --                       | --                       | 508<br>(378 - 794)             | 218<br>(159 - 341)                 | 253<br>(186 - 386)                   |
| Kidney cancer                                 | 14,720<br>(13,067 - 16,180)          | 224<br>(169 - 293)       | 67<br>(57 - 78)          | 2,009<br>(1,732 - 2,351)       | 6,373<br>(5,481 - 7,200)           | 6,047<br>(5,449 - 6,565)             |
| Bladder cancer                                | 25,771<br>(22,004 - 31,120)          | --                       | --                       | 1,011<br>(846 - 1,236)         | 8,284<br>(6,808 - 10,170)          | 16,475<br>(14,208 - 20,006)          |
| Brain and nervous system cancer               | 52,411<br>(42,810 - 69,191)          | 950<br>(607 - 1,400)     | 1,633<br>(1,301 - 2,197) | 13,281<br>(10,645 - 17,561)    | 21,925<br>(17,552 - 29,644)        | 14,622<br>(11,966 - 19,178)          |
| Thyroid cancer                                | 4,975<br>(3,921 - 5,808)             | --                       | 10<br>(8 - 12)           | 628<br>(506 - 781)             | 2,158<br>(1,714 - 2,580)           | 2,179<br>(1,657 - 2,500)             |
| Mesothelioma                                  | 11,856<br>(10,188 - 13,476)          | --                       | --                       | 526<br>(450 - 611)             | 9,746<br>(8,268 - 11,217)          | 1,584<br>(1,384 - 1,757)             |
| Hodgkin lymphoma                              | 4,278<br>(3,444 - 6,814)             | 123<br>(87 - 280)        | 94<br>(72 - 176)         | 1,765<br>(1,379 - 2,864)       | 1,361<br>(1,072 - 2,107)           | 936<br>(765 - 1,445)                 |
| Non-Hodgkin lymphoma                          | 28,113<br>(20,603 - 32,645)          | 325<br>(230 - 415)       | 409<br>(311 - 485)       | 5,781<br>(4,333 - 7,030)       | 11,911<br>(8,348 - 14,220)         | 9,687<br>(6,973 - 11,060)            |
| Multiple myeloma                              | 8,335<br>(6,578 - 9,746)             | --                       | --                       | 1,157<br>(872 - 1,393)         | 3,935<br>(3,065 - 4,678)           | 3,242<br>(2,553 - 3,769)             |
| Leukemia                                      | 55,620<br>(49,653 - 61,528)          | 3,286<br>(2,525 - 4,109) | 3,413<br>(2,881 - 3,809) | 20,748<br>(18,217 - 23,843)    | 17,357<br>(14,928 - 19,731)        | 10,816<br>(9,745 - 11,842)           |
| Other neoplasms                               | 60,051<br>(47,289 - 67,902)          | 2,636<br>(1,566 - 3,567) | 1,543<br>(1,143 - 1,850) | 11,455<br>(8,337 - 13,548)     | 23,774<br>(17,872 - 27,899)        | 20,642<br>(16,728 - 22,857)          |
| Cardiovascular diseases                       | 3,723,770<br>(3,345,960 - 4,017,408) | 4,521<br>(3,744 - 5,312) | 2,536<br>(2,110 - 2,900) | 205,284<br>(175,291 - 237,270) | 1,001,519<br>(858,330 - 1,128,755) | 2,509,909<br>(2,298,552 - 2,653,202) |
| Rheumatic heart disease                       | 72,912<br>(55,330 - 90,955)          | 114<br>(58 - 167)        | 190<br>(133 - 235)       | 7,878<br>(5,857 - 10,018)      | 24,284<br>(17,955 - 30,648)        | 40,446<br>(30,629 - 50,528)          |
| Ischemic heart disease                        | 1,394,366<br>(1,061,479 - 1,563,778) | 727<br>(517 - 945)       | 761<br>(586 - 902)       | 84,946<br>(65,313 - 101,442)   | 355,000<br>(276,267 - 413,735)     | 952,933<br>(712,122 - 1,052,884)     |
| Cerebrovascular disease                       | 1,920,688<br>(1,715,666 - 2,196,207) | 1,440<br>(1,179 - 1,698) | 956<br>(796 - 1,129)     | 94,652<br>(79,306 - 114,136)   | 544,695<br>(464,309 - 631,293)     | 1,278,946<br>(1,161,682 - 1,465,180) |
| Ischemic stroke                               | 735,976<br>(554,471 - 849,199)       | 125<br>(79 - 192)        | 121<br>(87 - 162)        | 13,387<br>(9,747 - 18,588)     | 154,585<br>(115,045 - 187,579)     | 567,758<br>(421,968 - 649,505)       |
| Hemorrhagic stroke                            | 1,184,712<br>(1,024,961 - 1,462,700) | 1,315<br>(1,088 - 1,535) | 834<br>(702 - 982)       | 81,264<br>(68,150 - 98,095)    | 390,110<br>(330,943 - 460,968)     | 711,188<br>(615,116 - 918,586)       |
| Hypertensive heart disease                    | 238,764<br>(171,528 - 284,851)       | 88<br>(70 - 135)         | 45<br>(35 - 65)          | 7,652<br>(5,803 - 10,661)      | 48,594<br>(35,065 - 61,137)        | 182,384<br>(129,779 - 215,280)       |
| Cardiomyopathy and myocarditis                | 26,674<br>(18,939 - 30,905)          | 1,145<br>(704 - 1,518)   | 376<br>(244 - 460)       | 4,486<br>(3,000 - 5,579)       | 7,555<br>(5,168 - 9,214)           | 13,112<br>(9,336 - 14,924)           |
| Atrial fibrillation and flutter               | 1,021<br>(892 - 1,229)               | --                       | --                       | 59<br>(49 - 73)                | 152<br>(127 - 185)                 | 810<br>(695 - 979)                   |
| Aortic aneurysm                               | 10,184<br>(8,349 - 12,210)           | --                       | --                       | 1,458<br>(1,160 - 1,815)       | 3,305<br>(2,635 - 3,992)           | 5,421<br>(4,473 - 6,566)             |
| Peripheral vascular disease                   | 1,209<br>(1,052 - 1,425)             | --                       | --                       | 53<br>(43 - 69)                | 277<br>(226 - 334)                 | 879<br>(767 - 1,041)                 |
| Endocarditis                                  | 2,901<br>(2,151 - 3,560)             | 139<br>(98 - 175)        | 28<br>(19 - 36)          | 588<br>(431 - 797)             | 695<br>(511 - 903)                 | 1,451<br>(1,025 - 1,770)             |
| Other cardiovascular and circulatory diseases | 55,051<br>(46,220 - 84,473)          | 868<br>(706 - 1,173)     | 182<br>(144 - 276)       | 3,512<br>(2,801 - 5,900)       | 16,962<br>(13,590 - 26,708)        | 33,527<br>(28,523 - 49,374)          |

Web Table 31- China deaths with 95% UI by age, sex, and cause in 2013

| Cause                                               | Both Sexes, All Ages               | Both Sexes, 0-4 Years  | Both Sexes, 5-14 Years | Both Sexes, 15-49 Years     | Both Sexes, 50-69 Years        | Both Sexes, 70-80 Years        |
|-----------------------------------------------------|------------------------------------|------------------------|------------------------|-----------------------------|--------------------------------|--------------------------------|
| Chronic respiratory diseases                        | 1,069,105<br>(960,975 - 1,182,150) | 1,271<br>(988 - 1,451) | 432<br>(344 - 488)     | 18,946<br>(15,720 - 22,226) | 186,041<br>(157,108 - 216,341) | 862,415<br>(783,258 - 948,636) |
| Chronic obstructive pulmonary disease               | 910,809<br>(817,530 - 1,015,436)   | 677<br>(512 - 798)     | 220<br>(171 - 256)     | 14,188<br>(11,741 - 16,582) | 159,178<br>(134,242 - 185,609) | 736,546<br>(663,607 - 822,700) |
| Pneumoconiosis                                      | 10,514<br>(7,217 - 14,195)         | 19<br>(11 - 28)        | 16<br>(12 - 21)        | 1,145<br>(773 - 1,551)      | 3,239<br>(2,108 - 4,477)       | 6,094<br>(4,112 - 8,281)       |
| Silicosis                                           | 5,211<br>(3,457 - 7,018)           | 4<br>(3 - 7)           | 4<br>(3 - 5)           | 632<br>(413 - 867)          | 1,855<br>(1,185 - 2,579)       | 2,716<br>(1,827 - 3,641)       |
| Asbestosis                                          | 352<br>(251 - 463)                 | 4<br>(3 - 7)           | 4<br>(3 - 5)           | 70<br>(50 - 93)             | 70<br>(48 - 97)                | 203<br>(140 - 271)             |
| Coal workers pneumoconiosis                         | 1,745<br>(1,160 - 2,377)           | 5<br>(3 - 7)           | 4<br>(3 - 5)           | 140<br>(97 - 190)           | 622<br>(400 - 889)             | 973<br>(633 - 1,303)           |
| Other pneumoconiosis                                | 3,206<br>(2,237 - 4,306)           | 5<br>(3 - 7)           | 4<br>(3 - 5)           | 303<br>(209 - 406)          | 691<br>(478 - 961)             | 2,202<br>(1,510 - 3,016)       |
| Asthma                                              | 25,163<br>(20,355 - 30,424)        | 65<br>(39 - 93)        | 68<br>(50 - 80)        | 2,005<br>(1,532 - 2,477)    | 5,205<br>(4,123 - 6,404)       | 17,821<br>(14,432 - 21,878)    |
| Interstitial lung disease and pulmonary sarcoidosis | 82,328<br>(57,703 - 103,972)       | 41<br>(26 - 60)        | 26<br>(19 - 37)        | 562<br>(420 - 766)          | 13,959<br>(9,960 - 18,138)     | 67,740<br>(46,936 - 86,602)    |
| Other chronic respiratory diseases                  | 40,291<br>(33,556 - 48,759)        | 469<br>(366 - 546)     | 102<br>(79 - 120)      | 1,046<br>(836 - 1,275)      | 4,460<br>(3,581 - 5,497)       | 34,213<br>(28,348 - 41,525)    |
| Cirrhosis                                           | 157,357<br>(137,907 - 174,359)     | 136<br>(94 - 185)      | 197<br>(171 - 219)     | 34,019<br>(29,101 - 39,743) | 74,082<br>(63,299 - 83,557)    | 48,923<br>(44,522 - 53,032)    |
| Cirrhosis due to hepatitis B                        | 70,761<br>(61,432 - 79,964)        | 14<br>(9 - 20)         | 63<br>(53 - 74)        | 15,470<br>(13,014 - 18,207) | 32,870<br>(27,745 - 37,834)    | 22,345<br>(20,040 - 24,719)    |
| Cirrhosis due to hepatitis C                        | 35,435<br>(31,115 - 40,432)        | 8<br>(5 - 12)          | 27<br>(24 - 31)        | 7,554<br>(6,424 - 9,013)    | 17,195<br>(14,710 - 19,974)    | 10,650<br>(9,505 - 11,904)     |
| Cirrhosis due to alcohol use                        | 41,163<br>(34,830 - 46,935)        | --                     | --                     | 7,381<br>(5,963 - 9,000)    | 19,711<br>(16,190 - 22,990)    | 14,071<br>(12,422 - 15,618)    |
| Cirrhosis due to other causes                       | 9,998<br>(8,626 - 11,568)          | 114<br>(78 - 155)      | 107<br>(91 - 119)      | 3,614<br>(3,042 - 4,317)    | 4,306<br>(3,613 - 5,068)       | 1,856<br>(1,642 - 2,075)       |
| Digestive diseases                                  | 121,005<br>(106,683 - 133,572)     | 980<br>(656 - 1,330)   | 423<br>(367 - 474)     | 10,951<br>(9,384 - 13,000)  | 35,400<br>(29,756 - 40,634)    | 73,251<br>(66,095 - 79,981)    |
| Peptic ulcer disease                                | 40,612<br>(31,643 - 46,710)        | 42<br>(23 - 61)        | 48<br>(35 - 59)        | 3,449<br>(2,580 - 4,211)    | 12,797<br>(9,717 - 15,195)     | 24,276<br>(18,844 - 27,587)    |
| Gastritis and duodenitis                            | 19,823<br>(13,432 - 26,653)        | 47<br>(27 - 74)        | 27<br>(16 - 38)        | 1,354<br>(935 - 1,894)      | 6,419<br>(4,180 - 8,514)       | 11,976<br>(8,068 - 16,003)     |
| Appendicitis                                        | 2,009<br>(1,590 - 2,639)           | 23<br>(13 - 34)        | 35<br>(26 - 44)        | 301<br>(221 - 387)          | 536<br>(414 - 717)             | 1,113<br>(863 - 1,477)         |
| Paralytic ileus and intestinal obstruction          | 14,092<br>(9,834 - 20,779)         | 229<br>(138 - 377)     | 118<br>(90 - 170)      | 1,243<br>(856 - 1,919)      | 3,034<br>(2,066 - 4,754)       | 9,469<br>(6,556 - 13,718)      |
| Inguinal, femoral, and abdominal hernia             | 1,084<br>(787 - 1,548)             | 22<br>(12 - 32)        | 12<br>(7 - 16)         | 79<br>(51 - 100)            | 216<br>(158 - 310)             | 755<br>(543 - 1,119)           |
| Inflammatory bowel disease                          | 6,070<br>(4,853 - 8,098)           | 275<br>(163 - 396)     | 58<br>(42 - 71)        | 538<br>(411 - 693)          | 1,451<br>(1,129 - 1,960)       | 3,749<br>(2,991 - 5,268)       |
| Vascular intestinal disorders                       | 669<br>(392 - 1,094)               | 4<br>(1 - 10)          | 9<br>(2 - 19)          | 66<br>(36 - 113)            | 128<br>(67 - 230)              | 462<br>(269 - 727)             |
| Gallbladder and biliary diseases                    | 15,390<br>(13,186 - 19,793)        | 32<br>(21 - 44)        | 22<br>(17 - 27)        | 773<br>(632 - 960)          | 3,407<br>(2,775 - 4,461)       | 11,156<br>(9,585 - 14,483)     |
| Pancreatitis                                        | 10,862<br>(8,126 - 14,282)         | 10<br>(6 - 15)         | 24<br>(16 - 31)        | 2,145<br>(1,588 - 2,742)    | 3,783<br>(2,714 - 5,020)       | 4,900<br>(3,591 - 6,580)       |
| Other digestive diseases                            | 10,394<br>(8,466 - 14,301)         | 297<br>(192 - 413)     | 70<br>(53 - 84)        | 1,003<br>(786 - 1,429)      | 3,629<br>(2,838 - 4,973)       | 5,396<br>(4,425 - 7,280)       |
| Neurological disorders                              | 254,197<br>(233,924 - 279,614)     | 1,127<br>(942 - 1,488) | 907<br>(772 - 1,148)   | 10,440<br>(9,006 - 13,324)  | 25,773<br>(22,326 - 29,191)    | 215,949<br>(199,968 - 237,417) |
| Alzheimer disease and other dementias               | 225,444<br>(208,156 - 247,160)     | --                     | --                     | 136<br>(108 - 168)          | 18,306<br>(15,705 - 20,874)    | 207,002<br>(191,810 - 227,511) |
| Parkinson disease                                   | 7,913<br>(6,774 - 9,929)           | --                     | --                     | 177<br>(145 - 219)          | 1,871<br>(1,568 - 2,308)       | 5,865<br>(5,006 - 7,355)       |
| Epilepsy                                            | 13,323<br>(11,400 - 17,568)        | 703<br>(538 - 1,089)   | 703<br>(591 - 940)     | 7,412<br>(6,245 - 10,115)   | 2,782<br>(2,228 - 3,647)       | 1,723<br>(1,349 - 2,234)       |
| Multiple sclerosis                                  | 210<br>(152 - 336)                 | --                     | --                     | 99<br>(69 - 158)            | 71<br>(51 - 113)               | 40<br>(30 - 68)                |
| Other neurological disorders                        | 7,308<br>(6,012 - 8,385)           | 424<br>(331 - 480)     | 204<br>(160 - 236)     | 2,616<br>(2,090 - 3,148)    | 2,744<br>(2,272 - 3,207)       | 1,320<br>(1,133 - 1,477)       |
| Mental and substance use disorders                  | 42,606<br>(35,868 - 52,780)        | 258<br>(209 - 313)     | 4<br>(3 - 5)           | 19,584<br>(16,309 - 24,710) | 13,572<br>(10,994 - 17,242)    | 9,187<br>(8,067 - 11,154)      |
| Schizophrenia                                       | 8,732<br>(6,666 - 14,500)          | --                     | --                     | 3,281<br>(2,430 - 5,371)    | 3,303<br>(2,462 - 5,605)       | 2,148<br>(1,662 - 3,596)       |
| Alcohol use disorders                               | 15,459<br>(10,132 - 22,104)        | --                     | --                     | 7,739<br>(4,844 - 10,786)   | 6,186<br>(4,127 - 8,864)       | 1,534<br>(1,064 - 2,152)       |
| Drug use disorders                                  | 18,352<br>(16,125 - 20,929)        | 258<br>(209 - 313)     | --                     | 8,505<br>(7,324 - 10,217)   | 4,083<br>(3,455 - 4,726)       | 5,506<br>(4,908 - 6,084)       |
| Opioid use disorders                                | 7,334<br>(6,440 - 8,384)           | 105<br>(81 - 132)      | --                     | 3,458<br>(2,957 - 4,189)    | 1,496<br>(1,249 - 1,770)       | 2,275<br>(1,987 - 2,601)       |
| Cocaine use disorders                               | 1,443<br>(1,247 - 1,677)           | 26<br>(18 - 37)        | --                     | 760<br>(626 - 934)          | 273<br>(223 - 339)             | 383<br>(313 - 471)             |
| Amphetamine use disorders                           | 1,593<br>(1,364 - 1,877)           | 33<br>(24 - 47)        | --                     | 724<br>(600 - 895)          | 365<br>(292 - 449)             | 470<br>(375 - 577)             |
| Other drug use disorders                            | 7,982<br>(6,938 - 9,222)           | 94<br>(71 - 119)       | --                     | 3,562<br>(3,009 - 4,395)    | 1,949<br>(1,622 - 2,287)       | 2,377<br>(2,069 - 2,687)       |

Web Table 31- China deaths with 95% UI by age, sex, and cause in 2013

| Cause                                               | Both Sexes, All Ages           | Both Sexes, 0-4 Years       | Both Sexes, 5-14 Years   | Both Sexes, 15-49 Years     | Both Sexes, 50-69 Years       | Both Sexes, 70-80 Years        |
|-----------------------------------------------------|--------------------------------|-----------------------------|--------------------------|-----------------------------|-------------------------------|--------------------------------|
| Eating disorders                                    | 64<br>(54 - 74)                | --                          | 4<br>(3 - 5)             | 60<br>(50 - 70)             | --                            | --                             |
| Anorexia nervosa                                    | 64<br>(54 - 74)                | --                          | 4<br>(3 - 5)             | 60<br>(50 - 70)             | --                            | --                             |
| Diabetes, urogenital, blood, and endocrine diseases | 337,252<br>(298,935 - 370,549) | 3,372<br>(2,890 - 3,989)    | 1,570<br>(1,341 - 1,818) | 37,102<br>(32,505 - 42,795) | 111,655<br>(95,890 - 126,069) | 183,553<br>(162,346 - 198,059) |
| Diabetes mellitus                                   | 131,206<br>(118,266 - 144,476) | 391<br>(308 - 489)          | 157<br>(118 - 213)       | 9,304<br>(8,146 - 10,705)   | 47,106<br>(40,553 - 53,576)   | 74,248<br>(68,055 - 81,239)    |
| Acute glomerulonephritis                            | 7,514<br>(6,203 - 9,272)       | 90<br>(68 - 114)            | 120<br>(97 - 143)        | 1,814<br>(1,462 - 2,274)    | 2,493<br>(1,984 - 3,154)      | 2,998<br>(2,432 - 3,679)       |
| Chronic kidney disease                              | 155,390<br>(122,887 - 172,858) | 292<br>(231 - 338)          | 372<br>(314 - 422)       | 17,968<br>(15,292 - 20,946) | 50,245<br>(40,577 - 57,631)   | 86,513<br>(66,060 - 94,564)    |
| Chronic kidney disease due to diabetes mellitus     | 30,192<br>(23,245 - 38,248)    | 12<br>(8 - 18)              | 16<br>(12 - 23)          | 2,790<br>(2,144 - 3,911)    | 12,235<br>(9,165 - 15,275)    | 15,140<br>(11,341 - 19,320)    |
| Chronic kidney disease due to hypertension          | 40,028<br>(22,422 - 50,736)    | 37<br>(23 - 47)             | 23<br>(14 - 30)          | 2,597<br>(1,504 - 3,349)    | 10,378<br>(5,655 - 13,481)    | 26,994<br>(14,941 - 34,401)    |
| Chronic kidney disease due to glomerulonephritis    | 34,904<br>(28,473 - 44,181)    | 126<br>(96 - 154)           | 197<br>(166 - 227)       | 6,781<br>(5,570 - 8,303)    | 11,994<br>(9,500 - 15,273)    | 15,805<br>(12,831 - 20,553)    |
| Chronic kidney disease due to other causes          | 50,266<br>(35,850 - 59,801)    | 118<br>(86 - 144)           | 136<br>(106 - 166)       | 5,801<br>(4,575 - 7,024)    | 15,637<br>(11,468 - 18,875)   | 28,574<br>(19,131 - 35,003)    |
| Urinary diseases and male infertility               | 16,231<br>(14,228 - 21,552)    | 159<br>(137 - 190)          | 67<br>(58 - 83)          | 1,909<br>(1,635 - 2,439)    | 4,295<br>(3,631 - 5,587)      | 9,800<br>(8,592 - 13,323)      |
| Interstitial nephritis and urinary tract infections | 7,818<br>(6,628 - 10,009)      | 128<br>(110 - 161)          | 35<br>(29 - 46)          | 1,073<br>(902 - 1,389)      | 2,104<br>(1,723 - 2,750)      | 4,478<br>(3,735 - 5,841)       |
| Urolithiasis                                        | 3,182<br>(2,543 - 5,192)       | --                          | 14<br>(11 - 18)          | 382<br>(309 - 567)          | 1,031<br>(815 - 1,647)        | 1,755<br>(1,338 - 3,038)       |
| Other urinary diseases                              | 5,231<br>(4,166 - 7,433)       | 31<br>(20 - 42)             | 18<br>(13 - 23)          | 455<br>(342 - 593)          | 1,160<br>(867 - 1,603)        | 3,567<br>(2,821 - 5,238)       |
| Gynecological diseases                              | 293<br>(209 - 361)             | --                          | --                       | 90<br>(61 - 115)            | 108<br>(75 - 138)             | 95<br>(71 - 119)               |
| Uterine fibroids                                    | 77<br>(55 - 96)                | --                          | --                       | 20<br>(13 - 26)             | 29<br>(20 - 37)               | 29<br>(22 - 36)                |
| Polycystic ovarian syndrome                         | 5<br>(3 - 6)                   | --                          | --                       | 5<br>(3 - 6)                | 1<br>(0 - 1)                  | --                             |
| Endometriosis                                       | 15<br>(10 - 19)                | --                          | --                       | 13<br>(9 - 17)              | 2<br>(1 - 3)                  | --                             |
| Genital prolapse                                    | 55<br>(39 - 68)                | --                          | --                       | 11<br>(7 - 13)              | 20<br>(14 - 25)               | 24<br>(18 - 30)                |
| Other gynecological diseases                        | 141<br>(100 - 173)             | --                          | --                       | 42<br>(28 - 53)             | 57<br>(39 - 73)               | 42<br>(31 - 52)                |
| Hemoglobinopathies and hemolytic anemias            | 10,765<br>(7,561 - 14,511)     | 960<br>(658 - 1,312)        | 464<br>(319 - 625)       | 2,800<br>(1,960 - 3,786)    | 3,378<br>(2,278 - 4,619)      | 3,164<br>(2,186 - 4,303)       |
| Thalassemias                                        | 2,892<br>(2,053 - 3,852)       | 818<br>(556 - 1,129)        | 427<br>(293 - 576)       | 1,487<br>(1,045 - 2,028)    | 145<br>(97 - 197)             | 15<br>(10 - 20)                |
| Sickle cell disorders                               | 1<br>(1 - 1)                   | 0<br>(0 - 0)                | 0<br>(0 - 0)             | 1<br>(0 - 1)                | 0<br>(0 - 0)                  | 0<br>(0 - 0)                   |
| G6PD deficiency                                     | 463<br>(319 - 625)             | 15<br>(10 - 21)             | 8<br>(6 - 11)            | 147<br>(101 - 199)          | 246<br>(167 - 338)            | 46<br>(31 - 63)                |
| Other hemoglobinopathies and hemolytic anemias      | 7,409<br>(5,134 - 9,969)       | 126<br>(88 - 171)           | 29<br>(20 - 39)          | 1,165<br>(804 - 1,568)      | 2,987<br>(2,011 - 4,075)      | 3,103<br>(2,143 - 4,221)       |
| Endocrine, metabolic, blood, and immune disorders   | 15,853<br>(13,082 - 18,806)    | 1,479<br>(1,176 - 1,889)    | 389<br>(306 - 475)       | 3,217<br>(2,662 - 3,951)    | 4,030<br>(3,272 - 4,967)      | 6,737<br>(5,397 - 8,120)       |
| Musculoskeletal disorders                           | 18,231<br>(15,547 - 23,822)    | --                          | 294<br>(246 - 370)       | 4,806<br>(3,969 - 6,220)    | 5,579<br>(4,657 - 7,428)      | 7,552<br>(6,451 - 9,910)       |
| Rheumatoid arthritis                                | 8,313<br>(7,011 - 10,806)      | --                          | 43<br>(34 - 57)          | 730<br>(595 - 1,006)        | 2,841<br>(2,329 - 3,763)      | 4,700<br>(3,992 - 5,967)       |
| Other musculoskeletal disorders                     | 9,917<br>(8,286 - 13,109)      | --                          | 251<br>(209 - 312)       | 4,076<br>(3,368 - 5,222)    | 2,738<br>(2,242 - 3,760)      | 2,852<br>(2,297 - 4,041)       |
| Other non-communicable diseases                     | 72,308<br>(64,396 - 79,429)    | 51,833<br>(44,515 - 58,674) | 2,756<br>(2,312 - 3,121) | 7,980<br>(6,794 - 9,306)    | 2,782<br>(2,393 - 3,259)      | 6,957<br>(6,313 - 8,053)       |
| Congenital anomalies                                | 64,025<br>(56,074 - 70,933)    | 50,853<br>(43,777 - 57,646) | 2,701<br>(2,261 - 3,062) | 7,422<br>(6,262 - 8,662)    | 1,844<br>(1,548 - 2,196)      | 1,205<br>(1,031 - 1,441)       |
| Neural tube defects                                 | 1,461<br>(1,096 - 2,344)       | 1,288<br>(940 - 2,084)      | 36<br>(28 - 55)          | 90<br>(68 - 132)            | 31<br>(21 - 47)               | 16<br>(12 - 25)                |
| Congenital heart anomalies                          | 45,627<br>(39,480 - 50,535)    | 36,035<br>(30,564 - 40,674) | 2,115<br>(1,767 - 2,413) | 5,905<br>(4,948 - 6,918)    | 1,052<br>(875 - 1,268)        | 520<br>(434 - 635)             |
| Cleft lip and cleft palate                          | 535<br>(316 - 823)             | 535<br>(316 - 823)          | --                       | --                          | --                            | --                             |
| Down syndrome                                       | 762<br>(525 - 994)             | 595<br>(395 - 795)          | 29<br>(21 - 38)          | 92<br>(67 - 122)            | 35<br>(25 - 48)               | 11<br>(8 - 15)                 |
| Chromosomal unbalanced rearrangements               | 469<br>(367 - 639)             | 298<br>(218 - 434)          | 36<br>(24 - 47)          | 100<br>(76 - 128)           | 26<br>(20 - 37)               | 9<br>(6 - 14)                  |
| Other congenital anomalies                          | 15,171<br>(12,893 - 18,040)    | 12,102<br>(9,987 - 14,872)  | 485<br>(387 - 587)       | 1,234<br>(1,021 - 1,511)    | 700<br>(583 - 844)            | 649<br>(550 - 789)             |
| Skin and subcutaneous diseases                      | 7,480<br>(6,803 - 8,675)       | 177<br>(149 - 213)          | 56<br>(48 - 65)          | 558<br>(477 - 680)          | 938<br>(805 - 1,086)          | 5,752<br>(5,188 - 6,761)       |
| Cellulitis                                          | 348<br>(257 - 470)             | 35<br>(27 - 48)             | 10<br>(7 - 12)           | 63<br>(44 - 83)             | 64<br>(47 - 88)               | 175<br>(126 - 252)             |
| Pyoderma                                            | 1,526<br>(1,351 - 1,745)       | 105<br>(87 - 127)           | 18<br>(16 - 22)          | 198<br>(167 - 239)          | 295<br>(248 - 344)            | 909<br>(796 - 1,057)           |



Web Table 31- China deaths with 95% UI by age, sex, and cause in 2013

| Cause                                           | Both Sexes, All Ages           | Both Sexes, 0-4 Years       | Both Sexes, 5-14 Years      | Both Sexes, 15-49 Years        | Both Sexes, 50-69 Years        | Both Sexes, 70-80 Years        |
|-------------------------------------------------|--------------------------------|-----------------------------|-----------------------------|--------------------------------|--------------------------------|--------------------------------|
| Decubitus ulcer                                 | 5,212<br>(4,691 - 6,080)       | 14<br>(9 - 20)              | 16<br>(14 - 21)             | 216<br>(178 - 281)             | 501<br>(425 - 606)             | 4,464<br>(3,990 - 5,233)       |
| Other skin and subcutaneous diseases            | 395<br>(335 - 532)             | 23<br>(17 - 33)             | 11<br>(9 - 15)              | 80<br>(64 - 108)               | 77<br>(62 - 104)               | 203<br>(166 - 281)             |
| Sudden infant death syndrome                    | 803<br>(379 - 1,127)           | 803<br>(379 - 1,127)        | --                          | --                             | --                             | --                             |
| Injuries                                        | 794,033<br>(712,477 - 889,506) | 46,765<br>(38,083 - 61,154) | 27,001<br>(24,707 - 30,425) | 348,910<br>(306,838 - 406,157) | 211,312<br>(179,474 - 241,003) | 160,046<br>(141,987 - 181,615) |
| Transport injuries                              | 324,892<br>(273,024 - 373,054) | 8,611<br>(6,283 - 11,374)   | 8,515<br>(7,020 - 9,500)    | 178,939<br>(148,902 - 212,974) | 93,103<br>(75,996 - 108,226)   | 35,724<br>(31,246 - 42,999)    |
| Road injuries                                   | 313,676<br>(263,598 - 359,834) | 8,216<br>(5,949 - 10,868)   | 8,212<br>(6,744 - 9,152)    | 172,924<br>(143,777 - 205,809) | 89,884<br>(73,495 - 104,332)   | 34,441<br>(30,119 - 41,440)    |
| Pedestrian road injuries                        | 165,872<br>(129,562 - 200,352) | 5,499<br>(3,729 - 7,487)    | 5,353<br>(4,226 - 6,165)    | 79,824<br>(60,035 - 99,822)    | 50,634<br>(38,652 - 61,662)    | 24,561<br>(20,672 - 29,141)    |
| Cyclist road injuries                           | 24,496<br>(18,879 - 30,404)    | 316<br>(199 - 459)          | 620<br>(466 - 769)          | 10,806<br>(8,405 - 13,447)     | 9,855<br>(7,514 - 12,731)      | 2,899<br>(2,142 - 3,828)       |
| Motorcyclist road injuries                      | 56,622<br>(42,155 - 73,273)    | 513<br>(359 - 698)          | 699<br>(514 - 907)          | 41,526<br>(31,509 - 54,128)    | 12,000<br>(8,440 - 15,875)     | 1,885<br>(1,339 - 2,629)       |
| Motor vehicle road injuries                     | 64,811<br>(51,756 - 80,395)    | 1,796<br>(1,325 - 2,384)    | 1,458<br>(1,144 - 1,775)    | 39,800<br>(31,833 - 49,464)    | 16,888<br>(13,129 - 21,642)    | 4,868<br>(3,742 - 6,365)       |
| Other road injuries                             | 1,875<br>(1,084 - 2,451)       | 92<br>(50 - 141)            | 81<br>(48 - 107)            | 968<br>(536 - 1,303)           | 507<br>(296 - 677)             | 227<br>(144 - 308)             |
| Other transport injuries                        | 11,216<br>(8,823 - 13,293)     | 396<br>(293 - 506)          | 303<br>(235 - 356)          | 6,016<br>(4,540 - 7,275)       | 3,218<br>(2,428 - 3,942)       | 1,283<br>(1,059 - 1,678)       |
| Unintentional injuries                          | 311,215<br>(275,135 - 349,761) | 36,358<br>(30,188 - 49,938) | 16,754<br>(14,907 - 21,368) | 106,118<br>(89,314 - 125,637)  | 68,178<br>(54,545 - 78,323)    | 83,807<br>(67,396 - 94,841)    |
| Falls                                           | 109,365<br>(79,029 - 127,236)  | 3,257<br>(2,340 - 4,418)    | 1,763<br>(1,259 - 2,168)    | 29,481<br>(19,850 - 35,936)    | 26,055<br>(18,069 - 31,320)    | 48,808<br>(33,816 - 59,746)    |
| Drowning                                        | 63,619<br>(52,896 - 95,397)    | 12,483<br>(8,499 - 20,606)  | 11,484<br>(9,794 - 16,797)  | 20,754<br>(16,469 - 31,102)    | 9,718<br>(7,421 - 14,227)      | 9,181<br>(6,680 - 12,996)      |
| Fire, heat, and hot substances                  | 11,147<br>(9,286 - 13,316)     | 881<br>(640 - 1,274)        | 350<br>(275 - 440)          | 2,887<br>(2,352 - 3,637)       | 2,197<br>(1,758 - 2,709)       | 4,832<br>(3,817 - 5,817)       |
| Poisonings                                      | 28,208<br>(18,046 - 33,143)    | 1,654<br>(1,071 - 2,174)    | 816<br>(521 - 961)          | 10,776<br>(6,922 - 13,070)     | 8,556<br>(5,371 - 10,331)      | 6,406<br>(4,060 - 7,437)       |
| Exposure to mechanical forces                   | 52,297<br>(41,772 - 62,322)    | 12,448<br>(9,849 - 21,900)  | 1,082<br>(825 - 1,245)      | 22,499<br>(13,836 - 27,325)    | 11,020<br>(6,905 - 13,001)     | 5,249<br>(3,876 - 6,130)       |
| Unintentional firearm injuries                  | 440<br>(371 - 778)             | 32<br>(27 - 49)             | 24<br>(20 - 35)             | 249<br>(202 - 426)             | 75<br>(61 - 128)               | 60<br>(50 - 113)               |
| Unintentional suffocation                       | 16,624<br>(13,702 - 27,926)    | 11,494<br>(8,846 - 21,134)  | 284<br>(206 - 402)          | 1,885<br>(1,350 - 2,532)       | 1,388<br>(961 - 1,819)         | 1,574<br>(1,124 - 2,389)       |
| Other exposure to mechanical forces             | 35,233<br>(20,450 - 41,505)    | 922<br>(571 - 1,180)        | 774<br>(529 - 889)          | 20,365<br>(11,604 - 24,791)    | 9,557<br>(5,363 - 11,348)      | 3,615<br>(2,437 - 4,086)       |
| Adverse effects of medical treatment            | 8,069<br>(6,708 - 11,139)      | 1,439<br>(1,011 - 2,543)    | 223<br>(180 - 329)          | 1,881<br>(1,500 - 2,653)       | 1,920<br>(1,552 - 2,524)       | 2,606<br>(2,126 - 3,433)       |
| Animal contact                                  | 3,429<br>(2,726 - 5,845)       | 196<br>(144 - 344)          | 174<br>(129 - 305)          | 967<br>(752 - 1,603)           | 1,303<br>(982 - 2,170)         | 789<br>(594 - 1,437)           |
| Venomous animal contact                         | 1,699<br>(1,296 - 2,936)       | 71<br>(46 - 122)            | 91<br>(64 - 156)            | 462<br>(344 - 781)             | 679<br>(505 - 1,186)           | 395<br>(278 - 746)             |
| Non-venomous animal contact                     | 1,730<br>(1,328 - 2,896)       | 125<br>(90 - 232)           | 82<br>(59 - 148)            | 505<br>(386 - 804)             | 624<br>(456 - 1,014)           | 394<br>(277 - 730)             |
| Foreign body                                    | 10,109<br>(7,204 - 14,704)     | 3,136<br>(2,201 - 4,405)    | 190<br>(129 - 277)          | 943<br>(648 - 1,422)           | 1,562<br>(1,061 - 2,367)       | 4,278<br>(3,025 - 6,340)       |
| Pulmonary aspiration and foreign body in airway | 9,587<br>(6,773 - 14,188)      | 2,982<br>(2,046 - 4,224)    | 170<br>(110 - 255)          | 825<br>(521 - 1,290)           | 1,477<br>(979 - 2,276)         | 4,133<br>(2,886 - 6,206)       |
| Foreign body in other body part                 | 521<br>(382 - 767)             | 154<br>(104 - 234)          | 20<br>(14 - 28)             | 118<br>(86 - 176)              | 85<br>(61 - 130)               | 144<br>(105 - 205)             |
| Other unintentional injuries                    | 24,972<br>(21,455 - 29,247)    | 863<br>(706 - 1,041)        | 673<br>(555 - 785)          | 15,932<br>(13,548 - 19,111)    | 5,847<br>(4,864 - 6,827)       | 1,658<br>(1,470 - 1,962)       |
| Self-harm and interpersonal violence            | 150,920<br>(131,069 - 213,564) | 1,128<br>(904 - 1,712)      | 1,666<br>(1,424 - 2,263)    | 62,284<br>(53,044 - 86,182)    | 47,400<br>(39,687 - 66,526)    | 38,441<br>(33,586 - 54,944)    |
| Self-harm                                       | 130,403<br>(112,502 - 185,384) | --                          | 924<br>(774 - 1,301)        | 49,698<br>(42,392 - 70,747)    | 43,650<br>(36,454 - 61,892)    | 36,131<br>(31,550 - 51,893)    |
| Interpersonal violence                          | 20,517<br>(16,816 - 31,871)    | 1,128<br>(904 - 1,712)      | 743<br>(613 - 1,129)        | 12,586<br>(10,093 - 19,764)    | 3,750<br>(2,938 - 6,014)       | 2,311<br>(1,900 - 3,555)       |
| Assault by firearm                              | 1,791<br>(1,223 - 3,336)       | 91<br>(62 - 168)            | 31<br>(21 - 58)             | 1,204<br>(795 - 2,239)         | 252<br>(162 - 498)             | 213<br>(143 - 403)             |
| Assault by sharp object                         | 8,799<br>(6,777 - 14,634)      | 247<br>(172 - 441)          | 280<br>(217 - 468)          | 6,480<br>(5,000 - 10,951)      | 1,298<br>(951 - 2,203)         | 493<br>(361 - 851)             |
| Assault by other means                          | 9,927<br>(7,629 - 15,236)      | 790<br>(619 - 1,160)        | 431<br>(337 - 636)          | 4,902<br>(3,512 - 7,694)       | 2,199<br>(1,639 - 3,466)       | 1,605<br>(1,250 - 2,473)       |
| Forces of nature, war, and legal intervention   | 7,005<br>(5,065 - 9,021)       | 667<br>(0 - 3)              | 66<br>(46 - 124)            | 1,568<br>(1,182 - 2,231)       | 2,631<br>(2,040 - 3,558)       | 2,073<br>(1,787 - 2,556)       |
| Exposure to forces of nature                    | 7,005<br>(5,065 - 9,021)       | 667<br>(0 - 3)              | 66<br>(46 - 124)            | 1,568<br>(1,182 - 2,231)       | 2,631<br>(2,040 - 3,558)       | 2,073<br>(1,787 - 2,556)       |

Web Table 31- China deaths with 95% UI by age, sex, and cause in 2013

| Cause                                                             | Males, All Ages                      | Males, 0-4 Years               | Males, 5-14 Years           | Males, 15-49 Years             | Males, 50-69 Years                   | Males, 70-80 Years                   |
|-------------------------------------------------------------------|--------------------------------------|--------------------------------|-----------------------------|--------------------------------|--------------------------------------|--------------------------------------|
| All causes                                                        | 5,534,834<br>(4,767,589 - 6,024,949) | 137,955<br>(123,744 - 151,890) | 28,517<br>(25,690 - 31,970) | 717,550<br>(609,563 - 851,021) | 1,856,233<br>(1,528,633 - 2,083,281) | 2,794,577<br>(2,456,155 - 2,996,559) |
| Communicable, maternal, neonatal, and nutritional diseases        | 253,275<br>(230,657 - 273,439)       | 69,753<br>(62,023 - 76,756)    | 2,107<br>(1,795 - 2,497)    | 29,932<br>(26,031 - 34,725)    | 47,430<br>(40,478 - 54,294)          | 104,053<br>(90,491 - 115,716)        |
| HIV/AIDS and tuberculosis                                         | 42,379<br>(36,198 - 50,246)          | 369<br>(249 - 525)             | 185<br>(133 - 243)          | 12,672<br>(10,621 - 15,500)    | 15,061<br>(12,381 - 18,202)          | 14,091<br>(11,818 - 16,438)          |
| Tuberculosis                                                      | 33,391<br>(27,605 - 39,691)          | 136<br>(96 - 178)              | 80<br>(62 - 98)             | 6,195<br>(5,097 - 7,724)       | 13,189<br>(10,568 - 16,061)          | 13,791<br>(11,483 - 16,038)          |
| HIV/AIDS                                                          | 8,988<br>(7,010 - 12,114)            | 233<br>(119 - 392)             | 105<br>(55 - 161)           | 6,477<br>(4,915 - 9,103)       | 1,873<br>(1,214 - 2,891)             | 300<br>(167 - 508)                   |
| HIV/AIDS resulting in mycobacterial infection                     | 563<br>(405 - 790)                   | 13<br>(7 - 22)                 | 6<br>(3 - 9)                | 401<br>(284 - 573)             | 122<br>(73 - 189)                    | 21<br>(11 - 35)                      |
| HIV/AIDS resulting in other diseases                              | 8,425<br>(6,555 - 11,350)            | 220<br>(113 - 370)             | 99<br>(52 - 153)            | 6,077<br>(4,595 - 8,538)       | 1,750<br>(1,145 - 2,706)             | 279<br>(155 - 470)                   |
| Diarrhea, lower respiratory, and other common infectious diseases | 129,373<br>(112,109 - 143,779)       | 20,266<br>(17,468 - 22,784)    | 1,468<br>(1,211 - 1,808)    | 8,509<br>(7,108 - 10,418)      | 20,445<br>(16,476 - 23,776)          | 78,685<br>(66,519 - 87,748)          |
| Diarrheal diseases                                                | 3,848<br>(3,315 - 4,446)             | 1,551<br>(1,191 - 1,968)       | 83<br>(65 - 102)            | 461<br>(378 - 564)             | 724<br>(581 - 871)                   | 1,028<br>(863 - 1,193)               |
| Intestinal infectious diseases                                    | 793<br>(476 - 1,256)                 | 264<br>(145 - 448)             | 143<br>(75 - 246)           | 242<br>(145 - 395)             | 93<br>(56 - 147)                     | 51<br>(32 - 76)                      |
| Typhoid fever                                                     | 439<br>(208 - 803)                   | 140<br>(63 - 270)              | 93<br>(46 - 171)            | 136<br>(63 - 250)              | 48<br>(22 - 92)                      | 22<br>(11 - 40)                      |
| Paratyphoid fever                                                 | 143<br>(66 - 262)                    | 56<br>(25 - 108)               | 34<br>(16 - 62)             | 38<br>(17 - 72)                | 10<br>(5 - 19)                       | 4<br>(2 - 7)                         |
| Other intestinal infectious diseases                              | 211<br>(169 - 257)                   | 68<br>(43 - 97)                | 15<br>(8 - 26)              | 68<br>(48 - 95)                | 35<br>(22 - 53)                      | 25<br>(14 - 37)                      |
| Lower respiratory infections                                      | 115,193<br>(98,700 - 128,436)        | 15,132<br>(12,917 - 17,173)    | 639<br>(493 - 770)          | 5,566<br>(4,561 - 6,882)       | 17,779<br>(14,162 - 20,809)          | 76,076<br>(64,296 - 87,072)          |
| Upper respiratory infections                                      | 243<br>(186 - 306)                   | 8<br>(5 - 12)                  | 2<br>(1 - 3)                | 45<br>(31 - 61)                | 88<br>(57 - 124)                     | 101<br>(67 - 148)                    |
| Otitis media                                                      | 97<br>(84 - 110)                     | 6<br>(5 - 8)                   | 8<br>(6 - 9)                | 40<br>(34 - 48)                | 20<br>(16 - 23)                      | 23<br>(19 - 26)                      |
| Meningitis                                                        | 4,574<br>(3,565 - 5,386)             | 1,586<br>(888 - 2,165)         | 262<br>(193 - 318)          | 1,012<br>(822 - 1,250)         | 880<br>(688 - 1,029)                 | 834<br>(654 - 951)                   |
| Pneumococcal meningitis                                           | 1,085<br>(856 - 1,287)               | 253<br>(140 - 347)             | 50<br>(36 - 64)             | 283<br>(228 - 353)             | 251<br>(191 - 313)                   | 248<br>(183 - 293)                   |
| H influenzae type B meningitis                                    | 509<br>(379 - 623)                   | 253<br>(143 - 349)             | 36<br>(27 - 45)             | 89<br>(71 - 112)               | 66<br>(49 - 84)                      | 64<br>(46 - 77)                      |
| Meningococcal meningitis                                          | 732<br>(587 - 862)                   | 233<br>(132 - 322)             | 40<br>(30 - 50)             | 162<br>(130 - 205)             | 147<br>(112 - 180)                   | 150<br>(120 - 176)                   |
| Other meningitis                                                  | 2,247<br>(1,727 - 2,645)             | 848<br>(471 - 1,144)           | 135<br>(100 - 168)          | 477<br>(375 - 587)             | 416<br>(320 - 493)                   | 371<br>(297 - 431)                   |
| Encephalitis                                                      | 3,361<br>(2,632 - 5,034)             | 1,281<br>(870 - 2,061)         | 290<br>(205 - 539)          | 879<br>(649 - 1,445)           | 597<br>(422 - 982)                   | 314<br>(222 - 501)                   |
| Diphtheria                                                        | 30<br>(19 - 47)                      | 11<br>(3 - 24)                 | 5<br>(2 - 11)               | 9<br>(5 - 16)                  | 5<br>(2 - 10)                        | --                                   |
| Whooping cough                                                    | 161<br>(67 - 331)                    | 148<br>(61 - 302)              | 9<br>(3 - 17)               | 4<br>(2 - 7)                   | 1<br>(0 - 2)                         | --                                   |
| Tetanus                                                           | 717<br>(556 - 1,221)                 | 204<br>(151 - 320)             | 13<br>(8 - 20)              | 184<br>(132 - 300)             | 211<br>(145 - 401)                   | 105<br>(69 - 224)                    |
| Measles                                                           | 41<br>(6 - 136)                      | 34<br>(5 - 116)                | 5<br>(1 - 16)               | 1<br>(0 - 3)                   | 0<br>(0 - 0)                         | --                                   |
| Varicella and herpes zoster                                       | 315<br>(236 - 424)                   | 39<br>(23 - 62)                | 10<br>(6 - 16)              | 66<br>(47 - 89)                | 46<br>(30 - 67)                      | 154<br>(85 - 245)                    |
| Neglected tropical diseases and malaria                           | 2,714<br>(2,077 - 3,356)             | 167<br>(117 - 238)             | 202<br>(137 - 276)          | 927<br>(705 - 1,191)           | 1,039<br>(750 - 1,296)               | 379<br>(303 - 446)                   |
| Malaria                                                           | 88<br>(73 - 108)                     | 5<br>(4 - 7)                   | 7<br>(5 - 9)                | 47<br>(38 - 61)                | 20<br>(16 - 25)                      | 8<br>(6 - 11)                        |
| Leishmaniasis                                                     | 29<br>(22 - 36)                      | 13<br>(8 - 20)                 | 2<br>(1 - 3)                | 6<br>(4 - 9)                   | 5<br>(3 - 7)                         | 2<br>(2 - 3)                         |
| Visceral leishmaniasis                                            | 29<br>(22 - 36)                      | 13<br>(8 - 20)                 | 2<br>(1 - 3)                | 6<br>(4 - 9)                   | 5<br>(3 - 7)                         | 2<br>(2 - 3)                         |
| Schistosomiasis                                                   | 218<br>(173 - 268)                   | 0<br>(0 - 0)                   | 1<br>(1 - 1)                | 43<br>(33 - 56)                | 101<br>(75 - 130)                    | 73<br>(55 - 94)                      |
| Cysticercosis                                                     | 9<br>(7 - 11)                        | 0<br>(0 - 0)                   | 0<br>(0 - 0)                | 4<br>(3 - 5)                   | 4<br>(3 - 5)                         | 1<br>(1 - 2)                         |
| Cystic echinococcosis                                             | 157<br>(133 - 181)                   | 2<br>(2 - 3)                   | 8<br>(6 - 9)                | 57<br>(48 - 68)                | 57<br>(46 - 67)                      | 33<br>(28 - 37)                      |
| Dengue                                                            | 70<br>(55 - 84)                      | 4<br>(3 - 6)                   | 8<br>(6 - 10)               | 39<br>(30 - 49)                | 15<br>(11 - 19)                      | 4<br>(3 - 6)                         |
| Rabies                                                            | 1,530<br>(948 - 2,111)               | 74<br>(40 - 133)               | 154<br>(93 - 231)           | 552<br>(331 - 786)             | 612<br>(359 - 833)                   | 137<br>(84 - 183)                    |
| Intestinal nematode infections                                    | 111<br>(78 - 147)                    | 29<br>(15 - 51)                | 12<br>(4 - 25)              | 19<br>(8 - 32)                 | 23<br>(11 - 39)                      | 27<br>(14 - 45)                      |
| Ascariasis                                                        | 111<br>(78 - 147)                    | 29<br>(15 - 51)                | 12<br>(4 - 25)              | 19<br>(8 - 32)                 | 23<br>(11 - 39)                      | 27<br>(14 - 45)                      |
| Other neglected tropical diseases                                 | 503<br>(409 - 614)                   | 37<br>(29 - 50)                | 10<br>(8 - 12)              | 160<br>(127 - 209)             | 203<br>(155 - 252)                   | 93<br>(72 - 114)                     |
| Maternal disorders                                                | --                                   | --                             | --                          | --                             | --                                   | --                                   |

Web Table 31- China deaths with 95% UI by age, sex, and cause in 2013

| Cause                                                            | Males, All Ages                      | Males, 0-4 Years            | Males, 5-14 Years         | Males, 15-49 Years             | Males, 50-69 Years                   | Males, 70-80 Years                   |
|------------------------------------------------------------------|--------------------------------------|-----------------------------|---------------------------|--------------------------------|--------------------------------------|--------------------------------------|
| Maternal hemorrhage                                              | --                                   | --                          | --                        | --                             | --                                   | --                                   |
| Maternal sepsis and other maternal infections                    | --                                   | --                          | --                        | --                             | --                                   | --                                   |
| Maternal hypertensive disorders                                  | --                                   | --                          | --                        | --                             | --                                   | --                                   |
| Maternal obstructed labor                                        | --                                   | --                          | --                        | --                             | --                                   | --                                   |
| Maternal abortive outcome                                        | --                                   | --                          | --                        | --                             | --                                   | --                                   |
| Indirect maternal deaths                                         | --                                   | --                          | --                        | --                             | --                                   | --                                   |
| Late maternal deaths                                             | --                                   | --                          | --                        | --                             | --                                   | --                                   |
| Maternal deaths aggravated by HIV/AIDS                           | --                                   | --                          | --                        | --                             | --                                   | --                                   |
| Other maternal disorders                                         | --                                   | --                          | --                        | --                             | --                                   | --                                   |
| Neonatal disorders                                               | 47,110<br>(41,423 - 51,799)          | 47,110<br>(41,423 - 51,799) | --                        | --                             | --                                   | --                                   |
| Neonatal preterm birth complications                             | 21,234<br>(13,684 - 25,535)          | 21,234<br>(13,684 - 25,535) | --                        | --                             | --                                   | --                                   |
| Neonatal encephalopathy due to birth asphyxia and trauma         | 17,240<br>(13,436 - 22,386)          | 17,240<br>(13,436 - 22,386) | --                        | --                             | --                                   | --                                   |
| Neonatal sepsis and other neonatal infections                    | 2,247<br>(1,019 - 4,569)             | 2,247<br>(1,019 - 4,569)    | --                        | --                             | --                                   | --                                   |
| Hemolytic disease and other neonatal jaundice                    | 1,061<br>(562 - 1,709)               | 1,061<br>(562 - 1,709)      | --                        | --                             | --                                   | --                                   |
| Other neonatal disorders                                         | 5,327<br>(4,057 - 7,129)             | 5,327<br>(4,057 - 7,129)    | --                        | --                             | --                                   | --                                   |
| Nutritional deficiencies                                         | 8,451<br>(5,696 - 13,686)            | 920<br>(605 - 1,448)        | 104<br>(66 - 164)         | 974<br>(658 - 1,627)           | 1,483<br>(1,018 - 2,478)             | 4,970<br>(3,221 - 7,905)             |
| Protein-energy malnutrition                                      | 4,336<br>(2,682 - 6,975)             | 550<br>(303 - 980)          | 42<br>(23 - 76)           | 383<br>(224 - 699)             | 591<br>(340 - 1,115)                 | 2,770<br>(1,615 - 4,383)             |
| Iodine deficiency                                                | 41<br>(20 - 73)                      | 2<br>(1 - 5)                | 1<br>(0 - 2)              | 7<br>(3 - 13)                  | 13<br>(5 - 25)                       | 19<br>(6 - 40)                       |
| Iron-deficiency anemia                                           | 2,743<br>(1,289 - 4,948)             | 145<br>(47 - 284)           | 38<br>(17 - 65)           | 420<br>(203 - 731)             | 679<br>(350 - 1,212)                 | 1,460<br>(686 - 2,731)               |
| Other nutritional deficiencies                                   | 1,331<br>(610 - 2,452)               | 222<br>(81 - 432)           | 23<br>(10 - 42)           | 165<br>(70 - 315)              | 200<br>(87 - 378)                    | 721<br>(305 - 1,371)                 |
| Other communicable, maternal, neonatal, and nutritional diseases | 23,248<br>(18,529 - 29,625)          | 921<br>(681 - 1,371)        | 147<br>(117 - 209)        | 6,850<br>(5,343 - 9,773)       | 9,402<br>(7,156 - 11,793)            | 5,928<br>(4,417 - 7,362)             |
| Sexually transmitted diseases excluding HIV                      | 480<br>(307 - 705)                   | 295<br>(153 - 495)          | 25<br>(14 - 40)           | 49<br>(35 - 69)                | 61<br>(43 - 87)                      | 50<br>(37 - 70)                      |
| Syphilis                                                         | 431<br>(265 - 655)                   | 295<br>(153 - 495)          | 23<br>(12 - 38)           | 27<br>(19 - 38)                | 45<br>(32 - 64)                      | 42<br>(30 - 59)                      |
| Chlamydial infection                                             | --                                   | --                          | --                        | --                             | --                                   | --                                   |
| Gonococcal infection                                             | 30<br>(22 - 41)                      | --                          | 1<br>(1 - 1)              | 12<br>(9 - 17)                 | 10<br>(7 - 15)                       | 6<br>(4 - 8)                         |
| Other sexually transmitted diseases                              | 19<br>(14 - 27)                      | --                          | 1<br>(1 - 1)              | 10<br>(7 - 14)                 | 6<br>(4 - 8)                         | 2<br>(2 - 3)                         |
| Hepatitis                                                        | 21,834<br>(17,267 - 28,071)          | 404<br>(279 - 845)          | 95<br>(73 - 157)          | 6,609<br>(5,127 - 9,534)       | 9,118<br>(6,882 - 11,486)            | 5,609<br>(4,068 - 6,945)             |
| Acute hepatitis A                                                | 847<br>(214 - 1,961)                 | 122<br>(34 - 308)           | 24<br>(8 - 50)            | 404<br>(103 - 939)             | 227<br>(53 - 557)                    | 70<br>(15 - 172)                     |
| Acute hepatitis B                                                | 15,879<br>(11,658 - 20,145)          | 276<br>(150 - 615)          | 39<br>(21 - 70)           | 3,420<br>(2,121 - 5,232)       | 7,242<br>(5,276 - 9,296)             | 4,903<br>(3,491 - 6,147)             |
| Acute hepatitis C                                                | 460<br>(88 - 1,138)                  | --                          | 3<br>(1 - 8)              | 138<br>(27 - 370)              | 184<br>(33 - 466)                    | 135<br>(25 - 338)                    |
| Acute hepatitis E                                                | 4,648<br>(2,613 - 7,584)             | 6<br>(2 - 13)               | 28<br>(17 - 47)           | 2,647<br>(1,599 - 4,181)       | 1,465<br>(706 - 2,600)               | 501<br>(220 - 989)                   |
| Other infectious diseases                                        | 933<br>(726 - 1,448)                 | 222<br>(152 - 312)          | 27<br>(20 - 40)           | 192<br>(147 - 300)             | 222<br>(151 - 378)                   | 270<br>(186 - 473)                   |
| Non-communicable diseases                                        | 4,731,727<br>(4,052,782 - 5,167,466) | 40,870<br>(35,522 - 46,188) | 9,022<br>(7,794 - 10,501) | 417,100<br>(350,498 - 496,514) | 1,657,935<br>(1,365,955 - 1,866,166) | 2,606,799<br>(2,289,948 - 2,795,828) |
| Neoplasms                                                        | 1,416,077<br>(1,192,529 - 1,570,688) | 4,307<br>(3,191 - 5,698)    | 4,194<br>(3,555 - 5,011)  | 171,668<br>(144,553 - 204,204) | 683,586<br>(564,867 - 771,826)       | 552,322<br>(476,658 - 599,596)       |
| Esophageal cancer                                                | 151,995<br>(118,302 - 206,908)       | --                          | --                        | 8,854<br>(6,682 - 12,732)      | 80,004<br>(61,163 - 107,886)         | 63,137<br>(49,313 - 85,634)          |
| Stomach cancer                                                   | 227,157<br>(190,500 - 253,347)       | --                          | --                        | 15,386<br>(12,730 - 18,424)    | 112,413<br>(92,032 - 128,588)        | 99,357<br>(84,980 - 109,878)         |
| Liver cancer                                                     | 268,484<br>(225,482 - 302,048)       | --                          | 202<br>(158 - 249)        | 58,652<br>(48,809 - 70,671)    | 140,611<br>(115,355 - 160,514)       | 69,018<br>(58,500 - 77,010)          |
| Liver cancer due to hepatitis B                                  | 129,491<br>(104,108 - 153,392)       | --                          | 94<br>(72 - 120)          | 31,963<br>(25,986 - 39,512)    | 68,608<br>(53,598 - 83,173)          | 28,825<br>(23,378 - 34,076)          |
| Liver cancer due to hepatitis C                                  | 100,546<br>(80,485 - 123,062)        | --                          | 27<br>(21 - 36)           | 18,686<br>(13,904 - 23,775)    | 53,252<br>(41,382 - 66,821)          | 28,581<br>(23,911 - 33,498)          |
| Liver cancer due to alcohol use                                  | 20,518<br>(16,221 - 25,312)          | --                          | --                        | 2,703<br>(2,047 - 3,558)       | 9,966<br>(7,625 - 12,544)            | 7,849<br>(6,475 - 9,447)             |

Web Table 31- China deaths with 95% UI by age, sex, and cause in 2013

| Cause                                         | Males, All Ages                      | Males, 0-4 Years         | Males, 5-14 Years        | Males, 15-49 Years             | Males, 50-69 Years             | Males, 70-80 Years                   |
|-----------------------------------------------|--------------------------------------|--------------------------|--------------------------|--------------------------------|--------------------------------|--------------------------------------|
| Liver cancer due to other causes              | 17,930<br>(14,297 - 21,813)          | --                       | 80<br>(62 - 102)         | 5,300<br>(4,179 - 6,597)       | 8,786<br>(6,849 - 10,897)      | 3,763<br>(3,085 - 4,497)             |
| Larynx cancer                                 | 12,037<br>(8,168 - 14,762)           | --                       | --                       | 1,061<br>(736 - 1,359)         | 6,209<br>(4,139 - 7,665)       | 4,767<br>(3,290 - 5,977)             |
| Tracheal, bronchus and lung cancer            | 396,104<br>(331,924 - 438,543)       | --                       | --                       | 26,739<br>(21,815 - 32,161)    | 193,427<br>(158,843 - 219,070) | 175,937<br>(150,280 - 191,825)       |
| Breast cancer                                 | 1,254<br>(877 - 1,480)               | --                       | --                       | 283<br>(192 - 363)             | 585<br>(390 - 719)             | 386<br>(274 - 468)                   |
| Cervical cancer                               | --                                   | --                       | --                       | --                             | --                             | --                                   |
| Uterine cancer                                | --                                   | --                       | --                       | --                             | --                             | --                                   |
| Prostate cancer                               | 17,847<br>(10,583 - 24,802)          | --                       | --                       | 218<br>(148 - 308)             | 3,660<br>(2,219 - 4,991)       | 13,969<br>(8,139 - 19,624)           |
| Colon and rectum cancer                       | 86,338<br>(73,379 - 95,918)          | --                       | --                       | 9,731<br>(8,063 - 11,702)      | 37,479<br>(30,679 - 42,558)    | 39,128<br>(33,931 - 42,645)          |
| Lip and oral cavity cancer                    | 8,458<br>(5,462 - 10,076)            | --                       | --                       | 1,254<br>(839 - 1,628)         | 3,648<br>(2,416 - 4,475)       | 3,556<br>(2,175 - 4,206)             |
| Nasopharynx cancer                            | 21,615<br>(17,536 - 25,168)          | --                       | 38<br>(27 - 54)          | 6,198<br>(4,907 - 7,810)       | 11,375<br>(9,043 - 13,398)     | 4,004<br>(3,269 - 4,602)             |
| Other pharynx cancer                          | 4,537<br>(3,181 - 5,218)             | --                       | --                       | 694<br>(511 - 863)             | 2,152<br>(1,568 - 2,545)       | 1,691<br>(1,057 - 1,955)             |
| Gallbladder and biliary tract cancer          | 11,245<br>(8,175 - 13,117)           | --                       | --                       | 815<br>(602 - 1,017)           | 4,764<br>(3,446 - 5,710)       | 5,667<br>(4,102 - 6,566)             |
| Pancreatic cancer                             | 35,024<br>(29,612 - 38,960)          | --                       | --                       | 3,780<br>(3,119 - 4,515)       | 16,789<br>(13,825 - 19,077)    | 14,455<br>(12,395 - 15,932)          |
| Malignant skin melanoma                       | 2,135<br>(1,358 - 3,367)             | --                       | --                       | 521<br>(336 - 843)             | 795<br>(502 - 1,298)           | 818<br>(517 - 1,260)                 |
| Non-melanoma skin cancer                      | 5,126<br>(3,437 - 7,813)             | --                       | --                       | 505<br>(340 - 781)             | 1,605<br>(1,090 - 2,472)       | 3,016<br>(2,111 - 4,671)             |
| Ovarian cancer                                | --                                   | --                       | --                       | --                             | --                             | --                                   |
| Testicular cancer                             | 979<br>(734 - 1,497)                 | --                       | --                       | 508<br>(378 - 794)             | 218<br>(159 - 341)             | 253<br>(186 - 386)                   |
| Kidney cancer                                 | 9,788<br>(8,254 - 10,974)            | 122<br>(82 - 175)        | 29<br>(23 - 38)          | 1,413<br>(1,158 - 1,726)       | 4,473<br>(3,654 - 5,164)       | 3,749<br>(3,165 - 4,200)             |
| Bladder cancer                                | 20,241<br>(16,951 - 24,631)          | --                       | --                       | 736<br>(594 - 924)             | 6,825<br>(5,433 - 8,629)       | 12,680<br>(10,810 - 15,135)          |
| Brain and nervous system cancer               | 30,977<br>(21,315 - 45,513)          | 540<br>(283 - 963)       | 908<br>(636 - 1,442)     | 7,995<br>(5,293 - 11,937)      | 13,289<br>(8,953 - 19,692)     | 8,244<br>(5,776 - 12,156)            |
| Thyroid cancer                                | 2,292<br>(1,842 - 2,727)             | --                       | 5<br>(3 - 6)             | 355<br>(275 - 459)             | 1,073<br>(844 - 1,311)         | 860<br>(677 - 1,001)                 |
| Mesothelioma                                  | 7,719<br>(6,354 - 8,897)             | --                       | --                       | 275<br>(223 - 338)             | 6,224<br>(5,036 - 7,280)       | 1,221<br>(1,029 - 1,392)             |
| Hodgkin lymphoma                              | 3,052<br>(2,352 - 4,749)             | 76<br>(49 - 180)         | 59<br>(41 - 120)         | 1,450<br>(1,085 - 2,394)       | 922<br>(686 - 1,431)           | 545<br>(420 - 836)                   |
| Non-Hodgkin lymphoma                          | 18,403<br>(12,788 - 21,754)          | 191<br>(119 - 264)       | 261<br>(186 - 331)       | 3,956<br>(2,743 - 4,989)       | 8,033<br>(5,445 - 9,651)       | 5,962<br>(4,131 - 6,978)             |
| Multiple myeloma                              | 5,009<br>(3,544 - 6,215)             | --                       | --                       | 721<br>(490 - 926)             | 2,376<br>(1,681 - 2,976)       | 1,912<br>(1,339 - 2,330)             |
| Leukemia                                      | 32,727<br>(28,137 - 37,215)          | 1,864<br>(1,317 - 2,508) | 1,840<br>(1,494 - 2,160) | 12,506<br>(10,618 - 15,117)    | 10,119<br>(8,275 - 11,662)     | 6,398<br>(5,421 - 7,224)             |
| Other neoplasms                               | 35,534<br>(27,432 - 40,465)          | 1,513<br>(859 - 2,158)   | 853<br>(581 - 1,086)     | 7,059<br>(5,069 - 8,628)       | 14,517<br>(10,890 - 17,068)    | 11,592<br>(9,166 - 13,286)           |
| Cardiovascular diseases                       | 2,114,687<br>(1,813,767 - 2,319,039) | 2,579<br>(2,169 - 2,976) | 1,398<br>(1,170 - 1,618) | 144,568<br>(119,490 - 172,580) | 670,649<br>(552,479 - 757,558) | 1,295,492<br>(1,139,203 - 1,396,518) |
| Rheumatic heart disease                       | 30,963<br>(19,465 - 39,234)          | 63<br>(27 - 102)         | 67<br>(44 - 92)          | 3,225<br>(2,085 - 4,432)       | 10,984<br>(7,030 - 14,458)     | 16,624<br>(9,961 - 21,379)           |
| Ischemic heart disease                        | 798,595<br>(569,113 - 927,049)       | 446<br>(289 - 550)       | 506<br>(365 - 626)       | 63,982<br>(47,520 - 79,323)    | 248,536<br>(181,197 - 298,202) | 485,125<br>(336,748 - 559,001)       |
| Cerebrovascular disease                       | 1,110,239<br>(928,780 - 1,356,982)   | 926<br>(724 - 1,134)     | 558<br>(446 - 693)       | 65,329<br>(51,959 - 82,508)    | 364,490<br>(294,489 - 440,682) | 678,936<br>(573,557 - 832,499)       |
| Ischemic stroke                               | 414,114<br>(295,377 - 511,239)       | 74<br>(44 - 114)         | 66<br>(43 - 99)          | 9,205<br>(6,438 - 14,089)      | 105,461<br>(73,464 - 134,878)  | 299,307<br>(215,984 - 370,076)       |
| Hemorrhagic stroke                            | 696,125<br>(558,315 - 897,514)       | 852<br>(668 - 1,034)     | 492<br>(393 - 604)       | 56,124<br>(44,899 - 71,455)    | 259,029<br>(206,123 - 320,556) | 379,629<br>(303,107 - 512,954)       |
| Hypertensive heart disease                    | 121,670<br>(75,075 - 160,558)        | 50<br>(33 - 96)          | 30<br>(22 - 51)          | 5,196<br>(3,555 - 7,981)       | 30,504<br>(19,379 - 42,059)    | 85,890<br>(51,172 - 112,971)         |
| Cardiomyopathy and myocarditis                | 14,174<br>(7,992 - 18,162)           | 503<br>(293 - 697)       | 128<br>(69 - 188)        | 2,858<br>(1,476 - 3,938)       | 4,757<br>(2,613 - 6,287)       | 5,928<br>(3,347 - 7,556)             |
| Atrial fibrillation and flutter               | 432<br>(350 - 524)                   | --                       | --                       | 33<br>(26 - 42)                | 88<br>(68 - 111)               | 311<br>(250 - 384)                   |
| Aortic aneurysm                               | 7,611<br>(6,125 - 9,043)             | --                       | --                       | 1,188<br>(926 - 1,509)         | 2,578<br>(1,989 - 3,139)       | 3,845<br>(3,171 - 4,584)             |
| Peripheral vascular disease                   | 767<br>(626 - 916)                   | --                       | --                       | 33<br>(25 - 44)                | 213<br>(164 - 264)             | 520<br>(427 - 630)                   |
| Endocarditis                                  | 1,800<br>(1,235 - 2,385)             | 87<br>(56 - 118)         | 15<br>(10 - 21)          | 468<br>(319 - 658)             | 478<br>(311 - 645)             | 751<br>(493 - 1,024)                 |
| Other cardiovascular and circulatory diseases | 28,437<br>(21,597 - 37,602)          | 504<br>(385 - 662)       | 93<br>(70 - 128)         | 2,257<br>(1,718 - 3,474)       | 8,021<br>(5,947 - 10,753)      | 17,562<br>(13,300 - 23,187)          |

Web Table 31- China deaths with 95% UI by age, sex, and cause in 2013

| Cause                                               | Males, All Ages                | Males, 0-4 Years   | Males, 5-14 Years  | Males, 15-49 Years          | Males, 50-69 Years             | Males, 70-80 Years             |
|-----------------------------------------------------|--------------------------------|--------------------|--------------------|-----------------------------|--------------------------------|--------------------------------|
| Chronic respiratory diseases                        | 621,244<br>(526,613 - 698,435) | 748<br>(545 - 903) | 244<br>(178 - 293) | 12,619<br>(9,818 - 15,380)  | 128,362<br>(102,515 - 153,527) | 479,271<br>(409,976 - 531,665) |
| Chronic obstructive pulmonary disease               | 530,866<br>(449,044 - 603,741) | 401<br>(288 - 483) | 127<br>(92 - 152)  | 9,224<br>(7,099 - 11,307)   | 109,086<br>(86,535 - 130,460)  | 412,028<br>(353,246 - 464,610) |
| Pneumoconiosis                                      | 9,944<br>(6,626 - 13,592)      | 12<br>(6 - 20)     | 8<br>(5 - 12)      | 1,073<br>(699 - 1,468)      | 3,115<br>(1,981 - 4,365)       | 5,735<br>(3,713 - 7,867)       |
| Silicosis                                           | 5,013<br>(3,247 - 6,840)       | 3<br>(1 - 4)       | 2<br>(1 - 3)       | 617<br>(400 - 849)          | 1,834<br>(1,167 - 2,557)       | 2,558<br>(1,635 - 3,477)       |
| Asbestosis                                          | 301<br>(199 - 412)             | 3<br>(1 - 5)       | 2<br>(1 - 3)       | 58<br>(38 - 82)             | 61<br>(38 - 86)                | 178<br>(113 - 247)             |
| Coal workers pneumoconiosis                         | 1,674<br>(1,089 - 2,312)       | 3<br>(2 - 5)       | 2<br>(1 - 3)       | 127<br>(83 - 178)           | 609<br>(387 - 877)             | 933<br>(589 - 1,270)           |
| Other pneumoconiosis                                | 2,956<br>(1,963 - 4,079)       | 3<br>(2 - 5)       | 2<br>(1 - 3)       | 273<br>(179 - 376)          | 612<br>(394 - 875)             | 2,066<br>(1,361 - 2,879)       |
| Asthma                                              | 14,333<br>(11,651 - 16,928)    | 38<br>(22 - 58)    | 38<br>(27 - 47)    | 1,255<br>(967 - 1,552)      | 3,527<br>(2,750 - 4,329)       | 9,475<br>(7,788 - 11,229)      |
| Interstitial lung disease and pulmonary sarcoidosis | 45,139<br>(27,982 - 59,208)    | 22<br>(12 - 35)    | 12<br>(8 - 18)     | 329<br>(225 - 479)          | 9,817<br>(6,374 - 13,534)      | 34,960<br>(20,780 - 45,898)    |
| Other chronic respiratory diseases                  | 20,960<br>(17,115 - 24,564)    | 276<br>(201 - 336) | 58<br>(40 - 72)    | 737<br>(559 - 920)          | 2,817<br>(2,172 - 3,529)       | 17,072<br>(13,888 - 19,888)    |
| Cirrhosis                                           | 114,855<br>(96,296 - 129,032)  | 80<br>(51 - 115)   | 115<br>(96 - 134)  | 28,758<br>(23,879 - 34,213) | 56,604<br>(46,537 - 64,523)    | 29,299<br>(25,160 - 32,288)    |
| Cirrhosis due to hepatitis B                        | 48,247<br>(39,133 - 55,691)    | 9<br>(6 - 14)      | 42<br>(33 - 52)    | 12,994<br>(10,546 - 15,698) | 23,811<br>(19,077 - 27,838)    | 11,391<br>(9,319 - 13,059)     |
| Cirrhosis due to hepatitis C                        | 24,318<br>(19,997 - 28,569)    | 6<br>(4 - 9)       | 16<br>(13 - 19)    | 6,030<br>(4,937 - 7,418)    | 12,274<br>(9,889 - 14,858)     | 5,992<br>(5,008 - 7,039)       |
| Cirrhosis due to alcohol use                        | 35,236<br>(28,891 - 41,090)    | --                 | --                 | 6,863<br>(5,434 - 8,465)    | 17,455<br>(13,937 - 20,674)    | 10,918<br>(9,226 - 12,314)     |
| Cirrhosis due to other causes                       | 7,053<br>(5,827 - 8,433)       | 64<br>(40 - 93)    | 57<br>(46 - 67)    | 2,870<br>(2,340 - 3,538)    | 3,064<br>(2,479 - 3,715)       | 997<br>(814 - 1,163)           |
| Digestive diseases                                  | 71,538<br>(57,229 - 80,464)    | 542<br>(330 - 780) | 217<br>(172 - 255) | 7,909<br>(6,430 - 9,750)    | 24,770<br>(19,438 - 28,658)    | 38,099<br>(30,569 - 42,276)    |
| Peptic ulcer disease                                | 26,300<br>(18,621 - 31,575)    | 23<br>(11 - 37)    | 28<br>(18 - 37)    | 2,733<br>(1,956 - 3,489)    | 9,576<br>(6,768 - 11,726)      | 13,941<br>(9,706 - 16,568)     |
| Gastritis and duodenitis                            | 11,749<br>(6,195 - 16,333)     | 28<br>(13 - 48)    | 12<br>(6 - 18)     | 938<br>(533 - 1,447)        | 4,608<br>(2,380 - 6,484)       | 6,163<br>(3,155 - 8,757)       |
| Appendicitis                                        | 1,055<br>(716 - 1,435)         | 14<br>(7 - 22)     | 16<br>(10 - 22)    | 201<br>(136 - 282)          | 320<br>(219 - 442)             | 505<br>(334 - 714)             |
| Paralytic ileus and intestinal obstruction          | 7,638<br>(4,269 - 12,414)      | 128<br>(67 - 230)  | 61<br>(38 - 97)    | 825<br>(476 - 1,429)        | 1,973<br>(1,081 - 3,418)       | 4,651<br>(2,645 - 7,296)       |
| Inguinal, femoral, and abdominal hernia             | 724<br>(465 - 1,129)           | 15<br>(8 - 24)     | 6<br>(3 - 8)       | 51<br>(32 - 72)             | 162<br>(105 - 255)             | 489<br>(304 - 792)             |
| Inflammatory bowel disease                          | 3,199<br>(2,388 - 4,363)       | 149<br>(74 - 227)  | 31<br>(20 - 41)    | 345<br>(250 - 465)          | 927<br>(672 - 1,321)           | 1,747<br>(1,301 - 2,460)       |
| Vascular intestinal disorders                       | 363<br>(147 - 738)             | 3<br>(1 - 7)       | 6<br>(2 - 14)      | 39<br>(15 - 83)             | 90<br>(35 - 192)               | 225<br>(92 - 468)              |
| Gallbladder and biliary diseases                    | 7,065<br>(5,457 - 9,628)       | 13<br>(7 - 20)     | 10<br>(7 - 13)     | 455<br>(344 - 617)          | 1,886<br>(1,417 - 2,643)       | 4,701<br>(3,670 - 6,286)       |
| Pancreatitis                                        | 6,674<br>(4,236 - 9,398)       | 5<br>(3 - 9)       | 10<br>(6 - 16)     | 1,572<br>(1,034 - 2,160)    | 2,479<br>(1,566 - 3,599)       | 2,608<br>(1,582 - 3,881)       |
| Other digestive diseases                            | 6,771<br>(5,069 - 10,342)      | 164<br>(97 - 248)  | 35<br>(25 - 50)    | 751<br>(560 - 1,175)        | 2,751<br>(2,044 - 4,137)       | 3,070<br>(2,234 - 4,829)       |
| Neurological disorders                              | 133,450<br>(116,497 - 147,730) | 654<br>(508 - 905) | 533<br>(430 - 717) | 6,919<br>(5,661 - 9,221)    | 15,756<br>(12,633 - 18,237)    | 109,589<br>(96,119 - 120,804)  |
| Alzheimer disease and other dementias               | 115,944<br>(100,917 - 128,033) | --                 | --                 | 73<br>(51 - 101)            | 11,284<br>(9,013 - 13,221)     | 104,586<br>(91,356 - 115,271)  |
| Parkinson disease                                   | 4,494<br>(3,744 - 5,154)       | --                 | --                 | 102<br>(82 - 131)           | 1,077<br>(848 - 1,274)         | 3,315<br>(2,780 - 3,829)       |
| Epilepsy                                            | 8,372<br>(6,666 - 11,488)      | 402<br>(281 - 651) | 398<br>(313 - 579) | 4,812<br>(3,828 - 6,779)    | 1,808<br>(1,312 - 2,618)       | 951<br>(669 - 1,337)           |
| Multiple sclerosis                                  | 82<br>(41 - 152)               | --                 | --                 | 41<br>(21 - 78)             | 25<br>(13 - 48)                | 16<br>(8 - 29)                 |
| Other neurological disorders                        | 4,559<br>(3,376 - 5,441)       | 252<br>(177 - 305) | 134<br>(93 - 166)  | 1,889<br>(1,398 - 2,399)    | 1,562<br>(1,128 - 1,880)       | 721<br>(521 - 851)             |
| Mental and substance use disorders                  | 31,889<br>(25,470 - 40,871)    | 141<br>(108 - 170) | 1<br>(0 - 1)       | 16,151<br>(12,942 - 20,960) | 10,493<br>(8,046 - 13,775)     | 5,104<br>(4,137 - 6,534)       |
| Schizophrenia                                       | 5,055<br>(3,280 - 10,137)      | --                 | --                 | 2,116<br>(1,315 - 4,077)    | 1,967<br>(1,233 - 4,084)       | 971<br>(605 - 2,015)           |
| Alcohol use disorders                               | 14,496<br>(9,358 - 20,664)     | --                 | --                 | 7,375<br>(4,516 - 10,407)   | 5,873<br>(3,873 - 8,432)       | 1,247<br>(792 - 1,805)         |
| Drug use disorders                                  | 12,323<br>(10,307 - 14,812)    | 141<br>(108 - 170) | --                 | 6,645<br>(5,522 - 8,392)    | 2,652<br>(2,130 - 3,169)       | 2,885<br>(2,404 - 3,403)       |
| Opioid use disorders                                | 5,058<br>(4,230 - 6,118)       | 60<br>(42 - 79)    | --                 | 2,760<br>(2,257 - 3,509)    | 1,006<br>(786 - 1,243)         | 1,232<br>(996 - 1,496)         |
| Cocaine use disorders                               | 871<br>(709 - 1,079)           | 12<br>(7 - 19)     | --                 | 541<br>(424 - 714)          | 152<br>(112 - 198)             | 166<br>(118 - 223)             |
| Amphetamine use disorders                           | 916<br>(741 - 1,139)           | 15<br>(10 - 23)    | --                 | 506<br>(394 - 674)          | 199<br>(147 - 266)             | 196<br>(140 - 262)             |
| Other drug use disorders                            | 5,478<br>(4,531 - 6,608)       | 54<br>(36 - 72)    | --                 | 2,838<br>(2,304 - 3,692)    | 1,296<br>(1,015 - 1,588)       | 1,291<br>(1,034 - 1,562)       |

Web Table 31- China deaths with 95% UI by age, sex, and cause in 2013

| Cause                                               | Males, All Ages                | Males, 0-4 Years            | Males, 5-14 Years        | Males, 15-49 Years          | Males, 50-69 Years          | Males, 70-80 Years           |
|-----------------------------------------------------|--------------------------------|-----------------------------|--------------------------|-----------------------------|-----------------------------|------------------------------|
| Eating disorders                                    | 15<br>(12 - 18)                | --                          | 1<br>(0 - 1)             | 14<br>(12 - 18)             | --                          | --                           |
| Anorexia nervosa                                    | 15<br>(12 - 18)                | --                          | 1<br>(0 - 1)             | 14<br>(12 - 18)             | --                          | --                           |
| Diabetes, urogenital, blood, and endocrine diseases | 180,993<br>(151,214 - 200,965) | 1,985<br>(1,629 - 2,462)    | 785<br>(655 - 955)       | 22,548<br>(18,863 - 27,220) | 63,905<br>(51,517 - 73,034) | 91,769<br>(77,960 - 100,576) |
| Diabetes mellitus                                   | 65,409<br>(55,443 - 72,191)    | 217<br>(185 - 248)          | 70<br>(59 - 82)          | 5,769<br>(4,782 - 6,927)    | 25,250<br>(20,691 - 28,677) | 34,102<br>(29,303 - 37,527)  |
| Acute glomerulonephritis                            | 4,406<br>(3,328 - 5,902)       | 42<br>(27 - 61)             | 57<br>(40 - 78)          | 1,109<br>(840 - 1,527)      | 1,535<br>(1,117 - 2,097)    | 1,662<br>(1,137 - 2,203)     |
| Chronic kidney disease                              | 86,369<br>(67,320 - 97,171)    | 183<br>(138 - 224)          | 199<br>(164 - 237)       | 11,129<br>(8,988 - 13,749)  | 29,890<br>(22,984 - 34,485) | 44,969<br>(33,590 - 50,014)  |
| Chronic kidney disease due to diabetes mellitus     | 15,103<br>(9,951 - 22,982)     | 7<br>(4 - 12)               | 9<br>(5 - 17)            | 1,655<br>(1,037 - 2,725)    | 6,303<br>(4,114 - 9,072)    | 7,130<br>(4,752 - 11,321)    |
| Chronic kidney disease due to hypertension          | 24,022<br>(11,006 - 29,083)    | 24<br>(12 - 33)             | 12<br>(6 - 18)           | 1,759<br>(873 - 2,342)      | 6,982<br>(3,005 - 8,845)    | 15,244<br>(7,025 - 18,577)   |
| Chronic kidney disease due to glomerulonephritis    | 20,088<br>(15,384 - 26,845)    | 81<br>(58 - 104)            | 108<br>(85 - 131)        | 4,100<br>(3,183 - 5,309)    | 7,218<br>(5,297 - 9,631)    | 8,581<br>(6,377 - 12,151)    |
| Chronic kidney disease due to other causes          | 27,156<br>(18,630 - 33,451)    | 71<br>(47 - 94)             | 70<br>(50 - 91)          | 3,615<br>(2,607 - 4,702)    | 9,387<br>(6,551 - 11,685)   | 14,013<br>(9,183 - 18,118)   |
| Urinary diseases and male infertility               | 10,486<br>(8,768 - 14,709)     | 109<br>(91 - 142)           | 40<br>(32 - 52)          | 1,242<br>(1,020 - 1,691)    | 2,881<br>(2,271 - 3,982)    | 6,215<br>(5,210 - 9,111)     |
| Interstitial nephritis and urinary tract infections | 4,246<br>(3,351 - 6,092)       | 88<br>(72 - 122)            | 20<br>(16 - 30)          | 651<br>(514 - 930)          | 1,256<br>(946 - 1,801)      | 2,230<br>(1,684 - 3,273)     |
| Urolithiasis                                        | 2,021<br>(1,437 - 3,775)       | --                          | 7<br>(5 - 10)            | 246<br>(183 - 395)          | 696<br>(498 - 1,242)        | 1,072<br>(714 - 2,114)       |
| Other urinary diseases                              | 4,220<br>(3,131 - 6,291)       | 21<br>(12 - 30)             | 12<br>(8 - 17)           | 345<br>(241 - 479)          | 929<br>(645 - 1,348)        | 2,913<br>(2,165 - 4,431)     |
| Gynecological diseases                              | --                             | --                          | --                       | --                          | --                          | --                           |
| Uterine fibroids                                    | --                             | --                          | --                       | --                          | --                          | --                           |
| Polycystic ovarian syndrome                         | --                             | --                          | --                       | --                          | --                          | --                           |
| Endometriosis                                       | --                             | --                          | --                       | --                          | --                          | --                           |
| Genital prolapse                                    | --                             | --                          | --                       | --                          | --                          | --                           |
| Other gynecological diseases                        | --                             | --                          | --                       | --                          | --                          | --                           |
| Hemoglobinopathies and hemolytic anemias            | 6,055<br>(3,618 - 8,763)       | 507<br>(295 - 771)          | 213<br>(124 - 324)       | 1,502<br>(898 - 2,210)      | 2,062<br>(1,160 - 3,085)    | 1,770<br>(1,003 - 2,633)     |
| Thalassemias                                        | 1,571<br>(950 - 2,293)         | 444<br>(256 - 672)          | 195<br>(113 - 295)       | 830<br>(497 - 1,236)        | 94<br>(53 - 139)            | 9<br>(5 - 14)                |
| Sickle cell disorders                               | 1<br>(0 - 1)                   | 0<br>(0 - 0)                | 0<br>(0 - 0)             | 0<br>(0 - 1)                | 0<br>(0 - 0)                | 0<br>(0 - 0)                 |
| G6PD deficiency                                     | 291<br>(170 - 422)             | 10<br>(6 - 15)              | 5<br>(3 - 7)             | 76<br>(45 - 113)            | 170<br>(96 - 253)           | 30<br>(17 - 45)              |
| Other hemoglobinopathies and hemolytic anemias      | 4,192<br>(2,459 - 6,088)       | 52<br>(32 - 78)             | 14<br>(8 - 21)           | 596<br>(348 - 887)          | 1,798<br>(1,009 - 2,693)    | 1,731<br>(980 - 2,575)       |
| Endocrine, metabolic, blood, and immune disorders   | 8,268<br>(6,534 - 10,818)      | 927<br>(689 - 1,264)        | 206<br>(151 - 262)       | 1,796<br>(1,384 - 2,367)    | 2,287<br>(1,758 - 3,128)    | 3,052<br>(2,329 - 4,016)     |
| Musculoskeletal disorders                           | 6,658<br>(5,260 - 9,877)       | --                          | 97<br>(76 - 152)         | 1,249<br>(988 - 1,947)      | 2,242<br>(1,727 - 3,318)    | 3,070<br>(2,402 - 4,698)     |
| Rheumatoid arthritis                                | 3,257<br>(2,452 - 4,850)       | --                          | 23<br>(16 - 36)          | 317<br>(226 - 500)          | 1,182<br>(865 - 1,777)      | 1,735<br>(1,289 - 2,582)     |
| Other musculoskeletal disorders                     | 3,401<br>(2,646 - 5,440)       | --                          | 74<br>(57 - 114)         | 931<br>(728 - 1,459)        | 1,060<br>(791 - 1,658)      | 1,335<br>(999 - 2,218)       |
| Other non-communicable diseases                     | 40,337<br>(35,393 - 44,513)    | 29,834<br>(25,584 - 33,786) | 1,438<br>(1,131 - 1,724) | 4,713<br>(3,897 - 5,856)    | 1,567<br>(1,270 - 1,852)    | 2,785<br>(2,370 - 3,184)     |
| Congenital anomalies                                | 36,568<br>(31,559 - 40,734)    | 29,232<br>(25,025 - 33,077) | 1,408<br>(1,104 - 1,689) | 4,352<br>(3,584 - 5,420)    | 980<br>(777 - 1,207)        | 596<br>(489 - 756)           |
| Neural tube defects                                 | 773<br>(537 - 1,527)           | 673<br>(450 - 1,394)        | 18<br>(12 - 31)          | 53<br>(38 - 89)             | 20<br>(13 - 34)             | 11<br>(7 - 19)               |
| Congenital heart anomalies                          | 25,846<br>(22,218 - 28,645)    | 20,634<br>(17,552 - 23,238) | 1,080<br>(836 - 1,313)   | 3,361<br>(2,750 - 4,196)    | 539<br>(418 - 677)          | 232<br>(181 - 308)           |
| Cleft lip and cleft palate                          | 272<br>(130 - 520)             | 272<br>(130 - 520)          | --                       | --                          | --                          | --                           |
| Down syndrome                                       | 480<br>(276 - 683)             | 385<br>(210 - 572)          | 15<br>(9 - 22)           | 56<br>(35 - 81)             | 17<br>(11 - 26)             | 7<br>(4 - 10)                |
| Chromosomal unbalanced rearrangements               | 197<br>(154 - 249)             | 117<br>(86 - 156)           | 14<br>(10 - 19)          | 47<br>(34 - 62)             | 14<br>(10 - 21)             | 4<br>(3 - 7)                 |
| Other congenital anomalies                          | 9,001<br>(7,378 - 11,086)      | 7,151<br>(5,635 - 9,128)    | 281<br>(209 - 362)       | 835<br>(660 - 1,079)        | 390<br>(305 - 491)          | 343<br>(278 - 444)           |
| Skin and subcutaneous diseases                      | 3,254<br>(2,785 - 3,667)       | 87<br>(67 - 114)            | 30<br>(24 - 38)          | 361<br>(294 - 458)          | 587<br>(477 - 694)          | 2,189<br>(1,861 - 2,500)     |
| Cellulitis                                          | 184<br>(115 - 263)             | 17<br>(10 - 24)             | 5<br>(3 - 7)             | 37<br>(21 - 50)             | 43<br>(26 - 61)             | 83<br>(51 - 124)             |
| Pyoderma                                            | 835<br>(694 - 969)             | 51<br>(38 - 67)             | 10<br>(7 - 12)           | 137<br>(111 - 172)          | 194<br>(152 - 232)          | 444<br>(358 - 528)           |

Web Table 31- China deaths with 95% UI by age, sex, and cause in 2013

| Cause                                           | Males, All Ages                | Males, 0-4 Years            | Males, 5-14 Years           | Males, 15-49 Years             | Males, 50-69 Years             | Males, 70-80 Years          |
|-------------------------------------------------|--------------------------------|-----------------------------|-----------------------------|--------------------------------|--------------------------------|-----------------------------|
| Decubitus ulcer                                 | 2,023<br>(1,701 - 2,329)       | 6<br>(4 - 11)               | 9<br>(7 - 13)               | 144<br>(114 - 200)             | 306<br>(247 - 369)             | 1,558<br>(1,306 - 1,796)    |
| Other skin and subcutaneous diseases            | 211<br>(155 - 279)             | 13<br>(9 - 20)              | 6<br>(4 - 8)                | 44<br>(34 - 63)                | 43<br>(31 - 58)                | 104<br>(75 - 147)           |
| Sudden infant death syndrome                    | 515<br>(185 - 771)             | 515<br>(185 - 771)          | --                          | --                             | --                             | --                          |
| Injuries                                        | 549,832<br>(465,701 - 631,232) | 27,333<br>(20,811 - 37,214) | 17,388<br>(15,357 - 20,220) | 270,518<br>(229,444 - 325,845) | 150,868<br>(119,923 - 175,102) | 83,725<br>(69,225 - 97,630) |
| Transport injuries                              | 246,882<br>(200,406 - 291,397) | 4,898<br>(3,266 - 6,882)    | 4,970<br>(3,858 - 5,857)    | 145,031<br>(117,569 - 176,849) | 69,829<br>(53,914 - 82,661)    | 22,155<br>(18,051 - 26,271) |
| Road injuries                                   | 238,394<br>(194,253 - 281,402) | 4,688<br>(3,112 - 6,593)    | 4,794<br>(3,724 - 5,659)    | 140,135<br>(113,675 - 171,389) | 67,396<br>(51,998 - 79,643)    | 21,381<br>(17,431 - 25,308) |
| Pedestrian road injuries                        | 118,438<br>(86,860 - 147,965)  | 3,132<br>(1,947 - 4,581)    | 3,101<br>(2,292 - 3,786)    | 61,788<br>(44,342 - 79,775)    | 36,057<br>(25,576 - 45,470)    | 14,360<br>(11,178 - 17,401) |
| Cyclist road injuries                           | 17,979<br>(12,925 - 23,492)    | 191<br>(104 - 313)          | 392<br>(264 - 530)          | 7,615<br>(5,435 - 9,976)       | 7,437<br>(5,030 - 10,115)      | 2,344<br>(1,590 - 3,259)    |
| Motorcyclist road injuries                      | 49,411<br>(35,524 - 66,319)    | 292<br>(167 - 460)          | 449<br>(288 - 648)          | 36,991<br>(26,915 - 49,629)    | 10,295<br>(6,684 - 14,196)     | 1,385<br>(892 - 2,069)      |
| Motor vehicle road injuries                     | 51,127<br>(38,799 - 65,670)    | 1,021<br>(662 - 1,484)      | 804<br>(568 - 1,086)        | 32,936<br>(24,935 - 42,351)    | 13,221<br>(9,367 - 17,792)     | 3,146<br>(2,193 - 4,296)    |
| Other road injuries                             | 1,438<br>(736 - 1,970)         | 52<br>(22 - 94)             | 49<br>(25 - 73)             | 805<br>(405 - 1,135)           | 386<br>(197 - 548)             | 146<br>(79 - 217)           |
| Other transport injuries                        | 8,488<br>(6,100 - 10,348)      | 210<br>(141 - 295)          | 176<br>(123 - 216)          | 4,896<br>(3,429 - 6,096)       | 2,433<br>(1,684 - 3,046)       | 774<br>(577 - 970)          |
| Unintentional injuries                          | 211,667<br>(177,218 - 244,191) | 21,526<br>(16,796 - 30,324) | 11,525<br>(9,846 - 14,738)  | 86,726<br>(71,292 - 105,176)   | 51,263<br>(38,862 - 60,255)    | 40,628<br>(30,176 - 46,634) |
| Falls                                           | 71,082<br>(47,201 - 85,107)    | 2,018<br>(1,313 - 2,865)    | 1,156<br>(760 - 1,467)      | 25,353<br>(16,369 - 31,724)    | 20,560<br>(13,337 - 25,594)    | 21,995<br>(14,125 - 27,638) |
| Drowning                                        | 42,694<br>(33,265 - 62,259)    | 7,825<br>(4,937 - 13,090)   | 8,341<br>(6,814 - 11,887)   | 15,949<br>(12,073 - 22,977)    | 6,237<br>(4,282 - 8,785)       | 4,342<br>(2,726 - 5,825)    |
| Fire, heat, and hot substances                  | 7,257<br>(5,691 - 9,408)       | 518<br>(353 - 786)          | 176<br>(134 - 241)          | 2,240<br>(1,753 - 2,956)       | 1,638<br>(1,216 - 2,114)       | 2,685<br>(1,958 - 3,451)    |
| Poisonings                                      | 17,011<br>(8,977 - 20,599)     | 963<br>(516 - 1,364)        | 401<br>(208 - 506)          | 6,579<br>(3,447 - 8,349)       | 5,533<br>(2,797 - 6,845)       | 3,535<br>(1,781 - 4,235)    |
| Exposure to mechanical forces                   | 39,065<br>(26,875 - 45,779)    | 6,914<br>(5,312 - 13,045)   | 675<br>(433 - 810)          | 19,384<br>(10,995 - 24,008)    | 9,081<br>(5,032 - 10,902)      | 3,012<br>(1,830 - 3,444)    |
| Unintentional firearm injuries                  | 306<br>(240 - 543)             | 13<br>(10 - 20)             | 11<br>(8 - 16)              | 202<br>(156 - 373)             | 52<br>(38 - 91)                | 28<br>(21 - 50)             |
| Unintentional suffocation                       | 9,898<br>(8,046 - 17,466)      | 6,383<br>(4,824 - 12,754)   | 169<br>(113 - 231)          | 1,474<br>(967 - 1,957)         | 1,041<br>(673 - 1,350)         | 831<br>(540 - 1,017)        |
| Other exposure to mechanical forces             | 28,861<br>(14,968 - 34,901)    | 517<br>(243 - 701)          | 495<br>(252 - 594)          | 17,708<br>(8,942 - 22,091)     | 7,988<br>(4,028 - 9,648)       | 2,153<br>(1,100 - 2,496)    |
| Adverse effects of medical treatment            | 4,554<br>(3,528 - 6,356)       | 794<br>(513 - 1,505)        | 108<br>(78 - 170)           | 1,146<br>(859 - 1,623)         | 1,162<br>(855 - 1,615)         | 1,344<br>(978 - 1,841)      |
| Animal contact                                  | 2,187<br>(1,678 - 3,363)       | 96<br>(66 - 135)            | 88<br>(64 - 128)            | 691<br>(528 - 1,056)           | 903<br>(642 - 1,453)           | 409<br>(304 - 675)          |
| Venomous animal contact                         | 1,073<br>(809 - 1,705)         | 38<br>(24 - 56)             | 47<br>(33 - 68)             | 326<br>(235 - 512)             | 454<br>(327 - 768)             | 208<br>(148 - 350)          |
| Non-venomous animal contact                     | 1,114<br>(793 - 1,680)         | 58<br>(39 - 80)             | 41<br>(27 - 60)             | 366<br>(268 - 545)             | 450<br>(308 - 697)             | 200<br>(142 - 306)          |
| Foreign body                                    | 6,207<br>(3,547 - 10,091)      | 1,893<br>(1,034 - 2,942)    | 124<br>(67 - 195)           | 718<br>(421 - 1,176)           | 1,119<br>(635 - 1,855)         | 2,353<br>(1,330 - 4,080)    |
| Pulmonary aspiration and foreign body in airway | 5,874<br>(3,247 - 9,722)       | 1,785<br>(916 - 2,802)      | 112<br>(58 - 179)           | 642<br>(345 - 1,093)           | 1,062<br>(579 - 1,788)         | 2,273<br>(1,245 - 3,994)    |
| Foreign body in other body part                 | 333<br>(210 - 575)             | 108<br>(64 - 188)           | 11<br>(6 - 19)              | 76<br>(48 - 131)               | 57<br>(35 - 98)                | 80<br>(49 - 136)            |
| Other unintentional injuries                    | 21,610<br>(18,118 - 25,584)    | 504<br>(394 - 629)          | 456<br>(366 - 546)          | 14,666<br>(12,245 - 17,768)    | 5,031<br>(4,039 - 5,927)       | 953<br>(801 - 1,079)        |
| Self-harm and interpersonal violence            | 89,766<br>(73,089 - 134,378)   | 531<br>(366 - 889)          | 877<br>(700 - 1,306)        | 38,384<br>(31,250 - 56,232)    | 29,242<br>(23,002 - 43,918)    | 20,733<br>(16,827 - 32,055) |
| Self-harm                                       | 75,584<br>(61,138 - 118,003)   | --                          | 472<br>(361 - 708)          | 29,054<br>(23,537 - 45,034)    | 26,579<br>(20,554 - 41,468)    | 19,478<br>(15,676 - 30,257) |
| Interpersonal violence                          | 14,181<br>(10,469 - 24,175)    | 531<br>(366 - 889)          | 405<br>(281 - 681)          | 9,329<br>(6,831 - 15,607)      | 2,663<br>(1,911 - 4,690)       | 1,254<br>(885 - 2,200)      |
| Assault by firearm                              | 1,280<br>(717 - 2,697)         | 42<br>(23 - 85)             | 17<br>(9 - 36)              | 901<br>(491 - 1,890)           | 195<br>(111 - 408)             | 125<br>(68 - 255)           |
| Assault by sharp object                         | 6,279<br>(4,244 - 11,319)      | 130<br>(78 - 257)           | 157<br>(100 - 293)          | 4,860<br>(3,297 - 8,798)       | 884<br>(553 - 1,624)           | 248<br>(138 - 453)          |
| Assault by other means                          | 6,622<br>(4,482 - 11,248)      | 359<br>(234 - 575)          | 231<br>(151 - 391)          | 3,568<br>(2,345 - 6,076)       | 1,583<br>(1,053 - 2,726)       | 881<br>(607 - 1,527)        |
| Forces of nature, war, and legal intervention   | 1,517<br>(445 - 3,281)         | 379<br>(0 - 2)              | 17<br>(4 - 52)              | 378<br>(149 - 952)             | 534<br>(211 - 1,345)           | 210<br>(79 - 556)           |
| Exposure to forces of nature                    | 1,517<br>(445 - 3,281)         | 379<br>(0 - 2)              | 17<br>(4 - 52)              | 378<br>(149 - 952)             | 534<br>(211 - 1,345)           | 210<br>(79 - 556)           |

Web Table 31- China deaths with 95% UI by age, sex, and cause in 2013

| Cause                                                             | Females, All Ages                    | Females, 0-4 Years            | Females, 5-14 Years         | Females, 15-49 Years           | Females, 50-69 Years             | Females, 70-80 Years                 |
|-------------------------------------------------------------------|--------------------------------------|-------------------------------|-----------------------------|--------------------------------|----------------------------------|--------------------------------------|
| All causes                                                        | 3,609,451<br>(3,252,860 - 3,949,053) | 101,058<br>(90,295 - 113,747) | 19,104<br>(17,417 - 20,777) | 295,676<br>(247,479 - 345,192) | 853,059<br>(710,818 - 1,021,671) | 2,340,555<br>(2,173,242 - 2,471,359) |
| Communicable, maternal, neonatal, and nutritional diseases        | 181,134<br>(166,116 - 205,181)       | 51,453<br>(43,066 - 60,105)   | 1,866<br>(1,647 - 2,134)    | 15,038<br>(13,325 - 16,795)    | 19,259<br>(16,474 - 22,790)      | 93,517<br>(84,382 - 118,571)         |
| HIV/AIDS and tuberculosis                                         | 14,951<br>(12,678 - 17,603)          | 317<br>(215 - 455)            | 190<br>(144 - 241)          | 4,798<br>(3,785 - 6,152)       | 4,421<br>(3,571 - 5,390)         | 5,225<br>(4,498 - 6,276)             |
| Tuberculosis                                                      | 11,794<br>(9,908 - 14,032)           | 113<br>(81 - 138)             | 102<br>(80 - 124)           | 2,418<br>(1,943 - 2,917)       | 3,982<br>(3,200 - 4,885)         | 5,179<br>(4,432 - 6,219)             |
| HIV/AIDS                                                          | 3,157<br>(2,118 - 4,554)             | 203<br>(103 - 340)            | 89<br>(46 - 136)            | 2,380<br>(1,527 - 3,594)       | 439<br>(253 - 703)               | 46<br>(16 - 93)                      |
| HIV/AIDS resulting in mycobacterial infection                     | 144<br>(91 - 221)                    | 9<br>(4 - 15)                 | 4<br>(2 - 6)                | 108<br>(66 - 168)              | 21<br>(11 - 35)                  | 2<br>(1 - 5)                         |
| HIV/AIDS resulting in other diseases                              | 3,013<br>(2,022 - 4,347)             | 195<br>(99 - 325)             | 85<br>(44 - 130)            | 2,272<br>(1,465 - 3,433)       | 418<br>(241 - 669)               | 44<br>(16 - 89)                      |
| Diarrhea, lower respiratory, and other common infectious diseases | 106,025<br>(95,281 - 130,599)        | 14,739<br>(12,476 - 16,902)   | 1,294<br>(1,108 - 1,522)    | 3,980<br>(3,224 - 4,841)       | 9,323<br>(7,538 - 11,516)        | 76,690<br>(68,094 - 101,087)         |
| Diarrheal diseases                                                | 2,895<br>(2,520 - 3,318)             | 1,075<br>(827 - 1,390)        | 86<br>(70 - 104)            | 227<br>(180 - 280)             | 413<br>(334 - 516)               | 1,094<br>(931 - 1,291)               |
| Intestinal infectious diseases                                    | 626<br>(370 - 1,015)                 | 192<br>(108 - 321)            | 116<br>(61 - 198)           | 210<br>(115 - 358)             | 70<br>(41 - 115)                 | 39<br>(25 - 58)                      |
| Typhoid fever                                                     | 373<br>(175 - 667)                   | 109<br>(49 - 201)             | 79<br>(38 - 145)            | 131<br>(59 - 247)              | 38<br>(17 - 71)                  | 16<br>(7 - 28)                       |
| Paratyphoid fever                                                 | 112<br>(53 - 202)                    | 41<br>(18 - 75)               | 27<br>(13 - 48)             | 34<br>(15 - 62)                | 8<br>(4 - 16)                    | 3<br>(1 - 6)                         |
| Other intestinal infectious diseases                              | 141<br>(109 - 176)                   | 42<br>(27 - 61)               | 10<br>(4 - 19)              | 45<br>(31 - 64)                | 24<br>(14 - 38)                  | 20<br>(12 - 33)                      |
| Lower respiratory infections                                      | 95,836<br>(85,825 - 120,344)         | 10,963<br>(9,053 - 12,905)    | 562<br>(468 - 657)          | 2,326<br>(1,859 - 2,865)       | 7,841<br>(6,312 - 9,808)         | 74,144<br>(65,772 - 98,544)          |
| Upper respiratory infections                                      | 151<br>(112 - 203)                   | 6<br>(4 - 9)                  | 2<br>(1 - 2)                | 18<br>(13 - 25)                | 39<br>(26 - 56)                  | 86<br>(53 - 134)                     |
| Otitis media                                                      | 99<br>(85 - 112)                     | 6<br>(5 - 7)                  | 8<br>(7 - 9)                | 36<br>(29 - 42)                | 21<br>(17 - 27)                  | 28<br>(24 - 33)                      |
| Meningitis                                                        | 3,061<br>(2,430 - 3,422)             | 1,202<br>(909 - 1,401)        | 229<br>(172 - 269)          | 495<br>(350 - 605)             | 432<br>(321 - 536)               | 703<br>(579 - 808)                   |
| Pneumococcal meningitis                                           | 702<br>(558 - 791)                   | 180<br>(135 - 214)            | 43<br>(33 - 51)             | 139<br>(98 - 170)              | 125<br>(94 - 158)                | 215<br>(177 - 258)                   |
| H influenzae type B meningitis                                    | 400<br>(328 - 465)                   | 220<br>(173 - 268)            | 34<br>(26 - 42)             | 47<br>(36 - 60)                | 35<br>(26 - 45)                  | 63<br>(47 - 78)                      |
| Meningococcal meningitis                                          | 453<br>(356 - 518)                   | 160<br>(118 - 189)            | 35<br>(26 - 43)             | 72<br>(51 - 90)                | 66<br>(46 - 86)                  | 120<br>(94 - 143)                    |
| Other meningitis                                                  | 1,507<br>(1,168 - 1,683)             | 642<br>(470 - 750)            | 117<br>(85 - 138)           | 237<br>(163 - 295)             | 206<br>(150 - 257)               | 304<br>(247 - 352)                   |
| Encephalitis                                                      | 2,353<br>(1,896 - 3,429)             | 887<br>(627 - 1,442)          | 257<br>(193 - 421)          | 516<br>(369 - 889)             | 389<br>(279 - 600)               | 303<br>(236 - 509)                   |
| Diphtheria                                                        | 17<br>(10 - 29)                      | 8<br>(3 - 18)                 | 4<br>(1 - 8)                | 4<br>(2 - 7)                   | 2<br>(1 - 4)                     | --                                   |
| Whooping cough                                                    | 171<br>(73 - 346)                    | 156<br>(66 - 317)             | 10<br>(4 - 20)              | 4<br>(2 - 7)                   | 1<br>(0 - 2)                     | --                                   |
| Tetanus                                                           | 428<br>(343 - 678)                   | 181<br>(127 - 313)            | 7<br>(4 - 8)                | 81<br>(58 - 128)               | 71<br>(50 - 122)                 | 89<br>(66 - 171)                     |
| Measles                                                           | 37<br>(6 - 117)                      | 30<br>(5 - 97)                | 5<br>(1 - 16)               | 1<br>(0 - 4)                   | 0<br>(0 - 0)                     | --                                   |
| Varicella and herpes zoster                                       | 351<br>(245 - 502)                   | 33<br>(20 - 54)               | 9<br>(5 - 15)               | 62<br>(42 - 85)                | 44<br>(29 - 67)                  | 203<br>(108 - 350)                   |
| Neglected tropical diseases and malaria                           | 1,445<br>(1,190 - 1,862)             | 119<br>(93 - 157)             | 132<br>(104 - 180)          | 405<br>(322 - 526)             | 481<br>(369 - 600)               | 308<br>(265 - 393)                   |
| Malaria                                                           | 56<br>(45 - 72)                      | 6<br>(4 - 8)                  | 6<br>(5 - 8)                | 29<br>(22 - 39)                | 11<br>(8 - 15)                   | 4<br>(3 - 5)                         |
| Leishmaniasis                                                     | 15<br>(11 - 18)                      | 5<br>(3 - 8)                  | 1<br>(0 - 1)                | 3<br>(2 - 4)                   | 2<br>(1 - 3)                     | 4<br>(3 - 6)                         |
| Visceral leishmaniasis                                            | 15<br>(11 - 18)                      | 5<br>(3 - 8)                  | 1<br>(0 - 1)                | 3<br>(2 - 4)                   | 2<br>(1 - 3)                     | 4<br>(3 - 6)                         |
| Schistosomiasis                                                   | 109<br>(88 - 134)                    | 0<br>(0 - 0)                  | 1<br>(0 - 1)                | 17<br>(12 - 22)                | 41<br>(30 - 54)                  | 51<br>(38 - 66)                      |
| Cysticercosis                                                     | 6<br>(5 - 8)                         | 0<br>(0 - 0)                  | 0<br>(0 - 0)                | 2<br>(2 - 3)                   | 2<br>(2 - 3)                     | 1<br>(1 - 2)                         |
| Cystic echinococcosis                                             | 124<br>(105 - 143)                   | 3<br>(2 - 3)                  | 9<br>(7 - 10)               | 36<br>(29 - 43)                | 41<br>(33 - 50)                  | 36<br>(32 - 41)                      |
| Dengue                                                            | 66<br>(47 - 81)                      | 4<br>(2 - 5)                  | 8<br>(6 - 10)               | 36<br>(25 - 45)                | 14<br>(10 - 17)                  | 5<br>(4 - 7)                         |
| Rabies                                                            | 703<br>(499 - 1,054)                 | 54<br>(35 - 91)               | 88<br>(65 - 135)            | 202<br>(136 - 305)             | 266<br>(185 - 414)               | 93<br>(69 - 137)                     |
| Intestinal nematode infections                                    | 81<br>(58 - 113)                     | 24<br>(12 - 43)               | 10<br>(3 - 23)              | 9<br>(2 - 20)                  | 12<br>(4 - 25)                   | 26<br>(13 - 44)                      |
| Ascariasis                                                        | 81<br>(58 - 113)                     | 24<br>(12 - 43)               | 10<br>(3 - 23)              | 9<br>(2 - 20)                  | 12<br>(4 - 25)                   | 26<br>(13 - 44)                      |
| Other neglected tropical diseases                                 | 285<br>(235 - 354)                   | 23<br>(18 - 30)               | 10<br>(8 - 12)              | 71<br>(56 - 89)                | 93<br>(70 - 125)                 | 88<br>(71 - 120)                     |
| Maternal disorders                                                | 3,233<br>(2,633 - 3,815)             | --                            | 20<br>(15 - 26)             | 3,213<br>(2,617 - 3,798)       | --                               | --                                   |



Web Table 31- China deaths with 95% UI by age, sex, and cause in 2013

| Cause                                                            | Females, All Ages                    | Females, 0-4 Years          | Females, 5-14 Years      | Females, 15-49 Years           | Females, 50-69 Years           | Females, 70-80 Years                 |
|------------------------------------------------------------------|--------------------------------------|-----------------------------|--------------------------|--------------------------------|--------------------------------|--------------------------------------|
| Maternal hemorrhage                                              | 655<br>(532 - 798)                   | --                          | 3<br>(2 - 4)             | 652<br>(529 - 795)             | --                             | --                                   |
| Maternal sepsis and other maternal infections                    | 268<br>(217 - 326)                   | --                          | 2<br>(2 - 3)             | 266<br>(215 - 323)             | --                             | --                                   |
| Maternal hypertensive disorders                                  | 296<br>(241 - 353)                   | --                          | 2<br>(1 - 2)             | 294<br>(239 - 352)             | --                             | --                                   |
| Maternal obstructed labor                                        | 330<br>(264 - 400)                   | --                          | 2<br>(1 - 3)             | 328<br>(262 - 398)             | --                             | --                                   |
| Maternal abortive outcome                                        | 360<br>(290 - 431)                   | --                          | 2<br>(1 - 3)             | 358<br>(288 - 429)             | --                             | --                                   |
| Indirect maternal deaths                                         | 479<br>(377 - 580)                   | --                          | 3<br>(2 - 4)             | 477<br>(374 - 577)             | --                             | --                                   |
| Late maternal deaths                                             | 341<br>(273 - 413)                   | --                          | 4<br>(3 - 5)             | 337<br>(270 - 410)             | --                             | --                                   |
| Maternal deaths aggravated by HIV/AIDS                           | 0<br>(0 - 0)                         | --                          | --                       | 0<br>(0 - 0)                   | --                             | --                                   |
| Other maternal disorders                                         | 497<br>(405 - 596)                   | --                          | 3<br>(2 - 4)             | 494<br>(402 - 593)             | --                             | --                                   |
| Neonatal disorders                                               | 34,776<br>(28,141 - 41,755)          | 34,776<br>(28,141 - 41,755) | --                       | --                             | --                             | --                                   |
| Neonatal preterm birth complications                             | 16,233<br>(10,499 - 20,637)          | 16,233<br>(10,499 - 20,637) | --                       | --                             | --                             | --                                   |
| Neonatal encephalopathy due to birth asphyxia and trauma         | 12,519<br>(9,554 - 16,562)           | 12,519<br>(9,554 - 16,562)  | --                       | --                             | --                             | --                                   |
| Neonatal sepsis and other neonatal infections                    | 1,427<br>(769 - 2,610)               | 1,427<br>(769 - 2,610)      | --                       | --                             | --                             | --                                   |
| Hemolytic disease and other neonatal jaundice                    | 695<br>(349 - 1,136)                 | 695<br>(349 - 1,136)        | --                       | --                             | --                             | --                                   |
| Other neonatal disorders                                         | 3,902<br>(2,813 - 5,113)             | 3,902<br>(2,813 - 5,113)    | --                       | --                             | --                             | --                                   |
| Nutritional deficiencies                                         | 9,412<br>(8,228 - 10,838)            | 806<br>(632 - 984)          | 90<br>(74 - 108)         | 696<br>(560 - 866)             | 974<br>(782 - 1,255)           | 6,845<br>(5,905 - 8,034)             |
| Protein-energy malnutrition                                      | 4,957<br>(3,460 - 6,532)             | 538<br>(319 - 749)          | 33<br>(20 - 48)          | 164<br>(85 - 281)              | 305<br>(163 - 504)             | 3,918<br>(2,688 - 5,159)             |
| Iodine deficiency                                                | 45<br>(20 - 82)                      | 3<br>(1 - 8)                | 1<br>(0 - 3)             | 5<br>(2 - 8)                   | 10<br>(4 - 19)                 | 27<br>(9 - 62)                       |
| Iron-deficiency anemia                                           | 3,082<br>(1,762 - 4,800)             | 117<br>(34 - 222)           | 37<br>(20 - 56)          | 426<br>(276 - 562)             | 528<br>(316 - 729)             | 1,975<br>(1,077 - 3,345)             |
| Other nutritional deficiencies                                   | 1,327<br>(659 - 2,122)               | 148<br>(52 - 242)           | 20<br>(9 - 29)           | 103<br>(44 - 168)              | 131<br>(59 - 212)              | 926<br>(447 - 1,522)                 |
| Other communicable, maternal, neonatal, and nutritional diseases | 11,292<br>(9,247 - 14,229)           | 696<br>(507 - 969)          | 140<br>(116 - 172)       | 1,946<br>(1,546 - 2,710)       | 4,060<br>(3,133 - 5,506)       | 4,450<br>(3,595 - 5,696)             |
| Sexually transmitted diseases excluding HIV                      | 616<br>(434 - 868)                   | 304<br>(156 - 523)          | 30<br>(17 - 48)          | 88<br>(65 - 118)               | 104<br>(72 - 149)              | 91<br>(69 - 116)                     |
| Syphilis                                                         | 494<br>(326 - 746)                   | 304<br>(156 - 523)          | 27<br>(14 - 46)          | 36<br>(27 - 49)                | 57<br>(40 - 82)                | 69<br>(53 - 89)                      |
| Chlamydial infection                                             | 37<br>(28 - 49)                      | --                          | 1<br>(1 - 1)             | 17<br>(13 - 23)                | 14<br>(10 - 20)                | 5<br>(4 - 7)                         |
| Gonococcal infection                                             | 48<br>(36 - 63)                      | --                          | 1<br>(1 - 1)             | 18<br>(13 - 24)                | 18<br>(13 - 27)                | 11<br>(8 - 14)                       |
| Other sexually transmitted diseases                              | 37<br>(27 - 48)                      | --                          | 1<br>(1 - 1)             | 17<br>(12 - 22)                | 14<br>(10 - 20)                | 5<br>(4 - 7)                         |
| Hepatitis                                                        | 9,943<br>(8,037 - 12,732)            | 237<br>(170 - 438)          | 84<br>(68 - 107)         | 1,744<br>(1,375 - 2,497)       | 3,811<br>(2,922 - 5,229)       | 4,067<br>(3,227 - 5,234)             |
| Acute hepatitis A                                                | 392<br>(110 - 850)                   | 85<br>(28 - 176)            | 25<br>(8 - 45)           | 105<br>(27 - 237)              | 112<br>(27 - 272)              | 65<br>(15 - 161)                     |
| Acute hepatitis B                                                | 7,210<br>(5,532 - 9,280)             | 149<br>(82 - 283)           | 31<br>(17 - 48)          | 751<br>(465 - 1,160)           | 2,867<br>(2,062 - 4,013)       | 3,412<br>(2,617 - 4,426)             |
| Acute hepatitis C                                                | 277<br>(52 - 673)                    | --                          | 3<br>(1 - 8)             | 38<br>(7 - 93)                 | 97<br>(17 - 242)               | 139<br>(26 - 346)                    |
| Acute hepatitis E                                                | 2,063<br>(1,185 - 3,310)             | 3<br>(1 - 8)                | 24<br>(14 - 39)          | 851<br>(558 - 1,269)           | 735<br>(373 - 1,273)           | 450<br>(209 - 838)                   |
| Other infectious diseases                                        | 733<br>(590 - 1,073)                 | 156<br>(117 - 210)          | 26<br>(19 - 37)          | 114<br>(86 - 153)              | 145<br>(103 - 217)             | 292<br>(210 - 505)                   |
| Non-communicable diseases                                        | 3,184,117<br>(2,860,782 - 3,495,576) | 30,172<br>(25,693 - 34,533) | 7,625<br>(6,642 - 8,462) | 202,246<br>(166,964 - 239,104) | 773,356<br>(642,732 - 929,122) | 2,170,718<br>(2,013,100 - 2,294,715) |
| Neoplasms                                                        | 703,936<br>(603,023 - 810,692)       | 3,237<br>(2,587 - 3,869)    | 3,332<br>(2,874 - 3,726) | 98,567<br>(80,998 - 117,952)   | 291,301<br>(238,708 - 353,255) | 307,499<br>(277,198 - 342,391)       |
| Esophageal cancer                                                | 45,789<br>(36,943 - 52,733)          | --                          | --                       | 1,529<br>(1,196 - 1,888)       | 17,682<br>(13,840 - 21,636)    | 26,579<br>(21,243 - 29,983)          |
| Stomach cancer                                                   | 90,603<br>(76,993 - 105,653)         | --                          | --                       | 9,094<br>(7,261 - 11,139)      | 33,602<br>(27,351 - 41,271)    | 47,906<br>(42,227 - 54,830)          |
| Liver cancer                                                     | 89,627<br>(76,235 - 104,468)         | --                          | 98<br>(83 - 115)         | 11,410<br>(9,177 - 13,705)     | 39,822<br>(32,456 - 48,846)    | 38,298<br>(34,034 - 44,002)          |
| Liver cancer due to hepatitis B                                  | 34,125<br>(28,759 - 40,226)          | --                          | 33<br>(27 - 40)          | 5,485<br>(4,395 - 6,649)       | 16,588<br>(13,438 - 20,548)    | 12,018<br>(10,426 - 13,776)          |
| Liver cancer due to hepatitis C                                  | 33,680<br>(27,983 - 40,389)          | --                          | 9<br>(7 - 12)            | 2,914<br>(2,189 - 3,722)       | 13,915<br>(10,844 - 17,590)    | 16,842<br>(14,585 - 19,707)          |
| Liver cancer due to alcohol use                                  | 5,148<br>(4,308 - 6,222)             | --                          | --                       | 312<br>(243 - 390)             | 1,855<br>(1,458 - 2,344)       | 2,981<br>(2,515 - 3,589)             |

Web Table 31- China deaths with 95% UI by age, sex, and cause in 2013

| Cause                                         | Females, All Ages                    | Females, 0-4 Years       | Females, 5-14 Years      | Females, 15-49 Years        | Females, 50-69 Years           | Females, 70-80 Years                 |
|-----------------------------------------------|--------------------------------------|--------------------------|--------------------------|-----------------------------|--------------------------------|--------------------------------------|
| Liver cancer due to other causes              | 16,675<br>(13,870 - 20,065)          | --                       | 55<br>(46 - 65)          | 2,699<br>(2,161 - 3,276)    | 7,463<br>(5,933 - 9,345)       | 6,457<br>(5,534 - 7,631)             |
| Larynx cancer                                 | 2,293<br>(1,181 - 4,157)             | --                       | --                       | 197<br>(98 - 348)           | 869<br>(428 - 1,532)           | 1,226<br>(634 - 2,239)               |
| Tracheal, bronchus and lung cancer            | 150,156<br>(127,355 - 178,293)       | --                       | --                       | 12,596<br>(9,995 - 16,012)  | 60,919<br>(48,939 - 76,899)    | 76,642<br>(67,909 - 88,899)          |
| Breast cancer                                 | 51,480<br>(40,991 - 62,222)          | --                       | --                       | 14,908<br>(11,506 - 18,177) | 25,000<br>(19,276 - 31,220)    | 11,573<br>(9,965 - 13,068)           |
| Cervical cancer                               | 28,010<br>(18,711 - 33,877)          | --                       | --                       | 8,311<br>(5,232 - 10,320)   | 12,847<br>(8,131 - 16,088)     | 6,853<br>(5,194 - 7,874)             |
| Uterine cancer                                | 15,360<br>(9,388 - 20,031)           | --                       | --                       | 3,014<br>(1,825 - 4,087)    | 7,872<br>(4,607 - 10,446)      | 4,474<br>(2,886 - 6,006)             |
| Prostate cancer                               | --                                   | --                       | --                       | --                          | --                             | --                                   |
| Colon and rectum cancer                       | 61,659<br>(53,479 - 70,418)          | --                       | --                       | 6,317<br>(5,142 - 7,532)    | 23,746<br>(19,652 - 28,826)    | 31,597<br>(28,295 - 35,747)          |
| Lip and oral cavity cancer                    | 3,514<br>(2,412 - 4,547)             | --                       | --                       | 624<br>(433 - 883)          | 1,436<br>(984 - 1,961)         | 1,454<br>(967 - 1,796)               |
| Nasopharynx cancer                            | 6,933<br>(4,732 - 10,498)            | --                       | 21<br>(13 - 30)          | 1,871<br>(1,280 - 2,886)    | 3,367<br>(2,241 - 5,190)       | 1,675<br>(1,121 - 2,505)             |
| Other pharynx cancer                          | 958<br>(802 - 1,141)                 | --                       | --                       | 149<br>(118 - 186)          | 398<br>(314 - 503)             | 410<br>(353 - 478)                   |
| Gallbladder and biliary tract cancer          | 13,255<br>(9,309 - 15,949)           | --                       | --                       | 948<br>(663 - 1,190)        | 5,265<br>(3,604 - 6,632)       | 7,041<br>(4,839 - 8,268)             |
| Pancreatic cancer                             | 24,399<br>(21,103 - 27,968)          | --                       | --                       | 1,808<br>(1,486 - 2,169)    | 10,328<br>(8,516 - 12,434)     | 12,263<br>(10,933 - 13,878)          |
| Malignant skin melanoma                       | 1,573<br>(1,276 - 1,877)             | --                       | --                       | 296<br>(224 - 363)          | 732<br>(564 - 918)             | 545<br>(473 - 635)                   |
| Non-melanoma skin cancer                      | 3,394<br>(2,219 - 5,501)             | --                       | --                       | 338<br>(219 - 529)          | 747<br>(488 - 1,186)           | 2,309<br>(1,476 - 3,836)             |
| Ovarian cancer                                | 14,547<br>(11,910 - 17,610)          | --                       | --                       | 3,265<br>(2,583 - 4,077)    | 7,696<br>(6,171 - 9,606)       | 3,586<br>(3,160 - 4,100)             |
| Testicular cancer                             | --                                   | --                       | --                       | --                          | --                             | --                                   |
| Kidney cancer                                 | 4,932<br>(4,170 - 5,939)             | 102<br>(76 - 134)        | 38<br>(30 - 46)          | 595<br>(469 - 742)          | 1,900<br>(1,506 - 2,403)       | 2,298<br>(2,006 - 2,669)             |
| Bladder cancer                                | 5,529<br>(4,162 - 8,468)             | --                       | --                       | 275<br>(192 - 405)          | 1,459<br>(1,047 - 2,220)       | 3,795<br>(2,873 - 5,927)             |
| Brain and nervous system cancer               | 21,435<br>(17,983 - 25,492)          | 409<br>(290 - 551)       | 725<br>(615 - 863)       | 5,286<br>(4,309 - 6,614)    | 8,636<br>(6,958 - 10,870)      | 6,378<br>(5,479 - 7,415)             |
| Thyroid cancer                                | 2,682<br>(1,688 - 3,341)             | --                       | 5<br>(3 - 7)             | 273<br>(169 - 369)          | 1,084<br>(665 - 1,442)         | 1,319<br>(829 - 1,578)               |
| Mesothelioma                                  | 4,137<br>(3,283 - 5,094)             | --                       | --                       | 252<br>(200 - 313)          | 3,522<br>(2,738 - 4,398)       | 364<br>(312 - 423)                   |
| Hodgkin lymphoma                              | 1,226<br>(935 - 2,291)               | 47<br>(35 - 112)         | 34<br>(27 - 63)          | 315<br>(228 - 588)          | 439<br>(318 - 810)             | 391<br>(314 - 707)                   |
| Non-Hodgkin lymphoma                          | 9,710<br>(5,683 - 12,012)            | 134<br>(76 - 174)        | 148<br>(94 - 184)        | 1,825<br>(1,065 - 2,392)    | 3,878<br>(2,175 - 5,085)       | 3,726<br>(2,218 - 4,406)             |
| Multiple myeloma                              | 3,326<br>(2,473 - 4,206)             | --                       | --                       | 436<br>(309 - 564)          | 1,559<br>(1,122 - 2,028)       | 1,331<br>(991 - 1,708)               |
| Leukemia                                      | 22,893<br>(18,921 - 26,542)          | 1,423<br>(1,100 - 1,742) | 1,573<br>(1,316 - 1,787) | 8,241<br>(6,578 - 9,920)    | 7,238<br>(5,777 - 8,872)       | 4,418<br>(3,877 - 5,017)             |
| Other neoplasms                               | 24,516<br>(15,490 - 30,108)          | 1,123<br>(594 - 1,590)   | 691<br>(460 - 856)       | 4,396<br>(2,637 - 5,796)    | 9,257<br>(5,618 - 12,019)      | 9,050<br>(6,081 - 10,555)            |
| Cardiovascular diseases                       | 1,609,084<br>(1,397,999 - 1,785,055) | 1,942<br>(1,361 - 2,710) | 1,138<br>(829 - 1,394)   | 60,716<br>(46,522 - 74,356) | 330,870<br>(266,076 - 403,654) | 1,214,417<br>(1,075,957 - 1,307,230) |
| Rheumatic heart disease                       | 41,949<br>(28,917 - 56,113)          | 50<br>(25 - 72)          | 123<br>(77 - 160)        | 4,653<br>(3,170 - 6,322)    | 13,300<br>(9,264 - 18,229)     | 23,823<br>(17,018 - 32,753)          |
| Ischemic heart disease                        | 595,772<br>(435,255 - 685,877)       | 281<br>(148 - 453)       | 254<br>(162 - 355)       | 20,963<br>(13,565 - 27,830) | 106,465<br>(73,147 - 134,354)  | 467,808<br>(340,769 - 529,081)       |
| Cerebrovascular disease                       | 810,450<br>(692,117 - 924,962)       | 514<br>(333 - 655)       | 397<br>(284 - 487)       | 29,323<br>(22,027 - 36,149) | 180,205<br>(145,366 - 221,772) | 600,010<br>(519,021 - 692,927)       |
| Ischemic stroke                               | 321,863<br>(212,679 - 376,982)       | 51<br>(24 - 83)          | 55<br>(31 - 74)          | 4,182<br>(2,380 - 6,046)    | 49,124<br>(31,619 - 64,135)    | 268,451<br>(179,947 - 310,206)       |
| Hemorrhagic stroke                            | 488,587<br>(413,673 - 634,570)       | 463<br>(305 - 584)       | 342<br>(249 - 424)       | 25,141<br>(19,389 - 30,982) | 131,081<br>(105,391 - 162,383) | 331,559<br>(283,028 - 448,192)       |
| Hypertensive heart disease                    | 117,093<br>(82,699 - 139,981)        | 38<br>(22 - 53)          | 14<br>(9 - 18)           | 2,457<br>(1,700 - 3,235)    | 18,090<br>(12,801 - 23,267)    | 96,495<br>(66,680 - 115,545)         |
| Cardiomyopathy and myocarditis                | 12,500<br>(8,603 - 16,145)           | 642<br>(349 - 1,079)     | 248<br>(156 - 327)       | 1,628<br>(1,016 - 2,410)    | 2,798<br>(1,870 - 3,911)       | 7,184<br>(4,833 - 9,992)             |
| Atrial fibrillation and flutter               | 589<br>(486 - 746)                   | --                       | --                       | 26<br>(20 - 34)             | 65<br>(49 - 85)                | 499<br>(408 - 635)                   |
| Aortic aneurysm                               | 2,573<br>(1,651 - 3,885)             | --                       | --                       | 271<br>(158 - 415)          | 727<br>(434 - 1,114)           | 1,576<br>(1,013 - 2,412)             |
| Peripheral vascular disease                   | 442<br>(373 - 574)                   | --                       | --                       | 20<br>(15 - 28)             | 64<br>(50 - 88)                | 358<br>(300 - 464)                   |
| Endocarditis                                  | 1,102<br>(676 - 1,484)               | 52<br>(28 - 76)          | 13<br>(7 - 19)           | 121<br>(72 - 170)           | 216<br>(132 - 306)             | 700<br>(432 - 939)                   |
| Other cardiovascular and circulatory diseases | 26,614<br>(21,347 - 44,944)          | 365<br>(252 - 568)       | 89<br>(62 - 159)         | 1,256<br>(891 - 2,391)      | 8,940<br>(6,652 - 15,499)      | 15,965<br>(13,175 - 27,248)          |

Web Table 31- China deaths with 95% UI by age, sex, and cause in 2013

| Cause                                               | Females, All Ages              | Females, 0-4 Years | Females, 5-14 Years | Females, 15-49 Years     | Females, 50-69 Years        | Females, 70-80 Years           |
|-----------------------------------------------------|--------------------------------|--------------------|---------------------|--------------------------|-----------------------------|--------------------------------|
| Chronic respiratory diseases                        | 447,861<br>(399,303 - 534,313) | 523<br>(397 - 611) | 188<br>(155 - 219)  | 6,327<br>(5,032 - 7,775) | 57,679<br>(47,121 - 70,410) | 383,144<br>(344,555 - 463,032) |
| Chronic obstructive pulmonary disease               | 379,942<br>(333,000 - 456,135) | 277<br>(200 - 359) | 93<br>(68 - 119)    | 4,964<br>(3,795 - 6,159) | 50,092<br>(40,615 - 61,992) | 324,517<br>(286,072 - 392,689) |
| Pneumoconiosis                                      | 569<br>(388 - 795)             | 7<br>(4 - 10)      | 8<br>(6 - 10)       | 72<br>(47 - 103)         | 124<br>(77 - 187)           | 359<br>(245 - 520)             |
| Silicosis                                           | 198<br>(135 - 283)             | 2<br>(1 - 3)       | 2<br>(1 - 3)        | 15<br>(10 - 22)          | 21<br>(13 - 33)             | 158<br>(106 - 232)             |
| Asbestosis                                          | 51<br>(34 - 72)                | 2<br>(1 - 2)       | 2<br>(1 - 3)        | 12<br>(8 - 17)           | 10<br>(6 - 15)              | 25<br>(17 - 37)                |
| Coal workers pneumoconiosis                         | 71<br>(46 - 102)               | 2<br>(1 - 3)       | 2<br>(1 - 3)        | 14<br>(9 - 19)           | 13<br>(8 - 21)              | 40<br>(26 - 62)                |
| Other pneumoconiosis                                | 250<br>(167 - 349)             | 2<br>(1 - 3)       | 2<br>(1 - 3)        | 31<br>(20 - 44)          | 79<br>(49 - 120)            | 136<br>(92 - 199)              |
| Asthma                                              | 10,830<br>(6,734 - 15,429)     | 27<br>(14 - 39)    | 30<br>(18 - 40)     | 750<br>(433 - 1,106)     | 1,677<br>(943 - 2,535)      | 8,346<br>(5,180 - 12,100)      |
| Interstitial lung disease and pulmonary sarcoidosis | 37,189<br>(21,779 - 56,286)    | 19<br>(11 - 31)    | 14<br>(9 - 22)      | 233<br>(136 - 380)       | 4,142<br>(2,274 - 6,725)    | 32,780<br>(19,018 - 49,895)    |
| Other chronic respiratory diseases                  | 19,331<br>(13,312 - 27,599)    | 193<br>(135 - 247) | 44<br>(31 - 56)     | 309<br>(201 - 434)       | 1,644<br>(1,010 - 2,425)    | 17,142<br>(11,830 - 24,688)    |
| Cirrhosis                                           | 42,501<br>(36,544 - 48,602)    | 56<br>(42 - 72)    | 83<br>(71 - 92)     | 5,261<br>(4,290 - 6,260) | 17,478<br>(14,407 - 21,200) | 19,624<br>(17,597 - 22,084)    |
| Cirrhosis due to hepatitis B                        | 22,514<br>(19,353 - 26,353)    | 4<br>(3 - 6)       | 21<br>(17 - 26)     | 2,476<br>(2,005 - 2,990) | 9,059<br>(7,471 - 11,105)   | 10,954<br>(9,705 - 12,567)     |
| Cirrhosis due to hepatitis C                        | 11,116<br>(9,255 - 13,101)     | 2<br>(2 - 3)       | 12<br>(9 - 14)      | 1,523<br>(1,201 - 1,870) | 4,921<br>(3,952 - 6,113)    | 4,658<br>(3,924 - 5,397)       |
| Cirrhosis due to alcohol use                        | 5,927<br>(4,987 - 7,057)       | --                 | --                  | 518<br>(401 - 636)       | 2,256<br>(1,796 - 2,803)    | 3,153<br>(2,679 - 3,714)       |
| Cirrhosis due to other causes                       | 2,945<br>(2,426 - 3,545)       | 50<br>(37 - 64)    | 50<br>(42 - 58)     | 744<br>(594 - 907)       | 1,242<br>(972 - 1,560)      | 859<br>(733 - 1,010)           |
| Digestive diseases                                  | 49,467<br>(43,279 - 58,433)    | 437<br>(316 - 559) | 206<br>(177 - 236)  | 3,041<br>(2,480 - 3,702) | 10,630<br>(8,669 - 13,022)  | 35,153<br>(31,202 - 41,725)    |
| Peptic ulcer disease                                | 14,312<br>(10,446 - 17,323)    | 19<br>(10 - 28)    | 21<br>(14 - 27)     | 716<br>(491 - 929)       | 3,221<br>(2,278 - 4,138)    | 10,335<br>(7,543 - 12,531)     |
| Gastritis and duodenitis                            | 8,074<br>(4,718 - 13,294)      | 19<br>(9 - 35)     | 15<br>(7 - 25)      | 416<br>(226 - 713)       | 1,811<br>(990 - 3,037)      | 5,813<br>(3,433 - 9,511)       |
| Appendicitis                                        | 954<br>(701 - 1,366)           | 9<br>(5 - 14)      | 19<br>(12 - 25)     | 101<br>(66 - 140)        | 216<br>(145 - 326)          | 608<br>(453 - 899)             |
| Paralytic ileus and intestinal obstruction          | 6,454<br>(3,823 - 10,711)      | 101<br>(59 - 173)  | 57<br>(39 - 89)     | 417<br>(259 - 733)       | 1,061<br>(623 - 1,891)      | 4,818<br>(2,817 - 7,972)       |
| Inguinal, femoral, and abdominal hernia             | 360<br>(201 - 566)             | 6<br>(3 - 10)      | 6<br>(3 - 8)        | 28<br>(12 - 38)          | 54<br>(31 - 86)             | 266<br>(151 - 433)             |
| Inflammatory bowel disease                          | 2,871<br>(2,024 - 4,410)       | 126<br>(74 - 178)  | 26<br>(16 - 36)     | 193<br>(128 - 277)       | 524<br>(351 - 791)          | 2,002<br>(1,432 - 3,234)       |
| Vascular intestinal disorders                       | 306<br>(152 - 559)             | 1<br>(0 - 6)       | 2<br>(0 - 11)       | 27<br>(13 - 55)          | 37<br>(18 - 72)             | 237<br>(111 - 427)             |
| Gallbladder and biliary diseases                    | 8,326<br>(6,575 - 12,284)      | 19<br>(12 - 26)    | 12<br>(9 - 16)      | 318<br>(229 - 440)       | 1,521<br>(1,120 - 2,241)    | 6,455<br>(5,181 - 9,644)       |
| Pancreatitis                                        | 4,188<br>(2,791 - 6,012)       | 5<br>(3 - 7)       | 13<br>(8 - 19)      | 573<br>(385 - 794)       | 1,305<br>(851 - 1,913)      | 2,292<br>(1,483 - 3,431)       |
| Other digestive diseases                            | 3,622<br>(2,834 - 4,275)       | 132<br>(83 - 181)  | 34<br>(24 - 42)     | 252<br>(184 - 318)       | 878<br>(644 - 1,121)        | 2,326<br>(1,816 - 2,812)       |
| Neurological disorders                              | 120,747<br>(108,724 - 138,347) | 473<br>(388 - 644) | 375<br>(305 - 488)  | 3,521<br>(2,776 - 4,795) | 10,017<br>(8,168 - 12,101)  | 106,361<br>(96,463 - 122,594)  |
| Alzheimer disease and other dementias               | 109,500<br>(98,851 - 126,014)  | --                 | --                  | 63<br>(46 - 82)          | 7,022<br>(5,700 - 8,605)    | 102,416<br>(92,808 - 118,275)  |
| Parkinson disease                                   | 3,419<br>(2,753 - 5,034)       | --                 | --                  | 74<br>(55 - 104)         | 795<br>(607 - 1,139)        | 2,550<br>(2,040 - 3,777)       |
| Epilepsy                                            | 4,951<br>(3,901 - 7,172)       | 301<br>(222 - 496) | 305<br>(240 - 418)  | 2,600<br>(1,995 - 3,853) | 974<br>(748 - 1,385)        | 771<br>(597 - 1,078)           |
| Multiple sclerosis                                  | 128<br>(79 - 219)              | --                 | --                  | 57<br>(33 - 98)          | 46<br>(28 - 80)             | 25<br>(16 - 44)                |
| Other neurological disorders                        | 2,749<br>(2,334 - 3,208)       | 172<br>(140 - 201) | 70<br>(59 - 80)     | 726<br>(591 - 877)       | 1,182<br>(963 - 1,452)      | 599<br>(527 - 676)             |
| Mental and substance use disorders                  | 10,717<br>(8,997 - 13,660)     | 118<br>(90 - 154)  | 4<br>(3 - 5)        | 3,434<br>(2,758 - 4,329) | 3,079<br>(2,445 - 4,192)    | 4,083<br>(3,561 - 5,051)       |
| Schizophrenia                                       | 3,677<br>(2,795 - 6,084)       | --                 | --                  | 1,165<br>(864 - 1,829)   | 1,336<br>(981 - 2,220)      | 1,176<br>(915 - 2,049)         |
| Alcohol use disorders                               | 963<br>(434 - 1,814)           | --                 | --                  | 364<br>(159 - 679)       | 312<br>(139 - 588)          | 287<br>(127 - 556)             |
| Drug use disorders                                  | 6,028<br>(5,227 - 6,862)       | 118<br>(90 - 154)  | --                  | 1,860<br>(1,529 - 2,199) | 1,431<br>(1,170 - 1,743)    | 2,620<br>(2,343 - 2,936)       |
| Opioid use disorders                                | 2,276<br>(1,934 - 2,630)       | 45<br>(32 - 63)    | --                  | 698<br>(563 - 854)       | 490<br>(391 - 611)          | 1,043<br>(871 - 1,225)         |
| Cocaine use disorders                               | 572<br>(475 - 688)             | 14<br>(9 - 22)     | --                  | 219<br>(171 - 268)       | 121<br>(92 - 160)           | 217<br>(164 - 281)             |
| Amphetamine use disorders                           | 677<br>(554 - 806)             | 18<br>(12 - 27)    | --                  | 219<br>(172 - 267)       | 165<br>(122 - 216)          | 274<br>(207 - 357)             |
| Other drug use disorders                            | 2,504<br>(2,134 - 2,896)       | 40<br>(28 - 55)    | --                  | 724<br>(580 - 863)       | 654<br>(522 - 815)          | 1,086<br>(907 - 1,273)         |

Web Table 31- China deaths with 95% UI by age, sex, and cause in 2013

| Cause                                               | Females, All Ages              | Females, 0-4 Years          | Females, 5-14 Years      | Females, 15-49 Years        | Females, 50-69 Years        | Females, 70-80 Years         |
|-----------------------------------------------------|--------------------------------|-----------------------------|--------------------------|-----------------------------|-----------------------------|------------------------------|
| Eating disorders                                    | 49<br>(40 - 59)                | --                          | 4<br>(3 - 5)             | 46<br>(36 - 55)             | --                          | --                           |
| Anorexia nervosa                                    | 49<br>(40 - 59)                | --                          | 4<br>(3 - 5)             | 46<br>(36 - 55)             | --                          | --                           |
| Diabetes, urogenital, blood, and endocrine diseases | 156,260<br>(131,888 - 179,636) | 1,387<br>(1,105 - 1,711)    | 784<br>(631 - 942)       | 14,555<br>(11,881 - 17,573) | 47,750<br>(38,954 - 58,451) | 91,783<br>(77,125 - 103,816) |
| Diabetes mellitus                                   | 65,797<br>(56,181 - 76,098)    | 174<br>(104 - 270)          | 87<br>(51 - 141)         | 3,535<br>(2,830 - 4,326)    | 21,856<br>(17,751 - 27,031) | 40,146<br>(35,277 - 46,028)  |
| Acute glomerulonephritis                            | 3,109<br>(2,395 - 4,026)       | 48<br>(34 - 63)             | 63<br>(48 - 79)          | 705<br>(525 - 925)          | 958<br>(692 - 1,284)        | 1,335<br>(1,003 - 1,746)     |
| Chronic kidney disease                              | 69,021<br>(49,012 - 80,458)    | 110<br>(76 - 134)           | 173<br>(135 - 202)       | 6,840<br>(5,145 - 8,342)    | 20,355<br>(14,723 - 25,387) | 41,544<br>(28,070 - 47,667)  |
| Chronic kidney disease due to diabetes mellitus     | 15,089<br>(10,485 - 19,298)    | 5<br>(3 - 6)                | 7<br>(5 - 9)             | 1,136<br>(816 - 1,477)      | 5,932<br>(4,244 - 7,674)    | 8,010<br>(5,415 - 10,461)    |
| Chronic kidney disease due to hypertension          | 16,006<br>(7,912 - 23,085)     | 13<br>(7 - 20)              | 10<br>(5 - 17)           | 838<br>(398 - 1,282)        | 3,396<br>(1,578 - 5,243)    | 11,749<br>(5,805 - 16,792)   |
| Chronic kidney disease due to glomerulonephritis    | 14,816<br>(11,072 - 20,359)    | 45<br>(32 - 56)             | 89<br>(70 - 107)         | 2,681<br>(2,021 - 3,442)    | 4,776<br>(3,455 - 6,577)    | 7,224<br>(5,332 - 10,226)    |
| Chronic kidney disease due to other causes          | 23,110<br>(13,044 - 30,058)    | 46<br>(28 - 64)             | 66<br>(46 - 87)          | 2,186<br>(1,414 - 2,880)    | 6,251<br>(3,738 - 8,265)    | 14,561<br>(7,555 - 19,580)   |
| Urinary diseases and male infertility               | 5,744<br>(4,894 - 7,532)       | 50<br>(38 - 67)             | 27<br>(22 - 34)          | 667<br>(525 - 853)          | 1,414<br>(1,119 - 1,873)    | 3,585<br>(3,052 - 4,928)     |
| Interstitial nephritis and urinary tract infections | 3,572<br>(2,877 - 4,486)       | 40<br>(30 - 57)             | 14<br>(11 - 19)          | 421<br>(323 - 551)          | 848<br>(646 - 1,097)        | 2,248<br>(1,736 - 2,996)     |
| Urolithiasis                                        | 1,161<br>(868 - 1,980)         | --                          | 7<br>(5 - 10)            | 136<br>(98 - 196)           | 336<br>(242 - 540)          | 683<br>(501 - 1,277)         |
| Other urinary diseases                              | 1,011<br>(775 - 1,544)         | 10<br>(6 - 15)              | 6<br>(4 - 8)             | 110<br>(74 - 160)           | 231<br>(161 - 338)          | 654<br>(500 - 1,078)         |
| Gynecological diseases                              | 293<br>(209 - 361)             | --                          | --                       | 90<br>(61 - 115)            | 108<br>(75 - 138)           | 95<br>(71 - 119)             |
| Uterine fibroids                                    | 77<br>(55 - 96)                | --                          | --                       | 20<br>(13 - 26)             | 29<br>(20 - 37)             | 29<br>(22 - 36)              |
| Polycystic ovarian syndrome                         | 5<br>(3 - 6)                   | --                          | --                       | 5<br>(3 - 6)                | 1<br>(0 - 1)                | --                           |
| Endometriosis                                       | 15<br>(10 - 19)                | --                          | --                       | 13<br>(9 - 17)              | 2<br>(1 - 3)                | --                           |
| Genital prolapse                                    | 55<br>(39 - 68)                | --                          | --                       | 11<br>(7 - 13)              | 20<br>(14 - 25)             | 24<br>(18 - 30)              |
| Other gynecological diseases                        | 141<br>(100 - 173)             | --                          | --                       | 42<br>(28 - 53)             | 57<br>(39 - 73)             | 42<br>(31 - 52)              |
| Hemoglobinopathies and hemolytic anemias            | 4,710<br>(2,925 - 6,757)       | 453<br>(283 - 640)          | 251<br>(150 - 375)       | 1,297<br>(792 - 1,906)      | 1,316<br>(775 - 1,935)      | 1,394<br>(871 - 2,087)       |
| Thalassemias                                        | 1,321<br>(845 - 1,886)         | 374<br>(234 - 530)          | 232<br>(139 - 348)       | 658<br>(406 - 969)          | 51<br>(30 - 77)             | 5<br>(3 - 8)                 |
| Sickle cell disorders                               | 0<br>(0 - 1)                   | 0<br>(0 - 0)                | 0<br>(0 - 0)             | 0<br>(0 - 0)                | 0<br>(0 - 0)                | 0<br>(0 - 0)                 |
| G6PD deficiency                                     | 171<br>(105 - 249)             | 5<br>(3 - 8)                | 3<br>(2 - 5)             | 71<br>(42 - 104)            | 76<br>(45 - 114)            | 16<br>(10 - 23)              |
| Other hemoglobinopathies and hemolytic anemias      | 3,218<br>(1,943 - 4,681)       | 73<br>(45 - 112)            | 15<br>(9 - 22)           | 569<br>(338 - 850)          | 1,189<br>(700 - 1,747)      | 1,373<br>(857 - 2,056)       |
| Endocrine, metabolic, blood, and immune disorders   | 7,585<br>(5,463 - 9,731)       | 552<br>(350 - 735)          | 184<br>(127 - 232)       | 1,421<br>(994 - 1,900)      | 1,743<br>(1,266 - 2,288)    | 3,685<br>(2,593 - 4,787)     |
| Musculoskeletal disorders                           | 11,572<br>(9,176 - 14,024)     | --                          | 197<br>(156 - 237)       | 3,557<br>(2,747 - 4,450)    | 3,337<br>(2,560 - 4,238)    | 4,482<br>(3,648 - 5,381)     |
| Rheumatoid arthritis                                | 5,056<br>(3,945 - 6,084)       | --                          | 20<br>(15 - 25)          | 413<br>(297 - 538)          | 1,659<br>(1,249 - 2,113)    | 2,964<br>(2,350 - 3,537)     |
| Other musculoskeletal disorders                     | 6,516<br>(5,183 - 8,093)       | --                          | 177<br>(141 - 213)       | 3,144<br>(2,427 - 3,960)    | 1,678<br>(1,283 - 2,153)    | 1,517<br>(1,198 - 2,072)     |
| Other non-communicable diseases                     | 31,972<br>(27,175 - 36,641)    | 22,000<br>(17,833 - 26,105) | 1,318<br>(1,059 - 1,530) | 3,267<br>(2,464 - 3,982)    | 1,215<br>(944 - 1,504)      | 4,172<br>(3,668 - 5,049)     |
| Congenital anomalies                                | 27,457<br>(22,715 - 31,751)    | 21,621<br>(17,485 - 25,716) | 1,292<br>(1,036 - 1,503) | 3,070<br>(2,308 - 3,757)    | 864<br>(653 - 1,080)        | 609<br>(490 - 732)           |
| Neural tube defects                                 | 687<br>(482 - 1,004)           | 615<br>(418 - 919)          | 18<br>(13 - 25)          | 37<br>(22 - 49)             | 12<br>(5 - 15)              | 6<br>(4 - 8)                 |
| Congenital heart anomalies                          | 19,782<br>(16,325 - 22,978)    | 15,401<br>(12,504 - 18,316) | 1,035<br>(827 - 1,204)   | 2,544<br>(1,901 - 3,123)    | 513<br>(388 - 651)          | 289<br>(229 - 353)           |
| Cleft lip and cleft palate                          | 263<br>(111 - 444)             | 263<br>(111 - 444)          | --                       | --                          | --                          | --                           |
| Down syndrome                                       | 281<br>(174 - 408)             | 210<br>(124 - 317)          | 14<br>(8 - 20)           | 36<br>(22 - 54)             | 18<br>(11 - 28)             | 4<br>(2 - 6)                 |
| Chromosomal unbalanced rearrangements               | 272<br>(176 - 430)             | 181<br>(108 - 316)          | 22<br>(11 - 32)          | 53<br>(33 - 78)             | 12<br>(8 - 19)              | 4<br>(3 - 8)                 |
| Other congenital anomalies                          | 6,170<br>(4,877 - 7,425)       | 4,951<br>(3,768 - 6,107)    | 204<br>(155 - 253)       | 399<br>(292 - 506)          | 310<br>(231 - 400)          | 306<br>(238 - 375)           |
| Skin and subcutaneous diseases                      | 4,227<br>(3,663 - 5,115)       | 90<br>(73 - 113)            | 26<br>(22 - 31)          | 197<br>(150 - 247)          | 351<br>(274 - 449)          | 3,563<br>(3,079 - 4,370)     |
| Cellulitis                                          | 163<br>(107 - 250)             | 18<br>(13 - 29)             | 5<br>(3 - 7)             | 27<br>(16 - 38)             | 22<br>(14 - 34)             | 92<br>(58 - 153)             |
| Pyoderma                                            | 690<br>(586 - 826)             | 54<br>(42 - 69)             | 9<br>(7 - 11)            | 62<br>(47 - 77)             | 100<br>(78 - 129)           | 465<br>(385 - 577)           |

Web Table 31- China deaths with 95% UI by age, sex, and cause in 2013

| Cause                                           | Females, All Ages              | Females, 0-4 Years          | Females, 5-14 Years       | Females, 15-49 Years        | Females, 50-69 Years        | Females, 70-80 Years        |
|-------------------------------------------------|--------------------------------|-----------------------------|---------------------------|-----------------------------|-----------------------------|-----------------------------|
| Decubitus ulcer                                 | 3,189<br>(2,726 - 3,864)       | 8<br>(5 - 11)               | 7<br>(6 - 9)              | 72<br>(54 - 93)             | 195<br>(149 - 253)          | 2,907<br>(2,493 - 3,543)    |
| Other skin and subcutaneous diseases            | 184<br>(139 - 275)             | 11<br>(7 - 16)              | 5<br>(4 - 7)              | 36<br>(25 - 50)             | 34<br>(24 - 50)             | 99<br>(73 - 156)            |
| Sudden infant death syndrome                    | 288<br>(91 - 470)              | 288<br>(91 - 470)           | --                        | --                          | --                          | --                          |
| Injuries                                        | 244,200<br>(212,185 - 284,705) | 19,432<br>(16,651 - 26,964) | 9,612<br>(8,650 - 10,887) | 78,392<br>(64,888 - 93,092) | 60,444<br>(49,606 - 74,311) | 76,320<br>(67,000 - 91,445) |
| Transport injuries                              | 78,010<br>(63,452 - 92,364)    | 3,714<br>(2,672 - 4,615)    | 3,545<br>(2,888 - 4,007)  | 33,909<br>(26,362 - 41,114) | 23,274<br>(17,903 - 29,405) | 13,569<br>(11,510 - 18,152) |
| Road injuries                                   | 75,282<br>(61,188 - 89,218)    | 3,528<br>(2,515 - 4,385)    | 3,417<br>(2,768 - 3,854)  | 32,789<br>(25,470 - 39,759) | 22,489<br>(17,309 - 28,446) | 13,060<br>(11,090 - 17,452) |
| Pedestrian road injuries                        | 47,434<br>(37,078 - 57,042)    | 2,367<br>(1,619 - 3,023)    | 2,252<br>(1,711 - 2,599)  | 18,036<br>(12,966 - 22,349) | 14,578<br>(10,832 - 18,653) | 10,200<br>(8,433 - 13,688)  |
| Cyclist road injuries                           | 6,516<br>(4,650 - 8,278)       | 125<br>(73 - 176)           | 228<br>(165 - 291)        | 3,190<br>(2,233 - 4,006)    | 2,418<br>(1,694 - 3,199)    | 555<br>(402 - 800)          |
| Motorcyclist road injuries                      | 7,211<br>(4,700 - 10,311)      | 221<br>(130 - 315)          | 250<br>(151 - 367)        | 4,534<br>(2,907 - 6,249)    | 1,705<br>(1,069 - 2,677)    | 501<br>(311 - 866)          |
| Motor vehicle road injuries                     | 13,684<br>(10,128 - 18,431)    | 776<br>(537 - 1,018)        | 655<br>(479 - 859)        | 6,864<br>(4,991 - 9,006)    | 3,667<br>(2,604 - 5,323)    | 1,723<br>(1,273 - 2,662)    |
| Other road injuries                             | 437<br>(242 - 601)             | 40<br>(20 - 61)             | 32<br>(16 - 45)           | 163<br>(90 - 224)           | 121<br>(64 - 174)           | 81<br>(46 - 132)            |
| Other transport injuries                        | 2,728<br>(2,091 - 3,702)       | 186<br>(129 - 246)          | 127<br>(95 - 163)         | 1,120<br>(813 - 1,463)      | 785<br>(579 - 1,118)        | 509<br>(400 - 799)          |
| Unintentional injuries                          | 99,548<br>(85,010 - 119,243)   | 14,832<br>(12,603 - 22,095) | 5,229<br>(4,568 - 6,783)  | 19,392<br>(15,616 - 23,662) | 16,915<br>(13,454 - 20,975) | 43,179<br>(33,771 - 52,797) |
| Falls                                           | 38,283<br>(25,605 - 49,338)    | 1,239<br>(832 - 1,714)      | 607<br>(409 - 794)        | 4,128<br>(2,766 - 5,354)    | 5,495<br>(3,653 - 7,291)    | 26,814<br>(16,869 - 35,375) |
| Drowning                                        | 20,926<br>(16,703 - 36,368)    | 4,658<br>(3,342 - 7,993)    | 3,143<br>(2,601 - 4,774)  | 4,805<br>(3,568 - 9,156)    | 3,481<br>(2,561 - 5,890)    | 4,839<br>(3,724 - 7,501)    |
| Fire, heat, and hot substances                  | 3,889<br>(2,835 - 4,832)       | 363<br>(238 - 538)          | 174<br>(125 - 225)        | 647<br>(465 - 871)          | 559<br>(395 - 745)          | 2,146<br>(1,509 - 2,713)    |
| Poisonings                                      | 11,197<br>(5,952 - 13,980)     | 691<br>(394 - 897)          | 414<br>(227 - 511)        | 4,197<br>(2,177 - 5,458)    | 3,024<br>(1,567 - 4,029)    | 2,872<br>(1,533 - 3,470)    |
| Exposure to mechanical forces                   | 13,232<br>(11,001 - 20,413)    | 5,534<br>(3,974 - 11,578)   | 407<br>(317 - 520)        | 3,115<br>(2,342 - 3,976)    | 1,939<br>(1,499 - 2,517)    | 2,237<br>(1,788 - 3,055)    |
| Unintentional firearm injuries                  | 135<br>(115 - 186)             | 19<br>(15 - 26)             | 13<br>(11 - 18)           | 47<br>(37 - 59)             | 24<br>(18 - 32)             | 32<br>(26 - 52)             |
| Unintentional suffocation                       | 6,726<br>(5,025 - 13,629)      | 5,111<br>(3,560 - 11,176)   | 115<br>(69 - 205)         | 410<br>(263 - 737)          | 347<br>(217 - 595)          | 743<br>(456 - 1,380)        |
| Other exposure to mechanical forces             | 6,372<br>(4,766 - 7,691)       | 405<br>(290 - 521)          | 279<br>(212 - 332)        | 2,657<br>(1,942 - 3,321)    | 1,569<br>(1,148 - 2,037)    | 1,462<br>(1,026 - 1,770)    |
| Adverse effects of medical treatment            | 3,515<br>(2,720 - 5,763)       | 645<br>(400 - 1,355)        | 115<br>(87 - 193)         | 735<br>(520 - 1,254)        | 758<br>(556 - 1,213)        | 1,262<br>(964 - 1,841)      |
| Animal contact                                  | 1,242<br>(704 - 2,902)         | 100<br>(54 - 221)           | 86<br>(46 - 188)          | 276<br>(152 - 623)          | 400<br>(220 - 948)          | 380<br>(218 - 904)          |
| Venomous animal contact                         | 626<br>(317 - 1,513)           | 33<br>(15 - 71)             | 44<br>(22 - 99)           | 136<br>(67 - 323)           | 226<br>(113 - 532)          | 187<br>(91 - 471)           |
| Non-venomous animal contact                     | 616<br>(317 - 1,491)           | 67<br>(37 - 163)            | 41<br>(20 - 92)           | 140<br>(74 - 334)           | 174<br>(82 - 435)           | 193<br>(101 - 489)          |
| Foreign body                                    | 3,901<br>(2,448 - 6,264)       | 1,242<br>(734 - 1,921)      | 66<br>(42 - 106)          | 225<br>(147 - 347)          | 443<br>(276 - 710)          | 1,925<br>(1,198 - 3,290)    |
| Pulmonary aspiration and foreign body in airway | 3,714<br>(2,244 - 6,090)       | 1,197<br>(688 - 1,887)      | 58<br>(32 - 97)           | 184<br>(106 - 303)          | 415<br>(245 - 680)          | 1,861<br>(1,128 - 3,218)    |
| Foreign body in other body part                 | 188<br>(127 - 255)             | 45<br>(28 - 60)             | 8<br>(6 - 12)             | 42<br>(29 - 57)             | 28<br>(19 - 40)             | 64<br>(43 - 94)             |
| Other unintentional injuries                    | 3,363<br>(2,815 - 4,334)       | 359<br>(284 - 463)          | 217<br>(173 - 281)        | 1,266<br>(1,004 - 1,628)    | 816<br>(642 - 1,070)        | 705<br>(598 - 1,021)        |
| Self-harm and interpersonal violence            | 61,155<br>(50,275 - 86,773)    | 598<br>(460 - 985)          | 789<br>(662 - 1,052)      | 23,901<br>(19,085 - 33,154) | 18,158<br>(14,358 - 25,758) | 17,709<br>(15,068 - 26,936) |
| Self-harm                                       | 54,819<br>(45,048 - 79,603)    | --                          | 451<br>(373 - 621)        | 20,644<br>(16,530 - 29,782) | 17,071<br>(13,512 - 24,369) | 16,652<br>(14,070 - 25,806) |
| Interpersonal violence                          | 6,336<br>(4,939 - 10,000)      | 598<br>(460 - 985)          | 338<br>(271 - 509)        | 3,257<br>(2,441 - 5,047)    | 1,087<br>(810 - 1,696)      | 1,057<br>(849 - 1,696)      |
| Assault by firearm                              | 512<br>(288 - 1,049)           | 49<br>(28 - 104)            | 14<br>(7 - 31)            | 303<br>(161 - 608)          | 57<br>(30 - 120)            | 88<br>(49 - 188)            |
| Assault by sharp object                         | 2,519<br>(1,820 - 4,233)       | 117<br>(76 - 225)           | 124<br>(86 - 212)         | 1,620<br>(1,159 - 2,729)    | 415<br>(289 - 739)          | 244<br>(169 - 441)          |
| Assault by other means                          | 3,305<br>(2,441 - 5,015)       | 432<br>(317 - 659)          | 200<br>(148 - 307)        | 1,334<br>(907 - 2,031)      | 616<br>(431 - 936)          | 724<br>(553 - 1,146)        |
| Forces of nature, war, and legal intervention   | 5,488<br>(4,467 - 6,824)       | 289<br>(0 - 2)              | 50<br>(40 - 79)           | 1,190<br>(968 - 1,481)      | 2,096<br>(1,734 - 2,576)    | 1,863<br>(1,686 - 2,272)    |
| Exposure to forces of nature                    | 5,488<br>(4,467 - 6,824)       | 289<br>(0 - 2)              | 50<br>(40 - 79)           | 1,190<br>(968 - 1,481)      | 2,096<br>(1,734 - 2,576)    | 1,863<br>(1,686 - 2,272)    |

Web Table 31- Colombia deaths with 95% UI by age, sex, and cause in 2013

| Cause                                                             | Both Sexes, All Ages           | Both Sexes, 0-4 Years       | Both Sexes, 5-14 Years   | Both Sexes, 15-49 Years     | Both Sexes, 50-69 Years     | Both Sexes, 70-80 Years        |
|-------------------------------------------------------------------|--------------------------------|-----------------------------|--------------------------|-----------------------------|-----------------------------|--------------------------------|
| All causes                                                        | 247,455<br>(220,684 - 276,281) | 16,332<br>(14,881 - 18,009) | 3,096<br>(2,879 - 3,347) | 49,909<br>(41,731 - 59,260) | 60,919<br>(51,979 - 70,451) | 117,199<br>(107,648 - 127,770) |
| Communicable, maternal, neonatal, and nutritional diseases        | 24,982<br>(22,607 - 27,389)    | 9,238<br>(8,244 - 10,442)   | 522<br>(443 - 618)       | 4,324<br>(3,703 - 4,935)    | 3,217<br>(2,660 - 3,781)    | 7,680<br>(6,303 - 9,072)       |
| HIV/AIDS and tuberculosis                                         | 3,432<br>(2,852 - 4,183)       | 25<br>(16 - 34)             | 19<br>(13 - 26)          | 1,942<br>(1,560 - 2,452)    | 928<br>(707 - 1,204)        | 517<br>(424 - 636)             |
| Tuberculosis                                                      | 1,398<br>(1,130 - 1,664)       | 22<br>(12 - 30)             | 15<br>(12 - 19)          | 393<br>(287 - 498)          | 502<br>(381 - 630)          | 467<br>(374 - 585)             |
| HIV/AIDS                                                          | 2,033<br>(1,553 - 2,791)       | 3<br>(1 - 7)                | 4<br>(0 - 10)            | 1,549<br>(1,176 - 2,087)    | 427<br>(248 - 680)          | 49<br>(25 - 83)                |
| HIV/AIDS resulting in mycobacterial infection                     | 122<br>(87 - 174)              | 0<br>(0 - 0)                | 0<br>(0 - 1)             | 91<br>(65 - 129)            | 27<br>(15 - 44)             | 3<br>(2 - 6)                   |
| HIV/AIDS resulting in other diseases                              | 1,911<br>(1,458 - 2,613)       | 3<br>(1 - 6)                | 4<br>(0 - 10)            | 1,458<br>(1,111 - 1,955)    | 400<br>(233 - 638)          | 46<br>(23 - 77)                |
| Diarrhea, lower respiratory, and other common infectious diseases | 12,016<br>(10,138 - 13,878)    | 3,100<br>(2,575 - 3,700)    | 377<br>(302 - 472)       | 1,309<br>(990 - 1,637)      | 1,713<br>(1,316 - 2,155)    | 5,517<br>(4,324 - 6,708)       |
| Diarrheal diseases                                                | 1,488<br>(1,206 - 1,810)       | 781<br>(561 - 1,044)        | 30<br>(21 - 42)          | 98<br>(74 - 127)            | 142<br>(104 - 189)          | 437<br>(305 - 614)             |
| Intestinal infectious diseases                                    | 433<br>(218 - 760)             | 130<br>(64 - 234)           | 117<br>(57 - 208)        | 151<br>(66 - 285)           | 24<br>(11 - 45)             | 10<br>(5 - 17)                 |
| Typhoid fever                                                     | 325<br>(154 - 587)             | 94<br>(42 - 171)            | 91<br>(44 - 165)         | 116<br>(50 - 223)           | 17<br>(7 - 34)              | 6<br>(3 - 13)                  |
| Paratyphoid fever                                                 | 88<br>(41 - 161)               | 28<br>(11 - 55)             | 24<br>(10 - 47)          | 30<br>(12 - 64)             | 4<br>(2 - 9)                | 1<br>(1 - 3)                   |
| Other intestinal infectious diseases                              | 20<br>(11 - 32)                | 9<br>(3 - 18)               | 2<br>(0 - 5)             | 6<br>(2 - 12)               | 2<br>(0 - 7)                | 2<br>(0 - 5)                   |
| Lower respiratory infections                                      | 8,891<br>(7,253 - 10,523)      | 1,739<br>(1,330 - 2,239)    | 136<br>(103 - 175)       | 756<br>(536 - 982)          | 1,359<br>(1,015 - 1,749)    | 4,902<br>(3,738 - 6,089)       |
| Upper respiratory infections                                      | 10<br>(5 - 19)                 | 1<br>(0 - 3)                | 0<br>(0 - 1)             | 3<br>(1 - 6)                | 3<br>(1 - 6)                | 4<br>(1 - 11)                  |
| Otitis media                                                      | 7<br>(6 - 8)                   | 1<br>(1 - 2)                | 1<br>(1 - 1)             | 3<br>(2 - 3)                | 1<br>(1 - 1)                | 1<br>(1 - 2)                   |
| Meningitis                                                        | 783<br>(663 - 919)             | 314<br>(236 - 430)          | 56<br>(45 - 68)          | 183<br>(142 - 232)          | 117<br>(91 - 146)           | 111<br>(91 - 137)              |
| Pneumococcal meningitis                                           | 260<br>(212 - 311)             | 86<br>(61 - 120)            | 21<br>(15 - 28)          | 69<br>(47 - 95)             | 43<br>(31 - 58)             | 40<br>(30 - 54)                |
| H influenzae type B meningitis                                    | 166<br>(130 - 211)             | 113<br>(79 - 160)           | 13<br>(9 - 19)           | 20<br>(13 - 27)             | 10<br>(7 - 14)              | 10<br>(7 - 14)                 |
| Meningococcal meningitis                                          | 89<br>(72 - 110)               | 29<br>(20 - 43)             | 7<br>(4 - 11)            | 25<br>(17 - 36)             | 14<br>(9 - 19)              | 14<br>(10 - 19)                |
| Other meningitis                                                  | 268<br>(217 - 336)             | 85<br>(57 - 137)            | 15<br>(9 - 22)           | 70<br>(48 - 96)             | 50<br>(34 - 66)             | 47<br>(35 - 61)                |
| Encephalitis                                                      | 324<br>(245 - 397)             | 95<br>(66 - 131)            | 32<br>(20 - 46)          | 99<br>(66 - 132)            | 58<br>(38 - 83)             | 39<br>(26 - 53)                |
| Diphtheria                                                        | 4<br>(0 - 14)                  | 2<br>(0 - 11)               | 1<br>(0 - 4)             | 1<br>(0 - 3)                | 0<br>(0 - 1)                | --                             |
| Whooping cough                                                    | 30<br>(8 - 123)                | 25<br>(3 - 118)             | 2<br>(1 - 2)             | 3<br>(2 - 3)                | 0<br>(0 - 1)                | --                             |
| Tetanus                                                           | 23<br>(16 - 30)                | 6<br>(4 - 10)               | 1<br>(1 - 2)             | 7<br>(4 - 9)                | 6<br>(3 - 8)                | 4<br>(2 - 7)                   |
| Measles                                                           | 0<br>(0 - 0)                   | 0<br>(0 - 0)                | 0<br>(0 - 0)             | 0<br>(0 - 0)                | 0<br>(0 - 0)                | --                             |
| Varicella and herpes zoster                                       | 23<br>(10 - 50)                | 5<br>(1 - 15)               | 1<br>(0 - 5)             | 5<br>(2 - 10)               | 3<br>(1 - 7)                | 10<br>(1 - 36)                 |
| Neglected tropical diseases and malaria                           | 413<br>(255 - 534)             | 97<br>(66 - 133)            | 36<br>(22 - 51)          | 115<br>(72 - 154)           | 95<br>(42 - 159)            | 70<br>(34 - 106)               |
| Malaria                                                           | 58<br>(38 - 91)                | 11<br>(5 - 21)              | 4<br>(2 - 8)             | 25<br>(13 - 44)             | 10<br>(5 - 21)              | 8<br>(3 - 17)                  |
| Chagas disease                                                    | 103<br>(16 - 188)              | 1<br>(0 - 1)                | 1<br>(0 - 2)             | 23<br>(4 - 42)              | 49<br>(6 - 108)             | 30<br>(3 - 62)                 |
| Leishmaniasis                                                     | 14<br>(11 - 18)                | 4<br>(3 - 7)                | 1<br>(1 - 2)             | 5<br>(3 - 7)                | 3<br>(2 - 4)                | 1<br>(1 - 2)                   |
| Visceral leishmaniasis                                            | 14<br>(11 - 18)                | 4<br>(3 - 7)                | 1<br>(1 - 2)             | 5<br>(3 - 7)                | 3<br>(2 - 4)                | 1<br>(1 - 2)                   |
| Cysticercosis                                                     | 14<br>(12 - 17)                | 0<br>(0 - 0)                | 0<br>(0 - 0)             | 8<br>(7 - 10)               | 4<br>(3 - 4)                | 2<br>(1 - 2)                   |
| Cystic echinococcosis                                             | 4<br>(4 - 5)                   | 0<br>(0 - 0)                | 0<br>(0 - 0)             | 2<br>(2 - 3)                | 1<br>(1 - 1)                | 1<br>(1 - 1)                   |
| Dengue                                                            | 90<br>(23 - 115)               | 25<br>(5 - 38)              | 14<br>(3 - 18)           | 25<br>(8 - 32)              | 14<br>(4 - 19)              | 12<br>(3 - 19)                 |
| Yellow fever                                                      | 2<br>(2 - 3)                   | 0<br>(0 - 1)                | 1<br>(0 - 1)             | 1<br>(1 - 2)                | 0<br>(0 - 1)                | 0<br>(0 - 0)                   |
| Rabies                                                            | 4<br>(2 - 5)                   | 0<br>(0 - 1)                | 1<br>(0 - 1)             | 2<br>(1 - 3)                | 1<br>(0 - 1)                | 0<br>(0 - 0)                   |
| Intestinal nematode infections                                    | 84<br>(57 - 117)               | 41<br>(24 - 65)             | 11<br>(4 - 23)           | 14<br>(5 - 29)              | 7<br>(2 - 16)               | 10<br>(3 - 20)                 |
| Ascariasis                                                        | 84<br>(57 - 117)               | 41<br>(24 - 65)             | 11<br>(4 - 23)           | 14<br>(5 - 29)              | 7<br>(2 - 16)               | 10<br>(3 - 20)                 |
| Other neglected tropical diseases                                 | 39<br>(32 - 50)                | 13<br>(9 - 20)              | 3<br>(2 - 4)             | 10<br>(7 - 13)              | 6<br>(4 - 9)                | 7<br>(4 - 10)                  |

Web Table 31- Colombia deaths with 95% UI by age, sex, and cause in 2013

| Cause                                                            | Both Sexes, All Ages           | Both Sexes, 0-4 Years    | Both Sexes, 5-14 Years   | Both Sexes, 15-49 Years     | Both Sexes, 50-69 Years     | Both Sexes, 70-80 Years       |
|------------------------------------------------------------------|--------------------------------|--------------------------|--------------------------|-----------------------------|-----------------------------|-------------------------------|
| Maternal disorders                                               | 577<br>(405 - 782)             | --                       | 5<br>(3 - 8)             | 572<br>(400 - 776)          | --                          | --                            |
| Maternal hemorrhage                                              | 68<br>(46 - 97)                | --                       | 0<br>(0 - 1)             | 68<br>(45 - 97)             | --                          | --                            |
| Maternal sepsis and other maternal infections                    | 45<br>(29 - 66)                | --                       | 0<br>(0 - 1)             | 45<br>(28 - 65)             | --                          | --                            |
| Maternal hypertensive disorders                                  | 136<br>(95 - 191)              | --                       | 2<br>(1 - 3)             | 135<br>(93 - 189)           | --                          | --                            |
| Maternal obstructed labor                                        | 31<br>(17 - 50)                | --                       | 0<br>(0 - 0)             | 30<br>(17 - 50)             | --                          | --                            |
| Maternal abortive outcome                                        | 73<br>(49 - 105)               | --                       | 0<br>(0 - 1)             | 72<br>(49 - 105)            | --                          | --                            |
| Indirect maternal deaths                                         | 99<br>(64 - 142)               | --                       | 1<br>(0 - 1)             | 99<br>(64 - 141)            | --                          | --                            |
| Late maternal deaths                                             | 38<br>(19 - 66)                | --                       | 0<br>(0 - 1)             | 38<br>(19 - 66)             | --                          | --                            |
| Maternal deaths aggravated by HIV/AIDS                           | 0<br>(0 - 0)                   | --                       | --                       | 0<br>(0 - 0)                | --                          | --                            |
| Other maternal disorders                                         | 85<br>(56 - 124)               | --                       | 1<br>(0 - 1)             | 84<br>(56 - 123)            | --                          | --                            |
| Neonatal disorders                                               | 5,122<br>(4,491 - 5,894)       | 5,122<br>(4,491 - 5,894) | --                       | --                          | --                          | --                            |
| Neonatal preterm birth complications                             | 2,341<br>(1,857 - 2,952)       | 2,341<br>(1,857 - 2,952) | --                       | --                          | --                          | --                            |
| Neonatal encephalopathy due to birth asphyxia and trauma         | 1,166<br>(827 - 1,732)         | 1,166<br>(827 - 1,732)   | --                       | --                          | --                          | --                            |
| Neonatal sepsis and other neonatal infections                    | 778<br>(389 - 1,213)           | 778<br>(389 - 1,213)     | --                       | --                          | --                          | --                            |
| Hemolytic disease and other neonatal jaundice                    | 71<br>(34 - 124)               | 71<br>(34 - 124)         | --                       | --                          | --                          | --                            |
| Other neonatal disorders                                         | 767<br>(442 - 1,062)           | 767<br>(442 - 1,062)     | --                       | --                          | --                          | --                            |
| Nutritional deficiencies                                         | 2,849<br>(2,255 - 3,603)       | 698<br>(514 - 902)       | 56<br>(42 - 72)          | 243<br>(183 - 323)          | 368<br>(279 - 525)          | 1,484<br>(1,121 - 1,953)      |
| Protein-energy malnutrition                                      | 2,275<br>(1,686 - 2,822)       | 655<br>(475 - 847)       | 44<br>(30 - 57)          | 158<br>(99 - 212)           | 258<br>(174 - 366)          | 1,161<br>(811 - 1,535)        |
| Iodine deficiency                                                | 3<br>(1 - 8)                   | 0<br>(0 - 3)             | 0<br>(0 - 1)             | 1<br>(0 - 2)                | 1<br>(0 - 2)                | 1<br>(0 - 5)                  |
| Iron-deficiency anemia                                           | 480<br>(292 - 885)             | 29<br>(12 - 74)          | 10<br>(6 - 19)           | 75<br>(47 - 130)            | 94<br>(55 - 177)            | 272<br>(150 - 518)            |
| Other nutritional deficiencies                                   | 91<br>(57 - 184)               | 13<br>(6 - 35)           | 2<br>(1 - 3)             | 10<br>(6 - 19)              | 16<br>(9 - 34)              | 50<br>(26 - 102)              |
| Other communicable, maternal, neonatal, and nutritional diseases | 573<br>(394 - 827)             | 197<br>(53 - 410)        | 29<br>(17 - 47)          | 142<br>(110 - 201)          | 112<br>(87 - 154)           | 92<br>(73 - 125)              |
| Sexually transmitted diseases excluding HIV                      | 183<br>(28 - 416)              | 143<br>(0 - 361)         | 11<br>(0 - 28)           | 13<br>(9 - 20)              | 7<br>(4 - 11)               | 8<br>(5 - 13)                 |
| Syphilis                                                         | 171<br>(16 - 404)              | 143<br>(0 - 361)         | 11<br>(0 - 28)           | 6<br>(4 - 9)                | 4<br>(3 - 8)                | 6<br>(4 - 10)                 |
| Chlamydial infection                                             | 3<br>(2 - 4)                   | --                       | 0<br>(0 - 0)             | 2<br>(1 - 3)                | 0<br>(0 - 1)                | 0<br>(0 - 0)                  |
| Gonococcal infection                                             | 5<br>(3 - 7)                   | --                       | 0<br>(0 - 0)             | 3<br>(2 - 4)                | 1<br>(1 - 2)                | 1<br>(1 - 1)                  |
| Other sexually transmitted diseases                              | 4<br>(3 - 6)                   | --                       | 0<br>(0 - 0)             | 3<br>(2 - 4)                | 1<br>(1 - 1)                | 0<br>(0 - 1)                  |
| Hepatitis                                                        | 78<br>(63 - 96)                | 5<br>(3 - 7)             | 3<br>(2 - 4)             | 26<br>(19 - 35)             | 26<br>(19 - 36)             | 18<br>(12 - 26)               |
| Acute hepatitis A                                                | 22<br>(9 - 37)                 | 3<br>(2 - 6)             | 2<br>(1 - 3)             | 12<br>(5 - 20)              | 4<br>(1 - 9)                | 1<br>(0 - 3)                  |
| Acute hepatitis B                                                | 43<br>(29 - 63)                | 1<br>(0 - 3)             | 0<br>(0 - 1)             | 10<br>(5 - 17)              | 18<br>(11 - 27)             | 14<br>(8 - 21)                |
| Acute hepatitis C                                                | 13<br>(3 - 27)                 | --                       | 0<br>(0 - 1)             | 5<br>(1 - 11)               | 4<br>(1 - 10)               | 3<br>(1 - 8)                  |
| Other infectious diseases                                        | 312<br>(247 - 434)             | 49<br>(36 - 66)          | 15<br>(11 - 22)          | 103<br>(75 - 159)           | 80<br>(58 - 120)            | 66<br>(49 - 101)              |
| Non-communicable diseases                                        | 180,135<br>(161,029 - 201,875) | 5,172<br>(4,391 - 5,961) | 1,146<br>(1,009 - 1,280) | 16,320<br>(13,433 - 19,669) | 51,792<br>(44,253 - 60,345) | 105,705<br>(96,897 - 115,437) |
| Neoplasms                                                        | 44,294<br>(38,581 - 51,071)    | 420<br>(314 - 542)       | 496<br>(412 - 574)       | 6,387<br>(5,204 - 7,741)    | 17,283<br>(14,747 - 20,381) | 19,708<br>(17,308 - 22,326)   |
| Esophageal cancer                                                | 1,268<br>(1,019 - 1,674)       | --                       | --                       | 78<br>(56 - 104)            | 465<br>(354 - 635)          | 725<br>(572 - 957)            |
| Stomach cancer                                                   | 6,797<br>(5,715 - 8,111)       | --                       | --                       | 760<br>(570 - 967)          | 2,650<br>(2,139 - 3,207)    | 3,388<br>(2,787 - 4,191)      |
| Liver cancer                                                     | 2,351<br>(1,939 - 2,852)       | --                       | 6<br>(4 - 8)             | 219<br>(163 - 288)          | 1,026<br>(805 - 1,289)      | 1,101<br>(868 - 1,395)        |
| Liver cancer due to hepatitis B                                  | 832<br>(553 - 1,117)           | --                       | 2<br>(1 - 4)             | 111<br>(76 - 153)           | 411<br>(256 - 580)          | 307<br>(189 - 427)            |
| Liver cancer due to hepatitis C                                  | 897<br>(636 - 1,234)           | --                       | 1<br>(0 - 1)             | 58<br>(34 - 94)             | 370<br>(233 - 552)          | 467<br>(324 - 651)            |
| Liver cancer due to alcohol use                                  | 402<br>(255 - 561)             | --                       | --                       | 18<br>(10 - 31)             | 146<br>(90 - 217)           | 237<br>(142 - 351)            |

Web Table 31- Colombia deaths with 95% UI by age, sex, and cause in 2013

| Cause                                         | Both Sexes, All Ages        | Both Sexes, 0-4 Years | Both Sexes, 5-14 Years | Both Sexes, 15-49 Years  | Both Sexes, 50-69 Years     | Both Sexes, 70-80 Years     |
|-----------------------------------------------|-----------------------------|-----------------------|------------------------|--------------------------|-----------------------------|-----------------------------|
| Liver cancer due to other causes              | 222<br>(147 - 328)          | --                    | 3<br>(2 - 4)           | 32<br>(22 - 46)          | 98<br>(62 - 151)            | 90<br>(53 - 138)            |
| Larynx cancer                                 | 583<br>(441 - 797)          | --                    | --                     | 35<br>(24 - 49)          | 250<br>(180 - 350)          | 299<br>(225 - 411)          |
| Tracheal, bronchus and lung cancer            | 5,170<br>(4,396 - 6,030)    | --                    | --                     | 347<br>(272 - 445)       | 2,241<br>(1,850 - 2,734)    | 2,582<br>(2,187 - 3,024)    |
| Breast cancer                                 | 2,838<br>(2,206 - 3,541)    | --                    | --                     | 686<br>(492 - 935)       | 1,379<br>(1,012 - 1,748)    | 773<br>(600 - 975)          |
| Cervical cancer                               | 2,537<br>(1,800 - 3,246)    | --                    | --                     | 675<br>(416 - 948)       | 1,079<br>(729 - 1,434)      | 783<br>(561 - 1,061)        |
| Uterine cancer                                | 282<br>(174 - 397)          | --                    | --                     | 23<br>(12 - 37)          | 134<br>(77 - 202)           | 125<br>(76 - 188)           |
| Prostate cancer                               | 3,209<br>(2,058 - 4,496)    | --                    | --                     | 29<br>(14 - 47)          | 708<br>(433 - 1,033)        | 2,471<br>(1,562 - 3,543)    |
| Colon and rectum cancer                       | 3,673<br>(3,076 - 4,359)    | --                    | --                     | 464<br>(365 - 575)       | 1,401<br>(1,154 - 1,692)    | 1,808<br>(1,475 - 2,182)    |
| Lip and oral cavity cancer                    | 538<br>(422 - 696)          | --                    | --                     | 56<br>(40 - 78)          | 215<br>(157 - 299)          | 267<br>(203 - 342)          |
| Nasopharynx cancer                            | 114<br>(87 - 154)           | --                    | 1<br>(1 - 3)           | 29<br>(20 - 41)          | 52<br>(37 - 72)             | 32<br>(23 - 47)             |
| Other pharynx cancer                          | 182<br>(144 - 242)          | --                    | --                     | 20<br>(14 - 28)          | 85<br>(62 - 119)            | 77<br>(58 - 106)            |
| Gallbladder and biliary tract cancer          | 1,083<br>(758 - 1,440)      | --                    | --                     | 79<br>(52 - 113)         | 496<br>(343 - 698)          | 507<br>(328 - 710)          |
| Pancreatic cancer                             | 1,834<br>(1,559 - 2,167)    | --                    | --                     | 170<br>(131 - 215)       | 851<br>(668 - 998)          | 851<br>(705 - 1,024)        |
| Malignant skin melanoma                       | 313<br>(234 - 425)          | --                    | --                     | 62<br>(43 - 88)          | 124<br>(87 - 175)           | 127<br>(94 - 173)           |
| Non-melanoma skin cancer                      | 438<br>(285 - 594)          | --                    | --                     | 39<br>(25 - 52)          | 121<br>(81 - 156)           | 278<br>(171 - 411)          |
| Ovarian cancer                                | 1,016<br>(773 - 1,322)      | --                    | --                     | 204<br>(143 - 291)       | 500<br>(368 - 685)          | 312<br>(223 - 423)          |
| Testicular cancer                             | 113<br>(72 - 162)           | --                    | --                     | 78<br>(47 - 118)         | 17<br>(11 - 27)             | 17<br>(10 - 27)             |
| Kidney cancer                                 | 543<br>(448 - 650)          | 15<br>(8 - 25)        | 8<br>(5 - 12)          | 73<br>(55 - 96)          | 245<br>(189 - 310)          | 203<br>(156 - 257)          |
| Bladder cancer                                | 665<br>(532 - 882)          | --                    | --                     | 30<br>(22 - 42)          | 221<br>(166 - 315)          | 414<br>(320 - 551)          |
| Brain and nervous system cancer               | 1,371<br>(991 - 1,669)      | 46<br>(25 - 77)       | 76<br>(49 - 101)       | 415<br>(293 - 539)       | 535<br>(396 - 674)          | 299<br>(198 - 386)          |
| Thyroid cancer                                | 330<br>(249 - 416)          | --                    | 0<br>(0 - 1)           | 27<br>(19 - 36)          | 131<br>(93 - 171)           | 170<br>(126 - 228)          |
| Mesothelioma                                  | 63<br>(50 - 79)             | --                    | --                     | 14<br>(10 - 21)          | 30<br>(21 - 40)             | 19<br>(13 - 26)             |
| Hodgkin lymphoma                              | 207<br>(162 - 267)          | 5<br>(3 - 8)          | 10<br>(6 - 19)         | 71<br>(52 - 98)          | 68<br>(48 - 97)             | 53<br>(37 - 73)             |
| Non-Hodgkin lymphoma                          | 1,605<br>(1,295 - 1,959)    | 40<br>(25 - 61)       | 43<br>(30 - 59)        | 352<br>(264 - 450)       | 633<br>(483 - 812)          | 538<br>(400 - 689)          |
| Multiple myeloma                              | 502<br>(383 - 621)          | --                    | --                     | 52<br>(38 - 70)          | 269<br>(203 - 342)          | 180<br>(135 - 230)          |
| Leukemia                                      | 2,086<br>(1,793 - 2,435)    | 170<br>(104 - 255)    | 238<br>(187 - 296)     | 683<br>(539 - 840)       | 509<br>(411 - 622)          | 486<br>(397 - 586)          |
| Other neoplasms                               | 2,585<br>(1,908 - 3,121)    | 144<br>(91 - 195)     | 113<br>(73 - 146)      | 618<br>(448 - 766)       | 886<br>(628 - 1,102)        | 823<br>(554 - 1,032)        |
| Cardiovascular diseases                       | 72,710<br>(64,471 - 81,741) | 242<br>(191 - 306)    | 141<br>(117 - 169)     | 4,893<br>(3,914 - 5,993) | 19,926<br>(16,771 - 23,335) | 47,509<br>(42,929 - 52,758) |
| Rheumatic heart disease                       | 336<br>(234 - 418)          | 2<br>(1 - 3)          | 6<br>(4 - 9)           | 85<br>(59 - 114)         | 112<br>(69 - 147)           | 131<br>(93 - 178)           |
| Ischemic heart disease                        | 38,925<br>(33,984 - 44,528) | 25<br>(13 - 35)       | 26<br>(18 - 33)        | 2,340<br>(1,853 - 2,933) | 10,985<br>(9,103 - 13,240)  | 25,550<br>(22,500 - 29,115) |
| Cerebrovascular disease                       | 20,772<br>(17,642 - 24,710) | 70<br>(52 - 89)       | 57<br>(46 - 70)        | 1,517<br>(1,170 - 1,902) | 5,454<br>(4,392 - 6,672)    | 13,674<br>(11,695 - 16,447) |
| Ischemic stroke                               | 4,644<br>(3,573 - 7,113)    | 7<br>(4 - 12)         | 6<br>(5 - 10)          | 173<br>(118 - 256)       | 972<br>(684 - 1,515)        | 3,486<br>(2,646 - 5,385)    |
| Hemorrhagic stroke                            | 16,129<br>(13,121 - 19,035) | 64<br>(47 - 81)       | 50<br>(40 - 62)        | 1,344<br>(1,032 - 1,682) | 4,482<br>(3,566 - 5,488)    | 10,189<br>(8,047 - 12,065)  |
| Hypertensive heart disease                    | 5,737<br>(4,272 - 8,130)    | 4<br>(3 - 7)          | 2<br>(2 - 3)           | 147<br>(98 - 227)        | 1,136<br>(755 - 1,845)      | 4,447<br>(3,300 - 6,244)    |
| Cardiomyopathy and myocarditis                | 1,372<br>(1,102 - 1,696)    | 82<br>(61 - 119)      | 22<br>(17 - 28)        | 240<br>(182 - 336)       | 408<br>(318 - 550)          | 619<br>(459 - 782)          |
| Atrial fibrillation and flutter               | 291<br>(225 - 370)          | --                    | --                     | 8<br>(6 - 11)            | 52<br>(40 - 66)             | 231<br>(173 - 306)          |
| Aortic aneurysm                               | 1,281<br>(1,012 - 1,565)    | --                    | --                     | 104<br>(75 - 136)        | 449<br>(345 - 566)          | 728<br>(565 - 906)          |
| Peripheral vascular disease                   | 117<br>(88 - 148)           | --                    | --                     | 2<br>(2 - 3)             | 19<br>(14 - 24)             | 96<br>(70 - 126)            |
| Endocarditis                                  | 326<br>(235 - 435)          | 22<br>(14 - 32)       | 8<br>(6 - 13)          | 86<br>(60 - 122)         | 101<br>(70 - 146)           | 109<br>(77 - 149)           |
| Other cardiovascular and circulatory diseases | 3,553<br>(2,817 - 4,503)    | 36<br>(26 - 51)       | 19<br>(13 - 28)        | 364<br>(256 - 478)       | 1,209<br>(878 - 1,624)      | 1,924<br>(1,428 - 2,608)    |



Web Table 31- Colombia deaths with 95% UI by age, sex, and cause in 2013

| Cause                                               | Both Sexes, All Ages        | Both Sexes, 0-4 Years | Both Sexes, 5-14 Years | Both Sexes, 15-49 Years | Both Sexes, 50-69 Years  | Both Sexes, 70-80 Years     |
|-----------------------------------------------------|-----------------------------|-----------------------|------------------------|-------------------------|--------------------------|-----------------------------|
| Chronic respiratory diseases                        | 17,830<br>(15,169 - 20,311) | 268<br>(204 - 360)    | 46<br>(38 - 55)        | 587<br>(453 - 734)      | 3,649<br>(3,016 - 4,406) | 13,280<br>(11,029 - 15,208) |
| Chronic obstructive pulmonary disease               | 16,020<br>(13,533 - 18,340) | 163<br>(118 - 235)    | 23<br>(18 - 31)        | 386<br>(294 - 490)      | 3,157<br>(2,591 - 3,827) | 12,291<br>(10,218 - 14,107) |
| Pneumoconiosis                                      | 256<br>(138 - 424)          | 2<br>(1 - 3)          | 1<br>(1 - 1)           | 19<br>(11 - 32)         | 89<br>(44 - 157)         | 145<br>(75 - 249)           |
| Silicosis                                           | 36<br>(19 - 63)             | 0<br>(0 - 1)          | 0<br>(0 - 0)           | 5<br>(2 - 8)            | 13<br>(6 - 23)           | 18<br>(8 - 33)              |
| Asbestosis                                          | 38<br>(19 - 64)             | 0<br>(0 - 1)          | 0<br>(0 - 0)           | 2<br>(1 - 4)            | 16<br>(8 - 29)           | 18<br>(9 - 34)              |
| Coal workers pneumoconiosis                         | 42<br>(23 - 72)             | 0<br>(0 - 1)          | 0<br>(0 - 0)           | 3<br>(2 - 6)            | 15<br>(7 - 27)           | 23<br>(12 - 42)             |
| Other pneumoconiosis                                | 139<br>(74 - 231)           | 0<br>(0 - 1)          | 0<br>(0 - 0)           | 9<br>(5 - 14)           | 45<br>(22 - 79)          | 85<br>(43 - 148)            |
| Asthma                                              | 685<br>(502 - 928)          | 52<br>(33 - 78)       | 12<br>(8 - 16)         | 106<br>(68 - 140)       | 195<br>(136 - 271)       | 320<br>(218 - 487)          |
| Interstitial lung disease and pulmonary sarcoidosis | 482<br>(288 - 657)          | 11<br>(6 - 20)        | 3<br>(2 - 5)           | 45<br>(24 - 66)         | 151<br>(88 - 216)        | 272<br>(150 - 389)          |
| Other chronic respiratory diseases                  | 387<br>(287 - 537)          | 39<br>(28 - 56)       | 6<br>(4 - 8)           | 32<br>(22 - 44)         | 57<br>(39 - 78)          | 253<br>(168 - 391)          |
| Cirrhosis                                           | 4,139<br>(3,490 - 4,801)    | 29<br>(21 - 38)       | 21<br>(17 - 24)        | 617<br>(475 - 777)      | 1,744<br>(1,428 - 2,093) | 1,728<br>(1,449 - 1,989)    |
| Cirrhosis due to hepatitis B                        | 141<br>(97 - 198)           | 0<br>(0 - 0)          | 0<br>(0 - 1)           | 22<br>(13 - 33)         | 61<br>(40 - 88)          | 58<br>(37 - 82)             |
| Cirrhosis due to hepatitis C                        | 1,827<br>(1,437 - 2,258)    | 2<br>(0 - 6)          | 4<br>(2 - 7)           | 216<br>(146 - 298)      | 746<br>(561 - 950)       | 858<br>(640 - 1,074)        |
| Cirrhosis due to alcohol use                        | 1,635<br>(1,247 - 2,133)    | --                    | --                     | 235<br>(155 - 339)      | 724<br>(533 - 976)       | 676<br>(497 - 891)          |
| Cirrhosis due to other causes                       | 538<br>(351 - 789)          | 27<br>(19 - 36)       | 16<br>(12 - 20)        | 145<br>(89 - 208)       | 213<br>(115 - 337)       | 137<br>(76 - 208)           |
| Digestive diseases                                  | 6,554<br>(5,560 - 7,552)    | 76<br>(55 - 102)      | 51<br>(43 - 60)        | 683<br>(546 - 842)      | 1,792<br>(1,468 - 2,172) | 3,951<br>(3,317 - 4,575)    |
| Peptic ulcer disease                                | 1,382<br>(1,088 - 1,801)    | 2<br>(1 - 3)          | 3<br>(2 - 4)           | 111<br>(82 - 150)       | 351<br>(258 - 476)       | 917<br>(707 - 1,222)        |
| Gastritis and duodenitis                            | 213<br>(125 - 307)          | 2<br>(1 - 3)          | 1<br>(1 - 2)           | 18<br>(10 - 26)         | 50<br>(28 - 72)          | 142<br>(82 - 212)           |
| Appendicitis                                        | 290<br>(204 - 388)          | 4<br>(2 - 7)          | 10<br>(7 - 14)         | 63<br>(42 - 86)         | 85<br>(54 - 122)         | 129<br>(85 - 183)           |
| Paralytic ileus and intestinal obstruction          | 1,162<br>(715 - 1,533)      | 36<br>(23 - 52)       | 19<br>(12 - 24)        | 124<br>(78 - 172)       | 306<br>(187 - 424)       | 677<br>(398 - 945)          |
| Inguinal, femoral, and abdominal hernia             | 277<br>(182 - 401)          | 5<br>(2 - 9)          | 3<br>(2 - 4)           | 16<br>(11 - 24)         | 76<br>(51 - 116)         | 178<br>(108 - 265)          |
| Inflammatory bowel disease                          | 117<br>(88 - 152)           | 4<br>(2 - 7)          | 2<br>(1 - 3)           | 23<br>(16 - 31)         | 35<br>(24 - 47)          | 53<br>(37 - 75)             |
| Vascular intestinal disorders                       | 869<br>(502 - 1,336)        | 5<br>(1 - 13)         | 2<br>(0 - 3)           | 49<br>(25 - 85)         | 230<br>(129 - 377)       | 583<br>(327 - 913)          |
| Gallbladder and biliary diseases                    | 1,041<br>(727 - 1,285)      | 2<br>(1 - 3)          | 2<br>(2 - 3)           | 95<br>(64 - 122)        | 289<br>(194 - 369)       | 653<br>(445 - 834)          |
| Pancreatitis                                        | 542<br>(397 - 716)          | 2<br>(1 - 4)          | 4<br>(3 - 5)           | 120<br>(85 - 163)       | 194<br>(140 - 270)       | 222<br>(150 - 302)          |
| Other digestive diseases                            | 660<br>(517 - 813)          | 14<br>(8 - 22)        | 6<br>(5 - 8)           | 65<br>(46 - 84)         | 177<br>(128 - 230)       | 398<br>(302 - 512)          |
| Neurological disorders                              | 9,928<br>(7,993 - 11,689)   | 91<br>(71 - 117)      | 62<br>(49 - 76)        | 577<br>(439 - 717)      | 918<br>(705 - 1,158)     | 8,279<br>(6,480 - 9,992)    |
| Alzheimer disease and other dementias               | 8,390<br>(6,520 - 10,074)   | --                    | --                     | 5<br>(2 - 9)            | 544<br>(380 - 724)       | 7,841<br>(6,015 - 9,524)    |
| Parkinson disease                                   | 314<br>(202 - 386)          | --                    | --                     | 7<br>(5 - 9)            | 58<br>(41 - 74)          | 249<br>(152 - 316)          |
| Epilepsy                                            | 685<br>(514 - 841)          | 44<br>(29 - 63)       | 44<br>(32 - 57)        | 403<br>(300 - 520)      | 115<br>(82 - 151)        | 80<br>(57 - 102)            |
| Multiple sclerosis                                  | 102<br>(50 - 141)           | --                    | --                     | 41<br>(19 - 59)         | 46<br>(23 - 67)          | 15<br>(8 - 22)              |
| Other neurological disorders                        | 437<br>(356 - 519)          | 48<br>(37 - 62)       | 18<br>(13 - 23)        | 121<br>(87 - 152)       | 155<br>(122 - 193)       | 94<br>(76 - 115)            |
| Mental and substance use disorders                  | 357<br>(286 - 481)          | 6<br>(4 - 9)          | 0<br>(0 - 1)           | 178<br>(135 - 237)      | 102<br>(76 - 144)        | 71<br>(56 - 94)             |
| Schizophrenia                                       | 10<br>(6 - 18)              | --                    | --                     | 4<br>(3 - 8)            | 4<br>(2 - 7)             | 2<br>(1 - 4)                |
| Alcohol use disorders                               | 148<br>(102 - 226)          | --                    | --                     | 64<br>(41 - 100)        | 58<br>(38 - 92)          | 26<br>(17 - 42)             |
| Drug use disorders                                  | 196<br>(155 - 249)          | 6<br>(4 - 9)          | --                     | 107<br>(79 - 143)       | 40<br>(30 - 53)          | 43<br>(32 - 57)             |
| Opioid use disorders                                | 41<br>(33 - 52)             | 1<br>(1 - 2)          | --                     | 23<br>(17 - 31)         | 8<br>(6 - 10)            | 9<br>(7 - 13)               |
| Cocaine use disorders                               | 5<br>(4 - 7)                | 0<br>(0 - 0)          | --                     | 3<br>(2 - 4)            | 1<br>(1 - 1)             | 1<br>(1 - 1)                |
| Amphetamine use disorders                           | 4<br>(3 - 5)                | 0<br>(0 - 0)          | --                     | 2<br>(2 - 3)            | 1<br>(1 - 1)             | 1<br>(1 - 1)                |
| Other drug use disorders                            | 144<br>(114 - 184)          | 4<br>(3 - 6)          | --                     | 78<br>(58 - 103)        | 31<br>(23 - 41)          | 32<br>(24 - 42)             |

Web Table 31- Colombia deaths with 95% UI by age, sex, and cause in 2013

| Cause                                               | Both Sexes, All Ages        | Both Sexes, 0-4 Years    | Both Sexes, 5-14 Years | Both Sexes, 15-49 Years  | Both Sexes, 50-69 Years  | Both Sexes, 70-80 Years    |
|-----------------------------------------------------|-----------------------------|--------------------------|------------------------|--------------------------|--------------------------|----------------------------|
| Eating disorders                                    | 4<br>(3 - 6)                | --                       | 0<br>(0 - 1)           | 4<br>(2 - 5)             | --                       | --                         |
| Anorexia nervosa                                    | 4<br>(3 - 6)                | --                       | 0<br>(0 - 1)           | 4<br>(2 - 5)             | --                       | --                         |
| Diabetes, urogenital, blood, and endocrine diseases | 17,974<br>(15,457 - 20,572) | 301<br>(247 - 370)       | 129<br>(109 - 152)     | 1,686<br>(1,362 - 2,081) | 5,818<br>(4,696 - 7,015) | 10,040<br>(8,591 - 11,468) |
| Diabetes mellitus                                   | 8,453<br>(7,259 - 9,800)    | 26<br>(20 - 35)          | 16<br>(12 - 23)        | 569<br>(451 - 711)       | 2,999<br>(2,436 - 3,690) | 4,843<br>(4,104 - 5,723)   |
| Acute glomerulonephritis                            | 12<br>(8 - 22)              | 1<br>(1 - 2)             | 1<br>(1 - 1)           | 3<br>(2 - 6)             | 3<br>(1 - 6)             | 4<br>(2 - 9)               |
| Chronic kidney disease                              | 6,484<br>(5,113 - 7,660)    | 65<br>(49 - 84)          | 42<br>(33 - 55)        | 702<br>(547 - 901)       | 2,171<br>(1,437 - 2,690) | 3,504<br>(2,831 - 4,189)   |
| Chronic kidney disease due to diabetes mellitus     | 1,756<br>(987 - 2,285)      | 5<br>(3 - 9)             | 2<br>(1 - 3)           | 176<br>(96 - 253)        | 768<br>(368 - 1,040)     | 805<br>(486 - 1,101)       |
| Chronic kidney disease due to hypertension          | 2,390<br>(1,802 - 3,333)    | 15<br>(11 - 24)          | 11<br>(8 - 18)         | 259<br>(180 - 418)       | 671<br>(475 - 1,005)     | 1,434<br>(1,051 - 1,937)   |
| Chronic kidney disease due to glomerulonephritis    | 229<br>(154 - 353)          | 14<br>(9 - 20)           | 10<br>(7 - 14)         | 51<br>(36 - 73)          | 52<br>(32 - 83)          | 103<br>(57 - 182)          |
| Chronic kidney disease due to other causes          | 2,108<br>(1,307 - 2,778)    | 32<br>(18 - 45)          | 19<br>(12 - 27)        | 216<br>(137 - 320)       | 680<br>(329 - 962)       | 1,162<br>(689 - 1,609)     |
| Urinary diseases and male infertility               | 1,915<br>(1,146 - 2,467)    | 55<br>(35 - 74)          | 13<br>(9 - 16)         | 147<br>(92 - 193)        | 368<br>(217 - 487)       | 1,332<br>(751 - 1,793)     |
| Interstitial nephritis and urinary tract infections | 1,690<br>(932 - 2,256)      | 50<br>(30 - 67)          | 10<br>(6 - 13)         | 120<br>(71 - 160)        | 309<br>(170 - 411)       | 1,201<br>(625 - 1,683)     |
| Urolithiasis                                        | 24<br>(16 - 41)             | --                       | 1<br>(1 - 1)           | 6<br>(4 - 10)            | 8<br>(5 - 14)            | 9<br>(5 - 18)              |
| Other urinary diseases                              | 202<br>(126 - 384)          | 6<br>(3 - 11)            | 2<br>(1 - 4)           | 20<br>(13 - 34)          | 52<br>(32 - 90)          | 122<br>(64 - 264)          |
| Gynecological diseases                              | 6<br>(4 - 9)                | --                       | --                     | 2<br>(1 - 3)             | 2<br>(1 - 2)             | 3<br>(2 - 5)               |
| Uterine fibroids                                    | 2<br>(1 - 2)                | --                       | --                     | 0<br>(0 - 1)             | 0<br>(0 - 1)             | 1<br>(0 - 1)               |
| Polycystic ovarian syndrome                         | 0<br>(0 - 0)                | --                       | --                     | 0<br>(0 - 0)             | 0<br>(0 - 0)             | --                         |
| Endometriosis                                       | 0<br>(0 - 1)                | --                       | --                     | 0<br>(0 - 0)             | 0<br>(0 - 0)             | --                         |
| Genital prolapse                                    | 1<br>(1 - 2)                | --                       | --                     | 0<br>(0 - 0)             | 0<br>(0 - 0)             | 1<br>(0 - 1)               |
| Other gynecological diseases                        | 3<br>(2 - 4)                | --                       | --                     | 1<br>(1 - 1)             | 1<br>(0 - 1)             | 1<br>(1 - 2)               |
| Hemoglobinopathies and hemolytic anemias            | 261<br>(175 - 350)          | 37<br>(23 - 56)          | 25<br>(16 - 34)        | 79<br>(52 - 109)         | 55<br>(36 - 76)          | 67<br>(43 - 93)            |
| Thalassemias                                        | 4<br>(3 - 6)                | 2<br>(1 - 3)             | 1<br>(1 - 1)           | 1<br>(1 - 2)             | 0<br>(0 - 0)             | 0<br>(0 - 0)               |
| Sickle cell disorders                               | 147<br>(99 - 200)           | 26<br>(16 - 40)          | 20<br>(13 - 28)        | 63<br>(42 - 88)          | 33<br>(22 - 45)          | 4<br>(3 - 6)               |
| G6PD deficiency                                     | 11<br>(7 - 16)              | 3<br>(2 - 5)             | 1<br>(1 - 2)           | 3<br>(2 - 5)             | 2<br>(2 - 3)             | 1<br>(1 - 2)               |
| Other hemoglobinopathies and hemolytic anemias      | 99<br>(65 - 135)            | 6<br>(4 - 9)             | 2<br>(1 - 3)           | 11<br>(7 - 15)           | 19<br>(13 - 28)          | 61<br>(39 - 86)            |
| Endocrine, metabolic, blood, and immune disorders   | 842<br>(686 - 1,101)        | 117<br>(82 - 173)        | 32<br>(24 - 43)        | 185<br>(142 - 248)       | 221<br>(167 - 296)       | 287<br>(207 - 389)         |
| Musculoskeletal disorders                           | 932<br>(749 - 1,155)        | --                       | 31<br>(23 - 40)        | 385<br>(282 - 501)       | 252<br>(195 - 321)       | 265<br>(204 - 348)         |
| Rheumatoid arthritis                                | 167<br>(129 - 222)          | --                       | 1<br>(1 - 1)           | 17<br>(11 - 26)          | 60<br>(42 - 85)          | 90<br>(64 - 130)           |
| Other musculoskeletal disorders                     | 765<br>(603 - 956)          | --                       | 30<br>(22 - 39)        | 368<br>(270 - 478)       | 192<br>(146 - 247)       | 175<br>(131 - 229)         |
| Other non-communicable diseases                     | 5,415<br>(4,367 - 6,244)    | 3,740<br>(3,004 - 4,468) | 169<br>(134 - 213)     | 325<br>(256 - 405)       | 308<br>(233 - 383)       | 874<br>(591 - 1,141)       |
| Congenital anomalies                                | 4,094<br>(3,279 - 4,786)    | 3,595<br>(2,837 - 4,288) | 160<br>(125 - 204)     | 217<br>(163 - 285)       | 66<br>(50 - 85)          | 55<br>(40 - 75)            |
| Neural tube defects                                 | 104<br>(65 - 156)           | 96<br>(58 - 147)         | 2<br>(1 - 4)           | 3<br>(2 - 5)             | 1<br>(1 - 2)             | 1<br>(1 - 2)               |
| Congenital heart anomalies                          | 2,244<br>(1,686 - 2,733)    | 1,940<br>(1,438 - 2,418) | 103<br>(77 - 136)      | 150<br>(109 - 197)       | 32<br>(23 - 42)          | 18<br>(12 - 25)            |
| Cleft lip and cleft palate                          | 5<br>(1 - 14)               | 5<br>(1 - 14)            | --                     | --                       | --                       | --                         |
| Down syndrome                                       | 55<br>(37 - 94)             | 38<br>(22 - 71)          | 5<br>(3 - 9)           | 8<br>(6 - 13)            | 3<br>(2 - 5)             | 1<br>(0 - 1)               |
| Chromosomal unbalanced rearrangements               | 50<br>(29 - 75)             | 43<br>(25 - 67)          | 1<br>(1 - 2)           | 4<br>(3 - 6)             | 1<br>(1 - 1)             | 0<br>(0 - 1)               |
| Other congenital anomalies                          | 1,636<br>(1,250 - 2,096)    | 1,474<br>(1,093 - 1,929) | 47<br>(32 - 67)        | 51<br>(36 - 71)          | 29<br>(21 - 41)          | 35<br>(25 - 47)            |
| Skin and subcutaneous diseases                      | 1,210<br>(873 - 1,528)      | 33<br>(23 - 51)          | 9<br>(7 - 11)          | 107<br>(78 - 137)        | 242<br>(176 - 304)       | 819<br>(539 - 1,084)       |
| Cellulitis                                          | 108<br>(61 - 162)           | 7<br>(4 - 12)            | 2<br>(1 - 3)           | 14<br>(8 - 20)           | 27<br>(15 - 42)          | 59<br>(27 - 104)           |
| Pyoderma                                            | 437<br>(319 - 580)          | 22<br>(14 - 35)          | 5<br>(3 - 6)           | 42<br>(31 - 55)          | 103<br>(73 - 136)        | 265<br>(173 - 389)         |

Web Table 31- Colombia deaths with 95% UI by age, sex, and cause in 2013

| Cause                                           | Both Sexes, All Ages        | Both Sexes, 0-4 Years    | Both Sexes, 5-14 Years   | Both Sexes, 15-49 Years     | Both Sexes, 50-69 Years  | Both Sexes, 70-80 Years  |
|-------------------------------------------------|-----------------------------|--------------------------|--------------------------|-----------------------------|--------------------------|--------------------------|
| Decubitus ulcer                                 | 636<br>(425 - 839)          | 1<br>(0 - 2)             | 1<br>(1 - 2)             | 45<br>(29 - 60)             | 105<br>(74 - 138)        | 484<br>(298 - 671)       |
| Other skin and subcutaneous diseases            | 29<br>(19 - 47)             | 3<br>(1 - 7)             | 1<br>(1 - 1)             | 7<br>(4 - 9)                | 7<br>(4 - 11)            | 11<br>(5 - 24)           |
| Sudden infant death syndrome                    | 112<br>(55 - 231)           | 112<br>(55 - 231)        | --                       | --                          | --                       | --                       |
| Injuries                                        | 42,338<br>(35,119 - 51,077) | 1,922<br>(1,544 - 2,475) | 1,428<br>(1,269 - 1,603) | 29,265<br>(23,820 - 36,009) | 5,910<br>(4,708 - 7,753) | 3,814<br>(3,238 - 4,689) |
| Transport injuries                              | 9,529<br>(7,812 - 11,532)   | 349<br>(258 - 452)       | 476<br>(392 - 586)       | 5,618<br>(4,316 - 7,176)    | 1,886<br>(1,487 - 2,321) | 1,201<br>(982 - 1,582)   |
| Road injuries                                   | 9,309<br>(7,625 - 11,261)   | 334<br>(248 - 433)       | 462<br>(380 - 564)       | 5,490<br>(4,209 - 7,013)    | 1,845<br>(1,455 - 2,277) | 1,179<br>(966 - 1,546)   |
| Pedestrian road injuries                        | 3,691<br>(2,949 - 4,643)    | 205<br>(143 - 277)       | 275<br>(220 - 347)       | 1,329<br>(962 - 1,818)      | 990<br>(739 - 1,265)     | 893<br>(725 - 1,185)     |
| Cyclist road injuries                           | 695<br>(479 - 940)          | 15<br>(8 - 24)           | 44<br>(29 - 66)          | 369<br>(249 - 510)          | 217<br>(140 - 305)       | 49<br>(29 - 77)          |
| Motorcyclist road injuries                      | 2,300<br>(1,645 - 3,048)    | 15<br>(9 - 23)           | 29<br>(16 - 48)          | 2,064<br>(1,477 - 2,762)    | 148<br>(78 - 253)        | 44<br>(28 - 65)          |
| Motor vehicle road injuries                     | 2,528<br>(1,891 - 3,217)    | 91<br>(64 - 127)         | 104<br>(77 - 148)        | 1,699<br>(1,164 - 2,234)    | 456<br>(332 - 654)       | 178<br>(126 - 249)       |
| Other road injuries                             | 96<br>(45 - 147)            | 10<br>(5 - 17)           | 9<br>(5 - 15)            | 29<br>(10 - 48)             | 35<br>(16 - 59)          | 14<br>(7 - 24)           |
| Other transport injuries                        | 220<br>(160 - 358)          | 14<br>(8 - 29)           | 14<br>(9 - 26)           | 128<br>(90 - 203)           | 41<br>(27 - 68)          | 22<br>(14 - 45)          |
| Unintentional injuries                          | 7,803<br>(6,585 - 9,476)    | 1,271<br>(986 - 1,773)   | 494<br>(414 - 604)       | 2,719<br>(2,104 - 3,488)    | 1,398<br>(1,119 - 1,764) | 1,922<br>(1,601 - 2,432) |
| Falls                                           | 2,014<br>(1,636 - 2,459)    | 58<br>(40 - 88)          | 55<br>(43 - 70)          | 571<br>(398 - 764)          | 537<br>(403 - 705)       | 793<br>(615 - 1,028)     |
| Drowning                                        | 1,737<br>(1,335 - 2,590)    | 413<br>(274 - 734)       | 239<br>(180 - 326)       | 812<br>(568 - 1,234)        | 179<br>(129 - 287)       | 94<br>(74 - 128)         |
| Fire, heat, and hot substances                  | 366<br>(285 - 499)          | 83<br>(54 - 134)         | 28<br>(19 - 41)          | 115<br>(81 - 171)           | 53<br>(38 - 76)          | 87<br>(65 - 116)         |
| Poisonings                                      | 159<br>(118 - 282)          | 13<br>(8 - 24)           | 7<br>(5 - 14)            | 79<br>(55 - 146)            | 30<br>(20 - 55)          | 29<br>(20 - 50)          |
| Exposure to mechanical forces                   | 762<br>(609 - 992)          | 67<br>(37 - 199)         | 48<br>(37 - 66)          | 445<br>(330 - 579)          | 134<br>(103 - 171)       | 67<br>(52 - 92)          |
| Unintentional firearm injuries                  | 185<br>(137 - 250)          | 5<br>(3 - 7)             | 10<br>(7 - 15)           | 131<br>(91 - 190)           | 25<br>(17 - 36)          | 13<br>(9 - 19)           |
| Unintentional suffocation                       | 89<br>(48 - 301)            | 42<br>(16 - 171)         | 7<br>(4 - 21)            | 20<br>(11 - 59)             | 10<br>(5 - 33)           | 10<br>(5 - 30)           |
| Other exposure to mechanical forces             | 488<br>(353 - 611)          | 21<br>(13 - 32)          | 30<br>(21 - 41)          | 294<br>(203 - 394)          | 99<br>(70 - 130)         | 44<br>(33 - 57)          |
| Adverse effects of medical treatment            | 687<br>(496 - 1,063)        | 88<br>(49 - 194)         | 8<br>(6 - 12)            | 95<br>(65 - 153)            | 164<br>(113 - 261)       | 333<br>(230 - 551)       |
| Animal contact                                  | 230<br>(175 - 402)          | 17<br>(10 - 28)          | 19<br>(12 - 39)          | 76<br>(52 - 146)            | 65<br>(46 - 120)         | 53<br>(36 - 94)          |
| Venomous animal contact                         | 156<br>(116 - 301)          | 12<br>(6 - 20)           | 13<br>(8 - 31)           | 54<br>(37 - 109)            | 45<br>(31 - 85)          | 32<br>(21 - 60)          |
| Non-venomous animal contact                     | 74<br>(48 - 119)            | 5<br>(3 - 10)            | 6<br>(4 - 10)            | 22<br>(13 - 36)             | 20<br>(13 - 34)          | 20<br>(13 - 35)          |
| Foreign body                                    | 1,296<br>(887 - 1,787)      | 509<br>(304 - 716)       | 64<br>(45 - 100)         | 145<br>(79 - 199)           | 156<br>(101 - 228)       | 422<br>(293 - 669)       |
| Pulmonary aspiration and foreign body in airway | 1,287<br>(876 - 1,777)      | 508<br>(303 - 715)       | 63<br>(44 - 99)          | 142<br>(76 - 195)           | 154<br>(99 - 226)        | 421<br>(291 - 668)       |
| Foreign body in other body part                 | 10<br>(7 - 13)              | 1<br>(1 - 2)             | 1<br>(1 - 2)             | 3<br>(2 - 4)                | 2<br>(2 - 4)             | 2<br>(1 - 3)             |
| Other unintentional injuries                    | 552<br>(406 - 757)          | 21<br>(12 - 35)          | 25<br>(13 - 43)          | 381<br>(248 - 572)          | 80<br>(46 - 136)         | 45<br>(30 - 68)          |
| Self-harm and interpersonal violence            | 25,007<br>(20,049 - 31,683) | 302<br>(180 - 459)       | 458<br>(336 - 586)       | 20,929<br>(16,622 - 26,422) | 2,626<br>(1,873 - 4,227) | 691<br>(505 - 1,027)     |
| Self-harm                                       | 3,303<br>(2,128 - 4,157)    | --                       | 83<br>(43 - 117)         | 2,385<br>(1,499 - 3,106)    | 573<br>(382 - 744)       | 262<br>(177 - 328)       |
| Interpersonal violence                          | 21,704<br>(17,207 - 28,371) | 302<br>(180 - 459)       | 376<br>(258 - 511)       | 18,544<br>(14,525 - 23,761) | 2,053<br>(1,344 - 3,623) | 430<br>(263 - 778)       |
| Assault by firearm                              | 16,956<br>(12,956 - 22,942) | 130                      | 265                      | 14,865<br>(11,335 - 19,631) | 1,471<br>(941 - 2,772)   | 226<br>(122 - 459)       |
| Assault by sharp object                         | 3,488<br>(2,191 - 5,846)    | 35<br>(19 - 68)          | 50<br>(27 - 83)          | 2,897<br>(1,786 - 4,849)    | 409<br>(214 - 793)       | 96<br>(51 - 192)         |
| Assault by other means                          | 1,260<br>(817 - 1,838)      | 137<br>(70 - 217)        | 61<br>(32 - 93)          | 782<br>(470 - 1,177)        | 172<br>(97 - 291)        | 108<br>(62 - 190)        |

Web Table 31- Colombia deaths with 95% UI by age, sex, and cause in 2013

| Cause                                                             | Males, All Ages                | Males, 0-4 Years          | Males, 5-14 Years        | Males, 15-49 Years          | Males, 50-69 Years          | Males, 70-80 Years          |
|-------------------------------------------------------------------|--------------------------------|---------------------------|--------------------------|-----------------------------|-----------------------------|-----------------------------|
| All causes                                                        | 139,493<br>(119,506 - 162,914) | 9,139<br>(8,181 - 10,237) | 1,834<br>(1,682 - 1,999) | 37,456<br>(30,213 - 46,199) | 35,434<br>(28,871 - 43,098) | 55,630<br>(49,549 - 62,330) |
| Communicable, maternal, neonatal, and nutritional diseases        | 13,948<br>(12,374 - 15,572)    | 5,220<br>(4,585 - 5,899)  | 277<br>(221 - 342)       | 2,717<br>(2,227 - 3,201)    | 2,132<br>(1,715 - 2,609)    | 3,602<br>(2,843 - 4,520)    |
| HIV/AIDS and tuberculosis                                         | 2,721<br>(2,223 - 3,392)       | 15<br>(8 - 21)            | 10<br>(7 - 14)           | 1,569<br>(1,236 - 2,004)    | 762<br>(554 - 1,025)        | 365<br>(280 - 474)          |
| Tuberculosis                                                      | 1,009<br>(765 - 1,259)         | 13<br>(7 - 19)            | 8<br>(6 - 10)            | 283<br>(191 - 384)          | 386<br>(274 - 513)          | 319<br>(237 - 426)          |
| HIV/AIDS                                                          | 1,712<br>(1,294 - 2,358)       | 2<br>(0 - 4)              | 2<br>(0 - 5)             | 1,286<br>(975 - 1,734)      | 377<br>(217 - 611)          | 45<br>(23 - 78)             |
| HIV/AIDS resulting in mycobacterial infection                     | 107<br>(76 - 156)              | 0<br>(0 - 0)              | 0<br>(0 - 0)             | 79<br>(56 - 114)            | 25<br>(14 - 41)             | 3<br>(2 - 6)                |
| HIV/AIDS resulting in other diseases                              | 1,605<br>(1,212 - 2,209)       | 2<br>(0 - 3)              | 2<br>(0 - 5)             | 1,206<br>(914 - 1,623)      | 352<br>(202 - 570)          | 42<br>(21 - 72)             |
| Diarrhea, lower respiratory, and other common infectious diseases | 6,284<br>(5,059 - 7,515)       | 1,732<br>(1,383 - 2,154)  | 203<br>(151 - 264)       | 828<br>(587 - 1,100)        | 1,010<br>(729 - 1,350)      | 2,510<br>(1,838 - 3,377)    |
| Diarrheal diseases                                                | 770<br>(575 - 1,005)           | 441<br>(274 - 661)        | 15<br>(9 - 24)           | 63<br>(43 - 87)             | 76<br>(49 - 111)            | 175<br>(109 - 273)          |
| Intestinal infectious diseases                                    | 229<br>(110 - 416)             | 68<br>(31 - 125)          | 66<br>(29 - 120)         | 80<br>(31 - 162)            | 11<br>(5 - 22)              | 4<br>(2 - 9)                |
| Typhoid fever                                                     | 171<br>(79 - 321)              | 48<br>(20 - 92)           | 51<br>(23 - 97)          | 61<br>(23 - 126)            | 8<br>(3 - 16)               | 3<br>(1 - 6)                |
| Paratyphoid fever                                                 | 46<br>(20 - 89)                | 14<br>(5 - 29)            | 14<br>(5 - 28)           | 16<br>(5 - 34)              | 2<br>(1 - 4)                | 1<br>(0 - 1)                |
| Other intestinal infectious diseases                              | 12<br>(5 - 21)                 | 5<br>(1 - 12)             | 1<br>(0 - 4)             | 3<br>(1 - 9)                | 1<br>(0 - 5)                | 1<br>(0 - 3)                |
| Lower respiratory infections                                      | 4,579<br>(3,470 - 5,638)       | 978<br>(694 - 1,328)      | 69<br>(45 - 101)         | 486<br>(310 - 674)          | 805<br>(554 - 1,112)        | 2,241<br>(1,838 - 3,096)    |
| Upper respiratory infections                                      | 6<br>(2 - 12)                  | 1<br>(0 - 2)              | 0<br>(0 - 0)             | 2<br>(0 - 6)                | 2<br>(0 - 5)                | 2<br>(0 - 6)                |
| Otitis media                                                      | 4<br>(3 - 5)                   | 1<br>(0 - 1)              | 0<br>(0 - 1)             | 2<br>(1 - 2)                | 1<br>(0 - 1)                | 1<br>(0 - 1)                |
| Meningitis                                                        | 470<br>(368 - 585)             | 178<br>(112 - 282)        | 31<br>(23 - 41)          | 124<br>(89 - 165)           | 75<br>(55 - 99)             | 62<br>(48 - 78)             |
| Pneumococcal meningitis                                           | 158<br>(122 - 201)             | 50<br>(30 - 77)           | 12<br>(8 - 18)           | 46<br>(30 - 69)             | 28<br>(18 - 40)             | 22<br>(15 - 31)             |
| H influenzae type B meningitis                                    | 95<br>(66 - 134)               | 64<br>(39 - 101)          | 7<br>(4 - 11)            | 13<br>(8 - 18)              | 6<br>(3 - 10)               | 5<br>(3 - 8)                |
| Meningococcal meningitis                                          | 53<br>(38 - 69)                | 16<br>(8 - 27)            | 4<br>(1 - 6)             | 17<br>(10 - 26)             | 9<br>(5 - 14)               | 8<br>(5 - 12)               |
| Other meningitis                                                  | 164<br>(121 - 215)             | 48<br>(23 - 87)           | 9<br>(5 - 14)            | 49<br>(31 - 69)             | 32<br>(20 - 45)             | 27<br>(18 - 37)             |
| Encephalitis                                                      | 184<br>(130 - 240)             | 48<br>(27 - 79)           | 18<br>(9 - 27)           | 62<br>(37 - 90)             | 36<br>(21 - 56)             | 20<br>(11 - 29)             |
| Diphtheria                                                        | 2<br>(0 - 10)                  | 1<br>(0 - 8)              | 0<br>(0 - 3)             | 1<br>(0 - 3)                | 0<br>(0 - 1)                | --                          |
| Whooping cough                                                    | 13<br>(3 - 58)                 | 11<br>(1 - 56)            | 1<br>(1 - 1)             | 1<br>(1 - 2)                | 0<br>(0 - 0)                | --                          |
| Tetanus                                                           | 15<br>(10 - 21)                | 4<br>(2 - 6)              | 1<br>(0 - 1)             | 5<br>(2 - 7)                | 4<br>(2 - 6)                | 2<br>(1 - 5)                |
| Measles                                                           | 0<br>(0 - 0)                   | 0<br>(0 - 0)              | 0<br>(0 - 0)             | 0<br>(0 - 0)                | 0<br>(0 - 0)                | --                          |
| Varicella and herpes zoster                                       | 11<br>(4 - 28)                 | 2<br>(0 - 10)             | 1<br>(0 - 3)             | 3<br>(0 - 7)                | 1<br>(0 - 4)                | 4<br>(0 - 20)               |
| Neglected tropical diseases and malaria                           | 247<br>(146 - 342)             | 51<br>(32 - 75)           | 20<br>(11 - 30)          | 80<br>(46 - 113)            | 59<br>(24 - 112)            | 38<br>(16 - 67)             |
| Malaria                                                           | 35<br>(21 - 60)                | 5<br>(2 - 11)             | 2<br>(1 - 5)             | 17<br>(8 - 34)              | 7<br>(3 - 15)               | 4<br>(1 - 11)               |
| Chagas disease                                                    | 66<br>(5 - 133)                | 0<br>(0 - 1)              | 1<br>(0 - 1)             | 16<br>(1 - 33)              | 31<br>(2 - 82)              | 17<br>(1 - 43)              |
| Leishmaniasis                                                     | 11<br>(8 - 14)                 | 3<br>(1 - 4)              | 1<br>(0 - 1)             | 4<br>(3 - 6)                | 2<br>(1 - 3)                | 1<br>(0 - 1)                |
| Visceral leishmaniasis                                            | 11<br>(8 - 14)                 | 3<br>(1 - 4)              | 1<br>(0 - 1)             | 4<br>(3 - 6)                | 2<br>(1 - 3)                | 1<br>(0 - 1)                |
| Cysticercosis                                                     | 9<br>(7 - 11)                  | 0<br>(0 - 0)              | 0<br>(0 - 0)             | 6<br>(5 - 8)                | 2<br>(2 - 2)                | 1<br>(1 - 1)                |
| Cystic echinococcosis                                             | 2<br>(2 - 3)                   | 0<br>(0 - 0)              | 0<br>(0 - 0)             | 1<br>(1 - 2)                | 0<br>(0 - 1)                | 0<br>(0 - 0)                |
| Dengue                                                            | 50<br>(14 - 65)                | 13<br>(2 - 22)            | 7<br>(2 - 10)            | 15<br>(4 - 20)              | 8<br>(2 - 11)               | 7<br>(2 - 10)               |
| Yellow fever                                                      | 2<br>(1 - 3)                   | 0<br>(0 - 0)              | 0<br>(0 - 1)             | 1<br>(0 - 2)                | 0<br>(0 - 0)                | 0<br>(0 - 0)                |
| Rabies                                                            | 2<br>(1 - 3)                   | 0<br>(0 - 0)              | 0<br>(0 - 1)             | 1<br>(0 - 1)                | 0<br>(0 - 0)                | 0<br>(0 - 0)                |
| Intestinal nematode infections                                    | 47<br>(28 - 72)                | 21<br>(10 - 40)           | 6<br>(1 - 14)            | 11<br>(3 - 24)              | 4<br>(0 - 11)               | 4<br>(1 - 11)               |
| Ascariasis                                                        | 47<br>(28 - 72)                | 21<br>(10 - 40)           | 6<br>(1 - 14)            | 11<br>(3 - 24)              | 4<br>(0 - 11)               | 4<br>(1 - 11)               |
| Other neglected tropical diseases                                 | 23<br>(18 - 32)                | 8<br>(4 - 13)             | 1<br>(1 - 2)             | 7<br>(5 - 9)                | 4<br>(2 - 7)                | 4<br>(2 - 6)                |

Web Table 31- Colombia deaths with 95% UI by age, sex, and cause in 2013

| Cause                                                            | Males, All Ages              | Males, 0-4 Years         | Males, 5-14 Years  | Males, 15-49 Years        | Males, 50-69 Years          | Males, 70-80 Years          |
|------------------------------------------------------------------|------------------------------|--------------------------|--------------------|---------------------------|-----------------------------|-----------------------------|
| Maternal disorders                                               | --                           | --                       | --                 | --                        | --                          | --                          |
| Maternal hemorrhage                                              | --                           | --                       | --                 | --                        | --                          | --                          |
| Maternal sepsis and other maternal infections                    | --                           | --                       | --                 | --                        | --                          | --                          |
| Maternal hypertensive disorders                                  | --                           | --                       | --                 | --                        | --                          | --                          |
| Maternal obstructed labor                                        | --                           | --                       | --                 | --                        | --                          | --                          |
| Maternal abortive outcome                                        | --                           | --                       | --                 | --                        | --                          | --                          |
| Indirect maternal deaths                                         | --                           | --                       | --                 | --                        | --                          | --                          |
| Late maternal deaths                                             | --                           | --                       | --                 | --                        | --                          | --                          |
| Maternal deaths aggravated by HIV/AIDS                           | --                           | --                       | --                 | --                        | --                          | --                          |
| Other maternal disorders                                         | --                           | --                       | --                 | --                        | --                          | --                          |
| Neonatal disorders                                               | 2,953<br>(2,601 - 3,373)     | 2,953<br>(2,601 - 3,373) | --                 | --                        | --                          | --                          |
| Neonatal preterm birth complications                             | 1,347<br>(947 - 1,821)       | 1,347<br>(947 - 1,821)   | --                 | --                        | --                          | --                          |
| Neonatal encephalopathy due to birth asphyxia and trauma         | 674<br>(449 - 1,078)         | 674<br>(449 - 1,078)     | --                 | --                        | --                          | --                          |
| Neonatal sepsis and other neonatal infections                    | 449<br>(168 - 759)           | 449<br>(168 - 759)       | --                 | --                        | --                          | --                          |
| Hemolytic disease and other neonatal jaundice                    | 43<br>(18 - 83)              | 43<br>(18 - 83)          | --                 | --                        | --                          | --                          |
| Other neonatal disorders                                         | 439<br>(232 - 668)           | 439<br>(232 - 668)       | --                 | --                        | --                          | --                          |
| Nutritional deficiencies                                         | 1,421<br>(948 - 2,141)       | 369<br>(228 - 536)       | 30<br>(18 - 45)    | 146<br>(92 - 227)         | 231<br>(155 - 381)          | 645<br>(394 - 1,065)        |
| Protein-energy malnutrition                                      | 1,141<br>(696 - 1,677)       | 346<br>(204 - 510)       | 23<br>(13 - 35)    | 100<br>(54 - 152)         | 166<br>(97 - 272)           | 504<br>(289 - 816)          |
| Iodine deficiency                                                | 1<br>(0 - 4)                 | 0<br>(0 - 1)             | 0<br>(0 - 1)       | 0<br>(0 - 2)              | 0<br>(0 - 2)                | 0<br>(0 - 2)                |
| Iron-deficiency anemia                                           | 232<br>(103 - 492)           | 15<br>(5 - 46)           | 5<br>(2 - 11)      | 39<br>(19 - 86)           | 54<br>(24 - 125)            | 118<br>(48 - 270)           |
| Other nutritional deficiencies                                   | 47<br>(22 - 109)             | 7<br>(2 - 25)            | 1<br>(0 - 2)       | 6<br>(2 - 13)             | 10<br>(4 - 25)              | 23<br>(9 - 58)              |
| Other communicable, maternal, neonatal, and nutritional diseases | 323<br>(219 - 467)           | 101<br>(28 - 213)        | 15<br>(8 - 24)     | 94<br>(67 - 146)          | 70<br>(48 - 107)            | 44<br>(31 - 69)             |
| Sexually transmitted diseases excluding HIV                      | 86<br>(9 - 206)              | 71<br>(0 - 183)          | 5<br>(0 - 13)      | 4<br>(2 - 6)              | 3<br>(1 - 7)                | 3<br>(1 - 6)                |
| Syphilis                                                         | 83<br>(6 - 202)              | 71<br>(0 - 183)          | 5<br>(0 - 13)      | 2<br>(1 - 4)              | 2<br>(1 - 5)                | 2<br>(1 - 5)                |
| Chlamydial infection                                             | --                           | --                       | --                 | --                        | --                          | --                          |
| Gonococcal infection                                             | 2<br>(1 - 3)                 | --                       | 0<br>(0 - 0)       | 1<br>(0 - 2)              | 1<br>(0 - 1)                | 0<br>(0 - 1)                |
| Other sexually transmitted diseases                              | 1<br>(1 - 2)                 | --                       | 0<br>(0 - 0)       | 1<br>(0 - 1)              | 0<br>(0 - 1)                | 0<br>(0 - 0)                |
| Hepatitis                                                        | 44<br>(33 - 57)              | 3<br>(1 - 5)             | 2<br>(1 - 2)       | 17<br>(11 - 24)           | 15<br>(9 - 22)              | 8<br>(5 - 13)               |
| Acute hepatitis A                                                | 12<br>(5 - 22)               | 2<br>(1 - 4)             | 1<br>(0 - 2)       | 7<br>(2 - 13)             | 2<br>(0 - 5)                | 0<br>(0 - 1)                |
| Acute hepatitis B                                                | 25<br>(16 - 37)              | 1<br>(0 - 2)             | 0<br>(0 - 1)       | 7<br>(3 - 12)             | 11<br>(6 - 17)              | 6<br>(4 - 10)               |
| Acute hepatitis C                                                | 7<br>(2 - 15)                | --                       | 0<br>(0 - 1)       | 3<br>(1 - 7)              | 2<br>(0 - 6)                | 1<br>(0 - 4)                |
| Other infectious diseases                                        | 192<br>(140 - 303)           | 26<br>(17 - 40)          | 8<br>(5 - 14)      | 74<br>(49 - 125)          | 52<br>(34 - 89)             | 33<br>(22 - 56)             |
| Non-communicable diseases                                        | 90,383<br>(77,590 - 104,605) | 2,819<br>(2,274 - 3,380) | 617<br>(519 - 708) | 8,704<br>(6,679 - 11,090) | 28,516<br>(23,121 - 34,631) | 49,727<br>(44,211 - 55,826) |
| Neoplasms                                                        | 22,168<br>(18,513 - 26,314)  | 232<br>(161 - 329)       | 288<br>(226 - 349) | 2,885<br>(2,221 - 3,699)  | 8,523<br>(6,872 - 10,489)   | 10,239<br>(8,765 - 11,935)  |
| Esophageal cancer                                                | 823<br>(606 - 1,207)         | --                       | --                 | 54<br>(36 - 78)           | 332<br>(236 - 498)          | 437<br>(310 - 653)          |
| Stomach cancer                                                   | 4,100<br>(3,332 - 5,029)     | --                       | --                 | 467<br>(332 - 637)        | 1,759<br>(1,345 - 2,244)    | 1,874<br>(1,497 - 2,357)    |
| Liver cancer                                                     | 1,149<br>(895 - 1,436)       | --                       | 3<br>(2 - 6)       | 120<br>(82 - 171)         | 533<br>(385 - 710)          | 493<br>(364 - 665)          |
| Liver cancer due to hepatitis B                                  | 511<br>(313 - 717)           | --                       | 2<br>(1 - 3)       | 70<br>(45 - 103)          | 261<br>(153 - 392)          | 177<br>(103 - 268)          |
| Liver cancer due to hepatitis C                                  | 399<br>(241 - 580)           | --                       | 0<br>(0 - 1)       | 29<br>(13 - 53)           | 174<br>(90 - 281)           | 196<br>(122 - 285)          |
| Liver cancer due to alcohol use                                  | 180<br>(99 - 302)            | --                       | --                 | 10<br>(3 - 17)            | 71<br>(36 - 122)            | 99<br>(54 - 177)            |

Web Table 31- Colombia deaths with 95% UI by age, sex, and cause in 2013

| Cause                                         | Males, All Ages             | Males, 0-4 Years  | Males, 5-14 Years | Males, 15-49 Years       | Males, 50-69 Years         | Males, 70-80 Years          |
|-----------------------------------------------|-----------------------------|-------------------|-------------------|--------------------------|----------------------------|-----------------------------|
| Liver cancer due to other causes              | 60<br>(38 - 90)             | --                | 1<br>(1 - 2)      | 10<br>(6 - 17)           | 26<br>(15 - 44)            | 22<br>(12 - 34)             |
| Larynx cancer                                 | 438<br>(320 - 616)          | --                | --                | 26<br>(17 - 39)          | 192<br>(132 - 274)         | 219<br>(158 - 314)          |
| Tracheal, bronchus and lung cancer            | 3,175<br>(2,578 - 3,869)    | --                | --                | 206<br>(147 - 278)       | 1,432<br>(1,110 - 1,808)   | 1,537<br>(1,244 - 1,871)    |
| Breast cancer                                 | 18<br>(12 - 26)             | --                | --                | 4<br>(2 - 6)             | 8<br>(5 - 12)              | 6<br>(3 - 11)               |
| Cervical cancer                               | --                          | --                | --                | --                       | --                         | --                          |
| Uterine cancer                                | --                          | --                | --                | --                       | --                         | --                          |
| Prostate cancer                               | 3,209<br>(2,058 - 4,496)    | --                | --                | 29<br>(14 - 47)          | 708<br>(433 - 1,033)       | 2,471<br>(1,562 - 3,543)    |
| Colon and rectum cancer                       | 1,645<br>(1,325 - 2,017)    | --                | --                | 240<br>(175 - 315)       | 667<br>(516 - 850)         | 738<br>(579 - 927)          |
| Lip and oral cavity cancer                    | 302<br>(211 - 416)          | --                | --                | 34<br>(22 - 51)          | 130<br>(88 - 186)          | 137<br>(95 - 193)           |
| Nasopharynx cancer                            | 73<br>(54 - 99)             | --                | 1<br>(0 - 3)      | 22<br>(14 - 32)          | 34<br>(23 - 52)            | 16<br>(10 - 23)             |
| Other pharynx cancer                          | 133<br>(97 - 192)           | --                | --                | 16<br>(10 - 23)          | 66<br>(45 - 97)            | 52<br>(35 - 78)             |
| Gallbladder and biliary tract cancer          | 315<br>(206 - 435)          | --                | --                | 31<br>(18 - 49)          | 140<br>(87 - 206)          | 144<br>(89 - 205)           |
| Pancreatic cancer                             | 835<br>(672 - 1,028)        | --                | --                | 102<br>(72 - 139)        | 408<br>(309 - 526)         | 325<br>(259 - 407)          |
| Malignant skin melanoma                       | 171<br>(93 - 272)           | --                | --                | 37<br>(19 - 61)          | 70<br>(37 - 116)           | 64<br>(34 - 106)            |
| Non-melanoma skin cancer                      | 233<br>(143 - 320)          | --                | --                | 24<br>(14 - 34)          | 77<br>(46 - 109)           | 133<br>(81 - 188)           |
| Ovarian cancer                                | --                          | --                | --                | --                       | --                         | --                          |
| Testicular cancer                             | 113<br>(72 - 162)           | --                | --                | 78<br>(47 - 118)         | 17<br>(11 - 27)            | 17<br>(10 - 27)             |
| Kidney cancer                                 | 322<br>(251 - 404)          | 8<br>(4 - 16)     | 4<br>(2 - 7)      | 46<br>(32 - 68)          | 153<br>(109 - 201)         | 109<br>(79 - 148)           |
| Bladder cancer                                | 430<br>(331 - 618)          | --                | --                | 18<br>(12 - 27)          | 151<br>(106 - 233)         | 261<br>(190 - 368)          |
| Brain and nervous system cancer               | 740<br>(436 - 953)          | 24<br>(8 - 47)    | 41<br>(20 - 60)   | 243<br>(140 - 339)       | 288<br>(176 - 404)         | 145<br>(78 - 204)           |
| Thyroid cancer                                | 104<br>(75 - 148)           | --                | 0<br>(0 - 0)      | 11<br>(7 - 17)           | 46<br>(30 - 69)            | 47<br>(33 - 67)             |
| Mesothelioma                                  | 40<br>(29 - 55)             | --                | --                | 10<br>(6 - 16)           | 19<br>(12 - 28)            | 11<br>(7 - 17)              |
| Hodgkin lymphoma                              | 126<br>(91 - 178)           | 3<br>(1 - 6)      | 7<br>(3 - 16)     | 47<br>(31 - 73)          | 41<br>(25 - 65)            | 27<br>(17 - 43)             |
| Non-Hodgkin lymphoma                          | 933<br>(694 - 1,258)        | 25<br>(13 - 43)   | 29<br>(18 - 43)   | 233<br>(165 - 325)       | 365<br>(254 - 526)         | 281<br>(196 - 392)          |
| Multiple myeloma                              | 264<br>(180 - 351)          | --                | --                | 30<br>(18 - 43)          | 146<br>(95 - 204)          | 88<br>(59 - 121)            |
| Leukemia                                      | 1,156<br>(938 - 1,396)      | 92<br>(47 - 159)  | 140<br>(99 - 185) | 409<br>(296 - 539)       | 267<br>(204 - 345)         | 248<br>(192 - 318)          |
| Other neoplasms                               | 1,321<br>(968 - 1,663)      | 81<br>(46 - 115)  | 62<br>(37 - 86)   | 349<br>(237 - 466)       | 470<br>(329 - 637)         | 359<br>(241 - 471)          |
| Cardiovascular diseases                       | 36,305<br>(30,871 - 42,553) | 127<br>(98 - 159) | 73<br>(59 - 91)   | 2,973<br>(2,210 - 3,837) | 11,752<br>(9,449 - 14,456) | 21,380<br>(18,664 - 24,406) |
| Rheumatic heart disease                       | 124<br>(72 - 172)           | 1<br>(0 - 2)      | 3<br>(1 - 5)      | 32<br>(18 - 49)          | 44<br>(23 - 65)            | 45<br>(26 - 68)             |
| Ischemic heart disease                        | 20,544<br>(16,962 - 24,349) | 14<br>(6 - 20)    | 14<br>(9 - 18)    | 1,594<br>(1,149 - 2,084) | 6,977<br>(5,475 - 8,711)   | 11,946<br>(10,093 - 13,967) |
| Cerebrovascular disease                       | 9,759<br>(7,653 - 12,327)   | 39<br>(27 - 52)   | 31<br>(23 - 41)   | 798<br>(549 - 1,110)     | 2,937<br>(2,180 - 3,881)   | 5,955<br>(4,714 - 7,556)    |
| Ischemic stroke                               | 2,147<br>(1,512 - 3,610)    | 4<br>(2 - 6)      | 3<br>(2 - 6)      | 97<br>(59 - 155)         | 549<br>(358 - 904)         | 1,495<br>(1,015 - 2,603)    |
| Hemorrhagic stroke                            | 7,612<br>(5,714 - 9,861)    | 35<br>(25 - 47)   | 28<br>(20 - 36)   | 701<br>(466 - 986)       | 2,388<br>(1,699 - 3,194)   | 4,460<br>(3,289 - 5,773)    |
| Hypertensive heart disease                    | 2,466<br>(1,709 - 3,966)    | 3<br>(1 - 5)      | 1<br>(1 - 2)      | 75<br>(46 - 130)         | 641<br>(386 - 1,129)       | 1,746<br>(1,176 - 2,792)    |
| Cardiomyopathy and myocarditis                | 728<br>(509 - 971)          | 42<br>(29 - 60)   | 11<br>(7 - 15)    | 150<br>(102 - 221)       | 262<br>(183 - 377)         | 263<br>(173 - 366)          |
| Atrial fibrillation and flutter               | 120<br>(86 - 167)           | --                | --                | 4<br>(2 - 5)             | 24<br>(17 - 34)            | 92<br>(62 - 136)            |
| Aortic aneurysm                               | 879<br>(691 - 1,110)        | --                | --                | 72<br>(51 - 100)         | 327<br>(245 - 440)         | 480<br>(373 - 598)          |
| Peripheral vascular disease                   | 56<br>(39 - 78)             | --                | --                | 1<br>(1 - 2)             | 9<br>(6 - 13)              | 46<br>(30 - 67)             |
| Endocarditis                                  | 191<br>(117 - 283)          | 14<br>(7 - 22)    | 5<br>(3 - 9)      | 57<br>(33 - 87)          | 64<br>(37 - 102)           | 51<br>(31 - 79)             |
| Other cardiovascular and circulatory diseases | 1,438<br>(1,066 - 1,861)    | 15<br>(10 - 22)   | 9<br>(6 - 12)     | 190<br>(121 - 265)       | 467<br>(313 - 643)         | 756<br>(538 - 1,036)        |

Web Table 31- Colombia deaths with 95% UI by age, sex, and cause in 2013

| Cause                                               | Males, All Ages           | Males, 0-4 Years   | Males, 5-14 Years | Males, 15-49 Years | Males, 50-69 Years       | Males, 70-80 Years       |
|-----------------------------------------------------|---------------------------|--------------------|-------------------|--------------------|--------------------------|--------------------------|
| Chronic respiratory diseases                        | 9,655<br>(7,824 - 11,450) | 150<br>(104 - 215) | 24<br>(18 - 31)   | 343<br>(241 - 456) | 2,247<br>(1,705 - 2,864) | 6,892<br>(5,612 - 8,106) |
| Chronic obstructive pulmonary disease               | 8,711<br>(7,070 - 10,290) | 90<br>(58 - 141)   | 13<br>(9 - 17)    | 241<br>(168 - 324) | 1,947<br>(1,469 - 2,478) | 6,420<br>(5,164 - 7,545) |
| Pneumoconiosis                                      | 236<br>(120 - 407)        | 1<br>(0 - 3)       | 1<br>(0 - 1)      | 17<br>(9 - 30)     | 86<br>(41 - 154)         | 130<br>(61 - 234)        |
| Silicosis                                           | 35<br>(17 - 62)           | 0<br>(0 - 1)       | 0<br>(0 - 0)      | 4<br>(2 - 8)       | 13<br>(6 - 23)           | 18<br>(8 - 32)           |
| Asbestosis                                          | 37<br>(18 - 63)           | 0<br>(0 - 1)       | 0<br>(0 - 0)      | 2<br>(1 - 4)       | 16<br>(8 - 29)           | 18<br>(8 - 33)           |
| Coal workers pneumoconiosis                         | 41<br>(22 - 71)           | 0<br>(0 - 1)       | 0<br>(0 - 0)      | 3<br>(2 - 5)       | 15<br>(7 - 27)           | 23<br>(11 - 42)          |
| Other pneumoconiosis                                | 123<br>(60 - 213)         | 0<br>(0 - 1)       | 0<br>(0 - 0)      | 8<br>(4 - 13)      | 42<br>(20 - 76)          | 72<br>(32 - 134)         |
| Asthma                                              | 291<br>(212 - 369)        | 29<br>(16 - 48)    | 6<br>(3 - 8)      | 48<br>(30 - 67)    | 88<br>(58 - 122)         | 120<br>(85 - 170)        |
| Interstitial lung disease and pulmonary sarcoidosis | 266<br>(158 - 381)        | 7<br>(3 - 14)      | 2<br>(1 - 3)      | 22<br>(11 - 34)    | 97<br>(55 - 152)         | 138<br>(76 - 203)        |
| Other chronic respiratory diseases                  | 152<br>(113 - 207)        | 23<br>(14 - 36)    | 3<br>(2 - 5)      | 14<br>(9 - 20)     | 28<br>(19 - 43)          | 83<br>(54 - 124)         |
| Cirrhosis                                           | 2,545<br>(2,048 - 3,123)  | 16<br>(10 - 23)    | 10<br>(8 - 13)    | 453<br>(330 - 605) | 1,173<br>(907 - 1,484)   | 893<br>(723 - 1,094)     |
| Cirrhosis due to hepatitis B                        | 81<br>(46 - 125)          | 0<br>(0 - 0)       | 0<br>(0 - 0)      | 15<br>(7 - 24)     | 38<br>(21 - 59)          | 28<br>(15 - 46)          |
| Cirrhosis due to hepatitis C                        | 878<br>(549 - 1,206)      | 1<br>(0 - 4)       | 2<br>(0 - 3)      | 130<br>(74 - 199)  | 404<br>(251 - 570)       | 340<br>(176 - 492)       |
| Cirrhosis due to alcohol use                        | 1,279<br>(942 - 1,730)    | --                 | --                | 210<br>(137 - 312) | 603<br>(425 - 841)       | 465<br>(332 - 666)       |
| Cirrhosis due to other causes                       | 307<br>(187 - 458)        | 15<br>(9 - 21)     | 8<br>(6 - 11)     | 98<br>(65 - 146)   | 128<br>(65 - 210)        | 59<br>(31 - 95)          |
| Digestive diseases                                  | 3,263<br>(2,649 - 3,984)  | 43<br>(28 - 63)    | 27<br>(21 - 33)   | 412<br>(304 - 552) | 1,018<br>(784 - 1,305)   | 1,763<br>(1,450 - 2,135) |
| Peptic ulcer disease                                | 767<br>(554 - 1,082)      | 1<br>(0 - 2)       | 1<br>(1 - 2)      | 79<br>(54 - 115)   | 231<br>(155 - 342)       | 454<br>(314 - 652)       |
| Gastritis and duodenitis                            | 108<br>(51 - 165)         | 1<br>(0 - 2)       | 1<br>(0 - 1)      | 12<br>(5 - 18)     | 31<br>(15 - 49)          | 64<br>(28 - 101)         |
| Appendicitis                                        | 158<br>(104 - 220)        | 2<br>(1 - 3)       | 5<br>(3 - 8)      | 38<br>(23 - 55)    | 48<br>(29 - 72)          | 66<br>(39 - 100)         |
| Paralytic ileus and intestinal obstruction          | 581<br>(304 - 821)        | 21<br>(11 - 33)    | 11<br>(6 - 15)    | 76<br>(38 - 114)   | 173<br>(88 - 271)        | 301<br>(142 - 448)       |
| Inguinal, femoral, and abdominal hernia             | 139<br>(78 - 233)         | 2<br>(1 - 6)       | 1<br>(1 - 3)      | 11<br>(6 - 18)     | 42<br>(24 - 75)          | 83<br>(44 - 146)         |
| Inflammatory bowel disease                          | 61<br>(42 - 84)           | 2<br>(1 - 4)       | 1<br>(0 - 1)      | 13<br>(8 - 19)     | 20<br>(13 - 30)          | 24<br>(15 - 37)          |
| Vascular intestinal disorders                       | 391<br>(151 - 753)        | 3<br>(1 - 8)       | 1<br>(0 - 3)      | 28<br>(10 - 61)    | 126<br>(47 - 247)        | 232<br>(89 - 451)        |
| Gallbladder and biliary diseases                    | 441<br>(275 - 590)        | 1<br>(0 - 2)       | 1<br>(1 - 2)      | 39<br>(24 - 56)    | 135<br>(80 - 187)        | 265<br>(156 - 360)       |
| Pancreatitis                                        | 294<br>(192 - 429)        | 1<br>(1 - 2)       | 2<br>(1 - 3)      | 75<br>(47 - 114)   | 111<br>(70 - 172)        | 104<br>(65 - 157)        |
| Other digestive diseases                            | 323<br>(225 - 439)        | 8<br>(4 - 14)      | 3<br>(2 - 5)      | 40<br>(26 - 57)    | 101<br>(66 - 145)        | 171<br>(114 - 252)       |
| Neurological disorders                              | 4,720<br>(3,587 - 6,085)  | 49<br>(35 - 69)    | 36<br>(26 - 46)   | 358<br>(246 - 475) | 521<br>(364 - 720)       | 3,756<br>(2,724 - 5,020) |
| Alzheimer disease and other dementias               | 3,847<br>(2,772 - 5,113)  | --                 | --                | 3<br>(1 - 6)       | 311<br>(185 - 471)       | 3,533<br>(2,513 - 4,789) |
| Parkinson disease                                   | 162<br>(108 - 210)        | --                 | --                | 5<br>(3 - 6)       | 34<br>(22 - 46)          | 124<br>(79 - 165)        |
| Epilepsy                                            | 418<br>(289 - 539)        | 23<br>(14 - 37)    | 25<br>(17 - 35)   | 256<br>(171 - 346) | 70<br>(45 - 98)          | 44<br>(29 - 60)          |
| Multiple sclerosis                                  | 40<br>(14 - 61)           | --                 | --                | 16<br>(5 - 26)     | 18<br>(6 - 30)           | 6<br>(3 - 10)            |
| Other neurological disorders                        | 253<br>(185 - 323)        | 26<br>(17 - 39)    | 11<br>(7 - 15)    | 79<br>(52 - 106)   | 89<br>(62 - 120)         | 49<br>(36 - 65)          |
| Mental and substance use disorders                  | 255<br>(188 - 383)        | 2<br>(1 - 4)       | 0<br>(0 - 0)      | 138<br>(96 - 197)  | 77<br>(54 - 118)         | 38<br>(27 - 60)          |
| Schizophrenia                                       | 5<br>(3 - 12)             | --                 | --                | 3<br>(1 - 6)       | 2<br>(1 - 4)             | 1<br>(0 - 2)             |
| Alcohol use disorders                               | 128<br>(87 - 206)         | --                 | --                | 57<br>(35 - 93)    | 51<br>(32 - 86)          | 20<br>(14 - 35)          |
| Drug use disorders                                  | 120<br>(88 - 170)         | 2<br>(1 - 4)       | --                | 77<br>(53 - 111)   | 24<br>(16 - 37)          | 16<br>(11 - 25)          |
| Opioid use disorders                                | 26<br>(19 - 37)           | 1<br>(0 - 1)       | --                | 17<br>(11 - 25)    | 5<br>(3 - 7)             | 4<br>(2 - 6)             |
| Cocaine use disorders                               | 3<br>(2 - 4)              | 0<br>(0 - 0)       | --                | 2<br>(1 - 3)       | 0<br>(0 - 1)             | 0<br>(0 - 0)             |
| Amphetamine use disorders                           | 2<br>(2 - 3)              | 0<br>(0 - 0)       | --                | 1<br>(1 - 2)       | 0<br>(0 - 1)             | 0<br>(0 - 0)             |
| Other drug use disorders                            | 89<br>(65 - 126)          | 2<br>(1 - 3)       | --                | 57<br>(39 - 82)    | 19<br>(13 - 29)          | 12<br>(8 - 19)           |

Web Table 31- Colombia deaths with 95% UI by age, sex, and cause in 2013

| Cause                                               | Males, All Ages           | Males, 0-4 Years         | Males, 5-14 Years | Males, 15-49 Years   | Males, 50-69 Years       | Males, 70-80 Years       |
|-----------------------------------------------------|---------------------------|--------------------------|-------------------|----------------------|--------------------------|--------------------------|
| Eating disorders                                    | 1<br>(1 - 2)              | --                       | 0<br>(0 - 0)      | 1<br>(1 - 2)         | --                       | --                       |
| Anorexia nervosa                                    | 1<br>(1 - 2)              | --                       | 0<br>(0 - 0)      | 1<br>(1 - 2)         | --                       | --                       |
| Diabetes, urogenital, blood, and endocrine diseases | 8,446<br>(6,963 - 10,209) | 170<br>(128 - 225)       | 64<br>(51 - 79)   | 890<br>(659 - 1,146) | 2,969<br>(2,309 - 3,799) | 4,353<br>(3,598 - 5,183) |
| Diabetes mellitus                                   | 3,620<br>(2,921 - 4,391)  | 13<br>(10 - 17)          | 6<br>(5 - 8)      | 310<br>(228 - 417)   | 1,456<br>(1,115 - 1,915) | 1,834<br>(1,460 - 2,259) |
| Acute glomerulonephritis                            | 7<br>(4 - 13)             | 1<br>(0 - 1)             | 1<br>(0 - 1)      | 2<br>(1 - 4)         | 2<br>(1 - 4)             | 2<br>(1 - 5)             |
| Chronic kidney disease                              | 3,425<br>(2,534 - 4,281)  | 37<br>(25 - 51)          | 20<br>(14 - 27)   | 381<br>(270 - 529)   | 1,202<br>(804 - 1,604)   | 1,785<br>(1,284 - 2,242) |
| Chronic kidney disease due to diabetes mellitus     | 880<br>(268 - 1,294)      | 3<br>(1 - 5)             | 1<br>(0 - 2)      | 97<br>(30 - 154)     | 400<br>(103 - 596)       | 378<br>(126 - 592)       |
| Chronic kidney disease due to hypertension          | 1,290<br>(919 - 2,078)    | 8<br>(5 - 16)            | 5<br>(3 - 9)      | 136<br>(89 - 252)    | 391<br>(249 - 685)       | 749<br>(522 - 1,156)     |
| Chronic kidney disease due to glomerulonephritis    | 122<br>(78 - 213)         | 8<br>(5 - 13)            | 5<br>(3 - 8)      | 30<br>(18 - 47)      | 30<br>(17 - 55)          | 49<br>(25 - 103)         |
| Chronic kidney disease due to other causes          | 1,134<br>(540 - 1,606)    | 18<br>(8 - 28)           | 9<br>(5 - 14)     | 118<br>(61 - 187)    | 381<br>(155 - 602)       | 608<br>(260 - 911)       |
| Urinary diseases and male infertility               | 875<br>(518 - 1,137)      | 29<br>(17 - 42)          | 6<br>(4 - 8)      | 73<br>(40 - 101)     | 180<br>(106 - 246)       | 587<br>(327 - 805)       |
| Interstitial nephritis and urinary tract infections | 716<br>(373 - 964)        | 26<br>(15 - 37)          | 4<br>(3 - 6)      | 57<br>(29 - 78)      | 136<br>(73 - 191)        | 493<br>(240 - 691)       |
| Urolithiasis                                        | 11<br>(7 - 19)            | --                       | 0<br>(0 - 1)      | 3<br>(2 - 5)         | 4<br>(2 - 7)             | 4<br>(2 - 8)             |
| Other urinary diseases                              | 149<br>(85 - 304)         | 3<br>(2 - 7)             | 1<br>(1 - 2)      | 14<br>(8 - 23)       | 40<br>(22 - 72)          | 91<br>(43 - 208)         |
| Gynecological diseases                              | --                        | --                       | --                | --                   | --                       | --                       |
| Uterine fibroids                                    | --                        | --                       | --                | --                   | --                       | --                       |
| Polycystic ovarian syndrome                         | --                        | --                       | --                | --                   | --                       | --                       |
| Endometriosis                                       | --                        | --                       | --                | --                   | --                       | --                       |
| Genital prolapse                                    | --                        | --                       | --                | --                   | --                       | --                       |
| Other gynecological diseases                        | --                        | --                       | --                | --                   | --                       | --                       |
| Hemoglobinopathies and hemolytic anemias            | 126<br>(73 - 184)         | 20<br>(11 - 34)          | 14<br>(7 - 21)    | 38<br>(21 - 57)      | 27<br>(15 - 41)          | 28<br>(16 - 43)          |
| Thalassemias                                        | 2<br>(1 - 3)              | 1<br>(0 - 1)             | 0<br>(0 - 1)      | 1<br>(0 - 1)         | 0<br>(0 - 0)             | 0<br>(0 - 0)             |
| Sickle cell disorders                               | 72<br>(41 - 105)          | 14<br>(8 - 24)           | 11<br>(6 - 17)    | 30<br>(16 - 44)      | 15<br>(9 - 23)           | 2<br>(1 - 2)             |
| G6PD deficiency                                     | 9<br>(5 - 13)             | 2<br>(1 - 4)             | 1<br>(1 - 2)      | 2<br>(1 - 4)         | 2<br>(1 - 3)             | 1<br>(1 - 2)             |
| Other hemoglobinopathies and hemolytic anemias      | 44<br>(25 - 65)           | 2<br>(1 - 4)             | 1<br>(1 - 2)      | 5<br>(3 - 8)         | 10<br>(5 - 15)           | 26<br>(15 - 39)          |
| Endocrine, metabolic, blood, and immune disorders   | 392<br>(292 - 563)        | 70<br>(43 - 115)         | 18<br>(12 - 26)   | 85<br>(56 - 124)     | 103<br>(68 - 166)        | 116<br>(76 - 171)        |
| Musculoskeletal disorders                           | 242<br>(173 - 321)        | --                       | 11<br>(7 - 16)    | 69<br>(45 - 95)      | 75<br>(51 - 103)         | 87<br>(60 - 127)         |
| Rheumatoid arthritis                                | 46<br>(30 - 74)           | --                       | 0<br>(0 - 1)      | 5<br>(2 - 8)         | 17<br>(9 - 32)           | 24<br>(14 - 40)          |
| Other musculoskeletal disorders                     | 196<br>(135 - 260)        | --                       | 10<br>(7 - 15)    | 64<br>(41 - 88)      | 58<br>(38 - 80)          | 63<br>(42 - 92)          |
| Other non-communicable diseases                     | 2,784<br>(2,205 - 3,295)  | 2,029<br>(1,539 - 2,498) | 83<br>(60 - 112)  | 183<br>(135 - 242)   | 161<br>(117 - 213)       | 327<br>(224 - 452)       |
| Congenital anomalies                                | 2,216<br>(1,703 - 2,691)  | 1,959<br>(1,462 - 2,429) | 79<br>(56 - 108)  | 117<br>(83 - 162)    | 36<br>(26 - 49)          | 26<br>(18 - 37)          |
| Neural tube defects                                 | 51<br>(28 - 86)           | 47<br>(24 - 81)          | 1<br>(0 - 2)      | 2<br>(1 - 3)         | 1<br>(0 - 1)             | 0<br>(0 - 1)             |
| Congenital heart anomalies                          | 1,210<br>(797 - 1,540)    | 1,055<br>(677 - 1,387)   | 51<br>(32 - 74)   | 80<br>(54 - 113)     | 17<br>(11 - 25)          | 8<br>(4 - 12)            |
| Cleft lip and cleft palate                          | 2<br>(0 - 9)              | 2<br>(0 - 9)             | --                | --                   | --                       | --                       |
| Down syndrome                                       | 26<br>(16 - 51)           | 17<br>(8 - 36)           | 2<br>(1 - 4)      | 5<br>(3 - 10)        | 2<br>(1 - 4)             | 0<br>(0 - 1)             |
| Chromosomal unbalanced rearrangements               | 24<br>(12 - 39)           | 22<br>(10 - 36)          | 1<br>(0 - 1)      | 2<br>(1 - 2)         | 0<br>(0 - 1)             | 0<br>(0 - 0)             |
| Other congenital anomalies                          | 902<br>(621 - 1,220)      | 816<br>(544 - 1,126)     | 25<br>(13 - 41)   | 28<br>(17 - 43)      | 15<br>(10 - 23)          | 17<br>(11 - 26)          |
| Skin and subcutaneous diseases                      | 512<br>(364 - 673)        | 14<br>(9 - 24)           | 4<br>(2 - 6)      | 67<br>(46 - 91)      | 125<br>(88 - 172)        | 302<br>(201 - 423)       |
| Cellulitis                                          | 51<br>(27 - 85)           | 3<br>(1 - 6)             | 1<br>(0 - 1)      | 9<br>(4 - 13)        | 14<br>(6 - 25)           | 25<br>(10 - 50)          |
| Pyoderma                                            | 193<br>(135 - 264)        | 10<br>(5 - 17)           | 2<br>(1 - 3)      | 26<br>(18 - 36)      | 54<br>(34 - 79)          | 102<br>(61 - 161)        |



Web Table 31- Colombia deaths with 95% UI by age, sex, and cause in 2013

| Cause                                           | Males, All Ages             | Males, 0-4 Years       | Males, 5-14 Years    | Males, 15-49 Years          | Males, 50-69 Years       | Males, 70-80 Years       |
|-------------------------------------------------|-----------------------------|------------------------|----------------------|-----------------------------|--------------------------|--------------------------|
| Decubitus ulcer                                 | 257<br>(171 - 354)          | 0<br>(0 - 0)           | 0<br>(0 - 1)         | 29<br>(18 - 43)             | 55<br>(36 - 81)          | 171<br>(102 - 248)       |
| Other skin and subcutaneous diseases            | 11<br>(7 - 17)              | 1<br>(0 - 3)           | 0<br>(0 - 1)         | 3<br>(2 - 5)                | 3<br>(1 - 4)             | 4<br>(1 - 8)             |
| Sudden infant death syndrome                    | 56<br>(22 - 127)            | 56<br>(22 - 127)       | --                   | --                          | --                       | --                       |
| Injuries                                        | 35,162<br>(28,416 - 43,799) | 1,100<br>(832 - 1,446) | 940<br>(826 - 1,070) | 26,036<br>(20,798 - 33,173) | 4,786<br>(3,705 - 6,608) | 2,300<br>(1,890 - 2,954) |
| Transport injuries                              | 7,533<br>(5,908 - 9,541)    | 200<br>(130 - 290)     | 311<br>(237 - 395)   | 4,775<br>(3,550 - 6,290)    | 1,451<br>(1,086 - 1,863) | 798<br>(613 - 1,084)     |
| Road injuries                                   | 7,356<br>(5,745 - 9,328)    | 191<br>(124 - 278)     | 301<br>(230 - 384)   | 4,665<br>(3,462 - 6,127)    | 1,417<br>(1,064 - 1,820) | 782<br>(604 - 1,057)     |
| Pedestrian road injuries                        | 2,648<br>(1,978 - 3,571)    | 120<br>(71 - 180)      | 183<br>(133 - 245)   | 1,024<br>(680 - 1,503)      | 734<br>(510 - 1,007)     | 587<br>(441 - 814)       |
| Cyclist road injuries                           | 638<br>(433 - 876)          | 12<br>(5 - 21)         | 38<br>(23 - 59)      | 340<br>(223 - 476)          | 206<br>(131 - 293)       | 43<br>(23 - 71)          |
| Motorcyclist road injuries                      | 2,056<br>(1,437 - 2,802)    | 7<br>(3 - 14)          | 16<br>(7 - 33)       | 1,872<br>(1,319 - 2,570)    | 125<br>(60 - 227)        | 35<br>(20 - 56)          |
| Motor vehicle road injuries                     | 1,933<br>(1,336 - 2,607)    | 45<br>(26 - 73)        | 57<br>(35 - 87)      | 1,404<br>(880 - 1,962)      | 321<br>(209 - 488)       | 107<br>(64 - 167)        |
| Other road injuries                             | 81<br>(33 - 130)            | 7<br>(3 - 14)          | 7<br>(3 - 13)        | 25<br>(7 - 44)              | 31<br>(13 - 54)          | 11<br>(4 - 20)           |
| Other transport injuries                        | 178<br>(126 - 289)          | 9<br>(5 - 17)          | 9<br>(5 - 17)        | 110<br>(75 - 174)           | 34<br>(21 - 57)          | 16<br>(9 - 32)           |
| Unintentional injuries                          | 5,492<br>(4,480 - 6,833)    | 729<br>(523 - 1,030)   | 333<br>(273 - 430)   | 2,370<br>(1,776 - 3,122)    | 1,084<br>(834 - 1,399)   | 975<br>(793 - 1,237)     |
| Falls                                           | 1,492<br>(1,149 - 1,887)    | 43<br>(28 - 68)        | 43<br>(32 - 58)      | 533<br>(363 - 725)          | 458<br>(329 - 621)       | 414<br>(308 - 582)       |
| Drowning                                        | 1,368<br>(994 - 2,066)      | 254<br>(151 - 450)     | 167<br>(114 - 246)   | 725<br>(485 - 1,138)        | 151<br>(105 - 241)       | 71<br>(53 - 100)         |
| Fire, heat, and hot substances                  | 223<br>(166 - 333)          | 49<br>(28 - 90)        | 15<br>(9 - 25)       | 83<br>(55 - 130)            | 33<br>(21 - 51)          | 43<br>(30 - 63)          |
| Poisonings                                      | 106<br>(75 - 200)           | 7<br>(4 - 14)          | 4<br>(2 - 8)         | 59<br>(38 - 112)            | 23<br>(14 - 45)          | 14<br>(9 - 27)           |
| Exposure to mechanical forces                   | 620<br>(470 - 805)          | 36<br>(19 - 134)       | 31<br>(23 - 45)      | 396<br>(284 - 527)          | 112<br>(83 - 148)        | 45<br>(35 - 63)          |
| Unintentional firearm injuries                  | 150<br>(104 - 213)          | 2<br>(1 - 3)           | 7<br>(4 - 11)        | 112<br>(74 - 170)           | 22<br>(13 - 32)          | 7<br>(4 - 11)            |
| Unintentional suffocation                       | 58<br>(33 - 221)            | 25<br>(9 - 125)        | 5<br>(2 - 16)        | 14<br>(7 - 45)              | 7<br>(4 - 26)            | 6<br>(3 - 21)            |
| Other exposure to mechanical forces             | 413<br>(288 - 537)          | 9<br>(5 - 14)          | 19<br>(13 - 27)      | 270<br>(177 - 369)          | 83<br>(56 - 112)         | 32<br>(23 - 42)          |
| Adverse effects of medical treatment            | 331<br>(220 - 571)          | 47<br>(24 - 122)       | 4<br>(3 - 7)         | 50<br>(32 - 88)             | 85<br>(52 - 156)         | 145<br>(90 - 263)        |
| Animal contact                                  | 173<br>(127 - 316)          | 9<br>(5 - 17)          | 13<br>(8 - 29)       | 61<br>(41 - 120)            | 50<br>(33 - 92)          | 40<br>(26 - 73)          |
| Venomous animal contact                         | 117<br>(84 - 236)           | 7<br>(3 - 12)          | 8<br>(5 - 22)        | 42<br>(27 - 93)             | 34<br>(22 - 69)          | 26<br>(16 - 50)          |
| Non-venomous animal contact                     | 57<br>(34 - 94)             | 3<br>(1 - 6)           | 5<br>(2 - 8)         | 19<br>(10 - 33)             | 16<br>(9 - 27)           | 14<br>(7 - 24)           |
| Foreign body                                    | 695<br>(354 - 1,013)        | 269<br>(120 - 414)     | 37<br>(23 - 68)      | 108<br>(46 - 158)           | 104<br>(55 - 162)        | 176<br>(92 - 288)        |
| Pulmonary aspiration and foreign body in airway | 689<br>(349 - 1,007)        | 268<br>(119 - 413)     | 37<br>(22 - 67)      | 106<br>(44 - 156)           | 103<br>(53 - 160)        | 176<br>(91 - 288)        |
| Foreign body in other body part                 | 6<br>(3 - 9)                | 1<br>(0 - 2)           | 1<br>(0 - 1)         | 2<br>(1 - 3)                | 2<br>(1 - 3)             | 0<br>(0 - 1)             |
| Other unintentional injuries                    | 483<br>(340 - 682)          | 14<br>(7 - 26)         | 18<br>(8 - 35)       | 356<br>(221 - 546)          | 68<br>(35 - 123)         | 27<br>(16 - 44)          |
| Self-harm and interpersonal violence            | 22,137<br>(17,368 - 28,675) | 171<br>(86 - 309)      | 296<br>(191 - 414)   | 18,891<br>(14,745 - 24,225) | 2,251<br>(1,523 - 3,842) | 528<br>(359 - 854)       |
| Self-harm                                       | 2,715<br>(1,656 - 3,529)    | --                     | 43<br>(18 - 70)      | 1,953<br>(1,139 - 2,609)    | 504<br>(322 - 672)       | 215<br>(136 - 278)       |
| Interpersonal violence                          | 19,422<br>(14,975 - 26,125) | 171<br>(86 - 309)      | 253<br>(158 - 374)   | 16,938<br>(13,048 - 22,013) | 1,747<br>(1,082 - 3,318) | 313<br>(163 - 650)       |
| Assault by firearm                              | 15,491<br>(11,589 - 21,443) | 86<br>(37 - 169)       | 189<br>(114 - 289)   | 13,747<br>(10,367 - 18,311) | 1,282<br>(766 - 2,585)   | 187<br>(89 - 408)        |
| Assault by sharp object                         | 3,009<br>(1,710 - 5,359)    | 20<br>(8 - 47)         | 32<br>(13 - 62)      | 2,549<br>(1,457 - 4,491)    | 343<br>(149 - 725)       | 66<br>(25 - 153)         |
| Assault by other means                          | 922<br>(521 - 1,498)        | 66<br>(25 - 126)       | 33<br>(14 - 62)      | 641<br>(366 - 1,054)        | 122<br>(55 - 242)        | 60<br>(26 - 128)         |

Web Table 31- Colombia deaths with 95% UI by age, sex, and cause in 2013

| Cause                                                             | Females, All Ages             | Females, 0-4 Years       | Females, 5-14 Years      | Females, 15-49 Years       | Females, 50-69 Years        | Females, 70-80 Years        |
|-------------------------------------------------------------------|-------------------------------|--------------------------|--------------------------|----------------------------|-----------------------------|-----------------------------|
| All causes                                                        | 107,962<br>(94,242 - 124,796) | 7,193<br>(6,366 - 8,146) | 1,262<br>(1,128 - 1,422) | 12,452<br>(9,937 - 15,632) | 25,485<br>(20,814 - 31,340) | 61,569<br>(55,003 - 69,538) |
| Communicable, maternal, neonatal, and nutritional diseases        | 11,033<br>(9,499 - 12,578)    | 4,018<br>(3,408 - 4,801) | 245<br>(201 - 297)       | 1,607<br>(1,315 - 1,905)   | 1,085<br>(836 - 1,353)      | 4,078<br>(3,142 - 5,200)    |
| HIV/AIDS and tuberculosis                                         | 710<br>(570 - 880)            | 10<br>(6 - 15)           | 9<br>(6 - 13)            | 373<br>(283 - 499)         | 166<br>(123 - 228)          | 152<br>(109 - 213)          |
| Tuberculosis                                                      | 389<br>(304 - 504)            | 9<br>(5 - 13)            | 7<br>(5 - 11)            | 109<br>(77 - 152)          | 116<br>(82 - 159)           | 148<br>(106 - 208)          |
| HIV/AIDS                                                          | 321<br>(219 - 482)            | 2<br>(0 - 3)             | 2<br>(0 - 5)             | 264<br>(179 - 387)         | 50<br>(26 - 94)             | 4<br>(1 - 10)               |
| HIV/AIDS resulting in mycobacterial infection                     | 15<br>(9 - 23)                | 0<br>(0 - 0)             | 0<br>(0 - 0)             | 12<br>(8 - 18)             | 2<br>(1 - 4)                | 0<br>(0 - 0)                |
| HIV/AIDS resulting in other diseases                              | 306<br>(210 - 459)            | 2<br>(0 - 3)             | 2<br>(0 - 5)             | 252<br>(171 - 370)         | 48<br>(25 - 89)             | 4<br>(1 - 9)                |
| Diarrhea, lower respiratory, and other common infectious diseases | 5,733<br>(4,597 - 6,934)      | 1,367<br>(1,073 - 1,732) | 175<br>(135 - 222)       | 481<br>(348 - 641)         | 703<br>(501 - 944)          | 3,006<br>(2,153 - 3,989)    |
| Diarrheal diseases                                                | 718<br>(534 - 973)            | 339<br>(215 - 511)       | 15<br>(9 - 24)           | 36<br>(25 - 51)            | 67<br>(43 - 97)             | 262<br>(153 - 419)          |
| Intestinal infectious diseases                                    | 204<br>(99 - 372)             | 63<br>(31 - 113)         | 51<br>(24 - 95)          | 71<br>(27 - 144)           | 13<br>(5 - 27)              | 5<br>(2 - 11)               |
| Typhoid fever                                                     | 154<br>(71 - 285)             | 46<br>(20 - 84)          | 40<br>(18 - 76)          | 54<br>(20 - 112)           | 10<br>(3 - 20)              | 4<br>(2 - 8)                |
| Paratyphoid fever                                                 | 42<br>(19 - 83)               | 14<br>(5 - 28)           | 11<br>(4 - 21)           | 14<br>(5 - 34)             | 2<br>(1 - 6)                | 1<br>(0 - 2)                |
| Other intestinal infectious diseases                              | 8<br>(3 - 16)                 | 3<br>(1 - 9)             | 1<br>(0 - 3)             | 2<br>(0 - 7)               | 1<br>(0 - 4)                | 1<br>(0 - 4)                |
| Lower respiratory infections                                      | 4,312<br>(3,296 - 5,415)      | 761<br>(538 - 1,025)     | 66<br>(48 - 91)          | 271<br>(186 - 364)         | 554<br>(375 - 759)          | 2,660<br>(1,838 - 3,629)    |
| Upper respiratory infections                                      | 4<br>(1 - 11)                 | 0<br>(0 - 2)             | 0<br>(0 - 0)             | 1<br>(0 - 2)               | 1<br>(0 - 3)                | 2<br>(0 - 8)                |
| Otitis media                                                      | 3<br>(3 - 4)                  | 1<br>(0 - 1)             | 0<br>(0 - 1)             | 1<br>(1 - 1)               | 0<br>(0 - 1)                | 1<br>(0 - 1)                |
| Meningitis                                                        | 313<br>(253 - 382)            | 137<br>(98 - 184)        | 25<br>(18 - 33)          | 59<br>(41 - 80)            | 42<br>(29 - 56)             | 49<br>(36 - 69)             |
| Pneumococcal meningitis                                           | 102<br>(78 - 131)             | 36<br>(24 - 54)          | 9<br>(5 - 14)            | 22<br>(13 - 34)            | 15<br>(9 - 25)              | 18<br>(12 - 27)             |
| H influenzae type B meningitis                                    | 70<br>(51 - 97)               | 49<br>(31 - 74)          | 6<br>(4 - 10)            | 7<br>(4 - 11)              | 4<br>(2 - 6)                | 4<br>(3 - 7)                |
| Meningococcal meningitis                                          | 36<br>(27 - 48)               | 14<br>(8 - 21)           | 3<br>(2 - 6)             | 8<br>(4 - 13)              | 5<br>(2 - 8)                | 6<br>(4 - 10)               |
| Other meningitis                                                  | 105<br>(76 - 135)             | 38<br>(18 - 62)          | 6<br>(3 - 11)            | 22<br>(12 - 33)            | 18<br>(11 - 27)             | 20<br>(13 - 29)             |
| Encephalitis                                                      | 140<br>(98 - 183)             | 46<br>(27 - 73)          | 15<br>(8 - 22)           | 37<br>(23 - 55)            | 22<br>(12 - 33)             | 20<br>(11 - 29)             |
| Diphtheria                                                        | 1<br>(0 - 7)                  | 1<br>(0 - 7)             | 0<br>(0 - 2)             | 0<br>(0 - 1)               | 0<br>(0 - 1)                | --                          |
| Whooping cough                                                    | 17<br>(3 - 94)                | 15<br>(1 - 91)           | 1<br>(1 - 1)             | 1<br>(1 - 2)               | 0<br>(0 - 0)                | --                          |
| Tetanus                                                           | 8<br>(5 - 11)                 | 2<br>(1 - 4)             | 0<br>(0 - 1)             | 2<br>(1 - 3)               | 2<br>(1 - 3)                | 2<br>(1 - 3)                |
| Measles                                                           | 0<br>(0 - 0)                  | 0<br>(0 - 0)             | 0<br>(0 - 0)             | 0<br>(0 - 0)               | 0<br>(0 - 0)                | --                          |
| Varicella and herpes zoster                                       | 12<br>(3 - 34)                | 2<br>(0 - 10)            | 1<br>(0 - 3)             | 2<br>(0 - 6)               | 1<br>(0 - 5)                | 5<br>(0 - 27)               |
| Neglected tropical diseases and malaria                           | 166<br>(92 - 218)             | 46<br>(28 - 66)          | 16<br>(8 - 26)           | 35<br>(19 - 51)            | 36<br>(13 - 62)             | 32<br>(13 - 51)             |
| Malaria                                                           | 23<br>(14 - 37)               | 6<br>(2 - 15)            | 2<br>(1 - 4)             | 8<br>(4 - 13)              | 4<br>(2 - 7)                | 3<br>(1 - 8)                |
| Chagas disease                                                    | 38<br>(3 - 72)                | 0<br>(0 - 1)             | 0<br>(0 - 1)             | 6<br>(1 - 12)              | 18<br>(1 - 41)              | 13<br>(1 - 28)              |
| Leishmaniasis                                                     | 4<br>(2 - 6)                  | 2<br>(1 - 3)             | 0<br>(0 - 1)             | 1<br>(0 - 2)               | 0<br>(0 - 1)                | 0<br>(0 - 0)                |
| Visceral leishmaniasis                                            | 4<br>(2 - 6)                  | 2<br>(1 - 3)             | 0<br>(0 - 1)             | 1<br>(0 - 2)               | 0<br>(0 - 1)                | 0<br>(0 - 0)                |
| Cysticercosis                                                     | 5<br>(4 - 7)                  | 0<br>(0 - 0)             | 0<br>(0 - 0)             | 2<br>(2 - 3)               | 2<br>(1 - 2)                | 1<br>(1 - 1)                |
| Cystic echinococcosis                                             | 2<br>(1 - 2)                  | 0<br>(0 - 0)             | 0<br>(0 - 0)             | 1<br>(0 - 1)               | 0<br>(0 - 1)                | 0<br>(0 - 0)                |
| Dengue                                                            | 40<br>(7 - 55)                | 12<br>(1 - 19)           | 6<br>(1 - 9)             | 10<br>(2 - 14)             | 6<br>(1 - 9)                | 6<br>(1 - 11)               |
| Yellow fever                                                      | 1<br>(0 - 1)                  | 0<br>(0 - 0)             | 0<br>(0 - 0)             | 0<br>(0 - 1)               | 0<br>(0 - 0)                | 0<br>(0 - 0)                |
| Rabies                                                            | 2<br>(1 - 2)                  | 0<br>(0 - 0)             | 0<br>(0 - 0)             | 1<br>(0 - 1)               | 0<br>(0 - 0)                | 0<br>(0 - 0)                |
| Intestinal nematode infections                                    | 37<br>(21 - 58)               | 20<br>(9 - 36)           | 5<br>(1 - 13)            | 3<br>(0 - 10)              | 3<br>(0 - 10)               | 5<br>(1 - 13)               |
| Ascariasis                                                        | 37<br>(21 - 58)               | 20<br>(9 - 36)           | 5<br>(1 - 13)            | 3<br>(0 - 10)              | 3<br>(0 - 10)               | 5<br>(1 - 13)               |
| Other neglected tropical diseases                                 | 16<br>(12 - 21)               | 6<br>(3 - 10)            | 1<br>(1 - 2)             | 3<br>(2 - 4)               | 2<br>(1 - 4)                | 3<br>(2 - 5)                |

Web Table 31- Colombia deaths with 95% UI by age, sex, and cause in 2013

| Cause                                                            | Females, All Ages            | Females, 0-4 Years       | Females, 5-14 Years | Females, 15-49 Years     | Females, 50-69 Years        | Females, 70-80 Years        |
|------------------------------------------------------------------|------------------------------|--------------------------|---------------------|--------------------------|-----------------------------|-----------------------------|
| Maternal disorders                                               | 577<br>(405 - 782)           | --                       | 5<br>(3 - 8)        | 572<br>(400 - 776)       | --                          | --                          |
| Maternal hemorrhage                                              | 68<br>(46 - 97)              | --                       | 0<br>(0 - 1)        | 68<br>(45 - 97)          | --                          | --                          |
| Maternal sepsis and other maternal infections                    | 45<br>(29 - 66)              | --                       | 0<br>(0 - 1)        | 45<br>(28 - 65)          | --                          | --                          |
| Maternal hypertensive disorders                                  | 136<br>(95 - 191)            | --                       | 2<br>(1 - 3)        | 135<br>(93 - 189)        | --                          | --                          |
| Maternal obstructed labor                                        | 31<br>(17 - 50)              | --                       | 0<br>(0 - 0)        | 30<br>(17 - 50)          | --                          | --                          |
| Maternal abortive outcome                                        | 73<br>(49 - 105)             | --                       | 0<br>(0 - 1)        | 72<br>(49 - 105)         | --                          | --                          |
| Indirect maternal deaths                                         | 99<br>(64 - 142)             | --                       | 1<br>(0 - 1)        | 99<br>(64 - 141)         | --                          | --                          |
| Late maternal deaths                                             | 38<br>(19 - 66)              | --                       | 0<br>(0 - 1)        | 38<br>(19 - 66)          | --                          | --                          |
| Maternal deaths aggravated by HIV/AIDS                           | 0<br>(0 - 0)                 | --                       | --                  | 0<br>(0 - 0)             | --                          | --                          |
| Other maternal disorders                                         | 85<br>(56 - 124)             | --                       | 1<br>(0 - 1)        | 84<br>(56 - 123)         | --                          | --                          |
| Neonatal disorders                                               | 2,170<br>(1,772 - 2,634)     | 2,170<br>(1,772 - 2,634) | --                  | --                       | --                          | --                          |
| Neonatal preterm birth complications                             | 994<br>(706 - 1,315)         | 994<br>(706 - 1,315)     | --                  | --                       | --                          | --                          |
| Neonatal encephalopathy due to birth asphyxia and trauma         | 492<br>(325 - 818)           | 492<br>(325 - 818)       | --                  | --                       | --                          | --                          |
| Neonatal sepsis and other neonatal infections                    | 329<br>(139 - 549)           | 329<br>(139 - 549)       | --                  | --                       | --                          | --                          |
| Hemolytic disease and other neonatal jaundice                    | 27<br>(7 - 67)               | 27<br>(7 - 67)           | --                  | --                       | --                          | --                          |
| Other neonatal disorders                                         | 328<br>(173 - 502)           | 328<br>(173 - 502)       | --                  | --                       | --                          | --                          |
| Nutritional deficiencies                                         | 1,428<br>(1,125 - 1,791)     | 329<br>(227 - 444)       | 26<br>(19 - 35)     | 97<br>(72 - 133)         | 137<br>(101 - 185)          | 839<br>(602 - 1,161)        |
| Protein-energy malnutrition                                      | 1,134<br>(776 - 1,460)       | 308<br>(210 - 421)       | 20<br>(13 - 27)     | 58<br>(31 - 83)          | 91<br>(54 - 130)            | 657<br>(421 - 930)          |
| Iodine deficiency                                                | 1<br>(0 - 6)                 | 0<br>(0 - 2)             | 0<br>(0 - 1)        | 0<br>(0 - 1)             | 0<br>(0 - 2)                | 1<br>(0 - 4)                |
| Iron-deficiency anemia                                           | 248<br>(117 - 475)           | 14<br>(3 - 46)           | 5<br>(2 - 10)       | 36<br>(18 - 61)          | 39<br>(18 - 72)             | 154<br>(63 - 320)           |
| Other nutritional deficiencies                                   | 44<br>(23 - 89)              | 6<br>(2 - 18)            | 1<br>(0 - 2)        | 4<br>(2 - 8)             | 6<br>(3 - 13)               | 27<br>(11 - 58)             |
| Other communicable, maternal, neonatal, and nutritional diseases | 250<br>(162 - 378)           | 96<br>(25 - 205)         | 14<br>(8 - 23)      | 48<br>(35 - 67)          | 43<br>(31 - 58)             | 48<br>(35 - 71)             |
| Sexually transmitted diseases excluding HIV                      | 96<br>(18 - 216)             | 72<br>(0 - 180)          | 6<br>(0 - 15)       | 10<br>(6 - 15)           | 4<br>(2 - 6)                | 5<br>(3 - 8)                |
| Syphilis                                                         | 88<br>(10 - 205)             | 72<br>(0 - 180)          | 6<br>(0 - 15)       | 4<br>(3 - 6)             | 2<br>(1 - 3)                | 4<br>(2 - 6)                |
| Chlamydial infection                                             | 3<br>(2 - 4)                 | --                       | 0<br>(0 - 0)        | 2<br>(1 - 3)             | 0<br>(0 - 1)                | 0<br>(0 - 0)                |
| Gonococcal infection                                             | 3<br>(2 - 5)                 | --                       | 0<br>(0 - 0)        | 2<br>(1 - 3)             | 1<br>(0 - 1)                | 1<br>(0 - 1)                |
| Other sexually transmitted diseases                              | 3<br>(2 - 4)                 | --                       | 0<br>(0 - 0)        | 2<br>(1 - 3)             | 0<br>(0 - 1)                | 0<br>(0 - 0)                |
| Hepatitis                                                        | 34<br>(25 - 46)              | 2<br>(1 - 3)             | 1<br>(1 - 2)        | 9<br>(6 - 15)            | 11<br>(7 - 18)              | 10<br>(6 - 17)              |
| Acute hepatitis A                                                | 10<br>(4 - 17)               | 1<br>(1 - 3)             | 1<br>(1 - 2)        | 5<br>(2 - 8)             | 2<br>(0 - 4)                | 1<br>(0 - 2)                |
| Acute hepatitis B                                                | 18<br>(10 - 29)              | 0<br>(0 - 1)             | 0<br>(0 - 0)        | 3<br>(1 - 6)             | 7<br>(4 - 13)               | 7<br>(4 - 13)               |
| Acute hepatitis C                                                | 6<br>(1 - 13)                | --                       | 0<br>(0 - 1)        | 2<br>(0 - 5)             | 2<br>(0 - 5)                | 2<br>(0 - 5)                |
| Other infectious diseases                                        | 120<br>(89 - 163)            | 23<br>(16 - 33)          | 7<br>(5 - 11)       | 29<br>(20 - 45)          | 28<br>(19 - 40)             | 33<br>(22 - 53)             |
| Non-communicable diseases                                        | 89,752<br>(77,798 - 104,689) | 2,353<br>(1,900 - 2,818) | 529<br>(445 - 617)  | 7,616<br>(5,894 - 9,751) | 23,276<br>(19,051 - 28,618) | 55,978<br>(49,864 - 63,385) |
| Neoplasms                                                        | 22,126<br>(18,200 - 26,980)  | 187<br>(131 - 256)       | 208<br>(167 - 260)  | 3,502<br>(2,651 - 4,539) | 8,761<br>(7,015 - 10,980)   | 9,469<br>(7,968 - 11,237)   |
| Esophageal cancer                                                | 445<br>(343 - 576)           | --                       | --                  | 24<br>(16 - 35)          | 133<br>(94 - 184)           | 289<br>(214 - 385)          |
| Stomach cancer                                                   | 2,697<br>(2,063 - 3,496)     | --                       | --                  | 293<br>(198 - 398)       | 891<br>(659 - 1,162)        | 1,514<br>(1,096 - 2,100)    |
| Liver cancer                                                     | 1,202<br>(883 - 1,579)       | --                       | 2<br>(1 - 4)        | 100<br>(67 - 146)        | 493<br>(340 - 690)          | 607<br>(418 - 849)          |
| Liver cancer due to hepatitis B                                  | 321<br>(147 - 498)           | --                       | 1<br>(0 - 1)        | 41<br>(24 - 65)          | 150<br>(55 - 247)           | 130<br>(60 - 216)           |
| Liver cancer due to hepatitis C                                  | 498<br>(299 - 729)           | --                       | 0<br>(0 - 0)        | 29<br>(13 - 52)          | 197<br>(103 - 324)          | 272<br>(152 - 420)          |
| Liver cancer due to alcohol use                                  | 222<br>(122 - 348)           | --                       | --                  | 9<br>(3 - 17)            | 75<br>(38 - 125)            | 138<br>(68 - 235)           |

Web Table 31- Colombia deaths with 95% UI by age, sex, and cause in 2013

| Cause                                         | Females, All Ages           | Females, 0-4 Years | Females, 5-14 Years | Females, 15-49 Years     | Females, 50-69 Years      | Females, 70-80 Years        |
|-----------------------------------------------|-----------------------------|--------------------|---------------------|--------------------------|---------------------------|-----------------------------|
| Liver cancer due to other causes              | 162<br>(90 - 258)           | --                 | 1<br>(1 - 2)        | 21<br>(13 - 34)          | 72<br>(37 - 124)          | 68<br>(32 - 116)            |
| Larynx cancer                                 | 145<br>(80 - 272)           | --                 | --                  | 9<br>(4 - 17)            | 57<br>(30 - 106)          | 79<br>(42 - 147)            |
| Tracheal, bronchus and lung cancer            | 1,995<br>(1,554 - 2,501)    | --                 | --                  | 141<br>(102 - 201)       | 809<br>(607 - 1,069)      | 1,044<br>(781 - 1,364)      |
| Breast cancer                                 | 2,820<br>(2,190 - 3,521)    | --                 | --                  | 682<br>(489 - 930)       | 1,371<br>(1,005 - 1,739)  | 767<br>(593 - 968)          |
| Cervical cancer                               | 2,537<br>(1,800 - 3,246)    | --                 | --                  | 675<br>(416 - 948)       | 1,079<br>(729 - 1,434)    | 783<br>(561 - 1,061)        |
| Uterine cancer                                | 282<br>(174 - 397)          | --                 | --                  | 23<br>(12 - 37)          | 134<br>(77 - 202)         | 125<br>(76 - 188)           |
| Prostate cancer                               | --                          | --                 | --                  | --                       | --                        | --                          |
| Colon and rectum cancer                       | 2,028<br>(1,590 - 2,533)    | --                 | --                  | 224<br>(161 - 297)       | 734<br>(555 - 943)        | 1,070<br>(792 - 1,388)      |
| Lip and oral cavity cancer                    | 236<br>(169 - 342)          | --                 | --                  | 22<br>(13 - 36)          | 85<br>(53 - 135)          | 130<br>(89 - 184)           |
| Nasopharynx cancer                            | 41<br>(27 - 69)             | --                 | 0<br>(0 - 1)        | 7<br>(4 - 13)            | 18<br>(11 - 31)           | 16<br>(9 - 28)              |
| Other pharynx cancer                          | 48<br>(35 - 66)             | --                 | --                  | 4<br>(2 - 7)             | 19<br>(13 - 28)           | 25<br>(16 - 37)             |
| Gallbladder and biliary tract cancer          | 767<br>(511 - 1,091)        | --                 | --                  | 48<br>(28 - 75)          | 356<br>(231 - 538)        | 363<br>(212 - 559)          |
| Pancreatic cancer                             | 999<br>(780 - 1,246)        | --                 | --                  | 68<br>(47 - 95)          | 405<br>(297 - 537)        | 526<br>(399 - 678)          |
| Malignant skin melanoma                       | 142<br>(107 - 182)          | --                 | --                  | 25<br>(17 - 36)          | 54<br>(37 - 73)           | 63<br>(44 - 88)             |
| Non-melanoma skin cancer                      | 206<br>(111 - 332)          | --                 | --                  | 15<br>(9 - 23)           | 45<br>(25 - 63)           | 146<br>(73 - 263)           |
| Ovarian cancer                                | 1,016<br>(773 - 1,322)      | --                 | --                  | 204<br>(143 - 291)       | 500<br>(368 - 685)        | 312<br>(223 - 423)          |
| Testicular cancer                             | --                          | --                 | --                  | --                       | --                        | --                          |
| Kidney cancer                                 | 222<br>(166 - 291)          | 6<br>(3 - 12)      | 4<br>(2 - 7)        | 26<br>(17 - 38)          | 92<br>(62 - 131)          | 94<br>(62 - 139)            |
| Bladder cancer                                | 235<br>(164 - 360)          | --                 | --                  | 12<br>(8 - 21)           | 70<br>(45 - 110)          | 153<br>(101 - 235)          |
| Brain and nervous system cancer               | 630<br>(460 - 802)          | 22<br>(10 - 39)    | 35<br>(23 - 51)     | 172<br>(118 - 236)       | 246<br>(169 - 342)        | 155<br>(91 - 214)           |
| Thyroid cancer                                | 226<br>(150 - 308)          | --                 | 0<br>(0 - 1)        | 16<br>(9 - 24)           | 85<br>(51 - 121)          | 124<br>(82 - 179)           |
| Mesothelioma                                  | 22<br>(16 - 31)             | --                 | --                  | 4<br>(3 - 6)             | 10<br>(6 - 16)            | 8<br>(5 - 12)               |
| Hodgkin lymphoma                              | 81<br>(58 - 111)            | 2<br>(1 - 3)       | 3<br>(1 - 7)        | 23<br>(15 - 36)          | 27<br>(16 - 42)           | 26<br>(16 - 40)             |
| Non-Hodgkin lymphoma                          | 672<br>(437 - 893)          | 15<br>(7 - 25)     | 14<br>(8 - 21)      | 119<br>(70 - 168)        | 268<br>(171 - 371)        | 257<br>(161 - 362)          |
| Multiple myeloma                              | 237<br>(164 - 320)          | --                 | --                  | 22<br>(15 - 33)          | 122<br>(83 - 171)         | 93<br>(60 - 129)            |
| Leukemia                                      | 929<br>(734 - 1,136)        | 78<br>(40 - 132)   | 98<br>(70 - 134)    | 273<br>(200 - 363)       | 241<br>(176 - 317)        | 238<br>(177 - 310)          |
| Other neoplasms                               | 1,264<br>(786 - 1,641)      | 63<br>(34 - 93)    | 51<br>(29 - 71)     | 269<br>(166 - 373)       | 416<br>(236 - 588)        | 464<br>(262 - 627)          |
| Cardiovascular diseases                       | 36,406<br>(30,845 - 43,324) | 115<br>(77 - 177)  | 67<br>(51 - 90)     | 1,920<br>(1,426 - 2,675) | 8,173<br>(6,456 - 10,402) | 26,129<br>(22,661 - 30,492) |
| Rheumatic heart disease                       | 212<br>(138 - 283)          | 1<br>(0 - 1)       | 4<br>(2 - 6)        | 52<br>(33 - 75)          | 69<br>(37 - 97)           | 87<br>(57 - 125)            |
| Ischemic heart disease                        | 18,380<br>(14,873 - 22,384) | 11<br>(5 - 21)     | 12<br>(7 - 18)      | 745<br>(515 - 1,106)     | 4,008<br>(3,075 - 5,331)  | 13,604<br>(10,930 - 16,349) |
| Cerebrovascular disease                       | 11,013<br>(8,829 - 14,114)  | 32<br>(18 - 47)    | 26<br>(19 - 36)     | 719<br>(511 - 1,034)     | 2,517<br>(1,890 - 3,403)  | 7,719<br>(6,110 - 9,786)    |
| Ischemic stroke                               | 2,497<br>(1,785 - 4,142)    | 3<br>(1 - 7)       | 3<br>(2 - 5)        | 76<br>(46 - 134)         | 423<br>(266 - 777)        | 1,991<br>(1,398 - 3,250)    |
| Hemorrhagic stroke                            | 8,517<br>(6,518 - 10,514)   | 29<br>(16 - 41)    | 23<br>(17 - 31)     | 643<br>(457 - 919)       | 2,094<br>(1,573 - 2,775)  | 5,728<br>(4,271 - 7,066)    |
| Hypertensive heart disease                    | 3,271<br>(2,259 - 4,984)    | 2<br>(1 - 3)       | 1<br>(1 - 2)        | 72<br>(45 - 124)         | 495<br>(310 - 821)        | 2,701<br>(1,822 - 4,159)    |
| Cardiomyopathy and myocarditis                | 644<br>(490 - 847)          | 41<br>(26 - 74)    | 11<br>(7 - 16)      | 90<br>(61 - 137)         | 147<br>(105 - 208)        | 356<br>(245 - 491)          |
| Atrial fibrillation and flutter               | 171<br>(120 - 239)          | --                 | --                  | 5<br>(3 - 7)             | 28<br>(20 - 38)           | 139<br>(93 - 204)           |
| Aortic aneurysm                               | 402<br>(229 - 588)          | --                 | --                  | 32<br>(18 - 51)          | 122<br>(69 - 193)         | 248<br>(135 - 358)          |
| Peripheral vascular disease                   | 60<br>(41 - 85)             | --                 | --                  | 1<br>(1 - 2)             | 9<br>(6 - 14)             | 50<br>(32 - 74)             |
| Endocarditis                                  | 136<br>(86 - 205)           | 8<br>(4 - 15)      | 3<br>(2 - 5)        | 29<br>(17 - 50)          | 37<br>(22 - 59)           | 58<br>(33 - 91)             |
| Other cardiovascular and circulatory diseases | 2,115<br>(1,536 - 2,917)    | 21<br>(12 - 32)    | 11<br>(7 - 17)      | 174<br>(116 - 260)       | 741<br>(497 - 1,076)      | 1,168<br>(801 - 1,726)      |

Web Table 31- Colombia deaths with 95% UI by age, sex, and cause in 2013

| Cause                                               | Females, All Ages         | Females, 0-4 Years | Females, 5-14 Years | Females, 15-49 Years | Females, 50-69 Years     | Females, 70-80 Years     |
|-----------------------------------------------------|---------------------------|--------------------|---------------------|----------------------|--------------------------|--------------------------|
| Chronic respiratory diseases                        | 8,175<br>(6,398 - 10,102) | 118<br>(81 - 179)  | 21<br>(16 - 28)     | 245<br>(179 - 330)   | 1,402<br>(1,062 - 1,817) | 6,389<br>(4,915 - 7,999) |
| Chronic obstructive pulmonary disease               | 7,310<br>(5,714 - 9,045)  | 73<br>(45 - 117)   | 11<br>(7 - 15)      | 145<br>(98 - 206)    | 1,210<br>(918 - 1,577)   | 5,871<br>(4,476 - 7,267) |
| Pneumoconiosis                                      | 20<br>(11 - 34)           | 0<br>(0 - 1)       | 0<br>(0 - 1)        | 2<br>(1 - 2)         | 3<br>(1 - 5)             | 14<br>(7 - 28)           |
| Silicosis                                           | 1<br>(1 - 2)              | 0<br>(0 - 0)       | 0<br>(0 - 0)        | 0<br>(0 - 0)         | 0<br>(0 - 1)             | 1<br>(0 - 1)             |
| Asbestosis                                          | 1<br>(0 - 1)              | 0<br>(0 - 0)       | 0<br>(0 - 0)        | 0<br>(0 - 0)         | 0<br>(0 - 0)             | 0<br>(0 - 0)             |
| Coal workers pneumoconiosis                         | 1<br>(1 - 2)              | 0<br>(0 - 0)       | 0<br>(0 - 0)        | 0<br>(0 - 0)         | 0<br>(0 - 0)             | 0<br>(0 - 1)             |
| Other pneumoconiosis                                | 17<br>(9 - 30)            | 0<br>(0 - 0)       | 0<br>(0 - 0)        | 1<br>(1 - 1)         | 2<br>(1 - 4)             | 13<br>(6 - 25)           |
| Asthma                                              | 394<br>(237 - 624)        | 24<br>(13 - 41)    | 6<br>(4 - 9)        | 58<br>(31 - 86)      | 107<br>(58 - 179)        | 200<br>(110 - 359)       |
| Interstitial lung disease and pulmonary sarcoidosis | 216<br>(83 - 360)         | 4<br>(2 - 10)      | 2<br>(1 - 3)        | 22<br>(9 - 38)       | 54<br>(18 - 100)         | 134<br>(45 - 233)        |
| Other chronic respiratory diseases                  | 235<br>(143 - 382)        | 17<br>(10 - 28)    | 2<br>(1 - 4)        | 18<br>(11 - 28)      | 29<br>(16 - 46)          | 170<br>(90 - 305)        |
| Cirrhosis                                           | 1,594<br>(1,296 - 1,950)  | 13<br>(10 - 18)    | 10<br>(8 - 13)      | 164<br>(120 - 218)   | 571<br>(432 - 728)       | 835<br>(659 - 1,041)     |
| Cirrhosis due to hepatitis B                        | 59<br>(32 - 98)           | 0<br>(0 - 0)       | 0<br>(0 - 0)        | 7<br>(3 - 13)        | 23<br>(12 - 37)          | 29<br>(15 - 53)          |
| Cirrhosis due to hepatitis C                        | 949<br>(731 - 1,202)      | 1<br>(0 - 2)       | 2<br>(0 - 5)        | 86<br>(51 - 124)     | 342<br>(245 - 461)       | 518<br>(387 - 671)       |
| Cirrhosis due to alcohol use                        | 356<br>(235 - 525)        | --                 | --                  | 24<br>(13 - 41)      | 121<br>(75 - 180)        | 210<br>(127 - 321)       |
| Cirrhosis due to other causes                       | 230<br>(140 - 351)        | 12<br>(9 - 16)     | 8<br>(5 - 11)       | 47<br>(25 - 75)      | 86<br>(43 - 144)         | 78<br>(41 - 127)         |
| Digestive diseases                                  | 3,291<br>(2,583 - 4,014)  | 32<br>(24 - 43)    | 24<br>(19 - 30)     | 272<br>(196 - 358)   | 774<br>(581 - 1,005)     | 2,188<br>(1,695 - 2,660) |
| Peptic ulcer disease                                | 616<br>(436 - 852)        | 1<br>(0 - 1)       | 1<br>(1 - 2)        | 32<br>(20 - 45)      | 119<br>(77 - 169)        | 462<br>(317 - 665)       |
| Gastritis and duodenitis                            | 105<br>(48 - 196)         | 1<br>(0 - 2)       | 1<br>(0 - 1)        | 6<br>(3 - 11)        | 19<br>(8 - 34)           | 79<br>(34 - 153)         |
| Appendicitis                                        | 132<br>(82 - 198)         | 2<br>(1 - 5)       | 5<br>(3 - 8)        | 25<br>(15 - 39)      | 36<br>(20 - 60)          | 64<br>(34 - 111)         |
| Paralytic ileus and intestinal obstruction          | 580<br>(287 - 899)        | 15<br>(8 - 25)     | 8<br>(4 - 11)       | 49<br>(25 - 80)      | 132<br>(67 - 221)        | 376<br>(179 - 583)       |
| Inguinal, femoral, and abdominal hernia             | 138<br>(71 - 237)         | 2<br>(1 - 4)       | 1<br>(1 - 2)        | 5<br>(3 - 8)         | 34<br>(18 - 63)          | 95<br>(43 - 165)         |
| Inflammatory bowel disease                          | 56<br>(34 - 85)           | 2<br>(1 - 3)       | 1<br>(1 - 2)        | 10<br>(6 - 15)       | 15<br>(8 - 22)           | 29<br>(17 - 47)          |
| Vascular intestinal disorders                       | 478<br>(197 - 724)        | 1<br>(0 - 7)       | 0<br>(0 - 2)        | 21<br>(9 - 38)       | 104<br>(45 - 183)        | 351<br>(141 - 538)       |
| Gallbladder and biliary diseases                    | 600<br>(372 - 781)        | 1<br>(0 - 2)       | 1<br>(1 - 2)        | 56<br>(35 - 78)      | 154<br>(93 - 213)        | 388<br>(235 - 539)       |
| Pancreatitis                                        | 248<br>(156 - 368)        | 1<br>(1 - 2)       | 2<br>(1 - 3)        | 44<br>(27 - 65)      | 83<br>(52 - 126)         | 118<br>(70 - 176)        |
| Other digestive diseases                            | 337<br>(245 - 450)        | 6<br>(3 - 10)      | 3<br>(2 - 4)        | 25<br>(16 - 34)      | 77<br>(51 - 108)         | 227<br>(157 - 321)       |
| Neurological disorders                              | 5,208<br>(3,776 - 6,590)  | 42<br>(31 - 55)    | 26<br>(19 - 35)     | 219<br>(156 - 298)   | 397<br>(265 - 546)       | 4,523<br>(3,169 - 5,826) |
| Alzheimer disease and other dementias               | 4,543<br>(3,131 - 5,879)  | --                 | --                  | 2<br>(1 - 4)         | 233<br>(133 - 345)       | 4,308<br>(2,945 - 5,610) |
| Parkinson disease                                   | 152<br>(62 - 208)         | --                 | --                  | 3<br>(1 - 4)         | 24<br>(12 - 35)          | 125<br>(47 - 178)        |
| Epilepsy                                            | 267<br>(184 - 357)        | 20<br>(12 - 32)    | 19<br>(12 - 27)     | 147<br>(99 - 210)    | 45<br>(28 - 63)          | 36<br>(21 - 52)          |
| Multiple sclerosis                                  | 62<br>(23 - 90)           | --                 | --                  | 25<br>(9 - 38)       | 28<br>(10 - 45)          | 9<br>(3 - 14)            |
| Other neurological disorders                        | 184<br>(148 - 223)        | 22<br>(16 - 29)    | 7<br>(5 - 10)       | 43<br>(31 - 56)      | 67<br>(50 - 87)          | 46<br>(35 - 60)          |
| Mental and substance use disorders                  | 102<br>(78 - 130)         | 4<br>(2 - 6)       | 0<br>(0 - 1)        | 41<br>(29 - 55)      | 25<br>(18 - 34)          | 33<br>(23 - 45)          |
| Schizophrenia                                       | 5<br>(3 - 8)              | --                 | --                  | 2<br>(1 - 3)         | 2<br>(1 - 3)             | 1<br>(0 - 2)             |
| Alcohol use disorders                               | 19<br>(8 - 33)            | --                 | --                  | 7<br>(3 - 12)        | 7<br>(3 - 12)            | 5<br>(2 - 9)             |
| Drug use disorders                                  | 76<br>(58 - 96)           | 4<br>(2 - 6)       | --                  | 30<br>(20 - 41)      | 16<br>(11 - 22)          | 27<br>(18 - 37)          |
| Opioid use disorders                                | 16<br>(12 - 20)           | 1<br>(0 - 1)       | --                  | 6<br>(4 - 8)         | 3<br>(2 - 4)             | 6<br>(4 - 8)             |
| Cocaine use disorders                               | 3<br>(2 - 3)              | 0<br>(0 - 0)       | --                  | 1<br>(1 - 2)         | 0<br>(0 - 1)             | 1<br>(0 - 1)             |
| Amphetamine use disorders                           | 2<br>(2 - 3)              | 0<br>(0 - 0)       | --                  | 1<br>(1 - 1)         | 0<br>(0 - 1)             | 1<br>(0 - 1)             |
| Other drug use disorders                            | 55<br>(42 - 70)           | 3<br>(1 - 4)       | --                  | 21<br>(15 - 30)      | 12<br>(8 - 17)           | 19<br>(13 - 27)          |

Web Table 31- Colombia deaths with 95% UI by age, sex, and cause in 2013

| Cause                                               | Females, All Ages         | Females, 0-4 Years       | Females, 5-14 Years | Females, 15-49 Years | Females, 50-69 Years     | Females, 70-80 Years     |
|-----------------------------------------------------|---------------------------|--------------------------|---------------------|----------------------|--------------------------|--------------------------|
| Eating disorders                                    | 3<br>(1 - 4)              | --                       | 0<br>(0 - 1)        | 2<br>(1 - 4)         | --                       | --                       |
| Anorexia nervosa                                    | 3<br>(1 - 4)              | --                       | 0<br>(0 - 1)        | 2<br>(1 - 4)         | --                       | --                       |
| Diabetes, urogenital, blood, and endocrine diseases | 9,529<br>(7,678 - 11,456) | 131<br>(102 - 166)       | 65<br>(51 - 81)     | 797<br>(614 - 1,053) | 2,849<br>(2,083 - 3,579) | 5,687<br>(4,609 - 6,875) |
| Diabetes mellitus                                   | 4,833<br>(3,889 - 5,922)  | 13<br>(8 - 21)           | 10<br>(6 - 17)      | 259<br>(190 - 350)   | 1,543<br>(1,159 - 2,007) | 3,008<br>(2,397 - 3,748) |
| Acute glomerulonephritis                            | 6<br>(4 - 11)             | 0<br>(0 - 1)             | 0<br>(0 - 1)        | 1<br>(1 - 2)         | 1<br>(1 - 3)             | 2<br>(1 - 5)             |
| Chronic kidney disease                              | 3,059<br>(2,295 - 3,839)  | 28<br>(21 - 39)          | 22<br>(16 - 30)     | 321<br>(231 - 441)   | 968<br>(589 - 1,302)     | 1,719<br>(1,266 - 2,231) |
| Chronic kidney disease due to diabetes mellitus     | 876<br>(459 - 1,195)      | 2<br>(1 - 4)             | 1<br>(0 - 1)        | 79<br>(41 - 119)     | 368<br>(157 - 527)       | 427<br>(230 - 618)       |
| Chronic kidney disease due to hypertension          | 1,101<br>(693 - 1,676)    | 7<br>(4 - 11)            | 6<br>(4 - 11)       | 123<br>(73 - 204)    | 280<br>(158 - 458)       | 685<br>(422 - 1,028)     |
| Chronic kidney disease due to glomerulonephritis    | 107<br>(62 - 195)         | 5<br>(3 - 9)             | 5<br>(3 - 8)        | 21<br>(13 - 34)      | 22<br>(12 - 39)          | 54<br>(25 - 110)         |
| Chronic kidney disease due to other causes          | 974<br>(529 - 1,444)      | 14<br>(7 - 22)           | 10<br>(5 - 16)      | 98<br>(48 - 162)     | 299<br>(119 - 483)       | 553<br>(265 - 897)       |
| Urinary diseases and male infertility               | 1,040<br>(518 - 1,469)    | 26<br>(14 - 41)          | 7<br>(4 - 10)       | 73<br>(42 - 103)     | 189<br>(94 - 271)        | 745<br>(334 - 1,110)     |
| Interstitial nephritis and urinary tract infections | 974<br>(456 - 1,392)      | 24<br>(12 - 38)          | 5<br>(3 - 8)        | 64<br>(35 - 90)      | 173<br>(83 - 250)        | 709<br>(297 - 1,071)     |
| Urolithiasis                                        | 13<br>(8 - 25)            | --                       | 0<br>(0 - 1)        | 3<br>(2 - 5)         | 4<br>(2 - 8)             | 5<br>(3 - 13)            |
| Other urinary diseases                              | 53<br>(29 - 121)          | 2<br>(1 - 5)             | 1<br>(1 - 2)        | 7<br>(4 - 13)        | 12<br>(6 - 24)           | 31<br>(14 - 83)          |
| Gynecological diseases                              | 6<br>(4 - 9)              | --                       | --                  | 2<br>(1 - 3)         | 2<br>(1 - 3)             | 3<br>(2 - 5)             |
| Uterine fibroids                                    | 2<br>(1 - 2)              | --                       | --                  | 0<br>(0 - 1)         | 0<br>(0 - 1)             | 1<br>(0 - 1)             |
| Polycystic ovarian syndrome                         | 0<br>(0 - 0)              | --                       | --                  | 0<br>(0 - 0)         | 0<br>(0 - 0)             | --                       |
| Endometriosis                                       | 0<br>(0 - 1)              | --                       | --                  | 0<br>(0 - 0)         | 0<br>(0 - 0)             | --                       |
| Genital prolapse                                    | 1<br>(1 - 2)              | --                       | --                  | 0<br>(0 - 0)         | 0<br>(0 - 0)             | 1<br>(0 - 1)             |
| Other gynecological diseases                        | 3<br>(2 - 4)              | --                       | --                  | 1<br>(1 - 1)         | 1<br>(0 - 1)             | 1<br>(1 - 2)             |
| Hemoglobinopathies and hemolytic anemias            | 135<br>(84 - 204)         | 17<br>(10 - 29)          | 11<br>(6 - 17)      | 41<br>(25 - 66)      | 28<br>(16 - 44)          | 38<br>(21 - 62)          |
| Thalassemias                                        | 2<br>(1 - 3)              | 1<br>(1 - 2)             | 1<br>(0 - 1)        | 1<br>(0 - 1)         | 0<br>(0 - 0)             | 0<br>(0 - 0)             |
| Sickle cell disorders                               | 75<br>(46 - 113)          | 12<br>(7 - 20)           | 9<br>(5 - 14)       | 34<br>(20 - 54)      | 18<br>(10 - 28)          | 2<br>(1 - 4)             |
| G6PD deficiency                                     | 3<br>(2 - 4)              | 0<br>(0 - 1)             | 0<br>(0 - 0)        | 1<br>(1 - 1)         | 1<br>(0 - 1)             | 0<br>(0 - 1)             |
| Other hemoglobinopathies and hemolytic anemias      | 55<br>(33 - 86)           | 4<br>(2 - 6)             | 1<br>(1 - 2)        | 5<br>(3 - 9)         | 10<br>(6 - 15)           | 35<br>(19 - 57)          |
| Endocrine, metabolic, blood, and immune disorders   | 450<br>(323 - 614)        | 47<br>(30 - 71)          | 14<br>(10 - 21)     | 100<br>(67 - 151)    | 118<br>(77 - 167)        | 172<br>(108 - 253)       |
| Musculoskeletal disorders                           | 691<br>(517 - 891)        | --                       | 20<br>(13 - 27)     | 316<br>(215 - 424)   | 177<br>(126 - 237)       | 178<br>(128 - 238)       |
| Rheumatoid arthritis                                | 121<br>(87 - 165)         | --                       | 0<br>(0 - 1)        | 12<br>(7 - 19)       | 43<br>(28 - 62)          | 66<br>(43 - 97)          |
| Other musculoskeletal disorders                     | 569<br>(420 - 744)        | --                       | 20<br>(13 - 27)     | 304<br>(206 - 407)   | 134<br>(94 - 184)        | 112<br>(77 - 157)        |
| Other non-communicable diseases                     | 2,631<br>(2,005 - 3,167)  | 1,711<br>(1,259 - 2,186) | 86<br>(61 - 116)    | 141<br>(99 - 191)    | 147<br>(100 - 196)       | 547<br>(329 - 769)       |
| Congenital anomalies                                | 1,878<br>(1,392 - 2,343)  | 1,636<br>(1,189 - 2,090) | 81<br>(56 - 110)    | 101<br>(67 - 143)    | 31<br>(19 - 44)          | 30<br>(19 - 43)          |
| Neural tube defects                                 | 53<br>(27 - 88)           | 49<br>(24 - 83)          | 1<br>(1 - 2)        | 1<br>(1 - 2)         | 1<br>(0 - 1)             | 1<br>(0 - 2)             |
| Congenital heart anomalies                          | 1,034<br>(718 - 1,328)    | 886<br>(592 - 1,165)     | 53<br>(36 - 75)     | 71<br>(47 - 100)     | 15<br>(9 - 21)           | 10<br>(6 - 16)           |
| Cleft lip and cleft palate                          | 2<br>(0 - 9)              | 2<br>(0 - 9)             | --                  | --                   | --                       | --                       |
| Down syndrome                                       | 28<br>(15 - 54)           | 21<br>(10 - 44)          | 3<br>(2 - 6)        | 3<br>(2 - 5)         | 1<br>(0 - 2)             | 0<br>(0 - 0)             |
| Chromosomal unbalanced rearrangements               | 25<br>(10 - 43)           | 21<br>(8 - 37)           | 1<br>(0 - 1)        | 3<br>(1 - 4)         | 0<br>(0 - 1)             | 0<br>(0 - 0)             |
| Other congenital anomalies                          | 735<br>(497 - 1,008)      | 657<br>(434 - 915)       | 22<br>(13 - 36)     | 23<br>(14 - 36)      | 14<br>(8 - 21)           | 18<br>(11 - 26)          |
| Skin and subcutaneous diseases                      | 698<br>(439 - 964)        | 19<br>(11 - 32)          | 5<br>(3 - 7)        | 41<br>(27 - 58)      | 116<br>(76 - 159)        | 517<br>(307 - 743)       |
| Cellulitis                                          | 57<br>(25 - 97)           | 4<br>(2 - 7)             | 1<br>(1 - 1)        | 5<br>(3 - 9)         | 13<br>(6 - 23)           | 34<br>(11 - 72)          |
| Pyoderma                                            | 243<br>(159 - 359)        | 13<br>(7 - 22)           | 3<br>(2 - 4)        | 16<br>(10 - 24)      | 49<br>(31 - 72)          | 163<br>(91 - 271)        |

Web Table 31- Colombia deaths with 95% UI by age, sex, and cause in 2013

| Cause                                           | Females, All Ages        | Females, 0-4 Years   | Females, 5-14 Years | Females, 15-49 Years     | Females, 50-69 Years   | Females, 70-80 Years     |
|-------------------------------------------------|--------------------------|----------------------|---------------------|--------------------------|------------------------|--------------------------|
| Decubitus ulcer                                 | 380<br>(207 - 559)       | 1<br>(0 - 1)         | 1<br>(1 - 1)        | 15<br>(9 - 23)           | 50<br>(29 - 72)        | 313<br>(156 - 483)       |
| Other skin and subcutaneous diseases            | 18<br>(10 - 34)          | 2<br>(1 - 5)         | 1<br>(0 - 1)        | 4<br>(2 - 6)             | 4<br>(2 - 9)           | 7<br>(2 - 20)            |
| Sudden infant death syndrome                    | 55<br>(18 - 159)         | 55<br>(18 - 159)     | --                  | --                       | --                     | --                       |
| Injuries                                        | 7,176<br>(5,885 - 8,876) | 822<br>(652 - 1,101) | 488<br>(414 - 582)  | 3,229<br>(2,466 - 4,172) | 1,124<br>(862 - 1,483) | 1,514<br>(1,205 - 1,994) |
| Transport injuries                              | 1,996<br>(1,614 - 2,476) | 149<br>(107 - 200)   | 165<br>(127 - 217)  | 843<br>(630 - 1,112)     | 436<br>(326 - 573)     | 403<br>(306 - 553)       |
| Road injuries                                   | 1,954<br>(1,575 - 2,427) | 143<br>(102 - 194)   | 160<br>(124 - 209)  | 825<br>(616 - 1,086)     | 429<br>(321 - 565)     | 396<br>(302 - 543)       |
| Pedestrian road injuries                        | 1,043<br>(817 - 1,372)   | 85<br>(55 - 120)     | 92<br>(66 - 129)    | 304<br>(215 - 424)       | 256<br>(184 - 345)     | 306<br>(226 - 440)       |
| Cyclist road injuries                           | 57<br>(28 - 78)          | 3<br>(1 - 6)         | 7<br>(3 - 10)       | 30<br>(14 - 45)          | 11<br>(5 - 16)         | 7<br>(3 - 10)            |
| Motorcyclist road injuries                      | 244<br>(140 - 335)       | 7<br>(3 - 12)        | 13<br>(6 - 22)      | 192<br>(110 - 273)       | 23<br>(11 - 37)        | 8<br>(4 - 14)            |
| Motor vehicle road injuries                     | 596<br>(438 - 781)       | 46<br>(30 - 68)      | 48<br>(32 - 70)     | 295<br>(206 - 406)       | 135<br>(91 - 191)      | 72<br>(46 - 102)         |
| Other road injuries                             | 15<br>(8 - 31)           | 2<br>(1 - 5)         | 2<br>(1 - 3)        | 4<br>(2 - 7)             | 4<br>(2 - 7)           | 3<br>(2 - 8)             |
| Other transport injuries                        | 42<br>(28 - 85)          | 6<br>(3 - 14)        | 5<br>(2 - 11)       | 18<br>(11 - 34)          | 7<br>(4 - 14)          | 7<br>(3 - 17)            |
| Unintentional injuries                          | 2,311<br>(1,844 - 3,067) | 542<br>(395 - 837)   | 161<br>(128 - 205)  | 348<br>(251 - 505)       | 313<br>(237 - 428)     | 947<br>(721 - 1,335)     |
| Falls                                           | 522<br>(381 - 725)       | 15<br>(10 - 23)      | 12<br>(8 - 16)      | 37<br>(26 - 51)          | 79<br>(53 - 108)       | 379<br>(260 - 548)       |
| Drowning                                        | 368<br>(272 - 593)       | 159<br>(95 - 294)    | 73<br>(50 - 105)    | 87<br>(58 - 155)         | 27<br>(19 - 48)        | 23<br>(16 - 34)          |
| Fire, heat, and hot substances                  | 143<br>(106 - 213)       | 34<br>(21 - 63)      | 13<br>(8 - 20)      | 32<br>(21 - 51)          | 20<br>(14 - 31)        | 43<br>(29 - 66)          |
| Poisonings                                      | 53<br>(34 - 105)         | 6<br>(3 - 13)        | 4<br>(2 - 8)        | 21<br>(12 - 48)          | 7<br>(4 - 15)          | 15<br>(10 - 29)          |
| Exposure to mechanical forces                   | 141<br>(105 - 246)       | 32<br>(16 - 90)      | 17<br>(12 - 25)     | 49<br>(36 - 71)          | 22<br>(15 - 33)        | 22<br>(15 - 35)          |
| Unintentional firearm injuries                  | 35<br>(27 - 46)          | 3<br>(2 - 5)         | 4<br>(2 - 6)        | 19<br>(13 - 27)          | 4<br>(3 - 5)           | 6<br>(3 - 10)            |
| Unintentional suffocation                       | 31<br>(13 - 122)         | 17<br>(5 - 74)       | 2<br>(1 - 7)        | 6<br>(3 - 21)            | 3<br>(1 - 11)          | 4<br>(1 - 16)            |
| Other exposure to mechanical forces             | 75<br>(57 - 95)          | 12<br>(7 - 20)       | 11<br>(7 - 16)      | 24<br>(17 - 33)          | 15<br>(10 - 21)        | 12<br>(8 - 17)           |
| Adverse effects of medical treatment            | 356<br>(249 - 580)       | 41<br>(23 - 89)      | 4<br>(3 - 6)        | 45<br>(29 - 78)          | 79<br>(51 - 133)       | 187<br>(121 - 328)       |
| Animal contact                                  | 57<br>(30 - 132)         | 8<br>(3 - 15)        | 6<br>(3 - 16)       | 15<br>(8 - 37)           | 16<br>(8 - 39)         | 13<br>(6 - 31)           |
| Venomous animal contact                         | 40<br>(20 - 88)          | 5<br>(2 - 11)        | 5<br>(2 - 12)       | 12<br>(6 - 28)           | 11<br>(5 - 28)         | 7<br>(3 - 17)            |
| Non-venomous animal contact                     | 17<br>(7 - 42)           | 2<br>(1 - 6)         | 1<br>(0 - 4)        | 3<br>(1 - 7)             | 5<br>(2 - 12)          | 6<br>(3 - 15)            |
| Foreign body                                    | 602<br>(361 - 969)       | 240<br>(121 - 401)   | 26<br>(16 - 42)     | 37<br>(21 - 57)          | 52<br>(29 - 87)        | 246<br>(138 - 482)       |
| Pulmonary aspiration and foreign body in airway | 597<br>(356 - 965)       | 240<br>(120 - 400)   | 26<br>(16 - 42)     | 36<br>(19 - 55)          | 51<br>(29 - 86)        | 245<br>(137 - 481)       |
| Foreign body in other body part                 | 4<br>(3 - 7)             | 1<br>(0 - 1)         | 0<br>(0 - 1)        | 1<br>(1 - 2)             | 1<br>(0 - 1)           | 1<br>(1 - 3)             |
| Other unintentional injuries                    | 69<br>(49 - 101)         | 7<br>(3 - 14)        | 7<br>(3 - 13)       | 25<br>(15 - 43)          | 12<br>(7 - 21)         | 18<br>(10 - 33)          |
| Self-harm and interpersonal violence            | 2,869<br>(2,163 - 3,803) | 131<br>(62 - 235)    | 162<br>(108 - 234)  | 2,038<br>(1,467 - 2,774) | 375<br>(247 - 566)     | 163<br>(102 - 258)       |
| Self-harm                                       | 587<br>(381 - 766)       | --                   | 40<br>(21 - 59)     | 432<br>(273 - 573)       | 69<br>(43 - 92)        | 46<br>(31 - 62)          |
| Interpersonal violence                          | 2,282<br>(1,654 - 3,138) | 131<br>(62 - 235)    | 122<br>(73 - 189)   | 1,606<br>(1,125 - 2,251) | 306<br>(185 - 491)     | 117<br>(60 - 212)        |
| Assault by firearm                              | 1,466<br>(981 - 2,153)   | 44<br>(16 - 96)      | 76<br>(43 - 126)    | 1,117<br>(740 - 1,629)   | 189<br>(107 - 317)     | 39<br>(17 - 77)          |
| Assault by sharp object                         | 479<br>(281 - 838)       | 16<br>(7 - 33)       | 18<br>(8 - 35)      | 348<br>(195 - 626)       | 66<br>(34 - 126)       | 31<br>(14 - 62)          |
| Assault by other means                          | 337<br>(184 - 485)       | 71<br>(31 - 130)     | 28<br>(11 - 48)     | 140<br>(66 - 219)        | 50<br>(27 - 89)        | 48<br>(22 - 89)          |

Web Table 31- Comoros deaths with 95% UI by age, sex, and cause in 2013

| Cause                                                             | Both Sexes, All Ages     | Both Sexes, 0-4 Years  | Both Sexes, 5-14 Years | Both Sexes, 15-49 Years  | Both Sexes, 50-69 Years  | Both Sexes, 70-80 Years  |
|-------------------------------------------------------------------|--------------------------|------------------------|------------------------|--------------------------|--------------------------|--------------------------|
| All causes                                                        | 5,295<br>(4,373 - 6,254) | 1,180<br>(857 - 1,627) | 152<br>(121 - 192)     | 1,321<br>(1,040 - 1,667) | 1,445<br>(1,085 - 1,802) | 1,198<br>(1,002 - 1,378) |
| Communicable, maternal, neonatal, and nutritional diseases        | 2,570<br>(2,129 - 3,080) | 1,020<br>(754 - 1,400) | 101<br>(73 - 144)      | 631<br>(494 - 790)       | 463<br>(358 - 582)       | 355<br>(290 - 429)       |
| HIV/AIDS and tuberculosis                                         | 417<br>(278 - 593)       | 7<br>(3 - 15)          | 3<br>(2 - 7)           | 197<br>(119 - 306)       | 153<br>(101 - 218)       | 57<br>(41 - 75)          |
| Tuberculosis                                                      | 382<br>(251 - 530)       | 5<br>(2 - 10)          | 3<br>(1 - 4)           | 170<br>(100 - 252)       | 148<br>(97 - 209)        | 56<br>(40 - 74)          |
| HIV/AIDS                                                          | 35<br>(4 - 168)          | 2<br>(0 - 9)           | 1<br>(0 - 4)           | 27<br>(3 - 126)          | 5<br>(1 - 27)            | 1<br>(0 - 3)             |
| HIV/AIDS resulting in mycobacterial infection                     | 2<br>(0 - 11)            | 0<br>(0 - 1)           | 0<br>(0 - 0)           | 2<br>(0 - 8)             | 0<br>(0 - 2)             | 0<br>(0 - 0)             |
| HIV/AIDS resulting in other diseases                              | 33<br>(4 - 158)          | 2<br>(0 - 9)           | 1<br>(0 - 4)           | 25<br>(3 - 118)          | 5<br>(1 - 25)            | 1<br>(0 - 3)             |
| Diarrhea, lower respiratory, and other common infectious diseases | 1,079<br>(798 - 1,418)   | 393<br>(229 - 622)     | 49<br>(27 - 97)        | 189<br>(122 - 269)       | 217<br>(150 - 297)       | 230<br>(173 - 295)       |
| Diarrheal diseases                                                | 315<br>(208 - 439)       | 65<br>(26 - 128)       | 9<br>(4 - 16)          | 72<br>(42 - 111)         | 87<br>(48 - 140)         | 82<br>(49 - 126)         |
| Intestinal infectious diseases                                    | 34<br>(15 - 63)          | 9<br>(2 - 22)          | 8<br>(3 - 16)          | 14<br>(6 - 26)           | 2<br>(1 - 3)             | 0<br>(0 - 1)             |
| Typhoid fever                                                     | 26<br>(11 - 49)          | 7<br>(1 - 16)          | 6<br>(2 - 12)          | 11<br>(5 - 21)           | 1<br>(1 - 3)             | 0<br>(0 - 1)             |
| Paratyphoid fever                                                 | 7<br>(3 - 13)            | 2<br>(0 - 5)           | 2<br>(1 - 4)           | 3<br>(1 - 5)             | 0<br>(0 - 1)             | 0<br>(0 - 0)             |
| Other intestinal infectious diseases                              | 1<br>(0 - 5)             | 1<br>(0 - 3)           | 0<br>(0 - 1)           | 0<br>(0 - 3)             | 0<br>(0 - 1)             | 0<br>(0 - 0)             |
| Lower respiratory infections                                      | 500<br>(337 - 648)       | 173<br>(95 - 268)      | 10<br>(4 - 16)         | 67<br>(40 - 99)          | 109<br>(70 - 159)        | 140<br>(96 - 189)        |
| Upper respiratory infections                                      | 1<br>(0 - 1)             | 0<br>(0 - 0)           | 0<br>(0 - 0)           | 0<br>(0 - 1)             | 0<br>(0 - 1)             | 0<br>(0 - 0)             |
| Otitis media                                                      | 0<br>(0 - 1)             | 0<br>(0 - 0)           | 0<br>(0 - 0)           | 0<br>(0 - 0)             | 0<br>(0 - 0)             | 0<br>(0 - 0)             |
| Meningitis                                                        | 80<br>(54 - 110)         | 25<br>(12 - 43)        | 5<br>(3 - 9)           | 26<br>(16 - 40)          | 17<br>(10 - 27)          | 6<br>(4 - 10)            |
| Pneumococcal meningitis                                           | 20<br>(13 - 28)          | 4<br>(2 - 8)           | 2<br>(1 - 3)           | 7<br>(4 - 12)            | 5<br>(3 - 8)             | 2<br>(1 - 3)             |
| H influenzae type B meningitis                                    | 14<br>(9 - 21)           | 8<br>(4 - 14)          | 1<br>(0 - 2)           | 3<br>(2 - 5)             | 2<br>(1 - 3)             | 1<br>(0 - 1)             |
| Meningococcal meningitis                                          | 14<br>(9 - 21)           | 3<br>(1 - 5)           | 1<br>(0 - 1)           | 5<br>(3 - 8)             | 4<br>(2 - 7)             | 1<br>(1 - 3)             |
| Other meningitis                                                  | 33<br>(21 - 45)          | 11<br>(5 - 18)         | 2<br>(1 - 3)           | 11<br>(7 - 17)           | 7<br>(4 - 11)            | 3<br>(2 - 4)             |
| Encephalitis                                                      | 4<br>(2 - 6)             | 2<br>(1 - 3)           | 0<br>(0 - 0)           | 1<br>(1 - 2)             | 1<br>(0 - 1)             | 0<br>(0 - 0)             |
| Diphtheria                                                        | 0<br>(0 - 1)             | 0<br>(0 - 1)           | 0<br>(0 - 0)           | 0<br>(0 - 0)             | 0<br>(0 - 0)             | --<br>(0 - 0)            |
| Whooping cough                                                    | 13<br>(0 - 64)           | 12<br>(0 - 61)         | 1<br>(0 - 2)           | 0<br>(0 - 1)             | 0<br>(0 - 0)             | --<br>(0 - 0)            |
| Tetanus                                                           | 9<br>(4 - 15)            | 4<br>(1 - 8)           | 0<br>(0 - 1)           | 3<br>(1 - 6)             | 1<br>(1 - 3)             | 0<br>(0 - 0)             |
| Measles                                                           | 123<br>(6 - 466)         | 101<br>(5 - 360)       | 16<br>(1 - 77)         | 5<br>(0 - 32)            | 0<br>(0 - 1)             | --<br>(0 - 1)            |
| Varicella and herpes zoster                                       | 1<br>(0 - 1)             | 0<br>(0 - 1)           | 0<br>(0 - 0)           | 0<br>(0 - 0)             | 0<br>(0 - 0)             | 0<br>(0 - 0)             |
| Neglected tropical diseases and malaria                           | 290<br>(170 - 503)       | 80<br>(21 - 200)       | 40<br>(21 - 69)        | 112<br>(59 - 208)        | 40<br>(18 - 71)          | 18<br>(7 - 40)           |
| Malaria                                                           | 215<br>(98 - 414)        | 63<br>(10 - 186)       | 26<br>(9 - 54)         | 76<br>(26 - 170)         | 34<br>(13 - 66)          | 16<br>(5 - 38)           |
| Leishmaniasis                                                     | 68<br>(35 - 111)         | 16<br>(3 - 38)         | 14<br>(5 - 26)         | 33<br>(17 - 56)          | 5<br>(2 - 8)             | 1<br>(1 - 2)             |
| Visceral leishmaniasis                                            | 68<br>(35 - 111)         | 16<br>(3 - 38)         | 14<br>(5 - 26)         | 33<br>(17 - 56)          | 5<br>(2 - 8)             | 1<br>(1 - 2)             |
| Cysticercosis                                                     | 0<br>(0 - 0)             | 0<br>(0 - 0)           | 0<br>(0 - 0)           | 0<br>(0 - 0)             | 0<br>(0 - 0)             | 0<br>(0 - 0)             |
| Cystic echinococcosis                                             | 0<br>(0 - 0)             | 0<br>(0 - 0)           | 0<br>(0 - 0)           | 0<br>(0 - 0)             | 0<br>(0 - 0)             | 0<br>(0 - 0)             |
| Dengue                                                            | 0<br>(0 - 0)             | 0<br>(0 - 0)           | 0<br>(0 - 0)           | 0<br>(0 - 0)             | 0<br>(0 - 0)             | 0<br>(0 - 0)             |
| Rabies                                                            | 4<br>(2 - 7)             | 0<br>(0 - 1)           | 1<br>(0 - 2)           | 2<br>(1 - 4)             | 0<br>(0 - 1)             | 0<br>(0 - 0)             |
| Intestinal nematode infections                                    | 1<br>(0 - 7)             | 1<br>(0 - 5)           | 0<br>(0 - 2)           | 0<br>(0 - 2)             | 0<br>(0 - 1)             | 0<br>(0 - 0)             |
| Ascariasis                                                        | 1<br>(0 - 7)             | 1<br>(0 - 5)           | 0<br>(0 - 2)           | 0<br>(0 - 2)             | 0<br>(0 - 1)             | 0<br>(0 - 0)             |
| Other neglected tropical diseases                                 | 2<br>(1 - 3)             | 0<br>(0 - 1)           | 0<br>(0 - 0)           | 0<br>(0 - 1)             | 0<br>(0 - 1)             | 0<br>(0 - 1)             |
| Maternal disorders                                                | 85<br>(45 - 152)         | --                     | 0<br>(0 - 1)           | 85<br>(44 - 151)         | --                       | --                       |
| Maternal hemorrhage                                               | 11<br>(5 - 21)           | --                     | 0<br>(0 - 0)           | 11<br>(5 - 21)           | --                       | --                       |



Web Table 31- Comoros deaths with 95% UI by age, sex, and cause in 2013

| Cause                                                            | Both Sexes, All Ages     | Both Sexes, 0-4 Years | Both Sexes, 5-14 Years | Both Sexes, 15-49 Years | Both Sexes, 50-69 Years | Both Sexes, 70-80 Years |
|------------------------------------------------------------------|--------------------------|-----------------------|------------------------|-------------------------|-------------------------|-------------------------|
| Maternal sepsis and other maternal infections                    | 8<br>(4 - 14)            | --                    | 0<br>(0 - 0)           | 8<br>(4 - 14)           | --                      | --                      |
| Maternal hypertensive disorders                                  | 8<br>(4 - 16)            | --                    | 0<br>(0 - 0)           | 8<br>(4 - 16)           | --                      | --                      |
| Maternal obstructed labor                                        | 4<br>(2 - 8)             | --                    | 0<br>(0 - 0)           | 4<br>(2 - 8)            | --                      | --                      |
| Maternal abortive outcome                                        | 17<br>(8 - 30)           | --                    | 0<br>(0 - 0)           | 17<br>(8 - 30)          | --                      | --                      |
| Indirect maternal deaths                                         | 6<br>(3 - 12)            | --                    | 0<br>(0 - 0)           | 6<br>(3 - 12)           | --                      | --                      |
| Late maternal deaths                                             | 8<br>(4 - 15)            | --                    | 0<br>(0 - 0)           | 8<br>(4 - 14)           | --                      | --                      |
| Maternal deaths aggravated by HIV/AIDS                           | 0<br>(0 - 0)             | --                    | --                     | 0<br>(0 - 0)            | --                      | --                      |
| Other maternal disorders                                         | 24<br>(11 - 43)          | --                    | 0<br>(0 - 0)           | 23<br>(11 - 43)         | --                      | --                      |
| Neonatal disorders                                               | 474<br>(368 - 610)       | 474<br>(368 - 610)    | --                     | --                      | --                      | --                      |
| Neonatal preterm birth complications                             | 144<br>(90 - 220)        | 144<br>(90 - 220)     | --                     | --                      | --                      | --                      |
| Neonatal encephalopathy due to birth asphyxia and trauma         | 129<br>(85 - 180)        | 129<br>(85 - 180)     | --                     | --                      | --                      | --                      |
| Neonatal sepsis and other neonatal infections                    | 130<br>(77 - 215)        | 130<br>(77 - 215)     | --                     | --                      | --                      | --                      |
| Hemolytic disease and other neonatal jaundice                    | 2<br>(1 - 5)             | 2<br>(1 - 5)          | --                     | --                      | --                      | --                      |
| Other neonatal disorders                                         | 69<br>(36 - 104)         | 69<br>(36 - 104)      | --                     | --                      | --                      | --                      |
| Nutritional deficiencies                                         | 167<br>(109 - 229)       | 42<br>(11 - 82)       | 6<br>(3 - 9)           | 35<br>(21 - 52)         | 41<br>(26 - 61)         | 43<br>(31 - 60)         |
| Protein-energy malnutrition                                      | 112<br>(65 - 165)        | 38<br>(10 - 77)       | 5<br>(2 - 8)           | 15<br>(7 - 28)          | 25<br>(14 - 40)         | 28<br>(16 - 41)         |
| Iodine deficiency                                                | 0<br>(0 - 1)             | 0<br>(0 - 0)          | 0<br>(0 - 0)           | 0<br>(0 - 0)            | 0<br>(0 - 0)            | 0<br>(0 - 0)            |
| Iron-deficiency anemia                                           | 53<br>(31 - 92)          | 4<br>(0 - 9)          | 1<br>(0 - 2)           | 19<br>(10 - 31)         | 15<br>(8 - 27)          | 14<br>(7 - 28)          |
| Other nutritional deficiencies                                   | 1<br>(1 - 3)             | 0<br>(0 - 0)          | 0<br>(0 - 0)           | 0<br>(0 - 1)            | 0<br>(0 - 1)            | 1<br>(0 - 1)            |
| Other communicable, maternal, neonatal, and nutritional diseases | 57<br>(37 - 83)          | 23<br>(10 - 44)       | 2<br>(1 - 4)           | 14<br>(9 - 20)          | 12<br>(6 - 19)          | 7<br>(3 - 13)           |
| Sexually transmitted diseases excluding HIV                      | 23<br>(11 - 43)          | 16<br>(4 - 34)        | 1<br>(0 - 2)           | 3<br>(2 - 5)            | 2<br>(1 - 5)            | 1<br>(0 - 2)            |
| Syphilis                                                         | 21<br>(8 - 40)           | 16<br>(4 - 34)        | 1<br>(0 - 2)           | 1<br>(1 - 2)            | 1<br>(1 - 3)            | 1<br>(0 - 2)            |
| Chlamydial infection                                             | 1<br>(0 - 1)             | --                    | 0<br>(0 - 0)           | 0<br>(0 - 1)            | 0<br>(0 - 1)            | 0<br>(0 - 0)            |
| Gonococcal infection                                             | 1<br>(1 - 2)             | --                    | 0<br>(0 - 0)           | 1<br>(0 - 1)            | 0<br>(0 - 1)            | 0<br>(0 - 0)            |
| Other sexually transmitted diseases                              | 1<br>(1 - 2)             | --                    | 0<br>(0 - 0)           | 1<br>(0 - 1)            | 0<br>(0 - 1)            | 0<br>(0 - 0)            |
| Hepatitis                                                        | 8<br>(5 - 12)            | 0<br>(0 - 1)          | 0<br>(0 - 0)           | 4<br>(3 - 7)            | 2<br>(2 - 4)            | 1<br>(0 - 1)            |
| Acute hepatitis A                                                | 1<br>(0 - 1)             | 0<br>(0 - 0)          | 0<br>(0 - 0)           | 0<br>(0 - 1)            | 0<br>(0 - 0)            | 0<br>(0 - 0)            |
| Acute hepatitis B                                                | 5<br>(3 - 8)             | 0<br>(0 - 1)          | 0<br>(0 - 0)           | 2<br>(1 - 4)            | 2<br>(1 - 3)            | 1<br>(0 - 1)            |
| Acute hepatitis C                                                | 0<br>(0 - 0)             | --                    | 0<br>(0 - 0)           | 0<br>(0 - 0)            | 0<br>(0 - 0)            | 0<br>(0 - 0)            |
| Acute hepatitis E                                                | 2<br>(1 - 4)             | 0<br>(0 - 0)          | 0<br>(0 - 0)           | 2<br>(1 - 3)            | 0<br>(0 - 1)            | 0<br>(0 - 0)            |
| Other infectious diseases                                        | 26<br>(15 - 39)          | 6<br>(3 - 15)         | 1<br>(0 - 2)           | 7<br>(3 - 11)           | 7<br>(3 - 13)           | 5<br>(2 - 11)           |
| Non-communicable diseases                                        | 2,261<br>(1,741 - 2,834) | 120<br>(70 - 182)     | 24<br>(12 - 34)        | 443<br>(303 - 621)      | 881<br>(632 - 1,143)    | 792<br>(642 - 936)      |
| Neoplasms                                                        | 421<br>(304 - 549)       | 8<br>(2 - 15)         | 6<br>(3 - 10)          | 111<br>(70 - 162)       | 209<br>(148 - 277)      | 87<br>(69 - 106)        |
| Esophageal cancer                                                | 47<br>(33 - 66)          | --                    | --                     | 8<br>(5 - 13)           | 29<br>(19 - 41)         | 11<br>(8 - 16)          |
| Stomach cancer                                                   | 29<br>(21 - 37)          | --                    | --                     | 4<br>(3 - 7)            | 16<br>(11 - 22)         | 8<br>(6 - 10)           |
| Liver cancer                                                     | 38<br>(25 - 53)          | --                    | 0<br>(0 - 1)           | 14<br>(6 - 23)          | 18<br>(12 - 25)         | 7<br>(5 - 9)            |
| Liver cancer due to hepatitis B                                  | 9<br>(5 - 16)            | --                    | 0<br>(0 - 0)           | 4<br>(1 - 8)            | 4<br>(1 - 7)            | 1<br>(0 - 2)            |
| Liver cancer due to hepatitis C                                  | 18<br>(10 - 28)          | --                    | 0<br>(0 - 0)           | 5<br>(2 - 10)           | 9<br>(5 - 14)           | 3<br>(2 - 5)            |
| Liver cancer due to alcohol use                                  | 5<br>(3 - 7)             | --                    | --                     | 1<br>(0 - 2)            | 2<br>(1 - 4)            | 1<br>(1 - 2)            |
| Liver cancer due to other causes                                 | 6<br>(4 - 10)            | --                    | 0<br>(0 - 0)           | 3<br>(1 - 5)            | 3<br>(1 - 5)            | 1<br>(0 - 2)            |

Web Table 31- Comoros deaths with 95% UI by age, sex, and cause in 2013

| Cause                                         | Both Sexes, All Ages   | Both Sexes, 0-4 Years | Both Sexes, 5-14 Years | Both Sexes, 15-49 Years | Both Sexes, 50-69 Years | Both Sexes, 70-80 Years |
|-----------------------------------------------|------------------------|-----------------------|------------------------|-------------------------|-------------------------|-------------------------|
| Larynx cancer                                 | 2<br>(2 - 4)           | --                    | --                     | 0<br>(0 - 1)            | 1<br>(1 - 2)            | 1<br>(0 - 1)            |
| Tracheal, bronchus and lung cancer            | 20<br>(14 - 26)        | --                    | --                     | 2<br>(1 - 3)            | 13<br>(9 - 18)          | 5<br>(4 - 6)            |
| Breast cancer                                 | 39<br>(23 - 62)        | --                    | --                     | 17<br>(8 - 30)          | 17<br>(10 - 29)         | 5<br>(3 - 7)            |
| Cervical cancer                               | 67<br>(35 - 107)       | --                    | --                     | 15<br>(7 - 27)          | 43<br>(21 - 69)         | 9<br>(5 - 14)           |
| Uterine cancer                                | 3<br>(2 - 5)           | --                    | --                     | 0<br>(0 - 1)            | 2<br>(1 - 3)            | 1<br>(0 - 1)            |
| Prostate cancer                               | 13<br>(8 - 20)         | --                    | --                     | 0<br>(0 - 1)            | 5<br>(2 - 8)            | 8<br>(5 - 13)           |
| Colon and rectum cancer                       | 27<br>(19 - 35)        | --                    | --                     | 9<br>(6 - 12)           | 12<br>(8 - 16)          | 6<br>(5 - 8)            |
| Lip and oral cavity cancer                    | 6<br>(4 - 8)           | --                    | --                     | 2<br>(1 - 3)            | 3<br>(2 - 5)            | 1<br>(1 - 2)            |
| Nasopharynx cancer                            | 2<br>(1 - 3)           | --                    | 0<br>(0 - 0)           | 1<br>(1 - 2)            | 1<br>(0 - 1)            | 0<br>(0 - 0)            |
| Other pharynx cancer                          | 3<br>(2 - 3)           | --                    | --                     | 1<br>(0 - 1)            | 1<br>(1 - 2)            | 0<br>(0 - 1)            |
| Gallbladder and biliary tract cancer          | 5<br>(3 - 7)           | --                    | --                     | 2<br>(1 - 2)            | 2<br>(1 - 4)            | 1<br>(1 - 1)            |
| Pancreatic cancer                             | 9<br>(7 - 12)          | --                    | --                     | 2<br>(2 - 4)            | 5<br>(4 - 7)            | 2<br>(1 - 2)            |
| Malignant skin melanoma                       | 2<br>(1 - 3)           | --                    | --                     | 1<br>(0 - 1)            | 1<br>(1 - 2)            | 0<br>(0 - 1)            |
| Non-melanoma skin cancer                      | 2<br>(1 - 3)           | --                    | --                     | 0<br>(0 - 1)            | 1<br>(0 - 1)            | 1<br>(0 - 1)            |
| Ovarian cancer                                | 9<br>(5 - 15)          | --                    | --                     | 3<br>(1 - 5)            | 6<br>(3 - 9)            | 1<br>(1 - 2)            |
| Testicular cancer                             | 1<br>(1 - 2)           | --                    | --                     | 1<br>(0 - 1)            | 0<br>(0 - 1)            | 0<br>(0 - 0)            |
| Kidney cancer                                 | 7<br>(5 - 9)           | 0<br>(0 - 1)          | 0<br>(0 - 0)           | 1<br>(1 - 2)            | 4<br>(2 - 5)            | 1<br>(1 - 2)            |
| Bladder cancer                                | 7<br>(5 - 10)          | --                    | --                     | 1<br>(1 - 2)            | 3<br>(2 - 5)            | 3<br>(2 - 4)            |
| Brain and nervous system cancer               | 6<br>(4 - 8)           | 0<br>(0 - 0)          | 0<br>(0 - 1)           | 3<br>(2 - 5)            | 2<br>(1 - 3)            | 1<br>(0 - 1)            |
| Thyroid cancer                                | 1<br>(1 - 2)           | --                    | 0<br>(0 - 0)           | 0<br>(0 - 0)            | 1<br>(1 - 2)            | 0<br>(0 - 1)            |
| Mesothelioma                                  | 0<br>(0 - 1)           | --                    | --                     | 0<br>(0 - 0)            | 0<br>(0 - 0)            | 0<br>(0 - 0)            |
| Hodgkin lymphoma                              | 3<br>(2 - 4)           | 0<br>(0 - 0)          | 0<br>(0 - 0)           | 1<br>(0 - 2)            | 1<br>(1 - 2)            | 1<br>(0 - 1)            |
| Non-Hodgkin lymphoma                          | 22<br>(15 - 30)        | 2<br>(0 - 5)          | 2<br>(1 - 4)           | 8<br>(4 - 12)           | 7<br>(4 - 10)           | 3<br>(2 - 4)            |
| Multiple myeloma                              | 4<br>(3 - 6)           | --                    | --                     | 1<br>(1 - 2)            | 2<br>(1 - 3)            | 1<br>(1 - 2)            |
| Leukemia                                      | 7<br>(5 - 10)          | 0<br>(0 - 1)          | 1<br>(0 - 1)           | 4<br>(2 - 5)            | 2<br>(1 - 2)            | 1<br>(1 - 1)            |
| Other neoplasms                               | 39<br>(27 - 51)        | 5<br>(2 - 9)          | 2<br>(1 - 4)           | 11<br>(6 - 17)          | 12<br>(8 - 18)          | 9<br>(6 - 12)           |
| Cardiovascular diseases                       | 1,023<br>(780 - 1,275) | 5<br>(3 - 9)          | 3<br>(1 - 5)           | 142<br>(93 - 203)       | 411<br>(293 - 540)      | 462<br>(373 - 552)      |
| Rheumatic heart disease                       | 36<br>(24 - 55)        | 0<br>(0 - 0)          | 1<br>(0 - 1)           | 13<br>(8 - 21)          | 14<br>(9 - 22)          | 8<br>(5 - 12)           |
| Ischemic heart disease                        | 218<br>(156 - 291)     | 0<br>(0 - 0)          | 0<br>(0 - 0)           | 25<br>(15 - 40)         | 92<br>(62 - 130)        | 100<br>(72 - 131)       |
| Cerebrovascular disease                       | 496<br>(371 - 636)     | 1<br>(1 - 2)          | 0<br>(0 - 1)           | 51<br>(32 - 76)         | 199<br>(139 - 269)      | 245<br>(191 - 307)      |
| Ischemic stroke                               | 187<br>(73 - 269)      | 0<br>(0 - 0)          | 0<br>(0 - 0)           | 6<br>(2 - 11)           | 56<br>(18 - 90)         | 125<br>(52 - 173)       |
| Hemorrhagic stroke                            | 310<br>(207 - 472)     | 1<br>(1 - 2)          | 0<br>(0 - 1)           | 45<br>(29 - 65)         | 143<br>(94 - 210)       | 120<br>(76 - 204)       |
| Hypertensive heart disease                    | 94<br>(64 - 135)       | 0<br>(0 - 0)          | 0<br>(0 - 0)           | 10<br>(6 - 16)          | 34<br>(21 - 50)         | 50<br>(34 - 78)         |
| Cardiomyopathy and myocarditis                | 43<br>(29 - 63)        | 2<br>(1 - 4)          | 1<br>(0 - 1)           | 14<br>(8 - 22)          | 16<br>(10 - 23)         | 11<br>(7 - 18)          |
| Atrial fibrillation and flutter               | 1<br>(0 - 1)           | --                    | --                     | 0<br>(0 - 0)            | 0<br>(0 - 0)            | 0<br>(0 - 1)            |
| Aortic aneurysm                               | 13<br>(8 - 19)         | --                    | --                     | 2<br>(1 - 3)            | 5<br>(3 - 8)            | 5<br>(3 - 8)            |
| Peripheral vascular disease                   | 1<br>(0 - 1)           | --                    | --                     | 0<br>(0 - 0)            | 0<br>(0 - 0)            | 0<br>(0 - 1)            |
| Endocarditis                                  | 11<br>(7 - 16)         | 0<br>(0 - 1)          | 0<br>(0 - 0)           | 3<br>(2 - 5)            | 4<br>(2 - 5)            | 3<br>(2 - 5)            |
| Other cardiovascular and circulatory diseases | 112<br>(75 - 164)      | 2<br>(1 - 3)          | 1<br>(0 - 1)           | 23<br>(13 - 37)         | 48<br>(30 - 74)         | 39<br>(25 - 57)         |
| Chronic respiratory diseases                  | 136<br>(104 - 175)     | 2<br>(1 - 4)          | 1<br>(0 - 1)           | 18<br>(12 - 27)         | 53<br>(37 - 72)         | 61<br>(47 - 78)         |

Web Table 31- Comoros deaths with 95% UI by age, sex, and cause in 2013

| Cause                                               | Both Sexes, All Ages | Both Sexes, 0-4 Years | Both Sexes, 5-14 Years | Both Sexes, 15-49 Years | Both Sexes, 50-69 Years | Both Sexes, 70-80 Years |
|-----------------------------------------------------|----------------------|-----------------------|------------------------|-------------------------|-------------------------|-------------------------|
| Chronic obstructive pulmonary disease               | 85<br>(60 - 118)     | 1<br>(0 - 1)          | 0<br>(0 - 1)           | 8<br>(5 - 11)           | 34<br>(23 - 49)         | 42<br>(30 - 59)         |
| Pneumoconiosis                                      | 9<br>(5 - 15)        | 0<br>(0 - 0)          | 0<br>(0 - 0)           | 2<br>(1 - 4)            | 4<br>(2 - 7)            | 3<br>(2 - 5)            |
| Silicosis                                           | 2<br>(1 - 5)         | 0<br>(0 - 0)          | 0<br>(0 - 0)           | 1<br>(0 - 1)            | 1<br>(0 - 2)            | 1<br>(0 - 2)            |
| Asbestosis                                          | 1<br>(1 - 2)         | 0<br>(0 - 0)          | 0<br>(0 - 0)           | 0<br>(0 - 1)            | 1<br>(0 - 1)            | 0<br>(0 - 0)            |
| Coal workers pneumoconiosis                         | 1<br>(1 - 2)         | 0<br>(0 - 0)          | 0<br>(0 - 0)           | 0<br>(0 - 1)            | 1<br>(0 - 1)            | 0<br>(0 - 1)            |
| Other pneumoconiosis                                | 4<br>(2 - 8)         | 0<br>(0 - 0)          | 0<br>(0 - 0)           | 1<br>(1 - 2)            | 2<br>(1 - 4)            | 1<br>(1 - 2)            |
| Asthma                                              | 24<br>(15 - 33)      | 0<br>(0 - 1)          | 0<br>(0 - 0)           | 4<br>(3 - 6)            | 9<br>(5 - 14)           | 10<br>(6 - 14)          |
| Interstitial lung disease and pulmonary sarcoidosis | 11<br>(3 - 21)       | 0<br>(0 - 0)          | 0<br>(0 - 0)           | 2<br>(0 - 4)            | 4<br>(1 - 9)            | 5<br>(1 - 10)           |
| Other chronic respiratory diseases                  | 7<br>(5 - 10)        | 1<br>(1 - 2)          | 0<br>(0 - 0)           | 2<br>(1 - 4)            | 1<br>(1 - 2)            | 2<br>(1 - 3)            |
| Cirrhosis                                           | 72<br>(26 - 131)     | 0<br>(0 - 1)          | 0<br>(0 - 1)           | 22<br>(8 - 43)          | 36<br>(13 - 66)         | 14<br>(6 - 27)          |
| Cirrhosis due to hepatitis B                        | 16<br>(3 - 34)       | 0<br>(0 - 0)          | 0<br>(0 - 0)           | 5<br>(1 - 10)           | 8<br>(1 - 18)           | 3<br>(0 - 8)            |
| Cirrhosis due to hepatitis C                        | 17<br>(4 - 34)       | 0<br>(0 - 0)          | 0<br>(0 - 0)           | 5<br>(1 - 10)           | 9<br>(2 - 18)           | 3<br>(1 - 7)            |
| Cirrhosis due to alcohol use                        | 30<br>(13 - 58)      | --                    | --                     | 8<br>(3 - 20)           | 16<br>(6 - 31)          | 6<br>(3 - 12)           |
| Cirrhosis due to other causes                       | 9<br>(4 - 19)        | 0<br>(0 - 1)          | 0<br>(0 - 1)           | 4<br>(2 - 9)            | 3<br>(1 - 7)            | 1<br>(0 - 2)            |
| Digestive diseases                                  | 119<br>(88 - 158)    | 1<br>(0 - 2)          | 2<br>(1 - 3)           | 34<br>(23 - 50)         | 45<br>(31 - 64)         | 37<br>(29 - 49)         |
| Peptic ulcer disease                                | 33<br>(21 - 49)      | 0<br>(0 - 0)          | 0<br>(0 - 0)           | 8<br>(4 - 13)           | 14<br>(8 - 21)          | 11<br>(7 - 16)          |
| Gastritis and duodenitis                            | 4<br>(2 - 10)        | 0<br>(0 - 0)          | 0<br>(0 - 0)           | 1<br>(1 - 3)            | 2<br>(1 - 3)            | 2<br>(1 - 4)            |
| Appendicitis                                        | 9<br>(5 - 13)        | 0<br>(0 - 0)          | 0<br>(0 - 1)           | 3<br>(2 - 4)            | 3<br>(2 - 5)            | 2<br>(1 - 4)            |
| Paralytic ileus and intestinal obstruction          | 37<br>(25 - 56)      | 0<br>(0 - 1)          | 1<br>(0 - 1)           | 12<br>(7 - 19)          | 13<br>(8 - 20)          | 11<br>(7 - 18)          |
| Inguinal, femoral, and abdominal hernia             | 2<br>(1 - 3)         | 0<br>(0 - 0)          | 0<br>(0 - 0)           | 1<br>(0 - 1)            | 0<br>(0 - 1)            | 1<br>(0 - 1)            |
| Inflammatory bowel disease                          | 6<br>(4 - 10)        | 0<br>(0 - 0)          | 0<br>(0 - 0)           | 2<br>(1 - 4)            | 2<br>(1 - 4)            | 2<br>(1 - 3)            |
| Vascular intestinal disorders                       | 1<br>(1 - 2)         | 0<br>(0 - 0)          | 0<br>(0 - 0)           | 0<br>(0 - 0)            | 0<br>(0 - 1)            | 0<br>(0 - 1)            |
| Gallbladder and biliary diseases                    | 8<br>(5 - 12)        | 0<br>(0 - 0)          | 0<br>(0 - 0)           | 2<br>(1 - 2)            | 3<br>(2 - 5)            | 3<br>(2 - 5)            |
| Pancreatitis                                        | 6<br>(3 - 10)        | 0<br>(0 - 0)          | 0<br>(0 - 0)           | 3<br>(1 - 5)            | 2<br>(1 - 4)            | 1<br>(1 - 2)            |
| Other digestive diseases                            | 12<br>(8 - 19)       | 0<br>(0 - 0)          | 0<br>(0 - 0)           | 3<br>(2 - 6)            | 5<br>(3 - 8)            | 4<br>(2 - 6)            |
| Neurological disorders                              | 63<br>(48 - 82)      | 3<br>(1 - 8)          | 3<br>(1 - 6)           | 18<br>(11 - 27)         | 8<br>(6 - 11)           | 32<br>(25 - 40)         |
| Alzheimer disease and other dementias               | 31<br>(24 - 40)      | --                    | --                     | 0<br>(0 - 0)            | 3<br>(2 - 5)            | 28<br>(21 - 36)         |
| Parkinson disease                                   | 1<br>(0 - 1)         | --                    | --                     | 0<br>(0 - 0)            | 0<br>(0 - 0)            | 0<br>(0 - 1)            |
| Epilepsy                                            | 26<br>(17 - 40)      | 2<br>(0 - 7)          | 3<br>(1 - 5)           | 15<br>(9 - 25)          | 3<br>(2 - 5)            | 3<br>(2 - 5)            |
| Multiple sclerosis                                  | 0<br>(0 - 1)         | --                    | --                     | 0<br>(0 - 0)            | 0<br>(0 - 0)            | 0<br>(0 - 0)            |
| Other neurological disorders                        | 5<br>(4 - 7)         | 1<br>(0 - 2)          | 0<br>(0 - 0)           | 2<br>(1 - 3)            | 1<br>(1 - 2)            | 1<br>(0 - 1)            |
| Mental and substance use disorders                  | 29<br>(18 - 44)      | 1<br>(0 - 3)          | 0<br>(0 - 0)           | 20<br>(12 - 32)         | 6<br>(4 - 11)           | 1<br>(1 - 2)            |
| Schizophrenia                                       | 1<br>(1 - 2)         | --                    | --                     | 1<br>(0 - 1)            | 0<br>(0 - 1)            | 0<br>(0 - 0)            |
| Alcohol use disorders                               | 13<br>(6 - 25)       | --                    | --                     | 8<br>(4 - 16)           | 4<br>(2 - 8)            | 1<br>(0 - 1)            |
| Drug use disorders                                  | 14<br>(7 - 23)       | 1<br>(0 - 3)          | --                     | 11<br>(5 - 18)          | 1<br>(1 - 3)            | 0<br>(0 - 1)            |
| Opioid use disorders                                | 1<br>(1 - 2)         | 0<br>(0 - 0)          | --                     | 1<br>(1 - 2)            | 0<br>(0 - 0)            | 0<br>(0 - 0)            |
| Cocaine use disorders                               | 0<br>(0 - 0)         | 0<br>(0 - 0)          | --                     | 0<br>(0 - 0)            | 0<br>(0 - 0)            | 0<br>(0 - 0)            |
| Amphetamine use disorders                           | 0<br>(0 - 0)         | 0<br>(0 - 0)          | --                     | 0<br>(0 - 0)            | 0<br>(0 - 0)            | 0<br>(0 - 0)            |
| Other drug use disorders                            | 13<br>(6 - 20)       | 1<br>(0 - 2)          | --                     | 10<br>(5 - 16)          | 1<br>(1 - 2)            | 0<br>(0 - 1)            |
| Eating disorders                                    | 0<br>(0 - 0)         | --                    | 0<br>(0 - 0)           | 0<br>(0 - 0)            | --                      | --                      |

Web Table 31- Comoros deaths with 95% UI by age, sex, and cause in 2013

| Cause                                               | Both Sexes, All Ages | Both Sexes, 0-4 Years | Both Sexes, 5-14 Years | Both Sexes, 15-49 Years | Both Sexes, 50-69 Years | Both Sexes, 70-80 Years |
|-----------------------------------------------------|----------------------|-----------------------|------------------------|-------------------------|-------------------------|-------------------------|
| Anorexia nervosa                                    | 0<br>(0 - 0)         | --                    | 0<br>(0 - 0)           | 0<br>(0 - 0)            | --                      | --                      |
| Diabetes, urogenital, blood, and endocrine diseases | 271<br>(201 - 348)   | 11<br>(5 - 19)        | 4<br>(2 - 6)           | 63<br>(43 - 89)         | 104<br>(73 - 139)       | 88<br>(68 - 110)        |
| Diabetes mellitus                                   | 132<br>(93 - 173)    | 1<br>(0 - 1)          | 0<br>(0 - 0)           | 18<br>(11 - 26)         | 62<br>(41 - 85)         | 52<br>(37 - 68)         |
| Acute glomerulonephritis                            | 2<br>(1 - 4)         | 0<br>(0 - 0)          | 0<br>(0 - 0)           | 1<br>(0 - 2)            | 1<br>(0 - 2)            | 0<br>(0 - 1)            |
| Chronic kidney disease                              | 49<br>(33 - 70)      | 1<br>(0 - 2)          | 1<br>(0 - 2)           | 15<br>(9 - 23)          | 16<br>(10 - 25)         | 16<br>(11 - 23)         |
| Chronic kidney disease due to diabetes mellitus     | 0<br>(0 - 1)         | 0<br>(0 - 0)          | 0<br>(0 - 0)           | 0<br>(0 - 0)            | 0<br>(0 - 0)            | 0<br>(0 - 0)            |
| Chronic kidney disease due to hypertension          | 21<br>(14 - 33)      | 0<br>(0 - 0)          | 0<br>(0 - 0)           | 5<br>(3 - 8)            | 8<br>(5 - 13)           | 9<br>(6 - 13)           |
| Chronic kidney disease due to glomerulonephritis    | 13<br>(8 - 19)       | 1<br>(0 - 1)          | 0<br>(0 - 1)           | 5<br>(3 - 8)            | 4<br>(2 - 6)            | 3<br>(2 - 4)            |
| Chronic kidney disease due to other causes          | 14<br>(7 - 24)       | 0<br>(0 - 1)          | 0<br>(0 - 1)           | 5<br>(2 - 8)            | 4<br>(2 - 8)            | 5<br>(2 - 9)            |
| Urinary diseases and male infertility               | 38<br>(26 - 51)      | 1<br>(0 - 3)          | 0<br>(0 - 1)           | 11<br>(7 - 17)          | 15<br>(9 - 21)          | 10<br>(7 - 14)          |
| Interstitial nephritis and urinary tract infections | 27<br>(18 - 38)      | 1<br>(0 - 2)          | 0<br>(0 - 0)           | 8<br>(4 - 12)           | 10<br>(6 - 16)          | 8<br>(5 - 11)           |
| Urolithiasis                                        | 2<br>(1 - 3)         | --                    | 0<br>(0 - 0)           | 1<br>(0 - 1)            | 1<br>(0 - 1)            | 0<br>(0 - 1)            |
| Other urinary diseases                              | 9<br>(5 - 15)        | 0<br>(0 - 1)          | 0<br>(0 - 0)           | 3<br>(1 - 5)            | 4<br>(2 - 6)            | 2<br>(1 - 4)            |
| Gynecological diseases                              | 0<br>(0 - 1)         | --                    | --                     | 0<br>(0 - 1)            | 0<br>(0 - 0)            | 0<br>(0 - 0)            |
| Uterine fibroids                                    | 0<br>(0 - 0)         | --                    | --                     | 0<br>(0 - 0)            | 0<br>(0 - 0)            | 0<br>(0 - 0)            |
| Polycystic ovarian syndrome                         | 0<br>(0 - 0)         | --                    | --                     | 0<br>(0 - 0)            | 0<br>(0 - 0)            | --                      |
| Endometriosis                                       | 0<br>(0 - 0)         | --                    | --                     | 0<br>(0 - 0)            | 0<br>(0 - 0)            | --                      |
| Genital prolapse                                    | 0<br>(0 - 0)         | --                    | --                     | 0<br>(0 - 0)            | 0<br>(0 - 0)            | 0<br>(0 - 0)            |
| Other gynecological diseases                        | 0<br>(0 - 1)         | --                    | --                     | 0<br>(0 - 0)            | 0<br>(0 - 0)            | 0<br>(0 - 0)            |
| Hemoglobinopathies and hemolytic anemias            | 16<br>(9 - 28)       | 4<br>(1 - 7)          | 2<br>(1 - 3)           | 7<br>(3 - 12)           | 2<br>(1 - 4)            | 1<br>(1 - 3)            |
| Thalassemias                                        | 1<br>(1 - 3)         | 1<br>(0 - 1)          | 0<br>(0 - 0)           | 1<br>(0 - 1)            | 0<br>(0 - 0)            | 0<br>(0 - 0)            |
| Sickle cell disorders                               | 7<br>(4 - 13)        | 2<br>(0 - 3)          | 1<br>(0 - 2)           | 4<br>(2 - 7)            | 1<br>(1 - 2)            | 0<br>(0 - 0)            |
| G6PD deficiency                                     | 0<br>(0 - 1)         | 0<br>(0 - 0)          | 0<br>(0 - 0)           | 0<br>(0 - 0)            | 0<br>(0 - 0)            | 0<br>(0 - 0)            |
| Other hemoglobinopathies and hemolytic anemias      | 7<br>(4 - 12)        | 1<br>(1 - 2)          | 0<br>(0 - 1)           | 2<br>(1 - 4)            | 1<br>(1 - 2)            | 1<br>(1 - 3)            |
| Endocrine, metabolic, blood, and immune disorders   | 34<br>(24 - 46)      | 5<br>(2 - 9)          | 1<br>(0 - 1)           | 12<br>(7 - 18)          | 8<br>(5 - 13)           | 8<br>(5 - 12)           |
| Musculoskeletal disorders                           | 9<br>(5 - 14)        | --                    | 0<br>(0 - 1)           | 4<br>(2 - 7)            | 3<br>(1 - 4)            | 2<br>(1 - 2)            |
| Rheumatoid arthritis                                | 2<br>(1 - 3)         | --                    | 0<br>(0 - 0)           | 1<br>(0 - 1)            | 1<br>(0 - 2)            | 1<br>(0 - 1)            |
| Other musculoskeletal disorders                     | 7<br>(4 - 11)        | --                    | 0<br>(0 - 1)           | 4<br>(2 - 6)            | 2<br>(1 - 3)            | 1<br>(1 - 2)            |
| Other non-communicable diseases                     | 117<br>(78 - 164)    | 88<br>(52 - 134)      | 4<br>(2 - 6)           | 10<br>(7 - 15)          | 6<br>(4 - 9)            | 8<br>(6 - 11)           |
| Congenital anomalies                                | 96<br>(60 - 143)     | 84<br>(50 - 130)      | 4<br>(2 - 6)           | 6<br>(4 - 8)            | 1<br>(1 - 2)            | 1<br>(1 - 1)            |
| Neural tube defects                                 | 20<br>(7 - 44)       | 19<br>(6 - 42)        | 0<br>(0 - 1)           | 1<br>(0 - 1)            | 0<br>(0 - 0)            | 0<br>(0 - 0)            |
| Congenital heart anomalies                          | 43<br>(25 - 70)      | 37<br>(20 - 63)       | 2<br>(1 - 3)           | 3<br>(2 - 4)            | 1<br>(0 - 1)            | 0<br>(0 - 1)            |
| Cleft lip and cleft palate                          | 0<br>(0 - 1)         | 0<br>(0 - 1)          | --                     | --                      | --                      | --                      |
| Down syndrome                                       | 6<br>(2 - 11)        | 4<br>(1 - 9)          | 0<br>(0 - 1)           | 1<br>(0 - 1)            | 0<br>(0 - 0)            | 0<br>(0 - 0)            |
| Chromosomal unbalanced rearrangements               | 4<br>(2 - 8)         | 4<br>(1 - 8)          | 0<br>(0 - 0)           | 0<br>(0 - 0)            | 0<br>(0 - 0)            | 0<br>(0 - 0)            |
| Other congenital anomalies                          | 22<br>(10 - 46)      | 19<br>(9 - 42)        | 1<br>(0 - 1)           | 1<br>(1 - 2)            | 0<br>(0 - 1)            | 0<br>(0 - 1)            |
| Skin and subcutaneous diseases                      | 19<br>(14 - 26)      | 2<br>(1 - 6)          | 0<br>(0 - 0)           | 5<br>(3 - 8)            | 5<br>(3 - 7)            | 7<br>(5 - 9)            |
| Cellulitis                                          | 8<br>(4 - 13)        | 1<br>(0 - 3)          | 0<br>(0 - 0)           | 2<br>(1 - 4)            | 2<br>(1 - 4)            | 2<br>(1 - 4)            |
| Pyoderma                                            | 9<br>(6 - 13)        | 1<br>(0 - 4)          | 0<br>(0 - 0)           | 2<br>(1 - 4)            | 2<br>(1 - 4)            | 3<br>(2 - 5)            |
| Decubitus ulcer                                     | 2<br>(1 - 3)         | 0<br>(0 - 0)          | 0<br>(0 - 0)           | 0<br>(0 - 1)            | 0<br>(0 - 1)            | 1<br>(1 - 2)            |

Web Table 31- Comoros deaths with 95% UI by age, sex, and cause in 2013

| Cause                                           | Both Sexes, All Ages | Both Sexes, 0-4 Years | Both Sexes, 5-14 Years | Both Sexes, 15-49 Years | Both Sexes, 50-69 Years | Both Sexes, 70-80 Years |
|-------------------------------------------------|----------------------|-----------------------|------------------------|-------------------------|-------------------------|-------------------------|
| Other skin and subcutaneous diseases            | 1<br>(0 - 1)         | 0<br>(0 - 0)          | 0<br>(0 - 0)           | 0<br>(0 - 0)            | 0<br>(0 - 0)            | 0<br>(0 - 0)            |
| Sudden infant death syndrome                    | 1<br>(0 - 4)         | 1<br>(0 - 4)          | --                     | --                      | --                      | --                      |
| Injuries                                        | 464<br>(320 - 662)   | 40<br>(13 - 129)      | 27<br>(14 - 41)        | 247<br>(159 - 352)      | 100<br>(66 - 143)       | 50<br>(37 - 66)         |
| Transport injuries                              | 224<br>(139 - 320)   | 7<br>(2 - 14)         | 13<br>(6 - 21)         | 126<br>(71 - 186)       | 56<br>(34 - 84)         | 23<br>(15 - 31)         |
| Road injuries                                   | 219<br>(136 - 313)   | 6<br>(2 - 13)         | 13<br>(6 - 20)         | 124<br>(70 - 182)       | 54<br>(33 - 83)         | 22<br>(15 - 30)         |
| Pedestrian road injuries                        | 47<br>(20 - 81)      | 1<br>(0 - 3)          | 3<br>(1 - 6)           | 26<br>(10 - 47)         | 12<br>(5 - 21)          | 5<br>(3 - 8)            |
| Cyclist road injuries                           | 7<br>(3 - 14)        | 0<br>(0 - 1)          | 1<br>(0 - 1)           | 4<br>(1 - 7)            | 2<br>(1 - 4)            | 1<br>(0 - 1)            |
| Motorcyclist road injuries                      | 17<br>(5 - 29)       | 0<br>(0 - 1)          | 1<br>(0 - 1)           | 10<br>(3 - 19)          | 4<br>(1 - 7)            | 2<br>(0 - 3)            |
| Motor vehicle road injuries                     | 147<br>(93 - 218)    | 4<br>(1 - 9)          | 8<br>(4 - 13)          | 84<br>(50 - 128)        | 36<br>(22 - 55)         | 15<br>(9 - 21)          |
| Other road injuries                             | 1<br>(0 - 1)         | 0<br>(0 - 0)          | 0<br>(0 - 0)           | 0<br>(0 - 0)            | 0<br>(0 - 0)            | 0<br>(0 - 0)            |
| Other transport injuries                        | 5<br>(2 - 8)         | 0<br>(0 - 1)          | 1<br>(0 - 1)           | 2<br>(1 - 3)            | 1<br>(1 - 2)            | 1<br>(0 - 2)            |
| Unintentional injuries                          | 159<br>(101 - 379)   | 32<br>(10 - 121)      | 12<br>(6 - 26)         | 60<br>(35 - 140)        | 32<br>(20 - 63)         | 24<br>(15 - 34)         |
| Falls                                           | 18<br>(10 - 25)      | 1<br>(0 - 2)          | 1<br>(0 - 2)           | 6<br>(3 - 10)           | 4<br>(2 - 6)            | 6<br>(3 - 9)            |
| Drowning                                        | 31<br>(19 - 47)      | 5<br>(1 - 13)         | 5<br>(2 - 7)           | 16<br>(10 - 25)         | 4<br>(2 - 6)            | 1<br>(1 - 2)            |
| Fire, heat, and hot substances                  | 18<br>(12 - 30)      | 4<br>(1 - 12)         | 1<br>(1 - 3)           | 6<br>(4 - 10)           | 4<br>(2 - 6)            | 3<br>(2 - 4)            |
| Poisonings                                      | 6<br>(4 - 10)        | 1<br>(0 - 1)          | 0<br>(0 - 0)           | 4<br>(2 - 6)            | 2<br>(1 - 3)            | 0<br>(0 - 1)            |
| Exposure to mechanical forces                   | 44<br>(13 - 276)     | 13<br>(2 - 96)        | 3<br>(1 - 18)          | 16<br>(5 - 96)          | 9<br>(2 - 42)           | 3<br>(1 - 15)           |
| Unintentional firearm injuries                  | 4<br>(2 - 6)         | 0<br>(0 - 0)          | 0<br>(0 - 0)           | 3<br>(1 - 4)            | 1<br>(0 - 1)            | 0<br>(0 - 0)            |
| Unintentional suffocation                       | 29<br>(2 - 266)      | 11<br>(1 - 95)        | 2<br>(0 - 18)          | 10<br>(1 - 91)          | 5<br>(0 - 41)           | 2<br>(0 - 14)           |
| Other exposure to mechanical forces             | 11<br>(4 - 17)       | 2<br>(0 - 4)          | 1<br>(0 - 2)           | 4<br>(2 - 7)            | 3<br>(1 - 5)            | 1<br>(0 - 1)            |
| Adverse effects of medical treatment            | 24<br>(15 - 34)      | 4<br>(2 - 10)         | 1<br>(0 - 1)           | 6<br>(4 - 9)            | 6<br>(4 - 10)           | 7<br>(3 - 12)           |
| Animal contact                                  | 7<br>(3 - 13)        | 1<br>(0 - 2)          | 1<br>(0 - 2)           | 3<br>(1 - 6)            | 2<br>(1 - 4)            | 1<br>(0 - 2)            |
| Venomous animal contact                         | 4<br>(2 - 8)         | 0<br>(0 - 1)          | 0<br>(0 - 1)           | 2<br>(1 - 4)            | 1<br>(0 - 2)            | 1<br>(0 - 1)            |
| Non-venomous animal contact                     | 3<br>(2 - 7)         | 0<br>(0 - 1)          | 0<br>(0 - 1)           | 1<br>(1 - 3)            | 1<br>(0 - 2)            | 0<br>(0 - 1)            |
| Foreign body                                    | 7<br>(5 - 12)        | 3<br>(1 - 6)          | 0<br>(0 - 1)           | 1<br>(1 - 2)            | 1<br>(0 - 2)            | 2<br>(1 - 4)            |
| Pulmonary aspiration and foreign body in airway | 7<br>(4 - 10)        | 3<br>(1 - 6)          | 0<br>(0 - 0)           | 1<br>(1 - 1)            | 1<br>(0 - 1)            | 2<br>(1 - 3)            |
| Foreign body in other body part                 | 1<br>(0 - 3)         | 0<br>(0 - 0)          | 0<br>(0 - 0)           | 0<br>(0 - 1)            | 0<br>(0 - 1)            | 0<br>(0 - 1)            |
| Other unintentional injuries                    | 3<br>(1 - 6)         | 0<br>(0 - 1)          | 0<br>(0 - 1)           | 2<br>(1 - 4)            | 1<br>(0 - 1)            | 0<br>(0 - 1)            |
| Self-harm and interpersonal violence            | 80<br>(43 - 124)     | 1<br>(0 - 3)          | 1<br>(1 - 3)           | 62<br>(32 - 99)         | 12<br>(6 - 20)          | 4<br>(2 - 7)            |
| Self-harm                                       | 35<br>(16 - 62)      | --                    | 1<br>(0 - 1)           | 24<br>(10 - 44)         | 8<br>(4 - 15)           | 3<br>(2 - 6)            |
| Interpersonal violence                          | 45<br>(21 - 78)      | 1<br>(0 - 3)          | 1<br>(0 - 2)           | 38<br>(17 - 69)         | 4<br>(2 - 7)            | 1<br>(0 - 1)            |
| Assault by firearm                              | 17<br>(7 - 35)       | 0<br>(0 - 1)          | 0<br>(0 - 1)           | 15<br>(6 - 31)          | 1<br>(1 - 3)            | 0<br>(0 - 0)            |
| Assault by sharp object                         | 11<br>(5 - 20)       | 0<br>(0 - 1)          | 0<br>(0 - 0)           | 9<br>(4 - 18)           | 1<br>(0 - 2)            | 0<br>(0 - 0)            |
| Assault by other means                          | 17<br>(7 - 31)       | 1<br>(0 - 2)          | 1<br>(0 - 1)           | 14<br>(5 - 26)          | 2<br>(1 - 3)            | 0<br>(0 - 1)            |

Web Table 31- Comoros deaths with 95% UI by age, sex, and cause in 2013

| Cause                                                             | Males, All Ages          | Males, 0-4 Years   | Males, 5-14 Years | Males, 15-49 Years   | Males, 50-69 Years   | Males, 70-80 Years |
|-------------------------------------------------------------------|--------------------------|--------------------|-------------------|----------------------|----------------------|--------------------|
| All causes                                                        | 2,842<br>(2,234 - 3,575) | 654<br>(488 - 896) | 85<br>(65 - 108)  | 789<br>(514 - 1,114) | 782<br>(524 - 1,088) | 532<br>(426 - 621) |
| Communicable, maternal, neonatal, and nutritional diseases        | 1,388<br>(1,090 - 1,719) | 565<br>(404 - 756) | 56<br>(39 - 79)   | 343<br>(232 - 474)   | 262<br>(172 - 359)   | 163<br>(122 - 206) |
| HIV/AIDS and tuberculosis                                         | 277<br>(159 - 426)       | 4<br>(2 - 9)       | 2<br>(1 - 4)      | 137<br>(72 - 224)    | 100<br>(55 - 158)    | 33<br>(20 - 47)    |
| Tuberculosis                                                      | 252<br>(140 - 388)       | 4<br>(1 - 7)       | 1<br>(1 - 3)      | 117<br>(58 - 195)    | 96<br>(52 - 154)     | 33<br>(20 - 47)    |
| HIV/AIDS                                                          | 25<br>(4 - 117)          | 1<br>(0 - 5)       | 0<br>(0 - 2)      | 20<br>(3 - 90)       | 4<br>(1 - 20)        | 0<br>(0 - 2)       |
| HIV/AIDS resulting in mycobacterial infection                     | 2<br>(0 - 9)             | 0<br>(0 - 0)       | 0<br>(0 - 0)      | 1<br>(0 - 7)         | 0<br>(0 - 2)         | 0<br>(0 - 0)       |
| HIV/AIDS resulting in other diseases                              | 24<br>(3 - 109)          | 1<br>(0 - 4)       | 0<br>(0 - 2)      | 18<br>(3 - 83)       | 4<br>(1 - 19)        | 0<br>(0 - 2)       |
| Diarrhea, lower respiratory, and other common infectious diseases | 558<br>(376 - 775)       | 211<br>(118 - 330) | 26<br>(14 - 51)   | 109<br>(57 - 175)    | 112<br>(60 - 174)    | 101<br>(67 - 139)  |
| Diarrheal diseases                                                | 156<br>(83 - 244)        | 33<br>(10 - 80)    | 5<br>(2 - 10)     | 41<br>(20 - 72)      | 43<br>(19 - 82)      | 34<br>(17 - 56)    |
| Intestinal infectious diseases                                    | 17<br>(7 - 33)           | 4<br>(1 - 11)      | 4<br>(1 - 7)      | 7<br>(3 - 16)        | 1<br>(0 - 2)         | 0<br>(0 - 0)       |
| Typhoid fever                                                     | 12<br>(5 - 25)           | 3<br>(1 - 8)       | 3<br>(1 - 6)      | 6<br>(2 - 12)        | 1<br>(0 - 1)         | 0<br>(0 - 0)       |
| Paratyphoid fever                                                 | 3<br>(1 - 7)             | 1<br>(0 - 3)       | 1<br>(0 - 2)      | 1<br>(0 - 3)         | 0<br>(0 - 0)         | 0<br>(0 - 0)       |
| Other intestinal infectious diseases                              | 1<br>(0 - 4)             | 0<br>(0 - 2)       | 0<br>(0 - 1)      | 0<br>(0 - 2)         | 0<br>(0 - 0)         | 0<br>(0 - 0)       |
| Lower respiratory infections                                      | 264<br>(168 - 369)       | 95<br>(46 - 154)   | 5<br>(2 - 10)     | 41<br>(20 - 68)      | 58<br>(30 - 93)      | 64<br>(39 - 95)    |
| Upper respiratory infections                                      | 0<br>(0 - 1)             | 0<br>(0 - 0)       | 0<br>(0 - 0)      | 0<br>(0 - 1)         | 0<br>(0 - 0)         | 0<br>(0 - 0)       |
| Otitis media                                                      | 0<br>(0 - 0)             | 0<br>(0 - 0)       | 0<br>(0 - 0)      | 0<br>(0 - 0)         | 0<br>(0 - 0)         | 0<br>(0 - 0)       |
| Meningitis                                                        | 42<br>(25 - 64)          | 14<br>(6 - 27)     | 3<br>(1 - 5)      | 15<br>(7 - 26)       | 8<br>(4 - 15)        | 2<br>(1 - 4)       |
| Pneumococcal meningitis                                           | 10<br>(6 - 17)           | 2<br>(1 - 5)       | 1<br>(0 - 2)      | 4<br>(2 - 8)         | 2<br>(1 - 4)         | 1<br>(0 - 1)       |
| H influenzae type B meningitis                                    | 8<br>(4 - 13)            | 4<br>(2 - 9)       | 1<br>(0 - 1)      | 2<br>(1 - 4)         | 1<br>(0 - 2)         | 0<br>(0 - 1)       |
| Meningococcal meningitis                                          | 7<br>(4 - 12)            | 2<br>(1 - 3)       | 0<br>(0 - 1)      | 3<br>(1 - 5)         | 2<br>(1 - 4)         | 1<br>(0 - 1)       |
| Other meningitis                                                  | 16<br>(10 - 26)          | 5<br>(2 - 11)      | 1<br>(0 - 2)      | 6<br>(3 - 11)        | 3<br>(1 - 6)         | 1<br>(0 - 2)       |
| Encephalitis                                                      | 2<br>(1 - 3)             | 1<br>(0 - 2)       | 0<br>(0 - 0)      | 1<br>(0 - 1)         | 0<br>(0 - 0)         | 0<br>(0 - 0)       |
| Diphtheria                                                        | 0<br>(0 - 1)             | 0<br>(0 - 1)       | 0<br>(0 - 0)      | 0<br>(0 - 0)         | 0<br>(0 - 0)         | --<br>(0 - 0)      |
| Whooping cough                                                    | 6<br>(0 - 31)            | 6<br>(0 - 30)      | 0<br>(0 - 1)      | 0<br>(0 - 0)         | 0<br>(0 - 0)         | --<br>(0 - 0)      |
| Tetanus                                                           | 6<br>(2 - 11)            | 3<br>(1 - 6)       | 0<br>(0 - 0)      | 2<br>(1 - 5)         | 1<br>(0 - 2)         | 0<br>(0 - 0)       |
| Measles                                                           | 65<br>(3 - 242)          | 55<br>(2 - 197)    | 8<br>(0 - 41)     | 2<br>(0 - 15)        | 0<br>(0 - 1)         | --<br>(0 - 1)      |
| Varicella and herpes zoster                                       | 0<br>(0 - 1)             | 0<br>(0 - 1)       | 0<br>(0 - 0)      | 0<br>(0 - 0)         | 0<br>(0 - 0)         | 0<br>(0 - 0)       |
| Neglected tropical diseases and malaria                           | 163<br>(85 - 281)        | 41<br>(9 - 105)    | 24<br>(11 - 40)   | 68<br>(32 - 129)     | 22<br>(10 - 41)      | 8<br>(3 - 17)      |
| Malaria                                                           | 117<br>(56 - 222)        | 29<br>(4 - 86)     | 15<br>(5 - 30)    | 48<br>(18 - 99)      | 19<br>(7 - 37)       | 7<br>(2 - 15)      |
| Leishmaniasis                                                     | 42<br>(18 - 82)          | 11<br>(2 - 27)     | 8<br>(2 - 18)     | 19<br>(6 - 41)       | 3<br>(1 - 7)         | 1<br>(0 - 2)       |
| Visceral leishmaniasis                                            | 42<br>(18 - 82)          | 11<br>(2 - 27)     | 8<br>(2 - 18)     | 19<br>(6 - 41)       | 3<br>(1 - 7)         | 1<br>(0 - 2)       |
| Cysticercosis                                                     | 0<br>(0 - 0)             | 0<br>(0 - 0)       | 0<br>(0 - 0)      | 0<br>(0 - 0)         | 0<br>(0 - 0)         | 0<br>(0 - 0)       |
| Cystic echinococcosis                                             | 0<br>(0 - 0)             | 0<br>(0 - 0)       | 0<br>(0 - 0)      | 0<br>(0 - 0)         | 0<br>(0 - 0)         | 0<br>(0 - 0)       |
| Dengue                                                            | 0<br>(0 - 0)             | 0<br>(0 - 0)       | 0<br>(0 - 0)      | 0<br>(0 - 0)         | 0<br>(0 - 0)         | 0<br>(0 - 0)       |
| Rabies                                                            | 2<br>(1 - 3)             | 0<br>(0 - 1)       | 0<br>(0 - 1)      | 1<br>(0 - 2)         | 0<br>(0 - 0)         | 0<br>(0 - 0)       |
| Intestinal nematode infections                                    | 1<br>(0 - 5)             | 0<br>(0 - 3)       | 0<br>(0 - 1)      | 0<br>(0 - 1)         | 0<br>(0 - 0)         | 0<br>(0 - 0)       |
| Ascariasis                                                        | 1<br>(0 - 5)             | 0<br>(0 - 3)       | 0<br>(0 - 1)      | 0<br>(0 - 1)         | 0<br>(0 - 0)         | 0<br>(0 - 0)       |
| Other neglected tropical diseases                                 | 1<br>(0 - 2)             | 0<br>(0 - 0)       | 0<br>(0 - 0)      | 0<br>(0 - 0)         | 0<br>(0 - 1)         | 0<br>(0 - 0)       |
| Maternal disorders                                                | --                       | --                 | --                | --                   | --                   | --                 |
| Maternal hemorrhage                                               | --                       | --                 | --                | --                   | --                   | --                 |

Web Table 31- Comoros deaths with 95% UI by age, sex, and cause in 2013

| Cause                                                            | Males, All Ages        | Males, 0-4 Years   | Males, 5-14 Years | Males, 15-49 Years | Males, 50-69 Years | Males, 70-80 Years |
|------------------------------------------------------------------|------------------------|--------------------|-------------------|--------------------|--------------------|--------------------|
| Maternal sepsis and other maternal infections                    | --                     | --                 | --                | --                 | --                 | --                 |
| Maternal hypertensive disorders                                  | --                     | --                 | --                | --                 | --                 | --                 |
| Maternal obstructed labor                                        | --                     | --                 | --                | --                 | --                 | --                 |
| Maternal abortive outcome                                        | --                     | --                 | --                | --                 | --                 | --                 |
| Indirect maternal deaths                                         | --                     | --                 | --                | --                 | --                 | --                 |
| Late maternal deaths                                             | --                     | --                 | --                | --                 | --                 | --                 |
| Maternal deaths aggravated by HIV/AIDS                           | --                     | --                 | --                | --                 | --                 | --                 |
| Other maternal disorders                                         | --                     | --                 | --                | --                 | --                 | --                 |
| Neonatal disorders                                               | 273<br>(210 - 352)     | 273<br>(210 - 352) | --                | --                 | --                 | --                 |
| Neonatal preterm birth complications                             | 81<br>(43 - 133)       | 81<br>(43 - 133)   | --                | --                 | --                 | --                 |
| Neonatal encephalopathy due to birth asphyxia and trauma         | 71<br>(40 - 110)       | 71<br>(40 - 110)   | --                | --                 | --                 | --                 |
| Neonatal sepsis and other neonatal infections                    | 78<br>(38 - 142)       | 78<br>(38 - 142)   | --                | --                 | --                 | --                 |
| Hemolytic disease and other neonatal jaundice                    | 2<br>(0 - 4)           | 2<br>(0 - 4)       | --                | --                 | --                 | --                 |
| Other neonatal disorders                                         | 40<br>(17 - 67)        | 40<br>(17 - 67)    | --                | --                 | --                 | --                 |
| Nutritional deficiencies                                         | 87<br>(49 - 138)       | 25<br>(7 - 48)     | 3<br>(1 - 6)      | 20<br>(9 - 36)     | 21<br>(10 - 37)    | 18<br>(10 - 30)    |
| Protein-energy malnutrition                                      | 63<br>(31 - 105)       | 23<br>(6 - 44)     | 3<br>(1 - 5)      | 11<br>(4 - 21)     | 14<br>(6 - 27)     | 12<br>(6 - 21)     |
| Iodine deficiency                                                | 0<br>(0 - 0)           | 0<br>(0 - 0)       | 0<br>(0 - 0)      | 0<br>(0 - 0)       | 0<br>(0 - 0)       | 0<br>(0 - 0)       |
| Iron-deficiency anemia                                           | 24<br>(9 - 47)         | 2<br>(0 - 7)       | 1<br>(0 - 1)      | 9<br>(3 - 17)      | 6<br>(2 - 15)      | 6<br>(2 - 13)      |
| Other nutritional deficiencies                                   | 0<br>(0 - 1)           | 0<br>(0 - 0)       | 0<br>(0 - 0)      | 0<br>(0 - 0)       | 0<br>(0 - 0)       | 0<br>(0 - 0)       |
| Other communicable, maternal, neonatal, and nutritional diseases | 30<br>(18 - 45)        | 12<br>(5 - 23)     | 1<br>(0 - 2)      | 8<br>(4 - 14)      | 7<br>(3 - 12)      | 3<br>(1 - 6)       |
| Sexually transmitted diseases excluding HIV                      | 11<br>(4 - 20)         | 8<br>(2 - 17)      | 0<br>(0 - 1)      | 1<br>(0 - 2)       | 1<br>(0 - 2)       | 0<br>(0 - 1)       |
| Syphilis                                                         | 10<br>(3 - 20)         | 8<br>(2 - 17)      | 0<br>(0 - 1)      | 0<br>(0 - 1)       | 1<br>(0 - 2)       | 0<br>(0 - 1)       |
| Chlamydial infection                                             | --                     | --                 | --                | --                 | --                 | --                 |
| Gonococcal infection                                             | 0<br>(0 - 1)           | --                 | 0<br>(0 - 0)      | 0<br>(0 - 0)       | 0<br>(0 - 0)       | 0<br>(0 - 0)       |
| Other sexually transmitted diseases                              | 0<br>(0 - 1)           | --                 | 0<br>(0 - 0)      | 0<br>(0 - 0)       | 0<br>(0 - 0)       | 0<br>(0 - 0)       |
| Hepatitis                                                        | 5<br>(3 - 9)           | 0<br>(0 - 1)       | 0<br>(0 - 0)      | 3<br>(1 - 5)       | 2<br>(1 - 3)       | 0<br>(0 - 1)       |
| Acute hepatitis A                                                | 0<br>(0 - 1)           | 0<br>(0 - 0)       | 0<br>(0 - 0)      | 0<br>(0 - 0)       | 0<br>(0 - 0)       | 0<br>(0 - 0)       |
| Acute hepatitis B                                                | 4<br>(2 - 6)           | 0<br>(0 - 1)       | 0<br>(0 - 0)      | 2<br>(1 - 3)       | 1<br>(1 - 2)       | 0<br>(0 - 1)       |
| Acute hepatitis C                                                | 0<br>(0 - 0)           | --                 | 0<br>(0 - 0)      | 0<br>(0 - 0)       | 0<br>(0 - 0)       | 0<br>(0 - 0)       |
| Acute hepatitis E                                                | 1<br>(1 - 3)           | 0<br>(0 - 0)       | 0<br>(0 - 0)      | 1<br>(0 - 2)       | 0<br>(0 - 1)       | 0<br>(0 - 0)       |
| Other infectious diseases                                        | 14<br>(7 - 24)         | 3<br>(1 - 8)       | 0<br>(0 - 1)      | 4<br>(2 - 9)       | 4<br>(1 - 10)      | 2<br>(1 - 5)       |
| Non-communicable diseases                                        | 1,131<br>(772 - 1,567) | 66<br>(36 - 106)   | 13<br>(7 - 20)    | 253<br>(141 - 402) | 454<br>(285 - 667) | 344<br>(261 - 417) |
| Neoplasms                                                        | 170<br>(112 - 239)     | 4<br>(1 - 9)       | 3<br>(2 - 6)      | 43<br>(23 - 69)    | 79<br>(50 - 114)   | 40<br>(30 - 51)    |
| Esophageal cancer                                                | 26<br>(15 - 40)        | --                 | --                | 3<br>(2 - 6)       | 16<br>(9 - 26)     | 6<br>(4 - 9)       |
| Stomach cancer                                                   | 15<br>(10 - 22)        | --                 | --                | 3<br>(2 - 5)       | 8<br>(5 - 12)      | 4<br>(3 - 6)       |
| Liver cancer                                                     | 22<br>(13 - 35)        | --                 | 0<br>(0 - 0)      | 9<br>(4 - 17)      | 10<br>(5 - 15)     | 3<br>(2 - 5)       |
| Liver cancer due to hepatitis B                                  | 6<br>(2 - 12)          | --                 | 0<br>(0 - 0)      | 3<br>(1 - 7)       | 2<br>(1 - 5)       | 1<br>(0 - 1)       |
| Liver cancer due to hepatitis C                                  | 11<br>(4 - 19)         | --                 | 0<br>(0 - 0)      | 4<br>(1 - 8)       | 5<br>(2 - 9)       | 2<br>(1 - 3)       |
| Liver cancer due to alcohol use                                  | 3<br>(1 - 5)           | --                 | --                | 1<br>(0 - 2)       | 2<br>(1 - 3)       | 1<br>(0 - 1)       |
| Liver cancer due to other causes                                 | 2<br>(1 - 5)           | --                 | 0<br>(0 - 0)      | 1<br>(0 - 3)       | 1<br>(0 - 2)       | 0<br>(0 - 0)       |

Web Table 31- Comoros deaths with 95% UI by age, sex, and cause in 2013

| Cause                                         | Males, All Ages    | Males, 0-4 Years | Males, 5-14 Years | Males, 15-49 Years | Males, 50-69 Years | Males, 70-80 Years |
|-----------------------------------------------|--------------------|------------------|-------------------|--------------------|--------------------|--------------------|
| Larynx cancer                                 | 2<br>(1 - 3)       | --               | --                | 0<br>(0 - 1)       | 1<br>(1 - 2)       | 1<br>(0 - 1)       |
| Tracheal, bronchus and lung cancer            | 13<br>(8 - 19)     | --               | --                | 1<br>(1 - 2)       | 9<br>(5 - 13)      | 3<br>(2 - 4)       |
| Breast cancer                                 | 1<br>(1 - 2)       | --               | --                | 0<br>(0 - 1)       | 1<br>(0 - 1)       | 0<br>(0 - 0)       |
| Cervical cancer                               | --                 | --               | --                | --                 | --                 | --                 |
| Uterine cancer                                | --                 | --               | --                | --                 | --                 | --                 |
| Prostate cancer                               | 13<br>(8 - 20)     | --               | --                | 0<br>(0 - 1)       | 5<br>(2 - 8)       | 8<br>(5 - 13)      |
| Colon and rectum cancer                       | 14<br>(8 - 20)     | --               | --                | 5<br>(3 - 8)       | 6<br>(4 - 9)       | 3<br>(2 - 4)       |
| Lip and oral cavity cancer                    | 3<br>(2 - 5)       | --               | --                | 1<br>(0 - 1)       | 2<br>(1 - 3)       | 1<br>(0 - 1)       |
| Nasopharynx cancer                            | 1<br>(1 - 2)       | --               | 0<br>(0 - 0)      | 1<br>(0 - 1)       | 0<br>(0 - 1)       | 0<br>(0 - 0)       |
| Other pharynx cancer                          | 2<br>(1 - 2)       | --               | --                | 0<br>(0 - 1)       | 1<br>(0 - 1)       | 0<br>(0 - 0)       |
| Gallbladder and biliary tract cancer          | 2<br>(1 - 2)       | --               | --                | 1<br>(0 - 1)       | 1<br>(0 - 1)       | 0<br>(0 - 0)       |
| Pancreatic cancer                             | 5<br>(3 - 7)       | --               | --                | 1<br>(1 - 2)       | 3<br>(2 - 4)       | 1<br>(0 - 1)       |
| Malignant skin melanoma                       | 1<br>(0 - 2)       | --               | --                | 0<br>(0 - 1)       | 0<br>(0 - 1)       | 0<br>(0 - 0)       |
| Non-melanoma skin cancer                      | 1<br>(0 - 1)       | --               | --                | 0<br>(0 - 0)       | 0<br>(0 - 1)       | 0<br>(0 - 0)       |
| Ovarian cancer                                | --                 | --               | --                | --                 | --                 | --                 |
| Testicular cancer                             | 1<br>(1 - 2)       | --               | --                | 1<br>(0 - 1)       | 0<br>(0 - 1)       | 0<br>(0 - 0)       |
| Kidney cancer                                 | 4<br>(2 - 6)       | 0<br>(0 - 1)     | 0<br>(0 - 0)      | 1<br>(0 - 1)       | 2<br>(1 - 4)       | 1<br>(0 - 1)       |
| Bladder cancer                                | 5<br>(3 - 7)       | --               | --                | 1<br>(0 - 1)       | 2<br>(1 - 4)       | 2<br>(1 - 3)       |
| Brain and nervous system cancer               | 3<br>(2 - 5)       | 0<br>(0 - 0)     | 0<br>(0 - 1)      | 1<br>(1 - 3)       | 1<br>(1 - 2)       | 0<br>(0 - 1)       |
| Thyroid cancer                                | 0<br>(0 - 1)       | --               | 0<br>(0 - 0)      | 0<br>(0 - 0)       | 0<br>(0 - 0)       | 0<br>(0 - 0)       |
| Mesothelioma                                  | 0<br>(0 - 1)       | --               | --                | 0<br>(0 - 0)       | 0<br>(0 - 0)       | 0<br>(0 - 0)       |
| Hodgkin lymphoma                              | 1<br>(1 - 2)       | 0<br>(0 - 0)     | 0<br>(0 - 0)      | 1<br>(0 - 1)       | 0<br>(0 - 1)       | 0<br>(0 - 0)       |
| Non-Hodgkin lymphoma                          | 13<br>(8 - 19)     | 1<br>(0 - 4)     | 1<br>(0 - 3)      | 5<br>(2 - 8)       | 4<br>(2 - 6)       | 2<br>(1 - 2)       |
| Multiple myeloma                              | 2<br>(1 - 3)       | --               | --                | 0<br>(0 - 1)       | 1<br>(0 - 2)       | 0<br>(0 - 1)       |
| Leukemia                                      | 4<br>(2 - 6)       | 0<br>(0 - 0)     | 0<br>(0 - 1)      | 2<br>(1 - 3)       | 1<br>(0 - 1)       | 0<br>(0 - 1)       |
| Other neoplasms                               | 17<br>(11 - 25)    | 2<br>(1 - 5)     | 1<br>(0 - 2)      | 5<br>(2 - 8)       | 6<br>(3 - 9)       | 3<br>(2 - 5)       |
| Cardiovascular diseases                       | 506<br>(342 - 699) | 3<br>(1 - 5)     | 2<br>(1 - 3)      | 87<br>(46 - 139)   | 227<br>(142 - 334) | 188<br>(142 - 231) |
| Rheumatic heart disease                       | 15<br>(8 - 28)     | 0<br>(0 - 0)     | 0<br>(0 - 1)      | 6<br>(3 - 12)      | 6<br>(3 - 11)      | 3<br>(2 - 5)       |
| Ischemic heart disease                        | 120<br>(76 - 177)  | 0<br>(0 - 0)     | 0<br>(0 - 0)      | 18<br>(9 - 31)     | 60<br>(35 - 92)    | 42<br>(28 - 58)    |
| Cerebrovascular disease                       | 248<br>(162 - 346) | 1<br>(0 - 1)     | 0<br>(0 - 1)      | 32<br>(17 - 52)    | 111<br>(66 - 164)  | 104<br>(75 - 132)  |
| Ischemic stroke                               | 91<br>(27 - 149)   | 0<br>(0 - 0)     | 0<br>(0 - 0)      | 4<br>(1 - 9)       | 33<br>(9 - 61)     | 53<br>(18 - 82)    |
| Hemorrhagic stroke                            | 158<br>(93 - 250)  | 1<br>(0 - 1)     | 0<br>(0 - 1)      | 28<br>(15 - 45)    | 78<br>(44 - 126)   | 51<br>(28 - 88)    |
| Hypertensive heart disease                    | 36<br>(20 - 62)    | 0<br>(0 - 0)     | 0<br>(0 - 0)      | 5<br>(2 - 10)      | 15<br>(8 - 29)     | 15<br>(8 - 28)     |
| Cardiomyopathy and myocarditis                | 23<br>(12 - 37)    | 1<br>(0 - 2)     | 0<br>(0 - 1)      | 8<br>(4 - 15)      | 9<br>(4 - 16)      | 4<br>(2 - 7)       |
| Atrial fibrillation and flutter               | 0<br>(0 - 0)       | --               | --                | 0<br>(0 - 0)       | 0<br>(0 - 0)       | 0<br>(0 - 0)       |
| Aortic aneurysm                               | 7<br>(4 - 12)      | --               | --                | 1<br>(1 - 2)       | 3<br>(2 - 6)       | 3<br>(1 - 5)       |
| Peripheral vascular disease                   | 0<br>(0 - 0)       | --               | --                | 0<br>(0 - 0)       | 0<br>(0 - 0)       | 0<br>(0 - 0)       |
| Endocarditis                                  | 6<br>(3 - 11)      | 0<br>(0 - 1)     | 0<br>(0 - 0)      | 2<br>(1 - 4)       | 2<br>(1 - 4)       | 2<br>(1 - 3)       |
| Other cardiovascular and circulatory diseases | 50<br>(28 - 85)    | 1<br>(0 - 2)     | 0<br>(0 - 1)      | 13<br>(6 - 24)     | 21<br>(10 - 37)    | 15<br>(9 - 26)     |
| Chronic respiratory diseases                  | 72<br>(47 - 102)   | 1<br>(0 - 2)     | 0<br>(0 - 1)      | 10<br>(5 - 17)     | 29<br>(17 - 43)    | 32<br>(22 - 43)    |



Web Table 31- Comoros deaths with 95% UI by age, sex, and cause in 2013

| Cause                                               | Males, All Ages  | Males, 0-4 Years | Males, 5-14 Years | Males, 15-49 Years | Males, 50-69 Years | Males, 70-80 Years |
|-----------------------------------------------------|------------------|------------------|-------------------|--------------------|--------------------|--------------------|
| Chronic obstructive pulmonary disease               | 45<br>(29 - 66)  | 0<br>(0 - 1)     | 0<br>(0 - 0)      | 4<br>(2 - 8)       | 18<br>(10 - 28)    | 22<br>(14 - 32)    |
| Pneumoconiosis                                      | 9<br>(5 - 15)    | 0<br>(0 - 0)     | 0<br>(0 - 0)      | 2<br>(1 - 4)       | 4<br>(2 - 7)       | 3<br>(1 - 5)       |
| Silicosis                                           | 2<br>(1 - 5)     | 0<br>(0 - 0)     | 0<br>(0 - 0)      | 0<br>(0 - 1)       | 1<br>(0 - 2)       | 1<br>(0 - 2)       |
| Asbestosis                                          | 1<br>(0 - 2)     | 0<br>(0 - 0)     | 0<br>(0 - 0)      | 0<br>(0 - 0)       | 1<br>(0 - 1)       | 0<br>(0 - 0)       |
| Coal workers pneumoconiosis                         | 1<br>(1 - 2)     | 0<br>(0 - 0)     | 0<br>(0 - 0)      | 0<br>(0 - 1)       | 1<br>(0 - 1)       | 0<br>(0 - 1)       |
| Other pneumoconiosis                                | 4<br>(2 - 7)     | 0<br>(0 - 0)     | 0<br>(0 - 0)      | 1<br>(0 - 2)       | 2<br>(1 - 3)       | 1<br>(1 - 2)       |
| Asthma                                              | 10<br>(5 - 14)   | 0<br>(0 - 0)     | 0<br>(0 - 0)      | 2<br>(1 - 3)       | 4<br>(2 - 6)       | 4<br>(2 - 7)       |
| Interstitial lung disease and pulmonary sarcoidosis | 6<br>(1 - 11)    | 0<br>(0 - 0)     | 0<br>(0 - 0)      | 1<br>(0 - 2)       | 2<br>(0 - 5)       | 2<br>(0 - 5)       |
| Other chronic respiratory diseases                  | 3<br>(2 - 6)     | 1<br>(0 - 1)     | 0<br>(0 - 0)      | 1<br>(1 - 2)       | 1<br>(0 - 1)       | 1<br>(0 - 1)       |
| Cirrhosis                                           | 49<br>(16 - 103) | 0<br>(0 - 0)     | 0<br>(0 - 1)      | 16<br>(5 - 38)     | 24<br>(7 - 51)     | 8<br>(3 - 15)      |
| Cirrhosis due to hepatitis B                        | 9<br>(1 - 21)    | 0<br>(0 - 0)     | 0<br>(0 - 0)      | 3<br>(1 - 7)       | 5<br>(1 - 11)      | 2<br>(0 - 4)       |
| Cirrhosis due to hepatitis C                        | 11<br>(2 - 26)   | 0<br>(0 - 0)     | 0<br>(0 - 0)      | 3<br>(0 - 9)       | 6<br>(1 - 13)      | 2<br>(0 - 5)       |
| Cirrhosis due to alcohol use                        | 23<br>(8 - 53)   | --               | --                | 7<br>(2 - 18)      | 12<br>(4 - 28)     | 4<br>(1 - 8)       |
| Cirrhosis due to other causes                       | 6<br>(2 - 13)    | 0<br>(0 - 0)     | 0<br>(0 - 0)      | 3<br>(1 - 7)       | 2<br>(1 - 5)       | 0<br>(0 - 1)       |
| Digestive diseases                                  | 67<br>(42 - 98)  | 1<br>(0 - 1)     | 1<br>(1 - 2)      | 23<br>(13 - 38)    | 26<br>(15 - 41)    | 16<br>(11 - 22)    |
| Peptic ulcer disease                                | 20<br>(11 - 34)  | 0<br>(0 - 0)     | 0<br>(0 - 0)      | 6<br>(3 - 11)      | 9<br>(4 - 16)      | 6<br>(3 - 9)       |
| Gastritis and duodenitis                            | 2<br>(1 - 6)     | 0<br>(0 - 0)     | 0<br>(0 - 0)      | 1<br>(0 - 2)       | 1<br>(0 - 2)       | 1<br>(0 - 2)       |
| Appendicitis                                        | 4<br>(2 - 8)     | 0<br>(0 - 0)     | 0<br>(0 - 0)      | 2<br>(1 - 3)       | 2<br>(1 - 3)       | 1<br>(0 - 2)       |
| Paralytic ileus and intestinal obstruction          | 21<br>(12 - 34)  | 0<br>(0 - 1)     | 1<br>(0 - 1)      | 9<br>(4 - 15)      | 8<br>(4 - 13)      | 5<br>(2 - 8)       |
| Inguinal, femoral, and abdominal hernia             | 1<br>(0 - 2)     | 0<br>(0 - 0)     | 0<br>(0 - 0)      | 0<br>(0 - 1)       | 0<br>(0 - 1)       | 0<br>(0 - 1)       |
| Inflammatory bowel disease                          | 3<br>(2 - 6)     | 0<br>(0 - 0)     | 0<br>(0 - 0)      | 1<br>(1 - 2)       | 1<br>(0 - 2)       | 1<br>(0 - 1)       |
| Vascular intestinal disorders                       | 1<br>(0 - 1)     | 0<br>(0 - 0)     | 0<br>(0 - 0)      | 0<br>(0 - 0)       | 0<br>(0 - 0)       | 0<br>(0 - 0)       |
| Gallbladder and biliary diseases                    | 3<br>(2 - 5)     | 0<br>(0 - 0)     | 0<br>(0 - 0)      | 1<br>(0 - 1)       | 1<br>(1 - 2)       | 1<br>(1 - 2)       |
| Pancreatitis                                        | 4<br>(1 - 8)     | 0<br>(0 - 0)     | 0<br>(0 - 0)      | 2<br>(1 - 4)       | 1<br>(0 - 3)       | 1<br>(0 - 1)       |
| Other digestive diseases                            | 7<br>(4 - 13)    | 0<br>(0 - 0)     | 0<br>(0 - 0)      | 2<br>(1 - 4)       | 3<br>(1 - 5)       | 2<br>(1 - 3)       |
| Neurological disorders                              | 33<br>(23 - 45)  | 1<br>(0 - 4)     | 2<br>(1 - 4)      | 11<br>(6 - 18)     | 4<br>(2 - 6)       | 14<br>(11 - 19)    |
| Alzheimer disease and other dementias               | 14<br>(10 - 18)  | --               | --                | 0<br>(0 - 0)       | 2<br>(1 - 3)       | 12<br>(9 - 16)     |
| Parkinson disease                                   | 0<br>(0 - 1)     | --               | --                | 0<br>(0 - 0)       | 0<br>(0 - 0)       | 0<br>(0 - 1)       |
| Epilepsy                                            | 15<br>(9 - 24)   | 1<br>(0 - 3)     | 2<br>(1 - 3)      | 9<br>(5 - 16)      | 2<br>(1 - 2)       | 2<br>(1 - 3)       |
| Multiple sclerosis                                  | 0<br>(0 - 0)     | --               | --                | 0<br>(0 - 0)       | 0<br>(0 - 0)       | 0<br>(0 - 0)       |
| Other neurological disorders                        | 3<br>(2 - 5)     | 0<br>(0 - 1)     | 0<br>(0 - 0)      | 1<br>(1 - 2)       | 1<br>(0 - 1)       | 0<br>(0 - 0)       |
| Mental and substance use disorders                  | 21<br>(12 - 35)  | 1<br>(0 - 2)     | 0<br>(0 - 0)      | 16<br>(8 - 27)     | 4<br>(2 - 8)       | 1<br>(0 - 1)       |
| Schizophrenia                                       | 1<br>(0 - 1)     | --               | --                | 0<br>(0 - 1)       | 0<br>(0 - 0)       | 0<br>(0 - 0)       |
| Alcohol use disorders                               | 11<br>(4 - 22)   | --               | --                | 7<br>(3 - 14)      | 3<br>(1 - 7)       | 0<br>(0 - 1)       |
| Drug use disorders                                  | 10<br>(5 - 17)   | 1<br>(0 - 2)     | --                | 8<br>(4 - 14)      | 1<br>(0 - 1)       | 0<br>(0 - 0)       |
| Opioid use disorders                                | 1<br>(1 - 2)     | 0<br>(0 - 0)     | --                | 1<br>(0 - 2)       | 0<br>(0 - 0)       | 0<br>(0 - 0)       |
| Cocaine use disorders                               | 0<br>(0 - 0)     | 0<br>(0 - 0)     | --                | 0<br>(0 - 0)       | 0<br>(0 - 0)       | 0<br>(0 - 0)       |
| Amphetamine use disorders                           | 0<br>(0 - 0)     | 0<br>(0 - 0)     | --                | 0<br>(0 - 0)       | 0<br>(0 - 0)       | 0<br>(0 - 0)       |
| Other drug use disorders                            | 9<br>(4 - 15)    | 1<br>(0 - 2)     | --                | 7<br>(4 - 12)      | 1<br>(0 - 1)       | 0<br>(0 - 0)       |
| Eating disorders                                    | 0<br>(0 - 0)     | --               | 0<br>(0 - 0)      | 0<br>(0 - 0)       | --                 | --                 |

Web Table 31- Comoros deaths with 95% UI by age, sex, and cause in 2013

| Cause                                               | Males, All Ages   | Males, 0-4 Years | Males, 5-14 Years | Males, 15-49 Years | Males, 50-69 Years | Males, 70-80 Years |
|-----------------------------------------------------|-------------------|------------------|-------------------|--------------------|--------------------|--------------------|
| Anorexia nervosa                                    | 0<br>(0 - 0)      | --               | 0<br>(0 - 0)      | 0<br>(0 - 0)       | --                 | --                 |
| Diabetes, urogenital, blood, and endocrine diseases | 145<br>(91 - 207) | 7<br>(3 - 12)    | 2<br>(1 - 4)      | 39<br>(21 - 63)    | 56<br>(32 - 86)    | 41<br>(28 - 54)    |
| Diabetes mellitus                                   | 73<br>(44 - 109)  | 1<br>(0 - 1)     | 0<br>(0 - 0)      | 12<br>(6 - 21)     | 35<br>(19 - 56)    | 25<br>(16 - 36)    |
| Acute glomerulonephritis                            | 1<br>(0 - 2)      | 0<br>(0 - 0)     | 0<br>(0 - 0)      | 0<br>(0 - 0)       | 1<br>(0 - 2)       | 0<br>(0 - 1)       |
| Chronic kidney disease                              | 23<br>(13 - 35)   | 1<br>(0 - 2)     | 0<br>(0 - 1)      | 9<br>(5 - 15)      | 7<br>(4 - 11)      | 6<br>(4 - 9)       |
| Chronic kidney disease due to diabetes mellitus     | 0<br>(0 - 0)      | 0<br>(0 - 0)     | 0<br>(0 - 0)      | 0<br>(0 - 0)       | 0<br>(0 - 0)       | 0<br>(0 - 0)       |
| Chronic kidney disease due to hypertension          | 9<br>(5 - 16)     | 0<br>(0 - 0)     | 0<br>(0 - 0)      | 3<br>(1 - 5)       | 3<br>(2 - 6)       | 3<br>(2 - 5)       |
| Chronic kidney disease due to glomerulonephritis    | 6<br>(3 - 10)     | 0<br>(0 - 1)     | 0<br>(0 - 0)      | 3<br>(1 - 5)       | 2<br>(1 - 3)       | 1<br>(1 - 2)       |
| Chronic kidney disease due to other causes          | 7<br>(3 - 12)     | 0<br>(0 - 1)     | 0<br>(0 - 0)      | 3<br>(1 - 6)       | 2<br>(1 - 3)       | 2<br>(1 - 4)       |
| Urinary diseases and male infertility               | 24<br>(13 - 38)   | 1<br>(0 - 2)     | 0<br>(0 - 0)      | 8<br>(4 - 13)      | 9<br>(4 - 16)      | 6<br>(3 - 10)      |
| Interstitial nephritis and urinary tract infections | 17<br>(9 - 26)    | 1<br>(0 - 1)     | 0<br>(0 - 0)      | 5<br>(2 - 9)       | 6<br>(3 - 11)      | 5<br>(2 - 7)       |
| Urolithiasis                                        | 1<br>(0 - 2)      | --               | 0<br>(0 - 0)      | 0<br>(0 - 1)       | 0<br>(0 - 1)       | 0<br>(0 - 0)       |
| Other urinary diseases                              | 7<br>(3 - 13)     | 0<br>(0 - 0)     | 0<br>(0 - 0)      | 2<br>(1 - 4)       | 3<br>(1 - 5)       | 2<br>(1 - 3)       |
| Gynecological diseases                              | --                | --               | --                | --                 | --                 | --                 |
| Uterine fibroids                                    | --                | --               | --                | --                 | --                 | --                 |
| Polycystic ovarian syndrome                         | --                | --               | --                | --                 | --                 | --                 |
| Endometriosis                                       | --                | --               | --                | --                 | --                 | --                 |
| Genital prolapse                                    | --                | --               | --                | --                 | --                 | --                 |
| Other gynecological diseases                        | --                | --               | --                | --                 | --                 | --                 |
| Hemoglobinopathies and hemolytic anemias            | 9<br>(4 - 20)     | 2<br>(1 - 5)     | 1<br>(0 - 2)      | 4<br>(1 - 9)       | 1<br>(0 - 3)       | 1<br>(0 - 2)       |
| Thalassemias                                        | 1<br>(0 - 2)      | 0<br>(0 - 1)     | 0<br>(0 - 0)      | 0<br>(0 - 1)       | 0<br>(0 - 0)       | 0<br>(0 - 0)       |
| Sickle cell disorders                               | 4<br>(2 - 9)      | 1<br>(0 - 2)     | 1<br>(0 - 1)      | 2<br>(1 - 5)       | 0<br>(0 - 1)       | 0<br>(0 - 0)       |
| G6PD deficiency                                     | 0<br>(0 - 0)      | 0<br>(0 - 0)     | 0<br>(0 - 0)      | 0<br>(0 - 0)       | 0<br>(0 - 0)       | 0<br>(0 - 0)       |
| Other hemoglobinopathies and hemolytic anemias      | 4<br>(2 - 9)      | 1<br>(0 - 2)     | 0<br>(0 - 0)      | 1<br>(1 - 3)       | 1<br>(0 - 2)       | 1<br>(0 - 2)       |
| Endocrine, metabolic, blood, and immune disorders   | 15<br>(9 - 26)    | 2<br>(1 - 5)     | 0<br>(0 - 1)      | 7<br>(3 - 12)      | 4<br>(2 - 6)       | 2<br>(1 - 4)       |
| Musculoskeletal disorders                           | 5<br>(2 - 8)      | --               | 0<br>(0 - 0)      | 2<br>(1 - 4)       | 2<br>(1 - 3)       | 1<br>(0 - 1)       |
| Rheumatoid arthritis                                | 1<br>(0 - 2)      | --               | 0<br>(0 - 0)      | 0<br>(0 - 1)       | 0<br>(0 - 1)       | 0<br>(0 - 0)       |
| Other musculoskeletal disorders                     | 4<br>(2 - 7)      | --               | 0<br>(0 - 0)      | 2<br>(1 - 4)       | 1<br>(1 - 2)       | 1<br>(0 - 1)       |
| Other non-communicable diseases                     | 62<br>(36 - 96)   | 49<br>(25 - 82)  | 2<br>(1 - 3)      | 6<br>(3 - 9)       | 3<br>(2 - 5)       | 3<br>(2 - 4)       |
| Congenital anomalies                                | 52<br>(29 - 86)   | 47<br>(24 - 80)  | 2<br>(1 - 3)      | 3<br>(2 - 5)       | 1<br>(0 - 1)       | 0<br>(0 - 1)       |
| Neural tube defects                                 | 11<br>(3 - 27)    | 11<br>(3 - 26)   | 0<br>(0 - 1)      | 0<br>(0 - 1)       | 0<br>(0 - 0)       | 0<br>(0 - 0)       |
| Congenital heart anomalies                          | 24<br>(11 - 46)   | 21<br>(9 - 42)   | 1<br>(0 - 2)      | 2<br>(1 - 3)       | 0<br>(0 - 0)       | 0<br>(0 - 0)       |
| Cleft lip and cleft palate                          | 0<br>(0 - 1)      | 0<br>(0 - 1)     | --                | --                 | --                 | --                 |
| Down syndrome                                       | 3<br>(1 - 7)      | 2<br>(1 - 6)     | 0<br>(0 - 0)      | 0<br>(0 - 1)       | 0<br>(0 - 0)       | 0<br>(0 - 0)       |
| Chromosomal unbalanced rearrangements               | 1<br>(0 - 3)      | 1<br>(0 - 3)     | 0<br>(0 - 0)      | 0<br>(0 - 0)       | 0<br>(0 - 0)       | 0<br>(0 - 0)       |
| Other congenital anomalies                          | 13<br>(4 - 32)    | 11<br>(4 - 30)   | 0<br>(0 - 1)      | 1<br>(0 - 1)       | 0<br>(0 - 0)       | 0<br>(0 - 0)       |
| Skin and subcutaneous diseases                      | 8<br>(5 - 12)     | 1<br>(0 - 3)     | 0<br>(0 - 0)      | 3<br>(1 - 4)       | 2<br>(1 - 4)       | 2<br>(1 - 4)       |
| Cellulitis                                          | 3<br>(1 - 6)      | 0<br>(0 - 1)     | 0<br>(0 - 0)      | 1<br>(0 - 2)       | 1<br>(0 - 2)       | 1<br>(0 - 2)       |
| Pyoderma                                            | 4<br>(2 - 6)      | 0<br>(0 - 1)     | 0<br>(0 - 0)      | 1<br>(0 - 2)       | 1<br>(0 - 2)       | 1<br>(1 - 2)       |
| Decubitus ulcer                                     | 1<br>(0 - 1)      | 0<br>(0 - 0)     | 0<br>(0 - 0)      | 0<br>(0 - 0)       | 0<br>(0 - 0)       | 0<br>(0 - 1)       |

Web Table 31- Comoros deaths with 95% UI by age, sex, and cause in 2013

| Cause                                           | Males, All Ages    | Males, 0-4 Years | Males, 5-14 Years | Males, 15-49 Years | Males, 50-69 Years | Males, 70-80 Years |
|-------------------------------------------------|--------------------|------------------|-------------------|--------------------|--------------------|--------------------|
| Other skin and subcutaneous diseases            | 0<br>(0 - 0)       | 0<br>(0 - 0)     | 0<br>(0 - 0)      | 0<br>(0 - 0)       | 0<br>(0 - 0)       | 0<br>(0 - 0)       |
| Sudden infant death syndrome                    | 1<br>(0 - 3)       | 1<br>(0 - 3)     | --                | --                 | --                 | --                 |
| Injuries                                        | 324<br>(194 - 515) | 23<br>(6 - 100)  | 16<br>(8 - 27)    | 193<br>(108 - 307) | 66<br>(36 - 107)   | 25<br>(16 - 36)    |
| Transport injuries                              | 166<br>(85 - 259)  | 4<br>(1 - 9)     | 8<br>(3 - 14)     | 101<br>(50 - 156)  | 39<br>(18 - 67)    | 14<br>(7 - 22)     |
| Road injuries                                   | 163<br>(84 - 254)  | 4<br>(1 - 9)     | 8<br>(3 - 13)     | 100<br>(50 - 154)  | 38<br>(18 - 65)    | 13<br>(7 - 21)     |
| Pedestrian road injuries                        | 35<br>(10 - 66)    | 1<br>(0 - 2)     | 2<br>(0 - 4)      | 21<br>(6 - 41)     | 8<br>(2 - 17)      | 3<br>(1 - 6)       |
| Cyclist road injuries                           | 6<br>(2 - 13)      | 0<br>(0 - 0)     | 0<br>(0 - 1)      | 4<br>(1 - 7)       | 2<br>(0 - 3)       | 1<br>(0 - 1)       |
| Motorcyclist road injuries                      | 13<br>(3 - 24)     | 0<br>(0 - 1)     | 1<br>(0 - 1)      | 9<br>(2 - 17)      | 3<br>(1 - 5)       | 1<br>(0 - 2)       |
| Motor vehicle road injuries                     | 108<br>(57 - 182)  | 2<br>(1 - 5)     | 5<br>(2 - 9)      | 67<br>(34 - 110)   | 25<br>(12 - 44)    | 9<br>(4 - 15)      |
| Other road injuries                             | 0<br>(0 - 1)       | 0<br>(0 - 0)     | 0<br>(0 - 0)      | 0<br>(0 - 0)       | 0<br>(0 - 0)       | 0<br>(0 - 0)       |
| Other transport injuries                        | 3<br>(0 - 6)       | 0<br>(0 - 1)     | 0<br>(0 - 1)      | 1<br>(0 - 2)       | 1<br>(0 - 2)       | 0<br>(0 - 1)       |
| Unintentional injuries                          | 95<br>(52 - 293)   | 18<br>(5 - 95)   | 7<br>(3 - 22)     | 42<br>(21 - 114)   | 19<br>(9 - 40)     | 9<br>(5 - 15)      |
| Falls                                           | 10<br>(5 - 16)     | 1<br>(0 - 2)     | 1<br>(0 - 2)      | 5<br>(2 - 9)       | 2<br>(1 - 4)       | 2<br>(1 - 3)       |
| Drowning                                        | 22<br>(13 - 34)    | 3<br>(1 - 8)     | 3<br>(1 - 5)      | 13<br>(7 - 21)     | 2<br>(1 - 4)       | 1<br>(0 - 2)       |
| Fire, heat, and hot substances                  | 10<br>(5 - 16)     | 2<br>(0 - 7)     | 1<br>(0 - 1)      | 3<br>(2 - 6)       | 2<br>(1 - 4)       | 1<br>(1 - 2)       |
| Poisonings                                      | 4<br>(2 - 7)       | 0<br>(0 - 1)     | 0<br>(0 - 0)      | 3<br>(1 - 5)       | 1<br>(0 - 2)       | 0<br>(0 - 0)       |
| Exposure to mechanical forces                   | 30<br>(8 - 226)    | 8<br>(1 - 86)    | 2<br>(0 - 17)     | 12<br>(3 - 88)     | 7<br>(2 - 32)      | 2<br>(0 - 7)       |
| Unintentional firearm injuries                  | 2<br>(1 - 4)       | 0<br>(0 - 0)     | 0<br>(0 - 0)      | 2<br>(1 - 3)       | 0<br>(0 - 1)       | 0<br>(0 - 0)       |
| Unintentional suffocation                       | 21<br>(2 - 219)    | 7<br>(0 - 86)    | 1<br>(0 - 17)     | 7<br>(0 - 82)      | 4<br>(0 - 31)      | 1<br>(0 - 7)       |
| Other exposure to mechanical forces             | 7<br>(3 - 12)      | 1<br>(0 - 2)     | 0<br>(0 - 1)      | 3<br>(1 - 6)       | 2<br>(1 - 5)       | 0<br>(0 - 1)       |
| Adverse effects of medical treatment            | 12<br>(6 - 19)     | 2<br>(1 - 6)     | 0<br>(0 - 0)      | 3<br>(2 - 6)       | 3<br>(1 - 6)       | 3<br>(1 - 6)       |
| Animal contact                                  | 3<br>(1 - 5)       | 0<br>(0 - 1)     | 0<br>(0 - 1)      | 1<br>(0 - 2)       | 1<br>(0 - 2)       | 0<br>(0 - 1)       |
| Venomous animal contact                         | 1<br>(1 - 3)       | 0<br>(0 - 0)     | 0<br>(0 - 0)      | 1<br>(0 - 1)       | 0<br>(0 - 1)       | 0<br>(0 - 1)       |
| Non-venomous animal contact                     | 1<br>(1 - 3)       | 0<br>(0 - 0)     | 0<br>(0 - 0)      | 1<br>(0 - 1)       | 0<br>(0 - 1)       | 0<br>(0 - 0)       |
| Foreign body                                    | 3<br>(1 - 5)       | 1<br>(0 - 3)     | 0<br>(0 - 0)      | 1<br>(0 - 1)       | 0<br>(0 - 1)       | 0<br>(0 - 1)       |
| Pulmonary aspiration and foreign body in airway | 2<br>(1 - 4)       | 1<br>(0 - 3)     | 0<br>(0 - 0)      | 0<br>(0 - 1)       | 0<br>(0 - 0)       | 0<br>(0 - 1)       |
| Foreign body in other body part                 | 0<br>(0 - 1)       | 0<br>(0 - 0)     | 0<br>(0 - 0)      | 0<br>(0 - 0)       | 0<br>(0 - 1)       | 0<br>(0 - 0)       |
| Other unintentional injuries                    | 2<br>(1 - 5)       | 0<br>(0 - 0)     | 0<br>(0 - 0)      | 1<br>(0 - 3)       | 0<br>(0 - 1)       | 0<br>(0 - 0)       |
| Self-harm and interpersonal violence            | 63<br>(29 - 105)   | 1<br>(0 - 2)     | 1<br>(0 - 2)      | 50<br>(23 - 86)    | 9<br>(3 - 17)      | 2<br>(1 - 5)       |
| Self-harm                                       | 27<br>(9 - 52)     | --               | 0<br>(0 - 1)      | 19<br>(6 - 39)     | 6<br>(2 - 12)      | 2<br>(0 - 4)       |
| Interpersonal violence                          | 36<br>(15 - 65)    | 1<br>(0 - 2)     | 1<br>(0 - 1)      | 31<br>(13 - 58)    | 3<br>(1 - 6)       | 0<br>(0 - 1)       |
| Assault by firearm                              | 15<br>(6 - 31)     | 0<br>(0 - 0)     | 0<br>(0 - 0)      | 13<br>(5 - 29)     | 1<br>(0 - 2)       | 0<br>(0 - 0)       |
| Assault by sharp object                         | 8<br>(3 - 17)      | 0<br>(0 - 0)     | 0<br>(0 - 0)      | 7<br>(3 - 15)      | 1<br>(0 - 2)       | 0<br>(0 - 0)       |
| Assault by other means                          | 13<br>(5 - 24)     | 0<br>(0 - 1)     | 0<br>(0 - 1)      | 11<br>(4 - 21)     | 1<br>(0 - 2)       | 0<br>(0 - 0)       |

Web Table 31- Comoros deaths with 95% UI by age, sex, and cause in 2013

| Cause                                                             | Females, All Ages        | Females, 0-4 Years | Females, 5-14 Years | Females, 15-49 Years | Females, 50-69 Years | Females, 70-80 Years |
|-------------------------------------------------------------------|--------------------------|--------------------|---------------------|----------------------|----------------------|----------------------|
| All causes                                                        | 2,452<br>(1,833 - 3,090) | 525<br>(374 - 745) | 67<br>(51 - 88)     | 532<br>(358 - 762)   | 663<br>(422 - 933)   | 665<br>(512 - 833)   |
| Communicable, maternal, neonatal, and nutritional diseases        | 1,181<br>(928 - 1,479)   | 454<br>(323 - 645) | 46<br>(31 - 67)     | 288<br>(201 - 402)   | 202<br>(141 - 281)   | 192<br>(141 - 259)   |
| HIV/AIDS and tuberculosis                                         | 140<br>(81 - 232)        | 3<br>(1 - 7)       | 2<br>(1 - 3)        | 60<br>(27 - 114)     | 53<br>(31 - 85)      | 23<br>(15 - 35)      |
| Tuberculosis                                                      | 130<br>(77 - 212)        | 2<br>(1 - 4)       | 1<br>(0 - 2)        | 52<br>(23 - 95)      | 52<br>(31 - 82)      | 23<br>(15 - 35)      |
| HIV/AIDS                                                          | 10<br>(1 - 48)           | 1<br>(0 - 5)       | 0<br>(0 - 2)        | 7<br>(1 - 36)        | 1<br>(0 - 7)         | 0<br>(0 - 1)         |
| HIV/AIDS resulting in mycobacterial infection                     | 1<br>(0 - 3)             | 0<br>(0 - 0)       | 0<br>(0 - 0)        | 0<br>(0 - 2)         | 0<br>(0 - 0)         | 0<br>(0 - 0)         |
| HIV/AIDS resulting in other diseases                              | 9<br>(1 - 46)            | 1<br>(0 - 4)       | 0<br>(0 - 2)        | 7<br>(1 - 34)        | 1<br>(0 - 6)         | 0<br>(0 - 1)         |
| Diarrhea, lower respiratory, and other common infectious diseases | 521<br>(353 - 732)       | 182<br>(101 - 299) | 24<br>(10 - 46)     | 79<br>(42 - 142)     | 106<br>(58 - 166)    | 130<br>(86 - 190)    |
| Diarrheal diseases                                                | 159<br>(91 - 256)        | 32<br>(11 - 74)    | 4<br>(1 - 8)        | 31<br>(14 - 58)      | 44<br>(20 - 81)      | 48<br>(22 - 87)      |
| Intestinal infectious diseases                                    | 17<br>(6 - 35)           | 5<br>(1 - 13)      | 4<br>(1 - 9)        | 6<br>(2 - 14)        | 1<br>(0 - 2)         | 0<br>(0 - 1)         |
| Typhoid fever                                                     | 13<br>(5 - 28)           | 4<br>(1 - 9)       | 4<br>(1 - 8)        | 5<br>(2 - 12)        | 1<br>(0 - 2)         | 0<br>(0 - 0)         |
| Paratyphoid fever                                                 | 3<br>(1 - 7)             | 1<br>(0 - 3)       | 1<br>(0 - 2)        | 1<br>(0 - 3)         | 0<br>(0 - 0)         | 0<br>(0 - 0)         |
| Other intestinal infectious diseases                              | 0<br>(0 - 3)             | 0<br>(0 - 2)       | 0<br>(0 - 0)        | 0<br>(0 - 2)         | 0<br>(0 - 0)         | 0<br>(0 - 0)         |
| Lower respiratory infections                                      | 236<br>(147 - 329)       | 78<br>(42 - 128)   | 4<br>(2 - 8)        | 26<br>(11 - 47)      | 51<br>(25 - 83)      | 76<br>(45 - 115)     |
| Upper respiratory infections                                      | 0<br>(0 - 1)             | 0<br>(0 - 0)       | 0<br>(0 - 0)        | 0<br>(0 - 0)         | 0<br>(0 - 0)         | 0<br>(0 - 0)         |
| Otitis media                                                      | 0<br>(0 - 0)             | 0<br>(0 - 0)       | 0<br>(0 - 0)        | 0<br>(0 - 0)         | 0<br>(0 - 0)         | 0<br>(0 - 0)         |
| Meningitis                                                        | 39<br>(24 - 58)          | 12<br>(5 - 23)     | 2<br>(1 - 5)        | 12<br>(6 - 21)       | 9<br>(5 - 16)        | 4<br>(2 - 7)         |
| Pneumococcal meningitis                                           | 10<br>(6 - 15)           | 2<br>(1 - 4)       | 1<br>(0 - 1)        | 3<br>(1 - 7)         | 2<br>(1 - 5)         | 1<br>(0 - 2)         |
| H influenzae type B meningitis                                    | 6<br>(4 - 11)            | 3<br>(1 - 7)       | 1<br>(0 - 1)        | 1<br>(1 - 3)         | 1<br>(0 - 2)         | 0<br>(0 - 1)         |
| Meningococcal meningitis                                          | 7<br>(4 - 12)            | 1<br>(0 - 3)       | 0<br>(0 - 1)        | 2<br>(1 - 5)         | 2<br>(1 - 5)         | 1<br>(0 - 2)         |
| Other meningitis                                                  | 16<br>(9 - 25)           | 5<br>(2 - 10)      | 1<br>(0 - 2)        | 5<br>(2 - 9)         | 4<br>(1 - 7)         | 2<br>(1 - 3)         |
| Encephalitis                                                      | 2<br>(1 - 3)             | 1<br>(0 - 1)       | 0<br>(0 - 0)        | 0<br>(0 - 1)         | 0<br>(0 - 1)         | 0<br>(0 - 0)         |
| Diphtheria                                                        | 0<br>(0 - 1)             | 0<br>(0 - 1)       | 0<br>(0 - 0)        | 0<br>(0 - 0)         | 0<br>(0 - 0)         | --<br>(0 - 0)        |
| Whooping cough                                                    | 6<br>(0 - 32)            | 6<br>(0 - 30)      | 0<br>(0 - 1)        | 0<br>(0 - 0)         | 0<br>(0 - 0)         | --<br>(0 - 0)        |
| Tetanus                                                           | 3<br>(1 - 6)             | 1<br>(0 - 3)       | 0<br>(0 - 0)        | 1<br>(0 - 2)         | 1<br>(0 - 2)         | 0<br>(0 - 0)         |
| Measles                                                           | 57<br>(2 - 220)          | 46<br>(2 - 159)    | 8<br>(0 - 38)       | 3<br>(0 - 19)        | 0<br>(0 - 0)         | --<br>(0 - 0)        |
| Varicella and herpes zoster                                       | 0<br>(0 - 1)             | 0<br>(0 - 0)       | 0<br>(0 - 0)        | 0<br>(0 - 0)         | 0<br>(0 - 0)         | 0<br>(0 - 0)         |
| Neglected tropical diseases and malaria                           | 127<br>(49 - 273)        | 40<br>(8 - 124)    | 16<br>(5 - 36)      | 44<br>(11 - 120)     | 18<br>(3 - 49)       | 10<br>(1 - 32)       |
| Malaria                                                           | 97<br>(16 - 246)         | 34<br>(4 - 120)    | 11<br>(1 - 30)      | 29<br>(2 - 109)      | 16<br>(2 - 46)       | 9<br>(1 - 31)        |
| Leishmaniasis                                                     | 26<br>(10 - 57)          | 5<br>(1 - 14)      | 5<br>(1 - 12)       | 13<br>(4 - 34)       | 2<br>(0 - 4)         | 0<br>(0 - 1)         |
| Visceral leishmaniasis                                            | 26<br>(10 - 57)          | 5<br>(1 - 14)      | 5<br>(1 - 12)       | 13<br>(4 - 34)       | 2<br>(0 - 4)         | 0<br>(0 - 1)         |
| Cysticercosis                                                     | 0<br>(0 - 0)             | 0<br>(0 - 0)       | 0<br>(0 - 0)        | 0<br>(0 - 0)         | 0<br>(0 - 0)         | 0<br>(0 - 0)         |
| Cystic echinococcosis                                             | 0<br>(0 - 0)             | 0<br>(0 - 0)       | 0<br>(0 - 0)        | 0<br>(0 - 0)         | 0<br>(0 - 0)         | 0<br>(0 - 0)         |
| Dengue                                                            | 0<br>(0 - 0)             | 0<br>(0 - 0)       | 0<br>(0 - 0)        | 0<br>(0 - 0)         | 0<br>(0 - 0)         | 0<br>(0 - 0)         |
| Rabies                                                            | 2<br>(1 - 4)             | 0<br>(0 - 1)       | 0<br>(0 - 1)        | 1<br>(0 - 3)         | 0<br>(0 - 1)         | 0<br>(0 - 0)         |
| Intestinal nematode infections                                    | 1<br>(0 - 5)             | 0<br>(0 - 3)       | 0<br>(0 - 1)        | 0<br>(0 - 1)         | 0<br>(0 - 0)         | 0<br>(0 - 0)         |
| Ascariasis                                                        | 1<br>(0 - 5)             | 0<br>(0 - 3)       | 0<br>(0 - 1)        | 0<br>(0 - 1)         | 0<br>(0 - 0)         | 0<br>(0 - 0)         |
| Other neglected tropical diseases                                 | 1<br>(0 - 2)             | 0<br>(0 - 0)       | 0<br>(0 - 0)        | 0<br>(0 - 0)         | 0<br>(0 - 0)         | 0<br>(0 - 1)         |
| Maternal disorders                                                | 85<br>(45 - 152)         | --                 | 0<br>(0 - 1)        | 85<br>(44 - 151)     | --                   | --                   |
| Maternal hemorrhage                                               | 11<br>(5 - 21)           | --                 | 0<br>(0 - 0)        | 11<br>(5 - 21)       | --                   | --                   |

Web Table 31- Comoros deaths with 95% UI by age, sex, and cause in 2013

| Cause                                                            | Females, All Ages      | Females, 0-4 Years | Females, 5-14 Years | Females, 15-49 Years | Females, 50-69 Years | Females, 70-80 Years |
|------------------------------------------------------------------|------------------------|--------------------|---------------------|----------------------|----------------------|----------------------|
| Maternal sepsis and other maternal infections                    | 8<br>(4 - 14)          | --                 | 0<br>(0 - 0)        | 8<br>(4 - 14)        | --                   | --                   |
| Maternal hypertensive disorders                                  | 8<br>(4 - 16)          | --                 | 0<br>(0 - 0)        | 8<br>(4 - 16)        | --                   | --                   |
| Maternal obstructed labor                                        | 4<br>(2 - 8)           | --                 | 0<br>(0 - 0)        | 4<br>(2 - 8)         | --                   | --                   |
| Maternal abortive outcome                                        | 17<br>(8 - 30)         | --                 | 0<br>(0 - 0)        | 17<br>(8 - 30)       | --                   | --                   |
| Indirect maternal deaths                                         | 6<br>(3 - 12)          | --                 | 0<br>(0 - 0)        | 6<br>(3 - 12)        | --                   | --                   |
| Late maternal deaths                                             | 8<br>(4 - 15)          | --                 | 0<br>(0 - 0)        | 8<br>(4 - 14)        | --                   | --                   |
| Maternal deaths aggravated by HIV/AIDS                           | 0<br>(0 - 0)           | --                 | --                  | 0<br>(0 - 0)         | --                   | --                   |
| Other maternal disorders                                         | 24<br>(11 - 43)        | --                 | 0<br>(0 - 0)        | 23<br>(11 - 43)      | --                   | --                   |
| Neonatal disorders                                               | 201<br>(149 - 271)     | 201<br>(149 - 271) | --                  | --                   | --                   | --                   |
| Neonatal preterm birth complications                             | 63<br>(31 - 104)       | 63<br>(31 - 104)   | --                  | --                   | --                   | --                   |
| Neonatal encephalopathy due to birth asphyxia and trauma         | 58<br>(33 - 90)        | 58<br>(33 - 90)    | --                  | --                   | --                   | --                   |
| Neonatal sepsis and other neonatal infections                    | 52<br>(26 - 95)        | 52<br>(26 - 95)    | --                  | --                   | --                   | --                   |
| Hemolytic disease and other neonatal jaundice                    | 1<br>(0 - 1)           | 1<br>(0 - 1)       | --                  | --                   | --                   | --                   |
| Other neonatal disorders                                         | 28<br>(15 - 45)        | 28<br>(15 - 45)    | --                  | --                   | --                   | --                   |
| Nutritional deficiencies                                         | 80<br>(50 - 115)       | 17<br>(4 - 36)     | 3<br>(1 - 5)        | 15<br>(8 - 26)       | 20<br>(11 - 32)      | 25<br>(16 - 37)      |
| Protein-energy malnutrition                                      | 49<br>(23 - 76)        | 16<br>(4 - 34)     | 2<br>(1 - 4)        | 4<br>(1 - 9)         | 11<br>(5 - 19)       | 16<br>(7 - 26)       |
| Iodine deficiency                                                | 0<br>(0 - 1)           | 0<br>(0 - 0)       | 0<br>(0 - 0)        | 0<br>(0 - 0)         | 0<br>(0 - 0)         | 0<br>(0 - 0)         |
| Iron-deficiency anemia                                           | 30<br>(14 - 56)        | 1<br>(0 - 5)       | 1<br>(0 - 2)        | 11<br>(4 - 19)       | 9<br>(4 - 17)        | 9<br>(3 - 20)        |
| Other nutritional deficiencies                                   | 1<br>(0 - 2)           | 0<br>(0 - 0)       | 0<br>(0 - 0)        | 0<br>(0 - 0)         | 0<br>(0 - 1)         | 1<br>(0 - 1)         |
| Other communicable, maternal, neonatal, and nutritional diseases | 27<br>(15 - 41)        | 11<br>(5 - 23)     | 1<br>(0 - 2)        | 5<br>(3 - 9)         | 5<br>(2 - 10)        | 4<br>(1 - 9)         |
| Sexually transmitted diseases excluding HIV                      | 13<br>(6 - 23)         | 8<br>(2 - 17)      | 1<br>(0 - 1)        | 2<br>(1 - 4)         | 1<br>(0 - 4)         | 1<br>(0 - 2)         |
| Syphilis                                                         | 11<br>(4 - 21)         | 8<br>(2 - 17)      | 1<br>(0 - 1)        | 1<br>(0 - 2)         | 1<br>(0 - 2)         | 1<br>(0 - 1)         |
| Chlamydial infection                                             | 1<br>(0 - 1)           | --                 | 0<br>(0 - 0)        | 0<br>(0 - 1)         | 0<br>(0 - 1)         | 0<br>(0 - 0)         |
| Gonococcal infection                                             | 1<br>(0 - 1)           | --                 | 0<br>(0 - 0)        | 0<br>(0 - 1)         | 0<br>(0 - 1)         | 0<br>(0 - 0)         |
| Other sexually transmitted diseases                              | 1<br>(0 - 1)           | --                 | 0<br>(0 - 0)        | 0<br>(0 - 1)         | 0<br>(0 - 1)         | 0<br>(0 - 0)         |
| Hepatitis                                                        | 3<br>(1 - 4)           | 0<br>(0 - 1)       | 0<br>(0 - 0)        | 1<br>(1 - 2)         | 1<br>(0 - 1)         | 0<br>(0 - 0)         |
| Acute hepatitis A                                                | 0<br>(0 - 1)           | 0<br>(0 - 0)       | 0<br>(0 - 0)        | 0<br>(0 - 0)         | 0<br>(0 - 0)         | 0<br>(0 - 0)         |
| Acute hepatitis B                                                | 1<br>(1 - 2)           | 0<br>(0 - 0)       | 0<br>(0 - 0)        | 0<br>(0 - 1)         | 1<br>(0 - 1)         | 0<br>(0 - 0)         |
| Acute hepatitis C                                                | 0<br>(0 - 0)           | --                 | 0<br>(0 - 0)        | 0<br>(0 - 0)         | 0<br>(0 - 0)         | 0<br>(0 - 0)         |
| Acute hepatitis E                                                | 1<br>(0 - 2)           | 0<br>(0 - 0)       | 0<br>(0 - 0)        | 1<br>(0 - 1)         | 0<br>(0 - 0)         | 0<br>(0 - 0)         |
| Other infectious diseases                                        | 12<br>(5 - 21)         | 3<br>(1 - 9)       | 0<br>(0 - 1)        | 2<br>(1 - 4)         | 3<br>(1 - 7)         | 3<br>(1 - 8)         |
| Non-communicable diseases                                        | 1,130<br>(756 - 1,548) | 54<br>(30 - 86)    | 11<br>(5 - 18)      | 190<br>(102 - 311)   | 427<br>(254 - 615)   | 449<br>(334 - 568)   |
| Neoplasms                                                        | 250<br>(154 - 372)     | 3<br>(1 - 8)       | 3<br>(1 - 5)        | 68<br>(35 - 112)     | 130<br>(75 - 193)    | 46<br>(33 - 63)      |
| Esophageal cancer                                                | 22<br>(13 - 36)        | --                 | --                  | 4<br>(2 - 8)         | 12<br>(7 - 21)       | 5<br>(3 - 9)         |
| Stomach cancer                                                   | 13<br>(8 - 20)         | --                 | --                  | 1<br>(1 - 3)         | 9<br>(5 - 13)        | 3<br>(2 - 5)         |
| Liver cancer                                                     | 16<br>(9 - 25)         | --                 | 0<br>(0 - 0)        | 4<br>(2 - 9)         | 8<br>(5 - 13)        | 4<br>(2 - 6)         |
| Liver cancer due to hepatitis B                                  | 3<br>(1 - 6)           | --                 | 0<br>(0 - 0)        | 1<br>(0 - 2)         | 1<br>(0 - 3)         | 1<br>(0 - 1)         |
| Liver cancer due to hepatitis C                                  | 8<br>(3 - 13)          | --                 | 0<br>(0 - 0)        | 2<br>(0 - 4)         | 4<br>(2 - 7)         | 2<br>(1 - 3)         |
| Liver cancer due to alcohol use                                  | 2<br>(1 - 3)           | --                 | --                  | 0<br>(0 - 1)         | 1<br>(0 - 1)         | 1<br>(0 - 1)         |
| Liver cancer due to other causes                                 | 4<br>(2 - 7)           | --                 | 0<br>(0 - 0)        | 1<br>(0 - 3)         | 2<br>(1 - 4)         | 1<br>(0 - 1)         |

Web Table 31- Comoros deaths with 95% UI by age, sex, and cause in 2013

| Cause                                         | Females, All Ages  | Females, 0-4 Years | Females, 5-14 Years | Females, 15-49 Years | Females, 50-69 Years | Females, 70-80 Years |
|-----------------------------------------------|--------------------|--------------------|---------------------|----------------------|----------------------|----------------------|
| Larynx cancer                                 | 0<br>(0 - 1)       | --                 | --                  | 0<br>(0 - 0)         | 0<br>(0 - 1)         | 0<br>(0 - 0)         |
| Tracheal, bronchus and lung cancer            | 7<br>(4 - 10)      | --                 | --                  | 1<br>(0 - 1)         | 4<br>(2 - 6)         | 2<br>(1 - 3)         |
| Breast cancer                                 | 38<br>(22 - 61)    | --                 | --                  | 17<br>(8 - 30)       | 16<br>(9 - 28)       | 4<br>(3 - 7)         |
| Cervical cancer                               | 67<br>(35 - 107)   | --                 | --                  | 15<br>(7 - 27)       | 43<br>(21 - 69)      | 9<br>(5 - 14)        |
| Uterine cancer                                | 3<br>(2 - 5)       | --                 | --                  | 0<br>(0 - 1)         | 2<br>(1 - 3)         | 1<br>(0 - 1)         |
| Prostate cancer                               | --                 | --                 | --                  | --                   | --                   | --                   |
| Colon and rectum cancer                       | 14<br>(8 - 20)     | --                 | --                  | 4<br>(2 - 6)         | 6<br>(4 - 9)         | 4<br>(2 - 5)         |
| Lip and oral cavity cancer                    | 3<br>(2 - 5)       | --                 | --                  | 1<br>(0 - 2)         | 2<br>(1 - 2)         | 1<br>(0 - 1)         |
| Nasopharynx cancer                            | 1<br>(0 - 1)       | --                 | 0<br>(0 - 0)        | 0<br>(0 - 1)         | 0<br>(0 - 1)         | 0<br>(0 - 0)         |
| Other pharynx cancer                          | 1<br>(1 - 2)       | --                 | --                  | 0<br>(0 - 1)         | 1<br>(0 - 1)         | 0<br>(0 - 0)         |
| Gallbladder and biliary tract cancer          | 3<br>(2 - 5)       | --                 | --                  | 1<br>(0 - 2)         | 2<br>(1 - 3)         | 1<br>(0 - 1)         |
| Pancreatic cancer                             | 4<br>(3 - 7)       | --                 | --                  | 1<br>(1 - 2)         | 3<br>(1 - 4)         | 1<br>(1 - 1)         |
| Malignant skin melanoma                       | 1<br>(1 - 2)       | --                 | --                  | 0<br>(0 - 0)         | 1<br>(0 - 1)         | 0<br>(0 - 0)         |
| Non-melanoma skin cancer                      | 1<br>(0 - 2)       | --                 | --                  | 0<br>(0 - 0)         | 0<br>(0 - 1)         | 0<br>(0 - 1)         |
| Ovarian cancer                                | 9<br>(5 - 15)      | --                 | --                  | 3<br>(1 - 5)         | 6<br>(3 - 9)         | 1<br>(1 - 2)         |
| Testicular cancer                             | --                 | --                 | --                  | --                   | --                   | --                   |
| Kidney cancer                                 | 3<br>(2 - 4)       | 0<br>(0 - 1)       | 0<br>(0 - 0)        | 1<br>(0 - 1)         | 1<br>(1 - 2)         | 1<br>(0 - 1)         |
| Bladder cancer                                | 2<br>(1 - 3)       | --                 | --                  | 0<br>(0 - 1)         | 1<br>(0 - 2)         | 1<br>(0 - 1)         |
| Brain and nervous system cancer               | 3<br>(2 - 4)       | 0<br>(0 - 0)       | 0<br>(0 - 0)        | 2<br>(1 - 3)         | 1<br>(0 - 1)         | 0<br>(0 - 0)         |
| Thyroid cancer                                | 1<br>(1 - 2)       | --                 | 0<br>(0 - 0)        | 0<br>(0 - 0)         | 1<br>(0 - 1)         | 0<br>(0 - 0)         |
| Mesothelioma                                  | 0<br>(0 - 0)       | --                 | --                  | 0<br>(0 - 0)         | 0<br>(0 - 0)         | 0<br>(0 - 0)         |
| Hodgkin lymphoma                              | 2<br>(1 - 2)       | 0<br>(0 - 0)       | 0<br>(0 - 0)        | 0<br>(0 - 1)         | 1<br>(0 - 1)         | 0<br>(0 - 1)         |
| Non-Hodgkin lymphoma                          | 9<br>(5 - 15)      | 1<br>(0 - 2)       | 1<br>(0 - 2)        | 3<br>(1 - 6)         | 3<br>(2 - 5)         | 2<br>(1 - 3)         |
| Multiple myeloma                              | 2<br>(1 - 4)       | --                 | --                  | 1<br>(0 - 1)         | 1<br>(1 - 2)         | 1<br>(0 - 1)         |
| Leukemia                                      | 3<br>(2 - 5)       | 0<br>(0 - 0)       | 0<br>(0 - 1)        | 1<br>(1 - 2)         | 1<br>(1 - 1)         | 1<br>(0 - 1)         |
| Other neoplasms                               | 21<br>(13 - 32)    | 2<br>(1 - 5)       | 1<br>(1 - 3)        | 6<br>(2 - 11)        | 6<br>(3 - 11)        | 5<br>(3 - 8)         |
| Cardiovascular diseases                       | 517<br>(351 - 721) | 3<br>(1 - 6)       | 1<br>(0 - 3)        | 56<br>(28 - 106)     | 184<br>(113 - 275)   | 274<br>(200 - 354)   |
| Rheumatic heart disease                       | 21<br>(12 - 35)    | 0<br>(0 - 0)       | 0<br>(0 - 1)        | 7<br>(3 - 13)        | 8<br>(4 - 14)        | 5<br>(3 - 9)         |
| Ischemic heart disease                        | 98<br>(57 - 144)   | 0<br>(0 - 0)       | 0<br>(0 - 0)        | 7<br>(3 - 17)        | 33<br>(17 - 52)      | 58<br>(34 - 85)      |
| Cerebrovascular disease                       | 248<br>(166 - 354) | 0<br>(0 - 1)       | 0<br>(0 - 0)        | 19<br>(10 - 35)      | 88<br>(53 - 134)     | 141<br>(97 - 194)    |
| Ischemic stroke                               | 96<br>(34 - 153)   | 0<br>(0 - 0)       | 0<br>(0 - 0)        | 2<br>(0 - 5)         | 22<br>(6 - 41)       | 71<br>(27 - 110)     |
| Hemorrhagic stroke                            | 152<br>(89 - 256)  | 0<br>(0 - 1)       | 0<br>(0 - 0)        | 17<br>(9 - 31)       | 65<br>(38 - 107)     | 69<br>(39 - 130)     |
| Hypertensive heart disease                    | 58<br>(35 - 99)    | 0<br>(0 - 0)       | 0<br>(0 - 0)        | 5<br>(2 - 9)         | 18<br>(9 - 31)       | 35<br>(21 - 64)      |
| Cardiomyopathy and myocarditis                | 21<br>(12 - 35)    | 1<br>(0 - 3)       | 0<br>(0 - 1)        | 6<br>(2 - 12)        | 7<br>(4 - 11)        | 7<br>(3 - 13)        |
| Atrial fibrillation and flutter               | 0<br>(0 - 1)       | --                 | --                  | 0<br>(0 - 0)         | 0<br>(0 - 0)         | 0<br>(0 - 0)         |
| Aortic aneurysm                               | 5<br>(2 - 10)      | --                 | --                  | 1<br>(0 - 2)         | 2<br>(1 - 4)         | 3<br>(1 - 4)         |
| Peripheral vascular disease                   | 0<br>(0 - 1)       | --                 | --                  | 0<br>(0 - 0)         | 0<br>(0 - 0)         | 0<br>(0 - 0)         |
| Endocarditis                                  | 4<br>(2 - 7)       | 0<br>(0 - 0)       | 0<br>(0 - 0)        | 1<br>(0 - 2)         | 1<br>(1 - 2)         | 2<br>(1 - 3)         |
| Other cardiovascular and circulatory diseases | 61<br>(37 - 101)   | 1<br>(0 - 2)       | 0<br>(0 - 1)        | 10<br>(5 - 20)       | 27<br>(15 - 46)      | 23<br>(14 - 38)      |
| Chronic respiratory diseases                  | 64<br>(42 - 91)    | 1<br>(0 - 2)       | 0<br>(0 - 1)        | 8<br>(4 - 14)        | 24<br>(14 - 37)      | 30<br>(20 - 42)      |

Web Table 31- Comoros deaths with 95% UI by age, sex, and cause in 2013

| Cause                                               | Females, All Ages | Females, 0-4 Years | Females, 5-14 Years | Females, 15-49 Years | Females, 50-69 Years | Females, 70-80 Years |
|-----------------------------------------------------|-------------------|--------------------|---------------------|----------------------|----------------------|----------------------|
| Chronic obstructive pulmonary disease               | 40<br>(24 - 61)   | 0<br>(0 - 1)       | 0<br>(0 - 0)        | 3<br>(2 - 6)         | 16<br>(8 - 25)       | 20<br>(13 - 31)      |
| Pneumoconiosis                                      | 0<br>(0 - 1)      | 0<br>(0 - 0)       | 0<br>(0 - 0)        | 0<br>(0 - 0)         | 0<br>(0 - 0)         | 0<br>(0 - 0)         |
| Silicosis                                           | 0<br>(0 - 0)      | 0<br>(0 - 0)       | 0<br>(0 - 0)        | 0<br>(0 - 0)         | 0<br>(0 - 0)         | 0<br>(0 - 0)         |
| Asbestosis                                          | 0<br>(0 - 0)      | 0<br>(0 - 0)       | 0<br>(0 - 0)        | 0<br>(0 - 0)         | 0<br>(0 - 0)         | 0<br>(0 - 0)         |
| Coal workers pneumoconiosis                         | 0<br>(0 - 0)      | 0<br>(0 - 0)       | 0<br>(0 - 0)        | 0<br>(0 - 0)         | 0<br>(0 - 0)         | 0<br>(0 - 0)         |
| Other pneumoconiosis                                | 0<br>(0 - 1)      | 0<br>(0 - 0)       | 0<br>(0 - 0)        | 0<br>(0 - 0)         | 0<br>(0 - 0)         | 0<br>(0 - 0)         |
| Asthma                                              | 14<br>(7 - 23)    | 0<br>(0 - 1)       | 0<br>(0 - 0)        | 2<br>(1 - 5)         | 6<br>(2 - 10)        | 5<br>(2 - 9)         |
| Interstitial lung disease and pulmonary sarcoidosis | 6<br>(1 - 12)     | 0<br>(0 - 0)       | 0<br>(0 - 0)        | 1<br>(0 - 2)         | 2<br>(0 - 4)         | 3<br>(0 - 6)         |
| Other chronic respiratory diseases                  | 4<br>(2 - 7)      | 1<br>(0 - 1)       | 0<br>(0 - 0)        | 1<br>(1 - 2)         | 1<br>(0 - 1)         | 1<br>(1 - 2)         |
| Cirrhosis                                           | 24<br>(8 - 62)    | 0<br>(0 - 0)       | 0<br>(0 - 1)        | 5<br>(1 - 15)        | 12<br>(4 - 31)       | 7<br>(2 - 16)        |
| Cirrhosis due to hepatitis B                        | 7<br>(1 - 22)     | 0<br>(0 - 0)       | 0<br>(0 - 0)        | 2<br>(0 - 5)         | 3<br>(0 - 11)        | 2<br>(0 - 6)         |
| Cirrhosis due to hepatitis C                        | 6<br>(1 - 18)     | 0<br>(0 - 0)       | 0<br>(0 - 0)        | 1<br>(0 - 4)         | 3<br>(1 - 10)        | 1<br>(0 - 4)         |
| Cirrhosis due to alcohol use                        | 8<br>(3 - 20)     | --                 | --                  | 1<br>(0 - 3)         | 4<br>(1 - 10)        | 3<br>(1 - 7)         |
| Cirrhosis due to other causes                       | 3<br>(1 - 9)      | 0<br>(0 - 0)       | 0<br>(0 - 0)        | 1<br>(0 - 3)         | 1<br>(0 - 4)         | 1<br>(0 - 2)         |
| Digestive diseases                                  | 53<br>(34 - 78)   | 0<br>(0 - 1)       | 1<br>(0 - 1)        | 11<br>(6 - 18)       | 19<br>(11 - 30)      | 21<br>(15 - 30)      |
| Peptic ulcer disease                                | 13<br>(7 - 20)    | 0<br>(0 - 0)       | 0<br>(0 - 0)        | 2<br>(1 - 4)         | 5<br>(2 - 8)         | 6<br>(3 - 10)        |
| Gastritis and duodenitis                            | 2<br>(1 - 6)      | 0<br>(0 - 0)       | 0<br>(0 - 0)        | 0<br>(0 - 1)         | 1<br>(0 - 2)         | 1<br>(0 - 3)         |
| Appendicitis                                        | 4<br>(2 - 7)      | 0<br>(0 - 0)       | 0<br>(0 - 0)        | 1<br>(0 - 2)         | 2<br>(1 - 3)         | 2<br>(1 - 3)         |
| Paralytic ileus and intestinal obstruction          | 16<br>(9 - 28)    | 0<br>(0 - 0)       | 0<br>(0 - 1)        | 3<br>(1 - 6)         | 6<br>(3 - 10)        | 6<br>(3 - 12)        |
| Inguinal, femoral, and abdominal hernia             | 1<br>(0 - 2)      | 0<br>(0 - 0)       | 0<br>(0 - 0)        | 0<br>(0 - 1)         | 0<br>(0 - 0)         | 0<br>(0 - 1)         |
| Inflammatory bowel disease                          | 3<br>(2 - 6)      | 0<br>(0 - 0)       | 0<br>(0 - 0)        | 1<br>(0 - 2)         | 1<br>(1 - 2)         | 1<br>(1 - 2)         |
| Vascular intestinal disorders                       | 0<br>(0 - 1)      | 0<br>(0 - 0)       | 0<br>(0 - 0)        | 0<br>(0 - 0)         | 0<br>(0 - 0)         | 0<br>(0 - 1)         |
| Gallbladder and biliary diseases                    | 5<br>(3 - 8)      | 0<br>(0 - 0)       | 0<br>(0 - 0)        | 1<br>(0 - 1)         | 2<br>(1 - 3)         | 2<br>(1 - 3)         |
| Pancreatitis                                        | 2<br>(1 - 4)      | 0<br>(0 - 0)       | 0<br>(0 - 0)        | 1<br>(0 - 1)         | 1<br>(0 - 2)         | 1<br>(0 - 1)         |
| Other digestive diseases                            | 5<br>(3 - 9)      | 0<br>(0 - 0)       | 0<br>(0 - 0)        | 1<br>(0 - 2)         | 2<br>(1 - 3)         | 2<br>(1 - 4)         |
| Neurological disorders                              | 31<br>(21 - 44)   | 2<br>(0 - 5)       | 1<br>(0 - 2)        | 7<br>(3 - 13)        | 4<br>(2 - 6)         | 17<br>(12 - 23)      |
| Alzheimer disease and other dementias               | 17<br>(12 - 24)   | --                 | --                  | 0<br>(0 - 0)         | 2<br>(1 - 3)         | 16<br>(11 - 21)      |
| Parkinson disease                                   | 0<br>(0 - 0)      | --                 | --                  | 0<br>(0 - 0)         | 0<br>(0 - 0)         | 0<br>(0 - 0)         |
| Epilepsy                                            | 11<br>(6 - 20)    | 1<br>(0 - 4)       | 1<br>(0 - 2)        | 6<br>(2 - 12)        | 2<br>(1 - 3)         | 1<br>(1 - 2)         |
| Multiple sclerosis                                  | 0<br>(0 - 0)      | --                 | --                  | 0<br>(0 - 0)         | 0<br>(0 - 0)         | 0<br>(0 - 0)         |
| Other neurological disorders                        | 2<br>(1 - 3)      | 0<br>(0 - 1)       | 0<br>(0 - 0)        | 1<br>(0 - 1)         | 1<br>(0 - 1)         | 0<br>(0 - 1)         |
| Mental and substance use disorders                  | 7<br>(4 - 14)     | 0<br>(0 - 1)       | 0<br>(0 - 0)        | 5<br>(2 - 10)        | 2<br>(1 - 4)         | 0<br>(0 - 1)         |
| Schizophrenia                                       | 1<br>(0 - 2)      | --                 | --                  | 0<br>(0 - 1)         | 0<br>(0 - 1)         | 0<br>(0 - 0)         |
| Alcohol use disorders                               | 3<br>(1 - 5)      | --                 | --                  | 2<br>(0 - 3)         | 1<br>(0 - 2)         | 0<br>(0 - 0)         |
| Drug use disorders                                  | 4<br>(1 - 9)      | 0<br>(0 - 1)       | --                  | 3<br>(1 - 7)         | 1<br>(0 - 1)         | 0<br>(0 - 1)         |
| Opioid use disorders                                | 0<br>(0 - 1)      | 0<br>(0 - 0)       | --                  | 0<br>(0 - 1)         | 0<br>(0 - 0)         | 0<br>(0 - 0)         |
| Cocaine use disorders                               | 0<br>(0 - 0)      | 0<br>(0 - 0)       | --                  | 0<br>(0 - 0)         | 0<br>(0 - 0)         | 0<br>(0 - 0)         |
| Amphetamine use disorders                           | 0<br>(0 - 0)      | 0<br>(0 - 0)       | --                  | 0<br>(0 - 0)         | 0<br>(0 - 0)         | 0<br>(0 - 0)         |
| Other drug use disorders                            | 3<br>(1 - 8)      | 0<br>(0 - 0)       | --                  | 3<br>(1 - 6)         | 1<br>(0 - 1)         | 0<br>(0 - 0)         |
| Eating disorders                                    | 0<br>(0 - 0)      | --                 | 0<br>(0 - 0)        | 0<br>(0 - 0)         | --                   | --                   |

Web Table 31- Comoros deaths with 95% UI by age, sex, and cause in 2013

| Cause                                               | Females, All Ages | Females, 0-4 Years | Females, 5-14 Years | Females, 15-49 Years | Females, 50-69 Years | Females, 70-80 Years |
|-----------------------------------------------------|-------------------|--------------------|---------------------|----------------------|----------------------|----------------------|
| Anorexia nervosa                                    | 0<br>(0 - 0)      | --                 | 0<br>(0 - 0)        | 0<br>(0 - 0)         | --                   | --                   |
| Diabetes, urogenital, blood, and endocrine diseases | 126<br>(81 - 181) | 5<br>(2 - 9)       | 2<br>(1 - 3)        | 25<br>(13 - 40)      | 48<br>(28 - 73)      | 47<br>(32 - 64)      |
| Diabetes mellitus                                   | 59<br>(35 - 88)   | 0<br>(0 - 0)       | 0<br>(0 - 0)        | 6<br>(3 - 10)        | 26<br>(15 - 41)      | 27<br>(16 - 39)      |
| Acute glomerulonephritis                            | 1<br>(1 - 3)      | 0<br>(0 - 0)       | 0<br>(0 - 0)        | 1<br>(0 - 1)         | 0<br>(0 - 1)         | 0<br>(0 - 1)         |
| Chronic kidney disease                              | 26<br>(13 - 44)   | 0<br>(0 - 1)       | 1<br>(0 - 1)        | 6<br>(3 - 11)        | 9<br>(4 - 17)        | 10<br>(5 - 17)       |
| Chronic kidney disease due to diabetes mellitus     | 0<br>(0 - 0)      | 0<br>(0 - 0)       | 0<br>(0 - 0)        | 0<br>(0 - 0)         | 0<br>(0 - 0)         | 0<br>(0 - 0)         |
| Chronic kidney disease due to hypertension          | 12<br>(6 - 22)    | 0<br>(0 - 0)       | 0<br>(0 - 0)        | 2<br>(1 - 5)         | 4<br>(2 - 8)         | 5<br>(3 - 9)         |
| Chronic kidney disease due to glomerulonephritis    | 7<br>(3 - 12)     | 0<br>(0 - 0)       | 0<br>(0 - 0)        | 2<br>(1 - 4)         | 2<br>(1 - 4)         | 2<br>(1 - 3)         |
| Chronic kidney disease due to other causes          | 7<br>(2 - 14)     | 0<br>(0 - 1)       | 0<br>(0 - 1)        | 1<br>(0 - 3)         | 2<br>(1 - 6)         | 3<br>(1 - 6)         |
| Urinary diseases and male infertility               | 14<br>(8 - 21)    | 0<br>(0 - 1)       | 0<br>(0 - 0)        | 4<br>(2 - 7)         | 6<br>(3 - 9)         | 4<br>(2 - 6)         |
| Interstitial nephritis and urinary tract infections | 11<br>(6 - 17)    | 0<br>(0 - 1)       | 0<br>(0 - 0)        | 3<br>(1 - 5)         | 4<br>(2 - 7)         | 3<br>(2 - 5)         |
| Urolithiasis                                        | 1<br>(0 - 2)      | --                 | 0<br>(0 - 0)        | 0<br>(0 - 1)         | 0<br>(0 - 1)         | 0<br>(0 - 0)         |
| Other urinary diseases                              | 2<br>(1 - 4)      | 0<br>(0 - 0)       | 0<br>(0 - 0)        | 1<br>(0 - 1)         | 0<br>(0 - 2)         | 0<br>(0 - 1)         |
| Gynecological diseases                              | 0<br>(0 - 1)      | --                 | --                  | 0<br>(0 - 1)         | 0<br>(0 - 0)         | 0<br>(0 - 0)         |
| Uterine fibroids                                    | 0<br>(0 - 0)      | --                 | --                  | 0<br>(0 - 0)         | 0<br>(0 - 0)         | 0<br>(0 - 0)         |
| Polycystic ovarian syndrome                         | 0<br>(0 - 0)      | --                 | --                  | 0<br>(0 - 0)         | 0<br>(0 - 0)         | --                   |
| Endometriosis                                       | 0<br>(0 - 0)      | --                 | --                  | 0<br>(0 - 0)         | 0<br>(0 - 0)         | --                   |
| Genital prolapse                                    | 0<br>(0 - 0)      | --                 | --                  | 0<br>(0 - 0)         | 0<br>(0 - 0)         | 0<br>(0 - 0)         |
| Other gynecological diseases                        | 0<br>(0 - 1)      | --                 | --                  | 0<br>(0 - 0)         | 0<br>(0 - 0)         | 0<br>(0 - 0)         |
| Hemoglobinopathies and hemolytic anemias            | 7<br>(3 - 13)     | 1<br>(0 - 3)       | 1<br>(0 - 1)        | 3<br>(1 - 6)         | 1<br>(1 - 2)         | 1<br>(0 - 1)         |
| Thalassemias                                        | 1<br>(0 - 1)      | 0<br>(0 - 1)       | 0<br>(0 - 0)        | 0<br>(0 - 0)         | 0<br>(0 - 0)         | 0<br>(0 - 0)         |
| Sickle cell disorders                               | 3<br>(1 - 6)      | 1<br>(0 - 1)       | 0<br>(0 - 1)        | 2<br>(1 - 4)         | 0<br>(0 - 1)         | 0<br>(0 - 0)         |
| G6PD deficiency                                     | 0<br>(0 - 0)      | 0<br>(0 - 0)       | 0<br>(0 - 0)        | 0<br>(0 - 0)         | 0<br>(0 - 0)         | 0<br>(0 - 0)         |
| Other hemoglobinopathies and hemolytic anemias      | 3<br>(1 - 5)      | 1<br>(0 - 1)       | 0<br>(0 - 0)        | 1<br>(0 - 2)         | 1<br>(0 - 1)         | 1<br>(0 - 1)         |
| Endocrine, metabolic, blood, and immune disorders   | 18<br>(11 - 28)   | 2<br>(1 - 5)       | 0<br>(0 - 1)        | 5<br>(2 - 9)         | 5<br>(3 - 9)         | 5<br>(3 - 9)         |
| Musculoskeletal disorders                           | 4<br>(1 - 7)      | --                 | 0<br>(0 - 0)        | 2<br>(1 - 4)         | 1<br>(0 - 2)         | 1<br>(0 - 1)         |
| Rheumatoid arthritis                                | 1<br>(0 - 2)      | --                 | 0<br>(0 - 0)        | 0<br>(0 - 1)         | 0<br>(0 - 1)         | 0<br>(0 - 1)         |
| Other musculoskeletal disorders                     | 2<br>(1 - 5)      | --                 | 0<br>(0 - 0)        | 1<br>(1 - 3)         | 1<br>(0 - 1)         | 0<br>(0 - 1)         |
| Other non-communicable diseases                     | 55<br>(36 - 82)   | 40<br>(22 - 65)    | 2<br>(1 - 4)        | 5<br>(2 - 9)         | 3<br>(2 - 6)         | 5<br>(3 - 8)         |
| Congenital anomalies                                | 43<br>(26 - 70)   | 38<br>(22 - 62)    | 2<br>(1 - 3)        | 3<br>(1 - 4)         | 1<br>(0 - 1)         | 1<br>(0 - 1)         |
| Neural tube defects                                 | 9<br>(3 - 22)     | 9<br>(2 - 22)      | 0<br>(0 - 0)        | 0<br>(0 - 1)         | 0<br>(0 - 0)         | 0<br>(0 - 0)         |
| Congenital heart anomalies                          | 19<br>(10 - 33)   | 16<br>(8 - 30)     | 1<br>(0 - 2)        | 1<br>(1 - 2)         | 0<br>(0 - 1)         | 0<br>(0 - 1)         |
| Cleft lip and cleft palate                          | 0<br>(0 - 0)      | 0<br>(0 - 0)       | --                  | --                   | --                   | --                   |
| Down syndrome                                       | 3<br>(1 - 6)      | 2<br>(1 - 5)       | 0<br>(0 - 0)        | 0<br>(0 - 1)         | 0<br>(0 - 0)         | 0<br>(0 - 0)         |
| Chromosomal unbalanced rearrangements               | 3<br>(1 - 6)      | 2<br>(1 - 5)       | 0<br>(0 - 0)        | 0<br>(0 - 0)         | 0<br>(0 - 0)         | 0<br>(0 - 0)         |
| Other congenital anomalies                          | 10<br>(4 - 19)    | 8<br>(4 - 17)      | 0<br>(0 - 1)        | 0<br>(0 - 1)         | 0<br>(0 - 0)         | 0<br>(0 - 1)         |
| Skin and subcutaneous diseases                      | 11<br>(7 - 17)    | 2<br>(0 - 5)       | 0<br>(0 - 0)        | 2<br>(1 - 5)         | 3<br>(2 - 4)         | 4<br>(3 - 7)         |
| Cellulitis                                          | 4<br>(2 - 8)      | 1<br>(0 - 2)       | 0<br>(0 - 0)        | 1<br>(0 - 2)         | 1<br>(0 - 2)         | 2<br>(1 - 3)         |
| Pyoderma                                            | 5<br>(3 - 9)      | 1<br>(0 - 3)       | 0<br>(0 - 0)        | 1<br>(0 - 2)         | 1<br>(1 - 2)         | 2<br>(1 - 3)         |
| Decubitus ulcer                                     | 1<br>(1 - 2)      | 0<br>(0 - 0)       | 0<br>(0 - 0)        | 0<br>(0 - 0)         | 0<br>(0 - 0)         | 1<br>(0 - 2)         |



Web Table 31- Comoros deaths with 95% UI by age, sex, and cause in 2013

| Cause                                           | Females, All Ages | Females, 0-4 Years | Females, 5-14 Years | Females, 15-49 Years | Females, 50-69 Years | Females, 70-80 Years |
|-------------------------------------------------|-------------------|--------------------|---------------------|----------------------|----------------------|----------------------|
| Other skin and subcutaneous diseases            | 0<br>(0 - 1)      | 0<br>(0 - 0)       | 0<br>(0 - 0)        | 0<br>(0 - 0)         | 0<br>(0 - 0)         | 0<br>(0 - 0)         |
| Sudden infant death syndrome                    | 0<br>(0 - 1)      | 0<br>(0 - 1)       | --                  | --                   | --                   | --                   |
| Injuries                                        | 140<br>(86 - 228) | 17<br>(5 - 55)     | 10<br>(4 - 18)      | 54<br>(28 - 99)      | 34<br>(20 - 55)      | 25<br>(16 - 36)      |
| Transport injuries                              | 59<br>(35 - 88)   | 3<br>(1 - 6)       | 5<br>(2 - 10)       | 24<br>(13 - 41)      | 17<br>(10 - 27)      | 9<br>(6 - 14)        |
| Road injuries                                   | 56<br>(34 - 84)   | 2<br>(1 - 5)       | 5<br>(2 - 9)        | 24<br>(12 - 40)      | 17<br>(10 - 26)      | 9<br>(5 - 13)        |
| Pedestrian road injuries                        | 12<br>(5 - 24)    | 0<br>(0 - 1)       | 1<br>(0 - 3)        | 5<br>(2 - 11)        | 4<br>(1 - 8)         | 2<br>(1 - 4)         |
| Cyclist road injuries                           | 1<br>(0 - 2)      | 0<br>(0 - 0)       | 0<br>(0 - 1)        | 0<br>(0 - 1)         | 1<br>(0 - 1)         | 0<br>(0 - 0)         |
| Motorcyclist road injuries                      | 4<br>(1 - 7)      | 0<br>(0 - 0)       | 0<br>(0 - 1)        | 2<br>(0 - 4)         | 1<br>(0 - 2)         | 1<br>(0 - 1)         |
| Motor vehicle road injuries                     | 39<br>(21 - 62)   | 2<br>(0 - 4)       | 3<br>(1 - 6)        | 17<br>(8 - 29)       | 11<br>(5 - 19)       | 6<br>(3 - 10)        |
| Other road injuries                             | 0<br>(0 - 1)      | 0<br>(0 - 0)       | 0<br>(0 - 0)        | 0<br>(0 - 0)         | 0<br>(0 - 0)         | 0<br>(0 - 0)         |
| Other transport injuries                        | 2<br>(1 - 4)      | 0<br>(0 - 1)       | 0<br>(0 - 0)        | 1<br>(0 - 2)         | 1<br>(0 - 1)         | 1<br>(0 - 1)         |
| Unintentional injuries                          | 64<br>(37 - 140)  | 14<br>(4 - 52)     | 5<br>(2 - 10)       | 18<br>(8 - 41)       | 14<br>(7 - 24)       | 15<br>(9 - 23)       |
| Falls                                           | 8<br>(3 - 12)     | 0<br>(0 - 1)       | 0<br>(0 - 1)        | 1<br>(1 - 3)         | 2<br>(1 - 3)         | 4<br>(2 - 7)         |
| Drowning                                        | 9<br>(5 - 18)     | 2<br>(1 - 7)       | 1<br>(1 - 3)        | 3<br>(1 - 6)         | 2<br>(1 - 3)         | 1<br>(0 - 1)         |
| Fire, heat, and hot substances                  | 9<br>(5 - 16)     | 2<br>(0 - 6)       | 1<br>(0 - 2)        | 3<br>(1 - 6)         | 2<br>(1 - 3)         | 2<br>(1 - 3)         |
| Poisonings                                      | 2<br>(1 - 4)      | 0<br>(0 - 1)       | 0<br>(0 - 0)        | 1<br>(0 - 1)         | 1<br>(0 - 2)         | 0<br>(0 - 0)         |
| Exposure to mechanical forces                   | 14<br>(3 - 97)    | 5<br>(1 - 43)      | 1<br>(0 - 7)        | 4<br>(1 - 27)        | 2<br>(0 - 15)        | 1<br>(0 - 6)         |
| Unintentional firearm injuries                  | 1<br>(1 - 3)      | 0<br>(0 - 0)       | 0<br>(0 - 0)        | 1<br>(0 - 2)         | 0<br>(0 - 1)         | 0<br>(0 - 0)         |
| Unintentional suffocation                       | 9<br>(0 - 91)     | 4<br>(0 - 41)      | 1<br>(0 - 7)        | 2<br>(0 - 24)        | 1<br>(0 - 14)        | 1<br>(0 - 6)         |
| Other exposure to mechanical forces             | 4<br>(1 - 7)      | 1<br>(0 - 3)       | 0<br>(0 - 1)        | 1<br>(0 - 2)         | 1<br>(0 - 1)         | 1<br>(0 - 1)         |
| Adverse effects of medical treatment            | 13<br>(7 - 20)    | 2<br>(1 - 5)       | 0<br>(0 - 1)        | 3<br>(1 - 5)         | 3<br>(2 - 6)         | 4<br>(2 - 8)         |
| Animal contact                                  | 5<br>(1 - 10)     | 0<br>(0 - 2)       | 0<br>(0 - 1)        | 2<br>(0 - 5)         | 1<br>(0 - 3)         | 1<br>(0 - 1)         |
| Venomous animal contact                         | 3<br>(1 - 6)      | 0<br>(0 - 1)       | 0<br>(0 - 1)        | 1<br>(0 - 3)         | 1<br>(0 - 1)         | 0<br>(0 - 1)         |
| Non-venomous animal contact                     | 2<br>(0 - 5)      | 0<br>(0 - 0)       | 0<br>(0 - 1)        | 1<br>(0 - 2)         | 1<br>(0 - 2)         | 0<br>(0 - 1)         |
| Foreign body                                    | 5<br>(2 - 8)      | 2<br>(1 - 4)       | 0<br>(0 - 0)        | 0<br>(0 - 1)         | 0<br>(0 - 1)         | 2<br>(1 - 3)         |
| Pulmonary aspiration and foreign body in airway | 4<br>(2 - 8)      | 2<br>(1 - 4)       | 0<br>(0 - 0)        | 0<br>(0 - 1)         | 0<br>(0 - 1)         | 2<br>(1 - 3)         |
| Foreign body in other body part                 | 0<br>(0 - 2)      | 0<br>(0 - 0)       | 0<br>(0 - 0)        | 0<br>(0 - 1)         | 0<br>(0 - 0)         | 0<br>(0 - 0)         |
| Other unintentional injuries                    | 1<br>(0 - 2)      | 0<br>(0 - 0)       | 0<br>(0 - 0)        | 0<br>(0 - 1)         | 0<br>(0 - 1)         | 0<br>(0 - 0)         |
| Self-harm and interpersonal violence            | 17<br>(9 - 34)    | 1<br>(0 - 2)       | 1<br>(0 - 1)        | 11<br>(5 - 24)       | 3<br>(2 - 5)         | 2<br>(1 - 3)         |
| Self-harm                                       | 8<br>(4 - 15)     | --                 | 0<br>(0 - 0)        | 4<br>(2 - 10)        | 2<br>(1 - 4)         | 1<br>(1 - 2)         |
| Interpersonal violence                          | 9<br>(3 - 23)     | 1<br>(0 - 2)       | 0<br>(0 - 1)        | 7<br>(2 - 19)        | 1<br>(0 - 2)         | 0<br>(0 - 0)         |
| Assault by firearm                              | 2<br>(1 - 6)      | 0<br>(0 - 0)       | 0<br>(0 - 0)        | 2<br>(0 - 6)         | 0<br>(0 - 1)         | 0<br>(0 - 0)         |
| Assault by sharp object                         | 2<br>(1 - 6)      | 0<br>(0 - 0)       | 0<br>(0 - 0)        | 2<br>(1 - 6)         | 0<br>(0 - 0)         | 0<br>(0 - 0)         |
| Assault by other means                          | 4<br>(1 - 11)     | 0<br>(0 - 1)       | 0<br>(0 - 1)        | 3<br>(1 - 9)         | 1<br>(0 - 1)         | 0<br>(0 - 0)         |

Web Table 31- Congo deaths with 95% UI by age, sex, and cause in 2013

| Cause                                                             | Both Sexes, All Ages        | Both Sexes, 0-4 Years      | Both Sexes, 5-14 Years   | Both Sexes, 15-49 Years    | Both Sexes, 50-69 Years  | Both Sexes, 70-80 Years  |
|-------------------------------------------------------------------|-----------------------------|----------------------------|--------------------------|----------------------------|--------------------------|--------------------------|
| All causes                                                        | 38,724<br>(35,462 - 41,873) | 10,048<br>(8,521 - 11,508) | 1,164<br>(1,032 - 1,375) | 10,157<br>(9,146 - 11,200) | 8,513<br>(7,255 - 9,687) | 8,842<br>(7,941 - 9,630) |
| Communicable, maternal, neonatal, and nutritional diseases        | 19,559<br>(17,569 - 21,485) | 7,877<br>(6,527 - 9,176)   | 832<br>(705 - 994)       | 5,937<br>(5,067 - 7,097)   | 2,643<br>(2,144 - 3,062) | 2,270<br>(1,732 - 2,724) |
| HIV/AIDS and tuberculosis                                         | 6,467<br>(5,134 - 7,989)    | 409<br>(331 - 496)         | 380<br>(310 - 457)       | 4,096<br>(3,059 - 5,429)   | 1,217<br>(907 - 1,460)   | 365<br>(192 - 481)       |
| Tuberculosis                                                      | 1,340<br>(665 - 1,727)      | 37<br>(22 - 58)            | 9<br>(6 - 13)            | 502<br>(290 - 676)         | 505<br>(221 - 671)       | 287<br>(122 - 394)       |
| HIV/AIDS                                                          | 5,127<br>(4,074 - 6,664)    | 372<br>(298 - 462)         | 371<br>(301 - 449)       | 3,594<br>(2,554 - 4,992)   | 712<br>(565 - 911)       | 78<br>(55 - 105)         |
| HIV/AIDS resulting in mycobacterial infection                     | 312<br>(232 - 425)          | 21<br>(15 - 28)            | 19<br>(15 - 26)          | 219<br>(149 - 314)         | 47<br>(34 - 63)          | 5<br>(4 - 8)             |
| HIV/AIDS resulting in other diseases                              | 4,815<br>(3,833 - 6,280)    | 351<br>(280 - 436)         | 352<br>(286 - 426)       | 3,375<br>(2,390 - 4,724)   | 665<br>(527 - 850)       | 72<br>(51 - 97)          |
| Diarrhea, lower respiratory, and other common infectious diseases | 6,531<br>(4,996 - 7,945)    | 3,122<br>(2,059 - 4,263)   | 256<br>(182 - 355)       | 754<br>(569 - 985)         | 965<br>(718 - 1,255)     | 1,434<br>(1,059 - 1,830) |
| Diarrheal diseases                                                | 1,493<br>(1,002 - 2,102)    | 524<br>(232 - 1,008)       | 48<br>(24 - 82)          | 225<br>(141 - 332)         | 303<br>(179 - 467)       | 392<br>(233 - 591)       |
| Intestinal infectious diseases                                    | 197<br>(104 - 340)          | 82<br>(38 - 150)           | 45<br>(23 - 82)          | 58<br>(28 - 110)           | 9<br>(4 - 18)            | 3<br>(2 - 7)             |
| Typhoid fever                                                     | 139<br>(70 - 247)           | 55<br>(23 - 105)           | 33<br>(16 - 60)          | 42<br>(20 - 83)            | 7<br>(3 - 13)            | 2<br>(1 - 4)             |
| Paratyphoid fever                                                 | 46<br>(23 - 84)             | 20<br>(8 - 39)             | 11<br>(5 - 22)           | 13<br>(6 - 26)             | 2<br>(1 - 4)             | 1<br>(0 - 1)             |
| Other intestinal infectious diseases                              | 12<br>(4 - 22)              | 7<br>(2 - 17)              | 1<br>(0 - 4)             | 2<br>(0 - 8)               | 1<br>(0 - 4)             | 0<br>(0 - 3)             |
| Lower respiratory infections                                      | 3,462<br>(2,322 - 4,493)    | 1,491<br>(835 - 2,336)     | 60<br>(38 - 91)          | 328<br>(234 - 448)         | 581<br>(373 - 812)       | 1,002<br>(646 - 1,360)   |
| Upper respiratory infections                                      | 4<br>(2 - 6)                | 1<br>(0 - 4)               | 0<br>(0 - 0)             | 1<br>(0 - 2)               | 1<br>(0 - 2)             | 1<br>(0 - 2)             |
| Otitis media                                                      | 2<br>(2 - 3)                | 1<br>(1 - 2)               | 0<br>(0 - 0)             | 1<br>(0 - 1)               | 0<br>(0 - 0)             | 0<br>(0 - 0)             |
| Meningitis                                                        | 445<br>(316 - 624)          | 196<br>(109 - 316)         | 32<br>(18 - 51)          | 120<br>(77 - 175)          | 65<br>(39 - 95)          | 33<br>(21 - 49)          |
| Pneumococcal meningitis                                           | 147<br>(103 - 207)          | 51<br>(28 - 84)            | 13<br>(7 - 22)           | 46<br>(28 - 71)            | 24<br>(13 - 38)          | 12<br>(7 - 19)           |
| H influenzae type B meningitis                                    | 112<br>(73 - 171)           | 78<br>(43 - 130)           | 8<br>(5 - 14)            | 16<br>(10 - 25)            | 7<br>(4 - 11)            | 3<br>(2 - 5)             |
| Meningococcal meningitis                                          | 63<br>(45 - 89)             | 23<br>(12 - 41)            | 4<br>(2 - 6)             | 19<br>(11 - 29)            | 11<br>(6 - 17)           | 6<br>(4 - 10)            |
| Other meningitis                                                  | 123<br>(80 - 181)           | 43<br>(23 - 78)            | 7<br>(4 - 12)            | 39<br>(23 - 61)            | 23<br>(12 - 36)          | 11<br>(6 - 18)           |
| Encephalitis                                                      | 41<br>(29 - 60)             | 22<br>(12 - 41)            | 4<br>(2 - 6)             | 10<br>(6 - 15)             | 4<br>(2 - 5)             | 2<br>(1 - 3)             |
| Diphtheria                                                        | 2<br>(0 - 8)                | 1<br>(0 - 8)               | 0<br>(0 - 1)             | 0<br>(0 - 1)               | 0<br>(0 - 0)             | 0<br>(0 - 0)             |
| Whooping cough                                                    | 18<br>(0 - 84)              | 17<br>(0 - 81)             | 1<br>(0 - 3)             | 0<br>(0 - 1)               | 0<br>(0 - 0)             | 0<br>(0 - 0)             |
| Tetanus                                                           | 6<br>(3 - 11)               | 3<br>(1 - 7)               | 0<br>(0 - 1)             | 1<br>(1 - 2)               | 1<br>(0 - 2)             | 0<br>(0 - 1)             |
| Measles                                                           | 858<br>(332 - 1,711)        | 781<br>(300 - 1,540)       | 66<br>(24 - 145)         | 10<br>(3 - 23)             | 0<br>(0 - 1)             | 0<br>(0 - 1)             |
| Varicella and herpes zoster                                       | 3<br>(1 - 6)                | 1<br>(0 - 4)               | 0<br>(0 - 1)             | 1<br>(0 - 1)               | 0<br>(0 - 1)             | 1<br>(0 - 2)             |
| Neglected tropical diseases and malaria                           | 2,087<br>(1,123 - 3,572)    | 1,055<br>(396 - 2,414)     | 158<br>(73 - 305)        | 420<br>(237 - 674)         | 268<br>(126 - 446)       | 186<br>(69 - 343)        |
| Malaria                                                           | 1,968<br>(1,004 - 3,472)    | 1,024<br>(368 - 2,398)     | 147<br>(61 - 295)        | 371<br>(190 - 620)         | 248<br>(106 - 424)       | 178<br>(60 - 334)        |
| Leishmaniasis                                                     | 18<br>(12 - 26)             | 8<br>(4 - 14)              | 2<br>(1 - 4)             | 6<br>(3 - 9)               | 2<br>(1 - 3)             | 1<br>(0 - 1)             |
| Visceral leishmaniasis                                            | 18<br>(12 - 26)             | 8<br>(4 - 14)              | 2<br>(1 - 4)             | 6<br>(3 - 9)               | 2<br>(1 - 3)             | 1<br>(0 - 1)             |
| African trypanosomiasis                                           | 33<br>(18 - 53)             | 2<br>(1 - 4)               | 3<br>(2 - 5)             | 21<br>(11 - 34)            | 5<br>(3 - 8)             | 1<br>(1 - 2)             |
| Schistosomiasis                                                   | 21<br>(15 - 28)             | 0<br>(0 - 0)               | 0<br>(0 - 1)             | 8<br>(6 - 12)              | 8<br>(5 - 12)            | 4<br>(2 - 6)             |
| Cysticercosis                                                     | 1<br>(1 - 1)                | 0<br>(0 - 0)               | 0<br>(0 - 0)             | 1<br>(1 - 1)               | 0<br>(0 - 0)             | 0<br>(0 - 0)             |
| Cystic echinococcosis                                             | 2<br>(1 - 2)                | 0<br>(0 - 0)               | 0<br>(0 - 0)             | 1<br>(1 - 1)               | 0<br>(0 - 0)             | 0<br>(0 - 0)             |
| Dengue                                                            | 2<br>(1 - 3)                | 1<br>(0 - 1)               | 0<br>(0 - 0)             | 1<br>(0 - 1)               | 0<br>(0 - 0)             | 0<br>(0 - 0)             |
| Yellow fever                                                      | 7<br>(5 - 10)               | 1<br>(0 - 2)               | 1<br>(0 - 3)             | 4<br>(2 - 7)               | 1<br>(0 - 2)             | 0<br>(0 - 1)             |
| Rabies                                                            | 6<br>(3 - 9)                | 1<br>(0 - 3)               | 1<br>(1 - 2)             | 2<br>(1 - 4)               | 1<br>(0 - 1)             | 0<br>(0 - 0)             |
| Intestinal nematode infections                                    | 14<br>(4 - 28)              | 10<br>(2 - 24)             | 1<br>(0 - 6)             | 1<br>(0 - 6)               | 1<br>(0 - 5)             | 0<br>(0 - 3)             |
| Ascariasis                                                        | 14<br>(4 - 28)              | 10<br>(2 - 24)             | 1<br>(0 - 6)             | 1<br>(0 - 6)               | 1<br>(0 - 5)             | 0<br>(0 - 3)             |

Web Table 31- Congo deaths with 95% UI by age, sex, and cause in 2013

| Cause                                                            | Both Sexes, All Ages        | Both Sexes, 0-4 Years    | Both Sexes, 5-14 Years | Both Sexes, 15-49 Years  | Both Sexes, 50-69 Years  | Both Sexes, 70-80 Years  |
|------------------------------------------------------------------|-----------------------------|--------------------------|------------------------|--------------------------|--------------------------|--------------------------|
| Other neglected tropical diseases                                | 15<br>(7 - 26)              | 6<br>(2 - 14)            | 1<br>(0 - 2)           | 4<br>(2 - 8)             | 2<br>(1 - 4)             | 2<br>(1 - 3)             |
| Maternal disorders                                               | 494<br>(326 - 735)          | --                       | 1<br>(0 - 2)           | 493<br>(326 - 734)       | --                       | --                       |
| Maternal hemorrhage                                              | 72<br>(42 - 113)            | --                       | 0<br>(0 - 0)           | 72<br>(42 - 113)         | --                       | --                       |
| Maternal sepsis and other maternal infections                    | 44<br>(26 - 67)             | --                       | 0<br>(0 - 0)           | 44<br>(26 - 67)          | --                       | --                       |
| Maternal hypertensive disorders                                  | 54<br>(31 - 84)             | --                       | 0<br>(0 - 0)           | 53<br>(31 - 84)          | --                       | --                       |
| Maternal obstructed labor                                        | 28<br>(17 - 45)             | --                       | 0<br>(0 - 0)           | 28<br>(17 - 45)          | --                       | --                       |
| Maternal abortive outcome                                        | 85<br>(52 - 133)            | --                       | 0<br>(0 - 0)           | 85<br>(52 - 133)         | --                       | --                       |
| Indirect maternal deaths                                         | 39<br>(22 - 62)             | --                       | 0<br>(0 - 0)           | 39<br>(22 - 62)          | --                       | --                       |
| Late maternal deaths                                             | 75<br>(40 - 126)            | --                       | 0<br>(0 - 1)           | 74<br>(40 - 126)         | --                       | --                       |
| Maternal deaths aggravated by HIV/AIDS                           | 6<br>(3 - 9)                | --                       | --                     | 6<br>(3 - 9)             | --                       | --                       |
| Other maternal disorders                                         | 91<br>(54 - 137)            | --                       | 0<br>(0 - 0)           | 91<br>(54 - 137)         | --                       | --                       |
| Neonatal disorders                                               | 2,572<br>(1,781 - 3,507)    | 2,572<br>(1,781 - 3,507) | --                     | --                       | --                       | --                       |
| Neonatal preterm birth complications                             | 898<br>(482 - 1,463)        | 898<br>(482 - 1,463)     | --                     | --                       | --                       | --                       |
| Neonatal encephalopathy due to birth asphyxia and trauma         | 762<br>(398 - 1,317)        | 762<br>(398 - 1,317)     | --                     | --                       | --                       | --                       |
| Neonatal sepsis and other neonatal infections                    | 510<br>(226 - 954)          | 510<br>(226 - 954)       | --                     | --                       | --                       | --                       |
| Hemolytic disease and other neonatal jaundice                    | 15<br>(6 - 33)              | 15<br>(6 - 33)           | --                     | --                       | --                       | --                       |
| Other neonatal disorders                                         | 388<br>(180 - 696)          | 388<br>(180 - 696)       | --                     | --                       | --                       | --                       |
| Nutritional deficiencies                                         | 1,093<br>(648 - 1,606)      | 531<br>(253 - 877)       | 25<br>(14 - 40)        | 119<br>(77 - 217)        | 155<br>(94 - 241)        | 263<br>(150 - 400)       |
| Protein-energy malnutrition                                      | 794<br>(366 - 1,192)        | 432<br>(168 - 743)       | 20<br>(10 - 33)        | 56<br>(27 - 130)         | 103<br>(48 - 170)        | 183<br>(73 - 296)        |
| Iodine deficiency                                                | 5<br>(1 - 22)               | 3<br>(0 - 18)            | 0<br>(0 - 1)           | 1<br>(0 - 3)             | 1<br>(0 - 4)             | 1<br>(0 - 4)             |
| Iron-deficiency anemia                                           | 279<br>(151 - 576)          | 89<br>(18 - 284)         | 4<br>(2 - 9)           | 60<br>(33 - 106)         | 50<br>(24 - 92)          | 76<br>(36 - 145)         |
| Other nutritional deficiencies                                   | 15<br>(7 - 35)              | 7<br>(1 - 21)            | 0<br>(0 - 1)           | 3<br>(1 - 6)             | 2<br>(1 - 4)             | 3<br>(1 - 6)             |
| Other communicable, maternal, neonatal, and nutritional diseases | 314<br>(178 - 511)          | 189<br>(70 - 370)        | 12<br>(6 - 20)         | 54<br>(33 - 82)          | 37<br>(21 - 65)          | 22<br>(12 - 41)          |
| Sexually transmitted diseases excluding HIV                      | 135<br>(17 - 299)           | 115<br>(0 - 275)         | 5<br>(0 - 11)          | 7<br>(3 - 13)            | 4<br>(2 - 10)            | 3<br>(1 - 6)             |
| Syphilis                                                         | 128<br>(10 - 293)           | 115<br>(0 - 275)         | 5<br>(0 - 11)          | 3<br>(1 - 6)             | 3<br>(1 - 5)             | 2<br>(1 - 5)             |
| Chlamydial infection                                             | 2<br>(1 - 3)                | --                       | 0<br>(0 - 0)           | 1<br>(0 - 2)             | 0<br>(0 - 1)             | 0<br>(0 - 0)             |
| Gonococcal infection                                             | 3<br>(1 - 5)                | --                       | 0<br>(0 - 0)           | 2<br>(1 - 3)             | 1<br>(0 - 2)             | 0<br>(0 - 1)             |
| Other sexually transmitted diseases                              | 2<br>(1 - 4)                | --                       | 0<br>(0 - 0)           | 1<br>(1 - 3)             | 1<br>(0 - 1)             | 0<br>(0 - 0)             |
| Hepatitis                                                        | 42<br>(26 - 107)            | 9<br>(4 - 18)            | 2<br>(1 - 4)           | 17<br>(10 - 41)          | 10<br>(6 - 31)           | 4<br>(2 - 14)            |
| Acute hepatitis A                                                | 4<br>(1 - 9)                | 2<br>(0 - 6)             | 0<br>(0 - 1)           | 1<br>(0 - 2)             | 0<br>(0 - 1)             | 0<br>(0 - 0)             |
| Acute hepatitis B                                                | 25<br>(14 - 62)             | 6<br>(3 - 13)            | 1<br>(0 - 2)           | 6<br>(3 - 17)            | 8<br>(4 - 23)            | 3<br>(2 - 12)            |
| Acute hepatitis C                                                | 2<br>(0 - 6)                | --                       | 0<br>(0 - 0)           | 1<br>(0 - 2)             | 1<br>(0 - 2)             | 0<br>(0 - 1)             |
| Acute hepatitis E                                                | 12<br>(6 - 30)              | 0<br>(0 - 0)             | 0<br>(0 - 1)           | 9<br>(4 - 22)            | 2<br>(1 - 6)             | 0<br>(0 - 1)             |
| Other infectious diseases                                        | 138<br>(56 - 241)           | 65<br>(21 - 156)         | 5<br>(2 - 11)          | 30<br>(11 - 50)          | 22<br>(9 - 42)           | 15<br>(6 - 32)           |
| Non-communicable diseases                                        | 16,242<br>(14,001 - 18,429) | 1,685<br>(1,088 - 2,509) | 169<br>(124 - 238)     | 2,586<br>(2,066 - 3,173) | 5,460<br>(4,437 - 6,405) | 6,342<br>(5,501 - 7,146) |
| Neoplasms                                                        | 2,249<br>(1,898 - 2,607)    | 42<br>(25 - 68)          | 27<br>(20 - 36)        | 456<br>(361 - 573)       | 1,027<br>(835 - 1,227)   | 697<br>(587 - 821)       |
| Esophageal cancer                                                | 115<br>(83 - 152)           | --                       | --                     | 15<br>(10 - 22)          | 62<br>(42 - 86)          | 38<br>(27 - 53)          |
| Stomach cancer                                                   | 223<br>(175 - 281)          | --                       | --                     | 39<br>(29 - 55)          | 106<br>(79 - 141)        | 77<br>(60 - 99)          |
| Liver cancer                                                     | 185<br>(131 - 253)          | --                       | 1<br>(1 - 2)           | 32<br>(20 - 53)          | 93<br>(63 - 135)         | 59<br>(41 - 79)          |
| Liver cancer due to hepatitis B                                  | 62<br>(33 - 95)             | --                       | 0<br>(0 - 1)           | 14<br>(8 - 25)           | 32<br>(17 - 52)          | 14<br>(7 - 22)           |

Web Table 31- Congo deaths with 95% UI by age, sex, and cause in 2013

| Cause                                | Both Sexes, All Ages     | Both Sexes, 0-4 Years | Both Sexes, 5-14 Years | Both Sexes, 15-49 Years | Both Sexes, 50-69 Years  | Both Sexes, 70-80 Years  |
|--------------------------------------|--------------------------|-----------------------|------------------------|-------------------------|--------------------------|--------------------------|
| Liver cancer due to hepatitis C      | 62<br>(39 - 105)         | --                    | 0<br>(0 - 0)           | 7<br>(4 - 15)           | 32<br>(18 - 55)          | 23<br>(14 - 35)          |
| Liver cancer due to alcohol use      | 29<br>(17 - 44)          | --                    | --                     | 3<br>(1 - 5)            | 14<br>(7 - 23)           | 12<br>(7 - 19)           |
| Liver cancer due to other causes     | 32<br>(19 - 46)          | --                    | 1<br>(0 - 1)           | 7<br>(4 - 12)           | 15<br>(9 - 24)           | 9<br>(5 - 13)            |
| Larynx cancer                        | 25<br>(17 - 35)          | --                    | --                     | 4<br>(2 - 6)            | 14<br>(9 - 20)           | 7<br>(5 - 11)            |
| Tracheal, bronchus and lung cancer   | 183<br>(142 - 233)       | --                    | --                     | 22<br>(16 - 28)         | 103<br>(78 - 131)        | 58<br>(44 - 85)          |
| Breast cancer                        | 202<br>(153 - 260)       | --                    | --                     | 58<br>(41 - 83)         | 102<br>(73 - 136)        | 42<br>(26 - 56)          |
| Cervical cancer                      | 232<br>(171 - 306)       | --                    | --                     | 80<br>(53 - 114)        | 111<br>(79 - 153)        | 41<br>(28 - 57)          |
| Uterine cancer                       | 21<br>(13 - 31)          | --                    | --                     | 3<br>(1 - 4)            | 12<br>(7 - 19)           | 6<br>(4 - 11)            |
| Prostate cancer                      | 115<br>(75 - 184)        | --                    | --                     | 2<br>(1 - 4)            | 34<br>(20 - 58)          | 79<br>(51 - 123)         |
| Colon and rectum cancer              | 194<br>(163 - 227)       | --                    | --                     | 27<br>(21 - 35)         | 87<br>(70 - 106)         | 80<br>(65 - 97)          |
| Lip and oral cavity cancer           | 36<br>(26 - 47)          | --                    | --                     | 8<br>(5 - 12)           | 18<br>(12 - 25)          | 10<br>(7 - 14)           |
| Nasopharynx cancer                   | 9<br>(7 - 12)            | --                    | 0<br>(0 - 0)           | 3<br>(2 - 5)            | 4<br>(3 - 6)             | 1<br>(1 - 2)             |
| Other pharynx cancer                 | 17<br>(12 - 23)          | --                    | --                     | 3<br>(2 - 5)            | 10<br>(7 - 14)           | 4<br>(2 - 5)             |
| Gallbladder and biliary tract cancer | 42<br>(26 - 62)          | --                    | --                     | 4<br>(2 - 6)            | 21<br>(12 - 32)          | 17<br>(10 - 27)          |
| Pancreatic cancer                    | 65<br>(54 - 78)          | --                    | --                     | 7<br>(5 - 9)            | 33<br>(25 - 41)          | 25<br>(21 - 31)          |
| Malignant skin melanoma              | 13<br>(9 - 19)           | --                    | --                     | 4<br>(2 - 6)            | 5<br>(4 - 8)             | 4<br>(2 - 5)             |
| Non-melanoma skin cancer             | 12<br>(9 - 18)           | --                    | --                     | 2<br>(1 - 4)            | 4<br>(3 - 6)             | 6<br>(4 - 9)             |
| Ovarian cancer                       | 40<br>(26 - 55)          | --                    | --                     | 9<br>(5 - 16)           | 22<br>(14 - 32)          | 9<br>(6 - 12)            |
| Testicular cancer                    | 4<br>(3 - 6)             | --                    | --                     | 3<br>(2 - 5)            | 1<br>(0 - 1)             | 0<br>(0 - 1)             |
| Kidney cancer                        | 33<br>(25 - 41)          | 2<br>(1 - 3)          | 1<br>(0 - 1)           | 5<br>(4 - 7)            | 17<br>(12 - 22)          | 8<br>(6 - 12)            |
| Bladder cancer                       | 58<br>(45 - 72)          | --                    | --                     | 5<br>(4 - 7)            | 25<br>(18 - 33)          | 28<br>(21 - 37)          |
| Brain and nervous system cancer      | 38<br>(29 - 53)          | 3<br>(1 - 5)          | 3<br>(2 - 5)           | 13<br>(10 - 20)         | 14<br>(10 - 21)          | 5<br>(4 - 7)             |
| Thyroid cancer                       | 9<br>(7 - 12)            | --                    | 0<br>(0 - 0)           | 1<br>(1 - 2)            | 4<br>(3 - 6)             | 3<br>(2 - 5)             |
| Mesothelioma                         | 3<br>(2 - 4)             | --                    | --                     | 1<br>(0 - 1)            | 2<br>(1 - 2)             | 1<br>(1 - 1)             |
| Hodgkin lymphoma                     | 13<br>(8 - 20)           | 1<br>(0 - 2)          | 1<br>(0 - 2)           | 7<br>(3 - 11)           | 3<br>(2 - 5)             | 2<br>(1 - 2)             |
| Non-Hodgkin lymphoma                 | 103<br>(80 - 128)        | 5<br>(3 - 9)          | 4<br>(3 - 6)           | 30<br>(22 - 40)         | 39<br>(28 - 52)          | 25<br>(17 - 36)          |
| Multiple myeloma                     | 20<br>(15 - 26)          | --                    | --                     | 3<br>(2 - 4)            | 11<br>(8 - 14)           | 7<br>(5 - 9)             |
| Leukemia                             | 47<br>(39 - 56)          | 5<br>(3 - 9)          | 6<br>(4 - 8)           | 16<br>(12 - 20)         | 12<br>(9 - 15)           | 9<br>(6 - 11)            |
| Other neoplasms                      | 192<br>(157 - 253)       | 26<br>(15 - 47)       | 12<br>(8 - 17)         | 50<br>(36 - 81)         | 61<br>(45 - 83)          | 43<br>(30 - 58)          |
| Cardiovascular diseases              | 7,222<br>(6,106 - 8,372) | 85<br>(53 - 126)      | 20<br>(14 - 28)        | 899<br>(699 - 1,135)    | 2,610<br>(2,103 - 3,119) | 3,609<br>(3,097 - 4,118) |
| Rheumatic heart disease              | 139<br>(104 - 198)       | 2<br>(1 - 4)          | 2<br>(1 - 4)           | 48<br>(33 - 72)         | 50<br>(35 - 74)          | 37<br>(26 - 53)          |
| Ischemic heart disease               | 1,820<br>(1,413 - 2,225) | 3<br>(1 - 6)          | 1<br>(1 - 2)           | 208<br>(152 - 278)      | 696<br>(522 - 874)       | 912<br>(706 - 1,141)     |
| Cerebrovascular disease              | 3,927<br>(3,210 - 4,735) | 26<br>(14 - 41)       | 8<br>(5 - 11)          | 421<br>(312 - 543)      | 1,391<br>(1,092 - 1,712) | 2,082<br>(1,717 - 2,492) |
| Ischemic stroke                      | 1,814<br>(1,389 - 2,167) | 4<br>(1 - 8)          | 1<br>(1 - 2)           | 68<br>(34 - 108)        | 486<br>(348 - 633)       | 1,254<br>(974 - 1,504)   |
| Hemorrhagic stroke                   | 2,114<br>(1,652 - 2,801) | 22<br>(12 - 36)       | 7<br>(5 - 10)          | 353<br>(261 - 473)      | 905<br>(686 - 1,192)     | 828<br>(611 - 1,176)     |
| Hypertensive heart disease           | 452<br>(293 - 689)       | 1<br>(0 - 2)          | 0<br>(0 - 1)           | 36<br>(22 - 53)         | 147<br>(95 - 208)        | 267<br>(163 - 457)       |
| Cardiomyopathy and myocarditis       | 282<br>(198 - 388)       | 33<br>(16 - 55)       | 5<br>(3 - 7)           | 76<br>(44 - 111)        | 92<br>(62 - 134)         | 77<br>(50 - 128)         |
| Atrial fibrillation and flutter      | 2<br>(2 - 3)             | --                    | --                     | 0<br>(0 - 0)            | 1<br>(0 - 1)             | 2<br>(1 - 3)             |
| Aortic aneurysm                      | 61<br>(38 - 84)          | --                    | --                     | 9<br>(4 - 13)           | 24<br>(14 - 35)          | 28<br>(18 - 39)          |
| Peripheral vascular disease          | 4<br>(3 - 6)             | --                    | --                     | 0<br>(0 - 0)            | 1<br>(1 - 2)             | 3<br>(2 - 4)             |

Web Table 31- Congo deaths with 95% UI by age, sex, and cause in 2013

| Cause                                               | Both Sexes, All Ages     | Both Sexes, 0-4 Years | Both Sexes, 5-14 Years | Both Sexes, 15-49 Years | Both Sexes, 50-69 Years | Both Sexes, 70-80 Years |
|-----------------------------------------------------|--------------------------|-----------------------|------------------------|-------------------------|-------------------------|-------------------------|
| Endocarditis                                        | 47<br>(32 - 65)          | 4<br>(2 - 7)          | 1<br>(0 - 1)           | 11<br>(7 - 17)          | 14<br>(9 - 20)          | 17<br>(11 - 25)         |
| Other cardiovascular and circulatory diseases       | 487<br>(367 - 641)       | 17<br>(8 - 30)        | 3<br>(2 - 5)           | 90<br>(57 - 129)        | 192<br>(135 - 264)      | 185<br>(130 - 268)      |
| Chronic respiratory diseases                        | 1,392<br>(1,098 - 1,901) | 64<br>(38 - 103)      | 9<br>(7 - 12)          | 153<br>(112 - 211)      | 458<br>(344 - 639)      | 708<br>(553 - 993)      |
| Chronic obstructive pulmonary disease               | 999<br>(770 - 1,420)     | 31<br>(17 - 54)       | 3<br>(2 - 4)           | 70<br>(48 - 102)        | 331<br>(241 - 485)      | 565<br>(436 - 814)      |
| Pneumoconiosis                                      | 39<br>(25 - 65)          | 1<br>(0 - 1)          | 0<br>(0 - 0)           | 7<br>(4 - 13)           | 16<br>(9 - 28)          | 15<br>(9 - 25)          |
| Silicosis                                           | 9<br>(4 - 17)            | 0<br>(0 - 0)          | 0<br>(0 - 0)           | 1<br>(1 - 3)            | 3<br>(1 - 7)            | 4<br>(2 - 8)            |
| Asbestosis                                          | 5<br>(2 - 9)             | 0<br>(0 - 0)          | 0<br>(0 - 0)           | 1<br>(0 - 2)            | 2<br>(1 - 4)            | 1<br>(1 - 3)            |
| Coal workers pneumoconiosis                         | 4<br>(3 - 8)             | 0<br>(0 - 0)          | 0<br>(0 - 0)           | 1<br>(0 - 1)            | 2<br>(1 - 4)            | 2<br>(1 - 3)            |
| Other pneumoconiosis                                | 21<br>(13 - 35)          | 0<br>(0 - 1)          | 0<br>(0 - 0)           | 4<br>(3 - 8)            | 8<br>(4 - 14)           | 8<br>(5 - 13)           |
| Asthma                                              | 254<br>(152 - 386)       | 16<br>(7 - 31)        | 5<br>(3 - 7)           | 62<br>(38 - 90)         | 85<br>(48 - 135)        | 86<br>(48 - 140)        |
| Interstitial lung disease and pulmonary sarcoidosis | 58<br>(13 - 108)         | 1<br>(0 - 2)          | 0<br>(0 - 1)           | 5<br>(1 - 12)           | 19<br>(4 - 38)          | 33<br>(6 - 63)          |
| Other chronic respiratory diseases                  | 41<br>(27 - 70)          | 16<br>(8 - 28)        | 1<br>(1 - 2)           | 9<br>(5 - 16)           | 6<br>(4 - 12)           | 10<br>(5 - 18)          |
| Cirrhosis                                           | 741<br>(599 - 892)       | 7<br>(3 - 14)         | 4<br>(3 - 6)           | 205<br>(154 - 267)      | 360<br>(277 - 452)      | 166<br>(130 - 206)      |
| Cirrhosis due to hepatitis B                        | 156<br>(99 - 226)        | 0<br>(0 - 1)          | 1<br>(0 - 1)           | 40<br>(22 - 60)         | 77<br>(46 - 116)        | 38<br>(20 - 59)         |
| Cirrhosis due to hepatitis C                        | 244<br>(174 - 326)       | 1<br>(0 - 2)          | 1<br>(1 - 2)           | 69<br>(43 - 101)        | 122<br>(83 - 171)       | 51<br>(36 - 71)         |
| Cirrhosis due to alcohol use                        | 256<br>(183 - 337)       | --                    | --                     | 62<br>(40 - 90)         | 129<br>(89 - 177)       | 65<br>(45 - 89)         |
| Cirrhosis due to other causes                       | 85<br>(58 - 119)         | 6<br>(3 - 12)         | 3<br>(2 - 4)           | 33<br>(21 - 47)         | 32<br>(18 - 49)         | 11<br>(7 - 18)          |
| Digestive diseases                                  | 813<br>(645 - 1,035)     | 38<br>(19 - 66)       | 13<br>(9 - 18)         | 209<br>(153 - 282)      | 274<br>(204 - 360)      | 280<br>(214 - 371)      |
| Peptic ulcer disease                                | 198<br>(137 - 297)       | 2<br>(1 - 5)          | 1<br>(1 - 2)           | 47<br>(30 - 75)         | 76<br>(51 - 117)        | 72<br>(46 - 113)        |
| Gastritis and duodenitis                            | 36<br>(19 - 65)          | 2<br>(1 - 4)          | 1<br>(0 - 2)           | 10<br>(6 - 16)          | 11<br>(6 - 21)          | 11<br>(5 - 26)          |
| Appendicitis                                        | 40<br>(26 - 59)          | 4<br>(1 - 7)          | 2<br>(1 - 3)           | 15<br>(9 - 23)          | 11<br>(7 - 18)          | 8<br>(5 - 13)           |
| Paralytic ileus and intestinal obstruction          | 219<br>(154 - 316)       | 11<br>(5 - 22)        | 4<br>(3 - 7)           | 40<br>(26 - 63)         | 68<br>(45 - 101)        | 95<br>(64 - 136)        |
| Inguinal, femoral, and abdominal hernia             | 11<br>(7 - 18)           | 1<br>(0 - 1)          | 0<br>(0 - 0)           | 2<br>(1 - 4)            | 4<br>(2 - 6)            | 5<br>(3 - 9)            |
| Inflammatory bowel disease                          | 62<br>(42 - 86)          | 9<br>(4 - 17)         | 1<br>(1 - 2)           | 20<br>(13 - 30)         | 17<br>(11 - 24)         | 15<br>(9 - 23)          |
| Vascular intestinal disorders                       | 9<br>(5 - 16)            | 0<br>(0 - 1)          | 0<br>(0 - 0)           | 2<br>(1 - 3)            | 3<br>(2 - 6)            | 4<br>(2 - 8)            |
| Gallbladder and biliary diseases                    | 67<br>(46 - 91)          | 1<br>(0 - 2)          | 0<br>(0 - 1)           | 13<br>(9 - 20)          | 25<br>(16 - 36)         | 27<br>(18 - 41)         |
| Pancreatitis                                        | 65<br>(43 - 94)          | 1<br>(0 - 2)          | 0<br>(0 - 1)           | 30<br>(17 - 48)         | 22<br>(14 - 32)         | 12<br>(7 - 20)          |
| Other digestive diseases                            | 107<br>(77 - 142)        | 8<br>(3 - 15)         | 2<br>(1 - 3)           | 29<br>(19 - 42)         | 37<br>(24 - 52)         | 31<br>(20 - 45)         |
| Neurological disorders                              | 467<br>(387 - 551)       | 32<br>(14 - 60)       | 13<br>(8 - 20)         | 93<br>(55 - 135)        | 54<br>(42 - 67)         | 275<br>(224 - 330)      |
| Alzheimer disease and other dementias               | 287<br>(234 - 347)       | --                    | --                     | 0<br>(0 - 0)            | 28<br>(21 - 37)         | 259<br>(210 - 313)      |
| Parkinson disease                                   | 5<br>(3 - 6)             | --                    | --                     | 0<br>(0 - 0)            | 1<br>(1 - 2)            | 3<br>(2 - 5)            |
| Epilepsy                                            | 141<br>(87 - 195)        | 24<br>(9 - 51)        | 11<br>(6 - 18)         | 83<br>(46 - 124)        | 16<br>(11 - 22)         | 7<br>(5 - 10)           |
| Multiple sclerosis                                  | 1<br>(1 - 2)             | --                    | --                     | 1<br>(0 - 1)            | 0<br>(0 - 1)            | 0<br>(0 - 0)            |
| Other neurological disorders                        | 33<br>(25 - 41)          | 8<br>(5 - 12)         | 2<br>(1 - 3)           | 9<br>(6 - 12)           | 9<br>(7 - 11)           | 5<br>(4 - 7)            |
| Mental and substance use disorders                  | 227<br>(161 - 320)       | 12<br>(4 - 22)        | 0<br>(0 - 0)           | 149<br>(100 - 217)      | 56<br>(36 - 84)         | 11<br>(8 - 16)          |
| Schizophrenia                                       | 6<br>(4 - 10)            | --                    | --                     | 3<br>(2 - 5)            | 2<br>(1 - 3)            | 1<br>(1 - 2)            |
| Alcohol use disorders                               | 131<br>(78 - 193)        | --                    | --                     | 80<br>(44 - 127)        | 44<br>(26 - 70)         | 7<br>(4 - 12)           |
| Drug use disorders                                  | 90<br>(58 - 127)         | 12<br>(4 - 22)        | --                     | 66<br>(43 - 98)         | 9<br>(6 - 14)           | 3<br>(1 - 4)            |
| Opioid use disorders                                | 10<br>(6 - 14)           | 1<br>(0 - 3)          | --                     | 7<br>(5 - 11)           | 1<br>(1 - 1)            | 0<br>(0 - 0)            |
| Cocaine use disorders                               | 0<br>(0 - 1)             | 0<br>(0 - 0)          | --                     | 0<br>(0 - 0)            | 0<br>(0 - 0)            | 0<br>(0 - 0)            |

Web Table 31- Congo deaths with 95% UI by age, sex, and cause in 2013

| Cause                                               | Both Sexes, All Ages     | Both Sexes, 0-4 Years  | Both Sexes, 5-14 Years | Both Sexes, 15-49 Years | Both Sexes, 50-69 Years | Both Sexes, 70-80 Years |
|-----------------------------------------------------|--------------------------|------------------------|------------------------|-------------------------|-------------------------|-------------------------|
| Amphetamine use disorders                           | 0<br>(0 - 0)             | 0<br>(0 - 0)           | --                     | 0<br>(0 - 0)            | 0<br>(0 - 0)            | 0<br>(0 - 0)            |
| Other drug use disorders                            | 79<br>(51 - 113)         | 11<br>(3 - 20)         | --                     | 58<br>(38 - 87)         | 8<br>(5 - 12)           | 2<br>(1 - 3)            |
| Eating disorders                                    | 0<br>(0 - 1)             | --                     | 0<br>(0 - 0)           | 0<br>(0 - 1)            | --                      | --                      |
| Anorexia nervosa                                    | 0<br>(0 - 1)             | --                     | 0<br>(0 - 0)           | 0<br>(0 - 1)            | --                      | --                      |
| Diabetes, urogenital, blood, and endocrine diseases | 1,750<br>(1,441 - 2,043) | 227<br>(141 - 336)     | 50<br>(31 - 79)        | 348<br>(267 - 446)      | 577<br>(453 - 718)      | 548<br>(441 - 647)      |
| Diabetes mellitus                                   | 753<br>(594 - 893)       | 6<br>(3 - 10)          | 1<br>(1 - 2)           | 90<br>(68 - 116)        | 344<br>(261 - 435)      | 311<br>(242 - 384)      |
| Acute glomerulonephritis                            | 6<br>(3 - 9)             | 1<br>(0 - 2)           | 1<br>(0 - 1)           | 2<br>(1 - 3)            | 1<br>(1 - 2)            | 1<br>(1 - 1)            |
| Chronic kidney disease                              | 339<br>(256 - 461)       | 18<br>(10 - 32)        | 6<br>(4 - 9)           | 83<br>(59 - 120)        | 109<br>(76 - 163)       | 123<br>(88 - 165)       |
| Chronic kidney disease due to diabetes mellitus     | 2<br>(1 - 4)             | 0<br>(0 - 0)           | 0<br>(0 - 0)           | 0<br>(0 - 1)            | 1<br>(0 - 2)            | 1<br>(0 - 1)            |
| Chronic kidney disease due to hypertension          | 161<br>(117 - 248)       | 3<br>(1 - 7)           | 1<br>(1 - 2)           | 29<br>(18 - 47)         | 58<br>(39 - 96)         | 69<br>(48 - 101)        |
| Chronic kidney disease due to glomerulonephritis    | 71<br>(47 - 98)          | 7<br>(4 - 12)          | 3<br>(2 - 4)           | 24<br>(15 - 35)         | 20<br>(12 - 29)         | 17<br>(10 - 27)         |
| Chronic kidney disease due to other causes          | 105<br>(62 - 160)        | 7<br>(3 - 15)          | 2<br>(1 - 4)           | 29<br>(16 - 48)         | 30<br>(13 - 52)         | 36<br>(17 - 60)         |
| Urinary diseases and male infertility               | 162<br>(128 - 202)       | 16<br>(8 - 30)         | 2<br>(1 - 3)           | 34<br>(24 - 45)         | 48<br>(36 - 64)         | 62<br>(45 - 85)         |
| Interstitial nephritis and urinary tract infections | 114<br>(86 - 143)        | 11<br>(5 - 23)         | 1<br>(1 - 2)           | 21<br>(14 - 29)         | 33<br>(23 - 45)         | 47<br>(34 - 66)         |
| Urolithiasis                                        | 5<br>(3 - 8)             | --                     | 0<br>(0 - 0)           | 2<br>(1 - 3)            | 2<br>(1 - 3)            | 1<br>(1 - 3)            |
| Other urinary diseases                              | 43<br>(31 - 63)          | 5<br>(2 - 9)           | 1<br>(0 - 1)           | 11<br>(7 - 17)          | 13<br>(9 - 20)          | 14<br>(8 - 23)          |
| Gynecological diseases                              | 3<br>(1 - 9)             | --                     | --                     | 2<br>(1 - 6)            | 1<br>(0 - 2)            | 0<br>(0 - 1)            |
| Uterine fibroids                                    | 1<br>(0 - 2)             | --                     | --                     | 0<br>(0 - 1)            | 0<br>(0 - 1)            | 0<br>(0 - 0)            |
| Polycystic ovarian syndrome                         | 0<br>(0 - 0)             | --                     | --                     | 0<br>(0 - 0)            | 0<br>(0 - 0)            | --                      |
| Endometriosis                                       | 0<br>(0 - 1)             | --                     | --                     | 0<br>(0 - 1)            | 0<br>(0 - 0)            | --                      |
| Genital prolapse                                    | 0<br>(0 - 1)             | --                     | --                     | 0<br>(0 - 1)            | 0<br>(0 - 0)            | 0<br>(0 - 0)            |
| Other gynecological diseases                        | 1<br>(1 - 4)             | --                     | --                     | 1<br>(0 - 3)            | 0<br>(0 - 1)            | 0<br>(0 - 0)            |
| Hemoglobinopathies and hemolytic anemias            | 255<br>(135 - 395)       | 109<br>(52 - 192)      | 31<br>(13 - 57)        | 80<br>(39 - 131)        | 24<br>(13 - 38)         | 10<br>(7 - 16)          |
| Thalassemias                                        | 0<br>(0 - 0)             | 0<br>(0 - 0)           | 0<br>(0 - 0)           | 0<br>(0 - 0)            | 0<br>(0 - 0)            | 0<br>(0 - 0)            |
| Sickle cell disorders                               | 238<br>(124 - 375)       | 105<br>(49 - 187)      | 30<br>(13 - 56)        | 79<br>(38 - 129)        | 22<br>(12 - 35)         | 1<br>(1 - 2)            |
| G6PD deficiency                                     | 2<br>(1 - 3)             | 1<br>(0 - 2)           | 0<br>(0 - 0)           | 0<br>(0 - 1)            | 0<br>(0 - 0)            | 0<br>(0 - 1)            |
| Other hemoglobinopathies and hemolytic anemias      | 15<br>(10 - 22)          | 3<br>(2 - 6)           | 0<br>(0 - 0)           | 1<br>(0 - 2)            | 2<br>(1 - 3)            | 9<br>(5 - 13)           |
| Endocrine, metabolic, blood, and immune disorders   | 233<br>(151 - 300)       | 77<br>(44 - 119)       | 10<br>(5 - 15)         | 57<br>(37 - 77)         | 50<br>(31 - 69)         | 39<br>(21 - 60)         |
| Musculoskeletal disorders                           | 48<br>(38 - 63)          | --                     | 2<br>(2 - 3)           | 20<br>(14 - 29)         | 15<br>(11 - 21)         | 11<br>(7 - 16)          |
| Rheumatoid arthritis                                | 10<br>(7 - 14)           | --                     | 0<br>(0 - 1)           | 2<br>(1 - 3)            | 4<br>(2 - 6)            | 4<br>(2 - 6)            |
| Other musculoskeletal disorders                     | 38<br>(30 - 51)          | --                     | 2<br>(1 - 3)           | 18<br>(13 - 27)         | 11<br>(8 - 15)          | 7<br>(5 - 11)           |
| Other non-communicable diseases                     | 1,330<br>(794 - 2,074)   | 1,178<br>(657 - 1,885) | 31<br>(17 - 58)        | 53<br>(34 - 87)         | 29<br>(22 - 39)         | 38<br>(25 - 54)         |
| Congenital anomalies                                | 1,223<br>(688 - 1,970)   | 1,142<br>(630 - 1,844) | 29<br>(15 - 56)        | 38<br>(22 - 70)         | 9<br>(6 - 14)           | 5<br>(4 - 7)            |
| Neural tube defects                                 | 235<br>(65 - 516)        | 228<br>(62 - 501)      | 3<br>(1 - 6)           | 4<br>(1 - 8)            | 1<br>(0 - 1)            | 0<br>(0 - 0)            |
| Congenital heart anomalies                          | 559<br>(302 - 974)       | 516<br>(271 - 916)     | 17<br>(8 - 33)         | 20<br>(10 - 38)         | 4<br>(2 - 6)            | 2<br>(1 - 3)            |
| Cleft lip and cleft palate                          | 4<br>(1 - 12)            | 4<br>(1 - 12)          | --                     | --                      | --                      | --                      |
| Down syndrome                                       | 73<br>(25 - 146)         | 64<br>(20 - 133)       | 3<br>(1 - 6)           | 5<br>(2 - 9)            | 1<br>(1 - 2)            | 0<br>(0 - 0)            |
| Chromosomal unbalanced rearrangements               | 47<br>(18 - 104)         | 45<br>(17 - 100)       | 1<br>(0 - 1)           | 1<br>(1 - 3)            | 0<br>(0 - 0)            | 0<br>(0 - 0)            |
| Other congenital anomalies                          | 303<br>(140 - 679)       | 284<br>(123 - 633)     | 6<br>(3 - 16)          | 8<br>(4 - 19)           | 3<br>(2 - 6)            | 3<br>(2 - 4)            |
| Skin and subcutaneous diseases                      | 88<br>(67 - 110)         | 17<br>(9 - 29)         | 2<br>(1 - 3)           | 16<br>(11 - 21)         | 20<br>(14 - 28)         | 33<br>(20 - 49)         |

Web Table 31- Congo deaths with 95% UI by age, sex, and cause in 2013

| Cause                                           | Both Sexes, All Ages     | Both Sexes, 0-4 Years | Both Sexes, 5-14 Years | Both Sexes, 15-49 Years  | Both Sexes, 50-69 Years | Both Sexes, 70-80 Years |
|-------------------------------------------------|--------------------------|-----------------------|------------------------|--------------------------|-------------------------|-------------------------|
| Cellulitis                                      | 22<br>(13 - 34)          | 4<br>(2 - 9)          | 1<br>(0 - 1)           | 4<br>(2 - 7)             | 6<br>(3 - 9)            | 7<br>(3 - 13)           |
| Pyoderma                                        | 51<br>(38 - 65)          | 12<br>(5 - 20)        | 1<br>(1 - 2)           | 9<br>(6 - 13)            | 12<br>(8 - 17)          | 17<br>(10 - 25)         |
| Decubitus ulcer                                 | 11<br>(7 - 17)           | 0<br>(0 - 1)          | 0<br>(0 - 0)           | 1<br>(1 - 2)             | 2<br>(1 - 3)            | 8<br>(4 - 13)           |
| Other skin and subcutaneous diseases            | 4<br>(3 - 6)             | 1<br>(0 - 2)          | 0<br>(0 - 0)           | 1<br>(1 - 2)             | 1<br>(1 - 1)            | 1<br>(0 - 2)            |
| Sudden infant death syndrome                    | 19<br>(6 - 45)           | 19<br>(6 - 45)        | --                     | --                       | --                      | --                      |
| Injuries                                        | 2,923<br>(2,311 - 3,626) | 486<br>(287 - 713)    | 163<br>(123 - 216)     | 1,634<br>(1,226 - 2,142) | 411<br>(312 - 533)      | 230<br>(187 - 274)      |
| Transport injuries                              | 948<br>(600 - 1,419)     | 95<br>(45 - 163)      | 64<br>(39 - 100)       | 592<br>(361 - 941)       | 138<br>(84 - 211)       | 58<br>(36 - 83)         |
| Road injuries                                   | 888<br>(568 - 1,335)     | 85<br>(40 - 148)      | 60<br>(36 - 93)        | 558<br>(344 - 882)       | 129<br>(78 - 195)       | 55<br>(35 - 79)         |
| Pedestrian road injuries                        | 318<br>(190 - 470)       | 41<br>(19 - 74)       | 28<br>(16 - 45)        | 168<br>(88 - 268)        | 54<br>(32 - 84)         | 27<br>(16 - 41)         |
| Cyclist road injuries                           | 84<br>(50 - 137)         | 8<br>(3 - 18)         | 9<br>(5 - 16)          | 44<br>(24 - 79)          | 16<br>(9 - 28)          | 6<br>(3 - 10)           |
| Motorcyclist road injuries                      | 154<br>(84 - 261)        | 6<br>(2 - 11)         | 4<br>(2 - 6)           | 129<br>(69 - 225)        | 13<br>(7 - 23)          | 3<br>(2 - 5)            |
| Motor vehicle road injuries                     | 329<br>(198 - 522)       | 29<br>(13 - 52)       | 19<br>(10 - 31)        | 216<br>(125 - 368)       | 46<br>(26 - 74)         | 18<br>(9 - 30)          |
| Other road injuries                             | 3<br>(1 - 6)             | 0<br>(0 - 1)          | 0<br>(0 - 1)           | 2<br>(1 - 3)             | 1<br>(0 - 1)            | 0<br>(0 - 1)            |
| Other transport injuries                        | 60<br>(30 - 120)         | 10<br>(4 - 22)        | 4<br>(2 - 8)           | 34<br>(16 - 72)          | 9<br>(4 - 17)           | 3<br>(1 - 5)            |
| Unintentional injuries                          | 1,202<br>(850 - 1,519)   | 373<br>(192 - 559)    | 86<br>(58 - 120)       | 441<br>(312 - 579)       | 164<br>(120 - 209)      | 138<br>(110 - 168)      |
| Falls                                           | 220<br>(137 - 303)       | 28<br>(11 - 52)       | 8<br>(4 - 13)          | 79<br>(42 - 129)         | 45<br>(27 - 67)         | 61<br>(40 - 84)         |
| Drowning                                        | 283<br>(167 - 417)       | 105<br>(40 - 196)     | 39<br>(24 - 60)        | 109<br>(65 - 169)        | 22<br>(15 - 31)         | 8<br>(6 - 13)           |
| Fire, heat, and hot substances                  | 172<br>(87 - 246)        | 67<br>(24 - 121)      | 10<br>(5 - 18)         | 54<br>(25 - 82)          | 22<br>(13 - 31)         | 19<br>(12 - 28)         |
| Poisonings                                      | 56<br>(40 - 77)          | 14<br>(6 - 25)        | 2<br>(2 - 4)           | 28<br>(18 - 42)          | 8<br>(5 - 12)           | 4<br>(2 - 5)            |
| Exposure to mechanical forces                   | 166<br>(114 - 218)       | 39<br>(18 - 69)       | 12<br>(8 - 19)         | 90<br>(59 - 127)         | 20<br>(13 - 28)         | 5<br>(4 - 7)            |
| Unintentional firearm injuries                  | 45<br>(29 - 67)          | 5<br>(2 - 9)          | 3<br>(1 - 5)           | 31<br>(18 - 52)          | 5<br>(3 - 8)            | 1<br>(1 - 2)            |
| Unintentional suffocation                       | 20<br>(7 - 43)           | 13<br>(3 - 35)        | 1<br>(0 - 2)           | 4<br>(2 - 7)             | 1<br>(0 - 2)            | 0<br>(0 - 1)            |
| Other exposure to mechanical forces             | 102<br>(60 - 139)        | 21<br>(8 - 41)        | 8<br>(4 - 14)          | 55<br>(30 - 81)          | 14<br>(8 - 22)          | 3<br>(2 - 5)            |
| Adverse effects of medical treatment            | 120<br>(68 - 180)        | 34<br>(13 - 67)       | 3<br>(2 - 5)           | 29<br>(15 - 48)          | 27<br>(15 - 43)         | 27<br>(16 - 41)         |
| Animal contact                                  | 32<br>(20 - 58)          | 10<br>(5 - 22)        | 4<br>(2 - 7)           | 10<br>(6 - 18)           | 6<br>(3 - 11)           | 3<br>(2 - 6)            |
| Venomous animal contact                         | 21<br>(13 - 40)          | 7<br>(3 - 16)         | 2<br>(1 - 5)           | 7<br>(4 - 13)            | 4<br>(2 - 8)            | 2<br>(1 - 4)            |
| Non-venomous animal contact                     | 11<br>(6 - 20)           | 3<br>(1 - 8)          | 1<br>(0 - 2)           | 3<br>(2 - 6)             | 2<br>(1 - 4)            | 1<br>(1 - 3)            |
| Foreign body                                    | 101<br>(57 - 150)        | 66<br>(31 - 106)      | 3<br>(2 - 5)           | 14<br>(9 - 22)           | 8<br>(5 - 11)           | 9<br>(6 - 13)           |
| Pulmonary aspiration and foreign body in airway | 98<br>(55 - 146)         | 65<br>(30 - 105)      | 3<br>(2 - 5)           | 13<br>(8 - 21)           | 8<br>(5 - 11)           | 9<br>(5 - 13)           |
| Foreign body in other body part                 | 3<br>(2 - 5)             | 1<br>(0 - 2)          | 0<br>(0 - 1)           | 1<br>(1 - 2)             | 0<br>(0 - 1)            | 0<br>(0 - 0)            |
| Other unintentional injuries                    | 52<br>(31 - 71)          | 10<br>(5 - 17)        | 4<br>(2 - 6)           | 28<br>(16 - 41)          | 7<br>(4 - 10)           | 3<br>(2 - 5)            |
| Self-harm and interpersonal violence            | 773<br>(538 - 1,003)     | 17<br>(8 - 33)        | 12<br>(7 - 20)         | 601<br>(405 - 809)       | 108<br>(74 - 143)       | 34<br>(22 - 50)         |
| Self-harm                                       | 527<br>(353 - 704)       | --                    | 6<br>(3 - 13)          | 399<br>(258 - 551)       | 90<br>(59 - 124)        | 32<br>(20 - 47)         |
| Interpersonal violence                          | 246<br>(141 - 347)       | 17<br>(8 - 33)        | 6<br>(3 - 10)          | 203<br>(107 - 297)       | 18<br>(10 - 28)         | 3<br>(2 - 4)            |
| Assault by firearm                              | 95<br>(48 - 157)         | 2<br>(1 - 6)          | 1<br>(1 - 3)           | 85<br>(40 - 144)         | 6<br>(3 - 11)           | 1<br>(0 - 1)            |
| Assault by sharp object                         | 66<br>(28 - 114)         | 2<br>(1 - 4)          | 1<br>(0 - 2)           | 58<br>(23 - 103)         | 5<br>(2 - 9)            | 1<br>(0 - 1)            |
| Assault by other means                          | 85<br>(47 - 127)         | 13<br>(6 - 24)        | 3<br>(2 - 6)           | 60<br>(29 - 96)          | 7<br>(4 - 11)           | 2<br>(1 - 3)            |

Web Table 31- Congo deaths with 95% UI by age, sex, and cause in 2013

| Cause                                                             | Males, All Ages             | Males, 0-4 Years         | Males, 5-14 Years  | Males, 15-49 Years       | Males, 50-69 Years       | Males, 70-80 Years       |
|-------------------------------------------------------------------|-----------------------------|--------------------------|--------------------|--------------------------|--------------------------|--------------------------|
| All causes                                                        | 21,283<br>(18,848 - 23,704) | 5,468<br>(4,642 - 6,353) | 640<br>(563 - 762) | 5,995<br>(5,270 - 6,826) | 4,914<br>(3,867 - 5,872) | 4,266<br>(3,574 - 4,784) |
| Communicable, maternal, neonatal, and nutritional diseases        | 10,646<br>(9,383 - 11,839)  | 4,342<br>(3,583 - 5,107) | 449<br>(378 - 550) | 3,123<br>(2,559 - 3,736) | 1,578<br>(1,220 - 1,901) | 1,154<br>(826 - 1,464)   |
| HIV/AIDS and tuberculosis                                         | 3,800<br>(2,971 - 4,603)    | 221<br>(179 - 268)       | 198<br>(161 - 239) | 2,304<br>(1,702 - 2,987) | 821<br>(578 - 1,005)     | 256<br>(127 - 357)       |
| Tuberculosis                                                      | 986<br>(463 - 1,355)        | 24<br>(12 - 41)          | 5<br>(3 - 9)       | 382<br>(196 - 538)       | 370<br>(159 - 528)       | 205<br>(81 - 300)        |
| HIV/AIDS                                                          | 2,814<br>(2,208 - 3,561)    | 198<br>(158 - 245)       | 193<br>(156 - 233) | 1,922<br>(1,312 - 2,641) | 451<br>(337 - 598)       | 51<br>(33 - 74)          |
| HIV/AIDS resulting in mycobacterial infection                     | 193<br>(141 - 263)          | 12<br>(9 - 17)           | 11<br>(8 - 15)     | 132<br>(86 - 190)        | 33<br>(23 - 45)          | 4<br>(2 - 6)             |
| HIV/AIDS resulting in other diseases                              | 2,621<br>(2,059 - 3,327)    | 185<br>(148 - 230)       | 182<br>(147 - 220) | 1,789<br>(1,224 - 2,471) | 418<br>(311 - 552)       | 47<br>(30 - 68)          |
| Diarrhea, lower respiratory, and other common infectious diseases | 3,497<br>(2,549 - 4,477)    | 1,680<br>(1,063 - 2,411) | 140<br>(97 - 199)  | 467<br>(332 - 638)       | 523<br>(343 - 737)       | 686<br>(465 - 936)       |
| Diarrheal diseases                                                | 776<br>(453 - 1,223)        | 281<br>(98 - 661)        | 28<br>(12 - 53)    | 133<br>(76 - 218)        | 154<br>(76 - 272)        | 181<br>(91 - 303)        |
| Intestinal infectious diseases                                    | 103<br>(52 - 186)           | 40<br>(17 - 78)          | 23<br>(11 - 45)    | 33<br>(13 - 69)          | 4<br>(2 - 9)             | 2<br>(1 - 3)             |
| Typhoid fever                                                     | 70<br>(33 - 131)            | 26<br>(10 - 53)          | 17<br>(7 - 33)     | 24<br>(9 - 51)           | 3<br>(1 - 6)             | 1<br>(0 - 2)             |
| Paratyphoid fever                                                 | 25<br>(12 - 49)             | 10<br>(3 - 22)           | 6<br>(2 - 13)      | 8<br>(3 - 17)            | 1<br>(0 - 2)             | 0<br>(0 - 1)             |
| Other intestinal infectious diseases                              | 7<br>(2 - 16)               | 4<br>(1 - 12)            | 1<br>(0 - 3)       | 2<br>(0 - 6)             | 0<br>(0 - 3)             | 0<br>(0 - 2)             |
| Lower respiratory infections                                      | 1,865<br>(1,191 - 2,549)    | 803<br>(385 - 1,353)     | 34<br>(20 - 56)    | 214<br>(138 - 318)       | 326<br>(198 - 498)       | 488<br>(294 - 708)       |
| Upper respiratory infections                                      | 2<br>(1 - 4)                | 1<br>(0 - 2)             | 0<br>(0 - 0)       | 1<br>(0 - 2)             | 0<br>(0 - 1)             | 0<br>(0 - 1)             |
| Otitis media                                                      | 1<br>(1 - 2)                | 1<br>(0 - 1)             | 0<br>(0 - 0)       | 0<br>(0 - 0)             | 0<br>(0 - 0)             | 0<br>(0 - 0)             |
| Meningitis                                                        | 264<br>(175 - 395)          | 121<br>(61 - 226)        | 19<br>(9 - 36)     | 74<br>(44 - 120)         | 35<br>(18 - 59)          | 15<br>(8 - 25)           |
| Pneumococcal meningitis                                           | 88<br>(57 - 132)            | 32<br>(16 - 60)          | 8<br>(4 - 16)      | 29<br>(16 - 50)          | 13<br>(6 - 24)           | 5<br>(3 - 10)            |
| H influenzae type B meningitis                                    | 68<br>(40 - 116)            | 48<br>(23 - 92)          | 5<br>(2 - 10)      | 10<br>(5 - 18)           | 4<br>(2 - 7)             | 2<br>(1 - 3)             |
| Meningococcal meningitis                                          | 36<br>(23 - 53)             | 14<br>(6 - 28)           | 2<br>(1 - 5)       | 11<br>(6 - 20)           | 6<br>(2 - 10)            | 3<br>(1 - 5)             |
| Other meningitis                                                  | 73<br>(46 - 117)            | 27<br>(12 - 57)          | 4<br>(2 - 8)       | 24<br>(12 - 41)          | 12<br>(6 - 22)           | 5<br>(2 - 10)            |
| Encephalitis                                                      | 25<br>(15 - 42)             | 14<br>(6 - 30)           | 2<br>(1 - 4)       | 6<br>(3 - 9)             | 2<br>(1 - 3)             | 1<br>(1 - 2)             |
| Diphtheria                                                        | 1<br>(0 - 6)                | 1<br>(0 - 6)             | 0<br>(0 - 1)       | 0<br>(0 - 1)             | 0<br>(0 - 0)             | 0<br>(0 - 0)             |
| Whooping cough                                                    | 9<br>(0 - 43)               | 8<br>(0 - 41)            | 0<br>(0 - 1)       | 0<br>(0 - 0)             | 0<br>(0 - 0)             | 0<br>(0 - 0)             |
| Tetanus                                                           | 3<br>(2 - 7)                | 2<br>(1 - 5)             | 0<br>(0 - 1)       | 1<br>(0 - 2)             | 0<br>(0 - 1)             | 0<br>(0 - 0)             |
| Measles                                                           | 446<br>(153 - 903)          | 408<br>(137 - 829)       | 33<br>(12 - 73)    | 5<br>(2 - 11)            | 0<br>(0 - 0)             | 0<br>(0 - 0)             |
| Varicella and herpes zoster                                       | 1<br>(0 - 4)                | 1<br>(0 - 3)             | 0<br>(0 - 0)       | 0<br>(0 - 1)             | 0<br>(0 - 0)             | 0<br>(0 - 1)             |
| Neglected tropical diseases and malaria                           | 1,045<br>(622 - 1,860)      | 506<br>(188 - 1,260)     | 89<br>(40 - 173)   | 246<br>(145 - 384)       | 126<br>(67 - 218)        | 79<br>(34 - 157)         |
| Malaria                                                           | 977<br>(550 - 1,804)        | 488<br>(173 - 1,250)     | 83<br>(33 - 168)   | 217<br>(117 - 349)       | 115<br>(56 - 206)        | 75<br>(30 - 153)         |
| Leishmaniasis                                                     | 12<br>(7 - 18)              | 6<br>(3 - 11)            | 1<br>(1 - 3)       | 4<br>(1 - 7)             | 1<br>(0 - 2)             | 0<br>(0 - 1)             |
| Visceral leishmaniasis                                            | 12<br>(7 - 18)              | 6<br>(3 - 11)            | 1<br>(1 - 3)       | 4<br>(1 - 7)             | 1<br>(0 - 2)             | 0<br>(0 - 1)             |
| African trypanosomiasis                                           | 18<br>(9 - 28)              | 1<br>(0 - 2)             | 2<br>(1 - 3)       | 12<br>(6 - 19)           | 2<br>(1 - 4)             | 1<br>(0 - 1)             |
| Schistosomiasis                                                   | 12<br>(8 - 18)              | 0<br>(0 - 0)             | 0<br>(0 - 0)       | 6<br>(3 - 9)             | 5<br>(3 - 8)             | 2<br>(1 - 3)             |
| Cysticercosis                                                     | 1<br>(0 - 1)                | 0<br>(0 - 0)             | 0<br>(0 - 0)       | 0<br>(0 - 0)             | 0<br>(0 - 0)             | 0<br>(0 - 0)             |
| Cystic echinococcosis                                             | 1<br>(1 - 1)                | 0<br>(0 - 0)             | 0<br>(0 - 0)       | 0<br>(0 - 1)             | 0<br>(0 - 0)             | 0<br>(0 - 0)             |
| Dengue                                                            | 1<br>(1 - 2)                | 0<br>(0 - 1)             | 0<br>(0 - 0)       | 0<br>(0 - 1)             | 0<br>(0 - 0)             | 0<br>(0 - 0)             |
| Yellow fever                                                      | 5<br>(3 - 8)                | 1<br>(0 - 2)             | 1<br>(0 - 2)       | 3<br>(1 - 5)             | 1<br>(0 - 2)             | 0<br>(0 - 1)             |
| Rabies                                                            | 3<br>(1 - 6)                | 1<br>(0 - 2)             | 1<br>(0 - 1)       | 1<br>(1 - 2)             | 0<br>(0 - 1)             | 0<br>(0 - 0)             |
| Intestinal nematode infections                                    | 7<br>(1 - 20)               | 5<br>(0 - 17)            | 1<br>(0 - 4)       | 1<br>(0 - 4)             | 0<br>(0 - 3)             | 0<br>(0 - 1)             |
| Ascariasis                                                        | 7<br>(1 - 20)               | 5<br>(0 - 17)            | 1<br>(0 - 4)       | 1<br>(0 - 4)             | 0<br>(0 - 3)             | 0<br>(0 - 1)             |



Web Table 31- Congo deaths with 95% UI by age, sex, and cause in 2013

| Cause                                                            | Males, All Ages           | Males, 0-4 Years         | Males, 5-14 Years | Males, 15-49 Years       | Males, 50-69 Years       | Males, 70-80 Years       |
|------------------------------------------------------------------|---------------------------|--------------------------|-------------------|--------------------------|--------------------------|--------------------------|
| Other neglected tropical diseases                                | 8<br>(3 - 17)             | 3<br>(1 - 9)             | 1<br>(0 - 1)      | 2<br>(1 - 5)             | 1<br>(0 - 2)             | 1<br>(0 - 1)             |
| Maternal disorders                                               | --                        | --                       | --                | --                       | --                       | --                       |
| Maternal hemorrhage                                              | --                        | --                       | --                | --                       | --                       | --                       |
| Maternal sepsis and other maternal infections                    | --                        | --                       | --                | --                       | --                       | --                       |
| Maternal hypertensive disorders                                  | --                        | --                       | --                | --                       | --                       | --                       |
| Maternal obstructed labor                                        | --                        | --                       | --                | --                       | --                       | --                       |
| Maternal abortive outcome                                        | --                        | --                       | --                | --                       | --                       | --                       |
| Indirect maternal deaths                                         | --                        | --                       | --                | --                       | --                       | --                       |
| Late maternal deaths                                             | --                        | --                       | --                | --                       | --                       | --                       |
| Maternal deaths aggravated by HIV/AIDS                           | --                        | --                       | --                | --                       | --                       | --                       |
| Other maternal disorders                                         | --                        | --                       | --                | --                       | --                       | --                       |
| Neonatal disorders                                               | 1,519<br>(1,070 - 2,075)  | 1,519<br>(1,070 - 2,075) | --                | --                       | --                       | --                       |
| Neonatal preterm birth complications                             | 535<br>(254 - 954)        | 535<br>(254 - 954)       | --                | --                       | --                       | --                       |
| Neonatal encephalopathy due to birth asphyxia and trauma         | 438<br>(187 - 808)        | 438<br>(187 - 808)       | --                | --                       | --                       | --                       |
| Neonatal sepsis and other neonatal infections                    | 322<br>(112 - 673)        | 322<br>(112 - 673)       | --                | --                       | --                       | --                       |
| Hemolytic disease and other neonatal jaundice                    | 10<br>(3 - 26)            | 10<br>(3 - 26)           | --                | --                       | --                       | --                       |
| Other neonatal disorders                                         | 214<br>(80 - 450)         | 214<br>(80 - 450)        | --                | --                       | --                       | --                       |
| Nutritional deficiencies                                         | 616<br>(292 - 1,094)      | 316<br>(131 - 626)       | 15<br>(7 - 29)    | 74<br>(39 - 166)         | 88<br>(39 - 162)         | 122<br>(49 - 218)        |
| Protein-energy malnutrition                                      | 438<br>(167 - 785)        | 234<br>(72 - 514)        | 12<br>(5 - 23)    | 42<br>(16 - 111)         | 62<br>(21 - 119)         | 88<br>(27 - 165)         |
| Iodine deficiency                                                | 3<br>(0 - 18)             | 2<br>(0 - 16)            | 0<br>(0 - 1)      | 0<br>(0 - 2)             | 0<br>(0 - 2)             | 0<br>(0 - 2)             |
| Iron-deficiency anemia                                           | 166<br>(61 - 446)         | 74<br>(8 - 249)          | 3<br>(1 - 7)      | 31<br>(10 - 71)          | 25<br>(7 - 60)           | 33<br>(9 - 78)           |
| Other nutritional deficiencies                                   | 9<br>(3 - 29)             | 5<br>(1 - 19)            | 0<br>(0 - 1)      | 2<br>(0 - 4)             | 1<br>(0 - 3)             | 1<br>(0 - 3)             |
| Other communicable, maternal, neonatal, and nutritional diseases | 170<br>(89 - 287)         | 100<br>(34 - 208)        | 7<br>(3 - 12)     | 32<br>(17 - 56)          | 20<br>(9 - 41)           | 11<br>(5 - 24)           |
| Sexually transmitted diseases excluding HIV                      | 62<br>(4 - 146)           | 56<br>(0 - 137)          | 2<br>(0 - 5)      | 2<br>(1 - 4)             | 1<br>(0 - 2)             | 1<br>(0 - 2)             |
| Syphilis                                                         | 61<br>(3 - 144)           | 56<br>(0 - 137)          | 2<br>(0 - 5)      | 1<br>(0 - 2)             | 1<br>(0 - 2)             | 1<br>(0 - 1)             |
| Chlamydial infection                                             | --                        | --                       | --                | --                       | --                       | --                       |
| Gonococcal infection                                             | 1<br>(0 - 2)              | --                       | 0<br>(0 - 0)      | 0<br>(0 - 1)             | 0<br>(0 - 0)             | 0<br>(0 - 0)             |
| Other sexually transmitted diseases                              | 1<br>(0 - 1)              | --                       | 0<br>(0 - 0)      | 0<br>(0 - 1)             | 0<br>(0 - 0)             | 0<br>(0 - 0)             |
| Hepatitis                                                        | 26<br>(14 - 78)           | 5<br>(2 - 14)            | 1<br>(1 - 3)      | 11<br>(6 - 33)           | 6<br>(3 - 22)            | 2<br>(1 - 9)             |
| Acute hepatitis A                                                | 2<br>(0 - 6)              | 1<br>(0 - 4)             | 0<br>(0 - 1)      | 0<br>(0 - 2)             | 0<br>(0 - 0)             | 0<br>(0 - 0)             |
| Acute hepatitis B                                                | 16<br>(8 - 47)            | 4<br>(1 - 10)            | 1<br>(0 - 2)      | 5<br>(2 - 14)            | 5<br>(2 - 16)            | 2<br>(1 - 7)             |
| Acute hepatitis C                                                | 1<br>(0 - 3)              | --                       | 0<br>(0 - 0)      | 0<br>(0 - 2)             | 0<br>(0 - 1)             | 0<br>(0 - 1)             |
| Acute hepatitis E                                                | 7<br>(3 - 21)             | 0<br>(0 - 0)             | 0<br>(0 - 1)      | 5<br>(2 - 16)            | 1<br>(0 - 4)             | 0<br>(0 - 1)             |
| Other infectious diseases                                        | 82<br>(27 - 170)          | 38<br>(8 - 112)          | 3<br>(1 - 8)      | 20<br>(6 - 36)           | 13<br>(4 - 26)           | 8<br>(2 - 19)            |
| Non-communicable diseases                                        | 8,589<br>(6,886 - 10,189) | 851<br>(525 - 1,351)     | 88<br>(63 - 131)  | 1,594<br>(1,211 - 2,041) | 3,064<br>(2,268 - 3,823) | 2,993<br>(2,398 - 3,476) |
| Neoplasms                                                        | 1,093<br>(838 - 1,333)    | 23<br>(12 - 40)          | 15<br>(11 - 21)   | 194<br>(147 - 257)       | 491<br>(352 - 619)       | 370<br>(292 - 451)       |
| Esophageal cancer                                                | 84<br>(55 - 122)          | --                       | --                | 13<br>(8 - 20)           | 48<br>(29 - 72)          | 24<br>(15 - 35)          |
| Stomach cancer                                                   | 141<br>(101 - 192)        | --                       | --                | 25<br>(17 - 39)          | 68<br>(46 - 97)          | 48<br>(34 - 64)          |
| Liver cancer                                                     | 102<br>(62 - 152)         | --                       | 1<br>(0 - 1)      | 20<br>(11 - 35)          | 53<br>(30 - 83)          | 29<br>(18 - 44)          |
| Liver cancer due to hepatitis B                                  | 40<br>(21 - 64)           | --                       | 0<br>(0 - 1)      | 10<br>(5 - 18)           | 21<br>(10 - 36)          | 8<br>(4 - 14)            |

Web Table 31- Congo deaths with 95% UI by age, sex, and cause in 2013

| Cause                                | Males, All Ages          | Males, 0-4 Years | Males, 5-14 Years | Males, 15-49 Years | Males, 50-69 Years       | Males, 70-80 Years       |
|--------------------------------------|--------------------------|------------------|-------------------|--------------------|--------------------------|--------------------------|
| Liver cancer due to hepatitis C      | 31<br>(9 - 61)           | --               | 0<br>(0 - 0)      | 4<br>(1 - 9)       | 17<br>(4 - 32)           | 11<br>(3 - 20)           |
| Liver cancer due to alcohol use      | 19<br>(9 - 31)           | --               | --                | 2<br>(1 - 4)       | 9<br>(4 - 17)            | 7<br>(4 - 12)            |
| Liver cancer due to other causes     | 12<br>(6 - 22)           | --               | 0<br>(0 - 1)      | 3<br>(2 - 7)       | 6<br>(3 - 11)            | 2<br>(1 - 4)             |
| Larynx cancer                        | 22<br>(15 - 33)          | --               | --                | 3<br>(2 - 5)       | 12<br>(7 - 19)           | 7<br>(4 - 10)            |
| Tracheal, bronchus and lung cancer   | 128<br>(94 - 166)        | --               | --                | 15<br>(10 - 21)    | 73<br>(51 - 98)          | 40<br>(29 - 58)          |
| Breast cancer                        | 3<br>(2 - 5)             | --               | --                | 1<br>(0 - 2)       | 1<br>(1 - 2)             | 1<br>(0 - 1)             |
| Cervical cancer                      | --                       | --               | --                | --                 | --                       | --                       |
| Uterine cancer                       | --                       | --               | --                | --                 | --                       | --                       |
| Prostate cancer                      | 115<br>(75 - 184)        | --               | --                | 2<br>(1 - 4)       | 34<br>(20 - 58)          | 79<br>(51 - 123)         |
| Colon and rectum cancer              | 101<br>(76 - 125)        | --               | --                | 16<br>(11 - 21)    | 46<br>(32 - 60)          | 40<br>(30 - 51)          |
| Lip and oral cavity cancer           | 23<br>(15 - 32)          | --               | --                | 6<br>(3 - 8)       | 12<br>(8 - 18)           | 6<br>(3 - 9)             |
| Nasopharynx cancer                   | 6<br>(4 - 8)             | --               | 0<br>(0 - 0)      | 2<br>(1 - 3)       | 3<br>(2 - 4)             | 1<br>(1 - 1)             |
| Other pharynx cancer                 | 13<br>(9 - 19)           | --               | --                | 2<br>(1 - 4)       | 8<br>(5 - 12)            | 3<br>(2 - 4)             |
| Gallbladder and biliary tract cancer | 12<br>(6 - 19)           | --               | --                | 1<br>(1 - 2)       | 6<br>(3 - 10)            | 5<br>(3 - 8)             |
| Pancreatic cancer                    | 34<br>(25 - 43)          | --               | --                | 5<br>(3 - 6)       | 17<br>(12 - 23)          | 12<br>(8 - 15)           |
| Malignant skin melanoma              | 7<br>(4 - 13)            | --               | --                | 2<br>(1 - 5)       | 3<br>(1 - 5)             | 2<br>(1 - 3)             |
| Non-melanoma skin cancer             | 7<br>(4 - 10)            | --               | --                | 1<br>(1 - 2)       | 2<br>(1 - 4)             | 3<br>(2 - 4)             |
| Ovarian cancer                       | --                       | --               | --                | --                 | --                       | --                       |
| Testicular cancer                    | 4<br>(3 - 6)             | --               | --                | 3<br>(2 - 5)       | 1<br>(0 - 1)             | 0<br>(0 - 1)             |
| Kidney cancer                        | 20<br>(14 - 26)          | 1<br>(0 - 2)     | 0<br>(0 - 0)      | 3<br>(2 - 5)       | 10<br>(7 - 15)           | 5<br>(3 - 8)             |
| Bladder cancer                       | 41<br>(30 - 55)          | --               | --                | 3<br>(2 - 5)       | 18<br>(12 - 25)          | 20<br>(14 - 27)          |
| Brain and nervous system cancer      | 20<br>(14 - 34)          | 1<br>(0 - 3)     | 2<br>(1 - 3)      | 8<br>(5 - 14)      | 7<br>(4 - 13)            | 2<br>(1 - 4)             |
| Thyroid cancer                       | 3<br>(2 - 4)             | --               | 0<br>(0 - 0)      | 1<br>(0 - 1)       | 2<br>(1 - 2)             | 1<br>(1 - 1)             |
| Mesothelioma                         | 2<br>(1 - 3)             | --               | --                | 0<br>(0 - 1)       | 1<br>(1 - 2)             | 1<br>(0 - 1)             |
| Hodgkin lymphoma                     | 7<br>(4 - 14)            | 0<br>(0 - 1)     | 0<br>(0 - 1)      | 4<br>(2 - 8)       | 2<br>(1 - 4)             | 1<br>(0 - 1)             |
| Non-Hodgkin lymphoma                 | 62<br>(46 - 82)          | 3<br>(1 - 6)     | 3<br>(2 - 4)      | 19<br>(14 - 28)    | 23<br>(15 - 32)          | 14<br>(9 - 21)           |
| Multiple myeloma                     | 10<br>(7 - 14)           | --               | --                | 2<br>(1 - 3)       | 5<br>(3 - 7)             | 3<br>(2 - 5)             |
| Leukemia                             | 25<br>(20 - 32)          | 3<br>(1 - 6)     | 3<br>(2 - 5)      | 9<br>(6 - 12)      | 6<br>(4 - 8)             | 5<br>(3 - 6)             |
| Other neoplasms                      | 100<br>(75 - 146)        | 14<br>(7 - 28)   | 6<br>(4 - 10)     | 28<br>(19 - 51)    | 31<br>(20 - 48)          | 20<br>(13 - 29)          |
| Cardiovascular diseases              | 3,583<br>(2,792 - 4,305) | 44<br>(24 - 72)  | 10<br>(6 - 14)    | 584<br>(428 - 774) | 1,454<br>(1,055 - 1,827) | 1,491<br>(1,190 - 1,733) |
| Rheumatic heart disease              | 54<br>(36 - 86)          | 1<br>(0 - 2)     | 1<br>(1 - 2)      | 22<br>(13 - 35)    | 19<br>(12 - 32)          | 11<br>(7 - 19)           |
| Ischemic heart disease               | 1,006<br>(728 - 1,299)   | 2<br>(1 - 4)     | 1<br>(0 - 1)      | 161<br>(110 - 227) | 452<br>(311 - 599)       | 391<br>(281 - 510)       |
| Cerebrovascular disease              | 1,965<br>(1,473 - 2,457) | 16<br>(8 - 28)   | 4<br>(3 - 7)      | 277<br>(191 - 377) | 770<br>(544 - 996)       | 897<br>(691 - 1,094)     |
| Ischemic stroke                      | 881<br>(620 - 1,147)     | 2<br>(1 - 6)     | 1<br>(0 - 1)      | 47<br>(20 - 83)    | 286<br>(175 - 408)       | 545<br>(377 - 701)       |
| Hemorrhagic stroke                   | 1,084<br>(784 - 1,461)   | 14<br>(7 - 24)   | 4<br>(2 - 6)      | 230<br>(157 - 318) | 484<br>(326 - 672)       | 352<br>(249 - 511)       |
| Hypertensive heart disease           | 156<br>(91 - 268)        | 0<br>(0 - 1)     | 0<br>(0 - 0)      | 20<br>(10 - 33)    | 63<br>(35 - 107)         | 73<br>(36 - 142)         |
| Cardiomyopathy and myocarditis       | 138<br>(73 - 213)        | 15<br>(4 - 28)   | 2<br>(1 - 3)      | 44<br>(18 - 74)    | 49<br>(26 - 82)          | 28<br>(16 - 46)          |
| Atrial fibrillation and flutter      | 1<br>(0 - 1)             | --               | --                | 0<br>(0 - 0)       | 0<br>(0 - 0)             | 0<br>(0 - 1)             |
| Aortic aneurysm                      | 38<br>(21 - 59)          | --               | --                | 6<br>(3 - 9)       | 16<br>(9 - 26)           | 16<br>(8 - 25)           |
| Peripheral vascular disease          | 2<br>(1 - 3)             | --               | --                | 0<br>(0 - 0)       | 1<br>(0 - 1)             | 1<br>(1 - 2)             |

Web Table 31- Congo deaths with 95% UI by age, sex, and cause in 2013

| Cause                                               | Males, All Ages      | Males, 0-4 Years | Males, 5-14 Years | Males, 15-49 Years | Males, 50-69 Years | Males, 70-80 Years |
|-----------------------------------------------------|----------------------|------------------|-------------------|--------------------|--------------------|--------------------|
| Endocarditis                                        | 25<br>(15 - 38)      | 2<br>(1 - 4)     | 0<br>(0 - 1)      | 7<br>(4 - 10)      | 9<br>(5 - 14)      | 7<br>(4 - 12)      |
| Other cardiovascular and circulatory diseases       | 200<br>(131 - 288)   | 8<br>(3 - 18)    | 1<br>(1 - 2)      | 49<br>(29 - 76)    | 75<br>(46 - 116)   | 67<br>(43 - 102)   |
| Chronic respiratory diseases                        | 850<br>(613 - 1,261) | 38<br>(18 - 68)  | 5<br>(3 - 8)      | 90<br>(60 - 137)   | 287<br>(195 - 434) | 430<br>(307 - 645) |
| Chronic obstructive pulmonary disease               | 624<br>(432 - 961)   | 19<br>(8 - 37)   | 1<br>(1 - 2)      | 43<br>(28 - 69)    | 211<br>(137 - 335) | 351<br>(249 - 539) |
| Pneumoconiosis                                      | 38<br>(23 - 63)      | 0<br>(0 - 1)     | 0<br>(0 - 0)      | 7<br>(4 - 12)      | 15<br>(8 - 27)     | 15<br>(9 - 24)     |
| Silicosis                                           | 9<br>(4 - 16)        | 0<br>(0 - 0)     | 0<br>(0 - 0)      | 1<br>(1 - 2)       | 3<br>(1 - 7)       | 4<br>(2 - 8)       |
| Asbestosis                                          | 5<br>(2 - 8)         | 0<br>(0 - 0)     | 0<br>(0 - 0)      | 1<br>(0 - 2)       | 2<br>(1 - 4)       | 1<br>(1 - 3)       |
| Coal workers pneumoconiosis                         | 4<br>(2 - 7)         | 0<br>(0 - 0)     | 0<br>(0 - 0)      | 1<br>(0 - 1)       | 2<br>(1 - 3)       | 2<br>(1 - 3)       |
| Other pneumoconiosis                                | 20<br>(12 - 34)      | 0<br>(0 - 1)     | 0<br>(0 - 0)      | 4<br>(2 - 7)       | 8<br>(4 - 14)      | 8<br>(4 - 13)      |
| Asthma                                              | 131<br>(67 - 217)    | 9<br>(3 - 21)    | 3<br>(1 - 4)      | 33<br>(17 - 53)    | 45<br>(21 - 79)    | 42<br>(19 - 73)    |
| Interstitial lung disease and pulmonary sarcoidosis | 33<br>(8 - 68)       | 0<br>(0 - 1)     | 0<br>(0 - 0)      | 3<br>(1 - 7)       | 12<br>(3 - 28)     | 18<br>(4 - 39)     |
| Other chronic respiratory diseases                  | 23<br>(13 - 47)      | 9<br>(4 - 20)    | 1<br>(0 - 1)      | 5<br>(2 - 11)      | 4<br>(2 - 9)       | 5<br>(2 - 11)      |
| Cirrhosis                                           | 492<br>(360 - 623)   | 4<br>(1 - 9)     | 2<br>(1 - 3)      | 155<br>(109 - 212) | 240<br>(165 - 321) | 90<br>(63 - 122)   |
| Cirrhosis due to hepatitis B                        | 96<br>(50 - 162)     | 0<br>(0 - 0)     | 0<br>(0 - 1)      | 30<br>(15 - 50)    | 48<br>(23 - 85)    | 17<br>(6 - 33)     |
| Cirrhosis due to hepatitis C                        | 159<br>(95 - 230)    | 1<br>(0 - 2)     | 1<br>(0 - 1)      | 48<br>(26 - 77)    | 77<br>(42 - 119)   | 32<br>(20 - 48)    |
| Cirrhosis due to alcohol use                        | 187<br>(121 - 261)   | --               | --                | 54<br>(33 - 82)    | 97<br>(59 - 141)   | 36<br>(23 - 53)    |
| Cirrhosis due to other causes                       | 50<br>(28 - 76)      | 3<br>(1 - 7)     | 1<br>(1 - 2)      | 23<br>(12 - 36)    | 18<br>(8 - 31)     | 4<br>(2 - 8)       |
| Digestive diseases                                  | 460<br>(323 - 623)   | 23<br>(9 - 46)   | 7<br>(4 - 12)     | 138<br>(90 - 200)  | 157<br>(103 - 225) | 135<br>(91 - 195)  |
| Peptic ulcer disease                                | 125<br>(76 - 209)    | 1<br>(0 - 4)     | 1<br>(0 - 1)      | 35<br>(20 - 60)    | 49<br>(28 - 86)    | 39<br>(21 - 70)    |
| Gastritis and duodenitis                            | 19<br>(8 - 38)       | 1<br>(0 - 3)     | 0<br>(0 - 1)      | 6<br>(3 - 12)      | 6<br>(3 - 14)      | 5<br>(2 - 13)      |
| Appendicitis                                        | 19<br>(11 - 31)      | 2<br>(1 - 4)     | 1<br>(0 - 2)      | 8<br>(4 - 14)      | 5<br>(3 - 9)       | 4<br>(2 - 6)       |
| Paralytic ileus and intestinal obstruction          | 113<br>(70 - 184)    | 7<br>(2 - 15)    | 3<br>(1 - 5)      | 26<br>(14 - 46)    | 36<br>(20 - 63)    | 42<br>(24 - 70)    |
| Inguinal, femoral, and abdominal hernia             | 7<br>(4 - 13)        | 0<br>(0 - 1)     | 0<br>(0 - 0)      | 2<br>(1 - 3)       | 2<br>(1 - 4)       | 3<br>(1 - 6)       |
| Inflammatory bowel disease                          | 32<br>(16 - 48)      | 5<br>(1 - 12)    | 1<br>(0 - 1)      | 11<br>(6 - 18)     | 8<br>(4 - 14)      | 7<br>(3 - 12)      |
| Vascular intestinal disorders                       | 5<br>(2 - 11)        | 0<br>(0 - 1)     | 0<br>(0 - 0)      | 1<br>(0 - 2)       | 2<br>(1 - 4)       | 2<br>(1 - 4)       |
| Gallbladder and biliary diseases                    | 30<br>(18 - 45)      | 1<br>(0 - 1)     | 0<br>(0 - 0)      | 6<br>(3 - 10)      | 11<br>(6 - 18)     | 12<br>(6 - 20)     |
| Pancreatitis                                        | 44<br>(26 - 72)      | 0<br>(0 - 1)     | 0<br>(0 - 0)      | 23<br>(13 - 40)    | 14<br>(7 - 23)     | 6<br>(3 - 11)      |
| Other digestive diseases                            | 64<br>(39 - 92)      | 5<br>(1 - 11)    | 1<br>(1 - 2)      | 20<br>(11 - 31)    | 23<br>(12 - 35)    | 16<br>(9 - 26)     |
| Neurological disorders                              | 253<br>(200 - 318)   | 18<br>(7 - 41)   | 7<br>(4 - 13)     | 56<br>(31 - 85)    | 30<br>(20 - 41)    | 142<br>(109 - 180) |
| Alzheimer disease and other dementias               | 150<br>(115 - 189)   | --               | --                | 0<br>(0 - 0)       | 16<br>(10 - 23)    | 134<br>(101 - 171) |
| Parkinson disease                                   | 2<br>(1 - 4)         | --               | --                | 0<br>(0 - 0)       | 1<br>(0 - 1)       | 2<br>(1 - 3)       |
| Epilepsy                                            | 81<br>(44 - 121)     | 14<br>(4 - 36)   | 6<br>(3 - 11)     | 49<br>(25 - 77)    | 9<br>(5 - 14)      | 4<br>(2 - 6)       |
| Multiple sclerosis                                  | 0<br>(0 - 1)         | --               | --                | 0<br>(0 - 0)       | 0<br>(0 - 0)       | 0<br>(0 - 0)       |
| Other neurological disorders                        | 19<br>(11 - 26)      | 4<br>(2 - 8)     | 1<br>(1 - 2)      | 7<br>(4 - 9)       | 5<br>(3 - 7)       | 3<br>(2 - 4)       |
| Mental and substance use disorders                  | 194<br>(130 - 290)   | 9<br>(2 - 19)    | 0<br>(0 - 0)      | 130<br>(84 - 199)  | 46<br>(28 - 74)    | 8<br>(5 - 13)      |
| Schizophrenia                                       | 3<br>(1 - 5)         | --               | --                | 2<br>(1 - 3)       | 1<br>(0 - 2)       | 0<br>(0 - 1)       |
| Alcohol use disorders                               | 115<br>(68 - 181)    | --               | --                | 71<br>(38 - 120)   | 38<br>(21 - 64)    | 6<br>(3 - 10)      |
| Drug use disorders                                  | 76<br>(46 - 111)     | 9<br>(2 - 19)    | --                | 57<br>(36 - 87)    | 7<br>(4 - 11)      | 2<br>(1 - 3)       |
| Opioid use disorders                                | 8<br>(5 - 12)        | 1<br>(0 - 2)     | --                | 6<br>(4 - 10)      | 1<br>(0 - 1)       | 0<br>(0 - 0)       |
| Cocaine use disorders                               | 0<br>(0 - 0)         | 0<br>(0 - 0)     | --                | 0<br>(0 - 0)       | 0<br>(0 - 0)       | 0<br>(0 - 0)       |

Web Table 31- Congo deaths with 95% UI by age, sex, and cause in 2013

| Cause                                               | Males, All Ages      | Males, 0-4 Years     | Males, 5-14 Years | Males, 15-49 Years | Males, 50-69 Years | Males, 70-80 Years |
|-----------------------------------------------------|----------------------|----------------------|-------------------|--------------------|--------------------|--------------------|
| Amphetamine use disorders                           | 0<br>(0 - 0)         | 0<br>(0 - 0)         | --                | 0<br>(0 - 0)       | 0<br>(0 - 0)       | 0<br>(0 - 0)       |
| Other drug use disorders                            | 67<br>(41 - 98)      | 8<br>(2 - 16)        | --                | 51<br>(32 - 77)    | 7<br>(4 - 10)      | 2<br>(1 - 3)       |
| Eating disorders                                    | 0<br>(0 - 0)         | --                   | 0<br>(0 - 0)      | 0<br>(0 - 0)       | --                 | --                 |
| Anorexia nervosa                                    | 0<br>(0 - 0)         | --                   | 0<br>(0 - 0)      | 0<br>(0 - 0)       | --                 | --                 |
| Diabetes, urogenital, blood, and endocrine diseases | 999<br>(776 - 1,268) | 118<br>(66 - 196)    | 25<br>(13 - 46)   | 210<br>(151 - 287) | 338<br>(238 - 449) | 307<br>(231 - 385) |
| Diabetes mellitus                                   | 475<br>(346 - 601)   | 5<br>(2 - 9)         | 1<br>(1 - 1)      | 64<br>(44 - 88)    | 218<br>(148 - 295) | 187<br>(133 - 244) |
| Acute glomerulonephritis                            | 3<br>(2 - 4)         | 1<br>(0 - 1)         | 0<br>(0 - 0)      | 1<br>(1 - 1)       | 1<br>(0 - 1)       | 0<br>(0 - 1)       |
| Chronic kidney disease                              | 181<br>(122 - 258)   | 11<br>(5 - 21)       | 3<br>(2 - 5)      | 54<br>(34 - 79)    | 54<br>(31 - 92)    | 59<br>(36 - 87)    |
| Chronic kidney disease due to diabetes mellitus     | 1<br>(0 - 2)         | 0<br>(0 - 0)         | 0<br>(0 - 0)      | 0<br>(0 - 1)       | 0<br>(0 - 1)       | 0<br>(0 - 1)       |
| Chronic kidney disease due to hypertension          | 85<br>(52 - 142)     | 2<br>(1 - 5)         | 0<br>(0 - 1)      | 18<br>(10 - 32)    | 31<br>(17 - 56)    | 34<br>(19 - 56)    |
| Chronic kidney disease due to glomerulonephritis    | 36<br>(19 - 51)      | 4<br>(2 - 8)         | 1<br>(1 - 2)      | 14<br>(7 - 22)     | 8<br>(4 - 14)      | 8<br>(3 - 13)      |
| Chronic kidney disease due to other causes          | 59<br>(30 - 97)      | 4<br>(1 - 11)        | 1<br>(0 - 2)      | 21<br>(11 - 37)    | 15<br>(5 - 29)     | 17<br>(6 - 35)     |
| Urinary diseases and male infertility               | 103<br>(74 - 138)    | 11<br>(4 - 26)       | 1<br>(1 - 2)      | 22<br>(14 - 31)    | 30<br>(20 - 44)    | 39<br>(25 - 58)    |
| Interstitial nephritis and urinary tract infections | 68<br>(46 - 93)      | 8<br>(3 - 20)        | 1<br>(0 - 1)      | 13<br>(7 - 20)     | 19<br>(11 - 29)    | 27<br>(17 - 41)    |
| Urolithiasis                                        | 2<br>(1 - 3)         | --                   | 0<br>(0 - 0)      | 1<br>(0 - 1)       | 1<br>(0 - 1)       | 1<br>(0 - 1)       |
| Other urinary diseases                              | 33<br>(22 - 50)      | 3<br>(1 - 7)         | 0<br>(0 - 1)      | 8<br>(5 - 14)      | 10<br>(6 - 17)     | 11<br>(6 - 20)     |
| Gynecological diseases                              | --                   | --                   | --                | --                 | --                 | --                 |
| Uterine fibroids                                    | --                   | --                   | --                | --                 | --                 | --                 |
| Polycystic ovarian syndrome                         | --                   | --                   | --                | --                 | --                 | --                 |
| Endometriosis                                       | --                   | --                   | --                | --                 | --                 | --                 |
| Genital prolapse                                    | --                   | --                   | --                | --                 | --                 | --                 |
| Other gynecological diseases                        | --                   | --                   | --                | --                 | --                 | --                 |
| Hemoglobinopathies and hemolytic anemias            | 120<br>(41 - 244)    | 52<br>(17 - 115)     | 15<br>(4 - 34)    | 38<br>(11 - 81)    | 10<br>(4 - 24)     | 5<br>(3 - 11)      |
| Thalassemias                                        | 0<br>(0 - 0)         | 0<br>(0 - 0)         | 0<br>(0 - 0)      | 0<br>(0 - 0)       | 0<br>(0 - 0)       | 0<br>(0 - 0)       |
| Sickle cell disorders                               | 112<br>(37 - 232)    | 50<br>(16 - 112)     | 15<br>(4 - 34)    | 37<br>(11 - 79)    | 9<br>(3 - 22)      | 1<br>(0 - 1)       |
| G6PD deficiency                                     | 1<br>(0 - 2)         | 0<br>(0 - 1)         | 0<br>(0 - 0)      | 0<br>(0 - 1)       | 0<br>(0 - 0)       | 0<br>(0 - 0)       |
| Other hemoglobinopathies and hemolytic anemias      | 7<br>(3 - 14)        | 1<br>(0 - 2)         | 0<br>(0 - 0)      | 1<br>(0 - 1)       | 1<br>(0 - 2)       | 4<br>(2 - 9)       |
| Endocrine, metabolic, blood, and immune disorders   | 118<br>(71 - 163)    | 39<br>(19 - 69)      | 5<br>(3 - 9)      | 31<br>(18 - 45)    | 25<br>(14 - 38)    | 17<br>(9 - 28)     |
| Musculoskeletal disorders                           | 26<br>(18 - 36)      | --                   | 1<br>(1 - 2)      | 10<br>(7 - 16)     | 8<br>(5 - 12)      | 6<br>(4 - 9)       |
| Rheumatoid arthritis                                | 4<br>(2 - 6)         | --                   | 0<br>(0 - 0)      | 1<br>(0 - 2)       | 1<br>(1 - 2)       | 1<br>(1 - 2)       |
| Other musculoskeletal disorders                     | 22<br>(16 - 31)      | --                   | 1<br>(1 - 2)      | 9<br>(6 - 14)      | 7<br>(4 - 10)      | 4<br>(3 - 7)       |
| Other non-communicable diseases                     | 639<br>(369 - 1,134) | 574<br>(309 - 1,041) | 15<br>(8 - 34)    | 27<br>(18 - 44)    | 13<br>(8 - 18)     | 12<br>(7 - 18)     |
| Congenital anomalies                                | 592<br>(329 - 1,084) | 552<br>(293 - 1,021) | 14<br>(7 - 33)    | 19<br>(11 - 36)    | 4<br>(3 - 8)       | 2<br>(2 - 4)       |
| Neural tube defects                                 | 114<br>(20 - 289)    | 110<br>(18 - 284)    | 1<br>(0 - 3)      | 2<br>(1 - 4)       | 0<br>(0 - 1)       | 0<br>(0 - 0)       |
| Congenital heart anomalies                          | 273<br>(139 - 539)   | 252<br>(123 - 506)   | 8<br>(4 - 19)     | 10<br>(6 - 20)     | 2<br>(1 - 3)       | 1<br>(1 - 1)       |
| Cleft lip and cleft palate                          | 2<br>(0 - 7)         | 2<br>(0 - 7)         | --                | --                 | --                 | --                 |
| Down syndrome                                       | 35<br>(10 - 90)      | 31<br>(7 - 85)       | 1<br>(0 - 3)      | 2<br>(1 - 5)       | 1<br>(0 - 1)       | 0<br>(0 - 0)       |
| Chromosomal unbalanced rearrangements               | 13<br>(4 - 39)       | 13<br>(4 - 38)       | 0<br>(0 - 1)      | 0<br>(0 - 1)       | 0<br>(0 - 0)       | 0<br>(0 - 0)       |
| Other congenital anomalies                          | 155<br>(55 - 417)    | 145<br>(48 - 394)    | 3<br>(1 - 9)      | 4<br>(2 - 10)      | 2<br>(1 - 3)       | 1<br>(1 - 2)       |
| Skin and subcutaneous diseases                      | 35<br>(25 - 46)      | 8<br>(3 - 15)        | 1<br>(0 - 1)      | 8<br>(5 - 11)      | 8<br>(5 - 12)      | 9<br>(6 - 16)      |

Web Table 31- Congo deaths with 95% UI by age, sex, and cause in 2013

| Cause                                           | Males, All Ages          | Males, 0-4 Years   | Males, 5-14 Years | Males, 15-49 Years     | Males, 50-69 Years | Males, 70-80 Years |
|-------------------------------------------------|--------------------------|--------------------|-------------------|------------------------|--------------------|--------------------|
| Cellulitis                                      | 10<br>(5 - 18)           | 2<br>(1 - 5)       | 0<br>(0 - 0)      | 2<br>(1 - 4)           | 3<br>(1 - 5)       | 2<br>(1 - 5)       |
| Pyoderma                                        | 20<br>(13 - 27)          | 6<br>(2 - 10)      | 0<br>(0 - 1)      | 4<br>(3 - 7)           | 5<br>(3 - 7)       | 5<br>(3 - 8)       |
| Decubitus ulcer                                 | 4<br>(2 - 6)             | 0<br>(0 - 1)       | 0<br>(0 - 0)      | 1<br>(0 - 1)           | 1<br>(0 - 1)       | 2<br>(1 - 4)       |
| Other skin and subcutaneous diseases            | 1<br>(0 - 3)             | 0<br>(0 - 1)       | 0<br>(0 - 0)      | 0<br>(0 - 1)           | 0<br>(0 - 0)       | 0<br>(0 - 0)       |
| Sudden infant death syndrome                    | 13<br>(4 - 36)           | 13<br>(4 - 36)     | --                | --                     | --                 | --                 |
| Injuries                                        | 2,048<br>(1,546 - 2,650) | 275<br>(151 - 439) | 102<br>(71 - 144) | 1,279<br>(921 - 1,718) | 273<br>(184 - 376) | 119<br>(88 - 154)  |
| Transport injuries                              | 659<br>(378 - 1,074)     | 53<br>(18 - 108)   | 38<br>(19 - 67)   | 453<br>(252 - 752)     | 84<br>(42 - 146)   | 30<br>(15 - 52)    |
| Road injuries                                   | 621<br>(358 - 1,005)     | 48<br>(16 - 97)    | 36<br>(18 - 63)   | 429<br>(240 - 705)     | 79<br>(40 - 137)   | 29<br>(15 - 49)    |
| Pedestrian road injuries                        | 202<br>(97 - 337)        | 23<br>(8 - 52)     | 16<br>(7 - 30)    | 119<br>(54 - 210)      | 30<br>(13 - 58)    | 13<br>(6 - 24)     |
| Cyclist road injuries                           | 59<br>(31 - 104)         | 6<br>(1 - 14)      | 7<br>(3 - 12)     | 32<br>(16 - 57)        | 11<br>(5 - 21)     | 4<br>(2 - 8)       |
| Motorcyclist road injuries                      | 134<br>(66 - 237)        | 4<br>(1 - 9)       | 3<br>(1 - 5)      | 115<br>(56 - 209)      | 10<br>(5 - 20)     | 2<br>(1 - 4)       |
| Motor vehicle road injuries                     | 223<br>(114 - 392)       | 15<br>(5 - 33)     | 10<br>(4 - 21)    | 162<br>(80 - 292)      | 27<br>(11 - 55)    | 10<br>(4 - 19)     |
| Other road injuries                             | 2<br>(0 - 5)             | 0<br>(0 - 1)       | 0<br>(0 - 0)      | 1<br>(0 - 3)           | 0<br>(0 - 1)       | 0<br>(0 - 0)       |
| Other transport injuries                        | 38<br>(16 - 86)          | 5<br>(1 - 13)      | 2<br>(1 - 6)      | 24<br>(9 - 55)         | 5<br>(2 - 12)      | 1<br>(1 - 4)       |
| Unintentional injuries                          | 784<br>(550 - 1,019)     | 213<br>(103 - 353) | 56<br>(37 - 80)   | 346<br>(241 - 469)     | 106<br>(72 - 145)  | 63<br>(46 - 84)    |
| Falls                                           | 148<br>(88 - 223)        | 16<br>(5 - 39)     | 5<br>(2 - 10)     | 67<br>(35 - 114)       | 33<br>(18 - 53)    | 26<br>(15 - 41)    |
| Drowning                                        | 201<br>(119 - 322)       | 63<br>(22 - 137)   | 28<br>(15 - 46)   | 91<br>(52 - 149)       | 15<br>(9 - 24)     | 5<br>(3 - 8)       |
| Fire, heat, and hot substances                  | 94<br>(44 - 146)         | 36<br>(10 - 79)    | 5<br>(2 - 9)      | 33<br>(15 - 51)        | 11<br>(6 - 18)     | 8<br>(5 - 13)      |
| Poisonings                                      | 36<br>(22 - 54)          | 8<br>(3 - 17)      | 2<br>(1 - 3)      | 20<br>(12 - 33)        | 5<br>(3 - 8)       | 2<br>(1 - 3)       |
| Exposure to mechanical forces                   | 132<br>(88 - 180)        | 24<br>(10 - 47)    | 9<br>(5 - 14)     | 80<br>(51 - 117)       | 16<br>(9 - 24)     | 3<br>(2 - 5)       |
| Unintentional firearm injuries                  | 36<br>(21 - 58)          | 3<br>(1 - 7)       | 2<br>(1 - 4)      | 27<br>(14 - 46)        | 3<br>(2 - 6)       | 1<br>(0 - 2)       |
| Unintentional suffocation                       | 14<br>(4 - 32)           | 8<br>(2 - 25)      | 1<br>(0 - 2)      | 3<br>(1 - 6)           | 1<br>(0 - 2)       | 0<br>(0 - 1)       |
| Other exposure to mechanical forces             | 82<br>(45 - 116)         | 13<br>(4 - 27)     | 6<br>(3 - 10)     | 50<br>(27 - 75)        | 12<br>(6 - 19)     | 2<br>(1 - 3)       |
| Adverse effects of medical treatment            | 62<br>(32 - 104)         | 19<br>(6 - 44)     | 2<br>(1 - 3)      | 16<br>(7 - 28)         | 14<br>(7 - 25)     | 12<br>(6 - 20)     |
| Animal contact                                  | 14<br>(9 - 25)           | 4<br>(1 - 9)       | 2<br>(1 - 3)      | 5<br>(3 - 9)           | 3<br>(1 - 5)       | 1<br>(1 - 2)       |
| Venomous animal contact                         | 8<br>(5 - 17)            | 2<br>(1 - 6)       | 1<br>(0 - 2)      | 3<br>(2 - 6)           | 1<br>(1 - 3)       | 1<br>(0 - 1)       |
| Non-venomous animal contact                     | 6<br>(2 - 11)            | 2<br>(0 - 4)       | 1<br>(0 - 2)      | 2<br>(1 - 4)           | 1<br>(0 - 2)       | 1<br>(0 - 1)       |
| Foreign body                                    | 58<br>(29 - 101)         | 37<br>(13 - 69)    | 2<br>(1 - 4)      | 10<br>(6 - 17)         | 5<br>(3 - 8)       | 4<br>(2 - 7)       |
| Pulmonary aspiration and foreign body in airway | 56<br>(26 - 98)          | 36<br>(13 - 68)    | 2<br>(1 - 3)      | 9<br>(5 - 16)          | 5<br>(2 - 8)       | 4<br>(2 - 7)       |
| Foreign body in other body part                 | 2<br>(1 - 4)             | 1<br>(0 - 2)       | 0<br>(0 - 0)      | 1<br>(0 - 1)           | 0<br>(0 - 1)       | 0<br>(0 - 0)       |
| Other unintentional injuries                    | 38<br>(19 - 54)          | 6<br>(2 - 11)      | 2<br>(1 - 4)      | 23<br>(12 - 35)        | 5<br>(2 - 8)       | 1<br>(1 - 2)       |
| Self-harm and interpersonal violence            | 604<br>(400 - 822)       | 9<br>(4 - 19)      | 8<br>(4 - 14)     | 480<br>(307 - 675)     | 83<br>(52 - 117)   | 25<br>(14 - 40)    |
| Self-harm                                       | 407<br>(258 - 571)       | --                 | 4<br>(2 - 10)     | 311<br>(183 - 459)     | 69<br>(41 - 101)   | 24<br>(13 - 38)    |
| Interpersonal violence                          | 197<br>(95 - 290)        | 9<br>(4 - 19)      | 3<br>(1 - 6)      | 169<br>(79 - 258)      | 14<br>(6 - 24)     | 2<br>(1 - 3)       |
| Assault by firearm                              | 83<br>(37 - 143)         | 1<br>(0 - 4)       | 1<br>(0 - 2)      | 75<br>(33 - 132)       | 5<br>(2 - 10)      | 0<br>(0 - 1)       |
| Assault by sharp object                         | 52<br>(16 - 95)          | 1<br>(0 - 2)       | 0<br>(0 - 1)      | 46<br>(14 - 86)        | 4<br>(1 - 8)       | 0<br>(0 - 1)       |
| Assault by other means                          | 63<br>(28 - 100)         | 7<br>(3 - 16)      | 2<br>(1 - 4)      | 48<br>(18 - 81)        | 5<br>(2 - 9)       | 1<br>(0 - 2)       |

Web Table 31- Congo deaths with 95% UI by age, sex, and cause in 2013

| Cause                                                             | Females, All Ages           | Females, 0-4 Years       | Females, 5-14 Years | Females, 15-49 Years     | Females, 50-69 Years     | Females, 70-80 Years     |
|-------------------------------------------------------------------|-----------------------------|--------------------------|---------------------|--------------------------|--------------------------|--------------------------|
| All causes                                                        | 17,441<br>(15,729 - 19,327) | 4,580<br>(3,736 - 5,484) | 524<br>(452 - 626)  | 4,161<br>(3,597 - 4,755) | 3,599<br>(2,991 - 4,257) | 4,576<br>(4,095 - 5,139) |
| Communicable, maternal, neonatal, and nutritional diseases        | 8,912<br>(7,883 - 10,103)   | 3,535<br>(2,734 - 4,357) | 383<br>(310 - 478)  | 2,814<br>(2,311 - 3,424) | 1,065<br>(818 - 1,309)   | 1,116<br>(812 - 1,442)   |
| HIV/AIDS and tuberculosis                                         | 2,667<br>(1,978 - 3,559)    | 188<br>(150 - 230)       | 182<br>(148 - 219)  | 1,793<br>(1,249 - 2,585) | 396<br>(271 - 509)       | 109<br>(53 - 153)        |
| Tuberculosis                                                      | 354<br>(179 - 488)          | 13<br>(6 - 22)           | 3<br>(2 - 6)        | 120<br>(72 - 184)        | 135<br>(57 - 194)        | 82<br>(32 - 123)         |
| HIV/AIDS                                                          | 2,314<br>(1,656 - 3,222)    | 175<br>(139 - 217)       | 178<br>(144 - 215)  | 1,673<br>(1,123 - 2,476) | 261<br>(175 - 365)       | 27<br>(14 - 44)          |
| HIV/AIDS resulting in mycobacterial infection                     | 120<br>(83 - 172)           | 8<br>(6 - 12)            | 8<br>(6 - 11)       | 87<br>(56 - 132)         | 14<br>(9 - 21)           | 2<br>(1 - 3)             |
| HIV/AIDS resulting in other diseases                              | 2,194<br>(1,578 - 3,079)    | 166<br>(132 - 207)       | 170<br>(138 - 206)  | 1,586<br>(1,058 - 2,355) | 247<br>(165 - 345)       | 25<br>(13 - 41)          |
| Diarrhea, lower respiratory, and other common infectious diseases | 3,035<br>(2,231 - 3,909)    | 1,442<br>(827 - 2,111)   | 116<br>(75 - 174)   | 287<br>(195 - 416)       | 442<br>(302 - 611)       | 747<br>(496 - 1,034)     |
| Diarrheal diseases                                                | 717<br>(446 - 1,126)        | 244<br>(69 - 601)        | 20<br>(8 - 39)      | 92<br>(49 - 153)         | 150<br>(75 - 266)        | 212<br>(105 - 387)       |
| Intestinal infectious diseases                                    | 95<br>(46 - 173)            | 42<br>(16 - 79)          | 22<br>(10 - 42)     | 25<br>(11 - 48)          | 5<br>(2 - 10)            | 2<br>(1 - 4)             |
| Typhoid fever                                                     | 69<br>(33 - 128)            | 29<br>(11 - 57)          | 16<br>(7 - 33)      | 19<br>(8 - 37)           | 4<br>(2 - 7)             | 1<br>(1 - 3)             |
| Paratyphoid fever                                                 | 21<br>(9 - 41)              | 10<br>(3 - 20)           | 5<br>(2 - 11)       | 5<br>(2 - 11)            | 1<br>(0 - 2)             | 0<br>(0 - 1)             |
| Other intestinal infectious diseases                              | 5<br>(1 - 11)               | 3<br>(0 - 9)             | 0<br>(0 - 2)        | 1<br>(0 - 4)             | 0<br>(0 - 2)             | 0<br>(0 - 2)             |
| Lower respiratory infections                                      | 1,597<br>(1,006 - 2,243)    | 688<br>(313 - 1,210)     | 26<br>(13 - 44)     | 115<br>(70 - 176)        | 255<br>(147 - 392)       | 514<br>(294 - 770)       |
| Upper respiratory infections                                      | 2<br>(1 - 3)                | 1<br>(0 - 2)             | 0<br>(0 - 0)        | 0<br>(0 - 1)             | 0<br>(0 - 1)             | 0<br>(0 - 1)             |
| Otitis media                                                      | 1<br>(1 - 2)                | 1<br>(0 - 1)             | 0<br>(0 - 0)        | 0<br>(0 - 0)             | 0<br>(0 - 0)             | 0<br>(0 - 0)             |
| Meningitis                                                        | 180<br>(108 - 266)          | 75<br>(31 - 133)         | 13<br>(6 - 23)      | 45<br>(26 - 77)          | 30<br>(16 - 49)          | 18<br>(9 - 31)           |
| Pneumococcal meningitis                                           | 59<br>(37 - 86)             | 19<br>(8 - 36)           | 5<br>(3 - 9)        | 17<br>(9 - 30)           | 11<br>(5 - 19)           | 7<br>(3 - 12)            |
| H influenzae type B meningitis                                    | 44<br>(24 - 72)             | 30<br>(12 - 56)          | 3<br>(2 - 6)        | 6<br>(3 - 10)            | 3<br>(1 - 6)             | 2<br>(1 - 3)             |
| Meningococcal meningitis                                          | 27<br>(16 - 40)             | 9<br>(4 - 18)            | 1<br>(1 - 3)        | 7<br>(3 - 14)            | 5<br>(2 - 9)             | 3<br>(2 - 6)             |
| Other meningitis                                                  | 50<br>(27 - 79)             | 16<br>(6 - 30)           | 3<br>(1 - 6)        | 15<br>(7 - 27)           | 10<br>(4 - 20)           | 6<br>(3 - 11)            |
| Encephalitis                                                      | 16<br>(10 - 25)             | 8<br>(4 - 16)            | 1<br>(1 - 3)        | 4<br>(2 - 7)             | 2<br>(1 - 3)             | 1<br>(0 - 2)             |
| Diphtheria                                                        | 1<br>(0 - 5)                | 1<br>(0 - 5)             | 0<br>(0 - 1)        | 0<br>(0 - 0)             | 0<br>(0 - 0)             | 0<br>(0 - 0)             |
| Whooping cough                                                    | 9<br>(0 - 47)               | 9<br>(0 - 44)            | 0<br>(0 - 2)        | 0<br>(0 - 0)             | 0<br>(0 - 0)             | 0<br>(0 - 0)             |
| Tetanus                                                           | 2<br>(1 - 5)                | 1<br>(0 - 4)             | 0<br>(0 - 0)        | 0<br>(0 - 1)             | 0<br>(0 - 1)             | 0<br>(0 - 0)             |
| Measles                                                           | 413<br>(156 - 811)          | 373<br>(138 - 734)       | 34<br>(12 - 76)     | 5<br>(2 - 12)            | 0<br>(0 - 0)             | 0<br>(0 - 0)             |
| Varicella and herpes zoster                                       | 1<br>(0 - 4)                | 1<br>(0 - 2)             | 0<br>(0 - 0)        | 0<br>(0 - 1)             | 0<br>(0 - 0)             | 0<br>(0 - 2)             |
| Neglected tropical diseases and malaria                           | 1,042<br>(354 - 2,165)      | 549<br>(164 - 1,574)     | 69<br>(13 - 172)    | 174<br>(38 - 374)        | 142<br>(27 - 301)        | 108<br>(14 - 253)        |
| Malaria                                                           | 991<br>(298 - 2,116)        | 536<br>(150 - 1,568)     | 64<br>(8 - 169)     | 154<br>(20 - 352)        | 133<br>(18 - 291)        | 104<br>(10 - 248)        |
| Leishmaniasis                                                     | 6<br>(3 - 10)               | 2<br>(1 - 5)             | 1<br>(0 - 1)        | 2<br>(1 - 4)             | 1<br>(0 - 2)             | 0<br>(0 - 1)             |
| Visceral leishmaniasis                                            | 6<br>(3 - 10)               | 2<br>(1 - 5)             | 1<br>(0 - 1)        | 2<br>(1 - 4)             | 1<br>(0 - 2)             | 0<br>(0 - 1)             |
| African trypanosomiasis                                           | 16<br>(8 - 26)              | 1<br>(0 - 2)             | 1<br>(1 - 2)        | 10<br>(5 - 16)           | 3<br>(2 - 5)             | 1<br>(0 - 1)             |
| Schistosomiasis                                                   | 8<br>(6 - 12)               | 0<br>(0 - 0)             | 0<br>(0 - 0)        | 3<br>(2 - 5)             | 3<br>(2 - 6)             | 2<br>(1 - 3)             |
| Cysticercosis                                                     | 1<br>(0 - 1)                | 0<br>(0 - 0)             | 0<br>(0 - 0)        | 0<br>(0 - 0)             | 0<br>(0 - 0)             | 0<br>(0 - 0)             |
| Cystic echinococcosis                                             | 1<br>(1 - 1)                | 0<br>(0 - 0)             | 0<br>(0 - 0)        | 0<br>(0 - 1)             | 0<br>(0 - 0)             | 0<br>(0 - 0)             |
| Dengue                                                            | 1<br>(0 - 1)                | 0<br>(0 - 0)             | 0<br>(0 - 0)        | 0<br>(0 - 0)             | 0<br>(0 - 0)             | 0<br>(0 - 0)             |
| Yellow fever                                                      | 2<br>(1 - 4)                | 0<br>(0 - 1)             | 0<br>(0 - 1)        | 1<br>(0 - 2)             | 0<br>(0 - 1)             | 0<br>(0 - 0)             |
| Rabies                                                            | 3<br>(1 - 5)                | 1<br>(0 - 1)             | 1<br>(0 - 1)        | 1<br>(0 - 2)             | 0<br>(0 - 1)             | 0<br>(0 - 0)             |
| Intestinal nematode infections                                    | 6<br>(1 - 17)               | 5<br>(1 - 14)            | 1<br>(0 - 5)        | 0<br>(0 - 3)             | 0<br>(0 - 3)             | 0<br>(0 - 2)             |
| Ascariasis                                                        | 6<br>(1 - 17)               | 5<br>(1 - 14)            | 1<br>(0 - 5)        | 0<br>(0 - 3)             | 0<br>(0 - 3)             | 0<br>(0 - 2)             |

Web Table 31- Congo deaths with 95% UI by age, sex, and cause in 2013

| Cause                                                            | Females, All Ages        | Females, 0-4 Years     | Females, 5-14 Years | Females, 15-49 Years | Females, 50-69 Years     | Females, 70-80 Years     |
|------------------------------------------------------------------|--------------------------|------------------------|---------------------|----------------------|--------------------------|--------------------------|
| Other neglected tropical diseases                                | 7<br>(3 - 13)            | 3<br>(1 - 7)           | 0<br>(0 - 1)        | 2<br>(1 - 4)         | 1<br>(0 - 2)             | 1<br>(0 - 2)             |
| Maternal disorders                                               | 494<br>(326 - 735)       | --                     | 1<br>(0 - 2)        | 493<br>(326 - 734)   | --                       | --                       |
| Maternal hemorrhage                                              | 72<br>(42 - 113)         | --                     | 0<br>(0 - 0)        | 72<br>(42 - 113)     | --                       | --                       |
| Maternal sepsis and other maternal infections                    | 44<br>(26 - 67)          | --                     | 0<br>(0 - 0)        | 44<br>(26 - 67)      | --                       | --                       |
| Maternal hypertensive disorders                                  | 54<br>(31 - 84)          | --                     | 0<br>(0 - 0)        | 53<br>(31 - 84)      | --                       | --                       |
| Maternal obstructed labor                                        | 28<br>(17 - 45)          | --                     | 0<br>(0 - 0)        | 28<br>(17 - 45)      | --                       | --                       |
| Maternal abortive outcome                                        | 85<br>(52 - 133)         | --                     | 0<br>(0 - 0)        | 85<br>(52 - 133)     | --                       | --                       |
| Indirect maternal deaths                                         | 39<br>(22 - 62)          | --                     | 0<br>(0 - 0)        | 39<br>(22 - 62)      | --                       | --                       |
| Late maternal deaths                                             | 75<br>(40 - 126)         | --                     | 0<br>(0 - 1)        | 74<br>(40 - 126)     | --                       | --                       |
| Maternal deaths aggravated by HIV/AIDS                           | 6<br>(3 - 9)             | --                     | --                  | 6<br>(3 - 9)         | --                       | --                       |
| Other maternal disorders                                         | 91<br>(54 - 137)         | --                     | 0<br>(0 - 0)        | 91<br>(54 - 137)     | --                       | --                       |
| Neonatal disorders                                               | 1,052<br>(619 - 1,556)   | 1,052<br>(619 - 1,556) | --                  | --                   | --                       | --                       |
| Neonatal preterm birth complications                             | 362<br>(142 - 669)       | 362<br>(142 - 669)     | --                  | --                   | --                       | --                       |
| Neonatal encephalopathy due to birth asphyxia and trauma         | 324<br>(119 - 647)       | 324<br>(119 - 647)     | --                  | --                   | --                       | --                       |
| Neonatal sepsis and other neonatal infections                    | 188<br>(65 - 408)        | 188<br>(65 - 408)      | --                  | --                   | --                       | --                       |
| Hemolytic disease and other neonatal jaundice                    | 4<br>(1 - 11)            | 4<br>(1 - 11)          | --                  | --                   | --                       | --                       |
| Other neonatal disorders                                         | 174<br>(66 - 355)        | 174<br>(66 - 355)      | --                  | --                   | --                       | --                       |
| Nutritional deficiencies                                         | 477<br>(283 - 694)       | 215<br>(85 - 386)      | 10<br>(5 - 17)      | 45<br>(28 - 71)      | 67<br>(41 - 101)         | 141<br>(74 - 217)        |
| Protein-energy malnutrition                                      | 357<br>(179 - 563)       | 198<br>(78 - 361)      | 8<br>(4 - 14)       | 14<br>(5 - 28)       | 41<br>(17 - 68)          | 95<br>(34 - 169)         |
| Iodine deficiency                                                | 2<br>(0 - 9)             | 1<br>(0 - 7)           | 0<br>(0 - 0)        | 0<br>(0 - 2)         | 0<br>(0 - 3)             | 1<br>(0 - 3)             |
| Iron-deficiency anemia                                           | 113<br>(53 - 202)        | 15<br>(2 - 54)         | 2<br>(0 - 4)        | 29<br>(14 - 49)      | 24<br>(10 - 46)          | 43<br>(16 - 85)          |
| Other nutritional deficiencies                                   | 5<br>(2 - 11)            | 1<br>(0 - 5)           | 0<br>(0 - 0)        | 1<br>(0 - 2)         | 1<br>(0 - 2)             | 2<br>(1 - 4)             |
| Other communicable, maternal, neonatal, and nutritional diseases | 144<br>(76 - 239)        | 88<br>(25 - 179)       | 6<br>(2 - 11)       | 22<br>(12 - 33)      | 17<br>(9 - 31)           | 11<br>(5 - 23)           |
| Sexually transmitted diseases excluding HIV                      | 73<br>(12 - 161)         | 59<br>(0 - 142)        | 3<br>(0 - 6)        | 6<br>(2 - 11)        | 3<br>(1 - 9)             | 2<br>(1 - 6)             |
| Syphilis                                                         | 67<br>(7 - 156)          | 59<br>(0 - 142)        | 3<br>(0 - 6)        | 2<br>(1 - 5)         | 2<br>(1 - 5)             | 2<br>(1 - 4)             |
| Chlamydial infection                                             | 2<br>(1 - 3)             | --                     | 0<br>(0 - 0)        | 1<br>(0 - 2)         | 0<br>(0 - 1)             | 0<br>(0 - 0)             |
| Gonococcal infection                                             | 2<br>(1 - 4)             | --                     | 0<br>(0 - 0)        | 1<br>(0 - 2)         | 1<br>(0 - 2)             | 0<br>(0 - 1)             |
| Other sexually transmitted diseases                              | 2<br>(1 - 3)             | --                     | 0<br>(0 - 0)        | 1<br>(0 - 2)         | 0<br>(0 - 1)             | 0<br>(0 - 0)             |
| Hepatitis                                                        | 16<br>(10 - 37)          | 3<br>(1 - 7)           | 1<br>(0 - 2)        | 6<br>(3 - 12)        | 4<br>(2 - 12)            | 2<br>(1 - 7)             |
| Acute hepatitis A                                                | 2<br>(0 - 4)             | 1<br>(0 - 3)           | 0<br>(0 - 1)        | 0<br>(0 - 1)         | 0<br>(0 - 0)             | 0<br>(0 - 0)             |
| Acute hepatitis B                                                | 9<br>(5 - 22)            | 2<br>(1 - 5)           | 0<br>(0 - 1)        | 2<br>(1 - 4)         | 3<br>(2 - 9)             | 2<br>(1 - 6)             |
| Acute hepatitis C                                                | 1<br>(0 - 2)             | --                     | 0<br>(0 - 0)        | 0<br>(0 - 1)         | 0<br>(0 - 1)             | 0<br>(0 - 1)             |
| Acute hepatitis E                                                | 5<br>(3 - 10)            | 0<br>(0 - 0)           | 0<br>(0 - 1)        | 4<br>(2 - 8)         | 1<br>(0 - 2)             | 0<br>(0 - 0)             |
| Other infectious diseases                                        | 56<br>(20 - 102)         | 26<br>(7 - 67)         | 2<br>(1 - 6)        | 10<br>(3 - 19)       | 10<br>(3 - 21)           | 7<br>(2 - 18)            |
| Non-communicable diseases                                        | 7,653<br>(6,385 - 9,084) | 834<br>(459 - 1,430)   | 81<br>(55 - 113)    | 992<br>(716 - 1,336) | 2,396<br>(1,899 - 2,913) | 3,349<br>(2,901 - 3,875) |
| Neoplasms                                                        | 1,156<br>(923 - 1,428)   | 19<br>(10 - 31)        | 12<br>(8 - 18)      | 262<br>(192 - 356)   | 536<br>(415 - 669)       | 327<br>(266 - 404)       |
| Esophageal cancer                                                | 31<br>(19 - 49)          | --                     | --                  | 2<br>(1 - 4)         | 14<br>(8 - 23)           | 14<br>(8 - 24)           |
| Stomach cancer                                                   | 82<br>(61 - 111)         | --                     | --                  | 14<br>(9 - 22)       | 38<br>(27 - 53)          | 30<br>(20 - 43)          |
| Liver cancer                                                     | 83<br>(53 - 120)         | --                     | 0<br>(0 - 1)        | 12<br>(6 - 22)       | 41<br>(24 - 64)          | 30<br>(18 - 44)          |
| Liver cancer due to hepatitis B                                  | 22<br>(8 - 37)           | --                     | 0<br>(0 - 0)        | 5<br>(2 - 9)         | 11<br>(4 - 20)           | 6<br>(2 - 11)            |

Web Table 31- Congo deaths with 95% UI by age, sex, and cause in 2013

| Cause                                | Females, All Ages        | Females, 0-4 Years | Females, 5-14 Years | Females, 15-49 Years | Females, 50-69 Years   | Females, 70-80 Years     |
|--------------------------------------|--------------------------|--------------------|---------------------|----------------------|------------------------|--------------------------|
| Liver cancer due to hepatitis C      | 31<br>(14 - 53)          | --                 | 0<br>(0 - 0)        | 3<br>(1 - 7)         | 15<br>(6 - 29)         | 12<br>(5 - 22)           |
| Liver cancer due to alcohol use      | 10<br>(5 - 17)           | --                 | --                  | 1<br>(0 - 1)         | 4<br>(2 - 8)           | 5<br>(2 - 10)            |
| Liver cancer due to other causes     | 20<br>(10 - 32)          | --                 | 0<br>(0 - 0)        | 4<br>(2 - 7)         | 10<br>(4 - 17)         | 6<br>(3 - 11)            |
| Larynx cancer                        | 3<br>(1 - 5)             | --                 | --                  | 0<br>(0 - 1)         | 2<br>(1 - 3)           | 1<br>(0 - 1)             |
| Tracheal, bronchus and lung cancer   | 55<br>(40 - 81)          | --                 | --                  | 7<br>(5 - 10)        | 29<br>(21 - 43)        | 19<br>(12 - 33)          |
| Breast cancer                        | 199<br>(149 - 257)       | --                 | --                  | 57<br>(40 - 82)      | 101<br>(71 - 135)      | 41<br>(25 - 55)          |
| Cervical cancer                      | 232<br>(171 - 306)       | --                 | --                  | 80<br>(53 - 114)     | 111<br>(79 - 153)      | 41<br>(28 - 57)          |
| Uterine cancer                       | 21<br>(13 - 31)          | --                 | --                  | 3<br>(1 - 4)         | 12<br>(7 - 19)         | 6<br>(4 - 11)            |
| Prostate cancer                      | --                       | --                 | --                  | --                   | --                     | --                       |
| Colon and rectum cancer              | 93<br>(72 - 117)         | --                 | --                  | 12<br>(8 - 17)       | 41<br>(31 - 54)        | 40<br>(31 - 53)          |
| Lip and oral cavity cancer           | 13<br>(7 - 21)           | --                 | --                  | 3<br>(1 - 6)         | 6<br>(3 - 11)          | 4<br>(2 - 6)             |
| Nasopharynx cancer                   | 4<br>(2 - 5)             | --                 | 0<br>(0 - 0)        | 1<br>(1 - 2)         | 2<br>(1 - 3)           | 1<br>(0 - 1)             |
| Other pharynx cancer                 | 4<br>(2 - 6)             | --                 | --                  | 1<br>(0 - 1)         | 2<br>(1 - 3)           | 1<br>(1 - 1)             |
| Gallbladder and biliary tract cancer | 29<br>(16 - 46)          | --                 | --                  | 2<br>(1 - 4)         | 15<br>(8 - 25)         | 12<br>(6 - 21)           |
| Pancreatic cancer                    | 31<br>(24 - 39)          | --                 | --                  | 3<br>(2 - 4)         | 15<br>(11 - 20)        | 14<br>(10 - 18)          |
| Malignant skin melanoma              | 6<br>(4 - 8)             | --                 | --                  | 1<br>(1 - 2)         | 3<br>(2 - 4)           | 2<br>(1 - 3)             |
| Non-melanoma skin cancer             | 6<br>(4 - 9)             | --                 | --                  | 1<br>(0 - 2)         | 2<br>(1 - 3)           | 3<br>(2 - 6)             |
| Ovarian cancer                       | 40<br>(26 - 55)          | --                 | --                  | 9<br>(5 - 16)        | 22<br>(14 - 32)        | 9<br>(6 - 12)            |
| Testicular cancer                    | --                       | --                 | --                  | --                   | --                     | --                       |
| Kidney cancer                        | 13<br>(9 - 18)           | 1<br>(0 - 2)       | 0<br>(0 - 1)        | 2<br>(1 - 3)         | 6<br>(4 - 9)           | 3<br>(2 - 6)             |
| Bladder cancer                       | 17<br>(11 - 24)          | --                 | --                  | 2<br>(1 - 3)         | 7<br>(4 - 11)          | 8<br>(5 - 12)            |
| Brain and nervous system cancer      | 18<br>(14 - 23)          | 1<br>(0 - 3)       | 1<br>(1 - 2)        | 6<br>(4 - 8)         | 7<br>(4 - 9)           | 3<br>(2 - 5)             |
| Thyroid cancer                       | 6<br>(4 - 8)             | --                 | 0<br>(0 - 0)        | 1<br>(0 - 1)         | 3<br>(2 - 4)           | 2<br>(1 - 4)             |
| Mesothelioma                         | 1<br>(1 - 2)             | --                 | --                  | 0<br>(0 - 0)         | 0<br>(0 - 1)           | 0<br>(0 - 0)             |
| Hodgkin lymphoma                     | 5<br>(3 - 8)             | 0<br>(0 - 1)       | 0<br>(0 - 1)        | 3<br>(1 - 5)         | 1<br>(1 - 2)           | 1<br>(0 - 1)             |
| Non-Hodgkin lymphoma                 | 41<br>(27 - 57)          | 2<br>(1 - 4)       | 1<br>(1 - 2)        | 11<br>(7 - 16)       | 16<br>(10 - 24)        | 11<br>(6 - 18)           |
| Multiple myeloma                     | 10<br>(7 - 14)           | --                 | --                  | 1<br>(1 - 2)         | 6<br>(4 - 8)           | 4<br>(3 - 5)             |
| Leukemia                             | 22<br>(17 - 28)          | 2<br>(1 - 5)       | 3<br>(1 - 4)        | 7<br>(5 - 9)         | 6<br>(4 - 8)           | 5<br>(3 - 6)             |
| Other neoplasms                      | 92<br>(70 - 125)         | 12<br>(6 - 21)     | 5<br>(3 - 9)        | 22<br>(14 - 36)      | 30<br>(20 - 44)        | 23<br>(14 - 34)          |
| Cardiovascular diseases              | 3,639<br>(2,918 - 4,509) | 41<br>(21 - 67)    | 10<br>(6 - 16)      | 315<br>(198 - 465)   | 1,155<br>(858 - 1,491) | 2,118<br>(1,761 - 2,556) |
| Rheumatic heart disease              | 85<br>(58 - 128)         | 1<br>(0 - 2)       | 1<br>(1 - 2)        | 26<br>(16 - 43)      | 31<br>(19 - 48)        | 26<br>(17 - 41)          |
| Ischemic heart disease               | 814<br>(556 - 1,116)     | 1<br>(0 - 3)       | 0<br>(0 - 1)        | 47<br>(24 - 75)      | 244<br>(158 - 345)     | 521<br>(350 - 720)       |
| Cerebrovascular disease              | 1,963<br>(1,465 - 2,642) | 9<br>(4 - 21)      | 3<br>(2 - 6)        | 144<br>(88 - 237)    | 621<br>(432 - 864)     | 1,185<br>(898 - 1,570)   |
| Ischemic stroke                      | 933<br>(682 - 1,219)     | 1<br>(0 - 3)       | 0<br>(0 - 1)        | 21<br>(8 - 42)       | 200<br>(124 - 291)     | 709<br>(525 - 924)       |
| Hemorrhagic stroke                   | 1,030<br>(710 - 1,561)   | 8<br>(3 - 18)      | 3<br>(2 - 5)        | 123<br>(76 - 212)    | 421<br>(281 - 619)     | 475<br>(304 - 751)       |
| Hypertensive heart disease           | 296<br>(164 - 526)       | 1<br>(0 - 1)       | 0<br>(0 - 0)        | 17<br>(8 - 27)       | 84<br>(41 - 133)       | 194<br>(105 - 378)       |
| Cardiomyopathy and myocarditis       | 144<br>(96 - 228)        | 18<br>(7 - 34)     | 3<br>(1 - 5)        | 32<br>(14 - 56)      | 43<br>(26 - 71)        | 49<br>(27 - 95)          |
| Atrial fibrillation and flutter      | 2<br>(1 - 3)             | --                 | --                  | 0<br>(0 - 0)         | 0<br>(0 - 1)           | 1<br>(1 - 2)             |
| Aortic aneurysm                      | 23<br>(12 - 35)          | --                 | --                  | 3<br>(1 - 5)         | 8<br>(4 - 12)          | 12<br>(7 - 19)           |
| Peripheral vascular disease          | 2<br>(1 - 3)             | --                 | --                  | 0<br>(0 - 0)         | 1<br>(0 - 1)           | 1<br>(1 - 2)             |



Web Table 31- Congo deaths with 95% UI by age, sex, and cause in 2013

| Cause                                               | Females, All Ages  | Females, 0-4 Years | Females, 5-14 Years | Females, 15-49 Years | Females, 50-69 Years | Females, 70-80 Years |
|-----------------------------------------------------|--------------------|--------------------|---------------------|----------------------|----------------------|----------------------|
| Endocarditis                                        | 23<br>(13 - 34)    | 2<br>(1 - 4)       | 0<br>(0 - 1)        | 5<br>(2 - 8)         | 6<br>(3 - 9)         | 10<br>(5 - 17)       |
| Other cardiovascular and circulatory diseases       | 287<br>(181 - 412) | 9<br>(3 - 17)      | 2<br>(1 - 3)        | 41<br>(20 - 65)      | 117<br>(72 - 178)    | 118<br>(72 - 180)    |
| Chronic respiratory diseases                        | 542<br>(411 - 776) | 26<br>(13 - 46)    | 4<br>(2 - 6)        | 63<br>(40 - 93)      | 171<br>(120 - 248)   | 278<br>(203 - 410)   |
| Chronic obstructive pulmonary disease               | 375<br>(271 - 551) | 12<br>(6 - 23)     | 1<br>(1 - 2)        | 27<br>(15 - 45)      | 120<br>(80 - 186)    | 214<br>(154 - 325)   |
| Pneumoconiosis                                      | 2<br>(1 - 3)       | 0<br>(0 - 0)       | 0<br>(0 - 0)        | 1<br>(0 - 1)         | 0<br>(0 - 1)         | 0<br>(0 - 1)         |
| Silicosis                                           | 0<br>(0 - 0)       | 0<br>(0 - 0)       | 0<br>(0 - 0)        | 0<br>(0 - 0)         | 0<br>(0 - 0)         | 0<br>(0 - 0)         |
| Asbestosis                                          | 0<br>(0 - 0)       | 0<br>(0 - 0)       | 0<br>(0 - 0)        | 0<br>(0 - 0)         | 0<br>(0 - 0)         | 0<br>(0 - 0)         |
| Coal workers pneumoconiosis                         | 0<br>(0 - 0)       | 0<br>(0 - 0)       | 0<br>(0 - 0)        | 0<br>(0 - 0)         | 0<br>(0 - 0)         | 0<br>(0 - 0)         |
| Other pneumoconiosis                                | 1<br>(1 - 2)       | 0<br>(0 - 0)       | 0<br>(0 - 0)        | 0<br>(0 - 1)         | 0<br>(0 - 1)         | 0<br>(0 - 1)         |
| Asthma                                              | 123<br>(64 - 212)  | 7<br>(3 - 16)      | 2<br>(1 - 3)        | 29<br>(13 - 48)      | 41<br>(19 - 74)      | 44<br>(21 - 90)      |
| Interstitial lung disease and pulmonary sarcoidosis | 25<br>(4 - 51)     | 0<br>(0 - 1)       | 0<br>(0 - 0)        | 2<br>(0 - 6)         | 7<br>(1 - 15)        | 15<br>(2 - 33)       |
| Other chronic respiratory diseases                  | 18<br>(10 - 31)    | 6<br>(3 - 13)      | 0<br>(0 - 1)        | 4<br>(2 - 7)         | 2<br>(1 - 5)         | 5<br>(2 - 10)        |
| Cirrhosis                                           | 250<br>(192 - 318) | 3<br>(1 - 7)       | 2<br>(1 - 3)        | 50<br>(34 - 70)      | 120<br>(86 - 162)    | 75<br>(54 - 104)     |
| Cirrhosis due to hepatitis B                        | 60<br>(28 - 102)   | 0<br>(0 - 0)       | 0<br>(0 - 0)        | 10<br>(4 - 17)       | 29<br>(13 - 50)      | 21<br>(8 - 38)       |
| Cirrhosis due to hepatitis C                        | 86<br>(43 - 127)   | 0<br>(0 - 1)       | 1<br>(0 - 1)        | 22<br>(12 - 35)      | 44<br>(21 - 68)      | 19<br>(7 - 32)       |
| Cirrhosis due to alcohol use                        | 70<br>(41 - 105)   | --                 | --                  | 8<br>(4 - 14)        | 33<br>(19 - 52)      | 29<br>(16 - 45)      |
| Cirrhosis due to other causes                       | 35<br>(20 - 57)    | 3<br>(1 - 6)       | 1<br>(1 - 2)        | 10<br>(5 - 17)       | 14<br>(6 - 25)       | 7<br>(3 - 12)        |
| Digestive diseases                                  | 354<br>(260 - 468) | 15<br>(7 - 27)     | 5<br>(3 - 8)        | 71<br>(47 - 106)     | 117<br>(81 - 163)    | 145<br>(103 - 202)   |
| Peptic ulcer disease                                | 73<br>(45 - 115)   | 1<br>(0 - 2)       | 0<br>(0 - 1)        | 12<br>(7 - 20)       | 27<br>(15 - 44)      | 33<br>(18 - 54)      |
| Gastritis and duodenitis                            | 16<br>(6 - 37)     | 1<br>(0 - 2)       | 0<br>(0 - 1)        | 4<br>(2 - 8)         | 5<br>(2 - 11)        | 6<br>(2 - 19)        |
| Appendicitis                                        | 20<br>(11 - 32)    | 2<br>(0 - 4)       | 1<br>(0 - 2)        | 7<br>(4 - 12)        | 6<br>(3 - 10)        | 5<br>(2 - 8)         |
| Paralytic ileus and intestinal obstruction          | 106<br>(60 - 161)  | 5<br>(2 - 10)      | 2<br>(1 - 3)        | 15<br>(8 - 25)       | 32<br>(17 - 51)      | 53<br>(29 - 82)      |
| Inguinal, femoral, and abdominal hernia             | 4<br>(2 - 8)       | 0<br>(0 - 0)       | 0<br>(0 - 0)        | 1<br>(0 - 1)         | 1<br>(1 - 2)         | 2<br>(1 - 5)         |
| Inflammatory bowel disease                          | 30<br>(18 - 50)    | 4<br>(1 - 8)       | 1<br>(0 - 1)        | 9<br>(5 - 16)        | 8<br>(4 - 15)        | 8<br>(4 - 15)        |
| Vascular intestinal disorders                       | 4<br>(2 - 10)      | 0<br>(0 - 0)       | 0<br>(0 - 0)        | 1<br>(0 - 1)         | 1<br>(1 - 3)         | 2<br>(1 - 6)         |
| Gallbladder and biliary diseases                    | 37<br>(23 - 56)    | 0<br>(0 - 1)       | 0<br>(0 - 0)        | 7<br>(4 - 11)        | 14<br>(8 - 23)       | 15<br>(8 - 26)       |
| Pancreatitis                                        | 21<br>(12 - 33)    | 0<br>(0 - 1)       | 0<br>(0 - 0)        | 7<br>(3 - 11)        | 8<br>(4 - 13)        | 6<br>(3 - 11)        |
| Other digestive diseases                            | 43<br>(28 - 62)    | 3<br>(1 - 5)       | 1<br>(0 - 1)        | 9<br>(6 - 14)        | 15<br>(8 - 24)       | 15<br>(8 - 25)       |
| Neurological disorders                              | 214<br>(162 - 268) | 14<br>(5 - 28)     | 6<br>(3 - 9)        | 37<br>(18 - 63)      | 25<br>(18 - 32)      | 132<br>(99 - 172)    |
| Alzheimer disease and other dementias               | 137<br>(103 - 176) | --                 | --                  | 0<br>(0 - 0)         | 12<br>(8 - 17)       | 125<br>(92 - 162)    |
| Parkinson disease                                   | 2<br>(1 - 3)       | --                 | --                  | 0<br>(0 - 0)         | 1<br>(1 - 2)         | 1<br>(1 - 2)         |
| Epilepsy                                            | 60<br>(34 - 93)    | 11<br>(3 - 23)     | 5<br>(2 - 8)        | 34<br>(16 - 59)      | 7<br>(4 - 11)        | 3<br>(2 - 6)         |
| Multiple sclerosis                                  | 1<br>(0 - 1)       | --                 | --                  | 0<br>(0 - 1)         | 0<br>(0 - 1)         | 0<br>(0 - 0)         |
| Other neurological disorders                        | 14<br>(10 - 17)    | 3<br>(2 - 6)       | 1<br>(0 - 1)        | 3<br>(2 - 4)         | 4<br>(3 - 6)         | 3<br>(2 - 4)         |
| Mental and substance use disorders                  | 33<br>(22 - 49)    | 3<br>(1 - 4)       | 0<br>(0 - 0)        | 19<br>(12 - 29)      | 9<br>(5 - 15)        | 2<br>(2 - 4)         |
| Schizophrenia                                       | 3<br>(1 - 6)       | --                 | --                  | 2<br>(0 - 3)         | 1<br>(0 - 2)         | 1<br>(0 - 1)         |
| Alcohol use disorders                               | 16<br>(5 - 27)     | --                 | --                  | 8<br>(3 - 15)        | 6<br>(2 - 11)        | 1<br>(0 - 2)         |
| Drug use disorders                                  | 14<br>(10 - 19)    | 3<br>(1 - 4)       | --                  | 9<br>(6 - 13)        | 2<br>(1 - 3)         | 1<br>(0 - 1)         |
| Opioid use disorders                                | 1<br>(1 - 2)       | 0<br>(0 - 1)       | --                  | 1<br>(1 - 1)         | 0<br>(0 - 0)         | 0<br>(0 - 0)         |
| Cocaine use disorders                               | 0<br>(0 - 0)       | 0<br>(0 - 0)       | --                  | 0<br>(0 - 0)         | 0<br>(0 - 0)         | 0<br>(0 - 0)         |

Web Table 31- Congo deaths with 95% UI by age, sex, and cause in 2013

| Cause                                               | Females, All Ages    | Females, 0-4 Years   | Females, 5-14 Years | Females, 15-49 Years | Females, 50-69 Years | Females, 70-80 Years |
|-----------------------------------------------------|----------------------|----------------------|---------------------|----------------------|----------------------|----------------------|
| Amphetamine use disorders                           | 0<br>(0 - 0)         | 0<br>(0 - 0)         | --                  | 0<br>(0 - 0)         | 0<br>(0 - 0)         | 0<br>(0 - 0)         |
| Other drug use disorders                            | 12<br>(9 - 17)       | 2<br>(1 - 4)         | --                  | 8<br>(5 - 11)        | 2<br>(1 - 3)         | 1<br>(0 - 1)         |
| Eating disorders                                    | 0<br>(0 - 1)         | --                   | 0<br>(0 - 0)        | 0<br>(0 - 1)         | --                   | --                   |
| Anorexia nervosa                                    | 0<br>(0 - 1)         | --                   | 0<br>(0 - 0)        | 0<br>(0 - 1)         | --                   | --                   |
| Diabetes, urogenital, blood, and endocrine diseases | 751<br>(576 - 936)   | 109<br>(56 - 176)    | 25<br>(15 - 39)     | 138<br>(94 - 197)    | 239<br>(180 - 306)   | 240<br>(182 - 306)   |
| Diabetes mellitus                                   | 278<br>(205 - 356)   | 1<br>(0 - 2)         | 0<br>(0 - 1)        | 25<br>(17 - 36)      | 127<br>(87 - 169)    | 125<br>(86 - 167)    |
| Acute glomerulonephritis                            | 3<br>(1 - 6)         | 1<br>(0 - 1)         | 0<br>(0 - 1)        | 1<br>(0 - 2)         | 1<br>(0 - 1)         | 0<br>(0 - 1)         |
| Chronic kidney disease                              | 158<br>(110 - 227)   | 7<br>(3 - 15)        | 3<br>(2 - 5)        | 29<br>(18 - 51)      | 55<br>(34 - 87)      | 64<br>(42 - 93)      |
| Chronic kidney disease due to diabetes mellitus     | 1<br>(0 - 2)         | 0<br>(0 - 0)         | 0<br>(0 - 0)        | 0<br>(0 - 0)         | 0<br>(0 - 1)         | 0<br>(0 - 1)         |
| Chronic kidney disease due to hypertension          | 76<br>(47 - 115)     | 1<br>(0 - 3)         | 0<br>(0 - 1)        | 11<br>(6 - 20)       | 28<br>(16 - 45)      | 35<br>(21 - 56)      |
| Chronic kidney disease due to glomerulonephritis    | 36<br>(21 - 55)      | 3<br>(1 - 6)         | 1<br>(1 - 2)        | 10<br>(5 - 18)       | 11<br>(6 - 19)       | 10<br>(4 - 18)       |
| Chronic kidney disease due to other causes          | 46<br>(20 - 81)      | 3<br>(1 - 8)         | 1<br>(0 - 3)        | 8<br>(3 - 18)        | 15<br>(5 - 32)       | 19<br>(7 - 36)       |
| Urinary diseases and male infertility               | 59<br>(43 - 78)      | 4<br>(2 - 9)         | 1<br>(0 - 1)        | 12<br>(7 - 19)       | 18<br>(12 - 26)      | 24<br>(15 - 38)      |
| Interstitial nephritis and urinary tract infections | 45<br>(32 - 61)      | 3<br>(1 - 6)         | 0<br>(0 - 1)        | 8<br>(5 - 13)        | 14<br>(9 - 21)       | 20<br>(12 - 32)      |
| Urolithiasis                                        | 3<br>(2 - 6)         | --                   | 0<br>(0 - 0)        | 1<br>(0 - 2)         | 1<br>(0 - 3)         | 1<br>(0 - 2)         |
| Other urinary diseases                              | 10<br>(7 - 16)       | 1<br>(1 - 3)         | 0<br>(0 - 0)        | 3<br>(1 - 5)         | 3<br>(2 - 5)         | 3<br>(1 - 6)         |
| Gynecological diseases                              | 3<br>(1 - 9)         | --                   | --                  | 2<br>(1 - 6)         | 1<br>(0 - 2)         | 0<br>(0 - 1)         |
| Uterine fibroids                                    | 1<br>(0 - 2)         | --                   | --                  | 0<br>(0 - 1)         | 0<br>(0 - 1)         | 0<br>(0 - 0)         |
| Polycystic ovarian syndrome                         | 0<br>(0 - 0)         | --                   | --                  | 0<br>(0 - 0)         | 0<br>(0 - 0)         | --                   |
| Endometriosis                                       | 0<br>(0 - 1)         | --                   | --                  | 0<br>(0 - 1)         | 0<br>(0 - 0)         | 0                    |
| Genital prolapse                                    | 0<br>(0 - 1)         | --                   | --                  | 0<br>(0 - 1)         | 0<br>(0 - 0)         | 0<br>(0 - 0)         |
| Other gynecological diseases                        | 1<br>(1 - 4)         | --                   | --                  | 1<br>(0 - 3)         | 0<br>(0 - 1)         | 0<br>(0 - 0)         |
| Hemoglobinopathies and hemolytic anemias            | 134<br>(69 - 217)    | 57<br>(24 - 109)     | 16<br>(8 - 28)      | 43<br>(21 - 74)      | 14<br>(8 - 22)       | 5<br>(3 - 8)         |
| Thalassemias                                        | 0<br>(0 - 0)         | 0<br>(0 - 0)         | 0<br>(0 - 0)        | 0<br>(0 - 0)         | 0<br>(0 - 0)         | 0<br>(0 - 0)         |
| Sickle cell disorders                               | 125<br>(64 - 203)    | 55<br>(23 - 104)     | 16<br>(8 - 28)      | 42<br>(20 - 73)      | 13<br>(7 - 20)       | 1<br>(0 - 1)         |
| G6PD deficiency                                     | 1<br>(0 - 1)         | 0<br>(0 - 1)         | 0<br>(0 - 0)        | 0<br>(0 - 0)         | 0<br>(0 - 0)         | 0<br>(0 - 0)         |
| Other hemoglobinopathies and hemolytic anemias      | 8<br>(5 - 13)        | 2<br>(1 - 5)         | 0<br>(0 - 0)        | 0<br>(0 - 1)         | 1<br>(0 - 2)         | 4<br>(2 - 7)         |
| Endocrine, metabolic, blood, and immune disorders   | 115<br>(63 - 162)    | 38<br>(17 - 67)      | 4<br>(2 - 8)        | 26<br>(14 - 39)      | 25<br>(13 - 39)      | 22<br>(9 - 39)       |
| Musculoskeletal disorders                           | 23<br>(15 - 33)      | --                   | 1<br>(1 - 1)        | 10<br>(6 - 17)       | 7<br>(4 - 11)        | 5<br>(3 - 9)         |
| Rheumatoid arthritis                                | 6<br>(4 - 10)        | --                   | 0<br>(0 - 0)        | 1<br>(0 - 2)         | 3<br>(1 - 4)         | 2<br>(1 - 5)         |
| Other musculoskeletal disorders                     | 17<br>(11 - 25)      | --                   | 1<br>(0 - 1)        | 9<br>(5 - 15)        | 4<br>(3 - 7)         | 2<br>(1 - 5)         |
| Other non-communicable diseases                     | 690<br>(349 - 1,273) | 604<br>(279 - 1,168) | 16<br>(7 - 33)      | 27<br>(13 - 53)      | 17<br>(11 - 24)      | 26<br>(16 - 41)      |
| Congenital anomalies                                | 631<br>(293 - 1,209) | 589<br>(269 - 1,151) | 15<br>(6 - 32)      | 19<br>(8 - 43)       | 5<br>(3 - 8)         | 3<br>(2 - 4)         |
| Neural tube defects                                 | 122<br>(29 - 329)    | 118<br>(27 - 322)    | 1<br>(0 - 4)        | 2<br>(1 - 5)         | 0<br>(0 - 1)         | 0<br>(0 - 0)         |
| Congenital heart anomalies                          | 286<br>(116 - 581)   | 265<br>(104 - 549)   | 8<br>(3 - 19)       | 10<br>(3 - 23)       | 2<br>(1 - 4)         | 1<br>(1 - 2)         |
| Cleft lip and cleft palate                          | 2<br>(0 - 8)         | 2<br>(0 - 8)         | --                  | --                   | --                   | --                   |
| Down syndrome                                       | 39<br>(10 - 84)      | 34<br>(8 - 76)       | 2<br>(1 - 4)        | 3<br>(1 - 6)         | 1<br>(0 - 2)         | 0<br>(0 - 0)         |
| Chromosomal unbalanced rearrangements               | 34<br>(10 - 89)      | 32<br>(9 - 87)       | 0<br>(0 - 1)        | 1<br>(0 - 2)         | 0<br>(0 - 0)         | 0<br>(0 - 0)         |
| Other congenital anomalies                          | 149<br>(57 - 335)    | 139<br>(51 - 321)    | 3<br>(1 - 8)        | 4<br>(1 - 10)        | 2<br>(1 - 3)         | 1<br>(1 - 2)         |
| Skin and subcutaneous diseases                      | 53<br>(38 - 73)      | 9<br>(4 - 18)        | 1<br>(1 - 2)        | 8<br>(4 - 12)        | 12<br>(8 - 18)       | 23<br>(13 - 38)      |

Web Table 31- Congo deaths with 95% UI by age, sex, and cause in 2013

| Cause                                           | Females, All Ages    | Females, 0-4 Years | Females, 5-14 Years | Females, 15-49 Years | Females, 50-69 Years | Females, 70-80 Years |
|-------------------------------------------------|----------------------|--------------------|---------------------|----------------------|----------------------|----------------------|
| Cellulitis                                      | 12<br>(6 - 20)       | 2<br>(1 - 5)       | 0<br>(0 - 1)        | 2<br>(1 - 3)         | 3<br>(2 - 6)         | 5<br>(2 - 9)         |
| Pyoderma                                        | 31<br>(21 - 42)      | 7<br>(2 - 13)      | 1<br>(0 - 1)        | 4<br>(2 - 7)         | 7<br>(4 - 11)        | 12<br>(7 - 20)       |
| Decubitus ulcer                                 | 7<br>(4 - 13)        | 0<br>(0 - 0)       | 0<br>(0 - 0)        | 0<br>(0 - 1)         | 1<br>(1 - 2)         | 6<br>(2 - 11)        |
| Other skin and subcutaneous diseases            | 3<br>(2 - 5)         | 1<br>(0 - 1)       | 0<br>(0 - 0)        | 1<br>(0 - 1)         | 1<br>(0 - 1)         | 1<br>(0 - 2)         |
| Sudden infant death syndrome                    | 6<br>(1 - 20)        | 6<br>(1 - 20)      | --                  | --                   | --                   | --                   |
| Injuries                                        | 876<br>(645 - 1,147) | 210<br>(112 - 326) | 61<br>(40 - 87)     | 356<br>(229 - 520)   | 138<br>(97 - 187)    | 111<br>(83 - 142)    |
| Transport injuries                              | 289<br>(147 - 497)   | 42<br>(18 - 86)    | 26<br>(13 - 44)     | 139<br>(65 - 261)    | 54<br>(26 - 85)      | 28<br>(14 - 42)      |
| Road injuries                                   | 267<br>(134 - 453)   | 37<br>(15 - 76)    | 24<br>(12 - 41)     | 129<br>(60 - 242)    | 51<br>(24 - 81)      | 26<br>(13 - 39)      |
| Pedestrian road injuries                        | 116<br>(57 - 197)    | 18<br>(6 - 39)     | 12<br>(5 - 22)      | 48<br>(22 - 91)      | 23<br>(11 - 40)      | 14<br>(7 - 23)       |
| Cyclist road injuries                           | 25<br>(12 - 46)      | 3<br>(1 - 7)       | 3<br>(1 - 5)        | 12<br>(5 - 26)       | 6<br>(3 - 11)        | 2<br>(1 - 3)         |
| Motorcyclist road injuries                      | 20<br>(9 - 46)       | 2<br>(1 - 4)       | 1<br>(0 - 2)        | 13<br>(6 - 33)       | 3<br>(1 - 6)         | 1<br>(0 - 2)         |
| Motor vehicle road injuries                     | 105<br>(50 - 184)    | 15<br>(5 - 32)     | 8<br>(3 - 16)       | 55<br>(23 - 108)     | 19<br>(8 - 33)       | 9<br>(4 - 16)        |
| Other road injuries                             | 1<br>(0 - 3)         | 0<br>(0 - 1)       | 0<br>(0 - 0)        | 0<br>(0 - 1)         | 0<br>(0 - 0)         | 0<br>(0 - 0)         |
| Other transport injuries                        | 22<br>(10 - 48)      | 5<br>(2 - 12)      | 2<br>(1 - 4)        | 10<br>(4 - 25)       | 4<br>(2 - 7)         | 1<br>(1 - 3)         |
| Unintentional injuries                          | 418<br>(270 - 555)   | 160<br>(71 - 255)  | 30<br>(18 - 47)     | 95<br>(54 - 143)     | 58<br>(40 - 78)      | 74<br>(53 - 98)      |
| Falls                                           | 72<br>(43 - 99)      | 11<br>(4 - 23)     | 2<br>(1 - 4)        | 12<br>(5 - 19)       | 13<br>(7 - 19)       | 34<br>(19 - 53)      |
| Drowning                                        | 82<br>(41 - 136)     | 43<br>(13 - 90)    | 12<br>(6 - 21)      | 18<br>(8 - 31)       | 7<br>(4 - 10)        | 3<br>(2 - 6)         |
| Fire, heat, and hot substances                  | 78<br>(35 - 124)     | 31<br>(10 - 63)    | 5<br>(2 - 11)       | 21<br>(8 - 38)       | 10<br>(5 - 16)       | 10<br>(6 - 18)       |
| Poisonings                                      | 19<br>(12 - 31)      | 6<br>(2 - 12)      | 1<br>(0 - 2)        | 8<br>(4 - 14)        | 3<br>(2 - 5)         | 2<br>(1 - 3)         |
| Exposure to mechanical forces                   | 34<br>(18 - 53)      | 15<br>(6 - 29)     | 4<br>(2 - 6)        | 10<br>(5 - 17)       | 4<br>(2 - 5)         | 2<br>(1 - 3)         |
| Unintentional firearm injuries                  | 9<br>(5 - 14)        | 2<br>(1 - 4)       | 1<br>(0 - 2)        | 4<br>(2 - 9)         | 1<br>(1 - 2)         | 0<br>(0 - 1)         |
| Unintentional suffocation                       | 6<br>(1 - 17)        | 4<br>(1 - 15)      | 0<br>(0 - 1)        | 1<br>(0 - 2)         | 0<br>(0 - 1)         | 0<br>(0 - 0)         |
| Other exposure to mechanical forces             | 19<br>(9 - 29)       | 8<br>(3 - 17)      | 3<br>(1 - 5)        | 5<br>(2 - 8)         | 2<br>(1 - 4)         | 1<br>(1 - 2)         |
| Adverse effects of medical treatment            | 57<br>(29 - 91)      | 15<br>(5 - 35)     | 2<br>(1 - 3)        | 13<br>(5 - 24)       | 13<br>(6 - 23)       | 15<br>(8 - 26)       |
| Animal contact                                  | 18<br>(9 - 41)       | 6<br>(2 - 17)      | 2<br>(1 - 4)        | 5<br>(2 - 11)        | 3<br>(1 - 7)         | 2<br>(1 - 4)         |
| Venomous animal contact                         | 13<br>(6 - 29)       | 5<br>(2 - 12)      | 2<br>(1 - 4)        | 4<br>(2 - 8)         | 2<br>(1 - 5)         | 1<br>(0 - 3)         |
| Non-venomous animal contact                     | 5<br>(2 - 13)        | 2<br>(0 - 5)       | 0<br>(0 - 1)        | 1<br>(0 - 3)         | 1<br>(0 - 2)         | 1<br>(0 - 2)         |
| Foreign body                                    | 42<br>(23 - 70)      | 29<br>(12 - 54)    | 1<br>(1 - 2)        | 4<br>(2 - 7)         | 3<br>(2 - 5)         | 5<br>(2 - 8)         |
| Pulmonary aspiration and foreign body in airway | 42<br>(22 - 69)      | 29<br>(12 - 53)    | 1<br>(1 - 2)        | 4<br>(2 - 7)         | 3<br>(2 - 5)         | 5<br>(2 - 8)         |
| Foreign body in other body part                 | 1<br>(0 - 1)         | 0<br>(0 - 1)       | 0<br>(0 - 0)        | 0<br>(0 - 0)         | 0<br>(0 - 0)         | 0<br>(0 - 0)         |
| Other unintentional injuries                    | 14<br>(7 - 21)       | 4<br>(2 - 8)       | 1<br>(0 - 2)        | 5<br>(2 - 8)         | 2<br>(1 - 4)         | 1<br>(1 - 3)         |
| Self-harm and interpersonal violence            | 169<br>(103 - 246)   | 8<br>(3 - 18)      | 4<br>(2 - 8)        | 122<br>(68 - 191)    | 26<br>(15 - 37)      | 9<br>(5 - 14)        |
| Self-harm                                       | 120<br>(68 - 181)    | --                 | 2<br>(1 - 4)        | 88<br>(45 - 143)     | 22<br>(12 - 32)      | 8<br>(4 - 13)        |
| Interpersonal violence                          | 49<br>(27 - 79)      | 8<br>(3 - 18)      | 2<br>(1 - 5)        | 33<br>(17 - 57)      | 4<br>(2 - 7)         | 1<br>(1 - 2)         |
| Assault by firearm                              | 12<br>(5 - 23)       | 1<br>(0 - 4)       | 1<br>(0 - 1)        | 9<br>(4 - 19)        | 1<br>(0 - 2)         | 0<br>(0 - 0)         |
| Assault by sharp object                         | 14<br>(6 - 26)       | 1<br>(0 - 3)       | 0<br>(0 - 1)        | 12<br>(5 - 22)       | 1<br>(0 - 2)         | 0<br>(0 - 0)         |
| Assault by other means                          | 22<br>(11 - 39)      | 6<br>(2 - 13)      | 1<br>(1 - 3)        | 13<br>(5 - 23)       | 2<br>(1 - 3)         | 1<br>(0 - 1)         |

Web Table 31- Costa Rica deaths with 95% UI by age, sex, and cause in 2013

| Cause                                                             | Both Sexes, All Ages        | Both Sexes, 0-4 Years | Both Sexes, 5-14 Years | Both Sexes, 15-49 Years  | Both Sexes, 50-69 Years  | Both Sexes, 70-80 Years     |
|-------------------------------------------------------------------|-----------------------------|-----------------------|------------------------|--------------------------|--------------------------|-----------------------------|
| All causes                                                        | 21,445<br>(20,597 - 22,275) | 768<br>(698 - 848)    | 154<br>(144 - 163)     | 2,935<br>(2,747 - 3,123) | 5,258<br>(4,954 - 5,549) | 12,331<br>(11,973 - 12,667) |
| Communicable, maternal, neonatal, and nutritional diseases        | 1,379<br>(1,262 - 1,577)    | 361<br>(318 - 407)    | 24<br>(19 - 31)        | 231<br>(203 - 258)       | 194<br>(169 - 219)       | 569<br>(475 - 747)          |
| HIV/AIDS and tuberculosis                                         | 196<br>(160 - 235)          | 0<br>(0 - 1)          | 0<br>(0 - 1)           | 111<br>(89 - 133)        | 51<br>(37 - 69)          | 33<br>(27 - 44)             |
| Tuberculosis                                                      | 67<br>(58 - 91)             | 0<br>(0 - 0)          | 0<br>(0 - 0)           | 13<br>(11 - 16)          | 23<br>(19 - 33)          | 30<br>(25 - 42)             |
| HIV/AIDS                                                          | 130<br>(95 - 167)           | 0<br>(0 - 0)          | 0<br>(0 - 0)           | 98<br>(76 - 121)         | 28<br>(16 - 46)          | 3<br>(1 - 6)                |
| HIV/AIDS resulting in mycobacterial infection                     | 7<br>(5 - 10)               | 0<br>(0 - 0)          | 0<br>(0 - 0)           | 6<br>(4 - 7)             | 2<br>(1 - 3)             | 0<br>(0 - 0)                |
| HIV/AIDS resulting in other diseases                              | 122<br>(90 - 158)           | 0<br>(0 - 0)          | 0<br>(0 - 0)           | 93<br>(72 - 114)         | 26<br>(15 - 43)          | 3<br>(1 - 5)                |
| Diarrhea, lower respiratory, and other common infectious diseases | 787<br>(693 - 960)          | 85<br>(70 - 102)      | 20<br>(15 - 27)        | 82<br>(68 - 99)          | 120<br>(102 - 137)       | 481<br>(392 - 645)          |
| Diarrheal diseases                                                | 90<br>(73 - 111)            | 19<br>(13 - 26)       | 2<br>(1 - 2)           | 5<br>(4 - 6)             | 12<br>(9 - 15)           | 53<br>(37 - 74)             |
| Intestinal infectious diseases                                    | 38<br>(19 - 70)             | 10<br>(5 - 19)        | 10<br>(5 - 17)         | 15<br>(6 - 29)           | 3<br>(1 - 5)             | 1<br>(0 - 2)                |
| Typhoid fever                                                     | 30<br>(14 - 55)             | 8<br>(4 - 15)         | 8<br>(4 - 13)          | 12<br>(5 - 23)           | 2<br>(1 - 4)             | 1<br>(0 - 2)                |
| Paratyphoid fever                                                 | 8<br>(4 - 15)               | 2<br>(1 - 4)          | 2<br>(1 - 4)           | 3<br>(1 - 6)             | 0<br>(0 - 1)             | 0<br>(0 - 0)                |
| Other intestinal infectious diseases                              | 1<br>(0 - 3)                | 0<br>(0 - 2)          | 0<br>(0 - 0)           | 0<br>(0 - 1)             | 0<br>(0 - 1)             | 0<br>(0 - 1)                |
| Lower respiratory infections                                      | 591<br>(504 - 751)          | 42<br>(31 - 55)       | 3<br>(2 - 4)           | 42<br>(35 - 50)          | 90<br>(72 - 108)         | 413<br>(328 - 579)          |
| Upper respiratory infections                                      | 1<br>(0 - 2)                | 0<br>(0 - 0)          | 0<br>(0 - 0)           | 0<br>(0 - 0)             | 0<br>(0 - 0)             | 0<br>(0 - 1)                |
| Otitis media                                                      | 1<br>(0 - 1)                | 0<br>(0 - 0)          | 0<br>(0 - 0)           | 0<br>(0 - 0)             | 0<br>(0 - 0)             | 0<br>(0 - 0)                |
| Meningitis                                                        | 39<br>(35 - 44)             | 8<br>(6 - 12)         | 2<br>(1 - 2)           | 10<br>(9 - 12)           | 9<br>(8 - 11)            | 9<br>(8 - 11)               |
| Pneumococcal meningitis                                           | 13<br>(11 - 16)             | 2<br>(1 - 3)          | 1<br>(0 - 1)           | 4<br>(3 - 5)             | 3<br>(2 - 4)             | 3<br>(3 - 4)                |
| H influenzae type B meningitis                                    | 6<br>(5 - 8)                | 3<br>(2 - 4)          | 0<br>(0 - 1)           | 1<br>(1 - 1)             | 1<br>(1 - 1)             | 1<br>(1 - 1)                |
| Meningococcal meningitis                                          | 5<br>(4 - 6)                | 1<br>(1 - 1)          | 0<br>(0 - 0)           | 1<br>(1 - 2)             | 1<br>(1 - 2)             | 1<br>(1 - 2)                |
| Other meningitis                                                  | 15<br>(12 - 18)             | 2<br>(1 - 3)          | 1<br>(0 - 1)           | 4<br>(3 - 6)             | 4<br>(3 - 5)             | 4<br>(3 - 5)                |
| Encephalitis                                                      | 23<br>(17 - 35)             | 4<br>(2 - 8)          | 3<br>(2 - 6)           | 8<br>(6 - 12)            | 5<br>(3 - 9)             | 3<br>(2 - 5)                |
| Diphtheria                                                        | 0<br>(0 - 1)                | 0<br>(0 - 1)          | 0<br>(0 - 0)           | 0<br>(0 - 0)             | 0<br>(0 - 0)             | --                          |
| Whooping cough                                                    | 1<br>(1 - 4)                | 1<br>(0 - 3)          | 0<br>(0 - 0)           | 0<br>(0 - 0)             | 0<br>(0 - 0)             | --                          |
| Tetanus                                                           | 1<br>(0 - 1)                | 0<br>(0 - 0)          | 0<br>(0 - 0)           | 0<br>(0 - 0)             | 0<br>(0 - 0)             | 0<br>(0 - 0)                |
| Measles                                                           | 0<br>(0 - 0)                | 0<br>(0 - 0)          | 0<br>(0 - 0)           | 0<br>(0 - 0)             | 0<br>(0 - 0)             | --                          |
| Varicella and herpes zoster                                       | 3<br>(1 - 7)                | 0<br>(0 - 1)          | 0<br>(0 - 1)           | 1<br>(0 - 1)             | 0<br>(0 - 1)             | 1<br>(0 - 5)                |
| Neglected tropical diseases and malaria                           | 8<br>(6 - 18)               | 1<br>(1 - 3)          | 1<br>(0 - 2)           | 3<br>(2 - 4)             | 2<br>(1 - 5)             | 2<br>(1 - 7)                |
| Malaria                                                           | 0<br>(0 - 0)                | 0<br>(0 - 0)          | 0<br>(0 - 0)           | 0<br>(0 - 0)             | 0<br>(0 - 0)             | 0<br>(0 - 0)                |
| Chagas disease                                                    | 2<br>(1 - 11)               | 0<br>(0 - 0)          | 0<br>(0 - 0)           | 0<br>(0 - 1)             | 1<br>(0 - 4)             | 1<br>(0 - 6)                |
| Leishmaniasis                                                     | 1<br>(0 - 1)                | 0<br>(0 - 0)          | 0<br>(0 - 0)           | 0<br>(0 - 0)             | 0<br>(0 - 0)             | 0<br>(0 - 0)                |
| Visceral leishmaniasis                                            | 1<br>(0 - 1)                | 0<br>(0 - 0)          | 0<br>(0 - 0)           | 0<br>(0 - 0)             | 0<br>(0 - 0)             | 0<br>(0 - 0)                |
| Cysticercosis                                                     | 1<br>(1 - 1)                | 0<br>(0 - 0)          | 0<br>(0 - 0)           | 0<br>(0 - 1)             | 0<br>(0 - 0)             | 0<br>(0 - 0)                |
| Cystic echinococcosis                                             | 0<br>(0 - 0)                | 0<br>(0 - 0)          | 0<br>(0 - 0)           | 0<br>(0 - 0)             | 0<br>(0 - 0)             | 0<br>(0 - 0)                |
| Dengue                                                            | 1<br>(1 - 3)                | 0<br>(0 - 0)          | 0<br>(0 - 0)           | 1<br>(0 - 1)             | 0<br>(0 - 0)             | 0<br>(0 - 0)                |
| Rabies                                                            | 0<br>(0 - 1)                | 0<br>(0 - 0)          | 0<br>(0 - 0)           | 0<br>(0 - 0)             | 0<br>(0 - 0)             | 0<br>(0 - 0)                |
| Intestinal nematode infections                                    | 1<br>(0 - 4)                | 0<br>(0 - 2)          | 0<br>(0 - 1)           | 0<br>(0 - 1)             | 0<br>(0 - 1)             | 0<br>(0 - 1)                |
| Ascariasis                                                        | 1<br>(0 - 4)                | 0<br>(0 - 2)          | 0<br>(0 - 1)           | 0<br>(0 - 1)             | 0<br>(0 - 1)             | 0<br>(0 - 1)                |
| Other neglected tropical diseases                                 | 2<br>(1 - 3)                | 1<br>(0 - 1)          | 0<br>(0 - 0)           | 0<br>(0 - 1)             | 0<br>(0 - 0)             | 0<br>(0 - 0)                |
| Maternal disorders                                                | 19<br>(15 - 23)             | --                    | 0<br>(0 - 0)           | 19<br>(15 - 23)          | --                       | --                          |

Web Table 31- Costa Rica deaths with 95% UI by age, sex, and cause in 2013

| Cause                                                            | Both Sexes, All Ages        | Both Sexes, 0-4 Years | Both Sexes, 5-14 Years | Both Sexes, 15-49 Years  | Both Sexes, 50-69 Years  | Both Sexes, 70-80 Years     |
|------------------------------------------------------------------|-----------------------------|-----------------------|------------------------|--------------------------|--------------------------|-----------------------------|
| Maternal hemorrhage                                              | 2<br>(2 - 3)                | --                    | 0<br>(0 - 0)           | 2<br>(2 - 3)             | --                       | --                          |
| Maternal sepsis and other maternal infections                    | 2<br>(1 - 2)                | --                    | 0<br>(0 - 0)           | 2<br>(1 - 2)             | --                       | --                          |
| Maternal hypertensive disorders                                  | 2<br>(2 - 3)                | --                    | 0<br>(0 - 0)           | 2<br>(1 - 3)             | --                       | --                          |
| Maternal obstructed labor                                        | 2<br>(1 - 2)                | --                    | 0<br>(0 - 0)           | 2<br>(1 - 2)             | --                       | --                          |
| Maternal abortive outcome                                        | 3<br>(2 - 4)                | --                    | 0<br>(0 - 0)           | 3<br>(2 - 4)             | --                       | --                          |
| Indirect maternal deaths                                         | 3<br>(2 - 4)                | --                    | 0<br>(0 - 0)           | 3<br>(2 - 4)             | --                       | --                          |
| Late maternal deaths                                             | 1<br>(1 - 2)                | --                    | 0<br>(0 - 0)           | 1<br>(1 - 2)             | --                       | --                          |
| Maternal deaths aggravated by HIV/AIDS                           | 0<br>(0 - 0)                | --                    | --                     | 0<br>(0 - 0)             | --                       | --                          |
| Other maternal disorders                                         | 3<br>(2 - 4)                | --                    | 0<br>(0 - 0)           | 3<br>(2 - 4)             | --                       | --                          |
| Neonatal disorders                                               | 254<br>(222 - 294)          | 254<br>(222 - 294)    | --                     | --                       | --                       | --                          |
| Neonatal preterm birth complications                             | 133<br>(101 - 163)          | 133<br>(101 - 163)    | --                     | --                       | --                       | --                          |
| Neonatal encephalopathy due to birth asphyxia and trauma         | 50<br>(38 - 65)             | 50<br>(38 - 65)       | --                     | --                       | --                       | --                          |
| Neonatal sepsis and other neonatal infections                    | 23<br>(14 - 41)             | 23<br>(14 - 41)       | --                     | --                       | --                       | --                          |
| Hemolytic disease and other neonatal jaundice                    | 0<br>(0 - 1)                | 0<br>(0 - 1)          | --                     | --                       | --                       | --                          |
| Other neonatal disorders                                         | 47<br>(34 - 61)             | 47<br>(34 - 61)       | --                     | --                       | --                       | --                          |
| Nutritional deficiencies                                         | 54<br>(43 - 84)             | 5<br>(3 - 8)          | 1<br>(0 - 1)           | 4<br>(3 - 7)             | 6<br>(4 - 9)             | 39<br>(29 - 60)             |
| Protein-energy malnutrition                                      | 40<br>(30 - 60)             | 4<br>(3 - 7)          | 0<br>(0 - 1)           | 2<br>(1 - 4)             | 4<br>(3 - 5)             | 30<br>(22 - 46)             |
| Iodine deficiency                                                | 0<br>(0 - 1)                | 0<br>(0 - 0)          | 0<br>(0 - 0)           | 0<br>(0 - 0)             | 0<br>(0 - 0)             | 0<br>(0 - 1)                |
| Iron-deficiency anemia                                           | 10<br>(6 - 19)              | 0<br>(0 - 1)          | 0<br>(0 - 0)           | 1<br>(1 - 3)             | 1<br>(1 - 3)             | 6<br>(3 - 14)               |
| Other nutritional deficiencies                                   | 4<br>(3 - 9)                | 0<br>(0 - 0)          | 0<br>(0 - 0)           | 1<br>(1 - 2)             | 1<br>(1 - 2)             | 2<br>(1 - 5)                |
| Other communicable, maternal, neonatal, and nutritional diseases | 61<br>(45 - 85)             | 16<br>(3 - 38)        | 2<br>(1 - 4)           | 13<br>(11 - 16)          | 15<br>(12 - 18)          | 14<br>(11 - 17)             |
| Sexually transmitted diseases excluding HIV                      | 18<br>(3 - 41)              | 13<br>(0 - 34)        | 1<br>(0 - 3)           | 1<br>(1 - 2)             | 1<br>(1 - 2)             | 2<br>(1 - 3)                |
| Syphilis                                                         | 16<br>(2 - 40)              | 13<br>(0 - 34)        | 1<br>(0 - 2)           | 1<br>(0 - 1)             | 1<br>(0 - 1)             | 1<br>(1 - 2)                |
| Chlamydial infection                                             | 0<br>(0 - 0)                | --                    | 0<br>(0 - 0)           | 0<br>(0 - 0)             | 0<br>(0 - 0)             | 0<br>(0 - 0)                |
| Gonococcal infection                                             | 1<br>(0 - 1)                | --                    | 0<br>(0 - 0)           | 0<br>(0 - 0)             | 0<br>(0 - 0)             | 0<br>(0 - 0)                |
| Other sexually transmitted diseases                              | 0<br>(0 - 1)                | --                    | 0<br>(0 - 0)           | 0<br>(0 - 0)             | 0<br>(0 - 0)             | 0<br>(0 - 0)                |
| Hepatitis                                                        | 18<br>(15 - 20)             | 1<br>(0 - 1)          | 1<br>(0 - 1)           | 6<br>(5 - 7)             | 7<br>(5 - 8)             | 4<br>(3 - 6)                |
| Acute hepatitis A                                                | 5<br>(2 - 8)                | 0<br>(0 - 1)          | 0<br>(0 - 1)           | 2<br>(1 - 4)             | 1<br>(0 - 2)             | 0<br>(0 - 1)                |
| Acute hepatitis B                                                | 10<br>(7 - 14)              | 0<br>(0 - 0)          | 0<br>(0 - 0)           | 2<br>(1 - 4)             | 4<br>(3 - 6)             | 3<br>(2 - 5)                |
| Acute hepatitis C                                                | 3<br>(1 - 6)                | --                    | 0<br>(0 - 0)           | 1<br>(0 - 2)             | 1<br>(0 - 2)             | 1<br>(0 - 2)                |
| Other infectious diseases                                        | 25<br>(18 - 30)             | 3<br>(2 - 4)          | 1<br>(1 - 1)           | 7<br>(5 - 8)             | 7<br>(5 - 9)             | 8<br>(6 - 11)               |
| Non-communicable diseases                                        | 17,781<br>(17,062 - 18,509) | 360<br>(319 - 406)    | 73<br>(65 - 80)        | 1,506<br>(1,400 - 1,622) | 4,624<br>(4,354 - 4,879) | 11,217<br>(10,844 - 11,574) |
| Neoplasms                                                        | 4,920<br>(4,611 - 5,218)    | 18<br>(14 - 24)       | 32<br>(28 - 36)        | 581<br>(533 - 631)       | 1,666<br>(1,552 - 1,785) | 2,623<br>(2,404 - 2,807)    |
| Esophageal cancer                                                | 105<br>(89 - 131)           | --                    | --                     | 5<br>(4 - 6)             | 33<br>(26 - 43)          | 68<br>(55 - 84)             |
| Stomach cancer                                                   | 822<br>(738 - 910)          | --                    | --                     | 69<br>(59 - 80)          | 271<br>(242 - 302)       | 482<br>(414 - 561)          |
| Liver cancer                                                     | 277<br>(245 - 311)          | --                    | 1<br>(0 - 1)           | 27<br>(22 - 32)          | 106<br>(90 - 124)        | 143<br>(118 - 172)          |
| Liver cancer due to hepatitis B                                  | 69<br>(40 - 100)            | --                    | 0<br>(0 - 0)           | 11<br>(8 - 16)           | 31<br>(16 - 49)          | 26<br>(14 - 40)             |
| Liver cancer due to hepatitis C                                  | 129<br>(92 - 165)           | --                    | 0<br>(0 - 0)           | 8<br>(5 - 13)            | 47<br>(30 - 64)          | 74<br>(51 - 97)             |
| Liver cancer due to alcohol use                                  | 54<br>(31 - 78)             | --                    | --                     | 3<br>(2 - 4)             | 18<br>(11 - 28)          | 33<br>(18 - 50)             |
| Liver cancer due to other causes                                 | 24<br>(16 - 33)             | --                    | 0<br>(0 - 1)           | 4<br>(3 - 6)             | 10<br>(6 - 14)           | 10<br>(6 - 16)              |

Web Table 31- Costa Rica deaths with 95% UI by age, sex, and cause in 2013

| Cause                                         | Both Sexes, All Ages     | Both Sexes, 0-4 Years | Both Sexes, 5-14 Years | Both Sexes, 15-49 Years | Both Sexes, 50-69 Years  | Both Sexes, 70-80 Years  |
|-----------------------------------------------|--------------------------|-----------------------|------------------------|-------------------------|--------------------------|--------------------------|
| Larynx cancer                                 | 48<br>(38 - 62)          | --                    | --                     | 3<br>(2 - 4)            | 20<br>(15 - 27)          | 25<br>(19 - 33)          |
| Tracheal, bronchus and lung cancer            | 390<br>(356 - 431)       | --                    | --                     | 22<br>(18 - 26)         | 147<br>(130 - 167)       | 221<br>(196 - 253)       |
| Breast cancer                                 | 339<br>(299 - 385)       | --                    | --                     | 64<br>(54 - 77)         | 149<br>(127 - 171)       | 126<br>(102 - 152)       |
| Cervical cancer                               | 184<br>(152 - 257)       | --                    | --                     | 47<br>(37 - 60)         | 67<br>(53 - 100)         | 70<br>(53 - 100)         |
| Uterine cancer                                | 42<br>(25 - 55)          | --                    | --                     | 2<br>(1 - 3)            | 17<br>(10 - 24)          | 22<br>(13 - 31)          |
| Prostate cancer                               | 451<br>(279 - 596)       | --                    | --                     | 2<br>(1 - 3)            | 69<br>(41 - 95)          | 381<br>(230 - 511)       |
| Colon and rectum cancer                       | 512<br>(465 - 568)       | --                    | --                     | 51<br>(45 - 57)         | 173<br>(155 - 191)       | 289<br>(250 - 336)       |
| Lip and oral cavity cancer                    | 48<br>(36 - 58)          | --                    | --                     | 6<br>(4 - 7)            | 17<br>(13 - 22)          | 25<br>(18 - 33)          |
| Nasopharynx cancer                            | 17<br>(14 - 22)          | --                    | 0<br>(0 - 1)           | 5<br>(4 - 7)            | 7<br>(5 - 10)            | 4<br>(3 - 6)             |
| Other pharynx cancer                          | 24<br>(19 - 30)          | --                    | --                     | 3<br>(2 - 4)            | 11<br>(9 - 15)           | 9<br>(7 - 13)            |
| Gallbladder and biliary tract cancer          | 83<br>(62 - 128)         | --                    | --                     | 5<br>(3 - 8)            | 31<br>(22 - 50)          | 47<br>(34 - 71)          |
| Pancreatic cancer                             | 244<br>(221 - 269)       | --                    | --                     | 17<br>(14 - 20)         | 90<br>(79 - 102)         | 136<br>(119 - 156)       |
| Malignant skin melanoma                       | 45<br>(32 - 63)          | --                    | --                     | 8<br>(6 - 11)           | 16<br>(11 - 23)          | 21<br>(15 - 29)          |
| Non-melanoma skin cancer                      | 53<br>(41 - 77)          | --                    | --                     | 2<br>(1 - 3)            | 8<br>(7 - 13)            | 42<br>(32 - 62)          |
| Ovarian cancer                                | 94<br>(80 - 109)         | --                    | --                     | 15<br>(12 - 19)         | 43<br>(35 - 52)          | 36<br>(28 - 45)          |
| Testicular cancer                             | 9<br>(4 - 15)            | --                    | --                     | 7<br>(3 - 12)           | 1<br>(0 - 2)             | 1<br>(0 - 2)             |
| Kidney cancer                                 | 85<br>(74 - 97)          | 0<br>(0 - 0)          | 0<br>(0 - 0)           | 8<br>(7 - 10)           | 38<br>(32 - 44)          | 39<br>(31 - 48)          |
| Bladder cancer                                | 86<br>(72 - 111)         | --                    | --                     | 3<br>(2 - 5)            | 23<br>(18 - 33)          | 59<br>(48 - 76)          |
| Brain and nervous system cancer               | 113<br>(74 - 131)        | 3<br>(1 - 4)          | 5<br>(3 - 7)           | 32<br>(22 - 39)         | 44<br>(29 - 54)          | 28<br>(16 - 37)          |
| Thyroid cancer                                | 23<br>(19 - 29)          | --                    | 0<br>(0 - 0)           | 2<br>(2 - 3)            | 9<br>(7 - 12)            | 12<br>(9 - 16)           |
| Mesothelioma                                  | 4<br>(3 - 5)             | --                    | --                     | 1<br>(1 - 1)            | 2<br>(1 - 2)             | 2<br>(1 - 2)             |
| Hodgkin lymphoma                              | 26<br>(10 - 35)          | 0<br>(0 - 0)          | 1<br>(0 - 1)           | 9<br>(4 - 13)           | 7<br>(3 - 11)            | 8<br>(2 - 13)            |
| Non-Hodgkin lymphoma                          | 205<br>(156 - 239)       | 1<br>(1 - 2)          | 2<br>(2 - 3)           | 37<br>(30 - 46)         | 75<br>(59 - 92)          | 89<br>(60 - 111)         |
| Multiple myeloma                              | 79<br>(61 - 93)          | --                    | --                     | 6<br>(5 - 8)            | 35<br>(28 - 43)          | 38<br>(27 - 48)          |
| Leukemia                                      | 219<br>(200 - 239)       | 7<br>(4 - 10)         | 14<br>(11 - 17)        | 63<br>(56 - 73)         | 57<br>(50 - 66)          | 78<br>(65 - 91)          |
| Other neoplasms                               | 294<br>(239 - 333)       | 7<br>(5 - 11)         | 9<br>(6 - 11)          | 62<br>(51 - 73)         | 97<br>(78 - 115)         | 119<br>(87 - 141)        |
| Cardiovascular diseases                       | 6,208<br>(5,815 - 6,828) | 9<br>(7 - 11)         | 6<br>(5 - 7)           | 355<br>(320 - 400)      | 1,471<br>(1,353 - 1,617) | 4,367<br>(4,076 - 4,822) |
| Rheumatic heart disease                       | 51<br>(33 - 60)          | 0<br>(0 - 0)          | 1<br>(0 - 1)           | 16<br>(11 - 20)         | 19<br>(12 - 23)          | 16<br>(9 - 21)           |
| Ischemic heart disease                        | 3,453<br>(3,116 - 4,146) | 1<br>(0 - 1)          | 1<br>(1 - 1)           | 166<br>(144 - 203)      | 906<br>(814 - 1,054)     | 2,380<br>(2,113 - 2,906) |
| Cerebrovascular disease                       | 1,484<br>(1,287 - 1,744) | 1<br>(1 - 1)          | 1<br>(1 - 2)           | 75<br>(63 - 89)         | 275<br>(234 - 326)       | 1,132<br>(963 - 1,357)   |
| Ischemic stroke                               | 505<br>(347 - 857)       | 0<br>(0 - 0)          | 0<br>(0 - 1)           | 12<br>(8 - 23)          | 73<br>(50 - 128)         | 420<br>(281 - 718)       |
| Hemorrhagic stroke                            | 979<br>(624 - 1,182)     | 1<br>(0 - 1)          | 1<br>(1 - 1)           | 63<br>(49 - 75)         | 202<br>(143 - 243)       | 712<br>(411 - 880)       |
| Hypertensive heart disease                    | 521<br>(313 - 683)       | 0<br>(0 - 0)          | 0<br>(0 - 0)           | 13<br>(9 - 17)          | 81<br>(55 - 103)         | 427<br>(245 - 575)       |
| Cardiomyopathy and myocarditis                | 205<br>(168 - 251)       | 6<br>(5 - 7)          | 2<br>(2 - 3)           | 38<br>(31 - 46)         | 62<br>(48 - 74)          | 97<br>(78 - 127)         |
| Atrial fibrillation and flutter               | 29<br>(20 - 37)          | --                    | --                     | 0<br>(0 - 0)            | 3<br>(2 - 3)             | 26<br>(17 - 34)          |
| Aortic aneurysm                               | 104<br>(84 - 123)        | --                    | --                     | 9<br>(7 - 11)           | 30<br>(24 - 36)          | 65<br>(50 - 78)          |
| Peripheral vascular disease                   | 20<br>(15 - 26)          | --                    | --                     | 0<br>(0 - 0)            | 2<br>(2 - 3)             | 18<br>(13 - 23)          |
| Endocarditis                                  | 28<br>(20 - 37)          | 1<br>(0 - 1)          | 0<br>(0 - 0)           | 7<br>(5 - 10)           | 10<br>(7 - 15)           | 10<br>(6 - 13)           |
| Other cardiovascular and circulatory diseases | 312<br>(214 - 376)       | 1<br>(1 - 1)          | 1<br>(1 - 1)           | 31<br>(22 - 38)         | 82<br>(51 - 102)         | 197<br>(136 - 251)       |
| Chronic respiratory diseases                  | 1,422<br>(1,217 - 1,558) | 13<br>(9 - 16)        | 2<br>(1 - 2)           | 45<br>(39 - 52)         | 206<br>(184 - 246)       | 1,157<br>(954 - 1,279)   |

Web Table 31- Costa Rica deaths with 95% UI by age, sex, and cause in 2013

| Cause                                               | Both Sexes, All Ages     | Both Sexes, 0-4 Years | Both Sexes, 5-14 Years | Both Sexes, 15-49 Years | Both Sexes, 50-69 Years | Both Sexes, 70-80 Years |
|-----------------------------------------------------|--------------------------|-----------------------|------------------------|-------------------------|-------------------------|-------------------------|
| Chronic obstructive pulmonary disease               | 1,191<br>(1,001 - 1,317) | 6<br>(3 - 8)          | 0<br>(0 - 1)           | 16<br>(13 - 20)         | 147<br>(128 - 179)      | 1,022<br>(840 - 1,138)  |
| Pneumoconiosis                                      | 6<br>(4 - 9)             | 0<br>(0 - 0)          | 0<br>(0 - 0)           | 1<br>(1 - 1)            | 2<br>(1 - 3)            | 3<br>(2 - 5)            |
| Silicosis                                           | 0<br>(0 - 1)             | 0<br>(0 - 0)          | 0<br>(0 - 0)           | 0<br>(0 - 0)            | 0<br>(0 - 0)            | 0<br>(0 - 0)            |
| Asbestosis                                          | 1<br>(1 - 2)             | 0<br>(0 - 0)          | 0<br>(0 - 0)           | 0<br>(0 - 0)            | 0<br>(0 - 1)            | 1<br>(0 - 1)            |
| Coal workers pneumoconiosis                         | 1<br>(0 - 1)             | 0<br>(0 - 0)          | 0<br>(0 - 0)           | 0<br>(0 - 0)            | 0<br>(0 - 0)            | 0<br>(0 - 1)            |
| Other pneumoconiosis                                | 4<br>(2 - 5)             | 0<br>(0 - 0)          | 0<br>(0 - 0)           | 0<br>(0 - 0)            | 1<br>(1 - 1)            | 2<br>(1 - 3)            |
| Asthma                                              | 65<br>(51 - 80)          | 1<br>(0 - 1)          | 1<br>(0 - 1)           | 16<br>(13 - 19)         | 24<br>(18 - 31)         | 24<br>(16 - 33)         |
| Interstitial lung disease and pulmonary sarcoidosis | 144<br>(101 - 203)       | 3<br>(2 - 4)          | 0<br>(0 - 0)           | 9<br>(7 - 11)           | 31<br>(23 - 44)         | 101<br>(63 - 147)       |
| Other chronic respiratory diseases                  | 17<br>(13 - 21)          | 4<br>(3 - 5)          | 0<br>(0 - 0)           | 3<br>(2 - 4)            | 2<br>(2 - 3)            | 7<br>(5 - 10)           |
| Cirrhosis                                           | 796<br>(739 - 859)       | 1<br>(1 - 2)          | 2<br>(2 - 2)           | 147<br>(130 - 166)      | 369<br>(333 - 407)      | 278<br>(250 - 309)      |
| Cirrhosis due to hepatitis B                        | 27<br>(16 - 39)          | 0<br>(0 - 0)          | 0<br>(0 - 0)           | 5<br>(2 - 8)            | 12<br>(7 - 19)          | 9<br>(6 - 14)           |
| Cirrhosis due to hepatitis C                        | 317<br>(256 - 376)       | 0<br>(0 - 0)          | 0<br>(0 - 1)           | 45<br>(32 - 59)         | 142<br>(110 - 173)      | 130<br>(103 - 156)      |
| Cirrhosis due to alcohol use                        | 357<br>(298 - 427)       | --                    | --                     | 66<br>(52 - 85)         | 172<br>(142 - 211)      | 118<br>(94 - 145)       |
| Cirrhosis due to other causes                       | 95<br>(55 - 143)         | 1<br>(1 - 2)          | 1<br>(1 - 2)           | 30<br>(18 - 43)         | 42<br>(21 - 66)         | 20<br>(11 - 32)         |
| Digestive diseases                                  | 696<br>(612 - 767)       | 2<br>(1 - 3)          | 2<br>(2 - 3)           | 64<br>(55 - 72)         | 156<br>(133 - 175)      | 473<br>(414 - 530)      |
| Peptic ulcer disease                                | 102<br>(80 - 133)        | 0<br>(0 - 0)          | 0<br>(0 - 0)           | 8<br>(6 - 10)           | 24<br>(19 - 31)         | 70<br>(52 - 95)         |
| Gastritis and duodenitis                            | 11<br>(7 - 18)           | 0<br>(0 - 0)          | 0<br>(0 - 0)           | 1<br>(1 - 2)            | 2<br>(1 - 3)            | 7<br>(4 - 13)           |
| Appendicitis                                        | 18<br>(14 - 24)          | 0<br>(0 - 0)          | 0<br>(0 - 1)           | 4<br>(3 - 6)            | 5<br>(4 - 7)            | 8<br>(5 - 12)           |
| Paralytic ileus and intestinal obstruction          | 55<br>(13 - 93)          | 1<br>(0 - 1)          | 0<br>(0 - 1)           | 5<br>(1 - 7)            | 10<br>(2 - 17)          | 40<br>(9 - 70)          |
| Inguinal, femoral, and abdominal hernia             | 29<br>(19 - 56)          | 0<br>(0 - 0)          | 0<br>(0 - 0)           | 2<br>(1 - 3)            | 7<br>(4 - 12)           | 20<br>(12 - 41)         |
| Inflammatory bowel disease                          | 8<br>(5 - 10)            | 0<br>(0 - 0)          | 0<br>(0 - 0)           | 2<br>(2 - 3)            | 2<br>(1 - 3)            | 3<br>(2 - 5)            |
| Vascular intestinal disorders                       | 192<br>(132 - 267)       | 0<br>(0 - 1)          | 0<br>(0 - 0)           | 6<br>(4 - 10)           | 32<br>(20 - 47)         | 154<br>(106 - 215)      |
| Gallbladder and biliary diseases                    | 86<br>(66 - 110)         | 0<br>(0 - 0)          | 0<br>(0 - 0)           | 6<br>(5 - 7)            | 17<br>(13 - 21)         | 63<br>(46 - 84)         |
| Pancreatitis                                        | 100<br>(77 - 134)        | 0<br>(0 - 0)          | 0<br>(0 - 0)           | 21<br>(17 - 26)         | 31<br>(24 - 41)         | 48<br>(34 - 69)         |
| Other digestive diseases                            | 95<br>(65 - 118)         | 0<br>(0 - 0)          | 0<br>(0 - 0)           | 9<br>(6 - 11)           | 26<br>(17 - 32)         | 60<br>(41 - 78)         |
| Neurological disorders                              | 1,346<br>(1,159 - 1,556) | 7<br>(6 - 9)          | 5<br>(4 - 6)           | 56<br>(48 - 65)         | 130<br>(112 - 149)      | 1,149<br>(968 - 1,356)  |
| Alzheimer disease and other dementias               | 1,092<br>(912 - 1,299)   | --                    | --                     | 0<br>(0 - 1)            | 60<br>(45 - 76)         | 1,032<br>(852 - 1,235)  |
| Parkinson disease                                   | 93<br>(70 - 116)         | --                    | --                     | 1<br>(1 - 1)            | 13<br>(10 - 16)         | 80<br>(59 - 102)        |
| Epilepsy                                            | 55<br>(47 - 66)          | 2<br>(1 - 2)          | 2<br>(1 - 2)           | 27<br>(22 - 32)         | 14<br>(12 - 18)         | 10<br>(8 - 13)          |
| Multiple sclerosis                                  | 9<br>(6 - 14)            | --                    | --                     | 3<br>(2 - 5)            | 4<br>(2 - 6)            | 2<br>(1 - 3)            |
| Other neurological disorders                        | 97<br>(80 - 109)         | 6<br>(4 - 7)          | 3<br>(3 - 4)           | 24<br>(20 - 29)         | 39<br>(32 - 45)         | 25<br>(19 - 30)         |
| Mental and substance use disorders                  | 89<br>(69 - 116)         | 0<br>(0 - 0)          | 0<br>(0 - 0)           | 39<br>(30 - 51)         | 31<br>(23 - 44)         | 19<br>(14 - 24)         |
| Schizophrenia                                       | 4<br>(2 - 5)             | --                    | --                     | 1<br>(0 - 1)            | 1<br>(1 - 2)            | 2<br>(1 - 3)            |
| Alcohol use disorders                               | 54<br>(39 - 83)          | --                    | --                     | 22<br>(16 - 35)         | 24<br>(17 - 37)         | 8<br>(5 - 12)           |
| Drug use disorders                                  | 31<br>(21 - 37)          | 0<br>(0 - 0)          | --                     | 16<br>(10 - 20)         | 6<br>(4 - 7)            | 9<br>(7 - 12)           |
| Opioid use disorders                                | 7<br>(5 - 8)             | 0<br>(0 - 0)          | --                     | 3<br>(2 - 4)            | 1<br>(1 - 1)            | 2<br>(1 - 3)            |
| Cocaine use disorders                               | 1<br>(1 - 1)             | 0<br>(0 - 0)          | --                     | 0<br>(0 - 1)            | 0<br>(0 - 0)            | 0<br>(0 - 0)            |
| Amphetamine use disorders                           | 1<br>(0 - 1)             | 0<br>(0 - 0)          | --                     | 0<br>(0 - 0)            | 0<br>(0 - 0)            | 0<br>(0 - 0)            |
| Other drug use disorders                            | 23<br>(16 - 27)          | 0<br>(0 - 0)          | --                     | 12<br>(7 - 14)          | 4<br>(3 - 6)            | 7<br>(5 - 9)            |
| Eating disorders                                    | 0<br>(0 - 0)             | --                    | 0<br>(0 - 0)           | 0<br>(0 - 0)            | --                      | --                      |

Web Table 31- Costa Rica deaths with 95% UI by age, sex, and cause in 2013

| Cause                                               | Both Sexes, All Ages     | Both Sexes, 0-4 Years | Both Sexes, 5-14 Years | Both Sexes, 15-49 Years | Both Sexes, 50-69 Years | Both Sexes, 70-80 Years |
|-----------------------------------------------------|--------------------------|-----------------------|------------------------|-------------------------|-------------------------|-------------------------|
| Anorexia nervosa                                    | 0<br>(0 - 0)             | --                    | 0<br>(0 - 0)           | 0<br>(0 - 0)            | --                      | --                      |
| Diabetes, urogenital, blood, and endocrine diseases | 1,791<br>(1,535 - 1,947) | 14<br>(11 - 20)       | 7<br>(6 - 9)           | 166<br>(146 - 185)      | 550<br>(449 - 608)      | 1,053<br>(895 - 1,165)  |
| Diabetes mellitus                                   | 456<br>(411 - 518)       | 0<br>(0 - 0)          | 0<br>(0 - 1)           | 30<br>(26 - 36)         | 137<br>(120 - 170)      | 288<br>(250 - 336)      |
| Acute glomerulonephritis                            | 1<br>(1 - 2)             | 0<br>(0 - 0)          | 0<br>(0 - 0)           | 0<br>(0 - 0)            | 0<br>(0 - 0)            | 0<br>(0 - 1)            |
| Chronic kidney disease                              | 1,094<br>(868 - 1,218)   | 4<br>(3 - 5)          | 3<br>(2 - 4)           | 104<br>(87 - 119)       | 363<br>(253 - 415)      | 619<br>(495 - 714)      |
| Chronic kidney disease due to diabetes mellitus     | 532<br>(414 - 636)       | 0<br>(0 - 0)          | 0<br>(0 - 0)           | 42<br>(30 - 53)         | 214<br>(154 - 257)      | 277<br>(214 - 345)      |
| Chronic kidney disease due to hypertension          | 255<br>(152 - 325)       | 1<br>(1 - 1)          | 0<br>(0 - 0)           | 24<br>(15 - 32)         | 60<br>(29 - 79)         | 171<br>(101 - 224)      |
| Chronic kidney disease due to glomerulonephritis    | 13<br>(9 - 17)           | 1<br>(1 - 1)          | 1<br>(0 - 1)           | 4<br>(3 - 5)            | 3<br>(2 - 5)            | 4<br>(3 - 6)            |
| Chronic kidney disease due to other causes          | 294<br>(154 - 380)       | 2<br>(2 - 3)          | 2<br>(1 - 3)           | 34<br>(23 - 44)         | 87<br>(35 - 122)        | 168<br>(93 - 233)       |
| Urinary diseases and male infertility               | 125<br>(64 - 159)        | 1<br>(0 - 1)          | 0<br>(0 - 0)           | 7<br>(4 - 9)            | 20<br>(11 - 25)         | 97<br>(48 - 128)        |
| Interstitial nephritis and urinary tract infections | 112<br>(55 - 145)        | 0<br>(0 - 1)          | 0<br>(0 - 0)           | 6<br>(3 - 8)            | 17<br>(9 - 21)          | 89<br>(42 - 119)        |
| Urolithiasis                                        | 1<br>(1 - 2)             | --                    | 0<br>(0 - 0)           | 0<br>(0 - 1)            | 1<br>(0 - 1)            | 0<br>(0 - 1)            |
| Other urinary diseases                              | 12<br>(7 - 21)           | 0<br>(0 - 0)          | 0<br>(0 - 0)           | 1<br>(1 - 1)            | 3<br>(2 - 4)            | 8<br>(4 - 15)           |
| Gynecological diseases                              | 1<br>(1 - 1)             | --                    | --                     | 0<br>(0 - 1)            | 0<br>(0 - 0)            | 0<br>(0 - 1)            |
| Uterine fibroids                                    | 0<br>(0 - 0)             | --                    | --                     | 0<br>(0 - 0)            | 0<br>(0 - 0)            | 0<br>(0 - 0)            |
| Polycystic ovarian syndrome                         | 0<br>(0 - 0)             | --                    | --                     | 0<br>(0 - 0)            | 0<br>(0 - 0)            | --                      |
| Endometriosis                                       | 0<br>(0 - 0)             | --                    | --                     | 0<br>(0 - 0)            | 0<br>(0 - 0)            | --                      |
| Genital prolapse                                    | 0<br>(0 - 0)             | --                    | --                     | 0<br>(0 - 0)            | 0<br>(0 - 0)            | 0<br>(0 - 0)            |
| Other gynecological diseases                        | 1<br>(0 - 1)             | --                    | --                     | 0<br>(0 - 0)            | 0<br>(0 - 0)            | 0<br>(0 - 0)            |
| Hemoglobinopathies and hemolytic anemias            | 33<br>(22 - 43)          | 2<br>(1 - 4)          | 2<br>(1 - 3)           | 9<br>(6 - 11)           | 8<br>(6 - 11)           | 12<br>(8 - 16)          |
| Thalassemias                                        | 0<br>(0 - 0)             | 0<br>(0 - 0)          | 0<br>(0 - 0)           | 0<br>(0 - 0)            | 0<br>(0 - 0)            | 0<br>(0 - 0)            |
| Sickle cell disorders                               | 12<br>(8 - 15)           | 1<br>(1 - 2)          | 1<br>(1 - 2)           | 6<br>(4 - 7)            | 3<br>(2 - 4)            | 0<br>(0 - 0)            |
| G6PD deficiency                                     | 2<br>(1 - 2)             | 0<br>(0 - 0)          | 0<br>(0 - 0)           | 1<br>(0 - 1)            | 0<br>(0 - 1)            | 0<br>(0 - 0)            |
| Other hemoglobinopathies and hemolytic anemias      | 20<br>(13 - 26)          | 1<br>(0 - 1)          | 0<br>(0 - 1)           | 2<br>(2 - 3)            | 5<br>(3 - 6)            | 11<br>(7 - 16)          |
| Endocrine, metabolic, blood, and immune disorders   | 80<br>(66 - 124)         | 7<br>(5 - 12)         | 2<br>(1 - 3)           | 15<br>(13 - 23)         | 20<br>(16 - 30)         | 36<br>(27 - 59)         |
| Musculoskeletal disorders                           | 98<br>(31 - 116)         | --                    | 2<br>(1 - 3)           | 30<br>(11 - 36)         | 32<br>(10 - 41)         | 34<br>(9 - 44)          |
| Rheumatoid arthritis                                | 28<br>(9 - 36)           | --                    | 0<br>(0 - 0)           | 2<br>(1 - 3)            | 10<br>(3 - 13)          | 16<br>(5 - 22)          |
| Other musculoskeletal disorders                     | 70<br>(20 - 83)          | --                    | 2<br>(1 - 2)           | 28<br>(10 - 34)         | 23<br>(6 - 28)          | 18<br>(4 - 24)          |
| Other non-communicable diseases                     | 414<br>(358 - 463)       | 295<br>(256 - 337)    | 14<br>(11 - 18)        | 24<br>(20 - 30)         | 14<br>(8 - 17)          | 66<br>(22 - 85)         |
| Congenital anomalies                                | 329<br>(286 - 370)       | 286<br>(247 - 325)    | 14<br>(11 - 17)        | 21<br>(17 - 26)         | 5<br>(4 - 6)            | 3<br>(2 - 5)            |
| Neural tube defects                                 | 17<br>(12 - 22)          | 14<br>(10 - 20)       | 1<br>(1 - 2)           | 1<br>(1 - 2)            | 0<br>(0 - 0)            | 0<br>(0 - 0)            |
| Congenital heart anomalies                          | 145<br>(121 - 171)       | 127<br>(105 - 151)    | 6<br>(4 - 8)           | 10<br>(8 - 13)          | 2<br>(1 - 2)            | 0<br>(0 - 1)            |
| Cleft lip and cleft palate                          | 0<br>(0 - 0)             | 0<br>(0 - 0)          | --                     | --                      | --                      | --                      |
| Down syndrome                                       | 10<br>(7 - 17)           | 8<br>(5 - 13)         | 1<br>(0 - 1)           | 2<br>(1 - 2)            | 0<br>(0 - 1)            | 0<br>(0 - 0)            |
| Chromosomal unbalanced rearrangements               | 14<br>(10 - 20)          | 14<br>(9 - 20)        | 0<br>(0 - 0)           | 0<br>(0 - 0)            | 0<br>(0 - 0)            | 0<br>(0 - 0)            |
| Other congenital anomalies                          | 142<br>(118 - 169)       | 123<br>(101 - 151)    | 6<br>(4 - 8)           | 7<br>(6 - 10)           | 3<br>(2 - 3)            | 3<br>(2 - 4)            |
| Skin and subcutaneous diseases                      | 77<br>(24 - 97)          | 2<br>(1 - 3)          | 0<br>(0 - 0)           | 4<br>(1 - 5)            | 9<br>(3 - 11)           | 62<br>(19 - 81)         |
| Cellulitis                                          | 9<br>(2 - 13)            | 0<br>(0 - 0)          | 0<br>(0 - 0)           | 1<br>(0 - 1)            | 2<br>(1 - 3)            | 5<br>(1 - 9)            |
| Pyoderma                                            | 14<br>(4 - 19)           | 1<br>(0 - 1)          | 0<br>(0 - 0)           | 1<br>(0 - 1)            | 3<br>(1 - 3)            | 10<br>(3 - 14)          |
| Decubitus ulcer                                     | 50<br>(16 - 67)          | 0<br>(0 - 0)          | 0<br>(0 - 0)           | 1<br>(0 - 1)            | 4<br>(1 - 5)            | 45<br>(15 - 62)         |



Web Table 31- Costa Rica deaths with 95% UI by age, sex, and cause in 2013

| Cause                                           | Both Sexes, All Ages     | Both Sexes, 0-4 Years | Both Sexes, 5-14 Years | Both Sexes, 15-49 Years  | Both Sexes, 50-69 Years | Both Sexes, 70-80 Years |
|-------------------------------------------------|--------------------------|-----------------------|------------------------|--------------------------|-------------------------|-------------------------|
| Other skin and subcutaneous diseases            | 5<br>(1 - 7)             | 1<br>(0 - 1)          | 0<br>(0 - 0)           | 1<br>(0 - 1)             | 1<br>(0 - 1)            | 2<br>(0 - 4)            |
| Sudden infant death syndrome                    | 8<br>(4 - 17)            | 8<br>(4 - 17)         | --                     | --                       | --                      | --                      |
| Injuries                                        | 2,286<br>(2,118 - 2,462) | 46<br>(37 - 59)       | 57<br>(51 - 63)        | 1,197<br>(1,095 - 1,301) | 441<br>(395 - 493)      | 545<br>(471 - 621)      |
| Transport injuries                              | 800<br>(724 - 908)       | 11<br>(8 - 14)        | 25<br>(21 - 29)        | 444<br>(393 - 508)       | 180<br>(156 - 211)      | 141<br>(119 - 164)      |
| Road injuries                                   | 778<br>(700 - 878)       | 10<br>(8 - 14)        | 24<br>(21 - 28)        | 430<br>(382 - 491)       | 174<br>(152 - 204)      | 139<br>(116 - 161)      |
| Pedestrian road injuries                        | 323<br>(270 - 392)       | 7<br>(5 - 9)          | 14<br>(12 - 17)        | 112<br>(88 - 149)        | 87<br>(70 - 111)        | 102<br>(83 - 121)       |
| Cyclist road injuries                           | 63<br>(49 - 78)          | 1<br>(0 - 1)          | 2<br>(2 - 3)           | 30<br>(24 - 38)          | 23<br>(17 - 31)         | 7<br>(5 - 9)            |
| Motorcyclist road injuries                      | 95<br>(68 - 123)         | 0<br>(0 - 0)          | 1<br>(1 - 1)           | 80<br>(56 - 104)         | 12<br>(7 - 17)          | 3<br>(2 - 4)            |
| Motor vehicle road injuries                     | 294<br>(247 - 346)       | 3<br>(2 - 4)          | 6<br>(5 - 8)           | 207<br>(173 - 246)       | 51<br>(40 - 64)         | 27<br>(19 - 35)         |
| Other road injuries                             | 3<br>(2 - 7)             | 0<br>(0 - 0)          | 0<br>(0 - 1)           | 1<br>(1 - 2)             | 1<br>(1 - 2)            | 1<br>(0 - 2)            |
| Other transport injuries                        | 22<br>(18 - 34)          | 0<br>(0 - 0)          | 1<br>(0 - 1)           | 13<br>(10 - 21)          | 6<br>(4 - 9)            | 2<br>(2 - 4)            |
| Unintentional injuries                          | 767<br>(692 - 902)       | 30<br>(24 - 41)       | 23<br>(19 - 30)        | 216<br>(184 - 285)       | 135<br>(120 - 161)      | 364<br>(299 - 439)      |
| Falls                                           | 286<br>(237 - 380)       | 1<br>(1 - 2)          | 2<br>(1 - 2)           | 33<br>(27 - 44)          | 44<br>(36 - 55)         | 206<br>(159 - 287)      |
| Drowning                                        | 165<br>(133 - 256)       | 11<br>(6 - 20)        | 14<br>(10 - 21)        | 97<br>(75 - 155)         | 29<br>(22 - 44)         | 15<br>(12 - 20)         |
| Fire, heat, and hot substances                  | 50<br>(26 - 73)          | 3<br>(2 - 5)          | 1<br>(1 - 2)           | 7<br>(5 - 9)             | 6<br>(4 - 8)            | 32<br>(13 - 53)         |
| Poisonings                                      | 11<br>(9 - 18)           | 0<br>(0 - 0)          | 0<br>(0 - 0)           | 6<br>(4 - 9)             | 3<br>(2 - 5)            | 2<br>(1 - 3)            |
| Exposure to mechanical forces                   | 27<br>(22 - 59)          | 1<br>(1 - 2)          | 2<br>(1 - 3)           | 16<br>(12 - 36)          | 6<br>(5 - 12)           | 3<br>(2 - 5)            |
| Unintentional firearm injuries                  | 6<br>(4 - 8)             | 0<br>(0 - 0)          | 0<br>(0 - 1)           | 4<br>(3 - 6)             | 1<br>(1 - 2)            | 0<br>(0 - 1)            |
| Unintentional suffocation                       | 4<br>(3 - 6)             | 1<br>(0 - 1)          | 0<br>(0 - 1)           | 1<br>(1 - 2)             | 1<br>(1 - 1)            | 1<br>(1 - 2)            |
| Other exposure to mechanical forces             | 18<br>(13 - 48)          | 0<br>(0 - 1)          | 1<br>(1 - 2)           | 11<br>(7 - 31)           | 4<br>(3 - 10)           | 2<br>(1 - 4)            |
| Adverse effects of medical treatment            | 123<br>(94 - 151)        | 3<br>(2 - 5)          | 1<br>(1 - 2)           | 21<br>(18 - 30)          | 28<br>(22 - 38)         | 69<br>(45 - 87)         |
| Animal contact                                  | 11<br>(7 - 14)           | 0<br>(0 - 1)          | 0<br>(0 - 1)           | 3<br>(2 - 4)             | 4<br>(2 - 5)            | 3<br>(1 - 4)            |
| Venomous animal contact                         | 5<br>(3 - 8)             | 0<br>(0 - 0)          | 0<br>(0 - 0)           | 1<br>(1 - 1)             | 2<br>(1 - 4)            | 2<br>(1 - 3)            |
| Non-venomous animal contact                     | 5<br>(3 - 7)             | 0<br>(0 - 0)          | 0<br>(0 - 0)           | 2<br>(1 - 3)             | 1<br>(1 - 2)            | 1<br>(1 - 2)            |
| Foreign body                                    | 58<br>(39 - 85)          | 10<br>(6 - 14)        | 1<br>(1 - 2)           | 8<br>(5 - 12)            | 9<br>(6 - 13)           | 31<br>(19 - 49)         |
| Pulmonary aspiration and foreign body in airway | 57<br>(38 - 84)          | 10<br>(6 - 14)        | 1<br>(1 - 1)           | 8<br>(5 - 11)            | 8<br>(5 - 12)           | 31<br>(19 - 48)         |
| Foreign body in other body part                 | 1<br>(1 - 2)             | 0<br>(0 - 0)          | 0<br>(0 - 0)           | 0<br>(0 - 1)             | 1<br>(0 - 1)            | 0<br>(0 - 0)            |
| Other unintentional injuries                    | 36<br>(28 - 46)          | 1<br>(1 - 1)          | 1<br>(1 - 2)           | 24<br>(17 - 33)          | 6<br>(4 - 10)           | 4<br>(3 - 5)            |
| Self-harm and interpersonal violence            | 718<br>(560 - 819)       | 5<br>(3 - 8)          | 9<br>(6 - 12)          | 538<br>(413 - 620)       | 126<br>(96 - 153)       | 40<br>(30 - 49)         |
| Self-harm                                       | 346<br>(288 - 409)       | --                    | 4<br>(3 - 5)           | 240<br>(196 - 286)       | 75<br>(60 - 94)         | 27<br>(21 - 33)         |
| Interpersonal violence                          | 372<br>(223 - 457)       | 5<br>(3 - 8)          | 5<br>(3 - 8)           | 298<br>(177 - 370)       | 51<br>(28 - 73)         | 13<br>(6 - 21)          |
| Assault by firearm                              | 238<br>(121 - 308)       | 1<br>(0 - 2)          | 3<br>(1 - 4)           | 201<br>(102 - 263)       | 30<br>(14 - 46)         | 3<br>(1 - 6)            |
| Assault by sharp object                         | 89<br>(49 - 150)         | 1<br>(0 - 1)          | 1<br>(0 - 1)           | 71<br>(39 - 124)         | 13<br>(6 - 22)          | 3<br>(1 - 5)            |
| Assault by other means                          | 45<br>(24 - 66)          | 3<br>(2 - 5)          | 2<br>(1 - 2)           | 26<br>(13 - 40)          | 9<br>(4 - 13)           | 7<br>(3 - 11)           |

Web Table 31- Costa Rica deaths with 95% UI by age, sex, and cause in 2013

| Cause                                                             | Males, All Ages             | Males, 0-4 Years   | Males, 5-14 Years | Males, 15-49 Years       | Males, 50-69 Years       | Males, 70-80 Years       |
|-------------------------------------------------------------------|-----------------------------|--------------------|-------------------|--------------------------|--------------------------|--------------------------|
| All causes                                                        | 11,865<br>(11,199 - 12,514) | 431<br>(382 - 486) | 86<br>(79 - 93)   | 2,043<br>(1,879 - 2,203) | 3,200<br>(2,951 - 3,439) | 6,105<br>(5,854 - 6,344) |
| Communicable, maternal, neonatal, and nutritional diseases        | 783<br>(705 - 902)          | 207<br>(177 - 239) | 13<br>(9 - 17)    | 154<br>(132 - 176)       | 130<br>(110 - 152)       | 280<br>(222 - 382)       |
| HIV/AIDS and tuberculosis                                         | 156<br>(125 - 190)          | 0<br>(0 - 0)       | 0<br>(0 - 0)      | 91<br>(71 - 109)         | 42<br>(29 - 58)          | 23<br>(18 - 32)          |
| Tuberculosis                                                      | 46<br>(39 - 67)             | 0<br>(0 - 0)       | 0<br>(0 - 0)      | 9<br>(7 - 12)            | 17<br>(13 - 25)          | 20<br>(16 - 30)          |
| HIV/AIDS                                                          | 110<br>(81 - 143)           | 0<br>(0 - 0)       | 0<br>(0 - 0)      | 82<br>(62 - 101)         | 25<br>(14 - 41)          | 3<br>(1 - 5)             |
| HIV/AIDS resulting in mycobacterial infection                     | 7<br>(4 - 9)                | 0<br>(0 - 0)       | 0<br>(0 - 0)      | 5<br>(3 - 6)             | 2<br>(1 - 3)             | 0<br>(0 - 0)             |
| HIV/AIDS resulting in other diseases                              | 103<br>(75 - 134)           | 0<br>(0 - 0)       | 0<br>(0 - 0)      | 77<br>(59 - 95)          | 24<br>(13 - 39)          | 3<br>(1 - 5)             |
| Diarrhea, lower respiratory, and other common infectious diseases | 413<br>(352 - 511)          | 47<br>(37 - 61)    | 11<br>(7 - 15)    | 52<br>(42 - 64)          | 75<br>(61 - 90)          | 229<br>(174 - 322)       |
| Diarrheal diseases                                                | 40<br>(31 - 53)             | 10<br>(7 - 16)     | 1<br>(0 - 1)      | 3<br>(2 - 3)             | 6<br>(4 - 8)             | 21<br>(14 - 33)          |
| Intestinal infectious diseases                                    | 20<br>(9 - 38)              | 5<br>(2 - 11)      | 5<br>(2 - 10)     | 8<br>(3 - 16)            | 1<br>(0 - 2)             | 1<br>(0 - 1)             |
| Typhoid fever                                                     | 16<br>(7 - 29)              | 4<br>(2 - 8)       | 4<br>(2 - 8)      | 6<br>(2 - 13)            | 1<br>(0 - 2)             | 0<br>(0 - 1)             |
| Paratyphoid fever                                                 | 4<br>(2 - 8)                | 1<br>(0 - 2)       | 1<br>(0 - 2)      | 2<br>(1 - 4)             | 0<br>(0 - 0)             | 0<br>(0 - 0)             |
| Other intestinal infectious diseases                              | 0<br>(0 - 2)                | 0<br>(0 - 1)       | 0<br>(0 - 0)      | 0<br>(0 - 1)             | 0<br>(0 - 0)             | 0<br>(0 - 0)             |
| Lower respiratory infections                                      | 312<br>(254 - 409)          | 24<br>(16 - 33)    | 2<br>(1 - 2)      | 29<br>(22 - 36)          | 58<br>(45 - 73)          | 200<br>(147 - 291)       |
| Upper respiratory infections                                      | 0<br>(0 - 1)                | 0<br>(0 - 0)       | 0<br>(0 - 0)      | 0<br>(0 - 0)             | 0<br>(0 - 0)             | 0<br>(0 - 1)             |
| Otitis media                                                      | 0<br>(0 - 0)                | 0<br>(0 - 0)       | 0<br>(0 - 0)      | 0<br>(0 - 0)             | 0<br>(0 - 0)             | 0<br>(0 - 0)             |
| Meningitis                                                        | 25<br>(21 - 29)             | 5<br>(3 - 8)       | 1<br>(1 - 1)      | 7<br>(6 - 8)             | 6<br>(5 - 8)             | 5<br>(4 - 7)             |
| Pneumococcal meningitis                                           | 8<br>(7 - 10)               | 1<br>(1 - 2)       | 0<br>(0 - 1)      | 2<br>(2 - 3)             | 2<br>(1 - 3)             | 2<br>(1 - 3)             |
| H influenzae type B meningitis                                    | 4<br>(3 - 5)                | 2<br>(1 - 3)       | 0<br>(0 - 0)      | 1<br>(0 - 1)             | 0<br>(0 - 1)             | 0<br>(0 - 1)             |
| Meningococcal meningitis                                          | 3<br>(2 - 4)                | 0<br>(0 - 1)       | 0<br>(0 - 0)      | 1<br>(1 - 1)             | 1<br>(0 - 1)             | 1<br>(0 - 1)             |
| Other meningitis                                                  | 10<br>(7 - 12)              | 1<br>(1 - 2)       | 0<br>(0 - 0)      | 3<br>(2 - 4)             | 3<br>(2 - 4)             | 2<br>(1 - 3)             |
| Encephalitis                                                      | 13<br>(9 - 22)              | 2<br>(1 - 5)       | 2<br>(1 - 3)      | 5<br>(3 - 8)             | 3<br>(2 - 5)             | 2<br>(1 - 3)             |
| Diphtheria                                                        | 0<br>(0 - 1)                | 0<br>(0 - 0)       | 0<br>(0 - 0)      | 0<br>(0 - 0)             | 0<br>(0 - 0)             | --                       |
| Whooping cough                                                    | 0<br>(0 - 1)                | 0<br>(0 - 1)       | 0<br>(0 - 0)      | 0<br>(0 - 0)             | 0<br>(0 - 0)             | --                       |
| Tetanus                                                           | 0<br>(0 - 1)                | 0<br>(0 - 0)       | 0<br>(0 - 0)      | 0<br>(0 - 0)             | 0<br>(0 - 0)             | 0<br>(0 - 0)             |
| Measles                                                           | 0<br>(0 - 0)                | 0<br>(0 - 0)       | 0<br>(0 - 0)      | 0<br>(0 - 0)             | 0<br>(0 - 0)             | --                       |
| Varicella and herpes zoster                                       | 1<br>(0 - 4)                | 0<br>(0 - 1)       | 0<br>(0 - 0)      | 0<br>(0 - 1)             | 0<br>(0 - 0)             | 1<br>(0 - 3)             |
| Neglected tropical diseases and malaria                           | 4<br>(3 - 10)               | 0<br>(0 - 1)       | 0<br>(0 - 1)      | 1<br>(1 - 3)             | 1<br>(1 - 3)             | 1<br>(0 - 4)             |
| Malaria                                                           | 0<br>(0 - 0)                | 0<br>(0 - 0)       | 0<br>(0 - 0)      | 0<br>(0 - 0)             | 0<br>(0 - 0)             | 0<br>(0 - 0)             |
| Chagas disease                                                    | 1<br>(0 - 5)                | 0<br>(0 - 0)       | 0<br>(0 - 0)      | 0<br>(0 - 0)             | 1<br>(0 - 3)             | 0<br>(0 - 3)             |
| Leishmaniasis                                                     | 1<br>(0 - 1)                | 0<br>(0 - 0)       | 0<br>(0 - 0)      | 0<br>(0 - 0)             | 0<br>(0 - 0)             | 0<br>(0 - 0)             |
| Visceral leishmaniasis                                            | 1<br>(0 - 1)                | 0<br>(0 - 0)       | 0<br>(0 - 0)      | 0<br>(0 - 0)             | 0<br>(0 - 0)             | 0<br>(0 - 0)             |
| Cysticercosis                                                     | 1<br>(0 - 1)                | 0<br>(0 - 0)       | 0<br>(0 - 0)      | 0<br>(0 - 0)             | 0<br>(0 - 0)             | 0<br>(0 - 0)             |
| Cystic echinococcosis                                             | 0<br>(0 - 0)                | 0<br>(0 - 0)       | 0<br>(0 - 0)      | 0<br>(0 - 0)             | 0<br>(0 - 0)             | 0<br>(0 - 0)             |
| Dengue                                                            | 1<br>(1 - 1)                | 0<br>(0 - 0)       | 0<br>(0 - 0)      | 0<br>(0 - 0)             | 0<br>(0 - 0)             | 0<br>(0 - 0)             |
| Rabies                                                            | 0<br>(0 - 0)                | 0<br>(0 - 0)       | 0<br>(0 - 0)      | 0<br>(0 - 0)             | 0<br>(0 - 0)             | 0<br>(0 - 0)             |
| Intestinal nematode infections                                    | 0<br>(0 - 3)                | 0<br>(0 - 1)       | 0<br>(0 - 0)      | 0<br>(0 - 1)             | 0<br>(0 - 1)             | 0<br>(0 - 0)             |
| Ascariasis                                                        | 0<br>(0 - 3)                | 0<br>(0 - 1)       | 0<br>(0 - 0)      | 0<br>(0 - 1)             | 0<br>(0 - 1)             | 0<br>(0 - 0)             |
| Other neglected tropical diseases                                 | 1<br>(0 - 1)                | 0<br>(0 - 0)       | 0<br>(0 - 0)      | 0<br>(0 - 0)             | 0<br>(0 - 0)             | 0<br>(0 - 0)             |
| Maternal disorders                                                | --                          | --                 | --                | --                       | --                       | --                       |

Web Table 31- Costa Rica deaths with 95% UI by age, sex, and cause in 2013

| Cause                                                            | Males, All Ages          | Males, 0-4 Years   | Males, 5-14 Years | Males, 15-49 Years | Males, 50-69 Years       | Males, 70-80 Years       |
|------------------------------------------------------------------|--------------------------|--------------------|-------------------|--------------------|--------------------------|--------------------------|
| Maternal hemorrhage                                              | --                       | --                 | --                | --                 | --                       | --                       |
| Maternal sepsis and other maternal infections                    | --                       | --                 | --                | --                 | --                       | --                       |
| Maternal hypertensive disorders                                  | --                       | --                 | --                | --                 | --                       | --                       |
| Maternal obstructed labor                                        | --                       | --                 | --                | --                 | --                       | --                       |
| Maternal abortive outcome                                        | --                       | --                 | --                | --                 | --                       | --                       |
| Indirect maternal deaths                                         | --                       | --                 | --                | --                 | --                       | --                       |
| Late maternal deaths                                             | --                       | --                 | --                | --                 | --                       | --                       |
| Maternal deaths aggravated by HIV/AIDS                           | --                       | --                 | --                | --                 | --                       | --                       |
| Other maternal disorders                                         | --                       | --                 | --                | --                 | --                       | --                       |
| Neonatal disorders                                               | 147<br>(126 - 171)       | 147<br>(126 - 171) | --                | --                 | --                       | --                       |
| Neonatal preterm birth complications                             | 79<br>(55 - 102)         | 79<br>(55 - 102)   | --                | --                 | --                       | --                       |
| Neonatal encephalopathy due to birth asphyxia and trauma         | 26<br>(17 - 38)          | 26<br>(17 - 38)    | --                | --                 | --                       | --                       |
| Neonatal sepsis and other neonatal infections                    | 13<br>(6 - 27)           | 13<br>(6 - 27)     | --                | --                 | --                       | --                       |
| Hemolytic disease and other neonatal jaundice                    | 0<br>(0 - 1)             | 0<br>(0 - 1)       | --                | --                 | --                       | --                       |
| Other neonatal disorders                                         | 29<br>(18 - 41)          | 29<br>(18 - 41)    | --                | --                 | --                       | --                       |
| Nutritional deficiencies                                         | 29<br>(21 - 56)          | 3<br>(2 - 6)       | 0<br>(0 - 1)      | 2<br>(2 - 5)       | 3<br>(2 - 7)             | 20<br>(14 - 39)          |
| Protein-energy malnutrition                                      | 22<br>(15 - 41)          | 3<br>(1 - 5)       | 0<br>(0 - 0)      | 1<br>(1 - 3)       | 2<br>(2 - 4)             | 16<br>(10 - 30)          |
| Iodine deficiency                                                | 0<br>(0 - 0)             | 0<br>(0 - 0)       | 0<br>(0 - 0)      | 0<br>(0 - 0)       | 0<br>(0 - 0)             | 0<br>(0 - 0)             |
| Iron-deficiency anemia                                           | 5<br>(2 - 12)            | 0<br>(0 - 1)       | 0<br>(0 - 0)      | 1<br>(0 - 1)       | 1<br>(0 - 2)             | 3<br>(1 - 9)             |
| Other nutritional deficiencies                                   | 2<br>(1 - 6)             | 0<br>(0 - 0)       | 0<br>(0 - 0)      | 1<br>(0 - 1)       | 0<br>(0 - 1)             | 1<br>(0 - 4)             |
| Other communicable, maternal, neonatal, and nutritional diseases | 34<br>(23 - 46)          | 8<br>(2 - 19)      | 1<br>(1 - 2)      | 8<br>(6 - 10)      | 9<br>(6 - 11)            | 7<br>(5 - 9)             |
| Sexually transmitted diseases excluding HIV                      | 9<br>(1 - 21)            | 6<br>(0 - 17)      | 0<br>(0 - 1)      | 0<br>(0 - 1)       | 1<br>(0 - 1)             | 1<br>(0 - 2)             |
| Syphilis                                                         | 8<br>(1 - 20)            | 6<br>(0 - 17)      | 0<br>(0 - 1)      | 0<br>(0 - 0)       | 1<br>(0 - 1)             | 1<br>(0 - 2)             |
| Chlamydial infection                                             | --                       | --                 | --                | --                 | --                       | --                       |
| Gonococcal infection                                             | 0<br>(0 - 1)             | --                 | 0<br>(0 - 0)      | 0<br>(0 - 0)       | 0<br>(0 - 0)             | 0<br>(0 - 0)             |
| Other sexually transmitted diseases                              | 0<br>(0 - 0)             | --                 | 0<br>(0 - 0)      | 0<br>(0 - 0)       | 0<br>(0 - 0)             | 0<br>(0 - 0)             |
| Hepatitis                                                        | 9<br>(8 - 11)            | 0<br>(0 - 1)       | 0<br>(0 - 0)      | 3<br>(2 - 5)       | 3<br>(2 - 4)             | 2<br>(1 - 3)             |
| Acute hepatitis A                                                | 2<br>(1 - 4)             | 0<br>(0 - 0)       | 0<br>(0 - 0)      | 1<br>(1 - 2)       | 1<br>(0 - 1)             | 0<br>(0 - 0)             |
| Acute hepatitis B                                                | 6<br>(4 - 8)             | 0<br>(0 - 0)       | 0<br>(0 - 0)      | 2<br>(1 - 3)       | 2<br>(1 - 4)             | 2<br>(1 - 3)             |
| Acute hepatitis C                                                | 1<br>(0 - 3)             | --                 | 0<br>(0 - 0)      | 0<br>(0 - 1)       | 0<br>(0 - 1)             | 0<br>(0 - 1)             |
| Other infectious diseases                                        | 15<br>(9 - 19)           | 2<br>(1 - 3)       | 1<br>(0 - 1)      | 5<br>(3 - 6)       | 5<br>(3 - 6)             | 4<br>(2 - 6)             |
| Non-communicable diseases                                        | 9,355<br>(8,844 - 9,892) | 198<br>(170 - 230) | 38<br>(32 - 43)   | 858<br>(775 - 946) | 2,705<br>(2,491 - 2,923) | 5,556<br>(5,313 - 5,807) |
| Neoplasms                                                        | 2,651<br>(2,413 - 2,886) | 10<br>(6 - 14)     | 18<br>(15 - 21)   | 266<br>(235 - 298) | 884<br>(806 - 966)       | 1,473<br>(1,305 - 1,631) |
| Esophageal cancer                                                | 71<br>(56 - 95)          | --                 | --                | 3<br>(2 - 5)       | 25<br>(18 - 35)          | 43<br>(32 - 57)          |
| Stomach cancer                                                   | 516<br>(452 - 582)       | --                 | --                | 39<br>(32 - 48)    | 185<br>(158 - 212)       | 292<br>(244 - 345)       |
| Liver cancer                                                     | 165<br>(142 - 193)       | --                 | 0<br>(0 - 1)      | 17<br>(13 - 21)    | 68<br>(56 - 83)          | 80<br>(63 - 100)         |
| Liver cancer due to hepatitis B                                  | 51<br>(23 - 79)          | --                 | 0<br>(0 - 0)      | 8<br>(5 - 12)      | 24<br>(8 - 41)           | 19<br>(7 - 31)           |
| Liver cancer due to hepatitis C                                  | 72<br>(40 - 107)         | --                 | 0<br>(0 - 0)      | 5<br>(2 - 9)       | 28<br>(13 - 46)          | 39<br>(22 - 59)          |
| Liver cancer due to alcohol use                                  | 33<br>(17 - 53)          | --                 | --                | 2<br>(1 - 3)       | 12<br>(6 - 20)           | 19<br>(9 - 32)           |
| Liver cancer due to other causes                                 | 9<br>(5 - 16)            | --                 | 0<br>(0 - 0)      | 2<br>(1 - 3)       | 4<br>(2 - 7)             | 3<br>(2 - 6)             |

Web Table 31- Costa Rica deaths with 95% UI by age, sex, and cause in 2013

| Cause                                         | Males, All Ages          | Males, 0-4 Years | Males, 5-14 Years | Males, 15-49 Years | Males, 50-69 Years   | Males, 70-80 Years       |
|-----------------------------------------------|--------------------------|------------------|-------------------|--------------------|----------------------|--------------------------|
| Larynx cancer                                 | 41<br>(32 - 55)          | --               | --                | 2<br>(2 - 3)       | 17<br>(13 - 24)      | 22<br>(16 - 29)          |
| Tracheal, bronchus and lung cancer            | 260<br>(231 - 293)       | --               | --                | 13<br>(10 - 16)    | 103<br>(89 - 117)    | 144<br>(124 - 168)       |
| Breast cancer                                 | 2<br>(1 - 4)             | --               | --                | 0<br>(0 - 1)       | 1<br>(0 - 1)         | 1<br>(0 - 2)             |
| Cervical cancer                               | --                       | --               | --                | --                 | --                   | --                       |
| Uterine cancer                                | --                       | --               | --                | --                 | --                   | --                       |
| Prostate cancer                               | 451<br>(279 - 596)       | --               | --                | 2<br>(1 - 3)       | 69<br>(41 - 95)      | 381<br>(230 - 511)       |
| Colon and rectum cancer                       | 238<br>(209 - 269)       | --               | --                | 27<br>(22 - 32)    | 88<br>(76 - 102)     | 122<br>(101 - 146)       |
| Lip and oral cavity cancer                    | 34<br>(22 - 42)          | --               | --                | 4<br>(3 - 5)       | 13<br>(9 - 18)       | 17<br>(10 - 23)          |
| Nasopharynx cancer                            | 13<br>(10 - 15)          | --               | 0<br>(0 - 1)      | 4<br>(3 - 5)       | 6<br>(4 - 8)         | 3<br>(2 - 4)             |
| Other pharynx cancer                          | 20<br>(16 - 26)          | --               | --                | 2<br>(2 - 3)       | 10<br>(7 - 14)       | 7<br>(5 - 11)            |
| Gallbladder and biliary tract cancer          | 27<br>(19 - 49)          | --               | --                | 2<br>(1 - 3)       | 10<br>(6 - 20)       | 15<br>(10 - 26)          |
| Pancreatic cancer                             | 123<br>(108 - 140)       | --               | --                | 11<br>(8 - 13)     | 50<br>(41 - 58)      | 63<br>(52 - 75)          |
| Malignant skin melanoma                       | 27<br>(15 - 43)          | --               | --                | 5<br>(3 - 8)       | 10<br>(6 - 17)       | 12<br>(6 - 18)           |
| Non-melanoma skin cancer                      | 28<br>(21 - 47)          | --               | --                | 1<br>(1 - 2)       | 7<br>(5 - 11)        | 21<br>(15 - 35)          |
| Ovarian cancer                                | --                       | --               | --                | --                 | --                   | --                       |
| Testicular cancer                             | 9<br>(4 - 15)            | --               | --                | 7<br>(3 - 12)      | 1<br>(0 - 2)         | 1<br>(0 - 2)             |
| Kidney cancer                                 | 54<br>(46 - 64)          | 0<br>(0 - 0)     | 0<br>(0 - 0)      | 6<br>(4 - 7)       | 26<br>(21 - 32)      | 22<br>(17 - 29)          |
| Bladder cancer                                | 62<br>(51 - 85)          | --               | --                | 2<br>(1 - 3)       | 17<br>(13 - 26)      | 43<br>(33 - 58)          |
| Brain and nervous system cancer               | 61<br>(30 - 77)          | 1<br>(0 - 3)     | 2<br>(1 - 4)      | 18<br>(9 - 23)     | 25<br>(13 - 33)      | 15<br>(6 - 21)           |
| Thyroid cancer                                | 8<br>(6 - 10)            | --               | 0<br>(0 - 0)      | 1<br>(1 - 2)       | 3<br>(2 - 5)         | 3<br>(2 - 4)             |
| Mesothelioma                                  | 2<br>(2 - 3)             | --               | --                | 1<br>(0 - 1)       | 1<br>(1 - 1)         | 1<br>(1 - 1)             |
| Hodgkin lymphoma                              | 13<br>(5 - 19)           | 0<br>(0 - 0)     | 0<br>(0 - 1)      | 5<br>(2 - 7)       | 4<br>(2 - 7)         | 3<br>(1 - 6)             |
| Non-Hodgkin lymphoma                          | 123<br>(92 - 150)        | 1<br>(1 - 2)     | 2<br>(1 - 3)      | 24<br>(19 - 32)    | 46<br>(35 - 60)      | 50<br>(32 - 66)          |
| Multiple myeloma                              | 43<br>(28 - 53)          | --               | --                | 4<br>(2 - 5)       | 19<br>(12 - 25)      | 20<br>(13 - 27)          |
| Leukemia                                      | 117<br>(104 - 132)       | 4<br>(2 - 6)     | 7<br>(5 - 9)      | 34<br>(29 - 41)    | 30<br>(24 - 36)      | 42<br>(34 - 51)          |
| Other neoplasms                               | 144<br>(112 - 164)       | 4<br>(2 - 6)     | 5<br>(3 - 6)      | 35<br>(28 - 41)    | 49<br>(37 - 59)      | 51<br>(35 - 64)          |
| Cardiovascular diseases                       | 3,229<br>(3,005 - 3,467) | 5<br>(4 - 7)     | 3<br>(3 - 4)      | 234<br>(206 - 264) | 942<br>(853 - 1,034) | 2,044<br>(1,896 - 2,208) |
| Rheumatic heart disease                       | 21<br>(11 - 27)          | 0<br>(0 - 0)     | 0<br>(0 - 1)      | 7<br>(4 - 9)       | 8<br>(4 - 11)        | 6<br>(3 - 9)             |
| Ischemic heart disease                        | 1,912<br>(1,709 - 2,263) | 0<br>(0 - 1)     | 0<br>(0 - 1)      | 121<br>(102 - 148) | 623<br>(554 - 703)   | 1,168<br>(1,023 - 1,432) |
| Cerebrovascular disease                       | 707<br>(557 - 858)       | 0<br>(0 - 1)     | 1<br>(0 - 1)      | 42<br>(32 - 53)    | 155<br>(121 - 193)   | 510<br>(388 - 626)       |
| Ischemic stroke                               | 243<br>(154 - 445)       | 0<br>(0 - 0)     | 0<br>(0 - 0)      | 7<br>(4 - 14)      | 43<br>(28 - 78)      | 193<br>(117 - 354)       |
| Hemorrhagic stroke                            | 464<br>(261 - 605)       | 0<br>(0 - 1)     | 1<br>(0 - 1)      | 35<br>(24 - 45)    | 112<br>(70 - 146)    | 316<br>(163 - 426)       |
| Hypertensive heart disease                    | 212<br>(117 - 296)       | 0<br>(0 - 0)     | 0<br>(0 - 0)      | 8<br>(5 - 11)      | 42<br>(25 - 57)      | 161<br>(81 - 240)        |
| Cardiomyopathy and myocarditis                | 122<br>(91 - 158)        | 3<br>(3 - 4)     | 1<br>(1 - 2)      | 27<br>(19 - 34)    | 48<br>(30 - 53)      | 48<br>(35 - 70)          |
| Atrial fibrillation and flutter               | 11<br>(7 - 16)           | --               | --                | 0<br>(0 - 0)       | 2<br>(1 - 2)         | 10<br>(6 - 14)           |
| Aortic aneurysm                               | 76<br>(57 - 89)          | --               | --                | 6<br>(5 - 8)       | 23<br>(18 - 28)      | 46<br>(33 - 56)          |
| Peripheral vascular disease                   | 10<br>(7 - 14)           | --               | --                | 0<br>(0 - 0)       | 2<br>(1 - 2)         | 9<br>(6 - 13)            |
| Endocarditis                                  | 17<br>(11 - 25)          | 0<br>(0 - 1)     | 0<br>(0 - 0)      | 5<br>(3 - 8)       | 7<br>(5 - 11)        | 4<br>(2 - 6)             |
| Other cardiovascular and circulatory diseases | 140<br>(82 - 167)        | 0<br>(0 - 1)     | 0<br>(0 - 1)      | 17<br>(10 - 21)    | 40<br>(23 - 49)      | 83<br>(47 - 105)         |
| Chronic respiratory diseases                  | 747<br>(610 - 851)       | 7<br>(4 - 9)     | 1<br>(1 - 1)      | 24<br>(20 - 29)    | 121<br>(103 - 155)   | 595<br>(468 - 678)       |

Web Table 31- Costa Rica deaths with 95% UI by age, sex, and cause in 2013

| Cause                                               | Males, All Ages    | Males, 0-4 Years | Males, 5-14 Years | Males, 15-49 Years | Males, 50-69 Years | Males, 70-80 Years |
|-----------------------------------------------------|--------------------|------------------|-------------------|--------------------|--------------------|--------------------|
| Chronic obstructive pulmonary disease               | 640<br>(517 - 731) | 3<br>(2 - 5)     | 0<br>(0 - 0)      | 10<br>(8 - 13)     | 92<br>(77 - 118)   | 534<br>(423 - 614) |
| Pneumoconiosis                                      | 5<br>(4 - 8)       | 0<br>(0 - 0)     | 0<br>(0 - 0)      | 0<br>(0 - 1)       | 2<br>(1 - 2)       | 3<br>(2 - 5)       |
| Silicosis                                           | 0<br>(0 - 1)       | 0<br>(0 - 0)     | 0<br>(0 - 0)      | 0<br>(0 - 0)       | 0<br>(0 - 0)       | 0<br>(0 - 0)       |
| Asbestosis                                          | 1<br>(1 - 2)       | 0<br>(0 - 0)     | 0<br>(0 - 0)      | 0<br>(0 - 0)       | 0<br>(0 - 1)       | 1<br>(0 - 1)       |
| Coal workers pneumoconiosis                         | 1<br>(0 - 1)       | 0<br>(0 - 0)     | 0<br>(0 - 0)      | 0<br>(0 - 0)       | 0<br>(0 - 0)       | 0<br>(0 - 1)       |
| Other pneumoconiosis                                | 3<br>(2 - 5)       | 0<br>(0 - 0)     | 0<br>(0 - 0)      | 0<br>(0 - 0)       | 1<br>(1 - 1)       | 2<br>(1 - 3)       |
| Asthma                                              | 25<br>(20 - 30)    | 0<br>(0 - 1)     | 0<br>(0 - 1)      | 7<br>(5 - 8)       | 9<br>(7 - 12)      | 9<br>(6 - 12)      |
| Interstitial lung disease and pulmonary sarcoidosis | 68<br>(46 - 102)   | 1<br>(1 - 3)     | 0<br>(0 - 0)      | 5<br>(3 - 7)       | 17<br>(11 - 24)    | 45<br>(27 - 73)    |
| Other chronic respiratory diseases                  | 9<br>(6 - 11)      | 2<br>(1 - 3)     | 0<br>(0 - 0)      | 2<br>(1 - 2)       | 2<br>(1 - 2)       | 3<br>(2 - 5)       |
| Cirrhosis                                           | 502<br>(455 - 556) | 1<br>(0 - 1)     | 1<br>(1 - 1)      | 112<br>(95 - 130)  | 252<br>(221 - 286) | 136<br>(118 - 157) |
| Cirrhosis due to hepatitis B                        | 16<br>(8 - 26)     | 0<br>(0 - 0)     | 0<br>(0 - 0)      | 4<br>(2 - 6)       | 8<br>(4 - 13)      | 4<br>(2 - 8)       |
| Cirrhosis due to hepatitis C                        | 147<br>(105 - 193) | 0<br>(0 - 0)     | 0<br>(0 - 0)      | 27<br>(15 - 40)    | 74<br>(49 - 101)   | 45<br>(31 - 60)    |
| Cirrhosis due to alcohol use                        | 283<br>(234 - 341) | --               | --                | 60<br>(46 - 78)    | 145<br>(117 - 179) | 78<br>(63 - 96)    |
| Cirrhosis due to other causes                       | 56<br>(32 - 84)    | 1<br>(0 - 1)     | 1<br>(1 - 1)      | 21<br>(12 - 31)    | 26<br>(13 - 41)    | 8<br>(4 - 13)      |
| Digestive diseases                                  | 336<br>(286 - 384) | 1<br>(1 - 1)     | 1<br>(1 - 1)      | 40<br>(34 - 48)    | 88<br>(72 - 104)   | 207<br>(171 - 242) |
| Peptic ulcer disease                                | 57<br>(41 - 78)    | 0<br>(0 - 0)     | 0<br>(0 - 0)      | 6<br>(4 - 8)       | 17<br>(12 - 22)    | 34<br>(22 - 51)    |
| Gastritis and duodenitis                            | 6<br>(3 - 10)      | 0<br>(0 - 0)     | 0<br>(0 - 0)      | 1<br>(1 - 2)       | 1<br>(1 - 2)       | 3<br>(2 - 6)       |
| Appendicitis                                        | 9<br>(6 - 13)      | 0<br>(0 - 0)     | 0<br>(0 - 0)      | 2<br>(2 - 4)       | 3<br>(2 - 4)       | 3<br>(2 - 6)       |
| Paralytic ileus and intestinal obstruction          | 27<br>(5 - 47)     | 0<br>(0 - 1)     | 0<br>(0 - 0)      | 3<br>(1 - 5)       | 5<br>(1 - 8)       | 19<br>(3 - 34)     |
| Inguinal, femoral, and abdominal hernia             | 14<br>(8 - 29)     | 0<br>(0 - 0)     | 0<br>(0 - 0)      | 1<br>(1 - 2)       | 3<br>(2 - 7)       | 9<br>(5 - 21)      |
| Inflammatory bowel disease                          | 4<br>(2 - 5)       | 0<br>(0 - 0)     | 0<br>(0 - 0)      | 1<br>(1 - 2)       | 1<br>(1 - 2)       | 1<br>(1 - 2)       |
| Vascular intestinal disorders                       | 86<br>(42 - 146)   | 0<br>(0 - 0)     | 0<br>(0 - 0)      | 3<br>(1 - 7)       | 18<br>(8 - 32)     | 65<br>(31 - 109)   |
| Gallbladder and biliary diseases                    | 37<br>(25 - 51)    | 0<br>(0 - 0)     | 0<br>(0 - 0)      | 2<br>(2 - 3)       | 8<br>(5 - 10)      | 27<br>(17 - 39)    |
| Pancreatitis                                        | 57<br>(40 - 81)    | 0<br>(0 - 0)     | 0<br>(0 - 0)      | 15<br>(11 - 20)    | 21<br>(14 - 29)    | 22<br>(13 - 34)    |
| Other digestive diseases                            | 41<br>(18 - 56)    | 0<br>(0 - 0)     | 0<br>(0 - 0)      | 5<br>(2 - 6)       | 12<br>(5 - 16)     | 24<br>(9 - 35)     |
| Neurological disorders                              | 687<br>(534 - 833) | 4<br>(3 - 6)     | 3<br>(2 - 4)      | 34<br>(28 - 41)    | 79<br>(63 - 96)    | 567<br>(420 - 708) |
| Alzheimer disease and other dementias               | 540<br>(390 - 681) | --               | --                | 0<br>(0 - 1)       | 37<br>(23 - 52)    | 503<br>(353 - 644) |
| Parkinson disease                                   | 52<br>(41 - 65)    | --               | --                | 0<br>(0 - 0)       | 8<br>(6 - 11)      | 44<br>(32 - 56)    |
| Epilepsy                                            | 34<br>(28 - 43)    | 1<br>(1 - 2)     | 1<br>(1 - 1)      | 17<br>(13 - 22)    | 9<br>(7 - 13)      | 6<br>(4 - 8)       |
| Multiple sclerosis                                  | 2<br>(1 - 6)       | --               | --                | 1<br>(0 - 2)       | 1<br>(1 - 3)       | 0<br>(0 - 1)       |
| Other neurological disorders                        | 58<br>(43 - 71)    | 3<br>(2 - 5)     | 2<br>(1 - 3)      | 16<br>(12 - 20)    | 23<br>(17 - 29)    | 15<br>(9 - 19)     |
| Mental and substance use disorders                  | 71<br>(53 - 99)    | 0<br>(0 - 0)     | 0<br>(0 - 0)      | 32<br>(24 - 45)    | 27<br>(19 - 40)    | 11<br>(8 - 15)     |
| Schizophrenia                                       | 2<br>(1 - 3)       | --               | --                | 0<br>(0 - 0)       | 1<br>(0 - 1)       | 1<br>(0 - 1)       |
| Alcohol use disorders                               | 49<br>(34 - 78)    | --               | --                | 20<br>(14 - 32)    | 22<br>(15 - 36)    | 7<br>(4 - 12)      |
| Drug use disorders                                  | 20<br>(10 - 24)    | 0<br>(0 - 0)     | --                | 12<br>(7 - 16)     | 4<br>(2 - 5)       | 3<br>(1 - 5)       |
| Opioid use disorders                                | 4<br>(2 - 5)       | 0<br>(0 - 0)     | --                | 3<br>(1 - 4)       | 1<br>(0 - 1)       | 1<br>(0 - 1)       |
| Cocaine use disorders                               | 0<br>(0 - 1)       | 0<br>(0 - 0)     | --                | 0<br>(0 - 0)       | 0<br>(0 - 0)       | 0<br>(0 - 0)       |
| Amphetamine use disorders                           | 0<br>(0 - 0)       | 0<br>(0 - 0)     | --                | 0<br>(0 - 0)       | 0<br>(0 - 0)       | 0<br>(0 - 0)       |
| Other drug use disorders                            | 15<br>(7 - 18)     | 0<br>(0 - 0)     | --                | 9<br>(5 - 12)      | 3<br>(2 - 4)       | 2<br>(1 - 3)       |
| Eating disorders                                    | 0<br>(0 - 0)       | --               | 0<br>(0 - 0)      | 0<br>(0 - 0)       | --                 | --                 |

Web Table 31- Costa Rica deaths with 95% UI by age, sex, and cause in 2013

| Cause                                               | Males, All Ages    | Males, 0-4 Years   | Males, 5-14 Years | Males, 15-49 Years | Males, 50-69 Years | Males, 70-80 Years |
|-----------------------------------------------------|--------------------|--------------------|-------------------|--------------------|--------------------|--------------------|
| Anorexia nervosa                                    | 0<br>(0 - 0)       | --                 | 0<br>(0 - 0)      | 0<br>(0 - 0)       | --                 | --                 |
| Diabetes, urogenital, blood, and endocrine diseases | 896<br>(760 - 992) | 8<br>(6 - 12)      | 3<br>(3 - 4)      | 97<br>(82 - 112)   | 298<br>(232 - 342) | 489<br>(412 - 556) |
| Diabetes mellitus                                   | 189<br>(166 - 213) | 0<br>(0 - 0)       | 0<br>(0 - 0)      | 16<br>(14 - 20)    | 66<br>(56 - 78)    | 106<br>(89 - 126)  |
| Acute glomerulonephritis                            | 1<br>(1 - 1)       | 0<br>(0 - 0)       | 0<br>(0 - 0)      | 0<br>(0 - 0)       | 0<br>(0 - 0)       | 0<br>(0 - 1)       |
| Chronic kidney disease                              | 597<br>(477 - 679) | 2<br>(2 - 3)       | 2<br>(1 - 2)      | 65<br>(51 - 77)    | 209<br>(143 - 250) | 319<br>(258 - 379) |
| Chronic kidney disease due to diabetes mellitus     | 265<br>(182 - 373) | 0<br>(0 - 0)       | 0<br>(0 - 0)      | 23<br>(15 - 35)    | 115<br>(75 - 153)  | 126<br>(86 - 187)  |
| Chronic kidney disease due to hypertension          | 158<br>(76 - 221)  | 0<br>(0 - 1)       | 0<br>(0 - 0)      | 17<br>(9 - 23)     | 41<br>(15 - 60)    | 100<br>(50 - 142)  |
| Chronic kidney disease due to glomerulonephritis    | 8<br>(5 - 12)      | 0<br>(0 - 1)       | 0<br>(0 - 1)      | 3<br>(2 - 4)       | 2<br>(1 - 3)       | 2<br>(1 - 4)       |
| Chronic kidney disease due to other causes          | 166<br>(76 - 224)  | 1<br>(1 - 2)       | 1<br>(0 - 1)      | 22<br>(13 - 31)    | 52<br>(17 - 79)    | 90<br>(41 - 134)   |
| Urinary diseases and male infertility               | 56<br>(28 - 72)    | 0<br>(0 - 0)       | 0<br>(0 - 0)      | 3<br>(2 - 4)       | 9<br>(5 - 12)      | 43<br>(20 - 58)    |
| Interstitial nephritis and urinary tract infections | 45<br>(21 - 61)    | 0<br>(0 - 0)       | 0<br>(0 - 0)      | 2<br>(1 - 3)       | 7<br>(3 - 9)       | 36<br>(16 - 50)    |
| Urolithiasis                                        | 1<br>(0 - 1)       | --                 | 0<br>(0 - 0)      | 0<br>(0 - 0)       | 0<br>(0 - 0)       | 0<br>(0 - 0)       |
| Other urinary diseases                              | 10<br>(5 - 18)     | 0<br>(0 - 0)       | 0<br>(0 - 0)      | 1<br>(0 - 1)       | 2<br>(1 - 4)       | 7<br>(3 - 14)      |
| Gynecological diseases                              | --                 | --                 | --                | --                 | --                 | --                 |
| Uterine fibroids                                    | --                 | --                 | --                | --                 | --                 | --                 |
| Polycystic ovarian syndrome                         | --                 | --                 | --                | --                 | --                 | --                 |
| Endometriosis                                       | --                 | --                 | --                | --                 | --                 | --                 |
| Genital prolapse                                    | --                 | --                 | --                | --                 | --                 | --                 |
| Other gynecological diseases                        | --                 | --                 | --                | --                 | --                 | --                 |
| Hemoglobinopathies and hemolytic anemias            | 19<br>(11 - 28)    | 1<br>(1 - 2)       | 1<br>(0 - 1)      | 5<br>(3 - 8)       | 5<br>(3 - 7)       | 7<br>(4 - 11)      |
| Thalassemias                                        | 0<br>(0 - 0)       | 0<br>(0 - 0)       | 0<br>(0 - 0)      | 0<br>(0 - 0)       | 0<br>(0 - 0)       | 0<br>(0 - 0)       |
| Sickle cell disorders                               | 6<br>(4 - 9)       | 1<br>(0 - 1)       | 1<br>(0 - 1)      | 3<br>(2 - 5)       | 2<br>(1 - 2)       | 0<br>(0 - 0)       |
| G6PD deficiency                                     | 1<br>(1 - 2)       | 0<br>(0 - 0)       | 0<br>(0 - 0)      | 0<br>(0 - 1)       | 0<br>(0 - 1)       | 0<br>(0 - 0)       |
| Other hemoglobinopathies and hemolytic anemias      | 11<br>(7 - 17)     | 0<br>(0 - 1)       | 0<br>(0 - 0)      | 1<br>(1 - 2)       | 3<br>(2 - 4)       | 7<br>(4 - 10)      |
| Endocrine, metabolic, blood, and immune disorders   | 35<br>(27 - 61)    | 4<br>(2 - 8)       | 1<br>(1 - 1)      | 8<br>(6 - 13)      | 9<br>(6 - 15)      | 14<br>(9 - 27)     |
| Musculoskeletal disorders                           | 21<br>(8 - 27)     | --                 | 1<br>(0 - 1)      | 6<br>(3 - 8)       | 6<br>(2 - 8)       | 8<br>(3 - 11)      |
| Rheumatoid arthritis                                | 4<br>(2 - 7)       | --                 | 0<br>(0 - 0)      | 1<br>(0 - 1)       | 1<br>(0 - 2)       | 2<br>(1 - 4)       |
| Other musculoskeletal disorders                     | 16<br>(6 - 22)     | --                 | 1<br>(0 - 1)      | 6<br>(2 - 8)       | 5<br>(2 - 7)       | 5<br>(2 - 8)       |
| Other non-communicable diseases                     | 215<br>(183 - 246) | 162<br>(137 - 192) | 7<br>(5 - 9)      | 13<br>(11 - 17)    | 7<br>(4 - 8)       | 26<br>(10 - 35)    |
| Congenital anomalies                                | 179<br>(152 - 210) | 157<br>(131 - 186) | 7<br>(5 - 9)      | 11<br>(9 - 15)     | 2<br>(2 - 3)       | 2<br>(1 - 2)       |
| Neural tube defects                                 | 8<br>(5 - 12)      | 7<br>(4 - 10)      | 0<br>(0 - 1)      | 1<br>(1 - 1)       | 0<br>(0 - 0)       | 0<br>(0 - 0)       |
| Congenital heart anomalies                          | 82<br>(65 - 102)   | 72<br>(56 - 91)    | 3<br>(2 - 4)      | 5<br>(4 - 8)       | 1<br>(1 - 1)       | 0<br>(0 - 0)       |
| Cleft lip and cleft palate                          | 0<br>(0 - 0)       | 0<br>(0 - 0)       | --                | --                 | --                 | --                 |
| Down syndrome                                       | 6<br>(4 - 12)      | 5<br>(3 - 10)      | 0<br>(0 - 1)      | 1<br>(1 - 2)       | 0<br>(0 - 0)       | 0<br>(0 - 0)       |
| Chromosomal unbalanced rearrangements               | 6<br>(4 - 9)       | 5<br>(3 - 8)       | 0<br>(0 - 0)      | 0<br>(0 - 0)       | 0<br>(0 - 0)       | 0<br>(0 - 0)       |
| Other congenital anomalies                          | 77<br>(59 - 99)    | 67<br>(50 - 88)    | 3<br>(2 - 4)      | 4<br>(3 - 5)       | 1<br>(1 - 2)       | 1<br>(1 - 2)       |
| Skin and subcutaneous diseases                      | 32<br>(11 - 42)    | 1<br>(0 - 1)       | 0<br>(0 - 0)      | 2<br>(1 - 3)       | 4<br>(1 - 6)       | 24<br>(8 - 34)     |
| Cellulitis                                          | 3<br>(1 - 6)       | 0<br>(0 - 0)       | 0<br>(0 - 0)      | 1<br>(0 - 1)       | 1<br>(0 - 2)       | 2<br>(0 - 4)       |
| Pyoderma                                            | 7<br>(2 - 9)       | 0<br>(0 - 1)       | 0<br>(0 - 0)      | 0<br>(0 - 1)       | 1<br>(0 - 2)       | 4<br>(1 - 7)       |
| Decubitus ulcer                                     | 20<br>(7 - 28)     | 0<br>(0 - 0)       | 0<br>(0 - 0)      | 1<br>(0 - 1)       | 2<br>(1 - 3)       | 17<br>(6 - 25)     |

Web Table 31- Costa Rica deaths with 95% UI by age, sex, and cause in 2013

| Cause                                           | Males, All Ages          | Males, 0-4 Years | Males, 5-14 Years | Males, 15-49 Years     | Males, 50-69 Years | Males, 70-80 Years |
|-------------------------------------------------|--------------------------|------------------|-------------------|------------------------|--------------------|--------------------|
| Other skin and subcutaneous diseases            | 2<br>(1 - 3)             | 0<br>(0 - 1)     | 0<br>(0 - 0)      | 0<br>(0 - 1)           | 0<br>(0 - 0)       | 1<br>(0 - 2)       |
| Sudden infant death syndrome                    | 5<br>(2 - 10)            | 5<br>(2 - 10)    | --                | --                     | --                 | --                 |
| Injuries                                        | 1,727<br>(1,580 - 1,890) | 27<br>(20 - 36)  | 36<br>(31 - 41)   | 1,030<br>(932 - 1,132) | 365<br>(323 - 419) | 269<br>(235 - 311) |
| Transport injuries                              | 636<br>(563 - 745)       | 6<br>(4 - 8)     | 15<br>(12 - 19)   | 377<br>(326 - 442)     | 148<br>(124 - 180) | 90<br>(73 - 112)   |
| Road injuries                                   | 618<br>(547 - 718)       | 6<br>(4 - 8)     | 15<br>(12 - 18)   | 366<br>(317 - 426)     | 143<br>(121 - 172) | 89<br>(72 - 110)   |
| Pedestrian road injuries                        | 235<br>(187 - 301)       | 3<br>(2 - 5)     | 8<br>(6 - 11)     | 87<br>(62 - 123)       | 71<br>(55 - 93)    | 66<br>(52 - 83)    |
| Cyclist road injuries                           | 56<br>(42 - 72)          | 0<br>(0 - 1)     | 2<br>(1 - 3)      | 26<br>(20 - 34)        | 22<br>(16 - 29)    | 6<br>(4 - 8)       |
| Motorcyclist road injuries                      | 88<br>(60 - 116)         | 0<br>(0 - 0)     | 1<br>(0 - 1)      | 74<br>(51 - 99)        | 11<br>(7 - 16)     | 2<br>(1 - 4)       |
| Motor vehicle road injuries                     | 236<br>(191 - 288)       | 2<br>(1 - 3)     | 4<br>(3 - 5)      | 178<br>(144 - 216)     | 38<br>(28 - 51)    | 14<br>(9 - 21)     |
| Other road injuries                             | 3<br>(2 - 6)             | 0<br>(0 - 0)     | 0<br>(0 - 0)      | 1<br>(1 - 2)           | 1<br>(1 - 2)       | 1<br>(0 - 2)       |
| Other transport injuries                        | 18<br>(14 - 30)          | 0<br>(0 - 0)     | 0<br>(0 - 1)      | 11<br>(8 - 19)         | 5<br>(3 - 8)       | 2<br>(1 - 3)       |
| Unintentional injuries                          | 471<br>(416 - 585)       | 18<br>(13 - 26)  | 15<br>(12 - 22)   | 184<br>(152 - 245)     | 105<br>(91 - 129)  | 148<br>(121 - 184) |
| Falls                                           | 139<br>(115 - 191)       | 1<br>(1 - 1)     | 1<br>(1 - 1)      | 31<br>(25 - 42)        | 36<br>(29 - 48)    | 69<br>(52 - 104)   |
| Drowning                                        | 138<br>(108 - 217)       | 7<br>(4 - 15)    | 10<br>(7 - 16)    | 87<br>(66 - 138)       | 26<br>(19 - 40)    | 8<br>(6 - 12)      |
| Fire, heat, and hot substances                  | 22<br>(13 - 30)          | 2<br>(1 - 3)     | 1<br>(0 - 1)      | 5<br>(3 - 7)           | 4<br>(3 - 6)       | 10<br>(5 - 17)     |
| Poisonings                                      | 9<br>(7 - 15)            | 0<br>(0 - 0)     | 0<br>(0 - 0)      | 5<br>(3 - 8)           | 3<br>(2 - 5)       | 1<br>(0 - 2)       |
| Exposure to mechanical forces                   | 22<br>(18 - 52)          | 1<br>(0 - 1)     | 1<br>(1 - 2)      | 14<br>(11 - 33)        | 5<br>(4 - 11)      | 2<br>(1 - 4)       |
| Unintentional firearm injuries                  | 5<br>(3 - 7)             | 0<br>(0 - 0)     | 0<br>(0 - 0)      | 4<br>(2 - 5)           | 1<br>(1 - 1)       | 0<br>(0 - 0)       |
| Unintentional suffocation                       | 3<br>(2 - 4)             | 0<br>(0 - 1)     | 0<br>(0 - 1)      | 1<br>(1 - 1)           | 1<br>(0 - 1)       | 0<br>(0 - 1)       |
| Other exposure to mechanical forces             | 15<br>(11 - 43)          | 0<br>(0 - 0)     | 1<br>(0 - 2)      | 10<br>(7 - 29)         | 3<br>(2 - 9)       | 1<br>(1 - 3)       |
| Adverse effects of medical treatment            | 59<br>(42 - 79)          | 2<br>(1 - 3)     | 1<br>(0 - 1)      | 11<br>(8 - 16)         | 15<br>(11 - 23)    | 30<br>(18 - 42)    |
| Animal contact                                  | 9<br>(4 - 10)            | 0<br>(0 - 0)     | 0<br>(0 - 1)      | 3<br>(2 - 4)           | 3<br>(1 - 3)       | 2<br>(1 - 3)       |
| Venomous animal contact                         | 4<br>(2 - 5)             | 0<br>(0 - 0)     | 0<br>(0 - 0)      | 1<br>(0 - 1)           | 1<br>(1 - 2)       | 1<br>(0 - 2)       |
| Non-venomous animal contact                     | 5<br>(2 - 6)             | 0<br>(0 - 0)     | 0<br>(0 - 0)      | 2<br>(1 - 3)           | 1<br>(0 - 2)       | 1<br>(0 - 1)       |
| Foreign body                                    | 42<br>(24 - 67)          | 5<br>(3 - 8)     | 1<br>(0 - 1)      | 6<br>(3 - 9)           | 7<br>(4 - 11)      | 23<br>(12 - 39)    |
| Pulmonary aspiration and foreign body in airway | 41<br>(23 - 66)          | 5<br>(3 - 8)     | 1<br>(0 - 1)      | 6<br>(3 - 9)           | 7<br>(4 - 10)      | 23<br>(12 - 39)    |
| Foreign body in other body part                 | 1<br>(1 - 1)             | 0<br>(0 - 0)     | 0<br>(0 - 0)      | 0<br>(0 - 0)           | 1<br>(0 - 1)       | 0<br>(0 - 0)       |
| Other unintentional injuries                    | 32<br>(24 - 42)          | 1<br>(0 - 1)     | 1<br>(0 - 2)      | 22<br>(16 - 31)        | 6<br>(3 - 9)       | 3<br>(2 - 4)       |
| Self-harm and interpersonal violence            | 620<br>(468 - 720)       | 3<br>(1 - 6)     | 5<br>(3 - 8)      | 469<br>(351 - 547)     | 112<br>(82 - 140)  | 30<br>(22 - 39)    |
| Self-harm                                       | 295<br>(236 - 355)       | --               | 2<br>(1 - 4)      | 204<br>(161 - 248)     | 68<br>(52 - 85)    | 21<br>(16 - 27)    |
| Interpersonal violence                          | 325<br>(184 - 406)       | 3<br>(1 - 6)     | 3<br>(1 - 5)      | 264<br>(152 - 333)     | 45<br>(23 - 67)    | 10<br>(4 - 17)     |
| Assault by firearm                              | 219<br>(108 - 287)       | 1<br>(0 - 2)     | 2<br>(1 - 3)      | 186<br>(91 - 246)      | 27<br>(12 - 43)    | 3<br>(1 - 6)       |
| Assault by sharp object                         | 75<br>(37 - 134)         | 0<br>(0 - 1)     | 0<br>(0 - 1)      | 61<br>(29 - 110)       | 11<br>(5 - 20)     | 2<br>(1 - 5)       |
| Assault by other means                          | 31<br>(14 - 49)          | 2<br>(1 - 3)     | 1<br>(0 - 1)      | 18<br>(8 - 31)         | 7<br>(3 - 11)      | 4<br>(2 - 8)       |

Web Table 31- Costa Rica deaths with 95% UI by age, sex, and cause in 2013

| Cause                                                             | Females, All Ages         | Females, 0-4 Years | Females, 5-14 Years | Females, 15-49 Years | Females, 50-69 Years     | Females, 70-80 Years     |
|-------------------------------------------------------------------|---------------------------|--------------------|---------------------|----------------------|--------------------------|--------------------------|
| All causes                                                        | 9,580<br>(9,039 - 10,072) | 336<br>(299 - 386) | 68<br>(63 - 73)     | 892<br>(805 - 974)   | 2,059<br>(1,884 - 2,219) | 6,226<br>(5,952 - 6,476) |
| Communicable, maternal, neonatal, and nutritional diseases        | 595<br>(521 - 719)        | 154<br>(128 - 185) | 11<br>(9 - 15)      | 77<br>(67 - 88)      | 64<br>(55 - 73)          | 289<br>(224 - 407)       |
| HIV/AIDS and tuberculosis                                         | 40<br>(33 - 50)           | 0<br>(0 - 0)       | 0<br>(0 - 0)        | 20<br>(15 - 26)      | 9<br>(7 - 12)            | 10<br>(7 - 14)           |
| Tuberculosis                                                      | 20<br>(16 - 27)           | 0<br>(0 - 0)       | 0<br>(0 - 0)        | 4<br>(3 - 5)         | 6<br>(5 - 9)             | 10<br>(7 - 14)           |
| HIV/AIDS                                                          | 20<br>(14 - 27)           | 0<br>(0 - 0)       | 0<br>(0 - 0)        | 17<br>(12 - 23)      | 3<br>(2 - 5)             | 0<br>(0 - 0)             |
| HIV/AIDS resulting in mycobacterial infection                     | 1<br>(1 - 1)              | 0<br>(0 - 0)       | 0<br>(0 - 0)        | 1<br>(0 - 1)         | 0<br>(0 - 0)             | 0<br>(0 - 0)             |
| HIV/AIDS resulting in other diseases                              | 19<br>(13 - 26)           | 0<br>(0 - 0)       | 0<br>(0 - 0)        | 16<br>(11 - 22)      | 3<br>(1 - 5)             | 0<br>(0 - 0)             |
| Diarrhea, lower respiratory, and other common infectious diseases | 374<br>(308 - 488)        | 38<br>(30 - 47)    | 9<br>(7 - 13)       | 30<br>(24 - 39)      | 45<br>(37 - 54)          | 252<br>(188 - 366)       |
| Diarrheal diseases                                                | 49<br>(37 - 67)           | 8<br>(5 - 12)      | 1<br>(1 - 1)        | 2<br>(2 - 3)         | 6<br>(4 - 9)             | 32<br>(20 - 49)          |
| Intestinal infectious diseases                                    | 18<br>(9 - 33)            | 5<br>(2 - 9)       | 4<br>(2 - 8)        | 7<br>(2 - 15)        | 1<br>(1 - 3)             | 1<br>(0 - 1)             |
| Typhoid fever                                                     | 14<br>(7 - 26)            | 4<br>(2 - 7)       | 3<br>(2 - 6)        | 6<br>(2 - 11)        | 1<br>(0 - 2)             | 0<br>(0 - 1)             |
| Paratyphoid fever                                                 | 4<br>(2 - 7)              | 1<br>(0 - 2)       | 1<br>(0 - 2)        | 1<br>(0 - 4)         | 0<br>(0 - 1)             | 0<br>(0 - 0)             |
| Other intestinal infectious diseases                              | 0<br>(0 - 2)              | 0<br>(0 - 1)       | 0<br>(0 - 0)        | 0<br>(0 - 1)         | 0<br>(0 - 0)             | 0<br>(0 - 0)             |
| Lower respiratory infections                                      | 279<br>(217 - 391)        | 19<br>(12 - 26)    | 2<br>(1 - 2)        | 13<br>(10 - 16)      | 32<br>(25 - 40)          | 213<br>(155 - 328)       |
| Upper respiratory infections                                      | 0<br>(0 - 1)              | 0<br>(0 - 0)       | 0<br>(0 - 0)        | 0<br>(0 - 0)         | 0<br>(0 - 0)             | 0<br>(0 - 1)             |
| Otitis media                                                      | 0<br>(0 - 0)              | 0<br>(0 - 0)       | 0<br>(0 - 0)        | 0<br>(0 - 0)         | 0<br>(0 - 0)             | 0<br>(0 - 0)             |
| Meningitis                                                        | 15<br>(12 - 17)           | 3<br>(2 - 4)       | 1<br>(1 - 1)        | 4<br>(3 - 4)         | 3<br>(2 - 4)             | 4<br>(3 - 5)             |
| Pneumococcal meningitis                                           | 5<br>(4 - 6)              | 1<br>(1 - 1)       | 0<br>(0 - 0)        | 1<br>(1 - 2)         | 1<br>(1 - 2)             | 1<br>(1 - 2)             |
| H influenzae type B meningitis                                    | 2<br>(2 - 3)              | 1<br>(1 - 2)       | 0<br>(0 - 0)        | 0<br>(0 - 1)         | 0<br>(0 - 0)             | 0<br>(0 - 1)             |
| Meningococcal meningitis                                          | 2<br>(1 - 2)              | 0<br>(0 - 0)       | 0<br>(0 - 0)        | 0<br>(0 - 1)         | 0<br>(0 - 1)             | 1<br>(0 - 1)             |
| Other meningitis                                                  | 6<br>(4 - 7)              | 1<br>(0 - 1)       | 0<br>(0 - 0)        | 1<br>(1 - 2)         | 1<br>(1 - 2)             | 2<br>(1 - 2)             |
| Encephalitis                                                      | 10<br>(8 - 16)            | 2<br>(1 - 4)       | 2<br>(1 - 3)        | 3<br>(2 - 5)         | 2<br>(1 - 4)             | 1<br>(1 - 2)             |
| Diphtheria                                                        | 0<br>(0 - 0)              | 0<br>(0 - 0)       | 0<br>(0 - 0)        | 0<br>(0 - 0)         | 0<br>(0 - 0)             | --                       |
| Whooping cough                                                    | 1<br>(0 - 3)              | 1<br>(0 - 2)       | 0<br>(0 - 0)        | 0<br>(0 - 0)         | 0<br>(0 - 0)             | --                       |
| Tetanus                                                           | 0<br>(0 - 1)              | 0<br>(0 - 0)       | 0<br>(0 - 0)        | 0<br>(0 - 0)         | 0<br>(0 - 0)             | 0<br>(0 - 0)             |
| Measles                                                           | 0<br>(0 - 0)              | 0<br>(0 - 0)       | 0<br>(0 - 0)        | 0<br>(0 - 0)         | 0<br>(0 - 0)             | --                       |
| Varicella and herpes zoster                                       | 1<br>(0 - 5)              | 0<br>(0 - 1)       | 0<br>(0 - 0)        | 0<br>(0 - 1)         | 0<br>(0 - 0)             | 1<br>(0 - 4)             |
| Neglected tropical diseases and malaria                           | 4<br>(3 - 10)             | 1<br>(0 - 2)       | 0<br>(0 - 1)        | 1<br>(1 - 2)         | 1<br>(0 - 2)             | 1<br>(0 - 4)             |
| Malaria                                                           | 0<br>(0 - 0)              | 0<br>(0 - 0)       | 0<br>(0 - 0)        | 0<br>(0 - 0)         | 0<br>(0 - 0)             | 0<br>(0 - 0)             |
| Chagas disease                                                    | 1<br>(0 - 6)              | 0<br>(0 - 0)       | 0<br>(0 - 0)        | 0<br>(0 - 1)         | 0<br>(0 - 2)             | 1<br>(0 - 3)             |
| Leishmaniasis                                                     | 0<br>(0 - 0)              | 0<br>(0 - 0)       | 0<br>(0 - 0)        | 0<br>(0 - 0)         | 0<br>(0 - 0)             | 0<br>(0 - 0)             |
| Visceral leishmaniasis                                            | 0<br>(0 - 0)              | 0<br>(0 - 0)       | 0<br>(0 - 0)        | 0<br>(0 - 0)         | 0<br>(0 - 0)             | 0<br>(0 - 0)             |
| Cysticercosis                                                     | 0<br>(0 - 1)              | 0<br>(0 - 0)       | 0<br>(0 - 0)        | 0<br>(0 - 0)         | 0<br>(0 - 0)             | 0<br>(0 - 0)             |
| Cystic echinococcosis                                             | 0<br>(0 - 0)              | 0<br>(0 - 0)       | 0<br>(0 - 0)        | 0<br>(0 - 0)         | 0<br>(0 - 0)             | 0<br>(0 - 0)             |
| Dengue                                                            | 1<br>(1 - 1)              | 0<br>(0 - 0)       | 0<br>(0 - 0)        | 0<br>(0 - 1)         | 0<br>(0 - 0)             | 0<br>(0 - 0)             |
| Rabies                                                            | 0<br>(0 - 0)              | 0<br>(0 - 0)       | 0<br>(0 - 0)        | 0<br>(0 - 0)         | 0<br>(0 - 0)             | 0<br>(0 - 0)             |
| Intestinal nematode infections                                    | 0<br>(0 - 2)              | 0<br>(0 - 1)       | 0<br>(0 - 0)        | 0<br>(0 - 0)         | 0<br>(0 - 0)             | 0<br>(0 - 1)             |
| Ascariasis                                                        | 0<br>(0 - 2)              | 0<br>(0 - 1)       | 0<br>(0 - 0)        | 0<br>(0 - 0)         | 0<br>(0 - 0)             | 0<br>(0 - 1)             |
| Other neglected tropical diseases                                 | 1<br>(1 - 2)              | 0<br>(0 - 1)       | 0<br>(0 - 0)        | 0<br>(0 - 0)         | 0<br>(0 - 0)             | 0<br>(0 - 0)             |
| Maternal disorders                                                | 19<br>(15 - 23)           | --                 | 0<br>(0 - 0)        | 19<br>(15 - 23)      | --                       | --                       |



Web Table 31- Costa Rica deaths with 95% UI by age, sex, and cause in 2013

| Cause                                                            | Females, All Ages        | Females, 0-4 Years | Females, 5-14 Years | Females, 15-49 Years | Females, 50-69 Years     | Females, 70-80 Years     |
|------------------------------------------------------------------|--------------------------|--------------------|---------------------|----------------------|--------------------------|--------------------------|
| Maternal hemorrhage                                              | 2<br>(2 - 3)             | --                 | 0<br>(0 - 0)        | 2<br>(2 - 3)         | --                       | --                       |
| Maternal sepsis and other maternal infections                    | 2<br>(1 - 2)             | --                 | 0<br>(0 - 0)        | 2<br>(1 - 2)         | --                       | --                       |
| Maternal hypertensive disorders                                  | 2<br>(2 - 3)             | --                 | 0<br>(0 - 0)        | 2<br>(1 - 3)         | --                       | --                       |
| Maternal obstructed labor                                        | 2<br>(1 - 2)             | --                 | 0<br>(0 - 0)        | 2<br>(1 - 2)         | --                       | --                       |
| Maternal abortive outcome                                        | 3<br>(2 - 4)             | --                 | 0<br>(0 - 0)        | 3<br>(2 - 4)         | --                       | --                       |
| Indirect maternal deaths                                         | 3<br>(2 - 4)             | --                 | 0<br>(0 - 0)        | 3<br>(2 - 4)         | --                       | --                       |
| Late maternal deaths                                             | 1<br>(1 - 2)             | --                 | 0<br>(0 - 0)        | 1<br>(1 - 2)         | --                       | --                       |
| Maternal deaths aggravated by HIV/AIDS                           | 0<br>(0 - 0)             | --                 | --                  | 0<br>(0 - 0)         | --                       | --                       |
| Other maternal disorders                                         | 3<br>(2 - 4)             | --                 | 0<br>(0 - 0)        | 3<br>(2 - 4)         | --                       | --                       |
| Neonatal disorders                                               | 107<br>(84 - 131)        | 107<br>(84 - 131)  | --                  | --                   | --                       | --                       |
| Neonatal preterm birth complications                             | 53<br>(36 - 71)          | 53<br>(36 - 71)    | --                  | --                   | --                       | --                       |
| Neonatal encephalopathy due to birth asphyxia and trauma         | 24<br>(16 - 34)          | 24<br>(16 - 34)    | --                  | --                   | --                       | --                       |
| Neonatal sepsis and other neonatal infections                    | 11<br>(6 - 21)           | 11<br>(6 - 21)     | --                  | --                   | --                       | --                       |
| Hemolytic disease and other neonatal jaundice                    | 0<br>(0 - 0)             | 0<br>(0 - 0)       | --                  | --                   | --                       | --                       |
| Other neonatal disorders                                         | 18<br>(12 - 27)          | 18<br>(12 - 27)    | --                  | --                   | --                       | --                       |
| Nutritional deficiencies                                         | 25<br>(19 - 35)          | 2<br>(1 - 3)       | 0<br>(0 - 0)        | 2<br>(2 - 3)         | 2<br>(2 - 3)             | 19<br>(13 - 27)          |
| Protein-energy malnutrition                                      | 18<br>(12 - 26)          | 2<br>(1 - 2)       | 0<br>(0 - 0)        | 1<br>(0 - 1)         | 1<br>(1 - 2)             | 14<br>(9 - 22)           |
| Iodine deficiency                                                | 0<br>(0 - 1)             | 0<br>(0 - 0)       | 0<br>(0 - 0)        | 0<br>(0 - 0)         | 0<br>(0 - 0)             | 0<br>(0 - 0)             |
| Iron-deficiency anemia                                           | 5<br>(2 - 10)            | 0<br>(0 - 0)       | 0<br>(0 - 0)        | 1<br>(0 - 1)         | 1<br>(0 - 1)             | 3<br>(1 - 7)             |
| Other nutritional deficiencies                                   | 2<br>(1 - 3)             | 0<br>(0 - 0)       | 0<br>(0 - 0)        | 0<br>(0 - 0)         | 0<br>(0 - 1)             | 1<br>(0 - 2)             |
| Other communicable, maternal, neonatal, and nutritional diseases | 27<br>(19 - 39)          | 8<br>(1 - 19)      | 1<br>(1 - 2)        | 5<br>(4 - 6)         | 6<br>(5 - 8)             | 7<br>(5 - 9)             |
| Sexually transmitted diseases excluding HIV                      | 9<br>(2 - 21)            | 6<br>(0 - 17)      | 1<br>(0 - 1)        | 1<br>(0 - 1)         | 1<br>(0 - 1)             | 1<br>(0 - 1)             |
| Syphilis                                                         | 8<br>(1 - 20)            | 6<br>(0 - 17)      | 0<br>(0 - 1)        | 0<br>(0 - 0)         | 0<br>(0 - 1)             | 1<br>(0 - 1)             |
| Chlamydial infection                                             | 0<br>(0 - 0)             | --                 | 0<br>(0 - 0)        | 0<br>(0 - 0)         | 0<br>(0 - 0)             | 0<br>(0 - 0)             |
| Gonococcal infection                                             | 0<br>(0 - 0)             | --                 | 0<br>(0 - 0)        | 0<br>(0 - 0)         | 0<br>(0 - 0)             | 0<br>(0 - 0)             |
| Other sexually transmitted diseases                              | 0<br>(0 - 0)             | --                 | 0<br>(0 - 0)        | 0<br>(0 - 0)         | 0<br>(0 - 0)             | 0<br>(0 - 0)             |
| Hepatitis                                                        | 8<br>(7 - 11)            | 0<br>(0 - 1)       | 0<br>(0 - 0)        | 2<br>(2 - 3)         | 3<br>(2 - 5)             | 2<br>(1 - 4)             |
| Acute hepatitis A                                                | 2<br>(1 - 4)             | 0<br>(0 - 0)       | 0<br>(0 - 0)        | 1<br>(0 - 2)         | 1<br>(0 - 1)             | 0<br>(0 - 1)             |
| Acute hepatitis B                                                | 5<br>(3 - 7)             | 0<br>(0 - 0)       | 0<br>(0 - 0)        | 1<br>(0 - 1)         | 2<br>(1 - 3)             | 2<br>(1 - 3)             |
| Acute hepatitis C                                                | 1<br>(0 - 3)             | --                 | 0<br>(0 - 0)        | 0<br>(0 - 1)         | 0<br>(0 - 1)             | 0<br>(0 - 1)             |
| Other infectious diseases                                        | 10<br>(8 - 13)           | 1<br>(1 - 1)       | 0<br>(0 - 0)        | 2<br>(2 - 3)         | 2<br>(2 - 3)             | 4<br>(3 - 7)             |
| Non-communicable diseases                                        | 8,426<br>(7,905 - 8,891) | 162<br>(139 - 190) | 35<br>(31 - 40)     | 648<br>(582 - 713)   | 1,919<br>(1,755 - 2,069) | 5,661<br>(5,376 - 5,907) |
| Neoplasms                                                        | 2,269<br>(2,072 - 2,486) | 9<br>(6 - 12)      | 14<br>(12 - 17)     | 315<br>(280 - 354)   | 781<br>(704 - 861)       | 1,149<br>(1,033 - 1,275) |
| Esophageal cancer                                                | 34<br>(26 - 43)          | --                 | --                  | 1<br>(1 - 2)         | 8<br>(6 - 10)            | 25<br>(17 - 32)          |
| Stomach cancer                                                   | 306<br>(253 - 368)       | --                 | --                  | 30<br>(24 - 38)      | 86<br>(70 - 101)         | 191<br>(144 - 248)       |
| Liver cancer                                                     | 112<br>(90 - 138)        | --                 | 0<br>(0 - 0)        | 10<br>(8 - 13)       | 38<br>(30 - 48)          | 63<br>(46 - 87)          |
| Liver cancer due to hepatitis B                                  | 18<br>(7 - 32)           | --                 | 0<br>(0 - 0)        | 3<br>(2 - 5)         | 7<br>(2 - 14)            | 8<br>(2 - 15)            |
| Liver cancer due to hepatitis C                                  | 58<br>(40 - 78)          | --                 | 0<br>(0 - 0)        | 4<br>(2 - 6)         | 20<br>(12 - 28)          | 34<br>(22 - 50)          |
| Liver cancer due to alcohol use                                  | 21<br>(11 - 34)          | --                 | --                  | 1<br>(0 - 2)         | 6<br>(3 - 10)            | 14<br>(7 - 25)           |
| Liver cancer due to other causes                                 | 15<br>(7 - 25)           | --                 | 0<br>(0 - 0)        | 2<br>(1 - 4)         | 6<br>(3 - 10)            | 7<br>(3 - 13)            |

Web Table 31- Costa Rica deaths with 95% UI by age, sex, and cause in 2013

| Cause                                         | Females, All Ages        | Females, 0-4 Years | Females, 5-14 Years | Females, 15-49 Years | Females, 50-69 Years | Females, 70-80 Years     |
|-----------------------------------------------|--------------------------|--------------------|---------------------|----------------------|----------------------|--------------------------|
| Larynx cancer                                 | 6<br>(3 - 12)            | --                 | --                  | 0<br>(0 - 1)         | 2<br>(1 - 4)         | 4<br>(2 - 6)             |
| Tracheal, bronchus and lung cancer            | 130<br>(111 - 157)       | --                 | --                  | 9<br>(7 - 12)        | 44<br>(37 - 55)      | 77<br>(62 - 98)          |
| Breast cancer                                 | 338<br>(297 - 384)       | --                 | --                  | 64<br>(53 - 76)      | 148<br>(127 - 170)   | 125<br>(101 - 152)       |
| Cervical cancer                               | 184<br>(152 - 257)       | --                 | --                  | 47<br>(37 - 60)      | 67<br>(53 - 100)     | 70<br>(53 - 100)         |
| Uterine cancer                                | 42<br>(25 - 55)          | --                 | --                  | 2<br>(1 - 3)         | 17<br>(10 - 24)      | 22<br>(13 - 31)          |
| Prostate cancer                               | --                       | --                 | --                  | --                   | --                   | --                       |
| Colon and rectum cancer                       | 275<br>(236 - 321)       | --                 | --                  | 24<br>(20 - 29)      | 84<br>(72 - 97)      | 166<br>(133 - 206)       |
| Lip and oral cavity cancer                    | 14<br>(10 - 20)          | --                 | --                  | 2<br>(1 - 3)         | 4<br>(3 - 6)         | 9<br>(6 - 12)            |
| Nasopharynx cancer                            | 4<br>(3 - 8)             | --                 | 0<br>(0 - 0)        | 1<br>(1 - 2)         | 1<br>(1 - 3)         | 1<br>(1 - 3)             |
| Other pharynx cancer                          | 4<br>(3 - 5)             | --                 | --                  | 0<br>(0 - 0)         | 1<br>(1 - 2)         | 2<br>(1 - 3)             |
| Gallbladder and biliary tract cancer          | 55<br>(40 - 86)          | --                 | --                  | 3<br>(2 - 5)         | 21<br>(14 - 32)      | 31<br>(21 - 50)          |
| Pancreatic cancer                             | 121<br>(102 - 141)       | --                 | --                  | 6<br>(5 - 8)         | 41<br>(33 - 50)      | 74<br>(58 - 93)          |
| Malignant skin melanoma                       | 18<br>(15 - 23)          | --                 | --                  | 3<br>(2 - 4)         | 6<br>(4 - 7)         | 9<br>(7 - 13)            |
| Non-melanoma skin cancer                      | 24<br>(16 - 37)          | --                 | --                  | 1<br>(1 - 1)         | 2<br>(1 - 3)         | 21<br>(14 - 34)          |
| Ovarian cancer                                | 94<br>(80 - 109)         | --                 | --                  | 15<br>(12 - 19)      | 43<br>(35 - 52)      | 36<br>(28 - 45)          |
| Testicular cancer                             | --                       | --                 | --                  | --                   | --                   | --                       |
| Kidney cancer                                 | 31<br>(24 - 39)          | 0<br>(0 - 0)       | 0<br>(0 - 0)        | 3<br>(2 - 4)         | 12<br>(9 - 15)       | 17<br>(12 - 24)          |
| Bladder cancer                                | 24<br>(17 - 35)          | --                 | --                  | 1<br>(1 - 2)         | 6<br>(4 - 10)        | 16<br>(11 - 24)          |
| Brain and nervous system cancer               | 51<br>(29 - 61)          | 2<br>(1 - 3)       | 3<br>(1 - 4)        | 14<br>(9 - 18)       | 19<br>(11 - 25)      | 14<br>(6 - 19)           |
| Thyroid cancer                                | 15<br>(11 - 21)          | --                 | 0<br>(0 - 0)        | 1<br>(1 - 2)         | 5<br>(4 - 8)         | 9<br>(6 - 12)            |
| Mesothelioma                                  | 1<br>(1 - 2)             | --                 | --                  | 0<br>(0 - 0)         | 1<br>(0 - 1)         | 1<br>(0 - 1)             |
| Hodgkin lymphoma                              | 13<br>(4 - 18)           | 0<br>(0 - 0)       | 0<br>(0 - 1)        | 5<br>(1 - 7)         | 3<br>(1 - 5)         | 5<br>(1 - 8)             |
| Non-Hodgkin lymphoma                          | 83<br>(48 - 101)         | 0<br>(0 - 1)       | 1<br>(0 - 1)        | 13<br>(9 - 17)       | 29<br>(17 - 37)      | 40<br>(21 - 53)          |
| Multiple myeloma                              | 36<br>(27 - 45)          | --                 | --                  | 2<br>(2 - 3)         | 16<br>(12 - 22)      | 18<br>(12 - 24)          |
| Leukemia                                      | 102<br>(89 - 116)        | 3<br>(2 - 5)       | 7<br>(5 - 9)        | 29<br>(24 - 35)      | 28<br>(22 - 34)      | 35<br>(27 - 44)          |
| Other neoplasms                               | 150<br>(110 - 183)       | 4<br>(2 - 5)       | 4<br>(3 - 5)        | 27<br>(21 - 36)      | 48<br>(35 - 65)      | 67<br>(42 - 86)          |
| Cardiovascular diseases                       | 2,979<br>(2,660 - 3,545) | 4<br>(3 - 5)       | 3<br>(2 - 4)        | 121<br>(101 - 155)   | 529<br>(459 - 650)   | 2,323<br>(2,060 - 2,749) |
| Rheumatic heart disease                       | 30<br>(17 - 38)          | 0<br>(0 - 0)       | 0<br>(0 - 1)        | 9<br>(6 - 12)        | 11<br>(6 - 15)       | 9<br>(5 - 13)            |
| Ischemic heart disease                        | 1,541<br>(1,316 - 2,031) | 0<br>(0 - 0)       | 0<br>(0 - 1)        | 45<br>(35 - 65)      | 283<br>(238 - 384)   | 1,212<br>(1,017 - 1,616) |
| Cerebrovascular disease                       | 777<br>(623 - 1,010)     | 0<br>(0 - 1)       | 1<br>(1 - 1)        | 33<br>(26 - 44)      | 120<br>(95 - 159)    | 622<br>(482 - 811)       |
| Ischemic stroke                               | 261<br>(175 - 492)       | 0<br>(0 - 0)       | 0<br>(0 - 0)        | 5<br>(3 - 10)        | 30<br>(20 - 59)      | 226<br>(148 - 431)       |
| Hemorrhagic stroke                            | 515<br>(307 - 625)       | 0<br>(0 - 0)       | 1<br>(0 - 1)        | 28<br>(21 - 35)      | 91<br>(62 - 110)     | 396<br>(212 - 494)       |
| Hypertensive heart disease                    | 310<br>(165 - 426)       | 0<br>(0 - 0)       | 0<br>(0 - 0)        | 5<br>(3 - 7)         | 39<br>(23 - 51)      | 266<br>(133 - 376)       |
| Cardiomyopathy and myocarditis                | 84<br>(63 - 113)         | 2<br>(2 - 3)       | 1<br>(1 - 1)        | 11<br>(8 - 15)       | 20<br>(15 - 28)      | 49<br>(34 - 70)          |
| Atrial fibrillation and flutter               | 17<br>(11 - 24)          | --                 | --                  | 0<br>(0 - 0)         | 1<br>(1 - 2)         | 16<br>(10 - 23)          |
| Aortic aneurysm                               | 28<br>(16 - 43)          | --                 | --                  | 2<br>(1 - 3)         | 7<br>(4 - 11)        | 19<br>(11 - 29)          |
| Peripheral vascular disease                   | 10<br>(6 - 15)           | --                 | --                  | 0<br>(0 - 0)         | 1<br>(0 - 1)         | 9<br>(6 - 14)            |
| Endocarditis                                  | 11<br>(7 - 16)           | 0<br>(0 - 0)       | 0<br>(0 - 0)        | 2<br>(1 - 3)         | 3<br>(2 - 5)         | 6<br>(3 - 8)             |
| Other cardiovascular and circulatory diseases | 172<br>(110 - 218)       | 0<br>(0 - 1)       | 0<br>(0 - 1)        | 14<br>(10 - 19)      | 42<br>(23 - 56)      | 115<br>(73 - 157)        |
| Chronic respiratory diseases                  | 675<br>(554 - 780)       | 6<br>(4 - 8)       | 1<br>(1 - 1)        | 21<br>(17 - 26)      | 85<br>(71 - 107)     | 562<br>(437 - 662)       |

Web Table 31- Costa Rica deaths with 95% UI by age, sex, and cause in 2013

| Cause                                               | Females, All Ages  | Females, 0-4 Years | Females, 5-14 Years | Females, 15-49 Years | Females, 50-69 Years | Females, 70-80 Years |
|-----------------------------------------------------|--------------------|--------------------|---------------------|----------------------|----------------------|----------------------|
| Chronic obstructive pulmonary disease               | 551<br>(438 - 650) | 3<br>(1 - 4)       | 0<br>(0 - 0)        | 6<br>(4 - 9)         | 55<br>(42 - 70)      | 488<br>(374 - 578)   |
| Pneumoconiosis                                      | 1<br>(0 - 1)       | 0<br>(0 - 0)       | 0<br>(0 - 0)        | 0<br>(0 - 0)         | 0<br>(0 - 0)         | 0<br>(0 - 0)         |
| Silicosis                                           | 0<br>(0 - 0)       | 0<br>(0 - 0)       | 0<br>(0 - 0)        | 0<br>(0 - 0)         | 0<br>(0 - 0)         | 0<br>(0 - 0)         |
| Asbestosis                                          | 0<br>(0 - 0)       | 0<br>(0 - 0)       | 0<br>(0 - 0)        | 0<br>(0 - 0)         | 0<br>(0 - 0)         | 0<br>(0 - 0)         |
| Coal workers pneumoconiosis                         | 0<br>(0 - 0)       | 0<br>(0 - 0)       | 0<br>(0 - 0)        | 0<br>(0 - 0)         | 0<br>(0 - 0)         | 0<br>(0 - 0)         |
| Other pneumoconiosis                                | 0<br>(0 - 0)       | 0<br>(0 - 0)       | 0<br>(0 - 0)        | 0<br>(0 - 0)         | 0<br>(0 - 0)         | 0<br>(0 - 0)         |
| Asthma                                              | 40<br>(26 - 55)    | 0<br>(0 - 1)       | 0<br>(0 - 0)        | 9<br>(7 - 13)        | 15<br>(9 - 21)       | 15<br>(8 - 24)       |
| Interstitial lung disease and pulmonary sarcoidosis | 76<br>(42 - 126)   | 1<br>(1 - 2)       | 0<br>(0 - 0)        | 4<br>(3 - 6)         | 15<br>(9 - 25)       | 55<br>(27 - 97)      |
| Other chronic respiratory diseases                  | 8<br>(5 - 11)      | 2<br>(1 - 2)       | 0<br>(0 - 0)        | 1<br>(1 - 2)         | 1<br>(1 - 1)         | 4<br>(2 - 7)         |
| Cirrhosis                                           | 294<br>(259 - 331) | 1<br>(0 - 1)       | 1<br>(1 - 1)        | 35<br>(29 - 41)      | 116<br>(99 - 134)    | 142<br>(118 - 166)   |
| Cirrhosis due to hepatitis B                        | 11<br>(5 - 17)     | 0<br>(0 - 0)       | 0<br>(0 - 0)        | 1<br>(0 - 3)         | 4<br>(2 - 7)         | 5<br>(2 - 8)         |
| Cirrhosis due to hepatitis C                        | 170<br>(129 - 207) | 0<br>(0 - 0)       | 0<br>(0 - 0)        | 18<br>(11 - 25)      | 68<br>(50 - 86)      | 84<br>(63 - 104)     |
| Cirrhosis due to alcohol use                        | 74<br>(49 - 104)   | --                 | --                  | 6<br>(3 - 9)         | 28<br>(17 - 40)      | 40<br>(26 - 59)      |
| Cirrhosis due to other causes                       | 40<br>(22 - 60)    | 1<br>(0 - 1)       | 1<br>(1 - 1)        | 9<br>(5 - 14)        | 17<br>(8 - 27)       | 12<br>(7 - 21)       |
| Digestive diseases                                  | 360<br>(293 - 412) | 1<br>(1 - 1)       | 1<br>(1 - 1)        | 24<br>(19 - 28)      | 68<br>(53 - 81)      | 266<br>(214 - 311)   |
| Peptic ulcer disease                                | 45<br>(31 - 67)    | 0<br>(0 - 0)       | 0<br>(0 - 0)        | 2<br>(1 - 3)         | 8<br>(5 - 11)        | 35<br>(23 - 55)      |
| Gastritis and duodenitis                            | 5<br>(2 - 11)      | 0<br>(0 - 0)       | 0<br>(0 - 0)        | 0<br>(0 - 0)         | 1<br>(0 - 1)         | 4<br>(2 - 9)         |
| Appendicitis                                        | 9<br>(6 - 13)      | 0<br>(0 - 0)       | 0<br>(0 - 0)        | 2<br>(1 - 3)         | 2<br>(1 - 4)         | 5<br>(3 - 8)         |
| Paralytic ileus and intestinal obstruction          | 28<br>(5 - 51)     | 0<br>(0 - 0)       | 0<br>(0 - 0)        | 2<br>(0 - 3)         | 5<br>(1 - 9)         | 21<br>(4 - 40)       |
| Inguinal, femoral, and abdominal hernia             | 15<br>(8 - 35)     | 0<br>(0 - 0)       | 0<br>(0 - 0)        | 1<br>(0 - 2)         | 3<br>(2 - 6)         | 11<br>(6 - 27)       |
| Inflammatory bowel disease                          | 5<br>(2 - 6)       | 0<br>(0 - 0)       | 0<br>(0 - 0)        | 1<br>(1 - 2)         | 1<br>(1 - 2)         | 2<br>(1 - 4)         |
| Vascular intestinal disorders                       | 106<br>(66 - 172)  | 0<br>(0 - 0)       | 0<br>(0 - 0)        | 3<br>(2 - 5)         | 14<br>(8 - 24)       | 89<br>(55 - 144)     |
| Gallbladder and biliary diseases                    | 49<br>(33 - 68)    | 0<br>(0 - 0)       | 0<br>(0 - 0)        | 3<br>(2 - 4)         | 9<br>(6 - 12)        | 37<br>(23 - 54)      |
| Pancreatitis                                        | 43<br>(29 - 64)    | 0<br>(0 - 0)       | 0<br>(0 - 0)        | 6<br>(4 - 8)         | 11<br>(7 - 16)       | 26<br>(16 - 41)      |
| Other digestive diseases                            | 54<br>(38 - 72)    | 0<br>(0 - 0)       | 0<br>(0 - 0)        | 4<br>(3 - 5)         | 14<br>(9 - 18)       | 36<br>(24 - 52)      |
| Neurological disorders                              | 659<br>(503 - 837) | 3<br>(2 - 4)       | 2<br>(2 - 3)        | 22<br>(18 - 26)      | 51<br>(41 - 62)      | 581<br>(430 - 761)   |
| Alzheimer disease and other dementias               | 552<br>(397 - 733) | --                 | --                  | 0<br>(0 - 0)         | 23<br>(14 - 33)      | 529<br>(377 - 711)   |
| Parkinson disease                                   | 41<br>(22 - 58)    | --                 | --                  | 0<br>(0 - 1)         | 4<br>(3 - 6)         | 36<br>(18 - 52)      |
| Epilepsy                                            | 21<br>(16 - 27)    | 1<br>(0 - 1)       | 1<br>(0 - 1)        | 10<br>(7 - 14)       | 5<br>(4 - 7)         | 4<br>(3 - 6)         |
| Multiple sclerosis                                  | 7<br>(4 - 10)      | --                 | --                  | 3<br>(1 - 4)         | 3<br>(1 - 4)         | 1<br>(1 - 2)         |
| Other neurological disorders                        | 38<br>(34 - 43)    | 2<br>(2 - 3)       | 1<br>(1 - 2)        | 9<br>(7 - 10)        | 16<br>(13 - 19)      | 10<br>(8 - 13)       |
| Mental and substance use disorders                  | 19<br>(14 - 23)    | 0<br>(0 - 0)       | 0<br>(0 - 0)        | 7<br>(5 - 9)         | 4<br>(3 - 6)         | 8<br>(6 - 11)        |
| Schizophrenia                                       | 2<br>(1 - 3)       | --                 | --                  | 0<br>(0 - 0)         | 0<br>(0 - 0)         | 1<br>(1 - 2)         |
| Alcohol use disorders                               | 5<br>(2 - 9)       | --                 | --                  | 2<br>(1 - 4)         | 2<br>(1 - 4)         | 1<br>(0 - 1)         |
| Drug use disorders                                  | 12<br>(9 - 14)     | 0<br>(0 - 0)       | --                  | 4<br>(3 - 5)         | 2<br>(1 - 2)         | 6<br>(4 - 8)         |
| Opioid use disorders                                | 2<br>(2 - 3)       | 0<br>(0 - 0)       | --                  | 1<br>(1 - 1)         | 0<br>(0 - 0)         | 1<br>(1 - 2)         |
| Cocaine use disorders                               | 0<br>(0 - 0)       | 0<br>(0 - 0)       | --                  | 0<br>(0 - 0)         | 0<br>(0 - 0)         | 0<br>(0 - 0)         |
| Amphetamine use disorders                           | 0<br>(0 - 0)       | 0<br>(0 - 0)       | --                  | 0<br>(0 - 0)         | 0<br>(0 - 0)         | 0<br>(0 - 0)         |
| Other drug use disorders                            | 8<br>(7 - 11)      | 0<br>(0 - 0)       | --                  | 3<br>(2 - 3)         | 1<br>(1 - 2)         | 4<br>(3 - 6)         |
| Eating disorders                                    | 0<br>(0 - 0)       | --                 | 0<br>(0 - 0)        | 0<br>(0 - 0)         | --                   | --                   |

Web Table 31- Costa Rica deaths with 95% UI by age, sex, and cause in 2013

| Cause                                               | Females, All Ages    | Females, 0-4 Years | Females, 5-14 Years | Females, 15-49 Years | Females, 50-69 Years | Females, 70-80 Years |
|-----------------------------------------------------|----------------------|--------------------|---------------------|----------------------|----------------------|----------------------|
| Anorexia nervosa                                    | 0<br>(0 - 0)         | --                 | 0<br>(0 - 0)        | 0<br>(0 - 0)         | --                   | --                   |
| Diabetes, urogenital, blood, and endocrine diseases | 895<br>(716 - 1,009) | 6<br>(5 - 9)       | 4<br>(3 - 5)        | 69<br>(58 - 80)      | 251<br>(190 - 289)   | 564<br>(448 - 651)   |
| Diabetes mellitus                                   | 267<br>(228 - 323)   | 0<br>(0 - 0)       | 0<br>(0 - 1)        | 14<br>(11 - 18)      | 71<br>(58 - 106)     | 181<br>(149 - 225)   |
| Acute glomerulonephritis                            | 0                    | 0                  | 0                   | 0                    | 0                    | 0                    |
| Chronic kidney disease                              | 497<br>(338 - 583)   | 2<br>(1 - 3)       | 2<br>(1 - 2)        | 39<br>(28 - 47)      | 154<br>(90 - 185)    | 301<br>(208 - 365)   |
| Chronic kidney disease due to diabetes mellitus     | 267<br>(187 - 330)   | 0<br>(0 - 0)       | 0<br>(0 - 0)        | 18<br>(13 - 23)      | 99<br>(65 - 121)     | 150<br>(101 - 198)   |
| Chronic kidney disease due to hypertension          | 97<br>(46 - 146)     | 0<br>(0 - 1)       | 0<br>(0 - 0)        | 7<br>(4 - 12)        | 19<br>(8 - 31)       | 70<br>(32 - 110)     |
| Chronic kidney disease due to glomerulonephritis    | 5                    | 0                  | 0                   | 1                    | 1                    | 2                    |
| Chronic kidney disease due to other causes          | 128<br>(52 - 189)    | 1<br>(1 - 2)       | 1<br>(1 - 2)        | 12<br>(7 - 18)       | 35<br>(10 - 56)      | 78<br>(32 - 125)     |
| Urinary diseases and male infertility               | 69<br>(30 - 97)      | 0<br>(0 - 0)       | 0<br>(0 - 0)        | 4<br>(2 - 6)         | 11<br>(5 - 14)       | 54<br>(21 - 80)      |
| Interstitial nephritis and urinary tract infections | 67<br>(29 - 94)      | 0<br>(0 - 0)       | 0<br>(0 - 0)        | 4<br>(2 - 5)         | 10<br>(5 - 13)       | 53<br>(20 - 78)      |
| Urolithiasis                                        | 1<br>(0 - 1)         | --                 | 0<br>(0 - 0)        | 0<br>(0 - 0)         | 0<br>(0 - 1)         | 0<br>(0 - 0)         |
| Other urinary diseases                              | 2<br>(1 - 4)         | 0<br>(0 - 0)       | 0<br>(0 - 0)        | 0<br>(0 - 1)         | 0<br>(0 - 1)         | 1<br>(0 - 3)         |
| Gynecological diseases                              | 1<br>(1 - 1)         | --                 | --                  | 0<br>(0 - 1)         | 0<br>(0 - 0)         | 0<br>(0 - 1)         |
| Uterine fibroids                                    | 0<br>(0 - 0)         | --                 | --                  | 0<br>(0 - 0)         | 0<br>(0 - 0)         | 0<br>(0 - 0)         |
| Polycystic ovarian syndrome                         | 0<br>(0 - 0)         | --                 | --                  | 0<br>(0 - 0)         | 0<br>(0 - 0)         | --                   |
| Endometriosis                                       | 0<br>(0 - 0)         | --                 | --                  | 0<br>(0 - 0)         | 0<br>(0 - 0)         | --                   |
| Genital prolapse                                    | 0<br>(0 - 0)         | --                 | --                  | 0<br>(0 - 0)         | 0<br>(0 - 0)         | 0<br>(0 - 0)         |
| Other gynecological diseases                        | 1<br>(0 - 1)         | --                 | --                  | 0<br>(0 - 0)         | 0<br>(0 - 0)         | 0<br>(0 - 0)         |
| Hemoglobinopathies and hemolytic anemias            | 15<br>(8 - 21)       | 1<br>(1 - 2)       | 1<br>(1 - 2)        | 4<br>(2 - 5)         | 4<br>(2 - 5)         | 5<br>(2 - 8)         |
| Thalassemias                                        | 0<br>(0 - 0)         | 0<br>(0 - 0)       | 0<br>(0 - 0)        | 0<br>(0 - 0)         | 0<br>(0 - 0)         | 0<br>(0 - 0)         |
| Sickle cell disorders                               | 6<br>(3 - 8)         | 1<br>(0 - 1)       | 1<br>(0 - 1)        | 3<br>(1 - 4)         | 2<br>(1 - 2)         | 0<br>(0 - 0)         |
| G6PD deficiency                                     | 0<br>(0 - 1)         | 0<br>(0 - 0)       | 0<br>(0 - 0)        | 0<br>(0 - 0)         | 0<br>(0 - 0)         | 0<br>(0 - 0)         |
| Other hemoglobinopathies and hemolytic anemias      | 8<br>(5 - 12)        | 0<br>(0 - 1)       | 0<br>(0 - 0)        | 1<br>(1 - 1)         | 2<br>(1 - 3)         | 5<br>(2 - 8)         |
| Endocrine, metabolic, blood, and immune disorders   | 46<br>(36 - 74)      | 3<br>(2 - 5)       | 1<br>(1 - 2)        | 8<br>(6 - 12)        | 12<br>(9 - 18)       | 23<br>(16 - 40)      |
| Musculoskeletal disorders                           | 78<br>(19 - 93)      | --                 | 2<br>(0 - 2)        | 24<br>(7 - 30)       | 26<br>(6 - 34)       | 26<br>(5 - 35)       |
| Rheumatoid arthritis                                | 24<br>(7 - 31)       | --                 | 0<br>(0 - 0)        | 2<br>(1 - 2)         | 8<br>(3 - 11)        | 14<br>(3 - 19)       |
| Other musculoskeletal disorders                     | 54<br>(11 - 65)      | --                 | 1<br>(0 - 2)        | 22<br>(6 - 28)       | 18<br>(3 - 23)       | 12<br>(2 - 17)       |
| Other non-communicable diseases                     | 199<br>(163 - 231)   | 133<br>(111 - 159) | 7<br>(5 - 10)       | 11<br>(9 - 15)       | 7<br>(4 - 9)         | 40<br>(13 - 56)      |
| Congenital anomalies                                | 150<br>(125 - 176)   | 129<br>(106 - 154) | 7<br>(5 - 9)        | 9<br>(7 - 13)        | 3<br>(2 - 3)         | 2<br>(1 - 3)         |
| Neural tube defects                                 | 9<br>(6 - 13)        | 7<br>(4 - 11)      | 1<br>(0 - 1)        | 1<br>(0 - 1)         | 0<br>(0 - 0)         | 0<br>(0 - 0)         |
| Congenital heart anomalies                          | 64<br>(50 - 79)      | 55<br>(42 - 70)    | 3<br>(2 - 4)        | 5<br>(3 - 6)         | 1<br>(1 - 1)         | 0<br>(0 - 0)         |
| Cleft lip and cleft palate                          | 0<br>(0 - 0)         | 0<br>(0 - 0)       | --                  | --                   | --                   | --                   |
| Down syndrome                                       | 4<br>(2 - 7)         | 3<br>(2 - 6)       | 0<br>(0 - 0)        | 1<br>(0 - 1)         | 0<br>(0 - 0)         | 0<br>(0 - 0)         |
| Chromosomal unbalanced rearrangements               | 9<br>(5 - 14)        | 8<br>(5 - 13)      | 0<br>(0 - 0)        | 0<br>(0 - 0)         | 0<br>(0 - 0)         | 0<br>(0 - 0)         |
| Other congenital anomalies                          | 65<br>(50 - 82)      | 56<br>(42 - 72)    | 3<br>(2 - 4)        | 3<br>(2 - 5)         | 1<br>(1 - 2)         | 2<br>(1 - 2)         |
| Skin and subcutaneous diseases                      | 46<br>(13 - 63)      | 1<br>(0 - 1)       | 0<br>(0 - 0)        | 2<br>(1 - 2)         | 5<br>(1 - 7)         | 38<br>(10 - 55)      |
| Cellulitis                                          | 5<br>(1 - 9)         | 0<br>(0 - 0)       | 0<br>(0 - 0)        | 0<br>(0 - 1)         | 1<br>(0 - 2)         | 4<br>(1 - 7)         |
| Pyoderma                                            | 7<br>(2 - 11)        | 0<br>(0 - 1)       | 0<br>(0 - 0)        | 0<br>(0 - 1)         | 1<br>(0 - 2)         | 5<br>(1 - 9)         |
| Decubitus ulcer                                     | 30<br>(9 - 45)       | 0<br>(0 - 0)       | 0<br>(0 - 0)        | 0<br>(0 - 1)         | 2<br>(1 - 2)         | 28<br>(8 - 42)       |

Web Table 31- Costa Rica deaths with 95% UI by age, sex, and cause in 2013

| Cause                                           | Females, All Ages  | Females, 0-4 Years | Females, 5-14 Years | Females, 15-49 Years | Females, 50-69 Years | Females, 70-80 Years |
|-------------------------------------------------|--------------------|--------------------|---------------------|----------------------|----------------------|----------------------|
| Other skin and subcutaneous diseases            | 3<br>(1 - 5)       | 0<br>(0 - 1)       | 0<br>(0 - 0)        | 1<br>(0 - 1)         | 1<br>(0 - 1)         | 1<br>(0 - 3)         |
| Sudden infant death syndrome                    | 4<br>(1 - 10)      | 4<br>(1 - 10)      | --                  | --                   | --                   | --                   |
| Injuries                                        | 559<br>(481 - 640) | 20<br>(16 - 25)    | 21<br>(18 - 24)     | 167<br>(144 - 188)   | 76<br>(65 - 86)      | 276<br>(216 - 341)   |
| Transport injuries                              | 164<br>(134 - 186) | 5<br>(4 - 7)       | 10<br>(8 - 12)      | 66<br>(54 - 78)      | 32<br>(26 - 39)      | 51<br>(37 - 64)      |
| Road injuries                                   | 160<br>(132 - 182) | 5<br>(3 - 7)       | 10<br>(8 - 12)      | 64<br>(53 - 75)      | 31<br>(25 - 38)      | 50<br>(36 - 63)      |
| Pedestrian road injuries                        | 87<br>(70 - 103)   | 3<br>(2 - 5)       | 6<br>(5 - 8)        | 25<br>(20 - 32)      | 16<br>(12 - 21)      | 36<br>(26 - 46)      |
| Cyclist road injuries                           | 7<br>(5 - 9)       | 0<br>(0 - 0)       | 1<br>(0 - 1)        | 4<br>(2 - 5)         | 1<br>(1 - 2)         | 1<br>(1 - 2)         |
| Motorcyclist road injuries                      | 7<br>(4 - 9)       | 0<br>(0 - 0)       | 0<br>(0 - 0)        | 5<br>(3 - 7)         | 1<br>(0 - 1)         | 0<br>(0 - 1)         |
| Motor vehicle road injuries                     | 59<br>(45 - 71)    | 1<br>(1 - 2)       | 2<br>(2 - 3)        | 30<br>(23 - 36)      | 13<br>(9 - 16)       | 12<br>(7 - 18)       |
| Other road injuries                             | 0<br>(0 - 1)       | 0<br>(0 - 0)       | 0<br>(0 - 0)        | 0<br>(0 - 0)         | 0<br>(0 - 0)         | 0<br>(0 - 0)         |
| Other transport injuries                        | 4<br>(3 - 5)       | 0<br>(0 - 0)       | 0<br>(0 - 0)        | 2<br>(1 - 2)         | 1<br>(1 - 1)         | 1<br>(0 - 2)         |
| Unintentional injuries                          | 296<br>(235 - 370) | 12<br>(9 - 18)     | 7<br>(6 - 9)        | 32<br>(27 - 42)      | 29<br>(23 - 36)      | 215<br>(159 - 277)   |
| Falls                                           | 147<br>(104 - 222) | 1<br>(0 - 1)       | 0<br>(0 - 1)        | 2<br>(2 - 4)         | 7<br>(5 - 10)        | 137<br>(94 - 209)    |
| Drowning                                        | 27<br>(21 - 41)    | 4<br>(2 - 7)       | 4<br>(3 - 6)        | 10<br>(8 - 16)       | 3<br>(2 - 4)         | 6<br>(4 - 9)         |
| Fire, heat, and hot substances                  | 29<br>(12 - 47)    | 2<br>(1 - 3)       | 1<br>(0 - 1)        | 2<br>(1 - 3)         | 2<br>(1 - 3)         | 22<br>(7 - 38)       |
| Poisonings                                      | 3<br>(1 - 3)       | 0<br>(0 - 0)       | 0<br>(0 - 0)        | 1<br>(0 - 1)         | 0<br>(0 - 1)         | 1<br>(1 - 2)         |
| Exposure to mechanical forces                   | 5<br>(4 - 7)       | 1<br>(0 - 1)       | 1<br>(0 - 1)        | 2<br>(1 - 2)         | 1<br>(1 - 1)         | 1<br>(1 - 2)         |
| Unintentional firearm injuries                  | 1<br>(1 - 1)       | 0<br>(0 - 0)       | 0<br>(0 - 0)        | 1<br>(0 - 1)         | 0<br>(0 - 0)         | 0<br>(0 - 0)         |
| Unintentional suffocation                       | 1<br>(1 - 2)       | 0<br>(0 - 1)       | 0<br>(0 - 0)        | 0<br>(0 - 0)         | 0<br>(0 - 0)         | 0<br>(0 - 1)         |
| Other exposure to mechanical forces             | 3<br>(2 - 5)       | 0<br>(0 - 1)       | 0<br>(0 - 1)        | 1<br>(1 - 2)         | 1<br>(0 - 1)         | 1<br>(0 - 1)         |
| Adverse effects of medical treatment            | 64<br>(41 - 84)    | 1<br>(1 - 2)       | 1<br>(0 - 1)        | 11<br>(8 - 17)       | 13<br>(8 - 19)       | 39<br>(21 - 54)      |
| Animal contact                                  | 2<br>(1 - 5)       | 0<br>(0 - 0)       | 0<br>(0 - 0)        | 0<br>(0 - 1)         | 1<br>(0 - 3)         | 1<br>(0 - 1)         |
| Venomous animal contact                         | 1<br>(1 - 3)       | 0<br>(0 - 0)       | 0<br>(0 - 0)        | 0<br>(0 - 0)         | 1<br>(0 - 2)         | 0<br>(0 - 1)         |
| Non-venomous animal contact                     | 1<br>(0 - 2)       | 0<br>(0 - 0)       | 0<br>(0 - 0)        | 0<br>(0 - 0)         | 0<br>(0 - 0)         | 0<br>(0 - 1)         |
| Foreign body                                    | 17<br>(11 - 26)    | 4<br>(3 - 7)       | 1<br>(0 - 1)        | 2<br>(1 - 3)         | 1<br>(1 - 2)         | 8<br>(5 - 14)        |
| Pulmonary aspiration and foreign body in airway | 16<br>(10 - 26)    | 4<br>(3 - 7)       | 1<br>(0 - 1)        | 2<br>(1 - 3)         | 1<br>(1 - 2)         | 8<br>(5 - 14)        |
| Foreign body in other body part                 | 0<br>(0 - 0)       | 0<br>(0 - 0)       | 0<br>(0 - 0)        | 0<br>(0 - 0)         | 0<br>(0 - 0)         | 0<br>(0 - 0)         |
| Other unintentional injuries                    | 4<br>(3 - 5)       | 0<br>(0 - 0)       | 0<br>(0 - 0)        | 1<br>(1 - 2)         | 1<br>(0 - 1)         | 1<br>(1 - 2)         |
| Self-harm and interpersonal violence            | 98<br>(76 - 115)   | 2<br>(1 - 4)       | 4<br>(2 - 5)        | 69<br>(53 - 83)      | 14<br>(10 - 18)      | 9<br>(6 - 13)        |
| Self-harm                                       | 51<br>(43 - 60)    | --                 | 2<br>(1 - 2)        | 36<br>(29 - 43)      | 8<br>(6 - 10)        | 6<br>(4 - 8)         |
| Interpersonal violence                          | 48<br>(29 - 61)    | 2<br>(1 - 4)       | 2<br>(1 - 4)        | 33<br>(19 - 44)      | 6<br>(3 - 9)         | 4<br>(1 - 7)         |
| Assault by firearm                              | 19<br>(10 - 28)    | 0<br>(0 - 1)       | 1<br>(0 - 2)        | 15<br>(7 - 22)       | 2<br>(1 - 4)         | 0<br>(0 - 1)         |
| Assault by sharp object                         | 14<br>(8 - 22)     | 0<br>(0 - 1)       | 0<br>(0 - 1)        | 10<br>(5 - 17)       | 2<br>(1 - 4)         | 1<br>(0 - 1)         |
| Assault by other means                          | 15<br>(7 - 20)     | 2<br>(1 - 3)       | 1<br>(0 - 2)        | 8<br>(4 - 12)        | 2<br>(1 - 3)         | 2<br>(1 - 4)         |

Web Table 31- Cote d'Ivoire deaths with 95% UI by age, sex, and cause in 2013

| Cause                                                             | Both Sexes, All Ages           | Both Sexes, 0-4 Years       | Both Sexes, 5-14 Years   | Both Sexes, 15-49 Years     | Both Sexes, 50-69 Years     | Both Sexes, 70-80 Years     |
|-------------------------------------------------------------------|--------------------------------|-----------------------------|--------------------------|-----------------------------|-----------------------------|-----------------------------|
| All causes                                                        | 198,008<br>(185,764 - 213,871) | 70,182<br>(63,312 - 79,527) | 7,228<br>(6,436 - 8,221) | 53,382<br>(48,896 - 57,646) | 39,392<br>(35,262 - 45,331) | 27,824<br>(25,681 - 30,852) |
| Communicable, maternal, neonatal, and nutritional diseases        | 122,227<br>(112,281 - 132,478) | 60,651<br>(53,742 - 68,617) | 5,074<br>(4,332 - 5,967) | 34,143<br>(30,523 - 37,817) | 14,197<br>(11,777 - 16,442) | 8,162<br>(6,232 - 9,561)    |
| HIV/AIDS and tuberculosis                                         | 32,841<br>(28,380 - 37,663)    | 723<br>(477 - 1,001)        | 1,738<br>(1,425 - 2,107) | 21,649<br>(17,820 - 25,506) | 7,214<br>(5,580 - 8,968)    | 1,517<br>(1,087 - 1,877)    |
| Tuberculosis                                                      | 6,526<br>(4,937 - 7,802)       | 252<br>(160 - 378)          | 100<br>(68 - 143)        | 2,965<br>(2,240 - 3,692)    | 2,124<br>(1,467 - 2,737)    | 1,085<br>(657 - 1,409)      |
| HIV/AIDS                                                          | 26,315<br>(21,554 - 31,624)    | 471<br>(257 - 739)          | 1,638<br>(1,315 - 2,013) | 18,684<br>(14,276 - 22,672) | 5,090<br>(3,496 - 6,997)    | 432<br>(288 - 618)          |
| HIV/AIDS resulting in mycobacterial infection                     | 1,653<br>(1,257 - 2,138)       | 27<br>(14 - 44)             | 89<br>(65 - 116)         | 1,166<br>(857 - 1,553)      | 340<br>(226 - 477)          | 31<br>(20 - 45)             |
| HIV/AIDS resulting in other diseases                              | 24,662<br>(20,166 - 29,570)    | 444<br>(242 - 699)          | 1,549<br>(1,246 - 1,912) | 17,518<br>(13,433 - 21,233) | 4,749<br>(3,268 - 6,534)    | 402<br>(267 - 574)          |
| Diarrhea, lower respiratory, and other common infectious diseases | 40,467<br>(32,850 - 48,341)    | 24,014<br>(18,192 - 30,523) | 1,693<br>(1,250 - 2,342) | 5,244<br>(4,183 - 6,477)    | 4,655<br>(3,365 - 5,996)    | 4,861<br>(3,426 - 6,031)    |
| Diarrheal diseases                                                | 10,186<br>(7,102 - 14,409)     | 6,199<br>(3,247 - 10,298)   | 332<br>(187 - 560)       | 1,522<br>(1,118 - 2,048)    | 1,132<br>(758 - 1,610)      | 1,000<br>(693 - 1,397)      |
| Intestinal infectious diseases                                    | 997<br>(532 - 1,722)           | 362<br>(165 - 710)          | 268<br>(135 - 485)       | 309<br>(148 - 559)          | 44<br>(21 - 78)             | 14<br>(7 - 24)              |
| Typhoid fever                                                     | 645<br>(325 - 1,175)           | 221<br>(92 - 439)           | 178<br>(85 - 331)        | 208<br>(93 - 391)           | 29<br>(13 - 53)             | 9<br>(4 - 16)               |
| Paratyphoid fever                                                 | 301<br>(146 - 538)             | 111<br>(43 - 230)           | 85<br>(39 - 168)         | 90<br>(40 - 173)            | 11<br>(4 - 23)              | 3<br>(1 - 7)                |
| Other intestinal infectious diseases                              | 52<br>(32 - 78)                | 30<br>(15 - 53)             | 5<br>(1 - 11)            | 11<br>(4 - 22)              | 4<br>(0 - 11)               | 2<br>(0 - 7)                |
| Lower respiratory infections                                      | 21,966<br>(17,136 - 27,131)    | 12,977<br>(9,067 - 17,634)  | 515<br>(342 - 775)       | 1,969<br>(1,448 - 2,559)    | 2,908<br>(1,846 - 3,936)    | 3,597<br>(2,330 - 4,652)    |
| Upper respiratory infections                                      | 27<br>(14 - 48)                | 11<br>(2 - 27)              | 1<br>(0 - 4)             | 8<br>(3 - 16)               | 5<br>(1 - 11)               | 3<br>(0 - 7)                |
| Otitis media                                                      | 10<br>(8 - 12)                 | 3<br>(2 - 4)                | 1<br>(0 - 1)             | 2<br>(2 - 3)                | 2<br>(2 - 3)                | 3<br>(2 - 3)                |
| Meningitis                                                        | 4,738<br>(3,552 - 6,144)       | 2,402<br>(1,481 - 3,755)    | 376<br>(235 - 573)       | 1,254<br>(863 - 1,691)      | 492<br>(296 - 677)          | 215<br>(128 - 308)          |
| Pneumococcal meningitis                                           | 1,139<br>(773 - 1,497)         | 493<br>(245 - 810)          | 98<br>(52 - 170)         | 357<br>(222 - 542)          | 135<br>(75 - 218)           | 56<br>(33 - 89)             |
| H influenzae type B meningitis                                    | 821<br>(505 - 1,269)           | 563<br>(282 - 1,005)        | 60<br>(31 - 105)         | 141<br>(83 - 215)           | 42<br>(23 - 70)             | 15<br>(8 - 25)              |
| Meningococcal meningitis                                          | 2,195<br>(1,617 - 2,913)       | 1,110<br>(663 - 1,768)      | 179<br>(107 - 282)       | 584<br>(387 - 824)          | 224<br>(120 - 330)          | 98<br>(56 - 154)            |
| Other meningitis                                                  | 583<br>(358 - 862)             | 236<br>(94 - 417)           | 38<br>(14 - 75)          | 172<br>(84 - 313)           | 91<br>(28 - 173)            | 46<br>(15 - 89)             |
| Encephalitis                                                      | 215<br>(163 - 297)             | 85<br>(49 - 145)            | 23<br>(14 - 42)          | 60<br>(39 - 96)             | 30<br>(20 - 43)             | 16<br>(8 - 24)              |
| Diphtheria                                                        | 25<br>(2 - 115)                | 19<br>(0 - 107)             | 3<br>(0 - 22)            | 2<br>(0 - 6)                | 0<br>(0 - 2)                | --                          |
| Whooping cough                                                    | 533<br>(1 - 2,578)             | 504<br>(1 - 2,429)          | 23<br>(0 - 118)          | 4<br>(0 - 23)               | 1<br>(0 - 3)                | --                          |
| Tetanus                                                           | 562<br>(223 - 959)             | 406<br>(110 - 795)          | 21<br>(12 - 34)          | 88<br>(44 - 144)            | 37<br>(18 - 61)             | 9<br>(5 - 15)               |
| Measles                                                           | 1,183<br>(20 - 6,796)          | 1,035<br>(18 - 5,822)       | 127<br>(2 - 763)         | 21<br>(0 - 123)             | 1<br>(0 - 3)                | --                          |
| Varicella and herpes zoster                                       | 25<br>(11 - 50)                | 11<br>(1 - 33)              | 2<br>(0 - 8)             | 5<br>(2 - 12)               | 2<br>(0 - 6)                | 5<br>(1 - 15)               |
| Neglected tropical diseases and malaria                           | 17,201<br>(10,019 - 26,029)    | 12,123<br>(5,887 - 20,983)  | 1,234<br>(645 - 1,986)   | 1,936<br>(1,084 - 3,432)    | 1,145<br>(557 - 2,222)      | 762<br>(365 - 1,502)        |
| Malaria                                                           | 16,780<br>(9,577 - 25,660)     | 12,022<br>(5,773 - 20,910)  | 1,170<br>(567 - 1,921)   | 1,776<br>(931 - 3,264)      | 1,075<br>(487 - 2,150)      | 736<br>(338 - 1,476)        |
| Leishmaniasis                                                     | 1<br>(0 - 1)                   | 0<br>(0 - 0)                | 0<br>(0 - 0)             | 0<br>(0 - 0)                | 0<br>(0 - 0)                | 0<br>(0 - 0)                |
| Visceral leishmaniasis                                            | 1<br>(0 - 1)                   | 0<br>(0 - 0)                | 0<br>(0 - 0)             | 0<br>(0 - 0)                | 0<br>(0 - 0)                | 0<br>(0 - 0)                |
| African trypanosomiasis                                           | 36<br>(16 - 68)                | 2<br>(1 - 5)                | 4<br>(2 - 7)             | 24<br>(10 - 45)             | 5<br>(2 - 10)               | 1<br>(0 - 2)                |
| Schistosomiasis                                                   | 99<br>(74 - 131)               | 1<br>(1 - 3)                | 3<br>(2 - 4)             | 46<br>(31 - 64)             | 36<br>(23 - 55)             | 14<br>(9 - 21)              |
| Cysticercosis                                                     | 6<br>(1 - 18)                  | 0<br>(0 - 1)                | 0<br>(0 - 1)             | 4<br>(1 - 12)               | 1<br>(0 - 4)                | 0<br>(0 - 1)                |
| Cystic echinococcosis                                             | 10<br>(9 - 12)                 | 1<br>(1 - 2)                | 2<br>(1 - 2)             | 5<br>(4 - 6)                | 2<br>(1 - 2)                | 1<br>(0 - 1)                |
| Dengue                                                            | 22<br>(15 - 31)                | 9<br>(4 - 15)               | 5<br>(3 - 7)             | 7<br>(5 - 11)               | 1<br>(1 - 3)                | 0<br>(0 - 1)                |
| Yellow fever                                                      | 12<br>(8 - 18)                 | 1<br>(0 - 3)                | 2<br>(1 - 5)             | 6<br>(4 - 11)               | 1<br>(0 - 3)                | 0<br>(0 - 1)                |
| Rabies                                                            | 143<br>(78 - 200)              | 30<br>(11 - 66)             | 39<br>(19 - 65)          | 54<br>(31 - 73)             | 17<br>(8 - 25)              | 4<br>(1 - 8)                |
| Intestinal nematode infections                                    | 58<br>(30 - 96)                | 44<br>(19 - 80)             | 7<br>(2 - 18)            | 4<br>(0 - 14)               | 1<br>(0 - 7)                | 1<br>(0 - 6)                |
| Ascariasis                                                        | 58<br>(30 - 96)                | 44<br>(19 - 80)             | 7<br>(2 - 18)            | 4<br>(0 - 14)               | 1<br>(0 - 7)                | 1<br>(0 - 6)                |

Web Table 31- Cote d'Ivoire deaths with 95% UI by age, sex, and cause in 2013

| Cause                                                            | Both Sexes, All Ages        | Both Sexes, 0-4 Years       | Both Sexes, 5-14 Years | Both Sexes, 15-49 Years     | Both Sexes, 50-69 Years     | Both Sexes, 70-80 Years     |
|------------------------------------------------------------------|-----------------------------|-----------------------------|------------------------|-----------------------------|-----------------------------|-----------------------------|
| Other neglected tropical diseases                                | 33<br>(24 - 58)             | 12<br>(6 - 25)              | 2<br>(1 - 5)           | 10<br>(6 - 17)              | 5<br>(3 - 8)                | 4<br>(3 - 7)                |
| Maternal disorders                                               | 3,824<br>(2,702 - 4,987)    | --                          | 19<br>(7 - 40)         | 3,806<br>(2,687 - 4,972)    | --                          | --                          |
| Maternal hemorrhage                                              | 706<br>(428 - 1,027)        | --                          | 2<br>(1 - 4)           | 704<br>(427 - 1,024)        | --                          | --                          |
| Maternal sepsis and other maternal infections                    | 217<br>(125 - 326)          | --                          | 1<br>(0 - 3)           | 216<br>(124 - 324)          | --                          | --                          |
| Maternal hypertensive disorders                                  | 282<br>(157 - 439)          | --                          | 1<br>(0 - 3)           | 280<br>(155 - 436)          | --                          | --                          |
| Maternal obstructed labor                                        | 197<br>(116 - 298)          | --                          | 1<br>(0 - 2)           | 196<br>(116 - 297)          | --                          | --                          |
| Maternal abortive outcome                                        | 657<br>(431 - 939)          | --                          | 3<br>(1 - 8)           | 653<br>(430 - 935)          | --                          | --                          |
| Indirect maternal deaths                                         | 405<br>(239 - 627)          | --                          | 2<br>(0 - 4)           | 404<br>(238 - 625)          | --                          | --                          |
| Late maternal deaths                                             | 597<br>(359 - 922)          | --                          | 5<br>(1 - 12)          | 592<br>(352 - 912)          | --                          | --                          |
| Maternal deaths aggravated by HIV/AIDS                           | 40<br>(20 - 62)             | --                          | --                     | 40<br>(20 - 62)             | --                          | --                          |
| Other maternal disorders                                         | 716<br>(446 - 1,050)        | --                          | 3<br>(1 - 8)           | 713<br>(443 - 1,046)        | --                          | --                          |
| Neonatal disorders                                               | 19,000<br>(15,521 - 22,567) | 19,000<br>(15,521 - 22,567) | --                     | --                          | --                          | --                          |
| Neonatal preterm birth complications                             | 6,858<br>(4,035 - 10,436)   | 6,858<br>(4,035 - 10,436)   | --                     | --                          | --                          | --                          |
| Neonatal encephalopathy due to birth asphyxia and trauma         | 5,778<br>(3,623 - 8,376)    | 5,778<br>(3,623 - 8,376)    | --                     | --                          | --                          | --                          |
| Neonatal sepsis and other neonatal infections                    | 4,614<br>(2,446 - 7,514)    | 4,614<br>(2,446 - 7,514)    | --                     | --                          | --                          | --                          |
| Hemolytic disease and other neonatal jaundice                    | 134<br>(61 - 285)           | 134<br>(61 - 285)           | --                     | --                          | --                          | --                          |
| Other neonatal disorders                                         | 1,616<br>(886 - 2,698)      | 1,616<br>(886 - 2,698)      | --                     | --                          | --                          | --                          |
| Nutritional deficiencies                                         | 7,319<br>(5,198 - 9,757)    | 4,035<br>(2,357 - 6,216)    | 318<br>(198 - 461)     | 1,195<br>(859 - 1,595)      | 923<br>(649 - 1,237)        | 848<br>(597 - 1,175)        |
| Protein-energy malnutrition                                      | 5,189<br>(3,381 - 7,499)    | 3,527<br>(1,995 - 5,668)    | 239<br>(144 - 364)     | 458<br>(259 - 812)          | 504<br>(312 - 783)          | 462<br>(281 - 745)          |
| Iodine deficiency                                                | 12<br>(2 - 44)              | 5<br>(0 - 36)               | 1<br>(0 - 5)           | 3<br>(0 - 10)               | 2<br>(0 - 7)                | 1<br>(0 - 5)                |
| Iron-deficiency anemia                                           | 2,083<br>(1,148 - 3,184)    | 496<br>(132 - 1,227)        | 77<br>(32 - 139)       | 723<br>(415 - 1,021)        | 407<br>(192 - 637)          | 380<br>(197 - 602)          |
| Other nutritional deficiencies                                   | 35<br>(18 - 58)             | 7<br>(2 - 19)               | 1<br>(1 - 3)           | 11<br>(5 - 18)              | 11<br>(4 - 20)              | 5<br>(2 - 10)               |
| Other communicable, maternal, neonatal, and nutritional diseases | 1,574<br>(1,115 - 2,116)    | 755<br>(431 - 1,216)        | 72<br>(45 - 109)       | 314<br>(202 - 443)          | 260<br>(153 - 391)          | 174<br>(106 - 260)          |
| Sexually transmitted diseases excluding HIV                      | 601<br>(293 - 1,053)        | 495<br>(212 - 924)          | 36<br>(17 - 67)        | 36<br>(18 - 50)             | 20<br>(11 - 37)             | 13<br>(7 - 27)              |
| Syphilis                                                         | 571<br>(270 - 1,024)        | 495<br>(212 - 924)          | 35<br>(15 - 66)        | 17<br>(9 - 24)              | 14<br>(7 - 25)              | 11<br>(5 - 22)              |
| Chlamydial infection                                             | 4<br>(1 - 7)                | --                          | 0<br>(0 - 0)           | 3<br>(1 - 5)                | 1<br>(0 - 2)                | 0<br>(0 - 1)                |
| Gonococcal infection                                             | 14<br>(9 - 20)              | --                          | 1<br>(0 - 1)           | 8<br>(4 - 12)               | 4<br>(2 - 7)                | 2<br>(1 - 3)                |
| Other sexually transmitted diseases                              | 11<br>(6 - 15)              | --                          | 1<br>(0 - 1)           | 7<br>(4 - 10)               | 2<br>(1 - 4)                | 1<br>(0 - 2)                |
| Hepatitis                                                        | 493<br>(243 - 674)          | 65<br>(26 - 122)            | 18<br>(9 - 27)         | 183<br>(81 - 264)           | 139<br>(74 - 207)           | 88<br>(48 - 132)            |
| Acute hepatitis A                                                | 31<br>(8 - 68)              | 18<br>(4 - 42)              | 4<br>(1 - 9)           | 7<br>(2 - 17)               | 1<br>(0 - 3)                | 0<br>(0 - 1)                |
| Acute hepatitis B                                                | 315<br>(158 - 462)          | 47<br>(18 - 93)             | 8<br>(3 - 15)          | 72<br>(31 - 123)            | 111<br>(59 - 170)           | 77<br>(42 - 116)            |
| Acute hepatitis C                                                | 15<br>(3 - 41)              | --                          | 1<br>(0 - 3)           | 5<br>(1 - 14)               | 5<br>(1 - 14)               | 4<br>(1 - 11)               |
| Acute hepatitis E                                                | 133<br>(58 - 222)           | 1<br>(0 - 3)                | 4<br>(2 - 8)           | 99<br>(41 - 163)            | 22<br>(7 - 47)              | 7<br>(2 - 18)               |
| Other infectious diseases                                        | 481<br>(284 - 754)          | 195<br>(91 - 384)           | 18<br>(7 - 35)         | 95<br>(42 - 191)            | 100<br>(47 - 202)           | 73<br>(32 - 138)            |
| Non-communicable diseases                                        | 61,995<br>(54,848 - 71,893) | 7,304<br>(4,557 - 11,268)   | 1,084<br>(811 - 1,420) | 12,145<br>(10,147 - 14,308) | 23,011<br>(19,686 - 27,852) | 18,452<br>(16,407 - 21,361) |
| Neoplasms                                                        | 8,512<br>(7,382 - 9,924)    | 191<br>(117 - 299)          | 156<br>(114 - 210)     | 1,609<br>(1,355 - 1,890)    | 4,264<br>(3,548 - 5,190)    | 2,293<br>(1,969 - 2,722)    |
| Esophageal cancer                                                | 247<br>(180 - 362)          | --                          | --                     | 49<br>(34 - 70)             | 140<br>(97 - 211)           | 57<br>(37 - 92)             |
| Stomach cancer                                                   | 639<br>(534 - 778)          | --                          | --                     | 77<br>(61 - 97)             | 347<br>(278 - 437)          | 215<br>(165 - 285)          |
| Liver cancer                                                     | 1,327<br>(1,091 - 1,627)    | --                          | 3<br>(2 - 5)           | 275<br>(208 - 355)          | 655<br>(509 - 856)          | 393<br>(302 - 512)          |
| Liver cancer due to hepatitis B                                  | 531<br>(350 - 731)          | --                          | 1<br>(1 - 2)           | 145<br>(101 - 204)          | 269<br>(166 - 396)          | 116<br>(71 - 168)           |

Web Table 31- Cote d'Ivoire deaths with 95% UI by age, sex, and cause in 2013

| Cause                                | Both Sexes, All Ages        | Both Sexes, 0-4 Years | Both Sexes, 5-14 Years | Both Sexes, 15-49 Years  | Both Sexes, 50-69 Years    | Both Sexes, 70-80 Years   |
|--------------------------------------|-----------------------------|-----------------------|------------------------|--------------------------|----------------------------|---------------------------|
| Liver cancer due to hepatitis C      | 452<br>(287 - 634)          | --                    | 0<br>(0 - 0)           | 57<br>(29 - 95)          | 225<br>(134 - 335)         | 169<br>(112 - 236)        |
| Liver cancer due to alcohol use      | 182<br>(122 - 265)          | --                    | --                     | 23<br>(12 - 37)          | 88<br>(56 - 138)           | 71<br>(45 - 111)          |
| Liver cancer due to other causes     | 161<br>(105 - 234)          | --                    | 1<br>(1 - 3)           | 50<br>(33 - 72)          | 73<br>(41 - 115)           | 37<br>(22 - 60)           |
| Larynx cancer                        | 98<br>(73 - 148)            | --                    | --                     | 6<br>(4 - 10)            | 63<br>(44 - 99)            | 28<br>(20 - 43)           |
| Tracheal, bronchus and lung cancer   | 577<br>(486 - 706)          | --                    | --                     | 31<br>(25 - 39)          | 357<br>(289 - 449)         | 189<br>(151 - 238)        |
| Breast cancer                        | 682<br>(528 - 911)          | --                    | --                     | 199<br>(154 - 269)       | 383<br>(280 - 530)         | 99<br>(72 - 150)          |
| Cervical cancer                      | 1,374<br>(990 - 1,849)      | --                    | --                     | 202<br>(142 - 292)       | 890<br>(595 - 1,241)       | 282<br>(182 - 425)        |
| Uterine cancer                       | 73<br>(48 - 118)            | --                    | --                     | 11<br>(6 - 25)           | 34<br>(20 - 55)            | 28<br>(17 - 44)           |
| Prostate cancer                      | 368<br>(244 - 637)          | --                    | --                     | 8<br>(4 - 15)            | 123<br>(72 - 215)          | 238<br>(154 - 406)        |
| Colon and rectum cancer              | 314<br>(268 - 374)          | --                    | --                     | 86<br>(70 - 103)         | 127<br>(101 - 158)         | 101<br>(81 - 127)         |
| Lip and oral cavity cancer           | 76<br>(56 - 95)             | --                    | --                     | 15<br>(10 - 21)          | 32<br>(24 - 43)            | 29<br>(20 - 40)           |
| Nasopharynx cancer                   | 56<br>(38 - 75)             | --                    | 2<br>(1 - 5)           | 13<br>(7 - 19)           | 34<br>(22 - 48)            | 8<br>(5 - 12)             |
| Other pharynx cancer                 | 62<br>(43 - 78)             | --                    | --                     | 14<br>(10 - 19)          | 31<br>(22 - 41)            | 17<br>(9 - 24)            |
| Gallbladder and biliary tract cancer | 83<br>(61 - 117)            | --                    | --                     | 8<br>(6 - 11)            | 41<br>(28 - 61)            | 34<br>(23 - 52)           |
| Pancreatic cancer                    | 222<br>(188 - 270)          | --                    | --                     | 23<br>(17 - 29)          | 112<br>(91 - 143)          | 88<br>(70 - 111)          |
| Malignant skin melanoma              | 31<br>(21 - 44)             | --                    | --                     | 7<br>(5 - 11)            | 14<br>(10 - 20)            | 10<br>(6 - 15)            |
| Non-melanoma skin cancer             | 21<br>(15 - 30)             | --                    | --                     | 5<br>(3 - 7)             | 7<br>(4 - 12)              | 9<br>(6 - 13)             |
| Ovarian cancer                       | 296<br>(201 - 418)          | --                    | --                     | 57<br>(39 - 79)          | 211<br>(134 - 312)         | 28<br>(16 - 47)           |
| Testicular cancer                    | 9<br>(5 - 12)               | --                    | --                     | 6<br>(4 - 9)             | 1<br>(1 - 2)               | 1<br>(0 - 1)              |
| Kidney cancer                        | 91<br>(69 - 116)            | 11<br>(5 - 23)        | 5<br>(3 - 8)           | 18<br>(12 - 25)          | 42<br>(28 - 59)            | 15<br>(11 - 21)           |
| Bladder cancer                       | 214<br>(169 - 291)          | --                    | --                     | 48<br>(32 - 67)          | 84<br>(60 - 130)           | 81<br>(60 - 127)          |
| Brain and nervous system cancer      | 97<br>(70 - 121)            | 5<br>(2 - 9)          | 4<br>(3 - 6)           | 19<br>(15 - 26)          | 42<br>(29 - 57)            | 26<br>(13 - 39)           |
| Thyroid cancer                       | 59<br>(31 - 89)             | --                    | 0<br>(0 - 0)           | 4<br>(3 - 5)             | 25<br>(15 - 39)            | 30<br>(12 - 50)           |
| Mesothelioma                         | 9<br>(7 - 11)               | --                    | --                     | 2<br>(2 - 3)             | 4<br>(3 - 6)               | 3<br>(2 - 4)              |
| Hodgkin lymphoma                     | 78<br>(42 - 114)            | 2<br>(1 - 4)          | 2<br>(1 - 4)           | 20<br>(14 - 27)          | 31<br>(13 - 51)            | 24<br>(5 - 47)            |
| Non-Hodgkin lymphoma                 | 480<br>(368 - 601)          | 43<br>(21 - 80)       | 60<br>(37 - 91)        | 166<br>(121 - 216)       | 153<br>(112 - 214)         | 57<br>(39 - 81)           |
| Multiple myeloma                     | 83<br>(58 - 108)            | --                    | --                     | 8<br>(6 - 11)            | 42<br>(27 - 58)            | 33<br>(22 - 46)           |
| Leukemia                             | 170<br>(145 - 200)          | 9<br>(4 - 16)         | 19<br>(13 - 25)        | 69<br>(54 - 86)          | 39<br>(30 - 49)            | 36<br>(28 - 45)           |
| Other neoplasms                      | 676<br>(527 - 1,033)        | 121<br>(73 - 196)     | 61<br>(39 - 89)        | 163<br>(113 - 293)       | 198<br>(130 - 352)         | 134<br>(97 - 205)         |
| Cardiovascular diseases              | 24,959<br>(21,267 - 30,065) | 604<br>(393 - 915)    | 167<br>(119 - 237)     | 3,845<br>(3,085 - 4,900) | 10,577<br>(8,754 - 13,035) | 9,767<br>(8,315 - 11,613) |
| Rheumatic heart disease              | 273<br>(162 - 678)          | 10<br>(4 - 20)        | 10<br>(6 - 21)         | 90<br>(42 - 270)         | 87<br>(43 - 241)           | 77<br>(49 - 155)          |
| Ischemic heart disease               | 6,869<br>(5,490 - 8,952)    | 22<br>(8 - 44)        | 20<br>(12 - 30)        | 1,010<br>(751 - 1,400)   | 2,090<br>(2,443 - 4,108)   | 2,727<br>(2,118 - 3,660)  |
| Cerebrovascular disease              | 11,647<br>(9,792 - 14,274)  | 179<br>(107 - 281)    | 49<br>(33 - 72)        | 1,473<br>(1,150 - 1,897) | 4,909<br>(3,965 - 6,274)   | 5,037<br>(4,279 - 6,108)  |
| Ischemic stroke                      | 7,064<br>(4,792 - 8,778)    | 22<br>(9 - 48)        | 7<br>(3 - 15)          | 362<br>(197 - 557)       | 2,878<br>(1,676 - 3,825)   | 3,795<br>(2,825 - 4,597)  |
| Hemorrhagic stroke                   | 4,583<br>(3,266 - 7,511)    | 157<br>(93 - 244)     | 42<br>(27 - 61)        | 1,111<br>(838 - 1,511)   | 2,031<br>(1,344 - 3,558)   | 1,242<br>(746 - 2,427)    |
| Hypertensive heart disease           | 1,512<br>(747 - 2,323)      | 7<br>(2 - 13)         | 2<br>(1 - 4)           | 205<br>(66 - 363)        | 607<br>(274 - 1,011)       | 691<br>(361 - 1,026)      |
| Cardiomyopathy and myocarditis       | 1,567<br>(1,110 - 2,022)    | 141<br>(68 - 290)     | 35<br>(21 - 55)        | 402<br>(256 - 564)       | 580<br>(357 - 843)         | 410<br>(260 - 572)        |
| Atrial fibrillation and flutter      | 2<br>(1 - 2)                | --                    | --                     | 0<br>(0 - 0)             | 1<br>(0 - 1)               | 1<br>(0 - 1)              |
| Aortic aneurysm                      | 259<br>(190 - 360)          | --                    | --                     | 38<br>(25 - 56)          | 129<br>(89 - 184)          | 92<br>(63 - 135)          |
| Peripheral vascular disease          | 16<br>(10 - 22)             | --                    | --                     | 1<br>(0 - 1)             | 7<br>(4 - 9)               | 9<br>(5 - 13)             |



Web Table 31- Cote d'Ivoire deaths with 95% UI by age, sex, and cause in 2013

| Cause                                               | Both Sexes, All Ages     | Both Sexes, 0-4 Years | Both Sexes, 5-14 Years | Both Sexes, 15-49 Years | Both Sexes, 50-69 Years  | Both Sexes, 70-80 Years  |
|-----------------------------------------------------|--------------------------|-----------------------|------------------------|-------------------------|--------------------------|--------------------------|
| Endocarditis                                        | 414<br>(291 - 589)       | 70<br>(30 - 135)      | 9<br>(6 - 15)          | 92<br>(60 - 140)        | 127<br>(81 - 211)        | 115<br>(74 - 184)        |
| Other cardiovascular and circulatory diseases       | 2,400<br>(1,862 - 4,007) | 176<br>(97 - 302)     | 41<br>(26 - 62)        | 533<br>(378 - 860)      | 1,041<br>(750 - 1,629)   | 609<br>(427 - 1,172)     |
| Chronic respiratory diseases                        | 4,536<br>(3,664 - 7,071) | 196<br>(103 - 374)    | 44<br>(32 - 69)        | 644<br>(491 - 963)      | 1,777<br>(1,342 - 2,826) | 1,874<br>(1,466 - 2,834) |
| Chronic obstructive pulmonary disease               | 2,817<br>(2,168 - 4,487) | 98<br>(48 - 197)      | 19<br>(13 - 30)        | 224<br>(159 - 348)      | 1,118<br>(809 - 1,848)   | 1,358<br>(1,028 - 2,128) |
| Pneumoconiosis                                      | 282<br>(176 - 479)       | 2<br>(0 - 5)          | 2<br>(1 - 3)           | 64<br>(38 - 104)        | 157<br>(90 - 272)        | 58<br>(29 - 119)         |
| Silicosis                                           | 51<br>(31 - 94)          | 1<br>(0 - 2)          | 0<br>(0 - 1)           | 12<br>(7 - 20)          | 15<br>(8 - 30)           | 22<br>(10 - 50)          |
| Asbestosis                                          | 20<br>(12 - 34)          | 0<br>(0 - 1)          | 0<br>(0 - 1)           | 4<br>(2 - 7)            | 13<br>(7 - 23)           | 2<br>(1 - 4)             |
| Coal workers pneumoconiosis                         | 73<br>(44 - 124)         | 0<br>(0 - 1)          | 0<br>(0 - 1)           | 3<br>(2 - 6)            | 62<br>(36 - 107)         | 7<br>(3 - 14)            |
| Other pneumoconiosis                                | 138<br>(85 - 231)        | 0<br>(0 - 1)          | 0<br>(0 - 1)           | 44<br>(26 - 74)         | 66<br>(37 - 116)         | 27<br>(13 - 52)          |
| Asthma                                              | 795<br>(621 - 1,205)     | 53<br>(20 - 105)      | 13<br>(8 - 23)         | 217<br>(162 - 334)      | 298<br>(209 - 452)       | 215<br>(150 - 329)       |
| Interstitial lung disease and pulmonary sarcoidosis | 320<br>(105 - 521)       | 2<br>(0 - 5)          | 1<br>(1 - 2)           | 17<br>(11 - 26)         | 130<br>(43 - 227)        | 170<br>(45 - 303)        |
| Other chronic respiratory diseases                  | 322<br>(239 - 545)       | 42<br>(22 - 88)       | 9<br>(6 - 15)          | 123<br>(87 - 193)       | 75<br>(46 - 135)         | 72<br>(46 - 134)         |
| Cirrhosis                                           | 3,845<br>(3,190 - 4,743) | 70<br>(29 - 136)      | 36<br>(25 - 51)        | 1,307<br>(995 - 1,692)  | 1,783<br>(1,416 - 2,293) | 649<br>(508 - 826)       |
| Cirrhosis due to hepatitis B                        | 1,013<br>(565 - 1,519)   | 4<br>(1 - 8)          | 6<br>(2 - 10)          | 328<br>(179 - 523)      | 490<br>(259 - 763)       | 185<br>(94 - 287)        |
| Cirrhosis due to hepatitis C                        | 905<br>(536 - 1,278)     | 5<br>(1 - 13)         | 8<br>(3 - 15)          | 304<br>(189 - 429)      | 417<br>(234 - 643)       | 171<br>(101 - 259)       |
| Cirrhosis due to alcohol use                        | 1,430<br>(1,029 - 1,968) | --                    | --                     | 444<br>(290 - 636)      | 730<br>(502 - 1,040)     | 257<br>(184 - 359)       |
| Cirrhosis due to other causes                       | 496<br>(360 - 685)       | 61<br>(25 - 119)      | 23<br>(15 - 32)        | 231<br>(151 - 342)      | 145<br>(91 - 221)        | 36<br>(24 - 54)          |
| Digestive diseases                                  | 3,757<br>(2,976 - 4,623) | 165<br>(73 - 314)     | 108<br>(78 - 148)      | 1,219<br>(903 - 1,571)  | 1,323<br>(998 - 1,744)   | 941<br>(739 - 1,177)     |
| Peptic ulcer disease                                | 996<br>(717 - 1,364)     | 16<br>(6 - 35)        | 14<br>(7 - 25)         | 315<br>(214 - 451)      | 382<br>(246 - 574)       | 268<br>(183 - 384)       |
| Gastritis and duodenitis                            | 137<br>(73 - 240)        | 9<br>(3 - 18)         | 6<br>(3 - 10)          | 42<br>(26 - 66)         | 43<br>(21 - 85)          | 37<br>(14 - 86)          |
| Appendicitis                                        | 275<br>(202 - 359)       | 21<br>(7 - 47)        | 20<br>(11 - 34)        | 107<br>(72 - 157)       | 74<br>(45 - 109)         | 54<br>(26 - 91)          |
| Paralytic ileus and intestinal obstruction          | 963<br>(631 - 1,332)     | 48<br>(17 - 98)       | 31<br>(18 - 47)        | 227<br>(130 - 336)      | 378<br>(224 - 551)       | 279<br>(181 - 426)       |
| Inguinal, femoral, and abdominal hernia             | 102<br>(64 - 165)        | 2<br>(1 - 6)          | 1<br>(1 - 3)           | 25<br>(13 - 45)         | 39<br>(22 - 67)          | 34<br>(20 - 57)          |
| Inflammatory bowel disease                          | 207<br>(134 - 276)       | 30<br>(10 - 66)       | 6<br>(3 - 10)          | 75<br>(49 - 106)        | 58<br>(28 - 86)          | 38<br>(19 - 58)          |
| Vascular intestinal disorders                       | 16<br>(7 - 29)           | 1<br>(0 - 3)          | 1<br>(0 - 1)           | 4<br>(2 - 8)            | 5<br>(2 - 9)             | 5<br>(2 - 10)            |
| Gallbladder and biliary diseases                    | 266<br>(173 - 354)       | 5<br>(2 - 10)         | 8<br>(3 - 13)          | 76<br>(46 - 111)        | 90<br>(58 - 128)         | 86<br>(51 - 127)         |
| Pancreatitis                                        | 279<br>(168 - 389)       | 2<br>(1 - 5)          | 3<br>(2 - 4)           | 146<br>(76 - 221)       | 87<br>(53 - 130)         | 42<br>(21 - 68)          |
| Other digestive diseases                            | 517<br>(371 - 703)       | 32<br>(13 - 75)       | 18<br>(12 - 28)        | 201<br>(132 - 291)      | 167<br>(109 - 241)       | 99<br>(64 - 144)         |
| Neurological disorders                              | 1,474<br>(1,248 - 1,738) | 165<br>(87 - 293)     | 63<br>(39 - 98)        | 365<br>(262 - 489)      | 171<br>(138 - 214)       | 710<br>(568 - 848)       |
| Alzheimer disease and other dementias               | 733<br>(585 - 879)       | --                    | --                     | 1<br>(0 - 1)            | 85<br>(65 - 113)         | 647<br>(507 - 780)       |
| Parkinson disease                                   | 9<br>(5 - 17)            | --                    | --                     | 1<br>(1 - 2)            | 1<br>(1 - 3)             | 7<br>(3 - 14)            |
| Epilepsy                                            | 578<br>(434 - 758)       | 132<br>(62 - 257)     | 53<br>(29 - 88)        | 316<br>(217 - 437)      | 42<br>(28 - 61)          | 34<br>(23 - 52)          |
| Multiple sclerosis                                  | 2<br>(1 - 7)             | --                    | --                     | 1<br>(0 - 4)            | 1<br>(0 - 2)             | 0<br>(0 - 1)             |
| Other neurological disorders                        | 152<br>(105 - 204)       | 33<br>(18 - 73)       | 10<br>(6 - 15)         | 47<br>(31 - 63)         | 41<br>(29 - 55)          | 21<br>(15 - 28)          |
| Mental and substance use disorders                  | 1,282<br>(822 - 1,653)   | 38<br>(9 - 80)        | 0<br>(0 - 0)           | 854<br>(536 - 1,169)    | 305<br>(170 - 425)       | 86<br>(40 - 124)         |
| Schizophrenia                                       | 3<br>(2 - 4)             | --                    | --                     | 2<br>(1 - 2)            | 1<br>(1 - 1)             | 0<br>(0 - 1)             |
| Alcohol use disorders                               | 645<br>(317 - 879)       | --                    | --                     | 341<br>(184 - 482)      | 240<br>(108 - 349)       | 64<br>(19 - 99)          |
| Drug use disorders                                  | 633<br>(376 - 863)       | 38<br>(9 - 80)        | --                     | 510<br>(277 - 748)      | 64<br>(49 - 83)          | 22<br>(17 - 28)          |
| Opioid use disorders                                | 68<br>(39 - 96)          | 4<br>(1 - 10)         | --                     | 55<br>(29 - 83)         | 6<br>(4 - 8)             | 2<br>(2 - 3)             |
| Cocaine use disorders                               | 2<br>(1 - 4)             | 0<br>(0 - 0)          | --                     | 2<br>(1 - 3)            | 0<br>(0 - 0)             | 0<br>(0 - 0)             |

Web Table 31- Cote d'Ivoire deaths with 95% UI by age, sex, and cause in 2013

| Cause                                               | Both Sexes, All Ages     | Both Sexes, 0-4 Years    | Both Sexes, 5-14 Years | Both Sexes, 15-49 Years  | Both Sexes, 50-69 Years  | Both Sexes, 70-80 Years  |
|-----------------------------------------------------|--------------------------|--------------------------|------------------------|--------------------------|--------------------------|--------------------------|
| Amphetamine use disorders                           | 2<br>(1 - 2)             | 0<br>(0 - 0)             | --                     | 1<br>(1 - 2)             | 0<br>(0 - 0)             | 0<br>(0 - 0)             |
| Other drug use disorders                            | 561<br>(334 - 770)       | 33<br>(8 - 70)           | --                     | 451<br>(247 - 660)       | 58<br>(44 - 75)          | 19<br>(15 - 25)          |
| Eating disorders                                    | 1<br>(1 - 2)             | --                       | 0<br>(0 - 0)           | 1<br>(1 - 2)             | --                       | --                       |
| Anorexia nervosa                                    | 1<br>(1 - 2)             | --                       | 0<br>(0 - 0)           | 1<br>(1 - 2)             | --                       | --                       |
| Diabetes, urogenital, blood, and endocrine diseases | 8,007<br>(6,446 - 9,516) | 1,301<br>(746 - 2,215)   | 315<br>(196 - 482)     | 1,907<br>(1,450 - 2,301) | 2,565<br>(2,093 - 3,214) | 1,919<br>(1,579 - 2,276) |
| Diabetes mellitus                                   | 2,931<br>(2,493 - 3,498) | 40<br>(23 - 64)          | 12<br>(8 - 18)         | 438<br>(352 - 534)       | 1,420<br>(1,158 - 1,789) | 1,021<br>(818 - 1,260)   |
| Acute glomerulonephritis                            | 27<br>(19 - 47)          | 4<br>(1 - 11)            | 2<br>(1 - 5)           | 11<br>(7 - 18)           | 8<br>(6 - 11)            | 2<br>(1 - 5)             |
| Chronic kidney disease                              | 1,477<br>(1,178 - 1,813) | 110<br>(64 - 181)        | 50<br>(33 - 67)        | 541<br>(381 - 689)       | 437<br>(324 - 589)       | 340<br>(257 - 450)       |
| Chronic kidney disease due to diabetes mellitus     | 19<br>(7 - 28)           | 0<br>(0 - 1)             | 0<br>(0 - 1)           | 2<br>(1 - 3)             | 16<br>(5 - 24)           | 1<br>(0 - 2)             |
| Chronic kidney disease due to hypertension          | 482<br>(366 - 706)       | 14<br>(5 - 27)           | 4<br>(2 - 8)           | 126<br>(86 - 178)        | 184<br>(126 - 285)       | 153<br>(105 - 248)       |
| Chronic kidney disease due to glomerulonephritis    | 627<br>(426 - 809)       | 63<br>(37 - 103)         | 32<br>(22 - 44)        | 291<br>(191 - 393)       | 138<br>(85 - 199)        | 102<br>(56 - 149)        |
| Chronic kidney disease due to other causes          | 350<br>(215 - 496)       | 32<br>(13 - 64)          | 14<br>(6 - 22)         | 121<br>(63 - 197)        | 99<br>(49 - 158)         | 84<br>(42 - 133)         |
| Urinary diseases and male infertility               | 1,225<br>(832 - 1,521)   | 127<br>(60 - 246)        | 19<br>(12 - 29)        | 334<br>(197 - 443)       | 399<br>(272 - 541)       | 346<br>(250 - 464)       |
| Interstitial nephritis and urinary tract infections | 1,052<br>(694 - 1,313)   | 117<br>(52 - 240)        | 15<br>(8 - 25)         | 270<br>(143 - 364)       | 343<br>(233 - 465)       | 307<br>(222 - 412)       |
| Urolithiasis                                        | 13<br>(6 - 36)           | --                       | 1<br>(0 - 3)           | 6<br>(2 - 18)            | 5<br>(2 - 12)            | 2<br>(1 - 7)             |
| Other urinary diseases                              | 159<br>(99 - 224)        | 10<br>(3 - 23)           | 3<br>(1 - 5)           | 58<br>(32 - 91)          | 52<br>(25 - 84)          | 37<br>(17 - 65)          |
| Gynecological diseases                              | 9<br>(6 - 15)            | --                       | --                     | 6<br>(4 - 11)            | 2<br>(1 - 4)             | 1<br>(1 - 2)             |
| Uterine fibroids                                    | 2<br>(1 - 3)             | --                       | --                     | 1<br>(1 - 1)             | 1<br>(0 - 1)             | 0<br>(0 - 1)             |
| Polycystic ovarian syndrome                         | 0<br>(0 - 1)             | --                       | --                     | 0<br>(0 - 1)             | 0<br>(0 - 0)             | --                       |
| Endometriosis                                       | 1<br>(1 - 2)             | --                       | --                     | 1<br>(1 - 2)             | 0<br>(0 - 0)             | --                       |
| Genital prolapse                                    | 1<br>(1 - 2)             | --                       | --                     | 1<br>(1 - 2)             | 0<br>(0 - 1)             | 0<br>(0 - 0)             |
| Other gynecological diseases                        | 5<br>(3 - 7)             | --                       | --                     | 3<br>(2 - 5)             | 1<br>(1 - 2)             | 0<br>(0 - 1)             |
| Hemoglobinopathies and hemolytic anemias            | 1,482<br>(709 - 2,615)   | 795<br>(327 - 1,685)     | 197<br>(86 - 363)      | 354<br>(162 - 589)       | 88<br>(46 - 179)         | 49<br>(23 - 96)          |
| Thalassemias                                        | 50<br>(22 - 97)          | 37<br>(15 - 78)          | 6<br>(2 - 10)          | 8<br>(3 - 14)            | 0<br>(0 - 0)             | 0<br>(0 - 0)             |
| Sickle cell disorders                               | 1,345<br>(626 - 2,397)   | 729<br>(297 - 1,556)     | 188<br>(82 - 346)      | 336<br>(154 - 557)       | 77<br>(40 - 159)         | 15<br>(7 - 30)           |
| G6PD deficiency                                     | 27<br>(13 - 47)          | 14<br>(6 - 28)           | 2<br>(1 - 4)           | 5<br>(2 - 9)             | 3<br>(1 - 5)             | 3<br>(1 - 5)             |
| Other hemoglobinopathies and hemolytic anemias      | 60<br>(32 - 107)         | 16<br>(8 - 27)           | 1<br>(1 - 2)           | 5<br>(2 - 9)             | 8<br>(4 - 15)            | 31<br>(15 - 63)          |
| Endocrine, metabolic, blood, and immune disorders   | 855<br>(576 - 1,076)     | 226<br>(139 - 376)       | 35<br>(21 - 55)        | 223<br>(142 - 315)       | 212<br>(124 - 292)       | 160<br>(82 - 225)        |
| Musculoskeletal disorders                           | 226<br>(163 - 285)       | --                       | 18<br>(10 - 26)        | 93<br>(63 - 123)         | 71<br>(49 - 97)          | 43<br>(31 - 61)          |
| Rheumatoid arthritis                                | 25<br>(17 - 35)          | --                       | 2<br>(1 - 4)           | 6<br>(3 - 9)             | 8<br>(5 - 13)            | 10<br>(6 - 15)           |
| Other musculoskeletal disorders                     | 200<br>(137 - 258)       | --                       | 16<br>(9 - 23)         | 87<br>(58 - 116)         | 64<br>(43 - 87)          | 33<br>(24 - 48)          |
| Other non-communicable diseases                     | 5,398<br>(3,125 - 8,821) | 4,574<br>(2,391 - 7,942) | 176<br>(98 - 319)      | 302<br>(204 - 429)       | 174<br>(123 - 231)       | 171<br>(118 - 229)       |
| Congenital anomalies                                | 4,778<br>(2,534 - 8,222) | 4,394<br>(2,235 - 7,742) | 163<br>(86 - 305)      | 166<br>(100 - 287)       | 33<br>(25 - 45)          | 22<br>(17 - 28)          |
| Neural tube defects                                 | 1,047<br>(307 - 2,355)   | 996<br>(283 - 2,274)     | 23<br>(8 - 54)         | 26<br>(8 - 60)           | 2<br>(0 - 5)             | 1<br>(0 - 3)             |
| Congenital heart anomalies                          | 2,138<br>(1,138 - 3,857) | 1,948<br>(1,004 - 3,521) | 83<br>(43 - 168)       | 79<br>(42 - 145)         | 18<br>(13 - 25)          | 10<br>(8 - 14)           |
| Cleft lip and cleft palate                          | 24<br>(5 - 61)           | 24<br>(5 - 61)           | --                     | --                       | --                       | --                       |
| Down syndrome                                       | 501<br>(164 - 1,095)     | 446<br>(127 - 1,012)     | 23<br>(10 - 47)        | 26<br>(15 - 48)          | 4<br>(2 - 8)             | 1<br>(0 - 1)             |
| Chromosomal unbalanced rearrangements               | 159<br>(51 - 350)        | 148<br>(44 - 333)        | 4<br>(1 - 8)           | 6<br>(3 - 11)            | 1<br>(0 - 1)             | 1<br>(0 - 1)             |
| Other congenital anomalies                          | 908<br>(310 - 2,770)     | 833<br>(257 - 2,607)     | 29<br>(11 - 82)        | 29<br>(16 - 67)          | 8<br>(5 - 12)            | 9<br>(6 - 13)            |
| Skin and subcutaneous diseases                      | 567<br>(355 - 701)       | 127<br>(62 - 210)        | 14<br>(9 - 19)         | 136<br>(77 - 185)        | 141<br>(83 - 196)        | 149<br>(98 - 205)        |

Web Table 31- Cote d'Ivoire deaths with 95% UI by age, sex, and cause in 2013

| Cause                                           | Both Sexes, All Ages        | Both Sexes, 0-4 Years    | Both Sexes, 5-14 Years | Both Sexes, 15-49 Years  | Both Sexes, 50-69 Years  | Both Sexes, 70-80 Years |
|-------------------------------------------------|-----------------------------|--------------------------|------------------------|--------------------------|--------------------------|-------------------------|
| Cellulitis                                      | 170<br>(85 - 251)           | 31<br>(12 - 58)          | 6<br>(3 - 8)           | 36<br>(16 - 57)          | 48<br>(19 - 82)          | 49<br>(21 - 86)         |
| Pyoderma                                        | 365<br>(244 - 468)          | 89<br>(44 - 153)         | 7<br>(4 - 10)          | 90<br>(56 - 120)         | 90<br>(56 - 134)         | 89<br>(52 - 135)        |
| Decubitus ulcer                                 | 13<br>(8 - 20)              | 0<br>(0 - 1)             | 1<br>(0 - 1)           | 3<br>(2 - 4)             | 1<br>(1 - 2)             | 8<br>(4 - 15)           |
| Other skin and subcutaneous diseases            | 19<br>(10 - 30)             | 7<br>(2 - 15)            | 1<br>(0 - 1)           | 7<br>(3 - 12)            | 2<br>(1 - 4)             | 3<br>(1 - 6)            |
| Sudden infant death syndrome                    | 53<br>(20 - 128)            | 53<br>(20 - 128)         | --                     | --                       | --                       | --                      |
| Injuries                                        | 13,786<br>(11,543 - 16,536) | 2,228<br>(1,342 - 3,456) | 1,071<br>(795 - 1,399) | 7,094<br>(5,554 - 8,748) | 2,184<br>(1,739 - 2,749) | 1,210<br>(896 - 1,491)  |
| Transport injuries                              | 7,082<br>(5,639 - 8,970)    | 628<br>(333 - 1,102)     | 518<br>(354 - 716)     | 4,401<br>(3,333 - 5,666) | 1,103<br>(823 - 1,450)   | 431<br>(299 - 573)      |
| Road injuries                                   | 6,856<br>(5,462 - 8,661)    | 570<br>(302 - 1,006)     | 493<br>(336 - 684)     | 4,324<br>(3,274 - 5,564) | 1,064<br>(795 - 1,400)   | 406<br>(291 - 534)      |
| Pedestrian road injuries                        | 1,849<br>(1,322 - 2,527)    | 196<br>(92 - 377)        | 179<br>(111 - 259)     | 995<br>(662 - 1,440)     | 329<br>(226 - 460)       | 150<br>(103 - 211)      |
| Cyclist road injuries                           | 338<br>(239 - 460)          | 36<br>(14 - 80)          | 44<br>(26 - 72)        | 155<br>(105 - 221)       | 78<br>(46 - 114)         | 25<br>(14 - 40)         |
| Motorcyclist road injuries                      | 900<br>(584 - 1,335)        | 43<br>(20 - 82)          | 33<br>(18 - 54)        | 681<br>(412 - 1,044)     | 112<br>(69 - 170)        | 31<br>(18 - 46)         |
| Motor vehicle road injuries                     | 3,650<br>(2,822 - 4,701)    | 270<br>(147 - 463)       | 218<br>(143 - 312)     | 2,450<br>(1,802 - 3,204) | 524<br>(378 - 724)       | 189<br>(129 - 266)      |
| Other road injuries                             | 120<br>(74 - 178)           | 25<br>(8 - 49)           | 19<br>(9 - 34)         | 43<br>(25 - 78)          | 22<br>(12 - 35)          | 11<br>(5 - 19)          |
| Other transport injuries                        | 225<br>(146 - 315)          | 59<br>(24 - 111)         | 25<br>(13 - 43)        | 77<br>(50 - 133)         | 40<br>(20 - 64)          | 24<br>(6 - 41)          |
| Unintentional injuries                          | 5,355<br>(4,353 - 6,500)    | 1,592<br>(966 - 2,497)   | 530<br>(388 - 702)     | 1,791<br>(1,366 - 2,379) | 795<br>(595 - 1,031)     | 647<br>(444 - 848)      |
| Falls                                           | 1,246<br>(944 - 1,858)      | 192<br>(103 - 336)       | 71<br>(44 - 108)       | 416<br>(258 - 767)       | 260<br>(174 - 430)       | 307<br>(208 - 424)      |
| Drowning                                        | 1,221<br>(826 - 1,871)      | 470<br>(223 - 907)       | 210<br>(119 - 322)     | 411<br>(236 - 736)       | 93<br>(66 - 134)         | 37<br>(24 - 52)         |
| Fire, heat, and hot substances                  | 616<br>(338 - 884)          | 233<br>(100 - 426)       | 51<br>(27 - 81)        | 181<br>(104 - 244)       | 86<br>(50 - 135)         | 64<br>(34 - 99)         |
| Poisonings                                      | 259<br>(184 - 422)          | 68<br>(31 - 132)         | 18<br>(11 - 29)        | 117<br>(75 - 225)        | 43<br>(26 - 62)          | 14<br>(8 - 21)          |
| Exposure to mechanical forces                   | 756<br>(591 - 970)          | 195<br>(108 - 331)       | 75<br>(47 - 113)       | 334<br>(237 - 486)       | 112<br>(69 - 154)        | 39<br>(18 - 53)         |
| Unintentional firearm injuries                  | 287<br>(209 - 403)          | 48<br>(23 - 96)          | 17<br>(10 - 29)        | 173<br>(109 - 265)       | 37<br>(23 - 57)          | 12<br>(7 - 19)          |
| Unintentional suffocation                       | 72<br>(41 - 136)            | 41<br>(15 - 101)         | 8<br>(4 - 13)          | 15<br>(8 - 28)           | 6<br>(3 - 10)            | 2<br>(1 - 3)            |
| Other exposure to mechanical forces             | 398<br>(286 - 529)          | 106<br>(46 - 207)        | 50<br>(27 - 84)        | 147<br>(101 - 220)       | 69<br>(31 - 104)         | 25<br>(7 - 37)          |
| Adverse effects of medical treatment            | 402<br>(156 - 652)          | 112<br>(33 - 240)        | 18<br>(7 - 33)         | 97<br>(39 - 160)         | 90<br>(34 - 161)         | 85<br>(28 - 161)        |
| Animal contact                                  | 158<br>(92 - 223)           | 34<br>(17 - 66)          | 23<br>(13 - 40)        | 50<br>(26 - 71)          | 30<br>(14 - 44)          | 21<br>(8 - 32)          |
| Venomous animal contact                         | 84<br>(50 - 136)            | 20<br>(9 - 46)           | 12<br>(6 - 24)         | 29<br>(15 - 46)          | 14<br>(7 - 22)           | 10<br>(3 - 16)          |
| Non-venomous animal contact                     | 74<br>(38 - 101)            | 14<br>(7 - 25)           | 11<br>(5 - 19)         | 21<br>(10 - 30)          | 16<br>(7 - 25)           | 12<br>(5 - 18)          |
| Foreign body                                    | 376<br>(232 - 526)          | 225<br>(129 - 358)       | 24<br>(14 - 35)        | 49<br>(30 - 68)          | 32<br>(18 - 45)          | 46<br>(22 - 69)         |
| Pulmonary aspiration and foreign body in airway | 360<br>(218 - 507)          | 220<br>(126 - 354)       | 22<br>(12 - 33)        | 47<br>(27 - 65)          | 28<br>(16 - 40)          | 43<br>(20 - 66)         |
| Foreign body in other body part                 | 16<br>(10 - 22)             | 5<br>(3 - 8)             | 2<br>(1 - 3)           | 3<br>(2 - 5)             | 4<br>(2 - 6)             | 2<br>(1 - 3)            |
| Other unintentional injuries                    | 320<br>(257 - 384)          | 63<br>(36 - 96)          | 40<br>(27 - 57)        | 136<br>(98 - 176)        | 47<br>(35 - 63)          | 34<br>(24 - 45)         |
| Self-harm and interpersonal violence            | 1,350<br>(1,009 - 1,948)    | 8<br>(3 - 20)            | 22<br>(11 - 40)        | 902<br>(610 - 1,503)     | 286<br>(200 - 392)       | 132<br>(70 - 192)       |
| Self-harm                                       | 1,216<br>(917 - 1,709)      | --                       | 19<br>(9 - 37)         | 786<br>(527 - 1,294)     | 280<br>(191 - 383)       | 132<br>(69 - 191)       |
| Interpersonal violence                          | 134<br>(73 - 317)           | 8<br>(3 - 20)            | 4<br>(2 - 9)           | 116<br>(61 - 277)        | 6<br>(3 - 17)            | 1<br>(0 - 2)            |
| Assault by firearm                              | 67<br>(34 - 159)            | 2<br>(1 - 5)             | 1<br>(0 - 2)           | 61<br>(31 - 147)         | 3<br>(1 - 7)             | 0<br>(0 - 1)            |
| Assault by sharp object                         | 24<br>(11 - 59)             | 1<br>(0 - 3)             | 1<br>(0 - 1)           | 20<br>(8 - 51)           | 2<br>(1 - 4)             | 0<br>(0 - 0)            |
| Assault by other means                          | 43<br>(20 - 118)            | 5<br>(2 - 14)            | 2<br>(1 - 5)           | 34<br>(15 - 95)          | 2<br>(1 - 6)             | 0<br>(0 - 1)            |

Web Table 31- Cote d'Ivoire deaths with 95% UI by age, sex, and cause in 2013

| Cause                                                             | Males, All Ages                | Males, 0-4 Years            | Males, 5-14 Years        | Males, 15-49 Years          | Males, 50-69 Years          | Males, 70-80 Years          |
|-------------------------------------------------------------------|--------------------------------|-----------------------------|--------------------------|-----------------------------|-----------------------------|-----------------------------|
| All causes                                                        | 112,446<br>(102,873 - 125,566) | 38,099<br>(33,682 - 43,968) | 3,726<br>(3,255 - 4,302) | 29,976<br>(26,279 - 33,263) | 24,784<br>(21,702 - 29,456) | 15,862<br>(14,433 - 18,111) |
| Communicable, maternal, neonatal, and nutritional diseases        | 66,463<br>(59,983 - 73,565)    | 32,928<br>(28,559 - 38,023) | 2,498<br>(2,033 - 3,024) | 16,815<br>(14,101 - 19,697) | 9,294<br>(7,619 - 11,031)   | 4,927<br>(3,712 - 6,091)    |
| HIV/AIDS and tuberculosis                                         | 19,193<br>(16,082 - 22,697)    | 411<br>(270 - 560)          | 899<br>(739 - 1,088)     | 11,876<br>(9,062 - 14,941)  | 4,918<br>(3,837 - 6,037)    | 1,087<br>(785 - 1,403)      |
| Tuberculosis                                                      | 4,389<br>(3,289 - 5,529)       | 165<br>(96 - 260)           | 55<br>(33 - 88)          | 1,822<br>(1,278 - 2,497)    | 1,562<br>(1,080 - 2,075)    | 786<br>(484 - 1,095)        |
| HIV/AIDS                                                          | 14,804<br>(11,522 - 18,328)    | 247<br>(133 - 388)          | 845<br>(676 - 1,038)     | 10,055<br>(7,007 - 13,304)  | 3,356<br>(2,345 - 4,501)    | 302<br>(196 - 432)          |
| HIV/AIDS resulting in mycobacterial infection                     | 1,041<br>(770 - 1,379)         | 16<br>(8 - 26)              | 51<br>(38 - 67)          | 705<br>(490 - 978)          | 245<br>(166 - 344)          | 23<br>(15 - 34)             |
| HIV/AIDS resulting in other diseases                              | 13,763<br>(10,645 - 17,142)    | 231<br>(125 - 364)          | 793<br>(637 - 978)       | 9,350<br>(6,510 - 12,391)   | 3,111<br>(2,177 - 4,204)    | 279<br>(181 - 399)          |
| Diarrhea, lower respiratory, and other common infectious diseases | 23,302<br>(18,185 - 29,082)    | 13,400<br>(9,358 - 18,373)  | 881<br>(593 - 1,260)     | 3,053<br>(2,278 - 4,019)    | 3,031<br>(2,033 - 4,084)    | 2,937<br>(2,035 - 3,827)    |
| Diarrheal diseases                                                | 5,838<br>(3,761 - 9,239)       | 3,546<br>(1,539 - 6,974)    | 176<br>(76 - 348)        | 829<br>(530 - 1,259)        | 713<br>(412 - 1,141)        | 575<br>(335 - 909)          |
| Intestinal infectious diseases                                    | 528<br>(272 - 989)             | 185<br>(75 - 371)           | 137<br>(63 - 259)        | 175<br>(78 - 344)           | 24<br>(11 - 44)             | 8<br>(3 - 14)               |
| Typhoid fever                                                     | 324<br>(152 - 628)             | 104<br>(38 - 221)           | 87<br>(37 - 171)         | 113<br>(47 - 234)           | 16<br>(6 - 31)              | 5<br>(2 - 9)                |
| Paratyphoid fever                                                 | 172<br>(82 - 327)              | 62<br>(23 - 133)            | 47<br>(20 - 96)          | 55<br>(21 - 118)            | 7<br>(2 - 15)               | 2<br>(0 - 5)                |
| Other intestinal infectious diseases                              | 32<br>(17 - 54)                | 19<br>(8 - 37)              | 3<br>(0 - 8)             | 7<br>(2 - 16)               | 2<br>(0 - 7)                | 1<br>(0 - 5)                |
| Lower respiratory infections                                      | 12,869<br>(9,494 - 16,725)     | 7,202<br>(4,692 - 10,627)   | 270<br>(154 - 460)       | 1,231<br>(828 - 1,755)      | 1,940<br>(1,162 - 2,890)    | 2,226<br>(1,354 - 3,043)    |
| Upper respiratory infections                                      | 16<br>(6 - 32)                 | 6<br>(0 - 21)               | 1<br>(0 - 2)             | 5<br>(1 - 12)               | 3<br>(0 - 9)                | 2<br>(0 - 5)                |
| Otitis media                                                      | 5<br>(4 - 7)                   | 1<br>(1 - 2)                | 0<br>(0 - 0)             | 1<br>(1 - 2)                | 1<br>(1 - 1)                | 1<br>(1 - 2)                |
| Meningitis                                                        | 2,656<br>(1,754 - 3,750)       | 1,336<br>(621 - 2,356)      | 200<br>(101 - 358)       | 703<br>(444 - 1,080)        | 306<br>(160 - 474)          | 110<br>(61 - 184)           |
| Pneumococcal meningitis                                           | 632<br>(396 - 948)             | 277<br>(121 - 509)          | 50<br>(17 - 105)         | 198<br>(111 - 343)          | 80<br>(33 - 153)            | 28<br>(12 - 53)             |
| H influenzae type B meningitis                                    | 491<br>(213 - 883)             | 336<br>(96 - 735)           | 33<br>(10 - 68)          | 85<br>(41 - 150)            | 28<br>(13 - 54)             | 8<br>(3 - 15)               |
| Meningococcal meningitis                                          | 1,196<br>(759 - 1,754)         | 586<br>(257 - 1,091)        | 96<br>(43 - 178)         | 321<br>(180 - 529)          | 141<br>(73 - 225)           | 52<br>(28 - 92)             |
| Other meningitis                                                  | 337<br>(193 - 502)             | 137<br>(46 - 272)           | 21<br>(7 - 44)           | 100<br>(46 - 190)           | 57<br>(15 - 114)            | 23<br>(7 - 46)              |
| Encephalitis                                                      | 134<br>(90 - 204)              | 55<br>(25 - 108)            | 14<br>(7 - 28)           | 39<br>(22 - 67)             | 18<br>(11 - 26)             | 9<br>(5 - 13)               |
| Diphtheria                                                        | 14<br>(0 - 87)                 | 11<br>(0 - 84)              | 2<br>(0 - 14)            | 1<br>(0 - 4)                | 0<br>(0 - 2)                | --                          |
| Whooping cough                                                    | 254<br>(1 - 1,214)             | 241<br>(1 - 1,155)          | 10<br>(0 - 49)           | 2<br>(0 - 12)               | 0<br>(0 - 1)                | --                          |
| Tetanus                                                           | 347<br>(119 - 674)             | 254<br>(67 - 553)           | 10<br>(5 - 21)           | 54<br>(21 - 106)            | 24<br>(9 - 48)              | 4<br>(2 - 9)                |
| Measles                                                           | 628<br>(11 - 3,640)            | 558<br>(9 - 3,180)          | 61<br>(1 - 340)          | 10<br>(0 - 54)              | 0<br>(0 - 2)                | --                          |
| Varicella and herpes zoster                                       | 14<br>(4 - 31)                 | 6<br>(0 - 23)               | 1<br>(0 - 5)             | 3<br>(0 - 9)                | 1<br>(0 - 4)                | 2<br>(0 - 10)               |
| Neglected tropical diseases and malaria                           | 8,169<br>(4,034 - 14,253)      | 5,624<br>(2,447 - 10,920)   | 516<br>(163 - 1,161)     | 1,023<br>(353 - 2,429)      | 650<br>(199 - 1,708)        | 356<br>(101 - 1,026)        |
| Malaria                                                           | 7,931<br>(3,796 - 14,026)      | 5,567<br>(2,381 - 10,871)   | 479<br>(122 - 1,119)     | 933<br>(267 - 2,340)        | 609<br>(159 - 1,667)        | 343<br>(89 - 1,012)         |
| Leishmaniasis                                                     | 0<br>(0 - 1)                   | 0<br>(0 - 0)                | 0<br>(0 - 0)             | 0<br>(0 - 0)                | 0<br>(0 - 0)                | 0<br>(0 - 0)                |
| Visceral leishmaniasis                                            | 0<br>(0 - 1)                   | 0<br>(0 - 0)                | 0<br>(0 - 0)             | 0<br>(0 - 0)                | 0<br>(0 - 0)                | 0<br>(0 - 0)                |
| African trypanosomiasis                                           | 20<br>(9 - 37)                 | 1<br>(0 - 3)                | 2<br>(1 - 4)             | 13<br>(5 - 25)              | 3<br>(1 - 5)                | 1<br>(0 - 1)                |
| Schistosomiasis                                                   | 62<br>(43 - 88)                | 1<br>(0 - 2)                | 2<br>(1 - 3)             | 29<br>(18 - 44)             | 23<br>(13 - 37)             | 8<br>(4 - 13)               |
| Cysticercosis                                                     | 3<br>(1 - 9)                   | 0<br>(0 - 0)                | 0<br>(0 - 0)             | 2<br>(0 - 6)                | 1<br>(0 - 2)                | 0<br>(0 - 0)                |
| Cystic echinococcosis                                             | 5<br>(4 - 6)                   | 1<br>(0 - 1)                | 1<br>(0 - 1)             | 3<br>(2 - 3)                | 1<br>(1 - 1)                | 0<br>(0 - 0)                |
| Dengue                                                            | 15<br>(7 - 22)                 | 6<br>(2 - 12)               | 3<br>(1 - 4)             | 4<br>(3 - 7)                | 1<br>(0 - 2)                | 0<br>(0 - 1)                |
| Yellow fever                                                      | 8<br>(5 - 14)                  | 1<br>(0 - 2)                | 2<br>(0 - 4)             | 5<br>(2 - 10)               | 1<br>(0 - 2)                | 0<br>(0 - 1)                |
| Rabies                                                            | 78<br>(32 - 126)               | 18<br>(4 - 47)              | 24<br>(8 - 48)           | 27<br>(13 - 41)             | 8<br>(3 - 14)               | 1<br>(0 - 2)                |
| Intestinal nematode infections                                    | 31<br>(12 - 59)                | 24<br>(8 - 50)              | 3<br>(0 - 11)            | 2<br>(0 - 9)                | 1<br>(0 - 5)                | 0<br>(0 - 4)                |
| Ascariasis                                                        | 31<br>(12 - 59)                | 24<br>(8 - 50)              | 3<br>(0 - 11)            | 2<br>(0 - 9)                | 1<br>(0 - 5)                | 0<br>(0 - 4)                |

Web Table 31- Cote d'Ivoire deaths with 95% UI by age, sex, and cause in 2013

| Cause                                                            | Males, All Ages             | Males, 0-4 Years           | Males, 5-14 Years  | Males, 15-49 Years       | Males, 50-69 Years          | Males, 70-80 Years         |
|------------------------------------------------------------------|-----------------------------|----------------------------|--------------------|--------------------------|-----------------------------|----------------------------|
| Other neglected tropical diseases                                | 18<br>(12 - 29)             | 5<br>(2 - 12)              | 1<br>(1 - 3)       | 6<br>(3 - 10)            | 3<br>(2 - 5)                | 2<br>(1 - 4)               |
| Maternal disorders                                               | --                          | --                         | --                 | --                       | --                          | --                         |
| Maternal hemorrhage                                              | --                          | --                         | --                 | --                       | --                          | --                         |
| Maternal sepsis and other maternal infections                    | --                          | --                         | --                 | --                       | --                          | --                         |
| Maternal hypertensive disorders                                  | --                          | --                         | --                 | --                       | --                          | --                         |
| Maternal obstructed labor                                        | --                          | --                         | --                 | --                       | --                          | --                         |
| Maternal abortive outcome                                        | --                          | --                         | --                 | --                       | --                          | --                         |
| Indirect maternal deaths                                         | --                          | --                         | --                 | --                       | --                          | --                         |
| Late maternal deaths                                             | --                          | --                         | --                 | --                       | --                          | --                         |
| Maternal deaths aggravated by HIV/AIDS                           | --                          | --                         | --                 | --                       | --                          | --                         |
| Other maternal disorders                                         | --                          | --                         | --                 | --                       | --                          | --                         |
| Neonatal disorders                                               | 10,821<br>(8,570 - 12,985)  | 10,821<br>(8,570 - 12,985) | --                 | --                       | --                          | --                         |
| Neonatal preterm birth complications                             | 3,821<br>(1,825 - 6,331)    | 3,821<br>(1,825 - 6,331)   | --                 | --                       | --                          | --                         |
| Neonatal encephalopathy due to birth asphyxia and trauma         | 3,046<br>(1,519 - 5,012)    | 3,046<br>(1,519 - 5,012)   | --                 | --                       | --                          | --                         |
| Neonatal sepsis and other neonatal infections                    | 2,977<br>(1,348 - 5,446)    | 2,977<br>(1,348 - 5,446)   | --                 | --                       | --                          | --                         |
| Hemolytic disease and other neonatal jaundice                    | 87<br>(28 - 229)            | 87<br>(28 - 229)           | --                 | --                       | --                          | --                         |
| Other neonatal disorders                                         | 891<br>(385 - 1,790)        | 891<br>(385 - 1,790)       | --                 | --                       | --                          | --                         |
| Nutritional deficiencies                                         | 4,115<br>(2,429 - 6,052)    | 2,277<br>(1,146 - 3,934)   | 163<br>(86 - 279)  | 662<br>(385 - 989)       | 548<br>(309 - 828)          | 466<br>(265 - 733)         |
| Protein-energy malnutrition                                      | 2,904<br>(1,573 - 4,789)    | 1,895<br>(761 - 3,474)     | 119<br>(56 - 217)  | 325<br>(157 - 608)       | 315<br>(159 - 576)          | 250<br>(111 - 492)         |
| Iodine deficiency                                                | 6<br>(0 - 31)               | 3<br>(0 - 24)              | 0<br>(0 - 2)       | 2<br>(0 - 8)             | 1<br>(0 - 5)                | 1<br>(0 - 4)               |
| Iron-deficiency anemia                                           | 1,186<br>(453 - 2,183)      | 376<br>(50 - 1,126)        | 43<br>(10 - 87)    | 326<br>(118 - 549)       | 228<br>(71 - 402)           | 213<br>(70 - 368)          |
| Other nutritional deficiencies                                   | 19<br>(6 - 35)              | 3<br>(0 - 11)              | 1<br>(0 - 2)       | 8<br>(2 - 16)            | 4<br>(1 - 8)                | 3<br>(1 - 7)               |
| Other communicable, maternal, neonatal, and nutritional diseases | 863<br>(584 - 1,233)        | 395<br>(207 - 660)         | 38<br>(23 - 61)    | 201<br>(120 - 316)       | 147<br>(81 - 257)           | 81<br>(46 - 147)           |
| Sexually transmitted diseases excluding HIV                      | 310<br>(158 - 539)          | 249<br>(103 - 471)         | 17<br>(8 - 32)     | 22<br>(12 - 32)          | 14<br>(7 - 29)              | 9<br>(4 - 20)              |
| Syphilis                                                         | 294<br>(142 - 524)          | 249<br>(103 - 471)         | 16<br>(7 - 31)     | 11<br>(6 - 17)           | 10<br>(5 - 21)              | 8<br>(3 - 17)              |
| Chlamydial infection                                             | --                          | --                         | --                 | --                       | --                          | --                         |
| Gonococcal infection                                             | 10<br>(6 - 14)              | --                         | 0<br>(0 - 1)       | 6<br>(3 - 8)             | 2<br>(1 - 5)                | 1<br>(0 - 2)               |
| Other sexually transmitted diseases                              | 7<br>(4 - 10)               | --                         | 0<br>(0 - 1)       | 5<br>(3 - 7)             | 1<br>(1 - 3)                | 0<br>(0 - 1)               |
| Hepatitis                                                        | 253<br>(126 - 378)          | 39<br>(14 - 85)            | 11<br>(5 - 18)     | 112<br>(51 - 179)        | 64<br>(33 - 105)            | 28<br>(15 - 46)            |
| Acute hepatitis A                                                | 16<br>(4 - 39)              | 9<br>(2 - 25)              | 2<br>(1 - 5)       | 4<br>(1 - 11)            | 0<br>(0 - 1)                | 0<br>(0 - 0)               |
| Acute hepatitis B                                                | 159<br>(78 - 247)           | 29<br>(10 - 64)            | 5<br>(2 - 10)      | 49<br>(20 - 88)          | 51<br>(26 - 86)             | 24<br>(13 - 39)            |
| Acute hepatitis C                                                | 7<br>(1 - 20)               | --                         | 1<br>(0 - 2)       | 4<br>(1 - 11)            | 2<br>(0 - 6)                | 1<br>(0 - 3)               |
| Acute hepatitis E                                                | 71<br>(30 - 130)            | 1<br>(0 - 2)               | 2<br>(1 - 6)       | 55<br>(23 - 100)         | 11<br>(3 - 27)              | 3<br>(1 - 6)               |
| Other infectious diseases                                        | 299<br>(151 - 570)          | 108<br>(38 - 234)          | 10<br>(3 - 25)     | 68<br>(24 - 155)         | 69<br>(24 - 170)            | 44<br>(15 - 105)           |
| Non-communicable diseases                                        | 36,328<br>(31,055 - 43,694) | 3,791<br>(2,259 - 6,626)   | 571<br>(383 - 819) | 7,745<br>(6,019 - 9,505) | 13,971<br>(11,457 - 17,749) | 10,249<br>(8,902 - 12,279) |
| Neoplasms                                                        | 3,909<br>(3,265 - 4,824)    | 123<br>(69 - 206)          | 81<br>(52 - 113)   | 714<br>(546 - 900)       | 1,765<br>(1,420 - 2,269)    | 1,226<br>(1,025 - 1,527)   |
| Esophageal cancer                                                | 222<br>(158 - 330)          | --                         | --                 | 46<br>(32 - 67)          | 125<br>(83 - 194)           | 50<br>(32 - 79)            |
| Stomach cancer                                                   | 301<br>(239 - 380)          | --                         | --                 | 50<br>(36 - 66)          | 163<br>(123 - 217)          | 88<br>(65 - 118)           |
| Liver cancer                                                     | 884<br>(693 - 1,131)        | --                         | 1<br>(1 - 3)       | 196<br>(137 - 274)       | 433<br>(312 - 595)          | 253<br>(181 - 356)         |
| Liver cancer due to hepatitis B                                  | 376<br>(225 - 560)          | --                         | 1<br>(0 - 1)       | 111<br>(70 - 167)        | 187<br>(100 - 301)          | 78<br>(41 - 124)           |

Web Table 31- Cote d'Ivoire deaths with 95% UI by age, sex, and cause in 2013

| Cause                                | Males, All Ages             | Males, 0-4 Years   | Males, 5-14 Years | Males, 15-49 Years       | Males, 50-69 Years       | Males, 70-80 Years       |
|--------------------------------------|-----------------------------|--------------------|-------------------|--------------------------|--------------------------|--------------------------|
| Liver cancer due to hepatitis C      | 298<br>(140 - 461)          | --                 | 0<br>(0 - 0)      | 40<br>(14 - 76)          | 149<br>(61 - 248)        | 109<br>(57 - 168)        |
| Liver cancer due to alcohol use      | 137<br>(82 - 220)           | --                 | --                | 19<br>(8 - 32)           | 65<br>(35 - 114)         | 53<br>(29 - 91)          |
| Liver cancer due to other causes     | 74<br>(36 - 120)            | --                 | 1<br>(0 - 1)      | 27<br>(13 - 47)          | 32<br>(14 - 56)          | 14<br>(6 - 26)           |
| Larynx cancer                        | 94<br>(70 - 143)            | --                 | --                | 5<br>(4 - 9)             | 61<br>(42 - 96)          | 27<br>(19 - 42)          |
| Tracheal, bronchus and lung cancer   | 437<br>(350 - 560)          | --                 | --                | 20<br>(15 - 26)          | 261<br>(201 - 354)       | 156<br>(119 - 202)       |
| Breast cancer                        | 30<br>(9 - 50)              | --                 | --                | 8<br>(2 - 15)            | 15<br>(4 - 29)           | 7<br>(2 - 15)            |
| Cervical cancer                      | --                          | --                 | --                | --                       | --                       | --                       |
| Uterine cancer                       | --                          | --                 | --                | --                       | --                       | --                       |
| Prostate cancer                      | 368<br>(244 - 637)          | --                 | --                | 8<br>(4 - 15)            | 123<br>(72 - 215)        | 238<br>(154 - 406)       |
| Colon and rectum cancer              | 137<br>(111 - 169)          | --                 | --                | 37<br>(28 - 48)          | 58<br>(45 - 77)          | 42<br>(32 - 54)          |
| Lip and oral cavity cancer           | 51<br>(33 - 68)             | --                 | --                | 6<br>(4 - 9)             | 22<br>(15 - 33)          | 22<br>(13 - 33)          |
| Nasopharynx cancer                   | 36<br>(25 - 49)             | --                 | 1<br>(0 - 4)      | 4<br>(2 - 6)             | 25<br>(16 - 37)          | 6<br>(3 - 9)             |
| Other pharynx cancer                 | 40<br>(26 - 55)             | --                 | --                | 7<br>(5 - 10)            | 19<br>(12 - 28)          | 15<br>(7 - 22)           |
| Gallbladder and biliary tract cancer | 19<br>(13 - 27)             | --                 | --                | 3<br>(2 - 4)             | 8<br>(5 - 12)            | 8<br>(5 - 12)            |
| Pancreatic cancer                    | 126<br>(100 - 161)          | --                 | --                | 16<br>(11 - 22)          | 67<br>(50 - 89)          | 44<br>(33 - 57)          |
| Malignant skin melanoma              | 20<br>(10 - 32)             | --                 | --                | 4<br>(2 - 8)             | 8<br>(4 - 14)            | 8<br>(4 - 13)            |
| Non-melanoma skin cancer             | 13<br>(9 - 21)              | --                 | --                | 3<br>(2 - 5)             | 5<br>(3 - 9)             | 5<br>(3 - 8)             |
| Ovarian cancer                       | --                          | --                 | --                | --                       | --                       | --                       |
| Testicular cancer                    | 9<br>(5 - 12)               | --                 | --                | 6<br>(4 - 9)             | 1<br>(1 - 2)             | 1<br>(0 - 1)             |
| Kidney cancer                        | 55<br>(38 - 77)             | 7<br>(2 - 16)      | 2<br>(1 - 4)      | 10<br>(6 - 15)           | 26<br>(16 - 41)          | 11<br>(7 - 16)           |
| Bladder cancer                       | 151<br>(113 - 224)          | --                 | --                | 32<br>(20 - 47)          | 58<br>(39 - 100)         | 60<br>(43 - 101)         |
| Brain and nervous system cancer      | 39<br>(22 - 52)             | 1<br>(0 - 3)       | 2<br>(1 - 3)      | 9<br>(6 - 15)            | 19<br>(10 - 28)          | 7<br>(2 - 12)            |
| Thyroid cancer                       | 5<br>(3 - 7)                | --                 | 0<br>(0 - 0)      | 1<br>(1 - 2)             | 2<br>(1 - 4)             | 1<br>(1 - 2)             |
| Mesothelioma                         | 4<br>(3 - 6)                | --                 | --                | 1<br>(0 - 1)             | 2<br>(1 - 3)             | 2<br>(1 - 4)             |
| Hodgkin lymphoma                     | 38<br>(21 - 58)             | 1<br>(0 - 2)       | 1<br>(0 - 2)      | 12<br>(8 - 19)           | 18<br>(7 - 34)           | 6<br>(1 - 11)            |
| Non-Hodgkin lymphoma                 | 291<br>(206 - 381)          | 25<br>(10 - 50)    | 36<br>(18 - 61)   | 96<br>(63 - 133)         | 87<br>(58 - 128)         | 46<br>(29 - 69)          |
| Multiple myeloma                     | 48<br>(29 - 69)             | --                 | --                | 3<br>(2 - 5)             | 21<br>(11 - 33)          | 25<br>(15 - 37)          |
| Leukemia                             | 103<br>(82 - 128)           | 5<br>(2 - 11)      | 8<br>(5 - 12)     | 42<br>(31 - 56)          | 22<br>(17 - 30)          | 25<br>(18 - 33)          |
| Other neoplasms                      | 388<br>(268 - 630)          | 84<br>(45 - 154)   | 28<br>(16 - 44)   | 88<br>(54 - 166)         | 114<br>(61 - 229)        | 74<br>(44 - 128)         |
| Cardiovascular diseases              | 14,365<br>(12,143 - 17,536) | 311<br>(182 - 496) | 89<br>(56 - 131)  | 2,390<br>(1,809 - 3,069) | 6,535<br>(5,292 - 8,359) | 5,040<br>(4,298 - 6,118) |
| Rheumatic heart disease              | 119<br>(66 - 288)           | 6<br>(2 - 15)      | 3<br>(2 - 9)      | 38<br>(17 - 102)         | 42<br>(19 - 114)         | 29<br>(17 - 65)          |
| Ischemic heart disease               | 4,363<br>(3,421 - 5,795)    | 16<br>(5 - 36)     | 13<br>(7 - 22)    | 708<br>(504 - 976)       | 2,163<br>(1,635 - 2,971) | 1,463<br>(1,117 - 2,013) |
| Cerebrovascular disease              | 6,661<br>(5,321 - 8,549)    | 103<br>(56 - 178)  | 28<br>(16 - 44)   | 911<br>(654 - 1,243)     | 2,963<br>(2,233 - 3,983) | 2,656<br>(2,161 - 3,317) |
| Ischemic stroke                      | 3,995<br>(2,172 - 5,429)    | 9<br>(3 - 23)      | 4<br>(2 - 8)      | 244<br>(95 - 413)        | 1,765<br>(819 - 2,569)   | 1,974<br>(1,221 - 2,567) |
| Hemorrhagic stroke                   | 2,666<br>(1,662 - 4,860)    | 94<br>(46 - 163)   | 24<br>(13 - 38)   | 667<br>(440 - 964)       | 1,198<br>(671 - 2,373)   | 682<br>(344 - 1,492)     |
| Hypertensive heart disease           | 566<br>(184 - 1,028)        | 3<br>(0 - 9)       | 1<br>(0 - 2)      | 101<br>(18 - 224)        | 249<br>(76 - 484)        | 212<br>(77 - 372)        |
| Cardiomyopathy and myocarditis       | 964<br>(564 - 1,371)        | 57<br>(19 - 140)   | 18<br>(8 - 32)    | 237<br>(134 - 355)       | 435<br>(218 - 703)       | 217<br>(105 - 352)       |
| Atrial fibrillation and flutter      | 1<br>(0 - 1)                | --                 | --                | 0<br>(0 - 0)             | 0<br>(0 - 0)             | 0<br>(0 - 0)             |
| Aortic aneurysm                      | 189<br>(129 - 280)          | --                 | --                | 26<br>(15 - 41)          | 102<br>(66 - 153)        | 61<br>(39 - 98)          |
| Peripheral vascular disease          | 11<br>(5 - 17)              | --                 | --                | 1<br>(0 - 1)             | 3<br>(2 - 5)             | 7<br>(3 - 11)            |

Web Table 31- Cote d'Ivoire deaths with 95% UI by age, sex, and cause in 2013

| Cause                                               | Males, All Ages          | Males, 0-4 Years  | Males, 5-14 Years | Males, 15-49 Years     | Males, 50-69 Years       | Males, 70-80 Years     |
|-----------------------------------------------------|--------------------------|-------------------|-------------------|------------------------|--------------------------|------------------------|
| Endocarditis                                        | 280<br>(177 - 435)       | 37<br>(12 - 82)   | 5<br>(2 - 9)      | 56<br>(35 - 92)        | 102<br>(61 - 177)        | 79<br>(45 - 133)       |
| Other cardiovascular and circulatory diseases       | 1,212<br>(871 - 2,138)   | 89<br>(41 - 175)  | 20<br>(11 - 33)   | 313<br>(199 - 503)     | 475<br>(313 - 849)       | 315<br>(204 - 591)     |
| Chronic respiratory diseases                        | 3,085<br>(2,334 - 5,081) | 113<br>(50 - 242) | 21<br>(14 - 37)   | 412<br>(282 - 668)     | 1,245<br>(879 - 2,111)   | 1,293<br>(963 - 2,135) |
| Chronic obstructive pulmonary disease               | 1,987<br>(1,451 - 3,382) | 58<br>(24 - 132)  | 9<br>(5 - 16)     | 145<br>(94 - 238)      | 787<br>(528 - 1,377)     | 987<br>(706 - 1,664)   |
| Pneumoconiosis                                      | 278<br>(172 - 475)       | 2<br>(0 - 5)      | 1<br>(0 - 3)      | 62<br>(36 - 102)       | 155<br>(89 - 269)        | 58<br>(29 - 119)       |
| Silicosis                                           | 50<br>(30 - 94)          | 1<br>(0 - 2)      | 0<br>(0 - 1)      | 12<br>(6 - 20)         | 15<br>(8 - 30)           | 22<br>(10 - 50)        |
| Asbestosis                                          | 20<br>(12 - 34)          | 0<br>(0 - 1)      | 0<br>(0 - 1)      | 4<br>(2 - 7)           | 13<br>(7 - 23)           | 2<br>(1 - 4)           |
| Coal workers pneumoconiosis                         | 73<br>(43 - 124)         | 0<br>(0 - 1)      | 0<br>(0 - 1)      | 3<br>(2 - 6)           | 62<br>(36 - 107)         | 7<br>(3 - 14)          |
| Other pneumoconiosis                                | 135<br>(82 - 228)        | 0<br>(0 - 1)      | 0<br>(0 - 1)      | 43<br>(25 - 72)        | 65<br>(36 - 114)         | 26<br>(13 - 51)        |
| Asthma                                              | 411<br>(288 - 740)       | 26<br>(8 - 66)    | 5<br>(3 - 8)      | 124<br>(84 - 207)      | 154<br>(96 - 297)        | 102<br>(60 - 192)      |
| Interstitial lung disease and pulmonary sarcoidosis | 224<br>(62 - 399)        | 1<br>(0 - 3)      | 1<br>(0 - 1)      | 8<br>(4 - 13)          | 100<br>(27 - 193)        | 115<br>(25 - 222)      |
| Other chronic respiratory diseases                  | 184<br>(123 - 320)       | 26<br>(11 - 60)   | 6<br>(3 - 10)     | 73<br>(45 - 120)       | 48<br>(26 - 91)          | 32<br>(17 - 60)        |
| Cirrhosis                                           | 2,843<br>(2,267 - 3,642) | 43<br>(15 - 96)   | 20<br>(13 - 29)   | 1,005<br>(721 - 1,375) | 1,355<br>(1,014 - 1,798) | 420<br>(319 - 561)     |
| Cirrhosis due to hepatitis B                        | 730<br>(317 - 1,216)     | 2<br>(0 - 5)      | 3<br>(1 - 6)      | 247<br>(106 - 439)     | 362<br>(156 - 617)       | 116<br>(48 - 197)      |
| Cirrhosis due to hepatitis C                        | 509<br>(269 - 910)       | 2<br>(0 - 7)      | 3<br>(1 - 6)      | 169<br>(84 - 311)      | 247<br>(94 - 463)        | 89<br>(31 - 162)       |
| Cirrhosis due to alcohol use                        | 1,237<br>(851 - 1,747)   | --                | --                | 407<br>(253 - 594)     | 637<br>(413 - 926)       | 193<br>(129 - 284)     |
| Cirrhosis due to other causes                       | 367<br>(241 - 545)       | 39<br>(13 - 86)   | 14<br>(9 - 22)    | 181<br>(107 - 287)     | 110<br>(59 - 183)        | 22<br>(11 - 38)        |
| Digestive diseases                                  | 2,498<br>(1,846 - 3,274) | 99<br>(37 - 221)  | 59<br>(36 - 90)   | 856<br>(575 - 1,177)   | 929<br>(643 - 1,288)     | 555<br>(410 - 750)     |
| Peptic ulcer disease                                | 740<br>(492 - 1,104)     | 11<br>(3 - 30)    | 9<br>(4 - 19)     | 248<br>(151 - 376)     | 294<br>(173 - 469)       | 177<br>(106 - 278)     |
| Gastritis and duodenitis                            | 76<br>(35 - 151)         | 5<br>(1 - 12)     | 2<br>(1 - 5)      | 23<br>(12 - 42)        | 27<br>(11 - 60)          | 18<br>(6 - 48)         |
| Appendicitis                                        | 129<br>(80 - 188)        | 9<br>(2 - 24)     | 8<br>(3 - 15)     | 46<br>(26 - 75)        | 41<br>(21 - 69)          | 25<br>(11 - 45)        |
| Paralytic ileus and intestinal obstruction          | 639<br>(353 - 956)       | 28<br>(9 - 66)    | 19<br>(9 - 33)    | 168<br>(83 - 270)      | 265<br>(134 - 408)       | 158<br>(87 - 268)      |
| Inguinal, femoral, and abdominal hernia             | 88<br>(53 - 152)         | 1<br>(0 - 3)      | 1<br>(0 - 3)      | 22<br>(11 - 42)        | 35<br>(19 - 64)          | 29<br>(16 - 53)        |
| Inflammatory bowel disease                          | 123<br>(63 - 176)        | 19<br>(5 - 48)    | 3<br>(1 - 6)      | 40<br>(20 - 62)        | 39<br>(13 - 66)          | 22<br>(8 - 37)         |
| Vascular intestinal disorders                       | 11<br>(4 - 23)           | 1<br>(0 - 3)      | 0<br>(0 - 1)      | 3<br>(1 - 6)           | 3<br>(1 - 7)             | 3<br>(1 - 7)           |
| Gallbladder and biliary diseases                    | 145<br>(74 - 212)        | 2<br>(1 - 5)      | 4<br>(1 - 7)      | 45<br>(17 - 75)        | 48<br>(25 - 79)          | 47<br>(24 - 79)        |
| Pancreatitis                                        | 216<br>(118 - 314)       | 1<br>(0 - 4)      | 2<br>(1 - 3)      | 128<br>(59 - 205)      | 59<br>(34 - 96)          | 26<br>(12 - 46)        |
| Other digestive diseases                            | 333<br>(215 - 491)       | 21<br>(7 - 59)    | 11<br>(6 - 18)    | 134<br>(74 - 216)      | 118<br>(66 - 188)        | 49<br>(26 - 83)        |
| Neurological disorders                              | 849<br>(678 - 1,055)     | 88<br>(38 - 188)  | 31<br>(17 - 55)   | 211<br>(134 - 303)     | 105<br>(79 - 142)        | 413<br>(314 - 516)     |
| Alzheimer disease and other dementias               | 432<br>(325 - 547)       | --                | --                | 0<br>(0 - 1)           | 54<br>(34 - 79)          | 377<br>(278 - 478)     |
| Parkinson disease                                   | 7<br>(4 - 14)            | --                | --                | 1<br>(0 - 1)           | 0<br>(0 - 1)             | 6<br>(3 - 12)          |
| Epilepsy                                            | 313<br>(209 - 447)       | 69<br>(25 - 163)  | 26<br>(11 - 49)   | 175<br>(105 - 263)     | 25<br>(16 - 40)          | 18<br>(11 - 28)        |
| Multiple sclerosis                                  | 1<br>(0 - 2)             | --                | --                | 0<br>(0 - 1)           | 0<br>(0 - 1)             | 0<br>(0 - 0)           |
| Other neurological disorders                        | 96<br>(50 - 146)         | 19<br>(8 - 58)    | 6<br>(3 - 11)     | 34<br>(18 - 50)        | 25<br>(13 - 36)          | 12<br>(6 - 18)         |
| Mental and substance use disorders                  | 1,141<br>(725 - 1,496)   | 29<br>(5 - 70)    | 0<br>(0 - 0)      | 776<br>(487 - 1,083)   | 263<br>(142 - 386)       | 73<br>(29 - 110)       |
| Schizophrenia                                       | 1<br>(1 - 1)             | --                | --                | 0<br>(0 - 1)           | 0<br>(0 - 0)             | 0<br>(0 - 0)           |
| Alcohol use disorders                               | 577<br>(297 - 806)       | --                | --                | 299<br>(168 - 437)     | 218<br>(100 - 335)       | 60<br>(17 - 97)        |
| Drug use disorders                                  | 563<br>(303 - 795)       | 29<br>(5 - 70)    | --                | 477<br>(240 - 714)     | 44<br>(29 - 62)          | 12<br>(7 - 18)         |
| Opioid use disorders                                | 61<br>(32 - 88)          | 3<br>(1 - 9)      | --                | 52<br>(25 - 79)        | 4<br>(3 - 6)             | 1<br>(1 - 2)           |
| Cocaine use disorders                               | 2<br>(1 - 3)             | 0<br>(0 - 0)      | --                | 2<br>(1 - 3)           | 0<br>(0 - 0)             | 0<br>(0 - 0)           |

Web Table 31- Cote d'Ivoire deaths with 95% UI by age, sex, and cause in 2013

| Cause                                               | Males, All Ages          | Males, 0-4 Years         | Males, 5-14 Years | Males, 15-49 Years     | Males, 50-69 Years       | Males, 70-80 Years     |
|-----------------------------------------------------|--------------------------|--------------------------|-------------------|------------------------|--------------------------|------------------------|
| Amphetamine use disorders                           | 1<br>(1 - 2)             | 0<br>(0 - 0)             | --                | 1<br>(1 - 2)           | 0<br>(0 - 0)             | 0<br>(0 - 0)           |
| Other drug use disorders                            | 499<br>(267 - 706)       | 26<br>(5 - 61)           | --                | 422<br>(212 - 633)     | 40<br>(27 - 56)          | 11<br>(6 - 16)         |
| Eating disorders                                    | 0<br>(0 - 0)             | --                       | 0<br>(0 - 0)      | 0<br>(0 - 0)           | --                       | --                     |
| Anorexia nervosa                                    | 0<br>(0 - 0)             | --                       | 0<br>(0 - 0)      | 0<br>(0 - 0)           | --                       | --                     |
| Diabetes, urogenital, blood, and endocrine diseases | 4,977<br>(3,758 - 6,558) | 816<br>(357 - 1,766)     | 183<br>(84 - 361) | 1,198<br>(823 - 1,585) | 1,649<br>(1,261 - 2,164) | 1,131<br>(901 - 1,409) |
| Diabetes mellitus                                   | 1,734<br>(1,396 - 2,192) | 32<br>(18 - 56)          | 6<br>(4 - 10)     | 253<br>(181 - 335)     | 889<br>(659 - 1,200)     | 553<br>(422 - 727)     |
| Acute glomerulonephritis                            | 14<br>(8 - 32)           | 2<br>(1 - 8)             | 1<br>(0 - 3)      | 4<br>(2 - 11)          | 5<br>(3 - 8)             | 2<br>(1 - 4)           |
| Chronic kidney disease                              | 978<br>(703 - 1,283)     | 64<br>(31 - 119)         | 29<br>(16 - 44)   | 376<br>(242 - 515)     | 289<br>(198 - 417)       | 219<br>(154 - 317)     |
| Chronic kidney disease due to diabetes mellitus     | 12<br>(3 - 20)           | 0<br>(0 - 0)             | 0<br>(0 - 0)      | 1<br>(1 - 2)           | 10<br>(2 - 18)           | 0<br>(0 - 1)           |
| Chronic kidney disease due to hypertension          | 260<br>(170 - 461)       | 8<br>(2 - 19)            | 2<br>(1 - 4)      | 73<br>(41 - 121)       | 100<br>(55 - 188)        | 78<br>(43 - 158)       |
| Chronic kidney disease due to glomerulonephritis    | 472<br>(289 - 637)       | 37<br>(16 - 73)          | 21<br>(13 - 32)   | 213<br>(124 - 304)     | 112<br>(61 - 168)        | 88<br>(45 - 136)       |
| Chronic kidney disease due to other causes          | 233<br>(126 - 360)       | 20<br>(5 - 45)           | 6<br>(2 - 12)     | 89<br>(41 - 151)       | 66<br>(26 - 120)         | 53<br>(21 - 99)        |
| Urinary diseases and male infertility               | 870<br>(549 - 1,115)     | 89<br>(38 - 193)         | 10<br>(6 - 15)    | 236<br>(125 - 332)     | 283<br>(173 - 405)       | 252<br>(165 - 359)     |
| Interstitial nephritis and urinary tract infections | 738<br>(455 - 950)       | 82<br>(33 - 186)         | 8<br>(5 - 12)     | 187<br>(90 - 270)      | 241<br>(148 - 348)       | 220<br>(143 - 313)     |
| Urolithiasis                                        | 4<br>(2 - 6)             | --                       | 0<br>(0 - 1)      | 2<br>(1 - 3)           | 1<br>(0 - 2)             | 1<br>(0 - 1)           |
| Other urinary diseases                              | 128<br>(67 - 193)        | 7<br>(2 - 19)            | 1<br>(1 - 3)      | 48<br>(21 - 82)        | 41<br>(19 - 72)          | 31<br>(13 - 58)        |
| Gynecological diseases                              | --                       | --                       | --                | --                     | --                       | --                     |
| Uterine fibroids                                    | --                       | --                       | --                | --                     | --                       | --                     |
| Polycystic ovarian syndrome                         | --                       | --                       | --                | --                     | --                       | --                     |
| Endometriosis                                       | --                       | --                       | --                | --                     | --                       | --                     |
| Genital prolapse                                    | --                       | --                       | --                | --                     | --                       | --                     |
| Other gynecological diseases                        | --                       | --                       | --                | --                     | --                       | --                     |
| Hemoglobinopathies and hemolytic anemias            | 915<br>(231 - 2,225)     | 519<br>(109 - 1,486)     | 117<br>(26 - 298) | 201<br>(55 - 507)      | 52<br>(17 - 157)         | 26<br>(10 - 79)        |
| Thalassemias                                        | 32<br>(7 - 83)           | 24<br>(5 - 69)           | 3<br>(1 - 8)      | 5<br>(1 - 12)          | 0<br>(0 - 0)             | 0<br>(0 - 0)           |
| Sickle cell disorders                               | 835<br>(207 - 2,040)     | 479<br>(101 - 1,378)     | 112<br>(24 - 285) | 190<br>(52 - 479)      | 46<br>(15 - 140)         | 8<br>(3 - 23)          |
| G6PD deficiency                                     | 16<br>(4 - 38)           | 9<br>(2 - 24)            | 1<br>(0 - 3)      | 3<br>(1 - 7)           | 1<br>(0 - 4)             | 1<br>(1 - 4)           |
| Other hemoglobinopathies and hemolytic anemias      | 32<br>(11 - 87)          | 7<br>(1 - 18)            | 1<br>(0 - 2)      | 3<br>(1 - 8)           | 4<br>(2 - 13)            | 17<br>(7 - 51)         |
| Endocrine, metabolic, blood, and immune disorders   | 467<br>(267 - 625)       | 110<br>(60 - 192)        | 19<br>(10 - 33)   | 127<br>(66 - 191)      | 132<br>(61 - 199)        | 79<br>(34 - 123)       |
| Musculoskeletal disorders                           | 133<br>(88 - 187)        | --                       | 10<br>(5 - 17)    | 54<br>(32 - 81)        | 44<br>(27 - 65)          | 25<br>(16 - 38)        |
| Rheumatoid arthritis                                | 10<br>(5 - 16)           | --                       | 1<br>(0 - 2)      | 2<br>(1 - 4)           | 3<br>(2 - 6)             | 3<br>(1 - 6)           |
| Other musculoskeletal disorders                     | 123<br>(83 - 174)        | --                       | 9<br>(5 - 16)     | 52<br>(31 - 79)        | 41<br>(25 - 60)          | 22<br>(14 - 34)        |
| Other non-communicable diseases                     | 2,529<br>(1,453 - 4,838) | 2,168<br>(1,130 - 4,398) | 78<br>(42 - 160)  | 129<br>(88 - 179)      | 80<br>(40 - 114)         | 74<br>(30 - 105)       |
| Congenital anomalies                                | 2,269<br>(1,221 - 4,568) | 2,088<br>(1,068 - 4,330) | 73<br>(38 - 156)  | 79<br>(50 - 123)       | 18<br>(12 - 26)          | 12<br>(8 - 17)         |
| Neural tube defects                                 | 496<br>(94 - 1,261)      | 472<br>(85 - 1,216)      | 10<br>(2 - 23)    | 12<br>(3 - 29)         | 1<br>(0 - 3)             | 1<br>(0 - 2)           |
| Congenital heart anomalies                          | 1,025<br>(494 - 2,007)   | 925<br>(414 - 1,871)     | 43<br>(22 - 90)   | 42<br>(25 - 73)        | 10<br>(7 - 15)           | 5<br>(3 - 8)           |
| Cleft lip and cleft palate                          | 13<br>(2 - 40)           | 13<br>(2 - 40)           | --                | --                     | --                       | --                     |
| Down syndrome                                       | 159<br>(36 - 463)        | 147<br>(28 - 450)        | 4<br>(2 - 9)      | 6<br>(3 - 13)          | 1<br>(1 - 3)             | 0<br>(0 - 0)           |
| Chromosomal unbalanced rearrangements               | 62<br>(17 - 172)         | 57<br>(14 - 164)         | 2<br>(1 - 4)      | 2<br>(1 - 4)           | 0<br>(0 - 1)             | 0<br>(0 - 1)           |
| Other congenital anomalies                          | 515<br>(137 - 1,826)     | 474<br>(108 - 1,757)     | 14<br>(4 - 50)    | 16<br>(7 - 32)         | 5<br>(3 - 7)             | 6<br>(3 - 8)           |
| Skin and subcutaneous diseases                      | 225<br>(82 - 303)        | 46<br>(16 - 80)          | 5<br>(2 - 8)      | 50<br>(22 - 70)        | 62<br>(21 - 94)          | 62<br>(20 - 92)        |



Web Table 31- Cote d'Ivoire deaths with 95% UI by age, sex, and cause in 2013

| Cause                                           | Males, All Ages           | Males, 0-4 Years       | Males, 5-14 Years  | Males, 15-49 Years       | Males, 50-69 Years       | Males, 70-80 Years |
|-------------------------------------------------|---------------------------|------------------------|--------------------|--------------------------|--------------------------|--------------------|
| Cellulitis                                      | 85<br>(26 - 134)          | 17<br>(5 - 35)         | 3<br>(1 - 5)       | 15<br>(6 - 25)           | 30<br>(8 - 55)           | 20<br>(5 - 37)     |
| Pyoderma                                        | 130<br>(51 - 192)         | 28<br>(10 - 51)        | 2<br>(1 - 3)       | 33<br>(15 - 49)          | 31<br>(11 - 58)          | 36<br>(13 - 58)    |
| Decubitus ulcer                                 | 8<br>(2 - 14)             | 0<br>(0 - 0)           | 0<br>(0 - 0)       | 1<br>(0 - 2)             | 0<br>(0 - 1)             | 6<br>(1 - 12)      |
| Other skin and subcutaneous diseases            | 1<br>(1 - 3)              | 0<br>(0 - 1)           | 0<br>(0 - 0)       | 1<br>(0 - 1)             | 0<br>(0 - 1)             | 0<br>(0 - 0)       |
| Sudden infant death syndrome                    | 35<br>(9 - 92)            | 35<br>(9 - 92)         | --                 | --                       | --                       | --                 |
| Injuries                                        | 9,655<br>(7,746 - 11,984) | 1,380<br>(752 - 2,294) | 657<br>(444 - 922) | 5,415<br>(4,069 - 6,919) | 1,518<br>(1,173 - 1,995) | 685<br>(524 - 874) |
| Transport injuries                              | 5,063<br>(3,823 - 6,805)  | 390<br>(175 - 766)     | 312<br>(195 - 469) | 3,341<br>(2,401 - 4,493) | 753<br>(529 - 1,061)     | 268<br>(174 - 379) |
| Road injuries                                   | 4,907<br>(3,706 - 6,627)  | 351<br>(155 - 697)     | 294<br>(181 - 440) | 3,284<br>(2,354 - 4,427) | 726<br>(509 - 1,028)     | 251<br>(166 - 353) |
| Pedestrian road injuries                        | 1,285<br>(819 - 1,904)    | 130<br>(49 - 286)      | 109<br>(58 - 183)  | 751<br>(445 - 1,168)     | 210<br>(127 - 327)       | 85<br>(52 - 129)   |
| Cyclist road injuries                           | 246<br>(163 - 353)        | 24<br>(7 - 60)         | 29<br>(14 - 52)    | 126<br>(80 - 186)        | 49<br>(28 - 80)          | 19<br>(10 - 33)    |
| Motorcyclist road injuries                      | 695<br>(407 - 1,124)      | 29<br>(11 - 65)        | 23<br>(11 - 44)    | 535<br>(292 - 877)       | 87<br>(47 - 138)         | 21<br>(11 - 34)    |
| Motor vehicle road injuries                     | 2,599<br>(1,843 - 3,537)  | 151<br>(68 - 295)      | 120<br>(68 - 195)  | 1,843<br>(1,268 - 2,550) | 365<br>(241 - 551)       | 120<br>(71 - 187)  |
| Other road injuries                             | 81<br>(38 - 134)          | 17<br>(3 - 38)         | 13<br>(4 - 27)     | 29<br>(13 - 61)          | 15<br>(7 - 26)           | 7<br>(3 - 14)      |
| Other transport injuries                        | 156<br>(106 - 229)        | 39<br>(15 - 83)        | 17<br>(9 - 32)     | 56<br>(31 - 116)         | 27<br>(15 - 44)          | 16<br>(5 - 30)     |
| Unintentional injuries                          | 3,581<br>(2,863 - 4,652)  | 986<br>(540 - 1,630)   | 329<br>(215 - 469) | 1,381<br>(990 - 1,993)   | 556<br>(406 - 764)       | 329<br>(224 - 449) |
| Falls                                           | 868<br>(603 - 1,551)      | 133<br>(58 - 265)      | 47<br>(25 - 84)    | 342<br>(197 - 686)       | 202<br>(120 - 371)       | 145<br>(84 - 272)  |
| Drowning                                        | 897<br>(553 - 1,512)      | 320<br>(124 - 665)     | 143<br>(66 - 245)  | 339<br>(175 - 650)       | 69<br>(45 - 109)         | 25<br>(15 - 38)    |
| Fire, heat, and hot substances                  | 344<br>(186 - 515)        | 125<br>(46 - 253)      | 24<br>(12 - 43)    | 110<br>(60 - 161)        | 52<br>(27 - 87)          | 34<br>(16 - 56)    |
| Poisonings                                      | 201<br>(136 - 384)        | 48<br>(18 - 111)       | 12<br>(7 - 23)     | 98<br>(59 - 210)         | 33<br>(20 - 54)          | 10<br>(6 - 17)     |
| Exposure to mechanical forces                   | 563<br>(429 - 748)        | 124<br>(60 - 227)      | 50<br>(28 - 78)    | 282<br>(193 - 433)       | 84<br>(52 - 120)         | 24<br>(12 - 33)    |
| Unintentional firearm injuries                  | 229<br>(156 - 352)        | 35<br>(14 - 83)        | 11<br>(5 - 22)     | 146<br>(84 - 239)        | 29<br>(16 - 48)          | 9<br>(5 - 15)      |
| Unintentional suffocation                       | 53<br>(28 - 108)          | 28<br>(8 - 76)         | 5<br>(2 - 11)      | 14<br>(8 - 26)           | 5<br>(3 - 9)             | 1<br>(1 - 2)       |
| Other exposure to mechanical forces             | 281<br>(205 - 379)        | 61<br>(21 - 123)       | 33<br>(16 - 58)    | 122<br>(81 - 191)        | 50<br>(23 - 79)          | 14<br>(4 - 21)     |
| Adverse effects of medical treatment            | 217<br>(79 - 387)         | 66<br>(15 - 164)       | 9<br>(3 - 18)      | 51<br>(19 - 90)          | 49<br>(15 - 97)          | 43<br>(11 - 89)    |
| Animal contact                                  | 74<br>(42 - 101)          | 16<br>(7 - 33)         | 10<br>(5 - 18)     | 20<br>(11 - 29)          | 16<br>(7 - 25)           | 12<br>(3 - 20)     |
| Venomous animal contact                         | 31<br>(16 - 44)           | 5<br>(2 - 13)          | 3<br>(1 - 7)       | 10<br>(5 - 16)           | 6<br>(3 - 11)            | 1<br>(1 - 10)      |
| Non-venomous animal contact                     | 43<br>(21 - 60)           | 10<br>(4 - 20)         | 7<br>(3 - 12)      | 10<br>(5 - 16)           | 9<br>(4 - 16)            | 7<br>(2 - 11)      |
| Foreign body                                    | 197<br>(97 - 314)         | 117<br>(53 - 217)      | 11<br>(6 - 18)     | 33<br>(16 - 49)          | 19<br>(9 - 29)           | 18<br>(7 - 28)     |
| Pulmonary aspiration and foreign body in airway | 186<br>(87 - 304)         | 113<br>(50 - 212)      | 10<br>(4 - 17)     | 31<br>(14 - 47)          | 16<br>(7 - 25)           | 17<br>(6 - 26)     |
| Foreign body in other body part                 | 11<br>(6 - 17)            | 4<br>(2 - 7)           | 1<br>(1 - 2)       | 2<br>(1 - 4)             | 3<br>(1 - 5)             | 1<br>(0 - 1)       |
| Other unintentional injuries                    | 220<br>(170 - 278)        | 38<br>(20 - 63)        | 23<br>(14 - 35)    | 107<br>(73 - 146)        | 32<br>(22 - 46)          | 20<br>(14 - 29)    |
| Self-harm and interpersonal violence            | 1,011<br>(691 - 1,530)    | 4<br>(1 - 12)          | 16<br>(7 - 32)     | 693<br>(439 - 1,204)     | 209<br>(133 - 304)       | 89<br>(42 - 145)   |
| Self-harm                                       | 906<br>(613 - 1,353)      | --                     | 14<br>(5 - 30)     | 599<br>(370 - 1,043)     | 204<br>(128 - 300)       | 88<br>(42 - 145)   |
| Interpersonal violence                          | 106<br>(55 - 268)         | 4<br>(1 - 12)          | 2<br>(1 - 6)       | 94<br>(48 - 239)         | 5<br>(2 - 15)            | 0<br>(0 - 1)       |
| Assault by firearm                              | 58<br>(29 - 143)          | 1<br>(0 - 3)           | 0<br>(0 - 1)       | 55<br>(27 - 133)         | 2<br>(1 - 7)             | 0<br>(0 - 0)       |
| Assault by sharp object                         | 15<br>(6 - 44)            | 1<br>(0 - 1)           | 0<br>(0 - 1)       | 13<br>(4 - 40)           | 1<br>(1 - 3)             | 0<br>(0 - 0)       |
| Assault by other means                          | 32<br>(12 - 99)           | 3<br>(1 - 9)           | 1<br>(0 - 4)       | 26<br>(9 - 80)           | 2<br>(1 - 5)             | 0<br>(0 - 1)       |

Web Table 31- Cote d'Ivoire deaths with 95% UI by age, sex, and cause in 2013

| Cause                                                             | Females, All Ages           | Females, 0-4 Years          | Females, 5-14 Years      | Females, 15-49 Years        | Females, 50-69 Years        | Females, 70-80 Years        |
|-------------------------------------------------------------------|-----------------------------|-----------------------------|--------------------------|-----------------------------|-----------------------------|-----------------------------|
| All causes                                                        | 85,562<br>(79,139 - 92,503) | 32,083<br>(28,300 - 37,539) | 3,502<br>(3,010 - 4,123) | 23,406<br>(21,014 - 25,608) | 14,609<br>(12,248 - 17,225) | 11,962<br>(10,491 - 13,574) |
| Communicable, maternal, neonatal, and nutritional diseases        | 55,764<br>(50,699 - 62,126) | 27,722<br>(23,738 - 32,808) | 2,576<br>(2,098 - 3,174) | 17,327<br>(15,258 - 19,435) | 4,904<br>(3,843 - 6,027)    | 3,235<br>(2,365 - 4,009)    |
| HIV/AIDS and tuberculosis                                         | 13,648<br>(11,166 - 16,277) | 312<br>(195 - 462)          | 838<br>(684 - 1,021)     | 9,773<br>(7,961 - 11,642)   | 2,296<br>(1,507 - 3,265)    | 430<br>(263 - 593)          |
| Tuberculosis                                                      | 2,138<br>(1,373 - 2,701)    | 88<br>(45 - 153)            | 45<br>(25 - 71)          | 1,143<br>(755 - 1,510)      | 562<br>(329 - 797)          | 299<br>(148 - 428)          |
| HIV/AIDS                                                          | 11,511<br>(8,942 - 14,260)  | 224<br>(123 - 354)          | 793<br>(639 - 975)       | 8,629<br>(6,798 - 10,636)   | 1,733<br>(967 - 2,688)      | 131<br>(59 - 227)           |
| HIV/AIDS resulting in mycobacterial infection                     | 612<br>(445 - 802)          | 11<br>(6 - 18)              | 37<br>(27 - 49)          | 461<br>(336 - 602)          | 95<br>(51 - 150)            | 8<br>(3 - 14)               |
| HIV/AIDS resulting in other diseases                              | 10,899<br>(8,457 - 13,544)  | 213<br>(117 - 337)          | 756<br>(610 - 934)       | 8,168<br>(6,409 - 10,025)   | 1,638<br>(914 - 2,549)      | 123<br>(55 - 212)           |
| Diarrhea, lower respiratory, and other common infectious diseases | 17,165<br>(13,756 - 20,926) | 10,614<br>(7,754 - 14,146)  | 812<br>(531 - 1,186)     | 2,191<br>(1,672 - 2,771)    | 1,624<br>(1,067 - 2,253)    | 1,924<br>(1,229 - 2,623)    |
| Diarrheal diseases                                                | 4,348<br>(2,627 - 6,810)    | 2,653<br>(1,025 - 5,090)    | 157<br>(69 - 312)        | 693<br>(468 - 980)          | 419<br>(226 - 724)          | 425<br>(242 - 688)          |
| Intestinal infectious diseases                                    | 469<br>(233 - 867)          | 178<br>(69 - 372)           | 132<br>(59 - 260)        | 134<br>(59 - 254)           | 19<br>(8 - 38)              | 7<br>(3 - 13)               |
| Typhoid fever                                                     | 321<br>(150 - 625)          | 117<br>(43 - 258)           | 91<br>(39 - 181)         | 95<br>(40 - 185)            | 14<br>(5 - 28)              | 4<br>(2 - 8)                |
| Paratyphoid fever                                                 | 128<br>(54 - 257)           | 50<br>(16 - 113)            | 39<br>(13 - 90)          | 35<br>(11 - 76)             | 4<br>(1 - 11)               | 1<br>(0 - 4)                |
| Other intestinal infectious diseases                              | 20<br>(9 - 35)              | 11<br>(4 - 24)              | 2<br>(0 - 6)             | 4<br>(1 - 11)               | 1<br>(0 - 6)                | 1<br>(0 - 4)                |
| Lower respiratory infections                                      | 9,097<br>(6,612 - 11,812)   | 5,775<br>(3,675 - 8,330)    | 245<br>(135 - 416)       | 738<br>(504 - 1,008)        | 968<br>(566 - 1,418)        | 1,371<br>(806 - 1,968)      |
| Upper respiratory infections                                      | 12<br>(4 - 26)              | 5<br>(0 - 19)               | 1<br>(0 - 2)             | 3<br>(1 - 8)                | 2<br>(0 - 6)                | 1<br>(0 - 5)                |
| Otitis media                                                      | 5<br>(4 - 7)                | 1<br>(1 - 3)                | 0<br>(0 - 1)             | 1<br>(1 - 1)                | 1<br>(1 - 2)                | 1<br>(1 - 2)                |
| Meningitis                                                        | 2,083<br>(1,487 - 2,832)    | 1,066<br>(601 - 1,828)      | 176<br>(94 - 297)        | 551<br>(360 - 799)          | 186<br>(101 - 295)          | 104<br>(52 - 178)           |
| Pneumococcal meningitis                                           | 506<br>(325 - 753)          | 216<br>(89 - 421)           | 48<br>(19 - 96)          | 159<br>(79 - 273)           | 55<br>(28 - 99)             | 29<br>(11 - 56)             |
| H influenzae type B meningitis                                    | 331<br>(188 - 538)          | 226<br>(99 - 439)           | 27<br>(11 - 53)          | 56<br>(22 - 110)            | 14<br>(6 - 28)              | 7<br>(3 - 14)               |
| Meningococcal meningitis                                          | 1,000<br>(698 - 1,436)      | 524<br>(274 - 936)          | 83<br>(40 - 148)         | 263<br>(160 - 397)          | 84<br>(36 - 151)            | 46<br>(20 - 87)             |
| Other meningitis                                                  | 246<br>(145 - 398)          | 100<br>(39 - 196)           | 17<br>(6 - 37)           | 72<br>(31 - 148)            | 34<br>(9 - 77)              | 23<br>(7 - 52)              |
| Encephalitis                                                      | 81<br>(59 - 114)            | 30<br>(15 - 62)             | 9<br>(5 - 17)            | 21<br>(13 - 35)             | 12<br>(6 - 20)              | 8<br>(3 - 13)               |
| Diphtheria                                                        | 11<br>(0 - 66)              | 8<br>(0 - 58)               | 2<br>(0 - 15)            | 1<br>(0 - 3)                | 0<br>(0 - 1)                | --<br>(0 - 1)               |
| Whooping cough                                                    | 279<br>(1 - 1,329)          | 263<br>(1 - 1,266)          | 13<br>(0 - 68)           | 2<br>(0 - 10)               | 0<br>(0 - 1)                | --<br>(0 - 1)               |
| Tetanus                                                           | 215<br>(67 - 417)           | 152<br>(29 - 357)           | 11<br>(5 - 21)           | 34<br>(16 - 58)             | 13<br>(6 - 25)              | 5<br>(2 - 9)                |
| Measles                                                           | 555<br>(10 - 3,313)         | 477<br>(8 - 2,879)          | 66<br>(1 - 415)          | 11<br>(0 - 67)              | 0<br>(0 - 1)                | --<br>(0 - 1)               |
| Varicella and herpes zoster                                       | 12<br>(4 - 28)              | 5<br>(0 - 21)               | 1<br>(0 - 5)             | 2<br>(0 - 6)                | 1<br>(0 - 3)                | 2<br>(0 - 11)               |
| Neglected tropical diseases and malaria                           | 9,031<br>(4,931 - 13,760)   | 6,499<br>(2,685 - 11,202)   | 718<br>(188 - 1,359)     | 913<br>(253 - 1,622)        | 495<br>(133 - 1,074)        | 406<br>(91 - 955)           |
| Malaria                                                           | 8,849<br>(4,705 - 13,599)   | 6,456<br>(2,623 - 11,172)   | 691<br>(157 - 1,340)     | 843<br>(179 - 1,555)        | 467<br>(95 - 1,040)         | 393<br>(74 - 945)           |
| Leishmaniasis                                                     | 0<br>(0 - 0)                | 0<br>(0 - 0)                | 0<br>(0 - 0)             | 0<br>(0 - 0)                | 0<br>(0 - 0)                | 0<br>(0 - 0)                |
| Visceral leishmaniasis                                            | 0<br>(0 - 0)                | 0<br>(0 - 0)                | 0<br>(0 - 0)             | 0<br>(0 - 0)                | 0<br>(0 - 0)                | 0<br>(0 - 0)                |
| African trypanosomiasis                                           | 17<br>(7 - 31)              | 1<br>(0 - 2)                | 2<br>(1 - 4)             | 11<br>(5 - 20)              | 2<br>(1 - 5)                | 1<br>(0 - 1)                |
| Schistosomiasis                                                   | 38<br>(25 - 51)             | 1<br>(0 - 1)                | 1<br>(1 - 3)             | 17<br>(10 - 26)             | 13<br>(7 - 22)              | 6<br>(3 - 10)               |
| Cysticercosis                                                     | 3<br>(1 - 9)                | 0<br>(0 - 0)                | 0<br>(0 - 1)             | 2<br>(0 - 6)                | 1<br>(0 - 2)                | 0<br>(0 - 0)                |
| Cystic echinococcosis                                             | 5<br>(4 - 6)                | 1<br>(0 - 1)                | 1<br>(1 - 1)             | 3<br>(2 - 3)                | 1<br>(1 - 1)                | 0<br>(0 - 0)                |
| Dengue                                                            | 8<br>(4 - 14)               | 3<br>(1 - 5)                | 2<br>(1 - 4)             | 3<br>(1 - 5)                | 0<br>(0 - 1)                | 0<br>(0 - 0)                |
| Yellow fever                                                      | 3<br>(2 - 5)                | 0<br>(0 - 1)                | 1<br>(0 - 2)             | 2<br>(1 - 4)                | 0<br>(0 - 1)                | 0<br>(0 - 1)                |
| Rabies                                                            | 66<br>(37 - 89)             | 12<br>(5 - 26)              | 15<br>(8 - 26)           | 27<br>(15 - 37)             | 9<br>(4 - 14)               | 4<br>(1 - 7)                |
| Intestinal nematode infections                                    | 27<br>(11 - 52)             | 20<br>(7 - 43)              | 4<br>(0 - 12)            | 2<br>(0 - 8)                | 1<br>(0 - 5)                | 0<br>(0 - 4)                |
| Ascariasis                                                        | 27<br>(11 - 52)             | 20<br>(7 - 43)              | 4<br>(0 - 12)            | 2<br>(0 - 8)                | 1<br>(0 - 5)                | 0<br>(0 - 4)                |

Web Table 31- Cote d'Ivoire deaths with 95% UI by age, sex, and cause in 2013

| Cause                                                            | Females, All Ages           | Females, 0-4 Years        | Females, 5-14 Years | Females, 15-49 Years     | Females, 50-69 Years      | Females, 70-80 Years     |
|------------------------------------------------------------------|-----------------------------|---------------------------|---------------------|--------------------------|---------------------------|--------------------------|
| Other neglected tropical diseases                                | 16<br>(10 - 34)             | 6<br>(3 - 15)             | 1<br>(1 - 3)        | 4<br>(2 - 11)            | 2<br>(1 - 4)              | 2<br>(1 - 3)             |
| Maternal disorders                                               | 3,824<br>(2,702 - 4,987)    | --                        | 19<br>(7 - 40)      | 3,806<br>(2,687 - 4,972) | --                        | --                       |
| Maternal hemorrhage                                              | 706<br>(428 - 1,027)        | --                        | 2<br>(1 - 4)        | 704<br>(427 - 1,024)     | --                        | --                       |
| Maternal sepsis and other maternal infections                    | 217<br>(125 - 326)          | --                        | 1<br>(0 - 3)        | 216<br>(124 - 324)       | --                        | --                       |
| Maternal hypertensive disorders                                  | 282<br>(157 - 439)          | --                        | 1<br>(0 - 3)        | 280<br>(155 - 436)       | --                        | --                       |
| Maternal obstructed labor                                        | 197<br>(116 - 298)          | --                        | 1<br>(0 - 2)        | 196<br>(116 - 297)       | --                        | --                       |
| Maternal abortive outcome                                        | 657<br>(431 - 939)          | --                        | 3<br>(1 - 8)        | 653<br>(430 - 935)       | --                        | --                       |
| Indirect maternal deaths                                         | 405<br>(239 - 627)          | --                        | 2<br>(0 - 4)        | 404<br>(238 - 625)       | --                        | --                       |
| Late maternal deaths                                             | 597<br>(359 - 922)          | --                        | 5<br>(1 - 12)       | 592<br>(352 - 912)       | --                        | --                       |
| Maternal deaths aggravated by HIV/AIDS                           | 40<br>(20 - 62)             | --                        | --                  | 40<br>(20 - 62)          | --                        | --                       |
| Other maternal disorders                                         | 716<br>(446 - 1,050)        | --                        | 3<br>(1 - 8)        | 713<br>(443 - 1,046)     | --                        | --                       |
| Neonatal disorders                                               | 8,179<br>(6,240 - 10,261)   | 8,179<br>(6,240 - 10,261) | --                  | --                       | --                        | --                       |
| Neonatal preterm birth complications                             | 3,037<br>(1,430 - 4,986)    | 3,037<br>(1,430 - 4,986)  | --                  | --                       | --                        | --                       |
| Neonatal encephalopathy due to birth asphyxia and trauma         | 2,733<br>(1,375 - 4,355)    | 2,733<br>(1,375 - 4,355)  | --                  | --                       | --                        | --                       |
| Neonatal sepsis and other neonatal infections                    | 1,637<br>(667 - 3,188)      | 1,637<br>(667 - 3,188)    | --                  | --                       | --                        | --                       |
| Hemolytic disease and other neonatal jaundice                    | 47<br>(16 - 120)            | 47<br>(16 - 120)          | --                  | --                       | --                        | --                       |
| Other neonatal disorders                                         | 725<br>(323 - 1,389)        | 725<br>(323 - 1,389)      | --                  | --                       | --                        | --                       |
| Nutritional deficiencies                                         | 3,204<br>(2,213 - 4,498)    | 1,758<br>(897 - 2,930)    | 155<br>(86 - 253)   | 533<br>(387 - 736)       | 375<br>(242 - 557)        | 382<br>(251 - 554)       |
| Protein-energy malnutrition                                      | 2,285<br>(1,299 - 3,490)    | 1,632<br>(785 - 2,780)    | 119<br>(61 - 205)   | 133<br>(58 - 285)        | 189<br>(95 - 313)         | 212<br>(102 - 351)       |
| Iodine deficiency                                                | 6<br>(1 - 24)               | 2<br>(0 - 18)             | 0<br>(0 - 4)        | 1<br>(0 - 6)             | 1<br>(0 - 5)              | 1<br>(0 - 4)             |
| Iron-deficiency anemia                                           | 897<br>(477 - 1,405)        | 120<br>(24 - 359)         | 35<br>(12 - 75)     | 396<br>(233 - 574)       | 179<br>(74 - 307)         | 167<br>(74 - 306)        |
| Other nutritional deficiencies                                   | 16<br>(6 - 31)              | 4<br>(1 - 13)             | 1<br>(0 - 1)        | 3<br>(1 - 7)             | 7<br>(1 - 15)             | 2<br>(1 - 5)             |
| Other communicable, maternal, neonatal, and nutritional diseases | 712<br>(462 - 1,035)        | 360<br>(190 - 632)        | 34<br>(17 - 59)     | 112<br>(63 - 159)        | 113<br>(57 - 178)         | 93<br>(45 - 151)         |
| Sexually transmitted diseases excluding HIV                      | 290<br>(136 - 530)          | 246<br>(103 - 471)        | 19<br>(8 - 38)      | 14<br>(4 - 24)           | 6<br>(2 - 17)             | 4<br>(1 - 13)            |
| Syphilis                                                         | 277<br>(125 - 517)          | 246<br>(103 - 471)        | 19<br>(8 - 37)      | 6<br>(2 - 10)            | 4<br>(1 - 9)              | 3<br>(1 - 10)            |
| Chlamydial infection                                             | 4<br>(1 - 7)                | --                        | 0<br>(0 - 0)        | 3<br>(1 - 5)             | 1<br>(0 - 2)              | 0<br>(0 - 1)             |
| Gonococcal infection                                             | 5<br>(2 - 8)                | --                        | 0<br>(0 - 0)        | 3<br>(1 - 5)             | 1<br>(0 - 3)              | 1<br>(0 - 2)             |
| Other sexually transmitted diseases                              | 4<br>(1 - 7)                | --                        | 0<br>(0 - 0)        | 3<br>(1 - 5)             | 1<br>(0 - 2)              | 0<br>(0 - 1)             |
| Hepatitis                                                        | 239<br>(106 - 354)          | 27<br>(9 - 56)            | 7<br>(3 - 13)       | 71<br>(27 - 110)         | 75<br>(35 - 125)          | 60<br>(27 - 99)          |
| Acute hepatitis A                                                | 14<br>(3 - 33)              | 8<br>(2 - 22)             | 2<br>(0 - 5)        | 3<br>(1 - 7)             | 1<br>(0 - 2)              | 0<br>(0 - 1)             |
| Acute hepatitis B                                                | 156<br>(70 - 239)           | 18<br>(5 - 40)            | 3<br>(1 - 7)        | 22<br>(7 - 43)           | 60<br>(27 - 102)          | 52<br>(23 - 87)          |
| Acute hepatitis C                                                | 8<br>(1 - 23)               | --                        | 0<br>(0 - 1)        | 2<br>(0 - 5)             | 3<br>(0 - 9)              | 3<br>(0 - 9)             |
| Acute hepatitis E                                                | 61<br>(23 - 109)            | 0<br>(0 - 2)              | 1<br>(0 - 3)        | 44<br>(16 - 74)          | 11<br>(2 - 28)            | 4<br>(0 - 14)            |
| Other infectious diseases                                        | 183<br>(97 - 329)           | 87<br>(34 - 215)          | 8<br>(2 - 20)       | 27<br>(11 - 48)          | 32<br>(11 - 70)           | 29<br>(9 - 68)           |
| Non-communicable diseases                                        | 25,667<br>(21,361 - 30,661) | 3,513<br>(1,957 - 6,201)  | 512<br>(361 - 702)  | 4,400<br>(3,563 - 5,293) | 9,039<br>(7,136 - 11,406) | 8,203<br>(6,808 - 9,708) |
| Neoplasms                                                        | 4,603<br>(3,664 - 5,731)    | 68<br>(38 - 119)          | 75<br>(46 - 112)    | 894<br>(725 - 1,089)     | 2,499<br>(1,895 - 3,267)  | 1,067<br>(822 - 1,372)   |
| Esophageal cancer                                                | 25<br>(17 - 54)             | --                        | --                  | 3<br>(2 - 8)             | 15<br>(10 - 23)           | 7<br>(4 - 24)            |
| Stomach cancer                                                   | 338<br>(251 - 453)          | --                        | --                  | 27<br>(19 - 38)          | 184<br>(130 - 258)        | 127<br>(86 - 189)        |
| Liver cancer                                                     | 443<br>(323 - 607)          | --                        | 1<br>(1 - 3)        | 79<br>(55 - 114)         | 222<br>(142 - 336)        | 140<br>(91 - 214)        |
| Liver cancer due to hepatitis B                                  | 155<br>(74 - 251)           | --                        | 0<br>(0 - 1)        | 34<br>(18 - 54)          | 82<br>(35 - 145)          | 38<br>(16 - 68)          |

Web Table 31- Cote d'Ivoire deaths with 95% UI by age, sex, and cause in 2013

| Cause                                | Females, All Ages          | Females, 0-4 Years | Females, 5-14 Years | Females, 15-49 Years   | Females, 50-69 Years     | Females, 70-80 Years     |
|--------------------------------------|----------------------------|--------------------|---------------------|------------------------|--------------------------|--------------------------|
| Liver cancer due to hepatitis C      | 155<br>(79 - 253)          | --                 | 0<br>(0 - 0)        | 18<br>(8 - 33)         | 76<br>(33 - 138)         | 61<br>(30 - 105)         |
| Liver cancer due to alcohol use      | 46<br>(24 - 75)            | --                 | --                  | 4<br>(2 - 7)           | 23<br>(11 - 39)          | 19<br>(9 - 35)           |
| Liver cancer due to other causes     | 87<br>(46 - 145)           | --                 | 1<br>(0 - 2)        | 23<br>(14 - 37)        | 41<br>(17 - 76)          | 22<br>(9 - 42)           |
| Larynx cancer                        | 4<br>(2 - 6)               | --                 | --                  | 1<br>(0 - 2)           | 2<br>(1 - 3)             | 1<br>(0 - 1)             |
| Tracheal, bronchus and lung cancer   | 140<br>(105 - 187)         | --                 | --                  | 11<br>(8 - 15)         | 95<br>(69 - 130)         | 33<br>(23 - 51)          |
| Breast cancer                        | 651<br>(498 - 885)         | --                 | --                  | 191<br>(145 - 260)     | 369<br>(263 - 518)       | 92<br>(65 - 143)         |
| Cervical cancer                      | 1,374<br>(990 - 1,849)     | --                 | --                  | 202<br>(142 - 292)     | 890<br>(595 - 1,241)     | 282<br>(182 - 425)       |
| Uterine cancer                       | 73<br>(48 - 118)           | --                 | --                  | 11<br>(6 - 25)         | 34<br>(20 - 55)          | 28<br>(17 - 44)          |
| Prostate cancer                      | --                         | --                 | --                  | --                     | --                       | --                       |
| Colon and rectum cancer              | 178<br>(138 - 226)         | --                 | --                  | 49<br>(38 - 62)        | 69<br>(49 - 95)          | 60<br>(43 - 83)          |
| Lip and oral cavity cancer           | 25<br>(17 - 34)            | --                 | --                  | 9<br>(5 - 15)          | 10<br>(6 - 15)           | 6<br>(4 - 12)            |
| Nasopharynx cancer                   | 21<br>(7 - 33)             | --                 | 1<br>(0 - 2)        | 9<br>(3 - 15)          | 9<br>(3 - 17)            | 2<br>(1 - 4)             |
| Other pharynx cancer                 | 21<br>(13 - 30)            | --                 | --                  | 7<br>(4 - 11)          | 12<br>(6 - 18)           | 2<br>(1 - 3)             |
| Gallbladder and biliary tract cancer | 65<br>(44 - 95)            | --                 | --                  | 5<br>(4 - 7)           | 33<br>(21 - 52)          | 26<br>(16 - 42)          |
| Pancreatic cancer                    | 96<br>(72 - 128)           | --                 | --                  | 7<br>(5 - 9)           | 45<br>(32 - 64)          | 44<br>(31 - 62)          |
| Malignant skin melanoma              | 11<br>(8 - 14)             | --                 | --                  | 3<br>(2 - 4)           | 6<br>(4 - 9)             | 2<br>(1 - 3)             |
| Non-melanoma skin cancer             | 8<br>(5 - 12)              | --                 | --                  | 2<br>(1 - 4)           | 2<br>(1 - 3)             | 4<br>(2 - 6)             |
| Ovarian cancer                       | 296<br>(201 - 418)         | --                 | --                  | 57<br>(39 - 79)        | 211<br>(134 - 312)       | 28<br>(16 - 47)          |
| Testicular cancer                    | --                         | --                 | --                  | --                     | --                       | --                       |
| Kidney cancer                        | 36<br>(25 - 49)            | 4<br>(1 - 11)      | 3<br>(1 - 5)        | 8<br>(5 - 12)          | 16<br>(10 - 26)          | 5<br>(3 - 8)             |
| Bladder cancer                       | 63<br>(42 - 92)            | --                 | --                  | 16<br>(8 - 25)         | 26<br>(16 - 41)          | 21<br>(12 - 36)          |
| Brain and nervous system cancer      | 58<br>(38 - 76)            | 3<br>(1 - 8)       | 2<br>(1 - 3)        | 10<br>(7 - 13)         | 23<br>(14 - 34)          | 19<br>(9 - 30)           |
| Thyroid cancer                       | 55<br>(26 - 84)            | --                 | 0<br>(0 - 0)        | 2<br>(1 - 3)           | 24<br>(12 - 37)          | 29<br>(11 - 49)          |
| Mesothelioma                         | 4<br>(3 - 6)               | --                 | --                  | 2<br>(1 - 3)           | 2<br>(1 - 4)             | 1<br>(0 - 1)             |
| Hodgkin lymphoma                     | 41<br>(16 - 66)            | 1<br>(0 - 2)       | 1<br>(0 - 3)        | 7<br>(5 - 11)          | 13<br>(5 - 24)           | 18<br>(3 - 40)           |
| Non-Hodgkin lymphoma                 | 189<br>(114 - 261)         | 18<br>(7 - 38)     | 23<br>(10 - 42)     | 70<br>(41 - 101)       | 67<br>(37 - 106)         | 11<br>(6 - 21)           |
| Multiple myeloma                     | 35<br>(23 - 48)            | --                 | --                  | 5<br>(3 - 7)           | 21<br>(13 - 31)          | 8<br>(5 - 12)            |
| Leukemia                             | 67<br>(53 - 85)            | 4<br>(2 - 8)       | 10<br>(6 - 16)      | 26<br>(19 - 36)        | 16<br>(11 - 24)          | 11<br>(7 - 16)           |
| Other neoplasms                      | 288<br>(210 - 431)         | 37<br>(19 - 70)    | 33<br>(17 - 56)     | 75<br>(49 - 128)       | 84<br>(55 - 139)         | 60<br>(39 - 93)          |
| Cardiovascular diseases              | 10,594<br>(7,727 - 14,363) | 293<br>(159 - 519) | 78<br>(48 - 128)    | 1,454<br>(941 - 2,213) | 4,042<br>(2,840 - 5,595) | 4,727<br>(3,526 - 6,210) |
| Rheumatic heart disease              | 155<br>(80 - 459)          | 4<br>(1 - 10)      | 7<br>(3 - 15)       | 52<br>(21 - 187)       | 45<br>(18 - 148)         | 47<br>(26 - 106)         |
| Ischemic heart disease               | 2,506<br>(1,527 - 3,967)   | 6<br>(1 - 19)      | 7<br>(3 - 14)       | 302<br>(149 - 534)     | 927<br>(534 - 1,486)     | 1,264<br>(790 - 1,993)   |
| Cerebrovascular disease              | 4,986<br>(3,721 - 6,951)   | 76<br>(36 - 156)   | 21<br>(11 - 40)     | 562<br>(366 - 834)     | 1,946<br>(1,365 - 2,766) | 2,381<br>(1,819 - 3,285) |
| Ischemic stroke                      | 3,069<br>(2,042 - 4,112)   | 13<br>(4 - 34)     | 3<br>(1 - 8)        | 118<br>(63 - 217)      | 1,113<br>(662 - 1,582)   | 1,821<br>(1,309 - 2,348) |
| Hemorrhagic stroke                   | 1,918<br>(1,257 - 3,371)   | 63<br>(30 - 126)   | 18<br>(10 - 34)     | 445<br>(269 - 670)     | 833<br>(505 - 1,501)     | 559<br>(306 - 1,226)     |
| Hypertensive heart disease           | 946<br>(425 - 1,432)       | 3<br>(1 - 7)       | 1<br>(1 - 2)        | 104<br>(37 - 164)      | 358<br>(139 - 609)       | 480<br>(223 - 726)       |
| Cardiomyopathy and myocarditis       | 603<br>(405 - 938)         | 84<br>(35 - 196)   | 17<br>(9 - 35)      | 165<br>(88 - 284)      | 145<br>(84 - 252)        | 193<br>(105 - 326)       |
| Atrial fibrillation and flutter      | 1<br>(1 - 1)               | --                 | --                  | 0<br>(0 - 0)           | 0<br>(0 - 0)             | 1<br>(0 - 1)             |
| Aortic aneurysm                      | 70<br>(39 - 112)           | --                 | --                  | 12<br>(5 - 21)         | 27<br>(13 - 44)          | 31<br>(17 - 52)          |
| Peripheral vascular disease          | 5<br>(3 - 7)               | --                 | --                  | 0<br>(0 - 0)           | 3<br>(2 - 5)             | 2<br>(1 - 2)             |

Web Table 31- Cote d'Ivoire deaths with 95% UI by age, sex, and cause in 2013

| Cause                                               | Females, All Ages        | Females, 0-4 Years | Females, 5-14 Years | Females, 15-49 Years | Females, 50-69 Years | Females, 70-80 Years |
|-----------------------------------------------------|--------------------------|--------------------|---------------------|----------------------|----------------------|----------------------|
| Endocarditis                                        | 134<br>(73 - 223)        | 34<br>(10 - 70)    | 5<br>(2 - 8)        | 36<br>(14 - 61)      | 24<br>(14 - 51)      | 36<br>(19 - 72)      |
| Other cardiovascular and circulatory diseases       | 1,188<br>(865 - 1,972)   | 87<br>(42 - 173)   | 20<br>(11 - 36)     | 221<br>(148 - 396)   | 566<br>(373 - 924)   | 294<br>(189 - 579)   |
| Chronic respiratory diseases                        | 1,451<br>(1,108 - 2,503) | 83<br>(40 - 175)   | 23<br>(15 - 37)     | 233<br>(175 - 402)   | 532<br>(365 - 895)   | 580<br>(417 - 969)   |
| Chronic obstructive pulmonary disease               | 830<br>(562 - 1,485)     | 40<br>(17 - 91)    | 10<br>(6 - 17)      | 79<br>(49 - 144)     | 330<br>(206 - 607)   | 370<br>(245 - 662)   |
| Pneumoconiosis                                      | 4<br>(3 - 8)             | 0<br>(0 - 1)       | 1<br>(0 - 1)        | 2<br>(1 - 3)         | 1<br>(1 - 3)         | 0<br>(0 - 1)         |
| Silicosis                                           | 0<br>(0 - 1)             | 0<br>(0 - 0)       | 0<br>(0 - 0)        | 0<br>(0 - 0)         | 0<br>(0 - 0)         | 0<br>(0 - 0)         |
| Asbestosis                                          | 0<br>(0 - 1)             | 0<br>(0 - 0)       | 0<br>(0 - 0)        | 0<br>(0 - 0)         | 0<br>(0 - 0)         | 0<br>(0 - 0)         |
| Coal workers pneumoconiosis                         | 0<br>(0 - 1)             | 0<br>(0 - 0)       | 0<br>(0 - 0)        | 0<br>(0 - 0)         | 0<br>(0 - 0)         | 0<br>(0 - 0)         |
| Other pneumoconiosis                                | 3<br>(2 - 6)             | 0<br>(0 - 0)       | 0<br>(0 - 0)        | 1<br>(1 - 3)         | 1<br>(1 - 2)         | 0<br>(0 - 1)         |
| Asthma                                              | 384<br>(261 - 565)       | 26<br>(8 - 58)     | 8<br>(5 - 16)       | 93<br>(64 - 161)     | 143<br>(84 - 225)    | 113<br>(58 - 176)    |
| Interstitial lung disease and pulmonary sarcoidosis | 96<br>(31 - 177)         | 1<br>(0 - 2)       | 1<br>(0 - 1)        | 9<br>(5 - 16)        | 30<br>(10 - 62)      | 55<br>(13 - 111)     |
| Other chronic respiratory diseases                  | 137<br>(92 - 280)        | 16<br>(8 - 39)     | 3<br>(2 - 6)        | 50<br>(34 - 94)      | 27<br>(15 - 53)      | 41<br>(22 - 86)      |
| Cirrhosis                                           | 1,002<br>(724 - 1,368)   | 27<br>(9 - 65)     | 16<br>(10 - 26)     | 303<br>(215 - 417)   | 427<br>(280 - 619)   | 229<br>(147 - 345)   |
| Cirrhosis due to hepatitis B                        | 283<br>(154 - 456)       | 2<br>(0 - 5)       | 3<br>(1 - 6)        | 81<br>(37 - 134)     | 128<br>(64 - 221)    | 69<br>(34 - 126)     |
| Cirrhosis due to hepatitis C                        | 396<br>(200 - 626)       | 3<br>(1 - 9)       | 5<br>(2 - 11)       | 135<br>(69 - 227)    | 171<br>(64 - 287)    | 82<br>(35 - 140)     |
| Cirrhosis due to alcohol use                        | 193<br>(102 - 313)       | --                 | --                  | 37<br>(18 - 68)      | 92<br>(44 - 160)     | 64<br>(31 - 109)     |
| Cirrhosis due to other causes                       | 130<br>(77 - 213)        | 22<br>(7 - 52)     | 8<br>(4 - 15)       | 50<br>(27 - 84)      | 36<br>(13 - 69)      | 14<br>(6 - 25)       |
| Digestive diseases                                  | 1,260<br>(968 - 1,614)   | 67<br>(26 - 133)   | 49<br>(31 - 73)     | 363<br>(269 - 481)   | 394<br>(275 - 560)   | 386<br>(271 - 539)   |
| Peptic ulcer disease                                | 256<br>(159 - 381)       | 4<br>(1 - 10)      | 5<br>(2 - 11)       | 67<br>(39 - 106)     | 89<br>(49 - 143)     | 92<br>(50 - 150)     |
| Gastritis and duodenitis                            | 61<br>(23 - 137)         | 4<br>(1 - 9)       | 4<br>(1 - 7)        | 19<br>(9 - 36)       | 16<br>(6 - 43)       | 19<br>(5 - 57)       |
| Appendicitis                                        | 147<br>(97 - 205)        | 12<br>(4 - 29)     | 12<br>(5 - 22)      | 61<br>(38 - 96)      | 33<br>(17 - 56)      | 29<br>(10 - 54)      |
| Paralytic ileus and intestinal obstruction          | 324<br>(190 - 508)       | 19<br>(5 - 45)     | 12<br>(5 - 21)      | 60<br>(30 - 95)      | 113<br>(61 - 185)    | 120<br>(68 - 217)    |
| Inguinal, femoral, and abdominal hernia             | 14<br>(5 - 23)           | 1<br>(0 - 4)       | 0<br>(0 - 1)        | 4<br>(1 - 6)         | 4<br>(1 - 7)         | 5<br>(1 - 10)        |
| Inflammatory bowel disease                          | 84<br>(47 - 132)         | 11<br>(3 - 27)     | 3<br>(2 - 6)        | 35<br>(19 - 55)      | 19<br>(9 - 33)       | 17<br>(7 - 30)       |
| Vascular intestinal disorders                       | 5<br>(2 - 14)            | 0<br>(0 - 0)       | 0<br>(0 - 0)        | 2<br>(1 - 4)         | 2<br>(1 - 5)         | 1<br>(0 - 5)         |
| Gallbladder and biliary diseases                    | 120<br>(78 - 173)        | 3<br>(1 - 7)       | 4<br>(1 - 8)        | 31<br>(20 - 46)      | 43<br>(22 - 72)      | 39<br>(21 - 66)      |
| Pancreatitis                                        | 64<br>(33 - 107)         | 1<br>(0 - 3)       | 1<br>(1 - 3)        | 18<br>(10 - 29)      | 28<br>(11 - 58)      | 16<br>(6 - 33)       |
| Other digestive diseases                            | 184<br>(126 - 250)       | 11<br>(3 - 26)     | 8<br>(4 - 13)       | 68<br>(44 - 96)      | 49<br>(27 - 77)      | 50<br>(28 - 80)      |
| Neurological disorders                              | 625<br>(487 - 796)       | 77<br>(32 - 158)   | 32<br>(17 - 56)     | 154<br>(96 - 234)    | 66<br>(47 - 91)      | 296<br>(214 - 395)   |
| Alzheimer disease and other dementias               | 301<br>(218 - 406)       | --                 | --                  | 0<br>(0 - 0)         | 31<br>(21 - 43)      | 270<br>(192 - 368)   |
| Parkinson disease                                   | 2<br>(1 - 6)             | --                 | --                  | 0<br>(0 - 1)         | 1<br>(0 - 2)         | 1<br>(0 - 3)         |
| Epilepsy                                            | 265<br>(175 - 383)       | 63<br>(24 - 141)   | 28<br>(13 - 50)     | 141<br>(84 - 218)    | 17<br>(8 - 31)       | 17<br>(8 - 32)       |
| Multiple sclerosis                                  | 1<br>(0 - 6)             | --                 | --                  | 1<br>(0 - 4)         | 0<br>(0 - 2)         | 0<br>(0 - 1)         |
| Other neurological disorders                        | 56<br>(43 - 70)          | 14<br>(7 - 23)     | 4<br>(3 - 6)        | 12<br>(9 - 15)       | 17<br>(12 - 23)      | 9<br>(6 - 12)        |
| Mental and substance use disorders                  | 141<br>(76 - 204)        | 9<br>(2 - 15)      | 0<br>(0 - 0)        | 78<br>(36 - 121)     | 42<br>(21 - 67)      | 13<br>(8 - 18)       |
| Schizophrenia                                       | 2<br>(1 - 3)             | --                 | --                  | 1<br>(1 - 2)         | 1<br>(0 - 1)         | 0<br>(0 - 0)         |
| Alcohol use disorders                               | 68<br>(12 - 123)         | --                 | --                  | 43<br>(7 - 81)       | 22<br>(4 - 44)       | 3<br>(1 - 6)         |
| Drug use disorders                                  | 70<br>(54 - 93)          | 9<br>(2 - 15)      | --                  | 33<br>(22 - 48)      | 19<br>(14 - 28)      | 9<br>(6 - 13)        |
| Opioid use disorders                                | 7<br>(5 - 9)             | 1<br>(0 - 2)       | --                  | 3<br>(2 - 5)         | 2<br>(1 - 3)         | 1<br>(1 - 1)         |
| Cocaine use disorders                               | 0<br>(0 - 1)             | 0<br>(0 - 0)       | --                  | 0<br>(0 - 0)         | 0<br>(0 - 0)         | 0<br>(0 - 0)         |

Web Table 31- Cote d'Ivoire deaths with 95% UI by age, sex, and cause in 2013

| Cause                                               | Females, All Ages        | Females, 0-4 Years       | Females, 5-14 Years | Females, 15-49 Years | Females, 50-69 Years | Females, 70-80 Years |
|-----------------------------------------------------|--------------------------|--------------------------|---------------------|----------------------|----------------------|----------------------|
| Amphetamine use disorders                           | 0<br>(0 - 0)             | 0<br>(0 - 0)             | --                  | 0<br>(0 - 0)         | 0<br>(0 - 0)         | 0<br>(0 - 0)         |
| Other drug use disorders                            | 63<br>(48 - 83)          | 8<br>(2 - 14)            | --                  | 29<br>(20 - 43)      | 18<br>(12 - 25)      | 8<br>(6 - 12)        |
| Eating disorders                                    | 1<br>(1 - 2)             | --                       | 0<br>(0 - 0)        | 1<br>(0 - 2)         | --                   | --                   |
| Anorexia nervosa                                    | 1<br>(1 - 2)             | --                       | 0<br>(0 - 0)        | 1<br>(0 - 2)         | --                   | --                   |
| Diabetes, urogenital, blood, and endocrine diseases | 3,030<br>(2,437 - 3,861) | 485<br>(268 - 847)       | 133<br>(77 - 226)   | 709<br>(534 - 917)   | 916<br>(675 - 1,208) | 788<br>(591 - 1,025) |
| Diabetes mellitus                                   | 1,197<br>(924 - 1,540)   | 7<br>(4 - 12)            | 6<br>(3 - 10)       | 185<br>(144 - 234)   | 531<br>(376 - 727)   | 468<br>(332 - 645)   |
| Acute glomerulonephritis                            | 13<br>(10 - 18)          | 1<br>(1 - 3)             | 1<br>(1 - 2)        | 7<br>(4 - 9)         | 4<br>(2 - 6)         | 1<br>(0 - 2)         |
| Chronic kidney disease                              | 500<br>(380 - 636)       | 45<br>(22 - 83)          | 21<br>(12 - 32)     | 165<br>(117 - 222)   | 149<br>(101 - 212)   | 120<br>(82 - 175)    |
| Chronic kidney disease due to diabetes mellitus     | 7<br>(3 - 12)            | 0<br>(0 - 0)             | 0<br>(0 - 1)        | 1<br>(0 - 1)         | 5<br>(2 - 10)        | 0<br>(0 - 0)         |
| Chronic kidney disease due to hypertension          | 221<br>(151 - 324)       | 6<br>(2 - 14)            | 3<br>(1 - 5)        | 54<br>(30 - 85)      | 84<br>(52 - 132)     | 75<br>(48 - 116)     |
| Chronic kidney disease due to glomerulonephritis    | 155<br>(104 - 204)       | 27<br>(12 - 48)          | 10<br>(6 - 16)      | 78<br>(49 - 111)     | 26<br>(13 - 45)      | 14<br>(6 - 27)       |
| Chronic kidney disease due to other causes          | 116<br>(68 - 179)        | 12<br>(4 - 29)           | 8<br>(3 - 14)       | 32<br>(16 - 57)      | 33<br>(14 - 64)      | 31<br>(12 - 61)      |
| Urinary diseases and male infertility               | 355<br>(242 - 474)       | 38<br>(14 - 94)          | 10<br>(4 - 18)      | 98<br>(61 - 140)     | 115<br>(70 - 173)    | 94<br>(62 - 143)     |
| Interstitial nephritis and urinary tract infections | 315<br>(196 - 430)       | 35<br>(11 - 86)          | 8<br>(2 - 16)       | 84<br>(45 - 127)     | 101<br>(59 - 155)    | 87<br>(57 - 134)     |
| Urolithiasis                                        | 10<br>(3 - 32)           | --                       | 1<br>(0 - 2)        | 4<br>(1 - 11)        | 4<br>(1 - 11)        | 1<br>(0 - 6)         |
| Other urinary diseases                              | 31<br>(18 - 49)          | 3<br>(1 - 9)             | 1<br>(0 - 4)        | 10<br>(4 - 22)       | 10<br>(4 - 20)       | 6<br>(2 - 12)        |
| Gynecological diseases                              | 9<br>(6 - 15)            | --                       | --                  | 6<br>(4 - 11)        | 2<br>(1 - 4)         | 1<br>(1 - 2)         |
| Uterine fibroids                                    | 2<br>(1 - 3)             | --                       | --                  | 1<br>(1 - 1)         | 1<br>(0 - 1)         | 0<br>(0 - 1)         |
| Polycystic ovarian syndrome                         | 0<br>(0 - 1)             | --                       | --                  | 0<br>(0 - 1)         | 0<br>(0 - 0)         | --                   |
| Endometriosis                                       | 1<br>(1 - 2)             | --                       | --                  | 1<br>(1 - 2)         | 0<br>(0 - 0)         | --                   |
| Genital prolapse                                    | 1<br>(1 - 2)             | --                       | --                  | 1<br>(1 - 2)         | 0<br>(0 - 1)         | 0<br>(0 - 0)         |
| Other gynecological diseases                        | 5<br>(3 - 7)             | --                       | --                  | 3<br>(2 - 5)         | 1<br>(1 - 2)         | 0<br>(0 - 1)         |
| Hemoglobinopathies and hemolytic anemias            | 567<br>(287 - 1,136)     | 276<br>(121 - 588)       | 79<br>(37 - 163)    | 153<br>(57 - 328)    | 36<br>(15 - 63)      | 23<br>(7 - 42)       |
| Thalassemias                                        | 18<br>(9 - 37)           | 13<br>(5 - 27)           | 2<br>(1 - 5)        | 3<br>(1 - 7)         | 0<br>(0 - 0)         | 0<br>(0 - 0)         |
| Sickle cell disorders                               | 510<br>(257 - 1,032)     | 251<br>(109 - 535)       | 75<br>(36 - 155)    | 146<br>(54 - 312)    | 31<br>(13 - 55)      | 7<br>(2 - 15)        |
| G6PD deficiency                                     | 11<br>(5 - 20)           | 4<br>(2 - 10)            | 1<br>(0 - 2)        | 2<br>(1 - 5)         | 1<br>(0 - 2)         | 1<br>(0 - 3)         |
| Other hemoglobinopathies and hemolytic anemias      | 28<br>(13 - 45)          | 9<br>(4 - 19)            | 1<br>(0 - 1)        | 2<br>(1 - 3)         | 4<br>(1 - 6)         | 14<br>(5 - 25)       |
| Endocrine, metabolic, blood, and immune disorders   | 389<br>(254 - 598)       | 117<br>(59 - 234)        | 16<br>(7 - 33)      | 95<br>(56 - 172)     | 80<br>(47 - 128)     | 81<br>(36 - 132)     |
| Musculoskeletal disorders                           | 93<br>(64 - 121)         | --                       | 8<br>(4 - 12)       | 39<br>(25 - 55)      | 27<br>(15 - 41)      | 18<br>(10 - 28)      |
| Rheumatoid arthritis                                | 16<br>(10 - 24)          | --                       | 1<br>(0 - 2)        | 3<br>(2 - 6)         | 4<br>(2 - 9)         | 7<br>(3 - 11)        |
| Other musculoskeletal disorders                     | 77<br>(49 - 101)         | --                       | 7<br>(3 - 10)       | 36<br>(22 - 50)      | 23<br>(11 - 34)      | 12<br>(6 - 19)       |
| Other non-communicable diseases                     | 2,869<br>(1,407 - 5,381) | 2,406<br>(1,027 - 4,845) | 99<br>(44 - 196)    | 173<br>(102 - 278)   | 94<br>(62 - 138)     | 97<br>(63 - 139)     |
| Congenital anomalies                                | 2,509<br>(1,080 - 5,006) | 2,307<br>(949 - 4,735)   | 90<br>(37 - 184)    | 87<br>(39 - 174)     | 16<br>(10 - 23)      | 10<br>(7 - 14)       |
| Neural tube defects                                 | 551<br>(119 - 1,549)     | 524<br>(105 - 1,492)     | 14<br>(4 - 37)      | 13<br>(4 - 39)       | 1<br>(0 - 2)         | 0<br>(0 - 1)         |
| Congenital heart anomalies                          | 1,113<br>(452 - 2,323)   | 1,023<br>(403 - 2,191)   | 41<br>(14 - 91)     | 36<br>(13 - 81)      | 8<br>(4 - 13)        | 5<br>(3 - 8)         |
| Cleft lip and cleft palate                          | 11<br>(1 - 36)           | 11<br>(1 - 36)           | --                  | --                   | --                   | --                   |
| Down syndrome                                       | 342<br>(92 - 870)        | 299<br>(68 - 805)        | 19<br>(7 - 42)      | 20<br>(9 - 40)       | 3<br>(1 - 6)         | 0<br>(0 - 1)         |
| Chromosomal unbalanced rearrangements               | 97<br>(23 - 242)         | 91<br>(20 - 230)         | 2<br>(1 - 5)        | 4<br>(1 - 8)         | 0<br>(0 - 1)         | 0<br>(0 - 0)         |
| Other congenital anomalies                          | 394<br>(113 - 1,197)     | 358<br>(92 - 1,100)      | 14<br>(4 - 45)      | 14<br>(5 - 40)       | 4<br>(2 - 6)         | 4<br>(2 - 6)         |
| Skin and subcutaneous diseases                      | 342<br>(247 - 440)       | 82<br>(38 - 148)         | 9<br>(5 - 13)       | 86<br>(49 - 122)     | 79<br>(49 - 118)     | 87<br>(53 - 128)     |

Web Table 31- Cote d'Ivoire deaths with 95% UI by age, sex, and cause in 2013

| Cause                                           | Females, All Ages        | Females, 0-4 Years   | Females, 5-14 Years | Females, 15-49 Years     | Females, 50-69 Years | Females, 70-80 Years |
|-------------------------------------------------|--------------------------|----------------------|---------------------|--------------------------|----------------------|----------------------|
| Cellulitis                                      | 84<br>(39 - 131)         | 14<br>(4 - 32)       | 3<br>(1 - 5)        | 21<br>(9 - 35)           | 17<br>(6 - 34)       | 30<br>(10 - 56)      |
| Pyoderma                                        | 234<br>(165 - 312)       | 61<br>(27 - 111)     | 5<br>(3 - 8)        | 57<br>(34 - 81)          | 59<br>(36 - 91)      | 53<br>(29 - 88)      |
| Decubitus ulcer                                 | 6<br>(4 - 9)             | 0<br>(0 - 1)         | 0<br>(0 - 1)        | 2<br>(1 - 3)             | 1<br>(0 - 1)         | 2<br>(1 - 5)         |
| Other skin and subcutaneous diseases            | 18<br>(9 - 28)           | 6<br>(1 - 15)        | 1<br>(0 - 1)        | 7<br>(3 - 12)            | 2<br>(1 - 3)         | 3<br>(1 - 6)         |
| Sudden infant death syndrome                    | 18<br>(4 - 59)           | 18<br>(4 - 59)       | --                  | --                       | --                   | --                   |
| Injuries                                        | 4,131<br>(3,233 - 5,083) | 848<br>(498 - 1,393) | 414<br>(277 - 564)  | 1,679<br>(1,266 - 2,198) | 666<br>(452 - 906)   | 525<br>(306 - 718)   |
| Transport injuries                              | 2,019<br>(1,507 - 2,683) | 239<br>(112 - 456)   | 206<br>(117 - 329)  | 1,060<br>(722 - 1,539)   | 350<br>(227 - 519)   | 163<br>(95 - 236)    |
| Road injuries                                   | 1,950<br>(1,455 - 2,609) | 219<br>(99 - 420)    | 199<br>(112 - 314)  | 1,039<br>(701 - 1,515)   | 338<br>(220 - 500)   | 155<br>(92 - 226)    |
| Pedestrian road injuries                        | 564<br>(384 - 800)       | 66<br>(27 - 137)     | 70<br>(34 - 120)    | 244<br>(147 - 387)       | 119<br>(70 - 185)    | 65<br>(35 - 103)     |
| Cyclist road injuries                           | 91<br>(54 - 136)         | 12<br>(3 - 32)       | 15<br>(7 - 29)      | 29<br>(16 - 55)          | 28<br>(11 - 47)      | 6<br>(2 - 11)        |
| Motorcyclist road injuries                      | 205<br>(118 - 334)       | 14<br>(6 - 30)       | 10<br>(4 - 21)      | 146<br>(78 - 251)        | 25<br>(12 - 43)      | 10<br>(4 - 18)       |
| Motor vehicle road injuries                     | 1,051<br>(758 - 1,433)   | 118<br>(53 - 240)    | 98<br>(53 - 159)    | 606<br>(405 - 874)       | 159<br>(101 - 240)   | 69<br>(40 - 108)     |
| Other road injuries                             | 39<br>(18 - 64)          | 8<br>(2 - 18)        | 6<br>(2 - 13)       | 14<br>(6 - 30)           | 7<br>(3 - 14)        | 4<br>(1 - 8)         |
| Other transport injuries                        | 69<br>(24 - 112)         | 20<br>(6 - 47)       | 8<br>(2 - 16)       | 21<br>(10 - 34)          | 13<br>(3 - 24)       | 8<br>(1 - 16)        |
| Unintentional injuries                          | 1,774<br>(1,196 - 2,276) | 606<br>(348 - 982)   | 201<br>(130 - 286)  | 410<br>(279 - 522)       | 239<br>(145 - 339)   | 318<br>(170 - 467)   |
| Falls                                           | 378<br>(229 - 514)       | 59<br>(28 - 113)     | 24<br>(11 - 41)     | 74<br>(40 - 108)         | 59<br>(36 - 88)      | 163<br>(80 - 265)    |
| Drowning                                        | 324<br>(207 - 501)       | 149<br>(69 - 319)    | 67<br>(33 - 111)    | 72<br>(44 - 121)         | 24<br>(14 - 36)      | 12<br>(7 - 18)       |
| Fire, heat, and hot substances                  | 272<br>(142 - 421)       | 109<br>(43 - 236)    | 27<br>(13 - 51)     | 71<br>(35 - 108)         | 34<br>(16 - 57)      | 31<br>(14 - 53)      |
| Poisonings                                      | 58<br>(23 - 97)          | 20<br>(6 - 53)       | 6<br>(2 - 12)       | 18<br>(9 - 30)           | 10<br>(2 - 17)       | 4<br>(1 - 7)         |
| Exposure to mechanical forces                   | 193<br>(133 - 258)       | 72<br>(36 - 128)     | 25<br>(14 - 40)     | 52<br>(35 - 72)          | 28<br>(13 - 40)      | 15<br>(6 - 22)       |
| Unintentional firearm injuries                  | 57<br>(38 - 80)          | 13<br>(6 - 27)       | 5<br>(2 - 11)       | 26<br>(15 - 42)          | 8<br>(4 - 14)        | 4<br>(2 - 6)         |
| Unintentional suffocation                       | 19<br>(8 - 48)           | 14<br>(4 - 39)       | 2<br>(1 - 5)        | 1<br>(1 - 5)             | 1<br>(0 - 2)         | 1<br>(0 - 1)         |
| Other exposure to mechanical forces             | 117<br>(73 - 166)        | 45<br>(20 - 87)      | 17<br>(9 - 32)      | 25<br>(16 - 37)          | 19<br>(7 - 29)       | 11<br>(3 - 17)       |
| Adverse effects of medical treatment            | 185<br>(64 - 315)        | 45<br>(14 - 110)     | 9<br>(3 - 19)       | 47<br>(16 - 80)          | 42<br>(13 - 82)      | 42<br>(11 - 88)      |
| Animal contact                                  | 85<br>(36 - 142)         | 19<br>(8 - 48)       | 13<br>(5 - 28)      | 30<br>(10 - 48)          | 14<br>(4 - 25)       | 9<br>(2 - 16)        |
| Venomous animal contact                         | 54<br>(24 - 101)         | 15<br>(5 - 40)       | 9<br>(3 - 21)       | 19<br>(7 - 34)           | 7<br>(2 - 15)        | 4<br>(1 - 8)         |
| Non-venomous animal contact                     | 31<br>(9 - 51)           | 4<br>(1 - 11)        | 4<br>(1 - 10)       | 11<br>(3 - 19)           | 7<br>(2 - 13)        | 5<br>(1 - 10)        |
| Foreign body                                    | 179<br>(98 - 284)        | 108<br>(55 - 203)    | 13<br>(6 - 22)      | 16<br>(10 - 28)          | 13<br>(7 - 21)       | 28<br>(11 - 47)      |
| Pulmonary aspiration and foreign body in airway | 174<br>(93 - 278)        | 107<br>(54 - 202)    | 13<br>(5 - 21)      | 16<br>(9 - 27)           | 13<br>(6 - 20)       | 27<br>(10 - 46)      |
| Foreign body in other body part                 | 5<br>(3 - 7)             | 1<br>(1 - 3)         | 0<br>(0 - 1)        | 1<br>(1 - 2)             | 1<br>(0 - 2)         | 1<br>(0 - 2)         |
| Other unintentional injuries                    | 99<br>(69 - 126)         | 25<br>(13 - 44)      | 17<br>(8 - 28)      | 29<br>(19 - 41)          | 15<br>(8 - 22)       | 15<br>(6 - 22)       |
| Self-harm and interpersonal violence            | 339<br>(24 - 493)        | 3<br>(1 - 9)         | 7<br>(3 - 14)       | 208<br>(134 - 382)       | 77<br>(43 - 118)     | 44<br>(18 - 71)      |
| Self-harm                                       | 310<br>(213 - 451)       | --                   | 5<br>(2 - 12)       | 186<br>(116 - 350)       | 76<br>(42 - 117)     | 43<br>(17 - 70)      |
| Interpersonal violence                          | 28<br>(14 - 69)          | 3<br>(1 - 9)         | 2<br>(1 - 4)        | 22<br>(10 - 55)          | 1<br>(0 - 3)         | 0<br>(0 - 1)         |
| Assault by firearm                              | 8<br>(4 - 24)            | 1<br>(0 - 3)         | 0<br>(0 - 1)        | 7<br>(3 - 20)            | 0<br>(0 - 1)         | 0<br>(0 - 0)         |
| Assault by sharp object                         | 8<br>(4 - 20)            | 1<br>(0 - 2)         | 0<br>(0 - 1)        | 7<br>(3 - 17)            | 0<br>(0 - 1)         | 0<br>(0 - 0)         |
| Assault by other means                          | 12<br>(5 - 29)           | 2<br>(1 - 6)         | 1<br>(0 - 2)        | 8<br>(3 - 22)            | 0<br>(0 - 1)         | 0<br>(0 - 0)         |

Web Table 31- Croatia deaths with 95% UI by age, sex, and cause in 2013

| Cause                                                              | Both Sexes, All Ages        | Both Sexes, 0-4 Years | Both Sexes, 5-14 Years | Both Sexes, 15-49 Years  | Both Sexes, 50-69 Years     | Both Sexes, 70-80 Years     |
|--------------------------------------------------------------------|-----------------------------|-----------------------|------------------------|--------------------------|-----------------------------|-----------------------------|
| All causes                                                         | 51,894<br>(50,355 - 53,640) | 187<br>(127 - 270)    | 51<br>(41 - 62)        | 2,440<br>(2,337 - 2,554) | 11,427<br>(10,913 - 11,912) | 37,789<br>(36,781 - 39,023) |
| Communicable, maternal, neonatal, and nutritional diseases         | 969<br>(824 - 1,414)        | 91<br>(60 - 131)      | 3<br>(2 - 4)           | 59<br>(53 - 67)          | 165<br>(141 - 219)          | 651<br>(526 - 1,053)        |
| HIV/AIDS and tuberculosis                                          | 97<br>(84 - 141)            | 0<br>(0 - 0)          | 0<br>(0 - 0)           | 17<br>(14 - 21)          | 30<br>(25 - 45)             | 50<br>(41 - 74)             |
| Tuberculosis                                                       | 85<br>(73 - 127)            | 0<br>(0 - 0)          | 0<br>(0 - 0)           | 9<br>(8 - 14)            | 26<br>(22 - 41)             | 49<br>(40 - 73)             |
| HIV/AIDS                                                           | 12<br>(8 - 17)              | 0<br>(0 - 0)          | 0<br>(0 - 0)           | 7<br>(5 - 10)            | 4<br>(2 - 6)                | 1<br>(0 - 1)                |
| HIV/AIDS resulting in mycobacterial infection                      | 1<br>(0 - 1)                | 0<br>(0 - 0)          | 0<br>(0 - 0)           | 0<br>(0 - 1)             | 0<br>(0 - 0)                | 0<br>(0 - 0)                |
| HIV/AIDS resulting in other diseases                               | 11<br>(8 - 16)              | 0<br>(0 - 0)          | 0<br>(0 - 0)           | 7<br>(5 - 9)             | 3<br>(2 - 5)                | 1<br>(0 - 1)                |
| Diarrrhea, lower respiratory, and other common infectious diseases | 730<br>(595 - 1,158)        | 8<br>(5 - 12)         | 2<br>(2 - 3)           | 33<br>(29 - 39)          | 126<br>(104 - 170)          | 560<br>(435 - 953)          |
| Diarrheal diseases                                                 | 16<br>(13 - 20)             | 1<br>(0 - 1)          | 0<br>(0 - 0)           | 1<br>(1 - 1)             | 3<br>(2 - 4)                | 11<br>(8 - 15)              |
| Intestinal infectious diseases                                     | 4<br>(1 - 10)               | 0<br>(0 - 2)          | 0<br>(0 - 1)           | 2<br>(0 - 4)             | 1<br>(0 - 3)                | 1<br>(0 - 3)                |
| Typhoid fever                                                      | 3<br>(1 - 7)                | 0<br>(0 - 1)          | 0<br>(0 - 1)           | 1<br>(0 - 3)             | 1<br>(0 - 2)                | 1<br>(0 - 2)                |
| Paratyphoid fever                                                  | 1<br>(0 - 2)                | 0<br>(0 - 0)          | 0<br>(0 - 0)           | 0<br>(0 - 1)             | 0<br>(0 - 0)                | 0<br>(0 - 0)                |
| Other intestinal infectious diseases                               | 0<br>(0 - 3)                | 0<br>(0 - 1)          | 0<br>(0 - 0)           | 0<br>(0 - 1)             | 0<br>(0 - 1)                | 0<br>(0 - 1)                |
| Lower respiratory infections                                       | 673<br>(540 - 1,104)        | 5<br>(3 - 7)          | 1<br>(1 - 1)           | 25<br>(21 - 31)          | 110<br>(88 - 155)           | 531<br>(407 - 922)          |
| Upper respiratory infections                                       | 1<br>(0 - 3)                | 0<br>(0 - 0)          | 0<br>(0 - 0)           | 0<br>(0 - 0)             | 0<br>(0 - 1)                | 1<br>(0 - 3)                |
| Otitis media                                                       | 1<br>(1 - 1)                | 0<br>(0 - 0)          | 0<br>(0 - 0)           | 0<br>(0 - 0)             | 0<br>(0 - 0)                | 0<br>(0 - 0)                |
| Meningitis                                                         | 20<br>(16 - 23)             | 2<br>(1 - 3)          | 0<br>(0 - 0)           | 3<br>(3 - 4)             | 7<br>(6 - 9)                | 8<br>(6 - 9)                |
| Pneumococcal meningitis                                            | 8<br>(6 - 9)                | 0<br>(0 - 1)          | 0<br>(0 - 0)           | 1<br>(1 - 2)             | 3<br>(2 - 4)                | 3<br>(2 - 4)                |
| H influenzae type B meningitis                                     | 2<br>(1 - 3)                | 0<br>(0 - 1)          | 0<br>(0 - 0)           | 0<br>(0 - 0)             | 1<br>(0 - 1)                | 1<br>(0 - 1)                |
| Meningococcal meningitis                                           | 3<br>(2 - 5)                | 0<br>(0 - 1)          | 0<br>(0 - 0)           | 1<br>(0 - 1)             | 1<br>(1 - 2)                | 1<br>(1 - 2)                |
| Other meningitis                                                   | 7<br>(5 - 8)                | 0<br>(0 - 1)          | 0<br>(0 - 0)           | 1<br>(1 - 2)             | 3<br>(2 - 4)                | 3<br>(2 - 3)                |
| Encephalitis                                                       | 8<br>(5 - 10)               | 0<br>(0 - 0)          | 0<br>(0 - 0)           | 1<br>(1 - 2)             | 3<br>(1 - 4)                | 4<br>(2 - 5)                |
| Diphtheria                                                         | 0<br>(0 - 0)                | 0<br>(0 - 0)          | 0<br>(0 - 0)           | 0<br>(0 - 0)             | 0<br>(0 - 0)                | --                          |
| Whooping cough                                                     | 0<br>(0 - 0)                | 0<br>(0 - 0)          | 0<br>(0 - 0)           | 0<br>(0 - 0)             | 0<br>(0 - 0)                | --                          |
| Tetanus                                                            | 2<br>(1 - 3)                | 0<br>(0 - 0)          | 0<br>(0 - 0)           | 0<br>(0 - 0)             | 0<br>(0 - 1)                | 1<br>(1 - 2)                |
| Measles                                                            | 0<br>(0 - 0)                | 0<br>(0 - 0)          | 0<br>(0 - 0)           | 0<br>(0 - 0)             | 0<br>(0 - 0)                | --                          |
| Varicella and herpes zoster                                        | 4<br>(1 - 12)               | 0<br>(0 - 0)          | 0<br>(0 - 0)           | 0<br>(0 - 1)             | 0<br>(0 - 1)                | 3<br>(0 - 11)               |
| Neglected tropical diseases and malaria                            | 2<br>(2 - 2)                | 0<br>(0 - 0)          | 0<br>(0 - 0)           | 1<br>(1 - 1)             | 1<br>(1 - 1)                | 1<br>(1 - 1)                |
| Leishmaniasis                                                      | 0<br>(0 - 0)                | 0<br>(0 - 0)          | 0<br>(0 - 0)           | 0<br>(0 - 0)             | 0<br>(0 - 0)                | 0<br>(0 - 0)                |
| Visceral leishmaniasis                                             | 0<br>(0 - 0)                | 0<br>(0 - 0)          | 0<br>(0 - 0)           | 0<br>(0 - 0)             | 0<br>(0 - 0)                | 0<br>(0 - 0)                |
| Cysticercosis                                                      | 0<br>(0 - 0)                | 0<br>(0 - 0)          | 0<br>(0 - 0)           | 0<br>(0 - 0)             | 0<br>(0 - 0)                | 0<br>(0 - 0)                |
| Cystic echinococcosis                                              | 1<br>(1 - 1)                | 0<br>(0 - 0)          | 0<br>(0 - 0)           | 0<br>(0 - 0)             | 0<br>(0 - 0)                | 0<br>(0 - 0)                |
| Dengue                                                             | 0<br>(0 - 0)                | 0<br>(0 - 0)          | 0<br>(0 - 0)           | 0<br>(0 - 0)             | 0<br>(0 - 0)                | 0<br>(0 - 0)                |
| Rabies                                                             | 0<br>(0 - 0)                | 0<br>(0 - 0)          | 0<br>(0 - 0)           | 0<br>(0 - 0)             | 0<br>(0 - 0)                | 0<br>(0 - 0)                |
| Other neglected tropical diseases                                  | 1<br>(0 - 1)                | 0<br>(0 - 0)          | 0<br>(0 - 0)           | 0<br>(0 - 0)             | 0<br>(0 - 0)                | 0<br>(0 - 0)                |
| Maternal disorders                                                 | 4<br>(3 - 5)                | --                    | 0<br>(0 - 0)           | 4<br>(3 - 5)             | --                          | --                          |
| Maternal hemorrhage                                                | 1<br>(0 - 1)                | --                    | 0<br>(0 - 0)           | 1<br>(0 - 1)             | --                          | --                          |
| Maternal sepsis and other maternal infections                      | 0<br>(0 - 0)                | --                    | 0<br>(0 - 0)           | 0<br>(0 - 0)             | --                          | --                          |
| Maternal hypertensive disorders                                    | 0<br>(0 - 1)                | --                    | 0<br>(0 - 0)           | 0<br>(0 - 1)             | --                          | --                          |
| Maternal obstructed labor                                          | 0<br>(0 - 1)                | --                    | 0<br>(0 - 0)           | 0<br>(0 - 1)             | --                          | --                          |



Web Table 31- Croatia deaths with 95% UI by age, sex, and cause in 2013

| Cause                                                            | Both Sexes, All Ages        | Both Sexes, 0-4 Years | Both Sexes, 5-14 Years | Both Sexes, 15-49 Years  | Both Sexes, 50-69 Years     | Both Sexes, 70-80 Years     |
|------------------------------------------------------------------|-----------------------------|-----------------------|------------------------|--------------------------|-----------------------------|-----------------------------|
| Maternal abortive outcome                                        | 1<br>(1 - 1)                | --                    | 0<br>(0 - 0)           | 1<br>(1 - 1)             | --                          | --                          |
| Indirect maternal deaths                                         | 0<br>(0 - 1)                | --                    | 0<br>(0 - 0)           | 0<br>(0 - 1)             | --                          | --                          |
| Late maternal deaths                                             | 0<br>(0 - 1)                | --                    | 0<br>(0 - 0)           | 0<br>(0 - 1)             | --                          | --                          |
| Maternal deaths aggravated by HIV/AIDS                           | 0<br>(0 - 0)                | --                    | --                     | 0<br>(0 - 0)             | --                          | --                          |
| Other maternal disorders                                         | 1<br>(0 - 1)                | --                    | 0<br>(0 - 0)           | 1<br>(0 - 1)             | --                          | --                          |
| Neonatal disorders                                               | 79<br>(53 - 114)            | 79<br>(53 - 114)      | --                     | --                       | --                          | --                          |
| Neonatal preterm birth complications                             | 32<br>(20 - 51)             | 32<br>(20 - 51)       | --                     | --                       | --                          | --                          |
| Neonatal encephalopathy due to birth asphyxia and trauma         | 19<br>(10 - 31)             | 19<br>(10 - 31)       | --                     | --                       | --                          | --                          |
| Neonatal sepsis and other neonatal infections                    | 4<br>(1 - 13)               | 4<br>(1 - 13)         | --                     | --                       | --                          | --                          |
| Hemolytic disease and other neonatal jaundice                    | 0<br>(0 - 0)                | 0<br>(0 - 0)          | --                     | --                       | --                          | --                          |
| Other neonatal disorders                                         | 23<br>(14 - 37)             | 23<br>(14 - 37)       | --                     | --                       | --                          | --                          |
| Nutritional deficiencies                                         | 36<br>(28 - 43)             | 0<br>(0 - 0)          | 0<br>(0 - 0)           | 2<br>(1 - 2)             | 4<br>(3 - 5)                | 30<br>(23 - 37)             |
| Protein-energy malnutrition                                      | 0<br>(0 - 1)                | 0<br>(0 - 0)          | 0<br>(0 - 0)           | 0<br>(0 - 0)             | 0<br>(0 - 0)                | 0<br>(0 - 0)                |
| Iodine deficiency                                                | 0<br>(0 - 1)                | 0<br>(0 - 0)          | 0<br>(0 - 0)           | 0<br>(0 - 0)             | 0<br>(0 - 0)                | 0<br>(0 - 1)                |
| Iron-deficiency anemia                                           | 32<br>(25 - 40)             | 0<br>(0 - 0)          | 0<br>(0 - 0)           | 1<br>(1 - 2)             | 3<br>(2 - 4)                | 27<br>(21 - 35)             |
| Other nutritional deficiencies                                   | 3<br>(1 - 5)                | 0<br>(0 - 0)          | 0<br>(0 - 0)           | 0<br>(0 - 0)             | 0<br>(0 - 1)                | 2<br>(0 - 4)                |
| Other communicable, maternal, neonatal, and nutritional diseases | 21<br>(17 - 26)             | 3<br>(1 - 6)          | 0<br>(0 - 1)           | 2<br>(2 - 3)             | 5<br>(4 - 6)                | 10<br>(8 - 14)              |
| Sexually transmitted diseases excluding HIV                      | 3<br>(1 - 6)                | 2<br>(1 - 5)          | 0<br>(0 - 0)           | 0<br>(0 - 0)             | 0<br>(0 - 0)                | 0<br>(0 - 1)                |
| Syphilis                                                         | 3<br>(1 - 6)                | 2<br>(1 - 5)          | 0<br>(0 - 0)           | 0<br>(0 - 0)             | 0<br>(0 - 0)                | 0<br>(0 - 0)                |
| Chlamydial infection                                             | 0<br>(0 - 0)                | --                    | 0<br>(0 - 0)           | 0<br>(0 - 0)             | 0<br>(0 - 0)                | 0<br>(0 - 0)                |
| Gonococcal infection                                             | 0<br>(0 - 0)                | --                    | 0<br>(0 - 0)           | 0<br>(0 - 0)             | 0<br>(0 - 0)                | 0<br>(0 - 0)                |
| Other sexually transmitted diseases                              | 0<br>(0 - 0)                | --                    | 0<br>(0 - 0)           | 0<br>(0 - 0)             | 0<br>(0 - 0)                | 0<br>(0 - 0)                |
| Hepatitis                                                        | 2<br>(1 - 2)                | 0<br>(0 - 0)          | 0<br>(0 - 0)           | 0<br>(0 - 1)             | 1<br>(0 - 1)                | 0<br>(0 - 1)                |
| Acute hepatitis A                                                | 0<br>(0 - 1)                | 0<br>(0 - 0)          | 0<br>(0 - 0)           | 0<br>(0 - 0)             | 0<br>(0 - 0)                | 0<br>(0 - 0)                |
| Acute hepatitis B                                                | 1<br>(1 - 2)                | 0<br>(0 - 0)          | 0<br>(0 - 0)           | 0<br>(0 - 0)             | 1<br>(0 - 1)                | 0<br>(0 - 1)                |
| Acute hepatitis C                                                | 0<br>(0 - 0)                | --                    | 0<br>(0 - 0)           | 0<br>(0 - 0)             | 0<br>(0 - 0)                | 0<br>(0 - 0)                |
| Other infectious diseases                                        | 16<br>(12 - 20)             | 0<br>(0 - 1)          | 0<br>(0 - 0)           | 2<br>(1 - 2)             | 4<br>(3 - 5)                | 9<br>(7 - 13)               |
| Non-communicable diseases                                        | 48,152<br>(46,638 - 49,770) | 85<br>(57 - 122)      | 26<br>(21 - 33)        | 1,628<br>(1,556 - 1,701) | 10,584<br>(10,094 - 11,046) | 35,828<br>(34,793 - 36,996) |
| Neoplasms                                                        | 13,059<br>(12,121 - 13,760) | 8<br>(5 - 12)         | 13<br>(11 - 17)        | 711<br>(671 - 752)       | 4,912<br>(4,595 - 5,180)    | 7,416<br>(6,778 - 7,874)    |
| Esophageal cancer                                                | 226<br>(191 - 254)          | --                    | --                     | 14<br>(11 - 19)          | 116<br>(97 - 136)           | 95<br>(78 - 109)            |
| Stomach cancer                                                   | 992<br>(876 - 1,138)        | --                    | --                     | 39<br>(33 - 46)          | 325<br>(289 - 367)          | 628<br>(532 - 748)          |
| Liver cancer                                                     | 472<br>(341 - 572)          | --                    | 0<br>(0 - 0)           | 17<br>(12 - 21)          | 174<br>(119 - 219)          | 280<br>(199 - 351)          |
| Liver cancer due to hepatitis B                                  | 87<br>(52 - 127)            | --                    | 0<br>(0 - 0)           | 5<br>(3 - 7)             | 41<br>(23 - 66)             | 41<br>(23 - 61)             |
| Liver cancer due to hepatitis C                                  | 219<br>(140 - 290)          | --                    | 0<br>(0 - 0)           | 7<br>(4 - 10)            | 81<br>(48 - 112)            | 131<br>(81 - 176)           |
| Liver cancer due to alcohol use                                  | 122<br>(84 - 163)           | --                    | --                     | 3<br>(1 - 4)             | 38<br>(23 - 54)             | 82<br>(56 - 112)            |
| Liver cancer due to other causes                                 | 44<br>(29 - 63)             | --                    | 0<br>(0 - 0)           | 2<br>(1 - 3)             | 15<br>(9 - 21)              | 27<br>(16 - 42)             |
| Larynx cancer                                                    | 197<br>(153 - 263)          | --                    | --                     | 13<br>(10 - 19)          | 105<br>(82 - 146)           | 80<br>(58 - 102)            |
| Tracheal, bronchus and lung cancer                               | 2,773<br>(2,569 - 2,977)    | --                    | --                     | 117<br>(102 - 133)       | 1,276<br>(1,259 - 1,500)    | 1,276<br>(1,164 - 1,387)    |
| Breast cancer                                                    | 909<br>(640 - 1,046)        | --                    | --                     | 78<br>(63 - 94)          | 326<br>(234 - 378)          | 505<br>(321 - 606)          |
| Cervical cancer                                                  | 219<br>(177 - 263)          | --                    | --                     | 28<br>(22 - 34)          | 78<br>(60 - 94)             | 113<br>(89 - 145)           |

Web Table 31- Croatia deaths with 95% UI by age, sex, and cause in 2013

| Cause                                         | Both Sexes, All Ages        | Both Sexes, 0-4 Years | Both Sexes, 5-14 Years | Both Sexes, 15-49 Years | Both Sexes, 50-69 Years  | Both Sexes, 70-80 Years     |
|-----------------------------------------------|-----------------------------|-----------------------|------------------------|-------------------------|--------------------------|-----------------------------|
| Uterine cancer                                | 126<br>(93 - 152)           | --                    | --                     | 3<br>(2 - 4)            | 43<br>(31 - 54)          | 80<br>(57 - 98)             |
| Prostate cancer                               | 777<br>(570 - 1,019)        | --                    | --                     | 2<br>(1 - 3)            | 125<br>(89 - 166)        | 651<br>(464 - 863)          |
| Colon and rectum cancer                       | 1,972<br>(1,823 - 2,119)    | --                    | --                     | 65<br>(58 - 72)         | 610<br>(562 - 657)       | 1,297<br>(1,175 - 1,433)    |
| Lip and oral cavity cancer                    | 196<br>(175 - 220)          | --                    | --                     | 18<br>(15 - 23)         | 105<br>(89 - 121)        | 73<br>(62 - 85)             |
| Nasopharynx cancer                            | 25<br>(20 - 32)             | --                    | 0<br>(0 - 0)           | 5<br>(3 - 7)            | 14<br>(10 - 19)          | 7<br>(5 - 9)                |
| Other pharynx cancer                          | 148<br>(124 - 191)          | --                    | --                     | 15<br>(11 - 21)         | 98<br>(79 - 130)         | 35<br>(27 - 44)             |
| Gallbladder and biliary tract cancer          | 264<br>(173 - 318)          | --                    | --                     | 6<br>(4 - 8)            | 80<br>(53 - 97)          | 178<br>(112 - 222)          |
| Pancreatic cancer                             | 726<br>(673 - 781)          | --                    | --                     | 30<br>(26 - 35)         | 273<br>(248 - 297)       | 423<br>(382 - 468)          |
| Malignant skin melanoma                       | 174<br>(110 - 229)          | --                    | --                     | 29<br>(20 - 40)         | 67<br>(42 - 92)          | 78<br>(47 - 100)            |
| Non-melanoma skin cancer                      | 89<br>(68 - 120)            | --                    | --                     | 1<br>(1 - 1)            | 9<br>(7 - 13)            | 79<br>(60 - 107)            |
| Ovarian cancer                                | 309<br>(267 - 352)          | --                    | --                     | 30<br>(25 - 37)         | 137<br>(116 - 160)       | 142<br>(115 - 172)          |
| Testicular cancer                             | 14<br>(8 - 20)              | --                    | --                     | 8<br>(4 - 13)           | 3<br>(2 - 5)             | 3<br>(2 - 4)                |
| Kidney cancer                                 | 330<br>(283 - 381)          | 0<br>(0 - 0)          | 0<br>(0 - 0)           | 16<br>(13 - 19)         | 136<br>(116 - 157)       | 178<br>(141 - 226)          |
| Bladder cancer                                | 353<br>(283 - 402)          | --                    | --                     | 5<br>(4 - 6)            | 87<br>(69 - 99)          | 262<br>(208 - 305)          |
| Brain and nervous system cancer               | 430<br>(324 - 491)          | 2<br>(1 - 3)          | 5<br>(4 - 7)           | 57<br>(48 - 68)         | 187<br>(155 - 219)       | 178<br>(105 - 228)          |
| Thyroid cancer                                | 42<br>(34 - 56)             | --                    | 0<br>(0 - 0)           | 2<br>(1 - 3)            | 14<br>(11 - 19)          | 26<br>(20 - 36)             |
| Mesothelioma                                  | 62<br>(43 - 80)             | --                    | --                     | 5<br>(3 - 7)            | 33<br>(21 - 47)          | 24<br>(14 - 34)             |
| Hodgkin lymphoma                              | 27<br>(21 - 37)             | 0<br>(0 - 0)          | 0<br>(0 - 0)           | 7<br>(6 - 10)           | 9<br>(7 - 13)            | 10<br>(7 - 14)              |
| Non-Hodgkin lymphoma                          | 251<br>(154 - 305)          | 1<br>(0 - 1)          | 1<br>(1 - 2)           | 86<br>(16 - 32)         | 137<br>(56 - 105)        | 137<br>(75 - 175)           |
| Multiple myeloma                              | 148<br>(98 - 200)           | --                    | --                     | 5<br>(4 - 8)            | 53<br>(35 - 75)          | 89<br>(58 - 123)            |
| Leukemia                                      | 354<br>(317 - 388)          | 2<br>(1 - 3)          | 3<br>(2 - 5)           | 30<br>(26 - 34)         | 99<br>(87 - 113)         | 220<br>(191 - 248)          |
| Other neoplasms                               | 453<br>(324 - 537)          | 3<br>(2 - 5)          | 3<br>(2 - 4)           | 39<br>(28 - 46)         | 140<br>(104 - 162)       | 268<br>(176 - 334)          |
| Cardiovascular diseases                       | 24,266<br>(23,170 - 25,645) | 2<br>(2 - 4)          | 2<br>(1 - 2)           | 445<br>(411 - 483)      | 3,685<br>(3,461 - 4,012) | 20,133<br>(19,242 - 21,256) |
| Rheumatic heart disease                       | 112<br>(85 - 141)           | 0<br>(0 - 0)          | 0<br>(0 - 0)           | 4<br>(3 - 7)            | 21<br>(17 - 30)          | 86<br>(62 - 109)            |
| Ischemic heart disease                        | 11,902<br>(10,586 - 13,035) | 0<br>(0 - 0)          | 0<br>(0 - 0)           | 250<br>(222 - 281)      | 1,953<br>(1,771 - 2,193) | 9,699<br>(8,427 - 10,662)   |
| Cerebrovascular disease                       | 8,459<br>(7,593 - 9,481)    | 1<br>(1 - 1)          | 1<br>(0 - 1)           | 118<br>(98 - 139)       | 1,175<br>(1,027 - 1,368) | 7,165<br>(6,348 - 8,045)    |
| Ischemic stroke                               | 6,601<br>(5,795 - 7,420)    | 0<br>(0 - 0)          | 0<br>(0 - 0)           | 15<br>(10 - 20)         | 479<br>(349 - 576)       | 6,107<br>(5,346 - 6,887)    |
| Hemorrhagic stroke                            | 1,857<br>(1,578 - 2,320)    | 1<br>(1 - 1)          | 1<br>(0 - 1)           | 102<br>(85 - 122)       | 696<br>(588 - 890)       | 1,057<br>(810 - 1,391)      |
| Hypertensive heart disease                    | 2,078<br>(1,638 - 2,979)    | 0<br>(0 - 0)          | 0<br>(0 - 0)           | 12<br>(8 - 17)          | 179<br>(133 - 243)       | 1,887<br>(1,464 - 2,747)    |
| Cardiomyopathy and myocarditis                | 493<br>(390 - 604)          | 1<br>(1 - 1)          | 1<br>(0 - 1)           | 23<br>(15 - 29)         | 77<br>(50 - 96)          | 392<br>(309 - 496)          |
| Atrial fibrillation and flutter               | 79<br>(60 - 98)             | --                    | --                     | 1<br>(1 - 1)            | 7<br>(5 - 9)             | 71<br>(54 - 90)             |
| Aortic aneurysm                               | 251<br>(186 - 299)          | --                    | --                     | 12<br>(10 - 15)         | 83<br>(62 - 99)          | 156<br>(111 - 193)          |
| Peripheral vascular disease                   | 208<br>(167 - 251)          | --                    | --                     | 1<br>(1 - 1)            | 23<br>(18 - 28)          | 184<br>(144 - 224)          |
| Endocarditis                                  | 35<br>(27 - 51)             | 0<br>(0 - 0)          | 0<br>(0 - 0)           | 4<br>(3 - 6)            | 10<br>(7 - 15)           | 21<br>(16 - 31)             |
| Other cardiovascular and circulatory diseases | 649<br>(504 - 1,278)        | 0<br>(0 - 1)          | 0<br>(0 - 0)           | 20<br>(16 - 34)         | 157<br>(121 - 291)       | 472<br>(352 - 950)          |
| Chronic respiratory diseases                  | 2,600<br>(2,253 - 2,855)    | 0<br>(0 - 1)          | 0<br>(0 - 0)           | 19<br>(16 - 23)         | 321<br>(266 - 363)       | 2,258<br>(1,945 - 2,497)    |
| Chronic obstructive pulmonary disease         | 2,284<br>(1,936 - 2,527)    | 0<br>(0 - 0)          | 0<br>(0 - 0)           | 13<br>(10 - 16)         | 263<br>(211 - 298)       | 2,008<br>(1,709 - 2,240)    |
| Pneumoconiosis                                | 44<br>(30 - 63)             | 0<br>(0 - 0)          | 0<br>(0 - 0)           | 2<br>(1 - 2)            | 15<br>(10 - 22)          | 28<br>(18 - 41)             |
| Silicosis                                     | 15<br>(10 - 22)             | 0<br>(0 - 0)          | 0<br>(0 - 0)           | 0<br>(0 - 1)            | 3<br>(2 - 4)             | 12<br>(7 - 18)              |
| Asbestosis                                    | 8<br>(5 - 11)               | 0<br>(0 - 0)          | 0<br>(0 - 0)           | 0<br>(0 - 1)            | 3<br>(2 - 4)             | 5<br>(3 - 7)                |

Web Table 31- Croatia deaths with 95% UI by age, sex, and cause in 2013

| Cause                                               | Both Sexes, All Ages     | Both Sexes, 0-4 Years | Both Sexes, 5-14 Years | Both Sexes, 15-49 Years | Both Sexes, 50-69 Years | Both Sexes, 70-80 Years  |
|-----------------------------------------------------|--------------------------|-----------------------|------------------------|-------------------------|-------------------------|--------------------------|
| Coal workers pneumoconiosis                         | 5<br>(3 - 7)             | 0<br>(0 - 0)          | 0<br>(0 - 0)           | 0<br>(0 - 0)            | 3<br>(2 - 4)            | 2<br>(2 - 4)             |
| Other pneumoconiosis                                | 16<br>(11 - 23)          | 0<br>(0 - 0)          | 0<br>(0 - 0)           | 1<br>(0 - 1)            | 7<br>(4 - 10)           | 9<br>(6 - 13)            |
| Asthma                                              | 78<br>(59 - 107)         | 0<br>(0 - 0)          | 0<br>(0 - 0)           | 2<br>(1 - 2)            | 13<br>(10 - 16)         | 64<br>(46 - 90)          |
| Interstitial lung disease and pulmonary sarcoidosis | 170<br>(120 - 269)       | 0<br>(0 - 0)          | 0<br>(0 - 0)           | 2<br>(1 - 2)            | 28<br>(20 - 46)         | 140<br>(95 - 228)        |
| Other chronic respiratory diseases                  | 23<br>(15 - 34)          | 0<br>(0 - 0)          | 0<br>(0 - 0)           | 1<br>(1 - 2)            | 2<br>(2 - 3)            | 19<br>(12 - 30)          |
| Cirrhosis                                           | 1,206<br>(1,122 - 1,285) | 0<br>(0 - 0)          | 0<br>(0 - 0)           | 158<br>(142 - 175)      | 659<br>(602 - 716)      | 389<br>(350 - 428)       |
| Cirrhosis due to hepatitis B                        | 327<br>(233 - 430)       | 0<br>(0 - 0)          | 0<br>(0 - 0)           | 44<br>(28 - 61)         | 179<br>(125 - 242)      | 104<br>(71 - 144)        |
| Cirrhosis due to hepatitis C                        | 349<br>(223 - 518)       | 0<br>(0 - 0)          | 0<br>(0 - 0)           | 37<br>(21 - 64)         | 187<br>(113 - 288)      | 125<br>(72 - 179)        |
| Cirrhosis due to alcohol use                        | 342<br>(198 - 474)       | --                    | --                     | 33<br>(9 - 52)          | 188<br>(96 - 266)       | 120<br>(75 - 172)        |
| Cirrhosis due to other causes                       | 188<br>(121 - 270)       | 0<br>(0 - 0)          | 0<br>(0 - 0)           | 43<br>(28 - 57)         | 105<br>(62 - 156)       | 40<br>(24 - 61)          |
| Digestive diseases                                  | 975<br>(783 - 1,084)     | 0<br>(0 - 0)          | 0<br>(0 - 0)           | 40<br>(34 - 45)         | 193<br>(160 - 217)      | 742<br>(573 - 834)       |
| Peptic ulcer disease                                | 195<br>(136 - 244)       | 0<br>(0 - 0)          | 0<br>(0 - 0)           | 7<br>(5 - 9)            | 45<br>(33 - 58)         | 143<br>(95 - 184)        |
| Gastritis and duodenitis                            | 11<br>(3 - 20)           | 0<br>(0 - 0)          | 0<br>(0 - 0)           | 0<br>(0 - 1)            | 2<br>(1 - 3)            | 9<br>(2 - 17)            |
| Appendicitis                                        | 12<br>(7 - 17)           | 0<br>(0 - 0)          | 0<br>(0 - 0)           | 1<br>(0 - 1)            | 3<br>(2 - 4)            | 8<br>(5 - 12)            |
| Paralytic ileus and intestinal obstruction          | 154<br>(106 - 239)       | 0<br>(0 - 0)          | 0<br>(0 - 0)           | 4<br>(3 - 6)            | 25<br>(17 - 39)         | 125<br>(85 - 195)        |
| Inguinal, femoral, and abdominal hernia             | 38<br>(18 - 54)          | 0<br>(0 - 0)          | 0<br>(0 - 0)           | 1<br>(0 - 1)            | 6<br>(3 - 8)            | 31<br>(14 - 46)          |
| Inflammatory bowel disease                          | 25<br>(12 - 34)          | 0<br>(0 - 0)          | 0<br>(0 - 0)           | 3<br>(2 - 4)            | 7<br>(3 - 10)           | 14<br>(6 - 21)           |
| Vascular intestinal disorders                       | 227<br>(147 - 323)       | 0<br>(0 - 0)          | 0<br>(0 - 0)           | 3<br>(1 - 5)            | 37<br>(22 - 58)         | 188<br>(119 - 267)       |
| Gallbladder and biliary diseases                    | 108<br>(66 - 139)        | 0<br>(0 - 0)          | 0<br>(0 - 0)           | 1<br>(1 - 1)            | 14<br>(9 - 18)          | 93<br>(57 - 122)         |
| Pancreatitis                                        | 142<br>(103 - 182)       | 0<br>(0 - 0)          | 0<br>(0 - 0)           | 18<br>(14 - 23)         | 42<br>(30 - 55)         | 83<br>(56 - 111)         |
| Other digestive diseases                            | 63<br>(44 - 77)          | 0<br>(0 - 0)          | 0<br>(0 - 0)           | 3<br>(2 - 4)            | 13<br>(9 - 16)          | 47<br>(32 - 60)          |
| Neurological disorders                              | 3,406<br>(2,905 - 3,968) | 3<br>(2 - 5)          | 3<br>(2 - 4)           | 55<br>(43 - 64)         | 227<br>(189 - 260)      | 3,118<br>(2,644 - 3,684) |
| Alzheimer disease and other dementias               | 2,930<br>(2,468 - 3,501) | --                    | --                     | 0<br>(0 - 1)            | 121<br>(95 - 147)       | 2,809<br>(2,344 - 3,380) |
| Parkinson disease                                   | 286<br>(146 - 344)       | --                    | --                     | 1<br>(1 - 1)            | 28<br>(18 - 34)         | 258<br>(127 - 314)       |
| Epilepsy                                            | 66<br>(44 - 80)          | 1<br>(0 - 1)          | 2<br>(1 - 2)           | 26<br>(18 - 33)         | 22<br>(13 - 28)         | 16<br>(10 - 21)          |
| Multiple sclerosis                                  | 40<br>(27 - 60)          | --                    | --                     | 11<br>(7 - 17)          | 19<br>(13 - 30)         | 10<br>(6 - 15)           |
| Other neurological disorders                        | 84<br>(67 - 93)          | 2<br>(2 - 4)          | 2<br>(1 - 2)           | 16<br>(13 - 19)         | 37<br>(30 - 42)         | 27<br>(21 - 31)          |
| Mental and substance use disorders                  | 363<br>(214 - 422)       | 0<br>(0 - 0)          | 0<br>(0 - 0)           | 117<br>(78 - 136)       | 152<br>(77 - 189)       | 94<br>(48 - 117)         |
| Schizophrenia                                       | 37<br>(9 - 57)           | --                    | --                     | 5<br>(1 - 8)            | 17<br>(4 - 27)          | 16<br>(3 - 26)           |
| Alcohol use disorders                               | 237<br>(121 - 287)       | --                    | --                     | 44<br>(24 - 57)         | 126<br>(64 - 159)       | 67<br>(32 - 86)          |
| Drug use disorders                                  | 89<br>(54 - 103)         | 0<br>(0 - 0)          | --                     | 67<br>(38 - 82)         | 10<br>(6 - 12)          | 11<br>(9 - 14)           |
| Opioid use disorders                                | 35<br>(21 - 41)          | 0<br>(0 - 0)          | --                     | 27<br>(15 - 33)         | 3<br>(2 - 4)            | 4<br>(3 - 6)             |
| Cocaine use disorders                               | 5<br>(3 - 6)             | 0<br>(0 - 0)          | --                     | 4<br>(2 - 5)            | 0<br>(0 - 1)            | 1<br>(0 - 1)             |
| Amphetamine use disorders                           | 4<br>(3 - 5)             | 0<br>(0 - 0)          | --                     | 3<br>(2 - 4)            | 1<br>(0 - 1)            | 1<br>(0 - 1)             |
| Other drug use disorders                            | 45<br>(27 - 52)          | 0<br>(0 - 0)          | --                     | 34<br>(19 - 41)         | 5<br>(3 - 7)            | 6<br>(4 - 7)             |
| Eating disorders                                    | 0<br>(0 - 0)             | --                    | 0<br>(0 - 0)           | 0<br>(0 - 0)            | --                      | --                       |
| Anorexia nervosa                                    | 0<br>(0 - 0)             | --                    | 0<br>(0 - 0)           | 0<br>(0 - 0)            | --                      | --                       |
| Diabetes, urogenital, blood, and endocrine diseases | 2,063<br>(1,847 - 2,255) | 3<br>(2 - 6)          | 2<br>(2 - 3)           | 57<br>(52 - 65)         | 397<br>(364 - 449)      | 1,604<br>(1,404 - 1,771) |
| Diabetes mellitus                                   | 999<br>(902 - 1,192)     | 0<br>(0 - 0)          | 0<br>(0 - 0)           | 19<br>(16 - 22)         | 214<br>(191 - 246)      | 767<br>(677 - 912)       |
| Acute glomerulonephritis                            | 1<br>(1 - 2)             | 0<br>(0 - 0)          | 0<br>(0 - 0)           | 0<br>(0 - 0)            | 0<br>(0 - 1)            | 1<br>(0 - 1)             |

Web Table 31- Croatia deaths with 95% UI by age, sex, and cause in 2013

| Cause                                               | Both Sexes, All Ages     | Both Sexes, 0-4 Years | Both Sexes, 5-14 Years | Both Sexes, 15-49 Years | Both Sexes, 50-69 Years | Both Sexes, 70-80 Years  |
|-----------------------------------------------------|--------------------------|-----------------------|------------------------|-------------------------|-------------------------|--------------------------|
| Chronic kidney disease                              | 661<br>(547 - 737)       | 0<br>(0 - 0)          | 0<br>(0 - 0)           | 18<br>(16 - 22)         | 124<br>(108 - 147)      | 519<br>(412 - 589)       |
| Chronic kidney disease due to diabetes mellitus     | 280<br>(217 - 344)       | 0<br>(0 - 0)          | 0<br>(0 - 0)           | 8<br>(6 - 11)           | 58<br>(43 - 72)         | 214<br>(165 - 266)       |
| Chronic kidney disease due to hypertension          | 45<br>(30 - 82)          | 0<br>(0 - 0)          | 0<br>(0 - 0)           | 1<br>(1 - 2)            | 6<br>(4 - 12)           | 38<br>(24 - 70)          |
| Chronic kidney disease due to glomerulonephritis    | 14<br>(8 - 24)           | 0<br>(0 - 0)          | 0<br>(0 - 0)           | 1<br>(1 - 2)            | 4<br>(2 - 7)            | 8<br>(4 - 15)            |
| Chronic kidney disease due to other causes          | 323<br>(203 - 397)       | 0<br>(0 - 0)          | 0<br>(0 - 0)           | 9<br>(6 - 11)           | 55<br>(38 - 74)         | 258<br>(149 - 325)       |
| Urinary diseases and male infertility               | 335<br>(225 - 409)       | 0<br>(0 - 0)          | 0<br>(0 - 0)           | 6<br>(5 - 7)            | 40<br>(32 - 48)         | 289<br>(183 - 360)       |
| Interstitial nephritis and urinary tract infections | 309<br>(196 - 383)       | 0<br>(0 - 0)          | 0<br>(0 - 0)           | 5<br>(4 - 6)            | 35<br>(26 - 41)         | 269<br>(162 - 342)       |
| Urolithiasis                                        | 7<br>(4 - 11)            | --                    | 0<br>(0 - 0)           | 0<br>(0 - 1)            | 1<br>(1 - 2)            | 5<br>(3 - 9)             |
| Other urinary diseases                              | 20<br>(10 - 47)          | 0<br>(0 - 0)          | 0<br>(0 - 0)           | 1<br>(0 - 1)            | 4<br>(2 - 8)            | 15<br>(7 - 39)           |
| Gynecological diseases                              | 0<br>(0 - 0)             | --                    | --                     | 0<br>(0 - 0)            | 0<br>(0 - 0)            | 0<br>(0 - 0)             |
| Uterine fibroids                                    | 0<br>(0 - 0)             | --                    | --                     | 0<br>(0 - 0)            | 0<br>(0 - 0)            | 0<br>(0 - 0)             |
| Polycystic ovarian syndrome                         | 0<br>(0 - 0)             | --                    | --                     | 0<br>(0 - 0)            | 0<br>(0 - 0)            | --                       |
| Endometriosis                                       | 0<br>(0 - 0)             | --                    | --                     | 0<br>(0 - 0)            | 0<br>(0 - 0)            | --                       |
| Genital prolapse                                    | 0<br>(0 - 0)             | --                    | --                     | 0<br>(0 - 0)            | 0<br>(0 - 0)            | 0<br>(0 - 0)             |
| Other gynecological diseases                        | 0<br>(0 - 0)             | --                    | --                     | 0<br>(0 - 0)            | 0<br>(0 - 0)            | 0<br>(0 - 0)             |
| Hemoglobinopathies and hemolytic anemias            | 17<br>(13 - 25)          | 1<br>(0 - 1)          | 0<br>(0 - 1)           | 4<br>(3 - 7)            | 3<br>(2 - 4)            | 9<br>(7 - 14)            |
| Thalassemias                                        | 2<br>(1 - 3)             | 0<br>(0 - 1)          | 0<br>(0 - 0)           | 1<br>(1 - 2)            | 0<br>(0 - 0)            | 0<br>(0 - 0)             |
| Sickle cell disorders                               | 1<br>(1 - 1)             | 0<br>(0 - 0)          | 0<br>(0 - 0)           | 1<br>(0 - 1)            | 0<br>(0 - 0)            | 0<br>(0 - 0)             |
| G6PD deficiency                                     | 0<br>(0 - 0)             | 0<br>(0 - 0)          | 0<br>(0 - 0)           | 0<br>(0 - 0)            | 0<br>(0 - 0)            | 0<br>(0 - 0)             |
| Other hemoglobinopathies and hemolytic anemias      | 14<br>(11 - 20)          | 0<br>(0 - 0)          | 0<br>(0 - 0)           | 3<br>(2 - 4)            | 2<br>(2 - 3)            | 9<br>(7 - 14)            |
| Endocrine, metabolic, blood, and immune disorders   | 48<br>(40 - 74)          | 3<br>(1 - 4)          | 1<br>(1 - 2)           | 9<br>(7 - 14)           | 16<br>(13 - 26)         | 19<br>(14 - 30)          |
| Musculoskeletal disorders                           | 88<br>(72 - 106)         | --                    | 0<br>(0 - 1)           | 11<br>(9 - 13)          | 27<br>(22 - 35)         | 50<br>(37 - 62)          |
| Rheumatoid arthritis                                | 36<br>(18 - 44)          | --                    | 0<br>(0 - 0)           | 1<br>(1 - 2)            | 7<br>(3 - 9)            | 27<br>(13 - 35)          |
| Other musculoskeletal disorders                     | 52<br>(42 - 76)          | --                    | 0<br>(0 - 0)           | 9<br>(8 - 12)           | 20<br>(16 - 28)         | 23<br>(17 - 35)          |
| Other non-communicable diseases                     | 127<br>(102 - 158)       | 68<br>(45 - 97)       | 5<br>(3 - 6)           | 17<br>(15 - 20)         | 12<br>(10 - 13)         | 25<br>(21 - 31)          |
| Congenital anomalies                                | 102<br>(79 - 132)        | 62<br>(40 - 90)       | 5<br>(3 - 6)           | 16<br>(14 - 19)         | 8<br>(7 - 10)           | 12<br>(9 - 15)           |
| Neural tube defects                                 | 1<br>(1 - 2)             | 1<br>(0 - 1)          | 0<br>(0 - 0)           | 0<br>(0 - 0)            | 0<br>(0 - 0)            | 0<br>(0 - 0)             |
| Congenital heart anomalies                          | 41<br>(31 - 52)          | 21<br>(13 - 32)       | 2<br>(1 - 2)           | 7<br>(6 - 9)            | 3<br>(2 - 4)            | 8<br>(6 - 10)            |
| Cleft lip and cleft palate                          | 0<br>(0 - 1)             | 0<br>(0 - 1)          | --                     | --                      | --                      | --                       |
| Down syndrome                                       | 12<br>(9 - 17)           | 5<br>(3 - 9)          | 1<br>(0 - 1)           | 4<br>(3 - 5)            | 2<br>(2 - 3)            | 0<br>(0 - 0)             |
| Chromosomal unbalanced rearrangements               | 6<br>(4 - 9)             | 5<br>(3 - 8)          | 0<br>(0 - 0)           | 1<br>(1 - 1)            | 0<br>(0 - 0)            | 0<br>(0 - 0)             |
| Other congenital anomalies                          | 42<br>(30 - 58)          | 30<br>(19 - 45)       | 2<br>(1 - 3)           | 4<br>(3 - 5)            | 2<br>(2 - 3)            | 4<br>(3 - 5)             |
| Skin and subcutaneous diseases                      | 19<br>(13 - 23)          | 0<br>(0 - 0)          | 0<br>(0 - 0)           | 1<br>(1 - 1)            | 4<br>(3 - 5)            | 14<br>(9 - 18)           |
| Cellulitis                                          | 4<br>(2 - 5)             | 0<br>(0 - 0)          | 0<br>(0 - 0)           | 0<br>(0 - 0)            | 1<br>(1 - 1)            | 2<br>(1 - 4)             |
| Pyoderma                                            | 8<br>(6 - 11)            | 0<br>(0 - 0)          | 0<br>(0 - 0)           | 0<br>(0 - 0)            | 2<br>(1 - 2)            | 6<br>(4 - 9)             |
| Decubitus ulcer                                     | 4<br>(2 - 6)             | 0<br>(0 - 0)          | 0<br>(0 - 0)           | 0<br>(0 - 0)            | 1<br>(0 - 1)            | 4<br>(1 - 6)             |
| Other skin and subcutaneous diseases                | 2<br>(1 - 4)             | 0<br>(0 - 0)          | 0<br>(0 - 0)           | 0<br>(0 - 0)            | 1<br>(0 - 1)            | 2<br>(0 - 3)             |
| Sudden infant death syndrome                        | 6<br>(1 - 11)            | 6<br>(1 - 11)         | --                     | --                      | --                      | --                       |
| Injuries                                            | 2,773<br>(2,519 - 3,028) | 11<br>(7 - 17)        | 21<br>(17 - 26)        | 753<br>(703 - 826)      | 678<br>(620 - 777)      | 1,309<br>(1,093 - 1,506) |
| Transport injuries                                  | 571<br>(530 - 619)       | 4<br>(2 - 6)          | 11<br>(8 - 14)         | 300<br>(274 - 333)      | 141<br>(127 - 158)      | 115<br>(100 - 133)       |

Web Table 31- Croatia deaths with 95% UI by age, sex, and cause in 2013

| Cause                                           | Both Sexes, All Ages     | Both Sexes, 0-4 Years | Both Sexes, 5-14 Years | Both Sexes, 15-49 Years | Both Sexes, 50-69 Years | Both Sexes, 70-80 Years |
|-------------------------------------------------|--------------------------|-----------------------|------------------------|-------------------------|-------------------------|-------------------------|
| Road injuries                                   | 511<br>(472 - 557)       | 3<br>(2 - 5)          | 10<br>(8 - 13)         | 278<br>(252 - 308)      | 120<br>(106 - 136)      | 100<br>(86 - 118)       |
| Pedestrian road injuries                        | 126<br>(89 - 175)        | 1<br>(1 - 2)          | 3<br>(2 - 5)           | 37<br>(24 - 64)         | 35<br>(23 - 49)         | 49<br>(34 - 63)         |
| Cyclist road injuries                           | 46<br>(35 - 70)          | 0<br>(0 - 0)          | 1<br>(1 - 2)           | 17<br>(12 - 28)         | 16<br>(11 - 25)         | 12<br>(8 - 19)          |
| Motorcyclist road injuries                      | 86<br>(56 - 121)         | 0<br>(0 - 1)          | 1<br>(1 - 2)           | 63<br>(39 - 90)         | 13<br>(9 - 21)          | 8<br>(5 - 13)           |
| Motor vehicle road injuries                     | 249<br>(189 - 292)       | 2<br>(1 - 3)          | 4<br>(3 - 6)           | 159<br>(118 - 189)      | 54<br>(39 - 67)         | 30<br>(21 - 40)         |
| Other road injuries                             | 4<br>(1 - 16)            | 0<br>(0 - 0)          | 0<br>(0 - 0)           | 2<br>(1 - 7)            | 1<br>(0 - 5)            | 1<br>(0 - 4)            |
| Other transport injuries                        | 60<br>(45 - 72)          | 0<br>(0 - 1)          | 1<br>(0 - 1)           | 22<br>(16 - 28)         | 22<br>(15 - 29)         | 15<br>(10 - 20)         |
| Unintentional injuries                          | 1,333<br>(1,084 - 1,511) | 7<br>(4 - 11)         | 7<br>(6 - 10)          | 134<br>(118 - 150)      | 230<br>(186 - 255)      | 956<br>(736 - 1,124)    |
| Falls                                           | 977<br>(728 - 1,154)     | 1<br>(0 - 1)          | 1<br>(0 - 1)           | 36<br>(24 - 44)         | 120<br>(81 - 141)       | 820<br>(601 - 982)      |
| Drowning                                        | 86<br>(63 - 118)         | 1<br>(1 - 3)          | 4<br>(2 - 6)           | 33<br>(24 - 47)         | 28<br>(19 - 40)         | 20<br>(14 - 27)         |
| Fire, heat, and hot substances                  | 50<br>(41 - 65)          | 1<br>(0 - 1)          | 0<br>(0 - 1)           | 6<br>(5 - 8)            | 11<br>(9 - 14)          | 32<br>(25 - 42)         |
| Poisonings                                      | 24<br>(19 - 31)          | 0<br>(0 - 1)          | 0<br>(0 - 1)           | 7<br>(5 - 9)            | 7<br>(5 - 9)            | 10<br>(7 - 13)          |
| Exposure to mechanical forces                   | 47<br>(35 - 54)          | 1<br>(0 - 1)          | 1<br>(1 - 2)           | 22<br>(16 - 26)         | 15<br>(11 - 19)         | 8<br>(6 - 10)           |
| Unintentional firearm injuries                  | 4<br>(3 - 6)             | 0<br>(0 - 0)          | 0<br>(0 - 0)           | 3<br>(2 - 4)            | 1<br>(1 - 2)            | 0<br>(0 - 1)            |
| Unintentional suffocation                       | 1<br>(1 - 3)             | 0<br>(0 - 0)          | 0<br>(0 - 0)           | 0<br>(0 - 1)            | 0<br>(0 - 1)            | 0<br>(0 - 1)            |
| Other exposure to mechanical forces             | 42<br>(27 - 49)          | 0<br>(0 - 1)          | 1<br>(1 - 1)           | 19<br>(12 - 23)         | 14<br>(9 - 17)          | 7<br>(5 - 9)            |
| Adverse effects of medical treatment            | 66<br>(46 - 81)          | 0<br>(0 - 1)          | 0<br>(0 - 0)           | 6<br>(4 - 8)            | 17<br>(11 - 22)         | 43<br>(28 - 54)         |
| Animal contact                                  | 7<br>(5 - 9)             | 0<br>(0 - 0)          | 0<br>(0 - 0)           | 1<br>(1 - 2)            | 3<br>(2 - 4)            | 3<br>(2 - 4)            |
| Venomous animal contact                         | 2<br>(1 - 3)             | 0<br>(0 - 0)          | 0<br>(0 - 0)           | 1<br>(0 - 1)            | 1<br>(0 - 1)            | 0<br>(0 - 0)            |
| Non-venomous animal contact                     | 5<br>(4 - 7)             | 0<br>(0 - 0)          | 0<br>(0 - 0)           | 1<br>(0 - 1)            | 2<br>(1 - 3)            | 3<br>(2 - 4)            |
| Foreign body                                    | 42<br>(28 - 57)          | 2<br>(1 - 4)          | 0<br>(0 - 0)           | 9<br>(6 - 13)           | 17<br>(11 - 23)         | 13<br>(9 - 19)          |
| Pulmonary aspiration and foreign body in airway | 41<br>(27 - 56)          | 2<br>(1 - 4)          | 0<br>(0 - 0)           | 9<br>(6 - 13)           | 16<br>(11 - 23)         | 13<br>(9 - 18)          |
| Foreign body in other body part                 | 1<br>(0 - 1)             | 0<br>(0 - 0)          | 0<br>(0 - 0)           | 0<br>(0 - 0)            | 0<br>(0 - 0)            | 0<br>(0 - 0)            |
| Other unintentional injuries                    | 35<br>(27 - 51)          | 0<br>(0 - 0)          | 1<br>(0 - 1)           | 13<br>(9 - 19)          | 13<br>(9 - 20)          | 8<br>(5 - 16)           |
| Self-harm and interpersonal violence            | 869<br>(783 - 1,111)     | 1<br>(1 - 2)          | 3<br>(2 - 5)           | 320<br>(279 - 390)      | 307<br>(267 - 415)      | 238<br>(206 - 329)      |
| Self-harm                                       | 799<br>(719 - 1,015)     | --                    | 2<br>(2 - 4)           | 284<br>(245 - 340)      | 285<br>(247 - 389)      | 227<br>(196 - 318)      |
| Interpersonal violence                          | 70<br>(58 - 108)         | 1<br>(1 - 2)          | 1<br>(1 - 1)           | 36<br>(28 - 56)         | 22<br>(17 - 36)         | 11<br>(8 - 17)          |
| Assault by firearm                              | 29<br>(21 - 51)          | 0<br>(0 - 0)          | 0<br>(0 - 1)           | 19<br>(14 - 32)         | 8<br>(5 - 15)           | 2<br>(1 - 4)            |
| Assault by sharp object                         | 19<br>(13 - 35)          | 0<br>(0 - 0)          | 0<br>(0 - 0)           | 10<br>(6 - 18)          | 6<br>(4 - 12)           | 3<br>(2 - 5)            |
| Assault by other means                          | 21<br>(15 - 31)          | 1<br>(0 - 1)          | 0<br>(0 - 0)           | 7<br>(5 - 11)           | 8<br>(5 - 12)           | 6<br>(4 - 9)            |

Web Table 31- Croatia deaths with 95% UI by age, sex, and cause in 2013

| Cause                                                             | Males, All Ages             | Males, 0-4 Years  | Males, 5-14 Years | Males, 15-49 Years       | Males, 50-69 Years       | Males, 70-80 Years          |
|-------------------------------------------------------------------|-----------------------------|-------------------|-------------------|--------------------------|--------------------------|-----------------------------|
| All causes                                                        | 25,984<br>(25,062 - 26,911) | 104<br>(69 - 151) | 31<br>(24 - 39)   | 1,765<br>(1,684 - 1,872) | 7,781<br>(7,347 - 8,181) | 16,302<br>(15,855 - 16,758) |
| Communicable, maternal, neonatal, and nutritional diseases        | 525<br>(433 - 777)          | 50<br>(32 - 73)   | 2<br>(1 - 2)      | 40<br>(34 - 48)          | 115<br>(95 - 162)        | 319<br>(243 - 518)          |
| HIV/AIDS and tuberculosis                                         | 66<br>(55 - 104)            | 0<br>(0 - 0)      | 0<br>(0 - 0)      | 13<br>(11 - 17)          | 24<br>(19 - 39)          | 29<br>(22 - 49)             |
| Tuberculosis                                                      | 57<br>(47 - 95)             | 0<br>(0 - 0)      | 0<br>(0 - 0)      | 8<br>(6 - 12)            | 21<br>(17 - 36)          | 28<br>(22 - 48)             |
| HIV/AIDS                                                          | 9<br>(6 - 13)               | 0<br>(0 - 0)      | 0<br>(0 - 0)      | 5<br>(4 - 7)             | 3<br>(2 - 5)             | 1<br>(0 - 1)                |
| HIV/AIDS resulting in mycobacterial infection                     | 1<br>(0 - 1)                | 0<br>(0 - 0)      | 0<br>(0 - 0)      | 0<br>(0 - 0)             | 0<br>(0 - 0)             | 0<br>(0 - 0)                |
| HIV/AIDS resulting in other diseases                              | 8<br>(5 - 12)               | 0<br>(0 - 0)      | 0<br>(0 - 0)      | 5<br>(4 - 7)             | 3<br>(1 - 4)             | 1<br>(0 - 1)                |
| Diarrhea, lower respiratory, and other common infectious diseases | 394<br>(310 - 624)          | 5<br>(3 - 7)      | 1<br>(1 - 2)      | 24<br>(20 - 29)          | 86<br>(67 - 126)         | 278<br>(204 - 466)          |
| Diarrheal diseases                                                | 6<br>(5 - 8)                | 0<br>(0 - 1)      | 0<br>(0 - 0)      | 1<br>(1 - 1)             | 2<br>(1 - 2)             | 4<br>(2 - 5)                |
| Intestinal infectious diseases                                    | 2<br>(1 - 5)                | 0<br>(0 - 1)      | 0<br>(0 - 1)      | 1<br>(0 - 2)             | 1<br>(0 - 2)             | 0<br>(0 - 1)                |
| Typhoid fever                                                     | 2<br>(0 - 4)                | 0<br>(0 - 0)      | 0<br>(0 - 0)      | 1<br>(0 - 2)             | 0<br>(0 - 1)             | 0<br>(0 - 1)                |
| Paratyphoid fever                                                 | 0<br>(0 - 1)                | 0<br>(0 - 0)      | 0<br>(0 - 0)      | 0<br>(0 - 1)             | 0<br>(0 - 0)             | 0<br>(0 - 0)                |
| Other intestinal infectious diseases                              | 0<br>(0 - 2)                | 0<br>(0 - 0)      | 0<br>(0 - 0)      | 0<br>(0 - 1)             | 0<br>(0 - 1)             | 0<br>(0 - 1)                |
| Lower respiratory infections                                      | 366<br>(283 - 599)          | 3<br>(2 - 5)      | 1<br>(0 - 1)      | 19<br>(15 - 24)          | 77<br>(58 - 117)         | 267<br>(193 - 456)          |
| Upper respiratory infections                                      | 1<br>(0 - 2)                | 0<br>(0 - 0)      | 0<br>(0 - 0)      | 0<br>(0 - 0)             | 0<br>(0 - 1)             | 0<br>(0 - 1)                |
| Otitis media                                                      | 0<br>(0 - 0)                | 0<br>(0 - 0)      | 0<br>(0 - 0)      | 0<br>(0 - 0)             | 0<br>(0 - 0)             | 0<br>(0 - 0)                |
| Meningitis                                                        | 11<br>(9 - 13)              | 1<br>(0 - 2)      | 0<br>(0 - 0)      | 2<br>(2 - 3)             | 5<br>(4 - 6)             | 3<br>(2 - 4)                |
| Pneumococcal meningitis                                           | 4<br>(3 - 5)                | 0<br>(0 - 1)      | 0<br>(0 - 0)      | 1<br>(0 - 1)             | 2<br>(1 - 2)             | 1<br>(1 - 2)                |
| H influenzae type B meningitis                                    | 1<br>(1 - 2)                | 0<br>(0 - 0)      | 0<br>(0 - 0)      | 0<br>(0 - 0)             | 0<br>(0 - 1)             | 0<br>(0 - 1)                |
| Meningococcal meningitis                                          | 2<br>(1 - 2)                | 0<br>(0 - 0)      | 0<br>(0 - 0)      | 0<br>(0 - 1)             | 1<br>(0 - 1)             | 0<br>(0 - 1)                |
| Other meningitis                                                  | 4<br>(3 - 5)                | 0<br>(0 - 0)      | 0<br>(0 - 0)      | 1<br>(0 - 1)             | 2<br>(1 - 3)             | 1<br>(1 - 2)                |
| Encephalitis                                                      | 5<br>(2 - 6)                | 0<br>(0 - 0)      | 0<br>(0 - 0)      | 1<br>(0 - 1)             | 2<br>(1 - 2)             | 2<br>(1 - 3)                |
| Diphtheria                                                        | 0<br>(0 - 0)                | 0<br>(0 - 0)      | 0<br>(0 - 0)      | 0<br>(0 - 0)             | 0<br>(0 - 0)             | --                          |
| Whooping cough                                                    | 0<br>(0 - 0)                | 0<br>(0 - 0)      | 0<br>(0 - 0)      | 0<br>(0 - 0)             | 0<br>(0 - 0)             | --                          |
| Tetanus                                                           | 0<br>(0 - 1)                | 0<br>(0 - 0)      | 0<br>(0 - 0)      | 0<br>(0 - 0)             | 0<br>(0 - 0)             | 0<br>(0 - 0)                |
| Measles                                                           | 0<br>(0 - 0)                | 0<br>(0 - 0)      | 0<br>(0 - 0)      | 0<br>(0 - 0)             | 0<br>(0 - 0)             | --                          |
| Varicella and herpes zoster                                       | 2<br>(0 - 5)                | 0<br>(0 - 0)      | 0<br>(0 - 0)      | 0<br>(0 - 1)             | 0<br>(0 - 1)             | 1<br>(0 - 5)                |
| Neglected tropical diseases and malaria                           | 1<br>(1 - 1)                | 0<br>(0 - 0)      | 0<br>(0 - 0)      | 0<br>(0 - 1)             | 0<br>(0 - 0)             | 0<br>(0 - 0)                |
| Leishmaniasis                                                     | 0<br>(0 - 0)                | 0<br>(0 - 0)      | 0<br>(0 - 0)      | 0<br>(0 - 0)             | 0<br>(0 - 0)             | 0<br>(0 - 0)                |
| Visceral leishmaniasis                                            | 0<br>(0 - 0)                | 0<br>(0 - 0)      | 0<br>(0 - 0)      | 0<br>(0 - 0)             | 0<br>(0 - 0)             | 0<br>(0 - 0)                |
| Cysticercosis                                                     | 0<br>(0 - 0)                | 0<br>(0 - 0)      | 0<br>(0 - 0)      | 0<br>(0 - 0)             | 0<br>(0 - 0)             | 0<br>(0 - 0)                |
| Cystic echinococcosis                                             | 0<br>(0 - 0)                | 0<br>(0 - 0)      | 0<br>(0 - 0)      | 0<br>(0 - 0)             | 0<br>(0 - 0)             | 0<br>(0 - 0)                |
| Dengue                                                            | 0<br>(0 - 0)                | 0<br>(0 - 0)      | 0<br>(0 - 0)      | 0<br>(0 - 0)             | 0<br>(0 - 0)             | 0<br>(0 - 0)                |
| Rabies                                                            | 0<br>(0 - 0)                | 0<br>(0 - 0)      | 0<br>(0 - 0)      | 0<br>(0 - 0)             | 0<br>(0 - 0)             | 0<br>(0 - 0)                |
| Other neglected tropical diseases                                 | 0<br>(0 - 0)                | 0<br>(0 - 0)      | 0<br>(0 - 0)      | 0<br>(0 - 0)             | 0<br>(0 - 0)             | 0<br>(0 - 0)                |
| Maternal disorders                                                | --                          | --                | --                | --                       | --                       | --                          |
| Maternal hemorrhage                                               | --                          | --                | --                | --                       | --                       | --                          |
| Maternal sepsis and other maternal infections                     | --                          | --                | --                | --                       | --                       | --                          |
| Maternal hypertensive disorders                                   | --                          | --                | --                | --                       | --                       | --                          |
| Maternal obstructed labor                                         | --                          | --                | --                | --                       | --                       | --                          |

Web Table 31- Croatia deaths with 95% UI by age, sex, and cause in 2013

| Cause                                                            | Males, All Ages             | Males, 0-4 Years | Males, 5-14 Years | Males, 15-49 Years       | Males, 50-69 Years       | Males, 70-80 Years          |
|------------------------------------------------------------------|-----------------------------|------------------|-------------------|--------------------------|--------------------------|-----------------------------|
| Maternal abortive outcome                                        | --                          | --               | --                | --                       | --                       | --                          |
| Indirect maternal deaths                                         | --                          | --               | --                | --                       | --                       | --                          |
| Late maternal deaths                                             | --                          | --               | --                | --                       | --                       | --                          |
| Maternal deaths aggravated by HIV/AIDS                           | --                          | --               | --                | --                       | --                       | --                          |
| Other maternal disorders                                         | --                          | --               | --                | --                       | --                       | --                          |
| Neonatal disorders                                               | 44<br>(28 - 65)             | 44<br>(28 - 65)  | --                | --                       | --                       | --                          |
| Neonatal preterm birth complications                             | 18<br>(11 - 29)             | 18<br>(11 - 29)  | --                | --                       | --                       | --                          |
| Neonatal encephalopathy due to birth asphyxia and trauma         | 10<br>(5 - 17)              | 10<br>(5 - 17)   | --                | --                       | --                       | --                          |
| Neonatal sepsis and other neonatal infections                    | 3<br>(0 - 8)                | 3<br>(0 - 8)     | --                | --                       | --                       | --                          |
| Hemolytic disease and other neonatal jaundice                    | 0<br>(0 - 0)                | 0<br>(0 - 0)     | --                | --                       | --                       | --                          |
| Other neonatal disorders                                         | 13<br>(7 - 22)              | 13<br>(7 - 22)   | --                | --                       | --                       | --                          |
| Nutritional deficiencies                                         | 11<br>(7 - 17)              | 0<br>(0 - 0)     | 0<br>(0 - 0)      | 1<br>(0 - 1)             | 2<br>(1 - 3)             | 9<br>(5 - 13)               |
| Protein-energy malnutrition                                      | 0<br>(0 - 0)                | 0<br>(0 - 0)     | 0<br>(0 - 0)      | 0<br>(0 - 0)             | 0<br>(0 - 0)             | 0<br>(0 - 0)                |
| Iodine deficiency                                                | 0<br>(0 - 1)                | 0<br>(0 - 0)     | 0<br>(0 - 0)      | 0<br>(0 - 0)             | 0<br>(0 - 0)             | 0<br>(0 - 0)                |
| Iron-deficiency anemia                                           | 10<br>(6 - 15)              | 0<br>(0 - 0)     | 0<br>(0 - 0)      | 1<br>(0 - 1)             | 2<br>(1 - 3)             | 8<br>(5 - 12)               |
| Other nutritional deficiencies                                   | 1<br>(0 - 2)                | 0<br>(0 - 0)     | 0<br>(0 - 0)      | 0<br>(0 - 0)             | 0<br>(0 - 1)             | 1<br>(0 - 2)                |
| Other communicable, maternal, neonatal, and nutritional diseases | 9<br>(7 - 13)               | 1<br>(0 - 3)     | 0<br>(0 - 0)      | 2<br>(1 - 2)             | 3<br>(2 - 4)             | 3<br>(2 - 5)                |
| Sexually transmitted diseases excluding HIV                      | 1<br>(0 - 3)                | 1<br>(0 - 3)     | 0<br>(0 - 0)      | 0<br>(0 - 0)             | 0<br>(0 - 0)             | 0<br>(0 - 0)                |
| Syphilis                                                         | 1<br>(0 - 3)                | 1<br>(0 - 3)     | 0<br>(0 - 0)      | 0<br>(0 - 0)             | 0<br>(0 - 0)             | 0<br>(0 - 0)                |
| Chlamydial infection                                             | --                          | --               | --                | --                       | --                       | --                          |
| Gonococcal infection                                             | 0<br>(0 - 0)                | --               | 0<br>(0 - 0)      | 0<br>(0 - 0)             | 0<br>(0 - 0)             | 0<br>(0 - 0)                |
| Other sexually transmitted diseases                              | 0<br>(0 - 0)                | --               | 0<br>(0 - 0)      | 0<br>(0 - 0)             | 0<br>(0 - 0)             | 0<br>(0 - 0)                |
| Hepatitis                                                        | 1<br>(1 - 1)                | 0<br>(0 - 0)     | 0<br>(0 - 0)      | 0<br>(0 - 0)             | 0<br>(0 - 0)             | 0<br>(0 - 0)                |
| Acute hepatitis A                                                | 0<br>(0 - 0)                | 0<br>(0 - 0)     | 0<br>(0 - 0)      | 0<br>(0 - 0)             | 0<br>(0 - 0)             | 0<br>(0 - 0)                |
| Acute hepatitis B                                                | 1<br>(0 - 1)                | 0<br>(0 - 0)     | 0<br>(0 - 0)      | 0<br>(0 - 0)             | 0<br>(0 - 0)             | 0<br>(0 - 0)                |
| Acute hepatitis C                                                | 0<br>(0 - 0)                | --               | 0<br>(0 - 0)      | 0<br>(0 - 0)             | 0<br>(0 - 0)             | 0<br>(0 - 0)                |
| Other infectious diseases                                        | 7<br>(5 - 10)               | 0<br>(0 - 0)     | 0<br>(0 - 0)      | 1<br>(1 - 2)             | 3<br>(2 - 4)             | 3<br>(2 - 5)                |
| Non-communicable diseases                                        | 23,702<br>(22,781 - 24,605) | 48<br>(31 - 70)  | 14<br>(11 - 19)   | 1,092<br>(1,027 - 1,162) | 7,151<br>(6,713 - 7,538) | 15,396<br>(14,910 - 15,869) |
| Neoplasms                                                        | 7,701<br>(7,262 - 8,144)    | 4<br>(2 - 7)     | 8<br>(6 - 10)     | 390<br>(359 - 422)       | 3,202<br>(2,981 - 3,397) | 4,098<br>(3,803 - 4,373)    |
| Esophageal cancer                                                | 182<br>(149 - 209)          | --               | --                | 12<br>(9 - 17)           | 104<br>(85 - 125)        | 66<br>(48 - 78)             |
| Stomach cancer                                                   | 615<br>(553 - 680)          | --               | --                | 27<br>(22 - 32)          | 241<br>(213 - 273)       | 347<br>(297 - 400)          |
| Liver cancer                                                     | 281<br>(171 - 363)          | --               | 0<br>(0 - 0)      | 11<br>(7 - 16)           | 128<br>(75 - 172)        | 141<br>(81 - 191)           |
| Liver cancer due to hepatitis B                                  | 60<br>(29 - 102)            | --               | 0<br>(0 - 0)      | 4<br>(2 - 6)             | 32<br>(14 - 56)          | 25<br>(11 - 44)             |
| Liver cancer due to hepatitis C                                  | 133<br>(70 - 189)           | --               | 0<br>(0 - 0)      | 5<br>(3 - 7)             | 60<br>(31 - 88)          | 68<br>(32 - 98)             |
| Liver cancer due to alcohol use                                  | 75<br>(41 - 113)            | --               | --                | 2<br>(1 - 3)             | 30<br>(15 - 46)          | 43<br>(23 - 67)             |
| Liver cancer due to other causes                                 | 13<br>(6 - 22)              | --               | 0<br>(0 - 0)      | 1<br>(0 - 2)             | 6<br>(3 - 11)            | 5<br>(2 - 10)               |
| Larynx cancer                                                    | 183<br>(138 - 249)          | --               | --                | 11<br>(9 - 18)           | 100<br>(77 - 141)        | 72<br>(51 - 93)             |
| Tracheal, bronchus and lung cancer                               | 2,138<br>(1,972 - 2,313)    | --               | --                | 83<br>(70 - 97)          | 1,106<br>(1,004 - 1,213) | 949<br>(867 - 1,041)        |
| Breast cancer                                                    | 15<br>(6 - 32)              | --               | --                | 1<br>(0 - 1)             | 6<br>(2 - 12)            | 9<br>(3 - 18)               |
| Cervical cancer                                                  | --                          | --               | --                | --                       | --                       | --                          |

Web Table 31- Croatia deaths with 95% UI by age, sex, and cause in 2013

| Cause                                         | Males, All Ages            | Males, 0-4 Years | Males, 5-14 Years | Males, 15-49 Years | Males, 50-69 Years       | Males, 70-80 Years       |
|-----------------------------------------------|----------------------------|------------------|-------------------|--------------------|--------------------------|--------------------------|
| Uterine cancer                                | --                         | --               | --                | --                 | --                       | --                       |
| Prostate cancer                               | 777<br>(570 - 1,019)       | --               | --                | 2<br>(1 - 3)       | 125<br>(89 - 166)        | 651<br>(464 - 863)       |
| Colon and rectum cancer                       | 1,149<br>(1,055 - 1,247)   | --               | --                | 39<br>(34 - 45)    | 397<br>(358 - 434)       | 714<br>(639 - 796)       |
| Lip and oral cavity cancer                    | 159<br>(140 - 183)         | --               | --                | 16<br>(12 - 21)    | 94<br>(79 - 111)         | 49<br>(40 - 60)          |
| Nasopharynx cancer                            | 20<br>(15 - 26)            | --               | 0<br>(0 - 0)      | 4<br>(2 - 6)       | 12<br>(9 - 17)           | 4<br>(3 - 6)             |
| Other pharynx cancer                          | 136<br>(113 - 180)         | --               | --                | 14<br>(10 - 20)    | 93<br>(74 - 125)         | 30<br>(22 - 39)          |
| Gallbladder and biliary tract cancer          | 96<br>(52 - 119)           | --               | --                | 2<br>(1 - 3)       | 33<br>(19 - 44)          | 60<br>(32 - 76)          |
| Pancreatic cancer                             | 380<br>(347 - 411)         | --               | --                | 21<br>(18 - 26)    | 171<br>(151 - 190)       | 188<br>(167 - 209)       |
| Malignant skin melanoma                       | 95<br>(47 - 151)           | --               | --                | 16<br>(8 - 27)     | 41<br>(20 - 67)          | 38<br>(17 - 57)          |
| Non-melanoma skin cancer                      | 39<br>(25 - 62)            | --               | --                | 1<br>(0 - 1)       | 7<br>(4 - 10)            | 32<br>(20 - 52)          |
| Ovarian cancer                                | --                         | --               | --                | --                 | --                       | --                       |
| Testicular cancer                             | 14<br>(8 - 20)             | --               | --                | 8<br>(4 - 13)      | 3<br>(2 - 5)             | 3<br>(2 - 4)             |
| Kidney cancer                                 | 234<br>(203 - 270)         | 0<br>(0 - 0)     | 0<br>(0 - 0)      | 12<br>(9 - 16)     | 104<br>(85 - 123)        | 117<br>(94 - 145)        |
| Bladder cancer                                | 264<br>(197 - 306)         | --               | --                | 3<br>(3 - 4)       | 71<br>(54 - 84)          | 190<br>(137 - 226)       |
| Brain and nervous system cancer               | 218<br>(159 - 260)         | 1<br>(1 - 2)     | 3<br>(2 - 4)      | 35<br>(27 - 44)    | 107<br>(83 - 137)        | 72<br>(41 - 101)         |
| Thyroid cancer                                | 15<br>(12 - 18)            | --               | 0<br>(0 - 0)      | 1<br>(1 - 2)       | 6<br>(5 - 8)             | 7<br>(6 - 9)             |
| Mesothelioma                                  | 50<br>(29 - 68)            | --               | --                | 4<br>(3 - 7)       | 27<br>(16 - 41)          | 18<br>(9 - 28)           |
| Hodgkin lymphoma                              | 16<br>(11 - 23)            | 0<br>(0 - 0)     | 0<br>(0 - 0)      | 4<br>(3 - 7)       | 6<br>(4 - 9)             | 6<br>(4 - 8)             |
| Non-Hodgkin lymphoma                          | 136<br>(64 - 167)          | 0<br>(0 - 1)     | 1<br>(0 - 1)      | 17<br>(8 - 21)     | 52<br>(25 - 67)          | 66<br>(31 - 88)          |
| Multiple myeloma                              | 71<br>(36 - 108)           | --               | --                | 3<br>(2 - 5)       | 27<br>(14 - 42)          | 41<br>(21 - 61)          |
| Leukemia                                      | 199<br>(178 - 221)         | 1<br>(0 - 2)     | 2<br>(1 - 3)      | 17<br>(15 - 21)    | 60<br>(51 - 70)          | 118<br>(102 - 138)       |
| Other neoplasms                               | 218<br>(133 - 261)         | 1<br>(1 - 3)     | 2<br>(1 - 2)      | 24<br>(14 - 29)    | 80<br>(52 - 98)          | 111<br>(61 - 142)        |
| Cardiovascular diseases                       | 10,280<br>(9,785 - 10,751) | 1<br>(1 - 2)     | 1<br>(1 - 1)      | 342<br>(312 - 373) | 2,553<br>(2,366 - 2,735) | 7,383<br>(7,024 - 7,739) |
| Rheumatic heart disease                       | 38<br>(26 - 58)            | 0<br>(0 - 0)     | 0<br>(0 - 0)      | 3<br>(2 - 4)       | 12<br>(8 - 19)           | 24<br>(15 - 35)          |
| Ischemic heart disease                        | 5,307<br>(4,735 - 5,933)   | 0<br>(0 - 0)     | 0<br>(0 - 0)      | 209<br>(183 - 235) | 1,450<br>(1,304 - 1,630) | 3,649<br>(3,188 - 4,166) |
| Cerebrovascular disease                       | 3,585<br>(3,023 - 4,130)   | 0<br>(0 - 1)     | 0<br>(0 - 0)      | 74<br>(57 - 93)    | 755<br>(620 - 887)       | 2,754<br>(2,306 - 3,194) |
| Ischemic stroke                               | 2,719<br>(2,230 - 3,146)   | 0<br>(0 - 0)     | 0<br>(0 - 0)      | 11<br>(6 - 15)     | 350<br>(248 - 440)       | 2,358<br>(1,946 - 2,750) |
| Hemorrhagic stroke                            | 866<br>(638 - 1,098)       | 0<br>(0 - 1)     | 0<br>(0 - 0)      | 64<br>(49 - 80)    | 405<br>(309 - 517)       | 396<br>(258 - 547)       |
| Hypertensive heart disease                    | 545<br>(365 - 829)         | 0<br>(0 - 0)     | 0<br>(0 - 0)      | 9<br>(6 - 14)      | 109<br>(68 - 158)        | 427<br>(276 - 681)       |
| Cardiomyopathy and myocarditis                | 211<br>(140 - 266)         | 0<br>(0 - 1)     | 0<br>(0 - 0)      | 19<br>(11 - 25)    | 57<br>(33 - 75)          | 134<br>(89 - 188)        |
| Atrial fibrillation and flutter               | 33<br>(20 - 43)            | --               | --                | 1<br>(0 - 1)       | 5<br>(3 - 6)             | 27<br>(14 - 37)          |
| Aortic aneurysm                               | 182<br>(127 - 211)         | --               | --                | 10<br>(8 - 12)     | 67<br>(47 - 80)          | 105<br>(70 - 127)        |
| Peripheral vascular disease                   | 98<br>(75 - 124)           | --               | --                | 1<br>(0 - 1)       | 18<br>(13 - 23)          | 80<br>(59 - 104)         |
| Endocarditis                                  | 21<br>(13 - 33)            | 0<br>(0 - 0)     | 0<br>(0 - 0)      | 3<br>(2 - 5)       | 7<br>(4 - 11)            | 11<br>(7 - 18)           |
| Other cardiovascular and circulatory diseases | 260<br>(208 - 534)         | 0<br>(0 - 0)     | 0<br>(0 - 0)      | 14<br>(11 - 23)    | 74<br>(58 - 144)         | 172<br>(132 - 364)       |
| Chronic respiratory diseases                  | 1,625<br>(1,373 - 1,832)   | 0<br>(0 - 0)     | 0<br>(0 - 0)      | 13<br>(10 - 16)    | 246<br>(200 - 292)       | 1,365<br>(1,157 - 1,554) |
| Chronic obstructive pulmonary disease         | 1,443<br>(1,194 - 1,630)   | 0<br>(0 - 0)     | 0<br>(0 - 0)      | 9<br>(7 - 12)      | 199<br>(156 - 231)       | 1,235<br>(1,035 - 1,404) |
| Pneumoconiosis                                | 43<br>(28 - 61)            | 0<br>(0 - 0)     | 0<br>(0 - 0)      | 2<br>(1 - 2)       | 15<br>(9 - 21)           | 27<br>(16 - 40)          |
| Silicosis                                     | 15<br>(9 - 22)             | 0<br>(0 - 0)     | 0<br>(0 - 0)      | 0<br>(0 - 1)       | 3<br>(2 - 4)             | 12<br>(7 - 18)           |
| Asbestosis                                    | 8<br>(5 - 11)              | 0<br>(0 - 0)     | 0<br>(0 - 0)      | 0<br>(0 - 0)       | 3<br>(2 - 4)             | 5<br>(3 - 7)             |



Web Table 31- Croatia deaths with 95% UI by age, sex, and cause in 2013

| Cause                                               | Males, All Ages          | Males, 0-4 Years | Males, 5-14 Years | Males, 15-49 Years | Males, 50-69 Years | Males, 70-80 Years       |
|-----------------------------------------------------|--------------------------|------------------|-------------------|--------------------|--------------------|--------------------------|
| Coal workers pneumoconiosis                         | 5<br>(3 - 7)             | 0<br>(0 - 0)     | 0<br>(0 - 0)      | 0<br>(0 - 0)       | 3<br>(2 - 4)       | 2<br>(2 - 4)             |
| Other pneumoconiosis                                | 15<br>(10 - 22)          | 0<br>(0 - 0)     | 0<br>(0 - 0)      | 1<br>(0 - 1)       | 6<br>(4 - 10)      | 8<br>(5 - 12)            |
| Asthma                                              | 38<br>(29 - 47)          | 0<br>(0 - 0)     | 0<br>(0 - 0)      | 1<br>(1 - 1)       | 8<br>(5 - 10)      | 29<br>(22 - 39)          |
| Interstitial lung disease and pulmonary sarcoidosis | 95<br>(67 - 164)         | 0<br>(0 - 0)     | 0<br>(0 - 0)      | 1<br>(1 - 1)       | 24<br>(16 - 40)    | 70<br>(47 - 123)         |
| Other chronic respiratory diseases                  | 6<br>(5 - 8)             | 0<br>(0 - 0)     | 0<br>(0 - 0)      | 1<br>(0 - 1)       | 2<br>(1 - 2)       | 4<br>(3 - 6)             |
| Cirrhosis                                           | 897<br>(823 - 972)       | 0<br>(0 - 0)     | 0<br>(0 - 0)      | 130<br>(115 - 147) | 515<br>(460 - 567) | 251<br>(221 - 284)       |
| Cirrhosis due to hepatitis B                        | 205<br>(129 - 304)       | 0<br>(0 - 0)     | 0<br>(0 - 0)      | 33<br>(19 - 51)    | 122<br>(78 - 181)  | 50<br>(27 - 77)          |
| Cirrhosis due to hepatitis C                        | 257<br>(117 - 401)       | 0<br>(0 - 0)     | 0<br>(0 - 0)      | 30<br>(15 - 57)    | 143<br>(61 - 235)  | 84<br>(32 - 134)         |
| Cirrhosis due to alcohol use                        | 297<br>(142 - 420)       | --               | --                | 31<br>(6 - 49)     | 170<br>(75 - 245)  | 95<br>(51 - 139)         |
| Cirrhosis due to other causes                       | 138<br>(74 - 212)        | 0<br>(0 - 0)     | 0<br>(0 - 0)      | 36<br>(20 - 50)    | 79<br>(39 - 128)   | 23<br>(11 - 40)          |
| Digestive diseases                                  | 457<br>(352 - 518)       | 0<br>(0 - 0)     | 0<br>(0 - 0)      | 30<br>(26 - 36)    | 128<br>(102 - 149) | 299<br>(218 - 344)       |
| Peptic ulcer disease                                | 103<br>(70 - 133)        | 0<br>(0 - 0)     | 0<br>(0 - 0)      | 5<br>(4 - 7)       | 33<br>(23 - 44)    | 64<br>(41 - 87)          |
| Gastritis and duodenitis                            | 5<br>(1 - 9)             | 0<br>(0 - 0)     | 0<br>(0 - 0)      | 0<br>(0 - 0)       | 1<br>(0 - 2)       | 4<br>(1 - 7)             |
| Appendicitis                                        | 6<br>(4 - 9)             | 0<br>(0 - 0)     | 0<br>(0 - 0)      | 0<br>(0 - 0)       | 2<br>(1 - 3)       | 4<br>(2 - 6)             |
| Paralytic ileus and intestinal obstruction          | 67<br>(44 - 117)         | 0<br>(0 - 0)     | 0<br>(0 - 0)      | 3<br>(2 - 5)       | 15<br>(10 - 28)    | 49<br>(31 - 85)          |
| Inguinal, femoral, and abdominal hernia             | 21<br>(9 - 31)           | 0<br>(0 - 0)     | 0<br>(0 - 0)      | 0<br>(0 - 1)       | 4<br>(2 - 5)       | 16<br>(6 - 26)           |
| Inflammatory bowel disease                          | 12<br>(5 - 17)           | 0<br>(0 - 0)     | 0<br>(0 - 0)      | 2<br>(1 - 3)       | 4<br>(2 - 6)       | 6<br>(2 - 9)             |
| Vascular intestinal disorders                       | 92<br>(40 - 164)         | 0<br>(0 - 0)     | 0<br>(0 - 0)      | 2<br>(1 - 4)       | 24<br>(11 - 45)    | 66<br>(28 - 118)         |
| Gallbladder and biliary diseases                    | 49<br>(25 - 68)          | 0<br>(0 - 0)     | 0<br>(0 - 0)      | 1<br>(0 - 1)       | 8<br>(5 - 11)      | 40<br>(19 - 57)          |
| Pancreatitis                                        | 77<br>(51 - 106)         | 0<br>(0 - 0)     | 0<br>(0 - 0)      | 15<br>(11 - 20)    | 28<br>(18 - 38)    | 35<br>(20 - 50)          |
| Other digestive diseases                            | 25<br>(13 - 33)          | 0<br>(0 - 0)     | 0<br>(0 - 0)      | 2<br>(1 - 2)       | 8<br>(4 - 11)      | 15<br>(7 - 21)           |
| Neurological disorders                              | 1,452<br>(1,218 - 1,721) | 2<br>(1 - 3)     | 2<br>(1 - 3)      | 36<br>(26 - 44)    | 126<br>(101 - 150) | 1,287<br>(1,063 - 1,555) |
| Alzheimer disease and other dementias               | 1,196<br>(973 - 1,464)   | --               | --                | 0<br>(0 - 1)       | 66<br>(48 - 85)    | 1,130<br>(909 - 1,397)   |
| Parkinson disease                                   | 148<br>(69 - 179)        | --               | --                | 0<br>(0 - 1)       | 16<br>(10 - 21)    | 131<br>(59 - 161)        |
| Epilepsy                                            | 48<br>(30 - 61)          | 0<br>(0 - 1)     | 1<br>(1 - 1)      | 20<br>(12 - 26)    | 17<br>(10 - 23)    | 10<br>(6 - 13)           |
| Multiple sclerosis                                  | 14<br>(7 - 27)           | --               | --                | 4<br>(2 - 7)       | 7<br>(3 - 14)      | 3<br>(2 - 6)             |
| Other neurological disorders                        | 46<br>(31 - 53)          | 1<br>(1 - 2)     | 1<br>(1 - 1)      | 11<br>(8 - 14)     | 20<br>(13 - 24)    | 13<br>(7 - 16)           |
| Mental and substance use disorders                  | 292<br>(163 - 341)       | 0<br>(0 - 0)     | 0<br>(0 - 0)      | 103<br>(66 - 122)  | 126<br>(58 - 159)  | 63<br>(28 - 80)          |
| Schizophrenia                                       | 16<br>(3 - 27)           | --               | --                | 3<br>(1 - 5)       | 9<br>(2 - 16)      | 5<br>(1 - 9)             |
| Alcohol use disorders                               | 206<br>(96 - 247)        | --               | --                | 41<br>(20 - 52)    | 111<br>(48 - 143)  | 54<br>(24 - 69)          |
| Drug use disorders                                  | 70<br>(37 - 84)          | 0<br>(0 - 0)     | --                | 59<br>(29 - 73)    | 6<br>(3 - 8)       | 4<br>(2 - 6)             |
| Opioid use disorders                                | 28<br>(14 - 34)          | 0<br>(0 - 0)     | --                | 24<br>(12 - 30)    | 2<br>(1 - 3)       | 2<br>(1 - 2)             |
| Cocaine use disorders                               | 4<br>(2 - 5)             | 0<br>(0 - 0)     | --                | 3<br>(2 - 4)       | 0<br>(0 - 0)       | 0<br>(0 - 0)             |
| Amphetamine use disorders                           | 3<br>(2 - 4)             | 0<br>(0 - 0)     | --                | 3<br>(1 - 3)       | 0<br>(0 - 0)       | 0<br>(0 - 0)             |
| Other drug use disorders                            | 35<br>(19 - 43)          | 0<br>(0 - 0)     | --                | 30<br>(15 - 37)    | 3<br>(2 - 5)       | 2<br>(1 - 3)             |
| Eating disorders                                    | 0<br>(0 - 0)             | --               | 0<br>(0 - 0)      | 0<br>(0 - 0)       | --                 | --                       |
| Anorexia nervosa                                    | 0<br>(0 - 0)             | --               | 0<br>(0 - 0)      | 0<br>(0 - 0)       | --                 | --                       |
| Diabetes, urogenital, blood, and endocrine diseases | 914<br>(837 - 991)       | 2<br>(1 - 4)     | 1<br>(1 - 2)      | 36<br>(32 - 43)    | 241<br>(213 - 272) | 633<br>(565 - 695)       |
| Diabetes mellitus                                   | 442<br>(399 - 489)       | 0<br>(0 - 0)     | 0<br>(0 - 0)      | 13<br>(11 - 16)    | 137<br>(119 - 157) | 291<br>(254 - 332)       |
| Acute glomerulonephritis                            | 1<br>(0 - 1)             | 0<br>(0 - 0)     | 0<br>(0 - 0)      | 0<br>(0 - 0)       | 0<br>(0 - 0)       | 0<br>(0 - 1)             |

Web Table 31- Croatia deaths with 95% UI by age, sex, and cause in 2013

| Cause                                               | Males, All Ages          | Males, 0-4 Years | Males, 5-14 Years | Males, 15-49 Years | Males, 50-69 Years | Males, 70-80 Years |
|-----------------------------------------------------|--------------------------|------------------|-------------------|--------------------|--------------------|--------------------|
| Chronic kidney disease                              | 308<br>(260 - 354)       | 0<br>(0 - 0)     | 0<br>(0 - 0)      | 12<br>(10 - 15)    | 73<br>(59 - 90)    | 223<br>(183 - 262) |
| Chronic kidney disease due to diabetes mellitus     | 133<br>(82 - 194)        | 0<br>(0 - 0)     | 0<br>(0 - 0)      | 5<br>(3 - 8)       | 36<br>(20 - 48)    | 92<br>(56 - 137)   |
| Chronic kidney disease due to hypertension          | 14<br>(9 - 30)           | 0<br>(0 - 0)     | 0<br>(0 - 0)      | 1<br>(0 - 1)       | 3<br>(2 - 6)       | 10<br>(6 - 23)     |
| Chronic kidney disease due to glomerulonephritis    | 7<br>(4 - 14)            | 0<br>(0 - 0)     | 0<br>(0 - 0)      | 1<br>(0 - 1)       | 2<br>(1 - 5)       | 4<br>(2 - 9)       |
| Chronic kidney disease due to other causes          | 154<br>(87 - 205)        | 0<br>(0 - 0)     | 0<br>(0 - 0)      | 6<br>(3 - 8)       | 32<br>(18 - 51)    | 116<br>(61 - 157)  |
| Urinary diseases and male infertility               | 130<br>(88 - 158)        | 0<br>(0 - 0)     | 0<br>(0 - 0)      | 3<br>(3 - 4)       | 19<br>(14 - 25)    | 107<br>(67 - 134)  |
| Interstitial nephritis and urinary tract infections | 114<br>(70 - 141)        | 0<br>(0 - 0)     | 0<br>(0 - 0)      | 3<br>(2 - 3)       | 16<br>(11 - 20)    | 96<br>(56 - 121)   |
| Urolithiasis                                        | 3<br>(2 - 5)             | --               | 0<br>(0 - 0)      | 0<br>(0 - 0)       | 1<br>(0 - 1)       | 2<br>(1 - 4)       |
| Other urinary diseases                              | 13<br>(6 - 30)           | 0<br>(0 - 0)     | 0<br>(0 - 0)      | 0<br>(0 - 1)       | 3<br>(1 - 6)       | 10<br>(4 - 24)     |
| Gynecological diseases                              | --                       | --               | --                | --                 | --                 | --                 |
| Uterine fibroids                                    | --                       | --               | --                | --                 | --                 | --                 |
| Polycystic ovarian syndrome                         | --                       | --               | --                | --                 | --                 | --                 |
| Endometriosis                                       | --                       | --               | --                | --                 | --                 | --                 |
| Genital prolapse                                    | --                       | --               | --                | --                 | --                 | --                 |
| Other gynecological diseases                        | --                       | --               | --                | --                 | --                 | --                 |
| Hemoglobinopathies and hemolytic anemias            | 8<br>(5 - 12)            | 0<br>(0 - 1)     | 0<br>(0 - 0)      | 2<br>(1 - 4)       | 1<br>(1 - 2)       | 4<br>(2 - 6)       |
| Thalassemias                                        | 1<br>(0 - 1)             | 0<br>(0 - 0)     | 0<br>(0 - 0)      | 0<br>(0 - 1)       | 0<br>(0 - 0)       | 0<br>(0 - 0)       |
| Sickle cell disorders                               | 1<br>(0 - 1)             | 0<br>(0 - 0)     | 0<br>(0 - 0)      | 0<br>(0 - 1)       | 0<br>(0 - 0)       | 0<br>(0 - 0)       |
| G6PD deficiency                                     | 0<br>(0 - 0)             | 0<br>(0 - 0)     | 0<br>(0 - 0)      | 0<br>(0 - 0)       | 0<br>(0 - 0)       | 0<br>(0 - 0)       |
| Other hemoglobinopathies and hemolytic anemias      | 6<br>(4 - 10)            | 0<br>(0 - 0)     | 0<br>(0 - 0)      | 1<br>(1 - 2)       | 1<br>(1 - 2)       | 4<br>(2 - 6)       |
| Endocrine, metabolic, blood, and immune disorders   | 25<br>(20 - 42)          | 2<br>(1 - 3)     | 1<br>(0 - 1)      | 6<br>(4 - 9)       | 10<br>(7 - 16)     | 7<br>(5 - 13)      |
| Musculoskeletal disorders                           | 21<br>(14 - 28)          | --               | 0<br>(0 - 0)      | 3<br>(2 - 4)       | 8<br>(5 - 10)      | 10<br>(6 - 14)     |
| Rheumatoid arthritis                                | 5<br>(2 - 8)             | --               | 0<br>(0 - 0)      | 0<br>(0 - 1)       | 1<br>(0 - 2)       | 3<br>(1 - 6)       |
| Other musculoskeletal disorders                     | 16<br>(11 - 23)          | --               | 0<br>(0 - 0)      | 3<br>(2 - 4)       | 6<br>(4 - 9)       | 7<br>(4 - 11)      |
| Other non-communicable diseases                     | 63<br>(48 - 82)          | 38<br>(25 - 56)  | 2<br>(2 - 3)      | 9<br>(8 - 11)      | 6<br>(5 - 7)       | 7<br>(6 - 9)       |
| Congenital anomalies                                | 53<br>(39 - 72)          | 34<br>(22 - 51)  | 2<br>(2 - 3)      | 9<br>(7 - 10)      | 4<br>(3 - 5)       | 3<br>(3 - 4)       |
| Neural tube defects                                 | 0<br>(0 - 0)             | 0<br>(0 - 0)     | 0<br>(0 - 0)      | 0<br>(0 - 0)       | 0<br>(0 - 0)       | 0<br>(0 - 0)       |
| Congenital heart anomalies                          | 21<br>(15 - 29)          | 13<br>(8 - 21)   | 1<br>(1 - 1)      | 4<br>(3 - 5)       | 2<br>(1 - 2)       | 1<br>(1 - 2)       |
| Cleft lip and cleft palate                          | 0<br>(0 - 1)             | 0<br>(0 - 1)     | --                | --                 | --                 | --                 |
| Down syndrome                                       | 5<br>(3 - 8)             | 2<br>(1 - 5)     | 0<br>(0 - 1)      | 1<br>(1 - 2)       | 1<br>(0 - 1)       | 0<br>(0 - 0)       |
| Chromosomal unbalanced rearrangements               | 3<br>(2 - 5)             | 2<br>(1 - 4)     | 0<br>(0 - 0)      | 0<br>(0 - 1)       | 0<br>(0 - 0)       | 0<br>(0 - 0)       |
| Other congenital anomalies                          | 23<br>(16 - 33)          | 17<br>(10 - 26)  | 1<br>(1 - 2)      | 2<br>(2 - 3)       | 1<br>(1 - 2)       | 2<br>(1 - 2)       |
| Skin and subcutaneous diseases                      | 7<br>(5 - 8)             | 0<br>(0 - 0)     | 0<br>(0 - 0)      | 1<br>(0 - 1)       | 2<br>(1 - 2)       | 4<br>(3 - 5)       |
| Cellulitis                                          | 2<br>(1 - 3)             | 0<br>(0 - 0)     | 0<br>(0 - 0)      | 0<br>(0 - 0)       | 0<br>(0 - 1)       | 1<br>(1 - 2)       |
| Pyoderma                                            | 3<br>(2 - 4)             | 0<br>(0 - 0)     | 0<br>(0 - 0)      | 0<br>(0 - 0)       | 1<br>(1 - 1)       | 2<br>(1 - 2)       |
| Decubitus ulcer                                     | 1<br>(1 - 2)             | 0<br>(0 - 0)     | 0<br>(0 - 0)      | 0<br>(0 - 0)       | 0<br>(0 - 0)       | 1<br>(0 - 1)       |
| Other skin and subcutaneous diseases                | 1<br>(0 - 1)             | 0<br>(0 - 0)     | 0<br>(0 - 0)      | 0<br>(0 - 0)       | 0<br>(0 - 0)       | 0<br>(0 - 1)       |
| Sudden infant death syndrome                        | 4<br>(0 - 8)             | 4<br>(0 - 8)     | --                | --                 | --                 | --                 |
| Injuries                                            | 1,757<br>(1,597 - 1,924) | 7<br>(4 - 10)    | 15<br>(11 - 19)   | 633<br>(585 - 698) | 515<br>(458 - 591) | 587<br>(486 - 666) |
| Transport injuries                                  | 446<br>(411 - 484)       | 2<br>(1 - 4)     | 7<br>(5 - 9)      | 257<br>(232 - 286) | 108<br>(96 - 122)  | 72<br>(61 - 83)    |

Web Table 31- Croatia deaths with 95% UI by age, sex, and cause in 2013

| Cause                                           | Males, All Ages    | Males, 0-4 Years | Males, 5-14 Years | Males, 15-49 Years | Males, 50-69 Years | Males, 70-80 Years |
|-------------------------------------------------|--------------------|------------------|-------------------|--------------------|--------------------|--------------------|
| Road injuries                                   | 397<br>(364 - 434) | 2<br>(1 - 3)     | 7<br>(5 - 9)      | 238<br>(214 - 267) | 89<br>(77 - 102)   | 62<br>(52 - 72)    |
| Pedestrian road injuries                        | 81<br>(46 - 131)   | 1<br>(0 - 1)     | 2<br>(1 - 3)      | 29<br>(16 - 56)    | 23<br>(12 - 36)    | 27<br>(16 - 38)    |
| Cyclist road injuries                           | 38<br>(27 - 60)    | 0<br>(0 - 0)     | 1<br>(0 - 2)      | 14<br>(9 - 25)     | 13<br>(8 - 22)     | 10<br>(6 - 15)     |
| Motorcyclist road injuries                      | 80<br>(49 - 113)   | 0<br>(0 - 1)     | 1<br>(1 - 2)      | 60<br>(35 - 88)    | 12<br>(7 - 19)     | 6<br>(3 - 11)      |
| Motor vehicle road injuries                     | 196<br>(138 - 240) | 1<br>(0 - 2)     | 3<br>(1 - 4)      | 133<br>(94 - 161)  | 41<br>(26 - 52)    | 19<br>(11 - 28)    |
| Other road injuries                             | 3<br>(1 - 13)      | 0<br>(0 - 0)     | 0<br>(0 - 0)      | 1<br>(0 - 6)       | 1<br>(0 - 4)       | 1<br>(0 - 3)       |
| Other transport injuries                        | 49<br>(35 - 60)    | 0<br>(0 - 0)     | 0<br>(0 - 1)      | 19<br>(13 - 24)    | 19<br>(12 - 25)    | 10<br>(7 - 14)     |
| Unintentional injuries                          | 655<br>(510 - 738) | 4<br>(2 - 7)     | 5<br>(4 - 7)      | 116<br>(99 - 130)  | 177<br>(133 - 200) | 353<br>(252 - 423) |
| Falls                                           | 415<br>(280 - 489) | 0<br>(0 - 1)     | 0<br>(0 - 1)      | 32<br>(20 - 40)    | 94<br>(58 - 113)   | 288<br>(190 - 358) |
| Drowning                                        | 65<br>(44 - 89)    | 1<br>(0 - 2)     | 3<br>(2 - 4)      | 29<br>(20 - 42)    | 22<br>(13 - 30)    | 11<br>(6 - 15)     |
| Fire, heat, and hot substances                  | 28<br>(21 - 35)    | 0<br>(0 - 1)     | 0<br>(0 - 0)      | 5<br>(4 - 7)       | 7<br>(5 - 10)      | 15<br>(10 - 19)    |
| Poisonings                                      | 15<br>(10 - 20)    | 0<br>(0 - 0)     | 0<br>(0 - 0)      | 5<br>(4 - 7)       | 5<br>(3 - 7)       | 5<br>(3 - 7)       |
| Exposure to mechanical forces                   | 41<br>(28 - 47)    | 0<br>(0 - 1)     | 1<br>(1 - 1)      | 21<br>(14 - 25)    | 14<br>(9 - 17)     | 5<br>(4 - 7)       |
| Unintentional firearm injuries                  | 4<br>(3 - 5)       | 0<br>(0 - 0)     | 0<br>(0 - 0)      | 2<br>(2 - 3)       | 1<br>(1 - 2)       | 0<br>(0 - 0)       |
| Unintentional suffocation                       | 1<br>(0 - 2)       | 0<br>(0 - 0)     | 0<br>(0 - 0)      | 0<br>(0 - 1)       | 0<br>(0 - 0)       | 0<br>(0 - 0)       |
| Other exposure to mechanical forces             | 37<br>(22 - 43)    | 0<br>(0 - 1)     | 1<br>(0 - 1)      | 18<br>(11 - 22)    | 13<br>(7 - 16)     | 5<br>(3 - 6)       |
| Adverse effects of medical treatment            | 30<br>(21 - 39)    | 0<br>(0 - 1)     | 0<br>(0 - 0)      | 4<br>(2 - 5)       | 10<br>(6 - 14)     | 16<br>(10 - 21)    |
| Animal contact                                  | 5<br>(3 - 7)       | 0<br>(0 - 0)     | 0<br>(0 - 0)      | 1<br>(1 - 2)       | 2<br>(1 - 3)       | 2<br>(1 - 3)       |
| Venomous animal contact                         | 1<br>(1 - 2)       | 0<br>(0 - 0)     | 0<br>(0 - 0)      | 1<br>(0 - 1)       | 1<br>(0 - 1)       | 0<br>(0 - 0)       |
| Non-venomous animal contact                     | 4<br>(2 - 5)       | 0<br>(0 - 0)     | 0<br>(0 - 0)      | 1<br>(0 - 1)       | 1<br>(1 - 2)       | 2<br>(1 - 2)       |
| Foreign body                                    | 27<br>(15 - 41)    | 1<br>(1 - 2)     | 0<br>(0 - 0)      | 7<br>(4 - 10)      | 11<br>(6 - 16)     | 8<br>(4 - 12)      |
| Pulmonary aspiration and foreign body in airway | 27<br>(14 - 41)    | 1<br>(1 - 2)     | 0<br>(0 - 0)      | 7<br>(4 - 10)      | 11<br>(6 - 16)     | 8<br>(4 - 12)      |
| Foreign body in other body part                 | 0<br>(0 - 1)       | 0<br>(0 - 0)     | 0<br>(0 - 0)      | 0<br>(0 - 0)       | 0<br>(0 - 0)       | 0<br>(0 - 0)       |
| Other unintentional injuries                    | 29<br>(22 - 37)    | 0<br>(0 - 0)     | 0<br>(0 - 1)      | 12<br>(8 - 17)     | 12<br>(8 - 18)     | 5<br>(3 - 7)       |
| Self-harm and interpersonal violence            | 656<br>(572 - 866) | 0<br>(0 - 1)     | 2<br>(1 - 3)      | 261<br>(220 - 320) | 230<br>(190 - 320) | 162<br>(133 - 236) |
| Self-harm                                       | 610<br>(525 - 799) | --               | 2<br>(1 - 3)      | 235<br>(192 - 285) | 216<br>(176 - 298) | 157<br>(128 - 229) |
| Interpersonal violence                          | 46<br>(36 - 81)    | 0<br>(0 - 1)     | 0<br>(0 - 1)      | 26<br>(19 - 45)    | 14<br>(11 - 27)    | 5<br>(4 - 10)      |
| Assault by firearm                              | 21<br>(14 - 41)    | 0<br>(0 - 0)     | 0<br>(0 - 0)      | 14<br>(9 - 26)     | 6<br>(3 - 12)      | 1<br>(1 - 3)       |
| Assault by sharp object                         | 13<br>(7 - 27)     | 0<br>(0 - 0)     | 0<br>(0 - 0)      | 7<br>(4 - 15)      | 4<br>(2 - 9)       | 1<br>(1 - 3)       |
| Assault by other means                          | 12<br>(7 - 21)     | 0<br>(0 - 1)     | 0<br>(0 - 0)      | 4<br>(2 - 8)       | 5<br>(3 - 9)       | 3<br>(2 - 5)       |

Web Table 31- Croatia deaths with 95% UI by age, sex, and cause in 2013

| Cause                                                             | Females, All Ages           | Females, 0-4 Years | Females, 5-14 Years | Females, 15-49 Years | Females, 50-69 Years     | Females, 70-80 Years        |
|-------------------------------------------------------------------|-----------------------------|--------------------|---------------------|----------------------|--------------------------|-----------------------------|
| All causes                                                        | 25,910<br>(24,766 - 27,294) | 83<br>(55 - 118)   | 20<br>(17 - 24)     | 675<br>(630 - 720)   | 3,645<br>(3,407 - 3,963) | 21,487<br>(20,616 - 22,501) |
| Communicable, maternal, neonatal, and nutritional diseases        | 444<br>(360 - 706)          | 41<br>(27 - 59)    | 2<br>(1 - 2)        | 19<br>(17 - 22)      | 50<br>(42 - 60)          | 333<br>(252 - 589)          |
| HIV/AIDS and tuberculosis                                         | 31<br>(25 - 39)             | 0<br>(0 - 0)       | 0<br>(0 - 0)        | 4<br>(3 - 5)         | 6<br>(5 - 8)             | 21<br>(16 - 29)             |
| Tuberculosis                                                      | 28<br>(22 - 36)             | 0<br>(0 - 0)       | 0<br>(0 - 0)        | 2<br>(1 - 2)         | 5<br>(4 - 7)             | 21<br>(16 - 28)             |
| HIV/AIDS                                                          | 3<br>(2 - 5)                | 0<br>(0 - 0)       | 0<br>(0 - 0)        | 2<br>(1 - 3)         | 1<br>(0 - 1)             | 0<br>(0 - 0)                |
| HIV/AIDS resulting in mycobacterial infection                     | 0<br>(0 - 0)                | 0<br>(0 - 0)       | 0<br>(0 - 0)        | 0<br>(0 - 0)         | 0<br>(0 - 0)             | 0<br>(0 - 0)                |
| HIV/AIDS resulting in other diseases                              | 3<br>(2 - 4)                | 0<br>(0 - 0)       | 0<br>(0 - 0)        | 2<br>(1 - 3)         | 1<br>(0 - 1)             | 0<br>(0 - 0)                |
| Diarrhea, lower respiratory, and other common infectious diseases | 336<br>(255 - 602)          | 4<br>(2 - 5)       | 1<br>(1 - 2)        | 9<br>(8 - 11)        | 40<br>(32 - 51)          | 283<br>(203 - 540)          |
| Diarrheal diseases                                                | 10<br>(7 - 14)              | 0<br>(0 - 1)       | 0<br>(0 - 0)        | 0<br>(0 - 1)         | 1<br>(1 - 2)             | 8<br>(5 - 12)               |
| Intestinal infectious diseases                                    | 2<br>(1 - 5)                | 0<br>(0 - 1)       | 0<br>(0 - 1)        | 1<br>(0 - 2)         | 0<br>(0 - 1)             | 1<br>(0 - 2)                |
| Typhoid fever                                                     | 1<br>(0 - 3)                | 0<br>(0 - 1)       | 0<br>(0 - 0)        | 0<br>(0 - 1)         | 0<br>(0 - 1)             | 0<br>(0 - 1)                |
| Paratyphoid fever                                                 | 0<br>(0 - 1)                | 0<br>(0 - 0)       | 0<br>(0 - 0)        | 0<br>(0 - 0)         | 0<br>(0 - 0)             | 0<br>(0 - 0)                |
| Other intestinal infectious diseases                              | 0<br>(0 - 2)                | 0<br>(0 - 0)       | 0<br>(0 - 0)        | 0<br>(0 - 1)         | 0<br>(0 - 0)             | 0<br>(0 - 1)                |
| Lower respiratory infections                                      | 306<br>(226 - 573)          | 2<br>(1 - 3)       | 0<br>(0 - 1)        | 6<br>(5 - 8)         | 33<br>(26 - 44)          | 264<br>(186 - 521)          |
| Upper respiratory infections                                      | 1<br>(0 - 2)                | 0<br>(0 - 0)       | 0<br>(0 - 0)        | 0<br>(0 - 0)         | 0<br>(0 - 0)             | 1<br>(0 - 2)                |
| Otitis media                                                      | 0<br>(0 - 0)                | 0<br>(0 - 0)       | 0<br>(0 - 0)        | 0<br>(0 - 0)         | 0<br>(0 - 0)             | 0<br>(0 - 0)                |
| Meningitis                                                        | 9<br>(6 - 11)               | 1<br>(0 - 1)       | 0<br>(0 - 0)        | 1<br>(1 - 1)         | 3<br>(2 - 4)             | 4<br>(3 - 6)                |
| Pneumococcal meningitis                                           | 4<br>(3 - 5)                | 0<br>(0 - 0)       | 0<br>(0 - 0)        | 0<br>(0 - 1)         | 1<br>(1 - 2)             | 2<br>(1 - 3)                |
| H influenzae type B meningitis                                    | 1<br>(0 - 1)                | 0<br>(0 - 0)       | 0<br>(0 - 0)        | 0<br>(0 - 0)         | 0<br>(0 - 0)             | 0<br>(0 - 1)                |
| Meningococcal meningitis                                          | 2<br>(1 - 3)                | 0<br>(0 - 0)       | 0<br>(0 - 0)        | 0<br>(0 - 0)         | 1<br>(0 - 1)             | 1<br>(0 - 1)                |
| Other meningitis                                                  | 3<br>(2 - 4)                | 0<br>(0 - 0)       | 0<br>(0 - 0)        | 0<br>(0 - 1)         | 1<br>(1 - 1)             | 1<br>(1 - 2)                |
| Encephalitis                                                      | 4<br>(2 - 5)                | 0<br>(0 - 0)       | 0<br>(0 - 0)        | 1<br>(0 - 1)         | 1<br>(1 - 2)             | 2<br>(1 - 3)                |
| Diphtheria                                                        | 0<br>(0 - 0)                | 0<br>(0 - 0)       | 0<br>(0 - 0)        | 0<br>(0 - 0)         | 0<br>(0 - 0)             | --                          |
| Whooping cough                                                    | 0<br>(0 - 0)                | 0<br>(0 - 0)       | 0<br>(0 - 0)        | 0<br>(0 - 0)         | 0<br>(0 - 0)             | --                          |
| Tetanus                                                           | 1<br>(1 - 2)                | 0<br>(0 - 0)       | 0<br>(0 - 0)        | 0<br>(0 - 0)         | 0<br>(0 - 0)             | 1<br>(0 - 2)                |
| Measles                                                           | 0<br>(0 - 0)                | 0<br>(0 - 0)       | 0<br>(0 - 0)        | 0<br>(0 - 0)         | 0<br>(0 - 0)             | --                          |
| Varicella and herpes zoster                                       | 2<br>(0 - 10)               | 0<br>(0 - 0)       | 0<br>(0 - 0)        | 0<br>(0 - 0)         | 0<br>(0 - 1)             | 2<br>(0 - 10)               |
| Neglected tropical diseases and malaria                           | 1<br>(1 - 1)                | 0<br>(0 - 0)       | 0<br>(0 - 0)        | 0<br>(0 - 0)         | 0<br>(0 - 0)             | 0<br>(0 - 0)                |
| Leishmaniasis                                                     | 0<br>(0 - 0)                | 0<br>(0 - 0)       | 0<br>(0 - 0)        | 0<br>(0 - 0)         | 0<br>(0 - 0)             | 0<br>(0 - 0)                |
| Visceral leishmaniasis                                            | 0<br>(0 - 0)                | 0<br>(0 - 0)       | 0<br>(0 - 0)        | 0<br>(0 - 0)         | 0<br>(0 - 0)             | 0<br>(0 - 0)                |
| Cysticercosis                                                     | 0<br>(0 - 0)                | 0<br>(0 - 0)       | 0<br>(0 - 0)        | 0<br>(0 - 0)         | 0<br>(0 - 0)             | 0<br>(0 - 0)                |
| Cystic echinococcosis                                             | 0<br>(0 - 0)                | 0<br>(0 - 0)       | 0<br>(0 - 0)        | 0<br>(0 - 0)         | 0<br>(0 - 0)             | 0<br>(0 - 0)                |
| Dengue                                                            | 0<br>(0 - 0)                | 0<br>(0 - 0)       | 0<br>(0 - 0)        | 0<br>(0 - 0)         | 0<br>(0 - 0)             | 0<br>(0 - 0)                |
| Rabies                                                            | 0<br>(0 - 0)                | 0<br>(0 - 0)       | 0<br>(0 - 0)        | 0<br>(0 - 0)         | 0<br>(0 - 0)             | 0<br>(0 - 0)                |
| Other neglected tropical diseases                                 | 0<br>(0 - 0)                | 0<br>(0 - 0)       | 0<br>(0 - 0)        | 0<br>(0 - 0)         | 0<br>(0 - 0)             | 0<br>(0 - 0)                |
| Maternal disorders                                                | 4<br>(3 - 5)                | --                 | 0<br>(0 - 0)        | 4<br>(3 - 5)         | --                       | --                          |
| Maternal hemorrhage                                               | 1<br>(0 - 1)                | --                 | 0<br>(0 - 0)        | 1<br>(0 - 1)         | --                       | --                          |
| Maternal sepsis and other maternal infections                     | 0<br>(0 - 0)                | --                 | 0<br>(0 - 0)        | 0<br>(0 - 0)         | --                       | --                          |
| Maternal hypertensive disorders                                   | 0<br>(0 - 1)                | --                 | 0<br>(0 - 0)        | 0<br>(0 - 1)         | --                       | --                          |
| Maternal obstructed labor                                         | 0<br>(0 - 1)                | --                 | 0<br>(0 - 0)        | 0<br>(0 - 1)         | --                       | --                          |

Web Table 31- Croatia deaths with 95% UI by age, sex, and cause in 2013

| Cause                                                            | Females, All Ages           | Females, 0-4 Years | Females, 5-14 Years | Females, 15-49 Years | Females, 50-69 Years     | Females, 70-80 Years        |
|------------------------------------------------------------------|-----------------------------|--------------------|---------------------|----------------------|--------------------------|-----------------------------|
| Maternal abortive outcome                                        | 1<br>(1 - 1)                | --                 | 0<br>(0 - 0)        | 1<br>(1 - 1)         | --                       | --                          |
| Indirect maternal deaths                                         | 0<br>(0 - 1)                | --                 | 0<br>(0 - 0)        | 0<br>(0 - 1)         | --                       | --                          |
| Late maternal deaths                                             | 0<br>(0 - 1)                | --                 | 0<br>(0 - 0)        | 0<br>(0 - 1)         | --                       | --                          |
| Maternal deaths aggravated by HIV/AIDS                           | 0<br>(0 - 0)                | --                 | --                  | 0<br>(0 - 0)         | --                       | --                          |
| Other maternal disorders                                         | 1<br>(0 - 1)                | --                 | 0<br>(0 - 0)        | 1<br>(0 - 1)         | --                       | --                          |
| Neonatal disorders                                               | 36<br>(23 - 52)             | 36<br>(23 - 52)    | --                  | --                   | --                       | --                          |
| Neonatal preterm birth complications                             | 14<br>(8 - 23)              | 14<br>(8 - 23)     | --                  | --                   | --                       | --                          |
| Neonatal encephalopathy due to birth asphyxia and trauma         | 10<br>(5 - 16)              | 10<br>(5 - 16)     | --                  | --                   | --                       | --                          |
| Neonatal sepsis and other neonatal infections                    | 2<br>(0 - 5)                | 2<br>(0 - 5)       | --                  | --                   | --                       | --                          |
| Hemolytic disease and other neonatal jaundice                    | 0<br>(0 - 0)                | 0<br>(0 - 0)       | --                  | --                   | --                       | --                          |
| Other neonatal disorders                                         | 10<br>(6 - 17)              | 10<br>(6 - 17)     | --                  | --                   | --                       | --                          |
| Nutritional deficiencies                                         | 24<br>(18 - 31)             | 0<br>(0 - 0)       | 0<br>(0 - 0)        | 1<br>(1 - 1)         | 2<br>(1 - 2)             | 21<br>(16 - 28)             |
| Protein-energy malnutrition                                      | 0<br>(0 - 0)                | 0<br>(0 - 0)       | 0<br>(0 - 0)        | 0<br>(0 - 0)         | 0<br>(0 - 0)             | 0<br>(0 - 0)                |
| Iodine deficiency                                                | 0<br>(0 - 1)                | 0<br>(0 - 0)       | 0<br>(0 - 0)        | 0<br>(0 - 0)         | 0<br>(0 - 0)             | 0<br>(0 - 1)                |
| Iron-deficiency anemia                                           | 22<br>(16 - 28)             | 0<br>(0 - 0)       | 0<br>(0 - 0)        | 1<br>(1 - 1)         | 1<br>(1 - 2)             | 20<br>(14 - 26)             |
| Other nutritional deficiencies                                   | 2<br>(0 - 4)                | 0<br>(0 - 0)       | 0<br>(0 - 0)        | 0<br>(0 - 0)         | 0<br>(0 - 0)             | 1<br>(0 - 3)                |
| Other communicable, maternal, neonatal, and nutritional diseases | 11<br>(9 - 15)              | 1<br>(0 - 3)       | 0<br>(0 - 0)        | 1<br>(1 - 1)         | 2<br>(2 - 3)             | 7<br>(5 - 10)               |
| Sexually transmitted diseases excluding HIV                      | 2<br>(1 - 3)                | 1<br>(0 - 3)       | 0<br>(0 - 0)        | 0<br>(0 - 0)         | 0<br>(0 - 0)             | 0<br>(0 - 0)                |
| Syphilis                                                         | 2<br>(1 - 3)                | 1<br>(0 - 3)       | 0<br>(0 - 0)        | 0<br>(0 - 0)         | 0<br>(0 - 0)             | 0<br>(0 - 0)                |
| Chlamydial infection                                             | 0<br>(0 - 0)                | --                 | 0<br>(0 - 0)        | 0<br>(0 - 0)         | 0<br>(0 - 0)             | 0<br>(0 - 0)                |
| Gonococcal infection                                             | 0<br>(0 - 0)                | --                 | 0<br>(0 - 0)        | 0<br>(0 - 0)         | 0<br>(0 - 0)             | 0<br>(0 - 0)                |
| Other sexually transmitted diseases                              | 0<br>(0 - 0)                | --                 | 0<br>(0 - 0)        | 0<br>(0 - 0)         | 0<br>(0 - 0)             | 0<br>(0 - 0)                |
| Hepatitis                                                        | 1<br>(1 - 1)                | 0<br>(0 - 0)       | 0<br>(0 - 0)        | 0<br>(0 - 0)         | 0<br>(0 - 0)             | 0<br>(0 - 0)                |
| Acute hepatitis A                                                | 0<br>(0 - 0)                | 0<br>(0 - 0)       | 0<br>(0 - 0)        | 0<br>(0 - 0)         | 0<br>(0 - 0)             | 0<br>(0 - 0)                |
| Acute hepatitis B                                                | 1<br>(0 - 1)                | 0<br>(0 - 0)       | 0<br>(0 - 0)        | 0<br>(0 - 0)         | 0<br>(0 - 0)             | 0<br>(0 - 0)                |
| Acute hepatitis C                                                | 0<br>(0 - 0)                | --                 | 0<br>(0 - 0)        | 0<br>(0 - 0)         | 0<br>(0 - 0)             | 0<br>(0 - 0)                |
| Other infectious diseases                                        | 9<br>(6 - 12)               | 0<br>(0 - 0)       | 0<br>(0 - 0)        | 0<br>(0 - 1)         | 2<br>(1 - 2)             | 6<br>(4 - 9)                |
| Non-communicable diseases                                        | 24,451<br>(23,326 - 25,773) | 37<br>(25 - 53)    | 12<br>(10 - 14)     | 536<br>(499 - 575)   | 3,433<br>(3,207 - 3,731) | 20,432<br>(19,529 - 21,419) |
| Neoplasms                                                        | 5,358<br>(4,625 - 5,843)    | 3<br>(2 - 5)       | 6<br>(4 - 7)        | 321<br>(291 - 347)   | 1,710<br>(1,473 - 1,887) | 3,318<br>(2,817 - 3,655)    |
| Esophageal cancer                                                | 43<br>(36 - 51)             | --                 | --                  | 1<br>(1 - 2)         | 12<br>(10 - 15)          | 30<br>(24 - 36)             |
| Stomach cancer                                                   | 378<br>(280 - 507)          | --                 | --                  | 12<br>(9 - 16)       | 84<br>(62 - 110)         | 281<br>(204 - 388)          |
| Liver cancer                                                     | 191<br>(138 - 240)          | --                 | 0<br>(0 - 0)        | 5<br>(4 - 7)         | 46<br>(35 - 57)          | 139<br>(96 - 183)           |
| Liver cancer due to hepatitis B                                  | 26<br>(12 - 42)             | --                 | 0<br>(0 - 0)        | 1<br>(1 - 2)         | 9<br>(4 - 16)            | 16<br>(7 - 27)              |
| Liver cancer due to hepatitis C                                  | 86<br>(41 - 120)            | --                 | 0<br>(0 - 0)        | 2<br>(1 - 3)         | 20<br>(11 - 29)          | 64<br>(27 - 94)             |
| Liver cancer due to alcohol use                                  | 47<br>(27 - 74)             | --                 | --                  | 1<br>(0 - 1)         | 8<br>(5 - 14)            | 39<br>(21 - 61)             |
| Liver cancer due to other causes                                 | 31<br>(18 - 49)             | --                 | 0<br>(0 - 0)        | 1<br>(1 - 2)         | 8<br>(5 - 13)            | 22<br>(11 - 36)             |
| Larynx cancer                                                    | 14<br>(9 - 20)              | --                 | --                  | 1<br>(1 - 2)         | 5<br>(3 - 7)             | 8<br>(5 - 12)               |
| Tracheal, bronchus and lung cancer                               | 635<br>(461 - 734)          | --                 | --                  | 34<br>(25 - 41)      | 274<br>(186 - 324)       | 327<br>(234 - 392)          |
| Breast cancer                                                    | 894<br>(617 - 1,030)        | --                 | --                  | 78<br>(62 - 94)      | 320<br>(227 - 372)       | 496<br>(312 - 594)          |
| Cervical cancer                                                  | 219<br>(177 - 263)          | --                 | --                  | 28<br>(22 - 34)      | 78<br>(60 - 94)          | 113<br>(89 - 145)           |

Web Table 31- Croatia deaths with 95% UI by age, sex, and cause in 2013

| Cause                                         | Females, All Ages           | Females, 0-4 Years | Females, 5-14 Years | Females, 15-49 Years | Females, 50-69 Years     | Females, 70-80 Years        |
|-----------------------------------------------|-----------------------------|--------------------|---------------------|----------------------|--------------------------|-----------------------------|
| Uterine cancer                                | 126<br>(93 - 152)           | --                 | --                  | 3<br>(2 - 4)         | 43<br>(31 - 54)          | 80<br>(57 - 98)             |
| Prostate cancer                               | --                          | --                 | --                  | --                   | --                       | --                          |
| Colon and rectum cancer                       | 823<br>(716 - 945)          | --                 | --                  | 26<br>(22 - 30)      | 214<br>(186 - 241)       | 583<br>(488 - 698)          |
| Lip and oral cavity cancer                    | 37<br>(30 - 44)             | --                 | --                  | 2<br>(2 - 3)         | 10<br>(8 - 12)           | 24<br>(18 - 31)             |
| Nasopharynx cancer                            | 5<br>(2 - 9)                | --                 | 0<br>(0 - 0)        | 1<br>(0 - 2)         | 2<br>(1 - 3)             | 2<br>(1 - 4)                |
| Other pharynx cancer                          | 12<br>(9 - 15)              | --                 | --                  | 1<br>(1 - 2)         | 6<br>(4 - 8)             | 5<br>(4 - 7)                |
| Gallbladder and biliary tract cancer          | 169<br>(100 - 216)          | --                 | --                  | 4<br>(2 - 5)         | 47<br>(29 - 59)          | 118<br>(68 - 160)           |
| Pancreatic cancer                             | 346<br>(303 - 393)          | --                 | --                  | 9<br>(7 - 11)        | 102<br>(87 - 118)        | 235<br>(200 - 273)          |
| Malignant skin melanoma                       | 79<br>(44 - 96)             | --                 | --                  | 13<br>(8 - 16)       | 27<br>(15 - 34)          | 40<br>(21 - 52)             |
| Non-melanoma skin cancer                      | 50<br>(36 - 71)             | --                 | --                  | 0<br>(0 - 1)         | 3<br>(2 - 4)             | 47<br>(33 - 67)             |
| Ovarian cancer                                | 309<br>(267 - 352)          | --                 | --                  | 30<br>(25 - 37)      | 137<br>(116 - 160)       | 142<br>(115 - 172)          |
| Testicular cancer                             | --                          | --                 | --                  | --                   | --                       | --                          |
| Kidney cancer                                 | 96<br>(62 - 141)            | 0<br>(0 - 0)       | 0<br>(0 - 0)        | 4<br>(3 - 5)         | 32<br>(22 - 41)          | 61<br>(34 - 100)            |
| Bladder cancer                                | 88<br>(57 - 125)            | --                 | --                  | 1<br>(1 - 2)         | 15<br>(10 - 22)          | 72<br>(46 - 102)            |
| Brain and nervous system cancer               | 212<br>(131 - 254)          | 1<br>(0 - 1)       | 2<br>(2 - 3)        | 23<br>(17 - 27)      | 80<br>(57 - 97)          | 106<br>(51 - 140)           |
| Thyroid cancer                                | 27<br>(21 - 40)             | --                 | 0<br>(0 - 0)        | 1<br>(1 - 1)         | 7<br>(5 - 11)            | 19<br>(14 - 28)             |
| Mesothelioma                                  | 12<br>(8 - 18)              | --                 | --                  | 1<br>(1 - 1)         | 5<br>(3 - 8)             | 6<br>(4 - 9)                |
| Hodgkin lymphoma                              | 11<br>(8 - 15)              | 0<br>(0 - 0)       | 0<br>(0 - 0)        | 3<br>(2 - 4)         | 3<br>(2 - 5)             | 5<br>(3 - 7)                |
| Non-Hodgkin lymphoma                          | 115<br>(48 - 151)           | 0<br>(0 - 0)       | 0<br>(0 - 1)        | 10<br>(4 - 13)       | 34<br>(15 - 45)          | 71<br>(27 - 98)             |
| Multiple myeloma                              | 77<br>(48 - 115)            | --                 | --                  | 2<br>(1 - 4)         | 27<br>(16 - 41)          | 49<br>(28 - 73)             |
| Leukemia                                      | 155<br>(125 - 183)          | 1<br>(0 - 1)       | 1<br>(1 - 2)        | 12<br>(10 - 15)      | 39<br>(30 - 47)          | 102<br>(79 - 123)           |
| Other neoplasms                               | 235<br>(158 - 291)          | 2<br>(1 - 3)       | 2<br>(1 - 2)        | 15<br>(12 - 18)      | 60<br>(42 - 74)          | 157<br>(94 - 205)           |
| Cardiovascular diseases                       | 13,986<br>(13,058 - 15,299) | 1<br>(1 - 2)       | 1<br>(1 - 1)        | 103<br>(87 - 128)    | 1,132<br>(1,002 - 1,436) | 12,749<br>(11,912 - 13,774) |
| Rheumatic heart disease                       | 73<br>(50 - 98)             | 0<br>(0 - 0)       | 0<br>(0 - 0)        | 2<br>(1 - 3)         | 10<br>(7 - 13)           | 62<br>(41 - 83)             |
| Ischemic heart disease                        | 6,594<br>(5,315 - 7,599)    | 0<br>(0 - 0)       | 0<br>(0 - 0)        | 42<br>(31 - 55)      | 503<br>(408 - 669)       | 6,050<br>(4,821 - 6,884)    |
| Cerebrovascular disease                       | 4,874<br>(4,178 - 5,899)    | 0<br>(0 - 1)       | 0<br>(0 - 1)        | 43<br>(34 - 58)      | 420<br>(351 - 574)       | 4,410<br>(3,729 - 5,285)    |
| Ischemic stroke                               | 3,883<br>(3,229 - 4,623)    | 0<br>(0 - 0)       | 0<br>(0 - 0)        | 4<br>(2 - 6)         | 129<br>(83 - 173)        | 3,749<br>(3,128 - 4,457)    |
| Hemorrhagic stroke                            | 991<br>(776 - 1,457)        | 0<br>(0 - 1)       | 0<br>(0 - 1)        | 39<br>(31 - 53)      | 291<br>(232 - 431)       | 661<br>(457 - 1,003)        |
| Hypertensive heart disease                    | 1,533<br>(1,141 - 2,332)    | 0<br>(0 - 0)       | 0<br>(0 - 0)        | 3<br>(2 - 4)         | 70<br>(51 - 107)         | 1,460<br>(1,077 - 2,239)    |
| Cardiomyopathy and myocarditis                | 282<br>(210 - 391)          | 1<br>(0 - 1)       | 0<br>(0 - 1)        | 4<br>(2 - 5)         | 20<br>(13 - 26)          | 257<br>(188 - 364)          |
| Atrial fibrillation and flutter               | 46<br>(34 - 63)             | --                 | --                  | 0<br>(0 - 0)         | 2<br>(2 - 3)             | 44<br>(32 - 60)             |
| Aortic aneurysm                               | 69<br>(36 - 101)            | --                 | --                  | 2<br>(1 - 3)         | 16<br>(8 - 23)           | 51<br>(25 - 78)             |
| Peripheral vascular disease                   | 109<br>(80 - 145)           | --                 | --                  | 0<br>(0 - 0)         | 5<br>(4 - 7)             | 104<br>(75 - 140)           |
| Endocarditis                                  | 15<br>(10 - 25)             | 0<br>(0 - 0)       | 0<br>(0 - 0)        | 1<br>(1 - 1)         | 3<br>(2 - 6)             | 11<br>(7 - 18)              |
| Other cardiovascular and circulatory diseases | 389<br>(286 - 815)          | 0<br>(0 - 0)       | 0<br>(0 - 0)        | 7<br>(5 - 12)        | 82<br>(59 - 168)         | 300<br>(213 - 651)          |
| Chronic respiratory diseases                  | 975<br>(756 - 1,153)        | 0<br>(0 - 0)       | 0<br>(0 - 0)        | 6<br>(4 - 7)         | 75<br>(54 - 87)          | 894<br>(681 - 1,068)        |
| Chronic obstructive pulmonary disease         | 841<br>(606 - 1,000)        | 0<br>(0 - 0)       | 0<br>(0 - 0)        | 4<br>(2 - 5)         | 64<br>(46 - 76)          | 773<br>(553 - 930)          |
| Pneumoconiosis                                | 2<br>(1 - 3)                | 0<br>(0 - 0)       | 0<br>(0 - 0)        | 0<br>(0 - 0)         | 0<br>(0 - 1)             | 1<br>(1 - 2)                |
| Silicosis                                     | 0<br>(0 - 0)                | 0<br>(0 - 0)       | 0<br>(0 - 0)        | 0<br>(0 - 0)         | 0<br>(0 - 0)             | 0<br>(0 - 0)                |
| Asbestosis                                    | 0<br>(0 - 0)                | 0<br>(0 - 0)       | 0<br>(0 - 0)        | 0<br>(0 - 0)         | 0<br>(0 - 0)             | 0<br>(0 - 0)                |

Web Table 31- Croatia deaths with 95% UI by age, sex, and cause in 2013

| Cause                                               | Females, All Ages        | Females, 0-4 Years | Females, 5-14 Years | Females, 15-49 Years | Females, 50-69 Years | Females, 70-80 Years     |
|-----------------------------------------------------|--------------------------|--------------------|---------------------|----------------------|----------------------|--------------------------|
| Coal workers pneumoconiosis                         | 0<br>(0 - 0)             | 0<br>(0 - 0)       | 0<br>(0 - 0)        | 0<br>(0 - 0)         | 0<br>(0 - 0)         | 0<br>(0 - 0)             |
| Other pneumoconiosis                                | 1<br>(1 - 2)             | 0<br>(0 - 0)       | 0<br>(0 - 0)        | 0<br>(0 - 0)         | 0<br>(0 - 0)         | 1<br>(1 - 2)             |
| Asthma                                              | 41<br>(23 - 72)          | 0<br>(0 - 0)       | 0<br>(0 - 0)        | 1<br>(1 - 1)         | 5<br>(3 - 8)         | 35<br>(19 - 63)          |
| Interstitial lung disease and pulmonary sarcoidosis | 75<br>(39 - 147)         | 0<br>(0 - 0)       | 0<br>(0 - 0)        | 1<br>(0 - 1)         | 4<br>(2 - 8)         | 70<br>(36 - 139)         |
| Other chronic respiratory diseases                  | 17<br>(10 - 28)          | 0<br>(0 - 0)       | 0<br>(0 - 0)        | 1<br>(0 - 1)         | 1<br>(0 - 1)         | 15<br>(8 - 26)           |
| Cirrhosis                                           | 309<br>(271 - 347)       | 0<br>(0 - 0)       | 0<br>(0 - 0)        | 27<br>(23 - 32)      | 144<br>(123 - 167)   | 138<br>(118 - 161)       |
| Cirrhosis due to hepatitis B                        | 122<br>(75 - 173)        | 0<br>(0 - 0)       | 0<br>(0 - 0)        | 11<br>(7 - 15)       | 57<br>(36 - 83)      | 54<br>(30 - 81)          |
| Cirrhosis due to hepatitis C                        | 91<br>(30 - 144)         | 0<br>(0 - 0)       | 0<br>(0 - 0)        | 7<br>(2 - 11)        | 44<br>(13 - 70)      | 41<br>(15 - 66)          |
| Cirrhosis due to alcohol use                        | 45<br>(19 - 72)          | --                 | --                  | 2<br>(0 - 4)         | 18<br>(6 - 29)       | 25<br>(11 - 41)          |
| Cirrhosis due to other causes                       | 50<br>(24 - 81)          | 0<br>(0 - 0)       | 0<br>(0 - 0)        | 8<br>(3 - 12)        | 26<br>(12 - 43)      | 17<br>(8 - 29)           |
| Digestive diseases                                  | 518<br>(377 - 601)       | 0<br>(0 - 0)       | 0<br>(0 - 0)        | 10<br>(7 - 11)       | 65<br>(49 - 76)      | 443<br>(319 - 522)       |
| Peptic ulcer disease                                | 92<br>(52 - 127)         | 0<br>(0 - 0)       | 0<br>(0 - 0)        | 2<br>(1 - 2)         | 12<br>(7 - 16)       | 78<br>(43 - 111)         |
| Gastritis and duodenitis                            | 6<br>(1 - 13)            | 0<br>(0 - 0)       | 0<br>(0 - 0)        | 0<br>(0 - 0)         | 0<br>(0 - 1)         | 5<br>(0 - 12)            |
| Appendicitis                                        | 6<br>(3 - 9)             | 0<br>(0 - 0)       | 0<br>(0 - 0)        | 0<br>(0 - 0)         | 1<br>(1 - 2)         | 4<br>(2 - 8)             |
| Paralytic ileus and intestinal obstruction          | 87<br>(44 - 155)         | 0<br>(0 - 0)       | 0<br>(0 - 0)        | 1<br>(1 - 2)         | 9<br>(5 - 16)        | 77<br>(38 - 140)         |
| Inguinal, femoral, and abdominal hernia             | 17<br>(7 - 33)           | 0<br>(0 - 0)       | 0<br>(0 - 0)        | 0<br>(0 - 0)         | 2<br>(1 - 4)         | 15<br>(6 - 29)           |
| Inflammatory bowel disease                          | 13<br>(4 - 19)           | 0<br>(0 - 0)       | 0<br>(0 - 0)        | 1<br>(1 - 2)         | 3<br>(1 - 4)         | 8<br>(3 - 14)            |
| Vascular intestinal disorders                       | 136<br>(73 - 211)        | 0<br>(0 - 0)       | 0<br>(0 - 0)        | 1<br>(0 - 1)         | 13<br>(7 - 21)       | 122<br>(65 - 192)        |
| Gallbladder and biliary diseases                    | 59<br>(33 - 81)          | 0<br>(0 - 0)       | 0<br>(0 - 0)        | 0<br>(0 - 1)         | 6<br>(3 - 8)         | 53<br>(29 - 73)          |
| Pancreatitis                                        | 65<br>(38 - 93)          | 0<br>(0 - 0)       | 0<br>(0 - 0)        | 3<br>(2 - 4)         | 14<br>(9 - 20)       | 48<br>(27 - 71)          |
| Other digestive diseases                            | 38<br>(24 - 51)          | 0<br>(0 - 0)       | 0<br>(0 - 0)        | 1<br>(1 - 1)         | 5<br>(3 - 7)         | 32<br>(20 - 44)          |
| Neurological disorders                              | 1,954<br>(1,570 - 2,468) | 2<br>(1 - 2)       | 1<br>(1 - 2)        | 19<br>(15 - 23)      | 101<br>(82 - 120)    | 1,831<br>(1,451 - 2,345) |
| Alzheimer disease and other dementias               | 1,733<br>(1,355 - 2,241) | --                 | --                  | 0<br>(0 - 0)         | 55<br>(40 - 71)      | 1,678<br>(1,302 - 2,186) |
| Parkinson disease                                   | 139<br>(47 - 185)        | --                 | --                  | 0<br>(0 - 0)         | 12<br>(6 - 16)       | 127<br>(42 - 171)        |
| Epilepsy                                            | 18<br>(12 - 23)          | 0<br>(0 - 0)       | 1<br>(0 - 1)        | 6<br>(4 - 8)         | 5<br>(3 - 6)         | 6<br>(3 - 9)             |
| Multiple sclerosis                                  | 26<br>(14 - 39)          | --                 | --                  | 7<br>(4 - 11)        | 12<br>(6 - 19)       | 7<br>(3 - 11)            |
| Other neurological disorders                        | 38<br>(33 - 43)          | 1<br>(1 - 2)       | 1<br>(1 - 1)        | 5<br>(4 - 6)         | 17<br>(14 - 21)      | 14<br>(11 - 17)          |
| Mental and substance use disorders                  | 71<br>(38 - 91)          | 0<br>(0 - 0)       | 0<br>(0 - 0)        | 14<br>(10 - 17)      | 26<br>(12 - 37)      | 31<br>(15 - 42)          |
| Schizophrenia                                       | 21<br>(4 - 33)           | --                 | --                  | 2<br>(1 - 3)         | 8<br>(2 - 13)        | 11<br>(2 - 19)           |
| Alcohol use disorders                               | 31<br>(12 - 53)          | --                 | --                  | 4<br>(1 - 6)         | 15<br>(6 - 27)       | 12<br>(4 - 21)           |
| Drug use disorders                                  | 19<br>(15 - 22)          | 0<br>(0 - 0)       | --                  | 8<br>(6 - 10)        | 3<br>(3 - 4)         | 7<br>(5 - 10)            |
| Opioid use disorders                                | 7<br>(6 - 8)             | 0<br>(0 - 0)       | --                  | 3<br>(2 - 4)         | 1<br>(1 - 2)         | 3<br>(2 - 4)             |
| Cocaine use disorders                               | 1<br>(1 - 2)             | 0<br>(0 - 0)       | --                  | 1<br>(1 - 1)         | 0<br>(0 - 0)         | 0<br>(0 - 1)             |
| Amphetamine use disorders                           | 1<br>(1 - 2)             | 0<br>(0 - 0)       | --                  | 1<br>(0 - 1)         | 0<br>(0 - 0)         | 0<br>(0 - 1)             |
| Other drug use disorders                            | 9<br>(8 - 11)            | 0<br>(0 - 0)       | --                  | 4<br>(3 - 5)         | 2<br>(1 - 2)         | 4<br>(2 - 5)             |
| Eating disorders                                    | 0<br>(0 - 0)             | --                 | 0<br>(0 - 0)        | 0<br>(0 - 0)         | --                   | --                       |
| Anorexia nervosa                                    | 0<br>(0 - 0)             | --                 | 0<br>(0 - 0)        | 0<br>(0 - 0)         | --                   | --                       |
| Diabetes, urogenital, blood, and endocrine diseases | 1,149<br>(967 - 1,322)   | 1<br>(1 - 2)       | 1<br>(1 - 1)        | 21<br>(18 - 24)      | 155<br>(133 - 188)   | 971<br>(796 - 1,121)     |
| Diabetes mellitus                                   | 558<br>(471 - 742)       | 0<br>(0 - 0)       | 0<br>(0 - 0)        | 6<br>(4 - 7)         | 77<br>(62 - 101)     | 476<br>(393 - 627)       |
| Acute glomerulonephritis                            | 1<br>(0 - 1)             | 0<br>(0 - 0)       | 0<br>(0 - 0)        | 0<br>(0 - 0)         | 0<br>(0 - 0)         | 0<br>(0 - 1)             |

Web Table 31- Croatia deaths with 95% UI by age, sex, and cause in 2013

| Cause                                               | Females, All Ages      | Females, 0-4 Years | Females, 5-14 Years | Females, 15-49 Years | Females, 50-69 Years | Females, 70-80 Years |
|-----------------------------------------------------|------------------------|--------------------|---------------------|----------------------|----------------------|----------------------|
| Chronic kidney disease                              | 353<br>(259 - 417)     | 0<br>(0 - 0)       | 0<br>(0 - 0)        | 7<br>(5 - 8)         | 51<br>(40 - 64)      | 296<br>(208 - 357)   |
| Chronic kidney disease due to diabetes mellitus     | 147<br>(110 - 186)     | 0<br>(0 - 0)       | 0<br>(0 - 0)        | 3<br>(2 - 4)         | 23<br>(17 - 30)      | 121<br>(85 - 157)    |
| Chronic kidney disease due to hypertension          | 32<br>(17 - 63)        | 0<br>(0 - 0)       | 0<br>(0 - 0)        | 0<br>(0 - 1)         | 3<br>(2 - 7)         | 28<br>(15 - 56)      |
| Chronic kidney disease due to glomerulonephritis    | 7<br>(4 - 13)          | 0<br>(0 - 0)       | 0<br>(0 - 0)        | 0<br>(0 - 1)         | 2<br>(1 - 4)         | 4<br>(2 - 9)         |
| Chronic kidney disease due to other causes          | 169<br>(91 - 227)      | 0<br>(0 - 0)       | 0<br>(0 - 0)        | 3<br>(2 - 4)         | 23<br>(14 - 34)      | 143<br>(66 - 197)    |
| Urinary diseases and male infertility               | 205<br>(110 - 271)     | 0<br>(0 - 0)       | 0<br>(0 - 0)        | 3<br>(2 - 4)         | 20<br>(14 - 27)      | 182<br>(90 - 246)    |
| Interstitial nephritis and urinary tract infections | 194<br>(102 - 257)     | 0<br>(0 - 0)       | 0<br>(0 - 0)        | 3<br>(2 - 3)         | 19<br>(13 - 24)      | 173<br>(83 - 235)    |
| Urolithiasis                                        | 4<br>(1 - 7)           | --                 | 0<br>(0 - 0)        | 0<br>(0 - 0)         | 1<br>(0 - 1)         | 3<br>(1 - 6)         |
| Other urinary diseases                              | 7<br>(3 - 23)          | 0<br>(0 - 0)       | 0<br>(0 - 0)        | 0<br>(0 - 1)         | 1<br>(1 - 3)         | 6<br>(2 - 20)        |
| Gynecological diseases                              | 0<br>(0 - 0)           | --                 | --                  | 0<br>(0 - 0)         | 0<br>(0 - 0)         | 0<br>(0 - 0)         |
| Uterine fibroids                                    | 0<br>(0 - 0)           | --                 | --                  | 0<br>(0 - 0)         | 0<br>(0 - 0)         | 0<br>(0 - 0)         |
| Polycystic ovarian syndrome                         | 0<br>(0 - 0)           | --                 | --                  | 0<br>(0 - 0)         | 0<br>(0 - 0)         | --                   |
| Endometriosis                                       | 0<br>(0 - 0)           | --                 | --                  | 0<br>(0 - 0)         | 0<br>(0 - 0)         | --                   |
| Genital prolapse                                    | 0<br>(0 - 0)           | --                 | --                  | 0<br>(0 - 0)         | 0<br>(0 - 0)         | 0<br>(0 - 0)         |
| Other gynecological diseases                        | 0<br>(0 - 0)           | --                 | --                  | 0<br>(0 - 0)         | 0<br>(0 - 0)         | 0<br>(0 - 0)         |
| Hemoglobinopathies and hemolytic anemias            | 9<br>(6 - 16)          | 0<br>(0 - 1)       | 0<br>(0 - 0)        | 2<br>(1 - 4)         | 1<br>(1 - 2)         | 6<br>(4 - 9)         |
| Thalassemias                                        | 1<br>(1 - 2)           | 0<br>(0 - 0)       | 0<br>(0 - 0)        | 1<br>(0 - 1)         | 0<br>(0 - 0)         | 0<br>(0 - 0)         |
| Sickle cell disorders                               | 0<br>(0 - 1)           | 0<br>(0 - 0)       | 0<br>(0 - 0)        | 0<br>(0 - 0)         | 0<br>(0 - 0)         | 0<br>(0 - 0)         |
| G6PD deficiency                                     | 0<br>(0 - 0)           | 0<br>(0 - 0)       | 0<br>(0 - 0)        | 0<br>(0 - 0)         | 0<br>(0 - 0)         | 0<br>(0 - 0)         |
| Other hemoglobinopathies and hemolytic anemias      | 8<br>(5 - 13)          | 0<br>(0 - 0)       | 0<br>(0 - 0)        | 1<br>(1 - 2)         | 1<br>(1 - 2)         | 6<br>(4 - 9)         |
| Endocrine, metabolic, blood, and immune disorders   | 23<br>(18 - 40)        | 1<br>(0 - 1)       | 0<br>(0 - 1)        | 4<br>(3 - 6)         | 6<br>(5 - 11)        | 12<br>(8 - 21)       |
| Musculoskeletal disorders                           | 67<br>(53 - 82)        | --                 | 0<br>(0 - 0)        | 8<br>(6 - 10)        | 19<br>(15 - 26)      | 40<br>(29 - 51)      |
| Rheumatoid arthritis                                | 31<br>(14 - 40)        | --                 | 0<br>(0 - 0)        | 1<br>(0 - 1)         | 6<br>(3 - 8)         | 24<br>(11 - 31)      |
| Other musculoskeletal disorders                     | 36<br>(29 - 57)        | --                 | 0<br>(0 - 0)        | 7<br>(5 - 9)         | 13<br>(10 - 19)      | 16<br>(11 - 28)      |
| Other non-communicable diseases                     | 64<br>(52 - 79)        | 29<br>(20 - 42)    | 2<br>(2 - 3)        | 8<br>(6 - 10)        | 6<br>(5 - 7)         | 18<br>(14 - 23)      |
| Congenital anomalies                                | 50<br>(38 - 64)        | 27<br>(18 - 41)    | 2<br>(2 - 3)        | 8<br>(6 - 9)         | 4<br>(3 - 5)         | 8<br>(6 - 11)        |
| Neural tube defects                                 | 1<br>(0 - 1)           | 1<br>(0 - 1)       | 0<br>(0 - 0)        | 0<br>(0 - 0)         | 0<br>(0 - 0)         | 0<br>(0 - 0)         |
| Congenital heart anomalies                          | 19<br>(15 - 25)        | 8<br>(5 - 13)      | 1<br>(0 - 1)        | 3<br>(2 - 4)         | 1<br>(1 - 2)         | 6<br>(4 - 9)         |
| Cleft lip and cleft palate                          | 0<br>(0 - 0)           | 0<br>(0 - 0)       | --                  | --                   | --                   | --                   |
| Down syndrome                                       | 7<br>(5 - 10)          | 3<br>(1 - 5)       | 0<br>(0 - 1)        | 2<br>(1 - 3)         | 2<br>(1 - 2)         | 0<br>(0 - 0)         |
| Chromosomal unbalanced rearrangements               | 4<br>(2 - 6)           | 3<br>(1 - 5)       | 0<br>(0 - 0)        | 0<br>(0 - 1)         | 0<br>(0 - 0)         | 0<br>(0 - 0)         |
| Other congenital anomalies                          | 19<br>(13 - 26)        | 13<br>(8 - 20)     | 1<br>(1 - 1)        | 2<br>(1 - 2)         | 1<br>(1 - 1)         | 2<br>(1 - 3)         |
| Skin and subcutaneous diseases                      | 12<br>(7 - 16)         | 0<br>(0 - 0)       | 0<br>(0 - 0)        | 0<br>(0 - 0)         | 2<br>(1 - 2)         | 10<br>(6 - 14)       |
| Cellulitis                                          | 2<br>(1 - 3)           | 0<br>(0 - 0)       | 0<br>(0 - 0)        | 0<br>(0 - 0)         | 0<br>(0 - 1)         | 1<br>(1 - 3)         |
| Pyoderma                                            | 5<br>(3 - 8)           | 0<br>(0 - 0)       | 0<br>(0 - 0)        | 0<br>(0 - 0)         | 1<br>(0 - 1)         | 4<br>(3 - 7)         |
| Decubitus ulcer                                     | 3<br>(1 - 5)           | 0<br>(0 - 0)       | 0<br>(0 - 0)        | 0<br>(0 - 0)         | 0<br>(0 - 0)         | 3<br>(1 - 5)         |
| Other skin and subcutaneous diseases                | 2<br>(0 - 4)           | 0<br>(0 - 0)       | 0<br>(0 - 0)        | 0<br>(0 - 0)         | 0<br>(0 - 1)         | 1<br>(0 - 3)         |
| Sudden infant death syndrome                        | 2<br>(0 - 5)           | 2<br>(0 - 5)       | --                  | --                   | --                   | --                   |
| Injuries                                            | 1,016<br>(833 - 1,218) | 5<br>(3 - 7)       | 7<br>(5 - 8)        | 120<br>(106 - 141)   | 163<br>(142 - 207)   | 722<br>(545 - 897)   |
| Transport injuries                                  | 125<br>(103 - 153)     | 1<br>(1 - 2)       | 4<br>(3 - 5)        | 43<br>(36 - 51)      | 34<br>(26 - 44)      | 43<br>(32 - 56)      |



Web Table 31- Croatia deaths with 95% UI by age, sex, and cause in 2013

| Cause                                           | Females, All Ages  | Females, 0-4 Years | Females, 5-14 Years | Females, 15-49 Years | Females, 50-69 Years | Females, 70-80 Years |
|-------------------------------------------------|--------------------|--------------------|---------------------|----------------------|----------------------|----------------------|
| Road injuries                                   | 114<br>(94 - 141)  | 1<br>(1 - 2)       | 3<br>(2 - 4)        | 40<br>(33 - 47)      | 31<br>(24 - 41)      | 39<br>(29 - 51)      |
| Pedestrian road injuries                        | 45<br>(28 - 57)    | 0<br>(0 - 1)       | 1<br>(1 - 2)        | 8<br>(5 - 12)        | 12<br>(7 - 17)       | 23<br>(13 - 31)      |
| Cyclist road injuries                           | 8<br>(6 - 15)      | 0<br>(0 - 0)       | 0<br>(0 - 1)        | 3<br>(2 - 5)         | 3<br>(2 - 5)         | 2<br>(1 - 5)         |
| Motorcyclist road injuries                      | 6<br>(3 - 14)      | 0<br>(0 - 0)       | 0<br>(0 - 1)        | 3<br>(1 - 6)         | 1<br>(1 - 3)         | 2<br>(1 - 5)         |
| Motor vehicle road injuries                     | 53<br>(38 - 69)    | 1<br>(0 - 1)       | 1<br>(1 - 2)        | 26<br>(19 - 32)      | 13<br>(9 - 20)       | 12<br>(7 - 18)       |
| Other road injuries                             | 1<br>(0 - 4)       | 0<br>(0 - 0)       | 0<br>(0 - 0)        | 0<br>(0 - 1)         | 0<br>(0 - 1)         | 0<br>(0 - 1)         |
| Other transport injuries                        | 11<br>(7 - 17)     | 0<br>(0 - 0)       | 0<br>(0 - 0)        | 3<br>(2 - 5)         | 3<br>(2 - 5)         | 4<br>(2 - 7)         |
| Unintentional injuries                          | 678<br>(502 - 844) | 3<br>(2 - 4)       | 2<br>(2 - 3)        | 18<br>(15 - 23)      | 53<br>(43 - 63)      | 603<br>(433 - 765)   |
| Falls                                           | 562<br>(378 - 723) | 0<br>(0 - 0)       | 0<br>(0 - 0)        | 4<br>(3 - 5)         | 26<br>(18 - 32)      | 532<br>(357 - 692)   |
| Drowning                                        | 20<br>(15 - 32)    | 0<br>(0 - 1)       | 1<br>(1 - 2)        | 3<br>(3 - 5)         | 6<br>(4 - 10)        | 9<br>(6 - 13)        |
| Fire, heat, and hot substances                  | 23<br>(17 - 33)    | 0<br>(0 - 0)       | 0<br>(0 - 0)        | 1<br>(1 - 2)         | 4<br>(3 - 5)         | 18<br>(12 - 27)      |
| Poisonings                                      | 9<br>(6 - 13)      | 0<br>(0 - 0)       | 0<br>(0 - 0)        | 2<br>(1 - 3)         | 2<br>(1 - 2)         | 5<br>(3 - 8)         |
| Exposure to mechanical forces                   | 6<br>(5 - 8)       | 0<br>(0 - 1)       | 0<br>(0 - 0)        | 1<br>(1 - 2)         | 2<br>(1 - 2)         | 3<br>(2 - 4)         |
| Unintentional firearm injuries                  | 1<br>(0 - 1)       | 0<br>(0 - 0)       | 0<br>(0 - 0)        | 0<br>(0 - 0)         | 0<br>(0 - 0)         | 0<br>(0 - 0)         |
| Unintentional suffocation                       | 1<br>(0 - 1)       | 0<br>(0 - 0)       | 0<br>(0 - 0)        | 0<br>(0 - 0)         | 0<br>(0 - 0)         | 0<br>(0 - 0)         |
| Other exposure to mechanical forces             | 5<br>(4 - 6)       | 0<br>(0 - 0)       | 0<br>(0 - 0)        | 1<br>(1 - 1)         | 1<br>(1 - 2)         | 2<br>(2 - 3)         |
| Adverse effects of medical treatment            | 36<br>(21 - 48)    | 0<br>(0 - 1)       | 0<br>(0 - 0)        | 2<br>(1 - 3)         | 7<br>(4 - 9)         | 27<br>(15 - 38)      |
| Animal contact                                  | 2<br>(1 - 3)       | 0<br>(0 - 0)       | 0<br>(0 - 0)        | 0<br>(0 - 1)         | 0<br>(0 - 1)         | 1<br>(0 - 2)         |
| Venomous animal contact                         | 0<br>(0 - 1)       | 0<br>(0 - 0)       | 0<br>(0 - 0)        | 0<br>(0 - 0)         | 0<br>(0 - 0)         | 0<br>(0 - 0)         |
| Non-venomous animal contact                     | 1<br>(1 - 3)       | 0<br>(0 - 0)       | 0<br>(0 - 0)        | 0<br>(0 - 0)         | 0<br>(0 - 1)         | 1<br>(0 - 2)         |
| Foreign body                                    | 14<br>(9 - 21)     | 1<br>(0 - 2)       | 0<br>(0 - 0)        | 2<br>(1 - 3)         | 6<br>(3 - 9)         | 6<br>(3 - 8)         |
| Pulmonary aspiration and foreign body in airway | 14<br>(8 - 21)     | 1<br>(0 - 2)       | 0<br>(0 - 0)        | 2<br>(1 - 3)         | 5<br>(3 - 8)         | 6<br>(3 - 8)         |
| Foreign body in other body part                 | 0<br>(0 - 1)       | 0<br>(0 - 0)       | 0<br>(0 - 0)        | 0<br>(0 - 0)         | 0<br>(0 - 0)         | 0<br>(0 - 0)         |
| Other unintentional injuries                    | 6<br>(4 - 20)      | 0<br>(0 - 0)       | 0<br>(0 - 0)        | 1<br>(1 - 5)         | 1<br>(1 - 5)         | 3<br>(2 - 11)        |
| Self-harm and interpersonal violence            | 213<br>(186 - 291) | 1<br>(0 - 1)       | 1<br>(1 - 1)        | 59<br>(50 - 76)      | 76<br>(64 - 112)     | 76<br>(62 - 108)     |
| Self-harm                                       | 189<br>(163 - 261) | --                 | 1<br>(0 - 1)        | 49<br>(41 - 63)      | 69<br>(57 - 103)     | 71<br>(57 - 102)     |
| Interpersonal violence                          | 23<br>(18 - 34)    | 1<br>(0 - 1)       | 0<br>(0 - 1)        | 10<br>(7 - 15)       | 7<br>(5 - 11)        | 5<br>(4 - 8)         |
| Assault by firearm                              | 8<br>(5 - 13)      | 0<br>(0 - 0)       | 0<br>(0 - 0)        | 4<br>(3 - 7)         | 2<br>(1 - 4)         | 1<br>(0 - 2)         |
| Assault by sharp object                         | 6<br>(4 - 11)      | 0<br>(0 - 0)       | 0<br>(0 - 0)        | 3<br>(2 - 5)         | 2<br>(1 - 4)         | 1<br>(1 - 2)         |
| Assault by other means                          | 9<br>(6 - 13)      | 0<br>(0 - 1)       | 0<br>(0 - 0)        | 3<br>(2 - 4)         | 3<br>(2 - 4)         | 3<br>(2 - 5)         |

Web Table 31- Cuba deaths with 95% UI by age, sex, and cause in 2013

| Cause                                                             | Both Sexes, All Ages         | Both Sexes, 0-4 Years | Both Sexes, 5-14 Years | Both Sexes, 15-49 Years  | Both Sexes, 50-69 Years     | Both Sexes, 70-80 Years     |
|-------------------------------------------------------------------|------------------------------|-----------------------|------------------------|--------------------------|-----------------------------|-----------------------------|
| All causes                                                        | 96,525<br>(91,972 - 101,529) | 611<br>(527 - 710)    | 244<br>(224 - 269)     | 7,616<br>(7,008 - 8,287) | 22,609<br>(21,023 - 24,325) | 65,446<br>(63,049 - 67,993) |
| Communicable, maternal, neonatal, and nutritional diseases        | 7,485<br>(6,489 - 8,649)     | 323<br>(266 - 382)    | 34<br>(27 - 43)        | 507<br>(445 - 580)       | 880<br>(768 - 1,007)        | 5,741<br>(4,802 - 6,835)    |
| HIV/AIDS and tuberculosis                                         | 266<br>(218 - 329)           | 0<br>(0 - 0)          | 2<br>(1 - 3)           | 166<br>(133 - 209)       | 66<br>(50 - 86)             | 32<br>(26 - 40)             |
| Tuberculosis                                                      | 44<br>(38 - 52)              | 0<br>(0 - 0)          | 0<br>(0 - 0)           | 6<br>(5 - 8)             | 15<br>(12 - 18)             | 23<br>(19 - 29)             |
| HIV/AIDS                                                          | 221<br>(175 - 284)           | 0<br>(0 - 0)          | 2<br>(1 - 3)           | 160<br>(127 - 204)       | 51<br>(35 - 70)             | 8<br>(5 - 14)               |
| HIV/AIDS resulting in mycobacterial infection                     | 12<br>(9 - 16)               | 0<br>(0 - 0)          | 0<br>(0 - 0)           | 8<br>(6 - 11)            | 3<br>(2 - 4)                | 1<br>(0 - 1)                |
| HIV/AIDS resulting in other diseases                              | 209<br>(166 - 269)           | 0<br>(0 - 0)          | 2<br>(1 - 3)           | 151<br>(120 - 193)       | 48<br>(33 - 66)             | 8<br>(4 - 13)               |
| Diarrhea, lower respiratory, and other common infectious diseases | 6,596<br>(5,633 - 7,762)     | 94<br>(74 - 116)      | 27<br>(21 - 36)        | 248<br>(204 - 294)       | 743<br>(636 - 864)          | 5,485<br>(4,560 - 6,555)    |
| Diarrheal diseases                                                | 249<br>(196 - 322)           | 11<br>(7 - 15)        | 1<br>(1 - 1)           | 14<br>(11 - 19)          | 46<br>(35 - 58)             | 177<br>(127 - 247)          |
| Intestinal infectious diseases                                    | 56<br>(29 - 99)              | 13<br>(6 - 24)        | 11<br>(5 - 20)         | 22<br>(10 - 40)          | 6<br>(3 - 12)               | 4<br>(1 - 8)                |
| Typhoid fever                                                     | 39<br>(18 - 70)              | 9<br>(4 - 17)         | 9<br>(4 - 15)          | 16<br>(7 - 30)           | 4<br>(1 - 8)                | 2<br>(1 - 4)                |
| Paratyphoid fever                                                 | 11<br>(5 - 20)               | 3<br>(1 - 5)          | 2<br>(1 - 5)           | 4<br>(2 - 9)             | 1<br>(0 - 2)                | 0<br>(0 - 1)                |
| Other intestinal infectious diseases                              | 6<br>(2 - 13)                | 1<br>(0 - 5)          | 0<br>(0 - 2)           | 2<br>(0 - 6)             | 1<br>(0 - 5)                | 2<br>(0 - 5)                |
| Lower respiratory infections                                      | 6,132<br>(5,153 - 7,258)     | 52<br>(39 - 67)       | 7<br>(5 - 10)          | 173<br>(131 - 213)       | 647<br>(545 - 766)          | 5,253<br>(4,300 - 6,558)    |
| Upper respiratory infections                                      | 4<br>(1 - 8)                 | 0<br>(0 - 0)          | 0<br>(0 - 0)           | 0<br>(0 - 1)             | 1<br>(0 - 2)                | 2<br>(0 - 7)                |
| Otitis media                                                      | 2<br>(1 - 2)                 | 0<br>(0 - 0)          | 0<br>(0 - 0)           | 1<br>(1 - 1)             | 0<br>(0 - 0)                | 0<br>(0 - 0)                |
| Meningitis                                                        | 103<br>(90 - 129)            | 13<br>(9 - 20)        | 3<br>(3 - 4)           | 20<br>(17 - 25)          | 30<br>(25 - 40)             | 36<br>(29 - 48)             |
| Pneumococcal meningitis                                           | 27<br>(21 - 37)              | 3<br>(2 - 4)          | 1<br>(1 - 1)           | 5<br>(4 - 7)             | 8<br>(6 - 12)               | 10<br>(6 - 16)              |
| H influenzae type B meningitis                                    | 11<br>(8 - 14)               | 4<br>(2 - 6)          | 1<br>(0 - 1)           | 2<br>(1 - 3)             | 2<br>(1 - 4)                | 3<br>(2 - 5)                |
| Meningococcal meningitis                                          | 15<br>(11 - 20)              | 1<br>(1 - 2)          | 0<br>(0 - 1)           | 3<br>(2 - 4)             | 4<br>(2 - 6)                | 6<br>(4 - 9)                |
| Other meningitis                                                  | 50<br>(40 - 63)              | 5<br>(3 - 8)          | 1<br>(1 - 2)           | 10<br>(7 - 14)           | 16<br>(12 - 22)             | 18<br>(12 - 23)             |
| Encephalitis                                                      | 41<br>(31 - 65)              | 5<br>(3 - 8)          | 4<br>(2 - 7)           | 15<br>(11 - 27)          | 11<br>(8 - 18)              | 7<br>(5 - 10)               |
| Diphtheria                                                        | 0<br>(0 - 1)                 | 0<br>(0 - 0)          | 0<br>(0 - 0)           | 0<br>(0 - 0)             | 0<br>(0 - 0)                | --<br>(0 - 0)               |
| Whooping cough                                                    | 1<br>(1 - 1)                 | 0<br>(0 - 0)          | 0<br>(0 - 0)           | 1<br>(0 - 1)             | 0<br>(0 - 0)                | --<br>(0 - 0)               |
| Tetanus                                                           | 1<br>(1 - 2)                 | 0<br>(0 - 0)          | 0<br>(0 - 0)           | 0<br>(0 - 1)             | 0<br>(0 - 1)                | 0<br>(0 - 1)                |
| Measles                                                           | 0<br>(0 - 0)                 | 0<br>(0 - 0)          | 0<br>(0 - 0)           | 0<br>(0 - 0)             | 0<br>(0 - 0)                | --<br>(0 - 0)               |
| Varicella and herpes zoster                                       | 7<br>(2 - 21)                | 0<br>(0 - 1)          | 0<br>(0 - 0)           | 1<br>(0 - 2)             | 1<br>(0 - 2)                | 5<br>(0 - 18)               |
| Neglected tropical diseases and malaria                           | 23<br>(19 - 31)              | 2<br>(1 - 4)          | 2<br>(1 - 4)           | 7<br>(6 - 10)            | 6<br>(5 - 10)               | 6<br>(5 - 10)               |
| Leishmaniasis                                                     | 4<br>(3 - 6)                 | 1<br>(0 - 1)          | 0<br>(0 - 0)           | 2<br>(1 - 2)             | 1<br>(1 - 2)                | 1<br>(0 - 1)                |
| Visceral leishmaniasis                                            | 4<br>(3 - 6)                 | 1<br>(0 - 1)          | 0<br>(0 - 0)           | 2<br>(1 - 2)             | 1<br>(1 - 2)                | 1<br>(0 - 1)                |
| Cysticercosis                                                     | 4<br>(3 - 4)                 | 0<br>(0 - 0)          | 0<br>(0 - 0)           | 1<br>(1 - 1)             | 1<br>(1 - 2)                | 1<br>(1 - 1)                |
| Cystic echinococcosis                                             | 1<br>(1 - 1)                 | 0<br>(0 - 0)          | 0<br>(0 - 0)           | 0<br>(0 - 0)             | 0<br>(0 - 0)                | 0<br>(0 - 0)                |
| Dengue                                                            | 8<br>(7 - 12)                | 1<br>(0 - 2)          | 1<br>(1 - 2)           | 2<br>(2 - 4)             | 2<br>(2 - 3)                | 2<br>(1 - 3)                |
| Rabies                                                            | 1<br>(1 - 2)                 | 0<br>(0 - 0)          | 0<br>(0 - 0)           | 1<br>(0 - 1)             | 0<br>(0 - 0)                | 0<br>(0 - 0)                |
| Intestinal nematode infections                                    | 2<br>(0 - 8)                 | 0<br>(0 - 2)          | 0<br>(0 - 2)           | 0<br>(0 - 3)             | 1<br>(0 - 4)                | 1<br>(0 - 5)                |
| Ascariasis                                                        | 2<br>(0 - 8)                 | 0<br>(0 - 2)          | 0<br>(0 - 2)           | 0<br>(0 - 3)             | 1<br>(0 - 4)                | 1<br>(0 - 5)                |
| Other neglected tropical diseases                                 | 3<br>(2 - 4)                 | 0<br>(0 - 0)          | 0<br>(0 - 0)           | 1<br>(1 - 1)             | 1<br>(0 - 1)                | 1<br>(1 - 2)                |
| Maternal disorders                                                | 44<br>(35 - 54)              | --                    | 0<br>(0 - 0)           | 44<br>(35 - 54)          | --                          | --                          |
| Maternal hemorrhage                                               | 5<br>(3 - 7)                 | --                    | 0<br>(0 - 0)           | 5<br>(3 - 7)             | --                          | --                          |
| Maternal sepsis and other maternal infections                     | 4<br>(3 - 6)                 | --                    | 0<br>(0 - 0)           | 4<br>(3 - 6)             | --                          | --                          |

Web Table 31- Cuba deaths with 95% UI by age, sex, and cause in 2013

| Cause                                                            | Both Sexes, All Ages        | Both Sexes, 0-4 Years | Both Sexes, 5-14 Years | Both Sexes, 15-49 Years  | Both Sexes, 50-69 Years     | Both Sexes, 70-80 Years     |
|------------------------------------------------------------------|-----------------------------|-----------------------|------------------------|--------------------------|-----------------------------|-----------------------------|
| Maternal hypertensive disorders                                  | 4<br>(2 - 6)                | --                    | 0<br>(0 - 0)           | 4<br>(2 - 6)             | --                          | --                          |
| Maternal obstructed labor                                        | 3<br>(2 - 5)                | --                    | 0<br>(0 - 0)           | 3<br>(2 - 5)             | --                          | --                          |
| Maternal abortive outcome                                        | 7<br>(5 - 10)               | --                    | 0<br>(0 - 0)           | 7<br>(5 - 10)            | --                          | --                          |
| Indirect maternal deaths                                         | 10<br>(7 - 13)              | --                    | 0<br>(0 - 0)           | 9<br>(7 - 13)            | --                          | --                          |
| Late maternal deaths                                             | 3<br>(2 - 5)                | --                    | 0<br>(0 - 0)           | 3<br>(2 - 5)             | --                          | --                          |
| Maternal deaths aggravated by HIV/AIDS                           | 0<br>(0 - 0)                | --                    | --                     | 0<br>(0 - 0)             | --                          | --                          |
| Other maternal disorders                                         | 7<br>(5 - 9)                | --                    | 0<br>(0 - 0)           | 7<br>(5 - 9)             | --                          | --                          |
| Neonatal disorders                                               | 219<br>(178 - 265)          | 219<br>(178 - 265)    | --                     | --                       | --                          | --                          |
| Neonatal preterm birth complications                             | 60<br>(38 - 81)             | 60<br>(38 - 81)       | --                     | --                       | --                          | --                          |
| Neonatal encephalopathy due to birth asphyxia and trauma         | 57<br>(42 - 76)             | 57<br>(42 - 76)       | --                     | --                       | --                          | --                          |
| Neonatal sepsis and other neonatal infections                    | 45<br>(28 - 71)             | 45<br>(28 - 71)       | --                     | --                       | --                          | --                          |
| Hemolytic disease and other neonatal jaundice                    | 3<br>(1 - 9)                | 3<br>(1 - 9)          | --                     | --                       | --                          | --                          |
| Other neonatal disorders                                         | 54<br>(32 - 73)             | 54<br>(32 - 73)       | --                     | --                       | --                          | --                          |
| Nutritional deficiencies                                         | 249<br>(175 - 309)          | 4<br>(3 - 6)          | 1<br>(1 - 2)           | 19<br>(14 - 24)          | 33<br>(24 - 41)             | 191<br>(133 - 244)          |
| Protein-energy malnutrition                                      | 49<br>(23 - 72)             | 4<br>(2 - 5)          | 1<br>(0 - 1)           | 4<br>(2 - 6)             | 9<br>(5 - 13)               | 32<br>(14 - 50)             |
| Iodine deficiency                                                | 1<br>(0 - 5)                | 0<br>(0 - 0)          | 0<br>(0 - 0)           | 0<br>(0 - 1)             | 0<br>(0 - 1)                | 1<br>(0 - 4)                |
| Iron-deficiency anemia                                           | 176<br>(122 - 226)          | 0<br>(0 - 1)          | 0<br>(0 - 0)           | 8<br>(5 - 11)            | 20<br>(13 - 28)             | 148<br>(101 - 193)          |
| Other nutritional deficiencies                                   | 23<br>(12 - 34)             | 0<br>(0 - 1)          | 1<br>(0 - 1)           | 7<br>(4 - 10)            | 4<br>(2 - 6)                | 11<br>(4 - 19)              |
| Other communicable, maternal, neonatal, and nutritional diseases | 88<br>(68 - 104)            | 3<br>(2 - 5)          | 2<br>(1 - 2)           | 24<br>(16 - 29)          | 32<br>(24 - 39)             | 28<br>(21 - 37)             |
| Sexually transmitted diseases excluding HIV                      | 4<br>(2 - 6)                | 0<br>(0 - 1)          | 0<br>(0 - 0)           | 1<br>(1 - 2)             | 1<br>(1 - 1)                | 1<br>(1 - 2)                |
| Syphilis                                                         | 2<br>(1 - 4)                | 0<br>(0 - 1)          | 0<br>(0 - 0)           | 1<br>(0 - 1)             | 1<br>(0 - 1)                | 1<br>(1 - 2)                |
| Chlamydial infection                                             | 0<br>(0 - 1)                | --                    | 0<br>(0 - 0)           | 0<br>(0 - 0)             | 0<br>(0 - 0)                | 0<br>(0 - 0)                |
| Gonococcal infection                                             | 1<br>(0 - 1)                | --                    | 0<br>(0 - 0)           | 0<br>(0 - 0)             | 0<br>(0 - 0)                | 0<br>(0 - 0)                |
| Other sexually transmitted diseases                              | 0<br>(0 - 1)                | --                    | 0<br>(0 - 0)           | 0<br>(0 - 0)             | 0<br>(0 - 0)                | 0<br>(0 - 0)                |
| Hepatitis                                                        | 7<br>(6 - 8)                | 0<br>(0 - 0)          | 0<br>(0 - 0)           | 3<br>(2 - 4)             | 2<br>(2 - 3)                | 1<br>(1 - 2)                |
| Acute hepatitis A                                                | 2<br>(1 - 3)                | 0<br>(0 - 0)          | 0<br>(0 - 0)           | 1<br>(0 - 2)             | 0<br>(0 - 1)                | 0<br>(0 - 0)                |
| Acute hepatitis B                                                | 4<br>(3 - 6)                | 0<br>(0 - 0)          | 0<br>(0 - 0)           | 1<br>(1 - 2)             | 2<br>(1 - 2)                | 1<br>(1 - 2)                |
| Acute hepatitis C                                                | 1<br>(0 - 1)                | --                    | 0<br>(0 - 0)           | 0<br>(0 - 1)             | 0<br>(0 - 0)                | 0<br>(0 - 0)                |
| Other infectious diseases                                        | 78<br>(58 - 94)             | 3<br>(2 - 4)          | 2<br>(1 - 2)           | 20<br>(12 - 25)          | 29<br>(21 - 36)             | 25<br>(19 - 35)             |
| Non-communicable diseases                                        | 81,522<br>(77,284 - 85,894) | 239<br>(195 - 288)    | 116<br>(99 - 132)      | 4,885<br>(4,411 - 5,328) | 20,253<br>(18,810 - 21,819) | 56,030<br>(53,564 - 58,445) |
| Neoplasms                                                        | 23,163<br>(21,146 - 24,964) | 21<br>(15 - 28)       | 52<br>(42 - 61)        | 1,925<br>(1,675 - 2,137) | 7,938<br>(7,155 - 8,642)    | 13,226<br>(11,911 - 14,416) |
| Esophageal cancer                                                | 627<br>(459 - 755)          | --                    | --                     | 48<br>(30 - 70)          | 272<br>(180 - 343)          | 308<br>(233 - 383)          |
| Stomach cancer                                                   | 920<br>(808 - 1,052)        | --                    | --                     | 58<br>(47 - 70)          | 310<br>(266 - 355)          | 552<br>(460 - 669)          |
| Liver cancer                                                     | 695<br>(596 - 818)          | --                    | 0<br>(0 - 1)           | 49<br>(39 - 61)          | 238<br>(200 - 281)          | 408<br>(327 - 513)          |
| Liver cancer due to hepatitis B                                  | 144<br>(84 - 204)           | --                    | 0<br>(0 - 0)           | 17<br>(10 - 26)          | 64<br>(38 - 95)             | 63<br>(34 - 92)             |
| Liver cancer due to hepatitis C                                  | 334<br>(258 - 423)          | --                    | 0<br>(0 - 0)           | 17<br>(9 - 25)           | 106<br>(75 - 140)           | 211<br>(158 - 278)          |
| Liver cancer due to alcohol use                                  | 151<br>(102 - 204)          | --                    | --                     | 6<br>(4 - 10)            | 43<br>(28 - 63)             | 101<br>(65 - 143)           |
| Liver cancer due to other causes                                 | 65<br>(39 - 100)            | --                    | 0<br>(0 - 0)           | 8<br>(5 - 12)            | 25<br>(15 - 38)             | 33<br>(17 - 55)             |
| Larynx cancer                                                    | 696<br>(460 - 833)          | --                    | --                     | 44<br>(26 - 59)          | 314<br>(196 - 390)          | 338<br>(231 - 429)          |
| Tracheal, bronchus and lung cancer                               | 5,342<br>(4,829 - 5,910)    | --                    | --                     | 296<br>(247 - 345)       | 2,238<br>(1,995 - 2,501)    | 2,808<br>(2,454 - 3,211)    |

Web Table 31- Cuba deaths with 95% UI by age, sex, and cause in 2013

| Cause                                         | Both Sexes, All Ages        | Both Sexes, 0-4 Years | Both Sexes, 5-14 Years | Both Sexes, 15-49 Years  | Both Sexes, 50-69 Years  | Both Sexes, 70-80 Years     |
|-----------------------------------------------|-----------------------------|-----------------------|------------------------|--------------------------|--------------------------|-----------------------------|
| Breast cancer                                 | 1,599<br>(1,376 - 1,842)    | --                    | --                     | 242<br>(196 - 291)       | 608<br>(504 - 719)       | 749<br>(607 - 917)          |
| Cervical cancer                               | 612<br>(478 - 745)          | --                    | --                     | 178<br>(123 - 227)       | 238<br>(174 - 302)       | 197<br>(145 - 276)          |
| Uterine cancer                                | 507<br>(270 - 664)          | --                    | --                     | 38<br>(16 - 60)          | 189<br>(97 - 261)        | 280<br>(146 - 396)          |
| Prostate cancer                               | 2,904<br>(1,843 - 4,092)    | --                    | --                     | 12<br>(7 - 19)           | 442<br>(278 - 620)       | 2,450<br>(1,544 - 3,486)    |
| Colon and rectum cancer                       | 2,715<br>(2,389 - 3,083)    | --                    | --                     | 139<br>(118 - 161)       | 745<br>(657 - 841)       | 1,832<br>(1,549 - 2,152)    |
| Lip and oral cavity cancer                    | 452<br>(323 - 549)          | --                    | --                     | 37<br>(24 - 50)          | 174<br>(115 - 219)       | 241<br>(175 - 307)          |
| Nasopharynx cancer                            | 79<br>(63 - 97)             | --                    | 0<br>(0 - 0)           | 15<br>(10 - 21)          | 37<br>(27 - 49)          | 27<br>(20 - 37)             |
| Other pharynx cancer                          | 157<br>(128 - 189)          | --                    | --                     | 16<br>(11 - 22)          | 73<br>(58 - 92)          | 68<br>(52 - 89)             |
| Gallbladder and biliary tract cancer          | 207<br>(152 - 340)          | --                    | --                     | 10<br>(7 - 15)           | 68<br>(49 - 111)         | 129<br>(91 - 217)           |
| Pancreatic cancer                             | 933<br>(823 - 1,054)        | --                    | --                     | 58<br>(48 - 71)          | 324<br>(282 - 373)       | 550<br>(460 - 652)          |
| Malignant skin melanoma                       | 79<br>(61 - 121)            | --                    | --                     | 14<br>(10 - 23)          | 25<br>(19 - 42)          | 39<br>(29 - 59)             |
| Non-melanoma skin cancer                      | 225<br>(142 - 299)          | --                    | --                     | 12<br>(9 - 16)           | 61<br>(45 - 85)          | 152<br>(87 - 224)           |
| Ovarian cancer                                | 316<br>(263 - 372)          | --                    | --                     | 53<br>(40 - 69)          | 138<br>(110 - 168)       | 125<br>(95 - 160)           |
| Testicular cancer                             | 12<br>(4 - 21)              | --                    | --                     | 6<br>(2 - 11)            | 2<br>(1 - 4)             | 4<br>(1 - 8)                |
| Kidney cancer                                 | 286<br>(248 - 333)          | 0<br>(0 - 1)          | 0<br>(0 - 1)           | 25<br>(20 - 31)          | 122<br>(101 - 146)       | 138<br>(110 - 173)          |
| Bladder cancer                                | 642<br>(537 - 759)          | --                    | --                     | 14<br>(11 - 19)          | 153<br>(124 - 185)       | 474<br>(382 - 578)          |
| Brain and nervous system cancer               | 489<br>(151 - 616)          | 3<br>(1 - 6)          | 10<br>(4 - 15)         | 114<br>(41 - 149)        | 204<br>(63 - 270)        | 157<br>(42 - 215)           |
| Thyroid cancer                                | 66<br>(46 - 81)             | --                    | 0<br>(0 - 0)           | 6<br>(5 - 8)             | 24<br>(17 - 30)          | 35<br>(23 - 47)             |
| Mesothelioma                                  | 31<br>(25 - 39)             | --                    | --                     | 4<br>(3 - 5)             | 12<br>(9 - 16)           | 16<br>(11 - 22)             |
| Hodgkin lymphoma                              | 94<br>(18 - 136)            | 0<br>(0 - 0)          | 1<br>(0 - 2)           | 28<br>(5 - 43)           | 32<br>(6 - 52)           | 33<br>(6 - 52)              |
| Non-Hodgkin lymphoma                          | 575<br>(480 - 720)          | 2<br>(1 - 4)          | 6<br>(4 - 9)           | 92<br>(74 - 120)         | 220<br>(180 - 283)       | 254<br>(199 - 327)          |
| Multiple myeloma                              | 320<br>(249 - 378)          | --                    | --                     | 23<br>(18 - 30)          | 134<br>(105 - 166)       | 162<br>(122 - 199)          |
| Leukemia                                      | 586<br>(529 - 654)          | 6<br>(4 - 10)         | 18<br>(14 - 23)        | 115<br>(98 - 134)        | 177<br>(154 - 205)       | 269<br>(230 - 314)          |
| Other neoplasms                               | 997<br>(808 - 1,139)        | 9<br>(6 - 13)         | 16<br>(11 - 21)        | 178<br>(143 - 219)       | 363<br>(293 - 428)       | 430<br>(322 - 520)          |
| Cardiovascular diseases                       | 39,084<br>(36,464 - 42,278) | 6<br>(4 - 7)          | 9<br>(7 - 11)          | 1,504<br>(1,339 - 1,698) | 8,041<br>(7,376 - 8,856) | 29,524<br>(27,584 - 31,930) |
| Rheumatic heart disease                       | 190<br>(89 - 239)           | 0<br>(0 - 0)          | 2<br>(1 - 3)           | 68<br>(36 - 87)          | 66<br>(32 - 86)          | 54<br>(20 - 77)             |
| Ischemic heart disease                        | 22,625<br>(20,293 - 26,992) | 0<br>(0 - 0)          | 1<br>(1 - 1)           | 759<br>(652 - 938)       | 4,706<br>(4,197 - 5,596) | 17,159<br>(15,301 - 20,627) |
| Cerebrovascular disease                       | 11,414<br>(9,407 - 13,037)  | 0<br>(0 - 1)          | 2<br>(2 - 3)           | 408<br>(335 - 491)       | 2,116<br>(1,777 - 2,446) | 8,887<br>(7,192 - 10,190)   |
| Ischemic stroke                               | 7,542<br>(5,527 - 8,802)    | 0<br>(0 - 0)          | 1<br>(0 - 1)           | 76<br>(45 - 107)         | 925<br>(608 - 1,137)     | 6,540<br>(4,795 - 7,656)    |
| Hemorrhagic stroke                            | 3,872<br>(3,132 - 5,132)    | 0<br>(0 - 0)          | 2<br>(1 - 2)           | 332<br>(271 - 406)       | 1,190<br>(977 - 1,455)   | 2,347<br>(1,801 - 3,274)    |
| Hypertensive heart disease                    | 1,727<br>(823 - 2,582)      | 0<br>(0 - 0)          | 0<br>(0 - 0)           | 58<br>(33 - 83)          | 359<br>(197 - 503)       | 1,309<br>(573 - 2,055)      |
| Cardiomyopathy and myocarditis                | 584<br>(428 - 684)          | 4<br>(3 - 6)          | 3<br>(2 - 4)           | 106<br>(79 - 129)        | 218<br>(162 - 266)       | 253<br>(169 - 315)          |
| Atrial fibrillation and flutter               | 183<br>(138 - 235)          | --                    | --                     | 4<br>(3 - 5)             | 25<br>(19 - 32)          | 154<br>(112 - 203)          |
| Aortic aneurysm                               | 869<br>(700 - 1,130)        | --                    | --                     | 18<br>(14 - 24)          | 193<br>(155 - 248)       | 657<br>(522 - 875)          |
| Peripheral vascular disease                   | 414<br>(325 - 522)          | --                    | --                     | 6<br>(4 - 8)             | 65<br>(51 - 81)          | 344<br>(262 - 445)          |
| Endocarditis                                  | 54<br>(39 - 73)             | 0<br>(0 - 1)          | 0<br>(0 - 0)           | 13<br>(9 - 18)           | 16<br>(11 - 23)          | 24<br>(16 - 32)             |
| Other cardiovascular and circulatory diseases | 1,025<br>(629 - 1,273)      | 0<br>(0 - 1)          | 1<br>(0 - 1)           | 64<br>(35 - 82)          | 277<br>(153 - 349)       | 682<br>(416 - 892)          |
| Chronic respiratory diseases                  | 4,148<br>(3,126 - 4,623)    | 3<br>(2 - 4)          | 2<br>(2 - 3)           | 154<br>(129 - 178)       | 910<br>(681 - 1,036)     | 3,079<br>(2,297 - 3,477)    |
| Chronic obstructive pulmonary disease         | 3,672<br>(2,772 - 4,108)    | 1<br>(0 - 1)          | 0<br>(0 - 1)           | 72<br>(57 - 90)          | 755<br>(562 - 866)       | 2,843<br>(2,131 - 3,226)    |
| Pneumoconiosis                                | 52<br>(31 - 78)             | 0<br>(0 - 0)          | 0<br>(0 - 0)           | 2<br>(1 - 3)             | 15<br>(9 - 23)           | 35<br>(20 - 55)             |

Web Table 31- Cuba deaths with 95% UI by age, sex, and cause in 2013

| Cause                                               | Both Sexes, All Ages     | Both Sexes, 0-4 Years | Both Sexes, 5-14 Years | Both Sexes, 15-49 Years | Both Sexes, 50-69 Years  | Both Sexes, 70-80 Years  |
|-----------------------------------------------------|--------------------------|-----------------------|------------------------|-------------------------|--------------------------|--------------------------|
| Silicosis                                           | 3<br>(2 - 4)             | 0<br>(0 - 0)          | 0<br>(0 - 0)           | 0<br>(0 - 1)            | 1<br>(0 - 1)             | 1<br>(1 - 2)             |
| Asbestosis                                          | 5<br>(3 - 8)             | 0<br>(0 - 0)          | 0<br>(0 - 0)           | 0<br>(0 - 0)            | 5<br>(3 - 7)             | 0<br>(0 - 0)             |
| Coal workers pneumoconiosis                         | 10<br>(6 - 16)           | 0<br>(0 - 0)          | 0<br>(0 - 0)           | 1<br>(0 - 1)            | 4<br>(2 - 6)             | 6<br>(3 - 10)            |
| Other pneumoconiosis                                | 34<br>(20 - 52)          | 0<br>(0 - 0)          | 0<br>(0 - 0)           | 1<br>(0 - 1)            | 6<br>(3 - 9)             | 28<br>(16 - 44)          |
| Asthma                                              | 295<br>(200 - 366)       | 1<br>(0 - 1)          | 1<br>(1 - 2)           | 69<br>(54 - 83)         | 112<br>(74 - 146)        | 112<br>(64 - 153)        |
| Interstitial lung disease and pulmonary sarcoidosis | 106<br>(70 - 142)        | 1<br>(0 - 1)          | 0<br>(0 - 0)           | 7<br>(5 - 10)           | 22<br>(14 - 29)          | 77<br>(48 - 108)         |
| Other chronic respiratory diseases                  | 23<br>(18 - 30)          | 1<br>(0 - 1)          | 0<br>(0 - 0)           | 4<br>(3 - 5)            | 6<br>(5 - 9)             | 12<br>(8 - 17)           |
| Cirrhosis                                           | 1,482<br>(1,330 - 1,632) | 1<br>(0 - 1)          | 2<br>(2 - 2)           | 259<br>(220 - 306)      | 664<br>(584 - 751)       | 556<br>(491 - 626)       |
| Cirrhosis due to hepatitis B                        | 136<br>(62 - 214)        | 0<br>(0 - 0)          | 0<br>(0 - 0)           | 24<br>(9 - 44)          | 62<br>(27 - 103)         | 50<br>(24 - 76)          |
| Cirrhosis due to hepatitis C                        | 473<br>(301 - 682)       | 0<br>(0 - 0)          | 0<br>(0 - 1)           | 57<br>(28 - 105)        | 192<br>(105 - 300)       | 224<br>(150 - 305)       |
| Cirrhosis due to alcohol use                        | 677<br>(517 - 861)       | --                    | --                     | 118<br>(76 - 159)       | 321<br>(238 - 424)       | 238<br>(177 - 314)       |
| Cirrhosis due to other causes                       | 196<br>(128 - 272)       | 1<br>(0 - 1)          | 1<br>(1 - 2)           | 59<br>(40 - 82)         | 89<br>(53 - 130)         | 45<br>(27 - 68)          |
| Digestive diseases                                  | 2,086<br>(1,834 - 2,343) | 1<br>(1 - 2)          | 3<br>(2 - 3)           | 168<br>(139 - 195)      | 489<br>(430 - 572)       | 1,424<br>(1,232 - 1,622) |
| Peptic ulcer disease                                | 417<br>(322 - 558)       | 0<br>(0 - 0)          | 0<br>(0 - 0)           | 24<br>(18 - 31)         | 99<br>(76 - 137)         | 293<br>(219 - 402)       |
| Gastritis and duodenitis                            | 124<br>(87 - 213)        | 0<br>(0 - 0)          | 0<br>(0 - 0)           | 8<br>(5 - 12)           | 23<br>(16 - 37)          | 93<br>(62 - 167)         |
| Appendicitis                                        | 68<br>(47 - 88)          | 0<br>(0 - 0)          | 1<br>(0 - 1)           | 12<br>(8 - 16)          | 19<br>(13 - 26)          | 36<br>(23 - 50)          |
| Paralytic ileus and intestinal obstruction          | 252<br>(30 - 456)        | 0<br>(0 - 1)          | 1<br>(0 - 1)           | 18<br>(3 - 31)          | 50<br>(6 - 91)           | 183<br>(20 - 347)        |
| Inguinal, femoral, and abdominal hernia             | 174<br>(106 - 352)       | 0<br>(0 - 0)          | 0<br>(0 - 0)           | 9<br>(6 - 19)           | 33<br>(19 - 68)          | 131<br>(78 - 267)        |
| Inflammatory bowel disease                          | 49<br>(37 - 73)          | 0<br>(0 - 0)          | 0<br>(0 - 0)           | 6<br>(5 - 10)           | 15<br>(11 - 23)          | 27<br>(19 - 43)          |
| Vascular intestinal disorders                       | 422<br>(273 - 657)       | 0<br>(0 - 0)          | 0<br>(0 - 0)           | 17<br>(10 - 27)         | 90<br>(55 - 139)         | 314<br>(205 - 499)       |
| Gallbladder and biliary diseases                    | 226<br>(181 - 309)       | 0<br>(0 - 0)          | 0<br>(0 - 0)           | 16<br>(12 - 20)         | 57<br>(45 - 78)          | 153<br>(116 - 217)       |
| Pancreatitis                                        | 175<br>(132 - 236)       | 0<br>(0 - 0)          | 0<br>(0 - 0)           | 46<br>(34 - 60)         | 61<br>(45 - 84)          | 68<br>(48 - 95)          |
| Other digestive diseases                            | 179<br>(136 - 229)       | 0<br>(0 - 0)          | 0<br>(0 - 0)           | 12<br>(8 - 16)          | 41<br>(30 - 52)          | 125<br>(92 - 170)        |
| Neurological disorders                              | 5,586<br>(4,644 - 6,534) | 7<br>(5 - 9)          | 8<br>(6 - 10)          | 132<br>(112 - 153)      | 423<br>(358 - 496)       | 5,016<br>(4,093 - 5,926) |
| Alzheimer disease and other dementias               | 4,737<br>(3,829 - 5,662) | --                    | --                     | 1<br>(0 - 3)            | 212<br>(161 - 269)       | 4,524<br>(3,634 - 5,431) |
| Parkinson disease                                   | 467<br>(341 - 555)       | --                    | --                     | 3<br>(2 - 4)            | 67<br>(52 - 82)          | 398<br>(275 - 483)       |
| Epilepsy                                            | 97<br>(73 - 116)         | 1<br>(1 - 2)          | 2<br>(2 - 3)           | 50<br>(39 - 63)         | 28<br>(20 - 35)          | 15<br>(9 - 21)           |
| Multiple sclerosis                                  | 44<br>(27 - 61)          | --                    | --                     | 15<br>(9 - 22)          | 19<br>(12 - 28)          | 10<br>(5 - 14)           |
| Other neurological disorders                        | 242<br>(207 - 280)       | 6<br>(4 - 8)          | 6<br>(4 - 7)           | 62<br>(51 - 73)         | 98<br>(84 - 115)         | 70<br>(58 - 84)          |
| Mental and substance use disorders                  | 451<br>(204 - 552)       | 0<br>(0 - 1)          | 0<br>(0 - 0)           | 133<br>(57 - 172)       | 214<br>(87 - 278)        | 103<br>(54 - 130)        |
| Schizophrenia                                       | 39<br>(24 - 50)          | --                    | --                     | 7<br>(4 - 11)           | 19<br>(11 - 25)          | 13<br>(7 - 19)           |
| Alcohol use disorders                               | 344<br>(111 - 438)       | --                    | --                     | 109<br>(34 - 146)       | 182<br>(59 - 244)        | 53<br>(14 - 72)          |
| Drug use disorders                                  | 67<br>(42 - 82)          | 0<br>(0 - 1)          | --                     | 16<br>(11 - 21)         | 13<br>(9 - 17)           | 37<br>(21 - 50)          |
| Opioid use disorders                                | 20<br>(12 - 25)          | 0<br>(0 - 0)          | --                     | 5<br>(3 - 6)            | 3<br>(2 - 5)             | 11<br>(6 - 16)           |
| Cocaine use disorders                               | 3<br>(2 - 3)             | 0<br>(0 - 0)          | --                     | 1<br>(1 - 1)            | 0<br>(0 - 1)             | 1<br>(1 - 2)             |
| Amphetamine use disorders                           | 2<br>(1 - 3)             | 0<br>(0 - 0)          | --                     | 1<br>(0 - 1)            | 0<br>(0 - 1)             | 1<br>(1 - 2)             |
| Other drug use disorders                            | 43<br>(26 - 52)          | 0<br>(0 - 0)          | --                     | 10<br>(7 - 13)          | 9<br>(6 - 11)            | 23<br>(13 - 32)          |
| Eating disorders                                    | 1<br>(0 - 1)             | --                    | 0<br>(0 - 0)           | 1<br>(0 - 1)            | --                       | --                       |
| Anorexia nervosa                                    | 1<br>(0 - 1)             | --                    | 0<br>(0 - 0)           | 1<br>(0 - 1)            | --                       | --                       |
| Diabetes, urogenital, blood, and endocrine diseases | 4,716<br>(4,229 - 5,594) | 18<br>(13 - 26)       | 11<br>(9 - 14)         | 421<br>(370 - 493)      | 1,415<br>(1,233 - 1,682) | 2,851<br>(2,512 - 3,495) |

Web Table 31- Cuba deaths with 95% UI by age, sex, and cause in 2013

| Cause                                               | Both Sexes, All Ages     | Both Sexes, 0-4 Years | Both Sexes, 5-14 Years | Both Sexes, 15-49 Years | Both Sexes, 50-69 Years | Both Sexes, 70-80 Years  |
|-----------------------------------------------------|--------------------------|-----------------------|------------------------|-------------------------|-------------------------|--------------------------|
| Diabetes mellitus                                   | 2,081<br>(1,847 - 2,688) | 0<br>(0 - 0)          | 1<br>(0 - 1)           | 113<br>(96 - 134)       | 608<br>(523 - 804)      | 1,359<br>(1,163 - 1,744) |
| Acute glomerulonephritis                            | 4<br>(3 - 5)             | 0<br>(0 - 0)          | 0<br>(0 - 0)           | 1<br>(1 - 1)            | 1<br>(1 - 1)            | 2<br>(1 - 3)             |
| Chronic kidney disease                              | 2,088<br>(1,694 - 2,515) | 2<br>(1 - 2)          | 3<br>(2 - 4)           | 217<br>(178 - 268)      | 653<br>(497 - 788)      | 1,214<br>(971 - 1,514)   |
| Chronic kidney disease due to diabetes mellitus     | 713<br>(420 - 883)       | 0<br>(0 - 0)          | 0<br>(0 - 0)           | 79<br>(48 - 101)        | 284<br>(157 - 360)      | 350<br>(211 - 459)       |
| Chronic kidney disease due to hypertension          | 773<br>(566 - 1,037)     | 0<br>(0 - 0)          | 0<br>(0 - 0)           | 67<br>(47 - 99)         | 209<br>(143 - 296)      | 497<br>(358 - 668)       |
| Chronic kidney disease due to glomerulonephritis    | 33<br>(24 - 45)          | 1<br>(1 - 1)          | 1<br>(1 - 1)           | 14<br>(10 - 19)         | 8<br>(6 - 12)           | 9<br>(6 - 14)            |
| Chronic kidney disease due to other causes          | 570<br>(375 - 908)       | 1<br>(0 - 1)          | 1<br>(1 - 2)           | 57<br>(38 - 89)         | 152<br>(93 - 236)       | 358<br>(221 - 597)       |
| Urinary diseases and male infertility               | 207<br>(161 - 244)       | 0<br>(0 - 0)          | 0<br>(0 - 0)           | 16<br>(12 - 20)         | 50<br>(39 - 59)         | 140<br>(104 - 174)       |
| Interstitial nephritis and urinary tract infections | 141<br>(104 - 172)       | 0<br>(0 - 0)          | 0<br>(0 - 0)           | 10<br>(7 - 12)          | 30<br>(21 - 37)         | 101<br>(71 - 129)        |
| Urolithiasis                                        | 25<br>(17 - 33)          | --                    | 0<br>(0 - 0)           | 3<br>(2 - 4)            | 9<br>(6 - 12)           | 13<br>(8 - 18)           |
| Other urinary diseases                              | 42<br>(30 - 57)          | 0<br>(0 - 0)          | 0<br>(0 - 0)           | 4<br>(2 - 5)            | 11<br>(8 - 15)          | 27<br>(17 - 39)          |
| Gynecological diseases                              | 10<br>(8 - 20)           | --                    | --                     | 5<br>(3 - 10)           | 3<br>(2 - 5)            | 3<br>(2 - 5)             |
| Uterine fibroids                                    | 3<br>(2 - 5)             | --                    | --                     | 1<br>(1 - 2)            | 1<br>(1 - 2)            | 1<br>(1 - 2)             |
| Polycystic ovarian syndrome                         | 0<br>(0 - 0)             | --                    | --                     | 0<br>(0 - 0)            | 0<br>(0 - 0)            | --                       |
| Endometriosis                                       | 1<br>(1 - 1)             | --                    | --                     | 1<br>(0 - 1)            | 0<br>(0 - 0)            | --                       |
| Genital prolapse                                    | 2<br>(1 - 3)             | --                    | --                     | 1<br>(0 - 1)            | 0<br>(0 - 1)            | 1<br>(0 - 1)             |
| Other gynecological diseases                        | 5<br>(3 - 9)             | --                    | --                     | 2<br>(1 - 4)            | 1<br>(1 - 3)            | 1<br>(1 - 2)             |
| Hemoglobinopathies and hemolytic anemias            | 68<br>(45 - 87)          | 4<br>(2 - 6)          | 3<br>(2 - 4)           | 25<br>(16 - 32)         | 18<br>(11 - 24)         | 19<br>(12 - 26)          |
| Thalassemias                                        | 0<br>(0 - 1)             | 0<br>(0 - 0)          | 0<br>(0 - 0)           | 0<br>(0 - 0)            | 0<br>(0 - 0)            | 0<br>(0 - 0)             |
| Sickle cell disorders                               | 45<br>(30 - 58)          | 3<br>(2 - 5)          | 3<br>(2 - 4)           | 22<br>(15 - 30)         | 14<br>(9 - 19)          | 2<br>(2 - 3)             |
| G6PD deficiency                                     | 1<br>(1 - 1)             | 0<br>(0 - 0)          | 0<br>(0 - 0)           | 0<br>(0 - 0)            | 0<br>(0 - 0)            | 0<br>(0 - 0)             |
| Other hemoglobinopathies and hemolytic anemias      | 22<br>(14 - 29)          | 0<br>(0 - 1)          | 0<br>(0 - 0)           | 2<br>(1 - 2)            | 3<br>(2 - 4)            | 16<br>(11 - 22)          |
| Endocrine, metabolic, blood, and immune disorders   | 257<br>(215 - 399)       | 12<br>(8 - 19)        | 4<br>(3 - 6)           | 45<br>(35 - 65)         | 83<br>(66 - 128)        | 114<br>(86 - 197)        |
| Musculoskeletal disorders                           | 179<br>(65 - 215)        | --                    | 2<br>(1 - 3)           | 57<br>(19 - 70)         | 56<br>(20 - 70)         | 64<br>(25 - 84)          |
| Rheumatoid arthritis                                | 60<br>(27 - 77)          | --                    | 0<br>(0 - 0)           | 5<br>(2 - 7)            | 17<br>(8 - 23)          | 38<br>(16 - 51)          |
| Other musculoskeletal disorders                     | 119<br>(35 - 146)        | --                    | 2<br>(1 - 2)           | 53<br>(16 - 65)         | 39<br>(11 - 49)         | 27<br>(8 - 37)           |
| Other non-communicable diseases                     | 626<br>(513 - 702)       | 182<br>(145 - 224)    | 27<br>(21 - 33)        | 131<br>(107 - 153)      | 101<br>(79 - 120)       | 186<br>(82 - 228)        |
| Congenital anomalies                                | 455<br>(390 - 519)       | 173<br>(137 - 216)    | 26<br>(20 - 32)        | 118<br>(97 - 140)       | 73<br>(60 - 91)         | 66<br>(44 - 85)          |
| Neural tube defects                                 | 3<br>(2 - 3)             | 1<br>(1 - 2)          | 0<br>(0 - 0)           | 1<br>(0 - 1)            | 0<br>(0 - 0)            | 0<br>(0 - 0)             |
| Congenital heart anomalies                          | 185<br>(155 - 222)       | 89<br>(69 - 114)      | 12<br>(9 - 17)         | 41<br>(33 - 54)         | 14<br>(10 - 20)         | 28<br>(16 - 41)          |
| Cleft lip and cleft palate                          | 0<br>(0 - 0)             | 0<br>(0 - 0)          | --                     | --                      | --                      | --                       |
| Down syndrome                                       | 35<br>(26 - 46)          | 4<br>(2 - 7)          | 1<br>(1 - 2)           | 14<br>(10 - 20)         | 14<br>(10 - 20)         | 1<br>(1 - 1)             |
| Chromosomal unbalanced rearrangements               | 9<br>(6 - 12)            | 5<br>(3 - 8)          | 0<br>(0 - 1)           | 1<br>(1 - 2)            | 1<br>(0 - 1)            | 1<br>(1 - 2)             |
| Other congenital anomalies                          | 224<br>(185 - 267)       | 73<br>(54 - 97)       | 12<br>(8 - 16)         | 60<br>(47 - 75)         | 44<br>(34 - 57)         | 36<br>(25 - 46)          |
| Skin and subcutaneous diseases                      | 165<br>(46 - 204)        | 3<br>(1 - 5)          | 1<br>(0 - 2)           | 13<br>(4 - 16)          | 27<br>(9 - 34)          | 120<br>(32 - 157)        |
| Cellulitis                                          | 36<br>(9 - 52)           | 1<br>(0 - 1)          | 0<br>(0 - 1)           | 4<br>(1 - 6)            | 8<br>(2 - 11)           | 22<br>(5 - 37)           |
| Pyoderma                                            | 37<br>(10 - 48)          | 2<br>(1 - 3)          | 0<br>(0 - 1)           | 5<br>(1 - 7)            | 9<br>(3 - 13)           | 20<br>(5 - 30)           |
| Decubitus ulcer                                     | 78<br>(23 - 105)         | 0<br>(0 - 0)          | 0<br>(0 - 0)           | 1<br>(0 - 2)            | 7<br>(2 - 9)            | 69<br>(21 - 96)          |
| Other skin and subcutaneous diseases                | 15<br>(4 - 24)           | 0<br>(0 - 1)          | 0<br>(0 - 0)           | 2<br>(1 - 3)            | 3<br>(1 - 5)            | 9<br>(2 - 17)            |
| Sudden infant death syndrome                        | 6<br>(3 - 11)            | 6<br>(3 - 11)         | --                     | --                      | --                      | --                       |

Web Table 31- Cuba deaths with 95% UI by age, sex, and cause in 2013

| Cause                                           | Both Sexes, All Ages     | Both Sexes, 0-4 Years | Both Sexes, 5-14 Years | Both Sexes, 15-49 Years  | Both Sexes, 50-69 Years  | Both Sexes, 70-80 Years  |
|-------------------------------------------------|--------------------------|-----------------------|------------------------|--------------------------|--------------------------|--------------------------|
| Injuries                                        | 7,518<br>(6,762 - 8,531) | 49<br>(38 - 66)       | 94<br>(81 - 112)       | 2,224<br>(1,999 - 2,598) | 1,476<br>(1,311 - 1,805) | 3,674<br>(3,064 - 4,302) |
| Transport injuries                              | 1,407<br>(1,228 - 1,895) | 7<br>(5 - 10)         | 35<br>(29 - 44)        | 651<br>(550 - 875)       | 371<br>(312 - 530)       | 344<br>(275 - 433)       |
| Road injuries                                   | 1,299<br>(1,128 - 1,688) | 6<br>(4 - 9)          | 33<br>(27 - 41)        | 598<br>(508 - 785)       | 338<br>(285 - 468)       | 323<br>(252 - 397)       |
| Pedestrian road injuries                        | 414<br>(332 - 565)       | 3<br>(2 - 5)          | 15<br>(12 - 20)        | 121<br>(89 - 168)        | 119<br>(90 - 164)        | 156<br>(125 - 223)       |
| Cyclist road injuries                           | 215<br>(167 - 316)       | 1<br>(0 - 1)          | 7<br>(5 - 9)           | 103<br>(79 - 149)        | 71<br>(51 - 110)         | 34<br>(23 - 52)          |
| Motorcyclist road injuries                      | 139<br>(101 - 196)       | 0<br>(0 - 0)          | 1<br>(1 - 1)           | 103<br>(72 - 144)        | 29<br>(19 - 44)          | 7<br>(4 - 10)            |
| Motor vehicle road injuries                     | 481<br>(398 - 589)       | 2<br>(2 - 4)          | 9<br>(7 - 12)          | 248<br>(198 - 335)       | 103<br>(81 - 145)        | 117<br>(70 - 161)        |
| Other road injuries                             | 50<br>(30 - 76)          | 0<br>(0 - 0)          | 1<br>(1 - 2)           | 24<br>(12 - 35)          | 16<br>(10 - 25)          | 9<br>(5 - 15)            |
| Other transport injuries                        | 109<br>(81 - 192)        | 0<br>(0 - 1)          | 2<br>(1 - 4)           | 53<br>(38 - 89)          | 33<br>(23 - 65)          | 20<br>(13 - 44)          |
| Unintentional injuries                          | 3,839<br>(3,227 - 4,454) | 37<br>(28 - 51)       | 47<br>(39 - 62)        | 484<br>(422 - 584)       | 442<br>(387 - 505)       | 2,828<br>(2,258 - 3,414) |
| Falls                                           | 2,533<br>(2,032 - 3,138) | 2<br>(2 - 4)          | 5<br>(3 - 6)           | 100<br>(76 - 122)        | 203<br>(163 - 244)       | 2,223<br>(1,736 - 2,795) |
| Drowning                                        | 271<br>(197 - 423)       | 7<br>(4 - 16)         | 24<br>(18 - 43)        | 151<br>(111 - 243)       | 56<br>(36 - 83)          | 33<br>(20 - 45)          |
| Fire, heat, and hot substances                  | 141<br>(108 - 168)       | 3<br>(2 - 5)          | 4<br>(3 - 6)           | 32<br>(24 - 49)          | 26<br>(20 - 34)          | 76<br>(46 - 105)         |
| Poisonings                                      | 44<br>(28 - 60)          | 1<br>(1 - 3)          | 1<br>(0 - 1)           | 9<br>(7 - 15)            | 9<br>(6 - 16)            | 23<br>(12 - 34)          |
| Exposure to mechanical forces                   | 128<br>(110 - 178)       | 4<br>(3 - 8)          | 5<br>(4 - 7)           | 63<br>(52 - 91)          | 32<br>(25 - 46)          | 24<br>(19 - 31)          |
| Unintentional firearm injuries                  | 35<br>(27 - 44)          | 0<br>(0 - 0)          | 1<br>(1 - 2)           | 15<br>(11 - 20)          | 6<br>(4 - 9)             | 13<br>(8 - 19)           |
| Unintentional suffocation                       | 7<br>(5 - 12)            | 3<br>(2 - 6)          | 0<br>(0 - 0)           | 1<br>(1 - 2)             | 1<br>(1 - 2)             | 1<br>(1 - 2)             |
| Other exposure to mechanical forces             | 86<br>(71 - 133)         | 1<br>(1 - 2)          | 4<br>(3 - 5)           | 47<br>(37 - 74)          | 24<br>(18 - 38)          | 10<br>(7 - 15)           |
| Adverse effects of medical treatment            | 302<br>(169 - 418)       | 2<br>(1 - 4)          | 0<br>(0 - 1)           | 21<br>(13 - 28)          | 37<br>(22 - 49)          | 241<br>(126 - 348)       |
| Animal contact                                  | 66<br>(34 - 97)          | 0<br>(0 - 0)          | 0<br>(0 - 1)           | 6<br>(4 - 8)             | 10<br>(6 - 14)           | 50<br>(21 - 79)          |
| Venomous animal contact                         | 5<br>(3 - 9)             | 0<br>(0 - 0)          | 0<br>(0 - 0)           | 1<br>(1 - 1)             | 1<br>(1 - 2)             | 3<br>(1 - 6)             |
| Non-venomous animal contact                     | 61<br>(31 - 89)          | 0<br>(0 - 0)          | 0<br>(0 - 0)           | 5<br>(3 - 7)             | 9<br>(5 - 12)            | 47<br>(19 - 75)          |
| Foreign body                                    | 210<br>(145 - 300)       | 12<br>(8 - 18)        | 2<br>(1 - 3)           | 23<br>(16 - 36)          | 39<br>(27 - 61)          | 134<br>(87 - 197)        |
| Pulmonary aspiration and foreign body in airway | 203<br>(138 - 292)       | 12<br>(8 - 18)        | 2<br>(1 - 3)           | 21<br>(14 - 33)          | 37<br>(25 - 59)          | 131<br>(84 - 194)        |
| Foreign body in other body part                 | 7<br>(5 - 10)            | 0<br>(0 - 0)          | 0<br>(0 - 0)           | 2<br>(1 - 3)             | 2<br>(1 - 3)             | 3<br>(2 - 5)             |
| Other unintentional injuries                    | 144<br>(114 - 182)       | 4<br>(3 - 7)          | 5<br>(3 - 9)           | 79<br>(56 - 110)         | 31<br>(20 - 50)          | 24<br>(16 - 35)          |
| Self-harm and interpersonal violence            | 2,272<br>(2,007 - 2,805) | 5<br>(3 - 8)          | 12<br>(8 - 16)         | 1,089<br>(940 - 1,304)   | 663<br>(567 - 861)       | 503<br>(415 - 678)       |
| Self-harm                                       | 1,679<br>(1,467 - 2,190) | --                    | 5<br>(4 - 7)           | 669<br>(566 - 836)       | 552<br>(470 - 739)       | 452<br>(373 - 638)       |
| Interpersonal violence                          | 593<br>(435 - 780)       | 5<br>(3 - 8)          | 6<br>(4 - 10)          | 420<br>(306 - 535)       | 111<br>(74 - 183)        | 50<br>(28 - 80)          |
| Assault by firearm                              | 62<br>(35 - 114)         | 0<br>(0 - 1)          | 1<br>(1 - 3)           | 42<br>(21 - 77)          | 12<br>(6 - 26)           | 7<br>(3 - 13)            |
| Assault by sharp object                         | 371<br>(262 - 500)       | 1<br>(0 - 1)          | 2<br>(1 - 4)           | 304<br>(213 - 412)       | 50<br>(31 - 83)          | 13<br>(7 - 23)           |
| Assault by other means                          | 159<br>(102 - 225)       | 4<br>(3 - 7)          | 3<br>(1 - 4)           | 74<br>(44 - 112)         | 49<br>(31 - 84)          | 30<br>(16 - 49)          |

Web Table 31- Cuba deaths with 95% UI by age, sex, and cause in 2013

| Cause                                                             | Males, All Ages             | Males, 0-4 Years   | Males, 5-14 Years  | Males, 15-49 Years       | Males, 50-69 Years          | Males, 70-80 Years          |
|-------------------------------------------------------------------|-----------------------------|--------------------|--------------------|--------------------------|-----------------------------|-----------------------------|
| All causes                                                        | 51,014<br>(47,636 - 54,911) | 345<br>(289 - 408) | 152<br>(136 - 169) | 4,919<br>(4,424 - 5,501) | 13,618<br>(12,357 - 15,071) | 31,980<br>(30,342 - 33,804) |
| Communicable, maternal, neonatal, and nutritional diseases        | 3,915<br>(3,242 - 4,689)    | 188<br>(153 - 224) | 19<br>(15 - 25)    | 326<br>(277 - 383)       | 554<br>(460 - 669)          | 2,828<br>(2,209 - 3,535)    |
| HIV/AIDS and tuberculosis                                         | 217<br>(177 - 269)          | 0<br>(0 - 0)       | 1<br>(0 - 2)       | 136<br>(108 - 174)       | 56<br>(42 - 74)             | 24<br>(18 - 31)             |
| Tuberculosis                                                      | 32<br>(26 - 39)             | 0<br>(0 - 0)       | 0<br>(0 - 0)       | 5<br>(4 - 6)             | 11<br>(8 - 14)              | 16<br>(12 - 21)             |
| HIV/AIDS                                                          | 186<br>(146 - 239)          | 0<br>(0 - 0)       | 1<br>(0 - 1)       | 132<br>(104 - 170)       | 45<br>(31 - 62)             | 8<br>(4 - 13)               |
| HIV/AIDS resulting in mycobacterial infection                     | 10<br>(8 - 14)              | 0<br>(0 - 0)       | 0<br>(0 - 0)       | 7<br>(5 - 10)            | 3<br>(2 - 4)                | 0<br>(0 - 1)                |
| HIV/AIDS resulting in other diseases                              | 175<br>(138 - 226)          | 0<br>(0 - 0)       | 1<br>(0 - 1)       | 124<br>(98 - 161)        | 43<br>(30 - 59)             | 7<br>(4 - 12)               |
| Diarrhea, lower respiratory, and other common infectious diseases | 3,359<br>(2,703 - 4,128)    | 53<br>(40 - 68)    | 15<br>(11 - 21)    | 159<br>(125 - 198)       | 452<br>(361 - 568)          | 2,680<br>(2,054 - 3,401)    |
| Diarrheal diseases                                                | 115<br>(86 - 154)           | 6<br>(4 - 10)      | 0<br>(0 - 1)       | 8<br>(6 - 12)            | 24<br>(17 - 33)             | 76<br>(49 - 113)            |
| Intestinal infectious diseases                                    | 29<br>(14 - 53)             | 7<br>(3 - 12)      | 6<br>(3 - 11)      | 11<br>(4 - 22)           | 3<br>(1 - 7)                | 2<br>(0 - 5)                |
| Typhoid fever                                                     | 20<br>(9 - 37)              | 5<br>(2 - 9)       | 5<br>(2 - 9)       | 8<br>(2 - 17)            | 2<br>(0 - 4)                | 1<br>(0 - 2)                |
| Paratyphoid fever                                                 | 5<br>(2 - 11)               | 1<br>(1 - 3)       | 1<br>(1 - 3)       | 2<br>(1 - 5)             | 0<br>(0 - 1)                | 0<br>(0 - 1)                |
| Other intestinal infectious diseases                              | 3<br>(1 - 9)                | 1<br>(0 - 4)       | 0<br>(0 - 2)       | 1<br>(0 - 4)             | 1<br>(0 - 4)                | 1<br>(0 - 3)                |
| Lower respiratory infections                                      | 3,127<br>(2,476 - 3,886)    | 30<br>(21 - 42)    | 4<br>(3 - 6)       | 115<br>(82 - 150)        | 401<br>(312 - 510)          | 2,577<br>(1,960 - 3,290)    |
| Upper respiratory infections                                      | 2<br>(1 - 5)                | 0<br>(0 - 0)       | 0<br>(0 - 0)       | 0<br>(0 - 1)             | 1<br>(0 - 2)                | 1<br>(0 - 4)                |
| Otitis media                                                      | 1<br>(1 - 1)                | 0<br>(0 - 0)       | 0<br>(0 - 0)       | 0<br>(0 - 0)             | 0<br>(0 - 0)                | 0<br>(0 - 0)                |
| Meningitis                                                        | 59<br>(50 - 73)             | 8<br>(5 - 14)      | 2<br>(1 - 3)       | 13<br>(11 - 17)          | 17<br>(14 - 23)             | 18<br>(14 - 25)             |
| Pneumococcal meningitis                                           | 15<br>(11 - 21)             | 2<br>(1 - 3)       | 1<br>(0 - 1)       | 3<br>(2 - 5)             | 5<br>(3 - 7)                | 5<br>(3 - 8)                |
| H influenzae type B meningitis                                    | 6<br>(4 - 9)                | 2<br>(1 - 4)       | 0<br>(0 - 1)       | 1<br>(1 - 2)             | 1<br>(0 - 3)                | 1<br>(1 - 2)                |
| Meningococcal meningitis                                          | 8<br>(6 - 12)               | 1<br>(0 - 2)       | 0<br>(0 - 0)       | 2<br>(1 - 3)             | 2<br>(1 - 4)                | 3<br>(1 - 5)                |
| Other meningitis                                                  | 29<br>(19 - 39)             | 3<br>(2 - 6)       | 1<br>(0 - 1)       | 7<br>(4 - 10)            | 9<br>(5 - 14)               | 9<br>(5 - 13)               |
| Encephalitis                                                      | 22<br>(16 - 41)             | 2<br>(1 - 4)       | 2<br>(1 - 4)       | 9<br>(6 - 19)            | 5<br>(4 - 10)               | 3<br>(2 - 6)                |
| Diphtheria                                                        | 0<br>(0 - 1)                | 0<br>(0 - 0)       | 0<br>(0 - 0)       | 0<br>(0 - 0)             | 0<br>(0 - 0)                | --<br>(0 - 0)               |
| Whooping cough                                                    | 0<br>(0 - 1)                | 0<br>(0 - 0)       | 0<br>(0 - 0)       | 0<br>(0 - 0)             | 0<br>(0 - 0)                | --<br>(0 - 0)               |
| Tetanus                                                           | 1<br>(0 - 2)                | 0<br>(0 - 0)       | 0<br>(0 - 0)       | 0<br>(0 - 0)             | 0<br>(0 - 1)                | 0<br>(0 - 1)                |
| Measles                                                           | 0<br>(0 - 0)                | 0<br>(0 - 0)       | 0<br>(0 - 0)       | 0<br>(0 - 0)             | 0<br>(0 - 0)                | --<br>(0 - 0)               |
| Varicella and herpes zoster                                       | 3<br>(1 - 12)               | 0<br>(0 - 1)       | 0<br>(0 - 0)       | 0<br>(0 - 1)             | 0<br>(0 - 1)                | 2<br>(0 - 11)               |
| Neglected tropical diseases and malaria                           | 15<br>(12 - 20)             | 1<br>(1 - 3)       | 1<br>(1 - 2)       | 5<br>(4 - 7)             | 4<br>(3 - 7)                | 4<br>(2 - 7)                |
| Leishmaniasis                                                     | 4<br>(3 - 6)                | 1<br>(0 - 1)       | 0<br>(0 - 0)       | 2<br>(1 - 2)             | 1<br>(1 - 2)                | 1<br>(0 - 1)                |
| Visceral leishmaniasis                                            | 4<br>(3 - 6)                | 1<br>(0 - 1)       | 0<br>(0 - 0)       | 2<br>(1 - 2)             | 1<br>(1 - 2)                | 1<br>(0 - 1)                |
| Cysticercosis                                                     | 2<br>(2 - 2)                | 0<br>(0 - 0)       | 0<br>(0 - 0)       | 1<br>(1 - 1)             | 1<br>(1 - 1)                | 0<br>(0 - 0)                |
| Cystic echinococcosis                                             | 0<br>(0 - 1)                | 0<br>(0 - 0)       | 0<br>(0 - 0)       | 0<br>(0 - 0)             | 0<br>(0 - 0)                | 0<br>(0 - 0)                |
| Dengue                                                            | 5<br>(4 - 7)                | 0<br>(0 - 1)       | 1<br>(0 - 1)       | 1<br>(1 - 2)             | 1<br>(1 - 2)                | 1<br>(1 - 3)                |
| Rabies                                                            | 1<br>(0 - 1)                | 0<br>(0 - 0)       | 0<br>(0 - 0)       | 0<br>(0 - 1)             | 0<br>(0 - 0)                | 0<br>(0 - 0)                |
| Intestinal nematode infections                                    | 1<br>(0 - 5)                | 0<br>(0 - 1)       | 0<br>(0 - 1)       | 0<br>(0 - 2)             | 0<br>(0 - 3)                | 1<br>(0 - 4)                |
| Ascariasis                                                        | 1<br>(0 - 5)                | 0<br>(0 - 1)       | 0<br>(0 - 1)       | 0<br>(0 - 2)             | 0<br>(0 - 3)                | 1<br>(0 - 4)                |
| Other neglected tropical diseases                                 | 1<br>(1 - 2)                | 0<br>(0 - 0)       | 0<br>(0 - 0)       | 0<br>(0 - 1)             | 0<br>(0 - 0)                | 0<br>(0 - 1)                |
| Maternal disorders                                                | --                          | --                 | --                 | --                       | --                          | --                          |
| Maternal hemorrhage                                               | --                          | --                 | --                 | --                       | --                          | --                          |
| Maternal sepsis and other maternal infections                     | --                          | --                 | --                 | --                       | --                          | --                          |



Web Table 31- Cuba deaths with 95% UI by age, sex, and cause in 2013

| Cause                                                            | Males, All Ages             | Males, 0-4 Years   | Males, 5-14 Years | Males, 15-49 Years       | Males, 50-69 Years          | Males, 70-80 Years          |
|------------------------------------------------------------------|-----------------------------|--------------------|-------------------|--------------------------|-----------------------------|-----------------------------|
| Maternal hypertensive disorders                                  | --                          | --                 | --                | --                       | --                          | --                          |
| Maternal obstructed labor                                        | --                          | --                 | --                | --                       | --                          | --                          |
| Maternal abortive outcome                                        | --                          | --                 | --                | --                       | --                          | --                          |
| Indirect maternal deaths                                         | --                          | --                 | --                | --                       | --                          | --                          |
| Late maternal deaths                                             | --                          | --                 | --                | --                       | --                          | --                          |
| Maternal deaths aggravated by HIV/AIDS                           | --                          | --                 | --                | --                       | --                          | --                          |
| Other maternal disorders                                         | --                          | --                 | --                | --                       | --                          | --                          |
| Neonatal disorders                                               | 129<br>(105 - 155)          | 129<br>(105 - 155) | --                | --                       | --                          | --                          |
| Neonatal preterm birth complications                             | 37<br>(20 - 54)             | 37<br>(20 - 54)    | --                | --                       | --                          | --                          |
| Neonatal encephalopathy due to birth asphyxia and trauma         | 31<br>(21 - 46)             | 31<br>(21 - 46)    | --                | --                       | --                          | --                          |
| Neonatal sepsis and other neonatal infections                    | 27<br>(14 - 48)             | 27<br>(14 - 48)    | --                | --                       | --                          | --                          |
| Hemolytic disease and other neonatal jaundice                    | 1<br>(1 - 3)                | 1<br>(1 - 3)       | --                | --                       | --                          | --                          |
| Other neonatal disorders                                         | 32<br>(18 - 46)             | 32<br>(18 - 46)    | --                | --                       | --                          | --                          |
| Nutritional deficiencies                                         | 140<br>(78 - 192)           | 2<br>(1 - 4)       | 1<br>(0 - 1)      | 10<br>(6 - 15)           | 21<br>(12 - 29)             | 106<br>(56 - 153)           |
| Protein-energy malnutrition                                      | 30<br>(10 - 47)             | 2<br>(1 - 3)       | 0<br>(0 - 1)      | 3<br>(1 - 5)             | 6<br>(2 - 9)                | 19<br>(6 - 34)              |
| Iodine deficiency                                                | 1<br>(0 - 2)                | 0<br>(0 - 0)       | 0<br>(0 - 0)      | 0<br>(0 - 0)             | 0<br>(0 - 1)                | 0<br>(0 - 2)                |
| Iron-deficiency anemia                                           | 97<br>(50 - 145)            | 0<br>(0 - 0)       | 0<br>(0 - 0)      | 3<br>(1 - 5)             | 13<br>(7 - 20)              | 81<br>(40 - 123)            |
| Other nutritional deficiencies                                   | 13<br>(6 - 23)              | 0<br>(0 - 1)       | 0<br>(0 - 1)      | 4<br>(2 - 7)             | 2<br>(1 - 4)                | 6<br>(2 - 12)               |
| Other communicable, maternal, neonatal, and nutritional diseases | 55<br>(39 - 71)             | 2<br>(1 - 3)       | 1<br>(1 - 2)      | 16<br>(10 - 21)          | 21<br>(14 - 28)             | 15<br>(10 - 23)             |
| Sexually transmitted diseases excluding HIV                      | 1<br>(1 - 2)                | 0<br>(0 - 1)       | 0<br>(0 - 0)      | 0<br>(0 - 0)             | 0<br>(0 - 1)                | 0<br>(0 - 1)                |
| Syphilis                                                         | 1<br>(0 - 1)                | 0<br>(0 - 1)       | 0<br>(0 - 0)      | 0<br>(0 - 0)             | 0<br>(0 - 0)                | 0<br>(0 - 1)                |
| Chlamydial infection                                             | --                          | --                 | --                | --                       | --                          | --                          |
| Gonococcal infection                                             | 0<br>(0 - 0)                | --                 | 0<br>(0 - 0)      | 0<br>(0 - 0)             | 0<br>(0 - 0)                | 0<br>(0 - 0)                |
| Other sexually transmitted diseases                              | 0<br>(0 - 0)                | --                 | 0<br>(0 - 0)      | 0<br>(0 - 0)             | 0<br>(0 - 0)                | 0<br>(0 - 0)                |
| Hepatitis                                                        | 3<br>(3 - 4)                | 0<br>(0 - 0)       | 0<br>(0 - 0)      | 1<br>(1 - 2)             | 1<br>(1 - 2)                | 1<br>(0 - 1)                |
| Acute hepatitis A                                                | 1<br>(0 - 1)                | 0<br>(0 - 0)       | 0<br>(0 - 0)      | 0<br>(0 - 1)             | 0<br>(0 - 0)                | 0<br>(0 - 0)                |
| Acute hepatitis B                                                | 2<br>(2 - 3)                | 0<br>(0 - 0)       | 0<br>(0 - 0)      | 1<br>(0 - 1)             | 1<br>(1 - 1)                | 1<br>(0 - 1)                |
| Acute hepatitis C                                                | 0<br>(0 - 1)                | --                 | 0<br>(0 - 0)      | 0<br>(0 - 0)             | 0<br>(0 - 0)                | 0<br>(0 - 0)                |
| Other infectious diseases                                        | 51<br>(35 - 66)             | 2<br>(1 - 2)       | 1<br>(1 - 1)      | 15<br>(8 - 20)           | 20<br>(13 - 27)             | 14<br>(9 - 23)              |
| Non-communicable diseases                                        | 42,531<br>(39,477 - 45,902) | 128<br>(101 - 160) | 67<br>(54 - 78)   | 2,793<br>(2,438 - 3,164) | 11,945<br>(10,830 - 13,213) | 27,598<br>(25,979 - 29,408) |
| Neoplasms                                                        | 13,206<br>(11,599 - 14,626) | 12<br>(8 - 18)     | 31<br>(24 - 38)   | 872<br>(725 - 1,000)     | 4,493<br>(3,969 - 5,003)    | 7,798<br>(6,757 - 8,817)    |
| Esophageal cancer                                                | 481<br>(326 - 602)          | --                 | --                | 41<br>(23 - 62)          | 221<br>(134 - 292)          | 219<br>(153 - 288)          |
| Stomach cancer                                                   | 577<br>(496 - 668)          | --                 | --                | 37<br>(28 - 48)          | 215<br>(177 - 255)          | 325<br>(264 - 402)          |
| Liver cancer                                                     | 338<br>(283 - 397)          | --                 | 0<br>(0 - 0)      | 27<br>(21 - 37)          | 131<br>(104 - 161)          | 179<br>(138 - 229)          |
| Liver cancer due to hepatitis B                                  | 83<br>(36 - 127)            | --                 | 0<br>(0 - 0)      | 11<br>(4 - 17)           | 40<br>(17 - 65)             | 32<br>(13 - 52)             |
| Liver cancer due to hepatitis C                                  | 161<br>(102 - 220)          | --                 | 0<br>(0 - 0)      | 10<br>(3 - 17)           | 57<br>(29 - 86)             | 94<br>(62 - 131)            |
| Liver cancer due to alcohol use                                  | 75<br>(44 - 115)            | --                 | --                | 4<br>(2 - 8)             | 25<br>(13 - 42)             | 46<br>(27 - 69)             |
| Liver cancer due to other causes                                 | 18<br>(11 - 29)             | --                 | 0<br>(0 - 0)      | 3<br>(2 - 5)             | 7<br>(4 - 13)               | 8<br>(4 - 13)               |
| Larynx cancer                                                    | 608<br>(397 - 732)          | --                 | --                | 40<br>(22 - 54)          | 280<br>(169 - 356)          | 288<br>(195 - 368)          |
| Tracheal, bronchus and lung cancer                               | 3,548<br>(3,147 - 4,025)    | --                 | --                | 181<br>(142 - 223)       | 1,510<br>(1,313 - 1,745)    | 1,857<br>(1,589 - 2,161)    |

Web Table 31- Cuba deaths with 95% UI by age, sex, and cause in 2013

| Cause                                         | Males, All Ages             | Males, 0-4 Years | Males, 5-14 Years | Males, 15-49 Years     | Males, 50-69 Years       | Males, 70-80 Years          |
|-----------------------------------------------|-----------------------------|------------------|-------------------|------------------------|--------------------------|-----------------------------|
| Breast cancer                                 | 17<br>(9 - 58)              | --               | --                | 1<br>(1 - 4)           | 5<br>(3 - 16)            | 10<br>(5 - 39)              |
| Cervical cancer                               | --                          | --               | --                | --                     | --                       | --                          |
| Uterine cancer                                | --                          | --               | --                | --                     | --                       | --                          |
| Prostate cancer                               | 2,904<br>(1,843 - 4,092)    | --               | --                | 12<br>(7 - 19)         | 442<br>(278 - 620)       | 2,450<br>(1,544 - 3,486)    |
| Colon and rectum cancer                       | 1,116<br>(973 - 1,273)      | --               | --                | 66<br>(53 - 81)        | 341<br>(292 - 403)       | 709<br>(594 - 842)          |
| Lip and oral cavity cancer                    | 333<br>(211 - 416)          | --               | --                | 31<br>(18 - 44)        | 142<br>(87 - 183)        | 161<br>(102 - 219)          |
| Nasopharynx cancer                            | 61<br>(48 - 76)             | --               | 0<br>(0 - 0)      | 12<br>(7 - 17)         | 30<br>(21 - 41)          | 19<br>(13 - 26)             |
| Other pharynx cancer                          | 128<br>(102 - 162)          | --               | --                | 14<br>(9 - 20)         | 63<br>(47 - 82)          | 52<br>(37 - 71)             |
| Gallbladder and biliary tract cancer          | 79<br>(55 - 141)            | --               | --                | 4<br>(3 - 7)           | 26<br>(17 - 47)          | 48<br>(32 - 88)             |
| Pancreatic cancer                             | 454<br>(389 - 525)          | --               | --                | 37<br>(28 - 47)        | 176<br>(145 - 210)       | 241<br>(195 - 295)          |
| Malignant skin melanoma                       | 47<br>(30 - 89)             | --               | --                | 9<br>(6 - 18)          | 16<br>(10 - 32)          | 22<br>(13 - 40)             |
| Non-melanoma skin cancer                      | 151<br>(89 - 206)           | --               | --                | 8<br>(5 - 12)          | 47<br>(32 - 68)          | 96<br>(50 - 146)            |
| Ovarian cancer                                | --                          | --               | --                | --                     | --                       | --                          |
| Testicular cancer                             | 12<br>(4 - 21)              | --               | --                | 6<br>(2 - 11)          | 2<br>(1 - 4)             | 4<br>(1 - 8)                |
| Kidney cancer                                 | 177<br>(148 - 210)          | 0<br>(0 - 0)     | 0<br>(0 - 0)      | 16<br>(12 - 21)        | 84<br>(67 - 106)         | 76<br>(58 - 100)            |
| Bladder cancer                                | 478<br>(390 - 587)          | --               | --                | 9<br>(6 - 12)          | 118<br>(92 - 152)        | 351<br>(273 - 448)          |
| Brain and nervous system cancer               | 250<br>(60 - 352)           | 2<br>(0 - 4)     | 5<br>(1 - 8)      | 58<br>(16 - 85)        | 109<br>(25 - 160)        | 76<br>(15 - 121)            |
| Thyroid cancer                                | 24<br>(18 - 30)             | --               | 0<br>(0 - 0)      | 3<br>(2 - 5)           | 10<br>(7 - 13)           | 11<br>(7 - 15)              |
| Mesothelioma                                  | 20<br>(15 - 27)             | --               | --                | 3<br>(2 - 3)           | 7<br>(5 - 11)            | 10<br>(6 - 16)              |
| Hodgkin lymphoma                              | 54<br>(9 - 87)              | 0<br>(0 - 0)     | 1<br>(0 - 2)      | 16<br>(2 - 29)         | 21<br>(3 - 38)           | 16<br>(2 - 30)              |
| Non-Hodgkin lymphoma                          | 346<br>(276 - 473)          | 1<br>(1 - 3)     | 4<br>(3 - 7)      | 61<br>(45 - 89)        | 134<br>(102 - 189)       | 145<br>(108 - 201)          |
| Multiple myeloma                              | 173<br>(125 - 226)          | --               | --                | 14<br>(9 - 20)         | 74<br>(52 - 102)         | 85<br>(60 - 113)            |
| Leukemia                                      | 327<br>(284 - 376)          | 4<br>(2 - 7)     | 12<br>(8 - 16)    | 66<br>(54 - 79)        | 99<br>(82 - 119)         | 146<br>(118 - 182)          |
| Other neoplasms                               | 504<br>(391 - 582)          | 5<br>(3 - 8)     | 9<br>(6 - 12)     | 100<br>(75 - 122)      | 189<br>(145 - 229)       | 200<br>(137 - 252)          |
| Cardiovascular diseases                       | 19,359<br>(17,818 - 21,081) | 3<br>(2 - 4)     | 5<br>(4 - 7)      | 1,005<br>(867 - 1,158) | 5,007<br>(4,489 - 5,605) | 13,339<br>(12,303 - 14,486) |
| Rheumatic heart disease                       | 82<br>(30 - 113)            | 0<br>(0 - 0)     | 1<br>(0 - 2)      | 27<br>(11 - 40)        | 27<br>(10 - 41)          | 27<br>(7 - 43)              |
| Ischemic heart disease                        | 11,542<br>(10,198 - 13,755) | 0<br>(0 - 0)     | 1<br>(0 - 1)      | 554<br>(460 - 676)     | 3,086<br>(2,705 - 3,628) | 7,902<br>(6,877 - 9,499)    |
| Cerebrovascular disease                       | 5,384<br>(4,321 - 6,535)    | 0<br>(0 - 0)     | 1<br>(1 - 2)      | 243<br>(179 - 318)     | 1,226<br>(959 - 1,509)   | 3,913<br>(3,101 - 4,786)    |
| Ischemic stroke                               | 3,492<br>(2,467 - 4,359)    | 0<br>(0 - 0)     | 0<br>(0 - 1)      | 47<br>(24 - 72)        | 559<br>(337 - 740)       | 2,886<br>(2,050 - 3,610)    |
| Hemorrhagic stroke                            | 1,892<br>(1,446 - 2,603)    | 0<br>(0 - 0)     | 1<br>(1 - 2)      | 196<br>(144 - 259)     | 667<br>(511 - 865)       | 1,027<br>(724 - 1,559)      |
| Hypertensive heart disease                    | 623<br>(271 - 996)          | 0<br>(0 - 0)     | 0<br>(0 - 0)      | 35<br>(16 - 54)        | 185<br>(88 - 275)        | 403<br>(145 - 701)          |
| Cardiomyopathy and myocarditis                | 386<br>(254 - 484)          | 2<br>(1 - 3)     | 2<br>(1 - 2)      | 80<br>(55 - 102)       | 156<br>(101 - 200)       | 146<br>(81 - 196)           |
| Atrial fibrillation and flutter               | 73<br>(52 - 98)             | --               | --                | 2<br>(2 - 3)           | 13<br>(9 - 18)           | 58<br>(38 - 81)             |
| Aortic aneurysm                               | 550<br>(458 - 685)          | --               | --                | 13<br>(10 - 17)        | 139<br>(111 - 175)       | 398<br>(323 - 507)          |
| Peripheral vascular disease                   | 215<br>(155 - 290)          | --               | --                | 4<br>(3 - 7)           | 39<br>(29 - 53)          | 171<br>(119 - 238)          |
| Endocarditis                                  | 30<br>(19 - 47)             | 0<br>(0 - 0)     | 0<br>(0 - 0)      | 8<br>(5 - 13)          | 10<br>(6 - 17)           | 11<br>(6 - 17)              |
| Other cardiovascular and circulatory diseases | 473<br>(246 - 597)          | 0<br>(0 - 0)     | 0<br>(0 - 1)      | 38<br>(17 - 50)        | 126<br>(63 - 160)        | 309<br>(158 - 415)          |
| Chronic respiratory diseases                  | 2,461<br>(1,776 - 2,830)    | 2<br>(1 - 2)     | 1<br>(1 - 2)      | 73<br>(58 - 93)        | 500<br>(365 - 592)       | 1,885<br>(1,322 - 2,202)    |
| Chronic obstructive pulmonary disease         | 2,176<br>(1,560 - 2,518)    | 0<br>(0 - 1)     | 0<br>(0 - 0)      | 35<br>(27 - 46)        | 413<br>(301 - 491)       | 1,728<br>(1,198 - 2,023)    |
| Pneumoconiosis                                | 51<br>(30 - 77)             | 0<br>(0 - 0)     | 0<br>(0 - 0)      | 2<br>(1 - 2)           | 15<br>(9 - 22)           | 34<br>(19 - 55)             |

Web Table 31- Cuba deaths with 95% UI by age, sex, and cause in 2013

| Cause                                               | Males, All Ages          | Males, 0-4 Years | Males, 5-14 Years | Males, 15-49 Years | Males, 50-69 Years | Males, 70-80 Years       |
|-----------------------------------------------------|--------------------------|------------------|-------------------|--------------------|--------------------|--------------------------|
| Silicosis                                           | 2<br>(1 - 4)             | 0<br>(0 - 0)     | 0<br>(0 - 0)      | 0<br>(0 - 0)       | 1<br>(0 - 1)       | 1<br>(1 - 2)             |
| Asbestosis                                          | 5<br>(3 - 8)             | 0<br>(0 - 0)     | 0<br>(0 - 0)      | 0<br>(0 - 0)       | 5<br>(3 - 7)       | 0<br>(0 - 0)             |
| Coal workers pneumoconiosis                         | 10<br>(6 - 15)           | 0<br>(0 - 0)     | 0<br>(0 - 0)      | 1<br>(0 - 1)       | 4<br>(2 - 6)       | 6<br>(3 - 10)            |
| Other pneumoconiosis                                | 33<br>(19 - 52)          | 0<br>(0 - 0)     | 0<br>(0 - 0)      | 0<br>(0 - 1)       | 6<br>(3 - 9)       | 27<br>(16 - 43)          |
| Asthma                                              | 136<br>(101 - 164)       | 0<br>(0 - 0)     | 1<br>(0 - 1)      | 31<br>(24 - 40)    | 53<br>(37 - 67)    | 51<br>(34 - 68)          |
| Interstitial lung disease and pulmonary sarcoidosis | 81<br>(49 - 122)         | 0<br>(0 - 1)     | 0<br>(0 - 0)      | 4<br>(2 - 5)       | 14<br>(8 - 21)     | 63<br>(36 - 97)          |
| Other chronic respiratory diseases                  | 16<br>(12 - 22)          | 1<br>(0 - 1)     | 0<br>(0 - 0)      | 2<br>(1 - 3)       | 5<br>(3 - 7)       | 9<br>(5 - 13)            |
| Cirrhosis                                           | 1,021<br>(898 - 1,155)   | 0<br>(0 - 1)     | 1<br>(1 - 1)      | 216<br>(179 - 259) | 496<br>(421 - 579) | 308<br>(264 - 360)       |
| Cirrhosis due to hepatitis B                        | 86<br>(16 - 172)         | 0<br>(0 - 0)     | 0<br>(0 - 0)      | 20<br>(4 - 41)     | 43<br>(8 - 89)     | 23<br>(4 - 48)           |
| Cirrhosis due to hepatitis C                        | 237<br>(90 - 435)        | 0<br>(0 - 0)     | 0<br>(0 - 0)      | 37<br>(11 - 87)    | 106<br>(31 - 215)  | 93<br>(42 - 146)         |
| Cirrhosis due to alcohol use                        | 566<br>(411 - 735)       | --               | --                | 111<br>(71 - 152)  | 284<br>(197 - 376) | 171<br>(123 - 236)       |
| Cirrhosis due to other causes                       | 133<br>(73 - 204)        | 0<br>(0 - 1)     | 1<br>(1 - 1)      | 48<br>(30 - 71)    | 63<br>(29 - 102)   | 21<br>(10 - 36)          |
| Digestive diseases                                  | 1,059<br>(906 - 1,240)   | 1<br>(0 - 1)     | 2<br>(1 - 2)      | 110<br>(86 - 132)  | 290<br>(242 - 355) | 656<br>(546 - 794)       |
| Peptic ulcer disease                                | 251<br>(177 - 361)       | 0<br>(0 - 0)     | 0<br>(0 - 0)      | 17<br>(12 - 24)    | 70<br>(49 - 103)   | 163<br>(111 - 240)       |
| Gastritis and duodenitis                            | 67<br>(41 - 119)         | 0<br>(0 - 0)     | 0<br>(0 - 0)      | 6<br>(3 - 10)      | 15<br>(9 - 27)     | 46<br>(26 - 84)          |
| Appendicitis                                        | 36<br>(23 - 51)          | 0<br>(0 - 0)     | 0<br>(0 - 1)      | 8<br>(5 - 11)      | 11<br>(7 - 16)     | 17<br>(9 - 26)           |
| Paralytic ileus and intestinal obstruction          | 120<br>(12 - 217)        | 0<br>(0 - 1)     | 0<br>(0 - 1)      | 10<br>(1 - 19)     | 28<br>(3 - 53)     | 81<br>(7 - 152)          |
| Inguinal, femoral, and abdominal hernia             | 84<br>(49 - 177)         | 0<br>(0 - 0)     | 0<br>(0 - 0)      | 5<br>(3 - 12)      | 18<br>(9 - 40)     | 61<br>(34 - 131)         |
| Inflammatory bowel disease                          | 25<br>(17 - 41)          | 0<br>(0 - 0)     | 0<br>(0 - 0)      | 3<br>(2 - 5)       | 8<br>(5 - 14)      | 13<br>(8 - 23)           |
| Vascular intestinal disorders                       | 194<br>(85 - 348)        | 0<br>(0 - 0)     | 0<br>(0 - 0)      | 9<br>(3 - 18)      | 53<br>(23 - 94)    | 132<br>(58 - 242)        |
| Gallbladder and biliary diseases                    | 95<br>(67 - 141)         | 0<br>(0 - 0)     | 0<br>(0 - 0)      | 6<br>(4 - 8)       | 24<br>(17 - 37)    | 65<br>(43 - 100)         |
| Pancreatitis                                        | 112<br>(77 - 164)        | 0<br>(0 - 0)     | 0<br>(0 - 0)      | 38<br>(27 - 53)    | 42<br>(27 - 64)    | 31<br>(19 - 52)          |
| Other digestive diseases                            | 75<br>(37 - 109)         | 0<br>(0 - 0)     | 0<br>(0 - 0)      | 7<br>(3 - 11)      | 20<br>(10 - 29)    | 47<br>(23 - 73)          |
| Neurological disorders                              | 2,658<br>(2,096 - 3,241) | 4<br>(3 - 6)     | 5<br>(4 - 7)      | 82<br>(67 - 101)   | 236<br>(189 - 291) | 2,331<br>(1,774 - 2,901) |
| Alzheimer disease and other dementias               | 2,143<br>(1,600 - 2,711) | --               | --                | 0<br>(0 - 2)       | 109<br>(69 - 153)  | 2,034<br>(1,489 - 2,589) |
| Parkinson disease                                   | 297<br>(188 - 377)       | --               | --                | 2<br>(1 - 2)       | 44<br>(33 - 57)    | 251<br>(157 - 323)       |
| Epilepsy                                            | 66<br>(48 - 83)          | 1<br>(0 - 1)     | 2<br>(1 - 2)      | 35<br>(27 - 47)    | 20<br>(13 - 26)    | 9<br>(5 - 14)            |
| Multiple sclerosis                                  | 16<br>(8 - 27)           | --               | --                | 5<br>(2 - 9)       | 7<br>(3 - 12)      | 4<br>(2 - 6)             |
| Other neurological disorders                        | 136<br>(109 - 174)       | 3<br>(2 - 5)     | 4<br>(2 - 5)      | 39<br>(30 - 50)    | 57<br>(45 - 74)    | 33<br>(25 - 43)          |
| Mental and substance use disorders                  | 399<br>(163 - 498)       | 0<br>(0 - 0)     | 0<br>(0 - 0)      | 123<br>(49 - 163)  | 198<br>(75 - 260)  | 78<br>(31 - 101)         |
| Schizophrenia                                       | 22<br>(12 - 30)          | --               | --                | 5<br>(2 - 8)       | 12<br>(6 - 18)     | 6<br>(3 - 10)            |
| Alcohol use disorders                               | 328<br>(102 - 421)       | --               | --                | 105<br>(32 - 143)  | 176<br>(55 - 236)  | 47<br>(12 - 64)          |
| Drug use disorders                                  | 49<br>(24 - 63)          | 0<br>(0 - 0)     | --                | 13<br>(9 - 18)     | 10<br>(6 - 13)     | 26<br>(9 - 37)           |
| Opioid use disorders                                | 14<br>(7 - 19)           | 0<br>(0 - 0)     | --                | 4<br>(2 - 5)       | 3<br>(2 - 4)       | 8<br>(3 - 12)            |
| Cocaine use disorders                               | 2<br>(1 - 2)             | 0<br>(0 - 0)     | --                | 1<br>(0 - 1)       | 0<br>(0 - 0)       | 1<br>(0 - 1)             |
| Amphetamine use disorders                           | 1<br>(1 - 2)             | 0<br>(0 - 0)     | --                | 0<br>(0 - 1)       | 0<br>(0 - 0)       | 1<br>(0 - 1)             |
| Other drug use disorders                            | 31<br>(16 - 40)          | 0<br>(0 - 0)     | --                | 9<br>(5 - 12)      | 7<br>(4 - 9)       | 16<br>(6 - 23)           |
| Eating disorders                                    | 0<br>(0 - 0)             | --               | 0<br>(0 - 0)      | 0<br>(0 - 0)       | --                 | --                       |
| Anorexia nervosa                                    | 0<br>(0 - 0)             | --               | 0<br>(0 - 0)      | 0<br>(0 - 0)       | --                 | --                       |
| Diabetes, urogenital, blood, and endocrine diseases | 2,030<br>(1,783 - 2,381) | 10<br>(7 - 16)   | 6<br>(4 - 8)      | 232<br>(193 - 282) | 662<br>(570 - 793) | 1,120<br>(961 - 1,335)   |

Web Table 31- Cuba deaths with 95% UI by age, sex, and cause in 2013

| Cause                                               | Males, All Ages      | Males, 0-4 Years | Males, 5-14 Years | Males, 15-49 Years | Males, 50-69 Years | Males, 70-80 Years |
|-----------------------------------------------------|----------------------|------------------|-------------------|--------------------|--------------------|--------------------|
| Diabetes mellitus                                   | 769<br>(673 - 888)   | 0<br>(0 - 0)     | 0<br>(0 - 0)      | 60<br>(48 - 75)    | 262<br>(219 - 314) | 446<br>(376 - 535) |
| Acute glomerulonephritis                            | 2<br>(1 - 3)         | 0<br>(0 - 0)     | 0<br>(0 - 0)      | 0<br>(0 - 1)       | 1<br>(0 - 1)       | 1<br>(0 - 2)       |
| Chronic kidney disease                              | 996<br>(809 - 1,279) | 1<br>(1 - 1)     | 2<br>(1 - 2)      | 126<br>(96 - 164)  | 324<br>(252 - 420) | 543<br>(424 - 706) |
| Chronic kidney disease due to diabetes mellitus     | 277<br>(133 - 397)   | 0<br>(0 - 0)     | 0<br>(0 - 0)      | 41<br>(20 - 64)    | 111<br>(51 - 165)  | 124<br>(52 - 185)  |
| Chronic kidney disease due to hypertension          | 417<br>(261 - 603)   | 0<br>(0 - 0)     | 0<br>(0 - 0)      | 44<br>(26 - 69)    | 130<br>(81 - 210)  | 243<br>(142 - 338) |
| Chronic kidney disease due to glomerulonephritis    | 21<br>(13 - 30)      | 0<br>(0 - 1)     | 1<br>(0 - 1)      | 9<br>(5 - 14)      | 5<br>(3 - 8)       | 6<br>(3 - 9)       |
| Chronic kidney disease due to other causes          | 281<br>(177 - 483)   | 0<br>(0 - 1)     | 1<br>(0 - 1)      | 32<br>(18 - 54)    | 78<br>(42 - 138)   | 170<br>(93 - 309)  |
| Urinary diseases and male infertility               | 112<br>(84 - 137)    | 0<br>(0 - 0)     | 0<br>(0 - 0)      | 8<br>(6 - 10)      | 27<br>(20 - 35)    | 76<br>(52 - 98)    |
| Interstitial nephritis and urinary tract infections | 64<br>(42 - 82)      | 0<br>(0 - 0)     | 0<br>(0 - 0)      | 4<br>(3 - 6)       | 14<br>(9 - 18)     | 46<br>(28 - 62)    |
| Urolithiasis                                        | 14<br>(9 - 19)       | --               | 0<br>(0 - 0)      | 2<br>(1 - 2)       | 5<br>(3 - 7)       | 7<br>(4 - 11)      |
| Other urinary diseases                              | 34<br>(22 - 49)      | 0<br>(0 - 0)     | 0<br>(0 - 0)      | 3<br>(2 - 4)       | 9<br>(5 - 13)      | 23<br>(13 - 34)    |
| Gynecological diseases                              | --                   | --               | --                | --                 | --                 | --                 |
| Uterine fibroids                                    | --                   | --               | --                | --                 | --                 | --                 |
| Polycystic ovarian syndrome                         | --                   | --               | --                | --                 | --                 | --                 |
| Endometriosis                                       | --                   | --               | --                | --                 | --                 | --                 |
| Genital prolapse                                    | --                   | --               | --                | --                 | --                 | --                 |
| Other gynecological diseases                        | --                   | --               | --                | --                 | --                 | --                 |
| Hemoglobinopathies and hemolytic anemias            | 36<br>(21 - 50)      | 2<br>(1 - 3)     | 1<br>(1 - 2)      | 14<br>(8 - 20)     | 8<br>(5 - 12)      | 10<br>(6 - 15)     |
| Thalassemias                                        | 0<br>(0 - 0)         | 0<br>(0 - 0)     | 0<br>(0 - 0)      | 0<br>(0 - 0)       | 0<br>(0 - 0)       | 0<br>(0 - 0)       |
| Sickle cell disorders                               | 23<br>(14 - 33)      | 1<br>(1 - 2)     | 1<br>(1 - 2)      | 13<br>(7 - 18)     | 7<br>(4 - 10)      | 1<br>(1 - 2)       |
| G6PD deficiency                                     | 0<br>(0 - 1)         | 0<br>(0 - 0)     | 0<br>(0 - 0)      | 0<br>(0 - 0)       | 0<br>(0 - 0)       | 0<br>(0 - 0)       |
| Other hemoglobinopathies and hemolytic anemias      | 12<br>(7 - 17)       | 0<br>(0 - 0)     | 0<br>(0 - 0)      | 1<br>(1 - 2)       | 2<br>(1 - 2)       | 9<br>(5 - 13)      |
| Endocrine, metabolic, blood, and immune disorders   | 116<br>(91 - 200)    | 7<br>(4 - 13)    | 2<br>(2 - 4)      | 23<br>(17 - 37)    | 39<br>(28 - 68)    | 44<br>(30 - 88)    |
| Musculoskeletal disorders                           | 37<br>(15 - 48)      | --               | 1<br>(0 - 1)      | 8<br>(3 - 11)      | 12<br>(5 - 16)     | 16<br>(6 - 23)     |
| Rheumatoid arthritis                                | 13<br>(5 - 19)       | --               | 0<br>(0 - 0)      | 1<br>(0 - 2)       | 4<br>(2 - 6)       | 8<br>(3 - 12)      |
| Other musculoskeletal disorders                     | 24<br>(9 - 32)       | --               | 0<br>(0 - 1)      | 7<br>(3 - 10)      | 8<br>(3 - 11)      | 8<br>(3 - 13)      |
| Other non-communicable diseases                     | 302<br>(255 - 348)   | 96<br>(75 - 125) | 14<br>(10 - 19)   | 72<br>(58 - 87)    | 52<br>(40 - 64)    | 68<br>(34 - 85)    |
| Congenital anomalies                                | 238<br>(203 - 282)   | 92<br>(70 - 120) | 14<br>(10 - 18)   | 65<br>(52 - 80)    | 39<br>(30 - 51)    | 29<br>(21 - 40)    |
| Neural tube defects                                 | 2<br>(1 - 2)         | 1<br>(0 - 1)     | 0<br>(0 - 0)      | 1<br>(0 - 1)       | 0<br>(0 - 0)       | 0<br>(0 - 0)       |
| Congenital heart anomalies                          | 91<br>(74 - 117)     | 47<br>(34 - 66)  | 7<br>(4 - 10)     | 22<br>(16 - 30)    | 7<br>(4 - 11)      | 8<br>(4 - 13)      |
| Cleft lip and cleft palate                          | 0<br>(0 - 0)         | 0<br>(0 - 0)     | --                | --                 | --                 | --                 |
| Down syndrome                                       | 17<br>(11 - 26)      | 2<br>(1 - 5)     | 0<br>(0 - 1)      | 7<br>(4 - 11)      | 7<br>(4 - 12)      | 1<br>(0 - 1)       |
| Chromosomal unbalanced rearrangements               | 3<br>(2 - 5)         | 2<br>(1 - 3)     | 0<br>(0 - 0)      | 0<br>(0 - 1)       | 0<br>(0 - 1)       | 0<br>(0 - 1)       |
| Other congenital anomalies                          | 125<br>(102 - 154)   | 40<br>(27 - 56)  | 6<br>(4 - 10)     | 34<br>(26 - 46)    | 24<br>(18 - 33)    | 20<br>(13 - 27)    |
| Skin and subcutaneous diseases                      | 61<br>(17 - 78)      | 2<br>(0 - 3)     | 1<br>(0 - 1)      | 7<br>(2 - 10)      | 13<br>(4 - 17)     | 39<br>(11 - 52)    |
| Cellulitis                                          | 15<br>(4 - 22)       | 0<br>(0 - 1)     | 0<br>(0 - 0)      | 3<br>(1 - 4)       | 3<br>(1 - 5)       | 8<br>(2 - 15)      |
| Pyoderma                                            | 17<br>(4 - 23)       | 1<br>(0 - 2)     | 0<br>(0 - 0)      | 3<br>(1 - 4)       | 5<br>(1 - 7)       | 8<br>(2 - 13)      |
| Decubitus ulcer                                     | 24<br>(8 - 34)       | 0<br>(0 - 0)     | 0<br>(0 - 0)      | 1<br>(0 - 1)       | 4<br>(1 - 5)       | 19<br>(6 - 29)     |
| Other skin and subcutaneous diseases                | 6<br>(2 - 10)        | 0<br>(0 - 0)     | 0<br>(0 - 0)      | 1<br>(0 - 2)       | 1<br>(0 - 2)       | 3<br>(1 - 7)       |
| Sudden infant death syndrome                        | 3<br>(1 - 5)         | 3<br>(1 - 5)     | --                | --                 | --                 | --                 |

Web Table 31- Cuba deaths with 95% UI by age, sex, and cause in 2013

| Cause                                           | Males, All Ages          | Males, 0-4 Years | Males, 5-14 Years | Males, 15-49 Years       | Males, 50-69 Years     | Males, 70-80 Years       |
|-------------------------------------------------|--------------------------|------------------|-------------------|--------------------------|------------------------|--------------------------|
| Injuries                                        | 4,568<br>(4,049 - 5,452) | 29<br>(21 - 41)  | 66<br>(56 - 79)   | 1,800<br>(1,584 - 2,118) | 1,119<br>(966 - 1,407) | 1,554<br>(1,301 - 1,918) |
| Transport injuries                              | 1,024<br>(861 - 1,501)   | 4<br>(2 - 6)     | 23<br>(17 - 30)   | 520<br>(427 - 729)       | 290<br>(234 - 440)     | 188<br>(147 - 302)       |
| Road injuries                                   | 937<br>(784 - 1,343)     | 3<br>(2 - 6)     | 21<br>(16 - 27)   | 475<br>(390 - 650)       | 265<br>(212 - 387)     | 172<br>(134 - 267)       |
| Pedestrian road injuries                        | 308<br>(227 - 443)       | 2<br>(1 - 3)     | 10<br>(7 - 13)    | 96<br>(65 - 140)         | 88<br>(60 - 130)       | 113<br>(84 - 178)        |
| Cyclist road injuries                           | 196<br>(150 - 293)       | 0<br>(0 - 1)     | 5<br>(3 - 8)      | 93<br>(69 - 136)         | 67<br>(47 - 105)       | 31<br>(20 - 49)          |
| Motorcyclist road injuries                      | 122<br>(82 - 175)        | 0<br>(0 - 0)     | 0<br>(0 - 1)      | 91<br>(61 - 129)         | 26<br>(16 - 42)        | 4<br>(2 - 6)             |
| Motor vehicle road injuries                     | 266<br>(200 - 399)       | 1<br>(1 - 2)     | 5<br>(3 - 7)      | 174<br>(129 - 258)       | 70<br>(49 - 110)       | 16<br>(10 - 26)          |
| Other road injuries                             | 44<br>(24 - 71)          | 0<br>(0 - 0)     | 1<br>(0 - 2)      | 22<br>(11 - 33)          | 14<br>(8 - 23)         | 8<br>(4 - 13)            |
| Other transport injuries                        | 88<br>(63 - 165)         | 0<br>(0 - 0)     | 2<br>(1 - 3)      | 45<br>(31 - 80)          | 25<br>(16 - 53)        | 16<br>(10 - 38)          |
| Unintentional injuries                          | 1,774<br>(1,480 - 2,126) | 22<br>(15 - 33)  | 36<br>(29 - 49)   | 413<br>(354 - 506)       | 317<br>(266 - 376)     | 986<br>(756 - 1,234)     |
| Falls                                           | 997<br>(765 - 1,271)     | 1<br>(1 - 2)     | 4<br>(3 - 5)      | 91<br>(68 - 114)         | 143<br>(107 - 179)     | 758<br>(543 - 994)       |
| Drowning                                        | 245<br>(172 - 387)       | 5<br>(2 - 12)    | 20<br>(14 - 36)   | 142<br>(102 - 228)       | 51<br>(31 - 75)        | 28<br>(16 - 39)          |
| Fire, heat, and hot substances                  | 71<br>(46 - 93)          | 2<br>(1 - 3)     | 2<br>(1 - 3)      | 16<br>(12 - 24)          | 12<br>(9 - 17)         | 39<br>(20 - 60)          |
| Poisonings                                      | 17<br>(13 - 34)          | 1<br>(0 - 2)     | 0<br>(0 - 1)      | 6<br>(4 - 13)            | 5<br>(4 - 12)          | 4<br>(3 - 8)             |
| Exposure to mechanical forces                   | 101<br>(84 - 144)        | 2<br>(1 - 5)     | 3<br>(2 - 5)      | 55<br>(45 - 82)          | 28<br>(21 - 41)        | 12<br>(9 - 16)           |
| Unintentional firearm injuries                  | 25<br>(18 - 32)          | 0<br>(0 - 0)     | 1<br>(0 - 1)      | 13<br>(8 - 18)           | 5<br>(3 - 8)           | 6<br>(4 - 9)             |
| Unintentional suffocation                       | 4<br>(3 - 7)             | 1<br>(1 - 3)     | 0<br>(0 - 0)      | 1<br>(1 - 1)             | 1<br>(1 - 2)           | 0<br>(0 - 0)             |
| Other exposure to mechanical forces             | 72<br>(59 - 115)         | 1<br>(0 - 1)     | 3<br>(2 - 4)      | 42<br>(33 - 68)          | 21<br>(16 - 34)        | 6<br>(4 - 8)             |
| Adverse effects of medical treatment            | 92<br>(54 - 125)         | 1<br>(1 - 2)     | 0<br>(0 - 0)      | 7<br>(4 - 9)             | 15<br>(9 - 20)         | 69<br>(37 - 97)          |
| Animal contact                                  | 26<br>(17 - 34)          | 0<br>(0 - 0)     | 0<br>(0 - 0)      | 5<br>(3 - 7)             | 9<br>(5 - 12)          | 12<br>(7 - 16)           |
| Venomous animal contact                         | 3<br>(1 - 4)             | 0<br>(0 - 0)     | 0<br>(0 - 0)      | 1<br>(0 - 1)             | 1<br>(0 - 1)           | 1<br>(1 - 2)             |
| Non-venomous animal contact                     | 24<br>(15 - 30)          | 0<br>(0 - 0)     | 0<br>(0 - 0)      | 5<br>(3 - 6)             | 8<br>(5 - 11)          | 11<br>(6 - 15)           |
| Foreign body                                    | 100<br>(62 - 164)        | 7<br>(4 - 12)    | 1<br>(1 - 2)      | 17<br>(11 - 29)          | 27<br>(16 - 46)        | 48<br>(28 - 82)          |
| Pulmonary aspiration and foreign body in airway | 97<br>(58 - 159)         | 7<br>(4 - 12)    | 1<br>(1 - 2)      | 16<br>(9 - 28)           | 26<br>(15 - 45)        | 47<br>(26 - 81)          |
| Foreign body in other body part                 | 4<br>(2 - 7)             | 0<br>(0 - 0)     | 0<br>(0 - 0)      | 1<br>(1 - 2)             | 1<br>(1 - 2)           | 1<br>(1 - 2)             |
| Other unintentional injuries                    | 124<br>(95 - 161)        | 3<br>(2 - 6)     | 5<br>(2 - 8)      | 73<br>(51 - 104)         | 27<br>(16 - 46)        | 16<br>(9 - 25)           |
| Self-harm and interpersonal violence            | 1,769<br>(1,511 - 2,199) | 3<br>(1 - 6)     | 7<br>(5 - 11)     | 867<br>(725 - 1,057)     | 512<br>(418 - 682)     | 380<br>(301 - 543)       |
| Self-harm                                       | 1,302<br>(1,106 - 1,715) | --               | 3<br>(2 - 4)      | 534<br>(426 - 665)       | 418<br>(339 - 563)     | 347<br>(274 - 507)       |
| Interpersonal violence                          | 467<br>(331 - 663)       | 3<br>(1 - 6)     | 4<br>(2 - 8)      | 333<br>(230 - 457)       | 93<br>(58 - 163)       | 33<br>(16 - 60)          |
| Assault by firearm                              | 52<br>(25 - 101)         | 0<br>(0 - 1)     | 1<br>(1 - 3)      | 36<br>(16 - 70)          | 11<br>(5 - 24)         | 4<br>(1 - 9)             |
| Assault by sharp object                         | 291<br>(194 - 424)       | 0<br>(0 - 1)     | 1<br>(1 - 3)      | 239<br>(157 - 340)       | 41<br>(22 - 73)        | 9<br>(4 - 17)            |
| Assault by other means                          | 124<br>(74 - 193)        | 2<br>(1 - 4)     | 2<br>(1 - 3)      | 58<br>(33 - 95)          | 42<br>(23 - 78)        | 21<br>(9 - 38)           |

Web Table 31- Cuba deaths with 95% UI by age, sex, and cause in 2013

| Cause                                                             | Females, All Ages           | Females, 0-4 Years | Females, 5-14 Years | Females, 15-49 Years     | Females, 50-69 Years     | Females, 70-80 Years        |
|-------------------------------------------------------------------|-----------------------------|--------------------|---------------------|--------------------------|--------------------------|-----------------------------|
| All causes                                                        | 45,512<br>(42,381 - 48,520) | 266<br>(223 - 316) | 92<br>(84 - 101)    | 2,698<br>(2,373 - 3,030) | 8,990<br>(8,063 - 9,887) | 33,466<br>(31,588 - 35,227) |
| Communicable, maternal, neonatal, and nutritional diseases        | 3,571<br>(2,810 - 4,428)    | 135<br>(107 - 164) | 15<br>(11 - 19)     | 182<br>(156 - 209)       | 325<br>(262 - 394)       | 2,914<br>(2,185 - 3,763)    |
| HIV/AIDS and tuberculosis                                         | 48<br>(37 - 64)             | 0<br>(0 - 0)       | 1<br>(0 - 1)        | 30<br>(22 - 41)          | 9<br>(7 - 13)            | 8<br>(6 - 11)               |
| Tuberculosis                                                      | 13<br>(10 - 17)             | 0<br>(0 - 0)       | 0<br>(0 - 0)        | 2<br>(1 - 2)             | 4<br>(3 - 5)             | 8<br>(5 - 10)               |
| HIV/AIDS                                                          | 35<br>(25 - 50)             | 0<br>(0 - 0)       | 1<br>(0 - 1)        | 28<br>(20 - 39)          | 6<br>(4 - 10)            | 1<br>(0 - 1)                |
| HIV/AIDS resulting in mycobacterial infection                     | 1<br>(1 - 2)                | 0<br>(0 - 0)       | 0<br>(0 - 0)        | 1<br>(1 - 2)             | 0<br>(0 - 0)             | 0<br>(0 - 0)                |
| HIV/AIDS resulting in other diseases                              | 34<br>(24 - 48)             | 0<br>(0 - 0)       | 1<br>(0 - 1)        | 27<br>(19 - 38)          | 6<br>(3 - 9)             | 1<br>(0 - 1)                |
| Diarrhea, lower respiratory, and other common infectious diseases | 3,238<br>(2,476 - 4,095)    | 41<br>(32 - 52)    | 12<br>(9 - 16)      | 89<br>(71 - 111)         | 291<br>(230 - 358)       | 2,805<br>(2,079 - 3,659)    |
| Diarrheal diseases                                                | 134<br>(93 - 193)           | 5<br>(3 - 7)       | 0<br>(0 - 1)        | 6<br>(4 - 9)             | 22<br>(15 - 30)          | 101<br>(63 - 158)           |
| Intestinal infectious diseases                                    | 27<br>(13 - 49)             | 6<br>(3 - 12)      | 5<br>(2 - 10)       | 10<br>(4 - 22)           | 3<br>(1 - 7)             | 2<br>(1 - 5)                |
| Typhoid fever                                                     | 19<br>(9 - 36)              | 4<br>(2 - 8)       | 4<br>(2 - 7)        | 8<br>(3 - 16)            | 2<br>(1 - 5)             | 1<br>(0 - 3)                |
| Paratyphoid fever                                                 | 5<br>(2 - 10)               | 1<br>(1 - 3)       | 1<br>(0 - 2)        | 2<br>(1 - 5)             | 1<br>(0 - 1)             | 0<br>(0 - 1)                |
| Other intestinal infectious diseases                              | 3<br>(0 - 7)                | 1<br>(0 - 3)       | 0<br>(0 - 1)        | 1<br>(0 - 4)             | 0<br>(0 - 3)             | 1<br>(0 - 4)                |
| Lower respiratory infections                                      | 3,006<br>(2,256 - 3,865)    | 22<br>(15 - 31)    | 3<br>(2 - 4)        | 58<br>(42 - 73)          | 247<br>(189 - 310)       | 2,676<br>(1,963 - 3,533)    |
| Upper respiratory infections                                      | 2<br>(0 - 5)                | 0<br>(0 - 0)       | 0<br>(0 - 0)        | 0<br>(0 - 0)             | 0<br>(0 - 1)             | 1<br>(0 - 5)                |
| Otitis media                                                      | 1<br>(1 - 1)                | 0<br>(0 - 0)       | 0<br>(0 - 0)        | 0<br>(0 - 0)             | 0<br>(0 - 0)             | 0<br>(0 - 0)                |
| Meningitis                                                        | 44<br>(37 - 57)             | 5<br>(4 - 8)       | 1<br>(1 - 2)        | 7<br>(6 - 9)             | 13<br>(10 - 17)          | 18<br>(13 - 26)             |
| Pneumococcal meningitis                                           | 12<br>(8 - 17)              | 1<br>(1 - 2)       | 0<br>(0 - 1)        | 2<br>(1 - 3)             | 3<br>(2 - 6)             | 5<br>(2 - 8)                |
| H influenzae type B meningitis                                    | 5<br>(4 - 7)                | 2<br>(1 - 3)       | 0<br>(0 - 0)        | 1<br>(0 - 1)             | 1<br>(0 - 2)             | 2<br>(1 - 3)                |
| Meningococcal meningitis                                          | 7<br>(4 - 10)               | 1<br>(0 - 1)       | 0<br>(0 - 0)        | 1<br>(0 - 2)             | 2<br>(1 - 3)             | 3<br>(2 - 5)                |
| Other meningitis                                                  | 21<br>(17 - 27)             | 2<br>(1 - 3)       | 0<br>(0 - 1)        | 3<br>(2 - 5)             | 6<br>(4 - 9)             | 9<br>(6 - 13)               |
| Encephalitis                                                      | 19<br>(14 - 29)             | 2<br>(1 - 4)       | 2<br>(1 - 3)        | 6<br>(4 - 11)            | 5<br>(3 - 8)             | 3<br>(2 - 5)                |
| Diphtheria                                                        | 0<br>(0 - 0)                | 0<br>(0 - 0)       | 0<br>(0 - 0)        | 0<br>(0 - 0)             | 0<br>(0 - 0)             | --<br>(0 - 0)               |
| Whooping cough                                                    | 0<br>(0 - 1)                | 0<br>(0 - 0)       | 0<br>(0 - 0)        | 0<br>(0 - 0)             | 0<br>(0 - 0)             | --<br>(0 - 0)               |
| Tetanus                                                           | 1<br>(0 - 1)                | 0<br>(0 - 0)       | 0<br>(0 - 0)        | 0<br>(0 - 0)             | 0<br>(0 - 0)             | 0<br>(0 - 0)                |
| Measles                                                           | 0<br>(0 - 0)                | 0<br>(0 - 0)       | 0<br>(0 - 0)        | 0<br>(0 - 0)             | 0<br>(0 - 0)             | --<br>(0 - 0)               |
| Varicella and herpes zoster                                       | 4<br>(1 - 16)               | 0<br>(0 - 1)       | 0<br>(0 - 0)        | 0<br>(0 - 1)             | 0<br>(0 - 1)             | 3<br>(0 - 14)               |
| Neglected tropical diseases and malaria                           | 9<br>(7 - 13)               | 1<br>(0 - 2)       | 1<br>(0 - 2)        | 2<br>(2 - 4)             | 2<br>(2 - 5)             | 3<br>(2 - 6)                |
| Leishmaniasis                                                     | 0<br>(0 - 0)                | 0<br>(0 - 0)       | 0<br>(0 - 0)        | 0<br>(0 - 0)             | 0<br>(0 - 0)             | 0<br>(0 - 0)                |
| Visceral leishmaniasis                                            | 0<br>(0 - 0)                | 0<br>(0 - 0)       | 0<br>(0 - 0)        | 0<br>(0 - 0)             | 0<br>(0 - 0)             | 0<br>(0 - 0)                |
| Cysticercosis                                                     | 2<br>(1 - 2)                | 0<br>(0 - 0)       | 0<br>(0 - 0)        | 1<br>(0 - 1)             | 1<br>(1 - 1)             | 1<br>(0 - 1)                |
| Cystic echinococcosis                                             | 1<br>(0 - 1)                | 0<br>(0 - 0)       | 0<br>(0 - 0)        | 0<br>(0 - 0)             | 0<br>(0 - 0)             | 0<br>(0 - 0)                |
| Dengue                                                            | 4<br>(2 - 5)                | 0<br>(0 - 1)       | 1<br>(0 - 1)        | 1<br>(1 - 2)             | 1<br>(1 - 1)             | 1<br>(0 - 1)                |
| Rabies                                                            | 1<br>(0 - 1)                | 0<br>(0 - 0)       | 0<br>(0 - 0)        | 0<br>(0 - 0)             | 0<br>(0 - 0)             | 0<br>(0 - 0)                |
| Intestinal nematode infections                                    | 1<br>(0 - 5)                | 0<br>(0 - 1)       | 0<br>(0 - 1)        | 0<br>(0 - 1)             | 0<br>(0 - 3)             | 1<br>(0 - 4)                |
| Ascariasis                                                        | 1<br>(0 - 5)                | 0<br>(0 - 1)       | 0<br>(0 - 1)        | 0<br>(0 - 1)             | 0<br>(0 - 3)             | 1<br>(0 - 4)                |
| Other neglected tropical diseases                                 | 1<br>(1 - 2)                | 0<br>(0 - 0)       | 0<br>(0 - 0)        | 0<br>(0 - 0)             | 0<br>(0 - 0)             | 0<br>(0 - 1)                |
| Maternal disorders                                                | 44<br>(35 - 54)             | --                 | 0<br>(0 - 0)        | 44<br>(35 - 54)          | --                       | --                          |
| Maternal hemorrhage                                               | 5<br>(3 - 7)                | --                 | 0<br>(0 - 0)        | 5<br>(3 - 7)             | --                       | --                          |
| Maternal sepsis and other maternal infections                     | 4<br>(3 - 6)                | --                 | 0<br>(0 - 0)        | 4<br>(3 - 6)             | --                       | --                          |

Web Table 31- Cuba deaths with 95% UI by age, sex, and cause in 2013

| Cause                                                            | Females, All Ages           | Females, 0-4 Years | Females, 5-14 Years | Females, 15-49 Years     | Females, 50-69 Years     | Females, 70-80 Years        |
|------------------------------------------------------------------|-----------------------------|--------------------|---------------------|--------------------------|--------------------------|-----------------------------|
| Maternal hypertensive disorders                                  | 4<br>(2 - 6)                | --                 | 0<br>(0 - 0)        | 4<br>(2 - 6)             | --                       | --                          |
| Maternal obstructed labor                                        | 3<br>(2 - 5)                | --                 | 0<br>(0 - 0)        | 3<br>(2 - 5)             | --                       | --                          |
| Maternal abortive outcome                                        | 7<br>(5 - 10)               | --                 | 0<br>(0 - 0)        | 7<br>(5 - 10)            | --                       | --                          |
| Indirect maternal deaths                                         | 10<br>(7 - 13)              | --                 | 0<br>(0 - 0)        | 9<br>(7 - 13)            | --                       | --                          |
| Late maternal deaths                                             | 3<br>(2 - 5)                | --                 | 0<br>(0 - 0)        | 3<br>(2 - 5)             | --                       | --                          |
| Maternal deaths aggravated by HIV/AIDS                           | 0<br>(0 - 0)                | --                 | --                  | 0<br>(0 - 0)             | --                       | --                          |
| Other maternal disorders                                         | 7<br>(5 - 9)                | --                 | 0<br>(0 - 0)        | 7<br>(5 - 9)             | --                       | --                          |
| Neonatal disorders                                               | 90<br>(70 - 112)            | 90<br>(70 - 112)   | --                  | --                       | --                       | --                          |
| Neonatal preterm birth complications                             | 23<br>(12 - 34)             | 23<br>(12 - 34)    | --                  | --                       | --                       | --                          |
| Neonatal encephalopathy due to birth asphyxia and trauma         | 26<br>(18 - 36)             | 26<br>(18 - 36)    | --                  | --                       | --                       | --                          |
| Neonatal sepsis and other neonatal infections                    | 18<br>(10 - 32)             | 18<br>(10 - 32)    | --                  | --                       | --                       | --                          |
| Hemolytic disease and other neonatal jaundice                    | 2<br>(1 - 8)                | 2<br>(1 - 8)       | --                  | --                       | --                       | --                          |
| Other neonatal disorders                                         | 21<br>(11 - 32)             | 21<br>(11 - 32)    | --                  | --                       | --                       | --                          |
| Nutritional deficiencies                                         | 109<br>(83 - 140)           | 2<br>(1 - 3)       | 1<br>(0 - 1)        | 9<br>(7 - 12)            | 12<br>(9 - 15)           | 85<br>(62 - 115)            |
| Protein-energy malnutrition                                      | 19<br>(8 - 34)              | 2<br>(1 - 2)       | 0<br>(0 - 0)        | 1<br>(0 - 2)             | 3<br>(2 - 5)             | 13<br>(4 - 27)              |
| Iodine deficiency                                                | 1<br>(0 - 4)                | 0<br>(0 - 0)       | 0<br>(0 - 0)        | 0<br>(0 - 0)             | 0<br>(0 - 1)             | 0<br>(0 - 3)                |
| Iron-deficiency anemia                                           | 79<br>(56 - 107)            | 0<br>(0 - 0)       | 0<br>(0 - 0)        | 5<br>(3 - 8)             | 7<br>(4 - 10)            | 67<br>(46 - 93)             |
| Other nutritional deficiencies                                   | 10<br>(4 - 17)              | 0<br>(0 - 0)       | 0<br>(0 - 0)        | 3<br>(1 - 4)             | 1<br>(1 - 3)             | 5<br>(2 - 10)               |
| Other communicable, maternal, neonatal, and nutritional diseases | 33<br>(24 - 41)             | 1<br>(1 - 2)       | 1<br>(0 - 1)        | 8<br>(5 - 10)            | 11<br>(8 - 14)           | 13<br>(9 - 18)              |
| Sexually transmitted diseases excluding HIV                      | 3<br>(1 - 5)                | 0<br>(0 - 1)       | 0<br>(0 - 0)        | 1<br>(0 - 2)             | 1<br>(0 - 1)             | 1<br>(0 - 2)                |
| Syphilis                                                         | 2<br>(1 - 3)                | 0<br>(0 - 1)       | 0<br>(0 - 0)        | 0<br>(0 - 1)             | 0<br>(0 - 1)             | 1<br>(0 - 1)                |
| Chlamydial infection                                             | 0<br>(0 - 1)                | --                 | 0<br>(0 - 0)        | 0<br>(0 - 0)             | 0<br>(0 - 0)             | 0<br>(0 - 0)                |
| Gonococcal infection                                             | 0<br>(0 - 1)                | --                 | 0<br>(0 - 0)        | 0<br>(0 - 0)             | 0<br>(0 - 0)             | 0<br>(0 - 0)                |
| Other sexually transmitted diseases                              | 0<br>(0 - 1)                | --                 | 0<br>(0 - 0)        | 0<br>(0 - 0)             | 0<br>(0 - 0)             | 0<br>(0 - 0)                |
| Hepatitis                                                        | 3<br>(3 - 4)                | 0<br>(0 - 0)       | 0<br>(0 - 0)        | 2<br>(1 - 2)             | 1<br>(1 - 1)             | 1<br>(0 - 1)                |
| Acute hepatitis A                                                | 1<br>(0 - 2)                | 0<br>(0 - 0)       | 0<br>(0 - 0)        | 1<br>(0 - 1)             | 0<br>(0 - 0)             | 0<br>(0 - 0)                |
| Acute hepatitis B                                                | 2<br>(1 - 3)                | 0<br>(0 - 0)       | 0<br>(0 - 0)        | 1<br>(0 - 1)             | 1<br>(0 - 1)             | 1<br>(0 - 1)                |
| Acute hepatitis C                                                | 0<br>(0 - 1)                | --                 | 0<br>(0 - 0)        | 0<br>(0 - 0)             | 0<br>(0 - 0)             | 0<br>(0 - 0)                |
| Other infectious diseases                                        | 27<br>(19 - 36)             | 1<br>(1 - 2)       | 1<br>(0 - 1)        | 5<br>(3 - 7)             | 9<br>(6 - 13)            | 11<br>(7 - 16)              |
| Non-communicable diseases                                        | 38,991<br>(36,070 - 41,879) | 110<br>(89 - 137)  | 49<br>(42 - 56)     | 2,092<br>(1,819 - 2,360) | 8,308<br>(7,439 - 9,133) | 28,432<br>(26,526 - 30,287) |
| Neoplasms                                                        | 9,957<br>(8,681 - 11,102)   | 9<br>(6 - 12)      | 21<br>(16 - 25)     | 1,053<br>(883 - 1,211)   | 3,446<br>(2,980 - 3,870) | 5,428<br>(4,706 - 6,130)    |
| Esophageal cancer                                                | 146<br>(94 - 179)           | --                 | --                  | 7<br>(4 - 10)            | 50<br>(31 - 65)          | 89<br>(57 - 115)            |
| Stomach cancer                                                   | 343<br>(268 - 443)          | --                 | --                  | 20<br>(15 - 27)          | 95<br>(75 - 117)         | 227<br>(166 - 317)          |
| Liver cancer                                                     | 357<br>(274 - 457)          | --                 | 0<br>(0 - 0)        | 21<br>(15 - 29)          | 107<br>(82 - 138)        | 228<br>(160 - 319)          |
| Liver cancer due to hepatitis B                                  | 61<br>(32 - 98)             | --                 | 0<br>(0 - 0)        | 7<br>(3 - 11)            | 24<br>(8 - 39)           | 31<br>(15 - 55)             |
| Liver cancer due to hepatitis C                                  | 173<br>(110 - 245)          | --                 | 0<br>(0 - 0)        | 7<br>(3 - 13)            | 48<br>(26 - 70)          | 117<br>(72 - 176)           |
| Liver cancer due to alcohol use                                  | 75<br>(36 - 121)            | --                 | --                  | 2<br>(1 - 4)             | 18<br>(9 - 30)           | 55<br>(24 - 93)             |
| Liver cancer due to other causes                                 | 47<br>(24 - 79)             | --                 | 0<br>(0 - 0)        | 5<br>(3 - 8)             | 17<br>(9 - 30)           | 25<br>(11 - 46)             |
| Larynx cancer                                                    | 88<br>(42 - 147)            | --                 | --                  | 5<br>(2 - 8)             | 34<br>(16 - 58)          | 50<br>(22 - 84)             |
| Tracheal, bronchus and lung cancer                               | 1,794<br>(1,513 - 2,125)    | --                 | --                  | 114<br>(86 - 147)        | 729<br>(600 - 868)       | 951<br>(762 - 1,207)        |

Web Table 31- Cuba deaths with 95% UI by age, sex, and cause in 2013

| Cause                                         | Females, All Ages           | Females, 0-4 Years | Females, 5-14 Years | Females, 15-49 Years | Females, 50-69 Years     | Females, 70-80 Years        |
|-----------------------------------------------|-----------------------------|--------------------|---------------------|----------------------|--------------------------|-----------------------------|
| Breast cancer                                 | 1,582<br>(1,349 - 1,824)    | --                 | --                  | 241<br>(193 - 290)   | 603<br>(499 - 714)       | 738<br>(589 - 905)          |
| Cervical cancer                               | 612<br>(478 - 745)          | --                 | --                  | 178<br>(123 - 227)   | 238<br>(174 - 302)       | 197<br>(145 - 276)          |
| Uterine cancer                                | 507<br>(270 - 664)          | --                 | --                  | 38<br>(16 - 60)      | 189<br>(97 - 261)        | 280<br>(146 - 396)          |
| Prostate cancer                               | --                          | --                 | --                  | --                   | --                       | --                          |
| Colon and rectum cancer                       | 1,600<br>(1,303 - 1,949)    | --                 | --                  | 73<br>(57 - 91)      | 404<br>(334 - 478)       | 1,123<br>(862 - 1,446)      |
| Lip and oral cavity cancer                    | 118<br>(76 - 162)           | --                 | --                  | 7<br>(4 - 10)        | 32<br>(20 - 44)          | 80<br>(49 - 114)            |
| Nasopharynx cancer                            | 18<br>(13 - 30)             | --                 | 0<br>(0 - 0)        | 3<br>(2 - 5)         | 7<br>(4 - 11)            | 9<br>(5 - 15)               |
| Other pharynx cancer                          | 29<br>(21 - 37)             | --                 | --                  | 2<br>(1 - 4)         | 10<br>(7 - 13)           | 17<br>(11 - 24)             |
| Gallbladder and biliary tract cancer          | 128<br>(91 - 220)           | --                 | --                  | 5<br>(3 - 9)         | 42<br>(29 - 70)          | 81<br>(52 - 148)            |
| Pancreatic cancer                             | 479<br>(395 - 577)          | --                 | --                  | 22<br>(16 - 28)      | 148<br>(120 - 180)       | 309<br>(241 - 397)          |
| Malignant skin melanoma                       | 32<br>(25 - 41)             | --                 | --                  | 5<br>(4 - 7)         | 9<br>(7 - 12)            | 17<br>(12 - 25)             |
| Non-melanoma skin cancer                      | 74<br>(40 - 120)            | --                 | --                  | 5<br>(3 - 6)         | 14<br>(9 - 21)           | 55<br>(27 - 101)            |
| Ovarian cancer                                | 316<br>(263 - 372)          | --                 | --                  | 53<br>(40 - 69)      | 138<br>(110 - 168)       | 125<br>(95 - 160)           |
| Testicular cancer                             | --                          | --                 | --                  | --                   | --                       | --                          |
| Kidney cancer                                 | 109<br>(85 - 143)           | 0<br>(0 - 0)       | 0<br>(0 - 0)        | 9<br>(6 - 13)        | 37<br>(27 - 49)          | 62<br>(43 - 89)             |
| Bladder cancer                                | 164<br>(102 - 228)          | --                 | --                  | 6<br>(3 - 8)         | 35<br>(21 - 48)          | 123<br>(73 - 177)           |
| Brain and nervous system cancer               | 239<br>(59 - 297)           | 1<br>(0 - 3)       | 5<br>(2 - 8)        | 56<br>(16 - 73)      | 95<br>(23 - 123)         | 81<br>(18 - 111)            |
| Thyroid cancer                                | 42<br>(25 - 55)             | --                 | 0<br>(0 - 0)        | 3<br>(2 - 4)         | 14<br>(8 - 20)           | 25<br>(14 - 35)             |
| Mesothelioma                                  | 11<br>(8 - 15)              | --                 | --                  | 1<br>(1 - 2)         | 5<br>(3 - 7)             | 5<br>(3 - 8)                |
| Hodgkin lymphoma                              | 40<br>(7 - 58)              | 0<br>(0 - 0)       | 0<br>(0 - 1)        | 11<br>(2 - 18)       | 12<br>(2 - 19)           | 17<br>(2 - 28)              |
| Non-Hodgkin lymphoma                          | 230<br>(149 - 299)          | 1<br>(0 - 2)       | 2<br>(1 - 3)        | 31<br>(18 - 43)      | 86<br>(59 - 116)         | 110<br>(71 - 151)           |
| Multiple myeloma                              | 147<br>(104 - 185)          | --                 | --                  | 9<br>(6 - 13)        | 60<br>(42 - 80)          | 78<br>(51 - 106)            |
| Leukemia                                      | 259<br>(216 - 304)          | 3<br>(1 - 5)       | 7<br>(5 - 9)        | 49<br>(38 - 61)      | 78<br>(63 - 95)          | 122<br>(96 - 156)           |
| Other neoplasms                               | 493<br>(356 - 650)          | 4<br>(2 - 6)       | 7<br>(4 - 10)       | 78<br>(52 - 109)     | 174<br>(123 - 246)       | 230<br>(154 - 313)          |
| Cardiovascular diseases                       | 19,724<br>(17,612 - 22,149) | 3<br>(2 - 4)       | 4<br>(2 - 5)        | 499<br>(409 - 634)   | 3,034<br>(2,613 - 3,540) | 16,185<br>(14,454 - 18,036) |
| Rheumatic heart disease                       | 108<br>(48 - 137)           | 0<br>(0 - 0)       | 1<br>(0 - 1)        | 41<br>(20 - 54)      | 39<br>(17 - 52)          | 27<br>(9 - 38)              |
| Ischemic heart disease                        | 11,082<br>(9,532 - 14,347)  | 0<br>(0 - 0)       | 0<br>(0 - 0)        | 204<br>(156 - 303)   | 1,620<br>(1,344 - 2,145) | 9,258<br>(7,914 - 11,995)   |
| Cerebrovascular disease                       | 6,030<br>(4,364 - 7,161)    | 0<br>(0 - 0)       | 1<br>(0 - 1)        | 165<br>(127 - 216)   | 890<br>(650 - 1,077)     | 4,974<br>(3,523 - 5,936)    |
| Ischemic stroke                               | 4,049<br>(2,644 - 4,870)    | 0<br>(0 - 0)       | 0<br>(0 - 0)        | 29<br>(16 - 45)      | 366<br>(202 - 473)       | 3,654<br>(2,384 - 4,420)    |
| Hemorrhagic stroke                            | 1,980<br>(1,441 - 2,802)    | 0<br>(0 - 0)       | 1<br>(0 - 1)        | 136<br>(104 - 182)   | 524<br>(390 - 713)       | 1,320<br>(886 - 1,999)      |
| Hypertensive heart disease                    | 1,104<br>(455 - 1,702)      | 0<br>(0 - 0)       | 0<br>(0 - 0)        | 24<br>(12 - 34)      | 174<br>(85 - 252)        | 906<br>(342 - 1,446)        |
| Cardiomyopathy and myocarditis                | 198<br>(143 - 249)          | 2<br>(2 - 3)       | 1<br>(1 - 2)        | 25<br>(18 - 35)      | 62<br>(45 - 84)          | 107<br>(67 - 141)           |
| Atrial fibrillation and flutter               | 110<br>(74 - 157)           | --                 | --                  | 2<br>(1 - 3)         | 12<br>(8 - 17)           | 96<br>(63 - 142)            |
| Aortic aneurysm                               | 319<br>(178 - 544)          | --                 | --                  | 5<br>(3 - 9)         | 54<br>(30 - 93)          | 259<br>(142 - 446)          |
| Peripheral vascular disease                   | 199<br>(140 - 285)          | --                 | --                  | 2<br>(1 - 2)         | 25<br>(18 - 34)          | 172<br>(114 - 253)          |
| Endocarditis                                  | 23<br>(14 - 34)             | 0<br>(0 - 0)       | 0<br>(0 - 0)        | 5<br>(3 - 7)         | 6<br>(3 - 9)             | 13<br>(6 - 20)              |
| Other cardiovascular and circulatory diseases | 551<br>(321 - 722)          | 0<br>(0 - 0)       | 0<br>(0 - 1)        | 27<br>(14 - 38)      | 152<br>(73 - 203)        | 373<br>(225 - 515)          |
| Chronic respiratory diseases                  | 1,688<br>(1,159 - 1,977)    | 1<br>(1 - 2)       | 1<br>(1 - 1)        | 81<br>(63 - 100)     | 411<br>(272 - 486)       | 1,194<br>(821 - 1,437)      |
| Chronic obstructive pulmonary disease         | 1,496<br>(1,032 - 1,761)    | 0<br>(0 - 1)       | 0<br>(0 - 0)        | 38<br>(25 - 52)      | 343<br>(227 - 412)       | 1,115<br>(756 - 1,345)      |
| Pneumoconiosis                                | 1<br>(1 - 2)                | 0<br>(0 - 0)       | 0<br>(0 - 0)        | 0<br>(0 - 0)         | 0<br>(0 - 0)             | 0<br>(0 - 1)                |



Web Table 31- Cuba deaths with 95% UI by age, sex, and cause in 2013

| Cause                                               | Females, All Ages        | Females, 0-4 Years | Females, 5-14 Years | Females, 15-49 Years | Females, 50-69 Years | Females, 70-80 Years     |
|-----------------------------------------------------|--------------------------|--------------------|---------------------|----------------------|----------------------|--------------------------|
| Silicosis                                           | 0<br>(0 - 0)             | 0<br>(0 - 0)       | 0<br>(0 - 0)        | 0<br>(0 - 0)         | 0<br>(0 - 0)         | 0<br>(0 - 0)             |
| Asbestosis                                          | 0<br>(0 - 0)             | 0<br>(0 - 0)       | 0<br>(0 - 0)        | 0<br>(0 - 0)         | 0<br>(0 - 0)         | 0<br>(0 - 0)             |
| Coal workers pneumoconiosis                         | 0<br>(0 - 0)             | 0<br>(0 - 0)       | 0<br>(0 - 0)        | 0<br>(0 - 0)         | 0<br>(0 - 0)         | 0<br>(0 - 0)             |
| Other pneumoconiosis                                | 1<br>(0 - 1)             | 0<br>(0 - 0)       | 0<br>(0 - 0)        | 0<br>(0 - 0)         | 0<br>(0 - 0)         | 0<br>(0 - 1)             |
| Asthma                                              | 159<br>(79 - 228)        | 0<br>(0 - 1)       | 1<br>(0 - 1)        | 38<br>(25 - 50)      | 59<br>(29 - 88)      | 61<br>(24 - 101)         |
| Interstitial lung disease and pulmonary sarcoidosis | 25<br>(12 - 41)          | 0<br>(0 - 0)       | 0<br>(0 - 0)        | 3<br>(2 - 5)         | 7<br>(3 - 13)        | 14<br>(6 - 25)           |
| Other chronic respiratory diseases                  | 7<br>(4 - 11)            | 0<br>(0 - 0)       | 0<br>(0 - 0)        | 1<br>(1 - 2)         | 1<br>(1 - 2)         | 4<br>(2 - 7)             |
| Cirrhosis                                           | 461<br>(389 - 531)       | 0<br>(0 - 0)       | 1<br>(1 - 1)        | 43<br>(33 - 53)      | 169<br>(138 - 199)   | 249<br>(204 - 300)       |
| Cirrhosis due to hepatitis B                        | 50<br>(22 - 88)          | 0<br>(0 - 0)       | 0<br>(0 - 0)        | 5<br>(2 - 8)         | 19<br>(9 - 34)       | 27<br>(10 - 48)          |
| Cirrhosis due to hepatitis C                        | 236<br>(154 - 330)       | 0<br>(0 - 0)       | 0<br>(0 - 0)        | 20<br>(11 - 32)      | 86<br>(50 - 127)     | 131<br>(85 - 186)        |
| Cirrhosis due to alcohol use                        | 112<br>(54 - 173)        | --                 | --                  | 7<br>(3 - 12)        | 37<br>(19 - 59)      | 67<br>(31 - 108)         |
| Cirrhosis due to other causes                       | 63<br>(33 - 104)         | 0<br>(0 - 0)       | 1<br>(0 - 1)        | 11<br>(6 - 18)       | 27<br>(12 - 46)      | 24<br>(12 - 43)          |
| Digestive diseases                                  | 1,027<br>(836 - 1,195)   | 1<br>(0 - 1)       | 1<br>(1 - 1)        | 58<br>(45 - 71)      | 199<br>(161 - 239)   | 768<br>(615 - 917)       |
| Peptic ulcer disease                                | 166<br>(115 - 239)       | 0<br>(0 - 0)       | 0<br>(0 - 0)        | 7<br>(4 - 10)        | 29<br>(20 - 41)      | 130<br>(85 - 192)        |
| Gastritis and duodenitis                            | 57<br>(31 - 123)         | 0<br>(0 - 0)       | 0<br>(0 - 0)        | 2<br>(1 - 4)         | 8<br>(4 - 16)        | 47<br>(23 - 106)         |
| Appendicitis                                        | 31<br>(17 - 46)          | 0<br>(0 - 0)       | 0<br>(0 - 0)        | 4<br>(2 - 6)         | 8<br>(4 - 12)        | 19<br>(9 - 31)           |
| Paralytic ileus and intestinal obstruction          | 132<br>(12 - 263)        | 0<br>(0 - 0)       | 0<br>(0 - 0)        | 7<br>(1 - 14)        | 22<br>(2 - 44)       | 102<br>(8 - 215)         |
| Inguinal, femoral, and abdominal hernia             | 90<br>(50 - 209)         | 0<br>(0 - 0)       | 0<br>(0 - 0)        | 4<br>(2 - 10)        | 16<br>(8 - 37)       | 70<br>(36 - 165)         |
| Inflammatory bowel disease                          | 24<br>(16 - 41)          | 0<br>(0 - 0)       | 0<br>(0 - 0)        | 3<br>(2 - 5)         | 7<br>(5 - 12)        | 14<br>(9 - 25)           |
| Vascular intestinal disorders                       | 228<br>(139 - 429)       | 0<br>(0 - 0)       | 0<br>(0 - 0)        | 8<br>(4 - 15)        | 38<br>(23 - 73)      | 182<br>(108 - 350)       |
| Gallbladder and biliary diseases                    | 132<br>(96 - 199)        | 0<br>(0 - 0)       | 0<br>(0 - 0)        | 10<br>(7 - 14)       | 33<br>(24 - 48)      | 89<br>(61 - 140)         |
| Pancreatitis                                        | 63<br>(42 - 95)          | 0<br>(0 - 0)       | 0<br>(0 - 0)        | 8<br>(5 - 11)        | 19<br>(13 - 30)      | 36<br>(22 - 57)          |
| Other digestive diseases                            | 104<br>(75 - 144)        | 0<br>(0 - 0)       | 0<br>(0 - 0)        | 5<br>(4 - 7)         | 21<br>(15 - 28)      | 78<br>(54 - 114)         |
| Neurological disorders                              | 2,928<br>(2,173 - 3,819) | 3<br>(2 - 4)       | 3<br>(2 - 4)        | 50<br>(40 - 60)      | 187<br>(147 - 236)   | 2,685<br>(1,937 - 3,579) |
| Alzheimer disease and other dementias               | 2,594<br>(1,845 - 3,468) | --                 | --                  | 1<br>(0 - 2)         | 104<br>(68 - 149)    | 2,489<br>(1,743 - 3,371) |
| Parkinson disease                                   | 170<br>(87 - 221)        | --                 | --                  | 1<br>(1 - 2)         | 22<br>(15 - 31)      | 147<br>(70 - 196)        |
| Epilepsy                                            | 30<br>(19 - 39)          | 0<br>(0 - 1)       | 1<br>(0 - 1)        | 15<br>(10 - 21)      | 8<br>(5 - 11)        | 6<br>(3 - 9)             |
| Multiple sclerosis                                  | 28<br>(15 - 40)          | --                 | --                  | 10<br>(5 - 15)       | 12<br>(6 - 18)       | 6<br>(2 - 10)            |
| Other neurological disorders                        | 106<br>(89 - 122)        | 3<br>(2 - 4)       | 2<br>(1 - 2)        | 23<br>(18 - 28)      | 41<br>(33 - 49)      | 37<br>(29 - 47)          |
| Mental and substance use disorders                  | 52<br>(32 - 68)          | 0<br>(0 - 1)       | 0<br>(0 - 0)        | 10<br>(6 - 14)       | 17<br>(9 - 23)       | 25<br>(15 - 34)          |
| Schizophrenia                                       | 17<br>(9 - 23)           | --                 | --                  | 2<br>(1 - 4)         | 7<br>(4 - 10)        | 7<br>(3 - 11)            |
| Alcohol use disorders                               | 17<br>(4 - 26)           | --                 | --                  | 4<br>(1 - 7)         | 6<br>(2 - 10)        | 6<br>(1 - 11)            |
| Drug use disorders                                  | 18<br>(14 - 24)          | 0<br>(0 - 1)       | --                  | 3<br>(2 - 4)         | 3<br>(2 - 5)         | 12<br>(8 - 17)           |
| Opioid use disorders                                | 5<br>(4 - 7)             | 0<br>(0 - 0)       | --                  | 1<br>(1 - 1)         | 1<br>(1 - 1)         | 3<br>(2 - 5)             |
| Cocaine use disorders                               | 1<br>(1 - 1)             | 0<br>(0 - 0)       | --                  | 0<br>(0 - 0)         | 0<br>(0 - 0)         | 1<br>(0 - 1)             |
| Amphetamine use disorders                           | 1<br>(1 - 1)             | 0<br>(0 - 0)       | --                  | 0<br>(0 - 0)         | 0<br>(0 - 0)         | 0<br>(0 - 1)             |
| Other drug use disorders                            | 11<br>(9 - 15)           | 0<br>(0 - 0)       | --                  | 2<br>(1 - 2)         | 2<br>(2 - 3)         | 7<br>(5 - 11)            |
| Eating disorders                                    | 1<br>(0 - 1)             | --                 | 0<br>(0 - 0)        | 0<br>(0 - 1)         | --                   | --                       |
| Anorexia nervosa                                    | 1<br>(0 - 1)             | --                 | 0<br>(0 - 1)        | 0<br>(0 - 1)         | --                   | --                       |
| Diabetes, urogenital, blood, and endocrine diseases | 2,687<br>(2,241 - 3,435) | 8<br>(5 - 12)      | 5<br>(4 - 6)        | 190<br>(157 - 236)   | 753<br>(598 - 946)   | 1,731<br>(1,422 - 2,287) |

Web Table 31- Cuba deaths with 95% UI by age, sex, and cause in 2013

| Cause                                               | Females, All Ages        | Females, 0-4 Years | Females, 5-14 Years | Females, 15-49 Years | Females, 50-69 Years | Females, 70-80 Years |
|-----------------------------------------------------|--------------------------|--------------------|---------------------|----------------------|----------------------|----------------------|
| Diabetes mellitus                                   | 1,313<br>(1,093 - 1,914) | 0<br>(0 - 0)       | 0<br>(0 - 1)        | 53<br>(42 - 71)      | 346<br>(279 - 534)   | 913<br>(736 - 1,287) |
| Acute glomerulonephritis                            | 2<br>(1 - 3)             | 0<br>(0 - 0)       | 0<br>(0 - 0)        | 0<br>(0 - 0)         | 0<br>(0 - 1)         | 1<br>(0 - 2)         |
| Chronic kidney disease                              | 1,093<br>(744 - 1,449)   | 1<br>(0 - 1)       | 2<br>(1 - 2)        | 91<br>(63 - 125)     | 328<br>(186 - 433)   | 671<br>(454 - 913)   |
| Chronic kidney disease due to diabetes mellitus     | 436<br>(243 - 588)       | 0<br>(0 - 0)       | 0<br>(0 - 0)        | 38<br>(23 - 55)      | 172<br>(91 - 237)    | 225<br>(124 - 330)   |
| Chronic kidney disease due to hypertension          | 356<br>(205 - 556)       | 0<br>(0 - 0)       | 0<br>(0 - 0)        | 23<br>(12 - 38)      | 79<br>(42 - 137)     | 254<br>(147 - 396)   |
| Chronic kidney disease due to glomerulonephritis    | 13<br>(8 - 19)           | 0<br>(0 - 1)       | 0<br>(0 - 1)        | 5<br>(3 - 8)         | 3<br>(2 - 6)         | 4<br>(2 - 6)         |
| Chronic kidney disease due to other causes          | 288<br>(153 - 486)       | 0<br>(0 - 1)       | 1<br>(0 - 1)        | 25<br>(14 - 46)      | 74<br>(34 - 123)     | 188<br>(88 - 343)    |
| Urinary diseases and male infertility               | 96<br>(63 - 124)         | 0<br>(0 - 0)       | 0<br>(0 - 0)        | 8<br>(5 - 11)        | 23<br>(14 - 30)      | 65<br>(41 - 91)      |
| Interstitial nephritis and urinary tract infections | 77<br>(51 - 102)         | 0<br>(0 - 0)       | 0<br>(0 - 0)        | 6<br>(3 - 8)         | 16<br>(10 - 22)      | 55<br>(34 - 77)      |
| Urolithiasis                                        | 11<br>(6 - 16)           | --                 | 0<br>(0 - 0)        | 2<br>(1 - 2)         | 4<br>(2 - 6)         | 5<br>(3 - 9)         |
| Other urinary diseases                              | 8<br>(5 - 14)            | 0<br>(0 - 0)       | 0<br>(0 - 0)        | 1<br>(1 - 2)         | 2<br>(1 - 4)         | 4<br>(2 - 9)         |
| Gynecological diseases                              | 10<br>(8 - 20)           | --                 | --                  | 5<br>(3 - 10)        | 3<br>(2 - 5)         | 3<br>(2 - 5)         |
| Uterine fibroids                                    | 3<br>(2 - 5)             | --                 | --                  | 1<br>(1 - 2)         | 1<br>(1 - 2)         | 1<br>(1 - 2)         |
| Polycystic ovarian syndrome                         | 0<br>(0 - 0)             | --                 | --                  | 0<br>(0 - 0)         | 0<br>(0 - 0)         | --                   |
| Endometriosis                                       | 1<br>(1 - 1)             | --                 | --                  | 1<br>(0 - 1)         | 0<br>(0 - 0)         | --                   |
| Genital prolapse                                    | 2<br>(1 - 3)             | --                 | --                  | 1<br>(0 - 1)         | 0<br>(0 - 1)         | 1<br>(0 - 1)         |
| Other gynecological diseases                        | 5<br>(3 - 9)             | --                 | --                  | 2<br>(1 - 4)         | 1<br>(1 - 3)         | 1<br>(1 - 2)         |
| Hemoglobinopathies and hemolytic anemias            | 32<br>(19 - 45)          | 2<br>(1 - 4)       | 1<br>(1 - 2)        | 10<br>(6 - 15)       | 9<br>(5 - 13)        | 9<br>(5 - 13)        |
| Thalassemias                                        | 0<br>(0 - 0)             | 0<br>(0 - 0)       | 0<br>(0 - 0)        | 0<br>(0 - 0)         | 0<br>(0 - 0)         | 0<br>(0 - 0)         |
| Sickle cell disorders                               | 21<br>(12 - 30)          | 1<br>(1 - 3)       | 1<br>(1 - 2)        | 10<br>(5 - 14)       | 8<br>(4 - 11)        | 1<br>(1 - 2)         |
| G6PD deficiency                                     | 0<br>(0 - 0)             | 0<br>(0 - 0)       | 0<br>(0 - 0)        | 0<br>(0 - 0)         | 0<br>(0 - 0)         | 0<br>(0 - 0)         |
| Other hemoglobinopathies and hemolytic anemias      | 10<br>(5 - 14)           | 0<br>(0 - 1)       | 0<br>(0 - 0)        | 1<br>(0 - 1)         | 2<br>(1 - 2)         | 8<br>(4 - 11)        |
| Endocrine, metabolic, blood, and immune disorders   | 141<br>(110 - 230)       | 5<br>(3 - 8)       | 1<br>(1 - 2)        | 22<br>(16 - 32)      | 44<br>(32 - 72)      | 70<br>(49 - 125)     |
| Musculoskeletal disorders                           | 142<br>(45 - 175)        | --                 | 1<br>(0 - 2)        | 49<br>(14 - 62)      | 44<br>(13 - 57)      | 48<br>(15 - 66)      |
| Rheumatoid arthritis                                | 47<br>(18 - 62)          | --                 | 0<br>(0 - 0)        | 4<br>(2 - 6)         | 13<br>(5 - 18)       | 30<br>(11 - 42)      |
| Other musculoskeletal disorders                     | 95<br>(24 - 118)         | --                 | 1<br>(0 - 2)        | 45<br>(12 - 57)      | 31<br>(7 - 41)       | 18<br>(4 - 27)       |
| Other non-communicable diseases                     | 325<br>(238 - 377)       | 85<br>(66 - 110)   | 12<br>(9 - 16)      | 59<br>(45 - 72)      | 49<br>(35 - 60)      | 119<br>(44 - 155)    |
| Congenital anomalies                                | 217<br>(178 - 255)       | 81<br>(62 - 104)   | 12<br>(9 - 15)      | 53<br>(41 - 66)      | 34<br>(25 - 45)      | 37<br>(20 - 52)      |
| Neural tube defects                                 | 1<br>(1 - 1)             | 1<br>(0 - 1)       | 0<br>(0 - 0)        | 0<br>(0 - 0)         | 0<br>(0 - 0)         | 0<br>(0 - 0)         |
| Congenital heart anomalies                          | 94<br>(74 - 120)         | 42<br>(31 - 56)    | 6<br>(4 - 8)        | 19<br>(14 - 26)      | 7<br>(4 - 10)        | 20<br>(10 - 31)      |
| Cleft lip and cleft palate                          | 0<br>(0 - 0)             | 0<br>(0 - 0)       | --                  | --                   | --                   | --                   |
| Down syndrome                                       | 17<br>(11 - 25)          | 2<br>(1 - 3)       | 1<br>(0 - 1)        | 7<br>(4 - 11)        | 7<br>(4 - 11)        | 0<br>(0 - 1)         |
| Chromosomal unbalanced rearrangements               | 5<br>(3 - 9)             | 3<br>(2 - 5)       | 0<br>(0 - 0)        | 1<br>(0 - 1)         | 0<br>(0 - 1)         | 1<br>(0 - 2)         |
| Other congenital anomalies                          | 100<br>(75 - 129)        | 33<br>(23 - 47)    | 5<br>(4 - 8)        | 26<br>(18 - 34)      | 19<br>(13 - 28)      | 16<br>(10 - 24)      |
| Skin and subcutaneous diseases                      | 104<br>(27 - 139)        | 2<br>(0 - 3)       | 1<br>(0 - 1)        | 6<br>(2 - 8)         | 15<br>(5 - 20)       | 81<br>(21 - 113)     |
| Cellulitis                                          | 21<br>(5 - 35)           | 0<br>(0 - 1)       | 0<br>(0 - 0)        | 2<br>(1 - 3)         | 5<br>(1 - 8)         | 14<br>(2 - 28)       |
| Pyoderma                                            | 20<br>(5 - 29)           | 1<br>(0 - 2)       | 0<br>(0 - 0)        | 3<br>(1 - 4)         | 5<br>(1 - 7)         | 12<br>(3 - 20)       |
| Decubitus ulcer                                     | 54<br>(14 - 80)          | 0<br>(0 - 0)       | 0<br>(0 - 0)        | 1<br>(0 - 1)         | 3<br>(1 - 4)         | 50<br>(13 - 76)      |
| Other skin and subcutaneous diseases                | 9<br>(3 - 17)            | 0<br>(0 - 0)       | 0<br>(0 - 0)        | 1<br>(0 - 2)         | 2<br>(1 - 3)         | 6<br>(1 - 13)        |
| Sudden infant death syndrome                        | 3<br>(1 - 8)             | 3<br>(1 - 8)       | --                  | --                   | --                   | --                   |

Web Table 31- Cuba deaths with 95% UI by age, sex, and cause in 2013

| Cause                                           | Females, All Ages        | Females, 0-4 Years | Females, 5-14 Years | Females, 15-49 Years | Females, 50-69 Years | Females, 70-80 Years     |
|-------------------------------------------------|--------------------------|--------------------|---------------------|----------------------|----------------------|--------------------------|
| Injuries                                        | 2,950<br>(2,350 - 3,559) | 20<br>(16 - 27)    | 28<br>(23 - 35)     | 424<br>(356 - 522)   | 357<br>(302 - 462)   | 2,120<br>(1,523 - 2,675) |
| Transport injuries                              | 383<br>(308 - 452)       | 3<br>(2 - 5)       | 13<br>(10 - 17)     | 131<br>(106 - 172)   | 80<br>(63 - 110)     | 156<br>(96 - 202)        |
| Road injuries                                   | 362<br>(286 - 426)       | 3<br>(2 - 4)       | 12<br>(10 - 16)     | 123<br>(99 - 160)    | 72<br>(57 - 97)      | 151<br>(91 - 197)        |
| Pedestrian road injuries                        | 105<br>(81 - 143)        | 1<br>(1 - 2)       | 6<br>(4 - 8)        | 25<br>(18 - 36)      | 31<br>(22 - 44)      | 43<br>(28 - 63)          |
| Cyclist road injuries                           | 19<br>(14 - 29)          | 0<br>(0 - 0)       | 2<br>(1 - 2)        | 11<br>(7 - 17)       | 4<br>(3 - 7)         | 3<br>(1 - 5)             |
| Motorcyclist road injuries                      | 17<br>(12 - 27)          | 0<br>(0 - 0)       | 0<br>(0 - 1)        | 11<br>(7 - 18)       | 2<br>(1 - 4)         | 3<br>(1 - 5)             |
| Motor vehicle road injuries                     | 215<br>(147 - 260)       | 1<br>(1 - 2)       | 5<br>(3 - 6)        | 74<br>(58 - 94)      | 33<br>(24 - 45)      | 102<br>(52 - 144)        |
| Other road injuries                             | 6<br>(3 - 9)             | 0<br>(0 - 0)       | 0<br>(0 - 0)        | 2<br>(1 - 4)         | 2<br>(1 - 3)         | 1<br>(1 - 2)             |
| Other transport injuries                        | 21<br>(15 - 35)          | 0<br>(0 - 0)       | 1<br>(0 - 1)        | 8<br>(5 - 14)        | 8<br>(5 - 14)        | 4<br>(3 - 7)             |
| Unintentional injuries                          | 2,064<br>(1,484 - 2,631) | 15<br>(11 - 21)    | 11<br>(8 - 15)      | 71<br>(59 - 90)      | 125<br>(102 - 150)   | 1,842<br>(1,284 - 2,397) |
| Falls                                           | 1,536<br>(1,061 - 2,102) | 1<br>(1 - 2)       | 1<br>(1 - 1)        | 9<br>(6 - 12)        | 60<br>(44 - 81)      | 1,465<br>(999 - 2,031)   |
| Drowning                                        | 25<br>(20 - 47)          | 2<br>(1 - 5)       | 4<br>(3 - 8)        | 10<br>(7 - 18)       | 5<br>(3 - 7)         | 5<br>(3 - 8)             |
| Fire, heat, and hot substances                  | 70<br>(51 - 93)          | 1<br>(1 - 2)       | 2<br>(1 - 3)        | 17<br>(11 - 28)      | 13<br>(9 - 21)       | 37<br>(20 - 53)          |
| Poisonings                                      | 27<br>(12 - 38)          | 1<br>(0 - 1)       | 0<br>(0 - 0)        | 3<br>(1 - 4)         | 4<br>(2 - 5)         | 19<br>(8 - 29)           |
| Exposure to mechanical forces                   | 27<br>(22 - 35)          | 2<br>(1 - 4)       | 2<br>(1 - 3)        | 7<br>(6 - 9)         | 4<br>(3 - 5)         | 12<br>(8 - 17)           |
| Unintentional firearm injuries                  | 11<br>(7 - 16)           | 0<br>(0 - 0)       | 1<br>(0 - 1)        | 2<br>(2 - 3)         | 1<br>(1 - 1)         | 7<br>(4 - 12)            |
| Unintentional suffocation                       | 3<br>(2 - 6)             | 1<br>(1 - 3)       | 0<br>(0 - 0)        | 0<br>(0 - 1)         | 0<br>(0 - 1)         | 1<br>(0 - 2)             |
| Other exposure to mechanical forces             | 13<br>(11 - 19)          | 1<br>(0 - 1)       | 1<br>(1 - 2)        | 5<br>(3 - 6)         | 3<br>(2 - 4)         | 4<br>(3 - 7)             |
| Adverse effects of medical treatment            | 210<br>(94 - 314)        | 1<br>(1 - 2)       | 0<br>(0 - 0)        | 14<br>(8 - 20)       | 22<br>(10 - 32)      | 172<br>(69 - 270)        |
| Animal contact                                  | 40<br>(12 - 71)          | 0<br>(0 - 0)       | 0<br>(0 - 0)        | 1<br>(0 - 1)         | 1<br>(0 - 2)         | 38<br>(11 - 67)          |
| Venomous animal contact                         | 3<br>(1 - 6)             | 0<br>(0 - 0)       | 0<br>(0 - 0)        | 0<br>(0 - 1)         | 1<br>(0 - 1)         | 2<br>(0 - 5)             |
| Non-venomous animal contact                     | 37<br>(11 - 66)          | 0<br>(0 - 0)       | 0<br>(0 - 0)        | 0<br>(0 - 1)         | 1<br>(0 - 1)         | 36<br>(10 - 64)          |
| Foreign body                                    | 109<br>(62 - 184)        | 5<br>(3 - 8)       | 1<br>(0 - 1)        | 6<br>(4 - 9)         | 12<br>(7 - 19)       | 86<br>(46 - 149)         |
| Pulmonary aspiration and foreign body in airway | 106<br>(59 - 181)        | 5<br>(3 - 8)       | 1<br>(0 - 1)        | 5<br>(3 - 8)         | 11<br>(7 - 18)       | 84<br>(44 - 148)         |
| Foreign body in other body part                 | 3<br>(2 - 5)             | 0<br>(0 - 0)       | 0<br>(0 - 0)        | 1<br>(0 - 1)         | 1<br>(0 - 1)         | 2<br>(1 - 3)             |
| Other unintentional injuries                    | 20<br>(14 - 28)          | 1<br>(1 - 2)       | 1<br>(0 - 1)        | 6<br>(3 - 9)         | 4<br>(2 - 7)         | 9<br>(5 - 15)            |
| Self-harm and interpersonal violence            | 503<br>(417 - 687)       | 2<br>(1 - 4)       | 5<br>(3 - 6)        | 222<br>(177 - 297)   | 151<br>(121 - 229)   | 122<br>(95 - 175)        |
| Self-harm                                       | 377<br>(310 - 572)       | --                 | 3<br>(2 - 4)        | 135<br>(107 - 210)   | 134<br>(105 - 209)   | 106<br>(82 - 167)        |
| Interpersonal violence                          | 126<br>(74 - 172)        | 2<br>(1 - 4)       | 2<br>(1 - 4)        | 87<br>(50 - 124)     | 18<br>(10 - 27)      | 17<br>(7 - 34)           |
| Assault by firearm                              | 11<br>(5 - 19)           | 0<br>(0 - 0)       | 0<br>(0 - 0)        | 6<br>(2 - 11)        | 2<br>(1 - 3)         | 3<br>(1 - 7)             |
| Assault by sharp object                         | 80<br>(48 - 113)         | 0<br>(0 - 1)       | 1<br>(0 - 2)        | 65<br>(37 - 95)      | 9<br>(5 - 15)        | 5<br>(2 - 10)            |
| Assault by other means                          | 35<br>(17 - 52)          | 2<br>(1 - 3)       | 1<br>(1 - 2)        | 16<br>(7 - 26)       | 7<br>(3 - 11)        | 9<br>(4 - 19)            |

Web Table 31- Cyprus deaths with 95% UI by age, sex, and cause in 2013

| Cause                                                              | Both Sexes, All Ages     | Both Sexes, 0-4 Years | Both Sexes, 5-14 Years | Both Sexes, 15-49 Years | Both Sexes, 50-69 Years | Both Sexes, 70-80 Years  |
|--------------------------------------------------------------------|--------------------------|-----------------------|------------------------|-------------------------|-------------------------|--------------------------|
| All causes                                                         | 6,011<br>(5,677 - 6,353) | 30<br>(24 - 37)       | 8<br>(7 - 10)          | 307<br>(274 - 341)      | 1,056<br>(954 - 1,163)  | 4,610<br>(4,405 - 4,805) |
| Communicable, maternal, neonatal, and nutritional diseases         | 284<br>(243 - 334)       | 18<br>(14 - 23)       | 1<br>(1 - 2)           | 11<br>(9 - 13)          | 23<br>(19 - 27)         | 232<br>(193 - 278)       |
| HIV/AIDS and tuberculosis                                          | 4<br>(3 - 5)             | 0<br>(0 - 0)          | 0<br>(0 - 0)           | 1<br>(1 - 2)            | 1<br>(0 - 1)            | 2<br>(2 - 3)             |
| Tuberculosis                                                       | 3<br>(2 - 4)             | 0<br>(0 - 0)          | 0<br>(0 - 0)           | 0<br>(0 - 1)            | 0<br>(0 - 0)            | 2<br>(2 - 3)             |
| HIV/AIDS                                                           | 1<br>(1 - 2)             | 0<br>(0 - 0)          | 0<br>(0 - 0)           | 1<br>(1 - 1)            | 0<br>(0 - 0)            | 0<br>(0 - 0)             |
| HIV/AIDS resulting in mycobacterial infection                      | 0<br>(0 - 0)             | 0<br>(0 - 0)          | 0<br>(0 - 0)           | 0<br>(0 - 0)            | 0<br>(0 - 0)            | 0<br>(0 - 0)             |
| HIV/AIDS resulting in other diseases                               | 1<br>(1 - 2)             | 0<br>(0 - 0)          | 0<br>(0 - 0)           | 1<br>(1 - 1)            | 0<br>(0 - 0)            | 0<br>(0 - 0)             |
| Diarrrhea, lower respiratory, and other common infectious diseases | 226<br>(186 - 275)       | 2<br>(1 - 2)          | 1<br>(0 - 1)           | 7<br>(5 - 9)            | 19<br>(15 - 23)         | 198<br>(160 - 246)       |
| Diarrheal diseases                                                 | 14<br>(10 - 20)          | 0<br>(0 - 0)          | 0<br>(0 - 0)           | 0<br>(0 - 0)            | 1<br>(1 - 1)            | 13<br>(9 - 19)           |
| Intestinal infectious diseases                                     | 3<br>(1 - 6)             | 0<br>(0 - 1)          | 0<br>(0 - 1)           | 1<br>(0 - 3)            | 0<br>(0 - 1)            | 0<br>(0 - 1)             |
| Typhoid fever                                                      | 2<br>(1 - 5)             | 0<br>(0 - 0)          | 0<br>(0 - 1)           | 1<br>(0 - 2)            | 0<br>(0 - 1)            | 0<br>(0 - 0)             |
| Paratyphoid fever                                                  | 1<br>(0 - 1)             | 0<br>(0 - 0)          | 0<br>(0 - 0)           | 0<br>(0 - 1)            | 0<br>(0 - 0)            | 0<br>(0 - 0)             |
| Other intestinal infectious diseases                               | 0<br>(0 - 1)             | 0<br>(0 - 0)          | 0<br>(0 - 0)           | 0<br>(0 - 0)            | 0<br>(0 - 0)            | 0<br>(0 - 0)             |
| Lower respiratory infections                                       | 203<br>(164 - 252)       | 1<br>(1 - 1)          | 0<br>(0 - 0)           | 4<br>(3 - 5)            | 17<br>(13 - 20)         | 181<br>(143 - 229)       |
| Upper respiratory infections                                       | 0<br>(0 - 0)             | 0<br>(0 - 0)          | 0<br>(0 - 0)           | 0<br>(0 - 0)            | 0<br>(0 - 0)            | 0<br>(0 - 0)             |
| Otitis media                                                       | 0<br>(0 - 0)             | 0<br>(0 - 0)          | 0<br>(0 - 0)           | 0<br>(0 - 0)            | 0<br>(0 - 0)            | 0<br>(0 - 0)             |
| Meningitis                                                         | 2<br>(2 - 2)             | 0<br>(0 - 0)          | 0<br>(0 - 0)           | 0<br>(0 - 0)            | 0<br>(0 - 0)            | 1<br>(1 - 2)             |
| Pneumococcal meningitis                                            | 0<br>(0 - 0)             | 0<br>(0 - 0)          | 0<br>(0 - 0)           | 0<br>(0 - 0)            | 0<br>(0 - 0)            | 0<br>(0 - 0)             |
| H influenzae type B meningitis                                     | 0<br>(0 - 0)             | 0<br>(0 - 0)          | 0<br>(0 - 0)           | 0<br>(0 - 0)            | 0<br>(0 - 0)            | 0<br>(0 - 0)             |
| Meningococcal meningitis                                           | 1<br>(0 - 1)             | 0<br>(0 - 0)          | 0<br>(0 - 0)           | 0<br>(0 - 0)            | 0<br>(0 - 0)            | 0<br>(0 - 1)             |
| Other meningitis                                                   | 1<br>(1 - 1)             | 0<br>(0 - 0)          | 0<br>(0 - 0)           | 0<br>(0 - 0)            | 0<br>(0 - 0)            | 0<br>(0 - 1)             |
| Encephalitis                                                       | 3<br>(2 - 4)             | 0<br>(0 - 0)          | 0<br>(0 - 0)           | 0<br>(0 - 1)            | 1<br>(0 - 1)            | 2<br>(1 - 2)             |
| Diphtheria                                                         | 0<br>(0 - 0)             | 0<br>(0 - 0)          | 0<br>(0 - 0)           | 0<br>(0 - 0)            | 0<br>(0 - 0)            | --                       |
| Whooping cough                                                     | 0<br>(0 - 0)             | 0<br>(0 - 0)          | 0<br>(0 - 0)           | 0<br>(0 - 0)            | 0<br>(0 - 0)            | --                       |
| Tetanus                                                            | 0<br>(0 - 0)             | 0<br>(0 - 0)          | 0<br>(0 - 0)           | 0<br>(0 - 0)            | 0<br>(0 - 0)            | 0<br>(0 - 0)             |
| Measles                                                            | 0<br>(0 - 0)             | 0<br>(0 - 0)          | 0<br>(0 - 0)           | 0<br>(0 - 0)            | 0<br>(0 - 0)            | --                       |
| Varicella and herpes zoster                                        | 1<br>(0 - 2)             | 0<br>(0 - 0)          | 0<br>(0 - 0)           | 0<br>(0 - 0)            | 0<br>(0 - 0)            | 0<br>(0 - 2)             |
| Neglected tropical diseases and malaria                            | 1<br>(1 - 1)             | 0<br>(0 - 0)          | 0<br>(0 - 0)           | 0<br>(0 - 1)            | 0<br>(0 - 0)            | 0<br>(0 - 0)             |
| Leishmaniasis                                                      | 0<br>(0 - 1)             | 0<br>(0 - 0)          | 0<br>(0 - 0)           | 0<br>(0 - 0)            | 0<br>(0 - 0)            | 0<br>(0 - 0)             |
| Visceral leishmaniasis                                             | 0<br>(0 - 1)             | 0<br>(0 - 0)          | 0<br>(0 - 0)           | 0<br>(0 - 0)            | 0<br>(0 - 0)            | 0<br>(0 - 0)             |
| Cysticercosis                                                      | 0<br>(0 - 0)             | 0<br>(0 - 0)          | 0<br>(0 - 0)           | 0<br>(0 - 0)            | 0<br>(0 - 0)            | 0<br>(0 - 0)             |
| Cystic echinococcosis                                              | 0<br>(0 - 0)             | 0<br>(0 - 0)          | 0<br>(0 - 0)           | 0<br>(0 - 0)            | 0<br>(0 - 0)            | 0<br>(0 - 0)             |
| Dengue                                                             | 0<br>(0 - 0)             | 0<br>(0 - 0)          | 0<br>(0 - 0)           | 0<br>(0 - 0)            | 0<br>(0 - 0)            | 0<br>(0 - 0)             |
| Rabies                                                             | 0<br>(0 - 0)             | 0<br>(0 - 0)          | 0<br>(0 - 0)           | 0<br>(0 - 0)            | 0<br>(0 - 0)            | 0<br>(0 - 0)             |
| Other neglected tropical diseases                                  | 0<br>(0 - 1)             | 0<br>(0 - 0)          | 0<br>(0 - 0)           | 0<br>(0 - 0)            | 0<br>(0 - 0)            | 0<br>(0 - 0)             |
| Maternal disorders                                                 | 1<br>(1 - 1)             | --                    | 0<br>(0 - 0)           | 1<br>(1 - 1)            | --                      | --                       |
| Maternal hemorrhage                                                | 0<br>(0 - 0)             | --                    | 0<br>(0 - 0)           | 0<br>(0 - 0)            | --                      | --                       |
| Maternal sepsis and other maternal infections                      | 0<br>(0 - 0)             | --                    | 0<br>(0 - 0)           | 0<br>(0 - 0)            | --                      | --                       |
| Maternal hypertensive disorders                                    | 0<br>(0 - 0)             | --                    | 0<br>(0 - 0)           | 0<br>(0 - 0)            | --                      | --                       |
| Maternal obstructed labor                                          | 0<br>(0 - 0)             | --                    | 0<br>(0 - 0)           | 0<br>(0 - 0)            | --                      | --                       |

Web Table 31- Cyprus deaths with 95% UI by age, sex, and cause in 2013

| Cause                                                            | Both Sexes, All Ages     | Both Sexes, 0-4 Years | Both Sexes, 5-14 Years | Both Sexes, 15-49 Years | Both Sexes, 50-69 Years | Both Sexes, 70-80 Years  |
|------------------------------------------------------------------|--------------------------|-----------------------|------------------------|-------------------------|-------------------------|--------------------------|
| Maternal abortive outcome                                        | 0<br>(0 - 0)             | --                    | 0<br>(0 - 0)           | 0<br>(0 - 0)            | --                      | --                       |
| Indirect maternal deaths                                         | 0<br>(0 - 0)             | --                    | 0<br>(0 - 0)           | 0<br>(0 - 0)            | --                      | --                       |
| Late maternal deaths                                             | 0<br>(0 - 0)             | --                    | 0<br>(0 - 0)           | 0<br>(0 - 0)            | --                      | --                       |
| Maternal deaths aggravated by HIV/AIDS                           | 0<br>(0 - 0)             | --                    | --                     | 0<br>(0 - 0)            | --                      | --                       |
| Other maternal disorders                                         | 0<br>(0 - 0)             | --                    | 0<br>(0 - 0)           | 0<br>(0 - 0)            | --                      | --                       |
| Neonatal disorders                                               | 16<br>(12 - 20)          | 16<br>(12 - 20)       | --                     | --                      | --                      | --                       |
| Neonatal preterm birth complications                             | 7<br>(5 - 9)             | 7<br>(5 - 9)          | --                     | --                      | --                      | --                       |
| Neonatal encephalopathy due to birth asphyxia and trauma         | 4<br>(2 - 5)             | 4<br>(2 - 5)          | --                     | --                      | --                      | --                       |
| Neonatal sepsis and other neonatal infections                    | 0<br>(0 - 0)             | 0<br>(0 - 0)          | --                     | --                      | --                      | --                       |
| Hemolytic disease and other neonatal jaundice                    | 0<br>(0 - 0)             | 0<br>(0 - 0)          | --                     | --                      | --                      | --                       |
| Other neonatal disorders                                         | 5<br>(4 - 8)             | 5<br>(4 - 8)          | --                     | --                      | --                      | --                       |
| Nutritional deficiencies                                         | 30<br>(23 - 39)          | 0<br>(0 - 0)          | 0<br>(0 - 0)           | 1<br>(1 - 1)            | 2<br>(1 - 2)            | 28<br>(20 - 36)          |
| Protein-energy malnutrition                                      | 2<br>(1 - 5)             | 0<br>(0 - 0)          | 0<br>(0 - 0)           | 0<br>(0 - 0)            | 0<br>(0 - 0)            | 2<br>(1 - 4)             |
| Iodine deficiency                                                | 0<br>(0 - 0)             | 0<br>(0 - 0)          | 0<br>(0 - 0)           | 0<br>(0 - 0)            | 0<br>(0 - 0)            | 0<br>(0 - 0)             |
| Iron-deficiency anemia                                           | 26<br>(19 - 34)          | 0<br>(0 - 0)          | 0<br>(0 - 0)           | 1<br>(1 - 1)            | 1<br>(1 - 2)            | 24<br>(17 - 32)          |
| Other nutritional deficiencies                                   | 1<br>(1 - 3)             | 0<br>(0 - 0)          | 0<br>(0 - 0)           | 0<br>(0 - 0)            | 0<br>(0 - 0)            | 1<br>(0 - 2)             |
| Other communicable, maternal, neonatal, and nutritional diseases | 6<br>(5 - 8)             | 0<br>(0 - 1)          | 0<br>(0 - 0)           | 1<br>(1 - 1)            | 2<br>(1 - 2)            | 3<br>(3 - 5)             |
| Sexually transmitted diseases excluding HIV                      | 0<br>(0 - 1)             | 0<br>(0 - 0)          | 0<br>(0 - 0)           | 0<br>(0 - 0)            | 0<br>(0 - 0)            | 0<br>(0 - 0)             |
| Syphilis                                                         | 0<br>(0 - 1)             | 0<br>(0 - 0)          | 0<br>(0 - 0)           | 0<br>(0 - 0)            | 0<br>(0 - 0)            | 0<br>(0 - 0)             |
| Chlamydial infection                                             | 0<br>(0 - 0)             | --                    | 0<br>(0 - 0)           | 0<br>(0 - 0)            | 0<br>(0 - 0)            | 0<br>(0 - 0)             |
| Gonococcal infection                                             | 0<br>(0 - 0)             | --                    | 0<br>(0 - 0)           | 0<br>(0 - 0)            | 0<br>(0 - 0)            | 0<br>(0 - 0)             |
| Other sexually transmitted diseases                              | 0<br>(0 - 0)             | --                    | 0<br>(0 - 0)           | 0<br>(0 - 0)            | 0<br>(0 - 0)            | 0<br>(0 - 0)             |
| Hepatitis                                                        | 1<br>(0 - 1)             | 0<br>(0 - 0)          | 0<br>(0 - 0)           | 0<br>(0 - 0)            | 0<br>(0 - 0)            | 0<br>(0 - 0)             |
| Acute hepatitis A                                                | 0<br>(0 - 0)             | 0<br>(0 - 0)          | 0<br>(0 - 0)           | 0<br>(0 - 0)            | 0<br>(0 - 0)            | 0<br>(0 - 0)             |
| Acute hepatitis B                                                | 0<br>(0 - 1)             | 0<br>(0 - 0)          | 0<br>(0 - 0)           | 0<br>(0 - 0)            | 0<br>(0 - 0)            | 0<br>(0 - 0)             |
| Acute hepatitis C                                                | 0<br>(0 - 0)             | --                    | 0<br>(0 - 0)           | 0<br>(0 - 0)            | 0<br>(0 - 0)            | 0<br>(0 - 0)             |
| Other infectious diseases                                        | 5<br>(4 - 7)             | 0<br>(0 - 0)          | 0<br>(0 - 0)           | 1<br>(0 - 1)            | 1<br>(1 - 2)            | 3<br>(2 - 4)             |
| Non-communicable diseases                                        | 5,408<br>(5,102 - 5,716) | 9<br>(7 - 12)         | 4<br>(3 - 5)           | 182<br>(161 - 203)      | 974<br>(880 - 1,072)    | 4,239<br>(4,045 - 4,430) |
| Neoplasms                                                        | 1,323<br>(1,210 - 1,441) | 1<br>(0 - 1)          | 2<br>(2 - 3)           | 75<br>(65 - 86)         | 446<br>(398 - 496)      | 799<br>(727 - 867)       |
| Esophageal cancer                                                | 9<br>(7 - 11)            | --                    | --                     | 0<br>(0 - 0)            | 4<br>(3 - 6)            | 4<br>(3 - 5)             |
| Stomach cancer                                                   | 80<br>(67 - 98)          | --                    | --                     | 4<br>(3 - 5)            | 23<br>(19 - 27)         | 53<br>(43 - 68)          |
| Liver cancer                                                     | 47<br>(37 - 62)          | --                    | 0<br>(0 - 0)           | 1<br>(1 - 2)            | 14<br>(11 - 19)         | 31<br>(24 - 43)          |
| Liver cancer due to hepatitis B                                  | 10                       | --                    | 0                      | 0                       | 4                       | 6                        |
| Liver cancer due to hepatitis C                                  | 25<br>(16 - 35)          | --                    | 0<br>(0 - 0)           | 0<br>(0 - 1)            | 8<br>(5 - 11)           | 17<br>(10 - 24)          |
| Liver cancer due to alcohol use                                  | 10<br>(5 - 15)           | --                    | --                     | 0<br>(0 - 0)            | 2<br>(1 - 4)            | 8<br>(4 - 12)            |
| Liver cancer due to other causes                                 | 2<br>(1 - 4)             | --                    | 0<br>(0 - 0)           | 0<br>(0 - 0)            | 1<br>(0 - 1)            | 1<br>(1 - 3)             |
| Larynx cancer                                                    | 7<br>(5 - 9)             | --                    | --                     | 0<br>(0 - 0)            | 3<br>(2 - 4)            | 4<br>(3 - 6)             |
| Tracheal, bronchus and lung cancer                               | 270<br>(236 - 306)       | --                    | --                     | 11<br>(9 - 13)          | 118<br>(100 - 137)      | 140<br>(123 - 160)       |
| Breast cancer                                                    | 119<br>(84 - 141)        | --                    | --                     | 15<br>(11 - 19)         | 51<br>(37 - 63)         | 53<br>(34 - 65)          |
| Cervical cancer                                                  | 14<br>(11 - 18)          | --                    | --                     | 2<br>(1 - 2)            | 5<br>(4 - 7)            | 7<br>(5 - 10)            |

Web Table 31- Cyprus deaths with 95% UI by age, sex, and cause in 2013

| Cause                                         | Both Sexes, All Ages     | Both Sexes, 0-4 Years | Both Sexes, 5-14 Years | Both Sexes, 15-49 Years | Both Sexes, 50-69 Years | Both Sexes, 70-80 Years  |
|-----------------------------------------------|--------------------------|-----------------------|------------------------|-------------------------|-------------------------|--------------------------|
| Uterine cancer                                | 16<br>(10 - 20)          | --                    | --                     | 0<br>(0 - 0)            | 6<br>(4 - 8)            | 10<br>(6 - 13)           |
| Prostate cancer                               | 112<br>(80 - 150)        | --                    | --                     | 0<br>(0 - 0)            | 14<br>(10 - 19)         | 97<br>(69 - 132)         |
| Colon and rectum cancer                       | 156<br>(139 - 174)       | --                    | --                     | 7<br>(5 - 8)            | 44<br>(38 - 50)         | 106<br>(92 - 122)        |
| Lip and oral cavity cancer                    | 9<br>(8 - 11)            | --                    | --                     | 1<br>(1 - 1)            | 4<br>(3 - 5)            | 5<br>(4 - 6)             |
| Nasopharynx cancer                            | 0<br>(0 - 1)             | --                    | 0<br>(0 - 0)           | 0<br>(0 - 0)            | 0<br>(0 - 0)            | 0<br>(0 - 0)             |
| Other pharynx cancer                          | 2<br>(2 - 3)             | --                    | --                     | 0<br>(0 - 1)            | 1<br>(1 - 2)            | 1<br>(1 - 1)             |
| Gallbladder and biliary tract cancer          | 19<br>(14 - 25)          | --                    | --                     | 0<br>(0 - 0)            | 4<br>(3 - 6)            | 14<br>(10 - 19)          |
| Pancreatic cancer                             | 80<br>(71 - 89)          | --                    | --                     | 3<br>(2 - 4)            | 31<br>(27 - 35)         | 46<br>(40 - 53)          |
| Malignant skin melanoma                       | 15<br>(10 - 22)          | --                    | --                     | 2<br>(2 - 4)            | 6<br>(4 - 9)            | 7<br>(4 - 10)            |
| Non-melanoma skin cancer                      | 7<br>(5 - 10)            | --                    | --                     | 0<br>(0 - 0)            | 1<br>(0 - 1)            | 6<br>(4 - 9)             |
| Ovarian cancer                                | 36<br>(29 - 43)          | --                    | --                     | 3<br>(2 - 4)            | 16<br>(12 - 20)         | 17<br>(12 - 22)          |
| Testicular cancer                             | 0<br>(0 - 0)             | --                    | --                     | 0<br>(0 - 0)            | 0<br>(0 - 0)            | 0<br>(0 - 0)             |
| Kidney cancer                                 | 24<br>(20 - 29)          | 0<br>(0 - 0)          | 0<br>(0 - 0)           | 1<br>(1 - 2)            | 10<br>(8 - 12)          | 13<br>(10 - 17)          |
| Bladder cancer                                | 42<br>(31 - 51)          | --                    | --                     | 0<br>(0 - 0)            | 8<br>(6 - 10)           | 34<br>(25 - 43)          |
| Brain and nervous system cancer               | 38<br>(32 - 48)          | 0<br>(0 - 0)          | 0<br>(0 - 0)           | 6<br>(5 - 9)            | 17<br>(14 - 22)         | 14<br>(11 - 18)          |
| Thyroid cancer                                | 4<br>(3 - 5)             | --                    | 0<br>(0 - 0)           | 0<br>(0 - 0)            | 2<br>(1 - 2)            | 2<br>(2 - 3)             |
| Mesothelioma                                  | 8<br>(6 - 12)            | --                    | --                     | 0<br>(0 - 0)            | 3<br>(2 - 5)            | 5<br>(3 - 8)             |
| Hodgkin lymphoma                              | 1<br>(1 - 2)             | 0<br>(0 - 0)          | 0<br>(0 - 0)           | 1<br>(0 - 1)            | 0<br>(0 - 0)            | 1<br>(0 - 1)             |
| Non-Hodgkin lymphoma                          | 54<br>(37 - 71)          | 0<br>(0 - 0)          | 0<br>(0 - 0)           | 3<br>(2 - 5)            | 16<br>(12 - 22)         | 35<br>(22 - 47)          |
| Multiple myeloma                              | 23<br>(14 - 32)          | --                    | --                     | 1<br>(1 - 2)            | 9<br>(5 - 12)           | 14<br>(8 - 19)           |
| Leukemia                                      | 56<br>(48 - 62)          | 0<br>(0 - 0)          | 1<br>(0 - 1)           | 3<br>(3 - 4)            | 15<br>(12 - 17)         | 37<br>(31 - 43)          |
| Other neoplasms                               | 73<br>(60 - 89)          | 0<br>(0 - 1)          | 1<br>(1 - 2)           | 8<br>(6 - 9)            | 22<br>(18 - 26)         | 42<br>(33 - 55)          |
| Cardiovascular diseases                       | 2,303<br>(2,131 - 2,532) | 2<br>(1 - 3)          | 1<br>(1 - 1)           | 64<br>(56 - 74)         | 347<br>(311 - 391)      | 1,888<br>(1,753 - 2,081) |
| Rheumatic heart disease                       | 18<br>(11 - 23)          | 0<br>(0 - 0)          | 0<br>(0 - 0)           | 1<br>(0 - 1)            | 5<br>(3 - 6)            | 13<br>(7 - 17)           |
| Ischemic heart disease                        | 1,331<br>(1,205 - 1,481) | 0<br>(0 - 0)          | 0<br>(0 - 0)           | 44<br>(37 - 52)         | 243<br>(213 - 277)      | 1,043<br>(934 - 1,172)   |
| Cerebrovascular disease                       | 561<br>(486 - 690)       | 1<br>(1 - 1)          | 0<br>(0 - 1)           | 11<br>(9 - 14)          | 54<br>(46 - 65)         | 494<br>(427 - 610)       |
| Ischemic stroke                               | 333<br>(283 - 415)       | 0<br>(0 - 0)          | 0<br>(0 - 0)           | 1<br>(1 - 2)            | 15<br>(12 - 20)         | 316<br>(268 - 396)       |
| Hemorrhagic stroke                            | 227<br>(191 - 295)       | 1<br>(1 - 1)          | 0<br>(0 - 0)           | 10<br>(8 - 12)          | 39<br>(32 - 48)         | 177<br>(145 - 233)       |
| Hypertensive heart disease                    | 79<br>(57 - 119)         | 0<br>(0 - 0)          | 0<br>(0 - 0)           | 0<br>(0 - 0)            | 4<br>(3 - 6)            | 75<br>(52 - 114)         |
| Cardiomyopathy and myocarditis                | 26<br>(21 - 37)          | 0<br>(0 - 0)          | 0<br>(0 - 0)           | 3<br>(2 - 4)            | 9<br>(7 - 13)           | 15<br>(10 - 21)          |
| Atrial fibrillation and flutter               | 108<br>(78 - 146)        | --                    | --                     | 0<br>(0 - 0)            | 3<br>(2 - 4)            | 105<br>(76 - 143)        |
| Aortic aneurysm                               | 45<br>(37 - 61)          | --                    | --                     | 2<br>(1 - 2)            | 12<br>(10 - 17)         | 31<br>(25 - 43)          |
| Peripheral vascular disease                   | 11<br>(8 - 14)           | --                    | --                     | 0<br>(0 - 0)            | 1<br>(1 - 1)            | 10<br>(7 - 13)           |
| Endocarditis                                  | 4<br>(3 - 6)             | 0<br>(0 - 0)          | 0<br>(0 - 0)           | 0<br>(0 - 1)            | 1<br>(0 - 1)            | 3<br>(2 - 5)             |
| Other cardiovascular and circulatory diseases | 119<br>(100 - 148)       | 1<br>(0 - 1)          | 0<br>(0 - 0)           | 3<br>(3 - 4)            | 16<br>(12 - 21)         | 99<br>(81 - 126)         |
| Chronic respiratory diseases                  | 309<br>(262 - 348)       | 0<br>(0 - 0)          | 0<br>(0 - 0)           | 4<br>(3 - 5)            | 29<br>(24 - 34)         | 276<br>(232 - 312)       |
| Chronic obstructive pulmonary disease         | 223<br>(184 - 255)       | 0<br>(0 - 0)          | 0<br>(0 - 0)           | 1<br>(1 - 2)            | 18<br>(14 - 21)         | 204<br>(169 - 234)       |
| Pneumoconiosis                                | 11<br>(7 - 16)           | 0<br>(0 - 0)          | 0<br>(0 - 0)           | 0<br>(0 - 0)            | 1<br>(1 - 1)            | 9<br>(6 - 14)            |
| Silicosis                                     | 0<br>(0 - 1)             | 0<br>(0 - 0)          | 0<br>(0 - 0)           | 0<br>(0 - 0)            | 0<br>(0 - 0)            | 0<br>(0 - 1)             |
| Asbestosis                                    | 4<br>(2 - 6)             | 0<br>(0 - 0)          | 0<br>(0 - 0)           | 0<br>(0 - 0)            | 0<br>(0 - 0)            | 3<br>(2 - 5)             |

Web Table 31- Cyprus deaths with 95% UI by age, sex, and cause in 2013

| Cause                                               | Both Sexes, All Ages | Both Sexes, 0-4 Years | Both Sexes, 5-14 Years | Both Sexes, 15-49 Years | Both Sexes, 50-69 Years | Both Sexes, 70-80 Years |
|-----------------------------------------------------|----------------------|-----------------------|------------------------|-------------------------|-------------------------|-------------------------|
| Coal workers pneumoconiosis                         | 1<br>(1 - 2)         | 0<br>(0 - 0)          | 0<br>(0 - 0)           | 0<br>(0 - 0)            | 0<br>(0 - 0)            | 1<br>(1 - 1)            |
| Other pneumoconiosis                                | 6<br>(3 - 8)         | 0<br>(0 - 0)          | 0<br>(0 - 0)           | 0<br>(0 - 0)            | 1<br>(0 - 1)            | 5<br>(3 - 8)            |
| Asthma                                              | 32<br>(23 - 43)      | 0<br>(0 - 0)          | 0<br>(0 - 0)           | 1<br>(1 - 1)            | 4<br>(3 - 5)            | 28<br>(19 - 39)         |
| Interstitial lung disease and pulmonary sarcoidosis | 40<br>(27 - 52)      | 0<br>(0 - 0)          | 0<br>(0 - 0)           | 0<br>(0 - 1)            | 6<br>(4 - 8)            | 33<br>(22 - 44)         |
| Other chronic respiratory diseases                  | 4<br>(3 - 5)         | 0<br>(0 - 0)          | 0<br>(0 - 0)           | 1<br>(1 - 2)            | 1<br>(1 - 1)            | 2<br>(1 - 3)            |
| Cirrhosis                                           | 67<br>(60 - 75)      | 0<br>(0 - 0)          | 0<br>(0 - 0)           | 5<br>(4 - 5)            | 24<br>(21 - 28)         | 38<br>(33 - 44)         |
| Cirrhosis due to hepatitis B                        | 8<br>(5 - 13)        | 0<br>(0 - 0)          | 0<br>(0 - 0)           | 1<br>(0 - 1)            | 3<br>(2 - 5)            | 4<br>(2 - 7)            |
| Cirrhosis due to hepatitis C                        | 31<br>(17 - 41)      | 0<br>(0 - 0)          | 0<br>(0 - 0)           | 2<br>(1 - 3)            | 11<br>(5 - 16)          | 18<br>(11 - 23)         |
| Cirrhosis due to alcohol use                        | 23<br>(15 - 31)      | --                    | --                     | 1<br>(1 - 2)            | 8<br>(5 - 13)           | 13<br>(9 - 18)          |
| Cirrhosis due to other causes                       | 5<br>(3 - 10)        | 0<br>(0 - 0)          | 0<br>(0 - 0)           | 1<br>(0 - 1)            | 2<br>(1 - 5)            | 2<br>(1 - 4)            |
| Digestive diseases                                  | 114<br>(92 - 131)    | 0<br>(0 - 0)          | 0<br>(0 - 0)           | 2<br>(2 - 3)            | 11<br>(9 - 13)          | 101<br>(81 - 117)       |
| Peptic ulcer disease                                | 12<br>(8 - 16)       | 0<br>(0 - 0)          | 0<br>(0 - 0)           | 0<br>(0 - 0)            | 1<br>(1 - 2)            | 10<br>(7 - 14)          |
| Gastritis and duodenitis                            | 0<br>(0 - 1)         | 0<br>(0 - 0)          | 0<br>(0 - 0)           | 0<br>(0 - 0)            | 0<br>(0 - 0)            | 0<br>(0 - 0)            |
| Appendicitis                                        | 1<br>(1 - 2)         | 0<br>(0 - 0)          | 0<br>(0 - 0)           | 0<br>(0 - 0)            | 0<br>(0 - 0)            | 1<br>(1 - 2)            |
| Paralytic ileus and intestinal obstruction          | 26<br>(16 - 36)      | 0<br>(0 - 0)          | 0<br>(0 - 0)           | 0<br>(0 - 0)            | 2<br>(1 - 3)            | 24<br>(14 - 33)         |
| Inguinal, femoral, and abdominal hernia             | 3<br>(2 - 5)         | 0<br>(0 - 0)          | 0<br>(0 - 0)           | 0<br>(0 - 0)            | 0<br>(0 - 0)            | 3<br>(2 - 4)            |
| Inflammatory bowel disease                          | 9<br>(6 - 14)        | 0<br>(0 - 0)          | 0<br>(0 - 0)           | 0<br>(0 - 0)            | 1<br>(1 - 1)            | 8<br>(5 - 13)           |
| Vascular intestinal disorders                       | 11<br>(6 - 17)       | 0<br>(0 - 0)          | 0<br>(0 - 0)           | 0<br>(0 - 1)            | 1<br>(0 - 2)            | 9<br>(6 - 16)           |
| Gallbladder and biliary diseases                    | 29<br>(20 - 38)      | 0<br>(0 - 0)          | 0<br>(0 - 0)           | 0<br>(0 - 0)            | 2<br>(1 - 2)            | 27<br>(19 - 37)         |
| Pancreatitis                                        | 11<br>(8 - 15)       | 0<br>(0 - 0)          | 0<br>(0 - 0)           | 1<br>(1 - 1)            | 2<br>(1 - 3)            | 9<br>(6 - 12)           |
| Other digestive diseases                            | 12<br>(8 - 16)       | 0<br>(0 - 0)          | 0<br>(0 - 0)           | 0<br>(0 - 0)            | 1<br>(1 - 2)            | 10<br>(7 - 14)          |
| Neurological disorders                              | 564<br>(463 - 666)   | 0<br>(0 - 1)          | 0<br>(0 - 0)           | 5<br>(4 - 7)            | 28<br>(23 - 35)         | 530<br>(431 - 626)      |
| Alzheimer disease and other dementias               | 508<br>(410 - 607)   | --                    | --                     | 0<br>(0 - 0)            | 15<br>(11 - 21)         | 492<br>(395 - 589)      |
| Parkinson disease                                   | 29<br>(20 - 40)      | --                    | --                     | 0<br>(0 - 0)            | 3<br>(2 - 4)            | 26<br>(18 - 37)         |
| Epilepsy                                            | 5<br>(4 - 7)         | 0<br>(0 - 0)          | 0<br>(0 - 0)           | 1<br>(1 - 2)            | 1<br>(1 - 2)            | 2<br>(2 - 4)            |
| Multiple sclerosis                                  | 3<br>(2 - 6)         | --                    | --                     | 1<br>(0 - 2)            | 1<br>(1 - 3)            | 1<br>(0 - 1)            |
| Other neurological disorders                        | 19<br>(16 - 23)      | 0<br>(0 - 1)          | 0<br>(0 - 0)           | 2<br>(2 - 3)            | 7<br>(6 - 9)            | 9<br>(7 - 11)           |
| Mental and substance use disorders                  | 18<br>(15 - 22)      | 0<br>(0 - 0)          | 0<br>(0 - 0)           | 12<br>(10 - 15)         | 3<br>(2 - 4)            | 3<br>(2 - 4)            |
| Schizophrenia                                       | 1<br>(0 - 1)         | --                    | --                     | 0<br>(0 - 0)            | 0<br>(0 - 0)            | 0<br>(0 - 0)            |
| Alcohol use disorders                               | 4<br>(3 - 6)         | --                    | --                     | 0<br>(0 - 1)            | 2<br>(1 - 3)            | 2<br>(1 - 2)            |
| Drug use disorders                                  | 14<br>(11 - 17)      | 0<br>(0 - 0)          | --                     | 12<br>(9 - 14)          | 1<br>(1 - 1)            | 1<br>(1 - 2)            |
| Opioid use disorders                                | 5<br>(4 - 6)         | 0<br>(0 - 0)          | --                     | 4<br>(3 - 6)            | 0<br>(0 - 0)            | 1<br>(0 - 1)            |
| Cocaine use disorders                               | 0<br>(0 - 1)         | 0<br>(0 - 0)          | --                     | 0<br>(0 - 0)            | 0<br>(0 - 0)            | 0<br>(0 - 0)            |
| Amphetamine use disorders                           | 0<br>(0 - 0)         | 0<br>(0 - 0)          | --                     | 0<br>(0 - 0)            | 0<br>(0 - 0)            | 0<br>(0 - 0)            |
| Other drug use disorders                            | 8<br>(7 - 10)        | 0<br>(0 - 0)          | --                     | 7<br>(5 - 8)            | 1<br>(0 - 1)            | 1<br>(1 - 1)            |
| Eating disorders                                    | 0<br>(0 - 0)         | --                    | 0<br>(0 - 0)           | 0<br>(0 - 0)            | --                      | --                      |
| Anorexia nervosa                                    | 0<br>(0 - 0)         | --                    | 0<br>(0 - 0)           | 0<br>(0 - 0)            | --                      | --                      |
| Diabetes, urogenital, blood, and endocrine diseases | 643<br>(543 - 714)   | 1<br>(1 - 1)          | 0<br>(0 - 1)           | 9<br>(8 - 11)           | 76<br>(65 - 86)         | 556<br>(462 - 620)      |
| Diabetes mellitus                                   | 381<br>(333 - 429)   | 0<br>(0 - 0)          | 0<br>(0 - 0)           | 3<br>(2 - 3)            | 45<br>(38 - 52)         | 334<br>(287 - 378)      |
| Acute glomerulonephritis                            | 0<br>(0 - 0)         | 0<br>(0 - 0)          | 0<br>(0 - 0)           | 0<br>(0 - 0)            | 0<br>(0 - 0)            | 0<br>(0 - 0)            |

Web Table 31- Cyprus deaths with 95% UI by age, sex, and cause in 2013

| Cause                                               | Both Sexes, All Ages | Both Sexes, 0-4 Years | Both Sexes, 5-14 Years | Both Sexes, 15-49 Years | Both Sexes, 50-69 Years | Both Sexes, 70-80 Years |
|-----------------------------------------------------|----------------------|-----------------------|------------------------|-------------------------|-------------------------|-------------------------|
| Chronic kidney disease                              | 159<br>(105 - 185)   | 0<br>(0 - 0)          | 0<br>(0 - 0)           | 3<br>(2 - 3)            | 16<br>(11 - 20)         | 140<br>(92 - 166)       |
| Chronic kidney disease due to diabetes mellitus     | 8<br>(5 - 14)        | 0<br>(0 - 0)          | 0<br>(0 - 0)           | 0<br>(0 - 0)            | 2<br>(1 - 3)            | 6<br>(3 - 10)           |
| Chronic kidney disease due to hypertension          | 72<br>(49 - 91)      | 0<br>(0 - 0)          | 0<br>(0 - 0)           | 1<br>(0 - 1)            | 6<br>(4 - 8)            | 66<br>(44 - 84)         |
| Chronic kidney disease due to glomerulonephritis    | 4<br>(2 - 6)         | 0<br>(0 - 0)          | 0<br>(0 - 0)           | 0<br>(0 - 0)            | 1<br>(1 - 1)            | 3<br>(2 - 5)            |
| Chronic kidney disease due to other causes          | 75<br>(39 - 100)     | 0<br>(0 - 0)          | 0<br>(0 - 0)           | 2<br>(1 - 2)            | 8<br>(4 - 11)           | 66<br>(32 - 89)         |
| Urinary diseases and male infertility               | 55<br>(34 - 70)      | 0<br>(0 - 0)          | 0<br>(0 - 0)           | 1<br>(0 - 1)            | 4<br>(3 - 5)            | 50<br>(30 - 65)         |
| Interstitial nephritis and urinary tract infections | 37<br>(22 - 50)      | 0<br>(0 - 0)          | 0<br>(0 - 0)           | 0<br>(0 - 0)            | 2<br>(1 - 3)            | 35<br>(20 - 48)         |
| Urolithiasis                                        | 2<br>(1 - 3)         | --                    | 0<br>(0 - 0)           | 0<br>(0 - 0)            | 0<br>(0 - 0)            | 1<br>(1 - 2)            |
| Other urinary diseases                              | 16<br>(8 - 22)       | 0<br>(0 - 0)          | 0<br>(0 - 0)           | 0<br>(0 - 0)            | 2<br>(1 - 3)            | 13<br>(7 - 19)          |
| Gynecological diseases                              | 0<br>(0 - 0)         | --                    | --                     | 0<br>(0 - 0)            | 0<br>(0 - 0)            | 0<br>(0 - 0)            |
| Uterine fibroids                                    | 0<br>(0 - 0)         | --                    | --                     | 0<br>(0 - 0)            | 0<br>(0 - 0)            | 0<br>(0 - 0)            |
| Polycystic ovarian syndrome                         | 0<br>(0 - 0)         | --                    | --                     | 0<br>(0 - 0)            | 0<br>(0 - 0)            | --                      |
| Endometriosis                                       | 0<br>(0 - 0)         | --                    | --                     | 0<br>(0 - 0)            | 0<br>(0 - 0)            | --                      |
| Genital prolapse                                    | 0<br>(0 - 0)         | --                    | --                     | 0<br>(0 - 0)            | 0<br>(0 - 0)            | 0<br>(0 - 0)            |
| Other gynecological diseases                        | 0<br>(0 - 0)         | --                    | --                     | 0<br>(0 - 0)            | 0<br>(0 - 0)            | 0<br>(0 - 0)            |
| Hemoglobinopathies and hemolytic anemias            | 7<br>(5 - 9)         | 0<br>(0 - 0)          | 0<br>(0 - 0)           | 1<br>(1 - 2)            | 1<br>(1 - 2)            | 4<br>(3 - 5)            |
| Thalassemias                                        | 1<br>(0 - 1)         | 0<br>(0 - 0)          | 0<br>(0 - 0)           | 0<br>(0 - 1)            | 0<br>(0 - 0)            | 0<br>(0 - 0)            |
| Sickle cell disorders                               | 2<br>(1 - 2)         | 0<br>(0 - 0)          | 0<br>(0 - 0)           | 0<br>(0 - 1)            | 1<br>(1 - 1)            | 0<br>(0 - 0)            |
| G6PD deficiency                                     | 0<br>(0 - 0)         | 0<br>(0 - 0)          | 0<br>(0 - 0)           | 0<br>(0 - 0)            | 0<br>(0 - 0)            | 0<br>(0 - 0)            |
| Other hemoglobinopathies and hemolytic anemias      | 4<br>(3 - 6)         | 0<br>(0 - 0)          | 0<br>(0 - 0)           | 0<br>(0 - 0)            | 1<br>(0 - 1)            | 4<br>(2 - 5)            |
| Endocrine, metabolic, blood, and immune disorders   | 41<br>(27 - 51)      | 0<br>(0 - 1)          | 0<br>(0 - 0)           | 3<br>(2 - 3)            | 9<br>(6 - 12)           | 29<br>(17 - 37)         |
| Musculoskeletal disorders                           | 18<br>(12 - 22)      | --                    | 0<br>(0 - 0)           | 2<br>(1 - 2)            | 4<br>(3 - 5)            | 12<br>(8 - 16)          |
| Rheumatoid arthritis                                | 7<br>(4 - 9)         | --                    | 0<br>(0 - 0)           | 0<br>(0 - 1)            | 1<br>(1 - 2)            | 5<br>(3 - 7)            |
| Other musculoskeletal disorders                     | 11<br>(7 - 14)       | --                    | 0<br>(0 - 0)           | 1<br>(1 - 2)            | 3<br>(2 - 4)            | 7<br>(4 - 9)            |
| Other non-communicable diseases                     | 51<br>(37 - 62)      | 5<br>(4 - 7)          | 1<br>(0 - 1)           | 4<br>(3 - 4)            | 6<br>(5 - 7)            | 36<br>(23 - 47)         |
| Congenital anomalies                                | 15<br>(13 - 18)      | 5<br>(4 - 7)          | 0<br>(0 - 1)           | 3<br>(2 - 3)            | 3<br>(3 - 4)            | 4<br>(3 - 5)            |
| Neural tube defects                                 | 0<br>(0 - 0)         | 0<br>(0 - 0)          | 0<br>(0 - 0)           | 0<br>(0 - 0)            | 0<br>(0 - 0)            | 0<br>(0 - 0)            |
| Congenital heart anomalies                          | 5<br>(4 - 6)         | 3<br>(2 - 4)          | 0<br>(0 - 0)           | 1<br>(1 - 1)            | 1<br>(0 - 1)            | 1<br>(0 - 1)            |
| Cleft lip and cleft palate                          | 0<br>(0 - 0)         | 0<br>(0 - 0)          | --                     | --                      | --                      | --                      |
| Down syndrome                                       | 3<br>(2 - 4)         | 0<br>(0 - 1)          | 0<br>(0 - 0)           | 1<br>(1 - 1)            | 2<br>(1 - 2)            | 0<br>(0 - 0)            |
| Chromosomal unbalanced rearrangements               | 0<br>(0 - 1)         | 0<br>(0 - 0)          | 0<br>(0 - 0)           | 0<br>(0 - 0)            | 0<br>(0 - 0)            | 0<br>(0 - 0)            |
| Other congenital anomalies                          | 7<br>(6 - 8)         | 2<br>(1 - 3)          | 0<br>(0 - 0)           | 1<br>(1 - 1)            | 1<br>(1 - 1)            | 3<br>(2 - 4)            |
| Skin and subcutaneous diseases                      | 35<br>(22 - 46)      | 0<br>(0 - 0)          | 0<br>(0 - 0)           | 1<br>(1 - 1)            | 2<br>(2 - 3)            | 32<br>(19 - 43)         |
| Cellulitis                                          | 1<br>(1 - 1)         | 0<br>(0 - 0)          | 0<br>(0 - 0)           | 0<br>(0 - 0)            | 0<br>(0 - 0)            | 1<br>(0 - 1)            |
| Pyoderma                                            | 3<br>(2 - 5)         | 0<br>(0 - 0)          | 0<br>(0 - 0)           | 0<br>(0 - 1)            | 1<br>(1 - 1)            | 2<br>(1 - 4)            |
| Decubitus ulcer                                     | 30<br>(18 - 40)      | 0<br>(0 - 0)          | 0<br>(0 - 0)           | 0<br>(0 - 0)            | 1<br>(1 - 2)            | 29<br>(17 - 39)         |
| Other skin and subcutaneous diseases                | 0<br>(0 - 1)         | 0<br>(0 - 0)          | 0<br>(0 - 0)           | 0<br>(0 - 0)            | 0<br>(0 - 0)            | 0<br>(0 - 0)            |
| Sudden infant death syndrome                        | 0<br>(0 - 1)         | 0<br>(0 - 1)          | --                     | --                      | --                      | --                      |
| Injuries                                            | 319<br>(273 - 357)   | 3<br>(2 - 4)          | 3<br>(3 - 4)           | 114<br>(101 - 129)      | 59<br>(51 - 67)         | 139<br>(108 - 164)      |
| Transport injuries                                  | 113<br>(101 - 128)   | 1<br>(1 - 1)          | 2<br>(2 - 3)           | 63<br>(55 - 71)         | 22<br>(19 - 26)         | 25<br>(21 - 30)         |



Web Table 31- Cyprus deaths with 95% UI by age, sex, and cause in 2013

| Cause                                           | Both Sexes, All Ages | Both Sexes, 0-4 Years | Both Sexes, 5-14 Years | Both Sexes, 15-49 Years | Both Sexes, 50-69 Years | Both Sexes, 70-80 Years |
|-------------------------------------------------|----------------------|-----------------------|------------------------|-------------------------|-------------------------|-------------------------|
| Road injuries                                   | 104<br>(92 - 118)    | 1<br>(1 - 1)          | 2<br>(1 - 2)           | 58<br>(51 - 66)         | 20<br>(17 - 24)         | 23<br>(19 - 28)         |
| Pedestrian road injuries                        | 23<br>(16 - 32)      | 1<br>(0 - 1)          | 1<br>(0 - 1)           | 6<br>(4 - 10)           | 6<br>(4 - 8)            | 10<br>(7 - 13)          |
| Cyclist road injuries                           | 4<br>(2 - 5)         | 0<br>(0 - 0)          | 0<br>(0 - 0)           | 2<br>(1 - 3)            | 1<br>(1 - 1)            | 1<br>(1 - 2)            |
| Motorcyclist road injuries                      | 25<br>(17 - 32)      | 0<br>(0 - 0)          | 0<br>(0 - 1)           | 18<br>(12 - 23)         | 3<br>(2 - 5)            | 3<br>(2 - 5)            |
| Motor vehicle road injuries                     | 53<br>(42 - 65)      | 0<br>(0 - 1)          | 1<br>(0 - 1)           | 32<br>(25 - 39)         | 11<br>(8 - 14)          | 10<br>(7 - 13)          |
| Other road injuries                             | 0<br>(0 - 1)         | 0<br>(0 - 0)          | 0<br>(0 - 0)           | 0<br>(0 - 0)            | 0<br>(0 - 0)            | 0<br>(0 - 0)            |
| Other transport injuries                        | 9<br>(7 - 12)        | 0<br>(0 - 0)          | 0<br>(0 - 1)           | 5<br>(4 - 7)            | 2<br>(1 - 3)            | 2<br>(1 - 3)            |
| Unintentional injuries                          | 160<br>(126 - 186)   | 1<br>(1 - 2)          | 1<br>(1 - 1)           | 25<br>(22 - 30)         | 24<br>(20 - 28)         | 109<br>(78 - 132)       |
| Falls                                           | 88<br>(56 - 111)     | 0<br>(0 - 0)          | 0<br>(0 - 0)           | 6<br>(4 - 7)            | 7<br>(5 - 10)           | 75<br>(47 - 97)         |
| Drowning                                        | 24<br>(19 - 30)      | 0<br>(0 - 0)          | 0<br>(0 - 1)           | 8<br>(6 - 10)           | 6<br>(5 - 8)            | 10<br>(8 - 12)          |
| Fire, heat, and hot substances                  | 6<br>(4 - 8)         | 0<br>(0 - 0)          | 0<br>(0 - 0)           | 1<br>(1 - 2)            | 1<br>(1 - 2)            | 3<br>(2 - 4)            |
| Poisonings                                      | 2<br>(1 - 2)         | 0<br>(0 - 0)          | 0<br>(0 - 0)           | 1<br>(1 - 1)            | 0<br>(0 - 0)            | 1<br>(0 - 1)            |
| Exposure to mechanical forces                   | 12<br>(10 - 15)      | 0<br>(0 - 0)          | 0<br>(0 - 0)           | 6<br>(5 - 8)            | 4<br>(3 - 6)            | 1<br>(1 - 2)            |
| Unintentional firearm injuries                  | 0<br>(0 - 1)         | 0<br>(0 - 0)          | 0<br>(0 - 0)           | 0<br>(0 - 1)            | 0<br>(0 - 0)            | 0<br>(0 - 0)            |
| Unintentional suffocation                       | 1<br>(1 - 2)         | 0<br>(0 - 0)          | 0<br>(0 - 0)           | 1<br>(0 - 1)            | 0<br>(0 - 0)            | 0<br>(0 - 0)            |
| Other exposure to mechanical forces             | 11<br>(8 - 13)       | 0<br>(0 - 0)          | 0<br>(0 - 0)           | 5<br>(4 - 7)            | 4<br>(3 - 5)            | 1<br>(1 - 1)            |
| Adverse effects of medical treatment            | 16<br>(9 - 21)       | 0<br>(0 - 0)          | 0<br>(0 - 0)           | 1<br>(1 - 1)            | 2<br>(1 - 3)            | 12<br>(7 - 17)          |
| Animal contact                                  | 1<br>(0 - 1)         | 0<br>(0 - 0)          | 0<br>(0 - 0)           | 0<br>(0 - 0)            | 0<br>(0 - 0)            | 0<br>(0 - 0)            |
| Venomous animal contact                         | 0<br>(0 - 0)         | 0<br>(0 - 0)          | 0<br>(0 - 0)           | 0<br>(0 - 0)            | 0<br>(0 - 0)            | 0<br>(0 - 0)            |
| Non-venomous animal contact                     | 0<br>(0 - 1)         | 0<br>(0 - 0)          | 0<br>(0 - 0)           | 0<br>(0 - 0)            | 0<br>(0 - 0)            | 0<br>(0 - 0)            |
| Foreign body                                    | 10<br>(7 - 15)       | 0<br>(0 - 1)          | 0<br>(0 - 0)           | 2<br>(1 - 3)            | 2<br>(1 - 3)            | 7<br>(4 - 9)            |
| Pulmonary aspiration and foreign body in airway | 10<br>(7 - 14)       | 0<br>(0 - 1)          | 0<br>(0 - 0)           | 2<br>(1 - 2)            | 2<br>(1 - 2)            | 7<br>(4 - 9)            |
| Foreign body in other body part                 | 0<br>(0 - 0)         | 0<br>(0 - 0)          | 0<br>(0 - 0)           | 0<br>(0 - 0)            | 0<br>(0 - 0)            | 0<br>(0 - 0)            |
| Other unintentional injuries                    | 2<br>(2 - 3)         | 0<br>(0 - 0)          | 0<br>(0 - 0)           | 1<br>(1 - 2)            | 1<br>(0 - 1)            | 1<br>(0 - 1)            |
| Self-harm and interpersonal violence            | 45<br>(32 - 53)      | 0<br>(0 - 0)          | 0<br>(0 - 0)           | 26<br>(18 - 31)         | 13<br>(9 - 16)          | 6<br>(4 - 7)            |
| Self-harm                                       | 35<br>(22 - 42)      | --                    | 0<br>(0 - 0)           | 20<br>(12 - 24)         | 10<br>(7 - 13)          | 5<br>(3 - 6)            |
| Interpersonal violence                          | 10<br>(7 - 13)       | 0<br>(0 - 0)          | 0<br>(0 - 0)           | 6<br>(4 - 8)            | 2<br>(2 - 3)            | 1<br>(1 - 1)            |
| Assault by firearm                              | 4<br>(3 - 6)         | 0<br>(0 - 0)          | 0<br>(0 - 0)           | 3<br>(2 - 4)            | 1<br>(1 - 2)            | 0<br>(0 - 0)            |
| Assault by sharp object                         | 2<br>(1 - 3)         | 0<br>(0 - 0)          | 0<br>(0 - 0)           | 1<br>(1 - 2)            | 0<br>(0 - 1)            | 0<br>(0 - 0)            |
| Assault by other means                          | 4<br>(3 - 5)         | 0<br>(0 - 0)          | 0<br>(0 - 0)           | 2<br>(1 - 3)            | 1<br>(0 - 1)            | 1<br>(0 - 1)            |

Web Table 31- Cyprus deaths with 95% UI by age, sex, and cause in 2013

| Cause                                                             | Males, All Ages          | Males, 0-4 Years | Males, 5-14 Years | Males, 15-49 Years | Males, 50-69 Years | Males, 70-80 Years       |
|-------------------------------------------------------------------|--------------------------|------------------|-------------------|--------------------|--------------------|--------------------------|
| All causes                                                        | 3,191<br>(2,950 - 3,460) | 17<br>(13 - 21)  | 5<br>(4 - 5)      | 204<br>(178 - 233) | 691<br>(613 - 782) | 2,275<br>(2,135 - 2,421) |
| Communicable, maternal, neonatal, and nutritional diseases        | 135<br>(111 - 167)       | 11<br>(8 - 14)   | 1<br>(0 - 1)      | 6<br>(5 - 7)       | 14<br>(11 - 18)    | 103<br>(80 - 134)        |
| HIV/AIDS and tuberculosis                                         | 3<br>(2 - 4)             | 0<br>(0 - 0)     | 0<br>(0 - 0)      | 1<br>(1 - 1)       | 0<br>(0 - 1)       | 1<br>(1 - 2)             |
| Tuberculosis                                                      | 2<br>(2 - 3)             | 0<br>(0 - 0)     | 0<br>(0 - 0)      | 0<br>(0 - 1)       | 0<br>(0 - 0)       | 1<br>(1 - 2)             |
| HIV/AIDS                                                          | 1<br>(0 - 1)             | 0<br>(0 - 0)     | 0<br>(0 - 0)      | 1<br>(0 - 1)       | 0<br>(0 - 0)       | 0<br>(0 - 0)             |
| HIV/AIDS resulting in mycobacterial infection                     | 0<br>(0 - 0)             | 0<br>(0 - 0)     | 0<br>(0 - 0)      | 0<br>(0 - 0)       | 0<br>(0 - 0)       | 0<br>(0 - 0)             |
| HIV/AIDS resulting in other diseases                              | 1<br>(0 - 1)             | 0<br>(0 - 0)     | 0<br>(0 - 0)      | 0<br>(0 - 1)       | 0<br>(0 - 0)       | 0<br>(0 - 0)             |
| Diarrhea, lower respiratory, and other common infectious diseases | 109<br>(85 - 141)        | 1<br>(1 - 2)     | 0<br>(0 - 1)      | 4<br>(3 - 5)       | 12<br>(9 - 15)     | 92<br>(68 - 121)         |
| Diarrheal diseases                                                | 5<br>(3 - 8)             | 0<br>(0 - 0)     | 0<br>(0 - 0)      | 0<br>(0 - 0)       | 0<br>(0 - 0)       | 5<br>(3 - 8)             |
| Intestinal infectious diseases                                    | 2<br>(1 - 4)             | 0<br>(0 - 0)     | 0<br>(0 - 1)      | 1<br>(0 - 2)       | 0<br>(0 - 0)       | 0<br>(0 - 0)             |
| Typhoid fever                                                     | 1<br>(0 - 3)             | 0<br>(0 - 0)     | 0<br>(0 - 1)      | 1<br>(0 - 2)       | 0<br>(0 - 0)       | 0<br>(0 - 0)             |
| Paratyphoid fever                                                 | 0<br>(0 - 1)             | 0<br>(0 - 0)     | 0<br>(0 - 0)      | 0<br>(0 - 0)       | 0<br>(0 - 0)       | 0<br>(0 - 0)             |
| Other intestinal infectious diseases                              | 0<br>(0 - 1)             | 0<br>(0 - 0)     | 0<br>(0 - 0)      | 0<br>(0 - 0)       | 0<br>(0 - 0)       | 0<br>(0 - 0)             |
| Lower respiratory infections                                      | 99<br>(76 - 130)         | 1<br>(1 - 1)     | 0<br>(0 - 0)      | 2<br>(2 - 3)       | 11<br>(8 - 14)     | 85<br>(61 - 115)         |
| Upper respiratory infections                                      | 0<br>(0 - 0)             | 0<br>(0 - 0)     | 0<br>(0 - 0)      | 0<br>(0 - 0)       | 0<br>(0 - 0)       | 0<br>(0 - 0)             |
| Otitis media                                                      | 0<br>(0 - 0)             | 0<br>(0 - 0)     | 0<br>(0 - 0)      | 0<br>(0 - 0)       | 0<br>(0 - 0)       | 0<br>(0 - 0)             |
| Meningitis                                                        | 1<br>(1 - 2)             | 0<br>(0 - 0)     | 0<br>(0 - 0)      | 0<br>(0 - 0)       | 0<br>(0 - 0)       | 1<br>(1 - 1)             |
| Pneumococcal meningitis                                           | 0<br>(0 - 0)             | 0<br>(0 - 0)     | 0<br>(0 - 0)      | 0<br>(0 - 0)       | 0<br>(0 - 0)       | 0<br>(0 - 0)             |
| H influenzae type B meningitis                                    | 0<br>(0 - 0)             | 0<br>(0 - 0)     | 0<br>(0 - 0)      | 0<br>(0 - 0)       | 0<br>(0 - 0)       | 0<br>(0 - 0)             |
| Meningococcal meningitis                                          | 0<br>(0 - 1)             | 0<br>(0 - 0)     | 0<br>(0 - 0)      | 0<br>(0 - 0)       | 0<br>(0 - 0)       | 0<br>(0 - 0)             |
| Other meningitis                                                  | 0<br>(0 - 1)             | 0<br>(0 - 0)     | 0<br>(0 - 0)      | 0<br>(0 - 0)       | 0<br>(0 - 0)       | 0<br>(0 - 0)             |
| Encephalitis                                                      | 2<br>(1 - 2)             | 0<br>(0 - 0)     | 0<br>(0 - 0)      | 0<br>(0 - 0)       | 0<br>(0 - 1)       | 1<br>(0 - 1)             |
| Diphtheria                                                        | 0<br>(0 - 0)             | 0<br>(0 - 0)     | 0<br>(0 - 0)      | 0<br>(0 - 0)       | 0<br>(0 - 0)       | --                       |
| Whooping cough                                                    | 0<br>(0 - 0)             | 0<br>(0 - 0)     | 0<br>(0 - 0)      | 0<br>(0 - 0)       | 0<br>(0 - 0)       | --                       |
| Tetanus                                                           | 0<br>(0 - 0)             | 0<br>(0 - 0)     | 0<br>(0 - 0)      | 0<br>(0 - 0)       | 0<br>(0 - 0)       | 0<br>(0 - 0)             |
| Measles                                                           | 0<br>(0 - 0)             | 0<br>(0 - 0)     | 0<br>(0 - 0)      | 0<br>(0 - 0)       | 0<br>(0 - 0)       | --                       |
| Varicella and herpes zoster                                       | 0<br>(0 - 1)             | 0<br>(0 - 0)     | 0<br>(0 - 0)      | 0<br>(0 - 0)       | 0<br>(0 - 0)       | 0<br>(0 - 1)             |
| Neglected tropical diseases and malaria                           | 1<br>(0 - 1)             | 0<br>(0 - 0)     | 0<br>(0 - 0)      | 0<br>(0 - 0)       | 0<br>(0 - 0)       | 0<br>(0 - 0)             |
| Leishmaniasis                                                     | 0<br>(0 - 1)             | 0<br>(0 - 0)     | 0<br>(0 - 0)      | 0<br>(0 - 0)       | 0<br>(0 - 0)       | 0<br>(0 - 0)             |
| Visceral leishmaniasis                                            | 0<br>(0 - 1)             | 0<br>(0 - 0)     | 0<br>(0 - 0)      | 0<br>(0 - 0)       | 0<br>(0 - 0)       | 0<br>(0 - 0)             |
| Cysticercosis                                                     | 0<br>(0 - 0)             | 0<br>(0 - 0)     | 0<br>(0 - 0)      | 0<br>(0 - 0)       | 0<br>(0 - 0)       | 0<br>(0 - 0)             |
| Cystic echinococcosis                                             | 0<br>(0 - 0)             | 0<br>(0 - 0)     | 0<br>(0 - 0)      | 0<br>(0 - 0)       | 0<br>(0 - 0)       | 0<br>(0 - 0)             |
| Dengue                                                            | 0<br>(0 - 0)             | 0<br>(0 - 0)     | 0<br>(0 - 0)      | 0<br>(0 - 0)       | 0<br>(0 - 0)       | 0<br>(0 - 0)             |
| Rabies                                                            | 0<br>(0 - 0)             | 0<br>(0 - 0)     | 0<br>(0 - 0)      | 0<br>(0 - 0)       | 0<br>(0 - 0)       | 0<br>(0 - 0)             |
| Other neglected tropical diseases                                 | 0<br>(0 - 0)             | 0<br>(0 - 0)     | 0<br>(0 - 0)      | 0<br>(0 - 0)       | 0<br>(0 - 0)       | 0<br>(0 - 0)             |
| Maternal disorders                                                | --                       | --               | --                | --                 | --                 | --                       |
| Maternal hemorrhage                                               | --                       | --               | --                | --                 | --                 | --                       |
| Maternal sepsis and other maternal infections                     | --                       | --               | --                | --                 | --                 | --                       |
| Maternal hypertensive disorders                                   | --                       | --               | --                | --                 | --                 | --                       |
| Maternal obstructed labor                                         | --                       | --               | --                | --                 | --                 | --                       |

Web Table 31- Cyprus deaths with 95% UI by age, sex, and cause in 2013

| Cause                                                            | Males, All Ages          | Males, 0-4 Years | Males, 5-14 Years | Males, 15-49 Years | Males, 50-69 Years | Males, 70-80 Years       |
|------------------------------------------------------------------|--------------------------|------------------|-------------------|--------------------|--------------------|--------------------------|
| Maternal abortive outcome                                        | --                       | --               | --                | --                 | --                 | --                       |
| Indirect maternal deaths                                         | --                       | --               | --                | --                 | --                 | --                       |
| Late maternal deaths                                             | --                       | --               | --                | --                 | --                 | --                       |
| Maternal deaths aggravated by HIV/AIDS                           | --                       | --               | --                | --                 | --                 | --                       |
| Other maternal disorders                                         | --                       | --               | --                | --                 | --                 | --                       |
| Neonatal disorders                                               | 9<br>(7 - 12)            | 9<br>(7 - 12)    | --                | --                 | --                 | --                       |
| Neonatal preterm birth complications                             | 4<br>(2 - 6)             | 4<br>(2 - 6)     | --                | --                 | --                 | --                       |
| Neonatal encephalopathy due to birth asphyxia and trauma         | 2<br>(1 - 3)             | 2<br>(1 - 3)     | --                | --                 | --                 | --                       |
| Neonatal sepsis and other neonatal infections                    | 0<br>(0 - 0)             | 0<br>(0 - 0)     | --                | --                 | --                 | --                       |
| Hemolytic disease and other neonatal jaundice                    | 0<br>(0 - 0)             | 0<br>(0 - 0)     | --                | --                 | --                 | --                       |
| Other neonatal disorders                                         | 4<br>(2 - 6)             | 4<br>(2 - 6)     | --                | --                 | --                 | --                       |
| Nutritional deficiencies                                         | 10<br>(6 - 15)           | 0<br>(0 - 0)     | 0<br>(0 - 0)      | 0<br>(0 - 1)       | 1<br>(1 - 2)       | 8<br>(5 - 13)            |
| Protein-energy malnutrition                                      | 1<br>(0 - 2)             | 0<br>(0 - 0)     | 0<br>(0 - 0)      | 0<br>(0 - 0)       | 0<br>(0 - 0)       | 1<br>(0 - 2)             |
| Iodine deficiency                                                | 0<br>(0 - 0)             | 0<br>(0 - 0)     | 0<br>(0 - 0)      | 0<br>(0 - 0)       | 0<br>(0 - 0)       | 0<br>(0 - 0)             |
| Iron-deficiency anemia                                           | 8<br>(4 - 12)            | 0<br>(0 - 0)     | 0<br>(0 - 0)      | 0<br>(0 - 0)       | 1<br>(0 - 1)       | 7<br>(4 - 11)            |
| Other nutritional deficiencies                                   | 1<br>(0 - 2)             | 0<br>(0 - 0)     | 0<br>(0 - 0)      | 0<br>(0 - 0)       | 0<br>(0 - 0)       | 0<br>(0 - 1)             |
| Other communicable, maternal, neonatal, and nutritional diseases | 4<br>(3 - 5)             | 0<br>(0 - 0)     | 0<br>(0 - 0)      | 0<br>(0 - 1)       | 1<br>(1 - 1)       | 2<br>(1 - 3)             |
| Sexually transmitted diseases excluding HIV                      | 0<br>(0 - 0)             | 0<br>(0 - 0)     | 0<br>(0 - 0)      | 0<br>(0 - 0)       | 0<br>(0 - 0)       | 0<br>(0 - 0)             |
| Syphilis                                                         | 0<br>(0 - 0)             | 0<br>(0 - 0)     | 0<br>(0 - 0)      | 0<br>(0 - 0)       | 0<br>(0 - 0)       | 0<br>(0 - 0)             |
| Chlamydial infection                                             | --                       | --               | --                | --                 | --                 | --                       |
| Gonococcal infection                                             | 0<br>(0 - 0)             | --               | 0<br>(0 - 0)      | 0<br>(0 - 0)       | 0<br>(0 - 0)       | 0<br>(0 - 0)             |
| Other sexually transmitted diseases                              | 0<br>(0 - 0)             | --               | 0<br>(0 - 0)      | 0<br>(0 - 0)       | 0<br>(0 - 0)       | 0<br>(0 - 0)             |
| Hepatitis                                                        | 0<br>(0 - 0)             | 0<br>(0 - 0)     | 0<br>(0 - 0)      | 0<br>(0 - 0)       | 0<br>(0 - 0)       | 0<br>(0 - 0)             |
| Acute hepatitis A                                                | 0<br>(0 - 0)             | 0<br>(0 - 0)     | 0<br>(0 - 0)      | 0<br>(0 - 0)       | 0<br>(0 - 0)       | 0<br>(0 - 0)             |
| Acute hepatitis B                                                | 0<br>(0 - 0)             | 0<br>(0 - 0)     | 0<br>(0 - 0)      | 0<br>(0 - 0)       | 0<br>(0 - 0)       | 0<br>(0 - 0)             |
| Acute hepatitis C                                                | 0<br>(0 - 0)             | --               | 0<br>(0 - 0)      | 0<br>(0 - 0)       | 0<br>(0 - 0)       | 0<br>(0 - 0)             |
| Other infectious diseases                                        | 3<br>(2 - 4)             | 0<br>(0 - 0)     | 0<br>(0 - 0)      | 0<br>(0 - 1)       | 1<br>(1 - 1)       | 2<br>(1 - 3)             |
| Non-communicable diseases                                        | 2,846<br>(2,620 - 3,082) | 5<br>(3 - 7)     | 2<br>(2 - 3)      | 108<br>(94 - 126)  | 633<br>(561 - 716) | 2,097<br>(1,962 - 2,235) |
| Neoplasms                                                        | 785<br>(704 - 879)       | 0<br>(0 - 0)     | 1<br>(1 - 2)      | 33<br>(27 - 40)    | 261<br>(228 - 302) | 489<br>(440 - 546)       |
| Esophageal cancer                                                | 8<br>(6 - 10)            | --               | --                | 0<br>(0 - 0)       | 4<br>(3 - 5)       | 4<br>(3 - 5)             |
| Stomach cancer                                                   | 52<br>(44 - 62)          | --               | --                | 2<br>(2 - 3)       | 16<br>(13 - 20)    | 34<br>(27 - 42)          |
| Liver cancer                                                     | 31<br>(23 - 45)          | --               | 0<br>(0 - 0)      | 1<br>(0 - 1)       | 10<br>(7 - 14)     | 21<br>(14 - 31)          |
| Liver cancer due to hepatitis B                                  | 7<br>(2 - 12)            | --               | 0<br>(0 - 0)      | 0<br>(0 - 1)       | 3<br>(1 - 5)       | 4<br>(1 - 7)             |
| Liver cancer due to hepatitis C                                  | 17<br>(9 - 27)           | --               | 0<br>(0 - 0)      | 0<br>(0 - 1)       | 5<br>(3 - 8)       | 11<br>(6 - 19)           |
| Liver cancer due to alcohol use                                  | 7<br>(3 - 12)            | --               | --                | 0<br>(0 - 0)       | 2<br>(1 - 3)       | 5<br>(2 - 10)            |
| Liver cancer due to other causes                                 | 1<br>(0 - 1)             | --               | 0<br>(0 - 0)      | 0<br>(0 - 0)       | 0<br>(0 - 0)       | 0<br>(0 - 1)             |
| Larynx cancer                                                    | 7<br>(4 - 9)             | --               | --                | 0<br>(0 - 0)       | 3<br>(2 - 4)       | 4<br>(2 - 6)             |
| Tracheal, bronchus and lung cancer                               | 215<br>(181 - 250)       | --               | --                | 7<br>(5 - 9)       | 95<br>(77 - 115)   | 113<br>(96 - 132)        |
| Breast cancer                                                    | 2<br>(1 - 4)             | --               | --                | 0<br>(0 - 0)       | 1<br>(0 - 1)       | 1<br>(0 - 2)             |
| Cervical cancer                                                  | --                       | --               | --                | --                 | --                 | --                       |

Web Table 31- Cyprus deaths with 95% UI by age, sex, and cause in 2013

| Cause                                         | Males, All Ages          | Males, 0-4 Years | Males, 5-14 Years | Males, 15-49 Years | Males, 50-69 Years | Males, 70-80 Years |
|-----------------------------------------------|--------------------------|------------------|-------------------|--------------------|--------------------|--------------------|
| Uterine cancer                                | --                       | --               | --                | --                 | --                 | --                 |
| Prostate cancer                               | 112<br>(80 - 150)        | --               | --                | 0<br>(0 - 0)       | 14<br>(10 - 19)    | 97<br>(69 - 132)   |
| Colon and rectum cancer                       | 87<br>(75 - 100)         | --               | --                | 3<br>(2 - 4)       | 26<br>(22 - 31)    | 58<br>(49 - 68)    |
| Lip and oral cavity cancer                    | 8<br>(6 - 9)             | --               | --                | 1<br>(1 - 1)       | 3<br>(3 - 4)       | 3<br>(2 - 5)       |
| Nasopharynx cancer                            | 0<br>(0 - 1)             | --               | 0<br>(0 - 0)      | 0<br>(0 - 0)       | 0<br>(0 - 0)       | 0<br>(0 - 0)       |
| Other pharynx cancer                          | 2<br>(2 - 3)             | --               | --                | 0<br>(0 - 1)       | 1<br>(1 - 2)       | 1<br>(1 - 1)       |
| Gallbladder and biliary tract cancer          | 6<br>(4 - 9)             | --               | --                | 0<br>(0 - 0)       | 2<br>(1 - 2)       | 5<br>(3 - 7)       |
| Pancreatic cancer                             | 47<br>(40 - 55)          | --               | --                | 2<br>(2 - 3)       | 21<br>(17 - 25)    | 24<br>(20 - 29)    |
| Malignant skin melanoma                       | 9<br>(5 - 16)            | --               | --                | 2<br>(1 - 3)       | 3<br>(2 - 6)       | 4<br>(2 - 7)       |
| Non-melanoma skin cancer                      | 5<br>(3 - 7)             | --               | --                | 0<br>(0 - 0)       | 0<br>(0 - 1)       | 4<br>(2 - 6)       |
| Ovarian cancer                                | --                       | --               | --                | --                 | --                 | --                 |
| Testicular cancer                             | 0<br>(0 - 0)             | --               | --                | 0<br>(0 - 0)       | 0<br>(0 - 0)       | 0<br>(0 - 0)       |
| Kidney cancer                                 | 16<br>(13 - 20)          | 0<br>(0 - 0)     | 0<br>(0 - 0)      | 1<br>(1 - 2)       | 7<br>(5 - 9)       | 9<br>(6 - 12)      |
| Bladder cancer                                | 35<br>(24 - 44)          | --               | --                | 0<br>(0 - 0)       | 7<br>(5 - 9)       | 28<br>(19 - 36)    |
| Brain and nervous system cancer               | 22<br>(18 - 29)          | 0<br>(0 - 0)     | 0<br>(0 - 0)      | 4<br>(3 - 6)       | 10<br>(8 - 13)     | 8<br>(6 - 11)      |
| Thyroid cancer                                | 1<br>(1 - 2)             | --               | 0<br>(0 - 0)      | 0<br>(0 - 0)       | 1<br>(0 - 1)       | 1<br>(0 - 1)       |
| Mesothelioma                                  | 7<br>(4 - 10)            | --               | --                | 0<br>(0 - 0)       | 2<br>(1 - 4)       | 4<br>(2 - 7)       |
| Hodgkin lymphoma                              | 1<br>(0 - 1)             | 0<br>(0 - 0)     | 0<br>(0 - 0)      | 0<br>(0 - 0)       | 0<br>(0 - 0)       | 0<br>(0 - 1)       |
| Non-Hodgkin lymphoma                          | 30<br>(17 - 40)          | 0<br>(0 - 0)     | 0<br>(0 - 0)      | 2<br>(1 - 2)       | 9<br>(5 - 13)      | 19<br>(11 - 26)    |
| Multiple myeloma                              | 11<br>(5 - 16)           | --               | --                | 0<br>(0 - 1)       | 4<br>(2 - 6)       | 7<br>(3 - 11)      |
| Leukemia                                      | 34<br>(28 - 40)          | 0<br>(0 - 0)     | 0<br>(0 - 1)      | 2<br>(2 - 3)       | 9<br>(7 - 12)      | 22<br>(18 - 26)    |
| Other neoplasms                               | 36<br>(26 - 47)          | 0<br>(0 - 0)     | 1<br>(1 - 1)      | 3<br>(2 - 4)       | 12<br>(8 - 15)     | 20<br>(13 - 28)    |
| Cardiovascular diseases                       | 1,140<br>(1,034 - 1,250) | 1<br>(0 - 1)     | 0<br>(0 - 0)      | 47<br>(40 - 55)    | 257<br>(223 - 293) | 836<br>(764 - 916) |
| Rheumatic heart disease                       | 6<br>(3 - 9)             | 0<br>(0 - 0)     | 0<br>(0 - 0)      | 0<br>(0 - 0)       | 1<br>(1 - 2)       | 4<br>(2 - 7)       |
| Ischemic heart disease                        | 714<br>(613 - 802)       | 0<br>(0 - 0)     | 0<br>(0 - 0)      | 36<br>(30 - 42)    | 189<br>(162 - 219) | 489<br>(421 - 558) |
| Cerebrovascular disease                       | 240<br>(194 - 300)       | 1<br>(0 - 1)     | 0<br>(0 - 0)      | 6<br>(5 - 8)       | 34<br>(27 - 43)    | 200<br>(158 - 251) |
| Ischemic stroke                               | 137<br>(105 - 178)       | 0<br>(0 - 0)     | 0<br>(0 - 0)      | 1<br>(1 - 1)       | 10<br>(7 - 14)     | 125<br>(96 - 166)  |
| Hemorrhagic stroke                            | 104<br>(79 - 134)        | 1<br>(0 - 1)     | 0<br>(0 - 0)      | 5<br>(4 - 7)       | 24<br>(18 - 31)    | 74<br>(54 - 99)    |
| Hypertensive heart disease                    | 27<br>(17 - 41)          | 0<br>(0 - 0)     | 0<br>(0 - 0)      | 0<br>(0 - 0)       | 3<br>(2 - 4)       | 24<br>(15 - 38)    |
| Cardiomyopathy and myocarditis                | 17<br>(13 - 25)          | 0<br>(0 - 0)     | 0<br>(0 - 0)      | 2<br>(2 - 3)       | 8<br>(5 - 11)      | 7<br>(5 - 12)      |
| Atrial fibrillation and flutter               | 42<br>(28 - 61)          | --               | --                | 0<br>(0 - 0)       | 1<br>(1 - 2)       | 41<br>(27 - 59)    |
| Aortic aneurysm                               | 33<br>(26 - 44)          | --               | --                | 1<br>(1 - 2)       | 10<br>(8 - 14)     | 22<br>(17 - 31)    |
| Peripheral vascular disease                   | 4<br>(3 - 6)             | --               | --                | 0<br>(0 - 0)       | 1<br>(0 - 1)       | 4<br>(3 - 5)       |
| Endocarditis                                  | 3<br>(2 - 4)             | 0<br>(0 - 0)     | 0<br>(0 - 0)      | 0<br>(0 - 0)       | 0<br>(0 - 1)       | 2<br>(1 - 3)       |
| Other cardiovascular and circulatory diseases | 54<br>(42 - 72)          | 0<br>(0 - 0)     | 0<br>(0 - 0)      | 1<br>(1 - 2)       | 10<br>(7 - 13)     | 43<br>(32 - 58)    |
| Chronic respiratory diseases                  | 202<br>(162 - 232)       | 0<br>(0 - 0)     | 0<br>(0 - 0)      | 1<br>(1 - 2)       | 20<br>(15 - 24)    | 180<br>(146 - 209) |
| Chronic obstructive pulmonary disease         | 147<br>(115 - 171)       | 0<br>(0 - 0)     | 0<br>(0 - 0)      | 1<br>(0 - 1)       | 13<br>(10 - 16)    | 133<br>(106 - 157) |
| Pneumoconiosis                                | 10<br>(6 - 15)           | 0<br>(0 - 0)     | 0<br>(0 - 0)      | 0<br>(0 - 0)       | 1<br>(0 - 1)       | 9<br>(6 - 14)      |
| Silicosis                                     | 0<br>(0 - 1)             | 0<br>(0 - 0)     | 0<br>(0 - 0)      | 0<br>(0 - 0)       | 0<br>(0 - 0)       | 0<br>(0 - 1)       |
| Asbestosis                                    | 4<br>(2 - 6)             | 0<br>(0 - 0)     | 0<br>(0 - 0)      | 0<br>(0 - 0)       | 0<br>(0 - 0)       | 3<br>(2 - 5)       |

Web Table 31- Cyprus deaths with 95% UI by age, sex, and cause in 2013

| Cause                                               | Males, All Ages    | Males, 0-4 Years | Males, 5-14 Years | Males, 15-49 Years | Males, 50-69 Years | Males, 70-80 Years |
|-----------------------------------------------------|--------------------|------------------|-------------------|--------------------|--------------------|--------------------|
| Coal workers pneumoconiosis                         | 1<br>(1 - 2)       | 0<br>(0 - 0)     | 0<br>(0 - 0)      | 0<br>(0 - 0)       | 0<br>(0 - 0)       | 1<br>(1 - 1)       |
| Other pneumoconiosis                                | 5<br>(3 - 8)       | 0<br>(0 - 0)     | 0<br>(0 - 0)      | 0<br>(0 - 0)       | 0<br>(0 - 1)       | 5<br>(3 - 7)       |
| Asthma                                              | 15<br>(10 - 21)    | 0<br>(0 - 0)     | 0<br>(0 - 0)      | 0<br>(0 - 0)       | 2<br>(1 - 2)       | 13<br>(8 - 19)     |
| Interstitial lung disease and pulmonary sarcoidosis | 28<br>(18 - 40)    | 0<br>(0 - 0)     | 0<br>(0 - 0)      | 0<br>(0 - 0)       | 4<br>(3 - 6)       | 24<br>(15 - 35)    |
| Other chronic respiratory diseases                  | 2<br>(1 - 2)       | 0<br>(0 - 0)     | 0<br>(0 - 0)      | 0<br>(0 - 0)       | 0<br>(0 - 0)       | 1<br>(1 - 1)       |
| Cirrhosis                                           | 44<br>(38 - 51)    | 0<br>(0 - 0)     | 0<br>(0 - 0)      | 3<br>(3 - 4)       | 18<br>(15 - 22)    | 22<br>(19 - 27)    |
| Cirrhosis due to hepatitis B                        | 4<br>(2 - 8)       | 0<br>(0 - 0)     | 0<br>(0 - 0)      | 0<br>(0 - 1)       | 2<br>(1 - 3)       | 2<br>(1 - 4)       |
| Cirrhosis due to hepatitis C                        | 18<br>(6 - 28)     | 0<br>(0 - 0)     | 0<br>(0 - 0)      | 1<br>(0 - 2)       | 7<br>(2 - 12)      | 9<br>(3 - 14)      |
| Cirrhosis due to alcohol use                        | 18<br>(10 - 28)    | --               | --                | 1<br>(0 - 2)       | 7<br>(4 - 12)      | 10<br>(6 - 15)     |
| Cirrhosis due to other causes                       | 3<br>(1 - 9)       | 0<br>(0 - 0)     | 0<br>(0 - 0)      | 1<br>(0 - 1)       | 2<br>(0 - 4)       | 1<br>(0 - 3)       |
| Digestive diseases                                  | 46<br>(37 - 54)    | 0<br>(0 - 0)     | 0<br>(0 - 0)      | 1<br>(1 - 2)       | 6<br>(5 - 8)       | 39<br>(31 - 46)    |
| Peptic ulcer disease                                | 6<br>(4 - 9)       | 0<br>(0 - 0)     | 0<br>(0 - 0)      | 0<br>(0 - 0)       | 1<br>(1 - 1)       | 5<br>(3 - 7)       |
| Gastritis and duodenitis                            | 0<br>(0 - 0)       | 0<br>(0 - 0)     | 0<br>(0 - 0)      | 0<br>(0 - 0)       | 0<br>(0 - 0)       | 0<br>(0 - 0)       |
| Appendicitis                                        | 1<br>(0 - 1)       | 0<br>(0 - 0)     | 0<br>(0 - 0)      | 0<br>(0 - 0)       | 0<br>(0 - 0)       | 0<br>(0 - 1)       |
| Paralytic ileus and intestinal obstruction          | 10<br>(6 - 15)     | 0<br>(0 - 0)     | 0<br>(0 - 0)      | 0<br>(0 - 0)       | 1<br>(1 - 2)       | 9<br>(5 - 13)      |
| Inguinal, femoral, and abdominal hernia             | 1<br>(1 - 2)       | 0<br>(0 - 0)     | 0<br>(0 - 0)      | 0<br>(0 - 0)       | 0<br>(0 - 0)       | 1<br>(1 - 2)       |
| Inflammatory bowel disease                          | 3<br>(2 - 5)       | 0<br>(0 - 0)     | 0<br>(0 - 0)      | 0<br>(0 - 0)       | 0<br>(0 - 1)       | 2<br>(1 - 4)       |
| Vascular intestinal disorders                       | 5<br>(2 - 10)      | 0<br>(0 - 0)     | 0<br>(0 - 0)      | 0<br>(0 - 0)       | 1<br>(0 - 1)       | 4<br>(2 - 8)       |
| Gallbladder and biliary diseases                    | 10<br>(6 - 15)     | 0<br>(0 - 0)     | 0<br>(0 - 0)      | 0<br>(0 - 0)       | 1<br>(0 - 1)       | 9<br>(6 - 14)      |
| Pancreatitis                                        | 6<br>(4 - 9)       | 0<br>(0 - 0)     | 0<br>(0 - 0)      | 1<br>(0 - 1)       | 2<br>(1 - 2)       | 4<br>(3 - 6)       |
| Other digestive diseases                            | 4<br>(2 - 5)       | 0<br>(0 - 0)     | 0<br>(0 - 0)      | 0<br>(0 - 0)       | 1<br>(0 - 1)       | 3<br>(2 - 5)       |
| Neurological disorders                              | 270<br>(205 - 327) | 0<br>(0 - 0)     | 0<br>(0 - 0)      | 3<br>(3 - 5)       | 17<br>(13 - 21)    | 249<br>(185 - 306) |
| Alzheimer disease and other dementias               | 234<br>(172 - 292) | --               | --                | 0<br>(0 - 0)       | 8<br>(6 - 12)      | 226<br>(163 - 282) |
| Parkinson disease                                   | 19<br>(12 - 28)    | --               | --                | 0<br>(0 - 0)       | 2<br>(1 - 3)       | 17<br>(10 - 26)    |
| Epilepsy                                            | 3<br>(2 - 4)       | 0<br>(0 - 0)     | 0<br>(0 - 0)      | 1<br>(1 - 1)       | 1<br>(0 - 1)       | 1<br>(0 - 1)       |
| Multiple sclerosis                                  | 2<br>(1 - 3)       | --               | --                | 1<br>(0 - 1)       | 1<br>(0 - 1)       | 0<br>(0 - 1)       |
| Other neurological disorders                        | 12<br>(10 - 16)    | 0<br>(0 - 0)     | 0<br>(0 - 0)      | 2<br>(1 - 3)       | 5<br>(4 - 7)       | 5<br>(4 - 7)       |
| Mental and substance use disorders                  | 16<br>(13 - 20)    | 0<br>(0 - 0)     | 0<br>(0 - 0)      | 11<br>(9 - 14)     | 2<br>(2 - 3)       | 2<br>(2 - 4)       |
| Schizophrenia                                       | 0<br>(0 - 0)       | --               | --                | 0<br>(0 - 0)       | 0<br>(0 - 0)       | 0<br>(0 - 0)       |
| Alcohol use disorders                               | 3<br>(2 - 5)       | --               | --                | 0<br>(0 - 1)       | 1<br>(1 - 3)       | 1<br>(1 - 2)       |
| Drug use disorders                                  | 12<br>(10 - 15)    | 0<br>(0 - 0)     | --                | 11<br>(8 - 13)     | 1<br>(0 - 1)       | 1<br>(1 - 1)       |
| Opioid use disorders                                | 5<br>(4 - 6)       | 0<br>(0 - 0)     | --                | 4<br>(3 - 5)       | 0<br>(0 - 0)       | 0<br>(0 - 0)       |
| Cocaine use disorders                               | 0<br>(0 - 0)       | 0<br>(0 - 0)     | --                | 0<br>(0 - 0)       | 0<br>(0 - 0)       | 0<br>(0 - 0)       |
| Amphetamine use disorders                           | 0<br>(0 - 0)       | 0<br>(0 - 0)     | --                | 0<br>(0 - 0)       | 0<br>(0 - 0)       | 0<br>(0 - 0)       |
| Other drug use disorders                            | 7<br>(5 - 9)       | 0<br>(0 - 0)     | --                | 6<br>(5 - 8)       | 0<br>(0 - 1)       | 0<br>(0 - 1)       |
| Eating disorders                                    | 0<br>(0 - 0)       | --               | 0<br>(0 - 0)      | 0<br>(0 - 0)       | --                 | --                 |
| Anorexia nervosa                                    | 0<br>(0 - 0)       | --               | 0<br>(0 - 0)      | 0<br>(0 - 0)       | --                 | --                 |
| Diabetes, urogenital, blood, and endocrine diseases | 317<br>(272 - 359) | 0<br>(0 - 0)     | 0<br>(0 - 0)      | 5<br>(4 - 6)       | 49<br>(41 - 58)    | 263<br>(224 - 299) |
| Diabetes mellitus                                   | 181<br>(155 - 211) | 0<br>(0 - 0)     | 0<br>(0 - 0)      | 2<br>(1 - 2)       | 29<br>(23 - 35)    | 151<br>(127 - 180) |
| Acute glomerulonephritis                            | 0<br>(0 - 0)       | 0<br>(0 - 0)     | 0<br>(0 - 0)      | 0<br>(0 - 0)       | 0<br>(0 - 0)       | 0<br>(0 - 0)       |

Web Table 31- Cyprus deaths with 95% UI by age, sex, and cause in 2013

| Cause                                               | Males, All Ages    | Males, 0-4 Years | Males, 5-14 Years | Males, 15-49 Years | Males, 50-69 Years | Males, 70-80 Years |
|-----------------------------------------------------|--------------------|------------------|-------------------|--------------------|--------------------|--------------------|
| Chronic kidney disease                              | 91<br>(57 - 109)   | 0<br>(0 - 0)     | 0<br>(0 - 0)      | 1<br>(1 - 2)       | 11<br>(7 - 14)     | 78<br>(48 - 96)    |
| Chronic kidney disease due to diabetes mellitus     | 5<br>(3 - 12)      | 0<br>(0 - 0)     | 0<br>(0 - 0)      | 0<br>(0 - 0)       | 1<br>(1 - 3)       | 4<br>(2 - 9)       |
| Chronic kidney disease due to hypertension          | 39<br>(24 - 52)    | 0<br>(0 - 0)     | 0<br>(0 - 0)      | 0<br>(0 - 0)       | 4<br>(2 - 6)       | 35<br>(21 - 46)    |
| Chronic kidney disease due to glomerulonephritis    | 2<br>(1 - 3)       | 0<br>(0 - 0)     | 0<br>(0 - 0)      | 0<br>(0 - 0)       | 0<br>(0 - 1)       | 2<br>(1 - 3)       |
| Chronic kidney disease due to other causes          | 44<br>(20 - 62)    | 0<br>(0 - 0)     | 0<br>(0 - 0)      | 1<br>(0 - 1)       | 5<br>(2 - 8)       | 38<br>(17 - 55)    |
| Urinary diseases and male infertility               | 23<br>(12 - 30)    | 0<br>(0 - 0)     | 0<br>(0 - 0)      | 0<br>(0 - 0)       | 2<br>(2 - 3)       | 20<br>(10 - 28)    |
| Interstitial nephritis and urinary tract infections | 14<br>(7 - 20)     | 0<br>(0 - 0)     | 0<br>(0 - 0)      | 0<br>(0 - 0)       | 1<br>(1 - 1)       | 13<br>(6 - 19)     |
| Urolithiasis                                        | 1<br>(0 - 1)       | --               | 0<br>(0 - 0)      | 0<br>(0 - 0)       | 0<br>(0 - 0)       | 0<br>(0 - 1)       |
| Other urinary diseases                              | 9<br>(4 - 13)      | 0<br>(0 - 0)     | 0<br>(0 - 0)      | 0<br>(0 - 0)       | 1<br>(1 - 2)       | 7<br>(3 - 12)      |
| Gynecological diseases                              | --                 | --               | --                | --                 | --                 | --                 |
| Uterine fibroids                                    | --                 | --               | --                | --                 | --                 | --                 |
| Polycystic ovarian syndrome                         | --                 | --               | --                | --                 | --                 | --                 |
| Endometriosis                                       | --                 | --               | --                | --                 | --                 | --                 |
| Genital prolapse                                    | --                 | --               | --                | --                 | --                 | --                 |
| Other gynecological diseases                        | --                 | --               | --                | --                 | --                 | --                 |
| Hemoglobinopathies and hemolytic anemias            | 3<br>(2 - 5)       | 0<br>(0 - 0)     | 0<br>(0 - 0)      | 1<br>(0 - 1)       | 1<br>(0 - 1)       | 2<br>(1 - 2)       |
| Thalassemias                                        | 0<br>(0 - 1)       | 0<br>(0 - 0)     | 0<br>(0 - 0)      | 0<br>(0 - 1)       | 0<br>(0 - 0)       | 0<br>(0 - 0)       |
| Sickle cell disorders                               | 1<br>(0 - 1)       | 0<br>(0 - 0)     | 0<br>(0 - 0)      | 0<br>(0 - 0)       | 0<br>(0 - 1)       | 0<br>(0 - 0)       |
| G6PD deficiency                                     | 0<br>(0 - 0)       | 0<br>(0 - 0)     | 0<br>(0 - 0)      | 0<br>(0 - 0)       | 0<br>(0 - 0)       | 0<br>(0 - 0)       |
| Other hemoglobinopathies and hemolytic anemias      | 2<br>(1 - 3)       | 0<br>(0 - 0)     | 0<br>(0 - 0)      | 0<br>(0 - 0)       | 0<br>(0 - 0)       | 2<br>(1 - 2)       |
| Endocrine, metabolic, blood, and immune disorders   | 19<br>(12 - 26)    | 0<br>(0 - 0)     | 0<br>(0 - 0)      | 1<br>(1 - 2)       | 6<br>(4 - 9)       | 11<br>(6 - 17)     |
| Musculoskeletal disorders                           | 5<br>(3 - 6)       | --               | 0<br>(0 - 0)      | 0<br>(0 - 1)       | 1<br>(1 - 1)       | 3<br>(2 - 4)       |
| Rheumatoid arthritis                                | 1<br>(1 - 2)       | --               | 0<br>(0 - 0)      | 0<br>(0 - 0)       | 0<br>(0 - 0)       | 1<br>(1 - 1)       |
| Other musculoskeletal disorders                     | 3<br>(2 - 4)       | --               | 0<br>(0 - 0)      | 0<br>(0 - 0)       | 1<br>(0 - 1)       | 2<br>(1 - 3)       |
| Other non-communicable diseases                     | 22<br>(17 - 28)    | 3<br>(2 - 4)     | 0<br>(0 - 0)      | 2<br>(2 - 3)       | 3<br>(2 - 3)       | 13<br>(9 - 20)     |
| Congenital anomalies                                | 8<br>(7 - 10)      | 3<br>(2 - 4)     | 0<br>(0 - 0)      | 2<br>(1 - 2)       | 2<br>(1 - 2)       | 2<br>(1 - 3)       |
| Neural tube defects                                 | 0<br>(0 - 0)       | 0<br>(0 - 0)     | 0<br>(0 - 0)      | 0<br>(0 - 0)       | 0<br>(0 - 0)       | 0<br>(0 - 0)       |
| Congenital heart anomalies                          | 3<br>(3 - 4)       | 2<br>(1 - 2)     | 0<br>(0 - 0)      | 1<br>(1 - 1)       | 1<br>(0 - 1)       | 0<br>(0 - 0)       |
| Cleft lip and cleft palate                          | 0<br>(0 - 0)       | 0<br>(0 - 0)     | --                | --                 | --                 | --                 |
| Down syndrome                                       | 1<br>(1 - 2)       | 0<br>(0 - 0)     | 0<br>(0 - 0)      | 0<br>(0 - 0)       | 1<br>(0 - 1)       | 0<br>(0 - 0)       |
| Chromosomal unbalanced rearrangements               | 0<br>(0 - 0)       | 0<br>(0 - 0)     | 0<br>(0 - 0)      | 0<br>(0 - 0)       | 0<br>(0 - 0)       | 0<br>(0 - 0)       |
| Other congenital anomalies                          | 4<br>(3 - 5)       | 1<br>(1 - 2)     | 0<br>(0 - 0)      | 0<br>(0 - 1)       | 0<br>(0 - 1)       | 2<br>(1 - 2)       |
| Skin and subcutaneous diseases                      | 13<br>(8 - 19)     | 0<br>(0 - 0)     | 0<br>(0 - 0)      | 1<br>(0 - 1)       | 1<br>(1 - 1)       | 12<br>(7 - 18)     |
| Cellulitis                                          | 1<br>(0 - 1)       | 0<br>(0 - 0)     | 0<br>(0 - 0)      | 0<br>(0 - 0)       | 0<br>(0 - 0)       | 0<br>(0 - 1)       |
| Pyoderma                                            | 2<br>(1 - 3)       | 0<br>(0 - 0)     | 0<br>(0 - 0)      | 0<br>(0 - 0)       | 0<br>(0 - 1)       | 1<br>(0 - 2)       |
| Decubitus ulcer                                     | 11<br>(6 - 16)     | 0<br>(0 - 0)     | 0<br>(0 - 0)      | 0<br>(0 - 0)       | 0<br>(0 - 1)       | 10<br>(6 - 16)     |
| Other skin and subcutaneous diseases                | 0<br>(0 - 0)       | 0<br>(0 - 0)     | 0<br>(0 - 0)      | 0<br>(0 - 0)       | 0<br>(0 - 0)       | 0<br>(0 - 0)       |
| Sudden infant death syndrome                        | 0<br>(0 - 1)       | 0<br>(0 - 1)     | --                | --                 | --                 | --                 |
| Injuries                                            | 211<br>(181 - 240) | 1<br>(1 - 2)     | 2<br>(1 - 2)      | 90<br>(77 - 103)   | 44<br>(37 - 52)    | 74<br>(58 - 88)    |
| Transport injuries                                  | 85<br>(74 - 98)    | 0<br>(0 - 0)     | 1<br>(1 - 2)      | 50<br>(43 - 58)    | 16<br>(13 - 19)    | 18<br>(14 - 22)    |

Web Table 31- Cyprus deaths with 95% UI by age, sex, and cause in 2013

| Cause                                           | Males, All Ages  | Males, 0-4 Years | Males, 5-14 Years | Males, 15-49 Years | Males, 50-69 Years | Males, 70-80 Years |
|-------------------------------------------------|------------------|------------------|-------------------|--------------------|--------------------|--------------------|
| Road injuries                                   | 79<br>(68 - 90)  | 0<br>(0 - 0)     | 1<br>(1 - 2)      | 46<br>(40 - 54)    | 15<br>(12 - 18)    | 16<br>(13 - 20)    |
| Pedestrian road injuries                        | 14<br>(8 - 23)   | 0<br>(0 - 0)     | 0<br>(0 - 1)      | 4<br>(2 - 7)       | 4<br>(2 - 6)       | 6<br>(4 - 10)      |
| Cyclist road injuries                           | 3<br>(2 - 4)     | 0<br>(0 - 0)     | 0<br>(0 - 0)      | 1<br>(1 - 2)       | 1<br>(0 - 1)       | 1<br>(0 - 1)       |
| Motorcyclist road injuries                      | 22<br>(14 - 28)  | 0<br>(0 - 0)     | 0<br>(0 - 1)      | 17<br>(11 - 22)    | 2<br>(1 - 3)       | 3<br>(1 - 4)       |
| Motor vehicle road injuries                     | 40<br>(29 - 50)  | 0<br>(0 - 0)     | 0<br>(0 - 0)      | 24<br>(19 - 31)    | 8<br>(6 - 11)      | 7<br>(4 - 10)      |
| Other road injuries                             | 0<br>(0 - 0)     | 0<br>(0 - 0)     | 0<br>(0 - 0)      | 0<br>(0 - 0)       | 0<br>(0 - 0)       | 0<br>(0 - 0)       |
| Other transport injuries                        | 7<br>(5 - 10)    | 0<br>(0 - 0)     | 0<br>(0 - 0)      | 3<br>(2 - 5)       | 2<br>(1 - 3)       | 2<br>(1 - 3)       |
| Unintentional injuries                          | 91<br>(72 - 107) | 1<br>(0 - 1)     | 0<br>(0 - 1)      | 20<br>(17 - 24)    | 18<br>(14 - 21)    | 52<br>(37 - 65)    |
| Falls                                           | 46<br>(28 - 60)  | 0<br>(0 - 0)     | 0<br>(0 - 0)      | 4<br>(3 - 6)       | 6<br>(4 - 8)       | 36<br>(20 - 48)    |
| Drowning                                        | 16<br>(12 - 21)  | 0<br>(0 - 0)     | 0<br>(0 - 0)      | 6<br>(4 - 8)       | 4<br>(3 - 5)       | 6<br>(4 - 8)       |
| Fire, heat, and hot substances                  | 3<br>(3 - 5)     | 0<br>(0 - 0)     | 0<br>(0 - 0)      | 1<br>(1 - 1)       | 1<br>(1 - 2)       | 1<br>(1 - 2)       |
| Poisonings                                      | 1<br>(1 - 1)     | 0<br>(0 - 0)     | 0<br>(0 - 0)      | 1<br>(0 - 1)       | 0<br>(0 - 0)       | 0<br>(0 - 0)       |
| Exposure to mechanical forces                   | 10<br>(8 - 13)   | 0<br>(0 - 0)     | 0<br>(0 - 0)      | 6<br>(5 - 8)       | 3<br>(2 - 5)       | 1<br>(1 - 1)       |
| Unintentional firearm injuries                  | 0<br>(0 - 1)     | 0<br>(0 - 0)     | 0<br>(0 - 0)      | 0<br>(0 - 0)       | 0<br>(0 - 0)       | 0<br>(0 - 0)       |
| Unintentional suffocation                       | 1<br>(0 - 2)     | 0<br>(0 - 0)     | 0<br>(0 - 0)      | 1<br>(0 - 1)       | 0<br>(0 - 0)       | 0<br>(0 - 0)       |
| Other exposure to mechanical forces             | 9<br>(7 - 12)    | 0<br>(0 - 0)     | 0<br>(0 - 0)      | 5<br>(4 - 7)       | 3<br>(2 - 5)       | 1<br>(0 - 1)       |
| Adverse effects of medical treatment            | 6<br>(4 - 8)     | 0<br>(0 - 0)     | 0<br>(0 - 0)      | 1<br>(0 - 1)       | 1<br>(1 - 2)       | 4<br>(2 - 6)       |
| Animal contact                                  | 0<br>(0 - 1)     | 0<br>(0 - 0)     | 0<br>(0 - 0)      | 0<br>(0 - 0)       | 0<br>(0 - 0)       | 0<br>(0 - 0)       |
| Venomous animal contact                         | 0<br>(0 - 0)     | 0<br>(0 - 0)     | 0<br>(0 - 0)      | 0<br>(0 - 0)       | 0<br>(0 - 0)       | 0<br>(0 - 0)       |
| Non-venomous animal contact                     | 0<br>(0 - 0)     | 0<br>(0 - 0)     | 0<br>(0 - 0)      | 0<br>(0 - 0)       | 0<br>(0 - 0)       | 0<br>(0 - 0)       |
| Foreign body                                    | 6<br>(3 - 9)     | 0<br>(0 - 1)     | 0<br>(0 - 0)      | 1<br>(1 - 2)       | 1<br>(1 - 2)       | 4<br>(2 - 5)       |
| Pulmonary aspiration and foreign body in airway | 6<br>(3 - 9)     | 0<br>(0 - 1)     | 0<br>(0 - 0)      | 1<br>(1 - 2)       | 1<br>(1 - 2)       | 4<br>(2 - 5)       |
| Foreign body in other body part                 | 0<br>(0 - 0)     | 0<br>(0 - 0)     | 0<br>(0 - 0)      | 0<br>(0 - 0)       | 0<br>(0 - 0)       | 0<br>(0 - 0)       |
| Other unintentional injuries                    | 2<br>(1 - 2)     | 0<br>(0 - 0)     | 0<br>(0 - 0)      | 1<br>(1 - 1)       | 0<br>(0 - 1)       | 0<br>(0 - 0)       |
| Self-harm and interpersonal violence            | 34<br>(23 - 41)  | 0<br>(0 - 0)     | 0<br>(0 - 0)      | 20<br>(13 - 25)    | 10<br>(7 - 13)     | 4<br>(3 - 5)       |
| Self-harm                                       | 27<br>(16 - 33)  | --               | 0<br>(0 - 0)      | 15<br>(9 - 19)     | 8<br>(5 - 10)      | 4<br>(2 - 5)       |
| Interpersonal violence                          | 7<br>(4 - 10)    | 0<br>(0 - 0)     | 0<br>(0 - 0)      | 4<br>(3 - 6)       | 2<br>(1 - 3)       | 0<br>(0 - 1)       |
| Assault by firearm                              | 4<br>(2 - 5)     | 0<br>(0 - 0)     | 0<br>(0 - 0)      | 2<br>(1 - 4)       | 1<br>(1 - 2)       | 0<br>(0 - 0)       |
| Assault by sharp object                         | 1<br>(1 - 2)     | 0<br>(0 - 0)     | 0<br>(0 - 0)      | 1<br>(0 - 1)       | 0<br>(0 - 1)       | 0<br>(0 - 0)       |
| Assault by other means                          | 3<br>(1 - 4)     | 0<br>(0 - 0)     | 0<br>(0 - 0)      | 1<br>(1 - 2)       | 1<br>(0 - 1)       | 0<br>(0 - 1)       |

Web Table 31- Cyprus deaths with 95% UI by age, sex, and cause in 2013

| Cause                                                             | Females, All Ages        | Females, 0-4 Years | Females, 5-14 Years | Females, 15-49 Years | Females, 50-69 Years | Females, 70-80 Years     |
|-------------------------------------------------------------------|--------------------------|--------------------|---------------------|----------------------|----------------------|--------------------------|
| All causes                                                        | 2,820<br>(2,642 - 3,022) | 13<br>(10 - 16)    | 4<br>(3 - 4)        | 103<br>(88 - 123)    | 364<br>(317 - 421)   | 2,336<br>(2,217 - 2,462) |
| Communicable, maternal, neonatal, and nutritional diseases        | 149<br>(119 - 185)       | 7<br>(5 - 9)       | 0<br>(0 - 1)        | 5<br>(4 - 6)         | 9<br>(7 - 11)        | 128<br>(99 - 164)        |
| HIV/AIDS and tuberculosis                                         | 1<br>(1 - 2)             | 0<br>(0 - 0)       | 0<br>(0 - 0)        | 0<br>(0 - 1)         | 0<br>(0 - 0)         | 1<br>(0 - 1)             |
| Tuberculosis                                                      | 1<br>(1 - 1)             | 0<br>(0 - 0)       | 0<br>(0 - 0)        | 0<br>(0 - 0)         | 0<br>(0 - 0)         | 1<br>(0 - 1)             |
| HIV/AIDS                                                          | 0<br>(0 - 1)             | 0<br>(0 - 0)       | 0<br>(0 - 0)        | 0<br>(0 - 0)         | 0<br>(0 - 0)         | 0<br>(0 - 0)             |
| HIV/AIDS resulting in mycobacterial infection                     | 0<br>(0 - 0)             | 0<br>(0 - 0)       | 0<br>(0 - 0)        | 0<br>(0 - 0)         | 0<br>(0 - 0)         | 0<br>(0 - 0)             |
| HIV/AIDS resulting in other diseases                              | 0<br>(0 - 1)             | 0<br>(0 - 0)       | 0<br>(0 - 0)        | 0<br>(0 - 0)         | 0<br>(0 - 0)         | 0<br>(0 - 0)             |
| Diarrhea, lower respiratory, and other common infectious diseases | 117<br>(89 - 153)        | 0<br>(0 - 0)       | 0<br>(0 - 0)        | 3<br>(2 - 4)         | 7<br>(5 - 9)         | 107<br>(78 - 141)        |
| Diarrheal diseases                                                | 9<br>(5 - 15)            | 0<br>(0 - 0)       | 0<br>(0 - 0)        | 0<br>(0 - 0)         | 0<br>(0 - 1)         | 9<br>(5 - 14)            |
| Intestinal infectious diseases                                    | 1<br>(0 - 2)             | 0<br>(0 - 0)       | 0<br>(0 - 0)        | 0<br>(0 - 1)         | 0<br>(0 - 0)         | 0<br>(0 - 0)             |
| Typhoid fever                                                     | 1<br>(0 - 2)             | 0<br>(0 - 0)       | 0<br>(0 - 0)        | 0<br>(0 - 1)         | 0<br>(0 - 0)         | 0<br>(0 - 0)             |
| Paratyphoid fever                                                 | 0<br>(0 - 0)             | 0<br>(0 - 0)       | 0<br>(0 - 0)        | 0<br>(0 - 0)         | 0<br>(0 - 0)         | 0<br>(0 - 0)             |
| Other intestinal infectious diseases                              | 0<br>(0 - 0)             | 0<br>(0 - 0)       | 0<br>(0 - 0)        | 0<br>(0 - 0)         | 0<br>(0 - 0)         | 0<br>(0 - 0)             |
| Lower respiratory infections                                      | 104<br>(77 - 140)        | 0<br>(0 - 0)       | 0<br>(0 - 0)        | 2<br>(1 - 2)         | 6<br>(5 - 8)         | 96<br>(69 - 130)         |
| Upper respiratory infections                                      | 0<br>(0 - 0)             | 0<br>(0 - 0)       | 0<br>(0 - 0)        | 0<br>(0 - 0)         | 0<br>(0 - 0)         | 0<br>(0 - 0)             |
| Otitis media                                                      | 0<br>(0 - 0)             | 0<br>(0 - 0)       | 0<br>(0 - 0)        | 0<br>(0 - 0)         | 0<br>(0 - 0)         | 0<br>(0 - 0)             |
| Meningitis                                                        | 1<br>(1 - 1)             | 0<br>(0 - 0)       | 0<br>(0 - 0)        | 0<br>(0 - 0)         | 0<br>(0 - 0)         | 0<br>(0 - 1)             |
| Pneumococcal meningitis                                           | 0<br>(0 - 0)             | 0<br>(0 - 0)       | 0<br>(0 - 0)        | 0<br>(0 - 0)         | 0<br>(0 - 0)         | 0<br>(0 - 0)             |
| H influenzae type B meningitis                                    | 0<br>(0 - 0)             | 0<br>(0 - 0)       | 0<br>(0 - 0)        | 0<br>(0 - 0)         | 0<br>(0 - 0)         | 0<br>(0 - 0)             |
| Meningococcal meningitis                                          | 0<br>(0 - 0)             | 0<br>(0 - 0)       | 0<br>(0 - 0)        | 0<br>(0 - 0)         | 0<br>(0 - 0)         | 0<br>(0 - 0)             |
| Other meningitis                                                  | 0<br>(0 - 0)             | 0<br>(0 - 0)       | 0<br>(0 - 0)        | 0<br>(0 - 0)         | 0<br>(0 - 0)         | 0<br>(0 - 0)             |
| Encephalitis                                                      | 1<br>(1 - 2)             | 0<br>(0 - 0)       | 0<br>(0 - 0)        | 0<br>(0 - 0)         | 0<br>(0 - 0)         | 1<br>(1 - 2)             |
| Diphtheria                                                        | 0<br>(0 - 0)             | 0<br>(0 - 0)       | 0<br>(0 - 0)        | 0<br>(0 - 0)         | 0<br>(0 - 0)         | --                       |
| Whooping cough                                                    | 0<br>(0 - 0)             | 0<br>(0 - 0)       | 0<br>(0 - 0)        | 0<br>(0 - 0)         | 0<br>(0 - 0)         | --                       |
| Tetanus                                                           | 0<br>(0 - 0)             | 0<br>(0 - 0)       | 0<br>(0 - 0)        | 0<br>(0 - 0)         | 0<br>(0 - 0)         | 0<br>(0 - 0)             |
| Measles                                                           | 0<br>(0 - 0)             | 0<br>(0 - 0)       | 0<br>(0 - 0)        | 0<br>(0 - 0)         | 0<br>(0 - 0)         | --                       |
| Varicella and herpes zoster                                       | 0<br>(0 - 1)             | 0<br>(0 - 0)       | 0<br>(0 - 0)        | 0<br>(0 - 0)         | 0<br>(0 - 0)         | 0<br>(0 - 1)             |
| Neglected tropical diseases and malaria                           | 0<br>(0 - 1)             | 0<br>(0 - 0)       | 0<br>(0 - 0)        | 0<br>(0 - 0)         | 0<br>(0 - 0)         | 0<br>(0 - 0)             |
| Leishmaniasis                                                     | 0<br>(0 - 0)             | 0<br>(0 - 0)       | 0<br>(0 - 0)        | 0<br>(0 - 0)         | 0<br>(0 - 0)         | 0<br>(0 - 0)             |
| Visceral leishmaniasis                                            | 0<br>(0 - 0)             | 0<br>(0 - 0)       | 0<br>(0 - 0)        | 0<br>(0 - 0)         | 0<br>(0 - 0)         | 0<br>(0 - 0)             |
| Cysticercosis                                                     | 0<br>(0 - 0)             | 0<br>(0 - 0)       | 0<br>(0 - 0)        | 0<br>(0 - 0)         | 0<br>(0 - 0)         | 0<br>(0 - 0)             |
| Cystic echinococcosis                                             | 0<br>(0 - 0)             | 0<br>(0 - 0)       | 0<br>(0 - 0)        | 0<br>(0 - 0)         | 0<br>(0 - 0)         | 0<br>(0 - 0)             |
| Dengue                                                            | 0<br>(0 - 0)             | 0<br>(0 - 0)       | 0<br>(0 - 0)        | 0<br>(0 - 0)         | 0<br>(0 - 0)         | 0<br>(0 - 0)             |
| Rabies                                                            | 0<br>(0 - 0)             | 0<br>(0 - 0)       | 0<br>(0 - 0)        | 0<br>(0 - 0)         | 0<br>(0 - 0)         | 0<br>(0 - 0)             |
| Other neglected tropical diseases                                 | 0<br>(0 - 0)             | 0<br>(0 - 0)       | 0<br>(0 - 0)        | 0<br>(0 - 0)         | 0<br>(0 - 0)         | 0<br>(0 - 0)             |
| Maternal disorders                                                | 1<br>(1 - 1)             | --                 | 0<br>(0 - 0)        | 1<br>(1 - 1)         | --                   | --                       |
| Maternal hemorrhage                                               | 0<br>(0 - 0)             | --                 | 0<br>(0 - 0)        | 0<br>(0 - 0)         | --                   | --                       |
| Maternal sepsis and other maternal infections                     | 0<br>(0 - 0)             | --                 | 0<br>(0 - 0)        | 0<br>(0 - 0)         | --                   | --                       |
| Maternal hypertensive disorders                                   | 0<br>(0 - 0)             | --                 | 0<br>(0 - 0)        | 0<br>(0 - 0)         | --                   | --                       |
| Maternal obstructed labor                                         | 0<br>(0 - 0)             | --                 | 0<br>(0 - 0)        | 0<br>(0 - 0)         | --                   | --                       |



Web Table 31- Cyprus deaths with 95% UI by age, sex, and cause in 2013

| Cause                                                            | Females, All Ages        | Females, 0-4 Years | Females, 5-14 Years | Females, 15-49 Years | Females, 50-69 Years | Females, 70-80 Years     |
|------------------------------------------------------------------|--------------------------|--------------------|---------------------|----------------------|----------------------|--------------------------|
| Maternal abortive outcome                                        | 0<br>(0 - 0)             | --                 | 0<br>(0 - 0)        | 0<br>(0 - 0)         | --                   | --                       |
| Indirect maternal deaths                                         | 0<br>(0 - 0)             | --                 | 0<br>(0 - 0)        | 0<br>(0 - 0)         | --                   | --                       |
| Late maternal deaths                                             | 0<br>(0 - 0)             | --                 | 0<br>(0 - 0)        | 0<br>(0 - 0)         | --                   | --                       |
| Maternal deaths aggravated by HIV/AIDS                           | 0<br>(0 - 0)             | --                 | --                  | 0<br>(0 - 0)         | --                   | --                       |
| Other maternal disorders                                         | 0<br>(0 - 0)             | --                 | 0<br>(0 - 0)        | 0<br>(0 - 0)         | --                   | --                       |
| Neonatal disorders                                               | 7<br>(5 - 8)             | 7<br>(5 - 8)       | --                  | --                   | --                   | --                       |
| Neonatal preterm birth complications                             | 3<br>(2 - 5)             | 3<br>(2 - 5)       | --                  | --                   | --                   | --                       |
| Neonatal encephalopathy due to birth asphyxia and trauma         | 2<br>(1 - 3)             | 2<br>(1 - 3)       | --                  | --                   | --                   | --                       |
| Neonatal sepsis and other neonatal infections                    | 0<br>(0 - 0)             | 0<br>(0 - 0)       | --                  | --                   | --                   | --                       |
| Hemolytic disease and other neonatal jaundice                    | 0<br>(0 - 0)             | 0<br>(0 - 0)       | --                  | --                   | --                   | --                       |
| Other neonatal disorders                                         | 2<br>(1 - 3)             | 2<br>(1 - 3)       | --                  | --                   | --                   | --                       |
| Nutritional deficiencies                                         | 21<br>(14 - 28)          | 0<br>(0 - 0)       | 0<br>(0 - 0)        | 0<br>(0 - 1)         | 1<br>(1 - 1)         | 19<br>(13 - 27)          |
| Protein-energy malnutrition                                      | 2<br>(1 - 4)             | 0<br>(0 - 0)       | 0<br>(0 - 0)        | 0<br>(0 - 0)         | 0<br>(0 - 0)         | 2<br>(0 - 4)             |
| Iodine deficiency                                                | 0<br>(0 - 0)             | 0<br>(0 - 0)       | 0<br>(0 - 0)        | 0<br>(0 - 0)         | 0<br>(0 - 0)         | 0<br>(0 - 0)             |
| Iron-deficiency anemia                                           | 18<br>(12 - 25)          | 0<br>(0 - 0)       | 0<br>(0 - 0)        | 0<br>(0 - 0)         | 1<br>(0 - 1)         | 17<br>(11 - 24)          |
| Other nutritional deficiencies                                   | 1<br>(0 - 2)             | 0<br>(0 - 0)       | 0<br>(0 - 0)        | 0<br>(0 - 0)         | 0<br>(0 - 0)         | 1<br>(0 - 1)             |
| Other communicable, maternal, neonatal, and nutritional diseases | 3<br>(2 - 4)             | 0<br>(0 - 0)       | 0<br>(0 - 0)        | 0<br>(0 - 0)         | 1<br>(0 - 1)         | 2<br>(1 - 3)             |
| Sexually transmitted diseases excluding HIV                      | 0<br>(0 - 0)             | 0<br>(0 - 0)       | 0<br>(0 - 0)        | 0<br>(0 - 0)         | 0<br>(0 - 0)         | 0<br>(0 - 0)             |
| Syphilis                                                         | 0<br>(0 - 0)             | 0<br>(0 - 0)       | 0<br>(0 - 0)        | 0<br>(0 - 0)         | 0<br>(0 - 0)         | 0<br>(0 - 0)             |
| Chlamydial infection                                             | 0<br>(0 - 0)             | --                 | 0<br>(0 - 0)        | 0<br>(0 - 0)         | 0<br>(0 - 0)         | 0<br>(0 - 0)             |
| Gonococcal infection                                             | 0<br>(0 - 0)             | --                 | 0<br>(0 - 0)        | 0<br>(0 - 0)         | 0<br>(0 - 0)         | 0<br>(0 - 0)             |
| Other sexually transmitted diseases                              | 0<br>(0 - 0)             | --                 | 0<br>(0 - 0)        | 0<br>(0 - 0)         | 0<br>(0 - 0)         | 0<br>(0 - 0)             |
| Hepatitis                                                        | 0<br>(0 - 0)             | 0<br>(0 - 0)       | 0<br>(0 - 0)        | 0<br>(0 - 0)         | 0<br>(0 - 0)         | 0<br>(0 - 0)             |
| Acute hepatitis A                                                | 0<br>(0 - 0)             | 0<br>(0 - 0)       | 0<br>(0 - 0)        | 0<br>(0 - 0)         | 0<br>(0 - 0)         | 0<br>(0 - 0)             |
| Acute hepatitis B                                                | 0<br>(0 - 0)             | 0<br>(0 - 0)       | 0<br>(0 - 0)        | 0<br>(0 - 0)         | 0<br>(0 - 0)         | 0<br>(0 - 0)             |
| Acute hepatitis C                                                | 0<br>(0 - 0)             | --                 | 0<br>(0 - 0)        | 0<br>(0 - 0)         | 0<br>(0 - 0)         | 0<br>(0 - 0)             |
| Other infectious diseases                                        | 2<br>(2 - 3)             | 0<br>(0 - 0)       | 0<br>(0 - 0)        | 0<br>(0 - 0)         | 1<br>(0 - 1)         | 1<br>(1 - 2)             |
| Non-communicable diseases                                        | 2,563<br>(2,386 - 2,755) | 5<br>(3 - 6)       | 2<br>(1 - 2)        | 74<br>(62 - 88)      | 341<br>(296 - 395)   | 2,142<br>(2,019 - 2,270) |
| Neoplasms                                                        | 538<br>(468 - 607)       | 0<br>(0 - 1)       | 1<br>(0 - 1)        | 42<br>(35 - 51)      | 185<br>(158 - 217)   | 310<br>(264 - 349)       |
| Esophageal cancer                                                | 1<br>(1 - 1)             | --                 | --                  | 0<br>(0 - 0)         | 0<br>(0 - 0)         | 0<br>(0 - 1)             |
| Stomach cancer                                                   | 28<br>(19 - 43)          | --                 | --                  | 2<br>(1 - 3)         | 7<br>(5 - 10)        | 19<br>(13 - 32)          |
| Liver cancer                                                     | 15<br>(12 - 20)          | --                 | 0<br>(0 - 0)        | 0<br>(0 - 0)         | 5<br>(3 - 6)         | 11<br>(7 - 14)           |
| Liver cancer due to hepatitis B                                  | 3<br>(1 - 7)             | --                 | 0<br>(0 - 0)        | 0<br>(0 - 0)         | 1<br>(0 - 2)         | 2<br>(0 - 4)             |
| Liver cancer due to hepatitis C                                  | 8<br>(4 - 13)            | --                 | 0<br>(0 - 0)        | 0<br>(0 - 0)         | 3<br>(1 - 4)         | 5<br>(2 - 9)             |
| Liver cancer due to alcohol use                                  | 3<br>(1 - 6)             | --                 | --                  | 0<br>(0 - 0)         | 1<br>(0 - 1)         | 2<br>(1 - 5)             |
| Liver cancer due to other causes                                 | 2<br>(0 - 3)             | --                 | 0<br>(0 - 0)        | 0<br>(0 - 0)         | 0<br>(0 - 1)         | 1<br>(0 - 2)             |
| Larynx cancer                                                    | 0<br>(0 - 0)             | --                 | --                  | 0<br>(0 - 0)         | 0<br>(0 - 0)         | 0<br>(0 - 0)             |
| Tracheal, bronchus and lung cancer                               | 55<br>(41 - 67)          | --                 | --                  | 4<br>(3 - 6)         | 23<br>(17 - 29)      | 28<br>(19 - 35)          |
| Breast cancer                                                    | 118<br>(82 - 139)        | --                 | --                  | 15<br>(11 - 19)      | 51<br>(36 - 62)      | 52<br>(33 - 64)          |
| Cervical cancer                                                  | 14<br>(11 - 18)          | --                 | --                  | 2<br>(1 - 2)         | 5<br>(4 - 7)         | 7<br>(5 - 10)            |

Web Table 31- Cyprus deaths with 95% UI by age, sex, and cause in 2013

| Cause                                         | Females, All Ages        | Females, 0-4 Years | Females, 5-14 Years | Females, 15-49 Years | Females, 50-69 Years | Females, 70-80 Years   |
|-----------------------------------------------|--------------------------|--------------------|---------------------|----------------------|----------------------|------------------------|
| Uterine cancer                                | 16<br>(10 - 20)          | --                 | --                  | 0<br>(0 - 0)         | 6<br>(4 - 8)         | 10<br>(6 - 13)         |
| Prostate cancer                               | --                       | --                 | --                  | --                   | --                   | --                     |
| Colon and rectum cancer                       | 69<br>(57 - 83)          | --                 | --                  | 4<br>(3 - 5)         | 18<br>(14 - 21)      | 48<br>(38 - 61)        |
| Lip and oral cavity cancer                    | 2<br>(1 - 2)             | --                 | --                  | 0<br>(0 - 0)         | 0<br>(0 - 1)         | 1<br>(1 - 2)           |
| Nasopharynx cancer                            | 0<br>(0 - 0)             | --                 | 0<br>(0 - 0)        | 0<br>(0 - 0)         | 0<br>(0 - 0)         | 0<br>(0 - 0)           |
| Other pharynx cancer                          | 0<br>(0 - 0)             | --                 | --                  | 0<br>(0 - 0)         | 0<br>(0 - 0)         | 0<br>(0 - 0)           |
| Gallbladder and biliary tract cancer          | 13<br>(8 - 18)           | --                 | --                  | 0<br>(0 - 0)         | 3<br>(2 - 4)         | 10<br>(6 - 14)         |
| Pancreatic cancer                             | 33<br>(27 - 39)          | --                 | --                  | 1<br>(1 - 1)         | 10<br>(8 - 12)       | 22<br>(17 - 27)        |
| Malignant skin melanoma                       | 6<br>(4 - 8)             | --                 | --                  | 1<br>(1 - 1)         | 3<br>(2 - 4)         | 3<br>(2 - 4)           |
| Non-melanoma skin cancer                      | 3<br>(2 - 3)             | --                 | --                  | 0<br>(0 - 0)         | 0<br>(0 - 0)         | 2<br>(2 - 3)           |
| Ovarian cancer                                | 36<br>(29 - 43)          | --                 | --                  | 3<br>(2 - 4)         | 16<br>(12 - 20)      | 17<br>(12 - 22)        |
| Testicular cancer                             | --                       | --                 | --                  | --                   | --                   | --                     |
| Kidney cancer                                 | 8<br>(6 - 11)            | 0<br>(0 - 0)       | 0<br>(0 - 0)        | 0<br>(0 - 0)         | 3<br>(2 - 4)         | 5<br>(3 - 7)           |
| Bladder cancer                                | 7<br>(5 - 10)            | --                 | --                  | 0<br>(0 - 0)         | 1<br>(0 - 1)         | 6<br>(4 - 9)           |
| Brain and nervous system cancer               | 16<br>(13 - 22)          | 0<br>(0 - 0)       | 0<br>(0 - 0)        | 2<br>(2 - 3)         | 7<br>(5 - 10)        | 6<br>(5 - 9)           |
| Thyroid cancer                                | 3<br>(2 - 4)             | --                 | 0<br>(0 - 0)        | 0<br>(0 - 0)         | 1<br>(1 - 1)         | 2<br>(1 - 3)           |
| Mesothelioma                                  | 1<br>(1 - 2)             | --                 | --                  | 0<br>(0 - 0)         | 1<br>(0 - 1)         | 1<br>(0 - 1)           |
| Hodgkin lymphoma                              | 1<br>(1 - 1)             | 0<br>(0 - 0)       | 0<br>(0 - 0)        | 0<br>(0 - 1)         | 0<br>(0 - 0)         | 0<br>(0 - 0)           |
| Non-Hodgkin lymphoma                          | 24<br>(12 - 36)          | 0<br>(0 - 0)       | 0<br>(0 - 0)        | 1<br>(1 - 3)         | 7<br>(4 - 11)        | 16<br>(8 - 23)         |
| Multiple myeloma                              | 12<br>(8 - 18)           | --                 | --                  | 1<br>(0 - 1)         | 5<br>(3 - 7)         | 7<br>(4 - 10)          |
| Leukemia                                      | 22<br>(17 - 26)          | 0<br>(0 - 0)       | 0<br>(0 - 0)        | 1<br>(1 - 2)         | 5<br>(4 - 7)         | 15<br>(12 - 19)        |
| Other neoplasms                               | 37<br>(28 - 48)          | 0<br>(0 - 0)       | 0<br>(0 - 0)        | 4<br>(3 - 5)         | 10<br>(8 - 13)       | 22<br>(15 - 31)        |
| Cardiovascular diseases                       | 1,162<br>(1,047 - 1,353) | 1<br>(1 - 2)       | 1<br>(0 - 1)        | 17<br>(13 - 22)      | 91<br>(75 - 114)     | 1,053<br>(949 - 1,214) |
| Rheumatic heart disease                       | 12<br>(7 - 17)           | 0<br>(0 - 0)       | 0<br>(0 - 0)        | 0<br>(0 - 0)         | 3<br>(2 - 4)         | 9<br>(5 - 12)          |
| Ischemic heart disease                        | 617<br>(531 - 746)       | 0<br>(0 - 0)       | 0<br>(0 - 0)        | 8<br>(6 - 11)        | 54<br>(43 - 70)      | 554<br>(476 - 667)     |
| Cerebrovascular disease                       | 320<br>(266 - 432)       | 0<br>(0 - 1)       | 0<br>(0 - 0)        | 5<br>(4 - 7)         | 20<br>(15 - 27)      | 294<br>(241 - 400)     |
| Ischemic stroke                               | 197<br>(154 - 273)       | 0<br>(0 - 0)       | 0<br>(0 - 0)        | 1<br>(0 - 1)         | 5<br>(3 - 7)         | 191<br>(150 - 265)     |
| Hemorrhagic stroke                            | 124<br>(96 - 180)        | 0<br>(0 - 1)       | 0<br>(0 - 0)        | 5<br>(4 - 7)         | 15<br>(11 - 20)      | 103<br>(78 - 155)      |
| Hypertensive heart disease                    | 53<br>(33 - 91)          | 0<br>(0 - 0)       | 0<br>(0 - 0)        | 0<br>(0 - 0)         | 1<br>(1 - 2)         | 51<br>(31 - 88)        |
| Cardiomyopathy and myocarditis                | 9<br>(6 - 15)            | 0<br>(0 - 0)       | 0<br>(0 - 0)        | 0<br>(0 - 1)         | 1<br>(1 - 3)         | 7<br>(4 - 12)          |
| Atrial fibrillation and flutter               | 66<br>(42 - 104)         | --                 | --                  | 0<br>(0 - 0)         | 1<br>(1 - 2)         | 65<br>(41 - 102)       |
| Aortic aneurysm                               | 13<br>(8 - 20)           | --                 | --                  | 0<br>(0 - 1)         | 3<br>(2 - 5)         | 9<br>(6 - 15)          |
| Peripheral vascular disease                   | 6<br>(4 - 10)            | --                 | --                  | 0<br>(0 - 0)         | 0<br>(0 - 0)         | 6<br>(4 - 9)           |
| Endocarditis                                  | 2<br>(1 - 3)             | 0<br>(0 - 0)       | 0<br>(0 - 0)        | 0<br>(0 - 0)         | 0<br>(0 - 0)         | 1<br>(1 - 2)           |
| Other cardiovascular and circulatory diseases | 65<br>(50 - 90)          | 1<br>(0 - 1)       | 0<br>(0 - 0)        | 2<br>(1 - 3)         | 6<br>(5 - 9)         | 56<br>(42 - 78)        |
| Chronic respiratory diseases                  | 108<br>(85 - 130)        | 0<br>(0 - 0)       | 0<br>(0 - 0)        | 2<br>(2 - 3)         | 9<br>(7 - 12)        | 96<br>(74 - 117)       |
| Chronic obstructive pulmonary disease         | 76<br>(58 - 96)          | 0<br>(0 - 0)       | 0<br>(0 - 0)        | 1<br>(1 - 1)         | 5<br>(3 - 6)         | 71<br>(53 - 89)        |
| Pneumoconiosis                                | 0<br>(0 - 1)             | 0<br>(0 - 0)       | 0<br>(0 - 0)        | 0<br>(0 - 0)         | 0<br>(0 - 0)         | 0<br>(0 - 0)           |
| Silicosis                                     | 0<br>(0 - 0)             | 0<br>(0 - 0)       | 0<br>(0 - 0)        | 0<br>(0 - 0)         | 0<br>(0 - 0)         | 0<br>(0 - 0)           |
| Asbestosis                                    | 0<br>(0 - 0)             | 0<br>(0 - 0)       | 0<br>(0 - 0)        | 0<br>(0 - 0)         | 0<br>(0 - 0)         | 0<br>(0 - 0)           |

Web Table 31- Cyprus deaths with 95% UI by age, sex, and cause in 2013

| Cause                                               | Females, All Ages  | Females, 0-4 Years | Females, 5-14 Years | Females, 15-49 Years | Females, 50-69 Years | Females, 70-80 Years |
|-----------------------------------------------------|--------------------|--------------------|---------------------|----------------------|----------------------|----------------------|
| Coal workers pneumoconiosis                         | 0<br>(0 - 0)       | 0<br>(0 - 0)       | 0<br>(0 - 0)        | 0<br>(0 - 0)         | 0<br>(0 - 0)         | 0<br>(0 - 0)         |
| Other pneumoconiosis                                | 0<br>(0 - 1)       | 0<br>(0 - 0)       | 0<br>(0 - 0)        | 0<br>(0 - 0)         | 0<br>(0 - 0)         | 0<br>(0 - 0)         |
| Asthma                                              | 17<br>(10 - 27)    | 0<br>(0 - 0)       | 0<br>(0 - 0)        | 0<br>(0 - 0)         | 2<br>(1 - 2)         | 15<br>(8 - 25)       |
| Interstitial lung disease and pulmonary sarcoidosis | 11<br>(6 - 17)     | 0<br>(0 - 0)       | 0<br>(0 - 0)        | 0<br>(0 - 0)         | 2<br>(1 - 3)         | 9<br>(5 - 14)        |
| Other chronic respiratory diseases                  | 2<br>(2 - 3)       | 0<br>(0 - 0)       | 0<br>(0 - 0)        | 1<br>(1 - 1)         | 1<br>(0 - 1)         | 1<br>(1 - 1)         |
| Cirrhosis                                           | 23<br>(19 - 27)    | 0<br>(0 - 0)       | 0<br>(0 - 0)        | 1<br>(1 - 1)         | 6<br>(5 - 8)         | 15<br>(12 - 19)      |
| Cirrhosis due to hepatitis B                        | 4<br>(1 - 7)       | 0<br>(0 - 0)       | 0<br>(0 - 0)        | 0<br>(0 - 0)         | 1<br>(0 - 2)         | 2<br>(1 - 5)         |
| Cirrhosis due to hepatitis C                        | 12<br>(7 - 17)     | 0<br>(0 - 0)       | 0<br>(0 - 0)        | 1<br>(0 - 1)         | 3<br>(2 - 5)         | 9<br>(5 - 12)        |
| Cirrhosis due to alcohol use                        | 5<br>(2 - 8)       | --                 | --                  | 0<br>(0 - 0)         | 1<br>(1 - 2)         | 3<br>(1 - 6)         |
| Cirrhosis due to other causes                       | 2<br>(1 - 4)       | 0<br>(0 - 0)       | 0<br>(0 - 0)        | 0<br>(0 - 0)         | 1<br>(0 - 2)         | 1<br>(0 - 2)         |
| Digestive diseases                                  | 68<br>(51 - 82)    | 0<br>(0 - 0)       | 0<br>(0 - 0)        | 1<br>(1 - 1)         | 5<br>(3 - 6)         | 63<br>(46 - 77)      |
| Peptic ulcer disease                                | 6<br>(3 - 8)       | 0<br>(0 - 0)       | 0<br>(0 - 0)        | 0<br>(0 - 0)         | 0<br>(0 - 1)         | 5<br>(3 - 8)         |
| Gastritis and duodenitis                            | 0<br>(0 - 0)       | 0<br>(0 - 0)       | 0<br>(0 - 0)        | 0<br>(0 - 0)         | 0<br>(0 - 0)         | 0<br>(0 - 0)         |
| Appendicitis                                        | 1<br>(0 - 1)       | 0<br>(0 - 0)       | 0<br>(0 - 0)        | 0<br>(0 - 0)         | 0<br>(0 - 0)         | 1<br>(0 - 1)         |
| Paralytic ileus and intestinal obstruction          | 16<br>(7 - 24)     | 0<br>(0 - 0)       | 0<br>(0 - 0)        | 0<br>(0 - 0)         | 1<br>(0 - 1)         | 15<br>(7 - 23)       |
| Inguinal, femoral, and abdominal hernia             | 2<br>(1 - 3)       | 0<br>(0 - 0)       | 0<br>(0 - 0)        | 0<br>(0 - 0)         | 0<br>(0 - 0)         | 2<br>(1 - 3)         |
| Inflammatory bowel disease                          | 6<br>(3 - 10)      | 0<br>(0 - 0)       | 0<br>(0 - 0)        | 0<br>(0 - 0)         | 0<br>(0 - 1)         | 6<br>(3 - 10)        |
| Vascular intestinal disorders                       | 6<br>(3 - 11)      | 0<br>(0 - 0)       | 0<br>(0 - 0)        | 0<br>(0 - 0)         | 0<br>(0 - 0)         | 5<br>(3 - 10)        |
| Gallbladder and biliary diseases                    | 18<br>(11 - 27)    | 0<br>(0 - 0)       | 0<br>(0 - 0)        | 0<br>(0 - 0)         | 1<br>(1 - 1)         | 17<br>(10 - 26)      |
| Pancreatitis                                        | 5<br>(3 - 8)       | 0<br>(0 - 0)       | 0<br>(0 - 0)        | 0<br>(0 - 0)         | 0<br>(0 - 1)         | 4<br>(2 - 7)         |
| Other digestive diseases                            | 8<br>(5 - 12)      | 0<br>(0 - 0)       | 0<br>(0 - 0)        | 0<br>(0 - 0)         | 1<br>(1 - 1)         | 7<br>(4 - 11)        |
| Neurological disorders                              | 294<br>(221 - 372) | 0<br>(0 - 0)       | 0<br>(0 - 0)        | 1<br>(1 - 2)         | 11<br>(8 - 16)       | 281<br>(209 - 357)   |
| Alzheimer disease and other dementias               | 274<br>(199 - 350) | --                 | --                  | 0<br>(0 - 0)         | 7<br>(4 - 10)        | 267<br>(193 - 342)   |
| Parkinson disease                                   | 10<br>(6 - 16)     | --                 | --                  | 0<br>(0 - 0)         | 1<br>(1 - 2)         | 9<br>(5 - 15)        |
| Epilepsy                                            | 2<br>(2 - 4)       | 0<br>(0 - 0)       | 0<br>(0 - 0)        | 0<br>(0 - 1)         | 0<br>(0 - 1)         | 2<br>(1 - 3)         |
| Multiple sclerosis                                  | 1<br>(1 - 3)       | --                 | --                  | 0<br>(0 - 1)         | 1<br>(0 - 2)         | 0<br>(0 - 1)         |
| Other neurological disorders                        | 7<br>(6 - 8)       | 0<br>(0 - 0)       | 0<br>(0 - 0)        | 1<br>(1 - 1)         | 2<br>(2 - 3)         | 4<br>(3 - 5)         |
| Mental and substance use disorders                  | 3<br>(2 - 3)       | 0<br>(0 - 0)       | 0<br>(0 - 0)        | 1<br>(1 - 2)         | 1<br>(0 - 1)         | 1<br>(1 - 1)         |
| Schizophrenia                                       | 0<br>(0 - 0)       | --                 | --                  | 0<br>(0 - 0)         | 0<br>(0 - 0)         | 0<br>(0 - 0)         |
| Alcohol use disorders                               | 0<br>(0 - 1)       | --                 | --                  | 0<br>(0 - 0)         | 0<br>(0 - 0)         | 0<br>(0 - 0)         |
| Drug use disorders                                  | 2<br>(1 - 2)       | 0<br>(0 - 0)       | --                  | 1<br>(1 - 1)         | 0<br>(0 - 0)         | 1<br>(0 - 1)         |
| Opioid use disorders                                | 1<br>(1 - 1)       | 0<br>(0 - 0)       | --                  | 0<br>(0 - 0)         | 0<br>(0 - 0)         | 0<br>(0 - 0)         |
| Cocaine use disorders                               | 0<br>(0 - 0)       | 0<br>(0 - 0)       | --                  | 0<br>(0 - 0)         | 0<br>(0 - 0)         | 0<br>(0 - 0)         |
| Amphetamine use disorders                           | 0<br>(0 - 0)       | 0<br>(0 - 0)       | --                  | 0<br>(0 - 0)         | 0<br>(0 - 0)         | 0<br>(0 - 0)         |
| Other drug use disorders                            | 1<br>(1 - 1)       | 0<br>(0 - 0)       | --                  | 1<br>(0 - 1)         | 0<br>(0 - 0)         | 0<br>(0 - 0)         |
| Eating disorders                                    | 0<br>(0 - 0)       | --                 | 0<br>(0 - 0)        | 0<br>(0 - 0)         | --                   | --                   |
| Anorexia nervosa                                    | 0<br>(0 - 0)       | --                 | 0<br>(0 - 0)        | 0<br>(0 - 0)         | --                   | --                   |
| Diabetes, urogenital, blood, and endocrine diseases | 325<br>(250 - 378) | 0<br>(0 - 1)       | 0<br>(0 - 0)        | 4<br>(3 - 5)         | 27<br>(21 - 33)      | 293<br>(223 - 343)   |
| Diabetes mellitus                                   | 200<br>(154 - 240) | 0<br>(0 - 0)       | 0<br>(0 - 0)        | 1<br>(1 - 1)         | 16<br>(12 - 21)      | 182<br>(140 - 221)   |
| Acute glomerulonephritis                            | 0<br>(0 - 0)       | 0<br>(0 - 0)       | 0<br>(0 - 0)        | 0<br>(0 - 0)         | 0<br>(0 - 0)         | 0<br>(0 - 0)         |

Web Table 31- Cyprus deaths with 95% UI by age, sex, and cause in 2013

| Cause                                               | Females, All Ages | Females, 0-4 Years | Females, 5-14 Years | Females, 15-49 Years | Females, 50-69 Years | Females, 70-80 Years |
|-----------------------------------------------------|-------------------|--------------------|---------------------|----------------------|----------------------|----------------------|
| Chronic kidney disease                              | 68<br>(39 - 86)   | 0<br>(0 - 0)       | 0<br>(0 - 0)        | 1<br>(1 - 2)         | 5<br>(3 - 7)         | 62<br>(34 - 80)      |
| Chronic kidney disease due to diabetes mellitus     | 2<br>(1 - 3)      | 0<br>(0 - 0)       | 0<br>(0 - 0)        | 0<br>(0 - 0)         | 0<br>(0 - 1)         | 2<br>(1 - 3)         |
| Chronic kidney disease due to hypertension          | 33<br>(20 - 47)   | 0<br>(0 - 0)       | 0<br>(0 - 0)        | 0<br>(0 - 0)         | 2<br>(1 - 3)         | 31<br>(18 - 44)      |
| Chronic kidney disease due to glomerulonephritis    | 2<br>(1 - 3)      | 0<br>(0 - 0)       | 0<br>(0 - 0)        | 0<br>(0 - 0)         | 1<br>(0 - 1)         | 1<br>(1 - 2)         |
| Chronic kidney disease due to other causes          | 31<br>(12 - 48)   | 0<br>(0 - 0)       | 0<br>(0 - 0)        | 1<br>(0 - 1)         | 3<br>(1 - 4)         | 28<br>(10 - 45)      |
| Urinary diseases and male infertility               | 32<br>(16 - 46)   | 0<br>(0 - 0)       | 0<br>(0 - 0)        | 0<br>(0 - 1)         | 2<br>(1 - 3)         | 29<br>(14 - 43)      |
| Interstitial nephritis and urinary tract infections | 24<br>(12 - 35)   | 0<br>(0 - 0)       | 0<br>(0 - 0)        | 0<br>(0 - 0)         | 1<br>(1 - 2)         | 22<br>(11 - 33)      |
| Urolithiasis                                        | 1<br>(1 - 2)      | --                 | 0<br>(0 - 0)        | 0<br>(0 - 0)         | 0<br>(0 - 0)         | 1<br>(0 - 2)         |
| Other urinary diseases                              | 7<br>(3 - 11)     | 0<br>(0 - 0)       | 0<br>(0 - 0)        | 0<br>(0 - 0)         | 1<br>(0 - 1)         | 6<br>(2 - 10)        |
| Gynecological diseases                              | 0<br>(0 - 0)      | --                 | --                  | 0<br>(0 - 0)         | 0<br>(0 - 0)         | 0<br>(0 - 0)         |
| Uterine fibroids                                    | 0<br>(0 - 0)      | --                 | --                  | 0<br>(0 - 0)         | 0<br>(0 - 0)         | 0<br>(0 - 0)         |
| Polycystic ovarian syndrome                         | 0<br>(0 - 0)      | --                 | --                  | 0<br>(0 - 0)         | 0<br>(0 - 0)         | --                   |
| Endometriosis                                       | 0<br>(0 - 0)      | --                 | --                  | 0<br>(0 - 0)         | 0<br>(0 - 0)         | --                   |
| Genital prolapse                                    | 0<br>(0 - 0)      | --                 | --                  | 0<br>(0 - 0)         | 0<br>(0 - 0)         | 0<br>(0 - 0)         |
| Other gynecological diseases                        | 0<br>(0 - 0)      | --                 | --                  | 0<br>(0 - 0)         | 0<br>(0 - 0)         | 0<br>(0 - 0)         |
| Hemoglobinopathies and hemolytic anemias            | 4<br>(2 - 5)      | 0<br>(0 - 0)       | 0<br>(0 - 0)        | 0<br>(0 - 0)         | 1<br>(1 - 1)         | 2<br>(1 - 4)         |
| Thalassemias                                        | 0<br>(0 - 0)      | 0<br>(0 - 0)       | 0<br>(0 - 0)        | 0<br>(0 - 0)         | 0<br>(0 - 0)         | 0<br>(0 - 0)         |
| Sickle cell disorders                               | 1<br>(0 - 1)      | 0<br>(0 - 0)       | 0<br>(0 - 0)        | 0<br>(0 - 0)         | 0<br>(0 - 1)         | 0<br>(0 - 0)         |
| G6PD deficiency                                     | 0<br>(0 - 0)      | 0<br>(0 - 0)       | 0<br>(0 - 0)        | 0<br>(0 - 0)         | 0<br>(0 - 0)         | 0<br>(0 - 0)         |
| Other hemoglobinopathies and hemolytic anemias      | 3<br>(1 - 4)      | 0<br>(0 - 0)       | 0<br>(0 - 0)        | 0<br>(0 - 0)         | 0<br>(0 - 1)         | 2<br>(1 - 3)         |
| Endocrine, metabolic, blood, and immune disorders   | 22<br>(13 - 30)   | 0<br>(0 - 1)       | 0<br>(0 - 0)        | 1<br>(1 - 2)         | 3<br>(2 - 4)         | 17<br>(10 - 25)      |
| Musculoskeletal disorders                           | 13<br>(8 - 17)    | --                 | 0<br>(0 - 0)        | 1<br>(1 - 2)         | 3<br>(2 - 4)         | 9<br>(5 - 12)        |
| Rheumatoid arthritis                                | 6<br>(3 - 8)      | --                 | 0<br>(0 - 0)        | 0<br>(0 - 0)         | 1<br>(1 - 1)         | 4<br>(2 - 6)         |
| Other musculoskeletal disorders                     | 8<br>(5 - 10)     | --                 | 0<br>(0 - 0)        | 1<br>(1 - 1)         | 2<br>(1 - 3)         | 4<br>(3 - 7)         |
| Other non-communicable diseases                     | 29<br>(18 - 38)   | 2<br>(1 - 3)       | 0<br>(0 - 0)        | 2<br>(1 - 2)         | 3<br>(2 - 4)         | 22<br>(12 - 31)      |
| Congenital anomalies                                | 7<br>(5 - 9)      | 2<br>(1 - 3)       | 0<br>(0 - 0)        | 1<br>(1 - 2)         | 2<br>(1 - 2)         | 2<br>(1 - 3)         |
| Neural tube defects                                 | 0<br>(0 - 0)      | 0<br>(0 - 0)       | 0<br>(0 - 0)        | 0<br>(0 - 0)         | 0<br>(0 - 0)         | 0<br>(0 - 0)         |
| Congenital heart anomalies                          | 1<br>(1 - 2)      | 1<br>(1 - 1)       | 0<br>(0 - 0)        | 0<br>(0 - 0)         | 0<br>(0 - 0)         | 0<br>(0 - 0)         |
| Cleft lip and cleft palate                          | 0<br>(0 - 0)      | 0<br>(0 - 0)       | --                  | --                   | --                   | --                   |
| Down syndrome                                       | 2<br>(1 - 3)      | 0<br>(0 - 0)       | 0<br>(0 - 0)        | 0<br>(0 - 1)         | 1<br>(1 - 2)         | 0<br>(0 - 0)         |
| Chromosomal unbalanced rearrangements               | 0<br>(0 - 0)      | 0<br>(0 - 0)       | 0<br>(0 - 0)        | 0<br>(0 - 0)         | 0<br>(0 - 0)         | 0<br>(0 - 0)         |
| Other congenital anomalies                          | 3<br>(3 - 4)      | 1<br>(0 - 1)       | 0<br>(0 - 0)        | 1<br>(0 - 1)         | 0<br>(0 - 1)         | 2<br>(1 - 2)         |
| Skin and subcutaneous diseases                      | 22<br>(12 - 31)   | 0<br>(0 - 0)       | 0<br>(0 - 0)        | 0<br>(0 - 0)         | 1<br>(1 - 2)         | 20<br>(11 - 29)      |
| Cellulitis                                          | 0<br>(0 - 1)      | 0<br>(0 - 0)       | 0<br>(0 - 0)        | 0<br>(0 - 0)         | 0<br>(0 - 0)         | 0<br>(0 - 0)         |
| Pyoderma                                            | 2<br>(1 - 3)      | 0<br>(0 - 0)       | 0<br>(0 - 0)        | 0<br>(0 - 0)         | 0<br>(0 - 1)         | 1<br>(1 - 3)         |
| Decubitus ulcer                                     | 19<br>(10 - 28)   | 0<br>(0 - 0)       | 0<br>(0 - 0)        | 0<br>(0 - 0)         | 1<br>(1 - 1)         | 18<br>(10 - 27)      |
| Other skin and subcutaneous diseases                | 0<br>(0 - 0)      | 0<br>(0 - 0)       | 0<br>(0 - 0)        | 0<br>(0 - 0)         | 0<br>(0 - 0)         | 0<br>(0 - 0)         |
| Sudden infant death syndrome                        | 0<br>(0 - 0)      | 0<br>(0 - 0)       | --                  | --                   | --                   | --                   |
| Injuries                                            | 108<br>(82 - 131) | 1<br>(1 - 2)       | 1<br>(1 - 2)        | 25<br>(20 - 30)      | 15<br>(12 - 19)      | 65<br>(43 - 83)      |
| Transport injuries                                  | 28<br>(22 - 36)   | 1<br>(0 - 1)       | 1<br>(1 - 1)        | 13<br>(10 - 17)      | 6<br>(5 - 9)         | 7<br>(5 - 9)         |

Web Table 31- Cyprus deaths with 95% UI by age, sex, and cause in 2013

| Cause                                           | Females, All Ages | Females, 0-4 Years | Females, 5-14 Years | Females, 15-49 Years | Females, 50-69 Years | Females, 70-80 Years |
|-------------------------------------------------|-------------------|--------------------|---------------------|----------------------|----------------------|----------------------|
| Road injuries                                   | 26<br>(21 - 33)   | 1<br>(0 - 1)       | 1<br>(1 - 1)        | 12<br>(9 - 15)       | 6<br>(4 - 8)         | 7<br>(5 - 9)         |
| Pedestrian road injuries                        | 9<br>(5 - 12)     | 0<br>(0 - 1)       | 0<br>(0 - 1)        | 2<br>(1 - 3)         | 2<br>(1 - 3)         | 4<br>(2 - 5)         |
| Cyclist road injuries                           | 1<br>(0 - 1)      | 0<br>(0 - 0)       | 0<br>(0 - 0)        | 0<br>(0 - 1)         | 0<br>(0 - 0)         | 0<br>(0 - 0)         |
| Motorcyclist road injuries                      | 3<br>(2 - 5)      | 0<br>(0 - 0)       | 0<br>(0 - 0)        | 2<br>(1 - 3)         | 1<br>(1 - 2)         | 0<br>(0 - 0)         |
| Motor vehicle road injuries                     | 13<br>(10 - 18)   | 0<br>(0 - 0)       | 0<br>(0 - 1)        | 7<br>(5 - 10)        | 2<br>(2 - 4)         | 3<br>(2 - 5)         |
| Other road injuries                             | 0<br>(0 - 0)      | 0<br>(0 - 0)       | 0<br>(0 - 0)        | 0<br>(0 - 0)         | 0<br>(0 - 0)         | 0<br>(0 - 0)         |
| Other transport injuries                        | 2<br>(1 - 3)      | 0<br>(0 - 0)       | 0<br>(0 - 0)        | 2<br>(1 - 3)         | 0<br>(0 - 1)         | 0<br>(0 - 0)         |
| Unintentional injuries                          | 69<br>(47 - 88)   | 1<br>(0 - 1)       | 0<br>(0 - 0)        | 5<br>(4 - 7)         | 6<br>(5 - 8)         | 57<br>(36 - 75)      |
| Falls                                           | 42<br>(23 - 59)   | 0<br>(0 - 0)       | 0<br>(0 - 0)        | 1<br>(1 - 2)         | 1<br>(1 - 2)         | 39<br>(21 - 56)      |
| Drowning                                        | 8<br>(6 - 11)     | 0<br>(0 - 0)       | 0<br>(0 - 0)        | 2<br>(1 - 3)         | 2<br>(2 - 3)         | 4<br>(3 - 5)         |
| Fire, heat, and hot substances                  | 2<br>(1 - 3)      | 0<br>(0 - 0)       | 0<br>(0 - 0)        | 0<br>(0 - 0)         | 0<br>(0 - 0)         | 2<br>(1 - 3)         |
| Poisonings                                      | 1<br>(0 - 1)      | 0<br>(0 - 0)       | 0<br>(0 - 0)        | 0<br>(0 - 0)         | 0<br>(0 - 0)         | 0<br>(0 - 1)         |
| Exposure to mechanical forces                   | 2<br>(1 - 2)      | 0<br>(0 - 0)       | 0<br>(0 - 0)        | 0<br>(0 - 0)         | 1<br>(1 - 1)         | 0<br>(0 - 1)         |
| Unintentional firearm injuries                  | 0<br>(0 - 0)      | 0<br>(0 - 0)       | 0<br>(0 - 0)        | 0<br>(0 - 0)         | 0<br>(0 - 0)         | 0<br>(0 - 0)         |
| Unintentional suffocation                       | 0<br>(0 - 0)      | 0<br>(0 - 0)       | 0<br>(0 - 0)        | 0<br>(0 - 0)         | 0<br>(0 - 0)         | 0<br>(0 - 0)         |
| Other exposure to mechanical forces             | 1<br>(1 - 2)      | 0<br>(0 - 0)       | 0<br>(0 - 0)        | 0<br>(0 - 0)         | 1<br>(0 - 1)         | 0<br>(0 - 1)         |
| Adverse effects of medical treatment            | 10<br>(5 - 14)    | 0<br>(0 - 0)       | 0<br>(0 - 0)        | 1<br>(0 - 1)         | 1<br>(0 - 1)         | 8<br>(4 - 12)        |
| Animal contact                                  | 0<br>(0 - 1)      | 0<br>(0 - 0)       | 0<br>(0 - 0)        | 0<br>(0 - 0)         | 0<br>(0 - 0)         | 0<br>(0 - 0)         |
| Venomous animal contact                         | 0<br>(0 - 0)      | 0<br>(0 - 0)       | 0<br>(0 - 0)        | 0<br>(0 - 0)         | 0<br>(0 - 0)         | 0<br>(0 - 0)         |
| Non-venomous animal contact                     | 0<br>(0 - 0)      | 0<br>(0 - 0)       | 0<br>(0 - 0)        | 0<br>(0 - 0)         | 0<br>(0 - 0)         | 0<br>(0 - 0)         |
| Foreign body                                    | 4<br>(3 - 7)      | 0<br>(0 - 0)       | 0<br>(0 - 0)        | 1<br>(0 - 1)         | 1<br>(0 - 1)         | 3<br>(2 - 5)         |
| Pulmonary aspiration and foreign body in airway | 4<br>(3 - 7)      | 0<br>(0 - 0)       | 0<br>(0 - 0)        | 1<br>(0 - 1)         | 1<br>(0 - 1)         | 3<br>(2 - 5)         |
| Foreign body in other body part                 | 0<br>(0 - 0)      | 0<br>(0 - 0)       | 0<br>(0 - 0)        | 0<br>(0 - 0)         | 0<br>(0 - 0)         | 0<br>(0 - 0)         |
| Other unintentional injuries                    | 0<br>(0 - 1)      | 0<br>(0 - 0)       | 0<br>(0 - 0)        | 0<br>(0 - 0)         | 0<br>(0 - 0)         | 0<br>(0 - 0)         |
| Self-harm and interpersonal violence            | 11<br>(6 - 14)    | 0<br>(0 - 0)       | 0<br>(0 - 0)        | 6<br>(4 - 8)         | 3<br>(1 - 4)         | 1<br>(1 - 2)         |
| Self-harm                                       | 8<br>(3 - 10)     | --                 | 0<br>(0 - 0)        | 4<br>(2 - 6)         | 3<br>(1 - 3)         | 1<br>(0 - 1)         |
| Interpersonal violence                          | 3<br>(2 - 4)      | 0<br>(0 - 0)       | 0<br>(0 - 0)        | 2<br>(1 - 3)         | 0<br>(0 - 0)         | 1<br>(0 - 1)         |
| Assault by firearm                              | 1<br>(0 - 1)      | 0<br>(0 - 0)       | 0<br>(0 - 0)        | 1<br>(0 - 1)         | 0<br>(0 - 0)         | 0<br>(0 - 0)         |
| Assault by sharp object                         | 1<br>(0 - 1)      | 0<br>(0 - 0)       | 0<br>(0 - 0)        | 1<br>(0 - 1)         | 0<br>(0 - 0)         | 0<br>(0 - 0)         |
| Assault by other means                          | 2<br>(1 - 2)      | 0<br>(0 - 0)       | 0<br>(0 - 0)        | 1<br>(1 - 1)         | 0<br>(0 - 0)         | 0<br>(0 - 1)         |

Web Table 31- Czech Republic deaths with 95% UI by age, sex, and cause in 2013

| Cause                                                             | Both Sexes, All Ages           | Both Sexes, 0-4 Years | Both Sexes, 5-14 Years | Both Sexes, 15-49 Years  | Both Sexes, 50-69 Years     | Both Sexes, 70-80 Years     |
|-------------------------------------------------------------------|--------------------------------|-----------------------|------------------------|--------------------------|-----------------------------|-----------------------------|
| All causes                                                        | 112,028<br>(109,155 - 114,656) | 355<br>(245 - 509)    | 99<br>(79 - 124)       | 5,298<br>(5,098 - 5,486) | 28,397<br>(27,458 - 29,297) | 77,879<br>(76,001 - 79,630) |
| Communicable, maternal, neonatal, and nutritional diseases        | 3,802<br>(3,036 - 4,365)       | 181<br>(125 - 258)    | 8<br>(5 - 10)          | 178<br>(140 - 203)       | 668<br>(481 - 779)          | 2,768<br>(2,189 - 3,270)    |
| HIV/AIDS and tuberculosis                                         | 78<br>(67 - 119)               | 0<br>(0 - 0)          | 0<br>(0 - 0)           | 17<br>(15 - 21)          | 26<br>(21 - 37)             | 35<br>(27 - 63)             |
| Tuberculosis                                                      | 62<br>(52 - 102)               | 0<br>(0 - 0)          | 0<br>(0 - 0)           | 6<br>(5 - 9)             | 22<br>(18 - 33)             | 34<br>(27 - 62)             |
| HIV/AIDS                                                          | 16<br>(12 - 20)                | 0<br>(0 - 0)          | 0<br>(0 - 0)           | 11<br>(9 - 14)           | 4<br>(3 - 6)                | 1<br>(0 - 1)                |
| HIV/AIDS resulting in mycobacterial infection                     | 1<br>(1 - 1)                   | 0<br>(0 - 0)          | 0<br>(0 - 0)           | 1<br>(0 - 1)             | 0<br>(0 - 0)                | 0<br>(0 - 0)                |
| HIV/AIDS resulting in other diseases                              | 15<br>(11 - 19)                | 0<br>(0 - 0)          | 0<br>(0 - 0)           | 11<br>(8 - 13)           | 4<br>(2 - 5)                | 1<br>(0 - 1)                |
| Diarrhea, lower respiratory, and other common infectious diseases | 3,390<br>(2,661 - 3,917)       | 25<br>(15 - 38)       | 6<br>(4 - 9)           | 137<br>(102 - 160)       | 605<br>(424 - 717)          | 2,616<br>(2,062 - 3,109)    |
| Diarrheal diseases                                                | 139<br>(109 - 176)             | 2<br>(1 - 3)          | 0<br>(0 - 0)           | 4<br>(3 - 4)             | 20<br>(16 - 25)             | 113<br>(84 - 150)           |
| Intestinal infectious diseases                                    | 8<br>(3 - 17)                  | 2<br>(0 - 4)          | 1<br>(0 - 3)           | 2<br>(1 - 5)             | 1<br>(0 - 4)                | 2<br>(0 - 4)                |
| Typhoid fever                                                     | 5<br>(2 - 12)                  | 1<br>(0 - 3)          | 1<br>(0 - 2)           | 1<br>(0 - 3)             | 1<br>(0 - 3)                | 1<br>(0 - 3)                |
| Paratyphoid fever                                                 | 2<br>(0 - 4)                   | 0<br>(0 - 1)          | 0<br>(0 - 1)           | 0<br>(0 - 1)             | 0<br>(0 - 1)                | 0<br>(0 - 1)                |
| Other intestinal infectious diseases                              | 1<br>(0 - 4)                   | 0<br>(0 - 1)          | 0<br>(0 - 0)           | 0<br>(0 - 2)             | 0<br>(0 - 2)                | 0<br>(0 - 2)                |
| Lower respiratory infections                                      | 3,160<br>(2,447 - 3,684)       | 15<br>(8 - 23)        | 3<br>(2 - 4)           | 116<br>(84 - 138)        | 554<br>(378 - 663)          | 2,472<br>(1,916 - 2,960)    |
| Upper respiratory infections                                      | 3<br>(1 - 6)                   | 0<br>(0 - 0)          | 0<br>(0 - 0)           | 0<br>(0 - 0)             | 1<br>(0 - 2)                | 2<br>(0 - 5)                |
| Otitis media                                                      | 2<br>(2 - 3)                   | 0<br>(0 - 1)          | 0<br>(0 - 0)           | 1<br>(0 - 1)             | 1<br>(0 - 1)                | 1<br>(1 - 1)                |
| Meningitis                                                        | 51<br>(43 - 56)                | 5<br>(3 - 7)          | 1<br>(1 - 1)           | 9<br>(7 - 10)            | 20<br>(16 - 23)             | 17<br>(13 - 20)             |
| Pneumococcal meningitis                                           | 14<br>(10 - 18)                | 1<br>(0 - 2)          | 0<br>(0 - 0)           | 2<br>(1 - 4)             | 5<br>(3 - 8)                | 5<br>(3 - 7)                |
| H influenzae type B meningitis                                    | 6<br>(5 - 8)                   | 1<br>(1 - 2)          | 0<br>(0 - 0)           | 1<br>(1 - 1)             | 2<br>(1 - 3)                | 2<br>(1 - 3)                |
| Meningococcal meningitis                                          | 10<br>(8 - 13)                 | 1<br>(1 - 2)          | 0<br>(0 - 0)           | 2<br>(1 - 2)             | 4<br>(2 - 5)                | 3<br>(2 - 5)                |
| Other meningitis                                                  | 20<br>(16 - 24)                | 1<br>(1 - 2)          | 0<br>(0 - 0)           | 3<br>(2 - 4)             | 9<br>(6 - 11)               | 7<br>(5 - 9)                |
| Encephalitis                                                      | 19<br>(8 - 27)                 | 1<br>(0 - 2)          | 1<br>(0 - 1)           | 5<br>(2 - 7)             | 7<br>(3 - 11)               | 6<br>(2 - 9)                |
| Diphtheria                                                        | 0<br>(0 - 0)                   | 0<br>(0 - 0)          | 0<br>(0 - 0)           | 0<br>(0 - 0)             | 0<br>(0 - 0)                | --                          |
| Whooping cough                                                    | 1<br>(1 - 1)                   | 0<br>(0 - 0)          | 0<br>(0 - 0)           | 0<br>(0 - 1)             | 0<br>(0 - 0)                | --                          |
| Tetanus                                                           | 1<br>(1 - 1)                   | 0<br>(0 - 0)          | 0<br>(0 - 0)           | 0<br>(0 - 1)             | 0<br>(0 - 0)                | 0<br>(0 - 0)                |
| Measles                                                           | 0<br>(0 - 0)                   | 0<br>(0 - 0)          | 0<br>(0 - 0)           | 0<br>(0 - 0)             | 0<br>(0 - 0)                | --                          |
| Varicella and herpes zoster                                       | 7<br>(2 - 23)                  | 0<br>(0 - 1)          | 0<br>(0 - 0)           | 1<br>(0 - 2)             | 1<br>(0 - 2)                | 5<br>(0 - 21)               |
| Neglected tropical diseases and malaria                           | 5<br>(4 - 6)                   | 0<br>(0 - 0)          | 0<br>(0 - 0)           | 2<br>(1 - 2)             | 2<br>(1 - 2)                | 1<br>(1 - 2)                |
| Cysticercosis                                                     | 0<br>(0 - 0)                   | 0<br>(0 - 0)          | 0<br>(0 - 0)           | 0<br>(0 - 0)             | 0<br>(0 - 0)                | 0<br>(0 - 0)                |
| Cystic echinococcosis                                             | 1<br>(1 - 1)                   | 0<br>(0 - 0)          | 0<br>(0 - 0)           | 0<br>(0 - 0)             | 0<br>(0 - 0)                | 0<br>(0 - 1)                |
| Dengue                                                            | 1<br>(1 - 1)                   | 0<br>(0 - 0)          | 0<br>(0 - 0)           | 0<br>(0 - 1)             | 0<br>(0 - 0)                | 0<br>(0 - 0)                |
| Rabies                                                            | 1<br>(1 - 1)                   | 0<br>(0 - 0)          | 0<br>(0 - 0)           | 0<br>(0 - 1)             | 0<br>(0 - 0)                | 0<br>(0 - 0)                |
| Other neglected tropical diseases                                 | 2<br>(2 - 3)                   | 0<br>(0 - 0)          | 0<br>(0 - 0)           | 1<br>(0 - 1)             | 1<br>(0 - 1)                | 1<br>(0 - 1)                |
| Maternal disorders                                                | 6<br>(5 - 8)                   | --                    | 0<br>(0 - 0)           | 6<br>(5 - 8)             | --                          | --                          |
| Maternal hemorrhage                                               | 1<br>(0 - 1)                   | --                    | 0<br>(0 - 0)           | 1<br>(0 - 1)             | --                          | --                          |
| Maternal sepsis and other maternal infections                     | 0<br>(0 - 1)                   | --                    | 0<br>(0 - 0)           | 0<br>(0 - 0)             | --                          | --                          |
| Maternal hypertensive disorders                                   | 1<br>(1 - 1)                   | --                    | 0<br>(0 - 0)           | 1<br>(1 - 1)             | --                          | --                          |
| Maternal obstructed labor                                         | 1<br>(1 - 1)                   | --                    | 0<br>(0 - 0)           | 1<br>(1 - 1)             | --                          | --                          |
| Maternal abortive outcome                                         | 1<br>(1 - 2)                   | --                    | 0<br>(0 - 0)           | 1<br>(1 - 2)             | --                          | --                          |
| Indirect maternal deaths                                          | 0<br>(0 - 1)                   | --                    | 0<br>(0 - 0)           | 0<br>(0 - 1)             | --                          | --                          |

Web Table 31- Czech Republic deaths with 95% UI by age, sex, and cause in 2013

| Cause                                                            | Both Sexes, All Ages          | Both Sexes, 0-4 Years | Both Sexes, 5-14 Years | Both Sexes, 15-49 Years  | Both Sexes, 50-69 Years     | Both Sexes, 70-80 Years     |
|------------------------------------------------------------------|-------------------------------|-----------------------|------------------------|--------------------------|-----------------------------|-----------------------------|
| Late maternal deaths                                             | 1<br>(0 - 1)                  | --                    | 0<br>(0 - 0)           | 1<br>(0 - 1)             | --                          | --                          |
| Maternal deaths aggravated by HIV/AIDS                           | 0<br>(0 - 0)                  | --                    | --                     | 0<br>(0 - 0)             | --                          | --                          |
| Other maternal disorders                                         | 1<br>(1 - 2)                  | --                    | 0<br>(0 - 0)           | 1<br>(1 - 2)             | --                          | --                          |
| Neonatal disorders                                               | 151<br>(104 - 219)            | 151<br>(104 - 219)    | --                     | --                       | --                          | --                          |
| Neonatal preterm birth complications                             | 60<br>(37 - 96)               | 60<br>(37 - 96)       | --                     | --                       | --                          | --                          |
| Neonatal encephalopathy due to birth asphyxia and trauma         | 37<br>(19 - 57)               | 37<br>(19 - 57)       | --                     | --                       | --                          | --                          |
| Neonatal sepsis and other neonatal infections                    | 11<br>(4 - 21)                | 11<br>(4 - 21)        | --                     | --                       | --                          | --                          |
| Hemolytic disease and other neonatal jaundice                    | 0<br>(0 - 0)                  | 0<br>(0 - 0)          | --                     | --                       | --                          | --                          |
| Other neonatal disorders                                         | 44<br>(26 - 66)               | 44<br>(26 - 66)       | --                     | --                       | --                          | --                          |
| Nutritional deficiencies                                         | 124<br>(59 - 153)             | 0<br>(0 - 1)          | 0<br>(0 - 0)           | 8<br>(5 - 10)            | 20<br>(11 - 26)             | 95<br>(42 - 121)            |
| Protein-energy malnutrition                                      | 53<br>(7 - 86)                | 0<br>(0 - 0)          | 0<br>(0 - 0)           | 3<br>(1 - 4)             | 9<br>(2 - 13)               | 41<br>(5 - 69)              |
| Iodine deficiency                                                | 1<br>(0 - 5)                  | 0<br>(0 - 0)          | 0<br>(0 - 0)           | 0<br>(0 - 0)             | 0<br>(0 - 1)                | 1<br>(0 - 4)                |
| Iron-deficiency anemia                                           | 63<br>(34 - 88)               | 0<br>(0 - 0)          | 0<br>(0 - 0)           | 5<br>(3 - 6)             | 10<br>(6 - 14)              | 48<br>(25 - 70)             |
| Other nutritional deficiencies                                   | 7<br>(4 - 17)                 | 0<br>(0 - 0)          | 0<br>(0 - 0)           | 1<br>(0 - 1)             | 1<br>(1 - 2)                | 6<br>(3 - 14)               |
| Other communicable, maternal, neonatal, and nutritional diseases | 46<br>(31 - 57)               | 4<br>(2 - 6)          | 1<br>(0 - 1)           | 7<br>(5 - 9)             | 15<br>(10 - 18)             | 20<br>(12 - 26)             |
| Sexually transmitted diseases excluding HIV                      | 5<br>(3 - 8)                  | 1<br>(0 - 3)          | 0<br>(0 - 0)           | 1<br>(1 - 2)             | 1<br>(1 - 1)                | 2<br>(1 - 2)                |
| Syphilis                                                         | 4<br>(2 - 6)                  | 1<br>(0 - 3)          | 0<br>(0 - 0)           | 0<br>(0 - 1)             | 1<br>(0 - 1)                | 1<br>(1 - 2)                |
| Chlamydial infection                                             | 0<br>(0 - 0)                  | --                    | 0<br>(0 - 0)           | 0<br>(0 - 0)             | 0<br>(0 - 0)                | 0<br>(0 - 0)                |
| Gonococcal infection                                             | 1<br>(0 - 1)                  | --                    | 0<br>(0 - 0)           | 0<br>(0 - 0)             | 0<br>(0 - 0)                | 0<br>(0 - 0)                |
| Other sexually transmitted diseases                              | 0<br>(0 - 1)                  | --                    | 0<br>(0 - 0)           | 0<br>(0 - 0)             | 0<br>(0 - 0)                | 0<br>(0 - 0)                |
| Hepatitis                                                        | 7<br>(6 - 9)                  | 0<br>(0 - 0)          | 0<br>(0 - 0)           | 1<br>(1 - 2)             | 3<br>(2 - 4)                | 3<br>(2 - 4)                |
| Acute hepatitis A                                                | 1<br>(0 - 2)                  | 0<br>(0 - 0)          | 0<br>(0 - 0)           | 0<br>(0 - 1)             | 0<br>(0 - 1)                | 0<br>(0 - 1)                |
| Acute hepatitis B                                                | 5<br>(4 - 7)                  | 0<br>(0 - 0)          | 0<br>(0 - 0)           | 1<br>(0 - 1)             | 2<br>(2 - 3)                | 2<br>(2 - 3)                |
| Acute hepatitis C                                                | 1<br>(0 - 1)                  | --                    | 0<br>(0 - 0)           | 0<br>(0 - 0)             | 0<br>(0 - 1)                | 0<br>(0 - 1)                |
| Other infectious diseases                                        | 34<br>(20 - 45)               | 2<br>(1 - 3)          | 0<br>(0 - 1)           | 5<br>(3 - 6)             | 11<br>(7 - 14)              | 15<br>(8 - 22)              |
| Non-communicable diseases                                        | 102,271<br>(99,536 - 104,959) | 138<br>(94 - 199)     | 50<br>(40 - 63)        | 3,359<br>(3,203 - 3,505) | 26,127<br>(25,277 - 26,913) | 72,596<br>(70,609 - 74,476) |
| Neoplasms                                                        | 28,646<br>(27,090 - 29,893)   | 14<br>(9 - 21)        | 26<br>(20 - 33)        | 1,448<br>(1,366 - 1,544) | 12,030<br>(11,449 - 12,557) | 15,128<br>(14,021 - 15,918) |
| Esophageal cancer                                                | 537<br>(465 - 620)            | --                    | --                     | 37<br>(29 - 53)          | 305<br>(251 - 357)          | 196<br>(167 - 226)          |
| Stomach cancer                                                   | 1,545<br>(1,343 - 1,778)      | --                    | --                     | 65<br>(55 - 77)          | 561<br>(495 - 637)          | 919<br>(763 - 1,110)        |
| Liver cancer                                                     | 980<br>(800 - 1,252)          | --                    | 0<br>(0 - 1)           | 37<br>(28 - 50)          | 418<br>(320 - 546)          | 525<br>(423 - 662)          |
| Liver cancer due to hepatitis B                                  | 207<br>(110 - 304)            | --                    | 0<br>(0 - 0)           | 12<br>(7 - 18)           | 109<br>(54 - 165)           | 86<br>(49 - 130)            |
| Liver cancer due to hepatitis C                                  | 451<br>(333 - 587)            | --                    | 0<br>(0 - 0)           | 15<br>(9 - 22)           | 189<br>(135 - 260)          | 247<br>(167 - 325)          |
| Liver cancer due to alcohol use                                  | 237<br>(157 - 334)            | --                    | --                     | 5<br>(3 - 8)             | 86<br>(52 - 128)            | 146<br>(95 - 208)           |
| Liver cancer due to other causes                                 | 84<br>(50 - 126)              | --                    | 0<br>(0 - 0)           | 5<br>(3 - 6)             | 34<br>(21 - 48)             | 46<br>(22 - 73)             |
| Larynx cancer                                                    | 266<br>(194 - 322)            | --                    | --                     | 20<br>(15 - 29)          | 159<br>(113 - 196)          | 86<br>(61 - 106)            |
| Tracheal, bronchus and lung cancer                               | 5,843<br>(5,344 - 6,242)      | --                    | --                     | 164<br>(142 - 190)       | 3,083<br>(2,800 - 3,311)    | 2,596<br>(2,283 - 2,824)    |
| Breast cancer                                                    | 1,811<br>(1,338 - 2,122)      | --                    | --                     | 144<br>(119 - 184)       | 719<br>(555 - 856)          | 948<br>(656 - 1,124)        |
| Cervical cancer                                                  | 494<br>(364 - 582)            | --                    | --                     | 83<br>(62 - 101)         | 201<br>(145 - 245)          | 210<br>(151 - 265)          |
| Uterine cancer                                                   | 394<br>(313 - 471)            | --                    | --                     | 12<br>(9 - 16)           | 146<br>(114 - 186)          | 235<br>(176 - 290)          |
| Prostate cancer                                                  | 1,574<br>(1,229 - 2,188)      | --                    | --                     | 4<br>(3 - 7)             | 361<br>(247 - 488)          | 1,209<br>(924 - 1,718)      |

Web Table 31- Czech Republic deaths with 95% UI by age, sex, and cause in 2013

| Cause                                         | Both Sexes, All Ages        | Both Sexes, 0-4 Years | Both Sexes, 5-14 Years | Both Sexes, 15-49 Years | Both Sexes, 50-69 Years   | Both Sexes, 70-80 Years     |
|-----------------------------------------------|-----------------------------|-----------------------|------------------------|-------------------------|---------------------------|-----------------------------|
| Colon and rectum cancer                       | 4,249<br>(3,974 - 4,536)    | --                    | --                     | 134<br>(120 - 149)      | 1,560<br>(1,441 - 1,680)  | 2,555<br>(2,317 - 2,797)    |
| Lip and oral cavity cancer                    | 375<br>(272 - 418)          | --                    | --                     | 40<br>(31 - 48)         | 214<br>(137 - 247)        | 121<br>(98 - 141)           |
| Nasopharynx cancer                            | 55<br>(45 - 77)             | --                    | 0<br>(0 - 0)           | 11<br>(8 - 16)          | 30<br>(23 - 40)           | 14<br>(10 - 22)             |
| Other pharynx cancer                          | 267<br>(164 - 319)          | --                    | --                     | 29<br>(19 - 39)         | 186<br>(108 - 229)        | 52<br>(36 - 64)             |
| Gallbladder and biliary tract cancer          | 912<br>(725 - 1,228)        | --                    | --                     | 20<br>(16 - 28)         | 315<br>(256 - 429)        | 578<br>(450 - 790)          |
| Pancreatic cancer                             | 2,095<br>(1,948 - 2,239)    | --                    | --                     | 78<br>(68 - 90)         | 908<br>(834 - 987)        | 1,108<br>(1,008 - 1,214)    |
| Malignant skin melanoma                       | 404<br>(271 - 580)          | --                    | --                     | 52<br>(37 - 77)         | 172<br>(117 - 262)        | 179<br>(114 - 237)          |
| Non-melanoma skin cancer                      | 172<br>(135 - 241)          | --                    | --                     | 4<br>(3 - 6)            | 28<br>(20 - 40)           | 140<br>(106 - 197)          |
| Ovarian cancer                                | 761<br>(643 - 857)          | --                    | --                     | 56<br>(46 - 67)         | 357<br>(297 - 411)        | 349<br>(274 - 421)          |
| Testicular cancer                             | 40<br>(27 - 54)             | --                    | --                     | 26<br>(17 - 35)         | 8<br>(5 - 12)             | 6<br>(4 - 9)                |
| Kidney cancer                                 | 1,151<br>(1,006 - 1,286)    | 0<br>(0 - 0)          | 0<br>(0 - 1)           | 43<br>(35 - 53)         | 507<br>(428 - 589)        | 600<br>(482 - 726)          |
| Bladder cancer                                | 734<br>(596 - 831)          | --                    | --                     | 10<br>(8 - 13)          | 232<br>(193 - 264)        | 492<br>(388 - 573)          |
| Brain and nervous system cancer               | 742<br>(580 - 831)          | 3<br>(2 - 5)          | 9<br>(6 - 12)          | 125<br>(106 - 148)      | 381<br>(308 - 443)        | 224<br>(138 - 280)          |
| Thyroid cancer                                | 108<br>(89 - 143)           | --                    | 0<br>(0 - 0)           | 5<br>(3 - 6)            | 38<br>(31 - 50)           | 66<br>(52 - 90)             |
| Mesothelioma                                  | 45<br>(34 - 59)             | --                    | --                     | 4<br>(3 - 5)            | 22<br>(16 - 32)           | 19<br>(13 - 26)             |
| Hodgkin lymphoma                              | 78<br>(64 - 132)            | 0<br>(0 - 0)          | 0<br>(0 - 1)           | 20<br>(16 - 33)         | 29<br>(22 - 52)           | 28<br>(22 - 47)             |
| Non-Hodgkin lymphoma                          | 642<br>(403 - 777)          | 1<br>(0 - 2)          | 2<br>(1 - 4)           | 49<br>(32 - 63)         | 244<br>(157 - 307)        | 347<br>(199 - 437)          |
| Multiple myeloma                              | 387<br>(270 - 542)          | --                    | --                     | 12<br>(8 - 19)          | 154<br>(106 - 226)        | 221<br>(150 - 308)          |
| Leukemia                                      | 873<br>(781 - 949)          | 3<br>(2 - 5)          | 7<br>(5 - 9)           | 65<br>(56 - 74)         | 294<br>(256 - 328)        | 504<br>(444 - 564)          |
| Other neoplasms                               | 1,114<br>(894 - 1,294)      | 7<br>(4 - 11)         | 6<br>(4 - 9)           | 100<br>(77 - 118)       | 398<br>(322 - 470)        | 602<br>(445 - 730)          |
| Cardiovascular diseases                       | 53,302<br>(51,139 - 56,219) | 4<br>(3 - 6)          | 3<br>(2 - 4)           | 863<br>(793 - 935)      | 9,397<br>(8,862 - 10,315) | 43,035<br>(41,270 - 45,157) |
| Rheumatic heart disease                       | 262<br>(185 - 312)          | 0<br>(0 - 0)          | 0<br>(0 - 0)           | 13<br>(9 - 18)          | 68<br>(53 - 108)          | 181<br>(109 - 222)          |
| Ischemic heart disease                        | 28,798<br>(25,350 - 31,039) | 0<br>(0 - 1)          | 0<br>(0 - 0)           | 441<br>(394 - 512)      | 5,622<br>(5,184 - 6,419)  | 22,735<br>(19,191 - 24,607) |
| Cerebrovascular disease                       | 17,482<br>(15,530 - 21,571) | 1<br>(0 - 1)          | 1<br>(1 - 1)           | 167<br>(134 - 198)      | 2,245<br>(1,925 - 2,700)  | 15,068<br>(13,326 - 18,786) |
| Ischemic stroke                               | 14,631<br>(12,787 - 18,635) | 0<br>(0 - 0)          | 0<br>(0 - 0)           | 43<br>(32 - 56)         | 1,281<br>(1,021 - 1,604)  | 13,307<br>(11,649 - 17,029) |
| Hemorrhagic stroke                            | 2,851<br>(2,243 - 3,614)    | 1<br>(0 - 1)          | 1<br>(0 - 1)           | 124<br>(98 - 147)       | 964<br>(780 - 1,240)      | 1,761<br>(1,255 - 2,330)    |
| Hypertensive heart disease                    | 2,284<br>(1,764 - 3,468)    | 0<br>(0 - 0)          | 0<br>(0 - 0)           | 41<br>(28 - 57)         | 298<br>(225 - 401)        | 1,945<br>(1,437 - 3,031)    |
| Cardiomyopathy and myocarditis                | 373<br>(252 - 444)          | 2<br>(1 - 3)          | 1<br>(1 - 2)           | 60<br>(41 - 74)         | 153<br>(97 - 191)         | 157<br>(101 - 192)          |
| Atrial fibrillation and flutter               | 374<br>(295 - 464)          | --                    | --                     | 1<br>(1 - 2)            | 30<br>(24 - 37)           | 342<br>(267 - 428)          |
| Aortic aneurysm                               | 485<br>(351 - 578)          | --                    | --                     | 22<br>(15 - 26)         | 156<br>(112 - 185)        | 307<br>(219 - 379)          |
| Peripheral vascular disease                   | 251<br>(212 - 301)          | --                    | --                     | 2<br>(2 - 3)            | 54<br>(43 - 66)           | 194<br>(159 - 238)          |
| Endocarditis                                  | 145<br>(87 - 188)           | 0<br>(0 - 0)          | 0<br>(0 - 0)           | 15<br>(9 - 20)          | 48<br>(29 - 64)           | 82<br>(46 - 111)            |
| Other cardiovascular and circulatory diseases | 2,848<br>(2,029 - 3,371)    | 0<br>(0 - 1)          | 0<br>(0 - 1)           | 102<br>(70 - 124)       | 722<br>(529 - 859)        | 2,024<br>(1,394 - 2,498)    |
| Chronic respiratory diseases                  | 4,148<br>(2,813 - 4,610)    | 1<br>(1 - 1)          | 1<br>(1 - 1)           | 72<br>(59 - 82)         | 1,040<br>(710 - 1,161)    | 3,035<br>(1,995 - 3,424)    |
| Chronic obstructive pulmonary disease         | 3,499<br>(2,336 - 3,947)    | 1<br>(0 - 1)          | 0<br>(0 - 0)           | 44<br>(35 - 52)         | 825<br>(551 - 946)        | 2,629<br>(1,728 - 3,002)    |
| Pneumoconiosis                                | 131<br>(90 - 195)           | 0<br>(0 - 0)          | 0<br>(0 - 0)           | 4<br>(2 - 5)            | 52<br>(34 - 80)           | 75<br>(50 - 115)            |
| Silicosis                                     | 31<br>(21 - 47)             | 0<br>(0 - 0)          | 0<br>(0 - 0)           | 1<br>(1 - 1)            | 9<br>(6 - 14)             | 21<br>(13 - 33)             |
| Asbestosis                                    | 7<br>(5 - 10)               | 0<br>(0 - 0)          | 0<br>(0 - 0)           | 1<br>(0 - 1)            | 4<br>(2 - 6)              | 2<br>(2 - 4)                |
| Coal workers pneumoconiosis                   | 59<br>(39 - 89)             | 0<br>(0 - 0)          | 0<br>(0 - 0)           | 1<br>(0 - 1)            | 21<br>(13 - 34)           | 37<br>(23 - 57)             |
| Other pneumoconiosis                          | 35<br>(24 - 50)             | 0<br>(0 - 0)          | 0<br>(0 - 0)           | 2<br>(1 - 2)            | 18<br>(12 - 28)           | 15<br>(10 - 23)             |



Web Table 31- Czech Republic deaths with 95% UI by age, sex, and cause in 2013

| Cause                                               | Both Sexes, All Ages     | Both Sexes, 0-4 Years | Both Sexes, 5-14 Years | Both Sexes, 15-49 Years | Both Sexes, 50-69 Years  | Both Sexes, 70-80 Years  |
|-----------------------------------------------------|--------------------------|-----------------------|------------------------|-------------------------|--------------------------|--------------------------|
| Asthma                                              | 126<br>(80 - 168)        | 0<br>(0 - 0)          | 0<br>(0 - 0)           | 10<br>(8 - 12)          | 44<br>(30 - 57)          | 72<br>(39 - 105)         |
| Interstitial lung disease and pulmonary sarcoidosis | 345<br>(148 - 536)       | 0<br>(0 - 0)          | 0<br>(0 - 0)           | 10<br>(6 - 14)          | 111<br>(52 - 165)        | 223<br>(83 - 369)        |
| Other chronic respiratory diseases                  | 47<br>(30 - 69)          | 0<br>(0 - 0)          | 0<br>(0 - 0)           | 4<br>(3 - 5)            | 8<br>(6 - 10)            | 35<br>(20 - 56)          |
| Cirrhosis                                           | 2,160<br>(2,024 - 2,297) | 1<br>(0 - 1)          | 1<br>(1 - 1)           | 369<br>(334 - 411)      | 1,307<br>(1,204 - 1,412) | 482<br>(440 - 527)       |
| Cirrhosis due to hepatitis B                        | 558<br>(398 - 720)       | 0<br>(0 - 0)          | 0<br>(0 - 0)           | 95<br>(63 - 129)        | 332<br>(229 - 437)       | 131<br>(94 - 174)        |
| Cirrhosis due to hepatitis C                        | 522<br>(308 - 735)       | 0<br>(0 - 0)          | 0<br>(0 - 0)           | 84<br>(41 - 129)        | 320<br>(175 - 462)       | 119<br>(75 - 165)        |
| Cirrhosis due to alcohol use                        | 743<br>(563 - 925)       | --                    | --                     | 97<br>(61 - 135)        | 462<br>(340 - 580)       | 184<br>(140 - 232)       |
| Cirrhosis due to other causes                       | 336<br>(224 - 461)       | 1<br>(0 - 1)          | 1<br>(0 - 1)           | 93<br>(63 - 128)        | 194<br>(123 - 274)       | 49<br>(33 - 67)          |
| Digestive diseases                                  | 2,224<br>(1,930 - 2,435) | 1<br>(0 - 1)          | 1<br>(1 - 1)           | 124<br>(109 - 142)      | 581<br>(485 - 638)       | 1,518<br>(1,288 - 1,701) |
| Peptic ulcer disease                                | 462<br>(353 - 552)       | 0<br>(0 - 0)          | 0<br>(0 - 0)           | 21<br>(15 - 27)         | 137<br>(98 - 168)        | 303<br>(225 - 379)       |
| Gastritis and duodenitis                            | 23<br>(12 - 33)          | 0<br>(0 - 0)          | 0<br>(0 - 0)           | 2<br>(1 - 3)            | 7<br>(4 - 10)            | 14<br>(8 - 22)           |
| Appendicitis                                        | 31<br>(22 - 42)          | 0<br>(0 - 0)          | 0<br>(0 - 0)           | 2<br>(1 - 2)            | 8<br>(5 - 11)            | 21<br>(14 - 30)          |
| Paralytic ileus and intestinal obstruction          | 323<br>(214 - 475)       | 0<br>(0 - 0)          | 0<br>(0 - 0)           | 13<br>(8 - 20)          | 68<br>(44 - 101)         | 241<br>(156 - 361)       |
| Inguinal, femoral, and abdominal hernia             | 56<br>(39 - 88)          | 0<br>(0 - 0)          | 0<br>(0 - 0)           | 1<br>(1 - 2)            | 11<br>(8 - 18)           | 43<br>(29 - 71)          |
| Inflammatory bowel disease                          | 100<br>(53 - 132)        | 0<br>(0 - 0)          | 0<br>(0 - 0)           | 8<br>(4 - 10)           | 29<br>(16 - 38)          | 63<br>(30 - 89)          |
| Vascular intestinal disorders                       | 288<br>(174 - 444)       | 0<br>(0 - 0)          | 0<br>(0 - 0)           | 5<br>(3 - 9)            | 56<br>(33 - 93)          | 226<br>(134 - 351)       |
| Gallbladder and biliary diseases                    | 315<br>(241 - 384)       | 0<br>(0 - 0)          | 0<br>(0 - 0)           | 5<br>(4 - 6)            | 53<br>(40 - 64)          | 257<br>(192 - 319)       |
| Pancreatitis                                        | 370<br>(282 - 459)       | 0<br>(0 - 0)          | 0<br>(0 - 0)           | 56<br>(44 - 70)         | 145<br>(109 - 181)       | 169<br>(123 - 225)       |
| Other digestive diseases                            | 257<br>(183 - 304)       | 0<br>(0 - 0)          | 0<br>(0 - 0)           | 11<br>(7 - 14)          | 66<br>(44 - 80)          | 179<br>(128 - 219)       |
| Neurological disorders                              | 7,043<br>(6,026 - 8,161) | 6<br>(4 - 9)          | 5<br>(4 - 6)           | 120<br>(104 - 154)      | 557<br>(481 - 638)       | 6,355<br>(5,323 - 7,482) |
| Alzheimer disease and other dementias               | 6,396<br>(5,350 - 7,516) | --                    | --                     | 1<br>(1 - 3)            | 325<br>(263 - 385)       | 6,069<br>(5,046 - 7,203) |
| Parkinson disease                                   | 228<br>(153 - 264)       | --                    | --                     | 1<br>(1 - 2)            | 35<br>(26 - 43)          | 191<br>(123 - 226)       |
| Epilepsy                                            | 104<br>(82 - 126)        | 1<br>(1 - 2)          | 2<br>(2 - 3)           | 52<br>(43 - 68)         | 32<br>(24 - 39)          | 16<br>(11 - 21)          |
| Multiple sclerosis                                  | 140<br>(103 - 243)       | --                    | --                     | 34<br>(24 - 61)         | 78<br>(55 - 137)         | 27<br>(18 - 43)          |
| Other neurological disorders                        | 176<br>(141 - 197)       | 5<br>(3 - 7)          | 3<br>(2 - 3)           | 31<br>(24 - 36)         | 87<br>(70 - 99)          | 51<br>(39 - 60)          |
| Mental and substance use disorders                  | 431<br>(276 - 493)       | 1<br>(0 - 1)          | 0<br>(0 - 0)           | 190<br>(137 - 221)      | 198<br>(108 - 237)       | 42<br>(28 - 50)          |
| Schizophrenia                                       | 2<br>(1 - 5)             | --                    | --                     | 1<br>(0 - 2)            | 1<br>(1 - 3)             | 0<br>(0 - 1)             |
| Alcohol use disorders                               | 288<br>(136 - 350)       | --                    | --                     | 106<br>(56 - 131)       | 159<br>(70 - 198)        | 23<br>(10 - 30)          |
| Drug use disorders                                  | 139<br>(118 - 159)       | 1<br>(0 - 1)          | --                     | 83<br>(68 - 100)        | 37<br>(31 - 44)          | 19<br>(15 - 23)          |
| Opioid use disorders                                | 53<br>(44 - 61)          | 0<br>(0 - 0)          | --                     | 32<br>(26 - 39)         | 13<br>(11 - 16)          | 7<br>(6 - 9)             |
| Cocaine use disorders                               | 8<br>(6 - 9)             | 0<br>(0 - 0)          | --                     | 5<br>(4 - 6)            | 2<br>(1 - 2)             | 1<br>(1 - 1)             |
| Amphetamine use disorders                           | 7<br>(6 - 8)             | 0<br>(0 - 0)          | --                     | 4<br>(3 - 5)            | 2<br>(2 - 2)             | 1<br>(1 - 1)             |
| Other drug use disorders                            | 72<br>(61 - 83)          | 0<br>(0 - 0)          | --                     | 42<br>(34 - 50)         | 21<br>(17 - 24)          | 9<br>(7 - 12)            |
| Eating disorders                                    | 1<br>(1 - 2)             | --                    | 0<br>(0 - 0)           | 1<br>(1 - 2)            | --                       | --                       |
| Anorexia nervosa                                    | 1<br>(1 - 2)             | --                    | 0<br>(0 - 0)           | 1<br>(1 - 2)            | --                       | --                       |
| Diabetes, urogenital, blood, and endocrine diseases | 3,937<br>(3,639 - 4,233) | 10<br>(6 - 16)        | 5<br>(4 - 7)           | 137<br>(124 - 151)      | 949<br>(869 - 1,067)     | 2,836<br>(2,553 - 3,093) |
| Diabetes mellitus                                   | 2,026<br>(1,791 - 2,229) | 0<br>(0 - 0)          | 0<br>(0 - 0)           | 48<br>(42 - 55)         | 517<br>(461 - 573)       | 1,460<br>(1,235 - 1,659) |
| Acute glomerulonephritis                            | 4<br>(3 - 7)             | 0<br>(0 - 0)          | 0<br>(0 - 0)           | 1<br>(1 - 1)            | 1<br>(1 - 2)             | 2<br>(1 - 4)             |
| Chronic kidney disease                              | 1,161<br>(1,034 - 1,331) | 1<br>(0 - 1)          | 1<br>(0 - 1)           | 39<br>(34 - 51)         | 256<br>(223 - 340)       | 865<br>(741 - 998)       |
| Chronic kidney disease due to diabetes mellitus     | 145<br>(107 - 224)       | 0<br>(0 - 0)          | 0<br>(0 - 0)           | 4<br>(3 - 7)            | 41<br>(30 - 71)          | 100<br>(69 - 154)        |

Web Table 31- Czech Republic deaths with 95% UI by age, sex, and cause in 2013

| Cause                                               | Both Sexes, All Ages     | Both Sexes, 0-4 Years | Both Sexes, 5-14 Years | Both Sexes, 15-49 Years  | Both Sexes, 50-69 Years  | Both Sexes, 70-80 Years  |
|-----------------------------------------------------|--------------------------|-----------------------|------------------------|--------------------------|--------------------------|--------------------------|
| Chronic kidney disease due to hypertension          | 394<br>(257 - 498)       | 0<br>(0 - 0)          | 0<br>(0 - 0)           | 13<br>(8 - 20)           | 80<br>(48 - 105)         | 301<br>(193 - 388)       |
| Chronic kidney disease due to glomerulonephritis    | 27<br>(14 - 50)          | 0<br>(0 - 0)          | 0<br>(0 - 0)           | 4<br>(2 - 7)             | 10<br>(5 - 19)           | 13<br>(6 - 25)           |
| Chronic kidney disease due to other causes          | 594<br>(472 - 752)       | 0<br>(0 - 0)          | 0<br>(0 - 0)           | 18<br>(12 - 24)          | 125<br>(96 - 195)        | 451<br>(339 - 583)       |
| Urinary diseases and male infertility               | 526<br>(448 - 694)       | 0<br>(0 - 0)          | 0<br>(0 - 0)           | 15<br>(12 - 21)          | 109<br>(90 - 165)        | 402<br>(329 - 530)       |
| Interstitial nephritis and urinary tract infections | 475<br>(404 - 631)       | 0<br>(0 - 0)          | 0<br>(0 - 0)           | 12<br>(10 - 17)          | 95<br>(78 - 143)         | 368<br>(299 - 485)       |
| Urolithiasis                                        | 23<br>(14 - 38)          | --                    | 0<br>(0 - 0)           | 1<br>(1 - 1)             | 6<br>(4 - 11)            | 16<br>(9 - 28)           |
| Other urinary diseases                              | 28<br>(20 - 43)          | 0<br>(0 - 0)          | 0<br>(0 - 0)           | 2<br>(2 - 3)             | 8<br>(5 - 12)            | 18<br>(11 - 29)          |
| Gynecological diseases                              | 1<br>(0 - 1)             | --                    | --                     | 0<br>(0 - 0)             | 0<br>(0 - 0)             | 0<br>(0 - 0)             |
| Uterine fibroids                                    | 0<br>(0 - 0)             | --                    | --                     | 0<br>(0 - 0)             | 0<br>(0 - 0)             | 0<br>(0 - 0)             |
| Polycystic ovarian syndrome                         | 0<br>(0 - 0)             | --                    | --                     | 0<br>(0 - 0)             | 0<br>(0 - 0)             | --                       |
| Endometriosis                                       | 0<br>(0 - 0)             | --                    | --                     | 0<br>(0 - 0)             | 0<br>(0 - 0)             | --                       |
| Genital prolapse                                    | 0<br>(0 - 0)             | --                    | --                     | 0<br>(0 - 0)             | 0<br>(0 - 0)             | 0<br>(0 - 0)             |
| Other gynecological diseases                        | 0<br>(0 - 0)             | --                    | --                     | 0<br>(0 - 0)             | 0<br>(0 - 0)             | 0<br>(0 - 0)             |
| Hemoglobinopathies and hemolytic anemias            | 32<br>(24 - 45)          | 1<br>(1 - 2)          | 1<br>(0 - 1)           | 9<br>(7 - 13)            | 7<br>(5 - 9)             | 14<br>(10 - 21)          |
| Thalassemias                                        | 4<br>(3 - 5)             | 1<br>(0 - 1)          | 1<br>(0 - 1)           | 2<br>(2 - 3)             | 0<br>(0 - 0)             | 0<br>(0 - 0)             |
| Sickle cell disorders                               | 2<br>(1 - 3)             | 0<br>(0 - 0)          | 0<br>(0 - 0)           | 1<br>(1 - 2)             | 1<br>(0 - 1)             | 0<br>(0 - 0)             |
| G6PD deficiency                                     | 1<br>(0 - 1)             | 0<br>(0 - 0)          | 0<br>(0 - 0)           | 0<br>(0 - 0)             | 0<br>(0 - 0)             | 0<br>(0 - 0)             |
| Other hemoglobinopathies and hemolytic anemias      | 26<br>(19 - 36)          | 0<br>(0 - 0)          | 0<br>(0 - 0)           | 5<br>(4 - 8)             | 6<br>(5 - 8)             | 14<br>(10 - 20)          |
| Endocrine, metabolic, blood, and immune disorders   | 188<br>(97 - 223)        | 8<br>(5 - 13)         | 4<br>(2 - 5)           | 25<br>(14 - 30)          | 58<br>(30 - 72)          | 93<br>(42 - 120)         |
| Musculoskeletal disorders                           | 112<br>(74 - 131)        | --                    | 1<br>(0 - 1)           | 11<br>(8 - 13)           | 40<br>(27 - 48)          | 61<br>(36 - 75)          |
| Rheumatoid arthritis                                | 11<br>(8 - 14)           | --                    | 0<br>(0 - 0)           | 1<br>(0 - 1)             | 4<br>(3 - 6)             | 6<br>(4 - 9)             |
| Other musculoskeletal disorders                     | 101<br>(67 - 119)        | --                    | 0<br>(0 - 1)           | 10<br>(7 - 12)           | 36<br>(25 - 44)          | 54<br>(32 - 68)          |
| Other non-communicable diseases                     | 266<br>(189 - 320)       | 101<br>(67 - 148)     | 8<br>(6 - 11)          | 25<br>(21 - 28)          | 28<br>(16 - 33)          | 104<br>(41 - 128)        |
| Congenital anomalies                                | 137<br>(103 - 183)       | 89<br>(58 - 129)      | 8<br>(6 - 11)          | 21<br>(17 - 24)          | 8<br>(7 - 10)            | 11<br>(8 - 14)           |
| Neural tube defects                                 | 2<br>(1 - 3)             | 1<br>(0 - 2)          | 0<br>(0 - 0)           | 0<br>(0 - 1)             | 0<br>(0 - 0)             | 0<br>(0 - 0)             |
| Congenital heart anomalies                          | 56<br>(41 - 75)          | 35<br>(22 - 53)       | 3<br>(2 - 4)           | 11<br>(9 - 13)           | 2<br>(2 - 3)             | 4<br>(3 - 6)             |
| Cleft lip and cleft palate                          | 1<br>(0 - 2)             | 1<br>(0 - 2)          | --                     | --                       | --                       | --                       |
| Down syndrome                                       | 10<br>(6 - 17)           | 4<br>(2 - 9)          | 1<br>(0 - 1)           | 3<br>(2 - 4)             | 2<br>(1 - 3)             | 0<br>(0 - 0)             |
| Chromosomal unbalanced rearrangements               | 8<br>(5 - 13)            | 6<br>(4 - 10)         | 0<br>(0 - 1)           | 1<br>(1 - 1)             | 0<br>(0 - 0)             | 0<br>(0 - 0)             |
| Other congenital anomalies                          | 60<br>(45 - 85)          | 42<br>(27 - 65)       | 4<br>(2 - 5)           | 5<br>(4 - 7)             | 3<br>(3 - 4)             | 6<br>(5 - 8)             |
| Skin and subcutaneous diseases                      | 117<br>(42 - 143)        | 0<br>(0 - 0)          | 0<br>(0 - 0)           | 4<br>(2 - 5)             | 20<br>(8 - 25)           | 93<br>(31 - 117)         |
| Cellulitis                                          | 20<br>(6 - 32)           | 0<br>(0 - 0)          | 0<br>(0 - 0)           | 1<br>(1 - 2)             | 5<br>(2 - 8)             | 13<br>(4 - 23)           |
| Pyoderma                                            | 37<br>(19 - 49)          | 0<br>(0 - 0)          | 0<br>(0 - 0)           | 1<br>(1 - 2)             | 9<br>(4 - 12)            | 27<br>(13 - 37)          |
| Decubitus ulcer                                     | 58<br>(13 - 79)          | 0<br>(0 - 0)          | 0<br>(0 - 0)           | 1<br>(0 - 2)             | 5<br>(2 - 8)             | 51<br>(11 - 70)          |
| Other skin and subcutaneous diseases                | 2<br>(1 - 4)             | 0<br>(0 - 0)          | 0<br>(0 - 0)           | 0<br>(0 - 1)             | 1<br>(0 - 1)             | 1<br>(0 - 3)             |
| Sudden infant death syndrome                        | 12<br>(4 - 21)           | 12<br>(4 - 21)        | --                     | --                       | --                       | --                       |
| Injuries                                            | 5,955<br>(5,432 - 7,278) | 36<br>(23 - 55)       | 41<br>(32 - 52)        | 1,762<br>(1,654 - 1,880) | 1,602<br>(1,472 - 1,773) | 2,515<br>(2,079 - 3,737) |
| Transport injuries                                  | 1,161<br>(1,060 - 1,256) | 7<br>(4 - 10)         | 18<br>(14 - 24)        | 545<br>(487 - 594)       | 345<br>(306 - 381)       | 245<br>(214 - 291)       |
| Road injuries                                       | 1,015<br>(922 - 1,107)   | 6<br>(4 - 9)          | 17<br>(12 - 22)        | 469<br>(421 - 512)       | 302<br>(266 - 339)       | 221<br>(192 - 258)       |
| Pedestrian road injuries                            | 227<br>(149 - 313)       | 2<br>(1 - 3)          | 5<br>(3 - 8)           | 65<br>(37 - 96)          | 71<br>(44 - 101)         | 83<br>(57 - 111)         |

Web Table 31- Czech Republic deaths with 95% UI by age, sex, and cause in 2013

| Cause                                           | Both Sexes, All Ages     | Both Sexes, 0-4 Years | Both Sexes, 5-14 Years | Both Sexes, 15-49 Years | Both Sexes, 50-69 Years | Both Sexes, 70-80 Years  |
|-------------------------------------------------|--------------------------|-----------------------|------------------------|-------------------------|-------------------------|--------------------------|
| Cyclist road injuries                           | 88<br>(33 - 128)         | 0<br>(0 - 1)          | 2<br>(1 - 3)           | 28<br>(9 - 42)          | 35<br>(13 - 52)         | 23<br>(9 - 35)           |
| Motorcyclist road injuries                      | 64<br>(19 - 97)          | 0<br>(0 - 0)          | 1<br>(0 - 1)           | 48<br>(14 - 74)         | 10<br>(3 - 16)          | 6<br>(2 - 9)             |
| Motor vehicle road injuries                     | 631<br>(534 - 788)       | 4<br>(2 - 6)          | 9<br>(6 - 13)          | 326<br>(276 - 397)      | 185<br>(148 - 237)      | 107<br>(82 - 146)        |
| Other road injuries                             | 5<br>(2 - 8)             | 0<br>(0 - 0)          | 0<br>(0 - 0)           | 2<br>(1 - 3)            | 1<br>(0 - 2)            | 2<br>(1 - 3)             |
| Other transport injuries                        | 146<br>(104 - 181)       | 1<br>(0 - 1)          | 2<br>(1 - 3)           | 77<br>(53 - 96)         | 43<br>(28 - 57)         | 24<br>(17 - 34)          |
| Unintentional injuries                          | 3,008<br>(2,534 - 4,288) | 27<br>(17 - 45)       | 17<br>(13 - 24)        | 407<br>(360 - 512)      | 613<br>(542 - 735)      | 1,945<br>(1,530 - 3,080) |
| Falls                                           | 1,984<br>(1,553 - 3,196) | 2<br>(1 - 3)          | 2<br>(1 - 3)           | 101<br>(83 - 136)       | 277<br>(234 - 372)      | 1,602<br>(1,200 - 2,743) |
| Drowning                                        | 206<br>(159 - 324)       | 5<br>(3 - 12)         | 8<br>(5 - 14)          | 87<br>(65 - 147)        | 65<br>(48 - 99)         | 40<br>(32 - 62)          |
| Fire, heat, and hot substances                  | 97<br>(75 - 126)         | 1<br>(1 - 2)          | 1<br>(0 - 1)           | 17<br>(13 - 23)         | 24<br>(18 - 32)         | 54<br>(42 - 72)          |
| Poisonings                                      | 93<br>(78 - 137)         | 1<br>(0 - 1)          | 1<br>(1 - 1)           | 32<br>(26 - 47)         | 28<br>(22 - 38)         | 32<br>(23 - 56)          |
| Exposure to mechanical forces                   | 86<br>(77 - 103)         | 2<br>(1 - 3)          | 2<br>(1 - 3)           | 40<br>(34 - 48)         | 28<br>(24 - 34)         | 15<br>(12 - 18)          |
| Unintentional firearm injuries                  | 17<br>(14 - 21)          | 0<br>(0 - 0)          | 0<br>(0 - 0)           | 7<br>(5 - 9)            | 6<br>(4 - 8)            | 4<br>(3 - 6)             |
| Unintentional suffocation                       | 7<br>(5 - 15)            | 1<br>(0 - 2)          | 0<br>(0 - 1)           | 3<br>(2 - 6)            | 2<br>(1 - 4)            | 1<br>(1 - 3)             |
| Other exposure to mechanical forces             | 62<br>(52 - 73)          | 1<br>(1 - 1)          | 1<br>(1 - 2)           | 30<br>(25 - 38)         | 20<br>(15 - 24)         | 9<br>(7 - 12)            |
| Adverse effects of medical treatment            | 139<br>(67 - 194)        | 1<br>(0 - 2)          | 0<br>(0 - 0)           | 10<br>(5 - 13)          | 34<br>(17 - 47)         | 95<br>(42 - 137)         |
| Animal contact                                  | 14<br>(11 - 22)          | 0<br>(0 - 0)          | 0<br>(0 - 0)           | 4<br>(3 - 6)            | 6<br>(4 - 10)           | 4<br>(3 - 6)             |
| Venomous animal contact                         | 6<br>(5 - 10)            | 0<br>(0 - 0)          | 0<br>(0 - 0)           | 2<br>(2 - 4)            | 3<br>(2 - 5)            | 1<br>(1 - 2)             |
| Non-venomous animal contact                     | 8<br>(6 - 12)            | 0<br>(0 - 0)          | 0<br>(0 - 0)           | 2<br>(1 - 3)            | 3<br>(2 - 5)            | 3<br>(2 - 4)             |
| Foreign body                                    | 248<br>(149 - 306)       | 14<br>(8 - 25)        | 2<br>(1 - 3)           | 65<br>(40 - 88)         | 88<br>(48 - 111)        | 79<br>(44 - 109)         |
| Pulmonary aspiration and foreign body in airway | 247<br>(147 - 304)       | 14<br>(8 - 24)        | 2<br>(1 - 2)           | 65<br>(40 - 88)         | 88<br>(47 - 111)        | 79<br>(43 - 108)         |
| Foreign body in other body part                 | 2<br>(1 - 2)             | 0<br>(0 - 0)          | 0<br>(0 - 0)           | 1<br>(0 - 1)            | 0<br>(0 - 1)            | 0<br>(0 - 1)             |
| Other unintentional injuries                    | 141<br>(115 - 174)       | 1<br>(0 - 1)          | 2<br>(1 - 3)           | 51<br>(39 - 68)         | 63<br>(45 - 90)         | 24<br>(18 - 34)          |
| Self-harm and interpersonal violence            | 1,786<br>(1,491 - 2,066) | 3<br>(2 - 4)          | 5<br>(4 - 8)           | 809<br>(636 - 911)      | 644<br>(489 - 748)      | 325<br>(275 - 481)       |
| Self-harm                                       | 1,652<br>(1,347 - 1,907) | --                    | 4<br>(2 - 5)           | 739<br>(560 - 838)      | 606<br>(442 - 709)      | 303<br>(254 - 458)       |
| Interpersonal violence                          | 134<br>(102 - 180)       | 3<br>(2 - 4)          | 2<br>(1 - 3)           | 70<br>(53 - 99)         | 37<br>(27 - 51)         | 22<br>(17 - 31)          |
| Assault by firearm                              | 31<br>(18 - 48)          | 0<br>(0 - 0)          | 0<br>(0 - 0)           | 20<br>(11 - 31)         | 8<br>(4 - 12)           | 3<br>(1 - 5)             |
| Assault by sharp object                         | 46<br>(34 - 72)          | 0<br>(0 - 1)          | 1<br>(0 - 1)           | 26<br>(18 - 41)         | 14<br>(9 - 21)          | 6<br>(4 - 9)             |
| Assault by other means                          | 57<br>(41 - 76)          | 2<br>(1 - 3)          | 1<br>(1 - 2)           | 24<br>(17 - 35)         | 15<br>(10 - 21)         | 14<br>(10 - 19)          |
| Forces of nature, war, and legal intervention   | 0<br>(0 - 0)             | 0<br>(0 - 0)          | --                     | --                      | --                      | 0<br>(0 - 0)             |
| Exposure to forces of nature                    | 0<br>(0 - 0)             | 0<br>(0 - 0)          | --                     | --                      | --                      | 0<br>(0 - 0)             |

Web Table 31- Czech Republic deaths with 95% UI by age, sex, and cause in 2013

| Cause                                                             | Males, All Ages             | Males, 0-4 Years   | Males, 5-14 Years | Males, 15-49 Years       | Males, 50-69 Years          | Males, 70-80 Years          |
|-------------------------------------------------------------------|-----------------------------|--------------------|-------------------|--------------------------|-----------------------------|-----------------------------|
| All causes                                                        | 55,055<br>(53,355 - 56,623) | 201<br>(139 - 291) | 57<br>(46 - 73)   | 3,717<br>(3,555 - 3,870) | 18,697<br>(17,999 - 19,345) | 32,383<br>(31,534 - 33,135) |
| Communicable, maternal, neonatal, and nutritional diseases        | 1,839<br>(1,370 - 2,143)    | 105<br>(72 - 150)  | 4<br>(3 - 6)      | 118<br>(89 - 140)        | 449<br>(312 - 547)          | 1,164<br>(867 - 1,424)      |
| HIV/AIDS and tuberculosis                                         | 53<br>(45 - 79)             | 0<br>(0 - 0)       | 0<br>(0 - 0)      | 14<br>(11 - 17)          | 21<br>(17 - 31)             | 18<br>(14 - 32)             |
| Tuberculosis                                                      | 40<br>(34 - 66)             | 0<br>(0 - 0)       | 0<br>(0 - 0)      | 5<br>(4 - 8)             | 17<br>(14 - 27)             | 18<br>(13 - 31)             |
| HIV/AIDS                                                          | 12<br>(9 - 16)              | 0<br>(0 - 0)       | 0<br>(0 - 0)      | 8<br>(6 - 11)            | 3<br>(2 - 5)                | 1<br>(0 - 1)                |
| HIV/AIDS resulting in mycobacterial infection                     | 1<br>(0 - 1)                | 0<br>(0 - 0)       | 0<br>(0 - 0)      | 0<br>(0 - 1)             | 0<br>(0 - 0)                | 0<br>(0 - 0)                |
| HIV/AIDS resulting in other diseases                              | 12<br>(9 - 15)              | 0<br>(0 - 0)       | 0<br>(0 - 0)      | 8<br>(6 - 10)            | 3<br>(2 - 5)                | 1<br>(0 - 1)                |
| Diarrhea, lower respiratory, and other common infectious diseases | 1,629<br>(1,193 - 1,925)    | 16<br>(9 - 23)     | 3<br>(2 - 5)      | 96<br>(67 - 116)         | 407<br>(272 - 503)          | 1,107<br>(825 - 1,367)      |
| Diarrheal diseases                                                | 52<br>(40 - 67)             | 1<br>(1 - 2)       | 0<br>(0 - 0)      | 2<br>(2 - 3)             | 12<br>(9 - 16)              | 37<br>(26 - 51)             |
| Intestinal infectious diseases                                    | 5<br>(1 - 11)               | 1<br>(0 - 3)       | 1<br>(0 - 2)      | 1<br>(0 - 3)             | 1<br>(0 - 2)                | 1<br>(0 - 3)                |
| Typhoid fever                                                     | 3<br>(1 - 8)                | 1<br>(0 - 2)       | 1<br>(0 - 1)      | 1<br>(0 - 2)             | 1<br>(0 - 1)                | 1<br>(0 - 2)                |
| Paratyphoid fever                                                 | 1<br>(0 - 2)                | 0<br>(0 - 1)       | 0<br>(0 - 1)      | 0<br>(0 - 0)             | 0<br>(0 - 0)                | 0<br>(0 - 0)                |
| Other intestinal infectious diseases                              | 0<br>(0 - 3)                | 0<br>(0 - 1)       | 0<br>(0 - 0)      | 0<br>(0 - 1)             | 0<br>(0 - 1)                | 0<br>(0 - 1)                |
| Lower respiratory infections                                      | 1,527<br>(1,096 - 1,825)    | 10<br>(5 - 16)     | 2<br>(1 - 3)      | 82<br>(56 - 102)         | 377<br>(246 - 472)          | 1,057<br>(773 - 1,309)      |
| Upper respiratory infections                                      | 1<br>(0 - 3)                | 0<br>(0 - 0)       | 0<br>(0 - 0)      | 0<br>(0 - 0)             | 1<br>(0 - 2)                | 1<br>(0 - 2)                |
| Otitis media                                                      | 1<br>(1 - 1)                | 0<br>(0 - 0)       | 0<br>(0 - 0)      | 0<br>(0 - 0)             | 0<br>(0 - 0)                | 0<br>(0 - 1)                |
| Meningitis                                                        | 28<br>(23 - 32)             | 3<br>(1 - 4)       | 0<br>(0 - 1)      | 6<br>(5 - 7)             | 12<br>(10 - 15)             | 7<br>(5 - 8)                |
| Pneumococcal meningitis                                           | 8<br>(4 - 11)               | 1<br>(0 - 1)       | 0<br>(0 - 0)      | 2<br>(1 - 3)             | 3<br>(2 - 5)                | 2<br>(1 - 3)                |
| H influenzae type B meningitis                                    | 4<br>(2 - 5)                | 1<br>(0 - 1)       | 0<br>(0 - 0)      | 1<br>(0 - 1)             | 1<br>(1 - 2)                | 1<br>(0 - 1)                |
| Meningococcal meningitis                                          | 5<br>(3 - 7)                | 1<br>(0 - 1)       | 0<br>(0 - 0)      | 1<br>(0 - 2)             | 2<br>(1 - 4)                | 1<br>(1 - 2)                |
| Other meningitis                                                  | 11<br>(8 - 14)              | 1<br>(0 - 1)       | 0<br>(0 - 0)      | 2<br>(1 - 3)             | 5<br>(3 - 8)                | 3<br>(2 - 4)                |
| Encephalitis                                                      | 11<br>(4 - 16)              | 1<br>(0 - 1)       | 0<br>(0 - 1)      | 3<br>(1 - 5)             | 4<br>(1 - 6)                | 3<br>(1 - 5)                |
| Diphtheria                                                        | 0<br>(0 - 0)                | 0<br>(0 - 0)       | 0<br>(0 - 0)      | 0<br>(0 - 0)             | 0<br>(0 - 0)                | --                          |
| Whooping cough                                                    | 0<br>(0 - 0)                | 0<br>(0 - 0)       | 0<br>(0 - 0)      | 0<br>(0 - 0)             | 0<br>(0 - 0)                | --                          |
| Tetanus                                                           | 0<br>(0 - 1)                | 0<br>(0 - 0)       | 0<br>(0 - 0)      | 0<br>(0 - 0)             | 0<br>(0 - 0)                | 0<br>(0 - 0)                |
| Measles                                                           | 0<br>(0 - 0)                | 0<br>(0 - 0)       | 0<br>(0 - 0)      | 0<br>(0 - 0)             | 0<br>(0 - 0)                | --                          |
| Varicella and herpes zoster                                       | 3<br>(1 - 10)               | 0<br>(0 - 1)       | 0<br>(0 - 0)      | 0<br>(0 - 1)             | 0<br>(0 - 1)                | 2<br>(0 - 9)                |
| Neglected tropical diseases and malaria                           | 3<br>(2 - 3)                | 0<br>(0 - 0)       | 0<br>(0 - 0)      | 1<br>(1 - 1)             | 1<br>(1 - 1)                | 1<br>(0 - 1)                |
| Cysticercosis                                                     | 0<br>(0 - 0)                | 0<br>(0 - 0)       | 0<br>(0 - 0)      | 0<br>(0 - 0)             | 0<br>(0 - 0)                | 0<br>(0 - 0)                |
| Cystic echinococcosis                                             | 1<br>(1 - 1)                | 0<br>(0 - 0)       | 0<br>(0 - 0)      | 0<br>(0 - 0)             | 0<br>(0 - 0)                | 0<br>(0 - 0)                |
| Dengue                                                            | 0<br>(0 - 1)                | 0<br>(0 - 0)       | 0<br>(0 - 0)      | 0<br>(0 - 0)             | 0<br>(0 - 0)                | 0<br>(0 - 0)                |
| Rabies                                                            | 0<br>(0 - 1)                | 0<br>(0 - 0)       | 0<br>(0 - 0)      | 0<br>(0 - 0)             | 0<br>(0 - 0)                | 0<br>(0 - 0)                |
| Other neglected tropical diseases                                 | 1<br>(1 - 1)                | 0<br>(0 - 0)       | 0<br>(0 - 0)      | 0<br>(0 - 0)             | 0<br>(0 - 0)                | 0<br>(0 - 0)                |
| Maternal disorders                                                | --                          | --                 | --                | --                       | --                          | --                          |
| Maternal hemorrhage                                               | --                          | --                 | --                | --                       | --                          | --                          |
| Maternal sepsis and other maternal infections                     | --                          | --                 | --                | --                       | --                          | --                          |
| Maternal hypertensive disorders                                   | --                          | --                 | --                | --                       | --                          | --                          |
| Maternal obstructed labor                                         | --                          | --                 | --                | --                       | --                          | --                          |
| Maternal abortive outcome                                         | --                          | --                 | --                | --                       | --                          | --                          |
| Indirect maternal deaths                                          | --                          | --                 | --                | --                       | --                          | --                          |

Web Table 31- Czech Republic deaths with 95% UI by age, sex, and cause in 2013

| Cause                                                            | Males, All Ages             | Males, 0-4 Years | Males, 5-14 Years | Males, 15-49 Years       | Males, 50-69 Years          | Males, 70-80 Years          |
|------------------------------------------------------------------|-----------------------------|------------------|-------------------|--------------------------|-----------------------------|-----------------------------|
| Late maternal deaths                                             | --                          | --               | --                | --                       | --                          | --                          |
| Maternal deaths aggravated by HIV/AIDS                           | --                          | --               | --                | --                       | --                          | --                          |
| Other maternal disorders                                         | --                          | --               | --                | --                       | --                          | --                          |
| Neonatal disorders                                               | 87<br>(59 - 125)            | 87<br>(59 - 125) | --                | --                       | --                          | --                          |
| Neonatal preterm birth complications                             | 33<br>(20 - 55)             | 33<br>(20 - 55)  | --                | --                       | --                          | --                          |
| Neonatal encephalopathy due to birth asphyxia and trauma         | 21<br>(10 - 33)             | 21<br>(10 - 33)  | --                | --                       | --                          | --                          |
| Neonatal sepsis and other neonatal infections                    | 5<br>(1 - 11)               | 5<br>(1 - 11)    | --                | --                       | --                          | --                          |
| Hemolytic disease and other neonatal jaundice                    | 0<br>(0 - 0)                | 0<br>(0 - 0)     | --                | --                       | --                          | --                          |
| Other neonatal disorders                                         | 27<br>(15 - 43)             | 27<br>(15 - 43)  | --                | --                       | --                          | --                          |
| Nutritional deficiencies                                         | 46<br>(15 - 61)             | 0<br>(0 - 0)     | 0<br>(0 - 0)      | 4<br>(2 - 5)             | 12<br>(4 - 16)              | 29<br>(9 - 42)              |
| Protein-energy malnutrition                                      | 21<br>(2 - 36)              | 0<br>(0 - 0)     | 0<br>(0 - 0)      | 1<br>(0 - 2)             | 6<br>(1 - 9)                | 14<br>(1 - 25)              |
| Iodine deficiency                                                | 0<br>(0 - 2)                | 0<br>(0 - 0)     | 0<br>(0 - 0)      | 0<br>(0 - 0)             | 0<br>(0 - 1)                | 0<br>(0 - 1)                |
| Iron-deficiency anemia                                           | 21<br>(8 - 30)              | 0<br>(0 - 0)     | 0<br>(0 - 0)      | 2<br>(1 - 3)             | 6<br>(2 - 9)                | 13<br>(4 - 21)              |
| Other nutritional deficiencies                                   | 3<br>(1 - 5)                | 0<br>(0 - 0)     | 0<br>(0 - 0)      | 0<br>(0 - 1)             | 0<br>(0 - 1)                | 2<br>(1 - 4)                |
| Other communicable, maternal, neonatal, and nutritional diseases | 23<br>(15 - 28)             | 2<br>(1 - 3)     | 0<br>(0 - 1)      | 4<br>(2 - 5)             | 8<br>(5 - 11)               | 8<br>(5 - 11)               |
| Sexually transmitted diseases excluding HIV                      | 2<br>(1 - 3)                | 1<br>(0 - 2)     | 0<br>(0 - 0)      | 0<br>(0 - 0)             | 0<br>(0 - 1)                | 0<br>(0 - 0)                |
| Syphilis                                                         | 1<br>(1 - 2)                | 1<br>(0 - 2)     | 0<br>(0 - 0)      | 0<br>(0 - 0)             | 0<br>(0 - 0)                | 0<br>(0 - 0)                |
| Chlamydial infection                                             | --                          | --               | --                | --                       | --                          | --                          |
| Gonococcal infection                                             | 0<br>(0 - 0)                | --               | 0<br>(0 - 0)      | 0<br>(0 - 0)             | 0<br>(0 - 0)                | 0<br>(0 - 0)                |
| Other sexually transmitted diseases                              | 0<br>(0 - 0)                | --               | 0<br>(0 - 0)      | 0<br>(0 - 0)             | 0<br>(0 - 0)                | 0<br>(0 - 0)                |
| Hepatitis                                                        | 4<br>(3 - 6)                | 0<br>(0 - 0)     | 0<br>(0 - 0)      | 1<br>(1 - 1)             | 2<br>(1 - 3)                | 2<br>(1 - 3)                |
| Acute hepatitis A                                                | 1<br>(0 - 1)                | 0<br>(0 - 0)     | 0<br>(0 - 0)      | 0<br>(0 - 0)             | 0<br>(0 - 1)                | 0<br>(0 - 0)                |
| Acute hepatitis B                                                | 3<br>(2 - 4)                | 0<br>(0 - 0)     | 0<br>(0 - 0)      | 0<br>(0 - 1)             | 2<br>(1 - 2)                | 1<br>(1 - 2)                |
| Acute hepatitis C                                                | 0<br>(0 - 1)                | --               | 0<br>(0 - 0)      | 0<br>(0 - 0)             | 0<br>(0 - 0)                | 0<br>(0 - 0)                |
| Other infectious diseases                                        | 17<br>(9 - 22)              | 1<br>(1 - 2)     | 0<br>(0 - 0)      | 3<br>(2 - 4)             | 6<br>(3 - 8)                | 6<br>(3 - 9)                |
| Non-communicable diseases                                        | 49,381<br>(47,819 - 50,816) | 77<br>(51 - 114) | 27<br>(21 - 35)   | 2,137<br>(2,008 - 2,271) | 17,008<br>(16,346 - 17,618) | 30,132<br>(29,337 - 30,913) |
| Neoplasms                                                        | 16,088<br>(15,257 - 17,018) | 8<br>(5 - 12)    | 15<br>(11 - 20)   | 761<br>(699 - 841)       | 7,449<br>(7,039 - 7,882)    | 7,856<br>(7,388 - 8,410)    |
| Esophageal cancer                                                | 427<br>(356 - 507)          | --               | --                | 34<br>(26 - 50)          | 265<br>(214 - 318)          | 128<br>(106 - 156)          |
| Stomach cancer                                                   | 933<br>(836 - 1,043)        | --               | --                | 41<br>(34 - 50)          | 408<br>(360 - 468)          | 484<br>(413 - 569)          |
| Liver cancer                                                     | 592<br>(433 - 818)          | --               | 0<br>(0 - 0)      | 25<br>(17 - 38)          | 298<br>(210 - 418)          | 270<br>(188 - 385)          |
| Liver cancer due to hepatitis B                                  | 146<br>(60 - 235)           | --               | 0<br>(0 - 0)      | 9<br>(4 - 15)            | 83<br>(31 - 136)            | 55<br>(23 - 93)             |
| Liver cancer due to hepatitis C                                  | 269<br>(170 - 386)          | --               | 0<br>(0 - 0)      | 10<br>(5 - 17)           | 135<br>(83 - 202)           | 124<br>(74 - 178)           |
| Liver cancer due to alcohol use                                  | 151<br>(84 - 240)           | --               | --                | 4<br>(2 - 7)             | 66<br>(35 - 108)            | 81<br>(46 - 132)            |
| Liver cancer due to other causes                                 | 26<br>(13 - 41)             | --               | 0<br>(0 - 0)      | 2<br>(1 - 3)             | 14<br>(6 - 23)              | 10<br>(4 - 17)              |
| Larynx cancer                                                    | 244<br>(172 - 299)          | --               | --                | 19<br>(14 - 27)          | 149<br>(101 - 184)          | 77<br>(52 - 96)             |
| Tracheal, bronchus and lung cancer                               | 4,208<br>(3,874 - 4,514)    | --               | --                | 107<br>(89 - 128)        | 2,318<br>(2,111 - 2,529)    | 1,783<br>(1,618 - 1,946)    |
| Breast cancer                                                    | 14<br>(5 - 25)              | --               | --                | 1<br>(0 - 1)             | 6<br>(2 - 10)               | 8<br>(2 - 13)               |
| Cervical cancer                                                  | --                          | --               | --                | --                       | --                          | --                          |
| Uterine cancer                                                   | --                          | --               | --                | --                       | --                          | --                          |
| Prostate cancer                                                  | 1,574<br>(1,229 - 2,188)    | --               | --                | 4<br>(3 - 7)             | 361<br>(247 - 488)          | 1,209<br>(924 - 1,718)      |

Web Table 31- Czech Republic deaths with 95% UI by age, sex, and cause in 2013

| Cause                                         | Males, All Ages             | Males, 0-4 Years | Males, 5-14 Years | Males, 15-49 Years | Males, 50-69 Years       | Males, 70-80 Years          |
|-----------------------------------------------|-----------------------------|------------------|-------------------|--------------------|--------------------------|-----------------------------|
| Colon and rectum cancer                       | 2,479<br>(2,292 - 2,671)    | --               | --                | 82<br>(71 - 95)    | 1,044<br>(954 - 1,134)   | 1,353<br>(1,212 - 1,508)    |
| Lip and oral cavity cancer                    | 290<br>(188 - 330)          | --               | --                | 33<br>(24 - 42)    | 184<br>(110 - 217)       | 73<br>(52 - 90)             |
| Nasopharynx cancer                            | 41<br>(33 - 57)             | --               | 0<br>(0 - 0)      | 9<br>(6 - 13)      | 25<br>(18 - 34)          | 8<br>(5 - 11)               |
| Other pharynx cancer                          | 230<br>(130 - 281)          | --               | --                | 26<br>(16 - 36)    | 166<br>(89 - 210)        | 38<br>(22 - 49)             |
| Gallbladder and biliary tract cancer          | 306<br>(218 - 454)          | --               | --                | 7<br>(5 - 11)      | 121<br>(82 - 190)        | 178<br>(121 - 255)          |
| Pancreatic cancer                             | 1,084<br>(999 - 1,170)      | --               | --                | 53<br>(45 - 63)    | 548<br>(492 - 610)       | 483<br>(433 - 540)          |
| Malignant skin melanoma                       | 235<br>(118 - 401)          | --               | --                | 31<br>(16 - 55)    | 110<br>(58 - 197)        | 95<br>(44 - 152)            |
| Non-melanoma skin cancer                      | 89<br>(56 - 143)            | --               | --                | 3<br>(2 - 4)       | 20<br>(11 - 31)          | 67<br>(42 - 108)            |
| Ovarian cancer                                | --                          | --               | --                | --                 | --                       | --                          |
| Testicular cancer                             | 40<br>(27 - 54)             | --               | --                | 26<br>(17 - 35)    | 8<br>(5 - 12)            | 6<br>(4 - 9)                |
| Kidney cancer                                 | 744<br>(636 - 857)          | 0<br>(0 - 0)     | 0<br>(0 - 0)      | 31<br>(24 - 40)    | 354<br>(289 - 416)       | 358<br>(292 - 444)          |
| Bladder cancer                                | 534<br>(415 - 606)          | --               | --                | 7<br>(5 - 9)       | 181<br>(146 - 209)       | 346<br>(259 - 407)          |
| Brain and nervous system cancer               | 392<br>(295 - 470)          | 2<br>(1 - 3)     | 5<br>(3 - 8)      | 76<br>(61 - 99)    | 213<br>(164 - 267)       | 96<br>(56 - 129)            |
| Thyroid cancer                                | 38<br>(31 - 47)             | --               | 0<br>(0 - 0)      | 2<br>(2 - 3)       | 18<br>(13 - 23)          | 18<br>(14 - 23)             |
| Mesothelioma                                  | 29<br>(19 - 43)             | --               | --                | 3<br>(2 - 4)       | 16<br>(10 - 27)          | 10<br>(6 - 16)              |
| Hodgkin lymphoma                              | 45<br>(34 - 82)             | 0<br>(0 - 0)     | 0<br>(0 - 0)      | 12<br>(8 - 21)     | 19<br>(13 - 36)          | 14<br>(10 - 24)             |
| Non-Hodgkin lymphoma                          | 350<br>(158 - 433)          | 1<br>(0 - 1)     | 2<br>(1 - 3)      | 31<br>(15 - 43)    | 150<br>(69 - 196)        | 167<br>(76 - 217)           |
| Multiple myeloma                              | 191<br>(110 - 306)          | --               | --                | 7<br>(4 - 14)      | 86<br>(50 - 150)         | 97<br>(53 - 157)            |
| Leukemia                                      | 485<br>(434 - 535)          | 2<br>(1 - 3)     | 4<br>(2 - 5)      | 37<br>(31 - 44)    | 179<br>(154 - 203)       | 264<br>(229 - 299)          |
| Other neoplasms                               | 493<br>(304 - 591)          | 4<br>(2 - 6)     | 3<br>(2 - 5)      | 56<br>(34 - 71)    | 205<br>(134 - 259)       | 225<br>(133 - 283)          |
| Cardiovascular diseases                       | 22,993<br>(21,954 - 24,009) | 2<br>(1 - 3)     | 1<br>(1 - 2)      | 643<br>(587 - 705) | 6,467<br>(6,099 - 6,826) | 15,880<br>(15,138 - 16,676) |
| Rheumatic heart disease                       | 88<br>(57 - 120)            | 0<br>(0 - 0)     | 0<br>(0 - 0)      | 8<br>(5 - 12)      | 35<br>(25 - 57)          | 45<br>(24 - 62)             |
| Ischemic heart disease                        | 12,986<br>(11,862 - 14,476) | 0<br>(0 - 0)     | 0<br>(0 - 0)      | 359<br>(316 - 421) | 4,126<br>(3,784 - 4,637) | 8,501<br>(7,601 - 9,520)    |
| Cerebrovascular disease                       | 7,443<br>(6,371 - 8,729)    | 0<br>(0 - 1)     | 0<br>(0 - 1)      | 109<br>(81 - 138)  | 1,437<br>(1,153 - 1,729) | 5,897<br>(5,053 - 6,927)    |
| Ischemic stroke                               | 6,098<br>(5,159 - 7,256)    | 0<br>(0 - 0)     | 0<br>(0 - 0)      | 32<br>(21 - 43)    | 860<br>(647 - 1,082)     | 5,205<br>(4,429 - 6,215)    |
| Hemorrhagic stroke                            | 1,346<br>(876 - 1,769)      | 0<br>(0 - 1)     | 0<br>(0 - 0)      | 77<br>(53 - 98)    | 577<br>(402 - 760)       | 691<br>(399 - 974)          |
| Hypertensive heart disease                    | 519<br>(357 - 746)          | 0<br>(0 - 0)     | 0<br>(0 - 0)      | 31<br>(20 - 47)    | 185<br>(121 - 277)       | 303<br>(197 - 438)          |
| Cardiomyopathy and myocarditis                | 233<br>(130 - 298)          | 1<br>(1 - 2)     | 1<br>(0 - 1)      | 46<br>(28 - 60)    | 112<br>(60 - 149)        | 73<br>(37 - 98)             |
| Atrial fibrillation and flutter               | 126<br>(94 - 162)           | --               | --                | 1<br>(1 - 1)       | 19<br>(14 - 25)          | 106<br>(77 - 139)           |
| Aortic aneurysm                               | 325<br>(214 - 378)          | --               | --                | 17<br>(10 - 21)    | 120<br>(82 - 143)        | 188<br>(120 - 225)          |
| Peripheral vascular disease                   | 124<br>(100 - 150)          | --               | --                | 2<br>(1 - 3)       | 42<br>(32 - 53)          | 80<br>(62 - 101)            |
| Endocarditis                                  | 74<br>(42 - 100)            | 0<br>(0 - 0)     | 0<br>(0 - 0)      | 11<br>(6 - 16)     | 30<br>(16 - 42)          | 32<br>(17 - 46)             |
| Other cardiovascular and circulatory diseases | 1,074<br>(748 - 1,245)      | 0<br>(0 - 0)     | 0<br>(0 - 0)      | 58<br>(35 - 71)    | 361<br>(242 - 426)       | 655<br>(443 - 796)          |
| Chronic respiratory diseases                  | 2,552<br>(1,709 - 2,849)    | 1<br>(0 - 1)     | 0<br>(0 - 1)      | 47<br>(37 - 55)    | 745<br>(512 - 847)       | 1,759<br>(1,169 - 1,998)    |
| Chronic obstructive pulmonary disease         | 2,197<br>(1,457 - 2,486)    | 0<br>(0 - 1)     | 0<br>(0 - 0)      | 32<br>(24 - 38)    | 599<br>(400 - 695)       | 1,565<br>(1,020 - 1,796)    |
| Pneumoconiosis                                | 124<br>(83 - 187)           | 0<br>(0 - 0)     | 0<br>(0 - 0)      | 3<br>(2 - 5)       | 50<br>(32 - 79)          | 70<br>(45 - 107)            |
| Silicosis                                     | 31<br>(20 - 47)             | 0<br>(0 - 0)     | 0<br>(0 - 0)      | 1<br>(1 - 1)       | 9<br>(6 - 14)            | 21<br>(13 - 33)             |
| Asbestosis                                    | 6<br>(4 - 9)                | 0<br>(0 - 0)     | 0<br>(0 - 0)      | 0<br>(0 - 1)       | 4<br>(2 - 6)             | 2<br>(1 - 4)                |
| Coal workers pneumoconiosis                   | 58<br>(39 - 89)             | 0<br>(0 - 0)     | 0<br>(0 - 0)      | 1<br>(0 - 1)       | 21<br>(13 - 34)          | 37<br>(23 - 57)             |
| Other pneumoconiosis                          | 29<br>(18 - 44)             | 0<br>(0 - 0)     | 0<br>(0 - 0)      | 1<br>(1 - 2)       | 17<br>(11 - 27)          | 10<br>(6 - 17)              |

Web Table 31- Czech Republic deaths with 95% UI by age, sex, and cause in 2013

| Cause                                               | Males, All Ages          | Males, 0-4 Years | Males, 5-14 Years | Males, 15-49 Years | Males, 50-69 Years   | Males, 70-80 Years       |
|-----------------------------------------------------|--------------------------|------------------|-------------------|--------------------|----------------------|--------------------------|
| Asthma                                              | 45<br>(32 - 54)          | 0<br>(0 - 0)     | 0<br>(0 - 0)      | 4<br>(3 - 5)       | 18<br>(13 - 23)      | 22<br>(15 - 29)          |
| Interstitial lung disease and pulmonary sarcoidosis | 173<br>(73 - 258)        | 0<br>(0 - 0)     | 0<br>(0 - 0)      | 5<br>(2 - 8)       | 72<br>(31 - 108)     | 95<br>(35 - 151)         |
| Other chronic respiratory diseases                  | 14<br>(10 - 18)          | 0<br>(0 - 0)     | 0<br>(0 - 0)      | 2<br>(2 - 3)       | 5<br>(4 - 7)         | 6<br>(4 - 9)             |
| Cirrhosis                                           | 1,453<br>(1,345 - 1,567) | 0<br>(0 - 1)     | 0<br>(0 - 1)      | 263<br>(232 - 298) | 929<br>(845 - 1,018) | 261<br>(232 - 291)       |
| Cirrhosis due to hepatitis B                        | 297<br>(163 - 420)       | 0<br>(0 - 0)     | 0<br>(0 - 0)      | 57<br>(34 - 85)    | 192<br>(104 - 275)   | 48<br>(26 - 73)          |
| Cirrhosis due to hepatitis C                        | 346<br>(179 - 522)       | 0<br>(0 - 0)     | 0<br>(0 - 0)      | 60<br>(30 - 96)    | 221<br>(106 - 339)   | 65<br>(33 - 105)         |
| Cirrhosis due to alcohol use                        | 600<br>(426 - 749)       | --               | --                | 84<br>(49 - 119)   | 391<br>(273 - 493)   | 126<br>(92 - 160)        |
| Cirrhosis due to other causes                       | 210<br>(118 - 317)       | 0<br>(0 - 0)     | 0<br>(0 - 0)      | 63<br>(37 - 96)    | 125<br>(64 - 193)    | 22<br>(11 - 37)          |
| Digestive diseases                                  | 1,001<br>(873 - 1,118)   | 0<br>(0 - 1)     | 0<br>(0 - 1)      | 91<br>(78 - 108)   | 373<br>(305 - 421)   | 537<br>(469 - 625)       |
| Peptic ulcer disease                                | 234<br>(175 - 288)       | 0<br>(0 - 0)     | 0<br>(0 - 0)      | 16<br>(11 - 22)    | 97<br>(68 - 121)     | 121<br>(89 - 155)        |
| Gastritis and duodenitis                            | 12<br>(6 - 19)           | 0<br>(0 - 0)     | 0<br>(0 - 0)      | 1<br>(1 - 2)       | 5<br>(2 - 8)         | 6<br>(3 - 10)            |
| Appendicitis                                        | 14<br>(10 - 21)          | 0<br>(0 - 0)     | 0<br>(0 - 0)      | 1<br>(1 - 2)       | 4<br>(3 - 7)         | 9<br>(6 - 14)            |
| Paralytic ileus and intestinal obstruction          | 127<br>(73 - 204)        | 0<br>(0 - 0)     | 0<br>(0 - 0)      | 8<br>(4 - 13)      | 40<br>(22 - 62)      | 79<br>(44 - 131)         |
| Inguinal, femoral, and abdominal hernia             | 24<br>(15 - 42)          | 0<br>(0 - 0)     | 0<br>(0 - 0)      | 1<br>(0 - 1)       | 6<br>(3 - 11)        | 17<br>(10 - 33)          |
| Inflammatory bowel disease                          | 37<br>(20 - 49)          | 0<br>(0 - 0)     | 0<br>(0 - 0)      | 4<br>(2 - 6)       | 15<br>(7 - 20)       | 18<br>(9 - 26)           |
| Vascular intestinal disorders                       | 102<br>(40 - 194)        | 0<br>(0 - 0)     | 0<br>(0 - 0)      | 3<br>(1 - 7)       | 32<br>(12 - 63)      | 67<br>(26 - 130)         |
| Gallbladder and biliary diseases                    | 128<br>(92 - 160)        | 0<br>(0 - 0)     | 0<br>(0 - 0)      | 3<br>(2 - 4)       | 31<br>(22 - 41)      | 94<br>(65 - 121)         |
| Pancreatitis                                        | 219<br>(156 - 292)       | 0<br>(0 - 0)     | 0<br>(0 - 0)      | 46<br>(35 - 61)    | 103<br>(71 - 135)    | 71<br>(46 - 100)         |
| Other digestive diseases                            | 103<br>(58 - 127)        | 0<br>(0 - 0)     | 0<br>(0 - 0)      | 8<br>(4 - 10)      | 40<br>(23 - 52)      | 55<br>(29 - 72)          |
| Neurological disorders                              | 3,056<br>(2,525 - 3,628) | 3<br>(2 - 5)     | 3<br>(2 - 4)      | 76<br>(63 - 101)   | 301<br>(250 - 358)   | 2,673<br>(2,143 - 3,240) |
| Alzheimer disease and other dementias               | 2,696<br>(2,167 - 3,255) | --               | --                | 1<br>(0 - 2)       | 177<br>(133 - 223)   | 2,518<br>(1,988 - 3,075) |
| Parkinson disease                                   | 136<br>(84 - 164)        | --               | --                | 1<br>(1 - 1)       | 22<br>(16 - 28)      | 114<br>(67 - 138)        |
| Epilepsy                                            | 70<br>(52 - 92)          | 1<br>(0 - 1)     | 1<br>(1 - 2)      | 37<br>(28 - 52)    | 23<br>(16 - 30)      | 8<br>(5 - 11)            |
| Multiple sclerosis                                  | 59<br>(31 - 118)         | --               | --                | 16<br>(8 - 34)     | 33<br>(16 - 69)      | 10<br>(4 - 19)           |
| Other neurological disorders                        | 95<br>(65 - 110)         | 2<br>(1 - 4)     | 1<br>(1 - 2)      | 21<br>(15 - 26)    | 46<br>(31 - 56)      | 24<br>(14 - 30)          |
| Mental and substance use disorders                  | 341<br>(209 - 392)       | 0<br>(0 - 1)     | 0<br>(0 - 0)      | 154<br>(106 - 186) | 157<br>(77 - 191)    | 28<br>(16 - 36)          |
| Schizophrenia                                       | 1<br>(1 - 3)             | --               | --                | 0<br>(0 - 1)       | 1<br>(0 - 2)         | 0<br>(0 - 1)             |
| Alcohol use disorders                               | 237<br>(107 - 285)       | --               | --                | 85<br>(41 - 107)   | 133<br>(54 - 166)    | 19<br>(7 - 25)           |
| Drug use disorders                                  | 102<br>(84 - 120)        | 0<br>(0 - 1)     | --                | 69<br>(54 - 85)    | 24<br>(18 - 30)      | 9<br>(6 - 12)            |
| Opioid use disorders                                | 39<br>(32 - 47)          | 0<br>(0 - 0)     | --                | 27<br>(21 - 34)    | 9<br>(6 - 11)        | 4<br>(3 - 5)             |
| Cocaine use disorders                               | 5<br>(4 - 6)             | 0<br>(0 - 0)     | --                | 4<br>(3 - 5)       | 1<br>(1 - 1)         | 0<br>(0 - 1)             |
| Amphetamine use disorders                           | 4<br>(3 - 5)             | 0<br>(0 - 0)     | --                | 3<br>(2 - 4)       | 1<br>(1 - 1)         | 0<br>(0 - 0)             |
| Other drug use disorders                            | 53<br>(44 - 64)          | 0<br>(0 - 0)     | --                | 35<br>(27 - 44)    | 13<br>(10 - 17)      | 5<br>(3 - 6)             |
| Eating disorders                                    | 0<br>(0 - 0)             | --               | 0<br>(0 - 0)      | 0<br>(0 - 0)       | --                   | --                       |
| Anorexia nervosa                                    | 0<br>(0 - 0)             | --               | 0<br>(0 - 0)      | 0<br>(0 - 0)       | --                   | --                       |
| Diabetes, urogenital, blood, and endocrine diseases | 1,739<br>(1,609 - 1,955) | 6<br>(4 - 11)    | 2<br>(2 - 3)      | 84<br>(74 - 99)    | 557<br>(503 - 658)   | 1,091<br>(990 - 1,235)   |
| Diabetes mellitus                                   | 901<br>(818 - 996)       | 0<br>(0 - 0)     | 0<br>(0 - 0)      | 34<br>(29 - 39)    | 317<br>(279 - 362)   | 550<br>(483 - 629)       |
| Acute glomerulonephritis                            | 2<br>(1 - 4)             | 0<br>(0 - 0)     | 0<br>(0 - 0)      | 0<br>(0 - 1)       | 1<br>(0 - 2)         | 1<br>(0 - 2)             |
| Chronic kidney disease                              | 523<br>(455 - 675)       | 0<br>(0 - 0)     | 0<br>(0 - 0)      | 25<br>(20 - 37)    | 152<br>(128 - 220)   | 346<br>(289 - 426)       |
| Chronic kidney disease due to diabetes mellitus     | 64<br>(41 - 129)         | 0<br>(0 - 0)     | 0<br>(0 - 0)      | 3<br>(1 - 6)       | 23<br>(14 - 52)      | 39<br>(23 - 81)          |

Web Table 31- Czech Republic deaths with 95% UI by age, sex, and cause in 2013

| Cause                                               | Males, All Ages          | Males, 0-4 Years | Males, 5-14 Years | Males, 15-49 Years       | Males, 50-69 Years       | Males, 70-80 Years     |
|-----------------------------------------------------|--------------------------|------------------|-------------------|--------------------------|--------------------------|------------------------|
| Chronic kidney disease due to hypertension          | 180<br>(95 - 228)        | 0<br>(0 - 0)     | 0<br>(0 - 0)      | 9<br>(5 - 14)            | 50<br>(23 - 70)          | 121<br>(59 - 155)      |
| Chronic kidney disease due to glomerulonephritis    | 13<br>(7 - 28)           | 0<br>(0 - 0)     | 0<br>(0 - 0)      | 2<br>(1 - 5)             | 5<br>(3 - 12)            | 5<br>(2 - 13)          |
| Chronic kidney disease due to other causes          | 266<br>(200 - 405)       | 0<br>(0 - 0)     | 0<br>(0 - 0)      | 11<br>(7 - 17)           | 74<br>(51 - 126)         | 181<br>(131 - 263)     |
| Urinary diseases and male infertility               | 222<br>(184 - 326)       | 0<br>(0 - 0)     | 0<br>(0 - 0)      | 8<br>(6 - 12)            | 55<br>(44 - 88)          | 159<br>(127 - 229)     |
| Interstitial nephritis and urinary tract infections | 196<br>(161 - 289)       | 0<br>(0 - 0)     | 0<br>(0 - 0)      | 6<br>(5 - 10)            | 47<br>(37 - 74)          | 142<br>(112 - 208)     |
| Urolithiasis                                        | 8<br>(5 - 19)            | --               | 0<br>(0 - 0)      | 0<br>(0 - 1)             | 2<br>(1 - 5)             | 6<br>(3 - 13)          |
| Other urinary diseases                              | 18<br>(10 - 27)          | 0<br>(0 - 0)     | 0<br>(0 - 0)      | 1<br>(1 - 2)             | 5<br>(3 - 8)             | 11<br>(5 - 18)         |
| Gynecological diseases                              | --                       | --               | --                | --                       | --                       | --                     |
| Uterine fibroids                                    | --                       | --               | --                | --                       | --                       | --                     |
| Polycystic ovarian syndrome                         | --                       | --               | --                | --                       | --                       | --                     |
| Endometriosis                                       | --                       | --               | --                | --                       | --                       | --                     |
| Genital prolapse                                    | --                       | --               | --                | --                       | --                       | --                     |
| Other gynecological diseases                        | --                       | --               | --                | --                       | --                       | --                     |
| Hemoglobinopathies and hemolytic anemias            | 13<br>(9 - 21)           | 0<br>(0 - 1)     | 0<br>(0 - 0)      | 4<br>(3 - 7)             | 3<br>(2 - 5)             | 6<br>(3 - 9)           |
| Thalassemias                                        | 1<br>(1 - 2)             | 0<br>(0 - 1)     | 0<br>(0 - 0)      | 1<br>(1 - 2)             | 0<br>(0 - 0)             | 0<br>(0 - 0)           |
| Sickle cell disorders                               | 1<br>(0 - 1)             | 0<br>(0 - 0)     | 0<br>(0 - 0)      | 0<br>(0 - 1)             | 0<br>(0 - 0)             | 0<br>(0 - 0)           |
| G6PD deficiency                                     | 0<br>(0 - 1)             | 0<br>(0 - 0)     | 0<br>(0 - 0)      | 0<br>(0 - 0)             | 0<br>(0 - 0)             | 0<br>(0 - 0)           |
| Other hemoglobinopathies and hemolytic anemias      | 11<br>(7 - 18)           | 0<br>(0 - 0)     | 0<br>(0 - 0)      | 3<br>(2 - 4)             | 3<br>(2 - 5)             | 5<br>(3 - 9)           |
| Endocrine, metabolic, blood, and immune disorders   | 79<br>(42 - 95)          | 5<br>(3 - 9)     | 2<br>(1 - 3)      | 13<br>(7 - 16)           | 29<br>(15 - 38)          | 30<br>(14 - 40)        |
| Musculoskeletal disorders                           | 38<br>(17 - 48)          | --               | 0<br>(0 - 0)      | 4<br>(2 - 6)             | 16<br>(7 - 20)           | 18<br>(7 - 24)         |
| Rheumatoid arthritis                                | 3<br>(1 - 5)             | --               | 0<br>(0 - 0)      | 0<br>(0 - 1)             | 1<br>(1 - 3)             | 1<br>(0 - 2)           |
| Other musculoskeletal disorders                     | 35<br>(16 - 44)          | --               | 0<br>(0 - 0)      | 4<br>(2 - 5)             | 14<br>(7 - 19)           | 17<br>(7 - 22)         |
| Other non-communicable diseases                     | 118<br>(92 - 148)        | 56<br>(36 - 84)  | 4<br>(3 - 6)      | 14<br>(12 - 16)          | 15<br>(8 - 19)           | 29<br>(11 - 37)        |
| Congenital anomalies                                | 73<br>(53 - 101)         | 49<br>(31 - 75)  | 4<br>(3 - 6)      | 12<br>(10 - 14)          | 5<br>(4 - 5)             | 3<br>(3 - 4)           |
| Neural tube defects                                 | 1<br>(1 - 1)             | 0<br>(0 - 1)     | 0<br>(0 - 0)      | 0<br>(0 - 0)             | 0<br>(0 - 0)             | 0<br>(0 - 0)           |
| Congenital heart anomalies                          | 31<br>(22 - 42)          | 20<br>(12 - 31)  | 2<br>(1 - 3)      | 7<br>(5 - 8)             | 1<br>(1 - 2)             | 1<br>(0 - 1)           |
| Cleft lip and cleft palate                          | 0<br>(0 - 2)             | 0<br>(0 - 2)     | --                | --                       | --                       | --                     |
| Down syndrome                                       | 5<br>(3 - 9)             | 2<br>(1 - 5)     | 1<br>(0 - 1)      | 1<br>(1 - 2)             | 1<br>(0 - 1)             | 0<br>(0 - 0)           |
| Chromosomal unbalanced rearrangements               | 4<br>(2 - 7)             | 3<br>(2 - 6)     | 0<br>(0 - 0)      | 0<br>(0 - 0)             | 0<br>(0 - 0)             | 0<br>(0 - 0)           |
| Other congenital anomalies                          | 32<br>(22 - 47)          | 23<br>(14 - 37)  | 2<br>(1 - 3)      | 3<br>(2 - 4)             | 2<br>(1 - 3)             | 2<br>(2 - 3)           |
| Skin and subcutaneous diseases                      | 39<br>(12 - 49)          | 0<br>(0 - 0)     | 0<br>(0 - 0)      | 2<br>(1 - 3)             | 11<br>(4 - 14)           | 26<br>(7 - 34)         |
| Cellulitis                                          | 9<br>(3 - 16)            | 0<br>(0 - 0)     | 0<br>(0 - 0)      | 1<br>(0 - 1)             | 3<br>(1 - 5)             | 6<br>(1 - 11)          |
| Pyoderma                                            | 14<br>(6 - 22)           | 0<br>(0 - 0)     | 0<br>(0 - 0)      | 1<br>(0 - 1)             | 5<br>(2 - 7)             | 9<br>(4 - 15)          |
| Decubitus ulcer                                     | 14<br>(2 - 21)           | 0<br>(0 - 0)     | 0<br>(0 - 0)      | 1<br>(0 - 1)             | 3<br>(1 - 5)             | 11<br>(2 - 17)         |
| Other skin and subcutaneous diseases                | 1<br>(0 - 2)             | 0<br>(0 - 0)     | 0<br>(0 - 0)      | 0<br>(0 - 0)             | 0<br>(0 - 0)             | 0<br>(0 - 1)           |
| Sudden infant death syndrome                        | 7<br>(1 - 13)            | 7<br>(1 - 13)    | --                | --                       | --                       | --                     |
| Injuries                                            | 3,835<br>(3,574 - 4,433) | 20<br>(12 - 31)  | 26<br>(20 - 34)   | 1,462<br>(1,352 - 1,569) | 1,240<br>(1,098 - 1,374) | 1,087<br>(937 - 1,480) |
| Transport injuries                                  | 853<br>(785 - 916)       | 4<br>(2 - 6)     | 11<br>(8 - 14)    | 435<br>(392 - 479)       | 257<br>(229 - 286)       | 147<br>(126 - 170)     |
| Road injuries                                       | 738<br>(677 - 801)       | 3<br>(2 - 6)     | 9<br>(7 - 13)     | 370<br>(328 - 408)       | 224<br>(197 - 254)       | 132<br>(114 - 152)     |
| Pedestrian road injuries                            | 132<br>(64 - 219)        | 1<br>(0 - 2)     | 3<br>(1 - 5)      | 46<br>(22 - 81)          | 45<br>(22 - 77)          | 37<br>(18 - 62)        |



Web Table 31- Czech Republic deaths with 95% UI by age, sex, and cause in 2013

| Cause                                           | Males, All Ages          | Males, 0-4 Years | Males, 5-14 Years | Males, 15-49 Years | Males, 50-69 Years | Males, 70-80 Years   |
|-------------------------------------------------|--------------------------|------------------|-------------------|--------------------|--------------------|----------------------|
| Cyclist road injuries                           | 67<br>(20 - 106)         | 0<br>(0 - 0)     | 1<br>(0 - 2)      | 22<br>(6 - 36)     | 27<br>(7 - 43)     | 17<br>(5 - 28)       |
| Motorcyclist road injuries                      | 58<br>(16 - 90)          | 0<br>(0 - 0)     | 0<br>(0 - 1)      | 44<br>(12 - 69)    | 9<br>(2 - 15)      | 5<br>(1 - 9)         |
| Motor vehicle road injuries                     | 477<br>(387 - 608)       | 2<br>(1 - 4)     | 5<br>(3 - 8)      | 256<br>(211 - 322) | 142<br>(108 - 187) | 72<br>(50 - 100)     |
| Other road injuries                             | 4<br>(1 - 6)             | 0<br>(0 - 0)     | 0<br>(0 - 0)      | 1<br>(0 - 3)       | 1<br>(0 - 2)       | 1<br>(0 - 2)         |
| Other transport injuries                        | 115<br>(76 - 145)        | 0<br>(0 - 1)     | 1<br>(1 - 2)      | 65<br>(42 - 84)    | 33<br>(19 - 46)    | 15<br>(9 - 22)       |
| Unintentional injuries                          | 1,541<br>(1,360 - 2,016) | 15<br>(9 - 25)   | 12<br>(9 - 17)    | 343<br>(301 - 436) | 460<br>(397 - 543) | 712<br>(583 - 1,013) |
| Falls                                           | 856<br>(710 - 1,268)     | 1<br>(1 - 2)     | 1<br>(1 - 2)      | 89<br>(72 - 121)   | 208<br>(169 - 286) | 557<br>(432 - 867)   |
| Drowning                                        | 155<br>(112 - 253)       | 3<br>(2 - 7)     | 6<br>(3 - 11)     | 75<br>(53 - 127)   | 50<br>(34 - 80)    | 22<br>(15 - 34)      |
| Fire, heat, and hot substances                  | 61<br>(44 - 82)          | 1<br>(0 - 1)     | 0<br>(0 - 1)      | 14<br>(10 - 19)    | 17<br>(12 - 24)    | 29<br>(20 - 38)      |
| Poisonings                                      | 65<br>(51 - 98)          | 0<br>(0 - 1)     | 0<br>(0 - 1)      | 27<br>(20 - 40)    | 22<br>(15 - 31)    | 15<br>(11 - 27)      |
| Exposure to mechanical forces                   | 71<br>(63 - 85)          | 1<br>(1 - 2)     | 1<br>(1 - 2)      | 36<br>(30 - 44)    | 25<br>(20 - 30)    | 8<br>(7 - 11)        |
| Unintentional firearm injuries                  | 15<br>(12 - 18)          | 0<br>(0 - 0)     | 0<br>(0 - 0)      | 6<br>(4 - 8)       | 5<br>(4 - 7)       | 3<br>(2 - 5)         |
| Unintentional suffocation                       | 5<br>(4 - 11)            | 0<br>(0 - 1)     | 0<br>(0 - 1)      | 2<br>(1 - 5)       | 2<br>(1 - 4)       | 1<br>(0 - 1)         |
| Other exposure to mechanical forces             | 52<br>(43 - 62)          | 1<br>(0 - 1)     | 1<br>(1 - 1)      | 28<br>(23 - 35)    | 18<br>(13 - 22)    | 5<br>(4 - 6)         |
| Adverse effects of medical treatment            | 51<br>(25 - 71)          | 1<br>(0 - 1)     | 0<br>(0 - 0)      | 5<br>(3 - 8)       | 17<br>(8 - 24)     | 28<br>(12 - 41)      |
| Animal contact                                  | 9<br>(7 - 14)            | 0<br>(0 - 0)     | 0<br>(0 - 0)      | 3<br>(2 - 5)       | 4<br>(3 - 6)       | 2<br>(1 - 4)         |
| Venomous animal contact                         | 4<br>(3 - 7)             | 0<br>(0 - 0)     | 0<br>(0 - 0)      | 1<br>(1 - 3)       | 2<br>(1 - 3)       | 1<br>(0 - 2)         |
| Non-venomous animal contact                     | 5<br>(3 - 7)             | 0<br>(0 - 0)     | 0<br>(0 - 0)      | 1<br>(1 - 2)       | 2<br>(1 - 3)       | 1<br>(1 - 2)         |
| Foreign body                                    | 153<br>(76 - 213)        | 7<br>(3 - 13)    | 1<br>(0 - 2)      | 49<br>(26 - 74)    | 61<br>(27 - 86)    | 35<br>(16 - 50)      |
| Pulmonary aspiration and foreign body in airway | 152<br>(75 - 211)        | 7<br>(3 - 13)    | 1<br>(0 - 2)      | 48<br>(26 - 73)    | 61<br>(27 - 85)    | 35<br>(16 - 49)      |
| Foreign body in other body part                 | 1<br>(1 - 1)             | 0<br>(0 - 0)     | 0<br>(0 - 0)      | 0<br>(0 - 0)       | 0<br>(0 - 1)       | 0<br>(0 - 0)         |
| Other unintentional injuries                    | 120<br>(96 - 150)        | 0<br>(0 - 1)     | 1<br>(1 - 2)      | 46<br>(34 - 62)    | 57<br>(39 - 82)    | 15<br>(10 - 23)      |
| Self-harm and interpersonal violence            | 1,440<br>(1,092 - 1,684) | 1<br>(1 - 2)     | 4<br>(2 - 6)      | 684<br>(498 - 783) | 523<br>(350 - 626) | 228<br>(184 - 344)   |
| Self-harm                                       | 1,355<br>(1,003 - 1,584) | --               | 3<br>(2 - 5)      | 637<br>(450 - 732) | 498<br>(324 - 601) | 217<br>(173 - 330)   |
| Interpersonal violence                          | 85<br>(58 - 129)         | 1<br>(1 - 2)     | 1<br>(0 - 1)      | 47<br>(32 - 74)    | 26<br>(16 - 39)    | 11<br>(7 - 17)       |
| Assault by firearm                              | 24<br>(11 - 40)          | 0<br>(0 - 0)     | 0<br>(0 - 0)      | 16<br>(8 - 26)     | 6<br>(3 - 10)      | 2<br>(1 - 3)         |
| Assault by sharp object                         | 29<br>(17 - 52)          | 0<br>(0 - 0)     | 0<br>(0 - 0)      | 16<br>(9 - 31)     | 10<br>(5 - 17)     | 3<br>(2 - 5)         |
| Assault by other means                          | 32<br>(18 - 48)          | 1<br>(1 - 2)     | 0<br>(0 - 1)      | 15<br>(8 - 24)     | 10<br>(5 - 15)     | 6<br>(4 - 9)         |
| Forces of nature, war, and legal intervention   | 0<br>(0 - 0)             | 0<br>(0 - 0)     | --                | --                 | --                 | 0<br>(0 - 0)         |
| Exposure to forces of nature                    | 0<br>(0 - 0)             | 0<br>(0 - 0)     | --                | --                 | --                 | 0<br>(0 - 0)         |

Web Table 31- Czech Republic deaths with 95% UI by age, sex, and cause in 2013

| Cause                                                             | Females, All Ages           | Females, 0-4 Years | Females, 5-14 Years | Females, 15-49 Years     | Females, 50-69 Years      | Females, 70-80 Years        |
|-------------------------------------------------------------------|-----------------------------|--------------------|---------------------|--------------------------|---------------------------|-----------------------------|
| All causes                                                        | 56,973<br>(54,900 - 59,138) | 154<br>(106 - 223) | 41<br>(34 - 51)     | 1,582<br>(1,493 - 1,677) | 9,700<br>(9,261 - 10,167) | 45,497<br>(43,935 - 47,152) |
| Communicable, maternal, neonatal, and nutritional diseases        | 1,963<br>(1,527 - 2,394)    | 76<br>(52 - 113)   | 4<br>(3 - 5)        | 60<br>(47 - 69)          | 219<br>(153 - 263)        | 1,605<br>(1,225 - 2,012)    |
| HIV/AIDS and tuberculosis                                         | 26<br>(19 - 44)             | 0<br>(0 - 0)       | 0<br>(0 - 0)        | 4<br>(3 - 5)             | 5<br>(4 - 9)              | 17<br>(11 - 32)             |
| Tuberculosis                                                      | 22<br>(16 - 41)             | 0<br>(0 - 0)       | 0<br>(0 - 0)        | 1<br>(1 - 2)             | 4<br>(3 - 8)              | 17<br>(11 - 32)             |
| HIV/AIDS                                                          | 3<br>(2 - 5)                | 0<br>(0 - 0)       | 0<br>(0 - 0)        | 3<br>(2 - 4)             | 1<br>(0 - 1)              | 0<br>(0 - 0)                |
| HIV/AIDS resulting in mycobacterial infection                     | 0<br>(0 - 0)                | 0<br>(0 - 0)       | 0<br>(0 - 0)        | 0<br>(0 - 0)             | 0<br>(0 - 0)              | 0<br>(0 - 0)                |
| HIV/AIDS resulting in other diseases                              | 3<br>(2 - 5)                | 0<br>(0 - 0)       | 0<br>(0 - 0)        | 3<br>(2 - 4)             | 1<br>(0 - 1)              | 0<br>(0 - 0)                |
| Diarrhea, lower respiratory, and other common infectious diseases | 1,761<br>(1,346 - 2,186)    | 10<br>(6 - 15)     | 3<br>(2 - 4)        | 41<br>(30 - 49)          | 198<br>(134 - 241)        | 1,509<br>(1,131 - 1,932)    |
| Diarrheal diseases                                                | 86<br>(59 - 122)            | 1<br>(0 - 1)       | 0<br>(0 - 0)        | 1<br>(1 - 2)             | 8<br>(6 - 12)             | 76<br>(49 - 111)            |
| Intestinal infectious diseases                                    | 3<br>(1 - 7)                | 1<br>(0 - 2)       | 0<br>(0 - 1)        | 1<br>(0 - 2)             | 1<br>(0 - 2)              | 1<br>(0 - 2)                |
| Typhoid fever                                                     | 2<br>(1 - 5)                | 0<br>(0 - 1)       | 0<br>(0 - 1)        | 1<br>(0 - 1)             | 0<br>(0 - 1)              | 0<br>(0 - 1)                |
| Paratyphoid fever                                                 | 1<br>(0 - 2)                | 0<br>(0 - 0)       | 0<br>(0 - 0)        | 0<br>(0 - 0)             | 0<br>(0 - 0)              | 0<br>(0 - 0)                |
| Other intestinal infectious diseases                              | 0<br>(0 - 3)                | 0<br>(0 - 1)       | 0<br>(0 - 0)        | 0<br>(0 - 1)             | 0<br>(0 - 1)              | 0<br>(0 - 1)                |
| Lower respiratory infections                                      | 1,633<br>(1,235 - 2,048)    | 5<br>(3 - 9)       | 1<br>(1 - 2)        | 34<br>(24 - 41)          | 178<br>(115 - 220)        | 1,415<br>(1,045 - 1,829)    |
| Upper respiratory infections                                      | 1<br>(0 - 5)                | 0<br>(0 - 0)       | 0<br>(0 - 0)        | 0<br>(0 - 0)             | 0<br>(0 - 1)              | 1<br>(0 - 4)                |
| Otitis media                                                      | 1<br>(1 - 2)                | 0<br>(0 - 0)       | 0<br>(0 - 0)        | 0<br>(0 - 0)             | 0<br>(0 - 0)              | 0<br>(0 - 1)                |
| Meningitis                                                        | 23<br>(18 - 26)             | 2<br>(1 - 3)       | 0<br>(0 - 1)        | 3<br>(2 - 3)             | 7<br>(6 - 9)              | 10<br>(7 - 13)              |
| Pneumococcal meningitis                                           | 6<br>(4 - 9)                | 0<br>(0 - 1)       | 0<br>(0 - 0)        | 1<br>(0 - 1)             | 2<br>(1 - 3)              | 3<br>(2 - 5)                |
| H influenzae type B meningitis                                    | 2<br>(2 - 3)                | 1<br>(0 - 1)       | 0<br>(0 - 0)        | 0<br>(0 - 0)             | 1<br>(0 - 1)              | 1<br>(0 - 2)                |
| Meningococcal meningitis                                          | 5<br>(3 - 7)                | 1<br>(0 - 1)       | 0<br>(0 - 0)        | 1<br>(0 - 1)             | 2<br>(1 - 2)              | 2<br>(1 - 4)                |
| Other meningitis                                                  | 9<br>(6 - 11)               | 1<br>(0 - 1)       | 0<br>(0 - 0)        | 1<br>(1 - 2)             | 3<br>(2 - 4)              | 4<br>(2 - 6)                |
| Encephalitis                                                      | 8<br>(3 - 11)               | 1<br>(0 - 1)       | 0<br>(0 - 1)        | 2<br>(1 - 2)             | 3<br>(1 - 4)              | 3<br>(1 - 4)                |
| Diphtheria                                                        | 0<br>(0 - 0)                | 0<br>(0 - 0)       | 0<br>(0 - 0)        | 0<br>(0 - 0)             | 0<br>(0 - 0)              | --                          |
| Whooping cough                                                    | 0<br>(0 - 0)                | 0<br>(0 - 0)       | 0<br>(0 - 0)        | 0<br>(0 - 0)             | 0<br>(0 - 0)              | --                          |
| Tetanus                                                           | 1<br>(0 - 1)                | 0<br>(0 - 0)       | 0<br>(0 - 0)        | 0<br>(0 - 0)             | 0<br>(0 - 0)              | 0<br>(0 - 0)                |
| Measles                                                           | 0<br>(0 - 0)                | 0<br>(0 - 0)       | 0<br>(0 - 0)        | 0<br>(0 - 0)             | 0<br>(0 - 0)              | --                          |
| Varicella and herpes zoster                                       | 5<br>(1 - 18)               | 0<br>(0 - 1)       | 0<br>(0 - 0)        | 0<br>(0 - 1)             | 0<br>(0 - 2)              | 3<br>(0 - 17)               |
| Neglected tropical diseases and malaria                           | 3<br>(2 - 3)                | 0<br>(0 - 0)       | 0<br>(0 - 0)        | 1<br>(1 - 1)             | 1<br>(1 - 1)              | 1<br>(1 - 1)                |
| Cysticercosis                                                     | 0<br>(0 - 0)                | 0<br>(0 - 0)       | 0<br>(0 - 0)        | 0<br>(0 - 0)             | 0<br>(0 - 0)              | 0<br>(0 - 0)                |
| Cystic echinococcosis                                             | 1<br>(1 - 1)                | 0<br>(0 - 0)       | 0<br>(0 - 0)        | 0<br>(0 - 0)             | 0<br>(0 - 0)              | 0<br>(0 - 0)                |
| Dengue                                                            | 1<br>(0 - 1)                | 0<br>(0 - 0)       | 0<br>(0 - 0)        | 0<br>(0 - 0)             | 0<br>(0 - 0)              | 0<br>(0 - 0)                |
| Rabies                                                            | 1<br>(0 - 1)                | 0<br>(0 - 0)       | 0<br>(0 - 0)        | 0<br>(0 - 0)             | 0<br>(0 - 0)              | 0<br>(0 - 0)                |
| Other neglected tropical diseases                                 | 1<br>(0 - 2)                | 0<br>(0 - 0)       | 0<br>(0 - 0)        | 0<br>(0 - 0)             | 0<br>(0 - 0)              | 0<br>(0 - 1)                |
| Maternal disorders                                                | 6<br>(5 - 8)                | --                 | 0<br>(0 - 0)        | 6<br>(5 - 8)             | --                        | --                          |
| Maternal hemorrhage                                               | 1<br>(0 - 1)                | --                 | 0<br>(0 - 0)        | 1<br>(0 - 1)             | --                        | --                          |
| Maternal sepsis and other maternal infections                     | 0<br>(0 - 1)                | --                 | 0<br>(0 - 0)        | 0<br>(0 - 0)             | --                        | --                          |
| Maternal hypertensive disorders                                   | 1<br>(1 - 1)                | --                 | 0<br>(0 - 0)        | 1<br>(1 - 1)             | --                        | --                          |
| Maternal obstructed labor                                         | 1<br>(1 - 1)                | --                 | 0<br>(0 - 0)        | 1<br>(1 - 1)             | --                        | --                          |
| Maternal abortive outcome                                         | 1<br>(1 - 2)                | --                 | 0<br>(0 - 0)        | 1<br>(1 - 2)             | --                        | --                          |
| Indirect maternal deaths                                          | 0<br>(0 - 1)                | --                 | 0<br>(0 - 0)        | 0<br>(0 - 1)             | --                        | --                          |

Web Table 31- Czech Republic deaths with 95% UI by age, sex, and cause in 2013

| Cause                                                            | Females, All Ages           | Females, 0-4 Years | Females, 5-14 Years | Females, 15-49 Years     | Females, 50-69 Years     | Females, 70-80 Years        |
|------------------------------------------------------------------|-----------------------------|--------------------|---------------------|--------------------------|--------------------------|-----------------------------|
| Late maternal deaths                                             | 1<br>(0 - 1)                | --                 | 0<br>(0 - 0)        | 1<br>(0 - 1)             | --                       | --                          |
| Maternal deaths aggravated by HIV/AIDS                           | 0<br>(0 - 0)                | --                 | --                  | 0<br>(0 - 0)             | --                       | --                          |
| Other maternal disorders                                         | 1<br>(1 - 2)                | --                 | 0<br>(0 - 0)        | 1<br>(1 - 2)             | --                       | --                          |
| Neonatal disorders                                               | 65<br>(43 - 96)             | 65<br>(43 - 96)    | --                  | --                       | --                       | --                          |
| Neonatal preterm birth complications                             | 26<br>(15 - 46)             | 26<br>(15 - 46)    | --                  | --                       | --                       | --                          |
| Neonatal encephalopathy due to birth asphyxia and trauma         | 16<br>(8 - 26)              | 16<br>(8 - 26)     | --                  | --                       | --                       | --                          |
| Neonatal sepsis and other neonatal infections                    | 5<br>(2 - 11)               | 5<br>(2 - 11)      | --                  | --                       | --                       | --                          |
| Hemolytic disease and other neonatal jaundice                    | 0<br>(0 - 0)                | 0<br>(0 - 0)       | --                  | --                       | --                       | --                          |
| Other neonatal disorders                                         | 17<br>(8 - 26)              | 17<br>(8 - 26)     | --                  | --                       | --                       | --                          |
| Nutritional deficiencies                                         | 79<br>(36 - 100)            | 0<br>(0 - 0)       | 0<br>(0 - 0)        | 4<br>(3 - 5)             | 8<br>(5 - 10)            | 66<br>(29 - 87)             |
| Protein-energy malnutrition                                      | 31<br>(4 - 56)              | 0<br>(0 - 0)       | 0<br>(0 - 0)        | 1<br>(0 - 2)             | 3<br>(0 - 5)             | 27<br>(3 - 49)              |
| Iodine deficiency                                                | 1<br>(0 - 4)                | 0<br>(0 - 0)       | 0<br>(0 - 0)        | 0<br>(0 - 0)             | 0<br>(0 - 1)             | 1<br>(0 - 4)                |
| Iron-deficiency anemia                                           | 42<br>(19 - 67)             | 0<br>(0 - 0)       | 0<br>(0 - 0)        | 3<br>(2 - 4)             | 5<br>(2 - 7)             | 34<br>(15 - 57)             |
| Other nutritional deficiencies                                   | 5<br>(2 - 14)               | 0<br>(0 - 0)       | 0<br>(0 - 0)        | 0<br>(0 - 1)             | 1<br>(0 - 2)             | 4<br>(1 - 12)               |
| Other communicable, maternal, neonatal, and nutritional diseases | 24<br>(14 - 31)             | 2<br>(1 - 3)       | 0<br>(0 - 1)        | 3<br>(2 - 4)             | 6<br>(4 - 8)             | 12<br>(6 - 17)              |
| Sexually transmitted diseases excluding HIV                      | 3<br>(2 - 5)                | 1<br>(0 - 2)       | 0<br>(0 - 0)        | 1<br>(1 - 1)             | 1<br>(0 - 1)             | 1<br>(1 - 2)                |
| Syphilis                                                         | 2<br>(1 - 4)                | 1<br>(0 - 2)       | 0<br>(0 - 0)        | 0<br>(0 - 1)             | 0<br>(0 - 1)             | 1<br>(1 - 2)                |
| Chlamydial infection                                             | 0<br>(0 - 0)                | --                 | 0<br>(0 - 0)        | 0<br>(0 - 0)             | 0<br>(0 - 0)             | 0<br>(0 - 0)                |
| Gonococcal infection                                             | 0<br>(0 - 1)                | --                 | 0<br>(0 - 0)        | 0<br>(0 - 0)             | 0<br>(0 - 0)             | 0<br>(0 - 0)                |
| Other sexually transmitted diseases                              | 0<br>(0 - 0)                | --                 | 0<br>(0 - 0)        | 0<br>(0 - 0)             | 0<br>(0 - 0)             | 0<br>(0 - 0)                |
| Hepatitis                                                        | 3<br>(2 - 4)                | 0<br>(0 - 0)       | 0<br>(0 - 0)        | 0<br>(0 - 1)             | 1<br>(1 - 1)             | 1<br>(1 - 2)                |
| Acute hepatitis A                                                | 1<br>(0 - 1)                | 0<br>(0 - 0)       | 0<br>(0 - 0)        | 0<br>(0 - 0)             | 0<br>(0 - 0)             | 0<br>(0 - 0)                |
| Acute hepatitis B                                                | 2<br>(1 - 3)                | 0<br>(0 - 0)       | 0<br>(0 - 0)        | 0<br>(0 - 0)             | 1<br>(0 - 1)             | 1<br>(1 - 2)                |
| Acute hepatitis C                                                | 0<br>(0 - 1)                | --                 | 0<br>(0 - 0)        | 0<br>(0 - 0)             | 0<br>(0 - 0)             | 0<br>(0 - 0)                |
| Other infectious diseases                                        | 17<br>(9 - 24)              | 1<br>(0 - 2)       | 0<br>(0 - 0)        | 2<br>(1 - 3)             | 5<br>(3 - 7)             | 9<br>(4 - 14)               |
| Non-communicable diseases                                        | 52,890<br>(50,728 - 54,983) | 61<br>(41 - 89)    | 23<br>(19 - 29)     | 1,222<br>(1,145 - 1,302) | 9,119<br>(8,687 - 9,570) | 42,464<br>(40,729 - 44,028) |
| Neoplasms                                                        | 12,558<br>(11,029 - 13,501) | 6<br>(4 - 10)      | 11<br>(8 - 14)      | 687<br>(633 - 743)       | 4,581<br>(3,988 - 4,924) | 7,273<br>(6,271 - 7,908)    |
| Esophageal cancer                                                | 110<br>(95 - 127)           | --                 | --                  | 3<br>(3 - 4)             | 40<br>(33 - 48)          | 67<br>(55 - 82)             |
| Stomach cancer                                                   | 612<br>(441 - 824)          | --                 | --                  | 24<br>(18 - 33)          | 153<br>(113 - 200)       | 434<br>(301 - 609)          |
| Liver cancer                                                     | 388<br>(303 - 479)          | --                 | 0<br>(0 - 0)        | 12<br>(8 - 16)           | 120<br>(91 - 156)        | 256<br>(195 - 332)          |
| Liver cancer due to hepatitis B                                  | 61<br>(21 - 101)            | --                 | 0<br>(0 - 0)        | 3<br>(2 - 5)             | 26<br>(9 - 44)           | 32<br>(10 - 56)             |
| Liver cancer due to hepatitis C                                  | 182<br>(101 - 252)          | --                 | 0<br>(0 - 0)        | 5<br>(3 - 8)             | 54<br>(32 - 80)          | 123<br>(64 - 178)           |
| Liver cancer due to alcohol use                                  | 86<br>(48 - 129)            | --                 | --                  | 1<br>(1 - 2)             | 20<br>(10 - 30)          | 65<br>(35 - 105)            |
| Liver cancer due to other causes                                 | 59<br>(24 - 93)             | --                 | 0<br>(0 - 0)        | 3<br>(2 - 4)             | 20<br>(9 - 31)           | 36<br>(12 - 62)             |
| Larynx cancer                                                    | 22<br>(14 - 31)             | --                 | --                  | 2<br>(1 - 2)             | 11<br>(7 - 15)           | 9<br>(6 - 15)               |
| Tracheal, bronchus and lung cancer                               | 1,635<br>(1,115 - 1,888)    | --                 | --                  | 57<br>(46 - 71)          | 765<br>(493 - 892)       | 813<br>(486 - 983)          |
| Breast cancer                                                    | 1,796<br>(1,326 - 2,106)    | --                 | --                  | 143<br>(118 - 184)       | 713<br>(551 - 852)       | 940<br>(640 - 1,115)        |
| Cervical cancer                                                  | 494<br>(364 - 582)          | --                 | --                  | 83<br>(62 - 101)         | 201<br>(145 - 245)       | 210<br>(151 - 265)          |
| Uterine cancer                                                   | 394<br>(313 - 471)          | --                 | --                  | 12<br>(9 - 16)           | 146<br>(114 - 186)       | 235<br>(176 - 290)          |
| Prostate cancer                                                  | --                          | --                 | --                  | --                       | --                       | --                          |

Web Table 31- Czech Republic deaths with 95% UI by age, sex, and cause in 2013

| Cause                                         | Females, All Ages           | Females, 0-4 Years | Females, 5-14 Years | Females, 15-49 Years | Females, 50-69 Years     | Females, 70-80 Years        |
|-----------------------------------------------|-----------------------------|--------------------|---------------------|----------------------|--------------------------|-----------------------------|
| Colon and rectum cancer                       | 1,770<br>(1,542 - 1,999)    | --                 | --                  | 52<br>(45 - 60)      | 516<br>(445 - 572)       | 1,202<br>(999 - 1,424)      |
| Lip and oral cavity cancer                    | 85<br>(68 - 100)            | --                 | --                  | 7<br>(5 - 8)         | 30<br>(23 - 38)          | 48<br>(36 - 61)             |
| Nasopharynx cancer                            | 14<br>(7 - 27)              | --                 | 0<br>(0 - 0)        | 2<br>(1 - 4)         | 5<br>(2 - 10)            | 7<br>(3 - 14)               |
| Other pharynx cancer                          | 37<br>(30 - 47)             | --                 | --                  | 3<br>(2 - 5)         | 20<br>(15 - 27)          | 14<br>(11 - 19)             |
| Gallbladder and biliary tract cancer          | 607<br>(452 - 854)          | --                 | --                  | 13<br>(9 - 19)       | 194<br>(150 - 266)       | 400<br>(283 - 587)          |
| Pancreatic cancer                             | 1,011<br>(888 - 1,124)      | --                 | --                  | 25<br>(20 - 30)      | 361<br>(309 - 410)       | 625<br>(542 - 721)          |
| Malignant skin melanoma                       | 168<br>(103 - 209)          | --                 | --                  | 22<br>(15 - 29)      | 62<br>(40 - 80)          | 84<br>(49 - 107)            |
| Non-melanoma skin cancer                      | 83<br>(58 - 121)            | --                 | --                  | 1<br>(1 - 2)         | 9<br>(6 - 12)            | 73<br>(49 - 108)            |
| Ovarian cancer                                | 761<br>(643 - 857)          | --                 | --                  | 56<br>(46 - 67)      | 357<br>(297 - 411)       | 349<br>(274 - 421)          |
| Testicular cancer                             | --                          | --                 | --                  | --                   | --                       | --                          |
| Kidney cancer                                 | 407<br>(291 - 539)          | 0<br>(0 - 0)       | 0<br>(0 - 0)        | 12<br>(9 - 16)       | 153<br>(113 - 196)       | 242<br>(148 - 361)          |
| Bladder cancer                                | 200<br>(122 - 263)          | --                 | --                  | 3<br>(2 - 5)         | 51<br>(30 - 71)          | 145<br>(87 - 196)           |
| Brain and nervous system cancer               | 349<br>(232 - 406)          | 1<br>(1 - 2)       | 4<br>(2 - 5)        | 49<br>(38 - 60)      | 168<br>(119 - 200)       | 127<br>(66 - 164)           |
| Thyroid cancer                                | 70<br>(55 - 99)             | --                 | 0<br>(0 - 0)        | 2<br>(2 - 3)         | 20<br>(15 - 29)          | 47<br>(35 - 70)             |
| Mesothelioma                                  | 16<br>(11 - 22)             | --                 | --                  | 1<br>(1 - 2)         | 6<br>(4 - 8)             | 9<br>(6 - 14)               |
| Hodgkin lymphoma                              | 33<br>(25 - 54)             | 0<br>(0 - 0)       | 0<br>(0 - 0)        | 8<br>(6 - 13)        | 10<br>(7 - 16)           | 14<br>(10 - 26)             |
| Non-Hodgkin lymphoma                          | 293<br>(116 - 392)          | 0<br>(0 - 1)       | 1<br>(0 - 1)        | 18<br>(8 - 26)       | 94<br>(36 - 125)         | 180<br>(69 - 248)           |
| Multiple myeloma                              | 196<br>(123 - 303)          | --                 | --                  | 5<br>(3 - 8)         | 68<br>(40 - 109)         | 124<br>(73 - 194)           |
| Leukemia                                      | 387<br>(288 - 445)          | 1<br>(1 - 2)       | 3<br>(2 - 4)        | 28<br>(22 - 33)      | 115<br>(85 - 136)        | 240<br>(179 - 287)          |
| Other neoplasms                               | 622<br>(474 - 758)          | 3<br>(2 - 5)       | 3<br>(2 - 4)        | 44<br>(36 - 54)      | 194<br>(150 - 234)       | 377<br>(262 - 494)          |
| Cardiovascular diseases                       | 30,308<br>(28,449 - 32,683) | 2<br>(1 - 3)       | 2<br>(1 - 2)        | 220<br>(184 - 266)   | 2,930<br>(2,623 - 3,654) | 27,155<br>(25,514 - 28,903) |
| Rheumatic heart disease                       | 174<br>(105 - 218)          | 0<br>(0 - 0)       | 0<br>(0 - 0)        | 5<br>(3 - 7)         | 33<br>(24 - 60)          | 136<br>(72 - 174)           |
| Ischemic heart disease                        | 15,812<br>(12,476 - 17,545) | 0<br>(0 - 0)       | 0<br>(0 - 0)        | 82<br>(64 - 117)     | 1,496<br>(1,282 - 2,036) | 14,234<br>(10,905 - 15,859) |
| Cerebrovascular disease                       | 10,038<br>(8,622 - 13,775)  | 0<br>(0 - 0)       | 0<br>(0 - 1)        | 58<br>(44 - 72)      | 808<br>(668 - 1,199)     | 9,172<br>(7,833 - 12,596)   |
| Ischemic stroke                               | 8,533<br>(7,180 - 11,950)   | 0<br>(0 - 0)       | 0<br>(0 - 0)        | 11<br>(7 - 15)       | 421<br>(303 - 661)       | 8,101<br>(6,827 - 11,352)   |
| Hemorrhagic stroke                            | 1,505<br>(1,152 - 2,143)    | 0<br>(0 - 0)       | 0<br>(0 - 0)        | 47<br>(36 - 59)      | 388<br>(304 - 593)       | 1,070<br>(740 - 1,563)      |
| Hypertensive heart disease                    | 1,764<br>(1,266 - 2,858)    | 0<br>(0 - 0)       | 0<br>(0 - 0)        | 9<br>(7 - 13)        | 113<br>(79 - 162)        | 1,642<br>(1,144 - 2,706)    |
| Cardiomyopathy and myocarditis                | 139<br>(83 - 168)           | 1<br>(1 - 2)       | 1<br>(0 - 1)        | 13<br>(9 - 18)       | 41<br>(23 - 53)          | 84<br>(44 - 104)            |
| Atrial fibrillation and flutter               | 248<br>(178 - 330)          | --                 | --                  | 0<br>(0 - 0)         | 11<br>(8 - 15)           | 236<br>(167 - 317)          |
| Aortic aneurysm                               | 160<br>(84 - 232)           | --                 | --                  | 5<br>(3 - 8)         | 36<br>(19 - 55)          | 119<br>(61 - 175)           |
| Peripheral vascular disease                   | 127<br>(97 - 168)           | --                 | --                  | 0<br>(0 - 1)         | 12<br>(9 - 17)           | 114<br>(85 - 155)           |
| Endocarditis                                  | 71<br>(34 - 99)             | 0<br>(0 - 0)       | 0<br>(0 - 0)        | 4<br>(2 - 5)         | 18<br>(9 - 26)           | 50<br>(22 - 73)             |
| Other cardiovascular and circulatory diseases | 1,774<br>(1,142 - 2,201)    | 0<br>(0 - 0)       | 0<br>(0 - 0)        | 44<br>(28 - 58)      | 361<br>(249 - 457)       | 1,368<br>(810 - 1,762)      |
| Chronic respiratory diseases                  | 1,596<br>(889 - 1,872)      | 0<br>(0 - 1)       | 0<br>(0 - 1)        | 25<br>(19 - 30)      | 295<br>(165 - 342)       | 1,276<br>(708 - 1,528)      |
| Chronic obstructive pulmonary disease         | 1,302<br>(758 - 1,585)      | 0<br>(0 - 0)       | 0<br>(0 - 0)        | 12<br>(8 - 17)       | 226<br>(130 - 277)       | 1,063<br>(615 - 1,314)      |
| Pneumoconiosis                                | 7<br>(3 - 12)               | 0<br>(0 - 0)       | 0<br>(0 - 0)        | 0<br>(0 - 0)         | 1<br>(1 - 2)             | 5<br>(2 - 9)                |
| Silicosis                                     | 0<br>(0 - 1)                | 0<br>(0 - 0)       | 0<br>(0 - 0)        | 0<br>(0 - 0)         | 0<br>(0 - 0)             | 0<br>(0 - 0)                |
| Asbestosis                                    | 0<br>(0 - 1)                | 0<br>(0 - 0)       | 0<br>(0 - 0)        | 0<br>(0 - 0)         | 0<br>(0 - 0)             | 0<br>(0 - 0)                |
| Coal workers pneumoconiosis                   | 0<br>(0 - 0)                | 0<br>(0 - 0)       | 0<br>(0 - 0)        | 0<br>(0 - 0)         | 0<br>(0 - 0)             | 0<br>(0 - 0)                |
| Other pneumoconiosis                          | 6<br>(3 - 10)               | 0<br>(0 - 0)       | 0<br>(0 - 0)        | 0<br>(0 - 0)         | 1<br>(0 - 2)             | 5<br>(2 - 9)                |

Web Table 31- Czech Republic deaths with 95% UI by age, sex, and cause in 2013

| Cause                                               | Females, All Ages        | Females, 0-4 Years | Females, 5-14 Years | Females, 15-49 Years | Females, 50-69 Years | Females, 70-80 Years     |
|-----------------------------------------------------|--------------------------|--------------------|---------------------|----------------------|----------------------|--------------------------|
| Asthma                                              | 81<br>(36 - 124)         | 0<br>(0 - 0)       | 0<br>(0 - 0)        | 6<br>(4 - 8)         | 25<br>(12 - 38)      | 50<br>(19 - 82)          |
| Interstitial lung disease and pulmonary sarcoidosis | 172<br>(52 - 309)        | 0<br>(0 - 0)       | 0<br>(0 - 0)        | 5<br>(2 - 7)         | 39<br>(14 - 67)      | 128<br>(33 - 237)        |
| Other chronic respiratory diseases                  | 33<br>(17 - 55)          | 0<br>(0 - 0)       | 0<br>(0 - 0)        | 2<br>(1 - 3)         | 2<br>(1 - 4)         | 29<br>(14 - 50)          |
| Cirrhosis                                           | 707<br>(628 - 773)       | 0<br>(0 - 0)       | 0<br>(0 - 1)        | 107<br>(92 - 122)    | 379<br>(324 - 423)   | 221<br>(191 - 256)       |
| Cirrhosis due to hepatitis B                        | 261<br>(170 - 371)       | 0<br>(0 - 0)       | 0<br>(0 - 0)        | 38<br>(23 - 56)      | 140<br>(88 - 203)    | 83<br>(53 - 121)         |
| Cirrhosis due to hepatitis C                        | 177<br>(72 - 270)        | 0<br>(0 - 0)       | 0<br>(0 - 0)        | 24<br>(5 - 40)       | 99<br>(32 - 153)     | 53<br>(25 - 91)          |
| Cirrhosis due to alcohol use                        | 143<br>(79 - 221)        | --<br>(0 - 0)      | --<br>(0 - 0)       | 13<br>(6 - 25)       | 71<br>(38 - 118)     | 58<br>(29 - 90)          |
| Cirrhosis due to other causes                       | 126<br>(73 - 189)        | 0<br>(0 - 0)       | 0<br>(0 - 0)        | 31<br>(19 - 44)      | 68<br>(36 - 108)     | 27<br>(15 - 41)          |
| Digestive diseases                                  | 1,223<br>(973 - 1,389)   | 0<br>(0 - 1)       | 1<br>(0 - 1)        | 33<br>(27 - 38)      | 208<br>(163 - 239)   | 981<br>(779 - 1,134)     |
| Peptic ulcer disease                                | 228<br>(147 - 299)       | 0<br>(0 - 0)       | 0<br>(0 - 0)        | 5<br>(3 - 7)         | 40<br>(26 - 55)      | 183<br>(117 - 247)       |
| Gastritis and duodenitis                            | 11<br>(4 - 18)           | 0<br>(0 - 0)       | 0<br>(0 - 0)        | 0<br>(0 - 1)         | 2<br>(1 - 3)         | 9<br>(3 - 15)            |
| Appendicitis                                        | 16<br>(9 - 25)           | 0<br>(0 - 0)       | 0<br>(0 - 0)        | 1<br>(0 - 1)         | 3<br>(2 - 5)         | 12<br>(6 - 20)           |
| Paralytic ileus and intestinal obstruction          | 196<br>(105 - 327)       | 0<br>(0 - 0)       | 0<br>(0 - 0)        | 5<br>(3 - 9)         | 28<br>(15 - 48)      | 162<br>(85 - 273)        |
| Inguinal, femoral, and abdominal hernia             | 32<br>(16 - 57)          | 0<br>(0 - 0)       | 0<br>(0 - 0)        | 0<br>(0 - 1)         | 5<br>(3 - 10)        | 26<br>(12 - 49)          |
| Inflammatory bowel disease                          | 63<br>(26 - 90)          | 0<br>(0 - 0)       | 0<br>(0 - 0)        | 4<br>(2 - 5)         | 14<br>(6 - 21)       | 45<br>(17 - 67)          |
| Vascular intestinal disorders                       | 186<br>(92 - 313)        | 0<br>(0 - 0)       | 0<br>(0 - 0)        | 2<br>(1 - 4)         | 25<br>(12 - 44)      | 159<br>(77 - 269)        |
| Gallbladder and biliary diseases                    | 187<br>(122 - 241)       | 0<br>(0 - 0)       | 0<br>(0 - 0)        | 2<br>(1 - 3)         | 22<br>(15 - 29)      | 163<br>(106 - 213)       |
| Pancreatitis                                        | 151<br>(99 - 218)        | 0<br>(0 - 0)       | 0<br>(0 - 0)        | 10<br>(7 - 14)       | 43<br>(28 - 62)      | 98<br>(61 - 147)         |
| Other digestive diseases                            | 154<br>(108 - 194)       | 0<br>(0 - 0)       | 0<br>(0 - 0)        | 4<br>(3 - 5)         | 26<br>(18 - 33)      | 124<br>(86 - 163)        |
| Neurological disorders                              | 3,987<br>(3,076 - 5,138) | 3<br>(2 - 4)       | 2<br>(2 - 3)        | 44<br>(36 - 58)      | 256<br>(204 - 312)   | 3,681<br>(2,769 - 4,837) |
| Alzheimer disease and other dementias               | 3,700<br>(2,803 - 4,835) | --<br>(0 - 0)      | --<br>(0 - 0)       | 1<br>(0 - 1)         | 147<br>(103 - 194)   | 3,552<br>(2,642 - 4,690) |
| Parkinson disease                                   | 91<br>(44 - 115)         | --<br>(0 - 0)      | --<br>(0 - 0)       | 0<br>(0 - 1)         | 13<br>(7 - 18)       | 78<br>(37 - 102)         |
| Epilepsy                                            | 34<br>(24 - 42)          | 0<br>(0 - 1)       | 1<br>(1 - 2)        | 15<br>(11 - 20)      | 9<br>(6 - 12)        | 8<br>(4 - 12)            |
| Multiple sclerosis                                  | 81<br>(51 - 141)         | --<br>(0 - 0)      | --<br>(0 - 0)       | 18<br>(11 - 34)      | 45<br>(27 - 83)      | 17<br>(10 - 29)          |
| Other neurological disorders                        | 81<br>(70 - 91)          | 2<br>(1 - 4)       | 1<br>(1 - 2)        | 10<br>(8 - 12)       | 41<br>(34 - 48)      | 27<br>(22 - 32)          |
| Mental and substance use disorders                  | 90<br>(54 - 113)         | 0<br>(0 - 0)       | 0<br>(0 - 0)        | 36<br>(22 - 46)      | 40<br>(21 - 54)      | 14<br>(9 - 18)           |
| Schizophrenia                                       | 1<br>(1 - 3)             | --<br>(0 - 0)      | --<br>(0 - 0)       | 0<br>(0 - 1)         | 0<br>(0 - 1)         | 0<br>(0 - 1)             |
| Alcohol use disorders                               | 51<br>(15 - 73)          | --<br>(0 - 0)      | --<br>(0 - 0)       | 21<br>(6 - 30)       | 27<br>(7 - 40)       | 4<br>(1 - 6)             |
| Drug use disorders                                  | 37<br>(32 - 43)          | 0<br>(0 - 0)       | --<br>(0 - 0)       | 14<br>(11 - 18)      | 13<br>(10 - 16)      | 10<br>(7 - 13)           |
| Opioid use disorders                                | 13<br>(11 - 16)          | 0<br>(0 - 0)       | --<br>(0 - 0)       | 5<br>(4 - 6)         | 4<br>(3 - 6)         | 4<br>(2 - 5)             |
| Cocaine use disorders                               | 3<br>(2 - 3)             | 0<br>(0 - 0)       | --<br>(0 - 0)       | 1<br>(1 - 2)         | 1<br>(1 - 1)         | 1<br>(0 - 1)             |
| Amphetamine use disorders                           | 2<br>(2 - 3)             | 0<br>(0 - 0)       | --<br>(0 - 0)       | 1<br>(1 - 1)         | 1<br>(1 - 1)         | 1<br>(0 - 1)             |
| Other drug use disorders                            | 19<br>(16 - 22)          | 0<br>(0 - 0)       | --<br>(0 - 0)       | 7<br>(5 - 9)         | 7<br>(5 - 9)         | 5<br>(3 - 6)             |
| Eating disorders                                    | 1<br>(0 - 1)             | --<br>(0 - 0)      | 0<br>(0 - 0)        | 1<br>(0 - 1)         | --<br>(0 - 0)        | --<br>(0 - 0)            |
| Anorexia nervosa                                    | 1<br>(0 - 1)             | --<br>(0 - 0)      | 0<br>(0 - 0)        | 1<br>(0 - 1)         | --<br>(0 - 0)        | --<br>(0 - 0)            |
| Diabetes, urogenital, blood, and endocrine diseases | 2,198<br>(1,856 - 2,455) | 4<br>(2 - 6)       | 3<br>(2 - 4)        | 53<br>(45 - 60)      | 392<br>(338 - 455)   | 1,746<br>(1,426 - 1,996) |
| Diabetes mellitus                                   | 1,125<br>(918 - 1,315)   | 0<br>(0 - 0)       | 0<br>(0 - 0)        | 14<br>(11 - 17)      | 200<br>(160 - 236)   | 911<br>(687 - 1,093)     |
| Acute glomerulonephritis                            | 2<br>(2 - 4)             | 0<br>(0 - 0)       | 0<br>(0 - 0)        | 0<br>(0 - 1)         | 1<br>(0 - 1)         | 1<br>(1 - 2)             |
| Chronic kidney disease                              | 638<br>(509 - 758)       | 0<br>(0 - 0)       | 0<br>(0 - 1)        | 14<br>(11 - 18)      | 104<br>(84 - 138)    | 519<br>(382 - 630)       |
| Chronic kidney disease due to diabetes mellitus     | 81<br>(54 - 110)         | 0<br>(0 - 0)       | 0<br>(0 - 0)        | 1<br>(1 - 2)         | 18<br>(12 - 27)      | 61<br>(37 - 86)          |

Web Table 31- Czech Republic deaths with 95% UI by age, sex, and cause in 2013

| Cause                                               | Females, All Ages        | Females, 0-4 Years | Females, 5-14 Years | Females, 15-49 Years | Females, 50-69 Years | Females, 70-80 Years     |
|-----------------------------------------------------|--------------------------|--------------------|---------------------|----------------------|----------------------|--------------------------|
| Chronic kidney disease due to hypertension          | 215<br>(118 - 307)       | 0<br>(0 - 0)       | 0<br>(0 - 0)        | 5<br>(2 - 7)         | 30<br>(16 - 45)      | 180<br>(99 - 262)        |
| Chronic kidney disease due to glomerulonephritis    | 14<br>(7 - 27)           | 0<br>(0 - 0)       | 0<br>(0 - 0)        | 2<br>(1 - 3)         | 5<br>(2 - 9)         | 8<br>(3 - 16)            |
| Chronic kidney disease due to other causes          | 328<br>(210 - 461)       | 0<br>(0 - 0)       | 0<br>(0 - 0)        | 7<br>(3 - 10)        | 51<br>(31 - 82)      | 270<br>(165 - 391)       |
| Urinary diseases and male infertility               | 304<br>(235 - 426)       | 0<br>(0 - 0)       | 0<br>(0 - 0)        | 7<br>(5 - 11)        | 54<br>(41 - 91)      | 243<br>(175 - 346)       |
| Interstitial nephritis and urinary tract infections | 280<br>(214 - 389)       | 0<br>(0 - 0)       | 0<br>(0 - 0)        | 6<br>(4 - 9)         | 48<br>(36 - 80)      | 226<br>(159 - 316)       |
| Urolithiasis                                        | 14<br>(8 - 24)           | --                 | 0<br>(0 - 0)        | 0<br>(0 - 1)         | 4<br>(2 - 7)         | 10<br>(5 - 18)           |
| Other urinary diseases                              | 11<br>(6 - 21)           | 0<br>(0 - 0)       | 0<br>(0 - 0)        | 1<br>(0 - 1)         | 3<br>(2 - 5)         | 7<br>(3 - 16)            |
| Gynecological diseases                              | 1<br>(0 - 1)             | --                 | --                  | 0<br>(0 - 0)         | 0<br>(0 - 0)         | 0<br>(0 - 0)             |
| Uterine fibroids                                    | 0<br>(0 - 0)             | --                 | --                  | 0<br>(0 - 0)         | 0<br>(0 - 0)         | 0<br>(0 - 0)             |
| Polycystic ovarian syndrome                         | 0<br>(0 - 0)             | --                 | --                  | 0<br>(0 - 0)         | 0<br>(0 - 0)         | --                       |
| Endometriosis                                       | 0<br>(0 - 0)             | --                 | --                  | 0<br>(0 - 0)         | 0<br>(0 - 0)         | --                       |
| Genital prolapse                                    | 0<br>(0 - 0)             | --                 | --                  | 0<br>(0 - 0)         | 0<br>(0 - 0)         | 0<br>(0 - 0)             |
| Other gynecological diseases                        | 0<br>(0 - 0)             | --                 | --                  | 0<br>(0 - 0)         | 0<br>(0 - 0)         | 0<br>(0 - 0)             |
| Hemoglobinopathies and hemolytic anemias            | 18<br>(12 - 29)          | 1<br>(0 - 1)       | 0<br>(0 - 1)        | 5<br>(3 - 8)         | 4<br>(2 - 6)         | 9<br>(5 - 14)            |
| Thalassemias                                        | 2<br>(1 - 4)             | 0<br>(0 - 1)       | 0<br>(0 - 1)        | 1<br>(1 - 2)         | 0<br>(0 - 0)         | 0<br>(0 - 0)             |
| Sickle cell disorders                               | 1<br>(1 - 2)             | 0<br>(0 - 0)       | 0<br>(0 - 0)        | 1<br>(0 - 1)         | 0<br>(0 - 1)         | 0<br>(0 - 0)             |
| G6PD deficiency                                     | 0<br>(0 - 0)             | 0<br>(0 - 0)       | 0<br>(0 - 0)        | 0<br>(0 - 0)         | 0<br>(0 - 0)         | 0<br>(0 - 0)             |
| Other hemoglobinopathies and hemolytic anemias      | 15<br>(10 - 23)          | 0<br>(0 - 0)       | 0<br>(0 - 0)        | 3<br>(2 - 4)         | 3<br>(2 - 5)         | 9<br>(5 - 14)            |
| Endocrine, metabolic, blood, and immune disorders   | 109<br>(44 - 138)        | 3<br>(1 - 5)       | 2<br>(1 - 3)        | 12<br>(6 - 15)       | 29<br>(12 - 39)      | 63<br>(22 - 86)          |
| Musculoskeletal disorders                           | 74<br>(47 - 88)          | --                 | 0<br>(0 - 0)        | 6<br>(5 - 8)         | 25<br>(16 - 30)      | 43<br>(23 - 55)          |
| Rheumatoid arthritis                                | 8<br>(5 - 10)            | --                 | 0<br>(0 - 0)        | 0<br>(0 - 0)         | 2<br>(2 - 3)         | 5<br>(3 - 8)             |
| Other musculoskeletal disorders                     | 66<br>(41 - 79)          | --                 | 0<br>(0 - 0)        | 6<br>(4 - 7)         | 22<br>(14 - 27)      | 38<br>(21 - 49)          |
| Other non-communicable diseases                     | 148<br>(97 - 180)        | 45<br>(30 - 67)    | 4<br>(3 - 5)        | 11<br>(8 - 13)       | 13<br>(7 - 16)       | 75<br>(27 - 97)          |
| Congenital anomalies                                | 64<br>(48 - 86)          | 40<br>(26 - 61)    | 4<br>(3 - 5)        | 9<br>(7 - 11)        | 4<br>(3 - 5)         | 8<br>(5 - 11)            |
| Neural tube defects                                 | 1<br>(1 - 1)             | 0<br>(0 - 1)       | 0<br>(0 - 0)        | 0<br>(0 - 0)         | 0<br>(0 - 0)         | 0<br>(0 - 0)             |
| Congenital heart anomalies                          | 25<br>(18 - 34)          | 15<br>(9 - 23)     | 1<br>(1 - 2)        | 4<br>(3 - 6)         | 1<br>(1 - 1)         | 4<br>(2 - 5)             |
| Cleft lip and cleft palate                          | 0<br>(0 - 1)             | 0<br>(0 - 1)       | --                  | --                   | --                   | --                       |
| Down syndrome                                       | 5<br>(3 - 9)             | 2<br>(1 - 5)       | 0<br>(0 - 1)        | 2<br>(1 - 2)         | 1<br>(1 - 2)         | 0<br>(0 - 0)             |
| Chromosomal unbalanced rearrangements               | 4<br>(2 - 6)             | 3<br>(1 - 5)       | 0<br>(0 - 0)        | 0<br>(0 - 1)         | 0<br>(0 - 0)         | 0<br>(0 - 0)             |
| Other congenital anomalies                          | 29<br>(20 - 40)          | 20<br>(12 - 30)    | 2<br>(1 - 3)        | 2<br>(1 - 3)         | 1<br>(1 - 2)         | 4<br>(3 - 6)             |
| Skin and subcutaneous diseases                      | 79<br>(25 - 100)         | 0<br>(0 - 0)       | 0<br>(0 - 0)        | 2<br>(1 - 3)         | 9<br>(4 - 12)        | 67<br>(20 - 88)          |
| Cellulitis                                          | 10<br>(3 - 18)           | 0<br>(0 - 0)       | 0<br>(0 - 0)        | 1<br>(0 - 1)         | 2<br>(1 - 4)         | 8<br>(2 - 15)            |
| Pyoderma                                            | 23<br>(11 - 32)          | 0<br>(0 - 0)       | 0<br>(0 - 0)        | 1<br>(0 - 1)         | 4<br>(2 - 6)         | 18<br>(9 - 27)           |
| Decubitus ulcer                                     | 44<br>(10 - 61)          | 0<br>(0 - 0)       | 0<br>(0 - 0)        | 1<br>(0 - 1)         | 3<br>(1 - 4)         | 40<br>(9 - 58)           |
| Other skin and subcutaneous diseases                | 1<br>(1 - 3)             | 0<br>(0 - 0)       | 0<br>(0 - 0)        | 0<br>(0 - 0)         | 0<br>(0 - 1)         | 1<br>(0 - 2)             |
| Sudden infant death syndrome                        | 5<br>(1 - 11)            | 5<br>(1 - 11)      | --                  | --                   | --                   | --                       |
| Injuries                                            | 2,120<br>(1,737 - 3,177) | 16<br>(10 - 26)    | 15<br>(11 - 18)     | 300<br>(271 - 342)   | 362<br>(319 - 427)   | 1,428<br>(1,073 - 2,433) |
| Transport injuries                                  | 308<br>(240 - 370)       | 3<br>(2 - 5)       | 8<br>(6 - 10)       | 110<br>(87 - 128)    | 88<br>(60 - 107)     | 98<br>(77 - 132)         |
| Road injuries                                       | 277<br>(214 - 335)       | 3<br>(2 - 4)       | 7<br>(5 - 10)       | 99<br>(75 - 115)     | 79<br>(53 - 96)      | 89<br>(69 - 116)         |
| Pedestrian road injuries                            | 94<br>(52 - 121)         | 1<br>(0 - 2)       | 3<br>(1 - 4)        | 19<br>(10 - 27)      | 25<br>(12 - 35)      | 46<br>(25 - 63)          |

Web Table 31- Czech Republic deaths with 95% UI by age, sex, and cause in 2013

| Cause                                           | Females, All Ages        | Females, 0-4 Years | Females, 5-14 Years | Females, 15-49 Years | Females, 50-69 Years | Females, 70-80 Years   |
|-------------------------------------------------|--------------------------|--------------------|---------------------|----------------------|----------------------|------------------------|
| Cyclist road injuries                           | 22<br>(9 - 31)           | 0<br>(0 - 0)       | 1<br>(0 - 1)        | 6<br>(2 - 9)         | 9<br>(3 - 13)        | 6<br>(3 - 11)          |
| Motorcyclist road injuries                      | 6<br>(2 - 9)             | 0<br>(0 - 0)       | 0<br>(0 - 0)        | 4<br>(1 - 6)         | 1<br>(0 - 2)         | 1<br>(0 - 2)           |
| Motor vehicle road injuries                     | 153<br>(124 - 209)       | 2<br>(1 - 3)       | 4<br>(3 - 6)        | 70<br>(56 - 87)      | 43<br>(31 - 60)      | 35<br>(24 - 60)        |
| Other road injuries                             | 1<br>(0 - 3)             | 0<br>(0 - 0)       | 0<br>(0 - 0)        | 0<br>(0 - 1)         | 0<br>(0 - 0)         | 1<br>(0 - 2)           |
| Other transport injuries                        | 31<br>(20 - 48)          | 0<br>(0 - 1)       | 1<br>(0 - 1)        | 11<br>(7 - 18)       | 9<br>(5 - 15)        | 9<br>(5 - 16)          |
| Unintentional injuries                          | 1,467<br>(1,108 - 2,464) | 12<br>(7 - 20)     | 5<br>(4 - 7)        | 64<br>(53 - 81)      | 153<br>(126 - 195)   | 1,233<br>(890 - 2,183) |
| Falls                                           | 1,128<br>(772 - 2,131)   | 1<br>(0 - 1)       | 1<br>(0 - 1)        | 13<br>(10 - 19)      | 69<br>(53 - 109)     | 1,045<br>(700 - 2,002) |
| Drowning                                        | 50<br>(40 - 82)          | 2<br>(1 - 4)       | 2<br>(1 - 4)        | 12<br>(9 - 21)       | 16<br>(11 - 24)      | 18<br>(14 - 30)        |
| Fire, heat, and hot substances                  | 36<br>(26 - 51)          | 1<br>(0 - 1)       | 0<br>(0 - 0)        | 3<br>(2 - 4)         | 7<br>(5 - 9)         | 26<br>(17 - 37)        |
| Poisonings                                      | 28<br>(20 - 54)          | 0<br>(0 - 0)       | 0<br>(0 - 1)        | 5<br>(4 - 9)         | 6<br>(4 - 11)        | 16<br>(10 - 35)        |
| Exposure to mechanical forces                   | 15<br>(13 - 19)          | 1<br>(0 - 1)       | 1<br>(0 - 1)        | 4<br>(3 - 5)         | 4<br>(3 - 5)         | 6<br>(5 - 8)           |
| Unintentional firearm injuries                  | 3<br>(2 - 4)             | 0<br>(0 - 0)       | 0<br>(0 - 0)        | 1<br>(1 - 1)         | 1<br>(1 - 1)         | 1<br>(1 - 2)           |
| Unintentional suffocation                       | 2<br>(1 - 5)             | 0<br>(0 - 1)       | 0<br>(0 - 0)        | 0<br>(0 - 1)         | 0<br>(0 - 1)         | 1<br>(0 - 2)           |
| Other exposure to mechanical forces             | 10<br>(8 - 13)           | 0<br>(0 - 1)       | 0<br>(0 - 1)        | 3<br>(2 - 3)         | 3<br>(2 - 3)         | 4<br>(3 - 6)           |
| Adverse effects of medical treatment            | 89<br>(37 - 129)         | 0<br>(0 - 1)       | 0<br>(0 - 0)        | 4<br>(2 - 6)         | 17<br>(8 - 26)       | 67<br>(25 - 102)       |
| Animal contact                                  | 5<br>(2 - 10)            | 0<br>(0 - 0)       | 0<br>(0 - 0)        | 1<br>(0 - 2)         | 2<br>(1 - 5)         | 2<br>(1 - 3)           |
| Venomous animal contact                         | 2<br>(1 - 4)             | 0<br>(0 - 0)       | 0<br>(0 - 0)        | 1<br>(0 - 2)         | 1<br>(0 - 2)         | 0<br>(0 - 1)           |
| Non-venomous animal contact                     | 3<br>(1 - 6)             | 0<br>(0 - 0)       | 0<br>(0 - 0)        | 0<br>(0 - 1)         | 1<br>(0 - 2)         | 1<br>(0 - 3)           |
| Foreign body                                    | 96<br>(46 - 133)         | 7<br>(4 - 14)      | 1<br>(0 - 1)        | 16<br>(9 - 24)       | 27<br>(12 - 38)      | 44<br>(19 - 68)        |
| Pulmonary aspiration and foreign body in airway | 95<br>(45 - 132)         | 7<br>(4 - 14)      | 1<br>(0 - 1)        | 16<br>(8 - 24)       | 27<br>(12 - 38)      | 44<br>(19 - 67)        |
| Foreign body in other body part                 | 1<br>(1 - 1)             | 0<br>(0 - 0)       | 0<br>(0 - 0)        | 0<br>(0 - 0)         | 0<br>(0 - 0)         | 0<br>(0 - 1)           |
| Other unintentional injuries                    | 21<br>(15 - 31)          | 0<br>(0 - 0)       | 0<br>(0 - 0)        | 5<br>(3 - 8)         | 6<br>(4 - 10)        | 9<br>(5 - 16)          |
| Self-harm and interpersonal violence            | 346<br>(304 - 477)       | 1<br>(1 - 3)       | 2<br>(1 - 2)        | 126<br>(108 - 150)   | 120<br>(100 - 153)   | 97<br>(78 - 154)       |
| Self-harm                                       | 297<br>(259 - 429)       | --                 | 1<br>(0 - 1)        | 102<br>(87 - 127)    | 109<br>(88 - 141)    | 86<br>(68 - 145)       |
| Interpersonal violence                          | 49<br>(36 - 66)          | 1<br>(1 - 3)       | 1<br>(1 - 2)        | 23<br>(17 - 31)      | 12<br>(8 - 16)       | 11<br>(8 - 17)         |
| Assault by firearm                              | 7<br>(4 - 12)            | 0<br>(0 - 0)       | 0<br>(0 - 0)        | 4<br>(2 - 7)         | 2<br>(1 - 3)         | 1<br>(0 - 2)           |
| Assault by sharp object                         | 17<br>(12 - 27)          | 0<br>(0 - 1)       | 0<br>(0 - 1)        | 9<br>(6 - 15)        | 4<br>(3 - 6)         | 3<br>(2 - 5)           |
| Assault by other means                          | 24<br>(17 - 34)          | 1<br>(1 - 2)       | 1<br>(0 - 1)        | 9<br>(6 - 14)        | 6<br>(4 - 8)         | 7<br>(5 - 12)          |
| Forces of nature, war, and legal intervention   | 0<br>(0 - 0)             | 0<br>(0 - 0)       | --                  | --                   | --                   | 0<br>(0 - 0)           |
| Exposure to forces of nature                    | 0<br>(0 - 0)             | 0<br>(0 - 0)       | --                  | --                   | --                   | 0<br>(0 - 0)           |

**Web Table 31- Democratic Republic of the Congo deaths with 95% UI by age, sex, and cause in 2013**

| Cause                                                             | Both Sexes, All Ages           | Both Sexes, 0-4 Years          | Both Sexes, 5-14 Years      | Both Sexes, 15-49 Years        | Both Sexes, 50-69 Years        | Both Sexes, 70-80 Years      |
|-------------------------------------------------------------------|--------------------------------|--------------------------------|-----------------------------|--------------------------------|--------------------------------|------------------------------|
| All causes                                                        | 732,457<br>(644,593 - 829,983) | 340,416<br>(272,301 - 425,814) | 32,677<br>(25,571 - 40,857) | 142,927<br>(127,043 - 157,319) | 120,876<br>(102,540 - 140,510) | 95,562<br>(85,097 - 106,251) |
| Communicable, maternal, neonatal, and nutritional diseases        | 461,173<br>(384,469 - 546,891) | 282,878<br>(215,280 - 361,652) | 19,256<br>(13,952 - 25,132) | 79,320<br>(70,488 - 88,484)    | 46,250<br>(38,782 - 53,933)    | 33,458<br>(28,195 - 39,082)  |
| HIV/AIDS and tuberculosis                                         | 70,700<br>(60,958 - 82,231)    | 5,684<br>(4,358 - 7,628)       | 2,558<br>(2,121 - 3,103)    | 39,455<br>(32,371 - 48,769)    | 17,696<br>(14,547 - 21,448)    | 5,308<br>(4,161 - 6,612)     |
| Tuberculosis                                                      | 36,085<br>(28,514 - 45,093)    | 2,895<br>(1,786 - 4,789)       | 678<br>(414 - 1,057)        | 14,950<br>(11,387 - 19,236)    | 12,752<br>(9,542 - 16,365)     | 4,810<br>(3,646 - 6,182)     |
| HIV/AIDS                                                          | 34,615<br>(27,369 - 44,771)    | 2,789<br>(2,332 - 3,339)       | 1,880<br>(1,570 - 2,227)    | 24,504<br>(17,243 - 34,360)    | 4,944<br>(3,929 - 6,136)       | 498<br>(345 - 650)           |
| HIV/AIDS resulting in mycobacterial infection                     | 2,184<br>(1,625 - 2,936)       | 169<br>(129 - 218)             | 105<br>(80 - 135)           | 1,540<br>(1,058 - 2,212)       | 335<br>(245 - 444)             | 498<br>(23 - 50)             |
| HIV/AIDS resulting in other diseases                              | 32,431<br>(25,630 - 41,982)    | 2,620<br>(2,186 - 3,130)       | 1,775<br>(1,486 - 2,097)    | 22,964<br>(16,077 - 32,320)    | 4,609<br>(3,682 - 5,721)       | 463<br>(321 - 604)           |
| Diarrhea, lower respiratory, and other common infectious diseases | 205,846<br>(163,339 - 253,427) | 132,351<br>(93,964 - 176,745)  | 10,778<br>(6,931 - 14,821)  | 18,840<br>(14,342 - 23,424)    | 21,659<br>(16,441 - 28,306)    | 22,219<br>(17,768 - 27,294)  |
| Diarrheal diseases                                                | 91,833<br>(63,536 - 126,661)   | 57,183<br>(31,352 - 88,779)    | 4,833<br>(2,588 - 7,739)    | 9,292<br>(6,174 - 12,679)      | 10,713<br>(6,872 - 15,492)     | 9,811<br>(6,638 - 13,555)    |
| Intestinal infectious diseases                                    | 3,553<br>(1,793 - 6,165)       | 1,407<br>(656 - 2,619)         | 975<br>(444 - 1,774)        | 1,009<br>(503 - 1,745)         | 126<br>(66 - 222)              | 36<br>(20 - 59)              |
| Typhoid fever                                                     | 2,442<br>(1,149 - 4,404)       | 891<br>(363 - 1,731)           | 711<br>(319 - 1,330)        | 732<br>(345 - 1,338)           | 85<br>(39 - 160)               | 22<br>(11 - 40)              |
| Paratyphoid fever                                                 | 795<br>(367 - 1,468)           | 315<br>(120 - 618)             | 233<br>(97 - 466)           | 217<br>(99 - 394)              | 25<br>(10 - 50)                | 6<br>(3 - 13)                |
| Other intestinal infectious diseases                              | 317<br>(217 - 439)             | 201<br>(126 - 306)             | 31<br>(15 - 54)             | 60<br>(38 - 86)                | 17<br>(8 - 28)                 | 7<br>(2 - 16)                |
| Lower respiratory infections                                      | 87,211<br>(63,806 - 111,548)   | 58,309<br>(37,562 - 81,750)    | 2,609<br>(1,632 - 3,933)    | 5,242<br>(3,928 - 6,770)       | 9,273<br>(6,894 - 12,026)      | 11,779<br>(8,695 - 15,458)   |
| Upper respiratory infections                                      | 201<br>(92 - 426)              | 107<br>(16 - 320)              | 41<br>(1 - 33)              | 15<br>(14 - 83)                | 29<br>(7 - 71)                 | 15<br>(2 - 39)               |
| Otitis media                                                      | 96<br>(63 - 137)               | 59<br>(33 - 93)                | 15<br>(10 - 21)             | 5<br>(11 - 19)                 | 5<br>(3 - 6)                   | 2<br>(2 - 3)                 |
| Meningitis                                                        | 15,545<br>(10,329 - 21,934)    | 8,985<br>(4,595 - 14,669)      | 1,712<br>(989 - 2,789)      | 2,903<br>(1,985 - 3,949)       | 1,414<br>(917 - 1,990)         | 532<br>(338 - 780)           |
| Pneumococcal meningitis                                           | 5,055<br>(3,288 - 7,158)       | 2,459<br>(1,205 - 4,201)       | 715<br>(390 - 1,183)        | 1,148<br>(789 - 1,598)         | 541<br>(331 - 818)             | 192<br>(114 - 288)           |
| H influenzae type B meningitis                                    | 4,595<br>(2,726 - 7,081)       | 3,539<br>(1,781 - 5,849)       | 450<br>(248 - 742)          | 406<br>(280 - 584)             | 147<br>(94 - 224)              | 53<br>(29 - 85)              |
| Meningococcal meningitis                                          | 2,080<br>(1,374 - 3,109)       | 1,073<br>(523 - 1,966)         | 208<br>(107 - 373)          | 453<br>(296 - 677)             | 250<br>(137 - 417)             | 96<br>(54 - 153)             |
| Other meningitis                                                  | 3,814<br>(2,438 - 5,400)       | 1,914<br>(966 - 3,312)         | 339<br>(167 - 604)          | 895<br>(464 - 1,376)           | 475<br>(269 - 778)             | 191<br>(114 - 301)           |
| Encephalitis                                                      | 1,226<br>(758 - 1,881)         | 830<br>(398 - 1,470)           | 122<br>(59 - 221)           | 187<br>(118 - 260)             | 61<br>(39 - 89)                | 25<br>(13 - 37)              |
| Diphtheria                                                        | 125<br>(5 - 623)               | 106<br>(0 - 606)               | 14<br>(0 - 85)              | 5<br>(0 - 15)                  | 1<br>(0 - 6)                   | --                           |
| Whooping cough                                                    | 1,449<br>(1 - 7,429)           | 1,377<br>(1 - 7,049)           | 60<br>(0 - 291)             | 10<br>(0 - 51)                 | 1<br>(0 - 5)                   | --                           |
| Tetanus                                                           | 612<br>(361 - 1,007)           | 460<br>(215 - 819)             | 41<br>(11 - 133)            | 71<br>(22 - 206)               | 29<br>(7 - 83)                 | 10<br>(2 - 30)               |
| Measles                                                           | 3,934<br>(660 - 13,120)        | 3,499<br>(574 - 11,754)        | 381<br>(64 - 1,233)         | 53<br>(9 - 179)                | 1<br>(0 - 4)                   | --                           |
| Varicella and herpes zoster                                       | 61<br>(25 - 129)               | 29<br>(4 - 85)                 | 5<br>(0 - 18)               | 13<br>(3 - 27)                 | 5<br>(1 - 12)                  | 9<br>(1 - 29)                |
| Neglected tropical diseases and malaria                           | 50,547<br>(29,094 - 87,023)    | 36,098<br>(15,213 - 72,935)    | 3,463<br>(2,096 - 5,401)    | 7,003<br>(4,854 - 10,048)      | 2,743<br>(1,683 - 4,796)       | 1,241<br>(657 - 2,512)       |
| Malaria                                                           | 42,914<br>(21,336 - 79,936)    | 34,629<br>(13,710 - 71,452)    | 2,369<br>(1,179 - 4,273)    | 3,057<br>(1,825 - 5,607)       | 1,825<br>(897 - 3,870)         | 1,034<br>(468 - 2,313)       |
| Leishmaniasis                                                     | 1,137<br>(756 - 1,649)         | 403<br>(201 - 704)             | 331<br>(166 - 565)          | 350<br>(200 - 502)             | 42<br>(22 - 67)                | 11<br>(5 - 18)               |
| Visceral leishmaniasis                                            | 1,137<br>(756 - 1,649)         | 403<br>(201 - 704)             | 331<br>(166 - 565)          | 350<br>(200 - 502)             | 42<br>(22 - 67)                | 11<br>(5 - 18)               |
| African trypanosomiasis                                           | 4,946<br>(2,696 - 7,666)       | 335<br>(153 - 597)             | 566<br>(263 - 920)          | 3,220<br>(1,743 - 5,000)       | 696<br>(379 - 1,095)           | 129<br>(71 - 199)            |
| Schistosomiasis                                                   | 275<br>(206 - 359)             | 9<br>(4 - 16)                  | 13<br>(7 - 23)              | 118<br>(81 - 161)              | 101<br>(64 - 149)              | 35<br>(23 - 54)              |
| Cysticercosis                                                     | 37<br>(30 - 44)                | 4<br>(2 - 6)                   | 3<br>(2 - 4)                | 21<br>(17 - 26)                | 7<br>(6 - 9)                   | 1<br>(1 - 2)                 |
| Cystic echinococcosis                                             | 44<br>(35 - 54)                | 10<br>(6 - 16)                 | 9<br>(6 - 12)               | 17<br>(14 - 21)                | 6<br>(5 - 7)                   | 2<br>(2 - 2)                 |
| Dengue                                                            | 44<br>(25 - 69)                | 22<br>(7 - 41)                 | 10<br>(5 - 16)              | 10<br>(6 - 20)                 | 2<br>(1 - 5)                   | 0<br>(0 - 1)                 |
| Yellow fever                                                      | 75<br>(49 - 117)               | 8<br>(2 - 20)                  | 16<br>(5 - 40)              | 42<br>(22 - 74)                | 8<br>(3 - 17)                  | 2<br>(1 - 7)                 |
| Rabies                                                            | 162<br>(83 - 292)              | 53<br>(14 - 138)               | 48<br>(23 - 92)             | 48<br>(32 - 72)                | 11<br>(7 - 16)                 | 2<br>(1 - 4)                 |
| Intestinal nematode infections                                    | 330<br>(207 - 505)             | 277<br>(163 - 438)             | 36<br>(17 - 62)             | 11<br>(3 - 23)                 | 4<br>(0 - 14)                  | 2<br>(0 - 8)                 |
| Ascariasis                                                        | 330<br>(207 - 505)             | 277<br>(163 - 438)             | 36<br>(17 - 62)             | 11<br>(3 - 23)                 | 4<br>(0 - 14)                  | 2<br>(0 - 8)                 |



Web Table 31- Democratic Republic of the Congo deaths with 95% UI by age, sex, and cause in 2013

| Cause                                                            | Both Sexes, All Ages           | Both Sexes, 0-4 Years       | Both Sexes, 5-14 Years    | Both Sexes, 15-49 Years     | Both Sexes, 50-69 Years     | Both Sexes, 70-80 Years     |
|------------------------------------------------------------------|--------------------------------|-----------------------------|---------------------------|-----------------------------|-----------------------------|-----------------------------|
| Other neglected tropical diseases                                | 582<br>(183 - 1,163)           | 348<br>(64 - 820)           | 63<br>(19 - 123)          | 110<br>(50 - 190)           | 41<br>(20 - 74)             | 21<br>(11 - 36)             |
| Maternal disorders                                               | 10,125<br>(7,437 - 13,213)     | --                          | 35<br>(12 - 79)           | 10,090<br>(7,403 - 13,190)  | --                          | --                          |
| Maternal hemorrhage                                              | 1,482<br>(947 - 2,165)         | --                          | 3<br>(1 - 7)              | 1,479<br>(944 - 2,163)      | --                          | --                          |
| Maternal sepsis and other maternal infections                    | 930<br>(566 - 1,365)           | --                          | 4<br>(1 - 9)              | 926<br>(563 - 1,362)        | --                          | --                          |
| Maternal hypertensive disorders                                  | 1,077<br>(692 - 1,572)         | --                          | 5<br>(2 - 12)             | 1,072<br>(688 - 1,566)      | --                          | --                          |
| Maternal obstructed labor                                        | 563<br>(376 - 781)             | --                          | 2<br>(1 - 4)              | 561<br>(374 - 779)          | --                          | --                          |
| Maternal abortive outcome                                        | 1,773<br>(1,205 - 2,456)       | --                          | 5<br>(2 - 12)             | 1,768<br>(1,200 - 2,450)    | --                          | --                          |
| Indirect maternal deaths                                         | 804<br>(483 - 1,181)           | --                          | 2<br>(1 - 5)              | 801<br>(482 - 1,179)        | --                          | --                          |
| Late maternal deaths                                             | 1,571<br>(985 - 2,373)         | --                          | 8<br>(3 - 20)             | 1,563<br>(978 - 2,363)      | --                          | --                          |
| Maternal deaths aggravated by HIV/AIDS                           | 47<br>(25 - 77)                | --                          | --                        | 47<br>(25 - 77)             | --                          | --                          |
| Other maternal disorders                                         | 1,858<br>(1,217 - 2,641)       | --                          | 6<br>(2 - 13)             | 1,852<br>(1,212 - 2,634)    | --                          | --                          |
| Neonatal disorders                                               | 63,701<br>(49,624 - 80,553)    | 63,701<br>(49,624 - 80,553) | --                        | --                          | --                          | --                          |
| Neonatal preterm birth complications                             | 26,984<br>(15,922 - 41,969)    | 26,984<br>(15,922 - 41,969) | --                        | --                          | --                          | --                          |
| Neonatal encephalopathy due to birth asphyxia and trauma         | 16,564<br>(7,431 - 29,919)     | 16,564<br>(7,431 - 29,919)  | --                        | --                          | --                          | --                          |
| Neonatal sepsis and other neonatal infections                    | 9,836<br>(3,148 - 20,679)      | 9,836<br>(3,148 - 20,679)   | --                        | --                          | --                          | --                          |
| Hemolytic disease and other neonatal jaundice                    | 606<br>(179 - 1,771)           | 606<br>(179 - 1,771)        | --                        | --                          | --                          | --                          |
| Other neonatal disorders                                         | 9,710<br>(4,112 - 18,473)      | 9,710<br>(4,112 - 18,473)   | --                        | --                          | --                          | --                          |
| Nutritional deficiencies                                         | 49,722<br>(34,062 - 70,704)    | 37,037<br>(23,005 - 56,586) | 1,742<br>(1,022 - 2,763)  | 2,946<br>(2,182 - 4,099)    | 3,572<br>(2,518 - 5,038)    | 4,424<br>(3,283 - 5,780)    |
| Protein-energy malnutrition                                      | 40,181<br>(26,047 - 59,078)    | 32,916<br>(19,973 - 50,471) | 1,328<br>(740 - 2,167)    | 1,112<br>(508 - 1,866)      | 2,106<br>(1,180 - 3,261)    | 2,719<br>(1,595 - 3,819)    |
| Iodine deficiency                                                | 36<br>(4 - 152)                | 22<br>(0 - 139)             | 5<br>(0 - 13)             | 2<br>(0 - 19)               | 4<br>(0 - 18)               | 2<br>(0 - 12)               |
| Iron-deficiency anemia                                           | 9,153<br>(4,954 - 16,663)      | 3,905<br>(1,163 - 9,740)    | 392<br>(173 - 803)        | 1,773<br>(1,194 - 2,599)    | 1,420<br>(748 - 2,320)      | 1,663<br>(860 - 2,737)      |
| Other nutritional deficiencies                                   | 352<br>(173 - 791)             | 193<br>(53 - 524)           | 20<br>(9 - 47)            | 57<br>(26 - 132)            | 42<br>(20 - 96)             | 40<br>(17 - 82)             |
| Other communicable, maternal, neonatal, and nutritional diseases | 10,532<br>(6,718 - 16,293)     | 8,008<br>(4,648 - 13,514)   | 681<br>(386 - 1,082)      | 998<br>(668 - 1,632)        | 580<br>(331 - 1,107)        | 265<br>(133 - 557)          |
| Sexually transmitted diseases excluding HIV                      | 5,897<br>(2,990 - 10,361)      | 5,273<br>(2,577 - 9,282)    | 373<br>(168 - 702)        | 146<br>(68 - 238)           | 71<br>(32 - 161)            | 35<br>(15 - 71)             |
| Syphilis                                                         | 5,770<br>(2,872 - 10,165)      | 5,273<br>(2,577 - 9,282)    | 364<br>(162 - 691)        | 64<br>(31 - 102)            | 43<br>(21 - 92)             | 27<br>(12 - 54)             |
| Chlamydial infection                                             | 32<br>(12 - 54)                | --                          | 2<br>(1 - 4)              | 7<br>(7 - 37)               | 2<br>(2 - 19)               | 2<br>(0 - 4)                |
| Gonococcal infection                                             | 52<br>(28 - 82)                | --                          | 3<br>(1 - 7)              | 32<br>(15 - 52)             | 13<br>(6 - 28)              | 4<br>(2 - 9)                |
| Other sexually transmitted diseases                              | 43<br>(22 - 69)                | --                          | 3<br>(1 - 6)              | 29<br>(13 - 47)             | 9<br>(4 - 21)               | 2<br>(1 - 5)                |
| Hepatitis                                                        | 844<br>(478 - 2,287)           | 288<br>(146 - 530)          | 70<br>(34 - 159)          | 287<br>(159 - 865)          | 153<br>(72 - 598)           | 46<br>(19 - 201)            |
| Acute hepatitis A                                                | 132<br>(34 - 313)              | 101<br>(25 - 235)           | 10<br>(5 - 52)            | 1<br>(2 - 41)               | 0<br>(0 - 4)                | 0<br>(0 - 0)                |
| Acute hepatitis B                                                | 467<br>(227 - 1,332)           | 182<br>(73 - 359)           | 30<br>(11 - 73)           | 101<br>(42 - 327)           | 116<br>(51 - 454)           | 39<br>(17 - 177)            |
| Acute hepatitis C                                                | 25<br>(4 - 102)                | --                          | 3<br>(0 - 11)             | 11<br>(2 - 40)              | 9<br>(1 - 42)               | 2<br>(0 - 13)               |
| Acute hepatitis E                                                | 219<br>(106 - 707)             | 5<br>(1 - 15)               | 17<br>(7 - 43)            | 165<br>(81 - 514)           | 28<br>(7 - 126)             | 4<br>(1 - 18)               |
| Other infectious diseases                                        | 3,792<br>(1,942 - 7,432)       | 2,447<br>(734 - 6,096)      | 238<br>(108 - 436)        | 565<br>(340 - 926)          | 356<br>(171 - 670)          | 185<br>(76 - 401)           |
| Non-communicable diseases                                        | 222,683<br>(184,626 - 271,782) | 42,393<br>(23,195 - 77,428) | 8,445<br>(4,822 - 14,005) | 41,484<br>(33,688 - 51,372) | 70,143<br>(57,704 - 84,136) | 60,218<br>(52,806 - 68,660) |
| Neoplasms                                                        | 28,696<br>(24,204 - 33,696)    | 966<br>(488 - 2,187)        | 720<br>(450 - 1,004)      | 6,876<br>(5,614 - 8,266)    | 13,303<br>(10,791 - 16,195) | 6,830<br>(5,563 - 8,077)    |
| Esophageal cancer                                                | 1,462<br>(1,066 - 1,914)       | --                          | --                        | 209<br>(145 - 294)          | 826<br>(581 - 1,134)        | 427<br>(307 - 575)          |
| Stomach cancer                                                   | 3,090<br>(2,491 - 3,731)       | --                          | --                        | 664<br>(505 - 838)          | 1,569<br>(1,190 - 1,978)    | 856<br>(663 - 1,080)        |
| Liver cancer                                                     | 2,240<br>(1,696 - 2,996)       | --                          | 26<br>(12 - 54)           | 460<br>(309 - 694)          | 571<br>(411 - 838)          | 571<br>(411 - 783)          |
| Liver cancer due to hepatitis B                                  | 785<br>(526 - 1,126)           | --                          | 10<br>(4 - 21)            | 214<br>(137 - 332)          | 141<br>(254 - 633)          | 141<br>(77 - 232)           |

Web Table 31- Democratic Republic of the Congo deaths with 95% UI by age, sex, and cause in 2013

| Cause                                | Both Sexes, All Ages        | Both Sexes, 0-4 Years    | Both Sexes, 5-14 Years | Both Sexes, 15-49 Years     | Both Sexes, 50-69 Years     | Both Sexes, 70-80 Years     |
|--------------------------------------|-----------------------------|--------------------------|------------------------|-----------------------------|-----------------------------|-----------------------------|
| Liver cancer due to hepatitis C      | 700<br>(403 - 1,095)        | --                       | 2<br>(0 - 4)           | 95<br>(44 - 167)            | 376<br>(195 - 631)          | 227<br>(126 - 353)          |
| Liver cancer due to alcohol use      | 348<br>(210 - 568)          | --                       | --                     | 42<br>(20 - 75)             | 187<br>(108 - 324)          | 120<br>(68 - 200)           |
| Liver cancer due to other causes     | 406<br>(256 - 619)          | --                       | 15<br>(6 - 31)         | 110<br>(65 - 179)           | 199<br>(115 - 324)          | 83<br>(46 - 138)            |
| Larynx cancer                        | 277<br>(198 - 408)          | --                       | --                     | 51<br>(33 - 79)             | 161<br>(109 - 247)          | 65<br>(45 - 93)             |
| Tracheal, bronchus and lung cancer   | 2,116<br>(1,695 - 2,624)    | --                       | --                     | 287<br>(219 - 362)          | 1,267<br>(981 - 1,600)      | 562<br>(431 - 787)          |
| Breast cancer                        | 2,353<br>(1,536 - 3,206)    | --                       | --                     | 749<br>(532 - 1,004)        | 1,216<br>(745 - 1,738)      | 388<br>(184 - 553)          |
| Cervical cancer                      | 3,246<br>(2,315 - 4,493)    | --                       | --                     | 1,255<br>(873 - 1,827)      | 439<br>(1,036 - 2,221)      | 289<br>(289 - 647)          |
| Uterine cancer                       | 249<br>(121 - 410)          | --                       | --                     | 37<br>(19 - 56)             | 147<br>(69 - 248)           | 65<br>(28 - 127)            |
| Prostate cancer                      | 952<br>(463 - 1,606)        | --                       | --                     | 18<br>(10 - 30)             | 335<br>(171 - 573)          | 599<br>(276 - 1,054)        |
| Colon and rectum cancer              | 2,253<br>(1,864 - 2,701)    | --                       | --                     | 390<br>(308 - 481)          | 1,099<br>(863 - 1,364)      | 764<br>(623 - 932)          |
| Lip and oral cavity cancer           | 431<br>(308 - 569)          | --                       | --                     | 114<br>(75 - 168)           | 224<br>(154 - 304)          | 94<br>(67 - 130)            |
| Nasopharynx cancer                   | 144<br>(100 - 198)          | --                       | 6<br>(3 - 12)          | 60<br>(40 - 86)             | 62<br>(40 - 95)             | 16<br>(10 - 26)             |
| Other pharynx cancer                 | 216<br>(159 - 282)          | --                       | --                     | 48<br>(34 - 65)             | 132<br>(94 - 179)           | 36<br>(23 - 53)             |
| Gallbladder and biliary tract cancer | 563<br>(395 - 760)          | --                       | --                     | 64<br>(43 - 91)             | 305<br>(203 - 433)          | 193<br>(131 - 281)          |
| Pancreatic cancer                    | 792<br>(633 - 968)          | --                       | --                     | 106<br>(80 - 135)           | 430<br>(327 - 548)          | 256<br>(199 - 317)          |
| Malignant skin melanoma              | 156<br>(111 - 215)          | --                       | --                     | 54<br>(38 - 78)             | 67<br>(46 - 94)             | 34<br>(21 - 52)             |
| Non-melanoma skin cancer             | 184<br>(102 - 340)          | --                       | --                     | 42<br>(23 - 69)             | 68<br>(36 - 123)            | 75<br>(35 - 165)            |
| Ovarian cancer                       | 419<br>(300 - 590)          | --                       | --                     | 110<br>(77 - 152)           | 234<br>(154 - 344)          | 75<br>(42 - 122)            |
| Testicular cancer                    | 61<br>(38 - 88)             | --                       | --                     | 48<br>(29 - 73)             | 9<br>(5 - 14)               | 4<br>(2 - 6)                |
| Kidney cancer                        | 429<br>(326 - 558)          | 55<br>(14 - 118)         | 17<br>(8 - 30)         | 74<br>(54 - 100)            | 203<br>(135 - 294)          | 80<br>(48 - 128)            |
| Bladder cancer                       | 624<br>(481 - 788)          | --                       | --                     | 72<br>(51 - 96)             | 299<br>(220 - 401)          | 254<br>(189 - 325)          |
| Brain and nervous system cancer      | 534<br>(380 - 703)          | 52<br>(18 - 147)         | 67<br>(34 - 108)       | 192<br>(134 - 253)          | 171<br>(119 - 229)          | 53<br>(35 - 73)             |
| Thyroid cancer                       | 119<br>(83 - 173)           | --                       | 1<br>(1 - 2)           | 22<br>(15 - 30)             | 59<br>(40 - 87)             | 38<br>(23 - 60)             |
| Mesothelioma                         | 52<br>(39 - 68)             | --                       | --                     | 12<br>(8 - 17)              | 28<br>(19 - 40)             | 12<br>(7 - 19)              |
| Hodgkin lymphoma                     | 255<br>(113 - 508)          | 36<br>(6 - 93)           | 30<br>(8 - 73)         | 122<br>(53 - 249)           | 49<br>(23 - 105)            | 18<br>(9 - 33)              |
| Non-Hodgkin lymphoma                 | 1,302<br>(947 - 1,769)      | 117<br>(48 - 266)        | 100<br>(60 - 155)      | 412<br>(290 - 566)          | 447<br>(263 - 636)          | 226<br>(119 - 339)          |
| Multiple myeloma                     | 231<br>(159 - 299)          | --                       | --                     | 36<br>(24 - 51)             | 128<br>(84 - 173)           | 67<br>(43 - 92)             |
| Leukemia                             | 896<br>(692 - 1,106)        | 116<br>(58 - 220)        | 159<br>(100 - 235)     | 323<br>(230 - 412)          | 188<br>(112 - 244)          | 111<br>(51 - 142)           |
| Other neoplasms                      | 3,049<br>(2,297 - 4,539)    | 589<br>(262 - 1,623)     | 314<br>(168 - 549)     | 844<br>(619 - 1,259)        | 849<br>(604 - 1,128)        | 454<br>(292 - 635)          |
| Cardiovascular diseases              | 82,936<br>(70,374 - 97,283) | 2,903<br>(1,626 - 4,516) | 761<br>(488 - 1,109)   | 12,642<br>(10,044 - 15,479) | 32,861<br>(26,774 - 40,109) | 33,768<br>(28,970 - 39,249) |
| Rheumatic heart disease              | 2,918<br>(1,942 - 4,752)    | 139<br>(49 - 338)        | 134<br>(69 - 241)      | 1,115<br>(716 - 1,799)      | 993<br>(620 - 1,659)        | 537<br>(344 - 862)          |
| Ischemic heart disease               | 20,800<br>(16,369 - 25,837) | 107<br>(39 - 223)        | 37<br>(19 - 61)        | 2,828<br>(1,998 - 3,679)    | 8,985<br>(6,863 - 11,458)   | 8,843<br>(6,777 - 11,617)   |
| Cerebrovascular disease              | 39,287<br>(31,579 - 47,383) | 806<br>(388 - 1,429)     | 266<br>(156 - 423)     | 5,014<br>(3,658 - 6,387)    | 15,524<br>(12,048 - 19,593) | 17,678<br>(14,279 - 21,230) |
| Ischemic stroke                      | 15,499<br>(7,496 - 21,142)  | 132<br>(15 - 311)        | 33<br>(10 - 65)        | 711<br>(304 - 1,153)        | 4,824<br>(2,077 - 6,940)    | 9,798<br>(4,945 - 13,303)   |
| Hemorrhagic stroke                   | 23,788<br>(17,939 - 31,600) | 673<br>(345 - 1,204)     | 233<br>(137 - 365)     | 4,303<br>(3,161 - 5,485)    | 10,700<br>(8,047 - 14,021)  | 7,879<br>(5,306 - 12,142)   |
| Hypertensive heart disease           | 6,125<br>(4,175 - 9,661)    | 48<br>(15 - 96)          | 15<br>(8 - 26)         | 642<br>(394 - 983)          | 2,338<br>(1,532 - 3,642)    | 3,082<br>(1,977 - 5,359)    |
| Cardiomyopathy and myocarditis       | 3,387<br>(2,072 - 4,508)    | 886<br>(207 - 1,594)     | 129<br>(48 - 211)      | 854<br>(469 - 1,200)        | 937<br>(631 - 1,306)        | 581<br>(383 - 902)          |
| Atrial fibrillation and flutter      | 20<br>(13 - 31)             | --                       | --                     | 2<br>(1 - 2)                | 6<br>(3 - 9)                | 13<br>(7 - 22)              |
| Aortic aneurysm                      | 624<br>(414 - 846)          | --                       | --                     | 104<br>(59 - 147)           | 277<br>(175 - 388)          | 243<br>(165 - 342)          |
| Peripheral vascular disease          | 41<br>(26 - 57)             | --                       | --                     | 2<br>(1 - 4)                | 16<br>(9 - 24)              | 23<br>(15 - 32)             |

Web Table 31- Democratic Republic of the Congo deaths with 95% UI by age, sex, and cause in 2013

| Cause                                               | Both Sexes, All Ages        | Both Sexes, 0-4 Years    | Both Sexes, 5-14 Years | Both Sexes, 15-49 Years  | Both Sexes, 50-69 Years  | Both Sexes, 70-80 Years  |
|-----------------------------------------------------|-----------------------------|--------------------------|------------------------|--------------------------|--------------------------|--------------------------|
| Endocarditis                                        | 934<br>(564 - 1,414)        | 111<br>(40 - 271)        | 23<br>(11 - 45)        | 249<br>(138 - 378)       | 286<br>(168 - 440)       | 265<br>(143 - 467)       |
| Other cardiovascular and circulatory diseases       | 8,798<br>(5,063 - 14,499)   | 806<br>(296 - 1,563)     | 158<br>(65 - 278)      | 1,831<br>(971 - 2,939)   | 3,500<br>(1,961 - 5,906) | 2,503<br>(1,349 - 4,646) |
| Chronic respiratory diseases                        | 19,166<br>(15,246 - 24,470) | 2,842<br>(1,616 - 4,751) | 418<br>(272 - 593)     | 2,585<br>(1,977 - 3,363) | 6,307<br>(4,734 - 8,218) | 7,014<br>(5,565 - 9,346) |
| Chronic obstructive pulmonary disease               | 12,279<br>(9,609 - 16,382)  | 1,218<br>(683 - 2,112)   | 109<br>(63 - 167)      | 1,100<br>(747 - 1,588)   | 4,410<br>(3,268 - 6,052) | 5,441<br>(4,249 - 7,350) |
| Pneumoconiosis                                      | 442<br>(267 - 748)          | 29<br>(11 - 66)          | 11<br>(6 - 17)         | 101<br>(59 - 180)        | 181<br>(97 - 324)        | 122<br>(71 - 206)        |
| Silicosis                                           | 99<br>(50 - 199)            | 7<br>(2 - 17)            | 3<br>(1 - 5)           | 20<br>(10 - 42)          | 38<br>(16 - 82)          | 31<br>(15 - 67)          |
| Asbestosis                                          | 52<br>(31 - 84)             | 4<br>(1 - 9)             | 2<br>(1 - 3)           | 12<br>(7 - 20)           | 24<br>(13 - 42)          | 11<br>(6 - 19)           |
| Coal workers pneumoconiosis                         | 74<br>(36 - 130)            | 2<br>(1 - 7)             | 2<br>(1 - 3)           | 16<br>(8 - 29)           | 34<br>(14 - 64)          | 20<br>(8 - 37)           |
| Other pneumoconiosis                                | 218<br>(131 - 362)          | 16<br>(6 - 40)           | 5<br>(3 - 8)           | 53<br>(30 - 95)          | 85<br>(45 - 148)         | 59<br>(33 - 97)          |
| Asthma                                              | 4,677<br>(2,734 - 6,891)    | 956<br>(406 - 1,828)     | 235<br>(136 - 359)     | 1,146<br>(716 - 1,649)   | 1,341<br>(723 - 2,116)   | 999<br>(522 - 1,725)     |
| Interstitial lung disease and pulmonary sarcoidosis | 768<br>(323 - 1,325)        | 35<br>(4 - 122)          | 10<br>(3 - 25)         | 87<br>(35 - 189)         | 284<br>(116 - 507)       | 352<br>(115 - 622)       |
| Other chronic respiratory diseases                  | 1,000<br>(607 - 1,683)      | 604<br>(297 - 1,111)     | 53<br>(29 - 91)        | 151<br>(96 - 237)        | 91<br>(52 - 153)         | 101<br>(60 - 172)        |
| Cirrhosis                                           | 9,580<br>(7,587 - 11,655)   | 320<br>(149 - 586)       | 175<br>(109 - 255)     | 2,708<br>(1,983 - 3,401) | 4,616<br>(3,511 - 5,860) | 1,761<br>(1,370 - 2,232) |
| Cirrhosis due to hepatitis B                        | 2,072<br>(952 - 3,057)      | 13<br>(3 - 30)           | 22<br>(8 - 42)         | 561<br>(232 - 866)       | 1,048<br>(478 - 1,603)   | 427<br>(207 - 642)       |
| Cirrhosis due to hepatitis C                        | 3,129<br>(1,885 - 4,215)    | 34<br>(11 - 80)          | 43<br>(23 - 71)        | 918<br>(508 - 1,261)     | 1,581<br>(880 - 2,230)   | 553<br>(354 - 796)       |
| Cirrhosis due to alcohol use                        | 3,015<br>(2,260 - 4,017)    | --                       | --                     | 775<br>(528 - 1,099)     | 1,579<br>(1,139 - 2,204) | 662<br>(485 - 889)       |
| Cirrhosis due to other causes                       | 1,364<br>(964 - 1,866)      | 273<br>(128 - 492)       | 109<br>(63 - 165)      | 455<br>(312 - 649)       | 407<br>(230 - 622)       | 120<br>(71 - 184)        |
| Digestive diseases                                  | 14,559<br>(11,501 - 18,343) | 2,456<br>(1,316 - 4,193) | 676<br>(441 - 992)     | 3,971<br>(2,956 - 5,126) | 4,314<br>(3,226 - 5,729) | 3,142<br>(2,458 - 3,994) |
| Peptic ulcer disease                                | 4,035<br>(2,749 - 5,759)    | 85<br>(88 - 564)         | 85<br>(43 - 157)       | 1,175<br>(768 - 1,757)   | 1,528<br>(1,007 - 2,252) | 997<br>(641 - 1,463)     |
| Gastritis and duodenitis                            | 723<br>(344 - 1,450)        | 147<br>(42 - 321)        | 50<br>(23 - 94)        | 205<br>(96 - 452)        | 183<br>(71 - 471)        | 137<br>(40 - 378)        |
| Appendicitis                                        | 1,255<br>(818 - 1,854)      | 396<br>(163 - 805)       | 165<br>(93 - 262)      | 393<br>(243 - 589)       | 199<br>(110 - 333)       | 102<br>(55 - 179)        |
| Paralytic ileus and intestinal obstruction          | 3,448<br>(2,173 - 5,100)    | 354<br>(130 - 749)       | 152<br>(82 - 284)      | 814<br>(472 - 1,295)     | 1,074<br>(637 - 1,686)   | 1,054<br>(648 - 1,528)   |
| Inguinal, femoral, and abdominal hernia             | 286<br>(171 - 452)          | 54<br>(10 - 143)         | 15<br>(7 - 30)         | 60<br>(32 - 96)          | 81<br>(43 - 140)         | 76<br>(36 - 134)         |
| Inflammatory bowel disease                          | 1,344<br>(772 - 2,082)      | 602<br>(250 - 1,176)     | 69<br>(35 - 117)       | 322<br>(168 - 493)       | 215<br>(94 - 351)        | 136<br>(58 - 228)        |
| Vascular intestinal disorders                       | 109<br>(53 - 207)           | 13<br>(1 - 41)           | 4<br>(1 - 10)          | 23<br>(11 - 44)          | 36<br>(17 - 69)          | 33<br>(15 - 69)          |
| Gallbladder and biliary diseases                    | 828<br>(559 - 1,136)        | 67<br>(26 - 138)         | 22<br>(13 - 35)        | 202<br>(135 - 288)       | 303<br>(180 - 464)       | 234<br>(136 - 367)       |
| Pancreatitis                                        | 636<br>(232 - 1,137)        | 31<br>(7 - 77)           | 13<br>(5 - 26)         | 306<br>(108 - 558)       | 203<br>(67 - 386)        | 83<br>(26 - 164)         |
| Other digestive diseases                            | 1,895<br>(1,325 - 2,654)    | 541<br>(227 - 1,063)     | 100<br>(56 - 157)      | 472<br>(311 - 681)       | 491<br>(311 - 748)       | 290<br>(177 - 478)       |
| Neurological disorders                              | 6,421<br>(5,324 - 7,827)    | 1,028<br>(395 - 1,985)   | 446<br>(265 - 695)     | 1,675<br>(1,186 - 2,374) | 758<br>(580 - 1,004)     | 2,514<br>(2,036 - 3,043) |
| Alzheimer disease and other dementias               | 2,750<br>(2,229 - 3,335)    | --                       | --                     | 3<br>(1 - 6)             | 389<br>(280 - 520)       | 2,359<br>(1,891 - 2,886) |
| Parkinson disease                                   | 35<br>(18 - 53)             | --                       | --                     | 3<br>(2 - 4)             | 10<br>(5 - 16)           | 21<br>(9 - 35)           |
| Epilepsy                                            | 3,168<br>(2,267 - 4,393)    | 911<br>(294 - 1,843)     | 410<br>(235 - 654)     | 1,523<br>(1,055 - 2,196) | 243<br>(148 - 420)       | 81<br>(44 - 166)         |
| Multiple sclerosis                                  | 14<br>(3 - 24)              | --                       | --                     | 7<br>(2 - 14)            | 5<br>(1 - 10)            | 1<br>(0 - 3)             |
| Other neurological disorders                        | 454<br>(344 - 612)          | 117<br>(68 - 270)        | 37<br>(23 - 54)        | 139<br>(97 - 180)        | 110<br>(82 - 145)        | 51<br>(38 - 68)          |
| Mental and substance use disorders                  | 3,151<br>(2,083 - 4,799)    | 179<br>(55 - 446)        | 0<br>(0 - 0)           | 2,047<br>(1,293 - 3,187) | 801<br>(482 - 1,352)     | 124<br>(72 - 211)        |
| Schizophrenia                                       | 167<br>(53 - 357)           | --                       | --                     | 88<br>(29 - 193)         | 57<br>(17 - 127)         | 22<br>(6 - 47)           |
| Alcohol use disorders                               | 2,012<br>(1,112 - 3,466)    | --                       | --                     | 1,274<br>(659 - 2,219)   | 655<br>(372 - 1,162)     | 83<br>(46 - 151)         |
| Drug use disorders                                  | 972<br>(590 - 1,394)        | 179<br>(55 - 446)        | --                     | 685<br>(426 - 976)       | 89<br>(49 - 137)         | 20<br>(9 - 32)           |
| Opioid use disorders                                | 104<br>(61 - 153)           | 20<br>(6 - 50)           | --                     | 73<br>(44 - 106)         | 8<br>(5 - 13)            | 2<br>(1 - 3)             |
| Cocaine use disorders                               | 4<br>(2 - 6)                | 1<br>(0 - 2)             | --                     | 3<br>(2 - 4)             | 0<br>(0 - 0)             | 0<br>(0 - 0)             |

Web Table 31- Democratic Republic of the Congo deaths with 95% UI by age, sex, and cause in 2013

| Cause                                               | Both Sexes, All Ages        | Both Sexes, 0-4 Years      | Both Sexes, 5-14 Years   | Both Sexes, 15-49 Years   | Both Sexes, 50-69 Years  | Both Sexes, 70-80 Years  |
|-----------------------------------------------------|-----------------------------|----------------------------|--------------------------|---------------------------|--------------------------|--------------------------|
| Amphetamine use disorders                           | 3<br>(2 - 4)                | 1<br>(0 - 2)               | --                       | 2<br>(1 - 3)              | 0<br>(0 - 0)             | 0<br>(0 - 0)             |
| Other drug use disorders                            | 862<br>(525 - 1,235)        | 157<br>(48 - 388)          | --                       | 607<br>(375 - 865)        | 80<br>(44 - 123)         | 18<br>(8 - 28)           |
| Eating disorders                                    | 1<br>(0 - 1)                | --                         | 0<br>(0 - 0)             | 0<br>(0 - 1)              | --                       | --                       |
| Anorexia nervosa                                    | 1<br>(0 - 1)                | --                         | 0<br>(0 - 0)             | 0<br>(0 - 1)              | --                       | --                       |
| Diabetes, urogenital, blood, and endocrine diseases | 35,090<br>(20,541 - 57,043) | 11,518<br>(4,109 - 25,578) | 4,398<br>(1,173 - 9,687) | 7,953<br>(4,156 - 16,071) | 6,642<br>(5,197 - 8,637) | 4,578<br>(3,710 - 5,547) |
| Diabetes mellitus                                   | 7,469<br>(6,102 - 8,972)    | 111<br>(66 - 170)          | 47<br>(27 - 78)          | 1,012<br>(781 - 1,267)    | 3,680<br>(2,901 - 4,598) | 2,619<br>(2,090 - 3,182) |
| Acute glomerulonephritis                            | 182<br>(64 - 328)           | 59<br>(10 - 152)           | 29<br>(9 - 57)           | 55<br>(21 - 99)           | 26<br>(10 - 54)          | 13<br>(5 - 32)           |
| Chronic kidney disease                              | 3,763<br>(3,040 - 4,604)    | 546<br>(318 - 866)         | 200<br>(120 - 317)       | 1,066<br>(803 - 1,331)    | 1,019<br>(752 - 1,342)   | 932<br>(711 - 1,230)     |
| Chronic kidney disease due to diabetes mellitus     | 19<br>(10 - 33)             | 2<br>(0 - 2)               | 2<br>(0 - 3)             | 5<br>(2 - 7)              | 4<br>(4 - 14)            | 4<br>(2 - 9)             |
| Chronic kidney disease due to hypertension          | 1,354<br>(943 - 1,797)      | 63<br>(21 - 128)           | 21<br>(10 - 36)          | 281<br>(175 - 397)        | 507<br>(331 - 730)       | 483<br>(315 - 693)       |
| Chronic kidney disease due to glomerulonephritis    | 1,252<br>(888 - 1,655)      | 314<br>(176 - 495)         | 110<br>(65 - 170)        | 398<br>(290 - 521)        | 253<br>(152 - 379)       | 178<br>(93 - 272)        |
| Chronic kidney disease due to other causes          | 1,138<br>(743 - 1,587)      | 68<br>(74 - 337)           | 68<br>(31 - 128)         | 382<br>(226 - 571)        | 253<br>(139 - 405)       | 267<br>(141 - 444)       |
| Urinary diseases and male infertility               | 2,096<br>(1,546 - 2,821)    | 462<br>(227 - 872)         | 62<br>(38 - 94)          | 461<br>(329 - 620)        | 572<br>(392 - 840)       | 539<br>(365 - 850)       |
| Interstitial nephritis and urinary tract infections | 1,463<br>(950 - 2,054)      | 290<br>(116 - 605)         | 33<br>(15 - 53)          | 310<br>(194 - 434)        | 409<br>(262 - 614)       | 421<br>(268 - 679)       |
| Urolithiasis                                        | 82<br>(42 - 177)            | --                         | 6<br>(2 - 13)            | 28<br>(13 - 60)           | 30<br>(13 - 70)          | 18<br>(7 - 49)           |
| Other urinary diseases                              | 550<br>(384 - 836)          | 172<br>(69 - 364)          | 23<br>(12 - 39)          | 123<br>(81 - 192)         | 132<br>(73 - 234)        | 101<br>(47 - 195)        |
| Gynecological diseases                              | 89<br>(27 - 366)            | --                         | --                       | 65<br>(19 - 271)          | 16<br>(5 - 66)           | 8<br>(2 - 28)            |
| Uterine fibroids                                    | 16<br>(5 - 66)              | --                         | --                       | 9<br>(3 - 39)             | 5<br>(1 - 19)            | 2<br>(1 - 9)             |
| Polycystic ovarian syndrome                         | 5<br>(1 - 20)               | --                         | --                       | 5<br>(1 - 20)             | 0<br>(0 - 1)             | --                       |
| Endometriosis                                       | 11<br>(3 - 47)              | --                         | --                       | 11<br>(3 - 45)            | 0<br>(0 - 2)             | --                       |
| Genital prolapse                                    | 14<br>(4 - 56)              | --                         | --                       | 9<br>(3 - 38)             | 3<br>(1 - 11)            | 2<br>(1 - 7)             |
| Other gynecological diseases                        | 43<br>(13 - 176)            | --                         | --                       | 31<br>(9 - 130)           | 8<br>(2 - 33)            | 3<br>(1 - 12)            |
| Hemoglobinopathies and hemolytic anemias            | 18,077<br>(3,298 - 40,033)  | 8,876<br>(1,881 - 21,797)  | 3,829<br>(574 - 9,162)   | 4,504<br>(600 - 12,591)   | 745<br>(122 - 2,214)     | 122<br>(42 - 352)        |
| Thalassemias                                        | 3<br>(1 - 7)                | 3<br>(1 - 6)               | 0<br>(0 - 1)             | 0<br>(0 - 0)              | 0<br>(0 - 0)             | 0<br>(0 - 0)             |
| Sickle cell disorders                               | 17,718<br>(3,218 - 39,358)  | 8,714<br>(1,848 - 21,503)  | 3,807<br>(570 - 9,106)   | 4,460<br>(595 - 12,454)   | 718<br>(115 - 2,138)     | 19<br>(7 - 52)           |
| G6PD deficiency                                     | 62<br>(11 - 155)            | 34<br>(6 - 89)             | 9<br>(1 - 24)            | 13<br>(1 - 43)            | 4<br>(1 - 12)            | 4<br>(1 - 12)            |
| Other hemoglobinopathies and hemolytic anemias      | 294<br>(73 - 699)           | 126<br>(26 - 273)          | 13<br>(2 - 31)           | 31<br>(4 - 99)            | 24<br>(6 - 68)           | 100<br>(34 - 285)        |
| Endocrine, metabolic, blood, and immune disorders   | 3,413<br>(2,244 - 4,629)    | 1,464<br>(716 - 2,851)     | 231<br>(123 - 371)       | 790<br>(483 - 1,061)      | 583<br>(295 - 899)       | 345<br>(149 - 585)       |
| Musculoskeletal disorders                           | 471<br>(347 - 683)          | 56<br>(20 - 141)           | 203<br>(30 - 85)         | 138<br>(141 - 307)        | 74<br>(94 - 212)         | 74<br>(47 - 130)         |
| Rheumatoid arthritis                                | 154<br>(90 - 281)           | 14<br>(7 - 25)             | 43<br>(7 - 25)           | 43<br>(23 - 73)           | 39<br>(33 - 114)         | 39<br>(19 - 86)          |
| Other musculoskeletal disorders                     | 317<br>(230 - 464)          | --                         | 42<br>(20 - 65)          | 161<br>(113 - 250)        | 35<br>(53 - 124)         | 35<br>(22 - 60)          |
| Other non-communicable diseases                     | 22,613<br>(11,074 - 44,448) | 20,179<br>(8,996 - 41,451) | 794<br>(394 - 1,462)     | 824<br>(626 - 1,104)      | 403<br>(274 - 556)       | 413<br>(223 - 661)       |
| Congenital anomalies                                | 20,953<br>(9,526 - 42,835)  | 19,520<br>(8,526 - 40,711) | 728<br>(345 - 1,374)     | 559<br>(380 - 823)        | 102<br>(77 - 137)        | 44<br>(32 - 57)          |
| Neural tube defects                                 | 6,946<br>(2,300 - 18,419)   | 6,644<br>(2,188 - 17,988)  | 171<br>(45 - 417)        | 114<br>(33 - 260)         | 13<br>(3 - 37)           | 4<br>(1 - 11)            |
| Congenital heart anomalies                          | 8,298<br>(2,788 - 20,531)   | 7,602<br>(2,352 - 19,286)  | 364<br>(141 - 808)       | 272<br>(161 - 448)        | 41<br>(26 - 61)          | 20<br>(11 - 30)          |
| Cleft lip and cleft palate                          | 126<br>(16 - 399)           | 126<br>(16 - 399)          | --                       | --                        | --                       | --                       |
| Down syndrome                                       | 1,491<br>(251 - 4,459)      | 1,324<br>(182 - 4,155)     | 78<br>(18 - 182)         | 71<br>(28 - 131)          | 16<br>(9 - 27)           | 1<br>(1 - 2)             |
| Chromosomal unbalanced rearrangements               | 703<br>(148 - 2,243)        | 665<br>(132 - 2,173)       | 16<br>(4 - 46)           | 18<br>(7 - 36)            | 3<br>(1 - 4)             | 1<br>(1 - 2)             |
| Other congenital anomalies                          | 3,388<br>(874 - 11,232)     | 3,159<br>(757 - 10,792)    | 99<br>(31 - 301)         | 84<br>(43 - 195)          | 28<br>(16 - 48)          | 18<br>(10 - 27)          |
| Skin and subcutaneous diseases                      | 1,502<br>(1,095 - 1,910)    | 501<br>(208 - 874)         | 66<br>(39 - 98)          | 265<br>(191 - 350)        | 301<br>(182 - 449)       | 369<br>(185 - 616)       |

Web Table 31- Democratic Republic of the Congo deaths with 95% UI by age, sex, and cause in 2013

| Cause                                           | Both Sexes, All Ages        | Both Sexes, 0-4 Years      | Both Sexes, 5-14 Years   | Both Sexes, 15-49 Years     | Both Sexes, 50-69 Years  | Both Sexes, 70-80 Years  |
|-------------------------------------------------|-----------------------------|----------------------------|--------------------------|-----------------------------|--------------------------|--------------------------|
| Cellulitis                                      | 791<br>(331 - 1,351)        | 245<br>(87 - 472)          | 37<br>(15 - 68)          | 147<br>(61 - 252)           | 172<br>(64 - 322)        | 190<br>(57 - 396)        |
| Pyoderma                                        | 596<br>(257 - 1,095)        | 241<br>(61 - 549)          | 24<br>(8 - 51)           | 99<br>(40 - 181)            | 110<br>(47 - 226)        | 123<br>(55 - 259)        |
| Decubitus ulcer                                 | 89<br>(39 - 198)            | 6<br>(0 - 19)              | 3<br>(1 - 7)             | 12<br>(4 - 23)              | 15<br>(6 - 34)           | 52<br>(18 - 132)         |
| Other skin and subcutaneous diseases            | 26<br>(7 - 65)              | 9<br>(0 - 33)              | 2<br>(0 - 7)             | 7<br>(2 - 16)               | 4<br>(1 - 8)             | 4<br>(2 - 9)             |
| Sudden infant death syndrome                    | 159<br>(28 - 556)           | 159<br>(28 - 556)          | --                       | --                          | --                       | --                       |
| Injuries                                        | 48,601<br>(36,934 - 61,514) | 15,146<br>(7,685 - 24,244) | 4,976<br>(3,329 - 7,057) | 22,110<br>(17,185 - 27,037) | 4,483<br>(3,478 - 5,614) | 1,886<br>(1,431 - 2,468) |
| Transport injuries                              | 10,737<br>(8,610 - 13,190)  | 2,252<br>(1,234 - 3,737)   | 1,468<br>(949 - 2,137)   | 5,656<br>(4,244 - 6,997)    | 1,033<br>(792 - 1,319)   | 328<br>(248 - 414)       |
| Road injuries                                   | 9,762<br>(7,835 - 12,044)   | 1,947<br>(1,019 - 3,281)   | 1,333<br>(855 - 1,941)   | 5,234<br>(3,912 - 6,495)    | 942<br>(720 - 1,204)     | 306<br>(232 - 383)       |
| Pedestrian road injuries                        | 4,004<br>(2,993 - 5,392)    | 892<br>(457 - 1,559)       | 601<br>(365 - 914)       | 1,942<br>(1,350 - 2,654)    | 417<br>(299 - 554)       | 151<br>(107 - 198)       |
| Cyclist road injuries                           | 1,133<br>(725 - 1,645)      | 290<br>(117 - 592)         | 246<br>(137 - 396)       | 437<br>(279 - 628)          | 126<br>(81 - 185)        | 34<br>(21 - 49)          |
| Motorcyclist road injuries                      | 1,606<br>(1,092 - 2,234)    | 172<br>(83 - 325)          | 93<br>(51 - 162)         | 1,229<br>(779 - 1,757)      | 95<br>(60 - 143)         | 17<br>(10 - 25)          |
| Motor vehicle road injuries                     | 2,960<br>(2,243 - 3,908)    | 581<br>(295 - 1,055)       | 384<br>(221 - 596)       | 1,596<br>(1,141 - 2,129)    | 298<br>(215 - 403)       | 102<br>(69 - 135)        |
| Other road injuries                             | 59<br>(37 - 87)             | 12<br>(5 - 24)             | 9<br>(5 - 17)            | 29<br>(17 - 46)             | 6<br>(4 - 10)            | 2<br>(1 - 4)             |
| Other transport injuries                        | 974<br>(557 - 1,430)        | 304<br>(137 - 590)         | 135<br>(64 - 225)        | 422<br>(247 - 611)          | 90<br>(50 - 131)         | 22<br>(11 - 34)          |
| Unintentional injuries                          | 26,170<br>(17,134 - 36,149) | 12,451<br>(5,660 - 20,885) | 3,143<br>(1,934 - 4,661) | 7,245<br>(5,439 - 9,039)    | 2,093<br>(1,571 - 2,659) | 1,238<br>(877 - 1,754)   |
| Falls                                           | 2,910<br>(1,241 - 4,899)    | 741<br>(187 - 1,839)       | 209<br>(78 - 424)        | 996<br>(399 - 1,727)        | 489<br>(181 - 793)       | 476<br>(147 - 781)       |
| Drowning                                        | 7,931<br>(3,167 - 13,858)   | 4,216<br>(960 - 9,074)     | 1,422<br>(581 - 2,388)   | 1,925<br>(1,220 - 2,727)    | 287<br>(184 - 422)       | 81<br>(48 - 143)         |
| Fire, heat, and hot substances                  | 4,706<br>(1,920 - 8,105)    | 2,813<br>(620 - 5,678)     | 438<br>(182 - 817)       | 941<br>(579 - 1,475)        | 316<br>(204 - 583)       | 198<br>(126 - 447)       |
| Poisonings                                      | 1,651<br>(1,074 - 2,811)    | 775<br>(336 - 1,681)       | 135<br>(78 - 234)        | 582<br>(397 - 925)          | 122<br>(82 - 185)        | 38<br>(25 - 58)          |
| Exposure to mechanical forces                   | 3,444<br>(2,226 - 4,819)    | 1,180<br>(489 - 2,224)     | 452<br>(244 - 707)       | 1,513<br>(968 - 2,143)      | 250<br>(146 - 377)       | 49<br>(30 - 74)          |
| Unintentional firearm injuries                  | 1,171<br>(727 - 1,777)      | 257<br>(109 - 500)         | 145<br>(71 - 260)        | 680<br>(383 - 1,144)        | 74<br>(43 - 119)         | 15<br>(9 - 26)           |
| Unintentional suffocation                       | 323<br>(51 - 802)           | 223<br>(31 - 687)          | 28<br>(4 - 59)           | 56<br>(8 - 91)              | 12<br>(2 - 22)           | 4<br>(1 - 7)             |
| Other exposure to mechanical forces             | 1,950<br>(1,029 - 2,981)    | 700<br>(204 - 1,528)       | 278<br>(106 - 489)       | 777<br>(408 - 1,199)        | 164<br>(72 - 268)        | 30<br>(14 - 51)          |
| Adverse effects of medical treatment            | 2,072<br>(1,102 - 3,104)    | 866<br>(260 - 1,842)       | 104<br>(45 - 176)        | 455<br>(268 - 649)          | 368<br>(217 - 586)       | 277<br>(143 - 519)       |
| Animal contact                                  | 947<br>(399 - 1,609)        | 442<br>(124 - 960)         | 164<br>(63 - 294)        | 205<br>(97 - 315)           | 99<br>(47 - 179)         | 37<br>(17 - 76)          |
| Venomous animal contact                         | 615<br>(228 - 1,093)        | 294<br>(80 - 674)          | 110<br>(36 - 202)        | 131<br>(47 - 220)           | 62<br>(20 - 133)         | 19<br>(5 - 48)           |
| Non-venomous animal contact                     | 331<br>(133 - 610)          | 148<br>(24 - 374)          | 54<br>(18 - 111)         | 75<br>(35 - 118)            | 36<br>(18 - 62)          | 18<br>(8 - 33)           |
| Foreign body                                    | 1,246<br>(594 - 2,594)      | 964<br>(388 - 2,163)       | 60<br>(29 - 124)         | 120<br>(59 - 233)           | 56<br>(27 - 108)         | 46<br>(19 - 96)          |
| Pulmonary aspiration and foreign body in airway | 1,200<br>(550 - 2,558)      | 947<br>(372 - 2,144)       | 53<br>(23 - 118)         | 106<br>(47 - 220)           | 51<br>(22 - 101)         | 44<br>(18 - 94)          |
| Foreign body in other body part                 | 45<br>(24 - 73)             | 17<br>(7 - 40)             | 7<br>(4 - 11)            | 14<br>(7 - 21)              | 6<br>(2 - 9)             | 2<br>(1 - 4)             |
| Other unintentional injuries                    | 1,264<br>(825 - 1,779)      | 453<br>(188 - 774)         | 161<br>(87 - 257)        | 508<br>(354 - 712)          | 106<br>(73 - 152)        | 35<br>(23 - 59)          |
| Self-harm and interpersonal violence            | 11,695<br>(8,580 - 15,033)  | 443<br>(239 - 788)         | 364<br>(218 - 570)       | 9,209<br>(6,622 - 11,937)   | 1,358<br>(895 - 1,972)   | 320<br>(182 - 516)       |
| Self-harm                                       | 7,605<br>(4,923 - 9,961)    | --                         | 185<br>(80 - 346)        | 5,980<br>(3,844 - 8,055)    | 1,143<br>(691 - 1,671)   | 297<br>(163 - 491)       |
| Interpersonal violence                          | 4,090<br>(2,955 - 5,996)    | 443<br>(239 - 788)         | 180<br>(104 - 295)       | 3,230<br>(2,243 - 4,699)    | 214<br>(138 - 373)       | 23<br>(14 - 40)          |
| Assault by firearm                              | 1,646<br>(867 - 2,936)      | 68<br>(25 - 144)           | 45<br>(20 - 88)          | 1,446<br>(733 - 2,594)      | 82<br>(38 - 180)         | 5<br>(2 - 13)            |
| Assault by sharp object                         | 1,085<br>(482 - 1,945)      | 41<br>(9 - 94)             | 26<br>(8 - 50)           | 951<br>(424 - 1,728)        | 62<br>(28 - 133)         | 6<br>(2 - 12)            |
| Assault by other means                          | 1,359<br>(870 - 2,211)      | 334<br>(168 - 635)         | 109<br>(59 - 192)        | 832<br>(480 - 1,469)        | 71<br>(40 - 125)         | 12<br>(7 - 22)           |

Web Table 31- Democratic Republic of the Congo deaths with 95% UI by age, sex, and cause in 2013

| Cause                                                             | Males, All Ages                | Males, 0-4 Years               | Males, 5-14 Years           | Males, 15-49 Years          | Males, 50-69 Years          | Males, 70-80 Years          |
|-------------------------------------------------------------------|--------------------------------|--------------------------------|-----------------------------|-----------------------------|-----------------------------|-----------------------------|
| All causes                                                        | 386,270<br>(331,436 - 446,830) | 182,593<br>(143,361 - 233,768) | 16,761<br>(12,803 - 21,597) | 79,063<br>(66,677 - 90,418) | 65,450<br>(54,262 - 79,466) | 42,402<br>(37,413 - 48,711) |
| Communicable, maternal, neonatal, and nutritional diseases        | 241,604<br>(198,082 - 292,766) | 153,186<br>(114,718 - 199,243) | 9,878<br>(6,887 - 13,490)   | 38,570<br>(32,795 - 44,226) | 25,002<br>(20,318 - 29,932) | 14,967<br>(11,971 - 18,102) |
| HIV/AIDS and tuberculosis                                         | 41,063<br>(33,858 - 49,759)    | 3,125<br>(2,269 - 4,449)       | 1,351<br>(1,099 - 1,676)    | 22,317<br>(17,768 - 27,429) | 11,127<br>(8,341 - 14,610)  | 3,144<br>(2,239 - 4,342)    |
| Tuberculosis                                                      | 23,672<br>(17,122 - 31,677)    | 1,676<br>(873 - 2,967)         | 367<br>(201 - 614)          | 10,407<br>(7,183 - 14,145)  | 8,367<br>(5,763 - 11,668)   | 2,854<br>(1,930 - 4,022)    |
| HIV/AIDS                                                          | 17,392<br>(13,740 - 22,269)    | 1,449<br>(1,207 - 1,735)       | 984<br>(822 - 1,166)        | 11,910<br>(8,254 - 16,631)  | 2,759<br>(2,040 - 3,589)    | 290<br>(181 - 408)          |
| HIV/AIDS resulting in mycobacterial infection                     | 1,243<br>(922 - 1,696)         | 98<br>(74 - 125)               | 61<br>(47 - 79)             | 852<br>(570 - 1,259)        | 208<br>(145 - 289)          | 23<br>(14 - 34)             |
| HIV/AIDS resulting in other diseases                              | 16,149<br>(12,738 - 20,693)    | 1,351<br>(1,121 - 1,627)       | 923<br>(773 - 1,091)        | 11,057<br>(7,631 - 15,364)  | 2,551<br>(1,884 - 3,305)    | 267<br>(167 - 376)          |
| Diarrhea, lower respiratory, and other common infectious diseases | 105,748<br>(78,779 - 135,884)  | 69,952<br>(48,042 - 95,887)    | 5,586<br>(3,361 - 8,266)    | 10,395<br>(7,204 - 13,736)  | 10,499<br>(7,424 - 14,543)  | 9,315<br>(6,786 - 12,331)   |
| Diarrheal diseases                                                | 46,359<br>(27,808 - 70,209)    | 30,321<br>(13,996 - 53,018)    | 2,484<br>(1,115 - 4,363)    | 4,863<br>(2,876 - 7,456)    | 4,863<br>(2,732 - 7,989)    | 4,863<br>(2,732 - 7,989)    |
| Intestinal infectious diseases                                    | 1,796<br>(856 - 3,249)         | 675<br>(292 - 1,307)           | 477<br>(202 - 909)          | 566<br>(253 - 1,043)        | 62<br>(27 - 113)            | 16<br>(8 - 30)              |
| Typhoid fever                                                     | 1,204<br>(529 - 2,262)         | 409<br>(152 - 860)             | 341<br>(137 - 659)          | 404<br>(167 - 777)          | 41<br>(15 - 82)             | 10<br>(4 - 20)              |
| Paratyphoid fever                                                 | 405<br>(175 - 775)             | 148<br>(53 - 317)              | 118<br>(43 - 251)           | 124<br>(45 - 245)           | 12<br>(4 - 27)              | 3<br>(1 - 7)                |
| Other intestinal infectious diseases                              | 187<br>(122 - 270)             | 18<br>(66 - 185)               | 18<br>(8 - 34)              | 38<br>(21 - 60)             | 9<br>(3 - 19)               | 4<br>(1 - 10)               |
| Lower respiratory infections                                      | 44,856<br>(30,801 - 61,194)    | 30,459<br>(17,799 - 45,919)    | 1,330<br>(703 - 2,229)      | 3,057<br>(2,035 - 4,290)    | 4,786<br>(3,151 - 6,877)    | 5,224<br>(3,570 - 7,111)    |
| Upper respiratory infections                                      | 109<br>(34 - 280)              | 58<br>(3 - 227)                | 5<br>(0 - 22)               | 24<br>(6 - 63)              | 7<br>(1 - 46)               | 7<br>(0 - 22)               |
| Otitis media                                                      | 52<br>(26 - 85)                | 33<br>(14 - 60)                | 7<br>(4 - 13)               | 8<br>(5 - 12)               | 2<br>(1 - 4)                | 1<br>(1 - 2)                |
| Meningitis                                                        | 8,801<br>(5,158 - 13,757)      | 5,203<br>(2,165 - 9,955)       | 968<br>(457 - 1,822)        | 1,690<br>(1,016 - 2,529)    | 720<br>(420 - 1,105)        | 221<br>(123 - 362)          |
| Pneumococcal meningitis                                           | 2,855<br>(1,698 - 4,476)       | 1,429<br>(534 - 2,872)         | 408<br>(183 - 788)          | 665<br>(386 - 1,051)        | 272<br>(147 - 459)          | 81<br>(41 - 137)            |
| H influenzae type B meningitis                                    | 2,634<br>(1,255 - 4,740)       | 2,053<br>(793 - 4,064)         | 253<br>(100 - 506)          | 229<br>(131 - 368)          | 76<br>(37 - 143)            | 22<br>(10 - 40)             |
| Meningococcal meningitis                                          | 1,161<br>(637 - 1,899)         | 622<br>(222 - 1,282)           | 120<br>(47 - 260)           | 265<br>(111 - 452)          | 116<br>(53 - 210)           | 38<br>(17 - 70)             |
| Other meningitis                                                  | 2,152<br>(1,131 - 3,411)       | 1,098<br>(384 - 2,184)         | 188<br>(74 - 392)           | 530<br>(196 - 948)          | 255<br>(115 - 471)          | 80<br>(42 - 141)            |
| Encephalitis                                                      | 689<br>(334 - 1,242)           | 466<br>(149 - 1,015)           | 69<br>(28 - 133)            | 109<br>(65 - 160)           | 33<br>(19 - 53)             | 12<br>(6 - 19)              |
| Diphtheria                                                        | 69<br>(1 - 490)                | 58<br>(0 - 482)                | 7<br>(0 - 54)               | 3<br>(0 - 11)               | 1<br>(0 - 5)                | --                          |
| Whooping cough                                                    | 661<br>(1 - 3,413)             | 630<br>(1 - 3,261)             | 26<br>(0 - 120)             | 5<br>(0 - 27)               | 1<br>(0 - 3)                | --                          |
| Tetanus                                                           | 375<br>(166 - 727)             | 292<br>(105 - 594)             | 27<br>(6 - 98)              | 39<br>(10 - 139)            | 13<br>(2 - 50)              | 3<br>(1 - 15)               |
| Measles                                                           | 1,951<br>(317 - 6,553)         | 1,743<br>(279 - 5,859)         | 184<br>(29 - 644)           | 24<br>(4 - 82)              | 1<br>(0 - 3)                | --                          |
| Varicella and herpes zoster                                       | 31<br>(8 - 82)                 | 15<br>(0 - 68)                 | 3<br>(0 - 13)               | 7<br>(1 - 20)               | 2<br>(0 - 8)                | 4<br>(0 - 16)               |
| Neglected tropical diseases and malaria                           | 24,235<br>(13,437 - 42,736)    | 17,417<br>(6,740 - 35,770)     | 1,646<br>(916 - 2,940)      | 3,627<br>(2,337 - 5,597)    | 1,113<br>(659 - 1,936)      | 432<br>(209 - 913)          |
| Malaria                                                           | 20,087<br>(9,338 - 38,586)     | 16,594<br>(5,997 - 35,026)     | 1,030<br>(412 - 2,219)      | 1,445<br>(679 - 3,192)      | 678<br>(272 - 1,550)        | 340<br>(123 - 823)          |
| Leishmaniasis                                                     | 753<br>(453 - 1,183)           | 281<br>(131 - 525)             | 225<br>(94 - 427)           | 221<br>(110 - 357)          | 20<br>(8 - 34)              | 6<br>(2 - 12)               |
| Visceral leishmaniasis                                            | 753<br>(453 - 1,183)           | 281<br>(131 - 525)             | 225<br>(94 - 427)           | 221<br>(110 - 357)          | 20<br>(8 - 34)              | 6<br>(2 - 12)               |
| African trypanosomiasis                                           | 2,580<br>(1,369 - 4,011)       | 170<br>(71 - 330)              | 289<br>(126 - 484)          | 1,745<br>(892 - 2,706)      | 321<br>(169 - 509)          | 54<br>(30 - 85)             |
| Schistosomiasis                                                   | 156<br>(108 - 218)             | 5<br>(2 - 11)                  | 7<br>(3 - 14)               | 73<br>(44 - 108)            | 55<br>(30 - 89)             | 17<br>(9 - 29)              |
| Cysticercosis                                                     | 17<br>(13 - 22)                | 2<br>(1 - 3)                   | 1<br>(1 - 2)                | 1<br>(8 - 13)               | 3<br>(2 - 4)                | 1<br>(0 - 1)                |
| Cystic echinococcosis                                             | 20<br>(15 - 25)                | 4<br>(2 - 8)                   | 4<br>(2 - 5)                | 8<br>(6 - 10)               | 3<br>(2 - 3)                | 1<br>(1 - 1)                |
| Dengue                                                            | 29<br>(11 - 49)                | 15<br>(3 - 32)                 | 6<br>(2 - 10)               | 6<br>(3 - 11)               | 1<br>(0 - 2)                | 0<br>(0 - 1)                |
| Yellow fever                                                      | 53<br>(30 - 90)                | 11<br>(1 - 15)                 | 11<br>(3 - 33)              | 30<br>(14 - 61)             | 5<br>(1 - 14)               | 2<br>(0 - 6)                |
| Rabies                                                            | 85<br>(39 - 181)               | 30<br>(5 - 92)                 | 25<br>(10 - 55)             | 24<br>(15 - 42)             | 1<br>(3 - 8)                | 1<br>(0 - 1)                |
| Intestinal nematode infections                                    | 166<br>(91 - 276)              | 140<br>(72 - 246)              | 17<br>(6 - 35)              | 6<br>(1 - 17)               | 2<br>(0 - 9)                | 1<br>(0 - 5)                |
| Ascariasis                                                        | 166<br>(91 - 276)              | 140<br>(72 - 246)              | 17<br>(6 - 35)              | 6<br>(1 - 17)               | 2<br>(0 - 9)                | 1<br>(0 - 5)                |

Web Table 31- Democratic Republic of the Congo deaths with 95% UI by age, sex, and cause in 2013

| Cause                                                            | Males, All Ages               | Males, 0-4 Years            | Males, 5-14 Years        | Males, 15-49 Years          | Males, 50-69 Years          | Males, 70-80 Years          |
|------------------------------------------------------------------|-------------------------------|-----------------------------|--------------------------|-----------------------------|-----------------------------|-----------------------------|
| Other neglected tropical diseases                                | 289<br>(78 - 734)             | 170<br>(24 - 526)           | 31<br>(8 - 79)           | 58<br>(23 - 112)            | 21<br>(8 - 41)              | 10<br>(4 - 19)              |
| Maternal disorders                                               | --                            | --                          | --                       | --                          | --                          | --                          |
| Maternal hemorrhage                                              | --                            | --                          | --                       | --                          | --                          | --                          |
| Maternal sepsis and other maternal infections                    | --                            | --                          | --                       | --                          | --                          | --                          |
| Maternal hypertensive disorders                                  | --                            | --                          | --                       | --                          | --                          | --                          |
| Maternal obstructed labor                                        | --                            | --                          | --                       | --                          | --                          | --                          |
| Maternal abortive outcome                                        | --                            | --                          | --                       | --                          | --                          | --                          |
| Indirect maternal deaths                                         | --                            | --                          | --                       | --                          | --                          | --                          |
| Late maternal deaths                                             | --                            | --                          | --                       | --                          | --                          | --                          |
| Maternal deaths aggravated by HIV/AIDS                           | --                            | --                          | --                       | --                          | --                          | --                          |
| Other maternal disorders                                         | --                            | --                          | --                       | --                          | --                          | --                          |
| Neonatal disorders                                               | 37,555<br>(28,653 - 47,252)   | 37,555<br>(28,653 - 47,252) | --                       | --                          | --                          | --                          |
| Neonatal preterm birth complications                             | 15,540<br>(7,263 - 26,429)    | 15,540<br>(7,263 - 26,429)  | --                       | --                          | --                          | --                          |
| Neonatal encephalopathy due to birth asphyxia and trauma         | 9,570<br>(3,395 - 19,009)     | 9,570<br>(3,395 - 19,009)   | --                       | --                          | --                          | --                          |
| Neonatal sepsis and other neonatal infections                    | 6,115<br>(1,007 - 14,594)     | 6,115<br>(1,007 - 14,594)   | --                       | --                          | --                          | --                          |
| Hemolytic disease and other neonatal jaundice                    | 435<br>(96 - 1,424)           | 435<br>(96 - 1,424)         | --                       | --                          | --                          | --                          |
| Other neonatal disorders                                         | 5,895<br>(1,906 - 12,106)     | 5,895<br>(1,906 - 12,106)   | --                       | --                          | --                          | --                          |
| Nutritional deficiencies                                         | 27,502<br>(16,555 - 44,100)   | 20,989<br>(11,496 - 35,523) | 953<br>(445 - 1,760)     | 1,662<br>(1,016 - 2,791)    | 1,951<br>(1,172 - 3,303)    | 1,948<br>(1,192 - 3,022)    |
| Protein-energy malnutrition                                      | 23,907<br>(13,574 - 39,070)   | 19,382<br>(10,364 - 33,468) | 796<br>(360 - 1,470)     | 909<br>(354 - 1,684)        | 1,388<br>(617 - 2,514)      | 1,431<br>(676 - 2,396)      |
| Iodine deficiency                                                | 17<br>(1 - 82)                | 9<br>(0 - 70)               | 1<br>(0 - 8)             | 3<br>(0 - 15)               | 2<br>(0 - 11)               | 1<br>(0 - 6)                |
| Iron-deficiency anemia                                           | 3,381<br>(1,152 - 8,112)      | 1,493<br>(196 - 4,763)      | 145<br>(31 - 399)        | 710<br>(283 - 1,412)        | 537<br>(191 - 1,273)        | 496<br>(163 - 1,262)        |
| Other nutritional deficiencies                                   | 198<br>(74 - 594)             | 104<br>(11 - 390)           | 11<br>(3 - 33)           | 39<br>(13 - 107)            | 24<br>(8 - 69)              | 20<br>(6 - 58)              |
| Other communicable, maternal, neonatal, and nutritional diseases | 5,500<br>(3,359 - 9,119)      | 4,149<br>(2,225 - 7,616)    | 342<br>(177 - 599)       | 569<br>(316 - 1,106)        | 312<br>(140 - 702)          | 128<br>(51 - 337)           |
| Sexually transmitted diseases excluding HIV                      | 2,819<br>(1,378 - 5,026)      | 2,575<br>(1,223 - 4,632)    | 173<br>(74 - 322)        | 40<br>(21 - 66)             | 22<br>(10 - 43)             | 10<br>(4 - 23)              |
| Syphilis                                                         | 2,790<br>(1,349 - 4,995)      | 2,575<br>(1,223 - 4,632)    | 170<br>(72 - 320)        | 21<br>(11 - 35)             | 16<br>(8 - 31)              | 9<br>(4 - 19)               |
| Chlamydial infection                                             | --                            | --                          | --                       | --                          | --                          | --                          |
| Gonococcal infection                                             | 17<br>(10 - 26)               | --                          | 2<br>(1 - 4)             | 10<br>(5 - 17)              | 4<br>(2 - 7)                | 1<br>(1 - 3)                |
| Other sexually transmitted diseases                              | 13<br>(7 - 20)                | --                          | 2<br>(1 - 3)             | 8<br>(4 - 14)               | 2<br>(1 - 4)                | 1<br>(0 - 1)                |
| Hepatitis                                                        | 483<br>(239 - 1,455)          | 160<br>(65 - 349)           | 37<br>(15 - 100)         | 171<br>(77 - 624)           | 90<br>(34 - 370)            | 24<br>(8 - 114)             |
| Acute hepatitis A                                                | 68<br>(14 - 187)              | 50<br>(10 - 135)            | 11<br>(2 - 32)           | 6<br>(1 - 29)               | 0<br>(0 - 2)                | 0<br>(0 - 0)                |
| Acute hepatitis B                                                | 291<br>(132 - 892)            | 108<br>(38 - 244)           | 19<br>(6 - 54)           | 75<br>(26 - 284)            | 68<br>(24 - 282)            | 21<br>(7 - 98)              |
| Acute hepatitis C                                                | 14<br>(2 - 67)                | --                          | 2<br>(0 - 6)             | 7<br>(1 - 31)               | 5<br>(0 - 24)               | 1<br>(0 - 7)                |
| Acute hepatitis E                                                | 110<br>(40 - 421)             | 1<br>(0 - 4)                | 6<br>(2 - 19)            | 83<br>(29 - 320)            | 17<br>(4 - 82)              | 2<br>(0 - 11)               |
| Other infectious diseases                                        | 2,198<br>(941 - 4,842)        | 1,414<br>(295 - 4,097)      | 132<br>(48 - 298)        | 359<br>(180 - 668)          | 200<br>(69 - 468)           | 93<br>(27 - 259)            |
| Non-communicable diseases                                        | 112,036<br>(89,424 - 145,023) | 20,647<br>(10,781 - 43,317) | 3,840<br>(2,040 - 7,631) | 23,576<br>(17,543 - 30,608) | 37,477<br>(29,544 - 47,363) | 26,497<br>(22,716 - 31,377) |
| Neoplasms                                                        | 13,137<br>(10,491 - 16,170)   | 480<br>(230 - 1,318)        | 372<br>(204 - 560)       | 2,839<br>(2,068 - 3,587)    | 6,094<br>(4,657 - 7,857)    | 3,351<br>(2,626 - 4,179)    |
| Esophageal cancer                                                | 853<br>(557 - 1,234)          | --                          | --                       | 148<br>(89 - 225)           | 193<br>(319 - 772)          | 193<br>(124 - 280)          |
| Stomach cancer                                                   | 1,946<br>(1,446 - 2,470)      | --                          | --                       | 415<br>(287 - 567)          | 521<br>(716 - 1,353)        | 521<br>(381 - 696)          |
| Liver cancer                                                     | 1,205<br>(803 - 1,712)        | --                          | 14<br>(5 - 33)           | 271<br>(161 - 442)          | 654<br>(413 - 984)          | 267<br>(166 - 410)          |
| Liver cancer due to hepatitis B                                  | 482<br>(258 - 798)            | --                          | 6<br>(2 - 14)            | 135<br>(74 - 238)           | 79<br>(126 - 451)           | 79<br>(35 - 149)            |

Web Table 31- Democratic Republic of the Congo deaths with 95% UI by age, sex, and cause in 2013

| Cause                                | Males, All Ages             | Males, 0-4 Years       | Males, 5-14 Years  | Males, 15-49 Years       | Males, 50-69 Years          | Males, 70-80 Years          |
|--------------------------------------|-----------------------------|------------------------|--------------------|--------------------------|-----------------------------|-----------------------------|
| Liver cancer due to hepatitis C      | 344<br>(93 - 614)           | --                     | 1<br>(0 - 3)       | 57<br>(16 - 108)         | 195<br>(50 - 372)           | 91<br>(27 - 166)            |
| Liver cancer due to alcohol use      | 224<br>(103 - 439)          | --                     | --                 | 29<br>(8 - 60)           | 123<br>(51 - 259)           | 72<br>(32 - 146)            |
| Liver cancer due to other causes     | 155<br>(79 - 284)           | --                     | 7<br>(2 - 18)      | 49<br>(23 - 93)          | 74<br>(34 - 147)            | 25<br>(11 - 50)             |
| Larynx cancer                        | 230<br>(159 - 360)          | --                     | --                 | 41<br>(25 - 65)          | 135<br>(89 - 221)           | 54<br>(37 - 82)             |
| Tracheal, bronchus and lung cancer   | 1,436<br>(1,101 - 1,845)    | --                     | --                 | 188<br>(126 - 253)       | 877<br>(646 - 1,166)        | 371<br>(279 - 526)          |
| Breast cancer                        | 41<br>(22 - 68)             | --                     | --                 | 13<br>(6 - 24)           | 19<br>(8 - 37)              | 9<br>(4 - 17)               |
| Cervical cancer                      | --                          | --                     | --                 | --                       | --                          | --                          |
| Uterine cancer                       | --                          | --                     | --                 | --                       | --                          | --                          |
| Prostate cancer                      | 952<br>(463 - 1,606)        | --                     | --                 | 18<br>(10 - 30)          | 335<br>(171 - 573)          | 599<br>(276 - 1,054)        |
| Colon and rectum cancer              | 1,120<br>(864 - 1,409)      | --                     | --                 | 213<br>(151 - 283)       | 551<br>(403 - 724)          | 355<br>(278 - 457)          |
| Lip and oral cavity cancer           | 273<br>(176 - 376)          | --                     | --                 | 74<br>(47 - 108)         | 52<br>(29 - 87)             | 29<br>(14 - 41)             |
| Nasopharynx cancer                   | 87<br>(56 - 123)            | --                     | 3<br>(1 - 8)       | 35<br>(21 - 55)          | 39<br>(23 - 64)             | 9<br>(5 - 15)               |
| Other pharynx cancer                 | 160<br>(108 - 226)          | --                     | --                 | 34<br>(22 - 50)          | 100<br>(65 - 146)           | 26<br>(14 - 41)             |
| Gallbladder and biliary tract cancer | 161<br>(98 - 233)           | --                     | --                 | 22<br>(12 - 33)          | 86<br>(48 - 135)            | 53<br>(32 - 82)             |
| Pancreatic cancer                    | 409<br>(307 - 532)          | --                     | --                 | 67<br>(45 - 94)          | 228<br>(158 - 310)          | 113<br>(84 - 154)           |
| Malignant skin melanoma              | 82<br>(46 - 142)            | --                     | --                 | 31<br>(18 - 56)          | 34<br>(18 - 59)             | 17<br>(9 - 32)              |
| Non-melanoma skin cancer             | 79<br>(45 - 139)            | --                     | --                 | 19<br>(10 - 34)          | 33<br>(17 - 61)             | 26<br>(14 - 49)             |
| Ovarian cancer                       | --                          | --                     | --                 | --                       | --                          | --                          |
| Testicular cancer                    | 61<br>(38 - 88)             | --                     | --                 | 48<br>(29 - 73)          | 9<br>(5 - 14)               | 4<br>(2 - 6)                |
| Kidney cancer                        | 249<br>(162 - 356)          | 22<br>(5 - 65)         | 7<br>(3 - 13)      | 45<br>(29 - 69)          | 128<br>(71 - 210)           | 47<br>(23 - 82)             |
| Bladder cancer                       | 424<br>(309 - 564)          | --                     | --                 | 42<br>(26 - 60)          | 207<br>(144 - 295)          | 174<br>(123 - 242)          |
| Brain and nervous system cancer      | 272<br>(156 - 410)          | 28<br>(6 - 116)        | 35<br>(14 - 67)    | 103<br>(60 - 161)        | 84<br>(50 - 124)            | 21<br>(11 - 33)             |
| Thyroid cancer                       | 39<br>(27 - 54)             | --                     | 1<br>(0 - 1)       | 10<br>(6 - 15)           | 19<br>(12 - 29)             | 10<br>(6 - 14)              |
| Mesothelioma                         | 34<br>(23 - 49)             | --                     | --                 | 7<br>(4 - 11)            | 19<br>(11 - 30)             | 8<br>(4 - 15)               |
| Hodgkin lymphoma                     | 148<br>(56 - 418)           | 20<br>(2 - 73)         | 19<br>(3 - 60)     | 71<br>(27 - 208)         | 29<br>(11 - 83)             | 9<br>(3 - 23)               |
| Non-Hodgkin lymphoma                 | 771<br>(554 - 1,043)        | 59<br>(20 - 186)       | 61<br>(32 - 102)   | 263<br>(168 - 370)       | 262<br>(140 - 396)          | 126<br>(59 - 198)           |
| Multiple myeloma                     | 112<br>(65 - 160)           | --                     | --                 | 22<br>(13 - 34)          | 61<br>(35 - 90)             | 30<br>(15 - 47)             |
| Leukemia                             | 462<br>(337 - 595)          | 59<br>(24 - 134)       | 82<br>(46 - 141)   | 179<br>(118 - 242)       | 89<br>(55 - 124)            | 53<br>(24 - 72)             |
| Other neoplasms                      | 1,532<br>(1,079 - 2,496)    | 291<br>(119 - 983)     | 151<br>(72 - 275)  | 460<br>(310 - 688)       | 426<br>(267 - 631)          | 204<br>(125 - 303)          |
| Cardiovascular diseases              | 39,613<br>(31,751 - 48,526) | 1,470<br>(787 - 2,510) | 342<br>(188 - 559) | 7,604<br>(5,432 - 9,686) | 17,278<br>(13,347 - 22,211) | 12,919<br>(10,807 - 15,452) |
| Rheumatic heart disease              | 1,289<br>(753 - 2,493)      | 64<br>(22 - 229)       | 527<br>(27 - 136)  | 431<br>(292 - 1,042)     | 186<br>(230 - 869)          | 186<br>(102 - 357)          |
| Ischemic heart disease               | 11,621<br>(8,392 - 14,909)  | 61<br>(20 - 150)       | 18<br>(8 - 35)     | 2,131<br>(1,371 - 2,910) | 5,727<br>(4,033 - 7,768)    | 3,684<br>(2,631 - 4,731)    |
| Cerebrovascular disease              | 17,910<br>(13,029 - 23,154) | 445<br>(221 - 825)     | 122<br>(61 - 211)  | 2,884<br>(1,835 - 4,038) | 7,744<br>(5,412 - 10,789)   | 6,714<br>(5,042 - 8,534)    |
| Ischemic stroke                      | 6,856<br>(2,163 - 10,126)   | 77<br>(9 - 246)        | 16<br>(4 - 38)     | 430<br>(106 - 767)       | 2,595<br>(717 - 4,147)      | 3,738<br>(1,278 - 5,366)    |
| Hemorrhagic stroke                   | 11,054<br>(7,938 - 15,282)  | 368<br>(169 - 691)     | 106<br>(53 - 188)  | 2,454<br>(1,576 - 3,396) | 5,149<br>(3,552 - 7,448)    | 2,977<br>(1,936 - 4,980)    |
| Hypertensive heart disease           | 2,330<br>(1,214 - 4,797)    | 20<br>(3 - 50)         | 6<br>(1 - 12)      | 350<br>(159 - 663)       | 1,047<br>(528 - 2,121)      | 907<br>(450 - 2,030)        |
| Cardiomyopathy and myocarditis       | 1,707<br>(770 - 2,526)      | 412<br>(49 - 852)      | 53<br>(10 - 106)   | 500<br>(212 - 796)       | 521<br>(281 - 818)          | 221<br>(127 - 347)          |
| Atrial fibrillation and flutter      | 6<br>(4 - 11)               | --                     | --                 | 1<br>(0 - 1)             | 3<br>(1 - 4)                | 3<br>(2 - 6)                |
| Aortic aneurysm                      | 384<br>(241 - 550)          | --                     | --                 | 68<br>(38 - 103)         | 183<br>(112 - 274)          | 132<br>(80 - 199)           |
| Peripheral vascular disease          | 21<br>(12 - 33)             | --                     | --                 | 2<br>(1 - 3)             | 9<br>(5 - 15)               | 10<br>(6 - 16)              |



Web Table 31- Democratic Republic of the Congo deaths with 95% UI by age, sex, and cause in 2013

| Cause                                               | Males, All Ages            | Males, 0-4 Years       | Males, 5-14 Years  | Males, 15-49 Years       | Males, 50-69 Years       | Males, 70-80 Years       |
|-----------------------------------------------------|----------------------------|------------------------|--------------------|--------------------------|--------------------------|--------------------------|
| Endocarditis                                        | 451<br>(190 - 794)         | 39<br>(13 - 88)        | 8<br>(3 - 20)      | 142<br>(53 - 263)        | 162<br>(64 - 297)        | 99<br>(40 - 184)         |
| Other cardiovascular and circulatory diseases       | 3,894<br>(1,957 - 7,844)   | 413<br>(131 - 903)     | 70<br>(24 - 134)   | 998<br>(463 - 1,862)     | 1,451<br>(700 - 3,074)   | 962<br>(478 - 1,965)     |
| Chronic respiratory diseases                        | 11,191<br>(8,263 - 16,185) | 1,644<br>(771 - 3,199) | 219<br>(127 - 352) | 1,429<br>(965 - 2,108)   | 3,871<br>(2,653 - 5,714) | 4,071<br>(3,002 - 5,842) |
| Chronic obstructive pulmonary disease               | 7,365<br>(5,255 - 10,741)  | 718<br>(316 - 1,432)   | 57<br>(28 - 98)    | 633<br>(375 - 1,024)     | 2,724<br>(1,782 - 4,125) | 3,234<br>(2,336 - 4,752) |
| Pneumoconiosis                                      | 416<br>(243 - 720)         | 21<br>(6 - 53)         | 7<br>(4 - 14)      | 93<br>(51 - 173)         | 176<br>(92 - 320)        | 118<br>(67 - 203)        |
| Silicosis                                           | 97<br>(48 - 197)           | 6<br>(1 - 16)          | 2<br>(1 - 4)       | 20<br>(9 - 42)           | 38<br>(16 - 82)          | 31<br>(15 - 66)          |
| Asbestosis                                          | 50<br>(30 - 83)            | 3<br>(0 - 9)           | 1<br>(1 - 2)       | 11<br>(6 - 20)           | 24<br>(13 - 42)          | 11<br>(6 - 19)           |
| Coal workers pneumoconiosis                         | 72<br>(34 - 127)           | 2<br>(0 - 6)           | 1<br>(1 - 2)       | 15<br>(7 - 29)           | 34<br>(14 - 63)          | 20<br>(8 - 37)           |
| Other pneumoconiosis                                | 196<br>(109 - 340)         | 10<br>(2 - 32)         | 3<br>(1 - 6)       | 47<br>(24 - 89)          | 81<br>(40 - 145)         | 56<br>(30 - 94)          |
| Asthma                                              | 2,425<br>(1,116 - 4,001)   | 534<br>(158 - 1,246)   | 124<br>(57 - 224)  | 582<br>(278 - 941)       | 699<br>(273 - 1,250)     | 488<br>(188 - 864)       |
| Interstitial lung disease and pulmonary sarcoidosis | 419<br>(162 - 780)         | 15<br>(1 - 68)         | 4<br>(1 - 13)      | 42<br>(16 - 98)          | 174<br>(65 - 317)        | 185<br>(58 - 349)        |
| Other chronic respiratory diseases                  | 566<br>(279 - 1,076)       | 356<br>(134 - 756)     | 28<br>(13 - 57)    | 80<br>(44 - 152)         | 54<br>(25 - 109)         | 47<br>(21 - 92)          |
| Cirrhosis                                           | 6,059<br>(4,445 - 7,802)   | 177<br>(62 - 378)      | 85<br>(47 - 134)   | 1,948<br>(1,311 - 2,597) | 2,951<br>(2,103 - 4,054) | 898<br>(656 - 1,223)     |
| Cirrhosis due to hepatitis B                        | 1,278<br>(237 - 2,228)     | 7<br>(1 - 21)          | 13<br>(2 - 26)     | 407<br>(75 - 711)        | 651<br>(118 - 1,214)     | 200<br>(37 - 365)        |
| Cirrhosis due to hepatitis C                        | 1,874<br>(859 - 2,883)     | 22<br>(4 - 65)         | 22<br>(9 - 39)     | 590<br>(234 - 942)       | 939<br>(371 - 1,538)     | 302<br>(174 - 464)       |
| Cirrhosis due to alcohol use                        | 2,146<br>(1,455 - 3,031)   | --                     | --                 | 658<br>(404 - 993)       | 1,139<br>(742 - 1,677)   | 349<br>(233 - 503)       |
| Cirrhosis due to other causes                       | 762<br>(489 - 1,146)       | 148<br>(52 - 315)      | 51<br>(27 - 84)    | 294<br>(176 - 446)       | 222<br>(107 - 386)       | 47<br>(24 - 78)          |
| Digestive diseases                                  | 8,273<br>(5,669 - 11,351)  | 1,519<br>(684 - 2,919) | 369<br>(203 - 583) | 2,435<br>(1,621 - 3,483) | 2,435<br>(1,598 - 3,620) | 1,446<br>(999 - 2,022)   |
| Peptic ulcer disease                                | 2,495<br>(1,310 - 3,975)   | 163<br>(39 - 443)      | 50<br>(18 - 111)   | 837<br>(432 - 1,368)     | 499<br>(468 - 1,587)     | 499<br>(240 - 851)       |
| Gastritis and duodenitis                            | 363<br>(109 - 856)         | 22<br>(14 - 215)       | 113<br>(7 - 54)    | 113<br>(34 - 311)        | 93<br>(23 - 309)         | 53<br>(11 - 190)         |
| Appendicitis                                        | 544<br>(294 - 914)         | 194<br>(60 - 486)      | 74<br>(33 - 133)   | 171<br>(87 - 284)        | 73<br>(32 - 147)         | 32<br>(13 - 67)          |
| Paralytic ileus and intestinal obstruction          | 2,003<br>(1,015 - 3,627)   | 231<br>(62 - 588)      | 99<br>(41 - 207)   | 557<br>(263 - 1,011)     | 625<br>(296 - 1,185)     | 490<br>(250 - 829)       |
| Inguinal, femoral, and abdominal hernia             | 188<br>(89 - 333)          | 43<br>(5 - 130)        | 11<br>(4 - 25)     | 43<br>(19 - 78)          | 50<br>(19 - 96)          | 42<br>(15 - 78)          |
| Inflammatory bowel disease                          | 697<br>(319 - 1,245)       | 355<br>(79 - 821)      | 33<br>(14 - 64)    | 154<br>(61 - 275)        | 100<br>(34 - 205)        | 55<br>(17 - 127)         |
| Vascular intestinal disorders                       | 63<br>(22 - 148)           | 12<br>(1 - 40)         | 3<br>(1 - 9)       | 14<br>(5 - 34)           | 20<br>(6 - 46)           | 14<br>(4 - 34)           |
| Gallbladder and biliary diseases                    | 322<br>(183 - 504)         | 36<br>(6 - 92)         | 11<br>(4 - 21)     | 81<br>(42 - 133)         | 111<br>(56 - 196)        | 82<br>(38 - 150)         |
| Pancreatitis                                        | 395<br>(92 - 793)          | 18<br>(3 - 60)         | 6<br>(2 - 16)      | 218<br>(53 - 441)        | 117<br>(24 - 261)        | 35<br>(6 - 83)           |
| Other digestive diseases                            | 1,203<br>(694 - 1,920)     | 384<br>(119 - 843)     | 59<br>(28 - 108)   | 316<br>(168 - 516)       | 300<br>(149 - 527)       | 144<br>(72 - 284)        |
| Neurological disorders                              | 3,190<br>(2,433 - 4,248)   | 553<br>(144 - 1,365)   | 229<br>(108 - 436) | 924<br>(581 - 1,452)     | 374<br>(256 - 535)       | 1,109<br>(802 - 1,427)   |
| Alzheimer disease and other dementias               | 1,230<br>(898 - 1,570)     | --                     | --                 | 1<br>(0 - 4)             | 191<br>(117 - 280)       | 1,038<br>(738 - 1,347)   |
| Parkinson disease                                   | 17<br>(8 - 29)             | --                     | --                 | 2<br>(1 - 2)             | 5<br>(2 - 9)             | 10<br>(4 - 20)           |
| Epilepsy                                            | 1,689<br>(1,055 - 2,602)   | 492<br>(103 - 1,260)   | 209<br>(93 - 414)  | 823<br>(505 - 1,367)     | 125<br>(68 - 238)        | 38<br>(19 - 82)          |
| Multiple sclerosis                                  | 4<br>(1 - 8)               | --                     | --                 | 3<br>(0 - 4)             | 0<br>(0 - 3)             | 0<br>(0 - 1)             |
| Other neurological disorders                        | 249<br>(146 - 410)         | 61<br>(27 - 217)       | 20<br>(10 - 33)    | 95<br>(55 - 132)         | 51<br>(30 - 74)          | 22<br>(12 - 31)          |
| Mental and substance use disorders                  | 2,502<br>(1,557 - 3,837)   | 137<br>(29 - 395)      | 0<br>(0 - 0)       | 1,683<br>(1,002 - 2,605) | 600<br>(349 - 1,034)     | 82<br>(47 - 149)         |
| Schizophrenia                                       | 63<br>(13 - 211)           | --                     | --                 | 36<br>(7 - 125)          | 6<br>(4 - 72)            | 6<br>(1 - 24)            |
| Alcohol use disorders                               | 1,607<br>(841 - 2,747)     | --                     | --                 | 1,039<br>(520 - 1,844)   | 507<br>(271 - 940)       | 61<br>(33 - 124)         |
| Drug use disorders                                  | 832<br>(483 - 1,216)       | 137<br>(29 - 395)      | --                 | 608<br>(361 - 875)       | 72<br>(37 - 114)         | 15<br>(6 - 24)           |
| Opioid use disorders                                | 89<br>(50 - 135)           | 15<br>(3 - 45)         | --                 | 66<br>(38 - 98)          | 7<br>(4 - 11)            | 2<br>(1 - 3)             |
| Cocaine use disorders                               | 3<br>(2 - 5)               | 1<br>(0 - 2)           | --                 | 2<br>(1 - 4)             | 0<br>(0 - 0)             | 0<br>(0 - 0)             |

Web Table 31- Democratic Republic of the Congo deaths with 95% UI by age, sex, and cause in 2013

| Cause                                               | Males, All Ages            | Males, 0-4 Years          | Males, 5-14 Years      | Males, 15-49 Years        | Males, 50-69 Years       | Males, 70-80 Years       |
|-----------------------------------------------------|----------------------------|---------------------------|------------------------|---------------------------|--------------------------|--------------------------|
| Amphetamine use disorders                           | 2<br>(1 - 3)               | 0<br>(0 - 1)              | --                     | 1<br>(1 - 2)              | 0<br>(0 - 0)             | 0<br>(0 - 0)             |
| Other drug use disorders                            | 738<br>(429 - 1,078)       | 121<br>(25 - 351)         | --                     | 539<br>(319 - 777)        | 65<br>(33 - 103)         | 13<br>(5 - 21)           |
| Eating disorders                                    | 0<br>(0 - 0)               | --                        | 0<br>(0 - 0)           | 0<br>(0 - 0)              | --                       | --                       |
| Anorexia nervosa                                    | 0<br>(0 - 0)               | --                        | 0<br>(0 - 0)           | 0<br>(0 - 0)              | --                       | --                       |
| Diabetes, urogenital, blood, and endocrine diseases | 17,422<br>(9,367 - 34,982) | 5,297<br>(1,437 - 14,967) | 1,838<br>(361 - 5,976) | 4,133<br>(1,929 - 10,815) | 3,682<br>(2,673 - 5,204) | 2,472<br>(1,918 - 3,120) |
| Diabetes mellitus                                   | 4,529<br>(3,544 - 5,697)   | 93<br>(53 - 152)          | 25<br>(13 - 43)        | 676<br>(471 - 894)        | 2,228<br>(1,607 - 2,959) | 1,508<br>(1,139 - 1,993) |
| Acute glomerulonephritis                            | 79<br>(30 - 167)           | 26<br>(4 - 88)            | 12<br>(4 - 28)         | 22<br>(9 - 46)            | 12<br>(4 - 29)           | 6<br>(2 - 16)            |
| Chronic kidney disease                              | 2,034<br>(1,531 - 2,587)   | 317<br>(164 - 574)        | 93<br>(46 - 165)       | 725<br>(487 - 962)        | 482<br>(329 - 675)       | 416<br>(295 - 557)       |
| Chronic kidney disease due to diabetes mellitus     | 10<br>(2 - 18)             | 1<br>(0 - 2)              | 3<br>(0 - 2)           | 3<br>(1 - 5)              | 3<br>(1 - 7)             | 2<br>(0 - 4)             |
| Chronic kidney disease due to hypertension          | 732<br>(411 - 1,050)       | 38<br>(7 - 94)            | 10<br>(3 - 18)         | 184<br>(95 - 286)         | 267<br>(145 - 420)       | 233<br>(127 - 367)       |
| Chronic kidney disease due to glomerulonephritis    | 624<br>(410 - 858)         | 179<br>(90 - 321)         | 51<br>(29 - 86)        | 228<br>(143 - 319)        | 97<br>(44 - 156)         | 68<br>(26 - 117)         |
| Chronic kidney disease due to other causes          | 668<br>(385 - 1,031)       | 100<br>(32 - 237)         | 31<br>(10 - 72)        | 310<br>(162 - 499)        | 114<br>(43 - 207)        | 113<br>(45 - 207)        |
| Urinary diseases and male infertility               | 1,364<br>(930 - 1,974)     | 345<br>(135 - 733)        | 40<br>(21 - 66)        | 290<br>(179 - 427)        | 358<br>(226 - 577)       | 331<br>(211 - 572)       |
| Interstitial nephritis and urinary tract infections | 920<br>(528 - 1,370)       | 227<br>(64 - 532)         | 23<br>(9 - 40)         | 189<br>(101 - 285)        | 240<br>(132 - 383)       | 240<br>(136 - 421)       |
| Urolithiasis                                        | 31<br>(12 - 104)           | --                        | 2<br>(1 - 5)           | 10<br>(4 - 34)            | 7<br>(3 - 40)            | 7<br>(2 - 31)            |
| Other urinary diseases                              | 413<br>(256 - 682)         | 118<br>(34 - 290)         | 15<br>(7 - 28)         | 91<br>(50 - 158)          | 83<br>(52 - 204)         | 83<br>(33 - 176)         |
| Gynecological diseases                              | --                         | --                        | --                     | --                        | --                       | --                       |
| Uterine fibroids                                    | --                         | --                        | --                     | --                        | --                       | --                       |
| Polycystic ovarian syndrome                         | --                         | --                        | --                     | --                        | --                       | --                       |
| Endometriosis                                       | --                         | --                        | --                     | --                        | --                       | --                       |
| Genital prolapse                                    | --                         | --                        | --                     | --                        | --                       | --                       |
| Other gynecological diseases                        | --                         | --                        | --                     | --                        | --                       | --                       |
| Hemoglobinopathies and hemolytic anemias            | 7,830<br>(683 - 25,875)    | 3,894<br>(414 - 13,155)   | 1,557<br>(87 - 5,834)  | 2,003<br>(109 - 8,907)    | 313<br>(32 - 1,477)      | 64<br>(17 - 280)         |
| Thalassemias                                        | 1<br>(0 - 4)               | 1<br>(0 - 3)              | 0<br>(0 - 0)           | 0<br>(0 - 0)              | 0<br>(0 - 0)             | 0<br>(0 - 0)             |
| Sickle cell disorders                               | 7,669<br>(656 - 25,293)    | 3,835<br>(408 - 12,991)   | 1,546<br>(87 - 5,795)  | 1,978<br>(108 - 8,795)    | 299<br>(30 - 1,425)      | 10<br>(3 - 42)           |
| G6PD deficiency                                     | 38<br>(4 - 126)            | 20<br>(2 - 67)            | 5<br>(0 - 18)          | 8<br>(0 - 36)             | 2<br>(0 - 11)            | 3<br>(1 - 11)            |
| Other hemoglobinopathies and hemolytic anemias      | 122<br>(21 - 486)          | 37<br>(4 - 125)           | 5<br>(0 - 19)          | 17<br>(1 - 76)            | 11<br>(2 - 49)           | 51<br>(14 - 224)         |
| Endocrine, metabolic, blood, and immune disorders   | 1,585<br>(866 - 2,413)     | 621<br>(264 - 1,505)      | 111<br>(45 - 198)      | 417<br>(196 - 622)        | 290<br>(129 - 476)       | 146<br>(55 - 241)        |
| Musculoskeletal disorders                           | 284<br>(171 - 374)         | 39                        | 117<br>(17 - 66)       | 84<br>(70 - 157)          | 43<br>(47 - 129)         | 43<br>(24 - 79)          |
| Rheumatoid arthritis                                | 64<br>(30 - 116)           | --                        | 8<br>(2 - 19)          | 18<br>(7 - 32)            | 16<br>(10 - 45)          | 23<br>(6 - 38)           |
| Other musculoskeletal disorders                     | 220<br>(126 - 295)         | --                        | 32<br>(12 - 53)        | 100<br>(59 - 136)         | 28<br>(33 - 93)          | 28<br>(14 - 46)          |
| Other non-communicable diseases                     | 10,365<br>(5,285 - 24,195) | 9,367<br>(4,355 - 22,675) | 346<br>(162 - 735)     | 393<br>(277 - 536)        | 153<br>(108 - 216)       | 104<br>(67 - 171)        |
| Congenital anomalies                                | 9,679<br>(4,650 - 23,464)  | 9,010<br>(4,122 - 22,296) | 319<br>(142 - 702)     | 279<br>(185 - 405)        | 51<br>(35 - 74)          | 20<br>(14 - 29)          |
| Neural tube defects                                 | 3,172<br>(723 - 7,390)     | 3,027<br>(674 - 7,042)    | 75<br>(14 - 172)       | 60<br>(11 - 155)          | 8<br>(1 - 26)            | 2<br>(0 - 7)             |
| Congenital heart anomalies                          | 3,790<br>(1,091 - 11,876)  | 3,463<br>(842 - 11,289)   | 161<br>(54 - 406)      | 136<br>(73 - 235)         | 21<br>(12 - 35)          | 8<br>(4 - 14)            |
| Cleft lip and cleft palate                          | 67<br>(7 - 267)            | 67<br>(7 - 267)           | --                     | --                        | --                       | --                       |
| Down syndrome                                       | 658<br>(79 - 2,346)        | 588<br>(49 - 2,223)       | 29<br>(4 - 81)         | 34<br>(12 - 65)           | 7<br>(3 - 12)            | 1<br>(0 - 1)             |
| Chromosomal unbalanced rearrangements               | 193<br>(32 - 857)          | 181<br>(28 - 822)         | 6<br>(1 - 21)          | 5<br>(2 - 11)             | 1<br>(0 - 2)             | 1<br>(0 - 1)             |
| Other congenital anomalies                          | 1,799<br>(319 - 8,217)     | 1,684<br>(255 - 7,952)    | 48<br>(9 - 193)        | 44<br>(16 - 106)          | 14<br>(7 - 26)           | 9<br>(4 - 14)            |
| Skin and subcutaneous diseases                      | 576<br>(411 - 798)         | 247<br>(69 - 452)         | 28<br>(14 - 46)        | 115<br>(79 - 162)         | 102<br>(65 - 155)        | 84<br>(49 - 151)         |

Web Table 31- Democratic Republic of the Congo deaths with 95% UI by age, sex, and cause in 2013

| Cause                                           | Males, All Ages             | Males, 0-4 Years          | Males, 5-14 Years        | Males, 15-49 Years          | Males, 50-69 Years       | Males, 70-80 Years   |
|-------------------------------------------------|-----------------------------|---------------------------|--------------------------|-----------------------------|--------------------------|----------------------|
| Cellulitis                                      | 279<br>(78 - 586)           | 112<br>(24 - 318)         | 14<br>(3 - 34)           | 58<br>(15 - 117)            | 54<br>(15 - 115)         | 41<br>(9 - 103)      |
| Pyoderma                                        | 257<br>(76 - 520)           | 126<br>(19 - 312)         | 11<br>(2 - 25)           | 47<br>(14 - 87)             | 41<br>(11 - 80)          | 33<br>(9 - 64)       |
| Decubitus ulcer                                 | 29<br>(7 - 60)              | 5<br>(0 - 17)             | 2<br>(0 - 5)             | 7<br>(2 - 16)               | 6<br>(1 - 13)            | 9<br>(2 - 22)        |
| Other skin and subcutaneous diseases            | 10<br>(1 - 35)              | 5<br>(0 - 22)             | 1<br>(0 - 4)             | 3<br>(0 - 8)                | 1<br>(0 - 3)             | 1<br>(0 - 2)         |
| Sudden infant death syndrome                    | 110<br>(13 - 413)           | 110<br>(13 - 413)         | --                       | --                          | --                       | --                   |
| Injuries                                        | 32,630<br>(24,111 - 42,547) | 8,761<br>(4,180 - 15,409) | 3,043<br>(1,897 - 4,433) | 16,917<br>(12,268 - 21,271) | 2,971<br>(2,165 - 3,983) | 938<br>(670 - 1,246) |
| Transport injuries                              | 7,503<br>(5,723 - 9,636)    | 1,391<br>(618 - 2,713)    | 895<br>(521 - 1,397)     | 4,385<br>(3,105 - 5,626)    | 659<br>(465 - 917)       | 174<br>(124 - 233)   |
| Road injuries                                   | 6,858<br>(5,194 - 8,774)    | 1,211<br>(530 - 2,377)    | 816<br>(473 - 1,305)     | 4,072<br>(2,890 - 5,258)    | 599<br>(425 - 841)       | 161<br>(116 - 217)   |
| Pedestrian road injuries                        | 2,669<br>(1,765 - 3,834)    | 535<br>(216 - 1,107)      | 1,459<br>(195 - 584)     | 1,459<br>(910 - 2,157)      | 250<br>(158 - 369)       | 73<br>(48 - 107)     |
| Cyclist road injuries                           | 813<br>(404 - 1,270)        | 209<br>(64 - 489)         | 174<br>(74 - 305)        | 319<br>(159 - 487)          | 88<br>(44 - 140)         | 25<br>(13 - 37)      |
| Motorcyclist road injuries                      | 1,331<br>(824 - 1,937)      | 118<br>(47 - 257)         | 67<br>(31 - 125)         | 1,059<br>(627 - 1,569)      | 76<br>(40 - 122)         | 12<br>(6 - 20)       |
| Motor vehicle road injuries                     | 2,004<br>(1,435 - 2,794)    | 341<br>(133 - 753)        | 219<br>(117 - 383)       | 1,213<br>(803 - 1,694)      | 181<br>(116 - 273)       | 51<br>(31 - 73)      |
| Other road injuries                             | 40<br>(22 - 64)             | 7<br>(2 - 17)             | 6<br>(2 - 12)            | 23<br>(11 - 38)             | 4<br>(2 - 8)             | 1<br>(1 - 2)         |
| Other transport injuries                        | 645<br>(373 - 1,019)        | 180<br>(64 - 397)         | 79<br>(34 - 141)         | 313<br>(174 - 505)          | 60<br>(32 - 97)          | 13<br>(6 - 21)       |
| Unintentional injuries                          | 16,333<br>(10,559 - 23,981) | 7,122<br>(2,962 - 13,204) | 1,936<br>(1,101 - 2,982) | 5,440<br>(3,827 - 7,035)    | 1,297<br>(884 - 1,775)   | 537<br>(359 - 739)   |
| Falls                                           | 1,949<br>(800 - 3,783)      | 426<br>(76 - 1,369)       | 136<br>(45 - 322)        | 833<br>(307 - 1,521)        | 352<br>(112 - 632)       | 202<br>(52 - 346)    |
| Drowning                                        | 5,308<br>(2,180 - 10,108)   | 2,567<br>(404 - 6,326)    | 953<br>(378 - 1,724)     | 1,553<br>(960 - 2,320)      | 193<br>(117 - 296)       | 43<br>(24 - 73)      |
| Fire, heat, and hot substances                  | 2,294<br>(877 - 4,218)      | 1,378<br>(255 - 3,136)    | 181<br>(66 - 327)        | 509<br>(294 - 849)          | 152<br>(88 - 282)        | 74<br>(45 - 138)     |
| Poisonings                                      | 1,038<br>(611 - 2,058)      | 473<br>(147 - 1,218)      | 80<br>(38 - 162)         | 392<br>(227 - 749)          | 74<br>(44 - 132)         | 19<br>(11 - 36)      |
| Exposure to mechanical forces                   | 2,636<br>(1,686 - 3,826)    | 764<br>(307 - 1,466)      | 317<br>(159 - 527)       | 1,326<br>(778 - 1,925)      | 199<br>(106 - 314)       | 30<br>(17 - 46)      |
| Unintentional firearm injuries                  | 952<br>(540 - 1,548)        | 181<br>(61 - 393)         | 106<br>(39 - 225)        | 595<br>(292 - 1,032)        | 58<br>(30 - 100)         | 11<br>(6 - 20)       |
| Unintentional suffocation                       | 202<br>(16 - 581)           | 130<br>(7 - 473)          | 20<br>(1 - 46)           | 42<br>(3 - 76)              | 9<br>(1 - 18)            | 2<br>(0 - 5)         |
| Other exposure to mechanical forces             | 1,483<br>(709 - 2,371)      | 454<br>(94 - 1,073)       | 192<br>(69 - 358)        | 689<br>(314 - 1,091)        | 131<br>(51 - 228)        | 17<br>(7 - 31)       |
| Adverse effects of medical treatment            | 1,063<br>(483 - 1,776)      | 483<br>(115 - 1,159)      | 51<br>(17 - 93)          | 237<br>(126 - 354)          | 178<br>(90 - 292)        | 113<br>(50 - 216)    |
| Animal contact                                  | 444<br>(176 - 813)          | 194<br>(40 - 513)         | 77<br>(23 - 150)         | 109<br>(45 - 171)           | 47<br>(18 - 86)          | 16<br>(6 - 31)       |
| Venomous animal contact                         | 225<br>(73 - 436)           | 98<br>(19 - 256)          | 41<br>(10 - 84)          | 57<br>(17 - 95)             | 23<br>(7 - 45)           | 6<br>(2 - 13)        |
| Non-venomous animal contact                     | 219<br>(74 - 443)           | 97<br>(10 - 278)          | 36<br>(10 - 81)          | 52<br>(20 - 92)             | 10<br>(8 - 46)           | 10<br>(3 - 22)       |
| Foreign body                                    | 766<br>(277 - 2,040)        | 583<br>(148 - 1,673)      | 38<br>(14 - 103)         | 87<br>(34 - 185)            | 36<br>(14 - 79)          | 23<br>(8 - 54)       |
| Pulmonary aspiration and foreign body in airway | 733<br>(247 - 2,012)        | 571<br>(136 - 1,665)      | 34<br>(10 - 98)          | 76<br>(25 - 177)            | 32<br>(10 - 73)          | 21<br>(6 - 53)       |
| Foreign body in other body part                 | 33<br>(14 - 53)             | 12<br>(5 - 30)            | 5<br>(2 - 8)             | 11<br>(3 - 17)              | 4<br>(1 - 8)             | 1<br>(0 - 2)         |
| Other unintentional injuries                    | 834<br>(536 - 1,257)        | 255<br>(64 - 497)         | 101<br>(42 - 180)        | 395<br>(259 - 596)          | 68<br>(42 - 107)         | 15<br>(10 - 25)      |
| Self-harm and interpersonal violence            | 8,794<br>(5,911 - 11,968)   | 247<br>(105 - 532)        | 213<br>(104 - 389)       | 7,092<br>(4,769 - 9,659)    | 1,015<br>(614 - 1,531)   | 227<br>(112 - 404)   |
| Self-harm                                       | 5,624<br>(3,257 - 7,798)    | --                        | 110<br>(35 - 257)        | 4,451<br>(2,503 - 6,308)    | 213<br>(469 - 1,317)     | 213<br>(99 - 390)    |
| Interpersonal violence                          | 3,170<br>(2,112 - 4,953)    | 247<br>(105 - 532)        | 102<br>(50 - 193)        | 2,641<br>(1,706 - 4,120)    | 165<br>(93 - 313)        | 14<br>(7 - 28)       |
| Assault by firearm                              | 1,430<br>(667 - 2,771)      | 38<br>(6 - 108)           | 29<br>(8 - 72)           | 1,290<br>(602 - 2,478)      | 69<br>(25 - 170)         | 4<br>(1 - 13)        |
| Assault by sharp object                         | 876<br>(320 - 1,727)        | 19<br>(3 - 58)            | 15<br>(3 - 37)           | 786<br>(285 - 1,539)        | 51<br>(18 - 123)         | 4<br>(1 - 9)         |
| Assault by other means                          | 864<br>(387 - 1,616)        | 190<br>(80 - 432)         | 58<br>(23 - 117)         | 564<br>(186 - 1,073)        | 45<br>(15 - 90)          | 6<br>(2 - 13)        |

Web Table 31- Democratic Republic of the Congo deaths with 95% UI by age, sex, and cause in 2013

| Cause                                                             | Females, All Ages              | Females, 0-4 Years             | Females, 5-14 Years         | Females, 15-49 Years        | Females, 50-69 Years        | Females, 70-80 Years        |
|-------------------------------------------------------------------|--------------------------------|--------------------------------|-----------------------------|-----------------------------|-----------------------------|-----------------------------|
| All causes                                                        | 346,188<br>(296,273 - 397,283) | 157,823<br>(122,583 - 200,463) | 15,915<br>(12,235 - 19,807) | 63,864<br>(55,820 - 71,258) | 55,426<br>(43,984 - 67,521) | 53,160<br>(44,806 - 61,805) |
| Communicable, maternal, neonatal, and nutritional diseases        | 219,570<br>(182,044 - 261,980) | 129,691<br>(97,316 - 169,813)  | 9,378<br>(6,685 - 12,406)   | 40,762<br>(35,403 - 45,991) | 21,248<br>(16,682 - 26,849) | 18,491<br>(14,582 - 22,857) |
| HIV/AIDS and tuberculosis                                         | 29,637<br>(24,505 - 35,562)    | 2,559<br>(1,904 - 3,567)       | 1,207<br>(988 - 1,483)      | 17,138<br>(13,102 - 22,557) | 6,569<br>(5,008 - 8,413)    | 2,164<br>(1,524 - 2,928)    |
| Tuberculosis                                                      | 12,414<br>(9,525 - 15,979)     | 1,219<br>(609 - 2,133)         | 312<br>(176 - 536)          | 4,543<br>(3,303 - 6,100)    | 4,385<br>(2,943 - 6,252)    | 1,955<br>(1,311 - 2,728)    |
| HIV/AIDS                                                          | 17,223<br>(13,018 - 23,364)    | 1,340<br>(1,119 - 1,606)       | 895<br>(748 - 1,061)        | 12,595<br>(8,658 - 18,209)  | 2,184<br>(1,582 - 2,902)    | 208<br>(108 - 327)          |
| HIV/AIDS resulting in mycobacterial infection                     | 941<br>(658 - 1,330)           | 71<br>(54 - 91)                | 44<br>(33 - 56)             | 688<br>(455 - 1,022)        | 126<br>(85 - 176)           | 196<br>(6 - 21)             |
| HIV/AIDS resulting in other diseases                              | 16,282<br>(12,307 - 22,094)    | 1,270<br>(1,056 - 1,516)       | 852<br>(713 - 1,007)        | 11,907<br>(8,186 - 17,212)  | 2,058<br>(1,486 - 2,734)    | 196<br>(102 - 309)          |
| Diarrhea, lower respiratory, and other common infectious diseases | 100,098<br>(77,841 - 126,537)  | 62,399<br>(41,857 - 87,181)    | 5,191<br>(3,223 - 7,501)    | 8,444<br>(6,088 - 11,377)   | 11,159<br>(7,567 - 15,967)  | 12,904<br>(9,575 - 16,895)  |
| Diarrheal diseases                                                | 45,474<br>(29,268 - 66,235)    | 26,863<br>(12,164 - 47,580)    | 2,349<br>(1,059 - 4,142)    | 4,428<br>(2,615 - 6,619)    | 5,880<br>(3,094 - 9,654)    | 5,984<br>(3,552 - 9,270)    |
| Intestinal infectious diseases                                    | 1,757<br>(879 - 3,113)         | 732<br>(326 - 1,368)           | 498<br>(214 - 931)          | 443<br>(201 - 797)          | 64<br>(29 - 124)            | 20<br>(8 - 35)              |
| Typhoid fever                                                     | 1,238<br>(573 - 2,232)         | 482<br>(191 - 955)             | 370<br>(152 - 691)          | 328<br>(135 - 616)          | 44<br>(17 - 92)             | 12<br>(5 - 25)              |
| Paratyphoid fever                                                 | 390<br>(167 - 753)             | 166<br>(56 - 355)              | 115<br>(44 - 244)           | 93<br>(36 - 190)            | 13<br>(4 - 31)              | 3<br>(1 - 9)                |
| Other intestinal infectious diseases                              | 130<br>(83 - 194)              | 83<br>(45 - 139)               | 13<br>(5 - 26)              | 23<br>(12 - 37)             | 8<br>(2 - 17)               | 4<br>(1 - 10)               |
| Lower respiratory infections                                      | 42,356<br>(28,808 - 57,385)    | 27,850<br>(15,605 - 42,649)    | 1,280<br>(724 - 2,098)      | 2,185<br>(1,565 - 2,979)    | 4,487<br>(2,905 - 6,497)    | 6,554<br>(4,386 - 9,313)    |
| Upper respiratory infections                                      | 93<br>(30 - 237)               | 49<br>(3 - 187)                | 5<br>(0 - 20)               | 17<br>(3 - 42)              | 8<br>(1 - 40)               | 8<br>(1 - 28)               |
| Otitis media                                                      | 44<br>(30 - 63)                | 26<br>(13 - 44)                | 7<br>(4 - 11)               | 7<br>(5 - 9)                | 3<br>(2 - 4)                | 1<br>(1 - 2)                |
| Meningitis                                                        | 6,744<br>(4,338 - 10,245)      | 3,782<br>(1,864 - 6,893)       | 743<br>(369 - 1,251)        | 1,213<br>(775 - 1,792)      | 694<br>(380 - 1,111)        | 311<br>(174 - 521)          |
| Pneumococcal meningitis                                           | 2,201<br>(1,355 - 3,277)       | 1,030<br>(487 - 1,947)         | 307<br>(151 - 546)          | 483<br>(289 - 744)          | 270<br>(137 - 464)          | 112<br>(55 - 196)           |
| H influenzae type B meningitis                                    | 1,962<br>(1,131 - 3,236)       | 1,485<br>(697 - 2,738)         | 197<br>(88 - 344)           | 177<br>(103 - 272)          | 71<br>(33 - 131)            | 31<br>(14 - 60)             |
| Meningococcal meningitis                                          | 919<br>(530 - 1,451)           | 451<br>(196 - 896)             | 88<br>(36 - 168)            | 188<br>(95 - 320)           | 134<br>(51 - 256)           | 58<br>(26 - 108)            |
| Other meningitis                                                  | 1,662<br>(1,053 - 2,617)       | 816<br>(336 - 1,662)           | 151<br>(53 - 300)           | 365<br>(177 - 622)          | 220<br>(82 - 416)           | 110<br>(52 - 200)           |
| Encephalitis                                                      | 537<br>(290 - 967)             | 365<br>(140 - 788)             | 53<br>(23 - 101)            | 78<br>(41 - 121)            | 28<br>(15 - 46)             | 13<br>(6 - 22)              |
| Diphtheria                                                        | 57<br>(1 - 428)                | 48<br>(0 - 392)                | 2<br>(0 - 51)               | 2<br>(0 - 9)                | 1<br>(0 - 4)                | --                          |
| Whooping cough                                                    | 787<br>(1 - 4,002)             | 747<br>(1 - 3,820)             | 34<br>(0 - 170)             | 5<br>(0 - 25)               | 1<br>(0 - 3)                | --                          |
| Tetanus                                                           | 237<br>(118 - 445)             | 167<br>(56 - 382)              | 15<br>(4 - 43)              | 32<br>(10 - 100)            | 15<br>(3 - 45)              | 7<br>(1 - 21)               |
| Measles                                                           | 1,983<br>(326 - 6,742)         | 1,757<br>(289 - 5,884)         | 197<br>(33 - 669)           | 29<br>(5 - 95)              | 1<br>(0 - 2)                | --                          |
| Varicella and herpes zoster                                       | 30<br>(10 - 72)                | 14<br>(1 - 50)                 | 3<br>(0 - 13)               | 6<br>(1 - 16)               | 3<br>(0 - 8)                | 6<br>(0 - 24)               |
| Neglected tropical diseases and malaria                           | 26,312<br>(12,611 - 54,040)    | 18,681<br>(6,862 - 44,985)     | 1,817<br>(780 - 3,535)      | 3,376<br>(1,868 - 5,104)    | 1,629<br>(735 - 3,267)      | 809<br>(270 - 1,978)        |
| Malaria                                                           | 22,827<br>(9,178 - 50,451)     | 18,035<br>(6,056 - 44,546)     | 1,339<br>(325 - 3,095)      | 1,612<br>(479 - 3,295)      | 1,147<br>(288 - 2,735)      | 694<br>(157 - 1,862)        |
| Leishmaniasis                                                     | 384<br>(178 - 645)             | 122<br>(18 - 260)              | 106<br>(27 - 239)           | 129<br>(59 - 206)           | 22<br>(8 - 45)              | 4<br>(2 - 8)                |
| Visceral leishmaniasis                                            | 384<br>(178 - 645)             | 122<br>(18 - 260)              | 106<br>(27 - 239)           | 129<br>(59 - 206)           | 22<br>(8 - 45)              | 4<br>(2 - 8)                |
| African trypanosomiasis                                           | 2,366<br>(1,281 - 3,719)       | 164<br>(74 - 293)              | 277<br>(133 - 451)          | 1,475<br>(794 - 2,362)      | 375<br>(193 - 606)          | 75<br>(40 - 119)            |
| Schistosomiasis                                                   | 119<br>(81 - 166)              | 4<br>(1 - 9)                   | 6<br>(2 - 11)               | 45<br>(27 - 67)             | 19<br>(25 - 75)             | 19<br>(10 - 33)             |
| Cysticercosis                                                     | 19<br>(16 - 24)                | 2<br>(1 - 3)                   | 2<br>(1 - 3)                | 11<br>(8 - 13)              | 4<br>(3 - 5)                | 1<br>(1 - 1)                |
| Cystic echinococcosis                                             | 24<br>(19 - 30)                | 6<br>(3 - 9)                   | 5<br>(3 - 7)                | 9<br>(7 - 11)               | 3<br>(3 - 4)                | 1<br>(1 - 1)                |
| Dengue                                                            | 15<br>(8 - 30)                 | 7<br>(2 - 14)                  | 4<br>(2 - 8)                | 4<br>(2 - 10)               | 1<br>(0 - 3)                | 0<br>(0 - 1)                |
| Yellow fever                                                      | 22<br>(12 - 40)                | 2<br>(0 - 8)                   | 5<br>(1 - 13)               | 12<br>(5 - 26)              | 3<br>(1 - 8)                | 1<br>(0 - 3)                |
| Rabies                                                            | 77<br>(36 - 146)               | 23<br>(6 - 61)                 | 23<br>(8 - 48)              | 23<br>(13 - 35)             | 6<br>(4 - 10)               | 1<br>(1 - 3)                |
| Intestinal nematode infections                                    | 165<br>(95 - 261)              | 138<br>(74 - 227)              | 19<br>(7 - 37)              | 5<br>(1 - 13)               | 2<br>(0 - 10)               | 1<br>(0 - 7)                |
| Ascariasis                                                        | 165<br>(95 - 261)              | 138<br>(74 - 227)              | 19<br>(7 - 37)              | 5<br>(1 - 13)               | 2<br>(0 - 10)               | 1<br>(0 - 7)                |

Web Table 31- Democratic Republic of the Congo deaths with 95% UI by age, sex, and cause in 2013

| Cause                                                            | Females, All Ages             | Females, 0-4 Years          | Females, 5-14 Years      | Females, 15-49 Years        | Females, 50-69 Years        | Females, 70-80 Years        |
|------------------------------------------------------------------|-------------------------------|-----------------------------|--------------------------|-----------------------------|-----------------------------|-----------------------------|
| Other neglected tropical diseases                                | 293<br>(79 - 741)             | 178<br>(25 - 526)           | 32<br>(7 - 83)           | 52<br>(19 - 114)            | 20<br>(8 - 45)              | 11<br>(5 - 23)              |
| Maternal disorders                                               | 10,125<br>(7,437 - 13,213)    | --                          | 35<br>(12 - 79)          | 10,090<br>(7,403 - 13,190)  | --                          | --                          |
| Maternal hemorrhage                                              | 1,482<br>(947 - 2,165)        | --                          | 3<br>(1 - 7)             | 1,479<br>(944 - 2,163)      | --                          | --                          |
| Maternal sepsis and other maternal infections                    | 930<br>(566 - 1,365)          | --                          | 4<br>(1 - 9)             | 926<br>(563 - 1,362)        | --                          | --                          |
| Maternal hypertensive disorders                                  | 1,077<br>(692 - 1,572)        | --                          | 5<br>(2 - 12)            | 1,072<br>(688 - 1,566)      | --                          | --                          |
| Maternal obstructed labor                                        | 563<br>(376 - 781)            | --                          | 2<br>(1 - 4)             | 561<br>(374 - 779)          | --                          | --                          |
| Maternal abortive outcome                                        | 1,773<br>(1,205 - 2,456)      | --                          | 5<br>(2 - 12)            | 1,768<br>(1,200 - 2,450)    | --                          | --                          |
| Indirect maternal deaths                                         | 804<br>(483 - 1,181)          | --                          | 2<br>(1 - 5)             | 801<br>(482 - 1,179)        | --                          | --                          |
| Late maternal deaths                                             | 1,571<br>(985 - 2,373)        | --                          | 8<br>(3 - 20)            | 1,563<br>(978 - 2,363)      | --                          | --                          |
| Maternal deaths aggravated by HIV/AIDS                           | 47<br>(25 - 77)               | --                          | --                       | 47<br>(25 - 77)             | --                          | --                          |
| Other maternal disorders                                         | 1,858<br>(1,217 - 2,641)      | --                          | 6<br>(2 - 13)            | 1,852<br>(1,212 - 2,634)    | --                          | --                          |
| Neonatal disorders                                               | 26,146<br>(19,532 - 35,412)   | 26,146<br>(19,532 - 35,412) | --                       | --                          | --                          | --                          |
| Neonatal preterm birth complications                             | 11,444<br>(5,674 - 18,689)    | 11,444<br>(5,674 - 18,689)  | --                       | --                          | --                          | --                          |
| Neonatal encephalopathy due to birth asphyxia and trauma         | 6,994<br>(2,216 - 14,090)     | 6,994<br>(2,216 - 14,090)   | --                       | --                          | --                          | --                          |
| Neonatal sepsis and other neonatal infections                    | 3,721<br>(426 - 8,976)        | 3,721<br>(426 - 8,976)      | --                       | --                          | --                          | --                          |
| Hemolytic disease and other neonatal jaundice                    | 171<br>(41 - 625)             | 171<br>(41 - 625)           | --                       | --                          | --                          | --                          |
| Other neonatal disorders                                         | 3,815<br>(1,357 - 9,212)      | 3,815<br>(1,357 - 9,212)    | --                       | --                          | --                          | --                          |
| Nutritional deficiencies                                         | 22,219<br>(14,513 - 32,951)   | 16,048<br>(8,519 - 26,683)  | 789<br>(426 - 1,288)     | 1,284<br>(930 - 1,708)      | 1,622<br>(1,035 - 2,356)    | 2,477<br>(1,661 - 3,394)    |
| Protein-energy malnutrition                                      | 16,274<br>(9,161 - 26,675)    | 13,534<br>(7,043 - 23,359)  | 532<br>(252 - 949)       | 203<br>(71 - 438)           | 717<br>(300 - 1,257)        | 1,288<br>(576 - 2,066)      |
| Iodine deficiency                                                | 20<br>(1 - 116)               | 13<br>(0 - 108)             | 1<br>(0 - 9)             | 2<br>(0 - 10)               | 2<br>(0 - 11)               | 2<br>(0 - 10)               |
| Iron-deficiency anemia                                           | 5,772<br>(2,630 - 10,996)     | 2,412<br>(508 - 7,053)      | 247<br>(82 - 550)        | 1,062<br>(704 - 1,436)      | 884<br>(401 - 1,457)        | 1,167<br>(490 - 2,036)      |
| Other nutritional deficiencies                                   | 153<br>(62 - 346)             | 89<br>(23 - 267)            | 9<br>(3 - 21)            | 17<br>(6 - 39)              | 18<br>(7 - 40)              | 20<br>(7 - 44)              |
| Other communicable, maternal, neonatal, and nutritional diseases | 5,033<br>(3,092 - 8,092)      | 3,859<br>(2,073 - 6,741)    | 339<br>(183 - 586)       | 429<br>(288 - 651)          | 268<br>(143 - 499)          | 138<br>(63 - 293)           |
| Sexually transmitted diseases excluding HIV                      | 3,078<br>(1,574 - 5,452)      | 2,698<br>(1,306 - 4,926)    | 200<br>(92 - 380)        | 106<br>(35 - 188)           | 50<br>(14 - 138)            | 24<br>(7 - 62)              |
| Syphilis                                                         | 2,980<br>(1,511 - 5,335)      | 2,698<br>(1,306 - 4,926)    | 194<br>(86 - 374)        | 43<br>(14 - 75)             | 27<br>(8 - 74)              | 18<br>(5 - 47)              |
| Chlamydial infection                                             | 32<br>(12 - 54)               | --                          | 2<br>(1 - 4)             | 21<br>(7 - 37)              | 7<br>(2 - 19)               | 2<br>(0 - 4)                |
| Gonococcal infection                                             | 35<br>(14 - 61)               | --                          | 2<br>(0 - 4)             | 22<br>(7 - 39)              | 9<br>(3 - 25)               | 3<br>(1 - 8)                |
| Other sexually transmitted diseases                              | 31<br>(12 - 52)               | --                          | 2<br>(0 - 4)             | 20<br>(7 - 36)              | 7<br>(2 - 19)               | 2<br>(0 - 4)                |
| Hepatitis                                                        | 361<br>(216 - 1,015)          | 128<br>(61 - 254)           | 33<br>(16 - 79)          | 116<br>(67 - 348)           | 63<br>(30 - 266)            | 21<br>(9 - 106)             |
| Acute hepatitis A                                                | 65<br>(18 - 146)              | 51<br>(13 - 119)            | 10<br>(2 - 25)           | 4<br>(1 - 13)               | 0<br>(0 - 2)                | 0<br>(0 - 0)                |
| Acute hepatitis B                                                | 177<br>(89 - 517)             | 73<br>(27 - 168)            | 11<br>(4 - 28)           | 26<br>(10 - 74)             | 47<br>(21 - 197)            | 19<br>(8 - 93)              |
| Acute hepatitis C                                                | 11<br>(2 - 43)                | --                          | 2<br>(0 - 6)             | 4<br>(1 - 15)               | 4<br>(1 - 17)               | 1<br>(0 - 7)                |
| Acute hepatitis E                                                | 109<br>(57 - 330)             | 4<br>(1 - 12)               | 11<br>(4 - 29)           | 82<br>(44 - 254)            | 10<br>(3 - 52)              | 2<br>(0 - 9)                |
| Other infectious diseases                                        | 1,594<br>(744 - 3,762)        | 1,033<br>(255 - 3,204)      | 106<br>(34 - 255)        | 207<br>(117 - 358)          | 156<br>(62 - 352)           | 92<br>(28 - 246)            |
| Non-communicable diseases                                        | 110,648<br>(85,536 - 136,083) | 21,746<br>(10,413 - 37,398) | 4,605<br>(2,459 - 7,368) | 17,909<br>(13,878 - 22,983) | 32,666<br>(24,711 - 41,416) | 33,721<br>(27,482 - 40,320) |
| Neoplasms                                                        | 15,559<br>(12,300 - 19,267)   | 486<br>(215 - 1,098)        | 348<br>(198 - 551)       | 4,037<br>(3,112 - 5,079)    | 7,209<br>(5,379 - 9,294)    | 3,479<br>(2,708 - 4,380)    |
| Esophageal cancer                                                | 609<br>(399 - 890)            | --                          | --                       | 61<br>(38 - 93)             | 314<br>(196 - 497)          | 234<br>(142 - 365)          |
| Stomach cancer                                                   | 1,144<br>(842 - 1,488)        | --                          | --                       | 249<br>(178 - 337)          | 559<br>(386 - 765)          | 336<br>(222 - 487)          |
| Liver cancer                                                     | 1,035<br>(691 - 1,522)        | --                          | 12<br>(4 - 28)           | 189<br>(115 - 323)          | 529<br>(317 - 821)          | 304<br>(192 - 473)          |
| Liver cancer due to hepatitis B                                  | 304<br>(133 - 561)            | --                          | 4<br>(1 - 9)             | 78<br>(41 - 151)            | 160<br>(51 - 313)           | 62<br>(17 - 126)            |

Web Table 31- Democratic Republic of the Congo deaths with 95% UI by age, sex, and cause in 2013

| Cause                                | Females, All Ages           | Females, 0-4 Years     | Females, 5-14 Years | Females, 15-49 Years     | Females, 50-69 Years        | Females, 70-80 Years        |
|--------------------------------------|-----------------------------|------------------------|---------------------|--------------------------|-----------------------------|-----------------------------|
| Liver cancer due to hepatitis C      | 356<br>(170 - 630)          | --                     | 1<br>(0 - 2)        | 38<br>(12 - 78)          | 181<br>(74 - 356)           | 136<br>(66 - 233)           |
| Liver cancer due to alcohol use      | 124<br>(68 - 222)           | --                     | --                  | 12<br>(6 - 24)           | 64<br>(31 - 126)            | 48<br>(23 - 92)             |
| Liver cancer due to other causes     | 251<br>(145 - 438)          | --                     | 8<br>(2 - 19)       | 61<br>(32 - 112)         | 125<br>(61 - 240)           | 58<br>(28 - 111)            |
| Larynx cancer                        | 47<br>(24 - 101)            | --                     | --                  | 11<br>(5 - 23)           | 26<br>(12 - 56)             | 10<br>(5 - 22)              |
| Tracheal, bronchus and lung cancer   | 680<br>(481 - 1,005)        | --                     | --                  | 100<br>(73 - 133)        | 390<br>(261 - 574)          | 191<br>(122 - 332)          |
| Breast cancer                        | 2,312<br>(1,491 - 3,165)    | --                     | --                  | 736<br>(519 - 993)       | 1,197<br>(727 - 1,721)      | 380<br>(176 - 544)          |
| Cervical cancer                      | 3,246<br>(2,315 - 4,493)    | --                     | --                  | 1,255<br>(873 - 1,827)   | 1,552<br>(1,036 - 2,221)    | 439<br>(289 - 647)          |
| Uterine cancer                       | 249<br>(121 - 410)          | --                     | --                  | 37<br>(19 - 56)          | 147<br>(69 - 248)           | 65<br>(28 - 127)            |
| Prostate cancer                      | --                          | --                     | --                  | --                       | --                          | --                          |
| Colon and rectum cancer              | 1,134<br>(871 - 1,464)      | --                     | --                  | 177<br>(129 - 239)       | 548<br>(387 - 737)          | 409<br>(295 - 547)          |
| Lip and oral cavity cancer           | 158<br>(87 - 264)           | --                     | --                  | 40<br>(18 - 83)          | 77<br>(39 - 136)            | 41<br>(24 - 65)             |
| Nasopharynx cancer                   | 58<br>(32 - 102)            | --                     | 3<br>(1 - 7)        | 25<br>(14 - 42)          | 23<br>(11 - 45)             | 7<br>(3 - 14)               |
| Other pharynx cancer                 | 56<br>(38 - 80)             | --                     | --                  | 14<br>(8 - 22)           | 32<br>(20 - 50)             | 10<br>(6 - 18)              |
| Gallbladder and biliary tract cancer | 401<br>(250 - 573)          | --                     | --                  | 43<br>(22 - 64)          | 219<br>(128 - 331)          | 140<br>(82 - 221)           |
| Pancreatic cancer                    | 383<br>(280 - 508)          | --                     | --                  | 38<br>(27 - 54)          | 202<br>(140 - 289)          | 143<br>(100 - 198)          |
| Malignant skin melanoma              | 73<br>(50 - 102)            | --                     | --                  | 23<br>(15 - 32)          | 34<br>(21 - 49)             | 17<br>(9 - 27)              |
| Non-melanoma skin cancer             | 106<br>(42 - 249)           | --                     | --                  | 23<br>(8 - 45)           | 35<br>(13 - 87)             | 49<br>(16 - 138)            |
| Ovarian cancer                       | 419<br>(300 - 590)          | --                     | --                  | 110<br>(77 - 152)        | 234<br>(154 - 344)          | 75<br>(42 - 122)            |
| Testicular cancer                    | --                          | --                     | --                  | --                       | --                          | --                          |
| Kidney cancer                        | 180<br>(127 - 252)          | 33<br>(7 - 77)         | 11<br>(4 - 21)      | 29<br>(19 - 41)          | 75<br>(44 - 118)            | 33<br>(18 - 61)             |
| Bladder cancer                       | 201<br>(125 - 291)          | --                     | --                  | 30<br>(17 - 45)          | 91<br>(54 - 145)            | 80<br>(49 - 121)            |
| Brain and nervous system cancer      | 262<br>(189 - 336)          | 24<br>(9 - 51)         | 32<br>(16 - 54)     | 89<br>(60 - 119)         | 86<br>(54 - 123)            | 31<br>(18 - 47)             |
| Thyroid cancer                       | 80<br>(46 - 134)            | --                     | 1<br>(0 - 2)        | 12<br>(7 - 18)           | 39<br>(23 - 68)             | 28<br>(13 - 49)             |
| Mesothelioma                         | 18<br>(12 - 27)             | --                     | --                  | 5<br>(3 - 8)             | 9<br>(5 - 15)               | 3<br>(2 - 6)                |
| Hodgkin lymphoma                     | 107<br>(48 - 208)           | 16<br>(2 - 45)         | 12<br>(3 - 31)      | 51<br>(21 - 106)         | 19<br>(9 - 39)              | 9<br>(5 - 17)               |
| Non-Hodgkin lymphoma                 | 531<br>(346 - 809)          | 58<br>(17 - 161)       | 39<br>(19 - 83)     | 150<br>(98 - 241)        | 185<br>(96 - 302)           | 100<br>(44 - 174)           |
| Multiple myeloma                     | 118<br>(74 - 167)           | --                     | --                  | 14<br>(9 - 22)           | 67<br>(40 - 100)            | 37<br>(22 - 57)             |
| Leukemia                             | 435<br>(304 - 554)          | 58<br>(23 - 128)       | 77<br>(44 - 125)    | 144<br>(95 - 191)        | 98<br>(46 - 142)            | 58<br>(21 - 83)             |
| Other neoplasms                      | 1,517<br>(1,019 - 2,423)    | 298<br>(102 - 892)     | 163<br>(73 - 330)   | 384<br>(254 - 599)       | 423<br>(267 - 645)          | 250<br>(131 - 412)          |
| Cardiovascular diseases              | 43,323<br>(33,918 - 55,364) | 1,433<br>(461 - 2,567) | 419<br>(212 - 678)  | 5,038<br>(3,447 - 7,067) | 15,583<br>(11,147 - 21,011) | 20,849<br>(16,482 - 26,300) |
| Rheumatic heart disease              | 1,630<br>(976 - 2,749)      | 58<br>(10 - 165)       | 70<br>(30 - 128)    | 588<br>(305 - 1,015)     | 562<br>(305 - 1,033)        | 352<br>(191 - 625)          |
| Ischemic heart disease               | 9,178<br>(6,320 - 12,889)   | 46<br>(5 - 118)        | 18<br>(6 - 36)      | 697<br>(428 - 1,095)     | 3,259<br>(2,068 - 4,769)    | 5,159<br>(3,495 - 7,784)    |
| Cerebrovascular disease              | 21,377<br>(15,287 - 28,074) | 361<br>(108 - 826)     | 144<br>(70 - 260)   | 2,130<br>(1,383 - 3,127) | 7,780<br>(5,293 - 10,620)   | 10,963<br>(7,923 - 14,295)  |
| Ischemic stroke                      | 8,643<br>(3,936 - 12,558)   | 56<br>(4 - 156)        | 17<br>(3 - 41)      | 280<br>(105 - 510)       | 2,229<br>(897 - 3,605)      | 6,061<br>(2,820 - 8,747)    |
| Hemorrhagic stroke                   | 12,734<br>(8,284 - 19,259)  | 305<br>(93 - 723)      | 126<br>(62 - 225)   | 1,850<br>(1,196 - 2,770) | 5,550<br>(3,586 - 8,125)    | 4,902<br>(2,842 - 8,585)    |
| Hypertensive heart disease           | 3,795<br>(2,273 - 7,024)    | 28<br>(4 - 74)         | 10<br>(4 - 19)      | 291<br>(169 - 493)       | 1,290<br>(702 - 2,193)      | 2,176<br>(1,217 - 4,413)    |
| Cardiomyopathy and myocarditis       | 1,680<br>(955 - 2,478)      | 475<br>(52 - 1,033)    | 76<br>(20 - 144)    | 354<br>(173 - 557)       | 416<br>(245 - 665)          | 360<br>(191 - 685)          |
| Atrial fibrillation and flutter      | 14<br>(7 - 25)              | --                     | --                  | 1<br>(0 - 1)             | 3<br>(2 - 6)                | 10<br>(5 - 18)              |
| Aortic aneurysm                      | 241<br>(124 - 391)          | --                     | --                  | 36<br>(14 - 62)          | 94<br>(45 - 162)            | 111<br>(57 - 184)           |
| Peripheral vascular disease          | 20<br>(11 - 31)             | --                     | --                  | 1<br>(0 - 2)             | 7<br>(3 - 11)               | 13<br>(7 - 20)              |

Web Table 31- Democratic Republic of the Congo deaths with 95% UI by age, sex, and cause in 2013

| Cause                                               | Females, All Ages         | Females, 0-4 Years     | Females, 5-14 Years | Females, 15-49 Years     | Females, 50-69 Years     | Females, 70-80 Years     |
|-----------------------------------------------------|---------------------------|------------------------|---------------------|--------------------------|--------------------------|--------------------------|
| Endocarditis                                        | 483<br>(250 - 1,009)      | 73<br>(17 - 211)       | 15<br>(6 - 35)      | 107<br>(56 - 211)        | 124<br>(49 - 270)        | 166<br>(53 - 372)        |
| Other cardiovascular and circulatory diseases       | 4,904<br>(2,731 - 9,048)  | 393<br>(121 - 904)     | 87<br>(31 - 176)    | 833<br>(397 - 1,506)     | 2,049<br>(1,087 - 3,797) | 1,541<br>(776 - 3,221)   |
| Chronic respiratory diseases                        | 7,976<br>(5,826 - 10,888) | 1,198<br>(570 - 2,198) | 199<br>(114 - 320)  | 1,156<br>(819 - 1,604)   | 2,480<br>(1,668 - 3,613) | 2,943<br>(2,067 - 4,251) |
| Chronic obstructive pulmonary disease               | 4,914<br>(3,254 - 6,754)  | 500<br>(204 - 961)     | 52<br>(18 - 91)     | 467<br>(244 - 716)       | 1,687<br>(1,047 - 2,478) | 2,207<br>(1,442 - 3,127) |
| Pneumoconiosis                                      | 26<br>(14 - 43)           | 8<br>(2 - 20)          | 3<br>(1 - 6)        | 8<br>(4 - 12)            | 4<br>(2 - 7)             | 3<br>(2 - 6)             |
| Silicosis                                           | 2<br>(1 - 5)              | 1<br>(0 - 2)           | 0<br>(0 - 1)        | 1<br>(0 - 1)             | 0<br>(0 - 0)             | 0<br>(0 - 0)             |
| Asbestosis                                          | 2<br>(1 - 3)              | 0<br>(0 - 2)           | 0<br>(0 - 1)        | 0<br>(0 - 1)             | 0<br>(0 - 0)             | 0<br>(0 - 0)             |
| Coal workers pneumoconiosis                         | 2<br>(1 - 3)              | 1<br>(0 - 2)           | 0<br>(0 - 1)        | 0<br>(0 - 1)             | 0<br>(0 - 0)             | 0<br>(0 - 0)             |
| Other pneumoconiosis                                | 21<br>(10 - 34)           | 6<br>(1 - 16)          | 2<br>(1 - 4)        | 6<br>(3 - 10)            | 4<br>(2 - 7)             | 3<br>(1 - 5)             |
| Asthma                                              | 2,251<br>(1,111 - 4,156)  | 422<br>(114 - 962)     | 112<br>(45 - 199)   | 564<br>(290 - 995)       | 642<br>(276 - 1,218)     | 511<br>(211 - 1,235)     |
| Interstitial lung disease and pulmonary sarcoidosis | 349<br>(106 - 662)        | 20<br>(1 - 69)         | 46<br>(1 - 15)      | 111<br>(10 - 103)        | 167<br>(31 - 228)        | 167<br>(41 - 349)        |
| Other chronic respiratory diseases                  | 435<br>(240 - 782)        | 248<br>(105 - 531)     | 25<br>(10 - 49)     | 71<br>(37 - 123)         | 54<br>(18 - 67)          | 54<br>(27 - 100)         |
| Cirrhosis                                           | 3,521<br>(2,636 - 4,450)  | 143<br>(52 - 295)      | 90<br>(51 - 143)    | 760<br>(556 - 1,002)     | 1,665<br>(1,159 - 2,269) | 863<br>(596 - 1,192)     |
| Cirrhosis due to hepatitis B                        | 794<br>(309 - 1,395)      | 5<br>(1 - 15)          | 10<br>(1 - 21)      | 155<br>(43 - 276)        | 398<br>(155 - 744)       | 227<br>(85 - 405)        |
| Cirrhosis due to hepatitis C                        | 1,256<br>(637 - 1,946)    | 12<br>(3 - 28)         | 22<br>(9 - 43)      | 328<br>(154 - 505)       | 642<br>(297 - 1,047)     | 251<br>(116 - 448)       |
| Cirrhosis due to alcohol use                        | 869<br>(494 - 1,343)      | --                     | --                  | 117<br>(27 - 202)        | 440<br>(222 - 720)       | 312<br>(190 - 504)       |
| Cirrhosis due to other causes                       | 602<br>(397 - 909)        | 126<br>(46 - 257)      | 58<br>(30 - 99)     | 160<br>(93 - 265)        | 185<br>(95 - 332)        | 73<br>(37 - 134)         |
| Digestive diseases                                  | 6,286<br>(4,763 - 8,004)  | 936<br>(450 - 1,709)   | 307<br>(183 - 472)  | 1,468<br>(1,049 - 1,943) | 1,880<br>(1,278 - 2,612) | 1,695<br>(1,232 - 2,267) |
| Peptic ulcer disease                                | 1,540<br>(899 - 2,411)    | 86<br>(30 - 195)       | 36<br>(16 - 68)     | 338<br>(191 - 542)       | 498<br>(320 - 942)       | 498<br>(265 - 811)       |
| Gastritis and duodenitis                            | 360<br>(110 - 891)        | 65<br>(13 - 161)       | 28<br>(9 - 60)      | 92<br>(28 - 216)         | 85<br>(22 - 279)         | 85<br>(17 - 306)         |
| Appendicitis                                        | 711<br>(389 - 1,175)      | 202<br>(61 - 472)      | 91<br>(43 - 165)    | 222<br>(113 - 355)       | 126<br>(58 - 235)        | 70<br>(30 - 134)         |
| Paralytic ileus and intestinal obstruction          | 1,446<br>(737 - 2,259)    | 123<br>(34 - 298)      | 53<br>(23 - 102)    | 257<br>(126 - 424)       | 449<br>(203 - 778)       | 564<br>(275 - 914)       |
| Inguinal, femoral, and abdominal hernia             | 98<br>(50 - 178)          | 12<br>(2 - 35)         | 4<br>(2 - 9)        | 16<br>(8 - 29)           | 31<br>(13 - 63)          | 34<br>(13 - 73)          |
| Inflammatory bowel disease                          | 647<br>(348 - 1,099)      | 247<br>(90 - 535)      | 36<br>(16 - 70)     | 168<br>(82 - 288)        | 115<br>(47 - 211)        | 81<br>(31 - 151)         |
| Vascular intestinal disorders                       | 46<br>(19 - 112)          | 1<br>(0 - 10)          | 1<br>(0 - 4)        | 8<br>(4 - 19)            | 19<br>(6 - 40)           | 19<br>(7 - 49)           |
| Gallbladder and biliary diseases                    | 506<br>(306 - 764)        | 30<br>(11 - 68)        | 11<br>(5 - 20)      | 121<br>(71 - 187)        | 192<br>(102 - 329)       | 152<br>(77 - 266)        |
| Pancreatitis                                        | 241<br>(91 - 444)         | 13<br>(2 - 36)         | 7<br>(2 - 15)       | 88<br>(36 - 171)         | 47<br>(28 - 180)         | 47<br>(14 - 104)         |
| Other digestive diseases                            | 692<br>(416 - 1,087)      | 157<br>(52 - 349)      | 41<br>(20 - 71)     | 156<br>(90 - 246)        | 192<br>(98 - 354)        | 146<br>(72 - 284)        |
| Neurological disorders                              | 3,231<br>(2,489 - 4,150)  | 475<br>(154 - 1,042)   | 217<br>(102 - 390)  | 750<br>(466 - 1,151)     | 384<br>(261 - 559)       | 1,404<br>(1,027 - 1,849) |
| Alzheimer disease and other dementias               | 1,520<br>(1,105 - 1,994)  | --                     | --                  | 198<br>(0 - 3)           | 1,320<br>(121 - 289)     | 1,320<br>(947 - 1,759)   |
| Parkinson disease                                   | 18<br>(7 - 30)            | --                     | --                  | 11<br>(1 - 2)            | 5<br>(2 - 9)             | 11<br>(4 - 21)           |
| Epilepsy                                            | 1,479<br>(895 - 2,242)    | 419<br>(108 - 962)     | 200<br>(88 - 368)   | 699<br>(416 - 1,104)     | 118<br>(61 - 233)        | 43<br>(19 - 104)         |
| Multiple sclerosis                                  | 10<br>(2 - 19)            | --                     | --                  | 5<br>(1 - 11)            | 1<br>(1 - 8)             | 1<br>(0 - 2)             |
| Other neurological disorders                        | 205<br>(148 - 284)        | 56<br>(30 - 95)        | 17<br>(10 - 27)     | 44<br>(31 - 60)          | 29<br>(39 - 84)          | 29<br>(20 - 42)          |
| Mental and substance use disorders                  | 649<br>(319 - 1,512)      | 41<br>(9 - 85)         | 0<br>(0 - 0)        | 364<br>(178 - 877)       | 202<br>(84 - 532)        | 42<br>(17 - 104)         |
| Schizophrenia                                       | 104<br>(24 - 199)         | --                     | --                  | 52<br>(12 - 102)         | 15<br>(8 - 75)           | 15<br>(3 - 33)           |
| Alcohol use disorders                               | 404<br>(119 - 1,206)      | --                     | --                  | 235<br>(68 - 717)        | 148<br>(40 - 465)        | 22<br>(6 - 72)           |
| Drug use disorders                                  | 140<br>(73 - 248)         | 41<br>(9 - 85)         | --                  | 77<br>(36 - 144)         | 5<br>(6 - 39)            | 5<br>(2 - 13)            |
| Opioid use disorders                                | 14<br>(7 - 26)            | 4<br>(1 - 10)          | --                  | 8<br>(4 - 15)            | 2<br>(1 - 4)             | 1<br>(0 - 1)             |
| Cocaine use disorders                               | 1<br>(0 - 1)              | 0<br>(0 - 1)           | --                  | 0<br>(0 - 1)             | 0<br>(0 - 0)             | 0<br>(0 - 0)             |

Web Table 31- Democratic Republic of the Congo deaths with 95% UI by age, sex, and cause in 2013

| Cause                                               | Females, All Ages          | Females, 0-4 Years         | Females, 5-14 Years    | Females, 15-49 Years     | Females, 50-69 Years     | Females, 70-80 Years     |
|-----------------------------------------------------|----------------------------|----------------------------|------------------------|--------------------------|--------------------------|--------------------------|
| Amphetamine use disorders                           | 1<br>(0 - 1)               | 0<br>(0 - 1)               | --                     | 0<br>(0 - 1)             | 0<br>(0 - 0)             | 0<br>(0 - 0)             |
| Other drug use disorders                            | 124<br>(64 - 220)          | 36<br>(8 - 74)             | --                     | 68<br>(32 - 127)         | 15<br>(6 - 35)           | 4<br>(1 - 11)            |
| Eating disorders                                    | 0<br>(0 - 1)               | --                         | 0<br>(0 - 0)           | 0<br>(0 - 1)             | --                       | --                       |
| Anorexia nervosa                                    | 0<br>(0 - 1)               | --                         | 0<br>(0 - 0)           | 0<br>(0 - 1)             | --                       | --                       |
| Diabetes, urogenital, blood, and endocrine diseases | 17,668<br>(9,448 - 28,990) | 6,222<br>(2,029 - 12,921)  | 2,560<br>(658 - 5,575) | 3,820<br>(1,703 - 7,562) | 2,960<br>(2,098 - 4,122) | 2,107<br>(1,590 - 2,810) |
| Diabetes mellitus                                   | 2,940<br>(2,184 - 3,828)   | 18<br>(9 - 34)             | 22<br>(10 - 41)        | 337<br>(245 - 452)       | 1,452<br>(1,008 - 2,023) | 1,111<br>(785 - 1,506)   |
| Acute glomerulonephritis                            | 103<br>(27 - 231)          | 33<br>(4 - 99)             | 17<br>(4 - 41)         | 33<br>(9 - 68)           | 13<br>(3 - 31)           | 7<br>(1 - 19)            |
| Chronic kidney disease                              | 1,730<br>(1,290 - 2,381)   | 229<br>(114 - 432)         | 107<br>(58 - 189)      | 341<br>(241 - 473)       | 538<br>(349 - 777)       | 516<br>(352 - 751)       |
| Chronic kidney disease due to diabetes mellitus     | 10<br>(4 - 20)             | 1<br>(0 - 1)               | 2<br>(0 - 2)           | 3<br>(1 - 3)             | 4<br>(1 - 9)             | 3<br>(1 - 7)             |
| Chronic kidney disease due to hypertension          | 623<br>(364 - 948)         | 25<br>(6 - 61)             | 11<br>(4 - 22)         | 97<br>(50 - 161)         | 239<br>(123 - 399)       | 250<br>(139 - 413)       |
| Chronic kidney disease due to glomerulonephritis    | 628<br>(370 - 933)         | 135<br>(61 - 243)          | 58<br>(29 - 97)        | 170<br>(103 - 252)       | 156<br>(76 - 266)        | 109<br>(44 - 194)        |
| Chronic kidney disease due to other causes          | 470<br>(256 - 794)         | 69<br>(22 - 167)           | 37<br>(14 - 83)        | 72<br>(37 - 129)         | 139<br>(62 - 264)        | 154<br>(58 - 307)        |
| Urinary diseases and male infertility               | 732<br>(505 - 1,118)       | 117<br>(36 - 236)          | 22<br>(11 - 38)        | 171<br>(116 - 248)       | 214<br>(125 - 367)       | 209<br>(113 - 443)       |
| Interstitial nephritis and urinary tract infections | 543<br>(327 - 912)         | 63<br>(18 - 153)           | 10<br>(4 - 20)         | 120<br>(71 - 188)        | 169<br>(94 - 300)        | 180<br>(94 - 387)        |
| Urolithiasis                                        | 52<br>(20 - 115)           | --                         | 4<br>(1 - 10)          | 19<br>(6 - 43)           | 11<br>(6 - 47)           | 11<br>(3 - 34)           |
| Other urinary diseases                              | 137<br>(78 - 214)          | 54<br>(12 - 111)           | 8<br>(3 - 15)          | 32<br>(17 - 54)          | 26<br>(12 - 54)          | 18<br>(7 - 49)           |
| Gynecological diseases                              | 89<br>(27 - 366)           | --                         | --                     | 65<br>(19 - 271)         | 8<br>(5 - 66)            | 8<br>(2 - 28)            |
| Uterine fibroids                                    | 16<br>(5 - 66)             | --                         | --                     | 9<br>(3 - 39)            | 5<br>(1 - 19)            | 2<br>(1 - 9)             |
| Polycystic ovarian syndrome                         | 5<br>(1 - 20)              | --                         | --                     | 5<br>(1 - 20)            | 0<br>(0 - 1)             | --                       |
| Endometriosis                                       | 11<br>(3 - 47)             | --                         | --                     | 11<br>(3 - 45)           | 0<br>(0 - 2)             | --                       |
| Genital prolapse                                    | 14<br>(4 - 56)             | --                         | --                     | 9<br>(3 - 38)            | 3<br>(1 - 11)            | 2<br>(1 - 7)             |
| Other gynecological diseases                        | 43<br>(13 - 176)           | --                         | --                     | 31<br>(9 - 130)          | 8<br>(2 - 33)            | 3<br>(1 - 12)            |
| Hemoglobinopathies and hemolytic anemias            | 10,247<br>(2,220 - 21,683) | 4,982<br>(1,127 - 11,123)  | 2,272<br>(389 - 5,324) | 2,501<br>(417 - 6,335)   | 433<br>(76 - 1,208)      | 58<br>(20 - 146)         |
| Thalassemias                                        | 2<br>(0 - 4)               | 2<br>(0 - 4)               | 0<br>(0 - 1)           | 0<br>(0 - 0)             | 0<br>(0 - 0)             | 0<br>(0 - 0)             |
| Sickle cell disorders                               | 10,049<br>(2,167 - 21,334) | 4,879<br>(1,104 - 10,907)  | 2,261<br>(386 - 5,296) | 2,482<br>(414 - 6,285)   | 418<br>(72 - 1,177)      | 9<br>(3 - 21)            |
| G6PD deficiency                                     | 24<br>(6 - 50)             | 13<br>(3 - 29)             | 4<br>(1 - 9)           | 5<br>(1 - 12)            | 1<br>(0 - 4)             | 1<br>(0 - 3)             |
| Other hemoglobinopathies and hemolytic anemias      | 172<br>(44 - 378)          | 88<br>(19 - 204)           | 8<br>(1 - 19)          | 14<br>(2 - 38)           | 13<br>(3 - 31)           | 48<br>(16 - 122)         |
| Endocrine, metabolic, blood, and immune disorders   | 1,828<br>(1,104 - 2,720)   | 843<br>(332 - 1,750)       | 120<br>(53 - 218)      | 373<br>(227 - 560)       | 293<br>(139 - 526)       | 198<br>(81 - 403)        |
| Musculoskeletal disorders                           | 187<br>(106 - 374)         | --                         | 17<br>(8 - 33)         | 86<br>(49 - 175)         | 54<br>(26 - 116)         | 30<br>(13 - 76)          |
| Rheumatoid arthritis                                | 90<br>(50 - 193)           | --                         | 7<br>(2 - 13)          | 25<br>(11 - 52)          | 36<br>(17 - 81)          | 23<br>(10 - 62)          |
| Other musculoskeletal disorders                     | 97<br>(52 - 211)           | --                         | 11<br>(5 - 22)         | 61<br>(32 - 133)         | 18<br>(7 - 48)           | 7<br>(2 - 27)            |
| Other non-communicable diseases                     | 12,248<br>(4,968 - 25,237) | 10,812<br>(3,778 - 23,161) | 448<br>(167 - 902)     | 430<br>(277 - 648)       | 250<br>(143 - 394)       | 308<br>(142 - 547)       |
| Congenital anomalies                                | 11,274<br>(4,063 - 24,306) | 10,510<br>(3,568 - 22,931) | 410<br>(137 - 859)     | 280<br>(144 - 495)       | 51<br>(33 - 77)          | 24<br>(16 - 36)          |
| Neural tube defects                                 | 3,774<br>(875 - 12,533)    | 3,618<br>(803 - 12,019)    | 96<br>(23 - 289)       | 53<br>(18 - 157)         | 6<br>(2 - 16)            | 2<br>(0 - 5)             |
| Congenital heart anomalies                          | 4,509<br>(1,142 - 11,222)  | 4,138<br>(948 - 10,606)    | 203<br>(56 - 519)      | 136<br>(58 - 276)        | 20<br>(10 - 33)          | 12<br>(5 - 20)           |
| Cleft lip and cleft palate                          | 59<br>(2 - 233)            | 59<br>(2 - 233)            | --                     | --                       | --                       | --                       |
| Down syndrome                                       | 833<br>(116 - 2,391)       | 736<br>(86 - 2,229)        | 49<br>(9 - 124)        | 38<br>(11 - 76)          | 9<br>(4 - 17)            | 1<br>(0 - 1)             |
| Chromosomal unbalanced rearrangements               | 510<br>(78 - 1,555)        | 484<br>(68 - 1,494)        | 11<br>(2 - 29)         | 13<br>(4 - 28)           | 2<br>(1 - 3)             | 1<br>(0 - 1)             |
| Other congenital anomalies                          | 1,589<br>(326 - 5,642)     | 1,475<br>(279 - 5,388)     | 51<br>(12 - 187)       | 40<br>(14 - 112)         | 14<br>(6 - 28)           | 9<br>(5 - 16)            |
| Skin and subcutaneous diseases                      | 926<br>(626 - 1,251)       | 254<br>(98 - 509)          | 38<br>(21 - 61)        | 150<br>(102 - 218)       | 199<br>(101 - 337)       | 285<br>(121 - 518)       |



Web Table 31- Democratic Republic of the Congo deaths with 95% UI by age, sex, and cause in 2013

| Cause                                           | Females, All Ages           | Females, 0-4 Years        | Females, 5-14 Years      | Females, 15-49 Years     | Females, 50-69 Years     | Females, 70-80 Years |
|-------------------------------------------------|-----------------------------|---------------------------|--------------------------|--------------------------|--------------------------|----------------------|
| Cellulitis                                      | 511<br>(160 - 910)          | 133<br>(13 - 289)         | 23<br>(5 - 42)           | 89<br>(26 - 168)         | 118<br>(35 - 242)        | 149<br>(30 - 346)    |
| Pyoderma                                        | 338<br>(126 - 732)          | 115<br>(20 - 332)         | 13<br>(3 - 33)           | 52<br>(17 - 118)         | 68<br>(24 - 174)         | 90<br>(32 - 222)     |
| Decubitus ulcer                                 | 60<br>(18 - 164)            | 1<br>(0 - 6)              | 1<br>(0 - 3)             | 5<br>(2 - 14)            | 9<br>(3 - 29)            | 43<br>(11 - 122)     |
| Other skin and subcutaneous diseases            | 16<br>(4 - 35)              | 4<br>(0 - 17)             | 1<br>(0 - 3)             | 5<br>(1 - 10)            | 3<br>(1 - 7)             | 3<br>(1 - 9)         |
| Sudden infant death syndrome                    | 48<br>(4 - 207)             | 48<br>(4 - 207)           | --                       | --                       | --                       | --                   |
| Injuries                                        | 15,971<br>(11,349 - 21,291) | 6,385<br>(2,968 - 10,585) | 1,932<br>(1,198 - 2,824) | 5,193<br>(3,915 - 6,521) | 1,512<br>(1,080 - 2,060) | 948<br>(650 - 1,384) |
| Transport injuries                              | 3,233<br>(2,379 - 4,275)    | 861<br>(399 - 1,601)      | 573<br>(318 - 931)       | 1,271<br>(922 - 1,678)   | 374<br>(253 - 524)       | 154<br>(97 - 214)    |
| Road injuries                                   | 2,904<br>(2,157 - 3,870)    | 737<br>(333 - 1,351)      | 517<br>(286 - 841)       | 1,162<br>(838 - 1,571)   | 344<br>(232 - 483)       | 144<br>(93 - 202)    |
| Pedestrian road injuries                        | 1,335<br>(931 - 1,805)      | 357<br>(151 - 689)        | 250<br>(131 - 420)       | 483<br>(324 - 685)       | 167<br>(108 - 246)       | 78<br>(48 - 113)     |
| Cyclist road injuries                           | 319<br>(133 - 547)          | 81<br>(21 - 196)          | 73<br>(24 - 145)         | 119<br>(47 - 218)        | 38<br>(15 - 66)          | 9<br>(3 - 17)        |
| Motorcyclist road injuries                      | 275<br>(167 - 454)          | 54<br>(20 - 120)          | 27<br>(11 - 55)          | 170<br>(98 - 285)        | 19<br>(10 - 34)          | 5<br>(2 - 9)         |
| Motor vehicle road injuries                     | 956<br>(649 - 1,356)        | 240<br>(96 - 481)         | 165<br>(77 - 291)        | 383<br>(240 - 562)       | 117<br>(69 - 171)        | 51<br>(29 - 78)      |
| Other road injuries                             | 18<br>(11 - 32)             | 5<br>(1 - 12)             | 4<br>(1 - 8)             | 7<br>(4 - 12)            | 2<br>(1 - 4)             | 1<br>(0 - 2)         |
| Other transport injuries                        | 329<br>(96 - 540)           | 124<br>(34 - 273)         | 56<br>(13 - 110)         | 109<br>(32 - 175)        | 30<br>(8 - 51)           | 10<br>(2 - 17)       |
| Unintentional injuries                          | 9,837<br>(6,050 - 14,179)   | 5,328<br>(2,198 - 9,238)  | 1,207<br>(702 - 1,876)   | 1,805<br>(1,311 - 2,380) | 796<br>(532 - 1,171)     | 701<br>(429 - 1,125) |
| Falls                                           | 961<br>(389 - 1,702)        | 315<br>(71 - 827)         | 72<br>(25 - 157)         | 163<br>(65 - 288)        | 137<br>(47 - 249)        | 274<br>(76 - 523)    |
| Drowning                                        | 2,622<br>(823 - 4,967)      | 1,649<br>(306 - 3,810)    | 469<br>(157 - 849)       | 372<br>(183 - 583)       | 95<br>(48 - 181)         | 38<br>(18 - 87)      |
| Fire, heat, and hot substances                  | 2,412<br>(824 - 4,889)      | 1,435<br>(245 - 3,296)    | 256<br>(80 - 549)        | 432<br>(211 - 819)       | 164<br>(85 - 369)        | 124<br>(65 - 327)    |
| Poisonings                                      | 613<br>(324 - 1,156)        | 302<br>(107 - 730)        | 55<br>(26 - 108)         | 191<br>(97 - 323)        | 48<br>(24 - 80)          | 19<br>(10 - 32)      |
| Exposure to mechanical forces                   | 808<br>(361 - 1,481)        | 416<br>(121 - 1,017)      | 134<br>(47 - 239)        | 187<br>(108 - 265)       | 51<br>(26 - 81)          | 19<br>(9 - 34)       |
| Unintentional firearm injuries                  | 219<br>(108 - 358)          | 76<br>(18 - 173)          | 39<br>(13 - 79)          | 85<br>(45 - 137)         | 15<br>(8 - 27)           | 4<br>(2 - 9)         |
| Unintentional suffocation                       | 121<br>(9 - 428)            | 93<br>(7 - 387)           | 9<br>(1 - 22)            | 14<br>(1 - 28)           | 3<br>(0 - 7)             | 2<br>(0 - 4)         |
| Other exposure to mechanical forces             | 467<br>(154 - 953)          | 246<br>(65 - 680)         | 87<br>(27 - 177)         | 88<br>(29 - 141)         | 32<br>(9 - 58)           | 13<br>(3 - 26)       |
| Adverse effects of medical treatment            | 1,009<br>(480 - 1,657)      | 383<br>(94 - 991)         | 53<br>(17 - 103)         | 218<br>(104 - 351)       | 190<br>(96 - 341)        | 164<br>(68 - 352)    |
| Animal contact                                  | 503<br>(133 - 943)          | 248<br>(55 - 597)         | 87<br>(20 - 186)         | 96<br>(21 - 185)         | 52<br>(9 - 127)          | 20<br>(3 - 54)       |
| Venomous animal contact                         | 391<br>(100 - 774)          | 196<br>(38 - 492)         | 69<br>(16 - 146)         | 74<br>(15 - 153)         | 39<br>(6 - 103)          | 13<br>(2 - 41)       |
| Non-venomous animal contact                     | 113<br>(19 - 252)           | 52<br>(6 - 157)           | 18<br>(2 - 49)           | 23<br>(4 - 46)           | 13<br>(2 - 30)           | 8<br>(1 - 19)        |
| Foreign body                                    | 479<br>(190 - 1,189)        | 381<br>(134 - 1,012)      | 21<br>(8 - 54)           | 33<br>(13 - 70)          | 20<br>(6 - 46)           | 23<br>(6 - 60)       |
| Pulmonary aspiration and foreign body in airway | 467<br>(175 - 1,177)        | 377<br>(131 - 1,004)      | 19<br>(6 - 51)           | 30<br>(10 - 66)          | 19<br>(5 - 44)           | 22<br>(5 - 58)       |
| Foreign body in other body part                 | 13<br>(4 - 26)              | 5<br>(1 - 15)             | 2<br>(1 - 4)             | 3<br>(1 - 5)             | 1<br>(0 - 2)             | 1<br>(0 - 2)         |
| Other unintentional injuries                    | 430<br>(216 - 656)          | 199<br>(48 - 380)         | 60<br>(25 - 106)         | 112<br>(68 - 165)        | 38<br>(22 - 67)          | 20<br>(10 - 43)      |
| Self-harm and interpersonal violence            | 2,901<br>(1,932 - 3,929)    | 196<br>(92 - 400)         | 152<br>(77 - 277)        | 2,117<br>(1,345 - 2,968) | 342<br>(197 - 589)       | 94<br>(49 - 204)     |
| Self-harm                                       | 1,981<br>(1,139 - 2,795)    | --                        | 75<br>(22 - 175)         | 1,529<br>(836 - 2,269)   | 293<br>(155 - 524)       | 84<br>(42 - 190)     |
| Interpersonal violence                          | 920<br>(621 - 1,379)        | 196<br>(92 - 400)         | 77<br>(40 - 129)         | 589<br>(389 - 912)       | 49<br>(29 - 83)          | 9<br>(4 - 18)        |
| Assault by firearm                              | 216<br>(82 - 378)           | 30<br>(7 - 76)            | 16<br>(5 - 34)           | 156<br>(58 - 281)        | 12<br>(4 - 24)           | 1<br>(0 - 3)         |
| Assault by sharp object                         | 209<br>(89 - 348)           | 22<br>(4 - 58)            | 10<br>(3 - 23)           | 165<br>(71 - 282)        | 2<br>(4 - 22)            | 2<br>(0 - 4)         |
| Assault by other means                          | 495<br>(276 - 906)          | 143<br>(60 - 319)         | 51<br>(23 - 100)         | 268<br>(129 - 520)       | 6<br>(13 - 55)           | 6<br>(3 - 13)        |

Web Table 31- Denmark deaths with 95% UI by age, sex, and cause in 2013

| Cause                                                             | Both Sexes, All Ages        | Both Sexes, 0-4 Years | Both Sexes, 5-14 Years | Both Sexes, 15-49 Years  | Both Sexes, 50-69 Years     | Both Sexes, 70-80 Years     |
|-------------------------------------------------------------------|-----------------------------|-----------------------|------------------------|--------------------------|-----------------------------|-----------------------------|
| All causes                                                        | 53,989<br>(51,862 - 56,694) | 243<br>(192 - 309)    | 54<br>(47 - 63)        | 2,313<br>(2,171 - 2,499) | 12,093<br>(11,460 - 12,931) | 39,286<br>(37,832 - 41,041) |
| Communicable, maternal, neonatal, and nutritional diseases        | 3,236<br>(2,579 - 3,787)    | 120<br>(93 - 154)     | 4<br>(3 - 5)           | 82<br>(67 - 98)          | 296<br>(225 - 349)          | 2,734<br>(2,149 - 3,273)    |
| HIV/AIDS and tuberculosis                                         | 73<br>(56 - 92)             | 0<br>(0 - 0)          | 0<br>(0 - 0)           | 26<br>(16 - 39)          | 20<br>(15 - 28)             | 27<br>(22 - 32)             |
| Tuberculosis                                                      | 39<br>(34 - 46)             | 0<br>(0 - 0)          | 0<br>(0 - 0)           | 3<br>(2 - 3)             | 11<br>(9 - 13)              | 25<br>(21 - 31)             |
| HIV/AIDS                                                          | 34<br>(19 - 52)             | 0<br>(0 - 0)          | 0<br>(0 - 0)           | 23<br>(13 - 37)          | 9<br>(4 - 17)               | 1<br>(0 - 3)                |
| HIV/AIDS resulting in mycobacterial infection                     | 2<br>(1 - 3)                | 0<br>(0 - 0)          | 0<br>(0 - 0)           | 1<br>(1 - 2)             | 1<br>(0 - 1)                | 0<br>(0 - 0)                |
| HIV/AIDS resulting in other diseases                              | 32<br>(18 - 49)             | 0<br>(0 - 0)          | 0<br>(0 - 0)           | 22<br>(13 - 35)          | 9<br>(4 - 16)               | 1<br>(0 - 3)                |
| Diarrhea, lower respiratory, and other common infectious diseases | 2,746<br>(2,153 - 3,282)    | 17<br>(12 - 22)       | 3<br>(2 - 4)           | 38<br>(30 - 45)          | 234<br>(170 - 283)          | 2,453<br>(1,919 - 2,980)    |
| Diarrheal diseases                                                | 270<br>(200 - 376)          | 4<br>(3 - 6)          | 0<br>(0 - 0)           | 3<br>(3 - 4)             | 20<br>(15 - 27)             | 242<br>(172 - 347)          |
| Intestinal infectious diseases                                    | 5<br>(2 - 11)               | 1<br>(0 - 2)          | 1<br>(0 - 2)           | 2<br>(1 - 4)             | 1<br>(0 - 2)                | 1<br>(0 - 2)                |
| Typhoid fever                                                     | 4<br>(1 - 8)                | 1<br>(0 - 1)          | 1<br>(0 - 1)           | 1<br>(0 - 3)             | 1<br>(0 - 1)                | 0<br>(0 - 1)                |
| Paratyphoid fever                                                 | 1<br>(0 - 2)                | 0<br>(0 - 0)          | 0<br>(0 - 0)           | 0<br>(0 - 1)             | 0<br>(0 - 0)                | 0<br>(0 - 0)                |
| Other intestinal infectious diseases                              | 1<br>(0 - 3)                | 0<br>(0 - 1)          | 0<br>(0 - 0)           | 0<br>(0 - 1)             | 0<br>(0 - 1)                | 0<br>(0 - 1)                |
| Lower respiratory infections                                      | 2,404<br>(1,816 - 2,928)    | 6<br>(4 - 9)          | 1<br>(1 - 1)           | 25<br>(18 - 30)          | 196<br>(130 - 243)          | 2,177<br>(1,651 - 2,692)    |
| Upper respiratory infections                                      | 1<br>(0 - 3)                | 0<br>(0 - 0)          | 0<br>(0 - 0)           | 0<br>(0 - 0)             | 0<br>(0 - 1)                | 1<br>(0 - 2)                |
| Otitis media                                                      | 1<br>(1 - 2)                | 0<br>(0 - 0)          | 0<br>(0 - 0)           | 0<br>(0 - 0)             | 0<br>(0 - 0)                | 1<br>(0 - 1)                |
| Meningitis                                                        | 48<br>(42 - 59)             | 4<br>(3 - 7)          | 1<br>(1 - 1)           | 5<br>(5 - 7)             | 13<br>(11 - 16)             | 34<br>(20 - 33)             |
| Pneumococcal meningitis                                           | 9<br>(6 - 12)               | 1<br>(0 - 1)          | 0<br>(0 - 0)           | 1<br>(1 - 1)             | 2<br>(2 - 4)                | 5<br>(3 - 7)                |
| H influenzae type B meningitis                                    | 6<br>(4 - 7)                | 1<br>(1 - 2)          | 0<br>(0 - 0)           | 1<br>(0 - 1)             | 1<br>(1 - 2)                | 2<br>(2 - 4)                |
| Meningococcal meningitis                                          | 15<br>(11 - 22)             | 1<br>(1 - 2)          | 0<br>(0 - 0)           | 2<br>(1 - 2)             | 4<br>(3 - 6)                | 8<br>(5 - 12)               |
| Other meningitis                                                  | 18<br>(14 - 23)             | 1<br>(1 - 2)          | 0<br>(0 - 0)           | 2<br>(2 - 3)             | 5<br>(4 - 7)                | 9<br>(7 - 13)               |
| Encephalitis                                                      | 9<br>(4 - 12)               | 0<br>(0 - 1)          | 0<br>(0 - 0)           | 1<br>(1 - 2)             | 3<br>(1 - 4)                | 4<br>(1 - 5)                |
| Diphtheria                                                        | 0<br>(0 - 0)                | 0<br>(0 - 0)          | 0<br>(0 - 0)           | 0<br>(0 - 0)             | 0<br>(0 - 0)                | --                          |
| Whooping cough                                                    | 0<br>(0 - 1)                | 0<br>(0 - 0)          | 0<br>(0 - 0)           | 0<br>(0 - 0)             | 0<br>(0 - 0)                | --                          |
| Tetanus                                                           | 1<br>(0 - 1)                | 0<br>(0 - 0)          | 0<br>(0 - 0)           | 0<br>(0 - 0)             | 0<br>(0 - 0)                | 0<br>(0 - 0)                |
| Measles                                                           | 0<br>(0 - 0)                | 0<br>(0 - 0)          | 0<br>(0 - 0)           | 0<br>(0 - 0)             | 0<br>(0 - 0)                | --                          |
| Varicella and herpes zoster                                       | 6<br>(2 - 20)               | 0<br>(0 - 1)          | 0<br>(0 - 0)           | 1<br>(0 - 1)             | 1<br>(0 - 2)                | 4<br>(0 - 18)               |
| Neglected tropical diseases and malaria                           | 6<br>(4 - 8)                | 0<br>(0 - 0)          | 0<br>(0 - 0)           | 1<br>(1 - 1)             | 2<br>(1 - 2)                | 3<br>(1 - 4)                |
| Cysticercosis                                                     | 0<br>(0 - 0)                | 0<br>(0 - 0)          | 0<br>(0 - 0)           | 0<br>(0 - 0)             | 0<br>(0 - 0)                | 0<br>(0 - 0)                |
| Cystic echinococcosis                                             | 0<br>(0 - 1)                | 0<br>(0 - 0)          | 0<br>(0 - 0)           | 0<br>(0 - 0)             | 0<br>(0 - 0)                | 0<br>(0 - 0)                |
| Dengue                                                            | 1<br>(0 - 1)                | 0<br>(0 - 0)          | 0<br>(0 - 0)           | 0<br>(0 - 0)             | 0<br>(0 - 0)                | 0<br>(0 - 0)                |
| Rabies                                                            | 1<br>(0 - 1)                | 0<br>(0 - 0)          | 0<br>(0 - 0)           | 0<br>(0 - 0)             | 0<br>(0 - 0)                | 0<br>(0 - 0)                |
| Other neglected tropical diseases                                 | 4<br>(2 - 6)                | 0<br>(0 - 0)          | 0<br>(0 - 0)           | 1<br>(0 - 1)             | 1<br>(0 - 1)                | 3<br>(1 - 4)                |
| Maternal disorders                                                | 3<br>(2 - 4)                | --                    | 0<br>(0 - 0)           | 3<br>(2 - 4)             | --                          | --                          |
| Maternal hemorrhage                                               | 0<br>(0 - 0)                | --                    | 0<br>(0 - 0)           | 0<br>(0 - 0)             | --                          | --                          |
| Maternal sepsis and other maternal infections                     | 0<br>(0 - 0)                | --                    | 0<br>(0 - 0)           | 0<br>(0 - 0)             | --                          | --                          |
| Maternal hypertensive disorders                                   | 0<br>(0 - 1)                | --                    | 0<br>(0 - 0)           | 0<br>(0 - 1)             | --                          | --                          |
| Maternal obstructed labor                                         | 0<br>(0 - 0)                | --                    | 0<br>(0 - 0)           | 0<br>(0 - 0)             | --                          | --                          |
| Maternal abortive outcome                                         | 1<br>(0 - 1)                | --                    | 0<br>(0 - 0)           | 1<br>(0 - 1)             | --                          | --                          |
| Indirect maternal deaths                                          | 0<br>(0 - 0)                | --                    | 0<br>(0 - 0)           | 0<br>(0 - 0)             | --                          | --                          |

Web Table 31- Denmark deaths with 95% UI by age, sex, and cause in 2013

| Cause                                                            | Both Sexes, All Ages        | Both Sexes, 0-4 Years | Both Sexes, 5-14 Years | Both Sexes, 15-49 Years  | Both Sexes, 50-69 Years     | Both Sexes, 70-80 Years     |
|------------------------------------------------------------------|-----------------------------|-----------------------|------------------------|--------------------------|-----------------------------|-----------------------------|
| Late maternal deaths                                             | 0<br>(0 - 0)                | --                    | 0<br>(0 - 0)           | 0<br>(0 - 0)             | --                          | --                          |
| Maternal deaths aggravated by HIV/AIDS                           | 0<br>(0 - 0)                | --                    | --                     | 0<br>(0 - 0)             | --                          | --                          |
| Other maternal disorders                                         | 1<br>(0 - 1)                | --                    | 0<br>(0 - 0)           | 1<br>(0 - 1)             | --                          | --                          |
| Neonatal disorders                                               | 102<br>(78 - 131)           | 102<br>(78 - 131)     | --                     | --                       | --                          | --                          |
| Neonatal preterm birth complications                             | 71<br>(52 - 93)             | 71<br>(52 - 93)       | --                     | --                       | --                          | --                          |
| Neonatal encephalopathy due to birth asphyxia and trauma         | 21<br>(13 - 31)             | 21<br>(13 - 31)       | --                     | --                       | --                          | --                          |
| Neonatal sepsis and other neonatal infections                    | 0<br>(0 - 1)                | 0<br>(0 - 1)          | --                     | --                       | --                          | --                          |
| Hemolytic disease and other neonatal jaundice                    | 0<br>(0 - 0)                | 0<br>(0 - 0)          | --                     | --                       | --                          | --                          |
| Other neonatal disorders                                         | 9<br>(5 - 14)               | 9<br>(5 - 14)         | --                     | --                       | --                          | --                          |
| Nutritional deficiencies                                         | 228<br>(122 - 295)          | 0<br>(0 - 1)          | 0<br>(0 - 0)           | 4<br>(2 - 5)             | 16<br>(9 - 21)              | 208<br>(112 - 272)          |
| Protein-energy malnutrition                                      | 40<br>(18 - 66)             | 0<br>(0 - 0)          | 0<br>(0 - 0)           | 1<br>(0 - 1)             | 3<br>(1 - 5)                | 36<br>(15 - 60)             |
| Iodine deficiency                                                | 0<br>(0 - 2)                | 0<br>(0 - 0)          | 0<br>(0 - 0)           | 0<br>(0 - 0)             | 0<br>(0 - 1)                | 0<br>(0 - 2)                |
| Iron-deficiency anemia                                           | 168<br>(84 - 227)           | 0<br>(0 - 0)          | 0<br>(0 - 0)           | 2<br>(1 - 3)             | 11<br>(5 - 14)              | 155<br>(78 - 211)           |
| Other nutritional deficiencies                                   | 20<br>(7 - 34)              | 0<br>(0 - 0)          | 0<br>(0 - 0)           | 1<br>(0 - 1)             | 2<br>(1 - 3)                | 17<br>(5 - 30)              |
| Other communicable, maternal, neonatal, and nutritional diseases | 78<br>(60 - 95)             | 2<br>(1 - 2)          | 0<br>(0 - 0)           | 11<br>(8 - 15)           | 23<br>(17 - 29)             | 43<br>(30 - 54)             |
| Sexually transmitted diseases excluding HIV                      | 8<br>(4 - 13)               | 0<br>(0 - 1)          | 0<br>(0 - 0)           | 0<br>(0 - 0)             | 1<br>(1 - 2)                | 6<br>(3 - 11)               |
| Syphilis                                                         | 6<br>(3 - 10)               | 0<br>(0 - 1)          | 0<br>(0 - 0)           | 0<br>(0 - 0)             | 1<br>(0 - 1)                | 5<br>(2 - 8)                |
| Chlamydial infection                                             | 0<br>(0 - 1)                | --                    | 0<br>(0 - 0)           | 0<br>(0 - 0)             | 0<br>(0 - 0)                | 0<br>(0 - 0)                |
| Gonococcal infection                                             | 1<br>(1 - 2)                | --                    | 0<br>(0 - 0)           | 0<br>(0 - 0)             | 0<br>(0 - 0)                | 1<br>(0 - 1)                |
| Other sexually transmitted diseases                              | 0<br>(0 - 1)                | --                    | 0<br>(0 - 0)           | 0<br>(0 - 0)             | 0<br>(0 - 0)                | 0<br>(0 - 0)                |
| Hepatitis                                                        | 2<br>(2 - 3)                | 0<br>(0 - 0)          | 0<br>(0 - 0)           | 1<br>(1 - 1)             | 1<br>(1 - 1)                | 1<br>(1 - 1)                |
| Acute hepatitis A                                                | 1<br>(0 - 1)                | 0<br>(0 - 0)          | 0<br>(0 - 0)           | 0<br>(0 - 0)             | 0<br>(0 - 0)                | 0<br>(0 - 0)                |
| Acute hepatitis B                                                | 2<br>(1 - 2)                | 0<br>(0 - 0)          | 0<br>(0 - 0)           | 0<br>(0 - 1)             | 1<br>(0 - 1)                | 1<br>(0 - 1)                |
| Acute hepatitis C                                                | 0<br>(0 - 0)                | --                    | 0<br>(0 - 0)           | 0<br>(0 - 0)             | 0<br>(0 - 0)                | 0<br>(0 - 0)                |
| Other infectious diseases                                        | 68<br>(49 - 83)             | 1<br>(1 - 2)          | 0<br>(0 - 0)           | 9<br>(7 - 14)            | 21<br>(15 - 28)             | 36<br>(22 - 47)             |
| Non-communicable diseases                                        | 48,115<br>(46,015 - 50,517) | 104<br>(81 - 135)     | 31<br>(27 - 37)        | 1,638<br>(1,483 - 1,778) | 11,177<br>(10,558 - 11,944) | 35,165<br>(33,709 - 36,782) |
| Neoplasms                                                        | 13,974<br>(13,058 - 14,976) | 8<br>(6 - 11)         | 16<br>(13 - 20)        | 613<br>(557 - 681)       | 5,112<br>(4,787 - 5,481)    | 8,224<br>(7,509 - 8,852)    |
| Esophageal cancer                                                | 341<br>(290 - 383)          | --                    | --                     | 13<br>(10 - 17)          | 154<br>(129 - 179)          | 173<br>(145 - 197)          |
| Stomach cancer                                                   | 423<br>(369 - 502)          | --                    | --                     | 17<br>(14 - 20)          | 137<br>(119 - 160)          | 270<br>(224 - 328)          |
| Liver cancer                                                     | 384<br>(293 - 464)          | --                    | 0<br>(0 - 0)           | 15<br>(11 - 20)          | 152<br>(112 - 188)          | 217<br>(162 - 271)          |
| Liver cancer due to hepatitis B                                  | 72<br>(40 - 133)            | --                    | 0<br>(0 - 0)           | 5<br>(3 - 9)             | 34<br>(17 - 65)             | 33<br>(17 - 59)             |
| Liver cancer due to hepatitis C                                  | 201<br>(131 - 267)          | --                    | 0<br>(0 - 0)           | 7<br>(4 - 10)            | 80<br>(50 - 114)            | 114<br>(69 - 159)           |
| Liver cancer due to alcohol use                                  | 92<br>(55 - 130)            | --                    | --                     | 2<br>(1 - 4)             | 31<br>(18 - 47)             | 59<br>(33 - 89)             |
| Liver cancer due to other causes                                 | 20<br>(9 - 38)              | --                    | 0<br>(0 - 0)           | 1<br>(1 - 2)             | 7<br>(3 - 15)               | 11<br>(5 - 23)              |
| Larynx cancer                                                    | 88<br>(72 - 115)            | --                    | --                     | 4<br>(3 - 6)             | 45<br>(36 - 60)             | 38<br>(30 - 52)             |
| Tracheal, bronchus and lung cancer                               | 3,185<br>(2,797 - 3,473)    | --                    | --                     | 91<br>(76 - 112)         | 1,376<br>(1,232 - 1,524)    | 1,718<br>(1,405 - 1,922)    |
| Breast cancer                                                    | 1,047<br>(830 - 1,276)      | --                    | --                     | 81<br>(65 - 108)         | 433<br>(346 - 522)          | 533<br>(405 - 668)          |
| Cervical cancer                                                  | 126<br>(101 - 169)          | --                    | --                     | 20<br>(15 - 26)          | 48<br>(37 - 65)             | 58<br>(43 - 82)             |
| Uterine cancer                                                   | 117<br>(90 - 143)           | --                    | --                     | 2<br>(2 - 3)             | 40<br>(30 - 51)             | 75<br>(56 - 94)             |
| Prostate cancer                                                  | 1,073<br>(822 - 1,502)      | --                    | --                     | 2<br>(1 - 3)             | 219<br>(187 - 333)          | 852<br>(633 - 1,212)        |

Web Table 31- Denmark deaths with 95% UI by age, sex, and cause in 2013

| Cause                                         | Both Sexes, All Ages        | Both Sexes, 0-4 Years | Both Sexes, 5-14 Years | Both Sexes, 15-49 Years | Both Sexes, 50-69 Years  | Both Sexes, 70-80 Years     |
|-----------------------------------------------|-----------------------------|-----------------------|------------------------|-------------------------|--------------------------|-----------------------------|
| Colon and rectum cancer                       | 2,267<br>(2,074 - 2,481)    | --                    | --                     | 52<br>(45 - 60)         | 680<br>(618 - 743)       | 1,536<br>(1,378 - 1,728)    |
| Lip and oral cavity cancer                    | 144<br>(100 - 168)          | --                    | --                     | 12<br>(8 - 15)          | 73<br>(44 - 88)          | 60<br>(46 - 73)             |
| Nasopharynx cancer                            | 20<br>(16 - 32)             | --                    | 0<br>(0 - 0)           | 3<br>(2 - 4)            | 12<br>(8 - 18)           | 6<br>(4 - 10)               |
| Other pharynx cancer                          | 125<br>(78 - 154)           | --                    | --                     | 9<br>(6 - 12)           | 81<br>(48 - 103)         | 35<br>(22 - 47)             |
| Gallbladder and biliary tract cancer          | 142<br>(117 - 191)          | --                    | --                     | 3<br>(3 - 5)            | 43<br>(34 - 59)          | 95<br>(75 - 129)            |
| Pancreatic cancer                             | 816<br>(747 - 884)          | --                    | --                     | 24<br>(20 - 29)         | 327<br>(293 - 362)       | 464<br>(416 - 515)          |
| Malignant skin melanoma                       | 246<br>(172 - 368)          | --                    | --                     | 36<br>(25 - 57)         | 103<br>(71 - 164)        | 107<br>(72 - 150)           |
| Non-melanoma skin cancer                      | 75<br>(55 - 100)            | --                    | --                     | 1<br>(1 - 2)            | 11<br>(8 - 16)           | 62<br>(45 - 83)             |
| Ovarian cancer                                | 332<br>(278 - 391)          | --                    | --                     | 20<br>(15 - 26)         | 150<br>(124 - 178)       | 161<br>(125 - 201)          |
| Testicular cancer                             | 13<br>(10 - 20)             | --                    | --                     | 6<br>(4 - 9)            | 4<br>(3 - 6)             | 3<br>(2 - 4)                |
| Kidney cancer                                 | 296<br>(257 - 344)          | 0<br>(0 - 0)          | 0<br>(0 - 0)           | 11<br>(8 - 14)          | 122<br>(101 - 144)       | 163<br>(134 - 196)          |
| Bladder cancer                                | 438<br>(370 - 515)          | --                    | --                     | 6<br>(5 - 8)            | 110<br>(93 - 136)        | 322<br>(262 - 382)          |
| Brain and nervous system cancer               | 432<br>(353 - 491)          | 2<br>(1 - 3)          | 5<br>(4 - 7)           | 65<br>(54 - 79)         | 206<br>(169 - 245)       | 154<br>(112 - 188)          |
| Thyroid cancer                                | 41<br>(34 - 51)             | --                    | 0<br>(0 - 0)           | 3<br>(2 - 4)            | 14<br>(11 - 18)          | 25<br>(20 - 31)             |
| Mesothelioma                                  | 113<br>(83 - 167)           | --                    | --                     | 4<br>(2 - 5)            | 51<br>(36 - 85)          | 59<br>(36 - 91)             |
| Hodgkin lymphoma                              | 33<br>(25 - 45)             | 0<br>(0 - 0)          | 0<br>(0 - 1)           | 8<br>(6 - 11)           | 11<br>(8 - 17)           | 14<br>(10 - 18)             |
| Non-Hodgkin lymphoma                          | 332<br>(229 - 441)          | 0<br>(0 - 1)          | 1<br>(1 - 2)           | 23<br>(15 - 36)         | 118<br>(74 - 161)        | 189<br>(130 - 249)          |
| Multiple myeloma                              | 238<br>(168 - 342)          | --                    | --                     | 7<br>(4 - 10)           | 84<br>(60 - 128)         | 147<br>(97 - 209)           |
| Leukemia                                      | 446<br>(401 - 494)          | 2<br>(1 - 4)          | 5<br>(4 - 6)           | 30<br>(26 - 36)         | 128<br>(111 - 145)       | 280<br>(245 - 319)          |
| Other neoplasms                               | 640<br>(486 - 752)          | 3<br>(2 - 5)          | 5<br>(3 - 6)           | 46<br>(35 - 55)         | 179<br>(136 - 213)       | 407<br>(289 - 507)          |
| Cardiovascular diseases                       | 17,231<br>(15,795 - 19,803) | 1<br>(1 - 1)          | 1<br>(1 - 1)           | 280<br>(243 - 315)      | 2,649<br>(2,429 - 2,999) | 14,300<br>(13,041 - 16,609) |
| Rheumatic heart disease                       | 75<br>(57 - 108)            | 0<br>(0 - 0)          | 0<br>(0 - 0)           | 2<br>(2 - 4)            | 15<br>(11 - 25)          | 58<br>(42 - 83)             |
| Ischemic heart disease                        | 8,802<br>(7,611 - 11,751)   | 0<br>(0 - 0)          | 0<br>(0 - 0)           | 133<br>(113 - 156)      | 1,450<br>(1,270 - 1,876) | 7,219<br>(6,144 - 9,784)    |
| Cerebrovascular disease                       | 5,045<br>(4,137 - 5,895)    | 0<br>(0 - 0)          | 0<br>(0 - 0)           | 82<br>(57 - 99)         | 690<br>(509 - 818)       | 4,272<br>(3,506 - 5,093)    |
| Ischemic stroke                               | 2,846<br>(2,191 - 3,370)    | 0<br>(0 - 0)          | 0<br>(0 - 0)           | 11<br>(6 - 14)          | 223<br>(137 - 282)       | 2,612<br>(2,017 - 3,134)    |
| Hemorrhagic stroke                            | 2,199<br>(1,787 - 2,722)    | 0<br>(0 - 0)          | 0<br>(0 - 0)           | 72<br>(51 - 86)         | 467<br>(356 - 562)       | 1,660<br>(1,342 - 2,145)    |
| Hypertensive heart disease                    | 252<br>(169 - 324)          | 0<br>(0 - 0)          | 0<br>(0 - 0)           | 3<br>(2 - 4)            | 31<br>(22 - 42)          | 218<br>(140 - 288)          |
| Cardiomyopathy and myocarditis                | 219<br>(143 - 263)          | 1<br>(0 - 1)          | 0<br>(0 - 0)           | 24<br>(17 - 30)         | 77<br>(52 - 96)          | 118<br>(70 - 149)           |
| Atrial fibrillation and flutter               | 990<br>(723 - 1,251)        | --                    | --                     | 2<br>(1 - 2)            | 61<br>(42 - 78)          | 927<br>(669 - 1,180)        |
| Aortic aneurysm                               | 628<br>(467 - 767)          | --                    | --                     | 9<br>(7 - 12)           | 138<br>(105 - 167)       | 481<br>(358 - 602)          |
| Peripheral vascular disease                   | 177<br>(136 - 224)          | --                    | --                     | 1<br>(0 - 1)            | 20<br>(15 - 26)          | 156<br>(117 - 202)          |
| Endocarditis                                  | 61<br>(35 - 82)             | 0<br>(0 - 0)          | 0<br>(0 - 0)           | 3<br>(2 - 5)            | 15<br>(8 - 20)           | 43<br>(24 - 60)             |
| Other cardiovascular and circulatory diseases | 982<br>(744 - 1,234)        | 0<br>(0 - 0)          | 0<br>(0 - 0)           | 20<br>(14 - 26)         | 153<br>(116 - 194)       | 809<br>(593 - 1,048)        |
| Chronic respiratory diseases                  | 4,377<br>(3,152 - 4,902)    | 2<br>(1 - 2)          | 1<br>(1 - 1)           | 43<br>(31 - 50)         | 818<br>(695 - 920)       | 3,514<br>(2,385 - 4,002)    |
| Chronic obstructive pulmonary disease         | 3,990<br>(2,818 - 4,463)    | 1<br>(0 - 1)          | 0<br>(0 - 0)           | 24<br>(16 - 29)         | 733<br>(612 - 829)       | 3,232<br>(2,152 - 3,686)    |
| Pneumoconiosis                                | 50<br>(31 - 76)             | 0<br>(0 - 0)          | 0<br>(0 - 0)           | 1<br>(1 - 2)            | 8<br>(5 - 12)            | 40<br>(24 - 63)             |
| Silicosis                                     | 1<br>(1 - 2)                | 0<br>(0 - 0)          | 0<br>(0 - 0)           | 0<br>(0 - 0)            | 0<br>(0 - 0)             | 1<br>(1 - 2)                |
| Asbestosis                                    | 24<br>(15 - 37)             | 0<br>(0 - 0)          | 0<br>(0 - 0)           | 0<br>(0 - 0)            | 4<br>(3 - 7)             | 19<br>(12 - 31)             |
| Coal workers pneumoconiosis                   | 3<br>(2 - 5)                | 0<br>(0 - 0)          | 0<br>(0 - 0)           | 0<br>(0 - 0)            | 0<br>(0 - 0)             | 3<br>(2 - 5)                |
| Other pneumoconiosis                          | 21<br>(13 - 32)             | 0<br>(0 - 0)          | 0<br>(0 - 0)           | 0<br>(0 - 1)            | 4<br>(2 - 5)             | 17<br>(10 - 27)             |

Web Table 31- Denmark deaths with 95% UI by age, sex, and cause in 2013

| Cause                                               | Both Sexes, All Ages     | Both Sexes, 0-4 Years | Both Sexes, 5-14 Years | Both Sexes, 15-49 Years | Both Sexes, 50-69 Years | Both Sexes, 70-80 Years  |
|-----------------------------------------------------|--------------------------|-----------------------|------------------------|-------------------------|-------------------------|--------------------------|
| Asthma                                              | 106<br>(72 - 145)        | 0<br>(0 - 0)          | 0<br>(0 - 0)           | 8<br>(5 - 10)           | 26<br>(18 - 36)         | 72<br>(44 - 105)         |
| Interstitial lung disease and pulmonary sarcoidosis | 212<br>(144 - 293)       | 0<br>(0 - 0)          | 0<br>(0 - 0)           | 8<br>(6 - 11)           | 46<br>(30 - 66)         | 158<br>(99 - 221)        |
| Other chronic respiratory diseases                  | 19<br>(13 - 25)          | 1<br>(0 - 1)          | 0<br>(0 - 0)           | 2<br>(1 - 2)            | 4<br>(3 - 6)            | 12<br>(7 - 18)           |
| Cirrhosis                                           | 1,132<br>(1,040 - 1,228) | 0<br>(0 - 0)          | 0<br>(0 - 0)           | 154<br>(133 - 175)      | 653<br>(587 - 722)      | 324<br>(289 - 362)       |
| Cirrhosis due to hepatitis B                        | 129<br>(83 - 181)        | 0<br>(0 - 0)          | 0<br>(0 - 0)           | 17<br>(10 - 25)         | 74<br>(47 - 106)        | 38<br>(24 - 56)          |
| Cirrhosis due to hepatitis C                        | 543<br>(395 - 691)       | 0<br>(0 - 0)          | 0<br>(0 - 0)           | 75<br>(51 - 102)        | 312<br>(217 - 405)      | 156<br>(113 - 196)       |
| Cirrhosis due to alcohol use                        | 342<br>(233 - 464)       | --                    | --                     | 37<br>(19 - 57)         | 197<br>(128 - 278)      | 107<br>(76 - 147)        |
| Cirrhosis due to other causes                       | 118<br>(64 - 177)        | 0<br>(0 - 0)          | 0<br>(0 - 0)           | 26<br>(14 - 39)         | 69<br>(35 - 108)        | 23<br>(12 - 37)          |
| Digestive diseases                                  | 1,706<br>(1,363 - 1,913) | 1<br>(0 - 1)          | 1<br>(0 - 1)           | 43<br>(30 - 51)         | 312<br>(229 - 359)      | 1,350<br>(1,072 - 1,534) |
| Peptic ulcer disease                                | 412<br>(292 - 522)       | 0<br>(0 - 0)          | 0<br>(0 - 0)           | 6<br>(4 - 9)            | 63<br>(39 - 85)         | 342<br>(243 - 438)       |
| Gastritis and duodenitis                            | 21<br>(10 - 31)          | 0<br>(0 - 0)          | 0<br>(0 - 0)           | 1<br>(0 - 1)            | 3<br>(2 - 5)            | 17<br>(8 - 26)           |
| Appendicitis                                        | 31<br>(21 - 42)          | 0<br>(0 - 0)          | 0<br>(0 - 0)           | 2<br>(1 - 3)            | 7<br>(4 - 9)            | 22<br>(14 - 33)          |
| Paralytic ileus and intestinal obstruction          | 312<br>(195 - 440)       | 0<br>(0 - 0)          | 0<br>(0 - 0)           | 4<br>(3 - 6)            | 47<br>(27 - 68)         | 261<br>(160 - 373)       |
| Inguinal, femoral, and abdominal hernia             | 53<br>(29 - 76)          | 0<br>(0 - 0)          | 0<br>(0 - 0)           | 1<br>(0 - 1)            | 7<br>(4 - 10)           | 45<br>(23 - 67)          |
| Inflammatory bowel disease                          | 72<br>(45 - 93)          | 0<br>(0 - 0)          | 0<br>(0 - 0)           | 4<br>(2 - 5)            | 16<br>(9 - 20)          | 53<br>(31 - 72)          |
| Vascular intestinal disorders                       | 222<br>(139 - 358)       | 0<br>(0 - 0)          | 0<br>(0 - 0)           | 3<br>(2 - 4)            | 50<br>(29 - 79)         | 170<br>(106 - 284)       |
| Gallbladder and biliary diseases                    | 164<br>(115 - 204)       | 0<br>(0 - 0)          | 0<br>(0 - 0)           | 1<br>(1 - 2)            | 19<br>(12 - 24)         | 144<br>(101 - 184)       |
| Pancreatitis                                        | 144<br>(100 - 183)       | 0<br>(0 - 0)          | 0<br>(0 - 0)           | 16<br>(12 - 21)         | 56<br>(37 - 72)         | 71<br>(49 - 96)          |
| Other digestive diseases                            | 274<br>(197 - 333)       | 0<br>(0 - 0)          | 0<br>(0 - 0)           | 5<br>(3 - 6)            | 45<br>(29 - 56)         | 224<br>(159 - 282)       |
| Neurological disorders                              | 5,257<br>(4,273 - 6,293) | 5<br>(4 - 7)          | 2<br>(2 - 3)           | 71<br>(53 - 85)         | 396<br>(337 - 464)      | 4,783<br>(3,820 - 5,804) |
| Alzheimer disease and other dementias               | 4,424<br>(3,437 - 5,454) | --                    | --                     | 1<br>(0 - 1)            | 148<br>(110 - 192)      | 4,276<br>(3,310 - 5,294) |
| Parkinson disease                                   | 351<br>(280 - 438)       | --                    | --                     | 1<br>(0 - 1)            | 33<br>(25 - 41)         | 318<br>(252 - 399)       |
| Epilepsy                                            | 77<br>(42 - 103)         | 1<br>(0 - 1)          | 1<br>(0 - 2)           | 26<br>(15 - 35)         | 26<br>(14 - 36)         | 23<br>(11 - 35)          |
| Multiple sclerosis                                  | 137<br>(95 - 201)        | --                    | --                     | 21<br>(14 - 32)         | 73<br>(50 - 110)        | 43<br>(28 - 69)          |
| Other neurological disorders                        | 268<br>(227 - 304)       | 4<br>(3 - 6)          | 1<br>(1 - 2)           | 23<br>(18 - 27)         | 116<br>(97 - 137)       | 123<br>(102 - 144)       |
| Mental and substance use disorders                  | 974<br>(627 - 1,154)     | 0<br>(0 - 0)          | 0<br>(0 - 0)           | 284<br>(212 - 332)      | 522<br>(304 - 640)      | 169<br>(99 - 211)        |
| Schizophrenia                                       | 47<br>(24 - 64)          | --                    | --                     | 6<br>(3 - 9)            | 17<br>(8 - 24)          | 24<br>(12 - 36)          |
| Alcohol use disorders                               | 713<br>(398 - 875)       | --                    | --                     | 117<br>(73 - 154)       | 461<br>(254 - 575)      | 135<br>(71 - 177)        |
| Drug use disorders                                  | 214<br>(166 - 247)       | 0<br>(0 - 0)          | --                     | 160<br>(123 - 189)      | 44<br>(32 - 54)         | 10<br>(8 - 12)           |
| Opioid use disorders                                | 78<br>(60 - 91)          | 0<br>(0 - 0)          | --                     | 59<br>(46 - 71)         | 15<br>(11 - 19)         | 4<br>(3 - 5)             |
| Cocaine use disorders                               | 6<br>(5 - 7)             | 0<br>(0 - 0)          | --                     | 5<br>(4 - 6)            | 1<br>(1 - 1)            | 0<br>(0 - 0)             |
| Amphetamine use disorders                           | 6<br>(5 - 7)             | 0<br>(0 - 0)          | --                     | 4<br>(3 - 5)            | 1<br>(1 - 2)            | 0<br>(0 - 0)             |
| Other drug use disorders                            | 124<br>(96 - 145)        | 0<br>(0 - 0)          | --                     | 92<br>(70 - 109)        | 27<br>(20 - 33)         | 6<br>(4 - 7)             |
| Eating disorders                                    | 1<br>(1 - 1)             | --                    | 0<br>(0 - 0)           | 1<br>(0 - 1)            | --                      | --                       |
| Anorexia nervosa                                    | 1<br>(1 - 1)             | --                    | 0<br>(0 - 0)           | 1<br>(0 - 1)            | --                      | --                       |
| Diabetes, urogenital, blood, and endocrine diseases | 2,953<br>(2,397 - 3,282) | 8<br>(3 - 13)         | 3<br>(1 - 4)           | 110<br>(79 - 129)       | 615<br>(510 - 692)      | 2,216<br>(1,769 - 2,497) |
| Diabetes mellitus                                   | 1,393<br>(1,237 - 1,546) | 0<br>(0 - 0)          | 0<br>(0 - 0)           | 53<br>(45 - 63)         | 344<br>(303 - 388)      | 995<br>(858 - 1,135)     |
| Acute glomerulonephritis                            | 4<br>(2 - 5)             | 0<br>(0 - 0)          | 0<br>(0 - 0)           | 0<br>(0 - 1)            | 1<br>(1 - 2)            | 2<br>(1 - 3)             |
| Chronic kidney disease                              | 834<br>(599 - 972)       | 0<br>(0 - 0)          | 0<br>(0 - 0)           | 20<br>(15 - 24)         | 135<br>(102 - 160)      | 679<br>(472 - 804)       |
| Chronic kidney disease due to diabetes mellitus     | 165<br>(121 - 262)       | 0<br>(0 - 0)          | 0<br>(0 - 0)           | 6<br>(4 - 9)            | 40<br>(29 - 63)         | 119<br>(83 - 193)        |

Web Table 31- Denmark deaths with 95% UI by age, sex, and cause in 2013

| Cause                                               | Both Sexes, All Ages     | Both Sexes, 0-4 Years | Both Sexes, 5-14 Years | Both Sexes, 15-49 Years | Both Sexes, 50-69 Years | Both Sexes, 70-80 Years  |
|-----------------------------------------------------|--------------------------|-----------------------|------------------------|-------------------------|-------------------------|--------------------------|
| Chronic kidney disease due to hypertension          | 218<br>(120 - 283)       | 0<br>(0 - 0)          | 0<br>(0 - 0)           | 3<br>(2 - 4)            | 24<br>(12 - 33)         | 191<br>(106 - 250)       |
| Chronic kidney disease due to glomerulonephritis    | 39<br>(26 - 61)          | 0<br>(0 - 0)          | 0<br>(0 - 0)           | 1<br>(1 - 2)            | 8<br>(6 - 13)           | 29<br>(19 - 48)          |
| Chronic kidney disease due to other causes          | 412<br>(215 - 526)       | 0<br>(0 - 0)          | 0<br>(0 - 0)           | 10<br>(6 - 13)          | 62<br>(37 - 83)         | 339<br>(166 - 440)       |
| Urinary diseases and male infertility               | 411<br>(273 - 513)       | 0<br>(0 - 0)          | 0<br>(0 - 0)           | 6<br>(4 - 7)            | 37<br>(29 - 48)         | 368<br>(233 - 468)       |
| Interstitial nephritis and urinary tract infections | 361<br>(228 - 458)       | 0<br>(0 - 0)          | 0<br>(0 - 0)           | 4<br>(3 - 6)            | 29<br>(23 - 38)         | 327<br>(199 - 424)       |
| Urolithiasis                                        | 19<br>(12 - 29)          | --<br>(0 - 0)         | 0<br>(0 - 0)           | 0<br>(0 - 1)            | 3<br>(2 - 5)            | 15<br>(9 - 24)           |
| Other urinary diseases                              | 32<br>(21 - 56)          | 0<br>(0 - 0)          | 0<br>(0 - 0)           | 1<br>(0 - 1)            | 5<br>(3 - 7)            | 26<br>(16 - 48)          |
| Gynecological diseases                              | 3<br>(2 - 5)             | --<br>(0 - 0)         | --<br>(0 - 0)          | 0<br>(0 - 0)            | 1<br>(0 - 1)            | 2<br>(1 - 4)             |
| Uterine fibroids                                    | 1<br>(1 - 1)             | --<br>(0 - 0)         | --<br>(0 - 0)          | 0<br>(0 - 0)            | 0<br>(0 - 0)            | 1<br>(0 - 1)             |
| Polycystic ovarian syndrome                         | 0<br>(0 - 0)             | --<br>(0 - 0)         | --<br>(0 - 0)          | 0<br>(0 - 0)            | 0<br>(0 - 0)            | --<br>(0 - 0)            |
| Endometriosis                                       | 0<br>(0 - 0)             | --<br>(0 - 0)         | --<br>(0 - 0)          | 0<br>(0 - 0)            | 0<br>(0 - 0)            | --<br>(0 - 0)            |
| Genital prolapse                                    | 1<br>(0 - 1)             | --<br>(0 - 0)         | --<br>(0 - 0)          | 0<br>(0 - 0)            | 0<br>(0 - 0)            | 0<br>(0 - 1)             |
| Other gynecological diseases                        | 1<br>(1 - 2)             | --<br>(0 - 0)         | --<br>(0 - 0)          | 0<br>(0 - 0)            | 0<br>(0 - 1)            | 1<br>(0 - 2)             |
| Hemoglobinopathies and hemolytic anemias            | 28<br>(19 - 37)          | 0<br>(0 - 0)          | 0<br>(0 - 0)           | 2<br>(1 - 2)            | 5<br>(4 - 7)            | 21<br>(13 - 28)          |
| Thalassemias                                        | 1<br>(0 - 1)             | 0<br>(0 - 0)          | 0<br>(0 - 0)           | 0<br>(0 - 0)            | 0<br>(0 - 0)            | 0<br>(0 - 0)             |
| Sickle cell disorders                               | 3<br>(2 - 5)             | 0<br>(0 - 0)          | 0<br>(0 - 0)           | 1<br>(0 - 1)            | 2<br>(1 - 2)            | 1<br>(1 - 1)             |
| G6PD deficiency                                     | 0<br>(0 - 0)             | 0<br>(0 - 0)          | 0<br>(0 - 0)           | 0<br>(0 - 0)            | 0<br>(0 - 0)            | 0<br>(0 - 0)             |
| Other hemoglobinopathies and hemolytic anemias      | 24<br>(16 - 32)          | 0<br>(0 - 0)          | 0<br>(0 - 0)           | 1<br>(0 - 1)            | 3<br>(2 - 5)            | 20<br>(13 - 27)          |
| Endocrine, metabolic, blood, and immune disorders   | 281<br>(60 - 368)        | 8<br>(2 - 12)         | 2<br>(0 - 3)           | 29<br>(6 - 39)          | 92<br>(21 - 123)        | 150<br>(29 - 209)        |
| Musculoskeletal disorders                           | 222<br>(186 - 286)       | --<br>(0 - 1)         | 1<br>(0 - 1)           | 9<br>(8 - 12)           | 49<br>(40 - 68)         | 164<br>(131 - 211)       |
| Rheumatoid arthritis                                | 92<br>(71 - 122)         | --<br>(0 - 0)         | 0<br>(0 - 0)           | 1<br>(1 - 2)            | 16<br>(12 - 22)         | 75<br>(55 - 102)         |
| Other musculoskeletal disorders                     | 130<br>(104 - 184)       | --<br>(0 - 1)         | 0<br>(0 - 1)           | 8<br>(7 - 11)           | 33<br>(26 - 48)         | 89<br>(68 - 126)         |
| Other non-communicable diseases                     | 288<br>(249 - 335)       | 79<br>(59 - 109)      | 6<br>(5 - 8)           | 31<br>(27 - 37)         | 52<br>(45 - 62)         | 120<br>(69 - 155)        |
| Congenital anomalies                                | 164<br>(141 - 214)       | 71<br>(53 - 99)       | 6<br>(5 - 8)           | 29<br>(25 - 35)         | 37<br>(31 - 49)         | 21<br>(17 - 27)          |
| Neural tube defects                                 | 2<br>(1 - 3)             | 1<br>(0 - 2)          | 0<br>(0 - 0)           | 0<br>(0 - 0)            | 0<br>(0 - 0)            | 0<br>(0 - 0)             |
| Congenital heart anomalies                          | 50<br>(40 - 70)          | 27<br>(20 - 40)       | 2<br>(2 - 3)           | 2<br>(8 - 14)           | 7<br>(5 - 10)           | 3<br>(2 - 4)             |
| Cleft lip and cleft palate                          | 0<br>(0 - 0)             | 0<br>(0 - 0)          | --<br>(0 - 0)          | --<br>(0 - 0)           | --<br>(0 - 0)           | --<br>(0 - 0)            |
| Down syndrome                                       | 27<br>(20 - 34)          | 3<br>(1 - 4)          | 1<br>(0 - 1)           | 5<br>(3 - 7)            | 17<br>(12 - 22)         | 2<br>(1 - 3)             |
| Chromosomal unbalanced rearrangements               | 10<br>(7 - 17)           | 9<br>(5 - 15)         | 0<br>(0 - 0)           | 1<br>(1 - 1)            | 0<br>(0 - 1)            | 0<br>(0 - 0)             |
| Other congenital anomalies                          | 76<br>(63 - 98)          | 32<br>(23 - 46)       | 3<br>(2 - 4)           | 12<br>(10 - 16)         | 13<br>(10 - 17)         | 16<br>(13 - 20)          |
| Skin and subcutaneous diseases                      | 116<br>(52 - 152)        | 0<br>(0 - 0)          | 0<br>(0 - 0)           | 2<br>(1 - 3)            | 15<br>(7 - 19)          | 99<br>(45 - 133)         |
| Cellulitis                                          | 5<br>(2 - 8)             | 0<br>(0 - 0)          | 0<br>(0 - 0)           | 0<br>(0 - 0)            | 1<br>(0 - 2)            | 4<br>(1 - 6)             |
| Pyoderma                                            | 81<br>(34 - 106)         | 0<br>(0 - 0)          | 0<br>(0 - 0)           | 1<br>(1 - 2)            | 11<br>(5 - 14)          | 68<br>(29 - 93)          |
| Decubitus ulcer                                     | 24<br>(11 - 35)          | 0<br>(0 - 0)          | 0<br>(0 - 0)           | 0<br>(0 - 0)            | 2<br>(1 - 3)            | 21<br>(10 - 33)          |
| Other skin and subcutaneous diseases                | 7<br>(3 - 17)            | 0<br>(0 - 0)          | 0<br>(0 - 0)           | 0<br>(0 - 0)            | 1<br>(1 - 2)            | 5<br>(2 - 14)            |
| Sudden infant death syndrome                        | 7<br>(3 - 16)            | 7<br>(3 - 16)         | --<br>(0 - 0)          | --<br>(0 - 0)           | --<br>(0 - 0)           | --<br>(0 - 0)            |
| Injuries                                            | 2,638<br>(2,341 - 3,464) | 18<br>(13 - 24)       | 19<br>(16 - 23)        | 594<br>(535 - 721)      | 620<br>(552 - 823)      | 1,387<br>(1,165 - 1,960) |
| Transport injuries                                  | 407<br>(367 - 452)       | 5<br>(3 - 7)          | 10<br>(8 - 13)         | 171<br>(149 - 194)      | 106<br>(93 - 124)       | 115<br>(97 - 136)        |
| Road injuries                                       | 384<br>(345 - 427)       | 4<br>(3 - 6)          | 10<br>(8 - 12)         | 162<br>(140 - 184)      | 98<br>(84 - 115)        | 110<br>(92 - 130)        |
| Pedestrian road injuries                            | 77<br>(55 - 113)         | 2<br>(1 - 2)          | 3<br>(2 - 4)           | 19<br>(12 - 31)         | 19<br>(13 - 28)         | 35<br>(24 - 50)          |

Web Table 31- Denmark deaths with 95% UI by age, sex, and cause in 2013

| Cause                                           | Both Sexes, All Ages     | Both Sexes, 0-4 Years | Both Sexes, 5-14 Years | Both Sexes, 15-49 Years | Both Sexes, 50-69 Years | Both Sexes, 70-80 Years |
|-------------------------------------------------|--------------------------|-----------------------|------------------------|-------------------------|-------------------------|-------------------------|
| Cyclist road injuries                           | 53<br>(39 - 66)          | 0<br>(0 - 1)          | 3<br>(2 - 4)           | 12<br>(9 - 16)          | 19<br>(13 - 25)         | 18<br>(12 - 25)         |
| Motorcyclist road injuries                      | 49<br>(28 - 63)          | 0<br>(0 - 0)          | 1<br>(0 - 1)           | 31<br>(17 - 42)         | 12<br>(7 - 16)          | 6<br>(3 - 8)            |
| Motor vehicle road injuries                     | 204<br>(168 - 244)       | 2<br>(2 - 3)          | 4<br>(3 - 5)           | 99<br>(81 - 117)        | 48<br>(38 - 61)         | 51<br>(39 - 65)         |
| Other road injuries                             | 2<br>(1 - 3)             | 0<br>(0 - 0)          | 0<br>(0 - 0)           | 1<br>(0 - 1)            | 1<br>(0 - 1)            | 0<br>(0 - 1)            |
| Other transport injuries                        | 23<br>(18 - 32)          | 0<br>(0 - 1)          | 1<br>(0 - 1)           | 9<br>(6 - 12)           | 8<br>(6 - 12)           | 5<br>(4 - 8)            |
| Unintentional injuries                          | 1,393<br>(1,160 - 1,895) | 11<br>(8 - 15)        | 6<br>(4 - 7)           | 95<br>(81 - 118)        | 190<br>(161 - 224)      | 1,091<br>(883 - 1,569)  |
| Falls                                           | 1,066<br>(836 - 1,627)   | 1<br>(1 - 2)          | 1<br>(0 - 1)           | 24<br>(19 - 33)         | 98<br>(80 - 131)        | 942<br>(723 - 1,455)    |
| Drowning                                        | 45<br>(31 - 61)          | 3<br>(2 - 5)          | 2<br>(1 - 3)           | 15<br>(10 - 21)         | 16<br>(10 - 22)         | 9<br>(6 - 12)           |
| Fire, heat, and hot substances                  | 88<br>(60 - 113)         | 1<br>(1 - 2)          | 1<br>(0 - 1)           | 15<br>(10 - 20)         | 22<br>(15 - 30)         | 49<br>(32 - 66)         |
| Poisonings                                      | 20<br>(15 - 39)          | 0<br>(0 - 0)          | 0<br>(0 - 0)           | 10<br>(7 - 21)          | 6<br>(4 - 11)           | 4<br>(3 - 8)            |
| Exposure to mechanical forces                   | 38<br>(33 - 47)          | 2<br>(1 - 3)          | 1<br>(1 - 2)           | 14<br>(11 - 17)         | 12<br>(10 - 15)         | 9<br>(7 - 13)           |
| Unintentional firearm injuries                  | 2<br>(1 - 2)             | 0<br>(0 - 0)          | 0<br>(0 - 0)           | 1<br>(1 - 1)            | 0<br>(0 - 0)            | 0<br>(0 - 0)            |
| Unintentional suffocation                       | 6<br>(4 - 8)             | 1<br>(1 - 2)          | 0<br>(0 - 1)           | 1<br>(1 - 2)            | 1<br>(1 - 2)            | 2<br>(1 - 3)            |
| Other exposure to mechanical forces             | 31<br>(26 - 38)          | 1<br>(0 - 1)          | 1<br>(0 - 1)           | 12<br>(9 - 15)          | 11<br>(9 - 14)          | 7<br>(5 - 10)           |
| Adverse effects of medical treatment            | 51<br>(4 - 99)           | 1<br>(0 - 2)          | 0<br>(0 - 0)           | 3<br>(1 - 5)            | 12<br>(1 - 23)          | 35<br>(2 - 71)          |
| Animal contact                                  | 6<br>(4 - 9)             | 0<br>(0 - 0)          | 0<br>(0 - 0)           | 1<br>(1 - 2)            | 2<br>(1 - 3)            | 2<br>(1 - 3)            |
| Venomous animal contact                         | 2<br>(1 - 3)             | 0<br>(0 - 0)          | 0<br>(0 - 0)           | 0<br>(0 - 1)            | 1<br>(0 - 1)            | 0<br>(0 - 1)            |
| Non-venomous animal contact                     | 4<br>(3 - 7)             | 0<br>(0 - 0)          | 0<br>(0 - 0)           | 1<br>(0 - 1)            | 1<br>(1 - 2)            | 2<br>(1 - 3)            |
| Foreign body                                    | 70<br>(47 - 97)          | 2<br>(1 - 3)          | 0<br>(0 - 1)           | 12<br>(8 - 17)          | 19<br>(14 - 27)         | 37<br>(23 - 51)         |
| Pulmonary aspiration and foreign body in airway | 69<br>(46 - 95)          | 2<br>(1 - 3)          | 0<br>(0 - 1)           | 11<br>(8 - 17)          | 19<br>(13 - 27)         | 36<br>(23 - 51)         |
| Foreign body in other body part                 | 1<br>(1 - 2)             | 0<br>(0 - 0)          | 0<br>(0 - 0)           | 0<br>(0 - 1)            | 0<br>(0 - 0)            | 1<br>(0 - 1)            |
| Other unintentional injuries                    | 9<br>(7 - 16)            | 0<br>(0 - 1)          | 0<br>(0 - 0)           | 2<br>(2 - 4)            | 3<br>(2 - 5)            | 4<br>(2 - 7)            |
| Self-harm and interpersonal violence            | 839<br>(732 - 1,270)     | 3<br>(2 - 4)          | 3<br>(2 - 4)           | 328<br>(282 - 453)      | 324<br>(274 - 500)      | 182<br>(149 - 302)      |
| Self-harm                                       | 784<br>(680 - 1,216)     | --                    | 1<br>(1 - 2)           | 299<br>(254 - 426)      | 310<br>(261 - 485)      | 174<br>(143 - 295)      |
| Interpersonal violence                          | 54<br>(36 - 67)          | 3<br>(2 - 4)          | 2<br>(1 - 3)           | 29<br>(19 - 37)         | 13<br>(9 - 17)          | 7<br>(5 - 9)            |
| Assault by firearm                              | 12<br>(7 - 19)           | 0<br>(0 - 1)          | 1<br>(0 - 1)           | 8<br>(4 - 12)           | 2<br>(1 - 3)            | 1<br>(1 - 2)            |
| Assault by sharp object                         | 15<br>(10 - 23)          | 0<br>(0 - 1)          | 0<br>(0 - 0)           | 10<br>(7 - 15)          | 4<br>(2 - 6)            | 1<br>(1 - 2)            |
| Assault by other means                          | 27<br>(16 - 34)          | 2<br>(1 - 3)          | 1<br>(1 - 1)           | 11<br>(7 - 15)          | 7<br>(4 - 10)           | 5<br>(3 - 6)            |

Web Table 31- Denmark deaths with 95% UI by age, sex, and cause in 2013

| Cause                                                             | Males, All Ages             | Males, 0-4 Years   | Males, 5-14 Years | Males, 15-49 Years       | Males, 50-69 Years       | Males, 70-80 Years          |
|-------------------------------------------------------------------|-----------------------------|--------------------|-------------------|--------------------------|--------------------------|-----------------------------|
| All causes                                                        | 27,085<br>(25,421 - 29,032) | 138<br>(108 - 177) | 32<br>(27 - 38)   | 1,501<br>(1,370 - 1,654) | 7,272<br>(6,706 - 7,944) | 18,143<br>(17,194 - 19,253) |
| Communicable, maternal, neonatal, and nutritional diseases        | 1,466<br>(1,123 - 1,784)    | 69<br>(52 - 90)    | 2<br>(2 - 3)      | 54<br>(43 - 67)          | 180<br>(130 - 223)       | 1,161<br>(884 - 1,461)      |
| HIV/AIDS and tuberculosis                                         | 51<br>(38 - 68)             | 0<br>(0 - 0)       | 0<br>(0 - 0)      | 21<br>(12 - 33)          | 15<br>(10 - 22)          | 16<br>(12 - 20)             |
| Tuberculosis                                                      | 23<br>(19 - 29)             | 0<br>(0 - 0)       | 0<br>(0 - 0)      | 2<br>(1 - 2)             | 7<br>(5 - 9)             | 15<br>(11 - 19)             |
| HIV/AIDS                                                          | 28<br>(15 - 44)             | 0<br>(0 - 0)       | 0<br>(0 - 0)      | 19<br>(11 - 31)          | 8<br>(4 - 15)            | 1<br>(0 - 2)                |
| HIV/AIDS resulting in mycobacterial infection                     | 2<br>(1 - 3)                | 0<br>(0 - 0)       | 0<br>(0 - 0)      | 1<br>(1 - 2)             | 0<br>(0 - 1)             | 0<br>(0 - 0)                |
| HIV/AIDS resulting in other diseases                              | 26<br>(15 - 41)             | 0<br>(0 - 0)       | 0<br>(0 - 0)      | 18<br>(10 - 29)          | 7<br>(3 - 14)            | 1<br>(0 - 2)                |
| Diarrhea, lower respiratory, and other common infectious diseases | 1,231<br>(945 - 1,542)      | 9<br>(6 - 13)      | 2<br>(1 - 2)      | 23<br>(17 - 28)          | 142<br>(96 - 182)        | 1,055<br>(800 - 1,353)      |
| Diarrheal diseases                                                | 95<br>(64 - 139)            | 2<br>(1 - 3)       | 0<br>(0 - 0)      | 2<br>(1 - 2)             | 10<br>(7 - 14)           | 81<br>(52 - 124)            |
| Intestinal infectious diseases                                    | 2<br>(1 - 5)                | 0<br>(0 - 1)       | 0<br>(0 - 1)      | 1<br>(0 - 2)             | 0<br>(0 - 1)             | 0<br>(0 - 1)                |
| Typhoid fever                                                     | 2<br>(1 - 3)                | 0<br>(0 - 1)       | 0<br>(0 - 1)      | 1<br>(0 - 1)             | 0<br>(0 - 1)             | 0<br>(0 - 0)                |
| Paratyphoid fever                                                 | 0<br>(0 - 1)                | 0<br>(0 - 0)       | 0<br>(0 - 0)      | 0<br>(0 - 0)             | 0<br>(0 - 0)             | 0<br>(0 - 0)                |
| Other intestinal infectious diseases                              | 0<br>(0 - 2)                | 0<br>(0 - 1)       | 0<br>(0 - 0)      | 0<br>(0 - 1)             | 0<br>(0 - 1)             | 0<br>(0 - 1)                |
| Lower respiratory infections                                      | 1,102<br>(818 - 1,415)      | 3<br>(2 - 5)       | 0<br>(0 - 1)      | 15<br>(10 - 20)          | 123<br>(76 - 162)        | 960<br>(711 - 1,264)        |
| Upper respiratory infections                                      | 1<br>(0 - 2)                | 0<br>(0 - 0)       | 0<br>(0 - 0)      | 0<br>(0 - 0)             | 0<br>(0 - 1)             | 0<br>(0 - 1)                |
| Otitis media                                                      | 1<br>(1 - 1)                | 0<br>(0 - 0)       | 0<br>(0 - 0)      | 0<br>(0 - 0)             | 0<br>(0 - 0)             | 0<br>(0 - 0)                |
| Meningitis                                                        | 23<br>(19 - 28)             | 2<br>(1 - 4)       | 0<br>(0 - 1)      | 3<br>(3 - 4)             | 7<br>(5 - 9)             | 10<br>(8 - 13)              |
| Pneumococcal meningitis                                           | 4<br>(3 - 6)                | 0<br>(0 - 1)       | 0<br>(0 - 0)      | 1<br>(0 - 1)             | 1<br>(1 - 2)             | 2<br>(1 - 3)                |
| H influenzae type B meningitis                                    | 3<br>(2 - 4)                | 1<br>(0 - 1)       | 0<br>(0 - 0)      | 0<br>(0 - 1)             | 1<br>(0 - 1)             | 1<br>(1 - 2)                |
| Meningococcal meningitis                                          | 7<br>(5 - 9)                | 1<br>(0 - 1)       | 0<br>(0 - 0)      | 1<br>(1 - 1)             | 2<br>(1 - 3)             | 3<br>(2 - 4)                |
| Other meningitis                                                  | 9<br>(7 - 12)               | 1<br>(0 - 1)       | 0<br>(0 - 0)      | 1<br>(1 - 2)             | 3<br>(2 - 5)             | 4<br>(3 - 6)                |
| Encephalitis                                                      | 4<br>(2 - 6)                | 0<br>(0 - 1)       | 0<br>(0 - 0)      | 1<br>(0 - 1)             | 1<br>(1 - 2)             | 2<br>(1 - 2)                |
| Diphtheria                                                        | 0<br>(0 - 0)                | 0<br>(0 - 0)       | 0<br>(0 - 0)      | 0<br>(0 - 0)             | 0<br>(0 - 0)             | --                          |
| Whooping cough                                                    | 0<br>(0 - 0)                | 0<br>(0 - 0)       | 0<br>(0 - 0)      | 0<br>(0 - 0)             | 0<br>(0 - 0)             | --                          |
| Tetanus                                                           | 0<br>(0 - 0)                | 0<br>(0 - 0)       | 0<br>(0 - 0)      | 0<br>(0 - 0)             | 0<br>(0 - 0)             | 0<br>(0 - 0)                |
| Measles                                                           | 0<br>(0 - 0)                | 0<br>(0 - 0)       | 0<br>(0 - 0)      | 0<br>(0 - 0)             | 0<br>(0 - 0)             | --                          |
| Varicella and herpes zoster                                       | 2<br>(1 - 9)                | 0<br>(0 - 1)       | 0<br>(0 - 0)      | 0<br>(0 - 1)             | 0<br>(0 - 1)             | 2<br>(0 - 8)                |
| Neglected tropical diseases and malaria                           | 4<br>(2 - 5)                | 0<br>(0 - 0)       | 0<br>(0 - 0)      | 1<br>(1 - 1)             | 1<br>(1 - 1)             | 2<br>(1 - 3)                |
| Cysticercosis                                                     | 0<br>(0 - 0)                | 0<br>(0 - 0)       | 0<br>(0 - 0)      | 0<br>(0 - 0)             | 0<br>(0 - 0)             | 0<br>(0 - 0)                |
| Cystic echinococcosis                                             | 0<br>(0 - 0)                | 0<br>(0 - 0)       | 0<br>(0 - 0)      | 0<br>(0 - 0)             | 0<br>(0 - 0)             | 0<br>(0 - 0)                |
| Dengue                                                            | 0<br>(0 - 0)                | 0<br>(0 - 0)       | 0<br>(0 - 0)      | 0<br>(0 - 0)             | 0<br>(0 - 0)             | 0<br>(0 - 0)                |
| Rabies                                                            | 0<br>(0 - 1)                | 0<br>(0 - 0)       | 0<br>(0 - 0)      | 0<br>(0 - 0)             | 0<br>(0 - 0)             | 0<br>(0 - 0)                |
| Other neglected tropical diseases                                 | 3<br>(1 - 4)                | 0<br>(0 - 0)       | 0<br>(0 - 0)      | 0<br>(0 - 0)             | 1<br>(0 - 1)             | 2<br>(0 - 3)                |
| Maternal disorders                                                | --                          | --                 | --                | --                       | --                       | --                          |
| Maternal hemorrhage                                               | --                          | --                 | --                | --                       | --                       | --                          |
| Maternal sepsis and other maternal infections                     | --                          | --                 | --                | --                       | --                       | --                          |
| Maternal hypertensive disorders                                   | --                          | --                 | --                | --                       | --                       | --                          |
| Maternal obstructed labor                                         | --                          | --                 | --                | --                       | --                       | --                          |
| Maternal abortive outcome                                         | --                          | --                 | --                | --                       | --                       | --                          |
| Indirect maternal deaths                                          | --                          | --                 | --                | --                       | --                       | --                          |



Web Table 31- Denmark deaths with 95% UI by age, sex, and cause in 2013

| Cause                                                            | Males, All Ages             | Males, 0-4 Years | Males, 5-14 Years | Males, 15-49 Years   | Males, 50-69 Years       | Males, 70-80 Years          |
|------------------------------------------------------------------|-----------------------------|------------------|-------------------|----------------------|--------------------------|-----------------------------|
| Late maternal deaths                                             | --                          | --               | --                | --                   | --                       | --                          |
| Maternal deaths aggravated by HIV/AIDS                           | --                          | --               | --                | --                   | --                       | --                          |
| Other maternal disorders                                         | --                          | --               | --                | --                   | --                       | --                          |
| Neonatal disorders                                               | 59<br>(44 - 77)             | 59<br>(44 - 77)  | --                | --                   | --                       | --                          |
| Neonatal preterm birth complications                             | 43<br>(29 - 57)             | 43<br>(29 - 57)  | --                | --                   | --                       | --                          |
| Neonatal encephalopathy due to birth asphyxia and trauma         | 11<br>(6 - 18)              | 11<br>(6 - 18)   | --                | --                   | --                       | --                          |
| Neonatal sepsis and other neonatal infections                    | 0<br>(0 - 1)                | 0<br>(0 - 1)     | --                | --                   | --                       | --                          |
| Hemolytic disease and other neonatal jaundice                    | 0<br>(0 - 0)                | 0<br>(0 - 0)     | --                | --                   | --                       | --                          |
| Other neonatal disorders                                         | 5<br>(2 - 9)                | 5<br>(2 - 9)     | --                | --                   | --                       | --                          |
| Nutritional deficiencies                                         | 83<br>(30 - 117)            | 0<br>(0 - 0)     | 0<br>(0 - 0)      | 2<br>(1 - 3)         | 9<br>(3 - 13)            | 72<br>(25 - 104)            |
| Protein-energy malnutrition                                      | 13<br>(4 - 24)              | 0<br>(0 - 0)     | 0<br>(0 - 0)      | 0<br>(0 - 1)         | 2<br>(0 - 3)             | 11<br>(3 - 21)              |
| Iodine deficiency                                                | 0<br>(0 - 1)                | 0<br>(0 - 0)     | 0<br>(0 - 0)      | 0<br>(0 - 0)         | 0<br>(0 - 0)             | 0<br>(0 - 1)                |
| Iron-deficiency anemia                                           | 63<br>(20 - 93)             | 0<br>(0 - 0)     | 0<br>(0 - 0)      | 1<br>(0 - 2)         | 6<br>(2 - 10)            | 55<br>(17 - 84)             |
| Other nutritional deficiencies                                   | 7<br>(2 - 15)               | 0<br>(0 - 0)     | 0<br>(0 - 0)      | 0<br>(0 - 1)         | 1<br>(0 - 2)             | 6<br>(1 - 13)               |
| Other communicable, maternal, neonatal, and nutritional diseases | 38<br>(28 - 52)             | 1<br>(0 - 1)     | 0<br>(0 - 0)      | 8<br>(6 - 13)        | 13<br>(8 - 19)           | 17<br>(10 - 22)             |
| Sexually transmitted diseases excluding HIV                      | 2<br>(1 - 4)                | 0<br>(0 - 1)     | 0<br>(0 - 0)      | 0<br>(0 - 0)         | 0<br>(0 - 1)             | 1<br>(0 - 3)                |
| Syphilis                                                         | 1<br>(1 - 3)                | 0<br>(0 - 1)     | 0<br>(0 - 0)      | 0<br>(0 - 0)         | 0<br>(0 - 1)             | 1<br>(0 - 2)                |
| Chlamydial infection                                             | --                          | --               | --                | --                   | --                       | --                          |
| Gonococcal infection                                             | 0<br>(0 - 0)                | --               | 0<br>(0 - 0)      | 0<br>(0 - 0)         | 0<br>(0 - 0)             | 0<br>(0 - 0)                |
| Other sexually transmitted diseases                              | 0<br>(0 - 0)                | --               | 0<br>(0 - 0)      | 0<br>(0 - 0)         | 0<br>(0 - 0)             | 0<br>(0 - 0)                |
| Hepatitis                                                        | 1<br>(1 - 2)                | 0<br>(0 - 0)     | 0<br>(0 - 0)      | 0<br>(0 - 1)         | 0<br>(0 - 1)             | 0<br>(0 - 0)                |
| Acute hepatitis A                                                | 0<br>(0 - 1)                | 0<br>(0 - 0)     | 0<br>(0 - 0)      | 0<br>(0 - 0)         | 0<br>(0 - 0)             | 0<br>(0 - 0)                |
| Acute hepatitis B                                                | 1<br>(1 - 1)                | 0<br>(0 - 0)     | 0<br>(0 - 0)      | 0<br>(0 - 0)         | 0<br>(0 - 1)             | 0<br>(0 - 0)                |
| Acute hepatitis C                                                | 0<br>(0 - 0)                | --               | 0<br>(0 - 0)      | 0<br>(0 - 0)         | 0<br>(0 - 0)             | 0<br>(0 - 0)                |
| Other infectious diseases                                        | 36<br>(24 - 48)             | 1<br>(0 - 1)     | 0<br>(0 - 0)      | 7<br>(5 - 12)        | 12<br>(8 - 18)           | 16<br>(9 - 21)              |
| Non-communicable diseases                                        | 24,096<br>(22,624 - 25,828) | 57<br>(43 - 76)  | 18<br>(15 - 21)   | 990<br>(865 - 1,108) | 6,670<br>(6,150 - 7,293) | 16,360<br>(15,482 - 17,385) |
| Neoplasms                                                        | 7,390<br>(6,769 - 8,091)    | 4<br>(3 - 7)     | 9<br>(7 - 12)     | 277<br>(243 - 319)   | 2,744<br>(2,485 - 3,026) | 4,355<br>(3,972 - 4,793)    |
| Esophageal cancer                                                | 251<br>(200 - 292)          | --               | --                | 11<br>(8 - 15)       | 123<br>(98 - 148)        | 116<br>(89 - 137)           |
| Stomach cancer                                                   | 239<br>(210 - 274)          | --               | --                | 10<br>(8 - 12)       | 93<br>(79 - 110)         | 137<br>(114 - 161)          |
| Liver cancer                                                     | 238<br>(154 - 302)          | --               | 0<br>(0 - 0)      | 9<br>(6 - 13)        | 108<br>(69 - 140)        | 120<br>(72 - 160)           |
| Liver cancer due to hepatitis B                                  | 47<br>(16 - 86)             | --               | 0<br>(0 - 0)      | 3<br>(1 - 6)         | 25<br>(7 - 49)           | 18<br>(7 - 34)              |
| Liver cancer due to hepatitis C                                  | 131<br>(74 - 185)           | --               | 0<br>(0 - 0)      | 4<br>(2 - 7)         | 58<br>(33 - 89)          | 68<br>(37 - 99)             |
| Liver cancer due to alcohol use                                  | 56<br>(29 - 89)             | --               | --                | 1<br>(1 - 3)         | 23<br>(12 - 39)          | 32<br>(15 - 52)             |
| Liver cancer due to other causes                                 | 4<br>(1 - 9)                | --               | 0<br>(0 - 0)      | 0<br>(0 - 1)         | 2<br>(1 - 4)             | 2<br>(1 - 4)                |
| Larynx cancer                                                    | 68<br>(54 - 95)             | --               | --                | 3<br>(2 - 5)         | 35<br>(26 - 49)          | 30<br>(23 - 44)             |
| Tracheal, bronchus and lung cancer                               | 1,735<br>(1,575 - 1,915)    | --               | --                | 38<br>(30 - 46)      | 726<br>(645 - 819)       | 971<br>(872 - 1,081)        |
| Breast cancer                                                    | 11<br>(5 - 24)              | --               | --                | 0<br>(0 - 1)         | 5<br>(2 - 9)             | 6<br>(3 - 13)               |
| Cervical cancer                                                  | --                          | --               | --                | --                   | --                       | --                          |
| Uterine cancer                                                   | --                          | --               | --                | --                   | --                       | --                          |
| Prostate cancer                                                  | 1,073<br>(822 - 1,502)      | --               | --                | 2<br>(1 - 3)         | 219<br>(187 - 333)       | 852<br>(633 - 1,212)        |

Web Table 31- Denmark deaths with 95% UI by age, sex, and cause in 2013

| Cause                                         | Males, All Ages          | Males, 0-4 Years | Males, 5-14 Years | Males, 15-49 Years | Males, 50-69 Years       | Males, 70-80 Years       |
|-----------------------------------------------|--------------------------|------------------|-------------------|--------------------|--------------------------|--------------------------|
| Colon and rectum cancer                       | 1,183<br>(1,064 - 1,316) | --               | --                | 27<br>(22 - 32)    | 398<br>(355 - 447)       | 758<br>(663 - 863)       |
| Lip and oral cavity cancer                    | 101<br>(58 - 119)        | --               | --                | 9<br>(5 - 11)      | 57<br>(30 - 69)          | 35<br>(22 - 44)          |
| Nasopharynx cancer                            | 14<br>(10 - 22)          | --               | 0<br>(0 - 0)      | 2<br>(1 - 3)       | 8<br>(6 - 13)            | 4<br>(3 - 6)             |
| Other pharynx cancer                          | 105<br>(60 - 133)        | --               | --                | 7<br>(4 - 9)       | 70<br>(38 - 91)          | 28<br>(16 - 38)          |
| Gallbladder and biliary tract cancer          | 57<br>(43 - 83)          | --               | --                | 2<br>(1 - 3)       | 19<br>(13 - 30)          | 36<br>(26 - 53)          |
| Pancreatic cancer                             | 415<br>(374 - 463)       | --               | --                | 15<br>(12 - 19)    | 185<br>(161 - 213)       | 215<br>(189 - 246)       |
| Malignant skin melanoma                       | 146<br>(75 - 262)        | --               | --                | 21<br>(12 - 41)    | 65<br>(34 - 124)         | 59<br>(28 - 102)         |
| Non-melanoma skin cancer                      | 39<br>(23 - 59)          | --               | --                | 1<br>(0 - 1)       | 7<br>(4 - 12)            | 31<br>(18 - 47)          |
| Ovarian cancer                                | --                       | --               | --                | --                 | --                       | --                       |
| Testicular cancer                             | 13<br>(10 - 20)          | --               | --                | 6<br>(4 - 9)       | 4<br>(3 - 6)             | 3<br>(2 - 4)             |
| Kidney cancer                                 | 182<br>(154 - 213)       | 0<br>(0 - 0)     | 0<br>(0 - 0)      | 8<br>(5 - 10)      | 81<br>(67 - 100)         | 93<br>(74 - 116)         |
| Bladder cancer                                | 295<br>(246 - 348)       | --               | --                | 3<br>(2 - 5)       | 76<br>(63 - 94)          | 216<br>(171 - 260)       |
| Brain and nervous system cancer               | 238<br>(176 - 287)       | 1<br>(0 - 2)     | 3<br>(2 - 4)      | 38<br>(30 - 51)    | 119<br>(88 - 151)        | 76<br>(49 - 99)          |
| Thyroid cancer                                | 16<br>(12 - 21)          | --               | 0<br>(0 - 0)      | 1<br>(1 - 2)       | 6<br>(5 - 9)             | 8<br>(6 - 11)            |
| Mesothelioma                                  | 95<br>(67 - 150)         | --               | --                | 2<br>(1 - 4)       | 42<br>(27 - 75)          | 51<br>(27 - 84)          |
| Hodgkin lymphoma                              | 18<br>(13 - 28)          | 0<br>(0 - 0)     | 0<br>(0 - 0)      | 4<br>(3 - 7)       | 7<br>(5 - 11)            | 7<br>(5 - 11)            |
| Non-Hodgkin lymphoma                          | 183<br>(88 - 252)        | 0<br>(0 - 0)     | 1<br>(0 - 2)      | 14<br>(8 - 22)     | 71<br>(33 - 99)          | 97<br>(47 - 135)         |
| Multiple myeloma                              | 128<br>(71 - 208)        | --               | --                | 3<br>(2 - 6)       | 47<br>(27 - 82)          | 77<br>(40 - 123)         |
| Leukemia                                      | 253<br>(218 - 287)       | 1<br>(1 - 2)     | 3<br>(2 - 4)      | 17<br>(14 - 20)    | 79<br>(66 - 94)          | 152<br>(128 - 180)       |
| Other neoplasms                               | 297<br>(187 - 362)       | 2<br>(1 - 3)     | 2<br>(1 - 3)      | 23<br>(14 - 29)    | 93<br>(58 - 118)         | 177<br>(105 - 232)       |
| Cardiovascular diseases                       | 8,230<br>(7,592 - 8,982) | 0<br>(0 - 1)     | 1<br>(0 - 1)      | 195<br>(167 - 227) | 1,810<br>(1,646 - 2,015) | 6,225<br>(5,694 - 6,803) |
| Rheumatic heart disease                       | 25<br>(17 - 44)          | 0<br>(0 - 0)     | 0<br>(0 - 0)      | 1<br>(1 - 2)       | 6<br>(4 - 12)            | 18<br>(11 - 30)          |
| Ischemic heart disease                        | 4,328<br>(3,747 - 5,688) | 0<br>(0 - 0)     | 0<br>(0 - 0)      | 106<br>(87 - 129)  | 1,043<br>(905 - 1,303)   | 3,179<br>(2,698 - 4,260) |
| Cerebrovascular disease                       | 2,287<br>(1,557 - 2,790) | 0<br>(0 - 0)     | 0<br>(0 - 0)      | 44<br>(28 - 57)    | 423<br>(270 - 539)       | 1,819<br>(1,240 - 2,240) |
| Ischemic stroke                               | 1,251<br>(757 - 1,561)   | 0<br>(0 - 0)     | 0<br>(0 - 0)      | 7<br>(3 - 10)      | 149<br>(75 - 203)        | 1,095<br>(677 - 1,381)   |
| Hemorrhagic stroke                            | 1,035<br>(715 - 1,303)   | 0<br>(0 - 0)     | 0<br>(0 - 0)      | 38<br>(24 - 49)    | 273<br>(181 - 352)       | 724<br>(485 - 944)       |
| Hypertensive heart disease                    | 97<br>(54 - 136)         | 0<br>(0 - 0)     | 0<br>(0 - 0)      | 2<br>(1 - 3)       | 20<br>(12 - 30)          | 74<br>(39 - 111)         |
| Cardiomyopathy and myocarditis                | 135<br>(83 - 170)        | 0<br>(0 - 0)     | 0<br>(0 - 0)      | 18<br>(12 - 24)    | 59<br>(37 - 78)          | 58<br>(31 - 79)          |
| Atrial fibrillation and flutter               | 411<br>(263 - 549)       | --               | --                | 1<br>(1 - 2)       | 45<br>(26 - 61)          | 364<br>(233 - 498)       |
| Aortic aneurysm                               | 411<br>(283 - 483)       | --               | --                | 7<br>(5 - 9)       | 100<br>(68 - 123)        | 304<br>(206 - 364)       |
| Peripheral vascular disease                   | 76<br>(51 - 99)          | --               | --                | 0<br>(0 - 1)       | 13<br>(9 - 19)           | 62<br>(41 - 85)          |
| Endocarditis                                  | 34<br>(17 - 48)          | 0<br>(0 - 0)     | 0<br>(0 - 0)      | 2<br>(1 - 4)       | 10<br>(4 - 14)           | 22<br>(10 - 32)          |
| Other cardiovascular and circulatory diseases | 428<br>(292 - 528)       | 0<br>(0 - 0)     | 0<br>(0 - 0)      | 12<br>(8 - 15)     | 90<br>(60 - 116)         | 326<br>(219 - 415)       |
| Chronic respiratory diseases                  | 2,175<br>(1,628 - 2,461) | 1<br>(1 - 1)     | 0<br>(0 - 1)      | 23<br>(16 - 28)    | 420<br>(346 - 499)       | 1,731<br>(1,244 - 2,001) |
| Chronic obstructive pulmonary disease         | 1,942<br>(1,415 - 2,199) | 0<br>(0 - 1)     | 0<br>(0 - 0)      | 12<br>(8 - 16)     | 368<br>(300 - 435)       | 1,561<br>(1,104 - 1,796) |
| Pneumoconiosis                                | 46<br>(28 - 72)          | 0<br>(0 - 0)     | 0<br>(0 - 0)      | 1<br>(0 - 1)       | 8<br>(5 - 12)            | 38<br>(22 - 60)          |
| Silicosis                                     | 1<br>(1 - 2)             | 0<br>(0 - 0)     | 0<br>(0 - 0)      | 0<br>(0 - 0)       | 0<br>(0 - 0)             | 1<br>(0 - 1)             |
| Asbestosis                                    | 23<br>(15 - 36)          | 0<br>(0 - 0)     | 0<br>(0 - 0)      | 0<br>(0 - 0)       | 4<br>(3 - 6)             | 19<br>(11 - 30)          |
| Coal workers pneumoconiosis                   | 3<br>(2 - 5)             | 0<br>(0 - 0)     | 0<br>(0 - 0)      | 0<br>(0 - 0)       | 0<br>(0 - 0)             | 3<br>(1 - 5)             |
| Other pneumoconiosis                          | 19<br>(11 - 29)          | 0<br>(0 - 0)     | 0<br>(0 - 0)      | 0<br>(0 - 1)       | 3<br>(2 - 5)             | 15<br>(8 - 24)           |

Web Table 31- Denmark deaths with 95% UI by age, sex, and cause in 2013

| Cause                                               | Males, All Ages          | Males, 0-4 Years | Males, 5-14 Years | Males, 15-49 Years | Males, 50-69 Years | Males, 70-80 Years       |
|-----------------------------------------------------|--------------------------|------------------|-------------------|--------------------|--------------------|--------------------------|
| Asthma                                              | 34<br>(26 - 43)          | 0<br>(0 - 0)     | 0<br>(0 - 0)      | 4<br>(2 - 5)       | 10<br>(7 - 13)     | 21<br>(14 - 28)          |
| Interstitial lung disease and pulmonary sarcoidosis | 142<br>(87 - 204)        | 0<br>(0 - 0)     | 0<br>(0 - 0)      | 5<br>(3 - 7)       | 31<br>(18 - 46)    | 106<br>(61 - 154)        |
| Other chronic respiratory diseases                  | 11<br>(8 - 15)           | 0<br>(0 - 0)     | 0<br>(0 - 0)      | 1<br>(1 - 2)       | 3<br>(2 - 5)       | 6<br>(4 - 9)             |
| Cirrhosis                                           | 729<br>(651 - 810)       | 0<br>(0 - 0)     | 0<br>(0 - 0)      | 106<br>(88 - 125)  | 446<br>(391 - 506) | 177<br>(152 - 202)       |
| Cirrhosis due to hepatitis B                        | 71<br>(42 - 116)         | 0<br>(0 - 0)     | 0<br>(0 - 0)      | 10<br>(6 - 19)     | 44<br>(25 - 73)    | 17<br>(10 - 27)          |
| Cirrhosis due to hepatitis C                        | 331<br>(201 - 443)       | 0<br>(0 - 0)     | 0<br>(0 - 0)      | 50<br>(28 - 72)    | 204<br>(117 - 278) | 78<br>(50 - 105)         |
| Cirrhosis due to alcohol use                        | 261<br>(165 - 374)       | --               | --                | 31<br>(14 - 51)    | 159<br>(95 - 235)  | 72<br>(46 - 99)          |
| Cirrhosis due to other causes                       | 65<br>(29 - 108)         | 0<br>(0 - 0)     | 0<br>(0 - 0)      | 15<br>(7 - 25)     | 40<br>(17 - 70)    | 10<br>(4 - 18)           |
| Digestive diseases                                  | 722<br>(566 - 823)       | 0<br>(0 - 0)     | 0<br>(0 - 0)      | 28<br>(19 - 34)    | 178<br>(123 - 213) | 515<br>(412 - 600)       |
| Peptic ulcer disease                                | 171<br>(118 - 227)       | 0<br>(0 - 0)     | 0<br>(0 - 0)      | 4<br>(2 - 6)       | 35<br>(20 - 51)    | 132<br>(90 - 176)        |
| Gastritis and duodenitis                            | 10<br>(4 - 15)           | 0<br>(0 - 0)     | 0<br>(0 - 0)      | 0<br>(0 - 1)       | 3<br>(1 - 4)       | 7<br>(3 - 11)            |
| Appendicitis                                        | 16<br>(10 - 23)          | 0<br>(0 - 0)     | 0<br>(0 - 0)      | 2<br>(1 - 2)       | 4<br>(2 - 6)       | 10<br>(6 - 16)           |
| Paralytic ileus and intestinal obstruction          | 125<br>(69 - 195)        | 0<br>(0 - 0)     | 0<br>(0 - 0)      | 3<br>(1 - 4)       | 23<br>(11 - 36)    | 99<br>(56 - 162)         |
| Inguinal, femoral, and abdominal hernia             | 25<br>(12 - 40)          | 0<br>(0 - 0)     | 0<br>(0 - 0)      | 0<br>(0 - 1)       | 4<br>(2 - 7)       | 21<br>(9 - 34)           |
| Inflammatory bowel disease                          | 28<br>(16 - 38)          | 0<br>(0 - 0)     | 0<br>(0 - 0)      | 2<br>(1 - 3)       | 8<br>(4 - 11)      | 19<br>(10 - 27)          |
| Vascular intestinal disorders                       | 91<br>(38 - 178)         | 0<br>(0 - 0)     | 0<br>(0 - 0)      | 1<br>(0 - 2)       | 27<br>(11 - 52)    | 63<br>(25 - 129)         |
| Gallbladder and biliary diseases                    | 62<br>(42 - 83)          | 0<br>(0 - 0)     | 0<br>(0 - 0)      | 1<br>(0 - 1)       | 9<br>(5 - 12)      | 52<br>(36 - 72)          |
| Pancreatitis                                        | 87<br>(57 - 116)         | 0<br>(0 - 0)     | 0<br>(0 - 0)      | 13<br>(9 - 16)     | 41<br>(25 - 56)    | 33<br>(20 - 47)          |
| Other digestive diseases                            | 107<br>(75 - 141)        | 0<br>(0 - 0)     | 0<br>(0 - 0)      | 3<br>(2 - 4)       | 25<br>(15 - 34)    | 79<br>(54 - 113)         |
| Neurological disorders                              | 2,347<br>(1,759 - 2,978) | 3<br>(2 - 4)     | 2<br>(1 - 2)      | 43<br>(30 - 53)    | 220<br>(180 - 276) | 2,080<br>(1,518 - 2,696) |
| Alzheimer disease and other dementias               | 1,906<br>(1,317 - 2,525) | --               | --                | 0<br>(0 - 1)       | 85<br>(56 - 122)   | 1,821<br>(1,242 - 2,430) |
| Parkinson disease                                   | 197<br>(151 - 248)       | --               | --                | 0<br>(0 - 1)       | 22<br>(15 - 30)    | 174<br>(131 - 223)       |
| Epilepsy                                            | 48<br>(26 - 65)          | 1<br>(0 - 1)     | 1<br>(0 - 1)      | 18<br>(10 - 25)    | 18<br>(9 - 25)     | 12<br>(5 - 17)           |
| Multiple sclerosis                                  | 57<br>(28 - 98)          | --               | --                | 9<br>(4 - 17)      | 32<br>(15 - 57)    | 16<br>(7 - 29)           |
| Other neurological disorders                        | 138<br>(101 - 165)       | 2<br>(1 - 4)     | 1<br>(1 - 1)      | 15<br>(10 - 18)    | 63<br>(46 - 78)    | 58<br>(40 - 71)          |
| Mental and substance use disorders                  | 735<br>(440 - 876)       | 0<br>(0 - 0)     | 0<br>(0 - 0)      | 225<br>(161 - 269) | 398<br>(203 - 498) | 112<br>(53 - 142)        |
| Schizophrenia                                       | 23<br>(9 - 34)           | --               | --                | 4<br>(2 - 7)       | 11<br>(4 - 17)     | 8<br>(3 - 13)            |
| Alcohol use disorders                               | 553<br>(269 - 682)       | --               | --                | 92<br>(51 - 124)   | 361<br>(169 - 461) | 100<br>(44 - 130)        |
| Drug use disorders                                  | 159<br>(112 - 192)       | 0<br>(0 - 0)     | --                | 128<br>(92 - 157)  | 27<br>(17 - 36)    | 4<br>(3 - 5)             |
| Opioid use disorders                                | 59<br>(42 - 72)          | 0<br>(0 - 0)     | --                | 48<br>(35 - 60)    | 9<br>(6 - 13)      | 1<br>(1 - 2)             |
| Cocaine use disorders                               | 4<br>(3 - 5)             | 0<br>(0 - 0)     | --                | 3<br>(2 - 4)       | 1<br>(0 - 1)       | 0<br>(0 - 0)             |
| Amphetamine use disorders                           | 4<br>(3 - 5)             | 0<br>(0 - 0)     | --                | 3<br>(2 - 4)       | 1<br>(0 - 1)       | 0<br>(0 - 0)             |
| Other drug use disorders                            | 93<br>(66 - 112)         | 0<br>(0 - 0)     | --                | 74<br>(53 - 91)    | 16<br>(11 - 22)    | 2<br>(2 - 3)             |
| Eating disorders                                    | 0<br>(0 - 0)             | --               | 0<br>(0 - 0)      | 0<br>(0 - 0)       | --                 | --                       |
| Anorexia nervosa                                    | 0<br>(0 - 0)             | --               | 0<br>(0 - 0)      | 0<br>(0 - 0)       | --                 | --                       |
| Diabetes, urogenital, blood, and endocrine diseases | 1,558<br>(1,316 - 1,749) | 5<br>(1 - 8)     | 2<br>(1 - 3)      | 73<br>(52 - 88)    | 406<br>(333 - 467) | 1,072<br>(912 - 1,214)   |
| Diabetes mellitus                                   | 785<br>(688 - 889)       | 0<br>(0 - 0)     | 0<br>(0 - 0)      | 39<br>(32 - 48)    | 243<br>(206 - 286) | 502<br>(427 - 590)       |
| Acute glomerulonephritis                            | 2<br>(1 - 4)             | 0<br>(0 - 0)     | 0<br>(0 - 0)      | 0<br>(0 - 0)       | 1<br>(0 - 1)       | 1<br>(0 - 2)             |
| Chronic kidney disease                              | 464<br>(345 - 564)       | 0<br>(0 - 0)     | 0<br>(0 - 0)      | 12<br>(9 - 16)     | 86<br>(63 - 109)   | 365<br>(263 - 451)       |
| Chronic kidney disease due to diabetes mellitus     | 102<br>(65 - 206)        | 0<br>(0 - 0)     | 0<br>(0 - 0)      | 4<br>(2 - 7)       | 27<br>(17 - 52)    | 71<br>(41 - 151)         |

Web Table 31- Denmark deaths with 95% UI by age, sex, and cause in 2013

| Cause                                               | Males, All Ages          | Males, 0-4 Years | Males, 5-14 Years | Males, 15-49 Years | Males, 50-69 Years | Males, 70-80 Years |
|-----------------------------------------------------|--------------------------|------------------|-------------------|--------------------|--------------------|--------------------|
| Chronic kidney disease due to hypertension          | 119<br>(48 - 156)        | 0<br>(0 - 0)     | 0<br>(0 - 0)      | 2<br>(1 - 3)       | 16<br>(5 - 24)     | 100<br>(42 - 134)  |
| Chronic kidney disease due to glomerulonephritis    | 19<br>(12 - 36)          | 0<br>(0 - 0)     | 0<br>(0 - 0)      | 1<br>(0 - 1)       | 5<br>(3 - 8)       | 14<br>(8 - 27)     |
| Chronic kidney disease due to other causes          | 224<br>(120 - 311)       | 0<br>(0 - 0)     | 0<br>(0 - 0)      | 6<br>(3 - 9)       | 38<br>(20 - 57)    | 180<br>(96 - 254)  |
| Urinary diseases and male infertility               | 170<br>(109 - 219)       | 0<br>(0 - 0)     | 0<br>(0 - 0)      | 2<br>(2 - 3)       | 18<br>(12 - 24)    | 149<br>(93 - 198)  |
| Interstitial nephritis and urinary tract infections | 139<br>(82 - 183)        | 0<br>(0 - 0)     | 0<br>(0 - 0)      | 2<br>(1 - 2)       | 13<br>(8 - 17)     | 125<br>(70 - 166)  |
| Urolithiasis                                        | 9<br>(5 - 16)            | --<br>(0 - 0)    | 0<br>(0 - 0)      | 0<br>(0 - 0)       | 2<br>(1 - 3)       | 7<br>(4 - 13)      |
| Other urinary diseases                              | 22<br>(12 - 40)          | 0<br>(0 - 0)     | 0<br>(0 - 0)      | 1<br>(0 - 1)       | 4<br>(2 - 6)       | 17<br>(9 - 35)     |
| Gynecological diseases                              | --                       | --               | --                | --                 | --                 | --                 |
| Uterine fibroids                                    | --                       | --               | --                | --                 | --                 | --                 |
| Polycystic ovarian syndrome                         | --                       | --               | --                | --                 | --                 | --                 |
| Endometriosis                                       | --                       | --               | --                | --                 | --                 | --                 |
| Genital prolapse                                    | --                       | --               | --                | --                 | --                 | --                 |
| Other gynecological diseases                        | --                       | --               | --                | --                 | --                 | --                 |
| Hemoglobinopathies and hemolytic anemias            | 13<br>(8 - 19)           | 0<br>(0 - 0)     | 0<br>(0 - 0)      | 1<br>(1 - 1)       | 3<br>(2 - 4)       | 9<br>(5 - 14)      |
| Thalassemias                                        | 0<br>(0 - 1)             | 0<br>(0 - 0)     | 0<br>(0 - 0)      | 0<br>(0 - 0)       | 0<br>(0 - 0)       | 0<br>(0 - 0)       |
| Sickle cell disorders                               | 2<br>(1 - 3)             | 0<br>(0 - 0)     | 0<br>(0 - 0)      | 0<br>(0 - 0)       | 1<br>(1 - 1)       | 0<br>(0 - 1)       |
| G6PD deficiency                                     | 0<br>(0 - 0)             | 0<br>(0 - 0)     | 0<br>(0 - 0)      | 0<br>(0 - 0)       | 0<br>(0 - 0)       | 0<br>(0 - 0)       |
| Other hemoglobinopathies and hemolytic anemias      | 11<br>(6 - 17)           | 0<br>(0 - 0)     | 0<br>(0 - 0)      | 0<br>(0 - 1)       | 2<br>(1 - 3)       | 9<br>(5 - 13)      |
| Endocrine, metabolic, blood, and immune disorders   | 123<br>(21 - 165)        | 5<br>(1 - 8)     | 1<br>(0 - 2)      | 18<br>(3 - 26)     | 55<br>(10 - 76)    | 44<br>(6 - 66)     |
| Musculoskeletal disorders                           | 76<br>(55 - 108)         | --<br>(0 - 0)    | 0<br>(0 - 0)      | 4<br>(3 - 5)       | 20<br>(15 - 31)    | 52<br>(35 - 73)    |
| Rheumatoid arthritis                                | 23<br>(14 - 34)          | --<br>(0 - 0)    | 0<br>(0 - 0)      | 1<br>(0 - 1)       | 5<br>(3 - 9)       | 17<br>(10 - 26)    |
| Other musculoskeletal disorders                     | 53<br>(38 - 79)          | --<br>(0 - 0)    | 0<br>(0 - 0)      | 3<br>(2 - 4)       | 15<br>(10 - 24)    | 35<br>(23 - 53)    |
| Other non-communicable diseases                     | 133<br>(115 - 158)       | 43<br>(31 - 62)  | 3<br>(2 - 4)      | 17<br>(14 - 21)    | 28<br>(23 - 34)    | 42<br>(24 - 55)    |
| Congenital anomalies                                | 87<br>(72 - 115)         | 39<br>(28 - 56)  | 3<br>(2 - 4)      | 16<br>(13 - 20)    | 20<br>(16 - 25)    | 10<br>(8 - 13)     |
| Neural tube defects                                 | 1<br>(1 - 1)             | 0<br>(0 - 1)     | 0<br>(0 - 0)      | 0<br>(0 - 0)       | 0<br>(0 - 0)       | 0<br>(0 - 0)       |
| Congenital heart anomalies                          | 28<br>(21 - 45)          | 15<br>(10 - 24)  | 1<br>(1 - 2)      | 6<br>(5 - 9)       | 4<br>(2 - 6)       | 1<br>(1 - 2)       |
| Cleft lip and cleft palate                          | 0<br>(0 - 0)             | 0<br>(0 - 0)     | --<br>(0 - 0)     | --<br>(0 - 0)      | --<br>(0 - 0)      | --<br>(0 - 0)      |
| Down syndrome                                       | 13<br>(8 - 18)           | 1<br>(1 - 2)     | 0<br>(0 - 0)      | 2<br>(1 - 3)       | 9<br>(5 - 12)      | 1<br>(0 - 2)       |
| Chromosomal unbalanced rearrangements               | 4<br>(3 - 7)             | 4<br>(2 - 6)     | 0<br>(0 - 0)      | 0<br>(0 - 1)       | 0<br>(0 - 0)       | 0<br>(0 - 0)       |
| Other congenital anomalies                          | 41<br>(33 - 53)          | 18<br>(12 - 27)  | 2<br>(1 - 2)      | 7<br>(5 - 9)       | 7<br>(4 - 10)      | 8<br>(6 - 10)      |
| Skin and subcutaneous diseases                      | 42<br>(17 - 56)          | 0<br>(0 - 0)     | 0<br>(0 - 0)      | 1<br>(1 - 2)       | 8<br>(3 - 11)      | 32<br>(13 - 45)    |
| Cellulitis                                          | 2<br>(1 - 4)             | 0<br>(0 - 0)     | 0<br>(0 - 0)      | 0<br>(0 - 0)       | 1<br>(0 - 1)       | 2<br>(0 - 3)       |
| Pyoderma                                            | 31<br>(12 - 41)          | 0<br>(0 - 0)     | 0<br>(0 - 0)      | 1<br>(0 - 1)       | 6<br>(2 - 8)       | 23<br>(10 - 34)    |
| Decubitus ulcer                                     | 6<br>(2 - 10)            | 0<br>(0 - 0)     | 0<br>(0 - 0)      | 0<br>(0 - 0)       | 1<br>(0 - 1)       | 5<br>(2 - 9)       |
| Other skin and subcutaneous diseases                | 3<br>(1 - 5)             | 0<br>(0 - 0)     | 0<br>(0 - 0)      | 0<br>(0 - 0)       | 1<br>(0 - 1)       | 2<br>(1 - 4)       |
| Sudden infant death syndrome                        | 4<br>(2 - 10)            | 4<br>(2 - 10)    | --<br>(0 - 0)     | --<br>(0 - 0)      | --<br>(0 - 0)      | --<br>(0 - 0)      |
| Injuries                                            | 1,523<br>(1,343 - 1,966) | 11<br>(8 - 16)   | 12<br>(10 - 15)   | 456<br>(403 - 549) | 422<br>(366 - 562) | 621<br>(514 - 880) |
| Transport injuries                                  | 282<br>(249 - 318)       | 3<br>(2 - 4)     | 6<br>(5 - 8)      | 134<br>(114 - 155) | 74<br>(62 - 87)    | 66<br>(54 - 80)    |
| Road injuries                                       | 264<br>(230 - 298)       | 2<br>(2 - 4)     | 6<br>(4 - 7)      | 126<br>(107 - 147) | 67<br>(56 - 79)    | 63<br>(52 - 76)    |
| Pedestrian road injuries                            | 47<br>(26 - 77)          | 1<br>(0 - 2)     | 2<br>(1 - 2)      | 15<br>(8 - 28)     | 13<br>(7 - 21)     | 17<br>(9 - 27)     |

Web Table 31- Denmark deaths with 95% UI by age, sex, and cause in 2013

| Cause                                           | Males, All Ages    | Males, 0-4 Years | Males, 5-14 Years | Males, 15-49 Years | Males, 50-69 Years | Males, 70-80 Years |
|-------------------------------------------------|--------------------|------------------|-------------------|--------------------|--------------------|--------------------|
| Cyclist road injuries                           | 32<br>(20 - 44)    | 0<br>(0 - 0)     | 2<br>(1 - 3)      | 7<br>(4 - 10)      | 10<br>(6 - 15)     | 12<br>(7 - 18)     |
| Motorcyclist road injuries                      | 44<br>(25 - 59)    | 0<br>(0 - 0)     | 0<br>(0 - 1)      | 29<br>(16 - 40)    | 10<br>(6 - 15)     | 5<br>(2 - 7)       |
| Motor vehicle road injuries                     | 140<br>(107 - 173) | 1<br>(1 - 2)     | 2<br>(1 - 3)      | 74<br>(58 - 91)    | 34<br>(25 - 45)    | 29<br>(20 - 40)    |
| Other road injuries                             | 1<br>(0 - 1)       | 0<br>(0 - 0)     | 0<br>(0 - 0)      | 0<br>(0 - 0)       | 0<br>(0 - 1)       | 0<br>(0 - 0)       |
| Other transport injuries                        | 19<br>(14 - 26)    | 0<br>(0 - 1)     | 0<br>(0 - 1)      | 8<br>(6 - 11)      | 7<br>(5 - 10)      | 3<br>(2 - 5)       |
| Unintentional injuries                          | 642<br>(531 - 871) | 7<br>(5 - 10)    | 4<br>(3 - 6)      | 74<br>(63 - 95)    | 125<br>(102 - 152) | 431<br>(340 - 633) |
| Falls                                           | 448<br>(352 - 689) | 1<br>(0 - 1)     | 0<br>(0 - 1)      | 20<br>(15 - 28)    | 65<br>(51 - 90)    | 362<br>(272 - 584) |
| Drowning                                        | 37<br>(24 - 50)    | 2<br>(1 - 4)     | 2<br>(1 - 3)      | 13<br>(9 - 19)     | 13<br>(8 - 19)     | 6<br>(4 - 9)       |
| Fire, heat, and hot substances                  | 44<br>(30 - 59)    | 1<br>(0 - 2)     | 0<br>(0 - 1)      | 10<br>(7 - 15)     | 12<br>(8 - 18)     | 20<br>(14 - 29)    |
| Poisonings                                      | 11<br>(8 - 24)     | 0<br>(0 - 0)     | 0<br>(0 - 0)      | 7<br>(4 - 15)      | 3<br>(2 - 6)       | 1<br>(1 - 3)       |
| Exposure to mechanical forces                   | 31<br>(26 - 37)    | 2<br>(1 - 3)     | 1<br>(1 - 1)      | 12<br>(10 - 16)    | 11<br>(8 - 13)     | 5<br>(4 - 7)       |
| Unintentional firearm injuries                  | 1<br>(1 - 1)       | 0<br>(0 - 0)     | 0<br>(0 - 0)      | 1<br>(0 - 1)       | 0<br>(0 - 0)       | 0<br>(0 - 0)       |
| Unintentional suffocation                       | 4<br>(3 - 6)       | 1<br>(1 - 2)     | 0<br>(0 - 1)      | 1<br>(1 - 2)       | 1<br>(0 - 1)       | 1<br>(0 - 2)       |
| Other exposure to mechanical forces             | 25<br>(21 - 31)    | 0<br>(0 - 1)     | 1<br>(0 - 1)      | 11<br>(8 - 14)     | 10<br>(8 - 12)     | 4<br>(3 - 6)       |
| Adverse effects of medical treatment            | 23<br>(2 - 47)     | 0<br>(0 - 1)     | 0<br>(0 - 0)      | 1<br>(0 - 3)       | 6<br>(1 - 13)      | 15<br>(1 - 32)     |
| Animal contact                                  | 3<br>(2 - 5)       | 0<br>(0 - 0)     | 0<br>(0 - 0)      | 1<br>(0 - 1)       | 1<br>(1 - 2)       | 1<br>(1 - 1)       |
| Venomous animal contact                         | 1<br>(1 - 2)       | 0<br>(0 - 0)     | 0<br>(0 - 0)      | 0<br>(0 - 1)       | 1<br>(0 - 1)       | 0<br>(0 - 0)       |
| Non-venomous animal contact                     | 2<br>(1 - 3)       | 0<br>(0 - 0)     | 0<br>(0 - 0)      | 0<br>(0 - 1)       | 1<br>(0 - 1)       | 1<br>(0 - 1)       |
| Foreign body                                    | 39<br>(22 - 59)    | 1<br>(1 - 2)     | 0<br>(0 - 0)      | 8<br>(5 - 13)      | 11<br>(6 - 17)     | 19<br>(10 - 28)    |
| Pulmonary aspiration and foreign body in airway | 39<br>(21 - 58)    | 1<br>(1 - 2)     | 0<br>(0 - 0)      | 8<br>(5 - 13)      | 10<br>(6 - 17)     | 19<br>(10 - 28)    |
| Foreign body in other body part                 | 1<br>(0 - 1)       | 0<br>(0 - 0)     | 0<br>(0 - 0)      | 0<br>(0 - 0)       | 0<br>(0 - 0)       | 0<br>(0 - 0)       |
| Other unintentional injuries                    | 6<br>(5 - 9)       | 0<br>(0 - 0)     | 0<br>(0 - 0)      | 2<br>(1 - 3)       | 2<br>(1 - 3)       | 2<br>(1 - 3)       |
| Self-harm and interpersonal violence            | 599<br>(506 - 907) | 1<br>(1 - 2)     | 2<br>(1 - 3)      | 248<br>(206 - 345) | 223<br>(182 - 344) | 124<br>(98 - 207)  |
| Self-harm                                       | 565<br>(474 - 875) | --               | 1<br>(0 - 1)      | 229<br>(188 - 328) | 215<br>(174 - 337) | 121<br>(94 - 205)  |
| Interpersonal violence                          | 34<br>(19 - 44)    | 1<br>(1 - 2)     | 1<br>(1 - 2)      | 19<br>(11 - 26)    | 8<br>(5 - 12)      | 3<br>(2 - 5)       |
| Assault by firearm                              | 8<br>(4 - 13)      | 0<br>(0 - 0)     | 0<br>(0 - 1)      | 6<br>(2 - 9)       | 1<br>(1 - 3)       | 1<br>(0 - 1)       |
| Assault by sharp object                         | 10<br>(6 - 17)     | 0<br>(0 - 0)     | 0<br>(0 - 0)      | 7<br>(4 - 11)      | 2<br>(1 - 4)       | 0<br>(0 - 1)       |
| Assault by other means                          | 15<br>(7 - 21)     | 1<br>(1 - 2)     | 0<br>(0 - 1)      | 7<br>(3 - 10)      | 5<br>(2 - 6)       | 2<br>(1 - 3)       |

Web Table 31- Denmark deaths with 95% UI by age, sex, and cause in 2013

| Cause                                                             | Females, All Ages           | Females, 0-4 Years | Females, 5-14 Years | Females, 15-49 Years | Females, 50-69 Years     | Females, 70-80 Years        |
|-------------------------------------------------------------------|-----------------------------|--------------------|---------------------|----------------------|--------------------------|-----------------------------|
| All causes                                                        | 26,904<br>(25,108 - 28,828) | 105<br>(82 - 133)  | 22<br>(20 - 26)     | 813<br>(729 - 903)   | 4,821<br>(4,405 - 5,273) | 21,143<br>(19,853 - 22,532) |
| Communicable, maternal, neonatal, and nutritional diseases        | 1,770<br>(1,323 - 2,223)    | 51<br>(38 - 67)    | 2<br>(1 - 3)        | 28<br>(22 - 33)      | 116<br>(85 - 141)        | 1,572<br>(1,141 - 2,012)    |
| HIV/AIDS and tuberculosis                                         | 22<br>(17 - 27)             | 0<br>(0 - 0)       | 0<br>(0 - 0)        | 5<br>(3 - 7)         | 6<br>(4 - 8)             | 11<br>(8 - 16)              |
| Tuberculosis                                                      | 16<br>(12 - 21)             | 0<br>(0 - 0)       | 0<br>(0 - 0)        | 1<br>(1 - 1)         | 4<br>(3 - 6)             | 11<br>(8 - 15)              |
| HIV/AIDS                                                          | 6<br>(3 - 9)                | 0<br>(0 - 0)       | 0<br>(0 - 0)        | 4<br>(2 - 6)         | 1<br>(1 - 2)             | 0<br>(0 - 0)                |
| HIV/AIDS resulting in mycobacterial infection                     | 0<br>(0 - 0)                | 0<br>(0 - 0)       | 0<br>(0 - 0)        | 0<br>(0 - 0)         | 0<br>(0 - 0)             | 0<br>(0 - 0)                |
| HIV/AIDS resulting in other diseases                              | 5<br>(3 - 8)                | 0<br>(0 - 0)       | 0<br>(0 - 0)        | 4<br>(2 - 6)         | 1<br>(1 - 2)             | 0<br>(0 - 0)                |
| Diarrhea, lower respiratory, and other common infectious diseases | 1,515<br>(1,084 - 1,955)    | 7<br>(5 - 10)      | 2<br>(1 - 2)        | 15<br>(11 - 19)      | 92<br>(63 - 115)         | 1,398<br>(987 - 1,826)      |
| Diarrheal diseases                                                | 175<br>(112 - 278)          | 2<br>(1 - 3)       | 0<br>(0 - 0)        | 2<br>(1 - 2)         | 10<br>(7 - 15)           | 161<br>(96 - 264)           |
| Intestinal infectious diseases                                    | 3<br>(1 - 6)                | 0<br>(0 - 1)       | 0<br>(0 - 1)        | 1<br>(0 - 2)         | 0<br>(0 - 1)             | 0<br>(0 - 1)                |
| Typhoid fever                                                     | 2<br>(1 - 5)                | 0<br>(0 - 1)       | 0<br>(0 - 1)        | 1<br>(0 - 2)         | 0<br>(0 - 1)             | 0<br>(0 - 1)                |
| Paratyphoid fever                                                 | 0<br>(0 - 1)                | 0<br>(0 - 0)       | 0<br>(0 - 0)        | 0<br>(0 - 0)         | 0<br>(0 - 0)             | 0<br>(0 - 0)                |
| Other intestinal infectious diseases                              | 0<br>(0 - 2)                | 0<br>(0 - 0)       | 0<br>(0 - 0)        | 0<br>(0 - 0)         | 0<br>(0 - 1)             | 0<br>(0 - 1)                |
| Lower respiratory infections                                      | 1,302<br>(881 - 1,743)      | 3<br>(2 - 4)       | 0<br>(0 - 1)        | 9<br>(6 - 12)        | 73<br>(45 - 95)          | 1,217<br>(815 - 1,653)      |
| Upper respiratory infections                                      | 1<br>(0 - 2)                | 0<br>(0 - 0)       | 0<br>(0 - 0)        | 0<br>(0 - 0)         | 0<br>(0 - 0)             | 0<br>(0 - 2)                |
| Otitis media                                                      | 1<br>(1 - 1)                | 0<br>(0 - 0)       | 0<br>(0 - 0)        | 0<br>(0 - 0)         | 0<br>(0 - 0)             | 0<br>(0 - 1)                |
| Meningitis                                                        | 25<br>(21 - 34)             | 2<br>(1 - 3)       | 0<br>(0 - 1)        | 2<br>(2 - 3)         | 6<br>(5 - 8)             | 14<br>(11 - 21)             |
| Pneumococcal meningitis                                           | 5<br>(3 - 9)                | 0<br>(0 - 0)       | 0<br>(0 - 0)        | 0<br>(0 - 0)         | 1<br>(1 - 2)             | 3<br>(2 - 6)                |
| H influenzae type B meningitis                                    | 3<br>(2 - 4)                | 1<br>(0 - 1)       | 0<br>(0 - 0)        | 0<br>(0 - 0)         | 1<br>(0 - 1)             | 1<br>(1 - 2)                |
| Meningococcal meningitis                                          | 9<br>(6 - 13)               | 1<br>(0 - 1)       | 0<br>(0 - 0)        | 1<br>(1 - 1)         | 2<br>(1 - 3)             | 5<br>(3 - 9)                |
| Other meningitis                                                  | 9<br>(5 - 13)               | 1<br>(0 - 1)       | 0<br>(0 - 0)        | 1<br>(0 - 1)         | 2<br>(1 - 3)             | 5<br>(3 - 8)                |
| Encephalitis                                                      | 4<br>(2 - 6)                | 0<br>(0 - 0)       | 0<br>(0 - 0)        | 1<br>(0 - 1)         | 1<br>(1 - 2)             | 2<br>(1 - 3)                |
| Diphtheria                                                        | 0<br>(0 - 0)                | 0<br>(0 - 0)       | 0<br>(0 - 0)        | 0<br>(0 - 0)         | 0<br>(0 - 0)             | --                          |
| Whooping cough                                                    | 0<br>(0 - 0)                | 0<br>(0 - 0)       | 0<br>(0 - 0)        | 0<br>(0 - 0)         | 0<br>(0 - 0)             | --                          |
| Tetanus                                                           | 0<br>(0 - 0)                | 0<br>(0 - 0)       | 0<br>(0 - 0)        | 0<br>(0 - 0)         | 0<br>(0 - 0)             | 0<br>(0 - 0)                |
| Measles                                                           | 0<br>(0 - 0)                | 0<br>(0 - 0)       | 0<br>(0 - 0)        | 0<br>(0 - 0)         | 0<br>(0 - 0)             | --                          |
| Varicella and herpes zoster                                       | 4<br>(1 - 16)               | 0<br>(0 - 1)       | 0<br>(0 - 0)        | 0<br>(0 - 1)         | 0<br>(0 - 1)             | 3<br>(0 - 15)               |
| Neglected tropical diseases and malaria                           | 2<br>(1 - 3)                | 0<br>(0 - 0)       | 0<br>(0 - 0)        | 0<br>(0 - 1)         | 1<br>(0 - 1)             | 1<br>(0 - 1)                |
| Cysticercosis                                                     | 0<br>(0 - 0)                | 0<br>(0 - 0)       | 0<br>(0 - 0)        | 0<br>(0 - 0)         | 0<br>(0 - 0)             | 0<br>(0 - 0)                |
| Cystic echinococcosis                                             | 0<br>(0 - 0)                | 0<br>(0 - 0)       | 0<br>(0 - 0)        | 0<br>(0 - 0)         | 0<br>(0 - 0)             | 0<br>(0 - 0)                |
| Dengue                                                            | 0<br>(0 - 0)                | 0<br>(0 - 0)       | 0<br>(0 - 0)        | 0<br>(0 - 0)         | 0<br>(0 - 0)             | 0<br>(0 - 0)                |
| Rabies                                                            | 0<br>(0 - 0)                | 0<br>(0 - 0)       | 0<br>(0 - 0)        | 0<br>(0 - 0)         | 0<br>(0 - 0)             | 0<br>(0 - 0)                |
| Other neglected tropical diseases                                 | 1<br>(0 - 2)                | 0<br>(0 - 0)       | 0<br>(0 - 0)        | 0<br>(0 - 0)         | 0<br>(0 - 0)             | 1<br>(0 - 1)                |
| Maternal disorders                                                | 3<br>(2 - 4)                | --                 | 0<br>(0 - 0)        | 3<br>(2 - 4)         | --                       | --                          |
| Maternal hemorrhage                                               | 0<br>(0 - 0)                | --                 | 0<br>(0 - 0)        | 0<br>(0 - 0)         | --                       | --                          |
| Maternal sepsis and other maternal infections                     | 0<br>(0 - 0)                | --                 | 0<br>(0 - 0)        | 0<br>(0 - 0)         | --                       | --                          |
| Maternal hypertensive disorders                                   | 0<br>(0 - 1)                | --                 | 0<br>(0 - 0)        | 0<br>(0 - 1)         | --                       | --                          |
| Maternal obstructed labor                                         | 0<br>(0 - 0)                | --                 | 0<br>(0 - 0)        | 0<br>(0 - 0)         | --                       | --                          |
| Maternal abortive outcome                                         | 1<br>(0 - 1)                | --                 | 0<br>(0 - 0)        | 1<br>(0 - 1)         | --                       | --                          |
| Indirect maternal deaths                                          | 0<br>(0 - 0)                | --                 | 0<br>(0 - 0)        | 0<br>(0 - 0)         | --                       | --                          |

Web Table 31- Denmark deaths with 95% UI by age, sex, and cause in 2013

| Cause                                                            | Females, All Ages           | Females, 0-4 Years | Females, 5-14 Years | Females, 15-49 Years | Females, 50-69 Years     | Females, 70-80 Years        |
|------------------------------------------------------------------|-----------------------------|--------------------|---------------------|----------------------|--------------------------|-----------------------------|
| Late maternal deaths                                             | 0<br>(0 - 0)                | --                 | 0<br>(0 - 0)        | 0<br>(0 - 0)         | --                       | --                          |
| Maternal deaths aggravated by HIV/AIDS                           | 0<br>(0 - 0)                | --                 | --                  | 0<br>(0 - 0)         | --                       | --                          |
| Other maternal disorders                                         | 1<br>(0 - 1)                | --                 | 0<br>(0 - 0)        | 1<br>(0 - 1)         | --                       | --                          |
| Neonatal disorders                                               | 43<br>(31 - 57)             | 43<br>(31 - 57)    | --                  | --                   | --                       | --                          |
| Neonatal preterm birth complications                             | 29<br>(20 - 39)             | 29<br>(20 - 39)    | --                  | --                   | --                       | --                          |
| Neonatal encephalopathy due to birth asphyxia and trauma         | 10<br>(6 - 16)              | 10<br>(6 - 16)     | --                  | --                   | --                       | --                          |
| Neonatal sepsis and other neonatal infections                    | 0<br>(0 - 0)                | 0<br>(0 - 0)       | --                  | --                   | --                       | --                          |
| Hemolytic disease and other neonatal jaundice                    | 0<br>(0 - 0)                | 0<br>(0 - 0)       | --                  | --                   | --                       | --                          |
| Other neonatal disorders                                         | 4<br>(2 - 7)                | 4<br>(2 - 7)       | --                  | --                   | --                       | --                          |
| Nutritional deficiencies                                         | 145<br>(78 - 196)           | 0<br>(0 - 0)       | 0<br>(0 - 0)        | 2<br>(1 - 2)         | 7<br>(4 - 9)             | 136<br>(73 - 187)           |
| Protein-energy malnutrition                                      | 28<br>(10 - 51)             | 0<br>(0 - 0)       | 0<br>(0 - 0)        | 0<br>(0 - 1)         | 2<br>(1 - 3)             | 26<br>(9 - 48)              |
| Iodine deficiency                                                | 0<br>(0 - 1)                | 0<br>(0 - 0)       | 0<br>(0 - 0)        | 0<br>(0 - 0)         | 0<br>(0 - 0)             | 0<br>(0 - 1)                |
| Iron-deficiency anemia                                           | 105<br>(55 - 151)           | 0<br>(0 - 0)       | 0<br>(0 - 0)        | 1<br>(0 - 1)         | 4<br>(2 - 6)             | 100<br>(51 - 145)           |
| Other nutritional deficiencies                                   | 12<br>(3 - 25)              | 0<br>(0 - 0)       | 0<br>(0 - 0)        | 0<br>(0 - 0)         | 1<br>(0 - 2)             | 11<br>(3 - 23)              |
| Other communicable, maternal, neonatal, and nutritional diseases | 40<br>(28 - 52)             | 1<br>(0 - 1)       | 0<br>(0 - 0)        | 3<br>(2 - 4)         | 10<br>(7 - 14)           | 26<br>(17 - 36)             |
| Sexually transmitted diseases excluding HIV                      | 6<br>(3 - 11)               | 0<br>(0 - 1)       | 0<br>(0 - 0)        | 0<br>(0 - 0)         | 1<br>(0 - 1)             | 5<br>(2 - 9)                |
| Syphilis                                                         | 5<br>(2 - 8)                | 0<br>(0 - 1)       | 0<br>(0 - 0)        | 0<br>(0 - 0)         | 0<br>(0 - 1)             | 4<br>(2 - 7)                |
| Chlamydial infection                                             | 0<br>(0 - 1)                | --                 | 0<br>(0 - 0)        | 0<br>(0 - 0)         | 0<br>(0 - 0)             | 0<br>(0 - 0)                |
| Gonococcal infection                                             | 1<br>(0 - 1)                | --                 | 0<br>(0 - 0)        | 0<br>(0 - 0)         | 0<br>(0 - 0)             | 1<br>(0 - 1)                |
| Other sexually transmitted diseases                              | 0<br>(0 - 1)                | --                 | 0<br>(0 - 0)        | 0<br>(0 - 0)         | 0<br>(0 - 0)             | 0<br>(0 - 0)                |
| Hepatitis                                                        | 1<br>(1 - 1)                | 0<br>(0 - 0)       | 0<br>(0 - 0)        | 0<br>(0 - 0)         | 0<br>(0 - 1)             | 0<br>(0 - 1)                |
| Acute hepatitis A                                                | 0<br>(0 - 1)                | 0<br>(0 - 0)       | 0<br>(0 - 0)        | 0<br>(0 - 0)         | 0<br>(0 - 0)             | 0<br>(0 - 0)                |
| Acute hepatitis B                                                | 1<br>(0 - 1)                | 0<br>(0 - 0)       | 0<br>(0 - 0)        | 0<br>(0 - 0)         | 0<br>(0 - 0)             | 0<br>(0 - 1)                |
| Acute hepatitis C                                                | 0<br>(0 - 0)                | --                 | 0<br>(0 - 0)        | 0<br>(0 - 0)         | 0<br>(0 - 0)             | 0<br>(0 - 0)                |
| Other infectious diseases                                        | 33<br>(20 - 43)             | 1<br>(0 - 1)       | 0<br>(0 - 0)        | 2<br>(1 - 3)         | 9<br>(6 - 13)            | 21<br>(12 - 29)             |
| Non-communicable diseases                                        | 24,019<br>(22,364 - 25,729) | 47<br>(36 - 62)    | 14<br>(12 - 16)     | 647<br>(575 - 723)   | 4,507<br>(4,120 - 4,932) | 18,804<br>(17,549 - 20,067) |
| Neoplasms                                                        | 6,584<br>(5,717 - 7,299)    | 4<br>(3 - 5)       | 7<br>(6 - 9)        | 336<br>(296 - 386)   | 2,368<br>(2,105 - 2,633) | 3,869<br>(3,203 - 4,349)    |
| Esophageal cancer                                                | 90<br>(77 - 106)            | --                 | --                  | 2<br>(2 - 3)         | 31<br>(24 - 38)          | 57<br>(46 - 70)             |
| Stomach cancer                                                   | 184<br>(131 - 259)          | --                 | --                  | 7<br>(5 - 9)         | 44<br>(33 - 59)          | 133<br>(91 - 196)           |
| Liver cancer                                                     | 146<br>(100 - 184)          | --                 | 0<br>(0 - 0)        | 6<br>(4 - 9)         | 44<br>(31 - 57)          | 96<br>(62 - 130)            |
| Liver cancer due to hepatitis B                                  | 25<br>(5 - 55)              | --                 | 0<br>(0 - 0)        | 2<br>(1 - 3)         | 9<br>(1 - 20)            | 15<br>(3 - 33)              |
| Liver cancer due to hepatitis C                                  | 70<br>(27 - 111)            | --                 | 0<br>(0 - 0)        | 3<br>(1 - 5)         | 22<br>(7 - 36)           | 46<br>(18 - 76)             |
| Liver cancer due to alcohol use                                  | 36<br>(12 - 66)             | --                 | --                  | 1<br>(0 - 2)         | 8<br>(2 - 17)            | 27<br>(9 - 52)              |
| Liver cancer due to other causes                                 | 15<br>(5 - 34)              | --                 | 0<br>(0 - 0)        | 1<br>(0 - 2)         | 5<br>(2 - 13)            | 9<br>(3 - 21)               |
| Larynx cancer                                                    | 20<br>(14 - 28)             | --                 | --                  | 1<br>(1 - 2)         | 10<br>(7 - 15)           | 9<br>(6 - 12)               |
| Tracheal, bronchus and lung cancer                               | 1,450<br>(1,032 - 1,692)    | --                 | --                  | 53<br>(40 - 74)      | 650<br>(518 - 764)       | 747<br>(427 - 921)          |
| Breast cancer                                                    | 1,036<br>(813 - 1,259)      | --                 | --                  | 81<br>(65 - 107)     | 429<br>(340 - 518)       | 526<br>(400 - 660)          |
| Cervical cancer                                                  | 126<br>(101 - 169)          | --                 | --                  | 20<br>(15 - 26)      | 48<br>(37 - 65)          | 58<br>(43 - 82)             |
| Uterine cancer                                                   | 117<br>(90 - 143)           | --                 | --                  | 2<br>(2 - 3)         | 40<br>(30 - 51)          | 75<br>(56 - 94)             |
| Prostate cancer                                                  | --                          | --                 | --                  | --                   | --                       | --                          |

Web Table 31- Denmark deaths with 95% UI by age, sex, and cause in 2013

| Cause                                         | Females, All Ages         | Females, 0-4 Years | Females, 5-14 Years | Females, 15-49 Years | Females, 50-69 Years | Females, 70-80 Years      |
|-----------------------------------------------|---------------------------|--------------------|---------------------|----------------------|----------------------|---------------------------|
| Colon and rectum cancer                       | 1,085<br>(919 - 1,267)    | --                 | --                  | 25<br>(20 - 30)      | 281<br>(242 - 321)   | 779<br>(635 - 952)        |
| Lip and oral cavity cancer                    | 44<br>(35 - 56)           | --                 | --                  | 3<br>(2 - 4)         | 16<br>(13 - 21)      | 24<br>(18 - 34)           |
| Nasopharynx cancer                            | 7<br>(4 - 15)             | --                 | 0<br>(0 - 0)        | 1<br>(0 - 2)         | 4<br>(2 - 8)         | 2<br>(1 - 5)              |
| Other pharynx cancer                          | 20<br>(14 - 33)           | --                 | --                  | 2<br>(1 - 3)         | 11<br>(8 - 17)       | 7<br>(4 - 14)             |
| Gallbladder and biliary tract cancer          | 84<br>(63 - 123)          | --                 | --                  | 1<br>(1 - 2)         | 24<br>(18 - 35)      | 59<br>(41 - 86)           |
| Pancreatic cancer                             | 400<br>(344 - 459)        | --                 | --                  | 10<br>(7 - 12)       | 142<br>(119 - 167)   | 249<br>(209 - 293)        |
| Malignant skin melanoma                       | 101<br>(68 - 136)         | --                 | --                  | 15<br>(11 - 22)      | 38<br>(27 - 53)      | 48<br>(29 - 65)           |
| Non-melanoma skin cancer                      | 36<br>(26 - 49)           | --                 | --                  | 1<br>(0 - 1)         | 4<br>(3 - 5)         | 31<br>(22 - 44)           |
| Ovarian cancer                                | 332<br>(278 - 391)        | --                 | --                  | 20<br>(15 - 26)      | 150<br>(124 - 178)   | 161<br>(125 - 201)        |
| Testicular cancer                             | --                        | --                 | --                  | --                   | --                   | --                        |
| Kidney cancer                                 | 114<br>(87 - 148)         | 0<br>(0 - 0)       | 0<br>(0 - 0)        | 3<br>(2 - 5)         | 41<br>(30 - 55)      | 70<br>(49 - 96)           |
| Bladder cancer                                | 143<br>(95 - 196)         | --                 | --                  | 3<br>(2 - 4)         | 34<br>(24 - 50)      | 107<br>(68 - 146)         |
| Brain and nervous system cancer               | 194<br>(141 - 233)        | 1<br>(0 - 1)       | 2<br>(2 - 3)        | 26<br>(20 - 34)      | 87<br>(66 - 108)     | 78<br>(49 - 99)           |
| Thyroid cancer                                | 26<br>(19 - 33)           | --                 | 0<br>(0 - 0)        | 1<br>(1 - 2)         | 7<br>(5 - 10)        | 17<br>(12 - 22)           |
| Mesothelioma                                  | 18<br>(13 - 25)           | --                 | --                  | 1<br>(1 - 2)         | 9<br>(6 - 13)        | 8<br>(5 - 12)             |
| Hodgkin lymphoma                              | 14<br>(9 - 20)            | 0<br>(0 - 0)       | 0<br>(0 - 0)        | 3<br>(2 - 5)         | 4<br>(3 - 6)         | 6<br>(4 - 9)              |
| Non-Hodgkin lymphoma                          | 150<br>(79 - 230)         | 0<br>(0 - 0)       | 0<br>(0 - 1)        | 10<br>(5 - 17)       | 47<br>(25 - 73)      | 93<br>(49 - 146)          |
| Multiple myeloma                              | 110<br>(71 - 172)         | --                 | --                  | 3<br>(2 - 5)         | 37<br>(23 - 63)      | 70<br>(42 - 110)          |
| Leukemia                                      | 193<br>(161 - 229)        | 1<br>(1 - 2)       | 2<br>(1 - 3)        | 13<br>(10 - 17)      | 48<br>(39 - 58)      | 129<br>(103 - 157)        |
| Other neoplasms                               | 344<br>(246 - 456)        | 2<br>(1 - 2)       | 2<br>(2 - 3)        | 24<br>(18 - 29)      | 86<br>(64 - 108)     | 230<br>(148 - 324)        |
| Cardiovascular diseases                       | 9,001<br>(7,893 - 11,373) | 1<br>(0 - 1)       | 0<br>(0 - 1)        | 85<br>(61 - 104)     | 840<br>(706 - 1,140) | 8,075<br>(7,026 - 10,146) |
| Rheumatic heart disease                       | 49<br>(34 - 78)           | 0<br>(0 - 0)       | 0<br>(0 - 0)        | 1<br>(1 - 1)         | 8<br>(6 - 15)        | 40<br>(27 - 62)           |
| Ischemic heart disease                        | 4,474<br>(3,590 - 6,693)  | 0<br>(0 - 0)       | 0<br>(0 - 0)        | 26<br>(19 - 35)      | 407<br>(317 - 651)   | 4,041<br>(3,196 - 6,027)  |
| Cerebrovascular disease                       | 2,759<br>(2,194 - 3,551)  | 0<br>(0 - 0)       | 0<br>(0 - 0)        | 38<br>(25 - 48)      | 267<br>(194 - 349)   | 2,453<br>(1,953 - 3,177)  |
| Ischemic stroke                               | 1,594<br>(1,215 - 2,077)  | 0<br>(0 - 0)       | 0<br>(0 - 0)        | 4<br>(2 - 5)         | 73<br>(46 - 99)      | 1,517<br>(1,153 - 1,997)  |
| Hemorrhagic stroke                            | 1,164<br>(875 - 1,652)    | 0<br>(0 - 0)       | 0<br>(0 - 0)        | 34<br>(22 - 43)      | 194<br>(145 - 263)   | 936<br>(690 - 1,380)      |
| Hypertensive heart disease                    | 156<br>(92 - 225)         | 0<br>(0 - 0)       | 0<br>(0 - 0)        | 1<br>(0 - 1)         | 11<br>(7 - 16)       | 144<br>(82 - 212)         |
| Cardiomyopathy and myocarditis                | 84<br>(49 - 108)          | 0<br>(0 - 1)       | 0<br>(0 - 0)        | 6<br>(4 - 8)         | 18<br>(11 - 23)      | 60<br>(32 - 81)           |
| Atrial fibrillation and flutter               | 579<br>(377 - 810)        | --                 | --                  | 0<br>(0 - 1)         | 16<br>(11 - 23)      | 562<br>(363 - 789)        |
| Aortic aneurysm                               | 217<br>(129 - 335)        | --                 | --                  | 3<br>(1 - 4)         | 38<br>(21 - 60)      | 177<br>(102 - 278)        |
| Peripheral vascular disease                   | 101<br>(68 - 140)         | --                 | --                  | 0<br>(0 - 0)         | 7<br>(5 - 10)        | 94<br>(62 - 132)          |
| Endocarditis                                  | 28<br>(14 - 41)           | 0<br>(0 - 0)       | 0<br>(0 - 0)        | 1<br>(1 - 2)         | 5<br>(3 - 8)         | 22<br>(10 - 33)           |
| Other cardiovascular and circulatory diseases | 555<br>(371 - 753)        | 0<br>(0 - 0)       | 0<br>(0 - 0)        | 9<br>(5 - 12)        | 63<br>(41 - 87)      | 483<br>(313 - 676)        |
| Chronic respiratory diseases                  | 2,202<br>(1,309 - 2,610)  | 1<br>(0 - 1)       | 1<br>(0 - 1)        | 20<br>(13 - 25)      | 398<br>(311 - 471)   | 1,783<br>(965 - 2,161)    |
| Chronic obstructive pulmonary disease         | 2,049<br>(1,210 - 2,437)  | 0<br>(0 - 1)       | 0<br>(0 - 0)        | 12<br>(7 - 16)       | 365<br>(281 - 435)   | 1,671<br>(910 - 2,027)    |
| Pneumoconiosis                                | 3<br>(2 - 6)              | 0<br>(0 - 0)       | 0<br>(0 - 0)        | 0<br>(0 - 0)         | 0<br>(0 - 1)         | 3<br>(1 - 5)              |
| Silicosis                                     | 0<br>(0 - 0)              | 0<br>(0 - 0)       | 0<br>(0 - 0)        | 0<br>(0 - 0)         | 0<br>(0 - 0)         | 0<br>(0 - 0)              |
| Asbestosis                                    | 0<br>(0 - 0)              | 0<br>(0 - 0)       | 0<br>(0 - 0)        | 0<br>(0 - 0)         | 0<br>(0 - 0)         | 0<br>(0 - 0)              |
| Coal workers pneumoconiosis                   | 0<br>(0 - 0)              | 0<br>(0 - 0)       | 0<br>(0 - 0)        | 0<br>(0 - 0)         | 0<br>(0 - 0)         | 0<br>(0 - 0)              |
| Other pneumoconiosis                          | 3<br>(1 - 5)              | 0<br>(0 - 0)       | 0<br>(0 - 0)        | 0<br>(0 - 0)         | 0<br>(0 - 0)         | 2<br>(1 - 4)              |



Web Table 31- Denmark deaths with 95% UI by age, sex, and cause in 2013

| Cause                                               | Females, All Ages        | Females, 0-4 Years | Females, 5-14 Years | Females, 15-49 Years | Females, 50-69 Years | Females, 70-80 Years     |
|-----------------------------------------------------|--------------------------|--------------------|---------------------|----------------------|----------------------|--------------------------|
| Asthma                                              | 72<br>(39 - 110)         | 0<br>(0 - 0)       | 0<br>(0 - 0)        | 4<br>(3 - 6)         | 16<br>(9 - 27)       | 52<br>(25 - 83)          |
| Interstitial lung disease and pulmonary sarcoidosis | 70<br>(32 - 118)         | 0<br>(0 - 0)       | 0<br>(0 - 0)        | 3<br>(2 - 5)         | 15<br>(7 - 27)       | 52<br>(21 - 93)          |
| Other chronic respiratory diseases                  | 8<br>(4 - 13)            | 0<br>(0 - 0)       | 0<br>(0 - 0)        | 0<br>(0 - 0)         | 1<br>(1 - 2)         | 6<br>(3 - 11)            |
| Cirrhosis                                           | 403<br>(350 - 460)       | 0<br>(0 - 0)       | 0<br>(0 - 0)        | 48<br>(38 - 59)      | 207<br>(176 - 240)   | 148<br>(121 - 176)       |
| Cirrhosis due to hepatitis B                        | 57<br>(31 - 97)          | 0<br>(0 - 0)       | 0<br>(0 - 0)        | 6<br>(3 - 12)        | 30<br>(16 - 54)      | 21<br>(10 - 37)          |
| Cirrhosis due to hepatitis C                        | 212<br>(91 - 285)        | 0<br>(0 - 0)       | 0<br>(0 - 0)        | 25<br>(12 - 37)      | 109<br>(40 - 152)    | 78<br>(40 - 107)         |
| Cirrhosis due to alcohol use                        | 81<br>(35 - 147)         | --                 | --                  | 6<br>(2 - 13)        | 39<br>(16 - 76)      | 35<br>(15 - 61)          |
| Cirrhosis due to other causes                       | 53<br>(19 - 93)          | 0<br>(0 - 0)       | 0<br>(0 - 0)        | 11<br>(4 - 19)       | 29<br>(9 - 54)       | 13<br>(5 - 24)           |
| Digestive diseases                                  | 984<br>(715 - 1,175)     | 0<br>(0 - 0)       | 0<br>(0 - 0)        | 15<br>(10 - 18)      | 835<br>(91 - 162)    | 835<br>(601 - 1,013)     |
| Peptic ulcer disease                                | 241<br>(149 - 328)       | 0<br>(0 - 0)       | 0<br>(0 - 0)        | 2<br>(2 - 3)         | 28<br>(16 - 40)      | 210<br>(130 - 290)       |
| Gastritis and duodenitis                            | 12<br>(4 - 20)           | 0<br>(0 - 0)       | 0<br>(0 - 0)        | 0<br>(0 - 0)         | 1<br>(0 - 2)         | 10<br>(3 - 18)           |
| Appendicitis                                        | 16<br>(8 - 26)           | 0<br>(0 - 0)       | 0<br>(0 - 0)        | 1<br>(0 - 1)         | 3<br>(1 - 4)         | 12<br>(6 - 22)           |
| Paralytic ileus and intestinal obstruction          | 188<br>(94 - 296)        | 0<br>(0 - 0)       | 0<br>(0 - 0)        | 2<br>(1 - 3)         | 24<br>(11 - 38)      | 162<br>(80 - 254)        |
| Inguinal, femoral, and abdominal hernia             | 27<br>(10 - 45)          | 0<br>(0 - 0)       | 0<br>(0 - 0)        | 0<br>(0 - 0)         | 3<br>(1 - 4)         | 24<br>(9 - 41)           |
| Inflammatory bowel disease                          | 44<br>(22 - 63)          | 0<br>(0 - 0)       | 0<br>(0 - 0)        | 2<br>(1 - 2)         | 8<br>(4 - 12)        | 34<br>(15 - 52)          |
| Vascular intestinal disorders                       | 132<br>(72 - 236)        | 0<br>(0 - 0)       | 0<br>(0 - 0)        | 1<br>(1 - 3)         | 23<br>(13 - 42)      | 107<br>(57 - 196)        |
| Gallbladder and biliary diseases                    | 103<br>(62 - 140)        | 0<br>(0 - 0)       | 0<br>(0 - 0)        | 1<br>(0 - 1)         | 10<br>(5 - 14)       | 92<br>(55 - 128)         |
| Pancreatitis                                        | 57<br>(34 - 83)          | 0<br>(0 - 0)       | 0<br>(0 - 0)        | 4<br>(2 - 5)         | 14<br>(8 - 21)       | 39<br>(21 - 58)          |
| Other digestive diseases                            | 166<br>(106 - 221)       | 0<br>(0 - 0)       | 0<br>(0 - 0)        | 2<br>(1 - 2)         | 20<br>(11 - 27)      | 145<br>(91 - 199)        |
| Neurological disorders                              | 2,910<br>(2,113 - 3,684) | 2<br>(1 - 3)       | 1<br>(1 - 1)        | 28<br>(20 - 36)      | 176<br>(142 - 212)   | 2,703<br>(1,929 - 3,468) |
| Alzheimer disease and other dementias               | 2,518<br>(1,750 - 3,287) | --                 | --                  | 0<br>(0 - 1)         | 62<br>(39 - 88)      | 2,455<br>(1,682 - 3,220) |
| Parkinson disease                                   | 154<br>(95 - 224)        | --                 | --                  | 0<br>(0 - 0)         | 10<br>(6 - 15)       | 144<br>(86 - 207)        |
| Epilepsy                                            | 29<br>(14 - 42)          | 0<br>(0 - 1)       | 0<br>(0 - 1)        | 8<br>(4 - 12)        | 9<br>(4 - 13)        | 12<br>(4 - 20)           |
| Multiple sclerosis                                  | 80<br>(51 - 120)         | --                 | --                  | 11<br>(7 - 19)       | 41<br>(26 - 62)      | 27<br>(16 - 42)          |
| Other neurological disorders                        | 130<br>(111 - 151)       | 2<br>(1 - 3)       | 1<br>(0 - 1)        | 8<br>(6 - 10)        | 54<br>(44 - 65)      | 66<br>(52 - 80)          |
| Mental and substance use disorders                  | 239<br>(140 - 326)       | 0<br>(0 - 0)       | 0<br>(0 - 0)        | 59<br>(44 - 77)      | 123<br>(60 - 182)    | 57<br>(30 - 80)          |
| Schizophrenia                                       | 24<br>(11 - 36)          | --                 | --                  | 1<br>(1 - 2)         | 6<br>(2 - 9)         | 17<br>(7 - 27)           |
| Alcohol use disorders                               | 160<br>(62 - 252)        | --                 | --                  | 25<br>(11 - 43)      | 100<br>(36 - 161)    | 35<br>(13 - 59)          |
| Drug use disorders                                  | 55<br>(44 - 67)          | 0<br>(0 - 0)       | --                  | 32<br>(24 - 41)      | 17<br>(13 - 22)      | 6<br>(4 - 8)             |
| Opioid use disorders                                | 19<br>(15 - 24)          | 0<br>(0 - 0)       | --                  | 11<br>(8 - 15)       | 6<br>(4 - 7)         | 2<br>(1 - 3)             |
| Cocaine use disorders                               | 2<br>(2 - 3)             | 0<br>(0 - 0)       | --                  | 1<br>(1 - 2)         | 1<br>(0 - 1)         | 0<br>(0 - 0)             |
| Amphetamine use disorders                           | 2<br>(2 - 3)             | 0<br>(0 - 0)       | --                  | 1<br>(1 - 2)         | 1<br>(0 - 1)         | 0<br>(0 - 0)             |
| Other drug use disorders                            | 32<br>(25 - 39)          | 0<br>(0 - 0)       | --                  | 18<br>(14 - 23)      | 10<br>(8 - 13)       | 3<br>(2 - 5)             |
| Eating disorders                                    | 1<br>(0 - 1)             | --                 | 0<br>(0 - 0)        | 1<br>(0 - 1)         | --                   | --                       |
| Anorexia nervosa                                    | 1<br>(0 - 1)             | --                 | 0<br>(0 - 0)        | 1<br>(0 - 1)         | --                   | --                       |
| Diabetes, urogenital, blood, and endocrine diseases | 1,395<br>(998 - 1,634)   | 3<br>(1 - 5)       | 1<br>(0 - 2)        | 37<br>(24 - 46)      | 209<br>(157 - 245)   | 1,144<br>(802 - 1,367)   |
| Diabetes mellitus                                   | 608<br>(489 - 738)       | 0<br>(0 - 0)       | 0<br>(0 - 0)        | 14<br>(11 - 17)      | 101<br>(83 - 123)    | 493<br>(388 - 613)       |
| Acute glomerulonephritis                            | 1<br>(1 - 2)             | 0<br>(0 - 0)       | 0<br>(0 - 0)        | 0<br>(0 - 0)         | 0<br>(0 - 1)         | 1<br>(0 - 1)             |
| Chronic kidney disease                              | 370<br>(192 - 462)       | 0<br>(0 - 0)       | 0<br>(0 - 0)        | 8<br>(5 - 10)        | 49<br>(31 - 61)      | 313<br>(154 - 405)       |
| Chronic kidney disease due to diabetes mellitus     | 63<br>(41 - 87)          | 0<br>(0 - 0)       | 0<br>(0 - 0)        | 2<br>(1 - 3)         | 13<br>(9 - 18)       | 48<br>(29 - 69)          |

Web Table 31- Denmark deaths with 95% UI by age, sex, and cause in 2013

| Cause                                               | Females, All Ages      | Females, 0-4 Years | Females, 5-14 Years | Females, 15-49 Years | Females, 50-69 Years | Females, 70-80 Years |
|-----------------------------------------------------|------------------------|--------------------|---------------------|----------------------|----------------------|----------------------|
| Chronic kidney disease due to hypertension          | 100<br>(46 - 149)      | 0<br>(0 - 0)       | 0<br>(0 - 0)        | 1<br>(0 - 1)         | 8<br>(4 - 12)        | 91<br>(41 - 137)     |
| Chronic kidney disease due to glomerulonephritis    | 19<br>(12 - 34)        | 0<br>(0 - 0)       | 0<br>(0 - 0)        | 1<br>(0 - 1)         | 3<br>(2 - 6)         | 15<br>(8 - 28)       |
| Chronic kidney disease due to other causes          | 187<br>(62 - 265)      | 0<br>(0 - 0)       | 0<br>(0 - 0)        | 4<br>(2 - 6)         | 24<br>(11 - 35)      | 159<br>(48 - 235)    |
| Urinary diseases and male infertility               | 241<br>(137 - 336)     | 0<br>(0 - 0)       | 0<br>(0 - 0)        | 3<br>(2 - 5)         | 19<br>(14 - 29)      | 219<br>(113 - 315)   |
| Interstitial nephritis and urinary tract infections | 222<br>(120 - 311)     | 0<br>(0 - 0)       | 0<br>(0 - 0)        | 3<br>(2 - 4)         | 16<br>(12 - 25)      | 202<br>(101 - 291)   |
| Urolithiasis                                        | 9<br>(5 - 17)          | --<br>(0 - 0)      | 0<br>(0 - 0)        | 0<br>(0 - 0)         | 2<br>(1 - 3)         | 7<br>(4 - 15)        |
| Other urinary diseases                              | 10<br>(5 - 23)         | 0<br>(0 - 0)       | 0<br>(0 - 0)        | 0<br>(0 - 0)         | 1<br>(1 - 2)         | 9<br>(4 - 21)        |
| Gynecological diseases                              | 3<br>(2 - 5)           | --<br>(0 - 0)      | --<br>(0 - 0)       | 0<br>(0 - 0)         | 1<br>(0 - 1)         | 2<br>(1 - 4)         |
| Uterine fibroids                                    | 1<br>(1 - 1)           | --<br>(0 - 0)      | --<br>(0 - 0)       | 0<br>(0 - 0)         | 0<br>(0 - 0)         | 1<br>(0 - 1)         |
| Polycystic ovarian syndrome                         | 0<br>(0 - 0)           | --<br>(0 - 0)      | --<br>(0 - 0)       | 0<br>(0 - 0)         | 0<br>(0 - 0)         | --<br>(0 - 0)        |
| Endometriosis                                       | 0<br>(0 - 0)           | --<br>(0 - 0)      | --<br>(0 - 0)       | 0<br>(0 - 0)         | 0<br>(0 - 0)         | --<br>(0 - 0)        |
| Genital prolapse                                    | 1<br>(0 - 1)           | --<br>(0 - 0)      | --<br>(0 - 0)       | 0<br>(0 - 0)         | 0<br>(0 - 0)         | 0<br>(0 - 1)         |
| Other gynecological diseases                        | 1<br>(1 - 2)           | --<br>(0 - 0)      | --<br>(0 - 0)       | 0<br>(0 - 0)         | 0<br>(0 - 1)         | 1<br>(0 - 2)         |
| Hemoglobinopathies and hemolytic anemias            | 15<br>(9 - 22)         | 0<br>(0 - 0)       | 0<br>(0 - 0)        | 1<br>(1 - 1)         | 2<br>(1 - 4)         | 12<br>(6 - 18)       |
| Thalassemias                                        | 0<br>(0 - 0)           | 0<br>(0 - 0)       | 0<br>(0 - 0)        | 0<br>(0 - 0)         | 0<br>(0 - 0)         | 0<br>(0 - 0)         |
| Sickle cell disorders                               | 2<br>(1 - 2)           | 0<br>(0 - 0)       | 0<br>(0 - 0)        | 0<br>(0 - 1)         | 1<br>(0 - 1)         | 0<br>(0 - 1)         |
| G6PD deficiency                                     | 0<br>(0 - 0)           | 0<br>(0 - 0)       | 0<br>(0 - 0)        | 0<br>(0 - 0)         | 0<br>(0 - 0)         | 0<br>(0 - 0)         |
| Other hemoglobinopathies and hemolytic anemias      | 13<br>(7 - 19)         | 0<br>(0 - 0)       | 0<br>(0 - 0)        | 0<br>(0 - 0)         | 2<br>(1 - 2)         | 11<br>(6 - 17)       |
| Endocrine, metabolic, blood, and immune disorders   | 157<br>(33 - 220)      | 3<br>(1 - 5)       | 1<br>(0 - 1)        | 11<br>(3 - 16)       | 37<br>(9 - 53)       | 105<br>(20 - 155)    |
| Musculoskeletal disorders                           | 146<br>(114 - 195)     | --<br>(0 - 0)      | 0<br>(0 - 1)        | 6<br>(4 - 7)         | 29<br>(22 - 39)      | 111<br>(83 - 153)    |
| Rheumatoid arthritis                                | 69<br>(49 - 96)        | --<br>(0 - 0)      | 0<br>(0 - 0)        | 1<br>(1 - 1)         | 11<br>(7 - 15)       | 58<br>(40 - 82)      |
| Other musculoskeletal disorders                     | 77<br>(57 - 108)       | --<br>(0 - 0)      | 0<br>(0 - 0)        | 5<br>(4 - 6)         | 18<br>(14 - 26)      | 54<br>(36 - 78)      |
| Other non-communicable diseases                     | 155<br>(124 - 193)     | 36<br>(26 - 51)    | 3<br>(2 - 4)        | 14<br>(11 - 17)      | 25<br>(20 - 31)      | 78<br>(43 - 108)     |
| Congenital anomalies                                | 77<br>(63 - 103)       | 33<br>(24 - 47)    | 3<br>(2 - 4)        | 13<br>(10 - 16)      | 18<br>(14 - 24)      | 11<br>(8 - 16)       |
| Neural tube defects                                 | 1<br>(1 - 2)           | 0<br>(0 - 1)       | 0<br>(0 - 0)        | 0<br>(0 - 0)         | 0<br>(0 - 0)         | 0<br>(0 - 0)         |
| Congenital heart anomalies                          | 22<br>(17 - 30)        | 12<br>(8 - 17)     | 1<br>(1 - 1)        | 4<br>(3 - 5)         | 3<br>(2 - 5)         | 2<br>(1 - 3)         |
| Cleft lip and cleft palate                          | 0<br>(0 - 0)           | 0<br>(0 - 0)       | --<br>(0 - 0)       | --<br>(0 - 0)        | --<br>(0 - 0)        | --<br>(0 - 0)        |
| Down syndrome                                       | 13<br>(8 - 18)         | 1<br>(1 - 2)       | 0<br>(0 - 1)        | 3<br>(1 - 4)         | 8<br>(5 - 12)        | 1<br>(1 - 2)         |
| Chromosomal unbalanced rearrangements               | 6<br>(4 - 10)          | 5<br>(3 - 9)       | 0<br>(0 - 0)        | 0<br>(0 - 1)         | 0<br>(0 - 0)         | 0<br>(0 - 0)         |
| Other congenital anomalies                          | 35<br>(28 - 48)        | 14<br>(10 - 21)    | 1<br>(1 - 2)        | 6<br>(4 - 7)         | 6<br>(4 - 9)         | 8<br>(6 - 12)        |
| Skin and subcutaneous diseases                      | 74<br>(35 - 105)       | 0<br>(0 - 0)       | 0<br>(0 - 0)        | 1<br>(0 - 1)         | 7<br>(3 - 9)         | 67<br>(32 - 97)      |
| Cellulitis                                          | 2<br>(1 - 5)           | 0<br>(0 - 0)       | 0<br>(0 - 0)        | 0<br>(0 - 0)         | 0<br>(0 - 1)         | 2<br>(1 - 4)         |
| Pyoderma                                            | 50<br>(20 - 74)        | 0<br>(0 - 0)       | 0<br>(0 - 0)        | 0<br>(0 - 1)         | 5<br>(2 - 7)         | 45<br>(19 - 68)      |
| Decubitus ulcer                                     | 17<br>(9 - 29)         | 0<br>(0 - 0)       | 0<br>(0 - 0)        | 0<br>(0 - 0)         | 1<br>(1 - 2)         | 16<br>(7 - 27)       |
| Other skin and subcutaneous diseases                | 4<br>(2 - 12)          | 0<br>(0 - 0)       | 0<br>(0 - 0)        | 0<br>(0 - 0)         | 1<br>(0 - 1)         | 3<br>(1 - 12)        |
| Sudden infant death syndrome                        | 3<br>(1 - 9)           | 3<br>(1 - 9)       | --<br>(0 - 0)       | --<br>(0 - 0)        | --<br>(0 - 0)        | --<br>(0 - 0)        |
| Injuries                                            | 1,115<br>(906 - 1,659) | 7<br>(5 - 9)       | 7<br>(5 - 9)        | 137<br>(118 - 183)   | 198<br>(166 - 287)   | 766<br>(585 - 1,186) |
| Transport injuries                                  | 124<br>(103 - 162)     | 2<br>(1 - 3)       | 4<br>(3 - 6)        | 37<br>(30 - 45)      | 32<br>(25 - 44)      | 49<br>(37 - 67)      |
| Road injuries                                       | 120<br>(99 - 157)      | 2<br>(1 - 3)       | 4<br>(3 - 5)        | 36<br>(29 - 44)      | 31<br>(24 - 43)      | 47<br>(35 - 64)      |
| Pedestrian road injuries                            | 30<br>(19 - 44)        | 1<br>(0 - 1)       | 1<br>(1 - 2)        | 4<br>(2 - 6)         | 6<br>(4 - 10)        | 18<br>(11 - 27)      |

Web Table 31- Denmark deaths with 95% UI by age, sex, and cause in 2013

| Cause                                           | Females, All Ages    | Females, 0-4 Years | Females, 5-14 Years | Females, 15-49 Years | Females, 50-69 Years | Females, 70-80 Years |
|-------------------------------------------------|----------------------|--------------------|---------------------|----------------------|----------------------|----------------------|
| Cyclist road injuries                           | 21<br>(14 - 30)      | 0<br>(0 - 0)       | 1<br>(1 - 2)        | 5<br>(3 - 7)         | 9<br>(5 - 13)        | 6<br>(4 - 9)         |
| Motorcyclist road injuries                      | 4<br>(2 - 7)         | 0<br>(0 - 0)       | 0<br>(0 - 0)        | 2<br>(1 - 4)         | 1<br>(0 - 2)         | 1<br>(0 - 1)         |
| Motor vehicle road injuries                     | 64<br>(48 - 82)      | 1<br>(1 - 2)       | 2<br>(1 - 3)        | 24<br>(19 - 30)      | 15<br>(10 - 21)      | 22<br>(15 - 32)      |
| Other road injuries                             | 1<br>(1 - 2)         | 0<br>(0 - 0)       | 0<br>(0 - 0)        | 1<br>(0 - 1)         | 0<br>(0 - 1)         | 0<br>(0 - 0)         |
| Other transport injuries                        | 4<br>(3 - 7)         | 0<br>(0 - 0)       | 0<br>(0 - 0)        | 1<br>(1 - 1)         | 1<br>(1 - 2)         | 2<br>(1 - 4)         |
| Unintentional injuries                          | 751<br>(571 - 1,127) | 4<br>(3 - 5)       | 2<br>(1 - 2)        | 21<br>(16 - 26)      | 65<br>(51 - 82)      | 659<br>(485 - 1,033) |
| Falls                                           | 617<br>(434 - 1,023) | 0<br>(0 - 1)       | 0<br>(0 - 0)        | 4<br>(3 - 6)         | 32<br>(24 - 50)      | 581<br>(402 - 975)   |
| Drowning                                        | 8<br>(5 - 11)        | 1<br>(1 - 2)       | 0<br>(0 - 1)        | 2<br>(1 - 3)         | 3<br>(2 - 4)         | 2<br>(2 - 3)         |
| Fire, heat, and hot substances                  | 44<br>(25 - 61)      | 1<br>(0 - 1)       | 0<br>(0 - 1)        | 4<br>(3 - 6)         | 10<br>(6 - 14)       | 28<br>(15 - 42)      |
| Poisonings                                      | 9<br>(6 - 18)        | 0<br>(0 - 0)       | 0<br>(0 - 0)        | 4<br>(2 - 8)         | 3<br>(2 - 6)         | 3<br>(2 - 6)         |
| Exposure to mechanical forces                   | 8<br>(6 - 11)        | 1<br>(0 - 1)       | 0<br>(0 - 0)        | 1<br>(1 - 2)         | 2<br>(1 - 2)         | 4<br>(3 - 6)         |
| Unintentional firearm injuries                  | 1<br>(0 - 1)         | 0<br>(0 - 0)       | 0<br>(0 - 0)        | 0<br>(0 - 0)         | 0<br>(0 - 0)         | 0<br>(0 - 0)         |
| Unintentional suffocation                       | 1<br>(1 - 4)         | 0<br>(0 - 1)       | 0<br>(0 - 0)        | 0<br>(0 - 0)         | 0<br>(0 - 1)         | 1<br>(0 - 2)         |
| Other exposure to mechanical forces             | 6<br>(4 - 8)         | 0<br>(0 - 1)       | 0<br>(0 - 0)        | 1<br>(1 - 1)         | 1<br>(1 - 2)         | 3<br>(2 - 5)         |
| Adverse effects of medical treatment            | 28<br>(2 - 57)       | 0<br>(0 - 1)       | 0<br>(0 - 0)        | 1<br>(0 - 3)         | 6<br>(1 - 11)        | 20<br>(1 - 44)       |
| Animal contact                                  | 3<br>(1 - 5)         | 0<br>(0 - 0)       | 0<br>(0 - 0)        | 1<br>(0 - 1)         | 1<br>(0 - 2)         | 1<br>(0 - 2)         |
| Venomous animal contact                         | 1<br>(0 - 1)         | 0<br>(0 - 0)       | 0<br>(0 - 0)        | 0<br>(0 - 0)         | 0<br>(0 - 0)         | 0<br>(0 - 0)         |
| Non-venomous animal contact                     | 2<br>(1 - 4)         | 0<br>(0 - 0)       | 0<br>(0 - 0)        | 0<br>(0 - 1)         | 1<br>(0 - 1)         | 1<br>(0 - 2)         |
| Foreign body                                    | 31<br>(18 - 47)      | 1<br>(0 - 1)       | 0<br>(0 - 0)        | 3<br>(2 - 6)         | 9<br>(5 - 14)        | 18<br>(10 - 28)      |
| Pulmonary aspiration and foreign body in airway | 30<br>(17 - 46)      | 1<br>(0 - 1)       | 0<br>(0 - 0)        | 3<br>(2 - 5)         | 9<br>(5 - 14)        | 18<br>(9 - 28)       |
| Foreign body in other body part                 | 1<br>(0 - 1)         | 0<br>(0 - 0)       | 0<br>(0 - 0)        | 0<br>(0 - 0)         | 0<br>(0 - 0)         | 0<br>(0 - 1)         |
| Other unintentional injuries                    | 3<br>(2 - 9)         | 0<br>(0 - 0)       | 0<br>(0 - 0)        | 0<br>(0 - 1)         | 1<br>(0 - 3)         | 2<br>(1 - 5)         |
| Self-harm and interpersonal violence            | 240<br>(201 - 390)   | 1<br>(1 - 2)       | 1<br>(1 - 1)        | 79<br>(66 - 119)     | 101<br>(80 - 167)    | 58<br>(44 - 108)     |
| Self-harm                                       | 219<br>(183 - 369)   | --                 | 0<br>(0 - 0)        | 70<br>(56 - 110)     | 96<br>(76 - 162)     | 54<br>(41 - 104)     |
| Interpersonal violence                          | 21<br>(14 - 27)      | 1<br>(1 - 2)       | 1<br>(1 - 1)        | 10<br>(7 - 13)       | 5<br>(3 - 6)         | 4<br>(2 - 5)         |
| Assault by firearm                              | 4<br>(2 - 7)         | 0<br>(0 - 0)       | 0<br>(0 - 0)        | 2<br>(1 - 4)         | 1<br>(0 - 1)         | 1<br>(0 - 1)         |
| Assault by sharp object                         | 5<br>(3 - 8)         | 0<br>(0 - 0)       | 0<br>(0 - 0)        | 3<br>(2 - 5)         | 1<br>(1 - 2)         | 0<br>(0 - 1)         |
| Assault by other means                          | 11<br>(7 - 15)       | 1<br>(1 - 1)       | 0<br>(0 - 1)        | 4<br>(3 - 6)         | 3<br>(2 - 4)         | 3<br>(2 - 4)         |

Web Table 31- Djibouti deaths with 95% UI by age, sex, and cause in 2013

| Cause                                                             | Both Sexes, All Ages     | Both Sexes, 0-4 Years    | Both Sexes, 5-14 Years | Both Sexes, 15-49 Years  | Both Sexes, 50-69 Years  | Both Sexes, 70-80 Years  |
|-------------------------------------------------------------------|--------------------------|--------------------------|------------------------|--------------------------|--------------------------|--------------------------|
| All causes                                                        | 7,096<br>(5,823 - 9,439) | 1,502<br>(1,129 - 1,964) | 180<br>(148 - 218)     | 1,886<br>(1,450 - 2,589) | 1,778<br>(1,233 - 2,819) | 1,750<br>(1,375 - 2,353) |
| Communicable, maternal, neonatal, and nutritional diseases        | 3,565<br>(3,011 - 4,346) | 1,297<br>(976 - 1,704)   | 120<br>(97 - 146)      | 1,139<br>(903 - 1,440)   | 551<br>(396 - 810)       | 459<br>(357 - 607)       |
| HIV/AIDS and tuberculosis                                         | 1,153<br>(858 - 1,492)   | 46<br>(31 - 65)          | 47<br>(36 - 59)        | 721<br>(517 - 939)       | 255<br>(177 - 368)       | 84<br>(56 - 133)         |
| Tuberculosis                                                      | 372<br>(213 - 649)       | 11<br>(5 - 20)           | 3<br>(2 - 6)           | 152<br>(79 - 282)        | 135<br>(77 - 246)        | 71<br>(44 - 120)         |
| HIV/AIDS                                                          | 780<br>(516 - 1,027)     | 36<br>(21 - 54)          | 44<br>(33 - 56)        | 569<br>(363 - 776)       | 119<br>(77 - 166)        | 13<br>(7 - 19)           |
| HIV/AIDS resulting in mycobacterial infection                     | 48<br>(32 - 67)          | 2<br>(1 - 3)             | 2<br>(2 - 3)           | 35<br>(22 - 50)          | 8<br>(5 - 12)            | 1<br>(0 - 1)             |
| HIV/AIDS resulting in other diseases                              | 732<br>(487 - 963)       | 33<br>(20 - 51)          | 41<br>(32 - 53)        | 534<br>(340 - 724)       | 112<br>(72 - 155)        | 12<br>(7 - 18)           |
| Diarrhea, lower respiratory, and other common infectious diseases | 1,141<br>(865 - 1,520)   | 402<br>(254 - 598)       | 45<br>(32 - 66)        | 186<br>(121 - 286)       | 218<br>(135 - 347)       | 291<br>(207 - 397)       |
| Diarrheal diseases                                                | 316<br>(201 - 490)       | 97<br>(44 - 189)         | 10<br>(5 - 19)         | 57<br>(32 - 105)         | 70<br>(35 - 131)         | 82<br>(48 - 140)         |
| Intestinal infectious diseases                                    | 40<br>(18 - 74)          | 11<br>(4 - 24)           | 10<br>(5 - 18)         | 16<br>(7 - 33)           | 2<br>(1 - 5)             | 1<br>(0 - 1)             |
| Typhoid fever                                                     | 32<br>(14 - 59)          | 8<br>(3 - 18)            | 8<br>(4 - 15)          | 13<br>(5 - 27)           | 2<br>(1 - 4)             | 1<br>(0 - 1)             |
| Paratyphoid fever                                                 | 8<br>(4 - 15)            | 2<br>(1 - 6)             | 2<br>(1 - 4)           | 3<br>(1 - 6)             | 0<br>(0 - 1)             | 0<br>(0 - 0)             |
| Other intestinal infectious diseases                              | 1<br>(0 - 5)             | 0<br>(0 - 3)             | 0<br>(0 - 1)           | 0<br>(0 - 2)             | 0<br>(0 - 1)             | 0<br>(0 - 0)             |
| Lower respiratory infections                                      | 618<br>(443 - 841)       | 214<br>(129 - 339)       | 14<br>(8 - 21)         | 72<br>(43 - 113)         | 123<br>(74 - 199)        | 197<br>(131 - 280)       |
| Upper respiratory infections                                      | 1<br>(0 - 1)             | 0<br>(0 - 1)             | 0<br>(0 - 0)           | 0<br>(0 - 1)             | 0<br>(0 - 0)             | 0<br>(0 - 0)             |
| Otitis media                                                      | 1<br>(1 - 1)             | 0<br>(0 - 0)             | 0<br>(0 - 0)           | 0<br>(0 - 0)             | 0<br>(0 - 0)             | 0<br>(0 - 0)             |
| Meningitis                                                        | 127<br>(87 - 185)        | 51<br>(26 - 94)          | 8<br>(5 - 15)          | 36<br>(21 - 60)          | 21<br>(11 - 36)          | 10<br>(6 - 17)           |
| Pneumococcal meningitis                                           | 31<br>(20 - 47)          | 10<br>(5 - 18)           | 3<br>(1 - 5)           | 10<br>(5 - 18)           | 6<br>(2 - 11)            | 3<br>(1 - 4)             |
| H influenzae type B meningitis                                    | 24<br>(15 - 39)          | 15<br>(7 - 28)           | 2<br>(1 - 3)           | 4<br>(2 - 8)             | 2<br>(1 - 4)             | 1<br>(0 - 2)             |
| Meningococcal meningitis                                          | 20<br>(14 - 31)          | 5<br>(2 - 11)            | 1<br>(0 - 2)           | 7<br>(3 - 11)            | 5<br>(2 - 9)             | 2<br>(1 - 4)             |
| Other meningitis                                                  | 52<br>(34 - 77)          | 21<br>(10 - 41)          | 3<br>(2 - 6)           | 15<br>(8 - 25)           | 9<br>(4 - 15)            | 4<br>(2 - 7)             |
| Encephalitis                                                      | 4<br>(3 - 7)             | 2<br>(1 - 3)             | 0<br>(0 - 1)           | 1<br>(1 - 2)             | 1<br>(0 - 1)             | 0<br>(0 - 1)             |
| Diphtheria                                                        | 0<br>(0 - 1)             | 0<br>(0 - 1)             | 0<br>(0 - 0)           | 0<br>(0 - 0)             | 0<br>(0 - 0)             | --                       |
| Whooping cough                                                    | 5<br>(0 - 22)            | 4<br>(0 - 21)            | 0<br>(0 - 1)           | 0<br>(0 - 0)             | 0<br>(0 - 0)             | --                       |
| Tetanus                                                           | 7<br>(2 - 13)            | 4<br>(1 - 8)             | 0<br>(0 - 0)           | 2<br>(0 - 4)             | 1<br>(0 - 2)             | 0<br>(0 - 0)             |
| Measles                                                           | 20<br>(0 - 126)          | 18<br>(0 - 111)          | 2<br>(0 - 15)          | 1<br>(0 - 4)             | 0<br>(0 - 0)             | --                       |
| Varicella and herpes zoster                                       | 1<br>(0 - 2)             | 0<br>(0 - 1)             | 0<br>(0 - 0)           | 0<br>(0 - 1)             | 0<br>(0 - 0)             | 0<br>(0 - 1)             |
| Neglected tropical diseases and malaria                           | 407<br>(203 - 670)       | 310<br>(127 - 564)       | 16<br>(7 - 30)         | 55<br>(29 - 103)         | 18<br>(8 - 44)           | 9<br>(4 - 24)            |
| Malaria                                                           | 345<br>(147 - 599)       | 299<br>(117 - 556)       | 9<br>(2 - 23)          | 21<br>(4 - 58)           | 10<br>(2 - 33)           | 6<br>(1 - 20)            |
| Leishmaniasis                                                     | 50<br>(31 - 79)          | 8<br>(3 - 16)            | 6<br>(2 - 11)          | 29<br>(15 - 51)          | 5<br>(3 - 10)            | 2<br>(1 - 3)             |
| Visceral leishmaniasis                                            | 50<br>(31 - 79)          | 8<br>(3 - 16)            | 6<br>(2 - 11)          | 29<br>(15 - 51)          | 5<br>(3 - 10)            | 2<br>(1 - 3)             |
| Schistosomiasis                                                   | 4<br>(3 - 7)             | 0<br>(0 - 0)             | 0<br>(0 - 0)           | 2<br>(1 - 3)             | 2<br>(1 - 3)             | 1<br>(0 - 1)             |
| Cysticercosis                                                     | 0<br>(0 - 1)             | 0<br>(0 - 0)             | 0<br>(0 - 0)           | 0<br>(0 - 1)             | 0<br>(0 - 0)             | 0<br>(0 - 0)             |
| Cystic echinococcosis                                             | 0<br>(0 - 1)             | 0<br>(0 - 0)             | 0<br>(0 - 0)           | 0<br>(0 - 0)             | 0<br>(0 - 0)             | 0<br>(0 - 0)             |
| Dengue                                                            | 0<br>(0 - 0)             | 0<br>(0 - 0)             | 0<br>(0 - 0)           | 0<br>(0 - 0)             | 0<br>(0 - 0)             | 0<br>(0 - 0)             |
| Rabies                                                            | 4<br>(2 - 6)             | 1<br>(0 - 1)             | 1<br>(0 - 1)           | 2<br>(1 - 3)             | 0<br>(0 - 1)             | 0<br>(0 - 0)             |
| Intestinal nematode infections                                    | 2<br>(0 - 8)             | 1<br>(0 - 7)             | 0<br>(0 - 2)           | 0<br>(0 - 2)             | 0<br>(0 - 1)             | 0<br>(0 - 1)             |
| Ascariasis                                                        | 2<br>(0 - 8)             | 1<br>(0 - 7)             | 0<br>(0 - 2)           | 0<br>(0 - 2)             | 0<br>(0 - 1)             | 0<br>(0 - 1)             |
| Other neglected tropical diseases                                 | 2<br>(1 - 4)             | 0<br>(0 - 1)             | 0<br>(0 - 0)           | 0<br>(0 - 1)             | 0<br>(0 - 1)             | 0<br>(0 - 1)             |
| Maternal disorders                                                | 123<br>(77 - 193)        | --                       | 0<br>(0 - 1)           | 122<br>(77 - 192)        | --                       | --                       |

Web Table 31- Djibouti deaths with 95% UI by age, sex, and cause in 2013

| Cause                                                            | Both Sexes, All Ages     | Both Sexes, 0-4 Years | Both Sexes, 5-14 Years | Both Sexes, 15-49 Years | Both Sexes, 50-69 Years | Both Sexes, 70-80 Years |
|------------------------------------------------------------------|--------------------------|-----------------------|------------------------|-------------------------|-------------------------|-------------------------|
| Maternal hemorrhage                                              | 15<br>(9 - 25)           | --                    | 0<br>(0 - 0)           | 15<br>(9 - 25)          | --                      | --                      |
| Maternal sepsis and other maternal infections                    | 12<br>(7 - 20)           | --                    | 0<br>(0 - 0)           | 12<br>(7 - 20)          | --                      | --                      |
| Maternal hypertensive disorders                                  | 13<br>(7 - 21)           | --                    | 0<br>(0 - 0)           | 13<br>(7 - 21)          | --                      | --                      |
| Maternal obstructed labor                                        | 6<br>(4 - 11)            | --                    | 0<br>(0 - 0)           | 6<br>(4 - 11)           | --                      | --                      |
| Maternal abortive outcome                                        | 24<br>(14 - 38)          | --                    | 0<br>(0 - 0)           | 24<br>(14 - 38)         | --                      | --                      |
| Indirect maternal deaths                                         | 10<br>(5 - 18)           | --                    | 0<br>(0 - 0)           | 10<br>(5 - 18)          | --                      | --                      |
| Late maternal deaths                                             | 11<br>(5 - 20)           | --                    | 0<br>(0 - 0)           | 11<br>(5 - 20)          | --                      | --                      |
| Maternal deaths aggravated by HIV/AIDS                           | 1<br>(0 - 1)             | --                    | --                     | 1<br>(0 - 1)            | --                      | --                      |
| Other maternal disorders                                         | 31<br>(18 - 50)          | --                    | 0<br>(0 - 0)           | 31<br>(18 - 50)         | --                      | --                      |
| Neonatal disorders                                               | 426<br>(331 - 546)       | 426<br>(331 - 546)    | --                     | --                      | --                      | --                      |
| Neonatal preterm birth complications                             | 109<br>(56 - 181)        | 109<br>(56 - 181)     | --                     | --                      | --                      | --                      |
| Neonatal encephalopathy due to birth asphyxia and trauma         | 138<br>(78 - 210)        | 138<br>(78 - 210)     | --                     | --                      | --                      | --                      |
| Neonatal sepsis and other neonatal infections                    | 109<br>(47 - 205)        | 109<br>(47 - 205)     | --                     | --                      | --                      | --                      |
| Hemolytic disease and other neonatal jaundice                    | 3<br>(1 - 7)             | 3<br>(1 - 7)          | --                     | --                      | --                      | --                      |
| Other neonatal disorders                                         | 67<br>(18 - 129)         | 67<br>(18 - 129)      | --                     | --                      | --                      | --                      |
| Nutritional deficiencies                                         | 264<br>(174 - 372)       | 97<br>(48 - 168)      | 9<br>(6 - 15)          | 42<br>(26 - 68)         | 49<br>(30 - 80)         | 67<br>(44 - 95)         |
| Protein-energy malnutrition                                      | 178<br>(104 - 263)       | 86<br>(42 - 150)      | 7<br>(4 - 11)          | 16<br>(7 - 30)          | 28<br>(14 - 49)         | 41<br>(22 - 64)         |
| Iodine deficiency                                                | 2<br>(0 - 6)             | 1<br>(0 - 3)          | 0<br>(0 - 1)           | 1<br>(0 - 2)            | 0<br>(0 - 2)            | 0<br>(0 - 2)            |
| Iron-deficiency anemia                                           | 82<br>(46 - 137)         | 10<br>(2 - 25)        | 2<br>(1 - 4)           | 26<br>(14 - 44)         | 20<br>(10 - 36)         | 25<br>(11 - 45)         |
| Other nutritional deficiencies                                   | 2<br>(1 - 4)             | 0<br>(0 - 0)          | 0<br>(0 - 0)           | 0<br>(0 - 1)            | 0<br>(0 - 1)            | 1<br>(0 - 2)            |
| Other communicable, maternal, neonatal, and nutritional diseases | 51<br>(34 - 72)          | 16<br>(8 - 29)        | 2<br>(1 - 3)           | 13<br>(8 - 21)          | 11<br>(6 - 21)          | 8<br>(4 - 17)           |
| Sexually transmitted diseases excluding HIV                      | 11<br>(5 - 19)           | 8<br>(2 - 15)         | 1<br>(0 - 1)           | 1<br>(0 - 2)            | 1<br>(0 - 2)            | 1<br>(0 - 1)            |
| Syphilis                                                         | 10<br>(4 - 18)           | 8<br>(2 - 15)         | 1<br>(0 - 1)           | 1<br>(0 - 1)            | 1<br>(0 - 1)            | 0<br>(0 - 1)            |
| Chlamydial infection                                             | 0<br>(0 - 1)             | --                    | 0<br>(0 - 0)           | 0<br>(0 - 0)            | 0<br>(0 - 0)            | 0<br>(0 - 0)            |
| Gonococcal infection                                             | 0<br>(0 - 1)             | --                    | 0<br>(0 - 0)           | 0<br>(0 - 1)            | 0<br>(0 - 0)            | 0<br>(0 - 0)            |
| Other sexually transmitted diseases                              | 0<br>(0 - 1)             | --                    | 0<br>(0 - 0)           | 0<br>(0 - 0)            | 0<br>(0 - 0)            | 0<br>(0 - 0)            |
| Hepatitis                                                        | 9<br>(6 - 14)            | 1<br>(0 - 2)          | 0<br>(0 - 1)           | 5<br>(3 - 8)            | 3<br>(2 - 5)            | 1<br>(1 - 1)            |
| Acute hepatitis A                                                | 1<br>(0 - 2)             | 0<br>(0 - 1)          | 0<br>(0 - 0)           | 0<br>(0 - 1)            | 0<br>(0 - 0)            | 0<br>(0 - 0)            |
| Acute hepatitis B                                                | 6<br>(4 - 10)            | 1<br>(0 - 1)          | 0<br>(0 - 0)           | 2<br>(1 - 4)            | 2<br>(1 - 4)            | 1<br>(1 - 1)            |
| Acute hepatitis C                                                | 0<br>(0 - 0)             | --                    | 0<br>(0 - 0)           | 0<br>(0 - 0)            | 0<br>(0 - 0)            | 0<br>(0 - 0)            |
| Acute hepatitis E                                                | 2<br>(1 - 4)             | 0<br>(0 - 0)          | 0<br>(0 - 0)           | 2<br>(1 - 3)            | 0<br>(0 - 1)            | 0<br>(0 - 0)            |
| Other infectious diseases                                        | 30<br>(17 - 49)          | 8<br>(4 - 18)         | 1<br>(0 - 2)           | 7<br>(3 - 13)           | 8<br>(3 - 16)           | 7<br>(3 - 15)           |
| Non-communicable diseases                                        | 3,059<br>(2,269 - 4,504) | 154<br>(99 - 230)     | 33<br>(24 - 44)        | 514<br>(339 - 814)      | 1,135<br>(749 - 1,832)  | 1,224<br>(960 - 1,652)  |
| Neoplasms                                                        | 557<br>(392 - 856)       | 10<br>(5 - 18)        | 8<br>(6 - 12)          | 123<br>(80 - 201)       | 275<br>(180 - 450)      | 140<br>(108 - 190)      |
| Esophageal cancer                                                | 58<br>(35 - 91)          | --                    | --                     | 8<br>(4 - 13)           | 34<br>(19 - 54)         | 17<br>(11 - 25)         |
| Stomach cancer                                                   | 34<br>(24 - 52)          | --                    | --                     | 4<br>(3 - 7)            | 19<br>(12 - 30)         | 11<br>(8 - 16)          |
| Liver cancer                                                     | 49<br>(30 - 80)          | --                    | 0<br>(0 - 1)           | 14<br>(6 - 26)          | 23<br>(15 - 39)         | 10<br>(7 - 16)          |
| Liver cancer due to hepatitis B                                  | 10<br>(5 - 19)           | --                    | 0<br>(0 - 0)           | 4<br>(2 - 8)            | 4<br>(1 - 10)           | 2<br>(1 - 3)            |
| Liver cancer due to hepatitis C                                  | 24<br>(12 - 43)          | --                    | 0<br>(0 - 0)           | 6<br>(2 - 13)           | 12<br>(5 - 22)          | 6<br>(3 - 9)            |
| Liver cancer due to alcohol use                                  | 7<br>(4 - 11)            | --                    | --                     | 1<br>(0 - 2)            | 3<br>(2 - 6)            | 2<br>(1 - 3)            |

Web Table 31- Djibouti deaths with 95% UI by age, sex, and cause in 2013

| Cause                                         | Both Sexes, All Ages     | Both Sexes, 0-4 Years | Both Sexes, 5-14 Years | Both Sexes, 15-49 Years | Both Sexes, 50-69 Years | Both Sexes, 70-80 Years |
|-----------------------------------------------|--------------------------|-----------------------|------------------------|-------------------------|-------------------------|-------------------------|
| Liver cancer due to other causes              | 8<br>(4 - 15)            | --                    | 0<br>(0 - 0)           | 3<br>(1 - 6)            | 4<br>(2 - 7)            | 1<br>(1 - 2)            |
| Larynx cancer                                 | 3<br>(2 - 5)             | --                    | --                     | 0<br>(0 - 1)            | 2<br>(1 - 3)            | 1<br>(1 - 2)            |
| Tracheal, bronchus and lung cancer            | 28<br>(19 - 43)          | --                    | --                     | 2<br>(1 - 4)            | 18<br>(12 - 29)         | 8<br>(6 - 11)           |
| Breast cancer                                 | 48<br>(30 - 79)          | --                    | --                     | 18<br>(11 - 30)         | 23<br>(13 - 40)         | 7<br>(5 - 13)           |
| Cervical cancer                               | 82<br>(43 - 140)         | --                    | --                     | 17<br>(8 - 31)          | 53<br>(25 - 91)         | 13<br>(7 - 21)          |
| Uterine cancer                                | 4<br>(2 - 7)             | --                    | --                     | 0<br>(0 - 1)            | 2<br>(1 - 4)            | 1<br>(1 - 2)            |
| Prostate cancer                               | 22<br>(13 - 36)          | --                    | --                     | 0<br>(0 - 1)            | 7<br>(4 - 13)           | 15<br>(9 - 24)          |
| Colon and rectum cancer                       | 40<br>(27 - 60)          | --                    | --                     | 10<br>(7 - 16)          | 18<br>(12 - 29)         | 11<br>(8 - 16)          |
| Lip and oral cavity cancer                    | 7<br>(5 - 11)            | --                    | --                     | 2<br>(1 - 3)            | 4<br>(2 - 6)            | 2<br>(1 - 3)            |
| Nasopharynx cancer                            | 2<br>(1 - 3)             | --                    | 0<br>(0 - 0)           | 1<br>(1 - 2)            | 1<br>(0 - 1)            | 0<br>(0 - 0)            |
| Other pharynx cancer                          | 3<br>(2 - 5)             | --                    | --                     | 1<br>(0 - 1)            | 2<br>(1 - 3)            | 1<br>(0 - 1)            |
| Gallbladder and biliary tract cancer          | 6<br>(4 - 10)            | --                    | --                     | 2<br>(1 - 3)            | 3<br>(2 - 5)            | 1<br>(1 - 2)            |
| Pancreatic cancer                             | 15<br>(10 - 24)          | --                    | --                     | 3<br>(2 - 5)            | 9<br>(6 - 14)           | 3<br>(2 - 5)            |
| Malignant skin melanoma                       | 3<br>(2 - 4)             | --                    | --                     | 1<br>(0 - 1)            | 1<br>(1 - 2)            | 1<br>(0 - 1)            |
| Non-melanoma skin cancer                      | 2<br>(1 - 4)             | --                    | --                     | 0<br>(0 - 1)            | 1<br>(0 - 1)            | 1<br>(1 - 2)            |
| Ovarian cancer                                | 15<br>(9 - 24)           | --                    | --                     | 3<br>(2 - 6)            | 9<br>(5 - 16)           | 2<br>(1 - 4)            |
| Testicular cancer                             | 1<br>(1 - 2)             | --                    | --                     | 1<br>(0 - 1)            | 0<br>(0 - 1)            | 0<br>(0 - 0)            |
| Kidney cancer                                 | 9<br>(6 - 14)            | 1<br>(0 - 2)          | 0<br>(0 - 1)           | 1<br>(1 - 2)            | 5<br>(3 - 8)            | 2<br>(1 - 3)            |
| Bladder cancer                                | 9<br>(6 - 14)            | --                    | --                     | 1<br>(1 - 2)            | 4<br>(3 - 6)            | 4<br>(3 - 6)            |
| Brain and nervous system cancer               | 8<br>(5 - 12)            | 0<br>(0 - 0)          | 1<br>(0 - 1)           | 4<br>(2 - 6)            | 2<br>(1 - 4)            | 1<br>(1 - 2)            |
| Thyroid cancer                                | 2<br>(1 - 3)             | --                    | 0<br>(0 - 0)           | 0<br>(0 - 0)            | 1<br>(1 - 2)            | 1<br>(0 - 1)            |
| Mesothelioma                                  | 1<br>(0 - 1)             | --                    | --                     | 0<br>(0 - 0)            | 0<br>(0 - 1)            | 0<br>(0 - 0)            |
| Hodgkin lymphoma                              | 4<br>(2 - 6)             | 0<br>(0 - 0)          | 0<br>(0 - 0)           | 1<br>(1 - 2)            | 1<br>(1 - 2)            | 1<br>(1 - 2)            |
| Non-Hodgkin lymphoma                          | 32<br>(22 - 48)          | 3<br>(1 - 7)          | 3<br>(2 - 5)           | 3<br>(6 - 16)           | 10<br>(6 - 18)          | 6<br>(4 - 10)           |
| Multiple myeloma                              | 5<br>(3 - 9)             | --                    | --                     | 1<br>(1 - 2)            | 3<br>(2 - 5)            | 2<br>(1 - 2)            |
| Leukemia                                      | 9<br>(7 - 14)            | 0<br>(0 - 1)          | 1<br>(1 - 1)           | 4<br>(3 - 6)            | 2<br>(1 - 4)            | 2<br>(1 - 3)            |
| Other neoplasms                               | 52<br>(35 - 75)          | 6<br>(3 - 9)          | 3<br>(2 - 5)           | 12<br>(7 - 20)          | 17<br>(11 - 27)         | 14<br>(9 - 20)          |
| Cardiovascular diseases                       | 1,402<br>(1,026 - 2,045) | 9<br>(5 - 14)         | 4<br>(3 - 6)           | 159<br>(102 - 262)      | 523<br>(351 - 837)      | 707<br>(552 - 953)      |
| Rheumatic heart disease                       | 43<br>(27 - 72)          | 0<br>(0 - 1)          | 1<br>(0 - 1)           | 15<br>(9 - 27)          | 15<br>(9 - 27)          | 11<br>(7 - 18)          |
| Ischemic heart disease                        | 402<br>(281 - 618)       | 0<br>(0 - 0)          | 0<br>(0 - 0)           | 38<br>(22 - 66)         | 159<br>(103 - 263)      | 206<br>(152 - 288)      |
| Cerebrovascular disease                       | 611<br>(429 - 903)       | 1<br>(1 - 2)          | 1<br>(0 - 1)           | 49<br>(30 - 83)         | 225<br>(144 - 365)      | 335<br>(247 - 465)      |
| Ischemic stroke                               | 303<br>(205 - 477)       | 0<br>(0 - 0)          | 0<br>(0 - 0)           | 9<br>(5 - 17)           | 84<br>(50 - 150)        | 210<br>(147 - 310)      |
| Hemorrhagic stroke                            | 308<br>(205 - 475)       | 1<br>(1 - 2)          | 1<br>(0 - 1)           | 41<br>(24 - 68)         | 140<br>(88 - 228)       | 125<br>(82 - 185)       |
| Hypertensive heart disease                    | 127<br>(83 - 199)        | 0<br>(0 - 0)          | 0<br>(0 - 0)           | 11<br>(6 - 18)          | 42<br>(25 - 70)         | 74<br>(48 - 117)        |
| Cardiomyopathy and myocarditis                | 68<br>(44 - 111)         | 4<br>(2 - 7)          | 1<br>(1 - 2)           | 19<br>(11 - 33)         | 24<br>(14 - 41)         | 20<br>(12 - 34)         |
| Atrial fibrillation and flutter               | 2<br>(1 - 3)             | --                    | --                     | 0<br>(0 - 0)            | 0<br>(0 - 1)            | 1<br>(0 - 2)            |
| Aortic aneurysm                               | 21<br>(14 - 33)          | --                    | --                     | 3<br>(2 - 5)            | 8<br>(5 - 14)           | 10<br>(7 - 15)          |
| Peripheral vascular disease                   | 2<br>(1 - 3)             | --                    | --                     | 0<br>(0 - 0)            | 1<br>(0 - 1)            | 1<br>(1 - 2)            |
| Endocarditis                                  | 16<br>(10 - 27)          | 1<br>(0 - 1)          | 0<br>(0 - 0)           | 4<br>(2 - 7)            | 5<br>(3 - 10)           | 6<br>(4 - 9)            |
| Other cardiovascular and circulatory diseases | 110<br>(68 - 193)        | 2<br>(1 - 4)          | 1<br>(0 - 1)           | 20<br>(12 - 35)         | 44<br>(24 - 81)         | 43<br>(26 - 84)         |

Web Table 31- Djibouti deaths with 95% UI by age, sex, and cause in 2013

| Cause                                               | Both Sexes, All Ages | Both Sexes, 0-4 Years | Both Sexes, 5-14 Years | Both Sexes, 15-49 Years | Both Sexes, 50-69 Years | Both Sexes, 70-80 Years |
|-----------------------------------------------------|----------------------|-----------------------|------------------------|-------------------------|-------------------------|-------------------------|
| Chronic respiratory diseases                        | 171<br>(117 - 257)   | 4<br>(2 - 7)          | 1<br>(1 - 2)           | 19<br>(12 - 32)         | 60<br>(37 - 98)         | 86<br>(62 - 121)        |
| Chronic obstructive pulmonary disease               | 98<br>(66 - 151)     | 1<br>(0 - 2)          | 0<br>(0 - 1)           | 7<br>(4 - 12)           | 35<br>(22 - 60)         | 55<br>(38 - 81)         |
| Pneumoconiosis                                      | 12<br>(7 - 20)       | 0<br>(0 - 0)          | 0<br>(0 - 0)           | 2<br>(1 - 4)            | 5<br>(3 - 9)            | 5<br>(2 - 8)            |
| Silicosis                                           | 4<br>(2 - 7)         | 0<br>(0 - 0)          | 0<br>(0 - 0)           | 1<br>(0 - 1)            | 1<br>(1 - 3)            | 1<br>(1 - 3)            |
| Asbestosis                                          | 1<br>(1 - 2)         | 0<br>(0 - 0)          | 0<br>(0 - 0)           | 0<br>(0 - 1)            | 1<br>(0 - 1)            | 0<br>(0 - 1)            |
| Coal workers pneumoconiosis                         | 1<br>(1 - 3)         | 0<br>(0 - 0)          | 0<br>(0 - 0)           | 0<br>(0 - 1)            | 1<br>(0 - 1)            | 1<br>(0 - 1)            |
| Other pneumoconiosis                                | 6<br>(3 - 10)        | 0<br>(0 - 0)          | 0<br>(0 - 0)           | 1<br>(1 - 2)            | 2<br>(1 - 4)            | 2<br>(1 - 4)            |
| Asthma                                              | 29<br>(12 - 53)      | 1<br>(0 - 2)          | 0<br>(0 - 1)           | 4<br>(2 - 8)            | 11<br>(4 - 21)          | 13<br>(5 - 23)          |
| Interstitial lung disease and pulmonary sarcoidosis | 19<br>(4 - 38)       | 0<br>(0 - 0)          | 0<br>(0 - 0)           | 2<br>(0 - 5)            | 6<br>(1 - 14)           | 10<br>(2 - 21)          |
| Other chronic respiratory diseases                  | 13<br>(8 - 21)       | 2<br>(1 - 4)          | 0<br>(0 - 1)           | 4<br>(2 - 7)            | 3<br>(1 - 5)            | 4<br>(2 - 7)            |
| Cirrhosis                                           | 144<br>(99 - 224)    | 1<br>(0 - 2)          | 1<br>(1 - 2)           | 36<br>(23 - 59)         | 69<br>(44 - 112)        | 36<br>(26 - 51)         |
| Cirrhosis due to hepatitis B                        | 34<br>(18 - 56)      | 0<br>(0 - 0)          | 0<br>(0 - 0)           | 8<br>(4 - 15)           | 17<br>(8 - 29)          | 9<br>(4 - 15)           |
| Cirrhosis due to hepatitis C                        | 33<br>(15 - 55)      | 0<br>(0 - 0)          | 0<br>(0 - 0)           | 7<br>(3 - 12)           | 16<br>(7 - 29)          | 9<br>(5 - 15)           |
| Cirrhosis due to alcohol use                        | 58<br>(37 - 93)      | --                    | --                     | 13<br>(8 - 23)          | 29<br>(17 - 49)         | 16<br>(10 - 25)         |
| Cirrhosis due to other causes                       | 20<br>(11 - 32)      | 1<br>(0 - 2)          | 1<br>(1 - 1)           | 8<br>(4 - 13)           | 7<br>(4 - 13)           | 3<br>(1 - 5)            |
| Digestive diseases                                  | 149<br>(106 - 222)   | 3<br>(1 - 6)          | 3<br>(2 - 4)           | 37<br>(24 - 60)         | 52<br>(33 - 84)         | 55<br>(41 - 75)         |
| Peptic ulcer disease                                | 38<br>(24 - 57)      | 0<br>(0 - 0)          | 0<br>(0 - 0)           | 8<br>(4 - 13)           | 14<br>(8 - 24)          | 16<br>(10 - 23)         |
| Gastritis and duodenitis                            | 5<br>(3 - 12)        | 0<br>(0 - 0)          | 0<br>(0 - 0)           | 1<br>(1 - 3)            | 2<br>(1 - 4)            | 2<br>(1 - 5)            |
| Appendicitis                                        | 10<br>(6 - 17)       | 0<br>(0 - 1)          | 0<br>(0 - 1)           | 3<br>(2 - 5)            | 3<br>(2 - 6)            | 3<br>(1 - 6)            |
| Paralytic ileus and intestinal obstruction          | 49<br>(30 - 76)      | 1<br>(0 - 2)          | 1<br>(1 - 2)           | 13<br>(7 - 22)          | 17<br>(10 - 29)         | 17<br>(11 - 28)         |
| Inguinal, femoral, and abdominal hernia             | 3<br>(2 - 4)         | 0<br>(0 - 0)          | 0<br>(0 - 0)           | 1<br>(0 - 2)            | 1<br>(0 - 1)            | 1<br>(1 - 2)            |
| Inflammatory bowel disease                          | 9<br>(4 - 13)        | 1<br>(0 - 1)          | 0<br>(0 - 0)           | 3<br>(1 - 4)            | 2<br>(1 - 4)            | 3<br>(1 - 4)            |
| Vascular intestinal disorders                       | 2<br>(1 - 3)         | 0<br>(0 - 0)          | 0<br>(0 - 0)           | 0<br>(0 - 1)            | 1<br>(0 - 1)            | 0<br>(0 - 2)            |
| Gallbladder and biliary diseases                    | 11<br>(7 - 16)       | 0<br>(0 - 0)          | 0<br>(0 - 0)           | 2<br>(1 - 3)            | 4<br>(2 - 7)            | 5<br>(3 - 8)            |
| Pancreatitis                                        | 8<br>(5 - 13)        | 0<br>(0 - 0)          | 0<br>(0 - 0)           | 3<br>(2 - 6)            | 3<br>(2 - 5)            | 2<br>(1 - 3)            |
| Other digestive diseases                            | 15<br>(10 - 23)      | 1<br>(0 - 1)          | 0<br>(0 - 1)           | 3<br>(2 - 6)            | 5<br>(3 - 9)            | 5<br>(3 - 8)            |
| Neurological disorders                              | 94<br>(73 - 128)     | 5<br>(2 - 11)         | 4<br>(2 - 6)           | 22<br>(13 - 37)         | 11<br>(7 - 18)          | 53<br>(41 - 68)         |
| Alzheimer disease and other dementias               | 51<br>(39 - 68)      | --                    | --                     | 0<br>(0 - 0)            | 5<br>(3 - 8)            | 46<br>(35 - 61)         |
| Parkinson disease                                   | 1<br>(1 - 2)         | --                    | --                     | 0<br>(0 - 0)            | 0<br>(0 - 0)            | 1<br>(0 - 2)            |
| Epilepsy                                            | 34<br>(23 - 54)      | 4<br>(2 - 9)          | 3<br>(2 - 6)           | 19<br>(11 - 33)         | 3<br>(2 - 6)            | 5<br>(3 - 7)            |
| Multiple sclerosis                                  | 0<br>(0 - 1)         | --                    | --                     | 0<br>(0 - 0)            | 0<br>(0 - 0)            | 0<br>(0 - 0)            |
| Other neurological disorders                        | 7<br>(5 - 11)        | 1<br>(1 - 2)          | 0<br>(0 - 1)           | 3<br>(2 - 4)            | 2<br>(1 - 3)            | 1<br>(1 - 2)            |
| Mental and substance use disorders                  | 34<br>(20 - 52)      | 1<br>(0 - 2)          | 0<br>(0 - 0)           | 24<br>(14 - 38)         | 7<br>(4 - 13)           | 2<br>(1 - 3)            |
| Schizophrenia                                       | 2<br>(1 - 3)         | --                    | --                     | 1<br>(0 - 2)            | 1<br>(0 - 1)            | 0<br>(0 - 0)            |
| Alcohol use disorders                               | 14<br>(7 - 26)       | --                    | --                     | 8<br>(4 - 16)           | 5<br>(2 - 9)            | 1<br>(0 - 1)            |
| Drug use disorders                                  | 18<br>(8 - 32)       | 1<br>(0 - 2)          | --                     | 15<br>(7 - 25)          | 2<br>(1 - 4)            | 1<br>(0 - 1)            |
| Opioid use disorders                                | 2<br>(1 - 3)         | 0<br>(0 - 0)          | --                     | 2<br>(1 - 3)            | 0<br>(0 - 0)            | 0<br>(0 - 0)            |
| Cocaine use disorders                               | 0<br>(0 - 0)         | 0<br>(0 - 0)          | --                     | 0<br>(0 - 0)            | 0<br>(0 - 0)            | 0<br>(0 - 0)            |
| Amphetamine use disorders                           | 0<br>(0 - 0)         | 0<br>(0 - 0)          | --                     | 0<br>(0 - 0)            | 0<br>(0 - 0)            | 0<br>(0 - 0)            |
| Other drug use disorders                            | 16<br>(7 - 28)       | 1<br>(0 - 2)          | --                     | 13<br>(6 - 23)          | 2<br>(1 - 4)            | 1<br>(0 - 1)            |

Web Table 31- Djibouti deaths with 95% UI by age, sex, and cause in 2013

| Cause                                               | Both Sexes, All Ages | Both Sexes, 0-4 Years | Both Sexes, 5-14 Years | Both Sexes, 15-49 Years | Both Sexes, 50-69 Years | Both Sexes, 70-80 Years |
|-----------------------------------------------------|----------------------|-----------------------|------------------------|-------------------------|-------------------------|-------------------------|
| Eating disorders                                    | 0<br>(0 - 0)         | --                    | 0<br>(0 - 0)           | 0<br>(0 - 0)            | --                      | --                      |
| Anorexia nervosa                                    | 0<br>(0 - 0)         | --                    | 0<br>(0 - 0)           | 0<br>(0 - 0)            | --                      | --                      |
| Diabetes, urogenital, blood, and endocrine diseases | 353<br>(260 - 510)   | 17<br>(10 - 28)       | 6<br>(4 - 8)           | 73<br>(48 - 112)        | 125<br>(83 - 200)       | 132<br>(101 - 179)      |
| Diabetes mellitus                                   | 166<br>(116 - 250)   | 1<br>(0 - 1)          | 0<br>(0 - 1)           | 18<br>(11 - 29)         | 72<br>(47 - 117)        | 75<br>(55 - 105)        |
| Acute glomerulonephritis                            | 3<br>(1 - 5)         | 0<br>(0 - 0)          | 0<br>(0 - 0)           | 1<br>(0 - 1)            | 1<br>(0 - 2)            | 1<br>(0 - 1)            |
| Chronic kidney disease                              | 73<br>(49 - 110)     | 3<br>(1 - 5)          | 1<br>(1 - 2)           | 21<br>(13 - 32)         | 21<br>(13 - 36)         | 27<br>(18 - 39)         |
| Chronic kidney disease due to diabetes mellitus     | 0<br>(0 - 1)         | 0<br>(0 - 0)          | 0<br>(0 - 0)           | 0<br>(0 - 0)            | 0<br>(0 - 0)            | 0<br>(0 - 0)            |
| Chronic kidney disease due to hypertension          | 35<br>(22 - 56)      | 0<br>(0 - 1)          | 0<br>(0 - 0)           | 7<br>(4 - 12)           | 12<br>(6 - 21)          | 16<br>(10 - 24)         |
| Chronic kidney disease due to glomerulonephritis    | 16<br>(10 - 26)      | 1<br>(1 - 2)          | 1<br>(0 - 1)           | 6<br>(4 - 10)           | 4<br>(2 - 7)            | 4<br>(2 - 6)            |
| Chronic kidney disease due to other causes          | 22<br>(11 - 34)      | 1<br>(0 - 2)          | 1<br>(0 - 1)           | 7<br>(3 - 13)           | 5<br>(2 - 10)           | 8<br>(3 - 13)           |
| Urinary diseases and male infertility               | 47<br>(33 - 69)      | 2<br>(1 - 3)          | 1<br>(0 - 1)           | 13<br>(8 - 20)          | 17<br>(11 - 28)         | 15<br>(10 - 21)         |
| Interstitial nephritis and urinary tract infections | 35<br>(24 - 51)      | 1<br>(1 - 2)          | 0<br>(0 - 1)           | 9<br>(5 - 14)           | 13<br>(8 - 21)          | 12<br>(8 - 17)          |
| Urolithiasis                                        | 2<br>(1 - 3)         | --                    | 0<br>(0 - 0)           | 1<br>(0 - 1)            | 1<br>(0 - 1)            | 0<br>(0 - 1)            |
| Other urinary diseases                              | 11<br>(7 - 17)       | 1<br>(0 - 1)          | 0<br>(0 - 0)           | 3<br>(2 - 6)            | 4<br>(2 - 7)            | 3<br>(1 - 5)            |
| Gynecological diseases                              | 0<br>(0 - 1)         | --                    | --                     | 0<br>(0 - 0)            | 0<br>(0 - 0)            | 0<br>(0 - 0)            |
| Uterine fibroids                                    | 0<br>(0 - 0)         | --                    | --                     | 0<br>(0 - 0)            | 0<br>(0 - 0)            | 0<br>(0 - 0)            |
| Polycystic ovarian syndrome                         | 0<br>(0 - 0)         | --                    | --                     | 0<br>(0 - 0)            | 0<br>(0 - 0)            | --                      |
| Endometriosis                                       | 0<br>(0 - 0)         | --                    | --                     | 0<br>(0 - 0)            | 0<br>(0 - 0)            | --                      |
| Genital prolapse                                    | 0<br>(0 - 0)         | --                    | --                     | 0<br>(0 - 0)            | 0<br>(0 - 0)            | 0<br>(0 - 0)            |
| Other gynecological diseases                        | 0<br>(0 - 0)         | --                    | --                     | 0<br>(0 - 0)            | 0<br>(0 - 0)            | 0<br>(0 - 0)            |
| Hemoglobinopathies and hemolytic anemias            | 23<br>(14 - 36)      | 7<br>(3 - 12)         | 2<br>(1 - 4)           | 9<br>(5 - 15)           | 3<br>(2 - 6)            | 2<br>(1 - 4)            |
| Thalassemias                                        | 1<br>(1 - 2)         | 1<br>(0 - 1)          | 0<br>(0 - 0)           | 0<br>(0 - 1)            | 0<br>(0 - 0)            | 0<br>(0 - 0)            |
| Sickle cell disorders                               | 15<br>(9 - 24)       | 5<br>(2 - 9)          | 2<br>(1 - 3)           | 7<br>(4 - 12)           | 2<br>(1 - 3)            | 0<br>(0 - 0)            |
| G6PD deficiency                                     | 1<br>(1 - 2)         | 0<br>(0 - 1)          | 0<br>(0 - 0)           | 0<br>(0 - 1)            | 0<br>(0 - 0)            | 0<br>(0 - 0)            |
| Other hemoglobinopathies and hemolytic anemias      | 6<br>(3 - 9)         | 1<br>(1 - 2)          | 0<br>(0 - 0)           | 1<br>(1 - 2)            | 1<br>(1 - 2)            | 2<br>(1 - 4)            |
| Endocrine, metabolic, blood, and immune disorders   | 41<br>(28 - 64)      | 5<br>(3 - 9)          | 1<br>(1 - 2)           | 12<br>(7 - 21)          | 11<br>(6 - 18)          | 12<br>(7 - 19)          |
| Musculoskeletal disorders                           | 12<br>(8 - 18)       | --                    | 1<br>(0 - 1)           | 5<br>(3 - 8)            | 3<br>(2 - 6)            | 2<br>(2 - 4)            |
| Rheumatoid arthritis                                | 3<br>(1 - 4)         | --                    | 0<br>(0 - 0)           | 1<br>(0 - 1)            | 1<br>(0 - 2)            | 1<br>(0 - 2)            |
| Other musculoskeletal disorders                     | 9<br>(6 - 14)        | --                    | 0<br>(0 - 1)           | 5<br>(3 - 7)            | 2<br>(2 - 4)            | 2<br>(1 - 3)            |
| Other non-communicable diseases                     | 143<br>(101 - 204)   | 104<br>(64 - 168)     | 5<br>(3 - 8)           | 13<br>(9 - 20)          | 8<br>(5 - 14)           | 12<br>(8 - 19)          |
| Congenital anomalies                                | 114<br>(74 - 178)    | 98<br>(60 - 161)      | 5<br>(3 - 8)           | 8<br>(5 - 12)           | 2<br>(1 - 3)            | 2<br>(1 - 2)            |
| Neural tube defects                                 | 11<br>(4 - 22)       | 10<br>(4 - 21)        | 0<br>(0 - 0)           | 0<br>(0 - 1)            | 0<br>(0 - 0)            | 0<br>(0 - 0)            |
| Congenital heart anomalies                          | 50<br>(30 - 80)      | 43<br>(23 - 72)       | 3<br>(1 - 4)           | 4<br>(2 - 6)            | 1<br>(0 - 1)            | 1<br>(0 - 1)            |
| Cleft lip and cleft palate                          | 0<br>(0 - 1)         | 0<br>(0 - 1)          | --                     | --                      | --                      | --                      |
| Down syndrome                                       | 10<br>(5 - 21)       | 8<br>(3 - 17)         | 1<br>(0 - 1)           | 1<br>(1 - 3)            | 0<br>(0 - 1)            | 0<br>(0 - 0)            |
| Chromosomal unbalanced rearrangements               | 6<br>(3 - 12)        | 5<br>(2 - 11)         | 0<br>(0 - 0)           | 0<br>(0 - 1)            | 0<br>(0 - 0)            | 0<br>(0 - 0)            |
| Other congenital anomalies                          | 37<br>(19 - 80)      | 32<br>(15 - 73)       | 1<br>(1 - 3)           | 2<br>(1 - 4)            | 1<br>(0 - 1)            | 1<br>(1 - 1)            |
| Skin and subcutaneous diseases                      | 27<br>(18 - 39)      | 4<br>(2 - 8)          | 0<br>(0 - 1)           | 5<br>(3 - 9)            | 7<br>(4 - 11)           | 11<br>(7 - 17)          |
| Cellulitis                                          | 10<br>(5 - 18)       | 1<br>(0 - 3)          | 0<br>(0 - 0)           | 2<br>(1 - 4)            | 3<br>(1 - 5)            | 4<br>(2 - 7)            |
| Pyoderma                                            | 13<br>(7 - 21)       | 2<br>(1 - 5)          | 0<br>(0 - 0)           | 3<br>(1 - 5)            | 3<br>(2 - 6)            | 5<br>(3 - 8)            |



Web Table 31- Djibouti deaths with 95% UI by age, sex, and cause in 2013

| Cause                                           | Both Sexes, All Ages | Both Sexes, 0-4 Years | Both Sexes, 5-14 Years | Both Sexes, 15-49 Years | Both Sexes, 50-69 Years | Both Sexes, 70-80 Years |
|-------------------------------------------------|----------------------|-----------------------|------------------------|-------------------------|-------------------------|-------------------------|
| Decubitus ulcer                                 | 3<br>(2 - 6)         | 0<br>(0 - 0)          | 0<br>(0 - 0)           | 0<br>(0 - 1)            | 1<br>(0 - 1)            | 2<br>(1 - 4)            |
| Other skin and subcutaneous diseases            | 1<br>(0 - 1)         | 0<br>(0 - 0)          | 0<br>(0 - 0)           | 0<br>(0 - 0)            | 0<br>(0 - 0)            | 0<br>(0 - 0)            |
| Sudden infant death syndrome                    | 2<br>(1 - 6)         | 2<br>(1 - 6)          | --                     | --                      | --                      | --                      |
| Injuries                                        | 472<br>(337 - 668)   | 51<br>(28 - 89)       | 28<br>(20 - 39)        | 233<br>(151 - 348)      | 92<br>(59 - 148)        | 67<br>(46 - 94)         |
| Transport injuries                              | 190<br>(131 - 282)   | 10<br>(5 - 19)        | 12<br>(8 - 18)         | 98<br>(61 - 152)        | 45<br>(28 - 73)         | 25<br>(17 - 35)         |
| Road injuries                                   | 182<br>(126 - 271)   | 9<br>(4 - 17)         | 11<br>(7 - 16)         | 95<br>(59 - 148)        | 43<br>(26 - 71)         | 24<br>(17 - 33)         |
| Pedestrian road injuries                        | 83<br>(47 - 130)     | 5<br>(2 - 10)         | 6<br>(3 - 9)           | 39<br>(19 - 65)         | 20<br>(11 - 35)         | 13<br>(8 - 19)          |
| Cyclist road injuries                           | 10<br>(5 - 18)       | 0<br>(0 - 1)          | 1<br>(0 - 1)           | 5<br>(2 - 9)            | 3<br>(1 - 5)            | 1<br>(1 - 2)            |
| Motorcyclist road injuries                      | 12<br>(6 - 21)       | 0<br>(0 - 1)          | 0<br>(0 - 1)           | 8<br>(4 - 15)           | 2<br>(1 - 4)            | 1<br>(1 - 2)            |
| Motor vehicle road injuries                     | 77<br>(48 - 132)     | 4<br>(2 - 7)          | 4<br>(2 - 7)           | 44<br>(25 - 79)         | 17<br>(10 - 31)         | 9<br>(5 - 14)           |
| Other road injuries                             | 1<br>(0 - 2)         | 0<br>(0 - 0)          | 0<br>(0 - 0)           | 0<br>(0 - 1)            | 0<br>(0 - 1)            | 0<br>(0 - 0)            |
| Other transport injuries                        | 7<br>(5 - 12)        | 1<br>(0 - 2)          | 1<br>(0 - 1)           | 3<br>(1 - 5)            | 2<br>(1 - 3)            | 1<br>(1 - 3)            |
| Unintentional injuries                          | 184<br>(133 - 257)   | 39<br>(21 - 71)       | 14<br>(10 - 22)        | 61<br>(38 - 95)         | 34<br>(21 - 54)         | 35<br>(22 - 54)         |
| Falls                                           | 25<br>(14 - 37)      | 2<br>(1 - 3)          | 1<br>(1 - 2)           | 8<br>(4 - 13)           | 5<br>(3 - 9)            | 9<br>(5 - 15)           |
| Drowning                                        | 38<br>(24 - 57)      | 9<br>(4 - 18)         | 6<br>(3 - 10)          | 17<br>(10 - 29)         | 4<br>(2 - 7)            | 2<br>(1 - 3)            |
| Fire, heat, and hot substances                  | 24<br>(14 - 38)      | 7<br>(3 - 17)         | 2<br>(1 - 3)           | 7<br>(4 - 11)           | 4<br>(2 - 8)            | 4<br>(2 - 6)            |
| Poisonings                                      | 8<br>(5 - 13)        | 1<br>(1 - 3)          | 0<br>(0 - 1)           | 4<br>(2 - 7)            | 2<br>(1 - 3)            | 1<br>(0 - 1)            |
| Exposure to mechanical forces                   | 30<br>(18 - 69)      | 8<br>(3 - 27)         | 2<br>(1 - 6)           | 11<br>(6 - 25)          | 6<br>(3 - 11)           | 2<br>(1 - 4)            |
| Unintentional firearm injuries                  | 4<br>(3 - 7)         | 0<br>(0 - 1)          | 0<br>(0 - 0)           | 3<br>(1 - 5)            | 1<br>(0 - 1)            | 0<br>(0 - 1)            |
| Unintentional suffocation                       | 11<br>(3 - 51)       | 5<br>(1 - 22)         | 1<br>(0 - 4)           | 3<br>(1 - 15)           | 2<br>(1 - 6)            | 0<br>(0 - 2)            |
| Other exposure to mechanical forces             | 15<br>(9 - 21)       | 3<br>(1 - 6)          | 1<br>(1 - 2)           | 5<br>(3 - 9)            | 4<br>(2 - 7)            | 2<br>(1 - 3)            |
| Adverse effects of medical treatment            | 31<br>(20 - 49)      | 5<br>(3 - 10)         | 1<br>(0 - 1)           | 7<br>(4 - 11)           | 8<br>(4 - 14)           | 11<br>(5 - 20)          |
| Animal contact                                  | 10<br>(5 - 21)       | 1<br>(0 - 4)          | 1<br>(0 - 2)           | 4<br>(2 - 8)            | 2<br>(1 - 5)            | 2<br>(1 - 3)            |
| Venomous animal contact                         | 6<br>(3 - 13)        | 1<br>(0 - 3)          | 1<br>(0 - 1)           | 2<br>(1 - 5)            | 1<br>(1 - 3)            | 1<br>(0 - 2)            |
| Non-venomous animal contact                     | 4<br>(2 - 8)         | 0<br>(0 - 1)          | 0<br>(0 - 1)           | 2<br>(1 - 3)            | 1<br>(0 - 2)            | 1<br>(0 - 1)            |
| Foreign body                                    | 13<br>(8 - 23)       | 5<br>(3 - 11)         | 1<br>(0 - 1)           | 2<br>(1 - 3)            | 1<br>(1 - 2)            | 4<br>(2 - 7)            |
| Pulmonary aspiration and foreign body in airway | 12<br>(7 - 22)       | 5<br>(3 - 11)         | 1<br>(0 - 1)           | 1<br>(1 - 3)            | 1<br>(0 - 2)            | 4<br>(2 - 7)            |
| Foreign body in other body part                 | 1<br>(0 - 2)         | 0<br>(0 - 0)          | 0<br>(0 - 0)           | 0<br>(0 - 0)            | 0<br>(0 - 1)            | 0<br>(0 - 0)            |
| Other unintentional injuries                    | 5<br>(2 - 8)         | 1<br>(0 - 1)          | 0<br>(0 - 1)           | 2<br>(1 - 5)            | 1<br>(0 - 1)            | 1<br>(0 - 1)            |
| Self-harm and interpersonal violence            | 97<br>(51 - 152)     | 2<br>(1 - 4)          | 2<br>(1 - 3)           | 74<br>(39 - 120)        | 14<br>(6 - 24)          | 6<br>(2 - 10)           |
| Self-harm                                       | 42<br>(19 - 71)      | --                    | 1<br>(0 - 1)           | 27<br>(13 - 47)         | 9<br>(4 - 16)           | 5<br>(2 - 9)            |
| Interpersonal violence                          | 55<br>(26 - 94)      | 2<br>(1 - 4)          | 1<br>(0 - 2)           | 47<br>(21 - 83)         | 5<br>(2 - 8)            | 1<br>(0 - 1)            |
| Assault by firearm                              | 21<br>(9 - 42)       | 0<br>(0 - 1)          | 0<br>(0 - 1)           | 19<br>(8 - 38)          | 1<br>(1 - 3)            | 0<br>(0 - 0)            |
| Assault by sharp object                         | 13<br>(6 - 25)       | 0<br>(0 - 1)          | 0<br>(0 - 0)           | 11<br>(5 - 22)          | 0<br>(0 - 2)            | 0<br>(0 - 0)            |
| Assault by other means                          | 21<br>(8 - 38)       | 1<br>(0 - 2)          | 1<br>(0 - 1)           | 17<br>(6 - 31)          | 2<br>(1 - 3)            | 0<br>(0 - 1)            |

Web Table 31- Djibouti deaths with 95% UI by age, sex, and cause in 2013

| Cause                                                             | Males, All Ages          | Males, 0-4 Years     | Males, 5-14 Years | Males, 15-49 Years   | Males, 50-69 Years   | Males, 70-80 Years   |
|-------------------------------------------------------------------|--------------------------|----------------------|-------------------|----------------------|----------------------|----------------------|
| All causes                                                        | 3,582<br>(2,967 - 4,774) | 822<br>(628 - 1,091) | 99<br>(82 - 122)  | 985<br>(739 - 1,335) | 894<br>(645 - 1,449) | 781<br>(648 - 1,048) |
| Communicable, maternal, neonatal, and nutritional diseases        | 1,818<br>(1,534 - 2,253) | 709<br>(540 - 931)   | 64<br>(52 - 80)   | 528<br>(405 - 685)   | 297<br>(215 - 450)   | 219<br>(172 - 297)   |
| HIV/AIDS and tuberculosis                                         | 622<br>(451 - 854)       | 26<br>(17 - 36)      | 24<br>(19 - 31)   | 366<br>(264 - 490)   | 153<br>(101 - 235)   | 54<br>(33 - 93)      |
| Tuberculosis                                                      | 249<br>(131 - 455)       | 7<br>(2 - 15)        | 2<br>(1 - 4)      | 102<br>(47 - 197)    | 90<br>(45 - 171)     | 47<br>(26 - 85)      |
| HIV/AIDS                                                          | 373<br>(259 - 492)       | 19<br>(11 - 28)      | 22<br>(17 - 29)   | 263<br>(170 - 360)   | 62<br>(38 - 89)      | 7<br>(4 - 12)        |
| HIV/AIDS resulting in mycobacterial infection                     | 26<br>(18 - 36)          | 1<br>(1 - 2)         | 1<br>(1 - 2)      | 18<br>(12 - 26)      | 5<br>(3 - 7)         | 1<br>(0 - 1)         |
| HIV/AIDS resulting in other diseases                              | 347<br>(241 - 460)       | 17<br>(10 - 26)      | 21<br>(16 - 27)   | 245<br>(159 - 335)   | 58<br>(35 - 82)      | 6<br>(4 - 11)        |
| Diarrhea, lower respiratory, and other common infectious diseases | 572<br>(412 - 778)       | 214<br>(121 - 349)   | 24<br>(16 - 35)   | 100<br>(60 - 159)    | 105<br>(63 - 180)    | 129<br>(88 - 180)    |
| Diarrheal diseases                                                | 153<br>(87 - 264)        | 47<br>(16 - 106)     | 6<br>(2 - 13)     | 31<br>(15 - 64)      | 33<br>(14 - 71)      | 36<br>(17 - 69)      |
| Intestinal infectious diseases                                    | 21<br>(9 - 39)           | 5<br>(2 - 12)        | 5<br>(2 - 10)     | 9<br>(3 - 19)        | 1<br>(0 - 3)         | 0<br>(0 - 1)         |
| Typhoid fever                                                     | 16<br>(7 - 30)           | 4<br>(1 - 9)         | 4<br>(2 - 8)      | 7<br>(3 - 15)        | 1<br>(0 - 2)         | 0<br>(0 - 1)         |
| Paratyphoid fever                                                 | 4<br>(2 - 8)             | 1<br>(0 - 3)         | 1<br>(0 - 2)      | 2<br>(1 - 4)         | 0<br>(0 - 1)         | 0<br>(0 - 0)         |
| Other intestinal infectious diseases                              | 1<br>(0 - 4)             | 0<br>(0 - 2)         | 0<br>(0 - 1)      | 0<br>(0 - 2)         | 0<br>(0 - 0)         | 0<br>(0 - 0)         |
| Lower respiratory infections                                      | 310<br>(213 - 438)       | 116<br>(62 - 202)    | 7<br>(4 - 12)     | 39<br>(22 - 66)      | 60<br>(33 - 103)     | 88<br>(54 - 132)     |
| Upper respiratory infections                                      | 0<br>(0 - 1)             | 0<br>(0 - 0)         | 0<br>(0 - 0)      | 0<br>(0 - 0)         | 0<br>(0 - 0)         | 0<br>(0 - 0)         |
| Otitis media                                                      | 0<br>(0 - 1)             | 0<br>(0 - 0)         | 0<br>(0 - 0)      | 0<br>(0 - 0)         | 0<br>(0 - 0)         | 0<br>(0 - 0)         |
| Meningitis                                                        | 67<br>(40 - 108)         | 30<br>(12 - 69)      | 4<br>(2 - 9)      | 18<br>(9 - 35)       | 10<br>(5 - 18)       | 4<br>(2 - 8)         |
| Pneumococcal meningitis                                           | 16<br>(9 - 27)           | 6<br>(2 - 13)        | 1<br>(1 - 3)      | 5<br>(2 - 11)        | 3<br>(1 - 6)         | 1<br>(1 - 2)         |
| H influenzae type B meningitis                                    | 14<br>(7 - 26)           | 9<br>(4 - 21)        | 1<br>(0 - 2)      | 2<br>(1 - 5)         | 1<br>(0 - 2)         | 0<br>(0 - 1)         |
| Meningococcal meningitis                                          | 10<br>(5 - 17)           | 3<br>(1 - 8)         | 1<br>(0 - 1)      | 3<br>(1 - 7)         | 2<br>(1 - 5)         | 1<br>(0 - 2)         |
| Other meningitis                                                  | 27<br>(16 - 44)          | 12<br>(4 - 31)       | 2<br>(1 - 3)      | 7<br>(3 - 15)        | 4<br>(2 - 8)         | 2<br>(1 - 3)         |
| Encephalitis                                                      | 3<br>(1 - 4)             | 1<br>(0 - 3)         | 0<br>(0 - 0)      | 1<br>(0 - 1)         | 0<br>(0 - 1)         | 0<br>(0 - 0)         |
| Diphtheria                                                        | 0<br>(0 - 1)             | 0<br>(0 - 1)         | 0<br>(0 - 0)      | 0<br>(0 - 0)         | 0<br>(0 - 0)         | --                   |
| Whooping cough                                                    | 2<br>(0 - 11)            | 2<br>(0 - 10)        | 0<br>(0 - 0)      | 0<br>(0 - 0)         | 0<br>(0 - 0)         | --                   |
| Tetanus                                                           | 4<br>(1 - 9)             | 3<br>(1 - 6)         | 0<br>(0 - 0)      | 1<br>(0 - 3)         | 0<br>(0 - 1)         | 0<br>(0 - 0)         |
| Measles                                                           | 10<br>(0 - 69)           | 9<br>(0 - 60)        | 1<br>(0 - 7)      | 0<br>(0 - 2)         | 0<br>(0 - 0)         | --                   |
| Varicella and herpes zoster                                       | 0<br>(0 - 1)             | 0<br>(0 - 1)         | 0<br>(0 - 0)      | 0<br>(0 - 0)         | 0<br>(0 - 0)         | 0<br>(0 - 0)         |
| Neglected tropical diseases and malaria                           | 220<br>(101 - 414)       | 161<br>(51 - 342)    | 10<br>(4 - 20)    | 34<br>(14 - 65)      | 10<br>(4 - 25)       | 5<br>(2 - 12)        |
| Malaria                                                           | 184<br>(68 - 369)        | 155<br>(46 - 335)    | 6<br>(1 - 15)     | 14<br>(2 - 41)       | 6<br>(1 - 18)        | 3<br>(0 - 10)        |
| Leishmaniasis                                                     | 30<br>(15 - 51)          | 5<br>(1 - 12)        | 3<br>(1 - 8)      | 17<br>(7 - 32)       | 3<br>(1 - 8)         | 1<br>(0 - 3)         |
| Visceral leishmaniasis                                            | 30<br>(15 - 51)          | 5<br>(1 - 12)        | 3<br>(1 - 8)      | 17<br>(7 - 32)       | 3<br>(1 - 8)         | 1<br>(0 - 3)         |
| Schistosomiasis                                                   | 2<br>(1 - 4)             | 0<br>(0 - 0)         | 0<br>(0 - 0)      | 1<br>(1 - 2)         | 1<br>(0 - 1)         | 0<br>(0 - 1)         |
| Cysticercosis                                                     | 0<br>(0 - 0)             | 0<br>(0 - 0)         | 0<br>(0 - 0)      | 0<br>(0 - 0)         | 0<br>(0 - 0)         | 0<br>(0 - 0)         |
| Cystic echinococcosis                                             | 0<br>(0 - 0)             | 0<br>(0 - 0)         | 0<br>(0 - 0)      | 0<br>(0 - 0)         | 0<br>(0 - 0)         | 0<br>(0 - 0)         |
| Dengue                                                            | 0<br>(0 - 0)             | 0<br>(0 - 0)         | 0<br>(0 - 0)      | 0<br>(0 - 0)         | 0<br>(0 - 0)         | 0<br>(0 - 0)         |
| Rabies                                                            | 2<br>(1 - 3)             | 0<br>(0 - 1)         | 0<br>(0 - 1)      | 1<br>(0 - 1)         | 0<br>(0 - 0)         | 0<br>(0 - 0)         |
| Intestinal nematode infections                                    | 1<br>(0 - 6)             | 1<br>(0 - 5)         | 0<br>(0 - 1)      | 0<br>(0 - 1)         | 0<br>(0 - 0)         | 0<br>(0 - 0)         |
| Ascariasis                                                        | 1<br>(0 - 6)             | 1<br>(0 - 5)         | 0<br>(0 - 1)      | 0<br>(0 - 1)         | 0<br>(0 - 0)         | 0<br>(0 - 0)         |
| Other neglected tropical diseases                                 | 1<br>(0 - 2)             | 0<br>(0 - 0)         | 0<br>(0 - 0)      | 0<br>(0 - 0)         | 0<br>(0 - 1)         | 0<br>(0 - 1)         |
| Maternal disorders                                                | --                       | --                   | --                | --                   | --                   | --                   |

Web Table 31- Djibouti deaths with 95% UI by age, sex, and cause in 2013

| Cause                                                            | Males, All Ages          | Males, 0-4 Years   | Males, 5-14 Years | Males, 15-49 Years | Males, 50-69 Years | Males, 70-80 Years |
|------------------------------------------------------------------|--------------------------|--------------------|-------------------|--------------------|--------------------|--------------------|
| Maternal hemorrhage                                              | --                       | --                 | --                | --                 | --                 | --                 |
| Maternal sepsis and other maternal infections                    | --                       | --                 | --                | --                 | --                 | --                 |
| Maternal hypertensive disorders                                  | --                       | --                 | --                | --                 | --                 | --                 |
| Maternal obstructed labor                                        | --                       | --                 | --                | --                 | --                 | --                 |
| Maternal abortive outcome                                        | --                       | --                 | --                | --                 | --                 | --                 |
| Indirect maternal deaths                                         | --                       | --                 | --                | --                 | --                 | --                 |
| Late maternal deaths                                             | --                       | --                 | --                | --                 | --                 | --                 |
| Maternal deaths aggravated by HIV/AIDS                           | --                       | --                 | --                | --                 | --                 | --                 |
| Other maternal disorders                                         | --                       | --                 | --                | --                 | --                 | --                 |
| Neonatal disorders                                               | 247<br>(190 - 318)       | 247<br>(190 - 318) | --                | --                 | --                 | --                 |
| Neonatal preterm birth complications                             | 59<br>(22 - 114)         | 59<br>(22 - 114)   | --                | --                 | --                 | --                 |
| Neonatal encephalopathy due to birth asphyxia and trauma         | 78<br>(33 - 131)         | 78<br>(33 - 131)   | --                | --                 | --                 | --                 |
| Neonatal sepsis and other neonatal infections                    | 66<br>(23 - 136)         | 66<br>(23 - 136)   | --                | --                 | --                 | --                 |
| Hemolytic disease and other neonatal jaundice                    | 2<br>(0 - 6)             | 2<br>(0 - 6)       | --                | --                 | --                 | --                 |
| Other neonatal disorders                                         | 42<br>(9 - 90)           | 42<br>(9 - 90)     | --                | --                 | --                 | --                 |
| Nutritional deficiencies                                         | 131<br>(68 - 198)        | 53<br>(20 - 103)   | 5<br>(2 - 9)      | 21<br>(11 - 38)    | 23<br>(11 - 40)    | 28<br>(15 - 45)    |
| Protein-energy malnutrition                                      | 96<br>(44 - 156)         | 48<br>(18 - 95)    | 4<br>(2 - 7)      | 11<br>(4 - 22)     | 15<br>(6 - 29)     | 18<br>(6 - 32)     |
| Iodine deficiency                                                | 1<br>(0 - 3)             | 0<br>(0 - 2)       | 0<br>(0 - 0)      | 0<br>(0 - 1)       | 0<br>(0 - 1)       | 0<br>(0 - 1)       |
| Iron-deficiency anemia                                           | 33<br>(13 - 67)          | 5<br>(1 - 16)      | 1<br>(0 - 3)      | 10<br>(4 - 20)     | 7<br>(3 - 16)      | 9<br>(3 - 21)      |
| Other nutritional deficiencies                                   | 1<br>(0 - 2)             | 0<br>(0 - 0)       | 0<br>(0 - 0)      | 0<br>(0 - 1)       | 0<br>(0 - 0)       | 0<br>(0 - 1)       |
| Other communicable, maternal, neonatal, and nutritional diseases | 27<br>(17 - 42)          | 8<br>(4 - 17)      | 1<br>(1 - 2)      | 8<br>(4 - 13)      | 6<br>(3 - 13)      | 4<br>(2 - 8)       |
| Sexually transmitted diseases excluding HIV                      | 5<br>(2 - 9)             | 4<br>(1 - 8)       | 0<br>(0 - 1)      | 0<br>(0 - 1)       | 0<br>(0 - 1)       | 0<br>(0 - 0)       |
| Syphilis                                                         | 5<br>(2 - 9)             | 4<br>(1 - 8)       | 0<br>(0 - 1)      | 0<br>(0 - 0)       | 0<br>(0 - 1)       | 0<br>(0 - 0)       |
| Chlamydial infection                                             | --                       | --                 | --                | --                 | --                 | --                 |
| Gonococcal infection                                             | 0<br>(0 - 0)             | --                 | 0<br>(0 - 0)      | 0<br>(0 - 0)       | 0<br>(0 - 0)       | 0<br>(0 - 0)       |
| Other sexually transmitted diseases                              | 0<br>(0 - 0)             | --                 | 0<br>(0 - 0)      | 0<br>(0 - 0)       | 0<br>(0 - 0)       | 0<br>(0 - 0)       |
| Hepatitis                                                        | 6<br>(4 - 10)            | 0<br>(0 - 1)       | 0<br>(0 - 0)      | 3<br>(2 - 5)       | 2<br>(1 - 3)       | 1<br>(0 - 1)       |
| Acute hepatitis A                                                | 0<br>(0 - 1)             | 0<br>(0 - 0)       | 0<br>(0 - 0)      | 0<br>(0 - 1)       | 0<br>(0 - 0)       | 0<br>(0 - 0)       |
| Acute hepatitis B                                                | 4<br>(3 - 7)             | 0<br>(0 - 1)       | 0<br>(0 - 0)      | 2<br>(1 - 3)       | 2<br>(1 - 3)       | 1<br>(0 - 1)       |
| Acute hepatitis C                                                | 0<br>(0 - 0)             | --                 | 0<br>(0 - 0)      | 0<br>(0 - 0)       | 0<br>(0 - 0)       | 0<br>(0 - 0)       |
| Acute hepatitis E                                                | 1<br>(0 - 3)             | 0<br>(0 - 0)       | 0<br>(0 - 0)      | 1<br>(0 - 2)       | 0<br>(0 - 1)       | 0<br>(0 - 0)       |
| Other infectious diseases                                        | 16<br>(9 - 29)           | 4<br>(1 - 12)      | 0<br>(0 - 1)      | 4<br>(2 - 9)       | 4<br>(1 - 10)      | 3<br>(1 - 7)       |
| Non-communicable diseases                                        | 1,457<br>(1,112 - 2,161) | 85<br>(47 - 142)   | 18<br>(13 - 24)   | 281<br>(179 - 442) | 543<br>(377 - 893) | 531<br>(437 - 715) |
| Neoplasms                                                        | 228<br>(166 - 348)       | 6<br>(2 - 11)      | 5<br>(3 - 7)      | 49<br>(29 - 77)    | 102<br>(69 - 169)  | 67<br>(53 - 92)    |
| Esophageal cancer                                                | 29<br>(19 - 47)          | --                 | --                | 3<br>(2 - 6)       | 17<br>(11 - 28)    | 9<br>(6 - 13)      |
| Stomach cancer                                                   | 17<br>(12 - 28)          | --                 | --                | 3<br>(2 - 5)       | 8<br>(5 - 14)      | 6<br>(4 - 9)       |
| Liver cancer                                                     | 28<br>(16 - 47)          | --                 | 0<br>(0 - 0)      | 10<br>(4 - 18)     | 13<br>(7 - 22)     | 5<br>(3 - 7)       |
| Liver cancer due to hepatitis B                                  | 6<br>(3 - 13)            | --                 | 0<br>(0 - 0)      | 3<br>(1 - 6)       | 2<br>(0 - 6)       | 1<br>(0 - 2)       |
| Liver cancer due to hepatitis C                                  | 14<br>(5 - 27)           | --                 | 0<br>(0 - 0)      | 4<br>(1 - 10)      | 6<br>(2 - 14)      | 3<br>(1 - 5)       |
| Liver cancer due to alcohol use                                  | 4<br>(2 - 9)             | --                 | --                | 1<br>(0 - 2)       | 2<br>(1 - 5)       | 1<br>(1 - 2)       |

Web Table 31- Djibouti deaths with 95% UI by age, sex, and cause in 2013

| Cause                                         | Males, All Ages    | Males, 0-4 Years | Males, 5-14 Years | Males, 15-49 Years | Males, 50-69 Years | Males, 70-80 Years |
|-----------------------------------------------|--------------------|------------------|-------------------|--------------------|--------------------|--------------------|
| Liver cancer due to other causes              | 3<br>(1 - 7)       | --               | 0<br>(0 - 0)      | 1<br>(0 - 3)       | 1<br>(1 - 3)       | 0<br>(0 - 1)       |
| Larynx cancer                                 | 3<br>(2 - 5)       | --               | --                | 0<br>(0 - 1)       | 1<br>(1 - 3)       | 1<br>(1 - 2)       |
| Tracheal, bronchus and lung cancer            | 18<br>(13 - 29)    | --               | --                | 1<br>(1 - 3)       | 12<br>(8 - 20)     | 5<br>(4 - 7)       |
| Breast cancer                                 | 1<br>(1 - 3)       | --               | --                | 0<br>(0 - 1)       | 1<br>(0 - 2)       | 0<br>(0 - 1)       |
| Cervical cancer                               | --                 | --               | --                | --                 | --                 | --                 |
| Uterine cancer                                | --                 | --               | --                | --                 | --                 | --                 |
| Prostate cancer                               | 22<br>(13 - 36)    | --               | --                | 0<br>(0 - 1)       | 7<br>(4 - 13)      | 15<br>(9 - 24)     |
| Colon and rectum cancer                       | 19<br>(13 - 30)    | --               | --                | 6<br>(3 - 9)       | 9<br>(6 - 14)      | 5<br>(4 - 7)       |
| Lip and oral cavity cancer                    | 4<br>(2 - 6)       | --               | --                | 1<br>(0 - 2)       | 2<br>(1 - 3)       | 1<br>(1 - 2)       |
| Nasopharynx cancer                            | 1<br>(1 - 2)       | --               | 0<br>(0 - 0)      | 1<br>(0 - 1)       | 0<br>(0 - 1)       | 0<br>(0 - 0)       |
| Other pharynx cancer                          | 2<br>(1 - 3)       | --               | --                | 0<br>(0 - 1)       | 1<br>(1 - 2)       | 0<br>(0 - 1)       |
| Gallbladder and biliary tract cancer          | 2<br>(2 - 4)       | --               | --                | 1<br>(0 - 1)       | 1<br>(1 - 2)       | 1<br>(0 - 1)       |
| Pancreatic cancer                             | 8<br>(6 - 13)      | --               | --                | 2<br>(1 - 3)       | 5<br>(3 - 8)       | 2<br>(1 - 2)       |
| Malignant skin melanoma                       | 1<br>(1 - 2)       | --               | --                | 0<br>(0 - 1)       | 0<br>(0 - 1)       | 0<br>(0 - 1)       |
| Non-melanoma skin cancer                      | 1<br>(0 - 2)       | --               | --                | 0<br>(0 - 0)       | 0<br>(0 - 1)       | 0<br>(0 - 1)       |
| Ovarian cancer                                | --                 | --               | --                | --                 | --                 | --                 |
| Testicular cancer                             | 1<br>(1 - 2)       | --               | --                | 1<br>(0 - 1)       | 0<br>(0 - 1)       | 0<br>(0 - 0)       |
| Kidney cancer                                 | 5<br>(4 - 8)       | 0<br>(0 - 1)     | 0<br>(0 - 0)      | 1<br>(0 - 1)       | 3<br>(2 - 5)       | 1<br>(1 - 2)       |
| Bladder cancer                                | 7<br>(5 - 10)      | --               | --                | 1<br>(0 - 1)       | 3<br>(2 - 5)       | 3<br>(2 - 5)       |
| Brain and nervous system cancer               | 5<br>(2 - 7)       | 0<br>(0 - 0)     | 0<br>(0 - 1)      | 2<br>(1 - 3)       | 2<br>(1 - 3)       | 1<br>(0 - 1)       |
| Thyroid cancer                                | 1<br>(0 - 1)       | --               | 0<br>(0 - 0)      | 0<br>(0 - 0)       | 0<br>(0 - 0)       | 0<br>(0 - 0)       |
| Mesothelioma                                  | 0<br>(0 - 1)       | --               | --                | 0<br>(0 - 0)       | 0<br>(0 - 1)       | 0<br>(0 - 0)       |
| Hodgkin lymphoma                              | 2<br>(1 - 3)       | 0<br>(0 - 0)     | 0<br>(0 - 0)      | 1<br>(0 - 2)       | 1<br>(0 - 1)       | 0<br>(0 - 1)       |
| Non-Hodgkin lymphoma                          | 18<br>(12 - 27)    | 2<br>(1 - 5)     | 2<br>(1 - 3)      | 6<br>(3 - 10)      | 5<br>(3 - 10)      | 3<br>(2 - 5)       |
| Multiple myeloma                              | 2<br>(1 - 4)       | --               | --                | 0<br>(0 - 1)       | 1<br>(1 - 2)       | 1<br>(0 - 1)       |
| Leukemia                                      | 5<br>(4 - 7)       | 0<br>(0 - 0)     | 0<br>(0 - 1)      | 3<br>(2 - 4)       | 1<br>(1 - 2)       | 1<br>(1 - 1)       |
| Other neoplasms                               | 24<br>(12 - 36)    | 3<br>(1 - 5)     | 1<br>(1 - 2)      | 6<br>(3 - 9)       | 8<br>(4 - 14)      | 6<br>(2 - 9)       |
| Cardiovascular diseases                       | 654<br>(487 - 987) | 4<br>(2 - 8)     | 2<br>(1 - 3)      | 91<br>(57 - 145)   | 267<br>(184 - 438) | 289<br>(234 - 389) |
| Rheumatic heart disease                       | 19<br>(11 - 34)    | 0<br>(0 - 1)     | 0<br>(0 - 1)      | 7<br>(4 - 13)      | 7<br>(4 - 13)      | 4<br>(3 - 8)       |
| Ischemic heart disease                        | 219<br>(152 - 345) | 0<br>(0 - 0)     | 0<br>(0 - 0)      | 26<br>(14 - 44)    | 98<br>(64 - 166)   | 95<br>(69 - 134)   |
| Cerebrovascular disease                       | 252<br>(181 - 377) | 1<br>(0 - 1)     | 0<br>(0 - 1)      | 25<br>(14 - 41)    | 100<br>(66 - 165)  | 126<br>(96 - 178)  |
| Ischemic stroke                               | 122<br>(68 - 200)  | 0<br>(0 - 0)     | 0<br>(0 - 0)      | 4<br>(2 - 8)       | 39<br>(19 - 73)    | 78<br>(44 - 121)   |
| Hemorrhagic stroke                            | 130<br>(83 - 204)  | 1<br>(0 - 1)     | 0<br>(0 - 1)      | 21<br>(12 - 34)    | 61<br>(37 - 100)   | 48<br>(27 - 78)    |
| Hypertensive heart disease                    | 52<br>(30 - 90)    | 0<br>(0 - 0)     | 0<br>(0 - 0)      | 6<br>(3 - 10)      | 20<br>(11 - 37)    | 26<br>(15 - 47)    |
| Cardiomyopathy and myocarditis                | 38<br>(22 - 64)    | 2<br>(1 - 4)     | 1<br>(0 - 1)      | 12<br>(6 - 21)     | 14<br>(8 - 26)     | 9<br>(5 - 15)      |
| Atrial fibrillation and flutter               | 1<br>(0 - 2)       | --               | --                | 0<br>(0 - 0)       | 0<br>(0 - 1)       | 1<br>(0 - 1)       |
| Aortic aneurysm                               | 14<br>(9 - 23)     | --               | --                | 2<br>(1 - 3)       | 6<br>(3 - 11)      | 6<br>(4 - 10)      |
| Peripheral vascular disease                   | 1<br>(0 - 2)       | --               | --                | 0<br>(0 - 0)       | 0<br>(0 - 1)       | 1<br>(0 - 1)       |
| Endocarditis                                  | 10<br>(6 - 18)     | 0<br>(0 - 1)     | 0<br>(0 - 0)      | 3<br>(1 - 5)       | 4<br>(2 - 7)       | 3<br>(2 - 5)       |
| Other cardiovascular and circulatory diseases | 48<br>(31 - 87)    | 1<br>(0 - 2)     | 0<br>(0 - 1)      | 11<br>(6 - 18)     | 18<br>(10 - 34)    | 18<br>(11 - 37)    |

Web Table 31- Djibouti deaths with 95% UI by age, sex, and cause in 2013

| Cause                                               | Males, All Ages  | Males, 0-4 Years | Males, 5-14 Years | Males, 15-49 Years | Males, 50-69 Years | Males, 70-80 Years |
|-----------------------------------------------------|------------------|------------------|-------------------|--------------------|--------------------|--------------------|
| Chronic respiratory diseases                        | 86<br>(57 - 131) | 2<br>(1 - 4)     | 0<br>(0 - 1)      | 10<br>(5 - 16)     | 31<br>(18 - 51)    | 44<br>(31 - 62)    |
| Chronic obstructive pulmonary disease               | 52<br>(35 - 81)  | 0<br>(0 - 1)     | 0<br>(0 - 0)      | 4<br>(2 - 7)       | 19<br>(11 - 32)    | 29<br>(19 - 42)    |
| Pneumoconiosis                                      | 11<br>(6 - 19)   | 0<br>(0 - 0)     | 0<br>(0 - 0)      | 2<br>(1 - 4)       | 5<br>(2 - 8)       | 4<br>(2 - 7)       |
| Silicosis                                           | 3<br>(2 - 7)     | 0<br>(0 - 0)     | 0<br>(0 - 0)      | 1<br>(0 - 1)       | 1<br>(1 - 3)       | 1<br>(1 - 3)       |
| Asbestosis                                          | 1<br>(1 - 2)     | 0<br>(0 - 0)     | 0<br>(0 - 0)      | 0<br>(0 - 0)       | 1<br>(0 - 1)       | 0<br>(0 - 1)       |
| Coal workers pneumoconiosis                         | 1<br>(1 - 3)     | 0<br>(0 - 0)     | 0<br>(0 - 0)      | 0<br>(0 - 1)       | 1<br>(0 - 1)       | 1<br>(0 - 1)       |
| Other pneumoconiosis                                | 5<br>(3 - 8)     | 0<br>(0 - 0)     | 0<br>(0 - 0)      | 1<br>(1 - 2)       | 2<br>(1 - 4)       | 2<br>(1 - 3)       |
| Asthma                                              | 10<br>(4 - 22)   | 0<br>(0 - 0)     | 0<br>(0 - 0)      | 1<br>(1 - 3)       | 4<br>(1 - 8)       | 5<br>(2 - 11)      |
| Interstitial lung disease and pulmonary sarcoidosis | 7<br>(2 - 16)    | 0<br>(0 - 0)     | 0<br>(0 - 0)      | 1<br>(0 - 2)       | 3<br>(1 - 6)       | 4<br>(1 - 8)       |
| Other chronic respiratory diseases                  | 5<br>(3 - 10)    | 1<br>(1 - 2)     | 0<br>(0 - 0)      | 2<br>(1 - 3)       | 1<br>(1 - 3)       | 1<br>(1 - 3)       |
| Cirrhosis                                           | 80<br>(54 - 128) | 1<br>(0 - 1)     | 1<br>(0 - 1)      | 24<br>(15 - 39)    | 39<br>(25 - 64)    | 16<br>(12 - 24)    |
| Cirrhosis due to hepatitis B                        | 19<br>(10 - 31)  | 0<br>(0 - 0)     | 0<br>(0 - 0)      | 5<br>(3 - 9)       | 9<br>(5 - 16)      | 4<br>(2 - 7)       |
| Cirrhosis due to hepatitis C                        | 17<br>(8 - 29)   | 0<br>(0 - 0)     | 0<br>(0 - 0)      | 4<br>(1 - 8)       | 8<br>(3 - 15)      | 4<br>(2 - 7)       |
| Cirrhosis due to alcohol use                        | 36<br>(22 - 57)  | --               | --                | 10<br>(6 - 18)     | 18<br>(11 - 30)    | 7<br>(5 - 11)      |
| Cirrhosis due to other causes                       | 9<br>(5 - 16)    | 0<br>(0 - 1)     | 0<br>(0 - 1)      | 4<br>(2 - 8)       | 3<br>(1 - 6)       | 1<br>(0 - 1)       |
| Digestive diseases                                  | 78<br>(53 - 119) | 2<br>(0 - 4)     | 2<br>(1 - 2)      | 24<br>(14 - 38)    | 28<br>(17 - 48)    | 24<br>(17 - 34)    |
| Peptic ulcer disease                                | 22<br>(13 - 36)  | 0<br>(0 - 0)     | 0<br>(0 - 0)      | 5<br>(3 - 10)      | 8<br>(5 - 16)      | 8<br>(5 - 13)      |
| Gastritis and duodenitis                            | 2<br>(1 - 5)     | 0<br>(0 - 0)     | 0<br>(0 - 0)      | 1<br>(0 - 2)       | 1<br>(0 - 2)       | 1<br>(0 - 2)       |
| Appendicitis                                        | 4<br>(2 - 8)     | 0<br>(0 - 0)     | 0<br>(0 - 0)      | 2<br>(1 - 3)       | 1<br>(1 - 3)       | 1<br>(0 - 2)       |
| Paralytic ileus and intestinal obstruction          | 27<br>(14 - 45)  | 0<br>(0 - 1)     | 1<br>(0 - 1)      | 9<br>(4 - 16)      | 10<br>(4 - 18)     | 7<br>(4 - 12)      |
| Inguinal, femoral, and abdominal hernia             | 1<br>(1 - 2)     | 0<br>(0 - 0)     | 0<br>(0 - 0)      | 0<br>(0 - 1)       | 0<br>(0 - 1)       | 1<br>(0 - 1)       |
| Inflammatory bowel disease                          | 4<br>(1 - 7)     | 0<br>(0 - 1)     | 0<br>(0 - 0)      | 1<br>(0 - 2)       | 1<br>(0 - 2)       | 1<br>(0 - 2)       |
| Vascular intestinal disorders                       | 1<br>(0 - 2)     | 0<br>(0 - 0)     | 0<br>(0 - 0)      | 0<br>(0 - 0)       | 0<br>(0 - 1)       | 0<br>(0 - 1)       |
| Gallbladder and biliary diseases                    | 4<br>(2 - 6)     | 0<br>(0 - 0)     | 0<br>(0 - 0)      | 1<br>(0 - 1)       | 1<br>(1 - 3)       | 2<br>(1 - 3)       |
| Pancreatitis                                        | 5<br>(2 - 9)     | 0<br>(0 - 0)     | 0<br>(0 - 0)      | 2<br>(1 - 4)       | 2<br>(1 - 3)       | 1<br>(0 - 2)       |
| Other digestive diseases                            | 8<br>(5 - 14)    | 0<br>(0 - 1)     | 0<br>(0 - 0)      | 2<br>(1 - 4)       | 3<br>(1 - 6)       | 2<br>(1 - 5)       |
| Neurological disorders                              | 48<br>(36 - 67)  | 2<br>(1 - 5)     | 2<br>(1 - 4)      | 14<br>(8 - 24)     | 5<br>(3 - 9)       | 25<br>(19 - 33)    |
| Alzheimer disease and other dementias               | 24<br>(18 - 32)  | --               | --                | 0<br>(0 - 0)       | 3<br>(2 - 4)       | 21<br>(16 - 28)    |
| Parkinson disease                                   | 1<br>(0 - 1)     | --               | --                | 0<br>(0 - 0)       | 0<br>(0 - 0)       | 1<br>(0 - 1)       |
| Epilepsy                                            | 19<br>(12 - 31)  | 2<br>(0 - 4)     | 2<br>(1 - 4)      | 12<br>(6 - 21)     | 1<br>(1 - 3)       | 3<br>(1 - 5)       |
| Multiple sclerosis                                  | 0<br>(0 - 0)     | --               | --                | 0<br>(0 - 0)       | 0<br>(0 - 0)       | 0<br>(0 - 0)       |
| Other neurological disorders                        | 4<br>(3 - 6)     | 1<br>(0 - 1)     | 0<br>(0 - 0)      | 2<br>(1 - 3)       | 1<br>(1 - 2)       | 1<br>(0 - 1)       |
| Mental and substance use disorders                  | 25<br>(14 - 38)  | 1<br>(0 - 2)     | 0<br>(0 - 0)      | 18<br>(10 - 28)    | 5<br>(3 - 9)       | 1<br>(1 - 1)       |
| Schizophrenia                                       | 1<br>(0 - 1)     | --               | --                | 0<br>(0 - 1)       | 0<br>(0 - 0)       | 0<br>(0 - 0)       |
| Alcohol use disorders                               | 11<br>(5 - 22)   | --               | --                | 7<br>(3 - 14)      | 3<br>(2 - 8)       | 1<br>(0 - 1)       |
| Drug use disorders                                  | 14<br>(6 - 22)   | 1<br>(0 - 2)     | --                | 11<br>(5 - 19)     | 1<br>(0 - 2)       | 0<br>(0 - 0)       |
| Opioid use disorders                                | 1<br>(1 - 2)     | 0<br>(0 - 0)     | --                | 1<br>(1 - 2)       | 0<br>(0 - 0)       | 0<br>(0 - 0)       |
| Cocaine use disorders                               | 0<br>(0 - 0)     | 0<br>(0 - 0)     | --                | 0<br>(0 - 0)       | 0<br>(0 - 0)       | 0<br>(0 - 0)       |
| Amphetamine use disorders                           | 0<br>(0 - 0)     | 0<br>(0 - 0)     | --                | 0<br>(0 - 0)       | 0<br>(0 - 0)       | 0<br>(0 - 0)       |
| Other drug use disorders                            | 12<br>(5 - 20)   | 1<br>(0 - 2)     | --                | 10<br>(5 - 17)     | 1<br>(0 - 2)       | 0<br>(0 - 0)       |

Web Table 31- Djibouti deaths with 95% UI by age, sex, and cause in 2013

| Cause                                               | Males, All Ages    | Males, 0-4 Years | Males, 5-14 Years | Males, 15-49 Years | Males, 50-69 Years | Males, 70-80 Years |
|-----------------------------------------------------|--------------------|------------------|-------------------|--------------------|--------------------|--------------------|
| Eating disorders                                    | 0<br>(0 - 0)       | --               | 0<br>(0 - 0)      | 0<br>(0 - 0)       | --                 | --                 |
| Anorexia nervosa                                    | 0<br>(0 - 0)       | --               | 0<br>(0 - 0)      | 0<br>(0 - 0)       | --                 | --                 |
| Diabetes, urogenital, blood, and endocrine diseases | 175<br>(130 - 255) | 9<br>(5 - 16)    | 3<br>(2 - 4)      | 42<br>(26 - 65)    | 61<br>(41 - 100)   | 59<br>(47 - 80)    |
| Diabetes mellitus                                   | 83<br>(60 - 125)   | 1<br>(0 - 1)     | 0<br>(0 - 0)      | 11<br>(7 - 17)     | 37<br>(24 - 61)    | 35<br>(26 - 49)    |
| Acute glomerulonephritis                            | 1<br>(0 - 2)       | 0<br>(0 - 0)     | 0<br>(0 - 0)      | 0<br>(0 - 0)       | 1<br>(0 - 1)       | 0<br>(0 - 1)       |
| Chronic kidney disease                              | 35<br>(22 - 51)    | 2<br>(1 - 3)     | 1<br>(0 - 1)      | 13<br>(7 - 21)     | 9<br>(5 - 15)      | 11<br>(7 - 16)     |
| Chronic kidney disease due to diabetes mellitus     | 0<br>(0 - 0)       | 0<br>(0 - 0)     | 0<br>(0 - 0)      | 0<br>(0 - 0)       | 0<br>(0 - 0)       | 0<br>(0 - 0)       |
| Chronic kidney disease due to hypertension          | 16<br>(9 - 26)     | 0<br>(0 - 1)     | 0<br>(0 - 0)      | 4<br>(2 - 7)       | 5<br>(3 - 9)       | 7<br>(4 - 11)      |
| Chronic kidney disease due to glomerulonephritis    | 7<br>(4 - 11)      | 1<br>(0 - 2)     | 0<br>(0 - 0)      | 3<br>(2 - 5)       | 2<br>(1 - 3)       | 1<br>(1 - 3)       |
| Chronic kidney disease due to other causes          | 11<br>(6 - 19)     | 1<br>(0 - 1)     | 0<br>(0 - 0)      | 6<br>(2 - 11)      | 2<br>(1 - 4)       | 3<br>(1 - 5)       |
| Urinary diseases and male infertility               | 28<br>(18 - 43)    | 1<br>(0 - 2)     | 0<br>(0 - 1)      | 8<br>(4 - 13)      | 10<br>(5 - 17)     | 9<br>(6 - 14)      |
| Interstitial nephritis and urinary tract infections | 20<br>(13 - 31)    | 1<br>(0 - 2)     | 0<br>(0 - 0)      | 5<br>(3 - 9)       | 7<br>(4 - 12)      | 7<br>(4 - 11)      |
| Urolithiasis                                        | 1<br>(0 - 2)       | --               | 0<br>(0 - 0)      | 0<br>(0 - 0)       | 0<br>(0 - 1)       | 0<br>(0 - 0)       |
| Other urinary diseases                              | 8<br>(4 - 13)      | 0<br>(0 - 1)     | 0<br>(0 - 0)      | 2<br>(1 - 4)       | 3<br>(1 - 6)       | 2<br>(1 - 4)       |
| Gynecological diseases                              | --                 | --               | --                | --                 | --                 | --                 |
| Uterine fibroids                                    | --                 | --               | --                | --                 | --                 | --                 |
| Polycystic ovarian syndrome                         | --                 | --               | --                | --                 | --                 | --                 |
| Endometriosis                                       | --                 | --               | --                | --                 | --                 | --                 |
| Genital prolapse                                    | --                 | --               | --                | --                 | --                 | --                 |
| Other gynecological diseases                        | --                 | --               | --                | --                 | --                 | --                 |
| Hemoglobinopathies and hemolytic anemias            | 12<br>(6 - 21)     | 4<br>(2 - 8)     | 1<br>(1 - 2)      | 4<br>(2 - 9)       | 1<br>(1 - 4)       | 1<br>(0 - 3)       |
| Thalassemias                                        | 1<br>(0 - 1)       | 0<br>(0 - 1)     | 0<br>(0 - 0)      | 0<br>(0 - 0)       | 0<br>(0 - 0)       | 0<br>(0 - 0)       |
| Sickle cell disorders                               | 8<br>(4 - 14)      | 3<br>(1 - 6)     | 1<br>(1 - 2)      | 3<br>(2 - 7)       | 1<br>(0 - 2)       | 0<br>(0 - 0)       |
| G6PD deficiency                                     | 0<br>(0 - 1)       | 0<br>(0 - 0)     | 0<br>(0 - 0)      | 0<br>(0 - 0)       | 0<br>(0 - 0)       | 0<br>(0 - 0)       |
| Other hemoglobinopathies and hemolytic anemias      | 3<br>(1 - 6)       | 1<br>(0 - 1)     | 0<br>(0 - 0)      | 1<br>(0 - 1)       | 0<br>(0 - 1)       | 0<br>(0 - 3)       |
| Endocrine, metabolic, blood, and immune disorders   | 16<br>(9 - 25)     | 2<br>(1 - 4)     | 0<br>(0 - 1)      | 6<br>(3 - 10)      | 4<br>(2 - 7)       | 3<br>(2 - 6)       |
| Musculoskeletal disorders                           | 6<br>(4 - 10)      | --               | 0<br>(0 - 1)      | 3<br>(2 - 4)       | 2<br>(1 - 3)       | 1<br>(1 - 2)       |
| Rheumatoid arthritis                                | 1<br>(0 - 2)       | --               | 0<br>(0 - 0)      | 0<br>(0 - 1)       | 0<br>(0 - 1)       | 0<br>(0 - 1)       |
| Other musculoskeletal disorders                     | 5<br>(3 - 8)       | --               | 0<br>(0 - 0)      | 2<br>(1 - 4)       | 1<br>(1 - 3)       | 1<br>(1 - 2)       |
| Other non-communicable diseases                     | 76<br>(47 - 129)   | 59<br>(30 - 112) | 3<br>(2 - 5)      | 7<br>(4 - 11)      | 4<br>(2 - 6)       | 4<br>(3 - 7)       |
| Congenital anomalies                                | 64<br>(36 - 117)   | 56<br>(28 - 108) | 3<br>(1 - 5)      | 4<br>(2 - 7)       | 1<br>(0 - 1)       | 1<br>(0 - 1)       |
| Neural tube defects                                 | 6<br>(1 - 16)      | 6<br>(1 - 16)    | 0<br>(0 - 0)      | 0<br>(0 - 0)       | 0<br>(0 - 0)       | 0<br>(0 - 0)       |
| Congenital heart anomalies                          | 28<br>(15 - 49)    | 24<br>(12 - 45)  | 1<br>(1 - 2)      | 2<br>(1 - 4)       | 0<br>(0 - 0)       | 0<br>(0 - 0)       |
| Cleft lip and cleft palate                          | 0<br>(0 - 1)       | 0<br>(0 - 1)     | --                | --                 | --                 | --                 |
| Down syndrome                                       | 5<br>(2 - 12)      | 4<br>(1 - 11)    | 0<br>(0 - 1)      | 1<br>(0 - 1)       | 0<br>(0 - 0)       | 0<br>(0 - 0)       |
| Chromosomal unbalanced rearrangements               | 2<br>(1 - 5)       | 2<br>(1 - 5)     | 0<br>(0 - 0)      | 0<br>(0 - 0)       | 0<br>(0 - 0)       | 0<br>(0 - 0)       |
| Other congenital anomalies                          | 22<br>(9 - 57)     | 20<br>(7 - 53)   | 1<br>(0 - 2)      | 1<br>(1 - 2)       | 0<br>(0 - 1)       | 0<br>(0 - 1)       |
| Skin and subcutaneous diseases                      | 11<br>(7 - 16)     | 1<br>(1 - 3)     | 0<br>(0 - 0)      | 3<br>(2 - 5)       | 3<br>(2 - 5)       | 4<br>(2 - 6)       |
| Cellulitis                                          | 4<br>(1 - 8)       | 0<br>(0 - 1)     | 0<br>(0 - 0)      | 1<br>(0 - 2)       | 1<br>(0 - 2)       | 1<br>(0 - 3)       |
| Pyoderma                                            | 6<br>(3 - 9)       | 1<br>(0 - 2)     | 0<br>(0 - 0)      | 1<br>(1 - 3)       | 2<br>(1 - 3)       | 2<br>(1 - 3)       |

Web Table 31- Djibouti deaths with 95% UI by age, sex, and cause in 2013

| Cause                                           | Males, All Ages    | Males, 0-4 Years | Males, 5-14 Years | Males, 15-49 Years | Males, 50-69 Years | Males, 70-80 Years |
|-------------------------------------------------|--------------------|------------------|-------------------|--------------------|--------------------|--------------------|
| Decubitus ulcer                                 | 1<br>(0 - 2)       | 0<br>(0 - 0)     | 0<br>(0 - 0)      | 0<br>(0 - 1)       | 0<br>(0 - 1)       | 1<br>(0 - 1)       |
| Other skin and subcutaneous diseases            | 0<br>(0 - 1)       | 0<br>(0 - 0)     | 0<br>(0 - 0)      | 0<br>(0 - 0)       | 0<br>(0 - 0)       | 0<br>(0 - 0)       |
| Sudden infant death syndrome                    | 2<br>(0 - 5)       | 2<br>(0 - 5)     | --                | --                 | --                 | --                 |
| Injuries                                        | 307<br>(205 - 440) | 28<br>(13 - 55)  | 17<br>(12 - 25)   | 177<br>(111 - 260) | 54<br>(35 - 89)    | 31<br>(20 - 45)    |
| Transport injuries                              | 129<br>(84 - 197)  | 6<br>(2 - 13)    | 7<br>(4 - 12)     | 75<br>(44 - 118)   | 26<br>(16 - 45)    | 14<br>(9 - 22)     |
| Road injuries                                   | 125<br>(81 - 191)  | 6<br>(2 - 12)    | 7<br>(4 - 11)     | 74<br>(44 - 116)   | 25<br>(15 - 43)    | 13<br>(9 - 21)     |
| Pedestrian road injuries                        | 56<br>(23 - 91)    | 3<br>(1 - 7)     | 4<br>(2 - 6)      | 31<br>(12 - 53)    | 12<br>(5 - 21)     | 7<br>(3 - 11)      |
| Cyclist road injuries                           | 8<br>(4 - 16)      | 0<br>(0 - 1)     | 1<br>(0 - 1)      | 4<br>(2 - 8)       | 2<br>(1 - 4)       | 1<br>(1 - 2)       |
| Motorcyclist road injuries                      | 10<br>(4 - 19)     | 0<br>(0 - 1)     | 0<br>(0 - 1)      | 7<br>(3 - 13)      | 1<br>(1 - 3)       | 1<br>(0 - 2)       |
| Motor vehicle road injuries                     | 51<br>(29 - 87)    | 2<br>(1 - 4)     | 2<br>(1 - 4)      | 32<br>(17 - 59)    | 10<br>(5 - 19)     | 5<br>(3 - 8)       |
| Other road injuries                             | 1<br>(0 - 1)       | 0<br>(0 - 0)     | 0<br>(0 - 0)      | 0<br>(0 - 0)       | 0<br>(0 - 0)       | 0<br>(0 - 0)       |
| Other transport injuries                        | 4<br>(1 - 7)       | 0<br>(0 - 1)     | 0<br>(0 - 1)      | 1<br>(1 - 3)       | 1<br>(0 - 2)       | 1<br>(0 - 1)       |
| Unintentional injuries                          | 102<br>(71 - 146)  | 21<br>(9 - 42)   | 9<br>(6 - 13)     | 41<br>(25 - 63)    | 18<br>(11 - 30)    | 13<br>(8 - 20)     |
| Falls                                           | 14<br>(7 - 22)     | 1<br>(0 - 2)     | 1<br>(0 - 2)      | 6<br>(3 - 11)      | 3<br>(1 - 6)       | 3<br>(1 - 5)       |
| Drowning                                        | 26<br>(15 - 41)    | 5<br>(2 - 12)    | 4<br>(2 - 7)      | 14<br>(7 - 24)     | 2<br>(1 - 5)       | 1<br>(1 - 2)       |
| Fire, heat, and hot substances                  | 12<br>(7 - 20)     | 4<br>(1 - 10)    | 1<br>(0 - 2)      | 4<br>(2 - 6)       | 2<br>(1 - 4)       | 2<br>(1 - 3)       |
| Poisonings                                      | 5<br>(3 - 8)       | 1<br>(0 - 2)     | 0<br>(0 - 0)      | 3<br>(1 - 5)       | 1<br>(0 - 1)       | 0<br>(0 - 0)       |
| Exposure to mechanical forces                   | 19<br>(11 - 43)    | 5<br>(1 - 16)    | 1<br>(1 - 3)      | 7<br>(4 - 18)      | 4<br>(2 - 8)       | 1<br>(1 - 2)       |
| Unintentional firearm injuries                  | 2<br>(1 - 4)       | 0<br>(0 - 0)     | 0<br>(0 - 0)      | 2<br>(1 - 3)       | 0<br>(0 - 0)       | 0<br>(0 - 0)       |
| Unintentional suffocation                       | 7<br>(2 - 33)      | 3<br>(0 - 15)    | 1<br>(0 - 3)      | 2<br>(0 - 11)      | 1<br>(0 - 3)       | 0<br>(0 - 1)       |
| Other exposure to mechanical forces             | 9<br>(5 - 14)      | 1<br>(0 - 3)     | 1<br>(0 - 2)      | 4<br>(2 - 7)       | 3<br>(1 - 5)       | 1<br>(0 - 1)       |
| Adverse effects of medical treatment            | 14<br>(9 - 23)     | 3<br>(1 - 7)     | 0<br>(0 - 1)      | 3<br>(2 - 6)       | 3<br>(2 - 7)       | 4<br>(2 - 9)       |
| Animal contact                                  | 4<br>(2 - 7)       | 0<br>(0 - 1)     | 0<br>(0 - 1)      | 1<br>(1 - 3)       | 1<br>(0 - 2)       | 1<br>(0 - 1)       |
| Venomous animal contact                         | 2<br>(1 - 4)       | 0<br>(0 - 1)     | 0<br>(0 - 0)      | 1<br>(0 - 2)       | 0<br>(0 - 1)       | 0<br>(0 - 1)       |
| Non-venomous animal contact                     | 2<br>(1 - 4)       | 0<br>(0 - 1)     | 0<br>(0 - 1)      | 1<br>(0 - 2)       | 0<br>(0 - 1)       | 0<br>(0 - 0)       |
| Foreign body                                    | 4<br>(2 - 8)       | 2<br>(1 - 4)     | 0<br>(0 - 0)      | 1<br>(0 - 2)       | 0<br>(0 - 1)       | 1<br>(0 - 1)       |
| Pulmonary aspiration and foreign body in airway | 4<br>(2 - 8)       | 2<br>(1 - 4)     | 0<br>(0 - 0)      | 1<br>(0 - 2)       | 0<br>(0 - 1)       | 1<br>(0 - 1)       |
| Foreign body in other body part                 | 0<br>(0 - 1)       | 0<br>(0 - 0)     | 0<br>(0 - 0)      | 0<br>(0 - 0)       | 0<br>(0 - 0)       | 0<br>(0 - 0)       |
| Other unintentional injuries                    | 3<br>(1 - 6)       | 0<br>(0 - 1)     | 0<br>(0 - 1)      | 2<br>(1 - 4)       | 0<br>(0 - 1)       | 0<br>(0 - 0)       |
| Self-harm and interpersonal violence            | 76<br>(37 - 120)   | 1<br>(0 - 2)     | 1<br>(0 - 2)      | 60<br>(30 - 97)    | 10<br>(4 - 18)     | 4<br>(1 - 7)       |
| Self-harm                                       | 32<br>(11 - 58)    | --               | 0<br>(0 - 1)      | 22<br>(8 - 41)     | 6<br>(2 - 13)      | 3<br>(1 - 7)       |
| Interpersonal violence                          | 43<br>(19 - 74)    | 1<br>(0 - 2)     | 1<br>(0 - 1)      | 38<br>(17 - 66)    | 3<br>(1 - 7)       | 0<br>(0 - 1)       |
| Assault by firearm                              | 18<br>(7 - 36)     | 0<br>(0 - 1)     | 0<br>(0 - 0)      | 16<br>(6 - 33)     | 1<br>(0 - 2)       | 0<br>(0 - 0)       |
| Assault by sharp object                         | 10<br>(4 - 19)     | 0<br>(0 - 0)     | 0<br>(0 - 0)      | 8<br>(3 - 17)      | 1<br>(0 - 2)       | 0<br>(0 - 0)       |
| Assault by other means                          | 16<br>(5 - 28)     | 1<br>(0 - 1)     | 0<br>(0 - 1)      | 13<br>(4 - 25)     | 1<br>(0 - 3)       | 0<br>(0 - 1)       |

Web Table 31- Djibouti deaths with 95% UI by age, sex, and cause in 2013

| Cause                                                             | Females, All Ages        | Females, 0-4 Years | Females, 5-14 Years | Females, 15-49 Years | Females, 50-69 Years | Females, 70-80 Years |
|-------------------------------------------------------------------|--------------------------|--------------------|---------------------|----------------------|----------------------|----------------------|
| All causes                                                        | 3,514<br>(2,862 - 4,677) | 680<br>(500 - 916) | 82<br>(67 - 102)    | 901<br>(706 - 1,242) | 883<br>(586 - 1,369) | 969<br>(725 - 1,304) |
| Communicable, maternal, neonatal, and nutritional diseases        | 1,747<br>(1,449 - 2,132) | 588<br>(434 - 783) | 56<br>(44 - 72)     | 611<br>(476 - 781)   | 254<br>(174 - 364)   | 240<br>(167 - 328)   |
| HIV/AIDS and tuberculosis                                         | 531<br>(365 - 716)       | 21<br>(13 - 30)    | 23<br>(17 - 28)     | 355<br>(242 - 496)   | 102<br>(63 - 155)    | 30<br>(15 - 55)      |
| Tuberculosis                                                      | 124<br>(49 - 246)        | 4<br>(1 - 9)       | 1<br>(0 - 3)        | 50<br>(20 - 107)     | 45<br>(17 - 94)      | 24<br>(9 - 50)       |
| HIV/AIDS                                                          | 407<br>(273 - 584)       | 17<br>(10 - 26)    | 21<br>(16 - 28)     | 306<br>(195 - 457)   | 57<br>(31 - 83)      | 6<br>(2 - 9)         |
| HIV/AIDS resulting in mycobacterial infection                     | 22<br>(14 - 33)          | 1<br>(0 - 1)       | 1<br>(1 - 1)        | 17<br>(10 - 25)      | 3<br>(2 - 5)         | 0<br>(0 - 1)         |
| HIV/AIDS resulting in other diseases                              | 385<br>(256 - 554)       | 16<br>(9 - 25)     | 20<br>(16 - 26)     | 289<br>(185 - 433)   | 54<br>(30 - 78)      | 5<br>(2 - 8)         |
| Diarrhea, lower respiratory, and other common infectious diseases | 570<br>(407 - 783)       | 188<br>(106 - 295) | 21<br>(14 - 32)     | 86<br>(55 - 140)     | 113<br>(65 - 182)    | 162<br>(103 - 234)   |
| Diarrheal diseases                                                | 163<br>(90 - 288)        | 51<br>(15 - 124)   | 4<br>(2 - 9)        | 27<br>(13 - 53)      | 36<br>(15 - 69)      | 46<br>(22 - 91)      |
| Intestinal infectious diseases                                    | 19<br>(9 - 39)           | 6<br>(2 - 13)      | 5<br>(2 - 10)       | 7<br>(3 - 15)        | 1<br>(0 - 3)         | 0<br>(0 - 1)         |
| Typhoid fever                                                     | 16<br>(7 - 31)           | 4<br>(1 - 10)      | 4<br>(2 - 8)        | 6<br>(2 - 13)        | 1<br>(0 - 2)         | 0<br>(0 - 1)         |
| Paratyphoid fever                                                 | 3<br>(1 - 7)             | 1<br>(0 - 3)       | 1<br>(0 - 2)        | 1<br>(0 - 3)         | 0<br>(0 - 0)         | 0<br>(0 - 0)         |
| Other intestinal infectious diseases                              | 0<br>(0 - 3)             | 0<br>(0 - 2)       | 0<br>(0 - 0)        | 0<br>(0 - 1)         | 0<br>(0 - 0)         | 0<br>(0 - 0)         |
| Lower respiratory infections                                      | 308<br>(207 - 427)       | 98<br>(50 - 174)   | 6<br>(3 - 11)       | 32<br>(17 - 52)      | 63<br>(33 - 106)     | 109<br>(61 - 163)    |
| Upper respiratory infections                                      | 0<br>(0 - 1)             | 0<br>(0 - 0)       | 0<br>(0 - 0)        | 0<br>(0 - 0)         | 0<br>(0 - 0)         | 0<br>(0 - 0)         |
| Otitis media                                                      | 0<br>(0 - 1)             | 0<br>(0 - 0)       | 0<br>(0 - 0)        | 0<br>(0 - 0)         | 0<br>(0 - 0)         | 0<br>(0 - 0)         |
| Meningitis                                                        | 60<br>(39 - 91)          | 21<br>(8 - 41)     | 4<br>(2 - 8)        | 18<br>(10 - 32)      | 12<br>(5 - 21)       | 6<br>(3 - 11)        |
| Pneumococcal meningitis                                           | 15<br>(9 - 25)           | 4<br>(2 - 8)       | 1<br>(1 - 2)        | 5<br>(2 - 10)        | 3<br>(1 - 7)         | 2<br>(1 - 3)         |
| H influenzae type B meningitis                                    | 10<br>(6 - 17)           | 5<br>(2 - 11)      | 1<br>(0 - 2)        | 2<br>(1 - 4)         | 1<br>(0 - 2)         | 1<br>(0 - 1)         |
| Meningococcal meningitis                                          | 10<br>(6 - 17)           | 2<br>(1 - 5)       | 0<br>(0 - 1)        | 3<br>(1 - 7)         | 3<br>(1 - 6)         | 2<br>(1 - 3)         |
| Other meningitis                                                  | 25<br>(15 - 40)          | 9<br>(3 - 20)      | 2<br>(1 - 3)        | 7<br>(3 - 14)        | 5<br>(2 - 9)         | 2<br>(1 - 5)         |
| Encephalitis                                                      | 2<br>(1 - 3)             | 1<br>(0 - 1)       | 0<br>(0 - 0)        | 0<br>(0 - 1)         | 0<br>(0 - 1)         | 0<br>(0 - 1)         |
| Diphtheria                                                        | 0<br>(0 - 1)             | 0<br>(0 - 1)       | 0<br>(0 - 0)        | 0<br>(0 - 0)         | 0<br>(0 - 0)         | --                   |
| Whooping cough                                                    | 2<br>(0 - 12)            | 2<br>(0 - 11)      | 0<br>(0 - 1)        | 0<br>(0 - 0)         | 0<br>(0 - 0)         | --                   |
| Tetanus                                                           | 3<br>(1 - 6)             | 1<br>(0 - 4)       | 0<br>(0 - 0)        | 1<br>(0 - 2)         | 0<br>(0 - 1)         | 0<br>(0 - 0)         |
| Measles                                                           | 10<br>(0 - 63)           | 9<br>(0 - 52)      | 1<br>(0 - 8)        | 0<br>(0 - 2)         | 0<br>(0 - 0)         | --                   |
| Varicella and herpes zoster                                       | 0<br>(0 - 1)             | 0<br>(0 - 1)       | 0<br>(0 - 0)        | 0<br>(0 - 0)         | 0<br>(0 - 0)         | 0<br>(0 - 1)         |
| Neglected tropical diseases and malaria                           | 187<br>(73 - 322)        | 148<br>(44 - 288)  | 6<br>(2 - 19)       | 21<br>(8 - 49)       | 8<br>(2 - 27)        | 4<br>(1 - 17)        |
| Malaria                                                           | 161<br>(49 - 297)        | 144<br>(39 - 285)  | 3<br>(0 - 17)       | 7<br>(0 - 32)        | 4<br>(0 - 22)        | 3<br>(0 - 15)        |
| Leishmaniasis                                                     | 20<br>(9 - 35)           | 3<br>(0 - 7)       | 2<br>(0 - 5)        | 12<br>(5 - 25)       | 2<br>(1 - 4)         | 0<br>(0 - 1)         |
| Visceral leishmaniasis                                            | 20<br>(9 - 35)           | 3<br>(0 - 7)       | 2<br>(0 - 5)        | 12<br>(5 - 25)       | 2<br>(1 - 4)         | 0<br>(0 - 1)         |
| Schistosomiasis                                                   | 2<br>(1 - 3)             | 0<br>(0 - 0)       | 0<br>(0 - 0)        | 1<br>(0 - 1)         | 1<br>(0 - 1)         | 0<br>(0 - 1)         |
| Cysticercosis                                                     | 0<br>(0 - 0)             | 0<br>(0 - 0)       | 0<br>(0 - 0)        | 0<br>(0 - 0)         | 0<br>(0 - 0)         | 0<br>(0 - 0)         |
| Cystic echinococcosis                                             | 0<br>(0 - 0)             | 0<br>(0 - 0)       | 0<br>(0 - 0)        | 0<br>(0 - 0)         | 0<br>(0 - 0)         | 0<br>(0 - 0)         |
| Dengue                                                            | 0<br>(0 - 0)             | 0<br>(0 - 0)       | 0<br>(0 - 0)        | 0<br>(0 - 0)         | 0<br>(0 - 0)         | 0<br>(0 - 0)         |
| Rabies                                                            | 2<br>(1 - 3)             | 0<br>(0 - 1)       | 0<br>(0 - 1)        | 1<br>(1 - 2)         | 0<br>(0 - 1)         | 0<br>(0 - 0)         |
| Intestinal nematode infections                                    | 1<br>(0 - 6)             | 1<br>(0 - 5)       | 0<br>(0 - 1)        | 0<br>(0 - 1)         | 0<br>(0 - 1)         | 0<br>(0 - 0)         |
| Ascariasis                                                        | 1<br>(0 - 6)             | 1<br>(0 - 5)       | 0<br>(0 - 1)        | 0<br>(0 - 1)         | 0<br>(0 - 1)         | 0<br>(0 - 0)         |
| Other neglected tropical diseases                                 | 1<br>(0 - 2)             | 0<br>(0 - 0)       | 0<br>(0 - 0)        | 0<br>(0 - 0)         | 0<br>(0 - 0)         | 0<br>(0 - 1)         |
| Maternal disorders                                                | 123<br>(77 - 193)        | --                 | 0<br>(0 - 1)        | 122<br>(77 - 192)    | --                   | --                   |



Web Table 31- Djibouti deaths with 95% UI by age, sex, and cause in 2013

| Cause                                                            | Females, All Ages        | Females, 0-4 Years | Females, 5-14 Years | Females, 15-49 Years | Females, 50-69 Years | Females, 70-80 Years |
|------------------------------------------------------------------|--------------------------|--------------------|---------------------|----------------------|----------------------|----------------------|
| Maternal hemorrhage                                              | 15<br>(9 - 25)           | --                 | 0<br>(0 - 0)        | 15<br>(9 - 25)       | --                   | --                   |
| Maternal sepsis and other maternal infections                    | 12<br>(7 - 20)           | --                 | 0<br>(0 - 0)        | 12<br>(7 - 20)       | --                   | --                   |
| Maternal hypertensive disorders                                  | 13<br>(7 - 21)           | --                 | 0<br>(0 - 0)        | 13<br>(7 - 21)       | --                   | --                   |
| Maternal obstructed labor                                        | 6<br>(4 - 11)            | --                 | 0<br>(0 - 0)        | 6<br>(4 - 11)        | --                   | --                   |
| Maternal abortive outcome                                        | 24<br>(14 - 38)          | --                 | 0<br>(0 - 0)        | 24<br>(14 - 38)      | --                   | --                   |
| Indirect maternal deaths                                         | 10<br>(5 - 18)           | --                 | 0<br>(0 - 0)        | 10<br>(5 - 18)       | --                   | --                   |
| Late maternal deaths                                             | 11<br>(5 - 20)           | --                 | 0<br>(0 - 0)        | 11<br>(5 - 20)       | --                   | --                   |
| Maternal deaths aggravated by HIV/AIDS                           | 1<br>(0 - 1)             | --                 | --                  | 1<br>(0 - 1)         | --                   | --                   |
| Other maternal disorders                                         | 31<br>(18 - 50)          | --                 | 0<br>(0 - 0)        | 31<br>(18 - 50)      | --                   | --                   |
| Neonatal disorders                                               | 179<br>(133 - 245)       | 179<br>(133 - 245) | --                  | --                   | --                   | --                   |
| Neonatal preterm birth complications                             | 50<br>(20 - 93)          | 50<br>(20 - 93)    | --                  | --                   | --                   | --                   |
| Neonatal encephalopathy due to birth asphyxia and trauma         | 61<br>(28 - 101)         | 61<br>(28 - 101)   | --                  | --                   | --                   | --                   |
| Neonatal sepsis and other neonatal infections                    | 43<br>(16 - 90)          | 43<br>(16 - 90)    | --                  | --                   | --                   | --                   |
| Hemolytic disease and other neonatal jaundice                    | 1<br>(0 - 3)             | 1<br>(0 - 3)       | --                  | --                   | --                   | --                   |
| Other neonatal disorders                                         | 25<br>(5 - 57)           | 25<br>(5 - 57)     | --                  | --                   | --                   | --                   |
| Nutritional deficiencies                                         | 134<br>(90 - 195)        | 43<br>(18 - 80)    | 4<br>(3 - 7)        | 21<br>(13 - 35)      | 26<br>(15 - 43)      | 39<br>(24 - 59)      |
| Protein-energy malnutrition                                      | 82<br>(41 - 132)         | 38<br>(15 - 72)    | 3<br>(2 - 6)        | 5<br>(1 - 12)        | 13<br>(5 - 25)       | 22<br>(8 - 39)       |
| Iodine deficiency                                                | 1<br>(0 - 4)             | 0<br>(0 - 2)       | 0<br>(0 - 0)        | 0<br>(0 - 1)         | 0<br>(0 - 2)         | 0<br>(0 - 2)         |
| Iron-deficiency anemia                                           | 49<br>(25 - 85)          | 5<br>(1 - 15)      | 1<br>(0 - 2)        | 16<br>(8 - 27)       | 13<br>(5 - 24)       | 15<br>(5 - 31)       |
| Other nutritional deficiencies                                   | 1<br>(0 - 3)             | 0<br>(0 - 0)       | 0<br>(0 - 0)        | 0<br>(0 - 0)         | 0<br>(0 - 1)         | 1<br>(0 - 2)         |
| Other communicable, maternal, neonatal, and nutritional diseases | 24<br>(14 - 37)          | 8<br>(4 - 16)      | 1<br>(0 - 2)        | 5<br>(3 - 9)         | 5<br>(2 - 11)        | 5<br>(1 - 11)        |
| Sexually transmitted diseases excluding HIV                      | 6<br>(3 - 11)            | 4<br>(1 - 8)       | 0<br>(0 - 1)        | 1<br>(0 - 2)         | 1<br>(0 - 2)         | 0<br>(0 - 1)         |
| Syphilis                                                         | 5<br>(2 - 9)             | 4<br>(1 - 8)       | 0<br>(0 - 1)        | 0<br>(0 - 1)         | 0<br>(0 - 1)         | 0<br>(0 - 1)         |
| Chlamydial infection                                             | 0<br>(0 - 1)             | --                 | 0<br>(0 - 0)        | 0<br>(0 - 0)         | 0<br>(0 - 0)         | 0<br>(0 - 0)         |
| Gonococcal infection                                             | 0<br>(0 - 1)             | --                 | 0<br>(0 - 0)        | 0<br>(0 - 0)         | 0<br>(0 - 0)         | 0<br>(0 - 0)         |
| Other sexually transmitted diseases                              | 0<br>(0 - 1)             | --                 | 0<br>(0 - 0)        | 0<br>(0 - 0)         | 0<br>(0 - 0)         | 0<br>(0 - 0)         |
| Hepatitis                                                        | 4<br>(2 - 6)             | 0<br>(0 - 1)       | 0<br>(0 - 0)        | 2<br>(1 - 3)         | 1<br>(0 - 2)         | 0<br>(0 - 1)         |
| Acute hepatitis A                                                | 0<br>(0 - 1)             | 0<br>(0 - 0)       | 0<br>(0 - 0)        | 0<br>(0 - 0)         | 0<br>(0 - 0)         | 0<br>(0 - 0)         |
| Acute hepatitis B                                                | 2<br>(1 - 3)             | 0<br>(0 - 0)       | 0<br>(0 - 0)        | 1<br>(0 - 1)         | 1<br>(0 - 1)         | 0<br>(0 - 1)         |
| Acute hepatitis C                                                | 0<br>(0 - 0)             | --                 | 0<br>(0 - 0)        | 0<br>(0 - 0)         | 0<br>(0 - 0)         | 0<br>(0 - 0)         |
| Acute hepatitis E                                                | 1<br>(0 - 2)             | 0<br>(0 - 0)       | 0<br>(0 - 0)        | 1<br>(0 - 2)         | 0<br>(0 - 0)         | 0<br>(0 - 0)         |
| Other infectious diseases                                        | 14<br>(6 - 26)           | 4<br>(1 - 10)      | 0<br>(0 - 1)        | 4<br>(1 - 5)         | 4<br>(1 - 9)         | 4<br>(1 - 10)        |
| Non-communicable diseases                                        | 1,602<br>(1,156 - 2,350) | 69<br>(42 - 107)   | 15<br>(10 - 22)     | 233<br>(156 - 384)   | 592<br>(379 - 941)   | 693<br>(520 - 936)   |
| Neoplasms                                                        | 329<br>(223 - 507)       | 5<br>(2 - 9)       | 4<br>(2 - 6)        | 74<br>(49 - 127)     | 173<br>(109 - 281)   | 73<br>(52 - 101)     |
| Esophageal cancer                                                | 30<br>(11 - 52)          | --                 | --                  | 5<br>(2 - 9)         | 17<br>(6 - 32)       | 8<br>(3 - 14)        |
| Stomach cancer                                                   | 17<br>(11 - 26)          | --                 | --                  | 2<br>(1 - 3)         | 10<br>(6 - 17)       | 5<br>(3 - 8)         |
| Liver cancer                                                     | 21<br>(13 - 34)          | --                 | 0<br>(0 - 0)        | 5<br>(2 - 9)         | 11<br>(6 - 18)       | 6<br>(3 - 9)         |
| Liver cancer due to hepatitis B                                  | 4<br>(2 - 8)             | --                 | 0<br>(0 - 0)        | 1<br>(0 - 2)         | 2<br>(1 - 5)         | 1<br>(0 - 2)         |
| Liver cancer due to hepatitis C                                  | 10<br>(5 - 17)           | --                 | 0<br>(0 - 0)        | 2<br>(1 - 4)         | 5<br>(2 - 10)        | 3<br>(2 - 5)         |
| Liver cancer due to alcohol use                                  | 2<br>(1 - 4)             | --                 | --                  | 0<br>(0 - 1)         | 1<br>(0 - 2)         | 1<br>(0 - 2)         |

Web Table 31- Djibouti deaths with 95% UI by age, sex, and cause in 2013

| Cause                                         | Females, All Ages    | Females, 0-4 Years | Females, 5-14 Years | Females, 15-49 Years | Females, 50-69 Years | Females, 70-80 Years |
|-----------------------------------------------|----------------------|--------------------|---------------------|----------------------|----------------------|----------------------|
| Liver cancer due to other causes              | 5<br>(3 - 9)         | --                 | 0<br>(0 - 0)        | 2<br>(1 - 3)         | 2<br>(1 - 4)         | 1<br>(0 - 2)         |
| Larynx cancer                                 | 0<br>(0 - 1)         | --                 | --                  | 0<br>(0 - 0)         | 0<br>(0 - 1)         | 0<br>(0 - 0)         |
| Tracheal, bronchus and lung cancer            | 10<br>(6 - 15)       | --                 | --                  | 1<br>(0 - 1)         | 6<br>(3 - 9)         | 3<br>(2 - 5)         |
| Breast cancer                                 | 47<br>(29 - 77)      | --                 | --                  | 17<br>(11 - 30)      | 22<br>(13 - 39)      | 7<br>(4 - 12)        |
| Cervical cancer                               | 82<br>(43 - 140)     | --                 | --                  | 17<br>(8 - 31)       | 53<br>(25 - 91)      | 13<br>(7 - 21)       |
| Uterine cancer                                | 4<br>(2 - 7)         | --                 | --                  | 0<br>(0 - 1)         | 2<br>(1 - 4)         | 1<br>(1 - 2)         |
| Prostate cancer                               | --                   | --                 | --                  | --                   | --                   | --                   |
| Colon and rectum cancer                       | 20<br>(14 - 31)      | --                 | --                  | 4<br>(3 - 8)         | 9<br>(6 - 15)        | 6<br>(4 - 10)        |
| Lip and oral cavity cancer                    | 4<br>(2 - 6)         | --                 | --                  | 1<br>(0 - 2)         | 2<br>(1 - 3)         | 1<br>(0 - 1)         |
| Nasopharynx cancer                            | 1<br>(0 - 2)         | --                 | 0<br>(0 - 0)        | 0<br>(0 - 1)         | 0<br>(0 - 1)         | 0<br>(0 - 0)         |
| Other pharynx cancer                          | 1<br>(1 - 2)         | --                 | --                  | 0<br>(0 - 1)         | 1<br>(0 - 1)         | 0<br>(0 - 0)         |
| Gallbladder and biliary tract cancer          | 4<br>(2 - 6)         | --                 | --                  | 1<br>(1 - 2)         | 2<br>(1 - 4)         | 1<br>(0 - 1)         |
| Pancreatic cancer                             | 7<br>(4 - 11)        | --                 | --                  | 1<br>(1 - 2)         | 4<br>(2 - 6)         | 2<br>(1 - 3)         |
| Malignant skin melanoma                       | 1<br>(1 - 2)         | --                 | --                  | 0<br>(0 - 0)         | 1<br>(1 - 1)         | 0<br>(0 - 1)         |
| Non-melanoma skin cancer                      | 1<br>(1 - 3)         | --                 | --                  | 0<br>(0 - 1)         | 0<br>(0 - 1)         | 1<br>(0 - 2)         |
| Ovarian cancer                                | 15<br>(9 - 24)       | --                 | --                  | 3<br>(2 - 6)         | 9<br>(5 - 16)        | 2<br>(1 - 4)         |
| Testicular cancer                             | --                   | --                 | --                  | --                   | --                   | --                   |
| Kidney cancer                                 | 4<br>(3 - 7)         | 0<br>(0 - 1)       | 0<br>(0 - 0)        | 1<br>(0 - 1)         | 2<br>(1 - 4)         | 1<br>(1 - 2)         |
| Bladder cancer                                | 2<br>(1 - 4)         | --                 | --                  | 0<br>(0 - 1)         | 1<br>(1 - 2)         | 1<br>(1 - 2)         |
| Brain and nervous system cancer               | 3<br>(2 - 5)         | 0<br>(0 - 0)       | 0<br>(0 - 0)        | 2<br>(1 - 3)         | 1<br>(0 - 1)         | 0<br>(0 - 1)         |
| Thyroid cancer                                | 1<br>(1 - 2)         | --                 | 0<br>(0 - 0)        | 0<br>(0 - 0)         | 1<br>(0 - 2)         | 0<br>(0 - 1)         |
| Mesothelioma                                  | 0<br>(0 - 0)         | --                 | --                  | 0<br>(0 - 0)         | 0<br>(0 - 0)         | 0<br>(0 - 0)         |
| Hodgkin lymphoma                              | 2<br>(1 - 3)         | 0<br>(0 - 0)       | 0<br>(0 - 0)        | 0<br>(0 - 1)         | 1<br>(0 - 1)         | 1<br>(0 - 1)         |
| Non-Hodgkin lymphoma                          | 14<br>(7 - 25)       | 1<br>(0 - 3)       | 1<br>(0 - 2)        | 4<br>(2 - 7)         | 5<br>(2 - 10)        | 3<br>(2 - 6)         |
| Multiple myeloma                              | 3<br>(2 - 5)         | --                 | --                  | 1<br>(0 - 1)         | 2<br>(1 - 3)         | 1<br>(1 - 1)         |
| Leukemia                                      | 4<br>(3 - 6)         | 0<br>(0 - 0)       | 0<br>(0 - 1)        | 1<br>(1 - 2)         | 1<br>(1 - 2)         | 1<br>(1 - 1)         |
| Other neoplasms                               | 28<br>(19 - 41)      | 3<br>(1 - 5)       | 2<br>(1 - 3)        | 7<br>(3 - 12)        | 9<br>(5 - 14)        | 8<br>(5 - 13)        |
| Cardiovascular diseases                       | 748<br>(523 - 1,097) | 4<br>(2 - 8)       | 2<br>(1 - 3)        | 68<br>(41 - 125)     | 256<br>(161 - 408)   | 417<br>(307 - 572)   |
| Rheumatic heart disease                       | 24<br>(14 - 43)      | 0<br>(0 - 0)       | 0<br>(0 - 1)        | 8<br>(4 - 16)        | 9<br>(5 - 16)        | 7<br>(4 - 11)        |
| Ischemic heart disease                        | 183<br>(116 - 289)   | 0<br>(0 - 0)       | 0<br>(0 - 0)        | 12<br>(6 - 29)       | 60<br>(33 - 104)     | 111<br>(73 - 162)    |
| Cerebrovascular disease                       | 359<br>(228 - 543)   | 1<br>(0 - 1)       | 0<br>(0 - 0)        | 24<br>(13 - 44)      | 125<br>(71 - 202)    | 209<br>(139 - 301)   |
| Ischemic stroke                               | 181<br>(110 - 297)   | 0<br>(0 - 0)       | 0<br>(0 - 0)        | 4<br>(2 - 10)        | 45<br>(23 - 87)      | 132<br>(84 - 206)    |
| Hemorrhagic stroke                            | 178<br>(103 - 297)   | 1<br>(0 - 1)       | 0<br>(0 - 0)        | 20<br>(11 - 37)      | 80<br>(42 - 134)     | 77<br>(43 - 121)     |
| Hypertensive heart disease                    | 75<br>(44 - 133)     | 0<br>(0 - 0)       | 0<br>(0 - 0)        | 5<br>(3 - 10)        | 22<br>(12 - 40)      | 48<br>(27 - 89)      |
| Cardiomyopathy and myocarditis                | 30<br>(17 - 54)      | 2<br>(1 - 4)       | 1<br>(0 - 1)        | 7<br>(4 - 14)        | 10<br>(5 - 19)       | 11<br>(5 - 23)       |
| Atrial fibrillation and flutter               | 1<br>(0 - 1)         | --                 | --                  | 0<br>(0 - 0)         | 0<br>(0 - 0)         | 1<br>(0 - 1)         |
| Aortic aneurysm                               | 7<br>(4 - 12)        | --                 | --                  | 1<br>(0 - 2)         | 2<br>(1 - 4)         | 4<br>(2 - 6)         |
| Peripheral vascular disease                   | 1<br>(0 - 1)         | --                 | --                  | 0<br>(0 - 0)         | 0<br>(0 - 0)         | 1<br>(0 - 1)         |
| Endocarditis                                  | 6<br>(3 - 10)        | 0<br>(0 - 1)       | 0<br>(0 - 0)        | 1<br>(1 - 3)         | 2<br>(1 - 3)         | 2<br>(1 - 5)         |
| Other cardiovascular and circulatory diseases | 62<br>(32 - 127)     | 1<br>(0 - 2)       | 0<br>(0 - 1)        | 9<br>(5 - 18)        | 26<br>(12 - 52)      | 25<br>(12 - 57)      |

Web Table 31- Djibouti deaths with 95% UI by age, sex, and cause in 2013

| Cause                                               | Females, All Ages | Females, 0-4 Years | Females, 5-14 Years | Females, 15-49 Years | Females, 50-69 Years | Females, 70-80 Years |
|-----------------------------------------------------|-------------------|--------------------|---------------------|----------------------|----------------------|----------------------|
| Chronic respiratory diseases                        | 84<br>(55 - 130)  | 2<br>(1 - 5)       | 1<br>(0 - 1)        | 10<br>(6 - 17)       | 30<br>(17 - 51)      | 42<br>(27 - 62)      |
| Chronic obstructive pulmonary disease               | 46<br>(26 - 77)   | 0<br>(0 - 1)       | 0<br>(0 - 0)        | 3<br>(1 - 6)         | 17<br>(9 - 30)       | 25<br>(14 - 42)      |
| Pneumoconiosis                                      | 1<br>(0 - 2)      | 0<br>(0 - 0)       | 0<br>(0 - 0)        | 0<br>(0 - 1)         | 0<br>(0 - 0)         | 0<br>(0 - 0)         |
| Silicosis                                           | 0<br>(0 - 0)      | 0<br>(0 - 0)       | 0<br>(0 - 0)        | 0<br>(0 - 0)         | 0<br>(0 - 0)         | 0<br>(0 - 0)         |
| Asbestosis                                          | 0<br>(0 - 0)      | 0<br>(0 - 0)       | 0<br>(0 - 0)        | 0<br>(0 - 0)         | 0<br>(0 - 0)         | 0<br>(0 - 0)         |
| Coal workers pneumoconiosis                         | 0<br>(0 - 0)      | 0<br>(0 - 0)       | 0<br>(0 - 0)        | 0<br>(0 - 0)         | 0<br>(0 - 0)         | 0<br>(0 - 0)         |
| Other pneumoconiosis                                | 1<br>(0 - 1)      | 0<br>(0 - 0)       | 0<br>(0 - 0)        | 0<br>(0 - 1)         | 0<br>(0 - 0)         | 0<br>(0 - 0)         |
| Asthma                                              | 19<br>(4 - 37)    | 1<br>(0 - 1)       | 0<br>(0 - 0)        | 3<br>(1 - 6)         | 7<br>(1 - 16)        | 8<br>(1 - 15)        |
| Interstitial lung disease and pulmonary sarcoidosis | 12<br>(2 - 26)    | 0<br>(0 - 0)       | 0<br>(0 - 0)        | 1<br>(0 - 4)         | 4<br>(1 - 9)         | 6<br>(1 - 14)        |
| Other chronic respiratory diseases                  | 7<br>(4 - 14)     | 1<br>(1 - 2)       | 0<br>(0 - 0)        | 2<br>(1 - 5)         | 1<br>(1 - 3)         | 2<br>(1 - 5)         |
| Cirrhosis                                           | 64<br>(43 - 96)   | 0<br>(0 - 1)       | 1<br>(0 - 1)        | 12<br>(8 - 20)       | 31<br>(19 - 48)      | 20<br>(13 - 29)      |
| Cirrhosis due to hepatitis B                        | 15<br>(5 - 29)    | 0<br>(0 - 0)       | 0<br>(0 - 0)        | 3<br>(1 - 6)         | 8<br>(2 - 15)        | 5<br>(2 - 10)        |
| Cirrhosis due to hepatitis C                        | 16<br>(6 - 32)    | 0<br>(0 - 0)       | 0<br>(0 - 0)        | 3<br>(1 - 7)         | 8<br>(3 - 17)        | 5<br>(2 - 9)         |
| Cirrhosis due to alcohol use                        | 22<br>(12 - 41)   | --                 | --                  | 3<br>(1 - 6)         | 11<br>(5 - 21)       | 8<br>(4 - 16)        |
| Cirrhosis due to other causes                       | 11<br>(5 - 19)    | 0<br>(0 - 1)       | 0<br>(0 - 1)        | 4<br>(2 - 7)         | 4<br>(2 - 8)         | 2<br>(1 - 4)         |
| Digestive diseases                                  | 71<br>(47 - 104)  | 1<br>(0 - 3)       | 1<br>(1 - 2)        | 14<br>(9 - 23)       | 24<br>(14 - 39)      | 31<br>(21 - 44)      |
| Peptic ulcer disease                                | 16<br>(9 - 25)    | 0<br>(0 - 0)       | 0<br>(0 - 0)        | 2<br>(1 - 4)         | 6<br>(3 - 10)        | 8<br>(4 - 12)        |
| Gastritis and duodenitis                            | 3<br>(1 - 8)      | 0<br>(0 - 0)       | 0<br>(0 - 0)        | 1<br>(0 - 2)         | 1<br>(0 - 2)         | 1<br>(0 - 4)         |
| Appendicitis                                        | 6<br>(3 - 10)     | 0<br>(0 - 0)       | 0<br>(0 - 0)        | 1<br>(1 - 3)         | 2<br>(1 - 4)         | 2<br>(1 - 5)         |
| Paralytic ileus and intestinal obstruction          | 22<br>(13 - 37)   | 0<br>(0 - 1)       | 0<br>(0 - 1)        | 4<br>(2 - 7)         | 7<br>(4 - 13)        | 10<br>(5 - 18)       |
| Inguinal, femoral, and abdominal hernia             | 1<br>(1 - 3)      | 0<br>(0 - 0)       | 0<br>(0 - 0)        | 0<br>(0 - 1)         | 0<br>(0 - 0)         | 1<br>(0 - 1)         |
| Inflammatory bowel disease                          | 5<br>(2 - 8)      | 0<br>(0 - 1)       | 0<br>(0 - 0)        | 1<br>(0 - 2)         | 1<br>(0 - 3)         | 2<br>(0 - 3)         |
| Vascular intestinal disorders                       | 1<br>(0 - 2)      | 0<br>(0 - 0)       | 0<br>(0 - 0)        | 0<br>(0 - 0)         | 0<br>(0 - 1)         | 0<br>(0 - 1)         |
| Gallbladder and biliary diseases                    | 7<br>(4 - 11)     | 0<br>(0 - 0)       | 0<br>(0 - 0)        | 1<br>(1 - 2)         | 3<br>(1 - 5)         | 3<br>(2 - 6)         |
| Pancreatitis                                        | 3<br>(2 - 6)      | 0<br>(0 - 0)       | 0<br>(0 - 0)        | 1<br>(0 - 2)         | 1<br>(1 - 3)         | 1<br>(1 - 2)         |
| Other digestive diseases                            | 7<br>(4 - 11)     | 0<br>(0 - 0)       | 0<br>(0 - 0)        | 1<br>(1 - 2)         | 2<br>(1 - 4)         | 3<br>(2 - 5)         |
| Neurological disorders                              | 46<br>(34 - 65)   | 3<br>(1 - 7)       | 1<br>(1 - 3)        | 9<br>(5 - 17)        | 6<br>(3 - 9)         | 28<br>(20 - 38)      |
| Alzheimer disease and other dementias               | 27<br>(19 - 38)   | --                 | --                  | 0<br>(0 - 0)         | 2<br>(1 - 4)         | 25<br>(18 - 35)      |
| Parkinson disease                                   | 0<br>(0 - 1)      | --                 | --                  | 0<br>(0 - 0)         | 0<br>(0 - 0)         | 0<br>(0 - 0)         |
| Epilepsy                                            | 15<br>(9 - 26)    | 2<br>(1 - 7)       | 1<br>(1 - 3)        | 8<br>(4 - 15)        | 2<br>(1 - 4)         | 2<br>(1 - 4)         |
| Multiple sclerosis                                  | 0<br>(0 - 1)      | --                 | --                  | 0<br>(0 - 0)         | 0<br>(0 - 0)         | 0<br>(0 - 0)         |
| Other neurological disorders                        | 3<br>(2 - 5)      | 1<br>(0 - 1)       | 0<br>(0 - 0)        | 1<br>(1 - 1)         | 1<br>(1 - 2)         | 1<br>(0 - 1)         |
| Mental and substance use disorders                  | 9<br>(5 - 16)     | 0<br>(0 - 0)       | 0<br>(0 - 0)        | 6<br>(3 - 11)        | 2<br>(1 - 4)         | 1<br>(0 - 1)         |
| Schizophrenia                                       | 1<br>(0 - 2)      | --                 | --                  | 0<br>(0 - 1)         | 0<br>(0 - 1)         | 0<br>(0 - 0)         |
| Alcohol use disorders                               | 3<br>(1 - 6)      | --                 | --                  | 2<br>(1 - 4)         | 1<br>(0 - 2)         | 0<br>(0 - 0)         |
| Drug use disorders                                  | 5<br>(2 - 11)     | 0<br>(0 - 0)       | --                  | 4<br>(1 - 8)         | 1<br>(0 - 2)         | 0<br>(0 - 1)         |
| Opioid use disorders                                | 0<br>(0 - 1)      | 0<br>(0 - 0)       | --                  | 0<br>(0 - 1)         | 0<br>(0 - 0)         | 0<br>(0 - 0)         |
| Cocaine use disorders                               | 0<br>(0 - 0)      | 0<br>(0 - 0)       | --                  | 0<br>(0 - 0)         | 0<br>(0 - 0)         | 0<br>(0 - 0)         |
| Amphetamine use disorders                           | 0<br>(0 - 0)      | 0<br>(0 - 0)       | --                  | 0<br>(0 - 0)         | 0<br>(0 - 0)         | 0<br>(0 - 0)         |
| Other drug use disorders                            | 4<br>(1 - 10)     | 0<br>(0 - 0)       | --                  | 3<br>(1 - 7)         | 1<br>(0 - 2)         | 0<br>(0 - 1)         |

Web Table 31- Djibouti deaths with 95% UI by age, sex, and cause in 2013

| Cause                                               | Females, All Ages  | Females, 0-4 Years | Females, 5-14 Years | Females, 15-49 Years | Females, 50-69 Years | Females, 70-80 Years |
|-----------------------------------------------------|--------------------|--------------------|---------------------|----------------------|----------------------|----------------------|
| Eating disorders                                    | 0<br>(0 - 0)       | --                 | 0<br>(0 - 0)        | 0<br>(0 - 0)         | --                   | --                   |
| Anorexia nervosa                                    | 0<br>(0 - 0)       | --                 | 0<br>(0 - 0)        | 0<br>(0 - 0)         | --                   | --                   |
| Diabetes, urogenital, blood, and endocrine diseases | 178<br>(123 - 261) | 8<br>(4 - 14)      | 3<br>(2 - 4)        | 31<br>(20 - 49)      | 64<br>(39 - 101)     | 72<br>(50 - 104)     |
| Diabetes mellitus                                   | 83<br>(52 - 126)   | 0<br>(0 - 0)       | 0<br>(0 - 0)        | 7<br>(4 - 12)        | 36<br>(20 - 57)      | 40<br>(26 - 60)      |
| Acute glomerulonephritis                            | 2<br>(1 - 3)       | 0<br>(0 - 0)       | 0<br>(0 - 0)        | 1<br>(0 - 1)         | 0<br>(0 - 1)         | 0<br>(0 - 1)         |
| Chronic kidney disease                              | 38<br>(23 - 62)    | 1<br>(0 - 2)       | 1<br>(0 - 1)        | 8<br>(4 - 15)        | 12<br>(6 - 23)       | 16<br>(9 - 25)       |
| Chronic kidney disease due to diabetes mellitus     | 0<br>(0 - 0)       | 0<br>(0 - 0)       | 0<br>(0 - 0)        | 0<br>(0 - 0)         | 0<br>(0 - 0)         | 0<br>(0 - 0)         |
| Chronic kidney disease due to hypertension          | 19<br>(10 - 33)    | 0<br>(0 - 0)       | 0<br>(0 - 0)        | 3<br>(1 - 6)         | 6<br>(3 - 12)        | 9<br>(5 - 15)        |
| Chronic kidney disease due to glomerulonephritis    | 9<br>(5 - 15)      | 1<br>(0 - 1)       | 0<br>(0 - 1)        | 3<br>(2 - 6)         | 3<br>(1 - 5)         | 2<br>(1 - 4)         |
| Chronic kidney disease due to other causes          | 11<br>(4 - 20)     | 0<br>(0 - 1)       | 0<br>(0 - 1)        | 2<br>(1 - 4)         | 3<br>(1 - 7)         | 5<br>(2 - 10)        |
| Urinary diseases and male infertility               | 19<br>(11 - 29)    | 1<br>(0 - 1)       | 0<br>(0 - 0)        | 5<br>(3 - 7)         | 7<br>(3 - 13)        | 6<br>(3 - 10)        |
| Interstitial nephritis and urinary tract infections | 15<br>(8 - 23)     | 0<br>(0 - 1)       | 0<br>(0 - 0)        | 3<br>(2 - 5)         | 6<br>(3 - 10)        | 5<br>(2 - 8)         |
| Urolithiasis                                        | 1<br>(0 - 2)       | --                 | 0<br>(0 - 0)        | 0<br>(0 - 1)         | 1<br>(0 - 1)         | 0<br>(0 - 1)         |
| Other urinary diseases                              | 3<br>(2 - 5)       | 0<br>(0 - 1)       | 0<br>(0 - 0)        | 1<br>(0 - 2)         | 1<br>(0 - 2)         | 1<br>(0 - 1)         |
| Gynecological diseases                              | 0<br>(0 - 1)       | --                 | --                  | 0<br>(0 - 0)         | 0<br>(0 - 0)         | 0<br>(0 - 0)         |
| Uterine fibroids                                    | 0<br>(0 - 0)       | --                 | --                  | 0<br>(0 - 0)         | 0<br>(0 - 0)         | 0<br>(0 - 0)         |
| Polycystic ovarian syndrome                         | 0<br>(0 - 0)       | --                 | --                  | 0<br>(0 - 0)         | 0<br>(0 - 0)         | --                   |
| Endometriosis                                       | 0<br>(0 - 0)       | --                 | --                  | 0<br>(0 - 0)         | 0<br>(0 - 0)         | --                   |
| Genital prolapse                                    | 0<br>(0 - 0)       | --                 | --                  | 0<br>(0 - 0)         | 0<br>(0 - 0)         | 0<br>(0 - 0)         |
| Other gynecological diseases                        | 0<br>(0 - 0)       | --                 | --                  | 0<br>(0 - 0)         | 0<br>(0 - 0)         | 0<br>(0 - 0)         |
| Hemoglobinopathies and hemolytic anemias            | 11<br>(5 - 20)     | 3<br>(1 - 6)       | 1<br>(0 - 2)        | 4<br>(2 - 8)         | 2<br>(1 - 3)         | 1<br>(1 - 2)         |
| Thalassemias                                        | 0<br>(0 - 1)       | 0<br>(0 - 1)       | 0<br>(0 - 0)        | 0<br>(0 - 0)         | 0<br>(0 - 0)         | 0<br>(0 - 0)         |
| Sickle cell disorders                               | 7<br>(3 - 13)      | 2<br>(0 - 4)       | 1<br>(0 - 2)        | 3<br>(1 - 6)         | 1<br>(0 - 2)         | 0<br>(0 - 0)         |
| G6PD deficiency                                     | 1<br>(0 - 1)       | 0<br>(0 - 0)       | 0<br>(0 - 0)        | 0<br>(0 - 0)         | 0<br>(0 - 0)         | 0<br>(0 - 0)         |
| Other hemoglobinopathies and hemolytic anemias      | 3<br>(2 - 5)       | 1<br>(0 - 1)       | 0<br>(0 - 0)        | 1<br>(0 - 1)         | 1<br>(0 - 1)         | 1<br>(1 - 2)         |
| Endocrine, metabolic, blood, and immune disorders   | 25<br>(16 - 44)    | 3<br>(1 - 6)       | 0<br>(0 - 1)        | 6<br>(3 - 12)        | 7<br>(3 - 13)        | 8<br>(4 - 15)        |
| Musculoskeletal disorders                           | 5<br>(2 - 10)      | --                 | 0<br>(0 - 0)        | 3<br>(1 - 5)         | 2<br>(1 - 3)         | 1<br>(0 - 2)         |
| Rheumatoid arthritis                                | 1<br>(1 - 3)       | --                 | 0<br>(0 - 0)        | 0<br>(0 - 1)         | 1<br>(0 - 1)         | 1<br>(0 - 1)         |
| Other musculoskeletal disorders                     | 4<br>(2 - 8)       | --                 | 0<br>(0 - 0)        | 2<br>(1 - 4)         | 1<br>(0 - 2)         | 1<br>(0 - 1)         |
| Other non-communicable diseases                     | 67<br>(46 - 99)    | 45<br>(26 - 75)    | 3<br>(1 - 4)        | 6<br>(4 - 10)        | 5<br>(3 - 8)         | 8<br>(5 - 13)        |
| Congenital anomalies                                | 50<br>(32 - 81)    | 42<br>(25 - 72)    | 2<br>(1 - 4)        | 3<br>(2 - 6)         | 1<br>(1 - 2)         | 1<br>(1 - 2)         |
| Neural tube defects                                 | 5<br>(1 - 12)      | 5<br>(1 - 12)      | 0<br>(0 - 0)        | 0<br>(0 - 0)         | 0<br>(0 - 0)         | 0<br>(0 - 0)         |
| Congenital heart anomalies                          | 22<br>(12 - 39)    | 18<br>(9 - 34)     | 1<br>(1 - 2)        | 2<br>(1 - 3)         | 0<br>(0 - 1)         | 0<br>(0 - 1)         |
| Cleft lip and cleft palate                          | 0<br>(0 - 1)       | 0<br>(0 - 1)       | --                  | --                   | --                   | --                   |
| Down syndrome                                       | 5<br>(2 - 11)      | 3<br>(1 - 9)       | 0<br>(0 - 1)        | 1<br>(0 - 1)         | 0<br>(0 - 0)         | 0<br>(0 - 0)         |
| Chromosomal unbalanced rearrangements               | 4<br>(1 - 10)      | 3<br>(1 - 9)       | 0<br>(0 - 0)        | 0<br>(0 - 1)         | 0<br>(0 - 0)         | 0<br>(0 - 0)         |
| Other congenital anomalies                          | 14<br>(7 - 30)     | 12<br>(5 - 26)     | 1<br>(0 - 1)        | 1<br>(0 - 2)         | 0<br>(0 - 1)         | 1<br>(0 - 1)         |
| Skin and subcutaneous diseases                      | 16<br>(10 - 24)    | 2<br>(1 - 6)       | 0<br>(0 - 0)        | 3<br>(1 - 5)         | 4<br>(2 - 7)         | 7<br>(4 - 12)        |
| Cellulitis                                          | 6<br>(2 - 13)      | 1<br>(0 - 2)       | 0<br>(0 - 0)        | 1<br>(0 - 3)         | 2<br>(1 - 3)         | 3<br>(1 - 5)         |
| Pyoderma                                            | 8<br>(4 - 14)      | 1<br>(0 - 4)       | 0<br>(0 - 0)        | 1<br>(1 - 3)         | 2<br>(1 - 4)         | 3<br>(1 - 6)         |

Web Table 31- Djibouti deaths with 95% UI by age, sex, and cause in 2013

| Cause                                           | Females, All Ages  | Females, 0-4 Years | Females, 5-14 Years | Females, 15-49 Years | Females, 50-69 Years | Females, 70-80 Years |
|-------------------------------------------------|--------------------|--------------------|---------------------|----------------------|----------------------|----------------------|
| Decubitus ulcer                                 | 2<br>(1 - 4)       | 0<br>(0 - 0)       | 0<br>(0 - 0)        | 0<br>(0 - 0)         | 0<br>(0 - 1)         | 1<br>(1 - 3)         |
| Other skin and subcutaneous diseases            | 0<br>(0 - 1)       | 0<br>(0 - 0)       | 0<br>(0 - 0)        | 0<br>(0 - 0)         | 0<br>(0 - 0)         | 0<br>(0 - 0)         |
| Sudden infant death syndrome                    | 1<br>(0 - 2)       | 1<br>(0 - 2)       | --                  | --                   | --                   | --                   |
| Injuries                                        | 165<br>(117 - 236) | 23<br>(12 - 45)    | 11<br>(7 - 17)      | 57<br>(36 - 92)      | 38<br>(23 - 61)      | 36<br>(23 - 51)      |
| Transport injuries                              | 61<br>(41 - 100)   | 4<br>(2 - 9)       | 4<br>(2 - 8)        | 22<br>(13 - 43)      | 18<br>(11 - 31)      | 11<br>(7 - 18)       |
| Road injuries                                   | 57<br>(38 - 91)    | 4<br>(1 - 8)       | 4<br>(2 - 7)        | 21<br>(13 - 39)      | 18<br>(10 - 29)      | 11<br>(7 - 16)       |
| Pedestrian road injuries                        | 27<br>(14 - 43)    | 2<br>(1 - 4)       | 2<br>(1 - 4)        | 8<br>(4 - 15)        | 9<br>(4 - 16)        | 6<br>(3 - 10)        |
| Cyclist road injuries                           | 2<br>(1 - 4)       | 0<br>(0 - 0)       | 0<br>(0 - 0)        | 0<br>(0 - 1)         | 1<br>(0 - 2)         | 0<br>(0 - 1)         |
| Motorcyclist road injuries                      | 2<br>(1 - 4)       | 0<br>(0 - 0)       | 0<br>(0 - 0)        | 1<br>(0 - 2)         | 0<br>(0 - 1)         | 0<br>(0 - 1)         |
| Motor vehicle road injuries                     | 26<br>(15 - 49)    | 2<br>(1 - 4)       | 2<br>(1 - 3)        | 12<br>(6 - 24)       | 7<br>(3 - 15)        | 4<br>(2 - 8)         |
| Other road injuries                             | 0<br>(0 - 1)       | 0<br>(0 - 0)       | 0<br>(0 - 0)        | 0<br>(0 - 0)         | 0<br>(0 - 0)         | 0<br>(0 - 0)         |
| Other transport injuries                        | 4<br>(2 - 8)       | 0<br>(0 - 1)       | 0<br>(0 - 1)        | 1<br>(0 - 4)         | 1<br>(0 - 2)         | 1<br>(0 - 1)         |
| Unintentional injuries                          | 83<br>(58 - 118)   | 18<br>(9 - 38)     | 6<br>(3 - 10)       | 20<br>(13 - 33)      | 16<br>(9 - 26)       | 22<br>(13 - 34)      |
| Falls                                           | 11<br>(6 - 19)     | 1<br>(0 - 1)       | 0<br>(0 - 1)        | 2<br>(1 - 3)         | 2<br>(1 - 4)         | 6<br>(3 - 12)        |
| Drowning                                        | 12<br>(8 - 21)     | 4<br>(1 - 9)       | 2<br>(1 - 4)        | 4<br>(2 - 7)         | 2<br>(1 - 3)         | 1<br>(0 - 1)         |
| Fire, heat, and hot substances                  | 12<br>(6 - 19)     | 3<br>(1 - 8)       | 1<br>(0 - 2)        | 3<br>(2 - 6)         | 2<br>(1 - 4)         | 2<br>(1 - 4)         |
| Poisonings                                      | 3<br>(2 - 6)       | 1<br>(0 - 1)       | 0<br>(0 - 0)        | 1<br>(1 - 3)         | 1<br>(0 - 2)         | 0<br>(0 - 1)         |
| Exposure to mechanical forces                   | 11<br>(6 - 29)     | 3<br>(1 - 12)      | 1<br>(0 - 3)        | 3<br>(2 - 8)         | 2<br>(1 - 4)         | 1<br>(0 - 2)         |
| Unintentional firearm injuries                  | 2<br>(1 - 3)       | 0<br>(0 - 0)       | 0<br>(0 - 0)        | 1<br>(1 - 2)         | 0<br>(0 - 1)         | 0<br>(0 - 0)         |
| Unintentional suffocation                       | 3<br>(1 - 20)      | 2<br>(0 - 10)      | 0<br>(0 - 2)        | 1<br>(0 - 5)         | 0<br>(0 - 2)         | 0<br>(0 - 1)         |
| Other exposure to mechanical forces             | 5<br>(3 - 9)       | 1<br>(0 - 3)       | 0<br>(0 - 1)        | 1<br>(1 - 3)         | 1<br>(0 - 2)         | 1<br>(0 - 2)         |
| Adverse effects of medical treatment            | 17<br>(9 - 27)     | 2<br>(1 - 5)       | 0<br>(0 - 1)        | 3<br>(2 - 6)         | 4<br>(2 - 9)         | 6<br>(3 - 12)        |
| Animal contact                                  | 7<br>(3 - 16)      | 1<br>(0 - 3)       | 1<br>(0 - 2)        | 2<br>(1 - 6)         | 2<br>(1 - 3)         | 1<br>(0 - 2)         |
| Venomous animal contact                         | 4<br>(2 - 11)      | 1<br>(0 - 3)       | 0<br>(0 - 1)        | 2<br>(1 - 4)         | 1<br>(0 - 2)         | 1<br>(0 - 1)         |
| Non-venomous animal contact                     | 2<br>(1 - 6)       | 0<br>(0 - 1)       | 0<br>(0 - 1)        | 1<br>(0 - 2)         | 1<br>(0 - 2)         | 0<br>(0 - 1)         |
| Foreign body                                    | 9<br>(4 - 17)      | 3<br>(1 - 9)       | 0<br>(0 - 1)        | 1<br>(0 - 2)         | 1<br>(0 - 2)         | 3<br>(1 - 7)         |
| Pulmonary aspiration and foreign body in airway | 8<br>(4 - 17)      | 3<br>(1 - 9)       | 0<br>(0 - 1)        | 1<br>(0 - 2)         | 1<br>(0 - 1)         | 3<br>(1 - 6)         |
| Foreign body in other body part                 | 0<br>(0 - 1)       | 0<br>(0 - 0)       | 0<br>(0 - 0)        | 0<br>(0 - 0)         | 0<br>(0 - 0)         | 0<br>(0 - 0)         |
| Other unintentional injuries                    | 2<br>(1 - 3)       | 0<br>(0 - 1)       | 0<br>(0 - 0)        | 1<br>(0 - 1)         | 0<br>(0 - 1)         | 0<br>(0 - 1)         |
| Self-harm and interpersonal violence            | 21<br>(12 - 36)    | 1<br>(0 - 2)       | 1<br>(0 - 1)        | 14<br>(7 - 26)       | 4<br>(2 - 6)         | 2<br>(1 - 4)         |
| Self-harm                                       | 9<br>(5 - 16)      | --                 | 0<br>(0 - 0)        | 5<br>(3 - 10)        | 2<br>(1 - 5)         | 2<br>(1 - 3)         |
| Interpersonal violence                          | 12<br>(5 - 24)     | 1<br>(0 - 2)       | 1<br>(0 - 1)        | 9<br>(3 - 20)        | 1<br>(0 - 2)         | 0<br>(0 - 1)         |
| Assault by firearm                              | 3<br>(1 - 7)       | 0<br>(0 - 1)       | 0<br>(0 - 0)        | 3<br>(1 - 6)         | 0<br>(0 - 1)         | 0<br>(0 - 0)         |
| Assault by sharp object                         | 3<br>(1 - 7)       | 0<br>(0 - 0)       | 0<br>(0 - 0)        | 3<br>(1 - 6)         | 0<br>(0 - 1)         | 0<br>(0 - 0)         |
| Assault by other means                          | 5<br>(2 - 11)      | 0<br>(0 - 1)       | 0<br>(0 - 1)        | 4<br>(1 - 9)         | 1<br>(0 - 1)         | 0<br>(0 - 0)         |

Web Table 31- Dominica deaths with 95% UI by age, sex, and cause in 2013

| Cause                                                             | Both Sexes, All Ages | Both Sexes, 0-4 Years | Both Sexes, 5-14 Years | Both Sexes, 15-49 Years | Both Sexes, 50-69 Years | Both Sexes, 70-80 Years |
|-------------------------------------------------------------------|----------------------|-----------------------|------------------------|-------------------------|-------------------------|-------------------------|
| All causes                                                        | 511<br>(441 - 594)   | 25<br>(12 - 49)       | 5<br>(3 - 7)           | 66<br>(53 - 81)         | 127<br>(101 - 160)      | 289<br>(257 - 335)      |
| Communicable, maternal, neonatal, and nutritional diseases        | 55<br>(44 - 72)      | 17<br>(8 - 32)        | 1<br>(1 - 1)           | 8<br>(7 - 11)           | 7<br>(5 - 9)            | 22<br>(17 - 27)         |
| HIV/AIDS and tuberculosis                                         | 7<br>(5 - 10)        | 0<br>(0 - 0)          | 0<br>(0 - 0)           | 4<br>(3 - 7)            | 2<br>(1 - 3)            | 1<br>(1 - 1)            |
| Tuberculosis                                                      | 2<br>(1 - 3)         | 0<br>(0 - 0)          | 0<br>(0 - 0)           | 1<br>(0 - 1)            | 1<br>(0 - 1)            | 1<br>(0 - 1)            |
| HIV/AIDS                                                          | 5<br>(4 - 9)         | 0<br>(0 - 0)          | 0<br>(0 - 0)           | 4<br>(3 - 6)            | 1<br>(1 - 2)            | 0<br>(0 - 0)            |
| HIV/AIDS resulting in mycobacterial infection                     | 0<br>(0 - 0)         | 0<br>(0 - 0)          | 0<br>(0 - 0)           | 0<br>(0 - 0)            | 0<br>(0 - 0)            | 0<br>(0 - 0)            |
| HIV/AIDS resulting in other diseases                              | 5<br>(3 - 8)         | 0<br>(0 - 0)          | 0<br>(0 - 0)           | 3<br>(2 - 6)            | 1<br>(1 - 2)            | 0<br>(0 - 0)            |
| Diarrhea, lower respiratory, and other common infectious diseases | 27<br>(22 - 34)      | 4<br>(2 - 8)          | 1<br>(0 - 1)           | 3<br>(2 - 3)            | 4<br>(3 - 5)            | 17<br>(13 - 21)         |
| Diarrheal diseases                                                | 2<br>(2 - 4)         | 1<br>(0 - 2)          | 0<br>(0 - 0)           | 0<br>(0 - 0)            | 0<br>(0 - 0)            | 1<br>(1 - 1)            |
| Intestinal infectious diseases                                    | 1<br>(0 - 1)         | 0<br>(0 - 0)          | 0<br>(0 - 0)           | 0<br>(0 - 0)            | 0<br>(0 - 0)            | 0<br>(0 - 0)            |
| Typhoid fever                                                     | 0<br>(0 - 1)         | 0<br>(0 - 0)          | 0<br>(0 - 0)           | 0<br>(0 - 0)            | 0<br>(0 - 0)            | 0<br>(0 - 0)            |
| Paratyphoid fever                                                 | 0<br>(0 - 0)         | 0<br>(0 - 0)          | 0<br>(0 - 0)           | 0<br>(0 - 0)            | 0<br>(0 - 0)            | 0<br>(0 - 0)            |
| Other intestinal infectious diseases                              | 0<br>(0 - 0)         | 0<br>(0 - 0)          | 0<br>(0 - 0)           | 0<br>(0 - 0)            | 0<br>(0 - 0)            | 0<br>(0 - 0)            |
| Lower respiratory infections                                      | 23<br>(18 - 28)      | 2<br>(1 - 5)          | 0<br>(0 - 0)           | 2<br>(1 - 2)            | 3<br>(2 - 4)            | 15<br>(12 - 20)         |
| Upper respiratory infections                                      | 0<br>(0 - 0)         | 0<br>(0 - 0)          | 0<br>(0 - 0)           | 0<br>(0 - 0)            | 0<br>(0 - 0)            | 0<br>(0 - 0)            |
| Otitis media                                                      | 0<br>(0 - 0)         | 0<br>(0 - 0)          | 0<br>(0 - 0)           | 0<br>(0 - 0)            | 0<br>(0 - 0)            | 0<br>(0 - 0)            |
| Meningitis                                                        | 1<br>(1 - 1)         | 0<br>(0 - 0)          | 0<br>(0 - 0)           | 0<br>(0 - 0)            | 0<br>(0 - 0)            | 0<br>(0 - 0)            |
| Pneumococcal meningitis                                           | 0<br>(0 - 0)         | 0<br>(0 - 0)          | 0<br>(0 - 0)           | 0<br>(0 - 0)            | 0<br>(0 - 0)            | 0<br>(0 - 0)            |
| H influenzae type B meningitis                                    | 0<br>(0 - 0)         | 0<br>(0 - 0)          | 0<br>(0 - 0)           | 0<br>(0 - 0)            | 0<br>(0 - 0)            | 0<br>(0 - 0)            |
| Meningococcal meningitis                                          | 0<br>(0 - 0)         | 0<br>(0 - 0)          | 0<br>(0 - 0)           | 0<br>(0 - 0)            | 0<br>(0 - 0)            | 0<br>(0 - 0)            |
| Other meningitis                                                  | 0<br>(0 - 0)         | 0<br>(0 - 0)          | 0<br>(0 - 0)           | 0<br>(0 - 0)            | 0<br>(0 - 0)            | 0<br>(0 - 0)            |
| Encephalitis                                                      | 1<br>(0 - 1)         | 0<br>(0 - 0)          | 0<br>(0 - 0)           | 0<br>(0 - 0)            | 0<br>(0 - 0)            | 0<br>(0 - 0)            |
| Diphtheria                                                        | 0<br>(0 - 0)         | 0<br>(0 - 0)          | 0<br>(0 - 0)           | 0<br>(0 - 0)            | 0<br>(0 - 0)            | --                      |
| Whooping cough                                                    | 0<br>(0 - 0)         | 0<br>(0 - 0)          | 0<br>(0 - 0)           | 0<br>(0 - 0)            | 0<br>(0 - 0)            | --                      |
| Tetanus                                                           | 0<br>(0 - 0)         | 0<br>(0 - 0)          | 0<br>(0 - 0)           | 0<br>(0 - 0)            | 0<br>(0 - 0)            | 0<br>(0 - 0)            |
| Measles                                                           | 0<br>(0 - 0)         | 0<br>(0 - 0)          | 0<br>(0 - 0)           | 0<br>(0 - 0)            | 0<br>(0 - 0)            | --                      |
| Varicella and herpes zoster                                       | 0<br>(0 - 0)         | 0<br>(0 - 0)          | 0<br>(0 - 0)           | 0<br>(0 - 0)            | 0<br>(0 - 0)            | 0<br>(0 - 0)            |
| Neglected tropical diseases and malaria                           | 0<br>(0 - 0)         | 0<br>(0 - 0)          | 0<br>(0 - 0)           | 0<br>(0 - 0)            | 0<br>(0 - 0)            | 0<br>(0 - 0)            |
| Leishmaniasis                                                     | 0<br>(0 - 0)         | 0<br>(0 - 0)          | 0<br>(0 - 0)           | 0<br>(0 - 0)            | 0<br>(0 - 0)            | 0<br>(0 - 0)            |
| Visceral leishmaniasis                                            | 0<br>(0 - 0)         | 0<br>(0 - 0)          | 0<br>(0 - 0)           | 0<br>(0 - 0)            | 0<br>(0 - 0)            | 0<br>(0 - 0)            |
| Cysticercosis                                                     | 0<br>(0 - 0)         | 0<br>(0 - 0)          | 0<br>(0 - 0)           | 0<br>(0 - 0)            | 0<br>(0 - 0)            | 0<br>(0 - 0)            |
| Cystic echinococcosis                                             | 0<br>(0 - 0)         | 0<br>(0 - 0)          | 0<br>(0 - 0)           | 0<br>(0 - 0)            | 0<br>(0 - 0)            | 0<br>(0 - 0)            |
| Dengue                                                            | 0<br>(0 - 0)         | 0<br>(0 - 0)          | 0<br>(0 - 0)           | 0<br>(0 - 0)            | 0<br>(0 - 0)            | 0<br>(0 - 0)            |
| Rabies                                                            | 0<br>(0 - 0)         | 0<br>(0 - 0)          | 0<br>(0 - 0)           | 0<br>(0 - 0)            | 0<br>(0 - 0)            | 0<br>(0 - 0)            |
| Intestinal nematode infections                                    | 0<br>(0 - 0)         | 0<br>(0 - 0)          | 0<br>(0 - 0)           | 0<br>(0 - 0)            | 0<br>(0 - 0)            | 0<br>(0 - 0)            |
| Ascariasis                                                        | 0<br>(0 - 0)         | 0<br>(0 - 0)          | 0<br>(0 - 0)           | 0<br>(0 - 0)            | 0<br>(0 - 0)            | 0<br>(0 - 0)            |
| Other neglected tropical diseases                                 | 0<br>(0 - 0)         | 0<br>(0 - 0)          | 0<br>(0 - 0)           | 0<br>(0 - 0)            | 0<br>(0 - 0)            | 0<br>(0 - 0)            |
| Maternal disorders                                                | 0<br>(0 - 1)         | --                    | 0<br>(0 - 0)           | 0<br>(0 - 1)            | --                      | --                      |
| Maternal hemorrhage                                               | 0<br>(0 - 0)         | --                    | 0<br>(0 - 0)           | 0<br>(0 - 0)            | --                      | --                      |
| Maternal sepsis and other maternal infections                     | 0<br>(0 - 0)         | --                    | 0<br>(0 - 0)           | 0<br>(0 - 0)            | --                      | --                      |

Web Table 31- Dominica deaths with 95% UI by age, sex, and cause in 2013

| Cause                                                            | Both Sexes, All Ages | Both Sexes, 0-4 Years | Both Sexes, 5-14 Years | Both Sexes, 15-49 Years | Both Sexes, 50-69 Years | Both Sexes, 70-80 Years |
|------------------------------------------------------------------|----------------------|-----------------------|------------------------|-------------------------|-------------------------|-------------------------|
| Maternal hypertensive disorders                                  | 0<br>(0 - 0)         | --                    | 0<br>(0 - 0)           | 0<br>(0 - 0)            | --                      | --                      |
| Maternal obstructed labor                                        | 0<br>(0 - 0)         | --                    | 0<br>(0 - 0)           | 0<br>(0 - 0)            | --                      | --                      |
| Maternal abortive outcome                                        | 0<br>(0 - 0)         | --                    | 0<br>(0 - 0)           | 0<br>(0 - 0)            | --                      | --                      |
| Indirect maternal deaths                                         | 0<br>(0 - 0)         | --                    | 0<br>(0 - 0)           | 0<br>(0 - 0)            | --                      | --                      |
| Late maternal deaths                                             | 0<br>(0 - 0)         | --                    | 0<br>(0 - 0)           | 0<br>(0 - 0)            | --                      | --                      |
| Maternal deaths aggravated by HIV/AIDS                           | 0<br>(0 - 0)         | --                    | --                     | 0<br>(0 - 0)            | --                      | --                      |
| Other maternal disorders                                         | 0<br>(0 - 0)         | --                    | 0<br>(0 - 0)           | 0<br>(0 - 0)            | --                      | --                      |
| Neonatal disorders                                               | 12<br>(5 - 22)       | 12<br>(5 - 22)        | --                     | --                      | --                      | --                      |
| Neonatal preterm birth complications                             | 5<br>(2 - 10)        | 5<br>(2 - 10)         | --                     | --                      | --                      | --                      |
| Neonatal encephalopathy due to birth asphyxia and trauma         | 4<br>(1 - 6)         | 4<br>(1 - 6)          | --                     | --                      | --                      | --                      |
| Neonatal sepsis and other neonatal infections                    | 2<br>(1 - 4)         | 2<br>(1 - 4)          | --                     | --                      | --                      | --                      |
| Hemolytic disease and other neonatal jaundice                    | 0<br>(0 - 0)         | 0<br>(0 - 0)          | --                     | --                      | --                      | --                      |
| Other neonatal disorders                                         | 1<br>(1 - 3)         | 1<br>(1 - 3)          | --                     | --                      | --                      | --                      |
| Nutritional deficiencies                                         | 6<br>(4 - 8)         | 1<br>(0 - 2)          | 0<br>(0 - 0)           | 1<br>(0 - 1)            | 1<br>(1 - 1)            | 4<br>(3 - 5)            |
| Protein-energy malnutrition                                      | 3<br>(2 - 4)         | 1<br>(0 - 2)          | 0<br>(0 - 0)           | 0<br>(0 - 0)            | 0<br>(0 - 0)            | 1<br>(1 - 2)            |
| Iodine deficiency                                                | 0<br>(0 - 0)         | 0<br>(0 - 0)          | 0<br>(0 - 0)           | 0<br>(0 - 0)            | 0<br>(0 - 0)            | 0<br>(0 - 0)            |
| Iron-deficiency anemia                                           | 3<br>(2 - 4)         | 0<br>(0 - 0)          | 0<br>(0 - 0)           | 0<br>(0 - 1)            | 1<br>(0 - 1)            | 2<br>(1 - 3)            |
| Other nutritional deficiencies                                   | 0<br>(0 - 1)         | 0<br>(0 - 0)          | 0<br>(0 - 0)           | 0<br>(0 - 0)            | 0<br>(0 - 0)            | 0<br>(0 - 0)            |
| Other communicable, maternal, neonatal, and nutritional diseases | 1<br>(1 - 2)         | 0<br>(0 - 0)          | 0<br>(0 - 0)           | 0<br>(0 - 1)            | 0<br>(0 - 1)            | 0<br>(0 - 1)            |
| Sexually transmitted diseases excluding HIV                      | 0<br>(0 - 0)         | 0<br>(0 - 0)          | 0<br>(0 - 0)           | 0<br>(0 - 0)            | 0<br>(0 - 0)            | 0<br>(0 - 0)            |
| Syphilis                                                         | 0<br>(0 - 0)         | 0<br>(0 - 0)          | 0<br>(0 - 0)           | 0<br>(0 - 0)            | 0<br>(0 - 0)            | 0<br>(0 - 0)            |
| Chlamydial infection                                             | 0<br>(0 - 0)         | --                    | 0<br>(0 - 0)           | 0<br>(0 - 0)            | 0<br>(0 - 0)            | 0<br>(0 - 0)            |
| Gonococcal infection                                             | 0<br>(0 - 0)         | --                    | 0<br>(0 - 0)           | 0<br>(0 - 0)            | 0<br>(0 - 0)            | 0<br>(0 - 0)            |
| Other sexually transmitted diseases                              | 0<br>(0 - 0)         | --                    | 0<br>(0 - 0)           | 0<br>(0 - 0)            | 0<br>(0 - 0)            | 0<br>(0 - 0)            |
| Hepatitis                                                        | 0<br>(0 - 0)         | 0<br>(0 - 0)          | 0<br>(0 - 0)           | 0<br>(0 - 0)            | 0<br>(0 - 0)            | 0<br>(0 - 0)            |
| Acute hepatitis A                                                | 0<br>(0 - 0)         | 0<br>(0 - 0)          | 0<br>(0 - 0)           | 0<br>(0 - 0)            | 0<br>(0 - 0)            | 0<br>(0 - 0)            |
| Acute hepatitis B                                                | 0<br>(0 - 0)         | 0<br>(0 - 0)          | 0<br>(0 - 0)           | 0<br>(0 - 0)            | 0<br>(0 - 0)            | 0<br>(0 - 0)            |
| Acute hepatitis C                                                | 0<br>(0 - 0)         | --                    | 0<br>(0 - 0)           | 0<br>(0 - 0)            | 0<br>(0 - 0)            | 0<br>(0 - 0)            |
| Other infectious diseases                                        | 1<br>(1 - 2)         | 0<br>(0 - 0)          | 0<br>(0 - 0)           | 0<br>(0 - 1)            | 0<br>(0 - 1)            | 0<br>(0 - 1)            |
| Non-communicable diseases                                        | 414<br>(357 - 490)   | 6<br>(3 - 13)         | 2<br>(1 - 3)           | 36<br>(28 - 44)         | 112<br>(88 - 141)       | 258<br>(229 - 300)      |
| Neoplasms                                                        | 88<br>(71 - 108)     | 0<br>(0 - 1)          | 1<br>(0 - 1)           | 9<br>(7 - 11)           | 28<br>(22 - 36)         | 50<br>(40 - 61)         |
| Esophageal cancer                                                | 2<br>(2 - 3)         | --                    | --                     | 0<br>(0 - 0)            | 1<br>(1 - 1)            | 1<br>(1 - 2)            |
| Stomach cancer                                                   | 5<br>(4 - 7)         | --                    | --                     | 0<br>(0 - 0)            | 2<br>(1 - 2)            | 3<br>(3 - 4)            |
| Liver cancer                                                     | 3<br>(2 - 4)         | --                    | 0<br>(0 - 0)           | 0<br>(0 - 0)            | 1<br>(1 - 2)            | 1<br>(1 - 2)            |
| Liver cancer due to hepatitis B                                  | 1<br>(0 - 1)         | --                    | 0<br>(0 - 0)           | 0<br>(0 - 0)            | 0<br>(0 - 1)            | 0<br>(0 - 0)            |
| Liver cancer due to hepatitis C                                  | 1<br>(1 - 2)         | --                    | 0<br>(0 - 0)           | 0<br>(0 - 0)            | 1<br>(0 - 1)            | 1<br>(1 - 1)            |
| Liver cancer due to alcohol use                                  | 1<br>(0 - 1)         | --                    | --                     | 0<br>(0 - 0)            | 0<br>(0 - 0)            | 0<br>(0 - 1)            |
| Liver cancer due to other causes                                 | 0<br>(0 - 0)         | --                    | 0<br>(0 - 0)           | 0<br>(0 - 0)            | 0<br>(0 - 0)            | 0<br>(0 - 0)            |
| Larynx cancer                                                    | 1<br>(1 - 1)         | --                    | --                     | 0<br>(0 - 0)            | 0<br>(0 - 1)            | 0<br>(0 - 1)            |
| Tracheal, bronchus and lung cancer                               | 9<br>(7 - 11)        | --                    | --                     | 1<br>(1 - 1)            | 4<br>(3 - 5)            | 4<br>(3 - 5)            |

Web Table 31- Dominica deaths with 95% UI by age, sex, and cause in 2013

| Cause                                         | Both Sexes, All Ages | Both Sexes, 0-4 Years | Both Sexes, 5-14 Years | Both Sexes, 15-49 Years | Both Sexes, 50-69 Years | Both Sexes, 70-80 Years |
|-----------------------------------------------|----------------------|-----------------------|------------------------|-------------------------|-------------------------|-------------------------|
| Breast cancer                                 | 7<br>(5 - 10)        | --                    | --                     | 1<br>(1 - 2)            | 3<br>(2 - 4)            | 3<br>(2 - 4)            |
| Cervical cancer                               | 4<br>(3 - 5)         | --                    | --                     | 1<br>(1 - 1)            | 1<br>(1 - 2)            | 2<br>(1 - 2)            |
| Uterine cancer                                | 2<br>(1 - 2)         | --                    | --                     | 0<br>(0 - 0)            | 1<br>(0 - 1)            | 1<br>(1 - 1)            |
| Prostate cancer                               | 22<br>(12 - 31)      | --                    | --                     | 0<br>(0 - 0)            | 4<br>(2 - 6)            | 18<br>(10 - 26)         |
| Colon and rectum cancer                       | 9<br>(7 - 11)        | --                    | --                     | 1<br>(1 - 1)            | 3<br>(2 - 4)            | 5<br>(4 - 7)            |
| Lip and oral cavity cancer                    | 1<br>(1 - 2)         | --                    | --                     | 0<br>(0 - 0)            | 0<br>(0 - 1)            | 1<br>(0 - 1)            |
| Nasopharynx cancer                            | 0<br>(0 - 0)         | --                    | 0<br>(0 - 0)           | 0<br>(0 - 0)            | 0<br>(0 - 0)            | 0<br>(0 - 0)            |
| Other pharynx cancer                          | 1<br>(0 - 1)         | --                    | --                     | 0<br>(0 - 0)            | 0<br>(0 - 0)            | 0<br>(0 - 0)            |
| Gallbladder and biliary tract cancer          | 1<br>(1 - 2)         | --                    | --                     | 0<br>(0 - 0)            | 0<br>(0 - 1)            | 1<br>(0 - 1)            |
| Pancreatic cancer                             | 4<br>(3 - 5)         | --                    | --                     | 0<br>(0 - 0)            | 1<br>(1 - 2)            | 2<br>(2 - 3)            |
| Malignant skin melanoma                       | 0<br>(0 - 1)         | --                    | --                     | 0<br>(0 - 0)            | 0<br>(0 - 0)            | 0<br>(0 - 0)            |
| Non-melanoma skin cancer                      | 0<br>(0 - 0)         | --                    | --                     | 0<br>(0 - 0)            | 0<br>(0 - 0)            | 0<br>(0 - 0)            |
| Ovarian cancer                                | 2<br>(1 - 2)         | --                    | --                     | 0<br>(0 - 0)            | 1<br>(0 - 1)            | 1<br>(1 - 1)            |
| Testicular cancer                             | 0<br>(0 - 0)         | --                    | --                     | 0<br>(0 - 0)            | 0<br>(0 - 0)            | 0<br>(0 - 0)            |
| Kidney cancer                                 | 1<br>(1 - 2)         | 0<br>(0 - 0)          | 0<br>(0 - 0)           | 0<br>(0 - 0)            | 1<br>(0 - 1)            | 1<br>(0 - 1)            |
| Bladder cancer                                | 1<br>(1 - 2)         | --                    | --                     | 0<br>(0 - 0)            | 0<br>(0 - 0)            | 1<br>(1 - 1)            |
| Brain and nervous system cancer               | 1<br>(0 - 1)         | 0<br>(0 - 0)          | 0<br>(0 - 0)           | 0<br>(0 - 0)            | 0<br>(0 - 1)            | 0<br>(0 - 0)            |
| Thyroid cancer                                | 0<br>(0 - 0)         | --                    | 0<br>(0 - 0)           | 0<br>(0 - 0)            | 0<br>(0 - 0)            | 0<br>(0 - 0)            |
| Mesothelioma                                  | 0<br>(0 - 0)         | --                    | --                     | 0<br>(0 - 0)            | 0<br>(0 - 0)            | 0<br>(0 - 0)            |
| Hodgkin lymphoma                              | 0<br>(0 - 0)         | 0<br>(0 - 0)          | 0<br>(0 - 0)           | 0<br>(0 - 0)            | 0<br>(0 - 0)            | 0<br>(0 - 0)            |
| Non-Hodgkin lymphoma                          | 3<br>(2 - 4)         | 0<br>(0 - 0)          | 0<br>(0 - 0)           | 1<br>(1 - 1)            | 1<br>(1 - 1)            | 1<br>(1 - 1)            |
| Multiple myeloma                              | 1<br>(1 - 2)         | --                    | --                     | 0<br>(0 - 0)            | 1<br>(0 - 1)            | 1<br>(0 - 1)            |
| Leukemia                                      | 2<br>(2 - 2)         | 0<br>(0 - 0)          | 0<br>(0 - 0)           | 1<br>(0 - 1)            | 1<br>(0 - 1)            | 1<br>(1 - 1)            |
| Other neoplasms                               | 4<br>(3 - 5)         | 0<br>(0 - 0)          | 0<br>(0 - 0)           | 1<br>(1 - 1)            | 1<br>(1 - 2)            | 2<br>(1 - 2)            |
| Cardiovascular diseases                       | 171<br>(147 - 203)   | 0<br>(0 - 1)          | 0<br>(0 - 1)           | 11<br>(8 - 14)          | 43<br>(34 - 55)         | 116<br>(102 - 136)      |
| Rheumatic heart disease                       | 1<br>(1 - 1)         | 0<br>(0 - 0)          | 0<br>(0 - 0)           | 0<br>(0 - 0)            | 0<br>(0 - 0)            | 0<br>(0 - 0)            |
| Ischemic heart disease                        | 68<br>(56 - 84)      | 0<br>(0 - 0)          | 0<br>(0 - 0)           | 5<br>(4 - 6)            | 19<br>(15 - 25)         | 44<br>(36 - 54)         |
| Cerebrovascular disease                       | 62<br>(51 - 76)      | 0<br>(0 - 0)          | 0<br>(0 - 0)           | 3<br>(2 - 4)            | 15<br>(11 - 19)         | 44<br>(36 - 53)         |
| Ischemic stroke                               | 39<br>(30 - 48)      | 0<br>(0 - 0)          | 0<br>(0 - 0)           | 1<br>(1 - 1)            | 8<br>(6 - 10)           | 30<br>(23 - 37)         |
| Hemorrhagic stroke                            | 23<br>(18 - 30)      | 0<br>(0 - 0)          | 0<br>(0 - 0)           | 2<br>(2 - 3)            | 7<br>(5 - 9)            | 14<br>(11 - 19)         |
| Hypertensive heart disease                    | 20<br>(15 - 28)      | 0<br>(0 - 0)          | 0<br>(0 - 0)           | 1<br>(1 - 1)            | 4<br>(3 - 6)            | 15<br>(11 - 21)         |
| Cardiomyopathy and myocarditis                | 6<br>(4 - 7)         | 0<br>(0 - 0)          | 0<br>(0 - 0)           | 1<br>(1 - 1)            | 2<br>(1 - 2)            | 3<br>(2 - 4)            |
| Atrial fibrillation and flutter               | 3<br>(2 - 4)         | --                    | --                     | 0<br>(0 - 0)            | 0<br>(0 - 1)            | 2<br>(2 - 3)            |
| Aortic aneurysm                               | 2<br>(2 - 3)         | --                    | --                     | 0<br>(0 - 0)            | 1<br>(0 - 1)            | 1<br>(1 - 2)            |
| Peripheral vascular disease                   | 2<br>(1 - 2)         | --                    | --                     | 0<br>(0 - 0)            | 0<br>(0 - 0)            | 1<br>(1 - 2)            |
| Endocarditis                                  | 1<br>(0 - 1)         | 0<br>(0 - 0)          | 0<br>(0 - 0)           | 0<br>(0 - 0)            | 0<br>(0 - 0)            | 0<br>(0 - 0)            |
| Other cardiovascular and circulatory diseases | 7<br>(5 - 9)         | 0<br>(0 - 0)          | 0<br>(0 - 0)           | 1<br>(1 - 1)            | 2<br>(1 - 3)            | 4<br>(3 - 6)            |
| Chronic respiratory diseases                  | 17<br>(14 - 22)      | 0<br>(0 - 1)          | 0<br>(0 - 0)           | 1<br>(1 - 2)            | 4<br>(3 - 5)            | 12<br>(10 - 15)         |
| Chronic obstructive pulmonary disease         | 12<br>(10 - 16)      | 0<br>(0 - 0)          | 0<br>(0 - 0)           | 1<br>(0 - 1)            | 2<br>(2 - 3)            | 9<br>(8 - 12)           |
| Pneumoconiosis                                | 1<br>(0 - 1)         | 0<br>(0 - 0)          | 0<br>(0 - 0)           | 0<br>(0 - 0)            | 0<br>(0 - 0)            | 0<br>(0 - 0)            |



Web Table 31- Dominica deaths with 95% UI by age, sex, and cause in 2013

| Cause                                               | Both Sexes, All Ages | Both Sexes, 0-4 Years | Both Sexes, 5-14 Years | Both Sexes, 15-49 Years | Both Sexes, 50-69 Years | Both Sexes, 70-80 Years |
|-----------------------------------------------------|----------------------|-----------------------|------------------------|-------------------------|-------------------------|-------------------------|
| Silicosis                                           | 0<br>(0 - 0)         | 0<br>(0 - 0)          | 0<br>(0 - 0)           | 0<br>(0 - 0)            | 0<br>(0 - 0)            | 0<br>(0 - 0)            |
| Asbestosis                                          | 0<br>(0 - 0)         | 0<br>(0 - 0)          | 0<br>(0 - 0)           | 0<br>(0 - 0)            | 0<br>(0 - 0)            | 0<br>(0 - 0)            |
| Coal workers pneumoconiosis                         | 0<br>(0 - 0)         | 0<br>(0 - 0)          | 0<br>(0 - 0)           | 0<br>(0 - 0)            | 0<br>(0 - 0)            | 0<br>(0 - 0)            |
| Other pneumoconiosis                                | 0<br>(0 - 0)         | 0<br>(0 - 0)          | 0<br>(0 - 0)           | 0<br>(0 - 0)            | 0<br>(0 - 0)            | 0<br>(0 - 0)            |
| Asthma                                              | 3<br>(2 - 4)         | 0<br>(0 - 0)          | 0<br>(0 - 0)           | 1<br>(0 - 1)            | 1<br>(1 - 1)            | 1<br>(1 - 2)            |
| Interstitial lung disease and pulmonary sarcoidosis | 1<br>(1 - 2)         | 0<br>(0 - 0)          | 0<br>(0 - 0)           | 0<br>(0 - 0)            | 0<br>(0 - 0)            | 1<br>(0 - 1)            |
| Other chronic respiratory diseases                  | 0<br>(0 - 1)         | 0<br>(0 - 0)          | 0<br>(0 - 0)           | 0<br>(0 - 0)            | 0<br>(0 - 0)            | 0<br>(0 - 0)            |
| Cirrhosis                                           | 9<br>(7 - 12)        | 0<br>(0 - 0)          | 0<br>(0 - 0)           | 2<br>(2 - 3)            | 4<br>(3 - 6)            | 2<br>(2 - 3)            |
| Cirrhosis due to hepatitis B                        | 1<br>(0 - 1)         | 0<br>(0 - 0)          | 0<br>(0 - 0)           | 0<br>(0 - 0)            | 0<br>(0 - 1)            | 0<br>(0 - 0)            |
| Cirrhosis due to hepatitis C                        | 3<br>(2 - 4)         | 0<br>(0 - 0)          | 0<br>(0 - 0)           | 1<br>(0 - 1)            | 1<br>(1 - 2)            | 1<br>(1 - 1)            |
| Cirrhosis due to alcohol use                        | 4<br>(3 - 6)         | --                    | --                     | 1<br>(1 - 1)            | 2<br>(1 - 3)            | 1<br>(1 - 2)            |
| Cirrhosis due to other causes                       | 1<br>(1 - 2)         | 0<br>(0 - 0)          | 0<br>(0 - 0)           | 1<br>(0 - 1)            | 1<br>(0 - 1)            | 0<br>(0 - 0)            |
| Digestive diseases                                  | 11<br>(9 - 13)       | 0<br>(0 - 0)          | 0<br>(0 - 0)           | 2<br>(1 - 2)            | 3<br>(2 - 4)            | 6<br>(5 - 7)            |
| Peptic ulcer disease                                | 3<br>(2 - 4)         | 0<br>(0 - 0)          | 0<br>(0 - 0)           | 0<br>(0 - 1)            | 1<br>(1 - 1)            | 1<br>(1 - 2)            |
| Gastritis and duodenitis                            | 1<br>(0 - 1)         | 0<br>(0 - 0)          | 0<br>(0 - 0)           | 0<br>(0 - 0)            | 0<br>(0 - 0)            | 0<br>(0 - 1)            |
| Appendicitis                                        | 0<br>(0 - 1)         | 0<br>(0 - 0)          | 0<br>(0 - 0)           | 0<br>(0 - 0)            | 0<br>(0 - 0)            | 0<br>(0 - 0)            |
| Paralytic ileus and intestinal obstruction          | 1<br>(1 - 2)         | 0<br>(0 - 0)          | 0<br>(0 - 0)           | 0<br>(0 - 0)            | 0<br>(0 - 1)            | 1<br>(0 - 1)            |
| Inguinal, femoral, and abdominal hernia             | 1<br>(0 - 1)         | 0<br>(0 - 0)          | 0<br>(0 - 0)           | 0<br>(0 - 0)            | 0<br>(0 - 0)            | 0<br>(0 - 1)            |
| Inflammatory bowel disease                          | 1<br>(1 - 1)         | 0<br>(0 - 0)          | 0<br>(0 - 0)           | 0<br>(0 - 0)            | 0<br>(0 - 0)            | 1<br>(0 - 1)            |
| Vascular intestinal disorders                       | 0<br>(0 - 1)         | 0<br>(0 - 0)          | 0<br>(0 - 0)           | 0<br>(0 - 0)            | 0<br>(0 - 0)            | 0<br>(0 - 0)            |
| Gallbladder and biliary diseases                    | 1<br>(1 - 1)         | 0<br>(0 - 0)          | 0<br>(0 - 0)           | 0<br>(0 - 0)            | 0<br>(0 - 0)            | 0<br>(0 - 1)            |
| Pancreatitis                                        | 1<br>(1 - 1)         | 0<br>(0 - 0)          | 0<br>(0 - 0)           | 0<br>(0 - 0)            | 0<br>(0 - 0)            | 0<br>(0 - 0)            |
| Other digestive diseases                            | 2<br>(1 - 2)         | 0<br>(0 - 0)          | 0<br>(0 - 0)           | 0<br>(0 - 0)            | 0<br>(0 - 1)            | 1<br>(1 - 2)            |
| Neurological disorders                              | 26<br>(22 - 32)      | 0<br>(0 - 0)          | 0<br>(0 - 0)           | 1<br>(1 - 1)            | 2<br>(2 - 3)            | 23<br>(19 - 28)         |
| Alzheimer disease and other dementias               | 23<br>(18 - 28)      | --                    | --                     | 0<br>(0 - 0)            | 1<br>(1 - 2)            | 21<br>(17 - 26)         |
| Parkinson disease                                   | 1<br>(1 - 2)         | --                    | --                     | 0<br>(0 - 0)            | 0<br>(0 - 0)            | 1<br>(1 - 2)            |
| Epilepsy                                            | 2<br>(1 - 2)         | 0<br>(0 - 0)          | 0<br>(0 - 0)           | 1<br>(1 - 1)            | 0<br>(0 - 0)            | 0<br>(0 - 0)            |
| Multiple sclerosis                                  | 0<br>(0 - 0)         | --                    | --                     | 0<br>(0 - 0)            | 0<br>(0 - 0)            | 0<br>(0 - 0)            |
| Other neurological disorders                        | 1<br>(1 - 1)         | 0<br>(0 - 0)          | 0<br>(0 - 0)           | 0<br>(0 - 0)            | 0<br>(0 - 0)            | 0<br>(0 - 0)            |
| Mental and substance use disorders                  | 2<br>(1 - 3)         | 0<br>(0 - 0)          | 0<br>(0 - 0)           | 1<br>(0 - 1)            | 1<br>(0 - 1)            | 1<br>(0 - 1)            |
| Schizophrenia                                       | 0<br>(0 - 0)         | --                    | --                     | 0<br>(0 - 0)            | 0<br>(0 - 0)            | 0<br>(0 - 0)            |
| Alcohol use disorders                               | 1<br>(1 - 2)         | --                    | --                     | 0<br>(0 - 1)            | 1<br>(0 - 1)            | 0<br>(0 - 0)            |
| Drug use disorders                                  | 1<br>(0 - 1)         | 0<br>(0 - 0)          | --                     | 0<br>(0 - 0)            | 0<br>(0 - 0)            | 0<br>(0 - 0)            |
| Opioid use disorders                                | 0<br>(0 - 0)         | 0<br>(0 - 0)          | --                     | 0<br>(0 - 0)            | 0<br>(0 - 0)            | 0<br>(0 - 0)            |
| Cocaine use disorders                               | 0<br>(0 - 0)         | 0<br>(0 - 0)          | --                     | 0<br>(0 - 0)            | 0<br>(0 - 0)            | 0<br>(0 - 0)            |
| Amphetamine use disorders                           | 0<br>(0 - 0)         | 0<br>(0 - 0)          | --                     | 0<br>(0 - 0)            | 0<br>(0 - 0)            | 0<br>(0 - 0)            |
| Other drug use disorders                            | 0<br>(0 - 1)         | 0<br>(0 - 0)          | --                     | 0<br>(0 - 0)            | 0<br>(0 - 0)            | 0<br>(0 - 0)            |
| Eating disorders                                    | 0<br>(0 - 0)         | --                    | 0<br>(0 - 0)           | 0<br>(0 - 0)            | --                      | --                      |
| Anorexia nervosa                                    | 0<br>(0 - 0)         | --                    | 0<br>(0 - 0)           | 0<br>(0 - 0)            | --                      | --                      |
| Diabetes, urogenital, blood, and endocrine diseases | 77<br>(62 - 104)     | 1<br>(0 - 1)          | 0<br>(0 - 1)           | 7<br>(5 - 11)           | 24<br>(18 - 33)         | 45<br>(37 - 58)         |

Web Table 31- Dominica deaths with 95% UI by age, sex, and cause in 2013

| Cause                                               | Both Sexes, All Ages | Both Sexes, 0-4 Years | Both Sexes, 5-14 Years | Both Sexes, 15-49 Years | Both Sexes, 50-69 Years | Both Sexes, 70-80 Years |
|-----------------------------------------------------|----------------------|-----------------------|------------------------|-------------------------|-------------------------|-------------------------|
| Diabetes mellitus                                   | 50<br>(41 - 61)      | 0<br>(0 - 0)          | 0<br>(0 - 0)           | 3<br>(2 - 4)            | 17<br>(13 - 22)         | 30<br>(25 - 36)         |
| Acute glomerulonephritis                            | 0<br>(0 - 0)         | 0<br>(0 - 0)          | 0<br>(0 - 0)           | 0<br>(0 - 0)            | 0<br>(0 - 0)            | 0<br>(0 - 0)            |
| Chronic kidney disease                              | 18<br>(12 - 42)      | 0<br>(0 - 0)          | 0<br>(0 - 0)           | 2<br>(2 - 6)            | 5<br>(3 - 12)           | 10<br>(7 - 23)          |
| Chronic kidney disease due to diabetes mellitus     | 3<br>(2 - 7)         | 0<br>(0 - 0)          | 0<br>(0 - 0)           | 0<br>(0 - 1)            | 1<br>(1 - 3)            | 1<br>(1 - 3)            |
| Chronic kidney disease due to hypertension          | 9<br>(6 - 16)        | 0<br>(0 - 0)          | 0<br>(0 - 0)           | 1<br>(1 - 2)            | 2<br>(1 - 4)            | 5<br>(4 - 10)           |
| Chronic kidney disease due to glomerulonephritis    | 0<br>(0 - 1)         | 0<br>(0 - 0)          | 0<br>(0 - 0)           | 0<br>(0 - 0)            | 0<br>(0 - 0)            | 0<br>(0 - 0)            |
| Chronic kidney disease due to other causes          | 6<br>(3 - 20)        | 0<br>(0 - 0)          | 0<br>(0 - 0)           | 1<br>(0 - 3)            | 1<br>(1 - 5)            | 3<br>(1 - 11)           |
| Urinary diseases and male infertility               | 3<br>(2 - 4)         | 0<br>(0 - 0)          | 0<br>(0 - 0)           | 0<br>(0 - 0)            | 1<br>(0 - 1)            | 2<br>(2 - 3)            |
| Interstitial nephritis and urinary tract infections | 3<br>(2 - 3)         | 0<br>(0 - 0)          | 0<br>(0 - 0)           | 0<br>(0 - 0)            | 1<br>(0 - 1)            | 2<br>(1 - 2)            |
| Urolithiasis                                        | 0<br>(0 - 0)         | --                    | 0<br>(0 - 0)           | 0<br>(0 - 0)            | 0<br>(0 - 0)            | 0<br>(0 - 0)            |
| Other urinary diseases                              | 1<br>(0 - 1)         | 0<br>(0 - 0)          | 0<br>(0 - 0)           | 0<br>(0 - 0)            | 0<br>(0 - 0)            | 0<br>(0 - 1)            |
| Gynecological diseases                              | 0<br>(0 - 0)         | --                    | --                     | 0<br>(0 - 0)            | 0<br>(0 - 0)            | 0<br>(0 - 0)            |
| Uterine fibroids                                    | 0<br>(0 - 0)         | --                    | --                     | 0<br>(0 - 0)            | 0<br>(0 - 0)            | 0<br>(0 - 0)            |
| Polycystic ovarian syndrome                         | 0<br>(0 - 0)         | --                    | --                     | 0<br>(0 - 0)            | 0<br>(0 - 0)            | --                      |
| Endometriosis                                       | 0<br>(0 - 0)         | --                    | --                     | 0<br>(0 - 0)            | 0<br>(0 - 0)            | --                      |
| Genital prolapse                                    | 0<br>(0 - 0)         | --                    | --                     | 0<br>(0 - 0)            | 0<br>(0 - 0)            | 0<br>(0 - 0)            |
| Other gynecological diseases                        | 0<br>(0 - 0)         | --                    | --                     | 0<br>(0 - 0)            | 0<br>(0 - 0)            | 0<br>(0 - 0)            |
| Hemoglobinopathies and hemolytic anemias            | 1<br>(1 - 2)         | 0<br>(0 - 0)          | 0<br>(0 - 0)           | 0<br>(0 - 1)            | 0<br>(0 - 0)            | 0<br>(0 - 0)            |
| Thalassemias                                        | 0<br>(0 - 0)         | 0<br>(0 - 0)          | 0<br>(0 - 0)           | 0<br>(0 - 0)            | 0<br>(0 - 0)            | 0<br>(0 - 0)            |
| Sickle cell disorders                               | 1<br>(1 - 1)         | 0<br>(0 - 0)          | 0<br>(0 - 0)           | 0<br>(0 - 1)            | 0<br>(0 - 0)            | 0<br>(0 - 0)            |
| G6PD deficiency                                     | 0<br>(0 - 0)         | 0<br>(0 - 0)          | 0<br>(0 - 0)           | 0<br>(0 - 0)            | 0<br>(0 - 0)            | 0<br>(0 - 0)            |
| Other hemoglobinopathies and hemolytic anemias      | 0<br>(0 - 0)         | 0<br>(0 - 0)          | 0<br>(0 - 0)           | 0<br>(0 - 0)            | 0<br>(0 - 0)            | 0<br>(0 - 0)            |
| Endocrine, metabolic, blood, and immune disorders   | 4<br>(3 - 8)         | 0<br>(0 - 1)          | 0<br>(0 - 0)           | 1<br>(1 - 2)            | 1<br>(1 - 2)            | 2<br>(1 - 4)            |
| Musculoskeletal disorders                           | 2<br>(1 - 2)         | --                    | 0<br>(0 - 0)           | 1<br>(0 - 1)            | 0<br>(0 - 1)            | 1<br>(0 - 1)            |
| Rheumatoid arthritis                                | 0<br>(0 - 0)         | --                    | 0<br>(0 - 0)           | 0<br>(0 - 0)            | 0<br>(0 - 0)            | 0<br>(0 - 0)            |
| Other musculoskeletal disorders                     | 2<br>(1 - 2)         | --                    | 0<br>(0 - 0)           | 1<br>(0 - 1)            | 0<br>(0 - 0)            | 1<br>(0 - 1)            |
| Other non-communicable diseases                     | 10<br>(7 - 16)       | 4<br>(2 - 9)          | 0<br>(0 - 1)           | 1<br>(1 - 1)            | 1<br>(0 - 1)            | 4<br>(1 - 5)            |
| Congenital anomalies                                | 5<br>(3 - 9)         | 4<br>(2 - 8)          | 0<br>(0 - 1)           | 1<br>(0 - 1)            | 0<br>(0 - 0)            | 0<br>(0 - 0)            |
| Neural tube defects                                 | 0<br>(0 - 0)         | 0<br>(0 - 0)          | 0<br>(0 - 0)           | 0<br>(0 - 0)            | 0<br>(0 - 0)            | 0<br>(0 - 0)            |
| Congenital heart anomalies                          | 3<br>(2 - 5)         | 2<br>(1 - 4)          | 0<br>(0 - 0)           | 0<br>(0 - 0)            | 0<br>(0 - 0)            | 0<br>(0 - 0)            |
| Cleft lip and cleft palate                          | 0<br>(0 - 0)         | 0<br>(0 - 0)          | --                     | --                      | --                      | --                      |
| Down syndrome                                       | 0<br>(0 - 0)         | 0<br>(0 - 0)          | 0<br>(0 - 0)           | 0<br>(0 - 0)            | 0<br>(0 - 0)            | 0<br>(0 - 0)            |
| Chromosomal unbalanced rearrangements               | 0<br>(0 - 0)         | 0<br>(0 - 0)          | 0<br>(0 - 0)           | 0<br>(0 - 0)            | 0<br>(0 - 0)            | 0<br>(0 - 0)            |
| Other congenital anomalies                          | 2<br>(1 - 4)         | 2<br>(1 - 3)          | 0<br>(0 - 0)           | 0<br>(0 - 0)            | 0<br>(0 - 0)            | 0<br>(0 - 0)            |
| Skin and subcutaneous diseases                      | 4<br>(1 - 6)         | 0<br>(0 - 0)          | 0<br>(0 - 0)           | 0<br>(0 - 0)            | 1<br>(0 - 1)            | 4<br>(1 - 5)            |
| Cellulitis                                          | 0<br>(0 - 0)         | 0<br>(0 - 0)          | 0<br>(0 - 0)           | 0<br>(0 - 0)            | 0<br>(0 - 0)            | 0<br>(0 - 0)            |
| Pyoderma                                            | 1<br>(0 - 1)         | 0<br>(0 - 0)          | 0<br>(0 - 0)           | 0<br>(0 - 0)            | 0<br>(0 - 0)            | 1<br>(0 - 1)            |
| Decubitus ulcer                                     | 3<br>(1 - 4)         | 0<br>(0 - 0)          | 0<br>(0 - 0)           | 0<br>(0 - 0)            | 0<br>(0 - 0)            | 3<br>(1 - 4)            |
| Other skin and subcutaneous diseases                | 0<br>(0 - 0)         | 0<br>(0 - 0)          | 0<br>(0 - 0)           | 0<br>(0 - 0)            | 0<br>(0 - 0)            | 0<br>(0 - 0)            |
| Sudden infant death syndrome                        | 1<br>(0 - 2)         | 1<br>(0 - 2)          | --                     | --                      | --                      | --                      |

Web Table 31- Dominica deaths with 95% UI by age, sex, and cause in 2013

| Cause                                           | Both Sexes, All Ages | Both Sexes, 0-4 Years | Both Sexes, 5-14 Years | Both Sexes, 15-49 Years | Both Sexes, 50-69 Years | Both Sexes, 70-80 Years |
|-------------------------------------------------|----------------------|-----------------------|------------------------|-------------------------|-------------------------|-------------------------|
| Injuries                                        | 42<br>(32 - 52)      | 2<br>(1 - 4)          | 2<br>(1 - 3)           | 22<br>(16 - 28)         | 8<br>(6 - 11)           | 8<br>(6 - 10)           |
| Transport injuries                              | 11<br>(9 - 14)       | 0<br>(0 - 1)          | 1<br>(0 - 1)           | 6<br>(4 - 7)            | 2<br>(2 - 3)            | 2<br>(1 - 2)            |
| Road injuries                                   | 10<br>(8 - 13)       | 0<br>(0 - 1)          | 1<br>(0 - 1)           | 5<br>(4 - 7)            | 2<br>(2 - 3)            | 2<br>(1 - 2)            |
| Pedestrian road injuries                        | 3<br>(2 - 4)         | 0<br>(0 - 0)          | 0<br>(0 - 0)           | 1<br>(1 - 1)            | 1<br>(0 - 1)            | 1<br>(0 - 1)            |
| Cyclist road injuries                           | 1<br>(0 - 1)         | 0<br>(0 - 0)          | 0<br>(0 - 0)           | 0<br>(0 - 0)            | 0<br>(0 - 0)            | 0<br>(0 - 0)            |
| Motorcyclist road injuries                      | 1<br>(1 - 1)         | 0<br>(0 - 0)          | 0<br>(0 - 0)           | 1<br>(0 - 1)            | 0<br>(0 - 0)            | 0<br>(0 - 0)            |
| Motor vehicle road injuries                     | 6<br>(4 - 7)         | 0<br>(0 - 0)          | 0<br>(0 - 1)           | 3<br>(2 - 4)            | 1<br>(1 - 2)            | 1<br>(1 - 1)            |
| Other road injuries                             | 0<br>(0 - 0)         | 0<br>(0 - 0)          | 0<br>(0 - 0)           | 0<br>(0 - 0)            | 0<br>(0 - 0)            | 0<br>(0 - 0)            |
| Other transport injuries                        | 1<br>(0 - 1)         | 0<br>(0 - 0)          | 0<br>(0 - 0)           | 0<br>(0 - 1)            | 0<br>(0 - 0)            | 0<br>(0 - 0)            |
| Unintentional injuries                          | 16<br>(12 - 21)      | 1<br>(1 - 3)          | 1<br>(0 - 1)           | 6<br>(4 - 7)            | 3<br>(2 - 4)            | 5<br>(4 - 7)            |
| Falls                                           | 3<br>(2 - 4)         | 0<br>(0 - 0)          | 0<br>(0 - 0)           | 1<br>(0 - 1)            | 1<br>(0 - 1)            | 2<br>(1 - 2)            |
| Drowning                                        | 4<br>(2 - 5)         | 0<br>(0 - 0)          | 0<br>(0 - 1)           | 2<br>(1 - 3)            | 1<br>(0 - 1)            | 0<br>(0 - 0)            |
| Fire, heat, and hot substances                  | 2<br>(1 - 2)         | 0<br>(0 - 0)          | 0<br>(0 - 0)           | 0<br>(0 - 0)            | 0<br>(0 - 0)            | 1<br>(0 - 1)            |
| Poisonings                                      | 0<br>(0 - 0)         | 0<br>(0 - 0)          | 0<br>(0 - 0)           | 0<br>(0 - 0)            | 0<br>(0 - 0)            | 0<br>(0 - 0)            |
| Exposure to mechanical forces                   | 2<br>(2 - 3)         | 0<br>(0 - 0)          | 0<br>(0 - 0)           | 2<br>(1 - 2)            | 0<br>(0 - 1)            | 0<br>(0 - 0)            |
| Unintentional firearm injuries                  | 1<br>(1 - 2)         | 0<br>(0 - 0)          | 0<br>(0 - 0)           | 1<br>(0 - 1)            | 0<br>(0 - 0)            | 0<br>(0 - 0)            |
| Unintentional suffocation                       | 0<br>(0 - 0)         | 0<br>(0 - 0)          | 0<br>(0 - 0)           | 0<br>(0 - 0)            | 0<br>(0 - 0)            | 0<br>(0 - 0)            |
| Other exposure to mechanical forces             | 1<br>(1 - 1)         | 0<br>(0 - 0)          | 0<br>(0 - 0)           | 1<br>(0 - 1)            | 0<br>(0 - 0)            | 0<br>(0 - 0)            |
| Adverse effects of medical treatment            | 2<br>(1 - 3)         | 0<br>(0 - 0)          | 0<br>(0 - 0)           | 0<br>(0 - 0)            | 0<br>(0 - 1)            | 1<br>(1 - 2)            |
| Animal contact                                  | 0<br>(0 - 0)         | 0<br>(0 - 0)          | 0<br>(0 - 0)           | 0<br>(0 - 0)            | 0<br>(0 - 0)            | 0<br>(0 - 0)            |
| Venomous animal contact                         | 0<br>(0 - 0)         | 0<br>(0 - 0)          | 0<br>(0 - 0)           | 0<br>(0 - 0)            | 0<br>(0 - 0)            | 0<br>(0 - 0)            |
| Non-venomous animal contact                     | 0<br>(0 - 0)         | 0<br>(0 - 0)          | 0<br>(0 - 0)           | 0<br>(0 - 0)            | 0<br>(0 - 0)            | 0<br>(0 - 0)            |
| Foreign body                                    | 3<br>(2 - 4)         | 1<br>(0 - 1)          | 0<br>(0 - 0)           | 0<br>(0 - 1)            | 0<br>(0 - 1)            | 1<br>(1 - 1)            |
| Pulmonary aspiration and foreign body in airway | 2<br>(2 - 4)         | 1<br>(0 - 1)          | 0<br>(0 - 0)           | 0<br>(0 - 1)            | 0<br>(0 - 1)            | 1<br>(1 - 1)            |
| Foreign body in other body part                 | 0<br>(0 - 0)         | 0<br>(0 - 0)          | 0<br>(0 - 0)           | 0<br>(0 - 0)            | 0<br>(0 - 0)            | 0<br>(0 - 0)            |
| Other unintentional injuries                    | 0<br>(0 - 1)         | 0<br>(0 - 0)          | 0<br>(0 - 0)           | 0<br>(0 - 0)            | 0<br>(0 - 0)            | 0<br>(0 - 0)            |
| Self-harm and interpersonal violence            | 14<br>(10 - 19)      | 0<br>(0 - 0)          | 0<br>(0 - 0)           | 10<br>(7 - 13)          | 3<br>(2 - 4)            | 1<br>(1 - 1)            |
| Self-harm                                       | 6<br>(4 - 8)         | --                    | 0<br>(0 - 0)           | 4<br>(3 - 5)            | 1<br>(1 - 2)            | 1<br>(0 - 1)            |
| Interpersonal violence                          | 8<br>(4 - 11)        | 0<br>(0 - 0)          | 0<br>(0 - 0)           | 6<br>(3 - 9)            | 1<br>(1 - 2)            | 0<br>(0 - 1)            |
| Assault by firearm                              | 4<br>(2 - 6)         | 0<br>(0 - 0)          | 0<br>(0 - 0)           | 3<br>(2 - 5)            | 0<br>(0 - 1)            | 0<br>(0 - 0)            |
| Assault by sharp object                         | 2<br>(1 - 4)         | 0<br>(0 - 0)          | 0<br>(0 - 0)           | 2<br>(1 - 3)            | 0<br>(0 - 1)            | 0<br>(0 - 0)            |
| Assault by other means                          | 2<br>(1 - 3)         | 0<br>(0 - 0)          | 0<br>(0 - 0)           | 1<br>(0 - 1)            | 0<br>(0 - 1)            | 0<br>(0 - 0)            |

Web Table 31- Dominica deaths with 95% UI by age, sex, and cause in 2013

| Cause                                                             | Males, All Ages    | Males, 0-4 Years | Males, 5-14 Years | Males, 15-49 Years | Males, 50-69 Years | Males, 70-80 Years |
|-------------------------------------------------------------------|--------------------|------------------|-------------------|--------------------|--------------------|--------------------|
| All causes                                                        | 297<br>(240 - 369) | 14<br>(6 - 27)   | 3<br>(2 - 4)      | 48<br>(36 - 61)    | 83<br>(61 - 111)   | 149<br>(124 - 181) |
| Communicable, maternal, neonatal, and nutritional diseases        | 33<br>(26 - 43)    | 10<br>(4 - 18)   | 0<br>(0 - 1)      | 6<br>(5 - 8)       | 5<br>(4 - 7)       | 12<br>(9 - 15)     |
| HIV/AIDS and tuberculosis                                         | 5                  | 0                | 0                 | 3                  | 2                  | 1                  |
| Tuberculosis                                                      | 2                  | 0                | 0                 | 0                  | 1                  | 1                  |
| HIV/AIDS                                                          | 4                  | 0                | 0                 | 3                  | 1                  | 0                  |
| HIV/AIDS resulting in mycobacterial infection                     | 0                  | 0                | 0                 | 0                  | 0                  | 0                  |
| HIV/AIDS resulting in other diseases                              | 3                  | 0                | 0                 | 2                  | 1                  | 0                  |
| Diarrhea, lower respiratory, and other common infectious diseases | 16<br>(12 - 20)    | 2<br>(1 - 4)     | 0<br>(0 - 1)      | 2<br>(1 - 3)       | 3<br>(2 - 4)       | 9<br>(6 - 12)      |
| Diarrheal diseases                                                | 1                  | 1                | 0                 | 0                  | 0                  | 1                  |
| Intestinal infectious diseases                                    | 0                  | 0                | 0                 | 0                  | 0                  | 0                  |
| Typhoid fever                                                     | 0                  | 0                | 0                 | 0                  | 0                  | 0                  |
| Paratyphoid fever                                                 | 0                  | 0                | 0                 | 0                  | 0                  | 0                  |
| Other intestinal infectious diseases                              | 0                  | 0                | 0                 | 0                  | 0                  | 0                  |
| Lower respiratory infections                                      | 13<br>(10 - 17)    | 1<br>(1 - 3)     | 0<br>(0 - 0)      | 1<br>(1 - 2)       | 2<br>(1 - 3)       | 8<br>(6 - 11)      |
| Upper respiratory infections                                      | 0                  | 0                | 0                 | 0                  | 0                  | 0                  |
| Otitis media                                                      | 0                  | 0                | 0                 | 0                  | 0                  | 0                  |
| Meningitis                                                        | 1                  | 0                | 0                 | 0                  | 0                  | 0                  |
| Pneumococcal meningitis                                           | 0                  | 0                | 0                 | 0                  | 0                  | 0                  |
| H influenzae type B meningitis                                    | 0                  | 0                | 0                 | 0                  | 0                  | 0                  |
| Meningococcal meningitis                                          | 0                  | 0                | 0                 | 0                  | 0                  | 0                  |
| Other meningitis                                                  | 0                  | 0                | 0                 | 0                  | 0                  | 0                  |
| Encephalitis                                                      | 0                  | 0                | 0                 | 0                  | 0                  | 0                  |
| Diphtheria                                                        | 0                  | 0                | 0                 | 0                  | 0                  | --                 |
| Whooping cough                                                    | 0                  | 0                | 0                 | 0                  | 0                  | --                 |
| Tetanus                                                           | 0                  | 0                | 0                 | 0                  | 0                  | 0                  |
| Measles                                                           | 0                  | 0                | 0                 | 0                  | 0                  | --                 |
| Varicella and herpes zoster                                       | 0                  | 0                | 0                 | 0                  | 0                  | 0                  |
| Neglected tropical diseases and malaria                           | 0                  | 0                | 0                 | 0                  | 0                  | 0                  |
| Leishmaniasis                                                     | 0                  | 0                | 0                 | 0                  | 0                  | 0                  |
| Visceral leishmaniasis                                            | 0                  | 0                | 0                 | 0                  | 0                  | 0                  |
| Cysticercosis                                                     | 0                  | 0                | 0                 | 0                  | 0                  | 0                  |
| Cystic echinococcosis                                             | 0                  | 0                | 0                 | 0                  | 0                  | 0                  |
| Dengue                                                            | 0                  | 0                | 0                 | 0                  | 0                  | 0                  |
| Rabies                                                            | 0                  | 0                | 0                 | 0                  | 0                  | 0                  |
| Intestinal nematode infections                                    | 0                  | 0                | 0                 | 0                  | 0                  | 0                  |
| Ascariasis                                                        | 0                  | 0                | 0                 | 0                  | 0                  | 0                  |
| Other neglected tropical diseases                                 | 0                  | 0                | 0                 | 0                  | 0                  | 0                  |
| Maternal disorders                                                | --                 | --               | --                | --                 | --                 | --                 |
| Maternal hemorrhage                                               | --                 | --               | --                | --                 | --                 | --                 |
| Maternal sepsis and other maternal infections                     | --                 | --               | --                | --                 | --                 | --                 |

Web Table 31- Dominica deaths with 95% UI by age, sex, and cause in 2013

| Cause                                                            | Males, All Ages    | Males, 0-4 Years | Males, 5-14 Years | Males, 15-49 Years | Males, 50-69 Years | Males, 70-80 Years |
|------------------------------------------------------------------|--------------------|------------------|-------------------|--------------------|--------------------|--------------------|
| Maternal hypertensive disorders                                  | --                 | --               | --                | --                 | --                 | --                 |
| Maternal obstructed labor                                        | --                 | --               | --                | --                 | --                 | --                 |
| Maternal abortive outcome                                        | --                 | --               | --                | --                 | --                 | --                 |
| Indirect maternal deaths                                         | --                 | --               | --                | --                 | --                 | --                 |
| Late maternal deaths                                             | --                 | --               | --                | --                 | --                 | --                 |
| Maternal deaths aggravated by HIV/AIDS                           | --                 | --               | --                | --                 | --                 | --                 |
| Other maternal disorders                                         | --                 | --               | --                | --                 | --                 | --                 |
| Neonatal disorders                                               | 7<br>(3 - 13)      | 7<br>(3 - 13)    | --                | --                 | --                 | --                 |
| Neonatal preterm birth complications                             | 3<br>(1 - 6)       | 3<br>(1 - 6)     | --                | --                 | --                 | --                 |
| Neonatal encephalopathy due to birth asphyxia and trauma         | 2<br>(1 - 4)       | 2<br>(1 - 4)     | --                | --                 | --                 | --                 |
| Neonatal sepsis and other neonatal infections                    | 1<br>(0 - 2)       | 1<br>(0 - 2)     | --                | --                 | --                 | --                 |
| Hemolytic disease and other neonatal jaundice                    | 0<br>(0 - 0)       | 0<br>(0 - 0)     | --                | --                 | --                 | --                 |
| Other neonatal disorders                                         | 1<br>(0 - 2)       | 1<br>(0 - 2)     | --                | --                 | --                 | --                 |
| Nutritional deficiencies                                         | 4<br>(2 - 5)       | 1<br>(0 - 1)     | 0<br>(0 - 0)      | 0<br>(0 - 1)       | 1<br>(0 - 1)       | 2<br>(1 - 3)       |
| Protein-energy malnutrition                                      | 2<br>(1 - 3)       | 0<br>(0 - 1)     | 0<br>(0 - 0)      | 0<br>(0 - 0)       | 0<br>(0 - 0)       | 1<br>(0 - 1)       |
| Iodine deficiency                                                | 0<br>(0 - 0)       | 0<br>(0 - 0)     | 0<br>(0 - 0)      | 0<br>(0 - 0)       | 0<br>(0 - 0)       | 0<br>(0 - 0)       |
| Iron-deficiency anemia                                           | 2<br>(1 - 3)       | 0<br>(0 - 0)     | 0<br>(0 - 0)      | 0<br>(0 - 0)       | 0<br>(0 - 1)       | 1<br>(0 - 2)       |
| Other nutritional deficiencies                                   | 0<br>(0 - 0)       | 0<br>(0 - 0)     | 0<br>(0 - 0)      | 0<br>(0 - 0)       | 0<br>(0 - 0)       | 0<br>(0 - 0)       |
| Other communicable, maternal, neonatal, and nutritional diseases | 1<br>(0 - 1)       | 0<br>(0 - 0)     | 0<br>(0 - 0)      | 0<br>(0 - 0)       | 0<br>(0 - 0)       | 0<br>(0 - 0)       |
| Sexually transmitted diseases excluding HIV                      | 0<br>(0 - 0)       | 0<br>(0 - 0)     | 0<br>(0 - 0)      | 0<br>(0 - 0)       | 0<br>(0 - 0)       | 0<br>(0 - 0)       |
| Syphilis                                                         | 0<br>(0 - 0)       | 0<br>(0 - 0)     | 0<br>(0 - 0)      | 0<br>(0 - 0)       | 0<br>(0 - 0)       | 0<br>(0 - 0)       |
| Chlamydial infection                                             | --                 | --               | --                | --                 | --                 | --                 |
| Gonococcal infection                                             | 0<br>(0 - 0)       | --               | 0<br>(0 - 0)      | 0<br>(0 - 0)       | 0<br>(0 - 0)       | 0<br>(0 - 0)       |
| Other sexually transmitted diseases                              | 0<br>(0 - 0)       | --               | 0<br>(0 - 0)      | 0<br>(0 - 0)       | 0<br>(0 - 0)       | 0<br>(0 - 0)       |
| Hepatitis                                                        | 0<br>(0 - 0)       | 0<br>(0 - 0)     | 0<br>(0 - 0)      | 0<br>(0 - 0)       | 0<br>(0 - 0)       | 0<br>(0 - 0)       |
| Acute hepatitis A                                                | 0<br>(0 - 0)       | 0<br>(0 - 0)     | 0<br>(0 - 0)      | 0<br>(0 - 0)       | 0<br>(0 - 0)       | 0<br>(0 - 0)       |
| Acute hepatitis B                                                | 0<br>(0 - 0)       | 0<br>(0 - 0)     | 0<br>(0 - 0)      | 0<br>(0 - 0)       | 0<br>(0 - 0)       | 0<br>(0 - 0)       |
| Acute hepatitis C                                                | 0<br>(0 - 0)       | --               | 0<br>(0 - 0)      | 0<br>(0 - 0)       | 0<br>(0 - 0)       | 0<br>(0 - 0)       |
| Other infectious diseases                                        | 1<br>(0 - 1)       | 0<br>(0 - 0)     | 0<br>(0 - 0)      | 0<br>(0 - 0)       | 0<br>(0 - 0)       | 0<br>(0 - 0)       |
| Non-communicable diseases                                        | 232<br>(185 - 290) | 3<br>(2 - 7)     | 1<br>(1 - 2)      | 23<br>(17 - 31)    | 72<br>(52 - 96)    | 133<br>(111 - 161) |
| Neoplasms                                                        | 55<br>(40 - 72)    | 0<br>(0 - 0)     | 0<br>(0 - 0)      | 4<br>(3 - 6)       | 17<br>(12 - 23)    | 33<br>(24 - 43)    |
| Esophageal cancer                                                | 2<br>(1 - 3)       | --               | --                | 0<br>(0 - 0)       | 1<br>(1 - 1)       | 1<br>(1 - 1)       |
| Stomach cancer                                                   | 4<br>(3 - 5)       | --               | --                | 0<br>(0 - 0)       | 1<br>(1 - 2)       | 2<br>(1 - 2)       |
| Liver cancer                                                     | 2<br>(1 - 2)       | --               | 0<br>(0 - 0)      | 0<br>(0 - 0)       | 1<br>(1 - 1)       | 1<br>(1 - 1)       |
| Liver cancer due to hepatitis B                                  | 0<br>(0 - 1)       | --               | 0<br>(0 - 0)      | 0<br>(0 - 0)       | 0<br>(0 - 0)       | 0<br>(0 - 0)       |
| Liver cancer due to hepatitis C                                  | 1<br>(0 - 1)       | --               | 0<br>(0 - 0)      | 0<br>(0 - 0)       | 0<br>(0 - 1)       | 0<br>(0 - 1)       |
| Liver cancer due to alcohol use                                  | 0<br>(0 - 1)       | --               | --                | 0<br>(0 - 0)       | 0<br>(0 - 0)       | 0<br>(0 - 0)       |
| Liver cancer due to other causes                                 | 0<br>(0 - 0)       | --               | 0<br>(0 - 0)      | 0<br>(0 - 0)       | 0<br>(0 - 0)       | 0<br>(0 - 0)       |
| Larynx cancer                                                    | 1<br>(1 - 1)       | --               | --                | 0<br>(0 - 0)       | 0<br>(0 - 1)       | 0<br>(0 - 1)       |
| Tracheal, bronchus and lung cancer                               | 7<br>(5 - 9)       | --               | --                | 1<br>(0 - 1)       | 3<br>(2 - 5)       | 3<br>(2 - 4)       |

Web Table 31- Dominica deaths with 95% UI by age, sex, and cause in 2013

| Cause                                         | Males, All Ages | Males, 0-4 Years | Males, 5-14 Years | Males, 15-49 Years | Males, 50-69 Years | Males, 70-80 Years |
|-----------------------------------------------|-----------------|------------------|-------------------|--------------------|--------------------|--------------------|
| Breast cancer                                 | 0<br>(0-0)      | --               | --                | 0<br>(0-0)         | 0<br>(0-0)         | 0<br>(0-0)         |
| Cervical cancer                               | --              | --               | --                | --                 | --                 | --                 |
| Uterine cancer                                | --              | --               | --                | --                 | --                 | --                 |
| Prostate cancer                               | 22<br>(12-31)   | --               | --                | 0<br>(0-0)         | 4<br>(2-6)         | 18<br>(10-26)      |
| Colon and rectum cancer                       | 5<br>(4-6)      | --               | --                | 0<br>(0-1)         | 2<br>(1-2)         | 3<br>(2-3)         |
| Lip and oral cavity cancer                    | 1<br>(1-1)      | --               | --                | 0<br>(0-0)         | 0<br>(0-1)         | 0<br>(0-1)         |
| Nasopharynx cancer                            | 0<br>(0-0)      | --               | 0<br>(0-0)        | 0<br>(0-0)         | 0<br>(0-0)         | 0<br>(0-0)         |
| Other pharynx cancer                          | 0<br>(0-1)      | --               | --                | 0<br>(0-0)         | 0<br>(0-0)         | 0<br>(0-0)         |
| Gallbladder and biliary tract cancer          | 0<br>(0-1)      | --               | --                | 0<br>(0-0)         | 0<br>(0-0)         | 0<br>(0-0)         |
| Pancreatic cancer                             | 2<br>(2-3)      | --               | --                | 0<br>(0-0)         | 1<br>(1-1)         | 1<br>(1-1)         |
| Malignant skin melanoma                       | 0<br>(0-0)      | --               | --                | 0<br>(0-0)         | 0<br>(0-0)         | 0<br>(0-0)         |
| Non-melanoma skin cancer                      | 0<br>(0-0)      | --               | --                | 0<br>(0-0)         | 0<br>(0-0)         | 0<br>(0-0)         |
| Ovarian cancer                                | --              | --               | --                | --                 | --                 | --                 |
| Testicular cancer                             | 0<br>(0-0)      | --               | --                | 0<br>(0-0)         | 0<br>(0-0)         | 0<br>(0-0)         |
| Kidney cancer                                 | 1<br>(1-1)      | 0<br>(0-0)       | 0<br>(0-0)        | 0<br>(0-0)         | 0<br>(0-1)         | 0<br>(0-0)         |
| Bladder cancer                                | 1<br>(1-1)      | --               | --                | 0<br>(0-0)         | 0<br>(0-0)         | 1<br>(0-1)         |
| Brain and nervous system cancer               | 1<br>(0-1)      | 0<br>(0-0)       | 0<br>(0-0)        | 0<br>(0-0)         | 0<br>(0-0)         | 0<br>(0-0)         |
| Thyroid cancer                                | 0<br>(0-0)      | --               | 0<br>(0-0)        | 0<br>(0-0)         | 0<br>(0-0)         | 0<br>(0-0)         |
| Mesothelioma                                  | 0<br>(0-0)      | --               | --                | 0<br>(0-0)         | 0<br>(0-0)         | 0<br>(0-0)         |
| Hodgkin lymphoma                              | 0<br>(0-0)      | 0<br>(0-0)       | 0<br>(0-0)        | 0<br>(0-0)         | 0<br>(0-0)         | 0<br>(0-0)         |
| Non-Hodgkin lymphoma                          | 2<br>(1-3)      | 0<br>(0-0)       | 0<br>(0-0)        | 1<br>(0-1)         | 1<br>(0-1)         | 1<br>(0-1)         |
| Multiple myeloma                              | 1<br>(0-1)      | --               | --                | 0<br>(0-0)         | 0<br>(0-1)         | 0<br>(0-0)         |
| Leukemia                                      | 1<br>(1-2)      | 0<br>(0-0)       | 0<br>(0-0)        | 0<br>(0-0)         | 0<br>(0-0)         | 0<br>(0-0)         |
| Other neoplasms                               | 2<br>(2-3)      | 0<br>(0-0)       | 0<br>(0-0)        | 1<br>(0-1)         | 1<br>(0-1)         | 1<br>(0-1)         |
| Cardiovascular diseases                       | 88<br>(69-111)  | 0<br>(0-0)       | 0<br>(0-0)        | 8<br>(5-10)        | 29<br>(21-39)      | 51<br>(42-63)      |
| Rheumatic heart disease                       | 0<br>(0-1)      | 0<br>(0-0)       | 0<br>(0-0)        | 0<br>(0-0)         | 0<br>(0-0)         | 0<br>(0-0)         |
| Ischemic heart disease                        | 38<br>(29-50)   | 0<br>(0-0)       | 0<br>(0-0)        | 4<br>(2-5)         | 14<br>(9-19)       | 21<br>(16-27)      |
| Cerebrovascular disease                       | 30<br>(22-40)   | 0<br>(0-0)       | 0<br>(0-0)        | 2<br>(1-3)         | 9<br>(6-13)        | 19<br>(14-24)      |
| Ischemic stroke                               | 18<br>(13-25)   | 0<br>(0-0)       | 0<br>(0-0)        | 1<br>(0-1)         | 5<br>(3-7)         | 13<br>(9-17)       |
| Hemorrhagic stroke                            | 12<br>(8-16)    | 0<br>(0-0)       | 0<br>(0-0)        | 1<br>(1-2)         | 4<br>(3-6)         | 6<br>(4-9)         |
| Hypertensive heart disease                    | 9<br>(5-14)     | 0<br>(0-0)       | 0<br>(0-0)        | 0<br>(0-1)         | 2<br>(1-4)         | 6<br>(3-9)         |
| Cardiomyopathy and myocarditis                | 4<br>(2-5)      | 0<br>(0-0)       | 0<br>(0-0)        | 1<br>(0-1)         | 1<br>(1-2)         | 2<br>(1-2)         |
| Atrial fibrillation and flutter               | 1<br>(1-2)      | --               | --                | 0<br>(0-0)         | 0<br>(0-0)         | 1<br>(1-1)         |
| Aortic aneurysm                               | 1<br>(1-2)      | --               | --                | 0<br>(0-0)         | 1<br>(0-1)         | 1<br>(1-1)         |
| Peripheral vascular disease                   | 1<br>(0-1)      | --               | --                | 0<br>(0-0)         | 0<br>(0-0)         | 1<br>(0-1)         |
| Endocarditis                                  | 0<br>(0-0)      | 0<br>(0-0)       | 0<br>(0-0)        | 0<br>(0-0)         | 0<br>(0-0)         | 0<br>(0-0)         |
| Other cardiovascular and circulatory diseases | 4<br>(2-5)      | 0<br>(0-0)       | 0<br>(0-0)        | 1<br>(0-1)         | 1<br>(1-2)         | 2<br>(1-3)         |
| Chronic respiratory diseases                  | 13<br>(10-17)   | 0<br>(0-0)       | 0<br>(0-0)        | 1<br>(1-1)         | 3<br>(2-4)         | 9<br>(7-11)        |
| Chronic obstructive pulmonary disease         | 10<br>(7-13)    | 0<br>(0-0)       | 0<br>(0-0)        | 0<br>(0-1)         | 2<br>(1-3)         | 7<br>(6-9)         |
| Pneumoconiosis                                | 0<br>(0-1)      | 0<br>(0-0)       | 0<br>(0-0)        | 0<br>(0-0)         | 0<br>(0-0)         | 0<br>(0-0)         |

Web Table 31- Dominica deaths with 95% UI by age, sex, and cause in 2013

| Cause                                               | Males, All Ages | Males, 0-4 Years | Males, 5-14 Years | Males, 15-49 Years | Males, 50-69 Years | Males, 70-80 Years |
|-----------------------------------------------------|-----------------|------------------|-------------------|--------------------|--------------------|--------------------|
| Silicosis                                           | 0<br>(0-0)      | 0<br>(0-0)       | 0<br>(0-0)        | 0<br>(0-0)         | 0<br>(0-0)         | 0<br>(0-0)         |
| Asbestosis                                          | 0<br>(0-0)      | 0<br>(0-0)       | 0<br>(0-0)        | 0<br>(0-0)         | 0<br>(0-0)         | 0<br>(0-0)         |
| Coal workers pneumoconiosis                         | 0<br>(0-0)      | 0<br>(0-0)       | 0<br>(0-0)        | 0<br>(0-0)         | 0<br>(0-0)         | 0<br>(0-0)         |
| Other pneumoconiosis                                | 0<br>(0-0)      | 0<br>(0-0)       | 0<br>(0-0)        | 0<br>(0-0)         | 0<br>(0-0)         | 0<br>(0-0)         |
| Asthma                                              | 2<br>(1-3)      | 0<br>(0-0)       | 0<br>(0-0)        | 0<br>(0-1)         | 1<br>(0-1)         | 1<br>(1-1)         |
| Interstitial lung disease and pulmonary sarcoidosis | 1<br>(0-1)      | 0<br>(0-0)       | 0<br>(0-0)        | 0<br>(0-0)         | 0<br>(0-0)         | 0<br>(0-1)         |
| Other chronic respiratory diseases                  | 0<br>(0-0)      | 0<br>(0-0)       | 0<br>(0-0)        | 0<br>(0-0)         | 0<br>(0-0)         | 0<br>(0-0)         |
| Cirrhosis                                           | 7<br>(5-9)      | 0<br>(0-0)       | 0<br>(0-0)        | 2<br>(1-3)         | 3<br>(2-5)         | 2<br>(1-2)         |
| Cirrhosis due to hepatitis B                        | 0<br>(0-1)      | 0<br>(0-0)       | 0<br>(0-0)        | 0<br>(0-0)         | 0<br>(0-0)         | 0<br>(0-0)         |
| Cirrhosis due to hepatitis C                        | 2<br>(1-3)      | 0<br>(0-0)       | 0<br>(0-0)        | 1<br>(0-1)         | 1<br>(1-2)         | 1<br>(0-1)         |
| Cirrhosis due to alcohol use                        | 4<br>(2-5)      | --               | --                | 1<br>(1-1)         | 2<br>(1-3)         | 1<br>(1-1)         |
| Cirrhosis due to other causes                       | 1<br>(1-2)      | 0<br>(0-0)       | 0<br>(0-0)        | 0<br>(0-1)         | 0<br>(0-1)         | 0<br>(0-0)         |
| Digestive diseases                                  | 7<br>(5-9)      | 0<br>(0-0)       | 0<br>(0-0)        | 1<br>(1-2)         | 2<br>(2-3)         | 3<br>(2-4)         |
| Peptic ulcer disease                                | 2<br>(1-3)      | 0<br>(0-0)       | 0<br>(0-0)        | 0<br>(0-1)         | 1<br>(0-1)         | 1<br>(1-1)         |
| Gastritis and duodenitis                            | 1<br>(0-1)      | 0<br>(0-0)       | 0<br>(0-0)        | 0<br>(0-0)         | 0<br>(0-0)         | 0<br>(0-0)         |
| Appendicitis                                        | 0<br>(0-0)      | 0<br>(0-0)       | 0<br>(0-0)        | 0<br>(0-0)         | 0<br>(0-0)         | 0<br>(0-0)         |
| Paralytic ileus and intestinal obstruction          | 1<br>(0-1)      | 0<br>(0-0)       | 0<br>(0-0)        | 0<br>(0-0)         | 0<br>(0-0)         | 0<br>(0-1)         |
| Inguinal, femoral, and abdominal hernia             | 0<br>(0-1)      | 0<br>(0-0)       | 0<br>(0-0)        | 0<br>(0-0)         | 0<br>(0-0)         | 0<br>(0-1)         |
| Inflammatory bowel disease                          | 1<br>(0-1)      | 0<br>(0-0)       | 0<br>(0-0)        | 0<br>(0-0)         | 0<br>(0-0)         | 0<br>(0-1)         |
| Vascular intestinal disorders                       | 0<br>(0-1)      | 0<br>(0-0)       | 0<br>(0-0)        | 0<br>(0-0)         | 0<br>(0-0)         | 0<br>(0-0)         |
| Gallbladder and biliary diseases                    | 0<br>(0-1)      | 0<br>(0-0)       | 0<br>(0-0)        | 0<br>(0-0)         | 0<br>(0-0)         | 0<br>(0-0)         |
| Pancreatitis                                        | 1<br>(0-1)      | 0<br>(0-0)       | 0<br>(0-0)        | 0<br>(0-0)         | 0<br>(0-0)         | 0<br>(0-0)         |
| Other digestive diseases                            | 1<br>(0-1)      | 0<br>(0-0)       | 0<br>(0-0)        | 0<br>(0-0)         | 0<br>(0-0)         | 0<br>(0-1)         |
| Neurological disorders                              | 15<br>(11-20)   | 0<br>(0-0)       | 0<br>(0-0)        | 1<br>(1-1)         | 2<br>(1-2)         | 12<br>(9-17)       |
| Alzheimer disease and other dementias               | 12<br>(9-17)    | --               | --                | 0<br>(0-0)         | 1<br>(1-1)         | 12<br>(8-15)       |
| Parkinson disease                                   | 1<br>(1-1)      | --               | --                | 0<br>(0-0)         | 0<br>(0-0)         | 1<br>(0-1)         |
| Epilepsy                                            | 1<br>(1-2)      | 0<br>(0-0)       | 0<br>(0-0)        | 1<br>(0-1)         | 0<br>(0-0)         | 0<br>(0-0)         |
| Multiple sclerosis                                  | 0<br>(0-0)      | --               | --                | 0<br>(0-0)         | 0<br>(0-0)         | 0<br>(0-0)         |
| Other neurological disorders                        | 1<br>(0-1)      | 0<br>(0-0)       | 0<br>(0-0)        | 0<br>(0-0)         | 0<br>(0-0)         | 0<br>(0-0)         |
| Mental and substance use disorders                  | 2<br>(1-3)      | 0<br>(0-0)       | 0<br>(0-0)        | 1<br>(0-1)         | 1<br>(0-1)         | 0<br>(0-1)         |
| Schizophrenia                                       | 0<br>(0-0)      | --               | --                | 0<br>(0-0)         | 0<br>(0-0)         | 0<br>(0-0)         |
| Alcohol use disorders                               | 1<br>(1-2)      | --               | --                | 0<br>(0-1)         | 1<br>(0-1)         | 0<br>(0-0)         |
| Drug use disorders                                  | 1<br>(0-1)      | 0<br>(0-0)       | --                | 0<br>(0-0)         | 0<br>(0-0)         | 0<br>(0-0)         |
| Opioid use disorders                                | 0<br>(0-0)      | 0<br>(0-0)       | --                | 0<br>(0-0)         | 0<br>(0-0)         | 0<br>(0-0)         |
| Cocaine use disorders                               | 0<br>(0-0)      | 0<br>(0-0)       | --                | 0<br>(0-0)         | 0<br>(0-0)         | 0<br>(0-0)         |
| Amphetamine use disorders                           | 0<br>(0-0)      | 0<br>(0-0)       | --                | 0<br>(0-0)         | 0<br>(0-0)         | 0<br>(0-0)         |
| Other drug use disorders                            | 0<br>(0-0)      | 0<br>(0-0)       | --                | 0<br>(0-0)         | 0<br>(0-0)         | 0<br>(0-0)         |
| Eating disorders                                    | 0<br>(0-0)      | --               | 0<br>(0-0)        | 0<br>(0-0)         | --                 | --                 |
| Anorexia nervosa                                    | 0<br>(0-0)      | --               | 0<br>(0-0)        | 0<br>(0-0)         | --                 | --                 |
| Diabetes, urogenital, blood, and endocrine diseases | 40<br>(29-57)   | 0<br>(0-1)       | 0<br>(0-0)        | 5<br>(3-7)         | 14<br>(10-21)      | 21<br>(16-30)      |

Web Table 31- Dominica deaths with 95% UI by age, sex, and cause in 2013

| Cause                                               | Males, All Ages | Males, 0-4 Years | Males, 5-14 Years | Males, 15-49 Years | Males, 50-69 Years | Males, 70-80 Years |
|-----------------------------------------------------|-----------------|------------------|-------------------|--------------------|--------------------|--------------------|
| Diabetes mellitus                                   | 24<br>(18 - 32) | 0<br>(0 - 0)     | 0<br>(0 - 0)      | 2<br>(1 - 3)       | 9<br>(6 - 13)      | 12<br>(9 - 16)     |
| Acute glomerulonephritis                            | 0<br>(0 - 0)    | 0<br>(0 - 0)     | 0<br>(0 - 0)      | 0<br>(0 - 0)       | 0<br>(0 - 0)       | 0<br>(0 - 0)       |
| Chronic kidney disease                              | 11<br>(7 - 25)  | 0<br>(0 - 0)     | 0<br>(0 - 0)      | 2<br>(1 - 4)       | 4<br>(2 - 8)       | 6<br>(3 - 14)      |
| Chronic kidney disease due to diabetes mellitus     | 2<br>(1 - 5)    | 0<br>(0 - 0)     | 0<br>(0 - 0)      | 0<br>(0 - 1)       | 1<br>(0 - 2)       | 1<br>(0 - 2)       |
| Chronic kidney disease due to hypertension          | 5<br>(3 - 10)   | 0<br>(0 - 0)     | 0<br>(0 - 0)      | 1<br>(0 - 1)       | 2<br>(1 - 3)       | 3<br>(2 - 5)       |
| Chronic kidney disease due to glomerulonephritis    | 0<br>(0 - 1)    | 0<br>(0 - 0)     | 0<br>(0 - 0)      | 0<br>(0 - 0)       | 0<br>(0 - 0)       | 0<br>(0 - 0)       |
| Chronic kidney disease due to other causes          | 4<br>(1 - 12)   | 0<br>(0 - 0)     | 0<br>(0 - 0)      | 1<br>(0 - 2)       | 1<br>(0 - 3)       | 2<br>(1 - 7)       |
| Urinary diseases and male infertility               | 2<br>(1 - 3)    | 0<br>(0 - 0)     | 0<br>(0 - 0)      | 0<br>(0 - 0)       | 1<br>(0 - 1)       | 2<br>(1 - 2)       |
| Interstitial nephritis and urinary tract infections | 2<br>(1 - 2)    | 0<br>(0 - 0)     | 0<br>(0 - 0)      | 0<br>(0 - 0)       | 0<br>(0 - 1)       | 1<br>(1 - 2)       |
| Urolithiasis                                        | 0<br>(0 - 0)    | --               | 0<br>(0 - 0)      | 0<br>(0 - 0)       | 0<br>(0 - 0)       | 0<br>(0 - 0)       |
| Other urinary diseases                              | 1<br>(0 - 1)    | 0<br>(0 - 0)     | 0<br>(0 - 0)      | 0<br>(0 - 0)       | 0<br>(0 - 0)       | 0<br>(0 - 1)       |
| Gynecological diseases                              | --              | --               | --                | --                 | --                 | --                 |
| Uterine fibroids                                    | --              | --               | --                | --                 | --                 | --                 |
| Polycystic ovarian syndrome                         | --              | --               | --                | --                 | --                 | --                 |
| Endometriosis                                       | --              | --               | --                | --                 | --                 | --                 |
| Genital prolapse                                    | --              | --               | --                | --                 | --                 | --                 |
| Other gynecological diseases                        | --              | --               | --                | --                 | --                 | --                 |
| Hemoglobinopathies and hemolytic anemias            | 1<br>(0 - 1)    | 0<br>(0 - 0)     | 0<br>(0 - 0)      | 0<br>(0 - 0)       | 0<br>(0 - 0)       | 0<br>(0 - 0)       |
| Thalassemias                                        | 0<br>(0 - 0)    | 0<br>(0 - 0)     | 0<br>(0 - 0)      | 0<br>(0 - 0)       | 0<br>(0 - 0)       | 0<br>(0 - 0)       |
| Sickle cell disorders                               | 0<br>(0 - 1)    | 0<br>(0 - 0)     | 0<br>(0 - 0)      | 0<br>(0 - 0)       | 0<br>(0 - 0)       | 0<br>(0 - 0)       |
| G6PD deficiency                                     | 0<br>(0 - 0)    | 0<br>(0 - 0)     | 0<br>(0 - 0)      | 0<br>(0 - 0)       | 0<br>(0 - 0)       | 0<br>(0 - 0)       |
| Other hemoglobinopathies and hemolytic anemias      | 0<br>(0 - 0)    | 0<br>(0 - 0)     | 0<br>(0 - 0)      | 0<br>(0 - 0)       | 0<br>(0 - 0)       | 0<br>(0 - 0)       |
| Endocrine, metabolic, blood, and immune disorders   | 2<br>(2 - 5)    | 0<br>(0 - 0)     | 0<br>(0 - 0)      | 1<br>(0 - 1)       | 1<br>(0 - 2)       | 1<br>(0 - 2)       |
| Musculoskeletal disorders                           | 1<br>(0 - 1)    | --               | 0<br>(0 - 0)      | 0<br>(0 - 0)       | 0<br>(0 - 0)       | 0<br>(0 - 0)       |
| Rheumatoid arthritis                                | 0<br>(0 - 0)    | --               | 0<br>(0 - 0)      | 0<br>(0 - 0)       | 0<br>(0 - 0)       | 0<br>(0 - 0)       |
| Other musculoskeletal disorders                     | 1<br>(0 - 1)    | --               | 0<br>(0 - 0)      | 0<br>(0 - 0)       | 0<br>(0 - 0)       | 0<br>(0 - 0)       |
| Other non-communicable diseases                     | 5<br>(3 - 8)    | 2<br>(1 - 5)     | 0<br>(0 - 0)      | 0<br>(0 - 1)       | 1<br>(0 - 1)       | 1<br>(1 - 2)       |
| Congenital anomalies                                | 3<br>(2 - 5)    | 2<br>(1 - 4)     | 0<br>(0 - 0)      | 0<br>(0 - 0)       | 0<br>(0 - 0)       | 0<br>(0 - 0)       |
| Neural tube defects                                 | 0<br>(0 - 0)    | 0<br>(0 - 0)     | 0<br>(0 - 0)      | 0<br>(0 - 0)       | 0<br>(0 - 0)       | 0<br>(0 - 0)       |
| Congenital heart anomalies                          | 1<br>(1 - 2)    | 1<br>(0 - 2)     | 0<br>(0 - 0)      | 0<br>(0 - 0)       | 0<br>(0 - 0)       | 0<br>(0 - 0)       |
| Cleft lip and cleft palate                          | 0<br>(0 - 0)    | 0<br>(0 - 0)     | --                | --                 | --                 | --                 |
| Down syndrome                                       | 0<br>(0 - 0)    | 0<br>(0 - 0)     | 0<br>(0 - 0)      | 0<br>(0 - 0)       | 0<br>(0 - 0)       | 0<br>(0 - 0)       |
| Chromosomal unbalanced rearrangements               | 0<br>(0 - 0)    | 0<br>(0 - 0)     | 0<br>(0 - 0)      | 0<br>(0 - 0)       | 0<br>(0 - 0)       | 0<br>(0 - 0)       |
| Other congenital anomalies                          | 1<br>(1 - 3)    | 1<br>(0 - 2)     | 0<br>(0 - 0)      | 0<br>(0 - 0)       | 0<br>(0 - 0)       | 0<br>(0 - 0)       |
| Skin and subcutaneous diseases                      | 2<br>(1 - 2)    | 0<br>(0 - 0)     | 0<br>(0 - 0)      | 0<br>(0 - 0)       | 0<br>(0 - 1)       | 1<br>(0 - 2)       |
| Cellulitis                                          | 0<br>(0 - 0)    | 0<br>(0 - 0)     | 0<br>(0 - 0)      | 0<br>(0 - 0)       | 0<br>(0 - 0)       | 0<br>(0 - 0)       |
| Pyoderma                                            | 0<br>(0 - 1)    | 0<br>(0 - 0)     | 0<br>(0 - 0)      | 0<br>(0 - 0)       | 0<br>(0 - 0)       | 0<br>(0 - 0)       |
| Decubitus ulcer                                     | 1<br>(0 - 2)    | 0<br>(0 - 0)     | 0<br>(0 - 0)      | 0<br>(0 - 0)       | 0<br>(0 - 0)       | 1<br>(0 - 1)       |
| Other skin and subcutaneous diseases                | 0<br>(0 - 0)    | 0<br>(0 - 0)     | 0<br>(0 - 0)      | 0<br>(0 - 0)       | 0<br>(0 - 0)       | 0<br>(0 - 0)       |
| Sudden infant death syndrome                        | 0<br>(0 - 1)    | 0<br>(0 - 1)     | --                | --                 | --                 | --                 |



Web Table 31- Dominica deaths with 95% UI by age, sex, and cause in 2013

| Cause                                           | Males, All Ages | Males, 0-4 Years | Males, 5-14 Years | Males, 15-49 Years | Males, 50-69 Years | Males, 70-80 Years |
|-------------------------------------------------|-----------------|------------------|-------------------|--------------------|--------------------|--------------------|
| Injuries                                        | 33<br>(24 - 42) | 1<br>(0 - 2)     | 1<br>(1 - 2)      | 19<br>(13 - 25)    | 7<br>(5 - 9)       | 5<br>(4 - 6)       |
| Transport injuries                              | 9<br>(7 - 11)   | 0<br>(0 - 0)     | 0<br>(0 - 1)      | 5<br>(4 - 7)       | 2<br>(1 - 3)       | 1<br>(1 - 2)       |
| Road injuries                                   | 8<br>(6 - 11)   | 0<br>(0 - 0)     | 0<br>(0 - 1)      | 5<br>(3 - 6)       | 2<br>(1 - 3)       | 1<br>(1 - 2)       |
| Pedestrian road injuries                        | 2<br>(1 - 3)    | 0<br>(0 - 0)     | 0<br>(0 - 0)      | 1<br>(1 - 1)       | 1<br>(0 - 1)       | 0<br>(0 - 1)       |
| Cyclist road injuries                           | 0<br>(0 - 1)    | 0<br>(0 - 0)     | 0<br>(0 - 0)      | 0<br>(0 - 0)       | 0<br>(0 - 0)       | 0<br>(0 - 0)       |
| Motorcyclist road injuries                      | 1<br>(1 - 1)    | 0<br>(0 - 0)     | 0<br>(0 - 0)      | 1<br>(0 - 1)       | 0<br>(0 - 0)       | 0<br>(0 - 0)       |
| Motor vehicle road injuries                     | 5<br>(3 - 6)    | 0<br>(0 - 0)     | 0<br>(0 - 0)      | 3<br>(2 - 4)       | 1<br>(1 - 2)       | 0<br>(0 - 1)       |
| Other road injuries                             | 0<br>(0 - 0)    | 0<br>(0 - 0)     | 0<br>(0 - 0)      | 0<br>(0 - 0)       | 0<br>(0 - 0)       | 0<br>(0 - 0)       |
| Other transport injuries                        | 1<br>(0 - 1)    | 0<br>(0 - 0)     | 0<br>(0 - 0)      | 0<br>(0 - 0)       | 0<br>(0 - 0)       | 0<br>(0 - 0)       |
| Unintentional injuries                          | 12<br>(8 - 15)  | 1<br>(0 - 2)     | 1<br>(0 - 1)      | 5<br>(3 - 7)       | 2<br>(2 - 3)       | 3<br>(2 - 4)       |
| Falls                                           | 2<br>(1 - 3)    | 0<br>(0 - 0)     | 0<br>(0 - 0)      | 1<br>(0 - 1)       | 1<br>(0 - 1)       | 1<br>(1 - 1)       |
| Drowning                                        | 3<br>(2 - 4)    | 0<br>(0 - 0)     | 0<br>(0 - 0)      | 2<br>(1 - 3)       | 1<br>(0 - 1)       | 0<br>(0 - 0)       |
| Fire, heat, and hot substances                  | 1<br>(1 - 1)    | 0<br>(0 - 0)     | 0<br>(0 - 0)      | 0<br>(0 - 0)       | 0<br>(0 - 0)       | 0<br>(0 - 0)       |
| Poisonings                                      | 0<br>(0 - 0)    | 0<br>(0 - 0)     | 0<br>(0 - 0)      | 0<br>(0 - 0)       | 0<br>(0 - 0)       | 0<br>(0 - 0)       |
| Exposure to mechanical forces                   | 2<br>(1 - 3)    | 0<br>(0 - 0)     | 0<br>(0 - 0)      | 1<br>(1 - 2)       | 0<br>(0 - 1)       | 0<br>(0 - 0)       |
| Unintentional firearm injuries                  | 1<br>(1 - 2)    | 0<br>(0 - 0)     | 0<br>(0 - 0)      | 1<br>(0 - 1)       | 0<br>(0 - 0)       | 0<br>(0 - 0)       |
| Unintentional suffocation                       | 0<br>(0 - 0)    | 0<br>(0 - 0)     | 0<br>(0 - 0)      | 0<br>(0 - 0)       | 0<br>(0 - 0)       | 0<br>(0 - 0)       |
| Other exposure to mechanical forces             | 1<br>(1 - 1)    | 0<br>(0 - 0)     | 0<br>(0 - 0)      | 0<br>(0 - 1)       | 0<br>(0 - 0)       | 0<br>(0 - 0)       |
| Adverse effects of medical treatment            | 1<br>(1 - 1)    | 0<br>(0 - 0)     | 0<br>(0 - 0)      | 0<br>(0 - 0)       | 0<br>(0 - 0)       | 0<br>(0 - 1)       |
| Animal contact                                  | 0<br>(0 - 0)    | 0<br>(0 - 0)     | 0<br>(0 - 0)      | 0<br>(0 - 0)       | 0<br>(0 - 0)       | 0<br>(0 - 0)       |
| Venomous animal contact                         | 0<br>(0 - 0)    | 0<br>(0 - 0)     | 0<br>(0 - 0)      | 0<br>(0 - 0)       | 0<br>(0 - 0)       | 0<br>(0 - 0)       |
| Non-venomous animal contact                     | 0<br>(0 - 0)    | 0<br>(0 - 0)     | 0<br>(0 - 0)      | 0<br>(0 - 0)       | 0<br>(0 - 0)       | 0<br>(0 - 0)       |
| Foreign body                                    | 2<br>(1 - 3)    | 0<br>(0 - 1)     | 0<br>(0 - 0)      | 0<br>(0 - 1)       | 0<br>(0 - 1)       | 1<br>(0 - 1)       |
| Pulmonary aspiration and foreign body in airway | 2<br>(1 - 2)    | 0<br>(0 - 1)     | 0<br>(0 - 0)      | 0<br>(0 - 1)       | 0<br>(0 - 1)       | 1<br>(0 - 1)       |
| Foreign body in other body part                 | 0<br>(0 - 0)    | 0<br>(0 - 0)     | 0<br>(0 - 0)      | 0<br>(0 - 0)       | 0<br>(0 - 0)       | 0<br>(0 - 0)       |
| Other unintentional injuries                    | 0<br>(0 - 1)    | 0<br>(0 - 0)     | 0<br>(0 - 0)      | 0<br>(0 - 0)       | 0<br>(0 - 0)       | 0<br>(0 - 0)       |
| Self-harm and interpersonal violence            | 12<br>(8 - 17)  | 0<br>(0 - 0)     | 0<br>(0 - 0)      | 9<br>(6 - 12)      | 2<br>(1 - 3)       | 1<br>(1 - 1)       |
| Self-harm                                       | 5<br>(4 - 7)    | --               | 0<br>(0 - 0)      | 3<br>(2 - 5)       | 1<br>(1 - 2)       | 0<br>(0 - 1)       |
| Interpersonal violence                          | 7<br>(4 - 10)   | 0<br>(0 - 0)     | 0<br>(0 - 0)      | 6<br>(3 - 8)       | 1<br>(0 - 2)       | 0<br>(0 - 1)       |
| Assault by firearm                              | 4<br>(2 - 6)    | 0<br>(0 - 0)     | 0<br>(0 - 0)      | 3<br>(2 - 5)       | 0<br>(0 - 1)       | 0<br>(0 - 0)       |
| Assault by sharp object                         | 2<br>(1 - 3)    | 0<br>(0 - 0)     | 0<br>(0 - 0)      | 2<br>(1 - 3)       | 0<br>(0 - 1)       | 0<br>(0 - 0)       |
| Assault by other means                          | 1<br>(1 - 2)    | 0<br>(0 - 0)     | 0<br>(0 - 0)      | 1<br>(0 - 1)       | 0<br>(0 - 1)       | 0<br>(0 - 0)       |

Web Table 31- Dominica deaths with 95% UI by age, sex, and cause in 2013

| Cause                                                             | Females, All Ages  | Females, 0-4 Years | Females, 5-14 Years | Females, 15-49 Years | Females, 50-69 Years | Females, 70-80 Years |
|-------------------------------------------------------------------|--------------------|--------------------|---------------------|----------------------|----------------------|----------------------|
| All causes                                                        | 213<br>(178 - 272) | 11<br>(5 - 21)     | 2<br>(1 - 3)        | 18<br>(13 - 24)      | 43<br>(30 - 60)      | 139<br>(122 - 177)   |
| Communicable, maternal, neonatal, and nutritional diseases        | 22<br>(17 - 31)    | 7<br>(3 - 14)      | 0<br>(0 - 1)        | 3<br>(2 - 4)         | 2<br>(1 - 2)         | 10<br>(7 - 14)       |
| HIV/AIDS and tuberculosis                                         | 2<br>(1 - 3)       | 0<br>(0 - 0)       | 0<br>(0 - 0)        | 1<br>(1 - 2)         | 0<br>(0 - 1)         | 0<br>(0 - 0)         |
| Tuberculosis                                                      | 0<br>(0 - 0)       | 0<br>(0 - 0)       | 0<br>(0 - 0)        | 0<br>(0 - 0)         | 0<br>(0 - 0)         | 0<br>(0 - 0)         |
| HIV/AIDS                                                          | 2<br>(1 - 3)       | 0<br>(0 - 0)       | 0<br>(0 - 0)        | 1<br>(1 - 2)         | 0<br>(0 - 1)         | 0<br>(0 - 0)         |
| HIV/AIDS resulting in mycobacterial infection                     | 0<br>(0 - 0)       | 0<br>(0 - 0)       | 0<br>(0 - 0)        | 0<br>(0 - 0)         | 0<br>(0 - 0)         | 0<br>(0 - 0)         |
| HIV/AIDS resulting in other diseases                              | 1<br>(1 - 2)       | 0<br>(0 - 0)       | 0<br>(0 - 0)        | 1<br>(1 - 2)         | 0<br>(0 - 0)         | 0<br>(0 - 0)         |
| Diarrhea, lower respiratory, and other common infectious diseases | 12<br>(9 - 16)     | 2<br>(1 - 3)       | 0<br>(0 - 0)        | 1<br>(0 - 1)         | 1<br>(1 - 2)         | 8<br>(6 - 11)        |
| Diarrheal diseases                                                | 1<br>(1 - 2)       | 0<br>(0 - 1)       | 0<br>(0 - 0)        | 0<br>(0 - 0)         | 0<br>(0 - 0)         | 0<br>(0 - 1)         |
| Intestinal infectious diseases                                    | 0<br>(0 - 1)       | 0<br>(0 - 0)       | 0<br>(0 - 0)        | 0<br>(0 - 0)         | 0<br>(0 - 0)         | 0<br>(0 - 0)         |
| Typhoid fever                                                     | 0<br>(0 - 0)       | 0<br>(0 - 0)       | 0<br>(0 - 0)        | 0<br>(0 - 0)         | 0<br>(0 - 0)         | 0<br>(0 - 0)         |
| Paratyphoid fever                                                 | 0<br>(0 - 0)       | 0<br>(0 - 0)       | 0<br>(0 - 0)        | 0<br>(0 - 0)         | 0<br>(0 - 0)         | 0<br>(0 - 0)         |
| Other intestinal infectious diseases                              | 0<br>(0 - 0)       | 0<br>(0 - 0)       | 0<br>(0 - 0)        | 0<br>(0 - 0)         | 0<br>(0 - 0)         | 0<br>(0 - 0)         |
| Lower respiratory infections                                      | 10<br>(7 - 13)     | 1<br>(0 - 2)       | 0<br>(0 - 0)        | 0<br>(0 - 1)         | 1<br>(1 - 1)         | 8<br>(5 - 11)        |
| Upper respiratory infections                                      | 0<br>(0 - 0)       | 0<br>(0 - 0)       | 0<br>(0 - 0)        | 0<br>(0 - 0)         | 0<br>(0 - 0)         | 0<br>(0 - 0)         |
| Otitis media                                                      | 0<br>(0 - 0)       | 0<br>(0 - 0)       | 0<br>(0 - 0)        | 0<br>(0 - 0)         | 0<br>(0 - 0)         | 0<br>(0 - 0)         |
| Meningitis                                                        | 0<br>(0 - 0)       | 0<br>(0 - 0)       | 0<br>(0 - 0)        | 0<br>(0 - 0)         | 0<br>(0 - 0)         | 0<br>(0 - 0)         |
| Pneumococcal meningitis                                           | 0<br>(0 - 0)       | 0<br>(0 - 0)       | 0<br>(0 - 0)        | 0<br>(0 - 0)         | 0<br>(0 - 0)         | 0<br>(0 - 0)         |
| H influenzae type B meningitis                                    | 0<br>(0 - 0)       | 0<br>(0 - 0)       | 0<br>(0 - 0)        | 0<br>(0 - 0)         | 0<br>(0 - 0)         | 0<br>(0 - 0)         |
| Meningococcal meningitis                                          | 0<br>(0 - 0)       | 0<br>(0 - 0)       | 0<br>(0 - 0)        | 0<br>(0 - 0)         | 0<br>(0 - 0)         | 0<br>(0 - 0)         |
| Other meningitis                                                  | 0<br>(0 - 0)       | 0<br>(0 - 0)       | 0<br>(0 - 0)        | 0<br>(0 - 0)         | 0<br>(0 - 0)         | 0<br>(0 - 0)         |
| Encephalitis                                                      | 0<br>(0 - 0)       | 0<br>(0 - 0)       | 0<br>(0 - 0)        | 0<br>(0 - 0)         | 0<br>(0 - 0)         | 0<br>(0 - 0)         |
| Diphtheria                                                        | 0<br>(0 - 0)       | 0<br>(0 - 0)       | 0<br>(0 - 0)        | 0<br>(0 - 0)         | 0<br>(0 - 0)         | --                   |
| Whooping cough                                                    | 0<br>(0 - 0)       | 0<br>(0 - 0)       | 0<br>(0 - 0)        | 0<br>(0 - 0)         | 0<br>(0 - 0)         | --                   |
| Tetanus                                                           | 0<br>(0 - 0)       | 0<br>(0 - 0)       | 0<br>(0 - 0)        | 0<br>(0 - 0)         | 0<br>(0 - 0)         | 0<br>(0 - 0)         |
| Measles                                                           | 0<br>(0 - 0)       | 0<br>(0 - 0)       | 0<br>(0 - 0)        | 0<br>(0 - 0)         | 0<br>(0 - 0)         | --                   |
| Varicella and herpes zoster                                       | 0<br>(0 - 0)       | 0<br>(0 - 0)       | 0<br>(0 - 0)        | 0<br>(0 - 0)         | 0<br>(0 - 0)         | 0<br>(0 - 0)         |
| Neglected tropical diseases and malaria                           | 0<br>(0 - 0)       | 0<br>(0 - 0)       | 0<br>(0 - 0)        | 0<br>(0 - 0)         | 0<br>(0 - 0)         | 0<br>(0 - 0)         |
| Leishmaniasis                                                     | 0<br>(0 - 0)       | 0<br>(0 - 0)       | 0<br>(0 - 0)        | 0<br>(0 - 0)         | 0<br>(0 - 0)         | 0<br>(0 - 0)         |
| Visceral leishmaniasis                                            | 0<br>(0 - 0)       | 0<br>(0 - 0)       | 0<br>(0 - 0)        | 0<br>(0 - 0)         | 0<br>(0 - 0)         | 0<br>(0 - 0)         |
| Cysticercosis                                                     | 0<br>(0 - 0)       | 0<br>(0 - 0)       | 0<br>(0 - 0)        | 0<br>(0 - 0)         | 0<br>(0 - 0)         | 0<br>(0 - 0)         |
| Cystic echinococcosis                                             | 0<br>(0 - 0)       | 0<br>(0 - 0)       | 0<br>(0 - 0)        | 0<br>(0 - 0)         | 0<br>(0 - 0)         | 0<br>(0 - 0)         |
| Dengue                                                            | 0<br>(0 - 0)       | 0<br>(0 - 0)       | 0<br>(0 - 0)        | 0<br>(0 - 0)         | 0<br>(0 - 0)         | 0<br>(0 - 0)         |
| Rabies                                                            | 0<br>(0 - 0)       | 0<br>(0 - 0)       | 0<br>(0 - 0)        | 0<br>(0 - 0)         | 0<br>(0 - 0)         | 0<br>(0 - 0)         |
| Intestinal nematode infections                                    | 0<br>(0 - 0)       | 0<br>(0 - 0)       | 0<br>(0 - 0)        | --                   | 0<br>(0 - 0)         | 0<br>(0 - 0)         |
| Ascariasis                                                        | 0<br>(0 - 0)       | 0<br>(0 - 0)       | 0<br>(0 - 0)        | --                   | 0<br>(0 - 0)         | 0<br>(0 - 0)         |
| Other neglected tropical diseases                                 | 0<br>(0 - 0)       | 0<br>(0 - 0)       | 0<br>(0 - 0)        | 0<br>(0 - 0)         | 0<br>(0 - 0)         | 0<br>(0 - 0)         |
| Maternal disorders                                                | 0<br>(0 - 1)       | --                 | 0<br>(0 - 0)        | 0<br>(0 - 1)         | --                   | --                   |
| Maternal hemorrhage                                               | 0<br>(0 - 0)       | --                 | 0<br>(0 - 0)        | 0<br>(0 - 0)         | --                   | --                   |
| Maternal sepsis and other maternal infections                     | 0<br>(0 - 0)       | --                 | 0<br>(0 - 0)        | 0<br>(0 - 0)         | --                   | --                   |

Web Table 31- Dominica deaths with 95% UI by age, sex, and cause in 2013

| Cause                                                            | Females, All Ages | Females, 0-4 Years | Females, 5-14 Years | Females, 15-49 Years | Females, 50-69 Years | Females, 70-80 Years |
|------------------------------------------------------------------|-------------------|--------------------|---------------------|----------------------|----------------------|----------------------|
| Maternal hypertensive disorders                                  | 0<br>(0-0)        | --                 | 0<br>(0-0)          | 0<br>(0-0)           | --                   | --                   |
| Maternal obstructed labor                                        | 0<br>(0-0)        | --                 | 0<br>(0-0)          | 0<br>(0-0)           | --                   | --                   |
| Maternal abortive outcome                                        | 0<br>(0-0)        | --                 | 0<br>(0-0)          | 0<br>(0-0)           | --                   | --                   |
| Indirect maternal deaths                                         | 0<br>(0-0)        | --                 | 0<br>(0-0)          | 0<br>(0-0)           | --                   | --                   |
| Late maternal deaths                                             | 0<br>(0-0)        | --                 | 0<br>(0-0)          | 0<br>(0-0)           | --                   | --                   |
| Maternal deaths aggravated by HIV/AIDS                           | 0<br>(0-0)        | --                 | --                  | 0<br>(0-0)           | --                   | --                   |
| Other maternal disorders                                         | 0<br>(0-0)        | --                 | 0<br>(0-0)          | 0<br>(0-0)           | --                   | --                   |
| Neonatal disorders                                               | 5<br>(2-9)        | 5<br>(2-9)         | --                  | --                   | --                   | --                   |
| Neonatal preterm birth complications                             | 2<br>(1-4)        | 2<br>(1-4)         | --                  | --                   | --                   | --                   |
| Neonatal encephalopathy due to birth asphyxia and trauma         | 1<br>(1-3)        | 1<br>(1-3)         | --                  | --                   | --                   | --                   |
| Neonatal sepsis and other neonatal infections                    | 1<br>(0-2)        | 1<br>(0-2)         | --                  | --                   | --                   | --                   |
| Hemolytic disease and other neonatal jaundice                    | 0<br>(0-0)        | 0<br>(0-0)         | --                  | --                   | --                   | --                   |
| Other neonatal disorders                                         | 1<br>(0-1)        | 1<br>(0-1)         | --                  | --                   | --                   | --                   |
| Nutritional deficiencies                                         | 3<br>(2-4)        | 0<br>(0-1)         | 0<br>(0-0)          | 0<br>(0-0)           | 0<br>(0-0)           | 2<br>(1-3)           |
| Protein-energy malnutrition                                      | 1<br>(1-2)        | 0<br>(0-1)         | 0<br>(0-0)          | 0<br>(0-0)           | 0<br>(0-0)           | 1<br>(0-1)           |
| Iodine deficiency                                                | 0<br>(0-0)        | 0<br>(0-0)         | 0<br>(0-0)          | 0<br>(0-0)           | 0<br>(0-0)           | 0<br>(0-0)           |
| Iron-deficiency anemia                                           | 1<br>(1-2)        | 0<br>(0-0)         | 0<br>(0-0)          | 0<br>(0-0)           | 0<br>(0-0)           | 1<br>(0-2)           |
| Other nutritional deficiencies                                   | 0<br>(0-0)        | 0<br>(0-0)         | 0<br>(0-0)          | 0<br>(0-0)           | 0<br>(0-0)           | 0<br>(0-0)           |
| Other communicable, maternal, neonatal, and nutritional diseases | 0<br>(0-1)        | 0<br>(0-0)         | 0<br>(0-0)          | 0<br>(0-0)           | 0<br>(0-0)           | 0<br>(0-0)           |
| Sexually transmitted diseases excluding HIV                      | 0<br>(0-0)        | 0<br>(0-0)         | 0<br>(0-0)          | 0<br>(0-0)           | 0<br>(0-0)           | 0<br>(0-0)           |
| Syphilis                                                         | 0<br>(0-0)        | 0<br>(0-0)         | 0<br>(0-0)          | 0<br>(0-0)           | 0<br>(0-0)           | 0<br>(0-0)           |
| Chlamydial infection                                             | 0<br>(0-0)        | --                 | 0<br>(0-0)          | 0<br>(0-0)           | 0<br>(0-0)           | 0<br>(0-0)           |
| Gonococcal infection                                             | 0<br>(0-0)        | --                 | 0<br>(0-0)          | 0<br>(0-0)           | 0<br>(0-0)           | 0<br>(0-0)           |
| Other sexually transmitted diseases                              | 0<br>(0-0)        | --                 | 0<br>(0-0)          | 0<br>(0-0)           | 0<br>(0-0)           | 0<br>(0-0)           |
| Hepatitis                                                        | 0<br>(0-0)        | 0<br>(0-0)         | 0<br>(0-0)          | 0<br>(0-0)           | 0<br>(0-0)           | 0<br>(0-0)           |
| Acute hepatitis A                                                | 0<br>(0-0)        | 0<br>(0-0)         | 0<br>(0-0)          | 0<br>(0-0)           | 0<br>(0-0)           | 0<br>(0-0)           |
| Acute hepatitis B                                                | 0<br>(0-0)        | 0<br>(0-0)         | 0<br>(0-0)          | 0<br>(0-0)           | 0<br>(0-0)           | 0<br>(0-0)           |
| Acute hepatitis C                                                | 0<br>(0-0)        | --                 | 0<br>(0-0)          | 0<br>(0-0)           | 0<br>(0-0)           | 0<br>(0-0)           |
| Other infectious diseases                                        | 0<br>(0-1)        | 0<br>(0-0)         | 0<br>(0-0)          | 0<br>(0-0)           | 0<br>(0-0)           | 0<br>(0-0)           |
| Non-communicable diseases                                        | 182<br>(151-236)  | 3<br>(1-6)         | 1<br>(1-1)          | 13<br>(9-17)         | 40<br>(28-56)        | 125<br>(110-159)     |
| Neoplasms                                                        | 33<br>(25-44)     | 0<br>(0-0)         | 0<br>(0-0)          | 5<br>(3-6)           | 11<br>(8-16)         | 17<br>(14-22)        |
| Esophageal cancer                                                | 0<br>(0-1)        | --                 | --                  | 0<br>(0-0)           | 0<br>(0-0)           | 0<br>(0-0)           |
| Stomach cancer                                                   | 2<br>(1-3)        | --                 | --                  | 0<br>(0-0)           | 0<br>(0-1)           | 1<br>(1-2)           |
| Liver cancer                                                     | 1<br>(1-2)        | --                 | 0<br>(0-0)          | 0<br>(0-0)           | 0<br>(0-1)           | 1<br>(0-1)           |
| Liver cancer due to hepatitis B                                  | 0<br>(0-0)        | --                 | 0<br>(0-0)          | 0<br>(0-0)           | 0<br>(0-0)           | 0<br>(0-0)           |
| Liver cancer due to hepatitis C                                  | 1<br>(0-1)        | --                 | 0<br>(0-0)          | 0<br>(0-0)           | 0<br>(0-0)           | 0<br>(0-1)           |
| Liver cancer due to alcohol use                                  | 0<br>(0-0)        | --                 | --                  | 0<br>(0-0)           | 0<br>(0-0)           | 0<br>(0-0)           |
| Liver cancer due to other causes                                 | 0<br>(0-0)        | --                 | 0<br>(0-0)          | 0<br>(0-0)           | 0<br>(0-0)           | 0<br>(0-0)           |
| Larynx cancer                                                    | 0<br>(0-0)        | --                 | --                  | 0<br>(0-0)           | 0<br>(0-0)           | 0<br>(0-0)           |
| Tracheal, bronchus and lung cancer                               | 2<br>(1-3)        | --                 | --                  | 0<br>(0-0)           | 1<br>(0-1)           | 1<br>(1-1)           |

Web Table 31- Dominica deaths with 95% UI by age, sex, and cause in 2013

| Cause                                         | Females, All Ages | Females, 0-4 Years | Females, 5-14 Years | Females, 15-49 Years | Females, 50-69 Years | Females, 70-80 Years |
|-----------------------------------------------|-------------------|--------------------|---------------------|----------------------|----------------------|----------------------|
| Breast cancer                                 | 7<br>(5 - 10)     | --                 | --                  | 1<br>(1 - 2)         | 3<br>(2 - 4)         | 3<br>(2 - 4)         |
| Cervical cancer                               | 4<br>(3 - 5)      | --                 | --                  | 1<br>(1 - 1)         | 1<br>(1 - 2)         | 2<br>(1 - 2)         |
| Uterine cancer                                | 2<br>(1 - 2)      | --                 | --                  | 0<br>(0 - 0)         | 1<br>(0 - 1)         | 1<br>(1 - 1)         |
| Prostate cancer                               | --                | --                 | --                  | --                   | --                   | --                   |
| Colon and rectum cancer                       | 4<br>(3 - 6)      | --                 | --                  | 0<br>(0 - 0)         | 1<br>(1 - 2)         | 3<br>(2 - 4)         |
| Lip and oral cavity cancer                    | 0<br>(0 - 0)      | --                 | --                  | 0<br>(0 - 0)         | 0<br>(0 - 0)         | 0<br>(0 - 0)         |
| Nasopharynx cancer                            | 0<br>(0 - 0)      | --                 | 0<br>(0 - 0)        | 0<br>(0 - 0)         | 0<br>(0 - 0)         | 0<br>(0 - 0)         |
| Other pharynx cancer                          | 0<br>(0 - 0)      | --                 | --                  | 0<br>(0 - 0)         | 0<br>(0 - 0)         | 0<br>(0 - 0)         |
| Gallbladder and biliary tract cancer          | 1<br>(0 - 1)      | --                 | --                  | 0<br>(0 - 0)         | 0<br>(0 - 0)         | 0<br>(0 - 1)         |
| Pancreatic cancer                             | 2<br>(1 - 2)      | --                 | --                  | 0<br>(0 - 0)         | 1<br>(0 - 1)         | 1<br>(1 - 2)         |
| Malignant skin melanoma                       | 0<br>(0 - 0)      | --                 | --                  | 0<br>(0 - 0)         | 0<br>(0 - 0)         | 0<br>(0 - 0)         |
| Non-melanoma skin cancer                      | 0<br>(0 - 0)      | --                 | --                  | 0<br>(0 - 0)         | 0<br>(0 - 0)         | 0<br>(0 - 0)         |
| Ovarian cancer                                | 2<br>(1 - 2)      | --                 | --                  | 0<br>(0 - 0)         | 1<br>(0 - 1)         | 1<br>(1 - 1)         |
| Testicular cancer                             | --                | --                 | --                  | --                   | --                   | --                   |
| Kidney cancer                                 | 0<br>(0 - 1)      | 0<br>(0 - 0)       | 0<br>(0 - 0)        | 0<br>(0 - 0)         | 0<br>(0 - 0)         | 0<br>(0 - 0)         |
| Bladder cancer                                | 0<br>(0 - 1)      | --                 | --                  | 0<br>(0 - 0)         | 0<br>(0 - 0)         | 0<br>(0 - 0)         |
| Brain and nervous system cancer               | 0<br>(0 - 1)      | 0<br>(0 - 0)       | 0<br>(0 - 0)        | 0<br>(0 - 0)         | 0<br>(0 - 0)         | 0<br>(0 - 0)         |
| Thyroid cancer                                | 0<br>(0 - 0)      | --                 | 0<br>(0 - 0)        | 0<br>(0 - 0)         | 0<br>(0 - 0)         | 0<br>(0 - 0)         |
| Mesothelioma                                  | 0<br>(0 - 0)      | --                 | --                  | 0<br>(0 - 0)         | 0<br>(0 - 0)         | 0<br>(0 - 0)         |
| Hodgkin lymphoma                              | 0<br>(0 - 0)      | 0<br>(0 - 0)       | 0<br>(0 - 0)        | 0<br>(0 - 0)         | 0<br>(0 - 0)         | 0<br>(0 - 0)         |
| Non-Hodgkin lymphoma                          | 1<br>(1 - 2)      | 0<br>(0 - 0)       | 0<br>(0 - 0)        | 0<br>(0 - 0)         | 0<br>(0 - 1)         | 0<br>(0 - 1)         |
| Multiple myeloma                              | 1<br>(0 - 1)      | --                 | --                  | 0<br>(0 - 0)         | 0<br>(0 - 0)         | 0<br>(0 - 0)         |
| Leukemia                                      | 1<br>(1 - 1)      | 0<br>(0 - 0)       | 0<br>(0 - 0)        | 0<br>(0 - 0)         | 0<br>(0 - 0)         | 0<br>(0 - 0)         |
| Other neoplasms                               | 2<br>(1 - 3)      | 0<br>(0 - 0)       | 0<br>(0 - 0)        | 0<br>(0 - 1)         | 1<br>(0 - 1)         | 1<br>(1 - 1)         |
| Cardiovascular diseases                       | 83<br>(68 - 105)  | 0<br>(0 - 0)       | 0<br>(0 - 0)        | 3<br>(2 - 5)         | 15<br>(10 - 20)      | 65<br>(55 - 80)      |
| Rheumatic heart disease                       | 0<br>(0 - 1)      | 0<br>(0 - 0)       | 0<br>(0 - 0)        | 0<br>(0 - 0)         | 0<br>(0 - 0)         | 0<br>(0 - 0)         |
| Ischemic heart disease                        | 30<br>(23 - 41)   | 0<br>(0 - 0)       | 0<br>(0 - 0)        | 1<br>(1 - 2)         | 6<br>(4 - 9)         | 23<br>(18 - 31)      |
| Cerebrovascular disease                       | 32<br>(23 - 42)   | 0<br>(0 - 0)       | 0<br>(0 - 0)        | 1<br>(1 - 1)         | 5<br>(4 - 8)         | 25<br>(19 - 33)      |
| Ischemic stroke                               | 20<br>(14 - 27)   | 0<br>(0 - 0)       | 0<br>(0 - 0)        | 0<br>(0 - 0)         | 3<br>(2 - 4)         | 17<br>(11 - 23)      |
| Hemorrhagic stroke                            | 12<br>(8 - 16)    | 0<br>(0 - 0)       | 0<br>(0 - 0)        | 1<br>(0 - 1)         | 3<br>(2 - 4)         | 8<br>(6 - 11)        |
| Hypertensive heart disease                    | 12<br>(8 - 17)    | 0<br>(0 - 0)       | 0<br>(0 - 0)        | 0<br>(0 - 0)         | 2<br>(1 - 3)         | 10<br>(7 - 15)       |
| Cardiomyopathy and myocarditis                | 2<br>(1 - 3)      | 0<br>(0 - 0)       | 0<br>(0 - 0)        | 0<br>(0 - 0)         | 0<br>(0 - 1)         | 1<br>(1 - 2)         |
| Atrial fibrillation and flutter               | 2<br>(1 - 2)      | --                 | --                  | 0<br>(0 - 0)         | 0<br>(0 - 0)         | 1<br>(1 - 2)         |
| Aortic aneurysm                               | 1<br>(0 - 1)      | --                 | --                  | 0<br>(0 - 0)         | 0<br>(0 - 0)         | 1<br>(0 - 1)         |
| Peripheral vascular disease                   | 1<br>(1 - 1)      | --                 | --                  | 0<br>(0 - 0)         | 0<br>(0 - 0)         | 1<br>(0 - 1)         |
| Endocarditis                                  | 0<br>(0 - 0)      | 0<br>(0 - 0)       | 0<br>(0 - 0)        | 0<br>(0 - 0)         | 0<br>(0 - 0)         | 0<br>(0 - 0)         |
| Other cardiovascular and circulatory diseases | 4<br>(2 - 5)      | 0<br>(0 - 0)       | 0<br>(0 - 0)        | 0<br>(0 - 0)         | 1<br>(0 - 1)         | 2<br>(1 - 4)         |
| Chronic respiratory diseases                  | 4<br>(3 - 6)      | 0<br>(0 - 0)       | 0<br>(0 - 0)        | 0<br>(0 - 1)         | 1<br>(1 - 1)         | 3<br>(2 - 4)         |
| Chronic obstructive pulmonary disease         | 3<br>(2 - 4)      | 0<br>(0 - 0)       | 0<br>(0 - 0)        | 0<br>(0 - 0)         | 0<br>(0 - 1)         | 2<br>(1 - 3)         |
| Pneumoconiosis                                | 0<br>(0 - 0)      | 0<br>(0 - 0)       | 0<br>(0 - 0)        | 0<br>(0 - 0)         | 0<br>(0 - 0)         | 0<br>(0 - 0)         |

Web Table 31- Dominica deaths with 95% UI by age, sex, and cause in 2013

| Cause                                               | Females, All Ages | Females, 0-4 Years | Females, 5-14 Years | Females, 15-49 Years | Females, 50-69 Years | Females, 70-80 Years |
|-----------------------------------------------------|-------------------|--------------------|---------------------|----------------------|----------------------|----------------------|
| Silicosis                                           | 0<br>(0-0)        | 0<br>(0-0)         | 0<br>(0-0)          | 0<br>(0-0)           | 0<br>(0-0)           | 0<br>(0-0)           |
| Asbestosis                                          | 0<br>(0-0)        | 0<br>(0-0)         | 0<br>(0-0)          | 0<br>(0-0)           | 0<br>(0-0)           | 0<br>(0-0)           |
| Coal workers pneumoconiosis                         | 0<br>(0-0)        | 0<br>(0-0)         | 0<br>(0-0)          | 0<br>(0-0)           | 0<br>(0-0)           | 0<br>(0-0)           |
| Other pneumoconiosis                                | 0<br>(0-0)        | 0<br>(0-0)         | 0<br>(0-0)          | 0<br>(0-0)           | 0<br>(0-0)           | 0<br>(0-0)           |
| Asthma                                              | 1<br>(1-2)        | 0<br>(0-0)         | 0<br>(0-0)          | 0<br>(0-0)           | 0<br>(0-0)           | 1<br>(0-1)           |
| Interstitial lung disease and pulmonary sarcoidosis | 0<br>(0-1)        | 0<br>(0-0)         | 0<br>(0-0)          | 0<br>(0-0)           | 0<br>(0-0)           | 0<br>(0-0)           |
| Other chronic respiratory diseases                  | 0<br>(0-0)        | 0<br>(0-0)         | 0<br>(0-0)          | 0<br>(0-0)           | 0<br>(0-0)           | 0<br>(0-0)           |
| Cirrhosis                                           | 2<br>(2-3)        | 0<br>(0-0)         | 0<br>(0-0)          | 0<br>(0-1)           | 1<br>(1-1)           | 1<br>(1-1)           |
| Cirrhosis due to hepatitis B                        | 0<br>(0-0)        | 0<br>(0-0)         | 0<br>(0-0)          | 0<br>(0-0)           | 0<br>(0-0)           | 0<br>(0-0)           |
| Cirrhosis due to hepatitis C                        | 1<br>(1-2)        | 0<br>(0-0)         | 0<br>(0-0)          | 0<br>(0-0)           | 0<br>(0-1)           | 0<br>(0-1)           |
| Cirrhosis due to alcohol use                        | 0<br>(0-1)        | --                 | --                  | 0<br>(0-0)           | 0<br>(0-0)           | 0<br>(0-0)           |
| Cirrhosis due to other causes                       | 0<br>(0-1)        | 0<br>(0-0)         | 0<br>(0-0)          | 0<br>(0-0)           | 0<br>(0-0)           | 0<br>(0-0)           |
| Digestive diseases                                  | 4<br>(3-6)        | 0<br>(0-0)         | 0<br>(0-0)          | 0<br>(0-1)           | 1<br>(1-1)           | 3<br>(2-4)           |
| Peptic ulcer disease                                | 1<br>(1-1)        | 0<br>(0-0)         | 0<br>(0-0)          | 0<br>(0-0)           | 0<br>(0-0)           | 1<br>(0-1)           |
| Gastritis and duodenitis                            | 0<br>(0-0)        | 0<br>(0-0)         | 0<br>(0-0)          | 0<br>(0-0)           | 0<br>(0-0)           | 0<br>(0-0)           |
| Appendicitis                                        | 0<br>(0-0)        | 0<br>(0-0)         | 0<br>(0-0)          | 0<br>(0-0)           | 0<br>(0-0)           | 0<br>(0-0)           |
| Paralytic ileus and intestinal obstruction          | 1<br>(0-1)        | 0<br>(0-0)         | 0<br>(0-0)          | 0<br>(0-0)           | 0<br>(0-0)           | 0<br>(0-1)           |
| Inguinal, femoral, and abdominal hernia             | 0<br>(0-1)        | 0<br>(0-0)         | 0<br>(0-0)          | 0<br>(0-0)           | 0<br>(0-0)           | 0<br>(0-0)           |
| Inflammatory bowel disease                          | 0<br>(0-1)        | 0<br>(0-0)         | 0<br>(0-0)          | 0<br>(0-0)           | 0<br>(0-0)           | 0<br>(0-0)           |
| Vascular intestinal disorders                       | 0<br>(0-0)        | 0<br>(0-0)         | 0<br>(0-0)          | 0<br>(0-0)           | 0<br>(0-0)           | 0<br>(0-0)           |
| Gallbladder and biliary diseases                    | 0<br>(0-1)        | 0<br>(0-0)         | 0<br>(0-0)          | 0<br>(0-0)           | 0<br>(0-0)           | 0<br>(0-0)           |
| Pancreatitis                                        | 0<br>(0-0)        | 0<br>(0-0)         | 0<br>(0-0)          | 0<br>(0-0)           | 0<br>(0-0)           | 0<br>(0-0)           |
| Other digestive diseases                            | 1<br>(1-2)        | 0<br>(0-0)         | 0<br>(0-0)          | 0<br>(0-0)           | 0<br>(0-0)           | 1<br>(0-1)           |
| Neurological disorders                              | 11<br>(9-15)      | 0<br>(0-0)         | 0<br>(0-0)          | 0<br>(0-0)           | 1<br>(1-1)           | 10<br>(8-14)         |
| Alzheimer disease and other dementias               | 10<br>(8-14)      | --                 | --                  | 0<br>(0-0)           | 1<br>(0-1)           | 10<br>(7-13)         |
| Parkinson disease                                   | 1<br>(0-1)        | --                 | --                  | 0<br>(0-0)           | 0<br>(0-0)           | 1<br>(0-1)           |
| Epilepsy                                            | 0<br>(0-1)        | 0<br>(0-0)         | 0<br>(0-0)          | 0<br>(0-0)           | 0<br>(0-0)           | 0<br>(0-0)           |
| Multiple sclerosis                                  | 0<br>(0-0)        | --                 | --                  | 0<br>(0-0)           | 0<br>(0-0)           | 0<br>(0-0)           |
| Other neurological disorders                        | 0<br>(0-0)        | 0<br>(0-0)         | 0<br>(0-0)          | 0<br>(0-0)           | 0<br>(0-0)           | 0<br>(0-0)           |
| Mental and substance use disorders                  | 0<br>(0-0)        | 0<br>(0-0)         | 0<br>(0-0)          | 0<br>(0-0)           | 0<br>(0-0)           | 0<br>(0-0)           |
| Schizophrenia                                       | 0<br>(0-0)        | --                 | --                  | 0<br>(0-0)           | 0<br>(0-0)           | 0<br>(0-0)           |
| Alcohol use disorders                               | 0<br>(0-0)        | --                 | --                  | 0<br>(0-0)           | 0<br>(0-0)           | 0<br>(0-0)           |
| Drug use disorders                                  | 0<br>(0-0)        | 0<br>(0-0)         | --                  | 0<br>(0-0)           | 0<br>(0-0)           | 0<br>(0-0)           |
| Opioid use disorders                                | 0<br>(0-0)        | 0<br>(0-0)         | --                  | 0<br>(0-0)           | 0<br>(0-0)           | 0<br>(0-0)           |
| Cocaine use disorders                               | 0<br>(0-0)        | 0<br>(0-0)         | --                  | 0<br>(0-0)           | 0<br>(0-0)           | 0<br>(0-0)           |
| Amphetamine use disorders                           | 0<br>(0-0)        | 0<br>(0-0)         | --                  | 0<br>(0-0)           | 0<br>(0-0)           | 0<br>(0-0)           |
| Other drug use disorders                            | 0<br>(0-0)        | 0<br>(0-0)         | --                  | 0<br>(0-0)           | 0<br>(0-0)           | 0<br>(0-0)           |
| Eating disorders                                    | 0<br>(0-0)        | --                 | 0<br>(0-0)          | 0<br>(0-0)           | --                   | --                   |
| Anorexia nervosa                                    | 0<br>(0-0)        | --                 | 0<br>(0-0)          | 0<br>(0-0)           | --                   | --                   |
| Diabetes, urogenital, blood, and endocrine diseases | 37<br>(29-50)     | 0<br>(0-1)         | 0<br>(0-0)          | 3<br>(2-4)           | 10<br>(7-15)         | 24<br>(19-32)        |

Web Table 31- Dominica deaths with 95% UI by age, sex, and cause in 2013

| Cause                                               | Females, All Ages | Females, 0-4 Years | Females, 5-14 Years | Females, 15-49 Years | Females, 50-69 Years | Females, 70-80 Years |
|-----------------------------------------------------|-------------------|--------------------|---------------------|----------------------|----------------------|----------------------|
| Diabetes mellitus                                   | 26<br>(19 - 35)   | 0<br>(0 - 0)       | 0<br>(0 - 0)        | 1<br>(1 - 2)         | 8<br>(5 - 11)        | 17<br>(13 - 23)      |
| Acute glomerulonephritis                            | 0<br>(0 - 0)      | 0<br>(0 - 0)       | 0<br>(0 - 0)        | 0<br>(0 - 0)         | 0<br>(0 - 0)         | 0<br>(0 - 0)         |
| Chronic kidney disease                              | 7<br>(4 - 18)     | 0<br>(0 - 0)       | 0<br>(0 - 0)        | 1<br>(0 - 2)         | 2<br>(1 - 4)         | 4<br>(3 - 11)        |
| Chronic kidney disease due to diabetes mellitus     | 1<br>(0 - 2)      | 0<br>(0 - 0)       | 0<br>(0 - 0)        | 0<br>(0 - 0)         | 1<br>(0 - 1)         | 1<br>(0 - 1)         |
| Chronic kidney disease due to hypertension          | 4<br>(2 - 8)      | 0<br>(0 - 0)       | 0<br>(0 - 0)        | 0<br>(0 - 1)         | 1<br>(0 - 2)         | 3<br>(2 - 5)         |
| Chronic kidney disease due to glomerulonephritis    | 0<br>(0 - 0)      | 0<br>(0 - 0)       | 0<br>(0 - 0)        | 0<br>(0 - 0)         | 0<br>(0 - 0)         | 0<br>(0 - 0)         |
| Chronic kidney disease due to other causes          | 2<br>(1 - 8)      | 0<br>(0 - 0)       | 0<br>(0 - 0)        | 0<br>(0 - 1)         | 1<br>(0 - 2)         | 1<br>(0 - 5)         |
| Urinary diseases and male infertility               | 1<br>(1 - 1)      | 0<br>(0 - 0)       | 0<br>(0 - 0)        | 0<br>(0 - 0)         | 0<br>(0 - 0)         | 1<br>(0 - 1)         |
| Interstitial nephritis and urinary tract infections | 1<br>(1 - 1)      | 0<br>(0 - 0)       | 0<br>(0 - 0)        | 0<br>(0 - 0)         | 0<br>(0 - 0)         | 1<br>(0 - 1)         |
| Urolithiasis                                        | 0<br>(0 - 0)      | --                 | 0<br>(0 - 0)        | 0<br>(0 - 0)         | 0<br>(0 - 0)         | 0<br>(0 - 0)         |
| Other urinary diseases                              | 0<br>(0 - 0)      | 0<br>(0 - 0)       | 0<br>(0 - 0)        | 0<br>(0 - 0)         | 0<br>(0 - 0)         | 0<br>(0 - 0)         |
| Gynecological diseases                              | 0<br>(0 - 0)      | --                 | --                  | 0<br>(0 - 0)         | 0<br>(0 - 0)         | 0<br>(0 - 0)         |
| Uterine fibroids                                    | 0<br>(0 - 0)      | --                 | --                  | 0<br>(0 - 0)         | 0<br>(0 - 0)         | 0<br>(0 - 0)         |
| Polycystic ovarian syndrome                         | 0<br>(0 - 0)      | --                 | --                  | 0<br>(0 - 0)         | 0<br>(0 - 0)         | --                   |
| Endometriosis                                       | 0<br>(0 - 0)      | --                 | --                  | 0<br>(0 - 0)         | 0<br>(0 - 0)         | --                   |
| Genital prolapse                                    | 0<br>(0 - 0)      | --                 | --                  | 0<br>(0 - 0)         | 0<br>(0 - 0)         | 0<br>(0 - 0)         |
| Other gynecological diseases                        | 0<br>(0 - 0)      | --                 | --                  | 0<br>(0 - 0)         | 0<br>(0 - 0)         | 0<br>(0 - 0)         |
| Hemoglobinopathies and hemolytic anemias            | 0<br>(0 - 1)      | 0<br>(0 - 0)       | 0<br>(0 - 0)        | 0<br>(0 - 0)         | 0<br>(0 - 0)         | 0<br>(0 - 0)         |
| Thalassemias                                        | 0<br>(0 - 0)      | 0<br>(0 - 0)       | 0<br>(0 - 0)        | 0<br>(0 - 0)         | 0<br>(0 - 0)         | 0<br>(0 - 0)         |
| Sickle cell disorders                               | 0<br>(0 - 1)      | 0<br>(0 - 0)       | 0<br>(0 - 0)        | 0<br>(0 - 0)         | 0<br>(0 - 0)         | 0<br>(0 - 0)         |
| G6PD deficiency                                     | 0<br>(0 - 0)      | 0<br>(0 - 0)       | 0<br>(0 - 0)        | 0<br>(0 - 0)         | 0<br>(0 - 0)         | 0<br>(0 - 0)         |
| Other hemoglobinopathies and hemolytic anemias      | 0<br>(0 - 0)      | 0<br>(0 - 0)       | 0<br>(0 - 0)        | 0<br>(0 - 0)         | 0<br>(0 - 0)         | 0<br>(0 - 0)         |
| Endocrine, metabolic, blood, and immune disorders   | 2<br>(1 - 4)      | 0<br>(0 - 0)       | 0<br>(0 - 0)        | 0<br>(0 - 1)         | 0<br>(0 - 1)         | 1<br>(1 - 2)         |
| Musculoskeletal disorders                           | 1<br>(0 - 2)      | --                 | 0<br>(0 - 0)        | 0<br>(0 - 1)         | 0<br>(0 - 0)         | 0<br>(0 - 1)         |
| Rheumatoid arthritis                                | 0<br>(0 - 0)      | --                 | 0<br>(0 - 0)        | 0<br>(0 - 0)         | 0<br>(0 - 0)         | 0<br>(0 - 0)         |
| Other musculoskeletal disorders                     | 1<br>(0 - 1)      | --                 | 0<br>(0 - 0)        | 0<br>(0 - 1)         | 0<br>(0 - 0)         | 0<br>(0 - 1)         |
| Other non-communicable diseases                     | 5<br>(3 - 8)      | 2<br>(1 - 4)       | 0<br>(0 - 0)        | 0<br>(0 - 0)         | 0<br>(0 - 0)         | 3<br>(1 - 4)         |
| Congenital anomalies                                | 2<br>(1 - 4)      | 2<br>(1 - 4)       | 0<br>(0 - 0)        | 0<br>(0 - 0)         | 0<br>(0 - 0)         | 0<br>(0 - 0)         |
| Neural tube defects                                 | 0<br>(0 - 0)      | 0<br>(0 - 0)       | 0<br>(0 - 0)        | 0<br>(0 - 0)         | 0<br>(0 - 0)         | 0<br>(0 - 0)         |
| Congenital heart anomalies                          | 1<br>(1 - 3)      | 1<br>(0 - 2)       | 0<br>(0 - 0)        | 0<br>(0 - 0)         | 0<br>(0 - 0)         | 0<br>(0 - 0)         |
| Cleft lip and cleft palate                          | 0<br>(0 - 0)      | 0<br>(0 - 0)       | --                  | --                   | --                   | --                   |
| Down syndrome                                       | 0<br>(0 - 0)      | 0<br>(0 - 0)       | 0<br>(0 - 0)        | 0<br>(0 - 0)         | 0<br>(0 - 0)         | 0<br>(0 - 0)         |
| Chromosomal unbalanced rearrangements               | 0<br>(0 - 0)      | 0<br>(0 - 0)       | 0<br>(0 - 0)        | 0<br>(0 - 0)         | 0<br>(0 - 0)         | 0<br>(0 - 0)         |
| Other congenital anomalies                          | 1<br>(0 - 1)      | 1<br>(0 - 1)       | 0<br>(0 - 0)        | 0<br>(0 - 0)         | 0<br>(0 - 0)         | 0<br>(0 - 0)         |
| Skin and subcutaneous diseases                      | 3<br>(1 - 4)      | 0<br>(0 - 0)       | 0<br>(0 - 0)        | 0<br>(0 - 0)         | 0<br>(0 - 0)         | 2<br>(1 - 4)         |
| Cellulitis                                          | 0<br>(0 - 0)      | 0<br>(0 - 0)       | 0<br>(0 - 0)        | 0<br>(0 - 0)         | 0<br>(0 - 0)         | 0<br>(0 - 0)         |
| Pyoderma                                            | 0<br>(0 - 1)      | 0<br>(0 - 0)       | 0<br>(0 - 0)        | 0<br>(0 - 0)         | 0<br>(0 - 0)         | 0<br>(0 - 1)         |
| Decubitus ulcer                                     | 2<br>(1 - 3)      | 0<br>(0 - 0)       | 0<br>(0 - 0)        | 0<br>(0 - 0)         | 0<br>(0 - 0)         | 2<br>(1 - 3)         |
| Other skin and subcutaneous diseases                | 0<br>(0 - 0)      | 0<br>(0 - 0)       | 0<br>(0 - 0)        | 0<br>(0 - 0)         | 0<br>(0 - 0)         | 0<br>(0 - 0)         |
| Sudden infant death syndrome                        | 0<br>(0 - 1)      | 0<br>(0 - 1)       | --                  | --                   | --                   | --                   |

Web Table 31- Dominica deaths with 95% UI by age, sex, and cause in 2013

| Cause                                           | Females, All Ages | Females, 0-4 Years | Females, 5-14 Years | Females, 15-49 Years | Females, 50-69 Years | Females, 70-80 Years |
|-------------------------------------------------|-------------------|--------------------|---------------------|----------------------|----------------------|----------------------|
| Injuries                                        | 9<br>(6 - 11)     | 1<br>(0 - 2)       | 1<br>(0 - 1)        | 3<br>(2 - 3)         | 1<br>(1 - 2)         | 4<br>(3 - 5)         |
| Transport injuries                              | 2<br>(2 - 3)      | 0<br>(0 - 0)       | 0<br>(0 - 0)        | 1<br>(0 - 1)         | 0<br>(0 - 1)         | 1<br>(0 - 1)         |
| Road injuries                                   | 2<br>(1 - 3)      | 0<br>(0 - 0)       | 0<br>(0 - 0)        | 1<br>(0 - 1)         | 0<br>(0 - 1)         | 1<br>(0 - 1)         |
| Pedestrian road injuries                        | 1<br>(0 - 1)      | 0<br>(0 - 0)       | 0<br>(0 - 0)        | 0<br>(0 - 0)         | 0<br>(0 - 0)         | 0<br>(0 - 0)         |
| Cyclist road injuries                           | 0<br>(0 - 0)      | 0<br>(0 - 0)       | 0<br>(0 - 0)        | 0<br>(0 - 0)         | 0<br>(0 - 0)         | 0<br>(0 - 0)         |
| Motorcyclist road injuries                      | 0<br>(0 - 0)      | 0<br>(0 - 0)       | 0<br>(0 - 0)        | 0<br>(0 - 0)         | 0<br>(0 - 0)         | 0<br>(0 - 0)         |
| Motor vehicle road injuries                     | 1<br>(1 - 2)      | 0<br>(0 - 0)       | 0<br>(0 - 0)        | 0<br>(0 - 1)         | 0<br>(0 - 0)         | 0<br>(0 - 1)         |
| Other road injuries                             | 0<br>(0 - 0)      | 0<br>(0 - 0)       | 0<br>(0 - 0)        | 0<br>(0 - 0)         | 0<br>(0 - 0)         | 0<br>(0 - 0)         |
| Other transport injuries                        | 0<br>(0 - 0)      | 0<br>(0 - 0)       | 0<br>(0 - 0)        | 0<br>(0 - 0)         | 0<br>(0 - 0)         | 0<br>(0 - 0)         |
| Unintentional injuries                          | 5<br>(3 - 6)      | 1<br>(0 - 1)       | 0<br>(0 - 0)        | 1<br>(0 - 1)         | 1<br>(0 - 1)         | 3<br>(2 - 4)         |
| Falls                                           | 1<br>(1 - 2)      | 0<br>(0 - 0)       | 0<br>(0 - 0)        | 0<br>(0 - 0)         | 0<br>(0 - 0)         | 1<br>(1 - 2)         |
| Drowning                                        | 0<br>(0 - 1)      | 0<br>(0 - 0)       | 0<br>(0 - 0)        | 0<br>(0 - 0)         | 0<br>(0 - 0)         | 0<br>(0 - 0)         |
| Fire, heat, and hot substances                  | 1<br>(0 - 1)      | 0<br>(0 - 0)       | 0<br>(0 - 0)        | 0<br>(0 - 0)         | 0<br>(0 - 0)         | 0<br>(0 - 1)         |
| Poisonings                                      | 0<br>(0 - 0)      | 0<br>(0 - 0)       | 0<br>(0 - 0)        | 0<br>(0 - 0)         | 0<br>(0 - 0)         | 0<br>(0 - 0)         |
| Exposure to mechanical forces                   | 0<br>(0 - 0)      | 0<br>(0 - 0)       | 0<br>(0 - 0)        | 0<br>(0 - 0)         | 0<br>(0 - 0)         | 0<br>(0 - 0)         |
| Unintentional firearm injuries                  | 0<br>(0 - 0)      | 0<br>(0 - 0)       | 0<br>(0 - 0)        | 0<br>(0 - 0)         | 0<br>(0 - 0)         | 0<br>(0 - 0)         |
| Unintentional suffocation                       | 0<br>(0 - 0)      | 0<br>(0 - 0)       | 0<br>(0 - 0)        | 0<br>(0 - 0)         | 0<br>(0 - 0)         | 0<br>(0 - 0)         |
| Other exposure to mechanical forces             | 0<br>(0 - 0)      | 0<br>(0 - 0)       | 0<br>(0 - 0)        | 0<br>(0 - 0)         | 0<br>(0 - 0)         | 0<br>(0 - 0)         |
| Adverse effects of medical treatment            | 1<br>(0 - 2)      | 0<br>(0 - 0)       | 0<br>(0 - 0)        | 0<br>(0 - 0)         | 0<br>(0 - 0)         | 1<br>(0 - 1)         |
| Animal contact                                  | 0<br>(0 - 0)      | 0<br>(0 - 0)       | 0<br>(0 - 0)        | 0<br>(0 - 0)         | 0<br>(0 - 0)         | 0<br>(0 - 0)         |
| Venomous animal contact                         | 0<br>(0 - 0)      | 0<br>(0 - 0)       | 0<br>(0 - 0)        | 0<br>(0 - 0)         | 0<br>(0 - 0)         | 0<br>(0 - 0)         |
| Non-venomous animal contact                     | 0<br>(0 - 0)      | 0<br>(0 - 0)       | 0<br>(0 - 0)        | 0<br>(0 - 0)         | 0<br>(0 - 0)         | 0<br>(0 - 0)         |
| Foreign body                                    | 1<br>(0 - 1)      | 0<br>(0 - 1)       | 0<br>(0 - 0)        | 0<br>(0 - 0)         | 0<br>(0 - 0)         | 0<br>(0 - 1)         |
| Pulmonary aspiration and foreign body in airway | 1<br>(0 - 1)      | 0<br>(0 - 1)       | 0<br>(0 - 0)        | 0<br>(0 - 0)         | 0<br>(0 - 0)         | 0<br>(0 - 1)         |
| Foreign body in other body part                 | 0<br>(0 - 0)      | 0<br>(0 - 0)       | 0<br>(0 - 0)        | 0<br>(0 - 0)         | 0<br>(0 - 0)         | 0<br>(0 - 0)         |
| Other unintentional injuries                    | 0<br>(0 - 0)      | 0<br>(0 - 0)       | 0<br>(0 - 0)        | 0<br>(0 - 0)         | 0<br>(0 - 0)         | 0<br>(0 - 0)         |
| Self-harm and interpersonal violence            | 2<br>(1 - 2)      | 0<br>(0 - 0)       | 0<br>(0 - 0)        | 1<br>(1 - 2)         | 0<br>(0 - 0)         | 0<br>(0 - 0)         |
| Self-harm                                       | 1<br>(1 - 1)      | --                 | 0<br>(0 - 0)        | 0<br>(0 - 1)         | 0<br>(0 - 0)         | 0<br>(0 - 0)         |
| Interpersonal violence                          | 1<br>(1 - 2)      | 0<br>(0 - 0)       | 0<br>(0 - 0)        | 1<br>(0 - 1)         | 0<br>(0 - 0)         | 0<br>(0 - 0)         |
| Assault by firearm                              | 0<br>(0 - 0)      | 0<br>(0 - 0)       | 0<br>(0 - 0)        | 0<br>(0 - 0)         | 0<br>(0 - 0)         | 0<br>(0 - 0)         |
| Assault by sharp object                         | 0<br>(0 - 1)      | 0<br>(0 - 0)       | 0<br>(0 - 0)        | 0<br>(0 - 0)         | 0<br>(0 - 0)         | 0<br>(0 - 0)         |
| Assault by other means                          | 0<br>(0 - 1)      | 0<br>(0 - 0)       | 0<br>(0 - 0)        | 0<br>(0 - 0)         | 0<br>(0 - 0)         | 0<br>(0 - 0)         |

Web Table 31- Dominican Republic deaths with 95% UI by age, sex, and cause in 2013

| Cause                                                             | Both Sexes, All Ages        | Both Sexes, 0-4 Years    | Both Sexes, 5-14 Years | Both Sexes, 15-49 Years   | Both Sexes, 50-69 Years     | Both Sexes, 70-80 Years     |
|-------------------------------------------------------------------|-----------------------------|--------------------------|------------------------|---------------------------|-----------------------------|-----------------------------|
| All causes                                                        | 63,611<br>(55,231 - 75,410) | 6,245<br>(5,229 - 7,493) | 911<br>(803 - 1,039)   | 9,607<br>(7,753 - 11,701) | 14,949<br>(11,897 - 19,185) | 31,899<br>(28,608 - 37,981) |
| Communicable, maternal, neonatal, and nutritional diseases        | 8,689<br>(7,699 - 9,780)    | 4,258<br>(3,570 - 5,028) | 187<br>(156 - 222)     | 1,260<br>(1,071 - 1,467)  | 810<br>(667 - 989)          | 2,173<br>(1,789 - 2,674)    |
| HIV/AIDS and tuberculosis                                         | 1,101<br>(883 - 1,368)      | 12<br>(8 - 17)           | 8<br>(5 - 10)          | 706<br>(549 - 903)        | 248<br>(190 - 321)          | 128<br>(102 - 187)          |
| Tuberculosis                                                      | 451<br>(365 - 591)          | 8<br>(5 - 11)            | 6<br>(5 - 9)           | 182<br>(142 - 235)        | 141<br>(105 - 185)          | 113<br>(87 - 169)           |
| HIV/AIDS                                                          | 650<br>(459 - 893)          | 4<br>(1 - 8)             | 1<br>(0 - 3)           | 524<br>(369 - 722)        | 107<br>(63 - 171)           | 15<br>(7 - 25)              |
| HIV/AIDS resulting in mycobacterial infection                     | 39<br>(25 - 57)             | 0<br>(0 - 0)             | 0<br>(0 - 0)           | 31<br>(20 - 45)           | 7<br>(4 - 11)               | 1<br>(0 - 2)                |
| HIV/AIDS resulting in other diseases                              | 612<br>(431 - 841)          | 4<br>(1 - 7)             | 1<br>(0 - 3)           | 494<br>(348 - 681)        | 100<br>(59 - 160)           | 14<br>(6 - 23)              |
| Diarrhea, lower respiratory, and other common infectious diseases | 3,509<br>(2,943 - 4,149)    | 1,011<br>(763 - 1,287)   | 130<br>(105 - 159)     | 316<br>(249 - 394)        | 393<br>(293 - 518)          | 1,660<br>(1,260 - 2,096)    |
| Diarrheal diseases                                                | 459<br>(362 - 579)          | 254<br>(169 - 365)       | 15<br>(10 - 21)        | 32<br>(23 - 41)           | 38<br>(27 - 52)             | 120<br>(85 - 173)           |
| Intestinal infectious diseases                                    | 101<br>(51 - 172)           | 40<br>(20 - 72)          | 26<br>(12 - 47)        | 28<br>(13 - 51)           | 4<br>(2 - 8)                | 2<br>(1 - 5)                |
| Typhoid fever                                                     | 72<br>(34 - 130)            | 27<br>(12 - 51)          | 20<br>(9 - 38)         | 21<br>(9 - 38)            | 3<br>(1 - 6)                | 1<br>(0 - 2)                |
| Paratyphoid fever                                                 | 20<br>(9 - 36)              | 8<br>(3 - 16)            | 5<br>(2 - 10)          | 5<br>(2 - 10)             | 1<br>(0 - 1)                | 0<br>(0 - 0)                |
| Other intestinal infectious diseases                              | 9<br>(3 - 19)               | 5<br>(1 - 13)            | 1<br>(0 - 4)           | 2<br>(0 - 7)              | 1<br>(0 - 3)                | 1<br>(0 - 3)                |
| Lower respiratory infections                                      | 2,617<br>(2,076 - 3,176)    | 570<br>(409 - 761)       | 56<br>(42 - 73)        | 195<br>(141 - 251)        | 309<br>(221 - 412)          | 1,487<br>(1,096 - 1,903)    |
| Upper respiratory infections                                      | 3<br>(1 - 5)                | 0<br>(0 - 1)             | 0<br>(0 - 0)           | 1<br>(0 - 1)              | 1<br>(0 - 2)                | 1<br>(0 - 3)                |
| Otitis media                                                      | 2<br>(2 - 2)                | 1<br>(0 - 1)             | 0<br>(0 - 0)           | 1<br>(0 - 1)              | 0<br>(0 - 0)                | 0<br>(0 - 1)                |
| Meningitis                                                        | 223<br>(181 - 286)          | 116<br>(81 - 169)        | 20<br>(15 - 27)        | 33<br>(26 - 43)           | 23<br>(17 - 31)             | 31<br>(24 - 41)             |
| Pneumococcal meningitis                                           | 69<br>(54 - 86)             | 32<br>(21 - 48)          | 7<br>(5 - 10)          | 11<br>(8 - 16)            | 8<br>(5 - 12)               | 11<br>(7 - 16)              |
| H influenzae type B meningitis                                    | 67<br>(50 - 93)             | 51<br>(34 - 76)          | 6<br>(4 - 9)           | 4<br>(3 - 6)              | 2<br>(1 - 4)                | 3<br>(2 - 5)                |
| Meningococcal meningitis                                          | 19<br>(14 - 26)             | 7<br>(4 - 12)            | 2<br>(1 - 3)           | 4<br>(2 - 6)              | 2<br>(1 - 4)                | 4<br>(2 - 6)                |
| Other meningitis                                                  | 67<br>(49 - 91)             | 26<br>(12 - 44)          | 5<br>(3 - 7)           | 14<br>(10 - 19)           | 10<br>(6 - 16)              | 13<br>(8 - 19)              |
| Encephalitis                                                      | 60<br>(44 - 89)             | 18<br>(10 - 32)          | 8<br>(5 - 13)          | 17<br>(12 - 27)           | 9<br>(6 - 16)               | 8<br>(6 - 15)               |
| Diphtheria                                                        | 2<br>(0 - 8)                | 1<br>(0 - 7)             | 0<br>(0 - 3)           | 0<br>(0 - 1)              | 0<br>(0 - 1)                | --                          |
| Whooping cough                                                    | 5<br>(3 - 13)               | 4<br>(1 - 12)            | 1<br>(0 - 1)           | 1<br>(1 - 1)              | 0<br>(0 - 0)                | --                          |
| Tetanus                                                           | 31<br>(19 - 42)             | 6<br>(2 - 10)            | 2<br>(1 - 4)           | 8<br>(5 - 11)             | 7<br>(4 - 12)               | 8<br>(4 - 14)               |
| Measles                                                           | 0<br>(0 - 0)                | 0<br>(0 - 0)             | 0<br>(0 - 0)           | 0<br>(0 - 0)              | 0<br>(0 - 0)                | --                          |
| Varicella and herpes zoster                                       | 6<br>(3 - 14)               | 2<br>(0 - 5)             | 0<br>(0 - 1)           | 1<br>(0 - 2)              | 1<br>(0 - 1)                | 3<br>(0 - 10)               |
| Neglected tropical diseases and malaria                           | 132<br>(68 - 169)           | 39<br>(11 - 59)          | 19<br>(7 - 26)         | 30<br>(18 - 39)           | 23<br>(15 - 30)             | 22<br>(14 - 30)             |
| Malaria                                                           | 8<br>(5 - 13)               | 0<br>(0 - 1)             | 1<br>(0 - 2)           | 3<br>(2 - 5)              | 2<br>(1 - 3)                | 2<br>(1 - 5)                |
| Leishmaniasis                                                     | 3<br>(2 - 4)                | 1<br>(0 - 2)             | 0<br>(0 - 1)           | 1<br>(0 - 1)              | 0<br>(0 - 1)                | 0<br>(0 - 0)                |
| Visceral leishmaniasis                                            | 3<br>(2 - 4)                | 1<br>(0 - 2)             | 0<br>(0 - 1)           | 1<br>(0 - 1)              | 0<br>(0 - 1)                | 0<br>(0 - 0)                |
| Schistosomiasis                                                   | 22<br>(16 - 30)             | 0<br>(0 - 0)             | 0<br>(0 - 1)           | 6<br>(4 - 9)              | 9<br>(6 - 13)               | 7<br>(4 - 11)               |
| Cysticercosis                                                     | 3<br>(3 - 4)                | 0<br>(0 - 0)             | 0<br>(0 - 0)           | 2<br>(1 - 2)              | 1<br>(1 - 1)                | 0<br>(0 - 1)                |
| Cystic echinococcosis                                             | 1<br>(1 - 1)                | 0<br>(0 - 0)             | 0<br>(0 - 0)           | 0<br>(0 - 0)              | 0<br>(0 - 0)                | 0<br>(0 - 0)                |
| Dengue                                                            | 84<br>(20 - 115)            | 34<br>(6 - 55)           | 17<br>(4 - 23)         | 15<br>(4 - 21)            | 9<br>(3 - 13)               | 9<br>(2 - 14)               |
| Rabies                                                            | 1<br>(1 - 2)                | 0<br>(0 - 0)             | 0<br>(0 - 1)           | 1<br>(0 - 1)              | 0<br>(0 - 0)                | 0<br>(0 - 0)                |
| Intestinal nematode infections                                    | 1<br>(0 - 6)                | 1<br>(0 - 4)             | 0<br>(0 - 2)           | 0<br>(0 - 1)              | 0<br>(0 - 1)                | 0<br>(0 - 1)                |
| Ascariasis                                                        | 1<br>(0 - 6)                | 1<br>(0 - 4)             | 0<br>(0 - 2)           | 0<br>(0 - 1)              | 0<br>(0 - 1)                | 0<br>(0 - 1)                |
| Other neglected tropical diseases                                 | 9<br>(7 - 12)               | 2<br>(1 - 3)             | 1<br>(0 - 1)           | 3<br>(1 - 3)              | 1<br>(1 - 2)                | 3<br>(2 - 4)                |
| Maternal disorders                                                | 90<br>(64 - 124)            | --                       | 1<br>(1 - 2)           | 90<br>(64 - 123)          | --                          | --                          |



Web Table 31- Dominican Republic deaths with 95% UI by age, sex, and cause in 2013

| Cause                                                            | Both Sexes, All Ages        | Both Sexes, 0-4 Years    | Both Sexes, 5-14 Years | Both Sexes, 15-49 Years  | Both Sexes, 50-69 Years     | Both Sexes, 70-80 Years     |
|------------------------------------------------------------------|-----------------------------|--------------------------|------------------------|--------------------------|-----------------------------|-----------------------------|
| Maternal hemorrhage                                              | 11<br>(6 - 16)              | --                       | 0<br>(0 - 0)           | 11<br>(6 - 16)           | --                          | --                          |
| Maternal sepsis and other maternal infections                    | 7<br>(4 - 10)               | --                       | 0<br>(0 - 0)           | 7<br>(4 - 10)            | --                          | --                          |
| Maternal hypertensive disorders                                  | 21<br>(14 - 30)             | --                       | 0<br>(0 - 1)           | 21<br>(14 - 30)          | --                          | --                          |
| Maternal obstructed labor                                        | 7<br>(4 - 11)               | --                       | 0<br>(0 - 0)           | 7<br>(4 - 11)            | --                          | --                          |
| Maternal abortive outcome                                        | 12<br>(6 - 18)              | --                       | 0<br>(0 - 0)           | 11<br>(6 - 18)           | --                          | --                          |
| Indirect maternal deaths                                         | 13<br>(8 - 19)              | --                       | 0<br>(0 - 0)           | 13<br>(8 - 19)           | --                          | --                          |
| Late maternal deaths                                             | 7<br>(5 - 11)               | --                       | 0<br>(0 - 0)           | 7<br>(4 - 11)            | --                          | --                          |
| Maternal deaths aggravated by HIV/AIDS                           | 0<br>(0 - 0)                | --                       | --                     | 0<br>(0 - 0)             | --                          | --                          |
| Other maternal disorders                                         | 13<br>(8 - 18)              | --                       | 0<br>(0 - 0)           | 13<br>(8 - 18)           | --                          | --                          |
| Neonatal disorders                                               | 3,010<br>(2,577 - 3,505)    | 3,010<br>(2,577 - 3,505) | --                     | --                       | --                          | --                          |
| Neonatal preterm birth complications                             | 1,409<br>(974 - 1,800)      | 1,409<br>(974 - 1,800)   | --                     | --                       | --                          | --                          |
| Neonatal encephalopathy due to birth asphyxia and trauma         | 491<br>(347 - 683)          | 491<br>(347 - 683)       | --                     | --                       | --                          | --                          |
| Neonatal sepsis and other neonatal infections                    | 826<br>(510 - 1,206)        | 826<br>(510 - 1,206)     | --                     | --                       | --                          | --                          |
| Hemolytic disease and other neonatal jaundice                    | 35<br>(15 - 69)             | 35<br>(15 - 69)          | --                     | --                       | --                          | --                          |
| Other neonatal disorders                                         | 250<br>(160 - 427)          | 250<br>(160 - 427)       | --                     | --                       | --                          | --                          |
| Nutritional deficiencies                                         | 614<br>(463 - 1,054)        | 163<br>(106 - 285)       | 20<br>(14 - 35)        | 59<br>(42 - 104)         | 80<br>(55 - 147)            | 291<br>(202 - 526)          |
| Protein-energy malnutrition                                      | 330<br>(212 - 675)          | 137<br>(85 - 252)        | 14<br>(9 - 28)         | 20<br>(11 - 49)          | 28<br>(15 - 70)             | 131<br>(65 - 316)           |
| Iodine deficiency                                                | 4<br>(1 - 12)               | 1<br>(0 - 4)             | 0<br>(0 - 2)           | 1<br>(0 - 2)             | 1<br>(0 - 3)                | 2<br>(0 - 8)                |
| Iron-deficiency anemia                                           | 265<br>(164 - 450)          | 23<br>(8 - 47)           | 5<br>(3 - 9)           | 36<br>(24 - 57)          | 47<br>(28 - 81)             | 154<br>(89 - 266)           |
| Other nutritional deficiencies                                   | 14<br>(7 - 31)              | 1<br>(0 - 3)             | 1<br>(0 - 1)           | 3<br>(2 - 8)             | 4<br>(2 - 9)                | 5<br>(2 - 11)               |
| Other communicable, maternal, neonatal, and nutritional diseases | 232<br>(188 - 302)          | 25<br>(14 - 39)          | 13<br>(7 - 13)         | 59<br>(45 - 75)          | 67<br>(50 - 93)             | 72<br>(53 - 106)            |
| Sexually transmitted diseases excluding HIV                      | 22<br>(10 - 39)             | 8<br>(0 - 20)            | 1<br>(0 - 2)           | 6<br>(3 - 9)             | 3<br>(2 - 7)                | 5<br>(2 - 9)                |
| Syphilis                                                         | 17<br>(6 - 31)              | 8<br>(0 - 20)            | 1<br>(0 - 2)           | 3<br>(2 - 4)             | 2<br>(1 - 5)                | 4<br>(2 - 7)                |
| Chlamydial infection                                             | 1<br>(1 - 2)                | --                       | 0<br>(0 - 0)           | 1<br>(0 - 1)             | 0<br>(0 - 0)                | 0<br>(0 - 0)                |
| Gonococcal infection                                             | 2<br>(1 - 4)                | --                       | 0<br>(0 - 0)           | 1<br>(1 - 2)             | 1<br>(0 - 1)                | 1<br>(0 - 1)                |
| Other sexually transmitted diseases                              | 2<br>(1 - 3)                | --                       | 0<br>(0 - 0)           | 1<br>(1 - 2)             | 0<br>(0 - 1)                | 0<br>(0 - 0)                |
| Hepatitis                                                        | 107<br>(85 - 137)           | 5<br>(3 - 8)             | 5<br>(3 - 7)           | 34<br>(25 - 45)          | 34<br>(24 - 51)             | 29<br>(20 - 42)             |
| Acute hepatitis A                                                | 25<br>(10 - 43)             | 3<br>(1 - 6)             | 3<br>(2 - 5)           | 13<br>(5 - 23)           | 4<br>(1 - 9)                | 1<br>(0 - 4)                |
| Acute hepatitis B                                                | 74<br>(51 - 102)            | 2<br>(1 - 4)             | 1<br>(0 - 3)           | 18<br>(9 - 28)           | 28<br>(19 - 42)             | 25<br>(17 - 37)             |
| Acute hepatitis C                                                | 8<br>(2 - 20)               | --                       | 0<br>(0 - 1)           | 3<br>(1 - 7)             | 2<br>(0 - 6)                | 3<br>(0 - 7)                |
| Other infectious diseases                                        | 103<br>(80 - 144)           | 12<br>(8 - 18)           | 4<br>(3 - 5)           | 19<br>(13 - 26)          | 29<br>(20 - 42)             | 39<br>(27 - 66)             |
| Non-communicable diseases                                        | 47,834<br>(41,402 - 57,747) | 1,570<br>(1,227 - 1,994) | 350<br>(297 - 415)     | 4,408<br>(3,513 - 5,478) | 12,821<br>(10,216 - 16,588) | 28,686<br>(25,677 - 34,173) |
| Neoplasms                                                        | 9,227<br>(7,703 - 11,437)   | 70<br>(49 - 96)          | 93<br>(78 - 110)       | 1,174<br>(934 - 1,454)   | 3,037<br>(2,408 - 3,913)    | 4,852<br>(3,992 - 5,896)    |
| Esophageal cancer                                                | 161<br>(120 - 211)          | --                       | --                     | 14<br>(10 - 18)          | 67<br>(48 - 92)             | 80<br>(60 - 105)            |
| Stomach cancer                                                   | 628<br>(513 - 786)          | --                       | --                     | 73<br>(57 - 93)          | 230<br>(180 - 300)          | 325<br>(266 - 403)          |
| Liver cancer                                                     | 698<br>(564 - 880)          | --                       | 3<br>(2 - 3)           | 92<br>(71 - 117)         | 272<br>(208 - 356)          | 331<br>(266 - 419)          |
| Liver cancer due to hepatitis B                                  | 154<br>(97 - 229)           | --                       | 1<br>(1 - 1)           | 33<br>(21 - 47)          | 69<br>(38 - 109)            | 51<br>(33 - 77)             |
| Liver cancer due to hepatitis C                                  | 340<br>(261 - 446)          | --                       | 0<br>(0 - 1)           | 34<br>(22 - 49)          | 130<br>(90 - 180)           | 176<br>(133 - 232)          |
| Liver cancer due to alcohol use                                  | 136<br>(90 - 199)           | --                       | --                     | 11<br>(6 - 17)           | 47<br>(29 - 73)             | 79<br>(50 - 115)            |
| Liver cancer due to other causes                                 | 68<br>(46 - 98)             | --                       | 2<br>(1 - 2)           | 15<br>(10 - 21)          | 27<br>(17 - 40)             | 25<br>(15 - 39)             |

Web Table 31- Dominican Republic deaths with 95% UI by age, sex, and cause in 2013

| Cause                                         | Both Sexes, All Ages        | Both Sexes, 0-4 Years | Both Sexes, 5-14 Years | Both Sexes, 15-49 Years  | Both Sexes, 50-69 Years  | Both Sexes, 70-80 Years     |
|-----------------------------------------------|-----------------------------|-----------------------|------------------------|--------------------------|--------------------------|-----------------------------|
| Larynx cancer                                 | 107<br>(80 - 156)           | --                    | --                     | 10<br>(7 - 15)           | 46<br>(33 - 70)          | 51<br>(37 - 76)             |
| Tracheal, bronchus and lung cancer            | 1,152<br>(941 - 1,438)      | --                    | --                     | 91<br>(70 - 116)         | 467<br>(358 - 608)       | 594<br>(493 - 724)          |
| Breast cancer                                 | 711<br>(542 - 949)          | --                    | --                     | 208<br>(148 - 278)       | 298<br>(212 - 416)       | 205<br>(158 - 275)          |
| Cervical cancer                               | 432<br>(319 - 616)          | --                    | --                     | 116<br>(76 - 168)        | 169<br>(116 - 262)       | 147<br>(109 - 216)          |
| Uterine cancer                                | 145<br>(102 - 227)          | --                    | --                     | 12<br>(8 - 19)           | 56<br>(37 - 90)          | 77<br>(55 - 125)            |
| Prostate cancer                               | 1,755<br>(911 - 2,457)      | --                    | --                     | 16<br>(9 - 24)           | 279<br>(140 - 448)       | 1,461<br>(739 - 2,044)      |
| Colon and rectum cancer                       | 767<br>(638 - 967)          | --                    | --                     | 75<br>(58 - 94)          | 258<br>(202 - 337)       | 435<br>(362 - 545)          |
| Lip and oral cavity cancer                    | 232<br>(172 - 300)          | --                    | --                     | 20<br>(14 - 26)          | 79<br>(54 - 107)         | 133<br>(102 - 168)          |
| Nasopharynx cancer                            | 54<br>(42 - 74)             | --                    | 0<br>(0 - 0)           | 11<br>(8 - 15)           | 24<br>(18 - 35)          | 19<br>(14 - 26)             |
| Other pharynx cancer                          | 103<br>(82 - 130)           | --                    | --                     | 12<br>(9 - 16)           | 38<br>(28 - 52)          | 53<br>(43 - 65)             |
| Gallbladder and biliary tract cancer          | 78<br>(52 - 150)            | --                    | --                     | 6<br>(4 - 10)            | 27<br>(18 - 51)          | 45<br>(30 - 90)             |
| Pancreatic cancer                             | 347<br>(284 - 436)          | --                    | --                     | 34<br>(26 - 44)          | 132<br>(102 - 169)       | 180<br>(146 - 232)          |
| Malignant skin melanoma                       | 28<br>(21 - 44)             | --                    | --                     | 7<br>(5 - 10)            | 9<br>(6 - 15)            | 12<br>(9 - 19)              |
| Non-melanoma skin cancer                      | 131<br>(87 - 177)           | --                    | --                     | 16<br>(11 - 22)          | 34<br>(23 - 49)          | 81<br>(52 - 109)            |
| Ovarian cancer                                | 84<br>(64 - 115)            | --                    | --                     | 17<br>(12 - 24)          | 37<br>(26 - 52)          | 30<br>(23 - 42)             |
| Testicular cancer                             | 5<br>(2 - 7)                | --                    | --                     | 2<br>(1 - 4)             | 1<br>(0 - 2)             | 1<br>(0 - 2)                |
| Kidney cancer                                 | 80<br>(65 - 101)            | 1<br>(1 - 2)          | 1<br>(1 - 1)           | 11<br>(9 - 15)           | 34<br>(26 - 45)          | 33<br>(27 - 41)             |
| Bladder cancer                                | 73<br>(55 - 106)            | --                    | --                     | 4<br>(3 - 5)             | 20<br>(14 - 30)          | 50<br>(37 - 73)             |
| Brain and nervous system cancer               | 176<br>(94 - 231)           | 5<br>(2 - 7)          | 10<br>(6 - 13)         | 49<br>(27 - 65)          | 64<br>(31 - 90)          | 48<br>(27 - 65)             |
| Thyroid cancer                                | 31<br>(24 - 42)             | --                    | 0<br>(0 - 0)           | 4<br>(3 - 6)             | 12<br>(9 - 16)           | 14<br>(11 - 20)             |
| Mesothelioma                                  | 15<br>(12 - 19)             | --                    | --                     | 1<br>(1 - 2)             | 4<br>(3 - 6)             | 9<br>(7 - 12)               |
| Hodgkin lymphoma                              | 21<br>(9 - 30)              | 1<br>(0 - 2)          | 2<br>(1 - 2)           | 7<br>(3 - 10)            | 7<br>(2 - 10)            | 5<br>(2 - 7)                |
| Non-Hodgkin lymphoma                          | 172<br>(132 - 223)          | 4<br>(3 - 8)          | 7<br>(5 - 9)           | 37<br>(26 - 50)          | 58<br>(42 - 80)          | 65<br>(46 - 90)             |
| Multiple myeloma                              | 82<br>(58 - 107)            | --                    | --                     | 9<br>(6 - 11)            | 37<br>(25 - 50)          | 37<br>(27 - 48)             |
| Leukemia                                      | 298<br>(249 - 363)          | 17<br>(12 - 25)       | 29<br>(23 - 36)        | 77<br>(60 - 95)          | 77<br>(58 - 101)         | 98<br>(80 - 123)            |
| Other neoplasms                               | 660<br>(493 - 825)          | 42<br>(25 - 58)       | 41<br>(30 - 53)        | 145<br>(102 - 186)       | 201<br>(142 - 269)       | 232<br>(164 - 301)          |
| Cardiovascular diseases                       | 23,966<br>(20,518 - 29,240) | 109<br>(82 - 146)     | 59<br>(48 - 71)        | 1,732<br>(1,349 - 2,166) | 6,373<br>(5,027 - 8,208) | 15,694<br>(13,785 - 18,658) |
| Rheumatic heart disease                       | 97<br>(69 - 124)            | 1<br>(0 - 1)          | 8<br>(6 - 11)          | 30<br>(21 - 39)          | 23<br>(16 - 32)          | 35<br>(22 - 47)             |
| Ischemic heart disease                        | 12,997<br>(10,898 - 15,989) | 24<br>(14 - 35)       | 18<br>(13 - 22)        | 986<br>(758 - 1,258)     | 3,636<br>(2,815 - 4,742) | 8,334<br>(7,065 - 9,982)    |
| Cerebrovascular disease                       | 7,879<br>(6,527 - 9,768)    | 24<br>(17 - 32)       | 16<br>(13 - 20)        | 495<br>(379 - 639)       | 2,056<br>(1,568 - 2,722) | 5,288<br>(4,435 - 6,465)    |
| Ischemic stroke                               | 4,742<br>(3,843 - 6,169)    | 4<br>(2 - 7)          | 5<br>(3 - 7)           | 122<br>(86 - 190)        | 993<br>(730 - 1,442)     | 3,618<br>(2,958 - 4,607)    |
| Hemorrhagic stroke                            | 3,137<br>(2,289 - 4,085)    | 20<br>(14 - 27)       | 12<br>(9 - 15)         | 373<br>(279 - 472)       | 1,062<br>(764 - 1,398)   | 1,670<br>(1,136 - 2,213)    |
| Hypertensive heart disease                    | 1,977<br>(1,287 - 2,610)    | 4<br>(2 - 6)          | 1<br>(1 - 2)           | 82<br>(52 - 112)         | 390<br>(252 - 532)       | 1,500<br>(960 - 1,991)      |
| Cardiomyopathy and myocarditis                | 196<br>(155 - 256)          | 23<br>(17 - 32)       | 5<br>(4 - 7)           | 36<br>(27 - 50)          | 46<br>(33 - 65)          | 86<br>(65 - 120)            |
| Atrial fibrillation and flutter               | 50<br>(37 - 69)             | --                    | --                     | 1<br>(1 - 2)             | 6<br>(4 - 8)             | 43<br>(30 - 60)             |
| Aortic aneurysm                               | 121<br>(94 - 164)           | --                    | --                     | 12<br>(9 - 17)           | 37<br>(27 - 52)          | 72<br>(56 - 97)             |
| Peripheral vascular disease                   | 25<br>(19 - 35)             | --                    | --                     | 0<br>(0 - 0)             | 4<br>(3 - 5)             | 22<br>(16 - 30)             |
| Endocarditis                                  | 63<br>(47 - 88)             | 17<br>(11 - 27)       | 3<br>(2 - 4)           | 12<br>(8 - 17)           | 9<br>(6 - 14)            | 22<br>(15 - 32)             |
| Other cardiovascular and circulatory diseases | 561<br>(422 - 970)          | 17<br>(11 - 26)       | 7<br>(5 - 11)          | 78<br>(57 - 125)         | 166<br>(117 - 268)       | 293<br>(209 - 546)          |
| Chronic respiratory diseases                  | 2,493<br>(2,113 - 3,079)    | 100<br>(66 - 141)     | 18<br>(14 - 23)        | 168<br>(132 - 212)       | 504<br>(390 - 665)       | 1,703<br>(1,441 - 2,095)    |

Web Table 31- Dominican Republic deaths with 95% UI by age, sex, and cause in 2013

| Cause                                               | Both Sexes, All Ages     | Both Sexes, 0-4 Years | Both Sexes, 5-14 Years | Both Sexes, 15-49 Years | Both Sexes, 50-69 Years | Both Sexes, 70-80 Years  |
|-----------------------------------------------------|--------------------------|-----------------------|------------------------|-------------------------|-------------------------|--------------------------|
| Chronic obstructive pulmonary disease               | 1,691<br>(1,411 - 2,093) | 38<br>(21 - 60)       | 4<br>(3 - 6)           | 70<br>(53 - 93)         | 308<br>(234 - 415)      | 1,271<br>(1,064 - 1,561) |
| Pneumoconiosis                                      | 56<br>(37 - 88)          | 0<br>(0 - 0)          | 0<br>(0 - 0)           | 6<br>(4 - 9)            | 22<br>(14 - 38)         | 27<br>(18 - 45)          |
| Silicosis                                           | 2<br>(1 - 3)             | 0<br>(0 - 0)          | 0<br>(0 - 0)           | 0<br>(0 - 1)            | 1<br>(0 - 1)            | 1<br>(0 - 1)             |
| Asbestosis                                          | 10<br>(6 - 17)           | 0<br>(0 - 0)          | 0<br>(0 - 0)           | 0<br>(0 - 1)            | 9<br>(5 - 15)           | 1<br>(0 - 1)             |
| Coal workers pneumoconiosis                         | 12<br>(8 - 19)           | 0<br>(0 - 0)          | 0<br>(0 - 0)           | 3<br>(2 - 4)            | 5<br>(3 - 9)            | 4<br>(3 - 8)             |
| Other pneumoconiosis                                | 31<br>(21 - 50)          | 0<br>(0 - 0)          | 0<br>(0 - 0)           | 2<br>(1 - 3)            | 8<br>(5 - 13)           | 21<br>(14 - 36)          |
| Asthma                                              | 573<br>(444 - 744)       | 31<br>(19 - 48)       | 12<br>(9 - 15)         | 76<br>(57 - 99)         | 139<br>(101 - 190)      | 315<br>(231 - 430)       |
| Interstitial lung disease and pulmonary sarcoidosis | 107<br>(73 - 171)        | 1<br>(0 - 2)          | 0<br>(0 - 0)           | 7<br>(5 - 11)           | 25<br>(16 - 41)         | 74<br>(48 - 124)         |
| Other chronic respiratory diseases                  | 65<br>(50 - 84)          | 30<br>(20 - 44)       | 2<br>(1 - 3)           | 9<br>(6 - 12)           | 9<br>(6 - 14)           | 15<br>(10 - 22)          |
| Cirrhosis                                           | 1,814<br>(1,485 - 2,310) | 5<br>(3 - 8)          | 9<br>(7 - 11)          | 271<br>(205 - 344)      | 736<br>(573 - 981)      | 793<br>(666 - 984)       |
| Cirrhosis due to hepatitis B                        | 153<br>(88 - 232)        | 0<br>(0 - 0)          | 0<br>(0 - 1)           | 22<br>(12 - 37)         | 64<br>(37 - 101)        | 67<br>(34 - 102)         |
| Cirrhosis due to hepatitis C                        | 687<br>(487 - 939)       | 0<br>(0 - 1)          | 2<br>(1 - 3)           | 86<br>(51 - 127)        | 265<br>(171 - 391)      | 333<br>(242 - 450)       |
| Cirrhosis due to alcohol use                        | 736<br>(553 - 979)       | --                    | --                     | 94<br>(63 - 133)        | 310<br>(224 - 426)      | 332<br>(248 - 447)       |
| Cirrhosis due to other causes                       | 238<br>(150 - 332)       | 5<br>(3 - 7)          | 7<br>(5 - 8)           | 68<br>(45 - 94)         | 97<br>(53 - 146)        | 61<br>(33 - 93)          |
| Digestive diseases                                  | 867<br>(677 - 1,391)     | 11<br>(7 - 17)        | 12<br>(9 - 18)         | 131<br>(94 - 219)       | 235<br>(168 - 388)      | 477<br>(374 - 753)       |
| Peptic ulcer disease                                | 360<br>(262 - 640)       | 0<br>(0 - 1)          | 1<br>(1 - 2)           | 51<br>(35 - 95)         | 106<br>(72 - 192)       | 201<br>(146 - 351)       |
| Gastritis and duodenitis                            | 37<br>(24 - 70)          | 1<br>(0 - 1)          | 1<br>(0 - 1)           | 4<br>(3 - 8)            | 9<br>(6 - 18)           | 22<br>(14 - 43)          |
| Appendicitis                                        | 34<br>(22 - 64)          | 1<br>(1 - 2)          | 3<br>(2 - 5)           | 10<br>(6 - 19)          | 9<br>(5 - 18)           | 11<br>(6 - 22)           |
| Paralytic ileus and intestinal obstruction          | 126<br>(52 - 187)        | 6<br>(3 - 9)          | 3<br>(1 - 4)           | 15<br>(6 - 22)          | 28<br>(11 - 45)         | 76<br>(29 - 115)         |
| Inguinal, femoral, and abdominal hernia             | 36<br>(13 - 96)          | 1<br>(0 - 2)          | 1<br>(0 - 2)           | 4<br>(2 - 11)           | 8<br>(3 - 22)           | 22<br>(7 - 62)           |
| Inflammatory bowel disease                          | 26<br>(18 - 47)          | 1<br>(0 - 2)          | 1<br>(0 - 1)           | 5<br>(3 - 9)            | 6<br>(4 - 12)           | 13<br>(8 - 25)           |
| Vascular intestinal disorders                       | 56<br>(31 - 100)         | 0<br>(0 - 1)          | 0<br>(0 - 1)           | 5<br>(3 - 11)           | 16<br>(8 - 30)          | 34<br>(19 - 61)          |
| Gallbladder and biliary diseases                    | 39<br>(26 - 88)          | 0<br>(0 - 0)          | 0<br>(0 - 1)           | 5<br>(3 - 11)           | 10<br>(6 - 21)          | 24<br>(15 - 56)          |
| Pancreatitis                                        | 75<br>(52 - 126)         | 0<br>(0 - 0)          | 1<br>(0 - 2)           | 20<br>(13 - 34)         | 23<br>(16 - 39)         | 30<br>(19 - 53)          |
| Other digestive diseases                            | 77<br>(57 - 130)         | 1<br>(1 - 2)          | 1<br>(1 - 2)           | 11<br>(8 - 20)          | 19<br>(13 - 32)         | 45<br>(31 - 76)          |
| Neurological disorders                              | 2,877<br>(2,316 - 3,516) | 13<br>(9 - 19)        | 15<br>(12 - 20)        | 92<br>(69 - 119)        | 235<br>(180 - 314)      | 2,522<br>(2,001 - 3,095) |
| Alzheimer disease and other dementias               | 2,527<br>(1,989 - 3,111) | --                    | --                     | 1<br>(0 - 2)            | 163<br>(119 - 223)      | 2,363<br>(1,844 - 2,911) |
| Parkinson disease                                   | 139<br>(105 - 224)       | --                    | --                     | 1<br>(1 - 2)            | 24<br>(17 - 37)         | 114<br>(85 - 186)        |
| Epilepsy                                            | 152<br>(113 - 195)       | 9<br>(5 - 13)         | 12<br>(9 - 16)         | 73<br>(52 - 97)         | 30<br>(20 - 42)         | 28<br>(21 - 39)          |
| Multiple sclerosis                                  | 12<br>(7 - 17)           | --                    | --                     | 3<br>(2 - 5)            | 4<br>(2 - 6)            | 5<br>(3 - 7)             |
| Other neurological disorders                        | 48<br>(39 - 60)          | 5<br>(3 - 7)          | 3<br>(2 - 4)           | 13<br>(10 - 18)         | 14<br>(10 - 18)         | 13<br>(10 - 16)          |
| Mental and substance use disorders                  | 169<br>(118 - 224)       | 5<br>(3 - 9)          | 0<br>(0 - 0)           | 79<br>(55 - 109)        | 52<br>(30 - 76)         | 32<br>(23 - 42)          |
| Schizophrenia                                       | 8<br>(6 - 12)            | --                    | --                     | 2<br>(1 - 3)            | 3<br>(2 - 4)            | 3<br>(2 - 5)             |
| Alcohol use disorders                               | 81<br>(33 - 115)         | --                    | --                     | 35<br>(14 - 50)         | 34<br>(13 - 52)         | 12<br>(5 - 18)           |
| Drug use disorders                                  | 79<br>(61 - 104)         | 5<br>(3 - 9)          | --                     | 42<br>(29 - 58)         | 15<br>(11 - 22)         | 17<br>(12 - 24)          |
| Opioid use disorders                                | 23<br>(17 - 30)          | 2<br>(1 - 3)          | --                     | 12<br>(8 - 17)          | 4<br>(3 - 6)            | 5<br>(3 - 7)             |
| Cocaine use disorders                               | 4<br>(3 - 5)             | 0<br>(0 - 1)          | --                     | 2<br>(1 - 3)            | 1<br>(0 - 1)            | 1<br>(0 - 1)             |
| Amphetamine use disorders                           | 3<br>(2 - 3)             | 0<br>(0 - 0)          | --                     | 1<br>(1 - 2)            | 0<br>(0 - 1)            | 0<br>(0 - 1)             |
| Other drug use disorders                            | 50<br>(38 - 66)          | 3<br>(2 - 5)          | --                     | 26<br>(18 - 37)         | 10<br>(7 - 15)          | 11<br>(7 - 15)           |
| Eating disorders                                    | 1<br>(1 - 1)             | --                    | 0<br>(0 - 0)           | 1<br>(1 - 1)            | --                      | --                       |

Web Table 31- Dominican Republic deaths with 95% UI by age, sex, and cause in 2013

| Cause                                               | Both Sexes, All Ages     | Both Sexes, 0-4 Years  | Both Sexes, 5-14 Years | Both Sexes, 15-49 Years | Both Sexes, 50-69 Years  | Both Sexes, 70-80 Years  |
|-----------------------------------------------------|--------------------------|------------------------|------------------------|-------------------------|--------------------------|--------------------------|
| Anorexia nervosa                                    | 1<br>(1 - 1)             | --                     | 0<br>(0 - 0)           | 1<br>(1 - 1)            | --                       | --                       |
| Diabetes, urogenital, blood, and endocrine diseases | 4,975<br>(4,146 - 6,369) | 157<br>(102 - 322)     | 72<br>(56 - 104)       | 649<br>(511 - 841)      | 1,590<br>(1,246 - 2,082) | 2,507<br>(2,105 - 3,221) |
| Diabetes mellitus                                   | 2,534<br>(2,089 - 3,219) | 8<br>(6 - 11)          | 9<br>(7 - 12)          | 248<br>(188 - 320)      | 853<br>(659 - 1,142)     | 1,416<br>(1,182 - 1,820) |
| Acute glomerulonephritis                            | 6<br>(5 - 8)             | 1<br>(0 - 1)           | 1<br>(0 - 1)           | 1<br>(1 - 2)            | 1<br>(1 - 2)             | 2<br>(1 - 4)             |
| Chronic kidney disease                              | 1,938<br>(1,569 - 2,519) | 37<br>(26 - 52)        | 22<br>(17 - 30)        | 297<br>(229 - 392)      | 649<br>(484 - 872)       | 933<br>(740 - 1,251)     |
| Chronic kidney disease due to diabetes mellitus     | 801<br>(595 - 1,111)     | 6<br>(4 - 10)          | 2<br>(2 - 5)           | 122<br>(85 - 171)       | 339<br>(243 - 466)       | 331<br>(228 - 486)       |
| Chronic kidney disease due to hypertension          | 566<br>(383 - 772)       | 7<br>(5 - 11)          | 3<br>(2 - 5)           | 80<br>(52 - 113)        | 157<br>(93 - 234)        | 318<br>(216 - 441)       |
| Chronic kidney disease due to glomerulonephritis    | 72<br>(51 - 99)          | 5<br>(3 - 7)           | 5<br>(3 - 6)           | 14<br>(10 - 20)         | 14<br>(9 - 20)           | 34<br>(23 - 52)          |
| Chronic kidney disease due to other causes          | 498<br>(337 - 740)       | 18<br>(11 - 29)        | 11<br>(8 - 18)         | 81<br>(49 - 128)        | 139<br>(77 - 227)        | 249<br>(157 - 399)       |
| Urinary diseases and male infertility               | 111<br>(88 - 157)        | 5<br>(3 - 11)          | 2<br>(1 - 2)           | 14<br>(11 - 20)         | 23<br>(17 - 34)          | 67<br>(51 - 95)          |
| Interstitial nephritis and urinary tract infections | 54<br>(41 - 82)          | 4<br>(2 - 9)           | 1<br>(1 - 2)           | 7<br>(5 - 11)           | 10<br>(7 - 15)           | 32<br>(22 - 49)          |
| Urolithiasis                                        | 8<br>(5 - 12)            | --                     | 0<br>(0 - 0)           | 1<br>(1 - 2)            | 2<br>(1 - 3)             | 5<br>(3 - 8)             |
| Other urinary diseases                              | 49<br>(36 - 73)          | 1<br>(1 - 2)           | 0<br>(0 - 0)           | 6<br>(4 - 9)            | 11<br>(8 - 17)           | 30<br>(20 - 47)          |
| Gynecological diseases                              | 2<br>(1 - 4)             | --                     | --                     | 1<br>(1 - 2)            | 0<br>(0 - 1)             | 0<br>(0 - 1)             |
| Uterine fibroids                                    | 0<br>(0 - 1)             | --                     | --                     | 0<br>(0 - 0)            | 0<br>(0 - 0)             | 0<br>(0 - 0)             |
| Polycystic ovarian syndrome                         | 0<br>(0 - 0)             | --                     | --                     | 0<br>(0 - 0)            | 0<br>(0 - 0)             | --                       |
| Endometriosis                                       | 0<br>(0 - 0)             | --                     | --                     | 0<br>(0 - 0)            | 0<br>(0 - 0)             | --                       |
| Genital prolapse                                    | 0<br>(0 - 1)             | --                     | --                     | 0<br>(0 - 0)            | 0<br>(0 - 0)             | 0<br>(0 - 0)             |
| Other gynecological diseases                        | 1<br>(0 - 2)             | --                     | --                     | 0<br>(0 - 1)            | 0<br>(0 - 0)             | 0<br>(0 - 1)             |
| Hemoglobinopathies and hemolytic anemias            | 179<br>(132 - 252)       | 52<br>(33 - 83)        | 33<br>(23 - 48)        | 51<br>(34 - 72)         | 23<br>(14 - 34)          | 21<br>(13 - 32)          |
| Thalassemias                                        | 2<br>(2 - 3)             | 1<br>(1 - 2)           | 0<br>(0 - 1)           | 0<br>(0 - 1)            | 0<br>(0 - 0)             | 0<br>(0 - 0)             |
| Sickle cell disorders                               | 149<br>(110 - 210)       | 47<br>(29 - 75)        | 31<br>(22 - 46)        | 48<br>(33 - 69)         | 20<br>(13 - 30)          | 3<br>(2 - 5)             |
| G6PD deficiency                                     | 2<br>(2 - 3)             | 1<br>(1 - 1)           | 0<br>(0 - 0)           | 0<br>(0 - 1)            | 0<br>(0 - 0)             | 0<br>(0 - 1)             |
| Other hemoglobinopathies and hemolytic anemias      | 26<br>(18 - 38)          | 4<br>(2 - 5)           | 1<br>(0 - 1)           | 1<br>(1 - 2)            | 2<br>(1 - 4)             | 18<br>(11 - 27)          |
| Endocrine, metabolic, blood, and immune disorders   | 205<br>(122 - 584)       | 54<br>(25 - 197)       | 7<br>(4 - 19)          | 37<br>(22 - 96)         | 41<br>(24 - 113)         | 66<br>(37 - 196)         |
| Musculoskeletal disorders                           | 100<br>(72 - 127)        | --                     | 4<br>(3 - 5)           | 38<br>(25 - 49)         | 23<br>(15 - 31)          | 36<br>(25 - 48)          |
| Rheumatoid arthritis                                | 17<br>(11 - 23)          | --                     | 0<br>(0 - 1)           | 2<br>(1 - 2)            | 3<br>(2 - 5)             | 11<br>(7 - 16)           |
| Other musculoskeletal disorders                     | 84<br>(58 - 106)         | --                     | 4<br>(3 - 5)           | 36<br>(24 - 47)         | 19<br>(13 - 27)          | 24<br>(16 - 33)          |
| Other non-communicable diseases                     | 1,347<br>(1,072 - 1,672) | 1,099<br>(846 - 1,405) | 67<br>(52 - 86)        | 74<br>(56 - 94)         | 37<br>(27 - 49)          | 70<br>(54 - 93)          |
| Congenital anomalies                                | 1,253<br>(985 - 1,568)   | 1,055<br>(807 - 1,352) | 66<br>(50 - 85)        | 67<br>(50 - 87)         | 26<br>(19 - 37)          | 39<br>(29 - 56)          |
| Neural tube defects                                 | 42<br>(27 - 62)          | 40<br>(25 - 60)        | 1<br>(0 - 1)           | 1<br>(0 - 1)            | 0<br>(0 - 1)             | 0<br>(0 - 1)             |
| Congenital heart anomalies                          | 611<br>(474 - 776)       | 499<br>(369 - 651)     | 40<br>(30 - 53)        | 36<br>(26 - 47)         | 10<br>(7 - 15)           | 25<br>(17 - 37)          |
| Cleft lip and cleft palate                          | 2<br>(1 - 3)             | 2<br>(1 - 3)           | --                     | --                      | --                       | --                       |
| Down syndrome                                       | 77<br>(50 - 109)         | 58<br>(33 - 89)        | 6<br>(3 - 9)           | 10<br>(7 - 14)          | 3<br>(2 - 5)             | 0<br>(0 - 0)             |
| Chromosomal unbalanced rearrangements               | 21<br>(14 - 32)          | 16<br>(10 - 27)        | 1<br>(1 - 2)           | 2<br>(1 - 2)            | 1<br>(0 - 1)             | 1<br>(1 - 2)             |
| Other congenital anomalies                          | 502<br>(366 - 671)       | 440<br>(309 - 599)     | 18<br>(12 - 27)        | 19<br>(13 - 25)         | 12<br>(8 - 18)           | 13<br>(9 - 19)           |
| Skin and subcutaneous diseases                      | 60<br>(46 - 75)          | 10<br>(6 - 15)         | 2<br>(1 - 2)           | 7<br>(5 - 9)            | 10<br>(8 - 14)           | 31<br>(21 - 42)          |
| Cellulitis                                          | 6<br>(4 - 10)            | 2<br>(1 - 3)           | 0<br>(0 - 0)           | 1<br>(0 - 1)            | 1<br>(1 - 2)             | 3<br>(1 - 5)             |
| Pyoderma                                            | 40<br>(30 - 50)          | 8<br>(5 - 12)          | 1<br>(1 - 1)           | 5<br>(3 - 6)            | 7<br>(5 - 10)            | 19<br>(12 - 27)          |
| Decubitus ulcer                                     | 11<br>(8 - 17)           | 0<br>(0 - 0)           | 0<br>(0 - 0)           | 1<br>(1 - 1)            | 1<br>(1 - 2)             | 9<br>(5 - 14)            |

Web Table 31- Dominican Republic deaths with 95% UI by age, sex, and cause in 2013

| Cause                                           | Both Sexes, All Ages     | Both Sexes, 0-4 Years | Both Sexes, 5-14 Years | Both Sexes, 15-49 Years  | Both Sexes, 50-69 Years | Both Sexes, 70-80 Years |
|-------------------------------------------------|--------------------------|-----------------------|------------------------|--------------------------|-------------------------|-------------------------|
| Other skin and subcutaneous diseases            | 2<br>(2 - 3)             | 0<br>(0 - 1)          | 0<br>(0 - 0)           | 1<br>(1 - 1)             | 0<br>(0 - 1)            | 1<br>(0 - 1)            |
| Sudden infant death syndrome                    | 34<br>(16 - 63)          | 34<br>(16 - 63)       | --                     | --                       | --                      | --                      |
| Injuries                                        | 7,087<br>(5,695 - 8,710) | 416<br>(297 - 544)    | 374<br>(320 - 434)     | 3,939<br>(3,060 - 4,971) | 1,318<br>(995 - 1,749)  | 1,040<br>(822 - 1,283)  |
| Transport injuries                              | 2,869<br>(2,285 - 3,590) | 77<br>(49 - 108)      | 177<br>(136 - 217)     | 1,654<br>(1,260 - 2,124) | 608<br>(462 - 819)      | 353<br>(284 - 456)      |
| Road injuries                                   | 2,848<br>(2,267 - 3,564) | 76<br>(48 - 106)      | 176<br>(135 - 216)     | 1,645<br>(1,253 - 2,113) | 602<br>(458 - 812)      | 349<br>(281 - 452)      |
| Pedestrian road injuries                        | 141<br>(97 - 196)        | 7<br>(4 - 11)         | 13<br>(8 - 18)         | 45<br>(30 - 65)          | 41<br>(27 - 60)         | 36<br>(23 - 55)         |
| Cyclist road injuries                           | 17<br>(13 - 23)          | 1<br>(0 - 1)          | 3<br>(2 - 4)           | 5<br>(4 - 8)             | 3<br>(2 - 5)            | 5<br>(3 - 8)            |
| Motorcyclist road injuries                      | 167<br>(113 - 239)       | 1<br>(1 - 2)          | 5<br>(3 - 7)           | 125<br>(81 - 182)        | 28<br>(18 - 44)         | 8<br>(5 - 12)           |
| Motor vehicle road injuries                     | 2,520<br>(1,997 - 3,173) | 66<br>(41 - 93)       | 155<br>(120 - 192)     | 1,469<br>(1,116 - 1,896) | 530<br>(400 - 723)      | 300<br>(241 - 389)      |
| Other road injuries                             | 4<br>(3 - 7)             | 0<br>(0 - 1)          | 1<br>(0 - 1)           | 1<br>(1 - 2)             | 1<br>(0 - 1)            | 1<br>(1 - 2)            |
| Other transport injuries                        | 21<br>(13 - 28)          | 1<br>(1 - 2)          | 1<br>(1 - 2)           | 9<br>(5 - 12)            | 6<br>(3 - 9)            | 4<br>(3 - 6)            |
| Unintentional injuries                          | 1,986<br>(1,468 - 2,465) | 284<br>(191 - 379)    | 141<br>(115 - 179)     | 714<br>(505 - 911)       | 321<br>(209 - 455)      | 527<br>(349 - 711)      |
| Falls                                           | 199<br>(140 - 255)       | 3<br>(2 - 5)          | 4<br>(3 - 5)           | 37<br>(23 - 50)          | 30<br>(18 - 42)         | 126<br>(89 - 173)       |
| Drowning                                        | 262<br>(200 - 406)       | 33<br>(19 - 70)       | 55<br>(39 - 96)        | 112<br>(77 - 176)        | 34<br>(22 - 50)         | 28<br>(20 - 43)         |
| Fire, heat, and hot substances                  | 133<br>(105 - 170)       | 27<br>(17 - 46)       | 11<br>(8 - 16)         | 31<br>(22 - 42)          | 18<br>(13 - 25)         | 45<br>(32 - 61)         |
| Poisonings                                      | 34<br>(26 - 46)          | 6<br>(4 - 9)          | 3<br>(3 - 5)           | 12<br>(9 - 17)           | 5<br>(4 - 8)            | 7<br>(5 - 11)           |
| Exposure to mechanical forces                   | 361<br>(172 - 490)       | 14<br>(9 - 22)        | 13<br>(9 - 19)         | 265<br>(107 - 367)       | 49<br>(27 - 74)         | 21<br>(12 - 30)         |
| Unintentional firearm injuries                  | 308<br>(45 - 420)        | 6<br>(1 - 10)         | 7<br>(2 - 11)          | 238<br>(33 - 331)        | 40<br>(5 - 61)          | 17<br>(3 - 26)          |
| Unintentional suffocation                       | 12<br>(8 - 23)           | 5<br>(3 - 13)         | 1<br>(0 - 1)           | 3<br>(2 - 5)             | 2<br>(1 - 4)            | 1<br>(0 - 1)            |
| Other exposure to mechanical forces             | 41<br>(28 - 114)         | 2<br>(1 - 4)          | 4<br>(3 - 11)          | 24<br>(15 - 74)          | 7<br>(5 - 20)           | 3<br>(2 - 8)            |
| Adverse effects of medical treatment            | 428<br>(192 - 662)       | 37<br>(14 - 62)       | 8<br>(4 - 12)          | 68<br>(32 - 106)         | 105<br>(43 - 179)       | 209<br>(84 - 334)       |
| Animal contact                                  | 16<br>(8 - 22)           | 2<br>(1 - 3)          | 1<br>(1 - 1)           | 2<br>(2 - 3)             | 2<br>(1 - 4)            | 9<br>(3 - 14)           |
| Venomous animal contact                         | 5<br>(3 - 7)             | 1<br>(0 - 1)          | 0<br>(0 - 1)           | 1<br>(1 - 2)             | 1<br>(1 - 2)            | 2<br>(1 - 3)            |
| Non-venomous animal contact                     | 11<br>(5 - 16)           | 1<br>(0 - 1)          | 1<br>(0 - 1)           | 1<br>(1 - 2)             | 1<br>(1 - 2)            | 7<br>(2 - 12)           |
| Foreign body                                    | 236<br>(136 - 323)       | 135<br>(74 - 203)     | 11<br>(7 - 15)         | 17<br>(10 - 24)          | 16<br>(9 - 25)          | 56<br>(30 - 80)         |
| Pulmonary aspiration and foreign body in airway | 234<br>(134 - 321)       | 135<br>(74 - 203)     | 11<br>(7 - 15)         | 17<br>(9 - 24)           | 16<br>(8 - 24)          | 56<br>(30 - 79)         |
| Foreign body in other body part                 | 2<br>(2 - 3)             | 0<br>(0 - 1)          | 0<br>(0 - 0)           | 1<br>(0 - 1)             | 0<br>(0 - 1)            | 0<br>(0 - 1)            |
| Other unintentional injuries                    | 317<br>(239 - 411)       | 26<br>(15 - 45)       | 34<br>(20 - 54)        | 169<br>(114 - 230)       | 60<br>(37 - 98)         | 27<br>(17 - 41)         |
| Self-harm and interpersonal violence            | 2,231<br>(1,621 - 2,945) | 55<br>(30 - 89)       | 56<br>(36 - 78)        | 1,571<br>(1,104 - 2,087) | 389<br>(276 - 553)      | 160<br>(116 - 263)      |
| Self-harm                                       | 669<br>(506 - 1,024)     | --                    | 12<br>(8 - 18)         | 392<br>(290 - 570)       | 171<br>(123 - 263)      | 94<br>(68 - 189)        |
| Interpersonal violence                          | 1,562<br>(968 - 2,115)   | 55<br>(30 - 89)       | 44<br>(23 - 66)        | 1,179<br>(714 - 1,590)   | 218<br>(121 - 333)      | 66<br>(39 - 111)        |
| Assault by firearm                              | 952<br>(524 - 1,342)     | 15<br>(7 - 28)        | 19<br>(9 - 31)         | 777<br>(435 - 1,091)     | 119<br>(55 - 193)       | 21<br>(10 - 39)         |
| Assault by sharp object                         | 380<br>(195 - 585)       | 8<br>(4 - 14)         | 8<br>(4 - 13)          | 298<br>(146 - 467)       | 52<br>(25 - 89)         | 14<br>(7 - 25)          |
| Assault by other means                          | 230<br>(148 - 347)       | 32<br>(16 - 54)       | 17<br>(9 - 27)         | 103<br>(61 - 162)        | 47<br>(27 - 84)         | 30<br>(18 - 55)         |

Web Table 31- Dominican Republic deaths with 95% UI by age, sex, and cause in 2013

| Cause                                                             | Males, All Ages             | Males, 0-4 Years         | Males, 5-14 Years  | Males, 15-49 Years       | Males, 50-69 Years        | Males, 70-80 Years          |
|-------------------------------------------------------------------|-----------------------------|--------------------------|--------------------|--------------------------|---------------------------|-----------------------------|
| All causes                                                        | 36,361<br>(30,533 - 44,750) | 3,531<br>(2,935 - 4,253) | 547<br>(486 - 620) | 6,468<br>(5,007 - 8,272) | 9,134<br>(7,026 - 12,354) | 16,683<br>(14,698 - 20,219) |
| Communicable, maternal, neonatal, and nutritional diseases        | 4,911<br>(4,332 - 5,616)    | 2,417<br>(2,000 - 2,881) | 104<br>(83 - 128)  | 740<br>(605 - 899)       | 536<br>(423 - 689)        | 1,115<br>(878 - 1,433)      |
| HIV/AIDS and tuberculosis                                         | 748<br>(579 - 958)          | 7<br>(4 - 10)            | 4<br>(3 - 5)       | 465<br>(353 - 609)       | 183<br>(134 - 248)        | 89<br>(67 - 139)            |
| Tuberculosis                                                      | 303<br>(228 - 429)          | 5<br>(3 - 7)             | 3<br>(2 - 5)       | 117<br>(83 - 167)        | 102<br>(71 - 145)         | 77<br>(55 - 123)            |
| HIV/AIDS                                                          | 445<br>(306 - 621)          | 2<br>(1 - 4)             | 1<br>(0 - 2)       | 348<br>(240 - 489)       | 82<br>(46 - 134)          | 12<br>(6 - 22)              |
| HIV/AIDS resulting in mycobacterial infection                     | 29<br>(19 - 42)             | 0<br>(0 - 0)             | 0<br>(0 - 0)       | 22<br>(14 - 33)          | 5<br>(3 - 9)              | 1<br>(0 - 2)                |
| HIV/AIDS resulting in other diseases                              | 416<br>(288 - 583)          | 2<br>(0 - 4)             | 1<br>(0 - 1)       | 326<br>(225 - 458)       | 76<br>(43 - 124)          | 12<br>(5 - 20)              |
| Diarrhea, lower respiratory, and other common infectious diseases | 1,878<br>(1,524 - 2,318)    | 570<br>(405 - 748)       | 72<br>(56 - 92)    | 186<br>(133 - 243)       | 240<br>(165 - 345)        | 809<br>(587 - 1,106)        |
| Diarrheal diseases                                                | 252<br>(185 - 338)          | 141<br>(86 - 217)        | 9<br>(5 - 14)      | 19<br>(13 - 27)          | 22<br>(14 - 34)           | 61<br>(38 - 97)             |
| Intestinal infectious diseases                                    | 51<br>(24 - 89)             | 21<br>(9 - 41)           | 14<br>(6 - 26)     | 13<br>(6 - 26)           | 2<br>(1 - 4)              | 1<br>(0 - 3)                |
| Typhoid fever                                                     | 36<br>(16 - 66)             | 14<br>(5 - 28)           | 11<br>(4 - 20)     | 10<br>(4 - 19)           | 1<br>(0 - 3)              | 0<br>(0 - 1)                |
| Paratyphoid fever                                                 | 10<br>(4 - 19)              | 4<br>(1 - 9)             | 3<br>(1 - 6)       | 2<br>(1 - 5)             | 0<br>(0 - 1)              | 0<br>(0 - 0)                |
| Other intestinal infectious diseases                              | 5<br>(1 - 13)               | 3<br>(0 - 10)            | 0<br>(0 - 3)       | 1<br>(0 - 4)             | 0<br>(0 - 3)              | 0<br>(0 - 3)                |
| Lower respiratory infections                                      | 1,371<br>(1,041 - 1,750)    | 320<br>(213 - 451)       | 30<br>(20 - 44)    | 114<br>(74 - 157)        | 189<br>(122 - 274)        | 717<br>(498 - 998)          |
| Upper respiratory infections                                      | 2<br>(1 - 3)                | 0<br>(0 - 1)             | 0<br>(0 - 0)       | 0<br>(0 - 1)             | 0<br>(0 - 1)              | 1<br>(0 - 2)                |
| Otitis media                                                      | 1<br>(1 - 1)                | 0<br>(0 - 0)             | 0<br>(0 - 0)       | 0<br>(0 - 0)             | 0<br>(0 - 0)              | 0<br>(0 - 0)                |
| Meningitis                                                        | 136<br>(105 - 187)          | 69<br>(43 - 115)         | 12<br>(9 - 17)     | 22<br>(15 - 30)          | 15<br>(10 - 22)           | 18<br>(13 - 25)             |
| Pneumococcal meningitis                                           | 42<br>(31 - 56)             | 19<br>(11 - 34)          | 4<br>(2 - 7)       | 7<br>(4 - 11)            | 5<br>(3 - 8)              | 6<br>(4 - 9)                |
| H influenzae type B meningitis                                    | 41<br>(27 - 61)             | 31<br>(18 - 51)          | 4<br>(2 - 6)       | 3<br>(2 - 4)             | 2<br>(1 - 3)              | 2<br>(1 - 3)                |
| Meningococcal meningitis                                          | 12<br>(8 - 18)              | 5<br>(2 - 8)             | 1<br>(1 - 2)       | 3<br>(1 - 5)             | 2<br>(1 - 3)              | 2<br>(1 - 4)                |
| Other meningitis                                                  | 41<br>(29 - 59)             | 14<br>(6 - 27)           | 3<br>(2 - 5)       | 9<br>(6 - 14)            | 7<br>(4 - 11)             | 8<br>(5 - 12)               |
| Encephalitis                                                      | 34<br>(23 - 56)             | 10<br>(5 - 21)           | 4<br>(2 - 8)       | 10<br>(6 - 18)           | 6<br>(3 - 10)             | 4<br>(3 - 9)                |
| Diphtheria                                                        | 1<br>(0 - 6)                | 1<br>(0 - 5)             | 0<br>(0 - 2)       | 0<br>(0 - 1)             | 0<br>(0 - 0)              | --                          |
| Whooping cough                                                    | 2<br>(1 - 6)                | 1<br>(0 - 5)             | 0<br>(0 - 0)       | 0<br>(0 - 1)             | 0<br>(0 - 0)              | --                          |
| Tetanus                                                           | 26<br>(14 - 36)             | 5<br>(1 - 8)             | 2<br>(1 - 3)       | 7<br>(4 - 10)            | 6<br>(3 - 11)             | 6<br>(3 - 12)               |
| Measles                                                           | 0<br>(0 - 0)                | 0<br>(0 - 0)             | 0<br>(0 - 0)       | 0<br>(0 - 0)             | 0<br>(0 - 0)              | --                          |
| Varicella and herpes zoster                                       | 3<br>(1 - 8)                | 1<br>(0 - 3)             | 0<br>(0 - 1)       | 1<br>(0 - 1)             | 0<br>(0 - 1)              | 1<br>(0 - 6)                |
| Neglected tropical diseases and malaria                           | 75<br>(37 - 99)             | 20<br>(5 - 34)           | 10<br>(4 - 15)     | 20<br>(11 - 27)          | 13<br>(8 - 20)            | 11<br>(7 - 16)              |
| Malaria                                                           | 4<br>(2 - 7)                | 0<br>(0 - 0)             | 0<br>(0 - 1)       | 2<br>(1 - 3)             | 1<br>(0 - 2)              | 1<br>(0 - 2)                |
| Leishmaniasis                                                     | 3<br>(2 - 4)                | 1<br>(0 - 2)             | 0<br>(0 - 1)       | 1<br>(0 - 1)             | 0<br>(0 - 1)              | 0<br>(0 - 0)                |
| Visceral leishmaniasis                                            | 3<br>(2 - 4)                | 1<br>(0 - 2)             | 0<br>(0 - 1)       | 1<br>(0 - 1)             | 0<br>(0 - 1)              | 0<br>(0 - 0)                |
| Schistosomiasis                                                   | 14<br>(9 - 21)              | 0<br>(0 - 0)             | 0<br>(0 - 0)       | 4<br>(2 - 6)             | 5<br>(3 - 9)              | 4<br>(2 - 7)                |
| Cysticercosis                                                     | 2<br>(1 - 2)                | 0<br>(0 - 0)             | 0<br>(0 - 0)       | 1<br>(1 - 1)             | 1<br>(1 - 1)              | 0<br>(0 - 0)                |
| Cystic echinococcosis                                             | 0<br>(0 - 1)                | 0<br>(0 - 0)             | 0<br>(0 - 0)       | 0<br>(0 - 0)             | 0<br>(0 - 0)              | 0<br>(0 - 0)                |
| Dengue                                                            | 47<br>(10 - 65)             | 17<br>(3 - 30)           | 9<br>(2 - 12)      | 11<br>(3 - 15)           | 5<br>(1 - 8)              | 4<br>(1 - 8)                |
| Rabies                                                            | 1<br>(0 - 1)                | 0<br>(0 - 0)             | 0<br>(0 - 0)       | 0<br>(0 - 0)             | 0<br>(0 - 0)              | 0<br>(0 - 0)                |
| Intestinal nematode infections                                    | 1<br>(0 - 4)                | 0<br>(0 - 3)             | 0<br>(0 - 1)       | 0<br>(0 - 1)             | 0<br>(0 - 0)              | 0<br>(0 - 1)                |
| Ascariasis                                                        | 1<br>(0 - 4)                | 0<br>(0 - 3)             | 0<br>(0 - 1)       | 0<br>(0 - 1)             | 0<br>(0 - 0)              | 0<br>(0 - 1)                |
| Other neglected tropical diseases                                 | 5<br>(4 - 7)                | 1<br>(1 - 2)             | 0<br>(0 - 0)       | 1<br>(1 - 2)             | 1<br>(0 - 1)              | 1<br>(1 - 2)                |
| Maternal disorders                                                | --                          | --                       | --                 | --                       | --                        | --                          |

Web Table 31- Dominican Republic deaths with 95% UI by age, sex, and cause in 2013

| Cause                                                            | Males, All Ages             | Males, 0-4 Years         | Males, 5-14 Years  | Males, 15-49 Years       | Males, 50-69 Years        | Males, 70-80 Years          |
|------------------------------------------------------------------|-----------------------------|--------------------------|--------------------|--------------------------|---------------------------|-----------------------------|
| Maternal hemorrhage                                              | --                          | --                       | --                 | --                       | --                        | --                          |
| Maternal sepsis and other maternal infections                    | --                          | --                       | --                 | --                       | --                        | --                          |
| Maternal hypertensive disorders                                  | --                          | --                       | --                 | --                       | --                        | --                          |
| Maternal obstructed labor                                        | --                          | --                       | --                 | --                       | --                        | --                          |
| Maternal abortive outcome                                        | --                          | --                       | --                 | --                       | --                        | --                          |
| Indirect maternal deaths                                         | --                          | --                       | --                 | --                       | --                        | --                          |
| Late maternal deaths                                             | --                          | --                       | --                 | --                       | --                        | --                          |
| Maternal deaths aggravated by HIV/AIDS                           | --                          | --                       | --                 | --                       | --                        | --                          |
| Other maternal disorders                                         | --                          | --                       | --                 | --                       | --                        | --                          |
| Neonatal disorders                                               | 1,707<br>(1,459 - 1,997)    | 1,707<br>(1,459 - 1,997) | --                 | --                       | --                        | --                          |
| Neonatal preterm birth complications                             | 778<br>(481 - 1,037)        | 778<br>(481 - 1,037)     | --                 | --                       | --                        | --                          |
| Neonatal encephalopathy due to birth asphyxia and trauma         | 301<br>(188 - 452)          | 301<br>(188 - 452)       | --                 | --                       | --                        | --                          |
| Neonatal sepsis and other neonatal infections                    | 473<br>(230 - 753)          | 473<br>(230 - 753)       | --                 | --                       | --                        | --                          |
| Hemolytic disease and other neonatal jaundice                    | 21<br>(8 - 47)              | 21<br>(8 - 47)           | --                 | --                       | --                        | --                          |
| Other neonatal disorders                                         | 133<br>(76 - 254)           | 133<br>(76 - 254)        | --                 | --                       | --                        | --                          |
| Nutritional deficiencies                                         | 359<br>(244 - 749)          | 99<br>(55 - 206)         | 11<br>(7 - 24)     | 30<br>(18 - 67)          | 54<br>(32 - 116)          | 165<br>(98 - 364)           |
| Protein-energy malnutrition                                      | 197<br>(110 - 463)          | 84<br>(45 - 186)         | 8<br>(4 - 20)      | 12<br>(6 - 35)           | 18<br>(8 - 54)            | 74<br>(31 - 208)            |
| Iodine deficiency                                                | 2<br>(0 - 7)                | 0<br>(0 - 2)             | 0<br>(0 - 1)       | 0<br>(0 - 2)             | 0<br>(0 - 2)              | 1<br>(0 - 4)                |
| Iron-deficiency anemia                                           | 150<br>(76 - 305)           | 14<br>(3 - 34)           | 3<br>(1 - 6)       | 14<br>(7 - 31)           | 32<br>(16 - 64)           | 87<br>(43 - 193)            |
| Other nutritional deficiencies                                   | 11<br>(4 - 27)              | 1<br>(0 - 2)             | 0<br>(0 - 1)       | 3<br>(1 - 7)             | 3<br>(1 - 7)              | 4<br>(1 - 11)               |
| Other communicable, maternal, neonatal, and nutritional diseases | 143<br>(111 - 189)          | 15<br>(8 - 23)           | 6<br>(4 - 8)       | 38<br>(27 - 51)          | 45<br>(31 - 69)           | 40<br>(29 - 60)             |
| Sexually transmitted diseases excluding HIV                      | 10<br>(4 - 22)              | 4<br>(0 - 10)            | 0<br>(0 - 1)       | 2<br>(1 - 6)             | 2<br>(1 - 5)              | 2<br>(0 - 5)                |
| Syphilis                                                         | 8<br>(2 - 17)               | 4<br>(0 - 10)            | 0<br>(0 - 1)       | 1<br>(1 - 3)             | 1<br>(0 - 4)              | 1<br>(0 - 4)                |
| Chlamydial infection                                             | --                          | --                       | --                 | --                       | --                        | --                          |
| Gonococcal infection                                             | 1<br>(1 - 3)                | --                       | 0<br>(0 - 0)       | 1<br>(0 - 1)             | 0<br>(0 - 1)              | 0<br>(0 - 1)                |
| Other sexually transmitted diseases                              | 1<br>(0 - 2)                | --                       | 0<br>(0 - 0)       | 1<br>(0 - 1)             | 0<br>(0 - 0)              | 0<br>(0 - 0)                |
| Hepatitis                                                        | 62<br>(46 - 83)             | 3<br>(1 - 5)             | 3<br>(2 - 4)       | 20<br>(13 - 29)          | 21<br>(13 - 34)           | 15<br>(9 - 23)              |
| Acute hepatitis A                                                | 14<br>(5 - 24)              | 2<br>(1 - 3)             | 2<br>(1 - 3)       | 7<br>(2 - 14)            | 2<br>(0 - 6)              | 1<br>(0 - 2)                |
| Acute hepatitis B                                                | 45<br>(30 - 63)             | 1<br>(0 - 2)             | 1<br>(0 - 2)       | 12<br>(6 - 20)           | 18<br>(11 - 29)           | 14<br>(8 - 21)              |
| Acute hepatitis C                                                | 4<br>(1 - 11)               | --                       | 0<br>(0 - 1)       | 1<br>(0 - 4)             | 1<br>(0 - 4)              | 1<br>(0 - 4)                |
| Other infectious diseases                                        | 71<br>(45 - 98)             | 8<br>(5 - 13)            | 3<br>(1 - 4)       | 15<br>(8 - 22)           | 22<br>(12 - 33)           | 23<br>(15 - 37)             |
| Non-communicable diseases                                        | 25,941<br>(21,776 - 32,462) | 871<br>(662 - 1,130)     | 190<br>(159 - 230) | 2,398<br>(1,763 - 3,143) | 7,545<br>(5,752 - 10,307) | 14,937<br>(13,167 - 18,160) |
| Neoplasms                                                        | 5,183<br>(4,001 - 6,749)    | 38<br>(25 - 56)          | 52<br>(42 - 63)    | 464<br>(340 - 609)       | 1,590<br>(1,183 - 2,216)  | 3,039<br>(2,275 - 3,910)    |
| Esophageal cancer                                                | 108<br>(74 - 151)           | --                       | --                 | 9<br>(6 - 13)            | 46<br>(31 - 68)           | 53<br>(36 - 72)             |
| Stomach cancer                                                   | 352<br>(276 - 464)          | --                       | --                 | 40<br>(29 - 54)          | 141<br>(104 - 201)        | 171<br>(134 - 222)          |
| Liver cancer                                                     | 380<br>(291 - 507)          | --                       | 1<br>(1 - 2)       | 56<br>(39 - 74)          | 157<br>(111 - 221)        | 165<br>(127 - 227)          |
| Liver cancer due to hepatitis B                                  | 89<br>(38 - 153)            | --                       | 0<br>(0 - 1)       | 20<br>(9 - 33)           | 42<br>(16 - 76)           | 26<br>(11 - 49)             |
| Liver cancer due to hepatitis C                                  | 192<br>(130 - 287)          | --                       | 0<br>(0 - 0)       | 22<br>(12 - 35)          | 78<br>(47 - 124)          | 93<br>(64 - 135)            |
| Liver cancer due to alcohol use                                  | 75<br>(44 - 121)            | --                       | --                 | 7<br>(3 - 14)            | 29<br>(15 - 51)           | 39<br>(23 - 62)             |
| Liver cancer due to other causes                                 | 24<br>(13 - 37)             | --                       | 1<br>(0 - 1)       | 6<br>(3 - 10)            | 9<br>(4 - 16)             | 8<br>(4 - 13)               |

Web Table 31- Dominican Republic deaths with 95% UI by age, sex, and cause in 2013

| Cause                                         | Males, All Ages             | Males, 0-4 Years | Males, 5-14 Years | Males, 15-49 Years     | Males, 50-69 Years       | Males, 70-80 Years       |
|-----------------------------------------------|-----------------------------|------------------|-------------------|------------------------|--------------------------|--------------------------|
| Larynx cancer                                 | 83<br>(60 - 129)            | --               | --                | 7<br>(5 - 12)          | 37<br>(25 - 59)          | 38<br>(28 - 61)          |
| Tracheal, bronchus and lung cancer            | 726<br>(569 - 955)          | --               | --                | 49<br>(35 - 68)        | 304<br>(221 - 423)       | 373<br>(293 - 482)       |
| Breast cancer                                 | 11<br>(7 - 25)              | --               | --                | 2<br>(1 - 4)           | 4<br>(2 - 9)             | 5<br>(3 - 12)            |
| Cervical cancer                               | --                          | --               | --                | --                     | --                       | --                       |
| Uterine cancer                                | --                          | --               | --                | --                     | --                       | --                       |
| Prostate cancer                               | 1,755<br>(911 - 2,457)      | --               | --                | 16<br>(9 - 24)         | 279<br>(140 - 448)       | 1,461<br>(739 - 2,044)   |
| Colon and rectum cancer                       | 373<br>(294 - 494)          | --               | --                | 40<br>(29 - 53)        | 133<br>(99 - 189)        | 199<br>(158 - 259)       |
| Lip and oral cavity cancer                    | 150<br>(97 - 204)           | --               | --                | 13<br>(8 - 18)         | 57<br>(35 - 83)          | 80<br>(53 - 108)         |
| Nasopharynx cancer                            | 44<br>(33 - 60)             | --               | 0<br>(0 - 0)      | 9<br>(6 - 12)          | 21<br>(15 - 30)          | 15<br>(11 - 19)          |
| Other pharynx cancer                          | 70<br>(52 - 95)             | --               | --                | 9<br>(6 - 13)          | 28<br>(20 - 40)          | 33<br>(24 - 44)          |
| Gallbladder and biliary tract cancer          | 34<br>(22 - 63)             | --               | --                | 3<br>(2 - 5)           | 12<br>(8 - 22)           | 19<br>(12 - 35)          |
| Pancreatic cancer                             | 171<br>(134 - 226)          | --               | --                | 21<br>(15 - 28)        | 71<br>(52 - 99)          | 80<br>(60 - 105)         |
| Malignant skin melanoma                       | 15<br>(9 - 30)              | --               | --                | 3<br>(2 - 7)           | 5<br>(3 - 10)            | 7<br>(4 - 14)            |
| Non-melanoma skin cancer                      | 82<br>(52 - 117)            | --               | --                | 10<br>(7 - 16)         | 25<br>(15 - 38)          | 47<br>(29 - 68)          |
| Ovarian cancer                                | --                          | --               | --                | --                     | --                       | --                       |
| Testicular cancer                             | 5<br>(2 - 7)                | --               | --                | 2<br>(1 - 4)           | 1<br>(0 - 2)             | 1<br>(0 - 2)             |
| Kidney cancer                                 | 49<br>(39 - 65)             | 1<br>(0 - 1)     | 1<br>(1 - 1)      | 7<br>(5 - 9)           | 22<br>(14 - 32)          | 19<br>(14 - 25)          |
| Bladder cancer                                | 56<br>(43 - 78)             | --               | --                | 2<br>(2 - 3)           | 14<br>(10 - 21)          | 40<br>(30 - 56)          |
| Brain and nervous system cancer               | 90<br>(32 - 134)            | 3<br>(1 - 5)     | 6<br>(2 - 8)      | 25<br>(8 - 37)         | 34<br>(11 - 56)          | 23<br>(7 - 34)           |
| Thyroid cancer                                | 12<br>(9 - 16)              | --               | 0<br>(0 - 0)      | 2<br>(1 - 3)           | 5<br>(4 - 8)             | 5<br>(3 - 6)             |
| Mesothelioma                                  | 11<br>(8 - 14)              | --               | --                | 1<br>(1 - 1)           | 3<br>(2 - 4)             | 7<br>(5 - 9)             |
| Hodgkin lymphoma                              | 13<br>(5 - 21)              | 1<br>(0 - 1)     | 1<br>(0 - 1)      | 4<br>(1 - 7)           | 5<br>(1 - 8)             | 3<br>(1 - 4)             |
| Non-Hodgkin lymphoma                          | 103<br>(73 - 146)           | 3<br>(2 - 6)     | 4<br>(3 - 6)      | 23<br>(15 - 34)        | 34<br>(21 - 53)          | 40<br>(25 - 57)          |
| Multiple myeloma                              | 44<br>(28 - 61)             | --               | --                | 5<br>(3 - 7)           | 21<br>(12 - 30)          | 18<br>(11 - 26)          |
| Leukemia                                      | 163<br>(131 - 208)          | 9<br>(5 - 15)    | 17<br>(12 - 23)   | 42<br>(31 - 57)        | 43<br>(31 - 61)          | 51<br>(39 - 68)          |
| Other neoplasms                               | 283<br>(217 - 360)          | 22<br>(13 - 34)  | 22<br>(15 - 30)   | 62<br>(43 - 84)        | 87<br>(59 - 125)         | 89<br>(65 - 121)         |
| Cardiovascular diseases                       | 12,612<br>(10,461 - 15,967) | 57<br>(41 - 77)  | 31<br>(24 - 37)   | 1,034<br>(758 - 1,375) | 3,891<br>(2,970 - 5,320) | 7,600<br>(6,575 - 9,294) |
| Rheumatic heart disease                       | 45<br>(27 - 63)             | 0<br>(0 - 1)     | 4<br>(2 - 6)      | 12<br>(7 - 18)         | 10<br>(6 - 16)           | 18<br>(10 - 29)          |
| Ischemic heart disease                        | 7,177<br>(5,691 - 9,247)    | 13<br>(7 - 19)   | 9<br>(7 - 12)     | 623<br>(447 - 834)     | 2,337<br>(1,743 - 3,212) | 4,196<br>(3,394 - 5,218) |
| Cerebrovascular disease                       | 4,044<br>(3,138 - 5,461)    | 13<br>(8 - 18)   | 9<br>(7 - 12)     | 282<br>(196 - 389)     | 1,199<br>(855 - 1,743)   | 2,541<br>(2,002 - 3,376) |
| Ischemic stroke                               | 2,421<br>(1,794 - 3,468)    | 2<br>(1 - 4)     | 3<br>(2 - 4)      | 70<br>(44 - 122)       | 593<br>(394 - 947)       | 1,753<br>(1,307 - 2,417) |
| Hemorrhagic stroke                            | 1,623<br>(1,093 - 2,299)    | 10<br>(7 - 14)   | 7<br>(4 - 9)      | 211<br>(144 - 295)     | 606<br>(395 - 896)       | 788<br>(490 - 1,143)     |
| Hypertensive heart disease                    | 840<br>(480 - 1,215)        | 2<br>(1 - 4)     | 1<br>(0 - 1)      | 42<br>(22 - 65)        | 208<br>(113 - 329)       | 586<br>(323 - 853)       |
| Cardiomyopathy and myocarditis                | 111<br>(80 - 154)           | 12<br>(8 - 19)   | 3<br>(2 - 4)      | 21<br>(14 - 31)        | 32<br>(21 - 48)          | 44<br>(30 - 64)          |
| Atrial fibrillation and flutter               | 20<br>(13 - 28)             | --               | --                | 1<br>(0 - 1)           | 3<br>(2 - 5)             | 16<br>(10 - 23)          |
| Aortic aneurysm                               | 82<br>(63 - 120)            | --               | --                | 9<br>(6 - 13)          | 28<br>(20 - 42)          | 46<br>(34 - 66)          |
| Peripheral vascular disease                   | 14<br>(10 - 21)             | --               | --                | 0<br>(0 - 0)           | 2<br>(2 - 4)             | 12<br>(7 - 18)           |
| Endocarditis                                  | 36<br>(24 - 53)             | 10<br>(6 - 16)   | 2<br>(1 - 3)      | 7<br>(4 - 11)          | 6<br>(3 - 10)            | 11<br>(6 - 17)           |
| Other cardiovascular and circulatory diseases | 244<br>(179 - 441)          | 7<br>(5 - 11)    | 3<br>(2 - 5)      | 38<br>(26 - 67)        | 64<br>(42 - 118)         | 131<br>(92 - 242)        |
| Chronic respiratory diseases                  | 1,495<br>(1,194 - 1,915)    | 56<br>(33 - 84)  | 10<br>(7 - 13)    | 84<br>(59 - 114)       | 327<br>(239 - 467)       | 1,018<br>(830 - 1,324)   |



Web Table 31- Dominican Republic deaths with 95% UI by age, sex, and cause in 2013

| Cause                                               | Males, All Ages          | Males, 0-4 Years | Males, 5-14 Years | Males, 15-49 Years | Males, 50-69 Years | Males, 70-80 Years       |
|-----------------------------------------------------|--------------------------|------------------|-------------------|--------------------|--------------------|--------------------------|
| Chronic obstructive pulmonary disease               | 1,063<br>(847 - 1,374)   | 21<br>(10 - 37)  | 2<br>(2 - 3)      | 36<br>(24 - 49)    | 213<br>(151 - 308) | 791<br>(637 - 1,024)     |
| Pneumoconiosis                                      | 53<br>(35 - 85)          | 0<br>(0 - 0)     | 0<br>(0 - 0)      | 5<br>(3 - 8)       | 22<br>(13 - 37)    | 26<br>(16 - 43)          |
| Silicosis                                           | 2<br>(1 - 3)             | 0<br>(0 - 0)     | 0<br>(0 - 0)      | 0<br>(0 - 1)       | 1<br>(0 - 1)       | 1<br>(0 - 1)             |
| Asbestosis                                          | 10<br>(6 - 17)           | 0<br>(0 - 0)     | 0<br>(0 - 0)      | 0<br>(0 - 1)       | 9<br>(5 - 15)      | 1<br>(0 - 1)             |
| Coal workers pneumoconiosis                         | 12<br>(8 - 19)           | 0<br>(0 - 0)     | 0<br>(0 - 0)      | 3<br>(2 - 4)       | 5<br>(3 - 9)       | 4<br>(3 - 8)             |
| Other pneumoconiosis                                | 29<br>(19 - 47)          | 0<br>(0 - 0)     | 0<br>(0 - 0)      | 2<br>(1 - 3)       | 7<br>(4 - 13)      | 20<br>(12 - 34)          |
| Asthma                                              | 269<br>(205 - 367)       | 16<br>(8 - 28)   | 6<br>(4 - 8)      | 36<br>(24 - 49)    | 69<br>(48 - 104)   | 143<br>(100 - 203)       |
| Interstitial lung disease and pulmonary sarcoidosis | 70<br>(43 - 127)         | 0<br>(0 - 0)     | 0<br>(0 - 0)      | 3<br>(2 - 6)       | 16<br>(10 - 31)    | 51<br>(30 - 96)          |
| Other chronic respiratory diseases                  | 40<br>(30 - 54)          | 20<br>(12 - 31)  | 1<br>(1 - 2)      | 4<br>(3 - 6)       | 7<br>(4 - 11)      | 8<br>(5 - 13)            |
| Cirrhosis                                           | 1,116<br>(880 - 1,475)   | 3<br>(2 - 5)     | 5<br>(4 - 7)      | 184<br>(132 - 247) | 480<br>(356 - 664) | 443<br>(354 - 584)       |
| Cirrhosis due to hepatitis B                        | 88<br>(37 - 159)         | 0<br>(0 - 0)     | 0<br>(0 - 0)      | 15<br>(6 - 28)     | 39<br>(15 - 77)    | 34<br>(14 - 63)          |
| Cirrhosis due to hepatitis C                        | 336<br>(161 - 535)       | 0<br>(0 - 0)     | 1<br>(0 - 2)      | 45<br>(15 - 82)    | 135<br>(47 - 238)  | 155<br>(92 - 232)        |
| Cirrhosis due to alcohol use                        | 559<br>(388 - 782)       | --               | --                | 82<br>(49 - 123)   | 251<br>(165 - 365) | 226<br>(156 - 316)       |
| Cirrhosis due to other causes                       | 132<br>(74 - 215)        | 3<br>(2 - 5)     | 4<br>(3 - 5)      | 42<br>(24 - 66)    | 55<br>(27 - 99)    | 28<br>(13 - 48)          |
| Digestive diseases                                  | 497<br>(370 - 851)       | 6<br>(4 - 10)    | 6<br>(5 - 10)     | 88<br>(59 - 156)   | 150<br>(101 - 269) | 246<br>(186 - 411)       |
| Peptic ulcer disease                                | 233<br>(160 - 436)       | 0<br>(0 - 0)     | 1<br>(0 - 1)      | 38<br>(24 - 75)    | 73<br>(45 - 140)   | 121<br>(83 - 226)        |
| Gastritis and duodenitis                            | 23<br>(14 - 48)          | 0<br>(0 - 1)     | 0<br>(0 - 1)      | 2<br>(1 - 5)       | 6<br>(3 - 14)      | 14<br>(7 - 29)           |
| Appendicitis                                        | 20<br>(13 - 39)          | 1<br>(0 - 1)     | 2<br>(1 - 3)      | 7<br>(4 - 14)      | 6<br>(3 - 11)      | 6<br>(3 - 11)            |
| Paralytic ileus and intestinal obstruction          | 56<br>(18 - 89)          | 3<br>(1 - 6)     | 1<br>(1 - 2)      | 7<br>(2 - 13)      | 15<br>(4 - 28)     | 29<br>(8 - 48)           |
| Inguinal, femoral, and abdominal hernia             | 24<br>(9 - 67)           | 1<br>(0 - 2)     | 0<br>(0 - 1)      | 3<br>(1 - 8)       | 6<br>(2 - 16)      | 14<br>(5 - 43)           |
| Inflammatory bowel disease                          | 14<br>(9 - 28)           | 0<br>(0 - 1)     | 0<br>(0 - 1)      | 3<br>(2 - 6)       | 4<br>(2 - 8)       | 6<br>(3 - 13)            |
| Vascular intestinal disorders                       | 31<br>(11 - 66)          | 0<br>(0 - 0)     | 0<br>(0 - 0)      | 4<br>(1 - 8)       | 10<br>(4 - 22)     | 17<br>(6 - 37)           |
| Gallbladder and biliary diseases                    | 16<br>(10 - 38)          | 0<br>(0 - 0)     | 0<br>(0 - 0)      | 3<br>(1 - 7)       | 4<br>(2 - 10)      | 9<br>(5 - 23)            |
| Pancreatitis                                        | 44<br>(28 - 81)          | 0<br>(0 - 0)     | 0<br>(0 - 1)      | 15<br>(9 - 27)     | 16<br>(9 - 28)     | 13<br>(8 - 25)           |
| Other digestive diseases                            | 35<br>(24 - 63)          | 1<br>(0 - 1)     | 1<br>(0 - 1)      | 6<br>(4 - 13)      | 10<br>(6 - 20)     | 18<br>(11 - 30)          |
| Neurological disorders                              | 1,632<br>(1,259 - 2,090) | 8<br>(5 - 12)    | 9<br>(7 - 13)     | 59<br>(42 - 81)    | 147<br>(103 - 216) | 1,408<br>(1,051 - 1,809) |
| Alzheimer disease and other dementias               | 1,414<br>(1,056 - 1,841) | --               | --                | 0<br>(0 - 1)       | 101<br>(67 - 153)  | 1,313<br>(959 - 1,697)   |
| Parkinson disease                                   | 86<br>(62 - 121)         | --               | --                | 1<br>(1 - 1)       | 16<br>(10 - 25)    | 69<br>(49 - 102)         |
| Epilepsy                                            | 100<br>(72 - 136)        | 5<br>(3 - 9)     | 8<br>(5 - 11)     | 48<br>(31 - 68)    | 21<br>(13 - 32)    | 18<br>(12 - 28)          |
| Multiple sclerosis                                  | 4<br>(2 - 6)             | --               | --                | 1<br>(0 - 2)       | 2<br>(1 - 3)       | 1<br>(1 - 2)             |
| Other neurological disorders                        | 27<br>(20 - 38)          | 3<br>(2 - 4)     | 2<br>(1 - 3)      | 9<br>(6 - 13)      | 8<br>(5 - 12)      | 6<br>(4 - 9)             |
| Mental and substance use disorders                  | 144<br>(92 - 195)        | 3<br>(1 - 5)     | 0<br>(0 - 0)      | 69<br>(45 - 97)    | 46<br>(23 - 68)    | 26<br>(16 - 35)          |
| Schizophrenia                                       | 6<br>(3 - 9)             | --               | --                | 2<br>(1 - 3)       | 2<br>(1 - 3)       | 2<br>(1 - 4)             |
| Alcohol use disorders                               | 73<br>(26 - 105)         | --               | --                | 31<br>(11 - 46)    | 31<br>(10 - 48)    | 10<br>(3 - 15)           |
| Drug use disorders                                  | 65<br>(47 - 89)          | 3<br>(1 - 5)     | --                | 36<br>(24 - 52)    | 13<br>(8 - 20)     | 13<br>(8 - 19)           |
| Opioid use disorders                                | 19<br>(13 - 26)          | 1<br>(0 - 2)     | --                | 11<br>(7 - 15)     | 3<br>(2 - 5)       | 4<br>(2 - 6)             |
| Cocaine use disorders                               | 3<br>(2 - 4)             | 0<br>(0 - 0)     | --                | 2<br>(1 - 2)       | 0<br>(0 - 1)       | 0<br>(0 - 1)             |
| Amphetamine use disorders                           | 2<br>(1 - 3)             | 0<br>(0 - 0)     | --                | 1<br>(1 - 2)       | 0<br>(0 - 1)       | 0<br>(0 - 1)             |
| Other drug use disorders                            | 41<br>(30 - 57)          | 2<br>(1 - 3)     | --                | 23<br>(15 - 33)    | 9<br>(6 - 13)      | 8<br>(5 - 12)            |
| Eating disorders                                    | 0<br>(0 - 0)             | --               | 0<br>(0 - 0)      | 0<br>(0 - 0)       | --                 | --                       |

Web Table 31- Dominican Republic deaths with 95% UI by age, sex, and cause in 2013

| Cause                                               | Males, All Ages          | Males, 0-4 Years   | Males, 5-14 Years | Males, 15-49 Years | Males, 50-69 Years   | Males, 70-80 Years     |
|-----------------------------------------------------|--------------------------|--------------------|-------------------|--------------------|----------------------|------------------------|
| Anorexia nervosa                                    | 0<br>(0 - 0)             | --                 | 0<br>(0 - 0)      | 0<br>(0 - 0)       | --                   | --                     |
| Diabetes, urogenital, blood, and endocrine diseases | 2,487<br>(1,982 - 3,224) | 83<br>(50 - 183)   | 38<br>(28 - 56)   | 367<br>(266 - 492) | 885<br>(652 - 1,234) | 1,115<br>(907 - 1,417) |
| Diabetes mellitus                                   | 1,142<br>(893 - 1,494)   | 5<br>(3 - 6)       | 4<br>(3 - 5)      | 143<br>(102 - 197) | 436<br>(316 - 607)   | 554<br>(438 - 718)     |
| Acute glomerulonephritis                            | 4<br>(3 - 6)             | 0<br>(0 - 1)       | 0<br>(0 - 0)      | 1<br>(1 - 1)       | 1<br>(0 - 1)         | 2<br>(1 - 3)           |
| Chronic kidney disease                              | 1,083<br>(817 - 1,448)   | 21<br>(13 - 30)    | 12<br>(9 - 17)    | 174<br>(122 - 239) | 400<br>(271 - 577)   | 477<br>(361 - 644)     |
| Chronic kidney disease due to diabetes mellitus     | 446<br>(301 - 683)       | 2<br>(1 - 5)       | 1<br>(1 - 3)      | 73<br>(44 - 113)   | 204<br>(131 - 310)   | 165<br>(102 - 295)     |
| Chronic kidney disease due to hypertension          | 325<br>(152 - 471)       | 5<br>(2 - 8)       | 2<br>(1 - 3)      | 47<br>(22 - 76)    | 106<br>(45 - 162)    | 164<br>(79 - 240)      |
| Chronic kidney disease due to glomerulonephritis    | 41<br>(25 - 61)          | 3<br>(2 - 5)       | 3<br>(2 - 4)      | 7<br>(4 - 12)      | 8<br>(4 - 14)        | 20<br>(11 - 33)        |
| Chronic kidney disease due to other causes          | 272<br>(152 - 414)       | 10<br>(5 - 17)     | 6<br>(3 - 9)      | 46<br>(22 - 76)    | 81<br>(32 - 150)     | 128<br>(67 - 212)      |
| Urinary diseases and male infertility               | 71<br>(54 - 105)         | 3<br>(2 - 6)       | 1<br>(0 - 1)      | 7<br>(5 - 10)      | 16<br>(11 - 25)      | 44<br>(31 - 68)        |
| Interstitial nephritis and urinary tract infections | 25<br>(17 - 43)          | 2<br>(1 - 5)       | 0<br>(0 - 1)      | 2<br>(1 - 4)       | 6<br>(3 - 10)        | 15<br>(9 - 27)         |
| Urolithiasis                                        | 6<br>(3 - 9)             | --                 | 0<br>(0 - 0)      | 1<br>(0 - 1)       | 1<br>(1 - 2)         | 4<br>(2 - 6)           |
| Other urinary diseases                              | 39<br>(27 - 62)          | 1<br>(0 - 1)       | 0<br>(0 - 0)      | 4<br>(3 - 7)       | 9<br>(5 - 14)        | 25<br>(15 - 41)        |
| Gynecological diseases                              | --                       | --                 | --                | --                 | --                   | --                     |
| Uterine fibroids                                    | --                       | --                 | --                | --                 | --                   | --                     |
| Polycystic ovarian syndrome                         | --                       | --                 | --                | --                 | --                   | --                     |
| Endometriosis                                       | --                       | --                 | --                | --                 | --                   | --                     |
| Genital prolapse                                    | --                       | --                 | --                | --                 | --                   | --                     |
| Other gynecological diseases                        | --                       | --                 | --                | --                 | --                   | --                     |
| Hemoglobinopathies and hemolytic anemias            | 94<br>(59 - 151)         | 27<br>(15 - 48)    | 17<br>(11 - 30)   | 25<br>(14 - 41)    | 12<br>(6 - 21)       | 13<br>(7 - 22)         |
| Thalassemias                                        | 1<br>(1 - 2)             | 1<br>(0 - 1)       | 0<br>(0 - 0)      | 0<br>(0 - 0)       | 0<br>(0 - 0)         | 0<br>(0 - 0)           |
| Sickle cell disorders                               | 77<br>(48 - 124)         | 25<br>(13 - 44)    | 17<br>(10 - 29)   | 23<br>(13 - 40)    | 10<br>(5 - 18)       | 2<br>(1 - 3)           |
| G6PD deficiency                                     | 1<br>(1 - 2)             | 0<br>(0 - 1)       | 0<br>(0 - 0)      | 0<br>(0 - 0)       | 0<br>(0 - 0)         | 0<br>(0 - 0)           |
| Other hemoglobinopathies and hemolytic anemias      | 15<br>(9 - 25)           | 1<br>(1 - 2)       | 0<br>(0 - 0)      | 1<br>(0 - 1)       | 2<br>(1 - 3)         | 11<br>(6 - 19)         |
| Endocrine, metabolic, blood, and immune disorders   | 93<br>(51 - 309)         | 27<br>(10 - 110)   | 3<br>(2 - 11)     | 17<br>(9 - 50)     | 21<br>(11 - 62)      | 26<br>(12 - 83)        |
| Musculoskeletal disorders                           | 32<br>(22 - 43)          | --                 | 2<br>(1 - 3)      | 9<br>(5 - 12)      | 8<br>(5 - 12)        | 14<br>(9 - 20)         |
| Rheumatoid arthritis                                | 7<br>(4 - 11)            | --                 | 0<br>(0 - 0)      | 1<br>(0 - 1)       | 1<br>(1 - 2)         | 5<br>(3 - 8)           |
| Other musculoskeletal disorders                     | 25<br>(16 - 34)          | --                 | 2<br>(1 - 3)      | 8<br>(5 - 11)      | 7<br>(4 - 10)        | 9<br>(5 - 13)          |
| Other non-communicable diseases                     | 741<br>(569 - 950)       | 616<br>(455 - 812) | 37<br>(26 - 52)   | 38<br>(26 - 52)    | 21<br>(15 - 31)      | 29<br>(21 - 40)        |
| Congenital anomalies                                | 694<br>(525 - 895)       | 592<br>(431 - 783) | 36<br>(26 - 51)   | 35<br>(23 - 47)    | 15<br>(10 - 23)      | 16<br>(11 - 23)        |
| Neural tube defects                                 | 27<br>(15 - 44)          | 26<br>(14 - 44)    | 0<br>(0 - 1)      | 0<br>(0 - 1)       | 0<br>(0 - 0)         | 0<br>(0 - 0)           |
| Congenital heart anomalies                          | 337<br>(243 - 454)       | 282<br>(192 - 391) | 22<br>(15 - 33)   | 19<br>(12 - 28)    | 6<br>(4 - 9)         | 9<br>(5 - 14)          |
| Cleft lip and cleft palate                          | 1<br>(0 - 2)             | 1<br>(0 - 2)       | --                | --                 | --                   | --                     |
| Down syndrome                                       | 35<br>(19 - 55)          | 25<br>(11 - 44)    | 3<br>(1 - 5)      | 6<br>(3 - 9)       | 1<br>(1 - 2)         | 0<br>(0 - 0)           |
| Chromosomal unbalanced rearrangements               | 7<br>(5 - 11)            | 5<br>(3 - 8)       | 0<br>(0 - 1)      | 1<br>(0 - 1)       | 0<br>(0 - 1)         | 1<br>(0 - 1)           |
| Other congenital anomalies                          | 286<br>(199 - 397)       | 254<br>(166 - 358) | 11<br>(5 - 18)    | 9<br>(5 - 14)      | 7<br>(4 - 12)        | 6<br>(4 - 10)          |
| Skin and subcutaneous diseases                      | 28<br>(20 - 37)          | 4<br>(3 - 7)       | 1<br>(0 - 1)      | 3<br>(2 - 5)       | 6<br>(4 - 9)         | 13<br>(8 - 19)         |
| Cellulitis                                          | 3<br>(2 - 5)             | 1<br>(0 - 1)       | 0<br>(0 - 0)      | 0<br>(0 - 1)       | 1<br>(0 - 2)         | 1<br>(0 - 3)           |
| Pyoderma                                            | 18<br>(13 - 25)          | 3<br>(2 - 6)       | 0<br>(0 - 1)      | 2<br>(2 - 3)       | 4<br>(3 - 7)         | 8<br>(4 - 12)          |
| Decubitus ulcer                                     | 5<br>(3 - 8)             | 0<br>(0 - 0)       | 0<br>(0 - 0)      | 0<br>(0 - 1)       | 1<br>(0 - 2)         | 4<br>(2 - 7)           |

Web Table 31- Dominican Republic deaths with 95% UI by age, sex, and cause in 2013

| Cause                                           | Males, All Ages          | Males, 0-4 Years   | Males, 5-14 Years  | Males, 15-49 Years       | Males, 50-69 Years     | Males, 70-80 Years |
|-------------------------------------------------|--------------------------|--------------------|--------------------|--------------------------|------------------------|--------------------|
| Other skin and subcutaneous diseases            | 1<br>(1 - 2)             | 0<br>(0 - 0)       | 0<br>(0 - 0)       | 0<br>(0 - 1)             | 0<br>(0 - 0)           | 0<br>(0 - 1)       |
| Sudden infant death syndrome                    | 20<br>(7 - 43)           | 20<br>(7 - 43)     | --                 | --                       | --                     | --                 |
| Injuries                                        | 5,510<br>(4,265 - 7,071) | 242<br>(164 - 332) | 253<br>(212 - 295) | 3,330<br>(2,483 - 4,334) | 1,053<br>(758 - 1,455) | 631<br>(492 - 812) |
| Transport injuries                              | 2,306<br>(1,756 - 2,995) | 50<br>(30 - 75)    | 119<br>(89 - 151)  | 1,400<br>(1,031 - 1,836) | 490<br>(349 - 688)     | 246<br>(186 - 336) |
| Road injuries                                   | 2,295<br>(1,748 - 2,981) | 50<br>(30 - 74)    | 119<br>(88 - 150)  | 1,395<br>(1,027 - 1,830) | 488<br>(348 - 685)     | 244<br>(185 - 333) |
| Pedestrian road injuries                        | 102<br>(63 - 155)        | 4<br>(2 - 7)       | 8<br>(5 - 12)      | 31<br>(18 - 51)          | 30<br>(17 - 47)        | 29<br>(17 - 48)    |
| Cyclist road injuries                           | 13<br>(10 - 18)          | 1<br>(0 - 1)       | 2<br>(1 - 3)       | 4<br>(3 - 6)             | 2<br>(2 - 4)           | 4<br>(2 - 6)       |
| Motorcyclist road injuries                      | 150<br>(94 - 220)        | 1<br>(0 - 1)       | 4<br>(2 - 6)       | 116<br>(72 - 172)        | 25<br>(15 - 42)        | 5<br>(3 - 7)       |
| Motor vehicle road injuries                     | 2,028<br>(1,528 - 2,649) | 45<br>(26 - 66)    | 105<br>(76 - 133)  | 1,243<br>(913 - 1,633)   | 430<br>(299 - 608)     | 206<br>(155 - 282) |
| Other road injuries                             | 3<br>(2 - 5)             | 0<br>(0 - 0)       | 1<br>(0 - 1)       | 1<br>(0 - 1)             | 0<br>(0 - 1)           | 1<br>(0 - 2)       |
| Other transport injuries                        | 10<br>(7 - 14)           | 0<br>(0 - 1)       | 1<br>(0 - 1)       | 5<br>(3 - 7)             | 2<br>(1 - 3)           | 2<br>(1 - 4)       |
| Unintentional injuries                          | 1,339<br>(989 - 1,701)   | 159<br>(101 - 227) | 97<br>(75 - 127)   | 592<br>(409 - 787)       | 228<br>(146 - 333)     | 263<br>(169 - 362) |
| Falls                                           | 107<br>(67 - 143)        | 2<br>(1 - 3)       | 3<br>(2 - 4)       | 33<br>(19 - 46)          | 24<br>(13 - 35)        | 45<br>(30 - 62)    |
| Drowning                                        | 209<br>(152 - 328)       | 20<br>(10 - 45)    | 42<br>(29 - 74)    | 97<br>(64 - 157)         | 27<br>(17 - 42)        | 22<br>(15 - 36)    |
| Fire, heat, and hot substances                  | 85<br>(63 - 117)         | 17<br>(9 - 30)     | 7<br>(4 - 10)      | 23<br>(15 - 33)          | 12<br>(8 - 18)         | 27<br>(18 - 40)    |
| Poisonings                                      | 20<br>(14 - 29)          | 3<br>(2 - 6)       | 2<br>(1 - 3)       | 9<br>(6 - 14)            | 3<br>(2 - 5)           | 2<br>(2 - 4)       |
| Exposure to mechanical forces                   | 318<br>(134 - 437)       | 9<br>(5 - 15)      | 8<br>(5 - 12)      | 242<br>(91 - 345)        | 44<br>(21 - 68)        | 15<br>(5 - 24)     |
| Unintentional firearm injuries                  | 279<br>(29 - 388)        | 4<br>(1 - 7)       | 5<br>(1 - 8)       | 220<br>(21 - 311)        | 37<br>(4 - 58)         | 13<br>(2 - 22)     |
| Unintentional suffocation                       | 9<br>(6 - 20)            | 4<br>(2 - 10)      | 1<br>(0 - 1)       | 2<br>(1 - 5)             | 2<br>(1 - 4)           | 0<br>(0 - 1)       |
| Other exposure to mechanical forces             | 30<br>(19 - 93)          | 1<br>(0 - 2)       | 2<br>(1 - 6)       | 20<br>(12 - 67)          | 6<br>(4 - 17)          | 1<br>(1 - 3)       |
| Adverse effects of medical treatment            | 219<br>(92 - 360)        | 19<br>(7 - 33)     | 4<br>(2 - 7)       | 34<br>(15 - 55)          | 58<br>(21 - 109)       | 104<br>(37 - 176)  |
| Animal contact                                  | 7<br>(4 - 9)             | 1<br>(0 - 1)       | 1<br>(0 - 1)       | 2<br>(1 - 2)             | 2<br>(1 - 2)           | 2<br>(1 - 4)       |
| Venomous animal contact                         | 4<br>(2 - 5)             | 0<br>(0 - 1)       | 0<br>(0 - 0)       | 1<br>(1 - 1)             | 1<br>(0 - 1)           | 1<br>(0 - 2)       |
| Non-venomous animal contact                     | 3<br>(1 - 5)             | 1<br>(0 - 1)       | 0<br>(0 - 1)       | 1<br>(0 - 1)             | 1<br>(0 - 1)           | 1<br>(0 - 2)       |
| Foreign body                                    | 128<br>(57 - 188)        | 72<br>(30 - 122)   | 6<br>(3 - 9)       | 11<br>(5 - 17)           | 12<br>(5 - 20)         | 27<br>(11 - 41)    |
| Pulmonary aspiration and foreign body in airway | 127<br>(56 - 186)        | 72<br>(30 - 121)   | 6<br>(3 - 9)       | 11<br>(5 - 17)           | 12<br>(5 - 19)         | 26<br>(11 - 41)    |
| Foreign body in other body part                 | 1<br>(1 - 2)             | 0<br>(0 - 0)       | 0<br>(0 - 0)       | 0<br>(0 - 1)             | 0<br>(0 - 1)           | 0<br>(0 - 0)       |
| Other unintentional injuries                    | 245<br>(176 - 331)       | 16<br>(7 - 29)     | 25<br>(12 - 44)    | 142<br>(90 - 200)        | 46<br>(24 - 84)        | 18<br>(11 - 30)    |
| Self-harm and interpersonal violence            | 1,865<br>(1,303 - 2,543) | 33<br>(14 - 60)    | 37<br>(20 - 56)    | 1,338<br>(917 - 1,834)   | 335<br>(224 - 493)     | 121<br>(82 - 206)  |
| Self-harm                                       | 546<br>(391 - 796)       | --                 | 7<br>(4 - 12)      | 318<br>(222 - 467)       | 148<br>(103 - 229)     | 73<br>(51 - 139)   |
| Interpersonal violence                          | 1,318<br>(764 - 1,854)   | 33<br>(14 - 60)    | 30<br>(13 - 49)    | 1,020<br>(584 - 1,427)   | 187<br>(95 - 302)      | 48<br>(24 - 86)    |
| Assault by firearm                              | 850<br>(438 - 1,242)     | 11<br>(4 - 22)     | 14<br>(5 - 25)     | 699<br>(371 - 1,016)     | 110<br>(46 - 183)      | 16<br>(6 - 32)     |
| Assault by sharp object                         | 316<br>(147 - 526)       | 6<br>(2 - 11)      | 5<br>(2 - 10)      | 252<br>(113 - 424)       | 42<br>(17 - 80)        | 11<br>(4 - 22)     |
| Assault by other means                          | 152<br>(82 - 262)        | 16<br>(6 - 34)     | 10<br>(5 - 19)     | 69<br>(34 - 127)         | 35<br>(15 - 69)        | 21<br>(10 - 41)    |

Web Table 31- Dominican Republic deaths with 95% UI by age, sex, and cause in 2013

| Cause                                                             | Females, All Ages           | Females, 0-4 Years       | Females, 5-14 Years | Females, 15-49 Years     | Females, 50-69 Years     | Females, 70-80 Years        |
|-------------------------------------------------------------------|-----------------------------|--------------------------|---------------------|--------------------------|--------------------------|-----------------------------|
| All causes                                                        | 27,249<br>(23,154 - 33,851) | 2,714<br>(2,194 - 3,330) | 364<br>(310 - 431)  | 3,139<br>(2,413 - 3,931) | 5,815<br>(4,345 - 7,816) | 15,217<br>(13,485 - 18,949) |
| Communicable, maternal, neonatal, and nutritional diseases        | 3,779<br>(3,250 - 4,393)    | 1,841<br>(1,494 - 2,252) | 84<br>(67 - 105)    | 520<br>(437 - 611)       | 275<br>(211 - 361)       | 1,059<br>(789 - 1,405)      |
| HIV/AIDS and tuberculosis                                         | 353<br>(272 - 450)          | 5<br>(3 - 7)             | 4<br>(2 - 5)        | 241<br>(178 - 316)       | 64<br>(46 - 90)          | 39<br>(26 - 55)             |
| Tuberculosis                                                      | 148<br>(109 - 199)          | 3<br>(2 - 5)             | 3<br>(2 - 5)        | 65<br>(44 - 92)          | 39<br>(26 - 57)          | 37<br>(25 - 54)             |
| HIV/AIDS                                                          | 206<br>(139 - 292)          | 2<br>(1 - 4)             | 1<br>(0 - 1)        | 176<br>(118 - 251)       | 25<br>(13 - 41)          | 2<br>(1 - 5)                |
| HIV/AIDS resulting in mycobacterial infection                     | 10<br>(6 - 15)              | 0<br>(0 - 0)             | 0<br>(0 - 0)        | 8<br>(5 - 13)            | 1<br>(1 - 2)             | 0<br>(0 - 0)                |
| HIV/AIDS resulting in other diseases                              | 196<br>(132 - 279)          | 2<br>(0 - 4)             | 1<br>(0 - 1)        | 168<br>(112 - 239)       | 24<br>(12 - 39)          | 2<br>(1 - 4)                |
| Diarrhea, lower respiratory, and other common infectious diseases | 1,631<br>(1,275 - 2,037)    | 441<br>(318 - 604)       | 57<br>(44 - 74)     | 130<br>(93 - 171)        | 152<br>(104 - 215)       | 851<br>(571 - 1,173)        |
| Diarrheal diseases                                                | 207<br>(144 - 289)          | 113<br>(66 - 184)        | 6<br>(4 - 10)       | 13<br>(8 - 17)           | 16<br>(10 - 25)          | 59<br>(34 - 103)            |
| Intestinal infectious diseases                                    | 50<br>(26 - 88)             | 19<br>(9 - 35)           | 13<br>(6 - 23)      | 15<br>(6 - 29)           | 2<br>(1 - 5)             | 1<br>(0 - 3)                |
| Typhoid fever                                                     | 36<br>(17 - 67)             | 14<br>(6 - 25)           | 10<br>(4 - 18)      | 11<br>(5 - 22)           | 1<br>(0 - 4)             | 1<br>(0 - 1)                |
| Paratyphoid fever                                                 | 10<br>(4 - 19)              | 4<br>(2 - 8)             | 3<br>(1 - 5)        | 3<br>(1 - 6)             | 0<br>(0 - 1)             | 0<br>(0 - 0)                |
| Other intestinal infectious diseases                              | 4<br>(1 - 10)               | 2<br>(0 - 7)             | 0<br>(0 - 2)        | 1<br>(0 - 5)             | 0<br>(0 - 2)             | 0<br>(0 - 2)                |
| Lower respiratory infections                                      | 1,246<br>(897 - 1,619)      | 249<br>(166 - 355)       | 26<br>(18 - 36)     | 81<br>(53 - 111)         | 120<br>(78 - 174)        | 770<br>(488 - 1,087)        |
| Upper respiratory infections                                      | 1<br>(0 - 3)                | 0<br>(0 - 1)             | 0<br>(0 - 0)        | 0<br>(0 - 0)             | 0<br>(0 - 1)             | 0<br>(0 - 2)                |
| Otitis media                                                      | 1<br>(1 - 1)                | 0<br>(0 - 0)             | 0<br>(0 - 0)        | 0<br>(0 - 0)             | 0<br>(0 - 0)             | 0<br>(0 - 0)                |
| Meningitis                                                        | 87<br>(67 - 115)            | 46<br>(31 - 69)          | 8<br>(6 - 11)       | 11<br>(8 - 16)           | 8<br>(6 - 12)            | 13<br>(9 - 21)              |
| Pneumococcal meningitis                                           | 27<br>(19 - 37)             | 12<br>(7 - 18)           | 3<br>(2 - 4)        | 4<br>(2 - 7)             | 3<br>(1 - 5)             | 5<br>(3 - 9)                |
| H influenzae type B meningitis                                    | 26<br>(18 - 39)             | 20<br>(12 - 32)          | 3<br>(1 - 4)        | 1<br>(1 - 2)             | 1<br>(0 - 1)             | 1<br>(1 - 2)                |
| Meningococcal meningitis                                          | 7<br>(5 - 10)               | 3<br>(1 - 5)             | 1<br>(0 - 1)        | 1<br>(1 - 2)             | 1<br>(0 - 2)             | 1<br>(1 - 3)                |
| Other meningitis                                                  | 26<br>(17 - 39)             | 11<br>(5 - 21)           | 2<br>(1 - 3)        | 4<br>(3 - 7)             | 4<br>(2 - 6)             | 5<br>(3 - 9)                |
| Encephalitis                                                      | 26<br>(19 - 41)             | 7<br>(4 - 15)            | 4<br>(2 - 7)        | 7<br>(5 - 12)            | 4<br>(2 - 7)             | 4<br>(2 - 8)                |
| Diphtheria                                                        | 1<br>(0 - 6)                | 1<br>(0 - 5)             | 0<br>(0 - 1)        | 0<br>(0 - 0)             | 0<br>(0 - 0)             | --                          |
| Whooping cough                                                    | 3<br>(1 - 11)               | 2<br>(0 - 10)            | 0<br>(0 - 0)        | 0<br>(0 - 1)             | 0<br>(0 - 0)             | --                          |
| Tetanus                                                           | 5<br>(4 - 8)                | 1<br>(0 - 2)             | 0<br>(0 - 0)        | 1<br>(1 - 2)             | 1<br>(1 - 2)             | 2<br>(1 - 3)                |
| Measles                                                           | 0<br>(0 - 0)                | 0<br>(0 - 0)             | 0<br>(0 - 0)        | 0<br>(0 - 0)             | 0<br>(0 - 0)             | --                          |
| Varicella and herpes zoster                                       | 3<br>(1 - 10)               | 1<br>(0 - 3)             | 0<br>(0 - 1)        | 1<br>(0 - 2)             | 0<br>(0 - 1)             | 2<br>(0 - 8)                |
| Neglected tropical diseases and malaria                           | 57<br>(26 - 76)             | 19<br>(4 - 31)           | 9<br>(3 - 13)       | 10<br>(6 - 13)           | 9<br>(5 - 13)            | 10<br>(6 - 16)              |
| Malaria                                                           | 4<br>(3 - 8)                | 0<br>(0 - 1)             | 0<br>(0 - 1)        | 2<br>(1 - 3)             | 1<br>(0 - 2)             | 1<br>(0 - 3)                |
| Leishmaniasis                                                     | 0<br>(0 - 0)                | 0<br>(0 - 0)             | 0<br>(0 - 0)        | 0<br>(0 - 0)             | 0<br>(0 - 0)             | 0<br>(0 - 0)                |
| Visceral leishmaniasis                                            | 0<br>(0 - 0)                | 0<br>(0 - 0)             | 0<br>(0 - 0)        | 0<br>(0 - 0)             | 0<br>(0 - 0)             | 0<br>(0 - 0)                |
| Schistosomiasis                                                   | 9<br>(6 - 12)               | 0<br>(0 - 0)             | 0<br>(0 - 0)        | 2<br>(1 - 3)             | 3<br>(2 - 5)             | 3<br>(2 - 6)                |
| Cysticercosis                                                     | 2<br>(1 - 2)                | 0<br>(0 - 0)             | 0<br>(0 - 0)        | 1<br>(1 - 1)             | 0<br>(0 - 1)             | 0<br>(0 - 0)                |
| Cystic echinococcosis                                             | 0<br>(0 - 1)                | 0<br>(0 - 0)             | 0<br>(0 - 0)        | 0<br>(0 - 0)             | 0<br>(0 - 0)             | 0<br>(0 - 0)                |
| Dengue                                                            | 37<br>(7 - 54)              | 17<br>(2 - 29)           | 8<br>(1 - 12)       | 4<br>(1 - 6)             | 4<br>(1 - 6)             | 4<br>(1 - 8)                |
| Rabies                                                            | 1<br>(0 - 1)                | 0<br>(0 - 0)             | 0<br>(0 - 0)        | 0<br>(0 - 0)             | 0<br>(0 - 0)             | 0<br>(0 - 0)                |
| Intestinal nematode infections                                    | 0<br>(0 - 4)                | 0<br>(0 - 3)             | 0<br>(0 - 1)        | 0<br>(0 - 0)             | 0<br>(0 - 0)             | 0<br>(0 - 0)                |
| Ascariasis                                                        | 0<br>(0 - 4)                | 0<br>(0 - 3)             | 0<br>(0 - 1)        | 0<br>(0 - 0)             | 0<br>(0 - 0)             | 0<br>(0 - 0)                |
| Other neglected tropical diseases                                 | 4<br>(3 - 6)                | 1<br>(0 - 2)             | 0<br>(0 - 1)        | 1<br>(1 - 1)             | 1<br>(0 - 1)             | 1<br>(1 - 3)                |
| Maternal disorders                                                | 90<br>(64 - 124)            | --                       | 1<br>(1 - 2)        | 90<br>(64 - 123)         | --                       | --                          |

Web Table 31- Dominican Republic deaths with 95% UI by age, sex, and cause in 2013

| Cause                                                            | Females, All Ages           | Females, 0-4 Years       | Females, 5-14 Years | Females, 15-49 Years     | Females, 50-69 Years     | Females, 70-80 Years        |
|------------------------------------------------------------------|-----------------------------|--------------------------|---------------------|--------------------------|--------------------------|-----------------------------|
| Maternal hemorrhage                                              | 11<br>(6 - 16)              | --                       | 0<br>(0 - 0)        | 11<br>(6 - 16)           | --                       | --                          |
| Maternal sepsis and other maternal infections                    | 7<br>(4 - 10)               | --                       | 0<br>(0 - 0)        | 7<br>(4 - 10)            | --                       | --                          |
| Maternal hypertensive disorders                                  | 21<br>(14 - 30)             | --                       | 0<br>(0 - 1)        | 21<br>(14 - 30)          | --                       | --                          |
| Maternal obstructed labor                                        | 7<br>(4 - 11)               | --                       | 0<br>(0 - 0)        | 7<br>(4 - 11)            | --                       | --                          |
| Maternal abortive outcome                                        | 12<br>(6 - 18)              | --                       | 0<br>(0 - 0)        | 11<br>(6 - 18)           | --                       | --                          |
| Indirect maternal deaths                                         | 13<br>(8 - 19)              | --                       | 0<br>(0 - 0)        | 13<br>(8 - 19)           | --                       | --                          |
| Late maternal deaths                                             | 7<br>(5 - 11)               | --                       | 0<br>(0 - 0)        | 7<br>(4 - 11)            | --                       | --                          |
| Maternal deaths aggravated by HIV/AIDS                           | 0<br>(0 - 0)                | --                       | --                  | 0<br>(0 - 0)             | --                       | --                          |
| Other maternal disorders                                         | 13<br>(8 - 18)              | --                       | 0<br>(0 - 0)        | 13<br>(8 - 18)           | --                       | --                          |
| Neonatal disorders                                               | 1,303<br>(1,066 - 1,561)    | 1,303<br>(1,066 - 1,561) | --                  | --                       | --                       | --                          |
| Neonatal preterm birth complications                             | 631<br>(381 - 847)          | 631<br>(381 - 847)       | --                  | --                       | --                       | --                          |
| Neonatal encephalopathy due to birth asphyxia and trauma         | 190<br>(122 - 300)          | 190<br>(122 - 300)       | --                  | --                       | --                       | --                          |
| Neonatal sepsis and other neonatal infections                    | 352<br>(188 - 581)          | 352<br>(188 - 581)       | --                  | --                       | --                       | --                          |
| Hemolytic disease and other neonatal jaundice                    | 14<br>(4 - 39)              | 14<br>(4 - 39)           | --                  | --                       | --                       | --                          |
| Other neonatal disorders                                         | 116<br>(69 - 205)           | 116<br>(69 - 205)        | --                  | --                       | --                       | --                          |
| Nutritional deficiencies                                         | 254<br>(193 - 440)          | 64<br>(41 - 100)         | 9<br>(6 - 15)       | 29<br>(20 - 47)          | 27<br>(18 - 44)          | 126<br>(85 - 236)           |
| Protein-energy malnutrition                                      | 133<br>(83 - 274)           | 53<br>(31 - 87)          | 6<br>(3 - 11)       | 7<br>(3 - 18)            | 10<br>(4 - 22)           | 57<br>(26 - 143)            |
| Iodine deficiency                                                | 2<br>(0 - 8)                | 0<br>(0 - 3)             | 0<br>(0 - 1)        | 0<br>(0 - 1)             | 0<br>(0 - 2)             | 1<br>(0 - 6)                |
| Iron-deficiency anemia                                           | 115<br>(57 - 180)           | 10<br>(2 - 23)           | 3<br>(1 - 5)        | 21<br>(13 - 32)          | 15<br>(8 - 25)           | 67<br>(27 - 114)            |
| Other nutritional deficiencies                                   | 3<br>(1 - 6)                | 1<br>(0 - 2)             | 0<br>(0 - 0)        | 0<br>(0 - 1)             | 1<br>(0 - 2)             | 1<br>(0 - 2)                |
| Other communicable, maternal, neonatal, and nutritional diseases | 89<br>(63 - 130)            | 10<br>(5 - 17)           | 4<br>(3 - 6)        | 21<br>(14 - 29)          | 22<br>(14 - 34)          | 33<br>(20 - 57)             |
| Sexually transmitted diseases excluding HIV                      | 12<br>(5 - 20)              | 4<br>(0 - 10)            | 0<br>(0 - 1)        | 3<br>(2 - 5)             | 2<br>(1 - 3)             | 3<br>(1 - 5)                |
| Syphilis                                                         | 9<br>(3 - 16)               | 4<br>(0 - 10)            | 0<br>(0 - 1)        | 1<br>(1 - 2)             | 1<br>(0 - 1)             | 2<br>(1 - 4)                |
| Chlamydial infection                                             | 1<br>(1 - 2)                | --                       | 0<br>(0 - 0)        | 1<br>(0 - 1)             | 0<br>(0 - 0)             | 0<br>(0 - 0)                |
| Gonococcal infection                                             | 1<br>(1 - 2)                | --                       | 0<br>(0 - 0)        | 1<br>(0 - 1)             | 0<br>(0 - 0)             | 0<br>(0 - 1)                |
| Other sexually transmitted diseases                              | 1<br>(1 - 2)                | --                       | 0<br>(0 - 0)        | 1<br>(0 - 1)             | 0<br>(0 - 0)             | 0<br>(0 - 0)                |
| Hepatitis                                                        | 45<br>(33 - 64)             | 2<br>(1 - 4)             | 2<br>(1 - 4)        | 13<br>(9 - 20)           | 13<br>(7 - 21)           | 14<br>(8 - 24)              |
| Acute hepatitis A                                                | 12<br>(5 - 20)              | 2<br>(1 - 3)             | 2<br>(1 - 3)        | 6<br>(2 - 11)            | 2<br>(0 - 4)             | 1<br>(0 - 2)                |
| Acute hepatitis B                                                | 29<br>(18 - 44)             | 1<br>(0 - 2)             | 0<br>(0 - 1)        | 6<br>(2 - 11)            | 10<br>(5 - 17)           | 12<br>(6 - 21)              |
| Acute hepatitis C                                                | 4<br>(1 - 11)               | --                       | 0<br>(0 - 1)        | 1<br>(0 - 4)             | 1<br>(0 - 3)             | 2<br>(0 - 5)                |
| Other infectious diseases                                        | 32<br>(20 - 60)             | 4<br>(2 - 7)             | 1<br>(1 - 2)        | 4<br>(3 - 7)             | 8<br>(4 - 14)            | 16<br>(8 - 34)              |
| Non-communicable diseases                                        | 21,893<br>(18,425 - 27,897) | 699<br>(519 - 932)       | 160<br>(130 - 195)  | 2,010<br>(1,471 - 2,635) | 5,276<br>(3,921 - 7,126) | 13,749<br>(12,149 - 17,136) |
| Neoplasms                                                        | 4,043<br>(3,222 - 5,329)    | 32<br>(21 - 45)          | 41<br>(32 - 52)     | 710<br>(515 - 934)       | 1,447<br>(1,064 - 1,961) | 1,813<br>(1,516 - 2,367)    |
| Esophageal cancer                                                | 53<br>(38 - 73)             | --                       | --                  | 4<br>(3 - 6)             | 21<br>(13 - 30)          | 28<br>(20 - 40)             |
| Stomach cancer                                                   | 276<br>(213 - 377)          | --                       | --                  | 33<br>(23 - 46)          | 89<br>(63 - 126)         | 154<br>(118 - 216)          |
| Liver cancer                                                     | 319<br>(239 - 437)          | --                       | 1<br>(1 - 2)        | 36<br>(25 - 50)          | 115<br>(81 - 164)        | 166<br>(121 - 233)          |
| Liver cancer due to hepatitis B                                  | 65<br>(36 - 104)            | --                       | 1<br>(0 - 1)        | 13<br>(7 - 20)           | 27<br>(13 - 47)          | 25<br>(14 - 41)             |
| Liver cancer due to hepatitis C                                  | 148<br>(97 - 221)           | --                       | 0<br>(0 - 0)        | 12<br>(6 - 19)           | 52<br>(31 - 82)          | 84<br>(53 - 127)            |
| Liver cancer due to alcohol use                                  | 61<br>(29 - 109)            | --                       | --                  | 3<br>(1 - 6)             | 18<br>(8 - 35)           | 40<br>(18 - 71)             |
| Liver cancer due to other causes                                 | 44<br>(25 - 70)             | --                       | 1<br>(1 - 1)        | 9<br>(5 - 13)            | 17<br>(9 - 30)           | 18<br>(8 - 31)              |

Web Table 31- Dominican Republic deaths with 95% UI by age, sex, and cause in 2013

| Cause                                         | Females, All Ages          | Females, 0-4 Years | Females, 5-14 Years | Females, 15-49 Years | Females, 50-69 Years     | Females, 70-80 Years      |
|-----------------------------------------------|----------------------------|--------------------|---------------------|----------------------|--------------------------|---------------------------|
| Larynx cancer                                 | 24<br>(12 - 43)            | --                 | --                  | 3<br>(1 - 5)         | 9<br>(4 - 16)            | 12<br>(6 - 23)            |
| Tracheal, bronchus and lung cancer            | 426<br>(331 - 574)         | --                 | --                  | 42<br>(29 - 57)      | 163<br>(116 - 228)       | 221<br>(169 - 300)        |
| Breast cancer                                 | 700<br>(532 - 938)         | --                 | --                  | 206<br>(147 - 275)   | 294<br>(208 - 412)       | 200<br>(152 - 268)        |
| Cervical cancer                               | 432<br>(319 - 616)         | --                 | --                  | 116<br>(76 - 168)    | 169<br>(116 - 262)       | 147<br>(109 - 216)        |
| Uterine cancer                                | 145<br>(102 - 227)         | --                 | --                  | 12<br>(8 - 19)       | 56<br>(37 - 90)          | 77<br>(55 - 125)          |
| Prostate cancer                               | --                         | --                 | --                  | --                   | --                       | --                        |
| Colon and rectum cancer                       | 395<br>(309 - 530)         | --                 | --                  | 34<br>(25 - 47)      | 125<br>(89 - 172)        | 236<br>(181 - 322)        |
| Lip and oral cavity cancer                    | 82<br>(54 - 118)           | --                 | --                  | 7<br>(4 - 10)        | 22<br>(13 - 32)          | 53<br>(35 - 78)           |
| Nasopharynx cancer                            | 10<br>(6 - 23)             | --                 | 0<br>(0 - 0)        | 2<br>(1 - 4)         | 4<br>(2 - 9)             | 4<br>(2 - 10)             |
| Other pharynx cancer                          | 33<br>(24 - 45)            | --                 | --                  | 3<br>(2 - 4)         | 10<br>(7 - 15)           | 20<br>(14 - 28)           |
| Gallbladder and biliary tract cancer          | 45<br>(28 - 91)            | --                 | --                  | 3<br>(2 - 5)         | 15<br>(9 - 30)           | 27<br>(16 - 58)           |
| Pancreatic cancer                             | 176<br>(132 - 238)         | --                 | --                  | 13<br>(9 - 19)       | 62<br>(44 - 87)          | 101<br>(75 - 141)         |
| Malignant skin melanoma                       | 12<br>(9 - 17)             | --                 | --                  | 3<br>(2 - 4)         | 4<br>(3 - 6)             | 5<br>(3 - 7)              |
| Non-melanoma skin cancer                      | 49<br>(26 - 75)            | --                 | --                  | 5<br>(3 - 8)         | 9<br>(5 - 14)            | 34<br>(17 - 54)           |
| Ovarian cancer                                | 84<br>(64 - 115)           | --                 | --                  | 17<br>(12 - 24)      | 37<br>(26 - 52)          | 30<br>(23 - 42)           |
| Testicular cancer                             | --                         | --                 | --                  | --                   | --                       | --                        |
| Kidney cancer                                 | 31<br>(23 - 43)            | 0<br>(0 - 1)       | 0<br>(0 - 0)        | 5<br>(3 - 7)         | 11<br>(8 - 17)           | 14<br>(11 - 20)           |
| Bladder cancer                                | 17<br>(10 - 37)            | --                 | --                  | 1<br>(1 - 3)         | 5<br>(3 - 12)            | 10<br>(6 - 23)            |
| Brain and nervous system cancer               | 86<br>(41 - 115)           | 2<br>(1 - 3)       | 4<br>(2 - 6)        | 25<br>(12 - 32)      | 29<br>(12 - 42)          | 25<br>(12 - 36)           |
| Thyroid cancer                                | 19<br>(14 - 29)            | --                 | 0<br>(0 - 0)        | 2<br>(2 - 4)         | 7<br>(4 - 10)            | 10<br>(7 - 15)            |
| Mesothelioma                                  | 4<br>(3 - 6)               | --                 | --                  | 0<br>(0 - 1)         | 1<br>(1 - 2)             | 2<br>(1 - 3)              |
| Hodgkin lymphoma                              | 8<br>(3 - 11)              | 1<br>(0 - 1)       | 1<br>(0 - 1)        | 3<br>(1 - 4)         | 2<br>(1 - 3)             | 2<br>(1 - 3)              |
| Non-Hodgkin lymphoma                          | 69<br>(46 - 97)            | 1<br>(1 - 2)       | 3<br>(2 - 4)        | 14<br>(9 - 20)       | 25<br>(15 - 38)          | 26<br>(15 - 41)           |
| Multiple myeloma                              | 38<br>(25 - 56)            | --                 | --                  | 4<br>(2 - 5)         | 16<br>(10 - 25)          | 18<br>(12 - 27)           |
| Leukemia                                      | 135<br>(108 - 175)         | 8<br>(5 - 12)      | 12<br>(9 - 16)      | 34<br>(24 - 45)      | 33<br>(24 - 49)          | 47<br>(36 - 66)           |
| Other neoplasms                               | 377<br>(239 - 512)         | 19<br>(9 - 30)     | 19<br>(12 - 27)     | 82<br>(49 - 113)     | 114<br>(66 - 165)        | 143<br>(83 - 205)         |
| Cardiovascular diseases                       | 11,354<br>(9,254 - 14,472) | 52<br>(34 - 78)    | 28<br>(21 - 37)     | 698<br>(503 - 931)   | 2,482<br>(1,823 - 3,336) | 8,094<br>(6,756 - 10,242) |
| Rheumatic heart disease                       | 52<br>(33 - 71)            | 0<br>(0 - 1)       | 4<br>(3 - 6)        | 18<br>(11 - 25)      | 13<br>(8 - 19)           | 17<br>(10 - 24)           |
| Ischemic heart disease                        | 5,820<br>(4,438 - 7,540)   | 11<br>(5 - 19)     | 8<br>(5 - 12)       | 364<br>(244 - 498)   | 1,299<br>(896 - 1,773)   | 4,138<br>(3,211 - 5,306)  |
| Cerebrovascular disease                       | 3,835<br>(2,893 - 5,045)   | 11<br>(7 - 17)     | 7<br>(5 - 9)        | 213<br>(147 - 309)   | 856<br>(606 - 1,215)     | 2,747<br>(2,048 - 3,631)  |
| Ischemic stroke                               | 2,321<br>(1,698 - 3,147)   | 2<br>(1 - 4)       | 2<br>(1 - 3)        | 52<br>(31 - 90)      | 400<br>(263 - 609)       | 1,865<br>(1,345 - 2,451)  |
| Hemorrhagic stroke                            | 1,514<br>(991 - 2,095)     | 10<br>(6 - 14)     | 5<br>(3 - 7)        | 162<br>(111 - 230)   | 456<br>(305 - 652)       | 882<br>(512 - 1,265)      |
| Hypertensive heart disease                    | 1,137<br>(650 - 1,620)     | 2<br>(1 - 3)       | 1<br>(0 - 1)        | 40<br>(21 - 59)      | 182<br>(100 - 278)       | 913<br>(502 - 1,317)      |
| Cardiomyopathy and myocarditis                | 85<br>(64 - 125)           | 11<br>(7 - 17)     | 3<br>(2 - 4)        | 15<br>(10 - 24)      | 14<br>(9 - 21)           | 43<br>(29 - 66)           |
| Atrial fibrillation and flutter               | 30<br>(19 - 46)            | --                 | --                  | 1<br>(0 - 1)         | 2<br>(2 - 4)             | 27<br>(16 - 42)           |
| Aortic aneurysm                               | 38<br>(23 - 61)            | --                 | --                  | 3<br>(2 - 6)         | 9<br>(5 - 15)            | 26<br>(15 - 42)           |
| Peripheral vascular disease                   | 11<br>(7 - 17)             | --                 | --                  | 0<br>(0 - 0)         | 1<br>(1 - 2)             | 10<br>(6 - 16)            |
| Endocarditis                                  | 28<br>(18 - 44)            | 7<br>(4 - 14)      | 1<br>(1 - 3)        | 5<br>(3 - 8)         | 3<br>(2 - 5)             | 12<br>(7 - 19)            |
| Other cardiovascular and circulatory diseases | 317<br>(227 - 530)         | 10<br>(6 - 16)     | 4<br>(3 - 7)        | 40<br>(26 - 66)      | 102<br>(66 - 161)        | 162<br>(107 - 308)        |
| Chronic respiratory diseases                  | 997<br>(787 - 1,338)       | 44<br>(29 - 64)    | 8<br>(6 - 11)       | 83<br>(59 - 112)     | 177<br>(124 - 255)       | 685<br>(526 - 944)        |

Web Table 31- Dominican Republic deaths with 95% UI by age, sex, and cause in 2013

| Cause                                               | Females, All Ages      | Females, 0-4 Years | Females, 5-14 Years | Females, 15-49 Years | Females, 50-69 Years | Females, 70-80 Years   |
|-----------------------------------------------------|------------------------|--------------------|---------------------|----------------------|----------------------|------------------------|
| Chronic obstructive pulmonary disease               | 628<br>(463 - 872)     | 17<br>(8 - 30)     | 2<br>(1 - 3)        | 34<br>(22 - 53)      | 95<br>(62 - 144)     | 480<br>(350 - 671)     |
| Pneumoconiosis                                      | 3<br>(2 - 5)           | 0<br>(0 - 0)       | 0<br>(0 - 0)        | 1<br>(0 - 1)         | 0<br>(0 - 1)         | 2<br>(1 - 3)           |
| Silicosis                                           | 0<br>(0 - 0)           | 0<br>(0 - 0)       | 0<br>(0 - 0)        | 0<br>(0 - 0)         | 0<br>(0 - 0)         | 0<br>(0 - 0)           |
| Asbestosis                                          | 0<br>(0 - 0)           | 0<br>(0 - 0)       | 0<br>(0 - 0)        | 0<br>(0 - 0)         | 0<br>(0 - 0)         | 0<br>(0 - 0)           |
| Coal workers pneumoconiosis                         | 0<br>(0 - 0)           | 0<br>(0 - 0)       | 0<br>(0 - 0)        | 0<br>(0 - 0)         | 0<br>(0 - 0)         | 0<br>(0 - 0)           |
| Other pneumoconiosis                                | 2<br>(1 - 4)           | 0<br>(0 - 0)       | 0<br>(0 - 0)        | 0<br>(0 - 1)         | 0<br>(0 - 1)         | 2<br>(1 - 3)           |
| Asthma                                              | 304<br>(195 - 447)     | 15<br>(9 - 24)     | 5<br>(4 - 7)        | 41<br>(25 - 59)      | 70<br>(42 - 109)     | 173<br>(103 - 282)     |
| Interstitial lung disease and pulmonary sarcoidosis | 37<br>(20 - 67)        | 1<br>(0 - 2)       | 0<br>(0 - 0)        | 3<br>(2 - 6)         | 9<br>(5 - 16)        | 23<br>(12 - 46)        |
| Other chronic respiratory diseases                  | 25<br>(17 - 36)        | 11<br>(6 - 18)     | 1<br>(0 - 1)        | 5<br>(3 - 7)         | 2<br>(1 - 4)         | 7<br>(4 - 12)          |
| Cirrhosis                                           | 698<br>(547 - 953)     | 2<br>(1 - 3)       | 4<br>(3 - 5)        | 86<br>(61 - 117)     | 256<br>(183 - 360)   | 350<br>(272 - 484)     |
| Cirrhosis due to hepatitis B                        | 65<br>(27 - 117)       | 0<br>(0 - 0)       | 0<br>(0 - 0)        | 8<br>(2 - 16)        | 25<br>(10 - 46)      | 32<br>(11 - 61)        |
| Cirrhosis due to hepatitis C                        | 351<br>(218 - 511)     | 0<br>(0 - 0)       | 1<br>(0 - 2)        | 41<br>(23 - 63)      | 130<br>(72 - 199)    | 178<br>(107 - 264)     |
| Cirrhosis due to alcohol use                        | 177<br>(90 - 290)      | --                 | --                  | 12<br>(5 - 21)       | 59<br>(31 - 104)     | 107<br>(49 - 180)      |
| Cirrhosis due to other causes                       | 105<br>(56 - 172)      | 2<br>(1 - 3)       | 3<br>(2 - 4)        | 26<br>(14 - 42)      | 42<br>(18 - 74)      | 33<br>(15 - 57)        |
| Digestive diseases                                  | 369<br>(276 - 576)     | 5<br>(3 - 8)       | 5<br>(4 - 9)        | 43<br>(30 - 67)      | 84<br>(55 - 140)     | 231<br>(170 - 373)     |
| Peptic ulcer disease                                | 128<br>(84 - 220)      | 0<br>(0 - 0)       | 1<br>(0 - 1)        | 13<br>(9 - 21)       | 33<br>(20 - 58)      | 81<br>(52 - 145)       |
| Gastritis and duodenitis                            | 14<br>(7 - 30)         | 0<br>(0 - 0)       | 0<br>(0 - 0)        | 2<br>(1 - 4)         | 3<br>(1 - 6)         | 9<br>(4 - 20)          |
| Appendicitis                                        | 14<br>(8 - 30)         | 0<br>(0 - 1)       | 1<br>(1 - 2)        | 3<br>(2 - 6)         | 4<br>(2 - 8)         | 5<br>(2 - 13)          |
| Paralytic ileus and intestinal obstruction          | 70<br>(26 - 112)       | 3<br>(1 - 4)       | 1<br>(1 - 2)        | 7<br>(3 - 11)        | 12<br>(4 - 22)       | 47<br>(15 - 79)        |
| Inguinal, femoral, and abdominal hernia             | 12<br>(3 - 40)         | 0<br>(0 - 1)       | 0<br>(0 - 1)        | 2<br>(0 - 4)         | 3<br>(1 - 8)         | 8<br>(2 - 28)          |
| Inflammatory bowel disease                          | 12<br>(7 - 24)         | 0<br>(0 - 1)       | 0<br>(0 - 1)        | 2<br>(1 - 4)         | 2<br>(1 - 5)         | 7<br>(4 - 14)          |
| Vascular intestinal disorders                       | 25<br>(14 - 57)        | 0<br>(0 - 1)       | 0<br>(0 - 1)        | 2<br>(1 - 4)         | 6<br>(3 - 14)        | 17<br>(9 - 40)         |
| Gallbladder and biliary diseases                    | 23<br>(14 - 55)        | 0<br>(0 - 0)       | 0<br>(0 - 0)        | 3<br>(2 - 5)         | 5<br>(3 - 13)        | 15<br>(8 - 37)         |
| Pancreatitis                                        | 30<br>(18 - 54)        | 0<br>(0 - 0)       | 0<br>(0 - 1)        | 5<br>(3 - 8)         | 8<br>(4 - 15)        | 17<br>(9 - 31)         |
| Other digestive diseases                            | 42<br>(27 - 74)        | 0<br>(0 - 1)       | 1<br>(1 - 1)        | 5<br>(3 - 8)         | 9<br>(5 - 15)        | 27<br>(16 - 50)        |
| Neurological disorders                              | 1,245<br>(933 - 1,687) | 6<br>(4 - 9)       | 6<br>(4 - 8)        | 33<br>(23 - 44)      | 87<br>(61 - 127)     | 1,113<br>(818 - 1,523) |
| Alzheimer disease and other dementias               | 1,112<br>(816 - 1,530) | --                 | --                  | 0<br>(0 - 1)         | 63<br>(41 - 94)      | 1,049<br>(761 - 1,443) |
| Parkinson disease                                   | 52<br>(35 - 105)       | --                 | --                  | 0<br>(0 - 1)         | 8<br>(5 - 17)        | 44<br>(28 - 91)        |
| Epilepsy                                            | 51<br>(36 - 71)        | 4<br>(2 - 6)       | 4<br>(3 - 7)        | 25<br>(17 - 36)      | 8<br>(5 - 13)        | 10<br>(6 - 15)         |
| Multiple sclerosis                                  | 8<br>(4 - 12)          | --                 | --                  | 2<br>(1 - 3)         | 3<br>(1 - 4)         | 3<br>(2 - 6)           |
| Other neurological disorders                        | 20<br>(16 - 27)        | 2<br>(2 - 3)       | 1<br>(1 - 2)        | 5<br>(3 - 6)         | 6<br>(4 - 8)         | 7<br>(5 - 9)           |
| Mental and substance use disorders                  | 26<br>(19 - 36)        | 2<br>(1 - 4)       | 0<br>(0 - 0)        | 10<br>(7 - 14)       | 7<br>(4 - 10)        | 6<br>(4 - 9)           |
| Schizophrenia                                       | 2<br>(1 - 4)           | --                 | --                  | 1<br>(0 - 1)         | 1<br>(0 - 2)         | 1<br>(0 - 1)           |
| Alcohol use disorders                               | 9<br>(3 - 17)          | --                 | --                  | 3<br>(1 - 6)         | 3<br>(1 - 7)         | 2<br>(1 - 4)           |
| Drug use disorders                                  | 14<br>(11 - 19)        | 2<br>(1 - 4)       | --                  | 6<br>(4 - 8)         | 3<br>(2 - 4)         | 3<br>(2 - 5)           |
| Opioid use disorders                                | 4<br>(3 - 5)           | 1<br>(0 - 1)       | --                  | 2<br>(1 - 2)         | 1<br>(0 - 1)         | 1<br>(1 - 2)           |
| Cocaine use disorders                               | 1<br>(1 - 1)           | 0<br>(0 - 0)       | --                  | 0<br>(0 - 1)         | 0<br>(0 - 0)         | 0<br>(0 - 0)           |
| Amphetamine use disorders                           | 1<br>(1 - 1)           | 0<br>(0 - 0)       | --                  | 0<br>(0 - 0)         | 0<br>(0 - 0)         | 0<br>(0 - 0)           |
| Other drug use disorders                            | 9<br>(7 - 11)          | 1<br>(1 - 3)       | --                  | 3<br>(2 - 5)         | 2<br>(1 - 3)         | 2<br>(1 - 3)           |
| Eating disorders                                    | 1<br>(0 - 1)           | --                 | 0<br>(0 - 0)        | 1<br>(0 - 1)         | --                   | --                     |

Web Table 31- Dominican Republic deaths with 95% UI by age, sex, and cause in 2013

| Cause                                               | Females, All Ages        | Females, 0-4 Years | Females, 5-14 Years | Females, 15-49 Years | Females, 50-69 Years | Females, 70-80 Years     |
|-----------------------------------------------------|--------------------------|--------------------|---------------------|----------------------|----------------------|--------------------------|
| Anorexia nervosa                                    | 1<br>(0 - 1)             | --                 | 0<br>(0 - 0)        | 1<br>(0 - 1)         | --                   | --                       |
| Diabetes, urogenital, blood, and endocrine diseases | 2,488<br>(1,983 - 3,396) | 74<br>(48 - 153)   | 35<br>(25 - 50)     | 282<br>(205 - 389)   | 705<br>(510 - 1,001) | 1,392<br>(1,113 - 1,946) |
| Diabetes mellitus                                   | 1,392<br>(1,079 - 1,924) | 4<br>(2 - 6)       | 5<br>(3 - 8)        | 104<br>(73 - 147)    | 417<br>(291 - 610)   | 863<br>(664 - 1,184)     |
| Acute glomerulonephritis                            | 2<br>(2 - 3)             | 0<br>(0 - 0)       | 0<br>(0 - 0)        | 1<br>(0 - 1)         | 0<br>(0 - 0)         | 1<br>(0 - 1)             |
| Chronic kidney disease                              | 854<br>(640 - 1,233)     | 16<br>(10 - 25)    | 10<br>(7 - 15)      | 123<br>(86 - 180)    | 249<br>(167 - 383)   | 456<br>(328 - 671)       |
| Chronic kidney disease due to diabetes mellitus     | 355<br>(235 - 511)       | 4<br>(2 - 6)       | 1<br>(1 - 2)        | 49<br>(31 - 72)      | 135<br>(86 - 205)    | 166<br>(105 - 254)       |
| Chronic kidney disease due to hypertension          | 241<br>(132 - 388)       | 2<br>(1 - 5)       | 1<br>(1 - 2)        | 33<br>(16 - 55)      | 51<br>(25 - 87)      | 154<br>(85 - 256)        |
| Chronic kidney disease due to glomerulonephritis    | 31<br>(20 - 46)          | 2<br>(1 - 3)       | 2<br>(1 - 3)        | 7<br>(4 - 11)        | 6<br>(3 - 9)         | 15<br>(8 - 25)           |
| Chronic kidney disease due to other causes          | 227<br>(136 - 413)       | 8<br>(4 - 15)      | 5<br>(3 - 10)       | 35<br>(19 - 66)      | 58<br>(27 - 111)     | 122<br>(65 - 234)        |
| Urinary diseases and male infertility               | 41<br>(30 - 63)          | 2<br>(1 - 5)       | 1<br>(1 - 1)        | 7<br>(5 - 11)        | 7<br>(5 - 12)        | 23<br>(15 - 39)          |
| Interstitial nephritis and urinary tract infections | 29<br>(20 - 45)          | 2<br>(1 - 5)       | 1<br>(0 - 1)        | 5<br>(4 - 8)         | 4<br>(3 - 7)         | 17<br>(10 - 29)          |
| Urolithiasis                                        | 2<br>(1 - 4)             | --                 | 0<br>(0 - 0)        | 0<br>(0 - 1)         | 0<br>(0 - 1)         | 1<br>(1 - 3)             |
| Other urinary diseases                              | 9<br>(6 - 17)            | 0<br>(0 - 1)       | 0<br>(0 - 0)        | 2<br>(1 - 3)         | 3<br>(1 - 5)         | 5<br>(2 - 9)             |
| Gynecological diseases                              | 2<br>(1 - 4)             | --                 | --                  | 1<br>(1 - 2)         | 0<br>(0 - 1)         | 0<br>(0 - 1)             |
| Uterine fibroids                                    | 0<br>(0 - 1)             | --                 | --                  | 0<br>(0 - 0)         | 0<br>(0 - 0)         | 0<br>(0 - 0)             |
| Polycystic ovarian syndrome                         | 0<br>(0 - 0)             | --                 | --                  | 0<br>(0 - 0)         | 0<br>(0 - 0)         | --                       |
| Endometriosis                                       | 0<br>(0 - 0)             | --                 | --                  | 0<br>(0 - 0)         | 0<br>(0 - 0)         | --                       |
| Genital prolapse                                    | 0<br>(0 - 1)             | --                 | --                  | 0<br>(0 - 0)         | 0<br>(0 - 0)         | 0<br>(0 - 0)             |
| Other gynecological diseases                        | 1<br>(0 - 2)             | --                 | --                  | 0<br>(0 - 1)         | 0<br>(0 - 0)         | 0<br>(0 - 1)             |
| Hemoglobinopathies and hemolytic anemias            | 85<br>(54 - 130)         | 25<br>(14 - 45)    | 15<br>(9 - 25)      | 26<br>(16 - 40)      | 11<br>(6 - 17)       | 8<br>(4 - 14)            |
| Thalassemias                                        | 1<br>(1 - 2)             | 1<br>(0 - 1)       | 0<br>(0 - 0)        | 0<br>(0 - 0)         | 0<br>(0 - 0)         | 0<br>(0 - 0)             |
| Sickle cell disorders                               | 72<br>(45 - 112)         | 22<br>(12 - 40)    | 15<br>(9 - 24)      | 25<br>(15 - 38)      | 10<br>(5 - 16)       | 1<br>(1 - 2)             |
| G6PD deficiency                                     | 1<br>(1 - 2)             | 0<br>(0 - 1)       | 0<br>(0 - 0)        | 0<br>(0 - 0)         | 0<br>(0 - 0)         | 0<br>(0 - 0)             |
| Other hemoglobinopathies and hemolytic anemias      | 11<br>(7 - 17)           | 2<br>(1 - 4)       | 0<br>(0 - 0)        | 1<br>(0 - 1)         | 1<br>(0 - 1)         | 7<br>(4 - 11)            |
| Endocrine, metabolic, blood, and immune disorders   | 112<br>(67 - 307)        | 27<br>(12 - 87)    | 4<br>(2 - 10)       | 20<br>(11 - 51)      | 20<br>(11 - 57)      | 41<br>(22 - 121)         |
| Musculoskeletal disorders                           | 68<br>(42 - 91)          | --                 | 2<br>(1 - 3)        | 29<br>(18 - 40)      | 14<br>(8 - 21)       | 22<br>(13 - 32)          |
| Rheumatoid arthritis                                | 9<br>(6 - 15)            | --                 | 0<br>(0 - 0)        | 1<br>(1 - 1)         | 2<br>(1 - 3)         | 6<br>(3 - 11)            |
| Other musculoskeletal disorders                     | 59<br>(35 - 79)          | --                 | 2<br>(1 - 3)        | 28<br>(17 - 39)      | 12<br>(7 - 18)       | 16<br>(8 - 23)           |
| Other non-communicable diseases                     | 606<br>(439 - 799)       | 482<br>(330 - 656) | 31<br>(22 - 42)     | 36<br>(24 - 47)      | 16<br>(10 - 23)      | 42<br>(29 - 59)          |
| Congenital anomalies                                | 560<br>(400 - 738)       | 463<br>(316 - 631) | 30<br>(21 - 41)     | 32<br>(22 - 44)      | 11<br>(7 - 18)       | 24<br>(15 - 37)          |
| Neural tube defects                                 | 15<br>(8 - 25)           | 14<br>(8 - 24)     | 0<br>(0 - 1)        | 0<br>(0 - 0)         | 0<br>(0 - 0)         | 0<br>(0 - 0)             |
| Congenital heart anomalies                          | 273<br>(191 - 367)       | 218<br>(142 - 308) | 18<br>(12 - 26)     | 17<br>(11 - 23)      | 4<br>(3 - 7)         | 16<br>(10 - 26)          |
| Cleft lip and cleft palate                          | 1<br>(0 - 1)             | 1<br>(0 - 1)       | --                  | --                   | --                   | --                       |
| Down syndrome                                       | 42<br>(23 - 69)          | 33<br>(17 - 57)    | 3<br>(1 - 5)        | 4<br>(2 - 6)         | 2<br>(1 - 3)         | 0<br>(0 - 0)             |
| Chromosomal unbalanced rearrangements               | 13<br>(7 - 25)           | 11<br>(5 - 21)     | 1<br>(0 - 1)        | 1<br>(1 - 2)         | 0<br>(0 - 0)         | 0<br>(0 - 1)             |
| Other congenital anomalies                          | 216<br>(144 - 318)       | 186<br>(117 - 282) | 8<br>(4 - 12)       | 10<br>(6 - 14)       | 5<br>(3 - 8)         | 7<br>(4 - 11)            |
| Skin and subcutaneous diseases                      | 32<br>(23 - 45)          | 6<br>(3 - 10)      | 1<br>(1 - 1)        | 3<br>(2 - 5)         | 4<br>(3 - 6)         | 18<br>(11 - 28)          |
| Cellulitis                                          | 3<br>(2 - 6)             | 1<br>(0 - 2)       | 0<br>(0 - 0)        | 0<br>(0 - 1)         | 0<br>(0 - 1)         | 1<br>(0 - 3)             |
| Pyoderma                                            | 21<br>(15 - 29)          | 4<br>(2 - 8)       | 1<br>(0 - 1)        | 2<br>(1 - 3)         | 3<br>(2 - 4)         | 11<br>(6 - 18)           |
| Decubitus ulcer                                     | 6<br>(4 - 11)            | 0<br>(0 - 0)       | 0<br>(0 - 0)        | 0<br>(0 - 1)         | 1<br>(0 - 1)         | 5<br>(3 - 9)             |



Web Table 31- Dominican Republic deaths with 95% UI by age, sex, and cause in 2013

| Cause                                           | Females, All Ages        | Females, 0-4 Years | Females, 5-14 Years | Females, 15-49 Years | Females, 50-69 Years | Females, 70-80 Years |
|-------------------------------------------------|--------------------------|--------------------|---------------------|----------------------|----------------------|----------------------|
| Other skin and subcutaneous diseases            | 1<br>(1 - 2)             | 0<br>(0 - 0)       | 0<br>(0 - 0)        | 0<br>(0 - 1)         | 0<br>(0 - 0)         | 0<br>(0 - 1)         |
| Sudden infant death syndrome                    | 14<br>(3 - 32)           | 14<br>(3 - 32)     | --                  | --                   | --                   | --                   |
| Injuries                                        | 1,577<br>(1,223 - 1,989) | 174<br>(121 - 237) | 121<br>(97 - 147)   | 608<br>(446 - 777)   | 265<br>(177 - 375)   | 409<br>(297 - 569)   |
| Transport injuries                              | 564<br>(410 - 726)       | 26<br>(15 - 39)    | 58<br>(42 - 75)     | 254<br>(169 - 330)   | 119<br>(79 - 169)    | 107<br>(79 - 154)    |
| Road injuries                                   | 553<br>(403 - 712)       | 26<br>(15 - 37)    | 57<br>(41 - 74)     | 251<br>(167 - 325)   | 115<br>(76 - 164)    | 105<br>(78 - 152)    |
| Pedestrian road injuries                        | 39<br>(25 - 56)          | 3<br>(1 - 6)       | 5<br>(2 - 8)        | 13<br>(8 - 19)       | 11<br>(7 - 18)       | 7<br>(4 - 11)        |
| Cyclist road injuries                           | 4<br>(3 - 6)             | 0<br>(0 - 0)       | 0<br>(0 - 1)        | 2<br>(1 - 2)         | 1<br>(1 - 1)         | 1<br>(1 - 2)         |
| Motorcyclist road injuries                      | 17<br>(10 - 26)          | 0<br>(0 - 1)       | 1<br>(1 - 2)        | 9<br>(5 - 15)        | 2<br>(1 - 5)         | 3<br>(2 - 6)         |
| Motor vehicle road injuries                     | 492<br>(362 - 631)       | 22<br>(13 - 33)    | 50<br>(37 - 66)     | 226<br>(149 - 294)   | 100<br>(66 - 143)    | 94<br>(70 - 135)     |
| Other road injuries                             | 1<br>(1 - 3)             | 0<br>(0 - 0)       | 0<br>(0 - 0)        | 0<br>(0 - 1)         | 0<br>(0 - 1)         | 0<br>(0 - 1)         |
| Other transport injuries                        | 11<br>(5 - 16)           | 1<br>(0 - 1)       | 1<br>(0 - 1)        | 3<br>(1 - 5)         | 4<br>(2 - 6)         | 2<br>(1 - 3)         |
| Unintentional injuries                          | 647<br>(446 - 858)       | 125<br>(79 - 178)  | 44<br>(33 - 58)     | 121<br>(79 - 164)    | 93<br>(49 - 145)     | 264<br>(163 - 391)   |
| Falls                                           | 92<br>(60 - 135)         | 1<br>(1 - 2)       | 1<br>(0 - 1)        | 4<br>(2 - 5)         | 6<br>(3 - 9)         | 80<br>(51 - 122)     |
| Drowning                                        | 53<br>(39 - 88)          | 13<br>(7 - 28)     | 13<br>(8 - 23)      | 15<br>(10 - 23)      | 6<br>(4 - 10)        | 6<br>(4 - 10)        |
| Fire, heat, and hot substances                  | 48<br>(34 - 66)          | 11<br>(6 - 19)     | 5<br>(3 - 7)        | 8<br>(5 - 11)        | 6<br>(4 - 10)        | 18<br>(11 - 27)      |
| Poisonings                                      | 14<br>(9 - 22)           | 3<br>(2 - 5)       | 2<br>(1 - 3)        | 3<br>(2 - 5)         | 2<br>(1 - 4)         | 4<br>(3 - 8)         |
| Exposure to mechanical forces                   | 43<br>(32 - 61)          | 5<br>(3 - 9)       | 5<br>(3 - 8)        | 23<br>(14 - 32)      | 5<br>(3 - 8)         | 6<br>(4 - 9)         |
| Unintentional firearm injuries                  | 29<br>(8 - 40)           | 2<br>(1 - 3)       | 3<br>(1 - 4)        | 18<br>(5 - 26)       | 3<br>(1 - 5)         | 3<br>(1 - 6)         |
| Unintentional suffocation                       | 3<br>(2 - 8)             | 2<br>(1 - 4)       | 0<br>(0 - 0)        | 1<br>(0 - 1)         | 0<br>(0 - 1)         | 0<br>(0 - 1)         |
| Other exposure to mechanical forces             | 11<br>(8 - 25)           | 1<br>(1 - 3)       | 2<br>(1 - 5)        | 4<br>(2 - 8)         | 2<br>(1 - 4)         | 2<br>(1 - 6)         |
| Adverse effects of medical treatment            | 209<br>(80 - 343)        | 18<br>(6 - 34)     | 4<br>(2 - 7)        | 34<br>(14 - 57)      | 47<br>(16 - 86)      | 105<br>(35 - 184)    |
| Animal contact                                  | 9<br>(2 - 15)            | 1<br>(0 - 1)       | 0<br>(0 - 1)        | 1<br>(0 - 1)         | 1<br>(0 - 2)         | 6<br>(1 - 11)        |
| Venomous animal contact                         | 2<br>(1 - 3)             | 0<br>(0 - 1)       | 0<br>(0 - 0)        | 0<br>(0 - 1)         | 0<br>(0 - 1)         | 0<br>(0 - 1)         |
| Non-venomous animal contact                     | 7<br>(2 - 12)            | 0<br>(0 - 1)       | 0<br>(0 - 0)        | 0<br>(0 - 1)         | 1<br>(0 - 1)         | 6<br>(1 - 11)        |
| Foreign body                                    | 108<br>(55 - 163)        | 63<br>(30 - 107)   | 5<br>(3 - 8)        | 6<br>(3 - 9)         | 4<br>(2 - 7)         | 29<br>(14 - 50)      |
| Pulmonary aspiration and foreign body in airway | 107<br>(54 - 162)        | 63<br>(30 - 106)   | 5<br>(3 - 8)        | 6<br>(3 - 9)         | 4<br>(2 - 7)         | 29<br>(13 - 49)      |
| Foreign body in other body part                 | 1<br>(1 - 2)             | 0<br>(0 - 1)       | 0<br>(0 - 0)        | 0<br>(0 - 0)         | 0<br>(0 - 0)         | 0<br>(0 - 1)         |
| Other unintentional injuries                    | 72<br>(26 - 102)         | 11<br>(3 - 22)     | 10<br>(3 - 19)      | 28<br>(10 - 44)      | 14<br>(4 - 25)       | 9<br>(2 - 17)        |
| Self-harm and interpersonal violence            | 367<br>(253 - 496)       | 22<br>(10 - 40)    | 19<br>(12 - 28)     | 233<br>(154 - 316)   | 54<br>(34 - 86)      | 38<br>(24 - 77)      |
| Self-harm                                       | 123<br>(87 - 232)        | 5<br>--            | 5<br>(3 - 8)        | 74<br>(50 - 124)     | 23<br>(16 - 45)      | 21<br>(13 - 51)      |
| Interpersonal violence                          | 243<br>(148 - 332)       | 22<br>(10 - 40)    | 14<br>(7 - 24)      | 159<br>(89 - 227)    | 31<br>(16 - 51)      | 18<br>(8 - 33)       |
| Assault by firearm                              | 101<br>(54 - 153)        | 4<br>(2 - 9)       | 5<br>(2 - 10)       | 78<br>(41 - 120)     | 9<br>(4 - 16)        | 4<br>(2 - 9)         |
| Assault by sharp object                         | 64<br>(33 - 98)          | 2<br>(1 - 4)       | 2<br>(1 - 5)        | 46<br>(22 - 73)      | 9<br>(4 - 16)        | 3<br>(1 - 7)         |
| Assault by other means                          | 79<br>(42 - 114)         | 16<br>(7 - 30)     | 7<br>(3 - 11)       | 34<br>(16 - 54)      | 12<br>(6 - 21)       | 10<br>(4 - 19)       |

Web Table 31- Ecuador deaths with 95% UI by age, sex, and cause in 2013

| Cause                                                             | Both Sexes, All Ages        | Both Sexes, 0-4 Years     | Both Sexes, 5-14 Years   | Both Sexes, 15-49 Years     | Both Sexes, 50-69 Years     | Both Sexes, 70-80 Years     |
|-------------------------------------------------------------------|-----------------------------|---------------------------|--------------------------|-----------------------------|-----------------------------|-----------------------------|
| All causes                                                        | 88,449<br>(78,832 - 99,042) | 9,373<br>(8,717 - 10,117) | 1,528<br>(1,424 - 1,634) | 17,839<br>(14,670 - 21,019) | 19,159<br>(16,037 - 22,492) | 40,551<br>(37,175 - 44,277) |
| Communicable, maternal, neonatal, and nutritional diseases        | 15,285<br>(13,909 - 16,668) | 5,871<br>(5,380 - 6,417)  | 322<br>(281 - 370)       | 2,352<br>(2,011 - 2,760)    | 1,558<br>(1,318 - 1,818)    | 5,183<br>(4,423 - 5,968)    |
| HIV/AIDS and tuberculosis                                         | 1,915<br>(1,588 - 2,483)    | 16<br>(12 - 20)           | 14<br>(11 - 18)          | 1,065<br>(850 - 1,487)      | 457<br>(363 - 604)          | 363<br>(297 - 461)          |
| Tuberculosis                                                      | 1,035<br>(863 - 1,329)      | 14<br>(10 - 18)           | 12<br>(10 - 16)          | 391<br>(310 - 533)          | 283<br>(223 - 370)          | 335<br>(272 - 432)          |
| HIV/AIDS                                                          | 880<br>(645 - 1,409)        | 2<br>(1 - 4)              | 1<br>(0 - 3)             | 674<br>(489 - 1,082)        | 174<br>(110 - 289)          | 29<br>(17 - 50)             |
| HIV/AIDS resulting in mycobacterial infection                     | 55<br>(37 - 88)             | 0<br>(0 - 0)              | 0<br>(0 - 0)             | 41<br>(28 - 67)             | 11<br>(7 - 19)              | 2<br>(1 - 3)                |
| HIV/AIDS resulting in other diseases                              | 825<br>(607 - 1,319)        | 2<br>(1 - 4)              | 1<br>(0 - 2)             | 633<br>(458 - 1,011)        | 163<br>(103 - 271)          | 27<br>(16 - 47)             |
| Diarrhea, lower respiratory, and other common infectious diseases | 8,563<br>(7,401 - 9,647)    | 2,876<br>(2,460 - 3,300)  | 255<br>(215 - 299)       | 775<br>(603 - 974)          | 875<br>(670 - 1,092)        | 3,782<br>(3,033 - 4,501)    |
| Diarrheal diseases                                                | 839<br>(673 - 1,033)        | 538<br>(391 - 715)        | 26<br>(18 - 36)          | 56<br>(43 - 72)             | 60<br>(44 - 79)             | 159<br>(115 - 218)          |
| Intestinal infectious diseases                                    | 171<br>(89 - 299)           | 58<br>(31 - 105)          | 45<br>(22 - 83)          | 56<br>(26 - 109)            | 8<br>(3 - 15)               | 4<br>(2 - 8)                |
| Typhoid fever                                                     | 125<br>(60 - 219)           | 40<br>(19 - 74)           | 35<br>(17 - 64)          | 42<br>(18 - 82)             | 5<br>(2 - 11)               | 2<br>(1 - 5)                |
| Paratyphoid fever                                                 | 34<br>(16 - 63)             | 12<br>(5 - 24)            | 9<br>(4 - 17)            | 11<br>(5 - 22)              | 1<br>(0 - 3)                | 1<br>(0 - 1)                |
| Other intestinal infectious diseases                              | 13<br>(6 - 22)              | 6<br>(2 - 14)             | 1<br>(0 - 4)             | 3<br>(0 - 8)                | 1<br>(0 - 5)                | 1<br>(0 - 5)                |
| Lower respiratory infections                                      | 7,009<br>(5,910 - 8,016)    | 1,992<br>(1,608 - 2,370)  | 138<br>(107 - 171)       | 556<br>(409 - 711)          | 757<br>(567 - 953)          | 3,568<br>(2,833 - 4,283)    |
| Upper respiratory infections                                      | 4<br>(2 - 8)                | 1<br>(0 - 2)              | 0<br>(0 - 0)             | 1<br>(0 - 2)                | 1<br>(0 - 2)                | 1<br>(0 - 5)                |
| Otitis media                                                      | 4<br>(3 - 5)                | 1<br>(0 - 1)              | 1<br>(0 - 1)             | 1<br>(1 - 1)                | 1<br>(1 - 1)                | 1<br>(1 - 2)                |
| Meningitis                                                        | 279<br>(223 - 332)          | 130<br>(93 - 171)         | 24<br>(18 - 29)          | 66<br>(50 - 82)             | 29<br>(22 - 37)             | 31<br>(23 - 38)             |
| Pneumococcal meningitis                                           | 70<br>(55 - 85)             | 28<br>(19 - 39)           | 7<br>(5 - 9)             | 19<br>(12 - 25)             | 8<br>(5 - 12)               | 9<br>(6 - 12)               |
| H influenzae type B meningitis                                    | 59<br>(43 - 76)             | 43<br>(27 - 59)           | 5<br>(3 - 7)             | 6<br>(4 - 9)                | 2<br>(2 - 3)                | 2<br>(2 - 4)                |
| Meningococcal meningitis                                          | 46<br>(36 - 58)             | 20<br>(13 - 29)           | 5<br>(3 - 7)             | 12<br>(8 - 17)              | 4<br>(2 - 6)                | 6<br>(4 - 8)                |
| Other meningitis                                                  | 103<br>(82 - 125)           | 39<br>(27 - 54)           | 7<br>(5 - 10)            | 29<br>(21 - 39)             | 15<br>(10 - 20)             | 14<br>(9 - 19)              |
| Encephalitis                                                      | 126<br>(101 - 169)          | 48<br>(33 - 71)           | 16<br>(11 - 26)          | 33<br>(25 - 48)             | 16<br>(12 - 25)             | 12<br>(9 - 18)              |
| Diphtheria                                                        | 2<br>(0 - 7)                | 1<br>(0 - 7)              | 0<br>(0 - 1)             | 0<br>(0 - 1)                | 0<br>(0 - 0)                | --                          |
| Whooping cough                                                    | 108<br>(41 - 279)           | 102<br>(35 - 273)         | 4<br>(3 - 6)             | 2<br>(1 - 2)                | 0<br>(0 - 0)                | --                          |
| Tetanus                                                           | 9<br>(5 - 13)               | 3<br>(1 - 4)              | 1<br>(0 - 1)             | 3<br>(1 - 4)                | 2<br>(1 - 3)                | 2<br>(1 - 3)                |
| Measles                                                           | 0<br>(0 - 0)                | 0<br>(0 - 0)              | 0<br>(0 - 0)             | 0<br>(0 - 0)                | 0<br>(0 - 0)                | --                          |
| Varicella and herpes zoster                                       | 10<br>(4 - 24)              | 2<br>(0 - 7)              | 1<br>(0 - 2)             | 2<br>(1 - 4)                | 1<br>(0 - 2)                | 5<br>(0 - 17)               |
| Neglected tropical diseases and malaria                           | 87<br>(67 - 150)            | 17<br>(11 - 25)           | 9<br>(7 - 13)            | 23<br>(18 - 31)             | 19<br>(11 - 48)             | 21<br>(12 - 53)             |
| Malaria                                                           | 12<br>(9 - 17)              | 3<br>(1 - 6)              | 1<br>(1 - 2)             | 5<br>(3 - 8)                | 2<br>(1 - 3)                | 2<br>(1 - 3)                |
| Chagas disease                                                    | 25<br>(9 - 85)              | 0<br>(0 - 1)              | 0<br>(0 - 1)             | 3<br>(1 - 9)                | 10<br>(3 - 39)              | 12<br>(4 - 46)              |
| Leishmaniasis                                                     | 0<br>(0 - 1)                | 0<br>(0 - 0)              | 0<br>(0 - 0)             | 0<br>(0 - 0)                | 0<br>(0 - 0)                | 0<br>(0 - 0)                |
| Visceral leishmaniasis                                            | 0<br>(0 - 1)                | 0<br>(0 - 0)              | 0<br>(0 - 0)             | 0<br>(0 - 0)                | 0<br>(0 - 0)                | 0<br>(0 - 0)                |
| Cysticercosis                                                     | 6<br>(5 - 7)                | 0<br>(0 - 0)              | 0<br>(0 - 0)             | 3<br>(3 - 4)                | 1<br>(1 - 2)                | 1<br>(1 - 1)                |
| Cystic echinococcosis                                             | 2<br>(1 - 2)                | 0<br>(0 - 0)              | 0<br>(0 - 0)             | 1<br>(1 - 1)                | 0<br>(0 - 0)                | 0<br>(0 - 0)                |
| Dengue                                                            | 23<br>(15 - 29)             | 7<br>(4 - 10)             | 5<br>(3 - 6)             | 6<br>(4 - 7)                | 2<br>(1 - 3)                | 4<br>(2 - 6)                |
| Yellow fever                                                      | 1<br>(1 - 1)                | 0<br>(0 - 0)              | 0<br>(0 - 0)             | 1<br>(0 - 1)                | 0<br>(0 - 0)                | 0<br>(0 - 0)                |
| Rabies                                                            | 3<br>(2 - 7)                | 0<br>(0 - 1)              | 1<br>(0 - 2)             | 1<br>(1 - 3)                | 0<br>(0 - 1)                | 0<br>(0 - 0)                |
| Intestinal nematode infections                                    | 5<br>(1 - 13)               | 3<br>(0 - 10)             | 1<br>(0 - 4)             | 1<br>(0 - 4)                | 0<br>(0 - 2)                | 0<br>(0 - 3)                |
| Ascariasis                                                        | 5<br>(1 - 13)               | 3<br>(0 - 10)             | 1<br>(0 - 4)             | 1<br>(0 - 4)                | 0<br>(0 - 2)                | 0<br>(0 - 3)                |
| Other neglected tropical diseases                                 | 10<br>(8 - 15)              | 2<br>(1 - 4)              | 1<br>(1 - 1)             | 3<br>(2 - 4)                | 2<br>(2 - 4)                | 2<br>(1 - 3)                |

Web Table 31- Ecuador deaths with 95% UI by age, sex, and cause in 2013

| Cause                                                            | Both Sexes, All Ages        | Both Sexes, 0-4 Years    | Both Sexes, 5-14 Years | Both Sexes, 15-49 Years  | Both Sexes, 50-69 Years     | Both Sexes, 70-80 Years     |
|------------------------------------------------------------------|-----------------------------|--------------------------|------------------------|--------------------------|-----------------------------|-----------------------------|
| Maternal disorders                                               | 282<br>(192 - 406)          | --                       | 2<br>(1 - 3)           | 280<br>(191 - 404)       | --                          | --                          |
| Maternal hemorrhage                                              | 41<br>(26 - 61)             | --                       | 0<br>(0 - 0)           | 41<br>(25 - 60)          | --                          | --                          |
| Maternal sepsis and other maternal infections                    | 20<br>(13 - 30)             | --                       | 0<br>(0 - 0)           | 20<br>(13 - 30)          | --                          | --                          |
| Maternal hypertensive disorders                                  | 62<br>(40 - 90)             | --                       | 0<br>(0 - 1)           | 61<br>(40 - 90)          | --                          | --                          |
| Maternal obstructed labor                                        | 12<br>(7 - 19)              | --                       | 0<br>(0 - 0)           | 12<br>(7 - 19)           | --                          | --                          |
| Maternal abortive outcome                                        | 26<br>(15 - 39)             | --                       | 0<br>(0 - 0)           | 26<br>(15 - 39)          | --                          | --                          |
| Indirect maternal deaths                                         | 27<br>(17 - 39)             | --                       | 0<br>(0 - 0)           | 27<br>(17 - 39)          | --                          | --                          |
| Late maternal deaths                                             | 64<br>(40 - 96)             | --                       | 0<br>(0 - 1)           | 64<br>(39 - 96)          | --                          | --                          |
| Maternal deaths aggravated by HIV/AIDS                           | 0<br>(0 - 0)                | --                       | --                     | 0<br>(0 - 0)             | --                          | --                          |
| Other maternal disorders                                         | 30<br>(19 - 43)             | --                       | 0<br>(0 - 0)           | 29<br>(19 - 43)          | --                          | --                          |
| Neonatal disorders                                               | 2,486<br>(2,227 - 2,765)    | 2,486<br>(2,227 - 2,765) | --                     | --                       | --                          | --                          |
| Neonatal preterm birth complications                             | 1,166<br>(859 - 1,421)      | 1,166<br>(859 - 1,421)   | --                     | --                       | --                          | --                          |
| Neonatal encephalopathy due to birth asphyxia and trauma         | 477<br>(363 - 608)          | 477<br>(363 - 608)       | --                     | --                       | --                          | --                          |
| Neonatal sepsis and other neonatal infections                    | 549<br>(367 - 844)          | 549<br>(367 - 844)       | --                     | --                       | --                          | --                          |
| Hemolytic disease and other neonatal jaundice                    | 23<br>(11 - 43)             | 23<br>(11 - 43)          | --                     | --                       | --                          | --                          |
| Other neonatal disorders                                         | 270<br>(185 - 351)          | 270<br>(185 - 351)       | --                     | --                       | --                          | --                          |
| Nutritional deficiencies                                         | 1,746<br>(1,420 - 2,513)    | 411<br>(310 - 631)       | 32<br>(25 - 44)        | 165<br>(126 - 252)       | 170<br>(127 - 266)          | 968<br>(741 - 1,380)        |
| Protein-energy malnutrition                                      | 1,061<br>(792 - 1,671)      | 358<br>(258 - 563)       | 18<br>(12 - 28)        | 48<br>(28 - 91)          | 69<br>(43 - 133)            | 568<br>(379 - 914)          |
| Iodine deficiency                                                | 1<br>(0 - 3)                | 0<br>(0 - 1)             | 0<br>(0 - 0)           | 0<br>(0 - 1)             | 0<br>(0 - 1)                | 0<br>(0 - 2)                |
| Iron-deficiency anemia                                           | 540<br>(344 - 874)          | 36<br>(14 - 76)          | 11<br>(6 - 17)         | 102<br>(72 - 159)        | 83<br>(55 - 136)            | 309<br>(176 - 537)          |
| Other nutritional deficiencies                                   | 144<br>(78 - 229)           | 17<br>(6 - 36)           | 3<br>(1 - 4)           | 14<br>(7 - 24)           | 19<br>(10 - 31)             | 91<br>(44 - 157)            |
| Other communicable, maternal, neonatal, and nutritional diseases | 206<br>(163 - 257)          | 66<br>(34 - 106)         | 12<br>(9 - 16)         | 43<br>(34 - 55)          | 37<br>(28 - 46)             | 48<br>(36 - 61)             |
| Sexually transmitted diseases excluding HIV                      | 48<br>(15 - 89)             | 38<br>(7 - 76)           | 3<br>(1 - 6)           | 2<br>(2 - 3)             | 2<br>(2 - 4)                | 3<br>(2 - 5)                |
| Syphilis                                                         | 46<br>(13 - 86)             | 38<br>(7 - 76)           | 3<br>(1 - 6)           | 1<br>(1 - 1)             | 2<br>(1 - 2)                | 2<br>(2 - 4)                |
| Chlamydial infection                                             | 0<br>(0 - 1)                | --                       | 0<br>(0 - 0)           | 0<br>(0 - 0)             | 0<br>(0 - 0)                | 0<br>(0 - 0)                |
| Gonococcal infection                                             | 1<br>(1 - 2)                | --                       | 0<br>(0 - 0)           | 1<br>(0 - 1)             | 0<br>(0 - 1)                | 0<br>(0 - 1)                |
| Other sexually transmitted diseases                              | 1<br>(1 - 1)                | --                       | 0<br>(0 - 0)           | 0<br>(0 - 1)             | 0<br>(0 - 0)                | 0<br>(0 - 0)                |
| Hepatitis                                                        | 37<br>(30 - 45)             | 3<br>(2 - 4)             | 2<br>(1 - 3)           | 13<br>(10 - 17)          | 10<br>(7 - 14)              | 9<br>(6 - 12)               |
| Acute hepatitis A                                                | 11<br>(5 - 17)              | 2<br>(1 - 3)             | 1<br>(1 - 2)           | 6<br>(2 - 10)            | 1<br>(0 - 3)                | 0<br>(0 - 1)                |
| Acute hepatitis B                                                | 24<br>(16 - 32)             | 1<br>(0 - 2)             | 0<br>(0 - 1)           | 6<br>(3 - 10)            | 8<br>(5 - 11)               | 8<br>(5 - 11)               |
| Acute hepatitis C                                                | 3<br>(1 - 6)                | --                       | 0<br>(0 - 0)           | 1<br>(0 - 2)             | 1<br>(0 - 2)                | 1<br>(0 - 2)                |
| Other infectious diseases                                        | 120<br>(93 - 148)           | 25<br>(18 - 34)          | 7<br>(5 - 10)          | 28<br>(21 - 37)          | 24<br>(17 - 32)             | 36<br>(24 - 48)             |
| Non-communicable diseases                                        | 59,425<br>(52,710 - 67,023) | 2,589<br>(2,216 - 3,010) | 525<br>(470 - 588)     | 7,200<br>(5,912 - 8,772) | 15,423<br>(12,885 - 18,240) | 33,689<br>(30,762 - 36,847) |
| Neoplasms                                                        | 14,042<br>(12,205 - 16,130) | 152<br>(115 - 203)       | 186<br>(160 - 216)     | 2,056<br>(1,667 - 2,549) | 4,441<br>(3,743 - 5,306)    | 7,206<br>(6,402 - 8,129)    |
| Esophageal cancer                                                | 185<br>(144 - 254)          | --                       | --                     | 14<br>(10 - 19)          | 60<br>(44 - 86)             | 111<br>(85 - 155)           |
| Stomach cancer                                                   | 2,626<br>(2,204 - 3,074)    | --                       | --                     | 293<br>(231 - 361)       | 800<br>(651 - 969)          | 1,533<br>(1,264 - 1,839)    |
| Liver cancer                                                     | 954<br>(785 - 1,145)        | --                       | 3<br>(2 - 5)           | 93<br>(73 - 120)         | 331<br>(267 - 413)          | 526<br>(417 - 667)          |
| Liver cancer due to hepatitis B                                  | 374<br>(274 - 482)          | --                       | 2<br>(1 - 2)           | 55<br>(41 - 74)          | 155<br>(108 - 207)          | 162<br>(112 - 220)          |
| Liver cancer due to hepatitis C                                  | 168<br>(98 - 264)           | --                       | 0<br>(0 - 0)           | 8<br>(4 - 13)            | 50<br>(30 - 78)             | 109<br>(56 - 185)           |
| Liver cancer due to alcohol use                                  | 288<br>(196 - 387)          | --                       | --                     | 12<br>(8 - 18)           | 81<br>(54 - 111)            | 195<br>(127 - 278)          |

Web Table 31- Ecuador deaths with 95% UI by age, sex, and cause in 2013

| Cause                                         | Both Sexes, All Ages        | Both Sexes, 0-4 Years | Both Sexes, 5-14 Years | Both Sexes, 15-49 Years  | Both Sexes, 50-69 Years  | Both Sexes, 70-80 Years     |
|-----------------------------------------------|-----------------------------|-----------------------|------------------------|--------------------------|--------------------------|-----------------------------|
| Liver cancer due to other causes              | 125<br>(84 - 175)           | --                    | 2<br>(1 - 2)           | 18<br>(12 - 26)          | 45<br>(28 - 69)          | 60<br>(36 - 98)             |
| Larynx cancer                                 | 77<br>(56 - 100)            | --                    | --                     | 8<br>(5 - 10)            | 26<br>(18 - 35)          | 44<br>(31 - 58)             |
| Tracheal, bronchus and lung cancer            | 1,199<br>(1,028 - 1,391)    | --                    | --                     | 115<br>(90 - 144)        | 416<br>(343 - 502)       | 668<br>(569 - 778)          |
| Breast cancer                                 | 719<br>(561 - 933)          | --                    | --                     | 199<br>(143 - 280)       | 317<br>(238 - 422)       | 202<br>(161 - 258)          |
| Cervical cancer                               | 819<br>(602 - 1,075)        | --                    | --                     | 230<br>(152 - 317)       | 324<br>(233 - 455)       | 266<br>(189 - 361)          |
| Uterine cancer                                | 204<br>(119 - 280)          | --                    | --                     | 17<br>(10 - 27)          | 84<br>(48 - 121)         | 103<br>(56 - 149)           |
| Prostate cancer                               | 1,325<br>(838 - 1,870)      | --                    | --                     | 8<br>(5 - 13)            | 189<br>(113 - 274)       | 1,127<br>(708 - 1,622)      |
| Colon and rectum cancer                       | 1,059<br>(896 - 1,231)      | --                    | --                     | 122<br>(98 - 152)        | 326<br>(266 - 391)       | 611<br>(512 - 728)          |
| Lip and oral cavity cancer                    | 99<br>(70 - 128)            | --                    | --                     | 14<br>(10 - 18)          | 32<br>(22 - 42)          | 54<br>(36 - 73)             |
| Nasopharynx cancer                            | 18<br>(14 - 26)             | --                    | 0<br>(0 - 1)           | 5<br>(4 - 8)             | 6<br>(4 - 10)            | 6<br>(4 - 9)                |
| Other pharynx cancer                          | 39<br>(31 - 48)             | --                    | --                     | 7<br>(5 - 9)             | 18<br>(13 - 23)          | 15<br>(11 - 19)             |
| Gallbladder and biliary tract cancer          | 428<br>(312 - 642)          | --                    | --                     | 30<br>(20 - 46)          | 159<br>(113 - 248)       | 239<br>(170 - 372)          |
| Pancreatic cancer                             | 560<br>(475 - 655)          | --                    | --                     | 49<br>(39 - 62)          | 212<br>(172 - 255)       | 299<br>(249 - 355)          |
| Malignant skin melanoma                       | 135<br>(103 - 198)          | --                    | --                     | 26<br>(18 - 38)          | 45<br>(32 - 69)          | 64<br>(47 - 91)             |
| Non-melanoma skin cancer                      | 125<br>(90 - 163)           | --                    | --                     | 9<br>(7 - 12)            | 20<br>(15 - 27)          | 96<br>(67 - 126)            |
| Ovarian cancer                                | 257<br>(196 - 336)          | --                    | --                     | 60<br>(41 - 86)          | 115<br>(85 - 157)        | 81<br>(61 - 107)            |
| Testicular cancer                             | 28<br>(12 - 45)             | --                    | --                     | 17<br>(7 - 30)           | 4<br>(2 - 8)             | 7<br>(3 - 12)               |
| Kidney cancer                                 | 229<br>(188 - 274)          | 4<br>(2 - 6)          | 2<br>(1 - 2)           | 28<br>(22 - 36)          | 96<br>(75 - 120)         | 99<br>(78 - 123)            |
| Bladder cancer                                | 179<br>(143 - 250)          | --                    | --                     | 11<br>(8 - 16)           | 50<br>(37 - 75)          | 118<br>(92 - 162)           |
| Brain and nervous system cancer               | 371<br>(198 - 469)          | 17<br>(8 - 30)        | 25<br>(14 - 34)        | 120<br>(63 - 162)        | 120<br>(64 - 159)        | 89<br>(43 - 119)            |
| Thyroid cancer                                | 133<br>(84 - 174)           | --                    | 0<br>(0 - 0)           | 13<br>(8 - 19)           | 44<br>(28 - 60)          | 75<br>(46 - 104)            |
| Mesothelioma                                  | 23<br>(18 - 29)             | --                    | --                     | 3<br>(2 - 4)             | 11<br>(8 - 14)           | 10<br>(7 - 13)              |
| Hodgkin lymphoma                              | 59<br>(23 - 81)             | 5<br>(1 - 8)          | 3<br>(1 - 6)           | 17<br>(6 - 24)           | 15<br>(6 - 23)           | 19<br>(7 - 28)              |
| Non-Hodgkin lymphoma                          | 531<br>(394 - 662)          | 22<br>(12 - 34)       | 17<br>(12 - 22)        | 111<br>(81 - 144)        | 171<br>(128 - 227)       | 209<br>(144 - 268)          |
| Multiple myeloma                              | 130<br>(101 - 159)          | --                    | --                     | 15<br>(11 - 20)          | 57<br>(43 - 74)          | 57<br>(43 - 73)             |
| Leukemia                                      | 734<br>(631 - 854)          | 62<br>(39 - 95)       | 97<br>(78 - 118)       | 242<br>(195 - 298)       | 153<br>(125 - 185)       | 180<br>(149 - 212)          |
| Other neoplasms                               | 798<br>(656 - 1,006)        | 42<br>(27 - 62)       | 38<br>(28 - 49)        | 181<br>(140 - 239)       | 238<br>(186 - 314)       | 298<br>(235 - 400)          |
| Cardiovascular diseases                       | 20,748<br>(18,212 - 23,717) | 112<br>(90 - 140)     | 81<br>(68 - 98)        | 2,199<br>(1,762 - 2,743) | 4,808<br>(3,953 - 5,773) | 13,546<br>(12,156 - 15,179) |
| Rheumatic heart disease                       | 165<br>(113 - 211)          | 1<br>(1 - 2)          | 5<br>(4 - 7)           | 49<br>(35 - 68)          | 45<br>(29 - 60)          | 64<br>(39 - 84)             |
| Ischemic heart disease                        | 11,154<br>(9,589 - 13,283)  | 7<br>(5 - 11)         | 24<br>(18 - 31)        | 1,098<br>(864 - 1,392)   | 2,635<br>(2,120 - 3,181) | 7,390<br>(6,445 - 8,811)    |
| Cerebrovascular disease                       | 6,016<br>(5,043 - 7,263)    | 10<br>(7 - 14)        | 25<br>(20 - 31)        | 705<br>(552 - 915)       | 1,439<br>(1,145 - 1,838) | 3,837<br>(3,250 - 4,605)    |
| Ischemic stroke                               | 3,333<br>(2,709 - 4,483)    | 3<br>(2 - 5)          | 5<br>(4 - 8)           | 149<br>(105 - 245)       | 571<br>(414 - 905)       | 2,606<br>(2,144 - 3,320)    |
| Hemorrhagic stroke                            | 2,683<br>(1,997 - 3,262)    | 7<br>(5 - 10)         | 20<br>(15 - 25)        | 556<br>(427 - 719)       | 868<br>(662 - 1,089)     | 1,232<br>(823 - 1,519)      |
| Hypertensive heart disease                    | 1,626<br>(1,103 - 2,106)    | 1<br>(1 - 2)          | 2<br>(1 - 2)           | 90<br>(60 - 124)         | 289<br>(181 - 403)       | 1,244<br>(822 - 1,642)      |
| Cardiomyopathy and myocarditis                | 315<br>(246 - 371)          | 61<br>(46 - 77)       | 11<br>(8 - 14)         | 51<br>(38 - 67)          | 63<br>(47 - 81)          | 129<br>(95 - 163)           |
| Atrial fibrillation and flutter               | 151<br>(114 - 199)          | --                    | --                     | 6<br>(4 - 8)             | 20<br>(15 - 25)          | 125<br>(91 - 169)           |
| Aortic aneurysm                               | 297<br>(238 - 364)          | --                    | --                     | 30<br>(22 - 40)          | 89<br>(69 - 118)         | 178<br>(138 - 220)          |
| Peripheral vascular disease                   | 6<br>(4 - 8)                | --                    | --                     | 0<br>(0 - 1)             | 1<br>(1 - 2)             | 4<br>(3 - 6)                |
| Endocarditis                                  | 116<br>(84 - 153)           | 18<br>(12 - 26)       | 5<br>(3 - 7)           | 27<br>(19 - 39)          | 21<br>(14 - 29)          | 45<br>(31 - 62)             |
| Other cardiovascular and circulatory diseases | 903<br>(718 - 1,167)        | 13<br>(9 - 20)        | 10<br>(7 - 15)         | 144<br>(109 - 201)       | 205<br>(157 - 275)       | 529<br>(399 - 708)          |

Web Table 31- Ecuador deaths with 95% UI by age, sex, and cause in 2013

| Cause                                               | Both Sexes, All Ages     | Both Sexes, 0-4 Years | Both Sexes, 5-14 Years | Both Sexes, 15-49 Years | Both Sexes, 50-69 Years  | Both Sexes, 70-80 Years  |
|-----------------------------------------------------|--------------------------|-----------------------|------------------------|-------------------------|--------------------------|--------------------------|
| Chronic respiratory diseases                        | 3,590<br>(3,109 - 4,379) | 125<br>(77 - 324)     | 20<br>(16 - 32)        | 175<br>(138 - 221)      | 451<br>(363 - 567)       | 2,820<br>(2,410 - 3,331) |
| Chronic obstructive pulmonary disease               | 2,782<br>(2,336 - 3,507) | 84<br>(49 - 227)      | 10<br>(8 - 17)         | 104<br>(81 - 135)       | 317<br>(251 - 414)       | 2,266<br>(1,901 - 2,753) |
| Pneumoconiosis                                      | 104<br>(71 - 156)        | 0<br>(0 - 1)          | 0<br>(0 - 1)           | 14<br>(9 - 21)          | 24<br>(15 - 37)          | 66<br>(43 - 106)         |
| Silicosis                                           | 6<br>(4 - 10)            | 0<br>(0 - 0)          | 0<br>(0 - 0)           | 4<br>(2 - 6)            | 1<br>(1 - 2)             | 2<br>(1 - 3)             |
| Asbestosis                                          | 30<br>(19 - 46)          | 0<br>(0 - 0)          | 0<br>(0 - 0)           | 3<br>(2 - 5)            | 7<br>(4 - 11)            | 19<br>(12 - 32)          |
| Coal workers pneumoconiosis                         | 7<br>(5 - 12)            | 0<br>(0 - 0)          | 0<br>(0 - 0)           | 1<br>(0 - 1)            | 0<br>(0 - 1)             | 6<br>(4 - 10)            |
| Other pneumoconiosis                                | 61<br>(41 - 94)          | 0<br>(0 - 0)          | 0<br>(0 - 0)           | 7<br>(4 - 10)           | 15<br>(10 - 24)          | 39<br>(25 - 63)          |
| Asthma                                              | 148<br>(115 - 200)       | 20<br>(11 - 46)       | 6<br>(4 - 9)           | 19<br>(14 - 25)         | 23<br>(17 - 32)          | 80<br>(57 - 111)         |
| Interstitial lung disease and pulmonary sarcoidosis | 506<br>(338 - 673)       | 3<br>(1 - 7)          | 2<br>(1 - 4)           | 28<br>(19 - 37)         | 81<br>(52 - 111)         | 392<br>(253 - 534)       |
| Other chronic respiratory diseases                  | 49<br>(36 - 82)          | 17<br>(10 - 43)       | 1<br>(1 - 2)           | 10<br>(7 - 15)          | 5<br>(4 - 7)             | 15<br>(10 - 22)          |
| Cirrhosis                                           | 3,095<br>(2,635 - 3,604) | 9<br>(6 - 11)         | 12<br>(10 - 14)        | 582<br>(454 - 725)      | 1,289<br>(1,056 - 1,551) | 1,203<br>(1,036 - 1,377) |
| Cirrhosis due to hepatitis B                        | 494<br>(320 - 677)       | 0<br>(0 - 0)          | 1<br>(0 - 2)           | 89<br>(56 - 132)        | 206<br>(135 - 288)       | 198<br>(112 - 287)       |
| Cirrhosis due to hepatitis C                        | 1,096<br>(746 - 1,468)   | 1<br>(0 - 2)          | 2<br>(1 - 3)           | 169<br>(97 - 264)       | 457<br>(293 - 654)       | 467<br>(315 - 605)       |
| Cirrhosis due to alcohol use                        | 999<br>(728 - 1,286)     | --                    | --                     | 159<br>(88 - 239)       | 428<br>(296 - 576)       | 411<br>(311 - 534)       |
| Cirrhosis due to other causes                       | 506<br>(349 - 695)       | 8<br>(5 - 10)         | 9<br>(8 - 11)          | 165<br>(109 - 223)      | 198<br>(124 - 290)       | 127<br>(82 - 188)        |
| Digestive diseases                                  | 2,613<br>(2,267 - 3,198) | 46<br>(33 - 62)       | 33<br>(28 - 39)        | 404<br>(324 - 535)      | 637<br>(520 - 832)       | 1,493<br>(1,296 - 1,795) |
| Peptic ulcer disease                                | 605<br>(445 - 924)       | 1<br>(0 - 1)          | 2<br>(1 - 3)           | 77<br>(54 - 117)        | 137<br>(96 - 220)        | 388<br>(278 - 593)       |
| Gastritis and duodenitis                            | 56<br>(30 - 79)          | 2<br>(1 - 3)          | 1<br>(0 - 1)           | 8<br>(4 - 12)           | 11<br>(6 - 16)           | 35<br>(18 - 52)          |
| Appendicitis                                        | 156<br>(117 - 220)       | 5<br>(3 - 8)          | 9<br>(7 - 13)          | 50<br>(36 - 72)         | 40<br>(28 - 60)          | 52<br>(36 - 75)          |
| Paralytic ileus and intestinal obstruction          | 338<br>(60 - 586)        | 17<br>(5 - 30)        | 6<br>(2 - 10)          | 38<br>(7 - 68)          | 82<br>(12 - 148)         | 196<br>(30 - 352)        |
| Inguinal, femoral, and abdominal hernia             | 171<br>(80 - 398)        | 3<br>(1 - 9)          | 2<br>(1 - 5)           | 21<br>(9 - 49)          | 39<br>(16 - 91)          | 107<br>(48 - 254)        |
| Inflammatory bowel disease                          | 31<br>(24 - 46)          | 4<br>(2 - 8)          | 1<br>(1 - 2)           | 7<br>(5 - 10)           | 6<br>(5 - 10)            | 13<br>(9 - 19)           |
| Vascular intestinal disorders                       | 208<br>(123 - 340)       | 2<br>(0 - 5)          | 1<br>(0 - 2)           | 17<br>(9 - 31)          | 36<br>(21 - 63)          | 152<br>(89 - 248)        |
| Gallbladder and biliary diseases                    | 432<br>(350 - 565)       | 1<br>(0 - 1)          | 1<br>(1 - 2)           | 54<br>(41 - 75)         | 104<br>(81 - 147)        | 272<br>(212 - 352)       |
| Pancreatitis                                        | 387<br>(293 - 556)       | 4<br>(2 - 7)          | 4<br>(2 - 6)           | 98<br>(73 - 140)        | 126<br>(91 - 182)        | 156<br>(111 - 228)       |
| Other digestive diseases                            | 229<br>(178 - 299)       | 9<br>(5 - 14)         | 6<br>(4 - 8)           | 35<br>(26 - 47)         | 56<br>(42 - 76)          | 123<br>(91 - 164)        |
| Neurological disorders                              | 2,738<br>(2,314 - 3,174) | 31<br>(22 - 51)       | 31<br>(24 - 45)        | 254<br>(186 - 363)      | 249<br>(201 - 303)       | 2,173<br>(1,787 - 2,557) |
| Alzheimer disease and other dementias               | 2,043<br>(1,664 - 2,426) | --                    | --                     | 0<br>(0 - 1)            | 112<br>(86 - 142)        | 1,930<br>(1,552 - 2,295) |
| Parkinson disease                                   | 219<br>(169 - 270)       | --                    | --                     | 3<br>(2 - 4)            | 38<br>(29 - 50)          | 179<br>(134 - 225)       |
| Epilepsy                                            | 353<br>(262 - 510)       | 23<br>(15 - 41)       | 26<br>(19 - 39)        | 214<br>(151 - 317)      | 57<br>(41 - 83)          | 33<br>(25 - 46)          |
| Multiple sclerosis                                  | 15<br>(9 - 23)           | --                    | --                     | 5<br>(3 - 7)            | 6<br>(3 - 9)             | 5<br>(3 - 9)             |
| Other neurological disorders                        | 107<br>(89 - 128)        | 9<br>(7 - 12)         | 5<br>(4 - 7)           | 32<br>(26 - 41)         | 36<br>(29 - 46)          | 25<br>(20 - 30)          |
| Mental and substance use disorders                  | 782<br>(403 - 1,008)     | 2<br>(1 - 4)          | 0<br>(0 - 0)           | 263<br>(160 - 350)      | 408<br>(178 - 550)       | 108<br>(63 - 139)        |
| Schizophrenia                                       | 5<br>(3 - 6)             | --                    | --                     | 2<br>(1 - 3)            | 2<br>(1 - 3)             | 1<br>(1 - 2)             |
| Alcohol use disorders                               | 631<br>(255 - 844)       | --                    | --                     | 187<br>(84 - 263)       | 369<br>(138 - 506)       | 75<br>(31 - 104)         |
| Drug use disorders                                  | 144<br>(112 - 242)       | 2<br>(1 - 4)          | --                     | 73<br>(53 - 146)        | 37<br>(27 - 57)          | 32<br>(25 - 42)          |
| Opioid use disorders                                | 22<br>(17 - 36)          | 0<br>(0 - 1)          | --                     | 11<br>(8 - 22)          | 5<br>(4 - 8)             | 5<br>(4 - 7)             |
| Cocaine use disorders                               | 3<br>(3 - 5)             | 0<br>(0 - 0)          | --                     | 2<br>(1 - 3)            | 1<br>(0 - 1)             | 1<br>(0 - 1)             |
| Amphetamine use disorders                           | 3<br>(2 - 4)             | 0<br>(0 - 0)          | --                     | 1<br>(1 - 3)            | 1<br>(1 - 1)             | 1<br>(0 - 1)             |
| Other drug use disorders                            | 116<br>(90 - 194)        | 2<br>(1 - 3)          | --                     | 58<br>(42 - 117)        | 31<br>(22 - 48)          | 25<br>(20 - 34)          |

Web Table 31- Ecuador deaths with 95% UI by age, sex, and cause in 2013

| Cause                                               | Both Sexes, All Ages      | Both Sexes, 0-4 Years    | Both Sexes, 5-14 Years | Both Sexes, 15-49 Years | Both Sexes, 50-69 Years  | Both Sexes, 70-80 Years  |
|-----------------------------------------------------|---------------------------|--------------------------|------------------------|-------------------------|--------------------------|--------------------------|
| Eating disorders                                    | 1<br>(1 - 2)              | --                       | 0<br>(0 - 0)           | 1<br>(1 - 2)            | --                       | --                       |
| Anorexia nervosa                                    | 1<br>(1 - 2)              | --                       | 0<br>(0 - 0)           | 1<br>(1 - 2)            | --                       | --                       |
| Diabetes, urogenital, blood, and endocrine diseases | 9,377<br>(7,736 - 10,872) | 192<br>(147 - 293)       | 70<br>(57 - 92)        | 1,095<br>(881 - 1,346)  | 3,040<br>(2,402 - 3,653) | 4,980<br>(3,876 - 5,706) |
| Diabetes mellitus                                   | 3,901<br>(3,286 - 4,533)  | 7<br>(6 - 10)            | 4<br>(3 - 6)           | 331<br>(266 - 412)      | 1,377<br>(1,134 - 1,669) | 2,181<br>(1,800 - 2,550) |
| Acute glomerulonephritis                            | 7<br>(5 - 10)             | 1<br>(0 - 1)             | 0<br>(0 - 0)           | 2<br>(1 - 2)            | 2<br>(1 - 2)             | 3<br>(2 - 5)             |
| Chronic kidney disease                              | 4,669<br>(3,012 - 5,565)  | 64<br>(51 - 82)          | 32<br>(25 - 38)        | 607<br>(457 - 754)      | 1,503<br>(850 - 1,870)   | 2,464<br>(1,554 - 2,948) |
| Chronic kidney disease due to diabetes mellitus     | 2,302<br>(1,373 - 2,826)  | 9<br>(6 - 13)            | 3<br>(2 - 5)           | 265<br>(172 - 342)      | 919<br>(508 - 1,162)     | 1,106<br>(638 - 1,385)   |
| Chronic kidney disease due to hypertension          | 922<br>(549 - 1,227)      | 16<br>(10 - 22)          | 7<br>(5 - 10)          | 125<br>(84 - 179)       | 166<br>(84 - 238)        | 608<br>(359 - 833)       |
| Chronic kidney disease due to glomerulonephritis    | 81<br>(60 - 111)          | 11<br>(8 - 15)           | 5<br>(4 - 7)           | 21<br>(15 - 29)         | 13<br>(8 - 19)           | 31<br>(19 - 48)          |
| Chronic kidney disease due to other causes          | 1,364<br>(615 - 1,781)    | 29<br>(19 - 43)          | 16<br>(11 - 21)        | 195<br>(127 - 263)      | 405<br>(148 - 565)       | 719<br>(303 - 989)       |
| Urinary diseases and male infertility               | 272<br>(220 - 332)        | 13<br>(10 - 17)          | 3<br>(3 - 4)           | 39<br>(29 - 50)         | 49<br>(37 - 62)          | 168<br>(129 - 220)       |
| Interstitial nephritis and urinary tract infections | 195<br>(146 - 240)        | 10<br>(7 - 13)           | 2<br>(2 - 3)           | 23<br>(16 - 31)         | 29<br>(19 - 38)          | 131<br>(95 - 175)        |
| Urolithiasis                                        | 12<br>(9 - 16)            | --                       | 0<br>(0 - 0)           | 3<br>(2 - 4)            | 4<br>(3 - 5)             | 5<br>(3 - 8)             |
| Other urinary diseases                              | 65<br>(49 - 91)           | 4<br>(2 - 5)             | 1<br>(1 - 1)           | 13<br>(9 - 17)          | 17<br>(12 - 22)          | 31<br>(21 - 49)          |
| Gynecological diseases                              | 3<br>(2 - 8)              | --                       | --                     | 2<br>(1 - 5)            | 0<br>(0 - 2)             | 0<br>(0 - 1)             |
| Uterine fibroids                                    | 1<br>(0 - 2)              | --                       | --                     | 0<br>(0 - 1)            | 0<br>(0 - 0)             | 0<br>(0 - 0)             |
| Polycystic ovarian syndrome                         | 0<br>(0 - 0)              | --                       | --                     | 0<br>(0 - 0)            | 0<br>(0 - 0)             | --                       |
| Endometriosis                                       | 0<br>(0 - 1)              | --                       | --                     | 0<br>(0 - 1)            | 0<br>(0 - 0)             | --                       |
| Genital prolapse                                    | 0<br>(0 - 1)              | --                       | --                     | 0<br>(0 - 1)            | 0<br>(0 - 0)             | 0<br>(0 - 0)             |
| Other gynecological diseases                        | 1<br>(1 - 4)              | --                       | --                     | 1<br>(0 - 3)            | 0<br>(0 - 1)             | 0<br>(0 - 1)             |
| Hemoglobinopathies and hemolytic anemias            | 168<br>(126 - 248)        | 30<br>(19 - 50)          | 18<br>(12 - 28)        | 52<br>(35 - 79)         | 33<br>(23 - 51)          | 35<br>(24 - 51)          |
| Thalassemias                                        | 33<br>(24 - 51)           | 13<br>(8 - 21)           | 8<br>(5 - 12)          | 12<br>(8 - 19)          | 0<br>(0 - 0)             | 0<br>(0 - 0)             |
| Sickle cell disorders                               | 30<br>(22 - 45)           | 5<br>(3 - 8)             | 4<br>(3 - 6)           | 13<br>(9 - 20)          | 8<br>(6 - 13)            | 0<br>(0 - 1)             |
| G6PD deficiency                                     | 4<br>(3 - 6)              | 1<br>(1 - 2)             | 1<br>(0 - 1)           | 2<br>(1 - 3)            | 1<br>(0 - 1)             | 0<br>(0 - 0)             |
| Other hemoglobinopathies and hemolytic anemias      | 101<br>(75 - 150)         | 11<br>(7 - 19)           | 6<br>(4 - 9)           | 25<br>(17 - 38)         | 24<br>(17 - 37)          | 34<br>(24 - 50)          |
| Endocrine, metabolic, blood, and immune disorders   | 357<br>(275 - 653)        | 77<br>(50 - 168)         | 12<br>(8 - 24)         | 64<br>(47 - 119)        | 75<br>(54 - 137)         | 129<br>(92 - 243)        |
| Musculoskeletal disorders                           | 255<br>(106 - 326)        | --                       | 12<br>(6 - 15)         | 79<br>(32 - 105)        | 64<br>(27 - 84)          | 100<br>(40 - 133)        |
| Rheumatoid arthritis                                | 70<br>(31 - 92)           | --                       | 1<br>(0 - 1)           | 8<br>(4 - 12)           | 25<br>(11 - 35)          | 37<br>(15 - 51)          |
| Other musculoskeletal disorders                     | 185<br>(74 - 237)         | --                       | 11<br>(6 - 14)         | 71<br>(28 - 94)         | 39<br>(15 - 53)          | 64<br>(23 - 87)          |
| Other non-communicable diseases                     | 2,186<br>(1,810 - 2,560)  | 1,920<br>(1,563 - 2,287) | 79<br>(63 - 96)        | 91<br>(68 - 117)        | 36<br>(27 - 45)          | 59<br>(42 - 73)          |
| Congenital anomalies                                | 2,061<br>(1,674 - 2,404)  | 1,847<br>(1,492 - 2,193) | 78<br>(62 - 95)        | 82<br>(60 - 107)        | 25<br>(17 - 32)          | 30<br>(18 - 41)          |
| Neural tube defects                                 | 51<br>(31 - 70)           | 47<br>(28 - 67)          | 1<br>(0 - 1)           | 2<br>(1 - 2)            | 0<br>(0 - 1)             | 1<br>(0 - 1)             |
| Congenital heart anomalies                          | 1,154<br>(881 - 1,396)    | 1,040<br>(785 - 1,278)   | 49<br>(38 - 62)        | 51<br>(36 - 67)         | 9<br>(5 - 12)            | 5<br>(2 - 8)             |
| Cleft lip and cleft palate                          | 13<br>(3 - 38)            | 13<br>(3 - 38)           | --                     | --                      | --                       | --                       |
| Down syndrome                                       | 110<br>(69 - 158)         | 94<br>(55 - 141)         | 6<br>(4 - 10)          | 7<br>(5 - 10)           | 2<br>(1 - 3)             | 1<br>(0 - 1)             |
| Chromosomal unbalanced rearrangements               | 35<br>(22 - 50)           | 32<br>(19 - 46)          | 1<br>(1 - 2)           | 1<br>(1 - 2)            | 0<br>(0 - 0)             | 0<br>(0 - 0)             |
| Other congenital anomalies                          | 700<br>(548 - 863)        | 621<br>(475 - 782)       | 21<br>(13 - 29)        | 21<br>(15 - 28)         | 13<br>(10 - 18)          | 23<br>(15 - 31)          |
| Skin and subcutaneous diseases                      | 59<br>(47 - 70)           | 7<br>(5 - 10)            | 2<br>(1 - 2)           | 9<br>(7 - 12)           | 11<br>(8 - 15)           | 29<br>(21 - 38)          |
| Cellulitis                                          | 10<br>(6 - 13)            | 2<br>(1 - 3)             | 0<br>(0 - 0)           | 1<br>(1 - 2)            | 2<br>(1 - 3)             | 4<br>(2 - 7)             |
| Pyoderma                                            | 44<br>(35 - 54)           | 5<br>(3 - 7)             | 1<br>(1 - 1)           | 6<br>(5 - 8)            | 8<br>(6 - 11)            | 24<br>(17 - 32)          |

Web Table 31- Ecuador deaths with 95% UI by age, sex, and cause in 2013

| Cause                                           | Both Sexes, All Ages        | Both Sexes, 0-4 Years | Both Sexes, 5-14 Years | Both Sexes, 15-49 Years   | Both Sexes, 50-69 Years  | Both Sexes, 70-80 Years  |
|-------------------------------------------------|-----------------------------|-----------------------|------------------------|---------------------------|--------------------------|--------------------------|
| Decubitus ulcer                                 | 2<br>(2 - 3)                | 0<br>(0 - 0)          | 0<br>(0 - 0)           | 1<br>(1 - 1)              | 0<br>(0 - 0)             | 1<br>(0 - 1)             |
| Other skin and subcutaneous diseases            | 3<br>(2 - 4)                | 0<br>(0 - 1)          | 0<br>(0 - 0)           | 1<br>(1 - 1)              | 1<br>(0 - 1)             | 1<br>(0 - 2)             |
| Sudden infant death syndrome                    | 66<br>(34 - 124)            | 66<br>(34 - 124)      | --                     | --                        | --                       | --                       |
| Injuries                                        | 13,740<br>(11,480 - 16,171) | 913<br>(704 - 1,130)  | 681<br>(616 - 748)     | 8,287<br>(6,674 - 10,087) | 2,179<br>(1,754 - 2,641) | 1,679<br>(1,344 - 1,954) |
| Transport injuries                              | 5,094<br>(4,239 - 6,089)    | 250<br>(156 - 340)    | 338<br>(286 - 385)     | 2,893<br>(2,289 - 3,577)  | 990<br>(785 - 1,222)     | 624<br>(525 - 732)       |
| Road injuries                                   | 4,972<br>(4,134 - 5,929)    | 246<br>(154 - 334)    | 332<br>(282 - 378)     | 2,817<br>(2,231 - 3,476)  | 964<br>(766 - 1,189)     | 614<br>(517 - 720)       |
| Pedestrian road injuries                        | 2,536<br>(2,015 - 3,209)    | 160<br>(98 - 224)     | 233<br>(196 - 274)     | 1,136<br>(808 - 1,590)    | 565<br>(432 - 732)       | 443<br>(363 - 533)       |
| Cyclist road injuries                           | 283<br>(210 - 357)          | 18<br>(9 - 32)        | 25<br>(17 - 36)        | 146<br>(109 - 188)        | 58<br>(39 - 82)          | 35<br>(24 - 50)          |
| Motorcyclist road injuries                      | 351<br>(200 - 540)          | 4<br>(2 - 6)          | 5<br>(3 - 7)           | 297<br>(166 - 468)        | 35<br>(20 - 56)          | 10<br>(6 - 14)           |
| Motor vehicle road injuries                     | 1,771<br>(1,252 - 2,275)    | 61<br>(35 - 86)       | 64<br>(45 - 84)        | 1,226<br>(859 - 1,600)    | 299<br>(214 - 401)       | 121<br>(82 - 162)        |
| Other road injuries                             | 32<br>(18 - 48)             | 4<br>(2 - 7)          | 4<br>(2 - 7)           | 11<br>(7 - 18)            | 7<br>(4 - 12)            | 6<br>(3 - 9)             |
| Other transport injuries                        | 122<br>(70 - 162)           | 4<br>(2 - 6)          | 6<br>(4 - 9)           | 76<br>(42 - 106)          | 25<br>(14 - 36)          | 10<br>(6 - 14)           |
| Unintentional injuries                          | 3,864<br>(3,210 - 4,560)    | 613<br>(447 - 802)    | 234<br>(198 - 290)     | 1,624<br>(1,213 - 2,097)  | 544<br>(428 - 671)       | 849<br>(570 - 1,034)     |
| Falls                                           | 1,163<br>(805 - 1,421)      | 29<br>(18 - 43)       | 31<br>(21 - 39)        | 430<br>(297 - 562)        | 200<br>(151 - 272)       | 473<br>(264 - 615)       |
| Drowning                                        | 802<br>(620 - 1,248)        | 149<br>(93 - 274)     | 103<br>(77 - 165)      | 390<br>(263 - 627)        | 101<br>(71 - 155)        | 59<br>(45 - 82)          |
| Fire, heat, and hot substances                  | 215<br>(161 - 260)          | 49<br>(34 - 71)       | 17<br>(13 - 24)        | 65<br>(46 - 85)           | 28<br>(20 - 37)          | 56<br>(32 - 80)          |
| Poisonings                                      | 109<br>(78 - 157)           | 9<br>(6 - 13)         | 6<br>(4 - 10)          | 61<br>(40 - 88)           | 20<br>(14 - 34)          | 13<br>(10 - 20)          |
| Exposure to mechanical forces                   | 176<br>(129 - 391)          | 14<br>(9 - 24)        | 17<br>(13 - 37)        | 105<br>(71 - 244)         | 30<br>(20 - 67)          | 10<br>(7 - 21)           |
| Unintentional firearm injuries                  | 29<br>(22 - 41)             | 1<br>(1 - 2)          | 3<br>(2 - 5)           | 21<br>(14 - 31)           | 3<br>(2 - 4)             | 1<br>(1 - 1)             |
| Unintentional suffocation                       | 17<br>(13 - 30)             | 8<br>(4 - 14)         | 3<br>(2 - 5)           | 4<br>(3 - 7)              | 1<br>(1 - 2)             | 1<br>(1 - 3)             |
| Other exposure to mechanical forces             | 129<br>(91 - 327)           | 5<br>(3 - 11)         | 11<br>(7 - 27)         | 80<br>(51 - 209)          | 26<br>(17 - 63)          | 8<br>(5 - 17)            |
| Adverse effects of medical treatment            | 205<br>(146 - 252)          | 29<br>(21 - 43)       | 5<br>(4 - 7)           | 45<br>(32 - 58)           | 36<br>(23 - 48)          | 90<br>(51 - 120)         |
| Animal contact                                  | 57<br>(18 - 74)             | 6<br>(2 - 9)          | 7<br>(2 - 10)          | 19<br>(7 - 26)            | 15<br>(4 - 21)           | 11<br>(2 - 15)           |
| Venomous animal contact                         | 47<br>(15 - 62)             | 4<br>(1 - 7)          | 6<br>(2 - 9)           | 16<br>(6 - 23)            | 12<br>(3 - 17)           | 9<br>(2 - 12)            |
| Non-venomous animal contact                     | 10<br>(2 - 14)              | 2<br>(0 - 3)          | 1<br>(0 - 2)           | 2<br>(1 - 4)              | 3<br>(1 - 4)             | 2<br>(0 - 4)             |
| Foreign body                                    | 971<br>(621 - 1,358)        | 324<br>(197 - 451)    | 41<br>(28 - 59)        | 401<br>(255 - 652)        | 84<br>(51 - 118)         | 121<br>(72 - 184)        |
| Pulmonary aspiration and foreign body in airway | 967<br>(616 - 1,354)        | 322<br>(196 - 449)    | 41<br>(27 - 58)        | 400<br>(253 - 651)        | 83<br>(51 - 118)         | 121<br>(72 - 184)        |
| Foreign body in other body part                 | 4<br>(3 - 6)                | 1<br>(1 - 2)          | 0<br>(0 - 0)           | 1<br>(1 - 2)              | 1<br>(0 - 1)             | 1<br>(0 - 1)             |
| Other unintentional injuries                    | 166<br>(124 - 219)          | 5<br>(3 - 7)          | 7<br>(4 - 11)          | 108<br>(74 - 154)         | 31<br>(19 - 48)          | 15<br>(10 - 22)          |
| Self-harm and interpersonal violence            | 4,759<br>(3,482 - 5,970)    | 50<br>(22 - 83)       | 108<br>(70 - 139)      | 3,761<br>(2,728 - 4,807)  | 639<br>(451 - 859)       | 201<br>(146 - 264)       |
| Self-harm                                       | 1,622<br>(1,142 - 1,997)    | --                    | 50<br>(31 - 68)        | 1,195<br>(862 - 1,486)    | 270<br>(176 - 345)       | 107<br>(67 - 133)        |
| Interpersonal violence                          | 3,137<br>(2,101 - 4,114)    | 50<br>(22 - 83)       | 58<br>(32 - 83)        | 2,566<br>(1,691 - 3,390)  | 369<br>(232 - 572)       | 94<br>(56 - 153)         |
| Assault by firearm                              | 2,088<br>(1,328 - 2,856)    | 11<br>(5 - 21)        | 28<br>(15 - 44)        | 1,797<br>(1,124 - 2,469)  | 219<br>(129 - 375)       | 33<br>(18 - 62)          |
| Assault by sharp object                         | 710<br>(373 - 1,156)        | 10<br>(4 - 17)        | 9<br>(4 - 15)          | 569<br>(293 - 949)        | 96<br>(49 - 163)         | 27<br>(15 - 47)          |
| Assault by other means                          | 339<br>(201 - 486)          | 29<br>(12 - 49)       | 21<br>(10 - 32)        | 200<br>(115 - 302)        | 55<br>(30 - 88)          | 35<br>(19 - 58)          |
| Forces of nature, war, and legal intervention   | 23<br>(14 - 41)             | 0<br>(0 - 0)          | 1<br>(0 - 1)           | 10<br>(6 - 19)            | 7<br>(4 - 13)            | 6<br>(3 - 10)            |
| Exposure to forces of nature                    | 23<br>(14 - 41)             | 0<br>(0 - 0)          | 1<br>(0 - 1)           | 10<br>(6 - 19)            | 7<br>(4 - 13)            | 6<br>(3 - 10)            |

Web Table 31- Ecuador deaths with 95% UI by age, sex, and cause in 2013

| Cause                                                             | Males, All Ages             | Males, 0-4 Years         | Males, 5-14 Years  | Males, 15-49 Years         | Males, 50-69 Years         | Males, 70-80 Years          |
|-------------------------------------------------------------------|-----------------------------|--------------------------|--------------------|----------------------------|----------------------------|-----------------------------|
| All causes                                                        | 50,821<br>(43,426 - 58,208) | 5,108<br>(4,551 - 5,627) | 886<br>(818 - 961) | 12,474<br>(9,859 - 15,241) | 11,616<br>(9,231 - 14,096) | 20,738<br>(18,391 - 23,018) |
| Communicable, maternal, neonatal, and nutritional diseases        | 8,411<br>(7,498 - 9,381)    | 3,249<br>(2,893 - 3,612) | 175<br>(144 - 211) | 1,388<br>(1,146 - 1,698)   | 1,018<br>(833 - 1,238)     | 2,580<br>(2,082 - 3,151)    |
| HIV/AIDS and tuberculosis                                         | 1,398<br>(1,128 - 1,854)    | 9<br>(7 - 13)            | 8<br>(6 - 10)      | 791<br>(618 - 1,109)       | 346<br>(267 - 468)         | 244<br>(190 - 329)          |
| Tuberculosis                                                      | 711<br>(562 - 992)          | 8<br>(6 - 12)            | 7<br>(5 - 10)      | 273<br>(205 - 385)         | 203<br>(150 - 281)         | 220<br>(167 - 303)          |
| HIV/AIDS                                                          | 687<br>(495 - 1,081)        | 1<br>(0 - 2)             | 1<br>(0 - 1)       | 518<br>(367 - 815)         | 142<br>(90 - 232)          | 25<br>(14 - 44)             |
| HIV/AIDS resulting in mycobacterial infection                     | 45<br>(30 - 73)             | 0<br>(0 - 0)             | 0<br>(0 - 0)       | 34<br>(23 - 54)            | 10<br>(6 - 16)             | 2<br>(1 - 3)                |
| HIV/AIDS resulting in other diseases                              | 642<br>(463 - 1,014)        | 1<br>(0 - 2)             | 1<br>(0 - 1)       | 485<br>(343 - 757)         | 133<br>(84 - 215)          | 23<br>(13 - 41)             |
| Diarrhea, lower respiratory, and other common infectious diseases | 4,568<br>(3,705 - 5,332)    | 1,548<br>(1,227 - 1,864) | 141<br>(111 - 174) | 468<br>(334 - 625)         | 540<br>(385 - 719)         | 1,871<br>(1,394 - 2,398)    |
| Diarrheal diseases                                                | 447<br>(333 - 595)          | 295<br>(187 - 448)       | 14<br>(9 - 21)     | 33<br>(23 - 46)            | 34<br>(23 - 49)            | 70<br>(46 - 104)            |
| Intestinal infectious diseases                                    | 92<br>(48 - 166)            | 31<br>(15 - 59)          | 26<br>(12 - 47)    | 29<br>(12 - 59)            | 4<br>(1 - 8)               | 2<br>(1 - 5)                |
| Typhoid fever                                                     | 66<br>(32 - 122)            | 21<br>(10 - 41)          | 20<br>(9 - 37)     | 22<br>(9 - 47)             | 2<br>(1 - 5)               | 1<br>(0 - 2)                |
| Paratyphoid fever                                                 | 18<br>(8 - 36)              | 6<br>(2 - 14)            | 5<br>(2 - 10)      | 5<br>(2 - 12)              | 1<br>(0 - 1)               | 0<br>(0 - 1)                |
| Other intestinal infectious diseases                              | 8<br>(2 - 15)               | 4<br>(1 - 10)            | 1<br>(0 - 3)       | 2<br>(0 - 6)               | 1<br>(0 - 3)               | 1<br>(0 - 3)                |
| Lower respiratory infections                                      | 3,735<br>(2,957 - 4,454)    | 1,073<br>(791 - 1,345)   | 77<br>(53 - 106)   | 343<br>(239 - 474)         | 471<br>(330 - 636)         | 1,771<br>(1,300 - 2,381)    |
| Upper respiratory infections                                      | 2<br>(1 - 5)                | 0<br>(0 - 2)             | 0<br>(0 - 0)       | 1<br>(0 - 2)               | 1<br>(0 - 2)               | 1<br>(0 - 3)                |
| Otitis media                                                      | 2<br>(2 - 3)                | 0<br>(0 - 0)             | 0<br>(0 - 0)       | 1<br>(0 - 1)               | 0<br>(0 - 1)               | 0<br>(0 - 1)                |
| Meningitis                                                        | 151<br>(113 - 192)          | 65<br>(36 - 98)          | 12<br>(9 - 16)     | 39<br>(27 - 51)            | 18<br>(13 - 24)            | 17<br>(12 - 22)             |
| Pneumococcal meningitis                                           | 37<br>(27 - 48)             | 14<br>(7 - 21)           | 3<br>(2 - 5)       | 10<br>(6 - 15)             | 5<br>(3 - 8)               | 5<br>(3 - 8)                |
| H influenzae type B meningitis                                    | 30<br>(19 - 42)             | 21<br>(11 - 33)          | 2<br>(1 - 4)       | 4<br>(2 - 6)               | 2<br>(1 - 2)               | 1<br>(1 - 2)                |
| Meningococcal meningitis                                          | 25<br>(18 - 34)             | 10<br>(5 - 17)           | 3<br>(1 - 4)       | 7<br>(4 - 10)              | 2<br>(1 - 4)               | 3<br>(2 - 5)                |
| Other meningitis                                                  | 59<br>(44 - 76)             | 20<br>(10 - 33)          | 4<br>(2 - 6)       | 18<br>(12 - 26)            | 9<br>(6 - 13)              | 8<br>(4 - 12)               |
| Encephalitis                                                      | 68<br>(50 - 100)            | 24<br>(14 - 41)          | 8<br>(5 - 16)      | 19<br>(12 - 31)            | 10<br>(6 - 16)             | 6<br>(4 - 11)               |
| Diphtheria                                                        | 1<br>(0 - 6)                | 1<br>(0 - 6)             | 0<br>(0 - 1)       | 0<br>(0 - 1)               | 0<br>(0 - 0)               | --                          |
| Whooping cough                                                    | 58<br>(17 - 178)            | 55<br>(14 - 174)         | 2<br>(1 - 3)       | 1<br>(1 - 1)               | 0<br>(0 - 0)               | --                          |
| Tetanus                                                           | 6<br>(3 - 10)               | 2<br>(0 - 3)             | 0<br>(0 - 1)       | 2<br>(1 - 3)               | 1<br>(0 - 2)               | 1<br>(0 - 2)                |
| Measles                                                           | 0<br>(0 - 0)                | 0<br>(0 - 0)             | 0<br>(0 - 0)       | 0<br>(0 - 0)               | 0<br>(0 - 0)               | --                          |
| Varicella and herpes zoster                                       | 5<br>(1 - 14)               | 1<br>(0 - 5)             | 0<br>(0 - 1)       | 1<br>(0 - 2)               | 0<br>(0 - 2)               | 2<br>(0 - 10)               |
| Neglected tropical diseases and malaria                           | 48<br>(34 - 90)             | 8<br>(5 - 14)            | 4<br>(3 - 7)       | 13<br>(10 - 18)            | 12<br>(6 - 35)             | 11<br>(5 - 28)              |
| Malaria                                                           | 6<br>(4 - 9)                | 1<br>(0 - 2)             | 0<br>(0 - 1)       | 3<br>(2 - 5)               | 1<br>(0 - 2)               | 1<br>(0 - 2)                |
| Chagas disease                                                    | 15<br>(3 - 56)              | 0<br>(0 - 0)             | 0<br>(0 - 0)       | 1<br>(0 - 5)               | 7<br>(1 - 30)              | 7<br>(1 - 24)               |
| Leishmaniasis                                                     | 0<br>(0 - 1)                | 0<br>(0 - 0)             | 0<br>(0 - 0)       | 0<br>(0 - 0)               | 0<br>(0 - 0)               | 0<br>(0 - 0)                |
| Visceral leishmaniasis                                            | 0<br>(0 - 1)                | 0<br>(0 - 0)             | 0<br>(0 - 0)       | 0<br>(0 - 0)               | 0<br>(0 - 0)               | 0<br>(0 - 0)                |
| Cysticercosis                                                     | 3<br>(3 - 4)                | 0<br>(0 - 0)             | 0<br>(0 - 0)       | 2<br>(2 - 3)               | 1<br>(1 - 1)               | 0<br>(0 - 0)                |
| Cystic echinococcosis                                             | 1<br>(1 - 1)                | 0<br>(0 - 0)             | 0<br>(0 - 0)       | 0<br>(0 - 1)               | 0<br>(0 - 0)               | 0<br>(0 - 0)                |
| Dengue                                                            | 11<br>(8 - 15)              | 3<br>(2 - 5)             | 2<br>(1 - 3)       | 3<br>(2 - 5)               | 1<br>(1 - 1)               | 2<br>(1 - 3)                |
| Yellow fever                                                      | 1<br>(0 - 1)                | 0<br>(0 - 0)             | 0<br>(0 - 0)       | 0<br>(0 - 1)               | 0<br>(0 - 0)               | 0<br>(0 - 0)                |
| Rabies                                                            | 2<br>(1 - 4)                | 0<br>(0 - 0)             | 0<br>(0 - 1)       | 1<br>(0 - 2)               | 0<br>(0 - 1)               | 0<br>(0 - 0)                |
| Intestinal nematode infections                                    | 3<br>(0 - 9)                | 2<br>(0 - 7)             | 0<br>(0 - 3)       | 0<br>(0 - 3)               | 0<br>(0 - 1)               | 0<br>(0 - 2)                |
| Ascariasis                                                        | 3<br>(0 - 9)                | 2<br>(0 - 7)             | 0<br>(0 - 3)       | 0<br>(0 - 3)               | 0<br>(0 - 1)               | 0<br>(0 - 2)                |
| Other neglected tropical diseases                                 | 6<br>(4 - 8)                | 1<br>(1 - 2)             | 0<br>(0 - 1)       | 2<br>(1 - 2)               | 1<br>(1 - 2)               | 1<br>(1 - 2)                |



Web Table 31- Ecuador deaths with 95% UI by age, sex, and cause in 2013

| Cause                                                            | Males, All Ages             | Males, 0-4 Years         | Males, 5-14 Years  | Males, 15-49 Years       | Males, 50-69 Years        | Males, 70-80 Years          |
|------------------------------------------------------------------|-----------------------------|--------------------------|--------------------|--------------------------|---------------------------|-----------------------------|
| Maternal disorders                                               | --                          | --                       | --                 | --                       | --                        | --                          |
| Maternal hemorrhage                                              | --                          | --                       | --                 | --                       | --                        | --                          |
| Maternal sepsis and other maternal infections                    | --                          | --                       | --                 | --                       | --                        | --                          |
| Maternal hypertensive disorders                                  | --                          | --                       | --                 | --                       | --                        | --                          |
| Maternal obstructed labor                                        | --                          | --                       | --                 | --                       | --                        | --                          |
| Maternal abortive outcome                                        | --                          | --                       | --                 | --                       | --                        | --                          |
| Indirect maternal deaths                                         | --                          | --                       | --                 | --                       | --                        | --                          |
| Late maternal deaths                                             | --                          | --                       | --                 | --                       | --                        | --                          |
| Maternal deaths aggravated by HIV/AIDS                           | --                          | --                       | --                 | --                       | --                        | --                          |
| Other maternal disorders                                         | --                          | --                       | --                 | --                       | --                        | --                          |
| Neonatal disorders                                               | 1,426<br>(1,277 - 1,587)    | 1,426<br>(1,277 - 1,587) | --                 | --                       | --                        | --                          |
| Neonatal preterm birth complications                             | 670<br>(445 - 857)          | 670<br>(445 - 857)       | --                 | --                       | --                        | --                          |
| Neonatal encephalopathy due to birth asphyxia and trauma         | 279<br>(183 - 387)          | 279<br>(183 - 387)       | --                 | --                       | --                        | --                          |
| Neonatal sepsis and other neonatal infections                    | 308<br>(163 - 547)          | 308<br>(163 - 547)       | --                 | --                       | --                        | --                          |
| Hemolytic disease and other neonatal jaundice                    | 13<br>(5 - 31)              | 13<br>(5 - 31)           | --                 | --                       | --                        | --                          |
| Other neonatal disorders                                         | 155<br>(92 - 219)           | 155<br>(92 - 219)        | --                 | --                       | --                        | --                          |
| Nutritional deficiencies                                         | 862<br>(633 - 1,492)        | 225<br>(147 - 406)       | 17<br>(11 - 27)    | 90<br>(58 - 167)         | 100<br>(65 - 185)         | 430<br>(293 - 776)          |
| Protein-energy malnutrition                                      | 528<br>(347 - 983)          | 197<br>(125 - 365)       | 9<br>(5 - 18)      | 30<br>(14 - 66)          | 41<br>(21 - 99)           | 250<br>(142 - 509)          |
| Iodine deficiency                                                | 0<br>(0 - 1)                | 0<br>(0 - 1)             | 0<br>(0 - 0)       | 0<br>(0 - 1)             | 0<br>(0 - 0)              | 0<br>(0 - 1)                |
| Iron-deficiency anemia                                           | 262<br>(131 - 522)          | 17<br>(5 - 48)           | 6<br>(3 - 12)      | 53<br>(30 - 105)         | 48<br>(23 - 97)           | 137<br>(58 - 285)           |
| Other nutritional deficiencies                                   | 72<br>(29 - 137)            | 10<br>(3 - 27)           | 1<br>(1 - 3)       | 7<br>(3 - 13)            | 11<br>(4 - 21)            | 43<br>(14 - 87)             |
| Other communicable, maternal, neonatal, and nutritional diseases | 109<br>(83 - 142)           | 33<br>(17 - 54)          | 6<br>(4 - 8)       | 26<br>(18 - 36)          | 21<br>(15 - 29)           | 24<br>(16 - 35)             |
| Sexually transmitted diseases excluding HIV                      | 24<br>(8 - 44)              | 19<br>(4 - 38)           | 1<br>(0 - 3)       | 1<br>(1 - 1)             | 1<br>(1 - 3)              | 2<br>(1 - 3)                |
| Syphilis                                                         | 23<br>(7 - 43)              | 19<br>(4 - 38)           | 1<br>(0 - 3)       | 1<br>(0 - 1)             | 1<br>(0 - 2)              | 1<br>(1 - 3)                |
| Chlamydial infection                                             | --                          | --                       | --                 | --                       | --                        | --                          |
| Gonococcal infection                                             | 1<br>(0 - 1)                | --                       | 0<br>(0 - 0)       | 0<br>(0 - 0)             | 0<br>(0 - 0)              | 0<br>(0 - 0)                |
| Other sexually transmitted diseases                              | 0<br>(0 - 1)                | --                       | 0<br>(0 - 0)       | 0<br>(0 - 0)             | 0<br>(0 - 0)              | 0<br>(0 - 0)                |
| Hepatitis                                                        | 23<br>(17 - 29)             | 2<br>(1 - 3)             | 1<br>(1 - 2)       | 8<br>(6 - 11)            | 7<br>(4 - 10)             | 5<br>(3 - 8)                |
| Acute hepatitis A                                                | 6<br>(2 - 10)               | 1<br>(0 - 2)             | 1<br>(0 - 1)       | 3<br>(1 - 6)             | 1<br>(0 - 2)              | 0<br>(0 - 1)                |
| Acute hepatitis B                                                | 15<br>(10 - 21)             | 1<br>(0 - 2)             | 0<br>(0 - 1)       | 4<br>(2 - 7)             | 6<br>(3 - 8)              | 4<br>(3 - 7)                |
| Acute hepatitis C                                                | 2<br>(0 - 4)                | --                       | 0<br>(0 - 0)       | 1<br>(0 - 2)             | 0<br>(0 - 1)              | 0<br>(0 - 1)                |
| Other infectious diseases                                        | 63<br>(42 - 87)             | 12<br>(7 - 19)           | 4<br>(2 - 6)       | 17<br>(11 - 26)          | 13<br>(8 - 20)            | 17<br>(10 - 27)             |
| Non-communicable diseases                                        | 31,623<br>(26,753 - 36,435) | 1,367<br>(1,103 - 1,648) | 285<br>(250 - 329) | 4,029<br>(3,038 - 5,055) | 8,849<br>(6,948 - 10,783) | 17,093<br>(15,015 - 19,071) |
| Neoplasms                                                        | 7,098<br>(5,941 - 8,298)    | 84<br>(58 - 123)         | 105<br>(85 - 127)  | 840<br>(637 - 1,072)     | 2,099<br>(1,639 - 2,598)  | 3,970<br>(3,400 - 4,587)    |
| Esophageal cancer                                                | 146<br>(108 - 213)          | --                       | --                 | 11<br>(8 - 16)           | 49<br>(34 - 74)           | 86<br>(62 - 128)            |
| Stomach cancer                                                   | 1,507<br>(1,214 - 1,839)    | --                       | --                 | 157<br>(113 - 209)       | 506<br>(385 - 649)        | 844<br>(666 - 1,047)        |
| Liver cancer                                                     | 437<br>(343 - 553)          | --                       | 2<br>(1 - 3)       | 46<br>(32 - 62)          | 164<br>(123 - 214)        | 225<br>(170 - 300)          |
| Liver cancer due to hepatitis B                                  | 202<br>(121 - 286)          | --                       | 1<br>(1 - 2)       | 30<br>(20 - 43)          | 87<br>(49 - 128)          | 83<br>(45 - 129)            |
| Liver cancer due to hepatitis C                                  | 67<br>(31 - 125)            | --                       | 0<br>(0 - 0)       | 3<br>(1 - 6)             | 22<br>(10 - 42)           | 41<br>(14 - 81)             |
| Liver cancer due to alcohol use                                  | 136<br>(89 - 202)           | --                       | --                 | 7<br>(4 - 11)            | 42<br>(25 - 69)           | 87<br>(55 - 132)            |

Web Table 31- Ecuador deaths with 95% UI by age, sex, and cause in 2013

| Cause                                         | Males, All Ages            | Males, 0-4 Years | Males, 5-14 Years | Males, 15-49 Years       | Males, 50-69 Years       | Males, 70-80 Years       |
|-----------------------------------------------|----------------------------|------------------|-------------------|--------------------------|--------------------------|--------------------------|
| Liver cancer due to other causes              | 32<br>(19 - 50)            | --               | 1<br>(0 - 1)      | 5<br>(3 - 9)             | 12<br>(6 - 21)           | 14<br>(7 - 23)           |
| Larynx cancer                                 | 64<br>(44 - 86)            | --               | --                | 6<br>(4 - 9)             | 22<br>(14 - 30)          | 37<br>(25 - 51)          |
| Tracheal, bronchus and lung cancer            | 751<br>(613 - 891)         | --               | --                | 61<br>(45 - 82)          | 260<br>(198 - 329)       | 429<br>(350 - 510)       |
| Breast cancer                                 | 9<br>(5 - 25)              | --               | --                | 2<br>(1 - 4)             | 3<br>(2 - 9)             | 4<br>(2 - 12)            |
| Cervical cancer                               | --                         | --               | --                | --                       | --                       | --                       |
| Uterine cancer                                | --                         | --               | --                | --                       | --                       | --                       |
| Prostate cancer                               | 1,325<br>(838 - 1,870)     | --               | --                | 8<br>(5 - 13)            | 189<br>(113 - 274)       | 1,127<br>(708 - 1,622)   |
| Colon and rectum cancer                       | 488<br>(394 - 591)         | --               | --                | 61<br>(44 - 80)          | 156<br>(119 - 200)       | 270<br>(216 - 332)       |
| Lip and oral cavity cancer                    | 58<br>(36 - 78)            | --               | --                | 9<br>(5 - 12)            | 21<br>(13 - 30)          | 28<br>(17 - 41)          |
| Nasopharynx cancer                            | 11<br>(8 - 14)             | --               | 0<br>(0 - 0)      | 3<br>(2 - 4)             | 4<br>(3 - 6)             | 4<br>(2 - 5)             |
| Other pharynx cancer                          | 30<br>(22 - 38)            | --               | --                | 5<br>(4 - 8)             | 14<br>(10 - 20)          | 10<br>(7 - 14)           |
| Gallbladder and biliary tract cancer          | 141<br>(96 - 243)          | --               | --                | 11<br>(6 - 19)           | 52<br>(33 - 88)          | 78<br>(51 - 134)         |
| Pancreatic cancer                             | 270<br>(214 - 327)         | --               | --                | 29<br>(21 - 39)          | 105<br>(79 - 136)        | 136<br>(106 - 167)       |
| Malignant skin melanoma                       | 70<br>(42 - 126)           | --               | --                | 14<br>(8 - 26)           | 23<br>(13 - 43)          | 33<br>(20 - 57)          |
| Non-melanoma skin cancer                      | 59<br>(38 - 84)            | --               | --                | 5<br>(3 - 7)             | 11<br>(7 - 16)           | 43<br>(27 - 62)          |
| Ovarian cancer                                | --                         | --               | --                | --                       | --                       | --                       |
| Testicular cancer                             | 28<br>(12 - 45)            | --               | --                | 17<br>(7 - 30)           | 4<br>(2 - 8)             | 7<br>(3 - 12)            |
| Kidney cancer                                 | 136<br>(105 - 169)         | 2<br>(1 - 4)     | 1<br>(0 - 1)      | 18<br>(13 - 24)          | 60<br>(44 - 81)          | 55<br>(41 - 73)          |
| Bladder cancer                                | 121<br>(91 - 184)          | --               | --                | 5<br>(4 - 8)             | 35<br>(24 - 56)          | 81<br>(59 - 120)         |
| Brain and nervous system cancer               | 189<br>(66 - 267)          | 8<br>(2 - 17)    | 13<br>(5 - 20)    | 61<br>(20 - 92)          | 62<br>(22 - 92)          | 45<br>(15 - 67)          |
| Thyroid cancer                                | 42<br>(28 - 55)            | --               | 0<br>(0 - 0)      | 6<br>(3 - 8)             | 16<br>(10 - 22)          | 21<br>(13 - 29)          |
| Mesothelioma                                  | 13<br>(9 - 18)             | --               | --                | 2<br>(1 - 3)             | 5<br>(3 - 7)             | 7<br>(4 - 10)            |
| Hodgkin lymphoma                              | 32<br>(12 - 49)            | 2<br>(1 - 5)     | 2<br>(1 - 5)      | 9<br>(3 - 15)            | 10<br>(3 - 16)           | 10<br>(3 - 16)           |
| Non-Hodgkin lymphoma                          | 305<br>(213 - 394)         | 12<br>(6 - 20)   | 11<br>(7 - 16)    | 67<br>(45 - 94)          | 100<br>(66 - 141)        | 115<br>(73 - 157)        |
| Multiple myeloma                              | 73<br>(51 - 97)            | --               | --                | 9<br>(6 - 13)            | 32<br>(21 - 45)          | 32<br>(22 - 44)          |
| Leukemia                                      | 400<br>(326 - 484)         | 35<br>(18 - 64)  | 55<br>(40 - 72)   | 127<br>(92 - 170)        | 81<br>(60 - 106)         | 102<br>(78 - 127)        |
| Other neoplasms                               | 392<br>(312 - 485)         | 25<br>(14 - 39)  | 21<br>(15 - 27)   | 92<br>(66 - 122)         | 114<br>(83 - 153)        | 141<br>(101 - 183)       |
| Cardiovascular diseases                       | 10,870<br>(9,105 - 12,596) | 63<br>(48 - 79)  | 44<br>(36 - 54)   | 1,334<br>(1,002 - 1,696) | 2,957<br>(2,329 - 3,639) | 6,474<br>(5,612 - 7,308) |
| Rheumatic heart disease                       | 58<br>(38 - 82)            | 1<br>(0 - 1)     | 2<br>(1 - 3)      | 18<br>(11 - 29)          | 14<br>(8 - 21)           | 24<br>(13 - 36)          |
| Ischemic heart disease                        | 5,942<br>(4,844 - 7,123)   | 4<br>(2 - 6)     | 13<br>(9 - 17)    | 727<br>(529 - 929)       | 1,699<br>(1,280 - 2,127) | 3,500<br>(2,916 - 4,148) |
| Cerebrovascular disease                       | 3,146<br>(2,461 - 3,981)   | 6<br>(4 - 10)    | 14<br>(10 - 18)   | 394<br>(278 - 538)       | 845<br>(610 - 1,107)     | 1,887<br>(1,468 - 2,367) |
| Ischemic stroke                               | 1,731<br>(1,306 - 2,294)   | 2<br>(1 - 3)     | 3<br>(2 - 5)      | 88<br>(56 - 148)         | 360<br>(244 - 560)       | 1,279<br>(977 - 1,671)   |
| Hemorrhagic stroke                            | 1,415<br>(952 - 1,863)     | 5<br>(3 - 7)     | 11<br>(8 - 15)    | 307<br>(208 - 424)       | 485<br>(323 - 670)       | 608<br>(368 - 827)       |
| Hypertensive heart disease                    | 734<br>(425 - 1,056)       | 1<br>(0 - 2)     | 1<br>(1 - 2)      | 48<br>(26 - 74)          | 162<br>(80 - 253)        | 522<br>(295 - 763)       |
| Cardiomyopathy and myocarditis                | 161<br>(108 - 203)         | 31<br>(21 - 42)  | 6<br>(4 - 8)      | 27<br>(17 - 36)          | 36<br>(22 - 50)          | 62<br>(38 - 85)          |
| Atrial fibrillation and flutter               | 66<br>(45 - 91)            | --               | --                | 3<br>(2 - 5)             | 11<br>(7 - 15)           | 52<br>(33 - 74)          |
| Aortic aneurysm                               | 209<br>(158 - 259)         | --               | --                | 18<br>(13 - 25)          | 62<br>(45 - 83)          | 129<br>(94 - 163)        |
| Peripheral vascular disease                   | 2<br>(1 - 2)               | --               | --                | 0<br>(0 - 0)             | 0<br>(0 - 1)             | 1<br>(1 - 2)             |
| Endocarditis                                  | 70<br>(44 - 104)           | 11<br>(6 - 19)   | 3<br>(2 - 4)      | 17<br>(10 - 26)          | 13<br>(7 - 20)           | 27<br>(16 - 43)          |
| Other cardiovascular and circulatory diseases | 482<br>(360 - 610)         | 8<br>(5 - 13)    | 6<br>(4 - 8)      | 82<br>(56 - 113)         | 115<br>(80 - 157)        | 271<br>(192 - 362)       |

Web Table 31- Ecuador deaths with 95% UI by age, sex, and cause in 2013

| Cause                                               | Males, All Ages          | Males, 0-4 Years | Males, 5-14 Years | Males, 15-49 Years | Males, 50-69 Years   | Males, 70-80 Years       |
|-----------------------------------------------------|--------------------------|------------------|-------------------|--------------------|----------------------|--------------------------|
| Chronic respiratory diseases                        | 2,231<br>(1,847 - 2,871) | 64<br>(32 - 175) | 11<br>(8 - 19)    | 104<br>(74 - 135)  | 306<br>(227 - 404)   | 1,746<br>(1,423 - 2,155) |
| Chronic obstructive pulmonary disease               | 1,692<br>(1,370 - 2,193) | 43<br>(19 - 124) | 5<br>(4 - 10)     | 56<br>(40 - 77)    | 222<br>(163 - 296)   | 1,366<br>(1,109 - 1,712) |
| Pneumoconiosis                                      | 97<br>(63 - 149)         | 0<br>(0 - 1)     | 0<br>(0 - 0)      | 13<br>(8 - 20)     | 22<br>(13 - 35)      | 62<br>(38 - 101)         |
| Silicosis                                           | 6<br>(4 - 9)             | 0<br>(0 - 0)     | 0<br>(0 - 0)      | 4<br>(2 - 6)       | 1<br>(1 - 2)         | 2<br>(1 - 3)             |
| Asbestosis                                          | 29<br>(19 - 46)          | 0<br>(0 - 0)     | 0<br>(0 - 0)      | 3<br>(2 - 5)       | 7<br>(4 - 11)        | 19<br>(12 - 32)          |
| Coal workers pneumoconiosis                         | 7<br>(4 - 11)            | 0<br>(0 - 0)     | 0<br>(0 - 0)      | 1<br>(0 - 1)       | 0<br>(0 - 1)         | 6<br>(3 - 10)            |
| Other pneumoconiosis                                | 55<br>(35 - 87)          | 0<br>(0 - 0)     | 0<br>(0 - 0)      | 6<br>(4 - 9)       | 14<br>(8 - 22)       | 35<br>(21 - 60)          |
| Asthma                                              | 77<br>(58 - 104)         | 11<br>(5 - 28)   | 4<br>(3 - 6)      | 10<br>(7 - 14)     | 11<br>(8 - 16)       | 41<br>(27 - 57)          |
| Interstitial lung disease and pulmonary sarcoidosis | 333<br>(216 - 492)       | 1<br>(0 - 4)     | 1<br>(1 - 2)      | 16<br>(10 - 23)    | 47<br>(27 - 70)      | 267<br>(170 - 411)       |
| Other chronic respiratory diseases                  | 32<br>(22 - 56)          | 9<br>(4 - 28)    | 1<br>(1 - 2)      | 8<br>(5 - 12)      | 4<br>(2 - 6)         | 10<br>(6 - 15)           |
| Cirrhosis                                           | 2,035<br>(1,604 - 2,483) | 4<br>(3 - 6)     | 6<br>(5 - 8)      | 445<br>(328 - 577) | 911<br>(699 - 1,143) | 668<br>(542 - 798)       |
| Cirrhosis due to hepatitis B                        | 286<br>(163 - 420)       | 0<br>(0 - 0)     | 0<br>(0 - 1)      | 62<br>(33 - 98)    | 131<br>(74 - 200)    | 93<br>(49 - 142)         |
| Cirrhosis due to hepatitis C                        | 694<br>(414 - 1,027)     | 1<br>(0 - 2)     | 2<br>(1 - 2)      | 129<br>(59 - 225)  | 306<br>(164 - 489)   | 257<br>(159 - 348)       |
| Cirrhosis due to alcohol use                        | 772<br>(512 - 1,066)     | --               | --                | 144<br>(73 - 223)  | 357<br>(229 - 514)   | 271<br>(184 - 368)       |
| Cirrhosis due to other causes                       | 282<br>(156 - 434)       | 3<br>(2 - 5)     | 4<br>(3 - 6)      | 111<br>(64 - 168)  | 117<br>(53 - 195)    | 47<br>(24 - 80)          |
| Digestive diseases                                  | 1,436<br>(1,157 - 1,843) | 25<br>(16 - 37)  | 18<br>(15 - 22)   | 250<br>(184 - 350) | 386<br>(288 - 527)   | 758<br>(621 - 932)       |
| Peptic ulcer disease                                | 360<br>(244 - 594)       | 0<br>(0 - 1)     | 1<br>(1 - 2)      | 56<br>(36 - 94)    | 95<br>(59 - 163)     | 208<br>(136 - 344)       |
| Gastritis and duodenitis                            | 27<br>(12 - 39)          | 1<br>(0 - 2)     | 0<br>(0 - 1)      | 4<br>(2 - 7)       | 6<br>(3 - 10)        | 15<br>(6 - 24)           |
| Appendicitis                                        | 88<br>(59 - 138)         | 2<br>(1 - 4)     | 5<br>(3 - 7)      | 31<br>(19 - 49)    | 23<br>(14 - 39)      | 27<br>(16 - 45)          |
| Paralytic ileus and intestinal obstruction          | 212<br>(30 - 372)        | 9<br>(2 - 18)    | 3<br>(1 - 6)      | 25<br>(3 - 45)     | 61<br>(8 - 111)      | 115<br>(14 - 209)        |
| Inguinal, femoral, and abdominal hernia             | 95<br>(42 - 240)         | 2<br>(0 - 5)     | 1<br>(0 - 3)      | 13<br>(5 - 32)     | 24<br>(9 - 61)       | 56<br>(24 - 142)         |
| Inflammatory bowel disease                          | 16<br>(11 - 25)          | 2<br>(1 - 5)     | 1<br>(0 - 1)      | 3<br>(2 - 6)       | 4<br>(2 - 6)         | 6<br>(4 - 9)             |
| Vascular intestinal disorders                       | 111<br>(44 - 227)        | 2<br>(0 - 4)     | 1<br>(0 - 1)      | 11<br>(4 - 24)     | 21<br>(8 - 44)       | 77<br>(29 - 159)         |
| Gallbladder and biliary diseases                    | 188<br>(138 - 262)       | 0<br>(0 - 1)     | 1<br>(0 - 1)      | 23<br>(16 - 36)    | 45<br>(31 - 71)      | 119<br>(83 - 164)        |
| Pancreatitis                                        | 220<br>(150 - 343)       | 2<br>(1 - 5)     | 2<br>(1 - 3)      | 63<br>(42 - 98)    | 78<br>(49 - 125)     | 76<br>(49 - 127)         |
| Other digestive diseases                            | 119<br>(71 - 165)        | 4<br>(2 - 8)     | 3<br>(2 - 5)      | 22<br>(14 - 32)    | 31<br>(20 - 47)      | 59<br>(30 - 86)          |
| Neurological disorders                              | 1,354<br>(1,100 - 1,668) | 17<br>(11 - 29)  | 18<br>(13 - 27)   | 154<br>(104 - 233) | 144<br>(106 - 185)   | 1,021<br>(798 - 1,282)   |
| Alzheimer disease and other dementias               | 942<br>(720 - 1,199)     | --               | --                | 0<br>(0 - 0)       | 59<br>(41 - 78)      | 882<br>(668 - 1,131)     |
| Parkinson disease                                   | 130<br>(96 - 170)        | --               | --                | 2<br>(1 - 2)       | 25<br>(18 - 35)      | 103<br>(75 - 138)        |
| Epilepsy                                            | 215<br>(149 - 329)       | 12<br>(7 - 23)   | 15<br>(10 - 25)   | 130<br>(86 - 207)  | 37<br>(24 - 58)      | 21<br>(14 - 31)          |
| Multiple sclerosis                                  | 8<br>(4 - 13)            | --               | --                | 3<br>(1 - 4)       | 3<br>(1 - 5)         | 3<br>(1 - 5)             |
| Other neurological disorders                        | 59<br>(45 - 75)          | 5<br>(3 - 7)     | 3<br>(2 - 4)      | 19<br>(13 - 26)    | 20<br>(14 - 27)      | 13<br>(9 - 16)           |
| Mental and substance use disorders                  | 695<br>(335 - 916)       | 0<br>(0 - 1)     | 0<br>(0 - 0)      | 232<br>(135 - 319) | 381<br>(157 - 520)   | 82<br>(41 - 112)         |
| Schizophrenia                                       | 3<br>(2 - 4)             | --               | --                | 1<br>(1 - 2)       | 1<br>(1 - 2)         | 1<br>(0 - 1)             |
| Alcohol use disorders                               | 596<br>(236 - 807)       | --               | --                | 175<br>(74 - 249)  | 352<br>(130 - 486)   | 69<br>(27 - 96)          |
| Drug use disorders                                  | 96<br>(66 - 197)         | 0<br>(0 - 1)     | --                | 56<br>(36 - 128)   | 27<br>(17 - 49)      | 13<br>(8 - 18)           |
| Opioid use disorders                                | 15<br>(10 - 30)          | 0<br>(0 - 0)     | --                | 9<br>(6 - 20)      | 4<br>(2 - 7)         | 2<br>(1 - 3)             |
| Cocaine use disorders                               | 2<br>(1 - 4)             | 0<br>(0 - 0)     | --                | 1<br>(1 - 3)       | 0<br>(0 - 1)         | 0<br>(0 - 0)             |
| Amphetamine use disorders                           | 2<br>(1 - 3)             | 0<br>(0 - 0)     | --                | 1<br>(1 - 2)       | 0<br>(0 - 1)         | 0<br>(0 - 0)             |
| Other drug use disorders                            | 78<br>(53 - 159)         | 0<br>(0 - 1)     | --                | 45<br>(29 - 103)   | 22<br>(14 - 41)      | 10<br>(7 - 15)           |

Web Table 31- Ecuador deaths with 95% UI by age, sex, and cause in 2013

| Cause                                               | Males, All Ages          | Males, 0-4 Years       | Males, 5-14 Years | Males, 15-49 Years | Males, 50-69 Years       | Males, 70-80 Years       |
|-----------------------------------------------------|--------------------------|------------------------|-------------------|--------------------|--------------------------|--------------------------|
| Eating disorders                                    | 0<br>(0 - 0)             | --                     | 0<br>(0 - 0)      | 0<br>(0 - 0)       | --                       | --                       |
| Anorexia nervosa                                    | 0<br>(0 - 0)             | --                     | 0<br>(0 - 0)      | 0<br>(0 - 0)       | --                       | --                       |
| Diabetes, urogenital, blood, and endocrine diseases | 4,678<br>(3,747 - 5,570) | 105<br>(75 - 172)      | 36<br>(28 - 49)   | 608<br>(445 - 775) | 1,624<br>(1,182 - 2,015) | 2,306<br>(1,830 - 2,701) |
| Diabetes mellitus                                   | 1,788<br>(1,443 - 2,164) | 4<br>(3 - 5)           | 2<br>(2 - 2)      | 183<br>(132 - 237) | 704<br>(536 - 885)       | 895<br>(733 - 1,091)     |
| Acute glomerulonephritis                            | 5<br>(3 - 6)             | 0<br>(0 - 0)           | 0<br>(0 - 0)      | 1<br>(1 - 1)       | 1<br>(1 - 2)             | 2<br>(1 - 3)             |
| Chronic kidney disease                              | 2,486<br>(1,537 - 3,048) | 35<br>(24 - 49)        | 16<br>(12 - 20)   | 344<br>(235 - 457) | 839<br>(437 - 1,093)     | 1,252<br>(752 - 1,535)   |
| Chronic kidney disease due to diabetes mellitus     | 1,161<br>(590 - 1,527)   | 4<br>(1 - 6)           | 1<br>(1 - 2)      | 152<br>(80 - 215)  | 488<br>(256 - 663)       | 516<br>(250 - 709)       |
| Chronic kidney disease due to hypertension          | 530<br>(240 - 759)       | 10<br>(5 - 15)         | 4<br>(2 - 5)      | 70<br>(39 - 111)   | 111<br>(41 - 174)        | 335<br>(142 - 491)       |
| Chronic kidney disease due to glomerulonephritis    | 43<br>(29 - 67)          | 6<br>(3 - 9)           | 3<br>(2 - 4)      | 11<br>(7 - 17)     | 8<br>(4 - 14)            | 15<br>(8 - 29)           |
| Chronic kidney disease due to other causes          | 753<br>(330 - 1,032)     | 15<br>(8 - 26)         | 8<br>(5 - 12)     | 112<br>(58 - 166)  | 232<br>(77 - 362)        | 386<br>(155 - 574)       |
| Urinary diseases and male infertility               | 136<br>(101 - 178)       | 8<br>(5 - 11)          | 2<br>(1 - 2)      | 18<br>(13 - 25)    | 28<br>(19 - 37)          | 81<br>(57 - 118)         |
| Interstitial nephritis and urinary tract infections | 78<br>(53 - 105)         | 6<br>(4 - 8)           | 1<br>(1 - 2)      | 8<br>(5 - 12)      | 13<br>(7 - 18)           | 50<br>(31 - 74)          |
| Urolithiasis                                        | 8<br>(5 - 11)            | --                     | 0<br>(0 - 0)      | 1<br>(1 - 2)       | 2<br>(1 - 2)             | 4<br>(2 - 6)             |
| Other urinary diseases                              | 50<br>(33 - 71)          | 2<br>(1 - 3)           | 1<br>(0 - 1)      | 8<br>(5 - 12)      | 13<br>(8 - 18)           | 26<br>(15 - 42)          |
| Gynecological diseases                              | --                       | --                     | --                | --                 | --                       | --                       |
| Uterine fibroids                                    | --                       | --                     | --                | --                 | --                       | --                       |
| Polycystic ovarian syndrome                         | --                       | --                     | --                | --                 | --                       | --                       |
| Endometriosis                                       | --                       | --                     | --                | --                 | --                       | --                       |
| Genital prolapse                                    | --                       | --                     | --                | --                 | --                       | --                       |
| Other gynecological diseases                        | --                       | --                     | --                | --                 | --                       | --                       |
| Hemoglobinopathies and hemolytic anemias            | 89<br>(59 - 146)         | 15<br>(8 - 27)         | 10<br>(6 - 16)    | 29<br>(17 - 50)    | 16<br>(9 - 27)           | 20<br>(13 - 33)          |
| Thalassemias                                        | 17<br>(11 - 30)          | 7<br>(4 - 13)          | 4<br>(3 - 7)      | 6<br>(4 - 11)      | 0<br>(0 - 0)             | 0<br>(0 - 0)             |
| Sickle cell disorders                               | 16<br>(11 - 27)          | 3<br>(2 - 5)           | 2<br>(1 - 4)      | 7<br>(4 - 12)      | 4<br>(2 - 6)             | 0<br>(0 - 0)             |
| G6PD deficiency                                     | 2<br>(2 - 4)             | 1<br>(0 - 1)           | 0<br>(0 - 1)      | 1<br>(1 - 2)       | 0<br>(0 - 1)             | 0<br>(0 - 0)             |
| Other hemoglobinopathies and hemolytic anemias      | 53<br>(35 - 86)          | 4<br>(3 - 8)           | 3<br>(2 - 5)      | 15<br>(9 - 25)     | 12<br>(7 - 20)           | 20<br>(12 - 33)          |
| Endocrine, metabolic, blood, and immune disorders   | 174<br>(126 - 358)       | 43<br>(24 - 105)       | 6<br>(4 - 15)     | 33<br>(22 - 66)    | 36<br>(23 - 76)          | 56<br>(35 - 130)         |
| Musculoskeletal disorders                           | 83<br>(33 - 113)         | --                     | 4<br>(2 - 6)      | 18<br>(7 - 26)     | 21<br>(8 - 30)           | 40<br>(14 - 58)          |
| Rheumatoid arthritis                                | 17<br>(6 - 27)           | --                     | 0<br>(0 - 1)      | 1<br>(0 - 2)       | 5<br>(2 - 9)             | 11<br>(4 - 18)           |
| Other musculoskeletal disorders                     | 66<br>(25 - 91)          | --                     | 4<br>(2 - 6)      | 17<br>(7 - 24)     | 16<br>(7 - 23)           | 29<br>(10 - 44)          |
| Other non-communicable diseases                     | 1,143<br>(898 - 1,360)   | 1,005<br>(778 - 1,217) | 43<br>(32 - 56)   | 45<br>(31 - 64)    | 20<br>(14 - 27)          | 29<br>(21 - 38)          |
| Congenital anomalies                                | 1,078<br>(837 - 1,287)   | 967<br>(739 - 1,174)   | 43<br>(32 - 55)   | 40<br>(27 - 57)    | 14<br>(9 - 19)           | 15<br>(9 - 21)           |
| Neural tube defects                                 | 24<br>(14 - 36)          | 23<br>(12 - 35)        | 0<br>(0 - 0)      | 1<br>(1 - 1)       | 0<br>(0 - 0)             | 0<br>(0 - 0)             |
| Congenital heart anomalies                          | 616<br>(435 - 782)       | 557<br>(385 - 717)     | 27<br>(18 - 36)   | 24<br>(16 - 36)    | 5<br>(3 - 8)             | 3<br>(1 - 5)             |
| Cleft lip and cleft palate                          | 7<br>(1 - 25)            | 7<br>(1 - 25)          | --                | --                 | --                       | --                       |
| Down syndrome                                       | 51<br>(27 - 82)          | 42<br>(21 - 72)        | 3<br>(2 - 6)      | 4<br>(2 - 7)       | 1<br>(0 - 1)             | 0<br>(0 - 1)             |
| Chromosomal unbalanced rearrangements               | 15<br>(9 - 24)           | 14<br>(8 - 23)         | 1<br>(0 - 1)      | 0<br>(0 - 1)       | 0<br>(0 - 0)             | 0<br>(0 - 0)             |
| Other congenital anomalies                          | 364<br>(267 - 482)       | 324<br>(228 - 441)     | 12<br>(6 - 19)    | 10<br>(6 - 15)     | 7<br>(5 - 11)            | 11<br>(7 - 16)           |
| Skin and subcutaneous diseases                      | 30<br>(22 - 38)          | 3<br>(2 - 5)           | 1<br>(1 - 1)      | 6<br>(4 - 8)       | 6<br>(4 - 9)             | 14<br>(10 - 20)          |
| Cellulitis                                          | 5<br>(3 - 8)             | 1<br>(0 - 1)           | 0<br>(0 - 0)      | 1<br>(0 - 1)       | 1<br>(1 - 2)             | 2<br>(1 - 4)             |
| Pyoderma                                            | 23<br>(17 - 30)          | 2<br>(1 - 4)           | 0<br>(0 - 1)      | 4<br>(3 - 6)       | 5<br>(3 - 7)             | 12<br>(8 - 17)           |

Web Table 31- Ecuador deaths with 95% UI by age, sex, and cause in 2013

| Cause                                           | Males, All Ages            | Males, 0-4 Years   | Males, 5-14 Years  | Males, 15-49 Years       | Males, 50-69 Years       | Males, 70-80 Years     |
|-------------------------------------------------|----------------------------|--------------------|--------------------|--------------------------|--------------------------|------------------------|
| Decubitus ulcer                                 | 1<br>(1 - 1)               | 0<br>(0 - 0)       | 0<br>(0 - 0)       | 0<br>(0 - 1)             | 0<br>(0 - 0)             | 0<br>(0 - 0)           |
| Other skin and subcutaneous diseases            | 1<br>(1 - 2)               | 0<br>(0 - 0)       | 0<br>(0 - 0)       | 1<br>(0 - 1)             | 0<br>(0 - 0)             | 0<br>(0 - 0)           |
| Sudden infant death syndrome                    | 35<br>(13 - 73)            | 35<br>(13 - 73)    | --                 | --                       | --                       | --                     |
| Injuries                                        | 10,787<br>(8,697 - 13,123) | 493<br>(347 - 667) | 425<br>(375 - 477) | 7,056<br>(5,502 - 8,801) | 1,749<br>(1,340 - 2,204) | 1,064<br>(863 - 1,262) |
| Transport injuries                              | 3,970<br>(3,137 - 4,897)   | 143<br>(82 - 212)  | 211<br>(172 - 252) | 2,427<br>(1,840 - 3,077) | 770<br>(570 - 990)       | 419<br>(333 - 520)     |
| Road injuries                                   | 3,866<br>(3,050 - 4,756)   | 141<br>(81 - 209)  | 207<br>(169 - 247) | 2,360<br>(1,790 - 3,002) | 748<br>(551 - 964)       | 411<br>(326 - 512)     |
| Pedestrian road injuries                        | 1,953<br>(1,461 - 2,567)   | 97<br>(55 - 147)   | 148<br>(118 - 182) | 974<br>(660 - 1,393)     | 450<br>(321 - 602)       | 285<br>(220 - 362)     |
| Cyclist road injuries                           | 190<br>(128 - 264)         | 15<br>(7 - 28)     | 21<br>(13 - 31)    | 77<br>(50 - 112)         | 49<br>(29 - 72)          | 28<br>(17 - 43)        |
| Motorcyclist road injuries                      | 326<br>(176 - 516)         | 3<br>(1 - 5)       | 4<br>(2 - 6)       | 280<br>(147 - 453)       | 32<br>(17 - 53)          | 8<br>(4 - 13)          |
| Motor vehicle road injuries                     | 1,372<br>(906 - 1,866)     | 24<br>(11 - 40)    | 31<br>(19 - 45)    | 1,021<br>(681 - 1,387)   | 211<br>(133 - 311)       | 85<br>(51 - 125)       |
| Other road injuries                             | 25<br>(13 - 39)            | 3<br>(1 - 5)       | 3<br>(2 - 6)       | 9<br>(5 - 15)            | 6<br>(3 - 10)            | 5<br>(2 - 8)           |
| Other transport injuries                        | 103<br>(56 - 142)          | 2<br>(1 - 4)       | 4<br>(2 - 7)       | 67<br>(34 - 96)          | 22<br>(11 - 33)          | 8<br>(4 - 11)          |
| Unintentional injuries                          | 2,805<br>(2,237 - 3,518)   | 323<br>(217 - 462) | 151<br>(124 - 194) | 1,424<br>(1,026 - 1,894) | 420<br>(313 - 542)       | 487<br>(346 - 598)     |
| Falls                                           | 844<br>(594 - 1,065)       | 20<br>(11 - 31)    | 23<br>(15 - 31)    | 401<br>(273 - 529)       | 162<br>(116 - 234)       | 238<br>(138 - 314)     |
| Drowning                                        | 622<br>(455 - 979)         | 79<br>(41 - 156)   | 68<br>(47 - 114)   | 346<br>(223 - 584)       | 86<br>(58 - 137)         | 44<br>(31 - 63)        |
| Fire, heat, and hot substances                  | 140<br>(99 - 181)          | 29<br>(17 - 48)    | 10<br>(7 - 15)     | 46<br>(30 - 65)          | 19<br>(12 - 26)          | 36<br>(19 - 54)        |
| Poisonings                                      | 48<br>(32 - 97)            | 2<br>(1 - 5)       | 2<br>(1 - 4)       | 25<br>(15 - 51)          | 12<br>(8 - 26)           | 6<br>(4 - 12)          |
| Exposure to mechanical forces                   | 139<br>(96 - 321)          | 7<br>(4 - 13)      | 10<br>(7 - 22)     | 92<br>(60 - 219)         | 25<br>(16 - 59)          | 6<br>(4 - 12)          |
| Unintentional firearm injuries                  | 24<br>(16 - 36)            | 1<br>(0 - 1)       | 2<br>(1 - 3)       | 18<br>(12 - 29)          | 2<br>(2 - 4)             | 1<br>(0 - 1)           |
| Unintentional suffocation                       | 12<br>(8 - 22)             | 5<br>(2 - 10)      | 2<br>(1 - 5)       | 3<br>(2 - 6)             | 1<br>(1 - 2)             | 1<br>(0 - 2)           |
| Other exposure to mechanical forces             | 103<br>(68 - 270)          | 1<br>(1 - 3)       | 5<br>(3 - 14)      | 70<br>(44 - 190)         | 21<br>(13 - 55)          | 5<br>(3 - 11)          |
| Adverse effects of medical treatment            | 105<br>(71 - 140)          | 15<br>(10 - 26)    | 3<br>(2 - 5)       | 23<br>(15 - 34)          | 21<br>(13 - 32)          | 42<br>(24 - 59)        |
| Animal contact                                  | 40<br>(10 - 53)            | 3<br>(1 - 6)       | 5<br>(1 - 7)       | 14<br>(5 - 19)           | 11<br>(2 - 16)           | 8<br>(1 - 12)          |
| Venomous animal contact                         | 34<br>(9 - 44)             | 2<br>(1 - 5)       | 4<br>(1 - 6)       | 12<br>(4 - 17)           | 9<br>(2 - 13)            | 7<br>(1 - 10)          |
| Non-venomous animal contact                     | 7<br>(1 - 10)              | 1<br>(0 - 2)       | 1<br>(0 - 1)       | 2<br>(0 - 2)             | 2<br>(0 - 4)             | 1<br>(0 - 2)           |
| Foreign body                                    | 721<br>(421 - 1,118)       | 165<br>(79 - 255)  | 25<br>(14 - 38)    | 378<br>(235 - 630)       | 57<br>(29 - 88)          | 96<br>(50 - 159)       |
| Pulmonary aspiration and foreign body in airway | 719<br>(418 - 1,116)       | 164<br>(79 - 255)  | 25<br>(13 - 38)    | 377<br>(234 - 629)       | 57<br>(28 - 87)          | 96<br>(50 - 159)       |
| Foreign body in other body part                 | 2<br>(1 - 4)               | 1<br>(0 - 1)       | 0<br>(0 - 0)       | 1<br>(0 - 1)             | 0<br>(0 - 1)             | 0<br>(0 - 0)           |
| Other unintentional injuries                    | 146<br>(105 - 196)         | 3<br>(1 - 6)       | 5<br>(3 - 10)      | 100<br>(65 - 146)        | 26<br>(15 - 44)          | 11<br>(6 - 17)         |
| Self-harm and interpersonal violence            | 3,999<br>(2,796 - 5,168)   | 27<br>(10 - 52)    | 62<br>(36 - 85)    | 3,199<br>(2,195 - 4,181) | 555<br>(368 - 786)       | 156<br>(104 - 217)     |
| Self-harm                                       | 1,205<br>(789 - 1,543)     | --                 | 26<br>(12 - 38)    | 867<br>(575 - 1,130)     | 227<br>(140 - 302)       | 84<br>(46 - 108)       |
| Interpersonal violence                          | 2,794<br>(1,816 - 3,737)   | 27<br>(10 - 52)    | 36<br>(16 - 58)    | 2,332<br>(1,493 - 3,159) | 328<br>(191 - 528)       | 72<br>(37 - 129)       |
| Assault by firearm                              | 1,937<br>(1,201 - 2,696)   | 7<br>(2 - 14)      | 20<br>(9 - 35)     | 1,680<br>(1,021 - 2,349) | 202<br>(109 - 357)       | 28<br>(14 - 57)        |
| Assault by sharp object                         | 617<br>(286 - 1,076)       | 5<br>(2 - 11)      | 6<br>(2 - 11)      | 502<br>(229 - 880)       | 83<br>(37 - 150)         | 21<br>(9 - 41)         |
| Assault by other means                          | 241<br>(121 - 375)         | 15<br>(4 - 30)     | 10<br>(4 - 19)     | 149<br>(76 - 241)        | 44<br>(19 - 78)          | 23<br>(10 - 42)        |
| Forces of nature, war, and legal intervention   | 14<br>(7 - 29)             | 0<br>(0 - 0)       | 0<br>(0 - 1)       | 7<br>(4 - 15)            | 4<br>(2 - 9)             | 2<br>(1 - 6)           |
| Exposure to forces of nature                    | 14<br>(7 - 29)             | 0<br>(0 - 0)       | 0<br>(0 - 1)       | 7<br>(4 - 15)            | 4<br>(2 - 9)             | 2<br>(1 - 6)           |

Web Table 31- Ecuador deaths with 95% UI by age, sex, and cause in 2013

| Cause                                                              | Females, All Ages           | Females, 0-4 Years       | Females, 5-14 Years | Females, 15-49 Years     | Females, 50-69 Years     | Females, 70-80 Years        |
|--------------------------------------------------------------------|-----------------------------|--------------------------|---------------------|--------------------------|--------------------------|-----------------------------|
| All causes                                                         | 37,629<br>(32,264 - 44,490) | 4,265<br>(3,785 - 4,846) | 643<br>(573 - 739)  | 5,365<br>(4,138 - 7,060) | 7,543<br>(5,886 - 9,663) | 19,813<br>(17,477 - 22,663) |
| Communicable, maternal, neonatal, and nutritional diseases         | 6,874<br>(6,012 - 7,825)    | 2,622<br>(2,250 - 3,033) | 147<br>(122 - 177)  | 963<br>(801 - 1,174)     | 539<br>(424 - 680)       | 2,602<br>(2,059 - 3,224)    |
| HIV/AIDS and tuberculosis                                          | 517<br>(398 - 676)          | 6<br>(5 - 9)             | 6<br>(4 - 9)        | 274<br>(198 - 386)       | 111<br>(79 - 154)        | 119<br>(84 - 160)           |
| Tuberculosis                                                       | 324<br>(239 - 416)          | 6<br>(4 - 8)             | 5<br>(4 - 8)        | 118<br>(80 - 165)        | 80<br>(55 - 110)         | 115<br>(80 - 156)           |
| HIV/AIDS                                                           | 193<br>(114 - 330)          | 1<br>(0 - 2)             | 1<br>(0 - 1)        | 156<br>(94 - 268)        | 31<br>(15 - 62)          | 4<br>(1 - 8)                |
| HIV/AIDS resulting in mycobacterial infection                      | 9<br>(5 - 16)               | 0<br>(0 - 0)             | 0<br>(0 - 0)        | 8<br>(4 - 13)            | 2<br>(1 - 3)             | 0<br>(0 - 0)                |
| HIV/AIDS resulting in other diseases                               | 183<br>(109 - 313)          | 1<br>(0 - 2)             | 1<br>(0 - 1)        | 148<br>(90 - 255)        | 30<br>(14 - 59)          | 4<br>(1 - 8)                |
| Diarrrhea, lower respiratory, and other common infectious diseases | 3,996<br>(3,289 - 4,777)    | 1,328<br>(1,063 - 1,623) | 114<br>(91 - 142)   | 307<br>(209 - 428)       | 335<br>(236 - 455)       | 1,912<br>(1,423 - 2,490)    |
| Diarrheal diseases                                                 | 392<br>(285 - 526)          | 244<br>(155 - 365)       | 12<br>(7 - 19)      | 23<br>(16 - 33)          | 26<br>(17 - 38)          | 88<br>(55 - 141)            |
| Intestinal infectious diseases                                     | 80<br>(38 - 143)            | 27<br>(13 - 50)          | 20<br>(9 - 39)      | 27<br>(11 - 55)          | 4<br>(2 - 9)             | 2<br>(1 - 5)                |
| Typhoid fever                                                      | 58<br>(26 - 107)            | 19<br>(9 - 35)           | 15<br>(7 - 30)      | 20<br>(8 - 43)           | 3<br>(1 - 6)             | 1<br>(0 - 3)                |
| Paratyphoid fever                                                  | 16<br>(7 - 30)              | 6<br>(2 - 11)            | 4<br>(1 - 8)        | 5<br>(2 - 11)            | 1<br>(0 - 2)             | 0<br>(0 - 1)                |
| Other intestinal infectious diseases                               | 5<br>(1 - 13)               | 3<br>(0 - 9)             | 0<br>(0 - 3)        | 1<br>(0 - 5)             | 1<br>(0 - 3)             | 1<br>(0 - 3)                |
| Lower respiratory infections                                       | 3,274<br>(2,628 - 3,971)    | 918<br>(687 - 1,185)     | 60<br>(44 - 79)     | 213<br>(137 - 299)       | 286<br>(197 - 395)       | 1,797<br>(1,307 - 2,369)    |
| Upper respiratory infections                                       | 2<br>(1 - 4)                | 0<br>(0 - 1)             | 0<br>(0 - 0)        | 0<br>(0 - 1)             | 0<br>(0 - 1)             | 1<br>(0 - 3)                |
| Otitis media                                                       | 2<br>(1 - 2)                | 0<br>(0 - 0)             | 0<br>(0 - 0)        | 1<br>(0 - 1)             | 0<br>(0 - 0)             | 1<br>(0 - 1)                |
| Meningitis                                                         | 128<br>(97 - 159)           | 65<br>(46 - 89)          | 11<br>(8 - 16)      | 27<br>(17 - 38)          | 11<br>(7 - 16)           | 14<br>(9 - 19)              |
| Pneumococcal meningitis                                            | 33<br>(24 - 43)             | 15<br>(9 - 22)           | 3<br>(2 - 6)        | 8<br>(4 - 14)            | 3<br>(2 - 5)             | 4<br>(2 - 6)                |
| H influenzae type B meningitis                                     | 29<br>(19 - 40)             | 21<br>(13 - 33)          | 3<br>(1 - 4)        | 3<br>(1 - 4)             | 1<br>(0 - 1)             | 1<br>(1 - 2)                |
| Meningococcal meningitis                                           | 21<br>(15 - 28)             | 10<br>(6 - 15)           | 2<br>(1 - 4)        | 5<br>(3 - 9)             | 2<br>(1 - 3)             | 3<br>(2 - 4)                |
| Other meningitis                                                   | 45<br>(31 - 59)             | 19<br>(10 - 32)          | 3<br>(2 - 5)        | 11<br>(6 - 17)           | 5<br>(3 - 8)             | 6<br>(4 - 9)                |
| Encephalitis                                                       | 58<br>(43 - 81)             | 24<br>(14 - 38)          | 8<br>(5 - 14)       | 14<br>(9 - 22)           | 7<br>(4 - 11)            | 6<br>(4 - 10)               |
| Diphtheria                                                         | 1<br>(0 - 4)                | 1<br>(0 - 4)             | 0<br>(0 - 1)        | 0<br>(0 - 0)             | 0<br>(0 - 0)             | --                          |
| Whooping cough                                                     | 50<br>(14 - 152)            | 47<br>(11 - 150)         | 2<br>(1 - 4)        | 1<br>(1 - 1)             | 0<br>(0 - 0)             | --                          |
| Tetanus                                                            | 3<br>(1 - 4)                | 1<br>(0 - 2)             | 0<br>(0 - 0)        | 1<br>(0 - 1)             | 1<br>(0 - 1)             | 0<br>(0 - 1)                |
| Measles                                                            | 0<br>(0 - 0)                | 0<br>(0 - 0)             | 0<br>(0 - 0)        | 0<br>(0 - 0)             | 0<br>(0 - 0)             | --                          |
| Varicella and herpes zoster                                        | 5<br>(2 - 16)               | 1<br>(0 - 5)             | 0<br>(0 - 1)        | 1<br>(0 - 3)             | 0<br>(0 - 1)             | 3<br>(0 - 13)               |
| Neglected tropical diseases and malaria                            | 39<br>(27 - 76)             | 9<br>(5 - 14)            | 4<br>(3 - 7)        | 10<br>(7 - 15)           | 7<br>(4 - 16)            | 10<br>(5 - 29)              |
| Malaria                                                            | 6<br>(4 - 10)               | 2<br>(1 - 4)             | 1<br>(0 - 1)        | 2<br>(1 - 4)             | 1<br>(0 - 2)             | 1<br>(0 - 2)                |
| Chagas disease                                                     | 9<br>(2 - 45)               | 0<br>(0 - 0)             | 0<br>(0 - 0)        | 1<br>(0 - 6)             | 3<br>(1 - 11)            | 5<br>(1 - 24)               |
| Leishmaniasis                                                      | 0<br>(0 - 0)                | 0<br>(0 - 0)             | 0<br>(0 - 0)        | 0<br>(0 - 0)             | 0<br>(0 - 0)             | 0<br>(0 - 0)                |
| Visceral leishmaniasis                                             | 0<br>(0 - 0)                | 0<br>(0 - 0)             | 0<br>(0 - 0)        | 0<br>(0 - 0)             | 0<br>(0 - 0)             | 0<br>(0 - 0)                |
| Cysticercosis                                                      | 3<br>(2 - 3)                | 0<br>(0 - 0)             | 0<br>(0 - 0)        | 1<br>(1 - 2)             | 1<br>(1 - 1)             | 0<br>(0 - 0)                |
| Cystic echinococcosis                                              | 1<br>(1 - 1)                | 0<br>(0 - 0)             | 0<br>(0 - 0)        | 0<br>(0 - 0)             | 0<br>(0 - 0)             | 0<br>(0 - 0)                |
| Dengue                                                             | 12<br>(6 - 16)              | 4<br>(2 - 6)             | 2<br>(1 - 3)        | 2<br>(1 - 3)             | 1<br>(1 - 2)             | 2<br>(1 - 4)                |
| Yellow fever                                                       | 0<br>(0 - 0)                | 0<br>(0 - 0)             | 0<br>(0 - 0)        | 0<br>(0 - 0)             | 0<br>(0 - 0)             | 0<br>(0 - 0)                |
| Rabies                                                             | 1<br>(1 - 3)                | 0<br>(0 - 0)             | 0<br>(0 - 1)        | 1<br>(0 - 1)             | 0<br>(0 - 1)             | 0<br>(0 - 0)                |
| Intestinal nematode infections                                     | 2<br>(0 - 8)                | 1<br>(0 - 7)             | 0<br>(0 - 3)        | 0<br>(0 - 2)             | 0<br>(0 - 1)             | 0<br>(0 - 2)                |
| Ascariasis                                                         | 2<br>(0 - 8)                | 1<br>(0 - 7)             | 0<br>(0 - 3)        | 0<br>(0 - 2)             | 0<br>(0 - 1)             | 0<br>(0 - 2)                |
| Other neglected tropical diseases                                  | 5<br>(3 - 8)                | 1<br>(1 - 2)             | 0<br>(0 - 1)        | 1<br>(1 - 2)             | 1<br>(1 - 2)             | 1<br>(0 - 1)                |

Web Table 31- Ecuador deaths with 95% UI by age, sex, and cause in 2013

| Cause                                                            | Females, All Ages           | Females, 0-4 Years     | Females, 5-14 Years | Females, 15-49 Years     | Females, 50-69 Years     | Females, 70-80 Years        |
|------------------------------------------------------------------|-----------------------------|------------------------|---------------------|--------------------------|--------------------------|-----------------------------|
| Maternal disorders                                               | 282<br>(192 - 406)          | --                     | 2<br>(1 - 3)        | 280<br>(191 - 404)       | --                       | --                          |
| Maternal hemorrhage                                              | 41<br>(26 - 61)             | --                     | 0<br>(0 - 0)        | 41<br>(25 - 60)          | --                       | --                          |
| Maternal sepsis and other maternal infections                    | 20<br>(13 - 30)             | --                     | 0<br>(0 - 0)        | 20<br>(13 - 30)          | --                       | --                          |
| Maternal hypertensive disorders                                  | 62<br>(40 - 90)             | --                     | 0<br>(0 - 1)        | 61<br>(40 - 90)          | --                       | --                          |
| Maternal obstructed labor                                        | 12<br>(7 - 19)              | --                     | 0<br>(0 - 0)        | 12<br>(7 - 19)           | --                       | --                          |
| Maternal abortive outcome                                        | 26<br>(15 - 39)             | --                     | 0<br>(0 - 0)        | 26<br>(15 - 39)          | --                       | --                          |
| Indirect maternal deaths                                         | 27<br>(17 - 39)             | --                     | 0<br>(0 - 0)        | 27<br>(17 - 39)          | --                       | --                          |
| Late maternal deaths                                             | 64<br>(40 - 96)             | --                     | 0<br>(0 - 1)        | 64<br>(39 - 96)          | --                       | --                          |
| Maternal deaths aggravated by HIV/AIDS                           | 0<br>(0 - 0)                | --                     | --                  | 0<br>(0 - 0)             | --                       | --                          |
| Other maternal disorders                                         | 30<br>(19 - 43)             | --                     | 0<br>(0 - 0)        | 29<br>(19 - 43)          | --                       | --                          |
| Neonatal disorders                                               | 1,060<br>(896 - 1,238)      | 1,060<br>(896 - 1,238) | --                  | --                       | --                       | --                          |
| Neonatal preterm birth complications                             | 496<br>(332 - 640)          | 496<br>(332 - 640)     | --                  | --                       | --                       | --                          |
| Neonatal encephalopathy due to birth asphyxia and trauma         | 198<br>(136 - 287)          | 198<br>(136 - 287)     | --                  | --                       | --                       | --                          |
| Neonatal sepsis and other neonatal infections                    | 241<br>(139 - 409)          | 241<br>(139 - 409)     | --                  | --                       | --                       | --                          |
| Hemolytic disease and other neonatal jaundice                    | 9<br>(3 - 21)               | 9<br>(3 - 21)          | --                  | --                       | --                       | --                          |
| Other neonatal disorders                                         | 116<br>(73 - 166)           | 116<br>(73 - 166)      | --                  | --                       | --                       | --                          |
| Nutritional deficiencies                                         | 884<br>(698 - 1,143)        | 186<br>(134 - 271)     | 15<br>(11 - 20)     | 76<br>(54 - 110)         | 70<br>(50 - 102)         | 538<br>(391 - 743)          |
| Protein-energy malnutrition                                      | 533<br>(364 - 756)          | 161<br>(110 - 246)     | 9<br>(5 - 13)       | 18<br>(8 - 35)           | 28<br>(13 - 48)          | 318<br>(181 - 490)          |
| Iodine deficiency                                                | 1<br>(0 - 2)                | 0<br>(0 - 1)           | 0<br>(0 - 0)        | 0<br>(0 - 0)             | 0<br>(0 - 0)             | 0<br>(0 - 1)                |
| Iron-deficiency anemia                                           | 279<br>(144 - 467)          | 18<br>(4 - 42)         | 5<br>(2 - 9)        | 49<br>(31 - 76)          | 35<br>(18 - 57)          | 172<br>(76 - 311)           |
| Other nutritional deficiencies                                   | 72<br>(28 - 128)            | 7<br>(2 - 15)          | 1<br>(1 - 2)        | 8<br>(3 - 14)            | 8<br>(3 - 14)            | 49<br>(16 - 96)             |
| Other communicable, maternal, neonatal, and nutritional diseases | 96<br>(71 - 126)            | 33<br>(17 - 55)        | 6<br>(4 - 8)        | 17<br>(12 - 24)          | 15<br>(11 - 22)          | 24<br>(16 - 33)             |
| Sexually transmitted diseases excluding HIV                      | 24<br>(8 - 47)              | 19<br>(4 - 40)         | 2<br>(0 - 3)        | 1<br>(1 - 2)             | 1<br>(1 - 1)             | 1<br>(1 - 2)                |
| Syphilis                                                         | 23<br>(6 - 46)              | 19<br>(4 - 40)         | 2<br>(0 - 3)        | 1<br>(0 - 1)             | 1<br>(0 - 1)             | 1<br>(1 - 2)                |
| Chlamydial infection                                             | 0<br>(0 - 1)                | --                     | 0<br>(0 - 0)        | 0<br>(0 - 0)             | 0<br>(0 - 0)             | 0<br>(0 - 0)                |
| Gonococcal infection                                             | 1<br>(0 - 1)                | --                     | 0<br>(0 - 0)        | 0<br>(0 - 0)             | 0<br>(0 - 0)             | 0<br>(0 - 0)                |
| Other sexually transmitted diseases                              | 0<br>(0 - 1)                | --                     | 0<br>(0 - 0)        | 0<br>(0 - 0)             | 0<br>(0 - 0)             | 0<br>(0 - 0)                |
| Hepatitis                                                        | 14<br>(11 - 19)             | 1<br>(1 - 2)           | 1<br>(0 - 1)        | 5<br>(3 - 8)             | 3<br>(2 - 5)             | 4<br>(2 - 6)                |
| Acute hepatitis A                                                | 5<br>(2 - 8)                | 1<br>(0 - 2)           | 1<br>(0 - 1)        | 3<br>(1 - 4)             | 0<br>(0 - 1)             | 0<br>(0 - 1)                |
| Acute hepatitis B                                                | 9<br>(5 - 13)               | 0<br>(0 - 1)           | 0<br>(0 - 0)        | 2<br>(1 - 4)             | 3<br>(1 - 4)             | 3<br>(2 - 6)                |
| Acute hepatitis C                                                | 1<br>(0 - 3)                | --                     | 0<br>(0 - 0)        | 0<br>(0 - 1)             | 0<br>(0 - 1)             | 0<br>(0 - 1)                |
| Other infectious diseases                                        | 57<br>(40 - 75)             | 13<br>(9 - 19)         | 3<br>(2 - 5)        | 11<br>(7 - 16)           | 11<br>(7 - 16)           | 19<br>(12 - 27)             |
| Non-communicable diseases                                        | 27,802<br>(23,532 - 33,168) | 1,223<br>(986 - 1,488) | 239<br>(206 - 284)  | 3,170<br>(2,343 - 4,366) | 6,574<br>(5,114 - 8,443) | 16,596<br>(14,544 - 18,960) |
| Neoplasms                                                        | 6,944<br>(5,606 - 8,544)    | 68<br>(49 - 90)        | 82<br>(65 - 102)    | 1,216<br>(888 - 1,648)   | 2,342<br>(1,826 - 3,022) | 3,236<br>(2,718 - 3,841)    |
| Esophageal cancer                                                | 39<br>(29 - 52)             | --                     | --                  | 3<br>(2 - 4)             | 11<br>(7 - 15)           | 25<br>(18 - 35)             |
| Stomach cancer                                                   | 1,119<br>(855 - 1,460)      | --                     | --                  | 136<br>(92 - 192)        | 294<br>(222 - 390)       | 689<br>(496 - 931)          |
| Liver cancer                                                     | 517<br>(388 - 682)          | --                     | 2<br>(1 - 3)        | 47<br>(32 - 70)          | 168<br>(118 - 233)       | 301<br>(206 - 424)          |
| Liver cancer due to hepatitis B                                  | 172<br>(103 - 255)          | --                     | 1<br>(0 - 1)        | 25<br>(16 - 38)          | 68<br>(40 - 104)         | 79<br>(41 - 126)            |
| Liver cancer due to hepatitis C                                  | 101<br>(45 - 195)           | --                     | 0<br>(0 - 0)        | 5<br>(2 - 9)             | 28<br>(12 - 54)          | 68<br>(29 - 140)            |
| Liver cancer due to alcohol use                                  | 152<br>(75 - 239)           | --                     | --                  | 5<br>(2 - 10)            | 38<br>(18 - 64)          | 108<br>(50 - 179)           |

Web Table 31- Ecuador deaths with 95% UI by age, sex, and cause in 2013

| Cause                                         | Females, All Ages         | Females, 0-4 Years | Females, 5-14 Years | Females, 15-49 Years | Females, 50-69 Years     | Females, 70-80 Years     |
|-----------------------------------------------|---------------------------|--------------------|---------------------|----------------------|--------------------------|--------------------------|
| Liver cancer due to other causes              | 93<br>(56 - 145)          | --                 | 1<br>(1 - 2)        | 13<br>(7 - 20)       | 33<br>(19 - 54)          | 46<br>(24 - 83)          |
| Larynx cancer                                 | 12<br>(6 - 22)            | --                 | --                  | 2<br>(1 - 3)         | 4<br>(2 - 8)             | 7<br>(3 - 12)            |
| Tracheal, bronchus and lung cancer            | 448<br>(346 - 586)        | --                 | --                  | 54<br>(37 - 76)      | 156<br>(112 - 209)       | 238<br>(175 - 321)       |
| Breast cancer                                 | 710<br>(551 - 920)        | --                 | --                  | 198<br>(141 - 279)   | 314<br>(235 - 415)       | 198<br>(157 - 253)       |
| Cervical cancer                               | 819<br>(602 - 1,075)      | --                 | --                  | 230<br>(152 - 317)   | 324<br>(233 - 455)       | 266<br>(189 - 361)       |
| Uterine cancer                                | 204<br>(119 - 280)        | --                 | --                  | 17<br>(10 - 27)      | 84<br>(48 - 121)         | 103<br>(56 - 149)        |
| Prostate cancer                               | --                        | --                 | --                  | --                   | --                       | --                       |
| Colon and rectum cancer                       | 571<br>(449 - 721)        | --                 | --                  | 61<br>(43 - 84)      | 169<br>(129 - 223)       | 341<br>(259 - 441)       |
| Lip and oral cavity cancer                    | 42<br>(25 - 60)           | --                 | --                  | 5<br>(3 - 8)         | 11<br>(6 - 16)           | 26<br>(14 - 40)          |
| Nasopharynx cancer                            | 7<br>(4 - 13)             | --                 | 0<br>(0 - 0)        | 2<br>(1 - 4)         | 2<br>(1 - 5)             | 3<br>(1 - 5)             |
| Other pharynx cancer                          | 9<br>(7 - 13)             | --                 | --                  | 1<br>(1 - 2)         | 4<br>(2 - 5)             | 4<br>(3 - 7)             |
| Gallbladder and biliary tract cancer          | 287<br>(197 - 436)        | --                 | --                  | 19<br>(12 - 30)      | 107<br>(70 - 172)        | 161<br>(104 - 255)       |
| Pancreatic cancer                             | 290<br>(225 - 366)        | --                 | --                  | 20<br>(13 - 28)      | 107<br>(78 - 144)        | 163<br>(125 - 213)       |
| Malignant skin melanoma                       | 65<br>(49 - 87)           | --                 | --                  | 12<br>(8 - 17)       | 22<br>(16 - 31)          | 31<br>(22 - 44)          |
| Non-melanoma skin cancer                      | 66<br>(41 - 98)           | --                 | --                  | 4<br>(3 - 7)         | 9<br>(5 - 13)            | 52<br>(32 - 79)          |
| Ovarian cancer                                | 257<br>(196 - 336)        | --                 | --                  | 60<br>(41 - 86)      | 115<br>(85 - 157)        | 81<br>(61 - 107)         |
| Testicular cancer                             | --                        | --                 | --                  | --                   | --                       | --                       |
| Kidney cancer                                 | 93<br>(68 - 123)          | 1<br>(1 - 3)       | 1<br>(1 - 1)        | 11<br>(7 - 16)       | 36<br>(25 - 51)          | 43<br>(29 - 61)          |
| Bladder cancer                                | 59<br>(40 - 92)           | --                 | --                  | 6<br>(3 - 10)        | 16<br>(10 - 27)          | 37<br>(25 - 57)          |
| Brain and nervous system cancer               | 182<br>(80 - 242)         | 9<br>(4 - 16)      | 12<br>(6 - 18)      | 59<br>(27 - 87)      | 58<br>(25 - 81)          | 44<br>(18 - 62)          |
| Thyroid cancer                                | 91<br>(47 - 126)          | --                 | 0<br>(0 - 0)        | 8<br>(4 - 12)        | 29<br>(14 - 43)          | 54<br>(28 - 80)          |
| Mesothelioma                                  | 10<br>(7 - 14)            | --                 | --                  | 1<br>(1 - 2)         | 6<br>(4 - 8)             | 3<br>(2 - 5)             |
| Hodgkin lymphoma                              | 26<br>(9 - 38)            | 2<br>(1 - 4)       | 1<br>(0 - 3)        | 8<br>(2 - 12)        | 6<br>(2 - 10)            | 9<br>(3 - 15)            |
| Non-Hodgkin lymphoma                          | 226<br>(138 - 315)        | 11<br>(4 - 18)     | 6<br>(3 - 9)        | 44<br>(26 - 65)      | 72<br>(46 - 106)         | 94<br>(52 - 135)         |
| Multiple myeloma                              | 57<br>(40 - 77)           | --                 | --                  | 6<br>(4 - 9)         | 25<br>(17 - 36)          | 25<br>(17 - 36)          |
| Leukemia                                      | 334<br>(265 - 415)        | 27<br>(15 - 44)    | 42<br>(31 - 56)     | 115<br>(82 - 158)    | 72<br>(52 - 96)          | 79<br>(58 - 101)         |
| Other neoplasms                               | 406<br>(299 - 583)        | 17<br>(10 - 28)    | 18<br>(12 - 26)     | 89<br>(59 - 137)     | 124<br>(85 - 192)        | 158<br>(113 - 242)       |
| Cardiovascular diseases                       | 9,877<br>(8,194 - 12,432) | 50<br>(34 - 73)    | 38<br>(28 - 52)     | 865<br>(615 - 1,258) | 1,852<br>(1,413 - 2,513) | 7,073<br>(6,050 - 8,608) |
| Rheumatic heart disease                       | 106<br>(62 - 148)         | 1<br>(0 - 1)       | 3<br>(2 - 5)        | 31<br>(18 - 49)      | 31<br>(17 - 45)          | 40<br>(22 - 56)          |
| Ischemic heart disease                        | 5,211<br>(4,248 - 6,957)  | 3<br>(1 - 6)       | 11<br>(7 - 17)      | 371<br>(256 - 581)   | 937<br>(684 - 1,329)     | 3,890<br>(3,196 - 5,150) |
| Cerebrovascular disease                       | 2,870<br>(2,281 - 3,855)  | 4<br>(2 - 6)       | 11<br>(8 - 16)      | 310<br>(215 - 457)   | 594<br>(433 - 865)       | 1,950<br>(1,516 - 2,622) |
| Ischemic stroke                               | 1,602<br>(1,256 - 2,367)  | 1<br>(1 - 2)       | 2<br>(2 - 4)        | 61<br>(39 - 119)     | 211<br>(137 - 392)       | 1,327<br>(1,035 - 1,891) |
| Hemorrhagic stroke                            | 1,268<br>(855 - 1,681)    | 3<br>(2 - 4)       | 9<br>(6 - 12)       | 249<br>(171 - 361)   | 383<br>(264 - 524)       | 624<br>(374 - 816)       |
| Hypertensive heart disease                    | 893<br>(552 - 1,221)      | 0<br>(0 - 1)       | 1<br>(0 - 1)        | 42<br>(25 - 62)      | 127<br>(75 - 186)        | 722<br>(435 - 1,014)     |
| Cardiomyopathy and myocarditis                | 154<br>(113 - 207)        | 30<br>(20 - 45)    | 5<br>(3 - 7)        | 24<br>(16 - 38)      | 28<br>(19 - 42)          | 67<br>(45 - 98)          |
| Atrial fibrillation and flutter               | 85<br>(57 - 125)          | --                 | --                  | 2<br>(2 - 4)         | 8<br>(6 - 12)            | 74<br>(48 - 113)         |
| Aortic aneurysm                               | 88<br>(53 - 134)          | --                 | --                  | 12<br>(7 - 20)       | 27<br>(16 - 43)          | 50<br>(29 - 77)          |
| Peripheral vascular disease                   | 4<br>(3 - 6)              | --                 | --                  | 0<br>(0 - 0)         | 1<br>(1 - 1)             | 3<br>(2 - 4)             |
| Endocarditis                                  | 46<br>(28 - 68)           | 7<br>(4 - 12)      | 2<br>(1 - 4)        | 10<br>(6 - 17)       | 8<br>(5 - 13)            | 18<br>(10 - 27)          |
| Other cardiovascular and circulatory diseases | 421<br>(302 - 590)        | 5<br>(3 - 9)       | 5<br>(3 - 8)        | 62<br>(40 - 96)      | 90<br>(58 - 132)         | 259<br>(173 - 377)       |



Web Table 31- Ecuador deaths with 95% UI by age, sex, and cause in 2013

| Cause                                               | Females, All Ages        | Females, 0-4 Years | Females, 5-14 Years | Females, 15-49 Years | Females, 50-69 Years | Females, 70-80 Years   |
|-----------------------------------------------------|--------------------------|--------------------|---------------------|----------------------|----------------------|------------------------|
| Chronic respiratory diseases                        | 1,359<br>(1,084 - 1,804) | 60<br>(36 - 168)   | 8<br>(6 - 15)       | 72<br>(51 - 104)     | 145<br>(107 - 201)   | 1,074<br>(845 - 1,379) |
| Chronic obstructive pulmonary disease               | 1,090<br>(856 - 1,450)   | 42<br>(23 - 117)   | 5<br>(3 - 8)        | 47<br>(33 - 71)      | 96<br>(67 - 138)     | 900<br>(701 - 1,176)   |
| Pneumoconiosis                                      | 7<br>(4 - 12)            | 0<br>(0 - 1)       | 0<br>(0 - 0)        | 1<br>(1 - 2)         | 2<br>(1 - 3)         | 4<br>(2 - 7)           |
| Silicosis                                           | 0<br>(0 - 1)             | 0<br>(0 - 0)       | 0<br>(0 - 0)        | 0<br>(0 - 0)         | 0<br>(0 - 0)         | 0<br>(0 - 0)           |
| Asbestosis                                          | 0<br>(0 - 1)             | 0<br>(0 - 0)       | 0<br>(0 - 0)        | 0<br>(0 - 0)         | 0<br>(0 - 0)         | 0<br>(0 - 0)           |
| Coal workers pneumoconiosis                         | 0<br>(0 - 1)             | 0<br>(0 - 0)       | 0<br>(0 - 0)        | 0<br>(0 - 0)         | 0<br>(0 - 0)         | 0<br>(0 - 0)           |
| Other pneumoconiosis                                | 6<br>(4 - 10)            | 0<br>(0 - 0)       | 0<br>(0 - 0)        | 1<br>(1 - 1)         | 2<br>(1 - 3)         | 4<br>(2 - 7)           |
| Asthma                                              | 72<br>(45 - 122)         | 9<br>(4 - 26)      | 2<br>(1 - 4)        | 9<br>(5 - 14)        | 12<br>(7 - 19)       | 39<br>(21 - 67)        |
| Interstitial lung disease and pulmonary sarcoidosis | 173<br>(76 - 276)        | 1<br>(1 - 4)       | 1<br>(1 - 2)        | 12<br>(6 - 19)       | 34<br>(16 - 56)      | 125<br>(50 - 214)      |
| Other chronic respiratory diseases                  | 17<br>(11 - 35)          | 7<br>(4 - 22)      | 0<br>(0 - 1)        | 2<br>(1 - 4)         | 2<br>(1 - 3)         | 5<br>(3 - 10)          |
| Cirrhosis                                           | 1,060<br>(835 - 1,321)   | 4<br>(3 - 6)       | 6<br>(5 - 7)        | 137<br>(98 - 193)    | 378<br>(287 - 496)   | 535<br>(423 - 668)     |
| Cirrhosis due to hepatitis B                        | 208<br>(74 - 370)        | 0<br>(0 - 0)       | 1<br>(0 - 1)        | 27<br>(12 - 51)      | 75<br>(28 - 133)     | 105<br>(33 - 189)      |
| Cirrhosis due to hepatitis C                        | 402<br>(241 - 608)       | 0<br>(0 - 0)       | 0<br>(0 - 1)        | 40<br>(16 - 69)      | 151<br>(83 - 237)    | 210<br>(120 - 321)     |
| Cirrhosis due to alcohol use                        | 227<br>(130 - 348)       | --                 | --                  | 16<br>(7 - 28)       | 71<br>(39 - 114)     | 140<br>(76 - 221)      |
| Cirrhosis due to other causes                       | 224<br>(135 - 342)       | 4<br>(3 - 6)       | 5<br>(4 - 6)        | 54<br>(31 - 84)      | 81<br>(43 - 135)     | 80<br>(41 - 133)       |
| Digestive diseases                                  | 1,177<br>(954 - 1,514)   | 21<br>(15 - 29)    | 15<br>(12 - 18)     | 155<br>(111 - 214)   | 251<br>(188 - 339)   | 736<br>(601 - 939)     |
| Peptic ulcer disease                                | 245<br>(168 - 382)       | 0<br>(0 - 1)       | 1<br>(1 - 1)        | 21<br>(14 - 32)      | 43<br>(28 - 66)      | 180<br>(117 - 282)     |
| Gastritis and duodenitis                            | 29<br>(12 - 48)          | 1<br>(0 - 2)       | 0<br>(0 - 1)        | 4<br>(2 - 7)         | 4<br>(2 - 8)         | 20<br>(7 - 33)         |
| Appendicitis                                        | 68<br>(45 - 102)         | 2<br>(1 - 4)       | 4<br>(3 - 7)        | 19<br>(12 - 29)      | 17<br>(10 - 27)      | 25<br>(14 - 41)        |
| Paralytic ileus and intestinal obstruction          | 125<br>(18 - 242)        | 8<br>(2 - 14)      | 3<br>(1 - 5)        | 13<br>(2 - 27)       | 21<br>(3 - 43)       | 81<br>(10 - 165)       |
| Inguinal, femoral, and abdominal hernia             | 77<br>(31 - 206)         | 2<br>(0 - 5)       | 1<br>(0 - 2)        | 8<br>(3 - 22)        | 15<br>(6 - 42)       | 51<br>(20 - 147)       |
| Inflammatory bowel disease                          | 16<br>(11 - 26)          | 2<br>(1 - 4)       | 0<br>(0 - 1)        | 3<br>(2 - 6)         | 3<br>(2 - 5)         | 7<br>(4 - 12)          |
| Vascular intestinal disorders                       | 97<br>(48 - 187)         | 0<br>(0 - 2)       | 0<br>(0 - 1)        | 6<br>(3 - 13)        | 15<br>(7 - 30)       | 75<br>(36 - 144)       |
| Gallbladder and biliary diseases                    | 245<br>(181 - 341)       | 0<br>(0 - 0)       | 1<br>(0 - 1)        | 31<br>(21 - 46)      | 59<br>(41 - 88)      | 153<br>(107 - 219)     |
| Pancreatitis                                        | 167<br>(108 - 260)       | 1<br>(1 - 3)       | 2<br>(1 - 3)        | 36<br>(22 - 56)      | 48<br>(30 - 78)      | 80<br>(49 - 129)       |
| Other digestive diseases                            | 110<br>(79 - 153)        | 4<br>(2 - 8)       | 3<br>(2 - 4)        | 14<br>(9 - 20)       | 25<br>(17 - 36)      | 64<br>(44 - 92)        |
| Neurological disorders                              | 1,384<br>(1,054 - 1,760) | 14<br>(9 - 25)     | 13<br>(9 - 20)      | 100<br>(67 - 161)    | 104<br>(77 - 139)    | 1,152<br>(843 - 1,486) |
| Alzheimer disease and other dementias               | 1,102<br>(796 - 1,434)   | --                 | --                  | 0<br>(0 - 1)         | 53<br>(35 - 77)      | 1,048<br>(745 - 1,370) |
| Parkinson disease                                   | 89<br>(53 - 126)         | --                 | --                  | 1<br>(1 - 2)         | 13<br>(8 - 19)       | 76<br>(42 - 109)       |
| Epilepsy                                            | 138<br>(96 - 220)        | 10<br>(6 - 21)     | 11<br>(7 - 18)      | 84<br>(54 - 142)     | 19<br>(12 - 30)      | 13<br>(8 - 19)         |
| Multiple sclerosis                                  | 7<br>(4 - 12)            | --                 | --                  | 2<br>(1 - 3)         | 3<br>(1 - 4)         | 3<br>(1 - 5)           |
| Other neurological disorders                        | 48<br>(38 - 61)          | 4<br>(3 - 6)       | 2<br>(2 - 3)        | 13<br>(9 - 18)       | 17<br>(12 - 22)      | 12<br>(9 - 16)         |
| Mental and substance use disorders                  | 86<br>(55 - 119)         | 2<br>(0 - 3)       | 0<br>(0 - 0)        | 31<br>(19 - 46)      | 27<br>(14 - 40)      | 26<br>(17 - 36)        |
| Schizophrenia                                       | 2<br>(1 - 3)             | --                 | --                  | 1<br>(0 - 1)         | 1<br>(0 - 1)         | 1<br>(0 - 1)           |
| Alcohol use disorders                               | 35<br>(11 - 56)          | --                 | --                  | 13<br>(4 - 21)       | 16<br>(5 - 27)       | 7<br>(2 - 11)          |
| Drug use disorders                                  | 48<br>(36 - 62)          | 2<br>(0 - 3)       | --                  | 17<br>(12 - 24)      | 10<br>(7 - 14)       | 19<br>(13 - 27)        |
| Opioid use disorders                                | 7<br>(5 - 9)             | 0<br>(0 - 1)       | --                  | 2<br>(2 - 4)         | 1<br>(1 - 2)         | 3<br>(2 - 4)           |
| Cocaine use disorders                               | 1<br>(1 - 2)             | 0<br>(0 - 0)       | --                  | 1<br>(0 - 1)         | 0<br>(0 - 0)         | 0<br>(0 - 1)           |
| Amphetamine use disorders                           | 1<br>(1 - 2)             | 0<br>(0 - 0)       | --                  | 0<br>(0 - 1)         | 0<br>(0 - 0)         | 0<br>(0 - 1)           |
| Other drug use disorders                            | 38<br>(28 - 50)          | 1<br>(0 - 2)       | --                  | 13<br>(9 - 19)       | 8<br>(6 - 12)        | 15<br>(10 - 22)        |

Web Table 31- Ecuador deaths with 95% UI by age, sex, and cause in 2013

| Cause                                               | Females, All Ages        | Females, 0-4 Years   | Females, 5-14 Years | Females, 15-49 Years | Females, 50-69 Years   | Females, 70-80 Years     |
|-----------------------------------------------------|--------------------------|----------------------|---------------------|----------------------|------------------------|--------------------------|
| Eating disorders                                    | 1<br>(1 - 2)             | --                   | 0<br>(0 - 0)        | 1<br>(1 - 2)         | --                     | --                       |
| Anorexia nervosa                                    | 1<br>(1 - 2)             | --                   | 0<br>(0 - 0)        | 1<br>(1 - 2)         | --                     | --                       |
| Diabetes, urogenital, blood, and endocrine diseases | 4,699<br>(3,517 - 5,783) | 88<br>(64 - 138)     | 34<br>(27 - 47)     | 488<br>(354 - 664)   | 1,416<br>(992 - 1,855) | 2,674<br>(1,891 - 3,276) |
| Diabetes mellitus                                   | 2,113<br>(1,613 - 2,638) | 3<br>(2 - 5)         | 2<br>(1 - 4)        | 148<br>(104 - 203)   | 673<br>(504 - 894)     | 1,286<br>(915 - 1,632)   |
| Acute glomerulonephritis                            | 2<br>(2 - 4)             | 0<br>(0 - 0)         | 0<br>(0 - 0)        | 1<br>(0 - 1)         | 1<br>(0 - 1)           | 1<br>(0 - 2)             |
| Chronic kidney disease                              | 2,182<br>(1,202 - 2,847) | 29<br>(21 - 42)      | 16<br>(12 - 21)     | 263<br>(175 - 363)   | 663<br>(324 - 896)     | 1,212<br>(640 - 1,587)   |
| Chronic kidney disease due to diabetes mellitus     | 1,141<br>(615 - 1,526)   | 5<br>(3 - 8)         | 2<br>(1 - 3)        | 113<br>(72 - 165)    | 431<br>(216 - 605)     | 590<br>(307 - 803)       |
| Chronic kidney disease due to hypertension          | 393<br>(198 - 616)       | 6<br>(3 - 10)        | 3<br>(2 - 5)        | 56<br>(29 - 96)      | 55<br>(23 - 99)        | 273<br>(132 - 434)       |
| Chronic kidney disease due to glomerulonephritis    | 38<br>(25 - 58)          | 5<br>(3 - 8)         | 3<br>(2 - 4)        | 10<br>(6 - 16)       | 5<br>(2 - 8)           | 15<br>(8 - 28)           |
| Chronic kidney disease due to other causes          | 611<br>(215 - 898)       | 13<br>(7 - 23)       | 8<br>(5 - 12)       | 84<br>(44 - 132)     | 173<br>(50 - 278)      | 333<br>(107 - 535)       |
| Urinary diseases and male infertility               | 136<br>(98 - 185)        | 6<br>(4 - 8)         | 2<br>(1 - 2)        | 20<br>(13 - 29)      | 22<br>(14 - 30)        | 87<br>(57 - 132)         |
| Interstitial nephritis and urinary tract infections | 117<br>(80 - 159)        | 4<br>(3 - 6)         | 1<br>(1 - 2)        | 15<br>(9 - 21)       | 16<br>(9 - 23)         | 81<br>(53 - 121)         |
| Urolithiasis                                        | 4<br>(3 - 7)             | --                   | 0<br>(0 - 0)        | 2<br>(1 - 2)         | 2<br>(1 - 3)           | 1<br>(1 - 2)             |
| Other urinary diseases                              | 15<br>(10 - 25)          | 2<br>(1 - 3)         | 0<br>(0 - 1)        | 4<br>(2 - 7)         | 4<br>(2 - 7)           | 5<br>(2 - 12)            |
| Gynecological diseases                              | 3<br>(2 - 8)             | --                   | --                  | 2<br>(1 - 5)         | 0<br>(0 - 2)           | 0<br>(0 - 1)             |
| Uterine fibroids                                    | 1<br>(0 - 2)             | --                   | --                  | 0<br>(0 - 1)         | 0<br>(0 - 0)           | 0<br>(0 - 0)             |
| Polycystic ovarian syndrome                         | 0<br>(0 - 0)             | --                   | --                  | 0<br>(0 - 0)         | 0<br>(0 - 0)           | --                       |
| Endometriosis                                       | 0<br>(0 - 1)             | --                   | --                  | 0<br>(0 - 1)         | 0<br>(0 - 0)           | 0<br>(0 - 0)             |
| Genital prolapse                                    | 0<br>(0 - 1)             | --                   | --                  | 0<br>(0 - 1)         | 0<br>(0 - 0)           | 0<br>(0 - 0)             |
| Other gynecological diseases                        | 1<br>(1 - 4)             | --                   | --                  | 1<br>(0 - 3)         | 0<br>(0 - 1)           | 0<br>(0 - 1)             |
| Hemoglobinopathies and hemolytic anemias            | 79<br>(53 - 126)         | 15<br>(9 - 29)       | 8<br>(5 - 14)       | 23<br>(14 - 38)      | 18<br>(11 - 29)        | 15<br>(9 - 23)           |
| Thalassemias                                        | 15<br>(10 - 26)          | 6<br>(3 - 11)        | 4<br>(2 - 6)        | 6<br>(4 - 10)        | 0<br>(0 - 0)           | 0<br>(0 - 0)             |
| Sickle cell disorders                               | 14<br>(9 - 24)           | 2<br>(1 - 4)         | 2<br>(1 - 3)        | 6<br>(4 - 10)        | 5<br>(3 - 8)           | 0<br>(0 - 0)             |
| G6PD deficiency                                     | 2<br>(1 - 3)             | 0<br>(0 - 1)         | 0<br>(0 - 0)        | 1<br>(0 - 1)         | 0<br>(0 - 1)           | 0<br>(0 - 0)             |
| Other hemoglobinopathies and hemolytic anemias      | 47<br>(31 - 76)          | 7<br>(4 - 13)        | 3<br>(2 - 5)        | 10<br>(6 - 17)       | 13<br>(8 - 21)         | 15<br>(9 - 23)           |
| Endocrine, metabolic, blood, and immune disorders   | 183<br>(132 - 352)       | 34<br>(20 - 73)      | 6<br>(4 - 11)       | 31<br>(20 - 62)      | 39<br>(26 - 75)        | 73<br>(48 - 145)         |
| Musculoskeletal disorders                           | 172<br>(55 - 233)        | --                   | 8<br>(3 - 11)       | 60<br>(21 - 87)      | 43<br>(14 - 61)        | 60<br>(18 - 85)          |
| Rheumatoid arthritis                                | 53<br>(20 - 74)          | --                   | 0<br>(0 - 1)        | 7<br>(3 - 10)        | 20<br>(7 - 29)         | 26<br>(8 - 37)           |
| Other musculoskeletal disorders                     | 119<br>(37 - 161)        | --                   | 7<br>(3 - 10)       | 54<br>(18 - 77)      | 23<br>(6 - 33)         | 35<br>(9 - 51)           |
| Other non-communicable diseases                     | 1,043<br>(790 - 1,299)   | 915<br>(669 - 1,159) | 36<br>(25 - 48)     | 46<br>(30 - 67)      | 16<br>(10 - 22)        | 30<br>(20 - 40)          |
| Congenital anomalies                                | 984<br>(714 - 1,227)     | 880<br>(632 - 1,119) | 35<br>(24 - 47)     | 43<br>(28 - 63)      | 11<br>(6 - 16)         | 15<br>(8 - 23)           |
| Neural tube defects                                 | 26<br>(14 - 43)          | 25<br>(13 - 41)      | 0<br>(0 - 1)        | 1<br>(0 - 1)         | 0<br>(0 - 0)           | 0<br>(0 - 1)             |
| Congenital heart anomalies                          | 538<br>(375 - 695)       | 483<br>(330 - 635)   | 23<br>(15 - 31)     | 27<br>(17 - 39)      | 3<br>(2 - 5)           | 2<br>(1 - 4)             |
| Cleft lip and cleft palate                          | 5<br>(1 - 19)            | 5<br>(1 - 19)        | --                  | --                   | --                     | --                       |
| Down syndrome                                       | 59<br>(29 - 97)          | 51<br>(23 - 87)      | 3<br>(2 - 5)        | 3<br>(2 - 5)         | 1<br>(1 - 2)           | 0<br>(0 - 1)             |
| Chromosomal unbalanced rearrangements               | 20<br>(11 - 32)          | 18<br>(9 - 30)       | 0<br>(0 - 1)        | 1<br>(0 - 1)         | 0<br>(0 - 0)           | 0<br>(0 - 0)             |
| Other congenital anomalies                          | 335<br>(239 - 447)       | 297<br>(209 - 405)   | 9<br>(5 - 13)       | 11<br>(7 - 17)       | 6<br>(4 - 9)           | 12<br>(6 - 18)           |
| Skin and subcutaneous diseases                      | 28<br>(21 - 37)          | 4<br>(3 - 7)         | 1<br>(1 - 1)        | 3<br>(2 - 5)         | 5<br>(3 - 7)           | 15<br>(10 - 22)          |
| Cellulitis                                          | 5<br>(3 - 8)             | 1<br>(1 - 2)         | 0<br>(0 - 0)        | 0<br>(0 - 1)         | 1<br>(0 - 2)           | 2<br>(1 - 4)             |
| Pyoderma                                            | 20<br>(14 - 28)          | 3<br>(1 - 5)         | 0<br>(0 - 1)        | 2<br>(1 - 3)         | 3<br>(2 - 5)           | 12<br>(7 - 18)           |

Web Table 31- Ecuador deaths with 95% UI by age, sex, and cause in 2013

| Cause                                           | Females, All Ages        | Females, 0-4 Years | Females, 5-14 Years | Females, 15-49 Years   | Females, 50-69 Years | Females, 70-80 Years |
|-------------------------------------------------|--------------------------|--------------------|---------------------|------------------------|----------------------|----------------------|
| Decubitus ulcer                                 | 1<br>(1 - 1)             | 0<br>(0 - 0)       | 0<br>(0 - 0)        | 0<br>(0 - 1)           | 0<br>(0 - 0)         | 0<br>(0 - 1)         |
| Other skin and subcutaneous diseases            | 2<br>(1 - 3)             | 0<br>(0 - 1)       | 0<br>(0 - 0)        | 0<br>(0 - 1)           | 0<br>(0 - 1)         | 1<br>(0 - 1)         |
| Sudden infant death syndrome                    | 32<br>(10 - 73)          | 32<br>(10 - 73)    | --                  | --                     | --                   | --                   |
| Injuries                                        | 2,953<br>(2,318 - 3,612) | 420<br>(314 - 532) | 256<br>(217 - 299)  | 1,231<br>(892 - 1,644) | 431<br>(325 - 561)   | 615<br>(438 - 770)   |
| Transport injuries                              | 1,125<br>(853 - 1,412)   | 106<br>(64 - 145)  | 126<br>(98 - 156)   | 466<br>(326 - 634)     | 220<br>(162 - 301)   | 206<br>(155 - 262)   |
| Road injuries                                   | 1,106<br>(845 - 1,390)   | 105<br>(63 - 143)  | 124<br>(96 - 153)   | 457<br>(322 - 622)     | 217<br>(160 - 297)   | 203<br>(153 - 259)   |
| Pedestrian road injuries                        | 583<br>(454 - 764)       | 63<br>(36 - 90)    | 85<br>(66 - 107)    | 162<br>(113 - 242)     | 115<br>(82 - 161)    | 158<br>(120 - 206)   |
| Cyclist road injuries                           | 93<br>(62 - 128)         | 3<br>(1 - 5)       | 4<br>(2 - 6)        | 70<br>(45 - 100)       | 10<br>(6 - 14)       | 7<br>(4 - 11)        |
| Motorcyclist road injuries                      | 24<br>(11 - 36)          | 1<br>(0 - 2)       | 1<br>(0 - 1)        | 18<br>(7 - 28)         | 3<br>(2 - 5)         | 2<br>(1 - 3)         |
| Motor vehicle road injuries                     | 400<br>(270 - 535)       | 37<br>(21 - 54)    | 33<br>(20 - 46)     | 206<br>(130 - 296)     | 88<br>(59 - 126)     | 36<br>(22 - 51)      |
| Other road injuries                             | 7<br>(3 - 11)            | 1<br>(0 - 2)       | 1<br>(0 - 2)        | 2<br>(1 - 4)           | 1<br>(0 - 2)         | 1<br>(0 - 2)         |
| Other transport injuries                        | 18<br>(9 - 26)           | 1<br>(0 - 3)       | 2<br>(1 - 3)        | 9<br>(4 - 14)          | 3<br>(2 - 5)         | 3<br>(1 - 4)         |
| Unintentional injuries                          | 1,058<br>(790 - 1,299)   | 290<br>(198 - 409) | 83<br>(66 - 108)    | 200<br>(144 - 268)     | 124<br>(90 - 164)    | 361<br>(212 - 490)   |
| Falls                                           | 319<br>(172 - 440)       | 10<br>(6 - 15)     | 7<br>(5 - 10)       | 30<br>(19 - 42)        | 39<br>(24 - 53)      | 234<br>(114 - 344)   |
| Drowning                                        | 179<br>(127 - 297)       | 70<br>(41 - 126)   | 34<br>(23 - 57)     | 44<br>(30 - 72)        | 15<br>(10 - 24)      | 15<br>(11 - 23)      |
| Fire, heat, and hot substances                  | 75<br>(53 - 98)          | 19<br>(13 - 30)    | 7<br>(5 - 10)       | 19<br>(12 - 27)        | 9<br>(6 - 13)        | 20<br>(11 - 30)      |
| Poisonings                                      | 61<br>(36 - 86)          | 6<br>(4 - 10)      | 4<br>(2 - 7)        | 37<br>(18 - 54)        | 7<br>(4 - 12)        | 7<br>(4 - 11)        |
| Exposure to mechanical forces                   | 37<br>(28 - 69)          | 7<br>(5 - 13)      | 8<br>(5 - 16)       | 13<br>(9 - 24)         | 5<br>(3 - 10)        | 4<br>(3 - 8)         |
| Unintentional firearm injuries                  | 5<br>(4 - 7)             | 1<br>(0 - 1)       | 1<br>(1 - 2)        | 2<br>(2 - 3)           | 0<br>(0 - 1)         | 0<br>(0 - 0)         |
| Unintentional suffocation                       | 5<br>(3 - 11)            | 3<br>(1 - 6)       | 1<br>(0 - 1)        | 1<br>(1 - 2)           | 0<br>(0 - 0)         | 1<br>(0 - 2)         |
| Other exposure to mechanical forces             | 26<br>(19 - 58)          | 4<br>(2 - 8)       | 6<br>(4 - 13)       | 9<br>(6 - 21)          | 4<br>(3 - 9)         | 3<br>(2 - 7)         |
| Adverse effects of medical treatment            | 100<br>(57 - 133)        | 14<br>(8 - 23)     | 2<br>(1 - 3)        | 22<br>(13 - 33)        | 14<br>(7 - 20)       | 48<br>(21 - 72)      |
| Animal contact                                  | 17<br>(4 - 25)           | 2<br>(0 - 5)       | 3<br>(1 - 4)        | 5<br>(1 - 9)           | 4<br>(1 - 6)         | 2<br>(0 - 4)         |
| Venomous animal contact                         | 14<br>(4 - 21)           | 2<br>(0 - 3)       | 2<br>(1 - 4)        | 5<br>(1 - 8)           | 4<br>(1 - 6)         | 1<br>(0 - 3)         |
| Non-venomous animal contact                     | 3<br>(1 - 5)             | 1<br>(0 - 1)       | 0<br>(0 - 1)        | 1<br>(0 - 2)           | 0<br>(0 - 1)         | 1<br>(0 - 2)         |
| Foreign body                                    | 250<br>(132 - 369)       | 159<br>(80 - 253)  | 16<br>(9 - 26)      | 23<br>(11 - 35)        | 27<br>(15 - 42)      | 25<br>(12 - 38)      |
| Pulmonary aspiration and foreign body in airway | 248<br>(130 - 367)       | 158<br>(79 - 251)  | 16<br>(9 - 25)      | 23<br>(11 - 35)        | 26<br>(15 - 42)      | 25<br>(12 - 38)      |
| Foreign body in other body part                 | 2<br>(1 - 3)             | 1<br>(0 - 1)       | 0<br>(0 - 0)        | 0<br>(0 - 1)           | 0<br>(0 - 0)         | 1<br>(0 - 1)         |
| Other unintentional injuries                    | 20<br>(8 - 29)           | 2<br>(1 - 3)       | 1<br>(1 - 3)        | 8<br>(3 - 13)          | 5<br>(1 - 8)         | 5<br>(1 - 8)         |
| Self-harm and interpersonal violence            | 760<br>(559 - 1,006)     | 24<br>(8 - 45)     | 46<br>(29 - 64)     | 562<br>(403 - 763)     | 83<br>(58 - 117)     | 45<br>(30 - 66)      |
| Self-harm                                       | 417<br>(303 - 564)       | --                 | 24<br>(14 - 36)     | 328<br>(235 - 451)     | 42<br>(28 - 57)      | 23<br>(15 - 31)      |
| Interpersonal violence                          | 343<br>(199 - 487)       | 24<br>(8 - 45)     | 22<br>(10 - 36)     | 234<br>(130 - 352)     | 41<br>(24 - 66)      | 22<br>(11 - 40)      |
| Assault by firearm                              | 151<br>(80 - 239)        | 5<br>(1 - 11)      | 9<br>(4 - 15)       | 116<br>(57 - 192)      | 17<br>(9 - 30)       | 4<br>(2 - 9)         |
| Assault by sharp object                         | 94<br>(48 - 144)         | 4<br>(1 - 9)       | 3<br>(1 - 6)        | 67<br>(33 - 107)       | 13<br>(6 - 23)       | 6<br>(3 - 12)        |
| Assault by other means                          | 98<br>(52 - 146)         | 14<br>(5 - 29)     | 10<br>(4 - 18)      | 51<br>(24 - 83)        | 11<br>(6 - 19)       | 12<br>(5 - 23)       |
| Forces of nature, war, and legal intervention   | 10<br>(5 - 22)           | 0<br>(0 - 0)       | 0<br>(0 - 1)        | 3<br>(2 - 7)           | 3<br>(2 - 7)         | 3<br>(2 - 7)         |
| Exposure to forces of nature                    | 10<br>(5 - 22)           | 0<br>(0 - 0)       | 0<br>(0 - 1)        | 3<br>(2 - 7)           | 3<br>(2 - 7)         | 3<br>(2 - 7)         |

Web Table 31- Egypt deaths with 95% UI by age, sex, and cause in 2013

| Cause                                                             | Both Sexes, All Ages           | Both Sexes, 0-4 Years       | Both Sexes, 5-14 Years   | Both Sexes, 15-49 Years     | Both Sexes, 50-69 Years        | Both Sexes, 70-80 Years        |
|-------------------------------------------------------------------|--------------------------------|-----------------------------|--------------------------|-----------------------------|--------------------------------|--------------------------------|
| All causes                                                        | 539,722<br>(499,830 - 584,814) | 41,267<br>(37,154 - 46,058) | 7,241<br>(6,730 - 7,804) | 70,956<br>(63,110 - 79,532) | 195,768<br>(177,287 - 215,951) | 224,491<br>(210,944 - 239,770) |
| Communicable, maternal, neonatal, and nutritional diseases        | 42,246<br>(38,371 - 47,264)    | 21,598<br>(18,502 - 25,492) | 1,485<br>(1,191 - 1,869) | 4,461<br>(3,831 - 5,220)    | 6,208<br>(5,394 - 7,149)       | 8,495<br>(7,233 - 9,797)       |
| HIV/AIDS and tuberculosis                                         | 946<br>(823 - 1,215)           | 14<br>(10 - 19)             | 12<br>(10 - 15)          | 389<br>(331 - 506)          | 342<br>(282 - 475)             | 189<br>(158 - 230)             |
| Tuberculosis                                                      | 837<br>(715 - 1,107)           | 5<br>(3 - 7)                | 10<br>(8 - 13)           | 312<br>(256 - 422)          | 324<br>(264 - 457)             | 186<br>(156 - 227)             |
| HIV/AIDS                                                          | 109<br>(81 - 143)              | 9<br>(5 - 14)               | 2<br>(1 - 3)             | 78<br>(60 - 96)             | 18<br>(10 - 30)                | 2<br>(1 - 4)                   |
| HIV/AIDS resulting in mycobacterial infection                     | 6<br>(4 - 8)                   | 0<br>(0 - 1)                | 0<br>(0 - 0)             | 4<br>(3 - 5)                | 1<br>(1 - 2)                   | 0<br>(0 - 0)                   |
| HIV/AIDS resulting in other diseases                              | 103<br>(77 - 135)              | 8<br>(5 - 13)               | 2<br>(1 - 3)             | 74<br>(57 - 91)             | 17<br>(9 - 28)                 | 2<br>(1 - 4)                   |
| Diarrhea, lower respiratory, and other common infectious diseases | 26,989<br>(23,944 - 30,588)    | 11,869<br>(9,831 - 14,478)  | 1,337<br>(1,041 - 1,732) | 2,602<br>(2,096 - 3,249)    | 4,330<br>(3,684 - 5,066)       | 6,851<br>(5,633 - 8,076)       |
| Diarrheal diseases                                                | 4,082<br>(3,059 - 5,342)       | 3,273<br>(2,291 - 4,500)    | 99<br>(71 - 132)         | 133<br>(109 - 162)          | 174<br>(140 - 212)             | 404<br>(303 - 523)             |
| Intestinal infectious diseases                                    | 2,102<br>(1,128 - 3,568)       | 586<br>(300 - 1,007)        | 594<br>(325 - 983)       | 703<br>(341 - 1,281)        | 153<br>(70 - 280)              | 66<br>(31 - 121)               |
| Typhoid fever                                                     | 1,622<br>(859 - 2,756)         | 433<br>(213 - 763)          | 460<br>(250 - 768)       | 552<br>(267 - 1,014)        | 123<br>(57 - 233)              | 53<br>(25 - 99)                |
| Paratyphoid fever                                                 | 469<br>(246 - 820)             | 148<br>(69 - 276)           | 133<br>(70 - 226)        | 148<br>(70 - 284)           | 28<br>(12 - 57)                | 12<br>(5 - 24)                 |
| Other intestinal infectious diseases                              | 11<br>(5 - 20)                 | 5<br>(1 - 11)               | 1<br>(0 - 4)             | 3<br>(1 - 8)                | 1<br>(0 - 5)                   | 1<br>(0 - 4)                   |
| Lower respiratory infections                                      | 18,578<br>(16,360 - 21,129)    | 7,371<br>(5,887 - 9,159)    | 462<br>(351 - 643)       | 1,279<br>(1,069 - 1,591)    | 3,472<br>(2,888 - 4,230)       | 5,994<br>(4,823 - 7,164)       |
| Upper respiratory infections                                      | 27<br>(13 - 45)                | 2<br>(1 - 6)                | 1<br>(0 - 2)             | 5<br>(2 - 10)               | 10<br>(2 - 23)                 | 9<br>(2 - 25)                  |
| Otitis media                                                      | 27<br>(23 - 32)                | 1<br>(1 - 2)                | 1<br>(1 - 2)             | 5<br>(4 - 6)                | 10<br>(8 - 12)                 | 10<br>(7 - 13)                 |
| Meningitis                                                        | 576<br>(505 - 666)             | 164<br>(115 - 235)          | 51<br>(41 - 62)          | 155<br>(132 - 185)          | 138<br>(109 - 162)             | 68<br>(55 - 81)                |
| Pneumococcal meningitis                                           | 134<br>(106 - 163)             | 30<br>(19 - 45)             | 14<br>(9 - 21)           | 41<br>(27 - 56)             | 33<br>(20 - 44)                | 17<br>(12 - 23)                |
| H influenzae type B meningitis                                    | 114<br>(90 - 146)              | 63<br>(42 - 94)             | 13<br>(9 - 18)           | 18<br>(12 - 25)             | 13<br>(8 - 19)                 | 7<br>(4 - 9)                   |
| Meningococcal meningitis                                          | 152<br>(123 - 185)             | 44<br>(29 - 67)             | 15<br>(10 - 20)          | 42<br>(29 - 57)             | 33<br>(23 - 47)                | 17<br>(11 - 24)                |
| Other meningitis                                                  | 176<br>(144 - 214)             | 27<br>(14 - 42)             | 9<br>(6 - 14)            | 54<br>(40 - 72)             | 59<br>(40 - 75)                | 28<br>(19 - 37)                |
| Encephalitis                                                      | 1,285<br>(949 - 1,540)         | 285<br>(176 - 409)          | 102<br>(68 - 164)        | 285<br>(219 - 391)          | 342<br>(217 - 436)             | 270<br>(106 - 424)             |
| Diphtheria                                                        | 6<br>(1 - 20)                  | 3<br>(0 - 15)               | 1<br>(0 - 7)             | 1<br>(0 - 3)                | 1<br>(0 - 4)                   | --                             |
| Whooping cough                                                    | 58<br>(0 - 276)                | 54<br>(0 - 256)             | 3<br>(0 - 17)            | 1<br>(0 - 4)                | 0<br>(0 - 1)                   | --                             |
| Tetanus                                                           | 78<br>(59 - 104)               | 14<br>(8 - 25)              | 3<br>(2 - 4)             | 24<br>(17 - 34)             | 26<br>(17 - 36)                | 11<br>(6 - 18)                 |
| Measles                                                           | 124<br>(2 - 820)               | 105<br>(2 - 692)            | 16<br>(0 - 99)           | 3<br>(0 - 19)               | 0<br>(0 - 1)                   | --                             |
| Varicella and herpes zoster                                       | 47<br>(21 - 96)                | 11<br>(1 - 35)              | 3<br>(0 - 9)             | 10<br>(3 - 22)              | 5<br>(1 - 14)                  | 18<br>(2 - 60)                 |
| Neglected tropical diseases and malaria                           | 383<br>(321 - 456)             | 42<br>(29 - 63)             | 29<br>(22 - 38)          | 101<br>(82 - 126)           | 136<br>(100 - 183)             | 75<br>(52 - 103)               |
| Malaria                                                           | 9<br>(6 - 12)                  | 1<br>(0 - 2)                | 1<br>(1 - 3)             | 4<br>(3 - 6)                | 1<br>(1 - 2)                   | 1<br>(0 - 1)                   |
| Leishmaniasis                                                     | 60<br>(40 - 90)                | 19<br>(7 - 35)              | 6<br>(3 - 11)            | 22<br>(13 - 36)             | 11<br>(4 - 18)                 | 3<br>(1 - 4)                   |
| Visceral leishmaniasis                                            | 60<br>(40 - 90)                | 19<br>(7 - 35)              | 6<br>(3 - 11)            | 22<br>(13 - 36)             | 11<br>(4 - 18)                 | 3<br>(1 - 4)                   |
| Schistosomiasis                                                   | 208<br>(157 - 269)             | 0<br>(0 - 1)                | 2<br>(1 - 4)             | 43<br>(29 - 60)             | 105<br>(70 - 154)              | 57<br>(37 - 85)                |
| Cysticercosis                                                     | 1<br>(0 - 1)                   | 0<br>(0 - 0)                | 0<br>(0 - 0)             | 0<br>(0 - 0)                | 0<br>(0 - 0)                   | 0<br>(0 - 0)                   |
| Cystic echinococcosis                                             | 9<br>(8 - 10)                  | 0<br>(0 - 0)                | 1<br>(1 - 1)             | 3<br>(3 - 3)                | 3<br>(3 - 4)                   | 2<br>(2 - 2)                   |
| Dengue                                                            | 8<br>(7 - 13)                  | 1<br>(1 - 2)                | 2<br>(1 - 2)             | 4<br>(4 - 6)                | 1<br>(1 - 2)                   | 0<br>(0 - 1)                   |
| Rabies                                                            | 28<br>(19 - 36)                | 3<br>(2 - 6)                | 11<br>(6 - 17)           | 9<br>(6 - 12)               | 4<br>(2 - 5)                   | 1<br>(1 - 1)                   |
| Intestinal nematode infections                                    | 3<br>(0 - 8)                   | 1<br>(0 - 5)                | 0<br>(0 - 4)             | 0<br>(0 - 2)                | 0<br>(0 - 3)                   | 0<br>(0 - 2)                   |
| Ascariasis                                                        | 3<br>(0 - 8)                   | 1<br>(0 - 5)                | 0<br>(0 - 4)             | 0<br>(0 - 2)                | 0<br>(0 - 3)                   | 0<br>(0 - 2)                   |
| Other neglected tropical diseases                                 | 57<br>(41 - 69)                | 16<br>(10 - 25)             | 5<br>(3 - 7)             | 16<br>(12 - 19)             | 10<br>(6 - 13)                 | 10<br>(7 - 15)                 |
| Maternal disorders                                                | 619<br>(465 - 803)             | --                          | 1<br>(0 - 1)             | 618<br>(465 - 802)          | --                             | --                             |

Web Table 31- Egypt deaths with 95% UI by age, sex, and cause in 2013

| Cause                                                            | Both Sexes, All Ages           | Both Sexes, 0-4 Years       | Both Sexes, 5-14 Years   | Both Sexes, 15-49 Years     | Both Sexes, 50-69 Years        | Both Sexes, 70-80 Years        |
|------------------------------------------------------------------|--------------------------------|-----------------------------|--------------------------|-----------------------------|--------------------------------|--------------------------------|
| Maternal hemorrhage                                              | 222<br>(159 - 299)             | --                          | 0<br>(0 - 0)             | 221<br>(159 - 299)          | --                             | --                             |
| Maternal sepsis and other maternal infections                    | 51<br>(37 - 69)                | --                          | 0<br>(0 - 0)             | 51<br>(37 - 68)             | --                             | --                             |
| Maternal hypertensive disorders                                  | 100<br>(75 - 134)              | --                          | 0<br>(0 - 0)             | 100<br>(75 - 134)           | --                             | --                             |
| Maternal obstructed labor                                        | 45<br>(26 - 70)                | --                          | 0<br>(0 - 0)             | 45<br>(26 - 70)             | --                             | --                             |
| Maternal abortive outcome                                        | 43<br>(30 - 59)                | --                          | 0<br>(0 - 0)             | 43<br>(30 - 59)             | --                             | --                             |
| Indirect maternal deaths                                         | 64<br>(30 - 109)               | --                          | 0<br>(0 - 0)             | 64<br>(30 - 109)            | --                             | --                             |
| Late maternal deaths                                             | 45<br>(20 - 81)                | --                          | 0<br>(0 - 0)             | 45<br>(20 - 81)             | --                             | --                             |
| Maternal deaths aggravated by HIV/AIDS                           | 0<br>(0 - 0)                   | --                          | --                       | 0<br>(0 - 0)                | --                             | --                             |
| Other maternal disorders                                         | 47<br>(32 - 65)                | --                          | 0<br>(0 - 0)             | 47<br>(32 - 65)             | --                             | --                             |
| Neonatal disorders                                               | 9,097<br>(7,700 - 10,754)      | 9,097<br>(7,700 - 10,754)   | --                       | --                          | --                             | --                             |
| Neonatal preterm birth complications                             | 5,787<br>(4,582 - 7,146)       | 5,787<br>(4,582 - 7,146)    | --                       | --                          | --                             | --                             |
| Neonatal encephalopathy due to birth asphyxia and trauma         | 581<br>(376 - 970)             | 581<br>(376 - 970)          | --                       | --                          | --                             | --                             |
| Neonatal sepsis and other neonatal infections                    | 1,042<br>(575 - 1,778)         | 1,042<br>(575 - 1,778)      | --                       | --                          | --                             | --                             |
| Hemolytic disease and other neonatal jaundice                    | 142<br>(69 - 283)              | 142<br>(69 - 283)           | --                       | --                          | --                             | --                             |
| Other neonatal disorders                                         | 1,545<br>(1,036 - 2,204)       | 1,545<br>(1,036 - 2,204)    | --                       | --                          | --                             | --                             |
| Nutritional deficiencies                                         | 1,569<br>(1,331 - 2,066)       | 314<br>(226 - 462)          | 46<br>(33 - 58)          | 372<br>(304 - 471)          | 262<br>(207 - 368)             | 574<br>(463 - 768)             |
| Protein-energy malnutrition                                      | 296<br>(171 - 415)             | 173<br>(81 - 276)           | 10<br>(5 - 15)           | 18<br>(9 - 34)              | 26<br>(13 - 43)                | 70<br>(26 - 111)               |
| Iodine deficiency                                                | 9<br>(2 - 25)                  | 1<br>(0 - 7)                | 0<br>(0 - 3)             | 1<br>(0 - 5)                | 3<br>(0 - 11)                  | 3<br>(0 - 16)                  |
| Iron-deficiency anemia                                           | 1,139<br>(928 - 1,537)         | 75<br>(40 - 135)            | 31<br>(21 - 40)          | 341<br>(277 - 435)          | 220<br>(168 - 317)             | 471<br>(369 - 657)             |
| Other nutritional deficiencies                                   | 125<br>(79 - 238)              | 64<br>(31 - 132)            | 5<br>(3 - 9)             | 12<br>(7 - 24)              | 14<br>(7 - 28)                 | 30<br>(13 - 55)                |
| Other communicable, maternal, neonatal, and nutritional diseases | 2,644<br>(2,310 - 3,021)       | 262<br>(196 - 342)          | 60<br>(45 - 74)          | 378<br>(309 - 472)          | 1,138<br>(928 - 1,370)         | 806<br>(665 - 975)             |
| Sexually transmitted diseases excluding HIV                      | 54<br>(34 - 79)                | 21<br>(6 - 40)              | 2<br>(1 - 4)             | 7<br>(5 - 10)               | 11<br>(7 - 17)                 | 12<br>(7 - 19)                 |
| Syphilis                                                         | 43<br>(26 - 65)                | 21<br>(6 - 40)              | 2<br>(1 - 3)             | 4<br>(2 - 5)                | 7<br>(4 - 12)                  | 10<br>(6 - 15)                 |
| Chlamydial infection                                             | 2<br>(1 - 2)                   | --                          | 0<br>(0 - 0)             | 1<br>(0 - 1)                | 1<br>(0 - 1)                   | 0<br>(0 - 1)                   |
| Gonococcal infection                                             | 5<br>(3 - 7)                   | --                          | 0<br>(0 - 0)             | 2<br>(1 - 2)                | 2<br>(1 - 3)                   | 1<br>(1 - 2)                   |
| Other sexually transmitted diseases                              | 3<br>(2 - 5)                   | --                          | 0<br>(0 - 0)             | 1<br>(1 - 2)                | 1<br>(1 - 2)                   | 1<br>(0 - 1)                   |
| Hepatitis                                                        | 1,730<br>(1,469 - 2,025)       | 22<br>(14 - 37)             | 13<br>(9 - 18)           | 227<br>(173 - 294)          | 915<br>(722 - 1,132)           | 553<br>(432 - 711)             |
| Acute hepatitis A                                                | 70<br>(19 - 153)               | 8<br>(3 - 17)               | 4<br>(1 - 7)             | 16<br>(4 - 40)              | 32<br>(7 - 75)                 | 10<br>(2 - 26)                 |
| Acute hepatitis B                                                | 1,126<br>(768 - 1,479)         | 12<br>(6 - 23)              | 4<br>(2 - 7)             | 93<br>(46 - 151)            | 600<br>(383 - 837)             | 417<br>(279 - 568)             |
| Acute hepatitis C                                                | 276<br>(65 - 585)              | --                          | 2<br>(0 - 4)             | 41<br>(10 - 93)             | 150<br>(34 - 331)              | 83<br>(18 - 189)               |
| Acute hepatitis E                                                | 257<br>(115 - 469)             | 1<br>(0 - 2)                | 4<br>(2 - 8)             | 77<br>(40 - 126)            | 132<br>(51 - 256)              | 43<br>(13 - 102)               |
| Other infectious diseases                                        | 860<br>(675 - 1,037)           | 219<br>(160 - 285)          | 44<br>(30 - 56)          | 144<br>(115 - 195)          | 212<br>(166 - 278)             | 241<br>(162 - 297)             |
| Non-communicable diseases                                        | 473,995<br>(436,342 - 514,255) | 17,882<br>(14,481 - 21,074) | 3,836<br>(3,442 - 4,304) | 56,276<br>(49,597 - 63,353) | 183,593<br>(165,321 - 203,051) | 212,408<br>(199,024 - 226,408) |
| Neoplasms                                                        | 46,282<br>(41,660 - 51,025)    | 417<br>(308 - 552)          | 750<br>(648 - 878)       | 9,451<br>(8,213 - 10,750)   | 23,235<br>(20,696 - 25,985)    | 12,430<br>(11,313 - 13,566)    |
| Esophageal cancer                                                | 680<br>(563 - 831)             | --                          | --                       | 136<br>(110 - 170)          | 338<br>(272 - 436)             | 206<br>(163 - 251)             |
| Stomach cancer                                                   | 2,862<br>(2,526 - 3,274)       | --                          | --                       | 527<br>(442 - 621)          | 1,493<br>(1,273 - 1,744)       | 842<br>(716 - 1,001)           |
| Liver cancer                                                     | 9,827<br>(8,513 - 11,156)      | --                          | 21<br>(14 - 28)          | 1,256<br>(1,011 - 1,525)    | 6,143<br>(5,141 - 7,187)       | 2,407<br>(2,020 - 2,870)       |
| Liver cancer due to hepatitis B                                  | 1,448<br>(879 - 2,084)         | --                          | 5<br>(3 - 8)             | 270<br>(185 - 374)          | 933<br>(503 - 1,403)           | 240<br>(154 - 339)             |
| Liver cancer due to hepatitis C                                  | 6,662<br>(5,493 - 7,974)       | --                          | 5<br>(2 - 11)            | 754<br>(565 - 976)          | 4,207<br>(3,366 - 5,119)       | 1,696<br>(1,400 - 2,038)       |
| Liver cancer due to alcohol use                                  | 757<br>(509 - 1,036)           | --                          | --                       | 56<br>(33 - 81)             | 434<br>(283 - 611)             | 267<br>(165 - 397)             |

Web Table 31- Egypt deaths with 95% UI by age, sex, and cause in 2013

| Cause                                         | Both Sexes, All Ages           | Both Sexes, 0-4 Years    | Both Sexes, 5-14 Years   | Both Sexes, 15-49 Years     | Both Sexes, 50-69 Years     | Both Sexes, 70-80 Years        |
|-----------------------------------------------|--------------------------------|--------------------------|--------------------------|-----------------------------|-----------------------------|--------------------------------|
| Liver cancer due to other causes              | 960<br>(516 - 1,445)           | --                       | 10<br>(6 - 15)           | 176<br>(102 - 271)          | 569<br>(284 - 882)          | 205<br>(106 - 327)             |
| Larynx cancer                                 | 596<br>(471 - 834)             | --                       | --                       | 92<br>(71 - 135)            | 312<br>(238 - 441)          | 192<br>(147 - 261)             |
| Tracheal, bronchus and lung cancer            | 4,820<br>(4,249 - 5,436)       | --                       | --                       | 776<br>(653 - 926)          | 2,558<br>(2,217 - 2,918)    | 1,487<br>(1,295 - 1,718)       |
| Breast cancer                                 | 4,671<br>(3,933 - 5,629)       | --                       | --                       | 1,351<br>(1,073 - 1,711)    | 2,406<br>(1,982 - 2,923)    | 914<br>(762 - 1,106)           |
| Cervical cancer                               | 623<br>(458 - 771)             | --                       | --                       | 174<br>(123 - 223)          | 288<br>(208 - 374)          | 161<br>(108 - 208)             |
| Uterine cancer                                | 240<br>(156 - 318)             | --                       | --                       | 38<br>(23 - 55)             | 136<br>(85 - 187)           | 67<br>(43 - 94)                |
| Prostate cancer                               | 1,008<br>(616 - 1,377)         | --                       | --                       | 15<br>(10 - 22)             | 283<br>(181 - 404)          | 709<br>(412 - 958)             |
| Colon and rectum cancer                       | 2,315<br>(2,060 - 2,610)       | --                       | --                       | 583<br>(495 - 680)          | 1,070<br>(928 - 1,231)      | 662<br>(577 - 754)             |
| Lip and oral cavity cancer                    | 404<br>(296 - 490)             | --                       | --                       | 106<br>(81 - 133)           | 194<br>(136 - 243)          | 104<br>(72 - 132)              |
| Nasopharynx cancer                            | 58<br>(47 - 71)                | --                       | 3<br>(1 - 5)             | 25<br>(19 - 32)             | 23<br>(18 - 31)             | 7<br>(5 - 9)                   |
| Other pharynx cancer                          | 214<br>(175 - 257)             | --                       | --                       | 57<br>(46 - 73)             | 113<br>(89 - 140)           | 44<br>(34 - 55)                |
| Gallbladder and biliary tract cancer          | 557<br>(337 - 692)             | --                       | --                       | 106<br>(64 - 139)           | 306<br>(179 - 391)          | 146<br>(85 - 188)              |
| Pancreatic cancer                             | 1,668<br>(1,475 - 1,898)       | --                       | --                       | 269<br>(222 - 324)          | 889<br>(766 - 1,031)        | 511<br>(439 - 594)             |
| Malignant skin melanoma                       | 68<br>(51 - 98)                | --                       | --                       | 22<br>(16 - 35)             | 32<br>(23 - 43)             | 15<br>(10 - 21)                |
| Non-melanoma skin cancer                      | 97<br>(75 - 138)               | --                       | --                       | 19<br>(15 - 28)             | 39<br>(30 - 56)             | 38<br>(29 - 53)                |
| Ovarian cancer                                | 514<br>(421 - 636)             | --                       | --                       | 147<br>(112 - 191)          | 271<br>(214 - 343)          | 97<br>(74 - 128)               |
| Testicular cancer                             | 59<br>(36 - 79)                | --                       | --                       | 35<br>(21 - 49)             | 13<br>(7 - 20)              | 11<br>(6 - 16)                 |
| Kidney cancer                                 | 641<br>(557 - 732)             | 15<br>(9 - 26)           | 14<br>(10 - 21)          | 117<br>(96 - 141)           | 346<br>(290 - 410)          | 149<br>(123 - 179)             |
| Bladder cancer                                | 3,500<br>(2,897 - 4,797)       | --                       | --                       | 313<br>(235 - 493)          | 1,883<br>(1,509 - 2,617)    | 1,304<br>(1,066 - 1,683)       |
| Brain and nervous system cancer               | 3,789<br>(2,731 - 4,448)       | 101<br>(59 - 157)        | 202<br>(147 - 256)       | 1,058<br>(807 - 1,276)      | 1,537<br>(1,052 - 1,838)    | 891<br>(574 - 1,095)           |
| Thyroid cancer                                | 283<br>(213 - 342)             | --                       | 1<br>(1 - 2)             | 47<br>(36 - 58)             | 137<br>(102 - 171)          | 98<br>(69 - 125)               |
| Mesothelioma                                  | 64<br>(52 - 78)                | --                       | --                       | 17<br>(12 - 23)             | 31<br>(24 - 41)             | 16<br>(11 - 21)                |
| Hodgkin lymphoma                              | 103<br>(83 - 139)              | 6<br>(4 - 10)            | 12<br>(7 - 21)           | 52<br>(39 - 72)             | 26<br>(18 - 37)             | 8<br>(6 - 12)                  |
| Non-Hodgkin lymphoma                          | 678<br>(558 - 935)             | 14<br>(9 - 24)           | 31<br>(21 - 45)          | 226<br>(176 - 325)          | 267<br>(208 - 379)          | 140<br>(110 - 197)             |
| Multiple myeloma                              | 101<br>(83 - 129)              | --                       | --                       | 32<br>(24 - 43)             | 49<br>(39 - 63)             | 20<br>(16 - 26)                |
| Leukemia                                      | 3,560<br>(3,162 - 3,993)       | 128<br>(89 - 182)        | 271<br>(218 - 331)       | 1,281<br>(1,099 - 1,504)    | 1,211<br>(1,038 - 1,391)    | 670<br>(578 - 773)             |
| Other neoplasms                               | 2,280<br>(1,844 - 2,596)       | 152<br>(85 - 210)        | 196<br>(146 - 265)       | 577<br>(465 - 677)          | 842<br>(651 - 1,000)        | 514<br>(373 - 609)             |
| Cardiovascular diseases                       | 224,691<br>(206,264 - 246,146) | 2,574<br>(2,052 - 3,198) | 1,331<br>(1,168 - 1,531) | 24,940<br>(21,956 - 28,420) | 79,677<br>(71,499 - 88,698) | 116,169<br>(107,788 - 126,197) |
| Rheumatic heart disease                       | 2,668<br>(2,100 - 3,363)       | 12<br>(6 - 19)           | 89<br>(66 - 134)         | 849<br>(665 - 1,149)        | 501<br>(360 - 646)          | 1,217<br>(915 - 1,540)         |
| Ischemic heart disease                        | 82,181<br>(72,310 - 93,041)    | 137<br>(95 - 201)        | 79<br>(58 - 100)         | 9,864<br>(8,391 - 11,554)   | 34,112<br>(29,243 - 39,284) | 37,989<br>(32,865 - 43,127)    |
| Cerebrovascular disease                       | 85,946<br>(77,590 - 98,122)    | 945<br>(734 - 1,195)     | 864<br>(749 - 1,000)     | 7,760<br>(6,548 - 9,260)    | 25,173<br>(21,964 - 29,792) | 51,203<br>(46,401 - 58,667)    |
| Ischemic stroke                               | 40,841<br>(35,648 - 48,869)    | 75<br>(50 - 120)         | 60<br>(46 - 81)          | 1,356<br>(1,048 - 1,888)    | 10,833<br>(9,091 - 13,899)  | 28,517<br>(24,828 - 33,696)    |
| Hemorrhagic stroke                            | 45,105<br>(39,361 - 52,519)    | 870<br>(676 - 1,104)     | 805<br>(694 - 929)       | 6,404<br>(5,371 - 7,657)    | 14,340<br>(12,150 - 17,017) | 22,686<br>(19,557 - 27,496)    |
| Hypertensive heart disease                    | 17,765<br>(14,110 - 22,306)    | 3<br>(2 - 6)             | 3<br>(2 - 4)             | 2,269<br>(1,754 - 2,987)    | 5,032<br>(3,869 - 6,281)    | 10,457<br>(7,850 - 13,765)     |
| Cardiomyopathy and myocarditis                | 11,649<br>(9,340 - 13,390)     | 1,140<br>(823 - 1,448)   | 204<br>(153 - 256)       | 1,961<br>(1,507 - 2,373)    | 3,332<br>(2,480 - 3,965)    | 5,011<br>(4,051 - 6,041)       |
| Atrial fibrillation and flutter               | 27<br>(22 - 33)                | --                       | --                       | 3<br>(2 - 4)                | 6<br>(5 - 8)                | 18<br>(14 - 24)                |
| Aortic aneurysm                               | 1,194<br>(997 - 1,455)         | --                       | --                       | 65<br>(50 - 84)             | 671<br>(549 - 841)          | 458<br>(374 - 564)             |
| Peripheral vascular disease                   | 22<br>(18 - 27)                | --                       | --                       | 2<br>(1 - 2)                | 8<br>(6 - 9)                | 13<br>(11 - 17)                |
| Endocarditis                                  | 546<br>(392 - 713)             | 76<br>(47 - 116)         | 11<br>(8 - 16)           | 125<br>(90 - 174)           | 193<br>(129 - 264)          | 140<br>(91 - 181)              |
| Other cardiovascular and circulatory diseases | 22,694<br>(19,381 - 28,589)    | 260<br>(192 - 348)       | 81<br>(59 - 110)         | 2,043<br>(1,652 - 2,617)    | 10,648<br>(8,734 - 13,278)  | 9,662<br>(7,866 - 12,476)      |

Web Table 31- Egypt deaths with 95% UI by age, sex, and cause in 2013

| Cause                                               | Both Sexes, All Ages        | Both Sexes, 0-4 Years | Both Sexes, 5-14 Years | Both Sexes, 15-49 Years  | Both Sexes, 50-69 Years     | Both Sexes, 70-80 Years     |
|-----------------------------------------------------|-----------------------------|-----------------------|------------------------|--------------------------|-----------------------------|-----------------------------|
| Chronic respiratory diseases                        | 49,845<br>(44,623 - 56,040) | 465<br>(357 - 691)    | 92<br>(77 - 111)       | 2,337<br>(1,987 - 2,869) | 15,742<br>(13,588 - 18,675) | 31,208<br>(27,716 - 34,443) |
| Chronic obstructive pulmonary disease               | 38,124<br>(33,609 - 43,111) | 268<br>(190 - 432)    | 51<br>(42 - 63)        | 1,377<br>(1,155 - 1,721) | 11,835<br>(10,018 - 14,171) | 24,593<br>(21,401 - 27,722) |
| Pneumoconiosis                                      | 1,464<br>(1,038 - 1,981)    | 2<br>(1 - 3)          | 3<br>(2 - 4)           | 460<br>(331 - 637)       | 581<br>(380 - 823)          | 418<br>(280 - 585)          |
| Silicosis                                           | 337<br>(222 - 475)          | 0<br>(0 - 1)          | 1<br>(0 - 1)           | 6<br>(4 - 8)             | 85<br>(53 - 125)            | 245<br>(154 - 350)          |
| Asbestosis                                          | 111<br>(79 - 146)           | 0<br>(0 - 1)          | 1<br>(0 - 1)           | 62<br>(43 - 85)          | 38<br>(25 - 52)             | 10<br>(6 - 14)              |
| Coal workers pneumoconiosis                         | 16<br>(12 - 20)             | 0<br>(0 - 1)          | 1<br>(0 - 1)           | 4<br>(3 - 5)             | 5<br>(3 - 6)                | 6<br>(4 - 9)                |
| Other pneumoconiosis                                | 1,000<br>(717 - 1,357)      | 1<br>(0 - 1)          | 1<br>(1 - 1)           | 388<br>(281 - 543)       | 453<br>(297 - 656)          | 157<br>(106 - 223)          |
| Asthma                                              | 1,852<br>(1,484 - 2,302)    | 13<br>(8 - 21)        | 9<br>(7 - 12)          | 139<br>(111 - 176)       | 591<br>(462 - 774)          | 1,099<br>(850 - 1,411)      |
| Interstitial lung disease and pulmonary sarcoidosis | 6,578<br>(4,966 - 9,092)    | 1<br>(0 - 1)          | 2<br>(1 - 3)           | 71<br>(47 - 108)         | 2,399<br>(1,787 - 3,481)    | 4,105<br>(3,033 - 5,795)    |
| Other chronic respiratory diseases                  | 1,826<br>(1,472 - 2,321)    | 182<br>(138 - 256)    | 27<br>(21 - 36)        | 290<br>(219 - 380)       | 335<br>(253 - 432)          | 992<br>(745 - 1,334)        |
| Cirrhosis                                           | 62,326<br>(55,629 - 69,452) | 85<br>(61 - 116)      | 133<br>(115 - 154)     | 7,619<br>(6,498 - 8,891) | 34,555<br>(30,278 - 38,775) | 19,935<br>(17,848 - 22,489) |
| Cirrhosis due to hepatitis B                        | 17,901<br>(10,326 - 24,348) | 3<br>(1 - 6)          | 18<br>(8 - 30)         | 2,052<br>(1,215 - 2,938) | 9,847<br>(5,715 - 13,860)   | 5,980<br>(3,172 - 8,400)    |
| Cirrhosis due to hepatitis C                        | 31,292<br>(23,292 - 39,640) | 8<br>(3 - 14)         | 35<br>(20 - 52)        | 3,828<br>(2,495 - 5,135) | 17,581<br>(12,350 - 22,908) | 9,840<br>(7,170 - 12,659)   |
| Cirrhosis due to alcohol use                        | 7,615<br>(4,610 - 11,055)   | -                     | -                      | 658<br>(271 - 1,078)     | 4,098<br>(2,231 - 6,189)    | 2,859<br>(1,822 - 3,941)    |
| Cirrhosis due to other causes                       | 5,519<br>(3,400 - 8,022)    | 74<br>(52 - 103)      | 79<br>(59 - 102)       | 1,080<br>(633 - 1,611)   | 3,029<br>(1,714 - 4,653)    | 1,255<br>(775 - 1,911)      |
| Digestive diseases                                  | 13,324<br>(11,481 - 15,571) | 143<br>(70 - 371)     | 121<br>(86 - 195)      | 2,776<br>(2,250 - 3,459) | 6,625<br>(5,511 - 7,943)    | 3,659<br>(3,026 - 4,347)    |
| Peptic ulcer disease                                | 3,789<br>(2,990 - 4,784)    | 4<br>(1 - 8)          | 11<br>(6 - 16)         | 690<br>(501 - 956)       | 1,910<br>(1,452 - 2,514)    | 1,174<br>(906 - 1,500)      |
| Gastritis and duodenitis                            | 342<br>(189 - 469)          | 2<br>(1 - 6)          | 5<br>(2 - 8)           | 67<br>(37 - 96)          | 153<br>(77 - 220)           | 114<br>(63 - 169)           |
| Appendicitis                                        | 292<br>(171 - 412)          | 8<br>(2 - 17)         | 13<br>(6 - 20)         | 140<br>(79 - 210)        | 103<br>(55 - 154)           | 28<br>(17 - 39)             |
| Paralytic ileus and intestinal obstruction          | 4,234<br>(3,279 - 6,333)    | 94<br>(41 - 270)      | 55<br>(33 - 109)       | 922<br>(673 - 1,448)     | 2,054<br>(1,498 - 3,122)    | 1,109<br>(811 - 1,556)      |
| Inguinal, femoral, and abdominal hernia             | 285<br>(191 - 429)          | 6<br>(2 - 19)         | 4<br>(2 - 7)           | 47<br>(29 - 71)          | 149<br>(92 - 242)           | 78<br>(49 - 121)            |
| Inflammatory bowel disease                          | 514<br>(338 - 654)          | 7<br>(3 - 15)         | 8<br>(5 - 13)          | 137<br>(89 - 185)        | 220<br>(130 - 305)          | 141<br>(91 - 196)           |
| Vascular intestinal disorders                       | 44<br>(23 - 78)             | 2<br>(0 - 6)          | 3<br>(1 - 8)           | 23<br>(12 - 44)          | 11<br>(5 - 20)              | 4<br>(2 - 7)                |
| Gallbladder and biliary diseases                    | 2,032<br>(1,432 - 2,531)    | 7<br>(3 - 17)         | 9<br>(5 - 15)          | 323<br>(209 - 445)       | 1,025<br>(678 - 1,373)      | 668<br>(465 - 869)          |
| Pancreatitis                                        | 693<br>(404 - 915)          | 2<br>(1 - 5)          | 5<br>(2 - 7)           | 166<br>(92 - 242)        | 388<br>(220 - 534)          | 132<br>(77 - 185)           |
| Other digestive diseases                            | 1,100<br>(701 - 1,498)      | 10<br>(4 - 27)        | 8<br>(5 - 14)          | 259<br>(156 - 384)       | 612<br>(371 - 868)          | 211<br>(143 - 286)          |
| Neurological disorders                              | 10,496<br>(8,982 - 12,041)  | 141<br>(90 - 202)     | 127<br>(91 - 162)      | 578<br>(457 - 696)       | 1,145<br>(931 - 1,378)      | 8,505<br>(7,100 - 9,951)    |
| Alzheimer disease and other dementias               | 9,168<br>(7,727 - 10,670)   | -                     | -                      | 5<br>(1 - 10)            | 865<br>(686 - 1,059)        | 8,298<br>(6,905 - 9,730)    |
| Parkinson disease                                   | 98<br>(82 - 126)            | -                     | -                      | 4<br>(4 - 6)             | 36<br>(29 - 49)             | 57<br>(46 - 75)             |
| Epilepsy                                            | 907<br>(646 - 1,100)        | 82<br>(39 - 130)      | 97<br>(63 - 130)       | 480<br>(365 - 585)       | 186<br>(106 - 252)          | 62<br>(36 - 84)             |
| Multiple sclerosis                                  | 26<br>(17 - 37)             | -                     | -                      | 6<br>(4 - 9)             | 10<br>(6 - 16)              | 9<br>(6 - 14)               |
| Other neurological disorders                        | 298<br>(259 - 349)          | 58<br>(44 - 79)       | 30<br>(24 - 38)        | 83<br>(69 - 100)         | 48<br>(40 - 57)             | 79<br>(66 - 95)             |
| Mental and substance use disorders                  | 2,777<br>(1,460 - 3,349)    | 33<br>(17 - 45)       | 0<br>(0 - 1)           | 2,071<br>(1,109 - 2,558) | 572<br>(291 - 715)          | 101<br>(63 - 122)           |
| Schizophrenia                                       | 14<br>(10 - 22)             | -                     | -                      | 6<br>(4 - 10)            | 4<br>(3 - 7)                | 3<br>(2 - 6)                |
| Alcohol use disorders                               | 142<br>(82 - 182)           | -                     | -                      | 55<br>(34 - 74)          | 68<br>(38 - 89)             | 19<br>(11 - 26)             |
| Drug use disorders                                  | 2,617<br>(1,351 - 3,167)    | 33<br>(17 - 45)       | -                      | 2,006<br>(1,053 - 2,473) | 500<br>(236 - 633)          | 78<br>(44 - 97)             |
| Opioid use disorders                                | 1,431<br>(753 - 1,742)      | 19<br>(10 - 27)       | -                      | 1,113<br>(592 - 1,379)   | 256<br>(118 - 329)          | 43<br>(24 - 53)             |
| Cocaine use disorders                               | 35<br>(19 - 43)             | 1<br>(0 - 1)          | -                      | 28<br>(16 - 36)          | 5<br>(2 - 6)                | 1<br>(1 - 1)                |
| Amphetamine use disorders                           | 31<br>(18 - 38)             | 1<br>(0 - 1)          | -                      | 24<br>(14 - 31)          | 6<br>(3 - 8)                | 1<br>(1 - 1)                |
| Other drug use disorders                            | 1,120<br>(570 - 1,354)      | 13<br>(6 - 18)        | -                      | 840<br>(436 - 1,044)     | 234<br>(112 - 299)          | 34<br>(19 - 42)             |

Web Table 31- Egypt deaths with 95% UI by age, sex, and cause in 2013

| Cause                                               | Both Sexes, All Ages        | Both Sexes, 0-4 Years      | Both Sexes, 5-14 Years | Both Sexes, 15-49 Years  | Both Sexes, 50-69 Years     | Both Sexes, 70-80 Years     |
|-----------------------------------------------------|-----------------------------|----------------------------|------------------------|--------------------------|-----------------------------|-----------------------------|
| Eating disorders                                    | 4<br>(2 - 5)                | --                         | 0<br>(0 - 1)           | 3<br>(2 - 5)             | --                          | --                          |
| Anorexia nervosa                                    | 4<br>(2 - 5)                | --                         | 0<br>(0 - 1)           | 3<br>(2 - 5)             | --                          | --                          |
| Diabetes, urogenital, blood, and endocrine diseases | 48,861<br>(41,842 - 54,187) | 1,631<br>(931 - 2,135)     | 421<br>(330 - 501)     | 5,649<br>(4,863 - 6,546) | 21,461<br>(18,480 - 24,240) | 19,698<br>(15,851 - 21,994) |
| Diabetes mellitus                                   | 20,629<br>(18,331 - 23,089) | 32<br>(24 - 41)            | 25<br>(19 - 36)        | 1,348<br>(1,138 - 1,602) | 9,573<br>(8,257 - 10,969)   | 9,652<br>(8,305 - 10,944)   |
| Acute glomerulonephritis                            | 150<br>(101 - 185)          | 2<br>(1 - 2)               | 3<br>(2 - 4)           | 25<br>(20 - 32)          | 56<br>(36 - 76)             | 63<br>(37 - 88)             |
| Chronic kidney disease                              | 18,889<br>(15,545 - 21,773) | 62<br>(45 - 82)            | 89<br>(71 - 112)       | 2,766<br>(2,303 - 3,366) | 8,638<br>(7,138 - 10,239)   | 7,334<br>(5,465 - 8,499)    |
| Chronic kidney disease due to diabetes mellitus     | 13<br>(9 - 23)              | 2<br>(1 - 5)               | 3<br>(2 - 6)           | 5<br>(3 - 9)             | 2<br>(1 - 3)                | 1<br>(0 - 1)                |
| Chronic kidney disease due to hypertension          | 9,529<br>(6,822 - 11,540)   | 13<br>(7 - 18)             | 14<br>(8 - 19)         | 1,412<br>(1,077 - 1,754) | 4,437<br>(3,178 - 5,505)    | 3,653<br>(2,434 - 4,532)    |
| Chronic kidney disease due to glomerulonephritis    | 1,412<br>(1,060 - 2,098)    | 7<br>(5 - 10)              | 11<br>(8 - 16)         | 196<br>(139 - 309)       | 717<br>(529 - 1,048)        | 481<br>(329 - 772)          |
| Chronic kidney disease due to other causes          | 7,935<br>(5,659 - 10,650)   | 39<br>(25 - 58)            | 61<br>(45 - 81)        | 1,153<br>(809 - 1,714)   | 3,482<br>(2,394 - 5,016)    | 3,199<br>(2,133 - 4,364)    |
| Urinary diseases and male infertility               | 1,188<br>(560 - 1,489)      | 31<br>(13 - 44)            | 11<br>(5 - 15)         | 177<br>(90 - 228)        | 493<br>(224 - 629)          | 476<br>(210 - 621)          |
| Interstitial nephritis and urinary tract infections | 616<br>(206 - 887)          | 24<br>(10 - 35)            | 6<br>(3 - 9)           | 97<br>(36 - 142)         | 244<br>(77 - 366)           | 245<br>(69 - 374)           |
| Urolithiasis                                        | 164<br>(69 - 320)           | --                         | 1<br>(1 - 3)           | 26<br>(13 - 48)          | 74<br>(31 - 146)            | 63<br>(23 - 134)            |
| Other urinary diseases                              | 408<br>(251 - 616)          | 7<br>(3 - 13)              | 3<br>(2 - 5)           | 54<br>(36 - 85)          | 175<br>(102 - 263)          | 168<br>(99 - 265)           |
| Gynecological diseases                              | 7<br>(5 - 16)               | --                         | --                     | 5<br>(3 - 11)            | 2<br>(1 - 4)                | 1<br>(0 - 1)                |
| Uterine fibroids                                    | 2<br>(1 - 4)                | --                         | --                     | 1<br>(1 - 2)             | 0<br>(0 - 1)                | 0<br>(0 - 0)                |
| Polycystic ovarian syndrome                         | 0<br>(0 - 1)                | --                         | --                     | 0<br>(0 - 1)             | 0<br>(0 - 0)                | --                          |
| Endometriosis                                       | 1<br>(1 - 2)                | --                         | --                     | 1<br>(0 - 2)             | 0<br>(0 - 0)                | --                          |
| Genital prolapse                                    | 1<br>(1 - 2)                | --                         | --                     | 1<br>(0 - 1)             | 0<br>(0 - 1)                | 0<br>(0 - 0)                |
| Other gynecological diseases                        | 3<br>(2 - 8)                | --                         | --                     | 2<br>(1 - 5)             | 1<br>(1 - 2)                | 0<br>(0 - 1)                |
| Hemoglobinopathies and hemolytic anemias            | 1,518<br>(942 - 2,180)      | 390<br>(241 - 570)         | 120<br>(74 - 180)      | 474<br>(274 - 764)       | 229<br>(123 - 312)          | 305<br>(162 - 536)          |
| Thalassemias                                        | 553<br>(343 - 825)          | 261<br>(161 - 382)         | 83<br>(51 - 125)       | 209<br>(117 - 365)       | 0<br>(0 - 0)                | 0<br>(0 - 0)                |
| Sickle cell disorders                               | 428<br>(266 - 568)          | 52<br>(32 - 76)            | 24<br>(15 - 36)        | 198<br>(113 - 307)       | 147<br>(77 - 201)           | 7<br>(4 - 10)               |
| G6PD deficiency                                     | 50<br>(32 - 68)             | 13<br>(8 - 19)             | 5<br>(3 - 7)           | 17<br>(10 - 27)          | 9<br>(5 - 12)               | 7<br>(4 - 10)               |
| Other hemoglobinopathies and hemolytic anemias      | 486<br>(282 - 757)          | 64<br>(37 - 97)            | 8<br>(5 - 12)          | 50<br>(29 - 75)          | 73<br>(40 - 102)            | 292<br>(154 - 519)          |
| Endocrine, metabolic, blood, and immune disorders   | 6,480<br>(3,724 - 7,853)    | 1,114<br>(500 - 1,602)     | 173<br>(114 - 239)     | 855<br>(637 - 1,110)     | 2,471<br>(1,557 - 3,180)    | 1,868<br>(689 - 2,702)      |
| Musculoskeletal disorders                           | 432<br>(341 - 529)          | --                         | 14<br>(11 - 18)        | 137<br>(110 - 174)       | 139<br>(102 - 172)          | 143<br>(110 - 180)          |
| Rheumatoid arthritis                                | 50<br>(36 - 69)             | --                         | 1<br>(1 - 2)           | 7<br>(5 - 10)            | 15<br>(11 - 22)             | 26<br>(17 - 40)             |
| Other musculoskeletal disorders                     | 382<br>(295 - 469)          | --                         | 13<br>(10 - 16)        | 129<br>(103 - 165)       | 123<br>(87 - 151)           | 117<br>(86 - 148)           |
| Other non-communicable diseases                     | 14,962<br>(11,356 - 18,010) | 12,394<br>(8,980 - 15,378) | 846<br>(692 - 1,011)   | 720<br>(610 - 836)       | 442<br>(356 - 516)          | 560<br>(377 - 663)          |
| Congenital anomalies                                | 14,379<br>(10,883 - 17,393) | 12,306<br>(8,836 - 15,275) | 840<br>(686 - 1,005)   | 665<br>(562 - 773)       | 329<br>(261 - 390)          | 240<br>(190 - 282)          |
| Neural tube defects                                 | 308<br>(119 - 691)          | 291<br>(102 - 671)         | 5<br>(3 - 10)          | 7<br>(6 - 12)            | 3<br>(2 - 5)                | 1<br>(1 - 3)                |
| Congenital heart anomalies                          | 8,601<br>(5,102 - 11,108)   | 7,517<br>(4,028 - 10,010)  | 585<br>(465 - 722)     | 359<br>(287 - 437)       | 89<br>(65 - 113)            | 51<br>(35 - 67)             |
| Cleft lip and cleft palate                          | 13<br>(3 - 42)              | 13<br>(3 - 42)             | --                     | --                       | --                          | --                          |
| Down syndrome                                       | 775<br>(486 - 1,124)        | 594<br>(321 - 922)         | 78<br>(50 - 124)       | 85<br>(58 - 117)         | 16<br>(11 - 25)             | 1<br>(1 - 2)                |
| Chromosomal unbalanced rearrangements               | 186<br>(117 - 258)          | 147<br>(82 - 217)          | 11<br>(8 - 18)         | 25<br>(17 - 36)          | 2<br>(1 - 3)                | 0<br>(0 - 1)                |
| Other congenital anomalies                          | 4,497<br>(3,210 - 5,637)    | 3,744<br>(2,530 - 4,862)   | 161<br>(113 - 222)     | 188<br>(151 - 229)       | 219<br>(174 - 263)          | 186<br>(148 - 218)          |
| Skin and subcutaneous diseases                      | 505<br>(315 - 609)          | 10<br>(7 - 16)             | 6<br>(4 - 8)           | 56<br>(42 - 67)          | 113<br>(82 - 139)           | 320<br>(167 - 409)          |
| Cellulitis                                          | 53<br>(30 - 70)             | 4<br>(2 - 6)               | 1<br>(1 - 2)           | 8<br>(5 - 11)            | 20<br>(11 - 28)             | 20<br>(9 - 32)              |
| Pyoderma                                            | 110<br>(77 - 134)           | 5<br>(3 - 9)               | 2<br>(1 - 3)           | 22<br>(16 - 27)          | 37<br>(25 - 48)             | 44<br>(25 - 61)             |



Web Table 31- Egypt deaths with 95% UI by age, sex, and cause in 2013

| Cause                                           | Both Sexes, All Ages        | Both Sexes, 0-4 Years    | Both Sexes, 5-14 Years   | Both Sexes, 15-49 Years    | Both Sexes, 50-69 Years  | Both Sexes, 70-80 Years  |
|-------------------------------------------------|-----------------------------|--------------------------|--------------------------|----------------------------|--------------------------|--------------------------|
| Decubitus ulcer                                 | 333<br>(190 - 414)          | 1<br>(0 - 1)             | 1<br>(1 - 2)             | 21<br>(16 - 27)            | 55<br>(39 - 69)          | 255<br>(132 - 333)       |
| Other skin and subcutaneous diseases            | 9<br>(7 - 14)               | 1<br>(0 - 1)             | 1<br>(1 - 2)             | 5<br>(3 - 6)               | 2<br>(1 - 3)             | 1<br>(0 - 2)             |
| Sudden infant death syndrome                    | 78<br>(31 - 246)            | 78<br>(31 - 246)         | --                       | --                         | --                       | --                       |
| Injuries                                        | 23,481<br>(15,594 - 27,924) | 1,787<br>(1,266 - 2,373) | 1,920<br>(1,466 - 2,210) | 10,219<br>(7,372 - 12,066) | 5,967<br>(3,298 - 7,679) | 3,588<br>(1,942 - 4,537) |
| Transport injuries                              | 9,701<br>(6,078 - 11,330)   | 625<br>(338 - 866)       | 899<br>(552 - 1,101)     | 5,211<br>(3,470 - 6,196)   | 2,198<br>(1,219 - 2,673) | 769<br>(427 - 919)       |
| Road injuries                                   | 9,126<br>(5,674 - 10,671)   | 588<br>(315 - 809)       | 840<br>(517 - 1,030)     | 4,904<br>(3,211 - 5,842)   | 2,069<br>(1,129 - 2,524) | 726<br>(399 - 871)       |
| Pedestrian road injuries                        | 3,050<br>(1,825 - 3,829)    | 263<br>(135 - 378)       | 389<br>(230 - 498)       | 1,326<br>(845 - 1,790)     | 710<br>(375 - 932)       | 362<br>(195 - 458)       |
| Cyclist road injuries                           | 332<br>(195 - 417)          | 19<br>(8 - 30)           | 32<br>(18 - 46)          | 156<br>(96 - 204)          | 93<br>(50 - 120)         | 31<br>(15 - 42)          |
| Motorcyclist road injuries                      | 911<br>(526 - 1,240)        | 14<br>(7 - 23)           | 20<br>(10 - 30)          | 606<br>(369 - 837)         | 242<br>(123 - 345)       | 29<br>(13 - 43)          |
| Motor vehicle road injuries                     | 4,766<br>(2,843 - 5,764)    | 282<br>(147 - 405)       | 388<br>(231 - 499)       | 2,783<br>(1,746 - 3,434)   | 1,012<br>(523 - 1,297)   | 300<br>(156 - 385)       |
| Other road injuries                             | 67<br>(30 - 92)             | 10<br>(5 - 16)           | 11<br>(4 - 18)           | 33<br>(15 - 47)            | 10<br>(4 - 16)           | 3<br>(1 - 5)             |
| Other transport injuries                        | 574<br>(394 - 698)          | 37<br>(17 - 55)          | 59<br>(34 - 83)          | 307<br>(229 - 413)         | 129<br>(74 - 169)        | 42<br>(23 - 56)          |
| Unintentional injuries                          | 11,060<br>(7,510 - 13,780)  | 967<br>(623 - 1,325)     | 922<br>(743 - 1,109)     | 3,590<br>(2,797 - 4,312)   | 3,142<br>(1,653 - 4,396) | 2,439<br>(1,281 - 3,251) |
| Falls                                           | 1,454<br>(643 - 1,825)      | 196<br>(65 - 304)        | 141<br>(60 - 191)        | 522<br>(237 - 679)         | 297<br>(127 - 391)       | 298<br>(114 - 395)       |
| Drowning                                        | 1,955<br>(1,510 - 2,725)    | 355<br>(192 - 591)       | 458<br>(339 - 672)       | 942<br>(738 - 1,333)       | 146<br>(102 - 191)       | 54<br>(41 - 69)          |
| Fire, heat, and hot substances                  | 420<br>(279 - 530)          | 62<br>(27 - 100)         | 37<br>(22 - 51)          | 156<br>(112 - 196)         | 85<br>(51 - 111)         | 81<br>(46 - 112)         |
| Poisonings                                      | 1,425<br>(733 - 1,803)      | 65<br>(30 - 92)          | 35<br>(20 - 46)          | 257<br>(159 - 319)         | 459<br>(221 - 614)       | 609<br>(276 - 810)       |
| Exposure to mechanical forces                   | 872<br>(560 - 1,030)        | 41<br>(30 - 58)          | 79<br>(61 - 103)         | 520<br>(315 - 643)         | 167<br>(101 - 207)       | 64<br>(38 - 79)          |
| Unintentional firearm injuries                  | 375<br>(131 - 475)          | 12<br>(6 - 18)           | 14<br>(6 - 20)           | 269<br>(86 - 354)          | 63<br>(23 - 88)          | 18<br>(6 - 24)           |
| Unintentional suffocation                       | 84<br>(65 - 136)            | 16<br>(10 - 29)          | 15<br>(9 - 26)           | 31<br>(23 - 51)            | 17<br>(12 - 29)          | 5<br>(3 - 9)             |
| Other exposure to mechanical forces             | 414<br>(291 - 482)          | 13<br>(8 - 19)           | 51<br>(36 - 68)          | 220<br>(162 - 272)         | 87<br>(55 - 108)         | 42<br>(21 - 54)          |
| Adverse effects of medical treatment            | 3,935<br>(1,823 - 5,752)    | 148<br>(60 - 226)        | 48<br>(23 - 71)          | 678<br>(327 - 982)         | 1,861<br>(754 - 2,862)   | 1,200<br>(514 - 1,773)   |
| Animal contact                                  | 71<br>(55 - 114)            | 17<br>(10 - 30)          | 17<br>(12 - 29)          | 15<br>(11 - 23)            | 9<br>(6 - 15)            | 13<br>(8 - 21)           |
| Venomous animal contact                         | 34<br>(25 - 62)             | 10<br>(6 - 20)           | 9<br>(6 - 16)            | 7<br>(5 - 12)              | 4<br>(3 - 7)             | 4<br>(3 - 8)             |
| Non-venomous animal contact                     | 36<br>(27 - 56)             | 6<br>(4 - 11)            | 9<br>(6 - 13)            | 8<br>(6 - 12)              | 5<br>(3 - 7)             | 8<br>(5 - 14)            |
| Foreign body                                    | 161<br>(108 - 206)          | 52<br>(29 - 74)          | 12<br>(8 - 16)           | 28<br>(21 - 38)            | 26<br>(18 - 36)          | 42<br>(27 - 56)          |
| Pulmonary aspiration and foreign body in airway | 149<br>(97 - 196)           | 51<br>(28 - 73)          | 10<br>(6 - 14)           | 24<br>(17 - 33)            | 23<br>(16 - 33)          | 41<br>(26 - 55)          |
| Foreign body in other body part                 | 11<br>(9 - 16)              | 1<br>(1 - 2)             | 2<br>(1 - 2)             | 4<br>(3 - 6)               | 3<br>(2 - 4)             | 1<br>(1 - 3)             |
| Other unintentional injuries                    | 768<br>(637 - 940)          | 30<br>(18 - 50)          | 96<br>(61 - 144)         | 472<br>(358 - 609)         | 93<br>(63 - 129)         | 77<br>(55 - 102)         |
| Self-harm and interpersonal violence            | 2,562<br>(1,279 - 3,090)    | 56<br>(13 - 100)         | 80<br>(41 - 108)         | 1,418<br>(745 - 1,747)     | 627<br>(285 - 773)       | 381<br>(158 - 463)       |
| Self-harm                                       | 1,814<br>(798 - 2,181)      | --                       | 46<br>(20 - 64)          | 938<br>(419 - 1,162)       | 490<br>(203 - 601)       | 339<br>(140 - 413)       |
| Interpersonal violence                          | 748<br>(353 - 983)          | 56<br>(13 - 100)         | 33<br>(13 - 52)          | 480<br>(232 - 648)         | 137<br>(63 - 198)        | 42<br>(14 - 68)          |
| Assault by firearm                              | 355<br>(149 - 505)          | 12<br>(2 - 22)           | 7<br>(2 - 12)            | 251<br>(108 - 366)         | 68<br>(30 - 102)         | 17<br>(5 - 29)           |
| Assault by sharp object                         | 184<br>(80 - 273)           | 10<br>(2 - 19)           | 5<br>(2 - 8)             | 115<br>(52 - 175)          | 44<br>(16 - 73)          | 11<br>(3 - 18)           |
| Assault by other means                          | 209<br>(88 - 298)           | 34<br>(8 - 64)           | 22<br>(8 - 35)           | 114<br>(50 - 170)          | 24<br>(10 - 37)          | 14<br>(4 - 24)           |
| Forces of nature, war, and legal intervention   | 158<br>(154 - 169)          | 138<br>(135 - 150)       | 19<br>(19 - 19)          | 0<br>(0 - 0)               | 0<br>(0 - 0)             | 0<br>(0 - 0)             |
| Collective violence and legal intervention      | 158<br>(154 - 169)          | 138<br>(135 - 150)       | 19<br>(19 - 19)          | 0<br>(0 - 0)               | 0<br>(0 - 0)             | 0<br>(0 - 0)             |

Web Table 31- Egypt deaths with 95% UI by age, sex, and cause in 2013

| Cause                                                              | Males, All Ages                | Males, 0-4 Years            | Males, 5-14 Years        | Males, 15-49 Years          | Males, 50-69 Years             | Males, 70-80 Years            |
|--------------------------------------------------------------------|--------------------------------|-----------------------------|--------------------------|-----------------------------|--------------------------------|-------------------------------|
| All causes                                                         | 293,574<br>(262,229 - 327,819) | 22,188<br>(19,458 - 25,407) | 4,434<br>(4,061 - 4,864) | 47,354<br>(40,546 - 55,117) | 118,594<br>(103,385 - 135,815) | 101,005<br>(92,983 - 109,718) |
| Communicable, maternal, neonatal, and nutritional diseases         | 21,773<br>(19,431 - 24,826)    | 11,270<br>(9,449 - 13,571)  | 802<br>(606 - 1,056)     | 2,116<br>(1,695 - 2,671)    | 3,656<br>(3,026 - 4,461)       | 3,928<br>(3,225 - 4,726)      |
| HIV/AIDS and tuberculosis                                          | 620<br>(512 - 868)             | 7<br>(5 - 10)               | 7<br>(5 - 9)             | 258<br>(210 - 364)          | 232<br>(181 - 353)             | 116<br>(92 - 152)             |
| Tuberculosis                                                       | 566<br>(461 - 812)             | 3<br>(2 - 4)                | 6<br>(4 - 8)             | 220<br>(175 - 326)          | 222<br>(172 - 340)             | 115<br>(91 - 151)             |
| HIV/AIDS                                                           | 54<br>(36 - 76)                | 5<br>(3 - 7)                | 1<br>(0 - 2)             | 38<br>(27 - 51)             | 9<br>(4 - 16)                  | 1<br>(0 - 2)                  |
| HIV/AIDS resulting in mycobacterial infection                      | 3<br>(2 - 5)                   | 0<br>(0 - 0)                | 0<br>(0 - 0)             | 2<br>(2 - 3)                | 1<br>(0 - 1)                   | 0<br>(0 - 0)                  |
| HIV/AIDS resulting in other diseases                               | 51<br>(34 - 71)                | 4<br>(3 - 7)                | 1<br>(0 - 1)             | 36<br>(25 - 48)             | 9<br>(4 - 15)                  | 1<br>(0 - 2)                  |
| Diarrrhea, lower respiratory, and other common infectious diseases | 13,440<br>(11,675 - 15,603)    | 5,600<br>(4,374 - 7,293)    | 727<br>(530 - 987)       | 1,468<br>(1,117 - 1,963)    | 2,485<br>(2,016 - 3,114)       | 3,160<br>(2,476 - 3,905)      |
| Diarrheal diseases                                                 | 1,809<br>(1,227 - 2,589)       | 1,434<br>(863 - 2,190)      | 50<br>(33 - 76)          | 79<br>(60 - 101)            | 95<br>(71 - 124)               | 150<br>(104 - 212)            |
| Intestinal infectious diseases                                     | 1,070<br>(537 - 1,881)         | 288<br>(135 - 519)          | 323<br>(167 - 552)       | 364<br>(149 - 735)          | 71<br>(29 - 143)               | 24<br>(9 - 48)                |
| Typhoid fever                                                      | 821<br>(412 - 1,443)           | 214<br>(101 - 405)          | 249<br>(126 - 434)       | 281<br>(113 - 560)          | 58<br>(24 - 118)               | 19<br>(7 - 39)                |
| Paratyphoid fever                                                  | 242<br>(118 - 456)             | 71<br>(29 - 141)            | 74<br>(34 - 143)         | 81<br>(29 - 186)            | 13<br>(4 - 29)                 | 4<br>(1 - 9)                  |
| Other intestinal infectious diseases                               | 6<br>(2 - 13)                  | 3<br>(0 - 7)                | 1<br>(0 - 3)             | 2<br>(0 - 6)                | 1<br>(0 - 3)                   | 0<br>(0 - 2)                  |
| Lower respiratory infections                                       | 9,381<br>(7,970 - 11,029)      | 3,552<br>(2,597 - 4,662)    | 250<br>(169 - 374)       | 740<br>(572 - 999)          | 2,024<br>(1,596 - 2,629)       | 2,814<br>(2,165 - 3,563)      |
| Upper respiratory infections                                       | 14<br>(5 - 28)                 | 1<br>(0 - 4)                | 0<br>(0 - 1)             | 3<br>(1 - 8)                | 6<br>(1 - 17)                  | 4<br>(0 - 13)                 |
| Otitis media                                                       | 15<br>(12 - 18)                | 1<br>(0 - 1)                | 1<br>(1 - 1)             | 3<br>(2 - 4)                | 6<br>(4 - 8)                   | 5<br>(3 - 7)                  |
| Meningitis                                                         | 313<br>(260 - 390)             | 86<br>(46 - 142)            | 28<br>(22 - 37)          | 92<br>(73 - 116)            | 73<br>(58 - 92)                | 33<br>(26 - 42)               |
| Pneumococcal meningitis                                            | 72<br>(54 - 96)                | 16<br>(7 - 28)              | 8<br>(4 - 13)            | 24<br>(14 - 37)             | 17<br>(9 - 28)                 | 8<br>(5 - 13)                 |
| H influenzae type B meningitis                                     | 64<br>(46 - 91)                | 35<br>(17 - 59)             | 7<br>(4 - 11)            | 11<br>(7 - 17)              | 8<br>(4 - 13)                  | 3<br>(1 - 6)                  |
| Meningococcal meningitis                                           | 83<br>(60 - 110)               | 22<br>(9 - 41)              | 8<br>(5 - 13)            | 27<br>(16 - 41)             | 18<br>(10 - 29)                | 8<br>(4 - 13)                 |
| Other meningitis                                                   | 94<br>(69 - 120)               | 15<br>(6 - 27)              | 5<br>(2 - 8)             | 30<br>(18 - 43)             | 30<br>(18 - 43)                | 14<br>(8 - 21)                |
| Encephalitis                                                       | 671<br>(470 - 856)             | 144<br>(71 - 240)           | 60<br>(36 - 106)         | 163<br>(116 - 252)          | 189<br>(102 - 261)             | 115<br>(44 - 173)             |
| Diphtheria                                                         | 3<br>(0 - 14)                  | 2<br>(0 - 11)               | 1<br>(0 - 6)             | 1<br>(0 - 3)                | 0<br>(0 - 3)                   | --                            |
| Whooping cough                                                     | 26<br>(0 - 122)                | 24<br>(0 - 112)             | 2<br>(0 - 7)             | 0<br>(0 - 2)                | 0<br>(0 - 0)                   | --                            |
| Tetanus                                                            | 57<br>(39 - 79)                | 12<br>(6 - 22)              | 2<br>(1 - 3)             | 17<br>(11 - 27)             | 18<br>(10 - 28)                | 8<br>(4 - 14)                 |
| Measles                                                            | 60<br>(1 - 407)                | 51<br>(1 - 350)             | 8<br>(0 - 52)            | 1<br>(0 - 8)                | 0<br>(0 - 0)                   | --                            |
| Varicella and herpes zoster                                        | 21<br>(7 - 50)                 | 5<br>(0 - 22)               | 1<br>(0 - 6)             | 5<br>(1 - 14)               | 3<br>(0 - 8)                   | 7<br>(0 - 30)                 |
| Neglected tropical diseases and malaria                            | 236<br>(188 - 297)             | 25<br>(14 - 44)             | 20<br>(14 - 27)          | 69<br>(51 - 92)             | 86<br>(57 - 125)               | 37<br>(24 - 55)               |
| Malaria                                                            | 5<br>(3 - 7)                   | 0<br>(0 - 1)                | 1<br>(0 - 1)             | 2<br>(1 - 4)                | 1<br>(0 - 1)                   | 0<br>(0 - 1)                  |
| Leishmaniasis                                                      | 46<br>(28 - 74)                | 13<br>(3 - 28)              | 5<br>(1 - 9)             | 18<br>(9 - 31)              | 9<br>(2 - 16)                  | 2<br>(1 - 4)                  |
| Visceral leishmaniasis                                             | 46<br>(28 - 74)                | 13<br>(3 - 28)              | 5<br>(1 - 9)             | 18<br>(9 - 31)              | 9<br>(2 - 16)                  | 2<br>(1 - 4)                  |
| Schistosomiasis                                                    | 124<br>(86 - 172)              | 0<br>(0 - 0)                | 2<br>(1 - 3)             | 29<br>(18 - 45)             | 66<br>(38 - 106)               | 28<br>(15 - 46)               |
| Cysticercosis                                                      | 0<br>(0 - 1)                   | 0<br>(0 - 0)                | 0<br>(0 - 0)             | 0<br>(0 - 0)                | 0<br>(0 - 0)                   | 0<br>(0 - 0)                  |
| Cystic echinococcosis                                              | 5<br>(4 - 5)                   | 0<br>(0 - 0)                | 0<br>(0 - 1)             | 2<br>(1 - 2)                | 2<br>(1 - 2)                   | 1<br>(1 - 1)                  |
| Dengue                                                             | 4<br>(3 - 7)                   | 1<br>(0 - 1)                | 1<br>(1 - 1)             | 2<br>(2 - 3)                | 1<br>(0 - 1)                   | 0<br>(0 - 0)                  |
| Rabies                                                             | 21<br>(12 - 29)                | 3<br>(1 - 4)                | 9<br>(5 - 15)            | 7<br>(4 - 9)                | 3<br>(1 - 4)                   | 1<br>(0 - 1)                  |
| Intestinal nematode infections                                     | 1<br>(0 - 6)                   | 1<br>(0 - 3)                | 0<br>(0 - 2)             | 0<br>(0 - 2)                | 0<br>(0 - 2)                   | 0<br>(0 - 1)                  |
| Ascariasis                                                         | 1<br>(0 - 6)                   | 1<br>(0 - 3)                | 0<br>(0 - 2)             | 0<br>(0 - 2)                | 0<br>(0 - 2)                   | 0<br>(0 - 1)                  |
| Other neglected tropical diseases                                  | 30<br>(22 - 38)                | 8<br>(5 - 13)               | 3<br>(2 - 4)             | 9<br>(6 - 11)               | 5<br>(3 - 7)                   | 5<br>(3 - 8)                  |
| Maternal disorders                                                 | --                             | --                          | --                       | --                          | --                             | --                            |

Web Table 31- Egypt deaths with 95% UI by age, sex, and cause in 2013

| Cause                                                            | Males, All Ages                | Males, 0-4 Years          | Males, 5-14 Years        | Males, 15-49 Years          | Males, 50-69 Years            | Males, 70-80 Years           |
|------------------------------------------------------------------|--------------------------------|---------------------------|--------------------------|-----------------------------|-------------------------------|------------------------------|
| Maternal hemorrhage                                              | --                             | --                        | --                       | --                          | --                            | --                           |
| Maternal sepsis and other maternal infections                    | --                             | --                        | --                       | --                          | --                            | --                           |
| Maternal hypertensive disorders                                  | --                             | --                        | --                       | --                          | --                            | --                           |
| Maternal obstructed labor                                        | --                             | --                        | --                       | --                          | --                            | --                           |
| Maternal abortive outcome                                        | --                             | --                        | --                       | --                          | --                            | --                           |
| Indirect maternal deaths                                         | --                             | --                        | --                       | --                          | --                            | --                           |
| Late maternal deaths                                             | --                             | --                        | --                       | --                          | --                            | --                           |
| Maternal deaths aggravated by HIV/AIDS                           | --                             | --                        | --                       | --                          | --                            | --                           |
| Other maternal disorders                                         | --                             | --                        | --                       | --                          | --                            | --                           |
| Neonatal disorders                                               | 5,396<br>(4,404 - 6,521)       | 5,396<br>(4,404 - 6,521)  | --                       | --                          | --                            | --                           |
| Neonatal preterm birth complications                             | 3,453<br>(2,538 - 4,524)       | 3,453<br>(2,538 - 4,524)  | --                       | --                          | --                            | --                           |
| Neonatal encephalopathy due to birth asphyxia and trauma         | 341<br>(193 - 641)             | 341<br>(193 - 641)        | --                       | --                          | --                            | --                           |
| Neonatal sepsis and other neonatal infections                    | 642<br>(259 - 1,296)           | 642<br>(259 - 1,296)      | --                       | --                          | --                            | --                           |
| Hemolytic disease and other neonatal jaundice                    | 83<br>(32 - 186)               | 83<br>(32 - 186)          | --                       | --                          | --                            | --                           |
| Other neonatal disorders                                         | 877<br>(516 - 1,385)           | 877<br>(516 - 1,385)      | --                       | --                          | --                            | --                           |
| Nutritional deficiencies                                         | 623<br>(424 - 997)             | 136<br>(81 - 227)         | 21<br>(12 - 29)          | 81<br>(55 - 139)            | 147<br>(100 - 250)            | 238<br>(154 - 383)           |
| Protein-energy malnutrition                                      | 127<br>(54 - 201)              | 71<br>(22 - 126)          | 4<br>(1 - 8)             | 9<br>(4 - 19)               | 12<br>(4 - 26)                | 31<br>(8 - 58)               |
| Iodine deficiency                                                | 4<br>(0 - 12)                  | 0<br>(0 - 3)              | 0<br>(0 - 2)             | 1<br>(0 - 4)                | 1<br>(0 - 7)                  | 1<br>(0 - 6)                 |
| Iron-deficiency anemia                                           | 438<br>(287 - 709)             | 36<br>(14 - 73)           | 14<br>(7 - 20)           | 66<br>(41 - 110)            | 127<br>(85 - 215)             | 195<br>(126 - 334)           |
| Other nutritional deficiencies                                   | 55<br>(28 - 126)               | 29<br>(11 - 80)           | 2<br>(1 - 4)             | 5<br>(2 - 12)               | 7<br>(3 - 17)                 | 11<br>(4 - 27)               |
| Other communicable, maternal, neonatal, and nutritional diseases | 1,458<br>(1,213 - 1,762)       | 107<br>(75 - 169)         | 28<br>(19 - 37)          | 240<br>(184 - 322)          | 707<br>(541 - 915)            | 376<br>(293 - 487)           |
| Sexually transmitted diseases excluding HIV                      | 27<br>(16 - 42)                | 10<br>(3 - 19)            | 1<br>(0 - 2)             | 4<br>(2 - 6)                | 7<br>(3 - 12)                 | 6<br>(2 - 10)                |
| Syphilis                                                         | 23<br>(13 - 35)                | 10<br>(3 - 19)            | 1<br>(0 - 1)             | 2<br>(1 - 4)                | 5<br>(2 - 9)                  | 5<br>(2 - 9)                 |
| Chlamydial infection                                             | --                             | --                        | --                       | --                          | --                            | --                           |
| Gonococcal infection                                             | 3<br>(2 - 4)                   | --                        | 0<br>(0 - 0)             | 1<br>(1 - 2)                | 1<br>(1 - 2)                  | 1<br>(0 - 1)                 |
| Other sexually transmitted diseases                              | 2<br>(1 - 3)                   | --                        | 0<br>(0 - 0)             | 1<br>(0 - 1)                | 1<br>(0 - 1)                  | 0<br>(0 - 1)                 |
| Hepatitis                                                        | 1,043<br>(840 - 1,296)         | 11<br>(6 - 19)            | 8<br>(5 - 11)            | 159<br>(114 - 224)          | 596<br>(438 - 787)            | 269<br>(196 - 370)           |
| Acute hepatitis A                                                | 39<br>(10 - 84)                | 4<br>(1 - 8)              | 2<br>(1 - 4)             | 11<br>(3 - 26)              | 18<br>(4 - 44)                | 4<br>(1 - 11)                |
| Acute hepatitis B                                                | 673<br>(440 - 928)             | 7<br>(3 - 13)             | 2<br>(1 - 5)             | 70<br>(32 - 119)            | 391<br>(236 - 575)            | 202<br>(124 - 295)           |
| Acute hepatitis C                                                | 163<br>(35 - 361)              | --                        | 1<br>(0 - 2)             | 28<br>(6 - 67)              | 95<br>(19 - 230)              | 39<br>(7 - 95)               |
| Acute hepatitis E                                                | 169<br>(73 - 310)              | 0<br>(0 - 1)              | 2<br>(1 - 5)             | 50<br>(23 - 92)             | 92<br>(35 - 187)              | 24<br>(7 - 54)               |
| Other infectious diseases                                        | 388<br>(281 - 542)             | 86<br>(58 - 146)          | 19<br>(11 - 27)          | 77<br>(56 - 121)            | 104<br>(66 - 159)             | 102<br>(58 - 149)            |
| Non-communicable diseases                                        | 255,028<br>(226,218 - 286,203) | 9,926<br>(7,692 - 12,094) | 2,242<br>(1,958 - 2,574) | 36,790<br>(31,149 - 43,083) | 110,941<br>(96,206 - 127,505) | 95,130<br>(87,164 - 103,690) |
| Neoplasms                                                        | 25,839<br>(22,373 - 29,603)    | 228<br>(152 - 323)        | 422<br>(349 - 520)       | 4,707<br>(3,973 - 5,590)    | 13,530<br>(11,586 - 15,765)   | 6,952<br>(6,141 - 7,896)     |
| Esophageal cancer                                                | 403<br>(304 - 539)             | --                        | --                       | 77<br>(56 - 106)            | 210<br>(153 - 299)            | 115<br>(80 - 153)            |
| Stomach cancer                                                   | 1,824<br>(1,557 - 2,135)       | --                        | --                       | 337<br>(267 - 415)          | 1,005<br>(824 - 1,227)        | 482<br>(398 - 585)           |
| Liver cancer                                                     | 6,714<br>(5,622 - 7,915)       | --                        | 12<br>(7 - 18)           | 841<br>(641 - 1,063)        | 4,412<br>(3,497 - 5,359)      | 1,449<br>(1,157 - 1,800)     |
| Liver cancer due to hepatitis B                                  | 1,043<br>(496 - 1,682)         | --                        | 3<br>(1 - 6)             | 185<br>(108 - 287)          | 699<br>(285 - 1,177)          | 157<br>(75 - 256)            |
| Liver cancer due to hepatitis C                                  | 4,668<br>(3,521 - 5,829)       | --                        | 3<br>(0 - 9)             | 529<br>(362 - 722)          | 3,084<br>(2,277 - 3,946)      | 1,051<br>(794 - 1,327)       |
| Liver cancer due to alcohol use                                  | 536<br>(317 - 814)             | --                        | --                       | 43<br>(23 - 69)             | 331<br>(190 - 510)            | 162<br>(93 - 276)            |

Web Table 31- Egypt deaths with 95% UI by age, sex, and cause in 2013

| Cause                                         | Males, All Ages               | Males, 0-4 Years         | Males, 5-14 Years  | Males, 15-49 Years          | Males, 50-69 Years          | Males, 70-80 Years          |
|-----------------------------------------------|-------------------------------|--------------------------|--------------------|-----------------------------|-----------------------------|-----------------------------|
| Liver cancer due to other causes              | 466<br>(147 - 925)            | --                       | 5<br>(2 - 10)      | 84<br>(30 - 154)            | 298<br>(89 - 613)           | 78<br>(24 - 160)            |
| Larynx cancer                                 | 477<br>(371 - 691)            | --                       | --                 | 70<br>(52 - 108)            | 256<br>(191 - 381)          | 152<br>(112 - 216)          |
| Tracheal, bronchus and lung cancer            | 3,259<br>(2,804 - 3,745)      | --                       | --                 | 475<br>(384 - 585)          | 1,786<br>(1,503 - 2,098)    | 998<br>(842 - 1,172)        |
| Breast cancer                                 | 105<br>(79 - 140)             | --                       | --                 | 20<br>(13 - 30)             | 51<br>(34 - 76)             | 33<br>(21 - 50)             |
| Cervical cancer                               | --                            | --                       | --                 | --                          | --                          | --                          |
| Uterine cancer                                | --                            | --                       | --                 | --                          | --                          | --                          |
| Prostate cancer                               | 1,008<br>(616 - 1,377)        | --                       | --                 | 15<br>(10 - 22)             | 283<br>(181 - 404)          | 709<br>(412 - 958)          |
| Colon and rectum cancer                       | 1,237<br>(1,052 - 1,431)      | --                       | --                 | 327<br>(266 - 399)          | 587<br>(485 - 704)          | 323<br>(274 - 380)          |
| Lip and oral cavity cancer                    | 257<br>(174 - 325)            | --                       | --                 | 71<br>(50 - 93)             | 128<br>(84 - 168)           | 58<br>(37 - 79)             |
| Nasopharynx cancer                            | 42<br>(33 - 52)               | --                       | 2<br>(1 - 4)       | 19<br>(14 - 25)             | 17<br>(12 - 23)             | 4<br>(3 - 6)                |
| Other pharynx cancer                          | 142<br>(112 - 182)            | --                       | --                 | 35<br>(26 - 48)             | 80<br>(60 - 107)            | 27<br>(20 - 37)             |
| Gallbladder and biliary tract cancer          | 185<br>(112 - 236)            | --                       | --                 | 30<br>(19 - 41)             | 97<br>(57 - 131)            | 58<br>(34 - 77)             |
| Pancreatic cancer                             | 986<br>(837 - 1,166)          | --                       | --                 | 183<br>(144 - 227)          | 558<br>(457 - 685)          | 245<br>(199 - 299)          |
| Malignant skin melanoma                       | 41<br>(23 - 69)               | --                       | --                 | 14<br>(8 - 27)              | 17<br>(9 - 27)              | 9<br>(5 - 15)               |
| Non-melanoma skin cancer                      | 51<br>(36 - 79)               | --                       | --                 | 11<br>(8 - 17)              | 22<br>(15 - 35)             | 18<br>(13 - 28)             |
| Ovarian cancer                                | --                            | --                       | --                 | --                          | --                          | --                          |
| Testicular cancer                             | 59<br>(36 - 79)               | --                       | --                 | 35<br>(21 - 49)             | 13<br>(7 - 20)              | 11<br>(6 - 16)              |
| Kidney cancer                                 | 404<br>(337 - 479)            | 6<br>(3 - 12)            | 7<br>(4 - 11)      | 73<br>(57 - 93)             | 223<br>(179 - 275)          | 94<br>(73 - 120)            |
| Bladder cancer                                | 2,773<br>(2,270 - 3,925)      | --                       | --                 | 226<br>(164 - 388)          | 1,524<br>(1,213 - 2,239)    | 1,024<br>(816 - 1,348)      |
| Brain and nervous system cancer               | 1,956<br>(1,089 - 2,418)      | 53<br>(20 - 97)          | 106<br>(54 - 151)  | 565<br>(325 - 755)          | 830<br>(451 - 1,068)        | 402<br>(195 - 534)          |
| Thyroid cancer                                | 103<br>(79 - 128)             | --                       | 1<br>(0 - 1)       | 20<br>(15 - 27)             | 56<br>(41 - 74)             | 26<br>(19 - 34)             |
| Mesothelioma                                  | 40<br>(31 - 51)               | --                       | --                 | 12<br>(8 - 19)              | 17<br>(12 - 23)             | 11<br>(7 - 16)              |
| Hodgkin lymphoma                              | 75<br>(57 - 108)              | 4<br>(2 - 7)             | 8<br>(3 - 16)      | 36<br>(26 - 56)             | 21<br>(14 - 32)             | 5<br>(3 - 8)                |
| Non-Hodgkin lymphoma                          | 410<br>(320 - 605)            | 6<br>(3 - 11)            | 17<br>(10 - 28)    | 148<br>(106 - 236)          | 162<br>(122 - 241)          | 76<br>(56 - 109)            |
| Multiple myeloma                              | 61<br>(47 - 84)               | --                       | --                 | 19<br>(13 - 27)             | 32<br>(23 - 45)             | 10<br>(7 - 14)              |
| Leukemia                                      | 1,951<br>(1,673 - 2,276)      | 72<br>(42 - 115)         | 159<br>(120 - 208) | 720<br>(584 - 882)          | 659<br>(534 - 793)          | 341<br>(278 - 408)          |
| Other neoplasms                               | 1,276<br>(1,017 - 1,489)      | 86<br>(47 - 127)         | 111<br>(79 - 156)  | 326<br>(259 - 400)          | 482<br>(352 - 605)          | 271<br>(179 - 338)          |
| Cardiovascular diseases                       | 109,036<br>(96,568 - 122,982) | 1,366<br>(1,091 - 1,741) | 816<br>(701 - 948) | 17,040<br>(14,369 - 20,060) | 45,473<br>(39,395 - 52,675) | 44,341<br>(40,182 - 49,463) |
| Rheumatic heart disease                       | 951<br>(655 - 1,375)          | 5<br>(2 - 9)             | 42<br>(26 - 69)    | 368<br>(252 - 572)          | 287<br>(184 - 400)          | 250<br>(159 - 364)          |
| Ischemic heart disease                        | 41,924<br>(35,221 - 50,244)   | 68<br>(44 - 101)         | 42<br>(30 - 57)    | 6,596<br>(5,309 - 8,291)    | 21,837<br>(18,169 - 26,251) | 13,381<br>(11,087 - 16,233) |
| Cerebrovascular disease                       | 42,850<br>(37,052 - 50,866)   | 556<br>(393 - 755)       | 576<br>(484 - 686) | 5,498<br>(4,445 - 6,819)    | 13,895<br>(11,311 - 17,015) | 22,326<br>(19,568 - 26,261) |
| Ischemic stroke                               | 19,831<br>(16,209 - 24,880)   | 39<br>(21 - 68)          | 33<br>(23 - 49)    | 921<br>(652 - 1,403)        | 5,779<br>(4,368 - 7,584)    | 13,059<br>(10,729 - 16,373) |
| Hemorrhagic stroke                            | 23,019<br>(18,820 - 27,922)   | 517<br>(370 - 699)       | 542<br>(455 - 645) | 4,577<br>(3,661 - 5,707)    | 8,116<br>(6,314 - 10,124)   | 9,267<br>(7,424 - 11,577)   |
| Hypertensive heart disease                    | 6,444<br>(4,541 - 8,942)      | 2<br>(1 - 4)             | 2<br>(1 - 2)       | 1,676<br>(1,191 - 2,370)    | 2,739<br>(1,814 - 3,782)    | 2,026<br>(1,338 - 2,939)    |
| Cardiomyopathy and myocarditis                | 5,936<br>(4,238 - 7,336)      | 558<br>(367 - 754)       | 105<br>(65 - 146)  | 1,367<br>(953 - 1,782)      | 1,925<br>(1,275 - 2,461)    | 1,981<br>(1,376 - 2,653)    |
| Atrial fibrillation and flutter               | 8<br>(6 - 10)                 | --                       | --                 | 1<br>(1 - 2)                | 2<br>(2 - 3)                | 4<br>(3 - 6)                |
| Aortic aneurysm                               | 980<br>(804 - 1,211)          | --                       | --                 | 32<br>(25 - 41)             | 637<br>(510 - 811)          | 311<br>(250 - 392)          |
| Peripheral vascular disease                   | 11<br>(9 - 15)                | --                       | --                 | 1<br>(1 - 1)                | 5<br>(3 - 6)                | 6<br>(4 - 8)                |
| Endocarditis                                  | 353<br>(227 - 507)            | 62<br>(35 - 101)         | 9<br>(5 - 14)      | 89<br>(57 - 133)            | 148<br>(86 - 223)           | 46<br>(25 - 67)             |
| Other cardiovascular and circulatory diseases | 9,578<br>(7,902 - 13,181)     | 116<br>(79 - 163)        | 42<br>(30 - 58)    | 1,412<br>(1,077 - 1,910)    | 3,998<br>(3,114 - 5,338)    | 4,010<br>(3,203 - 5,742)    |

Web Table 31- Egypt deaths with 95% UI by age, sex, and cause in 2013

| Cause                                               | Males, All Ages             | Males, 0-4 Years   | Males, 5-14 Years | Males, 15-49 Years       | Males, 50-69 Years          | Males, 70-80 Years          |
|-----------------------------------------------------|-----------------------------|--------------------|-------------------|--------------------------|-----------------------------|-----------------------------|
| Chronic respiratory diseases                        | 31,295<br>(26,830 - 35,685) | 254<br>(182 - 368) | 55<br>(43 - 70)   | 1,495<br>(1,194 - 1,938) | 10,910<br>(8,984 - 13,498)  | 18,581<br>(15,448 - 20,943) |
| Chronic obstructive pulmonary disease               | 23,765<br>(20,039 - 27,202) | 124<br>(77 - 203)  | 29<br>(21 - 38)   | 841<br>(656 - 1,130)     | 7,729<br>(6,227 - 9,625)    | 15,042<br>(12,420 - 17,096) |
| Pneumoconiosis                                      | 1,391<br>(971 - 1,907)      | 1<br>(0 - 2)       | 2<br>(1 - 2)      | 448<br>(320 - 627)       | 551<br>(348 - 800)          | 390<br>(253 - 560)          |
| Silicosis                                           | 325<br>(209 - 463)          | 0<br>(0 - 0)       | 0<br>(0 - 0)      | 4<br>(3 - 5)             | 80<br>(48 - 119)            | 241<br>(150 - 345)          |
| Asbestosis                                          | 96<br>(66 - 132)            | 0<br>(0 - 0)       | 0<br>(0 - 1)      | 59<br>(40 - 81)          | 32<br>(19 - 47)             | 5<br>(3 - 7)                |
| Coal workers pneumoconiosis                         | 8<br>(6 - 11)               | 0<br>(0 - 0)       | 0<br>(0 - 0)      | 2<br>(2 - 3)             | 2<br>(1 - 4)                | 3<br>(2 - 5)                |
| Other pneumoconiosis                                | 962<br>(678 - 1,317)        | 0<br>(0 - 1)       | 1<br>(0 - 1)      | 383<br>(275 - 538)       | 437<br>(280 - 636)          | 141<br>(89 - 205)           |
| Asthma                                              | 1,043<br>(814 - 1,265)      | 8<br>(4 - 14)      | 5<br>(3 - 7)      | 90<br>(67 - 118)         | 374<br>(279 - 492)          | 566<br>(417 - 707)          |
| Interstitial lung disease and pulmonary sarcoidosis | 4,232<br>(3,030 - 6,193)    | 0<br>(0 - 1)       | 1<br>(1 - 1)      | 15<br>(8 - 21)           | 2,037<br>(1,449 - 3,064)    | 2,180<br>(1,376 - 3,357)    |
| Other chronic respiratory diseases                  | 863<br>(693 - 1,095)        | 121<br>(86 - 174)  | 19<br>(14 - 26)   | 101<br>(74 - 139)        | 219<br>(157 - 301)          | 403<br>(296 - 537)          |
| Cirrhosis                                           | 38,707<br>(33,147 - 44,773) | 46<br>(30 - 68)    | 72<br>(59 - 86)   | 5,560<br>(4,551 - 6,738) | 23,095<br>(19,391 - 26,977) | 9,934<br>(8,620 - 11,421)   |
| Cirrhosis due to hepatitis B                        | 12,373<br>(7,066 - 17,267)  | 2<br>(1 - 4)       | 11<br>(5 - 20)    | 1,642<br>(929 - 2,489)   | 7,334<br>(4,223 - 10,520)   | 3,384<br>(1,622 - 4,844)    |
| Cirrhosis due to hepatitis C                        | 16,472<br>(9,189 - 23,921)  | 4<br>(1 - 9)       | 19<br>(8 - 31)    | 2,560<br>(1,295 - 3,775) | 10,120<br>(5,210 - 14,929)  | 3,769<br>(2,386 - 5,489)    |
| Cirrhosis due to alcohol use                        | 6,334<br>(3,050 - 9,859)    | -                  | -                 | 603<br>(199 - 1,030)     | 3,593<br>(1,578 - 5,836)    | 2,137<br>(1,098 - 3,321)    |
| Cirrhosis due to other causes                       | 3,528<br>(1,697 - 5,729)    | 40<br>(25 - 59)    | 42<br>(29 - 57)   | 754<br>(384 - 1,261)     | 2,048<br>(864 - 3,558)      | 644<br>(263 - 1,033)        |
| Digestive diseases                                  | 8,186<br>(6,646 - 9,814)    | 73<br>(33 - 178)   | 73<br>(48 - 119)  | 2,098<br>(1,623 - 2,716) | 4,221<br>(3,230 - 5,328)    | 1,722<br>(1,351 - 2,182)    |
| Peptic ulcer disease                                | 2,431<br>(1,803 - 3,253)    | 1<br>(0 - 3)       | 5<br>(2 - 9)      | 568<br>(394 - 820)       | 1,285<br>(884 - 1,814)      | 572<br>(405 - 787)          |
| Gastritis and duodenitis                            | 204<br>(78 - 296)           | 1<br>(0 - 2)       | 3<br>(1 - 5)      | 47<br>(19 - 74)          | 98<br>(34 - 152)            | 55<br>(22 - 86)             |
| Appendicitis                                        | 210<br>(107 - 323)          | 3<br>(1 - 8)       | 8<br>(3 - 14)     | 115<br>(59 - 182)        | 70<br>(30 - 119)            | 13<br>(6 - 22)              |
| Paralytic ileus and intestinal obstruction          | 2,558<br>(1,791 - 4,266)    | 47<br>(18 - 134)   | 34<br>(19 - 71)   | 652<br>(437 - 1,134)     | 1,288<br>(840 - 2,226)      | 537<br>(346 - 872)          |
| Inguinal, femoral, and abdominal hernia             | 162<br>(88 - 257)           | 3<br>(1 - 8)       | 2<br>(1 - 4)      | 35<br>(18 - 55)          | 78<br>(39 - 132)            | 44<br>(23 - 80)             |
| Inflammatory bowel disease                          | 288<br>(169 - 386)          | 5<br>(2 - 11)      | 5<br>(2 - 8)      | 95<br>(56 - 138)         | 128<br>(65 - 191)           | 56<br>(33 - 84)             |
| Vascular intestinal disorders                       | 28<br>(11 - 62)             | 1<br>(0 - 3)       | 2<br>(1 - 6)      | 17<br>(6 - 37)           | 6<br>(2 - 15)               | 1<br>(0 - 3)                |
| Gallbladder and biliary diseases                    | 1,080<br>(671 - 1,439)      | 4<br>(1 - 9)       | 6<br>(3 - 11)     | 229<br>(137 - 338)       | 586<br>(327 - 832)          | 255<br>(151 - 362)          |
| Pancreatitis                                        | 445<br>(225 - 635)          | 1<br>(0 - 2)       | 3<br>(1 - 4)      | 127<br>(58 - 203)        | 244<br>(121 - 370)          | 70<br>(36 - 105)            |
| Other digestive diseases                            | 780<br>(444 - 1,151)        | 7<br>(2 - 18)      | 4<br>(2 - 7)      | 214<br>(118 - 340)       | 438<br>(231 - 659)          | 118<br>(69 - 180)           |
| Neurological disorders                              | 5,168<br>(4,244 - 6,210)    | 70<br>(41 - 106)   | 71<br>(49 - 95)   | 351<br>(275 - 445)       | 657<br>(511 - 838)          | 4,020<br>(3,195 - 4,903)    |
| Alzheimer disease and other dementias               | 4,396<br>(3,501 - 5,351)    | -                  | -                 | 3<br>(0 - 8)             | 483<br>(368 - 628)          | 3,910<br>(3,075 - 4,784)    |
| Parkinson disease                                   | 64<br>(52 - 79)             | -                  | -                 | 3<br>(2 - 3)             | 25<br>(19 - 35)             | 36<br>(28 - 45)             |
| Epilepsy                                            | 538<br>(379 - 666)          | 42<br>(18 - 70)    | 55<br>(34 - 79)   | 291<br>(219 - 373)       | 114<br>(62 - 160)           | 36<br>(21 - 50)             |
| Multiple sclerosis                                  | 14<br>(7 - 25)              | -                  | -                 | 3<br>(2 - 6)             | 6<br>(3 - 11)               | 4<br>(2 - 8)                |
| Other neurological disorders                        | 157<br>(119 - 193)          | 29<br>(18 - 44)    | 15<br>(11 - 22)   | 51<br>(38 - 65)          | 28<br>(20 - 36)             | 35<br>(24 - 43)             |
| Mental and substance use disorders                  | 2,319<br>(1,031 - 2,897)    | 24<br>(9 - 37)     | 0<br>(0 - 0)      | 1,748<br>(780 - 2,242)   | 483<br>(218 - 613)          | 65<br>(28 - 84)             |
| Schizophrenia                                       | 8<br>(6 - 15)               | -                  | -                 | 4<br>(3 - 8)             | 3<br>(2 - 6)                | 1<br>(1 - 2)                |
| Alcohol use disorders                               | 101<br>(54 - 128)           | -                  | -                 | 42<br>(24 - 58)          | 44<br>(22 - 60)             | 14<br>(7 - 20)              |
| Drug use disorders                                  | 2,210<br>(947 - 2,763)      | 24<br>(9 - 37)     | -                 | 1,701<br>(739 - 2,180)   | 435<br>(170 - 564)          | 49<br>(15 - 66)             |
| Opioid use disorders                                | 1,211<br>(523 - 1,533)      | 14<br>(6 - 22)     | -                 | 946<br>(417 - 1,216)     | 223<br>(87 - 292)           | 27<br>(8 - 36)              |
| Cocaine use disorders                               | 27<br>(11 - 35)             | 0<br>(0 - 1)       | -                 | 22<br>(9 - 30)           | 4<br>(1 - 5)                | 0<br>(0 - 1)                |
| Amphetamine use disorders                           | 24<br>(10 - 31)             | 0<br>(0 - 1)       | -                 | 18<br>(8 - 25)           | 4<br>(2 - 6)                | 0<br>(0 - 1)                |
| Other drug use disorders                            | 948<br>(398 - 1,183)        | 9<br>(4 - 15)      | -                 | 714<br>(306 - 920)       | 204<br>(81 - 270)           | 21<br>(6 - 29)              |

Web Table 31- Egypt deaths with 95% UI by age, sex, and cause in 2013

| Cause                                               | Males, All Ages             | Males, 0-4 Years         | Males, 5-14 Years  | Males, 15-49 Years       | Males, 50-69 Years          | Males, 70-80 Years        |
|-----------------------------------------------------|-----------------------------|--------------------------|--------------------|--------------------------|-----------------------------|---------------------------|
| Eating disorders                                    | 1<br>(0 - 1)                | --                       | 0<br>(0 - 0)       | 1<br>(0 - 1)             | --                          | --                        |
| Anorexia nervosa                                    | 1<br>(0 - 1)                | --                       | 0<br>(0 - 0)       | 1<br>(0 - 1)             | --                          | --                        |
| Diabetes, urogenital, blood, and endocrine diseases | 26,049<br>(22,017 - 29,744) | 980<br>(616 - 1,274)     | 247<br>(190 - 316) | 3,322<br>(2,709 - 4,091) | 12,266<br>(10,284 - 14,386) | 9,234<br>(7,228 - 10,600) |
| Diabetes mellitus                                   | 9,287<br>(7,982 - 10,776)   | 20<br>(15 - 27)          | 12<br>(9 - 15)     | 759<br>(612 - 955)       | 4,769<br>(3,981 - 5,658)    | 3,727<br>(3,165 - 4,417)  |
| Acute glomerulonephritis                            | 77<br>(45 - 104)            | 1<br>(0 - 1)             | 2<br>(1 - 3)       | 16<br>(11 - 21)          | 31<br>(17 - 44)             | 28<br>(12 - 46)           |
| Chronic kidney disease                              | 10,270<br>(7,950 - 12,212)  | 32<br>(20 - 46)          | 42<br>(32 - 56)    | 1,589<br>(1,229 - 2,060) | 5,015<br>(3,736 - 6,148)    | 3,592<br>(2,496 - 4,314)  |
| Chronic kidney disease due to diabetes mellitus     | 6<br>(3 - 14)               | 1<br>(0 - 2)             | 2<br>(1 - 4)       | 2<br>(1 - 6)             | 1<br>(0 - 1)                | 0<br>(0 - 1)              |
| Chronic kidney disease due to hypertension          | 5,270<br>(3,396 - 6,519)    | 8<br>(3 - 12)            | 9<br>(4 - 12)      | 803<br>(549 - 1,063)     | 2,666<br>(1,714 - 3,381)    | 1,785<br>(1,006 - 2,319)  |
| Chronic kidney disease due to glomerulonephritis    | 809<br>(582 - 1,428)        | 4<br>(2 - 6)             | 4<br>(3 - 7)       | 131<br>(86 - 229)        | 369<br>(251 - 652)          | 301<br>(187 - 574)        |
| Chronic kidney disease due to other causes          | 4,185<br>(2,679 - 6,365)    | 19<br>(10 - 31)          | 28<br>(18 - 40)    | 653<br>(412 - 1,103)     | 1,979<br>(1,151 - 3,084)    | 1,506<br>(842 - 2,277)    |
| Urinary diseases and male infertility               | 711<br>(338 - 888)          | 19<br>(7 - 29)           | 6<br>(3 - 8)       | 94<br>(49 - 121)         | 321<br>(145 - 415)          | 271<br>(121 - 352)        |
| Interstitial nephritis and urinary tract infections | 314<br>(90 - 464)           | 14<br>(5 - 22)           | 4<br>(1 - 5)       | 42<br>(13 - 63)          | 142<br>(38 - 217)           | 113<br>(26 - 181)         |
| Urolithiasis                                        | 87<br>(37 - 157)            | --                       | 1<br>(0 - 2)       | 15<br>(8 - 24)           | 39<br>(17 - 72)             | 33<br>(11 - 65)           |
| Other urinary diseases                              | 310<br>(183 - 479)          | 5<br>(2 - 10)            | 2<br>(1 - 3)       | 38<br>(23 - 59)          | 140<br>(75 - 217)           | 126<br>(72 - 207)         |
| Gynecological diseases                              | --                          | --                       | --                 | --                       | --                          | --                        |
| Uterine fibroids                                    | --                          | --                       | --                 | --                       | --                          | --                        |
| Polycystic ovarian syndrome                         | --                          | --                       | --                 | --                       | --                          | --                        |
| Endometriosis                                       | --                          | --                       | --                 | --                       | --                          | --                        |
| Genital prolapse                                    | --                          | --                       | --                 | --                       | --                          | --                        |
| Other gynecological diseases                        | --                          | --                       | --                 | --                       | --                          | --                        |
| Hemoglobinopathies and hemolytic anemias            | 742<br>(449 - 1,068)        | 247<br>(134 - 385)       | 59<br>(35 - 92)    | 201<br>(117 - 303)       | 114<br>(62 - 184)           | 120<br>(62 - 190)         |
| Thalassemias                                        | 287<br>(165 - 431)          | 163<br>(87 - 254)        | 40<br>(24 - 63)    | 84<br>(47 - 131)         | 0<br>(0 - 0)                | 0<br>(0 - 0)              |
| Sickle cell disorders                               | 201<br>(123 - 297)          | 31<br>(17 - 48)          | 12<br>(7 - 19)     | 84<br>(50 - 127)         | 71<br>(37 - 115)            | 2<br>(1 - 4)              |
| G6PD deficiency                                     | 29<br>(18 - 42)             | 9<br>(5 - 14)            | 3<br>(2 - 4)       | 8<br>(5 - 12)            | 5<br>(3 - 9)                | 4<br>(2 - 5)              |
| Other hemoglobinopathies and hemolytic anemias      | 224<br>(128 - 322)          | 44<br>(23 - 69)          | 4<br>(2 - 6)       | 25<br>(15 - 38)          | 37<br>(20 - 60)             | 114<br>(59 - 181)         |
| Endocrine, metabolic, blood, and immune disorders   | 4,962<br>(2,471 - 6,223)    | 661<br>(333 - 893)       | 126<br>(81 - 179)  | 663<br>(454 - 907)       | 2,017<br>(1,095 - 2,698)    | 1,495<br>(359 - 2,288)    |
| Musculoskeletal disorders                           | 173<br>(105 - 240)          | --                       | 6<br>(3 - 8)       | 45<br>(28 - 64)          | 64<br>(38 - 89)             | 58<br>(34 - 84)           |
| Rheumatoid arthritis                                | 14<br>(8 - 25)              | --                       | 1<br>(0 - 1)       | 3<br>(2 - 5)             | 4<br>(2 - 8)                | 7<br>(3 - 13)             |
| Other musculoskeletal disorders                     | 159<br>(93 - 215)           | --                       | 5<br>(3 - 7)       | 42<br>(26 - 60)          | 60<br>(34 - 81)             | 52<br>(28 - 73)           |
| Other non-communicable diseases                     | 8,254<br>(6,023 - 10,298)   | 6,884<br>(4,687 - 8,873) | 480<br>(367 - 610) | 424<br>(342 - 520)       | 243<br>(194 - 296)          | 223<br>(159 - 268)        |
| Congenital anomalies                                | 8,017<br>(5,799 - 10,050)   | 6,849<br>(4,634 - 8,854) | 477<br>(365 - 607) | 391<br>(317 - 479)       | 182<br>(146 - 225)          | 118<br>(89 - 143)         |
| Neural tube defects                                 | 147<br>(46 - 409)           | 136<br>(37 - 399)        | 3<br>(1 - 6)       | 5<br>(3 - 8)             | 2<br>(1 - 4)                | 1<br>(0 - 2)              |
| Congenital heart anomalies                          | 5,015<br>(2,214 - 6,700)    | 4,379<br>(1,646 - 6,010) | 353<br>(261 - 467) | 209<br>(152 - 271)       | 46<br>(30 - 65)             | 28<br>(16 - 42)           |
| Cleft lip and cleft palate                          | 7<br>(1 - 33)               | 7<br>(1 - 33)            | --                 | --                       | --                          | --                        |
| Down syndrome                                       | 284<br>(168 - 441)          | 172<br>(81 - 304)        | 24<br>(12 - 45)    | 79<br>(53 - 111)         | 8<br>(4 - 13)               | 1<br>(0 - 1)              |
| Chromosomal unbalanced rearrangements               | 98<br>(48 - 146)            | 88<br>(38 - 134)         | 7<br>(4 - 12)      | 3<br>(2 - 4)             | 1<br>(0 - 1)                | 0<br>(0 - 0)              |
| Other congenital anomalies                          | 2,466<br>(1,737 - 3,508)    | 2,067<br>(1,339 - 3,094) | 90<br>(50 - 146)   | 95<br>(69 - 132)         | 125<br>(97 - 158)           | 88<br>(68 - 110)          |
| Skin and subcutaneous diseases                      | 206<br>(133 - 249)          | 4<br>(2 - 6)             | 3<br>(2 - 4)       | 33<br>(25 - 43)          | 60<br>(41 - 78)             | 105<br>(63 - 137)         |
| Cellulitis                                          | 28<br>(15 - 40)             | 1<br>(1 - 2)             | 1<br>(0 - 1)       | 4<br>(2 - 7)             | 13<br>(6 - 20)              | 9<br>(4 - 16)             |
| Pyoderma                                            | 54<br>(38 - 70)             | 2<br>(1 - 3)             | 1<br>(1 - 1)       | 13<br>(9 - 17)           | 20<br>(13 - 28)             | 19<br>(11 - 29)           |

Web Table 31- Egypt deaths with 95% UI by age, sex, and cause in 2013

| Cause                                           | Males, All Ages             | Males, 0-4 Years     | Males, 5-14 Years        | Males, 15-49 Years        | Males, 50-69 Years       | Males, 70-80 Years       |
|-------------------------------------------------|-----------------------------|----------------------|--------------------------|---------------------------|--------------------------|--------------------------|
| Decubitus ulcer                                 | 119<br>(72 - 150)           | 0<br>(0 - 0)         | 1<br>(0 - 1)             | 14<br>(10 - 18)           | 27<br>(18 - 37)          | 77<br>(44 - 103)         |
| Other skin and subcutaneous diseases            | 4<br>(3 - 7)                | 0<br>(0 - 1)         | 1<br>(0 - 1)             | 2<br>(2 - 4)              | 1<br>(0 - 1)             | 0<br>(0 - 0)             |
| Sudden infant death syndrome                    | 31<br>(11 - 104)            | 31<br>(11 - 104)     | --                       | --                        | --                       | --                       |
| Injuries                                        | 16,774<br>(10,968 - 20,244) | 991<br>(654 - 1,391) | 1,391<br>(1,031 - 1,637) | 8,448<br>(5,896 - 10,164) | 3,996<br>(2,098 - 5,278) | 1,947<br>(1,005 - 2,480) |
| Transport injuries                              | 7,733<br>(4,629 - 9,220)    | 352<br>(168 - 518)   | 662<br>(376 - 822)       | 4,536<br>(2,864 - 5,515)  | 1,659<br>(837 - 2,106)   | 524<br>(263 - 654)       |
| Road injuries                                   | 7,302<br>(4,314 - 8,730)    | 329<br>(158 - 487)   | 618<br>(354 - 768)       | 4,290<br>(2,674 - 5,224)  | 1,569<br>(783 - 1,997)   | 496<br>(249 - 618)       |
| Pedestrian road injuries                        | 2,365<br>(1,314 - 3,116)    | 154<br>(70 - 238)    | 299<br>(167 - 405)       | 1,150<br>(691 - 1,582)    | 514<br>(247 - 718)       | 247<br>(121 - 328)       |
| Cyclist road injuries                           | 263<br>(147 - 347)          | 11<br>(4 - 19)       | 25<br>(13 - 37)          | 141<br>(85 - 190)         | 61<br>(29 - 85)          | 25<br>(12 - 36)          |
| Motorcyclist road injuries                      | 855<br>(485 - 1,182)        | 12<br>(5 - 20)       | 18<br>(8 - 28)           | 567<br>(336 - 801)        | 231<br>(116 - 333)       | 28<br>(12 - 41)          |
| Motor vehicle road injuries                     | 3,764<br>(2,150 - 4,721)    | 146<br>(64 - 233)    | 268<br>(149 - 364)       | 2,403<br>(1,447 - 3,027)  | 754<br>(345 - 1,014)     | 193<br>(90 - 267)        |
| Other road injuries                             | 55<br>(23 - 77)             | 7<br>(3 - 12)        | 9<br>(3 - 15)            | 29<br>(12 - 43)           | 8<br>(3 - 13)            | 2<br>(1 - 4)             |
| Other transport injuries                        | 430<br>(298 - 575)          | 22<br>(10 - 36)      | 44<br>(24 - 64)          | 247<br>(174 - 353)        | 89<br>(48 - 128)         | 28<br>(14 - 40)          |
| Unintentional injuries                          | 7,141<br>(4,845 - 9,013)    | 539<br>(330 - 795)   | 666<br>(519 - 826)       | 2,827<br>(2,176 - 3,468)  | 1,909<br>(944 - 2,796)   | 1,200<br>(591 - 1,623)   |
| Falls                                           | 989<br>(408 - 1,266)        | 113<br>(30 - 188)    | 100<br>(37 - 139)        | 431<br>(181 - 573)        | 208<br>(82 - 279)        | 138<br>(47 - 183)        |
| Drowning                                        | 1,557<br>(1,183 - 2,175)    | 208<br>(97 - 394)    | 360<br>(250 - 525)       | 850<br>(648 - 1,224)      | 104<br>(70 - 142)        | 36<br>(25 - 49)          |
| Fire, heat, and hot substances                  | 214<br>(137 - 274)          | 30<br>(12 - 54)      | 21<br>(11 - 32)          | 88<br>(58 - 116)          | 41<br>(24 - 57)          | 35<br>(20 - 50)          |
| Poisonings                                      | 553<br>(261 - 680)          | 34<br>(13 - 50)      | 19<br>(9 - 28)           | 145<br>(75 - 189)         | 102<br>(48 - 134)        | 253<br>(102 - 333)       |
| Exposure to mechanical forces                   | 717<br>(415 - 869)          | 24<br>(15 - 36)      | 56<br>(40 - 71)          | 466<br>(264 - 584)        | 132<br>(71 - 168)        | 39<br>(19 - 49)          |
| Unintentional firearm injuries                  | 358<br>(115 - 458)          | 9<br>(4 - 15)        | 12<br>(4 - 18)           | 261<br>(80 - 345)         | 60<br>(20 - 85)          | 16<br>(5 - 23)           |
| Unintentional suffocation                       | 53<br>(39 - 95)             | 9<br>(4 - 17)        | 10<br>(6 - 19)           | 22<br>(15 - 40)           | 10<br>(6 - 18)           | 2<br>(1 - 4)             |
| Other exposure to mechanical forces             | 307<br>(199 - 368)          | 6<br>(3 - 9)         | 33<br>(20 - 44)          | 184<br>(122 - 230)        | 62<br>(35 - 78)          | 22<br>(10 - 28)          |
| Adverse effects of medical treatment            | 2,446<br>(1,041 - 3,725)    | 75<br>(29 - 124)     | 27<br>(12 - 42)          | 461<br>(205 - 695)        | 1,251<br>(463 - 2,018)   | 632<br>(249 - 972)       |
| Animal contact                                  | 43<br>(32 - 62)             | 9<br>(5 - 16)        | 12<br>(8 - 18)           | 10<br>(7 - 15)            | 5<br>(3 - 7)             | 7<br>(4 - 11)            |
| Venomous animal contact                         | 20<br>(15 - 32)             | 5<br>(2 - 9)         | 5<br>(3 - 8)             | 4<br>(3 - 7)              | 2<br>(1 - 4)             | 3<br>(2 - 6)             |
| Non-venomous animal contact                     | 23<br>(14 - 31)             | 4<br>(2 - 8)         | 7<br>(4 - 11)            | 6<br>(4 - 8)              | 3<br>(2 - 4)             | 3<br>(2 - 5)             |
| Foreign body                                    | 86<br>(48 - 124)            | 29<br>(13 - 44)      | 8<br>(4 - 11)            | 15<br>(9 - 22)            | 15<br>(9 - 24)           | 20<br>(10 - 30)          |
| Pulmonary aspiration and foreign body in airway | 80<br>(42 - 117)            | 28<br>(13 - 43)      | 7<br>(3 - 10)            | 12<br>(7 - 19)            | 13<br>(7 - 21)           | 19<br>(10 - 30)          |
| Foreign body in other body part                 | 6<br>(4 - 10)               | 1<br>(0 - 1)         | 1<br>(0 - 1)             | 2<br>(1 - 4)              | 2<br>(1 - 3)             | 0<br>(0 - 0)             |
| Other unintentional injuries                    | 536<br>(417 - 694)          | 17<br>(9 - 33)       | 65<br>(36 - 110)         | 362<br>(259 - 498)        | 52<br>(31 - 82)          | 40<br>(27 - 59)          |
| Self-harm and interpersonal violence            | 1,813<br>(809 - 2,259)      | 25<br>(5 - 50)       | 51<br>(21 - 74)          | 1,084<br>(499 - 1,378)    | 429<br>(180 - 559)       | 223<br>(79 - 288)        |
| Self-harm                                       | 1,222<br>(445 - 1,521)      | --                   | 32<br>(11 - 48)          | 673<br>(241 - 865)        | 319<br>(111 - 409)       | 198<br>(69 - 256)        |
| Interpersonal violence                          | 590<br>(262 - 794)          | 25<br>(5 - 50)       | 19<br>(6 - 32)           | 411<br>(186 - 571)        | 110<br>(46 - 168)        | 25<br>(7 - 44)           |
| Assault by firearm                              | 316<br>(127 - 460)          | 3<br>(1 - 7)         | 3<br>(1 - 7)             | 242<br>(102 - 358)        | 55<br>(20 - 88)          | 12<br>(3 - 23)           |
| Assault by sharp object                         | 127<br>(45 - 206)           | 3<br>(1 - 8)         | 2<br>(0 - 4)             | 76<br>(27 - 129)          | 40<br>(13 - 68)          | 6<br>(1 - 11)            |
| Assault by other means                          | 148<br>(56 - 221)           | 19<br>(4 - 38)       | 14<br>(5 - 24)           | 92<br>(36 - 146)          | 15<br>(5 - 26)           | 7<br>(2 - 14)            |
| Forces of nature, war, and legal intervention   | 87<br>(76 - 98)             | 75<br>(66 - 87)      | 11<br>(10 - 12)          | 0<br>(0 - 0)              | 0<br>(0 - 0)             | 0<br>(0 - 0)             |
| Collective violence and legal intervention      | 87<br>(76 - 98)             | 75<br>(66 - 87)      | 11<br>(10 - 12)          | 0<br>(0 - 0)              | 0<br>(0 - 0)             | 0<br>(0 - 0)             |

Web Table 31- Egypt deaths with 95% UI by age, sex, and cause in 2013

| Cause                                                             | Females, All Ages              | Females, 0-4 Years          | Females, 5-14 Years      | Females, 15-49 Years        | Females, 50-69 Years        | Females, 70-80 Years           |
|-------------------------------------------------------------------|--------------------------------|-----------------------------|--------------------------|-----------------------------|-----------------------------|--------------------------------|
| All causes                                                        | 246,148<br>(221,181 - 274,523) | 19,080<br>(16,650 - 22,033) | 2,806<br>(2,554 - 3,083) | 23,601<br>(19,950 - 27,913) | 77,175<br>(67,046 - 88,742) | 123,486<br>(112,810 - 135,247) |
| Communicable, maternal, neonatal, and nutritional diseases        | 20,473<br>(17,906 - 23,676)    | 10,328<br>(8,393 - 13,119)  | 683<br>(541 - 863)       | 2,344<br>(1,939 - 2,835)    | 2,552<br>(2,083 - 3,102)    | 4,567<br>(3,596 - 5,565)       |
| HIV/AIDS and tuberculosis                                         | 326<br>(272 - 400)             | 7<br>(5 - 9)                | 6<br>(4 - 8)             | 131<br>(106 - 164)          | 111<br>(87 - 146)           | 73<br>(54 - 95)                |
| Tuberculosis                                                      | 271<br>(222 - 342)             | 2<br>(1 - 4)                | 5<br>(3 - 7)             | 91<br>(70 - 124)            | 101<br>(78 - 135)           | 71<br>(53 - 93)                |
| HIV/AIDS                                                          | 55<br>(40 - 72)                | 4<br>(3 - 7)                | 1<br>(0 - 2)             | 40<br>(29 - 51)             | 9<br>(5 - 15)               | 1<br>(0 - 2)                   |
| HIV/AIDS resulting in mycobacterial infection                     | 2<br>(2 - 3)                   | 0<br>(0 - 0)                | 0<br>(0 - 0)             | 2<br>(1 - 2)                | 0<br>(0 - 1)                | 0<br>(0 - 0)                   |
| HIV/AIDS resulting in other diseases                              | 53<br>(38 - 69)                | 4<br>(2 - 6)                | 1<br>(0 - 1)             | 38<br>(28 - 48)             | 9<br>(5 - 14)               | 1<br>(0 - 2)                   |
| Diarrhea, lower respiratory, and other common infectious diseases | 13,549<br>(11,502 - 15,932)    | 6,270<br>(4,800 - 8,253)    | 610<br>(468 - 791)       | 1,134<br>(857 - 1,519)      | 1,845<br>(1,444 - 2,273)    | 3,691<br>(2,789 - 4,608)       |
| Diarrheal diseases                                                | 2,273<br>(1,518 - 3,321)       | 1,839<br>(1,095 - 2,864)    | 48<br>(31 - 73)          | 54<br>(41 - 71)             | 79<br>(57 - 106)            | 254<br>(173 - 359)             |
| Intestinal infectious diseases                                    | 1,032<br>(538 - 1,812)         | 298<br>(145 - 523)          | 271<br>(140 - 469)       | 339<br>(150 - 685)          | 81<br>(30 - 166)            | 42<br>(17 - 84)                |
| Typhoid fever                                                     | 800<br>(400 - 1,392)           | 219<br>(105 - 392)          | 211<br>(107 - 365)       | 270<br>(116 - 538)          | 65<br>(24 - 132)            | 34<br>(13 - 69)                |
| Paratyphoid fever                                                 | 227<br>(112 - 408)             | 77<br>(33 - 150)            | 60<br>(27 - 108)         | 67<br>(27 - 141)            | 15<br>(5 - 34)              | 8<br>(3 - 19)                  |
| Other intestinal infectious diseases                              | 5<br>(1 - 11)                  | 2<br>(0 - 7)                | 0<br>(0 - 3)             | 1<br>(0 - 5)                | 1<br>(0 - 3)                | 0<br>(0 - 3)                   |
| Lower respiratory infections                                      | 9,197<br>(7,738 - 11,043)      | 3,819<br>(2,830 - 5,168)    | 212<br>(155 - 301)       | 538<br>(416 - 674)          | 1,448<br>(1,121 - 1,830)    | 3,180<br>(2,370 - 4,097)       |
| Upper respiratory infections                                      | 12<br>(4 - 27)                 | 1<br>(0 - 4)                | 0<br>(0 - 1)             | 2<br>(0 - 4)                | 4<br>(0 - 12)               | 5<br>(0 - 19)                  |
| Otitis media                                                      | 12<br>(9 - 15)                 | 0<br>(0 - 1)                | 1<br>(0 - 1)             | 2<br>(2 - 3)                | 4<br>(3 - 5)                | 5<br>(3 - 7)                   |
| Meningitis                                                        | 263<br>(219 - 316)             | 77<br>(51 - 120)            | 23<br>(16 - 30)          | 63<br>(50 - 81)             | 64<br>(45 - 80)             | 35<br>(25 - 44)                |
| Pneumococcal meningitis                                           | 62<br>(44 - 85)                | 15<br>(8 - 24)              | 6<br>(3 - 11)            | 17<br>(9 - 27)              | 16<br>(8 - 26)              | 9<br>(5 - 13)                  |
| H influenzae type B meningitis                                    | 50<br>(35 - 71)                | 28<br>(17 - 47)             | 6<br>(4 - 9)             | 7<br>(4 - 11)               | 5<br>(2 - 9)                | 3<br>(2 - 6)                   |
| Meningococcal meningitis                                          | 68<br>(51 - 88)                | 23<br>(12 - 36)             | 6<br>(4 - 10)            | 15<br>(8 - 22)              | 15<br>(7 - 24)              | 10<br>(5 - 14)                 |
| Other meningitis                                                  | 83<br>(61 - 106)               | 12<br>(6 - 23)              | 4<br>(2 - 7)             | 24<br>(15 - 35)             | 29<br>(13 - 41)             | 14<br>(8 - 20)                 |
| Encephalitis                                                      | 614<br>(400 - 786)             | 142<br>(81 - 233)           | 42<br>(24 - 74)          | 122<br>(82 - 182)           | 154<br>(85 - 211)           | 155<br>(48 - 268)              |
| Diphtheria                                                        | 2<br>(0 - 11)                  | 1<br>(0 - 9)                | 0<br>(0 - 4)             | 0<br>(0 - 1)                | 0<br>(0 - 2)                | --                             |
| Whooping cough                                                    | 33<br>(0 - 155)                | 31<br>(0 - 143)             | 2<br>(0 - 9)             | 0<br>(0 - 2)                | 0<br>(0 - 0)                | --                             |
| Tetanus                                                           | 21<br>(16 - 31)                | 3<br>(1 - 5)                | 1<br>(1 - 1)             | 7<br>(5 - 10)               | 8<br>(5 - 13)               | 3<br>(2 - 6)                   |
| Measles                                                           | 64<br>(1 - 424)                | 54<br>(1 - 360)             | 8<br>(0 - 50)            | 2<br>(0 - 11)               | 0<br>(0 - 0)                | --                             |
| Varicella and herpes zoster                                       | 26<br>(8 - 70)                 | 5<br>(0 - 20)               | 1<br>(0 - 6)             | 5<br>(1 - 14)               | 3<br>(0 - 10)               | 12<br>(0 - 54)                 |
| Neglected tropical diseases and malaria                           | 147<br>(116 - 188)             | 17<br>(11 - 27)             | 9<br>(7 - 12)            | 33<br>(25 - 42)             | 50<br>(33 - 75)             | 37<br>(22 - 56)                |
| Malaria                                                           | 4<br>(3 - 6)                   | 1<br>(0 - 1)                | 1<br>(0 - 1)             | 2<br>(1 - 3)                | 1<br>(0 - 1)                | 0<br>(0 - 1)                   |
| Leishmaniasis                                                     | 14<br>(9 - 20)                 | 6<br>(2 - 11)               | 2<br>(1 - 3)             | 4<br>(2 - 7)                | 2<br>(1 - 3)                | 1<br>(0 - 1)                   |
| Visceral leishmaniasis                                            | 14<br>(9 - 20)                 | 6<br>(2 - 11)               | 2<br>(1 - 3)             | 4<br>(2 - 7)                | 2<br>(1 - 3)                | 1<br>(0 - 1)                   |
| Schistosomiasis                                                   | 84<br>(57 - 120)               | 0<br>(0 - 0)                | 1<br>(0 - 2)             | 13<br>(8 - 21)              | 40<br>(22 - 63)             | 29<br>(15 - 48)                |
| Cysticercosis                                                     | 0<br>(0 - 0)                   | 0<br>(0 - 0)                | 0<br>(0 - 0)             | 0<br>(0 - 0)                | 0<br>(0 - 0)                | 0<br>(0 - 0)                   |
| Cystic echinococcosis                                             | 5<br>(4 - 5)                   | 0<br>(0 - 0)                | 0<br>(0 - 0)             | 1<br>(1 - 2)                | 2<br>(1 - 2)                | 1<br>(1 - 1)                   |
| Dengue                                                            | 4<br>(3 - 7)                   | 0<br>(0 - 1)                | 1<br>(0 - 1)             | 2<br>(1 - 3)                | 1<br>(0 - 1)                | 0<br>(0 - 0)                   |
| Rabies                                                            | 7<br>(5 - 10)                  | 1<br>(0 - 2)                | 2<br>(1 - 3)             | 3<br>(2 - 3)                | 1<br>(1 - 2)                | 1<br>(0 - 1)                   |
| Intestinal nematode infections                                    | 1<br>(0 - 6)                   | 1<br>(0 - 4)                | 0<br>(0 - 2)             | 0<br>(0 - 1)                | 0<br>(0 - 1)                | 0<br>(0 - 2)                   |
| Ascariasis                                                        | 1<br>(0 - 6)                   | 1<br>(0 - 4)                | 0<br>(0 - 2)             | 0<br>(0 - 1)                | 0<br>(0 - 1)                | 0<br>(0 - 2)                   |
| Other neglected tropical diseases                                 | 28<br>(13 - 37)                | 9<br>(3 - 16)               | 3<br>(1 - 4)             | 7<br>(3 - 9)                | 4<br>(2 - 7)                | 5<br>(2 - 8)                   |
| Maternal disorders                                                | 619<br>(465 - 803)             | --                          | 1<br>(0 - 1)             | 618<br>(465 - 802)          | --                          | --                             |



Web Table 31- Egypt deaths with 95% UI by age, sex, and cause in 2013

| Cause                                                            | Females, All Ages              | Females, 0-4 Years       | Females, 5-14 Years      | Females, 15-49 Years        | Females, 50-69 Years        | Females, 70-80 Years           |
|------------------------------------------------------------------|--------------------------------|--------------------------|--------------------------|-----------------------------|-----------------------------|--------------------------------|
| Maternal hemorrhage                                              | 222<br>(159 - 299)             | --                       | 0<br>(0 - 0)             | 221<br>(159 - 299)          | --                          | --                             |
| Maternal sepsis and other maternal infections                    | 51<br>(37 - 69)                | --                       | 0<br>(0 - 0)             | 51<br>(37 - 68)             | --                          | --                             |
| Maternal hypertensive disorders                                  | 100<br>(75 - 134)              | --                       | 0<br>(0 - 0)             | 100<br>(75 - 134)           | --                          | --                             |
| Maternal obstructed labor                                        | 45<br>(26 - 70)                | --                       | 0<br>(0 - 0)             | 45<br>(26 - 70)             | --                          | --                             |
| Maternal abortive outcome                                        | 43<br>(30 - 59)                | --                       | 0<br>(0 - 0)             | 43<br>(30 - 59)             | --                          | --                             |
| Indirect maternal deaths                                         | 64<br>(30 - 109)               | --                       | 0<br>(0 - 0)             | 64<br>(30 - 109)            | --                          | --                             |
| Late maternal deaths                                             | 45<br>(20 - 81)                | --                       | 0<br>(0 - 0)             | 45<br>(20 - 81)             | --                          | --                             |
| Maternal deaths aggravated by HIV/AIDS                           | 0<br>(0 - 0)                   | --                       | --                       | 0<br>(0 - 0)                | --                          | --                             |
| Other maternal disorders                                         | 47<br>(32 - 65)                | --                       | 0<br>(0 - 0)             | 47<br>(32 - 65)             | --                          | --                             |
| Neonatal disorders                                               | 3,701<br>(2,843 - 4,682)       | 3,701<br>(2,843 - 4,682) | --                       | --                          | --                          | --                             |
| Neonatal preterm birth complications                             | 2,335<br>(1,638 - 3,095)       | 2,335<br>(1,638 - 3,095) | --                       | --                          | --                          | --                             |
| Neonatal encephalopathy due to birth asphyxia and trauma         | 240<br>(135 - 427)             | 240<br>(135 - 427)       | --                       | --                          | --                          | --                             |
| Neonatal sepsis and other neonatal infections                    | 400<br>(183 - 776)             | 400<br>(183 - 776)       | --                       | --                          | --                          | --                             |
| Hemolytic disease and other neonatal jaundice                    | 59<br>(19 - 164)               | 59<br>(19 - 164)         | --                       | --                          | --                          | --                             |
| Other neonatal disorders                                         | 668<br>(393 - 1,075)           | 668<br>(393 - 1,075)     | --                       | --                          | --                          | --                             |
| Nutritional deficiencies                                         | 945<br>(787 - 1,172)           | 179<br>(118 - 278)       | 25<br>(18 - 34)          | 291<br>(229 - 367)          | 115<br>(90 - 147)           | 336<br>(261 - 444)             |
| Protein-energy malnutrition                                      | 168<br>(85 - 263)              | 103<br>(40 - 184)        | 5<br>(2 - 9)             | 8<br>(3 - 19)               | 13<br>(5 - 27)              | 39<br>(11 - 75)                |
| Iodine deficiency                                                | 5<br>(0 - 20)                  | 1<br>(0 - 6)             | 0<br>(0 - 2)             | 1<br>(0 - 3)                | 1<br>(0 - 8)                | 2<br>(0 - 15)                  |
| Iron-deficiency anemia                                           | 701<br>(551 - 878)             | 40<br>(15 - 87)          | 17<br>(10 - 23)          | 275<br>(213 - 351)          | 93<br>(65 - 122)            | 276<br>(203 - 384)             |
| Other nutritional deficiencies                                   | 70<br>(34 - 141)               | 35<br>(14 - 83)          | 3<br>(1 - 6)             | 7<br>(3 - 17)               | 7<br>(3 - 15)               | 18<br>(6 - 38)                 |
| Other communicable, maternal, neonatal, and nutritional diseases | 1,186<br>(967 - 1,423)         | 155<br>(102 - 218)       | 32<br>(21 - 42)          | 138<br>(107 - 180)          | 431<br>(319 - 563)          | 430<br>(322 - 571)             |
| Sexually transmitted diseases excluding HIV                      | 26<br>(17 - 39)                | 11<br>(3 - 22)           | 1<br>(0 - 2)             | 3<br>(2 - 5)                | 4<br>(3 - 7)                | 7<br>(4 - 11)                  |
| Syphilis                                                         | 21<br>(12 - 32)                | 11<br>(3 - 22)           | 1<br>(0 - 2)             | 1<br>(1 - 2)                | 2<br>(2 - 4)                | 5<br>(3 - 8)                   |
| Chlamydial infection                                             | 2<br>(1 - 2)                   | --                       | 0<br>(0 - 0)             | 1<br>(0 - 1)                | 1<br>(0 - 1)                | 0<br>(0 - 1)                   |
| Gonococcal infection                                             | 2<br>(2 - 3)                   | --                       | 0<br>(0 - 0)             | 1<br>(0 - 1)                | 1<br>(1 - 1)                | 1<br>(0 - 1)                   |
| Other sexually transmitted diseases                              | 2<br>(1 - 2)                   | --                       | 0<br>(0 - 0)             | 1<br>(0 - 1)                | 1<br>(0 - 1)                | 0<br>(0 - 1)                   |
| Hepatitis                                                        | 687<br>(530 - 881)             | 10<br>(6 - 20)           | 6<br>(3 - 9)             | 68<br>(48 - 96)             | 318<br>(221 - 437)          | 285<br>(189 - 413)             |
| Acute hepatitis A                                                | 32<br>(8 - 71)                 | 4<br>(1 - 10)            | 2<br>(0 - 4)             | 6<br>(1 - 14)               | 14<br>(3 - 34)              | 6<br>(1 - 17)                  |
| Acute hepatitis B                                                | 454<br>(282 - 648)             | 6<br>(2 - 12)            | 1<br>(0 - 3)             | 22<br>(9 - 42)              | 210<br>(119 - 322)          | 215<br>(119 - 332)             |
| Acute hepatitis C                                                | 113<br>(27 - 249)              | --                       | 1<br>(0 - 2)             | 13<br>(3 - 29)              | 55<br>(11 - 128)            | 44<br>(8 - 115)                |
| Acute hepatitis E                                                | 88<br>(31 - 191)               | 0<br>(0 - 1)             | 2<br>(1 - 5)             | 27<br>(14 - 45)             | 40<br>(9 - 100)             | 19<br>(2 - 59)                 |
| Other infectious diseases                                        | 473<br>(329 - 583)             | 133<br>(85 - 189)        | 25<br>(15 - 34)          | 67<br>(48 - 90)             | 108<br>(77 - 152)           | 139<br>(83 - 186)              |
| Non-communicable diseases                                        | 218,967<br>(195,627 - 244,993) | 7,956<br>(5,656 - 9,975) | 1,594<br>(1,389 - 1,811) | 19,487<br>(16,324 - 23,132) | 72,653<br>(62,949 - 83,417) | 117,278<br>(106,809 - 128,582) |
| Neoplasms                                                        | 20,444<br>(17,533 - 23,842)    | 189<br>(134 - 265)       | 328<br>(262 - 399)       | 4,743<br>(3,902 - 5,764)    | 9,706<br>(8,221 - 11,452)   | 5,478<br>(4,772 - 6,275)       |
| Esophageal cancer                                                | 277<br>(222 - 338)             | --                       | --                       | 59<br>(43 - 78)             | 128<br>(96 - 164)           | 91<br>(68 - 117)               |
| Stomach cancer                                                   | 1,038<br>(849 - 1,274)         | --                       | --                       | 190<br>(146 - 242)          | 488<br>(393 - 616)          | 360<br>(273 - 470)             |
| Liver cancer                                                     | 3,113<br>(2,551 - 3,833)       | --                       | 9<br>(6 - 14)            | 415<br>(312 - 552)          | 1,731<br>(1,346 - 2,170)    | 959<br>(728 - 1,245)           |
| Liver cancer due to hepatitis B                                  | 405<br>(252 - 593)             | --                       | 2<br>(1 - 3)             | 85<br>(54 - 123)            | 234<br>(134 - 360)          | 84<br>(48 - 131)               |
| Liver cancer due to hepatitis C                                  | 1,994<br>(1,536 - 2,513)       | --                       | 2<br>(1 - 4)             | 225<br>(155 - 315)          | 1,123<br>(844 - 1,466)      | 644<br>(462 - 869)             |
| Liver cancer due to alcohol use                                  | 220<br>(105 - 374)             | --                       | --                       | 12<br>(4 - 26)              | 104<br>(51 - 174)           | 104<br>(40 - 210)              |

Web Table 31- Egypt deaths with 95% UI by age, sex, and cause in 2013

| Cause                                         | Females, All Ages              | Females, 0-4 Years     | Females, 5-14 Years | Females, 15-49 Years     | Females, 50-69 Years        | Females, 70-80 Years        |
|-----------------------------------------------|--------------------------------|------------------------|---------------------|--------------------------|-----------------------------|-----------------------------|
| Liver cancer due to other causes              | 494<br>(254 - 801)             | --                     | 5<br>(3 - 8)        | 92<br>(51 - 152)         | 271<br>(130 - 458)          | 126<br>(60 - 226)           |
| Larynx cancer                                 | 119<br>(60 - 207)              | --                     | --                  | 23<br>(12 - 41)          | 56<br>(27 - 97)             | 41<br>(20 - 72)             |
| Tracheal, bronchus and lung cancer            | 1,561<br>(1,290 - 1,862)       | --                     | --                  | 301<br>(230 - 387)       | 772<br>(621 - 943)          | 489<br>(376 - 608)          |
| Breast cancer                                 | 4,566<br>(3,834 - 5,531)       | --                     | --                  | 1,330<br>(1,057 - 1,690) | 2,355<br>(1,923 - 2,873)    | 881<br>(732 - 1,070)        |
| Cervical cancer                               | 623<br>(458 - 771)             | --                     | --                  | 174<br>(123 - 223)       | 288<br>(208 - 374)          | 161<br>(108 - 208)          |
| Uterine cancer                                | 240<br>(156 - 318)             | --                     | --                  | 38<br>(23 - 55)          | 136<br>(85 - 187)           | 67<br>(43 - 94)             |
| Prostate cancer                               | --                             | --                     | --                  | --                       | --                          | --                          |
| Colon and rectum cancer                       | 1,078<br>(915 - 1,279)         | --                     | --                  | 256<br>(205 - 320)       | 483<br>(395 - 588)          | 339<br>(277 - 417)          |
| Lip and oral cavity cancer                    | 147<br>(92 - 195)              | --                     | --                  | 35<br>(23 - 49)          | 66<br>(40 - 92)             | 46<br>(27 - 65)             |
| Nasopharynx cancer                            | 15<br>(10 - 25)                | --                     | 1<br>(0 - 2)        | 6<br>(4 - 10)            | 6<br>(4 - 11)               | 2<br>(1 - 4)                |
| Other pharynx cancer                          | 72<br>(54 - 92)                | --                     | --                  | 22<br>(15 - 32)          | 33<br>(23 - 44)             | 17<br>(11 - 23)             |
| Gallbladder and biliary tract cancer          | 372<br>(188 - 490)             | --                     | --                  | 75<br>(38 - 104)         | 209<br>(105 - 285)          | 88<br>(41 - 126)            |
| Pancreatic cancer                             | 682<br>(576 - 808)             | --                     | --                  | 86<br>(66 - 110)         | 330<br>(271 - 409)          | 266<br>(216 - 326)          |
| Malignant skin melanoma                       | 28<br>(23 - 34)                | --                     | --                  | 8<br>(6 - 10)            | 15<br>(11 - 19)             | 5<br>(4 - 7)                |
| Non-melanoma skin cancer                      | 46<br>(30 - 70)                | --                     | --                  | 8<br>(6 - 13)            | 17<br>(12 - 28)             | 20<br>(13 - 29)             |
| Ovarian cancer                                | 514<br>(421 - 636)             | --                     | --                  | 147<br>(112 - 191)       | 271<br>(214 - 343)          | 97<br>(74 - 128)            |
| Testicular cancer                             | --                             | --                     | --                  | --                       | --                          | --                          |
| Kidney cancer                                 | 237<br>(194 - 290)             | 9<br>(4 - 17)          | 7<br>(4 - 13)       | 44<br>(32 - 57)          | 123<br>(92 - 160)           | 55<br>(40 - 73)             |
| Bladder cancer                                | 726<br>(529 - 1,185)           | --                     | --                  | 87<br>(55 - 148)         | 359<br>(251 - 597)          | 281<br>(194 - 463)          |
| Brain and nervous system cancer               | 1,833<br>(1,134 - 2,278)       | 48<br>(26 - 79)        | 96<br>(64 - 128)    | 494<br>(340 - 624)       | 707<br>(408 - 907)          | 489<br>(276 - 647)          |
| Thyroid cancer                                | 180<br>(118 - 231)             | --                     | 0<br>(0 - 1)        | 26<br>(17 - 36)          | 81<br>(51 - 110)            | 72<br>(45 - 97)             |
| Mesothelioma                                  | 24<br>(18 - 32)                | --                     | --                  | 4<br>(3 - 6)             | 15<br>(10 - 22)             | 5<br>(3 - 7)                |
| Hodgkin lymphoma                              | 29<br>(22 - 39)                | 2<br>(1 - 4)           | 4<br>(2 - 8)        | 15<br>(11 - 23)          | 4<br>(3 - 6)                | 3<br>(2 - 5)                |
| Non-Hodgkin lymphoma                          | 268<br>(207 - 404)             | 8<br>(3 - 16)          | 14<br>(7 - 23)      | 78<br>(56 - 113)         | 104<br>(76 - 167)           | 64<br>(46 - 103)            |
| Multiple myeloma                              | 40<br>(30 - 54)                | --                     | --                  | 13<br>(9 - 20)           | 17<br>(12 - 23)             | 10<br>(7 - 14)              |
| Leukemia                                      | 1,609<br>(1,346 - 1,914)       | 56<br>(34 - 91)        | 112<br>(84 - 146)   | 561<br>(441 - 697)       | 552<br>(440 - 681)          | 329<br>(256 - 403)          |
| Other neoplasms                               | 1,005<br>(713 - 1,250)         | 66<br>(30 - 100)       | 85<br>(51 - 119)    | 250<br>(169 - 329)       | 360<br>(238 - 463)          | 243<br>(156 - 316)          |
| Cardiovascular diseases                       | 115,655<br>(102,825 - 131,182) | 1,208<br>(804 - 1,647) | 515<br>(418 - 647)  | 7,900<br>(6,470 - 9,664) | 34,204<br>(29,303 - 39,966) | 71,828<br>(64,795 - 79,755) |
| Rheumatic heart disease                       | 1,717<br>(1,257 - 2,269)       | 7<br>(2 - 12)          | 47<br>(33 - 77)     | 481<br>(354 - 682)       | 214<br>(144 - 289)          | 967<br>(674 - 1,273)        |
| Ischemic heart disease                        | 40,256<br>(32,329 - 47,189)    | 69<br>(33 - 121)       | 37<br>(21 - 52)     | 3,267<br>(2,484 - 4,070) | 12,275<br>(9,501 - 15,003)  | 24,608<br>(19,478 - 28,732) |
| Cerebrovascular disease                       | 43,095<br>(36,665 - 51,938)    | 389<br>(220 - 539)     | 289<br>(230 - 365)  | 2,263<br>(1,715 - 2,874) | 11,278<br>(9,241 - 14,347)  | 28,877<br>(24,911 - 34,463) |
| Ischemic stroke                               | 21,010<br>(17,019 - 26,387)    | 35<br>(17 - 60)        | 27<br>(17 - 39)     | 436<br>(311 - 648)       | 5,055<br>(3,901 - 7,099)    | 15,457<br>(12,308 - 19,117) |
| Hemorrhagic stroke                            | 22,086<br>(18,005 - 27,661)    | 354<br>(199 - 485)     | 262<br>(208 - 335)  | 1,827<br>(1,385 - 2,312) | 6,224<br>(4,903 - 7,950)    | 13,420<br>(10,899 - 17,355) |
| Hypertensive heart disease                    | 11,321<br>(8,152 - 15,267)     | 1<br>(1 - 2)           | 2<br>(1 - 2)        | 594<br>(416 - 823)       | 2,293<br>(1,542 - 3,044)    | 8,432<br>(5,988 - 11,552)   |
| Cardiomyopathy and myocarditis                | 5,713<br>(4,339 - 7,042)       | 582<br>(395 - 846)     | 99<br>(68 - 140)    | 594<br>(428 - 766)       | 1,407<br>(970 - 1,790)      | 3,030<br>(2,265 - 3,916)    |
| Atrial fibrillation and flutter               | 19<br>(14 - 25)                | --                     | --                  | 1<br>(1 - 2)             | 4<br>(3 - 5)                | 14<br>(10 - 19)             |
| Aortic aneurysm                               | 214<br>(132 - 324)             | --                     | --                  | 33<br>(20 - 51)          | 34<br>(20 - 51)             | 148<br>(89 - 229)           |
| Peripheral vascular disease                   | 11<br>(8 - 14)                 | --                     | --                  | 1<br>(0 - 1)             | 3<br>(2 - 4)                | 8<br>(5 - 11)               |
| Endocarditis                                  | 193<br>(118 - 257)             | 15<br>(6 - 28)         | 2<br>(1 - 3)        | 36<br>(23 - 52)          | 45<br>(25 - 63)             | 94<br>(54 - 135)            |
| Other cardiovascular and circulatory diseases | 13,116<br>(10,298 - 16,569)    | 144<br>(88 - 213)      | 39<br>(26 - 57)     | 630<br>(450 - 877)       | 6,650<br>(4,917 - 8,564)    | 5,652<br>(4,304 - 7,491)    |

Web Table 31- Egypt deaths with 95% UI by age, sex, and cause in 2013

| Cause                                               | Females, All Ages           | Females, 0-4 Years | Females, 5-14 Years | Females, 15-49 Years     | Females, 50-69 Years       | Females, 70-80 Years        |
|-----------------------------------------------------|-----------------------------|--------------------|---------------------|--------------------------|----------------------------|-----------------------------|
| Chronic respiratory diseases                        | 18,550<br>(15,940 - 22,460) | 211<br>(145 - 362) | 37<br>(29 - 47)     | 842<br>(673 - 1,088)     | 4,832<br>(3,962 - 6,261)   | 12,627<br>(10,558 - 15,234) |
| Chronic obstructive pulmonary disease               | 14,359<br>(11,919 - 17,546) | 144<br>(91 - 261)  | 23<br>(16 - 30)     | 536<br>(406 - 714)       | 4,106<br>(3,349 - 5,329)   | 9,551<br>(7,573 - 11,894)   |
| Pneumoconiosis                                      | 73<br>(47 - 108)            | 1<br>(0 - 2)       | 1<br>(1 - 2)        | 12<br>(8 - 18)           | 30<br>(18 - 51)            | 28<br>(16 - 47)             |
| Silicosis                                           | 12<br>(8 - 19)              | 0<br>(0 - 0)       | 0<br>(0 - 0)        | 2<br>(1 - 3)             | 5<br>(3 - 8)               | 5<br>(2 - 9)                |
| Asbestosis                                          | 15<br>(9 - 22)              | 0<br>(0 - 0)       | 0<br>(0 - 0)        | 3<br>(2 - 5)             | 6<br>(4 - 11)              | 5<br>(2 - 9)                |
| Coal workers pneumoconiosis                         | 8<br>(5 - 12)               | 0<br>(0 - 0)       | 0<br>(0 - 0)        | 2<br>(1 - 3)             | 2<br>(1 - 4)               | 3<br>(1 - 6)                |
| Other pneumoconiosis                                | 38<br>(24 - 58)             | 0<br>(0 - 0)       | 0<br>(0 - 0)        | 5<br>(4 - 8)             | 17<br>(10 - 27)            | 16<br>(9 - 27)              |
| Asthma                                              | 809<br>(519 - 1,277)        | 5<br>(2 - 10)      | 4<br>(3 - 6)        | 49<br>(32 - 73)          | 217<br>(129 - 363)         | 533<br>(327 - 869)          |
| Interstitial lung disease and pulmonary sarcoidosis | 2,346<br>(1,357 - 3,998)    | 0<br>(0 - 1)       | 1<br>(0 - 2)        | 56<br>(33 - 94)          | 363<br>(196 - 671)         | 1,926<br>(1,088 - 3,358)    |
| Other chronic respiratory diseases                  | 963<br>(650 - 1,411)        | 61<br>(42 - 98)    | 8<br>(5 - 12)       | 188<br>(126 - 272)       | 117<br>(71 - 187)          | 589<br>(368 - 911)          |
| Cirrhosis                                           | 23,619<br>(20,205 - 27,551) | 39<br>(27 - 53)    | 61<br>(50 - 74)     | 2,059<br>(1,688 - 2,544) | 11,460<br>(9,643 - 13,553) | 10,001<br>(8,421 - 11,645)  |
| Cirrhosis due to hepatitis B                        | 5,528<br>(2,495 - 10,308)   | 1<br>(0 - 3)       | 7<br>(1 - 16)       | 410<br>(183 - 781)       | 2,514<br>(1,254 - 4,872)   | 2,596<br>(970 - 4,833)      |
| Cirrhosis due to hepatitis C                        | 14,819<br>(8,720 - 19,331)  | 3<br>(1 - 9)       | 16<br>(5 - 29)      | 1,268<br>(701 - 1,738)   | 7,460<br>(4,038 - 9,950)   | 6,071<br>(3,692 - 8,201)    |
| Cirrhosis due to alcohol use                        | 1,281<br>(612 - 2,339)      | --                 | --                  | 55<br>(19 - 116)         | 504<br>(222 - 1,025)       | 722<br>(348 - 1,280)        |
| Cirrhosis due to other causes                       | 1,991<br>(1,039 - 3,642)    | 34<br>(23 - 48)    | 38<br>(24 - 51)     | 326<br>(160 - 625)       | 981<br>(436 - 2,043)       | 612<br>(315 - 1,122)        |
| Digestive diseases                                  | 5,137<br>(4,178 - 6,250)    | 70<br>(30 - 201)   | 48<br>(30 - 84)     | 678<br>(511 - 883)       | 2,404<br>(1,849 - 3,068)   | 1,938<br>(1,465 - 2,496)    |
| Peptic ulcer disease                                | 1,358<br>(962 - 1,956)      | 2<br>(1 - 6)       | 5<br>(3 - 10)       | 123<br>(78 - 194)        | 626<br>(412 - 979)         | 602<br>(404 - 842)          |
| Gastritis and duodenitis                            | 138<br>(62 - 251)           | 1<br>(0 - 4)       | 2<br>(1 - 5)        | 20<br>(9 - 40)           | 56<br>(24 - 100)           | 59<br>(27 - 113)            |
| Appendicitis                                        | 82<br>(50 - 118)            | 4<br>(1 - 11)      | 5<br>(2 - 9)        | 26<br>(15 - 39)          | 33<br>(18 - 54)            | 14<br>(8 - 24)              |
| Paralytic ileus and intestinal obstruction          | 1,676<br>(1,133 - 2,690)    | 48<br>(18 - 149)   | 21<br>(10 - 44)     | 270<br>(180 - 429)       | 766<br>(490 - 1,294)       | 572<br>(334 - 884)          |
| Inguinal, femoral, and abdominal hernia             | 122<br>(65 - 217)           | 4<br>(1 - 13)      | 2<br>(1 - 4)        | 12<br>(6 - 20)           | 71<br>(35 - 136)           | 34<br>(16 - 58)             |
| Inflammatory bowel disease                          | 226<br>(120 - 316)          | 2<br>(0 - 5)       | 3<br>(2 - 6)        | 43<br>(23 - 64)          | 92<br>(45 - 144)           | 86<br>(44 - 132)            |
| Vascular intestinal disorders                       | 16<br>(6 - 32)              | 1<br>(0 - 4)       | 1<br>(0 - 4)        | 7<br>(3 - 14)            | 4<br>(1 - 7)               | 3<br>(1 - 5)                |
| Gallbladder and biliary diseases                    | 952<br>(630 - 1,280)        | 3<br>(1 - 9)       | 3<br>(1 - 6)        | 94<br>(55 - 139)         | 439<br>(269 - 643)         | 413<br>(265 - 587)          |
| Pancreatitis                                        | 248<br>(137 - 368)          | 1<br>(0 - 3)       | 2<br>(1 - 4)        | 39<br>(21 - 60)          | 144<br>(73 - 226)          | 62<br>(32 - 100)            |
| Other digestive diseases                            | 320<br>(206 - 432)          | 3<br>(1 - 10)      | 4<br>(2 - 7)        | 45<br>(27 - 66)          | 174<br>(103 - 249)         | 93<br>(58 - 135)            |
| Neurological disorders                              | 5,328<br>(4,189 - 6,725)    | 70<br>(42 - 111)   | 56<br>(36 - 78)     | 227<br>(153 - 298)       | 489<br>(364 - 630)         | 4,485<br>(3,424 - 5,801)    |
| Alzheimer disease and other dementias               | 4,772<br>(3,648 - 6,109)    | --                 | --                  | 1<br>(0 - 5)             | 382<br>(265 - 515)         | 4,389<br>(3,333 - 5,693)    |
| Parkinson disease                                   | 34<br>(26 - 54)             | --                 | --                  | 2<br>(1 - 3)             | 11<br>(8 - 19)             | 21<br>(15 - 35)             |
| Epilepsy                                            | 369<br>(220 - 485)          | 41<br>(17 - 72)    | 42<br>(22 - 62)     | 189<br>(117 - 255)       | 72<br>(37 - 103)           | 26<br>(13 - 39)             |
| Multiple sclerosis                                  | 11<br>(6 - 16)              | --                 | --                  | 3<br>(1 - 4)             | 4<br>(2 - 6)               | 5<br>(2 - 8)                |
| Other neurological disorders                        | 141<br>(122 - 166)          | 30<br>(21 - 43)    | 14<br>(11 - 19)     | 32<br>(26 - 40)          | 20<br>(16 - 25)            | 44<br>(35 - 58)             |
| Mental and substance use disorders                  | 457<br>(369 - 559)          | 8<br>(5 - 12)      | 0<br>(0 - 1)        | 323<br>(252 - 410)       | 90<br>(66 - 113)           | 36<br>(28 - 47)             |
| Schizophrenia                                       | 5<br>(3 - 10)               | --                 | --                  | 2<br>(1 - 4)             | 1<br>(1 - 3)               | 2<br>(1 - 3)                |
| Alcohol use disorders                               | 41<br>(14 - 62)             | --                 | --                  | 13<br>(5 - 21)           | 23<br>(7 - 36)             | 5<br>(2 - 8)                |
| Drug use disorders                                  | 407<br>(325 - 508)          | 8<br>(5 - 12)      | --                  | 305<br>(237 - 392)       | 65<br>(50 - 82)            | 29<br>(22 - 39)             |
| Opioid use disorders                                | 220<br>(175 - 275)          | 5<br>(3 - 7)       | --                  | 167<br>(128 - 215)       | 33<br>(25 - 42)            | 16<br>(12 - 22)             |
| Cocaine use disorders                               | 8<br>(6 - 10)               | 0<br>(0 - 0)       | --                  | 6<br>(5 - 9)             | 1<br>(1 - 1)               | 0<br>(0 - 1)                |
| Amphetamine use disorders                           | 8<br>(6 - 10)               | 0<br>(0 - 0)       | --                  | 6<br>(4 - 8)             | 1<br>(1 - 2)               | 0<br>(0 - 1)                |
| Other drug use disorders                            | 172<br>(137 - 215)          | 3<br>(2 - 5)       | --                  | 126<br>(98 - 162)        | 30<br>(23 - 39)            | 12<br>(9 - 17)              |

Web Table 31- Egypt deaths with 95% UI by age, sex, and cause in 2013

| Cause                                               | Females, All Ages           | Females, 0-4 Years       | Females, 5-14 Years | Females, 15-49 Years     | Females, 50-69 Years      | Females, 70-80 Years       |
|-----------------------------------------------------|-----------------------------|--------------------------|---------------------|--------------------------|---------------------------|----------------------------|
| Eating disorders                                    | 3<br>(2 - 5)                | --                       | 0<br>(0 - 1)        | 3<br>(2 - 4)             | --                        | --                         |
| Anorexia nervosa                                    | 3<br>(2 - 5)                | --                       | 0<br>(0 - 1)        | 3<br>(2 - 4)             | --                        | --                         |
| Diabetes, urogenital, blood, and endocrine diseases | 22,811<br>(18,575 - 26,346) | 651<br>(298 - 1,047)     | 174<br>(121 - 231)  | 2,327<br>(1,889 - 2,888) | 9,196<br>(7,436 - 11,014) | 10,464<br>(8,253 - 12,154) |
| Diabetes mellitus                                   | 11,342<br>(9,446 - 13,402)  | 12<br>(7 - 19)           | 14<br>(8 - 24)      | 588<br>(458 - 753)       | 4,804<br>(3,871 - 5,894)  | 5,924<br>(4,666 - 7,104)   |
| Acute glomerulonephritis                            | 72<br>(49 - 98)             | 1<br>(0 - 1)             | 1<br>(1 - 2)        | 10<br>(7 - 14)           | 26<br>(14 - 39)           | 35<br>(20 - 54)            |
| Chronic kidney disease                              | 8,619<br>(6,805 - 10,469)   | 30<br>(21 - 44)          | 47<br>(35 - 62)     | 1,177<br>(896 - 1,538)   | 3,623<br>(2,756 - 4,568)  | 3,742<br>(2,767 - 4,625)   |
| Chronic kidney disease due to diabetes mellitus     | 6<br>(4 - 11)               | 1<br>(1 - 3)             | 1<br>(1 - 3)        | 2<br>(1 - 4)             | 1<br>(0 - 2)              | 0<br>(0 - 1)               |
| Chronic kidney disease due to hypertension          | 4,259<br>(2,575 - 5,580)    | 5<br>(3 - 9)             | 5<br>(2 - 9)        | 609<br>(395 - 831)       | 1,771<br>(1,028 - 2,405)  | 1,868<br>(1,136 - 2,542)   |
| Chronic kidney disease due to glomerulonephritis    | 603<br>(389 - 934)          | 4<br>(2 - 6)             | 7<br>(4 - 10)       | 65<br>(40 - 107)         | 347<br>(217 - 557)        | 180<br>(106 - 310)         |
| Chronic kidney disease due to other causes          | 3,751<br>(2,396 - 5,588)    | 21<br>(12 - 32)          | 33<br>(22 - 46)     | 500<br>(283 - 761)       | 1,503<br>(822 - 2,352)    | 1,693<br>(1,029 - 2,631)   |
| Urinary diseases and male infertility               | 476<br>(184 - 672)          | 12<br>(4 - 20)           | 5<br>(2 - 7)        | 83<br>(33 - 120)         | 172<br>(64 - 249)         | 205<br>(65 - 305)          |
| Interstitial nephritis and urinary tract infections | 302<br>(85 - 465)           | 10<br>(3 - 16)           | 3<br>(1 - 4)        | 55<br>(16 - 87)          | 103<br>(28 - 162)         | 132<br>(31 - 213)          |
| Urolithiasis                                        | 77<br>(25 - 187)            | --                       | 1<br>(0 - 1)        | 11<br>(4 - 27)           | 35<br>(11 - 83)           | 30<br>(9 - 81)             |
| Other urinary diseases                              | 98<br>(48 - 180)            | 2<br>(1 - 4)             | 2<br>(1 - 3)        | 16<br>(9 - 35)           | 35<br>(17 - 60)           | 43<br>(15 - 85)            |
| Gynecological diseases                              | 7<br>(5 - 16)               | --                       | --                  | 5<br>(3 - 11)            | 2<br>(1 - 4)              | 1<br>(0 - 1)               |
| Uterine fibroids                                    | 2<br>(1 - 4)                | --                       | --                  | 1<br>(1 - 2)             | 0<br>(0 - 1)              | 0<br>(0 - 0)               |
| Polycystic ovarian syndrome                         | 0<br>(0 - 1)                | --                       | --                  | 0<br>(0 - 1)             | 0<br>(0 - 0)              | --                         |
| Endometriosis                                       | 1<br>(1 - 2)                | --                       | --                  | 1<br>(0 - 2)             | 0<br>(0 - 0)              | --                         |
| Genital prolapse                                    | 1<br>(1 - 2)                | --                       | --                  | 1<br>(0 - 1)             | 0<br>(0 - 1)              | 0<br>(0 - 0)               |
| Other gynecological diseases                        | 3<br>(2 - 8)                | --                       | --                  | 2<br>(1 - 5)             | 1<br>(1 - 2)              | 0<br>(0 - 1)               |
| Hemoglobinopathies and hemolytic anemias            | 776<br>(380 - 1,351)        | 143<br>(74 - 231)        | 61<br>(28 - 110)    | 272<br>(119 - 540)       | 115<br>(49 - 181)         | 185<br>(77 - 395)          |
| Thalassemias                                        | 266<br>(132 - 468)          | 99<br>(52 - 160)         | 43<br>(20 - 77)     | 125<br>(52 - 261)        | 0<br>(0 - 0)              | 0<br>(0 - 0)               |
| Sickle cell disorders                               | 228<br>(107 - 372)          | 21<br>(11 - 34)          | 12<br>(6 - 22)      | 114<br>(48 - 221)        | 76<br>(32 - 119)          | 4<br>(2 - 7)               |
| G6PD deficiency                                     | 21<br>(10 - 36)             | 3<br>(2 - 6)             | 2<br>(1 - 4)        | 9<br>(4 - 18)            | 3<br>(1 - 5)              | 3<br>(2 - 6)               |
| Other hemoglobinopathies and hemolytic anemias      | 261<br>(115 - 505)          | 19<br>(9 - 35)           | 4<br>(2 - 8)        | 25<br>(11 - 48)          | 36<br>(15 - 59)           | 177<br>(73 - 385)          |
| Endocrine, metabolic, blood, and immune disorders   | 1,518<br>(903 - 2,066)      | 453<br>(113 - 861)       | 46<br>(21 - 96)     | 192<br>(120 - 285)       | 454<br>(270 - 728)        | 373<br>(205 - 597)         |
| Musculoskeletal disorders                           | 259<br>(212 - 313)          | --                       | 8<br>(6 - 11)       | 92<br>(69 - 120)         | 74<br>(55 - 92)           | 84<br>(65 - 111)           |
| Rheumatoid arthritis                                | 35<br>(26 - 48)             | --                       | 1<br>(0 - 1)        | 5<br>(3 - 7)             | 11<br>(7 - 16)            | 19<br>(12 - 29)            |
| Other musculoskeletal disorders                     | 223<br>(181 - 270)          | --                       | 8<br>(5 - 11)       | 87<br>(65 - 113)         | 63<br>(47 - 79)           | 66<br>(49 - 86)            |
| Other non-communicable diseases                     | 6,708<br>(4,216 - 8,671)    | 5,510<br>(3,129 - 7,463) | 366<br>(287 - 462)  | 296<br>(225 - 367)       | 199<br>(142 - 246)        | 337<br>(209 - 426)         |
| Congenital anomalies                                | 6,362<br>(3,877 - 8,312)    | 5,457<br>(2,963 - 7,400) | 363<br>(284 - 460)  | 274<br>(206 - 341)       | 146<br>(103 - 183)        | 122<br>(91 - 153)          |
| Neural tube defects                                 | 161<br>(39 - 454)           | 155<br>(34 - 449)        | 2<br>(1 - 5)        | 3<br>(2 - 4)             | 1<br>(1 - 2)              | 0<br>(0 - 1)               |
| Congenital heart anomalies                          | 3,586<br>(1,951 - 5,071)    | 3,138<br>(1,522 - 4,600) | 232<br>(172 - 304)  | 150<br>(109 - 191)       | 42<br>(30 - 57)           | 23<br>(15 - 33)            |
| Cleft lip and cleft palate                          | 6<br>(1 - 21)               | 6<br>(1 - 21)            | --                  | --                       | --                        | --                         |
| Down syndrome                                       | 491<br>(232 - 813)          | 422<br>(178 - 723)       | 54<br>(30 - 93)     | 6<br>(3 - 9)             | 9<br>(5 - 14)             | 0<br>(0 - 0)               |
| Chromosomal unbalanced rearrangements               | 88<br>(45 - 136)            | 59<br>(24 - 101)         | 5<br>(3 - 8)        | 22<br>(14 - 33)          | 1<br>(0 - 2)              | 0<br>(0 - 0)               |
| Other congenital anomalies                          | 2,031<br>(1,222 - 2,778)    | 1,677<br>(899 - 2,390)   | 71<br>(47 - 98)     | 92<br>(66 - 121)         | 93<br>(62 - 120)          | 98<br>(71 - 123)           |
| Skin and subcutaneous diseases                      | 299<br>(159 - 386)          | 7<br>(4 - 11)            | 3<br>(2 - 4)        | 22<br>(16 - 29)          | 53<br>(33 - 69)           | 215<br>(100 - 291)         |
| Cellulitis                                          | 25<br>(12 - 38)             | 3<br>(1 - 5)             | 1<br>(0 - 1)        | 3<br>(2 - 5)             | 7<br>(3 - 12)             | 12<br>(4 - 21)             |
| Pyoderma                                            | 56<br>(35 - 73)             | 3<br>(2 - 6)             | 1<br>(1 - 2)        | 9<br>(6 - 12)            | 18<br>(11 - 24)           | 25<br>(13 - 38)            |

Web Table 31- Egypt deaths with 95% UI by age, sex, and cause in 2013

| Cause                                           | Females, All Ages        | Females, 0-4 Years   | Females, 5-14 Years | Females, 15-49 Years     | Females, 50-69 Years     | Females, 70-80 Years   |
|-------------------------------------------------|--------------------------|----------------------|---------------------|--------------------------|--------------------------|------------------------|
| Decubitus ulcer                                 | 214<br>(110 - 283)       | 0<br>(0 - 1)         | 1<br>(0 - 1)        | 8<br>(5 - 11)            | 27<br>(17 - 37)          | 178<br>(81 - 244)      |
| Other skin and subcutaneous diseases            | 5<br>(3 - 7)             | 0<br>(0 - 1)         | 1<br>(0 - 1)        | 2<br>(1 - 3)             | 1<br>(0 - 2)             | 1<br>(0 - 2)           |
| Sudden infant death syndrome                    | 47<br>(14 - 177)         | 47<br>(14 - 177)     | --                  | --                       | --                       | --                     |
| Injuries                                        | 6,707<br>(4,261 - 8,448) | 796<br>(499 - 1,061) | 529<br>(394 - 636)  | 1,770<br>(1,248 - 2,208) | 1,971<br>(1,060 - 2,664) | 1,641<br>(851 - 2,176) |
| Transport injuries                              | 1,968<br>(1,225 - 2,396) | 274<br>(132 - 392)   | 237<br>(146 - 308)  | 674<br>(470 - 852)       | 539<br>(306 - 692)       | 244<br>(131 - 317)     |
| Road injuries                                   | 1,824<br>(1,128 - 2,221) | 259<br>(124 - 367)   | 222<br>(136 - 289)  | 614<br>(421 - 775)       | 499<br>(283 - 640)       | 230<br>(124 - 299)     |
| Pedestrian road injuries                        | 685<br>(412 - 865)       | 108<br>(51 - 167)    | 89<br>(55 - 124)    | 176<br>(117 - 232)       | 196<br>(109 - 267)       | 115<br>(60 - 155)      |
| Cyclist road injuries                           | 68<br>(36 - 90)          | 8<br>(3 - 15)        | 8<br>(4 - 11)       | 15<br>(8 - 20)           | 32<br>(17 - 45)          | 6<br>(2 - 8)           |
| Motorcyclist road injuries                      | 56<br>(30 - 77)          | 2<br>(1 - 4)         | 2<br>(1 - 3)        | 39<br>(22 - 56)          | 11<br>(5 - 17)           | 2<br>(1 - 2)           |
| Motor vehicle road injuries                     | 1,002<br>(592 - 1,248)   | 137<br>(63 - 202)    | 120<br>(67 - 163)   | 380<br>(252 - 491)       | 258<br>(133 - 343)       | 107<br>(51 - 147)      |
| Other road injuries                             | 13<br>(6 - 20)           | 3<br>(1 - 6)         | 2<br>(1 - 4)        | 4<br>(2 - 6)             | 2<br>(1 - 4)             | 1<br>(0 - 2)           |
| Other transport injuries                        | 144<br>(82 - 186)        | 15<br>(5 - 25)       | 15<br>(8 - 24)      | 61<br>(38 - 82)          | 40<br>(20 - 57)          | 14<br>(6 - 21)         |
| Unintentional injuries                          | 3,919<br>(2,317 - 5,184) | 428<br>(249 - 598)   | 256<br>(197 - 314)  | 762<br>(520 - 994)       | 1,233<br>(590 - 1,766)   | 1,239<br>(591 - 1,712) |
| Falls                                           | 465<br>(197 - 621)       | 83<br>(28 - 134)     | 41<br>(17 - 61)     | 91<br>(43 - 126)         | 90<br>(38 - 126)         | 160<br>(57 - 230)      |
| Drowning                                        | 398<br>(265 - 565)       | 147<br>(72 - 259)    | 98<br>(69 - 152)    | 92<br>(63 - 134)         | 42<br>(28 - 57)          | 18<br>(12 - 25)        |
| Fire, heat, and hot substances                  | 206<br>(120 - 271)       | 32<br>(12 - 53)      | 16<br>(8 - 24)      | 68<br>(46 - 89)          | 44<br>(24 - 61)          | 46<br>(22 - 68)        |
| Poisonings                                      | 872<br>(360 - 1,187)     | 32<br>(12 - 48)      | 15<br>(7 - 22)      | 112<br>(54 - 153)        | 357<br>(134 - 505)       | 356<br>(126 - 525)     |
| Exposure to mechanical forces                   | 155<br>(127 - 198)       | 17<br>(12 - 27)      | 24<br>(18 - 34)     | 53<br>(41 - 72)          | 36<br>(27 - 46)          | 25<br>(16 - 33)        |
| Unintentional firearm injuries                  | 17<br>(13 - 22)          | 3<br>(2 - 4)         | 2<br>(1 - 3)        | 8<br>(6 - 11)            | 3<br>(2 - 4)             | 2<br>(1 - 3)           |
| Unintentional suffocation                       | 31<br>(22 - 57)          | 7<br>(4 - 16)        | 5<br>(2 - 9)        | 9<br>(6 - 18)            | 7<br>(4 - 13)            | 2<br>(1 - 5)           |
| Other exposure to mechanical forces             | 107<br>(80 - 131)        | 7<br>(4 - 11)        | 18<br>(12 - 26)     | 36<br>(27 - 49)          | 25<br>(18 - 33)          | 21<br>(11 - 27)        |
| Adverse effects of medical treatment            | 1,489<br>(590 - 2,214)   | 73<br>(26 - 121)     | 21<br>(9 - 33)      | 217<br>(96 - 332)        | 610<br>(202 - 970)       | 569<br>(204 - 868)     |
| Animal contact                                  | 28<br>(15 - 61)          | 8<br>(3 - 18)        | 5<br>(3 - 13)       | 5<br>(2 - 10)            | 4<br>(2 - 9)             | 6<br>(3 - 13)          |
| Venomous animal contact                         | 14<br>(8 - 35)           | 6<br>(2 - 14)        | 4<br>(2 - 9)        | 2<br>(1 - 5)             | 2<br>(1 - 5)             | 1<br>(0 - 3)           |
| Non-venomous animal contact                     | 13<br>(6 - 28)           | 2<br>(1 - 5)         | 2<br>(1 - 5)        | 3<br>(1 - 6)             | 2<br>(1 - 4)             | 5<br>(2 - 10)          |
| Foreign body                                    | 75<br>(43 - 108)         | 23<br>(11 - 39)      | 4<br>(2 - 6)        | 14<br>(9 - 20)           | 11<br>(7 - 16)           | 22<br>(13 - 34)        |
| Pulmonary aspiration and foreign body in airway | 69<br>(39 - 103)         | 23<br>(11 - 39)      | 3<br>(2 - 6)        | 11<br>(7 - 18)           | 10<br>(6 - 16)           | 21<br>(12 - 33)        |
| Foreign body in other body part                 | 5<br>(4 - 8)             | 1<br>(0 - 1)         | 1<br>(1 - 1)        | 2<br>(2 - 3)             | 1<br>(0 - 1)             | 1<br>(1 - 2)           |
| Other unintentional injuries                    | 232<br>(145 - 301)       | 13<br>(6 - 24)       | 31<br>(14 - 51)     | 111<br>(66 - 161)        | 41<br>(22 - 64)          | 37<br>(18 - 57)        |
| Self-harm and interpersonal violence            | 749<br>(368 - 926)       | 31<br>(6 - 60)       | 28<br>(14 - 42)     | 334<br>(177 - 428)       | 198<br>(85 - 254)        | 157<br>(63 - 199)      |
| Self-harm                                       | 592<br>(260 - 736)       | --                   | 15<br>(6 - 21)      | 265<br>(122 - 345)       | 171<br>(66 - 221)        | 141<br>(55 - 179)      |
| Interpersonal violence                          | 158<br>(67 - 221)        | 31<br>(6 - 60)       | 14<br>(4 - 25)      | 69<br>(33 - 99)          | 27<br>(11 - 42)          | 17<br>(5 - 31)         |
| Assault by firearm                              | 39<br>(14 - 62)          | 9<br>(1 - 18)        | 3<br>(1 - 7)        | 9<br>(3 - 15)            | 13<br>(5 - 22)           | 5<br>(1 - 9)           |
| Assault by sharp object                         | 57<br>(25 - 86)          | 7<br>(1 - 14)        | 3<br>(1 - 5)        | 38<br>(18 - 57)          | 5<br>(2 - 8)             | 5<br>(1 - 10)          |
| Assault by other means                          | 61<br>(22 - 94)          | 16<br>(3 - 33)       | 8<br>(2 - 14)       | 22<br>(9 - 34)           | 9<br>(3 - 15)            | 7<br>(2 - 13)          |
| Forces of nature, war, and legal intervention   | 71<br>(64 - 80)          | 63<br>(57 - 72)      | 8<br>(7 - 9)        | 0<br>(0 - 0)             | 0<br>(0 - 0)             | 0<br>(0 - 0)           |
| Collective violence and legal intervention      | 71<br>(64 - 80)          | 63<br>(57 - 72)      | 8<br>(7 - 9)        | 0<br>(0 - 0)             | 0<br>(0 - 0)             | 0<br>(0 - 0)           |

Web Table 31- El Salvador deaths with 95% UI by age, sex, and cause in 2013

| Cause                                                             | Both Sexes, All Ages        | Both Sexes, 0-4 Years    | Both Sexes, 5-14 Years | Both Sexes, 15-49 Years    | Both Sexes, 50-69 Years  | Both Sexes, 70-80 Years     |
|-------------------------------------------------------------------|-----------------------------|--------------------------|------------------------|----------------------------|--------------------------|-----------------------------|
| All causes                                                        | 39,900<br>(36,082 - 43,949) | 1,712<br>(1,556 - 1,892) | 369<br>(340 - 399)     | 10,056<br>(8,597 - 11,768) | 8,077<br>(7,037 - 9,186) | 19,687<br>(18,350 - 21,206) |
| Communicable, maternal, neonatal, and nutritional diseases        | 4,792<br>(4,281 - 5,345)    | 936<br>(807 - 1,070)     | 71<br>(57 - 89)        | 757<br>(645 - 893)         | 629<br>(528 - 735)       | 2,398<br>(2,024 - 2,833)    |
| HIV/AIDS and tuberculosis                                         | 353<br>(269 - 472)          | 1<br>(1 - 2)             | 1<br>(0 - 1)           | 218<br>(155 - 309)         | 74<br>(52 - 105)         | 59<br>(47 - 88)             |
| Tuberculosis                                                      | 110<br>(89 - 166)           | 0<br>(0 - 1)             | 1<br>(0 - 1)           | 30<br>(24 - 43)            | 27<br>(21 - 44)          | 51<br>(40 - 78)             |
| HIV/AIDS                                                          | 243<br>(166 - 358)          | 1<br>(0 - 1)             | 0<br>(0 - 1)           | 188<br>(125 - 279)         | 46<br>(27 - 75)          | 8<br>(4 - 15)               |
| HIV/AIDS resulting in mycobacterial infection                     | 14<br>(9 - 21)              | 0<br>(0 - 0)             | 0<br>(0 - 0)           | 11<br>(7 - 16)             | 3<br>(2 - 5)             | 1<br>(0 - 1)                |
| HIV/AIDS resulting in other diseases                              | 229<br>(156 - 338)          | 1<br>(0 - 1)             | 0<br>(0 - 1)           | 177<br>(119 - 264)         | 44<br>(25 - 70)          | 8<br>(4 - 14)               |
| Diarrhea, lower respiratory, and other common infectious diseases | 3,124<br>(2,650 - 3,624)    | 335<br>(261 - 415)       | 59<br>(45 - 77)        | 349<br>(268 - 430)         | 446<br>(353 - 541)       | 1,935<br>(1,577 - 2,346)    |
| Diarrheal diseases                                                | 273<br>(225 - 333)          | 67<br>(44 - 97)          | 5<br>(4 - 7)           | 38<br>(29 - 49)            | 41<br>(31 - 54)          | 122<br>(87 - 172)           |
| Intestinal infectious diseases                                    | 93<br>(49 - 156)            | 30<br>(15 - 51)          | 26<br>(14 - 44)        | 30<br>(14 - 59)            | 4<br>(2 - 7)             | 2<br>(1 - 5)                |
| Typhoid fever                                                     | 70<br>(36 - 121)            | 22<br>(11 - 38)          | 21<br>(11 - 35)        | 23<br>(11 - 46)            | 3<br>(1 - 5)             | 2<br>(1 - 3)                |
| Paratyphoid fever                                                 | 19<br>(10 - 33)             | 6<br>(3 - 12)            | 6<br>(3 - 10)          | 6<br>(3 - 12)              | 1<br>(0 - 1)             | 0<br>(0 - 1)                |
| Other intestinal infectious diseases                              | 3<br>(0 - 8)                | 1<br>(0 - 5)             | 0<br>(0 - 2)           | 1<br>(0 - 3)               | 0<br>(0 - 2)             | 0<br>(0 - 2)                |
| Lower respiratory infections                                      | 2,614<br>(2,159 - 3,082)    | 215<br>(159 - 284)       | 18<br>(13 - 24)        | 237<br>(162 - 300)         | 374<br>(285 - 459)       | 1,769<br>(1,412 - 2,161)    |
| Upper respiratory infections                                      | 2<br>(1 - 4)                | 0<br>(0 - 0)             | 0<br>(0 - 0)           | 1<br>(0 - 1)               | 0<br>(0 - 1)             | 1<br>(0 - 2)                |
| Otitis media                                                      | 3<br>(2 - 3)                | 0<br>(0 - 0)             | 0<br>(0 - 0)           | 1<br>(0 - 1)               | 1<br>(0 - 1)             | 1<br>(1 - 2)                |
| Meningitis                                                        | 102<br>(87 - 117)           | 15<br>(10 - 21)          | 5<br>(4 - 6)           | 32<br>(25 - 40)            | 20<br>(16 - 25)          | 30<br>(25 - 36)             |
| Pneumococcal meningitis                                           | 36<br>(30 - 43)             | 4<br>(3 - 6)             | 2<br>(1 - 2)           | 12<br>(9 - 16)             | 8<br>(5 - 10)            | 11<br>(8 - 15)              |
| H influenzae type B meningitis                                    | 15<br>(12 - 18)             | 6<br>(4 - 8)             | 1<br>(1 - 2)           | 3<br>(2 - 5)               | 2<br>(1 - 3)             | 3<br>(2 - 4)                |
| Meningococcal meningitis                                          | 13<br>(10 - 16)             | 1<br>(1 - 2)             | 1<br>(0 - 1)           | 4<br>(3 - 6)               | 2<br>(2 - 4)             | 4<br>(2 - 5)                |
| Other meningitis                                                  | 38<br>(31 - 47)             | 4<br>(2 - 6)             | 1<br>(1 - 2)           | 12<br>(9 - 17)             | 9<br>(6 - 12)            | 12<br>(8 - 16)              |
| Encephalitis                                                      | 27<br>(19 - 46)             | 4<br>(2 - 8)             | 3<br>(2 - 6)           | 9<br>(6 - 15)              | 5<br>(3 - 9)             | 7<br>(4 - 13)               |
| Diphtheria                                                        | 0<br>(0 - 1)                | 0<br>(0 - 1)             | 0<br>(0 - 0)           | 0<br>(0 - 1)               | 0<br>(0 - 0)             | -<br>(0 - 0)                |
| Whooping cough                                                    | 2<br>(1 - 7)                | 2<br>(0 - 6)             | 0<br>(0 - 0)           | 0<br>(0 - 0)               | 0<br>(0 - 0)             | -<br>(0 - 0)                |
| Tetanus                                                           | 4<br>(3 - 9)                | 0<br>(0 - 1)             | 0<br>(0 - 0)           | 1<br>(1 - 2)               | 1<br>(1 - 2)             | 1<br>(1 - 4)                |
| Measles                                                           | 0<br>(0 - 0)                | 0<br>(0 - 0)             | 0<br>(0 - 0)           | 0<br>(0 - 0)               | 0<br>(0 - 0)             | -<br>(0 - 0)                |
| Varicella and herpes zoster                                       | 4<br>(1 - 10)               | 1<br>(0 - 2)             | 0<br>(0 - 1)           | 1<br>(0 - 1)               | 0<br>(0 - 1)             | 2<br>(0 - 8)                |
| Neglected tropical diseases and malaria                           | 24<br>(16 - 53)             | 2<br>(1 - 5)             | 2<br>(1 - 3)           | 7<br>(5 - 12)              | 6<br>(3 - 16)            | 7<br>(3 - 23)               |
| Malaria                                                           | 0<br>(0 - 0)                | 0<br>(0 - 0)             | 0<br>(0 - 0)           | 0<br>(0 - 0)               | 0<br>(0 - 0)             | 0<br>(0 - 0)                |
| Chagas disease                                                    | 12<br>(5 - 40)              | 0<br>(0 - 0)             | 0<br>(0 - 0)           | 2<br>(1 - 6)               | 4<br>(1 - 6)             | 5<br>(2 - 21)               |
| Leishmaniasis                                                     | 2<br>(1 - 3)                | 1<br>(0 - 1)             | 0<br>(0 - 0)           | 1<br>(0 - 1)               | 0<br>(0 - 1)             | 0<br>(0 - 0)                |
| Visceral leishmaniasis                                            | 2<br>(1 - 3)                | 1<br>(0 - 1)             | 0<br>(0 - 0)           | 1<br>(0 - 1)               | 0<br>(0 - 1)             | 0<br>(0 - 0)                |
| Cysticercosis                                                     | 3<br>(2 - 3)                | 0<br>(0 - 0)             | 0<br>(0 - 0)           | 2<br>(1 - 2)               | 1<br>(0 - 1)             | 0<br>(0 - 0)                |
| Cystic echinococcosis                                             | 1<br>(1 - 1)                | 0<br>(0 - 0)             | 0<br>(0 - 0)           | 0<br>(0 - 1)               | 0<br>(0 - 0)             | 0<br>(0 - 0)                |
| Dengue                                                            | 4<br>(3 - 6)                | 1<br>(1 - 2)             | 1<br>(1 - 1)           | 1<br>(1 - 1)               | 0<br>(0 - 1)             | 1<br>(0 - 1)                |
| Rabies                                                            | 1<br>(1 - 2)                | 0<br>(0 - 0)             | 0<br>(0 - 1)           | 1<br>(0 - 1)               | 0<br>(0 - 0)             | 0<br>(0 - 0)                |
| Intestinal nematode infections                                    | 1<br>(0 - 4)                | 0<br>(0 - 2)             | 0<br>(0 - 1)           | 0<br>(0 - 2)               | 0<br>(0 - 1)             | 0<br>(0 - 1)                |
| Ascariasis                                                        | 1<br>(0 - 4)                | 0<br>(0 - 2)             | 0<br>(0 - 1)           | 0<br>(0 - 2)               | 0<br>(0 - 1)             | 0<br>(0 - 1)                |
| Other neglected tropical diseases                                 | 1<br>(1 - 3)                | 0<br>(0 - 1)             | 0<br>(0 - 0)           | 0<br>(0 - 1)               | 0<br>(0 - 0)             | 0<br>(0 - 1)                |
| Maternal disorders                                                | 86<br>(58 - 119)            | -                        | 0<br>(0 - 0)           | 85<br>(57 - 119)           | -                        | -                           |

Web Table 31- El Salvador deaths with 95% UI by age, sex, and cause in 2013

| Cause                                                            | Both Sexes, All Ages        | Both Sexes, 0-4 Years | Both Sexes, 5-14 Years | Both Sexes, 15-49 Years  | Both Sexes, 50-69 Years  | Both Sexes, 70-80 Years     |
|------------------------------------------------------------------|-----------------------------|-----------------------|------------------------|--------------------------|--------------------------|-----------------------------|
| Maternal hemorrhage                                              | 15<br>(9 - 21)              | --                    | 0<br>(0 - 0)           | 15<br>(9 - 21)           | --                       | --                          |
| Maternal sepsis and other maternal infections                    | 9<br>(6 - 14)               | --                    | 0<br>(0 - 0)           | 9<br>(6 - 14)            | --                       | --                          |
| Maternal hypertensive disorders                                  | 14<br>(9 - 22)              | --                    | 0<br>(0 - 0)           | 14<br>(9 - 22)           | --                       | --                          |
| Maternal obstructed labor                                        | 5<br>(3 - 8)                | --                    | 0<br>(0 - 0)           | 5<br>(3 - 8)             | --                       | --                          |
| Maternal abortive outcome                                        | 15<br>(9 - 21)              | --                    | 0<br>(0 - 0)           | 15<br>(9 - 21)           | --                       | --                          |
| Indirect maternal deaths                                         | 8<br>(4 - 13)               | --                    | 0<br>(0 - 0)           | 8<br>(4 - 13)            | --                       | --                          |
| Late maternal deaths                                             | 6<br>(3 - 10)               | --                    | 0<br>(0 - 0)           | 6<br>(3 - 10)            | --                       | --                          |
| Maternal deaths aggravated by HIV/AIDS                           | 0<br>(0 - 0)                | --                    | --                     | 0<br>(0 - 0)             | --                       | --                          |
| Other maternal disorders                                         | 13<br>(8 - 20)              | --                    | 0<br>(0 - 0)           | 13<br>(8 - 20)           | --                       | --                          |
| Neonatal disorders                                               | 544<br>(454 - 662)          | 544<br>(454 - 662)    | --                     | --                       | --                       | --                          |
| Neonatal preterm birth complications                             | 291<br>(195 - 380)          | 291<br>(195 - 380)    | --                     | --                       | --                       | --                          |
| Neonatal encephalopathy due to birth asphyxia and trauma         | 88<br>(59 - 128)            | 88<br>(59 - 128)      | --                     | --                       | --                       | --                          |
| Neonatal sepsis and other neonatal infections                    | 118<br>(72 - 197)           | 118<br>(72 - 197)     | --                     | --                       | --                       | --                          |
| Hemolytic disease and other neonatal jaundice                    | 0<br>(0 - 0)                | 0<br>(0 - 0)          | --                     | --                       | --                       | --                          |
| Other neonatal disorders                                         | 47<br>(31 - 81)             | 47<br>(31 - 81)       | --                     | --                       | --                       | --                          |
| Nutritional deficiencies                                         | 580<br>(453 - 704)          | 37<br>(25 - 50)       | 7<br>(5 - 9)           | 79<br>(60 - 102)         | 90<br>(70 - 120)         | 368<br>(280 - 460)          |
| Protein-energy malnutrition                                      | 378<br>(261 - 501)          | 32<br>(22 - 45)       | 4<br>(3 - 6)           | 36<br>(21 - 52)          | 49<br>(32 - 72)          | 256<br>(170 - 343)          |
| Iodine deficiency                                                | 1<br>(0 - 3)                | 0<br>(0 - 0)          | 0<br>(0 - 0)           | 0<br>(0 - 1)             | 0<br>(0 - 1)             | 0<br>(0 - 2)                |
| Iron-deficiency anemia                                           | 200<br>(126 - 306)          | 4<br>(1 - 9)          | 2<br>(1 - 4)           | 42<br>(28 - 63)          | 40<br>(26 - 63)          | 112<br>(64 - 174)           |
| Other nutritional deficiencies                                   | 1<br>(1 - 2)                | 0<br>(0 - 0)          | 0<br>(0 - 0)           | 0<br>(0 - 1)             | 0<br>(0 - 0)             | 0<br>(0 - 1)                |
| Other communicable, maternal, neonatal, and nutritional diseases | 80<br>(62 - 106)            | 17<br>(7 - 31)        | 3<br>(2 - 4)           | 18<br>(14 - 24)          | 14<br>(11 - 19)          | 28<br>(20 - 44)             |
| Sexually transmitted diseases excluding HIV                      | 13                          | 10                    | 1                      | 1                        | 0                        | 1                           |
| Syphilis                                                         | 12<br>(1 - 26)              | 10<br>(0 - 24)        | 1<br>(0 - 2)           | 0<br>(0 - 0)             | 0<br>(0 - 0)             | 1<br>(0 - 1)                |
| Chlamydial infection                                             | 0<br>(0 - 0)                | --                    | 0<br>(0 - 0)           | 0<br>(0 - 0)             | 0<br>(0 - 0)             | 0<br>(0 - 0)                |
| Gonococcal infection                                             | 0<br>(0 - 0)                | --                    | 0<br>(0 - 0)           | 0<br>(0 - 0)             | 0<br>(0 - 0)             | 0<br>(0 - 0)                |
| Other sexually transmitted diseases                              | 0<br>(0 - 0)                | --                    | 0<br>(0 - 0)           | 0<br>(0 - 0)             | 0<br>(0 - 0)             | 0<br>(0 - 0)                |
| Hepatitis                                                        | 6<br>(5 - 7)                | 0<br>(0 - 0)          | 0<br>(0 - 0)           | 2<br>(1 - 3)             | 2<br>(1 - 2)             | 2<br>(1 - 2)                |
| Acute hepatitis A                                                | 1<br>(1 - 2)                | 0<br>(0 - 0)          | 0<br>(0 - 0)           | 1<br>(0 - 2)             | 0<br>(0 - 1)             | 0<br>(0 - 0)                |
| Acute hepatitis B                                                | 3<br>(2 - 5)                | 0<br>(0 - 0)          | 0<br>(0 - 0)           | 1<br>(0 - 1)             | 1<br>(1 - 2)             | 1<br>(1 - 2)                |
| Acute hepatitis C                                                | 1<br>(0 - 2)                | --                    | 0<br>(0 - 0)           | 0<br>(0 - 1)             | 0<br>(0 - 1)             | 0<br>(0 - 1)                |
| Other infectious diseases                                        | 62<br>(49 - 84)             | 7<br>(5 - 10)         | 2<br>(2 - 3)           | 16<br>(11 - 21)          | 12<br>(9 - 16)           | 26<br>(18 - 41)             |
| Non-communicable diseases                                        | 27,106<br>(24,487 - 29,765) | 684<br>(561 - 807)    | 120<br>(104 - 137)     | 3,598<br>(2,998 - 4,266) | 6,423<br>(5,577 - 7,346) | 16,282<br>(15,144 - 17,512) |
| Neoplasms                                                        | 4,807<br>(4,232 - 5,468)    | 23<br>(16 - 29)       | 35<br>(29 - 41)        | 802<br>(663 - 976)       | 1,461<br>(1,243 - 1,708) | 2,486<br>(2,216 - 2,760)    |
| Esophageal cancer                                                | 119<br>(86 - 146)           | --                    | --                     | 8<br>(6 - 11)            | 32<br>(22 - 41)          | 79<br>(57 - 98)             |
| Stomach cancer                                                   | 951<br>(832 - 1,083)        | --                    | --                     | 108<br>(89 - 132)        | 283<br>(237 - 333)       | 560<br>(483 - 646)          |
| Liver cancer                                                     | 297<br>(252 - 351)          | --                    | 1<br>(1 - 1)           | 32<br>(25 - 39)          | 105<br>(86 - 129)        | 160<br>(132 - 191)          |
| Liver cancer due to hepatitis B                                  | 68<br>(40 - 96)             | --                    | 0<br>(0 - 0)           | 12<br>(7 - 16)           | 30<br>(17 - 44)          | 27<br>(13 - 41)             |
| Liver cancer due to hepatitis C                                  | 144<br>(106 - 190)          | --                    | 0<br>(0 - 0)           | 12<br>(7 - 17)           | 49<br>(33 - 68)          | 83<br>(57 - 110)            |
| Liver cancer due to alcohol use                                  | 55<br>(33 - 80)             | --                    | --                     | 3<br>(1 - 4)             | 15<br>(9 - 24)           | 37<br>(21 - 55)             |
| Liver cancer due to other causes                                 | 30<br>(19 - 44)             | --                    | 0<br>(0 - 1)           | 5<br>(3 - 8)             | 11<br>(6 - 17)           | 14<br>(8 - 21)              |

Web Table 31- El Salvador deaths with 95% UI by age, sex, and cause in 2013

| Cause                                         | Both Sexes, All Ages      | Both Sexes, 0-4 Years | Both Sexes, 5-14 Years | Both Sexes, 15-49 Years | Both Sexes, 50-69 Years  | Both Sexes, 70-80 Years  |
|-----------------------------------------------|---------------------------|-----------------------|------------------------|-------------------------|--------------------------|--------------------------|
| Larynx cancer                                 | 30<br>(20 - 38)           | --                    | --                     | 3<br>(2 - 5)            | 10<br>(7 - 14)           | 16<br>(10 - 21)          |
| Tracheal, bronchus and lung cancer            | 414<br>(358 - 475)        | --                    | --                     | 42<br>(34 - 51)         | 133<br>(110 - 158)       | 240<br>(204 - 278)       |
| Breast cancer                                 | 207<br>(165 - 262)        | --                    | --                     | 63<br>(46 - 85)         | 82<br>(63 - 109)         | 62<br>(48 - 79)          |
| Cervical cancer                               | 521<br>(366 - 660)        | --                    | --                     | 161<br>(110 - 218)      | 178<br>(123 - 230)       | 181<br>(124 - 230)       |
| Uterine cancer                                | 56<br>(35 - 74)           | --                    | --                     | 6<br>(3 - 9)            | 24<br>(14 - 33)          | 26<br>(16 - 34)          |
| Prostate cancer                               | 319<br>(189 - 447)        | --                    | --                     | 2<br>(1 - 3)            | 42<br>(24 - 60)          | 274<br>(160 - 394)       |
| Colon and rectum cancer                       | 340<br>(297 - 395)        | --                    | --                     | 49<br>(41 - 59)         | 99<br>(84 - 118)         | 192<br>(163 - 225)       |
| Lip and oral cavity cancer                    | 60<br>(45 - 72)           | --                    | --                     | 7<br>(5 - 9)            | 20<br>(15 - 25)          | 33<br>(25 - 40)          |
| Nasopharynx cancer                            | 12<br>(9 - 17)            | --                    | 0<br>(0 - 0)           | 4<br>(3 - 5)            | 4<br>(3 - 5)             | 4<br>(3 - 6)             |
| Other pharynx cancer                          | 26<br>(22 - 31)           | --                    | --                     | 4<br>(3 - 5)            | 10<br>(8 - 13)           | 12<br>(10 - 15)          |
| Gallbladder and biliary tract cancer          | 112<br>(81 - 165)         | --                    | --                     | 8<br>(5 - 11)           | 37<br>(25 - 56)          | 67<br>(48 - 102)         |
| Pancreatic cancer                             | 199<br>(171 - 235)        | --                    | --                     | 19<br>(16 - 24)         | 70<br>(58 - 85)          | 110<br>(92 - 132)        |
| Malignant skin melanoma                       | 12<br>(9 - 19)            | --                    | --                     | 4<br>(3 - 6)            | 3<br>(3 - 5)             | 5<br>(4 - 8)             |
| Non-melanoma skin cancer                      | 28<br>(21 - 39)           | --                    | --                     | 2<br>(1 - 2)            | 5<br>(3 - 6)             | 22<br>(16 - 31)          |
| Ovarian cancer                                | 111<br>(87 - 139)         | --                    | --                     | 29<br>(22 - 38)         | 47<br>(35 - 61)          | 35<br>(27 - 44)          |
| Testicular cancer                             | 4<br>(2 - 5)              | --                    | --                     | 2<br>(1 - 3)            | 0<br>(0 - 0)             | 1<br>(1 - 2)             |
| Kidney cancer                                 | 70<br>(60 - 82)           | 0<br>(0 - 1)          | 0<br>(0 - 0)           | 10<br>(8 - 13)          | 25<br>(21 - 30)          | 34<br>(28 - 40)          |
| Bladder cancer                                | 39<br>(32 - 53)           | --                    | --                     | 2<br>(2 - 3)            | 9<br>(7 - 12)            | 28<br>(23 - 39)          |
| Brain and nervous system cancer               | 142<br>(88 - 172)         | 3<br>(2 - 4)          | 5<br>(3 - 7)           | 46<br>(29 - 58)         | 43<br>(26 - 55)          | 45<br>(26 - 57)          |
| Thyroid cancer                                | 35<br>(27 - 54)           | --                    | 0<br>(0 - 0)           | 4<br>(3 - 7)            | 12<br>(9 - 20)           | 18<br>(14 - 28)          |
| Mesothelioma                                  | 2<br>(2 - 3)              | --                    | --                     | 1<br>(0 - 1)            | 1<br>(1 - 1)             | 1<br>(1 - 1)             |
| Hodgkin lymphoma                              | 25<br>(9 - 33)            | 1<br>(0 - 1)          | 1<br>(0 - 2)           | 8<br>(3 - 11)           | 6<br>(2 - 8)             | 10<br>(3 - 13)           |
| Non-Hodgkin lymphoma                          | 210<br>(93 - 287)         | 3<br>(2 - 5)          | 3<br>(1 - 4)           | 41<br>(20 - 58)         | 62<br>(26 - 88)          | 102<br>(38 - 144)        |
| Multiple myeloma                              | 17<br>(14 - 21)           | --                    | --                     | 3<br>(3 - 4)            | 5<br>(4 - 7)             | 8<br>(7 - 11)            |
| Leukemia                                      | 230<br>(199 - 267)        | 8<br>(5 - 11)         | 18<br>(14 - 22)        | 88<br>(72 - 107)        | 52<br>(43 - 62)          | 64<br>(54 - 77)          |
| Other neoplasms                               | 218<br>(183 - 279)        | 7<br>(3 - 12)         | 7<br>(5 - 10)          | 46<br>(37 - 63)         | 61<br>(48 - 81)          | 96<br>(76 - 128)         |
| Cardiovascular diseases                       | 9,350<br>(8,271 - 10,404) | 23<br>(18 - 30)       | 23<br>(19 - 28)        | 791<br>(657 - 952)      | 1,845<br>(1,577 - 2,141) | 6,667<br>(5,934 - 7,346) |
| Rheumatic heart disease                       | 121<br>(57 - 161)         | 1<br>(0 - 1)          | 2<br>(1 - 3)           | 21<br>(10 - 29)         | 26<br>(12 - 36)          | 72<br>(32 - 102)         |
| Ischemic heart disease                        | 6,451<br>(5,560 - 7,208)  | 5<br>(3 - 7)          | 8<br>(6 - 10)          | 486<br>(397 - 597)      | 1,226<br>(1,026 - 1,425) | 4,726<br>(4,054 - 5,259) |
| Cerebrovascular disease                       | 2,001<br>(1,695 - 2,492)  | 5<br>(4 - 7)          | 8<br>(6 - 11)          | 172<br>(136 - 229)      | 404<br>(330 - 523)       | 1,411<br>(1,181 - 1,763) |
| Ischemic stroke                               | 718<br>(545 - 1,077)      | 1<br>(1 - 2)          | 2<br>(1 - 3)           | 36<br>(26 - 56)         | 120<br>(89 - 184)        | 559<br>(416 - 848)       |
| Hemorrhagic stroke                            | 1,283<br>(977 - 1,557)    | 4<br>(3 - 6)          | 6<br>(5 - 8)           | 136<br>(107 - 181)      | 284<br>(225 - 361)       | 852<br>(608 - 1,040)     |
| Hypertensive heart disease                    | 220<br>(84 - 369)         | 0<br>(0 - 0)          | 0<br>(0 - 0)           | 12<br>(6 - 19)          | 30<br>(13 - 51)          | 177<br>(62 - 305)        |
| Cardiomyopathy and myocarditis                | 91<br>(75 - 122)          | 4<br>(3 - 5)          | 1<br>(1 - 1)           | 34<br>(27 - 49)         | 27<br>(21 - 36)          | 25<br>(19 - 34)          |
| Atrial fibrillation and flutter               | 12<br>(9 - 17)            | --                    | --                     | 0<br>(0 - 1)            | 2<br>(2 - 3)             | 10<br>(7 - 14)           |
| Aortic aneurysm                               | 29<br>(23 - 37)           | --                    | --                     | 4<br>(3 - 6)            | 6<br>(5 - 8)             | 18<br>(14 - 24)          |
| Peripheral vascular disease                   | 2<br>(2 - 3)              | --                    | --                     | 0<br>(0 - 0)            | 0<br>(0 - 1)             | 1<br>(1 - 2)             |
| Endocarditis                                  | 56<br>(43 - 77)           | 5<br>(4 - 8)          | 1<br>(1 - 2)           | 13<br>(10 - 20)         | 13<br>(9 - 19)           | 23<br>(16 - 33)          |
| Other cardiovascular and circulatory diseases | 366<br>(283 - 530)        | 3<br>(2 - 5)          | 2<br>(1 - 3)           | 47<br>(35 - 75)         | 111<br>(80 - 157)        | 204<br>(148 - 301)       |
| Chronic respiratory diseases                  | 2,192<br>(1,886 - 2,526)  | 20<br>(15 - 30)       | 5<br>(4 - 6)           | 101<br>(82 - 122)       | 297<br>(250 - 361)       | 1,770<br>(1,507 - 2,043) |



Web Table 31- El Salvador deaths with 95% UI by age, sex, and cause in 2013

| Cause                                               | Both Sexes, All Ages     | Both Sexes, 0-4 Years | Both Sexes, 5-14 Years | Both Sexes, 15-49 Years | Both Sexes, 50-69 Years | Both Sexes, 70-80 Years  |
|-----------------------------------------------------|--------------------------|-----------------------|------------------------|-------------------------|-------------------------|--------------------------|
| Chronic obstructive pulmonary disease               | 1,727<br>(1,481 - 2,008) | 9<br>(6 - 14)         | 2<br>(1 - 2)           | 67<br>(54 - 83)         | 213<br>(174 - 263)      | 1,436<br>(1,221 - 1,664) |
| Pneumoconiosis                                      | 29<br>(20 - 43)          | 0<br>(0 - 0)          | 0<br>(0 - 0)           | 2<br>(1 - 3)            | 8<br>(6 - 12)           | 19<br>(12 - 29)          |
| Silicosis                                           | 0<br>(0 - 0)             | 0<br>(0 - 0)          | 0<br>(0 - 0)           | 0<br>(0 - 0)            | 0<br>(0 - 0)            | 0<br>(0 - 0)             |
| Asbestosis                                          | 5<br>(3 - 8)             | 0<br>(0 - 0)          | 0<br>(0 - 0)           | 0<br>(0 - 0)            | 2<br>(1 - 3)            | 3<br>(2 - 5)             |
| Coal workers pneumoconiosis                         | 4<br>(2 - 6)             | 0<br>(0 - 0)          | 0<br>(0 - 0)           | 0<br>(0 - 0)            | 1<br>(1 - 2)            | 3<br>(2 - 4)             |
| Other pneumoconiosis                                | 20<br>(13 - 30)          | 0<br>(0 - 0)          | 0<br>(0 - 0)           | 1<br>(1 - 2)            | 6<br>(4 - 8)            | 13<br>(8 - 20)           |
| Asthma                                              | 240<br>(175 - 322)       | 3<br>(2 - 5)          | 1<br>(1 - 2)           | 19<br>(14 - 26)         | 45<br>(32 - 63)         | 172<br>(121 - 238)       |
| Interstitial lung disease and pulmonary sarcoidosis | 123<br>(88 - 189)        | 1<br>(1 - 3)          | 1<br>(1 - 2)           | 8<br>(5 - 12)           | 24<br>(16 - 36)         | 89<br>(60 - 142)         |
| Other chronic respiratory diseases                  | 73<br>(53 - 105)         | 7<br>(5 - 10)         | 1<br>(0 - 1)           | 5<br>(4 - 7)            | 7<br>(5 - 10)           | 54<br>(35 - 83)          |
| Cirrhosis                                           | 1,285<br>(1,104 - 1,496) | 1<br>(1 - 2)          | 3<br>(2 - 3)           | 377<br>(302 - 473)      | 470<br>(395 - 554)      | 434<br>(381 - 505)       |
| Cirrhosis due to hepatitis B                        | 47<br>(30 - 72)          | 0<br>(0 - 0)          | 0<br>(0 - 0)           | 14<br>(8 - 23)          | 18<br>(11 - 27)         | 15<br>(10 - 24)          |
| Cirrhosis due to hepatitis C                        | 543<br>(412 - 679)       | 0<br>(0 - 0)          | 1<br>(0 - 1)           | 115<br>(73 - 163)       | 201<br>(148 - 259)      | 226<br>(178 - 282)       |
| Cirrhosis due to alcohol use                        | 509<br>(394 - 632)       | --                    | --                     | 156<br>(112 - 213)      | 193<br>(147 - 249)      | 160<br>(122 - 201)       |
| Cirrhosis due to other causes                       | 186<br>(131 - 252)       | 1<br>(1 - 2)          | 2<br>(2 - 3)           | 91<br>(59 - 131)        | 58<br>(36 - 85)         | 33<br>(21 - 47)          |
| Digestive diseases                                  | 942<br>(742 - 1,601)     | 3<br>(2 - 5)          | 4<br>(3 - 6)           | 120<br>(91 - 201)       | 204<br>(153 - 362)      | 611<br>(475 - 1,050)     |
| Peptic ulcer disease                                | 398<br>(283 - 750)       | 0<br>(0 - 0)          | 0<br>(0 - 1)           | 36<br>(25 - 67)         | 81<br>(54 - 159)        | 280<br>(196 - 526)       |
| Gastritis and duodenitis                            | 13<br>(8 - 32)           | 0<br>(0 - 0)          | 0<br>(0 - 0)           | 2<br>(1 - 3)            | 3<br>(2 - 7)            | 9<br>(5 - 22)            |
| Appendicitis                                        | 48<br>(29 - 74)          | 0<br>(0 - 0)          | 1<br>(1 - 1)           | 12<br>(8 - 19)          | 12<br>(7 - 19)          | 23<br>(12 - 38)          |
| Paralytic ileus and intestinal obstruction          | 53<br>(21 - 76)          | 2<br>(1 - 2)          | 1<br>(0 - 1)           | 8<br>(4 - 11)           | 9<br>(4 - 14)           | 33<br>(12 - 51)          |
| Inguinal, femoral, and abdominal hernia             | 68<br>(33 - 166)         | 0<br>(0 - 1)          | 0<br>(0 - 0)           | 4<br>(2 - 8)            | 13<br>(6 - 31)          | 51<br>(24 - 127)         |
| Inflammatory bowel disease                          | 17<br>(11 - 37)          | 0<br>(0 - 0)          | 0<br>(0 - 0)           | 3<br>(2 - 5)            | 3<br>(2 - 6)            | 11<br>(7 - 25)           |
| Vascular intestinal disorders                       | 34<br>(16 - 57)          | 0<br>(0 - 0)          | 0<br>(0 - 0)           | 2<br>(1 - 4)            | 7<br>(3 - 12)           | 25<br>(11 - 42)          |
| Gallbladder and biliary diseases                    | 102<br>(71 - 187)        | 0<br>(0 - 0)          | 0<br>(0 - 0)           | 10<br>(7 - 19)          | 24<br>(16 - 51)         | 68<br>(47 - 117)         |
| Pancreatitis                                        | 125<br>(90 - 211)        | 0<br>(0 - 1)          | 0<br>(0 - 1)           | 29<br>(20 - 48)         | 29<br>(20 - 48)         | 67<br>(43 - 119)         |
| Other digestive diseases                            | 84<br>(63 - 141)         | 1<br>(0 - 1)          | 1<br>(0 - 1)           | 15<br>(11 - 27)         | 23<br>(16 - 40)         | 45<br>(31 - 78)          |
| Neurological disorders                              | 1,694<br>(1,383 - 2,042) | 3<br>(2 - 5)          | 5<br>(3 - 6)           | 52<br>(39 - 66)         | 85<br>(66 - 109)        | 1,549<br>(1,247 - 1,881) |
| Alzheimer disease and other dementias               | 1,560<br>(1,258 - 1,890) | --                    | --                     | 0<br>(0 - 1)            | 62<br>(44 - 84)         | 1,497<br>(1,200 - 1,814) |
| Parkinson disease                                   | 39<br>(29 - 87)          | --                    | --                     | 0<br>(0 - 1)            | 5<br>(3 - 11)           | 34<br>(25 - 76)          |
| Epilepsy                                            | 72<br>(56 - 90)          | 2<br>(1 - 4)          | 3<br>(2 - 5)           | 43<br>(31 - 56)         | 12<br>(9 - 16)          | 12<br>(9 - 15)           |
| Multiple sclerosis                                  | 6<br>(4 - 9)             | --                    | --                     | 2<br>(1 - 3)            | 2<br>(1 - 3)            | 2<br>(2 - 4)             |
| Other neurological disorders                        | 17<br>(14 - 20)          | 1<br>(1 - 2)          | 1<br>(1 - 2)           | 7<br>(5 - 8)            | 4<br>(3 - 5)            | 4<br>(3 - 5)             |
| Mental and substance use disorders                  | 994<br>(541 - 1,287)     | 0<br>(0 - 0)          | 0<br>(0 - 0)           | 545<br>(297 - 724)      | 339<br>(181 - 449)      | 110<br>(57 - 149)        |
| Schizophrenia                                       | 1<br>(1 - 2)             | --                    | --                     | 1<br>(0 - 1)            | 0<br>(0 - 1)            | 0<br>(0 - 1)             |
| Alcohol use disorders                               | 979<br>(507 - 1,272)     | --                    | --                     | 536<br>(278 - 714)      | 335<br>(170 - 446)      | 107<br>(55 - 146)        |
| Drug use disorders                                  | 13<br>(9 - 53)           | 0<br>(0 - 0)          | --                     | 8<br>(5 - 37)           | 3<br>(2 - 14)           | 2<br>(1 - 3)             |
| Opioid use disorders                                | 3<br>(2 - 12)            | 0<br>(0 - 0)          | --                     | 2<br>(1 - 8)            | 1<br>(0 - 3)            | 0<br>(0 - 1)             |
| Cocaine use disorders                               | 0<br>(0 - 1)             | 0<br>(0 - 0)          | --                     | 0<br>(0 - 1)            | 0<br>(0 - 0)            | 0<br>(0 - 0)             |
| Amphetamine use disorders                           | 0<br>(0 - 1)             | 0<br>(0 - 0)          | --                     | 0<br>(0 - 1)            | 0<br>(0 - 0)            | 0<br>(0 - 0)             |
| Other drug use disorders                            | 10<br>(7 - 39)           | 0<br>(0 - 0)          | --                     | 6<br>(4 - 27)           | 2<br>(1 - 11)           | 1<br>(1 - 2)             |
| Eating disorders                                    | 1<br>(0 - 1)             | --                    | 0<br>(0 - 0)           | 1<br>(0 - 1)            | --                      | --                       |

Web Table 31- El Salvador deaths with 95% UI by age, sex, and cause in 2013

| Cause                                               | Both Sexes, All Ages     | Both Sexes, 0-4 Years | Both Sexes, 5-14 Years | Both Sexes, 15-49 Years | Both Sexes, 50-69 Years  | Both Sexes, 70-80 Years  |
|-----------------------------------------------------|--------------------------|-----------------------|------------------------|-------------------------|--------------------------|--------------------------|
| Anorexia nervosa                                    | 1<br>(0 - 1)             | --                    | 0<br>(0 - 0)           | 1<br>(0 - 1)            | --                       | --                       |
| Diabetes, urogenital, blood, and endocrine diseases | 4,975<br>(4,054 - 5,684) | 30<br>(21 - 61)       | 18<br>(15 - 23)        | 733<br>(559 - 876)      | 1,675<br>(1,299 - 1,976) | 2,519<br>(2,060 - 2,836) |
| Diabetes mellitus                                   | 1,843<br>(1,580 - 2,108) | 1<br>(1 - 1)          | 2<br>(1 - 2)           | 173<br>(140 - 213)      | 628<br>(519 - 742)       | 1,039<br>(874 - 1,211)   |
| Acute glomerulonephritis                            | 5<br>(4 - 7)             | 0<br>(0 - 0)          | 0<br>(0 - 0)           | 2<br>(1 - 2)            | 1<br>(1 - 2)             | 2<br>(1 - 3)             |
| Chronic kidney disease                              | 2,634<br>(1,614 - 3,109) | 9<br>(6 - 13)         | 9<br>(6 - 12)          | 467<br>(276 - 577)      | 924<br>(541 - 1,128)     | 1,224<br>(752 - 1,448)   |
| Chronic kidney disease due to diabetes mellitus     | 243<br>(163 - 391)       | 1<br>(0 - 1)          | 0<br>(0 - 1)           | 31<br>(19 - 56)         | 79<br>(51 - 134)         | 132<br>(88 - 194)        |
| Chronic kidney disease due to hypertension          | 1,068<br>(636 - 1,332)   | 4<br>(2 - 5)          | 3<br>(2 - 4)           | 214<br>(129 - 275)      | 379<br>(219 - 489)       | 468<br>(273 - 598)       |
| Chronic kidney disease due to glomerulonephritis    | 82<br>(57 - 109)         | 1<br>(0 - 1)          | 1<br>(1 - 1)           | 20<br>(12 - 27)         | 22<br>(14 - 31)          | 38<br>(25 - 56)          |
| Chronic kidney disease due to other causes          | 1,242<br>(594 - 1,585)   | 4<br>(2 - 8)          | 5<br>(3 - 7)           | 203<br>(93 - 277)       | 445<br>(197 - 602)       | 585<br>(299 - 772)       |
| Urinary diseases and male infertility               | 342<br>(282 - 423)       | 3<br>(2 - 4)          | 1<br>(1 - 2)           | 53<br>(43 - 67)         | 82<br>(66 - 104)         | 202<br>(159 - 268)       |
| Interstitial nephritis and urinary tract infections | 266<br>(213 - 323)       | 2<br>(2 - 3)          | 1<br>(1 - 1)           | 39<br>(31 - 50)         | 60<br>(45 - 76)          | 163<br>(125 - 212)       |
| Urolithiasis                                        | 11<br>(8 - 16)           | --                    | 0<br>(0 - 0)           | 2<br>(1 - 3)            | 3<br>(2 - 5)             | 6<br>(4 - 9)             |
| Other urinary diseases                              | 65<br>(47 - 98)          | 1<br>(0 - 1)          | 0<br>(0 - 0)           | 12<br>(9 - 17)          | 18<br>(13 - 28)          | 33<br>(21 - 57)          |
| Gynecological diseases                              | 1<br>(1 - 3)             | --                    | --                     | 1<br>(0 - 1)            | 0<br>(0 - 1)             | 0<br>(0 - 1)             |
| Uterine fibroids                                    | 0<br>(0 - 1)             | --                    | --                     | 0<br>(0 - 0)            | 0<br>(0 - 0)             | 0<br>(0 - 0)             |
| Polycystic ovarian syndrome                         | 0<br>(0 - 0)             | --                    | --                     | 0<br>(0 - 0)            | 0<br>(0 - 0)             | --                       |
| Endometriosis                                       | 0<br>(0 - 0)             | --                    | --                     | 0<br>(0 - 0)            | 0<br>(0 - 0)             | --                       |
| Genital prolapse                                    | 0<br>(0 - 0)             | --                    | --                     | 0<br>(0 - 0)            | 0<br>(0 - 0)             | 0<br>(0 - 0)             |
| Other gynecological diseases                        | 1<br>(0 - 1)             | --                    | --                     | 0<br>(0 - 1)            | 0<br>(0 - 0)             | 0<br>(0 - 0)             |
| Hemoglobinopathies and hemolytic anemias            | 61<br>(40 - 94)          | 5<br>(2 - 13)         | 4<br>(2 - 7)           | 19<br>(11 - 29)         | 19<br>(11 - 30)          | 15<br>(9 - 23)           |
| Thalassemias                                        | 1<br>(0 - 1)             | 0<br>(0 - 1)          | 0<br>(0 - 0)           | 0<br>(0 - 0)            | 0<br>(0 - 0)             | 0<br>(0 - 0)             |
| Sickle cell disorders                               | 24<br>(16 - 37)          | 3<br>(1 - 8)          | 3<br>(2 - 5)           | 11<br>(7 - 18)          | 7<br>(4 - 11)            | 0<br>(0 - 1)             |
| G6PD deficiency                                     | 2<br>(2 - 4)             | 0<br>(0 - 1)          | 0<br>(0 - 0)           | 1<br>(1 - 1)            | 1<br>(0 - 1)             | 0<br>(0 - 0)             |
| Other hemoglobinopathies and hemolytic anemias      | 34<br>(22 - 53)          | 1<br>(1 - 4)          | 1<br>(1 - 2)           | 6<br>(4 - 9)            | 12<br>(7 - 19)           | 14<br>(9 - 22)           |
| Endocrine, metabolic, blood, and immune disorders   | 89<br>(61 - 211)         | 12<br>(6 - 37)        | 2<br>(1 - 3)           | 18<br>(12 - 39)         | 20<br>(13 - 48)          | 38<br>(24 - 96)          |
| Musculoskeletal disorders                           | 103<br>(74 - 126)        | --                    | 2<br>(2 - 3)           | 32<br>(21 - 42)         | 21<br>(14 - 27)          | 47<br>(34 - 61)          |
| Rheumatoid arthritis                                | 13<br>(10 - 18)          | --                    | 0<br>(0 - 0)           | 2<br>(1 - 3)            | 3<br>(2 - 4)             | 9<br>(6 - 13)            |
| Other musculoskeletal disorders                     | 89<br>(62 - 110)         | --                    | 2<br>(1 - 3)           | 31<br>(20 - 40)         | 19<br>(12 - 23)          | 38<br>(27 - 50)          |
| Other non-communicable diseases                     | 764<br>(585 - 890)       | 579<br>(441 - 700)    | 25<br>(19 - 31)        | 45<br>(33 - 60)         | 26<br>(19 - 32)          | 89<br>(49 - 116)         |
| Congenital anomalies                                | 647<br>(492 - 769)       | 564<br>(425 - 687)    | 24<br>(19 - 30)        | 35<br>(25 - 50)         | 10<br>(7 - 14)           | 14<br>(7 - 19)           |
| Neural tube defects                                 | 48<br>(27 - 73)          | 46<br>(26 - 72)       | 0<br>(0 - 1)           | 1<br>(0 - 1)            | 0<br>(0 - 0)             | 0<br>(0 - 0)             |
| Congenital heart anomalies                          | 352<br>(252 - 437)       | 314<br>(221 - 399)    | 16<br>(11 - 20)        | 19<br>(13 - 28)         | 1<br>(1 - 2)             | 1<br>(1 - 2)             |
| Cleft lip and cleft palate                          | 0<br>(0 - 1)             | 0<br>(0 - 1)          | --                     | --                      | --                       | --                       |
| Down syndrome                                       | 8<br>(4 - 11)            | 5<br>(2 - 8)          | 1<br>(0 - 1)           | 2<br>(1 - 3)            | 0<br>(0 - 0)             | 0<br>(0 - 0)             |
| Chromosomal unbalanced rearrangements               | 7<br>(5 - 11)            | 6<br>(4 - 9)          | 0<br>(0 - 0)           | 1<br>(0 - 1)            | 0<br>(0 - 0)             | 0<br>(0 - 0)             |
| Other congenital anomalies                          | 233<br>(178 - 298)       | 192<br>(137 - 256)    | 7<br>(5 - 10)          | 13<br>(9 - 18)          | 9<br>(6 - 12)            | 12<br>(6 - 17)           |
| Skin and subcutaneous diseases                      | 105<br>(64 - 133)        | 3<br>(2 - 5)          | 1<br>(0 - 1)           | 10<br>(6 - 12)          | 16<br>(11 - 20)          | 75<br>(41 - 101)         |
| Cellulitis                                          | 7<br>(4 - 11)            | 1<br>(0 - 1)          | 0<br>(0 - 0)           | 1<br>(0 - 1)            | 2<br>(1 - 2)             | 4<br>(2 - 7)             |
| Pyoderma                                            | 81<br>(51 - 106)         | 3<br>(1 - 4)          | 0<br>(0 - 0)           | 7<br>(5 - 9)            | 13<br>(8 - 16)           | 58<br>(35 - 81)          |
| Decubitus ulcer                                     | 16<br>(6 - 25)           | 0<br>(0 - 0)          | 0<br>(0 - 0)           | 1<br>(1 - 2)            | 2<br>(1 - 2)             | 13<br>(4 - 22)           |

Web Table 31- El Salvador deaths with 95% UI by age, sex, and cause in 2013

| Cause                                           | Both Sexes, All Ages     | Both Sexes, 0-4 Years | Both Sexes, 5-14 Years | Both Sexes, 15-49 Years  | Both Sexes, 50-69 Years | Both Sexes, 70-80 Years |
|-------------------------------------------------|--------------------------|-----------------------|------------------------|--------------------------|-------------------------|-------------------------|
| Other skin and subcutaneous diseases            | 1<br>(1 - 2)             | 0<br>(0 - 0)          | 0<br>(0 - 0)           | 0<br>(0 - 1)             | 0<br>(0 - 0)            | 0<br>(0 - 1)            |
| Sudden infant death syndrome                    | 11<br>(5 - 22)           | 11<br>(5 - 22)        | --                     | --                       | --                      | --                      |
| Injuries                                        | 8,003<br>(6,797 - 9,364) | 92<br>(68 - 118)      | 178<br>(155 - 200)     | 5,701<br>(4,766 - 6,819) | 1,025<br>(846 - 1,284)  | 1,007<br>(867 - 1,156)  |
| Transport injuries                              | 2,114<br>(1,767 - 2,537) | 25<br>(18 - 35)       | 72<br>(60 - 86)        | 1,139<br>(913 - 1,430)   | 429<br>(351 - 527)      | 449<br>(374 - 541)      |
| Road injuries                                   | 2,059<br>(1,728 - 2,476) | 24<br>(17 - 32)       | 69<br>(57 - 84)        | 1,110<br>(890 - 1,396)   | 416<br>(342 - 516)      | 440<br>(367 - 533)      |
| Pedestrian road injuries                        | 408<br>(318 - 519)       | 10<br>(6 - 15)        | 29<br>(22 - 36)        | 123<br>(89 - 165)        | 92<br>(70 - 120)        | 155<br>(117 - 199)      |
| Cyclist road injuries                           | 201<br>(157 - 257)       | 2<br>(1 - 3)          | 7<br>(5 - 10)          | 62<br>(44 - 82)          | 86<br>(63 - 117)        | 43<br>(31 - 58)         |
| Motorcyclist road injuries                      | 168<br>(121 - 232)       | 1<br>(1 - 2)          | 3<br>(2 - 4)           | 116<br>(78 - 166)        | 27<br>(17 - 38)         | 22<br>(15 - 31)         |
| Motor vehicle road injuries                     | 1,280<br>(1,046 - 1,599) | 11<br>(8 - 15)        | 30<br>(23 - 39)        | 809<br>(637 - 1,053)     | 211<br>(170 - 272)      | 220<br>(175 - 286)      |
| Other road injuries                             | 2<br>(2 - 4)             | 0<br>(0 - 1)          | 0<br>(0 - 1)           | 1<br>(0 - 1)             | 0<br>(0 - 1)            | 1<br>(0 - 1)            |
| Other transport injuries                        | 55<br>(19 - 79)          | 1<br>(0 - 2)          | 3<br>(1 - 5)           | 29<br>(10 - 44)          | 13<br>(4 - 20)          | 9<br>(2 - 14)           |
| Unintentional injuries                          | 1,037<br>(831 - 1,224)   | 39<br>(27 - 57)       | 37<br>(27 - 47)        | 380<br>(283 - 484)       | 163<br>(131 - 196)      | 420<br>(315 - 512)      |
| Falls                                           | 473<br>(339 - 573)       | 3<br>(2 - 5)          | 5<br>(3 - 6)           | 78<br>(54 - 101)         | 79<br>(57 - 100)        | 308<br>(211 - 388)      |
| Drowning                                        | 232<br>(130 - 328)       | 9<br>(4 - 17)         | 21<br>(13 - 32)        | 163<br>(86 - 240)        | 25<br>(14 - 37)         | 12<br>(7 - 18)          |
| Fire, heat, and hot substances                  | 57<br>(45 - 70)          | 7<br>(4 - 14)         | 3<br>(2 - 4)           | 20<br>(15 - 26)          | 9<br>(7 - 12)           | 19<br>(13 - 24)         |
| Poisonings                                      | 24<br>(14 - 70)          | 0<br>(0 - 1)          | 1<br>(0 - 1)           | 14<br>(7 - 41)           | 5<br>(3 - 16)           | 5<br>(2 - 12)           |
| Exposure to mechanical forces                   | 30<br>(22 - 78)          | 1<br>(0 - 1)          | 2<br>(1 - 6)           | 19<br>(13 - 51)          | 5<br>(3 - 14)           | 3<br>(2 - 8)            |
| Unintentional firearm injuries                  | 5<br>(4 - 11)            | 0<br>(0 - 0)          | 0<br>(0 - 1)           | 4<br>(3 - 8)             | 1<br>(0 - 1)            | 0<br>(0 - 1)            |
| Unintentional suffocation                       | 2<br>(2 - 4)             | 0<br>(0 - 0)          | 0<br>(0 - 1)           | 1<br>(1 - 2)             | 0<br>(0 - 0)            | 0<br>(0 - 1)            |
| Other exposure to mechanical forces             | 23<br>(15 - 66)          | 0<br>(0 - 1)          | 2<br>(1 - 5)           | 14<br>(9 - 42)           | 4<br>(3 - 12)           | 2<br>(2 - 6)            |
| Adverse effects of medical treatment            | 89<br>(67 - 109)         | 5<br>(3 - 12)         | 1<br>(1 - 2)           | 17<br>(13 - 22)          | 18<br>(12 - 23)         | 47<br>(33 - 61)         |
| Animal contact                                  | 13<br>(4 - 17)           | 1<br>(0 - 1)          | 0<br>(0 - 1)           | 3<br>(2 - 4)             | 3<br>(1 - 4)            | 6<br>(1 - 8)            |
| Venomous animal contact                         | 10<br>(3 - 13)           | 1<br>(0 - 1)          | 0<br>(0 - 0)           | 3<br>(1 - 4)             | 2<br>(1 - 3)            | 5<br>(1 - 7)            |
| Non-venomous animal contact                     | 3<br>(1 - 4)             | 0<br>(0 - 0)          | 0<br>(0 - 0)           | 1<br>(0 - 1)             | 1<br>(0 - 1)            | 1<br>(0 - 2)            |
| Foreign body                                    | 58<br>(40 - 88)          | 12<br>(7 - 19)        | 2<br>(1 - 2)           | 22<br>(14 - 37)          | 11<br>(7 - 18)          | 12<br>(8 - 17)          |
| Pulmonary aspiration and foreign body in airway | 57<br>(39 - 87)          | 12<br>(7 - 19)        | 2<br>(1 - 2)           | 22<br>(14 - 37)          | 10<br>(7 - 18)          | 12<br>(7 - 17)          |
| Foreign body in other body part                 | 1<br>(1 - 2)             | 0<br>(0 - 0)          | 0<br>(0 - 0)           | 0<br>(0 - 1)             | 0<br>(0 - 0)            | 0<br>(0 - 0)            |
| Other unintentional injuries                    | 61<br>(44 - 84)          | 1<br>(0 - 1)          | 2<br>(1 - 3)           | 42<br>(27 - 65)          | 8<br>(5 - 13)           | 8<br>(5 - 11)           |
| Self-harm and interpersonal violence            | 4,852<br>(3,958 - 5,901) | 28<br>(13 - 46)       | 70<br>(49 - 91)        | 4,183<br>(3,369 - 5,041) | 433<br>(314 - 653)      | 138<br>(96 - 213)       |
| Self-harm                                       | 606<br>(479 - 922)       | --                    | 10<br>(6 - 14)         | 485<br>(378 - 754)       | 75<br>(57 - 111)        | 36<br>(28 - 52)         |
| Interpersonal violence                          | 4,247<br>(3,371 - 5,211) | 28<br>(13 - 46)       | 60<br>(38 - 82)        | 3,698<br>(2,900 - 4,498) | 358<br>(244 - 572)      | 102<br>(62 - 173)       |
| Assault by firearm                              | 3,324<br>(2,551 - 4,195) | 12<br>(5 - 21)        | 40<br>(24 - 55)        | 2,968<br>(2,300 - 3,664) | 250<br>(160 - 402)      | 54<br>(31 - 96)         |
| Assault by sharp object                         | 462<br>(277 - 787)       | 5<br>(2 - 10)         | 8<br>(5 - 14)          | 388<br>(227 - 650)       | 48<br>(24 - 93)         | 15<br>(8 - 28)          |
| Assault by other means                          | 460<br>(295 - 690)       | 12<br>(5 - 20)        | 12<br>(7 - 19)         | 342<br>(211 - 529)       | 60<br>(34 - 98)         | 34<br>(18 - 59)         |

Web Table 31- El Salvador deaths with 95% UI by age, sex, and cause in 2013

| Cause                                                             | Males, All Ages             | Males, 0-4 Years     | Males, 5-14 Years  | Males, 15-49 Years       | Males, 50-69 Years       | Males, 70-80 Years       |
|-------------------------------------------------------------------|-----------------------------|----------------------|--------------------|--------------------------|--------------------------|--------------------------|
| All causes                                                        | 22,360<br>(19,601 - 25,781) | 983<br>(878 - 1,103) | 210<br>(192 - 230) | 7,614<br>(6,327 - 9,256) | 4,569<br>(3,827 - 5,471) | 8,984<br>(8,235 - 9,835) |
| Communicable, maternal, neonatal, and nutritional diseases        | 2,514<br>(2,171 - 2,885)    | 548<br>(465 - 643)   | 39<br>(29 - 52)    | 440<br>(356 - 551)       | 365<br>(290 - 444)       | 1,121<br>(894 - 1,380)   |
| HIV/AIDS and tuberculosis                                         | 259<br>(195 - 353)          | 1<br>(0 - 1)         | 0<br>(0 - 1)       | 159<br>(112 - 229)       | 57<br>(39 - 84)          | 42<br>(31 - 65)          |
| Tuberculosis                                                      | 75<br>(58 - 121)            | 0<br>(0 - 0)         | 0<br>(0 - 0)       | 22<br>(16 - 33)          | 18<br>(13 - 32)          | 34<br>(25 - 55)          |
| HIV/AIDS                                                          | 184<br>(124 - 275)          | 0<br>(0 - 1)         | 0<br>(0 - 0)       | 138<br>(90 - 207)        | 39<br>(22 - 62)          | 8<br>(4 - 14)            |
| HIV/AIDS resulting in mycobacterial infection                     | 11<br>(7 - 17)              | 0<br>(0 - 0)         | 0<br>(0 - 0)       | 8<br>(5 - 13)            | 2<br>(1 - 4)             | 1<br>(0 - 1)             |
| HIV/AIDS resulting in other diseases                              | 173<br>(116 - 258)          | 0<br>(0 - 1)         | 0<br>(0 - 0)       | 129<br>(85 - 195)        | 36<br>(20 - 59)          | 7<br>(3 - 13)            |
| Diarrhea, lower respiratory, and other common infectious diseases | 1,589<br>(1,293 - 1,899)    | 195<br>(146 - 254)   | 33<br>(24 - 46)    | 220<br>(154 - 292)       | 247<br>(180 - 320)       | 894<br>(698 - 1,144)     |
| Diarrheal diseases                                                | 150<br>(116 - 190)          | 41<br>(24 - 67)      | 3<br>(2 - 4)       | 23<br>(17 - 33)          | 24<br>(17 - 35)          | 58<br>(37 - 88)          |
| Intestinal infectious diseases                                    | 49<br>(25 - 88)             | 15<br>(7 - 28)       | 16<br>(7 - 29)     | 15<br>(6 - 32)           | 2<br>(1 - 3)             | 1<br>(0 - 3)             |
| Typhoid fever                                                     | 37<br>(18 - 68)             | 11<br>(5 - 21)       | 12<br>(6 - 23)     | 12<br>(5 - 24)           | 1<br>(0 - 2)             | 1<br>(0 - 1)             |
| Paratyphoid fever                                                 | 10<br>(5 - 19)              | 3<br>(1 - 6)         | 3<br>(1 - 6)       | 3<br>(1 - 7)             | 0<br>(0 - 1)             | 0<br>(0 - 0)             |
| Other intestinal infectious diseases                              | 2<br>(0 - 6)                | 1<br>(0 - 4)         | 0<br>(0 - 1)       | 0<br>(0 - 3)             | 0<br>(0 - 1)             | 0<br>(0 - 2)             |
| Lower respiratory infections                                      | 1,309<br>(1,033 - 1,597)    | 126<br>(84 - 175)    | 10<br>(6 - 14)     | 154<br>(93 - 211)        | 205<br>(142 - 271)       | 815<br>(621 - 1,064)     |
| Upper respiratory infections                                      | 1<br>(0 - 2)                | 0<br>(0 - 0)         | 0<br>(0 - 0)       | 0<br>(0 - 1)             | 0<br>(0 - 1)             | 0<br>(0 - 1)             |
| Otitis media                                                      | 1<br>(1 - 2)                | 0<br>(0 - 0)         | 0<br>(0 - 0)       | 0<br>(0 - 0)             | 0<br>(0 - 0)             | 1<br>(0 - 1)             |
| Meningitis                                                        | 59<br>(47 - 71)             | 8<br>(4 - 14)        | 3<br>(2 - 3)       | 20<br>(15 - 28)          | 13<br>(10 - 17)          | 15<br>(11 - 19)          |
| Pneumococcal meningitis                                           | 22<br>(16 - 27)             | 2<br>(1 - 4)         | 1<br>(1 - 2)       | 8<br>(5 - 12)            | 5<br>(3 - 7)             | 5<br>(4 - 8)             |
| H influenzae type B meningitis                                    | 8<br>(6 - 11)               | 3<br>(1 - 5)         | 1<br>(0 - 1)       | 2<br>(1 - 3)             | 1<br>(1 - 2)             | 1<br>(1 - 2)             |
| Meningococcal meningitis                                          | 7<br>(5 - 10)               | 1<br>(0 - 1)         | 0<br>(0 - 0)       | 3<br>(1 - 4)             | 2<br>(1 - 2)             | 2<br>(1 - 3)             |
| Other meningitis                                                  | 22<br>(16 - 29)             | 2<br>(1 - 4)         | 1<br>(0 - 1)       | 8<br>(4 - 12)            | 5<br>(3 - 8)             | 6<br>(4 - 9)             |
| Encephalitis                                                      | 13<br>(9 - 24)              | 2<br>(1 - 4)         | 1<br>(1 - 3)       | 5<br>(3 - 10)            | 2<br>(1 - 4)             | 3<br>(2 - 6)             |
| Diphtheria                                                        | 0<br>(0 - 1)                | 0<br>(0 - 1)         | 0<br>(0 - 0)       | 0<br>(0 - 1)             | 0<br>(0 - 0)             | 0<br>(0 - 0)             |
| Whooping cough                                                    | 1<br>(0 - 3)                | 1<br>(0 - 3)         | 0<br>(0 - 0)       | 0<br>(0 - 0)             | 0<br>(0 - 0)             | 0<br>(0 - 0)             |
| Tetanus                                                           | 3<br>(2 - 6)                | 0<br>(0 - 1)         | 0<br>(0 - 0)       | 1<br>(1 - 1)             | 1<br>(0 - 1)             | 1<br>(0 - 3)             |
| Measles                                                           | 0<br>(0 - 0)                | 0<br>(0 - 0)         | 0<br>(0 - 0)       | 0<br>(0 - 0)             | 0<br>(0 - 0)             | 0<br>(0 - 0)             |
| Varicella and herpes zoster                                       | 2<br>(0 - 5)                | 0<br>(0 - 2)         | 0<br>(0 - 0)       | 0<br>(0 - 1)             | 0<br>(0 - 0)             | 1<br>(0 - 4)             |
| Neglected tropical diseases and malaria                           | 13<br>(8 - 28)              | 1<br>(1 - 3)         | 1<br>(1 - 2)       | 4<br>(3 - 8)             | 3<br>(1 - 9)             | 3<br>(1 - 10)            |
| Malaria                                                           | 0<br>(0 - 0)                | 0<br>(0 - 0)         | 0<br>(0 - 0)       | 0<br>(0 - 0)             | 0<br>(0 - 0)             | 0<br>(0 - 0)             |
| Chagas disease                                                    | 6<br>(1 - 19)               | 0<br>(0 - 0)         | 0<br>(0 - 0)       | 1<br>(0 - 3)             | 2<br>(0 - 8)             | 2<br>(0 - 8)             |
| Leishmaniasis                                                     | 2<br>(1 - 3)                | 0<br>(0 - 1)         | 0<br>(0 - 0)       | 1<br>(0 - 1)             | 0<br>(0 - 1)             | 0<br>(0 - 0)             |
| Visceral leishmaniasis                                            | 2<br>(1 - 3)                | 0<br>(0 - 1)         | 0<br>(0 - 0)       | 1<br>(0 - 1)             | 0<br>(0 - 1)             | 0<br>(0 - 0)             |
| Cysticercosis                                                     | 2<br>(1 - 2)                | 0<br>(0 - 0)         | 0<br>(0 - 0)       | 1<br>(1 - 1)             | 0<br>(0 - 0)             | 0<br>(0 - 0)             |
| Cystic echinococcosis                                             | 0<br>(0 - 1)                | 0<br>(0 - 0)         | 0<br>(0 - 0)       | 0<br>(0 - 0)             | 0<br>(0 - 0)             | 0<br>(0 - 0)             |
| Dengue                                                            | 2<br>(1 - 3)                | 0<br>(0 - 1)         | 0<br>(0 - 1)       | 1<br>(0 - 1)             | 0<br>(0 - 0)             | 0<br>(0 - 1)             |
| Rabies                                                            | 1<br>(0 - 1)                | 0<br>(0 - 0)         | 0<br>(0 - 0)       | 0<br>(0 - 1)             | 0<br>(0 - 0)             | 0<br>(0 - 0)             |
| Intestinal nematode infections                                    | 0<br>(0 - 3)                | 0<br>(0 - 1)         | 0<br>(0 - 0)       | 0<br>(0 - 2)             | 0<br>(0 - 0)             | 0<br>(0 - 1)             |
| Ascariasis                                                        | 0<br>(0 - 3)                | 0<br>(0 - 1)         | 0<br>(0 - 0)       | 0<br>(0 - 2)             | 0<br>(0 - 0)             | 0<br>(0 - 1)             |
| Other neglected tropical diseases                                 | 1<br>(0 - 1)                | 0<br>(0 - 0)         | 0<br>(0 - 0)       | 0<br>(0 - 0)             | 0<br>(0 - 0)             | 0<br>(0 - 0)             |
| Maternal disorders                                                | -                           | -                    | -                  | -                        | -                        | -                        |

Web Table 31- El Salvador deaths with 95% UI by age, sex, and cause in 2013

| Cause                                                            | Males, All Ages             | Males, 0-4 Years   | Males, 5-14 Years | Males, 15-49 Years       | Males, 50-69 Years       | Males, 70-80 Years       |
|------------------------------------------------------------------|-----------------------------|--------------------|-------------------|--------------------------|--------------------------|--------------------------|
| Maternal hemorrhage                                              | --                          | --                 | --                | --                       | --                       | --                       |
| Maternal sepsis and other maternal infections                    | --                          | --                 | --                | --                       | --                       | --                       |
| Maternal hypertensive disorders                                  | --                          | --                 | --                | --                       | --                       | --                       |
| Maternal obstructed labor                                        | --                          | --                 | --                | --                       | --                       | --                       |
| Maternal abortive outcome                                        | --                          | --                 | --                | --                       | --                       | --                       |
| Indirect maternal deaths                                         | --                          | --                 | --                | --                       | --                       | --                       |
| Late maternal deaths                                             | --                          | --                 | --                | --                       | --                       | --                       |
| Maternal deaths aggravated by HIV/AIDS                           | --                          | --                 | --                | --                       | --                       | --                       |
| Other maternal disorders                                         | --                          | --                 | --                | --                       | --                       | --                       |
| Neonatal disorders                                               | 323<br>(261 - 396)          | 323<br>(261 - 396) | --                | --                       | --                       | --                       |
| Neonatal preterm birth complications                             | 171<br>(99 - 229)           | 171<br>(99 - 229)  | --                | --                       | --                       | --                       |
| Neonatal encephalopathy due to birth asphyxia and trauma         | 51<br>(31 - 81)             | 51<br>(31 - 81)    | --                | --                       | --                       | --                       |
| Neonatal sepsis and other neonatal infections                    | 71<br>(36 - 136)            | 71<br>(36 - 136)   | --                | --                       | --                       | --                       |
| Hemolytic disease and other neonatal jaundice                    | 0<br>(0 - 0)                | 0<br>(0 - 0)       | --                | --                       | --                       | --                       |
| Other neonatal disorders                                         | 30<br>(17 - 53)             | 30<br>(17 - 53)    | --                | --                       | --                       | --                       |
| Nutritional deficiencies                                         | 286<br>(173 - 383)          | 19<br>(10 - 29)    | 3<br>(2 - 5)      | 44<br>(25 - 65)          | 50<br>(32 - 81)          | 169<br>(95 - 239)        |
| Protein-energy malnutrition                                      | 189<br>(101 - 276)          | 17<br>(9 - 26)     | 2<br>(1 - 3)      | 23<br>(11 - 36)          | 29<br>(15 - 49)          | 118<br>(58 - 176)        |
| Iodine deficiency                                                | 0<br>(0 - 1)                | 0<br>(0 - 0)       | 0<br>(0 - 0)      | 0<br>(0 - 1)             | 0<br>(0 - 0)             | 0<br>(0 - 1)             |
| Iron-deficiency anemia                                           | 96<br>(41 - 173)            | 2<br>(0 - 5)       | 1<br>(0 - 2)      | 21<br>(10 - 37)          | 21<br>(10 - 39)          | 51<br>(18 - 96)          |
| Other nutritional deficiencies                                   | 1<br>(0 - 1)                | 0<br>(0 - 0)       | 0<br>(0 - 0)      | 0<br>(0 - 1)             | 0<br>(0 - 0)             | 0<br>(0 - 0)             |
| Other communicable, maternal, neonatal, and nutritional diseases | 44<br>(33 - 62)             | 9<br>(4 - 16)      | 2<br>(1 - 3)      | 12<br>(8 - 17)           | 7<br>(5 - 11)            | 13<br>(9 - 24)           |
| Sexually transmitted diseases excluding HIV                      | 6<br>(1 - 13)               | 5<br>(0 - 12)      | 0<br>(0 - 1)      | 0<br>(0 - 0)             | 0<br>(0 - 0)             | 0<br>(0 - 1)             |
| Syphilis                                                         | 6<br>(1 - 13)               | 5<br>(0 - 12)      | 0<br>(0 - 1)      | 0<br>(0 - 0)             | 0<br>(0 - 0)             | 0<br>(0 - 1)             |
| Chlamydial infection                                             | --                          | --                 | --                | --                       | --                       | --                       |
| Gonococcal infection                                             | 0<br>(0 - 0)                | --                 | 0<br>(0 - 0)      | 0<br>(0 - 0)             | 0<br>(0 - 0)             | 0<br>(0 - 0)             |
| Other sexually transmitted diseases                              | 0<br>(0 - 0)                | --                 | 0<br>(0 - 0)      | 0<br>(0 - 0)             | 0<br>(0 - 0)             | 0<br>(0 - 0)             |
| Hepatitis                                                        | 4<br>(3 - 5)                | 0<br>(0 - 0)       | 0<br>(0 - 0)      | 1<br>(1 - 2)             | 1<br>(1 - 1)             | 1<br>(1 - 2)             |
| Acute hepatitis A                                                | 1<br>(0 - 2)                | 0<br>(0 - 0)       | 0<br>(0 - 0)      | 1<br>(0 - 1)             | 0<br>(0 - 0)             | 0<br>(0 - 0)             |
| Acute hepatitis B                                                | 2<br>(1 - 3)                | 0<br>(0 - 0)       | 0<br>(0 - 0)      | 1<br>(0 - 1)             | 1<br>(0 - 1)             | 1<br>(0 - 1)             |
| Acute hepatitis C                                                | 0<br>(0 - 1)                | --                 | 0<br>(0 - 0)      | 0<br>(0 - 1)             | 0<br>(0 - 0)             | 0<br>(0 - 1)             |
| Other infectious diseases                                        | 34<br>(24 - 51)             | 4<br>(2 - 7)       | 1<br>(1 - 2)      | 11<br>(6 - 15)           | 6<br>(4 - 9)             | 12<br>(8 - 23)           |
| Non-communicable diseases                                        | 13,361<br>(11,593 - 15,277) | 382<br>(297 - 463) | 61<br>(52 - 72)   | 2,224<br>(1,724 - 2,801) | 3,410<br>(2,814 - 4,099) | 7,284<br>(6,622 - 7,998) |
| Neoplasms                                                        | 2,016<br>(1,702 - 2,337)    | 14<br>(9 - 19)     | 20<br>(16 - 25)   | 276<br>(213 - 345)       | 564<br>(451 - 684)       | 1,142<br>(977 - 1,316)   |
| Esophageal cancer                                                | 67<br>(40 - 91)             | --                 | --                | 5<br>(3 - 7)             | 20<br>(11 - 28)          | 43<br>(25 - 60)          |
| Stomach cancer                                                   | 497<br>(417 - 588)          | --                 | --                | 57<br>(44 - 74)          | 154<br>(120 - 191)       | 286<br>(237 - 343)       |
| Liver cancer                                                     | 126<br>(102 - 151)          | --                 | 0<br>(0 - 1)      | 13<br>(9 - 17)           | 44<br>(34 - 57)          | 68<br>(54 - 86)          |
| Liver cancer due to hepatitis B                                  | 40<br>(19 - 63)             | --                 | 0<br>(0 - 0)      | 6<br>(4 - 10)            | 18<br>(8 - 29)           | 15<br>(6 - 27)           |
| Liver cancer due to hepatitis C                                  | 57<br>(26 - 84)             | --                 | 0<br>(0 - 0)      | 4<br>(1 - 7)             | 18<br>(7 - 29)           | 36<br>(16 - 51)          |
| Liver cancer due to alcohol use                                  | 22<br>(10 - 38)             | --                 | --                | 1<br>(0 - 2)             | 6<br>(3 - 11)            | 14<br>(7 - 26)           |
| Liver cancer due to other causes                                 | 7<br>(4 - 11)               | --                 | 0<br>(0 - 0)      | 1<br>(1 - 2)             | 2<br>(1 - 4)             | 3<br>(2 - 5)             |

Web Table 31- El Salvador deaths with 95% UI by age, sex, and cause in 2013

| Cause                                         | Males, All Ages          | Males, 0-4 Years | Males, 5-14 Years | Males, 15-49 Years | Males, 50-69 Years   | Males, 70-80 Years       |
|-----------------------------------------------|--------------------------|------------------|-------------------|--------------------|----------------------|--------------------------|
| Larynx cancer                                 | 25<br>(16 - 32)          | --               | --                | 3<br>(2 - 4)       | 9<br>(6 - 12)        | 14<br>(8 - 18)           |
| Tracheal, bronchus and lung cancer            | 204<br>(168 - 243)       | --               | --                | 19<br>(14 - 24)    | 68<br>(53 - 87)      | 117<br>(94 - 142)        |
| Breast cancer                                 | 2<br>(2 - 4)             | --               | --                | 0<br>(0 - 1)       | 1<br>(0 - 1)         | 1<br>(1 - 2)             |
| Cervical cancer                               | --                       | --               | --                | --                 | --                   | --                       |
| Uterine cancer                                | --                       | --               | --                | --                 | --                   | --                       |
| Prostate cancer                               | 319<br>(189 - 447)       | --               | --                | 2<br>(1 - 3)       | 42<br>(24 - 60)      | 274<br>(160 - 394)       |
| Colon and rectum cancer                       | 135<br>(112 - 160)       | --               | --                | 26<br>(21 - 33)    | 42<br>(33 - 52)      | 67<br>(54 - 82)          |
| Lip and oral cavity cancer                    | 36<br>(25 - 47)          | --               | --                | 5<br>(3 - 6)       | 13<br>(9 - 17)       | 19<br>(13 - 24)          |
| Nasopharynx cancer                            | 6<br>(5 - 7)             | --               | 0<br>(0 - 0)      | 2<br>(2 - 3)       | 2<br>(2 - 3)         | 2<br>(1 - 2)             |
| Other pharynx cancer                          | 20<br>(16 - 24)          | --               | --                | 3<br>(2 - 4)       | 8<br>(6 - 11)        | 9<br>(7 - 11)            |
| Gallbladder and biliary tract cancer          | 30<br>(20 - 42)          | --               | --                | 3<br>(2 - 4)       | 9<br>(6 - 13)        | 18<br>(12 - 26)          |
| Pancreatic cancer                             | 75<br>(62 - 90)          | --               | --                | 9<br>(7 - 12)      | 28<br>(22 - 35)      | 37<br>(30 - 46)          |
| Malignant skin melanoma                       | 6<br>(4 - 13)            | --               | --                | 2<br>(1 - 4)       | 1<br>(1 - 3)         | 3<br>(2 - 6)             |
| Non-melanoma skin cancer                      | 14<br>(9 - 20)           | --               | --                | 1<br>(1 - 1)       | 3<br>(2 - 4)         | 10<br>(7 - 15)           |
| Ovarian cancer                                | --                       | --               | --                | --                 | --                   | --                       |
| Testicular cancer                             | 4<br>(2 - 5)             | --               | --                | 2<br>(1 - 3)       | 0<br>(0 - 0)         | 1<br>(1 - 2)             |
| Kidney cancer                                 | 33<br>(27 - 39)          | 0<br>(0 - 1)     | 0<br>(0 - 0)      | 5<br>(4 - 6)       | 11<br>(9 - 14)       | 16<br>(13 - 20)          |
| Bladder cancer                                | 18<br>(15 - 25)          | --               | --                | 1<br>(1 - 1)       | 4<br>(3 - 5)         | 14<br>(11 - 19)          |
| Brain and nervous system cancer               | 66<br>(26 - 89)          | 2<br>(0 - 3)     | 3<br>(1 - 4)      | 22<br>(9 - 32)     | 20<br>(7 - 29)       | 20<br>(6 - 28)           |
| Thyroid cancer                                | 9<br>(7 - 12)            | --               | 0<br>(0 - 0)      | 1<br>(1 - 2)       | 3<br>(2 - 4)         | 4<br>(3 - 6)             |
| Mesothelioma                                  | 1<br>(1 - 2)             | --               | --                | 0<br>(0 - 0)       | 0<br>(0 - 1)         | 0<br>(0 - 1)             |
| Hodgkin lymphoma                              | 12<br>(4 - 18)           | 0<br>(0 - 1)     | 1<br>(0 - 1)      | 4<br>(1 - 6)       | 3<br>(1 - 4)         | 4<br>(1 - 6)             |
| Non-Hodgkin lymphoma                          | 93<br>(46 - 128)         | 2<br>(1 - 3)     | 1<br>(1 - 2)      | 21<br>(11 - 30)    | 26<br>(12 - 38)      | 42<br>(18 - 61)          |
| Multiple myeloma                              | 8<br>(6 - 11)            | --               | --                | 2<br>(1 - 2)       | 3<br>(2 - 4)         | 4<br>(3 - 5)             |
| Leukemia                                      | 115<br>(95 - 137)        | 5<br>(3 - 7)     | 10<br>(8 - 13)    | 46<br>(35 - 60)    | 23<br>(18 - 29)      | 31<br>(24 - 38)          |
| Other neoplasms                               | 96<br>(78 - 118)         | 5<br>(2 - 8)     | 5<br>(3 - 6)      | 23<br>(17 - 31)    | 27<br>(20 - 35)      | 37<br>(27 - 49)          |
| Cardiovascular diseases                       | 4,262<br>(3,736 - 4,917) | 13<br>(10 - 17)  | 11<br>(9 - 14)    | 464<br>(367 - 590) | 964<br>(788 - 1,173) | 2,810<br>(2,507 - 3,167) |
| Rheumatic heart disease                       | 59<br>(20 - 90)          | 0<br>(0 - 1)     | 1<br>(0 - 2)      | 10<br>(4 - 16)     | 13<br>(4 - 21)       | 35<br>(11 - 59)          |
| Ischemic heart disease                        | 3,036<br>(2,614 - 3,571) | 3<br>(2 - 4)     | 4<br>(3 - 5)      | 307<br>(236 - 399) | 678<br>(539 - 836)   | 2,044<br>(1,783 - 2,360) |
| Cerebrovascular disease                       | 894<br>(705 - 1,154)     | 3<br>(2 - 4)     | 4<br>(3 - 6)      | 88<br>(64 - 124)   | 203<br>(151 - 269)   | 596<br>(462 - 767)       |
| Ischemic stroke                               | 326<br>(223 - 521)       | 1<br>(0 - 1)     | 1<br>(1 - 2)      | 20<br>(13 - 34)    | 65<br>(43 - 104)     | 239<br>(158 - 398)       |
| Hemorrhagic stroke                            | 569<br>(396 - 746)       | 2<br>(1 - 4)     | 3<br>(2 - 4)      | 68<br>(49 - 96)    | 139<br>(98 - 185)    | 356<br>(232 - 472)       |
| Hypertensive heart disease                    | 57<br>(17 - 117)         | 0<br>(0 - 0)     | 0<br>(0 - 0)      | 5<br>(2 - 9)       | 13<br>(4 - 26)       | 39<br>(10 - 86)          |
| Cardiomyopathy and myocarditis                | 50<br>(37 - 70)          | 2<br>(1 - 3)     | 0<br>(0 - 1)      | 20<br>(14 - 31)    | 17<br>(12 - 24)      | 10<br>(7 - 14)           |
| Atrial fibrillation and flutter               | 4<br>(3 - 6)             | --               | --                | 0<br>(0 - 0)       | 1<br>(1 - 1)         | 3<br>(2 - 5)             |
| Aortic aneurysm                               | 16<br>(13 - 21)          | --               | --                | 2<br>(2 - 4)       | 4<br>(3 - 6)         | 10<br>(7 - 13)           |
| Peripheral vascular disease                   | 1<br>(1 - 1)             | --               | --                | 0<br>(0 - 0)       | 0<br>(0 - 0)         | 1<br>(0 - 1)             |
| Endocarditis                                  | 32<br>(21 - 50)          | 3<br>(2 - 5)     | 1<br>(0 - 1)      | 9<br>(5 - 15)      | 8<br>(5 - 12)        | 11<br>(7 - 19)           |
| Other cardiovascular and circulatory diseases | 113<br>(86 - 200)        | 1<br>(1 - 2)     | 1<br>(1 - 1)      | 22<br>(16 - 38)    | 27<br>(19 - 45)      | 62<br>(44 - 114)         |
| Chronic respiratory diseases                  | 991<br>(814 - 1,159)     | 11<br>(7 - 18)   | 2<br>(2 - 3)      | 52<br>(38 - 68)    | 148<br>(116 - 187)   | 779<br>(622 - 911)       |

Web Table 31- El Salvador deaths with 95% UI by age, sex, and cause in 2013

| Cause                                               | Males, All Ages      | Males, 0-4 Years | Males, 5-14 Years | Males, 15-49 Years | Males, 50-69 Years | Males, 70-80 Years |
|-----------------------------------------------------|----------------------|------------------|-------------------|--------------------|--------------------|--------------------|
| Chronic obstructive pulmonary disease               | 784<br>(636 - 917)   | 5<br>(3 - 9)     | 1<br>(1 - 2)      | 38<br>(28 - 49)    | 108<br>(83 - 136)  | 633<br>(508 - 744) |
| Pneumoconiosis                                      | 28<br>(18 - 41)      | 0<br>(0 - 0)     | 0<br>(0 - 0)      | 2<br>(1 - 2)       | 8<br>(5 - 12)      | 18<br>(11 - 28)    |
| Silicosis                                           | 0<br>(0 - 0)         | 0<br>(0 - 0)     | 0<br>(0 - 0)      | 0<br>(0 - 0)       | 0<br>(0 - 0)       | 0<br>(0 - 0)       |
| Asbestosis                                          | 5<br>(3 - 8)         | 0<br>(0 - 0)     | 0<br>(0 - 0)      | 0<br>(0 - 0)       | 2<br>(1 - 3)       | 3<br>(2 - 5)       |
| Coal workers pneumoconiosis                         | 4<br>(2 - 6)         | 0<br>(0 - 0)     | 0<br>(0 - 0)      | 0<br>(0 - 0)       | 1<br>(1 - 2)       | 3<br>(2 - 4)       |
| Other pneumoconiosis                                | 19<br>(12 - 28)      | 0<br>(0 - 0)     | 0<br>(0 - 0)      | 1<br>(1 - 2)       | 5<br>(3 - 8)       | 12<br>(8 - 19)     |
| Asthma                                              | 92<br>(68 - 122)     | 1<br>(1 - 3)     | 1<br>(0 - 1)      | 7<br>(5 - 10)      | 16<br>(11 - 23)    | 66<br>(46 - 91)    |
| Interstitial lung disease and pulmonary sarcoidosis | 58<br>(38 - 98)      | 0<br>(0 - 1)     | 0<br>(0 - 0)      | 3<br>(2 - 6)       | 13<br>(8 - 21)     | 42<br>(26 - 74)    |
| Other chronic respiratory diseases                  | 29<br>(20 - 40)      | 4<br>(2 - 6)     | 0<br>(0 - 0)      | 2<br>(1 - 2)       | 3<br>(2 - 5)       | 20<br>(12 - 31)    |
| Cirrhosis                                           | 805<br>(660 - 994)   | 1<br>(0 - 1)     | 1<br>(1 - 1)      | 308<br>(237 - 402) | 297<br>(236 - 373) | 198<br>(163 - 238) |
| Cirrhosis due to hepatitis B                        | 28<br>(15 - 50)      | 0<br>(0 - 0)     | 0<br>(0 - 0)      | 11<br>(6 - 20)     | 10<br>(5 - 18)     | 7<br>(3 - 12)      |
| Cirrhosis due to hepatitis C                        | 253<br>(165 - 346)   | 0<br>(0 - 0)     | 0<br>(0 - 0)      | 77<br>(41 - 119)   | 98<br>(61 - 139)   | 77<br>(51 - 102)   |
| Cirrhosis due to alcohol use                        | 405<br>(306 - 516)   | --               | --                | 147<br>(103 - 202) | 156<br>(114 - 206) | 102<br>(77 - 131)  |
| Cirrhosis due to other causes                       | 119<br>(74 - 177)    | 1<br>(0 - 1)     | 1<br>(1 - 1)      | 72<br>(44 - 109)   | 32<br>(15 - 53)    | 13<br>(6 - 20)     |
| Digestive diseases                                  | 425<br>(329 - 726)   | 2<br>(1 - 3)     | 2<br>(1 - 3)      | 77<br>(54 - 134)   | 103<br>(74 - 186)  | 241<br>(184 - 407) |
| Peptic ulcer disease                                | 168<br>(121 - 304)   | 0<br>(0 - 0)     | 0<br>(0 - 0)      | 23<br>(15 - 45)    | 41<br>(26 - 84)    | 103<br>(73 - 187)  |
| Gastritis and duodenitis                            | 5<br>(3 - 11)        | 0<br>(0 - 0)     | 0<br>(0 - 0)      | 1<br>(1 - 2)       | 1<br>(1 - 2)       | 3<br>(2 - 7)       |
| Appendicitis                                        | 24<br>(14 - 38)      | 0<br>(0 - 0)     | 0<br>(0 - 1)      | 8<br>(5 - 13)      | 6<br>(3 - 10)      | 9<br>(5 - 15)      |
| Paralytic ileus and intestinal obstruction          | 27<br>(9 - 41)       | 1<br>(1 - 2)     | 1<br>(0 - 1)      | 5<br>(2 - 8)       | 6<br>(2 - 9)       | 15<br>(4 - 24)     |
| Inguinal, femoral, and abdominal hernia             | 36<br>(18 - 85)      | 0<br>(0 - 0)     | 0<br>(0 - 0)      | 2<br>(1 - 6)       | 7<br>(3 - 16)      | 27<br>(12 - 64)    |
| Inflammatory bowel disease                          | 7<br>(4 - 15)        | 0<br>(0 - 0)     | 0<br>(0 - 0)      | 2<br>(1 - 4)       | 1<br>(1 - 2)       | 4<br>(2 - 9)       |
| Vascular intestinal disorders                       | 15<br>(6 - 33)       | 0<br>(0 - 0)     | 0<br>(0 - 0)      | 1<br>(1 - 3)       | 4<br>(1 - 9)       | 10<br>(3 - 22)     |
| Gallbladder and biliary diseases                    | 37<br>(24 - 62)      | 0<br>(0 - 0)     | 0<br>(0 - 0)      | 5<br>(3 - 10)      | 8<br>(5 - 16)      | 24<br>(15 - 37)    |
| Pancreatitis                                        | 62<br>(41 - 115)     | 0<br>(0 - 0)     | 0<br>(0 - 0)      | 19<br>(12 - 34)    | 16<br>(10 - 29)    | 27<br>(16 - 52)    |
| Other digestive diseases                            | 44<br>(31 - 79)      | 0<br>(0 - 1)     | 0<br>(0 - 0)      | 10<br>(7 - 21)     | 13<br>(8 - 25)     | 20<br>(13 - 36)    |
| Neurological disorders                              | 802<br>(603 - 1,045) | 2<br>(1 - 3)     | 3<br>(2 - 4)      | 30<br>(21 - 42)    | 45<br>(29 - 64)    | 723<br>(529 - 960) |
| Alzheimer disease and other dementias               | 726<br>(528 - 962)   | --               | --                | 0<br>(0 - 0)       | 33<br>(18 - 52)    | 693<br>(496 - 924) |
| Parkinson disease                                   | 22<br>(16 - 46)      | --               | --                | 0<br>(0 - 0)       | 3<br>(2 - 6)       | 19<br>(14 - 38)    |
| Epilepsy                                            | 42<br>(30 - 55)      | 1<br>(1 - 2)     | 2<br>(1 - 3)      | 25<br>(16 - 35)    | 7<br>(5 - 9)       | 7<br>(5 - 10)      |
| Multiple sclerosis                                  | 3<br>(1 - 5)         | --               | --                | 1<br>(0 - 1)       | 1<br>(0 - 1)       | 1<br>(1 - 2)       |
| Other neurological disorders                        | 10<br>(7 - 12)       | 1<br>(0 - 1)     | 1<br>(1 - 1)      | 4<br>(3 - 6)       | 2<br>(1 - 3)       | 2<br>(2 - 3)       |
| Mental and substance use disorders                  | 949<br>(507 - 1,237) | 0<br>(0 - 0)     | 0<br>(0 - 0)      | 523<br>(276 - 701) | 324<br>(169 - 435) | 102<br>(53 - 141)  |
| Schizophrenia                                       | 1<br>(0 - 1)         | --               | --                | 0<br>(0 - 1)       | 0<br>(0 - 1)       | 0<br>(0 - 1)       |
| Alcohol use disorders                               | 939<br>(484 - 1,228) | --               | --                | 516<br>(257 - 695) | 322<br>(161 - 432) | 101<br>(51 - 139)  |
| Drug use disorders                                  | 9<br>(4 - 48)        | 0<br>(0 - 0)     | --                | 6<br>(3 - 35)      | 2<br>(1 - 13)      | 0<br>(0 - 2)       |
| Opioid use disorders                                | 2<br>(1 - 11)        | 0<br>(0 - 0)     | --                | 1<br>(1 - 8)       | 0<br>(0 - 2)       | 0<br>(0 - 0)       |
| Cocaine use disorders                               | 0<br>(0 - 1)         | 0<br>(0 - 0)     | --                | 0<br>(0 - 1)       | 0<br>(0 - 0)       | 0<br>(0 - 0)       |
| Amphetamine use disorders                           | 0<br>(0 - 1)         | 0<br>(0 - 0)     | --                | 0<br>(0 - 1)       | 0<br>(0 - 0)       | 0<br>(0 - 0)       |
| Other drug use disorders                            | 6<br>(3 - 36)        | 0<br>(0 - 0)     | --                | 4<br>(2 - 26)      | 2<br>(1 - 10)      | 0<br>(0 - 1)       |
| Eating disorders                                    | 0<br>(0 - 0)         | --               | 0<br>(0 - 0)      | 0<br>(0 - 0)       | --                 | --                 |

Web Table 31- El Salvador deaths with 95% UI by age, sex, and cause in 2013

| Cause                                               | Males, All Ages          | Males, 0-4 Years   | Males, 5-14 Years | Males, 15-49 Years | Males, 50-69 Years   | Males, 70-80 Years     |
|-----------------------------------------------------|--------------------------|--------------------|-------------------|--------------------|----------------------|------------------------|
| Anorexia nervosa                                    | 0<br>(0 - 0)             | --                 | 0<br>(0 - 0)      | 0<br>(0 - 0)       | --                   | --                     |
| Diabetes, urogenital, blood, and endocrine diseases | 2,664<br>(1,931 - 3,162) | 17<br>(11 - 39)    | 9<br>(7 - 12)     | 461<br>(303 - 593) | 942<br>(666 - 1,171) | 1,235<br>(924 - 1,443) |
| Diabetes mellitus                                   | 683<br>(570 - 816)       | 0                  | 1<br>(0 - 1)      | 86<br>(65 - 112)   | 247<br>(194 - 309)   | 349<br>(287 - 427)     |
| Acute glomerulonephritis                            | 3<br>(2 - 4)             | 0<br>(0 - 0)       | 0<br>(0 - 0)      | 1<br>(1 - 1)       | 1<br>(1 - 2)         | 1<br>(0 - 2)           |
| Chronic kidney disease                              | 1,705<br>(941 - 2,097)   | 5<br>(3 - 8)       | 4<br>(2 - 6)      | 326<br>(168 - 430) | 623<br>(335 - 802)   | 747<br>(403 - 911)     |
| Chronic kidney disease due to diabetes mellitus     | 110<br>(66 - 241)        | 0<br>(0 - 1)       | 0<br>(0 - 1)      | 21<br>(11 - 48)    | 51<br>(28 - 105)     | 37<br>(19 - 88)        |
| Chronic kidney disease due to hypertension          | 756<br>(367 - 971)       | 2<br>(1 - 3)       | 1<br>(1 - 2)      | 148<br>(71 - 199)  | 259<br>(116 - 349)   | 346<br>(170 - 461)     |
| Chronic kidney disease due to glomerulonephritis    | 47<br>(28 - 70)          | 0<br>(0 - 1)       | 0<br>(0 - 1)      | 13<br>(7 - 20)     | 14<br>(8 - 21)       | 19<br>(11 - 30)        |
| Chronic kidney disease due to other causes          | 792<br>(328 - 1,080)     | 2<br>(1 - 5)       | 2<br>(1 - 4)      | 143<br>(49 - 215)  | 300<br>(118 - 433)   | 345<br>(148 - 501)     |
| Urinary diseases and male infertility               | 202<br>(159 - 266)       | 1<br>(1 - 2)       | 0<br>(0 - 1)      | 30<br>(23 - 40)    | 53<br>(38 - 70)      | 116<br>(87 - 170)      |
| Interstitial nephritis and urinary tract infections | 142<br>(105 - 185)       | 1<br>(1 - 2)       | 0<br>(0 - 1)      | 20<br>(14 - 27)    | 36<br>(24 - 50)      | 84<br>(59 - 117)       |
| Urolithiasis                                        | 7<br>(5 - 11)            | --                 | 0<br>(0 - 0)      | 1<br>(1 - 2)       | 2<br>(1 - 3)         | 4<br>(2 - 7)           |
| Other urinary diseases                              | 53<br>(36 - 84)          | 0<br>(0 - 1)       | 0<br>(0 - 0)      | 9<br>(6 - 14)      | 15<br>(10 - 24)      | 28<br>(17 - 49)        |
| Gynecological diseases                              | --                       | --                 | --                | --                 | --                   | --                     |
| Uterine fibroids                                    | --                       | --                 | --                | --                 | --                   | --                     |
| Polycystic ovarian syndrome                         | --                       | --                 | --                | --                 | --                   | --                     |
| Endometriosis                                       | --                       | --                 | --                | --                 | --                   | --                     |
| Genital prolapse                                    | --                       | --                 | --                | --                 | --                   | --                     |
| Other gynecological diseases                        | --                       | --                 | --                | --                 | --                   | --                     |
| Hemoglobinopathies and hemolytic anemias            | 33<br>(21 - 56)          | 3<br>(1 - 10)      | 2<br>(1 - 4)      | 10<br>(6 - 17)     | 9<br>(5 - 15)        | 9<br>(5 - 15)          |
| Thalassemias                                        | 0<br>(0 - 1)             | 0<br>(0 - 0)       | 0<br>(0 - 0)      | 0<br>(0 - 0)       | 0<br>(0 - 0)         | 0<br>(0 - 0)           |
| Sickle cell disorders                               | 12<br>(8 - 22)           | 2<br>(1 - 7)       | 2<br>(1 - 3)      | 6<br>(4 - 10)      | 3<br>(2 - 5)         | 0<br>(0 - 0)           |
| G6PD deficiency                                     | 2<br>(1 - 3)             | 0<br>(0 - 1)       | 0<br>(0 - 0)      | 1<br>(0 - 1)       | 1<br>(0 - 1)         | 0<br>(0 - 0)           |
| Other hemoglobinopathies and hemolytic anemias      | 19<br>(12 - 31)          | 1<br>(0 - 3)       | 0<br>(0 - 1)      | 3<br>(2 - 6)       | 5<br>(3 - 9)         | 9<br>(5 - 14)          |
| Endocrine, metabolic, blood, and immune disorders   | 37<br>(25 - 96)          | 7<br>(3 - 24)      | 1<br>(0 - 2)      | 8<br>(5 - 20)      | 8<br>(5 - 22)        | 13<br>(7 - 36)         |
| Musculoskeletal disorders                           | 39<br>(23 - 50)          | --                 | 1<br>(0 - 1)      | 10<br>(6 - 14)     | 8<br>(5 - 11)        | 20<br>(12 - 29)        |
| Rheumatoid arthritis                                | 5<br>(3 - 9)             | --                 | 0<br>(0 - 0)      | 1<br>(0 - 2)       | 1<br>(0 - 2)         | 3<br>(2 - 6)           |
| Other musculoskeletal disorders                     | 33<br>(20 - 43)          | --                 | 1<br>(0 - 1)      | 9<br>(5 - 12)      | 7<br>(4 - 10)        | 16<br>(9 - 23)         |
| Other non-communicable diseases                     | 408<br>(308 - 489)       | 323<br>(234 - 403) | 13<br>(9 - 17)    | 24<br>(17 - 35)    | 15<br>(11 - 20)      | 33<br>(21 - 44)        |
| Congenital anomalies                                | 360<br>(269 - 442)       | 315<br>(228 - 397) | 12<br>(8 - 17)    | 18<br>(13 - 28)    | 7<br>(5 - 10)        | 8<br>(4 - 11)          |
| Neural tube defects                                 | 19<br>(10 - 32)          | 19<br>(9 - 31)     | 0<br>(0 - 0)      | 0<br>(0 - 1)       | 0<br>(0 - 0)         | 0<br>(0 - 0)           |
| Congenital heart anomalies                          | 186<br>(105 - 241)       | 168<br>(91 - 221)  | 8<br>(5 - 11)     | 10<br>(6 - 15)     | 1<br>(0 - 1)         | 0<br>(0 - 0)           |
| Cleft lip and cleft palate                          | 0<br>(0 - 1)             | 0<br>(0 - 1)       | --                | --                 | --                   | --                     |
| Down syndrome                                       | 4<br>(2 - 6)             | 3<br>(1 - 5)       | 0<br>(0 - 0)      | 1<br>(0 - 2)       | 0<br>(0 - 0)         | 0<br>(0 - 0)           |
| Chromosomal unbalanced rearrangements               | 3<br>(2 - 5)             | 3<br>(1 - 5)       | 0<br>(0 - 0)      | 0<br>(0 - 0)       | 0<br>(0 - 0)         | 0<br>(0 - 0)           |
| Other congenital anomalies                          | 147<br>(103 - 197)       | 123<br>(80 - 176)  | 4<br>(2 - 6)      | 7<br>(5 - 11)      | 6<br>(4 - 8)         | 7<br>(4 - 11)          |
| Skin and subcutaneous diseases                      | 41<br>(26 - 53)          | 1<br>(1 - 3)       | 0<br>(0 - 1)      | 6<br>(4 - 8)       | 8<br>(5 - 11)        | 26<br>(15 - 36)        |
| Cellulitis                                          | 3<br>(2 - 6)             | 0<br>(0 - 0)       | 0<br>(0 - 0)      | 1<br>(0 - 1)       | 1<br>(0 - 2)         | 2<br>(1 - 4)           |
| Pyoderma                                            | 33<br>(22 - 43)          | 1<br>(1 - 2)       | 0<br>(0 - 0)      | 4<br>(3 - 6)       | 6<br>(4 - 9)         | 21<br>(12 - 30)        |
| Decubitus ulcer                                     | 4<br>(2 - 7)             | 0<br>(0 - 0)       | 0<br>(0 - 0)      | 1<br>(1 - 1)       | 1<br>(0 - 1)         | 3<br>(1 - 5)           |



Web Table 31- El Salvador deaths with 95% UI by age, sex, and cause in 2013

| Cause                                           | Males, All Ages          | Males, 0-4 Years | Males, 5-14 Years | Males, 15-49 Years       | Males, 50-69 Years   | Males, 70-80 Years |
|-------------------------------------------------|--------------------------|------------------|-------------------|--------------------------|----------------------|--------------------|
| Other skin and subcutaneous diseases            | 0<br>(0 - 0)             | 0<br>(0 - 0)     | 0<br>(0 - 0)      | 0<br>(0 - 0)             | 0<br>(0 - 0)         | 0<br>(0 - 0)       |
| Sudden infant death syndrome                    | 6<br>(2 - 11)            | 6<br>(2 - 11)    | --                | --                       | --                   | --                 |
| Injuries                                        | 6,486<br>(5,397 - 7,826) | 54<br>(37 - 73)  | 109<br>(92 - 127) | 4,949<br>(4,069 - 6,002) | 794<br>(621 - 1,031) | 580<br>(474 - 687) |
| Transport injuries                              | 1,616<br>(1,297 - 2,015) | 16<br>(10 - 23)  | 45<br>(35 - 56)   | 959<br>(742 - 1,237)     | 316<br>(242 - 403)   | 281<br>(218 - 353) |
| Road injuries                                   | 1,573<br>(1,260 - 1,965) | 15<br>(10 - 22)  | 43<br>(33 - 55)   | 935<br>(720 - 1,222)     | 306<br>(235 - 393)   | 274<br>(213 - 344) |
| Pedestrian road injuries                        | 246<br>(168 - 340)       | 6<br>(4 - 10)    | 18<br>(12 - 24)   | 75<br>(45 - 113)         | 51<br>(33 - 75)      | 96<br>(65 - 132)   |
| Cyclist road injuries                           | 173<br>(130 - 228)       | 2<br>(1 - 3)     | 6<br>(4 - 8)      | 52<br>(35 - 73)          | 78<br>(54 - 107)     | 36<br>(25 - 50)    |
| Motorcyclist road injuries                      | 151<br>(101 - 212)       | 1<br>(0 - 1)     | 2<br>(1 - 3)      | 106<br>(68 - 155)        | 23<br>(14 - 34)      | 19<br>(12 - 29)    |
| Motor vehicle road injuries                     | 1,002<br>(782 - 1,321)   | 6<br>(4 - 10)    | 18<br>(12 - 26)   | 701<br>(537 - 938)       | 154<br>(116 - 211)   | 122<br>(88 - 170)  |
| Other road injuries                             | 1<br>(1 - 2)             | 0<br>(0 - 0)     | 0<br>(0 - 0)      | 0<br>(0 - 1)             | 0<br>(0 - 0)         | 0<br>(0 - 1)       |
| Other transport injuries                        | 43<br>(14 - 64)          | 1<br>(0 - 1)     | 2<br>(1 - 3)      | 24<br>(8 - 38)           | 9<br>(3 - 15)        | 7<br>(2 - 11)      |
| Unintentional injuries                          | 685<br>(532 - 845)       | 22<br>(14 - 34)  | 23<br>(17 - 32)   | 324<br>(229 - 425)       | 118<br>(90 - 148)    | 198<br>(146 - 248) |
| Falls                                           | 275<br>(194 - 345)       | 2<br>(1 - 3)     | 4<br>(2 - 5)      | 71<br>(47 - 93)          | 60<br>(41 - 79)      | 139<br>(91 - 184)  |
| Drowning                                        | 193<br>(103 - 282)       | 5<br>(2 - 11)    | 14<br>(8 - 22)    | 144<br>(73 - 217)        | 21<br>(11 - 32)      | 9<br>(5 - 13)      |
| Fire, heat, and hot substances                  | 36<br>(26 - 46)          | 4<br>(2 - 8)     | 2<br>(1 - 3)      | 15<br>(10 - 21)          | 5<br>(3 - 8)         | 10<br>(7 - 15)     |
| Poisonings                                      | 15<br>(8 - 53)           | 0<br>(0 - 1)     | 0<br>(0 - 0)      | 9<br>(5 - 32)            | 4<br>(2 - 12)        | 2<br>(1 - 8)       |
| Exposure to mechanical forces                   | 21<br>(14 - 61)          | 0<br>(0 - 1)     | 1<br>(1 - 3)      | 15<br>(10 - 44)          | 3<br>(2 - 11)        | 1<br>(1 - 3)       |
| Unintentional firearm injuries                  | 4<br>(3 - 8)             | 0<br>(0 - 0)     | 0<br>(0 - 0)      | 3<br>(2 - 6)             | 0<br>(0 - 1)         | 0<br>(0 - 1)       |
| Unintentional suffocation                       | 1<br>(1 - 3)             | 0<br>(0 - 0)     | 0<br>(0 - 0)      | 1<br>(1 - 2)             | 0<br>(0 - 0)         | 0<br>(0 - 0)       |
| Other exposure to mechanical forces             | 15<br>(9 - 50)           | 0<br>(0 - 0)     | 1<br>(0 - 2)      | 11<br>(6 - 36)           | 3<br>(2 - 10)        | 1<br>(1 - 2)       |
| Adverse effects of medical treatment            | 43<br>(31 - 58)          | 3<br>(1 - 6)     | 1<br>(0 - 1)      | 10<br>(7 - 14)           | 9<br>(5 - 12)        | 21<br>(13 - 29)    |
| Animal contact                                  | 8<br>(2 - 11)            | 0<br>(0 - 1)     | 0<br>(0 - 0)      | 2<br>(1 - 3)             | 2<br>(0 - 2)         | 4<br>(1 - 6)       |
| Venomous animal contact                         | 7<br>(2 - 10)            | 0<br>(0 - 1)     | 0<br>(0 - 0)      | 2<br>(1 - 3)             | 1<br>(0 - 2)         | 3<br>(1 - 5)       |
| Non-venomous animal contact                     | 1<br>(0 - 2)             | 0<br>(0 - 0)     | 0<br>(0 - 0)      | 0<br>(0 - 0)             | 0<br>(0 - 0)         | 1<br>(0 - 1)       |
| Foreign body                                    | 40<br>(24 - 70)          | 6<br>(3 - 12)    | 1<br>(0 - 1)      | 18<br>(10 - 33)          | 8<br>(5 - 15)        | 7<br>(4 - 11)      |
| Pulmonary aspiration and foreign body in airway | 39<br>(24 - 69)          | 6<br>(3 - 12)    | 1<br>(0 - 1)      | 17<br>(10 - 32)          | 8<br>(5 - 15)        | 6<br>(3 - 11)      |
| Foreign body in other body part                 | 0<br>(0 - 1)             | 0<br>(0 - 0)     | 0<br>(0 - 0)      | 0<br>(0 - 0)             | 0<br>(0 - 0)         | 0<br>(0 - 0)       |
| Other unintentional injuries                    | 53<br>(37 - 76)          | 0<br>(0 - 1)     | 1<br>(0 - 3)      | 39<br>(25 - 62)          | 7<br>(4 - 11)        | 5<br>(3 - 8)       |
| Self-harm and interpersonal violence            | 4,185<br>(3,359 - 5,234) | 16<br>(6 - 30)   | 42<br>(26 - 58)   | 3,667<br>(2,926 - 4,558) | 360<br>(245 - 575)   | 101<br>(64 - 169)  |
| Self-harm                                       | 454<br>(339 - 714)       | --               | 3<br>(1 - 4)      | 358<br>(261 - 585)       | 64<br>(47 - 96)      | 29<br>(22 - 43)    |
| Interpersonal violence                          | 3,731<br>(2,907 - 4,697) | 16<br>(6 - 30)   | 39<br>(22 - 55)   | 3,309<br>(2,582 - 4,151) | 295<br>(183 - 508)   | 72<br>(37 - 136)   |
| Assault by firearm                              | 2,959<br>(2,216 - 3,833) | 7<br>(2 - 14)    | 28<br>(15 - 41)   | 2,676<br>(2,006 - 3,424) | 209<br>(128 - 359)   | 39<br>(19 - 82)    |
| Assault by sharp object                         | 394<br>(213 - 709)       | 3<br>(1 - 6)     | 4<br>(2 - 8)      | 338<br>(181 - 606)       | 39<br>(17 - 81)      | 11<br>(5 - 24)     |
| Assault by other means                          | 378<br>(221 - 610)       | 6<br>(2 - 12)    | 7<br>(3 - 12)     | 296<br>(176 - 484)       | 47<br>(21 - 84)      | 22<br>(10 - 45)    |

Web Table 31- El Salvador deaths with 95% UI by age, sex, and cause in 2013

| Cause                                                             | Females, All Ages           | Females, 0-4 Years | Females, 5-14 Years | Females, 15-49 Years     | Females, 50-69 Years     | Females, 70-80 Years       |
|-------------------------------------------------------------------|-----------------------------|--------------------|---------------------|--------------------------|--------------------------|----------------------------|
| All causes                                                        | 17,540<br>(15,233 - 20,373) | 728<br>(645 - 832) | 159<br>(140 - 180)  | 2,442<br>(1,928 - 3,126) | 3,508<br>(2,841 - 4,321) | 10,703<br>(9,586 - 11,995) |
| Communicable, maternal, neonatal, and nutritional diseases        | 2,278<br>(1,930 - 2,763)    | 387<br>(312 - 465) | 32<br>(25 - 41)     | 317<br>(256 - 382)       | 265<br>(204 - 340)       | 1,277<br>(1,003 - 1,659)   |
| HIV/AIDS and tuberculosis                                         | 94<br>(69 - 126)            | 0<br>(0 - 1)       | 0<br>(0 - 1)        | 59<br>(40 - 84)          | 17<br>(12 - 24)          | 17<br>(12 - 27)            |
| Tuberculosis                                                      | 35<br>(26 - 51)             | 0<br>(0 - 0)       | 0<br>(0 - 0)        | 9<br>(6 - 12)            | 9<br>(6 - 14)            | 17<br>(11 - 26)            |
| HIV/AIDS                                                          | 59<br>(39 - 87)             | 0<br>(0 - 1)       | 0<br>(0 - 0)        | 50<br>(33 - 75)          | 8<br>(4 - 13)            | 1<br>(0 - 2)               |
| HIV/AIDS resulting in mycobacterial infection                     | 3<br>(2 - 4)                | 0<br>(0 - 0)       | 0<br>(0 - 0)        | 2<br>(1 - 4)             | 0<br>(0 - 1)             | 0<br>(0 - 0)               |
| HIV/AIDS resulting in other diseases                              | 56<br>(37 - 83)             | 0<br>(0 - 1)       | 0<br>(0 - 0)        | 48<br>(31 - 71)          | 7<br>(4 - 13)            | 1<br>(0 - 2)               |
| Diarrhea, lower respiratory, and other common infectious diseases | 1,535<br>(1,233 - 1,955)    | 139<br>(101 - 183) | 26<br>(19 - 34)     | 129<br>(96 - 172)        | 199<br>(146 - 262)       | 1,041<br>(784 - 1,402)     |
| Diarrheal diseases                                                | 124<br>(91 - 168)           | 25<br>(15 - 42)    | 2<br>(1 - 4)        | 15<br>(10 - 21)          | 16<br>(11 - 24)          | 65<br>(38 - 104)           |
| Intestinal infectious diseases                                    | 44<br>(23 - 75)             | 15<br>(7 - 26)     | 11<br>(5 - 19)      | 15<br>(6 - 30)           | 2<br>(1 - 5)             | 1<br>(0 - 3)               |
| Typhoid fever                                                     | 33<br>(17 - 57)             | 11<br>(5 - 19)     | 8<br>(4 - 15)       | 11<br>(5 - 23)           | 2<br>(1 - 3)             | 1<br>(0 - 2)               |
| Paratyphoid fever                                                 | 9<br>(5 - 16)               | 3<br>(1 - 6)       | 2<br>(1 - 4)        | 3<br>(1 - 6)             | 0<br>(0 - 1)             | 0<br>(0 - 1)               |
| Other intestinal infectious diseases                              | 1<br>(0 - 5)                | 1<br>(0 - 3)       | 0<br>(0 - 1)        | 0<br>(0 - 2)             | 0<br>(0 - 1)             | 0<br>(0 - 2)               |
| Lower respiratory infections                                      | 1,304<br>(1,015 - 1,684)    | 89<br>(58 - 126)   | 9<br>(6 - 11)       | 84<br>(58 - 114)         | 170<br>(121 - 226)       | 954<br>(698 - 1,293)       |
| Upper respiratory infections                                      | 1<br>(0 - 2)                | 0<br>(0 - 0)       | 0<br>(0 - 0)        | 0<br>(0 - 0)             | 0<br>(0 - 1)             | 0<br>(0 - 1)               |
| Otitis media                                                      | 1<br>(1 - 2)                | 0<br>(0 - 0)       | 0<br>(0 - 0)        | 0<br>(0 - 0)             | 0<br>(0 - 0)             | 1<br>(0 - 1)               |
| Meningitis                                                        | 43<br>(34 - 53)             | 7<br>(4 - 10)      | 2<br>(2 - 3)        | 11<br>(8 - 15)           | 8<br>(5 - 10)            | 15<br>(11 - 20)            |
| Pneumococcal meningitis                                           | 15<br>(11 - 20)             | 2<br>(1 - 3)       | 1<br>(0 - 1)        | 4<br>(2 - 6)             | 3<br>(1 - 4)             | 5<br>(3 - 9)               |
| H influenzae type B meningitis                                    | 7<br>(5 - 8)                | 3<br>(2 - 4)       | 1<br>(0 - 1)        | 1<br>(1 - 2)             | 1<br>(0 - 1)             | 2<br>(1 - 2)               |
| Meningococcal meningitis                                          | 5<br>(4 - 7)                | 1<br>(0 - 1)       | 0<br>(0 - 1)        | 2<br>(1 - 2)             | 1<br>(0 - 1)             | 2<br>(1 - 3)               |
| Other meningitis                                                  | 16<br>(12 - 21)             | 2<br>(1 - 3)       | 1<br>(0 - 1)        | 5<br>(3 - 7)             | 3<br>(2 - 5)             | 6<br>(3 - 9)               |
| Encephalitis                                                      | 14<br>(9 - 25)              | 2<br>(1 - 5)       | 1<br>(1 - 3)        | 4<br>(2 - 7)             | 3<br>(2 - 5)             | 4<br>(2 - 9)               |
| Diphtheria                                                        | 0<br>(0 - 1)                | 0<br>(0 - 1)       | 0<br>(0 - 0)        | 0<br>(0 - 0)             | 0<br>(0 - 0)             | -                          |
| Whooping cough                                                    | 1<br>(0 - 5)                | 1<br>(0 - 4)       | 0<br>(0 - 0)        | 0<br>(0 - 0)             | 0<br>(0 - 0)             | -                          |
| Tetanus                                                           | 1<br>(1 - 3)                | 0<br>(0 - 0)       | 0<br>(0 - 0)        | 0<br>(0 - 1)             | 0<br>(0 - 1)             | 0<br>(0 - 1)               |
| Measles                                                           | 0<br>(0 - 0)                | 0<br>(0 - 0)       | 0<br>(0 - 0)        | 0<br>(0 - 0)             | 0<br>(0 - 0)             | -                          |
| Varicella and herpes zoster                                       | 2<br>(1 - 7)                | 0<br>(0 - 2)       | 0<br>(0 - 0)        | 0<br>(0 - 1)             | 0<br>(0 - 1)             | 1<br>(0 - 5)               |
| Neglected tropical diseases and malaria                           | 11<br>(7 - 30)              | 1<br>(1 - 3)       | 1<br>(1 - 2)        | 3<br>(2 - 6)             | 3<br>(1 - 8)             | 4<br>(2 - 14)              |
| Malaria                                                           | 0<br>(0 - 0)                | 0<br>(0 - 0)       | 0<br>(0 - 0)        | 0<br>(0 - 0)             | 0<br>(0 - 0)             | 0<br>(0 - 0)               |
| Chagas disease                                                    | 6<br>(1 - 24)               | 0<br>(0 - 0)       | 0<br>(0 - 0)        | 1<br>(0 - 3)             | 2<br>(0 - 7)             | 3<br>(1 - 13)              |
| Leishmaniasis                                                     | 0<br>(0 - 1)                | 0<br>(0 - 0)       | 0<br>(0 - 0)        | 0<br>(0 - 0)             | 0<br>(0 - 0)             | 0<br>(0 - 0)               |
| Visceral leishmaniasis                                            | 0<br>(0 - 1)                | 0<br>(0 - 0)       | 0<br>(0 - 0)        | 0<br>(0 - 0)             | 0<br>(0 - 0)             | 0<br>(0 - 0)               |
| Cysticercosis                                                     | 1<br>(1 - 1)                | 0<br>(0 - 0)       | 0<br>(0 - 0)        | 1<br>(0 - 1)             | 0<br>(0 - 0)             | 0<br>(0 - 0)               |
| Cystic echinococcosis                                             | 0<br>(0 - 0)                | 0<br>(0 - 0)       | 0<br>(0 - 0)        | 0<br>(0 - 0)             | 0<br>(0 - 0)             | 0<br>(0 - 0)               |
| Dengue                                                            | 2<br>(1 - 3)                | 1<br>(0 - 1)       | 0<br>(0 - 1)        | 1<br>(0 - 1)             | 0<br>(0 - 0)             | 0<br>(0 - 1)               |
| Rabies                                                            | 1<br>(0 - 1)                | 0<br>(0 - 0)       | 0<br>(0 - 0)        | 0<br>(0 - 1)             | 0<br>(0 - 0)             | 0<br>(0 - 0)               |
| Intestinal nematode infections                                    | 0<br>(0 - 3)                | 0<br>(0 - 1)       | 0<br>(0 - 0)        | 0<br>(0 - 1)             | 0<br>(0 - 0)             | 0<br>(0 - 1)               |
| Ascariasis                                                        | 0<br>(0 - 3)                | 0<br>(0 - 1)       | 0<br>(0 - 0)        | 0<br>(0 - 1)             | 0<br>(0 - 0)             | 0<br>(0 - 1)               |
| Other neglected tropical diseases                                 | 1<br>(0 - 2)                | 0<br>(0 - 0)       | 0<br>(0 - 0)        | 0<br>(0 - 0)             | 0<br>(0 - 0)             | 0<br>(0 - 1)               |
| Maternal disorders                                                | 86<br>(58 - 119)            | -                  | 0<br>(0 - 0)        | 85<br>(57 - 119)         | -                        | -                          |

Web Table 31- El Salvador deaths with 95% UI by age, sex, and cause in 2013

| Cause                                                            | Females, All Ages           | Females, 0-4 Years | Females, 5-14 Years | Females, 15-49 Years     | Females, 50-69 Years     | Females, 70-80 Years      |
|------------------------------------------------------------------|-----------------------------|--------------------|---------------------|--------------------------|--------------------------|---------------------------|
| Maternal hemorrhage                                              | 15<br>(9 - 21)              | --                 | 0<br>(0 - 0)        | 15<br>(9 - 21)           | --                       | --                        |
| Maternal sepsis and other maternal infections                    | 9<br>(6 - 14)               | --                 | 0<br>(0 - 0)        | 9<br>(6 - 14)            | --                       | --                        |
| Maternal hypertensive disorders                                  | 14<br>(9 - 22)              | --                 | 0<br>(0 - 0)        | 14<br>(9 - 22)           | --                       | --                        |
| Maternal obstructed labor                                        | 5<br>(3 - 8)                | --                 | 0<br>(0 - 0)        | 5<br>(3 - 8)             | --                       | --                        |
| Maternal abortive outcome                                        | 15<br>(9 - 21)              | --                 | 0<br>(0 - 0)        | 15<br>(9 - 21)           | --                       | --                        |
| Indirect maternal deaths                                         | 8<br>(4 - 13)               | --                 | 0<br>(0 - 0)        | 8<br>(4 - 13)            | --                       | --                        |
| Late maternal deaths                                             | 6<br>(3 - 10)               | --                 | 0<br>(0 - 0)        | 6<br>(3 - 10)            | --                       | --                        |
| Maternal deaths aggravated by HIV/AIDS                           | 0<br>(0 - 0)                | --                 | --                  | 0<br>(0 - 0)             | --                       | --                        |
| Other maternal disorders                                         | 13<br>(8 - 20)              | --                 | 0<br>(0 - 0)        | 13<br>(8 - 20)           | --                       | --                        |
| Neonatal disorders                                               | 221<br>(170 - 282)          | 221<br>(170 - 282) | --                  | --                       | --                       | --                        |
| Neonatal preterm birth complications                             | 120<br>(72 - 168)           | 120<br>(72 - 168)  | --                  | --                       | --                       | --                        |
| Neonatal encephalopathy due to birth asphyxia and trauma         | 37<br>(23 - 57)             | 37<br>(23 - 57)    | --                  | --                       | --                       | --                        |
| Neonatal sepsis and other neonatal infections                    | 47<br>(24 - 83)             | 47<br>(24 - 83)    | --                  | --                       | --                       | --                        |
| Hemolytic disease and other neonatal jaundice                    | 0<br>(0 - 0)                | 0<br>(0 - 0)       | --                  | --                       | --                       | --                        |
| Other neonatal disorders                                         | 17<br>(10 - 32)             | 17<br>(10 - 32)    | --                  | --                       | --                       | --                        |
| Nutritional deficiencies                                         | 294<br>(227 - 374)          | 18<br>(12 - 26)    | 3<br>(2 - 5)        | 35<br>(25 - 47)          | 39<br>(29 - 52)          | 199<br>(142 - 264)        |
| Protein-energy malnutrition                                      | 189<br>(119 - 265)          | 15<br>(9 - 23)     | 2<br>(1 - 3)        | 13<br>(7 - 23)           | 20<br>(11 - 31)          | 138<br>(83 - 201)         |
| Iodine deficiency                                                | 1<br>(0 - 2)                | 0<br>(0 - 0)       | 0<br>(0 - 0)        | 0<br>(0 - 0)             | 0<br>(0 - 1)             | 0<br>(0 - 2)              |
| Iron-deficiency anemia                                           | 104<br>(54 - 170)           | 2<br>(1 - 6)       | 1<br>(1 - 2)        | 21<br>(13 - 34)          | 19<br>(10 - 31)          | 61<br>(27 - 111)          |
| Other nutritional deficiencies                                   | 1<br>(0 - 2)                | 0<br>(0 - 0)       | 0<br>(0 - 0)        | 0<br>(0 - 0)             | 0<br>(0 - 0)             | 0<br>(0 - 1)              |
| Other communicable, maternal, neonatal, and nutritional diseases | 37<br>(26 - 53)             | 8<br>(3 - 14)      | 1<br>(1 - 2)        | 6<br>(4 - 9)             | 7<br>(5 - 10)            | 15<br>(10 - 26)           |
| Sexually transmitted diseases excluding HIV                      | 7<br>(1 - 14)               | 5<br>(0 - 12)      | 0<br>(0 - 1)        | 1<br>(0 - 1)             | 0<br>(0 - 0)             | 0<br>(0 - 1)              |
| Syphilis                                                         | 6<br>(1 - 14)               | 5<br>(0 - 12)      | 0<br>(0 - 1)        | 0<br>(0 - 0)             | 0<br>(0 - 0)             | 0<br>(0 - 1)              |
| Chlamydial infection                                             | 0<br>(0 - 0)                | --                 | 0<br>(0 - 0)        | 0<br>(0 - 0)             | 0<br>(0 - 0)             | 0<br>(0 - 0)              |
| Gonococcal infection                                             | 0<br>(0 - 0)                | --                 | 0<br>(0 - 0)        | 0<br>(0 - 0)             | 0<br>(0 - 0)             | 0<br>(0 - 0)              |
| Other sexually transmitted diseases                              | 0<br>(0 - 0)                | --                 | 0<br>(0 - 0)        | 0<br>(0 - 0)             | 0<br>(0 - 0)             | 0<br>(0 - 0)              |
| Hepatitis                                                        | 2<br>(2 - 3)                | 0<br>(0 - 0)       | 0<br>(0 - 0)        | 1<br>(0 - 1)             | 1<br>(0 - 1)             | 1<br>(1 - 1)              |
| Acute hepatitis A                                                | 1<br>(0 - 1)                | 0<br>(0 - 0)       | 0<br>(0 - 0)        | 0<br>(0 - 0)             | 0<br>(0 - 0)             | 0<br>(0 - 0)              |
| Acute hepatitis B                                                | 1<br>(1 - 2)                | 0<br>(0 - 0)       | 0<br>(0 - 0)        | 0<br>(0 - 0)             | 0<br>(0 - 1)             | 1<br>(0 - 1)              |
| Acute hepatitis C                                                | 0<br>(0 - 1)                | --                 | 0<br>(0 - 0)        | 0<br>(0 - 0)             | 0<br>(0 - 0)             | 0<br>(0 - 0)              |
| Other infectious diseases                                        | 28<br>(20 - 43)             | 2<br>(2 - 4)       | 1<br>(1 - 1)        | 5<br>(3 - 8)             | 6<br>(4 - 9)             | 14<br>(9 - 24)            |
| Non-communicable diseases                                        | 13,745<br>(11,918 - 15,991) | 302<br>(239 - 368) | 58<br>(48 - 70)     | 1,373<br>(1,053 - 1,786) | 3,012<br>(2,430 - 3,709) | 8,999<br>(8,064 - 10,087) |
| Neoplasms                                                        | 2,791<br>(2,305 - 3,354)    | 9<br>(6 - 12)      | 15<br>(12 - 18)     | 527<br>(401 - 683)       | 896<br>(716 - 1,102)     | 1,344<br>(1,151 - 1,565)  |
| Esophageal cancer                                                | 51<br>(34 - 64)             | --                 | --                  | 4<br>(2 - 5)             | 12<br>(8 - 16)           | 36<br>(24 - 45)           |
| Stomach cancer                                                   | 454<br>(366 - 552)          | --                 | --                  | 51<br>(39 - 68)          | 129<br>(99 - 164)        | 274<br>(218 - 339)        |
| Liver cancer                                                     | 171<br>(135 - 215)          | --                 | 0<br>(0 - 0)        | 19<br>(14 - 26)          | 61<br>(46 - 81)          | 91<br>(69 - 119)          |
| Liver cancer due to hepatitis B                                  | 29<br>(10 - 51)             | --                 | 0<br>(0 - 0)        | 6<br>(2 - 9)             | 12<br>(4 - 24)           | 11<br>(3 - 21)            |
| Liver cancer due to hepatitis C                                  | 86<br>(56 - 126)            | --                 | 0<br>(0 - 0)        | 8<br>(3 - 12)            | 31<br>(16 - 47)          | 47<br>(29 - 72)           |
| Liver cancer due to alcohol use                                  | 33<br>(15 - 54)             | --                 | --                  | 2<br>(1 - 3)             | 9<br>(4 - 17)            | 22<br>(10 - 38)           |
| Liver cancer due to other causes                                 | 23<br>(13 - 37)             | --                 | 0<br>(0 - 0)        | 4<br>(2 - 6)             | 9<br>(5 - 15)            | 11<br>(5 - 17)            |

Web Table 31- El Salvador deaths with 95% UI by age, sex, and cause in 2013

| Cause                                         | Females, All Ages        | Females, 0-4 Years | Females, 5-14 Years | Females, 15-49 Years | Females, 50-69 Years | Females, 70-80 Years     |
|-----------------------------------------------|--------------------------|--------------------|---------------------|----------------------|----------------------|--------------------------|
| Larynx cancer                                 | 5<br>(2 - 8)             | --                 | --                  | 1<br>(0 - 1)         | 2<br>(1 - 3)         | 2<br>(1 - 4)             |
| Tracheal, bronchus and lung cancer            | 211<br>(171 - 257)       | --                 | --                  | 23<br>(17 - 31)      | 64<br>(49 - 83)      | 123<br>(98 - 155)        |
| Breast cancer                                 | 205<br>(162 - 259)       | --                 | --                  | 62<br>(46 - 84)      | 82<br>(62 - 108)     | 61<br>(47 - 78)          |
| Cervical cancer                               | 521<br>(366 - 660)       | --                 | --                  | 161<br>(110 - 218)   | 178<br>(123 - 230)   | 181<br>(124 - 230)       |
| Uterine cancer                                | 56<br>(35 - 74)          | --                 | --                  | 6<br>(3 - 9)         | 24<br>(14 - 33)      | 26<br>(16 - 34)          |
| Prostate cancer                               | --                       | --                 | --                  | --                   | --                   | --                       |
| Colon and rectum cancer                       | 205<br>(168 - 252)       | --                 | --                  | 23<br>(17 - 30)      | 57<br>(45 - 73)      | 125<br>(101 - 160)       |
| Lip and oral cavity cancer                    | 24<br>(16 - 31)          | --                 | --                  | 3<br>(2 - 4)         | 7<br>(4 - 9)         | 14<br>(9 - 19)           |
| Nasopharynx cancer                            | 6<br>(4 - 10)            | --                 | 0<br>(0 - 0)        | 1<br>(1 - 3)         | 2<br>(1 - 3)         | 2<br>(2 - 4)             |
| Other pharynx cancer                          | 6<br>(5 - 8)             | --                 | --                  | 1<br>(1 - 1)         | 2<br>(1 - 3)         | 3<br>(2 - 5)             |
| Gallbladder and biliary tract cancer          | 81<br>(56 - 126)         | --                 | --                  | 5<br>(3 - 7)         | 28<br>(18 - 43)      | 49<br>(33 - 77)          |
| Pancreatic cancer                             | 124<br>(100 - 156)       | --                 | --                  | 10<br>(7 - 13)       | 42<br>(32 - 54)      | 72<br>(56 - 94)          |
| Malignant skin melanoma                       | 6<br>(5 - 7)             | --                 | --                  | 2<br>(2 - 3)         | 2<br>(1 - 3)         | 2<br>(1 - 2)             |
| Non-melanoma skin cancer                      | 15<br>(9 - 22)           | --                 | --                  | 1<br>(0 - 1)         | 2<br>(1 - 3)         | 12<br>(7 - 18)           |
| Ovarian cancer                                | 111<br>(87 - 139)        | --                 | --                  | 29<br>(22 - 38)      | 47<br>(35 - 61)      | 35<br>(27 - 44)          |
| Testicular cancer                             | --                       | --                 | --                  | --                   | --                   | --                       |
| Kidney cancer                                 | 37<br>(29 - 46)          | 0<br>(0 - 0)       | 0<br>(0 - 0)        | 5<br>(4 - 7)         | 14<br>(11 - 18)      | 17<br>(13 - 22)          |
| Bladder cancer                                | 21<br>(14 - 32)          | --                 | --                  | 1<br>(1 - 2)         | 5<br>(3 - 8)         | 15<br>(9 - 23)           |
| Brain and nervous system cancer               | 75<br>(51 - 95)          | 1<br>(1 - 2)       | 2<br>(1 - 3)        | 23<br>(16 - 31)      | 23<br>(15 - 30)      | 25<br>(15 - 32)          |
| Thyroid cancer                                | 27<br>(20 - 45)          | --                 | 0<br>(0 - 0)        | 3<br>(2 - 6)         | 9<br>(7 - 16)        | 14<br>(10 - 23)          |
| Mesothelioma                                  | 1<br>(1 - 2)             | --                 | --                  | 0<br>(0 - 0)         | 1<br>(0 - 1)         | 0<br>(0 - 0)             |
| Hodgkin lymphoma                              | 13<br>(5 - 18)           | 0<br>(0 - 0)       | 0<br>(0 - 1)        | 4<br>(1 - 6)         | 3<br>(1 - 4)         | 6<br>(2 - 8)             |
| Non-Hodgkin lymphoma                          | 118<br>(37 - 173)        | 2<br>(0 - 3)       | 1<br>(0 - 2)        | 20<br>(7 - 31)       | 35<br>(11 - 54)      | 59<br>(16 - 91)          |
| Multiple myeloma                              | 9<br>(6 - 12)            | --                 | --                  | 2<br>(1 - 2)         | 3<br>(2 - 4)         | 5<br>(3 - 6)             |
| Leukemia                                      | 115<br>(93 - 143)        | 3<br>(2 - 5)       | 8<br>(6 - 10)       | 42<br>(31 - 56)      | 29<br>(22 - 37)      | 34<br>(26 - 43)          |
| Other neoplasms                               | 121<br>(93 - 179)        | 2<br>(1 - 4)       | 3<br>(2 - 5)        | 24<br>(16 - 38)      | 34<br>(24 - 53)      | 59<br>(42 - 90)          |
| Cardiovascular diseases                       | 5,088<br>(4,164 - 6,030) | 11<br>(7 - 18)     | 12<br>(9 - 16)      | 327<br>(239 - 438)   | 882<br>(666 - 1,123) | 3,857<br>(3,169 - 4,472) |
| Rheumatic heart disease                       | 62<br>(28 - 84)          | 0<br>(0 - 0)       | 1<br>(0 - 1)        | 11<br>(5 - 16)       | 12<br>(6 - 18)       | 38<br>(17 - 55)          |
| Ischemic heart disease                        | 3,415<br>(2,653 - 4,072) | 2<br>(1 - 5)       | 4<br>(3 - 6)        | 178<br>(123 - 242)   | 549<br>(396 - 709)   | 2,682<br>(2,095 - 3,173) |
| Cerebrovascular disease                       | 1,107<br>(848 - 1,496)   | 2<br>(1 - 4)       | 4<br>(3 - 7)        | 84<br>(58 - 124)     | 201<br>(145 - 292)   | 815<br>(630 - 1,097)     |
| Ischemic stroke                               | 392<br>(279 - 635)       | 1<br>(0 - 1)       | 1<br>(1 - 2)        | 16<br>(10 - 28)      | 55<br>(37 - 95)      | 319<br>(222 - 526)       |
| Hemorrhagic stroke                            | 715<br>(500 - 940)       | 2<br>(1 - 3)       | 3<br>(2 - 5)        | 69<br>(47 - 104)     | 145<br>(104 - 209)   | 496<br>(321 - 660)       |
| Hypertensive heart disease                    | 163<br>(60 - 273)        | 0<br>(0 - 0)       | 0<br>(0 - 0)        | 7<br>(3 - 12)        | 17<br>(7 - 27)       | 138<br>(48 - 240)        |
| Cardiomyopathy and myocarditis                | 42<br>(30 - 60)          | 2<br>(1 - 3)       | 1<br>(0 - 1)        | 14<br>(10 - 22)      | 10<br>(7 - 15)       | 15<br>(10 - 23)          |
| Atrial fibrillation and flutter               | 8<br>(5 - 12)            | --                 | --                  | 0<br>(0 - 0)         | 1<br>(1 - 2)         | 6<br>(4 - 10)            |
| Aortic aneurysm                               | 13<br>(8 - 20)           | --                 | --                  | 2<br>(1 - 4)         | 2<br>(1 - 4)         | 8<br>(5 - 13)            |
| Peripheral vascular disease                   | 1<br>(1 - 2)             | --                 | --                  | 0<br>(0 - 0)         | 0<br>(0 - 0)         | 1<br>(1 - 1)             |
| Endocarditis                                  | 24<br>(15 - 37)          | 2<br>(1 - 3)       | 1<br>(0 - 1)        | 5<br>(3 - 7)         | 5<br>(3 - 8)         | 12<br>(6 - 19)           |
| Other cardiovascular and circulatory diseases | 254<br>(180 - 360)       | 2<br>(1 - 3)       | 1<br>(1 - 2)        | 24<br>(16 - 40)      | 84<br>(55 - 122)     | 142<br>(95 - 214)        |
| Chronic respiratory diseases                  | 1,202<br>(980 - 1,505)   | 10<br>(7 - 15)     | 2<br>(2 - 3)        | 50<br>(37 - 67)      | 149<br>(114 - 199)   | 991<br>(794 - 1,237)     |

Web Table 31- El Salvador deaths with 95% UI by age, sex, and cause in 2013

| Cause                                               | Females, All Ages    | Females, 0-4 Years | Females, 5-14 Years | Females, 15-49 Years | Females, 50-69 Years | Females, 70-80 Years |
|-----------------------------------------------------|----------------------|--------------------|---------------------|----------------------|----------------------|----------------------|
| Chronic obstructive pulmonary disease               | 942<br>(739 - 1,184) | 4<br>(2 - 7)       | 1<br>(0 - 1)        | 30<br>(21 - 42)      | 105<br>(77 - 144)    | 803<br>(627 - 1,009) |
| Pneumoconiosis                                      | 2<br>(1 - 3)         | 0<br>(0 - 0)       | 0<br>(0 - 0)        | 0<br>(0 - 0)         | 0<br>(0 - 1)         | 1<br>(0 - 2)         |
| Silicosis                                           | 0<br>(0 - 0)         | 0<br>(0 - 0)       | 0<br>(0 - 0)        | 0<br>(0 - 0)         | 0<br>(0 - 0)         | 0<br>(0 - 0)         |
| Asbestosis                                          | 0<br>(0 - 0)         | 0<br>(0 - 0)       | 0<br>(0 - 0)        | 0<br>(0 - 0)         | 0<br>(0 - 0)         | 0<br>(0 - 0)         |
| Coal workers pneumoconiosis                         | 0<br>(0 - 0)         | 0<br>(0 - 0)       | 0<br>(0 - 0)        | 0<br>(0 - 0)         | 0<br>(0 - 0)         | 0<br>(0 - 0)         |
| Other pneumoconiosis                                | 2<br>(1 - 2)         | 0<br>(0 - 0)       | 0<br>(0 - 0)        | 0<br>(0 - 0)         | 0<br>(0 - 1)         | 1<br>(0 - 2)         |
| Asthma                                              | 148<br>(88 - 231)    | 2<br>(1 - 3)       | 1<br>(0 - 1)        | 12<br>(7 - 18)       | 29<br>(17 - 46)      | 105<br>(59 - 171)    |
| Interstitial lung disease and pulmonary sarcoidosis | 65<br>(38 - 114)     | 1<br>(0 - 2)       | 1<br>(0 - 1)        | 5<br>(3 - 8)         | 11<br>(6 - 21)       | 48<br>(26 - 90)      |
| Other chronic respiratory diseases                  | 45<br>(28 - 72)      | 3<br>(2 - 5)       | 0<br>(0 - 1)        | 3<br>(2 - 5)         | 4<br>(2 - 6)         | 34<br>(18 - 59)      |
| Cirrhosis                                           | 480<br>(384 - 594)   | 1<br>(0 - 1)       | 2<br>(1 - 2)        | 69<br>(50 - 92)      | 173<br>(133 - 222)   | 236<br>(189 - 293)   |
| Cirrhosis due to hepatitis B                        | 19<br>(9 - 32)       | 0<br>(0 - 0)       | 0<br>(0 - 0)        | 3<br>(1 - 5)         | 7<br>(3 - 13)        | 9<br>(4 - 16)        |
| Cirrhosis due to hepatitis C                        | 290<br>(212 - 374)   | 0<br>(0 - 0)       | 1<br>(0 - 1)        | 38<br>(23 - 54)      | 103<br>(70 - 139)    | 148<br>(111 - 194)   |
| Cirrhosis due to alcohol use                        | 105<br>(64 - 154)    | -                  | -                   | 10<br>(5 - 16)       | 37<br>(21 - 58)      | 58<br>(34 - 87)      |
| Cirrhosis due to other causes                       | 67<br>(36 - 101)     | 1<br>(0 - 1)       | 1<br>(1 - 2)        | 19<br>(11 - 31)      | 26<br>(12 - 43)      | 21<br>(10 - 34)      |
| Digestive diseases                                  | 516<br>(377 - 943)   | 1<br>(1 - 2)       | 2<br>(2 - 3)        | 43<br>(30 - 71)      | 101<br>(69 - 192)    | 369<br>(265 - 682)   |
| Peptic ulcer disease                                | 230<br>(145 - 463)   | 0<br>(0 - 0)       | 0<br>(0 - 0)        | 13<br>(8 - 24)       | 40<br>(23 - 83)      | 176<br>(109 - 362)   |
| Gastritis and duodenitis                            | 8<br>(3 - 24)        | 0<br>(0 - 0)       | 0<br>(0 - 0)        | 1<br>(0 - 2)         | 2<br>(1 - 5)         | 6<br>(2 - 17)        |
| Appendicitis                                        | 24<br>(12 - 42)      | 0<br>(0 - 0)       | 1<br>(0 - 1)        | 4<br>(2 - 7)         | 5<br>(3 - 10)        | 14<br>(6 - 27)       |
| Paralytic ileus and intestinal obstruction          | 25<br>(8 - 42)       | 1<br>(0 - 1)       | 0<br>(0 - 1)        | 3<br>(1 - 4)         | 4<br>(1 - 6)         | 18<br>(5 - 31)       |
| Inguinal, femoral, and abdominal hernia             | 32<br>(12 - 98)      | 0<br>(0 - 0)       | 0<br>(0 - 0)        | 1<br>(0 - 3)         | 6<br>(3 - 17)        | 24<br>(9 - 77)       |
| Inflammatory bowel disease                          | 10<br>(6 - 23)       | 0<br>(0 - 0)       | 0<br>(0 - 0)        | 1<br>(1 - 2)         | 2<br>(1 - 4)         | 7<br>(4 - 18)        |
| Vascular intestinal disorders                       | 19<br>(6 - 33)       | 0<br>(0 - 0)       | 0<br>(0 - 0)        | 0<br>(0 - 1)         | 3<br>(1 - 6)         | 15<br>(5 - 27)       |
| Gallbladder and biliary diseases                    | 65<br>(41 - 129)     | 0<br>(0 - 0)       | 0<br>(0 - 0)        | 5<br>(3 - 10)        | 16<br>(9 - 39)       | 44<br>(27 - 86)      |
| Pancreatitis                                        | 63<br>(40 - 113)     | 0<br>(0 - 0)       | 0<br>(0 - 0)        | 10<br>(6 - 16)       | 13<br>(8 - 24)       | 40<br>(23 - 74)      |
| Other digestive diseases                            | 40<br>(27 - 70)      | 0<br>(0 - 1)       | 0<br>(0 - 1)        | 4<br>(3 - 7)         | 10<br>(6 - 17)       | 26<br>(16 - 46)      |
| Neurological disorders                              | 891<br>(647 - 1,146) | 2<br>(1 - 3)       | 2<br>(1 - 3)        | 22<br>(15 - 31)      | 40<br>(28 - 55)      | 826<br>(593 - 1,075) |
| Alzheimer disease and other dementias               | 834<br>(593 - 1,087) | -                  | -                   | 0<br>(0 - 1)         | 30<br>(19 - 43)      | 804<br>(570 - 1,053) |
| Parkinson disease                                   | 17<br>(11 - 44)      | -                  | -                   | 0<br>(0 - 0)         | 2<br>(1 - 6)         | 15<br>(9 - 38)       |
| Epilepsy                                            | 30<br>(21 - 43)      | 1<br>(1 - 2)       | 2<br>(1 - 2)        | 18<br>(12 - 27)      | 5<br>(3 - 8)         | 5<br>(3 - 7)         |
| Multiple sclerosis                                  | 3<br>(2 - 5)         | -                  | -                   | 1<br>(0 - 1)         | 1<br>(1 - 2)         | 1<br>(1 - 2)         |
| Other neurological disorders                        | 7<br>(6 - 9)         | 1<br>(0 - 1)       | 0<br>(0 - 1)        | 3<br>(2 - 3)         | 2<br>(2 - 3)         | 2<br>(1 - 2)         |
| Mental and substance use disorders                  | 45<br>(21 - 71)      | 0<br>(0 - 0)       | 0<br>(0 - 0)        | 22<br>(10 - 36)      | 15<br>(6 - 24)       | 8<br>(4 - 12)        |
| Schizophrenia                                       | 1<br>(0 - 1)         | -                  | -                   | 0<br>(0 - 1)         | 0<br>(0 - 0)         | 0<br>(0 - 0)         |
| Alcohol use disorders                               | 40<br>(15 - 65)      | -                  | -                   | 20<br>(7 - 33)       | 13<br>(5 - 23)       | 6<br>(2 - 10)        |
| Drug use disorders                                  | 5<br>(4 - 6)         | 0<br>(0 - 0)       | -                   | 2<br>(1 - 3)         | 1<br>(1 - 1)         | 2<br>(1 - 2)         |
| Opioid use disorders                                | 1<br>(1 - 1)         | 0<br>(0 - 0)       | -                   | 0<br>(0 - 1)         | 0<br>(0 - 0)         | 0<br>(0 - 1)         |
| Cocaine use disorders                               | 0<br>(0 - 0)         | 0<br>(0 - 0)       | -                   | 0<br>(0 - 0)         | 0<br>(0 - 0)         | 0<br>(0 - 0)         |
| Amphetamine use disorders                           | 0<br>(0 - 0)         | 0<br>(0 - 0)       | -                   | 0<br>(0 - 0)         | 0<br>(0 - 0)         | 0<br>(0 - 0)         |
| Other drug use disorders                            | 3<br>(3 - 4)         | 0<br>(0 - 0)       | -                   | 1<br>(1 - 2)         | 1<br>(1 - 1)         | 1<br>(1 - 2)         |
| Eating disorders                                    | 0<br>(0 - 1)         | -                  | 0<br>(0 - 0)        | 0<br>(0 - 1)         | -                    | -                    |

Web Table 31- El Salvador deaths with 95% UI by age, sex, and cause in 2013

| Cause                                               | Females, All Ages        | Females, 0-4 Years | Females, 5-14 Years | Females, 15-49 Years | Females, 50-69 Years | Females, 70-80 Years     |
|-----------------------------------------------------|--------------------------|--------------------|---------------------|----------------------|----------------------|--------------------------|
| Anorexia nervosa                                    | 0<br>(0 - 1)             | --                 | 0<br>(0 - 0)        | 0<br>(0 - 1)         | --                   | --                       |
| Diabetes, urogenital, blood, and endocrine diseases | 2,311<br>(1,865 - 2,785) | 12<br>(9 - 24)     | 9<br>(7 - 12)       | 272<br>(205 - 356)   | 733<br>(569 - 939)   | 1,285<br>(1,058 - 1,532) |
| Diabetes mellitus                                   | 1,160<br>(925 - 1,399)   | 0<br>(0 - 1)       | 1<br>(1 - 2)        | 88<br>(62 - 117)     | 381<br>(282 - 484)   | 690<br>(541 - 854)       |
| Acute glomerulonephritis                            | 2<br>(1 - 3)             | 0<br>(0 - 0)       | 0<br>(0 - 0)        | 1<br>(0 - 1)         | 0<br>(0 - 1)         | 1<br>(0 - 2)             |
| Chronic kidney disease                              | 929<br>(594 - 1,179)     | 4<br>(3 - 7)       | 5<br>(3 - 7)        | 142<br>(96 - 191)    | 301<br>(177 - 402)   | 477<br>(292 - 604)       |
| Chronic kidney disease due to diabetes mellitus     | 133<br>(80 - 185)        | 0<br>(0 - 1)       | 0<br>(0 - 0)        | 9<br>(5 - 14)        | 28<br>(16 - 45)      | 95<br>(56 - 137)         |
| Chronic kidney disease due to hypertension          | 311<br>(179 - 456)       | 2<br>(1 - 2)       | 2<br>(1 - 3)        | 66<br>(41 - 97)      | 120<br>(67 - 178)    | 122<br>(64 - 189)        |
| Chronic kidney disease due to glomerulonephritis    | 35<br>(20 - 49)          | 0<br>(0 - 1)       | 1<br>(0 - 1)        | 6<br>(3 - 9)         | 8<br>(5 - 12)        | 19<br>(11 - 31)          |
| Chronic kidney disease due to other causes          | 450<br>(203 - 635)       | 2<br>(1 - 4)       | 3<br>(1 - 4)        | 60<br>(33 - 88)      | 145<br>(55 - 217)    | 241<br>(97 - 349)        |
| Urinary diseases and male infertility               | 140<br>(102 - 187)       | 1<br>(1 - 2)       | 1<br>(1 - 1)        | 23<br>(16 - 32)      | 29<br>(20 - 38)      | 86<br>(57 - 126)         |
| Interstitial nephritis and urinary tract infections | 124<br>(89 - 168)        | 1<br>(1 - 2)       | 1<br>(0 - 1)        | 20<br>(14 - 27)      | 24<br>(16 - 32)      | 79<br>(53 - 116)         |
| Urolithiasis                                        | 4<br>(3 - 7)             | --                 | 0<br>(0 - 0)        | 1<br>(0 - 1)         | 1<br>(1 - 3)         | 2<br>(1 - 4)             |
| Other urinary diseases                              | 12<br>(7 - 20)           | 0<br>(0 - 0)       | 0<br>(0 - 0)        | 3<br>(2 - 5)         | 3<br>(2 - 6)         | 5<br>(2 - 10)            |
| Gynecological diseases                              | 1<br>(1 - 3)             | --                 | --                  | 1<br>(0 - 1)         | 0<br>(0 - 1)         | 0<br>(0 - 1)             |
| Uterine fibroids                                    | 0<br>(0 - 1)             | --                 | --                  | 0<br>(0 - 0)         | 0<br>(0 - 0)         | 0<br>(0 - 0)             |
| Polycystic ovarian syndrome                         | 0<br>(0 - 0)             | --                 | --                  | 0<br>(0 - 0)         | 0<br>(0 - 0)         | --                       |
| Endometriosis                                       | 0<br>(0 - 0)             | --                 | --                  | 0<br>(0 - 0)         | 0<br>(0 - 0)         | --                       |
| Genital prolapse                                    | 0<br>(0 - 0)             | --                 | --                  | 0<br>(0 - 0)         | 0<br>(0 - 0)         | 0<br>(0 - 0)             |
| Other gynecological diseases                        | 1<br>(0 - 1)             | --                 | --                  | 0<br>(0 - 1)         | 0<br>(0 - 0)         | 0<br>(0 - 0)             |
| Hemoglobinopathies and hemolytic anemias            | 27<br>(16 - 50)          | 1<br>(1 - 4)       | 2<br>(1 - 3)        | 8<br>(4 - 15)        | 10<br>(6 - 18)       | 6<br>(3 - 11)            |
| Thalassemias                                        | 0<br>(0 - 0)             | 0<br>(0 - 0)       | 0<br>(0 - 0)        | 0<br>(0 - 0)         | 0<br>(0 - 0)         | 0<br>(0 - 0)             |
| Sickle cell disorders                               | 12<br>(6 - 21)           | 1<br>(0 - 2)       | 1<br>(0 - 2)        | 5<br>(3 - 10)        | 4<br>(2 - 7)         | 0<br>(0 - 0)             |
| G6PD deficiency                                     | 1<br>(0 - 1)             | 0<br>(0 - 0)       | 0<br>(0 - 0)        | 0<br>(0 - 1)         | 0<br>(0 - 0)         | 0<br>(0 - 0)             |
| Other hemoglobinopathies and hemolytic anemias      | 15<br>(8 - 27)           | 1<br>(0 - 1)       | 0<br>(0 - 1)        | 2<br>(1 - 5)         | 6<br>(3 - 11)        | 5<br>(3 - 10)            |
| Endocrine, metabolic, blood, and immune disorders   | 52<br>(33 - 129)         | 5<br>(2 - 15)      | 1<br>(0 - 2)        | 9<br>(6 - 21)        | 12<br>(7 - 30)       | 25<br>(14 - 67)          |
| Musculoskeletal disorders                           | 64<br>(43 - 82)          | --                 | 1<br>(1 - 2)        | 23<br>(13 - 31)      | 13<br>(7 - 17)       | 27<br>(18 - 38)          |
| Rheumatoid arthritis                                | 8<br>(5 - 12)            | --                 | 0<br>(0 - 0)        | 1<br>(0 - 1)         | 2<br>(1 - 2)         | 6<br>(3 - 9)             |
| Other musculoskeletal disorders                     | 56<br>(34 - 73)          | --                 | 1<br>(1 - 2)        | 22<br>(12 - 30)      | 11<br>(6 - 16)       | 22<br>(14 - 31)          |
| Other non-communicable diseases                     | 356<br>(268 - 427)       | 257<br>(191 - 323) | 12<br>(9 - 16)      | 20<br>(13 - 29)      | 11<br>(6 - 15)       | 56<br>(27 - 79)          |
| Congenital anomalies                                | 287<br>(216 - 353)       | 249<br>(183 - 316) | 12<br>(9 - 16)      | 17<br>(10 - 25)      | 3<br>(2 - 5)         | 6<br>(3 - 10)            |
| Neural tube defects                                 | 28<br>(13 - 47)          | 28<br>(13 - 47)    | 0<br>(0 - 0)        | 0<br>(0 - 1)         | 0<br>(0 - 0)         | 0<br>(0 - 0)             |
| Congenital heart anomalies                          | 165<br>(119 - 212)       | 147<br>(103 - 195) | 8<br>(5 - 11)       | 9<br>(6 - 14)        | 0<br>(0 - 0)         | 1<br>(0 - 2)             |
| Cleft lip and cleft palate                          | 0<br>(0 - 0)             | 0<br>(0 - 0)       | --                  | --                   | --                   | --                       |
| Down syndrome                                       | 4<br>(2 - 6)             | 3<br>(1 - 5)       | 0<br>(0 - 1)        | 1<br>(0 - 1)         | 0<br>(0 - 0)         | 0<br>(0 - 0)             |
| Chromosomal unbalanced rearrangements               | 4<br>(2 - 7)             | 3<br>(1 - 6)       | 0<br>(0 - 0)        | 0<br>(0 - 1)         | 0<br>(0 - 0)         | 0<br>(0 - 0)             |
| Other congenital anomalies                          | 86<br>(58 - 115)         | 69<br>(44 - 97)    | 4<br>(2 - 5)        | 6<br>(4 - 9)         | 3<br>(1 - 4)         | 5<br>(2 - 7)             |
| Skin and subcutaneous diseases                      | 64<br>(34 - 88)          | 2<br>(1 - 3)       | 0<br>(0 - 1)        | 4<br>(2 - 5)         | 8<br>(4 - 11)        | 50<br>(24 - 72)          |
| Cellulitis                                          | 4<br>(2 - 7)             | 0<br>(0 - 1)       | 0<br>(0 - 0)        | 0<br>(0 - 1)         | 1<br>(0 - 1)         | 2<br>(1 - 5)             |
| Pyoderma                                            | 48<br>(26 - 68)          | 1<br>(1 - 3)       | 0<br>(0 - 0)        | 3<br>(2 - 4)         | 6<br>(3 - 8)         | 37<br>(17 - 56)          |
| Decubitus ulcer                                     | 12<br>(3 - 20)           | 0<br>(0 - 0)       | 0<br>(0 - 0)        | 0<br>(0 - 1)         | 1<br>(0 - 1)         | 10<br>(3 - 19)           |

Web Table 31- El Salvador deaths with 95% UI by age, sex, and cause in 2013

| Cause                                           | Females, All Ages        | Females, 0-4 Years | Females, 5-14 Years | Females, 15-49 Years | Females, 50-69 Years | Females, 70-80 Years |
|-------------------------------------------------|--------------------------|--------------------|---------------------|----------------------|----------------------|----------------------|
| Other skin and subcutaneous diseases            | 1<br>(0 - 2)             | 0<br>(0 - 0)       | 0<br>(0 - 0)        | 0<br>(0 - 0)         | 0<br>(0 - 0)         | 0<br>(0 - 1)         |
| Sudden infant death syndrome                    | 5<br>(1 - 15)            | 5<br>(1 - 15)      | --                  | --                   | --                   | --                   |
| Injuries                                        | 1,517<br>(1,206 - 1,887) | 39<br>(26 - 51)    | 69<br>(57 - 83)     | 752<br>(568 - 986)   | 231<br>(176 - 302)   | 427<br>(331 - 525)   |
| Transport injuries                              | 498<br>(397 - 635)       | 10<br>(6 - 14)     | 27<br>(21 - 35)     | 180<br>(134 - 245)   | 113<br>(84 - 152)    | 168<br>(132 - 217)   |
| Road injuries                                   | 486<br>(388 - 628)       | 9<br>(6 - 13)      | 26<br>(20 - 34)     | 175<br>(130 - 237)   | 110<br>(82 - 149)    | 166<br>(130 - 215)   |
| Pedestrian road injuries                        | 162<br>(121 - 220)       | 4<br>(2 - 6)       | 11<br>(8 - 15)      | 47<br>(32 - 67)      | 41<br>(28 - 59)      | 59<br>(40 - 83)      |
| Cyclist road injuries                           | 28<br>(20 - 38)          | 0<br>(0 - 1)       | 2<br>(1 - 3)        | 10<br>(7 - 14)       | 9<br>(6 - 14)        | 7<br>(4 - 10)        |
| Motorcyclist road injuries                      | 17<br>(10 - 24)          | 0<br>(0 - 0)       | 1<br>(0 - 1)        | 10<br>(6 - 15)       | 3<br>(2 - 5)         | 3<br>(1 - 4)         |
| Motor vehicle road injuries                     | 278<br>(215 - 366)       | 4<br>(3 - 6)       | 12<br>(9 - 16)      | 108<br>(78 - 149)    | 57<br>(40 - 77)      | 98<br>(71 - 132)     |
| Other road injuries                             | 1<br>(1 - 2)             | 0<br>(0 - 0)       | 0<br>(0 - 1)        | 0<br>(0 - 0)         | 0<br>(0 - 0)         | 0<br>(0 - 1)         |
| Other transport injuries                        | 12<br>(3 - 18)           | 1<br>(0 - 1)       | 1<br>(0 - 2)        | 5<br>(1 - 8)         | 3<br>(1 - 6)         | 2<br>(0 - 3)         |
| Unintentional injuries                          | 352<br>(259 - 439)       | 17<br>(11 - 26)    | 14<br>(9 - 18)      | 56<br>(41 - 72)      | 44<br>(33 - 57)      | 222<br>(146 - 297)   |
| Falls                                           | 198<br>(119 - 268)       | 1<br>(0 - 2)       | 1<br>(1 - 1)        | 8<br>(5 - 10)        | 19<br>(12 - 26)      | 170<br>(98 - 237)    |
| Drowning                                        | 39<br>(21 - 55)          | 4<br>(1 - 8)       | 8<br>(4 - 13)       | 19<br>(10 - 28)      | 4<br>(2 - 6)         | 3<br>(2 - 5)         |
| Fire, heat, and hot substances                  | 21<br>(15 - 29)          | 3<br>(2 - 6)       | 1<br>(1 - 2)        | 5<br>(4 - 8)         | 4<br>(3 - 5)         | 8<br>(5 - 11)        |
| Poisonings                                      | 9<br>(5 - 23)            | 0<br>(0 - 1)       | 0<br>(0 - 1)        | 4<br>(2 - 11)        | 2<br>(1 - 5)         | 2<br>(1 - 6)         |
| Exposure to mechanical forces                   | 9<br>(7 - 20)            | 0<br>(0 - 1)       | 1<br>(1 - 3)        | 4<br>(3 - 9)         | 2<br>(1 - 4)         | 2<br>(1 - 5)         |
| Unintentional firearm injuries                  | 1<br>(1 - 3)             | 0<br>(0 - 0)       | 0<br>(0 - 0)        | 1<br>(1 - 1)         | 0<br>(0 - 0)         | 0<br>(0 - 0)         |
| Unintentional suffocation                       | 1<br>(1 - 2)             | 0<br>(0 - 0)       | 0<br>(0 - 0)        | 0<br>(0 - 1)         | 0<br>(0 - 0)         | 0<br>(0 - 0)         |
| Other exposure to mechanical forces             | 7<br>(5 - 18)            | 0<br>(0 - 1)       | 1<br>(1 - 3)        | 3<br>(2 - 7)         | 1<br>(1 - 3)         | 2<br>(1 - 4)         |
| Adverse effects of medical treatment            | 45<br>(29 - 61)          | 2<br>(1 - 6)       | 1<br>(0 - 1)        | 7<br>(4 - 10)        | 9<br>(5 - 13)        | 26<br>(15 - 39)      |
| Animal contact                                  | 4<br>(1 - 7)             | 0<br>(0 - 1)       | 0<br>(0 - 0)        | 1<br>(0 - 2)         | 1<br>(0 - 2)         | 2<br>(0 - 3)         |
| Venomous animal contact                         | 3<br>(1 - 5)             | 0<br>(0 - 1)       | 0<br>(0 - 0)        | 1<br>(0 - 1)         | 1<br>(0 - 1)         | 1<br>(0 - 2)         |
| Non-venomous animal contact                     | 1<br>(0 - 3)             | 0<br>(0 - 0)       | 0<br>(0 - 0)        | 0<br>(0 - 0)         | 0<br>(0 - 1)         | 1<br>(0 - 1)         |
| Foreign body                                    | 18<br>(12 - 30)          | 5<br>(3 - 10)      | 1<br>(1 - 2)        | 4<br>(3 - 7)         | 2<br>(2 - 4)         | 5<br>(3 - 8)         |
| Pulmonary aspiration and foreign body in airway | 18<br>(11 - 29)          | 5<br>(3 - 10)      | 1<br>(1 - 1)        | 4<br>(3 - 7)         | 2<br>(1 - 4)         | 5<br>(3 - 8)         |
| Foreign body in other body part                 | 1<br>(0 - 1)             | 0<br>(0 - 0)       | 0<br>(0 - 0)        | 0<br>(0 - 0)         | 0<br>(0 - 0)         | 0<br>(0 - 0)         |
| Other unintentional injuries                    | 8<br>(3 - 12)            | 0<br>(0 - 1)       | 0<br>(0 - 1)        | 3<br>(1 - 5)         | 2<br>(0 - 3)         | 3<br>(0 - 5)         |
| Self-harm and interpersonal violence            | 667<br>(488 - 881)       | 13<br>(5 - 22)     | 28<br>(19 - 40)     | 516<br>(370 - 697)   | 74<br>(46 - 112)     | 37<br>(22 - 67)      |
| Self-harm                                       | 151<br>(110 - 265)       | --                 | 7<br>(4 - 11)       | 127<br>(91 - 225)    | 11<br>(8 - 20)       | 7<br>(5 - 11)        |
| Interpersonal violence                          | 515<br>(345 - 699)       | 13<br>(5 - 22)     | 21<br>(12 - 32)     | 389<br>(254 - 537)   | 63<br>(36 - 98)      | 31<br>(16 - 59)      |
| Assault by firearm                              | 365<br>(222 - 508)       | 5<br>(2 - 10)      | 11<br>(5 - 18)      | 293<br>(176 - 414)   | 41<br>(22 - 67)      | 15<br>(7 - 31)       |
| Assault by sharp object                         | 68<br>(36 - 114)         | 2<br>(1 - 4)       | 4<br>(2 - 8)        | 50<br>(25 - 83)      | 9<br>(4 - 16)        | 4<br>(2 - 8)         |
| Assault by other means                          | 82<br>(45 - 125)         | 6<br>(2 - 11)      | 6<br>(3 - 10)       | 46<br>(24 - 74)      | 13<br>(6 - 22)       | 11<br>(5 - 23)       |

Web Table 31- England deaths with 95% UI by age, sex, and cause in 2013

| Cause                                                             | Both Sexes, All Ages           | Both Sexes, 0-4 Years    | Both Sexes, 5-14 Years | Both Sexes, 15-49 Years     | Both Sexes, 50-69 Years     | Both Sexes, 70-80 Years        |
|-------------------------------------------------------------------|--------------------------------|--------------------------|------------------------|-----------------------------|-----------------------------|--------------------------------|
| All causes                                                        | 479,265<br>(462,399 - 495,788) | 3,284<br>(2,673 - 4,046) | 557<br>(492 - 633)     | 20,262<br>(19,126 - 21,372) | 82,186<br>(78,242 - 86,055) | 372,977<br>(360,807 - 384,533) |
| Communicable, maternal, neonatal, and nutritional diseases        | 39,367<br>(35,936 - 47,665)    | 1,695<br>(1,372 - 2,092) | 55<br>(44 - 70)        | 863<br>(758 - 953)          | 2,483<br>(2,089 - 2,725)    | 34,270<br>(30,920 - 42,684)    |
| HIV/AIDS and tuberculosis                                         | 595<br>(488 - 701)             | 1<br>(1 - 2)             | 1<br>(0 - 1)           | 175<br>(135 - 215)          | 158<br>(121 - 203)          | 260<br>(197 - 300)             |
| Tuberculosis                                                      | 379<br>(292 - 429)             | 1<br>(1 - 1)             | 1<br>(0 - 1)           | 33<br>(28 - 37)             | 93<br>(75 - 105)            | 251<br>(187 - 290)             |
| HIV/AIDS                                                          | 216<br>(148 - 292)             | 0<br>(0 - 1)             | 0<br>(0 - 0)           | 142<br>(103 - 182)          | 65<br>(33 - 107)            | 9<br>(2 - 18)                  |
| HIV/AIDS resulting in mycobacterial infection                     | 11<br>(7 - 16)                 | 0<br>(0 - 0)             | 0<br>(0 - 0)           | 7<br>(5 - 10)               | 4<br>(2 - 6)                | 1<br>(0 - 1)                   |
| HIV/AIDS resulting in other diseases                              | 205<br>(141 - 278)             | 0<br>(0 - 1)             | 0<br>(0 - 0)           | 135<br>(98 - 172)           | 61<br>(32 - 100)            | 8<br>(2 - 17)                  |
| Diarrhea, lower respiratory, and other common infectious diseases | 36,190<br>(32,760 - 44,584)    | 260<br>(203 - 328)       | 44<br>(35 - 58)        | 532<br>(465 - 592)          | 2,131<br>(1,764 - 2,342)    | 33,223<br>(29,899 - 41,697)    |
| Diarrheal diseases                                                | 1,742<br>(1,516 - 1,981)       | 42<br>(33 - 54)          | 3<br>(3 - 4)           | 32<br>(29 - 35)             | 118<br>(104 - 133)          | 1,547<br>(1,329 - 1,787)       |
| Intestinal infectious diseases                                    | 65<br>(24 - 142)               | 12<br>(4 - 25)           | 11<br>(4 - 25)         | 26<br>(9 - 58)              | 9<br>(3 - 20)               | 8<br>(3 - 16)                  |
| Typhoid fever                                                     | 48<br>(16 - 109)               | 8<br>(3 - 18)            | 9<br>(3 - 19)          | 20<br>(6 - 45)              | 6<br>(2 - 15)               | 5<br>(2 - 12)                  |
| Paratyphoid fever                                                 | 12<br>(4 - 27)                 | 3<br>(1 - 6)             | 3<br>(1 - 6)           | 5<br>(2 - 11)               | 1<br>(0 - 3)                | 1<br>(0 - 2)                   |
| Other intestinal infectious diseases                              | 5<br>(2 - 11)                  | 1<br>(0 - 4)             | 0<br>(0 - 2)           | 1<br>(0 - 4)                | 1<br>(0 - 4)                | 1<br>(0 - 5)                   |
| Lower respiratory infections                                      | 33,912<br>(30,500 - 42,356)    | 137<br>(104 - 177)       | 16<br>(13 - 19)        | 390<br>(336 - 434)          | 1,913<br>(1,548 - 2,115)    | 31,456<br>(28,192 - 39,945)    |
| Upper respiratory infections                                      | 10<br>(6 - 15)                 | 0<br>(0 - 0)             | 0<br>(0 - 0)           | 1<br>(0 - 1)                | 2<br>(1 - 3)                | 7<br>(4 - 12)                  |
| Otitis media                                                      | 12<br>(11 - 13)                | 2<br>(2 - 3)             | 1<br>(0 - 1)           | 3<br>(3 - 3)                | 2<br>(2 - 2)                | 4<br>(4 - 5)                   |
| Meningitis                                                        | 270<br>(243 - 334)             | 50<br>(37 - 71)          | 7<br>(6 - 8)           | 44<br>(40 - 50)             | 55<br>(49 - 66)             | 114<br>(100 - 157)             |
| Pneumococcal meningitis                                           | 46<br>(41 - 58)                | 6<br>(5 - 9)             | 1<br>(1 - 1)           | 7<br>(6 - 9)                | 10<br>(8 - 13)              | 21<br>(18 - 30)                |
| H influenzae type B meningitis                                    | 37<br>(32 - 45)                | 14<br>(10 - 21)          | 1<br>(1 - 2)           | 5<br>(4 - 6)                | 5<br>(4 - 6)                | 11<br>(9 - 14)                 |
| Meningococcal meningitis                                          | 87<br>(77 - 110)               | 15<br>(11 - 22)          | 3<br>(2 - 3)           | 14<br>(12 - 18)             | 17<br>(14 - 21)             | 38<br>(33 - 53)                |
| Other meningitis                                                  | 100<br>(90 - 124)              | 14<br>(10 - 20)          | 2<br>(2 - 3)           | 17<br>(15 - 20)             | 23<br>(20 - 28)             | 43<br>(36 - 59)                |
| Encephalitis                                                      | 114<br>(68 - 138)              | 10<br>(6 - 14)           | 4<br>(2 - 5)           | 27<br>(16 - 34)             | 27<br>(15 - 33)             | 46<br>(26 - 57)                |
| Diphtheria                                                        | 1<br>(0 - 1)                   | 0<br>(0 - 1)             | 0<br>(0 - 0)           | 0<br>(0 - 0)                | 0<br>(0 - 0)                | --                             |
| Whooping cough                                                    | 7<br>(4 - 12)                  | 3<br>(1 - 8)             | 1<br>(0 - 1)           | 2<br>(2 - 3)                | 1<br>(0 - 1)                | --                             |
| Tetanus                                                           | 5<br>(3 - 7)                   | 0<br>(0 - 0)             | 0<br>(0 - 1)           | 2<br>(1 - 3)                | 1<br>(1 - 2)                | 1<br>(1 - 3)                   |
| Measles                                                           | 0<br>(0 - 1)                   | 0<br>(0 - 1)             | 0<br>(0 - 0)           | 0<br>(0 - 0)                | 0<br>(0 - 0)                | --                             |
| Varicella and herpes zoster                                       | 52<br>(31 - 85)                | 3<br>(2 - 5)             | 1<br>(0 - 1)           | 4<br>(3 - 6)                | 4<br>(3 - 7)                | 40<br>(18 - 74)                |
| Neglected tropical diseases and malaria                           | 44<br>(33 - 50)                | 3<br>(2 - 4)             | 2<br>(1 - 2)           | 14<br>(11 - 16)             | 15<br>(11 - 17)             | 10<br>(8 - 13)                 |
| Cysticercosis                                                     | 1<br>(1 - 1)                   | 0<br>(0 - 0)             | 0<br>(0 - 0)           | 0<br>(0 - 0)                | 0<br>(0 - 0)                | 0<br>(0 - 0)                   |
| Cystic echinococcosis                                             | 4<br>(4 - 4)                   | 0<br>(0 - 0)             | 0<br>(0 - 0)           | 1<br>(1 - 1)                | 1<br>(1 - 1)                | 2<br>(2 - 2)                   |
| Dengue                                                            | 5<br>(3 - 5)                   | 0<br>(0 - 0)             | 1<br>(0 - 1)           | 2<br>(2 - 3)                | 1<br>(1 - 1)                | 1<br>(0 - 1)                   |
| Rabies                                                            | 5<br>(3 - 5)                   | 0<br>(0 - 0)             | 0<br>(0 - 1)           | 2<br>(1 - 3)                | 1<br>(1 - 1)                | 1<br>(0 - 1)                   |
| Other neglected tropical diseases                                 | 30<br>(21 - 36)                | 2<br>(1 - 3)             | 1<br>(1 - 1)           | 9<br>(6 - 10)               | 11<br>(8 - 14)              | 7<br>(5 - 9)                   |
| Maternal disorders                                                | 37<br>(31 - 42)                | --                       | 1<br>(0 - 1)           | 36<br>(31 - 41)             | --                          | --                             |
| Maternal hemorrhage                                               | 4<br>(3 - 4)                   | --                       | 0<br>(0 - 0)           | 4<br>(3 - 4)                | --                          | --                             |
| Maternal sepsis and other maternal infections                     | 3<br>(3 - 4)                   | --                       | 0<br>(0 - 0)           | 3<br>(3 - 4)                | --                          | --                             |
| Maternal hypertensive disorders                                   | 5<br>(4 - 5)                   | --                       | 0<br>(0 - 0)           | 4<br>(4 - 5)                | --                          | --                             |
| Maternal obstructed labor                                         | 3<br>(2 - 3)                   | --                       | 0<br>(0 - 0)           | 3<br>(2 - 3)                | --                          | --                             |
| Maternal abortive outcome                                         | 7<br>(6 - 9)                   | --                       | 0<br>(0 - 0)           | 7<br>(6 - 9)                | --                          | --                             |
| Indirect maternal deaths                                          | 4<br>(3 - 5)                   | --                       | 0<br>(0 - 0)           | 4<br>(3 - 5)                | --                          | --                             |



Web Table 31- England deaths with 95% UI by age, sex, and cause in 2013

| Cause                                                            | Both Sexes, All Ages           | Both Sexes, 0-4 Years    | Both Sexes, 5-14 Years | Both Sexes, 15-49 Years     | Both Sexes, 50-69 Years     | Both Sexes, 70-80 Years        |
|------------------------------------------------------------------|--------------------------------|--------------------------|------------------------|-----------------------------|-----------------------------|--------------------------------|
| Late maternal deaths                                             | 3<br>(2 - 3)                   | --                       | 0<br>(0 - 0)           | 3<br>(2 - 3)                | --                          | --                             |
| Maternal deaths aggravated by HIV/AIDS                           | 0<br>(0 - 0)                   | --                       | --                     | 0<br>(0 - 0)                | --                          | --                             |
| Other maternal disorders                                         | 8<br>(7 - 9)                   | --                       | 0<br>(0 - 0)           | 8<br>(6 - 9)                | --                          | --                             |
| Neonatal disorders                                               | 1,399<br>(1,134 - 1,741)       | 1,399<br>(1,134 - 1,741) | --                     | --                          | --                          | --                             |
| Neonatal preterm birth complications                             | 1,037<br>(816 - 1,314)         | 1,037<br>(816 - 1,314)   | --                     | --                          | --                          | --                             |
| Neonatal encephalopathy due to birth asphyxia and trauma         | 208<br>(144 - 290)             | 208<br>(144 - 290)       | --                     | --                          | --                          | --                             |
| Neonatal sepsis and other neonatal infections                    | 61<br>(35 - 127)               | 61<br>(35 - 127)         | --                     | --                          | --                          | --                             |
| Hemolytic disease and other neonatal jaundice                    | 3<br>(2 - 4)                   | 3<br>(2 - 4)             | --                     | --                          | --                          | --                             |
| Other neonatal disorders                                         | 90<br>(59 - 127)               | 90<br>(59 - 127)         | --                     | --                          | --                          | --                             |
| Nutritional deficiencies                                         | 567<br>(476 - 746)             | 2<br>(2 - 3)             | 1<br>(1 - 1)           | 13<br>(11 - 18)             | 36<br>(29 - 46)             | 514<br>(432 - 676)             |
| Protein-energy malnutrition                                      | 80<br>(39 - 127)               | 1<br>(1 - 2)             | 0<br>(0 - 0)           | 4<br>(2 - 5)                | 10<br>(5 - 14)              | 66<br>(31 - 106)               |
| Iodine deficiency                                                | 3<br>(1 - 7)                   | 0<br>(0 - 0)             | 0<br>(0 - 0)           | 0<br>(0 - 0)                | 1<br>(0 - 1)                | 2<br>(0 - 6)                   |
| Iron-deficiency anemia                                           | 430<br>(340 - 555)             | 1<br>(0 - 1)             | 0<br>(0 - 0)           | 8<br>(6 - 11)               | 22<br>(16 - 29)             | 399<br>(314 - 520)             |
| Other nutritional deficiencies                                   | 53<br>(28 - 112)               | 1<br>(0 - 1)             | 0<br>(0 - 0)           | 2<br>(1 - 3)                | 4<br>(2 - 7)                | 47<br>(23 - 101)               |
| Other communicable, maternal, neonatal, and nutritional diseases | 535<br>(389 - 633)             | 30<br>(18 - 42)          | 7<br>(5 - 9)           | 92<br>(68 - 109)            | 143<br>(102 - 175)          | 262<br>(189 - 309)             |
| Sexually transmitted diseases excluding HIV                      | 58<br>(43 - 79)                | 6<br>(2 - 11)            | 1<br>(0 - 1)           | 5<br>(4 - 6)                | 8<br>(6 - 12)               | 39<br>(28 - 57)                |
| Syphilis                                                         | 44<br>(33 - 61)                | 6<br>(2 - 11)            | 0<br>(0 - 1)           | 2<br>(2 - 3)                | 5<br>(4 - 7)                | 31<br>(22 - 45)                |
| Chlamydial infection                                             | 3<br>(3 - 5)                   | --                       | 0<br>(0 - 0)           | 1<br>(1 - 1)                | 1<br>(1 - 1)                | 2<br>(1 - 3)                   |
| Gonococcal infection                                             | 7<br>(5 - 9)                   | --                       | 0<br>(0 - 0)           | 1<br>(1 - 1)                | 1<br>(1 - 2)                | 4<br>(3 - 6)                   |
| Other sexually transmitted diseases                              | 4<br>(3 - 5)                   | --                       | 0<br>(0 - 0)           | 1<br>(1 - 1)                | 1<br>(1 - 1)                | 2<br>(1 - 3)                   |
| Hepatitis                                                        | 86<br>(77 - 100)               | 1<br>(1 - 2)             | 1<br>(1 - 2)           | 26<br>(22 - 31)             | 33<br>(29 - 40)             | 24<br>(21 - 28)                |
| Acute hepatitis A                                                | 21<br>(8 - 38)                 | 1<br>(1 - 1)             | 1<br>(0 - 1)           | 9<br>(3 - 16)               | 7<br>(2 - 13)               | 3<br>(1 - 7)                   |
| Acute hepatitis B                                                | 55<br>(38 - 73)                | 0<br>(0 - 1)             | 0<br>(0 - 1)           | 14<br>(8 - 21)              | 23<br>(16 - 30)             | 17<br>(13 - 22)                |
| Acute hepatitis C                                                | 9<br>(2 - 20)                  | --                       | 0<br>(0 - 0)           | 3<br>(1 - 6)                | 3<br>(1 - 8)                | 3<br>(1 - 6)                   |
| Other infectious diseases                                        | 391<br>(242 - 497)             | 23<br>(13 - 32)          | 6<br>(3 - 7)           | 61<br>(38 - 79)             | 102<br>(61 - 135)           | 199<br>(120 - 250)             |
| Non-communicable diseases                                        | 424,348<br>(409,442 - 439,582) | 1,396<br>(1,120 - 1,757) | 359<br>(314 - 410)     | 15,140<br>(14,300 - 16,002) | 77,093<br>(73,412 - 80,700) | 330,360<br>(318,975 - 341,139) |
| Neoplasms                                                        | 134,049<br>(125,197 - 140,795) | 99<br>(75 - 134)         | 175<br>(151 - 202)     | 6,335<br>(5,918 - 6,803)    | 40,066<br>(37,694 - 42,396) | 87,373<br>(80,201 - 91,947)    |
| Esophageal cancer                                                | 6,620<br>(5,909 - 8,254)       | --                       | --                     | 212<br>(180 - 256)          | 2,235<br>(1,933 - 2,796)    | 4,173<br>(3,756 - 5,188)       |
| Stomach cancer                                                   | 5,986<br>(5,276 - 6,873)       | --                       | --                     | 167<br>(147 - 192)          | 1,235<br>(1,104 - 1,400)    | 4,584<br>(4,001 - 5,335)       |
| Liver cancer                                                     | 2,859<br>(2,089 - 3,317)       | --                       | 2<br>(2 - 3)           | 133<br>(105 - 159)          | 919<br>(704 - 1,082)        | 1,805<br>(1,280 - 2,126)       |
| Liver cancer due to hepatitis B                                  | 579<br>(409 - 727)             | --                       | 1<br>(1 - 1)           | 48<br>(37 - 61)             | 236<br>(173 - 300)          | 295<br>(186 - 372)             |
| Liver cancer due to hepatitis C                                  | 1,500<br>(1,119 - 1,808)       | --                       | 1<br>(0 - 1)           | 59<br>(45 - 76)             | 466<br>(351 - 577)          | 975<br>(711 - 1,191)           |
| Liver cancer due to alcohol use                                  | 643<br>(444 - 818)             | --                       | --                     | 17<br>(11 - 23)             | 174<br>(117 - 226)          | 452<br>(293 - 580)             |
| Liver cancer due to other causes                                 | 137<br>(87 - 181)              | --                       | 1<br>(1 - 1)           | 10<br>(8 - 13)              | 43<br>(31 - 57)             | 83<br>(46 - 114)               |
| Larynx cancer                                                    | 709<br>(559 - 903)             | --                       | --                     | 30<br>(23 - 38)             | 270<br>(212 - 336)          | 410<br>(318 - 529)             |
| Tracheal, bronchus and lung cancer                               | 30,304<br>(27,531 - 32,743)    | --                       | --                     | 723<br>(639 - 809)          | 10,276<br>(9,340 - 11,194)  | 19,304<br>(16,960 - 20,912)    |
| Breast cancer                                                    | 11,227<br>(8,787 - 13,268)     | --                       | --                     | 1,167<br>(995 - 1,417)      | 4,042<br>(3,213 - 4,768)    | 6,018<br>(4,442 - 7,104)       |
| Cervical cancer                                                  | 1,013<br>(844 - 1,183)         | --                       | --                     | 219<br>(179 - 257)          | 317<br>(253 - 371)          | 477<br>(390 - 585)             |
| Uterine cancer                                                   | 1,504<br>(1,140 - 1,727)       | --                       | --                     | 29<br>(23 - 35)             | 465<br>(350 - 548)          | 1,010<br>(737 - 1,159)         |
| Prostate cancer                                                  | 9,818<br>(6,540 - 13,892)      | --                       | --                     | 17<br>(11 - 24)             | 1,424<br>(840 - 1,935)      | 8,376<br>(5,566 - 12,038)      |

Web Table 31- England deaths with 95% UI by age, sex, and cause in 2013

| Cause                                         | Both Sexes, All Ages           | Both Sexes, 0-4 Years | Both Sexes, 5-14 Years | Both Sexes, 15-49 Years  | Both Sexes, 50-69 Years     | Both Sexes, 70-80 Years        |
|-----------------------------------------------|--------------------------------|-----------------------|------------------------|--------------------------|-----------------------------|--------------------------------|
| Colon and rectum cancer                       | 16,691<br>(15,550 - 17,659)    | --                    | --                     | 501<br>(460 - 543)       | 4,371<br>(4,032 - 4,685)    | 11,819<br>(10,973 - 12,554)    |
| Lip and oral cavity cancer                    | 1,308<br>(1,094 - 1,440)       | --                    | --                     | 120<br>(101 - 133)       | 547<br>(415 - 608)          | 642<br>(554 - 719)             |
| Nasopharynx cancer                            | 136<br>(112 - 199)             | --                    | 1<br>(1 - 2)           | 26<br>(21 - 36)          | 60<br>(49 - 84)             | 50<br>(39 - 78)                |
| Other pharynx cancer                          | 558<br>(410 - 673)             | --                    | --                     | 52<br>(42 - 63)          | 298<br>(211 - 363)          | 208<br>(147 - 256)             |
| Gallbladder and biliary tract cancer          | 1,048<br>(778 - 1,299)         | --                    | --                     | 20<br>(15 - 24)          | 232<br>(177 - 289)          | 797<br>(585 - 996)             |
| Pancreatic cancer                             | 7,696<br>(7,178 - 8,148)       | --                    | --                     | 228<br>(209 - 250)       | 2,437<br>(2,242 - 2,611)    | 5,031<br>(4,666 - 5,332)       |
| Malignant skin melanoma                       | 1,902<br>(1,258 - 2,666)       | --                    | --                     | 300<br>(206 - 444)       | 679<br>(448 - 966)          | 923<br>(602 - 1,258)           |
| Non-melanoma skin cancer                      | 606<br>(455 - 813)             | --                    | --                     | 18<br>(12 - 24)          | 68<br>(47 - 92)             | 520<br>(386 - 699)             |
| Ovarian cancer                                | 4,075<br>(3,582 - 4,495)       | --                    | --                     | 262<br>(229 - 303)       | 1,566<br>(1,374 - 1,757)    | 2,247<br>(1,888 - 2,509)       |
| Testicular cancer                             | 76<br>(58 - 101)               | --                    | --                     | 48<br>(36 - 62)          | 15<br>(11 - 20)             | 14<br>(11 - 20)                |
| Kidney cancer                                 | 3,419<br>(3,040 - 3,765)       | 5<br>(3 - 7)          | 5<br>(4 - 6)           | 161<br>(139 - 185)       | 1,187<br>(1,047 - 1,342)    | 2,061<br>(1,756 - 3,326)       |
| Bladder cancer                                | 3,900<br>(3,304 - 4,517)       | --                    | --                     | 45<br>(38 - 53)          | 706<br>(609 - 816)          | 3,149<br>(2,637 - 3,690)       |
| Brain and nervous system cancer               | 3,100<br>(2,571 - 3,522)       | 19<br>(13 - 27)       | 48<br>(39 - 60)        | 502<br>(426 - 588)       | 1,408<br>(1,189 - 1,685)    | 1,124<br>(859 - 1,270)         |
| Thyroid cancer                                | 312<br>(260 - 366)             | --                    | 0<br>(0 - 0)           | 14<br>(12 - 16)          | 81<br>(68 - 94)             | 216<br>(177 - 257)             |
| Mesothelioma                                  | 1,899<br>(955 - 2,275)         | --                    | --                     | 46<br>(32 - 57)          | 700<br>(400 - 859)          | 1,153<br>(494 - 1,432)         |
| Hodgkin lymphoma                              | 283<br>(220 - 361)             | 0<br>(0 - 1)          | 2<br>(1 - 2)           | 94<br>(75 - 123)         | 87<br>(66 - 112)            | 100<br>(73 - 129)              |
| Non-Hodgkin lymphoma                          | 4,744<br>(3,166 - 5,617)       | 4<br>(3 - 6)          | 12<br>(7 - 17)         | 321<br>(214 - 427)       | 1,395<br>(902 - 1,809)      | 3,013<br>(1,984 - 3,526)       |
| Multiple myeloma                              | 2,833<br>(2,122 - 3,801)       | --                    | --                     | 72<br>(53 - 103)         | 809<br>(599 - 1,144)        | 1,952<br>(1,433 - 2,644)       |
| Leukemia                                      | 4,061<br>(3,615 - 4,398)       | 26<br>(19 - 35)       | 54<br>(44 - 64)        | 334<br>(294 - 366)       | 958<br>(827 - 1,048)        | 2,690<br>(2,393 - 2,927)       |
| Other neoplasms                               | 5,361<br>(4,256 - 5,936)       | 45<br>(32 - 60)       | 51<br>(40 - 61)        | 475<br>(391 - 530)       | 1,282<br>(1,079 - 1,456)    | 3,507<br>(2,645 - 3,966)       |
| Cardiovascular diseases                       | 157,838<br>(149,073 - 172,275) | 25<br>(19 - 32)       | 15<br>(12 - 17)        | 3,165<br>(2,887 - 3,448) | 20,822<br>(19,439 - 22,731) | 133,810<br>(125,926 - 146,546) |
| Rheumatic heart disease                       | 1,205<br>(987 - 1,957)         | 0<br>(0 - 0)          | 1<br>(0 - 1)           | 60<br>(48 - 85)          | 239<br>(195 - 407)          | 905<br>(720 - 1,483)           |
| Ischemic heart disease                        | 80,748<br>(74,219 - 94,076)    | 1<br>(1 - 2)          | 1<br>(1 - 2)           | 1,730<br>(1,561 - 1,947) | 12,997<br>(11,945 - 14,764) | 66,018<br>(59,689 - 77,500)    |
| Cerebrovascular disease                       | 46,582<br>(41,254 - 55,073)    | 5<br>(4 - 7)          | 5<br>(4 - 6)           | 667<br>(544 - 774)       | 3,889<br>(3,237 - 4,554)    | 42,017<br>(36,946 - 49,753)    |
| Ischemic stroke                               | 27,977<br>(24,115 - 34,922)    | 1<br>(1 - 2)          | 1<br>(0 - 1)           | 70<br>(46 - 88)          | 1,219<br>(889 - 1,595)      | 26,686<br>(23,071 - 33,375)    |
| Hemorrhagic stroke                            | 18,605<br>(13,744 - 21,993)    | 4<br>(3 - 5)          | 4<br>(3 - 5)           | 597<br>(490 - 691)       | 2,670<br>(2,174 - 3,155)    | 15,331<br>(11,120 - 18,474)    |
| Hypertensive heart disease                    | 2,545<br>(1,829 - 3,088)       | 0<br>(0 - 0)          | 0<br>(0 - 1)           | 70<br>(51 - 89)          | 459<br>(333 - 615)          | 2,016<br>(1,394 - 2,434)       |
| Cardiomyopathy and myocarditis                | 2,846<br>(2,304 - 3,750)       | 13<br>(10 - 17)       | 5<br>(4 - 7)           | 209<br>(151 - 258)       | 421<br>(299 - 536)          | 2,197<br>(1,813 - 2,972)       |
| Atrial fibrillation and flutter               | 4,230<br>(3,456 - 4,828)       | --                    | --                     | 5<br>(4 - 6)             | 146<br>(117 - 169)          | 4,079<br>(3,319 - 4,673)       |
| Aortic aneurysm                               | 6,955<br>(5,718 - 8,795)       | --                    | --                     | 77<br>(63 - 93)          | 925<br>(779 - 1,123)        | 5,953<br>(4,809 - 7,600)       |
| Peripheral vascular disease                   | 2,113<br>(1,802 - 2,412)       | --                    | --                     | 7<br>(6 - 8)             | 158<br>(136 - 186)          | 1,948<br>(1,648 - 2,228)       |
| Endocarditis                                  | 621<br>(491 - 876)             | 1<br>(1 - 2)          | 1<br>(0 - 1)           | 39<br>(29 - 51)          | 138<br>(108 - 196)          | 442<br>(347 - 636)             |
| Other cardiovascular and circulatory diseases | 9,993<br>(6,351 - 11,370)      | 4<br>(2 - 5)          | 2<br>(1 - 2)           | 301<br>(184 - 348)       | 1,451<br>(897 - 1,659)      | 8,236<br>(5,218 - 9,478)       |
| Chronic respiratory diseases                  | 34,232<br>(30,747 - 39,381)    | 28<br>(20 - 36)       | 14<br>(12 - 17)        | 397<br>(354 - 437)       | 5,021<br>(4,452 - 5,507)    | 28,772<br>(25,590 - 33,517)    |
| Chronic obstructive pulmonary disease         | 28,665<br>(25,677 - 34,079)    | 14<br>(10 - 19)       | 2<br>(1 - 3)           | 171<br>(141 - 203)       | 4,139<br>(3,642 - 4,671)    | 24,339<br>(21,717 - 29,334)    |
| Pneumoconiosis                                | 661<br>(431 - 1,014)           | 0<br>(0 - 0)          | 1<br>(0 - 1)           | 6<br>(4 - 8)             | 61<br>(39 - 87)             | 594<br>(383 - 925)             |
| Silicosis                                     | 15<br>(9 - 23)                 | 0<br>(0 - 0)          | 0<br>(0 - 0)           | 1<br>(1 - 1)             | 2<br>(1 - 3)                | 12<br>(7 - 19)                 |
| Asbestosis                                    | 293<br>(189 - 469)             | 0<br>(0 - 0)          | 0<br>(0 - 0)           | 2<br>(1 - 2)             | 32<br>(21 - 47)             | 259<br>(166 - 419)             |
| Coal workers pneumoconiosis                   | 239<br>(151 - 367)             | 0<br>(0 - 0)          | 0<br>(0 - 0)           | 1<br>(1 - 2)             | 15<br>(9 - 22)              | 222<br>(139 - 343)             |
| Other pneumoconiosis                          | 115<br>(75 - 168)              | 0<br>(0 - 0)          | 0<br>(0 - 0)           | 1<br>(1 - 2)             | 12<br>(7 - 16)              | 101<br>(66 - 151)              |

Web Table 31- England deaths with 95% UI by age, sex, and cause in 2013

| Cause                                               | Both Sexes, All Ages        | Both Sexes, 0-4 Years | Both Sexes, 5-14 Years | Both Sexes, 15-49 Years  | Both Sexes, 50-69 Years  | Both Sexes, 70-80 Years     |
|-----------------------------------------------------|-----------------------------|-----------------------|------------------------|--------------------------|--------------------------|-----------------------------|
| Asthma                                              | 1,338<br>(932 - 1,882)      | 4<br>(3 - 6)          | 10<br>(8 - 11)         | 149<br>(127 - 173)       | 238<br>(178 - 345)       | 938<br>(587 - 1,383)        |
| Interstitial lung disease and pulmonary sarcoidosis | 3,367<br>(1,543 - 5,057)    | 3<br>(2 - 5)          | 2<br>(1 - 2)           | 65<br>(35 - 90)          | 566<br>(271 - 802)       | 2,731<br>(1,201 - 4,187)    |
| Other chronic respiratory diseases                  | 201<br>(159 - 259)          | 6<br>(4 - 7)          | 1<br>(1 - 1)           | 6<br>(5 - 7)             | 17<br>(14 - 21)          | 171<br>(132 - 228)          |
| Cirrhosis                                           | 6,701<br>(6,239 - 7,112)    | 4<br>(3 - 6)          | 4<br>(3 - 4)           | 1,486<br>(1,369 - 1,597) | 3,127<br>(2,897 - 3,347) | 2,080<br>(1,926 - 2,212)    |
| Cirrhosis due to hepatitis B                        | 725<br>(593 - 860)          | 0<br>(0 - 0)          | 0<br>(0 - 0)           | 146<br>(113 - 176)       | 331<br>(261 - 404)       | 248<br>(205 - 292)          |
| Cirrhosis due to hepatitis C                        | 3,135<br>(2,805 - 3,475)    | 0<br>(0 - 1)          | 1<br>(1 - 1)           | 705<br>(628 - 799)       | 1,469<br>(1,293 - 1,649) | 960<br>(856 - 1,072)        |
| Cirrhosis due to alcohol use                        | 2,096<br>(1,787 - 2,383)    | --                    | --                     | 380<br>(308 - 442)       | 991<br>(822 - 1,143)     | 725<br>(622 - 821)          |
| Cirrhosis due to other causes                       | 745<br>(639 - 860)          | 4<br>(3 - 5)          | 2<br>(2 - 3)           | 255<br>(222 - 292)       | 337<br>(279 - 401)       | 147<br>(121 - 176)          |
| Digestive diseases                                  | 16,465<br>(14,720 - 20,432) | 11<br>(8 - 16)        | 10<br>(9 - 12)         | 422<br>(359 - 467)       | 2,147<br>(1,892 - 2,422) | 13,874<br>(12,417 - 17,625) |
| Peptic ulcer disease                                | 3,144<br>(2,488 - 4,578)    | 0<br>(0 - 1)          | 0<br>(0 - 1)           | 65<br>(51 - 80)          | 435<br>(328 - 543)       | 2,643<br>(2,059 - 4,002)    |
| Gastritis and duodenitis                            | 206<br>(117 - 296)          | 0<br>(0 - 1)          | 1<br>(0 - 1)           | 15<br>(9 - 20)           | 42<br>(23 - 60)          | 148<br>(80 - 223)           |
| Appendicitis                                        | 265<br>(166 - 457)          | 1<br>(0 - 1)          | 2<br>(1 - 2)           | 18<br>(13 - 23)          | 49<br>(33 - 74)          | 196<br>(113 - 363)          |
| Paralytic ileus and intestinal obstruction          | 2,225<br>(1,168 - 2,860)    | 3<br>(2 - 5)          | 3<br>(2 - 3)           | 45<br>(25 - 57)          | 222<br>(118 - 291)       | 1,952<br>(1,014 - 2,528)    |
| Inguinal, femoral, and abdominal hernia             | 861<br>(383 - 2,255)        | 0<br>(0 - 1)          | 0<br>(0 - 1)           | 9<br>(5 - 13)            | 80<br>(40 - 179)         | 771<br>(335 - 2,075)        |
| Inflammatory bowel disease                          | 1,154<br>(916 - 1,692)      | 4<br>(2 - 5)          | 1<br>(1 - 2)           | 45<br>(36 - 58)          | 155<br>(117 - 204)       | 950<br>(745 - 1,441)        |
| Vascular intestinal disorders                       | 2,504<br>(1,459 - 3,880)    | 0<br>(0 - 1)          | 0<br>(0 - 1)           | 37<br>(22 - 58)          | 368<br>(225 - 573)       | 2,099<br>(1,168 - 3,204)    |
| Gallbladder and biliary diseases                    | 1,763<br>(1,252 - 2,131)    | 0<br>(0 - 0)          | 1<br>(0 - 1)           | 27<br>(19 - 31)          | 177<br>(119 - 211)       | 1,559<br>(1,109 - 1,892)    |
| Pancreatitis                                        | 1,090<br>(805 - 1,530)      | 0<br>(0 - 1)          | 1<br>(0 - 1)           | 104<br>(78 - 127)        | 260<br>(181 - 341)       | 724<br>(524 - 1,078)        |
| Other digestive diseases                            | 3,252<br>(2,677 - 4,094)    | 2<br>(1 - 2)          | 1<br>(1 - 2)           | 57<br>(44 - 66)          | 359<br>(269 - 421)       | 2,833<br>(2,322 - 3,626)    |
| Neurological disorders                              | 49,887<br>(45,608 - 53,828) | 79<br>(62 - 99)       | 39<br>(33 - 48)        | 784<br>(684 - 921)       | 2,786<br>(2,461 - 3,068) | 46,198<br>(42,183 - 49,920) |
| Alzheimer disease and other dementias               | 41,109<br>(37,231 - 44,799) | --                    | --                     | 5<br>(3 - 7)             | 1,020<br>(908 - 1,127)   | 40,084<br>(36,233 - 43,756) |
| Parkinson disease                                   | 4,363<br>(3,528 - 4,866)    | --                    | --                     | 5<br>(4 - 5)             | 236<br>(197 - 279)       | 4,122<br>(3,313 - 4,603)    |
| Epilepsy                                            | 805<br>(632 - 946)          | 14<br>(10 - 20)       | 17<br>(13 - 21)        | 341<br>(285 - 414)       | 170<br>(128 - 211)       | 263<br>(186 - 316)          |
| Multiple sclerosis                                  | 872<br>(590 - 1,208)        | --                    | --                     | 181<br>(129 - 272)       | 436<br>(288 - 617)       | 255<br>(159 - 338)          |
| Other neurological disorders                        | 2,738<br>(2,339 - 2,991)    | 65<br>(50 - 82)       | 23<br>(19 - 28)        | 252<br>(213 - 293)       | 924<br>(787 - 1,034)     | 1,475<br>(1,244 - 1,612)    |
| Mental and substance use disorders                  | 2,157<br>(1,670 - 2,413)    | 3<br>(2 - 3)          | 0<br>(0 - 0)           | 1,529<br>(1,153 - 1,699) | 449<br>(319 - 549)       | 176<br>(148 - 206)          |
| Schizophrenia                                       | 71<br>(58 - 104)            | --                    | --                     | 3<br>(3 - 5)             | 11<br>(9 - 17)           | 57<br>(45 - 84)             |
| Alcohol use disorders                               | 617<br>(333 - 813)          | --                    | --                     | 258<br>(136 - 334)       | 294<br>(159 - 393)       | 65<br>(35 - 85)             |
| Drug use disorders                                  | 1,463<br>(1,118 - 1,619)    | 3<br>(2 - 3)          | --                     | 1,262<br>(941 - 1,402)   | 144<br>(112 - 162)       | 55<br>(42 - 65)             |
| Opioid use disorders                                | 540<br>(404 - 608)          | 1<br>(1 - 1)          | --                     | 471<br>(346 - 534)       | 48<br>(37 - 56)          | 20<br>(15 - 24)             |
| Cocaine use disorders                               | 43<br>(33 - 51)             | 0<br>(0 - 0)          | --                     | 38<br>(29 - 46)          | 3<br>(3 - 4)             | 1<br>(1 - 2)                |
| Amphetamine use disorders                           | 41<br>(32 - 48)             | 0<br>(0 - 0)          | --                     | 35<br>(27 - 41)          | 4<br>(3 - 6)             | 2<br>(1 - 2)                |
| Other drug use disorders                            | 839<br>(626 - 936)          | 1<br>(1 - 2)          | --                     | 718<br>(532 - 808)       | 88<br>(68 - 100)         | 32<br>(24 - 38)             |
| Eating disorders                                    | 7<br>(6 - 8)                | --                    | 0<br>(0 - 0)           | 6<br>(5 - 8)             | --                       | --                          |
| Anorexia nervosa                                    | 7<br>(6 - 8)                | --                    | 0<br>(0 - 0)           | 6<br>(5 - 8)             | --                       | --                          |
| Diabetes, urogenital, blood, and endocrine diseases | 17,799<br>(14,882 - 19,388) | 84<br>(65 - 107)      | 41<br>(34 - 52)        | 624<br>(562 - 683)       | 1,965<br>(1,757 - 2,117) | 15,084<br>(12,328 - 16,499) |
| Diabetes mellitus                                   | 4,854<br>(4,472 - 5,184)    | 3<br>(2 - 3)          | 3<br>(2 - 4)           | 173<br>(160 - 188)       | 709<br>(655 - 764)       | 3,966<br>(3,620 - 4,260)    |
| Acute glomerulonephritis                            | 12<br>(9 - 15)              | 0<br>(0 - 0)          | 0<br>(0 - 1)           | 2<br>(1 - 3)             | 2<br>(2 - 3)             | 7<br>(5 - 10)               |
| Chronic kidney disease                              | 4,569<br>(4,019 - 5,379)    | 4<br>(3 - 5)          | 2<br>(2 - 3)           | 114<br>(101 - 139)       | 435<br>(382 - 534)       | 4,014<br>(3,516 - 4,723)    |
| Chronic kidney disease due to diabetes mellitus     | 735<br>(610 - 1,137)        | 0<br>(0 - 0)          | 0<br>(0 - 1)           | 20<br>(17 - 32)          | 87<br>(71 - 130)         | 627<br>(514 - 968)          |

Web Table 31- England deaths with 95% UI by age, sex, and cause in 2013

| Cause                                               | Both Sexes, All Ages        | Both Sexes, 0-4 Years  | Both Sexes, 5-14 Years | Both Sexes, 15-49 Years  | Both Sexes, 50-69 Years  | Both Sexes, 70-80 Years  |
|-----------------------------------------------------|-----------------------------|------------------------|------------------------|--------------------------|--------------------------|--------------------------|
| Chronic kidney disease due to hypertension          | 1,261<br>(883 - 1,599)      | 0<br>(0 - 0)           | 0<br>(0 - 0)           | 22<br>(15 - 30)          | 117<br>(82 - 157)        | 1,121<br>(773 - 1,426)   |
| Chronic kidney disease due to glomerulonephritis    | 274<br>(151 - 353)          | 1<br>(1 - 2)           | 0<br>(0 - 1)           | 12<br>(8 - 15)           | 34<br>(24 - 45)          | 226<br>(117 - 298)       |
| Chronic kidney disease due to other causes          | 2,299<br>(1,849 - 2,931)    | 2<br>(2 - 3)           | 1<br>(1 - 1)           | 59<br>(50 - 80)          | 196<br>(155 - 262)       | 2,040<br>(1,616 - 2,579) |
| Urinary diseases and male infertility               | 6,458<br>(3,579 - 7,700)    | 9<br>(5 - 12)          | 3<br>(2 - 4)           | 91<br>(58 - 108)         | 419<br>(250 - 496)       | 5,936<br>(3,239 - 7,111) |
| Interstitial nephritis and urinary tract infections | 5,887<br>(3,250 - 7,077)    | 7<br>(3 - 9)           | 2<br>(1 - 3)           | 74<br>(46 - 89)          | 351<br>(206 - 416)       | 5,453<br>(2,988 - 6,591) |
| Urolithiasis                                        | 150<br>(83 - 297)           | --                     | 0<br>(0 - 1)           | 7<br>(4 - 12)            | 25<br>(15 - 47)          | 117<br>(63 - 239)        |
| Other urinary diseases                              | 421<br>(187 - 696)          | 2<br>(1 - 4)           | 1<br>(0 - 1)           | 10<br>(6 - 15)           | 42<br>(21 - 69)          | 366<br>(157 - 611)       |
| Gynecological diseases                              | 30<br>(24 - 43)             | --                     | --                     | 4<br>(3 - 6)             | 5<br>(4 - 7)             | 21<br>(16 - 30)          |
| Uterine fibroids                                    | 9<br>(7 - 12)               | --                     | --                     | 1<br>(1 - 2)             | 1<br>(1 - 2)             | 6<br>(5 - 9)             |
| Polycystic ovarian syndrome                         | 0<br>(0 - 0)                | --                     | --                     | 0<br>(0 - 0)             | 0<br>(0 - 0)             | --                       |
| Endometriosis                                       | 1<br>(1 - 1)                | --                     | --                     | 1<br>(0 - 1)             | 0<br>(0 - 0)             | --                       |
| Genital prolapse                                    | 7<br>(5 - 10)               | --                     | --                     | 0<br>(0 - 1)             | 1<br>(1 - 1)             | 5<br>(4 - 8)             |
| Other gynecological diseases                        | 14<br>(11 - 20)             | --                     | --                     | 2<br>(2 - 3)             | 3<br>(2 - 4)             | 9<br>(7 - 13)            |
| Hemoglobinopathies and hemolytic anemias            | 228<br>(169 - 333)          | 5<br>(4 - 8)           | 4<br>(3 - 6)           | 25<br>(19 - 36)          | 39<br>(29 - 56)          | 156<br>(115 - 232)       |
| Thalassemias                                        | 11<br>(8 - 16)              | 2<br>(1 - 3)           | 2<br>(1 - 2)           | 7<br>(5 - 10)            | 0<br>(0 - 0)             | 0<br>(0 - 0)             |
| Sickle cell disorders                               | 42<br>(31 - 59)             | 2<br>(1 - 3)           | 2<br>(1 - 3)           | 11<br>(8 - 15)           | 19<br>(14 - 27)          | 8<br>(6 - 12)            |
| G6PD deficiency                                     | 1<br>(1 - 1)                | 0<br>(0 - 0)           | 0<br>(0 - 0)           | 0<br>(0 - 0)             | 0<br>(0 - 0)             | 0<br>(0 - 0)             |
| Other hemoglobinopathies and hemolytic anemias      | 175<br>(130 - 260)          | 1<br>(1 - 2)           | 1<br>(1 - 1)           | 7<br>(5 - 10)            | 20<br>(15 - 29)          | 147<br>(108 - 220)       |
| Endocrine, metabolic, blood, and immune disorders   | 1,646<br>(1,431 - 2,457)    | 63<br>(48 - 84)        | 28<br>(23 - 39)        | 214<br>(182 - 276)       | 356<br>(304 - 498)       | 985<br>(836 - 1,559)     |
| Musculoskeletal disorders                           | 1,666<br>(1,183 - 1,962)    | --                     | 3<br>(2 - 4)           | 89<br>(76 - 107)         | 328<br>(256 - 400)       | 1,246<br>(825 - 1,462)   |
| Rheumatoid arthritis                                | 746<br>(566 - 901)          | --                     | 0<br>(0 - 1)           | 10<br>(7 - 12)           | 135<br>(102 - 165)       | 601<br>(448 - 734)       |
| Other musculoskeletal disorders                     | 920<br>(619 - 1,117)        | --                     | 3<br>(2 - 3)           | 80<br>(67 - 96)          | 193<br>(153 - 239)       | 645<br>(372 - 785)       |
| Other non-communicable diseases                     | 3,554<br>(3,163 - 3,954)    | 1,063<br>(843 - 1,370) | 57<br>(49 - 68)        | 309<br>(271 - 346)       | 380<br>(330 - 414)       | 1,745<br>(1,370 - 1,945) |
| Congenital anomalies                                | 1,646<br>(1,438 - 1,916)    | 834<br>(667 - 1,036)   | 56<br>(47 - 67)        | 277<br>(240 - 313)       | 240<br>(205 - 269)       | 240<br>(209 - 280)       |
| Neural tube defects                                 | 62<br>(49 - 78)             | 45<br>(33 - 58)        | 3<br>(2 - 4)           | 12<br>(10 - 15)          | 2<br>(1 - 2)             | 1<br>(1 - 1)             |
| Congenital heart anomalies                          | 643<br>(557 - 741)          | 287<br>(229 - 358)     | 30<br>(25 - 36)        | 162<br>(138 - 184)       | 86<br>(68 - 108)         | 79<br>(67 - 94)          |
| Cleft lip and cleft palate                          | 1<br>(0 - 1)                | 1<br>(0 - 1)           | --                     | --                       | --                       | --                       |
| Down syndrome                                       | 178<br>(117 - 220)          | 22<br>(12 - 30)        | 2<br>(1 - 3)           | 39<br>(23 - 50)          | 106<br>(74 - 130)        | 9<br>(5 - 13)            |
| Chromosomal unbalanced rearrangements               | 92<br>(66 - 121)            | 80<br>(56 - 107)       | 3<br>(2 - 4)           | 6<br>(4 - 7)             | 2<br>(1 - 2)             | 1<br>(1 - 2)             |
| Other congenital anomalies                          | 670<br>(567 - 806)          | 400<br>(316 - 511)     | 18<br>(14 - 22)        | 59<br>(49 - 69)          | 44<br>(34 - 56)          | 149<br>(128 - 178)       |
| Skin and subcutaneous diseases                      | 1,683<br>(1,223 - 1,892)    | 4<br>(2 - 5)           | 1<br>(1 - 2)           | 32<br>(25 - 37)          | 141<br>(102 - 162)       | 1,506<br>(1,102 - 1,704) |
| Cellulitis                                          | 673<br>(367 - 871)          | 1<br>(1 - 1)           | 0<br>(0 - 0)           | 13<br>(8 - 16)           | 67<br>(42 - 83)          | 592<br>(318 - 777)       |
| Pyoderma                                            | 634<br>(442 - 855)          | 2<br>(1 - 3)           | 1<br>(0 - 1)           | 13<br>(10 - 18)          | 50<br>(33 - 69)          | 568<br>(392 - 767)       |
| Decubitus ulcer                                     | 291<br>(220 - 416)          | 0<br>(0 - 0)           | 0<br>(0 - 0)           | 3<br>(2 - 4)             | 15<br>(11 - 23)          | 273<br>(205 - 392)       |
| Other skin and subcutaneous diseases                | 85<br>(55 - 155)            | 0<br>(0 - 1)           | 0<br>(0 - 0)           | 3<br>(2 - 5)             | 8<br>(5 - 14)            | 73<br>(46 - 138)         |
| Sudden infant death syndrome                        | 225<br>(139 - 424)          | 225<br>(139 - 424)     | --                     | --                       | --                       | --                       |
| Injuries                                            | 15,551<br>(13,699 - 16,769) | 192<br>(150 - 247)     | 142<br>(125 - 163)     | 4,259<br>(3,935 - 4,677) | 2,610<br>(2,375 - 2,855) | 8,347<br>(6,753 - 9,200) |
| Transport injuries                                  | 2,560<br>(2,337 - 2,788)    | 37<br>(27 - 50)        | 70<br>(61 - 82)        | 1,275<br>(1,157 - 1,401) | 505<br>(454 - 556)       | 673<br>(595 - 793)       |
| Road injuries                                       | 2,446<br>(2,232 - 2,675)    | 35<br>(25 - 47)        | 67<br>(58 - 79)        | 1,214<br>(1,103 - 1,335) | 474<br>(424 - 524)       | 656<br>(581 - 774)       |
| Pedestrian road injuries                            | 710<br>(553 - 940)          | 16<br>(10 - 22)        | 30<br>(23 - 38)        | 173<br>(117 - 257)       | 158<br>(119 - 213)       | 332<br>(266 - 431)       |

Web Table 31- England deaths with 95% UI by age, sex, and cause in 2013

| Cause                                           | Both Sexes, All Ages      | Both Sexes, 0-4 Years | Both Sexes, 5-14 Years | Both Sexes, 15-49 Years  | Both Sexes, 50-69 Years | Both Sexes, 70-80 Years  |
|-------------------------------------------------|---------------------------|-----------------------|------------------------|--------------------------|-------------------------|--------------------------|
| Cyclist road injuries                           | 139<br>(95 - 180)         | 2<br>(1 - 4)          | 13<br>(9 - 18)         | 53<br>(37 - 68)          | 35<br>(23 - 47)         | 35<br>(22 - 51)          |
| Motorcyclist road injuries                      | 362<br>(247 - 459)        | 1<br>(0 - 1)          | 2<br>(1 - 3)           | 302<br>(207 - 381)       | 40<br>(23 - 53)         | 18<br>(11 - 27)          |
| Motor vehicle road injuries                     | 1,218<br>(1,005 - 1,409)  | 15<br>(11 - 21)       | 21<br>(16 - 27)        | 680<br>(564 - 784)       | 236<br>(188 - 277)      | 265<br>(194 - 325)       |
| Other road injuries                             | 17<br>(12 - 29)           | 0<br>(0 - 1)          | 1<br>(0 - 1)           | 6<br>(4 - 9)             | 5<br>(3 - 8)            | 6<br>(4 - 11)            |
| Other transport injuries                        | 114<br>(89 - 136)         | 2<br>(1 - 3)          | 3<br>(2 - 4)           | 60<br>(46 - 72)          | 31<br>(24 - 38)         | 17<br>(13 - 23)          |
| Unintentional injuries                          | 9,152<br>(7,419 - 10,125) | 144<br>(111 - 185)    | 64<br>(54 - 74)        | 824<br>(741 - 922)       | 1,025<br>(884 - 1,146)  | 7,095<br>(5,515 - 7,934) |
| Falls                                           | 6,105<br>(4,315 - 7,026)  | 14<br>(10 - 19)       | 10<br>(8 - 12)         | 249<br>(187 - 295)       | 479<br>(329 - 571)      | 5,353<br>(3,732 - 6,164) |
| Drowning                                        | 216<br>(170 - 286)        | 18<br>(12 - 27)       | 14<br>(10 - 18)        | 88<br>(68 - 107)         | 47<br>(36 - 67)         | 49<br>(36 - 90)          |
| Fire, heat, and hot substances                  | 363<br>(304 - 501)        | 18<br>(13 - 27)       | 7<br>(5 - 10)          | 66<br>(54 - 86)          | 79<br>(64 - 115)        | 192<br>(160 - 266)       |
| Poisonings                                      | 162<br>(127 - 310)        | 2<br>(2 - 4)          | 2<br>(1 - 3)           | 77<br>(61 - 145)         | 39<br>(31 - 73)         | 42<br>(30 - 89)          |
| Exposure to mechanical forces                   | 307<br>(227 - 341)        | 34<br>(18 - 45)       | 16<br>(9 - 19)         | 136<br>(100 - 152)       | 55<br>(43 - 63)         | 67<br>(48 - 76)          |
| Unintentional firearm injuries                  | 10<br>(9 - 11)            | 0<br>(0 - 1)          | 1<br>(1 - 1)           | 5<br>(4 - 6)             | 2<br>(1 - 2)            | 2<br>(1 - 2)             |
| Unintentional suffocation                       | 150<br>(68 - 177)         | 28<br>(13 - 38)       | 10<br>(4 - 13)         | 65<br>(27 - 78)          | 20<br>(9 - 24)          | 28<br>(14 - 34)          |
| Other exposure to mechanical forces             | 147<br>(128 - 177)        | 6<br>(4 - 8)          | 5<br>(4 - 6)           | 66<br>(57 - 80)          | 34<br>(28 - 43)         | 37<br>(28 - 47)          |
| Adverse effects of medical treatment            | 776<br>(645 - 1,045)      | 10<br>(7 - 15)        | 3<br>(2 - 4)           | 44<br>(34 - 59)          | 140<br>(107 - 200)      | 579<br>(479 - 789)       |
| Animal contact                                  | 32<br>(19 - 41)           | 2<br>(1 - 2)          | 1<br>(1 - 2)           | 8<br>(5 - 10)            | 9<br>(5 - 11)           | 13<br>(8 - 17)           |
| Venomous animal contact                         | 8<br>(5 - 12)             | 0<br>(0 - 1)          | 0<br>(0 - 1)           | 3<br>(2 - 4)             | 3<br>(2 - 4)            | 2<br>(1 - 3)             |
| Non-venomous animal contact                     | 24<br>(14 - 30)           | 1<br>(1 - 2)          | 1<br>(0 - 1)           | 5<br>(3 - 6)             | 6<br>(3 - 8)            | 11<br>(6 - 14)           |
| Foreign body                                    | 1,122<br>(627 - 1,397)    | 38<br>(23 - 53)       | 11<br>(7 - 15)         | 135<br>(86 - 184)        | 162<br>(100 - 201)      | 776<br>(397 - 1,009)     |
| Pulmonary aspiration and foreign body in airway | 1,107<br>(614 - 1,382)    | 38<br>(23 - 52)       | 10<br>(7 - 14)         | 131<br>(83 - 180)        | 158<br>(97 - 197)       | 769<br>(390 - 1,001)     |
| Foreign body in other body part                 | 15<br>(10 - 18)           | 0<br>(0 - 1)          | 1<br>(0 - 1)           | 4<br>(2 - 5)             | 3<br>(2 - 4)            | 7<br>(4 - 10)            |
| Other unintentional injuries                    | 68<br>(62 - 77)           | 7<br>(5 - 9)          | 1<br>(1 - 2)           | 22<br>(19 - 26)          | 13<br>(12 - 16)         | 25<br>(21 - 29)          |
| Self-harm and interpersonal violence            | 3,838<br>(3,373 - 4,538)  | 11<br>(8 - 16)        | 8<br>(7 - 10)          | 2,160<br>(1,897 - 2,535) | 1,080<br>(915 - 1,252)  | 579<br>(516 - 734)       |
| Self-harm                                       | 3,650<br>(3,183 - 4,325)  | --                    | 4<br>(3 - 5)           | 2,042<br>(1,783 - 2,399) | 1,051<br>(881 - 1,218)  | 553<br>(492 - 707)       |
| Interpersonal violence                          | 188<br>(138 - 250)        | 11<br>(8 - 16)        | 5<br>(3 - 6)           | 118<br>(87 - 163)        | 29<br>(20 - 39)         | 26<br>(17 - 32)          |
| Assault by firearm                              | 34<br>(20 - 54)           | 1<br>(0 - 1)          | 1<br>(0 - 1)           | 26<br>(15 - 42)          | 5<br>(3 - 7)            | 2<br>(1 - 3)             |
| Assault by sharp object                         | 38<br>(24 - 58)           | 1<br>(0 - 1)          | 0<br>(0 - 1)           | 29<br>(19 - 45)          | 5<br>(3 - 8)            | 2<br>(1 - 3)             |
| Assault by other means                          | 116<br>(85 - 155)         | 10<br>(7 - 14)        | 4<br>(3 - 5)           | 63<br>(46 - 89)          | 19<br>(13 - 26)         | 21<br>(14 - 27)          |

Web Table 31- England deaths with 95% UI by age, sex, and cause in 2013

| Cause                                                              | Males, All Ages                | Males, 0-4 Years         | Males, 5-14 Years  | Males, 15-49 Years          | Males, 50-69 Years          | Males, 70-80 Years             |
|--------------------------------------------------------------------|--------------------------------|--------------------------|--------------------|-----------------------------|-----------------------------|--------------------------------|
| All causes                                                         | 232,244<br>(220,534 - 243,358) | 1,849<br>(1,480 - 2,293) | 315<br>(273 - 362) | 12,685<br>(11,748 - 13,621) | 48,537<br>(45,144 - 51,676) | 168,857<br>(161,064 - 176,121) |
| Communicable, maternal, neonatal, and nutritional diseases         | 16,237<br>(14,466 - 18,923)    | 970<br>(777 - 1,209)     | 28<br>(21 - 37)    | 514<br>(444 - 583)          | 1,443<br>(1,168 - 1,622)    | 13,281<br>(11,710 - 16,073)    |
| HIV/AIDS and tuberculosis                                          | 387<br>(295 - 470)             | 1<br>(0 - 1)             | 0<br>(0 - 0)       | 120<br>(89 - 157)           | 107<br>(77 - 142)           | 159<br>(109 - 192)             |
| Tuberculosis                                                       | 230<br>(167 - 269)             | 0<br>(0 - 1)             | 0<br>(0 - 0)       | 18<br>(15 - 21)             | 58<br>(45 - 67)             | 153<br>(105 - 184)             |
| HIV/AIDS                                                           | 156<br>(105 - 224)             | 0<br>(0 - 0)             | 0<br>(0 - 0)       | 101<br>(71 - 139)           | 48<br>(24 - 83)             | 7<br>(2 - 14)                  |
| HIV/AIDS resulting in mycobacterial infection                      | 9<br>(6 - 13)                  | 0<br>(0 - 0)             | 0<br>(0 - 0)       | 6<br>(4 - 8)                | 3<br>(1 - 5)                | 0<br>(0 - 1)                   |
| HIV/AIDS resulting in other diseases                               | 148<br>(99 - 210)              | 0<br>(0 - 0)             | 0<br>(0 - 0)       | 96<br>(67 - 131)            | 46<br>(22 - 78)             | 6<br>(1 - 13)                  |
| Diarrrhea, lower respiratory, and other common infectious diseases | 14,562<br>(12,888 - 17,266)    | 147<br>(113 - 190)       | 23<br>(17 - 31)    | 320<br>(273 - 368)          | 1,227<br>(957 - 1,400)      | 12,845<br>(11,275 - 15,632)    |
| Diarrrheal diseases                                                | 610<br>(507 - 733)             | 22<br>(16 - 28)          | 2<br>(1 - 2)       | 16<br>(14 - 18)             | 54<br>(46 - 63)             | 516<br>(415 - 634)             |
| Intestinal infectious diseases                                     | 37<br>(13 - 81)                | 7<br>(2 - 15)            | 6<br>(2 - 14)      | 15<br>(5 - 34)              | 5<br>(2 - 12)               | 4<br>(1 - 9)                   |
| Typhoid fever                                                      | 27<br>(9 - 60)                 | 4<br>(1 - 10)            | 5<br>(1 - 11)      | 11<br>(3 - 26)              | 4<br>(1 - 9)                | 3<br>(1 - 6)                   |
| Paratyphoid fever                                                  | 7<br>(2 - 16)                  | 2<br>(0 - 4)             | 2<br>(0 - 3)       | 3<br>(1 - 7)                | 1<br>(0 - 2)                | 1<br>(0 - 1)                   |
| Other intestinal infectious diseases                               | 3<br>(1 - 7)                   | 1<br>(0 - 3)             | 0<br>(0 - 1)       | 1<br>(0 - 3)                | 1<br>(0 - 3)                | 1<br>(0 - 3)                   |
| Lower respiratory infections                                       | 13,680<br>(12,008 - 16,444)    | 77<br>(58 - 102)         | 7<br>(6 - 9)       | 240<br>(198 - 277)          | 1,120<br>(847 - 1,288)      | 12,235<br>(10,712 - 15,068)    |
| Upper respiratory infections                                       | 5<br>(3 - 8)                   | 0<br>(0 - 0)             | 0<br>(0 - 0)       | 0<br>(0 - 1)                | 1<br>(1 - 2)                | 3<br>(1 - 6)                   |
| Otitis media                                                       | 5<br>(5 - 6)                   | 1<br>(1 - 1)             | 0<br>(0 - 0)       | 1<br>(1 - 2)                | 1<br>(1 - 1)                | 2<br>(1 - 2)                   |
| Meningitis                                                         | 139<br>(122 - 168)             | 31<br>(21 - 51)          | 4<br>(3 - 5)       | 26<br>(23 - 30)             | 29<br>(26 - 34)             | 49<br>(42 - 68)                |
| Pneumococcal meningitis                                            | 23<br>(20 - 28)                | 4<br>(3 - 7)             | 1<br>(0 - 1)       | 4<br>(4 - 6)                | 5<br>(4 - 7)                | 9<br>(7 - 13)                  |
| H influenzae type B meningitis                                     | 21<br>(17 - 28)                | 9<br>(6 - 15)            | 1<br>(1 - 1)       | 3<br>(3 - 4)                | 3<br>(2 - 4)                | 5<br>(4 - 7)                   |
| Meningococcal meningitis                                           | 44<br>(38 - 55)                | 9<br>(6 - 15)            | 1<br>(1 - 2)       | 9<br>(7 - 11)               | 9<br>(7 - 11)               | 16<br>(13 - 22)                |
| Other meningitis                                                   | 51<br>(44 - 62)                | 9<br>(6 - 15)            | 1<br>(1 - 1)       | 10<br>(8 - 12)              | 12<br>(10 - 15)             | 19<br>(15 - 26)                |
| Encephalitis                                                       | 57<br>(32 - 72)                | 6<br>(3 - 8)             | 2<br>(1 - 3)       | 16<br>(8 - 20)              | 13<br>(7 - 17)              | 21<br>(11 - 27)                |
| Diphtheria                                                         | 0<br>(0 - 1)                   | 0<br>(0 - 0)             | 0<br>(0 - 0)       | 0<br>(0 - 0)                | 0<br>(0 - 0)                | --                             |
| Whooping cough                                                     | 4<br>(2 - 7)                   | 2<br>(0 - 5)             | 0<br>(0 - 0)       | 1<br>(1 - 1)                | 0<br>(0 - 0)                | --                             |
| Tetanus                                                            | 3<br>(1 - 4)                   | 0<br>(0 - 0)             | 0<br>(0 - 0)       | 1<br>(1 - 1)                | 1<br>(0 - 1)                | 1<br>(0 - 2)                   |
| Measles                                                            | 0<br>(0 - 0)                   | 0<br>(0 - 0)             | 0<br>(0 - 0)       | 0<br>(0 - 0)                | 0<br>(0 - 0)                | --                             |
| Varicella and herpes zoster                                        | 21<br>(11 - 40)                | 1<br>(1 - 3)             | 0<br>(0 - 1)       | 2<br>(1 - 3)                | 2<br>(1 - 4)                | 15<br>(5 - 32)                 |
| Neglected tropical diseases and malaria                            | 26<br>(22 - 32)                | 2<br>(1 - 2)             | 1<br>(1 - 1)       | 8<br>(6 - 10)               | 9<br>(7 - 12)               | 6<br>(4 - 8)                   |
| Cysticercosis                                                      | 0<br>(0 - 0)                   | 0<br>(0 - 0)             | 0<br>(0 - 0)       | 0<br>(0 - 0)                | 0<br>(0 - 0)                | 0<br>(0 - 0)                   |
| Cystic echinococcosis                                              | 2<br>(2 - 2)                   | 0<br>(0 - 0)             | 0<br>(0 - 0)       | 0<br>(0 - 0)                | 1<br>(1 - 1)                | 1<br>(1 - 1)                   |
| Dengue                                                             | 2<br>(1 - 3)                   | 0<br>(0 - 0)             | 0<br>(0 - 0)       | 1<br>(1 - 1)                | 1<br>(0 - 1)                | 0<br>(0 - 0)                   |
| Rabies                                                             | 2<br>(1 - 3)                   | 0<br>(0 - 0)             | 0<br>(0 - 0)       | 1<br>(1 - 1)                | 1<br>(0 - 1)                | 0<br>(0 - 0)                   |
| Other neglected tropical diseases                                  | 19<br>(15 - 25)                | 1<br>(1 - 2)             | 0<br>(0 - 0)       | 6<br>(4 - 7)                | 8<br>(6 - 10)               | 4<br>(3 - 7)                   |
| Maternal disorders                                                 | --                             | --                       | --                 | --                          | --                          | --                             |
| Maternal hemorrhage                                                | --                             | --                       | --                 | --                          | --                          | --                             |
| Maternal sepsis and other maternal infections                      | --                             | --                       | --                 | --                          | --                          | --                             |
| Maternal hypertensive disorders                                    | --                             | --                       | --                 | --                          | --                          | --                             |
| Maternal obstructed labor                                          | --                             | --                       | --                 | --                          | --                          | --                             |
| Maternal abortive outcome                                          | --                             | --                       | --                 | --                          | --                          | --                             |
| Indirect maternal deaths                                           | --                             | --                       | --                 | --                          | --                          | --                             |

Web Table 31- England deaths with 95% UI by age, sex, and cause in 2013

| Cause                                                            | Males, All Ages                | Males, 0-4 Years     | Males, 5-14 Years  | Males, 15-49 Years       | Males, 50-69 Years          | Males, 70-80 Years             |
|------------------------------------------------------------------|--------------------------------|----------------------|--------------------|--------------------------|-----------------------------|--------------------------------|
| Late maternal deaths                                             | --                             | --                   | --                 | --                       | --                          | --                             |
| Maternal deaths aggravated by HIV/AIDS                           | --                             | --                   | --                 | --                       | --                          | --                             |
| Other maternal disorders                                         | --                             | --                   | --                 | --                       | --                          | --                             |
| Neonatal disorders                                               | 802<br>(639 - 1,002)           | 802<br>(639 - 1,002) | --                 | --                       | --                          | --                             |
| Neonatal preterm birth complications                             | 600<br>(453 - 769)             | 600<br>(453 - 769)   | --                 | --                       | --                          | --                             |
| Neonatal encephalopathy due to birth asphyxia and trauma         | 110<br>(70 - 170)              | 110<br>(70 - 170)    | --                 | --                       | --                          | --                             |
| Neonatal sepsis and other neonatal infections                    | 36<br>(17 - 88)                | 36<br>(17 - 88)      | --                 | --                       | --                          | --                             |
| Hemolytic disease and other neonatal jaundice                    | 2<br>(1 - 3)                   | 2<br>(1 - 3)         | --                 | --                       | --                          | --                             |
| Other neonatal disorders                                         | 54<br>(33 - 84)                | 54<br>(33 - 84)      | --                 | --                       | --                          | --                             |
| Nutritional deficiencies                                         | 182<br>(127 - 303)             | 1<br>(1 - 2)         | 0<br>(0 - 1)       | 6<br>(4 - 10)            | 16<br>(10 - 24)             | 158<br>(111 - 271)             |
| Protein-energy malnutrition                                      | 34<br>(13 - 64)                | 1<br>(0 - 1)         | 0<br>(0 - 0)       | 2<br>(1 - 3)             | 5<br>(2 - 9)                | 26<br>(10 - 52)                |
| Iodine deficiency                                                | 1<br>(0 - 3)                   | 0<br>(0 - 0)         | 0<br>(0 - 0)       | 0<br>(0 - 0)             | 0<br>(0 - 1)                | 1<br>(0 - 3)                   |
| Iron-deficiency anemia                                           | 126<br>(74 - 217)              | 0<br>(0 - 1)         | 0<br>(0 - 0)       | 4<br>(2 - 6)             | 9<br>(5 - 15)               | 113<br>(67 - 194)              |
| Other nutritional deficiencies                                   | 21<br>(9 - 54)                 | 0<br>(0 - 1)         | 0<br>(0 - 0)       | 1<br>(0 - 2)             | 2<br>(1 - 4)                | 18<br>(7 - 47)                 |
| Other communicable, maternal, neonatal, and nutritional diseases | 278<br>(183 - 344)             | 17<br>(10 - 25)      | 4<br>(3 - 5)       | 60<br>(42 - 73)          | 83<br>(56 - 105)            | 113<br>(67 - 143)              |
| Sexually transmitted diseases excluding HIV                      | 9<br>(6 - 14)                  | 3<br>(1 - 6)         | 0<br>(0 - 0)       | 1<br>(1 - 1)             | 1<br>(1 - 3)                | 3<br>(2 - 7)                   |
| Syphilis                                                         | 7<br>(5 - 12)                  | 3<br>(1 - 6)         | 0<br>(0 - 0)       | 1<br>(0 - 1)             | 1<br>(1 - 2)                | 3<br>(2 - 6)                   |
| Chlamydial infection                                             | --                             | --                   | --                 | --                       | --                          | --                             |
| Gonococcal infection                                             | 1<br>(1 - 2)                   | --                   | 0<br>(0 - 0)       | 0<br>(0 - 0)             | 0<br>(0 - 0)                | 0<br>(0 - 1)                   |
| Other sexually transmitted diseases                              | 1<br>(0 - 1)                   | --                   | 0<br>(0 - 0)       | 0<br>(0 - 0)             | 0<br>(0 - 0)                | 0<br>(0 - 0)                   |
| Hepatitis                                                        | 57<br>(50 - 68)                | 1<br>(1 - 1)         | 1<br>(1 - 1)       | 19<br>(16 - 23)          | 23<br>(19 - 29)             | 13<br>(11 - 16)                |
| Acute hepatitis A                                                | 13<br>(4 - 24)                 | 1<br>(0 - 1)         | 0<br>(0 - 1)       | 6<br>(2 - 11)            | 4<br>(1 - 9)                | 2<br>(0 - 3)                   |
| Acute hepatitis B                                                | 38<br>(26 - 50)                | 0<br>(0 - 1)         | 0<br>(0 - 0)       | 11<br>(7 - 16)           | 17<br>(11 - 22)             | 10<br>(7 - 12)                 |
| Acute hepatitis C                                                | 6<br>(1 - 14)                  | --                   | 0<br>(0 - 0)       | 2<br>(0 - 5)             | 2<br>(0 - 6)                | 2<br>(0 - 4)                   |
| Other infectious diseases                                        | 213<br>(115 - 278)             | 14<br>(7 - 20)       | 3<br>(2 - 4)       | 40<br>(23 - 52)          | 59<br>(31 - 80)             | 97<br>(49 - 127)               |
| Non-communicable diseases                                        | 207,016<br>(196,088 - 217,543) | 763<br>(594 - 973)   | 190<br>(163 - 222) | 8,787<br>(8,075 - 9,464) | 45,291<br>(42,217 - 48,264) | 151,985<br>(144,830 - 158,794) |
| Neoplasms                                                        | 70,679<br>(65,835 - 75,962)    | 53<br>(36 - 75)      | 97<br>(80 - 115)   | 2,835<br>(2,574 - 3,103) | 21,657<br>(20,003 - 23,343) | 46,037<br>(42,687 - 49,728)    |
| Esophageal cancer                                                | 4,476<br>(3,829 - 5,963)       | --                   | --                 | 172<br>(140 - 209)       | 1,759<br>(1,464 - 2,288)    | 2,545<br>(2,186 - 3,512)       |
| Stomach cancer                                                   | 3,480<br>(3,189 - 3,872)       | --                   | --                 | 104<br>(93 - 123)        | 855<br>(775 - 975)          | 2,520<br>(2,299 - 2,837)       |
| Liver cancer                                                     | 1,646<br>(1,063 - 2,031)       | --                   | 1<br>(1 - 2)       | 86<br>(58 - 109)         | 617<br>(410 - 774)          | 943<br>(562 - 1,205)           |
| Liver cancer due to hepatitis B                                  | 342<br>(216 - 460)             | --                   | 1<br>(1 - 1)       | 32<br>(21 - 44)          | 156<br>(97 - 215)           | 153<br>(84 - 211)              |
| Liver cancer due to hepatitis C                                  | 846<br>(532 - 1,094)           | --                   | 0<br>(0 - 1)       | 37<br>(25 - 52)          | 313<br>(203 - 411)          | 495<br>(288 - 664)             |
| Liver cancer due to alcohol use                                  | 427<br>(248 - 578)             | --                   | --                 | 14<br>(8 - 20)           | 134<br>(79 - 186)           | 279<br>(153 - 377)             |
| Liver cancer due to other causes                                 | 32<br>(19 - 46)                | --                   | 0<br>(0 - 0)       | 3<br>(2 - 4)             | 13<br>(8 - 19)              | 16<br>(9 - 24)                 |
| Larynx cancer                                                    | 560<br>(404 - 739)             | --                   | --                 | 23<br>(17 - 31)          | 214<br>(154 - 277)          | 322<br>(231 - 436)             |
| Tracheal, bronchus and lung cancer                               | 17,426<br>(15,624 - 19,201)    | --                   | --                 | 372<br>(313 - 426)       | 5,995<br>(5,203 - 6,730)    | 11,060<br>(10,037 - 12,106)    |
| Breast cancer                                                    | 81<br>(46 - 154)               | --                   | --                 | 4<br>(2 - 7)             | 25<br>(14 - 45)             | 52<br>(28 - 99)                |
| Cervical cancer                                                  | --                             | --                   | --                 | --                       | --                          | --                             |
| Uterine cancer                                                   | --                             | --                   | --                 | --                       | --                          | --                             |
| Prostate cancer                                                  | 9,818<br>(6,540 - 13,892)      | --                   | --                 | 17<br>(11 - 24)          | 1,424<br>(840 - 1,935)      | 8,376<br>(5,566 - 12,038)      |

Web Table 31- England deaths with 95% UI by age, sex, and cause in 2013

| Cause                                         | Males, All Ages             | Males, 0-4 Years | Males, 5-14 Years | Males, 15-49 Years       | Males, 50-69 Years          | Males, 70-80 Years          |
|-----------------------------------------------|-----------------------------|------------------|-------------------|--------------------------|-----------------------------|-----------------------------|
| Colon and rectum cancer                       | 9,024<br>(8,291 - 9,659)    | --               | --                | 289<br>(259 - 320)       | 2,742<br>(2,487 - 2,980)    | 5,992<br>(5,498 - 6,427)    |
| Lip and oral cavity cancer                    | 836<br>(611 - 933)          | --               | --                | 85<br>(67 - 98)          | 401<br>(273 - 451)          | 350<br>(278 - 405)          |
| Nasopharynx cancer                            | 87<br>(73 - 117)            | --               | 1<br>(0 - 1)      | 18<br>(15 - 25)          | 42<br>(35 - 58)             | 26<br>(20 - 37)             |
| Other pharynx cancer                          | 401<br>(258 - 505)          | --               | --                | 40<br>(30 - 50)          | 228<br>(144 - 289)          | 133<br>(77 - 176)           |
| Gallbladder and biliary tract cancer          | 307<br>(224 - 391)          | --               | --                | 9<br>(6 - 11)            | 82<br>(57 - 106)            | 216<br>(161 - 279)          |
| Pancreatic cancer                             | 3,760<br>(3,463 - 4,055)    | --               | --                | 140<br>(125 - 155)       | 1,408<br>(1,283 - 1,537)    | 2,213<br>(2,031 - 2,387)    |
| Malignant skin melanoma                       | 1,045<br>(473 - 1,690)      | --               | --                | 171<br>(82 - 296)        | 398<br>(180 - 646)          | 476<br>(215 - 756)          |
| Non-melanoma skin cancer                      | 330<br>(203 - 514)          | --               | --                | 13<br>(8 - 20)           | 45<br>(26 - 70)             | 271<br>(166 - 425)          |
| Ovarian cancer                                | --                          | --               | --                | --                       | --                          | --                          |
| Testicular cancer                             | 76<br>(58 - 101)            | --               | --                | 48<br>(36 - 62)          | 15<br>(11 - 20)             | 14<br>(11 - 20)             |
| Kidney cancer                                 | 2,137<br>(1,909 - 2,366)    | 2<br>(1 - 3)     | 2<br>(2 - 3)      | 109<br>(91 - 127)        | 793<br>(684 - 900)          | 1,231<br>(1,093 - 1,366)    |
| Bladder cancer                                | 2,592<br>(2,113 - 2,966)    | --               | --                | 27<br>(23 - 33)          | 508<br>(431 - 595)          | 2,056<br>(1,639 - 2,352)    |
| Brain and nervous system cancer               | 1,825<br>(1,389 - 2,218)    | 10<br>(7 - 16)   | 26<br>(20 - 39)   | 314<br>(243 - 391)       | 876<br>(678 - 1,129)        | 599<br>(422 - 709)          |
| Thyroid cancer                                | 123<br>(103 - 140)          | --               | 0<br>(0 - 0)      | 8<br>(6 - 9)             | 42<br>(34 - 49)             | 73<br>(59 - 84)             |
| Mesothelioma                                  | 1,589<br>(673 - 1,938)      | --               | --                | 33<br>(20 - 44)          | 583<br>(286 - 733)          | 972<br>(341 - 1,244)        |
| Hodgkin lymphoma                              | 154<br>(111 - 215)          | 0<br>(0 - 0)     | 1<br>(1 - 1)      | 55<br>(41 - 79)          | 51<br>(37 - 73)             | 47<br>(33 - 68)             |
| Non-Hodgkin lymphoma                          | 2,620<br>(1,291 - 3,171)    | 3<br>(1 - 4)     | 9<br>(4 - 12)     | 203<br>(112 - 268)       | 834<br>(411 - 1,110)        | 1,571<br>(761 - 1,896)      |
| Multiple myeloma                              | 1,516<br>(982 - 2,280)      | --               | --                | 44<br>(28 - 69)          | 468<br>(303 - 753)          | 1,004<br>(646 - 1,487)      |
| Leukemia                                      | 2,375<br>(2,032 - 2,599)    | 15<br>(10 - 20)  | 32<br>(26 - 38)   | 196<br>(167 - 217)       | 612<br>(510 - 684)          | 1,521<br>(1,309 - 1,670)    |
| Other neoplasms                               | 2,395<br>(1,738 - 2,730)    | 23<br>(13 - 33)  | 25<br>(15 - 32)   | 256<br>(203 - 294)       | 639<br>(489 - 781)          | 1,452<br>(985 - 1,701)      |
| Cardiovascular diseases                       | 73,141<br>(67,789 - 77,779) | 14<br>(10 - 18)  | 7<br>(6 - 9)      | 2,270<br>(2,060 - 2,495) | 14,317<br>(13,096 - 15,588) | 56,533<br>(52,189 - 59,864) |
| Rheumatic heart disease                       | 321<br>(219 - 488)          | 0<br>(0 - 0)     | 0<br>(0 - 0)      | 27<br>(19 - 39)          | 80<br>(58 - 125)            | 214<br>(142 - 336)          |
| Ischemic heart disease                        | 42,014<br>(37,894 - 46,736) | 1<br>(0 - 1)     | 1<br>(0 - 1)      | 1,411<br>(1,265 - 1,616) | 9,668<br>(8,809 - 10,671)   | 30,935<br>(27,461 - 34,614) |
| Cerebrovascular disease                       | 18,091<br>(13,867 - 21,607) | 3<br>(2 - 4)     | 2<br>(1 - 3)      | 360<br>(268 - 448)       | 2,197<br>(1,590 - 2,730)    | 15,529<br>(11,940 - 18,555) |
| Ischemic stroke                               | 10,697<br>(7,875 - 13,766)  | 1<br>(0 - 1)     | 0<br>(0 - 0)      | 43<br>(25 - 59)          | 773<br>(475 - 1,052)        | 9,880<br>(7,376 - 12,707)   |
| Hemorrhagic stroke                            | 7,394<br>(4,468 - 9,818)    | 2<br>(1 - 3)     | 2<br>(1 - 2)      | 316<br>(238 - 394)       | 1,424<br>(976 - 1,802)      | 5,649<br>(3,134 - 7,797)    |
| Hypertensive heart disease                    | 1,072<br>(642 - 1,543)      | 0<br>(0 - 0)     | 0<br>(0 - 0)      | 50<br>(32 - 70)          | 294<br>(183 - 446)          | 727<br>(417 - 1,038)        |
| Cardiomyopathy and myocarditis                | 1,289<br>(931 - 1,948)      | 7<br>(5 - 10)    | 3<br>(2 - 4)      | 165<br>(107 - 218)       | 317<br>(196 - 438)          | 796<br>(599 - 1,314)        |
| Atrial fibrillation and flutter               | 1,257<br>(941 - 1,481)      | --               | --                | 4<br>(3 - 4)             | 82<br>(58 - 99)             | 1,172<br>(881 - 1,381)      |
| Aortic aneurysm                               | 3,875<br>(3,203 - 4,424)    | --               | --                | 57<br>(43 - 69)          | 664<br>(543 - 794)          | 3,154<br>(2,600 - 3,627)    |
| Peripheral vascular disease                   | 800<br>(668 - 935)          | --               | --                | 4<br>(3 - 5)             | 102<br>(82 - 124)           | 694<br>(574 - 811)          |
| Endocarditis                                  | 347<br>(232 - 546)          | 1<br>(0 - 1)     | 0<br>(0 - 0)      | 28<br>(19 - 38)          | 90<br>(63 - 130)            | 228<br>(143 - 374)          |
| Other cardiovascular and circulatory diseases | 4,074<br>(2,226 - 4,678)    | 2<br>(1 - 3)     | 1<br>(1 - 1)      | 164<br>(91 - 194)        | 824<br>(434 - 956)          | 3,083<br>(1,723 - 3,609)    |
| Chronic respiratory diseases                  | 18,740<br>(16,369 - 24,477) | 14<br>(10 - 18)  | 6<br>(5 - 8)      | 206<br>(175 - 238)       | 2,884<br>(2,400 - 3,483)    | 15,630<br>(13,600 - 20,817) |
| Chronic obstructive pulmonary disease         | 15,658<br>(13,460 - 20,943) | 7<br>(5 - 9)     | 1<br>(1 - 1)      | 95<br>(81 - 115)         | 2,371<br>(1,979 - 2,889)    | 13,184<br>(11,323 - 17,978) |
| Pneumoconiosis                                | 641<br>(411 - 990)          | 0<br>(0 - 0)     | 0<br>(0 - 0)      | 4<br>(3 - 6)             | 58<br>(37 - 84)             | 578<br>(367 - 908)          |
| Silicosis                                     | 14<br>(8 - 22)              | 0<br>(0 - 0)     | 0<br>(0 - 0)      | 1<br>(1 - 1)             | 2<br>(1 - 3)                | 11<br>(6 - 18)              |
| Asbestosis                                    | 290<br>(185 - 465)          | 0<br>(0 - 0)     | 0<br>(0 - 0)      | 1<br>(1 - 2)             | 32<br>(20 - 46)             | 256<br>(163 - 416)          |
| Coal workers pneumoconiosis                   | 238<br>(151 - 366)          | 0<br>(0 - 0)     | 0<br>(0 - 0)      | 1<br>(1 - 2)             | 15<br>(9 - 22)              | 221<br>(139 - 343)          |
| Other pneumoconiosis                          | 100<br>(61 - 152)           | 0<br>(0 - 0)     | 0<br>(0 - 0)      | 1<br>(1 - 1)             | 10<br>(6 - 14)              | 89<br>(54 - 137)            |



Web Table 31- England deaths with 95% UI by age, sex, and cause in 2013

| Cause                                               | Males, All Ages             | Males, 0-4 Years | Males, 5-14 Years | Males, 15-49 Years     | Males, 50-69 Years       | Males, 70-80 Years          |
|-----------------------------------------------------|-----------------------------|------------------|-------------------|------------------------|--------------------------|-----------------------------|
| Asthma                                              | 347<br>(294 - 449)          | 2<br>(1 - 3)     | 4<br>(3 - 5)      | 66<br>(56 - 80)        | 84<br>(68 - 100)         | 191<br>(157 - 267)          |
| Interstitial lung disease and pulmonary sarcoidosis | 1,992<br>(831 - 2,827)      | 1<br>(1 - 2)     | 1<br>(0 - 1)      | 36<br>(18 - 51)        | 360<br>(159 - 511)       | 1,594<br>(645 - 2,285)      |
| Other chronic respiratory diseases                  | 103<br>(85 - 140)           | 3<br>(2 - 4)     | 0<br>(0 - 0)      | 4<br>(3 - 5)           | 11<br>(9 - 14)           | 84<br>(67 - 117)            |
| Cirrhosis                                           | 4,084<br>(3,748 - 4,394)    | 2<br>(2 - 3)     | 2<br>(2 - 2)      | 992<br>(899 - 1,080)   | 2,052<br>(1,872 - 2,223) | 1,035<br>(938 - 1,132)      |
| Cirrhosis due to hepatitis B                        | 364<br>(290 - 464)          | 0<br>(0 - 0)     | 0<br>(0 - 0)      | 86<br>(67 - 111)       | 183<br>(144 - 235)       | 95<br>(71 - 123)            |
| Cirrhosis due to hepatitis C                        | 1,698<br>(1,449 - 1,973)    | 0<br>(0 - 0)     | 1<br>(0 - 1)      | 428<br>(354 - 499)     | 866<br>(731 - 1,013)     | 403<br>(319 - 488)          |
| Cirrhosis due to alcohol use                        | 1,604<br>(1,323 - 1,858)    | --               | --                | 323<br>(260 - 382)     | 808<br>(660 - 939)       | 473<br>(381 - 559)          |
| Cirrhosis due to other causes                       | 418<br>(331 - 530)          | 2<br>(1 - 3)     | 1<br>(1 - 2)      | 155<br>(123 - 193)     | 196<br>(147 - 255)       | 64<br>(47 - 84)             |
| Digestive diseases                                  | 6,736<br>(5,770 - 9,453)    | 7<br>(4 - 9)     | 5<br>(4 - 6)      | 261<br>(207 - 297)     | 1,207<br>(1,034 - 1,408) | 5,256<br>(4,424 - 7,813)    |
| Peptic ulcer disease                                | 1,552<br>(1,106 - 2,682)    | 0<br>(0 - 0)     | 0<br>(0 - 0)      | 44<br>(31 - 57)        | 284<br>(202 - 375)       | 1,224<br>(847 - 2,236)      |
| Gastritis and duodenitis                            | 105<br>(47 - 164)           | 0<br>(0 - 0)     | 0<br>(0 - 0)      | 11<br>(5 - 16)         | 29<br>(13 - 42)          | 65<br>(28 - 113)            |
| Appendicitis                                        | 147<br>(72 - 285)           | 0<br>(0 - 1)     | 1<br>(1 - 1)      | 11<br>(7 - 15)         | 29<br>(16 - 48)          | 106<br>(45 - 221)           |
| Paralytic ileus and intestinal obstruction          | 908<br>(351 - 1,212)        | 2<br>(1 - 3)     | 1<br>(1 - 2)      | 24<br>(11 - 32)        | 123<br>(50 - 169)        | 758<br>(284 - 1,027)        |
| Inguinal, femoral, and abdominal hernia             | 406<br>(147 - 1,419)        | 0<br>(0 - 0)     | 0<br>(0 - 0)      | 5<br>(3 - 9)           | 44<br>(19 - 121)         | 357<br>(125 - 1,282)        |
| Inflammatory bowel disease                          | 422<br>(285 - 655)          | 2<br>(1 - 3)     | 1<br>(0 - 1)      | 22<br>(16 - 31)        | 74<br>(48 - 109)         | 323<br>(210 - 511)          |
| Vascular intestinal disorders                       | 888<br>(338 - 1,848)        | 0<br>(0 - 1)     | 0<br>(0 - 1)      | 19<br>(7 - 38)         | 181<br>(71 - 362)        | 688<br>(255 - 1,469)        |
| Gallbladder and biliary diseases                    | 714<br>(391 - 907)          | 0<br>(0 - 0)     | 0<br>(0 - 0)      | 13<br>(9 - 16)         | 93<br>(55 - 119)         | 607<br>(322 - 779)          |
| Pancreatitis                                        | 540<br>(330 - 778)          | 0<br>(0 - 0)     | 0<br>(0 - 0)      | 75<br>(51 - 96)        | 169<br>(102 - 230)       | 296<br>(170 - 476)          |
| Other digestive diseases                            | 1,053<br>(697 - 1,474)      | 1<br>(0 - 1)     | 1<br>(1 - 1)      | 36<br>(25 - 45)        | 181<br>(113 - 229)       | 834<br>(536 - 1,223)        |
| Neurological disorders                              | 22,502<br>(20,235 - 24,676) | 44<br>(32 - 59)  | 23<br>(19 - 31)   | 465<br>(391 - 576)     | 1,524<br>(1,327 - 1,704) | 20,446<br>(18,162 - 22,593) |
| Alzheimer disease and other dementias               | 17,641<br>(15,595 - 19,708) | --               | --                | 2<br>(1 - 4)           | 576<br>(502 - 660)       | 17,062<br>(15,071 - 19,091) |
| Parkinson disease                                   | 2,592<br>(2,185 - 2,918)    | --               | --                | 3<br>(2 - 3)           | 159<br>(125 - 186)       | 2,430<br>(2,025 - 2,748)    |
| Epilepsy                                            | 447<br>(339 - 578)          | 8<br>(5 - 12)    | 9<br>(7 - 13)     | 217<br>(174 - 278)     | 100<br>(70 - 134)        | 112<br>(75 - 150)           |
| Multiple sclerosis                                  | 309<br>(133 - 525)          | --               | --                | 72<br>(32 - 123)       | 154<br>(64 - 264)        | 84<br>(36 - 138)            |
| Other neurological disorders                        | 1,513<br>(1,159 - 1,774)    | 36<br>(26 - 50)  | 14<br>(11 - 20)   | 170<br>(136 - 211)     | 534<br>(421 - 662)       | 759<br>(547 - 871)          |
| Mental and substance use disorders                  | 1,584<br>(1,038 - 1,786)    | 2<br>(1 - 2)     | 0<br>(0 - 0)      | 1,211<br>(814 - 1,372) | 282<br>(155 - 333)       | 90<br>(61 - 108)            |
| Schizophrenia                                       | 26<br>(18 - 47)             | --               | --                | 2<br>(1 - 3)           | 6<br>(4 - 11)            | 18<br>(12 - 33)             |
| Alcohol use disorders                               | 405<br>(165 - 495)          | --               | --                | 178<br>(74 - 216)      | 183<br>(70 - 227)        | 43<br>(18 - 53)             |
| Drug use disorders                                  | 1,153<br>(780 - 1,309)      | 2<br>(1 - 2)     | --                | 1,030<br>(703 - 1,170) | 93<br>(56 - 109)         | 28<br>(16 - 34)             |
| Opioid use disorders                                | 431<br>(288 - 497)          | 1<br>(0 - 1)     | --                | 388<br>(262 - 450)     | 32<br>(19 - 39)          | 10<br>(6 - 13)              |
| Cocaine use disorders                               | 31<br>(20 - 38)             | 0<br>(0 - 0)     | --                | 28<br>(19 - 35)        | 2<br>(1 - 2)             | 1<br>(0 - 1)                |
| Amphetamine use disorders                           | 28<br>(19 - 35)             | 0<br>(0 - 0)     | --                | 25<br>(17 - 31)        | 2<br>(1 - 3)             | 1<br>(0 - 1)                |
| Other drug use disorders                            | 663<br>(433 - 757)          | 1<br>(0 - 1)     | --                | 588<br>(391 - 673)     | 57<br>(35 - 68)          | 17<br>(10 - 21)             |
| Eating disorders                                    | 1<br>(1 - 1)                | --               | 0<br>(0 - 0)      | 1<br>(1 - 1)           | --                       | --                          |
| Anorexia nervosa                                    | 1<br>(1 - 1)                | --               | 0<br>(0 - 0)      | 1<br>(1 - 1)           | --                       | --                          |
| Diabetes, urogenital, blood, and endocrine diseases | 7,524<br>(6,417 - 8,186)    | 47<br>(35 - 64)  | 20<br>(16 - 28)   | 345<br>(311 - 394)     | 1,053<br>(955 - 1,154)   | 6,060<br>(5,028 - 6,660)    |
| Diabetes mellitus                                   | 2,208<br>(2,051 - 2,377)    | 1<br>(1 - 2)     | 1<br>(1 - 1)      | 111<br>(101 - 122)     | 419<br>(380 - 456)       | 1,676<br>(1,543 - 1,820)    |
| Acute glomerulonephritis                            | 6<br>(5 - 9)                | 0<br>(0 - 0)     | 0<br>(0 - 0)      | 1<br>(1 - 1)           | 1<br>(1 - 2)             | 4<br>(3 - 6)                |
| Chronic kidney disease                              | 2,119<br>(1,886 - 2,507)    | 2<br>(2 - 3)     | 1<br>(1 - 1)      | 63<br>(54 - 79)        | 243<br>(209 - 302)       | 1,810<br>(1,614 - 2,140)    |
| Chronic kidney disease due to diabetes mellitus     | 361<br>(279 - 692)          | 0<br>(0 - 0)     | 0<br>(0 - 0)      | 10<br>(7 - 19)         | 51<br>(37 - 90)          | 300<br>(228 - 587)          |

Web Table 31- England deaths with 95% UI by age, sex, and cause in 2013

| Cause                                               | Males, All Ages          | Males, 0-4 Years   | Males, 5-14 Years | Males, 15-49 Years       | Males, 50-69 Years       | Males, 70-80 Years       |
|-----------------------------------------------------|--------------------------|--------------------|-------------------|--------------------------|--------------------------|--------------------------|
| Chronic kidney disease due to hypertension          | 578<br>(298 - 731)       | 0<br>(0 - 0)       | 0<br>(0 - 0)      | 15<br>(8 - 21)           | 67<br>(36 - 97)          | 496<br>(250 - 619)       |
| Chronic kidney disease due to glomerulonephritis    | 129<br>(68 - 185)        | 1<br>(0 - 1)       | 0<br>(0 - 0)      | 7<br>(4 - 9)             | 19<br>(13 - 27)          | 102<br>(48 - 150)        |
| Chronic kidney disease due to other causes          | 1,050<br>(831 - 1,372)   | 1<br>(1 - 2)       | 0<br>(0 - 1)      | 31<br>(25 - 46)          | 106<br>(78 - 152)        | 911<br>(716 - 1,185)     |
| Urinary diseases and male infertility               | 2,381<br>(1,169 - 2,877) | 5<br>(3 - 7)       | 1<br>(0 - 1)      | 37<br>(21 - 46)          | 184<br>(96 - 236)        | 2,154<br>(1,031 - 2,609) |
| Interstitial nephritis and urinary tract infections | 2,091<br>(1,022 - 2,536) | 4<br>(2 - 6)       | 1<br>(0 - 1)      | 28<br>(15 - 34)          | 146<br>(77 - 192)        | 1,913<br>(919 - 2,325)   |
| Urolithiasis                                        | 64<br>(21 - 136)         | --                 | 0<br>(0 - 0)      | 3<br>(1 - 6)             | 11<br>(4 - 22)           | 50<br>(15 - 110)         |
| Other urinary diseases                              | 226<br>(83 - 460)        | 1<br>(1 - 2)       | 0<br>(0 - 0)      | 6<br>(3 - 11)            | 27<br>(11 - 50)          | 191<br>(69 - 402)        |
| Gynecological diseases                              | --                       | --                 | --                | --                       | --                       | --                       |
| Uterine fibroids                                    | --                       | --                 | --                | --                       | --                       | --                       |
| Polycystic ovarian syndrome                         | --                       | --                 | --                | --                       | --                       | --                       |
| Endometriosis                                       | --                       | --                 | --                | --                       | --                       | --                       |
| Genital prolapse                                    | --                       | --                 | --                | --                       | --                       | --                       |
| Other gynecological diseases                        | --                       | --                 | --                | --                       | --                       | --                       |
| Hemoglobinopathies and hemolytic anemias            | 101<br>(64 - 160)        | 3<br>(2 - 5)       | 2<br>(1 - 3)      | 14<br>(9 - 22)           | 18<br>(11 - 30)          | 63<br>(41 - 101)         |
| Thalassemias                                        | 6<br>(4 - 9)             | 1<br>(1 - 2)       | 1<br>(0 - 1)      | 4<br>(2 - 6)             | 0<br>(0 - 0)             | 0<br>(0 - 0)             |
| Sickle cell disorders                               | 21<br>(13 - 33)          | 1<br>(1 - 2)       | 1<br>(1 - 1)      | 6<br>(4 - 10)            | 9<br>(6 - 15)            | 3<br>(2 - 5)             |
| G6PD deficiency                                     | 0<br>(0 - 1)             | 0<br>(0 - 0)       | 0<br>(0 - 0)      | 0<br>(0 - 0)             | 0<br>(0 - 0)             | 0<br>(0 - 0)             |
| Other hemoglobinopathies and hemolytic anemias      | 74<br>(47 - 119)         | 1<br>(0 - 1)       | 0<br>(0 - 1)      | 4<br>(3 - 6)             | 9<br>(6 - 15)            | 60<br>(38 - 96)          |
| Endocrine, metabolic, blood, and immune disorders   | 709<br>(572 - 1,178)     | 35<br>(25 - 52)    | 14<br>(11 - 22)   | 118<br>(96 - 162)        | 188<br>(147 - 307)       | 353<br>(275 - 665)       |
| Musculoskeletal disorders                           | 525<br>(279 - 640)       | --                 | 1<br>(1 - 2)      | 33<br>(21 - 42)          | 124<br>(75 - 164)        | 367<br>(168 - 442)       |
| Rheumatoid arthritis                                | 192<br>(92 - 255)        | --                 | 0<br>(0 - 0)      | 4<br>(2 - 5)             | 48<br>(26 - 71)          | 141<br>(59 - 186)        |
| Other musculoskeletal disorders                     | 333<br>(181 - 417)       | --                 | 1<br>(1 - 1)      | 29<br>(19 - 37)          | 77<br>(46 - 101)         | 226<br>(109 - 289)       |
| Other non-communicable diseases                     | 1,501<br>(1,323 - 1,705) | 582<br>(454 - 751) | 28<br>(23 - 34)   | 170<br>(146 - 189)       | 189<br>(160 - 211)       | 531<br>(400 - 601)       |
| Congenital anomalies                                | 865<br>(750 - 1,005)     | 454<br>(355 - 576) | 28<br>(22 - 34)   | 153<br>(130 - 172)       | 123<br>(102 - 138)       | 108<br>(93 - 127)        |
| Neural tube defects                                 | 28<br>(21 - 37)          | 20<br>(14 - 28)    | 1<br>(1 - 1)      | 6<br>(5 - 7)             | 1<br>(1 - 1)             | 0<br>(0 - 0)             |
| Congenital heart anomalies                          | 341<br>(292 - 396)       | 157<br>(122 - 201) | 15<br>(11 - 18)   | 89<br>(74 - 102)         | 46<br>(34 - 62)          | 34<br>(28 - 43)          |
| Cleft lip and cleft palate                          | 0<br>(0 - 1)             | 0<br>(0 - 1)       | --                | --                       | --                       | --                       |
| Down syndrome                                       | 87<br>(48 - 110)         | 12<br>(5 - 17)     | 1<br>(0 - 2)      | 18<br>(8 - 24)           | 51<br>(30 - 65)          | 5<br>(2 - 7)             |
| Chromosomal unbalanced rearrangements               | 38<br>(25 - 51)          | 32<br>(21 - 44)    | 1<br>(1 - 2)      | 3<br>(2 - 4)             | 1<br>(1 - 1)             | 1<br>(1 - 1)             |
| Other congenital anomalies                          | 371<br>(312 - 453)       | 233<br>(180 - 306) | 10<br>(7 - 13)    | 37<br>(30 - 45)          | 24<br>(18 - 33)          | 67<br>(56 - 80)          |
| Skin and subcutaneous diseases                      | 510<br>(339 - 588)       | 2<br>(1 - 3)       | 1<br>(0 - 1)      | 17<br>(11 - 21)          | 66<br>(41 - 83)          | 424<br>(283 - 489)       |
| Cellulitis                                          | 212<br>(108 - 287)       | 1<br>(0 - 1)       | 0<br>(0 - 0)      | 7<br>(4 - 9)             | 31<br>(17 - 41)          | 173<br>(84 - 239)        |
| Pyoderma                                            | 191<br>(126 - 262)       | 1<br>(1 - 2)       | 0<br>(0 - 0)      | 7<br>(5 - 11)            | 25<br>(16 - 37)          | 157<br>(104 - 216)       |
| Decubitus ulcer                                     | 81<br>(56 - 123)         | 0<br>(0 - 0)       | 0<br>(0 - 0)      | 1<br>(1 - 2)             | 7<br>(4 - 11)            | 73<br>(50 - 112)         |
| Other skin and subcutaneous diseases                | 25<br>(15 - 42)          | 0<br>(0 - 0)       | 0<br>(0 - 0)      | 1<br>(1 - 2)             | 4<br>(2 - 7)             | 20<br>(11 - 33)          |
| Sudden infant death syndrome                        | 126<br>(82 - 242)        | 126<br>(82 - 242)  | --                | --                       | --                       | --                       |
| Injuries                                            | 8,990<br>(7,889 - 9,863) | 115<br>(86 - 153)  | 97<br>(83 - 113)  | 3,383<br>(3,050 - 3,764) | 1,804<br>(1,568 - 2,028) | 3,591<br>(2,782 - 4,012) |
| Transport injuries                                  | 1,869<br>(1,693 - 2,043) | 23<br>(16 - 32)    | 46<br>(38 - 55)   | 1,041<br>(937 - 1,151)   | 366<br>(328 - 403)       | 393<br>(330 - 449)       |
| Road injuries                                       | 1,779<br>(1,608 - 1,946) | 21<br>(15 - 30)    | 44<br>(37 - 53)   | 991<br>(894 - 1,098)     | 341<br>(305 - 376)       | 381<br>(321 - 436)       |
| Pedestrian road injuries                            | 478<br>(331 - 684)       | 10<br>(6 - 15)     | 20<br>(14 - 27)   | 139<br>(83 - 220)        | 118<br>(81 - 174)        | 190<br>(134 - 260)       |

Web Table 31- England deaths with 95% UI by age, sex, and cause in 2013

| Cause                                           | Males, All Ages          | Males, 0-4 Years | Males, 5-14 Years | Males, 15-49 Years       | Males, 50-69 Years | Males, 70-80 Years       |
|-------------------------------------------------|--------------------------|------------------|-------------------|--------------------------|--------------------|--------------------------|
| Cyclist road injuries                           | 107<br>(66 - 146)        | 2<br>(1 - 3)     | 11<br>(7 - 15)    | 40<br>(26 - 53)          | 26<br>(15 - 37)    | 28<br>(15 - 43)          |
| Motorcyclist road injuries                      | 337<br>(223 - 429)       | 1<br>(0 - 1)     | 2<br>(1 - 2)      | 286<br>(190 - 362)       | 35<br>(20 - 47)    | 13<br>(7 - 21)           |
| Motor vehicle road injuries                     | 850<br>(657 - 1,017)     | 8<br>(5 - 12)    | 12<br>(7 - 16)    | 523<br>(418 - 620)       | 160<br>(119 - 197) | 148<br>(93 - 195)        |
| Other road injuries                             | 7<br>(4 - 15)            | 0<br>(0 - 0)     | 0<br>(0 - 0)      | 3<br>(2 - 6)             | 2<br>(1 - 4)       | 2<br>(1 - 5)             |
| Other transport injuries                        | 90<br>(66 - 107)         | 1<br>(1 - 2)     | 2<br>(1 - 2)      | 50<br>(37 - 60)          | 25<br>(18 - 31)    | 11<br>(7 - 16)           |
| Unintentional injuries                          | 4,231<br>(3,286 - 4,746) | 87<br>(63 - 115) | 46<br>(38 - 55)   | 629<br>(550 - 717)       | 649<br>(532 - 747) | 2,821<br>(2,013 - 3,197) |
| Falls                                           | 2,596<br>(1,695 - 3,030) | 10<br>(6 - 14)   | 8<br>(6 - 10)     | 206<br>(149 - 248)       | 335<br>(216 - 406) | 2,037<br>(1,305 - 2,374) |
| Drowning                                        | 165<br>(124 - 224)       | 13<br>(8 - 19)   | 11<br>(8 - 15)    | 75<br>(56 - 94)          | 35<br>(25 - 51)    | 32<br>(21 - 68)          |
| Fire, heat, and hot substances                  | 188<br>(152 - 287)       | 11<br>(7 - 17)   | 4<br>(3 - 6)      | 44<br>(35 - 60)          | 41<br>(31 - 65)    | 89<br>(70 - 141)         |
| Poisonings                                      | 88<br>(68 - 199)         | 1<br>(1 - 3)     | 1<br>(1 - 2)      | 49<br>(38 - 107)         | 19<br>(15 - 42)    | 18<br>(11 - 50)          |
| Exposure to mechanical forces                   | 221<br>(154 - 257)       | 20<br>(9 - 27)   | 12<br>(6 - 15)    | 116<br>(84 - 135)        | 43<br>(33 - 52)    | 30<br>(20 - 39)          |
| Unintentional firearm injuries                  | 6<br>(5 - 7)             | 0<br>(0 - 0)     | 0<br>(0 - 0)      | 4<br>(3 - 4)             | 1<br>(1 - 1)       | 1<br>(1 - 1)             |
| Unintentional suffocation                       | 110<br>(42 - 131)        | 17<br>(5 - 24)   | 8<br>(3 - 11)     | 54<br>(20 - 66)          | 15<br>(6 - 19)     | 16<br>(6 - 20)           |
| Other exposure to mechanical forces             | 105<br>(91 - 131)        | 3<br>(2 - 4)     | 3<br>(2 - 4)      | 59<br>(50 - 72)          | 26<br>(22 - 34)    | 14<br>(11 - 21)          |
| Adverse effects of medical treatment            | 331<br>(234 - 455)       | 6<br>(3 - 8)     | 1<br>(1 - 2)      | 24<br>(16 - 33)          | 68<br>(44 - 100)   | 232<br>(163 - 320)       |
| Animal contact                                  | 18<br>(9 - 22)           | 1<br>(0 - 1)     | 1<br>(0 - 1)      | 5<br>(2 - 5)             | 6<br>(3 - 7)       | 6<br>(3 - 8)             |
| Venomous animal contact                         | 4<br>(2 - 6)             | 0<br>(0 - 0)     | 0<br>(0 - 0)      | 1<br>(1 - 2)             | 2<br>(1 - 2)       | 1<br>(0 - 1)             |
| Non-venomous animal contact                     | 14<br>(7 - 17)           | 1<br>(0 - 1)     | 0<br>(0 - 0)      | 3<br>(1 - 4)             | 4<br>(2 - 5)       | 6<br>(2 - 7)             |
| Foreign body                                    | 579<br>(242 - 751)       | 21<br>(9 - 31)   | 8<br>(4 - 12)     | 92<br>(49 - 138)         | 93<br>(43 - 126)   | 365<br>(129 - 499)       |
| Pulmonary aspiration and foreign body in airway | 571<br>(237 - 743)       | 21<br>(9 - 31)   | 7<br>(4 - 12)     | 90<br>(47 - 137)         | 91<br>(41 - 124)   | 363<br>(127 - 497)       |
| Foreign body in other body part                 | 8<br>(4 - 11)            | 0<br>(0 - 0)     | 0<br>(0 - 0)      | 2<br>(1 - 3)             | 2<br>(1 - 3)       | 3<br>(1 - 4)             |
| Other unintentional injuries                    | 44<br>(39 - 50)          | 5<br>(3 - 6)     | 1<br>(1 - 1)      | 18<br>(16 - 22)          | 9<br>(8 - 11)      | 11<br>(9 - 13)           |
| Self-harm and interpersonal violence            | 2,891<br>(2,414 - 3,501) | 6<br>(3 - 9)     | 5<br>(4 - 6)      | 1,713<br>(1,440 - 2,055) | 789<br>(601 - 947) | 378<br>(316 - 489)       |
| Self-harm                                       | 2,769<br>(2,306 - 3,335) | --               | 3<br>(2 - 3)      | 1,628<br>(1,361 - 1,960) | 770<br>(587 - 925) | 368<br>(305 - 480)       |
| Interpersonal violence                          | 122<br>(78 - 187)        | 6<br>(3 - 9)     | 2<br>(1 - 4)      | 86<br>(57 - 134)         | 19<br>(12 - 29)    | 9<br>(4 - 14)            |
| Assault by firearm                              | 26<br>(13 - 46)          | 0<br>(0 - 1)     | 0<br>(0 - 0)      | 21<br>(11 - 38)          | 4<br>(2 - 6)       | 1<br>(0 - 2)             |
| Assault by sharp object                         | 25<br>(14 - 44)          | 0<br>(0 - 1)     | 0<br>(0 - 0)      | 20<br>(11 - 36)          | 3<br>(2 - 6)       | 1<br>(0 - 2)             |
| Assault by other means                          | 71<br>(46 - 112)         | 5<br>(3 - 8)     | 2<br>(1 - 3)      | 44<br>(29 - 71)          | 12<br>(7 - 19)     | 7<br>(4 - 11)            |

Web Table 31- England deaths with 95% UI by age, sex, and cause in 2013

| Cause                                                              | Females, All Ages              | Females, 0-4 Years       | Females, 5-14 Years | Females, 15-49 Years     | Females, 50-69 Years        | Females, 70-80 Years           |
|--------------------------------------------------------------------|--------------------------------|--------------------------|---------------------|--------------------------|-----------------------------|--------------------------------|
| All causes                                                         | 247,021<br>(235,640 - 260,915) | 1,435<br>(1,165 - 1,776) | 241<br>(215 - 272)  | 7,577<br>(7,006 - 8,269) | 33,649<br>(31,493 - 36,226) | 204,120<br>(195,338 - 214,711) |
| Communicable, maternal, neonatal, and nutritional diseases         | 23,130<br>(20,056 - 30,042)    | 725<br>(573 - 908)       | 27<br>(22 - 33)     | 349<br>(303 - 390)       | 1,041<br>(865 - 1,187)      | 20,988<br>(18,087 - 27,875)    |
| HIV/AIDS and tuberculosis                                          | 209<br>(167 - 247)             | 1<br>(0 - 1)             | 0<br>(0 - 0)        | 56<br>(41 - 77)          | 51<br>(40 - 65)             | 101<br>(75 - 118)              |
| Tuberculosis                                                       | 149<br>(115 - 171)             | 1<br>(0 - 1)             | 0<br>(0 - 0)        | 15<br>(12 - 17)          | 35<br>(27 - 41)             | 98<br>(72 - 116)               |
| HIV/AIDS                                                           | 60<br>(38 - 91)                | 0<br>(0 - 0)             | 0<br>(0 - 0)        | 41<br>(27 - 61)          | 16<br>(8 - 28)              | 2<br>(1 - 5)                   |
| HIV/AIDS resulting in mycobacterial infection                      | 3<br>(2 - 4)                   | 0<br>(0 - 0)             | 0<br>(0 - 0)        | 2<br>(1 - 3)             | 1<br>(0 - 1)                | 0<br>(0 - 0)                   |
| HIV/AIDS resulting in other diseases                               | 57<br>(37 - 87)                | 0<br>(0 - 0)             | 0<br>(0 - 0)        | 39<br>(26 - 58)          | 16<br>(8 - 27)              | 2<br>(1 - 5)                   |
| Diarrrhea, lower respiratory, and other common infectious diseases | 21,627<br>(18,646 - 28,595)    | 112<br>(85 - 144)        | 21<br>(17 - 28)     | 211<br>(180 - 242)       | 904<br>(748 - 1,040)        | 20,378<br>(17,526 - 27,277)    |
| Diarrrheal diseases                                                | 1,132<br>(951 - 1,350)         | 20<br>(15 - 27)          | 2<br>(1 - 2)        | 15<br>(13 - 17)          | 64<br>(54 - 75)             | 1,031<br>(853 - 1,242)         |
| Intestinal infectious diseases                                     | 28<br>(10 - 62)                | 5<br>(2 - 12)            | 5<br>(2 - 11)       | 11<br>(4 - 23)           | 4<br>(1 - 8)                | 4<br>(1 - 8)                   |
| Typhoid fever                                                      | 21<br>(7 - 49)                 | 4<br>(1 - 8)             | 4<br>(1 - 9)        | 8<br>(3 - 19)            | 3<br>(1 - 6)                | 3<br>(1 - 6)                   |
| Paratyphoid fever                                                  | 5<br>(2 - 11)                  | 1<br>(0 - 3)             | 1<br>(0 - 2)        | 2<br>(1 - 4)             | 0<br>(0 - 1)                | 0<br>(0 - 1)                   |
| Other intestinal infectious diseases                               | 2<br>(0 - 7)                   | 0<br>(0 - 3)             | 0<br>(0 - 1)        | 1<br>(0 - 3)             | 0<br>(0 - 2)                | 1<br>(0 - 3)                   |
| Lower respiratory infections                                       | 20,231<br>(17,291 - 27,208)    | 59<br>(43 - 79)          | 8<br>(7 - 10)       | 150<br>(123 - 173)       | 792<br>(650 - 917)          | 19,222<br>(16,420 - 26,025)    |
| Upper respiratory infections                                       | 5<br>(3 - 9)                   | 0<br>(0 - 0)             | 0<br>(0 - 0)        | 0<br>(0 - 0)             | 1<br>(0 - 1)                | 4<br>(2 - 8)                   |
| Otitis media                                                       | 7<br>(6 - 8)                   | 1<br>(1 - 2)             | 0<br>(0 - 0)        | 1<br>(1 - 2)             | 1<br>(1 - 1)                | 3<br>(2 - 3)                   |
| Meningitis                                                         | 131<br>(114 - 173)             | 19<br>(15 - 25)          | 3<br>(3 - 4)        | 18<br>(15 - 23)          | 26<br>(22 - 34)             | 65<br>(54 - 92)                |
| Pneumococcal meningitis                                            | 23<br>(19 - 32)                | 2<br>(2 - 3)             | 0<br>(0 - 1)        | 3<br>(2 - 4)             | 5<br>(4 - 7)                | 13<br>(10 - 20)                |
| H influenzae type B meningitis                                     | 16<br>(13 - 20)                | 5<br>(4 - 7)             | 1<br>(0 - 1)        | 2<br>(2 - 2)             | 2<br>(2 - 3)                | 6<br>(5 - 8)                   |
| Meningococcal meningitis                                           | 43<br>(36 - 59)                | 6<br>(4 - 8)             | 1<br>(1 - 2)        | 6<br>(5 - 8)             | 8<br>(6 - 11)               | 22<br>(18 - 33)                |
| Other meningitis                                                   | 48<br>(42 - 64)                | 5<br>(3 - 8)             | 1<br>(1 - 1)        | 7<br>(6 - 9)             | 11<br>(8 - 14)              | 24<br>(19 - 33)                |
| Encephalitis                                                       | 56<br>(32 - 71)                | 5<br>(2 - 6)             | 2<br>(1 - 2)        | 12<br>(6 - 15)           | 13<br>(7 - 17)              | 25<br>(13 - 32)                |
| Diphtheria                                                         | 0<br>(0 - 1)                   | 0<br>(0 - 0)             | 0<br>(0 - 0)        | 0<br>(0 - 0)             | 0<br>(0 - 0)                | --                             |
| Whooping cough                                                     | 3<br>(2 - 6)                   | 1<br>(0 - 4)             | 0<br>(0 - 0)        | 1<br>(1 - 1)             | 0<br>(0 - 0)                | --                             |
| Tetanus                                                            | 3<br>(1 - 3)                   | 0<br>(0 - 0)             | 0<br>(0 - 0)        | 1<br>(1 - 1)             | 1<br>(0 - 1)                | 1<br>(0 - 1)                   |
| Measles                                                            | 0<br>(0 - 0)                   | 0<br>(0 - 0)             | 0<br>(0 - 0)        | 0<br>(0 - 0)             | 0<br>(0 - 0)                | --                             |
| Varicella and herpes zoster                                        | 31<br>(14 - 60)                | 1<br>(1 - 3)             | 0<br>(0 - 1)        | 2<br>(1 - 3)             | 2<br>(1 - 4)                | 24<br>(8 - 54)                 |
| Neglected tropical diseases and malaria                            | 18<br>(10 - 21)                | 1<br>(0 - 2)             | 1<br>(1 - 1)        | 6<br>(4 - 7)             | 5<br>(3 - 6)                | 5<br>(3 - 6)                   |
| Cysticercosis                                                      | 0<br>(0 - 0)                   | 0<br>(0 - 0)             | 0<br>(0 - 0)        | 0<br>(0 - 0)             | 0<br>(0 - 0)                | 0<br>(0 - 0)                   |
| Cystic echinococcosis                                              | 2<br>(2 - 3)                   | 0<br>(0 - 0)             | 0<br>(0 - 0)        | 0<br>(0 - 0)             | 1<br>(1 - 1)                | 1<br>(1 - 1)                   |
| Dengue                                                             | 2<br>(1 - 3)                   | 0<br>(0 - 0)             | 0<br>(0 - 0)        | 1<br>(1 - 1)             | 1<br>(0 - 1)                | 0<br>(0 - 0)                   |
| Rabies                                                             | 2<br>(1 - 3)                   | 0<br>(0 - 0)             | 0<br>(0 - 0)        | 1<br>(1 - 1)             | 1<br>(0 - 1)                | 0<br>(0 - 0)                   |
| Other neglected tropical diseases                                  | 11<br>(3 - 13)                 | 1<br>(0 - 1)             | 0<br>(0 - 1)        | 3<br>(1 - 4)             | 3<br>(1 - 4)                | 3<br>(1 - 4)                   |
| Maternal disorders                                                 | 37<br>(31 - 42)                | --                       | 1<br>(0 - 1)        | 36<br>(31 - 41)          | --                          | --                             |
| Maternal hemorrhage                                                | 4<br>(3 - 4)                   | --                       | 0<br>(0 - 0)        | 4<br>(3 - 4)             | --                          | --                             |
| Maternal sepsis and other maternal infections                      | 3<br>(3 - 4)                   | --                       | 0<br>(0 - 0)        | 3<br>(3 - 4)             | --                          | --                             |
| Maternal hypertensive disorders                                    | 5<br>(4 - 5)                   | --                       | 0<br>(0 - 0)        | 4<br>(4 - 5)             | --                          | --                             |
| Maternal obstructed labor                                          | 3<br>(2 - 3)                   | --                       | 0<br>(0 - 0)        | 3<br>(2 - 3)             | --                          | --                             |
| Maternal abortive outcome                                          | 7<br>(6 - 9)                   | --                       | 0<br>(0 - 0)        | 7<br>(6 - 9)             | --                          | --                             |
| Indirect maternal deaths                                           | 4<br>(3 - 5)                   | --                       | 0<br>(0 - 0)        | 4<br>(3 - 5)             | --                          | --                             |

Web Table 31- England deaths with 95% UI by age, sex, and cause in 2013

| Cause                                                            | Females, All Ages              | Females, 0-4 Years | Females, 5-14 Years | Females, 15-49 Years     | Females, 50-69 Years        | Females, 70-80 Years           |
|------------------------------------------------------------------|--------------------------------|--------------------|---------------------|--------------------------|-----------------------------|--------------------------------|
| Late maternal deaths                                             | 3<br>(2 - 3)                   | --                 | 0<br>(0 - 0)        | 3<br>(2 - 3)             | --                          | --                             |
| Maternal deaths aggravated by HIV/AIDS                           | 0<br>(0 - 0)                   | --                 | --                  | 0<br>(0 - 0)             | --                          | --                             |
| Other maternal disorders                                         | 8<br>(7 - 9)                   | --                 | 0<br>(0 - 0)        | 8<br>(6 - 9)             | --                          | --                             |
| Neonatal disorders                                               | 597<br>(470 - 753)             | 597<br>(470 - 753) | --                  | --                       | --                          | --                             |
| Neonatal preterm birth complications                             | 437<br>(330 - 559)             | 437<br>(330 - 559) | --                  | --                       | --                          | --                             |
| Neonatal encephalopathy due to birth asphyxia and trauma         | 98<br>(62 - 140)               | 98<br>(62 - 140)   | --                  | --                       | --                          | --                             |
| Neonatal sepsis and other neonatal infections                    | 25<br>(14 - 49)                | 25<br>(14 - 49)    | --                  | --                       | --                          | --                             |
| Hemolytic disease and other neonatal jaundice                    | 1<br>(0 - 2)                   | 1<br>(0 - 2)       | --                  | --                       | --                          | --                             |
| Other neonatal disorders                                         | 36<br>(21 - 53)                | 36<br>(21 - 53)    | --                  | --                       | --                          | --                             |
| Nutritional deficiencies                                         | 385<br>(322 - 473)             | 1<br>(1 - 1)       | 0<br>(0 - 0)        | 7<br>(6 - 8)             | 20<br>(17 - 26)             | 356<br>(295 - 439)             |
| Protein-energy malnutrition                                      | 47<br>(15 - 80)                | 0<br>(0 - 1)       | 0<br>(0 - 0)        | 2<br>(1 - 3)             | 5<br>(2 - 7)                | 40<br>(12 - 69)                |
| Iodine deficiency                                                | 2<br>(0 - 6)                   | 0<br>(0 - 0)       | 0<br>(0 - 0)        | 0<br>(0 - 0)             | 0<br>(0 - 1)                | 2<br>(0 - 5)                   |
| Iron-deficiency anemia                                           | 304<br>(231 - 394)             | 0<br>(0 - 1)       | 0<br>(0 - 0)        | 4<br>(3 - 6)             | 13<br>(9 - 18)              | 286<br>(217 - 371)             |
| Other nutritional deficiencies                                   | 32<br>(12 - 80)                | 0<br>(0 - 0)       | 0<br>(0 - 0)        | 1<br>(0 - 2)             | 2<br>(1 - 4)                | 29<br>(11 - 73)                |
| Other communicable, maternal, neonatal, and nutritional diseases | 257<br>(181 - 302)             | 13<br>(7 - 18)     | 3<br>(2 - 4)        | 32<br>(23 - 39)          | 60<br>(41 - 74)             | 149<br>(103 - 175)             |
| Sexually transmitted diseases excluding HIV                      | 50<br>(36 - 69)                | 3<br>(1 - 5)       | 0<br>(0 - 1)        | 4<br>(3 - 5)             | 7<br>(5 - 10)               | 36<br>(25 - 52)                |
| Syphilis                                                         | 37<br>(27 - 51)                | 3<br>(1 - 5)       | 0<br>(0 - 0)        | 1<br>(1 - 2)             | 4<br>(3 - 6)                | 28<br>(19 - 41)                |
| Chlamydial infection                                             | 3<br>(3 - 5)                   | --                 | 0<br>(0 - 0)        | 1<br>(1 - 1)             | 1<br>(1 - 1)                | 2<br>(1 - 3)                   |
| Gonococcal infection                                             | 6<br>(4 - 8)                   | --                 | 0<br>(0 - 0)        | 1<br>(1 - 1)             | 1<br>(1 - 2)                | 4<br>(3 - 6)                   |
| Other sexually transmitted diseases                              | 3<br>(2 - 5)                   | --                 | 0<br>(0 - 0)        | 1<br>(0 - 1)             | 1<br>(1 - 1)                | 2<br>(1 - 3)                   |
| Hepatitis                                                        | 29<br>(25 - 34)                | 1<br>(0 - 1)       | 1<br>(0 - 1)        | 7<br>(6 - 9)             | 9<br>(8 - 12)               | 11<br>(9 - 14)                 |
| Acute hepatitis A                                                | 8<br>(3 - 14)                  | 0<br>(0 - 1)       | 0<br>(0 - 1)        | 3<br>(1 - 5)             | 2<br>(1 - 4)                | 2<br>(1 - 4)                   |
| Acute hepatitis B                                                | 17<br>(11 - 24)                | 0<br>(0 - 0)       | 0<br>(0 - 0)        | 3<br>(2 - 5)             | 6<br>(4 - 9)                | 8<br>(5 - 10)                  |
| Acute hepatitis C                                                | 3<br>(1 - 7)                   | --                 | 0<br>(0 - 0)        | 1<br>(0 - 2)             | 1<br>(0 - 2)                | 1<br>(0 - 3)                   |
| Other infectious diseases                                        | 178<br>(104 - 229)             | 9<br>(5 - 13)      | 2<br>(1 - 3)        | 22<br>(13 - 29)          | 43<br>(25 - 58)             | 102<br>(56 - 129)              |
| Non-communicable diseases                                        | 217,331<br>(206,151 - 229,323) | 633<br>(499 - 803) | 169<br>(149 - 192)  | 6,353<br>(5,861 - 6,922) | 31,802<br>(29,748 - 34,172) | 178,375<br>(169,752 - 187,408) |
| Neoplasms                                                        | 63,369<br>(55,783 - 68,541)    | 47<br>(36 - 59)    | 78<br>(68 - 91)     | 3,500<br>(3,192 - 3,847) | 18,409<br>(16,645 - 19,951) | 41,336<br>(35,463 - 44,784)    |
| Esophageal cancer                                                | 2,144<br>(1,929 - 2,397)       | --                 | --                  | 40<br>(34 - 49)          | 476<br>(416 - 547)          | 1,628<br>(1,461 - 1,818)       |
| Stomach cancer                                                   | 2,506<br>(1,856 - 3,374)       | --                 | --                  | 63<br>(46 - 82)          | 380<br>(278 - 508)          | 2,064<br>(1,518 - 2,849)       |
| Liver cancer                                                     | 1,213<br>(806 - 1,390)         | --                 | 1<br>(1 - 1)        | 48<br>(37 - 56)          | 302<br>(214 - 347)          | 862<br>(537 - 999)             |
| Liver cancer due to hepatitis B                                  | 237<br>(149 - 338)             | --                 | 0<br>(0 - 0)        | 16<br>(11 - 20)          | 80<br>(52 - 113)            | 142<br>(81 - 206)              |
| Liver cancer due to hepatitis C                                  | 654<br>(457 - 795)             | --                 | 0<br>(0 - 0)        | 21<br>(16 - 28)          | 153<br>(110 - 197)          | 480<br>(328 - 583)             |
| Liver cancer due to alcohol use                                  | 217<br>(132 - 275)             | --                 | --                  | 4<br>(3 - 5)             | 40<br>(28 - 51)             | 173<br>(98 - 222)              |
| Liver cancer due to other causes                                 | 105<br>(60 - 146)              | --                 | 0<br>(0 - 1)        | 7<br>(5 - 10)            | 30<br>(19 - 42)             | 67<br>(33 - 96)                |
| Larynx cancer                                                    | 149<br>(96 - 213)              | --                 | --                  | 6<br>(4 - 9)             | 56<br>(34 - 81)             | 87<br>(56 - 125)               |
| Tracheal, bronchus and lung cancer                               | 12,878<br>(9,957 - 14,399)     | --                 | --                  | 352<br>(301 - 412)       | 4,281<br>(3,457 - 4,748)    | 8,245<br>(5,891 - 9,372)       |
| Breast cancer                                                    | 11,146<br>(8,712 - 13,199)     | --                 | --                  | 1,163<br>(991 - 1,414)   | 4,017<br>(3,189 - 4,747)    | 5,966<br>(4,415 - 7,052)       |
| Cervical cancer                                                  | 1,013<br>(844 - 1,183)         | --                 | --                  | 219<br>(179 - 257)       | 317<br>(253 - 371)          | 477<br>(390 - 585)             |
| Uterine cancer                                                   | 1,504<br>(1,140 - 1,727)       | --                 | --                  | 29<br>(23 - 35)          | 465<br>(350 - 548)          | 1,010<br>(737 - 1,159)         |
| Prostate cancer                                                  | --                             | --                 | --                  | --                       | --                          | --                             |

Web Table 31- England deaths with 95% UI by age, sex, and cause in 2013

| Cause                                         | Females, All Ages            | Females, 0-4 Years | Females, 5-14 Years | Females, 15-49 Years | Females, 50-69 Years     | Females, 70-80 Years        |
|-----------------------------------------------|------------------------------|--------------------|---------------------|----------------------|--------------------------|-----------------------------|
| Colon and rectum cancer                       | 7,667<br>(6,894 - 8,369)     | --                 | --                  | 212<br>(188 - 238)   | 1,629<br>(1,456 - 1,784) | 5,827<br>(5,204 - 6,430)    |
| Lip and oral cavity cancer                    | 472<br>(400 - 551)           | --                 | --                  | 34<br>(28 - 40)      | 146<br>(120 - 174)       | 292<br>(241 - 356)          |
| Nasopharynx cancer                            | 49<br>(27 - 105)             | --                 | 0<br>(0 - 1)        | 7<br>(4 - 15)        | 17<br>(9 - 36)           | 24<br>(13 - 52)             |
| Other pharynx cancer                          | 157<br>(128 - 194)           | --                 | --                  | 12<br>(9 - 16)       | 70<br>(56 - 89)          | 75<br>(60 - 95)             |
| Gallbladder and biliary tract cancer          | 742<br>(501 - 959)           | --                 | --                  | 11<br>(8 - 15)       | 150<br>(103 - 193)       | 580<br>(386 - 768)          |
| Pancreatic cancer                             | 3,937<br>(3,557 - 4,265)     | --                 | --                  | 88<br>(78 - 100)     | 1,029<br>(912 - 1,136)   | 2,819<br>(2,522 - 3,061)    |
| Malignant skin melanoma                       | 857<br>(552 - 1,079)         | --                 | --                  | 128<br>(91 - 173)    | 282<br>(187 - 362)       | 447<br>(274 - 548)          |
| Non-melanoma skin cancer                      | 276<br>(201 - 353)           | --                 | --                  | 5<br>(4 - 6)         | 23<br>(17 - 29)          | 249<br>(177 - 321)          |
| Ovarian cancer                                | 4,075<br>(3,582 - 4,495)     | --                 | --                  | 262<br>(229 - 303)   | 1,566<br>(1,374 - 1,757) | 2,247<br>(1,888 - 2,509)    |
| Testicular cancer                             | --                           | --                 | --                  | --                   | --                       | --                          |
| Kidney cancer                                 | 1,281<br>(953 - 1,576)       | 3<br>(2 - 4)       | 3<br>(2 - 3)        | 52<br>(42 - 65)      | 394<br>(317 - 491)       | 830<br>(563 - 1,083)        |
| Bladder cancer                                | 1,308<br>(898 - 1,841)       | --                 | --                  | 18<br>(12 - 25)      | 197<br>(138 - 289)       | 1,093<br>(739 - 1,555)      |
| Brain and nervous system cancer               | 1,275<br>(943 - 1,456)       | 8<br>(6 - 12)      | 22<br>(18 - 28)     | 188<br>(152 - 231)   | 531<br>(418 - 640)       | 525<br>(337 - 603)          |
| Thyroid cancer                                | 189<br>(137 - 237)           | --                 | 0<br>(0 - 0)        | 6<br>(4 - 8)         | 39<br>(27 - 50)          | 144<br>(106 - 185)          |
| Mesothelioma                                  | 310<br>(208 - 418)           | --                 | --                  | 13<br>(9 - 18)       | 117<br>(85 - 166)        | 181<br>(115 - 237)          |
| Hodgkin lymphoma                              | 129<br>(87 - 165)            | 0<br>(0 - 0)       | 1<br>(0 - 1)        | 39<br>(27 - 50)      | 36<br>(24 - 46)          | 52<br>(33 - 68)             |
| Non-Hodgkin lymphoma                          | 2,125<br>(1,210 - 2,965)     | 2<br>(1 - 2)       | 3<br>(2 - 5)        | 118<br>(71 - 179)    | 560<br>(339 - 799)       | 1,442<br>(784 - 1,980)      |
| Multiple myeloma                              | 1,317<br>(888 - 1,985)       | --                 | --                  | 28<br>(19 - 43)      | 341<br>(218 - 528)       | 948<br>(627 - 1,431)        |
| Leukemia                                      | 1,686<br>(1,397 - 1,918)     | 11<br>(8 - 16)     | 22<br>(17 - 27)     | 138<br>(115 - 161)   | 346<br>(278 - 405)       | 1,169<br>(958 - 1,334)      |
| Other neoplasms                               | 2,965<br>(2,242 - 3,393)     | 22<br>(17 - 29)    | 26<br>(21 - 31)     | 219<br>(173 - 253)   | 642<br>(506 - 733)       | 2,055<br>(1,458 - 2,384)    |
| Cardiovascular diseases                       | 84,696<br>(77,833 - 100,093) | 11<br>(8 - 16)     | 7<br>(5 - 9)        | 895<br>(702 - 1,052) | 6,505<br>(5,764 - 8,676) | 77,277<br>(71,031 - 90,314) |
| Rheumatic heart disease                       | 884<br>(675 - 1,612)         | 0<br>(0 - 0)       | 0<br>(0 - 0)        | 34<br>(25 - 50)      | 159<br>(122 - 320)       | 691<br>(517 - 1,260)        |
| Ischemic heart disease                        | 38,734<br>(33,784 - 51,212)  | 1<br>(0 - 1)       | 1<br>(1 - 1)        | 319<br>(220 - 409)   | 3,329<br>(2,837 - 5,010) | 35,084<br>(30,396 - 46,049) |
| Cerebrovascular disease                       | 28,492<br>(24,723 - 37,183)  | 2<br>(2 - 3)       | 3<br>(2 - 3)        | 307<br>(226 - 367)   | 1,692<br>(1,407 - 2,298) | 26,488<br>(23,053 - 34,557) |
| Ischemic stroke                               | 17,280<br>(14,558 - 23,298)  | 1<br>(0 - 1)       | 0<br>(0 - 0)        | 26<br>(16 - 35)      | 447<br>(330 - 678)       | 16,806<br>(14,217 - 22,618) |
| Hemorrhagic stroke                            | 11,211<br>(8,077 - 14,663)   | 2<br>(1 - 2)       | 2<br>(2 - 3)        | 281<br>(209 - 335)   | 1,245<br>(1,013 - 1,701) | 9,682<br>(6,795 - 12,788)   |
| Hypertensive heart disease                    | 1,473<br>(947 - 1,893)       | 0<br>(0 - 0)       | 0<br>(0 - 0)        | 19<br>(12 - 25)      | 165<br>(113 - 218)       | 1,289<br>(806 - 1,668)      |
| Cardiomyopathy and myocarditis                | 1,556<br>(1,138 - 2,067)     | 6<br>(4 - 8)       | 2<br>(2 - 3)        | 44<br>(27 - 60)      | 103<br>(66 - 140)        | 1,401<br>(1,036 - 1,858)    |
| Atrial fibrillation and flutter               | 2,973<br>(2,320 - 3,512)     | --                 | --                  | 2<br>(1 - 2)         | 64<br>(50 - 80)          | 2,907<br>(2,264 - 3,435)    |
| Aortic aneurysm                               | 3,080<br>(1,995 - 4,835)     | --                 | --                  | 20<br>(12 - 31)      | 262<br>(168 - 426)       | 2,799<br>(1,787 - 4,406)    |
| Peripheral vascular disease                   | 1,312<br>(1,050 - 1,559)     | --                 | --                  | 3<br>(2 - 4)         | 55<br>(44 - 75)          | 1,254<br>(998 - 1,500)      |
| Endocarditis                                  | 274<br>(199 - 442)           | 1<br>(0 - 1)       | 0<br>(0 - 0)        | 11<br>(7 - 18)       | 48<br>(33 - 87)          | 214<br>(155 - 349)          |
| Other cardiovascular and circulatory diseases | 5,918<br>(3,643 - 7,048)     | 2<br>(1 - 3)       | 1<br>(1 - 1)        | 136<br>(81 - 168)    | 627<br>(404 - 807)       | 5,152<br>(3,125 - 6,145)    |
| Chronic respiratory diseases                  | 15,492<br>(11,765 - 17,165)  | 14<br>(9 - 18)     | 8<br>(6 - 9)        | 191<br>(158 - 218)   | 2,136<br>(1,780 - 2,470) | 13,143<br>(9,718 - 14,605)  |
| Chronic obstructive pulmonary disease         | 13,007<br>(10,479 - 15,022)  | 7<br>(5 - 10)      | 1<br>(1 - 2)        | 76<br>(53 - 102)     | 1,767<br>(1,473 - 2,077) | 11,155<br>(8,895 - 12,937)  |
| Pneumoconiosis                                | 21<br>(13 - 31)              | 0<br>(0 - 0)       | 0<br>(0 - 0)        | 2<br>(1 - 2)         | 3<br>(2 - 4)             | 16<br>(10 - 25)             |
| Silicosis                                     | 1<br>(1 - 1)                 | 0<br>(0 - 0)       | 0<br>(0 - 0)        | 0<br>(0 - 0)         | 0<br>(0 - 0)             | 0<br>(0 - 1)                |
| Asbestosis                                    | 4<br>(2 - 5)                 | 0<br>(0 - 0)       | 0<br>(0 - 0)        | 0<br>(0 - 0)         | 0<br>(0 - 1)             | 3<br>(1 - 4)                |
| Coal workers pneumoconiosis                   | 1<br>(1 - 1)                 | 0<br>(0 - 0)       | 0<br>(0 - 0)        | 0<br>(0 - 0)         | 0<br>(0 - 0)             | 0<br>(0 - 0)                |
| Other pneumoconiosis                          | 15<br>(9 - 24)               | 0<br>(0 - 0)       | 0<br>(0 - 0)        | 0<br>(0 - 1)         | 2<br>(1 - 3)             | 13<br>(8 - 20)              |

Web Table 31- England deaths with 95% UI by age, sex, and cause in 2013

| Cause                                               | Females, All Ages           | Females, 0-4 Years | Females, 5-14 Years | Females, 15-49 Years | Females, 50-69 Years     | Females, 70-80 Years        |
|-----------------------------------------------------|-----------------------------|--------------------|---------------------|----------------------|--------------------------|-----------------------------|
| Asthma                                              | 991<br>(581 - 1,529)        | 2<br>(1 - 3)       | 5<br>(4 - 6)        | 82<br>(64 - 104)     | 154<br>(96 - 262)        | 747<br>(386 - 1,187)        |
| Interstitial lung disease and pulmonary sarcoidosis | 1,375<br>(427 - 2,453)      | 2<br>(1 - 3)       | 1<br>(0 - 1)        | 29<br>(12 - 44)      | 206<br>(72 - 349)        | 1,137<br>(335 - 2,074)      |
| Other chronic respiratory diseases                  | 98<br>(62 - 147)            | 2<br>(1 - 3)       | 0<br>(0 - 0)        | 2<br>(2 - 3)         | 6<br>(4 - 9)             | 87<br>(53 - 134)            |
| Cirrhosis                                           | 2,618<br>(2,366 - 2,835)    | 2<br>(1 - 2)       | 2<br>(1 - 2)        | 493<br>(442 - 546)   | 1,075<br>(956 - 1,175)   | 1,046<br>(935 - 1,146)      |
| Cirrhosis due to hepatitis B                        | 361<br>(271 - 454)          | 0<br>(0 - 0)       | 0<br>(0 - 0)        | 60<br>(41 - 80)      | 148<br>(104 - 200)       | 154<br>(118 - 192)          |
| Cirrhosis due to hepatitis C                        | 1,437<br>(1,237 - 1,647)    | 0<br>(0 - 0)       | 1<br>(0 - 1)        | 277<br>(231 - 327)   | 603<br>(507 - 707)       | 556<br>(466 - 655)          |
| Cirrhosis due to alcohol use                        | 492<br>(397 - 613)          | --                 | --                  | 56<br>(36 - 76)      | 183<br>(136 - 240)       | 252<br>(209 - 313)          |
| Cirrhosis due to other causes                       | 327<br>(255 - 417)          | 2<br>(1 - 2)       | 1<br>(1 - 1)        | 100<br>(78 - 124)    | 141<br>(106 - 184)       | 83<br>(59 - 111)            |
| Digestive diseases                                  | 9,729<br>(8,349 - 12,063)   | 5<br>(4 - 7)       | 5<br>(4 - 6)        | 161<br>(132 - 184)   | 940<br>(780 - 1,089)     | 8,618<br>(7,359 - 10,807)   |
| Peptic ulcer disease                                | 1,592<br>(1,188 - 2,385)    | 0<br>(0 - 0)       | 0<br>(0 - 0)        | 21<br>(16 - 28)      | 151<br>(105 - 201)       | 1,419<br>(1,059 - 2,175)    |
| Gastritis and duodenitis                            | 101<br>(47 - 175)           | 0<br>(0 - 0)       | 0<br>(0 - 0)        | 4<br>(2 - 7)         | 14<br>(6 - 23)           | 83<br>(38 - 146)            |
| Appendicitis                                        | 118<br>(74 - 226)           | 0<br>(0 - 1)       | 1<br>(1 - 1)        | 7<br>(5 - 10)        | 20<br>(13 - 35)          | 89<br>(53 - 180)            |
| Paralytic ileus and intestinal obstruction          | 1,317<br>(644 - 1,998)      | 1<br>(1 - 2)       | 1<br>(1 - 2)        | 21<br>(10 - 31)      | 99<br>(47 - 151)         | 1,195<br>(580 - 1,817)      |
| Inguinal, femoral, and abdominal hernia             | 455<br>(175 - 1,142)        | 0<br>(0 - 0)       | 0<br>(0 - 0)        | 4<br>(2 - 6)         | 36<br>(15 - 83)          | 414<br>(155 - 1,057)        |
| Inflammatory bowel disease                          | 732<br>(515 - 1,198)        | 1<br>(1 - 2)       | 1<br>(1 - 1)        | 22<br>(16 - 32)      | 81<br>(55 - 121)         | 626<br>(432 - 1,042)        |
| Vascular intestinal disorders                       | 1,616<br>(675 - 2,622)      | 0<br>(0 - 1)       | 0<br>(0 - 1)        | 18<br>(8 - 31)       | 187<br>(85 - 303)        | 1,411<br>(577 - 2,323)      |
| Gallbladder and biliary diseases                    | 1,049<br>(655 - 1,344)      | 0<br>(0 - 0)       | 0<br>(0 - 0)        | 13<br>(8 - 16)       | 83<br>(49 - 106)         | 952<br>(591 - 1,225)        |
| Pancreatitis                                        | 549<br>(349 - 849)          | 0<br>(0 - 0)       | 0<br>(0 - 0)        | 29<br>(20 - 39)      | 91<br>(57 - 138)         | 429<br>(268 - 683)          |
| Other digestive diseases                            | 2,200<br>(1,739 - 2,788)    | 1<br>(1 - 1)       | 1<br>(0 - 1)        | 21<br>(16 - 25)      | 178<br>(131 - 214)       | 1,999<br>(1,584 - 2,564)    |
| Neurological disorders                              | 27,385<br>(24,109 - 30,699) | 35<br>(27 - 45)    | 16<br>(13 - 19)     | 319<br>(268 - 393)   | 1,262<br>(1,066 - 1,423) | 25,752<br>(22,575 - 28,961) |
| Alzheimer disease and other dementias               | 23,468<br>(20,382 - 26,649) | --                 | --                  | 2<br>(2 - 4)         | 444<br>(379 - 513)       | 23,022<br>(19,961 - 26,200) |
| Parkinson disease                                   | 1,771<br>(1,176 - 2,131)    | --                 | --                  | 2<br>(1 - 2)         | 77<br>(55 - 106)         | 1,692<br>(1,110 - 2,045)    |
| Epilepsy                                            | 358<br>(245 - 430)          | 6<br>(4 - 9)       | 8<br>(5 - 10)       | 124<br>(92 - 154)    | 70<br>(50 - 88)          | 150<br>(87 - 190)           |
| Multiple sclerosis                                  | 563<br>(315 - 840)          | --                 | --                  | 109<br>(70 - 180)    | 282<br>(160 - 423)       | 172<br>(86 - 232)           |
| Other neurological disorders                        | 1,226<br>(1,111 - 1,331)    | 29<br>(21 - 37)    | 9<br>(7 - 10)       | 82<br>(73 - 92)      | 390<br>(347 - 431)       | 716<br>(637 - 788)          |
| Mental and substance use disorders                  | 573<br>(459 - 775)          | 1<br>(1 - 1)       | 0<br>(0 - 0)        | 318<br>(273 - 401)   | 167<br>(106 - 271)       | 87<br>(68 - 113)            |
| Schizophrenia                                       | 45<br>(32 - 63)             | --                 | --                  | 1<br>(1 - 2)         | 5<br>(4 - 7)             | 39<br>(27 - 56)             |
| Alcohol use disorders                               | 212<br>(93 - 402)           | --                 | --                  | 79<br>(35 - 145)     | 111<br>(48 - 210)        | 22<br>(9 - 39)              |
| Drug use disorders                                  | 311<br>(270 - 363)          | 1<br>(1 - 1)       | --                  | 232<br>(199 - 275)   | 51<br>(42 - 60)          | 27<br>(21 - 33)             |
| Opioid use disorders                                | 109<br>(93 - 130)           | 0<br>(0 - 1)       | --                  | 83<br>(70 - 100)     | 17<br>(13 - 20)          | 10<br>(7 - 12)              |
| Cocaine use disorders                               | 12<br>(10 - 15)             | 0<br>(0 - 0)       | --                  | 10<br>(8 - 12)       | 2<br>(1 - 2)             | 1<br>(1 - 1)                |
| Amphetamine use disorders                           | 13<br>(10 - 16)             | 0<br>(0 - 0)       | --                  | 10<br>(8 - 12)       | 2<br>(2 - 3)             | 1<br>(1 - 1)                |
| Other drug use disorders                            | 176<br>(153 - 207)          | 1<br>(0 - 1)       | --                  | 130<br>(111 - 155)   | 31<br>(26 - 37)          | 15<br>(12 - 19)             |
| Eating disorders                                    | 5<br>(4 - 7)                | --                 | 0<br>(0 - 0)        | 5<br>(4 - 6)         | --                       | --                          |
| Anorexia nervosa                                    | 5<br>(4 - 7)                | --                 | 0<br>(0 - 0)        | 5<br>(4 - 6)         | --                       | --                          |
| Diabetes, urogenital, blood, and endocrine diseases | 10,274<br>(7,889 - 11,510)  | 37<br>(27 - 48)    | 21<br>(17 - 27)     | 280<br>(237 - 317)   | 913<br>(759 - 1,023)     | 9,024<br>(6,805 - 10,172)   |
| Diabetes mellitus                                   | 2,646<br>(2,319 - 2,915)    | 1<br>(1 - 2)       | 2<br>(1 - 3)        | 62<br>(55 - 70)      | 290<br>(256 - 325)       | 2,290<br>(1,984 - 2,550)    |
| Acute glomerulonephritis                            | 5<br>(4 - 7)                | 0<br>(0 - 0)       | 0<br>(0 - 0)        | 1<br>(1 - 1)         | 1<br>(1 - 1)             | 3<br>(2 - 4)                |
| Chronic kidney disease                              | 2,450<br>(2,027 - 3,054)    | 2<br>(1 - 2)       | 1<br>(1 - 2)        | 51<br>(42 - 63)      | 192<br>(162 - 244)       | 2,204<br>(1,813 - 2,742)    |
| Chronic kidney disease due to diabetes mellitus     | 374<br>(281 - 484)          | 0<br>(0 - 0)       | 0<br>(0 - 0)        | 10<br>(8 - 13)       | 37<br>(28 - 47)          | 327<br>(241 - 426)          |

Web Table 31- England deaths with 95% UI by age, sex, and cause in 2013

| Cause                                               | Females, All Ages        | Females, 0-4 Years | Females, 5-14 Years | Females, 15-49 Years | Females, 50-69 Years | Females, 70-80 Years     |
|-----------------------------------------------------|--------------------------|--------------------|---------------------|----------------------|----------------------|--------------------------|
| Chronic kidney disease due to hypertension          | 683<br>(376 - 983)       | 0<br>(0 - 0)       | 0<br>(0 - 0)        | 7<br>(4 - 11)        | 51<br>(28 - 78)      | 625<br>(342 - 894)       |
| Chronic kidney disease due to glomerulonephritis    | 145<br>(68 - 209)        | 1<br>(0 - 1)       | 0<br>(0 - 0)        | 5<br>(3 - 7)         | 15<br>(9 - 21)       | 124<br>(54 - 184)        |
| Chronic kidney disease due to other causes          | 1,248<br>(913 - 1,723)   | 1<br>(1 - 1)       | 1<br>(0 - 1)        | 28<br>(21 - 38)      | 90<br>(63 - 125)     | 1,129<br>(814 - 1,547)   |
| Urinary diseases and male infertility               | 4,077<br>(2,079 - 5,053) | 4<br>(2 - 5)       | 2<br>(1 - 3)        | 54<br>(33 - 69)      | 235<br>(133 - 297)   | 3,782<br>(1,877 - 4,712) |
| Interstitial nephritis and urinary tract infections | 3,796<br>(1,885 - 4,741) | 3<br>(1 - 4)       | 2<br>(1 - 2)        | 47<br>(27 - 59)      | 205<br>(115 - 259)   | 3,540<br>(1,720 - 4,442) |
| Urolithiasis                                        | 86<br>(47 - 179)         | --                 | 0<br>(0 - 0)        | 4<br>(2 - 7)         | 14<br>(7 - 27)       | 68<br>(35 - 146)         |
| Other urinary diseases                              | 195<br>(77 - 311)        | 1<br>(1 - 2)       | 0<br>(0 - 0)        | 4<br>(2 - 6)         | 15<br>(7 - 24)       | 174<br>(65 - 282)        |
| Gynecological diseases                              | 30<br>(24 - 43)          | --                 | --                  | 4<br>(3 - 6)         | 5<br>(4 - 7)         | 21<br>(16 - 30)          |
| Uterine fibroids                                    | 9<br>(7 - 12)            | --                 | --                  | 1<br>(1 - 2)         | 1<br>(1 - 2)         | 6<br>(5 - 9)             |
| Polycystic ovarian syndrome                         | 0<br>(0 - 0)             | --                 | --                  | 0<br>(0 - 0)         | 0<br>(0 - 0)         | --                       |
| Endometriosis                                       | 1<br>(1 - 1)             | --                 | --                  | 1<br>(0 - 1)         | 0<br>(0 - 0)         | --                       |
| Genital prolapse                                    | 7<br>(5 - 10)            | --                 | --                  | 0<br>(0 - 1)         | 1<br>(1 - 1)         | 5<br>(4 - 8)             |
| Other gynecological diseases                        | 14<br>(11 - 20)          | --                 | --                  | 2<br>(2 - 3)         | 3<br>(2 - 4)         | 9<br>(7 - 13)            |
| Hemoglobinopathies and hemolytic anemias            | 128<br>(87 - 208)        | 2<br>(2 - 4)       | 2<br>(1 - 3)        | 11<br>(7 - 17)       | 20<br>(13 - 32)      | 92<br>(61 - 153)         |
| Thalassemias                                        | 5<br>(3 - 8)             | 1<br>(1 - 2)       | 1<br>(1 - 1)        | 3<br>(2 - 5)         | 0<br>(0 - 0)         | 0<br>(0 - 0)             |
| Sickle cell disorders                               | 21<br>(14 - 33)          | 1<br>(1 - 2)       | 1<br>(1 - 1)        | 4<br>(3 - 7)         | 10<br>(6 - 16)       | 5<br>(3 - 8)             |
| G6PD deficiency                                     | 0<br>(0 - 0)             | 0<br>(0 - 0)       | 0<br>(0 - 0)        | 0<br>(0 - 0)         | 0<br>(0 - 0)         | 0<br>(0 - 0)             |
| Other hemoglobinopathies and hemolytic anemias      | 101<br>(68 - 166)        | 1<br>(0 - 1)       | 0<br>(0 - 1)        | 3<br>(2 - 4)         | 11<br>(7 - 17)       | 87<br>(57 - 145)         |
| Endocrine, metabolic, blood, and immune disorders   | 938<br>(754 - 1,402)     | 28<br>(19 - 37)    | 14<br>(11 - 19)     | 96<br>(72 - 128)     | 168<br>(128 - 233)   | 632<br>(501 - 1,000)     |
| Musculoskeletal disorders                           | 1,141<br>(709 - 1,376)   | --                 | 2<br>(1 - 2)        | 56<br>(46 - 70)      | 204<br>(138 - 254)   | 879<br>(545 - 1,066)     |
| Rheumatoid arthritis                                | 554<br>(396 - 697)       | --                 | 0<br>(0 - 0)        | 6<br>(5 - 8)         | 87<br>(60 - 112)     | 460<br>(328 - 575)       |
| Other musculoskeletal disorders                     | 587<br>(335 - 731)       | --                 | 2<br>(1 - 2)        | 50<br>(42 - 63)      | 117<br>(75 - 150)    | 419<br>(207 - 524)       |
| Other non-communicable diseases                     | 2,053<br>(1,743 - 2,330) | 481<br>(367 - 635) | 29<br>(24 - 36)     | 139<br>(117 - 165)   | 191<br>(160 - 218)   | 1,214<br>(926 - 1,402)   |
| Congenital anomalies                                | 780<br>(655 - 938)       | 379<br>(297 - 482) | 28<br>(23 - 35)     | 124<br>(103 - 151)   | 116<br>(97 - 139)    | 132<br>(106 - 167)       |
| Neural tube defects                                 | 34<br>(25 - 47)          | 25<br>(17 - 35)    | 2<br>(1 - 3)        | 6<br>(4 - 8)         | 1<br>(1 - 1)         | 1<br>(0 - 1)             |
| Congenital heart anomalies                          | 303<br>(250 - 364)       | 129<br>(99 - 167)  | 15<br>(12 - 19)     | 73<br>(58 - 89)      | 41<br>(30 - 54)      | 44<br>(36 - 57)          |
| Cleft lip and cleft palate                          | 0<br>(0 - 0)             | 0<br>(0 - 0)       | --                  | --                   | --                   | --                       |
| Down syndrome                                       | 91<br>(50 - 119)         | 10<br>(4 - 15)     | 1<br>(1 - 2)        | 21<br>(10 - 29)      | 54<br>(32 - 71)      | 4<br>(2 - 6)             |
| Chromosomal unbalanced rearrangements               | 54<br>(34 - 78)          | 48<br>(29 - 70)    | 2<br>(1 - 2)        | 3<br>(2 - 4)         | 1<br>(1 - 1)         | 0<br>(0 - 1)             |
| Other congenital anomalies                          | 298<br>(241 - 367)       | 167<br>(127 - 219) | 8<br>(6 - 10)       | 21<br>(16 - 27)      | 20<br>(14 - 28)      | 82<br>(65 - 106)         |
| Skin and subcutaneous diseases                      | 1,173<br>(852 - 1,369)   | 2<br>(1 - 2)       | 1<br>(1 - 1)        | 15<br>(12 - 17)      | 74<br>(56 - 88)      | 1,082<br>(801 - 1,266)   |
| Cellulitis                                          | 461<br>(217 - 624)       | 0<br>(0 - 1)       | 0<br>(0 - 0)        | 6<br>(3 - 8)         | 36<br>(20 - 48)      | 419<br>(194 - 574)       |
| Pyoderma                                            | 443<br>(281 - 626)       | 1<br>(1 - 1)       | 0<br>(0 - 0)        | 6<br>(4 - 8)         | 25<br>(17 - 37)      | 411<br>(258 - 578)       |
| Decubitus ulcer                                     | 210<br>(152 - 327)       | 0<br>(0 - 0)       | 0<br>(0 - 0)        | 2<br>(1 - 2)         | 9<br>(6 - 14)        | 200<br>(144 - 311)       |
| Other skin and subcutaneous diseases                | 59<br>(35 - 123)         | 0<br>(0 - 0)       | 0<br>(0 - 0)        | 2<br>(1 - 3)         | 4<br>(3 - 8)         | 53<br>(30 - 115)         |
| Sudden infant death syndrome                        | 100<br>(52 - 219)        | 100<br>(52 - 219)  | --                  | --                   | --                   | --                       |
| Injuries                                            | 6,560<br>(5,258 - 7,389) | 77<br>(60 - 97)    | 46<br>(40 - 54)     | 875<br>(787 - 1,006) | 806<br>(707 - 933)   | 4,756<br>(3,515 - 5,458) |
| Transport injuries                                  | 691<br>(565 - 885)       | 14<br>(10 - 19)    | 24<br>(20 - 31)     | 234<br>(192 - 281)   | 139<br>(106 - 172)   | 281<br>(222 - 394)       |
| Road injuries                                       | 667<br>(537 - 862)       | 13<br>(10 - 17)    | 23<br>(19 - 29)     | 223<br>(186 - 271)   | 133<br>(100 - 165)   | 275<br>(219 - 387)       |
| Pedestrian road injuries                            | 231<br>(168 - 333)       | 5<br>(3 - 8)       | 10<br>(8 - 14)      | 34<br>(21 - 49)      | 40<br>(26 - 57)      | 142<br>(103 - 217)       |



Web Table 31- England deaths with 95% UI by age, sex, and cause in 2013

| Cause                                           | Females, All Ages        | Females, 0-4 Years | Females, 5-14 Years | Females, 15-49 Years | Females, 50-69 Years | Females, 70-80 Years     |
|-------------------------------------------------|--------------------------|--------------------|---------------------|----------------------|----------------------|--------------------------|
| Cyclist road injuries                           | 32<br>(21 - 45)          | 0<br>(0 - 1)       | 3<br>(2 - 4)        | 13<br>(8 - 18)       | 9<br>(6 - 13)        | 7<br>(5 - 11)            |
| Motorcyclist road injuries                      | 25<br>(11 - 49)          | 0<br>(0 - 0)       | 0<br>(0 - 1)        | 16<br>(7 - 29)       | 4<br>(2 - 9)         | 5<br>(2 - 11)            |
| Motor vehicle road injuries                     | 368<br>(268 - 467)       | 7<br>(5 - 9)       | 9<br>(7 - 13)       | 157<br>(123 - 191)   | 76<br>(53 - 97)      | 118<br>(78 - 166)        |
| Other road injuries                             | 10<br>(6 - 17)           | 0<br>(0 - 0)       | 0<br>(0 - 1)        | 3<br>(2 - 4)         | 3<br>(2 - 5)         | 4<br>(2 - 7)             |
| Other transport injuries                        | 24<br>(16 - 40)          | 1<br>(0 - 1)       | 1<br>(1 - 2)        | 10<br>(7 - 17)       | 6<br>(4 - 10)        | 6<br>(3 - 11)            |
| Unintentional injuries                          | 4,921<br>(3,685 - 5,682) | 57<br>(44 - 73)    | 18<br>(15 - 21)     | 195<br>(171 - 233)   | 376<br>(316 - 435)   | 4,275<br>(3,058 - 4,971) |
| Falls                                           | 3,509<br>(2,306 - 4,162) | 4<br>(3 - 6)       | 2<br>(1 - 2)        | 43<br>(30 - 52)      | 144<br>(92 - 178)    | 3,317<br>(2,169 - 3,943) |
| Drowning                                        | 51<br>(39 - 70)          | 6<br>(4 - 8)       | 3<br>(2 - 4)        | 13<br>(10 - 17)      | 13<br>(9 - 18)       | 17<br>(13 - 25)          |
| Fire, heat, and hot substances                  | 175<br>(135 - 244)       | 8<br>(6 - 11)      | 3<br>(2 - 4)        | 22<br>(17 - 30)      | 39<br>(30 - 57)      | 103<br>(78 - 147)        |
| Poisonings                                      | 74<br>(55 - 141)         | 1<br>(1 - 2)       | 1<br>(1 - 1)        | 28<br>(21 - 52)      | 20<br>(15 - 39)      | 24<br>(17 - 49)          |
| Exposure to mechanical forces                   | 87<br>(57 - 103)         | 15<br>(7 - 20)     | 4<br>(3 - 5)        | 20<br>(13 - 23)      | 12<br>(9 - 15)       | 36<br>(24 - 44)          |
| Unintentional firearm injuries                  | 4<br>(3 - 4)             | 0<br>(0 - 0)       | 0<br>(0 - 0)        | 2<br>(1 - 2)         | 1<br>(1 - 1)         | 1<br>(1 - 1)             |
| Unintentional suffocation                       | 40<br>(14 - 51)          | 11<br>(3 - 16)     | 2<br>(1 - 3)        | 11<br>(4 - 14)       | 4<br>(1 - 6)         | 12<br>(4 - 17)           |
| Other exposure to mechanical forces             | 43<br>(29 - 52)          | 3<br>(2 - 4)       | 2<br>(1 - 2)        | 7<br>(5 - 9)         | 7<br>(5 - 9)         | 23<br>(16 - 29)          |
| Adverse effects of medical treatment            | 445<br>(351 - 682)       | 4<br>(3 - 7)       | 1<br>(1 - 2)        | 20<br>(16 - 32)      | 73<br>(55 - 114)     | 347<br>(269 - 550)       |
| Animal contact                                  | 14<br>(5 - 21)           | 1<br>(0 - 1)       | 1<br>(0 - 1)        | 3<br>(1 - 5)         | 3<br>(1 - 5)         | 6<br>(2 - 10)            |
| Venomous animal contact                         | 4<br>(1 - 7)             | 0<br>(0 - 0)       | 0<br>(0 - 0)        | 1<br>(0 - 2)         | 1<br>(0 - 2)         | 1<br>(0 - 2)             |
| Non-venomous animal contact                     | 10<br>(4 - 16)           | 1<br>(0 - 1)       | 0<br>(0 - 1)        | 2<br>(1 - 3)         | 2<br>(1 - 3)         | 5<br>(2 - 8)             |
| Foreign body                                    | 543<br>(279 - 723)       | 17<br>(10 - 25)    | 3<br>(2 - 4)        | 43<br>(25 - 64)      | 69<br>(39 - 98)      | 411<br>(194 - 549)       |
| Pulmonary aspiration and foreign body in airway | 535<br>(271 - 715)       | 17<br>(9 - 25)     | 3<br>(2 - 4)        | 42<br>(24 - 63)      | 68<br>(39 - 97)      | 407<br>(190 - 544)       |
| Foreign body in other body part                 | 7<br>(4 - 10)            | 0<br>(0 - 0)       | 0<br>(0 - 0)        | 1<br>(1 - 2)         | 1<br>(1 - 1)         | 4<br>(2 - 7)             |
| Other unintentional injuries                    | 24<br>(20 - 29)          | 2<br>(2 - 3)       | 0<br>(0 - 0)        | 4<br>(3 - 5)         | 4<br>(3 - 5)         | 14<br>(11 - 17)          |
| Self-harm and interpersonal violence            | 948<br>(835 - 1,167)     | 6<br>(4 - 8)       | 4<br>(3 - 5)        | 446<br>(393 - 544)   | 291<br>(246 - 363)   | 201<br>(170 - 263)       |
| Self-harm                                       | 881<br>(768 - 1,088)     | --                 | 1<br>(1 - 2)        | 414<br>(363 - 507)   | 281<br>(236 - 354)   | 185<br>(155 - 245)       |
| Interpersonal violence                          | 67<br>(45 - 88)          | 6<br>(4 - 8)       | 2<br>(2 - 3)        | 32<br>(22 - 43)      | 10<br>(7 - 13)       | 16<br>(11 - 21)          |
| Assault by firearm                              | 8<br>(4 - 13)            | 0<br>(0 - 1)       | 0<br>(0 - 1)        | 5<br>(2 - 8)         | 1<br>(1 - 2)         | 1<br>(1 - 2)             |
| Assault by sharp object                         | 13<br>(7 - 20)           | 0<br>(0 - 1)       | 0<br>(0 - 0)        | 9<br>(5 - 14)        | 2<br>(1 - 3)         | 1<br>(1 - 2)             |
| Assault by other means                          | 46<br>(30 - 62)          | 5<br>(3 - 7)       | 2<br>(1 - 3)        | 19<br>(12 - 26)      | 7<br>(5 - 10)        | 14<br>(9 - 19)           |

Web Table 31- Equatorial Guinea deaths with 95% UI by age, sex, and cause in 2013

| Cause                                                             | Both Sexes, All Ages     | Both Sexes, 0-4 Years    | Both Sexes, 5-14 Years | Both Sexes, 15-49 Years  | Both Sexes, 50-69 Years  | Both Sexes, 70-80 Years |
|-------------------------------------------------------------------|--------------------------|--------------------------|------------------------|--------------------------|--------------------------|-------------------------|
| All causes                                                        | 7,761<br>(6,478 - 9,766) | 2,882<br>(2,172 - 3,762) | 284<br>(222 - 379)     | 2,111<br>(1,626 - 2,668) | 1,412<br>(1,013 - 2,317) | 1,072<br>(902 - 1,487)  |
| Communicable, maternal, neonatal, and nutritional diseases        | 4,200<br>(3,427 - 5,110) | 2,162<br>(1,601 - 2,828) | 166<br>(123 - 223)     | 1,163<br>(820 - 1,528)   | 450<br>(294 - 682)       | 259<br>(172 - 379)      |
| HIV/AIDS and tuberculosis                                         | 1,302<br>(731 - 1,941)   | 123<br>(58 - 193)        | 67<br>(34 - 101)       | 819<br>(453 - 1,200)     | 249<br>(136 - 404)       | 44<br>(21 - 64)         |
| Tuberculosis                                                      | 257<br>(84 - 422)        | 17<br>(8 - 31)           | 3<br>(1 - 6)           | 117<br>(38 - 190)        | 88<br>(25 - 164)         | 32<br>(9 - 50)          |
| HIV/AIDS                                                          | 1,046<br>(457 - 1,689)   | 105<br>(38 - 174)        | 64<br>(30 - 98)        | 702<br>(322 - 1,095)     | 161<br>(59 - 308)        | 13<br>(4 - 26)          |
| HIV/AIDS resulting in mycobacterial infection                     | 63<br>(28 - 104)         | 6<br>(2 - 11)            | 3<br>(2 - 5)           | 43<br>(19 - 69)          | 10<br>(4 - 20)           | 1<br>(0 - 2)            |
| HIV/AIDS resulting in other diseases                              | 982<br>(428 - 1,586)     | 99<br>(35 - 163)         | 61<br>(29 - 93)        | 660<br>(303 - 1,030)     | 151<br>(55 - 289)        | 12<br>(4 - 24)          |
| Diarrhea, lower respiratory, and other common infectious diseases | 1,232<br>(831 - 1,779)   | 734<br>(397 - 1,224)     | 52<br>(31 - 84)        | 141<br>(85 - 215)        | 137<br>(78 - 240)        | 167<br>(105 - 252)      |
| Diarrheal diseases                                                | 205<br>(122 - 323)       | 108<br>(44 - 216)        | 11<br>(5 - 22)         | 31<br>(17 - 50)          | 27<br>(14 - 52)          | 28<br>(16 - 48)         |
| Intestinal infectious diseases                                    | 25<br>(8 - 58)           | 10<br>(3 - 26)           | 6<br>(2 - 14)          | 7<br>(2 - 18)            | 1<br>(0 - 4)             | 0<br>(0 - 1)            |
| Typhoid fever                                                     | 18<br>(5 - 43)           | 7<br>(2 - 18)            | 4<br>(1 - 11)          | 5<br>(1 - 13)            | 1<br>(0 - 3)             | 0<br>(0 - 1)            |
| Paratyphoid fever                                                 | 6<br>(2 - 15)            | 2<br>(1 - 7)             | 1<br>(0 - 4)           | 2<br>(0 - 4)             | 0<br>(0 - 1)             | 0<br>(0 - 0)            |
| Other intestinal infectious diseases                              | 1<br>(0 - 7)             | 1<br>(0 - 5)             | 0<br>(0 - 1)           | 0<br>(0 - 2)             | 0<br>(0 - 1)             | 0<br>(0 - 1)            |
| Lower respiratory infections                                      | 817<br>(493 - 1,262)     | 485<br>(220 - 902)       | 22<br>(12 - 37)        | 78<br>(46 - 124)         | 98<br>(51 - 175)         | 135<br>(76 - 208)       |
| Upper respiratory infections                                      | 0<br>(0 - 1)             | 0<br>(0 - 1)             | 0<br>(0 - 0)           | 0<br>(0 - 0)             | 0<br>(0 - 0)             | 0<br>(0 - 0)            |
| Otitis media                                                      | 1<br>(0 - 1)             | 0<br>(0 - 1)             | 0<br>(0 - 0)           | 0<br>(0 - 0)             | 0<br>(0 - 0)             | 0<br>(0 - 0)            |
| Meningitis                                                        | 112<br>(66 - 180)        | 68<br>(30 - 127)         | 9<br>(5 - 18)          | 22<br>(12 - 39)          | 9<br>(4 - 18)            | 3<br>(2 - 6)            |
| Pneumococcal meningitis                                           | 35<br>(21 - 55)          | 18<br>(8 - 35)           | 4<br>(2 - 7)           | 8<br>(4 - 15)            | 4<br>(2 - 7)             | 1<br>(1 - 2)            |
| H influenzae type B meningitis                                    | 34<br>(18 - 61)          | 28<br>(12 - 53)          | 3<br>(1 - 5)           | 3<br>(1 - 5)             | 1<br>(0 - 2)             | 0<br>(0 - 1)            |
| Meningococcal meningitis                                          | 15<br>(9 - 24)           | 8<br>(4 - 16)            | 1<br>(1 - 2)           | 4<br>(2 - 7)             | 2<br>(1 - 3)             | 1<br>(0 - 1)            |
| Other meningitis                                                  | 28<br>(15 - 44)          | 14<br>(4 - 26)           | 2<br>(1 - 4)           | 8<br>(4 - 14)            | 3<br>(1 - 7)             | 1<br>(1 - 2)            |
| Encephalitis                                                      | 10<br>(3 - 24)           | 6<br>(1 - 20)            | 1<br>(0 - 2)           | 2<br>(1 - 3)             | 1<br>(0 - 1)             | 0<br>(0 - 0)            |
| Diphtheria                                                        | 3<br>(0 - 13)            | 2<br>(0 - 12)            | 0<br>(0 - 2)           | 0<br>(0 - 1)             | 0<br>(0 - 0)             | --<br>(0 - 0)           |
| Whooping cough                                                    | 42<br>(0 - 196)          | 40<br>(0 - 188)          | 1<br>(0 - 7)           | 0<br>(0 - 1)             | 0<br>(0 - 0)             | --<br>(0 - 0)           |
| Tetanus                                                           | 3<br>(1 - 8)             | 2<br>(0 - 5)             | 0<br>(0 - 1)           | 0<br>(0 - 2)             | 0<br>(0 - 1)             | 0<br>(0 - 0)            |
| Measles                                                           | 14<br>(0 - 89)           | 12<br>(0 - 81)           | 1<br>(0 - 7)           | 0<br>(0 - 1)             | 0<br>(0 - 0)             | --<br>(0 - 0)           |
| Varicella and herpes zoster                                       | 1<br>(0 - 2)             | 0<br>(0 - 1)             | 0<br>(0 - 0)           | 0<br>(0 - 0)             | 0<br>(0 - 0)             | 0<br>(0 - 1)            |
| Neglected tropical diseases and malaria                           | 652<br>(276 - 1,092)     | 494<br>(95 - 948)        | 34<br>(16 - 63)        | 68<br>(34 - 130)         | 37<br>(16 - 82)          | 19<br>(8 - 40)          |
| Malaria                                                           | 631<br>(252 - 1,064)     | 485<br>(78 - 932)        | 32<br>(14 - 59)        | 62<br>(29 - 121)         | 34<br>(14 - 77)          | 18<br>(7 - 39)          |
| Leishmaniasis                                                     | 0<br>(0 - 0)             | 0<br>(0 - 0)             | 0<br>(0 - 0)           | 0<br>(0 - 0)             | 0<br>(0 - 0)             | 0<br>(0 - 0)            |
| Visceral leishmaniasis                                            | 0<br>(0 - 0)             | 0<br>(0 - 0)             | 0<br>(0 - 0)           | 0<br>(0 - 0)             | 0<br>(0 - 0)             | 0<br>(0 - 0)            |
| African trypanosomiasis                                           | 3<br>(1 - 5)             | 0<br>(0 - 0)             | 0<br>(0 - 1)           | 2<br>(1 - 3)             | 0<br>(0 - 1)             | 0<br>(0 - 0)            |
| Schistosomiasis                                                   | 3<br>(2 - 5)             | 0<br>(0 - 0)             | 0<br>(0 - 0)           | 2<br>(1 - 3)             | 1<br>(1 - 2)             | 0<br>(0 - 1)            |
| Cysticercosis                                                     | 0<br>(0 - 1)             | 0<br>(0 - 0)             | 0<br>(0 - 0)           | 0<br>(0 - 0)             | 0<br>(0 - 0)             | 0<br>(0 - 0)            |
| Cystic echinococcosis                                             | 0<br>(0 - 0)             | 0<br>(0 - 0)             | 0<br>(0 - 0)           | 0<br>(0 - 0)             | 0<br>(0 - 0)             | 0<br>(0 - 0)            |
| Dengue                                                            | 1<br>(0 - 2)             | 0<br>(0 - 1)             | 0<br>(0 - 0)           | 0<br>(0 - 0)             | 0<br>(0 - 0)             | 0<br>(0 - 0)            |
| Yellow fever                                                      | 1<br>(0 - 1)             | 0<br>(0 - 0)             | 0<br>(0 - 0)           | 0<br>(0 - 1)             | 0<br>(0 - 0)             | 0<br>(0 - 0)            |
| Rabies                                                            | 2<br>(1 - 6)             | 1<br>(0 - 2)             | 1<br>(0 - 1)           | 1<br>(0 - 2)             | 0<br>(0 - 0)             | 0<br>(0 - 0)            |
| Intestinal nematode infections                                    | 6<br>(1 - 19)            | 5<br>(0 - 16)            | 1<br>(0 - 3)           | 0<br>(0 - 3)             | 0<br>(0 - 1)             | 0<br>(0 - 0)            |
| Ascariasis                                                        | 6<br>(1 - 19)            | 5<br>(0 - 16)            | 1<br>(0 - 3)           | 0<br>(0 - 3)             | 0<br>(0 - 1)             | 0<br>(0 - 0)            |

Web Table 31- Equatorial Guinea deaths with 95% UI by age, sex, and cause in 2013

| Cause                                                            | Both Sexes, All Ages     | Both Sexes, 0-4 Years | Both Sexes, 5-14 Years | Both Sexes, 15-49 Years | Both Sexes, 50-69 Years | Both Sexes, 70-80 Years |
|------------------------------------------------------------------|--------------------------|-----------------------|------------------------|-------------------------|-------------------------|-------------------------|
| Other neglected tropical diseases                                | 4<br>(1 - 8)             | 2<br>(0 - 6)          | 0<br>(0 - 1)           | 1<br>(0 - 2)            | 0<br>(0 - 1)            | 0<br>(0 - 0)            |
| Maternal disorders                                               | 100<br>(54 - 168)        | --                    | 0<br>(0 - 1)           | 100<br>(54 - 168)       | --                      | --                      |
| Maternal hemorrhage                                              | 15<br>(7 - 27)           | --                    | 0<br>(0 - 0)           | 15<br>(7 - 27)          | --                      | --                      |
| Maternal sepsis and other maternal infections                    | 9<br>(4 - 16)            | --                    | 0<br>(0 - 0)           | 9<br>(4 - 16)           | --                      | --                      |
| Maternal hypertensive disorders                                  | 10<br>(5 - 19)           | --                    | 0<br>(0 - 0)           | 10<br>(5 - 19)          | --                      | --                      |
| Maternal obstructed labor                                        | 5<br>(3 - 10)            | --                    | 0<br>(0 - 0)           | 5<br>(3 - 10)           | --                      | --                      |
| Maternal abortive outcome                                        | 16<br>(8 - 31)           | --                    | 0<br>(0 - 0)           | 16<br>(8 - 31)          | --                      | --                      |
| Indirect maternal deaths                                         | 7<br>(4 - 14)            | --                    | 0<br>(0 - 0)           | 7<br>(4 - 14)           | --                      | --                      |
| Late maternal deaths                                             | 17<br>(7 - 34)           | --                    | 0<br>(0 - 0)           | 17<br>(7 - 33)          | --                      | --                      |
| Maternal deaths aggravated by HIV/AIDS                           | 2<br>(1 - 4)             | --                    | --                     | 2<br>(1 - 4)            | --                      | --                      |
| Other maternal disorders                                         | 18<br>(8 - 33)           | --                    | 0<br>(0 - 0)           | 18<br>(8 - 33)          | --                      | --                      |
| Neonatal disorders                                               | 537<br>(238 - 932)       | 537<br>(238 - 932)    | --                     | --                      | --                      | --                      |
| Neonatal preterm birth complications                             | 171<br>(48 - 407)        | 171<br>(48 - 407)     | --                     | --                      | --                      | --                      |
| Neonatal encephalopathy due to birth asphyxia and trauma         | 175<br>(54 - 436)        | 175<br>(54 - 436)     | --                     | --                      | --                      | --                      |
| Neonatal sepsis and other neonatal infections                    | 86<br>(18 - 213)         | 86<br>(18 - 213)      | --                     | --                      | --                      | --                      |
| Hemolytic disease and other neonatal jaundice                    | 4<br>(1 - 13)            | 4<br>(1 - 13)         | --                     | --                      | --                      | --                      |
| Other neonatal disorders                                         | 100<br>(23 - 232)        | 100<br>(23 - 232)     | --                     | --                      | --                      | --                      |
| Nutritional deficiencies                                         | 240<br>(113 - 410)       | 167<br>(61 - 317)     | 7<br>(3 - 12)          | 21<br>(10 - 39)         | 19<br>(8 - 40)          | 26<br>(12 - 46)         |
| Protein-energy malnutrition                                      | 182<br>(68 - 340)        | 133<br>(40 - 270)     | 6<br>(2 - 11)          | 11<br>(3 - 25)          | 14<br>(4 - 32)          | 19<br>(6 - 36)          |
| Iodine deficiency                                                | 1<br>(0 - 5)             | 1<br>(0 - 5)          | 0<br>(0 - 0)           | 0<br>(0 - 0)            | 0<br>(0 - 0)            | 0<br>(0 - 0)            |
| Iron-deficiency anemia                                           | 52<br>(20 - 117)         | 29<br>(5 - 83)        | 1<br>(0 - 3)           | 10<br>(3 - 21)          | 5<br>(1 - 13)           | 6<br>(2 - 14)           |
| Other nutritional deficiencies                                   | 5<br>(1 - 20)            | 4<br>(0 - 18)         | 0<br>(0 - 0)           | 1<br>(0 - 2)            | 0<br>(0 - 1)            | 0<br>(0 - 1)            |
| Other communicable, maternal, neonatal, and nutritional diseases | 137<br>(61 - 260)        | 107<br>(37 - 230)     | 6<br>(3 - 12)          | 14<br>(8 - 23)          | 7<br>(4 - 15)           | 3<br>(2 - 6)            |
| Sexually transmitted diseases excluding HIV                      | 89<br>(19 - 209)         | 80<br>(13 - 197)      | 4<br>(1 - 8)           | 4<br>(1 - 7)            | 2<br>(1 - 4)            | 1<br>(0 - 2)            |
| Syphilis                                                         | 86<br>(16 - 206)         | 80<br>(13 - 197)      | 4<br>(1 - 8)           | 2<br>(1 - 3)            | 1<br>(0 - 3)            | 1<br>(0 - 1)            |
| Chlamydial infection                                             | 1<br>(0 - 1)             | --                    | 0<br>(0 - 0)           | 1<br>(0 - 1)            | 0<br>(0 - 0)            | 0<br>(0 - 0)            |
| Gonococcal infection                                             | 1<br>(1 - 2)             | --                    | 0<br>(0 - 0)           | 1<br>(0 - 2)            | 0<br>(0 - 1)            | 0<br>(0 - 0)            |
| Other sexually transmitted diseases                              | 1<br>(0 - 2)             | --                    | 0<br>(0 - 0)           | 1<br>(0 - 1)            | 0<br>(0 - 0)            | 0<br>(0 - 0)            |
| Hepatitis                                                        | 9<br>(5 - 19)            | 3<br>(1 - 6)          | 1<br>(0 - 1)           | 3<br>(2 - 7)            | 2<br>(1 - 6)            | 0<br>(0 - 2)            |
| Acute hepatitis A                                                | 1<br>(0 - 2)             | 1<br>(0 - 2)          | 0<br>(0 - 0)           | 0<br>(0 - 0)            | 0<br>(0 - 0)            | 0<br>(0 - 0)            |
| Acute hepatitis B                                                | 5<br>(3 - 11)            | 2<br>(1 - 5)          | 0<br>(0 - 1)           | 1<br>(1 - 3)            | 1<br>(1 - 4)            | 0<br>(0 - 1)            |
| Acute hepatitis C                                                | 0<br>(0 - 1)             | --                    | 0<br>(0 - 0)           | 0<br>(0 - 0)            | 0<br>(0 - 0)            | 0<br>(0 - 0)            |
| Acute hepatitis E                                                | 2<br>(1 - 6)             | 0<br>(0 - 0)          | 0<br>(0 - 0)           | 2<br>(1 - 4)            | 0<br>(0 - 1)            | 0<br>(0 - 0)            |
| Other infectious diseases                                        | 39<br>(10 - 79)          | 24<br>(4 - 60)        | 2<br>(0 - 4)           | 7<br>(2 - 13)           | 4<br>(1 - 9)            | 2<br>(1 - 4)            |
| Non-communicable diseases                                        | 2,698<br>(2,020 - 3,872) | 461<br>(266 - 685)    | 50<br>(33 - 77)        | 547<br>(343 - 823)      | 864<br>(562 - 1,486)    | 776<br>(631 - 1,077)    |
| Neoplasms                                                        | 411<br>(284 - 641)       | 10<br>(5 - 23)        | 6<br>(4 - 10)          | 103<br>(63 - 164)       | 193<br>(122 - 336)      | 99<br>(75 - 142)        |
| Esophageal cancer                                                | 24<br>(15 - 42)          | --                    | --                     | 4<br>(2 - 8)            | 14<br>(8 - 25)          | 6<br>(4 - 9)            |
| Stomach cancer                                                   | 30<br>(19 - 52)          | --                    | --                     | 8<br>(4 - 13)           | 15<br>(9 - 26)          | 8<br>(5 - 12)           |
| Liver cancer                                                     | 35<br>(20 - 58)          | --                    | 0<br>(0 - 1)           | 8<br>(4 - 14)           | 19<br>(10 - 33)         | 8<br>(5 - 13)           |
| Liver cancer due to hepatitis B                                  | 13<br>(6 - 24)           | --                    | 0<br>(0 - 0)           | 3<br>(1 - 7)            | 7<br>(3 - 14)           | 2<br>(1 - 4)            |

Web Table 31- Equatorial Guinea deaths with 95% UI by age, sex, and cause in 2013

| Cause                                | Both Sexes, All Ages | Both Sexes, 0-4 Years | Both Sexes, 5-14 Years | Both Sexes, 15-49 Years | Both Sexes, 50-69 Years | Both Sexes, 70-80 Years |
|--------------------------------------|----------------------|-----------------------|------------------------|-------------------------|-------------------------|-------------------------|
| Liver cancer due to hepatitis C      | 10<br>(5 - 18)       | --                    | 0<br>(0 - 0)           | 2<br>(1 - 4)            | 6<br>(2 - 11)           | 3<br>(1 - 5)            |
| Liver cancer due to alcohol use      | 6<br>(3 - 10)        | --                    | --                     | 1<br>(0 - 2)            | 3<br>(1 - 6)            | 2<br>(1 - 3)            |
| Liver cancer due to other causes     | 6<br>(3 - 11)        | --                    | 0<br>(0 - 0)           | 2<br>(1 - 3)            | 3<br>(1 - 6)            | 1<br>(1 - 2)            |
| Larynx cancer                        | 4<br>(3 - 7)         | --                    | --                     | 1<br>(0 - 2)            | 2<br>(1 - 4)            | 1<br>(1 - 1)            |
| Tracheal, bronchus and lung cancer   | 31<br>(20 - 50)      | --                    | --                     | 5<br>(3 - 8)            | 19<br>(11 - 31)         | 7<br>(5 - 13)           |
| Breast cancer                        | 39<br>(23 - 69)      | --                    | --                     | 13<br>(7 - 23)          | 20<br>(10 - 38)         | 6<br>(3 - 10)           |
| Cervical cancer                      | 40<br>(24 - 68)      | --                    | --                     | 20<br>(11 - 32)         | 16<br>(8 - 31)          | 4<br>(3 - 7)            |
| Uterine cancer                       | 3<br>(2 - 7)         | --                    | --                     | 1<br>(0 - 2)            | 2<br>(1 - 4)            | 1<br>(0 - 2)            |
| Prostate cancer                      | 25<br>(13 - 48)      | --                    | --                     | 1<br>(0 - 1)            | 8<br>(4 - 18)           | 16<br>(9 - 29)          |
| Colon and rectum cancer              | 37<br>(26 - 59)      | --                    | --                     | 6<br>(4 - 10)           | 19<br>(12 - 32)         | 12<br>(9 - 18)          |
| Lip and oral cavity cancer           | 7<br>(4 - 11)        | --                    | --                     | 2<br>(1 - 3)            | 3<br>(2 - 6)            | 1<br>(1 - 2)            |
| Nasopharynx cancer                   | 2<br>(1 - 3)         | --                    | 0<br>(0 - 0)           | 1<br>(0 - 1)            | 1<br>(0 - 2)            | 0<br>(0 - 0)            |
| Other pharynx cancer                 | 4<br>(2 - 6)         | --                    | --                     | 1<br>(0 - 1)            | 2<br>(1 - 4)            | 1<br>(0 - 1)            |
| Gallbladder and biliary tract cancer | 8<br>(5 - 14)        | --                    | --                     | 1<br>(0 - 2)            | 4<br>(2 - 8)            | 3<br>(2 - 4)            |
| Pancreatic cancer                    | 14<br>(10 - 23)      | --                    | --                     | 2<br>(1 - 3)            | 8<br>(5 - 14)           | 4<br>(3 - 6)            |
| Malignant skin melanoma              | 3<br>(1 - 5)         | --                    | --                     | 1<br>(0 - 2)            | 1<br>(1 - 2)            | 1<br>(0 - 1)            |
| Non-melanoma skin cancer             | 1<br>(1 - 3)         | --                    | --                     | 0<br>(0 - 1)            | 1<br>(0 - 1)            | 1<br>(0 - 1)            |
| Ovarian cancer                       | 7<br>(4 - 13)        | --                    | --                     | 2<br>(1 - 4)            | 4<br>(2 - 7)            | 1<br>(1 - 2)            |
| Testicular cancer                    | 1<br>(0 - 1)         | --                    | --                     | 1<br>(0 - 1)            | 0<br>(0 - 0)            | 0<br>(0 - 0)            |
| Kidney cancer                        | 9<br>(5 - 14)        | 1<br>(0 - 2)          | 0<br>(0 - 0)           | 2<br>(1 - 3)            | 4<br>(2 - 8)            | 2<br>(1 - 3)            |
| Bladder cancer                       | 9<br>(6 - 14)        | --                    | --                     | 1<br>(1 - 2)            | 4<br>(3 - 7)            | 4<br>(3 - 5)            |
| Brain and nervous system cancer      | 8<br>(5 - 13)        | 1<br>(0 - 2)          | 1<br>(0 - 1)           | 3<br>(2 - 5)            | 3<br>(2 - 5)            | 1<br>(0 - 1)            |
| Thyroid cancer                       | 2<br>(1 - 3)         | --                    | 0<br>(0 - 0)           | 0<br>(0 - 1)            | 1<br>(0 - 1)            | 0<br>(0 - 1)            |
| Mesothelioma                         | 1<br>(0 - 1)         | --                    | --                     | 0<br>(0 - 0)            | 0<br>(0 - 1)            | 0<br>(0 - 0)            |
| Hodgkin lymphoma                     | 2<br>(1 - 4)         | 0<br>(0 - 1)          | 0<br>(0 - 0)           | 1<br>(1 - 2)            | 1<br>(0 - 1)            | 0<br>(0 - 0)            |
| Non-Hodgkin lymphoma                 | 19<br>(12 - 29)      | 1<br>(1 - 3)          | 1<br>(1 - 2)           | 6<br>(3 - 9)            | 7<br>(4 - 13)           | 3<br>(2 - 6)            |
| Multiple myeloma                     | 4<br>(3 - 8)         | --                    | --                     | 1<br>(0 - 1)            | 2<br>(1 - 5)            | 1<br>(1 - 2)            |
| Leukemia                             | 8<br>(5 - 12)        | 1<br>(0 - 2)          | 1<br>(1 - 2)           | 3<br>(2 - 4)            | 2<br>(1 - 4)            | 1<br>(1 - 2)            |
| Other neoplasms                      | 36<br>(24 - 59)      | 6<br>(2 - 17)         | 3<br>(1 - 5)           | 10<br>(5 - 19)          | 11<br>(7 - 21)          | 6<br>(3 - 9)            |
| Cardiovascular diseases              | 983<br>(704 - 1,475) | 28<br>(14 - 49)       | 6<br>(3 - 9)           | 176<br>(104 - 279)      | 368<br>(237 - 620)      | 405<br>(321 - 566)      |
| Rheumatic heart disease              | 20<br>(12 - 34)      | 1<br>(0 - 2)          | 1<br>(0 - 1)           | 9<br>(5 - 16)           | 6<br>(3 - 12)           | 4<br>(2 - 6)            |
| Ischemic heart disease               | 255<br>(171 - 400)   | 1<br>(0 - 2)          | 0<br>(0 - 1)           | 41<br>(24 - 69)         | 105<br>(66 - 177)       | 107<br>(74 - 158)       |
| Cerebrovascular disease              | 486<br>(349 - 739)   | 8<br>(4 - 16)         | 2<br>(1 - 4)           | 77<br>(45 - 126)        | 179<br>(113 - 306)      | 220<br>(172 - 312)      |
| Ischemic stroke                      | 231<br>(166 - 349)   | 2<br>(0 - 4)          | 0<br>(0 - 1)           | 16<br>(7 - 29)          | 70<br>(43 - 125)        | 143<br>(109 - 204)      |
| Hemorrhagic stroke                   | 256<br>(163 - 405)   | 6<br>(3 - 13)         | 2<br>(1 - 3)           | 62<br>(34 - 101)        | 109<br>(63 - 190)       | 77<br>(49 - 116)        |
| Hypertensive heart disease           | 63<br>(34 - 108)     | 0<br>(0 - 1)          | 0<br>(0 - 0)           | 8<br>(4 - 14)           | 22<br>(11 - 41)         | 33<br>(18 - 59)         |
| Cardiomyopathy and myocarditis       | 50<br>(29 - 78)      | 10<br>(3 - 21)        | 1<br>(1 - 2)           | 15<br>(6 - 26)          | 14<br>(8 - 26)          | 9<br>(5 - 16)           |
| Atrial fibrillation and flutter      | 1<br>(0 - 1)         | --                    | --                     | 0<br>(0 - 0)            | 0<br>(0 - 0)            | 0<br>(0 - 1)            |
| Aortic aneurysm                      | 10<br>(6 - 16)       | --                    | --                     | 2<br>(1 - 3)            | 4<br>(2 - 8)            | 4<br>(2 - 6)            |
| Peripheral vascular disease          | 1<br>(1 - 2)         | --                    | --                     | 0<br>(0 - 0)            | 0<br>(0 - 1)            | 1<br>(0 - 1)            |

Web Table 31- Equatorial Guinea deaths with 95% UI by age, sex, and cause in 2013

| Cause                                               | Both Sexes, All Ages | Both Sexes, 0-4 Years | Both Sexes, 5-14 Years | Both Sexes, 15-49 Years | Both Sexes, 50-69 Years | Both Sexes, 70-80 Years |
|-----------------------------------------------------|----------------------|-----------------------|------------------------|-------------------------|-------------------------|-------------------------|
| Endocarditis                                        | 7<br>(4 - 12)        | 1<br>(0 - 2)          | 0<br>(0 - 0)           | 2<br>(1 - 4)            | 2<br>(1 - 5)            | 2<br>(1 - 3)            |
| Other cardiovascular and circulatory diseases       | 90<br>(48 - 147)     | 7<br>(2 - 15)         | 1<br>(0 - 2)           | 22<br>(10 - 39)         | 33<br>(17 - 61)         | 26<br>(15 - 44)         |
| Chronic respiratory diseases                        | 223<br>(142 - 356)   | 26<br>(11 - 49)       | 3<br>(2 - 5)           | 35<br>(19 - 60)         | 71<br>(40 - 130)        | 87<br>(61 - 136)        |
| Chronic obstructive pulmonary disease               | 143<br>(92 - 226)    | 12<br>(5 - 22)        | 1<br>(0 - 1)           | 15<br>(8 - 27)          | 48<br>(27 - 84)         | 67<br>(46 - 106)        |
| Pneumoconiosis                                      | 8<br>(4 - 15)        | 0<br>(0 - 1)          | 0<br>(0 - 0)           | 2<br>(1 - 4)            | 3<br>(1 - 7)            | 2<br>(1 - 4)            |
| Silicosis                                           | 2<br>(1 - 4)         | 0<br>(0 - 0)          | 0<br>(0 - 0)           | 0<br>(0 - 1)            | 1<br>(0 - 2)            | 1<br>(0 - 1)            |
| Asbestosis                                          | 1<br>(0 - 2)         | 0<br>(0 - 0)          | 0<br>(0 - 0)           | 0<br>(0 - 0)            | 1<br>(0 - 1)            | 0<br>(0 - 0)            |
| Coal workers pneumoconiosis                         | 1<br>(0 - 2)         | 0<br>(0 - 0)          | 0<br>(0 - 0)           | 0<br>(0 - 0)            | 0<br>(0 - 1)            | 0<br>(0 - 0)            |
| Other pneumoconiosis                                | 4<br>(2 - 9)         | 0<br>(0 - 0)          | 0<br>(0 - 0)           | 1<br>(1 - 2)            | 2<br>(1 - 4)            | 1<br>(1 - 2)            |
| Asthma                                              | 52<br>(21 - 93)      | 8<br>(2 - 19)         | 2<br>(1 - 3)           | 15<br>(6 - 28)          | 15<br>(5 - 32)          | 12<br>(5 - 23)          |
| Interstitial lung disease and pulmonary sarcoidosis | 9<br>(2 - 21)        | 0<br>(0 - 1)          | 0<br>(0 - 0)           | 1<br>(0 - 3)            | 4<br>(1 - 9)            | 4<br>(1 - 10)           |
| Other chronic respiratory diseases                  | 11<br>(5 - 20)       | 6<br>(2 - 13)         | 0<br>(0 - 1)           | 2<br>(1 - 4)            | 1<br>(0 - 3)            | 1<br>(1 - 3)            |
| Cirrhosis                                           | 83<br>(32 - 157)     | 2<br>(0 - 5)          | 1<br>(0 - 2)           | 29<br>(10 - 55)         | 40<br>(15 - 79)         | 12<br>(5 - 21)          |
| Cirrhosis due to hepatitis B                        | 18<br>(6 - 37)       | 0<br>(0 - 0)          | 0<br>(0 - 0)           | 6<br>(2 - 13)           | 9<br>(3 - 19)           | 3<br>(1 - 6)            |
| Cirrhosis due to hepatitis C                        | 28<br>(9 - 55)       | 0<br>(0 - 1)          | 0<br>(0 - 0)           | 10<br>(3 - 20)          | 14<br>(4 - 28)          | 4<br>(2 - 7)            |
| Cirrhosis due to alcohol use                        | 28<br>(10 - 55)      | --                    | --                     | 9<br>(3 - 19)           | 14<br>(5 - 30)          | 5<br>(2 - 8)            |
| Cirrhosis due to other causes                       | 10<br>(4 - 19)       | 2<br>(0 - 4)          | 1<br>(0 - 1)           | 4<br>(1 - 9)            | 3<br>(1 - 7)            | 1<br>(0 - 1)            |
| Digestive diseases                                  | 127<br>(87 - 190)    | 16<br>(7 - 31)        | 4<br>(2 - 6)           | 40<br>(25 - 63)         | 38<br>(23 - 67)         | 29<br>(21 - 43)         |
| Peptic ulcer disease                                | 23<br>(14 - 37)      | 1<br>(0 - 2)          | 0<br>(0 - 1)           | 8<br>(4 - 13)           | 9<br>(4 - 16)           | 6<br>(4 - 9)            |
| Gastritis and duodenitis                            | 5<br>(3 - 8)         | 1<br>(0 - 2)          | 0<br>(0 - 0)           | 2<br>(1 - 3)            | 1<br>(1 - 3)            | 1<br>(0 - 2)            |
| Appendicitis                                        | 8<br>(5 - 13)        | 2<br>(1 - 4)          | 1<br>(0 - 1)           | 3<br>(2 - 6)            | 1<br>(1 - 3)            | 1<br>(0 - 1)            |
| Paralytic ileus and intestinal obstruction          | 29<br>(18 - 48)      | 2<br>(1 - 5)          | 1<br>(0 - 2)           | 6<br>(3 - 11)           | 10<br>(5 - 18)          | 10<br>(6 - 17)          |
| Inguinal, femoral, and abdominal hernia             | 2<br>(1 - 4)         | 0<br>(0 - 1)          | 0<br>(0 - 0)           | 1<br>(0 - 1)            | 1<br>(0 - 1)            | 1<br>(0 - 1)            |
| Inflammatory bowel disease                          | 13<br>(7 - 20)       | 4<br>(1 - 10)         | 0<br>(0 - 1)           | 4<br>(2 - 7)            | 2<br>(1 - 4)            | 1<br>(1 - 2)            |
| Vascular intestinal disorders                       | 1<br>(1 - 3)         | 0<br>(0 - 0)          | 0<br>(0 - 0)           | 0<br>(0 - 1)            | 0<br>(0 - 1)            | 0<br>(0 - 1)            |
| Gallbladder and biliary diseases                    | 10<br>(6 - 16)       | 1<br>(0 - 1)          | 0<br>(0 - 0)           | 3<br>(2 - 5)            | 3<br>(2 - 6)            | 3<br>(2 - 4)            |
| Pancreatitis                                        | 16<br>(8 - 31)       | 1<br>(0 - 2)          | 0<br>(0 - 1)           | 8<br>(3 - 17)           | 5<br>(2 - 10)           | 2<br>(1 - 3)            |
| Other digestive diseases                            | 20<br>(12 - 31)      | 4<br>(1 - 9)          | 1<br>(0 - 1)           | 6<br>(3 - 10)           | 5<br>(3 - 10)           | 3<br>(2 - 6)            |
| Neurological disorders                              | 91<br>(63 - 131)     | 11<br>(3 - 24)        | 4<br>(1 - 7)           | 20<br>(8 - 35)          | 11<br>(7 - 18)          | 45<br>(34 - 62)         |
| Alzheimer disease and other dementias               | 48<br>(36 - 67)      | --                    | --                     | 0<br>(0 - 0)            | 5<br>(3 - 9)            | 42<br>(32 - 58)         |
| Parkinson disease                                   | 1<br>(1 - 2)         | --                    | --                     | 0<br>(0 - 0)            | 0<br>(0 - 0)            | 1<br>(0 - 1)            |
| Epilepsy                                            | 34<br>(11 - 58)      | 9<br>(1 - 22)         | 3<br>(1 - 6)           | 18<br>(6 - 32)          | 3<br>(1 - 6)            | 1<br>(1 - 2)            |
| Multiple sclerosis                                  | 0<br>(0 - 0)         | --                    | --                     | 0<br>(0 - 0)            | 0<br>(0 - 0)            | 0<br>(0 - 0)            |
| Other neurological disorders                        | 8<br>(5 - 12)        | 2<br>(1 - 5)          | 0<br>(0 - 1)           | 2<br>(1 - 4)            | 2<br>(1 - 4)            | 1<br>(1 - 1)            |
| Mental and substance use disorders                  | 39<br>(23 - 63)      | 2<br>(1 - 5)          | 0<br>(0 - 0)           | 25<br>(14 - 42)         | 10<br>(5 - 18)          | 1<br>(1 - 2)            |
| Schizophrenia                                       | 1<br>(0 - 1)         | --                    | --                     | 0<br>(0 - 1)            | 0<br>(0 - 0)            | 0<br>(0 - 0)            |
| Alcohol use disorders                               | 23<br>(12 - 38)      | --                    | --                     | 14<br>(7 - 24)          | 8<br>(4 - 14)           | 1<br>(0 - 1)            |
| Drug use disorders                                  | 14<br>(8 - 24)       | 2<br>(1 - 5)          | --                     | 10<br>(5 - 17)          | 2<br>(1 - 4)            | 0<br>(0 - 1)            |
| Opioid use disorders                                | 2<br>(1 - 2)         | 0<br>(0 - 1)          | --                     | 1<br>(1 - 2)            | 0<br>(0 - 0)            | 0<br>(0 - 0)            |
| Cocaine use disorders                               | 0<br>(0 - 0)         | 0<br>(0 - 0)          | --                     | 0<br>(0 - 0)            | 0<br>(0 - 0)            | 0<br>(0 - 0)            |

Web Table 31- Equatorial Guinea deaths with 95% UI by age, sex, and cause in 2013

| Cause                                               | Both Sexes, All Ages | Both Sexes, 0-4 Years | Both Sexes, 5-14 Years | Both Sexes, 15-49 Years | Both Sexes, 50-69 Years | Both Sexes, 70-80 Years |
|-----------------------------------------------------|----------------------|-----------------------|------------------------|-------------------------|-------------------------|-------------------------|
| Amphetamine use disorders                           | 0<br>(0 - 0)         | 0<br>(0 - 0)          | --                     | 0<br>(0 - 0)            | 0<br>(0 - 0)            | 0<br>(0 - 0)            |
| Other drug use disorders                            | 13<br>(7 - 21)       | 2<br>(1 - 4)          | --                     | 9<br>(5 - 15)           | 2<br>(1 - 3)            | 0<br>(0 - 1)            |
| Eating disorders                                    | 1<br>(1 - 2)         | --                    | 0<br>(0 - 0)           | 1<br>(0 - 2)            | --                      | --                      |
| Anorexia nervosa                                    | 1<br>(1 - 2)         | --                    | 0<br>(0 - 0)           | 1<br>(0 - 2)            | --                      | --                      |
| Diabetes, urogenital, blood, and endocrine diseases | 427<br>(305 - 613)   | 92<br>(45 - 152)      | 18<br>(10 - 32)        | 100<br>(61 - 161)       | 125<br>(73 - 217)       | 91<br>(63 - 129)        |
| Diabetes mellitus                                   | 157<br>(93 - 252)    | 3<br>(1 - 6)          | 1<br>(0 - 1)           | 27<br>(14 - 44)         | 74<br>(40 - 132)        | 52<br>(33 - 77)         |
| Acute glomerulonephritis                            | 1<br>(0 - 4)         | 0<br>(0 - 1)          | 0<br>(0 - 0)           | 0<br>(0 - 1)            | 0<br>(0 - 0)            | 0<br>(0 - 0)            |
| Chronic kidney disease                              | 78<br>(40 - 159)     | 9<br>(4 - 18)         | 2<br>(1 - 4)           | 24<br>(11 - 54)         | 23<br>(11 - 50)         | 20<br>(11 - 37)         |
| Chronic kidney disease due to diabetes mellitus     | 1<br>(0 - 2)         | 0<br>(0 - 0)          | 0<br>(0 - 0)           | 0<br>(0 - 1)            | 0<br>(0 - 1)            | 0<br>(0 - 0)            |
| Chronic kidney disease due to hypertension          | 32<br>(19 - 59)      | 1<br>(0 - 3)          | 0<br>(0 - 1)           | 8<br>(4 - 17)           | 12<br>(6 - 24)          | 11<br>(7 - 19)          |
| Chronic kidney disease due to glomerulonephritis    | 19<br>(9 - 30)       | 4<br>(2 - 8)          | 1<br>(1 - 2)           | 7<br>(3 - 13)           | 4<br>(1 - 7)            | 2<br>(1 - 4)            |
| Chronic kidney disease due to other causes          | 27<br>(9 - 71)       | 4<br>(1 - 9)          | 1<br>(0 - 2)           | 8<br>(3 - 24)           | 7<br>(2 - 20)           | 7<br>(2 - 15)           |
| Urinary diseases and male infertility               | 36<br>(25 - 55)      | 7<br>(3 - 14)         | 1<br>(0 - 1)           | 9<br>(5 - 15)           | 10<br>(6 - 17)          | 10<br>(7 - 15)          |
| Interstitial nephritis and urinary tract infections | 25<br>(16 - 37)      | 4<br>(1 - 9)          | 0<br>(0 - 1)           | 6<br>(3 - 9)            | 7<br>(4 - 12)           | 8<br>(5 - 12)           |
| Urolithiasis                                        | 1<br>(0 - 2)         | --                    | 0<br>(0 - 0)           | 0<br>(0 - 1)            | 0<br>(0 - 1)            | 0<br>(0 - 0)            |
| Other urinary diseases                              | 11<br>(6 - 18)       | 3<br>(1 - 7)          | 0<br>(0 - 1)           | 3<br>(2 - 5)            | 3<br>(1 - 5)            | 2<br>(1 - 4)            |
| Gynecological diseases                              | 1<br>(0 - 4)         | --                    | --                     | 1<br>(0 - 3)            | 0<br>(0 - 1)            | 0<br>(0 - 0)            |
| Uterine fibroids                                    | 0<br>(0 - 1)         | --                    | --                     | 0<br>(0 - 0)            | 0<br>(0 - 0)            | 0<br>(0 - 0)            |
| Polycystic ovarian syndrome                         | 0<br>(0 - 0)         | --                    | --                     | 0<br>(0 - 0)            | 0<br>(0 - 0)            | --                      |
| Endometriosis                                       | 0<br>(0 - 1)         | --                    | --                     | 0<br>(0 - 1)            | 0<br>(0 - 0)            | --                      |
| Genital prolapse                                    | 0<br>(0 - 1)         | --                    | --                     | 0<br>(0 - 0)            | 0<br>(0 - 0)            | 0<br>(0 - 0)            |
| Other gynecological diseases                        | 1<br>(0 - 2)         | --                    | --                     | 0<br>(0 - 2)            | 0<br>(0 - 0)            | 0<br>(0 - 0)            |
| Hemoglobinopathies and hemolytic anemias            | 82<br>(27 - 144)     | 43<br>(9 - 87)        | 11<br>(4 - 22)         | 22<br>(8 - 43)          | 5<br>(2 - 10)           | 1<br>(1 - 2)            |
| Thalassemias                                        | 0<br>(0 - 0)         | 0<br>(0 - 0)          | 0<br>(0 - 0)           | 0<br>(0 - 0)            | 0<br>(0 - 0)            | 0<br>(0 - 0)            |
| Sickle cell disorders                               | 79<br>(26 - 139)     | 41<br>(8 - 85)        | 11<br>(4 - 22)         | 22<br>(8 - 42)          | 4<br>(2 - 10)           | 0<br>(0 - 0)            |
| G6PD deficiency                                     | 1<br>(0 - 1)         | 0<br>(0 - 1)          | 0<br>(0 - 0)           | 0<br>(0 - 0)            | 0<br>(0 - 0)            | 0<br>(0 - 0)            |
| Other hemoglobinopathies and hemolytic anemias      | 3<br>(1 - 5)         | 1<br>(0 - 3)          | 0<br>(0 - 0)           | 0<br>(0 - 0)            | 0<br>(0 - 0)            | 1<br>(1 - 2)            |
| Endocrine, metabolic, blood, and immune disorders   | 71<br>(43 - 151)     | 30<br>(12 - 83)       | 3<br>(2 - 8)           | 17<br>(9 - 36)          | 13<br>(7 - 26)          | 7<br>(5 - 12)           |
| Musculoskeletal disorders                           | 14<br>(7 - 24)       | --                    | 1<br>(0 - 2)           | 7<br>(2 - 12)           | 4<br>(2 - 7)            | 2<br>(1 - 3)            |
| Rheumatoid arthritis                                | 1<br>(1 - 2)         | --                    | 0<br>(0 - 0)           | 0<br>(0 - 1)            | 0<br>(0 - 1)            | 0<br>(0 - 1)            |
| Other musculoskeletal disorders                     | 13<br>(6 - 22)       | --                    | 1<br>(0 - 2)           | 7<br>(2 - 12)           | 3<br>(2 - 6)            | 2<br>(1 - 3)            |
| Other non-communicable diseases                     | 300<br>(128 - 503)   | 273<br>(105 - 471)    | 7<br>(3 - 14)          | 10<br>(5 - 18)          | 5<br>(3 - 9)            | 5<br>(3 - 8)            |
| Congenital anomalies                                | 267<br>(111 - 471)   | 252<br>(101 - 446)    | 7<br>(3 - 13)          | 7<br>(4 - 13)           | 2<br>(1 - 3)            | 1<br>(0 - 1)            |
| Neural tube defects                                 | 72<br>(8 - 207)      | 70<br>(8 - 203)       | 1<br>(0 - 3)           | 1<br>(0 - 3)            | 0<br>(0 - 0)            | 0<br>(0 - 0)            |
| Congenital heart anomalies                          | 102<br>(42 - 219)    | 94<br>(37 - 206)      | 3<br>(1 - 8)           | 3<br>(1 - 7)            | 1<br>(0 - 1)            | 0<br>(0 - 0)            |
| Cleft lip and cleft palate                          | 1<br>(0 - 4)         | 1<br>(0 - 4)          | --                     | --                      | --                      | --                      |
| Down syndrome                                       | 17<br>(4 - 38)       | 15<br>(3 - 35)        | 1<br>(0 - 1)           | 1<br>(0 - 2)            | 0<br>(0 - 0)            | 0<br>(0 - 0)            |
| Chromosomal unbalanced rearrangements               | 8<br>(2 - 22)        | 8<br>(2 - 21)         | 0<br>(0 - 0)           | 0<br>(0 - 0)            | 0<br>(0 - 0)            | 0<br>(0 - 0)            |
| Other congenital anomalies                          | 67<br>(22 - 182)     | 63<br>(20 - 173)      | 2<br>(0 - 5)           | 2<br>(1 - 4)            | 1<br>(0 - 1)            | 0<br>(0 - 1)            |
| Skin and subcutaneous diseases                      | 17<br>(11 - 24)      | 5<br>(2 - 9)          | 1<br>(0 - 1)           | 3<br>(2 - 5)            | 3<br>(2 - 6)            | 4<br>(2 - 7)            |

Web Table 31- Equatorial Guinea deaths with 95% UI by age, sex, and cause in 2013

| Cause                                           | Both Sexes, All Ages | Both Sexes, 0-4 Years | Both Sexes, 5-14 Years | Both Sexes, 15-49 Years | Both Sexes, 50-69 Years | Both Sexes, 70-80 Years |
|-------------------------------------------------|----------------------|-----------------------|------------------------|-------------------------|-------------------------|-------------------------|
| Cellulitis                                      | 5<br>(2 - 9)         | 2<br>(1 - 3)          | 0<br>(0 - 0)           | 1<br>(0 - 2)            | 1<br>(0 - 2)            | 1<br>(0 - 2)            |
| Pyoderma                                        | 8<br>(5 - 13)        | 3<br>(1 - 6)          | 0<br>(0 - 0)           | 2<br>(1 - 3)            | 2<br>(1 - 3)            | 2<br>(1 - 3)            |
| Decubitus ulcer                                 | 2<br>(1 - 4)         | 0<br>(0 - 0)          | 0<br>(0 - 0)           | 0<br>(0 - 1)            | 0<br>(0 - 1)            | 1<br>(1 - 3)            |
| Other skin and subcutaneous diseases            | 1<br>(1 - 2)         | 0<br>(0 - 1)          | 0<br>(0 - 0)           | 0<br>(0 - 1)            | 0<br>(0 - 1)            | 0<br>(0 - 0)            |
| Sudden infant death syndrome                    | 16<br>(1 - 77)       | 16<br>(1 - 77)        | --                     | --                      | --                      | --                      |
| Injuries                                        | 864<br>(605 - 1,217) | 259<br>(136 - 438)    | 68<br>(44 - 102)       | 401<br>(240 - 626)      | 98<br>(58 - 178)        | 38<br>(27 - 56)         |
| Transport injuries                              | 339<br>(157 - 636)   | 69<br>(26 - 149)      | 34<br>(14 - 62)        | 185<br>(81 - 351)       | 40<br>(15 - 88)         | 11<br>(5 - 21)          |
| Road injuries                                   | 318<br>(148 - 576)   | 62<br>(24 - 131)      | 31<br>(14 - 56)        | 175<br>(78 - 328)       | 38<br>(15 - 79)         | 11<br>(5 - 20)          |
| Pedestrian road injuries                        | 120<br>(52 - 223)    | 30<br>(9 - 69)        | 15<br>(6 - 28)         | 55<br>(21 - 106)        | 15<br>(6 - 33)          | 5<br>(2 - 10)           |
| Cyclist road injuries                           | 33<br>(12 - 64)      | 7<br>(2 - 17)         | 5<br>(2 - 10)          | 15<br>(5 - 32)          | 5<br>(2 - 11)           | 1<br>(0 - 2)            |
| Motorcyclist road injuries                      | 48<br>(19 - 94)      | 4<br>(1 - 10)         | 2<br>(1 - 4)           | 37<br>(14 - 74)         | 4<br>(1 - 9)            | 1<br>(0 - 1)            |
| Motor vehicle road injuries                     | 115<br>(52 - 223)    | 21<br>(7 - 47)        | 10<br>(4 - 19)         | 68<br>(29 - 138)        | 13<br>(5 - 31)          | 4<br>(1 - 7)            |
| Other road injuries                             | 2<br>(0 - 3)         | 0<br>(0 - 1)          | 0<br>(0 - 0)           | 1<br>(0 - 1)            | 0<br>(0 - 1)            | 0<br>(0 - 0)            |
| Other transport injuries                        | 21<br>(6 - 77)       | 7<br>(1 - 24)         | 2<br>(1 - 7)           | 10<br>(3 - 35)          | 2<br>(1 - 8)            | 1<br>(0 - 2)            |
| Unintentional injuries                          | 379<br>(221 - 581)   | 185<br>(74 - 342)     | 31<br>(18 - 50)        | 105<br>(61 - 163)       | 37<br>(22 - 64)         | 22<br>(15 - 32)         |
| Falls                                           | 56<br>(27 - 112)     | 13<br>(2 - 33)        | 3<br>(1 - 7)           | 19<br>(8 - 42)          | 11<br>(6 - 22)          | 10<br>(6 - 16)          |
| Drowning                                        | 79<br>(26 - 151)     | 41<br>(6 - 94)        | 12<br>(4 - 23)         | 22<br>(9 - 40)          | 4<br>(2 - 8)            | 1<br>(1 - 2)            |
| Fire, heat, and hot substances                  | 52<br>(13 - 88)      | 28<br>(4 - 61)        | 4<br>(1 - 7)           | 13<br>(4 - 21)          | 4<br>(2 - 9)            | 3<br>(1 - 6)            |
| Poisonings                                      | 16<br>(9 - 29)       | 7<br>(2 - 15)         | 1<br>(0 - 2)           | 6<br>(3 - 12)           | 1<br>(1 - 3)            | 0<br>(0 - 1)            |
| Exposure to mechanical forces                   | 51<br>(25 - 109)     | 16<br>(4 - 38)        | 5<br>(2 - 11)          | 23<br>(11 - 47)         | 5<br>(3 - 12)           | 1<br>(0 - 2)            |
| Unintentional firearm injuries                  | 12<br>(6 - 22)       | 2<br>(1 - 6)          | 1<br>(1 - 3)           | 7<br>(3 - 15)           | 1<br>(0 - 2)            | 0<br>(0 - 0)            |
| Unintentional suffocation                       | 4<br>(1 - 11)        | 3<br>(0 - 8)          | 0<br>(0 - 1)           | 1<br>(0 - 1)            | 0<br>(0 - 0)            | 0<br>(0 - 0)            |
| Other exposure to mechanical forces             | 35<br>(15 - 87)      | 11<br>(2 - 30)        | 4<br>(1 - 9)           | 15<br>(6 - 39)          | 4<br>(2 - 9)            | 1<br>(0 - 2)            |
| Adverse effects of medical treatment            | 21<br>(10 - 37)      | 8<br>(2 - 20)         | 1<br>(0 - 2)           | 5<br>(2 - 10)           | 4<br>(2 - 8)            | 3<br>(2 - 5)            |
| Animal contact                                  | 12<br>(4 - 39)       | 6<br>(1 - 21)         | 2<br>(1 - 5)           | 3<br>(1 - 9)            | 1<br>(1 - 4)            | 0<br>(0 - 2)            |
| Venomous animal contact                         | 9<br>(2 - 32)        | 4<br>(1 - 19)         | 1<br>(0 - 4)           | 2<br>(1 - 8)            | 1<br>(0 - 3)            | 0<br>(0 - 1)            |
| Non-venomous animal contact                     | 3<br>(1 - 8)         | 1<br>(0 - 4)          | 0<br>(0 - 1)           | 1<br>(0 - 2)            | 0<br>(0 - 1)            | 0<br>(0 - 1)            |
| Foreign body                                    | 78<br>(17 - 170)     | 62<br>(9 - 144)       | 3<br>(1 - 5)           | 7<br>(2 - 16)           | 3<br>(1 - 7)            | 3<br>(1 - 5)            |
| Pulmonary aspiration and foreign body in airway | 78<br>(16 - 169)     | 62<br>(9 - 144)       | 2<br>(1 - 5)           | 7<br>(2 - 15)           | 3<br>(1 - 7)            | 3<br>(1 - 5)            |
| Foreign body in other body part                 | 1<br>(0 - 1)         | 0<br>(0 - 1)          | 0<br>(0 - 0)           | 0<br>(0 - 0)            | 0<br>(0 - 0)            | 0<br>(0 - 0)            |
| Other unintentional injuries                    | 13<br>(7 - 19)       | 4<br>(2 - 7)          | 1<br>(1 - 2)           | 6<br>(3 - 10)           | 1<br>(1 - 3)            | 0<br>(0 - 1)            |
| Self-harm and interpersonal violence            | 146<br>(62 - 231)    | 5<br>(2 - 11)         | 3<br>(1 - 6)           | 111<br>(46 - 181)       | 22<br>(10 - 40)         | 4<br>(2 - 7)            |
| Self-harm                                       | 101<br>(35 - 164)    | --                    | 2<br>(0 - 4)           | 77<br>(24 - 126)        | 18<br>(7 - 33)          | 4<br>(2 - 7)            |
| Interpersonal violence                          | 45<br>(20 - 71)      | 5<br>(2 - 11)         | 2<br>(1 - 3)           | 34<br>(14 - 57)         | 3<br>(1 - 7)            | 0<br>(0 - 1)            |
| Assault by firearm                              | 15<br>(5 - 28)       | 1<br>(0 - 2)          | 0<br>(0 - 1)           | 12<br>(4 - 24)          | 1<br>(0 - 2)            | 0<br>(0 - 0)            |
| Assault by sharp object                         | 12<br>(4 - 23)       | 1<br>(0 - 2)          | 0<br>(0 - 1)           | 10<br>(3 - 20)          | 1<br>(0 - 2)            | 0<br>(0 - 0)            |
| Assault by other means                          | 18<br>(8 - 31)       | 4<br>(1 - 8)          | 1<br>(0 - 2)           | 12<br>(4 - 21)          | 1<br>(0 - 3)            | 0<br>(0 - 0)            |

Web Table 31- Equatorial Guinea deaths with 95% UI by age, sex, and cause in 2013

| Cause                                                             | Males, All Ages          | Males, 0-4 Years         | Males, 5-14 Years  | Males, 15-49 Years     | Males, 50-69 Years   | Males, 70-80 Years |
|-------------------------------------------------------------------|--------------------------|--------------------------|--------------------|------------------------|----------------------|--------------------|
| All causes                                                        | 4,278<br>(3,587 - 5,404) | 1,540<br>(1,180 - 2,036) | 156<br>(120 - 215) | 1,130<br>(857 - 1,476) | 903<br>(647 - 1,434) | 549<br>(449 - 735) |
| Communicable, maternal, neonatal, and nutritional diseases        | 2,242<br>(1,808 - 2,753) | 1,177<br>(876 - 1,574)   | 88<br>(63 - 122)   | 558<br>(369 - 768)     | 282<br>(184 - 418)   | 137<br>(86 - 196)  |
| HIV/AIDS and tuberculosis                                         | 719<br>(418 - 1,087)     | 64<br>(30 - 101)         | 35<br>(18 - 52)    | 433<br>(242 - 662)     | 159<br>(87 - 257)    | 28<br>(13 - 41)    |
| Tuberculosis                                                      | 164<br>(49 - 278)        | 9<br>(4 - 19)            | 2<br>(1 - 3)       | 71<br>(20 - 126)       | 63<br>(18 - 116)     | 19<br>(6 - 31)     |
| HIV/AIDS                                                          | 555<br>(246 - 945)       | 55<br>(20 - 90)          | 33<br>(16 - 51)    | 362<br>(155 - 595)     | 97<br>(37 - 196)     | 8<br>(3 - 17)      |
| HIV/AIDS resulting in mycobacterial infection                     | 38<br>(16 - 65)          | 4<br>(1 - 6)             | 2<br>(1 - 3)       | 25<br>(11 - 43)        | 7<br>(2 - 14)        | 1<br>(0 - 1)       |
| HIV/AIDS resulting in other diseases                              | 518<br>(229 - 883)       | 51<br>(18 - 85)          | 31<br>(15 - 48)    | 337<br>(145 - 555)     | 90<br>(34 - 181)     | 8<br>(3 - 16)      |
| Diarrhea, lower respiratory, and other common infectious diseases | 690<br>(440 - 1,019)     | 400<br>(191 - 710)       | 31<br>(18 - 50)    | 80<br>(46 - 132)       | 90<br>(51 - 155)     | 89<br>(53 - 133)   |
| Diarrheal diseases                                                | 110<br>(53 - 206)        | 56<br>(16 - 143)         | 7<br>(2 - 15)      | 16<br>(8 - 34)         | 17<br>(7 - 38)       | 14<br>(7 - 31)     |
| Intestinal infectious diseases                                    | 13<br>(4 - 31)           | 5<br>(1 - 14)            | 3<br>(1 - 8)       | 4<br>(1 - 10)          | 1<br>(0 - 2)         | 0<br>(0 - 0)       |
| Typhoid fever                                                     | 9<br>(3 - 22)            | 3<br>(1 - 9)             | 2<br>(1 - 6)       | 3<br>(1 - 7)           | 0<br>(0 - 1)         | 0<br>(0 - 0)       |
| Paratyphoid fever                                                 | 3<br>(1 - 8)             | 1<br>(0 - 4)             | 1<br>(0 - 2)       | 1<br>(0 - 3)           | 0<br>(0 - 0)         | 0<br>(0 - 0)       |
| Other intestinal infectious diseases                              | 1<br>(0 - 5)             | 1<br>(0 - 4)             | 0<br>(0 - 1)       | 0<br>(0 - 2)           | 0<br>(0 - 1)         | 0<br>(0 - 0)       |
| Lower respiratory infections                                      | 461<br>(263 - 746)       | 262<br>(100 - 524)       | 13<br>(7 - 23)     | 46<br>(25 - 80)        | 66<br>(34 - 115)     | 73<br>(40 - 109)   |
| Upper respiratory infections                                      | 0<br>(0 - 1)             | 0<br>(0 - 0)             | 0<br>(0 - 0)       | 0<br>(0 - 0)           | 0<br>(0 - 0)         | 0<br>(0 - 0)       |
| Otitis media                                                      | 0<br>(0 - 1)             | 0<br>(0 - 0)             | 0<br>(0 - 0)       | 0<br>(0 - 0)           | 0<br>(0 - 0)         | 0<br>(0 - 0)       |
| Meningitis                                                        | 68<br>(35 - 124)         | 43<br>(15 - 91)          | 6<br>(2 - 12)      | 12<br>(5 - 23)         | 6<br>(2 - 12)        | 2<br>(1 - 3)       |
| Pneumococcal meningitis                                           | 21<br>(11 - 37)          | 12<br>(4 - 26)           | 2<br>(1 - 5)       | 4<br>(2 - 9)           | 2<br>(1 - 5)         | 1<br>(0 - 1)       |
| H influenzae type B meningitis                                    | 22<br>(10 - 45)          | 18<br>(6 - 39)           | 2<br>(1 - 3)       | 2<br>(1 - 3)           | 1<br>(0 - 1)         | 0<br>(0 - 0)       |
| Meningococcal meningitis                                          | 9<br>(5 - 16)            | 5<br>(2 - 12)            | 1<br>(0 - 2)       | 2<br>(1 - 4)           | 1<br>(0 - 2)         | 0<br>(0 - 1)       |
| Other meningitis                                                  | 16<br>(8 - 29)           | 8<br>(2 - 19)            | 1<br>(0 - 3)       | 4<br>(2 - 8)           | 2<br>(1 - 4)         | 1<br>(0 - 1)       |
| Encephalitis                                                      | 7<br>(2 - 21)            | 5<br>(0 - 19)            | 1<br>(0 - 1)       | 1<br>(0 - 2)           | 0<br>(0 - 1)         | 0<br>(0 - 0)       |
| Diphtheria                                                        | 2<br>(0 - 10)            | 1<br>(0 - 10)            | 0<br>(0 - 1)       | 0<br>(0 - 0)           | 0<br>(0 - 0)         | --                 |
| Whooping cough                                                    | 20<br>(0 - 106)          | 19<br>(0 - 103)          | 1<br>(0 - 3)       | 0<br>(0 - 1)           | 0<br>(0 - 0)         | --                 |
| Tetanus                                                           | 2<br>(0 - 6)             | 1<br>(0 - 4)             | 0<br>(0 - 1)       | 0<br>(0 - 1)           | 0<br>(0 - 1)         | 0<br>(0 - 0)       |
| Measles                                                           | 7<br>(0 - 47)            | 6<br>(0 - 43)            | 1<br>(0 - 4)       | 0<br>(0 - 1)           | 0<br>(0 - 0)         | --                 |
| Varicella and herpes zoster                                       | 0<br>(0 - 1)             | 0<br>(0 - 1)             | 0<br>(0 - 0)       | 0<br>(0 - 0)           | 0<br>(0 - 0)         | 0<br>(0 - 0)       |
| Neglected tropical diseases and malaria                           | 309<br>(87 - 584)        | 246<br>(32 - 490)        | 14<br>(5 - 34)     | 26<br>(10 - 64)        | 16<br>(5 - 38)       | 6<br>(2 - 18)      |
| Malaria                                                           | 298<br>(75 - 572)        | 242<br>(27 - 482)        | 13<br>(4 - 33)     | 23<br>(7 - 59)         | 14<br>(4 - 36)       | 6<br>(2 - 17)      |
| Leishmaniasis                                                     | 0<br>(0 - 0)             | 0<br>(0 - 0)             | 0<br>(0 - 0)       | 0<br>(0 - 0)           | 0<br>(0 - 0)         | 0<br>(0 - 0)       |
| Visceral leishmaniasis                                            | 0<br>(0 - 0)             | 0<br>(0 - 0)             | 0<br>(0 - 0)       | 0<br>(0 - 0)           | 0<br>(0 - 0)         | 0<br>(0 - 0)       |
| African trypanosomiasis                                           | 1<br>(1 - 3)             | 0<br>(0 - 0)             | 0<br>(0 - 0)       | 1<br>(0 - 2)           | 0<br>(0 - 1)         | 0<br>(0 - 0)       |
| Schistosomiasis                                                   | 2<br>(1 - 3)             | 0<br>(0 - 0)             | 0<br>(0 - 0)       | 1<br>(1 - 2)           | 1<br>(0 - 2)         | 0<br>(0 - 0)       |
| Cysticercosis                                                     | 0<br>(0 - 0)             | 0<br>(0 - 0)             | 0<br>(0 - 0)       | 0<br>(0 - 0)           | 0<br>(0 - 0)         | 0<br>(0 - 0)       |
| Cystic echinococcosis                                             | 0<br>(0 - 0)             | 0<br>(0 - 0)             | 0<br>(0 - 0)       | 0<br>(0 - 0)           | 0<br>(0 - 0)         | 0<br>(0 - 0)       |
| Dengue                                                            | 1<br>(0 - 1)             | 0<br>(0 - 1)             | 0<br>(0 - 0)       | 0<br>(0 - 0)           | 0<br>(0 - 0)         | 0<br>(0 - 0)       |
| Yellow fever                                                      | 0<br>(0 - 1)             | 0<br>(0 - 0)             | 0<br>(0 - 0)       | 0<br>(0 - 0)           | 0<br>(0 - 0)         | 0<br>(0 - 0)       |
| Rabies                                                            | 1<br>(1 - 4)             | 0<br>(0 - 2)             | 0<br>(0 - 1)       | 0<br>(0 - 1)           | 0<br>(0 - 0)         | 0<br>(0 - 0)       |
| Intestinal nematode infections                                    | 3<br>(0 - 12)            | 3<br>(0 - 11)            | 0<br>(0 - 3)       | 0<br>(0 - 1)           | 0<br>(0 - 1)         | 0<br>(0 - 0)       |
| Ascariasis                                                        | 3<br>(0 - 12)            | 3<br>(0 - 11)            | 0<br>(0 - 3)       | 0<br>(0 - 1)           | 0<br>(0 - 1)         | 0<br>(0 - 0)       |



Web Table 31- Equatorial Guinea deaths with 95% UI by age, sex, and cause in 2013

| Cause                                                            | Males, All Ages          | Males, 0-4 Years   | Males, 5-14 Years | Males, 15-49 Years | Males, 50-69 Years | Males, 70-80 Years |
|------------------------------------------------------------------|--------------------------|--------------------|-------------------|--------------------|--------------------|--------------------|
| Other neglected tropical diseases                                | 2<br>(1 - 4)             | 1<br>(0 - 3)       | 0<br>(0 - 0)      | 0<br>(0 - 1)       | 0<br>(0 - 0)       | 0<br>(0 - 0)       |
| Maternal disorders                                               | --                       | --                 | --                | --                 | --                 | --                 |
| Maternal hemorrhage                                              | --                       | --                 | --                | --                 | --                 | --                 |
| Maternal sepsis and other maternal infections                    | --                       | --                 | --                | --                 | --                 | --                 |
| Maternal hypertensive disorders                                  | --                       | --                 | --                | --                 | --                 | --                 |
| Maternal obstructed labor                                        | --                       | --                 | --                | --                 | --                 | --                 |
| Maternal abortive outcome                                        | --                       | --                 | --                | --                 | --                 | --                 |
| Indirect maternal deaths                                         | --                       | --                 | --                | --                 | --                 | --                 |
| Late maternal deaths                                             | --                       | --                 | --                | --                 | --                 | --                 |
| Maternal deaths aggravated by HIV/AIDS                           | --                       | --                 | --                | --                 | --                 | --                 |
| Other maternal disorders                                         | --                       | --                 | --                | --                 | --                 | --                 |
| Neonatal disorders                                               | 316<br>(156 - 539)       | 316<br>(156 - 539) | --                | --                 | --                 | --                 |
| Neonatal preterm birth complications                             | 108<br>(24 - 250)        | 108<br>(24 - 250)  | --                | --                 | --                 | --                 |
| Neonatal encephalopathy due to birth asphyxia and trauma         | 98<br>(30 - 251)         | 98<br>(30 - 251)   | --                | --                 | --                 | --                 |
| Neonatal sepsis and other neonatal infections                    | 55<br>(10 - 154)         | 55<br>(10 - 154)   | --                | --                 | --                 | --                 |
| Hemolytic disease and other neonatal jaundice                    | 3<br>(0 - 11)            | 3<br>(0 - 11)      | --                | --                 | --                 | --                 |
| Other neonatal disorders                                         | 52<br>(11 - 160)         | 52<br>(11 - 160)   | --                | --                 | --                 | --                 |
| Nutritional deficiencies                                         | 136<br>(41 - 263)        | 95<br>(27 - 206)   | 4<br>(1 - 9)      | 11<br>(4 - 27)     | 13<br>(4 - 28)     | 13<br>(4 - 26)     |
| Protein-energy malnutrition                                      | 100<br>(25 - 204)        | 71<br>(15 - 161)   | 4<br>(1 - 8)      | 7<br>(2 - 19)      | 9<br>(2 - 23)      | 10<br>(2 - 21)     |
| Iodine deficiency                                                | 0<br>(0 - 4)             | 0<br>(0 - 4)       | 0<br>(0 - 0)      | 0<br>(0 - 0)       | 0<br>(0 - 0)       | 0<br>(0 - 0)       |
| Iron-deficiency anemia                                           | 31<br>(6 - 89)           | 21<br>(2 - 73)     | 1<br>(0 - 2)      | 4<br>(0 - 11)      | 3<br>(0 - 8)       | 3<br>(0 - 8)       |
| Other nutritional deficiencies                                   | 3<br>(0 - 15)            | 3<br>(0 - 13)      | 0<br>(0 - 0)      | 0<br>(0 - 1)       | 0<br>(0 - 1)       | 0<br>(0 - 1)       |
| Other communicable, maternal, neonatal, and nutritional diseases | 71<br>(31 - 140)         | 55<br>(18 - 122)   | 3<br>(1 - 6)      | 7<br>(3 - 13)      | 4<br>(2 - 10)      | 2<br>(1 - 4)       |
| Sexually transmitted diseases excluding HIV                      | 43                       | 40                 | 2                 | 1                  | 1                  | 0                  |
| Syphilis                                                         | 43<br>(8 - 103)          | 40<br>(6 - 98)     | 2<br>(0 - 4)      | 0<br>(0 - 3)       | 0<br>(0 - 2)       | 0<br>(0 - 1)       |
| Chlamydial infection                                             | --                       | --                 | --                | --                 | --                 | --                 |
| Gonococcal infection                                             | 0<br>(0 - 1)             | --                 | 0<br>(0 - 0)      | 0<br>(0 - 1)       | 0<br>(0 - 0)       | 0<br>(0 - 0)       |
| Other sexually transmitted diseases                              | 0<br>(0 - 1)             | --                 | 0<br>(0 - 0)      | 0<br>(0 - 1)       | 0<br>(0 - 0)       | 0<br>(0 - 0)       |
| Hepatitis                                                        | 5<br>(3 - 15)            | 2<br>(1 - 4)       | 0<br>(0 - 1)      | 2<br>(1 - 5)       | 1<br>(0 - 5)       | 0<br>(0 - 1)       |
| Acute hepatitis A                                                | 1<br>(0 - 1)             | 0<br>(0 - 1)       | 0<br>(0 - 0)      | 0<br>(0 - 0)       | 0<br>(0 - 0)       | 0<br>(0 - 0)       |
| Acute hepatitis B                                                | 3<br>(2 - 9)             | 1<br>(0 - 3)       | 0<br>(0 - 0)      | 1<br>(0 - 2)       | 1<br>(0 - 3)       | 0<br>(0 - 1)       |
| Acute hepatitis C                                                | 0<br>(0 - 1)             | --                 | 0<br>(0 - 0)      | 0<br>(0 - 0)       | 0<br>(0 - 0)       | 0<br>(0 - 0)       |
| Acute hepatitis E                                                | 1<br>(0 - 4)             | 0<br>(0 - 0)       | 0<br>(0 - 0)      | 1<br>(0 - 2)       | 0<br>(0 - 1)       | 0<br>(0 - 0)       |
| Other infectious diseases                                        | 22<br>(4 - 52)           | 14<br>(1 - 40)     | 1<br>(0 - 3)      | 4<br>(1 - 8)       | 3<br>(1 - 6)       | 1<br>(0 - 3)       |
| Non-communicable diseases                                        | 1,502<br>(1,129 - 2,122) | 229<br>(113 - 379) | 26<br>(17 - 41)   | 303<br>(187 - 485) | 551<br>(364 - 909) | 393<br>(308 - 525) |
| Neoplasms                                                        | 215<br>(148 - 325)       | 5<br>(2 - 14)      | 3<br>(2 - 6)      | 42<br>(25 - 68)    | 107<br>(69 - 175)  | 58<br>(43 - 80)    |
| Esophageal cancer                                                | 20<br>(12 - 36)          | --                 | --                | 4<br>(2 - 8)       | 12<br>(7 - 22)     | 4<br>(3 - 7)       |
| Stomach cancer                                                   | 20<br>(12 - 34)          | --                 | --                | 5<br>(2 - 8)       | 10<br>(6 - 19)     | 5<br>(3 - 8)       |
| Liver cancer                                                     | 22<br>(12 - 37)          | --                 | 0<br>(0 - 0)      | 5<br>(2 - 9)       | 13<br>(7 - 22)     | 5<br>(3 - 7)       |
| Liver cancer due to hepatitis B                                  | 9<br>(4 - 16)            | --                 | 0<br>(0 - 0)      | 2<br>(1 - 5)       | 5<br>(2 - 10)      | 1<br>(1 - 2)       |

Web Table 31- Equatorial Guinea deaths with 95% UI by age, sex, and cause in 2013

| Cause                                | Males, All Ages    | Males, 0-4 Years | Males, 5-14 Years | Males, 15-49 Years | Males, 50-69 Years | Males, 70-80 Years |
|--------------------------------------|--------------------|------------------|-------------------|--------------------|--------------------|--------------------|
| Liver cancer due to hepatitis C      | 7<br>(3 - 13)      | --               | 0<br>(0 - 0)      | 1<br>(0 - 3)       | 4<br>(1 - 8)       | 2<br>(1 - 3)       |
| Liver cancer due to alcohol use      | 4<br>(2 - 8)       | --               | --                | 1<br>(0 - 1)       | 2<br>(1 - 5)       | 1<br>(0 - 2)       |
| Liver cancer due to other causes     | 3<br>(1 - 5)       | --               | 0<br>(0 - 0)      | 1<br>(0 - 2)       | 1<br>(1 - 3)       | 0<br>(0 - 1)       |
| Larynx cancer                        | 4<br>(2 - 6)       | --               | --                | 1<br>(0 - 1)       | 2<br>(1 - 4)       | 1<br>(1 - 1)       |
| Tracheal, bronchus and lung cancer   | 23<br>(15 - 36)    | --               | --                | 3<br>(2 - 6)       | 14<br>(9 - 24)     | 5<br>(4 - 9)       |
| Breast cancer                        | 1<br>(0 - 1)       | --               | --                | 0<br>(0 - 0)       | 0<br>(0 - 1)       | 0<br>(0 - 0)       |
| Cervical cancer                      | --                 | --               | --                | --                 | --                 | --                 |
| Uterine cancer                       | --                 | --               | --                | --                 | --                 | --                 |
| Prostate cancer                      | 25<br>(13 - 48)    | --               | --                | 1<br>(0 - 1)       | 8<br>(4 - 18)      | 16<br>(9 - 29)     |
| Colon and rectum cancer              | 21<br>(15 - 33)    | --               | --                | 4<br>(2 - 6)       | 11<br>(7 - 18)     | 7<br>(5 - 9)       |
| Lip and oral cavity cancer           | 5<br>(2 - 7)       | --               | --                | 1<br>(1 - 2)       | 3<br>(1 - 4)       | 1<br>(0 - 1)       |
| Nasopharynx cancer                   | 1<br>(1 - 2)       | --               | 0<br>(0 - 0)      | 0<br>(0 - 1)       | 1<br>(0 - 1)       | 0<br>(0 - 0)       |
| Other pharynx cancer                 | 3<br>(2 - 5)       | --               | --                | 1<br>(0 - 1)       | 2<br>(1 - 3)       | 0<br>(0 - 1)       |
| Gallbladder and biliary tract cancer | 3<br>(1 - 4)       | --               | --                | 0<br>(0 - 1)       | 1<br>(1 - 3)       | 1<br>(0 - 1)       |
| Pancreatic cancer                    | 9<br>(6 - 14)      | --               | --                | 1<br>(1 - 2)       | 5<br>(3 - 9)       | 2<br>(2 - 3)       |
| Malignant skin melanoma              | 2<br>(1 - 5)       | --               | --                | 1<br>(0 - 2)       | 1<br>(0 - 2)       | 0<br>(0 - 1)       |
| Non-melanoma skin cancer             | 1<br>(0 - 1)       | --               | --                | 0<br>(0 - 0)       | 0<br>(0 - 1)       | 0<br>(0 - 0)       |
| Ovarian cancer                       | --                 | --               | --                | --                 | --                 | --                 |
| Testicular cancer                    | 1<br>(0 - 1)       | --               | --                | 1<br>(0 - 1)       | 0<br>(0 - 0)       | 0<br>(0 - 0)       |
| Kidney cancer                        | 6<br>(3 - 9)       | 0<br>(0 - 1)     | 0<br>(0 - 0)      | 1<br>(1 - 2)       | 3<br>(2 - 5)       | 1<br>(1 - 2)       |
| Bladder cancer                       | 6<br>(4 - 10)      | --               | --                | 1<br>(0 - 1)       | 3<br>(2 - 5)       | 3<br>(2 - 4)       |
| Brain and nervous system cancer      | 4<br>(3 - 8)       | 0<br>(0 - 1)     | 0<br>(0 - 1)      | 2<br>(1 - 3)       | 2<br>(1 - 3)       | 0<br>(0 - 1)       |
| Thyroid cancer                       | 1<br>(0 - 1)       | --               | 0<br>(0 - 0)      | 0<br>(0 - 0)       | 0<br>(0 - 1)       | 0<br>(0 - 0)       |
| Mesothelioma                         | 0<br>(0 - 1)       | --               | --                | 0<br>(0 - 0)       | 0<br>(0 - 0)       | 0<br>(0 - 0)       |
| Hodgkin lymphoma                     | 1<br>(1 - 2)       | 0<br>(0 - 0)     | 0<br>(0 - 0)      | 1<br>(0 - 1)       | 0<br>(0 - 1)       | 0<br>(0 - 0)       |
| Non-Hodgkin lymphoma                 | 12<br>(8 - 19)     | 1<br>(0 - 2)     | 1<br>(0 - 1)      | 4<br>(2 - 6)       | 5<br>(2 - 9)       | 2<br>(1 - 3)       |
| Multiple myeloma                     | 2<br>(1 - 5)       | --               | --                | 0<br>(0 - 1)       | 1<br>(1 - 3)       | 1<br>(0 - 1)       |
| Leukemia                             | 4<br>(3 - 6)       | 0<br>(0 - 1)     | 1<br>(0 - 1)      | 1<br>(1 - 2)       | 1<br>(1 - 2)       | 1<br>(0 - 1)       |
| Other neoplasms                      | 20<br>(12 - 34)    | 3<br>(1 - 10)    | 1<br>(1 - 3)      | 5<br>(3 - 10)      | 7<br>(4 - 12)      | 3<br>(2 - 5)       |
| Cardiovascular diseases              | 539<br>(381 - 805) | 14<br>(6 - 28)   | 3<br>(2 - 5)      | 107<br>(64 - 170)  | 237<br>(154 - 386) | 179<br>(140 - 241) |
| Rheumatic heart disease              | 8<br>(4 - 13)      | 0<br>(0 - 1)     | 0<br>(0 - 1)      | 3<br>(2 - 6)       | 3<br>(1 - 5)       | 1<br>(1 - 2)       |
| Ischemic heart disease               | 160<br>(105 - 250) | 1<br>(0 - 2)     | 0<br>(0 - 0)      | 32<br>(17 - 55)    | 78<br>(48 - 129)   | 50<br>(35 - 71)    |
| Cerebrovascular disease              | 265<br>(186 - 404) | 5<br>(2 - 10)    | 1<br>(1 - 2)      | 46<br>(26 - 76)    | 113<br>(72 - 190)  | 100<br>(75 - 136)  |
| Ischemic stroke                      | 123<br>(83 - 188)  | 1<br>(0 - 3)     | 0<br>(0 - 1)      | 10<br>(4 - 20)     | 47<br>(28 - 80)    | 65<br>(46 - 91)    |
| Hemorrhagic stroke                   | 142<br>(83 - 227)  | 4<br>(1 - 8)     | 1<br>(0 - 2)      | 36<br>(19 - 61)    | 67<br>(37 - 115)   | 34<br>(19 - 52)    |
| Hypertensive heart disease           | 26<br>(10 - 52)    | 0<br>(0 - 0)     | 0<br>(0 - 0)      | 4<br>(1 - 8)       | 12<br>(4 - 24)     | 10<br>(4 - 23)     |
| Cardiomyopathy and myocarditis       | 27<br>(12 - 45)    | 5<br>(1 - 11)    | 1<br>(0 - 1)      | 8<br>(3 - 16)      | 9<br>(5 - 16)      | 4<br>(2 - 6)       |
| Atrial fibrillation and flutter      | 0<br>(0 - 0)       | --               | --                | 0<br>(0 - 0)       | 0<br>(0 - 0)       | 0<br>(0 - 0)       |
| Aortic aneurysm                      | 6<br>(4 - 11)      | --               | --                | 1<br>(1 - 2)       | 3<br>(2 - 5)       | 2<br>(1 - 4)       |
| Peripheral vascular disease          | 1<br>(0 - 1)       | --               | --                | 0<br>(0 - 0)       | 0<br>(0 - 0)       | 0<br>(0 - 0)       |

Web Table 31- Equatorial Guinea deaths with 95% UI by age, sex, and cause in 2013

| Cause                                               | Males, All Ages   | Males, 0-4 Years | Males, 5-14 Years | Males, 15-49 Years | Males, 50-69 Years | Males, 70-80 Years |
|-----------------------------------------------------|-------------------|------------------|-------------------|--------------------|--------------------|--------------------|
| Endocarditis                                        | 4<br>(2 - 7)      | 0<br>(0 - 1)     | 0<br>(0 - 0)      | 1<br>(1 - 2)       | 2<br>(1 - 3)       | 1<br>(1 - 2)       |
| Other cardiovascular and circulatory diseases       | 43<br>(19 - 73)   | 3<br>(1 - 8)     | 1<br>(0 - 1)      | 11<br>(4 - 21)     | 16<br>(7 - 30)     | 11<br>(5 - 18)     |
| Chronic respiratory diseases                        | 140<br>(84 - 224) | 15<br>(5 - 33)   | 2<br>(1 - 3)      | 18<br>(9 - 33)     | 49<br>(27 - 87)    | 55<br>(35 - 87)    |
| Chronic obstructive pulmonary disease               | 90<br>(56 - 149)  | 7<br>(2 - 14)    | 0<br>(0 - 1)      | 8<br>(4 - 15)      | 33<br>(18 - 59)    | 42<br>(28 - 70)    |
| Pneumoconiosis                                      | 8<br>(4 - 15)     | 0<br>(0 - 1)     | 0<br>(0 - 0)      | 2<br>(1 - 3)       | 3<br>(1 - 7)       | 2<br>(1 - 4)       |
| Silicosis                                           | 2<br>(1 - 4)      | 0<br>(0 - 0)     | 0<br>(0 - 0)      | 0<br>(0 - 1)       | 1<br>(0 - 2)       | 1<br>(0 - 1)       |
| Asbestosis                                          | 1<br>(0 - 2)      | 0<br>(0 - 0)     | 0<br>(0 - 0)      | 0<br>(0 - 0)       | 1<br>(0 - 1)       | 0<br>(0 - 0)       |
| Coal workers pneumoconiosis                         | 1<br>(0 - 2)      | 0<br>(0 - 0)     | 0<br>(0 - 0)      | 0<br>(0 - 0)       | 0<br>(0 - 1)       | 0<br>(0 - 0)       |
| Other pneumoconiosis                                | 4<br>(2 - 8)      | 0<br>(0 - 0)     | 0<br>(0 - 0)      | 1<br>(0 - 2)       | 2<br>(1 - 4)       | 1<br>(1 - 2)       |
| Asthma                                              | 29<br>(9 - 57)    | 4<br>(1 - 12)    | 1<br>(0 - 2)      | 7<br>(2 - 14)      | 10<br>(2 - 22)     | 7<br>(2 - 14)      |
| Interstitial lung disease and pulmonary sarcoidosis | 6<br>(1 - 15)     | 0<br>(0 - 1)     | 0<br>(0 - 0)      | 1<br>(0 - 2)       | 3<br>(0 - 7)       | 3<br>(0 - 7)       |
| Other chronic respiratory diseases                  | 7<br>(3 - 14)     | 4<br>(1 - 9)     | 0<br>(0 - 1)      | 1<br>(0 - 2)       | 1<br>(0 - 2)       | 1<br>(0 - 2)       |
| Cirrhosis                                           | 64<br>(23 - 130)  | 1<br>(0 - 3)     | 1<br>(0 - 1)      | 22<br>(7 - 47)     | 32<br>(11 - 69)    | 8<br>(3 - 16)      |
| Cirrhosis due to hepatitis B                        | 13<br>(4 - 32)    | 0<br>(0 - 0)     | 0<br>(0 - 0)      | 4<br>(1 - 11)      | 7<br>(2 - 17)      | 2<br>(0 - 4)       |
| Cirrhosis due to hepatitis C                        | 20<br>(6 - 44)    | 0<br>(0 - 1)     | 0<br>(0 - 0)      | 7<br>(2 - 16)      | 10<br>(3 - 24)     | 3<br>(1 - 6)       |
| Cirrhosis due to alcohol use                        | 23<br>(8 - 48)    | --               | --                | 8<br>(2 - 17)      | 12<br>(4 - 27)     | 3<br>(1 - 6)       |
| Cirrhosis due to other causes                       | 7<br>(2 - 14)     | 1<br>(0 - 3)     | 0<br>(0 - 1)      | 3<br>(1 - 7)       | 2<br>(1 - 6)       | 0<br>(0 - 1)       |
| Digestive diseases                                  | 74<br>(48 - 114)  | 9<br>(3 - 21)    | 2<br>(1 - 4)      | 24<br>(13 - 40)    | 25<br>(14 - 43)    | 14<br>(10 - 20)    |
| Peptic ulcer disease                                | 15<br>(8 - 26)    | 1<br>(0 - 1)     | 0<br>(0 - 0)      | 5<br>(2 - 9)       | 6<br>(3 - 11)      | 3<br>(2 - 6)       |
| Gastritis and duodenitis                            | 3<br>(1 - 5)      | 0<br>(0 - 1)     | 0<br>(0 - 0)      | 1<br>(0 - 2)       | 1<br>(0 - 2)       | 0<br>(0 - 1)       |
| Appendicitis                                        | 4<br>(2 - 7)      | 1<br>(0 - 3)     | 0<br>(0 - 1)      | 1<br>(1 - 3)       | 1<br>(0 - 2)       | 0<br>(0 - 1)       |
| Paralytic ileus and intestinal obstruction          | 15<br>(8 - 27)    | 1<br>(0 - 4)     | 0<br>(0 - 1)      | 3<br>(2 - 7)       | 5<br>(3 - 11)      | 4<br>(2 - 8)       |
| Inguinal, femoral, and abdominal hernia             | 2<br>(1 - 3)      | 0<br>(0 - 1)     | 0<br>(0 - 0)      | 0<br>(0 - 1)       | 1<br>(0 - 1)       | 0<br>(0 - 1)       |
| Inflammatory bowel disease                          | 6<br>(3 - 12)     | 2<br>(0 - 6)     | 0<br>(0 - 1)      | 2<br>(1 - 3)       | 1<br>(0 - 3)       | 1<br>(0 - 1)       |
| Vascular intestinal disorders                       | 1<br>(0 - 2)      | 0<br>(0 - 0)     | 0<br>(0 - 0)      | 0<br>(0 - 0)       | 0<br>(0 - 1)       | 0<br>(0 - 1)       |
| Gallbladder and biliary diseases                    | 5<br>(2 - 8)      | 0<br>(0 - 1)     | 0<br>(0 - 0)      | 1<br>(1 - 2)       | 2<br>(1 - 3)       | 1<br>(1 - 2)       |
| Pancreatitis                                        | 11<br>(5 - 24)    | 0<br>(0 - 1)     | 0<br>(0 - 0)      | 6<br>(2 - 13)      | 4<br>(2 - 8)       | 1<br>(1 - 2)       |
| Other digestive diseases                            | 12<br>(6 - 22)    | 3<br>(0 - 7)     | 0<br>(0 - 1)      | 3<br>(1 - 7)       | 4<br>(2 - 7)       | 2<br>(1 - 3)       |
| Neurological disorders                              | 48<br>(32 - 68)   | 6<br>(1 - 16)    | 2<br>(1 - 4)      | 11<br>(4 - 19)     | 6<br>(4 - 11)      | 22<br>(16 - 30)    |
| Alzheimer disease and other dementias               | 24<br>(17 - 32)   | --               | --                | 0<br>(0 - 0)       | 3<br>(2 - 5)       | 21<br>(15 - 28)    |
| Parkinson disease                                   | 1<br>(0 - 1)      | --               | --                | 0<br>(0 - 0)       | 0<br>(0 - 0)       | 0<br>(0 - 1)       |
| Epilepsy                                            | 18<br>(6 - 34)    | 5<br>(1 - 14)    | 2<br>(0 - 4)      | 9<br>(3 - 16)      | 2<br>(1 - 4)       | 1<br>(0 - 1)       |
| Multiple sclerosis                                  | 0<br>(0 - 0)      | --               | --                | 0<br>(0 - 0)       | 0<br>(0 - 0)       | 0<br>(0 - 0)       |
| Other neurological disorders                        | 5<br>(3 - 9)      | 1<br>(0 - 4)     | 0<br>(0 - 1)      | 2<br>(1 - 3)       | 1<br>(1 - 2)       | 1<br>(0 - 1)       |
| Mental and substance use disorders                  | 32<br>(18 - 52)   | 2<br>(0 - 4)     | 0<br>(0 - 0)      | 20<br>(11 - 36)    | 9<br>(5 - 16)      | 1<br>(1 - 2)       |
| Schizophrenia                                       | 0<br>(0 - 1)      | --               | --                | 0<br>(0 - 0)       | 0<br>(0 - 0)       | 0<br>(0 - 0)       |
| Alcohol use disorders                               | 20<br>(10 - 33)   | --               | --                | 12<br>(6 - 21)     | 7<br>(3 - 13)      | 1<br>(0 - 1)       |
| Drug use disorders                                  | 11<br>(6 - 20)    | 2<br>(0 - 4)     | --                | 8<br>(4 - 14)      | 1<br>(1 - 3)       | 0<br>(0 - 0)       |
| Opioid use disorders                                | 1<br>(1 - 2)      | 0<br>(0 - 0)     | --                | 1<br>(0 - 2)       | 0<br>(0 - 0)       | 0<br>(0 - 0)       |
| Cocaine use disorders                               | 0<br>(0 - 0)      | 0<br>(0 - 0)     | --                | 0<br>(0 - 0)       | 0<br>(0 - 0)       | 0<br>(0 - 0)       |

Web Table 31- Equatorial Guinea deaths with 95% UI by age, sex, and cause in 2013

| Cause                                               | Males, All Ages    | Males, 0-4 Years  | Males, 5-14 Years | Males, 15-49 Years | Males, 50-69 Years | Males, 70-80 Years |
|-----------------------------------------------------|--------------------|-------------------|-------------------|--------------------|--------------------|--------------------|
| Amphetamine use disorders                           | 0<br>(0 - 0)       | 0<br>(0 - 0)      | --                | 0<br>(0 - 0)       | 0<br>(0 - 0)       | 0<br>(0 - 0)       |
| Other drug use disorders                            | 10<br>(5 - 18)     | 2<br>(0 - 4)      | --                | 7<br>(3 - 13)      | 1<br>(1 - 3)       | 0<br>(0 - 0)       |
| Eating disorders                                    | 0<br>(0 - 0)       | --                | 0<br>(0 - 0)      | 0<br>(0 - 0)       | --                 | --                 |
| Anorexia nervosa                                    | 0<br>(0 - 0)       | --                | 0<br>(0 - 0)      | 0<br>(0 - 0)       | --                 | --                 |
| Diabetes, urogenital, blood, and endocrine diseases | 240<br>(170 - 364) | 44<br>(18 - 89)   | 9<br>(4 - 18)     | 52<br>(31 - 88)    | 82<br>(48 - 141)   | 53<br>(36 - 79)    |
| Diabetes mellitus                                   | 109<br>(61 - 173)  | 3<br>(1 - 5)      | 1<br>(0 - 1)      | 19<br>(9 - 31)     | 53<br>(28 - 93)    | 34<br>(20 - 50)    |
| Acute glomerulonephritis                            | 1<br>(0 - 2)       | 0<br>(0 - 1)      | 0<br>(0 - 0)      | 0<br>(0 - 0)       | 0<br>(0 - 0)       | 0<br>(0 - 0)       |
| Chronic kidney disease                              | 39<br>(19 - 79)    | 5<br>(2 - 10)     | 1<br>(1 - 2)      | 12<br>(5 - 23)     | 12<br>(5 - 28)     | 9<br>(5 - 19)      |
| Chronic kidney disease due to diabetes mellitus     | 0<br>(0 - 2)       | 0<br>(0 - 0)      | 0<br>(0 - 0)      | 0<br>(0 - 0)       | 0<br>(0 - 1)       | 0<br>(0 - 0)       |
| Chronic kidney disease due to hypertension          | 16<br>(9 - 30)     | 1<br>(0 - 2)      | 0<br>(0 - 0)      | 4<br>(2 - 8)       | 6<br>(3 - 13)      | 5<br>(3 - 10)      |
| Chronic kidney disease due to glomerulonephritis    | 9<br>(3 - 15)      | 2<br>(1 - 5)      | 1<br>(0 - 1)      | 3<br>(1 - 6)       | 2<br>(0 - 4)       | 1<br>(0 - 2)       |
| Chronic kidney disease due to other causes          | 14<br>(3 - 36)     | 2<br>(0 - 5)      | 0<br>(0 - 1)      | 5<br>(1 - 12)      | 4<br>(0 - 12)      | 3<br>(1 - 8)       |
| Urinary diseases and male infertility               | 22<br>(13 - 36)    | 5<br>(1 - 12)     | 0<br>(0 - 1)      | 5<br>(2 - 9)       | 6<br>(3 - 11)      | 6<br>(3 - 9)       |
| Interstitial nephritis and urinary tract infections | 14<br>(8 - 24)     | 3<br>(1 - 9)      | 0<br>(0 - 1)      | 3<br>(1 - 5)       | 4<br>(2 - 7)       | 4<br>(2 - 7)       |
| Urolithiasis                                        | 0<br>(0 - 1)       | --                | 0<br>(0 - 0)      | 0<br>(0 - 0)       | 0<br>(0 - 0)       | 0<br>(0 - 0)       |
| Other urinary diseases                              | 7<br>(4 - 14)      | 2<br>(0 - 5)      | 2<br>(0 - 0)      | 2<br>(1 - 4)       | 2<br>(1 - 4)       | 2<br>(1 - 3)       |
| Gynecological diseases                              | --                 | --                | --                | --                 | --                 | --                 |
| Uterine fibroids                                    | --                 | --                | --                | --                 | --                 | --                 |
| Polycystic ovarian syndrome                         | --                 | --                | --                | --                 | --                 | --                 |
| Endometriosis                                       | --                 | --                | --                | --                 | --                 | --                 |
| Genital prolapse                                    | --                 | --                | --                | --                 | --                 | --                 |
| Other gynecological diseases                        | --                 | --                | --                | --                 | --                 | --                 |
| Hemoglobinopathies and hemolytic anemias            | 34<br>(13 - 74)    | 18<br>(4 - 44)    | 5<br>(2 - 13)     | 8<br>(2 - 20)      | 2<br>(1 - 6)       | 1<br>(0 - 2)       |
| Thalassemias                                        | 0<br>(0 - 0)       | 0<br>(0 - 0)      | 0<br>(0 - 0)      | 0<br>(0 - 0)       | 0<br>(0 - 0)       | 0<br>(0 - 0)       |
| Sickle cell disorders                               | 32<br>(12 - 72)    | 18<br>(4 - 44)    | 5<br>(1 - 12)     | 8<br>(2 - 19)      | 2<br>(1 - 5)       | 0<br>(0 - 0)       |
| G6PD deficiency                                     | 0<br>(0 - 1)       | 0<br>(0 - 0)      | 0<br>(0 - 0)      | 0<br>(0 - 0)       | 0<br>(0 - 0)       | 0<br>(0 - 0)       |
| Other hemoglobinopathies and hemolytic anemias      | 1<br>(1 - 2)       | 0<br>(0 - 1)      | 0<br>(0 - 0)      | 0<br>(0 - 0)       | 0<br>(0 - 0)       | 1<br>(0 - 1)       |
| Endocrine, metabolic, blood, and immune disorders   | 35<br>(18 - 100)   | 13<br>(4 - 54)    | 2<br>(1 - 6)      | 8<br>(4 - 20)      | 8<br>(4 - 16)      | 4<br>(2 - 6)       |
| Musculoskeletal disorders                           | 6<br>(3 - 11)      | --                | 1<br>(0 - 1)      | 3<br>(1 - 5)       | 2<br>(1 - 4)       | 1<br>(1 - 2)       |
| Rheumatoid arthritis                                | 1<br>(0 - 1)       | --                | 0<br>(0 - 0)      | 0<br>(0 - 0)       | 0<br>(0 - 0)       | 0<br>(0 - 0)       |
| Other musculoskeletal disorders                     | 6<br>(3 - 10)      | --                | 1<br>(0 - 1)      | 2<br>(1 - 4)       | 2<br>(1 - 3)       | 1<br>(1 - 1)       |
| Other non-communicable diseases                     | 145<br>(59 - 262)  | 132<br>(47 - 246) | 4<br>(2 - 8)      | 5<br>(3 - 8)       | 3<br>(2 - 4)       | 2<br>(1 - 3)       |
| Congenital anomalies                                | 127<br>(51 - 237)  | 119<br>(44 - 225) | 3<br>(1 - 8)      | 3<br>(2 - 5)       | 1<br>(1 - 2)       | 0<br>(0 - 0)       |
| Neural tube defects                                 | 33<br>(2 - 98)     | 32<br>(2 - 97)    | 0<br>(0 - 1)      | 0<br>(0 - 1)       | 0<br>(0 - 0)       | 0<br>(0 - 0)       |
| Congenital heart anomalies                          | 48<br>(18 - 121)   | 45<br>(15 - 115)  | 2<br>(1 - 5)      | 2<br>(1 - 3)       | 0<br>(0 - 1)       | 0<br>(0 - 0)       |
| Cleft lip and cleft palate                          | 1<br>(0 - 2)       | 1<br>(0 - 2)      | --                | --                 | --                 | --                 |
| Down syndrome                                       | 8<br>(2 - 24)      | 7<br>(1 - 23)     | 0<br>(0 - 1)      | 0<br>(0 - 1)       | 0<br>(0 - 0)       | 0<br>(0 - 0)       |
| Chromosomal unbalanced rearrangements               | 2<br>(0 - 9)       | 2<br>(0 - 9)      | 0<br>(0 - 0)      | 0<br>(0 - 0)       | 0<br>(0 - 0)       | 0<br>(0 - 0)       |
| Other congenital anomalies                          | 35<br>(7 - 108)    | 33<br>(6 - 103)   | 1<br>(0 - 3)      | 1<br>(0 - 2)       | 0<br>(0 - 1)       | 0<br>(0 - 0)       |
| Skin and subcutaneous diseases                      | 8<br>(4 - 11)      | 3<br>(1 - 6)      | 0<br>(0 - 1)      | 2<br>(1 - 3)       | 2<br>(1 - 3)       | 1<br>(1 - 2)       |

Web Table 31- Equatorial Guinea deaths with 95% UI by age, sex, and cause in 2013

| Cause                                           | Males, All Ages    | Males, 0-4 Years  | Males, 5-14 Years | Males, 15-49 Years | Males, 50-69 Years | Males, 70-80 Years |
|-------------------------------------------------|--------------------|-------------------|-------------------|--------------------|--------------------|--------------------|
| Cellulitis                                      | 3<br>(1 - 5)       | 1<br>(0 - 3)      | 0<br>(0 - 0)      | 1<br>(0 - 1)       | 1<br>(0 - 1)       | 0<br>(0 - 1)       |
| Pyoderma                                        | 4<br>(2 - 6)       | 2<br>(0 - 3)      | 0<br>(0 - 0)      | 1<br>(0 - 1)       | 1<br>(0 - 1)       | 1<br>(0 - 1)       |
| Decubitus ulcer                                 | 1<br>(0 - 2)       | 0<br>(0 - 0)      | 0<br>(0 - 0)      | 0<br>(0 - 0)       | 0<br>(0 - 0)       | 0<br>(0 - 1)       |
| Other skin and subcutaneous diseases            | 0<br>(0 - 1)       | 0<br>(0 - 0)      | 0<br>(0 - 0)      | 0<br>(0 - 0)       | 0<br>(0 - 0)       | 0<br>(0 - 0)       |
| Sudden infant death syndrome                    | 10<br>(1 - 61)     | 10<br>(1 - 61)    | --                | --                 | --                 | --                 |
| Injuries                                        | 534<br>(335 - 812) | 134<br>(59 - 249) | 41<br>(25 - 66)   | 269<br>(151 - 456) | 70<br>(40 - 126)   | 19<br>(13 - 30)    |
| Transport injuries                              | 199<br>(78 - 400)  | 33<br>(8 - 84)    | 19<br>(7 - 38)    | 115<br>(42 - 241)  | 26<br>(8 - 59)     | 6<br>(2 - 12)      |
| Road injuries                                   | 189<br>(74 - 366)  | 31<br>(7 - 79)    | 18<br>(7 - 36)    | 110<br>(41 - 221)  | 24<br>(8 - 56)     | 5<br>(2 - 11)      |
| Pedestrian road injuries                        | 69<br>(23 - 145)   | 16<br>(3 - 44)    | 9<br>(3 - 18)     | 33<br>(9 - 74)     | 10<br>(3 - 23)     | 3<br>(1 - 5)       |
| Cyclist road injuries                           | 18<br>(5 - 41)     | 4<br>(1 - 11)     | 3<br>(1 - 7)      | 8<br>(2 - 18)      | 3<br>(1 - 8)       | 1<br>(0 - 2)       |
| Motorcyclist road injuries                      | 36<br>(11 - 75)    | 2<br>(1 - 7)      | 1<br>(0 - 3)      | 29<br>(9 - 61)     | 3<br>(1 - 8)       | 0<br>(0 - 1)       |
| Motor vehicle road injuries                     | 64<br>(21 - 139)   | 9<br>(2 - 26)     | 5<br>(1 - 12)     | 41<br>(13 - 89)    | 8<br>(2 - 20)      | 2<br>(0 - 4)       |
| Other road injuries                             | 1<br>(0 - 2)       | 0<br>(0 - 0)      | 0<br>(0 - 0)      | 0<br>(0 - 1)       | 0<br>(0 - 0)       | 0<br>(0 - 0)       |
| Other transport injuries                        | 10<br>(2 - 39)     | 2<br>(0 - 9)      | 1<br>(0 - 3)      | 5<br>(1 - 18)      | 1<br>(0 - 5)       | 0<br>(0 - 1)       |
| Unintentional injuries                          | 231<br>(130 - 356) | 98<br>(33 - 193)  | 21<br>(11 - 34)   | 75<br>(44 - 119)   | 27<br>(16 - 46)    | 10<br>(7 - 16)     |
| Falls                                           | 38<br>(19 - 85)    | 7<br>(1 - 22)     | 2<br>(1 - 5)      | 15<br>(7 - 35)     | 9<br>(5 - 19)      | 5<br>(3 - 9)       |
| Drowning                                        | 54<br>(19 - 110)   | 25<br>(3 - 66)    | 9<br>(3 - 18)     | 17<br>(8 - 32)     | 3<br>(2 - 6)       | 1<br>(0 - 1)       |
| Fire, heat, and hot substances                  | 28<br>(8 - 53)     | 15<br>(2 - 38)    | 2<br>(1 - 4)      | 7<br>(3 - 12)      | 3<br>(1 - 5)       | 1<br>(1 - 2)       |
| Poisonings                                      | 9<br>(5 - 17)      | 4<br>(1 - 9)      | 1<br>(0 - 1)      | 4<br>(2 - 7)       | 1<br>(0 - 2)       | 0<br>(0 - 0)       |
| Exposure to mechanical forces                   | 39<br>(19 - 77)    | 10<br>(2 - 25)    | 4<br>(2 - 8)      | 20<br>(9 - 41)     | 5<br>(2 - 10)      | 1<br>(0 - 1)       |
| Unintentional firearm injuries                  | 9<br>(4 - 18)      | 1<br>(0 - 4)      | 1<br>(0 - 2)      | 6<br>(2 - 12)      | 1<br>(0 - 2)       | 0<br>(0 - 0)       |
| Unintentional suffocation                       | 2<br>(0 - 7)       | 2<br>(0 - 6)      | 0<br>(0 - 0)      | 0<br>(0 - 1)       | 0<br>(0 - 0)       | 0<br>(0 - 0)       |
| Other exposure to mechanical forces             | 28<br>(12 - 59)    | 7<br>(1 - 19)     | 3<br>(1 - 7)      | 13<br>(6 - 30)     | 4<br>(2 - 8)       | 0<br>(0 - 1)       |
| Adverse effects of medical treatment            | 11<br>(5 - 22)     | 5<br>(1 - 13)     | 0<br>(0 - 1)      | 3<br>(1 - 5)       | 2<br>(1 - 4)       | 1<br>(1 - 3)       |
| Animal contact                                  | 4<br>(2 - 12)      | 2<br>(0 - 6)      | 1<br>(0 - 2)      | 1<br>(0 - 3)       | 1<br>(0 - 2)       | 0<br>(0 - 0)       |
| Venomous animal contact                         | 3<br>(1 - 9)       | 1<br>(0 - 4)      | 0<br>(0 - 1)      | 1<br>(0 - 2)       | 0<br>(0 - 1)       | 0<br>(0 - 0)       |
| Non-venomous animal contact                     | 2<br>(0 - 4)       | 1<br>(0 - 2)      | 0<br>(0 - 1)      | 0<br>(0 - 1)       | 0<br>(0 - 1)       | 0<br>(0 - 0)       |
| Foreign body                                    | 37<br>(7 - 92)     | 28<br>(3 - 76)    | 1<br>(0 - 4)      | 4<br>(1 - 10)      | 2<br>(1 - 5)       | 1<br>(0 - 3)       |
| Pulmonary aspiration and foreign body in airway | 37<br>(7 - 92)     | 28<br>(3 - 76)    | 1<br>(0 - 4)      | 4<br>(1 - 10)      | 2<br>(1 - 5)       | 1<br>(0 - 3)       |
| Foreign body in other body part                 | 0<br>(0 - 1)       | 0<br>(0 - 1)      | 0<br>(0 - 0)      | 0<br>(0 - 0)       | 0<br>(0 - 0)       | 0<br>(0 - 0)       |
| Other unintentional injuries                    | 9<br>(4 - 15)      | 3<br>(0 - 5)      | 1<br>(0 - 2)      | 5<br>(2 - 8)       | 1<br>(0 - 2)       | 0<br>(0 - 0)       |
| Self-harm and interpersonal violence            | 104<br>(45 - 169)  | 3<br>(1 - 6)      | 2<br>(1 - 4)      | 78<br>(32 - 133)   | 18<br>(7 - 31)     | 3<br>(1 - 6)       |
| Self-harm                                       | 72<br>(27 - 118)   | --                | 1<br>(0 - 2)      | 52<br>(19 - 88)    | 15<br>(5 - 27)     | 3<br>(1 - 6)       |
| Interpersonal violence                          | 33<br>(11 - 57)    | 3<br>(1 - 6)      | 1<br>(0 - 2)      | 26<br>(8 - 47)     | 3<br>(1 - 6)       | 0<br>(0 - 0)       |
| Assault by firearm                              | 11<br>(2 - 24)     | 0<br>(0 - 1)      | 0<br>(0 - 0)      | 0<br>(1 - 21)      | 1<br>(0 - 2)       | 0<br>(0 - 0)       |
| Assault by sharp object                         | 8<br>(1 - 18)      | 0<br>(0 - 1)      | 0<br>(0 - 0)      | 7<br>(1 - 16)      | 1<br>(0 - 2)       | 0<br>(0 - 0)       |
| Assault by other means                          | 13<br>(4 - 24)     | 2<br>(1 - 5)      | 1<br>(0 - 1)      | 9<br>(2 - 17)      | 1<br>(0 - 2)       | 0<br>(0 - 0)       |

Web Table 31- Equatorial Guinea deaths with 95% UI by age, sex, and cause in 2013

| Cause                                                             | Females, All Ages        | Females, 0-4 Years     | Females, 5-14 Years | Females, 15-49 Years | Females, 50-69 Years | Females, 70-80 Years |
|-------------------------------------------------------------------|--------------------------|------------------------|---------------------|----------------------|----------------------|----------------------|
| All causes                                                        | 3,483<br>(2,879 - 4,425) | 1,341<br>(979 - 1,779) | 128<br>(95 - 181)   | 981<br>(757 - 1,228) | 510<br>(351 - 876)   | 523<br>(452 - 750)   |
| Communicable, maternal, neonatal, and nutritional diseases        | 1,958<br>(1,583 - 2,422) | 985<br>(694 - 1,331)   | 78<br>(55 - 108)    | 605<br>(437 - 780)   | 168<br>(103 - 268)   | 122<br>(76 - 192)    |
| HIV/AIDS and tuberculosis                                         | 583<br>(316 - 850)       | 59<br>(27 - 95)        | 32<br>(16 - 49)     | 386<br>(203 - 545)   | 90<br>(44 - 157)     | 17<br>(6 - 30)       |
| Tuberculosis                                                      | 93<br>(29 - 178)         | 8<br>(3 - 17)          | 2<br>(1 - 3)        | 45<br>(16 - 90)      | 25<br>(6 - 57)       | 12<br>(3 - 25)       |
| HIV/AIDS                                                          | 490<br>(209 - 744)       | 51<br>(18 - 82)        | 31<br>(15 - 47)     | 340<br>(150 - 505)   | 65<br>(24 - 126)     | 4<br>(1 - 9)         |
| HIV/AIDS resulting in mycobacterial infection                     | 26<br>(11 - 42)          | 3<br>(1 - 4)           | 1<br>(1 - 2)        | 18<br>(8 - 29)       | 3<br>(1 - 7)         | 0<br>(0 - 1)         |
| HIV/AIDS resulting in other diseases                              | 465<br>(197 - 707)       | 48<br>(17 - 78)        | 29<br>(14 - 45)     | 322<br>(142 - 478)   | 61<br>(22 - 119)     | 4<br>(1 - 8)         |
| Diarrhea, lower respiratory, and other common infectious diseases | 542<br>(347 - 836)       | 334<br>(160 - 601)     | 21<br>(11 - 39)     | 61<br>(36 - 94)      | 47<br>(25 - 92)      | 78<br>(45 - 129)     |
| Diarrheal diseases                                                | 95<br>(47 - 177)         | 52<br>(15 - 128)       | 4<br>(1 - 10)       | 15<br>(6 - 29)       | 10<br>(4 - 23)       | 14<br>(6 - 28)       |
| Intestinal infectious diseases                                    | 12<br>(3 - 28)           | 5<br>(1 - 14)          | 3<br>(1 - 7)        | 3<br>(1 - 8)         | 1<br>(0 - 2)         | 0<br>(0 - 0)         |
| Typhoid fever                                                     | 9<br>(2 - 22)            | 4<br>(1 - 10)          | 2<br>(1 - 5)        | 2<br>(1 - 6)         | 0<br>(0 - 1)         | 0<br>(0 - 0)         |
| Paratyphoid fever                                                 | 3<br>(1 - 7)             | 1<br>(0 - 4)           | 1<br>(0 - 2)        | 1<br>(0 - 2)         | 0<br>(0 - 0)         | 0<br>(0 - 0)         |
| Other intestinal infectious diseases                              | 1<br>(0 - 4)             | 0<br>(0 - 3)           | 0<br>(0 - 1)        | 0<br>(0 - 1)         | 0<br>(0 - 0)         | 0<br>(0 - 0)         |
| Lower respiratory infections                                      | 357<br>(191 - 606)       | 222<br>(85 - 452)      | 9<br>(4 - 17)       | 31<br>(16 - 55)      | 33<br>(14 - 65)      | 62<br>(32 - 106)     |
| Upper respiratory infections                                      | 0<br>(0 - 0)             | 0<br>(0 - 0)           | 0<br>(0 - 0)        | 0<br>(0 - 0)         | 0<br>(0 - 0)         | 0<br>(0 - 0)         |
| Otitis media                                                      | 0<br>(0 - 1)             | 0<br>(0 - 0)           | 0<br>(0 - 0)        | 0<br>(0 - 0)         | 0<br>(0 - 0)         | 0<br>(0 - 0)         |
| Meningitis                                                        | 44<br>(17 - 79)          | 24<br>(3 - 53)         | 4<br>(1 - 7)        | 11<br>(5 - 20)       | 3<br>(1 - 8)         | 2<br>(1 - 3)         |
| Pneumococcal meningitis                                           | 14<br>(6 - 24)           | 6<br>(1 - 15)          | 1<br>(1 - 3)        | 4<br>(2 - 8)         | 1<br>(0 - 3)         | 1<br>(0 - 1)         |
| H influenzae type B meningitis                                    | 12<br>(3 - 24)           | 9<br>(1 - 21)          | 1<br>(0 - 2)        | 1<br>(1 - 3)         | 0<br>(0 - 1)         | 0<br>(0 - 0)         |
| Meningococcal meningitis                                          | 6<br>(3 - 10)            | 3<br>(0 - 6)           | 0<br>(0 - 1)        | 2<br>(1 - 3)         | 1<br>(0 - 2)         | 0<br>(0 - 1)         |
| Other meningitis                                                  | 12<br>(5 - 20)           | 6<br>(1 - 13)          | 1<br>(0 - 2)        | 4<br>(1 - 7)         | 1<br>(0 - 3)         | 1<br>(0 - 1)         |
| Encephalitis                                                      | 3<br>(1 - 7)             | 1<br>(0 - 5)           | 0<br>(0 - 1)        | 1<br>(0 - 2)         | 0<br>(0 - 1)         | 0<br>(0 - 0)         |
| Diphtheria                                                        | 1<br>(0 - 8)             | 1<br>(0 - 8)           | 0<br>(0 - 1)        | 0<br>(0 - 0)         | 0<br>(0 - 0)         | --<br>(0 - 0)        |
| Whooping cough                                                    | 22<br>(0 - 101)          | 21<br>(0 - 97)         | 1<br>(0 - 4)        | 0<br>(0 - 1)         | 0<br>(0 - 0)         | --<br>(0 - 0)        |
| Tetanus                                                           | 1<br>(0 - 3)             | 1<br>(0 - 3)           | 0<br>(0 - 0)        | 0<br>(0 - 0)         | 0<br>(0 - 0)         | 0<br>(0 - 0)         |
| Measles                                                           | 7<br>(0 - 43)            | 6<br>(0 - 39)          | 1<br>(0 - 4)        | 0<br>(0 - 1)         | 0<br>(0 - 0)         | --<br>(0 - 0)        |
| Varicella and herpes zoster                                       | 0<br>(0 - 1)             | 0<br>(0 - 1)           | 0<br>(0 - 0)        | 0<br>(0 - 0)         | 0<br>(0 - 0)         | 0<br>(0 - 0)         |
| Neglected tropical diseases and malaria                           | 342<br>(116 - 637)       | 248<br>(20 - 531)      | 19<br>(5 - 43)      | 41<br>(11 - 94)      | 21<br>(5 - 57)       | 13<br>(3 - 33)       |
| Malaria                                                           | 333<br>(106 - 625)       | 243<br>(16 - 529)      | 18<br>(4 - 42)      | 39<br>(9 - 90)       | 20<br>(4 - 55)       | 12<br>(2 - 32)       |
| Leishmaniasis                                                     | 0<br>(0 - 0)             | 0<br>(0 - 0)           | 0<br>(0 - 0)        | 0<br>(0 - 0)         | 0<br>(0 - 0)         | 0<br>(0 - 0)         |
| Visceral leishmaniasis                                            | 0<br>(0 - 0)             | 0<br>(0 - 0)           | 0<br>(0 - 0)        | 0<br>(0 - 0)         | 0<br>(0 - 0)         | 0<br>(0 - 0)         |
| African trypanosomiasis                                           | 1<br>(1 - 2)             | 0<br>(0 - 0)           | 0<br>(0 - 0)        | 1<br>(0 - 1)         | 0<br>(0 - 0)         | 0<br>(0 - 0)         |
| Schistosomiasis                                                   | 1<br>(1 - 2)             | 0<br>(0 - 0)           | 0<br>(0 - 0)        | 1<br>(0 - 1)         | 0<br>(0 - 1)         | 0<br>(0 - 0)         |
| Cysticercosis                                                     | 0<br>(0 - 0)             | 0<br>(0 - 0)           | 0<br>(0 - 0)        | 0<br>(0 - 0)         | 0<br>(0 - 0)         | 0<br>(0 - 0)         |
| Cystic echinococcosis                                             | 0<br>(0 - 0)             | 0<br>(0 - 0)           | 0<br>(0 - 0)        | 0<br>(0 - 0)         | 0<br>(0 - 0)         | 0<br>(0 - 0)         |
| Dengue                                                            | 0<br>(0 - 1)             | 0<br>(0 - 0)           | 0<br>(0 - 0)        | 0<br>(0 - 0)         | 0<br>(0 - 0)         | 0<br>(0 - 0)         |
| Yellow fever                                                      | 0<br>(0 - 0)             | 0<br>(0 - 0)           | 0<br>(0 - 0)        | 0<br>(0 - 0)         | 0<br>(0 - 0)         | 0<br>(0 - 0)         |
| Rabies                                                            | 1<br>(0 - 2)             | 0<br>(0 - 1)           | 0<br>(0 - 0)        | 0<br>(0 - 1)         | 0<br>(0 - 0)         | 0<br>(0 - 0)         |
| Intestinal nematode infections                                    | 3<br>(0 - 11)            | 2<br>(0 - 11)          | 0<br>(0 - 2)        | 0<br>(0 - 2)         | 0<br>(0 - 0)         | 0<br>(0 - 0)         |
| Ascariasis                                                        | 3<br>(0 - 11)            | 2<br>(0 - 11)          | 0<br>(0 - 2)        | 0<br>(0 - 2)         | 0<br>(0 - 0)         | 0<br>(0 - 0)         |

Web Table 31- Equatorial Guinea deaths with 95% UI by age, sex, and cause in 2013

| Cause                                                            | Females, All Ages      | Females, 0-4 Years | Females, 5-14 Years | Females, 15-49 Years | Females, 50-69 Years | Females, 70-80 Years |
|------------------------------------------------------------------|------------------------|--------------------|---------------------|----------------------|----------------------|----------------------|
| Other neglected tropical diseases                                | 2<br>(1 - 5)           | 1<br>(0 - 4)       | 0<br>(0 - 0)        | 1<br>(0 - 1)         | 0<br>(0 - 0)         | 0<br>(0 - 0)         |
| Maternal disorders                                               | 100<br>(54 - 168)      | --                 | 0<br>(0 - 1)        | 100<br>(54 - 168)    | --                   | --                   |
| Maternal hemorrhage                                              | 15<br>(7 - 27)         | --                 | 0<br>(0 - 0)        | 15<br>(7 - 27)       | --                   | --                   |
| Maternal sepsis and other maternal infections                    | 9<br>(4 - 16)          | --                 | 0<br>(0 - 0)        | 9<br>(4 - 16)        | --                   | --                   |
| Maternal hypertensive disorders                                  | 10<br>(5 - 19)         | --                 | 0<br>(0 - 0)        | 10<br>(5 - 19)       | --                   | --                   |
| Maternal obstructed labor                                        | 5<br>(3 - 10)          | --                 | 0<br>(0 - 0)        | 5<br>(3 - 10)        | --                   | --                   |
| Maternal abortive outcome                                        | 16<br>(8 - 31)         | --                 | 0<br>(0 - 0)        | 16<br>(8 - 31)       | --                   | --                   |
| Indirect maternal deaths                                         | 7<br>(4 - 14)          | --                 | 0<br>(0 - 0)        | 7<br>(4 - 14)        | --                   | --                   |
| Late maternal deaths                                             | 17<br>(7 - 34)         | --                 | 0<br>(0 - 0)        | 17<br>(7 - 33)       | --                   | --                   |
| Maternal deaths aggravated by HIV/AIDS                           | 2<br>(1 - 4)           | --                 | --                  | 2<br>(1 - 4)         | --                   | --                   |
| Other maternal disorders                                         | 18<br>(8 - 33)         | --                 | 0<br>(0 - 0)        | 18<br>(8 - 33)       | --                   | --                   |
| Neonatal disorders                                               | 221<br>(74 - 419)      | 221<br>(74 - 419)  | --                  | --                   | --                   | --                   |
| Neonatal preterm birth complications                             | 63<br>(8 - 192)        | 63<br>(8 - 192)    | --                  | --                   | --                   | --                   |
| Neonatal encephalopathy due to birth asphyxia and trauma         | 77<br>(11 - 224)       | 77<br>(11 - 224)   | --                  | --                   | --                   | --                   |
| Neonatal sepsis and other neonatal infections                    | 31<br>(4 - 95)         | 31<br>(4 - 95)     | --                  | --                   | --                   | --                   |
| Hemolytic disease and other neonatal jaundice                    | 1<br>(0 - 4)           | 1<br>(0 - 4)       | --                  | --                   | --                   | --                   |
| Other neonatal disorders                                         | 48<br>(7 - 131)        | 48<br>(7 - 131)    | --                  | --                   | --                   | --                   |
| Nutritional deficiencies                                         | 104<br>(49 - 195)      | 72<br>(26 - 150)   | 3<br>(1 - 5)        | 10<br>(5 - 20)       | 7<br>(3 - 15)        | 13<br>(6 - 26)       |
| Protein-energy malnutrition                                      | 82<br>(29 - 163)       | 62<br>(16 - 137)   | 2<br>(1 - 5)        | 3<br>(1 - 9)         | 4<br>(1 - 10)        | 9<br>(3 - 20)        |
| Iodine deficiency                                                | 0<br>(0 - 3)           | 0<br>(0 - 3)       | 0<br>(0 - 0)        | 0<br>(0 - 0)         | 0<br>(0 - 0)         | 0<br>(0 - 0)         |
| Iron-deficiency anemia                                           | 20<br>(6 - 57)         | 8<br>(1 - 43)      | 0<br>(0 - 1)        | 6<br>(2 - 13)        | 2<br>(0 - 6)         | 4<br>(1 - 9)         |
| Other nutritional deficiencies                                   | 2<br>(0 - 10)          | 1<br>(0 - 8)       | 0<br>(0 - 0)        | 0<br>(0 - 1)         | 0<br>(0 - 0)         | 0<br>(0 - 1)         |
| Other communicable, maternal, neonatal, and nutritional diseases | 66<br>(27 - 128)       | 52<br>(15 - 113)   | 3<br>(1 - 6)        | 7<br>(4 - 12)        | 3<br>(1 - 7)         | 2<br>(1 - 3)         |
| Sexually transmitted diseases excluding HIV                      | 46<br>(10 - 109)       | 40<br>(6 - 102)    | 2<br>(0 - 4)        | 3<br>(1 - 5)         | 1<br>(0 - 2)         | 0<br>(0 - 1)         |
| Syphilis                                                         | 44<br>(9 - 106)        | 40<br>(6 - 102)    | 2<br>(0 - 4)        | 1<br>(0 - 2)         | 0<br>(0 - 1)         | 0<br>(0 - 1)         |
| Chlamydial infection                                             | 1<br>(0 - 1)           | --                 | 0<br>(0 - 0)        | 1<br>(0 - 1)         | 0<br>(0 - 0)         | 0<br>(0 - 0)         |
| Gonococcal infection                                             | 1<br>(0 - 1)           | --                 | 0<br>(0 - 0)        | 1<br>(0 - 1)         | 0<br>(0 - 0)         | 0<br>(0 - 0)         |
| Other sexually transmitted diseases                              | 1<br>(0 - 1)           | --                 | 0<br>(0 - 0)        | 0<br>(0 - 1)         | 0<br>(0 - 0)         | 0<br>(0 - 0)         |
| Hepatitis                                                        | 4<br>(2 - 6)           | 1<br>(0 - 3)       | 0<br>(0 - 0)        | 1<br>(1 - 3)         | 1<br>(0 - 2)         | 0<br>(0 - 1)         |
| Acute hepatitis A                                                | 0<br>(0 - 1)           | 0<br>(0 - 1)       | 0<br>(0 - 0)        | 0<br>(0 - 0)         | 0<br>(0 - 0)         | 0<br>(0 - 0)         |
| Acute hepatitis B                                                | 2<br>(1 - 4)           | 1<br>(0 - 2)       | 0<br>(0 - 0)        | 0<br>(0 - 1)         | 0<br>(0 - 1)         | 0<br>(0 - 1)         |
| Acute hepatitis C                                                | 0<br>(0 - 0)           | --                 | 0<br>(0 - 0)        | 0<br>(0 - 0)         | 0<br>(0 - 0)         | 0<br>(0 - 0)         |
| Acute hepatitis E                                                | 1<br>(1 - 2)           | 0<br>(0 - 0)       | 0<br>(0 - 0)        | 1<br>(0 - 2)         | 0<br>(0 - 0)         | 0<br>(0 - 0)         |
| Other infectious diseases                                        | 17<br>(3 - 38)         | 11<br>(1 - 28)     | 1<br>(0 - 2)        | 3<br>(0 - 7)         | 1<br>(0 - 4)         | 1<br>(0 - 2)         |
| Non-communicable diseases                                        | 1,196<br>(876 - 1,765) | 232<br>(109 - 413) | 23<br>(13 - 40)     | 244<br>(147 - 373)   | 313<br>(196 - 582)   | 383<br>(311 - 556)   |
| Neoplasms                                                        | 196<br>(131 - 324)     | 5<br>(2 - 11)      | 3<br>(1 - 5)        | 61<br>(37 - 99)      | 86<br>(52 - 163)     | 41<br>(30 - 62)      |
| Esophageal cancer                                                | 4<br>(2 - 9)           | --                 | --                  | 0<br>(0 - 1)         | 2<br>(1 - 5)         | 2<br>(1 - 3)         |
| Stomach cancer                                                   | 11<br>(6 - 20)         | --                 | --                  | 3<br>(2 - 6)         | 4<br>(2 - 9)         | 3<br>(2 - 5)         |
| Liver cancer                                                     | 13<br>(7 - 23)         | --                 | 0<br>(0 - 0)        | 3<br>(1 - 6)         | 6<br>(3 - 12)        | 4<br>(2 - 6)         |
| Liver cancer due to hepatitis B                                  | 4<br>(1 - 9)           | --                 | 0<br>(0 - 0)        | 1<br>(0 - 3)         | 2<br>(1 - 5)         | 1<br>(0 - 2)         |

Web Table 31- Equatorial Guinea deaths with 95% UI by age, sex, and cause in 2013

| Cause                                | Females, All Ages  | Females, 0-4 Years | Females, 5-14 Years | Females, 15-49 Years | Females, 50-69 Years | Females, 70-80 Years |
|--------------------------------------|--------------------|--------------------|---------------------|----------------------|----------------------|----------------------|
| Liver cancer due to hepatitis C      | 3<br>(1 - 7)       | --                 | 0<br>(0 - 0)        | 1<br>(0 - 2)         | 2<br>(0 - 4)         | 1<br>(0 - 3)         |
| Liver cancer due to alcohol use      | 2<br>(1 - 3)       | --                 | --                  | 0<br>(0 - 0)         | 1<br>(0 - 2)         | 1<br>(0 - 1)         |
| Liver cancer due to other causes     | 3<br>(1 - 7)       | --                 | 0<br>(0 - 0)        | 1<br>(0 - 2)         | 1<br>(1 - 3)         | 1<br>(0 - 2)         |
| Larynx cancer                        | 1<br>(0 - 1)       | --                 | --                  | 0<br>(0 - 0)         | 0<br>(0 - 1)         | 0<br>(0 - 0)         |
| Tracheal, bronchus and lung cancer   | 8<br>(5 - 15)      | --                 | --                  | 2<br>(1 - 3)         | 4<br>(2 - 9)         | 2<br>(1 - 5)         |
| Breast cancer                        | 39<br>(23 - 68)    | --                 | --                  | 13<br>(7 - 23)       | 20<br>(10 - 38)      | 6<br>(3 - 10)        |
| Cervical cancer                      | 40<br>(24 - 68)    | --                 | --                  | 20<br>(11 - 32)      | 16<br>(8 - 31)       | 4<br>(3 - 7)         |
| Uterine cancer                       | 3<br>(2 - 7)       | --                 | --                  | 1<br>(0 - 2)         | 2<br>(1 - 4)         | 1<br>(0 - 2)         |
| Prostate cancer                      | --                 | --                 | --                  | --                   | --                   | --                   |
| Colon and rectum cancer              | 16<br>(11 - 26)    | --                 | --                  | 3<br>(1 - 4)         | 7<br>(4 - 14)        | 6<br>(4 - 9)         |
| Lip and oral cavity cancer           | 2<br>(1 - 4)       | --                 | --                  | 1<br>(0 - 1)         | 1<br>(0 - 2)         | 1<br>(0 - 1)         |
| Nasopharynx cancer                   | 1<br>(0 - 1)       | --                 | 0<br>(0 - 0)        | 0<br>(0 - 1)         | 0<br>(0 - 0)         | 0<br>(0 - 0)         |
| Other pharynx cancer                 | 1<br>(0 - 1)       | --                 | --                  | 0<br>(0 - 0)         | 0<br>(0 - 1)         | 0<br>(0 - 0)         |
| Gallbladder and biliary tract cancer | 5<br>(3 - 10)      | --                 | --                  | 1<br>(0 - 1)         | 3<br>(1 - 6)         | 2<br>(1 - 3)         |
| Pancreatic cancer                    | 6<br>(4 - 10)      | --                 | --                  | 1<br>(0 - 1)         | 3<br>(2 - 6)         | 2<br>(1 - 3)         |
| Malignant skin melanoma              | 1<br>(1 - 2)       | --                 | --                  | 0<br>(0 - 1)         | 0<br>(0 - 1)         | 0<br>(0 - 0)         |
| Non-melanoma skin cancer             | 1<br>(0 - 1)       | --                 | --                  | 0<br>(0 - 0)         | 0<br>(0 - 0)         | 0<br>(0 - 1)         |
| Ovarian cancer                       | 7<br>(4 - 13)      | --                 | --                  | 2<br>(1 - 4)         | 4<br>(2 - 7)         | 1<br>(1 - 2)         |
| Testicular cancer                    | --                 | --                 | --                  | --                   | --                   | --                   |
| Kidney cancer                        | 3<br>(2 - 5)       | 0<br>(0 - 1)       | 0<br>(0 - 0)        | 1<br>(0 - 1)         | 1<br>(1 - 2)         | 1<br>(0 - 1)         |
| Bladder cancer                       | 2<br>(1 - 4)       | --                 | --                  | 0<br>(0 - 1)         | 1<br>(0 - 2)         | 1<br>(1 - 1)         |
| Brain and nervous system cancer      | 3<br>(2 - 5)       | 0<br>(0 - 1)       | 0<br>(0 - 1)        | 1<br>(1 - 2)         | 1<br>(1 - 2)         | 0<br>(0 - 1)         |
| Thyroid cancer                       | 1<br>(0 - 2)       | --                 | 0<br>(0 - 0)        | 0<br>(0 - 0)         | 0<br>(0 - 1)         | 0<br>(0 - 1)         |
| Mesothelioma                         | 0<br>(0 - 0)       | --                 | --                  | 0<br>(0 - 0)         | 0<br>(0 - 0)         | 0<br>(0 - 0)         |
| Hodgkin lymphoma                     | 1<br>(0 - 2)       | 0<br>(0 - 0)       | 0<br>(0 - 0)        | 1<br>(0 - 1)         | 0<br>(0 - 0)         | 0<br>(0 - 0)         |
| Non-Hodgkin lymphoma                 | 7<br>(4 - 12)      | 1<br>(0 - 2)       | 0<br>(0 - 1)        | 2<br>(1 - 4)         | 2<br>(1 - 5)         | 1<br>(0 - 3)         |
| Multiple myeloma                     | 2<br>(1 - 3)       | --                 | --                  | 0<br>(0 - 0)         | 1<br>(1 - 2)         | 1<br>(0 - 1)         |
| Leukemia                             | 3<br>(2 - 6)       | 0<br>(0 - 1)       | 0<br>(0 - 1)        | 1<br>(1 - 2)         | 1<br>(0 - 2)         | 1<br>(0 - 1)         |
| Other neoplasms                      | 17<br>(10 - 28)    | 3<br>(1 - 8)       | 1<br>(1 - 3)        | 5<br>(2 - 10)        | 5<br>(2 - 10)        | 3<br>(1 - 5)         |
| Cardiovascular diseases              | 443<br>(306 - 701) | 13<br>(4 - 29)     | 3<br>(1 - 5)        | 70<br>(32 - 120)     | 131<br>(76 - 248)    | 226<br>(172 - 336)   |
| Rheumatic heart disease              | 12<br>(6 - 23)     | 0<br>(0 - 1)       | 0<br>(0 - 1)        | 6<br>(2 - 12)        | 4<br>(2 - 7)         | 2<br>(1 - 4)         |
| Ischemic heart disease               | 94<br>(52 - 164)   | 0<br>(0 - 1)       | 0<br>(0 - 0)        | 10<br>(3 - 18)       | 27<br>(13 - 55)      | 57<br>(33 - 98)      |
| Cerebrovascular disease              | 222<br>(153 - 364) | 3<br>(1 - 10)      | 1<br>(0 - 2)        | 31<br>(15 - 58)      | 66<br>(38 - 127)     | 120<br>(86 - 184)    |
| Ischemic stroke                      | 108<br>(73 - 179)  | 1<br>(0 - 2)       | 0<br>(0 - 0)        | 6<br>(2 - 16)        | 23<br>(12 - 47)      | 78<br>(53 - 123)     |
| Hemorrhagic stroke                   | 114<br>(64 - 194)  | 3<br>(1 - 8)       | 1<br>(0 - 2)        | 25<br>(11 - 49)      | 43<br>(23 - 83)      | 42<br>(23 - 70)      |
| Hypertensive heart disease           | 37<br>(17 - 76)    | 0<br>(0 - 1)       | 0<br>(0 - 0)        | 4<br>(1 - 8)         | 10<br>(4 - 23)       | 23<br>(10 - 49)      |
| Cardiomyopathy and myocarditis       | 23<br>(10 - 39)    | 5<br>(1 - 14)      | 1<br>(0 - 1)        | 6<br>(2 - 12)        | 5<br>(3 - 11)        | 5<br>(3 - 12)        |
| Atrial fibrillation and flutter      | 0<br>(0 - 1)       | --                 | --                  | 0<br>(0 - 0)         | 0<br>(0 - 0)         | 0<br>(0 - 1)         |
| Aortic aneurysm                      | 3<br>(2 - 6)       | --                 | --                  | 1<br>(0 - 1)         | 1<br>(0 - 2)         | 2<br>(1 - 3)         |
| Peripheral vascular disease          | 0<br>(0 - 1)       | --                 | --                  | 0<br>(0 - 0)         | 0<br>(0 - 0)         | 0<br>(0 - 0)         |



Web Table 31- Equatorial Guinea deaths with 95% UI by age, sex, and cause in 2013

| Cause                                               | Females, All Ages | Females, 0-4 Years | Females, 5-14 Years | Females, 15-49 Years | Females, 50-69 Years | Females, 70-80 Years |
|-----------------------------------------------------|-------------------|--------------------|---------------------|----------------------|----------------------|----------------------|
| Endocarditis                                        | 3<br>(1 - 6)      | 0<br>(0 - 1)       | 0<br>(0 - 0)        | 1<br>(0 - 2)         | 1<br>(0 - 2)         | 1<br>(1 - 2)         |
| Other cardiovascular and circulatory diseases       | 47<br>(21 - 84)   | 3<br>(1 - 9)       | 1<br>(0 - 1)        | 11<br>(4 - 20)       | 17<br>(7 - 36)       | 16<br>(7 - 28)       |
| Chronic respiratory diseases                        | 84<br>(50 - 146)  | 11<br>(5 - 23)     | 1<br>(1 - 2)        | 17<br>(8 - 31)       | 22<br>(11 - 43)      | 32<br>(20 - 58)      |
| Chronic obstructive pulmonary disease               | 53<br>(30 - 93)   | 5<br>(2 - 11)      | 0<br>(0 - 1)        | 7<br>(3 - 14)        | 15<br>(8 - 29)       | 25<br>(15 - 44)      |
| Pneumoconiosis                                      | 0<br>(0 - 1)      | 0<br>(0 - 0)       | 0<br>(0 - 0)        | 0<br>(0 - 0)         | 0<br>(0 - 0)         | 0<br>(0 - 0)         |
| Silicosis                                           | 0<br>(0 - 0)      | 0<br>(0 - 0)       | 0<br>(0 - 0)        | 0<br>(0 - 0)         | 0<br>(0 - 0)         | 0<br>(0 - 0)         |
| Asbestosis                                          | 0<br>(0 - 0)      | 0<br>(0 - 0)       | 0<br>(0 - 0)        | 0<br>(0 - 0)         | 0<br>(0 - 0)         | 0<br>(0 - 0)         |
| Coal workers pneumoconiosis                         | 0<br>(0 - 0)      | 0<br>(0 - 0)       | 0<br>(0 - 0)        | 0<br>(0 - 0)         | 0<br>(0 - 0)         | 0<br>(0 - 0)         |
| Other pneumoconiosis                                | 0<br>(0 - 1)      | 0<br>(0 - 0)       | 0<br>(0 - 0)        | 0<br>(0 - 0)         | 0<br>(0 - 0)         | 0<br>(0 - 0)         |
| Asthma                                              | 24<br>(8 - 49)    | 4<br>(1 - 10)      | 1<br>(0 - 2)        | 8<br>(3 - 17)        | 6<br>(2 - 13)        | 5<br>(2 - 13)        |
| Interstitial lung disease and pulmonary sarcoidosis | 3<br>(0 - 7)      | 0<br>(0 - 0)       | 0<br>(0 - 0)        | 0<br>(0 - 1)         | 1<br>(0 - 2)         | 2<br>(0 - 4)         |
| Other chronic respiratory diseases                  | 4<br>(2 - 8)      | 2<br>(1 - 5)       | 0<br>(0 - 0)        | 1<br>(0 - 2)         | 0<br>(0 - 1)         | 1<br>(0 - 1)         |
| Cirrhosis                                           | 20<br>(8 - 49)    | 1<br>(0 - 3)       | 0<br>(0 - 1)        | 6<br>(2 - 17)        | 8<br>(3 - 21)        | 4<br>(2 - 11)        |
| Cirrhosis due to hepatitis B                        | 5<br>(1 - 11)     | 0<br>(0 - 0)       | 0<br>(0 - 0)        | 1<br>(0 - 4)         | 2<br>(0 - 5)         | 1<br>(0 - 3)         |
| Cirrhosis due to hepatitis C                        | 7<br>(2 - 19)     | 0<br>(0 - 0)       | 0<br>(0 - 0)        | 3<br>(1 - 7)         | 3<br>(1 - 9)         | 1<br>(0 - 3)         |
| Cirrhosis due to alcohol use                        | 5<br>(1 - 12)     | --                 | --                  | 1<br>(0 - 3)         | 2<br>(1 - 5)         | 1<br>(0 - 4)         |
| Cirrhosis due to other causes                       | 3<br>(1 - 9)      | 1<br>(0 - 2)       | 0<br>(0 - 1)        | 1<br>(0 - 4)         | 1<br>(0 - 3)         | 0<br>(0 - 1)         |
| Digestive diseases                                  | 53<br>(34 - 84)   | 7<br>(3 - 13)      | 2<br>(1 - 3)        | 17<br>(9 - 27)       | 13<br>(7 - 26)       | 14<br>(10 - 23)      |
| Peptic ulcer disease                                | 8<br>(4 - 14)     | 0<br>(0 - 1)       | 0<br>(0 - 0)        | 3<br>(1 - 5)         | 2<br>(1 - 5)         | 3<br>(1 - 5)         |
| Gastritis and duodenitis                            | 2<br>(1 - 4)      | 0<br>(0 - 1)       | 0<br>(0 - 0)        | 1<br>(0 - 2)         | 0<br>(0 - 1)         | 0<br>(0 - 1)         |
| Appendicitis                                        | 4<br>(2 - 7)      | 1<br>(0 - 2)       | 0<br>(0 - 1)        | 2<br>(1 - 3)         | 1<br>(0 - 1)         | 0<br>(0 - 1)         |
| Paralytic ileus and intestinal obstruction          | 14<br>(7 - 25)    | 1<br>(0 - 3)       | 0<br>(0 - 1)        | 3<br>(1 - 5)         | 4<br>(2 - 9)         | 6<br>(3 - 11)        |
| Inguinal, femoral, and abdominal hernia             | 1<br>(0 - 1)      | 0<br>(0 - 0)       | 0<br>(0 - 0)        | 0<br>(0 - 0)         | 0<br>(0 - 0)         | 0<br>(0 - 1)         |
| Inflammatory bowel disease                          | 6<br>(3 - 11)     | 2<br>(1 - 5)       | 0<br>(0 - 0)        | 2<br>(1 - 4)         | 1<br>(0 - 2)         | 1<br>(0 - 1)         |
| Vascular intestinal disorders                       | 1<br>(0 - 1)      | 0<br>(0 - 0)       | 0<br>(0 - 0)        | 0<br>(0 - 0)         | 0<br>(0 - 0)         | 0<br>(0 - 1)         |
| Gallbladder and biliary diseases                    | 5<br>(3 - 9)      | 0<br>(0 - 1)       | 0<br>(0 - 0)        | 2<br>(1 - 3)         | 1<br>(1 - 3)         | 1<br>(1 - 3)         |
| Pancreatitis                                        | 4<br>(2 - 9)      | 0<br>(0 - 1)       | 0<br>(0 - 0)        | 2<br>(1 - 4)         | 1<br>(0 - 3)         | 1<br>(0 - 1)         |
| Other digestive diseases                            | 8<br>(4 - 13)     | 1<br>(0 - 3)       | 0<br>(0 - 1)        | 3<br>(1 - 4)         | 2<br>(1 - 3)         | 2<br>(1 - 3)         |
| Neurological disorders                              | 43<br>(28 - 64)   | 5<br>(1 - 12)      | 2<br>(1 - 3)        | 10<br>(3 - 18)       | 4<br>(3 - 8)         | 23<br>(16 - 34)      |
| Alzheimer disease and other dementias               | 24<br>(16 - 36)   | --                 | --                  | 0<br>(0 - 0)         | 2<br>(1 - 4)         | 22<br>(15 - 32)      |
| Parkinson disease                                   | 0<br>(0 - 1)      | --                 | --                  | 0<br>(0 - 0)         | 0<br>(0 - 0)         | 0<br>(0 - 0)         |
| Epilepsy                                            | 16<br>(5 - 29)    | 4<br>(1 - 11)      | 1<br>(0 - 3)        | 9<br>(2 - 17)        | 1<br>(1 - 3)         | 0<br>(0 - 1)         |
| Multiple sclerosis                                  | 0<br>(0 - 0)      | --                 | --                  | 0<br>(0 - 0)         | 0<br>(0 - 0)         | 0<br>(0 - 0)         |
| Other neurological disorders                        | 3<br>(2 - 4)      | 1<br>(0 - 1)       | 0<br>(0 - 0)        | 1<br>(0 - 1)         | 1<br>(0 - 2)         | 0<br>(0 - 1)         |
| Mental and substance use disorders                  | 7<br>(4 - 12)     | 0<br>(0 - 1)       | 0<br>(0 - 0)        | 5<br>(2 - 9)         | 1<br>(1 - 3)         | 0<br>(0 - 0)         |
| Schizophrenia                                       | 0<br>(0 - 1)      | --                 | --                  | 0<br>(0 - 0)         | 0<br>(0 - 0)         | 0<br>(0 - 0)         |
| Alcohol use disorders                               | 3<br>(1 - 6)      | --                 | --                  | 2<br>(0 - 4)         | 1<br>(0 - 2)         | 0<br>(0 - 0)         |
| Drug use disorders                                  | 3<br>(2 - 6)      | 0<br>(0 - 1)       | --                  | 2<br>(1 - 5)         | 0<br>(0 - 1)         | 0<br>(0 - 0)         |
| Opioid use disorders                                | 0<br>(0 - 1)      | 0<br>(0 - 0)       | --                  | 0<br>(0 - 0)         | 0<br>(0 - 0)         | 0<br>(0 - 0)         |
| Cocaine use disorders                               | 0<br>(0 - 0)      | 0<br>(0 - 0)       | --                  | 0<br>(0 - 0)         | 0<br>(0 - 0)         | 0<br>(0 - 0)         |

Web Table 31- Equatorial Guinea deaths with 95% UI by age, sex, and cause in 2013

| Cause                                               | Females, All Ages  | Females, 0-4 Years | Females, 5-14 Years | Females, 15-49 Years | Females, 50-69 Years | Females, 70-80 Years |
|-----------------------------------------------------|--------------------|--------------------|---------------------|----------------------|----------------------|----------------------|
| Amphetamine use disorders                           | 0<br>(0 - 0)       | 0<br>(0 - 0)       | --                  | 0<br>(0 - 0)         | 0<br>(0 - 0)         | 0<br>(0 - 0)         |
| Other drug use disorders                            | 3<br>(1 - 5)       | 0<br>(0 - 1)       | --                  | 2<br>(1 - 4)         | 0<br>(0 - 1)         | 0<br>(0 - 0)         |
| Eating disorders                                    | 1<br>(0 - 2)       | --                 | 0<br>(0 - 0)        | 1<br>(0 - 1)         | --                   | --                   |
| Anorexia nervosa                                    | 1<br>(0 - 2)       | --                 | 0<br>(0 - 0)        | 1<br>(0 - 1)         | --                   | --                   |
| Diabetes, urogenital, blood, and endocrine diseases | 187<br>(121 - 281) | 49<br>(20 - 90)    | 9<br>(4 - 18)       | 48<br>(28 - 80)      | 43<br>(23 - 82)      | 37<br>(24 - 59)      |
| Diabetes mellitus                                   | 48<br>(26 - 83)    | 0<br>(0 - 1)       | 0<br>(0 - 0)        | 8<br>(4 - 14)        | 21<br>(10 - 40)      | 18<br>(10 - 30)      |
| Acute glomerulonephritis                            | 1<br>(0 - 2)       | 0<br>(0 - 1)       | 0<br>(0 - 0)        | 0<br>(0 - 1)         | 0<br>(0 - 0)         | 0<br>(0 - 0)         |
| Chronic kidney disease                              | 39<br>(16 - 88)    | 4<br>(1 - 10)      | 1<br>(0 - 3)        | 12<br>(3 - 35)       | 11<br>(4 - 25)       | 11<br>(5 - 22)       |
| Chronic kidney disease due to diabetes mellitus     | 0<br>(0 - 1)       | 0<br>(0 - 0)       | 0<br>(0 - 0)        | 0<br>(0 - 0)         | 0<br>(0 - 0)         | 0<br>(0 - 0)         |
| Chronic kidney disease due to hypertension          | 16<br>(7 - 34)     | 1<br>(0 - 2)       | 0<br>(0 - 0)        | 4<br>(1 - 11)        | 5<br>(2 - 12)        | 6<br>(3 - 11)        |
| Chronic kidney disease due to glomerulonephritis    | 9<br>(3 - 19)      | 2<br>(1 - 4)       | 1<br>(0 - 1)        | 4<br>(1 - 9)         | 2<br>(1 - 4)         | 1<br>(0 - 3)         |
| Chronic kidney disease due to other causes          | 13<br>(2 - 42)     | 2<br>(0 - 5)       | 1<br>(0 - 1)        | 4<br>(0 - 16)        | 4<br>(1 - 12)        | 4<br>(1 - 10)        |
| Urinary diseases and male infertility               | 14<br>(8 - 24)     | 2<br>(0 - 5)       | 0<br>(0 - 1)        | 4<br>(2 - 8)         | 4<br>(2 - 7)         | 4<br>(2 - 7)         |
| Interstitial nephritis and urinary tract infections | 10<br>(6 - 18)     | 1<br>(0 - 3)       | 0<br>(0 - 0)        | 3<br>(1 - 5)         | 3<br>(2 - 6)         | 4<br>(2 - 6)         |
| Urolithiasis                                        | 1<br>(0 - 2)       | --                 | 0<br>(0 - 0)        | 0<br>(0 - 1)         | 0<br>(0 - 0)         | 0<br>(0 - 0)         |
| Other urinary diseases                              | 3<br>(1 - 6)       | 1<br>(0 - 3)       | 0<br>(0 - 0)        | 1<br>(0 - 3)         | 0<br>(0 - 1)         | 0<br>(0 - 1)         |
| Gynecological diseases                              | 1<br>(0 - 4)       | --                 | --                  | 1<br>(0 - 3)         | 0<br>(0 - 1)         | 0<br>(0 - 0)         |
| Uterine fibroids                                    | 0<br>(0 - 1)       | --                 | --                  | 0<br>(0 - 0)         | 0<br>(0 - 0)         | 0<br>(0 - 0)         |
| Polycystic ovarian syndrome                         | 0<br>(0 - 0)       | --                 | --                  | 0<br>(0 - 0)         | 0<br>(0 - 0)         | --                   |
| Endometriosis                                       | 0<br>(0 - 1)       | --                 | --                  | 0<br>(0 - 1)         | 0<br>(0 - 0)         | 0<br>(0 - 0)         |
| Genital prolapse                                    | 0<br>(0 - 1)       | --                 | --                  | 0<br>(0 - 0)         | 0<br>(0 - 0)         | 0<br>(0 - 0)         |
| Other gynecological diseases                        | 1<br>(0 - 2)       | --                 | --                  | 0<br>(0 - 2)         | 0<br>(0 - 0)         | 0<br>(0 - 0)         |
| Hemoglobinopathies and hemolytic anemias            | 48<br>(11 - 99)    | 25<br>(3 - 62)     | 6<br>(2 - 13)       | 14<br>(3 - 29)       | 2<br>(1 - 6)         | 1<br>(0 - 1)         |
| Thalassemias                                        | 0<br>(0 - 0)       | 0<br>(0 - 0)       | 0<br>(0 - 0)        | 0<br>(0 - 0)         | 0<br>(0 - 0)         | 0<br>(0 - 0)         |
| Sickle cell disorders                               | 46<br>(10 - 95)    | 24<br>(3 - 60)     | 6<br>(2 - 13)       | 14<br>(3 - 29)       | 2<br>(1 - 5)         | 0<br>(0 - 0)         |
| G6PD deficiency                                     | 0<br>(0 - 1)       | 0<br>(0 - 1)       | 0<br>(0 - 0)        | 0<br>(0 - 0)         | 0<br>(0 - 0)         | 0<br>(0 - 0)         |
| Other hemoglobinopathies and hemolytic anemias      | 2<br>(0 - 4)       | 1<br>(0 - 2)       | 0<br>(0 - 0)        | 0<br>(0 - 0)         | 0<br>(0 - 0)         | 1<br>(0 - 1)         |
| Endocrine, metabolic, blood, and immune disorders   | 36<br>(17 - 67)    | 17<br>(5 - 40)     | 2<br>(0 - 4)        | 9<br>(3 - 18)        | 5<br>(2 - 11)        | 4<br>(2 - 7)         |
| Musculoskeletal disorders                           | 8<br>(3 - 15)      | --                 | 0<br>(0 - 1)        | 5<br>(1 - 9)         | 2<br>(1 - 4)         | 1<br>(0 - 2)         |
| Rheumatoid arthritis                                | 1<br>(0 - 2)       | --                 | 0<br>(0 - 0)        | 0<br>(0 - 0)         | 0<br>(0 - 1)         | 0<br>(0 - 1)         |
| Other musculoskeletal disorders                     | 7<br>(3 - 14)      | --                 | 0<br>(0 - 1)        | 4<br>(1 - 9)         | 2<br>(1 - 3)         | 1<br>(0 - 2)         |
| Other non-communicable diseases                     | 156<br>(56 - 322)  | 141<br>(44 - 303)  | 4<br>(1 - 8)        | 6<br>(2 - 11)        | 2<br>(1 - 5)         | 3<br>(2 - 6)         |
| Congenital anomalies                                | 141<br>(47 - 309)  | 133<br>(42 - 297)  | 3<br>(1 - 7)        | 4<br>(1 - 8)         | 1<br>(0 - 1)         | 0<br>(0 - 0)         |
| Neural tube defects                                 | 39<br>(4 - 124)    | 38<br>(3 - 122)    | 0<br>(0 - 2)        | 1<br>(0 - 2)         | 0<br>(0 - 0)         | 0<br>(0 - 0)         |
| Congenital heart anomalies                          | 54<br>(16 - 123)   | 50<br>(14 - 117)   | 2<br>(0 - 4)        | 2<br>(0 - 5)         | 0<br>(0 - 0)         | 0<br>(0 - 0)         |
| Cleft lip and cleft palate                          | 1<br>(0 - 3)       | 1<br>(0 - 3)       | --                  | --                   | --                   | --                   |
| Down syndrome                                       | 9<br>(2 - 22)      | 8<br>(1 - 21)      | 0<br>(0 - 1)        | 1<br>(0 - 1)         | 0<br>(0 - 0)         | 0<br>(0 - 0)         |
| Chromosomal unbalanced rearrangements               | 6<br>(1 - 18)      | 6<br>(1 - 18)      | 0<br>(0 - 0)        | 0<br>(0 - 0)         | 0<br>(0 - 0)         | 0<br>(0 - 0)         |
| Other congenital anomalies                          | 32<br>(11 - 83)    | 30<br>(10 - 79)    | 1<br>(0 - 2)        | 1<br>(0 - 3)         | 0<br>(0 - 1)         | 0<br>(0 - 0)         |
| Skin and subcutaneous diseases                      | 9<br>(6 - 14)      | 2<br>(1 - 5)       | 0<br>(0 - 1)        | 2<br>(1 - 3)         | 2<br>(1 - 3)         | 3<br>(1 - 5)         |

Web Table 31- Equatorial Guinea deaths with 95% UI by age, sex, and cause in 2013

| Cause                                           | Females, All Ages  | Females, 0-4 Years | Females, 5-14 Years | Females, 15-49 Years | Females, 50-69 Years | Females, 70-80 Years |
|-------------------------------------------------|--------------------|--------------------|---------------------|----------------------|----------------------|----------------------|
| Cellulitis                                      | 2<br>(1 - 5)       | 1<br>(0 - 2)       | 0<br>(0 - 0)        | 0<br>(0 - 1)         | 1<br>(0 - 1)         | 1<br>(0 - 1)         |
| Pyoderma                                        | 5<br>(3 - 8)       | 2<br>(0 - 4)       | 0<br>(0 - 0)        | 1<br>(0 - 2)         | 1<br>(0 - 2)         | 1<br>(1 - 2)         |
| Decubitus ulcer                                 | 1<br>(1 - 3)       | 0<br>(0 - 0)       | 0<br>(0 - 0)        | 0<br>(0 - 0)         | 0<br>(0 - 0)         | 1<br>(0 - 2)         |
| Other skin and subcutaneous diseases            | 1<br>(0 - 1)       | 0<br>(0 - 1)       | 0<br>(0 - 0)        | 0<br>(0 - 1)         | 0<br>(0 - 0)         | 0<br>(0 - 0)         |
| Sudden infant death syndrome                    | 6<br>(0 - 44)      | 6<br>(0 - 44)      | --                  | --                   | --                   | --                   |
| Injuries                                        | 330<br>(209 - 511) | 125<br>(57 - 250)  | 26<br>(14 - 45)     | 133<br>(70 - 214)    | 28<br>(15 - 57)      | 18<br>(12 - 29)      |
| Transport injuries                              | 141<br>(42 - 305)  | 36<br>(9 - 92)     | 15<br>(5 - 30)      | 70<br>(19 - 153)     | 14<br>(4 - 33)       | 6<br>(2 - 11)        |
| Road injuries                                   | 129<br>(40 - 265)  | 32<br>(8 - 78)     | 14<br>(4 - 28)      | 65<br>(18 - 139)     | 13<br>(3 - 30)       | 5<br>(2 - 10)        |
| Pedestrian road injuries                        | 51<br>(15 - 126)   | 14<br>(3 - 45)     | 6<br>(2 - 14)       | 22<br>(6 - 56)       | 6<br>(1 - 15)        | 3<br>(1 - 6)         |
| Cyclist road injuries                           | 14<br>(4 - 35)     | 3<br>(1 - 9)       | 2<br>(0 - 5)        | 7<br>(2 - 18)        | 2<br>(0 - 4)         | 0<br>(0 - 1)         |
| Motorcyclist road injuries                      | 12<br>(3 - 30)     | 2<br>(0 - 5)       | 1<br>(0 - 2)        | 9<br>(2 - 21)        | 1<br>(0 - 2)         | 0<br>(0 - 1)         |
| Motor vehicle road injuries                     | 51<br>(13 - 119)   | 12<br>(3 - 34)     | 5<br>(1 - 11)       | 27<br>(7 - 66)       | 5<br>(1 - 13)        | 2<br>(0 - 4)         |
| Other road injuries                             | 1<br>(0 - 2)       | 0<br>(0 - 1)       | 0<br>(0 - 0)        | 0<br>(0 - 1)         | 0<br>(0 - 0)         | 0<br>(0 - 0)         |
| Other transport injuries                        | 11<br>(2 - 47)     | 4<br>(1 - 18)      | 1<br>(0 - 4)        | 5<br>(1 - 22)        | 1<br>(0 - 4)         | 0<br>(0 - 1)         |
| Unintentional injuries                          | 148<br>(79 - 264)  | 86<br>(32 - 189)   | 10<br>(5 - 18)      | 30<br>(15 - 49)      | 10<br>(6 - 19)       | 11<br>(7 - 18)       |
| Falls                                           | 18<br>(8 - 35)     | 6<br>(1 - 16)      | 1<br>(0 - 2)        | 4<br>(1 - 9)         | 2<br>(1 - 5)         | 5<br>(3 - 9)         |
| Drowning                                        | 25<br>(5 - 55)     | 16<br>(2 - 42)     | 3<br>(1 - 7)        | 5<br>(1 - 9)         | 1<br>(0 - 2)         | 0<br>(0 - 1)         |
| Fire, heat, and hot substances                  | 24<br>(4 - 49)     | 13<br>(2 - 33)     | 2<br>(0 - 4)        | 6<br>(1 - 12)        | 2<br>(1 - 4)         | 1<br>(0 - 4)         |
| Poisonings                                      | 7<br>(3 - 17)      | 3<br>(1 - 9)       | 0<br>(0 - 1)        | 3<br>(1 - 7)         | 0<br>(0 - 1)         | 0<br>(0 - 0)         |
| Exposure to mechanical forces                   | 12<br>(4 - 35)     | 6<br>(1 - 19)      | 1<br>(0 - 4)        | 3<br>(1 - 10)        | 1<br>(0 - 2)         | 0<br>(0 - 1)         |
| Unintentional firearm injuries                  | 3<br>(1 - 6)       | 1<br>(0 - 2)       | 0<br>(0 - 1)        | 2<br>(0 - 3)         | 0<br>(0 - 0)         | 0<br>(0 - 0)         |
| Unintentional suffocation                       | 1<br>(0 - 5)       | 1<br>(0 - 4)       | 0<br>(0 - 0)        | 0<br>(0 - 0)         | 0<br>(0 - 0)         | 0<br>(0 - 0)         |
| Other exposure to mechanical forces             | 7<br>(2 - 33)      | 4<br>(1 - 17)      | 1<br>(0 - 4)        | 2<br>(1 - 8)         | 1<br>(0 - 2)         | 0<br>(0 - 1)         |
| Adverse effects of medical treatment            | 10<br>(4 - 18)     | 3<br>(1 - 10)      | 0<br>(0 - 1)        | 3<br>(1 - 6)         | 2<br>(1 - 4)         | 2<br>(1 - 4)         |
| Animal contact                                  | 8<br>(2 - 35)      | 4<br>(0 - 20)      | 1<br>(0 - 4)        | 2<br>(0 - 8)         | 1<br>(0 - 3)         | 0<br>(0 - 1)         |
| Venomous animal contact                         | 6<br>(1 - 29)      | 3<br>(0 - 18)      | 1<br>(0 - 3)        | 2<br>(0 - 7)         | 1<br>(0 - 2)         | 0<br>(0 - 1)         |
| Non-venomous animal contact                     | 2<br>(0 - 6)       | 1<br>(0 - 3)       | 0<br>(0 - 1)        | 0<br>(0 - 1)         | 0<br>(0 - 1)         | 0<br>(0 - 0)         |
| Foreign body                                    | 41<br>(6 - 130)    | 34<br>(3 - 112)    | 1<br>(0 - 3)        | 3<br>(1 - 10)        | 1<br>(0 - 4)         | 2<br>(1 - 4)         |
| Pulmonary aspiration and foreign body in airway | 41<br>(6 - 129)    | 34<br>(3 - 112)    | 1<br>(0 - 3)        | 3<br>(1 - 10)        | 1<br>(0 - 4)         | 2<br>(1 - 4)         |
| Foreign body in other body part                 | 0<br>(0 - 0)       | 0<br>(0 - 0)       | 0<br>(0 - 0)        | 0<br>(0 - 0)         | 0<br>(0 - 0)         | 0<br>(0 - 0)         |
| Other unintentional injuries                    | 4<br>(1 - 6)       | 2<br>(0 - 3)       | 0<br>(0 - 1)        | 1<br>(0 - 2)         | 0<br>(0 - 1)         | 0<br>(0 - 0)         |
| Self-harm and interpersonal violence            | 42<br>(17 - 71)    | 2<br>(1 - 6)       | 1<br>(0 - 3)        | 33<br>(11 - 58)      | 4<br>(2 - 8)         | 1<br>(0 - 2)         |
| Self-harm                                       | 29<br>(7 - 54)     | --                 | 1<br>(0 - 2)        | 24<br>(5 - 45)       | 3<br>(1 - 7)         | 1<br>(0 - 2)         |
| Interpersonal violence                          | 12<br>(5 - 21)     | 2<br>(1 - 6)       | 1<br>(0 - 1)        | 8<br>(3 - 16)        | 1<br>(0 - 1)         | 0<br>(0 - 0)         |
| Assault by firearm                              | 3<br>(1 - 8)       | 0<br>(0 - 2)       | 0<br>(0 - 0)        | 3<br>(1 - 6)         | 0<br>(0 - 1)         | 0<br>(0 - 0)         |
| Assault by sharp object                         | 4<br>(1 - 8)       | 0<br>(0 - 1)       | 0<br>(0 - 0)        | 3<br>(1 - 6)         | 0<br>(0 - 0)         | 0<br>(0 - 0)         |
| Assault by other means                          | 5<br>(1 - 10)      | 2<br>(0 - 4)       | 0<br>(0 - 1)        | 3<br>(1 - 6)         | 0<br>(0 - 1)         | 0<br>(0 - 0)         |

Web Table 31- Eritrea deaths with 95% UI by age, sex, and cause in 2013

| Cause                                                              | Both Sexes, All Ages        | Both Sexes, 0-4 Years      | Both Sexes, 5-14 Years   | Both Sexes, 15-49 Years     | Both Sexes, 50-69 Years    | Both Sexes, 70-89 Years  |
|--------------------------------------------------------------------|-----------------------------|----------------------------|--------------------------|-----------------------------|----------------------------|--------------------------|
| All causes                                                         | 45,137<br>(40,431 - 51,710) | 13,310<br>(9,602 - 18,225) | 1,550<br>(1,290 - 1,938) | 12,400<br>(11,029 - 14,077) | 10,902<br>(9,269 - 12,727) | 6,975<br>(6,150 - 7,774) |
| Communicable, maternal, neonatal, and nutritional diseases         | 27,289<br>(23,509 - 32,206) | 11,906<br>(8,715 - 16,425) | 1,156<br>(932 - 1,524)   | 7,541<br>(6,649 - 8,619)    | 4,227<br>(3,539 - 4,978)   | 2,460<br>(2,044 - 2,858) |
| HIV/AIDS and tuberculosis                                          | 5,511<br>(4,529 - 6,887)    | 216<br>(142 - 319)         | 222<br>(170 - 291)       | 3,168<br>(2,553 - 4,033)    | 1,510<br>(1,146 - 1,984)   | 395<br>(293 - 567)       |
| Tuberculosis                                                       | 3,137<br>(2,364 - 4,419)    | 110<br>(43 - 201)          | 33<br>(19 - 57)          | 1,483<br>(1,046 - 2,126)    | 1,139<br>(832 - 1,585)     | 372<br>(273 - 544)       |
| HIV/AIDS                                                           | 2,374<br>(1,703 - 3,356)    | 107<br>(71 - 154)          | 189<br>(137 - 258)       | 1,685<br>(1,195 - 2,548)    | 371<br>(225 - 703)         | 22<br>(12 - 35)          |
| HIV/AIDS resulting in mycobacterial infection                      | 149<br>(102 - 214)          | 6<br>(4 - 10)              | 10<br>(7 - 15)           | 106<br>(70 - 153)           | 25<br>(14 - 46)            | 2<br>(1 - 3)             |
| HIV/AIDS resulting in other diseases                               | 2,225<br>(1,593 - 3,143)    | 100<br>(67 - 145)          | 179<br>(130 - 244)       | 1,579<br>(1,114 - 2,353)    | 346<br>(209 - 651)         | 21<br>(11 - 33)          |
| Diarrrhea, lower respiratory, and other common infectious diseases | 11,968<br>(9,411 - 15,406)  | 5,338<br>(3,296 - 8,298)   | 583<br>(403 - 1,032)     | 2,156<br>(1,704 - 2,699)    | 2,182<br>(1,674 - 2,741)   | 1,710<br>(1,298 - 2,058) |
| Diarrrheal diseases                                                | 4,972<br>(3,657 - 6,493)    | 1,693<br>(660 - 2,983)     | 166<br>(85 - 268)        | 1,100<br>(820 - 1,448)      | 1,161<br>(818 - 1,602)     | 852<br>(594 - 1,174)     |
| Intestinal infectious diseases                                     | 274<br>(136 - 474)          | 90<br>(29 - 180)           | 67<br>(29 - 124)         | 103<br>(53 - 188)           | 11<br>(5 - 20)             | 3<br>(1 - 6)             |
| Typhoid fever                                                      | 199<br>(92 - 359)           | 60<br>(18 - 129)           | 52<br>(22 - 96)          | 78<br>(38 - 145)            | 8<br>(3 - 14)              | 2<br>(1 - 3)             |
| Paratyphoid fever                                                  | 50<br>(22 - 92)             | 17<br>(5 - 38)             | 13<br>(5 - 25)           | 18<br>(8 - 35)              | 2<br>(1 - 4)               | 0<br>(0 - 1)             |
| Other intestinal infectious diseases                               | 25<br>(12 - 44)             | 13<br>(4 - 29)             | 2<br>(0 - 7)             | 7<br>(2 - 16)               | 2<br>(0 - 6)               | 1<br>(0 - 3)             |
| Lower respiratory infections                                       | 4,017<br>(2,949 - 5,219)    | 1,779<br>(924 - 2,926)     | 102<br>(53 - 155)        | 533<br>(393 - 691)          | 808<br>(595 - 1,061)       | 795<br>(590 - 1,012)     |
| Upper respiratory infections                                       | 8<br>(4 - 14)               | 2<br>(0 - 7)               | 0<br>(0 - 1)             | 3<br>(1 - 6)                | 2<br>(0 - 4)               | 1<br>(0 - 2)             |
| Otitis media                                                       | 6<br>(4 - 8)                | 2<br>(1 - 4)               | 0<br>(0 - 0)             | 1<br>(1 - 2)                | 1<br>(1 - 1)               | 1<br>(1 - 1)             |
| Meningitis                                                         | 1,085<br>(739 - 1,546)      | 441<br>(187 - 869)         | 78<br>(40 - 123)         | 333<br>(235 - 458)          | 180<br>(115 - 253)         | 53<br>(34 - 77)          |
| Pneumococcal meningitis                                            | 271<br>(184 - 388)          | 84<br>(31 - 154)           | 25<br>(12 - 42)          | 99<br>(64 - 148)            | 49<br>(28 - 86)            | 14<br>(8 - 23)           |
| H influenzae type B meningitis                                     | 207<br>(122 - 341)          | 128<br>(52 - 264)          | 17<br>(8 - 29)           | 38<br>(23 - 61)             | 18<br>(10 - 30)            | 5<br>(3 - 8)             |
| Meningococcal meningitis                                           | 164<br>(106 - 229)          | 47<br>(18 - 96)            | 9<br>(4 - 17)            | 58<br>(27 - 93)             | 37<br>(21 - 64)            | 12<br>(7 - 20)           |
| Other meningitis                                                   | 444<br>(294 - 645)          | 182<br>(74 - 370)          | 27<br>(13 - 46)          | 138<br>(93 - 198)           | 76<br>(42 - 116)           | 21<br>(12 - 32)          |
| Encephalitis                                                       | 33<br>(19 - 53)             | 17<br>(6 - 35)             | 2<br>(1 - 4)             | 9<br>(5 - 13)               | 4<br>(2 - 7)               | 2<br>(1 - 3)             |
| Diphtheria                                                         | 2<br>(0 - 9)                | 1<br>(0 - 8)               | 0<br>(0 - 2)             | 0<br>(0 - 1)                | 0<br>(0 - 0)               | --                       |
| Whooping cough                                                     | 25<br>(0 - 124)             | 24<br>(0 - 117)            | 1<br>(0 - 6)             | 0<br>(0 - 1)                | 0<br>(0 - 0)               | --                       |
| Tetanus                                                            | 112<br>(74 - 163)           | 60<br>(31 - 109)           | 4<br>(2 - 8)             | 32<br>(19 - 45)             | 13<br>(8 - 19)             | 2<br>(1 - 3)             |
| Measles                                                            | 1,428<br>(53 - 5,925)       | 1,226<br>(47 - 4,877)      | 161<br>(6 - 761)         | 40<br>(1 - 236)             | 1<br>(0 - 6)               | --                       |
| Varicella and herpes zoster                                        | 7<br>(3 - 14)               | 3<br>(0 - 9)               | 1<br>(0 - 2)             | 2<br>(1 - 4)                | 1<br>(0 - 2)               | 1<br>(0 - 3)             |
| Neglected tropical diseases and malaria                            | 2,446<br>(1,366 - 3,986)    | 1,621<br>(645 - 3,228)     | 239<br>(119 - 394)       | 459<br>(295 - 704)          | 98<br>(57 - 217)           | 29<br>(14 - 81)          |
| Malaria                                                            | 1,636<br>(615 - 3,199)      | 1,410<br>(455 - 3,047)     | 51<br>(16 - 147)         | 108<br>(42 - 302)           | 48<br>(15 - 159)           | 18<br>(4 - 68)           |
| Leishmaniasis                                                      | 720<br>(385 - 1,140)        | 191<br>(44 - 414)          | 177<br>(70 - 302)        | 315<br>(183 - 516)          | 33<br>(16 - 51)            | 5<br>(2 - 9)             |
| Visceral leishmaniasis                                             | 720<br>(385 - 1,140)        | 191<br>(44 - 414)          | 177<br>(70 - 302)        | 315<br>(183 - 516)          | 33<br>(16 - 51)            | 5<br>(2 - 9)             |
| Schistosomiasis                                                    | 25<br>(17 - 34)             | 0<br>(0 - 1)               | 1<br>(0 - 1)             | 12<br>(8 - 18)              | 9<br>(6 - 14)              | 3<br>(2 - 4)             |
| Cysticercosis                                                      | 2<br>(0 - 5)                | 0<br>(0 - 0)               | 0<br>(0 - 0)             | 1<br>(0 - 4)                | 0<br>(0 - 1)               | 0<br>(0 - 0)             |
| Cystic echinococcosis                                              | 3<br>(3 - 4)                | 0<br>(0 - 1)               | 0<br>(0 - 0)             | 2<br>(1 - 2)                | 1<br>(0 - 1)               | 0<br>(0 - 0)             |
| Dengue                                                             | 1<br>(0 - 1)                | 0<br>(0 - 0)               | 0<br>(0 - 0)             | 1<br>(0 - 1)                | 0<br>(0 - 0)               | 0<br>(0 - 0)             |
| Yellow fever                                                       | 0<br>(0 - 1)                | 0<br>(0 - 0)               | 0<br>(0 - 0)             | 0<br>(0 - 1)                | 0<br>(0 - 0)               | 0<br>(0 - 0)             |
| Rabies                                                             | 34<br>(15 - 56)             | 6<br>(1 - 15)              | 7<br>(3 - 15)            | 16<br>(7 - 26)              | 4<br>(2 - 6)               | 1<br>(0 - 1)             |
| Intestinal nematode infections                                     | 14<br>(4 - 32)              | 11<br>(2 - 26)             | 2<br>(0 - 6)             | 1<br>(0 - 6)                | 1<br>(0 - 5)               | 0<br>(0 - 2)             |
| Ascariasis                                                         | 14<br>(4 - 32)              | 11<br>(2 - 26)             | 2<br>(0 - 6)             | 1<br>(0 - 6)                | 1<br>(0 - 5)               | 0<br>(0 - 2)             |
| Other neglected tropical diseases                                  | 11<br>(8 - 15)              | 3<br>(2 - 6)               | 0<br>(0 - 1)             | 3<br>(2 - 4)                | 3<br>(1 - 5)               | 2<br>(1 - 4)             |

Web Table 31- Eritrea deaths with 95% UI by age, sex, and cause in 2013

| Cause                                                            | Both Sexes, All Ages        | Both Sexes, 0-4 Years    | Both Sexes, 5-14 Years | Both Sexes, 15-49 Years  | Both Sexes, 50-69 Years  | Both Sexes, 70-80 Years  |
|------------------------------------------------------------------|-----------------------------|--------------------------|------------------------|--------------------------|--------------------------|--------------------------|
| Maternal disorders                                               | 1,313<br>(814 - 1,896)      | --                       | 5<br>(2 - 12)          | 1,308<br>(811 - 1,891)   | --                       | --                       |
| Maternal hemorrhage                                              | 160<br>(83 - 251)           | --                       | 0<br>(0 - 1)           | 160<br>(83 - 251)        | --                       | --                       |
| Maternal sepsis and other maternal infections                    | 120<br>(70 - 190)           | --                       | 1<br>(0 - 2)           | 119<br>(70 - 189)        | --                       | --                       |
| Maternal hypertensive disorders                                  | 138<br>(79 - 206)           | --                       | 1<br>(0 - 2)           | 137<br>(79 - 204)        | --                       | --                       |
| Maternal obstructed labor                                        | 69<br>(41 - 106)            | --                       | 0<br>(0 - 1)           | 69<br>(40 - 106)         | --                       | --                       |
| Maternal abortive outcome                                        | 247<br>(145 - 372)          | --                       | 1<br>(0 - 2)           | 246<br>(144 - 370)       | --                       | --                       |
| Indirect maternal deaths                                         | 101<br>(54 - 165)           | --                       | 0<br>(0 - 1)           | 101<br>(54 - 165)        | --                       | --                       |
| Late maternal deaths                                             | 123<br>(65 - 193)           | --                       | 1<br>(0 - 2)           | 122<br>(64 - 193)        | --                       | --                       |
| Maternal deaths aggravated by HIV/AIDS                           | 3<br>(2 - 6)                | --                       | --                     | 3<br>(2 - 6)             | --                       | --                       |
| Other maternal disorders                                         | 348<br>(206 - 533)          | --                       | 1<br>(0 - 3)           | 346<br>(205 - 532)       | --                       | --                       |
| Neonatal disorders                                               | 3,518<br>(2,612 - 4,765)    | 3,518<br>(2,612 - 4,765) | --                     | --                       | --                       | --                       |
| Neonatal preterm birth complications                             | 1,091<br>(543 - 1,794)      | 1,091<br>(543 - 1,794)   | --                     | --                       | --                       | --                       |
| Neonatal encephalopathy due to birth asphyxia and trauma         | 827<br>(379 - 1,460)        | 827<br>(379 - 1,460)     | --                     | --                       | --                       | --                       |
| Neonatal sepsis and other neonatal infections                    | 822<br>(366 - 1,500)        | 822<br>(366 - 1,500)     | --                     | --                       | --                       | --                       |
| Hemolytic disease and other neonatal jaundice                    | 17<br>(6 - 41)              | 17<br>(6 - 41)           | --                     | --                       | --                       | --                       |
| Other neonatal disorders                                         | 762<br>(314 - 1,569)        | 762<br>(314 - 1,569)     | --                     | --                       | --                       | --                       |
| Nutritional deficiencies                                         | 1,924<br>(1,241 - 2,816)    | 847<br>(283 - 1,530)     | 76<br>(39 - 119)       | 351<br>(252 - 509)       | 359<br>(247 - 488)       | 291<br>(204 - 395)       |
| Protein-energy malnutrition                                      | 1,293<br>(707 - 2,087)      | 751<br>(254 - 1,386)     | 55<br>(27 - 92)        | 136<br>(62 - 258)        | 193<br>(105 - 301)       | 158<br>(83 - 240)        |
| Iodine deficiency                                                | 2<br>(0 - 6)                | 1<br>(0 - 4)             | 0<br>(0 - 1)           | 1<br>(0 - 3)             | 0<br>(0 - 2)             | 0<br>(0 - 1)             |
| Iron-deficiency anemia                                           | 618<br>(363 - 928)          | 95<br>(17 - 250)         | 20<br>(7 - 39)         | 211<br>(121 - 317)       | 163<br>(94 - 256)        | 129<br>(70 - 208)        |
| Other nutritional deficiencies                                   | 11<br>(5 - 18)              | 1<br>(0 - 3)             | 0<br>(0 - 1)           | 3<br>(1 - 6)             | 3<br>(1 - 5)             | 4<br>(1 - 9)             |
| Other communicable, maternal, neonatal, and nutritional diseases | 610<br>(391 - 951)          | 365<br>(171 - 649)       | 32<br>(13 - 55)        | 100<br>(72 - 151)        | 77<br>(48 - 122)         | 36<br>(18 - 65)          |
| Sexually transmitted diseases excluding HIV                      | 337<br>(157 - 601)          | 290<br>(123 - 536)       | 21<br>(7 - 39)         | 14<br>(8 - 22)           | 9<br>(4 - 21)            | 4<br>(2 - 9)             |
| Syphilis                                                         | 325<br>(148 - 588)          | 290<br>(123 - 536)       | 21<br>(7 - 39)         | 6<br>(4 - 9)             | 6<br>(2 - 12)            | 3<br>(1 - 7)             |
| Chlamydial infection                                             | 3<br>(1 - 5)                | --                       | 0<br>(0 - 0)           | 2<br>(1 - 3)             | 1<br>(0 - 2)             | 0<br>(0 - 1)             |
| Gonococcal infection                                             | 5<br>(3 - 8)                | --                       | 0<br>(0 - 0)           | 3<br>(2 - 5)             | 2<br>(1 - 4)             | 0<br>(0 - 1)             |
| Other sexually transmitted diseases                              | 4<br>(2 - 7)                | --                       | 0<br>(0 - 0)           | 3<br>(2 - 4)             | 1<br>(0 - 3)             | 0<br>(0 - 1)             |
| Hepatitis                                                        | 62<br>(47 - 91)             | 7<br>(2 - 16)            | 3<br>(1 - 5)           | 33<br>(24 - 53)          | 17<br>(12 - 23)          | 3<br>(2 - 5)             |
| Acute hepatitis A                                                | 5<br>(1 - 13)               | 3<br>(1 - 7)             | 1<br>(0 - 2)           | 2<br>(0 - 4)             | 0<br>(0 - 0)             | 0<br>(0 - 0)             |
| Acute hepatitis B                                                | 35<br>(24 - 53)             | 4<br>(1 - 10)            | 1<br>(0 - 3)           | 14<br>(7 - 25)           | 13<br>(9 - 18)           | 3<br>(2 - 4)             |
| Acute hepatitis C                                                | 1<br>(0 - 2)                | --                       | 0<br>(0 - 0)           | 0<br>(0 - 1)             | 0<br>(0 - 1)             | 0<br>(0 - 0)             |
| Acute hepatitis E                                                | 21<br>(12 - 33)             | 0<br>(0 - 0)             | 0<br>(0 - 1)           | 17<br>(10 - 28)          | 3<br>(1 - 6)             | 0<br>(0 - 1)             |
| Other infectious diseases                                        | 210<br>(128 - 393)          | 68<br>(25 - 195)         | 8<br>(3 - 21)          | 53<br>(33 - 100)         | 51<br>(25 - 95)          | 29<br>(12 - 57)          |
| Non-communicable diseases                                        | 14,980<br>(12,684 - 17,743) | 1,064<br>(599 - 1,683)   | 216<br>(120 - 296)     | 3,235<br>(2,559 - 4,051) | 6,167<br>(5,038 - 7,362) | 4,297<br>(3,678 - 5,000) |
| Neoplasms                                                        | 2,800<br>(2,236 - 3,474)    | 73<br>(30 - 124)         | 56<br>(30 - 84)        | 727<br>(539 - 945)       | 1,455<br>(1,110 - 1,844) | 488<br>(382 - 598)       |
| Esophageal cancer                                                | 414<br>(199 - 719)          | --                       | --                     | 72<br>(29 - 135)         | 259<br>(123 - 464)       | 83<br>(41 - 142)         |
| Stomach cancer                                                   | 195<br>(153 - 239)          | --                       | --                     | 33<br>(25 - 43)          | 119<br>(90 - 151)        | 43<br>(33 - 55)          |
| Liver cancer                                                     | 234<br>(170 - 298)          | --                       | 2<br>(1 - 5)           | 86<br>(42 - 129)         | 111<br>(82 - 143)        | 34<br>(24 - 47)          |
| Liver cancer due to hepatitis B                                  | 67<br>(37 - 106)            | --                       | 1<br>(0 - 2)           | 32<br>(15 - 52)          | 28<br>(9 - 52)           | 6<br>(2 - 11)            |
| Liver cancer due to hepatitis C                                  | 99<br>(57 - 155)            | --                       | 0<br>(0 - 1)           | 31<br>(13 - 55)          | 51<br>(26 - 81)          | 17<br>(10 - 26)          |

Web Table 31- Eritrea deaths with 95% UI by age, sex, and cause in 2013

| Cause                                | Both Sexes, All Ages     | Both Sexes, 0-4 Years | Both Sexes, 5-14 Years | Both Sexes, 15-49 Years | Both Sexes, 50-69 Years  | Both Sexes, 70-80 Years  |
|--------------------------------------|--------------------------|-----------------------|------------------------|-------------------------|--------------------------|--------------------------|
| Liver cancer due to alcohol use      | 29<br>(18 - 46)          | --                    | --                     | 6<br>(3 - 11)           | 16<br>(9 - 29)           | 6<br>(4 - 11)            |
| Liver cancer due to other causes     | 39<br>(23 - 57)          | --                    | 1<br>(0 - 2)           | 16<br>(8 - 26)          | 17<br>(9 - 29)           | 5<br>(2 - 8)             |
| Larynx cancer                        | 16<br>(11 - 24)          | --                    | --                     | 3<br>(2 - 4)            | 10<br>(7 - 15)           | 3<br>(2 - 5)             |
| Tracheal, bronchus and lung cancer   | 140<br>(108 - 173)       | --                    | --                     | 15<br>(10 - 26)         | 98<br>(73 - 125)         | 27<br>(20 - 34)          |
| Breast cancer                        | 197<br>(140 - 271)       | --                    | --                     | 82<br>(43 - 125)        | 92<br>(65 - 133)         | 22<br>(16 - 32)          |
| Cervical cancer                      | 448<br>(197 - 638)       | --                    | --                     | 94<br>(49 - 146)        | 297<br>(118 - 438)       | 57<br>(23 - 88)          |
| Uterine cancer                       | 20<br>(10 - 33)          | --                    | --                     | 2<br>(1 - 6)            | 12<br>(6 - 21)           | 5<br>(2 - 8)             |
| Prostate cancer                      | 66<br>(39 - 97)          | --                    | --                     | 2<br>(1 - 4)            | 29<br>(17 - 45)          | 35<br>(20 - 53)          |
| Colon and rectum cancer              | 179<br>(145 - 218)       | --                    | --                     | 58<br>(45 - 75)         | 84<br>(66 - 105)         | 36<br>(28 - 46)          |
| Lip and oral cavity cancer           | 37<br>(27 - 48)          | --                    | --                     | 10<br>(7 - 16)          | 21<br>(14 - 28)          | 6<br>(4 - 8)             |
| Nasopharynx cancer                   | 12<br>(8 - 17)           | --                    | 0<br>(0 - 1)           | 7<br>(4 - 10)           | 4<br>(3 - 6)             | 1<br>(1 - 1)             |
| Other pharynx cancer                 | 16<br>(12 - 21)          | --                    | --                     | 5<br>(3 - 7)            | 9<br>(7 - 13)            | 2<br>(1 - 3)             |
| Gallbladder and biliary tract cancer | 35<br>(26 - 47)          | --                    | --                     | 12<br>(8 - 17)          | 17<br>(12 - 24)          | 5<br>(3 - 8)             |
| Pancreatic cancer                    | 47<br>(37 - 57)          | --                    | --                     | 13<br>(9 - 16)          | 27<br>(21 - 34)          | 7<br>(6 - 9)             |
| Malignant skin melanoma              | 11<br>(7 - 15)           | --                    | --                     | 3<br>(2 - 5)            | 6<br>(4 - 8)             | 2<br>(1 - 3)             |
| Non-melanoma skin cancer             | 13<br>(8 - 22)           | --                    | --                     | 3<br>(2 - 5)            | 5<br>(3 - 8)             | 5<br>(3 - 10)            |
| Ovarian cancer                       | 49<br>(32 - 72)          | --                    | --                     | 12<br>(8 - 19)          | 30<br>(17 - 48)          | 7<br>(3 - 11)            |
| Testicular cancer                    | 7<br>(4 - 10)            | --                    | --                     | 5<br>(3 - 7)            | 2<br>(1 - 4)             | 0<br>(0 - 1)             |
| Kidney cancer                        | 31<br>(22 - 40)          | 4<br>(1 - 11)         | 2<br>(1 - 3)           | 5<br>(4 - 8)            | 15<br>(11 - 21)          | 4<br>(3 - 6)             |
| Bladder cancer                       | 42<br>(31 - 55)          | --                    | --                     | 7<br>(4 - 9)            | 21<br>(15 - 29)          | 14<br>(10 - 19)          |
| Brain and nervous system cancer      | 38<br>(27 - 49)          | 2<br>(0 - 3)          | 3<br>(2 - 6)           | 20<br>(13 - 27)         | 10<br>(7 - 14)           | 3<br>(2 - 4)             |
| Thyroid cancer                       | 10<br>(7 - 15)           | --                    | 0<br>(0 - 0)           | 1<br>(1 - 2)            | 7<br>(4 - 10)            | 2<br>(1 - 4)             |
| Mesothelioma                         | 4<br>(2 - 5)             | --                    | --                     | 1<br>(0 - 1)            | 2<br>(1 - 3)             | 1<br>(0 - 1)             |
| Hodgkin lymphoma                     | 27<br>(19 - 37)          | 1<br>(0 - 2)          | 1<br>(0 - 3)           | 10<br>(6 - 17)          | 10<br>(6 - 14)           | 5<br>(3 - 8)             |
| Non-Hodgkin lymphoma                 | 162<br>(121 - 216)       | 22<br>(6 - 47)        | 18<br>(9 - 31)         | 57<br>(39 - 81)         | 47<br>(31 - 70)          | 18<br>(12 - 27)          |
| Multiple myeloma                     | 21<br>(15 - 27)          | --                    | --                     | 6<br>(4 - 8)            | 11<br>(8 - 14)           | 5<br>(3 - 6)             |
| Leukemia                             | 55<br>(43 - 67)          | 3<br>(1 - 7)          | 6<br>(3 - 10)          | 28<br>(20 - 35)         | 12<br>(9 - 15)           | 6<br>(5 - 8)             |
| Other neoplasms                      | 275<br>(212 - 351)       | 41<br>(18 - 71)       | 22<br>(10 - 36)        | 77<br>(46 - 109)        | 87<br>(63 - 118)         | 49<br>(35 - 66)          |
| Cardiovascular diseases              | 6,622<br>(5,370 - 8,767) | 63<br>(27 - 141)      | 28<br>(14 - 61)        | 1,015<br>(760 - 1,590)  | 2,930<br>(2,306 - 3,756) | 2,586<br>(2,150 - 3,326) |
| Rheumatic heart disease              | 317<br>(216 - 521)       | 3<br>(1 - 8)          | 7<br>(4 - 13)          | 126<br>(83 - 212)       | 124<br>(79 - 216)        | 56<br>(37 - 97)          |
| Ischemic heart disease               | 1,885<br>(1,375 - 2,734) | 1<br>(0 - 2)          | 1<br>(1 - 5)           | 233<br>(145 - 443)      | 886<br>(623 - 1,202)     | 764<br>(548 - 1,135)     |
| Cerebrovascular disease              | 2,524<br>(1,810 - 3,165) | 7<br>(3 - 14)         | 3<br>(2 - 6)           | 263<br>(176 - 387)      | 1,121<br>(779 - 1,460)   | 1,129<br>(789 - 1,413)   |
| Ischemic stroke                      | 1,112<br>(625 - 1,695)   | 1<br>(0 - 2)          | 0<br>(0 - 1)           | 43<br>(21 - 83)         | 394<br>(212 - 626)       | 674<br>(383 - 975)       |
| Hemorrhagic stroke                   | 1,412<br>(940 - 1,903)   | 7<br>(3 - 13)         | 3<br>(1 - 5)           | 221<br>(148 - 324)      | 727<br>(480 - 989)       | 455<br>(253 - 686)       |
| Hypertensive heart disease           | 611<br>(381 - 1,027)     | 1<br>(0 - 3)          | 1<br>(0 - 2)           | 69<br>(41 - 113)        | 251<br>(152 - 410)       | 289<br>(169 - 533)       |
| Cardiomyopathy and myocarditis       | 281<br>(168 - 399)       | 24<br>(8 - 51)        | 6<br>(3 - 15)          | 92<br>(51 - 135)        | 105<br>(63 - 151)        | 55<br>(31 - 89)          |
| Atrial fibrillation and flutter      | 3<br>(1 - 5)             | --                    | --                     | 0<br>(0 - 0)            | 1<br>(0 - 2)             | 2<br>(0 - 3)             |
| Aortic aneurysm                      | 61<br>(37 - 90)          | --                    | --                     | 10<br>(6 - 17)          | 29<br>(16 - 44)          | 22<br>(14 - 33)          |
| Peripheral vascular disease          | 2<br>(1 - 4)             | --                    | --                     | 0<br>(0 - 0)            | 1<br>(0 - 1)             | 1<br>(1 - 2)             |
| Endocarditis                         | 109<br>(71 - 185)        | 6<br>(2 - 16)         | 2<br>(1 - 5)           | 34<br>(20 - 56)         | 38<br>(23 - 61)          | 29<br>(16 - 60)          |

Web Table 31- Eritrea deaths with 95% UI by age, sex, and cause in 2013

| Cause                                               | Both Sexes, All Ages | Both Sexes, 0-4 Years | Both Sexes, 5-14 Years | Both Sexes, 15-49 Years | Both Sexes, 50-69 Years | Both Sexes, 70-80 Years |
|-----------------------------------------------------|----------------------|-----------------------|------------------------|-------------------------|-------------------------|-------------------------|
| Other cardiovascular and circulatory diseases       | 830<br>(526 - 1,759) | 21<br>(8 - 59)        | 7<br>(3 - 19)          | 187<br>(116 - 364)      | 374<br>(223 - 785)      | 240<br>(135 - 604)      |
| Chronic respiratory diseases                        | 876<br>(716 - 1,060) | 32<br>(12 - 61)       | 8<br>(4 - 12)          | 137<br>(106 - 177)      | 372<br>(287 - 473)      | 326<br>(262 - 398)      |
| Chronic obstructive pulmonary disease               | 505<br>(393 - 653)   | 6<br>(2 - 13)         | 3<br>(2 - 4)           | 52<br>(38 - 69)         | 230<br>(172 - 305)      | 214<br>(164 - 282)      |
| Pneumoconiosis                                      | 57<br>(34 - 93)      | 1<br>(0 - 2)          | 0<br>(0 - 1)           | 17<br>(10 - 26)         | 27<br>(14 - 46)         | 12<br>(7 - 20)          |
| Silicosis                                           | 14<br>(5 - 30)       | 0<br>(0 - 1)          | 0<br>(0 - 0)           | 4<br>(1 - 7)            | 6<br>(2 - 14)           | 4<br>(1 - 8)            |
| Asbestosis                                          | 7<br>(4 - 12)        | 0<br>(0 - 0)          | 0<br>(0 - 0)           | 2<br>(1 - 3)            | 4<br>(2 - 7)            | 1<br>(1 - 2)            |
| Coal workers pneumoconiosis                         | 8<br>(4 - 15)        | 0<br>(0 - 0)          | 0<br>(0 - 0)           | 2<br>(1 - 4)            | 4<br>(2 - 8)            | 2<br>(1 - 3)            |
| Other pneumoconiosis                                | 29<br>(16 - 46)      | 0<br>(0 - 1)          | 0<br>(0 - 0)           | 9<br>(5 - 15)           | 13<br>(6 - 22)          | 6<br>(3 - 10)           |
| Asthma                                              | 163<br>(113 - 221)   | 6<br>(2 - 14)         | 2<br>(1 - 3)           | 30<br>(20 - 46)         | 69<br>(44 - 99)         | 55<br>(36 - 81)         |
| Interstitial lung disease and pulmonary sarcoidosis | 74<br>(15 - 137)     | 1<br>(0 - 4)          | 0<br>(0 - 1)           | 11<br>(2 - 24)          | 31<br>(6 - 61)          | 31<br>(5 - 61)          |
| Other chronic respiratory diseases                  | 77<br>(53 - 109)     | 18<br>(7 - 33)        | 2<br>(1 - 4)           | 27<br>(17 - 40)         | 15<br>(9 - 24)          | 14<br>(8 - 22)          |
| Cirrhosis                                           | 612<br>(392 - 851)   | 6<br>(2 - 15)         | 5<br>(3 - 8)           | 193<br>(118 - 282)      | 308<br>(189 - 440)      | 100<br>(63 - 148)       |
| Cirrhosis due to hepatitis B                        | 163<br>(77 - 278)    | 0<br>(0 - 1)          | 1<br>(0 - 2)           | 48<br>(22 - 83)         | 85<br>(39 - 149)        | 29<br>(11 - 53)         |
| Cirrhosis due to hepatitis C                        | 115<br>(53 - 193)    | 1<br>(0 - 2)          | 1<br>(0 - 1)           | 32<br>(10 - 57)         | 61<br>(27 - 106)        | 21<br>(10 - 39)         |
| Cirrhosis due to alcohol use                        | 245<br>(159 - 348)   | --                    | --                     | 73<br>(45 - 111)        | 130<br>(81 - 192)       | 43<br>(26 - 62)         |
| Cirrhosis due to other causes                       | 89<br>(56 - 131)     | 6<br>(2 - 12)         | 4<br>(2 - 6)           | 40<br>(24 - 65)         | 32<br>(17 - 49)         | 7<br>(4 - 12)           |
| Digestive diseases                                  | 963<br>(731 - 1,224) | 29<br>(7 - 64)        | 22<br>(12 - 33)        | 316<br>(225 - 432)      | 362<br>(270 - 473)      | 233<br>(171 - 295)      |
| Peptic ulcer disease                                | 277<br>(193 - 380)   | 3<br>(1 - 6)          | 2<br>(1 - 4)           | 78<br>(46 - 123)        | 119<br>(77 - 169)       | 76<br>(50 - 107)        |
| Gastritis and duodenitis                            | 40<br>(19 - 81)      | 2<br>(0 - 4)          | 1<br>(1 - 3)           | 13<br>(6 - 27)          | 13<br>(6 - 30)          | 10<br>(4 - 27)          |
| Appendicitis                                        | 79<br>(46 - 118)     | 3<br>(1 - 7)          | 4<br>(2 - 6)           | 29<br>(17 - 43)         | 28<br>(14 - 46)         | 16<br>(7 - 31)          |
| Paralytic ileus and intestinal obstruction          | 292<br>(178 - 407)   | 8<br>(2 - 19)         | 10<br>(5 - 15)         | 106<br>(56 - 162)       | 104<br>(60 - 155)       | 65<br>(38 - 106)        |
| Inguinal, femoral, and abdominal hernia             | 18<br>(10 - 26)      | 1<br>(0 - 2)          | 0<br>(0 - 1)           | 7<br>(4 - 12)           | 4<br>(2 - 7)            | 5<br>(3 - 9)            |
| Inflammatory bowel disease                          | 55<br>(21 - 81)      | 6<br>(1 - 16)         | 2<br>(0 - 3)           | 19<br>(7 - 30)          | 17<br>(5 - 28)          | 11<br>(3 - 18)          |
| Vascular intestinal disorders                       | 8<br>(4 - 15)        | 0<br>(0 - 0)          | 0<br>(0 - 0)           | 2<br>(1 - 3)            | 3<br>(1 - 6)            | 3<br>(1 - 6)            |
| Gallbladder and biliary diseases                    | 58<br>(39 - 80)      | 1<br>(0 - 2)          | 1<br>(0 - 1)           | 13<br>(8 - 18)          | 25<br>(15 - 37)         | 20<br>(12 - 30)         |
| Pancreatitis                                        | 45<br>(20 - 74)      | 0<br>(0 - 1)          | 0<br>(0 - 1)           | 22<br>(9 - 38)          | 16<br>(7 - 27)          | 7<br>(3 - 12)           |
| Other digestive diseases                            | 90<br>(59 - 142)     | 6<br>(1 - 14)         | 2<br>(1 - 4)           | 28<br>(17 - 51)         | 34<br>(21 - 54)         | 20<br>(12 - 32)         |
| Neurological disorders                              | 410<br>(316 - 537)   | 36<br>(11 - 75)       | 26<br>(13 - 45)        | 143<br>(96 - 219)       | 54<br>(41 - 69)         | 151<br>(116 - 188)      |
| Alzheimer disease and other dementias               | 155<br>(120 - 193)   | --                    | --                     | 0<br>(0 - 0)            | 23<br>(17 - 30)         | 131<br>(101 - 165)      |
| Parkinson disease                                   | 3<br>(1 - 4)         | --                    | --                     | 0<br>(0 - 0)            | 1<br>(0 - 1)            | 2<br>(1 - 3)            |
| Epilepsy                                            | 214<br>(143 - 328)   | 29<br>(8 - 67)        | 23<br>(11 - 43)        | 127<br>(83 - 202)       | 20<br>(13 - 29)         | 14<br>(8 - 23)          |
| Multiple sclerosis                                  | 2<br>(1 - 4)         | --                    | --                     | 1<br>(0 - 2)            | 1<br>(0 - 1)            | 0<br>(0 - 0)            |
| Other neurological disorders                        | 37<br>(28 - 48)      | 7<br>(3 - 13)         | 3<br>(1 - 4)           | 14<br>(11 - 19)         | 10<br>(7 - 13)          | 4<br>(3 - 5)            |
| Mental and substance use disorders                  | 289<br>(192 - 463)   | 7<br>(1 - 19)         | 0<br>(0 - 0)           | 201<br>(135 - 315)      | 72<br>(42 - 128)        | 9<br>(5 - 17)           |
| Schizophrenia                                       | 11<br>(4 - 24)       | --                    | --                     | 6<br>(2 - 14)           | 4<br>(1 - 8)            | 1<br>(0 - 2)            |
| Alcohol use disorders                               | 191<br>(115 - 338)   | --                    | --                     | 125<br>(73 - 212)       | 60<br>(35 - 113)        | 6<br>(3 - 12)           |
| Drug use disorders                                  | 86<br>(45 - 125)     | 7<br>(1 - 19)         | --                     | 70<br>(39 - 99)         | 7<br>(3 - 13)           | 2<br>(1 - 3)            |
| Opioid use disorders                                | 9<br>(5 - 14)        | 1<br>(0 - 2)          | --                     | 8<br>(4 - 11)           | 1<br>(0 - 1)            | 0<br>(0 - 0)            |
| Cocaine use disorders                               | 0<br>(0 - 1)         | 0<br>(0 - 0)          | --                     | 0<br>(0 - 0)            | 0<br>(0 - 0)            | 0<br>(0 - 0)            |
| Amphetamine use disorders                           | 0<br>(0 - 0)         | 0<br>(0 - 0)          | --                     | 0<br>(0 - 0)            | 0<br>(0 - 0)            | 0<br>(0 - 0)            |

Web Table 31- Eritrea deaths with 95% UI by age, sex, and cause in 2013

| Cause                                               | Both Sexes, All Ages     | Both Sexes, 0-4 Years | Both Sexes, 5-14 Years | Both Sexes, 15-49 Years | Both Sexes, 50-69 Years | Both Sexes, 70-80 Years |
|-----------------------------------------------------|--------------------------|-----------------------|------------------------|-------------------------|-------------------------|-------------------------|
| Other drug use disorders                            | 76<br>(40 - 110)         | 6<br>(1 - 17)         | --                     | 62<br>(35 - 88)         | 7<br>(3 - 11)           | 1<br>(0 - 3)            |
| Eating disorders                                    | 0<br>(0 - 0)             | --                    | 0<br>(0 - 0)           | 0<br>(0 - 0)            | --                      | --                      |
| Anorexia nervosa                                    | 0<br>(0 - 0)             | --                    | 0<br>(0 - 0)           | 0<br>(0 - 0)            | --                      | --                      |
| Diabetes, urogenital, blood, and endocrine diseases | 1,384<br>(1,113 - 1,643) | 96<br>(42 - 163)      | 31<br>(17 - 49)        | 380<br>(290 - 472)      | 538<br>(418 - 662)      | 337<br>(262 - 409)      |
| Diabetes mellitus                                   | 606<br>(478 - 741)       | 3<br>(2 - 6)          | 2<br>(1 - 2)           | 92<br>(69 - 119)        | 314<br>(238 - 400)      | 196<br>(150 - 250)      |
| Acute glomerulonephritis                            | 22<br>(11 - 31)          | 2<br>(1 - 4)          | 1<br>(0 - 2)           | 6<br>(4 - 10)           | 9<br>(3 - 16)           | 3<br>(1 - 6)            |
| Chronic kidney disease                              | 252<br>(178 - 327)       | 13<br>(4 - 27)        | 6<br>(3 - 12)          | 97<br>(63 - 138)        | 76<br>(54 - 102)        | 60<br>(37 - 82)         |
| Chronic kidney disease due to diabetes mellitus     | 1<br>(0 - 3)             | 0<br>(0 - 0)          | 0<br>(0 - 0)           | 0<br>(0 - 1)            | 0<br>(0 - 1)            | 0<br>(0 - 1)            |
| Chronic kidney disease due to hypertension          | 86<br>(50 - 125)         | 1<br>(0 - 3)          | 1<br>(0 - 1)           | 23<br>(13 - 36)         | 33<br>(19 - 49)         | 27<br>(15 - 42)         |
| Chronic kidney disease due to glomerulonephritis    | 92<br>(59 - 132)         | 8<br>(2 - 16)         | 4<br>(2 - 6)           | 40<br>(26 - 61)         | 25<br>(14 - 36)         | 15<br>(7 - 24)          |
| Chronic kidney disease due to other causes          | 72<br>(36 - 110)         | 3<br>(1 - 9)          | 2<br>(1 - 4)           | 33<br>(14 - 55)         | 17<br>(9 - 28)          | 17<br>(6 - 31)          |
| Urinary diseases and male infertility               | 227<br>(156 - 289)       | 11<br>(4 - 22)        | 3<br>(2 - 6)           | 81<br>(49 - 110)        | 88<br>(53 - 123)        | 44<br>(31 - 61)         |
| Interstitial nephritis and urinary tract infections | 167<br>(106 - 220)       | 8<br>(3 - 17)         | 2<br>(1 - 4)           | 57<br>(31 - 81)         | 64<br>(38 - 93)         | 35<br>(22 - 50)         |
| Urolithiasis                                        | 10<br>(6 - 17)           | --                    | 0<br>(0 - 1)           | 4<br>(2 - 7)            | 4<br>(2 - 7)            | 1<br>(1 - 3)            |
| Other urinary diseases                              | 51<br>(30 - 78)          | 3<br>(1 - 5)          | 1<br>(0 - 2)           | 20<br>(11 - 31)         | 19<br>(10 - 33)         | 8<br>(4 - 14)           |
| Gynecological diseases                              | 3<br>(1 - 4)             | --                    | --                     | 1<br>(1 - 1)            | 1<br>(0 - 2)            | 1<br>(0 - 1)            |
| Uterine fibroids                                    | 1<br>(0 - 1)             | --                    | --                     | 0<br>(0 - 0)            | 0<br>(0 - 1)            | 0<br>(0 - 0)            |
| Polycystic ovarian syndrome                         | 0<br>(0 - 0)             | --                    | --                     | 0<br>(0 - 0)            | 0<br>(0 - 0)            | --                      |
| Endometriosis                                       | 0<br>(0 - 0)             | --                    | --                     | 0<br>(0 - 0)            | 0<br>(0 - 0)            | --                      |
| Genital prolapse                                    | 0<br>(0 - 1)             | --                    | --                     | 0<br>(0 - 0)            | 0<br>(0 - 0)            | 0<br>(0 - 0)            |
| Other gynecological diseases                        | 1<br>(1 - 2)             | --                    | --                     | 0<br>(0 - 1)            | 1<br>(0 - 1)            | 0<br>(0 - 0)            |
| Hemoglobinopathies and hemolytic anemias            | 127<br>(67 - 217)        | 42<br>(15 - 80)       | 15<br>(6 - 30)         | 48<br>(25 - 90)         | 15<br>(8 - 29)          | 7<br>(3 - 16)           |
| Thalassemias                                        | 26<br>(12 - 47)          | 14<br>(4 - 28)        | 4<br>(2 - 8)           | 8<br>(4 - 15)           | 0<br>(0 - 0)            | 0<br>(0 - 0)            |
| Sickle cell disorders                               | 16<br>(8 - 27)           | 5<br>(1 - 11)         | 3<br>(1 - 5)           | 7<br>(4 - 12)           | 1<br>(1 - 2)            | 0<br>(0 - 0)            |
| G6PD deficiency                                     | 17<br>(9 - 30)           | 6<br>(2 - 12)         | 2<br>(1 - 5)           | 7<br>(4 - 14)           | 1<br>(1 - 3)            | 0<br>(0 - 0)            |
| Other hemoglobinopathies and hemolytic anemias      | 67<br>(36 - 124)         | 17<br>(7 - 31)        | 6<br>(3 - 12)          | 26<br>(13 - 51)         | 12<br>(6 - 23)          | 7<br>(3 - 16)           |
| Endocrine, metabolic, blood, and immune disorders   | 148<br>(76 - 199)        | 26<br>(12 - 48)       | 5<br>(2 - 8)           | 56<br>(27 - 83)         | 36<br>(19 - 51)         | 26<br>(10 - 37)         |
| Musculoskeletal disorders                           | 52<br>(33 - 73)          | --                    | 3<br>(2 - 5)           | 26<br>(16 - 38)         | 16<br>(10 - 23)         | 6<br>(4 - 11)           |
| Rheumatoid arthritis                                | 16<br>(9 - 29)           | --                    | 1<br>(0 - 2)           | 5<br>(3 - 9)            | 7<br>(4 - 11)           | 4<br>(2 - 7)            |
| Other musculoskeletal disorders                     | 35<br>(23 - 50)          | --                    | 3<br>(1 - 4)           | 21<br>(13 - 30)         | 9<br>(5 - 14)           | 3<br>(2 - 5)            |
| Other non-communicable diseases                     | 973<br>(667 - 1,446)     | 720<br>(427 - 1,188)  | 36<br>(18 - 54)        | 95<br>(70 - 126)        | 61<br>(42 - 81)         | 61<br>(40 - 86)         |
| Congenital anomalies                                | 767<br>(481 - 1,229)     | 675<br>(395 - 1,139)  | 32<br>(16 - 50)        | 46<br>(33 - 62)         | 9<br>(6 - 12)           | 5<br>(4 - 7)            |
| Neural tube defects                                 | 175<br>(61 - 387)        | 163<br>(54 - 367)     | 4<br>(1 - 10)          | 7<br>(2 - 15)           | 1<br>(0 - 2)            | 0<br>(0 - 1)            |
| Congenital heart anomalies                          | 315<br>(178 - 534)       | 271<br>(143 - 479)    | 17<br>(8 - 27)         | 22<br>(13 - 31)         | 3<br>(2 - 5)            | 2<br>(1 - 4)            |
| Cleft lip and cleft palate                          | 3<br>(1 - 7)             | 3<br>(1 - 7)          | --                     | --                      | --                      | --                      |
| Down syndrome                                       | 63<br>(25 - 137)         | 49<br>(16 - 121)      | 4<br>(2 - 8)           | 8<br>(4 - 14)           | 2<br>(1 - 3)            | 0<br>(0 - 0)            |
| Chromosomal unbalanced rearrangements               | 31<br>(13 - 69)          | 28<br>(11 - 66)       | 1<br>(0 - 2)           | 2<br>(1 - 3)            | 0<br>(0 - 0)            | 0<br>(0 - 0)            |
| Other congenital anomalies                          | 181<br>(73 - 464)        | 160<br>(60 - 431)     | 6<br>(3 - 15)          | 9<br>(5 - 15)           | 3<br>(2 - 5)            | 3<br>(1 - 4)            |
| Skin and subcutaneous diseases                      | 197<br>(139 - 264)       | 38<br>(13 - 83)       | 3<br>(1 - 6)           | 49<br>(33 - 69)         | 52<br>(35 - 71)         | 55<br>(36 - 80)         |
| Cellulitis                                          | 123<br>(44 - 211)        | 23<br>(5 - 59)        | 2<br>(1 - 4)           | 31<br>(11 - 56)         | 33<br>(13 - 56)         | 34<br>(10 - 59)         |



Web Table 31- Eritrea deaths with 95% UI by age, sex, and cause in 2013

| Cause                                           | Both Sexes, All Ages     | Both Sexes, 0-4 Years | Both Sexes, 5-14 Years | Both Sexes, 15-49 Years  | Both Sexes, 50-69 Years | Both Sexes, 70-80 Years |
|-------------------------------------------------|--------------------------|-----------------------|------------------------|--------------------------|-------------------------|-------------------------|
| Pyoderma                                        | 62<br>(18 - 125)         | 14<br>(3 - 40)        | 1<br>(0 - 2)           | 15<br>(4 - 32)           | 16<br>(4 - 35)          | 16<br>(5 - 34)          |
| Decubitus ulcer                                 | 10<br>(3 - 23)           | 0<br>(0 - 1)          | 0<br>(0 - 0)           | 2<br>(0 - 4)             | 2<br>(0 - 5)            | 6<br>(1 - 14)           |
| Other skin and subcutaneous diseases            | 2<br>(0 - 4)             | 0<br>(0 - 1)          | 0<br>(0 - 0)           | 1<br>(0 - 2)             | 0<br>(0 - 1)            | 0<br>(0 - 1)            |
| Sudden infant death syndrome                    | 8<br>(2 - 23)            | 8<br>(2 - 23)         | --                     | --                       | --                      | --                      |
| Injuries                                        | 2,868<br>(2,304 - 3,494) | 340<br>(135 - 581)    | 178<br>(104 - 252)     | 1,623<br>(1,282 - 2,054) | 508<br>(352 - 647)      | 218<br>(137 - 286)      |
| Transport injuries                              | 1,040<br>(822 - 1,290)   | 69<br>(24 - 134)      | 67<br>(37 - 101)       | 602<br>(463 - 767)       | 224<br>(161 - 285)      | 78<br>(48 - 102)        |
| Road injuries                                   | 994<br>(785 - 1,228)     | 61<br>(22 - 119)      | 62<br>(34 - 94)        | 584<br>(448 - 744)       | 214<br>(155 - 272)      | 73<br>(46 - 95)         |
| Pedestrian road injuries                        | 470<br>(346 - 611)       | 34<br>(11 - 69)       | 34<br>(18 - 53)        | 253<br>(178 - 349)       | 108<br>(74 - 143)       | 41<br>(25 - 56)         |
| Cyclist road injuries                           | 49<br>(31 - 73)          | 3<br>(1 - 7)          | 4<br>(2 - 7)           | 25<br>(13 - 41)          | 13<br>(9 - 19)          | 4<br>(2 - 6)            |
| Motorcyclist road injuries                      | 70<br>(43 - 109)         | 2<br>(1 - 5)          | 2<br>(1 - 4)           | 52<br>(29 - 84)          | 11<br>(6 - 17)          | 3<br>(2 - 5)            |
| Motor vehicle road injuries                     | 399<br>(293 - 530)       | 21<br>(7 - 42)        | 21<br>(11 - 33)        | 252<br>(177 - 350)       | 80<br>(52 - 108)        | 24<br>(14 - 34)         |
| Other road injuries                             | 7<br>(4 - 13)            | 1<br>(0 - 3)          | 1<br>(0 - 2)           | 2<br>(1 - 6)             | 2<br>(1 - 3)            | 1<br>(0 - 1)            |
| Other transport injuries                        | 46<br>(33 - 65)          | 7<br>(2 - 15)         | 5<br>(3 - 9)           | 18<br>(11 - 33)          | 10<br>(6 - 15)          | 6<br>(2 - 9)            |
| Unintentional injuries                          | 1,087<br>(827 - 1,383)   | 257<br>(98 - 454)     | 97<br>(52 - 145)       | 425<br>(332 - 538)       | 192<br>(134 - 255)      | 116<br>(70 - 163)       |
| Falls                                           | 120<br>(62 - 162)        | 10<br>(4 - 22)        | 8<br>(3 - 16)          | 47<br>(25 - 72)          | 25<br>(12 - 38)         | 29<br>(13 - 45)         |
| Drowning                                        | 257<br>(178 - 368)       | 65<br>(22 - 131)      | 39<br>(19 - 67)        | 121<br>(83 - 174)        | 25<br>(16 - 35)         | 7<br>(4 - 10)           |
| Fire, heat, and hot substances                  | 170<br>(111 - 260)       | 61<br>(18 - 131)      | 13<br>(6 - 26)         | 51<br>(34 - 81)          | 29<br>(18 - 43)         | 16<br>(9 - 24)          |
| Poisonings                                      | 64<br>(46 - 95)          | 11<br>(4 - 23)        | 2<br>(1 - 4)           | 35<br>(23 - 56)          | 13<br>(8 - 19)          | 3<br>(2 - 4)            |
| Exposure to mechanical forces                   | 160<br>(118 - 214)       | 39<br>(16 - 78)       | 13<br>(6 - 21)         | 69<br>(50 - 98)          | 32<br>(18 - 47)         | 8<br>(4 - 11)           |
| Unintentional firearm injuries                  | 36<br>(26 - 55)          | 3<br>(1 - 6)          | 1<br>(1 - 3)           | 26<br>(17 - 41)          | 4<br>(3 - 6)            | 1<br>(1 - 2)            |
| Unintentional suffocation                       | 30<br>(14 - 56)          | 16<br>(5 - 41)        | 3<br>(1 - 6)           | 6<br>(3 - 9)             | 4<br>(1 - 7)            | 1<br>(0 - 1)            |
| Other exposure to mechanical forces             | 94<br>(67 - 130)         | 20<br>(8 - 42)        | 8<br>(4 - 16)          | 37<br>(25 - 55)          | 23<br>(12 - 36)         | 6<br>(2 - 9)            |
| Adverse effects of medical treatment            | 159<br>(103 - 219)       | 36<br>(14 - 73)       | 5<br>(2 - 9)           | 41<br>(29 - 63)          | 40<br>(24 - 63)         | 37<br>(17 - 62)         |
| Animal contact                                  | 81<br>(51 - 129)         | 13<br>(4 - 33)        | 9<br>(4 - 19)          | 32<br>(20 - 52)          | 19<br>(10 - 29)         | 8<br>(3 - 11)           |
| Venomous animal contact                         | 47<br>(28 - 81)          | 9<br>(2 - 25)         | 4<br>(2 - 10)          | 18<br>(11 - 33)          | 10<br>(5 - 16)          | 5<br>(2 - 8)            |
| Non-venomous animal contact                     | 35<br>(20 - 54)          | 4<br>(1 - 11)         | 5<br>(2 - 10)          | 14<br>(8 - 23)           | 9<br>(4 - 15)           | 3<br>(1 - 4)            |
| Foreign body                                    | 33<br>(18 - 54)          | 16<br>(6 - 33)        | 2<br>(1 - 3)           | 5<br>(3 - 9)             | 3<br>(2 - 5)            | 6<br>(3 - 11)           |
| Pulmonary aspiration and foreign body in airway | 30<br>(16 - 51)          | 16<br>(6 - 32)        | 2<br>(1 - 3)           | 4<br>(3 - 8)             | 2<br>(1 - 4)            | 6<br>(2 - 10)           |
| Foreign body in other body part                 | 3<br>(2 - 4)             | 1<br>(0 - 1)          | 0<br>(0 - 1)           | 1<br>(0 - 1)             | 1<br>(0 - 1)            | 0<br>(0 - 1)            |
| Other unintentional injuries                    | 43<br>(33 - 56)          | 6<br>(2 - 12)         | 5<br>(2 - 7)           | 23<br>(17 - 31)          | 6<br>(4 - 9)            | 3<br>(2 - 4)            |
| Self-harm and interpersonal violence            | 740<br>(443 - 1,056)     | 14<br>(5 - 32)        | 14<br>(6 - 25)         | 596<br>(362 - 881)       | 92<br>(46 - 131)        | 24<br>(9 - 36)          |
| Self-harm                                       | 351<br>(175 - 515)       | --                    | 5<br>(2 - 13)          | 260<br>(135 - 408)       | 65<br>(29 - 94)         | 21<br>(7 - 32)          |
| Interpersonal violence                          | 389<br>(207 - 624)       | 14<br>(5 - 32)        | 8<br>(3 - 16)          | 336<br>(179 - 549)       | 28<br>(12 - 44)         | 3<br>(1 - 5)            |
| Assault by firearm                              | 155<br>(80 - 274)        | 3<br>(1 - 8)          | 2<br>(1 - 4)           | 140<br>(73 - 250)        | 9<br>(4 - 16)           | 0<br>(0 - 1)            |
| Assault by sharp object                         | 92<br>(46 - 173)         | 3<br>(1 - 7)          | 1<br>(1 - 3)           | 79<br>(40 - 154)         | 7<br>(3 - 13)           | 1<br>(0 - 2)            |
| Assault by other means                          | 142<br>(61 - 232)        | 8<br>(3 - 19)         | 5<br>(2 - 10)          | 117<br>(48 - 197)        | 11<br>(5 - 18)          | 2<br>(1 - 3)            |

Web Table 31- Eritrea deaths with 95% UI by age, sex, and cause in 2013

| Cause                                                             | Males, All Ages             | Males, 0-4 Years          | Males, 5-14 Years    | Males, 15-49 Years       | Males, 50-69 Years       | Males, 70-80 Years       |
|-------------------------------------------------------------------|-----------------------------|---------------------------|----------------------|--------------------------|--------------------------|--------------------------|
| All causes                                                        | 23,148<br>(19,790 - 26,914) | 7,472<br>(5,414 - 10,371) | 865<br>(705 - 1,056) | 6,911<br>(5,873 - 8,063) | 5,427<br>(4,157 - 6,670) | 2,473<br>(2,046 - 2,840) |
| Communicable, maternal, neonatal, and nutritional diseases        | 13,940<br>(11,620 - 16,882) | 6,672<br>(4,889 - 9,264)  | 632<br>(501 - 822)   | 3,616<br>(3,078 - 4,231) | 2,139<br>(1,657 - 2,675) | 881<br>(692 - 1,078)     |
| HIV/AIDS and tuberculosis                                         | 3,035<br>(2,352 - 3,993)    | 122<br>(77 - 195)         | 119<br>(90 - 155)    | 1,768<br>(1,379 - 2,294) | 845<br>(568 - 1,210)     | 181<br>(120 - 280)       |
| Tuberculosis                                                      | 1,862<br>(1,218 - 2,781)    | 66<br>(24 - 133)          | 18<br>(9 - 31)       | 967<br>(625 - 1,424)     | 641<br>(390 - 974)       | 170<br>(108 - 269)       |
| HIV/AIDS                                                          | 1,174<br>(837 - 1,687)      | 57<br>(38 - 82)           | 101<br>(74 - 138)    | 801<br>(555 - 1,202)     | 204<br>(115 - 392)       | 11<br>(5 - 18)           |
| HIV/AIDS resulting in mycobacterial infection                     | 83<br>(57 - 121)            | 4<br>(2 - 6)              | 6<br>(4 - 9)         | 57<br>(38 - 84)          | 15<br>(8 - 29)           | 1<br>(0 - 1)             |
| HIV/AIDS resulting in other diseases                              | 1,090<br>(772 - 1,560)      | 53<br>(35 - 76)           | 95<br>(69 - 130)     | 744<br>(515 - 1,116)     | 189<br>(106 - 361)       | 10<br>(5 - 17)           |
| Diarrhea, lower respiratory, and other common infectious diseases | 6,054<br>(4,563 - 7,910)    | 2,879<br>(1,762 - 4,512)  | 308<br>(201 - 551)   | 1,277<br>(947 - 1,657)   | 1,017<br>(688 - 1,414)   | 572<br>(419 - 742)       |
| Diarrheal diseases                                                | 2,456<br>(1,677 - 3,448)    | 927<br>(342 - 1,738)      | 93<br>(40 - 169)     | 635<br>(430 - 877)       | 526<br>(318 - 840)       | 274<br>(174 - 417)       |
| Intestinal infectious diseases                                    | 149<br>(75 - 260)           | 45<br>(14 - 96)           | 33<br>(14 - 63)      | 65<br>(30 - 124)         | 5<br>(2 - 11)            | 1<br>(0 - 3)             |
| Typhoid fever                                                     | 106<br>(48 - 196)           | 28<br>(8 - 62)            | 25<br>(10 - 47)      | 48<br>(22 - 94)          | 4<br>(1 - 7)             | 1<br>(0 - 1)             |
| Paratyphoid fever                                                 | 29<br>(13 - 55)             | 9<br>(2 - 20)             | 7<br>(3 - 15)        | 12<br>(4 - 26)           | 1<br>(0 - 2)             | 0<br>(0 - 0)             |
| Other intestinal infectious diseases                              | 15<br>(6 - 29)              | 8<br>(2 - 19)             | 1<br>(0 - 5)         | 5<br>(1 - 12)            | 1<br>(0 - 4)             | 0<br>(0 - 2)             |
| Lower respiratory infections                                      | 1,986<br>(1,373 - 2,762)    | 952<br>(460 - 1,608)      | 53<br>(26 - 88)      | 319<br>(218 - 444)       | 386<br>(246 - 571)       | 276<br>(185 - 373)       |
| Upper respiratory infections                                      | 4<br>(2 - 9)                | 1<br>(0 - 5)              | 0<br>(0 - 1)         | 2<br>(0 - 5)             | 1<br>(0 - 3)             | 0<br>(0 - 1)             |
| Otitis media                                                      | 3<br>(2 - 5)                | 1<br>(0 - 3)              | 0<br>(0 - 0)         | 1<br>(1 - 1)             | 0<br>(0 - 1)             | 0<br>(0 - 0)             |
| Meningitis                                                        | 604<br>(393 - 861)          | 247<br>(95 - 497)         | 44<br>(19 - 77)      | 206<br>(129 - 305)       | 89<br>(49 - 143)         | 19<br>(10 - 31)          |
| Pneumococcal meningitis                                           | 150<br>(94 - 224)           | 43<br>(15 - 88)           | 14<br>(5 - 26)       | 62<br>(36 - 103)         | 25<br>(12 - 55)          | 5<br>(2 - 10)            |
| H influenzae type B meningitis                                    | 115<br>(62 - 201)           | 71<br>(21 - 157)          | 10<br>(4 - 20)       | 23<br>(11 - 45)          | 9<br>(4 - 17)            | 2<br>(1 - 4)             |
| Meningococcal meningitis                                          | 85<br>(50 - 131)            | 26<br>(8 - 59)            | 6<br>(2 - 12)        | 34<br>(14 - 62)          | 16<br>(6 - 32)           | 4<br>(2 - 7)             |
| Other meningitis                                                  | 254<br>(160 - 368)          | 106<br>(40 - 216)         | 15<br>(6 - 29)       | 86<br>(51 - 136)         | 39<br>(16 - 70)          | 8<br>(4 - 14)            |
| Encephalitis                                                      | 19<br>(10 - 34)             | 10<br>(3 - 24)            | 1<br>(0 - 2)         | 6<br>(3 - 9)             | 2<br>(1 - 3)             | 0<br>(0 - 1)             |
| Diphtheria                                                        | 1<br>(0 - 6)                | 1<br>(0 - 5)              | 0<br>(0 - 1)         | 0<br>(0 - 1)             | 0<br>(0 - 0)             | --                       |
| Whooping cough                                                    | 12<br>(0 - 58)              | 11<br>(0 - 55)            | 0<br>(0 - 2)         | 0<br>(0 - 1)             | 0<br>(0 - 0)             | --                       |
| Tetanus                                                           | 71<br>(42 - 118)            | 38<br>(16 - 88)           | 3<br>(1 - 6)         | 21<br>(12 - 32)          | 8<br>(4 - 12)            | 1<br>(0 - 1)             |
| Measles                                                           | 745<br>(27 - 3,047)         | 645<br>(23 - 2,553)       | 80<br>(3 - 392)      | 20<br>(0 - 114)          | 1<br>(0 - 4)             | --                       |
| Varicella and herpes zoster                                       | 3<br>(1 - 8)                | 1<br>(0 - 6)              | 0<br>(0 - 1)         | 1<br>(0 - 3)             | 0<br>(0 - 1)             | 0<br>(0 - 1)             |
| Neglected tropical diseases and malaria                           | 1,338<br>(724 - 2,293)      | 834<br>(265 - 1,818)      | 147<br>(63 - 252)    | 295<br>(150 - 517)       | 51<br>(24 - 107)         | 11<br>(5 - 24)           |
| Malaria                                                           | 815<br>(252 - 1,836)        | 687<br>(141 - 1,699)      | 28<br>(7 - 72)       | 71<br>(21 - 207)         | 23<br>(6 - 70)           | 6<br>(1 - 19)            |
| Leishmaniasis                                                     | 476<br>(207 - 855)          | 136<br>(27 - 324)         | 113<br>(35 - 220)    | 205<br>(82 - 412)        | 19<br>(4 - 35)           | 3<br>(1 - 6)             |
| Visceral leishmaniasis                                            | 476<br>(207 - 855)          | 136<br>(27 - 324)         | 113<br>(35 - 220)    | 205<br>(82 - 412)        | 19<br>(4 - 35)           | 3<br>(1 - 6)             |
| Schistosomiasis                                                   | 14<br>(9 - 21)              | 0<br>(0 - 0)              | 0<br>(0 - 1)         | 8<br>(4 - 12)            | 5<br>(3 - 8)             | 1<br>(1 - 2)             |
| Cysticercosis                                                     | 1<br>(0 - 3)                | 0<br>(0 - 0)              | 0<br>(0 - 0)         | 1<br>(0 - 2)             | 0<br>(0 - 0)             | 0<br>(0 - 0)             |
| Cystic echinococcosis                                             | 2<br>(1 - 2)                | 0<br>(0 - 0)              | 0<br>(0 - 0)         | 1<br>(1 - 1)             | 0<br>(0 - 0)             | 0<br>(0 - 0)             |
| Dengue                                                            | 1<br>(0 - 1)                | 0<br>(0 - 0)              | 0<br>(0 - 0)         | 0<br>(0 - 1)             | 0<br>(0 - 0)             | 0<br>(0 - 0)             |
| Yellow fever                                                      | 0<br>(0 - 1)                | 0<br>(0 - 0)              | 0<br>(0 - 0)         | 0<br>(0 - 1)             | 0<br>(0 - 0)             | 0<br>(0 - 0)             |
| Rabies                                                            | 16<br>(6 - 28)              | 3<br>(1 - 9)              | 4<br>(1 - 9)         | 7<br>(3 - 11)            | 1<br>(1 - 3)             | 0<br>(0 - 0)             |
| Intestinal nematode infections                                    | 8<br>(1 - 20)               | 6<br>(1 - 17)             | 1<br>(0 - 5)         | 1<br>(0 - 5)             | 0<br>(0 - 3)             | 0<br>(0 - 1)             |
| Ascariasis                                                        | 8<br>(1 - 20)               | 6<br>(1 - 17)             | 1<br>(0 - 5)         | 1<br>(0 - 5)             | 0<br>(0 - 3)             | 0<br>(0 - 1)             |
| Other neglected tropical diseases                                 | 6<br>(4 - 9)                | 2<br>(1 - 4)              | 0<br>(0 - 0)         | 2<br>(1 - 3)             | 1<br>(1 - 3)             | 1<br>(0 - 1)             |

Web Table 31- Eritrea deaths with 95% UI by age, sex, and cause in 2013

| Cause                                                            | Males, All Ages          | Males, 0-4 Years         | Males, 5-14 Years | Males, 15-49 Years       | Males, 50-69 Years       | Males, 70-80 Years       |
|------------------------------------------------------------------|--------------------------|--------------------------|-------------------|--------------------------|--------------------------|--------------------------|
| Maternal disorders                                               | --                       | --                       | --                | --                       | --                       | --                       |
| Maternal hemorrhage                                              | --                       | --                       | --                | --                       | --                       | --                       |
| Maternal sepsis and other maternal infections                    | --                       | --                       | --                | --                       | --                       | --                       |
| Maternal hypertensive disorders                                  | --                       | --                       | --                | --                       | --                       | --                       |
| Maternal obstructed labor                                        | --                       | --                       | --                | --                       | --                       | --                       |
| Maternal abortive outcome                                        | --                       | --                       | --                | --                       | --                       | --                       |
| Indirect maternal deaths                                         | --                       | --                       | --                | --                       | --                       | --                       |
| Late maternal deaths                                             | --                       | --                       | --                | --                       | --                       | --                       |
| Maternal deaths aggravated by HIV/AIDS                           | --                       | --                       | --                | --                       | --                       | --                       |
| Other maternal disorders                                         | --                       | --                       | --                | --                       | --                       | --                       |
| Neonatal disorders                                               | 2,169<br>(1,573 - 2,937) | 2,169<br>(1,573 - 2,937) | --                | --                       | --                       | --                       |
| Neonatal preterm birth complications                             | 651<br>(269 - 1,182)     | 651<br>(269 - 1,182)     | --                | --                       | --                       | --                       |
| Neonatal encephalopathy due to birth asphyxia and trauma         | 479<br>(195 - 904)       | 479<br>(195 - 904)       | --                | --                       | --                       | --                       |
| Neonatal sepsis and other neonatal infections                    | 512<br>(174 - 1,037)     | 512<br>(174 - 1,037)     | --                | --                       | --                       | --                       |
| Hemolytic disease and other neonatal jaundice                    | 12<br>(3 - 36)           | 12<br>(3 - 36)           | --                | --                       | --                       | --                       |
| Other neonatal disorders                                         | 515<br>(164 - 1,167)     | 515<br>(164 - 1,167)     | --                | --                       | --                       | --                       |
| Nutritional deficiencies                                         | 1,027<br>(595 - 1,658)   | 487<br>(154 - 938)       | 42<br>(19 - 76)   | 210<br>(137 - 354)       | 182<br>(108 - 291)       | 105<br>(61 - 160)        |
| Protein-energy malnutrition                                      | 787<br>(389 - 1,376)     | 448<br>(145 - 875)       | 34<br>(14 - 63)   | 113<br>(44 - 227)        | 123<br>(55 - 211)        | 70<br>(31 - 120)         |
| Iodine deficiency                                                | 1<br>(0 - 4)             | 0<br>(0 - 2)             | 0<br>(0 - 0)      | 0<br>(0 - 2)             | 0<br>(0 - 1)             | 0<br>(0 - 0)             |
| Iron-deficiency anemia                                           | 234<br>(94 - 476)        | 39<br>(5 - 145)          | 9<br>(2 - 21)     | 95<br>(36 - 177)         | 57<br>(23 - 122)         | 34<br>(12 - 78)          |
| Other nutritional deficiencies                                   | 5<br>(2 - 11)            | 0<br>(0 - 1)             | 0<br>(0 - 1)      | 2<br>(1 - 6)             | 1<br>(0 - 3)             | 1<br>(0 - 2)             |
| Other communicable, maternal, neonatal, and nutritional diseases | 318<br>(193 - 503)       | 181<br>(84 - 337)        | 15<br>(7 - 27)    | 66<br>(42 - 111)         | 43<br>(23 - 80)          | 13<br>(6 - 26)           |
| Sexually transmitted diseases excluding HIV                      | 163<br>(73 - 291)        | 143<br>(62 - 264)        | 10<br>(4 - 18)    | 5<br>(2 - 8)             | 4<br>(1 - 9)             | 1<br>(0 - 2)             |
| Syphilis                                                         | 159<br>(71 - 287)        | 143<br>(62 - 264)        | 10<br>(4 - 18)    | 3<br>(1 - 4)             | 3<br>(1 - 7)             | 1<br>(0 - 2)             |
| Chlamydial infection                                             | --                       | --                       | --                | --                       | --                       | --                       |
| Gonococcal infection                                             | 2<br>(1 - 3)             | --                       | 0<br>(0 - 0)      | 1<br>(1 - 2)             | 1<br>(0 - 2)             | 0<br>(0 - 0)             |
| Other sexually transmitted diseases                              | 2<br>(1 - 2)             | --                       | 0<br>(0 - 0)      | 1<br>(0 - 2)             | 0<br>(0 - 1)             | 0<br>(0 - 0)             |
| Hepatitis                                                        | 42<br>(29 - 63)          | 4<br>(1 - 10)            | 2<br>(1 - 3)      | 23<br>(15 - 39)          | 11<br>(7 - 16)           | 2<br>(1 - 3)             |
| Acute hepatitis A                                                | 3<br>(1 - 8)             | 1<br>(0 - 5)             | 1<br>(0 - 1)      | 1<br>(0 - 3)             | 0<br>(0 - 0)             | 0<br>(0 - 0)             |
| Acute hepatitis B                                                | 24<br>(15 - 38)          | 2<br>(1 - 7)             | 1<br>(0 - 2)      | 11<br>(5 - 19)           | 9<br>(5 - 13)            | 2<br>(1 - 3)             |
| Acute hepatitis C                                                | 1<br>(0 - 2)             | --                       | 0<br>(0 - 0)      | 0<br>(0 - 1)             | 0<br>(0 - 0)             | 0<br>(0 - 0)             |
| Acute hepatitis E                                                | 14<br>(7 - 24)           | 0<br>(0 - 0)             | 0<br>(0 - 1)      | 11<br>(5 - 20)           | 2<br>(1 - 5)             | 0<br>(0 - 0)             |
| Other infectious diseases                                        | 113<br>(60 - 233)        | 34<br>(11 - 105)         | 4<br>(1 - 11)     | 38<br>(19 - 79)          | 28<br>(11 - 65)          | 10<br>(3 - 23)           |
| Non-communicable diseases                                        | 7,153<br>(5,550 - 8,751) | 601<br>(312 - 1,050)     | 121<br>(69 - 164) | 1,957<br>(1,498 - 2,473) | 2,975<br>(2,132 - 3,806) | 1,499<br>(1,196 - 1,773) |
| Neoplasms                                                        | 1,069<br>(808 - 1,352)   | 39<br>(15 - 70)          | 31<br>(16 - 46)   | 312<br>(222 - 422)       | 506<br>(355 - 658)       | 181<br>(138 - 224)       |
| Esophageal cancer                                                | 132<br>(83 - 205)        | --                       | --                | 19<br>(11 - 33)          | 88<br>(54 - 139)         | 25<br>(16 - 39)          |
| Stomach cancer                                                   | 101<br>(72 - 130)        | --                       | --                | 24<br>(17 - 33)          | 56<br>(37 - 76)          | 21<br>(15 - 28)          |
| Liver cancer                                                     | 135<br>(86 - 191)        | --                       | 2<br>(1 - 3)      | 61<br>(28 - 94)          | 59<br>(38 - 84)          | 14<br>(9 - 20)           |
| Liver cancer due to hepatitis B                                  | 51<br>(21 - 93)          | --                       | 1<br>(0 - 1)      | 26<br>(12 - 47)          | 20<br>(2 - 44)           | 4<br>(1 - 8)             |
| Liver cancer due to hepatitis C                                  | 48<br>(12 - 100)         | --                       | 0<br>(0 - 1)      | 21<br>(7 - 42)           | 22<br>(1 - 51)           | 5<br>(0 - 12)            |

Web Table 31- Eritrea deaths with 95% UI by age, sex, and cause in 2013

| Cause                                | Males, All Ages          | Males, 0-4 Years | Males, 5-14 Years | Males, 15-49 Years | Males, 50-69 Years       | Males, 70-80 Years |
|--------------------------------------|--------------------------|------------------|-------------------|--------------------|--------------------------|--------------------|
| Liver cancer due to alcohol use      | 20<br>(10 - 37)          | --               | --                | 5<br>(2 - 9)       | 11<br>(5 - 24)           | 4<br>(2 - 8)       |
| Liver cancer due to other causes     | 17<br>(9 - 27)           | --               | 1<br>(0 - 1)      | 8<br>(4 - 14)      | 6<br>(3 - 14)            | 1<br>(1 - 3)       |
| Larynx cancer                        | 14<br>(9 - 20)           | --               | --                | 3<br>(2 - 4)       | 8<br>(5 - 12)            | 3<br>(2 - 5)       |
| Tracheal, bronchus and lung cancer   | 95<br>(65 - 126)         | --               | --                | 11<br>(7 - 20)     | 69<br>(46 - 95)          | 15<br>(11 - 20)    |
| Breast cancer                        | 6<br>(4 - 11)            | --               | --                | 2<br>(1 - 3)       | 4<br>(2 - 7)             | 1<br>(0 - 2)       |
| Cervical cancer                      | --                       | --               | --                | --                 | --                       | --                 |
| Uterine cancer                       | --                       | --               | --                | --                 | --                       | --                 |
| Prostate cancer                      | 66<br>(39 - 97)          | --               | --                | 2<br>(1 - 4)       | 29<br>(17 - 45)          | 35<br>(20 - 53)    |
| Colon and rectum cancer              | 85<br>(62 - 111)         | --               | --                | 34<br>(25 - 46)    | 38<br>(26 - 52)          | 12<br>(9 - 16)     |
| Lip and oral cavity cancer           | 19<br>(12 - 27)          | --               | --                | 5<br>(3 - 9)       | 11<br>(6 - 16)           | 3<br>(2 - 5)       |
| Nasopharynx cancer                   | 7<br>(4 - 10)            | --               | 0<br>(0 - 1)      | 4<br>(2 - 6)       | 2<br>(1 - 4)             | 0<br>(0 - 1)       |
| Other pharynx cancer                 | 10<br>(6 - 14)           | --               | --                | 3<br>(1 - 5)       | 6<br>(3 - 9)             | 1<br>(1 - 2)       |
| Gallbladder and biliary tract cancer | 13<br>(8 - 20)           | --               | --                | 6<br>(3 - 10)      | 5<br>(3 - 10)            | 2<br>(1 - 3)       |
| Pancreatic cancer                    | 23<br>(17 - 31)          | --               | --                | 8<br>(5 - 11)      | 13<br>(9 - 18)           | 3<br>(2 - 4)       |
| Malignant skin melanoma              | 5<br>(2 - 9)             | --               | --                | 2<br>(1 - 4)       | 2<br>(1 - 3)             | 1<br>(0 - 1)       |
| Non-melanoma skin cancer             | 5<br>(3 - 7)             | --               | --                | 1<br>(1 - 2)       | 2<br>(1 - 4)             | 1<br>(1 - 2)       |
| Ovarian cancer                       | --                       | --               | --                | --                 | --                       | --                 |
| Testicular cancer                    | 7<br>(4 - 10)            | --               | --                | 5<br>(3 - 7)       | 2<br>(1 - 4)             | 0<br>(0 - 1)       |
| Kidney cancer                        | 18<br>(12 - 24)          | 3<br>(1 - 7)     | 1<br>(0 - 2)      | 3<br>(2 - 4)       | 9<br>(6 - 14)            | 2<br>(1 - 3)       |
| Bladder cancer                       | 30<br>(20 - 41)          | --               | --                | 4<br>(3 - 6)       | 16<br>(10 - 22)          | 10<br>(6 - 14)     |
| Brain and nervous system cancer      | 22<br>(13 - 30)          | 0<br>(0 - 1)     | 2<br>(1 - 4)      | 11<br>(6 - 16)     | 7<br>(4 - 10)            | 1<br>(1 - 2)       |
| Thyroid cancer                       | 2<br>(2 - 3)             | --               | 0<br>(0 - 0)      | 1<br>(0 - 1)       | 1<br>(1 - 2)             | 1<br>(0 - 1)       |
| Mesothelioma                         | 2<br>(1 - 4)             | --               | --                | 0<br>(0 - 1)       | 2<br>(1 - 3)             | 1<br>(0 - 1)       |
| Hodgkin lymphoma                     | 14<br>(7 - 23)           | 1<br>(0 - 2)     | 1<br>(0 - 2)      | 6<br>(3 - 13)      | 4<br>(2 - 7)             | 1<br>(1 - 3)       |
| Non-Hodgkin lymphoma                 | 94<br>(67 - 129)         | 13<br>(4 - 29)   | 12<br>(5 - 21)    | 37<br>(25 - 56)    | 24<br>(15 - 41)          | 7<br>(5 - 12)      |
| Multiple myeloma                     | 9<br>(6 - 13)            | --               | --                | 3<br>(2 - 4)       | 5<br>(3 - 8)             | 2<br>(1 - 3)       |
| Leukemia                             | 30<br>(23 - 38)          | 2<br>(0 - 4)     | 3<br>(1 - 5)      | 18<br>(13 - 24)    | 5<br>(3 - 7)             | 3<br>(2 - 4)       |
| Other neoplasms                      | 126<br>(91 - 169)        | 21<br>(9 - 38)   | 10<br>(5 - 17)    | 38<br>(24 - 58)    | 41<br>(26 - 60)          | 16<br>(11 - 23)    |
| Cardiovascular diseases              | 2,890<br>(2,150 - 3,609) | 29<br>(12 - 56)  | 14<br>(8 - 22)    | 592<br>(430 - 780) | 1,450<br>(1,030 - 1,870) | 805<br>(632 - 968) |
| Rheumatic heart disease              | 154<br>(94 - 276)        | 2<br>(0 - 6)     | 4<br>(2 - 7)      | 68<br>(42 - 120)   | 59<br>(32 - 112)         | 20<br>(11 - 37)    |
| Ischemic heart disease               | 943<br>(612 - 1,264)     | 0<br>(0 - 1)     | 1<br>(0 - 1)      | 152<br>(90 - 223)  | 526<br>(333 - 724)       | 263<br>(178 - 351) |
| Cerebrovascular disease              | 932<br>(641 - 1,254)     | 3<br>(1 - 5)     | 2<br>(1 - 3)      | 135<br>(85 - 195)  | 479<br>(313 - 667)       | 313<br>(222 - 409) |
| Ischemic stroke                      | 376<br>(170 - 631)       | 0<br>(0 - 1)     | 0<br>(0 - 0)      | 22<br>(8 - 42)     | 172<br>(68 - 310)        | 181<br>(87 - 286)  |
| Hemorrhagic stroke                   | 557<br>(330 - 834)       | 3<br>(1 - 5)     | 2<br>(1 - 3)      | 114<br>(71 - 163)  | 306<br>(176 - 466)       | 132<br>(57 - 226)  |
| Hypertensive heart disease           | 235<br>(113 - 469)       | 0<br>(0 - 1)     | 0<br>(0 - 1)      | 39<br>(18 - 72)    | 117<br>(54 - 231)        | 78<br>(35 - 173)   |
| Cardiomyopathy and myocarditis       | 159<br>(78 - 239)        | 11<br>(3 - 24)   | 3<br>(1 - 6)      | 60<br>(27 - 96)    | 64<br>(30 - 103)         | 21<br>(11 - 36)    |
| Atrial fibrillation and flutter      | 1<br>(0 - 2)             | --               | --                | 0<br>(0 - 0)       | 0<br>(0 - 1)             | 0<br>(0 - 1)       |
| Aortic aneurysm                      | 36<br>(15 - 63)          | --               | --                | 7<br>(3 - 12)      | 18<br>(8 - 33)           | 11<br>(5 - 20)     |
| Peripheral vascular disease          | 1<br>(0 - 1)             | --               | --                | 0<br>(0 - 0)       | 0<br>(0 - 1)             | 0<br>(0 - 1)       |
| Endocarditis                         | 59<br>(28 - 101)         | 2<br>(1 - 5)     | 1<br>(0 - 2)      | 22<br>(9 - 37)     | 23<br>(11 - 43)          | 11<br>(5 - 19)     |

Web Table 31- Eritrea deaths with 95% UI by age, sex, and cause in 2013

| Cause                                               | Males, All Ages    | Males, 0-4 Years | Males, 5-14 Years | Males, 15-49 Years | Males, 50-69 Years | Males, 70-80 Years |
|-----------------------------------------------------|--------------------|------------------|-------------------|--------------------|--------------------|--------------------|
| Other cardiovascular and circulatory diseases       | 370<br>(221 - 667) | 10<br>(4 - 20)   | 4<br>(2 - 6)      | 108<br>(65 - 178)  | 162<br>(87 - 305)  | 86<br>(50 - 185)   |
| Chronic respiratory diseases                        | 444<br>(328 - 590) | 15<br>(5 - 30)   | 4<br>(2 - 6)      | 81<br>(58 - 110)   | 198<br>(132 - 279) | 147<br>(108 - 196) |
| Chronic obstructive pulmonary disease               | 258<br>(188 - 355) | 3<br>(1 - 7)     | 2<br>(1 - 3)      | 32<br>(22 - 46)    | 123<br>(82 - 185)  | 98<br>(70 - 136)   |
| Pneumoconiosis                                      | 55<br>(31 - 89)    | 1<br>(0 - 2)     | 0<br>(0 - 1)      | 16<br>(9 - 25)     | 26<br>(14 - 45)    | 12<br>(6 - 20)     |
| Silicosis                                           | 14<br>(5 - 29)     | 0<br>(0 - 1)     | 0<br>(0 - 0)      | 3<br>(1 - 7)       | 6<br>(2 - 14)      | 4<br>(1 - 8)       |
| Asbestosis                                          | 7<br>(4 - 12)      | 0<br>(0 - 0)     | 0<br>(0 - 0)      | 2<br>(1 - 3)       | 4<br>(2 - 7)       | 1<br>(1 - 2)       |
| Coal workers pneumoconiosis                         | 8<br>(4 - 15)      | 0<br>(0 - 0)     | 0<br>(0 - 0)      | 2<br>(1 - 4)       | 4<br>(2 - 8)       | 2<br>(1 - 3)       |
| Other pneumoconiosis                                | 26<br>(14 - 44)    | 0<br>(0 - 1)     | 0<br>(0 - 0)      | 8<br>(4 - 13)      | 12<br>(5 - 21)     | 6<br>(3 - 10)      |
| Asthma                                              | 65<br>(41 - 93)    | 1<br>(0 - 2)     | 0<br>(0 - 1)      | 14<br>(9 - 22)     | 27<br>(15 - 42)    | 22<br>(13 - 35)    |
| Interstitial lung disease and pulmonary sarcoidosis | 29<br>(6 - 60)     | 0<br>(0 - 2)     | 0<br>(0 - 0)      | 4<br>(1 - 11)      | 14<br>(3 - 32)     | 10<br>(2 - 21)     |
| Other chronic respiratory diseases                  | 38<br>(22 - 58)    | 10<br>(4 - 20)   | 1<br>(1 - 2)      | 14<br>(7 - 23)     | 8<br>(3 - 14)      | 5<br>(2 - 8)       |
| Cirrhosis                                           | 385<br>(223 - 581) | 4<br>(1 - 11)    | 3<br>(1 - 5)      | 145<br>(84 - 226)  | 189<br>(104 - 295) | 43<br>(25 - 67)    |
| Cirrhosis due to hepatitis B                        | 85<br>(23 - 172)   | 0<br>(0 - 0)     | 0<br>(0 - 1)      | 31<br>(10 - 64)    | 43<br>(10 - 94)    | 10<br>(2 - 23)     |
| Cirrhosis due to hepatitis C                        | 73<br>(21 - 148)   | 0<br>(0 - 2)     | 0<br>(0 - 1)      | 23<br>(5 - 50)     | 38<br>(10 - 78)    | 11<br>(3 - 22)     |
| Cirrhosis due to alcohol use                        | 174<br>(102 - 267) | --               | --                | 63<br>(37 - 100)   | 91<br>(50 - 147)   | 20<br>(11 - 32)    |
| Cirrhosis due to other causes                       | 53<br>(28 - 85)    | 4<br>(1 - 9)     | 2<br>(1 - 3)      | 28<br>(14 - 47)    | 17<br>(7 - 31)     | 3<br>(1 - 4)       |
| Digestive diseases                                  | 555<br>(385 - 758) | 18<br>(4 - 42)   | 14<br>(7 - 22)    | 229<br>(151 - 328) | 207<br>(131 - 296) | 88<br>(61 - 120)   |
| Peptic ulcer disease                                | 171<br>(104 - 264) | 2<br>(0 - 5)     | 1<br>(1 - 3)      | 60<br>(33 - 102)   | 75<br>(42 - 120)   | 33<br>(19 - 51)    |
| Gastritis and duodenitis                            | 20<br>(8 - 51)     | 1<br>(0 - 3)     | 1<br>(0 - 2)      | 8<br>(3 - 20)      | 7<br>(2 - 19)      | 3<br>(1 - 11)      |
| Appendicitis                                        | 39<br>(19 - 66)    | 1<br>(0 - 4)     | 2<br>(1 - 4)      | 19<br>(9 - 33)     | 13<br>(5 - 25)     | 5<br>(2 - 9)       |
| Paralytic ileus and intestinal obstruction          | 178<br>(91 - 272)  | 4<br>(1 - 13)    | 6<br>(3 - 10)     | 82<br>(38 - 134)   | 61<br>(27 - 102)   | 24<br>(12 - 40)    |
| Inguinal, femoral, and abdominal hernia             | 10<br>(4 - 16)     | 0<br>(0 - 0)     | 0<br>(0 - 1)      | 4<br>(1 - 7)       | 4<br>(2 - 6)       | 2<br>(1 - 4)       |
| Inflammatory bowel disease                          | 27<br>(7 - 50)     | 4<br>(1 - 11)    | 1<br>(0 - 2)      | 11<br>(3 - 21)     | 7<br>(2 - 17)      | 3<br>(1 - 9)       |
| Vascular intestinal disorders                       | 4<br>(1 - 9)       | 0<br>(0 - 0)     | 0<br>(0 - 0)      | 1<br>(0 - 3)       | 2<br>(0 - 4)       | 1<br>(0 - 2)       |
| Gallbladder and biliary diseases                    | 21<br>(12 - 32)    | 0<br>(0 - 1)     | 0<br>(0 - 1)      | 6<br>(3 - 10)      | 9<br>(5 - 15)      | 6<br>(3 - 10)      |
| Pancreatitis                                        | 29<br>(10 - 53)    | 0<br>(0 - 1)     | 0<br>(0 - 0)      | 17<br>(6 - 32)     | 9<br>(3 - 19)      | 2<br>(1 - 5)       |
| Other digestive diseases                            | 57<br>(31 - 110)   | 4<br>(1 - 12)    | 2<br>(1 - 3)      | 21<br>(11 - 45)    | 21<br>(10 - 40)    | 9<br>(4 - 18)      |
| Neurological disorders                              | 210<br>(151 - 287) | 16<br>(5 - 38)   | 15<br>(7 - 29)    | 98<br>(63 - 151)   | 25<br>(17 - 35)    | 56<br>(42 - 72)    |
| Alzheimer disease and other dementias               | 58<br>(43 - 74)    | --               | --                | 0<br>(0 - 0)       | 11<br>(7 - 16)     | 46<br>(34 - 61)    |
| Parkinson disease                                   | 1<br>(1 - 2)       | --               | --                | 0<br>(0 - 0)       | 0<br>(0 - 0)       | 1<br>(0 - 2)       |
| Epilepsy                                            | 130<br>(84 - 198)  | 13<br>(3 - 33)   | 14<br>(6 - 28)    | 87<br>(54 - 139)   | 9<br>(5 - 15)      | 7<br>(4 - 13)      |
| Multiple sclerosis                                  | 1<br>(0 - 1)       | --               | --                | 0<br>(0 - 1)       | 0<br>(0 - 0)       | 0<br>(0 - 0)       |
| Other neurological disorders                        | 20<br>(14 - 28)    | 3<br>(1 - 8)     | 1<br>(1 - 2)      | 10<br>(7 - 14)     | 4<br>(3 - 7)       | 1<br>(1 - 2)       |
| Mental and substance use disorders                  | 218<br>(135 - 354) | 5<br>(1 - 16)    | 0<br>(0 - 0)      | 159<br>(98 - 257)  | 50<br>(27 - 89)    | 5<br>(3 - 9)       |
| Schizophrenia                                       | 4<br>(1 - 13)      | --               | --                | 3<br>(1 - 8)       | 1<br>(0 - 4)       | 0<br>(0 - 1)       |
| Alcohol use disorders                               | 149<br>(85 - 273)  | --               | --                | 101<br>(55 - 189)  | 44<br>(23 - 83)    | 4<br>(2 - 8)       |
| Drug use disorders                                  | 65<br>(35 - 92)    | 5<br>(1 - 16)    | --                | 55<br>(31 - 81)    | 4<br>(2 - 7)       | 1<br>(0 - 1)       |
| Opioid use disorders                                | 7<br>(4 - 10)      | 1<br>(0 - 2)     | --                | 6<br>(3 - 9)       | 0<br>(0 - 1)       | 0<br>(0 - 0)       |
| Cocaine use disorders                               | 0<br>(0 - 0)       | 0<br>(0 - 0)     | --                | 0<br>(0 - 0)       | 0<br>(0 - 0)       | 0<br>(0 - 0)       |
| Amphetamine use disorders                           | 0<br>(0 - 0)       | 0<br>(0 - 0)     | --                | 0<br>(0 - 0)       | 0<br>(0 - 0)       | 0<br>(0 - 0)       |

Web Table 31- Eritrea deaths with 95% UI by age, sex, and cause in 2013

| Cause                                               | Males, All Ages      | Males, 0-4 Years   | Males, 5-14 Years | Males, 15-49 Years | Males, 50-69 Years | Males, 70-80 Years |
|-----------------------------------------------------|----------------------|--------------------|-------------------|--------------------|--------------------|--------------------|
| Other drug use disorders                            | 58<br>(31 - 82)      | 4<br>(1 - 14)      | --                | 49<br>(28 - 72)    | 4<br>(2 - 6)       | 1<br>(0 - 1)       |
| Eating disorders                                    | 0<br>(0 - 0)         | --                 | 0<br>(0 - 0)      | 0<br>(0 - 0)       | --                 | --                 |
| Anorexia nervosa                                    | 0<br>(0 - 0)         | --                 | 0<br>(0 - 0)      | 0<br>(0 - 0)       | --                 | --                 |
| Diabetes, urogenital, blood, and endocrine diseases | 819<br>(620 - 1,026) | 59<br>(26 - 107)   | 19<br>(10 - 34)   | 269<br>(200 - 349) | 316<br>(219 - 417) | 156<br>(119 - 200) |
| Diabetes mellitus                                   | 345<br>(251 - 443)   | 3<br>(1 - 5)       | 1<br>(1 - 2)      | 66<br>(47 - 91)    | 185<br>(125 - 251) | 90<br>(64 - 121)   |
| Acute glomerulonephritis                            | 9<br>(3 - 15)        | 1<br>(0 - 3)       | 0<br>(0 - 1)      | 1<br>(0 - 2)       | 5<br>(1 - 10)      | 1<br>(0 - 3)       |
| Chronic kidney disease                              | 154<br>(106 - 210)   | 9<br>(3 - 19)      | 3<br>(2 - 6)      | 74<br>(46 - 107)   | 42<br>(26 - 62)    | 26<br>(17 - 37)    |
| Chronic kidney disease due to diabetes mellitus     | 1<br>(0 - 2)         | 0<br>(0 - 0)       | 0<br>(0 - 0)      | 0<br>(0 - 1)       | 0<br>(0 - 1)       | 0<br>(0 - 0)       |
| Chronic kidney disease due to hypertension          | 53<br>(28 - 85)      | 1<br>(0 - 3)       | 0<br>(0 - 1)      | 18<br>(8 - 30)     | 21<br>(10 - 35)    | 13<br>(7 - 22)     |
| Chronic kidney disease due to glomerulonephritis    | 51<br>(32 - 77)      | 5<br>(2 - 11)      | 2<br>(1 - 3)      | 27<br>(16 - 41)    | 11<br>(5 - 19)     | 6<br>(2 - 10)      |
| Chronic kidney disease due to other causes          | 49<br>(24 - 84)      | 2<br>(0 - 7)       | 1<br>(0 - 2)      | 29<br>(12 - 50)    | 10<br>(4 - 19)     | 7<br>(3 - 14)      |
| Urinary diseases and male infertility               | 161<br>(103 - 218)   | 7<br>(2 - 16)      | 2<br>(1 - 4)      | 63<br>(36 - 89)    | 60<br>(34 - 90)    | 28<br>(18 - 41)    |
| Interstitial nephritis and urinary tract infections | 113<br>(68 - 158)    | 5<br>(2 - 13)      | 2<br>(1 - 3)      | 43<br>(23 - 63)    | 42<br>(22 - 66)    | 21<br>(12 - 32)    |
| Urolithiasis                                        | 5<br>(2 - 11)        | --                 | 0<br>(0 - 0)      | 2<br>(1 - 5)       | 2<br>(1 - 5)       | 1<br>(0 - 2)       |
| Other urinary diseases                              | 44<br>(24 - 71)      | 2<br>(0 - 4)       | 1<br>(0 - 1)      | 18<br>(9 - 29)     | 17<br>(7 - 30)     | 7<br>(3 - 13)      |
| Gynecological diseases                              | --                   | --                 | --                | --                 | --                 | --                 |
| Uterine fibroids                                    | --                   | --                 | --                | --                 | --                 | --                 |
| Polycystic ovarian syndrome                         | --                   | --                 | --                | --                 | --                 | --                 |
| Endometriosis                                       | --                   | --                 | --                | --                 | --                 | --                 |
| Genital prolapse                                    | --                   | --                 | --                | --                 | --                 | --                 |
| Other gynecological diseases                        | --                   | --                 | --                | --                 | --                 | --                 |
| Hemoglobinopathies and hemolytic anemias            | 72<br>(30 - 171)     | 25<br>(8 - 57)     | 8<br>(3 - 22)     | 29<br>(12 - 77)    | 7<br>(3 - 22)      | 3<br>(1 - 10)      |
| Thalassemias                                        | 17<br>(7 - 36)       | 10<br>(3 - 22)     | 2<br>(1 - 6)      | 5<br>(2 - 13)      | 0<br>(0 - 0)       | 0<br>(0 - 0)       |
| Sickle cell disorders                               | 6<br>(3 - 14)        | 3<br>(1 - 6)       | 1<br>(0 - 3)      | 2<br>(1 - 6)       | 0<br>(0 - 1)       | 0<br>(0 - 0)       |
| G6PD deficiency                                     | 11<br>(5 - 25)       | 4<br>(1 - 10)      | 2<br>(1 - 4)      | 5<br>(2 - 12)      | 1<br>(0 - 3)       | 0<br>(0 - 0)       |
| Other hemoglobinopathies and hemolytic anemias      | 38<br>(16 - 100)     | 9<br>(3 - 21)      | 4<br>(1 - 9)      | 17<br>(7 - 45)     | 6<br>(2 - 18)      | 3<br>(1 - 10)      |
| Endocrine, metabolic, blood, and immune disorders   | 78<br>(41 - 114)     | 14<br>(6 - 27)     | 3<br>(1 - 6)      | 37<br>(17 - 58)    | 17<br>(8 - 27)     | 8<br>(3 - 12)      |
| Musculoskeletal disorders                           | 35<br>(16 - 51)      | --                 | 3<br>(1 - 4)      | 18<br>(9 - 26)     | 10<br>(4 - 17)     | 4<br>(2 - 7)       |
| Rheumatoid arthritis                                | 7<br>(2 - 12)        | --                 | 0<br>(0 - 1)      | 2<br>(1 - 4)       | 3<br>(1 - 5)       | 1<br>(0 - 3)       |
| Other musculoskeletal disorders                     | 28<br>(14 - 40)      | --                 | 2<br>(1 - 3)      | 16<br>(8 - 23)     | 8<br>(3 - 12)      | 2<br>(1 - 4)       |
| Other non-communicable diseases                     | 528<br>(318 - 912)   | 416<br>(214 - 782) | 19<br>(9 - 30)    | 54<br>(39 - 75)    | 24<br>(15 - 36)    | 15<br>(9 - 21)     |
| Congenital anomalies                                | 449<br>(253 - 817)   | 398<br>(205 - 763) | 17<br>(9 - 28)    | 29<br>(19 - 43)    | 4<br>(2 - 5)       | 2<br>(1 - 2)       |
| Neural tube defects                                 | 104<br>(24 - 260)    | 97<br>(21 - 247)   | 2<br>(0 - 6)      | 4<br>(1 - 11)      | 0<br>(0 - 1)       | 0<br>(0 - 0)       |
| Congenital heart anomalies                          | 185<br>(92 - 364)    | 160<br>(70 - 335)  | 9<br>(4 - 16)     | 14<br>(8 - 21)     | 1<br>(1 - 2)       | 1<br>(0 - 1)       |
| Cleft lip and cleft palate                          | 2<br>(0 - 5)         | 2<br>(0 - 5)       | --                | --                 | --                 | --                 |
| Down syndrome                                       | 35<br>(10 - 92)      | 28<br>(6 - 84)     | 2<br>(1 - 4)      | 5<br>(2 - 9)       | 1<br>(0 - 1)       | 0<br>(0 - 0)       |
| Chromosomal unbalanced rearrangements               | 12<br>(3 - 36)       | 10<br>(3 - 34)     | 0<br>(0 - 1)      | 1<br>(0 - 1)       | 0<br>(0 - 0)       | 0<br>(0 - 0)       |
| Other congenital anomalies                          | 112<br>(36 - 340)    | 100<br>(29 - 316)  | 4<br>(1 - 9)      | 6<br>(2 - 12)      | 1<br>(1 - 3)       | 1<br>(0 - 1)       |
| Skin and subcutaneous diseases                      | 72<br>(51 - 102)     | 13<br>(4 - 30)     | 1<br>(1 - 3)      | 25<br>(16 - 37)    | 20<br>(12 - 31)    | 13<br>(8 - 20)     |
| Cellulitis                                          | 41<br>(13 - 79)      | 7<br>(1 - 23)      | 1<br>(0 - 2)      | 14<br>(4 - 29)     | 12<br>(4 - 24)     | 7<br>(2 - 15)      |

Web Table 31- Eritrea deaths with 95% UI by age, sex, and cause in 2013

| Cause                                           | Males, All Ages          | Males, 0-4 Years  | Males, 5-14 Years | Males, 15-49 Years       | Males, 50-69 Years | Males, 70-80 Years |
|-------------------------------------------------|--------------------------|-------------------|-------------------|--------------------------|--------------------|--------------------|
| Pyoderma                                        | 27<br>(6 - 56)           | 5<br>(1 - 14)     | 0<br>(0 - 1)      | 9<br>(2 - 20)            | 8<br>(1 - 18)      | 5<br>(1 - 11)      |
| Decubitus ulcer                                 | 4<br>(1 - 11)            | 0<br>(0 - 1)      | 0<br>(0 - 0)      | 1<br>(0 - 4)             | 1<br>(0 - 3)       | 1<br>(0 - 3)       |
| Other skin and subcutaneous diseases            | 1<br>(0 - 2)             | 0<br>(0 - 1)      | 0<br>(0 - 0)      | 0<br>(0 - 1)             | 0<br>(0 - 0)       | 0<br>(0 - 0)       |
| Sudden infant death syndrome                    | 6<br>(1 - 19)            | 6<br>(1 - 19)     | --                | --                       | --                 | --                 |
| Injuries                                        | 2,055<br>(1,596 - 2,581) | 198<br>(78 - 363) | 113<br>(69 - 159) | 1,339<br>(1,045 - 1,721) | 313<br>(200 - 421) | 93<br>(61 - 124)   |
| Transport injuries                              | 778<br>(599 - 1,000)     | 46<br>(15 - 99)   | 44<br>(24 - 67)   | 508<br>(381 - 674)       | 139<br>(91 - 192)  | 40<br>(25 - 56)    |
| Road injuries                                   | 749<br>(577 - 963)       | 41<br>(13 - 90)   | 41<br>(22 - 62)   | 495<br>(372 - 656)       | 133<br>(87 - 184)  | 38<br>(24 - 53)    |
| Pedestrian road injuries                        | 345<br>(235 - 481)       | 24<br>(7 - 52)    | 22<br>(11 - 36)   | 216<br>(140 - 310)       | 64<br>(39 - 94)    | 20<br>(12 - 30)    |
| Cyclist road injuries                           | 41<br>(23 - 64)          | 2<br>(0 - 6)      | 3<br>(1 - 6)      | 24<br>(12 - 39)          | 9<br>(5 - 14)      | 3<br>(2 - 5)       |
| Motorcyclist road injuries                      | 60<br>(32 - 98)          | 2<br>(1 - 4)      | 2<br>(1 - 3)      | 47<br>(24 - 79)          | 8<br>(4 - 14)      | 2<br>(1 - 4)       |
| Motor vehicle road injuries                     | 299<br>(201 - 429)       | 13<br>(4 - 29)    | 14<br>(6 - 24)    | 208<br>(135 - 309)       | 52<br>(31 - 78)    | 13<br>(7 - 20)     |
| Other road injuries                             | 5<br>(2 - 10)            | 1<br>(0 - 2)      | 1<br>(0 - 1)      | 2<br>(1 - 6)             | 1<br>(0 - 2)       | 0<br>(0 - 1)       |
| Other transport injuries                        | 29<br>(19 - 44)          | 5<br>(1 - 11)     | 3<br>(2 - 6)      | 13<br>(7 - 25)           | 6<br>(3 - 9)       | 2<br>(1 - 4)       |
| Unintentional injuries                          | 656<br>(491 - 852)       | 144<br>(54 - 267) | 59<br>(34 - 89)   | 312<br>(236 - 407)       | 103<br>(66 - 145)  | 38<br>(24 - 56)    |
| Falls                                           | 73<br>(36 - 106)         | 6<br>(2 - 14)     | 6<br>(2 - 13)     | 39<br>(19 - 62)          | 15<br>(6 - 24)     | 7<br>(3 - 12)      |
| Drowning                                        | 184<br>(123 - 273)       | 39<br>(11 - 86)   | 26<br>(13 - 48)   | 101<br>(67 - 152)        | 14<br>(8 - 22)     | 3<br>(2 - 6)       |
| Fire, heat, and hot substances                  | 90<br>(56 - 145)         | 34<br>(9 - 83)    | 6<br>(3 - 13)     | 30<br>(19 - 49)          | 15<br>(8 - 24)     | 6<br>(3 - 9)       |
| Poisonings                                      | 42<br>(28 - 72)          | 6<br>(2 - 16)     | 1<br>(1 - 3)      | 28<br>(18 - 48)          | 6<br>(3 - 10)      | 1<br>(1 - 2)       |
| Exposure to mechanical forces                   | 108<br>(77 - 145)        | 21<br>(8 - 47)    | 8<br>(4 - 14)     | 53<br>(36 - 79)          | 23<br>(12 - 36)    | 3<br>(2 - 4)       |
| Unintentional firearm injuries                  | 24<br>(15 - 40)          | 1<br>(1 - 3)      | 1<br>(0 - 1)      | 19<br>(11 - 33)          | 2<br>(1 - 4)       | 1<br>(0 - 1)       |
| Unintentional suffocation                       | 20<br>(6 - 38)           | 10<br>(2 - 26)    | 2<br>(0 - 4)      | 5<br>(2 - 9)             | 3<br>(1 - 6)       | 0<br>(0 - 1)       |
| Other exposure to mechanical forces             | 64<br>(45 - 91)          | 10<br>(4 - 23)    | 6<br>(3 - 11)     | 29<br>(19 - 47)          | 17<br>(8 - 29)     | 2<br>(1 - 3)       |
| Adverse effects of medical treatment            | 75<br>(47 - 108)         | 20<br>(7 - 48)    | 2<br>(1 - 4)      | 22<br>(14 - 37)          | 18<br>(9 - 30)     | 12<br>(5 - 23)     |
| Animal contact                                  | 36<br>(20 - 57)          | 5<br>(1 - 13)     | 4<br>(2 - 9)      | 16<br>(8 - 27)           | 8<br>(3 - 13)      | 3<br>(1 - 5)       |
| Venomous animal contact                         | 16<br>(9 - 25)           | 2<br>(0 - 5)      | 1<br>(0 - 2)      | 7<br>(4 - 13)            | 4<br>(2 - 7)       | 2<br>(0 - 4)       |
| Non-venomous animal contact                     | 20<br>(10 - 33)          | 4<br>(1 - 9)      | 3<br>(1 - 7)      | 9<br>(4 - 16)            | 3<br>(2 - 6)       | 1<br>(0 - 2)       |
| Foreign body                                    | 17<br>(9 - 32)           | 9<br>(3 - 19)     | 1<br>(1 - 2)      | 4<br>(2 - 7)             | 2<br>(1 - 3)       | 2<br>(1 - 2)       |
| Pulmonary aspiration and foreign body in airway | 15<br>(8 - 29)           | 8<br>(3 - 19)     | 1<br>(0 - 2)      | 3<br>(2 - 6)             | 1<br>(1 - 2)       | 1<br>(1 - 2)       |
| Foreign body in other body part                 | 2<br>(1 - 3)             | 0<br>(0 - 1)      | 0<br>(0 - 0)      | 0<br>(0 - 1)             | 1<br>(0 - 1)       | 0<br>(0 - 0)       |
| Other unintentional injuries                    | 31<br>(22 - 42)          | 4<br>(1 - 8)      | 3<br>(2 - 5)      | 19<br>(13 - 27)          | 4<br>(2 - 6)       | 1<br>(1 - 2)       |
| Self-harm and interpersonal violence            | 621<br>(362 - 900)       | 9<br>(3 - 22)     | 9<br>(4 - 18)     | 518<br>(306 - 771)       | 71<br>(34 - 105)   | 14<br>(5 - 23)     |
| Self-harm                                       | 298<br>(141 - 447)       | --                | 5<br>(1 - 12)     | 231<br>(108 - 369)       | 50<br>(20 - 78)    | 13<br>(4 - 22)     |
| Interpersonal violence                          | 323<br>(168 - 523)       | 9<br>(3 - 22)     | 5<br>(2 - 10)     | 287<br>(153 - 471)       | 21<br>(9 - 37)     | 2<br>(1 - 3)       |
| Assault by firearm                              | 138<br>(69 - 253)        | 2<br>(0 - 6)      | 1<br>(0 - 3)      | 127<br>(63 - 235)        | 7<br>(3 - 14)      | 0<br>(0 - 1)       |
| Assault by sharp object                         | 75<br>(35 - 146)         | 2<br>(0 - 5)      | 1<br>(0 - 2)      | 65<br>(30 - 131)         | 6<br>(2 - 11)      | 0<br>(0 - 1)       |
| Assault by other means                          | 110<br>(42 - 180)        | 5<br>(2 - 13)     | 2<br>(1 - 5)      | 94<br>(34 - 156)         | 8<br>(3 - 14)      | 1<br>(0 - 2)       |

Web Table 31- Eritrea deaths with 95% UI by age, sex, and cause in 2013

| Cause                                                             | Females, All Ages           | Females, 0-4 Years       | Females, 5-14 Years | Females, 15-49 Years     | Females, 50-69 Years     | Females, 70-80 Years     |
|-------------------------------------------------------------------|-----------------------------|--------------------------|---------------------|--------------------------|--------------------------|--------------------------|
| All causes                                                        | 21,989<br>(19,078 - 25,640) | 5,838<br>(4,315 - 8,115) | 685<br>(563 - 883)  | 5,489<br>(4,602 - 6,506) | 5,475<br>(4,519 - 6,619) | 4,502<br>(3,891 - 5,134) |
| Communicable, maternal, neonatal, and nutritional diseases        | 13,349<br>(11,479 - 15,794) | 5,233<br>(3,806 - 7,294) | 524<br>(407 - 710)  | 3,925<br>(3,294 - 4,638) | 2,088<br>(1,654 - 2,568) | 1,579<br>(1,197 - 1,931) |
| HIV/AIDS and tuberculosis                                         | 2,475<br>(1,869 - 3,303)    | 94<br>(61 - 142)         | 103<br>(78 - 136)   | 1,399<br>(1,026 - 1,880) | 664<br>(450 - 928)       | 214<br>(137 - 332)       |
| Tuberculosis                                                      | 1,275<br>(768 - 1,967)      | 44<br>(17 - 89)          | 15<br>(7 - 31)      | 516<br>(262 - 908)       | 498<br>(297 - 766)       | 202<br>(125 - 323)       |
| HIV/AIDS                                                          | 1,200<br>(861 - 1,695)      | 50<br>(33 - 72)          | 88<br>(64 - 120)    | 884<br>(613 - 1,289)     | 167<br>(98 - 284)        | 12<br>(6 - 19)           |
| HIV/AIDS resulting in mycobacterial infection                     | 66<br>(43 - 97)             | 3<br>(2 - 4)             | 4<br>(3 - 6)        | 49<br>(31 - 73)          | 10<br>(6 - 17)           | 1<br>(0 - 1)             |
| HIV/AIDS resulting in other diseases                              | 1,134<br>(809 - 1,588)      | 48<br>(32 - 68)          | 84<br>(61 - 114)    | 835<br>(577 - 1,220)     | 157<br>(92 - 269)        | 11<br>(6 - 18)           |
| Diarrhea, lower respiratory, and other common infectious diseases | 5,915<br>(4,418 - 7,649)    | 2,459<br>(1,430 - 3,967) | 274<br>(176 - 488)  | 879<br>(595 - 1,240)     | 1,165<br>(827 - 1,591)   | 1,137<br>(791 - 1,483)   |
| Diarrheal diseases                                                | 2,516<br>(1,718 - 3,497)    | 766<br>(268 - 1,463)     | 73<br>(33 - 128)    | 465<br>(295 - 701)       | 635<br>(377 - 979)       | 578<br>(351 - 862)       |
| Intestinal infectious diseases                                    | 124<br>(58 - 226)           | 45<br>(12 - 95)          | 34<br>(12 - 64)     | 38<br>(16 - 74)          | 6<br>(2 - 12)            | 2<br>(1 - 4)             |
| Typhoid fever                                                     | 94<br>(41 - 179)            | 32<br>(9 - 73)           | 27<br>(10 - 52)     | 30<br>(12 - 59)          | 4<br>(2 - 9)             | 1<br>(0 - 2)             |
| Paratyphoid fever                                                 | 21<br>(9 - 41)              | 8<br>(2 - 19)            | 6<br>(2 - 13)       | 6<br>(2 - 13)            | 1<br>(0 - 2)             | 0<br>(0 - 0)             |
| Other intestinal infectious diseases                              | 10<br>(3 - 19)              | 5<br>(1 - 13)            | 1<br>(0 - 4)        | 2<br>(0 - 8)             | 1<br>(0 - 4)             | 0<br>(0 - 2)             |
| Lower respiratory infections                                      | 2,031<br>(1,406 - 2,731)    | 827<br>(387 - 1,422)     | 48<br>(22 - 82)     | 214<br>(142 - 308)       | 423<br>(287 - 615)       | 519<br>(348 - 706)       |
| Upper respiratory infections                                      | 4<br>(1 - 8)                | 1<br>(0 - 4)             | 0<br>(0 - 0)        | 1<br>(0 - 3)             | 1<br>(0 - 3)             | 1<br>(0 - 2)             |
| Otitis media                                                      | 3<br>(2 - 4)                | 1<br>(0 - 2)             | 0<br>(0 - 0)        | 0<br>(0 - 0)             | 1<br>(0 - 1)             | 1<br>(0 - 1)             |
| Meningitis                                                        | 481<br>(296 - 781)          | 194<br>(68 - 477)        | 34<br>(15 - 61)     | 127<br>(77 - 196)        | 91<br>(51 - 147)         | 35<br>(18 - 54)          |
| Pneumococcal meningitis                                           | 121<br>(72 - 190)           | 40<br>(12 - 97)          | 11<br>(4 - 21)      | 37<br>(20 - 64)          | 23<br>(10 - 42)          | 9<br>(4 - 16)            |
| H influenzae type B meningitis                                    | 92<br>(49 - 171)            | 57<br>(18 - 137)         | 7<br>(3 - 13)       | 15<br>(7 - 29)           | 9<br>(4 - 18)            | 3<br>(1 - 6)             |
| Meningococcal meningitis                                          | 78<br>(42 - 121)            | 21<br>(6 - 53)           | 4<br>(1 - 7)        | 24<br>(8 - 46)           | 21<br>(8 - 40)           | 9<br>(4 - 15)            |
| Other meningitis                                                  | 190<br>(115 - 332)          | 76<br>(25 - 210)         | 13<br>(5 - 25)      | 51<br>(27 - 86)          | 37<br>(18 - 62)          | 14<br>(6 - 24)           |
| Encephalitis                                                      | 14<br>(8 - 23)              | 7<br>(2 - 14)            | 1<br>(0 - 2)        | 3<br>(1 - 5)             | 2<br>(1 - 4)             | 1<br>(0 - 2)             |
| Diphtheria                                                        | 1<br>(0 - 6)                | 1<br>(0 - 6)             | 0<br>(0 - 1)        | 0<br>(0 - 0)             | 0<br>(0 - 0)             | --                       |
| Whooping cough                                                    | 13<br>(0 - 70)              | 13<br>(0 - 67)           | 1<br>(0 - 3)        | 0<br>(0 - 1)             | 0<br>(0 - 0)             | --                       |
| Tetanus                                                           | 41<br>(23 - 69)             | 22<br>(8 - 49)           | 2<br>(1 - 3)        | 11<br>(5 - 17)           | 6<br>(3 - 10)            | 1<br>(1 - 2)             |
| Measles                                                           | 683<br>(26 - 2,809)         | 581<br>(23 - 2,334)      | 81<br>(3 - 377)     | 20<br>(0 - 118)          | 0<br>(0 - 3)             | --                       |
| Varicella and herpes zoster                                       | 3<br>(1 - 8)                | 1<br>(0 - 5)             | 0<br>(0 - 1)        | 1<br>(0 - 2)             | 0<br>(0 - 1)             | 1<br>(0 - 3)             |
| Neglected tropical diseases and malaria                           | 1,108<br>(554 - 2,034)      | 788<br>(259 - 1,756)     | 92<br>(34 - 180)    | 164<br>(75 - 292)        | 47<br>(16 - 138)         | 18<br>(6 - 61)           |
| Malaria                                                           | 821<br>(264 - 1,770)        | 723<br>(197 - 1,712)     | 23<br>(1 - 100)     | 38<br>(3 - 151)          | 25<br>(2 - 109)          | 12<br>(1 - 55)           |
| Leishmaniasis                                                     | 245<br>(106 - 395)          | 55<br>(12 - 131)         | 64<br>(22 - 119)    | 110<br>(44 - 200)        | 14<br>(3 - 30)           | 2<br>(1 - 4)             |
| Visceral leishmaniasis                                            | 245<br>(106 - 395)          | 55<br>(12 - 131)         | 64<br>(22 - 119)    | 110<br>(44 - 200)        | 14<br>(3 - 30)           | 2<br>(1 - 4)             |
| Schistosomiasis                                                   | 11<br>(7 - 16)              | 0<br>(0 - 0)             | 0<br>(0 - 0)        | 4<br>(2 - 7)             | 4<br>(2 - 7)             | 2<br>(1 - 3)             |
| Cysticercosis                                                     | 1<br>(0 - 3)                | 0<br>(0 - 0)             | 0<br>(0 - 0)        | 1<br>(0 - 2)             | 0<br>(0 - 1)             | 0<br>(0 - 0)             |
| Cystic echinococcosis                                             | 2<br>(1 - 2)                | 0<br>(0 - 0)             | 0<br>(0 - 0)        | 1<br>(1 - 1)             | 0<br>(0 - 0)             | 0<br>(0 - 0)             |
| Dengue                                                            | 0<br>(0 - 0)                | 0<br>(0 - 0)             | 0<br>(0 - 0)        | 0<br>(0 - 0)             | 0<br>(0 - 0)             | 0<br>(0 - 0)             |
| Yellow fever                                                      | 0<br>(0 - 0)                | 0<br>(0 - 0)             | 0<br>(0 - 0)        | 0<br>(0 - 0)             | 0<br>(0 - 0)             | 0<br>(0 - 0)             |
| Rabies                                                            | 18<br>(7 - 34)              | 3<br>(1 - 8)             | 3<br>(1 - 8)        | 9<br>(3 - 18)            | 2<br>(1 - 4)             | 0<br>(0 - 1)             |
| Intestinal nematode infections                                    | 6<br>(1 - 19)               | 5<br>(1 - 16)            | 1<br>(0 - 4)        | 1<br>(0 - 4)             | 0<br>(0 - 3)             | 0<br>(0 - 2)             |
| Ascariasis                                                        | 6<br>(1 - 19)               | 5<br>(1 - 16)            | 1<br>(0 - 4)        | 1<br>(0 - 4)             | 0<br>(0 - 3)             | 0<br>(0 - 2)             |
| Other neglected tropical diseases                                 | 5<br>(3 - 8)                | 1<br>(1 - 3)             | 0<br>(0 - 0)        | 1<br>(1 - 2)             | 1<br>(1 - 2)             | 1<br>(1 - 3)             |



Web Table 31- Eritrea deaths with 95% UI by age, sex, and cause in 2013

| Cause                                                            | Females, All Ages         | Females, 0-4 Years     | Females, 5-14 Years | Females, 15-49 Years   | Females, 50-69 Years     | Females, 70-80 Years     |
|------------------------------------------------------------------|---------------------------|------------------------|---------------------|------------------------|--------------------------|--------------------------|
| Maternal disorders                                               | 1,313<br>(814 - 1,896)    | --                     | 5<br>(2 - 12)       | 1,308<br>(811 - 1,891) | --                       | --                       |
| Maternal hemorrhage                                              | 160<br>(83 - 251)         | --                     | 0<br>(0 - 1)        | 160<br>(83 - 251)      | --                       | --                       |
| Maternal sepsis and other maternal infections                    | 120<br>(70 - 190)         | --                     | 1<br>(0 - 2)        | 119<br>(70 - 189)      | --                       | --                       |
| Maternal hypertensive disorders                                  | 138<br>(79 - 206)         | --                     | 1<br>(0 - 2)        | 137<br>(79 - 204)      | --                       | --                       |
| Maternal obstructed labor                                        | 69<br>(41 - 106)          | --                     | 0<br>(0 - 1)        | 69<br>(40 - 106)       | --                       | --                       |
| Maternal abortive outcome                                        | 247<br>(145 - 372)        | --                     | 1<br>(0 - 2)        | 246<br>(144 - 370)     | --                       | --                       |
| Indirect maternal deaths                                         | 101<br>(54 - 165)         | --                     | 0<br>(0 - 1)        | 101<br>(54 - 165)      | --                       | --                       |
| Late maternal deaths                                             | 123<br>(65 - 193)         | --                     | 1<br>(0 - 2)        | 122<br>(64 - 193)      | --                       | --                       |
| Maternal deaths aggravated by HIV/AIDS                           | 3<br>(2 - 6)              | --                     | --                  | 3<br>(2 - 6)           | --                       | --                       |
| Other maternal disorders                                         | 348<br>(206 - 533)        | --                     | 1<br>(0 - 3)        | 346<br>(205 - 532)     | --                       | --                       |
| Neonatal disorders                                               | 1,349<br>(960 - 1,924)    | 1,349<br>(960 - 1,924) | --                  | --                     | --                       | --                       |
| Neonatal preterm birth complications                             | 439<br>(158 - 828)        | 439<br>(158 - 828)     | --                  | --                     | --                       | --                       |
| Neonatal encephalopathy due to birth asphyxia and trauma         | 349<br>(118 - 711)        | 349<br>(118 - 711)     | --                  | --                     | --                       | --                       |
| Neonatal sepsis and other neonatal infections                    | 310<br>(88 - 612)         | 310<br>(88 - 612)      | --                  | --                     | --                       | --                       |
| Hemolytic disease and other neonatal jaundice                    | 4<br>(1 - 13)             | 4<br>(1 - 13)          | --                  | --                     | --                       | --                       |
| Other neonatal disorders                                         | 247<br>(84 - 615)         | 247<br>(84 - 615)      | --                  | --                     | --                       | --                       |
| Nutritional deficiencies                                         | 897<br>(587 - 1,305)      | 360<br>(115 - 717)     | 33<br>(15 - 57)     | 140<br>(95 - 202)      | 177<br>(115 - 254)       | 186<br>(122 - 268)       |
| Protein-energy malnutrition                                      | 507<br>(231 - 890)        | 303<br>(95 - 653)      | 22<br>(9 - 40)      | 24<br>(8 - 62)         | 69<br>(31 - 126)         | 89<br>(34 - 158)         |
| Iodine deficiency                                                | 1<br>(0 - 4)              | 0<br>(0 - 3)           | 0<br>(0 - 1)        | 0<br>(0 - 1)           | 0<br>(0 - 1)             | 0<br>(0 - 1)             |
| Iron-deficiency anemia                                           | 384<br>(205 - 592)        | 56<br>(6 - 186)        | 11<br>(3 - 23)      | 116<br>(67 - 172)      | 106<br>(51 - 168)        | 94<br>(44 - 167)         |
| Other nutritional deficiencies                                   | 6<br>(2 - 12)             | 1<br>(0 - 3)           | 0<br>(0 - 0)        | 0<br>(0 - 1)           | 2<br>(0 - 3)             | 3<br>(0 - 8)             |
| Other communicable, maternal, neonatal, and nutritional diseases | 292<br>(179 - 465)        | 184<br>(85 - 334)      | 16<br>(6 - 30)      | 34<br>(23 - 52)        | 34<br>(17 - 68)          | 24<br>(9 - 51)           |
| Sexually transmitted diseases excluding HIV                      | 174<br>(83 - 315)         | 146<br>(62 - 274)      | 11<br>(4 - 22)      | 9<br>(4 - 16)          | 5<br>(2 - 13)            | 3<br>(1 - 8)             |
| Syphilis                                                         | 166<br>(74 - 304)         | 146<br>(62 - 274)      | 11<br>(4 - 22)      | 4<br>(2 - 7)           | 3<br>(1 - 7)             | 2<br>(1 - 6)             |
| Chlamydial infection                                             | 3<br>(1 - 5)              | --                     | 0<br>(0 - 0)        | 2<br>(1 - 3)           | 1<br>(0 - 2)             | 0<br>(0 - 1)             |
| Gonococcal infection                                             | 3<br>(2 - 6)              | --                     | 0<br>(0 - 0)        | 2<br>(1 - 3)           | 1<br>(0 - 2)             | 0<br>(0 - 1)             |
| Other sexually transmitted diseases                              | 3<br>(1 - 5)              | --                     | 0<br>(0 - 0)        | 2<br>(1 - 3)           | 1<br>(0 - 2)             | 0<br>(0 - 1)             |
| Hepatitis                                                        | 21<br>(14 - 33)           | 3<br>(1 - 7)           | 1<br>(0 - 2)        | 10<br>(6 - 18)         | 6<br>(3 - 9)             | 2<br>(1 - 3)             |
| Acute hepatitis A                                                | 2<br>(1 - 6)              | 1<br>(0 - 4)           | 0<br>(0 - 1)        | 1<br>(0 - 2)           | 0<br>(0 - 0)             | 0<br>(0 - 0)             |
| Acute hepatitis B                                                | 11<br>(7 - 17)            | 1<br>(0 - 4)           | 0<br>(0 - 1)        | 3<br>(2 - 6)           | 5<br>(3 - 7)             | 2<br>(1 - 2)             |
| Acute hepatitis C                                                | 0<br>(0 - 1)              | --                     | 0<br>(0 - 0)        | 0<br>(0 - 0)           | 0<br>(0 - 0)             | 0<br>(0 - 0)             |
| Acute hepatitis E                                                | 7<br>(4 - 13)             | 0<br>(0 - 0)           | 0<br>(0 - 0)        | 6<br>(3 - 11)          | 1<br>(0 - 2)             | 0<br>(0 - 0)             |
| Other infectious diseases                                        | 97<br>(50 - 200)          | 35<br>(10 - 125)       | 4<br>(1 - 13)       | 16<br>(8 - 29)         | 23<br>(9 - 55)           | 19<br>(5 - 46)           |
| Non-communicable diseases                                        | 7,827<br>(6,210 - 10,109) | 463<br>(250 - 747)     | 96<br>(48 - 147)    | 1,279<br>(841 - 2,009) | 3,192<br>(2,460 - 4,115) | 2,798<br>(2,297 - 3,438) |
| Neoplasms                                                        | 1,731<br>(1,212 - 2,308)  | 34<br>(13 - 62)        | 25<br>(12 - 41)     | 416<br>(277 - 590)     | 949<br>(625 - 1,294)     | 307<br>(216 - 410)       |
| Esophageal cancer                                                | 282<br>(92 - 552)         | --                     | --                  | 52<br>(14 - 109)       | 171<br>(51 - 361)        | 59<br>(21 - 118)         |
| Stomach cancer                                                   | 95<br>(64 - 126)          | --                     | --                  | 9<br>(6 - 14)          | 63<br>(42 - 87)          | 22<br>(14 - 32)          |
| Liver cancer                                                     | 98<br>(67 - 133)          | --                     | 1<br>(0 - 2)        | 25<br>(11 - 43)        | 52<br>(34 - 76)          | 21<br>(12 - 31)          |
| Liver cancer due to hepatitis B                                  | 16<br>(6 - 30)            | --                     | 0<br>(0 - 0)        | 6<br>(2 - 12)          | 8<br>(3 - 17)            | 2<br>(1 - 5)             |
| Liver cancer due to hepatitis C                                  | 51<br>(26 - 76)           | --                     | 0<br>(0 - 0)        | 10<br>(4 - 19)         | 29<br>(14 - 45)          | 12<br>(6 - 19)           |

Web Table 31- Eritrea deaths with 95% UI by age, sex, and cause in 2013

| Cause                                | Females, All Ages        | Females, 0-4 Years | Females, 5-14 Years | Females, 15-49 Years | Females, 50-69 Years     | Females, 70-80 Years     |
|--------------------------------------|--------------------------|--------------------|---------------------|----------------------|--------------------------|--------------------------|
| Liver cancer due to alcohol use      | 9<br>(5 - 15)            | --                 | --                  | 1<br>(0 - 3)         | 5<br>(2 - 9)             | 3<br>(1 - 5)             |
| Liver cancer due to other causes     | 22<br>(9 - 37)           | --                 | 1<br>(0 - 1)        | 8<br>(3 - 15)        | 10<br>(4 - 20)           | 3<br>(1 - 7)             |
| Larynx cancer                        | 3<br>(1 - 5)             | --                 | --                  | 0<br>(0 - 1)         | 2<br>(1 - 4)             | 0<br>(0 - 1)             |
| Tracheal, bronchus and lung cancer   | 45<br>(31 - 60)          | --                 | --                  | 4<br>(2 - 7)         | 30<br>(20 - 40)          | 12<br>(8 - 16)           |
| Breast cancer                        | 190<br>(134 - 264)       | --                 | --                  | 81<br>(42 - 123)     | 88<br>(62 - 128)         | 21<br>(15 - 31)          |
| Cervical cancer                      | 448<br>(197 - 638)       | --                 | --                  | 94<br>(49 - 146)     | 297<br>(118 - 438)       | 57<br>(23 - 88)          |
| Uterine cancer                       | 20<br>(10 - 33)          | --                 | --                  | 2<br>(1 - 6)         | 12<br>(6 - 21)           | 5<br>(2 - 8)             |
| Prostate cancer                      | --                       | --                 | --                  | --                   | --                       | --                       |
| Colon and rectum cancer              | 94<br>(70 - 124)         | --                 | --                  | 24<br>(16 - 35)      | 46<br>(33 - 62)          | 24<br>(17 - 32)          |
| Lip and oral cavity cancer           | 18<br>(11 - 26)          | --                 | --                  | 5<br>(3 - 9)         | 10<br>(6 - 16)           | 3<br>(2 - 5)             |
| Nasopharynx cancer                   | 5<br>(3 - 8)             | --                 | 0<br>(0 - 0)        | 3<br>(1 - 5)         | 2<br>(1 - 3)             | 1<br>(0 - 1)             |
| Other pharynx cancer                 | 6<br>(4 - 9)             | --                 | --                  | 2<br>(1 - 4)         | 4<br>(2 - 6)             | 1<br>(0 - 1)             |
| Gallbladder and biliary tract cancer | 21<br>(15 - 30)          | --                 | --                  | 6<br>(3 - 9)         | 12<br>(8 - 18)           | 3<br>(2 - 6)             |
| Pancreatic cancer                    | 23<br>(17 - 31)          | --                 | --                  | 5<br>(3 - 7)         | 14<br>(10 - 19)          | 5<br>(3 - 6)             |
| Malignant skin melanoma              | 6<br>(4 - 9)             | --                 | --                  | 1<br>(0 - 1)         | 4<br>(2 - 6)             | 1<br>(1 - 2)             |
| Non-melanoma skin cancer             | 8<br>(4 - 18)            | --                 | --                  | 2<br>(1 - 4)         | 3<br>(1 - 6)             | 4<br>(1 - 9)             |
| Ovarian cancer                       | 49<br>(32 - 72)          | --                 | --                  | 12<br>(8 - 19)       | 30<br>(17 - 48)          | 7<br>(3 - 11)            |
| Testicular cancer                    | --                       | --                 | --                  | --                   | --                       | --                       |
| Kidney cancer                        | 13<br>(8 - 20)           | 2<br>(0 - 5)       | 1<br>(0 - 2)        | 2<br>(1 - 5)         | 6<br>(3 - 10)            | 2<br>(1 - 4)             |
| Bladder cancer                       | 12<br>(8 - 19)           | --                 | --                  | 2<br>(1 - 4)         | 6<br>(3 - 9)             | 4<br>(2 - 7)             |
| Brain and nervous system cancer      | 17<br>(10 - 23)          | 1<br>(0 - 3)       | 1<br>(0 - 2)        | 9<br>(4 - 14)        | 3<br>(2 - 5)             | 2<br>(1 - 2)             |
| Thyroid cancer                       | 8<br>(4 - 12)            | --                 | 0<br>(0 - 0)        | 1<br>(0 - 1)         | 6<br>(3 - 9)             | 2<br>(1 - 3)             |
| Mesothelioma                         | 1<br>(1 - 2)             | --                 | --                  | 0<br>(0 - 1)         | 1<br>(0 - 1)             | 0<br>(0 - 0)             |
| Hodgkin lymphoma                     | 13<br>(8 - 20)           | 0<br>(0 - 1)       | 0<br>(0 - 1)        | 3<br>(2 - 6)         | 6<br>(3 - 10)            | 4<br>(1 - 6)             |
| Non-Hodgkin lymphoma                 | 68<br>(43 - 101)         | 9<br>(2 - 22)      | 7<br>(2 - 14)       | 19<br>(10 - 32)      | 22<br>(12 - 40)          | 11<br>(6 - 18)           |
| Multiple myeloma                     | 11<br>(7 - 16)           | --                 | --                  | 3<br>(1 - 4)         | 6<br>(4 - 9)             | 3<br>(2 - 4)             |
| Leukemia                             | 25<br>(18 - 33)          | 2<br>(0 - 4)       | 3<br>(2 - 6)        | 9<br>(5 - 13)        | 7<br>(5 - 10)            | 4<br>(3 - 5)             |
| Other neoplasms                      | 149<br>(100 - 204)       | 20<br>(8 - 38)     | 12<br>(5 - 22)      | 39<br>(18 - 63)      | 46<br>(29 - 70)          | 32<br>(20 - 48)          |
| Cardiovascular diseases              | 3,732<br>(2,781 - 5,829) | 34<br>(12 - 111)   | 14<br>(6 - 46)      | 423<br>(246 - 1,018) | 1,480<br>(1,061 - 2,217) | 1,781<br>(1,384 - 2,486) |
| Rheumatic heart disease              | 163<br>(97 - 297)        | 1<br>(0 - 4)       | 3<br>(1 - 8)        | 58<br>(31 - 122)     | 65<br>(36 - 127)         | 36<br>(20 - 69)          |
| Ischemic heart disease               | 942<br>(573 - 1,783)     | 0<br>(0 - 2)       | 1<br>(0 - 4)        | 80<br>(34 - 304)     | 360<br>(212 - 649)       | 501<br>(316 - 866)       |
| Cerebrovascular disease              | 1,592<br>(961 - 2,177)   | 4<br>(1 - 11)      | 1<br>(0 - 4)        | 128<br>(63 - 248)    | 642<br>(364 - 911)       | 816<br>(521 - 1,092)     |
| Ischemic stroke                      | 736<br>(338 - 1,268)     | 0<br>(0 - 1)       | 0<br>(0 - 1)        | 21<br>(7 - 55)       | 221<br>(90 - 436)        | 493<br>(241 - 797)       |
| Hemorrhagic stroke                   | 855<br>(445 - 1,316)     | 4<br>(1 - 10)      | 1<br>(0 - 3)        | 107<br>(50 - 206)    | 420<br>(223 - 646)       | 323<br>(145 - 542)       |
| Hypertensive heart disease           | 376<br>(217 - 787)       | 1<br>(0 - 3)       | 0<br>(0 - 2)        | 31<br>(13 - 72)      | 134<br>(74 - 279)        | 210<br>(115 - 456)       |
| Cardiomyopathy and myocarditis       | 122<br>(67 - 232)        | 13<br>(4 - 37)     | 3<br>(1 - 11)       | 32<br>(15 - 66)      | 41<br>(21 - 73)          | 33<br>(15 - 70)          |
| Atrial fibrillation and flutter      | 2<br>(0 - 4)             | --                 | --                  | 0<br>(0 - 0)         | 0<br>(0 - 1)             | 1<br>(0 - 3)             |
| Aortic aneurysm                      | 25<br>(14 - 44)          | --                 | --                  | 4<br>(2 - 9)         | 10<br>(5 - 18)           | 11<br>(6 - 20)           |
| Peripheral vascular disease          | 1<br>(0 - 3)             | --                 | --                  | 0<br>(0 - 0)         | 0<br>(0 - 1)             | 1<br>(0 - 2)             |
| Endocarditis                         | 50<br>(22 - 135)         | 4<br>(1 - 14)      | 1<br>(0 - 4)        | 13<br>(5 - 40)       | 14<br>(6 - 37)           | 18<br>(6 - 51)           |

Web Table 31- Eritrea deaths with 95% UI by age, sex, and cause in 2013

| Cause                                               | Females, All Ages    | Females, 0-4 Years | Females, 5-14 Years | Females, 15-49 Years | Females, 50-69 Years | Females, 70-80 Years |
|-----------------------------------------------------|----------------------|--------------------|---------------------|----------------------|----------------------|----------------------|
| Other cardiovascular and circulatory diseases       | 460<br>(237 - 1,281) | 11<br>(3 - 47)     | 4<br>(1 - 13)       | 78<br>(34 - 208)     | 212<br>(109 - 565)   | 154<br>(74 - 475)    |
| Chronic respiratory diseases                        | 433<br>(323 - 553)   | 18<br>(6 - 37)     | 5<br>(2 - 7)        | 57<br>(39 - 81)      | 174<br>(123 - 238)   | 180<br>(127 - 234)   |
| Chronic obstructive pulmonary disease               | 247<br>(172 - 344)   | 3<br>(1 - 7)       | 1<br>(1 - 2)        | 19<br>(11 - 31)      | 107<br>(71 - 154)    | 116<br>(77 - 166)    |
| Pneumoconiosis                                      | 3<br>(2 - 4)         | 0<br>(0 - 1)       | 0<br>(0 - 0)        | 1<br>(1 - 2)         | 1<br>(0 - 1)         | 1<br>(0 - 1)         |
| Silicosis                                           | 0<br>(0 - 0)         | 0<br>(0 - 0)       | 0<br>(0 - 0)        | 0<br>(0 - 0)         | 0<br>(0 - 0)         | 0<br>(0 - 0)         |
| Asbestosis                                          | 0<br>(0 - 0)         | 0<br>(0 - 0)       | 0<br>(0 - 0)        | 0<br>(0 - 0)         | 0<br>(0 - 0)         | 0<br>(0 - 0)         |
| Coal workers pneumoconiosis                         | 0<br>(0 - 0)         | 0<br>(0 - 0)       | 0<br>(0 - 0)        | 0<br>(0 - 0)         | 0<br>(0 - 0)         | 0<br>(0 - 0)         |
| Other pneumoconiosis                                | 2<br>(2 - 4)         | 0<br>(0 - 0)       | 0<br>(0 - 0)        | 1<br>(1 - 2)         | 1<br>(0 - 1)         | 0<br>(0 - 1)         |
| Asthma                                              | 98<br>(60 - 147)     | 5<br>(1 - 12)      | 2<br>(1 - 3)        | 16<br>(9 - 32)       | 42<br>(24 - 67)      | 33<br>(17 - 54)      |
| Interstitial lung disease and pulmonary sarcoidosis | 45<br>(6 - 87)       | 1<br>(0 - 2)       | 0<br>(0 - 1)        | 7<br>(1 - 15)        | 16<br>(2 - 35)       | 21<br>(2 - 45)       |
| Other chronic respiratory diseases                  | 40<br>(26 - 60)      | 8<br>(3 - 18)      | 1<br>(1 - 2)        | 13<br>(8 - 21)       | 8<br>(4 - 13)        | 9<br>(5 - 16)        |
| Cirrhosis                                           | 228<br>(128 - 386)   | 2<br>(0 - 6)       | 2<br>(1 - 4)        | 48<br>(25 - 86)      | 119<br>(64 - 207)    | 56<br>(31 - 96)      |
| Cirrhosis due to hepatitis B                        | 78<br>(28 - 144)     | 0<br>(0 - 0)       | 0<br>(0 - 1)        | 16<br>(6 - 31)       | 42<br>(14 - 78)      | 19<br>(5 - 38)       |
| Cirrhosis due to hepatitis C                        | 43<br>(10 - 110)     | 0<br>(0 - 0)       | 0<br>(0 - 1)        | 9<br>(2 - 24)        | 23<br>(5 - 63)       | 10<br>(3 - 27)       |
| Cirrhosis due to alcohol use                        | 71<br>(39 - 116)     | --                 | --                  | 10<br>(4 - 18)       | 39<br>(20 - 66)      | 22<br>(11 - 38)      |
| Cirrhosis due to other causes                       | 36<br>(18 - 68)      | 2<br>(0 - 5)       | 2<br>(1 - 3)        | 12<br>(6 - 25)       | 15<br>(6 - 30)       | 5<br>(2 - 9)         |
| Digestive diseases                                  | 407<br>(285 - 547)   | 12<br>(3 - 26)     | 9<br>(4 - 14)       | 87<br>(55 - 126)     | 156<br>(101 - 216)   | 145<br>(94 - 197)    |
| Peptic ulcer disease                                | 106<br>(62 - 158)    | 1<br>(0 - 2)       | 1<br>(0 - 1)        | 17<br>(10 - 29)      | 44<br>(24 - 70)      | 43<br>(23 - 69)      |
| Gastritis and duodenitis                            | 20<br>(7 - 53)       | 1<br>(0 - 2)       | 1<br>(0 - 2)        | 5<br>(2 - 12)        | 7<br>(2 - 18)        | 7<br>(2 - 22)        |
| Appendicitis                                        | 40<br>(21 - 63)      | 1<br>(0 - 4)       | 2<br>(1 - 3)        | 10<br>(6 - 16)       | 15<br>(7 - 27)       | 12<br>(4 - 24)       |
| Paralytic ileus and intestinal obstruction          | 114<br>(64 - 195)    | 4<br>(1 - 9)       | 4<br>(2 - 7)        | 24<br>(12 - 42)      | 42<br>(22 - 73)      | 41<br>(20 - 77)      |
| Inguinal, femoral, and abdominal hernia             | 9<br>(4 - 14)        | 1<br>(0 - 2)       | 0<br>(0 - 0)        | 4<br>(1 - 7)         | 1<br>(0 - 2)         | 3<br>(1 - 6)         |
| Inflammatory bowel disease                          | 28<br>(8 - 46)       | 2<br>(0 - 7)       | 1<br>(0 - 1)        | 8<br>(2 - 14)        | 9<br>(2 - 17)        | 7<br>(2 - 13)        |
| Vascular intestinal disorders                       | 4<br>(1 - 10)        | 0<br>(0 - 0)       | 0<br>(0 - 0)        | 1<br>(0 - 1)         | 1<br>(1 - 3)         | 2<br>(1 - 5)         |
| Gallbladder and biliary diseases                    | 37<br>(21 - 56)      | 0<br>(0 - 1)       | 0<br>(0 - 0)        | 7<br>(4 - 11)        | 16<br>(8 - 26)       | 14<br>(7 - 23)       |
| Pancreatitis                                        | 16<br>(7 - 31)       | 0<br>(0 - 0)       | 0<br>(0 - 0)        | 5<br>(2 - 10)        | 7<br>(3 - 13)        | 4<br>(2 - 9)         |
| Other digestive diseases                            | 33<br>(18 - 53)      | 1<br>(0 - 4)       | 1<br>(0 - 1)        | 7<br>(3 - 11)        | 13<br>(6 - 22)       | 11<br>(5 - 22)       |
| Neurological disorders                              | 200<br>(143 - 280)   | 20<br>(6 - 46)     | 10<br>(4 - 21)      | 46<br>(25 - 88)      | 29<br>(20 - 40)      | 95<br>(64 - 127)     |
| Alzheimer disease and other dementias               | 97<br>(66 - 130)     | --                 | --                  | 0<br>(0 - 0)         | 12<br>(7 - 17)       | 85<br>(57 - 115)     |
| Parkinson disease                                   | 1<br>(1 - 2)         | --                 | --                  | 0<br>(0 - 0)         | 1<br>(0 - 1)         | 1<br>(0 - 1)         |
| Epilepsy                                            | 84<br>(47 - 151)     | 16<br>(4 - 41)     | 9<br>(3 - 20)       | 41<br>(20 - 81)      | 11<br>(6 - 18)       | 7<br>(3 - 13)        |
| Multiple sclerosis                                  | 1<br>(0 - 3)         | --                 | --                  | 1<br>(0 - 2)         | 0<br>(0 - 1)         | 0<br>(0 - 0)         |
| Other neurological disorders                        | 17<br>(11 - 23)      | 4<br>(1 - 7)       | 1<br>(1 - 2)        | 4<br>(3 - 6)         | 5<br>(3 - 7)         | 2<br>(2 - 4)         |
| Mental and substance use disorders                  | 70<br>(28 - 187)     | 2<br>(0 - 4)       | 0<br>(0 - 0)        | 42<br>(17 - 110)     | 22<br>(8 - 63)       | 4<br>(1 - 10)        |
| Schizophrenia                                       | 7<br>(2 - 14)        | --                 | --                  | 4<br>(1 - 8)         | 3<br>(1 - 5)         | 1<br>(0 - 2)         |
| Alcohol use disorders                               | 42<br>(14 - 141)     | --                 | --                  | 23<br>(8 - 82)       | 16<br>(5 - 55)       | 2<br>(1 - 7)         |
| Drug use disorders                                  | 21<br>(8 - 45)       | 2<br>(0 - 4)       | --                  | 15<br>(6 - 33)       | 3<br>(1 - 8)         | 1<br>(0 - 3)         |
| Opioid use disorders                                | 2<br>(1 - 5)         | 0<br>(0 - 0)       | --                  | 2<br>(1 - 3)         | 0<br>(0 - 1)         | 0<br>(0 - 0)         |
| Cocaine use disorders                               | 0<br>(0 - 0)         | 0<br>(0 - 0)       | --                  | 0<br>(0 - 0)         | 0<br>(0 - 0)         | 0<br>(0 - 0)         |
| Amphetamine use disorders                           | 0<br>(0 - 0)         | 0<br>(0 - 0)       | --                  | 0<br>(0 - 0)         | 0<br>(0 - 0)         | 0<br>(0 - 0)         |

Web Table 31- Eritrea deaths with 95% UI by age, sex, and cause in 2013

| Cause                                               | Females, All Ages  | Females, 0-4 Years | Females, 5-14 Years | Females, 15-49 Years | Females, 50-69 Years | Females, 70-80 Years |
|-----------------------------------------------------|--------------------|--------------------|---------------------|----------------------|----------------------|----------------------|
| Other drug use disorders                            | 19<br>(7 - 40)     | 2<br>(0 - 3)       | --                  | 13<br>(5 - 29)       | 3<br>(1 - 7)         | 1<br>(0 - 2)         |
| Eating disorders                                    | 0<br>(0 - 0)       | --                 | 0<br>(0 - 0)        | 0<br>(0 - 0)         | --                   | --                   |
| Anorexia nervosa                                    | 0<br>(0 - 0)       | --                 | 0<br>(0 - 0)        | 0<br>(0 - 0)         | --                   | --                   |
| Diabetes, urogenital, blood, and endocrine diseases | 564<br>(402 - 725) | 37<br>(13 - 73)    | 13<br>(6 - 22)      | 111<br>(70 - 159)    | 222<br>(158 - 298)   | 181<br>(123 - 237)   |
| Diabetes mellitus                                   | 262<br>(182 - 352) | 0<br>(0 - 1)       | 1<br>(0 - 1)        | 25<br>(16 - 37)      | 129<br>(86 - 182)    | 106<br>(68 - 148)    |
| Acute glomerulonephritis                            | 13<br>(6 - 19)     | 1<br>(0 - 2)       | 0<br>(0 - 1)        | 5<br>(3 - 10)        | 4<br>(2 - 8)         | 2<br>(1 - 3)         |
| Chronic kidney disease                              | 98<br>(49 - 149)   | 4<br>(1 - 11)      | 3<br>(1 - 7)        | 23<br>(12 - 50)      | 34<br>(19 - 51)      | 34<br>(14 - 51)      |
| Chronic kidney disease due to diabetes mellitus     | 1<br>(0 - 1)       | 0<br>(0 - 0)       | 0<br>(0 - 0)        | 0<br>(0 - 0)         | 0<br>(0 - 1)         | 0<br>(0 - 0)         |
| Chronic kidney disease due to hypertension          | 32<br>(14 - 61)    | 0<br>(0 - 1)       | 0<br>(0 - 1)        | 5<br>(2 - 12)        | 12<br>(5 - 24)       | 14<br>(6 - 27)       |
| Chronic kidney disease due to glomerulonephritis    | 42<br>(18 - 72)    | 3<br>(1 - 7)       | 2<br>(1 - 4)        | 13<br>(6 - 29)       | 14<br>(5 - 25)       | 10<br>(3 - 18)       |
| Chronic kidney disease due to other causes          | 23<br>(7 - 45)     | 1<br>(0 - 4)       | 1<br>(0 - 3)        | 4<br>(1 - 12)        | 8<br>(3 - 16)        | 10<br>(2 - 22)       |
| Urinary diseases and male infertility               | 66<br>(39 - 92)    | 4<br>(1 - 9)       | 1<br>(0 - 3)        | 18<br>(10 - 30)      | 28<br>(15 - 45)      | 16<br>(9 - 25)       |
| Interstitial nephritis and urinary tract infections | 54<br>(30 - 77)    | 3<br>(1 - 7)       | 1<br>(0 - 2)        | 14<br>(7 - 24)       | 23<br>(11 - 38)      | 14<br>(8 - 22)       |
| Urolithiasis                                        | 5<br>(2 - 9)       | --                 | 0<br>(0 - 0)        | 2<br>(1 - 4)         | 2<br>(1 - 5)         | 1<br>(0 - 2)         |
| Other urinary diseases                              | 7<br>(3 - 13)      | 1<br>(0 - 2)       | 0<br>(0 - 1)        | 2<br>(1 - 5)         | 3<br>(1 - 5)         | 1<br>(0 - 2)         |
| Gynecological diseases                              | 3<br>(1 - 4)       | --                 | --                  | 1<br>(1 - 1)         | 1<br>(0 - 2)         | 1<br>(0 - 1)         |
| Uterine fibroids                                    | 1<br>(0 - 1)       | --                 | --                  | 0<br>(0 - 0)         | 0<br>(0 - 1)         | 0<br>(0 - 0)         |
| Polycystic ovarian syndrome                         | 0<br>(0 - 0)       | --                 | --                  | 0<br>(0 - 0)         | 0<br>(0 - 0)         | --                   |
| Endometriosis                                       | 0<br>(0 - 0)       | --                 | --                  | 0<br>(0 - 0)         | 0<br>(0 - 0)         | --                   |
| Genital prolapse                                    | 0<br>(0 - 1)       | --                 | --                  | 0<br>(0 - 0)         | 0<br>(0 - 0)         | 0<br>(0 - 0)         |
| Other gynecological diseases                        | 1<br>(1 - 2)       | --                 | --                  | 0<br>(0 - 1)         | 1<br>(0 - 1)         | 0<br>(0 - 0)         |
| Hemoglobinopathies and hemolytic anemias            | 54<br>(23 - 97)    | 17<br>(4 - 37)     | 6<br>(2 - 12)       | 20<br>(8 - 35)       | 7<br>(3 - 13)        | 4<br>(2 - 9)         |
| Thalassemias                                        | 9<br>(3 - 18)      | 5<br>(1 - 11)      | 2<br>(1 - 3)        | 3<br>(1 - 5)         | 0<br>(0 - 0)         | 0<br>(0 - 0)         |
| Sickle cell disorders                               | 10<br>(4 - 18)     | 3<br>(1 - 6)       | 2<br>(1 - 3)        | 5<br>(2 - 8)         | 1<br>(0 - 2)         | 0<br>(0 - 0)         |
| G6PD deficiency                                     | 6<br>(2 - 11)      | 2<br>(0 - 4)       | 1<br>(0 - 2)        | 3<br>(1 - 5)         | 1<br>(0 - 1)         | 0<br>(0 - 0)         |
| Other hemoglobinopathies and hemolytic anemias      | 29<br>(13 - 50)    | 8<br>(2 - 16)      | 2<br>(1 - 4)        | 9<br>(4 - 16)        | 6<br>(3 - 10)        | 4<br>(2 - 8)         |
| Endocrine, metabolic, blood, and immune disorders   | 69<br>(27 - 108)   | 12<br>(4 - 28)     | 2<br>(1 - 4)        | 19<br>(8 - 36)       | 19<br>(8 - 30)       | 18<br>(5 - 29)       |
| Musculoskeletal disorders                           | 17<br>(9 - 37)     | --                 | 1<br>(0 - 2)        | 8<br>(4 - 18)        | 5<br>(3 - 11)        | 3<br>(1 - 7)         |
| Rheumatoid arthritis                                | 9<br>(5 - 23)      | --                 | 0<br>(0 - 1)        | 3<br>(1 - 7)         | 4<br>(2 - 9)         | 2<br>(1 - 6)         |
| Other musculoskeletal disorders                     | 7<br>(4 - 15)      | --                 | 0<br>(0 - 1)        | 5<br>(2 - 11)        | 1<br>(1 - 3)         | 1<br>(0 - 2)         |
| Other non-communicable diseases                     | 445<br>(297 - 660) | 304<br>(165 - 509) | 17<br>(7 - 30)      | 41<br>(24 - 65)      | 36<br>(23 - 53)      | 46<br>(28 - 68)      |
| Congenital anomalies                                | 318<br>(181 - 525) | 277<br>(145 - 477) | 15<br>(6 - 27)      | 17<br>(11 - 27)      | 5<br>(3 - 7)         | 4<br>(2 - 5)         |
| Neural tube defects                                 | 71<br>(19 - 188)   | 66<br>(15 - 178)   | 2<br>(1 - 5)        | 2<br>(1 - 6)         | 0<br>(0 - 1)         | 0<br>(0 - 0)         |
| Congenital heart anomalies                          | 130<br>(63 - 234)  | 111<br>(48 - 213)  | 8<br>(3 - 14)       | 8<br>(4 - 13)        | 2<br>(1 - 3)         | 2<br>(1 - 3)         |
| Cleft lip and cleft palate                          | 1<br>(0 - 4)       | 1<br>(0 - 4)       | --                  | --                   | --                   | --                   |
| Down syndrome                                       | 28<br>(9 - 64)     | 21<br>(6 - 54)     | 2<br>(1 - 5)        | 3<br>(1 - 6)         | 1<br>(0 - 2)         | 0<br>(0 - 0)         |
| Chromosomal unbalanced rearrangements               | 19<br>(7 - 45)     | 17<br>(6 - 43)     | 1<br>(0 - 1)        | 1<br>(0 - 2)         | 0<br>(0 - 0)         | 0<br>(0 - 0)         |
| Other congenital anomalies                          | 69<br>(27 - 159)   | 60<br>(21 - 142)   | 3<br>(1 - 7)        | 3<br>(1 - 7)         | 2<br>(1 - 3)         | 2<br>(1 - 3)         |
| Skin and subcutaneous diseases                      | 125<br>(77 - 189)  | 25<br>(6 - 64)     | 2<br>(1 - 4)        | 24<br>(11 - 41)      | 32<br>(19 - 48)      | 42<br>(24 - 64)      |
| Cellulitis                                          | 83<br>(20 - 150)   | 16<br>(2 - 47)     | 1<br>(0 - 3)        | 17<br>(4 - 36)       | 22<br>(6 - 38)       | 27<br>(6 - 49)       |

Web Table 31- Eritrea deaths with 95% UI by age, sex, and cause in 2013

| Cause                                           | Females, All Ages    | Females, 0-4 Years | Females, 5-14 Years | Females, 15-49 Years | Females, 50-69 Years | Females, 70-80 Years |
|-------------------------------------------------|----------------------|--------------------|---------------------|----------------------|----------------------|----------------------|
| Pyoderma                                        | 35<br>(8 - 95)       | 9<br>(1 - 34)      | 0<br>(0 - 2)        | 6<br>(1 - 20)        | 9<br>(2 - 23)        | 11<br>(2 - 27)       |
| Decubitus ulcer                                 | 6<br>(1 - 19)        | 0<br>(0 - 0)       | 0<br>(0 - 0)        | 1<br>(0 - 3)         | 1<br>(0 - 4)         | 4<br>(1 - 13)        |
| Other skin and subcutaneous diseases            | 1<br>(0 - 2)         | 0<br>(0 - 1)       | 0<br>(0 - 0)        | 0<br>(0 - 1)         | 0<br>(0 - 1)         | 0<br>(0 - 1)         |
| Sudden infant death syndrome                    | 2<br>(0 - 8)         | 2<br>(0 - 8)       | --                  | --                   | --                   | --                   |
| Injuries                                        | 813<br>(578 - 1,052) | 142<br>(55 - 251)  | 65<br>(33 - 103)    | 285<br>(188 - 417)   | 195<br>(127 - 268)   | 125<br>(73 - 175)    |
| Transport injuries                              | 263<br>(185 - 354)   | 23<br>(7 - 48)     | 23<br>(11 - 38)     | 94<br>(61 - 144)     | 85<br>(51 - 119)     | 38<br>(20 - 56)      |
| Road injuries                                   | 245<br>(172 - 330)   | 20<br>(6 - 42)     | 21<br>(10 - 36)     | 89<br>(56 - 135)     | 80<br>(49 - 113)     | 35<br>(19 - 51)      |
| Pedestrian road injuries                        | 125<br>(78 - 171)    | 10<br>(3 - 23)     | 12<br>(5 - 20)      | 37<br>(21 - 57)      | 44<br>(24 - 67)      | 21<br>(11 - 32)      |
| Cyclist road injuries                           | 8<br>(5 - 13)        | 1<br>(0 - 1)       | 1<br>(0 - 2)        | 2<br>(1 - 4)         | 4<br>(2 - 7)         | 1<br>(1 - 2)         |
| Motorcyclist road injuries                      | 10<br>(6 - 22)       | 1<br>(0 - 2)       | 0<br>(0 - 1)        | 5<br>(2 - 13)        | 3<br>(2 - 6)         | 1<br>(1 - 2)         |
| Motor vehicle road injuries                     | 100<br>(63 - 148)    | 8<br>(3 - 18)      | 8<br>(3 - 15)       | 45<br>(27 - 72)      | 28<br>(16 - 45)      | 11<br>(6 - 18)       |
| Other road injuries                             | 2<br>(1 - 4)         | 0<br>(0 - 1)       | 0<br>(0 - 1)        | 0<br>(0 - 1)         | 1<br>(0 - 2)         | 0<br>(0 - 1)         |
| Other transport injuries                        | 18<br>(11 - 25)      | 3<br>(1 - 6)       | 2<br>(1 - 4)        | 5<br>(3 - 10)        | 5<br>(2 - 8)         | 3<br>(1 - 6)         |
| Unintentional injuries                          | 431<br>(296 - 574)   | 114<br>(44 - 209)  | 38<br>(17 - 62)     | 113<br>(73 - 166)    | 89<br>(56 - 127)     | 78<br>(43 - 112)     |
| Falls                                           | 47<br>(23 - 69)      | 4<br>(2 - 9)       | 2<br>(1 - 5)        | 8<br>(4 - 17)        | 10<br>(5 - 16)       | 22<br>(9 - 37)       |
| Drowning                                        | 73<br>(43 - 124)     | 26<br>(9 - 57)     | 13<br>(5 - 28)      | 20<br>(11 - 36)      | 11<br>(6 - 17)       | 3<br>(2 - 5)         |
| Fire, heat, and hot substances                  | 80<br>(47 - 134)     | 28<br>(8 - 69)     | 7<br>(3 - 15)       | 20<br>(11 - 37)      | 14<br>(8 - 24)       | 10<br>(5 - 17)       |
| Poisonings                                      | 21<br>(12 - 32)      | 5<br>(1 - 11)      | 1<br>(0 - 2)        | 7<br>(4 - 14)        | 7<br>(3 - 12)        | 2<br>(1 - 3)         |
| Exposure to mechanical forces                   | 52<br>(33 - 79)      | 17<br>(7 - 39)     | 5<br>(2 - 9)        | 16<br>(10 - 25)      | 9<br>(5 - 13)        | 5<br>(2 - 7)         |
| Unintentional firearm injuries                  | 12<br>(8 - 21)       | 1<br>(0 - 3)       | 1<br>(0 - 1)        | 7<br>(4 - 14)        | 2<br>(1 - 4)         | 1<br>(0 - 2)         |
| Unintentional suffocation                       | 10<br>(2 - 25)       | 7<br>(1 - 20)      | 1<br>(0 - 3)        | 1<br>(0 - 2)         | 1<br>(0 - 2)         | 0<br>(0 - 1)         |
| Other exposure to mechanical forces             | 30<br>(17 - 49)      | 9<br>(3 - 24)      | 3<br>(1 - 7)        | 8<br>(4 - 14)        | 6<br>(3 - 9)         | 4<br>(1 - 6)         |
| Adverse effects of medical treatment            | 84<br>(47 - 125)     | 15<br>(5 - 37)     | 3<br>(1 - 5)        | 19<br>(11 - 32)      | 23<br>(11 - 39)      | 25<br>(10 - 44)      |
| Animal contact                                  | 45<br>(18 - 82)      | 8<br>(2 - 26)      | 5<br>(2 - 12)       | 16<br>(5 - 32)       | 11<br>(3 - 18)       | 4<br>(1 - 8)         |
| Venomous animal contact                         | 30<br>(13 - 61)      | 7<br>(2 - 22)      | 4<br>(1 - 9)        | 11<br>(4 - 23)       | 6<br>(2 - 11)        | 3<br>(1 - 6)         |
| Non-venomous animal contact                     | 14<br>(4 - 27)       | 1<br>(0 - 3)       | 2<br>(0 - 4)        | 5<br>(1 - 11)        | 5<br>(1 - 10)        | 2<br>(0 - 3)         |
| Foreign body                                    | 16<br>(6 - 30)       | 8<br>(2 - 20)      | 1<br>(0 - 2)        | 1<br>(1 - 3)         | 1<br>(1 - 2)         | 5<br>(2 - 9)         |
| Pulmonary aspiration and foreign body in airway | 15<br>(6 - 29)       | 7<br>(2 - 19)      | 1<br>(0 - 2)        | 1<br>(1 - 3)         | 1<br>(0 - 2)         | 5<br>(1 - 9)         |
| Foreign body in other body part                 | 1<br>(1 - 1)         | 0<br>(0 - 0)       | 0<br>(0 - 0)        | 0<br>(0 - 0)         | 0<br>(0 - 0)         | 0<br>(0 - 1)         |
| Other unintentional injuries                    | 12<br>(8 - 20)       | 2<br>(1 - 6)       | 2<br>(1 - 3)        | 4<br>(2 - 8)         | 2<br>(1 - 4)         | 2<br>(1 - 3)         |
| Self-harm and interpersonal violence            | 119<br>(64 - 192)    | 6<br>(2 - 15)      | 4<br>(2 - 9)        | 78<br>(40 - 140)     | 22<br>(9 - 33)       | 10<br>(3 - 15)       |
| Self-harm                                       | 53<br>(17 - 85)      | --                 | 1<br>(0 - 2)        | 29<br>(11 - 59)      | 15<br>(5 - 23)       | 8<br>(2 - 13)        |
| Interpersonal violence                          | 66<br>(26 - 133)     | 6<br>(2 - 15)      | 3<br>(1 - 8)        | 49<br>(17 - 109)     | 7<br>(2 - 11)        | 1<br>(0 - 3)         |
| Assault by firearm                              | 17<br>(5 - 38)       | 1<br>(0 - 3)       | 1<br>(0 - 2)        | 13<br>(4 - 31)       | 2<br>(1 - 4)         | 0<br>(0 - 0)         |
| Assault by sharp object                         | 17<br>(7 - 36)       | 1<br>(0 - 3)       | 1<br>(0 - 1)        | 14<br>(5 - 31)       | 1<br>(0 - 3)         | 0<br>(0 - 1)         |
| Assault by other means                          | 32<br>(11 - 67)      | 3<br>(1 - 8)       | 2<br>(1 - 6)        | 22<br>(7 - 51)       | 3<br>(1 - 6)         | 1<br>(0 - 2)         |

Web Table 31- Estonia deaths with 95% UI by age, sex, and cause in 2013

| Cause                                                             | Both Sexes, All Ages        | Both Sexes, 0-4 Years | Both Sexes, 5-14 Years | Both Sexes, 15-49 Years  | Both Sexes, 50-69 Years  | Both Sexes, 70-80 Years     |
|-------------------------------------------------------------------|-----------------------------|-----------------------|------------------------|--------------------------|--------------------------|-----------------------------|
| All causes                                                        | 15,850<br>(15,168 - 16,363) | 59<br>(48 - 73)       | 19<br>(17 - 21)        | 1,100<br>(1,043 - 1,159) | 3,679<br>(3,505 - 3,831) | 10,993<br>(10,497 - 11,325) |
| Communicable, maternal, neonatal, and nutritional diseases        | 284<br>(240 - 312)          | 26<br>(20 - 34)       | 1<br>(1 - 2)           | 69<br>(57 - 78)          | 94<br>(80 - 105)         | 94<br>(74 - 111)            |
| HIV/AIDS and tuberculosis                                         | 75<br>(65 - 86)             | 0<br>(0 - 0)          | 0<br>(0 - 0)           | 35<br>(29 - 43)          | 26<br>(22 - 31)          | 13<br>(11 - 15)             |
| Tuberculosis                                                      | 44<br>(35 - 49)             | 0<br>(0 - 0)          | 0<br>(0 - 0)           | 13<br>(9 - 16)           | 20<br>(16 - 24)          | 11<br>(9 - 14)              |
| HIV/AIDS                                                          | 31<br>(24 - 42)             | 0<br>(0 - 0)          | 0<br>(0 - 0)           | 23<br>(18 - 30)          | 7<br>(4 - 10)            | 1<br>(1 - 3)                |
| HIV/AIDS resulting in mycobacterial infection                     | 2<br>(1 - 3)                | 0<br>(0 - 0)          | 0<br>(0 - 0)           | 1<br>(1 - 2)             | 0<br>(0 - 1)             | 0<br>(0 - 0)                |
| HIV/AIDS resulting in other diseases                              | 29<br>(23 - 39)             | 0<br>(0 - 0)          | 0<br>(0 - 0)           | 21<br>(17 - 28)          | 6<br>(4 - 9)             | 1<br>(1 - 2)                |
| Diarrhea, lower respiratory, and other common infectious diseases | 177<br>(140 - 202)          | 6<br>(4 - 7)          | 1<br>(1 - 2)           | 30<br>(23 - 37)          | 63<br>(51 - 73)          | 77<br>(57 - 94)             |
| Diarrheal diseases                                                | 1<br>(1 - 1)                | 0<br>(0 - 0)          | 0<br>(0 - 0)           | 0<br>(0 - 0)             | 0<br>(0 - 0)             | 0<br>(0 - 0)                |
| Intestinal infectious diseases                                    | 2<br>(1 - 5)                | 0<br>(0 - 1)          | 0<br>(0 - 1)           | 1<br>(0 - 2)             | 0<br>(0 - 1)             | 0<br>(0 - 1)                |
| Typhoid fever                                                     | 2<br>(0 - 4)                | 0<br>(0 - 0)          | 0<br>(0 - 0)           | 1<br>(0 - 1)             | 0<br>(0 - 1)             | 0<br>(0 - 1)                |
| Paratyphoid fever                                                 | 0<br>(0 - 1)                | 0<br>(0 - 0)          | 0<br>(0 - 0)           | 0<br>(0 - 0)             | 0<br>(0 - 0)             | 0<br>(0 - 0)                |
| Other intestinal infectious diseases                              | 0<br>(0 - 1)                | 0<br>(0 - 0)          | 0<br>(0 - 0)           | 0<br>(0 - 1)             | 0<br>(0 - 0)             | 0<br>(0 - 1)                |
| Lower respiratory infections                                      | 159<br>(121 - 183)          | 4<br>(3 - 5)          | 1<br>(0 - 1)           | 26<br>(19 - 33)          | 57<br>(45 - 68)          | 71<br>(51 - 88)             |
| Upper respiratory infections                                      | 0<br>(0 - 1)                | 0<br>(0 - 0)          | 0<br>(0 - 0)           | 0<br>(0 - 0)             | 0<br>(0 - 0)             | 0<br>(0 - 1)                |
| Otitis media                                                      | 0<br>(0 - 0)                | 0<br>(0 - 0)          | 0<br>(0 - 0)           | 0<br>(0 - 0)             | 0<br>(0 - 0)             | 0<br>(0 - 0)                |
| Meningitis                                                        | 7<br>(6 - 8)                | 1<br>(0 - 1)          | 0<br>(0 - 0)           | 1<br>(1 - 2)             | 2<br>(2 - 3)             | 2<br>(2 - 3)                |
| Pneumococcal meningitis                                           | 2<br>(1 - 2)                | 0<br>(0 - 0)          | 0<br>(0 - 0)           | 0<br>(0 - 1)             | 1<br>(0 - 1)             | 1<br>(0 - 1)                |
| H influenzae type B meningitis                                    | 1<br>(1 - 1)                | 0<br>(0 - 0)          | 0<br>(0 - 0)           | 0<br>(0 - 0)             | 0<br>(0 - 0)             | 0<br>(0 - 0)                |
| Meningococcal meningitis                                          | 1<br>(1 - 2)                | 0<br>(0 - 0)          | 0<br>(0 - 0)           | 0<br>(0 - 0)             | 0<br>(0 - 1)             | 0<br>(0 - 1)                |
| Other meningitis                                                  | 3<br>(2 - 3)                | 0<br>(0 - 0)          | 0<br>(0 - 0)           | 1<br>(0 - 1)             | 1<br>(1 - 1)             | 1<br>(1 - 1)                |
| Encephalitis                                                      | 6<br>(4 - 9)                | 0<br>(0 - 1)          | 0<br>(0 - 0)           | 1<br>(1 - 2)             | 2<br>(1 - 3)             | 2<br>(1 - 3)                |
| Diphtheria                                                        | 0<br>(0 - 0)                | 0<br>(0 - 0)          | 0<br>(0 - 0)           | 0<br>(0 - 0)             | 0<br>(0 - 0)             | --                          |
| Whooping cough                                                    | 0<br>(0 - 0)                | 0<br>(0 - 0)          | 0<br>(0 - 0)           | 0<br>(0 - 0)             | 0<br>(0 - 0)             | --                          |
| Tetanus                                                           | 0<br>(0 - 0)                | 0<br>(0 - 0)          | 0<br>(0 - 0)           | 0<br>(0 - 0)             | 0<br>(0 - 0)             | 0<br>(0 - 0)                |
| Measles                                                           | 0<br>(0 - 0)                | 0<br>(0 - 0)          | 0<br>(0 - 0)           | 0<br>(0 - 0)             | 0<br>(0 - 0)             | --                          |
| Varicella and herpes zoster                                       | 1<br>(0 - 4)                | 0<br>(0 - 0)          | 0<br>(0 - 0)           | 0<br>(0 - 0)             | 0<br>(0 - 0)             | 1<br>(0 - 4)                |
| Neglected tropical diseases and malaria                           | 1<br>(1 - 1)                | 0<br>(0 - 0)          | 0<br>(0 - 0)           | 0<br>(0 - 0)             | 0<br>(0 - 0)             | 0<br>(0 - 0)                |
| Cysticercosis                                                     | 0<br>(0 - 0)                | 0<br>(0 - 0)          | 0<br>(0 - 0)           | 0<br>(0 - 0)             | 0<br>(0 - 0)             | 0<br>(0 - 0)                |
| Cystic echinococcosis                                             | 0<br>(0 - 0)                | 0<br>(0 - 0)          | 0<br>(0 - 0)           | 0<br>(0 - 0)             | 0<br>(0 - 0)             | 0<br>(0 - 0)                |
| Dengue                                                            | 0<br>(0 - 0)                | 0<br>(0 - 0)          | 0<br>(0 - 0)           | 0<br>(0 - 0)             | 0<br>(0 - 0)             | 0<br>(0 - 0)                |
| Rabies                                                            | 0<br>(0 - 0)                | 0<br>(0 - 0)          | 0<br>(0 - 0)           | 0<br>(0 - 0)             | 0<br>(0 - 0)             | 0<br>(0 - 0)                |
| Other neglected tropical diseases                                 | 0<br>(0 - 0)                | 0<br>(0 - 0)          | 0<br>(0 - 0)           | 0<br>(0 - 0)             | 0<br>(0 - 0)             | 0<br>(0 - 0)                |
| Maternal disorders                                                | 1<br>(1 - 1)                | --                    | 0<br>(0 - 0)           | 1<br>(1 - 1)             | --                       | --                          |
| Maternal hemorrhage                                               | 0<br>(0 - 0)                | --                    | 0<br>(0 - 0)           | 0<br>(0 - 0)             | --                       | --                          |
| Maternal sepsis and other maternal infections                     | 0<br>(0 - 0)                | --                    | 0<br>(0 - 0)           | 0<br>(0 - 0)             | --                       | --                          |
| Maternal hypertensive disorders                                   | 0<br>(0 - 0)                | --                    | 0<br>(0 - 0)           | 0<br>(0 - 0)             | --                       | --                          |
| Maternal obstructed labor                                         | 0<br>(0 - 0)                | --                    | 0<br>(0 - 0)           | 0<br>(0 - 0)             | --                       | --                          |
| Maternal abortive outcome                                         | 0<br>(0 - 0)                | --                    | 0<br>(0 - 0)           | 0<br>(0 - 0)             | --                       | --                          |
| Indirect maternal deaths                                          | 0<br>(0 - 0)                | --                    | 0<br>(0 - 0)           | 0<br>(0 - 0)             | --                       | --                          |

Web Table 31- Estonia deaths with 95% UI by age, sex, and cause in 2013

| Cause                                                            | Both Sexes, All Ages        | Both Sexes, 0-4 Years | Both Sexes, 5-14 Years | Both Sexes, 15-49 Years | Both Sexes, 50-69 Years  | Both Sexes, 70-80 Years     |
|------------------------------------------------------------------|-----------------------------|-----------------------|------------------------|-------------------------|--------------------------|-----------------------------|
| Late maternal deaths                                             | 0<br>(0 - 0)                | --                    | 0<br>(0 - 0)           | 0<br>(0 - 0)            | --                       | --                          |
| Maternal deaths aggravated by HIV/AIDS                           | 0<br>(0 - 0)                | --                    | --                     | 0<br>(0 - 0)            | --                       | --                          |
| Other maternal disorders                                         | 0<br>(0 - 0)                | --                    | 0<br>(0 - 0)           | 0<br>(0 - 0)            | --                       | --                          |
| Neonatal disorders                                               | 20<br>(15 - 26)             | 20<br>(15 - 26)       | --                     | --                      | --                       | --                          |
| Neonatal preterm birth complications                             | 7<br>(4 - 10)               | 7<br>(4 - 10)         | --                     | --                      | --                       | --                          |
| Neonatal encephalopathy due to birth asphyxia and trauma         | 7<br>(4 - 11)               | 7<br>(4 - 11)         | --                     | --                      | --                       | --                          |
| Neonatal sepsis and other neonatal infections                    | 2<br>(1 - 5)                | 2<br>(1 - 5)          | --                     | --                      | --                       | --                          |
| Hemolytic disease and other neonatal jaundice                    | 0<br>(0 - 0)                | 0<br>(0 - 0)          | --                     | --                      | --                       | --                          |
| Other neonatal disorders                                         | 4<br>(2 - 8)                | 4<br>(2 - 8)          | --                     | --                      | --                       | --                          |
| Nutritional deficiencies                                         | 6<br>(5 - 8)                | 0<br>(0 - 0)          | 0<br>(0 - 0)           | 1<br>(1 - 1)            | 2<br>(2 - 3)             | 3<br>(2 - 4)                |
| Protein-energy malnutrition                                      | 3<br>(2 - 4)                | 0<br>(0 - 0)          | 0<br>(0 - 0)           | 0<br>(0 - 1)            | 1<br>(1 - 2)             | 1<br>(1 - 2)                |
| Iodine deficiency                                                | 0<br>(0 - 1)                | 0<br>(0 - 0)          | 0<br>(0 - 0)           | 0<br>(0 - 0)            | 0<br>(0 - 0)             | 0<br>(0 - 0)                |
| Iron-deficiency anemia                                           | 1<br>(1 - 2)                | 0<br>(0 - 0)          | 0<br>(0 - 0)           | 0<br>(0 - 0)            | 0<br>(0 - 1)             | 1<br>(0 - 1)                |
| Other nutritional deficiencies                                   | 2<br>(1 - 2)                | 0<br>(0 - 0)          | 0<br>(0 - 0)           | 0<br>(0 - 0)            | 1<br>(0 - 1)             | 1<br>(0 - 1)                |
| Other communicable, maternal, neonatal, and nutritional diseases | 5<br>(4 - 6)                | 1<br>(0 - 1)          | 0<br>(0 - 0)           | 1<br>(1 - 1)            | 2<br>(2 - 2)             | 2<br>(1 - 2)                |
| Sexually transmitted diseases excluding HIV                      | 1<br>(1 - 2)                | 0<br>(0 - 0)          | 0<br>(0 - 0)           | 0<br>(0 - 0)            | 0<br>(0 - 1)             | 0<br>(0 - 1)                |
| Syphilis                                                         | 1<br>(0 - 1)                | 0<br>(0 - 0)          | 0<br>(0 - 0)           | 0<br>(0 - 0)            | 0<br>(0 - 0)             | 0<br>(0 - 1)                |
| Chlamydial infection                                             | 0<br>(0 - 0)                | --                    | 0<br>(0 - 0)           | 0<br>(0 - 0)            | 0<br>(0 - 0)             | 0<br>(0 - 0)                |
| Gonococcal infection                                             | 0<br>(0 - 0)                | --                    | 0<br>(0 - 0)           | 0<br>(0 - 0)            | 0<br>(0 - 0)             | 0<br>(0 - 0)                |
| Other sexually transmitted diseases                              | 0<br>(0 - 0)                | --                    | 0<br>(0 - 0)           | 0<br>(0 - 0)            | 0<br>(0 - 0)             | 0<br>(0 - 0)                |
| Hepatitis                                                        | 1<br>(0 - 1)                | 0<br>(0 - 0)          | 0<br>(0 - 0)           | 0<br>(0 - 0)            | 0<br>(0 - 0)             | 0<br>(0 - 0)                |
| Acute hepatitis A                                                | 0<br>(0 - 0)                | 0<br>(0 - 0)          | 0<br>(0 - 0)           | 0<br>(0 - 0)            | 0<br>(0 - 0)             | 0<br>(0 - 0)                |
| Acute hepatitis B                                                | 0<br>(0 - 1)                | 0<br>(0 - 0)          | 0<br>(0 - 0)           | 0<br>(0 - 0)            | 0<br>(0 - 0)             | 0<br>(0 - 0)                |
| Acute hepatitis C                                                | 0<br>(0 - 0)                | --                    | 0<br>(0 - 0)           | 0<br>(0 - 0)            | 0<br>(0 - 0)             | 0<br>(0 - 0)                |
| Other infectious diseases                                        | 3<br>(2 - 4)                | 0<br>(0 - 1)          | 0<br>(0 - 0)           | 0<br>(0 - 1)            | 1<br>(1 - 2)             | 1<br>(1 - 2)                |
| Non-communicable diseases                                        | 14,704<br>(14,026 - 15,199) | 23<br>(18 - 30)       | 9<br>(7 - 10)          | 690<br>(583 - 745)      | 3,282<br>(3,119 - 3,427) | 10,701<br>(10,162 - 11,025) |
| Neoplasms                                                        | 3,408<br>(3,117 - 3,606)    | 2<br>(1 - 3)          | 4<br>(3 - 5)           | 176<br>(161 - 192)      | 1,246<br>(1,159 - 1,321) | 1,979<br>(1,769 - 2,118)    |
| Esophageal cancer                                                | 61<br>(48 - 72)             | --                    | --                     | 3<br>(2 - 4)            | 33<br>(24 - 40)          | 25<br>(21 - 30)             |
| Stomach cancer                                                   | 308<br>(269 - 355)          | --                    | --                     | 18<br>(15 - 21)         | 111<br>(97 - 126)        | 179<br>(150 - 215)          |
| Liver cancer                                                     | 90<br>(68 - 112)            | --                    | 0<br>(0 - 0)           | 4<br>(3 - 5)            | 33<br>(25 - 43)          | 54<br>(38 - 67)             |
| Liver cancer due to hepatitis B                                  | 14<br>(7 - 22)              | --                    | 0<br>(0 - 0)           | 1<br>(1 - 2)            | 6<br>(3 - 10)            | 7<br>(3 - 11)               |
| Liver cancer due to hepatitis C                                  | 43<br>(32 - 56)             | --                    | 0<br>(0 - 0)           | 2<br>(1 - 2)            | 16<br>(11 - 21)          | 26<br>(18 - 35)             |
| Liver cancer due to alcohol use                                  | 23<br>(16 - 32)             | --                    | --                     | 1<br>(0 - 1)            | 8<br>(5 - 11)            | 15<br>(10 - 21)             |
| Liver cancer due to other causes                                 | 9<br>(6 - 14)               | --                    | 0<br>(0 - 0)           | 1<br>(0 - 1)            | 3<br>(2 - 5)             | 6<br>(3 - 9)                |
| Larynx cancer                                                    | 31<br>(23 - 39)             | --                    | --                     | 2<br>(2 - 3)            | 17<br>(13 - 22)          | 11<br>(8 - 14)              |
| Tracheal, bronchus and lung cancer                               | 679<br>(626 - 735)          | --                    | --                     | 22<br>(18 - 26)         | 306<br>(278 - 335)       | 351<br>(315 - 384)          |
| Breast cancer                                                    | 222<br>(128 - 268)          | --                    | --                     | 20<br>(14 - 26)         | 90<br>(53 - 110)         | 112<br>(58 - 137)           |
| Cervical cancer                                                  | 72<br>(49 - 92)             | --                    | --                     | 9<br>(6 - 13)           | 29<br>(19 - 38)          | 34<br>(23 - 45)             |
| Uterine cancer                                                   | 47<br>(35 - 60)             | --                    | --                     | 1<br>(1 - 2)            | 15<br>(11 - 21)          | 31<br>(21 - 40)             |
| Prostate cancer                                                  | 222<br>(150 - 271)          | --                    | --                     | 1<br>(0 - 1)            | 43<br>(26 - 57)          | 178<br>(119 - 221)          |

Web Table 31- Estonia deaths with 95% UI by age, sex, and cause in 2013

| Cause                                         | Both Sexes, All Ages     | Both Sexes, 0-4 Years | Both Sexes, 5-14 Years | Both Sexes, 15-49 Years | Both Sexes, 50-69 Years  | Both Sexes, 70-80 Years  |
|-----------------------------------------------|--------------------------|-----------------------|------------------------|-------------------------|--------------------------|--------------------------|
| Colon and rectum cancer                       | 424<br>(385 - 465)       | --                    | --                     | 12<br>(10 - 14)         | 112<br>(102 - 122)       | 301<br>(266 - 337)       |
| Lip and oral cavity cancer                    | 56<br>(38 - 64)          | --                    | --                     | 4<br>(3 - 6)            | 30<br>(19 - 36)          | 22<br>(16 - 26)          |
| Nasopharynx cancer                            | 5<br>(4 - 8)             | --                    | 0<br>(0 - 0)           | 1<br>(1 - 1)            | 3<br>(2 - 5)             | 1<br>(1 - 2)             |
| Other pharynx cancer                          | 34<br>(24 - 44)          | --                    | --                     | 2<br>(1 - 3)            | 24<br>(17 - 32)          | 7<br>(5 - 10)            |
| Gallbladder and biliary tract cancer          | 50<br>(34 - 62)          | --                    | --                     | 1<br>(1 - 2)            | 16<br>(11 - 20)          | 33<br>(21 - 43)          |
| Pancreatic cancer                             | 241<br>(220 - 263)       | --                    | --                     | 9<br>(8 - 11)           | 88<br>(78 - 97)          | 144<br>(129 - 161)       |
| Malignant skin melanoma                       | 46<br>(30 - 61)          | --                    | --                     | 6<br>(4 - 8)            | 17<br>(12 - 24)          | 23<br>(14 - 30)          |
| Non-melanoma skin cancer                      | 21<br>(16 - 28)          | --                    | --                     | 1<br>(1 - 1)            | 4<br>(3 - 5)             | 17<br>(13 - 22)          |
| Ovarian cancer                                | 108<br>(89 - 125)        | --                    | --                     | 7<br>(5 - 9)            | 41<br>(33 - 50)          | 60<br>(45 - 72)          |
| Testicular cancer                             | 3<br>(2 - 4)             | --                    | --                     | 2<br>(1 - 2)            | 1<br>(0 - 1)             | 1<br>(1 - 1)             |
| Kidney cancer                                 | 110<br>(89 - 131)        | 0<br>(0 - 0)          | 0<br>(0 - 0)           | 4<br>(3 - 6)            | 45<br>(37 - 52)          | 61<br>(44 - 80)          |
| Bladder cancer                                | 89<br>(68 - 104)         | --                    | --                     | 1<br>(1 - 1)            | 19<br>(16 - 23)          | 69<br>(51 - 81)          |
| Brain and nervous system cancer               | 88<br>(68 - 101)         | 1<br>(0 - 1)          | 1<br>(1 - 2)           | 15<br>(13 - 18)         | 43<br>(35 - 51)          | 27<br>(16 - 35)          |
| Thyroid cancer                                | 16<br>(11 - 20)          | --                    | 0<br>(0 - 0)           | 0<br>(0 - 1)            | 4<br>(3 - 5)             | 11<br>(8 - 15)           |
| Mesothelioma                                  | 4<br>(3 - 5)             | --                    | --                     | 0<br>(0 - 0)            | 2<br>(1 - 2)             | 2<br>(1 - 3)             |
| Hodgkin lymphoma                              | 8<br>(6 - 11)            | 0<br>(0 - 0)          | 0<br>(0 - 0)           | 2<br>(2 - 3)            | 3<br>(2 - 4)             | 3<br>(2 - 4)             |
| Non-Hodgkin lymphoma                          | 76<br>(47 - 96)          | 0<br>(0 - 0)          | 0<br>(0 - 0)           | 6<br>(3 - 7)            | 24<br>(16 - 31)          | 46<br>(25 - 61)          |
| Multiple myeloma                              | 41<br>(27 - 55)          | --                    | --                     | 2<br>(1 - 2)            | 16<br>(10 - 22)          | 24<br>(15 - 34)          |
| Leukemia                                      | 125<br>(101 - 142)       | 1<br>(0 - 1)          | 1<br>(1 - 2)           | 10<br>(8 - 12)          | 36<br>(29 - 41)          | 77<br>(61 - 89)          |
| Other neoplasms                               | 130<br>(97 - 153)        | 1<br>(1 - 1)          | 1<br>(1 - 1)           | 11<br>(7 - 13)          | 44<br>(30 - 52)          | 74<br>(54 - 91)          |
| Cardiovascular diseases                       | 8,556<br>(8,059 - 9,109) | 0<br>(0 - 0)          | 0<br>(0 - 0)           | 178<br>(159 - 196)      | 1,416<br>(1,324 - 1,529) | 6,962<br>(6,541 - 7,429) |
| Rheumatic heart disease                       | 31<br>(25 - 43)          | 0<br>(0 - 0)          | 0<br>(0 - 0)           | 4<br>(3 - 6)            | 15<br>(11 - 23)          | 13<br>(8 - 17)           |
| Ischemic heart disease                        | 4,835<br>(4,287 - 5,784) | 0<br>(0 - 0)          | 0<br>(0 - 0)           | 72<br>(61 - 86)         | 702<br>(613 - 870)       | 4,061<br>(3,584 - 4,862) |
| Cerebrovascular disease                       | 2,050<br>(1,666 - 2,748) | 0<br>(0 - 0)          | 0<br>(0 - 0)           | 34<br>(26 - 41)         | 336<br>(277 - 418)       | 1,679<br>(1,342 - 2,311) |
| Ischemic stroke                               | 1,628<br>(1,313 - 2,277) | 0<br>(0 - 0)          | 0<br>(0 - 0)           | 7<br>(5 - 10)           | 199<br>(162 - 263)       | 1,421<br>(1,129 - 2,014) |
| Hemorrhagic stroke                            | 422<br>(333 - 582)       | 0<br>(0 - 0)          | 0<br>(0 - 0)           | 27<br>(20 - 33)         | 137<br>(107 - 176)       | 258<br>(197 - 389)       |
| Hypertensive heart disease                    | 1,038<br>(339 - 1,690)   | 0<br>(0 - 0)          | 0<br>(0 - 0)           | 12<br>(5 - 21)          | 147<br>(61 - 238)        | 878<br>(268 - 1,447)     |
| Cardiomyopathy and myocarditis                | 265<br>(199 - 320)       | 0<br>(0 - 0)          | 0<br>(0 - 0)           | 42<br>(34 - 54)         | 136<br>(107 - 169)       | 87<br>(49 - 113)         |
| Atrial fibrillation and flutter               | 44<br>(32 - 56)          | --                    | --                     | 0<br>(0 - 0)            | 3<br>(2 - 5)             | 40<br>(29 - 53)          |
| Aortic aneurysm                               | 66<br>(53 - 80)          | --                    | --                     | 3<br>(2 - 3)            | 21<br>(17 - 26)          | 42<br>(32 - 53)          |
| Peripheral vascular disease                   | 28<br>(22 - 36)          | --                    | --                     | 0<br>(0 - 0)            | 2<br>(2 - 3)             | 26<br>(20 - 34)          |
| Endocarditis                                  | 17<br>(12 - 23)          | 0<br>(0 - 0)          | 0<br>(0 - 0)           | 3<br>(2 - 5)            | 7<br>(5 - 11)            | 6<br>(4 - 8)             |
| Other cardiovascular and circulatory diseases | 183<br>(59 - 235)        | 0<br>(0 - 0)          | 0<br>(0 - 0)           | 8<br>(3 - 11)           | 45<br>(19 - 58)          | 131<br>(35 - 176)        |
| Chronic respiratory diseases                  | 306<br>(222 - 340)       | 0<br>(0 - 0)          | 0<br>(0 - 0)           | 8<br>(6 - 9)            | 69<br>(59 - 80)          | 229<br>(149 - 260)       |
| Chronic obstructive pulmonary disease         | 236<br>(167 - 268)       | 0<br>(0 - 0)          | 0<br>(0 - 0)           | 3<br>(2 - 4)            | 51<br>(42 - 60)          | 181<br>(117 - 210)       |
| Pneumoconiosis                                | 0<br>(0 - 0)             | 0<br>(0 - 0)          | 0<br>(0 - 0)           | 0<br>(0 - 0)            | 0<br>(0 - 0)             | 0<br>(0 - 0)             |
| Silicosis                                     | 0<br>(0 - 0)             | 0<br>(0 - 0)          | 0<br>(0 - 0)           | 0<br>(0 - 0)            | 0<br>(0 - 0)             | 0<br>(0 - 0)             |
| Asbestosis                                    | 0<br>(0 - 0)             | 0<br>(0 - 0)          | 0<br>(0 - 0)           | 0<br>(0 - 0)            | 0<br>(0 - 0)             | 0<br>(0 - 0)             |
| Coal workers pneumoconiosis                   | 0<br>(0 - 0)             | 0<br>(0 - 0)          | 0<br>(0 - 0)           | 0<br>(0 - 0)            | 0<br>(0 - 0)             | 0<br>(0 - 0)             |
| Other pneumoconiosis                          | 0<br>(0 - 0)             | 0<br>(0 - 0)          | 0<br>(0 - 0)           | 0<br>(0 - 0)            | 0<br>(0 - 0)             | 0<br>(0 - 0)             |



Web Table 31- Estonia deaths with 95% UI by age, sex, and cause in 2013

| Cause                                               | Both Sexes, All Ages   | Both Sexes, 0-4 Years | Both Sexes, 5-14 Years | Both Sexes, 15-49 Years | Both Sexes, 50-69 Years | Both Sexes, 70-80 Years |
|-----------------------------------------------------|------------------------|-----------------------|------------------------|-------------------------|-------------------------|-------------------------|
| Asthma                                              | 45<br>(29 - 56)        | 0<br>(0 - 0)          | 0<br>(0 - 0)           | 2<br>(1 - 2)            | 11<br>(9 - 14)          | 32<br>(18 - 42)         |
| Interstitial lung disease and pulmonary sarcoidosis | 22<br>(12 - 32)        | 0<br>(0 - 0)          | 0<br>(0 - 0)           | 2<br>(1 - 2)            | 6<br>(4 - 9)            | 14<br>(7 - 22)          |
| Other chronic respiratory diseases                  | 2<br>(2 - 3)           | 0<br>(0 - 0)          | 0<br>(0 - 0)           | 0<br>(0 - 1)            | 0<br>(0 - 1)            | 2<br>(1 - 2)            |
| Cirrhosis                                           | 257<br>(235 - 278)     | 0<br>(0 - 0)          | 0<br>(0 - 0)           | 61<br>(53 - 70)         | 148<br>(133 - 162)      | 47<br>(42 - 53)         |
| Cirrhosis due to hepatitis B                        | 42<br>(28 - 58)        | 0<br>(0 - 0)          | 0<br>(0 - 0)           | 10<br>(7 - 15)          | 24<br>(16 - 34)         | 8<br>(5 - 11)           |
| Cirrhosis due to hepatitis C                        | 97<br>(66 - 124)       | 0<br>(0 - 0)          | 0<br>(0 - 0)           | 22<br>(14 - 29)         | 57<br>(37 - 74)         | 18<br>(12 - 24)         |
| Cirrhosis due to alcohol use                        | 95<br>(74 - 119)       | --                    | --                     | 21<br>(15 - 28)         | 55<br>(42 - 71)         | 19<br>(14 - 25)         |
| Cirrhosis due to other causes                       | 22<br>(15 - 31)        | 0<br>(0 - 0)          | 0<br>(0 - 0)           | 8<br>(6 - 11)           | 11<br>(7 - 17)          | 3<br>(2 - 4)            |
| Digestive diseases                                  | 284<br>(224 - 316)     | 0<br>(0 - 0)          | 0<br>(0 - 0)           | 20<br>(15 - 24)         | 72<br>(56 - 81)         | 192<br>(148 - 218)      |
| Peptic ulcer disease                                | 50<br>(31 - 66)        | 0<br>(0 - 0)          | 0<br>(0 - 0)           | 4<br>(2 - 5)            | 17<br>(11 - 23)         | 29<br>(17 - 39)         |
| Gastritis and duodenitis                            | 1<br>(1 - 2)           | 0<br>(0 - 0)          | 0<br>(0 - 0)           | 0<br>(0 - 0)            | 0<br>(0 - 1)            | 1<br>(0 - 1)            |
| Appendicitis                                        | 2<br>(1 - 2)           | 0<br>(0 - 0)          | 0<br>(0 - 0)           | 0<br>(0 - 0)            | 1<br>(0 - 1)            | 1<br>(0 - 1)            |
| Paralytic ileus and intestinal obstruction          | 19<br>(11 - 31)        | 0<br>(0 - 0)          | 0<br>(0 - 0)           | 1<br>(1 - 2)            | 4<br>(3 - 7)            | 14<br>(8 - 22)          |
| Inguinal, femoral, and abdominal hernia             | 4<br>(2 - 6)           | 0<br>(0 - 0)          | 0<br>(0 - 0)           | 0<br>(0 - 0)            | 1<br>(0 - 1)            | 3<br>(1 - 5)            |
| Inflammatory bowel disease                          | 7<br>(5 - 10)          | 0<br>(0 - 0)          | 0<br>(0 - 0)           | 1<br>(1 - 1)            | 2<br>(1 - 3)            | 4<br>(2 - 6)            |
| Vascular intestinal disorders                       | 114<br>(79 - 146)      | 0<br>(0 - 0)          | 0<br>(0 - 0)           | 1<br>(0 - 2)            | 17<br>(10 - 27)         | 96<br>(67 - 122)        |
| Gallbladder and biliary diseases                    | 19<br>(14 - 26)        | 0<br>(0 - 0)          | 0<br>(0 - 0)           | 0<br>(0 - 0)            | 4<br>(3 - 5)            | 15<br>(10 - 21)         |
| Pancreatitis                                        | 49<br>(34 - 62)        | 0<br>(0 - 0)          | 0<br>(0 - 0)           | 11<br>(8 - 13)          | 20<br>(13 - 26)         | 18<br>(12 - 27)         |
| Other digestive diseases                            | 19<br>(12 - 25)        | 0<br>(0 - 0)          | 0<br>(0 - 0)           | 1<br>(1 - 2)            | 6<br>(4 - 8)            | 12<br>(7 - 16)          |
| Neurological disorders                              | 1,044<br>(893 - 1,237) | 1<br>(1 - 2)          | 1<br>(0 - 1)           | 24<br>(19 - 31)         | 68<br>(57 - 77)         | 950<br>(797 - 1,139)    |
| Alzheimer disease and other dementias               | 928<br>(776 - 1,119)   | --                    | --                     | 0<br>(0 - 0)            | 32<br>(25 - 40)         | 895<br>(743 - 1,086)    |
| Parkinson disease                                   | 45<br>(30 - 54)        | --                    | --                     | 0<br>(0 - 0)            | 5<br>(4 - 6)            | 40<br>(26 - 49)         |
| Epilepsy                                            | 30<br>(21 - 39)        | 0<br>(0 - 0)          | 0<br>(0 - 1)           | 15<br>(10 - 20)         | 12<br>(8 - 16)          | 3<br>(2 - 3)            |
| Multiple sclerosis                                  | 12<br>(8 - 19)         | --                    | --                     | 5<br>(3 - 8)            | 6<br>(4 - 9)            | 2<br>(1 - 3)            |
| Other neurological disorders                        | 29<br>(24 - 33)        | 1<br>(1 - 1)          | 0<br>(0 - 0)           | 4<br>(3 - 5)            | 13<br>(11 - 15)         | 11<br>(9 - 13)          |
| Mental and substance use disorders                  | 333<br>(208 - 386)     | 0<br>(0 - 0)          | 0<br>(0 - 0)           | 182<br>(109 - 212)      | 135<br>(67 - 166)       | 15<br>(9 - 18)          |
| Schizophrenia                                       | 1<br>(0 - 2)           | --                    | --                     | 0<br>(0 - 0)            | 0<br>(0 - 0)            | 1<br>(0 - 1)            |
| Alcohol use disorders                               | 208<br>(98 - 251)      | --                    | --                     | 80<br>(42 - 99)         | 118<br>(52 - 148)       | 9<br>(4 - 13)           |
| Drug use disorders                                  | 124<br>(63 - 144)      | 0<br>(0 - 0)          | --                     | 102<br>(48 - 121)       | 17<br>(12 - 22)         | 5<br>(3 - 6)            |
| Opioid use disorders                                | 54<br>(27 - 64)        | 0<br>(0 - 0)          | --                     | 45<br>(21 - 55)         | 7<br>(5 - 9)            | 2<br>(1 - 3)            |
| Cocaine use disorders                               | 3<br>(2 - 4)           | 0<br>(0 - 0)          | --                     | 3<br>(1 - 3)            | 0<br>(0 - 0)            | 0<br>(0 - 0)            |
| Amphetamine use disorders                           | 3<br>(1 - 3)           | 0<br>(0 - 0)          | --                     | 2<br>(1 - 3)            | 0<br>(0 - 1)            | 0<br>(0 - 0)            |
| Other drug use disorders                            | 64<br>(33 - 74)        | 0<br>(0 - 0)          | --                     | 51<br>(25 - 62)         | 10<br>(7 - 12)          | 2<br>(2 - 3)            |
| Eating disorders                                    | 0<br>(0 - 0)           | --                    | 0<br>(0 - 0)           | 0<br>(0 - 0)            | --                      | --                      |
| Anorexia nervosa                                    | 0<br>(0 - 0)           | --                    | 0<br>(0 - 0)           | 0<br>(0 - 0)            | --                      | --                      |
| Diabetes, urogenital, blood, and endocrine diseases | 436<br>(317 - 483)     | 1<br>(1 - 1)          | 1<br>(0 - 1)           | 27<br>(22 - 30)         | 107<br>(92 - 118)       | 301<br>(205 - 340)      |
| Diabetes mellitus                                   | 139<br>(114 - 155)     | 0<br>(0 - 0)          | 0<br>(0 - 0)           | 12<br>(10 - 14)         | 43<br>(37 - 50)         | 84<br>(64 - 97)         |
| Acute glomerulonephritis                            | 0<br>(0 - 0)           | 0<br>(0 - 0)          | 0<br>(0 - 0)           | 0<br>(0 - 0)            | 0<br>(0 - 0)            | 0<br>(0 - 0)            |
| Chronic kidney disease                              | 184<br>(77 - 217)      | 0<br>(0 - 0)          | 0<br>(0 - 0)           | 9<br>(5 - 10)           | 37<br>(21 - 43)         | 138<br>(50 - 168)       |
| Chronic kidney disease due to diabetes mellitus     | 3<br>(0 - 4)           | 0<br>(0 - 0)          | 0<br>(0 - 0)           | 0<br>(0 - 0)            | 1<br>(0 - 1)            | 1<br>(0 - 2)            |

Web Table 31- Estonia deaths with 95% UI by age, sex, and cause in 2013

| Cause                                               | Both Sexes, All Ages | Both Sexes, 0-4 Years | Both Sexes, 5-14 Years | Both Sexes, 15-49 Years | Both Sexes, 50-69 Years | Both Sexes, 70-80 Years |
|-----------------------------------------------------|----------------------|-----------------------|------------------------|-------------------------|-------------------------|-------------------------|
| Chronic kidney disease due to hypertension          | 107<br>(53 - 134)    | 0<br>(0 - 0)          | 0<br>(0 - 0)           | 3<br>(2 - 4)            | 21<br>(13 - 25)         | 83<br>(37 - 108)        |
| Chronic kidney disease due to glomerulonephritis    | 7<br>(4 - 11)        | 0<br>(0 - 0)          | 0<br>(0 - 0)           | 2<br>(1 - 2)            | 3<br>(2 - 4)            | 3<br>(1 - 5)            |
| Chronic kidney disease due to other causes          | 67<br>(17 - 100)     | 0<br>(0 - 0)          | 0<br>(0 - 0)           | 4<br>(1 - 5)            | 13<br>(5 - 18)          | 51<br>(10 - 81)         |
| Urinary diseases and male infertility               | 87<br>(71 - 120)     | 0<br>(0 - 0)          | 0<br>(0 - 0)           | 3<br>(2 - 4)            | 18<br>(14 - 26)         | 66<br>(53 - 94)         |
| Interstitial nephritis and urinary tract infections | 78<br>(64 - 109)     | 0<br>(0 - 0)          | 0<br>(0 - 0)           | 3<br>(2 - 3)            | 16<br>(13 - 24)         | 60<br>(48 - 85)         |
| Urolithiasis                                        | 3<br>(2 - 7)         | --                    | 0<br>(0 - 0)           | 0<br>(0 - 0)            | 1<br>(0 - 1)            | 3<br>(1 - 5)            |
| Other urinary diseases                              | 5<br>(3 - 8)         | 0<br>(0 - 0)          | 0<br>(0 - 0)           | 0<br>(0 - 0)            | 1<br>(1 - 2)            | 4<br>(2 - 6)            |
| Gynecological diseases                              | 0<br>(0 - 0)         | --                    | --                     | 0<br>(0 - 0)            | 0<br>(0 - 0)            | 0<br>(0 - 0)            |
| Uterine fibroids                                    | 0<br>(0 - 0)         | --                    | --                     | 0<br>(0 - 0)            | 0<br>(0 - 0)            | 0<br>(0 - 0)            |
| Polycystic ovarian syndrome                         | 0<br>(0 - 0)         | --                    | --                     | 0<br>(0 - 0)            | 0<br>(0 - 0)            | --                      |
| Endometriosis                                       | 0<br>(0 - 0)         | --                    | --                     | 0<br>(0 - 0)            | 0<br>(0 - 0)            | --                      |
| Genital prolapse                                    | 0<br>(0 - 0)         | --                    | --                     | 0<br>(0 - 0)            | 0<br>(0 - 0)            | 0<br>(0 - 0)            |
| Other gynecological diseases                        | 0<br>(0 - 0)         | --                    | --                     | 0<br>(0 - 0)            | 0<br>(0 - 0)            | 0<br>(0 - 0)            |
| Hemoglobinopathies and hemolytic anemias            | 3<br>(2 - 5)         | 0<br>(0 - 0)          | 0<br>(0 - 0)           | 0<br>(0 - 0)            | 1<br>(1 - 1)            | 2<br>(1 - 3)            |
| Thalassemias                                        | 0<br>(0 - 0)         | 0<br>(0 - 0)          | 0<br>(0 - 0)           | 0<br>(0 - 0)            | 0<br>(0 - 0)            | 0<br>(0 - 0)            |
| Sickle cell disorders                               | 0<br>(0 - 0)         | 0<br>(0 - 0)          | 0<br>(0 - 0)           | 0<br>(0 - 0)            | 0<br>(0 - 0)            | 0<br>(0 - 0)            |
| G6PD deficiency                                     | 0<br>(0 - 0)         | 0<br>(0 - 0)          | 0<br>(0 - 0)           | 0<br>(0 - 0)            | 0<br>(0 - 0)            | 0<br>(0 - 0)            |
| Other hemoglobinopathies and hemolytic anemias      | 3<br>(2 - 4)         | 0<br>(0 - 0)          | 0<br>(0 - 0)           | 0<br>(0 - 0)            | 1<br>(1 - 1)            | 2<br>(1 - 3)            |
| Endocrine, metabolic, blood, and immune disorders   | 24<br>(15 - 29)      | 1<br>(0 - 1)          | 0<br>(0 - 0)           | 3<br>(2 - 4)            | 9<br>(5 - 11)           | 11<br>(6 - 14)          |
| Musculoskeletal disorders                           | 30<br>(26 - 41)      | --                    | 0<br>(0 - 0)           | 4<br>(3 - 5)            | 11<br>(9 - 15)          | 16<br>(12 - 21)         |
| Rheumatoid arthritis                                | 15<br>(12 - 19)      | --                    | 0<br>(0 - 0)           | 1<br>(1 - 1)            | 5<br>(4 - 7)            | 9<br>(6 - 12)           |
| Other musculoskeletal disorders                     | 16<br>(13 - 23)      | --                    | 0<br>(0 - 0)           | 3<br>(2 - 4)            | 6<br>(5 - 9)            | 7<br>(5 - 10)           |
| Other non-communicable diseases                     | 50<br>(42 - 57)      | 19<br>(14 - 24)       | 3<br>(2 - 3)           | 9<br>(7 - 10)           | 10<br>(7 - 11)          | 10<br>(5 - 13)          |
| Congenital anomalies                                | 34<br>(27 - 40)      | 16<br>(12 - 22)       | 3<br>(2 - 3)           | 7<br>(6 - 9)            | 5<br>(4 - 6)            | 2<br>(2 - 3)            |
| Neural tube defects                                 | 0<br>(0 - 0)         | 0<br>(0 - 0)          | 0<br>(0 - 0)           | 0<br>(0 - 0)            | 0<br>(0 - 0)            | 0<br>(0 - 0)            |
| Congenital heart anomalies                          | 13<br>(10 - 17)      | 7<br>(4 - 9)          | 1<br>(1 - 1)           | 3<br>(3 - 4)            | 2<br>(1 - 2)            | 1<br>(0 - 1)            |
| Cleft lip and cleft palate                          | 0<br>(0 - 0)         | 0<br>(0 - 0)          | --                     | --                      | --                      | --                      |
| Down syndrome                                       | 3<br>(2 - 5)         | 1<br>(0 - 1)          | 0<br>(0 - 1)           | 1<br>(1 - 2)            | 1<br>(1 - 1)            | 0<br>(0 - 0)            |
| Chromosomal unbalanced rearrangements               | 1<br>(0 - 1)         | 0<br>(0 - 1)          | 0<br>(0 - 0)           | 0<br>(0 - 0)            | 0<br>(0 - 0)            | 0<br>(0 - 0)            |
| Other congenital anomalies                          | 16<br>(12 - 20)      | 8<br>(6 - 12)         | 1<br>(1 - 2)           | 2<br>(2 - 3)            | 2<br>(2 - 3)            | 2<br>(1 - 2)            |
| Skin and subcutaneous diseases                      | 14<br>(4 - 18)       | 0<br>(0 - 0)          | 0<br>(0 - 0)           | 1<br>(0 - 2)            | 5<br>(1 - 6)            | 8<br>(3 - 11)           |
| Cellulitis                                          | 4<br>(2 - 6)         | 0<br>(0 - 0)          | 0<br>(0 - 0)           | 1<br>(0 - 1)            | 2<br>(1 - 3)            | 2<br>(1 - 3)            |
| Pyoderma                                            | 8<br>(2 - 11)        | 0<br>(0 - 0)          | 0<br>(0 - 0)           | 1<br>(0 - 1)            | 2<br>(1 - 3)            | 5<br>(2 - 7)            |
| Decubitus ulcer                                     | 2<br>(0 - 2)         | 0<br>(0 - 0)          | 0<br>(0 - 0)           | 0<br>(0 - 0)            | 0<br>(0 - 0)            | 1<br>(0 - 2)            |
| Other skin and subcutaneous diseases                | 0<br>(0 - 0)         | 0<br>(0 - 0)          | 0<br>(0 - 0)           | 0<br>(0 - 0)            | 0<br>(0 - 0)            | 0<br>(0 - 0)            |
| Sudden infant death syndrome                        | 2<br>(1 - 5)         | 2<br>(1 - 5)          | --                     | --                      | --                      | --                      |
| Injuries                                            | 862<br>(762 - 1,123) | 10<br>(7 - 14)        | 9<br>(7 - 11)          | 342<br>(300 - 451)      | 304<br>(268 - 385)      | 198<br>(169 - 268)      |
| Transport injuries                                  | 119<br>(107 - 133)   | 1<br>(0 - 1)          | 2<br>(2 - 3)           | 61<br>(52 - 69)         | 34<br>(30 - 40)         | 21<br>(18 - 28)         |
| Road injuries                                       | 106<br>(94 - 119)    | 1<br>(0 - 1)          | 2<br>(1 - 3)           | 54<br>(46 - 63)         | 30<br>(26 - 35)         | 19<br>(16 - 25)         |
| Pedestrian road injuries                            | 33<br>(24 - 44)      | 0<br>(0 - 0)          | 1<br>(1 - 1)           | 10<br>(6 - 15)          | 12<br>(8 - 16)          | 10<br>(7 - 13)          |

Web Table 31- Estonia deaths with 95% UI by age, sex, and cause in 2013

| Cause                                           | Both Sexes, All Ages | Both Sexes, 0-4 Years | Both Sexes, 5-14 Years | Both Sexes, 15-49 Years | Both Sexes, 50-69 Years | Both Sexes, 70-80 Years |
|-------------------------------------------------|----------------------|-----------------------|------------------------|-------------------------|-------------------------|-------------------------|
| Cyclist road injuries                           | 11<br>(8 - 15)       | 0<br>(0 - 0)          | 0<br>(0 - 0)           | 3<br>(2 - 5)            | 4<br>(3 - 6)            | 3<br>(2 - 4)            |
| Motorcyclist road injuries                      | 6<br>(4 - 10)        | 0<br>(0 - 0)          | 0<br>(0 - 0)           | 4<br>(2 - 7)            | 1<br>(1 - 2)            | 1<br>(0 - 1)            |
| Motor vehicle road injuries                     | 56<br>(42 - 66)      | 0<br>(0 - 1)          | 1<br>(0 - 1)           | 36<br>(28 - 43)         | 12<br>(9 - 16)          | 6<br>(4 - 8)            |
| Other road injuries                             | 0<br>(0 - 1)         | 0<br>(0 - 0)          | 0<br>(0 - 0)           | 0<br>(0 - 0)            | 0<br>(0 - 0)            | 0<br>(0 - 0)            |
| Other transport injuries                        | 13<br>(10 - 17)      | 0<br>(0 - 0)          | 0<br>(0 - 0)           | 6<br>(5 - 8)            | 4<br>(3 - 6)            | 2<br>(1 - 3)            |
| Unintentional injuries                          | 414<br>(351 - 574)   | 8<br>(6 - 13)         | 6<br>(4 - 8)           | 129<br>(107 - 191)      | 153<br>(130 - 206)      | 118<br>(96 - 170)       |
| Falls                                           | 129<br>(104 - 193)   | 1<br>(0 - 1)          | 0<br>(0 - 1)           | 28<br>(21 - 40)         | 42<br>(33 - 61)         | 58<br>(43 - 96)         |
| Drowning                                        | 76<br>(56 - 157)     | 2<br>(1 - 5)          | 3<br>(2 - 6)           | 35<br>(24 - 80)         | 24<br>(18 - 49)         | 11<br>(8 - 20)          |
| Fire, heat, and hot substances                  | 86<br>(70 - 127)     | 2<br>(1 - 3)          | 1<br>(1 - 1)           | 23<br>(17 - 38)         | 35<br>(27 - 52)         | 25<br>(19 - 40)         |
| Poisonings                                      | 15<br>(12 - 29)      | 0<br>(0 - 0)          | 0<br>(0 - 0)           | 6<br>(4 - 12)           | 7<br>(5 - 14)           | 2<br>(1 - 3)            |
| Exposure to mechanical forces                   | 18<br>(15 - 22)      | 1<br>(1 - 2)          | 1<br>(0 - 1)           | 9<br>(7 - 11)           | 6<br>(5 - 8)            | 2<br>(1 - 2)            |
| Unintentional firearm injuries                  | 0<br>(0 - 0)         | 0<br>(0 - 0)          | 0<br>(0 - 0)           | 0<br>(0 - 0)            | 0<br>(0 - 0)            | 0<br>(0 - 0)            |
| Unintentional suffocation                       | 3<br>(2 - 4)         | 1<br>(1 - 2)          | 0<br>(0 - 0)           | 1<br>(1 - 1)            | 1<br>(0 - 1)            | 0<br>(0 - 0)            |
| Other exposure to mechanical forces             | 15<br>(12 - 19)      | 0<br>(0 - 0)          | 0<br>(0 - 1)           | 7<br>(6 - 10)           | 5<br>(4 - 8)            | 2<br>(1 - 2)            |
| Adverse effects of medical treatment            | 20<br>(15 - 27)      | 0<br>(0 - 0)          | 0<br>(0 - 0)           | 2<br>(1 - 3)            | 6<br>(4 - 8)            | 12<br>(9 - 17)          |
| Animal contact                                  | 2<br>(1 - 3)         | 0<br>(0 - 0)          | 0<br>(0 - 0)           | 0<br>(0 - 1)            | 1<br>(1 - 2)            | 1<br>(0 - 1)            |
| Venomous animal contact                         | 1<br>(1 - 2)         | 0<br>(0 - 0)          | 0<br>(0 - 0)           | 0<br>(0 - 0)            | 1<br>(0 - 1)            | 0<br>(0 - 1)            |
| Non-venomous animal contact                     | 1<br>(1 - 2)         | 0<br>(0 - 0)          | 0<br>(0 - 0)           | 0<br>(0 - 0)            | 0<br>(0 - 1)            | 0<br>(0 - 1)            |
| Foreign body                                    | 64<br>(40 - 95)      | 2<br>(1 - 3)          | 0<br>(0 - 1)           | 25<br>(15 - 37)         | 29<br>(19 - 45)         | 7<br>(5 - 11)           |
| Pulmonary aspiration and foreign body in airway | 64<br>(40 - 95)      | 2<br>(1 - 3)          | 0<br>(0 - 1)           | 25<br>(15 - 37)         | 29<br>(19 - 45)         | 7<br>(5 - 11)           |
| Foreign body in other body part                 | 0<br>(0 - 0)         | 0<br>(0 - 0)          | 0<br>(0 - 0)           | 0<br>(0 - 0)            | 0<br>(0 - 0)            | 0<br>(0 - 0)            |
| Other unintentional injuries                    | 4<br>(3 - 5)         | 0<br>(0 - 0)          | 0<br>(0 - 0)           | 2<br>(1 - 3)            | 1<br>(1 - 2)            | 0<br>(0 - 1)            |
| Self-harm and interpersonal violence            | 329<br>(286 - 447)   | 0<br>(0 - 1)          | 1<br>(1 - 1)           | 152<br>(129 - 212)      | 116<br>(99 - 157)       | 59<br>(49 - 78)         |
| Self-harm                                       | 251<br>(215 - 349)   | --                    | 1<br>(0 - 1)           | 108<br>(88 - 154)       | 91<br>(77 - 128)        | 51<br>(42 - 67)         |
| Interpersonal violence                          | 78<br>(64 - 121)     | 0<br>(0 - 1)          | 0<br>(0 - 0)           | 44<br>(35 - 71)         | 25<br>(19 - 40)         | 8<br>(6 - 12)           |
| Assault by firearm                              | 6<br>(3 - 13)        | 0<br>(0 - 0)          | 0<br>(0 - 0)           | 4<br>(2 - 10)           | 1<br>(0 - 2)            | 0<br>(0 - 0)            |
| Assault by sharp object                         | 43<br>(32 - 72)      | 0<br>(0 - 0)          | 0<br>(0 - 0)           | 25<br>(18 - 44)         | 15<br>(10 - 23)         | 3<br>(2 - 5)            |
| Assault by other means                          | 30<br>(21 - 45)      | 0<br>(0 - 1)          | 0<br>(0 - 0)           | 15<br>(10 - 22)         | 10<br>(7 - 15)          | 5<br>(4 - 7)            |

Web Table 31- Estonia deaths with 95% UI by age, sex, and cause in 2013

| Cause                                                             | Males, All Ages          | Males, 0-4 Years | Males, 5-14 Years | Males, 15-49 Years | Males, 50-69 Years       | Males, 70-80 Years       |
|-------------------------------------------------------------------|--------------------------|------------------|-------------------|--------------------|--------------------------|--------------------------|
| All causes                                                        | 7,543<br>(7,259 - 7,822) | 34<br>(27 - 42)  | 12<br>(10 - 13)   | 860<br>(810 - 919) | 2,522<br>(2,409 - 2,648) | 4,116<br>(4,009 - 4,226) |
| Communicable, maternal, neonatal, and nutritional diseases        | 194<br>(167 - 215)       | 16<br>(12 - 20)  | 1<br>(0 - 1)      | 55<br>(45 - 64)    | 75<br>(64 - 86)          | 48<br>(38 - 59)          |
| HIV/AIDS and tuberculosis                                         | 62<br>(53 - 72)          | 0<br>(0 - 0)     | 0<br>(0 - 0)      | 30<br>(25 - 37)    | 23<br>(19 - 28)          | 9<br>(7 - 11)            |
| Tuberculosis                                                      | 35<br>(28 - 40)          | 0<br>(0 - 0)     | 0<br>(0 - 0)      | 11<br>(8 - 14)     | 17<br>(13 - 21)          | 7<br>(6 - 9)             |
| HIV/AIDS                                                          | 26<br>(21 - 36)          | 0<br>(0 - 0)     | 0<br>(0 - 0)      | 19<br>(15 - 25)    | 6<br>(4 - 9)             | 1<br>(1 - 2)             |
| HIV/AIDS resulting in mycobacterial infection                     | 2<br>(1 - 2)             | 0<br>(0 - 0)     | 0<br>(0 - 0)      | 1<br>(1 - 2)       | 0<br>(0 - 1)             | 0<br>(0 - 0)             |
| HIV/AIDS resulting in other diseases                              | 25<br>(19 - 33)          | 0<br>(0 - 0)     | 0<br>(0 - 0)      | 18<br>(14 - 23)    | 6<br>(3 - 8)             | 1<br>(1 - 2)             |
| Diarrhea, lower respiratory, and other common infectious diseases | 116<br>(91 - 134)        | 3<br>(2 - 5)     | 1<br>(0 - 1)      | 24<br>(18 - 30)    | 50<br>(40 - 60)          | 38<br>(27 - 49)          |
| Diarrheal diseases                                                | 1<br>(0 - 1)             | 0<br>(0 - 0)     | 0<br>(0 - 0)      | 0<br>(0 - 0)       | 0<br>(0 - 0)             | 0<br>(0 - 0)             |
| Intestinal infectious diseases                                    | 1<br>(0 - 3)             | 0<br>(0 - 0)     | 0<br>(0 - 0)      | 0<br>(0 - 1)       | 0<br>(0 - 1)             | 0<br>(0 - 0)             |
| Typhoid fever                                                     | 1<br>(0 - 2)             | 0<br>(0 - 0)     | 0<br>(0 - 0)      | 0<br>(0 - 1)       | 0<br>(0 - 0)             | 0<br>(0 - 0)             |
| Paratyphoid fever                                                 | 0<br>(0 - 1)             | 0<br>(0 - 0)     | 0<br>(0 - 0)      | 0<br>(0 - 0)       | 0<br>(0 - 0)             | 0<br>(0 - 0)             |
| Other intestinal infectious diseases                              | 0<br>(0 - 1)             | 0<br>(0 - 0)     | 0<br>(0 - 0)      | 0<br>(0 - 0)       | 0<br>(0 - 0)             | 0<br>(0 - 0)             |
| Lower respiratory infections                                      | 106<br>(81 - 125)        | 2<br>(1 - 3)     | 0<br>(0 - 0)      | 21<br>(15 - 28)    | 47<br>(36 - 57)          | 36<br>(25 - 47)          |
| Upper respiratory infections                                      | 0<br>(0 - 0)             | 0<br>(0 - 0)     | 0<br>(0 - 0)      | 0<br>(0 - 0)       | 0<br>(0 - 0)             | 0<br>(0 - 0)             |
| Otitis media                                                      | 0<br>(0 - 0)             | 0<br>(0 - 0)     | 0<br>(0 - 0)      | 0<br>(0 - 0)       | 0<br>(0 - 0)             | 0<br>(0 - 0)             |
| Meningitis                                                        | 3<br>(3 - 4)             | 0<br>(0 - 1)     | 0<br>(0 - 0)      | 1<br>(1 - 1)       | 1<br>(1 - 2)             | 1<br>(0 - 1)             |
| Pneumococcal meningitis                                           | 1<br>(1 - 1)             | 0<br>(0 - 0)     | 0<br>(0 - 0)      | 0<br>(0 - 0)       | 0<br>(0 - 0)             | 0<br>(0 - 0)             |
| H influenzae type B meningitis                                    | 0<br>(0 - 1)             | 0<br>(0 - 0)     | 0<br>(0 - 0)      | 0<br>(0 - 0)       | 0<br>(0 - 0)             | 0<br>(0 - 0)             |
| Meningococcal meningitis                                          | 1<br>(0 - 1)             | 0<br>(0 - 0)     | 0<br>(0 - 0)      | 0<br>(0 - 0)       | 0<br>(0 - 0)             | 0<br>(0 - 0)             |
| Other meningitis                                                  | 1<br>(1 - 2)             | 0<br>(0 - 0)     | 0<br>(0 - 0)      | 1<br>(0 - 1)       | 1<br>(0 - 1)             | 0<br>(0 - 0)             |
| Encephalitis                                                      | 3<br>(2 - 6)             | 0<br>(0 - 0)     | 0<br>(0 - 0)      | 1<br>(1 - 2)       | 1<br>(1 - 2)             | 1<br>(1 - 2)             |
| Diphtheria                                                        | 0<br>(0 - 0)             | 0<br>(0 - 0)     | 0<br>(0 - 0)      | 0<br>(0 - 0)       | 0<br>(0 - 0)             | --                       |
| Whooping cough                                                    | 0<br>(0 - 0)             | 0<br>(0 - 0)     | 0<br>(0 - 0)      | 0<br>(0 - 0)       | 0<br>(0 - 0)             | --                       |
| Tetanus                                                           | 0<br>(0 - 0)             | 0<br>(0 - 0)     | 0<br>(0 - 0)      | 0<br>(0 - 0)       | 0<br>(0 - 0)             | 0<br>(0 - 0)             |
| Measles                                                           | 0<br>(0 - 0)             | 0<br>(0 - 0)     | 0<br>(0 - 0)      | 0<br>(0 - 0)       | 0<br>(0 - 0)             | --                       |
| Varicella and herpes zoster                                       | 0<br>(0 - 1)             | 0<br>(0 - 0)     | 0<br>(0 - 0)      | 0<br>(0 - 0)       | 0<br>(0 - 0)             | 0<br>(0 - 1)             |
| Neglected tropical diseases and malaria                           | 0<br>(0 - 0)             | 0<br>(0 - 0)     | 0<br>(0 - 0)      | 0<br>(0 - 0)       | 0<br>(0 - 0)             | 0<br>(0 - 0)             |
| Cysticercosis                                                     | 0<br>(0 - 0)             | 0<br>(0 - 0)     | 0<br>(0 - 0)      | 0<br>(0 - 0)       | 0<br>(0 - 0)             | 0<br>(0 - 0)             |
| Cystic echinococcosis                                             | 0<br>(0 - 0)             | 0<br>(0 - 0)     | 0<br>(0 - 0)      | 0<br>(0 - 0)       | 0<br>(0 - 0)             | 0<br>(0 - 0)             |
| Dengue                                                            | 0<br>(0 - 0)             | 0<br>(0 - 0)     | 0<br>(0 - 0)      | 0<br>(0 - 0)       | 0<br>(0 - 0)             | 0<br>(0 - 0)             |
| Rabies                                                            | 0<br>(0 - 0)             | 0<br>(0 - 0)     | 0<br>(0 - 0)      | 0<br>(0 - 0)       | 0<br>(0 - 0)             | 0<br>(0 - 0)             |
| Other neglected tropical diseases                                 | 0<br>(0 - 0)             | 0<br>(0 - 0)     | 0<br>(0 - 0)      | 0<br>(0 - 0)       | 0<br>(0 - 0)             | 0<br>(0 - 0)             |
| Maternal disorders                                                | --                       | --               | --                | --                 | --                       | --                       |
| Maternal hemorrhage                                               | --                       | --               | --                | --                 | --                       | --                       |
| Maternal sepsis and other maternal infections                     | --                       | --               | --                | --                 | --                       | --                       |
| Maternal hypertensive disorders                                   | --                       | --               | --                | --                 | --                       | --                       |
| Maternal obstructed labor                                         | --                       | --               | --                | --                 | --                       | --                       |
| Maternal abortive outcome                                         | --                       | --               | --                | --                 | --                       | --                       |
| Indirect maternal deaths                                          | --                       | --               | --                | --                 | --                       | --                       |

Web Table 31- Estonia deaths with 95% UI by age, sex, and cause in 2013

| Cause                                                            | Males, All Ages          | Males, 0-4 Years | Males, 5-14 Years | Males, 15-49 Years | Males, 50-69 Years       | Males, 70-80 Years       |
|------------------------------------------------------------------|--------------------------|------------------|-------------------|--------------------|--------------------------|--------------------------|
| Late maternal deaths                                             | --                       | --               | --                | --                 | --                       | --                       |
| Maternal deaths aggravated by HIV/AIDS                           | --                       | --               | --                | --                 | --                       | --                       |
| Other maternal disorders                                         | --                       | --               | --                | --                 | --                       | --                       |
| Neonatal disorders                                               | 12<br>(9 - 16)           | 12<br>(9 - 16)   | --                | --                 | --                       | --                       |
| Neonatal preterm birth complications                             | 4<br>(2 - 6)             | 4<br>(2 - 6)     | --                | --                 | --                       | --                       |
| Neonatal encephalopathy due to birth asphyxia and trauma         | 3<br>(2 - 6)             | 3<br>(2 - 6)     | --                | --                 | --                       | --                       |
| Neonatal sepsis and other neonatal infections                    | 2<br>(0 - 4)             | 2<br>(0 - 4)     | --                | --                 | --                       | --                       |
| Hemolytic disease and other neonatal jaundice                    | 0<br>(0 - 0)             | 0<br>(0 - 0)     | --                | --                 | --                       | --                       |
| Other neonatal disorders                                         | 3<br>(1 - 6)             | 3<br>(1 - 6)     | --                | --                 | --                       | --                       |
| Nutritional deficiencies                                         | 3<br>(2 - 4)             | 0<br>(0 - 0)     | 0<br>(0 - 0)      | 0<br>(0 - 1)       | 1<br>(1 - 2)             | 1<br>(1 - 2)             |
| Protein-energy malnutrition                                      | 1<br>(1 - 3)             | 0<br>(0 - 0)     | 0<br>(0 - 0)      | 0<br>(0 - 0)       | 1<br>(0 - 1)             | 1<br>(0 - 1)             |
| Iodine deficiency                                                | 0<br>(0 - 0)             | 0<br>(0 - 0)     | 0<br>(0 - 0)      | 0<br>(0 - 0)       | 0<br>(0 - 0)             | 0<br>(0 - 0)             |
| Iron-deficiency anemia                                           | 0<br>(0 - 1)             | 0<br>(0 - 0)     | 0<br>(0 - 0)      | 0<br>(0 - 0)       | 0<br>(0 - 0)             | 0<br>(0 - 0)             |
| Other nutritional deficiencies                                   | 1<br>(0 - 1)             | 0<br>(0 - 0)     | 0<br>(0 - 0)      | 0<br>(0 - 0)       | 0<br>(0 - 0)             | 0<br>(0 - 1)             |
| Other communicable, maternal, neonatal, and nutritional diseases | 2<br>(2 - 3)             | 0<br>(0 - 0)     | 0<br>(0 - 0)      | 1<br>(0 - 1)       | 1<br>(1 - 1)             | 1<br>(0 - 1)             |
| Sexually transmitted diseases excluding HIV                      | 0<br>(0 - 1)             | 0<br>(0 - 0)     | 0<br>(0 - 0)      | 0<br>(0 - 0)       | 0<br>(0 - 0)             | 0<br>(0 - 0)             |
| Syphilis                                                         | 0<br>(0 - 1)             | 0<br>(0 - 0)     | 0<br>(0 - 0)      | 0<br>(0 - 0)       | 0<br>(0 - 0)             | 0<br>(0 - 0)             |
| Chlamydial infection                                             | --                       | --               | --                | --                 | --                       | --                       |
| Gonococcal infection                                             | 0<br>(0 - 0)             | --               | 0<br>(0 - 0)      | 0<br>(0 - 0)       | 0<br>(0 - 0)             | 0<br>(0 - 0)             |
| Other sexually transmitted diseases                              | 0<br>(0 - 0)             | --               | 0<br>(0 - 0)      | 0<br>(0 - 0)       | 0<br>(0 - 0)             | 0<br>(0 - 0)             |
| Hepatitis                                                        | 0<br>(0 - 1)             | 0<br>(0 - 0)     | 0<br>(0 - 0)      | 0<br>(0 - 0)       | 0<br>(0 - 0)             | 0<br>(0 - 0)             |
| Acute hepatitis A                                                | 0<br>(0 - 0)             | 0<br>(0 - 0)     | 0<br>(0 - 0)      | 0<br>(0 - 0)       | 0<br>(0 - 0)             | 0<br>(0 - 0)             |
| Acute hepatitis B                                                | 0<br>(0 - 0)             | 0<br>(0 - 0)     | 0<br>(0 - 0)      | 0<br>(0 - 0)       | 0<br>(0 - 0)             | 0<br>(0 - 0)             |
| Acute hepatitis C                                                | 0<br>(0 - 0)             | --               | 0<br>(0 - 0)      | 0<br>(0 - 0)       | 0<br>(0 - 0)             | 0<br>(0 - 0)             |
| Other infectious diseases                                        | 1<br>(1 - 2)             | 0<br>(0 - 0)     | 0<br>(0 - 0)      | 0<br>(0 - 1)       | 0<br>(0 - 1)             | 0<br>(0 - 1)             |
| Non-communicable diseases                                        | 6,698<br>(6,426 - 6,952) | 13<br>(9 - 17)   | 5<br>(3 - 6)      | 511<br>(414 - 559) | 2,203<br>(2,074 - 2,322) | 3,967<br>(3,861 - 4,077) |
| Neoplasms                                                        | 1,874<br>(1,762 - 1,975) | 1<br>(1 - 2)     | 2<br>(2 - 3)      | 95<br>(85 - 105)   | 773<br>(722 - 824)       | 1,003<br>(928 - 1,066)   |
| Esophageal cancer                                                | 49<br>(36 - 59)          | --               | --                | 3<br>(2 - 4)       | 30<br>(21 - 36)          | 16<br>(12 - 20)          |
| Stomach cancer                                                   | 174<br>(156 - 197)       | --               | --                | 11<br>(9 - 14)     | 73<br>(64 - 85)          | 90<br>(77 - 105)         |
| Liver cancer                                                     | 48<br>(33 - 65)          | --               | 0<br>(0 - 0)      | 2<br>(2 - 4)       | 23<br>(16 - 33)          | 23<br>(14 - 31)          |
| Liver cancer due to hepatitis B                                  | 9<br>(3 - 14)            | --               | 0<br>(0 - 0)      | 1<br>(0 - 1)       | 5<br>(2 - 8)             | 4<br>(1 - 6)             |
| Liver cancer due to hepatitis C                                  | 23<br>(14 - 32)          | --               | 0<br>(0 - 0)      | 1<br>(1 - 2)       | 11<br>(7 - 16)           | 11<br>(6 - 16)           |
| Liver cancer due to alcohol use                                  | 14<br>(8 - 20)           | --               | --                | 0<br>(0 - 1)       | 6<br>(3 - 10)            | 8<br>(4 - 11)            |
| Liver cancer due to other causes                                 | 3<br>(1 - 4)             | --               | 0<br>(0 - 0)      | 0<br>(0 - 0)       | 1<br>(1 - 2)             | 1<br>(1 - 2)             |
| Larynx cancer                                                    | 29<br>(22 - 38)          | --               | --                | 2<br>(1 - 3)       | 16<br>(12 - 22)          | 10<br>(7 - 14)           |
| Tracheal, bronchus and lung cancer                               | 523<br>(475 - 567)       | --               | --                | 17<br>(14 - 22)    | 250<br>(223 - 277)       | 255<br>(229 - 281)       |
| Breast cancer                                                    | 1<br>(0 - 1)             | --               | --                | 0<br>(0 - 0)       | 0<br>(0 - 1)             | 0<br>(0 - 1)             |
| Cervical cancer                                                  | --                       | --               | --                | --                 | --                       | --                       |
| Uterine cancer                                                   | --                       | --               | --                | --                 | --                       | --                       |
| Prostate cancer                                                  | 222<br>(150 - 271)       | --               | --                | 1<br>(0 - 1)       | 43<br>(26 - 57)          | 178<br>(119 - 221)       |

Web Table 31- Estonia deaths with 95% UI by age, sex, and cause in 2013

| Cause                                         | Males, All Ages          | Males, 0-4 Years | Males, 5-14 Years | Males, 15-49 Years | Males, 50-69 Years     | Males, 70-80 Years       |
|-----------------------------------------------|--------------------------|------------------|-------------------|--------------------|------------------------|--------------------------|
| Colon and rectum cancer                       | 209<br>(191 - 228)       | --               | --                | 7<br>(6 - 9)       | 68<br>(61 - 75)        | 133<br>(118 - 149)       |
| Lip and oral cavity cancer                    | 44<br>(26 - 51)          | --               | --                | 4<br>(2 - 5)       | 26<br>(15 - 32)        | 14<br>(9 - 18)           |
| Nasopharynx cancer                            | 5<br>(3 - 7)             | --               | 0<br>(0 - 0)      | 1<br>(0 - 1)       | 3<br>(2 - 5)           | 1<br>(1 - 1)             |
| Other pharynx cancer                          | 31<br>(22 - 41)          | --               | --                | 2<br>(1 - 3)       | 23<br>(15 - 31)        | 6<br>(4 - 9)             |
| Gallbladder and biliary tract cancer          | 15<br>(9 - 20)           | --               | --                | 1<br>(0 - 1)       | 6<br>(4 - 8)           | 9<br>(5 - 12)            |
| Pancreatic cancer                             | 117<br>(106 - 129)       | --               | --                | 7<br>(5 - 8)       | 55<br>(48 - 62)        | 55<br>(49 - 63)          |
| Malignant skin melanoma                       | 21<br>(11 - 34)          | --               | --                | 3<br>(1 - 5)       | 9<br>(5 - 15)          | 9<br>(4 - 14)            |
| Non-melanoma skin cancer                      | 10<br>(6 - 15)           | --               | --                | 0<br>(0 - 1)       | 2<br>(1 - 4)           | 7<br>(4 - 11)            |
| Ovarian cancer                                | --                       | --               | --                | --                 | --                     | --                       |
| Testicular cancer                             | 3<br>(2 - 4)             | --               | --                | 2<br>(1 - 2)       | 1<br>(0 - 1)           | 1<br>(1 - 1)             |
| Kidney cancer                                 | 75<br>(63 - 89)          | 0<br>(0 - 0)     | 0<br>(0 - 0)      | 3<br>(2 - 5)       | 35<br>(28 - 43)        | 37<br>(29 - 46)          |
| Bladder cancer                                | 65<br>(46 - 77)          | --               | --                | 1<br>(1 - 1)       | 16<br>(13 - 20)        | 48<br>(32 - 58)          |
| Brain and nervous system cancer               | 45<br>(33 - 54)          | 0<br>(0 - 1)     | 1<br>(1 - 1)      | 9<br>(7 - 12)      | 24<br>(18 - 31)        | 10<br>(6 - 14)           |
| Thyroid cancer                                | 4<br>(3 - 5)             | --               | 0<br>(0 - 0)      | 0<br>(0 - 0)       | 2<br>(1 - 2)           | 2<br>(2 - 3)             |
| Mesothelioma                                  | 3<br>(2 - 4)             | --               | --                | 0<br>(0 - 0)       | 1<br>(1 - 2)           | 1<br>(1 - 2)             |
| Hodgkin lymphoma                              | 4<br>(3 - 7)             | 0<br>(0 - 0)     | 0<br>(0 - 0)      | 1<br>(1 - 2)       | 2<br>(1 - 3)           | 1<br>(1 - 2)             |
| Non-Hodgkin lymphoma                          | 40<br>(20 - 51)          | 0<br>(0 - 0)     | 0<br>(0 - 0)      | 4<br>(2 - 5)       | 15<br>(8 - 20)         | 22<br>(10 - 29)          |
| Multiple myeloma                              | 19<br>(10 - 29)          | --               | --                | 1<br>(1 - 2)       | 8<br>(4 - 13)          | 10<br>(5 - 14)           |
| Leukemia                                      | 64<br>(55 - 73)          | 0<br>(0 - 1)     | 1<br>(0 - 1)      | 6<br>(5 - 7)       | 21<br>(16 - 24)        | 37<br>(31 - 43)          |
| Other neoplasms                               | 55<br>(33 - 66)          | 0<br>(0 - 0)     | 0<br>(0 - 1)      | 6<br>(3 - 8)       | 23<br>(12 - 29)        | 25<br>(15 - 32)          |
| Cardiovascular diseases                       | 3,455<br>(3,311 - 3,604) | 0<br>(0 - 0)     | 0<br>(0 - 0)      | 147<br>(128 - 164) | 1,017<br>(951 - 1,089) | 2,291<br>(2,200 - 2,400) |
| Rheumatic heart disease                       | 10<br>(7 - 19)           | 0<br>(0 - 0)     | 0<br>(0 - 0)      | 2<br>(1 - 4)       | 6<br>(4 - 12)          | 2<br>(1 - 4)             |
| Ischemic heart disease                        | 1,938<br>(1,706 - 2,345) | 0<br>(0 - 0)     | 0<br>(0 - 0)      | 63<br>(52 - 75)    | 531<br>(465 - 633)     | 1,344<br>(1,165 - 1,656) |
| Cerebrovascular disease                       | 892<br>(702 - 1,068)     | 0<br>(0 - 0)     | 0<br>(0 - 0)      | 26<br>(17 - 34)    | 231<br>(178 - 281)     | 635<br>(499 - 779)       |
| Ischemic stroke                               | 671<br>(542 - 813)       | 0<br>(0 - 0)     | 0<br>(0 - 0)      | 6<br>(4 - 8)       | 139<br>(109 - 172)     | 527<br>(421 - 647)       |
| Hemorrhagic stroke                            | 221<br>(131 - 308)       | 0<br>(0 - 0)     | 0<br>(0 - 0)      | 20<br>(12 - 27)    | 92<br>(58 - 122)       | 109<br>(58 - 167)        |
| Hypertensive heart disease                    | 289<br>(101 - 524)       | 0<br>(0 - 0)     | 0<br>(0 - 0)      | 11<br>(4 - 19)     | 94<br>(36 - 163)       | 185<br>(56 - 354)        |
| Cardiomyopathy and myocarditis                | 180<br>(132 - 229)       | 0<br>(0 - 0)     | 0<br>(0 - 0)      | 35<br>(27 - 46)    | 105<br>(79 - 136)      | 40<br>(22 - 55)          |
| Atrial fibrillation and flutter               | 14<br>(6 - 19)           | --               | --                | 0<br>(0 - 0)       | 3<br>(1 - 4)           | 11<br>(4 - 16)           |
| Aortic aneurysm                               | 43<br>(34 - 52)          | --               | --                | 2<br>(1 - 3)       | 16<br>(12 - 21)        | 25<br>(19 - 31)          |
| Peripheral vascular disease                   | 12<br>(9 - 16)           | --               | --                | 0<br>(0 - 0)       | 2<br>(1 - 3)           | 10<br>(7 - 14)           |
| Endocarditis                                  | 10<br>(7 - 16)           | 0<br>(0 - 0)     | 0<br>(0 - 0)      | 3<br>(2 - 4)       | 5<br>(3 - 8)           | 2<br>(1 - 4)             |
| Other cardiovascular and circulatory diseases | 66<br>(23 - 82)          | 0<br>(0 - 0)     | 0<br>(0 - 0)      | 5<br>(1 - 6)       | 25<br>(10 - 33)        | 35<br>(10 - 46)          |
| Chronic respiratory diseases                  | 195<br>(137 - 219)       | 0<br>(0 - 0)     | 0<br>(0 - 0)      | 5<br>(4 - 6)       | 53<br>(45 - 65)        | 137<br>(87 - 157)        |
| Chronic obstructive pulmonary disease         | 168<br>(115 - 190)       | 0<br>(0 - 0)     | 0<br>(0 - 0)      | 3<br>(2 - 3)       | 43<br>(36 - 52)        | 122<br>(77 - 141)        |
| Pneumoconiosis                                | 0<br>(0 - 0)             | 0<br>(0 - 0)     | 0<br>(0 - 0)      | 0<br>(0 - 0)       | 0<br>(0 - 0)           | 0<br>(0 - 0)             |
| Silicosis                                     | 0<br>(0 - 0)             | 0<br>(0 - 0)     | 0<br>(0 - 0)      | 0<br>(0 - 0)       | 0<br>(0 - 0)           | 0<br>(0 - 0)             |
| Asbestosis                                    | 0<br>(0 - 0)             | 0<br>(0 - 0)     | 0<br>(0 - 0)      | 0<br>(0 - 0)       | 0<br>(0 - 0)           | 0<br>(0 - 0)             |
| Coal workers pneumoconiosis                   | 0<br>(0 - 0)             | 0<br>(0 - 0)     | 0<br>(0 - 0)      | 0<br>(0 - 0)       | 0<br>(0 - 0)           | 0<br>(0 - 0)             |
| Other pneumoconiosis                          | 0<br>(0 - 0)             | 0<br>(0 - 0)     | 0<br>(0 - 0)      | 0<br>(0 - 0)       | 0<br>(0 - 0)           | 0<br>(0 - 0)             |

Web Table 31- Estonia deaths with 95% UI by age, sex, and cause in 2013

| Cause                                               | Males, All Ages    | Males, 0-4 Years | Males, 5-14 Years | Males, 15-49 Years | Males, 50-69 Years | Males, 70-80 Years |
|-----------------------------------------------------|--------------------|------------------|-------------------|--------------------|--------------------|--------------------|
| Asthma                                              | 16<br>(12 - 20)    | 0<br>(0 - 0)     | 0<br>(0 - 0)      | 1<br>(1 - 1)       | 6<br>(5 - 8)       | 9<br>(6 - 12)      |
| Interstitial lung disease and pulmonary sarcoidosis | 10<br>(5 - 14)     | 0<br>(0 - 0)     | 0<br>(0 - 0)      | 1<br>(1 - 2)       | 4<br>(2 - 6)       | 5<br>(2 - 7)       |
| Other chronic respiratory diseases                  | 1<br>(1 - 2)       | 0<br>(0 - 0)     | 0<br>(0 - 0)      | 0<br>(0 - 1)       | 0<br>(0 - 0)       | 1<br>(0 - 1)       |
| Cirrhosis                                           | 167<br>(152 - 183) | 0<br>(0 - 0)     | 0<br>(0 - 0)      | 45<br>(38 - 53)    | 97<br>(86 - 109)   | 25<br>(22 - 29)    |
| Cirrhosis due to hepatitis B                        | 24<br>(12 - 40)    | 0<br>(0 - 0)     | 0<br>(0 - 0)      | 6<br>(4 - 11)      | 14<br>(7 - 24)     | 4<br>(1 - 6)       |
| Cirrhosis due to hepatitis C                        | 54<br>(30 - 78)    | 0<br>(0 - 0)     | 0<br>(0 - 0)      | 15<br>(8 - 20)     | 32<br>(16 - 47)    | 8<br>(4 - 12)      |
| Cirrhosis due to alcohol use                        | 75<br>(57 - 95)    | --               | --                | 18<br>(13 - 25)    | 44<br>(33 - 57)    | 12<br>(9 - 16)     |
| Cirrhosis due to other causes                       | 14<br>(9 - 20)     | 0<br>(0 - 0)     | 0<br>(0 - 0)      | 6<br>(4 - 8)       | 7<br>(4 - 10)      | 1<br>(1 - 2)       |
| Digestive diseases                                  | 136<br>(110 - 152) | 0<br>(0 - 0)     | 0<br>(0 - 0)      | 16<br>(12 - 19)    | 50<br>(38 - 57)    | 70<br>(57 - 80)    |
| Peptic ulcer disease                                | 29<br>(18 - 41)    | 0<br>(0 - 0)     | 0<br>(0 - 0)      | 3<br>(2 - 5)       | 13<br>(8 - 18)     | 13<br>(7 - 20)     |
| Gastritis and duodenitis                            | 1<br>(0 - 1)       | 0<br>(0 - 0)     | 0<br>(0 - 0)      | 0<br>(0 - 0)       | 0<br>(0 - 1)       | 0<br>(0 - 1)       |
| Appendicitis                                        | 1<br>(1 - 2)       | 0<br>(0 - 0)     | 0<br>(0 - 0)      | 0<br>(0 - 0)       | 1<br>(0 - 1)       | 0<br>(0 - 1)       |
| Paralytic ileus and intestinal obstruction          | 8<br>(4 - 14)      | 0<br>(0 - 0)     | 0<br>(0 - 0)      | 1<br>(1 - 2)       | 3<br>(1 - 5)       | 4<br>(2 - 7)       |
| Inguinal, femoral, and abdominal hernia             | 2<br>(1 - 2)       | 0<br>(0 - 0)     | 0<br>(0 - 0)      | 0<br>(0 - 0)       | 0<br>(0 - 1)       | 1<br>(0 - 2)       |
| Inflammatory bowel disease                          | 3<br>(2 - 5)       | 0<br>(0 - 0)     | 0<br>(0 - 0)      | 1<br>(0 - 1)       | 1<br>(1 - 2)       | 1<br>(1 - 2)       |
| Vascular intestinal disorders                       | 44<br>(23 - 68)    | 0<br>(0 - 0)     | 0<br>(0 - 0)      | 1<br>(0 - 1)       | 11<br>(5 - 20)     | 32<br>(18 - 49)    |
| Gallbladder and biliary diseases                    | 8<br>(5 - 12)      | 0<br>(0 - 0)     | 0<br>(0 - 0)      | 0<br>(0 - 0)       | 2<br>(1 - 3)       | 6<br>(3 - 9)       |
| Pancreatitis                                        | 31<br>(20 - 41)    | 0<br>(0 - 0)     | 0<br>(0 - 0)      | 9<br>(6 - 12)      | 15<br>(9 - 20)     | 7<br>(4 - 12)      |
| Other digestive diseases                            | 10<br>(5 - 13)     | 0<br>(0 - 0)     | 0<br>(0 - 0)      | 1<br>(1 - 2)       | 4<br>(2 - 6)       | 4<br>(2 - 7)       |
| Neurological disorders                              | 379<br>(317 - 451) | 1<br>(0 - 1)     | 0<br>(0 - 1)      | 17<br>(12 - 23)    | 37<br>(31 - 44)    | 324<br>(263 - 396) |
| Alzheimer disease and other dementias               | 315<br>(253 - 389) | --               | --                | 0<br>(0 - 0)       | 17<br>(12 - 22)    | 298<br>(237 - 372) |
| Parkinson disease                                   | 21<br>(14 - 26)    | --               | --                | 0<br>(0 - 0)       | 3<br>(2 - 4)       | 19<br>(12 - 23)    |
| Epilepsy                                            | 24<br>(16 - 32)    | 0<br>(0 - 0)     | 0<br>(0 - 0)      | 12<br>(8 - 17)     | 10<br>(6 - 13)     | 2<br>(1 - 3)       |
| Multiple sclerosis                                  | 4<br>(2 - 8)       | --               | --                | 2<br>(1 - 4)       | 2<br>(1 - 4)       | 0<br>(0 - 1)       |
| Other neurological disorders                        | 15<br>(11 - 17)    | 1<br>(0 - 1)     | 0<br>(0 - 0)      | 3<br>(2 - 4)       | 6<br>(5 - 8)       | 4<br>(3 - 6)       |
| Mental and substance use disorders                  | 281<br>(166 - 326) | 0<br>(0 - 0)     | 0<br>(0 - 0)      | 162<br>(86 - 190)  | 109<br>(49 - 133)  | 10<br>(6 - 13)     |
| Schizophrenia                                       | 0<br>(0 - 1)       | --               | --                | 0<br>(0 - 0)       | 0<br>(0 - 0)       | 0<br>(0 - 0)       |
| Alcohol use disorders                               | 169<br>(74 - 205)  | --               | --                | 68<br>(31 - 84)    | 94<br>(39 - 119)   | 7<br>(3 - 10)      |
| Drug use disorders                                  | 111<br>(51 - 131)  | 0<br>(0 - 0)     | --                | 94<br>(40 - 113)   | 14<br>(9 - 19)     | 3<br>(2 - 4)       |
| Opioid use disorders                                | 49<br>(22 - 59)    | 0<br>(0 - 0)     | --                | 42<br>(18 - 51)    | 6<br>(4 - 8)       | 1<br>(1 - 2)       |
| Cocaine use disorders                               | 3<br>(1 - 3)       | 0<br>(0 - 0)     | --                | 2<br>(1 - 3)       | 0<br>(0 - 0)       | 0<br>(0 - 0)       |
| Amphetamine use disorders                           | 2<br>(1 - 3)       | 0<br>(0 - 0)     | --                | 2<br>(1 - 3)       | 0<br>(0 - 0)       | 0<br>(0 - 0)       |
| Other drug use disorders                            | 57<br>(27 - 68)    | 0<br>(0 - 0)     | --                | 47<br>(21 - 58)    | 8<br>(5 - 10)      | 2<br>(1 - 2)       |
| Eating disorders                                    | 0<br>(0 - 0)       | --               | 0<br>(0 - 0)      | 0<br>(0 - 0)       | --                 | --                 |
| Anorexia nervosa                                    | 0<br>(0 - 0)       | --               | 0<br>(0 - 0)      | 0<br>(0 - 0)       | --                 | --                 |
| Diabetes, urogenital, blood, and endocrine diseases | 178<br>(144 - 201) | 0<br>(0 - 1)     | 0<br>(0 - 0)      | 18<br>(14 - 20)    | 58<br>(51 - 65)    | 102<br>(76 - 118)  |
| Diabetes mellitus                                   | 56<br>(50 - 62)    | 0<br>(0 - 0)     | 0<br>(0 - 0)      | 8<br>(7 - 10)      | 23<br>(19 - 27)    | 25<br>(21 - 29)    |
| Acute glomerulonephritis                            | 0<br>(0 - 0)       | 0<br>(0 - 0)     | 0<br>(0 - 0)      | 0<br>(0 - 0)       | 0<br>(0 - 0)       | 0<br>(0 - 0)       |
| Chronic kidney disease                              | 79<br>(38 - 94)    | 0<br>(0 - 0)     | 0<br>(0 - 0)      | 6<br>(3 - 7)       | 22<br>(14 - 27)    | 51<br>(20 - 62)    |
| Chronic kidney disease due to diabetes mellitus     | 1<br>(0 - 1)       | 0<br>(0 - 0)     | 0<br>(0 - 0)      | 0<br>(0 - 0)       | 0<br>(0 - 1)       | 0<br>(0 - 1)       |

Web Table 31- Estonia deaths with 95% UI by age, sex, and cause in 2013

| Cause                                               | Males, All Ages    | Males, 0-4 Years | Males, 5-14 Years | Males, 15-49 Years | Males, 50-69 Years | Males, 70-80 Years |
|-----------------------------------------------------|--------------------|------------------|-------------------|--------------------|--------------------|--------------------|
| Chronic kidney disease due to hypertension          | 48<br>(24 - 59)    | 0<br>(0 - 0)     | 0<br>(0 - 0)      | 2<br>(1 - 3)       | 13<br>(8 - 17)     | 33<br>(14 - 42)    |
| Chronic kidney disease due to glomerulonephritis    | 4<br>(2 - 7)       | 0<br>(0 - 0)     | 0<br>(0 - 0)      | 1<br>(1 - 2)       | 2<br>(1 - 3)       | 1<br>(1 - 2)       |
| Chronic kidney disease due to other causes          | 26<br>(9 - 46)     | 0<br>(0 - 0)     | 0<br>(0 - 0)      | 2<br>(1 - 4)       | 7<br>(3 - 12)      | 17<br>(4 - 32)     |
| Urinary diseases and male infertility               | 33<br>(27 - 52)    | 0<br>(0 - 0)     | 0<br>(0 - 0)      | 2<br>(1 - 2)       | 9<br>(7 - 14)      | 23<br>(18 - 38)    |
| Interstitial nephritis and urinary tract infections | 29<br>(23 - 45)    | 0<br>(0 - 0)     | 0<br>(0 - 0)      | 1<br>(1 - 2)       | 7<br>(6 - 12)      | 20<br>(15 - 32)    |
| Urolithiasis                                        | 1<br>(1 - 3)       | --               | 0<br>(0 - 0)      | 0<br>(0 - 0)       | 0<br>(0 - 1)       | 1<br>(0 - 2)       |
| Other urinary diseases                              | 3<br>(2 - 5)       | 0<br>(0 - 0)     | 0<br>(0 - 0)      | 0<br>(0 - 0)       | 1<br>(0 - 1)       | 2<br>(1 - 4)       |
| Gynecological diseases                              | --                 | --               | --                | --                 | --                 | --                 |
| Uterine fibroids                                    | --                 | --               | --                | --                 | --                 | --                 |
| Polycystic ovarian syndrome                         | --                 | --               | --                | --                 | --                 | --                 |
| Endometriosis                                       | --                 | --               | --                | --                 | --                 | --                 |
| Genital prolapse                                    | --                 | --               | --                | --                 | --                 | --                 |
| Other gynecological diseases                        | --                 | --               | --                | --                 | --                 | --                 |
| Hemoglobinopathies and hemolytic anemias            | 1<br>(0 - 1)       | 0<br>(0 - 0)     | 0<br>(0 - 0)      | 0<br>(0 - 0)       | 0<br>(0 - 0)       | 0<br>(0 - 0)       |
| Thalassemias                                        | 0<br>(0 - 0)       | 0<br>(0 - 0)     | 0<br>(0 - 0)      | 0<br>(0 - 0)       | 0<br>(0 - 0)       | 0<br>(0 - 0)       |
| Sickle cell disorders                               | 0<br>(0 - 0)       | 0<br>(0 - 0)     | 0<br>(0 - 0)      | 0<br>(0 - 0)       | 0<br>(0 - 0)       | 0<br>(0 - 0)       |
| G6PD deficiency                                     | 0<br>(0 - 0)       | 0<br>(0 - 0)     | 0<br>(0 - 0)      | 0<br>(0 - 0)       | 0<br>(0 - 0)       | 0<br>(0 - 0)       |
| Other hemoglobinopathies and hemolytic anemias      | 1<br>(0 - 1)       | 0<br>(0 - 0)     | 0<br>(0 - 0)      | 0<br>(0 - 0)       | 0<br>(0 - 0)       | 0<br>(0 - 0)       |
| Endocrine, metabolic, blood, and immune disorders   | 9<br>(6 - 12)      | 0<br>(0 - 1)     | 0<br>(0 - 0)      | 2<br>(1 - 3)       | 4<br>(2 - 5)       | 3<br>(2 - 4)       |
| Musculoskeletal disorders                           | 9<br>(7 - 15)      | --               | 0<br>(0 - 0)      | 2<br>(1 - 3)       | 4<br>(3 - 6)       | 3<br>(2 - 6)       |
| Rheumatoid arthritis                                | 3<br>(2 - 5)       | --               | 0<br>(0 - 0)      | 0<br>(0 - 1)       | 1<br>(1 - 2)       | 1<br>(1 - 2)       |
| Other musculoskeletal disorders                     | 6<br>(5 - 10)      | --               | 0<br>(0 - 0)      | 1<br>(1 - 2)       | 3<br>(2 - 4)       | 2<br>(2 - 4)       |
| Other non-communicable diseases                     | 24<br>(20 - 28)    | 10<br>(7 - 13)   | 1<br>(1 - 2)      | 5<br>(4 - 6)       | 5<br>(3 - 6)       | 3<br>(2 - 4)       |
| Congenital anomalies                                | 18<br>(14 - 22)    | 9<br>(6 - 12)    | 1<br>(1 - 2)      | 4<br>(3 - 5)       | 2<br>(2 - 3)       | 1<br>(1 - 1)       |
| Neural tube defects                                 | 0<br>(0 - 0)       | 0<br>(0 - 0)     | 0<br>(0 - 0)      | 0<br>(0 - 0)       | 0<br>(0 - 0)       | 0<br>(0 - 0)       |
| Congenital heart anomalies                          | 7<br>(5 - 9)       | 4<br>(2 - 6)     | 0<br>(0 - 1)      | 2<br>(1 - 3)       | 1<br>(1 - 1)       | 0<br>(0 - 0)       |
| Cleft lip and cleft palate                          | 0<br>(0 - 0)       | 0<br>(0 - 0)     | --                | --                 | --                 | --                 |
| Down syndrome                                       | 2<br>(1 - 3)       | 0<br>(0 - 1)     | 0<br>(0 - 0)      | 1<br>(0 - 1)       | 0<br>(0 - 1)       | 0<br>(0 - 0)       |
| Chromosomal unbalanced rearrangements               | 0<br>(0 - 1)       | 0<br>(0 - 0)     | 0<br>(0 - 0)      | 0<br>(0 - 0)       | 0<br>(0 - 0)       | 0<br>(0 - 0)       |
| Other congenital anomalies                          | 8<br>(6 - 11)      | 4<br>(3 - 7)     | 1<br>(0 - 1)      | 2<br>(1 - 2)       | 1<br>(1 - 1)       | 1<br>(0 - 1)       |
| Skin and subcutaneous diseases                      | 5<br>(1 - 7)       | 0<br>(0 - 0)     | 0<br>(0 - 0)      | 1<br>(0 - 1)       | 3<br>(1 - 3)       | 2<br>(1 - 3)       |
| Cellulitis                                          | 2<br>(1 - 4)       | 0<br>(0 - 0)     | 0<br>(0 - 0)      | 1<br>(0 - 1)       | 1<br>(0 - 2)       | 1<br>(0 - 1)       |
| Pyoderma                                            | 3<br>(1 - 3)       | 0<br>(0 - 0)     | 0<br>(0 - 0)      | 0<br>(0 - 1)       | 1<br>(0 - 2)       | 1<br>(0 - 1)       |
| Decubitus ulcer                                     | 0<br>(0 - 1)       | 0<br>(0 - 0)     | 0<br>(0 - 0)      | 0<br>(0 - 0)       | 0<br>(0 - 0)       | 0<br>(0 - 0)       |
| Other skin and subcutaneous diseases                | 0<br>(0 - 0)       | 0<br>(0 - 0)     | 0<br>(0 - 0)      | 0<br>(0 - 0)       | 0<br>(0 - 0)       | 0<br>(0 - 0)       |
| Sudden infant death syndrome                        | 1<br>(0 - 2)       | 1<br>(0 - 2)     | --                | --                 | --                 | --                 |
| Injuries                                            | 650<br>(573 - 841) | 6<br>(4 - 8)     | 6<br>(5 - 8)      | 294<br>(255 - 392) | 244<br>(214 - 310) | 100<br>(86 - 133)  |
| Transport injuries                                  | 88<br>(78 - 99)    | 0<br>(0 - 1)     | 1<br>(1 - 2)      | 50<br>(42 - 59)    | 25<br>(21 - 29)    | 11<br>(9 - 13)     |
| Road injuries                                       | 77<br>(67 - 88)    | 0<br>(0 - 1)     | 1<br>(1 - 2)      | 45<br>(37 - 53)    | 21<br>(18 - 25)    | 10<br>(8 - 12)     |
| Pedestrian road injuries                            | 21<br>(11 - 30)    | 0<br>(0 - 0)     | 0<br>(0 - 1)      | 8<br>(4 - 13)      | 8<br>(4 - 11)      | 4<br>(2 - 6)       |



Web Table 31- Estonia deaths with 95% UI by age, sex, and cause in 2013

| Cause                                           | Males, All Ages    | Males, 0-4 Years | Males, 5-14 Years | Males, 15-49 Years | Males, 50-69 Years | Males, 70-80 Years |
|-------------------------------------------------|--------------------|------------------|-------------------|--------------------|--------------------|--------------------|
| Cyclist road injuries                           | 8<br>(6 - 12)      | 0<br>(0 - 0)     | 0<br>(0 - 0)      | 3<br>(2 - 4)       | 4<br>(2 - 5)       | 2<br>(1 - 3)       |
| Motorcyclist road injuries                      | 6<br>(4 - 10)      | 0<br>(0 - 0)     | 0<br>(0 - 0)      | 4<br>(2 - 7)       | 1<br>(1 - 2)       | 0<br>(0 - 1)       |
| Motor vehicle road injuries                     | 42<br>(29 - 52)    | 0<br>(0 - 0)     | 0<br>(0 - 1)      | 29<br>(21 - 36)    | 9<br>(5 - 12)      | 4<br>(2 - 5)       |
| Other road injuries                             | 0<br>(0 - 1)       | 0<br>(0 - 0)     | 0<br>(0 - 0)      | 0<br>(0 - 0)       | 0<br>(0 - 0)       | 0<br>(0 - 0)       |
| Other transport injuries                        | 10<br>(8 - 14)     | 0<br>(0 - 0)     | 0<br>(0 - 0)      | 5<br>(4 - 7)       | 3<br>(2 - 5)       | 1<br>(1 - 2)       |
| Unintentional injuries                          | 298<br>(253 - 418) | 5<br>(3 - 8)     | 4<br>(3 - 6)      | 111<br>(91 - 166)  | 124<br>(104 - 169) | 53<br>(44 - 76)    |
| Falls                                           | 84<br>(68 - 123)   | 0<br>(0 - 1)     | 0<br>(0 - 0)      | 24<br>(18 - 36)    | 36<br>(27 - 53)    | 24<br>(18 - 38)    |
| Drowning                                        | 59<br>(42 - 125)   | 1<br>(1 - 3)     | 2<br>(1 - 5)      | 30<br>(20 - 69)    | 20<br>(14 - 41)    | 6<br>(4 - 11)      |
| Fire, heat, and hot substances                  | 62<br>(49 - 92)    | 1<br>(1 - 2)     | 1<br>(0 - 1)      | 20<br>(14 - 32)    | 29<br>(21 - 43)    | 12<br>(9 - 20)     |
| Poisonings                                      | 13<br>(10 - 26)    | 0<br>(0 - 0)     | 0<br>(0 - 0)      | 5<br>(4 - 11)      | 6<br>(5 - 13)      | 1<br>(1 - 2)       |
| Exposure to mechanical forces                   | 16<br>(13 - 19)    | 1<br>(0 - 1)     | 0<br>(0 - 1)      | 8<br>(6 - 10)      | 5<br>(4 - 8)       | 1<br>(1 - 2)       |
| Unintentional firearm injuries                  | 0<br>(0 - 0)       | 0<br>(0 - 0)     | 0<br>(0 - 0)      | 0<br>(0 - 0)       | 0<br>(0 - 0)       | 0<br>(0 - 0)       |
| Unintentional suffocation                       | 2<br>(1 - 3)       | 1<br>(0 - 1)     | 0<br>(0 - 0)      | 1<br>(0 - 1)       | 0<br>(0 - 1)       | 0<br>(0 - 0)       |
| Other exposure to mechanical forces             | 14<br>(11 - 17)    | 0<br>(0 - 0)     | 0<br>(0 - 0)      | 7<br>(5 - 9)       | 5<br>(4 - 7)       | 1<br>(1 - 2)       |
| Adverse effects of medical treatment            | 8<br>(6 - 13)      | 0<br>(0 - 0)     | 0<br>(0 - 0)      | 1<br>(1 - 2)       | 3<br>(2 - 5)       | 4<br>(3 - 7)       |
| Animal contact                                  | 1<br>(1 - 2)       | 0<br>(0 - 0)     | 0<br>(0 - 0)      | 0<br>(0 - 0)       | 1<br>(1 - 1)       | 0<br>(0 - 0)       |
| Venomous animal contact                         | 1<br>(0 - 1)       | 0<br>(0 - 0)     | 0<br>(0 - 0)      | 0<br>(0 - 0)       | 0<br>(0 - 1)       | 0<br>(0 - 0)       |
| Non-venomous animal contact                     | 1<br>(0 - 1)       | 0<br>(0 - 0)     | 0<br>(0 - 0)      | 0<br>(0 - 0)       | 0<br>(0 - 1)       | 0<br>(0 - 0)       |
| Foreign body                                    | 50<br>(26 - 80)    | 1<br>(1 - 2)     | 0<br>(0 - 0)      | 21<br>(11 - 33)    | 23<br>(13 - 38)    | 5<br>(2 - 8)       |
| Pulmonary aspiration and foreign body in airway | 50<br>(26 - 80)    | 1<br>(1 - 2)     | 0<br>(0 - 0)      | 21<br>(11 - 33)    | 23<br>(13 - 38)    | 5<br>(2 - 8)       |
| Foreign body in other body part                 | 0<br>(0 - 0)       | 0<br>(0 - 0)     | 0<br>(0 - 0)      | 0<br>(0 - 0)       | 0<br>(0 - 0)       | 0<br>(0 - 0)       |
| Other unintentional injuries                    | 3<br>(3 - 4)       | 0<br>(0 - 0)     | 0<br>(0 - 0)      | 2<br>(1 - 2)       | 1<br>(1 - 2)       | 0<br>(0 - 0)       |
| Self-harm and interpersonal violence            | 265<br>(224 - 366) | 0<br>(0 - 0)     | 1<br>(0 - 1)      | 132<br>(109 - 189) | 96<br>(79 - 132)   | 36<br>(28 - 48)    |
| Self-harm                                       | 205<br>(167 - 294) | --               | 1<br>(0 - 1)      | 96<br>(76 - 143)   | 76<br>(61 - 107)   | 32<br>(25 - 44)    |
| Interpersonal violence                          | 60<br>(46 - 99)    | 0<br>(0 - 0)     | 0<br>(0 - 0)      | 36<br>(27 - 61)    | 20<br>(14 - 34)    | 4<br>(3 - 6)       |
| Assault by firearm                              | 5<br>(3 - 12)      | 0<br>(0 - 0)     | 0<br>(0 - 0)      | 4<br>(2 - 10)      | 1<br>(0 - 2)       | 0<br>(0 - 0)       |
| Assault by sharp object                         | 36<br>(25 - 60)    | 0<br>(0 - 0)     | 0<br>(0 - 0)      | 22<br>(15 - 40)    | 13<br>(8 - 21)     | 1<br>(1 - 2)       |
| Assault by other means                          | 20<br>(12 - 32)    | 0<br>(0 - 0)     | 0<br>(0 - 0)      | 10<br>(6 - 16)     | 7<br>(4 - 12)      | 2<br>(2 - 4)       |

Web Table 31- Estonia deaths with 95% UI by age, sex, and cause in 2013

| Cause                                                             | Females, All Ages        | Females, 0-4 Years | Females, 5-14 Years | Females, 15-49 Years | Females, 50-69 Years     | Females, 70-80 Years     |
|-------------------------------------------------------------------|--------------------------|--------------------|---------------------|----------------------|--------------------------|--------------------------|
| All causes                                                        | 8,307<br>(7,686 - 8,745) | 25<br>(20 - 32)    | 7<br>(6 - 8)        | 240<br>(222 - 260)   | 1,157<br>(1,055 - 1,240) | 6,877<br>(6,375 - 7,221) |
| Communicable, maternal, neonatal, and nutritional diseases        | 90<br>(70 - 105)         | 11<br>(8 - 14)     | 1<br>(0 - 1)        | 13<br>(11 - 16)      | 19<br>(15 - 23)          | 46<br>(33 - 58)          |
| HIV/AIDS and tuberculosis                                         | 13<br>(10 - 16)          | 0<br>(0 - 0)       | 0<br>(0 - 0)        | 5<br>(4 - 7)         | 3<br>(3 - 4)             | 4<br>(3 - 5)             |
| Tuberculosis                                                      | 8<br>(6 - 10)            | 0<br>(0 - 0)       | 0<br>(0 - 0)        | 2<br>(1 - 2)         | 3<br>(2 - 3)             | 4<br>(3 - 5)             |
| HIV/AIDS                                                          | 5<br>(3 - 7)             | 0<br>(0 - 0)       | 0<br>(0 - 0)        | 4<br>(3 - 5)         | 1<br>(0 - 1)             | 0<br>(0 - 0)             |
| HIV/AIDS resulting in mycobacterial infection                     | 0<br>(0 - 0)             | 0<br>(0 - 0)       | 0<br>(0 - 0)        | 0<br>(0 - 0)         | 0<br>(0 - 0)             | 0<br>(0 - 0)             |
| HIV/AIDS resulting in other diseases                              | 4<br>(3 - 6)             | 0<br>(0 - 0)       | 0<br>(0 - 0)        | 3<br>(2 - 5)         | 1<br>(0 - 1)             | 0<br>(0 - 0)             |
| Diarrhea, lower respiratory, and other common infectious diseases | 61<br>(43 - 74)          | 2<br>(2 - 3)       | 0<br>(0 - 1)        | 6<br>(5 - 8)         | 13<br>(10 - 16)          | 39<br>(27 - 51)          |
| Diarrheal diseases                                                | 0<br>(0 - 1)             | 0<br>(0 - 0)       | 0<br>(0 - 0)        | 0<br>(0 - 0)         | 0<br>(0 - 0)             | 0<br>(0 - 0)             |
| Intestinal infectious diseases                                    | 1<br>(0 - 3)             | 0<br>(0 - 0)       | 0<br>(0 - 0)        | 0<br>(0 - 1)         | 0<br>(0 - 1)             | 0<br>(0 - 1)             |
| Typhoid fever                                                     | 1<br>(0 - 2)             | 0<br>(0 - 0)       | 0<br>(0 - 0)        | 0<br>(0 - 1)         | 0<br>(0 - 1)             | 0<br>(0 - 1)             |
| Paratyphoid fever                                                 | 0<br>(0 - 1)             | 0<br>(0 - 0)       | 0<br>(0 - 0)        | 0<br>(0 - 0)         | 0<br>(0 - 0)             | 0<br>(0 - 0)             |
| Other intestinal infectious diseases                              | 0<br>(0 - 1)             | 0<br>(0 - 0)       | 0<br>(0 - 0)        | 0<br>(0 - 0)         | 0<br>(0 - 0)             | 0<br>(0 - 0)             |
| Lower respiratory infections                                      | 52<br>(35 - 65)          | 2<br>(1 - 2)       | 0<br>(0 - 0)        | 5<br>(3 - 6)         | 11<br>(7 - 14)           | 35<br>(23 - 46)          |
| Upper respiratory infections                                      | 0<br>(0 - 1)             | 0<br>(0 - 0)       | 0<br>(0 - 0)        | 0<br>(0 - 0)         | 0<br>(0 - 0)             | 0<br>(0 - 1)             |
| Otitis media                                                      | 0<br>(0 - 0)             | 0<br>(0 - 0)       | 0<br>(0 - 0)        | 0<br>(0 - 0)         | 0<br>(0 - 0)             | 0<br>(0 - 0)             |
| Meningitis                                                        | 3<br>(3 - 4)             | 0<br>(0 - 1)       | 0<br>(0 - 0)        | 1<br>(0 - 1)         | 1<br>(1 - 1)             | 1<br>(1 - 2)             |
| Pneumococcal meningitis                                           | 1<br>(1 - 1)             | 0<br>(0 - 0)       | 0<br>(0 - 0)        | 0<br>(0 - 0)         | 0<br>(0 - 0)             | 0<br>(0 - 1)             |
| H influenzae type B meningitis                                    | 1<br>(0 - 1)             | 0<br>(0 - 0)       | 0<br>(0 - 0)        | 0<br>(0 - 0)         | 0<br>(0 - 0)             | 0<br>(0 - 0)             |
| Meningococcal meningitis                                          | 1<br>(0 - 1)             | 0<br>(0 - 0)       | 0<br>(0 - 0)        | 0<br>(0 - 0)         | 0<br>(0 - 0)             | 0<br>(0 - 0)             |
| Other meningitis                                                  | 1<br>(1 - 2)             | 0<br>(0 - 0)       | 0<br>(0 - 0)        | 0<br>(0 - 0)         | 0<br>(0 - 1)             | 1<br>(0 - 1)             |
| Encephalitis                                                      | 3<br>(2 - 4)             | 0<br>(0 - 0)       | 0<br>(0 - 0)        | 0<br>(0 - 1)         | 1<br>(1 - 2)             | 1<br>(1 - 2)             |
| Diphtheria                                                        | 0<br>(0 - 0)             | 0<br>(0 - 0)       | 0<br>(0 - 0)        | 0<br>(0 - 0)         | 0<br>(0 - 0)             | --                       |
| Whooping cough                                                    | 0<br>(0 - 0)             | 0<br>(0 - 0)       | 0<br>(0 - 0)        | 0<br>(0 - 0)         | 0<br>(0 - 0)             | --                       |
| Tetanus                                                           | 0<br>(0 - 0)             | 0<br>(0 - 0)       | 0<br>(0 - 0)        | 0<br>(0 - 0)         | 0<br>(0 - 0)             | 0<br>(0 - 0)             |
| Measles                                                           | 0<br>(0 - 0)             | 0<br>(0 - 0)       | 0<br>(0 - 0)        | 0<br>(0 - 0)         | 0<br>(0 - 0)             | --                       |
| Varicella and herpes zoster                                       | 1<br>(0 - 4)             | 0<br>(0 - 0)       | 0<br>(0 - 0)        | 0<br>(0 - 0)         | 0<br>(0 - 0)             | 1<br>(0 - 3)             |
| Neglected tropical diseases and malaria                           | 0<br>(0 - 0)             | 0<br>(0 - 0)       | 0<br>(0 - 0)        | 0<br>(0 - 0)         | 0<br>(0 - 0)             | 0<br>(0 - 0)             |
| Cysticercosis                                                     | 0<br>(0 - 0)             | 0<br>(0 - 0)       | 0<br>(0 - 0)        | 0<br>(0 - 0)         | 0<br>(0 - 0)             | 0<br>(0 - 0)             |
| Cystic echinococcosis                                             | 0<br>(0 - 0)             | 0<br>(0 - 0)       | 0<br>(0 - 0)        | 0<br>(0 - 0)         | 0<br>(0 - 0)             | 0<br>(0 - 0)             |
| Dengue                                                            | 0<br>(0 - 0)             | 0<br>(0 - 0)       | 0<br>(0 - 0)        | 0<br>(0 - 0)         | 0<br>(0 - 0)             | 0<br>(0 - 0)             |
| Rabies                                                            | 0<br>(0 - 0)             | 0<br>(0 - 0)       | 0<br>(0 - 0)        | 0<br>(0 - 0)         | 0<br>(0 - 0)             | 0<br>(0 - 0)             |
| Other neglected tropical diseases                                 | 0<br>(0 - 0)             | 0<br>(0 - 0)       | 0<br>(0 - 0)        | 0<br>(0 - 0)         | 0<br>(0 - 0)             | 0<br>(0 - 0)             |
| Maternal disorders                                                | 1<br>(1 - 1)             | --                 | 0<br>(0 - 0)        | 1<br>(1 - 1)         | --                       | --                       |
| Maternal hemorrhage                                               | 0<br>(0 - 0)             | --                 | 0<br>(0 - 0)        | 0<br>(0 - 0)         | --                       | --                       |
| Maternal sepsis and other maternal infections                     | 0<br>(0 - 0)             | --                 | 0<br>(0 - 0)        | 0<br>(0 - 0)         | --                       | --                       |
| Maternal hypertensive disorders                                   | 0<br>(0 - 0)             | --                 | 0<br>(0 - 0)        | 0<br>(0 - 0)         | --                       | --                       |
| Maternal obstructed labor                                         | 0<br>(0 - 0)             | --                 | 0<br>(0 - 0)        | 0<br>(0 - 0)         | --                       | --                       |
| Maternal abortive outcome                                         | 0<br>(0 - 0)             | --                 | 0<br>(0 - 0)        | 0<br>(0 - 0)         | --                       | --                       |
| Indirect maternal deaths                                          | 0<br>(0 - 0)             | --                 | 0<br>(0 - 0)        | 0<br>(0 - 0)         | --                       | --                       |

Web Table 31- Estonia deaths with 95% UI by age, sex, and cause in 2013

| Cause                                                            | Females, All Ages        | Females, 0-4 Years | Females, 5-14 Years | Females, 15-49 Years | Females, 50-69 Years   | Females, 70-80 Years     |
|------------------------------------------------------------------|--------------------------|--------------------|---------------------|----------------------|------------------------|--------------------------|
| Late maternal deaths                                             | 0<br>(0 - 0)             | --                 | 0<br>(0 - 0)        | 0<br>(0 - 0)         | --                     | --                       |
| Maternal deaths aggravated by HIV/AIDS                           | 0<br>(0 - 0)             | --                 | --                  | 0<br>(0 - 0)         | --                     | --                       |
| Other maternal disorders                                         | 0<br>(0 - 0)             | --                 | 0<br>(0 - 0)        | 0<br>(0 - 0)         | --                     | --                       |
| Neonatal disorders                                               | 8<br>(6 - 10)            | 8<br>(6 - 10)      | --                  | --                   | --                     | --                       |
| Neonatal preterm birth complications                             | 3<br>(1 - 5)             | 3<br>(1 - 5)       | --                  | --                   | --                     | --                       |
| Neonatal encephalopathy due to birth asphyxia and trauma         | 4<br>(2 - 5)             | 4<br>(2 - 5)       | --                  | --                   | --                     | --                       |
| Neonatal sepsis and other neonatal infections                    | 0<br>(0 - 1)             | 0<br>(0 - 1)       | --                  | --                   | --                     | --                       |
| Hemolytic disease and other neonatal jaundice                    | 0<br>(0 - 0)             | 0<br>(0 - 0)       | --                  | --                   | --                     | --                       |
| Other neonatal disorders                                         | 1<br>(1 - 3)             | 1<br>(1 - 3)       | --                  | --                   | --                     | --                       |
| Nutritional deficiencies                                         | 3<br>(3 - 4)             | 0<br>(0 - 0)       | 0<br>(0 - 0)        | 0<br>(0 - 0)         | 1<br>(1 - 1)           | 2<br>(1 - 2)             |
| Protein-energy malnutrition                                      | 1<br>(1 - 2)             | 0<br>(0 - 0)       | 0<br>(0 - 0)        | 0<br>(0 - 0)         | 1<br>(0 - 1)           | 0<br>(0 - 1)             |
| Iodine deficiency                                                | 0<br>(0 - 0)             | 0<br>(0 - 0)       | 0<br>(0 - 0)        | 0<br>(0 - 0)         | 0<br>(0 - 0)           | 0<br>(0 - 0)             |
| Iron-deficiency anemia                                           | 1<br>(0 - 2)             | 0<br>(0 - 0)       | 0<br>(0 - 0)        | 0<br>(0 - 0)         | 0<br>(0 - 0)           | 1<br>(0 - 1)             |
| Other nutritional deficiencies                                   | 1<br>(0 - 2)             | 0<br>(0 - 0)       | 0<br>(0 - 0)        | 0<br>(0 - 0)         | 0<br>(0 - 0)           | 1<br>(0 - 1)             |
| Other communicable, maternal, neonatal, and nutritional diseases | 3<br>(2 - 4)             | 0<br>(0 - 1)       | 0<br>(0 - 0)        | 0<br>(0 - 0)         | 1<br>(1 - 2)           | 1<br>(1 - 2)             |
| Sexually transmitted diseases excluding HIV                      | 1<br>(0 - 1)             | 0<br>(0 - 0)       | 0<br>(0 - 0)        | 0<br>(0 - 0)         | 0<br>(0 - 0)           | 0<br>(0 - 1)             |
| Syphilis                                                         | 0<br>(0 - 1)             | 0<br>(0 - 0)       | 0<br>(0 - 0)        | 0<br>(0 - 0)         | 0<br>(0 - 0)           | 0<br>(0 - 0)             |
| Chlamydial infection                                             | 0<br>(0 - 0)             | --                 | 0<br>(0 - 0)        | 0<br>(0 - 0)         | 0<br>(0 - 0)           | 0<br>(0 - 0)             |
| Gonococcal infection                                             | 0<br>(0 - 0)             | --                 | 0<br>(0 - 0)        | 0<br>(0 - 0)         | 0<br>(0 - 0)           | 0<br>(0 - 0)             |
| Other sexually transmitted diseases                              | 0<br>(0 - 0)             | --                 | 0<br>(0 - 0)        | 0<br>(0 - 0)         | 0<br>(0 - 0)           | 0<br>(0 - 0)             |
| Hepatitis                                                        | 0<br>(0 - 0)             | 0<br>(0 - 0)       | 0<br>(0 - 0)        | 0<br>(0 - 0)         | 0<br>(0 - 0)           | 0<br>(0 - 0)             |
| Acute hepatitis A                                                | 0<br>(0 - 0)             | 0<br>(0 - 0)       | 0<br>(0 - 0)        | 0<br>(0 - 0)         | 0<br>(0 - 0)           | 0<br>(0 - 0)             |
| Acute hepatitis B                                                | 0<br>(0 - 0)             | 0<br>(0 - 0)       | 0<br>(0 - 0)        | 0<br>(0 - 0)         | 0<br>(0 - 0)           | 0<br>(0 - 0)             |
| Acute hepatitis C                                                | 0<br>(0 - 0)             | --                 | 0<br>(0 - 0)        | 0<br>(0 - 0)         | 0<br>(0 - 0)           | 0<br>(0 - 0)             |
| Other infectious diseases                                        | 2<br>(1 - 3)             | 0<br>(0 - 0)       | 0<br>(0 - 0)        | 0<br>(0 - 0)         | 1<br>(1 - 1)           | 1<br>(0 - 1)             |
| Non-communicable diseases                                        | 8,006<br>(7,369 - 8,432) | 11<br>(8 - 14)     | 4<br>(3 - 5)        | 179<br>(160 - 195)   | 1,079<br>(979 - 1,155) | 6,734<br>(6,226 - 7,073) |
| Neoplasms                                                        | 1,534<br>(1,273 - 1,691) | 1<br>(1 - 1)       | 2<br>(1 - 2)        | 81<br>(70 - 93)      | 474<br>(401 - 525)     | 976<br>(795 - 1,088)     |
| Esophageal cancer                                                | 12<br>(10 - 15)          | --                 | --                  | 0<br>(0 - 0)         | 3<br>(2 - 4)           | 9<br>(7 - 11)            |
| Stomach cancer                                                   | 134<br>(98 - 175)        | --                 | --                  | 6<br>(5 - 9)         | 38<br>(28 - 51)        | 89<br>(63 - 119)         |
| Liver cancer                                                     | 42<br>(26 - 52)          | --                 | 0<br>(0 - 0)        | 1<br>(1 - 2)         | 10<br>(7 - 13)         | 30<br>(18 - 40)          |
| Liver cancer due to hepatitis B                                  | 6<br>(2 - 10)            | --                 | 0<br>(0 - 0)        | 0<br>(0 - 1)         | 2<br>(1 - 3)           | 3<br>(1 - 6)             |
| Liver cancer due to hepatitis C                                  | 20<br>(13 - 27)          | --                 | 0<br>(0 - 0)        | 0<br>(0 - 1)         | 5<br>(3 - 7)           | 15<br>(9 - 21)           |
| Liver cancer due to alcohol use                                  | 9<br>(5 - 14)            | --                 | --                  | 0<br>(0 - 0)         | 2<br>(1 - 3)           | 7<br>(4 - 11)            |
| Liver cancer due to other causes                                 | 7<br>(3 - 11)            | --                 | 0<br>(0 - 0)        | 0<br>(0 - 1)         | 2<br>(1 - 3)           | 4<br>(2 - 7)             |
| Larynx cancer                                                    | 2<br>(1 - 2)             | --                 | --                  | 0<br>(0 - 0)         | 1<br>(1 - 1)           | 1<br>(0 - 1)             |
| Tracheal, bronchus and lung cancer                               | 157<br>(114 - 186)       | --                 | --                  | 4<br>(3 - 6)         | 56<br>(42 - 67)        | 96<br>(61 - 119)         |
| Breast cancer                                                    | 221<br>(127 - 267)       | --                 | --                  | 20<br>(14 - 26)      | 90<br>(53 - 110)       | 112<br>(58 - 136)        |
| Cervical cancer                                                  | 72<br>(49 - 92)          | --                 | --                  | 9<br>(6 - 13)        | 29<br>(19 - 38)        | 34<br>(23 - 45)          |
| Uterine cancer                                                   | 47<br>(35 - 60)          | --                 | --                  | 1<br>(1 - 2)         | 15<br>(11 - 21)        | 31<br>(21 - 40)          |
| Prostate cancer                                                  | --                       | --                 | --                  | --                   | --                     | --                       |

Web Table 31- Estonia deaths with 95% UI by age, sex, and cause in 2013

| Cause                                         | Females, All Ages        | Females, 0-4 Years | Females, 5-14 Years | Females, 15-49 Years | Females, 50-69 Years | Females, 70-80 Years     |
|-----------------------------------------------|--------------------------|--------------------|---------------------|----------------------|----------------------|--------------------------|
| Colon and rectum cancer                       | 215<br>(182 - 249)       | --                 | --                  | 4<br>(4 - 5)         | 43<br>(37 - 50)      | 167<br>(138 - 199)       |
| Lip and oral cavity cancer                    | 12<br>(10 - 15)          | --                 | --                  | 1<br>(0 - 1)         | 4<br>(3 - 5)         | 8<br>(6 - 10)            |
| Nasopharynx cancer                            | 1<br>(1 - 2)             | --                 | 0<br>(0 - 0)        | 0<br>(0 - 0)         | 0<br>(0 - 1)         | 0<br>(0 - 1)             |
| Other pharynx cancer                          | 3<br>(2 - 4)             | --                 | --                  | 0<br>(0 - 0)         | 1<br>(1 - 2)         | 1<br>(1 - 2)             |
| Gallbladder and biliary tract cancer          | 35<br>(21 - 46)          | --                 | --                  | 1<br>(1 - 1)         | 10<br>(6 - 13)       | 24<br>(14 - 34)          |
| Pancreatic cancer                             | 125<br>(106 - 142)       | --                 | --                  | 2<br>(2 - 3)         | 33<br>(27 - 39)      | 89<br>(74 - 105)         |
| Malignant skin melanoma                       | 26<br>(15 - 32)          | --                 | --                  | 3<br>(2 - 4)         | 8<br>(5 - 11)        | 14<br>(8 - 19)           |
| Non-melanoma skin cancer                      | 11<br>(8 - 15)           | --                 | --                  | 0<br>(0 - 1)         | 1<br>(1 - 2)         | 10<br>(7 - 13)           |
| Ovarian cancer                                | 108<br>(89 - 125)        | --                 | --                  | 7<br>(5 - 9)         | 41<br>(33 - 50)      | 60<br>(45 - 72)          |
| Testicular cancer                             | --                       | --                 | --                  | --                   | --                   | --                       |
| Kidney cancer                                 | 35<br>(20 - 57)          | 0<br>(0 - 0)       | 0<br>(0 - 0)        | 1<br>(1 - 1)         | 10<br>(7 - 15)       | 24<br>(12 - 44)          |
| Bladder cancer                                | 25<br>(16 - 34)          | --                 | --                  | 0<br>(0 - 0)         | 3<br>(2 - 5)         | 21<br>(13 - 30)          |
| Brain and nervous system cancer               | 43<br>(28 - 51)          | 0<br>(0 - 0)       | 1<br>(0 - 1)        | 6<br>(4 - 8)         | 19<br>(14 - 23)      | 17<br>(8 - 22)           |
| Thyroid cancer                                | 11<br>(7 - 15)           | --                 | 0<br>(0 - 0)        | 0<br>(0 - 0)         | 2<br>(1 - 3)         | 9<br>(5 - 13)            |
| Mesothelioma                                  | 1<br>(1 - 2)             | --                 | --                  | 0<br>(0 - 0)         | 0<br>(0 - 1)         | 1<br>(0 - 1)             |
| Hodgkin lymphoma                              | 4<br>(3 - 6)             | 0<br>(0 - 0)       | 0<br>(0 - 0)        | 1<br>(1 - 2)         | 1<br>(1 - 2)         | 2<br>(1 - 3)             |
| Non-Hodgkin lymphoma                          | 36<br>(12 - 49)          | 0<br>(0 - 0)       | 0<br>(0 - 0)        | 2<br>(1 - 3)         | 9<br>(3 - 13)        | 25<br>(8 - 35)           |
| Multiple myeloma                              | 22<br>(13 - 33)          | --                 | --                  | 1<br>(0 - 1)         | 8<br>(4 - 12)        | 14<br>(8 - 22)           |
| Leukemia                                      | 61<br>(35 - 75)          | 0<br>(0 - 1)       | 1<br>(0 - 1)        | 4<br>(3 - 6)         | 15<br>(9 - 19)       | 41<br>(23 - 51)          |
| Other neoplasms                               | 75<br>(54 - 92)          | 1<br>(0 - 1)       | 1<br>(0 - 1)        | 5<br>(4 - 6)         | 20<br>(14 - 25)      | 49<br>(32 - 64)          |
| Cardiovascular diseases                       | 5,101<br>(4,646 - 5,618) | 0<br>(0 - 0)       | 0<br>(0 - 0)        | 31<br>(26 - 40)      | 398<br>(345 - 497)   | 4,671<br>(4,262 - 5,105) |
| Rheumatic heart disease                       | 21<br>(14 - 27)          | 0<br>(0 - 0)       | 0<br>(0 - 0)        | 1<br>(1 - 2)         | 9<br>(6 - 13)        | 11<br>(6 - 14)           |
| Ischemic heart disease                        | 2,897<br>(2,467 - 3,569) | 0<br>(0 - 0)       | 0<br>(0 - 0)        | 9<br>(7 - 13)        | 171<br>(136 - 254)   | 2,717<br>(2,315 - 3,306) |
| Cerebrovascular disease                       | 1,158<br>(863 - 1,834)   | 0<br>(0 - 0)       | 0<br>(0 - 0)        | 8<br>(6 - 12)        | 106<br>(78 - 170)    | 1,044<br>(768 - 1,671)   |
| Ischemic stroke                               | 957<br>(708 - 1,574)     | 0<br>(0 - 0)       | 0<br>(0 - 0)        | 2<br>(1 - 3)         | 61<br>(43 - 105)     | 895<br>(660 - 1,467)     |
| Hemorrhagic stroke                            | 201<br>(146 - 339)       | 0<br>(0 - 0)       | 0<br>(0 - 0)        | 6<br>(5 - 10)        | 45<br>(33 - 73)      | 149<br>(105 - 261)       |
| Hypertensive heart disease                    | 748<br>(208 - 1,228)     | 0<br>(0 - 0)       | 0<br>(0 - 0)        | 2<br>(1 - 3)         | 54<br>(18 - 85)      | 693<br>(186 - 1,150)     |
| Cardiomyopathy and myocarditis                | 85<br>(50 - 111)         | 0<br>(0 - 0)       | 0<br>(0 - 0)        | 7<br>(5 - 11)        | 31<br>(22 - 42)      | 46<br>(19 - 64)          |
| Atrial fibrillation and flutter               | 30<br>(21 - 41)          | --                 | --                  | 0<br>(0 - 0)         | 1<br>(1 - 1)         | 29<br>(20 - 40)          |
| Aortic aneurysm                               | 23<br>(13 - 35)          | --                 | --                  | 0<br>(0 - 1)         | 5<br>(3 - 8)         | 18<br>(10 - 27)          |
| Peripheral vascular disease                   | 16<br>(11 - 23)          | --                 | --                  | 0<br>(0 - 0)         | 0<br>(0 - 0)         | 16<br>(11 - 23)          |
| Endocarditis                                  | 6<br>(4 - 9)             | 0<br>(0 - 0)       | 0<br>(0 - 0)        | 1<br>(0 - 1)         | 2<br>(1 - 3)         | 4<br>(2 - 5)             |
| Other cardiovascular and circulatory diseases | 118<br>(32 - 159)        | 0<br>(0 - 0)       | 0<br>(0 - 0)        | 3<br>(1 - 5)         | 19<br>(7 - 27)       | 95<br>(22 - 133)         |
| Chronic respiratory diseases                  | 111<br>(68 - 132)        | 0<br>(0 - 0)       | 0<br>(0 - 0)        | 2<br>(2 - 3)         | 16<br>(12 - 19)      | 92<br>(53 - 113)         |
| Chronic obstructive pulmonary disease         | 68<br>(41 - 87)          | 0<br>(0 - 0)       | 0<br>(0 - 0)        | 1<br>(0 - 1)         | 8<br>(6 - 11)        | 59<br>(34 - 77)          |
| Pneumoconiosis                                | 0<br>(0 - 0)             | 0<br>(0 - 0)       | 0<br>(0 - 0)        | 0<br>(0 - 0)         | 0<br>(0 - 0)         | 0<br>(0 - 0)             |
| Silicosis                                     | 0<br>(0 - 0)             | 0<br>(0 - 0)       | 0<br>(0 - 0)        | 0<br>(0 - 0)         | 0<br>(0 - 0)         | 0<br>(0 - 0)             |
| Asbestosis                                    | 0<br>(0 - 0)             | 0<br>(0 - 0)       | 0<br>(0 - 0)        | 0<br>(0 - 0)         | 0<br>(0 - 0)         | 0<br>(0 - 0)             |
| Coal workers pneumoconiosis                   | 0<br>(0 - 0)             | 0<br>(0 - 0)       | 0<br>(0 - 0)        | 0<br>(0 - 0)         | 0<br>(0 - 0)         | 0<br>(0 - 0)             |
| Other pneumoconiosis                          | 0<br>(0 - 0)             | 0<br>(0 - 0)       | 0<br>(0 - 0)        | 0<br>(0 - 0)         | 0<br>(0 - 0)         | 0<br>(0 - 0)             |

Web Table 31- Estonia deaths with 95% UI by age, sex, and cause in 2013

| Cause                                               | Females, All Ages  | Females, 0-4 Years | Females, 5-14 Years | Females, 15-49 Years | Females, 50-69 Years | Females, 70-80 Years |
|-----------------------------------------------------|--------------------|--------------------|---------------------|----------------------|----------------------|----------------------|
| Asthma                                              | 29<br>(13 - 40)    | 0<br>(0 - 0)       | 0<br>(0 - 0)        | 1<br>(1 - 1)         | 5<br>(3 - 7)         | 23<br>(9 - 33)       |
| Interstitial lung disease and pulmonary sarcoidosis | 12<br>(5 - 20)     | 0<br>(0 - 0)       | 0<br>(0 - 0)        | 0<br>(0 - 1)         | 2<br>(1 - 4)         | 9<br>(3 - 17)        |
| Other chronic respiratory diseases                  | 1<br>(1 - 2)       | 0<br>(0 - 0)       | 0<br>(0 - 0)        | 0<br>(0 - 0)         | 0<br>(0 - 0)         | 1<br>(0 - 2)         |
| Cirrhosis                                           | 89<br>(75 - 101)   | 0<br>(0 - 0)       | 0<br>(0 - 0)        | 16<br>(13 - 20)      | 51<br>(41 - 59)      | 22<br>(18 - 27)      |
| Cirrhosis due to hepatitis B                        | 18<br>(10 - 27)    | 0<br>(0 - 0)       | 0<br>(0 - 0)        | 4<br>(2 - 6)         | 10<br>(5 - 16)       | 4<br>(2 - 7)         |
| Cirrhosis due to hepatitis C                        | 43<br>(25 - 60)    | 0<br>(0 - 0)       | 0<br>(0 - 0)        | 8<br>(4 - 11)        | 25<br>(14 - 36)      | 10<br>(6 - 15)       |
| Cirrhosis due to alcohol use                        | 20<br>(8 - 32)     | --                 | --                  | 3<br>(1 - 4)         | 11<br>(4 - 18)       | 7<br>(2 - 11)        |
| Cirrhosis due to other causes                       | 9<br>(4 - 14)      | 0<br>(0 - 0)       | 0<br>(0 - 0)        | 3<br>(2 - 4)         | 5<br>(2 - 8)         | 1<br>(1 - 2)         |
| Digestive diseases                                  | 148<br>(104 - 174) | 0<br>(0 - 0)       | 0<br>(0 - 0)        | 4<br>(3 - 5)         | 22<br>(16 - 27)      | 122<br>(84 - 145)    |
| Peptic ulcer disease                                | 21<br>(10 - 30)    | 0<br>(0 - 0)       | 0<br>(0 - 0)        | 1<br>(0 - 1)         | 4<br>(2 - 6)         | 16<br>(7 - 24)       |
| Gastritis and duodenitis                            | 0<br>(0 - 1)       | 0<br>(0 - 0)       | 0<br>(0 - 0)        | 0<br>(0 - 0)         | 0<br>(0 - 0)         | 0<br>(0 - 0)         |
| Appendicitis                                        | 1<br>(0 - 1)       | 0<br>(0 - 0)       | 0<br>(0 - 0)        | 0<br>(0 - 0)         | 0<br>(0 - 0)         | 0<br>(0 - 1)         |
| Paralytic ileus and intestinal obstruction          | 12<br>(5 - 22)     | 0<br>(0 - 0)       | 0<br>(0 - 0)        | 1<br>(0 - 1)         | 2<br>(1 - 3)         | 10<br>(4 - 18)       |
| Inguinal, femoral, and abdominal hernia             | 3<br>(1 - 4)       | 0<br>(0 - 0)       | 0<br>(0 - 0)        | 0<br>(0 - 0)         | 0<br>(0 - 1)         | 2<br>(1 - 4)         |
| Inflammatory bowel disease                          | 4<br>(2 - 6)       | 0<br>(0 - 0)       | 0<br>(0 - 0)        | 0<br>(0 - 0)         | 1<br>(0 - 1)         | 3<br>(1 - 5)         |
| Vascular intestinal disorders                       | 70<br>(42 - 93)    | 0<br>(0 - 0)       | 0<br>(0 - 0)        | 0<br>(0 - 0)         | 6<br>(3 - 9)         | 64<br>(38 - 85)      |
| Gallbladder and biliary diseases                    | 11<br>(6 - 17)     | 0<br>(0 - 0)       | 0<br>(0 - 0)        | 0<br>(0 - 0)         | 2<br>(1 - 3)         | 9<br>(4 - 14)        |
| Pancreatitis                                        | 17<br>(10 - 27)    | 0<br>(0 - 0)       | 0<br>(0 - 0)        | 2<br>(1 - 2)         | 5<br>(3 - 7)         | 11<br>(6 - 19)       |
| Other digestive diseases                            | 9<br>(5 - 13)      | 0<br>(0 - 0)       | 0<br>(0 - 0)        | 0<br>(0 - 0)         | 2<br>(1 - 3)         | 7<br>(4 - 11)        |
| Neurological disorders                              | 665<br>(507 - 847) | 0<br>(0 - 1)       | 0<br>(0 - 0)        | 7<br>(6 - 10)        | 30<br>(24 - 37)      | 626<br>(472 - 804)   |
| Alzheimer disease and other dementias               | 613<br>(459 - 793) | --                 | --                  | 0<br>(0 - 0)         | 16<br>(11 - 22)      | 597<br>(446 - 776)   |
| Parkinson disease                                   | 24<br>(11 - 32)    | --                 | --                  | 0<br>(0 - 0)         | 2<br>(1 - 3)         | 22<br>(10 - 29)      |
| Epilepsy                                            | 6<br>(4 - 8)       | 0<br>(0 - 0)       | 0<br>(0 - 0)        | 3<br>(2 - 4)         | 2<br>(1 - 3)         | 1<br>(0 - 1)         |
| Multiple sclerosis                                  | 7<br>(4 - 12)      | --                 | --                  | 3<br>(2 - 5)         | 4<br>(2 - 6)         | 1<br>(1 - 2)         |
| Other neurological disorders                        | 14<br>(12 - 17)    | 0<br>(0 - 1)       | 0<br>(0 - 0)        | 1<br>(1 - 2)         | 7<br>(5 - 8)         | 6<br>(5 - 8)         |
| Mental and substance use disorders                  | 52<br>(26 - 71)    | 0<br>(0 - 0)       | 0<br>(0 - 0)        | 21<br>(13 - 27)      | 26<br>(10 - 40)      | 5<br>(2 - 7)         |
| Schizophrenia                                       | 1<br>(0 - 1)       | --                 | --                  | 0<br>(0 - 0)         | 0<br>(0 - 0)         | 0<br>(0 - 1)         |
| Alcohol use disorders                               | 38<br>(12 - 59)    | --                 | --                  | 12<br>(4 - 19)       | 23<br>(7 - 37)       | 3<br>(1 - 4)         |
| Drug use disorders                                  | 13<br>(10 - 15)    | 0<br>(0 - 0)       | --                  | 8<br>(6 - 10)        | 3<br>(2 - 4)         | 2<br>(1 - 2)         |
| Opioid use disorders                                | 5<br>(4 - 7)       | 0<br>(0 - 0)       | --                  | 4<br>(3 - 5)         | 1<br>(1 - 1)         | 1<br>(0 - 1)         |
| Cocaine use disorders                               | 0<br>(0 - 1)       | 0<br>(0 - 0)       | --                  | 0<br>(0 - 0)         | 0<br>(0 - 0)         | 0<br>(0 - 0)         |
| Amphetamine use disorders                           | 0<br>(0 - 1)       | 0<br>(0 - 0)       | --                  | 0<br>(0 - 0)         | 0<br>(0 - 0)         | 0<br>(0 - 0)         |
| Other drug use disorders                            | 6<br>(5 - 8)       | 0<br>(0 - 0)       | --                  | 4<br>(3 - 5)         | 2<br>(1 - 2)         | 1<br>(1 - 1)         |
| Eating disorders                                    | 0<br>(0 - 0)       | --                 | 0<br>(0 - 0)        | 0<br>(0 - 0)         | --                   | --                   |
| Anorexia nervosa                                    | 0<br>(0 - 0)       | --                 | 0<br>(0 - 0)        | 0<br>(0 - 0)         | --                   | --                   |
| Diabetes, urogenital, blood, and endocrine diseases | 258<br>(169 - 300) | 0<br>(0 - 1)       | 0<br>(0 - 0)        | 10<br>(7 - 11)       | 49<br>(37 - 58)      | 199<br>(122 - 235)   |
| Diabetes mellitus                                   | 83<br>(59 - 98)    | 0<br>(0 - 0)       | 0<br>(0 - 0)        | 4<br>(3 - 4)         | 20<br>(15 - 25)      | 59<br>(40 - 72)      |
| Acute glomerulonephritis                            | 0<br>(0 - 0)       | 0<br>(0 - 0)       | 0<br>(0 - 0)        | 0<br>(0 - 0)         | 0<br>(0 - 0)         | 0<br>(0 - 0)         |
| Chronic kidney disease                              | 104<br>(33 - 132)  | 0<br>(0 - 0)       | 0<br>(0 - 0)        | 3<br>(1 - 4)         | 14<br>(6 - 19)       | 87<br>(24 - 113)     |
| Chronic kidney disease due to diabetes mellitus     | 2<br>(0 - 3)       | 0<br>(0 - 0)       | 0<br>(0 - 0)        | 0<br>(0 - 0)         | 0<br>(0 - 1)         | 1<br>(0 - 2)         |

Web Table 31- Estonia deaths with 95% UI by age, sex, and cause in 2013

| Cause                                               | Females, All Ages  | Females, 0-4 Years | Females, 5-14 Years | Females, 15-49 Years | Females, 50-69 Years | Females, 70-80 Years |
|-----------------------------------------------------|--------------------|--------------------|---------------------|----------------------|----------------------|----------------------|
| Chronic kidney disease due to hypertension          | 59<br>(23 - 82)    | 0<br>(0 - 0)       | 0<br>(0 - 0)        | 1<br>(0 - 1)         | 7<br>(4 - 10)        | 51<br>(19 - 72)      |
| Chronic kidney disease due to glomerulonephritis    | 3<br>(2 - 5)       | 0<br>(0 - 0)       | 0<br>(0 - 0)        | 0<br>(0 - 1)         | 1<br>(1 - 2)         | 2<br>(1 - 3)         |
| Chronic kidney disease due to other causes          | 41<br>(5 - 70)     | 0<br>(0 - 0)       | 0<br>(0 - 0)        | 2<br>(0 - 2)         | 6<br>(1 - 9)         | 34<br>(3 - 61)       |
| Urinary diseases and male infertility               | 54<br>(40 - 79)    | 0<br>(0 - 0)       | 0<br>(0 - 0)        | 1<br>(1 - 2)         | 9<br>(7 - 15)        | 43<br>(30 - 66)      |
| Interstitial nephritis and urinary tract infections | 49<br>(38 - 72)    | 0<br>(0 - 0)       | 0<br>(0 - 0)        | 1<br>(1 - 2)         | 9<br>(6 - 14)        | 40<br>(28 - 60)      |
| Urolithiasis                                        | 2<br>(1 - 5)       | --                 | 0<br>(0 - 0)        | 0<br>(0 - 0)         | 0<br>(0 - 1)         | 2<br>(1 - 4)         |
| Other urinary diseases                              | 2<br>(1 - 3)       | 0<br>(0 - 0)       | 0<br>(0 - 0)        | 0<br>(0 - 0)         | 0<br>(0 - 1)         | 2<br>(1 - 3)         |
| Gynecological diseases                              | 0<br>(0 - 0)       | --                 | --                  | 0<br>(0 - 0)         | 0<br>(0 - 0)         | 0<br>(0 - 0)         |
| Uterine fibroids                                    | 0<br>(0 - 0)       | --                 | --                  | 0<br>(0 - 0)         | 0<br>(0 - 0)         | 0<br>(0 - 0)         |
| Polycystic ovarian syndrome                         | 0<br>(0 - 0)       | --                 | --                  | 0<br>(0 - 0)         | 0<br>(0 - 0)         | --                   |
| Endometriosis                                       | 0<br>(0 - 0)       | --                 | --                  | 0<br>(0 - 0)         | 0<br>(0 - 0)         | --                   |
| Genital prolapse                                    | 0<br>(0 - 0)       | --                 | --                  | 0<br>(0 - 0)         | 0<br>(0 - 0)         | 0<br>(0 - 0)         |
| Other gynecological diseases                        | 0<br>(0 - 0)       | --                 | --                  | 0<br>(0 - 0)         | 0<br>(0 - 0)         | 0<br>(0 - 0)         |
| Hemoglobinopathies and hemolytic anemias            | 2<br>(2 - 4)       | 0<br>(0 - 0)       | 0<br>(0 - 0)        | 0<br>(0 - 0)         | 1<br>(0 - 1)         | 2<br>(1 - 3)         |
| Thalassemias                                        | 0<br>(0 - 0)       | 0<br>(0 - 0)       | 0<br>(0 - 0)        | 0<br>(0 - 0)         | 0<br>(0 - 0)         | 0<br>(0 - 0)         |
| Sickle cell disorders                               | 0<br>(0 - 0)       | 0<br>(0 - 0)       | 0<br>(0 - 0)        | 0<br>(0 - 0)         | 0<br>(0 - 0)         | 0<br>(0 - 0)         |
| G6PD deficiency                                     | 0<br>(0 - 0)       | 0<br>(0 - 0)       | 0<br>(0 - 0)        | 0<br>(0 - 0)         | 0<br>(0 - 0)         | 0<br>(0 - 0)         |
| Other hemoglobinopathies and hemolytic anemias      | 2<br>(1 - 4)       | 0<br>(0 - 0)       | 0<br>(0 - 0)        | 0<br>(0 - 0)         | 1<br>(0 - 1)         | 2<br>(1 - 3)         |
| Endocrine, metabolic, blood, and immune disorders   | 14<br>(7 - 19)     | 0<br>(0 - 0)       | 0<br>(0 - 0)        | 1<br>(1 - 2)         | 5<br>(2 - 6)         | 8<br>(4 - 11)        |
| Musculoskeletal disorders                           | 22<br>(17 - 28)    | --                 | 0<br>(0 - 0)        | 2<br>(2 - 3)         | 8<br>(6 - 10)        | 12<br>(9 - 16)       |
| Rheumatoid arthritis                                | 12<br>(9 - 16)     | --                 | 0<br>(0 - 0)        | 0<br>(0 - 1)         | 4<br>(3 - 6)         | 8<br>(5 - 10)        |
| Other musculoskeletal disorders                     | 9<br>(7 - 14)      | --                 | 0<br>(0 - 0)        | 2<br>(1 - 2)         | 3<br>(2 - 5)         | 5<br>(3 - 7)         |
| Other non-communicable diseases                     | 26<br>(19 - 30)    | 9<br>(6 - 12)      | 1<br>(1 - 2)        | 4<br>(3 - 4)         | 5<br>(3 - 6)         | 8<br>(3 - 10)        |
| Congenital anomalies                                | 16<br>(12 - 19)    | 7<br>(5 - 10)      | 1<br>(1 - 2)        | 3<br>(2 - 4)         | 3<br>(2 - 3)         | 1<br>(1 - 2)         |
| Neural tube defects                                 | 0<br>(0 - 0)       | 0<br>(0 - 0)       | 0<br>(0 - 0)        | 0<br>(0 - 0)         | 0<br>(0 - 0)         | 0<br>(0 - 0)         |
| Congenital heart anomalies                          | 6<br>(4 - 8)       | 3<br>(2 - 4)       | 0<br>(0 - 1)        | 1<br>(1 - 2)         | 1<br>(1 - 1)         | 0<br>(0 - 0)         |
| Cleft lip and cleft palate                          | 0<br>(0 - 0)       | 0<br>(0 - 0)       | --                  | --                   | --                   | --                   |
| Down syndrome                                       | 2<br>(1 - 2)       | 0<br>(0 - 0)       | 0<br>(0 - 0)        | 1<br>(0 - 1)         | 0<br>(0 - 1)         | 0<br>(0 - 0)         |
| Chromosomal unbalanced rearrangements               | 0<br>(0 - 0)       | 0<br>(0 - 0)       | 0<br>(0 - 0)        | 0<br>(0 - 0)         | 0<br>(0 - 0)         | 0<br>(0 - 0)         |
| Other congenital anomalies                          | 7<br>(5 - 9)       | 4<br>(2 - 5)       | 1<br>(0 - 1)        | 1<br>(1 - 1)         | 1<br>(1 - 1)         | 1<br>(1 - 1)         |
| Skin and subcutaneous diseases                      | 9<br>(3 - 12)      | 0<br>(0 - 0)       | 0<br>(0 - 0)        | 0<br>(0 - 1)         | 2<br>(1 - 3)         | 6<br>(2 - 9)         |
| Cellulitis                                          | 2<br>(1 - 3)       | 0<br>(0 - 0)       | 0<br>(0 - 0)        | 0<br>(0 - 0)         | 1<br>(0 - 1)         | 1<br>(0 - 2)         |
| Pyoderma                                            | 6<br>(2 - 8)       | 0<br>(0 - 0)       | 0<br>(0 - 0)        | 0<br>(0 - 0)         | 1<br>(0 - 2)         | 4<br>(1 - 6)         |
| Decubitus ulcer                                     | 1<br>(0 - 2)       | 0<br>(0 - 0)       | 0<br>(0 - 0)        | 0<br>(0 - 0)         | 0<br>(0 - 0)         | 1<br>(0 - 1)         |
| Other skin and subcutaneous diseases                | 0<br>(0 - 0)       | 0<br>(0 - 0)       | 0<br>(0 - 0)        | 0<br>(0 - 0)         | 0<br>(0 - 0)         | 0<br>(0 - 0)         |
| Sudden infant death syndrome                        | 2<br>(0 - 4)       | 2<br>(0 - 4)       | --                  | --                   | --                   | --                   |
| Injuries                                            | 211<br>(180 - 296) | 4<br>(3 - 6)       | 3<br>(2 - 3)        | 48<br>(42 - 64)      | 59<br>(50 - 81)      | 97<br>(79 - 145)     |
| Transport injuries                                  | 31<br>(25 - 45)    | 0<br>(0 - 0)       | 1<br>(1 - 1)        | 10<br>(8 - 14)       | 10<br>(7 - 14)       | 10<br>(7 - 15)       |
| Road injuries                                       | 29<br>(23 - 41)    | 0<br>(0 - 0)       | 1<br>(1 - 1)        | 10<br>(7 - 13)       | 9<br>(7 - 13)        | 9<br>(7 - 14)        |
| Pedestrian road injuries                            | 12<br>(9 - 18)     | 0<br>(0 - 0)       | 0<br>(0 - 1)        | 2<br>(1 - 3)         | 4<br>(3 - 6)         | 6<br>(4 - 9)         |

Web Table 31- Estonia deaths with 95% UI by age, sex, and cause in 2013

| Cause                                           | Females, All Ages | Females, 0-4 Years | Females, 5-14 Years | Females, 15-49 Years | Females, 50-69 Years | Females, 70-89 Years |
|-------------------------------------------------|-------------------|--------------------|---------------------|----------------------|----------------------|----------------------|
| Cyclist road injuries                           | 2<br>(2 - 4)      | 0<br>(0 - 0)       | 0<br>(0 - 0)        | 1<br>(0 - 1)         | 1<br>(0 - 1)         | 1<br>(0 - 1)         |
| Motorcyclist road injuries                      | 0<br>(0 - 1)      | 0<br>(0 - 0)       | 0<br>(0 - 0)        | 0<br>(0 - 0)         | 0<br>(0 - 0)         | 0<br>(0 - 0)         |
| Motor vehicle road injuries                     | 14<br>(10 - 19)   | 0<br>(0 - 0)       | 0<br>(0 - 0)        | 7<br>(5 - 9)         | 4<br>(2 - 6)         | 3<br>(1 - 4)         |
| Other road injuries                             | 0<br>(0 - 0)      | 0<br>(0 - 0)       | 0<br>(0 - 0)        | 0<br>(0 - 0)         | 0<br>(0 - 0)         | 0<br>(0 - 0)         |
| Other transport injuries                        | 3<br>(2 - 5)      | 0<br>(0 - 0)       | 0<br>(0 - 0)        | 1<br>(1 - 1)         | 1<br>(0 - 1)         | 1<br>(1 - 2)         |
| Unintentional injuries                          | 116<br>(93 - 172) | 3<br>(2 - 6)       | 2<br>(1 - 2)        | 18<br>(14 - 27)      | 29<br>(24 - 40)      | 64<br>(49 - 102)     |
| Falls                                           | 45<br>(32 - 79)   | 0<br>(0 - 0)       | 0<br>(0 - 0)        | 3<br>(2 - 5)         | 7<br>(5 - 10)        | 35<br>(23 - 65)      |
| Drowning                                        | 17<br>(12 - 32)   | 1<br>(1 - 2)       | 1<br>(1 - 2)        | 5<br>(4 - 11)        | 4<br>(3 - 8)         | 5<br>(4 - 10)        |
| Fire, heat, and hot substances                  | 24<br>(18 - 40)   | 1<br>(0 - 1)       | 0<br>(0 - 1)        | 3<br>(2 - 6)         | 7<br>(5 - 11)        | 13<br>(9 - 22)       |
| Poisonings                                      | 3<br>(2 - 5)      | 0<br>(0 - 0)       | 0<br>(0 - 0)        | 1<br>(1 - 2)         | 1<br>(1 - 2)         | 1<br>(0 - 1)         |
| Exposure to mechanical forces                   | 2<br>(2 - 3)      | 0<br>(0 - 1)       | 0<br>(0 - 0)        | 1<br>(0 - 1)         | 1<br>(0 - 1)         | 0<br>(0 - 1)         |
| Unintentional firearm injuries                  | 0<br>(0 - 0)      | 0<br>(0 - 0)       | 0<br>(0 - 0)        | 0<br>(0 - 0)         | 0<br>(0 - 0)         | 0<br>(0 - 0)         |
| Unintentional suffocation                       | 1<br>(0 - 1)      | 0<br>(0 - 1)       | 0<br>(0 - 0)        | 0<br>(0 - 0)         | 0<br>(0 - 0)         | 0<br>(0 - 0)         |
| Other exposure to mechanical forces             | 1<br>(1 - 2)      | 0<br>(0 - 0)       | 0<br>(0 - 0)        | 0<br>(0 - 1)         | 0<br>(0 - 1)         | 0<br>(0 - 1)         |
| Adverse effects of medical treatment            | 12<br>(7 - 16)    | 0<br>(0 - 0)       | 0<br>(0 - 0)        | 1<br>(1 - 2)         | 3<br>(2 - 4)         | 8<br>(5 - 11)        |
| Animal contact                                  | 1<br>(0 - 2)      | 0<br>(0 - 0)       | 0<br>(0 - 0)        | 0<br>(0 - 0)         | 0<br>(0 - 0)         | 0<br>(0 - 1)         |
| Venomous animal contact                         | 0<br>(0 - 1)      | 0<br>(0 - 0)       | 0<br>(0 - 0)        | 0<br>(0 - 0)         | 0<br>(0 - 0)         | 0<br>(0 - 0)         |
| Non-venomous animal contact                     | 0<br>(0 - 1)      | 0<br>(0 - 0)       | 0<br>(0 - 0)        | 0<br>(0 - 0)         | 0<br>(0 - 0)         | 0<br>(0 - 1)         |
| Foreign body                                    | 14<br>(8 - 22)    | 1<br>(0 - 2)       | 0<br>(0 - 0)        | 4<br>(2 - 6)         | 7<br>(4 - 11)        | 2<br>(1 - 4)         |
| Pulmonary aspiration and foreign body in airway | 14<br>(8 - 22)    | 1<br>(0 - 2)       | 0<br>(0 - 0)        | 4<br>(2 - 6)         | 7<br>(4 - 11)        | 2<br>(1 - 4)         |
| Foreign body in other body part                 | 0<br>(0 - 0)      | 0<br>(0 - 0)       | 0<br>(0 - 0)        | 0<br>(0 - 0)         | 0<br>(0 - 0)         | 0<br>(0 - 0)         |
| Other unintentional injuries                    | 1<br>(0 - 2)      | 0<br>(0 - 0)       | 0<br>(0 - 0)        | 0<br>(0 - 1)         | 0<br>(0 - 1)         | 0<br>(0 - 0)         |
| Self-harm and interpersonal violence            | 64<br>(54 - 92)   | 0<br>(0 - 1)       | 0<br>(0 - 0)        | 20<br>(16 - 27)      | 20<br>(16 - 30)      | 23<br>(18 - 33)      |
| Self-harm                                       | 46<br>(37 - 71)   | --                 | 0<br>(0 - 0)        | 12<br>(9 - 16)       | 16<br>(12 - 24)      | 19<br>(14 - 28)      |
| Interpersonal violence                          | 18<br>(14 - 29)   | 0<br>(0 - 1)       | 0<br>(0 - 0)        | 8<br>(6 - 13)        | 5<br>(4 - 8)         | 4<br>(3 - 7)         |
| Assault by firearm                              | 1<br>(0 - 1)      | 0<br>(0 - 0)       | 0<br>(0 - 0)        | 0<br>(0 - 1)         | 0<br>(0 - 0)         | 0<br>(0 - 0)         |
| Assault by sharp object                         | 7<br>(5 - 13)     | 0<br>(0 - 0)       | 0<br>(0 - 0)        | 3<br>(2 - 6)         | 2<br>(1 - 4)         | 2<br>(1 - 3)         |
| Assault by other means                          | 10<br>(7 - 16)    | 0<br>(0 - 0)       | 0<br>(0 - 0)        | 4<br>(3 - 7)         | 3<br>(2 - 4)         | 3<br>(2 - 4)         |

Web Table 31- Ethiopia deaths with 95% UI by age, sex, and cause in 2013

| Cause                                                             | Both Sexes, All Ages           | Both Sexes, 0-4 Years          | Both Sexes, 5-14 Years      | Both Sexes, 15-49 Years        | Both Sexes, 50-69 Years        | Both Sexes, 70-80 Years        |
|-------------------------------------------------------------------|--------------------------------|--------------------------------|-----------------------------|--------------------------------|--------------------------------|--------------------------------|
| All causes                                                        | 747,609<br>(690,427 - 806,688) | 229,333<br>(193,394 - 272,952) | 28,206<br>(24,442 - 33,104) | 160,971<br>(146,020 - 174,805) | 159,343<br>(144,716 - 175,369) | 169,757<br>(159,797 - 180,991) |
| Communicable, maternal, neonatal, and nutritional diseases        | 430,229<br>(388,767 - 476,629) | 203,361<br>(168,969 - 242,457) | 19,554<br>(16,273 - 24,760) | 98,942<br>(90,884 - 107,204)   | 55,963<br>(50,593 - 62,231)    | 52,408<br>(47,083 - 57,937)    |
| HIV/AIDS and tuberculosis                                         | 102,593<br>(92,486 - 114,743)  | 4,106<br>(3,063 - 5,304)       | 5,720<br>(4,809 - 6,807)    | 56,085<br>(48,692 - 66,563)    | 25,306<br>(21,474 - 29,478)    | 11,376<br>(9,471 - 13,349)     |
| Tuberculosis                                                      | 50,188<br>(42,276 - 58,367)    | 1,739<br>(921 - 2,759)         | 603<br>(393 - 871)          | 18,915<br>(14,500 - 23,031)    | 18,311<br>(15,089 - 21,703)    | 10,620<br>(8,716 - 12,549)     |
| HIV/AIDS                                                          | 52,405<br>(43,394 - 64,763)    | 2,367<br>(1,820 - 3,015)       | 5,117<br>(4,225 - 6,153)    | 37,170<br>(29,505 - 48,656)    | 6,995<br>(4,875 - 10,756)      | 756<br>(480 - 1,154)           |
| HIV/AIDS resulting in mycobacterial infection                     | 3,288<br>(2,504 - 4,275)       | 140<br>(101 - 187)             | 283<br>(212 - 369)          | 2,334<br>(1,741 - 3,203)       | 476<br>(303 - 761)             | 55<br>(33 - 87)                |
| HIV/AIDS resulting in other diseases                              | 49,117<br>(40,419 - 60,905)    | 2,226<br>(1,712 - 2,840)       | 4,834<br>(3,977 - 5,836)    | 34,836<br>(27,587 - 45,720)    | 6,519<br>(4,546 - 9,954)       | 702<br>(447 - 1,069)           |
| Diarrhea, lower respiratory, and other common infectious diseases | 188,945<br>(159,770 - 231,122) | 97,963<br>(72,924 - 131,291)   | 10,015<br>(7,099 - 16,090)  | 21,097<br>(17,026 - 25,604)    | 24,840<br>(20,680 - 29,199)    | 35,031<br>(29,799 - 40,538)    |
| Diarrheal diseases                                                | 58,541<br>(44,103 - 74,551)    | 22,209<br>(9,118 - 36,515)     | 2,578<br>(1,421 - 3,967)    | 8,568<br>(6,592 - 10,877)      | 10,465<br>(7,593 - 13,834)     | 14,721<br>(11,171 - 19,135)    |
| Intestinal infectious diseases                                    | 4,205<br>(2,049 - 7,375)       | 1,441<br>(468 - 2,777)         | 1,124<br>(505 - 2,009)      | 1,390<br>(733 - 2,458)         | 183<br>(94 - 311)              | 67<br>(38 - 113)               |
| Typhoid fever                                                     | 3,084<br>(1,426 - 5,558)       | 966<br>(293 - 1,974)           | 871<br>(378 - 1,589)        | 1,071<br>(525 - 1,902)         | 132<br>(60 - 236)              | 44<br>(22 - 79)                |
| Paratyphoid fever                                                 | 774<br>(350 - 1,419)           | 279<br>(78 - 580)              | 219<br>(96 - 413)           | 238<br>(112 - 447)             | 28<br>(12 - 54)                | 9<br>(4 - 19)                  |
| Other intestinal infectious diseases                              | 347<br>(213 - 497)             | 195<br>(85 - 331)              | 34<br>(18 - 55)             | 81<br>(53 - 113)               | 22<br>(11 - 37)                | 14<br>(7 - 24)                 |
| Lower respiratory infections                                      | 77,036<br>(59,707 - 95,348)    | 38,427<br>(23,157 - 54,980)    | 2,017<br>(1,186 - 2,950)    | 6,021<br>(4,677 - 7,735)       | 11,580<br>(9,218 - 14,139)     | 18,991<br>(15,499 - 22,903)    |
| Upper respiratory infections                                      | 113<br>(59 - 198)              | 37<br>(6 - 117)                | 5<br>(0 - 16)               | 31<br>(11 - 64)                | 23<br>(5 - 52)                 | 18<br>(3 - 46)                 |
| Otitis media                                                      | 60<br>(49 - 74)                | 14<br>(6 - 25)                 | 3<br>(2 - 3)                | 8<br>(6 - 10)                  | 12<br>(9 - 15)                 | 23<br>(18 - 30)                |
| Meningitis                                                        | 15,314<br>(11,019 - 20,596)    | 7,397<br>(3,817 - 12,163)      | 1,446<br>(838 - 2,089)      | 3,481<br>(2,623 - 4,553)       | 2,013<br>(1,524 - 2,618)       | 977<br>(721 - 1,322)           |
| Pneumococcal meningitis                                           | 2,655<br>(1,879 - 3,611)       | 959<br>(459 - 1,744)           | 323<br>(174 - 519)          | 741<br>(457 - 1,096)           | 418<br>(255 - 662)             | 214<br>(127 - 354)             |
| H influenzae type B meningitis                                    | 4,058<br>(2,619 - 5,964)       | 2,764<br>(1,474 - 4,638)       | 411<br>(213 - 649)          | 539<br>(359 - 761)             | 231<br>(151 - 358)             | 113<br>(73 - 168)              |
| Meningococcal meningitis                                          | 3,101<br>(2,253 - 4,058)       | 1,069<br>(533 - 1,840)         | 234<br>(119 - 379)          | 893<br>(586 - 1,284)           | 596<br>(380 - 878)             | 310<br>(198 - 458)             |
| Other meningitis                                                  | 5,500<br>(3,940 - 7,689)       | 2,606<br>(1,292 - 4,535)       | 478<br>(267 - 744)          | 1,308<br>(875 - 1,842)         | 768<br>(506 - 1,075)           | 340<br>(216 - 496)             |
| Encephalitis                                                      | 539<br>(372 - 784)             | 250<br>(123 - 464)             | 33<br>(19 - 56)             | 112<br>(74 - 173)              | 88<br>(61 - 128)               | 56<br>(39 - 77)                |
| Diphtheria                                                        | 300<br>(23 - 1,341)            | 221<br>(0 - 1,206)             | 47<br>(0 - 275)             | 26<br>(3 - 84)                 | 7<br>(0 - 38)                  | --                             |
| Whooping cough                                                    | 15,268<br>(27 - 63,421)        | 14,223<br>(26 - 57,713)        | 843<br>(1 - 3,975)          | 182<br>(0 - 967)               | 20<br>(0 - 107)                | --                             |
| Tetanus                                                           | 2,661<br>(1,888 - 3,876)       | 1,222<br>(679 - 2,186)         | 129<br>(69 - 234)           | 830<br>(565 - 1,250)           | 404<br>(271 - 603)             | 75<br>(51 - 113)               |
| Measles                                                           | 14,487<br>(450 - 75,121)       | 12,367<br>(389 - 61,610)       | 1,756<br>(43 - 10,355)      | 354<br>(6 - 2,400)             | 9<br>(0 - 66)                  | --                             |
| Varicella and herpes zoster                                       | 421<br>(190 - 839)             | 155<br>(18 - 489)              | 35<br>(2 - 116)             | 94<br>(27 - 211)               | 35<br>(7 - 88)                 | 103<br>(10 - 348)              |
| Neglected tropical diseases and malaria                           | 22,043<br>(12,320 - 35,777)    | 16,191<br>(6,946 - 29,843)     | 1,914<br>(1,268 - 2,825)    | 2,660<br>(2,069 - 3,478)       | 891<br>(676 - 1,179)           | 387<br>(301 - 509)             |
| Malaria                                                           | 18,387<br>(9,037 - 32,209)     | 15,276<br>(6,088 - 29,006)     | 1,212<br>(657 - 2,017)      | 1,290<br>(833 - 2,028)         | 463<br>(278 - 739)             | 147<br>(84 - 255)              |
| Leishmaniasis                                                     | 2,029<br>(1,338 - 2,829)       | 536<br>(179 - 1,011)           | 495<br>(262 - 777)          | 862<br>(568 - 1,239)           | 101<br>(54 - 148)              | 35<br>(19 - 54)                |
| Visceral leishmaniasis                                            | 2,029<br>(1,338 - 2,829)       | 536<br>(179 - 1,011)           | 495<br>(262 - 777)          | 862<br>(568 - 1,239)           | 101<br>(54 - 148)              | 35<br>(19 - 54)                |
| Schistosomiasis                                                   | 342<br>(261 - 445)             | 4<br>(1 - 9)                   | 10<br>(5 - 16)              | 141<br>(96 - 196)              | 127<br>(84 - 184)              | 61<br>(37 - 89)                |
| Cysticercosis                                                     | 30<br>(7 - 92)                 | 1<br>(0 - 4)                   | 2<br>(0 - 5)                | 18<br>(4 - 57)                 | 7<br>(1 - 20)                  | 2<br>(0 - 5)                   |
| Cystic echinococcosis                                             | 48<br>(39 - 56)                | 5<br>(2 - 9)                   | 7<br>(5 - 10)               | 23<br>(18 - 27)                | 9<br>(7 - 10)                  | 4<br>(3 - 4)                   |
| Dengue                                                            | 14<br>(9 - 23)                 | 1<br>(0 - 4)                   | 2<br>(1 - 3)                | 8<br>(3 - 12)                  | 3<br>(1 - 5)                   | 1<br>(0 - 2)                   |
| Yellow fever                                                      | 0<br>(0 - 0)                   | 0<br>(0 - 0)                   | 0<br>(0 - 0)                | 0<br>(0 - 0)                   | 0<br>(0 - 0)                   | 0<br>(0 - 0)                   |
| Rabies                                                            | 597<br>(378 - 978)             | 105<br>(31 - 237)              | 141<br>(75 - 233)           | 234<br>(162 - 337)             | 91<br>(53 - 198)               | 25<br>(7 - 73)                 |
| Intestinal nematode infections                                    | 244<br>(108 - 380)             | 182<br>(66 - 302)              | 33<br>(16 - 56)             | 17<br>(6 - 34)                 | 7<br>(1 - 19)                  | 5<br>(1 - 15)                  |
| Ascariasis                                                        | 244<br>(108 - 380)             | 182<br>(66 - 302)              | 33<br>(16 - 56)             | 17<br>(6 - 34)                 | 7<br>(1 - 19)                  | 5<br>(1 - 15)                  |
| Other neglected tropical diseases                                 | 351<br>(280 - 445)             | 81<br>(45 - 136)               | 12<br>(6 - 21)              | 67<br>(47 - 95)                | 84<br>(60 - 117)               | 108<br>(75 - 155)              |



Web Table 31- Ethiopia deaths with 95% UI by age, sex, and cause in 2013

| Cause                                                            | Both Sexes, All Ages           | Both Sexes, 0-4 Years       | Both Sexes, 5-14 Years   | Both Sexes, 15-49 Years     | Both Sexes, 50-69 Years      | Both Sexes, 70-80 Years        |
|------------------------------------------------------------------|--------------------------------|-----------------------------|--------------------------|-----------------------------|------------------------------|--------------------------------|
| Maternal disorders                                               | 15,234<br>(11,378 - 19,871)    | --                          | 72<br>(24 - 160)         | 15,162<br>(11,327 - 19,810) | --                           | --                             |
| Maternal hemorrhage                                              | 1,851<br>(1,201 - 2,777)       | --                          | 6<br>(2 - 13)            | 1,845<br>(1,196 - 2,771)    | --                           | --                             |
| Maternal sepsis and other maternal infections                    | 1,462<br>(974 - 2,135)         | --                          | 9<br>(3 - 21)            | 1,453<br>(967 - 2,129)      | --                           | --                             |
| Maternal hypertensive disorders                                  | 1,561<br>(1,064 - 2,215)       | --                          | 8<br>(3 - 19)            | 1,552<br>(1,056 - 2,209)    | --                           | --                             |
| Maternal obstructed labor                                        | 800<br>(540 - 1,167)           | --                          | 3<br>(1 - 7)             | 797<br>(537 - 1,165)        | --                           | --                             |
| Maternal abortive outcome                                        | 2,982<br>(1,993 - 4,105)       | --                          | 13<br>(4 - 30)           | 2,969<br>(1,978 - 4,091)    | --                           | --                             |
| Indirect maternal deaths                                         | 1,154<br>(683 - 1,892)         | --                          | 4<br>(1 - 11)            | 1,149<br>(680 - 1,886)      | --                           | --                             |
| Late maternal deaths                                             | 1,420<br>(850 - 2,159)         | --                          | 12<br>(4 - 29)           | 1,408<br>(843 - 2,139)      | --                           | --                             |
| Maternal deaths aggravated by HIV/AIDS                           | 73<br>(36 - 112)               | --                          | --                       | 73<br>(36 - 112)            | --                           | --                             |
| Other maternal disorders                                         | 3,899<br>(2,761 - 5,234)       | --                          | 16<br>(5 - 36)           | 3,884<br>(2,747 - 5,216)    | --                           | --                             |
| Neonatal disorders                                               | 64,150<br>(53,652 - 74,708)    | 64,150<br>(53,652 - 74,708) | --                       | --                          | --                           | --                             |
| Neonatal preterm birth complications                             | 20,328<br>(12,614 - 28,635)    | 20,328<br>(12,614 - 28,635) | --                       | --                          | --                           | --                             |
| Neonatal encephalopathy due to birth asphyxia and trauma         | 17,243<br>(10,685 - 24,876)    | 17,243<br>(10,685 - 24,876) | --                       | --                          | --                           | --                             |
| Neonatal sepsis and other neonatal infections                    | 16,090<br>(9,302 - 26,519)     | 16,090<br>(9,302 - 26,519)  | --                       | --                          | --                           | --                             |
| Hemolytic disease and other neonatal jaundice                    | 416<br>(166 - 953)             | 416<br>(166 - 953)          | --                       | --                          | --                           | --                             |
| Other neonatal disorders                                         | 10,072<br>(5,567 - 16,400)     | 10,072<br>(5,567 - 16,400)  | --                       | --                          | --                           | --                             |
| Nutritional deficiencies                                         | 24,003<br>(16,044 - 32,653)    | 11,223<br>(4,504 - 18,657)  | 1,091<br>(633 - 1,638)   | 3,058<br>(2,283 - 3,964)    | 3,925<br>(3,024 - 4,982)     | 4,707<br>(3,546 - 6,118)       |
| Protein-energy malnutrition                                      | 16,025<br>(9,207 - 23,646)     | 9,603<br>(3,766 - 16,320)   | 785<br>(423 - 1,217)     | 976<br>(476 - 1,610)        | 2,058<br>(1,213 - 2,975)     | 2,602<br>(1,539 - 3,833)       |
| Iodine deficiency                                                | 86<br>(16 - 254)               | 33<br>(0 - 189)             | 6<br>(0 - 39)            | 18<br>(1 - 64)              | 17<br>(0 - 78)               | 12<br>(0 - 56)                 |
| Iron-deficiency anemia                                           | 7,716<br>(4,834 - 11,468)      | 1,572<br>(392 - 3,666)      | 296<br>(123 - 552)       | 2,034<br>(1,364 - 2,775)    | 1,808<br>(1,097 - 2,664)     | 2,005<br>(1,178 - 3,039)       |
| Other nutritional deficiencies                                   | 176<br>(94 - 323)              | 14<br>(3 - 39)              | 3<br>(1 - 6)             | 30<br>(12 - 62)             | 42<br>(21 - 77)              | 87<br>(42 - 171)               |
| Other communicable, maternal, neonatal, and nutritional diseases | 13,262<br>(8,031 - 21,055)     | 9,729<br>(4,884 - 16,892)   | 742<br>(370 - 1,294)     | 882<br>(689 - 1,152)        | 1,001<br>(696 - 1,561)       | 907<br>(519 - 1,595)           |
| Sexually transmitted diseases excluding HIV                      | 10,187<br>(5,059 - 17,831)     | 8,944<br>(4,215 - 16,078)   | 636<br>(273 - 1,170)     | 247<br>(167 - 368)          | 217<br>(116 - 390)           | 143<br>(75 - 274)              |
| Syphilis                                                         | 9,931<br>(4,810 - 17,593)      | 8,944<br>(4,215 - 16,078)   | 629<br>(265 - 1,162)     | 110<br>(74 - 161)           | 135<br>(75 - 229)            | 112<br>(60 - 214)              |
| Chlamydial infection                                             | 56<br>(34 - 92)                | --                          | 1<br>(1 - 2)             | 33<br>(20 - 57)             | 16<br>(6 - 40)               | 6<br>(2 - 13)                  |
| Gonococcal infection                                             | 114<br>(78 - 158)              | --                          | 3<br>(2 - 4)             | 55<br>(38 - 81)             | 38<br>(20 - 69)              | 17<br>(9 - 32)                 |
| Other sexually transmitted diseases                              | 87<br>(61 - 124)               | --                          | 3<br>(2 - 4)             | 49<br>(34 - 73)             | 27<br>(14 - 50)              | 8<br>(4 - 15)                  |
| Hepatitis                                                        | 705<br>(565 - 920)             | 97<br>(40 - 196)            | 39<br>(25 - 59)          | 308<br>(227 - 424)          | 192<br>(147 - 252)           | 68<br>(51 - 90)                |
| Acute hepatitis A                                                | 75<br>(23 - 153)               | 38<br>(10 - 86)             | 14<br>(4 - 27)           | 20<br>(5 - 46)              | 2<br>(0 - 5)                 | 0<br>(0 - 1)                   |
| Acute hepatitis B                                                | 452<br>(326 - 603)             | 58<br>(19 - 122)            | 19<br>(8 - 33)           | 152<br>(89 - 229)           | 161<br>(117 - 214)           | 62<br>(46 - 83)                |
| Acute hepatitis C                                                | 13<br>(3 - 34)                 | --                          | 1<br>(0 - 3)             | 6<br>(1 - 17)               | 4<br>(1 - 12)                | 1<br>(0 - 4)                   |
| Acute hepatitis E                                                | 165<br>(86 - 277)              | 1<br>(0 - 2)                | 5<br>(2 - 11)            | 130<br>(69 - 217)           | 24<br>(9 - 50)               | 5<br>(1 - 11)                  |
| Other infectious diseases                                        | 2,370<br>(1,669 - 3,576)       | 688<br>(351 - 1,249)        | 66<br>(31 - 130)         | 327<br>(217 - 487)          | 592<br>(324 - 1,132)         | 696<br>(329 - 1,366)           |
| Non-communicable diseases                                        | 262,017<br>(237,441 - 287,785) | 18,455<br>(11,359 - 27,681) | 3,746<br>(2,499 - 4,842) | 37,234<br>(31,183 - 42,842) | 93,211<br>(82,295 - 105,148) | 109,370<br>(100,652 - 118,525) |
| Neoplasms                                                        | 45,520<br>(40,075 - 51,095)    | 1,248<br>(596 - 1,930)      | 803<br>(506 - 1,083)     | 8,976<br>(7,313 - 10,764)   | 21,159<br>(17,959 - 24,376)  | 13,334<br>(11,970 - 15,004)    |
| Esophageal cancer                                                | 5,369<br>(3,810 - 7,233)       | --                          | --                       | 698<br>(411 - 1,037)        | 3,122<br>(1,965 - 4,324)     | 1,548<br>(1,137 - 2,076)       |
| Stomach cancer                                                   | 3,141<br>(2,716 - 3,680)       | --                          | --                       | 403<br>(307 - 512)          | 1,593<br>(1,306 - 1,933)     | 1,145<br>(935 - 1,415)         |
| Liver cancer                                                     | 3,766<br>(2,741 - 4,739)       | --                          | 43<br>(20 - 73)          | 1,088<br>(493 - 1,619)      | 1,793<br>(1,402 - 2,286)     | 842<br>(637 - 1,097)           |
| Liver cancer due to hepatitis B                                  | 664<br>(317 - 1,175)           | --                          | 9<br>(4 - 20)            | 276<br>(108 - 480)          | 288<br>(120 - 580)           | 90<br>(44 - 173)               |
| Liver cancer due to hepatitis C                                  | 1,928<br>(1,003 - 2,697)       | --                          | 12<br>(5 - 24)           | 496<br>(224 - 836)          | 937<br>(384 - 1,353)         | 483<br>(290 - 676)             |

Web Table 31- Ethiopia deaths with 95% UI by age, sex, and cause in 2013

| Cause                                | Both Sexes, All Ages           | Both Sexes, 0-4 Years  | Both Sexes, 5-14 Years | Both Sexes, 15-49 Years    | Both Sexes, 50-69 Years     | Both Sexes, 70-80 Years     |
|--------------------------------------|--------------------------------|------------------------|------------------------|----------------------------|-----------------------------|-----------------------------|
| Liver cancer due to alcohol use      | 504<br>(309 - 815)             | --                     | --                     | 92<br>(29 - 171)           | 257<br>(148 - 434)          | 156<br>(97 - 260)           |
| Liver cancer due to other causes     | 670<br>(377 - 1,018)           | --                     | 21<br>(9 - 38)         | 225<br>(88 - 363)          | 311<br>(169 - 532)          | 113<br>(65 - 192)           |
| Larynx cancer                        | 244<br>(190 - 329)             | --                     | --                     | 32<br>(21 - 46)            | 110<br>(79 - 153)           | 102<br>(74 - 144)           |
| Tracheal, bronchus and lung cancer   | 2,273<br>(1,982 - 2,658)       | --                     | --                     | 167<br>(121 - 231)         | 1,276<br>(1,069 - 1,525)    | 830<br>(701 - 984)          |
| Breast cancer                        | 3,594<br>(2,890 - 4,366)       | --                     | --                     | 1,285<br>(953 - 1,651)     | 1,663<br>(1,272 - 2,100)    | 647<br>(501 - 834)          |
| Cervical cancer                      | 6,481<br>(3,779 - 8,566)       | --                     | --                     | 1,137<br>(686 - 1,660)     | 4,287<br>(2,267 - 5,965)    | 1,057<br>(589 - 1,509)      |
| Uterine cancer                       | 299<br>(154 - 454)             | --                     | --                     | 30<br>(14 - 65)            | 180<br>(92 - 275)           | 90<br>(43 - 149)            |
| Prostate cancer                      | 1,954<br>(1,292 - 2,917)       | --                     | --                     | 38<br>(20 - 67)            | 540<br>(334 - 806)          | 1,376<br>(905 - 2,109)      |
| Colon and rectum cancer              | 4,184<br>(3,641 - 4,752)       | --                     | --                     | 857<br>(684 - 1,027)       | 1,621<br>(1,376 - 1,898)    | 1,705<br>(1,427 - 2,039)    |
| Lip and oral cavity cancer           | 610<br>(486 - 813)             | --                     | --                     | 119<br>(83 - 172)          | 292<br>(220 - 396)          | 199<br>(145 - 277)          |
| Nasopharynx cancer                   | 100<br>(77 - 133)              | --                     | 3<br>(1 - 6)           | 47<br>(33 - 66)            | 35<br>(25 - 48)             | 16<br>(11 - 23)             |
| Other pharynx cancer                 | 279<br>(221 - 353)             | --                     | --                     | 55<br>(39 - 76)            | 148<br>(109 - 201)          | 76<br>(57 - 103)            |
| Gallbladder and biliary tract cancer | 747<br>(617 - 922)             | --                     | --                     | 225<br>(174 - 283)         | 378<br>(283 - 508)          | 144<br>(109 - 192)          |
| Pancreatic cancer                    | 852<br>(740 - 986)             | --                     | --                     | 199<br>(155 - 251)         | 455<br>(377 - 544)          | 197<br>(161 - 237)          |
| Malignant skin melanoma              | 198<br>(154 - 253)             | --                     | --                     | 45<br>(29 - 68)            | 98<br>(75 - 127)            | 56<br>(42 - 75)             |
| Non-melanoma skin cancer             | 206<br>(123 - 348)             | --                     | --                     | 32<br>(19 - 54)            | 68<br>(41 - 110)            | 106<br>(57 - 210)           |
| Ovarian cancer                       | 484<br>(382 - 611)             | --                     | --                     | 106<br>(73 - 147)          | 286<br>(207 - 384)          | 92<br>(64 - 132)            |
| Testicular cancer                    | 135<br>(91 - 199)              | --                     | --                     | 65<br>(41 - 97)            | 59<br>(35 - 96)             | 11<br>(6 - 17)              |
| Kidney cancer                        | 824<br>(684 - 991)             | 87<br>(30 - 177)       | 29<br>(15 - 50)        | 105<br>(80 - 135)          | 337<br>(268 - 429)          | 266<br>(208 - 341)          |
| Bladder cancer                       | 538<br>(441 - 675)             | --                     | --                     | 67<br>(48 - 93)            | 161<br>(123 - 212)          | 309<br>(236 - 411)          |
| Brain and nervous system cancer      | 809<br>(619 - 1,039)           | 41<br>(11 - 91)        | 100<br>(54 - 157)      | 367<br>(272 - 490)         | 186<br>(138 - 274)          | 114<br>(83 - 155)           |
| Thyroid cancer                       | 124<br>(88 - 193)              | --                     | 1<br>(1 - 2)           | 8<br>(6 - 11)              | 79<br>(48 - 138)            | 36<br>(27 - 48)             |
| Mesothelioma                         | 99<br>(76 - 132)               | --                     | --                     | 9<br>(7 - 12)              | 53<br>(35 - 80)             | 36<br>(24 - 53)             |
| Hodgkin lymphoma                     | 338<br>(239 - 485)             | 13<br>(5 - 32)         | 20<br>(8 - 43)         | 91<br>(54 - 170)           | 109<br>(69 - 160)           | 105<br>(66 - 150)           |
| Non-Hodgkin lymphoma                 | 1,986<br>(1,578 - 2,533)       | 270<br>(93 - 489)      | 150<br>(88 - 227)      | 434<br>(328 - 556)         | 542<br>(424 - 695)          | 590<br>(453 - 787)          |
| Multiple myeloma                     | 423<br>(341 - 523)             | --                     | --                     | 81<br>(61 - 103)           | 133<br>(98 - 172)           | 209<br>(160 - 277)          |
| Leukemia                             | 738<br>(626 - 851)             | 47<br>(17 - 86)        | 63<br>(37 - 93)        | 263<br>(205 - 323)         | 168<br>(138 - 202)          | 196<br>(162 - 238)          |
| Other neoplasms                      | 4,725<br>(3,585 - 5,731)       | 789<br>(381 - 1,224)   | 393<br>(221 - 575)     | 922<br>(548 - 1,257)       | 1,387<br>(1,053 - 1,778)    | 1,233<br>(928 - 1,585)      |
| Cardiovascular diseases              | 121,211<br>(107,225 - 134,042) | 1,049<br>(577 - 1,659) | 443<br>(284 - 628)     | 10,363<br>(8,405 - 12,387) | 44,597<br>(38,406 - 50,994) | 64,759<br>(57,807 - 71,236) |
| Rheumatic heart disease              | 4,833<br>(3,263 - 8,044)       | 47<br>(14 - 107)       | 118<br>(71 - 187)      | 1,464<br>(989 - 2,399)     | 1,890<br>(1,205 - 3,199)    | 1,314<br>(840 - 2,178)      |
| Ischemic heart disease               | 30,980<br>(24,467 - 36,335)    | 6<br>(2 - 13)          | 27<br>(15 - 47)        | 2,020<br>(1,445 - 2,588)   | 11,443<br>(8,729 - 13,880)  | 17,484<br>(13,644 - 20,752) |
| Cerebrovascular disease              | 53,777<br>(43,469 - 61,947)    | 111<br>(62 - 180)      | 40<br>(22 - 60)        | 2,587<br>(1,886 - 3,274)   | 19,512<br>(15,445 - 23,267) | 31,526<br>(25,487 - 36,122) |
| Ischemic stroke                      | 23,264<br>(9,603 - 33,336)     | 7<br>(2 - 16)          | 4<br>(1 - 8)           | 353<br>(101 - 629)         | 5,926<br>(2,098 - 9,212)    | 16,974<br>(7,330 - 24,012)  |
| Hemorrhagic stroke                   | 30,513<br>(20,565 - 42,487)    | 104<br>(59 - 167)      | 36<br>(21 - 53)        | 2,234<br>(1,666 - 2,876)   | 13,586<br>(9,748 - 18,028)  | 14,552<br>(8,545 - 22,294)  |
| Hypertensive heart disease           | 10,826<br>(7,220 - 16,762)     | 16<br>(6 - 34)         | 11<br>(6 - 18)         | 745<br>(486 - 1,102)       | 3,670<br>(2,380 - 5,553)    | 6,384<br>(4,042 - 10,517)   |
| Cardiomyopathy and myocarditis       | 4,874<br>(3,458 - 7,444)       | 432<br>(190 - 759)     | 111<br>(57 - 188)      | 1,115<br>(741 - 1,608)     | 1,724<br>(1,171 - 2,569)    | 1,492<br>(943 - 2,771)      |
| Atrial fibrillation and flutter      | 52<br>(20 - 93)                | --                     | --                     | 2<br>(2 - 4)               | 12<br>(6 - 23)              | 37<br>(12 - 70)             |
| Aortic aneurysm                      | 1,125<br>(716 - 1,651)         | --                     | --                     | 122<br>(67 - 189)          | 444<br>(269 - 677)          | 558<br>(367 - 831)          |
| Peripheral vascular disease          | 48<br>(32 - 73)                | --                     | --                     | 2<br>(1 - 3)               | 15<br>(9 - 23)              | 31<br>(20 - 49)             |
| Endocarditis                         | 1,572<br>(1,115 - 2,254)       | 73<br>(28 - 141)       | 24<br>(13 - 40)        | 336<br>(219 - 473)         | 523<br>(347 - 760)          | 617<br>(385 - 991)          |

Web Table 31- Ethiopia deaths with 95% UI by age, sex, and cause in 2013

| Cause                                               | Both Sexes, All Ages        | Both Sexes, 0-4 Years | Both Sexes, 5-14 Years | Both Sexes, 15-49 Years  | Both Sexes, 50-69 Years  | Both Sexes, 70-80 Years  |
|-----------------------------------------------------|-----------------------------|-----------------------|------------------------|--------------------------|--------------------------|--------------------------|
| Other cardiovascular and circulatory diseases       | 13,124<br>(8,625 - 21,301)  | 363<br>(164 - 684)    | 113<br>(56 - 189)      | 1,969<br>(1,263 - 3,027) | 5,363<br>(3,386 - 8,511) | 5,316<br>(3,144 - 9,658) |
| Chronic respiratory diseases                        | 14,761<br>(12,894 - 16,944) | 433<br>(191 - 717)    | 137<br>(86 - 187)      | 1,332<br>(1,072 - 1,610) | 5,042<br>(4,196 - 6,011) | 7,817<br>(6,707 - 9,165) |
| Chronic obstructive pulmonary disease               | 8,588<br>(7,085 - 10,417)   | 77<br>(28 - 146)      | 55<br>(32 - 81)        | 462<br>(335 - 618)       | 3,006<br>(2,374 - 3,776) | 4,988<br>(4,013 - 6,158) |
| Pneumoconiosis                                      | 1,216<br>(578 - 1,909)      | 14<br>(4 - 33)        | 9<br>(5 - 15)          | 202<br>(101 - 336)       | 475<br>(205 - 792)       | 516<br>(239 - 852)       |
| Silicosis                                           | 350<br>(100 - 880)          | 4<br>(1 - 11)         | 3<br>(1 - 5)           | 51<br>(11 - 141)         | 129<br>(32 - 339)        | 163<br>(48 - 405)        |
| Asbestosis                                          | 127<br>(53 - 289)           | 2<br>(0 - 5)          | 1<br>(1 - 2)           | 23<br>(9 - 47)           | 60<br>(22 - 139)         | 41<br>(15 - 102)         |
| Coal workers pneumoconiosis                         | 208<br>(49 - 466)           | 1<br>(0 - 4)          | 2<br>(1 - 3)           | 33<br>(9 - 73)           | 88<br>(19 - 210)         | 83<br>(17 - 192)         |
| Other pneumoconiosis                                | 531<br>(255 - 950)          | 7<br>(2 - 15)         | 3<br>(2 - 5)           | 95<br>(49 - 169)         | 197<br>(88 - 378)        | 228<br>(95 - 439)        |
| Asthma                                              | 2,602<br>(2,000 - 3,283)    | 86<br>(24 - 183)      | 28<br>(15 - 45)        | 281<br>(203 - 373)       | 939<br>(682 - 1,260)     | 1,267<br>(924 - 1,661)   |
| Interstitial lung disease and pulmonary sarcoidosis | 1,272<br>(312 - 2,162)      | 14<br>(2 - 47)        | 6<br>(2 - 14)          | 122<br>(33 - 237)        | 416<br>(107 - 746)       | 714<br>(161 - 1,318)     |
| Other chronic respiratory diseases                  | 1,085<br>(660 - 1,604)      | 243<br>(114 - 406)    | 38<br>(20 - 61)        | 265<br>(158 - 403)       | 207<br>(103 - 362)       | 332<br>(174 - 556)       |
| Cirrhosis                                           | 12,244<br>(10,582 - 14,167) | 139<br>(45 - 265)     | 136<br>(86 - 189)      | 2,999<br>(2,324 - 3,765) | 5,961<br>(4,980 - 7,141) | 3,008<br>(2,498 - 3,669) |
| Cirrhosis due to hepatitis B                        | 3,197<br>(1,891 - 4,548)    | 7<br>(2 - 15)         | 23<br>(11 - 38)        | 762<br>(465 - 1,103)     | 1,600<br>(929 - 2,387)   | 806<br>(427 - 1,216)     |
| Cirrhosis due to hepatitis C                        | 2,531<br>(1,001 - 3,675)    | 8<br>(2 - 19)         | 13<br>(6 - 23)         | 528<br>(225 - 906)       | 1,312<br>(485 - 1,986)   | 670<br>(230 - 1,011)     |
| Cirrhosis due to alcohol use                        | 4,826<br>(3,511 - 6,449)    | --                    | --                     | 1,085<br>(686 - 1,613)   | 2,432<br>(1,697 - 3,367) | 1,310<br>(924 - 1,758)   |
| Cirrhosis due to other causes                       | 1,690<br>(1,256 - 2,243)    | 125<br>(38 - 244)     | 99<br>(61 - 142)       | 625<br>(443 - 840)       | 617<br>(415 - 890)       | 223<br>(149 - 329)       |
| Digestive diseases                                  | 14,272<br>(12,244 - 16,269) | 479<br>(162 - 1,013)  | 413<br>(270 - 579)     | 3,463<br>(2,735 - 4,251) | 4,892<br>(4,016 - 5,806) | 5,026<br>(4,187 - 5,920) |
| Peptic ulcer disease                                | 4,335<br>(3,111 - 5,769)    | 48<br>(12 - 130)      | 47<br>(24 - 83)        | 889<br>(565 - 1,319)     | 1,566<br>(1,088 - 2,228) | 1,786<br>(1,278 - 2,353) |
| Gastritis and duodenitis                            | 569<br>(221 - 1,328)        | 27<br>(8 - 64)        | 25<br>(10 - 50)        | 137<br>(57 - 303)        | 162<br>(58 - 396)        | 217<br>(66 - 591)        |
| Appendicitis                                        | 1,209<br>(806 - 1,571)      | 36<br>(10 - 79)       | 68<br>(39 - 103)       | 330<br>(218 - 461)       | 386<br>(243 - 557)       | 390<br>(241 - 567)       |
| Paralytic ileus and intestinal obstruction          | 4,316<br>(2,867 - 5,806)    | 144<br>(44 - 339)     | 167<br>(92 - 260)      | 1,129<br>(715 - 1,616)   | 1,582<br>(993 - 2,179)   | 1,294<br>(797 - 1,873)   |
| Inguinal, femoral, and abdominal hernia             | 258<br>(174 - 376)          | 13<br>(2 - 39)        | 6<br>(3 - 11)          | 80<br>(48 - 119)         | 57<br>(32 - 92)          | 102<br>(63 - 160)        |
| Inflammatory bowel disease                          | 734<br>(318 - 1,135)        | 101<br>(29 - 225)     | 31<br>(11 - 51)        | 204<br>(83 - 317)        | 190<br>(70 - 321)        | 208<br>(80 - 385)        |
| Vascular intestinal disorders                       | 110<br>(52 - 226)           | 2<br>(0 - 6)          | 2<br>(1 - 5)           | 16<br>(8 - 31)           | 34<br>(17 - 70)          | 54<br>(23 - 127)         |
| Gallbladder and biliary diseases                    | 842<br>(576 - 1,124)        | 12<br>(4 - 28)        | 11<br>(6 - 17)         | 139<br>(91 - 190)        | 293<br>(188 - 414)       | 387<br>(246 - 578)       |
| Pancreatitis                                        | 589<br>(255 - 976)          | 6<br>(2 - 14)         | 7<br>(3 - 13)          | 237<br>(95 - 416)        | 200<br>(80 - 354)        | 138<br>(57 - 259)        |
| Other digestive diseases                            | 1,311<br>(909 - 1,931)      | 90<br>(26 - 203)      | 48<br>(25 - 75)        | 303<br>(198 - 444)       | 421<br>(280 - 617)       | 450<br>(282 - 735)       |
| Neurological disorders                              | 8,405<br>(7,095 - 10,303)   | 639<br>(233 - 1,318)  | 490<br>(292 - 801)     | 1,781<br>(1,248 - 2,561) | 879<br>(716 - 1,071)     | 4,616<br>(3,906 - 5,470) |
| Alzheimer disease and other dementias               | 4,396<br>(3,688 - 5,251)    | --                    | --                     | 3<br>(1 - 5)             | 410<br>(319 - 517)       | 3,984<br>(3,301 - 4,804) |
| Parkinson disease                                   | 69<br>(43 - 109)            | --                    | --                     | 5<br>(4 - 6)             | 12<br>(6 - 22)           | 52<br>(28 - 90)          |
| Epilepsy                                            | 3,325<br>(2,408 - 4,862)    | 528<br>(170 - 1,177)  | 446<br>(253 - 749)     | 1,575<br>(1,064 - 2,332) | 293<br>(204 - 413)       | 483<br>(334 - 686)       |
| Multiple sclerosis                                  | 24<br>(9 - 39)              | --                    | --                     | 12<br>(4 - 21)           | 9<br>(3 - 15)            | 3<br>(1 - 5)             |
| Other neurological disorders                        | 591<br>(464 - 727)          | 111<br>(51 - 181)     | 43<br>(28 - 59)        | 187<br>(137 - 244)       | 156<br>(112 - 198)       | 94<br>(67 - 120)         |
| Mental and substance use disorders                  | 3,288<br>(2,091 - 5,247)    | 93<br>(10 - 267)      | 0<br>(0 - 0)           | 2,101<br>(1,240 - 3,288) | 918<br>(570 - 1,579)     | 176<br>(111 - 317)       |
| Schizophrenia                                       | 48<br>(24 - 84)             | --                    | --                     | 23<br>(12 - 42)          | 16<br>(8 - 30)           | 8<br>(3 - 15)            |
| Alcohol use disorders                               | 2,612<br>(1,601 - 4,186)    | --                    | --                     | 1,636<br>(932 - 2,662)   | 833<br>(504 - 1,464)     | 143<br>(87 - 270)        |
| Drug use disorders                                  | 627<br>(248 - 1,199)        | 93<br>(10 - 267)      | --                     | 440<br>(187 - 930)       | 69<br>(26 - 163)         | 26<br>(8 - 63)           |
| Opioid use disorders                                | 66<br>(26 - 125)            | 10<br>(1 - 31)        | --                     | 47<br>(19 - 102)         | 6<br>(2 - 14)            | 3<br>(1 - 7)             |
| Cocaine use disorders                               | 3<br>(1 - 6)                | 0<br>(0 - 1)          | --                     | 2<br>(1 - 4)             | 0<br>(0 - 1)             | 0<br>(0 - 0)             |
| Amphetamine use disorders                           | 2<br>(1 - 4)                | 0<br>(0 - 1)          | --                     | 1<br>(1 - 3)             | 0<br>(0 - 1)             | 0<br>(0 - 0)             |

Web Table 31- Ethiopia deaths with 95% UI by age, sex, and cause in 2013

| Cause                                               | Both Sexes, All Ages        | Both Sexes, 0-4 Years      | Both Sexes, 5-14 Years | Both Sexes, 15-49 Years  | Both Sexes, 50-69 Years   | Both Sexes, 70-80 Years   |
|-----------------------------------------------------|-----------------------------|----------------------------|------------------------|--------------------------|---------------------------|---------------------------|
| Other drug use disorders                            | 556<br>(221 - 1,068)        | 82<br>(9 - 234)            | --                     | 390<br>(165 - 822)       | 62<br>(23 - 147)          | 23<br>(7 - 56)            |
| Eating disorders                                    | 2<br>(1 - 3)                | --                         | 0<br>(0 - 0)           | 2<br>(1 - 3)             | --                        | --                        |
| Anorexia nervosa                                    | 2<br>(1 - 3)                | --                         | 0<br>(0 - 0)           | 2<br>(1 - 3)             | --                        | --                        |
| Diabetes, urogenital, blood, and endocrine diseases | 25,672<br>(22,533 - 29,023) | 1,963<br>(950 - 3,149)     | 657<br>(416 - 909)     | 4,921<br>(3,916 - 5,842) | 8,826<br>(7,533 - 10,228) | 9,304<br>(8,121 - 10,689) |
| Diabetes mellitus                                   | 11,666<br>(10,114 - 13,492) | 87<br>(52 - 136)           | 39<br>(24 - 58)        | 1,197<br>(960 - 1,457)   | 5,122<br>(4,193 - 6,175)  | 5,222<br>(4,348 - 6,267)  |
| Acute glomerulonephritis                            | 484<br>(295 - 677)          | 41<br>(13 - 92)            | 17<br>(8 - 32)         | 103<br>(67 - 161)        | 197<br>(99 - 305)         | 126<br>(65 - 192)         |
| Chronic kidney disease                              | 4,731<br>(3,988 - 5,550)    | 264<br>(108 - 458)         | 147<br>(93 - 211)      | 1,266<br>(957 - 1,568)   | 1,259<br>(1,017 - 1,552)  | 1,794<br>(1,457 - 2,211)  |
| Chronic kidney disease due to diabetes mellitus     | 19<br>(8 - 41)              | 1<br>(0 - 1)               | 1<br>(0 - 2)           | 5<br>(1 - 7)             | 7<br>(3 - 16)             | 6<br>(2 - 17)             |
| Chronic kidney disease due to hypertension          | 1,543<br>(943 - 2,252)      | 23<br>(5 - 51)             | 11<br>(4 - 22)         | 249<br>(130 - 381)       | 486<br>(288 - 735)        | 775<br>(462 - 1,187)      |
| Chronic kidney disease due to glomerulonephritis    | 2,056<br>(1,393 - 2,829)    | 191<br>(76 - 325)          | 105<br>(63 - 152)      | 666<br>(481 - 927)       | 531<br>(316 - 775)        | 564<br>(316 - 855)        |
| Chronic kidney disease due to other causes          | 1,113<br>(680 - 1,596)      | 51<br>(16 - 109)           | 30<br>(14 - 59)        | 347<br>(204 - 547)       | 236<br>(125 - 379)        | 449<br>(235 - 748)        |
| Urinary diseases and male infertility               | 3,756<br>(3,102 - 4,420)    | 203<br>(83 - 393)          | 68<br>(40 - 102)       | 983<br>(743 - 1,251)     | 1,342<br>(1,060 - 1,697)  | 1,159<br>(885 - 1,467)    |
| Interstitial nephritis and urinary tract infections | 3,026<br>(2,400 - 3,740)    | 167<br>(66 - 333)          | 48<br>(29 - 73)        | 758<br>(550 - 980)       | 1,084<br>(784 - 1,417)    | 968<br>(697 - 1,297)      |
| Urolithiasis                                        | 135<br>(72 - 267)           | --                         | 6<br>(2 - 12)          | 43<br>(21 - 83)          | 58<br>(27 - 116)          | 29<br>(11 - 70)           |
| Other urinary diseases                              | 594<br>(302 - 1,035)        | 36<br>(13 - 76)            | 14<br>(6 - 25)         | 182<br>(90 - 310)        | 200<br>(88 - 382)         | 162<br>(58 - 362)         |
| Gynecological diseases                              | 53<br>(27 - 78)             | --                         | --                     | 13<br>(7 - 18)           | 25<br>(12 - 43)           | 15<br>(7 - 26)            |
| Uterine fibroids                                    | 14<br>(7 - 20)              | --                         | --                     | 2<br>(1 - 4)             | 7<br>(3 - 12)             | 5<br>(2 - 8)              |
| Polycystic ovarian syndrome                         | 1<br>(1 - 1)                | --                         | --                     | 1<br>(0 - 1)             | 0<br>(0 - 0)              | --                        |
| Endometriosis                                       | 3<br>(1 - 4)                | --                         | --                     | 2<br>(1 - 3)             | 1<br>(0 - 2)              | --                        |
| Genital prolapse                                    | 10<br>(5 - 15)              | --                         | --                     | 2<br>(1 - 2)             | 4<br>(2 - 8)              | 4<br>(2 - 7)              |
| Other gynecological diseases                        | 26<br>(13 - 39)             | --                         | --                     | 6<br>(3 - 9)             | 13<br>(6 - 23)            | 7<br>(3 - 11)             |
| Hemoglobinopathies and hemolytic anemias            | 2,278<br>(1,270 - 3,676)    | 849<br>(310 - 1,589)       | 307<br>(156 - 505)     | 683<br>(381 - 1,219)     | 240<br>(128 - 498)        | 199<br>(94 - 493)         |
| Thalassemias                                        | 863<br>(390 - 1,446)        | 483<br>(158 - 922)         | 166<br>(83 - 272)      | 215<br>(120 - 386)       | 0<br>(0 - 0)              | 0<br>(0 - 0)              |
| Sickle cell disorders                               | 22<br>(11 - 35)             | 9<br>(3 - 17)              | 4<br>(2 - 7)           | 7<br>(4 - 12)            | 1<br>(1 - 3)              | 0<br>(0 - 0)              |
| G6PD deficiency                                     | 254<br>(138 - 411)          | 88<br>(29 - 167)           | 42<br>(21 - 69)        | 97<br>(54 - 164)         | 24<br>(13 - 52)           | 4<br>(2 - 10)             |
| Other hemoglobinopathies and hemolytic anemias      | 1,138<br>(648 - 2,003)      | 270<br>(115 - 485)         | 96<br>(49 - 158)       | 364<br>(199 - 669)       | 214<br>(115 - 444)        | 195<br>(93 - 483)         |
| Endocrine, metabolic, blood, and immune disorders   | 2,704<br>(1,677 - 3,464)    | 519<br>(268 - 867)         | 79<br>(39 - 131)       | 676<br>(346 - 949)       | 641<br>(414 - 857)        | 789<br>(482 - 1,101)      |
| Musculoskeletal disorders                           | 674<br>(484 - 994)          | --                         | 58<br>(33 - 83)        | 272<br>(180 - 389)       | 195<br>(132 - 313)        | 149<br>(101 - 279)        |
| Rheumatoid arthritis                                | 249<br>(137 - 418)          | --                         | 16<br>(7 - 26)         | 63<br>(30 - 95)          | 90<br>(48 - 153)          | 80<br>(44 - 160)          |
| Other musculoskeletal disorders                     | 425<br>(293 - 635)          | --                         | 42<br>(23 - 62)        | 210<br>(139 - 306)       | 104<br>(65 - 174)         | 69<br>(40 - 132)          |
| Other non-communicable diseases                     | 15,969<br>(11,146 - 24,189) | 12,413<br>(7,684 - 20,370) | 610<br>(347 - 933)     | 1,025<br>(776 - 1,289)   | 743<br>(578 - 945)        | 1,180<br>(881 - 1,534)    |
| Congenital anomalies                                | 13,201<br>(8,506 - 21,331)  | 11,763<br>(7,217 - 19,753) | 567<br>(321 - 885)     | 602<br>(431 - 781)       | 137<br>(110 - 170)        | 132<br>(107 - 163)        |
| Neural tube defects                                 | 3,994<br>(1,243 - 7,874)    | 3,750<br>(1,156 - 7,401)   | 109<br>(25 - 261)      | 110<br>(24 - 266)        | 15<br>(4 - 39)            | 9<br>(3 - 27)             |
| Congenital heart anomalies                          | 5,292<br>(2,833 - 9,962)    | 4,590<br>(2,224 - 9,161)   | 293<br>(160 - 499)     | 297<br>(204 - 403)       | 54<br>(36 - 72)           | 58<br>(36 - 80)           |
| Cleft lip and cleft palate                          | 79<br>(20 - 183)            | 79<br>(20 - 183)           | --                     | --                       | --                        | --                        |
| Down syndrome                                       | 802<br>(240 - 1,747)        | 652<br>(158 - 1,571)       | 55<br>(21 - 113)       | 72<br>(38 - 121)         | 20<br>(12 - 31)           | 3<br>(2 - 5)              |
| Chromosomal unbalanced rearrangements               | 419<br>(153 - 975)          | 380<br>(126 - 924)         | 13<br>(5 - 27)         | 19<br>(10 - 31)          | 4<br>(2 - 6)              | 3<br>(2 - 5)              |
| Other congenital anomalies                          | 2,614<br>(1,054 - 7,094)    | 2,310<br>(814 - 6,556)     | 97<br>(40 - 240)       | 104<br>(59 - 166)        | 44<br>(28 - 67)           | 59<br>(40 - 85)           |
| Skin and subcutaneous diseases                      | 2,568<br>(2,005 - 3,207)    | 450<br>(159 - 843)         | 42<br>(25 - 62)        | 423<br>(315 - 565)       | 606<br>(455 - 805)        | 1,047<br>(759 - 1,402)    |
| Cellulitis                                          | 1,938<br>(1,334 - 2,628)    | 352<br>(113 - 732)         | 33<br>(17 - 53)        | 330<br>(209 - 487)       | 481<br>(336 - 659)        | 743<br>(479 - 1,073)      |

Web Table 31- Ethiopia deaths with 95% UI by age, sex, and cause in 2013

| Cause                                           | Both Sexes, All Ages        | Both Sexes, 0-4 Years     | Both Sexes, 5-14 Years   | Both Sexes, 15-49 Years     | Both Sexes, 50-69 Years    | Both Sexes, 70-80 Years  |
|-------------------------------------------------|-----------------------------|---------------------------|--------------------------|-----------------------------|----------------------------|--------------------------|
| Pyoderma                                        | 384<br>(149 - 683)          | 86<br>(21 - 196)          | 5<br>(2 - 11)            | 60<br>(22 - 109)            | 86<br>(30 - 169)           | 145<br>(56 - 291)        |
| Decubitus ulcer                                 | 209<br>(75 - 411)           | 5<br>(1 - 13)             | 2<br>(1 - 5)             | 22<br>(7 - 39)              | 31<br>(10 - 66)            | 149<br>(53 - 310)        |
| Other skin and subcutaneous diseases            | 37<br>(11 - 76)             | 7<br>(1 - 22)             | 1<br>(0 - 4)             | 11<br>(3 - 24)              | 8<br>(2 - 16)              | 10<br>(3 - 19)           |
| Sudden infant death syndrome                    | 200<br>(61 - 503)           | 200<br>(61 - 503)         | --                       | --                          | --                         | --                       |
| Injuries                                        | 55,364<br>(46,124 - 64,316) | 7,516<br>(3,618 - 12,022) | 4,906<br>(3,214 - 6,418) | 24,794<br>(19,674 - 29,472) | 10,169<br>(8,686 - 11,798) | 7,979<br>(6,939 - 9,332) |
| Transport injuries                              | 18,585<br>(15,237 - 21,916) | 1,447<br>(532 - 2,639)    | 2,309<br>(1,441 - 3,187) | 8,694<br>(6,476 - 10,845)   | 3,824<br>(3,099 - 4,601)   | 2,310<br>(1,854 - 2,885) |
| Road injuries                                   | 17,803<br>(14,646 - 21,025) | 1,341<br>(490 - 2,485)    | 2,183<br>(1,353 - 3,004) | 8,509<br>(6,328 - 10,590)   | 3,638<br>(2,951 - 4,366)   | 2,132<br>(1,719 - 2,659) |
| Pedestrian road injuries                        | 9,643<br>(7,553 - 11,728)   | 782<br>(272 - 1,465)      | 1,376<br>(833 - 1,950)   | 4,097<br>(2,810 - 5,309)    | 2,080<br>(1,617 - 2,623)   | 1,309<br>(1,007 - 1,686) |
| Cyclist road injuries                           | 622<br>(459 - 825)          | 25<br>(7 - 55)            | 65<br>(39 - 101)         | 245<br>(162 - 351)          | 185<br>(131 - 245)         | 102<br>(68 - 151)        |
| Motorcyclist road injuries                      | 758<br>(526 - 1,028)        | 28<br>(9 - 56)            | 33<br>(18 - 55)          | 501<br>(324 - 719)          | 115<br>(78 - 161)          | 81<br>(53 - 122)         |
| Motor vehicle road injuries                     | 6,628<br>(5,082 - 8,386)    | 486<br>(174 - 910)        | 682<br>(404 - 1,041)     | 3,645<br>(2,547 - 4,800)    | 1,206<br>(901 - 1,572)     | 609<br>(436 - 812)       |
| Other road injuries                             | 153<br>(103 - 227)          | 20<br>(6 - 49)            | 27<br>(13 - 53)          | 21<br>(13 - 34)             | 52<br>(30 - 85)            | 32<br>(18 - 52)          |
| Other transport injuries                        | 782<br>(603 - 1,008)        | 106<br>(41 - 204)         | 126<br>(76 - 194)        | 185<br>(129 - 256)          | 187<br>(130 - 259)         | 178<br>(125 - 247)       |
| Unintentional injuries                          | 22,638<br>(18,069 - 28,890) | 5,686<br>(2,812 - 9,543)  | 2,127<br>(1,393 - 2,934) | 6,043<br>(4,791 - 7,570)    | 4,063<br>(3,410 - 4,987)   | 4,719<br>(3,962 - 5,823) |
| Falls                                           | 4,878<br>(3,943 - 6,061)    | 343<br>(171 - 583)        | 310<br>(179 - 463)       | 1,091<br>(759 - 1,485)      | 1,121<br>(850 - 1,487)     | 2,014<br>(1,463 - 2,748) |
| Drowning                                        | 4,409<br>(3,059 - 6,839)    | 1,257<br>(529 - 2,852)    | 682<br>(422 - 1,043)     | 1,673<br>(1,178 - 2,384)    | 524<br>(385 - 720)         | 274<br>(203 - 382)       |
| Fire, heat, and hot substances                  | 3,455<br>(2,380 - 5,047)    | 1,221<br>(486 - 2,447)    | 340<br>(188 - 557)       | 709<br>(515 - 981)          | 621<br>(461 - 826)         | 565<br>(406 - 768)       |
| Poisonings                                      | 1,005<br>(683 - 1,377)      | 303<br>(120 - 596)        | 51<br>(28 - 79)          | 394<br>(271 - 538)          | 200<br>(132 - 278)         | 57<br>(37 - 78)          |
| Exposure to mechanical forces                   | 3,012<br>(2,098 - 4,976)    | 1,062<br>(408 - 2,635)    | 291<br>(154 - 506)       | 897<br>(669 - 1,241)        | 524<br>(387 - 748)         | 238<br>(179 - 324)       |
| Unintentional firearm injuries                  | 534<br>(400 - 698)          | 51<br>(25 - 92)           | 25<br>(13 - 42)          | 352<br>(236 - 495)          | 66<br>(46 - 96)            | 41<br>(28 - 57)          |
| Unintentional suffocation                       | 1,048<br>(441 - 2,802)      | 671<br>(182 - 2,071)      | 106<br>(43 - 246)        | 120<br>(62 - 323)           | 114<br>(64 - 306)          | 37<br>(20 - 100)         |
| Other exposure to mechanical forces             | 1,429<br>(1,056 - 1,964)    | 340<br>(136 - 697)        | 161<br>(82 - 279)        | 425<br>(299 - 590)          | 343<br>(236 - 477)         | 160<br>(110 - 224)       |
| Adverse effects of medical treatment            | 2,664<br>(1,893 - 3,680)    | 658<br>(318 - 1,268)      | 76<br>(43 - 127)         | 354<br>(244 - 527)          | 592<br>(403 - 875)         | 985<br>(652 - 1,442)     |
| Animal contact                                  | 1,203<br>(832 - 2,092)      | 181<br>(69 - 364)         | 161<br>(85 - 304)        | 364<br>(245 - 669)          | 286<br>(180 - 513)         | 211<br>(138 - 356)       |
| Venomous animal contact                         | 677<br>(427 - 1,168)        | 118<br>(37 - 263)         | 73<br>(31 - 154)         | 199<br>(123 - 377)          | 139<br>(85 - 249)          | 147<br>(92 - 256)        |
| Non-venomous animal contact                     | 526<br>(357 - 917)          | 63<br>(21 - 135)          | 88<br>(46 - 177)         | 165<br>(105 - 295)          | 146<br>(84 - 283)          | 64<br>(38 - 121)         |
| Foreign body                                    | 939<br>(608 - 1,412)        | 472<br>(232 - 852)        | 49<br>(28 - 85)          | 76<br>(50 - 118)            | 61<br>(45 - 86)            | 280<br>(184 - 415)       |
| Pulmonary aspiration and foreign body in airway | 883<br>(551 - 1,341)        | 458<br>(225 - 832)        | 43<br>(23 - 75)          | 69<br>(44 - 109)            | 45<br>(31 - 65)            | 267<br>(173 - 403)       |
| Foreign body in other body part                 | 57<br>(39 - 93)             | 14<br>(6 - 26)            | 6<br>(3 - 11)            | 7<br>(5 - 11)               | 16<br>(11 - 26)            | 13<br>(9 - 22)           |
| Other unintentional injuries                    | 1,072<br>(810 - 1,338)      | 191<br>(81 - 319)         | 168<br>(102 - 247)       | 484<br>(360 - 639)          | 135<br>(101 - 174)         | 94<br>(71 - 124)         |
| Self-harm and interpersonal violence            | 14,141<br>(10,673 - 18,140) | 382<br>(154 - 736)        | 470<br>(281 - 719)       | 10,058<br>(7,356 - 13,205)  | 2,282<br>(1,724 - 2,944)   | 949<br>(630 - 1,265)     |
| Self-harm                                       | 6,121<br>(4,585 - 8,045)    | --                        | 160<br>(79 - 300)        | 3,987<br>(2,778 - 5,610)    | 1,244<br>(921 - 1,676)     | 730<br>(484 - 1,000)     |
| Interpersonal violence                          | 8,021<br>(5,003 - 10,823)   | 382<br>(154 - 736)        | 310<br>(167 - 498)       | 6,071<br>(3,717 - 8,533)    | 1,038<br>(638 - 1,486)     | 219<br>(100 - 367)       |
| Assault by firearm                              | 2,554<br>(1,303 - 3,980)    | 81<br>(31 - 168)          | 54<br>(22 - 100)         | 2,113<br>(1,056 - 3,366)    | 279<br>(144 - 441)         | 28<br>(10 - 56)          |
| Assault by sharp object                         | 1,723<br>(1,039 - 2,751)    | 68<br>(26 - 158)          | 33<br>(16 - 58)          | 1,247<br>(720 - 2,048)      | 297<br>(164 - 475)         | 78<br>(35 - 139)         |
| Assault by other means                          | 3,743<br>(2,036 - 5,447)    | 233<br>(79 - 467)         | 224<br>(113 - 367)       | 2,711<br>(1,403 - 4,088)    | 462<br>(258 - 690)         | 113<br>(48 - 190)        |

Web Table 31- Ethiopia deaths with 95% UI by age, sex, and cause in 2013

| Cause                                                             | Males, All Ages                | Males, 0-4 Years               | Males, 5-14 Years           | Males, 15-49 Years           | Males, 50-69 Years          | Males, 70-80 Years          |
|-------------------------------------------------------------------|--------------------------------|--------------------------------|-----------------------------|------------------------------|-----------------------------|-----------------------------|
| All causes                                                        | 389,436<br>(352,927 - 428,165) | 127,223<br>(105,745 - 154,297) | 15,448<br>(13,430 - 18,642) | 89,205<br>(76,727 - 100,459) | 78,971<br>(71,172 - 91,542) | 78,588<br>(74,510 - 87,491) |
| Communicable, maternal, neonatal, and nutritional diseases        | 223,733<br>(199,792 - 251,611) | 112,499<br>(92,017 - 136,636)  | 10,337<br>(8,648 - 13,268)  | 47,218<br>(41,982 - 53,007)  | 29,034<br>(25,366 - 33,710) | 24,646<br>(21,659 - 28,442) |
| HIV/AIDS and tuberculosis                                         | 57,010<br>(50,016 - 64,354)    | 2,218<br>(1,659 - 2,959)       | 2,973<br>(2,510 - 3,535)    | 31,019<br>(26,304 - 36,458)  | 14,527<br>(11,948 - 17,694) | 6,272<br>(4,956 - 7,754)    |
| Tuberculosis                                                      | 29,593<br>(23,362 - 36,203)    | 975<br>(505 - 1,637)           | 302<br>(180 - 460)          | 12,132<br>(8,605 - 15,578)   | 10,397<br>(8,098 - 13,294)  | 5,788<br>(4,499 - 7,215)    |
| HIV/AIDS                                                          | 27,417<br>(22,586 - 33,072)    | 1,243<br>(953 - 1,579)         | 2,671<br>(2,205 - 3,210)    | 18,887<br>(14,892 - 24,224)  | 4,130<br>(2,680 - 6,685)    | 484<br>(287 - 758)          |
| HIV/AIDS resulting in mycobacterial infection                     | 1,939<br>(1,475 - 2,523)       | 83<br>(60 - 111)               | 165<br>(124 - 217)          | 1,342<br>(980 - 1,826)       | 311<br>(191 - 518)          | 38<br>(22 - 63)             |
| HIV/AIDS resulting in other diseases                              | 25,478<br>(20,956 - 30,873)    | 1,160<br>(887 - 1,483)         | 2,506<br>(2,062 - 3,029)    | 17,545<br>(13,812 - 22,503)  | 3,819<br>(2,467 - 6,200)    | 446<br>(264 - 699)          |
| Diarrhea, lower respiratory, and other common infectious diseases | 96,540<br>(78,393 - 119,687)   | 52,145<br>(37,172 - 71,924)    | 5,176<br>(3,608 - 8,299)    | 12,080<br>(9,018 - 15,149)   | 11,528<br>(9,031 - 14,547)  | 15,611<br>(12,844 - 18,828) |
| Diarrheal diseases                                                | 28,857<br>(20,183 - 39,759)    | 12,106<br>(4,709 - 22,620)     | 1,411<br>(683 - 2,492)      | 4,779<br>(3,211 - 6,440)     | 4,645<br>(3,002 - 6,883)    | 5,916<br>(4,122 - 8,296)    |
| Intestinal infectious diseases                                    | 2,151<br>(1,038 - 3,736)       | 706<br>(235 - 1,387)           | 543<br>(226 - 1,023)        | 784<br>(368 - 1,485)         | 87<br>(40 - 157)            | 32<br>(17 - 54)             |
| Typhoid fever                                                     | 1,524<br>(665 - 2,722)         | 448<br>(132 - 901)             | 409<br>(165 - 775)          | 587<br>(248 - 1,131)         | 60<br>(23 - 115)            | 20<br>(9 - 37)              |
| Paratyphoid fever                                                 | 419<br>(180 - 786)             | 141<br>(37 - 311)              | 113<br>(43 - 247)           | 145<br>(58 - 303)            | 15<br>(5 - 31)              | 5<br>(2 - 10)               |
| Other intestinal infectious diseases                              | 208<br>(127 - 305)             | 118<br>(50 - 205)              | 20<br>(10 - 35)             | 51<br>(30 - 76)              | 12<br>(5 - 23)              | 8<br>(3 - 15)               |
| Lower respiratory infections                                      | 40,060<br>(30,677 - 51,162)    | 20,801<br>(12,590 - 30,738)    | 1,079<br>(581 - 1,719)      | 3,492<br>(2,428 - 4,773)     | 5,560<br>(4,109 - 7,346)    | 9,129<br>(7,009 - 11,645)   |
| Upper respiratory infections                                      | 60<br>(23 - 123)               | 20<br>(1 - 75)                 | 3<br>(0 - 11)               | 19<br>(3 - 46)               | 11<br>(1 - 33)              | 8<br>(0 - 27)               |
| Otitis media                                                      | 21<br>(16 - 27)                | 5<br>(2 - 9)                   | 1<br>(1 - 2)                | 6<br>(4 - 8)                 | 3<br>(2 - 5)                | 5<br>(4 - 7)                |
| Meningitis                                                        | 8,310<br>(5,718 - 12,099)      | 4,119<br>(1,978 - 7,642)       | 792<br>(406 - 1,306)        | 2,051<br>(1,402 - 2,905)     | 931<br>(608 - 1,373)        | 418<br>(268 - 645)          |
| Pneumococcal meningitis                                           | 1,418<br>(938 - 2,072)         | 509<br>(216 - 1,027)           | 177<br>(78 - 315)           | 437<br>(248 - 688)           | 202<br>(106 - 331)          | 93<br>(46 - 167)            |
| H influenzae type B meningitis                                    | 2,218<br>(1,329 - 3,683)       | 1,522<br>(659 - 2,934)         | 227<br>(101 - 410)          | 314<br>(179 - 493)           | 106<br>(57 - 178)           | 49<br>(25 - 89)             |
| Meningococcal meningitis                                          | 1,641<br>(1,137 - 2,351)       | 594<br>(266 - 1,144)           | 131<br>(53 - 240)           | 512<br>(311 - 788)           | 269<br>(144 - 427)          | 135<br>(72 - 233)           |
| Other meningitis                                                  | 3,034<br>(2,075 - 4,538)       | 1,494<br>(682 - 2,855)         | 258<br>(121 - 466)          | 788<br>(485 - 1,175)         | 353<br>(195 - 570)          | 141<br>(69 - 248)           |
| Encephalitis                                                      | 312<br>(190 - 535)             | 166<br>(68 - 353)              | 14<br>(7 - 29)              | 78<br>(48 - 128)             | 33<br>(22 - 51)             | 21<br>(13 - 30)             |
| Diphtheria                                                        | 163<br>(3 - 1,032)             | 121<br>(0 - 967)               | 23<br>(0 - 157)             | 16<br>(0 - 68)               | 3<br>(0 - 25)               | --                          |
| Whooping cough                                                    | 7,298<br>(13 - 30,929)         | 6,829<br>(12 - 28,234)         | 366<br>(1 - 1,760)          | 93<br>(0 - 500)              | 9<br>(0 - 50)               | --                          |
| Tetanus                                                           | 1,654<br>(1,060 - 2,716)       | 761<br>(347 - 1,549)           | 83<br>(43 - 169)            | 550<br>(345 - 893)           | 224<br>(136 - 392)          | 36<br>(21 - 65)             |
| Measles                                                           | 7,443<br>(223 - 38,499)        | 6,430<br>(191 - 31,949)        | 845<br>(19 - 5,210)         | 163<br>(3 - 1,038)           | 5<br>(0 - 35)               | --                          |
| Varicella and herpes zoster                                       | 210<br>(70 - 497)              | 82<br>(3 - 317)                | 16<br>(0 - 70)              | 52<br>(7 - 147)              | 16<br>(1 - 55)              | 45<br>(1 - 191)             |
| Neglected tropical diseases and malaria                           | 12,017<br>(7,021 - 19,708)     | 8,046<br>(3,424 - 15,214)      | 1,253<br>(772 - 1,901)      | 1,915<br>(1,371 - 2,680)     | 577<br>(399 - 822)          | 226<br>(158 - 326)          |
| Malaria                                                           | 9,877<br>(5,029 - 17,293)      | 7,467<br>(2,854 - 14,658)      | 823<br>(409 - 1,463)        | 1,120<br>(673 - 1,817)       | 356<br>(193 - 589)          | 111<br>(57 - 210)           |
| Leishmaniasis                                                     | 1,316<br>(797 - 1,957)         | 375<br>(119 - 747)             | 313<br>(157 - 513)          | 541<br>(304 - 855)           | 61<br>(29 - 95)             | 26<br>(11 - 43)             |
| Visceral leishmaniasis                                            | 1,316<br>(797 - 1,957)         | 375<br>(119 - 747)             | 313<br>(157 - 513)          | 541<br>(304 - 855)           | 61<br>(29 - 95)             | 26<br>(11 - 43)             |
| Schistosomiasis                                                   | 189<br>(136 - 262)             | 2<br>(1 - 6)                   | 5<br>(2 - 10)               | 88<br>(53 - 134)             | 65<br>(36 - 104)            | 29<br>(16 - 47)             |
| Cysticercosis                                                     | 14<br>(3 - 42)                 | 1<br>(0 - 2)                   | 1<br>(0 - 2)                | 9<br>(2 - 28)                | 3<br>(1 - 8)                | 1<br>(0 - 2)                |
| Cystic echinococcosis                                             | 22<br>(17 - 26)                | 2<br>(1 - 4)                   | 3<br>(2 - 4)                | 11<br>(8 - 14)               | 3<br>(3 - 4)                | 1<br>(1 - 1)                |
| Dengue                                                            | 11<br>(6 - 20)                 | 1<br>(0 - 3)                   | 1<br>(1 - 2)                | 6<br>(2 - 11)                | 2<br>(0 - 4)                | 1<br>(0 - 2)                |
| Yellow fever                                                      | 0<br>(0 - 0)                   | 0<br>(0 - 0)                   | 0<br>(0 - 0)                | 0<br>(0 - 0)                 | 0<br>(0 - 0)                | 0<br>(0 - 0)                |
| Rabies                                                            | 286<br>(160 - 498)             | 58<br>(16 - 146)               | 84<br>(41 - 149)            | 92<br>(54 - 140)             | 41<br>(20 - 104)            | 9<br>(3 - 31)               |
| Intestinal nematode infections                                    | 122<br>(54 - 204)              | 91<br>(34 - 167)               | 16<br>(7 - 30)              | 10<br>(2 - 24)               | 3<br>(0 - 11)               | 2<br>(0 - 9)                |
| Ascariasis                                                        | 122<br>(54 - 204)              | 91<br>(34 - 167)               | 16<br>(7 - 30)              | 10<br>(2 - 24)               | 3<br>(0 - 11)               | 2<br>(0 - 9)                |
| Other neglected tropical diseases                                 | 180<br>(134 - 248)             | 49<br>(23 - 97)                | 6<br>(3 - 12)               | 37<br>(24 - 56)              | 43<br>(28 - 66)             | 45<br>(28 - 70)             |

Web Table 31- Ethiopia deaths with 95% UI by age, sex, and cause in 2013

| Cause                                                            | Males, All Ages                | Males, 0-4 Years            | Males, 5-14 Years        | Males, 15-49 Years          | Males, 50-69 Years          | Males, 70-80 Years          |
|------------------------------------------------------------------|--------------------------------|-----------------------------|--------------------------|-----------------------------|-----------------------------|-----------------------------|
| Maternal disorders                                               | --                             | --                          | --                       | --                          | --                          | --                          |
| Maternal hemorrhage                                              | --                             | --                          | --                       | --                          | --                          | --                          |
| Maternal sepsis and other maternal infections                    | --                             | --                          | --                       | --                          | --                          | --                          |
| Maternal hypertensive disorders                                  | --                             | --                          | --                       | --                          | --                          | --                          |
| Maternal obstructed labor                                        | --                             | --                          | --                       | --                          | --                          | --                          |
| Maternal abortive outcome                                        | --                             | --                          | --                       | --                          | --                          | --                          |
| Indirect maternal deaths                                         | --                             | --                          | --                       | --                          | --                          | --                          |
| Late maternal deaths                                             | --                             | --                          | --                       | --                          | --                          | --                          |
| Maternal deaths aggravated by HIV/AIDS                           | --                             | --                          | --                       | --                          | --                          | --                          |
| Other maternal disorders                                         | --                             | --                          | --                       | --                          | --                          | --                          |
| Neonatal disorders                                               | 38,928<br>(32,196 - 46,237)    | 38,928<br>(32,196 - 46,237) | --                       | --                          | --                          | --                          |
| Neonatal preterm birth complications                             | 12,451<br>(6,310 - 19,499)     | 12,451<br>(6,310 - 19,499)  | --                       | --                          | --                          | --                          |
| Neonatal encephalopathy due to birth asphyxia and trauma         | 9,817<br>(4,841 - 15,970)      | 9,817<br>(4,841 - 15,970)   | --                       | --                          | --                          | --                          |
| Neonatal sepsis and other neonatal infections                    | 10,173<br>(4,526 - 18,689)     | 10,173<br>(4,526 - 18,689)  | --                       | --                          | --                          | --                          |
| Hemolytic disease and other neonatal jaundice                    | 319<br>(94 - 839)              | 319<br>(94 - 839)           | --                       | --                          | --                          | --                          |
| Other neonatal disorders                                         | 6,168<br>(2,674 - 11,158)      | 6,168<br>(2,674 - 11,158)   | --                       | --                          | --                          | --                          |
| Nutritional deficiencies                                         | 12,575<br>(7,429 - 19,347)     | 6,253<br>(2,350 - 11,363)   | 585<br>(281 - 973)       | 1,684<br>(1,043 - 2,517)    | 1,859<br>(1,151 - 2,820)    | 2,194<br>(1,366 - 3,393)    |
| Protein-energy malnutrition                                      | 9,241<br>(4,726 - 15,186)      | 5,494<br>(1,999 - 10,159)   | 447<br>(201 - 770)       | 763<br>(300 - 1,370)        | 1,182<br>(537 - 1,999)      | 1,355<br>(584 - 2,315)      |
| Iodine deficiency                                                | 38<br>(3 - 142)                | 15<br>(0 - 115)             | 3<br>(0 - 20)            | 11<br>(0 - 50)              | 6<br>(0 - 34)               | 4<br>(0 - 26)               |
| Iron-deficiency anemia                                           | 3,229<br>(1,242 - 6,130)       | 742<br>(112 - 2,119)        | 132<br>(31 - 308)        | 885<br>(356 - 1,486)        | 657<br>(239 - 1,336)        | 813<br>(288 - 1,661)        |
| Other nutritional deficiencies                                   | 65<br>(23 - 136)               | 2<br>(0 - 6)                | 2<br>(1 - 5)             | 25<br>(8 - 57)              | 14<br>(5 - 31)              | 22<br>(7 - 48)              |
| Other communicable, maternal, neonatal, and nutritional diseases | 6,664<br>(4,049 - 10,714)      | 4,908<br>(2,527 - 8,768)    | 350<br>(180 - 612)       | 520<br>(365 - 719)          | 542<br>(328 - 927)          | 344<br>(181 - 653)          |
| Sexually transmitted diseases excluding HIV                      | 5,012<br>(2,503 - 8,916)       | 4,487<br>(2,108 - 8,202)    | 289<br>(127 - 542)       | 84<br>(53 - 131)            | 99<br>(47 - 192)            | 52<br>(24 - 108)            |
| Syphilis                                                         | 4,932<br>(2,421 - 8,846)       | 4,487<br>(2,108 - 8,202)    | 286<br>(123 - 538)       | 45<br>(28 - 70)             | 72<br>(34 - 138)            | 43<br>(20 - 90)             |
| Chlamydial infection                                             | --                             | --                          | --                       | --                          | --                          | --                          |
| Gonococcal infection                                             | 47<br>(30 - 74)                | --                          | 2<br>(1 - 3)             | 22<br>(14 - 33)             | 17<br>(8 - 34)              | 6<br>(3 - 12)               |
| Other sexually transmitted diseases                              | 33<br>(21 - 50)                | --                          | 2<br>(1 - 3)             | 18<br>(11 - 27)             | 10<br>(5 - 20)              | 2<br>(1 - 5)                |
| Hepatitis                                                        | 467<br>(357 - 631)             | 57<br>(19 - 127)            | 25<br>(15 - 41)          | 206<br>(137 - 298)          | 133<br>(92 - 185)           | 45<br>(31 - 66)             |
| Acute hepatitis A                                                | 42<br>(12 - 93)                | 20<br>(4 - 54)              | 9<br>(3 - 18)            | 12<br>(3 - 31)              | 1<br>(0 - 3)                | 0<br>(0 - 0)                |
| Acute hepatitis B                                                | 328<br>(235 - 446)             | 37<br>(11 - 88)             | 13<br>(6 - 23)           | 121<br>(66 - 189)           | 115<br>(78 - 161)           | 42<br>(28 - 61)             |
| Acute hepatitis C                                                | 9<br>(2 - 25)                  | --                          | 1<br>(0 - 2)             | 5<br>(1 - 14)               | 3<br>(0 - 8)                | 1<br>(0 - 3)                |
| Acute hepatitis E                                                | 88<br>(31 - 174)               | 0<br>(0 - 1)                | 3<br>(1 - 7)             | 67<br>(22 - 136)            | 14<br>(4 - 33)              | 3<br>(1 - 7)                |
| Other infectious diseases                                        | 1,185<br>(728 - 1,952)         | 363<br>(159 - 772)          | 35<br>(14 - 73)          | 230<br>(133 - 383)          | 310<br>(139 - 721)          | 247<br>(98 - 559)           |
| Non-communicable diseases                                        | 128,254<br>(114,162 - 147,182) | 10,495<br>(6,144 - 17,944)  | 2,059<br>(1,413 - 2,722) | 21,892<br>(16,786 - 26,318) | 43,828<br>(38,121 - 53,444) | 49,980<br>(46,148 - 56,207) |
| Neoplasms                                                        | 18,808<br>(16,207 - 21,999)    | 691<br>(312 - 1,112)        | 418<br>(266 - 575)       | 3,715<br>(2,733 - 4,678)    | 7,401<br>(6,306 - 9,130)    | 6,583<br>(5,786 - 7,678)    |
| Esophageal cancer                                                | 1,931<br>(1,176 - 2,758)       | --                          | --                       | 194<br>(128 - 286)          | 1,102<br>(652 - 1,627)      | 635<br>(373 - 933)          |
| Stomach cancer                                                   | 1,737<br>(1,455 - 2,152)       | --                          | --                       | 297<br>(213 - 395)          | 751<br>(595 - 984)          | 690<br>(532 - 887)          |
| Liver cancer                                                     | 2,123<br>(1,325 - 2,879)       | --                          | 28<br>(12 - 52)          | 744<br>(301 - 1,154)        | 931<br>(644 - 1,303)        | 420<br>(285 - 591)          |
| Liver cancer due to hepatitis B                                  | 430<br>(155 - 862)             | --                          | 7<br>(2 - 16)            | 208<br>(71 - 417)           | 165<br>(28 - 396)           | 50<br>(15 - 103)            |
| Liver cancer due to hepatitis C                                  | 1,128<br>(595 - 1,772)         | --                          | 9<br>(3 - 21)            | 357<br>(141 - 651)          | 512<br>(188 - 846)          | 250<br>(136 - 379)          |

Web Table 31- Ethiopia deaths with 95% UI by age, sex, and cause in 2013

| Cause                                | Males, All Ages             | Males, 0-4 Years   | Males, 5-14 Years  | Males, 15-49 Years       | Males, 50-69 Years          | Males, 70-80 Years          |
|--------------------------------------|-----------------------------|--------------------|--------------------|--------------------------|-----------------------------|-----------------------------|
| Liver cancer due to alcohol use      | 325<br>(162 - 554)          | --                 | --                 | 73<br>(19 - 148)         | 162<br>(75 - 293)           | 90<br>(49 - 149)            |
| Liver cancer due to other causes     | 240<br>(107 - 437)          | --                 | 11<br>(4 - 24)     | 105<br>(36 - 201)        | 91<br>(38 - 197)            | 31<br>(15 - 56)             |
| Larynx cancer                        | 194<br>(143 - 266)          | --                 | --                 | 30<br>(19 - 44)          | 66<br>(44 - 91)             | 98<br>(71 - 140)            |
| Tracheal, bronchus and lung cancer   | 1,576<br>(1,336 - 1,917)    | --                 | --                 | 130<br>(87 - 187)        | 894<br>(713 - 1,122)        | 553<br>(449 - 669)          |
| Breast cancer                        | 128<br>(84 - 198)           | --                 | --                 | 19<br>(11 - 32)          | 63<br>(34 - 111)            | 45<br>(24 - 80)             |
| Cervical cancer                      | --                          | --                 | --                 | --                       | --                          | --                          |
| Uterine cancer                       | --                          | --                 | --                 | --                       | --                          | --                          |
| Prostate cancer                      | 1,954<br>(1,292 - 2,917)    | --                 | --                 | 38<br>(20 - 67)          | 540<br>(334 - 806)          | 1,376<br>(905 - 2,109)      |
| Colon and rectum cancer              | 2,123<br>(1,804 - 2,517)    | --                 | --                 | 563<br>(414 - 714)       | 779<br>(636 - 995)          | 781<br>(620 - 968)          |
| Lip and oral cavity cancer           | 336<br>(240 - 450)          | --                 | --                 | 46<br>(29 - 66)          | 145<br>(97 - 206)           | 146<br>(94 - 216)           |
| Nasopharynx cancer                   | 50<br>(38 - 65)             | --                 | 2<br>(1 - 5)       | 22<br>(14 - 31)          | 20<br>(13 - 29)             | 6<br>(4 - 9)                |
| Other pharynx cancer                 | 183<br>(134 - 248)          | --                 | --                 | 37<br>(23 - 55)          | 83<br>(54 - 126)            | 63<br>(44 - 88)             |
| Gallbladder and biliary tract cancer | 267<br>(204 - 338)          | --                 | --                 | 133<br>(92 - 182)        | 82<br>(55 - 118)            | 53<br>(37 - 73)             |
| Pancreatic cancer                    | 438<br>(358 - 547)          | --                 | --                 | 130<br>(90 - 174)        | 222<br>(174 - 293)          | 86<br>(66 - 112)            |
| Malignant skin melanoma              | 84<br>(47 - 138)            | --                 | --                 | 34<br>(18 - 56)          | 27<br>(14 - 44)             | 23<br>(13 - 39)             |
| Non-melanoma skin cancer             | 79<br>(41 - 116)            | --                 | --                 | 9<br>(5 - 16)            | 30<br>(15 - 50)             | 39<br>(20 - 63)             |
| Ovarian cancer                       | --                          | --                 | --                 | --                       | --                          | --                          |
| Testicular cancer                    | 135<br>(91 - 199)           | --                 | --                 | 65<br>(41 - 97)          | 59<br>(35 - 96)             | 11<br>(6 - 17)              |
| Kidney cancer                        | 510<br>(402 - 642)          | 51<br>(14 - 125)   | 16<br>(8 - 30)     | 67<br>(46 - 91)          | 234<br>(175 - 313)          | 142<br>(101 - 193)          |
| Bladder cancer                       | 437<br>(355 - 559)          | --                 | --                 | 45<br>(29 - 69)          | 127<br>(91 - 172)           | 265<br>(200 - 354)          |
| Brain and nervous system cancer      | 464<br>(304 - 672)          | 4<br>(1 - 12)      | 79<br>(37 - 127)   | 192<br>(118 - 301)       | 128<br>(85 - 202)           | 60<br>(37 - 93)             |
| Thyroid cancer                       | 26<br>(20 - 33)             | --                 | 1<br>(0 - 1)       | 5<br>(3 - 7)             | 7<br>(5 - 10)               | 13<br>(9 - 19)              |
| Mesothelioma                         | 79<br>(56 - 111)            | --                 | --                 | 4<br>(3 - 5)             | 44<br>(27 - 69)             | 31<br>(20 - 48)             |
| Hodgkin lymphoma                     | 153<br>(75 - 284)           | 9<br>(2 - 26)      | 12<br>(3 - 35)     | 57<br>(26 - 135)         | 43<br>(21 - 78)             | 32<br>(11 - 60)             |
| Non-Hodgkin lymphoma                 | 1,082<br>(828 - 1,461)      | 157<br>(49 - 316)  | 88<br>(48 - 139)   | 272<br>(188 - 382)       | 272<br>(197 - 373)          | 293<br>(201 - 427)          |
| Multiple myeloma                     | 175<br>(127 - 233)          | --                 | --                 | 39<br>(25 - 54)          | 52<br>(34 - 71)             | 85<br>(59 - 120)            |
| Leukemia                             | 373<br>(304 - 454)          | 21<br>(7 - 43)     | 24<br>(13 - 40)    | 177<br>(131 - 230)       | 68<br>(50 - 87)             | 83<br>(64 - 107)            |
| Other neoplasms                      | 2,173<br>(1,587 - 2,706)    | 449<br>(198 - 730) | 168<br>(94 - 266)  | 369<br>(257 - 494)       | 633<br>(456 - 849)          | 554<br>(394 - 746)          |
| Cardiovascular diseases              | 55,845<br>(49,753 - 64,994) | 512<br>(273 - 803) | 241<br>(151 - 353) | 6,048<br>(4,530 - 7,574) | 21,646<br>(18,410 - 26,334) | 27,399<br>(24,749 - 30,965) |
| Rheumatic heart disease              | 2,137<br>(1,213 - 3,802)    | 28<br>(7 - 72)     | 66<br>(32 - 116)   | 717<br>(392 - 1,279)     | 766<br>(414 - 1,466)        | 561<br>(296 - 1,004)        |
| Ischemic heart disease               | 15,622<br>(12,144 - 19,051) | 4<br>(1 - 11)      | 20<br>(10 - 34)    | 1,359<br>(871 - 1,812)   | 6,530<br>(4,908 - 8,290)    | 7,709<br>(5,825 - 9,311)    |
| Cerebrovascular disease              | 23,675<br>(19,160 - 28,488) | 51<br>(28 - 86)    | 25<br>(13 - 41)    | 1,458<br>(963 - 2,009)   | 9,082<br>(6,927 - 11,439)   | 13,058<br>(10,389 - 15,642) |
| Ischemic stroke                      | 10,187<br>(3,248 - 17,651)  | 3<br>(1 - 8)       | 3<br>(1 - 6)       | 206<br>(44 - 455)        | 2,959<br>(749 - 5,744)      | 7,015<br>(2,353 - 11,406)   |
| Hemorrhagic stroke                   | 13,488<br>(6,317 - 20,961)  | 48<br>(26 - 80)    | 23<br>(12 - 36)    | 1,251<br>(800 - 1,739)   | 6,123<br>(3,078 - 9,077)    | 6,042<br>(2,129 - 10,502)   |
| Hypertensive heart disease           | 4,329<br>(2,326 - 8,401)    | 7<br>(2 - 18)      | 5<br>(2 - 9)       | 408<br>(209 - 715)       | 1,602<br>(806 - 3,197)      | 2,307<br>(1,170 - 4,765)    |
| Cardiomyopathy and myocarditis       | 2,494<br>(1,659 - 3,518)    | 205<br>(58 - 384)  | 53<br>(20 - 95)    | 671<br>(394 - 1,007)     | 911<br>(579 - 1,357)        | 653<br>(396 - 1,080)        |
| Atrial fibrillation and flutter      | 16<br>(6 - 34)              | --                 | --                 | 1<br>(0 - 2)             | 4<br>(2 - 9)                | 10<br>(3 - 24)              |
| Aortic aneurysm                      | 683<br>(401 - 1,002)        | --                 | --                 | 78<br>(40 - 124)         | 277<br>(149 - 429)          | 329<br>(186 - 497)          |
| Peripheral vascular disease          | 27<br>(14 - 47)             | --                 | --                 | 1<br>(0 - 2)             | 9<br>(4 - 17)               | 17<br>(9 - 32)              |
| Endocarditis                         | 888<br>(472 - 1,421)        | 32<br>(11 - 70)    | 12<br>(5 - 22)     | 214<br>(103 - 355)       | 322<br>(165 - 552)          | 309<br>(162 - 523)          |



Web Table 31- Ethiopia deaths with 95% UI by age, sex, and cause in 2013

| Cause                                               | Males, All Ages           | Males, 0-4 Years  | Males, 5-14 Years  | Males, 15-49 Years       | Males, 50-69 Years       | Males, 70-80 Years       |
|-----------------------------------------------------|---------------------------|-------------------|--------------------|--------------------------|--------------------------|--------------------------|
| Other cardiovascular and circulatory diseases       | 5,974<br>(3,595 - 10,388) | 185<br>(82 - 363) | 60<br>(28 - 105)   | 1,140<br>(660 - 1,832)   | 2,143<br>(1,242 - 3,876) | 2,446<br>(1,374 - 4,482) |
| Chronic respiratory diseases                        | 7,880<br>(6,499 - 9,451)  | 188<br>(82 - 342) | 56<br>(35 - 80)    | 743<br>(543 - 965)       | 2,602<br>(2,047 - 3,318) | 4,291<br>(3,467 - 5,233) |
| Chronic obstructive pulmonary disease               | 4,412<br>(3,482 - 5,579)  | 35<br>(9 - 84)    | 22<br>(11 - 35)    | 256<br>(154 - 386)       | 1,443<br>(1,047 - 1,951) | 2,656<br>(2,071 - 3,382) |
| Pneumoconiosis                                      | 1,178<br>(547 - 1,873)    | 10<br>(2 - 28)    | 7<br>(3 - 12)      | 189<br>(88 - 323)        | 465<br>(196 - 783)       | 508<br>(231 - 841)       |
| Silicosis                                           | 348<br>(98 - 878)         | 4<br>(1 - 11)     | 2<br>(1 - 5)       | 50<br>(11 - 140)         | 129<br>(32 - 338)        | 163<br>(48 - 405)        |
| Asbestosis                                          | 125<br>(51 - 287)         | 1<br>(0 - 4)      | 1<br>(0 - 2)       | 22<br>(9 - 46)           | 59<br>(22 - 138)         | 41<br>(15 - 102)         |
| Coal workers pneumoconiosis                         | 206<br>(47 - 465)         | 1<br>(0 - 3)      | 1<br>(0 - 2)       | 32<br>(9 - 73)           | 88<br>(19 - 210)         | 83<br>(16 - 191)         |
| Other pneumoconiosis                                | 499<br>(218 - 916)        | 4<br>(1 - 11)     | 2<br>(1 - 4)       | 84<br>(38 - 157)         | 189<br>(79 - 370)        | 221<br>(87 - 431)        |
| Asthma                                              | 1,078<br>(807 - 1,441)    | 7<br>(2 - 19)     | 4<br>(2 - 8)       | 114<br>(68 - 179)        | 356<br>(241 - 508)       | 597<br>(407 - 851)       |
| Interstitial lung disease and pulmonary sarcoidosis | 607<br>(141 - 1,120)      | 4<br>(0 - 20)     | 2<br>(0 - 6)       | 44<br>(10 - 106)         | 211<br>(49 - 416)        | 345<br>(72 - 685)        |
| Other chronic respiratory diseases                  | 604<br>(278 - 1,099)      | 133<br>(57 - 253) | 21<br>(9 - 40)     | 141<br>(55 - 272)        | 126<br>(39 - 270)        | 184<br>(62 - 395)        |
| Cirrhosis                                           | 7,068<br>(5,813 - 8,646)  | 77<br>(22 - 174)  | 68<br>(43 - 98)    | 2,112<br>(1,529 - 2,817) | 3,341<br>(2,613 - 4,283) | 1,470<br>(1,137 - 1,884) |
| Cirrhosis due to hepatitis B                        | 1,594<br>(694 - 2,599)    | 3<br>(1 - 8)      | 11<br>(5 - 22)     | 476<br>(226 - 782)       | 767<br>(320 - 1,302)     | 336<br>(116 - 613)       |
| Cirrhosis due to hepatitis C                        | 1,434<br>(482 - 2,330)    | 6<br>(1 - 17)     | 9<br>(3 - 18)      | 353<br>(106 - 659)       | 709<br>(202 - 1,194)     | 358<br>(102 - 612)       |
| Cirrhosis due to alcohol use                        | 3,199<br>(2,172 - 4,679)  | --                | --                 | 907<br>(534 - 1,380)     | 1,595<br>(1,023 - 2,443) | 697<br>(455 - 1,026)     |
| Cirrhosis due to other causes                       | 841<br>(552 - 1,237)      | 68<br>(20 - 153)  | 48<br>(29 - 73)    | 376<br>(223 - 584)       | 270<br>(137 - 467)       | 79<br>(43 - 132)         |
| Digestive diseases                                  | 8,054<br>(6,663 - 9,736)  | 261<br>(88 - 574) | 245<br>(150 - 363) | 2,429<br>(1,764 - 3,155) | 2,776<br>(2,183 - 3,540) | 2,342<br>(1,870 - 2,959) |
| Peptic ulcer disease                                | 2,626<br>(1,721 - 3,738)  | 31<br>(6 - 101)   | 30<br>(13 - 60)    | 659<br>(375 - 1,061)     | 971<br>(613 - 1,509)     | 935<br>(592 - 1,361)     |
| Gastritis and duodenitis                            | 289<br>(96 - 941)         | 15<br>(4 - 36)    | 13<br>(4 - 32)     | 84<br>(29 - 262)         | 86<br>(26 - 313)         | 91<br>(23 - 362)         |
| Appendicitis                                        | 584<br>(352 - 843)        | 12<br>(3 - 32)    | 36<br>(18 - 64)    | 220<br>(123 - 338)       | 184<br>(99 - 288)        | 132<br>(67 - 213)        |
| Paralytic ileus and intestinal obstruction          | 2,542<br>(1,414 - 3,659)  | 72<br>(19 - 201)  | 100<br>(50 - 170)  | 857<br>(467 - 1,282)     | 917<br>(476 - 1,391)     | 596<br>(282 - 950)       |
| Inguinal, femoral, and abdominal hernia             | 139<br>(70 - 220)         | 0<br>(0 - 2)      | 5<br>(2 - 9)       | 40<br>(19 - 66)          | 47<br>(23 - 83)          | 46<br>(22 - 79)          |
| Inflammatory bowel disease                          | 355<br>(104 - 777)        | 56<br>(13 - 136)  | 17<br>(4 - 35)     | 108<br>(28 - 224)        | 85<br>(19 - 228)         | 88<br>(19 - 278)         |
| Vascular intestinal disorders                       | 54<br>(20 - 124)          | 2<br>(0 - 6)      | 2<br>(0 - 5)       | 10<br>(4 - 23)           | 18<br>(6 - 42)           | 22<br>(7 - 56)           |
| Gallbladder and biliary diseases                    | 322<br>(181 - 529)        | 6<br>(2 - 18)     | 6<br>(3 - 11)      | 61<br>(34 - 96)          | 106<br>(54 - 184)        | 143<br>(69 - 260)        |
| Pancreatitis                                        | 358<br>(100 - 718)        | 3<br>(1 - 9)      | 4<br>(1 - 8)       | 176<br>(52 - 353)        | 113<br>(29 - 254)        | 61<br>(15 - 153)         |
| Other digestive diseases                            | 785<br>(475 - 1,436)      | 62<br>(17 - 160)  | 31<br>(14 - 56)    | 214<br>(117 - 366)       | 249<br>(140 - 452)       | 228<br>(108 - 480)       |
| Neurological disorders                              | 4,603<br>(3,769 - 5,670)  | 264<br>(91 - 612) | 301<br>(160 - 530) | 1,215<br>(793 - 1,827)   | 402<br>(300 - 516)       | 2,421<br>(1,914 - 2,960) |
| Alzheimer disease and other dementias               | 2,246<br>(1,754 - 2,774)  | --                | --                 | 1<br>(0 - 4)             | 214<br>(152 - 282)       | 2,031<br>(1,575 - 2,531) |
| Parkinson disease                                   | 43<br>(22 - 80)           | --                | --                 | 3<br>(2 - 3)             | 1<br>(0 - 1)             | 40<br>(19 - 77)          |
| Epilepsy                                            | 2,002<br>(1,402 - 2,924)  | 212<br>(59 - 538) | 280<br>(141 - 508) | 1,085<br>(678 - 1,683)   | 117<br>(73 - 182)        | 307<br>(189 - 479)       |
| Multiple sclerosis                                  | 7<br>(2 - 12)             | --                | --                 | 4<br>(1 - 7)             | 2<br>(1 - 4)             | 1<br>(0 - 2)             |
| Other neurological disorders                        | 305<br>(200 - 405)        | 52<br>(22 - 99)   | 21<br>(13 - 31)    | 122<br>(75 - 172)        | 68<br>(37 - 98)          | 42<br>(19 - 59)          |
| Mental and substance use disorders                  | 2,462<br>(1,431 - 3,911)  | 67<br>(4 - 230)   | 0<br>(0 - 0)       | 1,635<br>(893 - 2,561)   | 644<br>(389 - 1,128)     | 116<br>(72 - 211)        |
| Schizophrenia                                       | 19<br>(7 - 48)            | --                | --                 | 10<br>(4 - 26)           | 6<br>(2 - 16)            | 3<br>(1 - 8)             |
| Alcohol use disorders                               | 2,040<br>(1,186 - 3,374)  | --                | --                 | 1,330<br>(709 - 2,144)   | 607<br>(360 - 1,098)     | 103<br>(61 - 199)        |
| Drug use disorders                                  | 402<br>(138 - 953)        | 67<br>(4 - 230)   | --                 | 294<br>(104 - 838)       | 31<br>(9 - 88)           | 10<br>(2 - 26)           |
| Opioid use disorders                                | 43<br>(14 - 106)          | 8<br>(0 - 27)     | --                 | 32<br>(11 - 94)          | 3<br>(1 - 8)             | 1<br>(0 - 3)             |
| Cocaine use disorders                               | 2<br>(0 - 4)              | 0<br>(0 - 1)      | --                 | 1<br>(0 - 3)             | 0<br>(0 - 0)             | 0<br>(0 - 0)             |
| Amphetamine use disorders                           | 1<br>(0 - 2)              | 0<br>(0 - 1)      | --                 | 1<br>(0 - 2)             | 0<br>(0 - 0)             | 0<br>(0 - 0)             |

Web Table 31- Ethiopia deaths with 95% UI by age, sex, and cause in 2013

| Cause                                               | Males, All Ages             | Males, 0-4 Years          | Males, 5-14 Years  | Males, 15-49 Years       | Males, 50-69 Years       | Males, 70-80 Years       |
|-----------------------------------------------------|-----------------------------|---------------------------|--------------------|--------------------------|--------------------------|--------------------------|
| Other drug use disorders                            | 356<br>(123 - 849)          | 59<br>(4 - 203)           | --                 | 260<br>(92 - 745)        | 28<br>(8 - 79)           | 9<br>(2 - 23)            |
| Eating disorders                                    | 0<br>(0 - 0)                | --                        | 0<br>(0 - 0)       | 0<br>(0 - 0)             | --                       | --                       |
| Anorexia nervosa                                    | 0<br>(0 - 0)                | --                        | 0<br>(0 - 0)       | 0<br>(0 - 0)             | --                       | --                       |
| Diabetes, urogenital, blood, and endocrine diseases | 14,153<br>(11,987 - 16,889) | 1,110<br>(551 - 1,784)    | 364<br>(233 - 560) | 3,234<br>(2,359 - 4,049) | 4,599<br>(3,736 - 5,756) | 4,845<br>(4,051 - 5,885) |
| Diabetes mellitus                                   | 6,431<br>(5,349 - 7,863)    | 76<br>(44 - 123)          | 22<br>(12 - 35)    | 798<br>(584 - 1,032)     | 2,739<br>(2,137 - 3,580) | 2,796<br>(2,214 - 3,566) |
| Acute glomerulonephritis                            | 232<br>(85 - 429)           | 30<br>(8 - 77)            | 11<br>(4 - 24)     | 17<br>(6 - 52)           | 105<br>(28 - 209)        | 69<br>(18 - 134)         |
| Chronic kidney disease                              | 2,492<br>(2,047 - 3,096)    | 160<br>(68 - 302)         | 64<br>(39 - 94)    | 898<br>(625 - 1,169)     | 560<br>(425 - 750)       | 809<br>(615 - 1,060)     |
| Chronic kidney disease due to diabetes mellitus     | 10<br>(1 - 23)              | 0<br>(0 - 1)              | 1<br>(0 - 1)       | 3<br>(0 - 6)             | 3<br>(0 - 9)             | 3<br>(0 - 8)             |
| Chronic kidney disease due to hypertension          | 898<br>(477 - 1,346)        | 16<br>(4 - 40)            | 6<br>(2 - 12)      | 185<br>(86 - 306)        | 276<br>(142 - 437)       | 414<br>(208 - 650)       |
| Chronic kidney disease due to glomerulonephritis    | 962<br>(673 - 1,401)        | 110<br>(44 - 201)         | 46<br>(28 - 66)    | 410<br>(273 - 584)       | 184<br>(98 - 313)        | 211<br>(103 - 359)       |
| Chronic kidney disease due to other causes          | 622<br>(359 - 959)          | 33<br>(8 - 81)            | 12<br>(5 - 24)     | 299<br>(157 - 497)       | 97<br>(41 - 178)         | 181<br>(74 - 328)        |
| Urinary diseases and male infertility               | 2,544<br>(1,955 - 3,177)    | 133<br>(50 - 292)         | 45<br>(28 - 71)    | 731<br>(511 - 994)       | 835<br>(606 - 1,154)     | 800<br>(564 - 1,091)     |
| Interstitial nephritis and urinary tract infections | 1,946<br>(1,371 - 2,615)    | 107<br>(38 - 259)         | 32<br>(18 - 51)    | 540<br>(345 - 756)       | 633<br>(391 - 936)       | 634<br>(394 - 922)       |
| Urolithiasis                                        | 64<br>(19 - 174)            | --                        | 2<br>(1 - 5)       | 23<br>(8 - 54)           | 24<br>(5 - 73)           | 15<br>(3 - 53)           |
| Other urinary diseases                              | 534<br>(248 - 982)          | 26<br>(9 - 61)            | 11<br>(5 - 21)     | 168<br>(75 - 294)        | 178<br>(68 - 360)        | 151<br>(47 - 345)        |
| Gynecological diseases                              | --                          | --                        | --                 | --                       | --                       | --                       |
| Uterine fibroids                                    | --                          | --                        | --                 | --                       | --                       | --                       |
| Polycystic ovarian syndrome                         | --                          | --                        | --                 | --                       | --                       | --                       |
| Endometriosis                                       | --                          | --                        | --                 | --                       | --                       | --                       |
| Genital prolapse                                    | --                          | --                        | --                 | --                       | --                       | --                       |
| Other gynecological diseases                        | --                          | --                        | --                 | --                       | --                       | --                       |
| Hemoglobinopathies and hemolytic anemias            | 1,279<br>(597 - 2,752)      | 499<br>(180 - 973)        | 174<br>(79 - 346)  | 382<br>(169 - 992)       | 116<br>(46 - 368)        | 108<br>(36 - 387)        |
| Thalassemias                                        | 504<br>(219 - 961)          | 297<br>(95 - 588)         | 91<br>(41 - 181)   | 117<br>(51 - 304)        | 0<br>(0 - 0)             | 0<br>(0 - 0)             |
| Sickle cell disorders                               | 13<br>(6 - 24)              | 6<br>(2 - 12)             | 2<br>(1 - 5)       | 4<br>(2 - 9)             | 1<br>(0 - 2)             | 0<br>(0 - 0)             |
| G6PD deficiency                                     | 144<br>(67 - 295)           | 54<br>(17 - 108)          | 26<br>(11 - 51)    | 49<br>(22 - 128)         | 13<br>(5 - 41)           | 2<br>(1 - 8)             |
| Other hemoglobinopathies and hemolytic anemias      | 618<br>(282 - 1,571)        | 143<br>(58 - 264)         | 55<br>(25 - 111)   | 212<br>(93 - 556)        | 102<br>(40 - 326)        | 106<br>(35 - 379)        |
| Endocrine, metabolic, blood, and immune disorders   | 1,176<br>(406 - 1,661)      | 212<br>(96 - 374)         | 47<br>(18 - 82)    | 408<br>(116 - 642)       | 244<br>(77 - 375)        | 263<br>(59 - 437)        |
| Musculoskeletal disorders                           | 450<br>(206 - 741)          | --                        | 45<br>(23 - 66)    | 181<br>(85 - 265)        | 125<br>(53 - 231)        | 98<br>(41 - 210)         |
| Rheumatoid arthritis                                | 132<br>(40 - 243)           | --                        | 11<br>(4 - 22)     | 35<br>(11 - 59)          | 44<br>(12 - 91)          | 42<br>(12 - 101)         |
| Other musculoskeletal disorders                     | 318<br>(152 - 506)          | --                        | 34<br>(17 - 52)    | 146<br>(69 - 220)        | 81<br>(37 - 152)         | 56<br>(25 - 116)         |
| Other non-communicable diseases                     | 8,932<br>(5,511 - 16,046)   | 7,325<br>(3,968 - 14,380) | 321<br>(180 - 553) | 579<br>(406 - 770)       | 291<br>(216 - 381)       | 416<br>(289 - 586)       |
| Congenital anomalies                                | 7,738<br>(4,431 - 14,824)   | 6,988<br>(3,740 - 14,020) | 300<br>(158 - 530) | 346<br>(228 - 490)       | 54<br>(40 - 73)          | 50<br>(37 - 67)          |
| Neural tube defects                                 | 2,285<br>(510 - 4,917)      | 2,155<br>(454 - 4,701)    | 55<br>(10 - 137)   | 64<br>(10 - 162)         | 6<br>(1 - 18)            | 4<br>(1 - 14)            |
| Congenital heart anomalies                          | 3,171<br>(1,308 - 7,413)    | 2,793<br>(1,011 - 6,896)  | 160<br>(72 - 326)  | 175<br>(102 - 257)       | 23<br>(14 - 33)          | 19<br>(10 - 30)          |
| Cleft lip and cleft palate                          | 46<br>(7 - 134)             | 46<br>(7 - 134)           | --                 | --                       | --                       | --                       |
| Down syndrome                                       | 456<br>(106 - 1,271)        | 386<br>(61 - 1,188)       | 24<br>(7 - 58)     | 39<br>(17 - 67)          | 6<br>(4 - 9)             | 1<br>(1 - 2)             |
| Chromosomal unbalanced rearrangements               | 157<br>(38 - 552)           | 144<br>(28 - 528)         | 5<br>(2 - 16)      | 6<br>(3 - 13)            | 1<br>(1 - 2)             | 1<br>(0 - 1)             |
| Other congenital anomalies                          | 1,622<br>(452 - 5,400)      | 1,464<br>(354 - 5,091)    | 54<br>(17 - 166)   | 61<br>(27 - 113)         | 18<br>(10 - 29)          | 25<br>(15 - 37)          |
| Skin and subcutaneous diseases                      | 1,044<br>(784 - 1,375)      | 187<br>(70 - 393)         | 21<br>(12 - 33)    | 233<br>(161 - 337)       | 237<br>(169 - 319)       | 365<br>(242 - 534)       |
| Cellulitis                                          | 779<br>(477 - 1,173)        | 142<br>(44 - 339)         | 16<br>(8 - 28)     | 177<br>(102 - 288)       | 183<br>(114 - 271)       | 261<br>(144 - 398)       |

Web Table 31- Ethiopia deaths with 95% UI by age, sex, and cause in 2013

| Cause                                           | Males, All Ages             | Males, 0-4 Years         | Males, 5-14 Years        | Males, 15-49 Years          | Males, 50-69 Years       | Males, 70-80 Years       |
|-------------------------------------------------|-----------------------------|--------------------------|--------------------------|-----------------------------|--------------------------|--------------------------|
| Pyoderma                                        | 177<br>(53 - 341)           | 39<br>(7 - 95)           | 3<br>(1 - 7)             | 37<br>(11 - 77)             | 39<br>(10 - 85)          | 59<br>(15 - 133)         |
| Decubitus ulcer                                 | 73<br>(16 - 151)            | 3<br>(0 - 11)            | 1<br>(0 - 3)             | 13<br>(3 - 29)              | 13<br>(3 - 29)           | 42<br>(8 - 93)           |
| Other skin and subcutaneous diseases            | 15<br>(2 - 40)              | 3<br>(0 - 14)            | 1<br>(0 - 2)             | 5<br>(1 - 15)               | 2<br>(0 - 6)             | 3<br>(1 - 7)             |
| Sudden infant death syndrome                    | 150<br>(34 - 438)           | 150<br>(34 - 438)        | --                       | --                          | --                       | --                       |
| Injuries                                        | 37,449<br>(30,539 - 45,130) | 4,229<br>(1,939 - 7,007) | 3,053<br>(2,102 - 4,082) | 20,095<br>(15,227 - 24,651) | 6,109<br>(5,022 - 7,629) | 3,962<br>(3,347 - 4,824) |
| Transport injuries                              | 13,224<br>(10,395 - 16,310) | 949<br>(335 - 1,946)     | 1,487<br>(930 - 2,139)   | 7,174<br>(5,069 - 9,128)    | 2,295<br>(1,737 - 2,978) | 1,320<br>(1,012 - 1,730) |
| Road injuries                                   | 12,771<br>(10,049 - 15,680) | 887<br>(299 - 1,836)     | 1,412<br>(878 - 2,036)   | 7,051<br>(4,991 - 8,996)    | 2,193<br>(1,655 - 2,823) | 1,229<br>(933 - 1,611)   |
| Pedestrian road injuries                        | 6,726<br>(4,865 - 8,623)    | 520<br>(172 - 1,068)     | 865<br>(509 - 1,302)     | 3,440<br>(2,200 - 4,647)    | 1,198<br>(837 - 1,637)   | 702<br>(484 - 975)       |
| Cyclist road injuries                           | 496<br>(343 - 690)          | 18<br>(5 - 43)           | 49<br>(27 - 82)          | 226<br>(146 - 329)          | 121<br>(75 - 178)        | 82<br>(49 - 132)         |
| Motorcyclist road injuries                      | 599<br>(384 - 879)          | 21<br>(6 - 46)           | 25<br>(12 - 43)          | 420<br>(248 - 639)          | 77<br>(44 - 121)         | 57<br>(32 - 91)          |
| Motor vehicle road injuries                     | 4,856<br>(3,409 - 6,449)    | 312<br>(97 - 689)        | 452<br>(251 - 744)       | 2,948<br>(1,906 - 4,077)    | 775<br>(499 - 1,108)     | 369<br>(236 - 534)       |
| Other road injuries                             | 94<br>(56 - 154)            | 15<br>(4 - 44)           | 21<br>(9 - 44)           | 17<br>(10 - 30)             | 22<br>(11 - 40)          | 19<br>(9 - 36)           |
| Other transport injuries                        | 453<br>(328 - 614)          | 62<br>(21 - 138)         | 75<br>(42 - 120)         | 123<br>(74 - 187)           | 102<br>(62 - 157)        | 91<br>(55 - 139)         |
| Unintentional injuries                          | 12,717<br>(9,976 - 16,633)  | 3,032<br>(1,417 - 5,427) | 1,247<br>(847 - 1,779)   | 4,359<br>(3,255 - 5,599)    | 2,115<br>(1,683 - 2,771) | 1,963<br>(1,557 - 2,656) |
| Falls                                           | 2,604<br>(1,952 - 3,466)    | 157<br>(69 - 306)        | 191<br>(96 - 321)        | 838<br>(540 - 1,193)        | 647<br>(436 - 945)       | 771<br>(507 - 1,278)     |
| Drowning                                        | 3,010<br>(2,030 - 4,584)    | 726<br>(279 - 1,628)     | 445<br>(250 - 745)       | 1,376<br>(909 - 2,011)      | 295<br>(201 - 443)       | 168<br>(112 - 252)       |
| Fire, heat, and hot substances                  | 1,808<br>(1,195 - 2,736)    | 661<br>(234 - 1,434)     | 171<br>(94 - 300)        | 404<br>(269 - 600)          | 308<br>(206 - 454)       | 264<br>(177 - 383)       |
| Poisonings                                      | 527<br>(327 - 775)          | 121<br>(42 - 276)        | 17<br>(9 - 29)           | 294<br>(177 - 433)          | 72<br>(42 - 108)         | 22<br>(13 - 34)          |
| Exposure to mechanical forces                   | 1,902<br>(1,305 - 3,353)    | 564<br>(193 - 1,653)     | 188<br>(101 - 334)       | 680<br>(479 - 973)          | 354<br>(249 - 556)       | 114<br>(84 - 174)        |
| Unintentional firearm injuries                  | 348<br>(229 - 486)          | 25<br>(10 - 51)          | 14<br>(7 - 26)           | 256<br>(152 - 387)          | 31<br>(19 - 50)          | 21<br>(12 - 33)          |
| Unintentional suffocation                       | 643<br>(249 - 1,915)        | 366<br>(68 - 1,365)      | 64<br>(20 - 179)         | 100<br>(50 - 284)           | 86<br>(42 - 270)         | 26<br>(13 - 85)          |
| Other exposure to mechanical forces             | 911<br>(660 - 1,260)        | 173<br>(68 - 366)        | 110<br>(55 - 190)        | 324<br>(219 - 460)          | 237<br>(155 - 351)       | 68<br>(46 - 93)          |
| Adverse effects of medical treatment            | 1,221<br>(810 - 1,825)      | 393<br>(177 - 845)       | 33<br>(17 - 60)          | 172<br>(110 - 275)          | 219<br>(133 - 348)       | 403<br>(233 - 664)       |
| Animal contact                                  | 516<br>(348 - 722)          | 70<br>(22 - 151)         | 71<br>(34 - 130)         | 158<br>(98 - 247)           | 108<br>(64 - 172)        | 109<br>(63 - 171)        |
| Venomous animal contact                         | 244<br>(163 - 368)          | 17<br>(5 - 40)           | 14<br>(4 - 33)           | 69<br>(39 - 116)            | 64<br>(36 - 107)         | 80<br>(45 - 130)         |
| Non-venomous animal contact                     | 272<br>(164 - 408)          | 53<br>(16 - 118)         | 57<br>(26 - 108)         | 89<br>(52 - 141)            | 44<br>(24 - 74)          | 29<br>(14 - 48)          |
| Foreign body                                    | 402<br>(207 - 697)          | 231<br>(93 - 472)        | 26<br>(14 - 46)          | 51<br>(28 - 87)             | 32<br>(21 - 49)          | 63<br>(35 - 101)         |
| Pulmonary aspiration and foreign body in airway | 367<br>(168 - 655)          | 221<br>(83 - 459)        | 21<br>(10 - 38)          | 46<br>(24 - 82)             | 20<br>(10 - 33)          | 58<br>(31 - 96)          |
| Foreign body in other body part                 | 35<br>(21 - 65)             | 10<br>(4 - 20)           | 4<br>(2 - 9)             | 4<br>(3 - 8)                | 12<br>(7 - 21)           | 4<br>(3 - 8)             |
| Other unintentional injuries                    | 728<br>(549 - 921)          | 108<br>(45 - 191)        | 105<br>(62 - 168)        | 386<br>(271 - 542)          | 80<br>(56 - 114)         | 49<br>(36 - 66)          |
| Self-harm and interpersonal violence            | 11,507<br>(8,314 - 15,255)  | 248<br>(91 - 511)        | 319<br>(178 - 525)       | 8,562<br>(6,057 - 11,619)   | 1,699<br>(1,217 - 2,322) | 679<br>(416 - 961)       |
| Self-harm                                       | 5,031<br>(3,547 - 6,822)    | --                       | 132<br>(55 - 272)        | 3,408<br>(2,234 - 4,868)    | 957<br>(662 - 1,377)     | 534<br>(315 - 804)       |
| Interpersonal violence                          | 6,476<br>(3,687 - 9,191)    | 248<br>(91 - 511)        | 187<br>(84 - 335)        | 5,154<br>(2,952 - 7,429)    | 742<br>(388 - 1,157)     | 145<br>(59 - 270)        |
| Assault by firearm                              | 2,191<br>(1,012 - 3,691)    | 45<br>(14 - 104)         | 39<br>(13 - 88)          | 1,891<br>(878 - 3,191)      | 194<br>(78 - 359)        | 23<br>(7 - 50)           |
| Assault by sharp object                         | 1,341<br>(694 - 2,266)      | 39<br>(13 - 99)          | 19<br>(7 - 40)           | 1,003<br>(490 - 1,770)      | 234<br>(112 - 395)       | 46<br>(16 - 91)          |
| Assault by other means                          | 2,944<br>(1,377 - 4,410)    | 164<br>(49 - 353)        | 129<br>(56 - 239)        | 2,260<br>(1,042 - 3,499)    | 314<br>(152 - 505)       | 76<br>(29 - 142)         |

Web Table 31- Ethiopia deaths with 95% UI by age, sex, and cause in 2013

| Cause                                                             | Females, All Ages              | Females, 0-4 Years            | Females, 5-14 Years         | Females, 15-49 Years        | Females, 50-69 Years        | Females, 70-80 Years         |
|-------------------------------------------------------------------|--------------------------------|-------------------------------|-----------------------------|-----------------------------|-----------------------------|------------------------------|
| All causes                                                        | 358,173<br>(324,223 - 393,579) | 102,109<br>(83,535 - 125,028) | 12,758<br>(10,657 - 15,327) | 71,765<br>(64,477 - 80,218) | 80,372<br>(67,444 - 91,491) | 91,169<br>(81,907 - 100,148) |
| Communicable, maternal, neonatal, and nutritional diseases        | 206,495<br>(185,052 - 230,097) | 90,863<br>(73,902 - 110,141)  | 9,217<br>(7,407 - 11,915)   | 51,724<br>(46,339 - 57,689) | 26,929<br>(22,783 - 31,618) | 27,762<br>(23,540 - 32,410)  |
| HIV/AIDS and tuberculosis                                         | 45,583<br>(38,197 - 54,043)    | 1,887<br>(1,365 - 2,525)      | 2,747<br>(2,305 - 3,264)    | 25,066<br>(19,975 - 31,819) | 10,779<br>(8,332 - 13,452)  | 5,104<br>(3,880 - 6,534)     |
| Tuberculosis                                                      | 20,595<br>(16,355 - 25,142)    | 764<br>(358 - 1,288)          | 301<br>(181 - 468)          | 6,783<br>(4,905 - 9,049)    | 7,914<br>(5,715 - 10,116)   | 4,832<br>(3,656 - 6,297)     |
| HIV/AIDS                                                          | 24,989<br>(18,874 - 33,145)    | 1,124<br>(860 - 1,425)        | 2,445<br>(2,018 - 2,939)    | 18,283<br>(13,218 - 25,443) | 2,865<br>(1,779 - 4,596)    | 272<br>(126 - 480)           |
| HIV/AIDS resulting in mycobacterial infection                     | 1,349<br>(957 - 1,897)         | 58<br>(42 - 78)               | 117<br>(88 - 153)           | 992<br>(682 - 1,463)        | 165<br>(97 - 275)           | 16<br>(8 - 29)               |
| HIV/AIDS resulting in other diseases                              | 23,640<br>(17,937 - 31,351)    | 1,066<br>(816 - 1,353)        | 2,328<br>(1,916 - 2,807)    | 17,291<br>(12,489 - 24,114) | 2,700<br>(1,675 - 4,343)    | 256<br>(118 - 449)           |
| Diarrhea, lower respiratory, and other common infectious diseases | 92,405<br>(76,689 - 112,928)   | 45,817<br>(33,226 - 62,270)   | 4,839<br>(3,242 - 7,788)    | 9,017<br>(7,000 - 11,826)   | 13,312<br>(9,955 - 16,894)  | 19,421<br>(15,299 - 23,702)  |
| Diarrheal diseases                                                | 29,685<br>(21,675 - 39,360)    | 10,103<br>(3,593 - 19,578)    | 1,167<br>(521 - 2,063)      | 3,789<br>(2,684 - 5,206)    | 5,820<br>(3,587 - 8,617)    | 8,805<br>(5,923 - 12,325)    |
| Intestinal infectious diseases                                    | 2,054<br>(950 - 3,658)         | 735<br>(218 - 1,522)          | 582<br>(243 - 1,072)        | 606<br>(285 - 1,118)        | 96<br>(44 - 180)            | 35<br>(16 - 63)              |
| Typhoid fever                                                     | 1,560<br>(689 - 2,845)         | 519<br>(130 - 1,134)          | 461<br>(186 - 858)          | 484<br>(214 - 904)          | 72<br>(28 - 142)            | 24<br>(9 - 48)               |
| Paratyphoid fever                                                 | 355<br>(146 - 671)             | 138<br>(35 - 316)             | 106<br>(39 - 210)           | 92<br>(38 - 191)            | 14<br>(4 - 29)              | 4<br>(1 - 10)                |
| Other intestinal infectious diseases                              | 139<br>(82 - 213)              | 78<br>(31 - 137)              | 14<br>(6 - 26)              | 30<br>(17 - 48)             | 10<br>(4 - 20)              | 6<br>(2 - 14)                |
| Lower respiratory infections                                      | 36,976<br>(27,364 - 48,066)    | 17,627<br>(9,426 - 27,839)    | 938<br>(482 - 1,541)        | 2,529<br>(1,789 - 3,456)    | 6,020<br>(4,223 - 7,892)    | 9,863<br>(7,255 - 12,934)    |
| Upper respiratory infections                                      | 53<br>(21 - 110)               | 16<br>(1 - 66)                | 2<br>(0 - 9)                | 12<br>(2 - 31)              | 12<br>(1 - 36)              | 10<br>(0 - 33)               |
| Otitis media                                                      | 39<br>(30 - 50)                | 9<br>(4 - 17)                 | 1<br>(1 - 2)                | 2<br>(2 - 3)                | 9<br>(6 - 12)               | 18<br>(13 - 24)              |
| Meningitis                                                        | 7,004<br>(4,919 - 9,728)       | 3,278<br>(1,645 - 5,601)      | 654<br>(346 - 1,047)        | 1,431<br>(957 - 2,099)      | 1,082<br>(723 - 1,523)      | 559<br>(363 - 838)           |
| Pneumococcal meningitis                                           | 1,237<br>(755 - 1,861)         | 450<br>(180 - 860)            | 146<br>(61 - 272)           | 304<br>(131 - 535)          | 216<br>(91 - 418)           | 121<br>(55 - 236)            |
| H influenzae type B meningitis                                    | 1,841<br>(1,103 - 2,865)       | 1,242<br>(591 - 2,247)        | 184<br>(86 - 327)           | 225<br>(126 - 371)          | 125<br>(65 - 235)           | 64<br>(34 - 110)             |
| Meningococcal meningitis                                          | 1,460<br>(869 - 2,163)         | 475<br>(136 - 957)            | 103<br>(41 - 198)           | 381<br>(196 - 629)          | 326<br>(159 - 556)          | 175<br>(88 - 299)            |
| Other meningitis                                                  | 2,466<br>(1,610 - 3,724)       | 1,112<br>(452 - 2,117)        | 220<br>(102 - 392)          | 520<br>(259 - 837)          | 415<br>(177 - 671)          | 199<br>(99 - 342)            |
| Encephalitis                                                      | 228<br>(156 - 318)             | 84<br>(40 - 154)              | 19<br>(10 - 32)             | 34<br>(20 - 58)             | 55<br>(34 - 90)             | 35<br>(22 - 52)              |
| Diphtheria                                                        | 137<br>(2 - 799)               | 100<br>(0 - 760)              | 23<br>(0 - 186)             | 10<br>(0 - 43)              | 3<br>(0 - 27)               | --                           |
| Whooping cough                                                    | 7,969<br>(14 - 31,639)         | 7,394<br>(13 - 28,956)        | 477<br>(1 - 2,233)          | 88<br>(0 - 478)             | 11<br>(0 - 57)              | --                           |
| Tetanus                                                           | 1,007<br>(638 - 1,572)         | 461<br>(191 - 916)            | 46<br>(21 - 86)             | 280<br>(166 - 416)          | 181<br>(99 - 282)           | 39<br>(21 - 63)              |
| Measles                                                           | 7,043<br>(212 - 35,757)        | 5,937<br>(184 - 28,563)       | 911<br>(24 - 5,158)         | 191<br>(3 - 1,285)          | 4<br>(0 - 29)               | --                           |
| Varicella and herpes zoster                                       | 211<br>(63 - 530)              | 73<br>(2 - 314)               | 19<br>(0 - 86)              | 42<br>(6 - 117)             | 19<br>(1 - 60)              | 58<br>(1 - 278)              |
| Neglected tropical diseases and malaria                           | 10,026<br>(4,919 - 18,324)     | 8,145<br>(3,170 - 16,544)     | 661<br>(360 - 1,317)        | 744<br>(547 - 1,017)        | 313<br>(222 - 458)          | 161<br>(116 - 231)           |
| Malaria                                                           | 8,510<br>(3,506 - 16,787)      | 7,809<br>(2,891 - 16,179)     | 389<br>(121 - 1,062)        | 170<br>(84 - 346)           | 106<br>(43 - 251)           | 36<br>(13 - 84)              |
| Leishmaniasis                                                     | 713<br>(442 - 1,072)           | 161<br>(43 - 352)             | 182<br>(74 - 339)           | 321<br>(187 - 487)          | 40<br>(15 - 71)             | 9<br>(3 - 14)                |
| Visceral leishmaniasis                                            | 713<br>(442 - 1,072)           | 161<br>(43 - 352)             | 182<br>(74 - 339)           | 321<br>(187 - 487)          | 40<br>(15 - 71)             | 9<br>(3 - 14)                |
| Schistosomiasis                                                   | 153<br>(107 - 210)             | 2<br>(0 - 4)                  | 4<br>(2 - 8)                | 53<br>(32 - 79)             | 62<br>(34 - 98)             | 32<br>(16 - 54)              |
| Cysticercosis                                                     | 16<br>(3 - 49)                 | 1<br>(0 - 2)                  | 1<br>(0 - 3)                | 9<br>(2 - 28)               | 4<br>(1 - 12)               | 1<br>(0 - 3)                 |
| Cystic echinococcosis                                             | 26<br>(21 - 32)                | 3<br>(1 - 5)                  | 4<br>(3 - 6)                | 11<br>(9 - 14)              | 5<br>(4 - 7)                | 2<br>(2 - 3)                 |
| Dengue                                                            | 3<br>(1 - 5)                   | 1<br>(0 - 1)                  | 1<br>(0 - 1)                | 1<br>(1 - 2)                | 0<br>(0 - 0)                | 0<br>(0 - 0)                 |
| Yellow fever                                                      | 0<br>(0 - 0)                   | 0<br>(0 - 0)                  | 0<br>(0 - 0)                | 0<br>(0 - 0)                | 0<br>(0 - 0)                | 0<br>(0 - 0)                 |
| Rabies                                                            | 312<br>(171 - 560)             | 47<br>(12 - 119)              | 57<br>(23 - 106)            | 142<br>(79 - 232)           | 50<br>(26 - 110)            | 16<br>(4 - 48)               |
| Intestinal nematode infections                                    | 122<br>(52 - 196)              | 91<br>(29 - 162)              | 17<br>(6 - 32)              | 7<br>(1 - 18)               | 4<br>(0 - 13)               | 3<br>(0 - 10)                |
| Ascariasis                                                        | 122<br>(52 - 196)              | 91<br>(29 - 162)              | 17<br>(6 - 32)              | 7<br>(1 - 18)               | 4<br>(0 - 13)               | 3<br>(0 - 10)                |
| Other neglected tropical diseases                                 | 171<br>(126 - 236)             | 32<br>(16 - 61)               | 6<br>(2 - 11)               | 30<br>(17 - 53)             | 41<br>(25 - 65)             | 63<br>(36 - 99)              |

Web Table 31- Ethiopia deaths with 95% UI by age, sex, and cause in 2013

| Cause                                                            | Females, All Ages              | Females, 0-4 Years          | Females, 5-14 Years      | Females, 15-49 Years        | Females, 50-69 Years        | Females, 70-80 Years        |
|------------------------------------------------------------------|--------------------------------|-----------------------------|--------------------------|-----------------------------|-----------------------------|-----------------------------|
| Maternal disorders                                               | 15,234<br>(11,378 - 19,871)    | --                          | 72<br>(24 - 160)         | 15,162<br>(11,327 - 19,810) | --                          | --                          |
| Maternal hemorrhage                                              | 1,851<br>(1,201 - 2,777)       | --                          | 6<br>(2 - 13)            | 1,845<br>(1,196 - 2,771)    | --                          | --                          |
| Maternal sepsis and other maternal infections                    | 1,462<br>(974 - 2,135)         | --                          | 9<br>(3 - 21)            | 1,453<br>(967 - 2,129)      | --                          | --                          |
| Maternal hypertensive disorders                                  | 1,561<br>(1,064 - 2,215)       | --                          | 8<br>(3 - 19)            | 1,552<br>(1,056 - 2,209)    | --                          | --                          |
| Maternal obstructed labor                                        | 800<br>(540 - 1,167)           | --                          | 3<br>(1 - 7)             | 797<br>(537 - 1,165)        | --                          | --                          |
| Maternal abortive outcome                                        | 2,982<br>(1,993 - 4,105)       | --                          | 13<br>(4 - 30)           | 2,969<br>(1,978 - 4,091)    | --                          | --                          |
| Indirect maternal deaths                                         | 1,154<br>(683 - 1,892)         | --                          | 4<br>(1 - 11)            | 1,149<br>(680 - 1,886)      | --                          | --                          |
| Late maternal deaths                                             | 1,420<br>(850 - 2,159)         | --                          | 12<br>(4 - 29)           | 1,408<br>(843 - 2,139)      | --                          | --                          |
| Maternal deaths aggravated by HIV/AIDS                           | 73<br>(36 - 112)               | --                          | --                       | 73<br>(36 - 112)            | --                          | --                          |
| Other maternal disorders                                         | 3,899<br>(2,761 - 5,234)       | --                          | 16<br>(5 - 36)           | 3,884<br>(2,747 - 5,216)    | --                          | --                          |
| Neonatal disorders                                               | 25,222<br>(20,229 - 30,853)    | 25,222<br>(20,229 - 30,853) | --                       | --                          | --                          | --                          |
| Neonatal preterm birth complications                             | 7,877<br>(3,768 - 12,607)      | 7,877<br>(3,768 - 12,607)   | --                       | --                          | --                          | --                          |
| Neonatal encephalopathy due to birth asphyxia and trauma         | 7,425<br>(3,910 - 11,967)      | 7,425<br>(3,910 - 11,967)   | --                       | --                          | --                          | --                          |
| Neonatal sepsis and other neonatal infections                    | 5,918<br>(2,937 - 10,777)      | 5,918<br>(2,937 - 10,777)   | --                       | --                          | --                          | --                          |
| Hemolytic disease and other neonatal jaundice                    | 97<br>(28 - 243)               | 97<br>(28 - 243)            | --                       | --                          | --                          | --                          |
| Other neonatal disorders                                         | 3,904<br>(1,798 - 6,959)       | 3,904<br>(1,798 - 6,959)    | --                       | --                          | --                          | --                          |
| Nutritional deficiencies                                         | 11,428<br>(7,818 - 15,788)     | 4,969<br>(1,876 - 8,964)    | 506<br>(262 - 806)       | 1,374<br>(1,004 - 1,820)    | 2,066<br>(1,477 - 2,769)    | 2,513<br>(1,808 - 3,440)    |
| Protein-energy malnutrition                                      | 6,783<br>(3,488 - 10,824)      | 4,109<br>(1,544 - 7,502)    | 338<br>(152 - 586)       | 213<br>(78 - 411)           | 877<br>(410 - 1,424)        | 1,247<br>(617 - 2,010)      |
| Iodine deficiency                                                | 48<br>(3 - 183)                | 18<br>(0 - 137)             | 4<br>(0 - 27)            | 7<br>(0 - 36)               | 11<br>(0 - 64)              | 8<br>(0 - 46)               |
| Iron-deficiency anemia                                           | 4,487<br>(2,720 - 6,976)       | 830<br>(148 - 2,499)        | 164<br>(62 - 322)        | 1,149<br>(795 - 1,550)      | 1,151<br>(650 - 1,745)      | 1,192<br>(639 - 1,910)      |
| Other nutritional deficiencies                                   | 110<br>(48 - 222)              | 12<br>(2 - 37)              | 1<br>(0 - 2)             | 5<br>(2 - 9)                | 27<br>(11 - 58)             | 65<br>(24 - 146)            |
| Other communicable, maternal, neonatal, and nutritional diseases | 6,598<br>(3,997 - 10,487)      | 4,822<br>(2,416 - 8,492)    | 392<br>(174 - 707)       | 362<br>(262 - 515)          | 459<br>(255 - 878)          | 563<br>(254 - 1,206)        |
| Sexually transmitted diseases excluding HIV                      | 5,175<br>(2,543 - 8,988)       | 4,457<br>(2,058 - 8,052)    | 347<br>(143 - 650)       | 163<br>(97 - 285)           | 117<br>(44 - 274)           | 91<br>(33 - 207)            |
| Syphilis                                                         | 4,998<br>(2,387 - 8,803)       | 4,457<br>(2,058 - 8,052)    | 344<br>(139 - 647)       | 65<br>(39 - 113)            | 64<br>(24 - 148)            | 69<br>(25 - 157)            |
| Chlamydial infection                                             | 56<br>(34 - 92)                | --                          | 1<br>(1 - 2)             | 33<br>(20 - 57)             | 16<br>(6 - 40)              | 6<br>(2 - 13)               |
| Gonococcal infection                                             | 67<br>(40 - 110)               | --                          | 1<br>(1 - 2)             | 33<br>(20 - 58)             | 21<br>(8 - 50)              | 11<br>(4 - 25)              |
| Other sexually transmitted diseases                              | 54<br>(33 - 89)                | --                          | 1<br>(1 - 2)             | 32<br>(19 - 55)             | 16<br>(6 - 39)              | 5<br>(2 - 13)               |
| Hepatitis                                                        | 238<br>(176 - 323)             | 40<br>(15 - 79)             | 14<br>(8 - 24)           | 102<br>(70 - 150)           | 59<br>(40 - 88)             | 22<br>(15 - 31)             |
| Acute hepatitis A                                                | 33<br>(10 - 68)                | 18<br>(4 - 43)              | 6<br>(2 - 12)            | 8<br>(2 - 18)               | 1<br>(0 - 2)                | 0<br>(0 - 0)                |
| Acute hepatitis B                                                | 124<br>(84 - 176)              | 21<br>(6 - 47)              | 6<br>(2 - 11)            | 31<br>(14 - 54)             | 47<br>(30 - 72)             | 20<br>(13 - 29)             |
| Acute hepatitis C                                                | 4<br>(1 - 10)                  | --                          | 0<br>(0 - 1)             | 1<br>(0 - 4)                | 2<br>(0 - 4)                | 1<br>(0 - 2)                |
| Acute hepatitis E                                                | 77<br>(44 - 123)               | 0<br>(0 - 1)                | 2<br>(1 - 5)             | 62<br>(36 - 100)            | 10<br>(3 - 22)              | 2<br>(0 - 5)                |
| Other infectious diseases                                        | 1,185<br>(710 - 2,100)         | 325<br>(129 - 659)          | 31<br>(10 - 78)          | 97<br>(58 - 160)            | 282<br>(120 - 661)          | 450<br>(160 - 1,065)        |
| Non-communicable diseases                                        | 133,763<br>(115,157 - 153,425) | 7,960<br>(4,598 - 12,209)   | 1,687<br>(1,045 - 2,315) | 15,342<br>(12,375 - 18,892) | 49,383<br>(39,932 - 58,025) | 59,390<br>(51,893 - 67,076) |
| Neoplasms                                                        | 26,712<br>(22,013 - 31,602)    | 557<br>(243 - 942)          | 385<br>(216 - 558)       | 5,261<br>(4,127 - 6,629)    | 13,758<br>(10,797 - 16,771) | 6,751<br>(5,710 - 8,014)    |
| Esophageal cancer                                                | 3,438<br>(1,947 - 5,287)       | --                          | --                       | 505<br>(233 - 847)          | 2,020<br>(1,027 - 3,283)    | 914<br>(495 - 1,481)        |
| Stomach cancer                                                   | 1,403<br>(1,091 - 1,780)       | --                          | --                       | 106<br>(74 - 144)           | 842<br>(627 - 1,110)        | 456<br>(320 - 646)          |
| Liver cancer                                                     | 1,643<br>(1,203 - 2,181)       | --                          | 15<br>(6 - 30)           | 344<br>(152 - 586)          | 862<br>(600 - 1,179)        | 422<br>(276 - 622)          |
| Liver cancer due to hepatitis B                                  | 233<br>(93 - 454)              | --                          | 2<br>(0 - 5)             | 68<br>(24 - 147)            | 123<br>(34 - 250)           | 41<br>(14 - 91)             |
| Liver cancer due to hepatitis C                                  | 800<br>(342 - 1,227)           | --                          | 3<br>(1 - 7)             | 139<br>(44 - 266)           | 425<br>(152 - 696)          | 233<br>(117 - 367)          |

Web Table 31- Ethiopia deaths with 95% UI by age, sex, and cause in 2013

| Cause                                | Females, All Ages           | Females, 0-4 Years   | Females, 5-14 Years | Females, 15-49 Years     | Females, 50-69 Years        | Females, 70-80 Years        |
|--------------------------------------|-----------------------------|----------------------|---------------------|--------------------------|-----------------------------|-----------------------------|
| Liver cancer due to alcohol use      | 180<br>(89 - 344)           | --                   | --                  | 18<br>(6 - 40)           | 95<br>(43 - 196)            | 66<br>(29 - 136)            |
| Liver cancer due to other causes     | 430<br>(210 - 752)          | --                   | 10<br>(3 - 20)      | 119<br>(39 - 228)        | 219<br>(85 - 427)           | 82<br>(38 - 159)            |
| Larynx cancer                        | 50<br>(25 - 93)             | --                   | --                  | 2<br>(1 - 4)             | 44<br>(22 - 83)             | 4<br>(2 - 7)                |
| Tracheal, bronchus and lung cancer   | 698<br>(545 - 878)          | --                   | --                  | 37<br>(25 - 58)          | 383<br>(281 - 497)          | 278<br>(205 - 373)          |
| Breast cancer                        | 3,467<br>(2,761 - 4,227)    | --                   | --                  | 1,266<br>(932 - 1,627)   | 1,599<br>(1,215 - 2,033)    | 602<br>(461 - 790)          |
| Cervical cancer                      | 6,481<br>(3,779 - 8,566)    | --                   | --                  | 1,137<br>(686 - 1,660)   | 4,287<br>(2,267 - 5,965)    | 1,057<br>(589 - 1,509)      |
| Uterine cancer                       | 299<br>(154 - 454)          | --                   | --                  | 30<br>(14 - 65)          | 180<br>(92 - 275)           | 90<br>(43 - 149)            |
| Prostate cancer                      | --                          | --                   | --                  | --                       | --                          | --                          |
| Colon and rectum cancer              | 2,061<br>(1,656 - 2,492)    | --                   | --                  | 295<br>(225 - 381)       | 842<br>(645 - 1,056)        | 924<br>(698 - 1,209)        |
| Lip and oral cavity cancer           | 273<br>(187 - 414)          | --                   | --                  | 73<br>(41 - 120)         | 147<br>(94 - 232)           | 54<br>(35 - 84)             |
| Nasopharynx cancer                   | 50<br>(31 - 77)             | --                   | 1<br>(0 - 2)        | 25<br>(14 - 43)          | 15<br>(8 - 25)              | 10<br>(5 - 17)              |
| Other pharynx cancer                 | 96<br>(69 - 131)            | --                   | --                  | 18<br>(10 - 30)          | 65<br>(43 - 94)             | 13<br>(9 - 20)              |
| Gallbladder and biliary tract cancer | 480<br>(356 - 653)          | --                   | --                  | 92<br>(63 - 125)         | 297<br>(206 - 420)          | 91<br>(60 - 138)            |
| Pancreatic cancer                    | 414<br>(328 - 501)          | --                   | --                  | 70<br>(52 - 93)          | 233<br>(172 - 294)          | 111<br>(82 - 145)           |
| Malignant skin melanoma              | 115<br>(87 - 145)           | --                   | --                  | 11<br>(7 - 16)           | 71<br>(51 - 95)             | 32<br>(23 - 46)             |
| Non-melanoma skin cancer             | 127<br>(61 - 276)           | --                   | --                  | 23<br>(11 - 43)          | 38<br>(17 - 81)             | 67<br>(26 - 172)            |
| Ovarian cancer                       | 484<br>(382 - 611)          | --                   | --                  | 106<br>(73 - 147)        | 286<br>(207 - 384)          | 92<br>(64 - 132)            |
| Testicular cancer                    | --                          | --                   | --                  | --                       | --                          | --                          |
| Kidney cancer                        | 314<br>(237 - 415)          | 36<br>(10 - 82)      | 13<br>(5 - 28)      | 39<br>(26 - 54)          | 103<br>(71 - 148)           | 123<br>(80 - 180)           |
| Bladder cancer                       | 101<br>(65 - 165)           | --                   | --                  | 22<br>(14 - 35)          | 34<br>(20 - 58)             | 44<br>(25 - 85)             |
| Brain and nervous system cancer      | 345<br>(262 - 450)          | 37<br>(9 - 87)       | 21<br>(10 - 34)     | 175<br>(125 - 237)       | 58<br>(39 - 84)             | 54<br>(36 - 78)             |
| Thyroid cancer                       | 99<br>(63 - 164)            | --                   | 1<br>(0 - 1)        | 4<br>(2 - 6)             | 71<br>(41 - 130)            | 23<br>(15 - 34)             |
| Mesothelioma                         | 19<br>(14 - 27)             | --                   | --                  | 5<br>(3 - 8)             | 9<br>(5 - 15)               | 5<br>(3 - 8)                |
| Hodgkin lymphoma                     | 185<br>(126 - 251)          | 4<br>(2 - 10)        | 7<br>(3 - 16)       | 34<br>(21 - 55)          | 66<br>(38 - 103)            | 73<br>(44 - 112)            |
| Non-Hodgkin lymphoma                 | 905<br>(592 - 1,255)        | 113<br>(34 - 247)    | 62<br>(26 - 119)    | 162<br>(96 - 234)        | 271<br>(171 - 388)          | 296<br>(195 - 440)          |
| Multiple myeloma                     | 247<br>(182 - 332)          | --                   | --                  | 42<br>(30 - 58)          | 80<br>(52 - 115)            | 125<br>(86 - 179)           |
| Leukemia                             | 365<br>(296 - 437)          | 26<br>(9 - 54)       | 39<br>(21 - 62)     | 86<br>(61 - 115)         | 101<br>(75 - 129)           | 113<br>(85 - 146)           |
| Other neoplasms                      | 2,552<br>(1,726 - 3,412)    | 340<br>(147 - 601)   | 225<br>(108 - 370)  | 554<br>(250 - 844)       | 755<br>(516 - 1,065)        | 679<br>(413 - 957)          |
| Cardiovascular diseases              | 65,366<br>(53,158 - 75,967) | 537<br>(260 - 1,012) | 203<br>(115 - 342)  | 4,316<br>(3,147 - 5,810) | 22,951<br>(17,735 - 28,050) | 37,360<br>(31,064 - 42,755) |
| Rheumatic heart disease              | 2,696<br>(1,454 - 5,230)    | 20<br>(4 - 51)       | 52<br>(23 - 97)     | 747<br>(404 - 1,352)     | 1,123<br>(550 - 2,162)      | 753<br>(366 - 1,449)        |
| Ischemic heart disease               | 15,358<br>(10,514 - 19,439) | 2<br>(0 - 4)         | 7<br>(3 - 20)       | 661<br>(364 - 1,036)     | 4,913<br>(3,100 - 6,634)    | 9,776<br>(6,783 - 12,589)   |
| Cerebrovascular disease              | 30,102<br>(22,394 - 36,271) | 60<br>(28 - 116)     | 15<br>(7 - 26)      | 1,130<br>(685 - 1,594)   | 10,430<br>(7,357 - 13,164)  | 18,468<br>(13,939 - 22,205) |
| Ischemic stroke                      | 13,078<br>(4,788 - 18,927)  | 4<br>(1 - 12)        | 2<br>(0 - 4)        | 147<br>(35 - 287)        | 2,967<br>(889 - 4,821)      | 9,959<br>(3,883 - 14,360)   |
| Hemorrhagic stroke                   | 17,025<br>(11,414 - 24,785) | 56<br>(27 - 108)     | 13<br>(6 - 23)      | 983<br>(605 - 1,411)     | 7,463<br>(5,030 - 10,392)   | 8,510<br>(5,114 - 13,815)   |
| Hypertensive heart disease           | 6,497<br>(3,939 - 12,636)   | 9<br>(3 - 22)        | 6<br>(3 - 12)       | 337<br>(183 - 610)       | 2,068<br>(1,175 - 3,789)    | 4,076<br>(2,353 - 8,342)    |
| Cardiomyopathy and myocarditis       | 2,380<br>(1,465 - 4,850)    | 227<br>(93 - 453)    | 58<br>(24 - 117)    | 444<br>(236 - 861)       | 813<br>(462 - 1,669)        | 838<br>(405 - 2,105)        |
| Atrial fibrillation and flutter      | 36<br>(11 - 70)             | --                   | --                  | 1<br>(1 - 2)             | 8<br>(3 - 16)               | 27<br>(7 - 57)              |
| Aortic aneurysm                      | 441<br>(204 - 886)          | --                   | --                  | 44<br>(17 - 93)          | 168<br>(73 - 342)           | 230<br>(103 - 461)          |
| Peripheral vascular disease          | 21<br>(13 - 38)             | --                   | --                  | 1<br>(0 - 1)             | 6<br>(3 - 10)               | 14<br>(8 - 27)              |
| Endocarditis                         | 685<br>(334 - 1,364)        | 41<br>(13 - 98)      | 12<br>(5 - 28)      | 122<br>(64 - 236)        | 201<br>(91 - 410)           | 308<br>(108 - 664)          |

Web Table 31- Ethiopia deaths with 95% UI by age, sex, and cause in 2013

| Cause                                               | Females, All Ages         | Females, 0-4 Years | Females, 5-14 Years | Females, 15-49 Years   | Females, 50-69 Years     | Females, 70-80 Years     |
|-----------------------------------------------------|---------------------------|--------------------|---------------------|------------------------|--------------------------|--------------------------|
| Other cardiovascular and circulatory diseases       | 7,150<br>(4,376 - 13,809) | 179<br>(65 - 407)  | 53<br>(23 - 105)    | 829<br>(484 - 1,469)   | 3,220<br>(1,903 - 5,668) | 2,870<br>(1,621 - 6,490) |
| Chronic respiratory diseases                        | 6,882<br>(5,572 - 8,446)  | 246<br>(91 - 448)  | 81<br>(46 - 121)    | 588<br>(443 - 755)     | 2,440<br>(1,795 - 3,112) | 3,526<br>(2,778 - 4,559) |
| Chronic obstructive pulmonary disease               | 4,175<br>(3,025 - 5,518)  | 42<br>(13 - 92)    | 33<br>(18 - 54)     | 206<br>(130 - 301)     | 1,563<br>(1,075 - 2,111) | 2,331<br>(1,666 - 3,187) |
| Pneumoconiosis                                      | 37<br>(25 - 56)           | 4<br>(1 - 10)      | 2<br>(1 - 4)        | 14<br>(9 - 21)         | 9<br>(5 - 16)            | 8<br>(4 - 15)            |
| Silicosis                                           | 2<br>(1 - 4)              | 0<br>(0 - 1)       | 0<br>(0 - 1)        | 1<br>(0 - 2)           | 0<br>(0 - 1)             | 0<br>(0 - 0)             |
| Asbestosis                                          | 2<br>(1 - 3)              | 0<br>(0 - 1)       | 0<br>(0 - 0)        | 1<br>(0 - 1)           | 0<br>(0 - 1)             | 0<br>(0 - 0)             |
| Coal workers pneumoconiosis                         | 2<br>(1 - 4)              | 0<br>(0 - 1)       | 0<br>(0 - 1)        | 1<br>(0 - 2)           | 0<br>(0 - 1)             | 0<br>(0 - 0)             |
| Other pneumoconiosis                                | 32<br>(21 - 48)           | 3<br>(1 - 7)       | 1<br>(1 - 3)        | 11<br>(7 - 18)         | 8<br>(5 - 14)            | 8<br>(4 - 14)            |
| Asthma                                              | 1,523<br>(999 - 2,174)    | 80<br>(22 - 171)   | 24<br>(12 - 40)     | 167<br>(109 - 239)     | 583<br>(345 - 866)       | 670<br>(400 - 1,019)     |
| Interstitial lung disease and pulmonary sarcoidosis | 665<br>(118 - 1,262)      | 10<br>(1 - 35)     | 4<br>(1 - 10)       | 77<br>(18 - 151)       | 205<br>(37 - 400)        | 369<br>(56 - 801)        |
| Other chronic respiratory diseases                  | 481<br>(328 - 720)        | 111<br>(43 - 203)  | 17<br>(8 - 32)      | 124<br>(82 - 195)      | 81<br>(44 - 136)         | 148<br>(77 - 255)        |
| Cirrhosis                                           | 5,176<br>(4,167 - 6,283)  | 63<br>(17 - 135)   | 68<br>(39 - 107)    | 887<br>(660 - 1,174)   | 2,620<br>(1,948 - 3,343) | 1,538<br>(1,140 - 2,021) |
| Cirrhosis due to hepatitis B                        | 1,603<br>(967 - 2,469)    | 3<br>(1 - 9)       | 12<br>(4 - 23)      | 285<br>(154 - 459)     | 833<br>(480 - 1,344)     | 470<br>(249 - 758)       |
| Cirrhosis due to hepatitis C                        | 1,097<br>(429 - 1,798)    | 2<br>(0 - 6)       | 5<br>(1 - 12)       | 174<br>(35 - 303)      | 603<br>(216 - 1,026)     | 312<br>(128 - 539)       |
| Cirrhosis due to alcohol use                        | 1,628<br>(972 - 2,329)    | --                 | --                  | 178<br>(71 - 284)      | 837<br>(443 - 1,236)     | 613<br>(368 - 937)       |
| Cirrhosis due to other causes                       | 848<br>(537 - 1,218)      | 57<br>(15 - 124)   | 51<br>(29 - 81)     | 250<br>(150 - 377)     | 347<br>(180 - 552)       | 143<br>(74 - 238)        |
| Digestive diseases                                  | 6,218<br>(4,984 - 7,567)  | 218<br>(64 - 466)  | 168<br>(99 - 245)   | 1,034<br>(769 - 1,334) | 2,116<br>(1,534 - 2,701) | 2,684<br>(2,073 - 3,441) |
| Peptic ulcer disease                                | 1,709<br>(1,101 - 2,429)  | 17<br>(4 - 42)     | 17<br>(7 - 32)      | 230<br>(133 - 345)     | 595<br>(354 - 909)       | 851<br>(529 - 1,257)     |
| Gastritis and duodenitis                            | 280<br>(74 - 829)         | 13<br>(2 - 35)     | 12<br>(3 - 29)      | 52<br>(17 - 129)       | 77<br>(19 - 232)         | 126<br>(28 - 442)        |
| Appendicitis                                        | 624<br>(395 - 900)        | 23<br>(5 - 59)     | 32<br>(15 - 56)     | 111<br>(66 - 169)      | 202<br>(110 - 327)       | 257<br>(135 - 424)       |
| Paralytic ileus and intestinal obstruction          | 1,774<br>(1,033 - 2,649)  | 72<br>(19 - 186)   | 68<br>(33 - 115)    | 272<br>(152 - 410)     | 665<br>(369 - 1,044)     | 699<br>(377 - 1,122)     |
| Inguinal, femoral, and abdominal hernia             | 119<br>(63 - 208)         | 12<br>(2 - 38)     | 1<br>(1 - 3)        | 40<br>(18 - 71)        | 10<br>(5 - 17)           | 56<br>(27 - 103)         |
| Inflammatory bowel disease                          | 379<br>(122 - 618)        | 44<br>(8 - 104)    | 14<br>(4 - 26)      | 95<br>(30 - 153)       | 105<br>(32 - 180)        | 120<br>(37 - 219)        |
| Vascular intestinal disorders                       | 55<br>(22 - 155)          | 0<br>(0 - 2)       | 0<br>(0 - 2)        | 6<br>(2 - 14)          | 17<br>(6 - 41)           | 32<br>(11 - 96)          |
| Gallbladder and biliary diseases                    | 520<br>(314 - 748)        | 6<br>(1 - 14)      | 5<br>(2 - 8)        | 78<br>(45 - 122)       | 187<br>(107 - 292)       | 244<br>(129 - 386)       |
| Pancreatitis                                        | 230<br>(109 - 416)        | 3<br>(1 - 8)       | 3<br>(1 - 7)        | 61<br>(29 - 106)       | 87<br>(40 - 161)         | 77<br>(33 - 162)         |
| Other digestive diseases                            | 527<br>(310 - 973)        | 28<br>(6 - 65)     | 16<br>(7 - 30)      | 89<br>(50 - 147)       | 172<br>(92 - 325)        | 222<br>(111 - 504)       |
| Neurological disorders                              | 3,802<br>(2,921 - 4,963)  | 375<br>(122 - 904) | 188<br>(91 - 357)   | 566<br>(359 - 927)     | 478<br>(354 - 632)       | 2,195<br>(1,650 - 2,930) |
| Alzheimer disease and other dementias               | 2,151<br>(1,587 - 2,896)  | --                 | --                  | 1<br>(0 - 3)           | 196<br>(133 - 273)       | 1,953<br>(1,417 - 2,670) |
| Parkinson disease                                   | 26<br>(16 - 42)           | --                 | --                  | 2<br>(1 - 3)           | 12<br>(6 - 21)           | 12<br>(6 - 23)           |
| Epilepsy                                            | 1,323<br>(831 - 2,282)    | 316<br>(87 - 836)  | 166<br>(73 - 330)   | 489<br>(285 - 847)     | 176<br>(106 - 277)       | 176<br>(102 - 295)       |
| Multiple sclerosis                                  | 17<br>(6 - 31)            | --                 | --                  | 8<br>(3 - 16)          | 7<br>(2 - 13)            | 2<br>(1 - 4)             |
| Other neurological disorders                        | 286<br>(206 - 374)        | 59<br>(25 - 102)   | 22<br>(13 - 33)     | 66<br>(47 - 88)        | 88<br>(60 - 119)         | 53<br>(36 - 72)          |
| Mental and substance use disorders                  | 826<br>(364 - 1,899)      | 25<br>(3 - 51)     | 0<br>(0 - 0)        | 466<br>(203 - 1,049)   | 274<br>(116 - 686)       | 61<br>(25 - 155)         |
| Schizophrenia                                       | 29<br>(13 - 47)           | --                 | --                  | 13<br>(6 - 20)         | 10<br>(4 - 18)           | 5<br>(2 - 12)            |
| Alcohol use disorders                               | 571<br>(167 - 1,470)      | --                 | --                  | 306<br>(87 - 743)      | 226<br>(65 - 597)        | 39<br>(11 - 117)         |
| Drug use disorders                                  | 225<br>(60 - 743)         | 25<br>(3 - 51)     | --                  | 146<br>(38 - 535)      | 38<br>(8 - 133)          | 16<br>(3 - 53)           |
| Opioid use disorders                                | 23<br>(6 - 75)            | 3<br>(0 - 6)       | --                  | 15<br>(4 - 54)         | 3<br>(1 - 12)            | 2<br>(0 - 6)             |
| Cocaine use disorders                               | 1<br>(0 - 4)              | 0<br>(0 - 0)       | --                  | 1<br>(0 - 3)           | 0<br>(0 - 1)             | 0<br>(0 - 0)             |
| Amphetamine use disorders                           | 1<br>(0 - 3)              | 0<br>(0 - 0)       | --                  | 1<br>(0 - 2)           | 0<br>(0 - 1)             | 0<br>(0 - 0)             |

Web Table 31- Ethiopia deaths with 95% UI by age, sex, and cause in 2013

| Cause                                               | Females, All Ages          | Females, 0-4 Years       | Females, 5-14 Years | Females, 15-49 Years     | Females, 50-69 Years     | Females, 70-80 Years     |
|-----------------------------------------------------|----------------------------|--------------------------|---------------------|--------------------------|--------------------------|--------------------------|
| Other drug use disorders                            | 200<br>(54 - 661)          | 22<br>(3 - 45)           | --                  | 129<br>(33 - 475)        | 34<br>(7 - 120)          | 14<br>(2 - 47)           |
| Eating disorders                                    | 2<br>(1 - 3)               | --                       | 0<br>(0 - 0)        | 1<br>(1 - 2)             | --                       | --                       |
| Anorexia nervosa                                    | 2<br>(1 - 3)               | --                       | 0<br>(0 - 0)        | 1<br>(1 - 2)             | --                       | --                       |
| Diabetes, urogenital, blood, and endocrine diseases | 11,519<br>(9,566 - 13,688) | 853<br>(363 - 1,554)     | 293<br>(168 - 461)  | 1,687<br>(1,294 - 2,138) | 4,227<br>(3,242 - 5,253) | 4,459<br>(3,626 - 5,603) |
| Diabetes mellitus                                   | 5,235<br>(4,117 - 6,476)   | 11<br>(5 - 19)           | 17<br>(8 - 30)      | 399<br>(296 - 526)       | 2,383<br>(1,753 - 3,126) | 2,425<br>(1,866 - 3,157) |
| Acute glomerulonephritis                            | 252<br>(180 - 358)         | 11<br>(3 - 27)           | 6<br>(3 - 12)       | 85<br>(54 - 130)         | 92<br>(61 - 137)         | 57<br>(38 - 85)          |
| Chronic kidney disease                              | 2,240<br>(1,731 - 2,821)   | 104<br>(33 - 214)        | 83<br>(47 - 135)    | 368<br>(252 - 513)       | 699<br>(481 - 926)       | 985<br>(717 - 1,342)     |
| Chronic kidney disease due to diabetes mellitus     | 9<br>(3 - 22)              | 0<br>(0 - 1)             | 1<br>(0 - 1)        | 1<br>(0 - 2)             | 3<br>(1 - 9)             | 4<br>(1 - 10)            |
| Chronic kidney disease due to hypertension          | 646<br>(278 - 1,287)       | 6<br>(1 - 20)            | 5<br>(1 - 15)       | 64<br>(21 - 158)         | 210<br>(87 - 446)        | 361<br>(157 - 726)       |
| Chronic kidney disease due to glomerulonephritis    | 1,094<br>(532 - 1,608)     | 80<br>(26 - 167)         | 59<br>(29 - 94)     | 255<br>(138 - 395)       | 347<br>(136 - 530)       | 353<br>(120 - 587)       |
| Chronic kidney disease due to other causes          | 491<br>(239 - 825)         | 17<br>(3 - 53)           | 19<br>(6 - 44)      | 48<br>(17 - 98)          | 139<br>(56 - 250)        | 268<br>(100 - 510)       |
| Urinary diseases and male infertility               | 1,212<br>(888 - 1,597)     | 70<br>(24 - 165)         | 22<br>(9 - 47)      | 253<br>(170 - 379)       | 508<br>(351 - 708)       | 359<br>(227 - 520)       |
| Interstitial nephritis and urinary tract infections | 1,080<br>(784 - 1,410)     | 60<br>(21 - 143)         | 16<br>(7 - 36)      | 218<br>(146 - 324)       | 452<br>(301 - 638)       | 334<br>(210 - 489)       |
| Urolithiasis                                        | 71<br>(39 - 139)           | --                       | 3<br>(1 - 9)        | 20<br>(9 - 42)           | 34<br>(15 - 70)          | 14<br>(5 - 31)           |
| Other urinary diseases                              | 60<br>(32 - 139)           | 10<br>(3 - 24)           | 3<br>(1 - 7)        | 14<br>(7 - 32)           | 22<br>(10 - 54)          | 11<br>(4 - 30)           |
| Gynecological diseases                              | 53<br>(27 - 78)            | --                       | --                  | 13<br>(7 - 18)           | 25<br>(12 - 43)          | 15<br>(7 - 26)           |
| Uterine fibroids                                    | 14<br>(7 - 20)             | --                       | --                  | 2<br>(1 - 4)             | 7<br>(3 - 12)            | 5<br>(2 - 8)             |
| Polycystic ovarian syndrome                         | 1<br>(1 - 1)               | --                       | --                  | 1<br>(0 - 1)             | 0<br>(0 - 0)             | --                       |
| Endometriosis                                       | 3<br>(1 - 4)               | --                       | --                  | 2<br>(1 - 3)             | 1<br>(0 - 2)             | --                       |
| Genital prolapse                                    | 10<br>(5 - 15)             | --                       | --                  | 2<br>(1 - 2)             | 4<br>(2 - 8)             | 4<br>(2 - 7)             |
| Other gynecological diseases                        | 26<br>(13 - 39)            | --                       | --                  | 6<br>(3 - 9)             | 13<br>(6 - 23)           | 7<br>(3 - 11)            |
| Hemoglobinopathies and hemolytic anemias            | 999<br>(478 - 1,794)       | 350<br>(94 - 792)        | 133<br>(54 - 255)   | 301<br>(149 - 529)       | 124<br>(64 - 201)        | 91<br>(43 - 165)         |
| Thalassemias                                        | 359<br>(136 - 712)         | 186<br>(45 - 440)        | 75<br>(30 - 144)    | 98<br>(48 - 178)         | 0<br>(0 - 0)             | 0<br>(0 - 0)             |
| Sickle cell disorders                               | 9<br>(4 - 17)              | 3<br>(1 - 8)             | 2<br>(1 - 3)        | 4<br>(2 - 7)             | 1<br>(0 - 1)             | 0<br>(0 - 0)             |
| G6PD deficiency                                     | 110<br>(52 - 201)          | 34<br>(9 - 77)           | 16<br>(7 - 31)      | 47<br>(23 - 84)          | 11<br>(6 - 18)           | 2<br>(1 - 3)             |
| Other hemoglobinopathies and hemolytic anemias      | 521<br>(272 - 892)         | 127<br>(40 - 272)        | 40<br>(17 - 76)     | 152<br>(75 - 264)        | 112<br>(58 - 182)        | 89<br>(43 - 162)         |
| Endocrine, metabolic, blood, and immune disorders   | 1,529<br>(999 - 2,085)     | 307<br>(129 - 576)       | 32<br>(15 - 60)     | 268<br>(168 - 405)       | 396<br>(246 - 592)       | 526<br>(327 - 819)       |
| Musculoskeletal disorders                           | 225<br>(119 - 438)         | --                       | 13<br>(6 - 26)      | 91<br>(48 - 175)         | 69<br>(35 - 142)         | 51<br>(23 - 122)         |
| Rheumatoid arthritis                                | 117<br>(59 - 250)          | --                       | 5<br>(2 - 11)       | 28<br>(13 - 57)          | 46<br>(22 - 98)          | 38<br>(18 - 96)          |
| Other musculoskeletal disorders                     | 107<br>(57 - 218)          | --                       | 8<br>(3 - 16)       | 63<br>(33 - 125)         | 23<br>(11 - 56)          | 13<br>(5 - 41)           |
| Other non-communicable diseases                     | 7,037<br>(4,849 - 10,434)  | 5,087<br>(2,937 - 8,182) | 289<br>(151 - 496)  | 446<br>(305 - 626)       | 451<br>(322 - 635)       | 764<br>(532 - 1,074)     |
| Congenital anomalies                                | 5,463<br>(3,375 - 8,697)   | 4,775<br>(2,738 - 7,798) | 268<br>(135 - 478)  | 256<br>(161 - 381)       | 82<br>(57 - 111)         | 82<br>(60 - 109)         |
| Neural tube defects                                 | 1,709<br>(391 - 4,065)     | 1,595<br>(359 - 3,776)   | 54<br>(11 - 149)    | 46<br>(12 - 120)         | 9<br>(2 - 24)            | 5<br>(2 - 15)            |
| Congenital heart anomalies                          | 2,121<br>(1,081 - 3,838)   | 1,798<br>(792 - 3,417)   | 133<br>(57 - 253)   | 122<br>(72 - 190)        | 31<br>(18 - 46)          | 38<br>(21 - 57)          |
| Cleft lip and cleft palate                          | 33<br>(5 - 98)             | 33<br>(5 - 98)           | --                  | --                       | --                       | --                       |
| Down syndrome                                       | 346<br>(105 - 798)         | 267<br>(62 - 670)        | 31<br>(10 - 70)     | 33<br>(14 - 69)          | 14<br>(7 - 24)           | 2<br>(1 - 3)             |
| Chromosomal unbalanced rearrangements               | 261<br>(78 - 620)          | 236<br>(66 - 579)        | 8<br>(3 - 17)       | 12<br>(5 - 23)           | 3<br>(1 - 5)             | 2<br>(1 - 4)             |
| Other congenital anomalies                          | 993<br>(384 - 2,265)       | 847<br>(278 - 2,051)     | 43<br>(16 - 95)     | 42<br>(19 - 86)          | 26<br>(14 - 45)          | 34<br>(19 - 54)          |
| Skin and subcutaneous diseases                      | 1,524<br>(1,133 - 2,094)   | 262<br>(84 - 568)        | 21<br>(11 - 36)     | 190<br>(126 - 293)       | 369<br>(253 - 541)       | 682<br>(453 - 982)       |
| Cellulitis                                          | 1,159<br>(742 - 1,659)     | 209<br>(63 - 474)        | 17<br>(8 - 30)      | 153<br>(86 - 249)        | 297<br>(192 - 447)       | 482<br>(271 - 751)       |



Web Table 31- Ethiopia deaths with 95% UI by age, sex, and cause in 2013

| Cause                                           | Females, All Ages           | Females, 0-4 Years       | Females, 5-14 Years      | Females, 15-49 Years     | Females, 50-69 Years     | Females, 70-80 Years     |
|-------------------------------------------------|-----------------------------|--------------------------|--------------------------|--------------------------|--------------------------|--------------------------|
| Pyoderma                                        | 207<br>(68 - 395)           | 48<br>(9 - 137)          | 2<br>(1 - 5)             | 23<br>(7 - 45)           | 48<br>(13 - 98)          | 86<br>(25 - 181)         |
| Decubitus ulcer                                 | 136<br>(43 - 325)           | 2<br>(0 - 6)             | 1<br>(0 - 3)             | 8<br>(3 - 23)            | 18<br>(5 - 49)           | 106<br>(30 - 259)        |
| Other skin and subcutaneous diseases            | 23<br>(7 - 42)              | 4<br>(1 - 11)            | 1<br>(0 - 2)             | 6<br>(2 - 11)            | 5<br>(1 - 11)            | 7<br>(2 - 14)            |
| Sudden infant death syndrome                    | 50<br>(9 - 162)             | 50<br>(9 - 162)          | --                       | --                       | --                       | --                       |
| Injuries                                        | 17,915<br>(14,370 - 21,634) | 3,287<br>(1,543 - 5,317) | 1,853<br>(1,118 - 2,553) | 4,699<br>(3,692 - 5,848) | 4,060<br>(3,149 - 5,015) | 4,016<br>(3,260 - 4,917) |
| Transport injuries                              | 5,360<br>(4,192 - 6,685)    | 499<br>(174 - 974)       | 822<br>(455 - 1,272)     | 1,520<br>(1,105 - 2,024) | 1,529<br>(1,111 - 2,005) | 991<br>(714 - 1,356)     |
| Road injuries                                   | 5,032<br>(3,906 - 6,304)    | 455<br>(158 - 898)       | 771<br>(424 - 1,200)     | 1,458<br>(1,054 - 1,938) | 1,445<br>(1,057 - 1,899) | 903<br>(645 - 1,240)     |
| Pedestrian road injuries                        | 2,918<br>(2,213 - 3,739)    | 262<br>(86 - 535)        | 510<br>(272 - 833)       | 657<br>(446 - 917)       | 882<br>(619 - 1,207)     | 607<br>(425 - 849)       |
| Cyclist road injuries                           | 125<br>(87 - 172)           | 6<br>(2 - 15)            | 16<br>(8 - 28)           | 20<br>(12 - 29)          | 64<br>(39 - 95)          | 20<br>(12 - 31)          |
| Motorcyclist road injuries                      | 159<br>(98 - 246)           | 7<br>(2 - 16)            | 8<br>(3 - 16)            | 81<br>(46 - 132)         | 39<br>(21 - 62)          | 24<br>(13 - 40)          |
| Motor vehicle road injuries                     | 1,772<br>(1,265 - 2,336)    | 174<br>(55 - 359)        | 230<br>(112 - 387)       | 697<br>(473 - 960)       | 431<br>(284 - 615)       | 240<br>(147 - 357)       |
| Other road injuries                             | 58<br>(34 - 95)             | 5<br>(1 - 13)            | 7<br>(2 - 16)            | 4<br>(2 - 7)             | 30<br>(13 - 61)          | 12<br>(5 - 25)           |
| Other transport injuries                        | 329<br>(233 - 476)          | 44<br>(15 - 93)          | 51<br>(23 - 90)          | 62<br>(40 - 95)          | 84<br>(51 - 131)         | 88<br>(53 - 140)         |
| Unintentional injuries                          | 9,921<br>(7,595 - 12,763)   | 2,654<br>(1,233 - 4,512) | 880<br>(524 - 1,277)     | 1,683<br>(1,302 - 2,261) | 1,948<br>(1,502 - 2,505) | 2,756<br>(2,154 - 3,519) |
| Falls                                           | 2,274<br>(1,681 - 3,010)    | 185<br>(86 - 337)        | 119<br>(60 - 195)        | 254<br>(169 - 377)       | 474<br>(329 - 682)       | 1,242<br>(819 - 1,847)   |
| Drowning                                        | 1,399<br>(874 - 2,332)      | 531<br>(211 - 1,177)     | 237<br>(125 - 412)       | 296<br>(186 - 484)       | 229<br>(149 - 343)       | 106<br>(69 - 164)        |
| Fire, heat, and hot substances                  | 1,647<br>(987 - 2,622)      | 559<br>(171 - 1,266)     | 169<br>(75 - 312)        | 305<br>(191 - 464)       | 312<br>(197 - 461)       | 301<br>(185 - 458)       |
| Poisonings                                      | 478<br>(273 - 768)          | 181<br>(62 - 420)        | 33<br>(16 - 58)          | 100<br>(60 - 158)        | 128<br>(70 - 199)        | 35<br>(19 - 52)          |
| Exposure to mechanical forces                   | 1,110<br>(688 - 2,052)      | 497<br>(169 - 1,318)     | 103<br>(47 - 206)        | 217<br>(150 - 331)       | 170<br>(118 - 268)       | 124<br>(86 - 176)        |
| Unintentional firearm injuries                  | 187<br>(131 - 275)          | 26<br>(10 - 55)          | 10<br>(4 - 22)           | 95<br>(56 - 156)         | 35<br>(21 - 57)          | 20<br>(12 - 33)          |
| Unintentional suffocation                       | 405<br>(126 - 1,234)        | 304<br>(62 - 1,043)      | 42<br>(14 - 122)         | 20<br>(9 - 76)           | 28<br>(14 - 91)          | 11<br>(5 - 36)           |
| Other exposure to mechanical forces             | 519<br>(341 - 822)          | 167<br>(59 - 402)        | 51<br>(22 - 103)         | 101<br>(64 - 156)        | 106<br>(70 - 154)        | 93<br>(60 - 137)         |
| Adverse effects of medical treatment            | 1,443<br>(944 - 2,231)      | 264<br>(102 - 613)       | 43<br>(21 - 82)          | 181<br>(108 - 316)       | 372<br>(218 - 601)       | 582<br>(319 - 957)       |
| Animal contact                                  | 687<br>(313 - 1,440)        | 111<br>(31 - 260)        | 90<br>(34 - 214)         | 206<br>(91 - 435)        | 178<br>(74 - 390)        | 103<br>(44 - 225)        |
| Venomous animal contact                         | 433<br>(190 - 871)          | 101<br>(26 - 244)        | 59<br>(21 - 138)         | 130<br>(58 - 272)        | 75<br>(30 - 155)         | 67<br>(28 - 157)         |
| Non-venomous animal contact                     | 255<br>(109 - 583)          | 10<br>(2 - 34)           | 30<br>(9 - 88)           | 76<br>(30 - 170)         | 103<br>(40 - 236)        | 35<br>(14 - 84)          |
| Foreign body                                    | 538<br>(296 - 908)          | 241<br>(101 - 503)       | 24<br>(11 - 46)          | 26<br>(14 - 44)          | 30<br>(18 - 48)          | 218<br>(126 - 349)       |
| Pulmonary aspiration and foreign body in airway | 516<br>(271 - 881)          | 237<br>(99 - 497)        | 22<br>(10 - 45)          | 23<br>(12 - 41)          | 26<br>(14 - 42)          | 208<br>(113 - 333)       |
| Foreign body in other body part                 | 22<br>(14 - 38)             | 4<br>(1 - 9)             | 2<br>(1 - 3)             | 3<br>(2 - 5)             | 4<br>(3 - 8)             | 9<br>(5 - 17)            |
| Other unintentional injuries                    | 344<br>(214 - 523)          | 84<br>(26 - 173)         | 63<br>(29 - 110)         | 98<br>(63 - 157)         | 55<br>(35 - 79)          | 45<br>(27 - 69)          |
| Self-harm and interpersonal violence            | 2,634<br>(1,839 - 3,507)    | 134<br>(43 - 288)        | 151<br>(76 - 263)        | 1,496<br>(987 - 2,115)   | 583<br>(380 - 802)       | 270<br>(156 - 390)       |
| Self-harm                                       | 1,090<br>(786 - 1,516)      | --                       | 28<br>(11 - 55)          | 579<br>(372 - 943)       | 287<br>(183 - 409)       | 196<br>(121 - 295)       |
| Interpersonal violence                          | 1,544<br>(810 - 2,295)      | 134<br>(43 - 288)        | 123<br>(54 - 234)        | 917<br>(480 - 1,480)     | 296<br>(159 - 450)       | 74<br>(26 - 138)         |
| Assault by firearm                              | 363<br>(157 - 630)          | 37<br>(11 - 92)          | 15<br>(5 - 34)           | 221<br>(92 - 404)        | 85<br>(38 - 148)         | 5<br>(1 - 12)            |
| Assault by sharp object                         | 383<br>(200 - 626)          | 29<br>(8 - 75)           | 13<br>(5 - 28)           | 245<br>(121 - 431)       | 63<br>(31 - 110)         | 32<br>(11 - 65)          |
| Assault by other means                          | 799<br>(371 - 1,230)        | 69<br>(18 - 156)         | 94<br>(39 - 186)         | 451<br>(201 - 779)       | 148<br>(71 - 236)        | 37<br>(11 - 74)          |

Web Table 31- Federated States of Micronesia deaths with 95% UI by age, sex, and cause in 2013

| Cause                                                             | Both Sexes, All Ages | Both Sexes, 0-4 Years | Both Sexes, 5-14 Years | Both Sexes, 15-49 Years | Both Sexes, 50-69 Years | Both Sexes, 70-80 Years |
|-------------------------------------------------------------------|----------------------|-----------------------|------------------------|-------------------------|-------------------------|-------------------------|
| All causes                                                        | 737<br>(523 - 1,065) | 36<br>(22 - 58)       | 10<br>(8 - 14)         | 156<br>(91 - 261)       | 283<br>(180 - 441)      | 251<br>(207 - 320)      |
| Communicable, maternal, neonatal, and nutritional diseases        | 119<br>(86 - 163)    | 25<br>(15 - 39)       | 4<br>(2 - 5)           | 25<br>(15 - 41)         | 28<br>(17 - 43)         | 37<br>(28 - 49)         |
| HIV/AIDS and tuberculosis                                         | 14<br>(9 - 20)       | 0<br>(0 - 0)          | 0<br>(0 - 0)           | 5<br>(3 - 7)            | 5<br>(3 - 8)            | 4<br>(2 - 5)            |
| Tuberculosis                                                      | 12<br>(8 - 19)       | 0<br>(0 - 0)          | 0<br>(0 - 0)           | 4<br>(2 - 6)            | 5<br>(3 - 8)            | 4<br>(2 - 5)            |
| HIV/AIDS                                                          | 1<br>(1 - 2)         | 0<br>(0 - 0)          | 0<br>(0 - 0)           | 1<br>(0 - 1)            | 0<br>(0 - 0)            | 0<br>(0 - 0)            |
| HIV/AIDS resulting in mycobacterial infection                     | 0<br>(0 - 0)         | 0<br>(0 - 0)          | 0<br>(0 - 0)           | 0<br>(0 - 0)            | 0<br>(0 - 0)            | 0<br>(0 - 0)            |
| HIV/AIDS resulting in other diseases                              | 1<br>(1 - 2)         | 0<br>(0 - 0)          | 0<br>(0 - 0)           | 1<br>(0 - 1)            | 0<br>(0 - 0)            | 0<br>(0 - 0)            |
| Diarrhea, lower respiratory, and other common infectious diseases | 62<br>(44 - 85)      | 7<br>(4 - 13)         | 2<br>(1 - 3)           | 11<br>(6 - 18)          | 16<br>(10 - 25)         | 26<br>(19 - 35)         |
| Diarrheal diseases                                                | 14<br>(9 - 20)       | 1<br>(0 - 2)          | 0<br>(0 - 1)           | 2<br>(1 - 3)            | 3<br>(2 - 6)            | 8<br>(4 - 12)           |
| Intestinal infectious diseases                                    | 2<br>(1 - 4)         | 1<br>(0 - 2)          | 1<br>(0 - 1)           | 1<br>(0 - 1)            | 0<br>(0 - 0)            | 0<br>(0 - 0)            |
| Typhoid fever                                                     | 2<br>(1 - 3)         | 1<br>(0 - 1)          | 0<br>(0 - 1)           | 0<br>(0 - 1)            | 0<br>(0 - 0)            | 0<br>(0 - 0)            |
| Paratyphoid fever                                                 | 0<br>(0 - 1)         | 0<br>(0 - 0)          | 0<br>(0 - 0)           | 0<br>(0 - 0)            | 0<br>(0 - 0)            | 0<br>(0 - 0)            |
| Other intestinal infectious diseases                              | 0<br>(0 - 1)         | 0<br>(0 - 0)          | 0<br>(0 - 0)           | 0<br>(0 - 0)            | 0<br>(0 - 0)            | 0<br>(0 - 0)            |
| Lower respiratory infections                                      | 39<br>(27 - 55)      | 3<br>(2 - 6)          | 1<br>(0 - 1)           | 6<br>(3 - 10)           | 11<br>(7 - 18)          | 18<br>(12 - 25)         |
| Upper respiratory infections                                      | 0<br>(0 - 0)         | 0<br>(0 - 0)          | 0<br>(0 - 0)           | 0<br>(0 - 0)            | 0<br>(0 - 0)            | 0<br>(0 - 0)            |
| Otitis media                                                      | 0<br>(0 - 0)         | 0<br>(0 - 0)          | 0<br>(0 - 0)           | 0<br>(0 - 0)            | 0<br>(0 - 0)            | 0<br>(0 - 0)            |
| Meningitis                                                        | 5<br>(3 - 7)         | 1<br>(0 - 2)          | 0<br>(0 - 1)           | 2<br>(1 - 3)            | 1<br>(1 - 2)            | 1<br>(0 - 1)            |
| Pneumococcal meningitis                                           | 2<br>(1 - 3)         | 0<br>(0 - 1)          | 0<br>(0 - 0)           | 1<br>(0 - 1)            | 0<br>(0 - 1)            | 0<br>(0 - 0)            |
| H influenzae type B meningitis                                    | 0<br>(0 - 1)         | 0<br>(0 - 0)          | 0<br>(0 - 0)           | 0<br>(0 - 0)            | 0<br>(0 - 0)            | 0<br>(0 - 0)            |
| Meningococcal meningitis                                          | 1<br>(1 - 1)         | 0<br>(0 - 0)          | 0<br>(0 - 0)           | 0<br>(0 - 1)            | 0<br>(0 - 0)            | 0<br>(0 - 0)            |
| Other meningitis                                                  | 2<br>(1 - 2)         | 0<br>(0 - 1)          | 0<br>(0 - 0)           | 1<br>(0 - 1)            | 0<br>(0 - 1)            | 0<br>(0 - 0)            |
| Encephalitis                                                      | 1<br>(0 - 1)         | 0<br>(0 - 0)          | 0<br>(0 - 0)           | 0<br>(0 - 1)            | 0<br>(0 - 0)            | 0<br>(0 - 0)            |
| Diphtheria                                                        | 0<br>(0 - 0)         | 0<br>(0 - 0)          | 0<br>(0 - 0)           | 0<br>(0 - 0)            | 0<br>(0 - 0)            | --                      |
| Whooping cough                                                    | 0<br>(0 - 2)         | 0<br>(0 - 1)          | 0<br>(0 - 0)           | 0<br>(0 - 0)            | 0<br>(0 - 0)            | --                      |
| Tetanus                                                           | 0<br>(0 - 0)         | 0<br>(0 - 0)          | 0<br>(0 - 0)           | 0<br>(0 - 0)            | 0<br>(0 - 0)            | 0<br>(0 - 0)            |
| Measles                                                           | 1<br>(0 - 4)         | 1<br>(0 - 3)          | 0<br>(0 - 1)           | 0<br>(0 - 0)            | 0<br>(0 - 0)            | --                      |
| Varicella and herpes zoster                                       | 0<br>(0 - 0)         | 0<br>(0 - 0)          | 0<br>(0 - 0)           | 0<br>(0 - 0)            | 0<br>(0 - 0)            | 0<br>(0 - 0)            |
| Neglected tropical diseases and malaria                           | 3<br>(2 - 5)         | 0<br>(0 - 1)          | 0<br>(0 - 0)           | 1<br>(1 - 2)            | 1<br>(0 - 1)            | 1<br>(0 - 2)            |
| Leishmaniasis                                                     | 0<br>(0 - 0)         | 0<br>(0 - 0)          | 0<br>(0 - 0)           | 0<br>(0 - 0)            | 0<br>(0 - 0)            | 0<br>(0 - 0)            |
| Visceral leishmaniasis                                            | 0<br>(0 - 0)         | 0<br>(0 - 0)          | 0<br>(0 - 0)           | 0<br>(0 - 0)            | 0<br>(0 - 0)            | 0<br>(0 - 0)            |
| Cysticercosis                                                     | 0<br>(0 - 0)         | 0<br>(0 - 0)          | 0<br>(0 - 0)           | 0<br>(0 - 0)            | 0<br>(0 - 0)            | 0<br>(0 - 0)            |
| Cystic echinococcosis                                             | 0<br>(0 - 0)         | 0<br>(0 - 0)          | 0<br>(0 - 0)           | 0<br>(0 - 0)            | 0<br>(0 - 0)            | 0<br>(0 - 0)            |
| Dengue                                                            | 3<br>(2 - 4)         | 0<br>(0 - 1)          | 0<br>(0 - 0)           | 1<br>(1 - 2)            | 1<br>(0 - 1)            | 1<br>(0 - 1)            |
| Rabies                                                            | 0<br>(0 - 0)         | 0<br>(0 - 0)          | 0<br>(0 - 0)           | 0<br>(0 - 0)            | 0<br>(0 - 0)            | 0<br>(0 - 0)            |
| Intestinal nematode infections                                    | 0<br>(0 - 1)         | 0<br>(0 - 0)          | 0<br>(0 - 0)           | 0<br>(0 - 0)            | 0<br>(0 - 0)            | 0<br>(0 - 0)            |
| Ascariasis                                                        | 0<br>(0 - 1)         | 0<br>(0 - 0)          | 0<br>(0 - 0)           | 0<br>(0 - 0)            | 0<br>(0 - 0)            | 0<br>(0 - 0)            |
| Other neglected tropical diseases                                 | 0<br>(0 - 1)         | 0<br>(0 - 0)          | 0<br>(0 - 0)           | 0<br>(0 - 0)            | 0<br>(0 - 0)            | 0<br>(0 - 0)            |
| Maternal disorders                                                | 2<br>(1 - 4)         | --                    | 0<br>(0 - 0)           | 2<br>(1 - 4)            | --                      | --                      |
| Maternal hemorrhage                                               | 0<br>(0 - 1)         | --                    | 0<br>(0 - 0)           | 0<br>(0 - 1)            | --                      | --                      |
| Maternal sepsis and other maternal infections                     | 0<br>(0 - 0)         | --                    | 0<br>(0 - 0)           | 0<br>(0 - 0)            | --                      | --                      |

Web Table 31- Federated States of Micronesia deaths with 95% UI by age, sex, and cause in 2013

| Cause                                                            | Both Sexes, All Ages | Both Sexes, 0-4 Years | Both Sexes, 5-14 Years | Both Sexes, 15-49 Years | Both Sexes, 50-69 Years | Both Sexes, 70-80 Years |
|------------------------------------------------------------------|----------------------|-----------------------|------------------------|-------------------------|-------------------------|-------------------------|
| Maternal hypertensive disorders                                  | 0<br>(0 - 0)         | --                    | 0<br>(0 - 0)           | 0<br>(0 - 0)            | --                      | --                      |
| Maternal obstructed labor                                        | 0<br>(0 - 0)         | --                    | 0<br>(0 - 0)           | 0<br>(0 - 0)            | --                      | --                      |
| Maternal abortive outcome                                        | 0<br>(0 - 1)         | --                    | 0<br>(0 - 0)           | 0<br>(0 - 1)            | --                      | --                      |
| Indirect maternal deaths                                         | 0<br>(0 - 0)         | --                    | 0<br>(0 - 0)           | 0<br>(0 - 0)            | --                      | --                      |
| Late maternal deaths                                             | 0<br>(0 - 1)         | --                    | 0<br>(0 - 0)           | 0<br>(0 - 1)            | --                      | --                      |
| Maternal deaths aggravated by HIV/AIDS                           | 0<br>(0 - 0)         | --                    | 0<br>(0 - 0)           | 0<br>(0 - 0)            | --                      | --                      |
| Other maternal disorders                                         | 0<br>(0 - 1)         | --                    | 0<br>(0 - 0)           | 0<br>(0 - 1)            | --                      | --                      |
| Neonatal disorders                                               | 15<br>(9 - 26)       | 15<br>(9 - 26)        | --                     | --                      | --                      | --                      |
| Neonatal preterm birth complications                             | 5<br>(2 - 10)        | 5<br>(2 - 10)         | --                     | --                      | --                      | --                      |
| Neonatal encephalopathy due to birth asphyxia and trauma         | 2<br>(1 - 5)         | 2<br>(1 - 5)          | --                     | --                      | --                      | --                      |
| Neonatal sepsis and other neonatal infections                    | 3<br>(1 - 6)         | 3<br>(1 - 6)          | --                     | --                      | --                      | --                      |
| Hemolytic disease and other neonatal jaundice                    | 0<br>(0 - 0)         | 0<br>(0 - 0)          | --                     | --                      | --                      | --                      |
| Other neonatal disorders                                         | 5<br>(2 - 10)        | 5<br>(2 - 10)         | --                     | --                      | --                      | --                      |
| Nutritional deficiencies                                         | 11<br>(7 - 16)       | 1<br>(0 - 1)          | 0<br>(0 - 1)           | 3<br>(1 - 4)            | 2<br>(1 - 4)            | 5<br>(3 - 7)            |
| Protein-energy malnutrition                                      | 5<br>(3 - 8)         | 1<br>(0 - 1)          | 0<br>(0 - 0)           | 1<br>(0 - 1)            | 1<br>(1 - 2)            | 2<br>(1 - 4)            |
| Iodine deficiency                                                | 0<br>(0 - 0)         | 0<br>(0 - 0)          | 0<br>(0 - 0)           | 0<br>(0 - 0)            | 0<br>(0 - 0)            | 0<br>(0 - 0)            |
| Iron-deficiency anemia                                           | 5<br>(3 - 8)         | 0<br>(0 - 0)          | 0<br>(0 - 0)           | 2<br>(1 - 3)            | 1<br>(1 - 2)            | 2<br>(1 - 3)            |
| Other nutritional deficiencies                                   | 1<br>(0 - 1)         | 0<br>(0 - 0)          | 0<br>(0 - 0)           | 0<br>(0 - 0)            | 0<br>(0 - 0)            | 0<br>(0 - 0)            |
| Other communicable, maternal, neonatal, and nutritional diseases | 12<br>(7 - 19)       | 1<br>(0 - 3)          | 0<br>(0 - 1)           | 4<br>(2 - 8)            | 4<br>(2 - 6)            | 2<br>(1 - 3)            |
| Sexually transmitted diseases excluding HIV                      | 1<br>(0 - 2)         | 1<br>(0 - 1)          | 0<br>(0 - 0)           | 0<br>(0 - 0)            | 0<br>(0 - 0)            | 0<br>(0 - 0)            |
| Syphilis                                                         | 1<br>(0 - 2)         | 1<br>(0 - 1)          | 0<br>(0 - 0)           | 0<br>(0 - 0)            | 0<br>(0 - 0)            | 0<br>(0 - 0)            |
| Chlamydial infection                                             | 0<br>(0 - 0)         | --                    | 0<br>(0 - 0)           | 0<br>(0 - 0)            | 0<br>(0 - 0)            | 0<br>(0 - 0)            |
| Gonococcal infection                                             | 0<br>(0 - 0)         | --                    | 0<br>(0 - 0)           | 0<br>(0 - 0)            | 0<br>(0 - 0)            | 0<br>(0 - 0)            |
| Other sexually transmitted diseases                              | 0<br>(0 - 0)         | --                    | 0<br>(0 - 0)           | 0<br>(0 - 0)            | 0<br>(0 - 0)            | 0<br>(0 - 0)            |
| Hepatitis                                                        | 5<br>(3 - 7)         | 0<br>(0 - 0)          | 0<br>(0 - 0)           | 2<br>(1 - 3)            | 2<br>(1 - 3)            | 1<br>(0 - 1)            |
| Acute hepatitis A                                                | 0<br>(0 - 0)         | 0<br>(0 - 0)          | 0<br>(0 - 0)           | 0<br>(0 - 0)            | 0<br>(0 - 0)            | 0<br>(0 - 0)            |
| Acute hepatitis B                                                | 3<br>(2 - 5)         | 0<br>(0 - 0)          | 0<br>(0 - 0)           | 1<br>(0 - 2)            | 2<br>(1 - 3)            | 1<br>(0 - 1)            |
| Acute hepatitis C                                                | 0<br>(0 - 0)         | --                    | 0<br>(0 - 0)           | 0<br>(0 - 0)            | 0<br>(0 - 0)            | 0<br>(0 - 0)            |
| Acute hepatitis E                                                | 1<br>(0 - 2)         | 0<br>(0 - 0)          | 0<br>(0 - 0)           | 1<br>(0 - 1)            | 0<br>(0 - 1)            | 0<br>(0 - 0)            |
| Other infectious diseases                                        | 6<br>(3 - 11)        | 0<br>(0 - 2)          | 0<br>(0 - 1)           | 2<br>(1 - 5)            | 2<br>(1 - 3)            | 1<br>(0 - 2)            |
| Non-communicable diseases                                        | 567<br>(397 - 828)   | 9<br>(5 - 17)         | 4<br>(3 - 6)           | 100<br>(56 - 167)       | 246<br>(156 - 384)      | 208<br>(170 - 265)      |
| Neoplasms                                                        | 45<br>(30 - 69)      | 0<br>(0 - 1)          | 0<br>(0 - 1)           | 12<br>(7 - 21)          | 20<br>(13 - 32)         | 12<br>(9 - 16)          |
| Esophageal cancer                                                | 1<br>(0 - 1)         | --                    | --                     | 0<br>(0 - 0)            | 0<br>(0 - 1)            | 0<br>(0 - 0)            |
| Stomach cancer                                                   | 3<br>(2 - 5)         | --                    | --                     | 1<br>(0 - 1)            | 2<br>(1 - 2)            | 1<br>(1 - 1)            |
| Liver cancer                                                     | 1<br>(1 - 2)         | --                    | 0<br>(0 - 0)           | 0<br>(0 - 1)            | 1<br>(0 - 1)            | 0<br>(0 - 1)            |
| Liver cancer due to hepatitis B                                  | 1<br>(0 - 1)         | --                    | 0<br>(0 - 0)           | 0<br>(0 - 0)            | 0<br>(0 - 1)            | 0<br>(0 - 0)            |
| Liver cancer due to hepatitis C                                  | 0<br>(0 - 1)         | --                    | 0<br>(0 - 0)           | 0<br>(0 - 0)            | 0<br>(0 - 0)            | 0<br>(0 - 0)            |
| Liver cancer due to alcohol use                                  | 0<br>(0 - 0)         | --                    | --                     | 0<br>(0 - 0)            | 0<br>(0 - 0)            | 0<br>(0 - 0)            |
| Liver cancer due to other causes                                 | 0<br>(0 - 0)         | --                    | 0<br>(0 - 0)           | 0<br>(0 - 0)            | 0<br>(0 - 0)            | 0<br>(0 - 0)            |
| Larynx cancer                                                    | 0<br>(0 - 0)         | --                    | --                     | 0<br>(0 - 0)            | 0<br>(0 - 0)            | 0<br>(0 - 0)            |

Web Table 31- Federated States of Micronesia deaths with 95% UI by age, sex, and cause in 2013

| Cause                                         | Both Sexes, All Ages | Both Sexes, 0-4 Years | Both Sexes, 5-14 Years | Both Sexes, 15-49 Years | Both Sexes, 50-69 Years | Both Sexes, 70-80 Years |
|-----------------------------------------------|----------------------|-----------------------|------------------------|-------------------------|-------------------------|-------------------------|
| Tracheal, bronchus and lung cancer            | 7<br>(5 - 11)        | --                    | --                     | 1<br>(1 - 3)            | 3<br>(2 - 5)            | 2<br>(2 - 3)            |
| Breast cancer                                 | 13<br>(7 - 22)       | --                    | --                     | 4<br>(2 - 8)            | 6<br>(3 - 10)           | 2<br>(2 - 4)            |
| Cervical cancer                               | 5<br>(3 - 8)         | --                    | --                     | 1<br>(1 - 2)            | 2<br>(1 - 3)            | 2<br>(1 - 3)            |
| Uterine cancer                                | 1<br>(0 - 1)         | --                    | --                     | 0<br>(0 - 0)            | 0<br>(0 - 1)            | 0<br>(0 - 0)            |
| Prostate cancer                               | 1<br>(0 - 2)         | --                    | --                     | 0<br>(0 - 0)            | 0<br>(0 - 1)            | 1<br>(0 - 1)            |
| Colon and rectum cancer                       | 3<br>(2 - 4)         | --                    | --                     | 1<br>(0 - 1)            | 1<br>(1 - 2)            | 1<br>(1 - 1)            |
| Lip and oral cavity cancer                    | 1<br>(0 - 1)         | --                    | --                     | 0<br>(0 - 0)            | 0<br>(0 - 0)            | 0<br>(0 - 0)            |
| Nasopharynx cancer                            | 1<br>(0 - 1)         | --                    | 0<br>(0 - 0)           | 0<br>(0 - 0)            | 0<br>(0 - 0)            | 0<br>(0 - 0)            |
| Other pharynx cancer                          | 0<br>(0 - 1)         | --                    | --                     | 0<br>(0 - 0)            | 0<br>(0 - 0)            | 0<br>(0 - 0)            |
| Gallbladder and biliary tract cancer          | 0<br>(0 - 1)         | --                    | --                     | 0<br>(0 - 0)            | 0<br>(0 - 0)            | 0<br>(0 - 0)            |
| Pancreatic cancer                             | 0<br>(0 - 1)         | --                    | --                     | 0<br>(0 - 0)            | 0<br>(0 - 0)            | 0<br>(0 - 0)            |
| Malignant skin melanoma                       | 0<br>(0 - 1)         | --                    | --                     | 0<br>(0 - 0)            | 0<br>(0 - 0)            | 0<br>(0 - 0)            |
| Non-melanoma skin cancer                      | 0<br>(0 - 1)         | --                    | --                     | 0<br>(0 - 0)            | 0<br>(0 - 0)            | 0<br>(0 - 0)            |
| Ovarian cancer                                | 0<br>(0 - 0)         | --                    | --                     | 0<br>(0 - 0)            | 0<br>(0 - 0)            | 0<br>(0 - 0)            |
| Testicular cancer                             | 0<br>(0 - 0)         | --                    | --                     | 0<br>(0 - 0)            | 0<br>(0 - 0)            | 0<br>(0 - 0)            |
| Kidney cancer                                 | 0<br>(0 - 1)         | 0<br>(0 - 0)          | 0<br>(0 - 0)           | 0<br>(0 - 0)            | 0<br>(0 - 0)            | 0<br>(0 - 0)            |
| Bladder cancer                                | 0<br>(0 - 0)         | --                    | --                     | 0<br>(0 - 0)            | 0<br>(0 - 0)            | 0<br>(0 - 0)            |
| Brain and nervous system cancer               | 0<br>(0 - 0)         | 0<br>(0 - 0)          | 0<br>(0 - 0)           | 0<br>(0 - 0)            | 0<br>(0 - 0)            | 0<br>(0 - 0)            |
| Thyroid cancer                                | 0<br>(0 - 0)         | --                    | 0<br>(0 - 0)           | 0<br>(0 - 0)            | 0<br>(0 - 0)            | 0<br>(0 - 0)            |
| Mesothelioma                                  | 0<br>(0 - 0)         | --                    | --                     | 0<br>(0 - 0)            | 0<br>(0 - 0)            | 0<br>(0 - 0)            |
| Hodgkin lymphoma                              | 0<br>(0 - 0)         | 0<br>(0 - 0)          | 0<br>(0 - 0)           | 0<br>(0 - 0)            | 0<br>(0 - 0)            | 0<br>(0 - 0)            |
| Non-Hodgkin lymphoma                          | 1<br>(0 - 1)         | 0<br>(0 - 0)          | 0<br>(0 - 0)           | 0<br>(0 - 0)            | 0<br>(0 - 0)            | 0<br>(0 - 0)            |
| Multiple myeloma                              | 0<br>(0 - 1)         | --                    | --                     | 0<br>(0 - 0)            | 0<br>(0 - 0)            | 0<br>(0 - 0)            |
| Leukemia                                      | 2<br>(1 - 3)         | 0<br>(0 - 0)          | 0<br>(0 - 0)           | 1<br>(1 - 2)            | 0<br>(0 - 1)            | 0<br>(0 - 0)            |
| Other neoplasms                               | 3<br>(2 - 4)         | 0<br>(0 - 0)          | 0<br>(0 - 0)           | 1<br>(1 - 2)            | 1<br>(1 - 1)            | 0<br>(0 - 1)            |
| Cardiovascular diseases                       | 242<br>(167 - 356)   | 1<br>(0 - 1)          | 1<br>(1 - 2)           | 44<br>(24 - 73)         | 108<br>(68 - 168)       | 88<br>(71 - 115)        |
| Rheumatic heart disease                       | 5<br>(3 - 8)         | 0<br>(0 - 0)          | 0<br>(0 - 0)           | 2<br>(1 - 4)            | 2<br>(1 - 3)            | 1<br>(1 - 1)            |
| Ischemic heart disease                        | 126<br>(85 - 192)    | 0<br>(0 - 0)          | 0<br>(0 - 0)           | 23<br>(13 - 39)         | 61<br>(39 - 97)         | 41<br>(31 - 60)         |
| Cerebrovascular disease                       | 81<br>(55 - 118)     | 0<br>(0 - 0)          | 0<br>(0 - 0)           | 11<br>(6 - 18)          | 33<br>(20 - 52)         | 37<br>(27 - 48)         |
| Ischemic stroke                               | 31<br>(20 - 46)      | 0<br>(0 - 0)          | 0<br>(0 - 0)           | 2<br>(1 - 4)            | 10<br>(6 - 16)          | 19<br>(14 - 26)         |
| Hemorrhagic stroke                            | 50<br>(31 - 76)      | 0<br>(0 - 0)          | 0<br>(0 - 0)           | 9<br>(5 - 15)           | 24<br>(14 - 39)         | 17<br>(11 - 24)         |
| Hypertensive heart disease                    | 6<br>(3 - 9)         | 0<br>(0 - 0)          | 0<br>(0 - 0)           | 1<br>(0 - 1)            | 2<br>(1 - 4)            | 2<br>(2 - 4)            |
| Cardiomyopathy and myocarditis                | 7<br>(4 - 12)        | 0<br>(0 - 0)          | 0<br>(0 - 0)           | 3<br>(1 - 5)            | 3<br>(1 - 5)            | 1<br>(1 - 2)            |
| Atrial fibrillation and flutter               | 1<br>(1 - 2)         | --                    | --                     | 0<br>(0 - 0)            | 0<br>(0 - 1)            | 1<br>(0 - 1)            |
| Aortic aneurysm                               | 2<br>(1 - 3)         | --                    | --                     | 0<br>(0 - 1)            | 1<br>(0 - 1)            | 1<br>(0 - 1)            |
| Peripheral vascular disease                   | 1<br>(1 - 2)         | --                    | --                     | 0<br>(0 - 0)            | 0<br>(0 - 0)            | 1<br>(1 - 1)            |
| Endocarditis                                  | 2<br>(1 - 4)         | 0<br>(0 - 0)          | 0<br>(0 - 0)           | 1<br>(1 - 2)            | 1<br>(0 - 1)            | 1<br>(0 - 1)            |
| Other cardiovascular and circulatory diseases | 11<br>(7 - 17)       | 0<br>(0 - 0)          | 0<br>(0 - 0)           | 3<br>(1 - 5)            | 5<br>(3 - 8)            | 3<br>(2 - 4)            |
| Chronic respiratory diseases                  | 61<br>(44 - 85)      | 0<br>(0 - 0)          | 0<br>(0 - 0)           | 6<br>(3 - 10)           | 23<br>(15 - 35)         | 32<br>(26 - 40)         |
| Chronic obstructive pulmonary disease         | 24<br>(17 - 34)      | 0<br>(0 - 0)          | 0<br>(0 - 0)           | 1<br>(1 - 2)            | 8<br>(4 - 12)           | 15<br>(11 - 19)         |

Web Table 31- Federated States of Micronesia deaths with 95% UI by age, sex, and cause in 2013

| Cause                                               | Both Sexes, All Ages | Both Sexes, 0-4 Years | Both Sexes, 5-14 Years | Both Sexes, 15-49 Years | Both Sexes, 50-69 Years | Both Sexes, 70-80 Years |
|-----------------------------------------------------|----------------------|-----------------------|------------------------|-------------------------|-------------------------|-------------------------|
| Pneumoconiosis                                      | 5<br>(3 - 8)         | 0<br>(0 - 0)          | 0<br>(0 - 0)           | 1<br>(0 - 1)            | 2<br>(1 - 4)            | 2<br>(1 - 3)            |
| Silicosis                                           | 2<br>(1 - 3)         | 0<br>(0 - 0)          | 0<br>(0 - 0)           | 0<br>(0 - 0)            | 1<br>(0 - 1)            | 1<br>(0 - 1)            |
| Asbestosis                                          | 1<br>(0 - 1)         | 0<br>(0 - 0)          | 0<br>(0 - 0)           | 0<br>(0 - 0)            | 0<br>(0 - 1)            | 0<br>(0 - 0)            |
| Coal workers pneumoconiosis                         | 1<br>(0 - 1)         | 0<br>(0 - 0)          | 0<br>(0 - 0)           | 0<br>(0 - 0)            | 0<br>(0 - 1)            | 0<br>(0 - 0)            |
| Other pneumoconiosis                                | 2<br>(1 - 4)         | 0<br>(0 - 0)          | 0<br>(0 - 0)           | 0<br>(0 - 0)            | 1<br>(1 - 2)            | 1<br>(1 - 1)            |
| Asthma                                              | 24<br>(16 - 35)      | 0<br>(0 - 0)          | 0<br>(0 - 0)           | 3<br>(2 - 5)            | 11<br>(6 - 16)          | 10<br>(7 - 15)          |
| Interstitial lung disease and pulmonary sarcoidosis | 3<br>(2 - 5)         | 0<br>(0 - 0)          | 0<br>(0 - 0)           | 0<br>(0 - 1)            | 1<br>(1 - 2)            | 2<br>(1 - 3)            |
| Other chronic respiratory diseases                  | 5<br>(3 - 7)         | 0<br>(0 - 0)          | 0<br>(0 - 0)           | 1<br>(0 - 1)            | 1<br>(1 - 2)            | 3<br>(2 - 4)            |
| Cirrhosis                                           | 12<br>(7 - 18)       | 0<br>(0 - 0)          | 0<br>(0 - 0)           | 5<br>(3 - 8)            | 5<br>(3 - 8)            | 2<br>(1 - 2)            |
| Cirrhosis due to hepatitis B                        | 6<br>(4 - 10)        | 0<br>(0 - 0)          | 0<br>(0 - 0)           | 3<br>(2 - 5)            | 3<br>(2 - 4)            | 1<br>(1 - 1)            |
| Cirrhosis due to hepatitis C                        | 2<br>(1 - 4)         | 0<br>(0 - 0)          | 0<br>(0 - 0)           | 1<br>(0 - 1)            | 1<br>(1 - 2)            | 0<br>(0 - 1)            |
| Cirrhosis due to alcohol use                        | 2<br>(1 - 3)         | --                    | --                     | 1<br>(0 - 1)            | 1<br>(1 - 2)            | 0<br>(0 - 1)            |
| Cirrhosis due to other causes                       | 1<br>(1 - 2)         | 0<br>(0 - 0)          | 0<br>(0 - 0)           | 1<br>(0 - 1)            | 0<br>(0 - 0)            | 0<br>(0 - 0)            |
| Digestive diseases                                  | 35<br>(24 - 52)      | 0<br>(0 - 0)          | 0<br>(0 - 1)           | 9<br>(5 - 15)           | 14<br>(9 - 22)          | 12<br>(9 - 16)          |
| Peptic ulcer disease                                | 7<br>(4 - 11)        | 0<br>(0 - 0)          | 0<br>(0 - 0)           | 2<br>(1 - 3)            | 3<br>(2 - 5)            | 2<br>(2 - 4)            |
| Gastritis and duodenitis                            | 0<br>(0 - 1)         | 0<br>(0 - 0)          | 0<br>(0 - 0)           | 0<br>(0 - 0)            | 0<br>(0 - 0)            | 0<br>(0 - 0)            |
| Appendicitis                                        | 3<br>(1 - 4)         | 0<br>(0 - 0)          | 0<br>(0 - 0)           | 1<br>(0 - 2)            | 1<br>(0 - 2)            | 1<br>(0 - 1)            |
| Paralytic ileus and intestinal obstruction          | 8<br>(5 - 12)        | 0<br>(0 - 0)          | 0<br>(0 - 0)           | 2<br>(1 - 3)            | 3<br>(1 - 5)            | 3<br>(2 - 4)            |
| Inguinal, femoral, and abdominal hernia             | 1<br>(0 - 1)         | 0<br>(0 - 0)          | 0<br>(0 - 0)           | 0<br>(0 - 0)            | 0<br>(0 - 0)            | 0<br>(0 - 1)            |
| Inflammatory bowel disease                          | 1<br>(0 - 1)         | 0<br>(0 - 0)          | 0<br>(0 - 0)           | 0<br>(0 - 0)            | 0<br>(0 - 0)            | 0<br>(0 - 1)            |
| Vascular intestinal disorders                       | 0<br>(0 - 0)         | 0<br>(0 - 0)          | 0<br>(0 - 0)           | 0<br>(0 - 0)            | 0<br>(0 - 0)            | 0<br>(0 - 0)            |
| Gallbladder and biliary diseases                    | 5<br>(3 - 8)         | 0<br>(0 - 0)          | 0<br>(0 - 0)           | 1<br>(1 - 2)            | 2<br>(1 - 3)            | 2<br>(1 - 3)            |
| Pancreatitis                                        | 1<br>(1 - 2)         | 0<br>(0 - 0)          | 0<br>(0 - 0)           | 0<br>(0 - 1)            | 0<br>(0 - 1)            | 0<br>(0 - 1)            |
| Other digestive diseases                            | 9<br>(6 - 15)        | 0<br>(0 - 0)          | 0<br>(0 - 0)           | 2<br>(1 - 4)            | 4<br>(2 - 7)            | 3<br>(2 - 4)            |
| Neurological disorders                              | 14<br>(11 - 18)      | 0<br>(0 - 0)          | 0<br>(0 - 0)           | 1<br>(1 - 2)            | 2<br>(1 - 3)            | 11<br>(8 - 14)          |
| Alzheimer disease and other dementias               | 12<br>(9 - 15)       | --                    | --                     | 0<br>(0 - 0)            | 1<br>(1 - 2)            | 10<br>(8 - 13)          |
| Parkinson disease                                   | 0<br>(0 - 0)         | --                    | --                     | 0<br>(0 - 0)            | 0<br>(0 - 0)            | 0<br>(0 - 0)            |
| Epilepsy                                            | 1<br>(0 - 2)         | 0<br>(0 - 0)          | 0<br>(0 - 0)           | 1<br>(0 - 2)            | 0<br>(0 - 0)            | 0<br>(0 - 0)            |
| Multiple sclerosis                                  | 0<br>(0 - 0)         | --                    | --                     | 0<br>(0 - 0)            | 0<br>(0 - 0)            | 0<br>(0 - 0)            |
| Other neurological disorders                        | 1<br>(1 - 2)         | 0<br>(0 - 0)          | 0<br>(0 - 0)           | 0<br>(0 - 1)            | 0<br>(0 - 1)            | 0<br>(0 - 1)            |
| Mental and substance use disorders                  | 1<br>(1 - 2)         | 0<br>(0 - 0)          | 0<br>(0 - 0)           | 1<br>(0 - 1)            | 0<br>(0 - 1)            | 0<br>(0 - 0)            |
| Schizophrenia                                       | 0<br>(0 - 0)         | --                    | --                     | 0<br>(0 - 0)            | 0<br>(0 - 0)            | 0<br>(0 - 0)            |
| Alcohol use disorders                               | 1<br>(0 - 2)         | --                    | --                     | 1<br>(0 - 1)            | 0<br>(0 - 0)            | 0<br>(0 - 0)            |
| Drug use disorders                                  | 0<br>(0 - 0)         | 0<br>(0 - 0)          | --                     | 0<br>(0 - 0)            | 0<br>(0 - 0)            | 0<br>(0 - 0)            |
| Opioid use disorders                                | 0<br>(0 - 0)         | 0<br>(0 - 0)          | --                     | 0<br>(0 - 0)            | 0<br>(0 - 0)            | 0<br>(0 - 0)            |
| Cocaine use disorders                               | 0<br>(0 - 0)         | 0<br>(0 - 0)          | --                     | 0<br>(0 - 0)            | 0<br>(0 - 0)            | 0<br>(0 - 0)            |
| Amphetamine use disorders                           | 0<br>(0 - 0)         | 0<br>(0 - 0)          | --                     | 0<br>(0 - 0)            | 0<br>(0 - 0)            | 0<br>(0 - 0)            |
| Other drug use disorders                            | 0<br>(0 - 0)         | 0<br>(0 - 0)          | --                     | 0<br>(0 - 0)            | 0<br>(0 - 0)            | 0<br>(0 - 0)            |
| Eating disorders                                    | 0<br>(0 - 0)         | --                    | 0<br>(0 - 0)           | 0<br>(0 - 0)            | --                      | --                      |
| Anorexia nervosa                                    | 0<br>(0 - 0)         | --                    | 0<br>(0 - 0)           | 0<br>(0 - 0)            | --                      | --                      |

Web Table 31- Federated States of Micronesia deaths with 95% UI by age, sex, and cause in 2013

| Cause                                               | Both Sexes, All Ages | Both Sexes, 0-4 Years | Both Sexes, 5-14 Years | Both Sexes, 15-49 Years | Both Sexes, 50-69 Years | Both Sexes, 70-80 Years |
|-----------------------------------------------------|----------------------|-----------------------|------------------------|-------------------------|-------------------------|-------------------------|
| Diabetes, urogenital, blood, and endocrine diseases | 144<br>(98 - 216)    | 1<br>(0 - 2)          | 1<br>(0 - 1)           | 20<br>(11 - 34)         | 73<br>(45 - 116)        | 49<br>(38 - 66)         |
| Diabetes mellitus                                   | 114<br>(78 - 171)    | 0<br>(0 - 0)          | 0<br>(0 - 0)           | 12<br>(7 - 22)          | 62<br>(38 - 97)         | 41<br>(31 - 54)         |
| Acute glomerulonephritis                            | 0<br>(0 - 0)         | 0<br>(0 - 0)          | 0<br>(0 - 0)           | 0<br>(0 - 0)            | 0<br>(0 - 0)            | 0<br>(0 - 0)            |
| Chronic kidney disease                              | 20<br>(11 - 41)      | 0<br>(0 - 0)          | 0<br>(0 - 0)           | 5<br>(2 - 10)           | 8<br>(4 - 18)           | 6<br>(4 - 14)           |
| Chronic kidney disease due to diabetes mellitus     | 3<br>(1 - 6)         | 0<br>(0 - 0)          | 0<br>(0 - 0)           | 1<br>(0 - 1)            | 1<br>(1 - 3)            | 1<br>(0 - 2)            |
| Chronic kidney disease due to hypertension          | 6<br>(3 - 11)        | 0<br>(0 - 0)          | 0<br>(0 - 0)           | 1<br>(1 - 2)            | 2<br>(1 - 5)            | 2<br>(1 - 4)            |
| Chronic kidney disease due to glomerulonephritis    | 1<br>(1 - 2)         | 0<br>(0 - 0)          | 0<br>(0 - 0)           | 0<br>(0 - 1)            | 0<br>(0 - 1)            | 0<br>(0 - 1)            |
| Chronic kidney disease due to other causes          | 10<br>(4 - 27)       | 0<br>(0 - 0)          | 0<br>(0 - 0)           | 3<br>(1 - 7)            | 4<br>(2 - 11)           | 3<br>(1 - 9)            |
| Urinary diseases and male infertility               | 2<br>(2 - 4)         | 0<br>(0 - 0)          | 0<br>(0 - 0)           | 1<br>(0 - 1)            | 1<br>(1 - 2)            | 1<br>(1 - 1)            |
| Interstitial nephritis and urinary tract infections | 1<br>(1 - 2)         | 0<br>(0 - 0)          | 0<br>(0 - 0)           | 0<br>(0 - 1)            | 0<br>(0 - 1)            | 0<br>(0 - 1)            |
| Urolithiasis                                        | 0<br>(0 - 0)         | --                    | 0<br>(0 - 0)           | 0<br>(0 - 0)            | 0<br>(0 - 0)            | 0<br>(0 - 0)            |
| Other urinary diseases                              | 1<br>(1 - 2)         | 0<br>(0 - 0)          | 0<br>(0 - 0)           | 0<br>(0 - 0)            | 0<br>(0 - 1)            | 0<br>(0 - 1)            |
| Gynecological diseases                              | 0<br>(0 - 0)         | --                    | --                     | 0<br>(0 - 0)            | 0<br>(0 - 0)            | 0<br>(0 - 0)            |
| Uterine fibroids                                    | 0<br>(0 - 0)         | --                    | --                     | 0<br>(0 - 0)            | 0<br>(0 - 0)            | 0<br>(0 - 0)            |
| Polycystic ovarian syndrome                         | 0<br>(0 - 0)         | --                    | --                     | 0<br>(0 - 0)            | 0<br>(0 - 0)            | --                      |
| Endometriosis                                       | 0<br>(0 - 0)         | --                    | --                     | 0<br>(0 - 0)            | 0<br>(0 - 0)            | --                      |
| Genital prolapse                                    | 0<br>(0 - 0)         | --                    | --                     | 0<br>(0 - 0)            | 0<br>(0 - 0)            | 0<br>(0 - 0)            |
| Other gynecological diseases                        | 0<br>(0 - 0)         | --                    | --                     | 0<br>(0 - 0)            | 0<br>(0 - 0)            | 0<br>(0 - 0)            |
| Hemoglobinopathies and hemolytic anemias            | 2<br>(1 - 3)         | 0<br>(0 - 1)          | 0<br>(0 - 0)           | 1<br>(0 - 1)            | 0<br>(0 - 0)            | 0<br>(0 - 0)            |
| Thalassemias                                        | 1<br>(0 - 2)         | 0<br>(0 - 1)          | 0<br>(0 - 0)           | 1<br>(0 - 1)            | 0<br>(0 - 0)            | 0<br>(0 - 0)            |
| Sickle cell disorders                               | 0<br>(0 - 0)         | 0<br>(0 - 0)          | 0<br>(0 - 0)           | 0<br>(0 - 0)            | 0<br>(0 - 0)            | 0<br>(0 - 0)            |
| G6PD deficiency                                     | 0<br>(0 - 0)         | 0<br>(0 - 0)          | 0<br>(0 - 0)           | 0<br>(0 - 0)            | 0<br>(0 - 0)            | 0<br>(0 - 0)            |
| Other hemoglobinopathies and hemolytic anemias      | 1<br>(1 - 1)         | 0<br>(0 - 0)          | 0<br>(0 - 0)           | 0<br>(0 - 0)            | 0<br>(0 - 0)            | 0<br>(0 - 0)            |
| Endocrine, metabolic, blood, and immune disorders   | 5<br>(3 - 8)         | 0<br>(0 - 1)          | 0<br>(0 - 0)           | 1<br>(1 - 2)            | 2<br>(1 - 3)            | 1<br>(1 - 2)            |
| Musculoskeletal disorders                           | 1<br>(1 - 2)         | --                    | 0<br>(0 - 0)           | 0<br>(0 - 1)            | 0<br>(0 - 1)            | 0<br>(0 - 0)            |
| Rheumatoid arthritis                                | 0<br>(0 - 0)         | --                    | 0<br>(0 - 0)           | 0<br>(0 - 0)            | 0<br>(0 - 0)            | 0<br>(0 - 0)            |
| Other musculoskeletal disorders                     | 1<br>(1 - 1)         | --                    | 0<br>(0 - 0)           | 0<br>(0 - 1)            | 0<br>(0 - 0)            | 0<br>(0 - 0)            |
| Other non-communicable diseases                     | 13<br>(8 - 19)       | 7<br>(3 - 13)         | 1<br>(1 - 2)           | 2<br>(1 - 4)            | 1<br>(1 - 2)            | 1<br>(1 - 2)            |
| Congenital anomalies                                | 11<br>(7 - 17)       | 7<br>(3 - 13)         | 1<br>(1 - 2)           | 2<br>(1 - 3)            | 1<br>(0 - 1)            | 0<br>(0 - 1)            |
| Neural tube defects                                 | 0<br>(0 - 0)         | 0<br>(0 - 0)          | 0<br>(0 - 0)           | 0<br>(0 - 0)            | 0<br>(0 - 0)            | 0<br>(0 - 0)            |
| Congenital heart anomalies                          | 2<br>(1 - 4)         | 1<br>(1 - 3)          | 0<br>(0 - 1)           | 0<br>(0 - 1)            | 0<br>(0 - 0)            | 0<br>(0 - 0)            |
| Cleft lip and cleft palate                          | 0<br>(0 - 0)         | 0<br>(0 - 0)          | --                     | --                      | --                      | --                      |
| Down syndrome                                       | 1<br>(0 - 1)         | 0<br>(0 - 1)          | 0<br>(0 - 0)           | 0<br>(0 - 0)            | 0<br>(0 - 0)            | 0<br>(0 - 0)            |
| Chromosomal unbalanced rearrangements               | 0<br>(0 - 1)         | 0<br>(0 - 1)          | 0<br>(0 - 0)           | 0<br>(0 - 0)            | 0<br>(0 - 0)            | 0<br>(0 - 0)            |
| Other congenital anomalies                          | 7<br>(4 - 12)        | 5<br>(2 - 9)          | 1<br>(0 - 1)           | 1<br>(1 - 2)            | 0<br>(0 - 1)            | 0<br>(0 - 0)            |
| Skin and subcutaneous diseases                      | 2<br>(1 - 3)         | 0<br>(0 - 0)          | 0<br>(0 - 0)           | 0<br>(0 - 1)            | 1<br>(0 - 1)            | 1<br>(0 - 1)            |
| Cellulitis                                          | 0<br>(0 - 0)         | 0<br>(0 - 0)          | 0<br>(0 - 0)           | 0<br>(0 - 0)            | 0<br>(0 - 0)            | 0<br>(0 - 0)            |
| Pyoderma                                            | 1<br>(1 - 2)         | 0<br>(0 - 0)          | 0<br>(0 - 0)           | 0<br>(0 - 0)            | 0<br>(0 - 1)            | 0<br>(0 - 1)            |
| Decubitus ulcer                                     | 0<br>(0 - 1)         | 0<br>(0 - 0)          | 0<br>(0 - 0)           | 0<br>(0 - 0)            | 0<br>(0 - 0)            | 0<br>(0 - 1)            |
| Other skin and subcutaneous diseases                | 0<br>(0 - 0)         | 0<br>(0 - 0)          | 0<br>(0 - 0)           | 0<br>(0 - 0)            | 0<br>(0 - 0)            | 0<br>(0 - 0)            |

Web Table 31- Federated States of Micronesia deaths with 95% UI by age, sex, and cause in 2013

| Cause                                           | Both Sexes, All Ages | Both Sexes, 0-4 Years | Both Sexes, 5-14 Years | Both Sexes, 15-49 Years | Both Sexes, 50-69 Years | Both Sexes, 70-80 Years |
|-------------------------------------------------|----------------------|-----------------------|------------------------|-------------------------|-------------------------|-------------------------|
| Sudden infant death syndrome                    | 0<br>(0 - 0)         | 0<br>(0 - 0)          | --                     | --                      | --                      | --                      |
| Injuries                                        | 51<br>(34 - 80)      | 2<br>(1 - 3)          | 3<br>(2 - 4)           | 31<br>(19 - 52)         | 9<br>(6 - 15)           | 7<br>(4 - 9)            |
| Transport injuries                              | 20<br>(13 - 31)      | 0<br>(0 - 1)          | 1<br>(1 - 2)           | 12<br>(7 - 20)          | 4<br>(2 - 6)            | 2<br>(2 - 3)            |
| Road injuries                                   | 19<br>(12 - 29)      | 0<br>(0 - 1)          | 1<br>(1 - 2)           | 11<br>(7 - 19)          | 4<br>(2 - 6)            | 2<br>(1 - 3)            |
| Pedestrian road injuries                        | 2<br>(1 - 3)         | 0<br>(0 - 0)          | 0<br>(0 - 0)           | 1<br>(1 - 2)            | 0<br>(0 - 1)            | 0<br>(0 - 0)            |
| Cyclist road injuries                           | 1<br>(0 - 1)         | 0<br>(0 - 0)          | 0<br>(0 - 0)           | 0<br>(0 - 1)            | 0<br>(0 - 0)            | 0<br>(0 - 0)            |
| Motorcyclist road injuries                      | 2<br>(1 - 4)         | 0<br>(0 - 0)          | 0<br>(0 - 0)           | 2<br>(1 - 3)            | 0<br>(0 - 1)            | 0<br>(0 - 0)            |
| Motor vehicle road injuries                     | 13<br>(9 - 21)       | 0<br>(0 - 1)          | 1<br>(1 - 1)           | 8<br>(5 - 13)           | 3<br>(2 - 4)            | 2<br>(1 - 2)            |
| Other road injuries                             | 0<br>(0 - 1)         | 0<br>(0 - 0)          | 0<br>(0 - 0)           | 0<br>(0 - 0)            | 0<br>(0 - 0)            | 0<br>(0 - 0)            |
| Other transport injuries                        | 1<br>(0 - 2)         | 0<br>(0 - 0)          | 0<br>(0 - 0)           | 1<br>(0 - 1)            | 0<br>(0 - 1)            | 0<br>(0 - 0)            |
| Unintentional injuries                          | 16<br>(10 - 25)      | 1<br>(1 - 3)          | 1<br>(1 - 2)           | 8<br>(4 - 13)           | 3<br>(2 - 5)            | 3<br>(2 - 5)            |
| Falls                                           | 2<br>(1 - 2)         | 0<br>(0 - 0)          | 0<br>(0 - 0)           | 1<br>(0 - 1)            | 0<br>(0 - 0)            | 1<br>(0 - 1)            |
| Drowning                                        | 4<br>(2 - 6)         | 0<br>(0 - 1)          | 0<br>(0 - 1)           | 2<br>(1 - 4)            | 1<br>(0 - 1)            | 0<br>(0 - 0)            |
| Fire, heat, and hot substances                  | 1<br>(1 - 2)         | 0<br>(0 - 0)          | 0<br>(0 - 0)           | 1<br>(0 - 1)            | 0<br>(0 - 0)            | 0<br>(0 - 0)            |
| Poisonings                                      | 1<br>(0 - 1)         | 0<br>(0 - 0)          | 0<br>(0 - 0)           | 0<br>(0 - 0)            | 0<br>(0 - 0)            | 0<br>(0 - 0)            |
| Exposure to mechanical forces                   | 2<br>(1 - 2)         | 0<br>(0 - 0)          | 0<br>(0 - 0)           | 1<br>(0 - 1)            | 0<br>(0 - 1)            | 0<br>(0 - 0)            |
| Unintentional firearm injuries                  | 0<br>(0 - 0)         | 0<br>(0 - 0)          | 0<br>(0 - 0)           | 0<br>(0 - 0)            | 0<br>(0 - 0)            | 0<br>(0 - 0)            |
| Unintentional suffocation                       | 0<br>(0 - 1)         | 0<br>(0 - 0)          | 0<br>(0 - 0)           | 0<br>(0 - 1)            | 0<br>(0 - 0)            | 0<br>(0 - 0)            |
| Other exposure to mechanical forces             | 1<br>(1 - 2)         | 0<br>(0 - 0)          | 0<br>(0 - 0)           | 0<br>(0 - 1)            | 0<br>(0 - 0)            | 0<br>(0 - 0)            |
| Adverse effects of medical treatment            | 4<br>(2 - 7)         | 0<br>(0 - 1)          | 0<br>(0 - 0)           | 1<br>(0 - 3)            | 1<br>(0 - 2)            | 1<br>(1 - 2)            |
| Animal contact                                  | 0<br>(0 - 1)         | 0<br>(0 - 0)          | 0<br>(0 - 0)           | 0<br>(0 - 0)            | 0<br>(0 - 0)            | 0<br>(0 - 0)            |
| Venomous animal contact                         | 0<br>(0 - 0)         | 0<br>(0 - 0)          | 0<br>(0 - 0)           | 0<br>(0 - 0)            | 0<br>(0 - 0)            | 0<br>(0 - 0)            |
| Non-venomous animal contact                     | 0<br>(0 - 0)         | 0<br>(0 - 0)          | 0<br>(0 - 0)           | 0<br>(0 - 0)            | 0<br>(0 - 0)            | 0<br>(0 - 0)            |
| Foreign body                                    | 1<br>(1 - 2)         | 0<br>(0 - 1)          | 0<br>(0 - 0)           | 0<br>(0 - 1)            | 0<br>(0 - 1)            | 0<br>(0 - 1)            |
| Pulmonary aspiration and foreign body in airway | 1<br>(1 - 2)         | 0<br>(0 - 1)          | 0<br>(0 - 0)           | 0<br>(0 - 0)            | 0<br>(0 - 0)            | 0<br>(0 - 1)            |
| Foreign body in other body part                 | 0<br>(0 - 0)         | 0<br>(0 - 0)          | 0<br>(0 - 0)           | 0<br>(0 - 0)            | 0<br>(0 - 0)            | 0<br>(0 - 0)            |
| Other unintentional injuries                    | 2<br>(1 - 3)         | 0<br>(0 - 0)          | 0<br>(0 - 0)           | 1<br>(1 - 2)            | 0<br>(0 - 1)            | 0<br>(0 - 0)            |
| Self-harm and interpersonal violence            | 15<br>(9 - 26)       | 0<br>(0 - 0)          | 0<br>(0 - 1)           | 12<br>(7 - 20)          | 2<br>(1 - 4)            | 1<br>(1 - 2)            |
| Self-harm                                       | 12<br>(7 - 19)       | --                    | 0<br>(0 - 1)           | 9<br>(5 - 15)           | 2<br>(1 - 3)            | 1<br>(1 - 1)            |
| Interpersonal violence                          | 4<br>(2 - 8)         | 0<br>(0 - 0)          | 0<br>(0 - 0)           | 3<br>(2 - 7)            | 0<br>(0 - 1)            | 0<br>(0 - 0)            |
| Assault by firearm                              | 1<br>(1 - 3)         | 0<br>(0 - 0)          | 0<br>(0 - 0)           | 1<br>(1 - 3)            | 0<br>(0 - 0)            | 0<br>(0 - 0)            |
| Assault by sharp object                         | 1<br>(1 - 3)         | 0<br>(0 - 0)          | 0<br>(0 - 0)           | 1<br>(1 - 3)            | 0<br>(0 - 0)            | 0<br>(0 - 0)            |
| Assault by other means                          | 1<br>(0 - 2)         | 0<br>(0 - 0)          | 0<br>(0 - 0)           | 1<br>(0 - 2)            | 0<br>(0 - 0)            | 0<br>(0 - 0)            |

Web Table 31- Federated States of Micronesia deaths with 95% UI by age, sex, and cause in 2013

| Cause                                                             | Males, All Ages    | Males, 0-4 Years | Males, 5-14 Years | Males, 15-49 Years | Males, 50-69 Years | Males, 70-80 Years |
|-------------------------------------------------------------------|--------------------|------------------|-------------------|--------------------|--------------------|--------------------|
| All causes                                                        | 406<br>(293 - 580) | 20<br>(12 - 33)  | 6<br>(4 - 8)      | 101<br>(60 - 164)  | 167<br>(110 - 256) | 112<br>(98 - 136)  |
| Communicable, maternal, neonatal, and nutritional diseases        | 60<br>(44 - 81)    | 14<br>(8 - 22)   | 2<br>(1 - 3)      | 14<br>(8 - 22)     | 16<br>(10 - 24)    | 15<br>(11 - 19)    |
| HIV/AIDS and tuberculosis                                         | 8<br>(5 - 11)      | 0<br>(0 - 0)     | 0<br>(0 - 0)      | 3<br>(2 - 4)       | 3<br>(2 - 5)       | 2<br>(1 - 3)       |
| Tuberculosis                                                      | 7<br>(4 - 11)      | 0<br>(0 - 0)     | 0<br>(0 - 0)      | 2<br>(1 - 4)       | 3<br>(2 - 5)       | 2<br>(1 - 3)       |
| HIV/AIDS                                                          | 1<br>(0 - 1)       | 0<br>(0 - 0)     | 0<br>(0 - 0)      | 0<br>(0 - 1)       | 0<br>(0 - 0)       | 0<br>(0 - 0)       |
| HIV/AIDS resulting in mycobacterial infection                     | 0<br>(0 - 0)       | 0<br>(0 - 0)     | 0<br>(0 - 0)      | 0<br>(0 - 0)       | 0<br>(0 - 0)       | 0<br>(0 - 0)       |
| HIV/AIDS resulting in other diseases                              | 1<br>(0 - 1)       | 0<br>(0 - 0)     | 0<br>(0 - 0)      | 0<br>(0 - 1)       | 0<br>(0 - 0)       | 0<br>(0 - 0)       |
| Diarrhea, lower respiratory, and other common infectious diseases | 31<br>(22 - 44)    | 4<br>(2 - 7)     | 1<br>(1 - 2)      | 7<br>(4 - 11)      | 9<br>(6 - 14)      | 11<br>(7 - 14)     |
| Diarrheal diseases                                                | 6<br>(4 - 9)       | 1<br>(0 - 2)     | 0<br>(0 - 0)      | 1<br>(0 - 2)       | 2<br>(1 - 3)       | 3<br>(2 - 5)       |
| Intestinal infectious diseases                                    | 1<br>(0 - 2)       | 0<br>(0 - 1)     | 0<br>(0 - 1)      | 0<br>(0 - 1)       | 0<br>(0 - 0)       | 0<br>(0 - 0)       |
| Typhoid fever                                                     | 1<br>(0 - 2)       | 0<br>(0 - 1)     | 0<br>(0 - 0)      | 0<br>(0 - 1)       | 0<br>(0 - 0)       | 0<br>(0 - 0)       |
| Paratyphoid fever                                                 | 0<br>(0 - 0)       | 0<br>(0 - 0)     | 0<br>(0 - 0)      | 0<br>(0 - 0)       | 0<br>(0 - 0)       | 0<br>(0 - 0)       |
| Other intestinal infectious diseases                              | 0<br>(0 - 0)       | 0<br>(0 - 0)     | 0<br>(0 - 0)      | 0<br>(0 - 0)       | 0<br>(0 - 0)       | 0<br>(0 - 0)       |
| Lower respiratory infections                                      | 21<br>(14 - 30)    | 2<br>(1 - 3)     | 0<br>(0 - 1)      | 4<br>(2 - 7)       | 7<br>(4 - 11)      | 7<br>(5 - 11)      |
| Upper respiratory infections                                      | 0<br>(0 - 0)       | 0<br>(0 - 0)     | 0<br>(0 - 0)      | 0<br>(0 - 0)       | 0<br>(0 - 0)       | 0<br>(0 - 0)       |
| Otitis media                                                      | 0<br>(0 - 0)       | 0<br>(0 - 0)     | 0<br>(0 - 0)      | 0<br>(0 - 0)       | 0<br>(0 - 0)       | 0<br>(0 - 0)       |
| Meningitis                                                        | 3<br>(2 - 4)       | 0<br>(0 - 1)     | 0<br>(0 - 0)      | 1<br>(1 - 2)       | 1<br>(0 - 1)       | 0<br>(0 - 0)       |
| Pneumococcal meningitis                                           | 1<br>(1 - 1)       | 0<br>(0 - 0)     | 0<br>(0 - 0)      | 0<br>(0 - 1)       | 0<br>(0 - 0)       | 0<br>(0 - 0)       |
| H influenzae type B meningitis                                    | 0<br>(0 - 0)       | 0<br>(0 - 0)     | 0<br>(0 - 0)      | 0<br>(0 - 0)       | 0<br>(0 - 0)       | 0<br>(0 - 0)       |
| Meningococcal meningitis                                          | 0<br>(0 - 1)       | 0<br>(0 - 0)     | 0<br>(0 - 0)      | 0<br>(0 - 0)       | 0<br>(0 - 0)       | 0<br>(0 - 0)       |
| Other meningitis                                                  | 1<br>(1 - 1)       | 0<br>(0 - 0)     | 0<br>(0 - 0)      | 0<br>(0 - 1)       | 0<br>(0 - 0)       | 0<br>(0 - 0)       |
| Encephalitis                                                      | 0<br>(0 - 1)       | 0<br>(0 - 0)     | 0<br>(0 - 0)      | 0<br>(0 - 0)       | 0<br>(0 - 0)       | 0<br>(0 - 0)       |
| Diphtheria                                                        | 0<br>(0 - 0)       | 0<br>(0 - 0)     | 0<br>(0 - 0)      | 0<br>(0 - 0)       | 0<br>(0 - 0)       | --                 |
| Whooping cough                                                    | 0<br>(0 - 1)       | 0<br>(0 - 1)     | 0<br>(0 - 0)      | 0<br>(0 - 0)       | 0<br>(0 - 0)       | --                 |
| Tetanus                                                           | 0<br>(0 - 0)       | 0<br>(0 - 0)     | 0<br>(0 - 0)      | 0<br>(0 - 0)       | 0<br>(0 - 0)       | 0<br>(0 - 0)       |
| Measles                                                           | 1<br>(0 - 2)       | 0<br>(0 - 2)     | 0<br>(0 - 0)      | 0<br>(0 - 0)       | 0<br>(0 - 0)       | --                 |
| Varicella and herpes zoster                                       | 0<br>(0 - 0)       | 0<br>(0 - 0)     | 0<br>(0 - 0)      | 0<br>(0 - 0)       | 0<br>(0 - 0)       | 0<br>(0 - 0)       |
| Neglected tropical diseases and malaria                           | 2<br>(1 - 3)       | 0<br>(0 - 0)     | 0<br>(0 - 0)      | 1<br>(0 - 1)       | 0<br>(0 - 1)       | 0<br>(0 - 0)       |
| Leishmaniasis                                                     | 0<br>(0 - 0)       | 0<br>(0 - 0)     | 0<br>(0 - 0)      | 0<br>(0 - 0)       | 0<br>(0 - 0)       | 0<br>(0 - 0)       |
| Visceral leishmaniasis                                            | 0<br>(0 - 0)       | 0<br>(0 - 0)     | 0<br>(0 - 0)      | 0<br>(0 - 0)       | 0<br>(0 - 0)       | 0<br>(0 - 0)       |
| Cysticercosis                                                     | 0<br>(0 - 0)       | 0<br>(0 - 0)     | 0<br>(0 - 0)      | 0<br>(0 - 0)       | 0<br>(0 - 0)       | 0<br>(0 - 0)       |
| Cystic echinococcosis                                             | 0<br>(0 - 0)       | 0<br>(0 - 0)     | 0<br>(0 - 0)      | 0<br>(0 - 0)       | 0<br>(0 - 0)       | 0<br>(0 - 0)       |
| Dengue                                                            | 1<br>(1 - 2)       | 0<br>(0 - 0)     | 0<br>(0 - 0)      | 1<br>(0 - 1)       | 0<br>(0 - 0)       | 0<br>(0 - 0)       |
| Rabies                                                            | 0<br>(0 - 0)       | 0<br>(0 - 0)     | 0<br>(0 - 0)      | 0<br>(0 - 0)       | 0<br>(0 - 0)       | 0<br>(0 - 0)       |
| Intestinal nematode infections                                    | 0<br>(0 - 0)       | 0<br>(0 - 0)     | 0<br>(0 - 0)      | 0<br>(0 - 0)       | 0<br>(0 - 0)       | 0<br>(0 - 0)       |
| Ascariasis                                                        | 0<br>(0 - 0)       | 0<br>(0 - 0)     | 0<br>(0 - 0)      | 0<br>(0 - 0)       | 0<br>(0 - 0)       | 0<br>(0 - 0)       |
| Other neglected tropical diseases                                 | 0<br>(0 - 0)       | 0<br>(0 - 0)     | 0<br>(0 - 0)      | 0<br>(0 - 0)       | 0<br>(0 - 0)       | 0<br>(0 - 0)       |
| Maternal disorders                                                | --                 | --               | --                | --                 | --                 | --                 |
| Maternal hemorrhage                                               | --                 | --               | --                | --                 | --                 | --                 |
| Maternal sepsis and other maternal infections                     | --                 | --               | --                | --                 | --                 | --                 |



Web Table 31- Federated States of Micronesia deaths with 95% UI by age, sex, and cause in 2013

| Cause                                                            | Males, All Ages    | Males, 0-4 Years | Males, 5-14 Years | Males, 15-49 Years | Males, 50-69 Years | Males, 70-80 Years |
|------------------------------------------------------------------|--------------------|------------------|-------------------|--------------------|--------------------|--------------------|
| Maternal hypertensive disorders                                  | --                 | --               | --                | --                 | --                 | --                 |
| Maternal obstructed labor                                        | --                 | --               | --                | --                 | --                 | --                 |
| Maternal abortive outcome                                        | --                 | --               | --                | --                 | --                 | --                 |
| Indirect maternal deaths                                         | --                 | --               | --                | --                 | --                 | --                 |
| Late maternal deaths                                             | --                 | --               | --                | --                 | --                 | --                 |
| Maternal deaths aggravated by HIV/AIDS                           | --                 | --               | --                | --                 | --                 | --                 |
| Other maternal disorders                                         | --                 | --               | --                | --                 | --                 | --                 |
| Neonatal disorders                                               | 9<br>(5 - 14)      | 9<br>(5 - 14)    | --                | --                 | --                 | --                 |
| Neonatal preterm birth complications                             | 2<br>(1 - 5)       | 2<br>(1 - 5)     | --                | --                 | --                 | --                 |
| Neonatal encephalopathy due to birth asphyxia and trauma         | 2<br>(0 - 4)       | 2<br>(0 - 4)     | --                | --                 | --                 | --                 |
| Neonatal sepsis and other neonatal infections                    | 2<br>(0 - 4)       | 2<br>(0 - 4)     | --                | --                 | --                 | --                 |
| Hemolytic disease and other neonatal jaundice                    | 0<br>(0 - 0)       | 0<br>(0 - 0)     | --                | --                 | --                 | --                 |
| Other neonatal disorders                                         | 3<br>(1 - 6)       | 3<br>(1 - 6)     | --                | --                 | --                 | --                 |
| Nutritional deficiencies                                         | 4<br>(2 - 7)       | 0<br>(0 - 1)     | 0<br>(0 - 0)      | 1<br>(1 - 2)       | 1<br>(1 - 2)       | 1<br>(1 - 2)       |
| Protein-energy malnutrition                                      | 2<br>(1 - 4)       | 0<br>(0 - 1)     | 0<br>(0 - 0)      | 1<br>(0 - 1)       | 1<br>(0 - 1)       | 1<br>(0 - 1)       |
| Iodine deficiency                                                | 0<br>(0 - 0)       | 0<br>(0 - 0)     | 0<br>(0 - 0)      | 0<br>(0 - 0)       | 0<br>(0 - 0)       | 0<br>(0 - 0)       |
| Iron-deficiency anemia                                           | 2<br>(1 - 3)       | 0<br>(0 - 0)     | 0<br>(0 - 0)      | 1<br>(0 - 1)       | 0<br>(0 - 1)       | 1<br>(0 - 1)       |
| Other nutritional deficiencies                                   | 0<br>(0 - 1)       | 0<br>(0 - 0)     | 0<br>(0 - 0)      | 0<br>(0 - 0)       | 0<br>(0 - 0)       | 0<br>(0 - 0)       |
| Other communicable, maternal, neonatal, and nutritional diseases | 7<br>(4 - 11)      | 1<br>(0 - 1)     | 0<br>(0 - 1)      | 3<br>(1 - 5)       | 2<br>(1 - 3)       | 1<br>(0 - 2)       |
| Sexually transmitted diseases excluding HIV                      | 0                  | 0                | 0                 | 0                  | 0                  | 0                  |
| Syphilis                                                         | 0<br>(0 - 1)       | 0<br>(0 - 1)     | 0<br>(0 - 0)      | 0<br>(0 - 0)       | 0<br>(0 - 0)       | 0<br>(0 - 0)       |
| Chlamydial infection                                             | --                 | --               | --                | --                 | --                 | --                 |
| Gonococcal infection                                             | 0<br>(0 - 0)       | --               | 0<br>(0 - 0)      | 0<br>(0 - 0)       | 0<br>(0 - 0)       | 0<br>(0 - 0)       |
| Other sexually transmitted diseases                              | 0<br>(0 - 0)       | --               | 0<br>(0 - 0)      | 0<br>(0 - 0)       | 0<br>(0 - 0)       | 0<br>(0 - 0)       |
| Hepatitis                                                        | 3<br>(2 - 5)       | 0<br>(0 - 0)     | 0<br>(0 - 0)      | 1<br>(1 - 2)       | 1<br>(1 - 2)       | 0<br>(0 - 1)       |
| Acute hepatitis A                                                | 0<br>(0 - 0)       | 0<br>(0 - 0)     | 0<br>(0 - 0)      | 0<br>(0 - 0)       | 0<br>(0 - 0)       | 0<br>(0 - 0)       |
| Acute hepatitis B                                                | 2<br>(1 - 4)       | 0<br>(0 - 0)     | 0<br>(0 - 0)      | 1<br>(0 - 2)       | 1<br>(1 - 2)       | 0<br>(0 - 1)       |
| Acute hepatitis C                                                | 0<br>(0 - 0)       | --               | 0<br>(0 - 0)      | 0<br>(0 - 0)       | 0<br>(0 - 0)       | 0<br>(0 - 0)       |
| Acute hepatitis E                                                | 1<br>(0 - 1)       | 0<br>(0 - 0)     | 0<br>(0 - 0)      | 0<br>(0 - 1)       | 0<br>(0 - 0)       | 0<br>(0 - 0)       |
| Other infectious diseases                                        | 3<br>(1 - 7)       | 0<br>(0 - 1)     | 0<br>(0 - 0)      | 2<br>(1 - 3)       | 1<br>(0 - 2)       | 0<br>(0 - 1)       |
| Non-communicable diseases                                        | 310<br>(223 - 448) | 6<br>(3 - 10)    | 2<br>(2 - 3)      | 63<br>(36 - 103)   | 145<br>(96 - 223)  | 94<br>(82 - 114)   |
| Neoplasms                                                        | 17<br>(12 - 25)    | 0<br>(0 - 1)     | 0<br>(0 - 0)      | 5<br>(3 - 7)       | 8<br>(5 - 12)      | 4<br>(3 - 5)       |
| Esophageal cancer                                                | 0<br>(0 - 1)       | --               | --                | 0<br>(0 - 0)       | 0<br>(0 - 1)       | 0<br>(0 - 0)       |
| Stomach cancer                                                   | 2<br>(1 - 3)       | --               | --                | 0<br>(0 - 1)       | 1<br>(1 - 1)       | 1<br>(0 - 1)       |
| Liver cancer                                                     | 0<br>(0 - 0)       | --               | 0<br>(0 - 0)      | 0<br>(0 - 0)       | 0<br>(0 - 0)       | 0<br>(0 - 0)       |
| Liver cancer due to hepatitis B                                  | 0<br>(0 - 0)       | --               | 0<br>(0 - 0)      | 0<br>(0 - 0)       | 0<br>(0 - 0)       | 0<br>(0 - 0)       |
| Liver cancer due to hepatitis C                                  | 0<br>(0 - 0)       | --               | 0<br>(0 - 0)      | 0<br>(0 - 0)       | 0<br>(0 - 0)       | 0<br>(0 - 0)       |
| Liver cancer due to alcohol use                                  | 0<br>(0 - 0)       | --               | --                | 0<br>(0 - 0)       | 0<br>(0 - 0)       | 0<br>(0 - 0)       |
| Liver cancer due to other causes                                 | 0<br>(0 - 0)       | --               | 0<br>(0 - 0)      | 0<br>(0 - 0)       | 0<br>(0 - 0)       | 0<br>(0 - 0)       |
| Larynx cancer                                                    | 0<br>(0 - 0)       | --               | --                | 0<br>(0 - 0)       | 0<br>(0 - 0)       | 0<br>(0 - 0)       |

Web Table 31- Federated States of Micronesia deaths with 95% UI by age, sex, and cause in 2013

| Cause                                         | Males, All Ages    | Males, 0-4 Years | Males, 5-14 Years | Males, 15-49 Years | Males, 50-69 Years | Males, 70-80 Years |
|-----------------------------------------------|--------------------|------------------|-------------------|--------------------|--------------------|--------------------|
| Tracheal, bronchus and lung cancer            | 5<br>(3 - 8)       | --               | --                | 1<br>(1 - 2)       | 3<br>(2 - 4)       | 1<br>(1 - 1)       |
| Breast cancer                                 | 0<br>(0 - 0)       | --               | --                | 0<br>(0 - 0)       | 0<br>(0 - 0)       | 0<br>(0 - 0)       |
| Cervical cancer                               | --                 | --               | --                | --                 | --                 | --                 |
| Uterine cancer                                | --                 | --               | --                | --                 | --                 | --                 |
| Prostate cancer                               | 1<br>(0 - 2)       | --               | --                | 0<br>(0 - 0)       | 0<br>(0 - 1)       | 1<br>(0 - 1)       |
| Colon and rectum cancer                       | 2<br>(1 - 3)       | --               | --                | 0<br>(0 - 1)       | 1<br>(1 - 1)       | 1<br>(0 - 1)       |
| Lip and oral cavity cancer                    | 1<br>(0 - 1)       | --               | --                | 0<br>(0 - 0)       | 0<br>(0 - 0)       | 0<br>(0 - 0)       |
| Nasopharynx cancer                            | 0<br>(0 - 1)       | --               | 0<br>(0 - 0)      | 0<br>(0 - 0)       | 0<br>(0 - 0)       | 0<br>(0 - 0)       |
| Other pharynx cancer                          | 0<br>(0 - 0)       | --               | --                | 0<br>(0 - 0)       | 0<br>(0 - 0)       | 0<br>(0 - 0)       |
| Gallbladder and biliary tract cancer          | 0<br>(0 - 0)       | --               | --                | 0<br>(0 - 0)       | 0<br>(0 - 0)       | 0<br>(0 - 0)       |
| Pancreatic cancer                             | 0<br>(0 - 0)       | --               | --                | 0<br>(0 - 0)       | 0<br>(0 - 0)       | 0<br>(0 - 0)       |
| Malignant skin melanoma                       | 0<br>(0 - 0)       | --               | --                | 0<br>(0 - 0)       | 0<br>(0 - 0)       | 0<br>(0 - 0)       |
| Non-melanoma skin cancer                      | 0<br>(0 - 0)       | --               | --                | 0<br>(0 - 0)       | 0<br>(0 - 0)       | 0<br>(0 - 0)       |
| Ovarian cancer                                | --                 | --               | --                | --                 | --                 | --                 |
| Testicular cancer                             | 0<br>(0 - 0)       | --               | --                | 0<br>(0 - 0)       | 0<br>(0 - 0)       | 0<br>(0 - 0)       |
| Kidney cancer                                 | 0<br>(0 - 0)       | 0<br>(0 - 0)     | 0<br>(0 - 0)      | 0<br>(0 - 0)       | 0<br>(0 - 0)       | 0<br>(0 - 0)       |
| Bladder cancer                                | 0<br>(0 - 0)       | --               | --                | 0<br>(0 - 0)       | 0<br>(0 - 0)       | 0<br>(0 - 0)       |
| Brain and nervous system cancer               | 0<br>(0 - 0)       | 0<br>(0 - 0)     | 0<br>(0 - 0)      | 0<br>(0 - 0)       | 0<br>(0 - 0)       | 0<br>(0 - 0)       |
| Thyroid cancer                                | 0<br>(0 - 0)       | --               | 0<br>(0 - 0)      | 0<br>(0 - 0)       | 0<br>(0 - 0)       | 0<br>(0 - 0)       |
| Mesothelioma                                  | 0<br>(0 - 0)       | --               | --                | 0<br>(0 - 0)       | 0<br>(0 - 0)       | 0<br>(0 - 0)       |
| Hodgkin lymphoma                              | 0<br>(0 - 0)       | 0<br>(0 - 0)     | 0<br>(0 - 0)      | 0<br>(0 - 0)       | 0<br>(0 - 0)       | 0<br>(0 - 0)       |
| Non-Hodgkin lymphoma                          | 0<br>(0 - 0)       | 0<br>(0 - 0)     | 0<br>(0 - 0)      | 0<br>(0 - 0)       | 0<br>(0 - 0)       | 0<br>(0 - 0)       |
| Multiple myeloma                              | 0<br>(0 - 0)       | --               | --                | 0<br>(0 - 0)       | 0<br>(0 - 0)       | 0<br>(0 - 0)       |
| Leukemia                                      | 1<br>(1 - 2)       | 0<br>(0 - 0)     | 0<br>(0 - 0)      | 1<br>(0 - 1)       | 0<br>(0 - 0)       | 0<br>(0 - 0)       |
| Other neoplasms                               | 2<br>(1 - 3)       | 0<br>(0 - 0)     | 0<br>(0 - 0)      | 1<br>(0 - 1)       | 1<br>(0 - 1)       | 0<br>(0 - 0)       |
| Cardiovascular diseases                       | 150<br>(103 - 221) | 0<br>(0 - 1)     | 0<br>(0 - 1)      | 33<br>(19 - 54)    | 75<br>(49 - 118)   | 41<br>(35 - 50)    |
| Rheumatic heart disease                       | 3<br>(2 - 5)       | 0<br>(0 - 0)     | 0<br>(0 - 0)      | 1<br>(1 - 2)       | 1<br>(1 - 2)       | 1<br>(0 - 1)       |
| Ischemic heart disease                        | 84<br>(56 - 128)   | 0<br>(0 - 0)     | 0<br>(0 - 0)      | 19<br>(10 - 33)    | 46<br>(30 - 71)    | 19<br>(15 - 24)    |
| Cerebrovascular disease                       | 47<br>(32 - 69)    | 0<br>(0 - 0)     | 0<br>(0 - 0)      | 7<br>(4 - 12)      | 22<br>(13 - 35)    | 18<br>(13 - 23)    |
| Ischemic stroke                               | 17<br>(11 - 27)    | 0<br>(0 - 0)     | 0<br>(0 - 0)      | 1<br>(1 - 3)       | 6<br>(4 - 11)      | 10<br>(6 - 14)     |
| Hemorrhagic stroke                            | 30<br>(18 - 46)    | 0<br>(0 - 0)     | 0<br>(0 - 0)      | 6<br>(3 - 10)      | 15<br>(9 - 25)     | 8<br>(5 - 12)      |
| Hypertensive heart disease                    | 2<br>(1 - 4)       | 0<br>(0 - 0)     | 0<br>(0 - 0)      | 0<br>(0 - 1)       | 1<br>(1 - 2)       | 1<br>(0 - 1)       |
| Cardiomyopathy and myocarditis                | 4<br>(2 - 7)       | 0<br>(0 - 0)     | 0<br>(0 - 0)      | 2<br>(1 - 4)       | 2<br>(1 - 3)       | 0<br>(0 - 1)       |
| Atrial fibrillation and flutter               | 0<br>(0 - 1)       | --               | --                | 0<br>(0 - 0)       | 0<br>(0 - 0)       | 0<br>(0 - 0)       |
| Aortic aneurysm                               | 1<br>(1 - 2)       | --               | --                | 0<br>(0 - 0)       | 1<br>(0 - 1)       | 0<br>(0 - 1)       |
| Peripheral vascular disease                   | 1<br>(0 - 1)       | --               | --                | 0<br>(0 - 0)       | 0<br>(0 - 0)       | 0<br>(0 - 0)       |
| Endocarditis                                  | 2<br>(1 - 3)       | 0<br>(0 - 0)     | 0<br>(0 - 0)      | 1<br>(0 - 1)       | 0<br>(0 - 1)       | 0<br>(0 - 0)       |
| Other cardiovascular and circulatory diseases | 6<br>(4 - 9)       | 0<br>(0 - 0)     | 0<br>(0 - 0)      | 2<br>(1 - 3)       | 2<br>(1 - 4)       | 1<br>(1 - 2)       |
| Chronic respiratory diseases                  | 42<br>(30 - 58)    | 0<br>(0 - 0)     | 0<br>(0 - 0)      | 4<br>(2 - 6)       | 17<br>(11 - 26)    | 21<br>(16 - 26)    |
| Chronic obstructive pulmonary disease         | 15<br>(11 - 21)    | 0<br>(0 - 0)     | 0<br>(0 - 0)      | 1<br>(1 - 2)       | 5<br>(3 - 8)       | 9<br>(7 - 12)      |

Web Table 31- Federated States of Micronesia deaths with 95% UI by age, sex, and cause in 2013

| Cause                                               | Males, All Ages | Males, 0-4 Years | Males, 5-14 Years | Males, 15-49 Years | Males, 50-69 Years | Males, 70-80 Years |
|-----------------------------------------------------|-----------------|------------------|-------------------|--------------------|--------------------|--------------------|
| Pneumoconiosis                                      | 5<br>(3 - 7)    | 0<br>(0 - 0)     | 0<br>(0 - 0)      | 0<br>(0 - 1)       | 2<br>(1 - 4)       | 2<br>(1 - 3)       |
| Silicosis                                           | 1<br>(1 - 3)    | 0<br>(0 - 0)     | 0<br>(0 - 0)      | 0<br>(0 - 0)       | 1<br>(0 - 1)       | 1<br>(0 - 1)       |
| Asbestosis                                          | 1<br>(0 - 1)    | 0<br>(0 - 0)     | 0<br>(0 - 0)      | 0<br>(0 - 0)       | 0<br>(0 - 1)       | 0<br>(0 - 0)       |
| Coal workers pneumoconiosis                         | 1<br>(0 - 1)    | 0<br>(0 - 0)     | 0<br>(0 - 0)      | 0<br>(0 - 0)       | 0<br>(0 - 1)       | 0<br>(0 - 0)       |
| Other pneumoconiosis                                | 2<br>(1 - 3)    | 0<br>(0 - 0)     | 0<br>(0 - 0)      | 0<br>(0 - 0)       | 1<br>(1 - 2)       | 1<br>(0 - 1)       |
| Asthma                                              | 17<br>(11 - 24) | 0<br>(0 - 0)     | 0<br>(0 - 0)      | 2<br>(1 - 3)       | 8<br>(5 - 12)      | 7<br>(4 - 10)      |
| Interstitial lung disease and pulmonary sarcoidosis | 2<br>(1 - 4)    | 0<br>(0 - 0)     | 0<br>(0 - 0)      | 0<br>(0 - 0)       | 1<br>(1 - 2)       | 1<br>(0 - 2)       |
| Other chronic respiratory diseases                  | 3<br>(2 - 4)    | 0<br>(0 - 0)     | 0<br>(0 - 0)      | 0<br>(0 - 0)       | 1<br>(1 - 2)       | 2<br>(1 - 3)       |
| Cirrhosis                                           | 8<br>(5 - 12)   | 0<br>(0 - 0)     | 0<br>(0 - 0)      | 3<br>(2 - 6)       | 3<br>(2 - 5)       | 1<br>(1 - 1)       |
| Cirrhosis due to hepatitis B                        | 4<br>(2 - 6)    | 0<br>(0 - 0)     | 0<br>(0 - 0)      | 2<br>(1 - 3)       | 2<br>(1 - 3)       | 0<br>(0 - 1)       |
| Cirrhosis due to hepatitis C                        | 1<br>(1 - 2)    | 0<br>(0 - 0)     | 0<br>(0 - 0)      | 1<br>(0 - 1)       | 1<br>(0 - 1)       | 0<br>(0 - 0)       |
| Cirrhosis due to alcohol use                        | 2<br>(1 - 3)    | --               | --                | 1<br>(0 - 1)       | 1<br>(0 - 1)       | 0<br>(0 - 0)       |
| Cirrhosis due to other causes                       | 1<br>(0 - 1)    | 0<br>(0 - 0)     | 0<br>(0 - 0)      | 0<br>(0 - 1)       | 0<br>(0 - 0)       | 0<br>(0 - 0)       |
| Digestive diseases                                  | 20<br>(14 - 30) | 0<br>(0 - 0)     | 0<br>(0 - 0)      | 6<br>(3 - 10)      | 8<br>(5 - 13)      | 6<br>(4 - 8)       |
| Peptic ulcer disease                                | 5<br>(3 - 9)    | 0<br>(0 - 0)     | 0<br>(0 - 0)      | 1<br>(1 - 2)       | 2<br>(1 - 4)       | 2<br>(1 - 2)       |
| Gastritis and duodenitis                            | 0<br>(0 - 1)    | 0<br>(0 - 0)     | 0<br>(0 - 0)      | 0<br>(0 - 0)       | 0<br>(0 - 0)       | 0<br>(0 - 0)       |
| Appendicitis                                        | 1<br>(1 - 2)    | 0<br>(0 - 0)     | 0<br>(0 - 0)      | 0<br>(0 - 1)       | 0<br>(0 - 1)       | 0<br>(0 - 0)       |
| Paralytic ileus and intestinal obstruction          | 4<br>(2 - 7)    | 0<br>(0 - 0)     | 0<br>(0 - 0)      | 1<br>(1 - 3)       | 1<br>(1 - 3)       | 1<br>(1 - 2)       |
| Inguinal, femoral, and abdominal hernia             | 1<br>(0 - 1)    | 0<br>(0 - 0)     | 0<br>(0 - 0)      | 0<br>(0 - 0)       | 0<br>(0 - 0)       | 0<br>(0 - 0)       |
| Inflammatory bowel disease                          | 0<br>(0 - 1)    | 0<br>(0 - 0)     | 0<br>(0 - 0)      | 0<br>(0 - 0)       | 0<br>(0 - 0)       | 0<br>(0 - 0)       |
| Vascular intestinal disorders                       | 0<br>(0 - 0)    | 0<br>(0 - 0)     | 0<br>(0 - 0)      | 0<br>(0 - 0)       | 0<br>(0 - 0)       | 0<br>(0 - 0)       |
| Gallbladder and biliary diseases                    | 3<br>(2 - 5)    | 0<br>(0 - 0)     | 0<br>(0 - 0)      | 1<br>(0 - 1)       | 1<br>(1 - 2)       | 1<br>(1 - 2)       |
| Pancreatitis                                        | 1<br>(0 - 1)    | 0<br>(0 - 0)     | 0<br>(0 - 0)      | 0<br>(0 - 1)       | 0<br>(0 - 0)       | 0<br>(0 - 0)       |
| Other digestive diseases                            | 5<br>(3 - 8)    | 0<br>(0 - 0)     | 0<br>(0 - 0)      | 1<br>(1 - 2)       | 3<br>(1 - 4)       | 1<br>(1 - 2)       |
| Neurological disorders                              | 7<br>(5 - 9)    | 0<br>(0 - 0)     | 0<br>(0 - 0)      | 1<br>(0 - 2)       | 1<br>(1 - 1)       | 5<br>(4 - 6)       |
| Alzheimer disease and other dementias               | 5<br>(4 - 7)    | --               | --                | 0<br>(0 - 0)       | 1<br>(0 - 1)       | 5<br>(4 - 6)       |
| Parkinson disease                                   | 0<br>(0 - 0)    | --               | --                | 0<br>(0 - 0)       | 0<br>(0 - 0)       | 0<br>(0 - 0)       |
| Epilepsy                                            | 1<br>(0 - 2)    | 0<br>(0 - 0)     | 0<br>(0 - 0)      | 1<br>(0 - 1)       | 0<br>(0 - 0)       | 0<br>(0 - 0)       |
| Multiple sclerosis                                  | 0<br>(0 - 0)    | --               | --                | 0<br>(0 - 0)       | 0<br>(0 - 0)       | 0<br>(0 - 0)       |
| Other neurological disorders                        | 1<br>(0 - 1)    | 0<br>(0 - 0)     | 0<br>(0 - 0)      | 0<br>(0 - 1)       | 0<br>(0 - 0)       | 0<br>(0 - 0)       |
| Mental and substance use disorders                  | 1<br>(1 - 2)    | 0<br>(0 - 0)     | 0<br>(0 - 0)      | 1<br>(0 - 1)       | 0<br>(0 - 0)       | 0<br>(0 - 0)       |
| Schizophrenia                                       | 0<br>(0 - 0)    | --               | --                | 0<br>(0 - 0)       | 0<br>(0 - 0)       | 0<br>(0 - 0)       |
| Alcohol use disorders                               | 1<br>(0 - 1)    | --               | --                | 1<br>(0 - 1)       | 0<br>(0 - 0)       | 0<br>(0 - 0)       |
| Drug use disorders                                  | 0<br>(0 - 0)    | 0<br>(0 - 0)     | --                | 0<br>(0 - 0)       | 0<br>(0 - 0)       | 0<br>(0 - 0)       |
| Opioid use disorders                                | 0<br>(0 - 0)    | 0<br>(0 - 0)     | --                | 0<br>(0 - 0)       | 0<br>(0 - 0)       | 0<br>(0 - 0)       |
| Cocaine use disorders                               | 0<br>(0 - 0)    | 0<br>(0 - 0)     | --                | 0<br>(0 - 0)       | 0<br>(0 - 0)       | 0<br>(0 - 0)       |
| Amphetamine use disorders                           | 0<br>(0 - 0)    | 0<br>(0 - 0)     | --                | 0<br>(0 - 0)       | 0<br>(0 - 0)       | 0<br>(0 - 0)       |
| Other drug use disorders                            | 0<br>(0 - 0)    | 0<br>(0 - 0)     | --                | 0<br>(0 - 0)       | 0<br>(0 - 0)       | 0<br>(0 - 0)       |
| Eating disorders                                    | 0<br>(0 - 0)    | --               | 0<br>(0 - 0)      | 0<br>(0 - 0)       | --                 | --                 |
| Anorexia nervosa                                    | 0<br>(0 - 0)    | --               | 0<br>(0 - 0)      | 0<br>(0 - 0)       | --                 | --                 |

Web Table 31- Federated States of Micronesia deaths with 95% UI by age, sex, and cause in 2013

| Cause                                               | Males, All Ages | Males, 0-4 Years | Males, 5-14 Years | Males, 15-49 Years | Males, 50-69 Years | Males, 70-80 Years |
|-----------------------------------------------------|-----------------|------------------|-------------------|--------------------|--------------------|--------------------|
| Diabetes, urogenital, blood, and endocrine diseases | 58<br>(41 - 86) | 0<br>(0 - 1)     | 0<br>(0 - 1)      | 9<br>(5 - 15)      | 32<br>(20 - 49)    | 16<br>(13 - 21)    |
| Diabetes mellitus                                   | 47<br>(33 - 70) | 0<br>(0 - 0)     | 0<br>(0 - 0)      | 6<br>(3 - 10)      | 27<br>(17 - 43)    | 14<br>(11 - 18)    |
| Acute glomerulonephritis                            | 0<br>(0 - 0)    | 0<br>(0 - 0)     | 0<br>(0 - 0)      | 0<br>(0 - 0)       | 0<br>(0 - 0)       | 0<br>(0 - 0)       |
| Chronic kidney disease                              | 5<br>(3 - 8)    | 0<br>(0 - 0)     | 0<br>(0 - 0)      | 2<br>(1 - 3)       | 2<br>(1 - 4)       | 1<br>(1 - 2)       |
| Chronic kidney disease due to diabetes mellitus     | 1<br>(0 - 1)    | 0<br>(0 - 0)     | 0<br>(0 - 0)      | 0<br>(0 - 0)       | 0<br>(0 - 1)       | 0<br>(0 - 0)       |
| Chronic kidney disease due to hypertension          | 2<br>(1 - 3)    | 0<br>(0 - 0)     | 0<br>(0 - 0)      | 1<br>(0 - 1)       | 1<br>(1 - 2)       | 1<br>(0 - 1)       |
| Chronic kidney disease due to glomerulonephritis    | 0<br>(0 - 1)    | 0<br>(0 - 0)     | 0<br>(0 - 0)      | 0<br>(0 - 0)       | 0<br>(0 - 0)       | 0<br>(0 - 0)       |
| Chronic kidney disease due to other causes          | 2<br>(1 - 4)    | 0<br>(0 - 0)     | 0<br>(0 - 0)      | 1<br>(0 - 2)       | 1<br>(0 - 2)       | 1<br>(0 - 1)       |
| Urinary diseases and male infertility               | 1<br>(1 - 2)    | 0<br>(0 - 0)     | 0<br>(0 - 0)      | 0<br>(0 - 1)       | 0<br>(0 - 1)       | 0<br>(0 - 1)       |
| Interstitial nephritis and urinary tract infections | 0<br>(0 - 1)    | 0<br>(0 - 0)     | 0<br>(0 - 0)      | 0<br>(0 - 0)       | 0<br>(0 - 0)       | 0<br>(0 - 0)       |
| Urolithiasis                                        | 0<br>(0 - 0)    | --               | 0<br>(0 - 0)      | 0<br>(0 - 0)       | 0<br>(0 - 0)       | 0<br>(0 - 0)       |
| Other urinary diseases                              | 1<br>(1 - 1)    | 0<br>(0 - 0)     | 0<br>(0 - 0)      | 0<br>(0 - 0)       | 0<br>(0 - 1)       | 0<br>(0 - 0)       |
| Gynecological diseases                              | --              | --               | --                | --                 | --                 | --                 |
| Uterine fibroids                                    | --              | --               | --                | --                 | --                 | --                 |
| Polycystic ovarian syndrome                         | --              | --               | --                | --                 | --                 | --                 |
| Endometriosis                                       | --              | --               | --                | --                 | --                 | --                 |
| Genital prolapse                                    | --              | --               | --                | --                 | --                 | --                 |
| Other gynecological diseases                        | --              | --               | --                | --                 | --                 | --                 |
| Hemoglobinopathies and hemolytic anemias            | 1<br>(1 - 2)    | 0<br>(0 - 0)     | 0<br>(0 - 0)      | 0<br>(0 - 1)       | 0<br>(0 - 0)       | 0<br>(0 - 0)       |
| Thalassemias                                        | 0<br>(0 - 1)    | 0<br>(0 - 0)     | 0<br>(0 - 0)      | 0<br>(0 - 0)       | 0<br>(0 - 0)       | 0<br>(0 - 0)       |
| Sickle cell disorders                               | 0<br>(0 - 0)    | 0<br>(0 - 0)     | 0<br>(0 - 0)      | 0<br>(0 - 0)       | 0<br>(0 - 0)       | 0<br>(0 - 0)       |
| G6PD deficiency                                     | 0<br>(0 - 0)    | 0<br>(0 - 0)     | 0<br>(0 - 0)      | 0<br>(0 - 0)       | 0<br>(0 - 0)       | 0<br>(0 - 0)       |
| Other hemoglobinopathies and hemolytic anemias      | 0<br>(0 - 1)    | 0<br>(0 - 0)     | 0<br>(0 - 0)      | 0<br>(0 - 0)       | 0<br>(0 - 0)       | 0<br>(0 - 0)       |
| Endocrine, metabolic, blood, and immune disorders   | 3<br>(2 - 6)    | 0<br>(0 - 1)     | 0<br>(0 - 0)      | 1<br>(0 - 2)       | 1<br>(1 - 2)       | 1<br>(0 - 1)       |
| Musculoskeletal disorders                           | 0<br>(0 - 1)    | --               | 0<br>(0 - 0)      | 0<br>(0 - 0)       | 0<br>(0 - 0)       | 0<br>(0 - 0)       |
| Rheumatoid arthritis                                | 0<br>(0 - 0)    | --               | 0<br>(0 - 0)      | 0<br>(0 - 0)       | 0<br>(0 - 0)       | 0<br>(0 - 0)       |
| Other musculoskeletal disorders                     | 0<br>(0 - 1)    | --               | 0<br>(0 - 0)      | 0<br>(0 - 0)       | 0<br>(0 - 0)       | 0<br>(0 - 0)       |
| Other non-communicable diseases                     | 8<br>(5 - 12)   | 4<br>(2 - 8)     | 1<br>(0 - 1)      | 1<br>(1 - 2)       | 1<br>(0 - 1)       | 1<br>(0 - 1)       |
| Congenital anomalies                                | 7<br>(4 - 11)   | 4<br>(2 - 8)     | 1<br>(0 - 1)      | 1<br>(1 - 2)       | 0<br>(0 - 1)       | 0<br>(0 - 0)       |
| Neural tube defects                                 | 0<br>(0 - 0)    | 0<br>(0 - 0)     | 0<br>(0 - 0)      | 0<br>(0 - 0)       | 0<br>(0 - 0)       | 0<br>(0 - 0)       |
| Congenital heart anomalies                          | 2<br>(1 - 3)    | 1<br>(0 - 2)     | 0<br>(0 - 0)      | 0<br>(0 - 0)       | 0<br>(0 - 0)       | 0<br>(0 - 0)       |
| Cleft lip and cleft palate                          | 0<br>(0 - 0)    | 0<br>(0 - 0)     | --                | --                 | --                 | --                 |
| Down syndrome                                       | 0<br>(0 - 1)    | 0<br>(0 - 0)     | 0<br>(0 - 0)      | 0<br>(0 - 0)       | 0<br>(0 - 0)       | 0<br>(0 - 0)       |
| Chromosomal unbalanced rearrangements               | 0<br>(0 - 1)    | 0<br>(0 - 1)     | 0<br>(0 - 0)      | 0<br>(0 - 0)       | 0<br>(0 - 0)       | 0<br>(0 - 0)       |
| Other congenital anomalies                          | 5<br>(3 - 8)    | 3<br>(1 - 6)     | 0<br>(0 - 1)      | 1<br>(0 - 2)       | 0<br>(0 - 0)       | 0<br>(0 - 0)       |
| Skin and subcutaneous diseases                      | 1<br>(1 - 1)    | 0<br>(0 - 0)     | 0<br>(0 - 0)      | 0<br>(0 - 0)       | 0<br>(0 - 0)       | 0<br>(0 - 1)       |
| Cellulitis                                          | 0<br>(0 - 0)    | 0<br>(0 - 0)     | 0<br>(0 - 0)      | 0<br>(0 - 0)       | 0<br>(0 - 0)       | 0<br>(0 - 0)       |
| Pyoderma                                            | 1<br>(0 - 1)    | 0<br>(0 - 0)     | 0<br>(0 - 0)      | 0<br>(0 - 0)       | 0<br>(0 - 0)       | 0<br>(0 - 0)       |
| Decubitus ulcer                                     | 0<br>(0 - 0)    | 0<br>(0 - 0)     | 0<br>(0 - 0)      | 0<br>(0 - 0)       | 0<br>(0 - 0)       | 0<br>(0 - 0)       |
| Other skin and subcutaneous diseases                | 0<br>(0 - 0)    | 0<br>(0 - 0)     | 0<br>(0 - 0)      | 0<br>(0 - 0)       | 0<br>(0 - 0)       | 0<br>(0 - 0)       |

Web Table 31- Federated States of Micronesia deaths with 95% UI by age, sex, and cause in 2013

| Cause                                           | Males, All Ages | Males, 0-4 Years | Males, 5-14 Years | Males, 15-49 Years | Males, 50-69 Years | Males, 70-80 Years |
|-------------------------------------------------|-----------------|------------------|-------------------|--------------------|--------------------|--------------------|
| Sudden infant death syndrome                    | 0<br>(0 - 0)    | 0<br>(0 - 0)     | --                | --                 | --                 | --                 |
| Injuries                                        | 36<br>(24 - 56) | 1<br>(0 - 2)     | 2<br>(1 - 2)      | 24<br>(15 - 40)    | 6<br>(4 - 9)       | 3<br>(2 - 4)       |
| Transport injuries                              | 13<br>(9 - 21)  | 0<br>(0 - 0)     | 1<br>(0 - 1)      | 9<br>(6 - 14)      | 2<br>(1 - 4)       | 1<br>(1 - 2)       |
| Road injuries                                   | 13<br>(9 - 20)  | 0<br>(0 - 0)     | 1<br>(0 - 1)      | 9<br>(5 - 14)      | 2<br>(1 - 4)       | 1<br>(1 - 1)       |
| Pedestrian road injuries                        | 1<br>(1 - 2)    | 0<br>(0 - 0)     | 0<br>(0 - 0)      | 1<br>(0 - 1)       | 0<br>(0 - 0)       | 0<br>(0 - 0)       |
| Cyclist road injuries                           | 0<br>(0 - 1)    | 0<br>(0 - 0)     | 0<br>(0 - 0)      | 0<br>(0 - 0)       | 0<br>(0 - 0)       | 0<br>(0 - 0)       |
| Motorcyclist road injuries                      | 2<br>(1 - 3)    | 0<br>(0 - 0)     | 0<br>(0 - 0)      | 2<br>(1 - 3)       | 0<br>(0 - 0)       | 0<br>(0 - 0)       |
| Motor vehicle road injuries                     | 9<br>(6 - 14)   | 0<br>(0 - 0)     | 1<br>(0 - 1)      | 6<br>(4 - 10)      | 2<br>(1 - 3)       | 1<br>(1 - 1)       |
| Other road injuries                             | 0<br>(0 - 0)    | 0<br>(0 - 0)     | 0<br>(0 - 0)      | 0<br>(0 - 0)       | 0<br>(0 - 0)       | 0<br>(0 - 0)       |
| Other transport injuries                        | 1<br>(0 - 1)    | 0<br>(0 - 0)     | 0<br>(0 - 0)      | 0<br>(0 - 1)       | 0<br>(0 - 0)       | 0<br>(0 - 0)       |
| Unintentional injuries                          | 10<br>(7 - 15)  | 1<br>(0 - 1)     | 1<br>(0 - 1)      | 6<br>(3 - 9)       | 2<br>(1 - 3)       | 1<br>(1 - 2)       |
| Falls                                           | 1<br>(0 - 1)    | 0<br>(0 - 0)     | 0<br>(0 - 0)      | 0<br>(0 - 1)       | 0<br>(0 - 0)       | 0<br>(0 - 0)       |
| Drowning                                        | 3<br>(1 - 5)    | 0<br>(0 - 1)     | 0<br>(0 - 1)      | 2<br>(1 - 3)       | 0<br>(0 - 1)       | 0<br>(0 - 0)       |
| Fire, heat, and hot substances                  | 1<br>(0 - 1)    | 0<br>(0 - 0)     | 0<br>(0 - 0)      | 0<br>(0 - 1)       | 0<br>(0 - 0)       | 0<br>(0 - 0)       |
| Poisonings                                      | 0<br>(0 - 1)    | 0<br>(0 - 0)     | 0<br>(0 - 0)      | 0<br>(0 - 0)       | 0<br>(0 - 0)       | 0<br>(0 - 0)       |
| Exposure to mechanical forces                   | 1<br>(0 - 1)    | 0<br>(0 - 0)     | 0<br>(0 - 0)      | 0<br>(0 - 1)       | 0<br>(0 - 0)       | 0<br>(0 - 0)       |
| Unintentional firearm injuries                  | 0<br>(0 - 0)    | 0<br>(0 - 0)     | 0<br>(0 - 0)      | 0<br>(0 - 0)       | 0<br>(0 - 0)       | 0<br>(0 - 0)       |
| Unintentional suffocation                       | 0<br>(0 - 0)    | 0<br>(0 - 0)     | 0<br>(0 - 0)      | 0<br>(0 - 0)       | 0<br>(0 - 0)       | 0<br>(0 - 0)       |
| Other exposure to mechanical forces             | 1<br>(0 - 1)    | 0<br>(0 - 0)     | 0<br>(0 - 0)      | 0<br>(0 - 1)       | 0<br>(0 - 0)       | 0<br>(0 - 0)       |
| Adverse effects of medical treatment            | 2<br>(1 - 4)    | 0<br>(0 - 1)     | 0<br>(0 - 0)      | 1<br>(0 - 2)       | 1<br>(0 - 1)       | 1<br>(0 - 1)       |
| Animal contact                                  | 0<br>(0 - 1)    | 0<br>(0 - 0)     | 0<br>(0 - 0)      | 0<br>(0 - 0)       | 0<br>(0 - 0)       | 0<br>(0 - 0)       |
| Venomous animal contact                         | 0<br>(0 - 0)    | 0<br>(0 - 0)     | 0<br>(0 - 0)      | 0<br>(0 - 0)       | 0<br>(0 - 0)       | 0<br>(0 - 0)       |
| Non-venomous animal contact                     | 0<br>(0 - 0)    | 0<br>(0 - 0)     | 0<br>(0 - 0)      | 0<br>(0 - 0)       | 0<br>(0 - 0)       | 0<br>(0 - 0)       |
| Foreign body                                    | 1<br>(0 - 1)    | 0<br>(0 - 0)     | 0<br>(0 - 0)      | 0<br>(0 - 0)       | 0<br>(0 - 0)       | 0<br>(0 - 0)       |
| Pulmonary aspiration and foreign body in airway | 1<br>(0 - 1)    | 0<br>(0 - 0)     | 0<br>(0 - 0)      | 0<br>(0 - 0)       | 0<br>(0 - 0)       | 0<br>(0 - 0)       |
| Foreign body in other body part                 | 0<br>(0 - 0)    | 0<br>(0 - 0)     | 0<br>(0 - 0)      | 0<br>(0 - 0)       | 0<br>(0 - 0)       | 0<br>(0 - 0)       |
| Other unintentional injuries                    | 2<br>(1 - 3)    | 0<br>(0 - 0)     | 0<br>(0 - 0)      | 1<br>(1 - 2)       | 0<br>(0 - 0)       | 0<br>(0 - 0)       |
| Self-harm and interpersonal violence            | 12<br>(7 - 20)  | 0<br>(0 - 0)     | 0<br>(0 - 1)      | 10<br>(5 - 16)     | 2<br>(1 - 3)       | 1<br>(0 - 1)       |
| Self-harm                                       | 9<br>(4 - 15)   | --               | 0<br>(0 - 0)      | 7<br>(3 - 12)      | 1<br>(1 - 2)       | 1<br>(0 - 1)       |
| Interpersonal violence                          | 3<br>(2 - 7)    | 0<br>(0 - 0)     | 0<br>(0 - 0)      | 3<br>(1 - 6)       | 0<br>(0 - 1)       | 0<br>(0 - 0)       |
| Assault by firearm                              | 1<br>(1 - 3)    | 0<br>(0 - 0)     | 0<br>(0 - 0)      | 1<br>(0 - 3)       | 0<br>(0 - 0)       | 0<br>(0 - 0)       |
| Assault by sharp object                         | 1<br>(1 - 3)    | 0<br>(0 - 0)     | 0<br>(0 - 0)      | 1<br>(0 - 2)       | 0<br>(0 - 0)       | 0<br>(0 - 0)       |
| Assault by other means                          | 1<br>(0 - 1)    | 0<br>(0 - 0)     | 0<br>(0 - 0)      | 0<br>(0 - 1)       | 0<br>(0 - 0)       | 0<br>(0 - 0)       |

Web Table 31- Federated States of Micronesia deaths with 95% UI by age, sex, and cause in 2013

| Cause                                                             | Females, All Ages  | Females, 0-4 Years | Females, 5-14 Years | Females, 15-49 Years | Females, 50-69 Years | Females, 70-80 Years |
|-------------------------------------------------------------------|--------------------|--------------------|---------------------|----------------------|----------------------|----------------------|
| All causes                                                        | 331<br>(230 - 484) | 16<br>(10 - 25)    | 4<br>(3 - 6)        | 55<br>(31 - 96)      | 116<br>(70 - 185)    | 139<br>(109 - 184)   |
| Communicable, maternal, neonatal, and nutritional diseases        | 58<br>(41 - 82)    | 11<br>(7 - 18)     | 2<br>(1 - 2)        | 11<br>(6 - 19)       | 12<br>(7 - 19)       | 22<br>(15 - 31)      |
| HIV/AIDS and tuberculosis                                         | 6<br>(3 - 10)      | 0<br>(0 - 0)       | 0<br>(0 - 0)        | 2<br>(1 - 3)         | 2<br>(1 - 4)         | 2<br>(1 - 3)         |
| Tuberculosis                                                      | 5<br>(3 - 9)       | 0<br>(0 - 0)       | 0<br>(0 - 0)        | 2<br>(1 - 3)         | 2<br>(1 - 4)         | 2<br>(1 - 3)         |
| HIV/AIDS                                                          | 1<br>(0 - 1)       | 0<br>(0 - 0)       | 0<br>(0 - 0)        | 0<br>(0 - 1)         | 0<br>(0 - 0)         | 0<br>(0 - 0)         |
| HIV/AIDS resulting in mycobacterial infection                     | 0<br>(0 - 0)       | 0<br>(0 - 0)       | 0<br>(0 - 0)        | 0<br>(0 - 0)         | 0<br>(0 - 0)         | 0<br>(0 - 0)         |
| HIV/AIDS resulting in other diseases                              | 1<br>(0 - 1)       | 0<br>(0 - 0)       | 0<br>(0 - 0)        | 0<br>(0 - 1)         | 0<br>(0 - 0)         | 0<br>(0 - 0)         |
| Diarrhea, lower respiratory, and other common infectious diseases | 30<br>(20 - 44)    | 3<br>(2 - 6)       | 1<br>(1 - 2)        | 4<br>(2 - 7)         | 7<br>(4 - 11)        | 15<br>(10 - 23)      |
| Diarrheal diseases                                                | 8<br>(4 - 13)      | 0<br>(0 - 1)       | 0<br>(0 - 0)        | 1<br>(0 - 1)         | 2<br>(1 - 3)         | 5<br>(2 - 9)         |
| Intestinal infectious diseases                                    | 1<br>(0 - 2)       | 0<br>(0 - 1)       | 0<br>(0 - 1)        | 0<br>(0 - 1)         | 0<br>(0 - 0)         | 0<br>(0 - 0)         |
| Typhoid fever                                                     | 1<br>(0 - 2)       | 0<br>(0 - 1)       | 0<br>(0 - 0)        | 0<br>(0 - 1)         | 0<br>(0 - 0)         | 0<br>(0 - 0)         |
| Paratyphoid fever                                                 | 0<br>(0 - 0)       | 0<br>(0 - 0)       | 0<br>(0 - 0)        | 0<br>(0 - 0)         | 0<br>(0 - 0)         | 0<br>(0 - 0)         |
| Other intestinal infectious diseases                              | 0<br>(0 - 0)       | 0<br>(0 - 0)       | 0<br>(0 - 0)        | 0<br>(0 - 0)         | 0<br>(0 - 0)         | 0<br>(0 - 0)         |
| Lower respiratory infections                                      | 18<br>(11 - 27)    | 1<br>(1 - 3)       | 0<br>(0 - 0)        | 2<br>(1 - 4)         | 4<br>(2 - 8)         | 10<br>(6 - 16)       |
| Upper respiratory infections                                      | 0<br>(0 - 0)       | 0<br>(0 - 0)       | 0<br>(0 - 0)        | 0<br>(0 - 0)         | 0<br>(0 - 0)         | 0<br>(0 - 0)         |
| Otitis media                                                      | 0<br>(0 - 0)       | 0<br>(0 - 0)       | 0<br>(0 - 0)        | 0<br>(0 - 0)         | 0<br>(0 - 0)         | 0<br>(0 - 0)         |
| Meningitis                                                        | 2<br>(1 - 4)       | 0<br>(0 - 1)       | 0<br>(0 - 0)        | 1<br>(0 - 1)         | 0<br>(0 - 1)         | 0<br>(0 - 1)         |
| Pneumococcal meningitis                                           | 1<br>(0 - 1)       | 0<br>(0 - 0)       | 0<br>(0 - 0)        | 0<br>(0 - 1)         | 0<br>(0 - 0)         | 0<br>(0 - 0)         |
| H influenzae type B meningitis                                    | 0<br>(0 - 0)       | 0<br>(0 - 0)       | 0<br>(0 - 0)        | 0<br>(0 - 0)         | 0<br>(0 - 0)         | 0<br>(0 - 0)         |
| Meningococcal meningitis                                          | 0<br>(0 - 1)       | 0<br>(0 - 0)       | 0<br>(0 - 0)        | 0<br>(0 - 0)         | 0<br>(0 - 0)         | 0<br>(0 - 0)         |
| Other meningitis                                                  | 1<br>(0 - 1)       | 0<br>(0 - 0)       | 0<br>(0 - 0)        | 0<br>(0 - 0)         | 0<br>(0 - 0)         | 0<br>(0 - 0)         |
| Encephalitis                                                      | 0<br>(0 - 1)       | 0<br>(0 - 0)       | 0<br>(0 - 0)        | 0<br>(0 - 0)         | 0<br>(0 - 0)         | 0<br>(0 - 0)         |
| Diphtheria                                                        | 0<br>(0 - 0)       | 0<br>(0 - 0)       | 0<br>(0 - 0)        | 0<br>(0 - 0)         | 0<br>(0 - 0)         | --                   |
| Whooping cough                                                    | 0<br>(0 - 1)       | 0<br>(0 - 1)       | 0<br>(0 - 0)        | 0<br>(0 - 0)         | 0<br>(0 - 0)         | --                   |
| Tetanus                                                           | 0<br>(0 - 0)       | 0<br>(0 - 0)       | 0<br>(0 - 0)        | 0<br>(0 - 0)         | 0<br>(0 - 0)         | 0<br>(0 - 0)         |
| Measles                                                           | 1<br>(0 - 2)       | 0<br>(0 - 1)       | 0<br>(0 - 0)        | 0<br>(0 - 0)         | 0<br>(0 - 0)         | --                   |
| Varicella and herpes zoster                                       | 0<br>(0 - 0)       | 0<br>(0 - 0)       | 0<br>(0 - 0)        | 0<br>(0 - 0)         | 0<br>(0 - 0)         | 0<br>(0 - 0)         |
| Neglected tropical diseases and malaria                           | 2<br>(1 - 3)       | 0<br>(0 - 0)       | 0<br>(0 - 0)        | 0<br>(0 - 1)         | 0<br>(0 - 1)         | 1<br>(0 - 1)         |
| Leishmaniasis                                                     | 0<br>(0 - 0)       | 0<br>(0 - 0)       | 0<br>(0 - 0)        | 0<br>(0 - 0)         | 0<br>(0 - 0)         | 0<br>(0 - 0)         |
| Visceral leishmaniasis                                            | 0<br>(0 - 0)       | 0<br>(0 - 0)       | 0<br>(0 - 0)        | 0<br>(0 - 0)         | 0<br>(0 - 0)         | 0<br>(0 - 0)         |
| Cysticercosis                                                     | 0<br>(0 - 0)       | 0<br>(0 - 0)       | 0<br>(0 - 0)        | 0<br>(0 - 0)         | 0<br>(0 - 0)         | 0<br>(0 - 0)         |
| Cystic echinococcosis                                             | 0<br>(0 - 0)       | 0<br>(0 - 0)       | 0<br>(0 - 0)        | 0<br>(0 - 0)         | 0<br>(0 - 0)         | 0<br>(0 - 0)         |
| Dengue                                                            | 1<br>(1 - 2)       | 0<br>(0 - 0)       | 0<br>(0 - 0)        | 0<br>(0 - 1)         | 0<br>(0 - 1)         | 1<br>(0 - 1)         |
| Rabies                                                            | 0<br>(0 - 0)       | 0<br>(0 - 0)       | 0<br>(0 - 0)        | 0<br>(0 - 0)         | 0<br>(0 - 0)         | 0<br>(0 - 0)         |
| Intestinal nematode infections                                    | 0<br>(0 - 0)       | 0<br>(0 - 0)       | 0<br>(0 - 0)        | 0<br>(0 - 0)         | 0<br>(0 - 0)         | 0<br>(0 - 0)         |
| Ascariasis                                                        | 0<br>(0 - 0)       | 0<br>(0 - 0)       | 0<br>(0 - 0)        | 0<br>(0 - 0)         | 0<br>(0 - 0)         | 0<br>(0 - 0)         |
| Other neglected tropical diseases                                 | 0<br>(0 - 0)       | 0<br>(0 - 0)       | 0<br>(0 - 0)        | 0<br>(0 - 0)         | 0<br>(0 - 0)         | 0<br>(0 - 0)         |
| Maternal disorders                                                | 2<br>(1 - 4)       | --                 | 0<br>(0 - 0)        | 2<br>(1 - 4)         | --                   | --                   |
| Maternal hemorrhage                                               | 0<br>(0 - 1)       | --                 | 0<br>(0 - 0)        | 0<br>(0 - 1)         | --                   | --                   |
| Maternal sepsis and other maternal infections                     | 0<br>(0 - 0)       | --                 | 0<br>(0 - 0)        | 0<br>(0 - 0)         | --                   | --                   |

Web Table 31- Federated States of Micronesia deaths with 95% UI by age, sex, and cause in 2013

| Cause                                                            | Females, All Ages | Females, 0-4 Years | Females, 5-14 Years | Females, 15-49 Years | Females, 50-69 Years | Females, 70-80 Years |
|------------------------------------------------------------------|-------------------|--------------------|---------------------|----------------------|----------------------|----------------------|
| Maternal hypertensive disorders                                  | 0<br>(0-0)        | --                 | 0<br>(0-0)          | 0<br>(0-0)           | --                   | --                   |
| Maternal obstructed labor                                        | 0<br>(0-0)        | --                 | 0<br>(0-0)          | 0<br>(0-0)           | --                   | --                   |
| Maternal abortive outcome                                        | 0<br>(0-1)        | --                 | 0<br>(0-0)          | 0<br>(0-1)           | --                   | --                   |
| Indirect maternal deaths                                         | 0<br>(0-0)        | --                 | 0<br>(0-0)          | 0<br>(0-0)           | --                   | --                   |
| Late maternal deaths                                             | 0<br>(0-1)        | --                 | 0<br>(0-0)          | 0<br>(0-1)           | --                   | --                   |
| Maternal deaths aggravated by HIV/AIDS                           | 0<br>(0-0)        | --                 | --                  | 0<br>(0-0)           | --                   | --                   |
| Other maternal disorders                                         | 0<br>(0-1)        | --                 | 0<br>(0-0)          | 0<br>(0-1)           | --                   | --                   |
| Neonatal disorders                                               | 7<br>(4-12)       | 7<br>(4-12)        | --                  | --                   | --                   | --                   |
| Neonatal preterm birth complications                             | 3<br>(1-5)        | 3<br>(1-5)         | --                  | --                   | --                   | --                   |
| Neonatal encephalopathy due to birth asphyxia and trauma         | 1<br>(0-2)        | 1<br>(0-2)         | --                  | --                   | --                   | --                   |
| Neonatal sepsis and other neonatal infections                    | 1<br>(0-3)        | 1<br>(0-3)         | --                  | --                   | --                   | --                   |
| Hemolytic disease and other neonatal jaundice                    | 0<br>(0-0)        | 0<br>(0-0)         | --                  | --                   | --                   | --                   |
| Other neonatal disorders                                         | 2<br>(1-5)        | 2<br>(1-5)         | --                  | --                   | --                   | --                   |
| Nutritional deficiencies                                         | 6<br>(4-10)       | 0<br>(0-1)         | 0<br>(0-0)          | 1<br>(1-2)           | 1<br>(1-2)           | 3<br>(2-6)           |
| Protein-energy malnutrition                                      | 3<br>(1-5)        | 0<br>(0-1)         | 0<br>(0-0)          | 0<br>(0-1)           | 0<br>(0-1)           | 2<br>(1-3)           |
| Iodine deficiency                                                | 0<br>(0-0)        | 0<br>(0-0)         | 0<br>(0-0)          | 0<br>(0-0)           | 0<br>(0-0)           | 0<br>(0-0)           |
| Iron-deficiency anemia                                           | 3<br>(2-6)        | 0<br>(0-0)         | 0<br>(0-0)          | 1<br>(1-2)           | 1<br>(0-1)           | 1<br>(1-3)           |
| Other nutritional deficiencies                                   | 0<br>(0-0)        | 0<br>(0-0)         | 0<br>(0-0)          | 0<br>(0-0)           | 0<br>(0-0)           | 0<br>(0-0)           |
| Other communicable, maternal, neonatal, and nutritional diseases | 5<br>(3-8)        | 1<br>(0-1)         | 0<br>(0-0)          | 1<br>(1-3)           | 2<br>(1-3)           | 1<br>(0-2)           |
| Sexually transmitted diseases excluding HIV                      | 1<br>(0-1)        | 0<br>(0-1)         | 0<br>(0-0)          | 0<br>(0-0)           | 0<br>(0-0)           | 0<br>(0-0)           |
| Syphilis                                                         | 1<br>(0-1)        | 0<br>(0-1)         | 0<br>(0-0)          | 0<br>(0-0)           | 0<br>(0-0)           | 0<br>(0-0)           |
| Chlamydial infection                                             | 0<br>(0-0)        | --                 | 0<br>(0-0)          | 0<br>(0-0)           | 0<br>(0-0)           | 0<br>(0-0)           |
| Gonococcal infection                                             | 0<br>(0-0)        | --                 | 0<br>(0-0)          | 0<br>(0-0)           | 0<br>(0-0)           | 0<br>(0-0)           |
| Other sexually transmitted diseases                              | 0<br>(0-0)        | --                 | 0<br>(0-0)          | 0<br>(0-0)           | 0<br>(0-0)           | 0<br>(0-0)           |
| Hepatitis                                                        | 2<br>(1-2)        | 0<br>(0-0)         | 0<br>(0-0)          | 1<br>(0-1)           | 1<br>(0-1)           | 0<br>(0-1)           |
| Acute hepatitis A                                                | 0<br>(0-0)        | 0<br>(0-0)         | 0<br>(0-0)          | 0<br>(0-0)           | 0<br>(0-0)           | 0<br>(0-0)           |
| Acute hepatitis B                                                | 1<br>(1-2)        | 0<br>(0-0)         | 0<br>(0-0)          | 0<br>(0-0)           | 1<br>(0-1)           | 0<br>(0-0)           |
| Acute hepatitis C                                                | 0<br>(0-0)        | --                 | 0<br>(0-0)          | 0<br>(0-0)           | 0<br>(0-0)           | 0<br>(0-0)           |
| Acute hepatitis E                                                | 0<br>(0-1)        | 0<br>(0-0)         | 0<br>(0-0)          | 0<br>(0-0)           | 0<br>(0-0)           | 0<br>(0-0)           |
| Other infectious diseases                                        | 3<br>(1-5)        | 0<br>(0-1)         | 0<br>(0-0)          | 1<br>(0-2)           | 1<br>(0-2)           | 1<br>(0-2)           |
| Non-communicable diseases                                        | 257<br>(175-381)  | 4<br>(2-7)         | 2<br>(1-3)          | 37<br>(20-65)        | 101<br>(61-160)      | 113<br>(88-152)      |
| Neoplasms                                                        | 28<br>(17-45)     | 0<br>(0-0)         | 0<br>(0-0)          | 8<br>(4-14)          | 12<br>(7-20)         | 8<br>(5-11)          |
| Esophageal cancer                                                | 0<br>(0-0)        | --                 | --                  | 0<br>(0-0)           | 0<br>(0-0)           | 0<br>(0-0)           |
| Stomach cancer                                                   | 1<br>(1-2)        | --                 | --                  | 0<br>(0-0)           | 1<br>(0-1)           | 0<br>(0-1)           |
| Liver cancer                                                     | 1<br>(1-2)        | --                 | 0<br>(0-0)          | 0<br>(0-0)           | 1<br>(0-1)           | 0<br>(0-1)           |
| Liver cancer due to hepatitis B                                  | 0<br>(0-1)        | --                 | 0<br>(0-0)          | 0<br>(0-0)           | 0<br>(0-1)           | 0<br>(0-0)           |
| Liver cancer due to hepatitis C                                  | 0<br>(0-1)        | --                 | 0<br>(0-0)          | 0<br>(0-0)           | 0<br>(0-0)           | 0<br>(0-0)           |
| Liver cancer due to alcohol use                                  | 0<br>(0-0)        | --                 | --                  | 0<br>(0-0)           | 0<br>(0-0)           | 0<br>(0-0)           |
| Liver cancer due to other causes                                 | 0<br>(0-0)        | --                 | 0<br>(0-0)          | 0<br>(0-0)           | 0<br>(0-0)           | 0<br>(0-0)           |
| Larynx cancer                                                    | 0<br>(0-0)        | --                 | --                  | 0<br>(0-0)           | 0<br>(0-0)           | 0<br>(0-0)           |

Web Table 31- Federated States of Micronesia deaths with 95% UI by age, sex, and cause in 2013

| Cause                                         | Females, All Ages | Females, 0-4 Years | Females, 5-14 Years | Females, 15-49 Years | Females, 50-69 Years | Females, 70-80 Years |
|-----------------------------------------------|-------------------|--------------------|---------------------|----------------------|----------------------|----------------------|
| Tracheal, bronchus and lung cancer            | 2<br>(1 - 3)      | --                 | --                  | 0<br>(0 - 1)         | 1<br>(0 - 1)         | 1<br>(1 - 2)         |
| Breast cancer                                 | 13<br>(7 - 22)    | --                 | --                  | 4<br>(2 - 8)         | 6<br>(3 - 10)        | 2<br>(2 - 4)         |
| Cervical cancer                               | 5<br>(3 - 8)      | --                 | --                  | 1<br>(1 - 2)         | 2<br>(1 - 3)         | 2<br>(1 - 3)         |
| Uterine cancer                                | 1<br>(0 - 1)      | --                 | --                  | 0<br>(0 - 0)         | 0<br>(0 - 1)         | 0<br>(0 - 0)         |
| Prostate cancer                               | --                | --                 | --                  | --                   | --                   | --                   |
| Colon and rectum cancer                       | 1<br>(1 - 2)      | --                 | --                  | 0<br>(0 - 0)         | 0<br>(0 - 1)         | 0<br>(0 - 1)         |
| Lip and oral cavity cancer                    | 0<br>(0 - 0)      | --                 | --                  | 0<br>(0 - 0)         | 0<br>(0 - 0)         | 0<br>(0 - 0)         |
| Nasopharynx cancer                            | 0<br>(0 - 0)      | --                 | 0<br>(0 - 0)        | 0<br>(0 - 0)         | 0<br>(0 - 0)         | 0<br>(0 - 0)         |
| Other pharynx cancer                          | 0<br>(0 - 0)      | --                 | --                  | 0<br>(0 - 0)         | 0<br>(0 - 0)         | 0<br>(0 - 0)         |
| Gallbladder and biliary tract cancer          | 0<br>(0 - 0)      | --                 | --                  | 0<br>(0 - 0)         | 0<br>(0 - 0)         | 0<br>(0 - 0)         |
| Pancreatic cancer                             | 0<br>(0 - 0)      | --                 | --                  | 0<br>(0 - 0)         | 0<br>(0 - 0)         | 0<br>(0 - 0)         |
| Malignant skin melanoma                       | 0<br>(0 - 0)      | --                 | --                  | 0<br>(0 - 0)         | 0<br>(0 - 0)         | 0<br>(0 - 0)         |
| Non-melanoma skin cancer                      | 0<br>(0 - 0)      | --                 | --                  | 0<br>(0 - 0)         | 0<br>(0 - 0)         | 0<br>(0 - 0)         |
| Ovarian cancer                                | 0<br>(0 - 0)      | --                 | --                  | 0<br>(0 - 0)         | 0<br>(0 - 0)         | 0<br>(0 - 0)         |
| Testicular cancer                             | --                | --                 | --                  | --                   | --                   | --                   |
| Kidney cancer                                 | 0<br>(0 - 0)      | 0<br>(0 - 0)       | 0<br>(0 - 0)        | 0<br>(0 - 0)         | 0<br>(0 - 0)         | 0<br>(0 - 0)         |
| Bladder cancer                                | 0<br>(0 - 0)      | --                 | --                  | 0<br>(0 - 0)         | 0<br>(0 - 0)         | 0<br>(0 - 0)         |
| Brain and nervous system cancer               | 0<br>(0 - 0)      | 0<br>(0 - 0)       | 0<br>(0 - 0)        | 0<br>(0 - 0)         | 0<br>(0 - 0)         | 0<br>(0 - 0)         |
| Thyroid cancer                                | 0<br>(0 - 0)      | --                 | 0<br>(0 - 0)        | 0<br>(0 - 0)         | 0<br>(0 - 0)         | 0<br>(0 - 0)         |
| Mesothelioma                                  | 0<br>(0 - 0)      | --                 | --                  | 0<br>(0 - 0)         | 0<br>(0 - 0)         | 0<br>(0 - 0)         |
| Hodgkin lymphoma                              | 0<br>(0 - 0)      | 0<br>(0 - 0)       | 0<br>(0 - 0)        | 0<br>(0 - 0)         | 0<br>(0 - 0)         | 0<br>(0 - 0)         |
| Non-Hodgkin lymphoma                          | 0<br>(0 - 1)      | 0<br>(0 - 0)       | 0<br>(0 - 0)        | 0<br>(0 - 0)         | 0<br>(0 - 0)         | 0<br>(0 - 0)         |
| Multiple myeloma                              | 0<br>(0 - 0)      | --                 | --                  | 0<br>(0 - 0)         | 0<br>(0 - 0)         | 0<br>(0 - 0)         |
| Leukemia                                      | 1<br>(1 - 1)      | 0<br>(0 - 0)       | 0<br>(0 - 0)        | 0<br>(0 - 1)         | 0<br>(0 - 0)         | 0<br>(0 - 0)         |
| Other neoplasms                               | 1<br>(1 - 1)      | 0<br>(0 - 0)       | 0<br>(0 - 0)        | 0<br>(0 - 1)         | 0<br>(0 - 1)         | 0<br>(0 - 0)         |
| Cardiovascular diseases                       | 92<br>(62 - 140)  | 0<br>(0 - 1)       | 1<br>(0 - 1)        | 11<br>(6 - 20)       | 33<br>(19 - 54)      | 47<br>(35 - 66)      |
| Rheumatic heart disease                       | 2<br>(1 - 4)      | 0<br>(0 - 0)       | 0<br>(0 - 0)        | 1<br>(0 - 2)         | 1<br>(0 - 1)         | 0<br>(0 - 1)         |
| Ischemic heart disease                        | 42<br>(27 - 69)   | 0<br>(0 - 0)       | 0<br>(0 - 0)        | 4<br>(2 - 8)         | 15<br>(9 - 26)       | 22<br>(15 - 37)      |
| Cerebrovascular disease                       | 34<br>(22 - 51)   | 0<br>(0 - 0)       | 0<br>(0 - 0)        | 3<br>(2 - 6)         | 12<br>(7 - 20)       | 19<br>(13 - 26)      |
| Ischemic stroke                               | 14<br>(8 - 21)    | 0<br>(0 - 0)       | 0<br>(0 - 0)        | 1<br>(0 - 2)         | 3<br>(2 - 6)         | 10<br>(6 - 15)       |
| Hemorrhagic stroke                            | 20<br>(12 - 32)   | 0<br>(0 - 0)       | 0<br>(0 - 0)        | 2<br>(1 - 5)         | 8<br>(5 - 14)        | 9<br>(5 - 14)        |
| Hypertensive heart disease                    | 3<br>(2 - 5)      | 0<br>(0 - 0)       | 0<br>(0 - 0)        | 0<br>(0 - 1)         | 1<br>(1 - 2)         | 2<br>(1 - 3)         |
| Cardiomyopathy and myocarditis                | 3<br>(2 - 5)      | 0<br>(0 - 0)       | 0<br>(0 - 0)        | 1<br>(0 - 2)         | 1<br>(0 - 2)         | 1<br>(0 - 1)         |
| Atrial fibrillation and flutter               | 1<br>(0 - 1)      | --                 | --                  | 0<br>(0 - 0)         | 0<br>(0 - 0)         | 0<br>(0 - 1)         |
| Aortic aneurysm                               | 1<br>(0 - 1)      | --                 | --                  | 0<br>(0 - 0)         | 0<br>(0 - 0)         | 0<br>(0 - 1)         |
| Peripheral vascular disease                   | 1<br>(0 - 1)      | --                 | --                  | 0<br>(0 - 0)         | 0<br>(0 - 0)         | 1<br>(0 - 1)         |
| Endocarditis                                  | 1<br>(0 - 1)      | 0<br>(0 - 0)       | 0<br>(0 - 0)        | 0<br>(0 - 0)         | 0<br>(0 - 0)         | 0<br>(0 - 1)         |
| Other cardiovascular and circulatory diseases | 5<br>(3 - 8)      | 0<br>(0 - 0)       | 0<br>(0 - 0)        | 1<br>(0 - 2)         | 3<br>(1 - 4)         | 1<br>(1 - 3)         |
| Chronic respiratory diseases                  | 20<br>(13 - 29)   | 0<br>(0 - 0)       | 0<br>(0 - 0)        | 2<br>(1 - 4)         | 6<br>(3 - 9)         | 12<br>(8 - 16)       |
| Chronic obstructive pulmonary disease         | 9<br>(5 - 13)     | 0<br>(0 - 0)       | 0<br>(0 - 0)        | 0<br>(0 - 1)         | 2<br>(1 - 4)         | 6<br>(3 - 9)         |



Web Table 31- Federated States of Micronesia deaths with 95% UI by age, sex, and cause in 2013

| Cause                                               | Females, All Ages | Females, 0-4 Years | Females, 5-14 Years | Females, 15-49 Years | Females, 50-69 Years | Females, 70-80 Years |
|-----------------------------------------------------|-------------------|--------------------|---------------------|----------------------|----------------------|----------------------|
| Pneumoconiosis                                      | 0<br>(0-0)        | 0<br>(0-0)         | 0<br>(0-0)          | 0<br>(0-0)           | 0<br>(0-0)           | 0<br>(0-0)           |
| Silicosis                                           | 0<br>(0-0)        | 0<br>(0-0)         | 0<br>(0-0)          | 0<br>(0-0)           | 0<br>(0-0)           | 0<br>(0-0)           |
| Asbestosis                                          | 0<br>(0-0)        | 0<br>(0-0)         | 0<br>(0-0)          | 0<br>(0-0)           | 0<br>(0-0)           | 0<br>(0-0)           |
| Coal workers pneumoconiosis                         | 0<br>(0-0)        | 0<br>(0-0)         | 0<br>(0-0)          | 0<br>(0-0)           | 0<br>(0-0)           | 0<br>(0-0)           |
| Other pneumoconiosis                                | 0<br>(0-0)        | 0<br>(0-0)         | 0<br>(0-0)          | 0<br>(0-0)           | 0<br>(0-0)           | 0<br>(0-0)           |
| Asthma                                              | 8<br>(4-12)       | 0<br>(0-0)         | 0<br>(0-0)          | 1<br>(1-2)           | 3<br>(1-5)           | 4<br>(2-6)           |
| Interstitial lung disease and pulmonary sarcoidosis | 1<br>(1-2)        | 0<br>(0-0)         | 0<br>(0-0)          | 0<br>(0-0)           | 0<br>(0-0)           | 1<br>(0-1)           |
| Other chronic respiratory diseases                  | 2<br>(1-3)        | 0<br>(0-0)         | 0<br>(0-0)          | 0<br>(0-1)           | 0<br>(0-1)           | 1<br>(1-2)           |
| Cirrhosis                                           | 4<br>(2-6)        | 0<br>(0-0)         | 0<br>(0-0)          | 1<br>(1-2)           | 2<br>(1-3)           | 1<br>(1-1)           |
| Cirrhosis due to hepatitis B                        | 2<br>(1-4)        | 0<br>(0-0)         | 0<br>(0-0)          | 1<br>(0-1)           | 1<br>(0-2)           | 1<br>(0-1)           |
| Cirrhosis due to hepatitis C                        | 1<br>(0-2)        | 0<br>(0-0)         | 0<br>(0-0)          | 0<br>(0-1)           | 0<br>(0-1)           | 0<br>(0-0)           |
| Cirrhosis due to alcohol use                        | 0<br>(0-1)        | --                 | --                  | 0<br>(0-0)           | 0<br>(0-0)           | 0<br>(0-0)           |
| Cirrhosis due to other causes                       | 0<br>(0-1)        | 0<br>(0-0)         | 0<br>(0-0)          | 0<br>(0-1)           | 0<br>(0-0)           | 0<br>(0-0)           |
| Digestive diseases                                  | 15<br>(9-23)      | 0<br>(0-0)         | 0<br>(0-0)          | 3<br>(2-5)           | 6<br>(3-9)           | 6<br>(4-9)           |
| Peptic ulcer disease                                | 2<br>(1-3)        | 0<br>(0-0)         | 0<br>(0-0)          | 0<br>(0-1)           | 1<br>(0-1)           | 1<br>(0-1)           |
| Gastritis and duodenitis                            | 0<br>(0-0)        | 0<br>(0-0)         | 0<br>(0-0)          | 0<br>(0-0)           | 0<br>(0-0)           | 0<br>(0-0)           |
| Appendicitis                                        | 1<br>(1-3)        | 0<br>(0-0)         | 0<br>(0-0)          | 0<br>(0-1)           | 1<br>(0-1)           | 0<br>(0-1)           |
| Paralytic ileus and intestinal obstruction          | 3<br>(2-6)        | 0<br>(0-0)         | 0<br>(0-0)          | 1<br>(0-1)           | 1<br>(1-3)           | 1<br>(1-3)           |
| Inguinal, femoral, and abdominal hernia             | 0<br>(0-0)        | 0<br>(0-0)         | 0<br>(0-0)          | 0<br>(0-0)           | 0<br>(0-0)           | 0<br>(0-0)           |
| Inflammatory bowel disease                          | 0<br>(0-1)        | 0<br>(0-0)         | 0<br>(0-0)          | 0<br>(0-0)           | 0<br>(0-0)           | 0<br>(0-1)           |
| Vascular intestinal disorders                       | 0<br>(0-0)        | 0<br>(0-0)         | 0<br>(0-0)          | 0<br>(0-0)           | 0<br>(0-0)           | 0<br>(0-0)           |
| Gallbladder and biliary diseases                    | 2<br>(1-4)        | 0<br>(0-0)         | 0<br>(0-0)          | 0<br>(0-1)           | 1<br>(0-1)           | 1<br>(0-2)           |
| Pancreatitis                                        | 1<br>(0-1)        | 0<br>(0-0)         | 0<br>(0-0)          | 0<br>(0-0)           | 0<br>(0-0)           | 0<br>(0-1)           |
| Other digestive diseases                            | 4<br>(2-8)        | 0<br>(0-0)         | 0<br>(0-0)          | 1<br>(0-2)           | 2<br>(1-3)           | 2<br>(1-3)           |
| Neurological disorders                              | 7<br>(5-10)       | 0<br>(0-0)         | 0<br>(0-0)          | 0<br>(0-0)           | 1<br>(0-1)           | 6<br>(4-8)           |
| Alzheimer disease and other dementias               | 6<br>(4-9)        | --                 | --                  | 0<br>(0-0)           | 1<br>(0-1)           | 6<br>(4-8)           |
| Parkinson disease                                   | 0<br>(0-0)        | --                 | --                  | 0<br>(0-0)           | 0<br>(0-0)           | 0<br>(0-0)           |
| Epilepsy                                            | 0<br>(0-1)        | 0<br>(0-0)         | 0<br>(0-0)          | 0<br>(0-0)           | 0<br>(0-0)           | 0<br>(0-0)           |
| Multiple sclerosis                                  | 0<br>(0-0)        | --                 | --                  | 0<br>(0-0)           | 0<br>(0-0)           | 0<br>(0-0)           |
| Other neurological disorders                        | 1<br>(0-1)        | 0<br>(0-0)         | 0<br>(0-0)          | 0<br>(0-0)           | 0<br>(0-0)           | 0<br>(0-0)           |
| Mental and substance use disorders                  | 0<br>(0-0)        | 0<br>(0-0)         | 0<br>(0-0)          | 0<br>(0-0)           | 0<br>(0-0)           | 0<br>(0-0)           |
| Schizophrenia                                       | 0<br>(0-0)        | --                 | --                  | 0<br>(0-0)           | 0<br>(0-0)           | 0<br>(0-0)           |
| Alcohol use disorders                               | 0<br>(0-0)        | --                 | --                  | 0<br>(0-0)           | 0<br>(0-0)           | 0<br>(0-0)           |
| Drug use disorders                                  | 0<br>(0-0)        | 0<br>(0-0)         | --                  | 0<br>(0-0)           | 0<br>(0-0)           | 0<br>(0-0)           |
| Opioid use disorders                                | 0<br>(0-0)        | 0<br>(0-0)         | --                  | 0<br>(0-0)           | 0<br>(0-0)           | 0<br>(0-0)           |
| Cocaine use disorders                               | 0<br>(0-0)        | 0<br>(0-0)         | --                  | 0<br>(0-0)           | 0<br>(0-0)           | 0<br>(0-0)           |
| Amphetamine use disorders                           | 0<br>(0-0)        | 0<br>(0-0)         | --                  | 0<br>(0-0)           | 0<br>(0-0)           | 0<br>(0-0)           |
| Other drug use disorders                            | 0<br>(0-0)        | 0<br>(0-0)         | --                  | 0<br>(0-0)           | 0<br>(0-0)           | 0<br>(0-0)           |
| Eating disorders                                    | 0<br>(0-0)        | --                 | 0<br>(0-0)          | 0<br>(0-0)           | --                   | --                   |
| Anorexia nervosa                                    | 0<br>(0-0)        | --                 | 0<br>(0-0)          | 0<br>(0-0)           | --                   | --                   |

Web Table 31- Federated States of Micronesia deaths with 95% UI by age, sex, and cause in 2013

| Cause                                               | Females, All Ages | Females, 0-4 Years | Females, 5-14 Years | Females, 15-49 Years | Females, 50-69 Years | Females, 70-80 Years |
|-----------------------------------------------------|-------------------|--------------------|---------------------|----------------------|----------------------|----------------------|
| Diabetes, urogenital, blood, and endocrine diseases | 85<br>(56 - 133)  | 0<br>(0 - 1)       | 0<br>(0 - 1)        | 10<br>(6 - 19)       | 41<br>(25 - 66)      | 33<br>(24 - 46)      |
| Diabetes mellitus                                   | 67<br>(43 - 101)  | 0<br>(0 - 0)       | 0<br>(0 - 0)        | 6<br>(3 - 11)        | 34<br>(20 - 55)      | 27<br>(18 - 38)      |
| Acute glomerulonephritis                            | 0<br>(0 - 0)      | 0<br>(0 - 0)       | 0<br>(0 - 0)        | 0<br>(0 - 0)         | 0<br>(0 - 0)         | 0<br>(0 - 0)         |
| Chronic kidney disease                              | 14<br>(7 - 33)    | 0<br>(0 - 0)       | 0<br>(0 - 0)        | 3<br>(1 - 8)         | 6<br>(3 - 14)        | 5<br>(2 - 12)        |
| Chronic kidney disease due to diabetes mellitus     | 2<br>(1 - 5)      | 0<br>(0 - 0)       | 0<br>(0 - 0)        | 0<br>(0 - 1)         | 1<br>(0 - 3)         | 1<br>(0 - 1)         |
| Chronic kidney disease due to hypertension          | 4<br>(1 - 8)      | 0<br>(0 - 0)       | 0<br>(0 - 0)        | 1<br>(0 - 1)         | 2<br>(1 - 3)         | 1<br>(0 - 3)         |
| Chronic kidney disease due to glomerulonephritis    | 1<br>(0 - 1)      | 0<br>(0 - 0)       | 0<br>(0 - 0)        | 0<br>(0 - 0)         | 0<br>(0 - 1)         | 0<br>(0 - 1)         |
| Chronic kidney disease due to other causes          | 8<br>(3 - 23)     | 0<br>(0 - 0)       | 0<br>(0 - 0)        | 2<br>(1 - 6)         | 3<br>(1 - 10)        | 3<br>(1 - 9)         |
| Urinary diseases and male infertility               | 1<br>(1 - 2)      | 0<br>(0 - 0)       | 0<br>(0 - 0)        | 0<br>(0 - 1)         | 0<br>(0 - 1)         | 0<br>(0 - 1)         |
| Interstitial nephritis and urinary tract infections | 1<br>(0 - 1)      | 0<br>(0 - 0)       | 0<br>(0 - 0)        | 0<br>(0 - 0)         | 0<br>(0 - 0)         | 0<br>(0 - 1)         |
| Urolithiasis                                        | 0<br>(0 - 0)      | --                 | 0<br>(0 - 0)        | 0<br>(0 - 0)         | 0<br>(0 - 0)         | 0<br>(0 - 0)         |
| Other urinary diseases                              | 0<br>(0 - 1)      | 0<br>(0 - 0)       | 0<br>(0 - 0)        | 0<br>(0 - 0)         | 0<br>(0 - 0)         | 0<br>(0 - 0)         |
| Gynecological diseases                              | 0<br>(0 - 0)      | --                 | --                  | 0<br>(0 - 0)         | 0<br>(0 - 0)         | 0<br>(0 - 0)         |
| Uterine fibroids                                    | 0<br>(0 - 0)      | --                 | --                  | 0<br>(0 - 0)         | 0<br>(0 - 0)         | 0<br>(0 - 0)         |
| Polycystic ovarian syndrome                         | 0<br>(0 - 0)      | --                 | --                  | 0<br>(0 - 0)         | 0<br>(0 - 0)         | --                   |
| Endometriosis                                       | 0<br>(0 - 0)      | --                 | --                  | 0<br>(0 - 0)         | 0<br>(0 - 0)         | --                   |
| Genital prolapse                                    | 0<br>(0 - 0)      | --                 | --                  | 0<br>(0 - 0)         | 0<br>(0 - 0)         | 0<br>(0 - 0)         |
| Other gynecological diseases                        | 0<br>(0 - 0)      | --                 | --                  | 0<br>(0 - 0)         | 0<br>(0 - 0)         | 0<br>(0 - 0)         |
| Hemoglobinopathies and hemolytic anemias            | 1<br>(0 - 2)      | 0<br>(0 - 0)       | 0<br>(0 - 0)        | 0<br>(0 - 1)         | 0<br>(0 - 0)         | 0<br>(0 - 0)         |
| Thalassemias                                        | 0<br>(0 - 1)      | 0<br>(0 - 0)       | 0<br>(0 - 0)        | 0<br>(0 - 1)         | 0<br>(0 - 0)         | 0<br>(0 - 0)         |
| Sickle cell disorders                               | 0<br>(0 - 0)      | 0<br>(0 - 0)       | 0<br>(0 - 0)        | 0<br>(0 - 0)         | 0<br>(0 - 0)         | 0<br>(0 - 0)         |
| G6PD deficiency                                     | 0<br>(0 - 0)      | 0<br>(0 - 0)       | 0<br>(0 - 0)        | 0<br>(0 - 0)         | 0<br>(0 - 0)         | 0<br>(0 - 0)         |
| Other hemoglobinopathies and hemolytic anemias      | 0<br>(0 - 1)      | 0<br>(0 - 0)       | 0<br>(0 - 0)        | 0<br>(0 - 0)         | 0<br>(0 - 0)         | 0<br>(0 - 0)         |
| Endocrine, metabolic, blood, and immune disorders   | 2<br>(1 - 3)      | 0<br>(0 - 0)       | 0<br>(0 - 0)        | 0<br>(0 - 1)         | 1<br>(0 - 1)         | 1<br>(0 - 1)         |
| Musculoskeletal disorders                           | 1<br>(0 - 1)      | --                 | 0<br>(0 - 0)        | 0<br>(0 - 0)         | 0<br>(0 - 0)         | 0<br>(0 - 0)         |
| Rheumatoid arthritis                                | 0<br>(0 - 0)      | --                 | 0<br>(0 - 0)        | 0<br>(0 - 0)         | 0<br>(0 - 0)         | 0<br>(0 - 0)         |
| Other musculoskeletal disorders                     | 0<br>(0 - 1)      | --                 | 0<br>(0 - 0)        | 0<br>(0 - 0)         | 0<br>(0 - 0)         | 0<br>(0 - 0)         |
| Other non-communicable diseases                     | 5<br>(3 - 8)      | 3<br>(1 - 5)       | 0<br>(0 - 1)        | 1<br>(0 - 1)         | 0<br>(0 - 1)         | 1<br>(0 - 1)         |
| Congenital anomalies                                | 4<br>(2 - 7)      | 3<br>(1 - 5)       | 0<br>(0 - 1)        | 1<br>(0 - 1)         | 0<br>(0 - 0)         | 0<br>(0 - 0)         |
| Neural tube defects                                 | 0<br>(0 - 0)      | 0<br>(0 - 0)       | 0<br>(0 - 0)        | 0<br>(0 - 0)         | 0<br>(0 - 0)         | 0<br>(0 - 0)         |
| Congenital heart anomalies                          | 1<br>(0 - 2)      | 0<br>(0 - 1)       | 0<br>(0 - 0)        | 0<br>(0 - 0)         | 0<br>(0 - 0)         | 0<br>(0 - 0)         |
| Cleft lip and cleft palate                          | 0<br>(0 - 0)      | 0<br>(0 - 0)       | --                  | --                   | --                   | --                   |
| Down syndrome                                       | 0<br>(0 - 0)      | 0<br>(0 - 0)       | 0<br>(0 - 0)        | 0<br>(0 - 0)         | 0<br>(0 - 0)         | 0<br>(0 - 0)         |
| Chromosomal unbalanced rearrangements               | 0<br>(0 - 0)      | 0<br>(0 - 0)       | 0<br>(0 - 0)        | 0<br>(0 - 0)         | 0<br>(0 - 0)         | 0<br>(0 - 0)         |
| Other congenital anomalies                          | 3<br>(2 - 5)      | 2<br>(1 - 4)       | 0<br>(0 - 0)        | 0<br>(0 - 1)         | 0<br>(0 - 0)         | 0<br>(0 - 0)         |
| Skin and subcutaneous diseases                      | 1<br>(1 - 2)      | 0<br>(0 - 0)       | 0<br>(0 - 0)        | 0<br>(0 - 0)         | 0<br>(0 - 0)         | 0<br>(0 - 1)         |
| Cellulitis                                          | 0<br>(0 - 0)      | 0<br>(0 - 0)       | 0<br>(0 - 0)        | 0<br>(0 - 0)         | 0<br>(0 - 0)         | 0<br>(0 - 0)         |
| Pyoderma                                            | 0<br>(0 - 1)      | 0<br>(0 - 0)       | 0<br>(0 - 0)        | 0<br>(0 - 0)         | 0<br>(0 - 0)         | 0<br>(0 - 0)         |
| Decubitus ulcer                                     | 0<br>(0 - 1)      | 0<br>(0 - 0)       | 0<br>(0 - 0)        | 0<br>(0 - 0)         | 0<br>(0 - 0)         | 0<br>(0 - 0)         |
| Other skin and subcutaneous diseases                | 0<br>(0 - 0)      | 0<br>(0 - 0)       | 0<br>(0 - 0)        | 0<br>(0 - 0)         | 0<br>(0 - 0)         | 0<br>(0 - 0)         |

Web Table 31- Federated States of Micronesia deaths with 95% UI by age, sex, and cause in 2013

| Cause                                           | Females, All Ages | Females, 0-4 Years | Females, 5-14 Years | Females, 15-49 Years | Females, 50-69 Years | Females, 70-80 Years |
|-------------------------------------------------|-------------------|--------------------|---------------------|----------------------|----------------------|----------------------|
| Sudden infant death syndrome                    | 0<br>(0 - 0)      | 0<br>(0 - 0)       | --                  | --                   | --                   | --                   |
| Injuries                                        | 16<br>(10 - 25)   | 1<br>(0 - 2)       | 1<br>(1 - 1)        | 7<br>(4 - 12)        | 3<br>(2 - 6)         | 4<br>(2 - 5)         |
| Transport injuries                              | 6<br>(4 - 10)     | 0<br>(0 - 0)       | 0<br>(0 - 1)        | 3<br>(2 - 5)         | 1<br>(1 - 2)         | 1<br>(1 - 2)         |
| Road injuries                                   | 6<br>(4 - 9)      | 0<br>(0 - 0)       | 0<br>(0 - 1)        | 3<br>(1 - 5)         | 1<br>(1 - 2)         | 1<br>(1 - 2)         |
| Pedestrian road injuries                        | 1<br>(0 - 1)      | 0<br>(0 - 0)       | 0<br>(0 - 0)        | 0<br>(0 - 1)         | 0<br>(0 - 0)         | 0<br>(0 - 0)         |
| Cyclist road injuries                           | 0<br>(0 - 0)      | 0<br>(0 - 0)       | 0<br>(0 - 0)        | 0<br>(0 - 0)         | 0<br>(0 - 0)         | 0<br>(0 - 0)         |
| Motorcyclist road injuries                      | 0<br>(0 - 1)      | 0<br>(0 - 0)       | 0<br>(0 - 0)        | 0<br>(0 - 1)         | 0<br>(0 - 0)         | 0<br>(0 - 0)         |
| Motor vehicle road injuries                     | 4<br>(3 - 7)      | 0<br>(0 - 0)       | 0<br>(0 - 1)        | 2<br>(1 - 4)         | 1<br>(1 - 2)         | 1<br>(0 - 1)         |
| Other road injuries                             | 0<br>(0 - 0)      | 0<br>(0 - 0)       | 0<br>(0 - 0)        | 0<br>(0 - 0)         | 0<br>(0 - 0)         | 0<br>(0 - 0)         |
| Other transport injuries                        | 0<br>(0 - 1)      | 0<br>(0 - 0)       | 0<br>(0 - 0)        | 0<br>(0 - 0)         | 0<br>(0 - 0)         | 0<br>(0 - 0)         |
| Unintentional injuries                          | 6<br>(3 - 10)     | 1<br>(0 - 1)       | 0<br>(0 - 1)        | 2<br>(1 - 4)         | 1<br>(1 - 2)         | 2<br>(1 - 3)         |
| Falls                                           | 1<br>(0 - 1)      | 0<br>(0 - 0)       | 0<br>(0 - 0)        | 0<br>(0 - 0)         | 0<br>(0 - 0)         | 0<br>(0 - 1)         |
| Drowning                                        | 1<br>(0 - 2)      | 0<br>(0 - 1)       | 0<br>(0 - 0)        | 0<br>(0 - 1)         | 0<br>(0 - 0)         | 0<br>(0 - 0)         |
| Fire, heat, and hot substances                  | 1<br>(0 - 1)      | 0<br>(0 - 0)       | 0<br>(0 - 0)        | 0<br>(0 - 1)         | 0<br>(0 - 0)         | 0<br>(0 - 0)         |
| Poisonings                                      | 0<br>(0 - 0)      | 0<br>(0 - 0)       | 0<br>(0 - 0)        | 0<br>(0 - 0)         | 0<br>(0 - 0)         | 0<br>(0 - 0)         |
| Exposure to mechanical forces                   | 1<br>(0 - 1)      | 0<br>(0 - 0)       | 0<br>(0 - 0)        | 0<br>(0 - 1)         | 0<br>(0 - 0)         | 0<br>(0 - 0)         |
| Unintentional firearm injuries                  | 0<br>(0 - 0)      | 0<br>(0 - 0)       | 0<br>(0 - 0)        | 0<br>(0 - 0)         | 0<br>(0 - 0)         | 0<br>(0 - 0)         |
| Unintentional suffocation                       | 0<br>(0 - 1)      | 0<br>(0 - 0)       | 0<br>(0 - 0)        | 0<br>(0 - 0)         | 0<br>(0 - 0)         | 0<br>(0 - 0)         |
| Other exposure to mechanical forces             | 0<br>(0 - 1)      | 0<br>(0 - 0)       | 0<br>(0 - 0)        | 0<br>(0 - 0)         | 0<br>(0 - 0)         | 0<br>(0 - 0)         |
| Adverse effects of medical treatment            | 2<br>(1 - 3)      | 0<br>(0 - 0)       | 0<br>(0 - 0)        | 0<br>(0 - 1)         | 0<br>(0 - 1)         | 1<br>(0 - 1)         |
| Animal contact                                  | 0<br>(0 - 0)      | 0<br>(0 - 0)       | 0<br>(0 - 0)        | 0<br>(0 - 0)         | 0<br>(0 - 0)         | 0<br>(0 - 0)         |
| Venomous animal contact                         | 0<br>(0 - 0)      | 0<br>(0 - 0)       | 0<br>(0 - 0)        | 0<br>(0 - 0)         | 0<br>(0 - 0)         | 0<br>(0 - 0)         |
| Non-venomous animal contact                     | 0<br>(0 - 0)      | 0<br>(0 - 0)       | 0<br>(0 - 0)        | 0<br>(0 - 0)         | 0<br>(0 - 0)         | 0<br>(0 - 0)         |
| Foreign body                                    | 1<br>(0 - 1)      | 0<br>(0 - 0)       | 0<br>(0 - 0)        | 0<br>(0 - 0)         | 0<br>(0 - 0)         | 0<br>(0 - 1)         |
| Pulmonary aspiration and foreign body in airway | 1<br>(0 - 1)      | 0<br>(0 - 0)       | 0<br>(0 - 0)        | 0<br>(0 - 0)         | 0<br>(0 - 0)         | 0<br>(0 - 1)         |
| Foreign body in other body part                 | 0<br>(0 - 0)      | 0<br>(0 - 0)       | 0<br>(0 - 0)        | 0<br>(0 - 0)         | 0<br>(0 - 0)         | 0<br>(0 - 0)         |
| Other unintentional injuries                    | 0<br>(0 - 1)      | 0<br>(0 - 0)       | 0<br>(0 - 0)        | 0<br>(0 - 0)         | 0<br>(0 - 0)         | 0<br>(0 - 0)         |
| Self-harm and interpersonal violence            | 3<br>(2 - 6)      | 0<br>(0 - 0)       | 0<br>(0 - 0)        | 2<br>(1 - 4)         | 1<br>(0 - 1)         | 0<br>(0 - 1)         |
| Self-harm                                       | 3<br>(1 - 5)      | --                 | 0<br>(0 - 0)        | 2<br>(1 - 3)         | 1<br>(0 - 1)         | 0<br>(0 - 1)         |
| Interpersonal violence                          | 1<br>(0 - 1)      | 0<br>(0 - 0)       | 0<br>(0 - 0)        | 0<br>(0 - 1)         | 0<br>(0 - 0)         | 0<br>(0 - 0)         |
| Assault by firearm                              | 0<br>(0 - 0)      | 0<br>(0 - 0)       | 0<br>(0 - 0)        | 0<br>(0 - 0)         | 0<br>(0 - 0)         | 0<br>(0 - 0)         |
| Assault by sharp object                         | 0<br>(0 - 0)      | 0<br>(0 - 0)       | 0<br>(0 - 0)        | 0<br>(0 - 0)         | 0<br>(0 - 0)         | 0<br>(0 - 0)         |
| Assault by other means                          | 0<br>(0 - 1)      | 0<br>(0 - 0)       | 0<br>(0 - 0)        | 0<br>(0 - 0)         | 0<br>(0 - 0)         | 0<br>(0 - 0)         |

Web Table 31- Fiji deaths with 95% UI by age, sex, and cause in 2013

| Cause                                                             | Both Sexes, All Ages     | Both Sexes, 0-4 Years | Both Sexes, 5-14 Years | Both Sexes, 15-49 Years  | Both Sexes, 50-69 Years  | Both Sexes, 70-80 Years  |
|-------------------------------------------------------------------|--------------------------|-----------------------|------------------------|--------------------------|--------------------------|--------------------------|
| All causes                                                        | 7,579<br>(6,519 - 8,709) | 593<br>(389 - 887)    | 102<br>(80 - 130)      | 1,600<br>(1,277 - 1,951) | 2,955<br>(2,464 - 3,489) | 2,329<br>(2,089 - 2,541) |
| Communicable, maternal, neonatal, and nutritional diseases        | 940<br>(764 - 1,158)     | 394<br>(262 - 578)    | 29<br>(20 - 47)        | 174<br>(142 - 211)       | 165<br>(135 - 203)       | 178<br>(151 - 221)       |
| HIV/AIDS and tuberculosis                                         | 49<br>(39 - 63)          | 1<br>(0 - 1)          | 1<br>(1 - 1)           | 22<br>(16 - 28)          | 17<br>(13 - 22)          | 10<br>(8 - 13)           |
| Tuberculosis                                                      | 36<br>(29 - 46)          | 0<br>(0 - 1)          | 0<br>(0 - 1)           | 12<br>(9 - 15)           | 14<br>(10 - 18)          | 10<br>(7 - 13)           |
| HIV/AIDS                                                          | 14<br>(7 - 22)           | 0<br>(0 - 0)          | 1<br>(0 - 1)           | 10<br>(5 - 16)           | 3<br>(1 - 5)             | 0<br>(0 - 1)             |
| HIV/AIDS resulting in mycobacterial infection                     | 1<br>(0 - 1)             | 0<br>(0 - 0)          | 0<br>(0 - 0)           | 1<br>(0 - 1)             | 0<br>(0 - 0)             | 0<br>(0 - 0)             |
| HIV/AIDS resulting in other diseases                              | 13<br>(7 - 21)           | 0<br>(0 - 0)          | 1<br>(0 - 1)           | 10<br>(5 - 15)           | 3<br>(1 - 5)             | 0<br>(0 - 0)             |
| Diarrhea, lower respiratory, and other common infectious diseases | 504<br>(404 - 649)       | 150<br>(85 - 258)     | 22<br>(14 - 40)        | 83<br>(64 - 105)         | 112<br>(88 - 142)        | 138<br>(112 - 179)       |
| Diarrheal diseases                                                | 92<br>(71 - 119)         | 23<br>(10 - 46)       | 3<br>(2 - 6)           | 12<br>(8 - 15)           | 22<br>(15 - 30)          | 32<br>(23 - 43)          |
| Intestinal infectious diseases                                    | 11<br>(5 - 22)           | 5<br>(2 - 11)         | 3<br>(1 - 6)           | 3<br>(1 - 5)             | 1<br>(0 - 1)             | 0<br>(0 - 0)             |
| Typhoid fever                                                     | 9<br>(4 - 16)            | 4<br>(1 - 8)          | 2<br>(1 - 4)           | 2<br>(1 - 4)             | 0<br>(0 - 1)             | 0<br>(0 - 0)             |
| Paratyphoid fever                                                 | 2<br>(1 - 5)             | 1<br>(0 - 3)          | 1<br>(0 - 1)           | 0<br>(0 - 1)             | 0<br>(0 - 0)             | 0<br>(0 - 0)             |
| Other intestinal infectious diseases                              | 0<br>(0 - 3)             | 0<br>(0 - 1)          | 0<br>(0 - 0)           | 0<br>(0 - 1)             | 0<br>(0 - 0)             | 0<br>(0 - 0)             |
| Lower respiratory infections                                      | 327<br>(262 - 420)       | 82<br>(45 - 141)      | 7<br>(4 - 11)          | 55<br>(41 - 73)          | 82<br>(63 - 111)         | 101<br>(78 - 140)        |
| Upper respiratory infections                                      | 0<br>(0 - 1)             | 0<br>(0 - 0)          | 0<br>(0 - 0)           | 0<br>(0 - 0)             | 0<br>(0 - 0)             | 0<br>(0 - 0)             |
| Otitis media                                                      | 1<br>(1 - 1)             | 0<br>(0 - 0)          | 0<br>(0 - 0)           | 0<br>(0 - 0)             | 0<br>(0 - 0)             | 0<br>(0 - 0)             |
| Meningitis                                                        | 26<br>(19 - 34)          | 8<br>(4 - 14)         | 3<br>(2 - 4)           | 8<br>(6 - 10)            | 4<br>(3 - 6)             | 3<br>(2 - 4)             |
| Pneumococcal meningitis                                           | 9<br>(7 - 13)            | 2<br>(1 - 5)          | 1<br>(1 - 2)           | 3<br>(2 - 4)             | 2<br>(1 - 3)             | 1<br>(1 - 2)             |
| H influenzae type B meningitis                                    | 3<br>(2 - 4)             | 1<br>(1 - 3)          | 0<br>(0 - 1)           | 1<br>(0 - 1)             | 0<br>(0 - 1)             | 0<br>(0 - 0)             |
| Meningococcal meningitis                                          | 5<br>(3 - 6)             | 1<br>(1 - 2)          | 0<br>(0 - 1)           | 1<br>(1 - 2)             | 1<br>(1 - 1)             | 1<br>(0 - 1)             |
| Other meningitis                                                  | 8<br>(6 - 12)            | 2<br>(1 - 5)          | 1<br>(0 - 1)           | 3<br>(2 - 4)             | 2<br>(1 - 2)             | 1<br>(1 - 1)             |
| Encephalitis                                                      | 10<br>(7 - 13)           | 1<br>(1 - 2)          | 0<br>(0 - 1)           | 4<br>(3 - 6)             | 2<br>(2 - 3)             | 2<br>(1 - 2)             |
| Diphtheria                                                        | 0<br>(0 - 0)             | 0<br>(0 - 0)          | 0<br>(0 - 0)           | 0<br>(0 - 0)             | 0<br>(0 - 0)             | --<br>(0 - 0)            |
| Whooping cough                                                    | 1<br>(0 - 4)             | 1<br>(0 - 4)          | 0<br>(0 - 0)           | 0<br>(0 - 0)             | 0<br>(0 - 0)             | --<br>(0 - 0)            |
| Tetanus                                                           | 0<br>(0 - 0)             | 0<br>(0 - 0)          | 0<br>(0 - 0)           | 0<br>(0 - 0)             | 0<br>(0 - 0)             | 0<br>(0 - 0)             |
| Measles                                                           | 37<br>(1 - 178)          | 31<br>(1 - 147)       | 5<br>(0 - 26)          | 1<br>(0 - 7)             | 0<br>(0 - 0)             | --<br>(0 - 0)            |
| Varicella and herpes zoster                                       | 0<br>(0 - 1)             | 0<br>(0 - 0)          | 0<br>(0 - 0)           | 0<br>(0 - 0)             | 0<br>(0 - 0)             | 0<br>(0 - 0)             |
| Neglected tropical diseases and malaria                           | 6<br>(4 - 14)            | 1<br>(0 - 5)          | 1<br>(0 - 3)           | 2<br>(1 - 5)             | 1<br>(1 - 3)             | 1<br>(1 - 2)             |
| Leishmaniasis                                                     | 0<br>(0 - 0)             | 0<br>(0 - 0)          | 0<br>(0 - 0)           | 0<br>(0 - 0)             | 0<br>(0 - 0)             | 0<br>(0 - 0)             |
| Visceral leishmaniasis                                            | 0<br>(0 - 0)             | 0<br>(0 - 0)          | 0<br>(0 - 0)           | 0<br>(0 - 0)             | 0<br>(0 - 0)             | 0<br>(0 - 0)             |
| Cysticercosis                                                     | 0<br>(0 - 0)             | 0<br>(0 - 0)          | 0<br>(0 - 0)           | 0<br>(0 - 0)             | 0<br>(0 - 0)             | 0<br>(0 - 0)             |
| Cystic echinococcosis                                             | 0<br>(0 - 0)             | 0<br>(0 - 0)          | 0<br>(0 - 0)           | 0<br>(0 - 0)             | 0<br>(0 - 0)             | 0<br>(0 - 0)             |
| Dengue                                                            | 3<br>(2 - 9)             | 0<br>(0 - 1)          | 0<br>(0 - 1)           | 1<br>(1 - 4)             | 1<br>(0 - 2)             | 0<br>(0 - 1)             |
| Rabies                                                            | 0<br>(0 - 1)             | 0<br>(0 - 0)          | 0<br>(0 - 0)           | 0<br>(0 - 0)             | 0<br>(0 - 0)             | 0<br>(0 - 0)             |
| Intestinal nematode infections                                    | 1<br>(0 - 6)             | 1<br>(0 - 5)          | 0<br>(0 - 2)           | 0<br>(0 - 2)             | 0<br>(0 - 2)             | 0<br>(0 - 1)             |
| Ascariasis                                                        | 1<br>(0 - 6)             | 1<br>(0 - 5)          | 0<br>(0 - 2)           | 0<br>(0 - 2)             | 0<br>(0 - 2)             | 0<br>(0 - 1)             |
| Other neglected tropical diseases                                 | 2<br>(1 - 2)             | 0<br>(0 - 0)          | 0<br>(0 - 0)           | 0<br>(0 - 0)             | 0<br>(0 - 1)             | 1<br>(1 - 1)             |
| Maternal disorders                                                | 12<br>(8 - 18)           | --                    | 0<br>(0 - 0)           | 12<br>(8 - 18)           | --                       | --                       |
| Maternal hemorrhage                                               | 2<br>(1 - 4)             | --                    | 0<br>(0 - 0)           | 2<br>(1 - 4)             | --                       | --                       |
| Maternal sepsis and other maternal infections                     | 1<br>(1 - 2)             | --                    | 0<br>(0 - 0)           | 1<br>(1 - 2)             | --                       | --                       |

Web Table 31- Fiji deaths with 95% UI by age, sex, and cause in 2013

| Cause                                                            | Both Sexes, All Ages     | Both Sexes, 0-4 Years | Both Sexes, 5-14 Years | Both Sexes, 15-49 Years | Both Sexes, 50-69 Years  | Both Sexes, 70-80 Years  |
|------------------------------------------------------------------|--------------------------|-----------------------|------------------------|-------------------------|--------------------------|--------------------------|
| Maternal hypertensive disorders                                  | 1<br>(1 - 2)             | --                    | 0<br>(0 - 0)           | 1<br>(1 - 2)            | --                       | --                       |
| Maternal obstructed labor                                        | 1<br>(1 - 2)             | --                    | 0<br>(0 - 0)           | 1<br>(1 - 2)            | --                       | --                       |
| Maternal abortive outcome                                        | 2<br>(1 - 3)             | --                    | 0<br>(0 - 0)           | 2<br>(1 - 3)            | --                       | --                       |
| Indirect maternal deaths                                         | 1<br>(1 - 2)             | --                    | 0<br>(0 - 0)           | 1<br>(1 - 2)            | --                       | --                       |
| Late maternal deaths                                             | 2<br>(1 - 3)             | --                    | 0<br>(0 - 0)           | 2<br>(1 - 3)            | --                       | --                       |
| Maternal deaths aggravated by HIV/AIDS                           | 0<br>(0 - 0)             | --                    | --                     | 0<br>(0 - 0)            | --                       | --                       |
| Other maternal disorders                                         | 2<br>(1 - 3)             | --                    | 0<br>(0 - 0)           | 2<br>(1 - 3)            | --                       | --                       |
| Neonatal disorders                                               | 212<br>(149 - 292)       | 212<br>(149 - 292)    | --                     | --                      | --                       | --                       |
| Neonatal preterm birth complications                             | 118<br>(75 - 168)        | 118<br>(75 - 168)     | --                     | --                      | --                       | --                       |
| Neonatal encephalopathy due to birth asphyxia and trauma         | 49<br>(29 - 77)          | 49<br>(29 - 77)       | --                     | --                      | --                       | --                       |
| Neonatal sepsis and other neonatal infections                    | 25<br>(13 - 47)          | 25<br>(13 - 47)       | --                     | --                      | --                       | --                       |
| Hemolytic disease and other neonatal jaundice                    | 1<br>(0 - 1)             | 1<br>(0 - 1)          | --                     | --                      | --                       | --                       |
| Other neonatal disorders                                         | 19<br>(10 - 34)          | 19<br>(10 - 34)       | --                     | --                      | --                       | --                       |
| Nutritional deficiencies                                         | 52<br>(39 - 71)          | 13<br>(6 - 25)        | 2<br>(1 - 3)           | 12<br>(9 - 16)          | 10<br>(7 - 13)           | 15<br>(11 - 19)          |
| Protein-energy malnutrition                                      | 24<br>(15 - 38)          | 11<br>(5 - 22)        | 1<br>(1 - 2)           | 2<br>(1 - 4)            | 4<br>(2 - 6)             | 5<br>(3 - 8)             |
| Iodine deficiency                                                | 1<br>(0 - 2)             | 0<br>(0 - 1)          | 0<br>(0 - 0)           | 0<br>(0 - 1)            | 0<br>(0 - 1)             | 0<br>(0 - 1)             |
| Iron-deficiency anemia                                           | 26<br>(18 - 34)          | 1<br>(0 - 4)          | 1<br>(0 - 1)           | 9<br>(6 - 12)           | 6<br>(4 - 8)             | 9<br>(6 - 13)            |
| Other nutritional deficiencies                                   | 1<br>(1 - 3)             | 0<br>(0 - 1)          | 0<br>(0 - 0)           | 0<br>(0 - 1)            | 0<br>(0 - 0)             | 1<br>(0 - 1)             |
| Other communicable, maternal, neonatal, and nutritional diseases | 104<br>(77 - 136)        | 16<br>(8 - 30)        | 4<br>(3 - 6)           | 44<br>(29 - 62)         | 26<br>(17 - 37)          | 15<br>(9 - 25)           |
| Sexually transmitted diseases excluding HIV                      | 12<br>(6 - 22)           | 6<br>(2 - 14)         | 1<br>(0 - 1)           | 3<br>(2 - 6)            | 1<br>(1 - 3)             | 1<br>(0 - 2)             |
| Syphilis                                                         | 9<br>(4 - 18)            | 6<br>(2 - 14)         | 1<br>(0 - 1)           | 1<br>(1 - 2)            | 1<br>(0 - 2)             | 1<br>(0 - 1)             |
| Chlamydial infection                                             | 1<br>(0 - 1)             | --                    | 0<br>(0 - 0)           | 1<br>(0 - 1)            | 0<br>(0 - 0)             | 0<br>(0 - 0)             |
| Gonococcal infection                                             | 1<br>(1 - 2)             | --                    | 0<br>(0 - 0)           | 1<br>(0 - 1)            | 0<br>(0 - 1)             | 0<br>(0 - 0)             |
| Other sexually transmitted diseases                              | 1<br>(0 - 1)             | --                    | 0<br>(0 - 0)           | 1<br>(0 - 1)            | 0<br>(0 - 0)             | 0<br>(0 - 0)             |
| Hepatitis                                                        | 19<br>(15 - 24)          | 1<br>(0 - 2)          | 1<br>(1 - 1)           | 8<br>(6 - 10)           | 7<br>(5 - 9)             | 2<br>(2 - 3)             |
| Acute hepatitis A                                                | 1<br>(0 - 2)             | 0<br>(0 - 1)          | 0<br>(0 - 0)           | 0<br>(0 - 1)            | 0<br>(0 - 0)             | 0<br>(0 - 0)             |
| Acute hepatitis B                                                | 13<br>(10 - 17)          | 1<br>(0 - 2)          | 1<br>(0 - 1)           | 4<br>(2 - 6)            | 6<br>(4 - 8)             | 2<br>(1 - 3)             |
| Acute hepatitis C                                                | 0<br>(0 - 1)             | --                    | 0<br>(0 - 0)           | 0<br>(0 - 0)            | 0<br>(0 - 0)             | 0<br>(0 - 0)             |
| Acute hepatitis E                                                | 4<br>(2 - 7)             | 0<br>(0 - 0)          | 0<br>(0 - 0)           | 3<br>(2 - 5)            | 1<br>(0 - 2)             | 0<br>(0 - 0)             |
| Other infectious diseases                                        | 73<br>(49 - 100)         | 9<br>(4 - 18)         | 2<br>(1 - 4)           | 33<br>(19 - 49)         | 18<br>(10 - 28)          | 11<br>(6 - 21)           |
| Non-communicable diseases                                        | 6,231<br>(5,316 - 7,186) | 164<br>(99 - 260)     | 49<br>(35 - 64)        | 1,199<br>(942 - 1,475)  | 2,719<br>(2,268 - 3,211) | 2,101<br>(1,886 - 2,299) |
| Neoplasms                                                        | 672<br>(553 - 807)       | 9<br>(4 - 16)         | 8<br>(5 - 11)          | 200<br>(156 - 250)      | 296<br>(243 - 354)       | 160<br>(133 - 185)       |
| Esophageal cancer                                                | 17<br>(13 - 22)          | --                    | --                     | 3<br>(2 - 4)            | 8<br>(6 - 11)            | 6<br>(4 - 7)             |
| Stomach cancer                                                   | 38<br>(32 - 46)          | --                    | --                     | 7<br>(5 - 9)            | 19<br>(15 - 24)          | 13<br>(10 - 16)          |
| Liver cancer                                                     | 64<br>(52 - 79)          | --                    | 0<br>(0 - 0)           | 15<br>(11 - 20)         | 37<br>(29 - 48)          | 12<br>(9 - 15)           |
| Liver cancer due to hepatitis B                                  | 31<br>(21 - 44)          | --                    | 0<br>(0 - 0)           | 8<br>(5 - 12)           | 18<br>(12 - 26)          | 5<br>(3 - 7)             |
| Liver cancer due to hepatitis C                                  | 21<br>(11 - 33)          | --                    | 0<br>(0 - 0)           | 4<br>(2 - 7)            | 12<br>(6 - 20)           | 5<br>(3 - 7)             |
| Liver cancer due to alcohol use                                  | 4<br>(3 - 7)             | --                    | --                     | 1<br>(0 - 1)            | 3<br>(1 - 4)             | 1<br>(1 - 2)             |
| Liver cancer due to other causes                                 | 8<br>(5 - 12)            | --                    | 0<br>(0 - 0)           | 2<br>(1 - 3)            | 4<br>(3 - 7)             | 1<br>(1 - 2)             |
| Larynx cancer                                                    | 4<br>(3 - 5)             | --                    | --                     | 1<br>(0 - 1)            | 2<br>(1 - 2)             | 1<br>(1 - 2)             |

Web Table 31- Fiji deaths with 95% UI by age, sex, and cause in 2013

| Cause                                         | Both Sexes, All Ages     | Both Sexes, 0-4 Years | Both Sexes, 5-14 Years | Both Sexes, 15-49 Years | Both Sexes, 50-69 Years | Both Sexes, 70-80 Years |
|-----------------------------------------------|--------------------------|-----------------------|------------------------|-------------------------|-------------------------|-------------------------|
| Tracheal, bronchus and lung cancer            | 64<br>(53 - 76)          | --                    | --                     | 15<br>(11 - 19)         | 30<br>(24 - 37)         | 19<br>(15 - 23)         |
| Breast cancer                                 | 155<br>(118 - 204)       | --                    | --                     | 58<br>(40 - 82)         | 67<br>(50 - 88)         | 30<br>(23 - 38)         |
| Cervical cancer                               | 57<br>(33 - 78)          | --                    | --                     | 18<br>(10 - 28)         | 25<br>(15 - 35)         | 14<br>(9 - 20)          |
| Uterine cancer                                | 18<br>(8 - 27)           | --                    | --                     | 3<br>(1 - 4)            | 12<br>(5 - 19)          | 3<br>(2 - 5)            |
| Prostate cancer                               | 18<br>(5 - 31)           | --                    | --                     | 1<br>(0 - 1)            | 8<br>(2 - 15)           | 9<br>(3 - 16)           |
| Colon and rectum cancer                       | 67<br>(56 - 79)          | --                    | --                     | 14<br>(11 - 18)         | 31<br>(25 - 37)         | 22<br>(18 - 27)         |
| Lip and oral cavity cancer                    | 6<br>(4 - 8)             | --                    | --                     | 2<br>(1 - 3)            | 3<br>(2 - 4)            | 2<br>(1 - 2)            |
| Nasopharynx cancer                            | 5<br>(4 - 7)             | --                    | 0<br>(0 - 0)           | 2<br>(1 - 3)            | 3<br>(2 - 4)            | 0<br>(0 - 1)            |
| Other pharynx cancer                          | 2<br>(2 - 3)             | --                    | --                     | 0<br>(0 - 0)            | 1<br>(1 - 2)            | 1<br>(1 - 1)            |
| Gallbladder and biliary tract cancer          | 7<br>(5 - 9)             | --                    | --                     | 1<br>(1 - 2)            | 5<br>(4 - 7)            | 1<br>(1 - 1)            |
| Pancreatic cancer                             | 12<br>(10 - 15)          | --                    | --                     | 2<br>(2 - 3)            | 5<br>(4 - 6)            | 5<br>(4 - 6)            |
| Malignant skin melanoma                       | 2<br>(1 - 3)             | --                    | --                     | 1<br>(1 - 1)            | 0<br>(0 - 0)            | 1<br>(0 - 1)            |
| Non-melanoma skin cancer                      | 2<br>(1 - 2)             | --                    | --                     | 0<br>(0 - 0)            | 1<br>(0 - 1)            | 1<br>(1 - 1)            |
| Ovarian cancer                                | 1<br>(1 - 2)             | --                    | --                     | 1<br>(0 - 1)            | 1<br>(0 - 1)            | 0<br>(0 - 0)            |
| Testicular cancer                             | 1<br>(0 - 1)             | --                    | --                     | 0<br>(0 - 1)            | 0<br>(0 - 0)            | 0<br>(0 - 1)            |
| Kidney cancer                                 | 2<br>(2 - 3)             | 0<br>(0 - 0)          | 0<br>(0 - 0)           | 1<br>(0 - 1)            | 1<br>(1 - 1)            | 1<br>(0 - 1)            |
| Bladder cancer                                | 6<br>(2 - 8)             | --                    | --                     | 1<br>(0 - 1)            | 3<br>(1 - 4)            | 2<br>(1 - 3)            |
| Brain and nervous system cancer               | 4<br>(2 - 5)             | 0<br>(0 - 1)          | 0<br>(0 - 0)           | 2<br>(1 - 3)            | 1<br>(1 - 2)            | 0<br>(0 - 0)            |
| Thyroid cancer                                | 1<br>(1 - 1)             | --                    | 0<br>(0 - 0)           | 0<br>(0 - 0)            | 0<br>(0 - 1)            | 0<br>(0 - 0)            |
| Mesothelioma                                  | 1<br>(1 - 1)             | --                    | --                     | 0<br>(0 - 0)            | 0<br>(0 - 1)            | 0<br>(0 - 0)            |
| Hodgkin lymphoma                              | 2<br>(1 - 2)             | 0<br>(0 - 0)          | 0<br>(0 - 0)           | 1<br>(0 - 1)            | 0<br>(0 - 0)            | 1<br>(0 - 1)            |
| Non-Hodgkin lymphoma                          | 10<br>(7 - 12)           | 1<br>(0 - 1)          | 0<br>(0 - 0)           | 4<br>(3 - 5)            | 3<br>(2 - 3)            | 2<br>(2 - 3)            |
| Multiple myeloma                              | 7<br>(5 - 9)             | --                    | --                     | 2<br>(1 - 2)            | 3<br>(2 - 4)            | 2<br>(1 - 3)            |
| Leukemia                                      | 45<br>(37 - 54)          | 3<br>(1 - 5)          | 5<br>(3 - 6)           | 22<br>(18 - 28)         | 11<br>(8 - 14)          | 5<br>(4 - 6)            |
| Other neoplasms                               | 57<br>(30 - 80)          | 5<br>(2 - 10)         | 3<br>(1 - 5)           | 25<br>(13 - 37)         | 17<br>(9 - 24)          | 7<br>(4 - 10)           |
| Cardiovascular diseases                       | 2,712<br>(2,281 - 3,144) | 21<br>(11 - 37)       | 14<br>(10 - 20)        | 553<br>(429 - 686)      | 1,171<br>(956 - 1,387)  | 953<br>(852 - 1,052)    |
| Rheumatic heart disease                       | 63<br>(39 - 81)          | 1<br>(0 - 2)          | 5<br>(3 - 7)           | 32<br>(20 - 43)         | 15<br>(9 - 20)          | 11<br>(6 - 14)          |
| Ischemic heart disease                        | 1,723<br>(1,426 - 2,043) | 6<br>(3 - 12)         | 3<br>(2 - 4)           | 346<br>(258 - 442)      | 802<br>(645 - 961)      | 567<br>(500 - 639)      |
| Cerebrovascular disease                       | 655<br>(537 - 817)       | 8<br>(4 - 13)         | 4<br>(3 - 7)           | 102<br>(78 - 132)       | 246<br>(191 - 329)      | 294<br>(249 - 359)      |
| Ischemic stroke                               | 194<br>(152 - 264)       | 1<br>(0 - 1)          | 1<br>(0 - 1)           | 17<br>(12 - 24)         | 52<br>(37 - 77)         | 125<br>(100 - 169)      |
| Hemorrhagic stroke                            | 460<br>(372 - 575)       | 7<br>(4 - 12)         | 4<br>(2 - 6)           | 85<br>(64 - 110)        | 195<br>(152 - 253)      | 169<br>(141 - 210)      |
| Hypertensive heart disease                    | 79<br>(46 - 112)         | 0<br>(0 - 0)          | 0<br>(0 - 0)           | 13<br>(7 - 21)          | 33<br>(18 - 49)         | 32<br>(18 - 46)         |
| Cardiomyopathy and myocarditis                | 43<br>(33 - 55)          | 2<br>(1 - 5)          | 1<br>(1 - 2)           | 20<br>(15 - 27)         | 15<br>(11 - 20)         | 5<br>(3 - 6)            |
| Atrial fibrillation and flutter               | 11<br>(8 - 14)           | --                    | --                     | 1<br>(1 - 1)            | 3<br>(2 - 4)            | 7<br>(5 - 10)           |
| Aortic aneurysm                               | 25<br>(20 - 33)          | --                    | --                     | 6<br>(4 - 8)            | 10<br>(8 - 14)          | 9<br>(7 - 12)           |
| Peripheral vascular disease                   | 2<br>(2 - 3)             | --                    | --                     | 0<br>(0 - 0)            | 1<br>(0 - 1)            | 2<br>(1 - 2)            |
| Endocarditis                                  | 22<br>(17 - 32)          | 1<br>(1 - 3)          | 0<br>(0 - 0)           | 11<br>(7 - 16)          | 5<br>(3 - 8)            | 5<br>(4 - 7)            |
| Other cardiovascular and circulatory diseases | 88<br>(65 - 112)         | 2<br>(1 - 4)          | 1<br>(1 - 2)           | 22<br>(16 - 31)         | 41<br>(29 - 54)         | 21<br>(16 - 27)         |
| Chronic respiratory diseases                  | 430<br>(358 - 513)       | 5<br>(2 - 9)          | 2<br>(2 - 3)           | 51<br>(39 - 65)         | 169<br>(132 - 212)      | 204<br>(172 - 236)      |
| Chronic obstructive pulmonary disease         | 215<br>(175 - 260)       | 4<br>(2 - 7)          | 1<br>(0 - 1)           | 18<br>(13 - 24)         | 71<br>(54 - 94)         | 122<br>(99 - 146)       |

Web Table 31- Fiji deaths with 95% UI by age, sex, and cause in 2013

| Cause                                               | Both Sexes, All Ages | Both Sexes, 0-4 Years | Both Sexes, 5-14 Years | Both Sexes, 15-49 Years | Both Sexes, 50-69 Years | Both Sexes, 70-80 Years |
|-----------------------------------------------------|----------------------|-----------------------|------------------------|-------------------------|-------------------------|-------------------------|
| Pneumoconiosis                                      | 24<br>(15 - 35)      | 0<br>(0 - 0)          | 0<br>(0 - 0)           | 3<br>(2 - 5)            | 12<br>(7 - 19)          | 9<br>(5 - 13)           |
| Silicosis                                           | 7<br>(4 - 11)        | 0<br>(0 - 0)          | 0<br>(0 - 0)           | 1<br>(0 - 2)            | 3<br>(2 - 6)            | 3<br>(1 - 4)            |
| Asbestosis                                          | 3<br>(2 - 5)         | 0<br>(0 - 0)          | 0<br>(0 - 0)           | 0<br>(0 - 1)            | 2<br>(1 - 3)            | 1<br>(0 - 2)            |
| Coal workers pneumoconiosis                         | 3<br>(2 - 5)         | 0<br>(0 - 0)          | 0<br>(0 - 0)           | 0<br>(0 - 1)            | 2<br>(1 - 3)            | 1<br>(1 - 2)            |
| Other pneumoconiosis                                | 11<br>(7 - 16)       | 0<br>(0 - 0)          | 0<br>(0 - 0)           | 1<br>(1 - 2)            | 5<br>(3 - 9)            | 4<br>(2 - 6)            |
| Asthma                                              | 159<br>(123 - 193)   | 1<br>(0 - 2)          | 1<br>(1 - 1)           | 23<br>(17 - 30)         | 74<br>(55 - 96)         | 60<br>(43 - 77)         |
| Interstitial lung disease and pulmonary sarcoidosis | 21<br>(15 - 30)      | 0<br>(0 - 0)          | 0<br>(0 - 0)           | 4<br>(2 - 5)            | 9<br>(6 - 14)           | 9<br>(6 - 13)           |
| Other chronic respiratory diseases                  | 11<br>(9 - 16)       | 0<br>(0 - 1)          | 0<br>(0 - 0)           | 3<br>(2 - 5)            | 3<br>(2 - 4)            | 5<br>(4 - 8)            |
| Cirrhosis                                           | 70<br>(57 - 85)      | 0<br>(0 - 1)          | 2<br>(1 - 3)           | 31<br>(24 - 40)         | 26<br>(21 - 32)         | 10<br>(8 - 13)          |
| Cirrhosis due to hepatitis B                        | 38<br>(29 - 48)      | 0<br>(0 - 0)          | 1<br>(0 - 1)           | 18<br>(12 - 24)         | 14<br>(11 - 18)         | 5<br>(4 - 7)            |
| Cirrhosis due to hepatitis C                        | 15<br>(10 - 21)      | 0<br>(0 - 0)          | 0<br>(0 - 0)           | 6<br>(4 - 9)            | 6<br>(4 - 9)            | 3<br>(2 - 4)            |
| Cirrhosis due to alcohol use                        | 11<br>(7 - 15)       | --                    | --                     | 4<br>(2 - 6)            | 5<br>(3 - 7)            | 2<br>(1 - 3)            |
| Cirrhosis due to other causes                       | 6<br>(5 - 8)         | 0<br>(0 - 1)          | 1<br>(0 - 1)           | 4<br>(2 - 5)            | 1<br>(1 - 2)            | 0<br>(0 - 1)            |
| Digestive diseases                                  | 128<br>(103 - 182)   | 1<br>(1 - 3)          | 3<br>(2 - 4)           | 35<br>(26 - 52)         | 50<br>(38 - 74)         | 40<br>(32 - 52)         |
| Peptic ulcer disease                                | 32<br>(24 - 48)      | 0<br>(0 - 0)          | 1<br>(0 - 1)           | 8<br>(6 - 13)           | 13<br>(9 - 21)          | 10<br>(7 - 14)          |
| Gastritis and duodenitis                            | 1<br>(1 - 2)         | 0<br>(0 - 0)          | 0<br>(0 - 0)           | 0<br>(0 - 0)            | 0<br>(0 - 1)            | 1<br>(0 - 1)            |
| Appendicitis                                        | 11<br>(8 - 16)       | 0<br>(0 - 0)          | 0<br>(0 - 1)           | 4<br>(3 - 6)            | 4<br>(3 - 6)            | 2<br>(1 - 3)            |
| Paralytic ileus and intestinal obstruction          | 24<br>(15 - 45)      | 0<br>(0 - 1)          | 0<br>(0 - 1)           | 6<br>(4 - 12)           | 9<br>(5 - 18)           | 8<br>(5 - 15)           |
| Inguinal, femoral, and abdominal hernia             | 4<br>(2 - 6)         | 0<br>(0 - 0)          | 0<br>(0 - 0)           | 1<br>(0 - 1)            | 2<br>(1 - 2)            | 2<br>(1 - 3)            |
| Inflammatory bowel disease                          | 5<br>(3 - 6)         | 0<br>(0 - 0)          | 0<br>(0 - 0)           | 1<br>(1 - 2)            | 1<br>(1 - 2)            | 2<br>(2 - 4)            |
| Vascular intestinal disorders                       | 3<br>(1 - 6)         | 0<br>(0 - 1)          | 0<br>(0 - 0)           | 2<br>(1 - 4)            | 0<br>(0 - 1)            | 1<br>(0 - 1)            |
| Gallbladder and biliary diseases                    | 21<br>(16 - 27)      | 0<br>(0 - 0)          | 0<br>(0 - 1)           | 5<br>(4 - 6)            | 8<br>(6 - 11)           | 8<br>(6 - 10)           |
| Pancreatitis                                        | 4<br>(2 - 6)         | 0<br>(0 - 0)          | 0<br>(0 - 0)           | 1<br>(1 - 2)            | 1<br>(1 - 2)            | 1<br>(1 - 2)            |
| Other digestive diseases                            | 23<br>(17 - 34)      | 0<br>(0 - 0)          | 1<br>(0 - 1)           | 6<br>(4 - 9)            | 10<br>(8 - 16)          | 6<br>(4 - 8)            |
| Neurological disorders                              | 91<br>(77 - 106)     | 1<br>(1 - 3)          | 1<br>(0 - 2)           | 9<br>(6 - 12)           | 14<br>(11 - 17)         | 66<br>(55 - 78)         |
| Alzheimer disease and other dementias               | 73<br>(61 - 86)      | --                    | --                     | 0<br>(0 - 0)            | 10<br>(8 - 13)          | 63<br>(52 - 75)         |
| Parkinson disease                                   | 3<br>(2 - 4)         | --                    | --                     | 0<br>(0 - 0)            | 1<br>(1 - 2)            | 2<br>(1 - 3)            |
| Epilepsy                                            | 10<br>(6 - 14)       | 1<br>(0 - 2)          | 1<br>(0 - 2)           | 7<br>(4 - 10)           | 1<br>(1 - 1)            | 0<br>(0 - 1)            |
| Multiple sclerosis                                  | 0<br>(0 - 0)         | --                    | --                     | 0<br>(0 - 0)            | 0<br>(0 - 0)            | 0<br>(0 - 0)            |
| Other neurological disorders                        | 5<br>(4 - 6)         | 0<br>(0 - 1)          | 0<br>(0 - 0)           | 1<br>(1 - 2)            | 2<br>(1 - 2)            | 2<br>(1 - 2)            |
| Mental and substance use disorders                  | 24<br>(15 - 32)      | 0<br>(0 - 0)          | 0<br>(0 - 0)           | 18<br>(11 - 25)         | 4<br>(3 - 7)            | 1<br>(1 - 2)            |
| Schizophrenia                                       | 0<br>(0 - 0)         | --                    | --                     | 0<br>(0 - 0)            | 0<br>(0 - 0)            | 0<br>(0 - 0)            |
| Alcohol use disorders                               | 21<br>(12 - 30)      | --                    | --                     | 16<br>(9 - 23)          | 4<br>(2 - 6)            | 1<br>(1 - 2)            |
| Drug use disorders                                  | 2<br>(2 - 3)         | 0<br>(0 - 0)          | --                     | 2<br>(1 - 2)            | 0<br>(0 - 0)            | 0<br>(0 - 0)            |
| Opioid use disorders                                | 0<br>(0 - 1)         | 0<br>(0 - 0)          | --                     | 0<br>(0 - 0)            | 0<br>(0 - 0)            | 0<br>(0 - 0)            |
| Cocaine use disorders                               | 0<br>(0 - 0)         | 0<br>(0 - 0)          | --                     | 0<br>(0 - 0)            | 0<br>(0 - 0)            | 0<br>(0 - 0)            |
| Amphetamine use disorders                           | 0<br>(0 - 0)         | 0<br>(0 - 0)          | --                     | 0<br>(0 - 0)            | 0<br>(0 - 0)            | 0<br>(0 - 0)            |
| Other drug use disorders                            | 1<br>(1 - 2)         | 0<br>(0 - 0)          | --                     | 1<br>(1 - 1)            | 0<br>(0 - 0)            | 0<br>(0 - 0)            |
| Eating disorders                                    | 0<br>(0 - 0)         | --                    | 0<br>(0 - 0)           | 0<br>(0 - 0)            | --                      | --                      |
| Anorexia nervosa                                    | 0<br>(0 - 0)         | --                    | 0<br>(0 - 0)           | 0<br>(0 - 0)            | --                      | --                      |

Web Table 31- Fiji deaths with 95% UI by age, sex, and cause in 2013

| Cause                                               | Both Sexes, All Ages     | Both Sexes, 0-4 Years | Both Sexes, 5-14 Years | Both Sexes, 15-49 Years | Both Sexes, 50-69 Years | Both Sexes, 70-80 Years |
|-----------------------------------------------------|--------------------------|-----------------------|------------------------|-------------------------|-------------------------|-------------------------|
| Diabetes, urogenital, blood, and endocrine diseases | 1,925<br>(1,612 - 2,238) | 15<br>(8 - 25)        | 6<br>(4 - 8)           | 274<br>(213 - 345)      | 975<br>(803 - 1,152)    | 654<br>(556 - 741)      |
| Diabetes mellitus                                   | 1,596<br>(1,316 - 1,854) | 4<br>(2 - 7)          | 1<br>(1 - 1)           | 181<br>(137 - 227)      | 843<br>(690 - 1,000)    | 568<br>(476 - 648)      |
| Acute glomerulonephritis                            | 0<br>(0 - 1)             | 0<br>(0 - 0)          | 0<br>(0 - 0)           | 0<br>(0 - 0)            | 0<br>(0 - 0)            | 0<br>(0 - 0)            |
| Chronic kidney disease                              | 226<br>(181 - 312)       | 3<br>(1 - 5)          | 2<br>(1 - 3)           | 65<br>(49 - 91)         | 95<br>(75 - 134)        | 60<br>(48 - 80)         |
| Chronic kidney disease due to diabetes mellitus     | 27<br>(19 - 41)          | 0<br>(0 - 0)          | 0<br>(0 - 0)           | 7<br>(4 - 10)           | 14<br>(9 - 20)          | 7<br>(4 - 10)           |
| Chronic kidney disease due to hypertension          | 70<br>(51 - 95)          | 0<br>(0 - 1)          | 0<br>(0 - 1)           | 21<br>(14 - 29)         | 32<br>(22 - 47)         | 17<br>(12 - 23)         |
| Chronic kidney disease due to glomerulonephritis    | 14<br>(10 - 18)          | 0<br>(0 - 1)          | 0<br>(0 - 0)           | 4<br>(3 - 6)            | 3<br>(2 - 5)            | 6<br>(4 - 8)            |
| Chronic kidney disease due to other causes          | 114<br>(85 - 172)        | 2<br>(1 - 3)          | 1<br>(1 - 2)           | 34<br>(23 - 54)         | 47<br>(31 - 71)         | 31<br>(21 - 47)         |
| Urinary diseases and male infertility               | 44<br>(31 - 55)          | 2<br>(1 - 3)          | 0<br>(0 - 1)           | 12<br>(8 - 17)          | 16<br>(11 - 21)         | 14<br>(9 - 18)          |
| Interstitial nephritis and urinary tract infections | 25<br>(17 - 32)          | 1<br>(0 - 2)          | 0<br>(0 - 0)           | 7<br>(4 - 10)           | 9<br>(6 - 12)           | 8<br>(5 - 11)           |
| Urolithiasis                                        | 1<br>(1 - 2)             | --                    | 0<br>(0 - 0)           | 0<br>(0 - 1)            | 0<br>(0 - 1)            | 0<br>(0 - 0)            |
| Other urinary diseases                              | 19<br>(12 - 24)          | 1<br>(0 - 1)          | 0<br>(0 - 0)           | 5<br>(3 - 7)            | 7<br>(4 - 9)            | 6<br>(4 - 8)            |
| Gynecological diseases                              | 1<br>(0 - 1)             | --                    | --                     | 0<br>(0 - 1)            | 0<br>(0 - 0)            | 0<br>(0 - 0)            |
| Uterine fibroids                                    | 0<br>(0 - 0)             | --                    | --                     | 0<br>(0 - 0)            | 0<br>(0 - 0)            | 0<br>(0 - 0)            |
| Polycystic ovarian syndrome                         | 0<br>(0 - 0)             | --                    | --                     | 0<br>(0 - 0)            | 0<br>(0 - 0)            | --                      |
| Endometriosis                                       | 0<br>(0 - 0)             | --                    | --                     | 0<br>(0 - 0)            | 0<br>(0 - 0)            | --                      |
| Genital prolapse                                    | 0<br>(0 - 0)             | --                    | --                     | 0<br>(0 - 0)            | 0<br>(0 - 0)            | 0<br>(0 - 0)            |
| Other gynecological diseases                        | 0<br>(0 - 1)             | --                    | --                     | 0<br>(0 - 0)            | 0<br>(0 - 0)            | 0<br>(0 - 0)            |
| Hemoglobinopathies and hemolytic anemias            | 17<br>(11 - 23)          | 3<br>(2 - 6)          | 2<br>(1 - 3)           | 7<br>(5 - 10)           | 2<br>(1 - 3)            | 2<br>(2 - 3)            |
| Thalassemias                                        | 9<br>(6 - 13)            | 3<br>(1 - 5)          | 2<br>(1 - 3)           | 4<br>(3 - 6)            | 0<br>(0 - 0)            | 0<br>(0 - 0)            |
| Sickle cell disorders                               | 0<br>(0 - 0)             | 0<br>(0 - 0)          | 0<br>(0 - 0)           | 0<br>(0 - 0)            | 0<br>(0 - 0)            | 0<br>(0 - 0)            |
| G6PD deficiency                                     | 0<br>(0 - 0)             | 0<br>(0 - 0)          | 0<br>(0 - 0)           | 0<br>(0 - 0)            | 0<br>(0 - 0)            | 0<br>(0 - 0)            |
| Other hemoglobinopathies and hemolytic anemias      | 8<br>(5 - 10)            | 0<br>(0 - 1)          | 0<br>(0 - 0)           | 3<br>(2 - 4)            | 2<br>(1 - 3)            | 2<br>(2 - 3)            |
| Endocrine, metabolic, blood, and immune disorders   | 41<br>(22 - 52)          | 3<br>(1 - 5)          | 0<br>(0 - 1)           | 9<br>(5 - 12)           | 19<br>(9 - 26)          | 10<br>(5 - 14)          |
| Musculoskeletal disorders                           | 13<br>(9 - 20)           | --                    | 1<br>(1 - 2)           | 5<br>(3 - 8)            | 4<br>(3 - 7)            | 3<br>(2 - 5)            |
| Rheumatoid arthritis                                | 4<br>(2 - 6)             | --                    | 0<br>(0 - 0)           | 1<br>(0 - 2)            | 1<br>(1 - 2)            | 1<br>(1 - 2)            |
| Other musculoskeletal disorders                     | 9<br>(6 - 14)            | --                    | 1<br>(0 - 1)           | 4<br>(3 - 7)            | 3<br>(2 - 5)            | 1<br>(1 - 3)            |
| Other non-communicable diseases                     | 167<br>(117 - 241)       | 112<br>(68 - 179)     | 12<br>(8 - 17)         | 23<br>(17 - 29)         | 10<br>(8 - 13)          | 10<br>(8 - 13)          |
| Congenital anomalies                                | 142<br>(98 - 209)        | 103<br>(63 - 164)     | 12<br>(7 - 17)         | 19<br>(14 - 24)         | 6<br>(4 - 7)            | 4<br>(3 - 5)            |
| Neural tube defects                                 | 4<br>(2 - 9)             | 3<br>(1 - 8)          | 0<br>(0 - 0)           | 1<br>(0 - 1)            | 0<br>(0 - 0)            | 0<br>(0 - 0)            |
| Congenital heart anomalies                          | 83<br>(55 - 126)         | 63<br>(36 - 102)      | 8<br>(5 - 12)          | 9<br>(7 - 12)           | 2<br>(1 - 3)            | 2<br>(1 - 2)            |
| Cleft lip and cleft palate                          | 0<br>(0 - 1)             | 0<br>(0 - 1)          | --                     | --                      | --                      | --                      |
| Down syndrome                                       | 5<br>(3 - 9)             | 4<br>(2 - 7)          | 0<br>(0 - 1)           | 1<br>(1 - 1)            | 0<br>(0 - 0)            | 0<br>(0 - 0)            |
| Chromosomal unbalanced rearrangements               | 6<br>(3 - 11)            | 5<br>(2 - 10)         | 0<br>(0 - 0)           | 1<br>(0 - 1)            | 0<br>(0 - 0)            | 0<br>(0 - 0)            |
| Other congenital anomalies                          | 44<br>(30 - 63)          | 28<br>(17 - 46)       | 3<br>(2 - 4)           | 8<br>(5 - 10)           | 3<br>(2 - 4)            | 2<br>(2 - 3)            |
| Skin and subcutaneous diseases                      | 16<br>(13 - 23)          | 1<br>(0 - 1)          | 0<br>(0 - 0)           | 4<br>(3 - 6)            | 5<br>(4 - 7)            | 6<br>(4 - 10)           |
| Cellulitis                                          | 4<br>(2 - 5)             | 0<br>(0 - 0)          | 0<br>(0 - 0)           | 1<br>(1 - 2)            | 1<br>(0 - 1)            | 1<br>(1 - 2)            |
| Pyoderma                                            | 9<br>(7 - 12)            | 0<br>(0 - 1)          | 0<br>(0 - 0)           | 2<br>(2 - 3)            | 3<br>(2 - 5)            | 3<br>(2 - 4)            |
| Decubitus ulcer                                     | 4<br>(3 - 6)             | 0<br>(0 - 0)          | 0<br>(0 - 0)           | 0<br>(0 - 1)            | 1<br>(1 - 1)            | 2<br>(1 - 4)            |
| Other skin and subcutaneous diseases                | 0<br>(0 - 1)             | 0<br>(0 - 0)          | 0<br>(0 - 0)           | 0<br>(0 - 0)            | 0<br>(0 - 0)            | 0<br>(0 - 0)            |



Web Table 31- Fiji deaths with 95% UI by age, sex, and cause in 2013

| Cause                                           | Both Sexes, All Ages | Both Sexes, 0-4 Years | Both Sexes, 5-14 Years | Both Sexes, 15-49 Years | Both Sexes, 50-69 Years | Both Sexes, 70-80 Years |
|-------------------------------------------------|----------------------|-----------------------|------------------------|-------------------------|-------------------------|-------------------------|
| Sudden infant death syndrome                    | 8<br>(3 - 18)        | 8<br>(3 - 18)         | --                     | --                      | --                      | --                      |
| Injuries                                        | 408<br>(330 - 496)   | 35<br>(17 - 61)       | 24<br>(17 - 33)        | 228<br>(182 - 278)      | 71<br>(55 - 87)         | 50<br>(39 - 59)         |
| Transport injuries                              | 120<br>(95 - 144)    | 7<br>(3 - 12)         | 9<br>(6 - 12)          | 71<br>(55 - 87)         | 22<br>(17 - 27)         | 12<br>(9 - 14)          |
| Road injuries                                   | 107<br>(85 - 130)    | 6<br>(3 - 11)         | 8<br>(5 - 12)          | 64<br>(50 - 80)         | 19<br>(15 - 24)         | 10<br>(8 - 12)          |
| Pedestrian road injuries                        | 26<br>(19 - 35)      | 2<br>(1 - 3)          | 2<br>(1 - 4)           | 14<br>(10 - 19)         | 5<br>(3 - 7)            | 3<br>(2 - 4)            |
| Cyclist road injuries                           | 6<br>(4 - 7)         | 0<br>(0 - 1)          | 1<br>(0 - 1)           | 3<br>(2 - 4)            | 1<br>(1 - 2)            | 1<br>(0 - 1)            |
| Motorcyclist road injuries                      | 17<br>(11 - 23)      | 1<br>(0 - 1)          | 1<br>(1 - 2)           | 12<br>(8 - 17)          | 2<br>(1 - 3)            | 1<br>(0 - 1)            |
| Motor vehicle road injuries                     | 57<br>(45 - 72)      | 3<br>(1 - 6)          | 4<br>(3 - 6)           | 34<br>(26 - 44)         | 10<br>(8 - 13)          | 5<br>(4 - 7)            |
| Other road injuries                             | 1<br>(1 - 2)         | 0<br>(0 - 0)          | 0<br>(0 - 0)           | 1<br>(0 - 1)            | 0<br>(0 - 0)            | 0<br>(0 - 0)            |
| Other transport injuries                        | 12<br>(10 - 15)      | 1<br>(0 - 2)          | 1<br>(0 - 1)           | 6<br>(5 - 8)            | 3<br>(2 - 4)            | 2<br>(1 - 2)            |
| Unintentional injuries                          | 202<br>(146 - 261)   | 27<br>(13 - 49)       | 13<br>(9 - 19)         | 93<br>(67 - 121)        | 36<br>(26 - 47)         | 32<br>(23 - 40)         |
| Falls                                           | 25<br>(15 - 33)      | 1<br>(0 - 2)          | 1<br>(0 - 1)           | 10<br>(6 - 14)          | 4<br>(2 - 6)            | 9<br>(5 - 13)           |
| Drowning                                        | 58<br>(31 - 89)      | 11<br>(4 - 24)        | 7<br>(3 - 12)          | 29<br>(15 - 44)         | 8<br>(4 - 13)           | 3<br>(2 - 5)            |
| Fire, heat, and hot substances                  | 35<br>(22 - 48)      | 4<br>(2 - 7)          | 2<br>(1 - 3)           | 18<br>(11 - 27)         | 6<br>(4 - 10)           | 4<br>(3 - 6)            |
| Poisonings                                      | 1<br>(1 - 2)         | 0<br>(0 - 0)          | 0<br>(0 - 0)           | 0<br>(0 - 1)            | 0<br>(0 - 0)            | 0<br>(0 - 1)            |
| Exposure to mechanical forces                   | 24<br>(17 - 32)      | 2<br>(1 - 4)          | 1<br>(1 - 2)           | 13<br>(9 - 18)          | 6<br>(4 - 9)            | 2<br>(1 - 3)            |
| Unintentional firearm injuries                  | 1<br>(1 - 2)         | 0<br>(0 - 0)          | 0<br>(0 - 0)           | 0<br>(0 - 1)            | 0<br>(0 - 1)            | 0<br>(0 - 0)            |
| Unintentional suffocation                       | 7<br>(4 - 12)        | 0<br>(0 - 1)          | 1<br>(0 - 1)           | 5<br>(3 - 9)            | 1<br>(0 - 2)            | 0<br>(0 - 0)            |
| Other exposure to mechanical forces             | 17<br>(10 - 22)      | 2<br>(1 - 3)          | 1<br>(0 - 1)           | 7<br>(4 - 10)           | 5<br>(3 - 8)            | 2<br>(1 - 3)            |
| Adverse effects of medical treatment            | 25<br>(17 - 32)      | 2<br>(1 - 5)          | 0<br>(0 - 0)           | 10<br>(6 - 14)          | 6<br>(3 - 8)            | 7<br>(4 - 10)           |
| Animal contact                                  | 3<br>(2 - 5)         | 0<br>(0 - 1)          | 0<br>(0 - 0)           | 1<br>(1 - 2)            | 1<br>(0 - 1)            | 1<br>(0 - 1)            |
| Venomous animal contact                         | 1<br>(1 - 2)         | 0<br>(0 - 0)          | 0<br>(0 - 0)           | 0<br>(0 - 1)            | 0<br>(0 - 0)            | 0<br>(0 - 0)            |
| Non-venomous animal contact                     | 2<br>(2 - 3)         | 0<br>(0 - 1)          | 0<br>(0 - 0)           | 1<br>(1 - 1)            | 0<br>(0 - 1)            | 1<br>(0 - 1)            |
| Foreign body                                    | 18<br>(12 - 28)      | 6<br>(3 - 11)         | 1<br>(1 - 2)           | 4<br>(2 - 8)            | 3<br>(2 - 5)            | 3<br>(2 - 5)            |
| Pulmonary aspiration and foreign body in airway | 17<br>(11 - 28)      | 6<br>(3 - 11)         | 1<br>(1 - 2)           | 4<br>(2 - 7)            | 3<br>(2 - 5)            | 3<br>(2 - 5)            |
| Foreign body in other body part                 | 0<br>(0 - 1)         | 0<br>(0 - 0)          | 0<br>(0 - 0)           | 0<br>(0 - 0)            | 0<br>(0 - 0)            | 0<br>(0 - 0)            |
| Other unintentional injuries                    | 13<br>(10 - 16)      | 1<br>(0 - 1)          | 1<br>(0 - 1)           | 8<br>(6 - 10)           | 2<br>(2 - 3)            | 1<br>(1 - 2)            |
| Self-harm and interpersonal violence            | 86<br>(67 - 114)     | 1<br>(0 - 2)          | 2<br>(1 - 3)           | 64<br>(47 - 89)         | 13<br>(9 - 17)          | 6<br>(4 - 8)            |
| Self-harm                                       | 60<br>(43 - 77)      | --                    | 1<br>(1 - 3)           | 44<br>(31 - 59)         | 9<br>(6 - 12)           | 6<br>(4 - 7)            |
| Interpersonal violence                          | 26<br>(18 - 46)      | 1<br>(0 - 2)          | 1<br>(0 - 1)           | 20<br>(13 - 39)         | 4<br>(2 - 6)            | 1<br>(0 - 1)            |
| Assault by firearm                              | 7<br>(4 - 14)        | 0<br>(0 - 0)          | 0<br>(0 - 0)           | 5<br>(3 - 12)           | 1<br>(1 - 2)            | 0<br>(0 - 0)            |
| Assault by sharp object                         | 12<br>(7 - 23)       | 0<br>(0 - 0)          | 0<br>(0 - 0)           | 10<br>(6 - 20)          | 1<br>(1 - 2)            | 0<br>(0 - 0)            |
| Assault by other means                          | 8<br>(6 - 13)        | 1<br>(0 - 2)          | 0<br>(0 - 1)           | 5<br>(3 - 10)           | 1<br>(1 - 2)            | 1<br>(0 - 1)            |

Web Table 31- Fiji deaths with 95% UI by age, sex, and cause in 2013

| Cause                                                             | Males, All Ages          | Males, 0-4 Years   | Males, 5-14 Years | Males, 15-49 Years   | Males, 50-69 Years       | Males, 70-80 Years     |
|-------------------------------------------------------------------|--------------------------|--------------------|-------------------|----------------------|--------------------------|------------------------|
| All causes                                                        | 4,160<br>(3,344 - 5,064) | 330<br>(218 - 480) | 58<br>(46 - 75)   | 997<br>(722 - 1,316) | 1,679<br>(1,266 - 2,118) | 1,096<br>(920 - 1,224) |
| Communicable, maternal, neonatal, and nutritional diseases        | 506<br>(409 - 631)       | 218<br>(146 - 318) | 16<br>(11 - 25)   | 97<br>(73 - 126)     | 91<br>(67 - 124)         | 83<br>(65 - 108)       |
| HIV/AIDS and tuberculosis                                         | 29<br>(23 - 40)          | 0<br>(0 - 1)       | 0<br>(0 - 1)      | 12<br>(9 - 17)       | 11<br>(8 - 15)           | 6<br>(4 - 8)           |
| Tuberculosis                                                      | 22<br>(17 - 33)          | 0<br>(0 - 0)       | 0<br>(0 - 0)      | 7<br>(5 - 11)        | 9<br>(6 - 14)            | 5<br>(4 - 8)           |
| HIV/AIDS                                                          | 7<br>(4 - 11)            | 0<br>(0 - 0)       | 0<br>(0 - 0)      | 5<br>(3 - 7)         | 2<br>(1 - 3)             | 0<br>(0 - 0)           |
| HIV/AIDS resulting in mycobacterial infection                     | 0<br>(0 - 1)             | 0<br>(0 - 0)       | 0<br>(0 - 0)      | 0<br>(0 - 0)         | 0<br>(0 - 0)             | 0<br>(0 - 0)           |
| HIV/AIDS resulting in other diseases                              | 7<br>(4 - 10)            | 0<br>(0 - 0)       | 0<br>(0 - 0)      | 5<br>(3 - 7)         | 1<br>(1 - 3)             | 0<br>(0 - 0)           |
| Diarrhea, lower respiratory, and other common infectious diseases | 271<br>(209 - 362)       | 84<br>(47 - 144)   | 11<br>(7 - 22)    | 49<br>(35 - 67)      | 61<br>(43 - 88)          | 65<br>(49 - 86)        |
| Diarrheal diseases                                                | 49<br>(36 - 69)          | 15<br>(6 - 31)     | 2<br>(1 - 4)      | 7<br>(4 - 10)        | 11<br>(6 - 17)           | 15<br>(10 - 21)        |
| Intestinal infectious diseases                                    | 6<br>(2 - 11)            | 2<br>(1 - 6)       | 1<br>(1 - 3)      | 1<br>(1 - 3)         | 0<br>(0 - 1)             | 0<br>(0 - 0)           |
| Typhoid fever                                                     | 4<br>(2 - 8)             | 2<br>(1 - 4)       | 1<br>(0 - 2)      | 1<br>(0 - 2)         | 0<br>(0 - 0)             | 0<br>(0 - 0)           |
| Paratyphoid fever                                                 | 1<br>(0 - 2)             | 1<br>(0 - 1)       | 0<br>(0 - 1)      | 0<br>(0 - 0)         | 0<br>(0 - 0)             | 0<br>(0 - 0)           |
| Other intestinal infectious diseases                              | 0<br>(0 - 2)             | 0<br>(0 - 1)       | 0<br>(0 - 0)      | 0<br>(0 - 1)         | 0<br>(0 - 0)             | 0<br>(0 - 0)           |
| Lower respiratory infections                                      | 177<br>(136 - 236)       | 46<br>(25 - 81)    | 4<br>(2 - 6)      | 33<br>(22 - 47)      | 46<br>(31 - 70)          | 48<br>(34 - 69)        |
| Upper respiratory infections                                      | 0<br>(0 - 1)             | 0<br>(0 - 0)       | 0<br>(0 - 0)      | 0<br>(0 - 0)         | 0<br>(0 - 0)             | 0<br>(0 - 0)           |
| Otitis media                                                      | 0<br>(0 - 1)             | 0<br>(0 - 0)       | 0<br>(0 - 0)      | 0<br>(0 - 0)         | 0<br>(0 - 0)             | 0<br>(0 - 0)           |
| Meningitis                                                        | 13<br>(10 - 18)          | 4<br>(2 - 7)       | 1<br>(1 - 2)      | 5<br>(3 - 7)         | 3<br>(2 - 4)             | 1<br>(1 - 2)           |
| Pneumococcal meningitis                                           | 5<br>(3 - 7)             | 1<br>(0 - 2)       | 0<br>(0 - 1)      | 2<br>(1 - 3)         | 1<br>(1 - 2)             | 0<br>(0 - 1)           |
| H influenzae type B meningitis                                    | 2<br>(1 - 2)             | 1<br>(0 - 1)       | 0<br>(0 - 0)      | 0<br>(0 - 1)         | 0<br>(0 - 0)             | 0<br>(0 - 0)           |
| Meningococcal meningitis                                          | 3<br>(2 - 4)             | 1<br>(0 - 1)       | 0<br>(0 - 0)      | 1<br>(1 - 2)         | 1<br>(0 - 1)             | 0<br>(0 - 0)           |
| Other meningitis                                                  | 4<br>(3 - 6)             | 1<br>(0 - 2)       | 0<br>(0 - 1)      | 2<br>(1 - 3)         | 1<br>(0 - 2)             | 0<br>(0 - 1)           |
| Encephalitis                                                      | 6<br>(4 - 8)             | 1<br>(0 - 1)       | 0<br>(0 - 0)      | 3<br>(2 - 4)         | 2<br>(1 - 2)             | 1<br>(0 - 1)           |
| Diphtheria                                                        | 0<br>(0 - 0)             | 0<br>(0 - 0)       | 0<br>(0 - 0)      | 0<br>(0 - 0)         | 0<br>(0 - 0)             | --<br>(0 - 0)          |
| Whooping cough                                                    | 0<br>(0 - 2)             | 0<br>(0 - 2)       | 0<br>(0 - 0)      | 0<br>(0 - 0)         | 0<br>(0 - 0)             | --<br>(0 - 0)          |
| Tetanus                                                           | 0<br>(0 - 0)             | 0<br>(0 - 0)       | 0<br>(0 - 0)      | 0<br>(0 - 0)         | 0<br>(0 - 0)             | 0<br>(0 - 0)           |
| Measles                                                           | 19<br>(0 - 94)           | 16<br>(0 - 76)     | 3<br>(0 - 13)     | 0<br>(0 - 3)         | 0<br>(0 - 0)             | --<br>(0 - 0)          |
| Varicella and herpes zoster                                       | 0<br>(0 - 0)             | 0<br>(0 - 0)       | 0<br>(0 - 0)      | 0<br>(0 - 0)         | 0<br>(0 - 0)             | 0<br>(0 - 0)           |
| Neglected tropical diseases and malaria                           | 3<br>(1 - 7)             | 1<br>(0 - 3)       | 0<br>(0 - 2)      | 1<br>(1 - 3)         | 0<br>(0 - 1)             | 0<br>(0 - 1)           |
| Leishmaniasis                                                     | 0<br>(0 - 0)             | 0<br>(0 - 0)       | 0<br>(0 - 0)      | 0<br>(0 - 0)         | 0<br>(0 - 0)             | 0<br>(0 - 0)           |
| Visceral leishmaniasis                                            | 0<br>(0 - 0)             | 0<br>(0 - 0)       | 0<br>(0 - 0)      | 0<br>(0 - 0)         | 0<br>(0 - 0)             | 0<br>(0 - 0)           |
| Cysticercosis                                                     | 0<br>(0 - 0)             | 0<br>(0 - 0)       | 0<br>(0 - 0)      | 0<br>(0 - 0)         | 0<br>(0 - 0)             | 0<br>(0 - 0)           |
| Cystic echinococcosis                                             | 0<br>(0 - 0)             | 0<br>(0 - 0)       | 0<br>(0 - 0)      | 0<br>(0 - 0)         | 0<br>(0 - 0)             | 0<br>(0 - 0)           |
| Dengue                                                            | 1<br>(1 - 4)             | 0<br>(0 - 1)       | 0<br>(0 - 1)      | 1<br>(0 - 2)         | 0<br>(0 - 1)             | 0<br>(0 - 1)           |
| Rabies                                                            | 0<br>(0 - 0)             | 0<br>(0 - 0)       | 0<br>(0 - 0)      | 0<br>(0 - 0)         | 0<br>(0 - 0)             | 0<br>(0 - 0)           |
| Intestinal nematode infections                                    | 1<br>(0 - 5)             | 0<br>(0 - 3)       | 0<br>(0 - 1)      | 0<br>(0 - 1)         | 0<br>(0 - 1)             | 0<br>(0 - 0)           |
| Ascariasis                                                        | 1<br>(0 - 5)             | 0<br>(0 - 3)       | 0<br>(0 - 1)      | 0<br>(0 - 1)         | 0<br>(0 - 1)             | 0<br>(0 - 1)           |
| Other neglected tropical diseases                                 | 0<br>(0 - 1)             | 0<br>(0 - 0)       | 0<br>(0 - 0)      | 0<br>(0 - 0)         | 0<br>(0 - 0)             | 0<br>(0 - 0)           |
| Maternal disorders                                                | --                       | --                 | --                | --                   | --                       | --                     |
| Maternal hemorrhage                                               | --                       | --                 | --                | --                   | --                       | --                     |
| Maternal sepsis and other maternal infections                     | --                       | --                 | --                | --                   | --                       | --                     |

Web Table 31- Fiji deaths with 95% UI by age, sex, and cause in 2013

| Cause                                                            | Males, All Ages          | Males, 0-4 Years  | Males, 5-14 Years | Males, 15-49 Years | Males, 50-69 Years       | Males, 70-80 Years   |
|------------------------------------------------------------------|--------------------------|-------------------|-------------------|--------------------|--------------------------|----------------------|
| Maternal hypertensive disorders                                  | --                       | --                | --                | --                 | --                       | --                   |
| Maternal obstructed labor                                        | --                       | --                | --                | --                 | --                       | --                   |
| Maternal abortive outcome                                        | --                       | --                | --                | --                 | --                       | --                   |
| Indirect maternal deaths                                         | --                       | --                | --                | --                 | --                       | --                   |
| Late maternal deaths                                             | --                       | --                | --                | --                 | --                       | --                   |
| Maternal deaths aggravated by HIV/AIDS                           | --                       | --                | --                | --                 | --                       | --                   |
| Other maternal disorders                                         | --                       | --                | --                | --                 | --                       | --                   |
| Neonatal disorders                                               | 117<br>(81 - 159)        | 117<br>(81 - 159) | --                | --                 | --                       | --                   |
| Neonatal preterm birth complications                             | 58<br>(33 - 89)          | 58<br>(33 - 89)   | --                | --                 | --                       | --                   |
| Neonatal encephalopathy due to birth asphyxia and trauma         | 35<br>(18 - 57)          | 35<br>(18 - 57)   | --                | --                 | --                       | --                   |
| Neonatal sepsis and other neonatal infections                    | 15<br>(6 - 33)           | 15<br>(6 - 33)    | --                | --                 | --                       | --                   |
| Hemolytic disease and other neonatal jaundice                    | 0<br>(0 - 1)             | 0<br>(0 - 1)      | --                | --                 | --                       | --                   |
| Other neonatal disorders                                         | 9<br>(4 - 17)            | 9<br>(4 - 17)     | --                | --                 | --                       | --                   |
| Nutritional deficiencies                                         | 26<br>(16 - 40)          | 8<br>(3 - 16)     | 1<br>(1 - 2)      | 6<br>(3 - 8)       | 6<br>(4 - 9)             | 5<br>(3 - 8)         |
| Protein-energy malnutrition                                      | 16<br>(9 - 25)           | 7<br>(3 - 15)     | 1<br>(0 - 1)      | 2<br>(1 - 4)       | 3<br>(1 - 5)             | 2<br>(1 - 4)         |
| Iodine deficiency                                                | 1<br>(0 - 1)             | 0<br>(0 - 0)      | 0<br>(0 - 0)      | 0<br>(0 - 1)       | 0<br>(0 - 1)             | 0<br>(0 - 1)         |
| Iron-deficiency anemia                                           | 9<br>(4 - 14)            | 0<br>(0 - 1)      | 0<br>(0 - 1)      | 3<br>(1 - 5)       | 3<br>(1 - 5)             | 3<br>(1 - 5)         |
| Other nutritional deficiencies                                   | 1<br>(0 - 2)             | 0<br>(0 - 0)      | 0<br>(0 - 0)      | 0<br>(0 - 1)       | 0<br>(0 - 0)             | 0<br>(0 - 1)         |
| Other communicable, maternal, neonatal, and nutritional diseases | 60<br>(40 - 83)          | 9<br>(4 - 17)     | 2<br>(1 - 4)      | 29<br>(17 - 45)    | 13<br>(7 - 21)           | 7<br>(4 - 12)        |
| Sexually transmitted diseases excluding HIV                      | 4<br>(1 - 8)             | 3<br>(1 - 7)      | 0<br>(0 - 1)      | 0<br>(0 - 0)       | 0<br>(0 - 0)             | 0<br>(0 - 0)         |
| Syphilis                                                         | 3<br>(1 - 8)             | 3<br>(1 - 7)      | 0<br>(0 - 1)      | 0<br>(0 - 0)       | 0<br>(0 - 0)             | 0<br>(0 - 0)         |
| Chlamydial infection                                             | --                       | --                | --                | --                 | --                       | --                   |
| Gonococcal infection                                             | 0<br>(0 - 0)             | --                | 0<br>(0 - 0)      | 0<br>(0 - 0)       | 0<br>(0 - 0)             | 0<br>(0 - 0)         |
| Other sexually transmitted diseases                              | 0<br>(0 - 0)             | --                | 0<br>(0 - 0)      | 0<br>(0 - 0)       | 0<br>(0 - 0)             | 0<br>(0 - 0)         |
| Hepatitis                                                        | 12<br>(9 - 16)           | 1<br>(0 - 2)      | 1<br>(1 - 1)      | 6<br>(4 - 8)       | 4<br>(2 - 5)             | 1<br>(1 - 2)         |
| Acute hepatitis A                                                | 1<br>(0 - 1)             | 0<br>(0 - 0)      | 0<br>(0 - 0)      | 0<br>(0 - 1)       | 0<br>(0 - 0)             | 0<br>(0 - 0)         |
| Acute hepatitis B                                                | 9<br>(6 - 12)            | 1<br>(0 - 1)      | 1<br>(0 - 1)      | 3<br>(2 - 5)       | 3<br>(2 - 5)             | 1<br>(1 - 2)         |
| Acute hepatitis C                                                | 0<br>(0 - 1)             | --                | 0<br>(0 - 0)      | 0<br>(0 - 0)       | 0<br>(0 - 0)             | 0<br>(0 - 0)         |
| Acute hepatitis E                                                | 3<br>(1 - 4)             | 0<br>(0 - 0)      | 0<br>(0 - 0)      | 2<br>(1 - 3)       | 0<br>(0 - 1)             | 0<br>(0 - 0)         |
| Other infectious diseases                                        | 44<br>(25 - 65)          | 5<br>(2 - 12)     | 1<br>(1 - 3)      | 23<br>(12 - 38)    | 9<br>(4 - 17)            | 6<br>(2 - 11)        |
| Non-communicable diseases                                        | 3,384<br>(2,659 - 4,134) | 93<br>(56 - 150)  | 27<br>(20 - 36)   | 732<br>(529 - 971) | 1,542<br>(1,161 - 1,950) | 989<br>(827 - 1,108) |
| Neoplasms                                                        | 274<br>(208 - 347)       | 6<br>(3 - 12)     | 5<br>(3 - 7)      | 80<br>(58 - 105)   | 120<br>(88 - 154)        | 63<br>(47 - 76)      |
| Esophageal cancer                                                | 12<br>(8 - 17)           | --                | --                | 2<br>(2 - 4)       | 6<br>(4 - 9)             | 4<br>(2 - 5)         |
| Stomach cancer                                                   | 22<br>(16 - 28)          | --                | --                | 4<br>(3 - 6)       | 11<br>(8 - 14)           | 7<br>(5 - 9)         |
| Liver cancer                                                     | 44<br>(32 - 57)          | --                | 0<br>(0 - 0)      | 11<br>(7 - 17)     | 26<br>(18 - 35)          | 7<br>(5 - 10)        |
| Liver cancer due to hepatitis B                                  | 22<br>(13 - 34)          | --                | 0<br>(0 - 0)      | 6<br>(4 - 10)      | 13<br>(7 - 20)           | 3<br>(2 - 5)         |
| Liver cancer due to hepatitis C                                  | 14<br>(4 - 25)           | --                | 0<br>(0 - 0)      | 3<br>(1 - 6)       | 9<br>(2 - 16)            | 3<br>(1 - 4)         |
| Liver cancer due to alcohol use                                  | 4<br>(2 - 6)             | --                | --                | 1<br>(0 - 1)       | 2<br>(1 - 4)             | 1<br>(0 - 1)         |
| Liver cancer due to other causes                                 | 4<br>(2 - 7)             | --                | 0<br>(0 - 0)      | 1<br>(1 - 2)       | 2<br>(1 - 4)             | 0<br>(0 - 1)         |
| Larynx cancer                                                    | 3<br>(2 - 5)             | --                | --                | 0<br>(0 - 1)       | 1<br>(1 - 2)             | 1<br>(1 - 2)         |

Web Table 31- Fiji deaths with 95% UI by age, sex, and cause in 2013

| Cause                                         | Males, All Ages          | Males, 0-4 Years | Males, 5-14 Years | Males, 15-49 Years | Males, 50-69 Years | Males, 70-80 Years |
|-----------------------------------------------|--------------------------|------------------|-------------------|--------------------|--------------------|--------------------|
| Tracheal, bronchus and lung cancer            | 39<br>(29 - 50)          | --               | --                | 11<br>(7 - 15)     | 20<br>(14 - 28)    | 8<br>(6 - 10)      |
| Breast cancer                                 | 1<br>(0 - 1)             | --               | --                | 0<br>(0 - 0)       | 0<br>(0 - 0)       | 0<br>(0 - 0)       |
| Cervical cancer                               | --                       | --               | --                | --                 | --                 | --                 |
| Uterine cancer                                | --                       | --               | --                | --                 | --                 | --                 |
| Prostate cancer                               | 18<br>(5 - 31)           | --               | --                | 1<br>(0 - 1)       | 8<br>(2 - 15)      | 9<br>(3 - 16)      |
| Colon and rectum cancer                       | 32<br>(25 - 40)          | --               | --                | 7<br>(5 - 10)      | 15<br>(11 - 20)    | 10<br>(8 - 13)     |
| Lip and oral cavity cancer                    | 6<br>(4 - 8)             | --               | --                | 2<br>(1 - 3)       | 2<br>(2 - 4)       | 2<br>(1 - 2)       |
| Nasopharynx cancer                            | 3<br>(2 - 4)             | --               | 0<br>(0 - 0)      | 1<br>(1 - 1)       | 1<br>(1 - 2)       | 0<br>(0 - 0)       |
| Other pharynx cancer                          | 2<br>(1 - 3)             | --               | --                | 0<br>(0 - 0)       | 1<br>(1 - 1)       | 1<br>(0 - 1)       |
| Gallbladder and biliary tract cancer          | 4<br>(3 - 6)             | --               | --                | 0<br>(0 - 1)       | 3<br>(2 - 4)       | 1<br>(0 - 1)       |
| Pancreatic cancer                             | 4<br>(3 - 5)             | --               | --                | 1<br>(1 - 2)       | 1<br>(0 - 1)       | 2<br>(2 - 3)       |
| Malignant skin melanoma                       | 1<br>(0 - 1)             | --               | --                | 0<br>(0 - 1)       | 0<br>(0 - 0)       | 0<br>(0 - 0)       |
| Non-melanoma skin cancer                      | 1<br>(1 - 1)             | --               | --                | 0<br>(0 - 0)       | 0<br>(0 - 1)       | 0<br>(0 - 1)       |
| Ovarian cancer                                | --                       | --               | --                | --                 | --                 | --                 |
| Testicular cancer                             | 1<br>(0 - 1)             | --               | --                | 0<br>(0 - 1)       | 0<br>(0 - 0)       | 0<br>(0 - 1)       |
| Kidney cancer                                 | 1<br>(1 - 2)             | 0<br>(0 - 0)     | 0<br>(0 - 0)      | 0<br>(0 - 1)       | 0<br>(0 - 1)       | 0<br>(0 - 0)       |
| Bladder cancer                                | 5<br>(2 - 7)             | --               | --                | 1<br>(0 - 1)       | 2<br>(1 - 3)       | 2<br>(1 - 3)       |
| Brain and nervous system cancer               | 3<br>(1 - 4)             | 0<br>(0 - 0)     | 0<br>(0 - 0)      | 1<br>(1 - 2)       | 1<br>(1 - 2)       | 0<br>(0 - 0)       |
| Thyroid cancer                                | 0<br>(0 - 0)             | --               | 0<br>(0 - 0)      | 0<br>(0 - 0)       | 0<br>(0 - 0)       | 0<br>(0 - 0)       |
| Mesothelioma                                  | 0<br>(0 - 1)             | --               | --                | 0<br>(0 - 0)       | 0<br>(0 - 0)       | 0<br>(0 - 0)       |
| Hodgkin lymphoma                              | 1<br>(1 - 1)             | 0<br>(0 - 0)     | 0<br>(0 - 0)      | 0<br>(0 - 1)       | 0<br>(0 - 0)       | 0<br>(0 - 0)       |
| Non-Hodgkin lymphoma                          | 4<br>(3 - 6)             | 0<br>(0 - 0)     | 0<br>(0 - 0)      | 2<br>(1 - 3)       | 1<br>(1 - 2)       | 1<br>(0 - 1)       |
| Multiple myeloma                              | 4<br>(3 - 6)             | --               | --                | 1<br>(1 - 2)       | 1<br>(1 - 2)       | 1<br>(1 - 2)       |
| Leukemia                                      | 29<br>(22 - 37)          | 2<br>(1 - 4)     | 3<br>(2 - 4)      | 14<br>(10 - 19)    | 8<br>(5 - 10)      | 2<br>(2 - 3)       |
| Other neoplasms                               | 36<br>(18 - 53)          | 4<br>(1 - 8)     | 2<br>(1 - 3)      | 16<br>(8 - 26)     | 10<br>(5 - 16)     | 4<br>(2 - 6)       |
| Cardiovascular diseases                       | 1,585<br>(1,223 - 1,972) | 12<br>(6 - 22)   | 6<br>(4 - 9)      | 387<br>(275 - 511) | 743<br>(556 - 948) | 437<br>(363 - 498) |
| Rheumatic heart disease                       | 31<br>(15 - 43)          | 0<br>(0 - 1)     | 2<br>(1 - 4)      | 14<br>(6 - 21)     | 8<br>(4 - 13)      | 6<br>(3 - 9)       |
| Ischemic heart disease                        | 1,112<br>(849 - 1,398)   | 5<br>(2 - 10)    | 1<br>(0 - 1)      | 274<br>(191 - 372) | 560<br>(420 - 718) | 273<br>(227 - 322) |
| Cerebrovascular disease                       | 324<br>(245 - 424)       | 4<br>(2 - 8)     | 2<br>(1 - 4)      | 59<br>(40 - 83)    | 131<br>(93 - 180)  | 128<br>(100 - 159) |
| Ischemic stroke                               | 96<br>(68 - 136)         | 0<br>(0 - 1)     | 0<br>(0 - 1)      | 8<br>(5 - 13)      | 28<br>(18 - 45)    | 59<br>(42 - 81)    |
| Hemorrhagic stroke                            | 228<br>(169 - 302)       | 4<br>(2 - 7)     | 2<br>(1 - 3)      | 51<br>(35 - 72)    | 103<br>(73 - 140)  | 69<br>(50 - 89)    |
| Hypertensive heart disease                    | 24<br>(11 - 41)          | 0<br>(0 - 0)     | 0<br>(0 - 0)      | 4<br>(2 - 8)       | 12<br>(5 - 22)     | 8<br>(3 - 13)      |
| Cardiomyopathy and myocarditis                | 26<br>(18 - 36)          | 1<br>(0 - 2)     | 0<br>(0 - 1)      | 13<br>(9 - 20)     | 9<br>(6 - 14)      | 2<br>(1 - 3)       |
| Atrial fibrillation and flutter               | 5<br>(3 - 7)             | --               | --                | 0<br>(0 - 0)       | 2<br>(1 - 2)       | 4<br>(2 - 5)       |
| Aortic aneurysm                               | 16<br>(12 - 21)          | --               | --                | 4<br>(3 - 6)       | 6<br>(4 - 9)       | 5<br>(4 - 8)       |
| Peripheral vascular disease                   | 0<br>(0 - 1)             | --               | --                | 0<br>(0 - 0)       | 0<br>(0 - 0)       | 0<br>(0 - 0)       |
| Endocarditis                                  | 14<br>(9 - 22)           | 1<br>(0 - 2)     | 0<br>(0 - 0)      | 8<br>(5 - 13)      | 3<br>(2 - 6)       | 2<br>(1 - 3)       |
| Other cardiovascular and circulatory diseases | 32<br>(22 - 42)          | 1<br>(0 - 2)     | 0<br>(0 - 1)      | 10<br>(7 - 14)     | 11<br>(7 - 16)     | 9<br>(6 - 12)      |
| Chronic respiratory diseases                  | 313<br>(239 - 386)       | 3<br>(1 - 6)     | 2<br>(1 - 2)      | 30<br>(21 - 42)    | 131<br>(95 - 174)  | 147<br>(115 - 176) |
| Chronic obstructive pulmonary disease         | 155<br>(116 - 192)       | 2<br>(1 - 4)     | 1<br>(0 - 1)      | 10<br>(7 - 15)     | 53<br>(36 - 71)    | 89<br>(67 - 109)   |

Web Table 31- Fiji deaths with 95% UI by age, sex, and cause in 2013

| Cause                                               | Males, All Ages   | Males, 0-4 Years | Males, 5-14 Years | Males, 15-49 Years | Males, 50-69 Years | Males, 70-80 Years |
|-----------------------------------------------------|-------------------|------------------|-------------------|--------------------|--------------------|--------------------|
| Pneumoconiosis                                      | 23<br>(14 - 35)   | 0<br>(0 - 0)     | 0<br>(0 - 0)      | 3<br>(2 - 5)       | 12<br>(7 - 19)     | 8<br>(5 - 13)      |
| Silicosis                                           | 7<br>(3 - 11)     | 0<br>(0 - 0)     | 0<br>(0 - 0)      | 1<br>(0 - 2)       | 3<br>(2 - 6)       | 3<br>(1 - 4)       |
| Asbestosis                                          | 3<br>(2 - 5)      | 0<br>(0 - 0)     | 0<br>(0 - 0)      | 0<br>(0 - 1)       | 2<br>(1 - 3)       | 1<br>(0 - 2)       |
| Coal workers pneumoconiosis                         | 3<br>(2 - 5)      | 0<br>(0 - 0)     | 0<br>(0 - 0)      | 0<br>(0 - 1)       | 2<br>(1 - 3)       | 1<br>(1 - 2)       |
| Other pneumoconiosis                                | 10<br>(6 - 16)    | 0<br>(0 - 0)     | 0<br>(0 - 0)      | 1<br>(1 - 2)       | 5<br>(3 - 8)       | 4<br>(2 - 6)       |
| Asthma                                              | 114<br>(85 - 146) | 1<br>(0 - 2)     | 1<br>(1 - 1)      | 13<br>(9 - 19)     | 57<br>(40 - 78)    | 43<br>(30 - 57)    |
| Interstitial lung disease and pulmonary sarcoidosis | 16<br>(10 - 23)   | 0<br>(0 - 0)     | 0<br>(0 - 0)      | 3<br>(2 - 5)       | 8<br>(5 - 13)      | 5<br>(3 - 7)       |
| Other chronic respiratory diseases                  | 5<br>(4 - 7)      | 0<br>(0 - 0)     | 0<br>(0 - 0)      | 1<br>(0 - 1)       | 2<br>(1 - 2)       | 2<br>(1 - 4)       |
| Cirrhosis                                           | 45<br>(34 - 58)   | 0<br>(0 - 0)     | 1<br>(1 - 2)      | 22<br>(15 - 30)    | 17<br>(12 - 22)    | 5<br>(4 - 7)       |
| Cirrhosis due to hepatitis B                        | 24<br>(16 - 33)   | 0<br>(0 - 0)     | 1<br>(0 - 1)      | 13<br>(8 - 18)     | 8<br>(6 - 12)      | 2<br>(1 - 3)       |
| Cirrhosis due to hepatitis C                        | 9<br>(5 - 14)     | 0<br>(0 - 0)     | 0<br>(0 - 0)      | 4<br>(2 - 6)       | 4<br>(2 - 6)       | 1<br>(1 - 2)       |
| Cirrhosis due to alcohol use                        | 9<br>(5 - 13)     | --               | --                | 3<br>(2 - 5)       | 4<br>(2 - 6)       | 1<br>(1 - 2)       |
| Cirrhosis due to other causes                       | 4<br>(2 - 6)      | 0<br>(0 - 0)     | 0<br>(0 - 1)      | 2<br>(1 - 3)       | 1<br>(0 - 1)       | 0<br>(0 - 0)       |
| Digestive diseases                                  | 76<br>(56 - 114)  | 1<br>(0 - 2)     | 2<br>(1 - 3)      | 22<br>(15 - 35)    | 30<br>(20 - 48)    | 21<br>(16 - 29)    |
| Peptic ulcer disease                                | 22<br>(16 - 34)   | 0<br>(0 - 0)     | 1<br>(0 - 1)      | 6<br>(4 - 10)      | 9<br>(6 - 16)      | 6<br>(4 - 9)       |
| Gastritis and duodenitis                            | 1<br>(1 - 2)      | 0<br>(0 - 0)     | 0<br>(0 - 0)      | 0<br>(0 - 0)       | 0<br>(0 - 1)       | 1<br>(0 - 1)       |
| Appendicitis                                        | 4<br>(2 - 6)      | 0<br>(0 - 0)     | 0<br>(0 - 0)      | 2<br>(1 - 3)       | 1<br>(1 - 2)       | 1<br>(0 - 1)       |
| Paralytic ileus and intestinal obstruction          | 13<br>(8 - 29)    | 0<br>(0 - 1)     | 0<br>(0 - 1)      | 4<br>(2 - 9)       | 4<br>(2 - 10)      | 4<br>(2 - 10)      |
| Inguinal, femoral, and abdominal hernia             | 4<br>(2 - 6)      | 0<br>(0 - 0)     | 0<br>(0 - 0)      | 1<br>(0 - 1)       | 1<br>(1 - 2)       | 2<br>(1 - 3)       |
| Inflammatory bowel disease                          | 3<br>(2 - 4)      | 0<br>(0 - 0)     | 0<br>(0 - 0)      | 1<br>(0 - 1)       | 1<br>(0 - 1)       | 1<br>(1 - 2)       |
| Vascular intestinal disorders                       | 2<br>(1 - 4)      | 0<br>(0 - 1)     | 0<br>(0 - 0)      | 1<br>(0 - 3)       | 0<br>(0 - 1)       | 0<br>(0 - 0)       |
| Gallbladder and biliary diseases                    | 13<br>(9 - 17)    | 0<br>(0 - 0)     | 0<br>(0 - 0)      | 3<br>(2 - 4)       | 5<br>(3 - 8)       | 4<br>(2 - 6)       |
| Pancreatitis                                        | 1<br>(1 - 2)      | 0<br>(0 - 0)     | 0<br>(0 - 0)      | 1<br>(0 - 1)       | 0<br>(0 - 1)       | 0<br>(0 - 0)       |
| Other digestive diseases                            | 13<br>(9 - 20)    | 0<br>(0 - 0)     | 0<br>(0 - 1)      | 4<br>(2 - 6)       | 7<br>(4 - 11)      | 2<br>(1 - 4)       |
| Neurological disorders                              | 45<br>(36 - 55)   | 0<br>(0 - 1)     | 1<br>(0 - 1)      | 5<br>(3 - 8)       | 8<br>(5 - 11)      | 31<br>(24 - 39)    |
| Alzheimer disease and other dementias               | 34<br>(26 - 43)   | --               | --                | 0<br>(0 - 0)       | 6<br>(4 - 8)       | 28<br>(21 - 36)    |
| Parkinson disease                                   | 3<br>(2 - 4)      | --               | --                | 0<br>(0 - 0)       | 1<br>(1 - 2)       | 2<br>(1 - 3)       |
| Epilepsy                                            | 5<br>(3 - 8)      | 0<br>(0 - 1)     | 1<br>(0 - 1)      | 4<br>(2 - 7)       | 0<br>(0 - 1)       | 0<br>(0 - 0)       |
| Multiple sclerosis                                  | 0<br>(0 - 0)      | --               | --                | 0<br>(0 - 0)       | 0<br>(0 - 0)       | 0<br>(0 - 0)       |
| Other neurological disorders                        | 3<br>(2 - 4)      | 0<br>(0 - 0)     | 0<br>(0 - 0)      | 1<br>(1 - 2)       | 1<br>(0 - 1)       | 1<br>(1 - 1)       |
| Mental and substance use disorders                  | 22<br>(13 - 31)   | 0<br>(0 - 0)     | 0<br>(0 - 0)      | 17<br>(10 - 24)    | 4<br>(2 - 6)       | 1<br>(1 - 2)       |
| Schizophrenia                                       | 0<br>(0 - 0)      | --               | --                | 0<br>(0 - 0)       | 0<br>(0 - 0)       | 0<br>(0 - 0)       |
| Alcohol use disorders                               | 21<br>(12 - 29)   | --               | --                | 16<br>(9 - 23)     | 4<br>(2 - 6)       | 1<br>(1 - 1)       |
| Drug use disorders                                  | 1<br>(1 - 2)      | 0<br>(0 - 0)     | --                | 1<br>(1 - 1)       | 0<br>(0 - 0)       | 0<br>(0 - 0)       |
| Opioid use disorders                                | 0<br>(0 - 0)      | 0<br>(0 - 0)     | --                | 0<br>(0 - 0)       | 0<br>(0 - 0)       | 0<br>(0 - 0)       |
| Cocaine use disorders                               | 0<br>(0 - 0)      | 0<br>(0 - 0)     | --                | 0<br>(0 - 0)       | 0<br>(0 - 0)       | 0<br>(0 - 0)       |
| Amphetamine use disorders                           | 0<br>(0 - 0)      | 0<br>(0 - 0)     | --                | 0<br>(0 - 0)       | 0<br>(0 - 0)       | 0<br>(0 - 0)       |
| Other drug use disorders                            | 1<br>(1 - 1)      | 0<br>(0 - 0)     | --                | 1<br>(0 - 1)       | 0<br>(0 - 0)       | 0<br>(0 - 0)       |
| Eating disorders                                    | 0<br>(0 - 0)      | --               | 0<br>(0 - 0)      | 0<br>(0 - 0)       | --                 | --                 |
| Anorexia nervosa                                    | 0<br>(0 - 0)      | --               | 0<br>(0 - 0)      | 0<br>(0 - 0)       | --                 | --                 |

Web Table 31- Fiji deaths with 95% UI by age, sex, and cause in 2013

| Cause                                               | Males, All Ages      | Males, 0-4 Years | Males, 5-14 Years | Males, 15-49 Years | Males, 50-69 Years | Males, 70-80 Years |
|-----------------------------------------------------|----------------------|------------------|-------------------|--------------------|--------------------|--------------------|
| Diabetes, urogenital, blood, and endocrine diseases | 926<br>(713 - 1,146) | 8<br>(4 - 14)    | 3<br>(2 - 5)      | 154<br>(107 - 210) | 483<br>(360 - 612) | 278<br>(226 - 323) |
| Diabetes mellitus                                   | 736<br>(565 - 906)   | 2<br>(1 - 3)     | 1<br>(0 - 1)      | 98<br>(66 - 133)   | 404<br>(298 - 515) | 232<br>(187 - 273) |
| Acute glomerulonephritis                            | 0<br>(0 - 0)         | 0<br>(0 - 0)     | 0<br>(0 - 0)      | 0<br>(0 - 0)       | 0<br>(0 - 0)       | 0<br>(0 - 0)       |
| Chronic kidney disease                              | 128<br>(95 - 170)    | 2<br>(1 - 3)     | 1<br>(1 - 2)      | 40<br>(26 - 57)    | 54<br>(38 - 77)    | 31<br>(23 - 40)    |
| Chronic kidney disease due to diabetes mellitus     | 12<br>(7 - 24)       | 0<br>(0 - 0)     | 0<br>(0 - 0)      | 3<br>(2 - 7)       | 6<br>(3 - 12)      | 3<br>(1 - 6)       |
| Chronic kidney disease due to hypertension          | 44<br>(29 - 63)      | 0<br>(0 - 1)     | 0<br>(0 - 0)      | 14<br>(8 - 21)     | 20<br>(12 - 30)    | 11<br>(6 - 15)     |
| Chronic kidney disease due to glomerulonephritis    | 5<br>(3 - 7)         | 0<br>(0 - 1)     | 0<br>(0 - 0)      | 2<br>(1 - 3)       | 1<br>(0 - 1)       | 2<br>(1 - 3)       |
| Chronic kidney disease due to other causes          | 66<br>(45 - 96)      | 1<br>(0 - 2)     | 1<br>(1 - 2)      | 21<br>(13 - 33)    | 28<br>(16 - 44)    | 16<br>(9 - 23)     |
| Urinary diseases and male infertility               | 24<br>(15 - 31)      | 0<br>(0 - 1)     | 0<br>(0 - 0)      | 6<br>(4 - 9)       | 9<br>(5 - 13)      | 8<br>(5 - 12)      |
| Interstitial nephritis and urinary tract infections | 10<br>(6 - 14)       | 0<br>(0 - 1)     | 0<br>(0 - 0)      | 2<br>(1 - 3)       | 4<br>(2 - 7)       | 3<br>(2 - 6)       |
| Urolithiasis                                        | 1<br>(0 - 1)         | --               | 0<br>(0 - 0)      | 0<br>(0 - 1)       | 0<br>(0 - 1)       | 0<br>(0 - 0)       |
| Other urinary diseases                              | 13<br>(8 - 18)       | 0<br>(0 - 0)     | 0<br>(0 - 0)      | 4<br>(2 - 6)       | 5<br>(2 - 7)       | 5<br>(3 - 7)       |
| Gynecological diseases                              | --                   | --               | --                | --                 | --                 | --                 |
| Uterine fibroids                                    | --                   | --               | --                | --                 | --                 | --                 |
| Polycystic ovarian syndrome                         | --                   | --               | --                | --                 | --                 | --                 |
| Endometriosis                                       | --                   | --               | --                | --                 | --                 | --                 |
| Genital prolapse                                    | --                   | --               | --                | --                 | --                 | --                 |
| Other gynecological diseases                        | --                   | --               | --                | --                 | --                 | --                 |
| Hemoglobinopathies and hemolytic anemias            | 9<br>(5 - 13)        | 2<br>(1 - 3)     | 1<br>(1 - 2)      | 3<br>(2 - 5)       | 1<br>(1 - 2)       | 1<br>(1 - 2)       |
| Thalassemias                                        | 4<br>(2 - 7)         | 1<br>(1 - 3)     | 1<br>(1 - 2)      | 2<br>(1 - 3)       | 0<br>(0 - 0)       | 0<br>(0 - 0)       |
| Sickle cell disorders                               | 0<br>(0 - 0)         | 0<br>(0 - 0)     | 0<br>(0 - 0)      | 0<br>(0 - 0)       | 0<br>(0 - 0)       | 0<br>(0 - 0)       |
| G6PD deficiency                                     | 0<br>(0 - 0)         | 0<br>(0 - 0)     | 0<br>(0 - 0)      | 0<br>(0 - 0)       | 0<br>(0 - 0)       | 0<br>(0 - 0)       |
| Other hemoglobinopathies and hemolytic anemias      | 4<br>(2 - 6)         | 0<br>(0 - 0)     | 0<br>(0 - 0)      | 1<br>(1 - 2)       | 1<br>(1 - 2)       | 1<br>(1 - 2)       |
| Endocrine, metabolic, blood, and immune disorders   | 29<br>(13 - 39)      | 2<br>(1 - 4)     | 0<br>(0 - 1)      | 6<br>(3 - 9)       | 14<br>(6 - 20)     | 6<br>(3 - 9)       |
| Musculoskeletal disorders                           | 3<br>(2 - 8)         | --               | 0<br>(0 - 0)      | 1<br>(1 - 3)       | 1<br>(1 - 3)       | 1<br>(0 - 2)       |
| Rheumatoid arthritis                                | 1<br>(0 - 2)         | --               | 0<br>(0 - 0)      | 0<br>(0 - 1)       | 0<br>(0 - 1)       | 0<br>(0 - 1)       |
| Other musculoskeletal disorders                     | 3<br>(1 - 6)         | --               | 0<br>(0 - 0)      | 1<br>(0 - 2)       | 1<br>(0 - 2)       | 1<br>(0 - 1)       |
| Other non-communicable diseases                     | 94<br>(65 - 136)     | 62<br>(37 - 102) | 8<br>(5 - 12)     | 14<br>(10 - 19)    | 6<br>(4 - 8)       | 4<br>(3 - 6)       |
| Congenital anomalies                                | 81<br>(55 - 120)     | 57<br>(34 - 93)  | 8<br>(5 - 12)     | 12<br>(8 - 16)     | 3<br>(2 - 4)       | 2<br>(1 - 3)       |
| Neural tube defects                                 | 1<br>(0 - 1)         | 0<br>(0 - 1)     | 0<br>(0 - 0)      | 0<br>(0 - 0)       | 0<br>(0 - 0)       | 0<br>(0 - 0)       |
| Congenital heart anomalies                          | 51<br>(33 - 78)      | 37<br>(21 - 62)  | 6<br>(4 - 9)      | 6<br>(4 - 8)       | 1<br>(1 - 2)       | 1<br>(1 - 1)       |
| Cleft lip and cleft palate                          | 0<br>(0 - 0)         | 0<br>(0 - 0)     | --                | --                 | --                 | --                 |
| Down syndrome                                       | 3<br>(1 - 5)         | 2<br>(1 - 4)     | 0<br>(0 - 0)      | 0<br>(0 - 1)       | 0<br>(0 - 0)       | 0<br>(0 - 0)       |
| Chromosomal unbalanced rearrangements               | 4<br>(2 - 8)         | 3<br>(1 - 7)     | 0<br>(0 - 0)      | 0<br>(0 - 1)       | 0<br>(0 - 0)       | 0<br>(0 - 0)       |
| Other congenital anomalies                          | 23<br>(16 - 34)      | 15<br>(8 - 25)   | 1<br>(1 - 2)      | 5<br>(3 - 7)       | 1<br>(1 - 2)       | 1<br>(1 - 1)       |
| Skin and subcutaneous diseases                      | 8<br>(6 - 10)        | 0<br>(0 - 0)     | 0<br>(0 - 0)      | 2<br>(2 - 3)       | 3<br>(2 - 4)       | 3<br>(2 - 4)       |
| Cellulitis                                          | 1<br>(1 - 2)         | 0<br>(0 - 0)     | 0<br>(0 - 0)      | 1<br>(0 - 1)       | 0<br>(0 - 0)       | 1<br>(0 - 1)       |
| Pyoderma                                            | 5<br>(4 - 7)         | 0<br>(0 - 0)     | 0<br>(0 - 0)      | 2<br>(1 - 2)       | 2<br>(1 - 3)       | 2<br>(1 - 2)       |
| Decubitus ulcer                                     | 1<br>(1 - 1)         | 0<br>(0 - 0)     | 0<br>(0 - 0)      | 0<br>(0 - 0)       | 0<br>(0 - 1)       | 0<br>(0 - 1)       |
| Other skin and subcutaneous diseases                | 0<br>(0 - 0)         | 0<br>(0 - 0)     | 0<br>(0 - 0)      | 0<br>(0 - 0)       | 0<br>(0 - 0)       | 0<br>(0 - 0)       |

Web Table 31- Fiji deaths with 95% UI by age, sex, and cause in 2013

| Cause                                           | Males, All Ages    | Males, 0-4 Years | Males, 5-14 Years | Males, 15-49 Years | Males, 50-69 Years | Males, 70-80 Years |
|-------------------------------------------------|--------------------|------------------|-------------------|--------------------|--------------------|--------------------|
| Sudden infant death syndrome                    | 5<br>(2 - 12)      | 5<br>(2 - 12)    | --                | --                 | --                 | --                 |
| Injuries                                        | 270<br>(205 - 340) | 18<br>(9 - 34)   | 15<br>(11 - 21)   | 167<br>(123 - 216) | 46<br>(31 - 61)    | 24<br>(18 - 29)    |
| Transport injuries                              | 84<br>(63 - 106)   | 3<br>(1 - 7)     | 6<br>(4 - 8)      | 54<br>(39 - 70)    | 14<br>(10 - 19)    | 6<br>(5 - 8)       |
| Road injuries                                   | 77<br>(57 - 97)    | 3<br>(1 - 6)     | 5<br>(3 - 8)      | 50<br>(36 - 66)    | 13<br>(9 - 17)     | 6<br>(4 - 7)       |
| Pedestrian road injuries                        | 19<br>(12 - 26)    | 1<br>(0 - 2)     | 2<br>(1 - 3)      | 11<br>(7 - 16)     | 3<br>(2 - 5)       | 2<br>(1 - 3)       |
| Cyclist road injuries                           | 4<br>(3 - 6)       | 0<br>(0 - 0)     | 0<br>(0 - 1)      | 2<br>(2 - 3)       | 1<br>(0 - 1)       | 0<br>(0 - 1)       |
| Motorcyclist road injuries                      | 14<br>(9 - 20)     | 1<br>(0 - 1)     | 1<br>(0 - 1)      | 11<br>(7 - 16)     | 2<br>(1 - 2)       | 0<br>(0 - 1)       |
| Motor vehicle road injuries                     | 39<br>(28 - 52)    | 1<br>(1 - 3)     | 2<br>(1 - 4)      | 26<br>(18 - 36)    | 7<br>(5 - 9)       | 3<br>(2 - 4)       |
| Other road injuries                             | 1<br>(0 - 1)       | 0<br>(0 - 0)     | 0<br>(0 - 0)      | 0<br>(0 - 1)       | 0<br>(0 - 0)       | 0<br>(0 - 0)       |
| Other transport injuries                        | 7<br>(5 - 10)      | 0<br>(0 - 1)     | 0<br>(0 - 1)      | 4<br>(3 - 6)       | 2<br>(1 - 2)       | 1<br>(0 - 1)       |
| Unintentional injuries                          | 122<br>(84 - 165)  | 14<br>(7 - 27)   | 8<br>(5 - 13)     | 63<br>(42 - 86)    | 23<br>(15 - 32)    | 14<br>(9 - 18)     |
| Falls                                           | 16<br>(9 - 22)     | 0<br>(0 - 1)     | 1<br>(0 - 1)      | 8<br>(5 - 12)      | 3<br>(1 - 5)       | 4<br>(2 - 6)       |
| Drowning                                        | 42<br>(21 - 67)    | 6<br>(2 - 15)    | 5<br>(2 - 10)     | 24<br>(12 - 39)    | 5<br>(2 - 9)       | 1<br>(1 - 2)       |
| Fire, heat, and hot substances                  | 14<br>(8 - 20)     | 1<br>(0 - 2)     | 1<br>(0 - 2)      | 7<br>(4 - 11)      | 4<br>(2 - 6)       | 1<br>(1 - 2)       |
| Poisonings                                      | 1<br>(0 - 1)       | 0<br>(0 - 0)     | 0<br>(0 - 0)      | 0<br>(0 - 1)       | 0<br>(0 - 0)       | 0<br>(0 - 0)       |
| Exposure to mechanical forces                   | 14<br>(8 - 19)     | 1<br>(0 - 2)     | 1<br>(0 - 1)      | 6<br>(4 - 9)       | 5<br>(2 - 7)       | 1<br>(1 - 2)       |
| Unintentional firearm injuries                  | 1<br>(0 - 1)       | 0<br>(0 - 0)     | 0<br>(0 - 0)      | 0<br>(0 - 0)       | 0<br>(0 - 0)       | 0<br>(0 - 0)       |
| Unintentional suffocation                       | 0<br>(0 - 0)       | 0<br>(0 - 0)     | 0<br>(0 - 0)      | 0<br>(0 - 0)       | 0<br>(0 - 0)       | 0<br>(0 - 0)       |
| Other exposure to mechanical forces             | 13<br>(7 - 18)     | 1<br>(0 - 2)     | 1<br>(0 - 1)      | 6<br>(3 - 9)       | 4<br>(2 - 7)       | 1<br>(1 - 2)       |
| Adverse effects of medical treatment            | 14<br>(9 - 19)     | 2<br>(1 - 3)     | 0<br>(0 - 0)      | 6<br>(4 - 10)      | 3<br>(1 - 4)       | 3<br>(1 - 5)       |
| Animal contact                                  | 2<br>(1 - 3)       | 0<br>(0 - 0)     | 0<br>(0 - 0)      | 1<br>(0 - 1)       | 0<br>(0 - 1)       | 0<br>(0 - 1)       |
| Venomous animal contact                         | 0<br>(0 - 1)       | 0<br>(0 - 0)     | 0<br>(0 - 0)      | 0<br>(0 - 0)       | 0<br>(0 - 0)       | 0<br>(0 - 0)       |
| Non-venomous animal contact                     | 1<br>(1 - 2)       | 0<br>(0 - 0)     | 0<br>(0 - 0)      | 1<br>(0 - 1)       | 0<br>(0 - 0)       | 0<br>(0 - 1)       |
| Foreign body                                    | 12<br>(7 - 22)     | 4<br>(2 - 8)     | 1<br>(0 - 1)      | 4<br>(2 - 7)       | 2<br>(1 - 4)       | 2<br>(1 - 3)       |
| Pulmonary aspiration and foreign body in airway | 12<br>(7 - 22)     | 4<br>(2 - 8)     | 1<br>(0 - 1)      | 4<br>(2 - 7)       | 2<br>(1 - 4)       | 2<br>(1 - 3)       |
| Foreign body in other body part                 | 0<br>(0 - 0)       | 0<br>(0 - 0)     | 0<br>(0 - 0)      | 0<br>(0 - 0)       | 0<br>(0 - 0)       | 0<br>(0 - 0)       |
| Other unintentional injuries                    | 8<br>(6 - 11)      | 0<br>(0 - 0)     | 0<br>(0 - 1)      | 6<br>(4 - 8)       | 1<br>(1 - 2)       | 1<br>(0 - 1)       |
| Self-harm and interpersonal violence            | 64<br>(45 - 91)    | 1<br>(0 - 1)     | 1<br>(1 - 2)      | 50<br>(35 - 74)    | 8<br>(5 - 12)      | 4<br>(2 - 5)       |
| Self-harm                                       | 44<br>(28 - 60)    | --               | 1<br>(0 - 2)      | 34<br>(21 - 49)    | 6<br>(3 - 8)       | 3<br>(2 - 5)       |
| Interpersonal violence                          | 20<br>(13 - 40)    | 1<br>(0 - 1)     | 0<br>(0 - 1)      | 16<br>(9 - 34)     | 3<br>(2 - 5)       | 0<br>(0 - 1)       |
| Assault by firearm                              | 6<br>(3 - 14)      | 0<br>(0 - 0)     | 0<br>(0 - 0)      | 4<br>(2 - 12)      | 1<br>(0 - 2)       | 0<br>(0 - 0)       |
| Assault by sharp object                         | 9<br>(5 - 20)      | 0<br>(0 - 0)     | 0<br>(0 - 0)      | 8<br>(4 - 18)      | 1<br>(1 - 2)       | 0<br>(0 - 0)       |
| Assault by other means                          | 5<br>(3 - 11)      | 0<br>(0 - 1)     | 0<br>(0 - 1)      | 4<br>(2 - 8)       | 1<br>(0 - 2)       | 0<br>(0 - 0)       |

Web Table 31- Fiji deaths with 95% UI by age, sex, and cause in 2013

| Cause                                                             | Females, All Ages        | Females, 0-4 Years | Females, 5-14 Years | Females, 15-49 Years | Females, 50-69 Years     | Females, 70-80 Years     |
|-------------------------------------------------------------------|--------------------------|--------------------|---------------------|----------------------|--------------------------|--------------------------|
| All causes                                                        | 3,420<br>(2,808 - 4,203) | 263<br>(170 - 406) | 44<br>(33 - 58)     | 604<br>(447 - 821)   | 1,276<br>(1,020 - 1,608) | 1,234<br>(1,026 - 1,435) |
| Communicable, maternal, neonatal, and nutritional diseases        | 435<br>(341 - 551)       | 176<br>(110 - 269) | 14<br>(9 - 22)      | 77<br>(59 - 100)     | 74<br>(55 - 98)          | 95<br>(74 - 126)         |
| HIV/AIDS and tuberculosis                                         | 20<br>(15 - 26)          | 0<br>(0 - 0)       | 0<br>(0 - 0)        | 9<br>(6 - 13)        | 6<br>(4 - 8)             | 4<br>(3 - 6)             |
| Tuberculosis                                                      | 13<br>(10 - 18)          | 0<br>(0 - 0)       | 0<br>(0 - 0)        | 4<br>(3 - 6)         | 5<br>(3 - 7)             | 4<br>(3 - 6)             |
| HIV/AIDS                                                          | 7<br>(3 - 12)            | 0<br>(0 - 0)       | 0<br>(0 - 0)        | 5<br>(2 - 8)         | 1<br>(0 - 3)             | 0<br>(0 - 0)             |
| HIV/AIDS resulting in mycobacterial infection                     | 0<br>(0 - 1)             | 0<br>(0 - 0)       | 0<br>(0 - 0)        | 0<br>(0 - 0)         | 0<br>(0 - 0)             | 0<br>(0 - 0)             |
| HIV/AIDS resulting in other diseases                              | 7<br>(3 - 11)            | 0<br>(0 - 0)       | 0<br>(0 - 0)        | 5<br>(2 - 8)         | 1<br>(0 - 2)             | 0<br>(0 - 0)             |
| Diarrhea, lower respiratory, and other common infectious diseases | 233<br>(177 - 308)       | 67<br>(36 - 123)   | 10<br>(6 - 19)      | 33<br>(23 - 48)      | 50<br>(36 - 70)          | 73<br>(54 - 99)          |
| Diarrheal diseases                                                | 42<br>(30 - 60)          | 9<br>(3 - 19)      | 1<br>(1 - 2)        | 5<br>(3 - 8)         | 11<br>(6 - 17)           | 17<br>(11 - 26)          |
| Intestinal infectious diseases                                    | 6<br>(2 - 12)            | 3<br>(1 - 6)       | 1<br>(1 - 3)        | 1<br>(1 - 3)         | 0<br>(0 - 1)             | 0<br>(0 - 0)             |
| Typhoid fever                                                     | 4<br>(2 - 9)             | 2<br>(1 - 5)       | 1<br>(0 - 2)        | 1<br>(0 - 2)         | 0<br>(0 - 1)             | 0<br>(0 - 0)             |
| Paratyphoid fever                                                 | 1<br>(0 - 2)             | 1<br>(0 - 2)       | 0<br>(0 - 1)        | 0<br>(0 - 0)         | 0<br>(0 - 0)             | 0<br>(0 - 0)             |
| Other intestinal infectious diseases                              | 0<br>(0 - 2)             | 0<br>(0 - 1)       | 0<br>(0 - 0)        | 0<br>(0 - 1)         | 0<br>(0 - 0)             | 0<br>(0 - 0)             |
| Lower respiratory infections                                      | 150<br>(112 - 203)       | 36<br>(18 - 66)    | 3<br>(2 - 5)        | 21<br>(14 - 32)      | 36<br>(25 - 53)          | 53<br>(36 - 79)          |
| Upper respiratory infections                                      | 0<br>(0 - 0)             | 0<br>(0 - 0)       | 0<br>(0 - 0)        | 0<br>(0 - 0)         | 0<br>(0 - 0)             | 0<br>(0 - 0)             |
| Otitis media                                                      | 0<br>(0 - 1)             | 0<br>(0 - 0)       | 0<br>(0 - 0)        | 0<br>(0 - 0)         | 0<br>(0 - 0)             | 0<br>(0 - 0)             |
| Meningitis                                                        | 12<br>(8 - 17)           | 4<br>(2 - 8)       | 2<br>(1 - 3)        | 3<br>(2 - 5)         | 2<br>(1 - 3)             | 2<br>(1 - 3)             |
| Pneumococcal meningitis                                           | 5<br>(3 - 6)             | 1<br>(1 - 3)       | 1<br>(0 - 1)        | 1<br>(1 - 2)         | 1<br>(0 - 1)             | 1<br>(0 - 1)             |
| H influenzae type B meningitis                                    | 2<br>(1 - 2)             | 1<br>(0 - 2)       | 0<br>(0 - 0)        | 0<br>(0 - 0)         | 0<br>(0 - 0)             | 0<br>(0 - 0)             |
| Meningococcal meningitis                                          | 2<br>(1 - 3)             | 1<br>(0 - 1)       | 0<br>(0 - 0)        | 1<br>(0 - 1)         | 0<br>(0 - 1)             | 0<br>(0 - 1)             |
| Other meningitis                                                  | 4<br>(3 - 6)             | 1<br>(0 - 3)       | 0<br>(0 - 1)        | 1<br>(1 - 2)         | 1<br>(0 - 1)             | 1<br>(0 - 1)             |
| Encephalitis                                                      | 4<br>(3 - 6)             | 0<br>(0 - 1)       | 0<br>(0 - 0)        | 2<br>(1 - 3)         | 1<br>(1 - 1)             | 1<br>(1 - 1)             |
| Diphtheria                                                        | 0<br>(0 - 0)             | 0<br>(0 - 0)       | 0<br>(0 - 0)        | 0<br>(0 - 0)         | 0<br>(0 - 0)             | --                       |
| Whooping cough                                                    | 0<br>(0 - 2)             | 0<br>(0 - 2)       | 0<br>(0 - 0)        | 0<br>(0 - 0)         | 0<br>(0 - 0)             | --                       |
| Tetanus                                                           | 0<br>(0 - 0)             | 0<br>(0 - 0)       | 0<br>(0 - 0)        | 0<br>(0 - 0)         | 0<br>(0 - 0)             | 0<br>(0 - 0)             |
| Measles                                                           | 18<br>(1 - 85)           | 15<br>(0 - 67)     | 2<br>(0 - 13)       | 1<br>(0 - 4)         | 0<br>(0 - 0)             | --                       |
| Varicella and herpes zoster                                       | 0<br>(0 - 0)             | 0<br>(0 - 0)       | 0<br>(0 - 0)        | 0<br>(0 - 0)         | 0<br>(0 - 0)             | 0<br>(0 - 0)             |
| Neglected tropical diseases and malaria                           | 4<br>(2 - 9)             | 1<br>(0 - 3)       | 0<br>(0 - 1)        | 1<br>(1 - 3)         | 1<br>(0 - 2)             | 1<br>(1 - 2)             |
| Leishmaniasis                                                     | 0<br>(0 - 0)             | 0<br>(0 - 0)       | 0<br>(0 - 0)        | 0<br>(0 - 0)         | 0<br>(0 - 0)             | 0<br>(0 - 0)             |
| Visceral leishmaniasis                                            | 0<br>(0 - 0)             | 0<br>(0 - 0)       | 0<br>(0 - 0)        | 0<br>(0 - 0)         | 0<br>(0 - 0)             | 0<br>(0 - 0)             |
| Cysticercosis                                                     | 0<br>(0 - 0)             | 0<br>(0 - 0)       | 0<br>(0 - 0)        | 0<br>(0 - 0)         | 0<br>(0 - 0)             | 0<br>(0 - 0)             |
| Cystic echinococcosis                                             | 0<br>(0 - 0)             | 0<br>(0 - 0)       | 0<br>(0 - 0)        | 0<br>(0 - 0)         | 0<br>(0 - 0)             | 0<br>(0 - 0)             |
| Dengue                                                            | 2<br>(1 - 6)             | 0<br>(0 - 1)       | 0<br>(0 - 0)        | 1<br>(0 - 2)         | 0<br>(0 - 1)             | 0<br>(0 - 1)             |
| Rabies                                                            | 0<br>(0 - 1)             | 0<br>(0 - 0)       | 0<br>(0 - 0)        | 0<br>(0 - 0)         | 0<br>(0 - 0)             | 0<br>(0 - 0)             |
| Intestinal nematode infections                                    | 1<br>(0 - 4)             | 0<br>(0 - 3)       | 0<br>(0 - 1)        | 0<br>(0 - 1)         | 0<br>(0 - 1)             | 0<br>(0 - 0)             |
| Ascariasis                                                        | 1<br>(0 - 4)             | 0<br>(0 - 3)       | 0<br>(0 - 1)        | 0<br>(0 - 1)         | 0<br>(0 - 1)             | 0<br>(0 - 0)             |
| Other neglected tropical diseases                                 | 1<br>(1 - 2)             | 0<br>(0 - 0)       | 0<br>(0 - 0)        | 0<br>(0 - 0)         | 0<br>(0 - 0)             | 1<br>(0 - 1)             |
| Maternal disorders                                                | 12<br>(8 - 18)           | --                 | 0<br>(0 - 0)        | 12<br>(8 - 18)       | --                       | --                       |
| Maternal hemorrhage                                               | 2<br>(1 - 4)             | --                 | 0<br>(0 - 0)        | 2<br>(1 - 4)         | --                       | --                       |
| Maternal sepsis and other maternal infections                     | 1<br>(1 - 2)             | --                 | 0<br>(0 - 0)        | 1<br>(1 - 2)         | --                       | --                       |



Web Table 31- Fiji deaths with 95% UI by age, sex, and cause in 2013

| Cause                                                            | Females, All Ages        | Females, 0-4 Years | Females, 5-14 Years | Females, 15-49 Years | Females, 50-69 Years   | Females, 70-80 Years   |
|------------------------------------------------------------------|--------------------------|--------------------|---------------------|----------------------|------------------------|------------------------|
| Maternal hypertensive disorders                                  | 1<br>(1 - 2)             | --                 | 0<br>(0 - 0)        | 1<br>(1 - 2)         | --                     | --                     |
| Maternal obstructed labor                                        | 1<br>(1 - 2)             | --                 | 0<br>(0 - 0)        | 1<br>(1 - 2)         | --                     | --                     |
| Maternal abortive outcome                                        | 2<br>(1 - 3)             | --                 | 0<br>(0 - 0)        | 2<br>(1 - 3)         | --                     | --                     |
| Indirect maternal deaths                                         | 1<br>(1 - 2)             | --                 | 0<br>(0 - 0)        | 1<br>(1 - 2)         | --                     | --                     |
| Late maternal deaths                                             | 2<br>(1 - 3)             | --                 | 0<br>(0 - 0)        | 2<br>(1 - 3)         | --                     | --                     |
| Maternal deaths aggravated by HIV/AIDS                           | 0<br>(0 - 0)             | --                 | --                  | 0<br>(0 - 0)         | --                     | --                     |
| Other maternal disorders                                         | 2<br>(1 - 3)             | --                 | 0<br>(0 - 0)        | 2<br>(1 - 3)         | --                     | --                     |
| Neonatal disorders                                               | 95<br>(63 - 137)         | 95<br>(63 - 137)   | --                  | --                   | --                     | --                     |
| Neonatal preterm birth complications                             | 60<br>(37 - 88)          | 60<br>(37 - 88)    | --                  | --                   | --                     | --                     |
| Neonatal encephalopathy due to birth asphyxia and trauma         | 15<br>(7 - 27)           | 15<br>(7 - 27)     | --                  | --                   | --                     | --                     |
| Neonatal sepsis and other neonatal infections                    | 10<br>(4 - 22)           | 10<br>(4 - 22)     | --                  | --                   | --                     | --                     |
| Hemolytic disease and other neonatal jaundice                    | 0<br>(0 - 1)             | 0<br>(0 - 1)       | --                  | --                   | --                     | --                     |
| Other neonatal disorders                                         | 10<br>(5 - 21)           | 10<br>(5 - 21)     | --                  | --                   | --                     | --                     |
| Nutritional deficiencies                                         | 26<br>(19 - 35)          | 5<br>(2 - 11)      | 1<br>(1 - 2)        | 6<br>(4 - 9)         | 4<br>(3 - 6)           | 9<br>(7 - 13)          |
| Protein-energy malnutrition                                      | 8<br>(4 - 15)            | 4<br>(1 - 9)       | 1<br>(0 - 1)        | 0<br>(0 - 1)         | 1<br>(0 - 1)           | 3<br>(1 - 5)           |
| Iodine deficiency                                                | 0<br>(0 - 1)             | 0<br>(0 - 0)       | 0<br>(0 - 0)        | 0<br>(0 - 0)         | 0<br>(0 - 0)           | 0<br>(0 - 1)           |
| Iron-deficiency anemia                                           | 17<br>(12 - 23)          | 1<br>(0 - 3)       | 0<br>(0 - 1)        | 6<br>(4 - 8)         | 3<br>(2 - 5)           | 6<br>(4 - 10)          |
| Other nutritional deficiencies                                   | 1<br>(0 - 1)             | 0<br>(0 - 0)       | 0<br>(0 - 0)        | 0<br>(0 - 0)         | 0<br>(0 - 0)           | 0<br>(0 - 0)           |
| Other communicable, maternal, neonatal, and nutritional diseases | 44<br>(31 - 62)          | 7<br>(3 - 14)      | 2<br>(1 - 3)        | 15<br>(9 - 23)       | 13<br>(7 - 22)         | 8<br>(4 - 15)          |
| Sexually transmitted diseases excluding HIV                      | 8<br>(5 - 14)            | 3<br>(1 - 7)       | 0<br>(0 - 1)        | 3<br>(1 - 6)         | 1<br>(0 - 3)           | 1<br>(0 - 2)           |
| Syphilis                                                         | 6<br>(3 - 11)            | 3<br>(1 - 7)       | 0<br>(0 - 1)        | 1<br>(1 - 2)         | 1<br>(0 - 2)           | 1<br>(0 - 1)           |
| Chlamydial infection                                             | 1<br>(0 - 1)             | --                 | 0<br>(0 - 0)        | 1<br>(0 - 1)         | 0<br>(0 - 0)           | 0<br>(0 - 0)           |
| Gonococcal infection                                             | 1<br>(1 - 2)             | --                 | 0<br>(0 - 0)        | 1<br>(0 - 1)         | 0<br>(0 - 1)           | 0<br>(0 - 0)           |
| Other sexually transmitted diseases                              | 1<br>(0 - 1)             | --                 | 0<br>(0 - 0)        | 1<br>(0 - 1)         | 0<br>(0 - 0)           | 0<br>(0 - 0)           |
| Hepatitis                                                        | 7<br>(5 - 9)             | 0<br>(0 - 1)       | 0<br>(0 - 0)        | 2<br>(1 - 3)         | 3<br>(2 - 5)           | 1<br>(1 - 2)           |
| Acute hepatitis A                                                | 0<br>(0 - 1)             | 0<br>(0 - 0)       | 0<br>(0 - 0)        | 0<br>(0 - 0)         | 0<br>(0 - 0)           | 0<br>(0 - 0)           |
| Acute hepatitis B                                                | 5<br>(3 - 6)             | 0<br>(0 - 1)       | 0<br>(0 - 0)        | 1<br>(0 - 1)         | 2<br>(2 - 4)           | 1<br>(1 - 1)           |
| Acute hepatitis C                                                | 0<br>(0 - 0)             | --                 | 0<br>(0 - 0)        | 0<br>(0 - 0)         | 0<br>(0 - 0)           | 0<br>(0 - 0)           |
| Acute hepatitis E                                                | 2<br>(1 - 3)             | 0<br>(0 - 0)       | 0<br>(0 - 0)        | 1<br>(1 - 2)         | 1<br>(0 - 1)           | 0<br>(0 - 0)           |
| Other infectious diseases                                        | 29<br>(17 - 44)          | 4<br>(2 - 9)       | 1<br>(0 - 2)        | 9<br>(5 - 16)        | 9<br>(4 - 17)          | 6<br>(2 - 13)          |
| Non-communicable diseases                                        | 2,848<br>(2,319 - 3,540) | 71<br>(39 - 116)   | 21<br>(14 - 29)     | 467<br>(341 - 639)   | 1,177<br>(939 - 1,491) | 1,112<br>(967 - 1,306) |
| Neoplasms                                                        | 398<br>(305 - 510)       | 3<br>(1 - 5)       | 3<br>(2 - 5)        | 120<br>(85 - 166)    | 175<br>(134 - 226)     | 97<br>(79 - 118)       |
| Esophageal cancer                                                | 5<br>(4 - 7)             | --                 | --                  | 1<br>(0 - 1)         | 2<br>(2 - 3)           | 2<br>(1 - 3)           |
| Stomach cancer                                                   | 17<br>(13 - 23)          | --                 | --                  | 3<br>(2 - 4)         | 8<br>(6 - 11)          | 6<br>(4 - 8)           |
| Liver cancer                                                     | 20<br>(15 - 27)          | --                 | 0<br>(0 - 0)        | 4<br>(2 - 5)         | 12<br>(8 - 16)         | 5<br>(3 - 7)           |
| Liver cancer due to hepatitis B                                  | 9<br>(5 - 13)            | --                 | 0<br>(0 - 0)        | 2<br>(1 - 3)         | 5<br>(3 - 8)           | 2<br>(1 - 3)           |
| Liver cancer due to hepatitis C                                  | 7<br>(4 - 10)            | --                 | 0<br>(0 - 0)        | 1<br>(0 - 1)         | 4<br>(2 - 6)           | 2<br>(1 - 3)           |
| Liver cancer due to alcohol use                                  | 1<br>(1 - 1)             | --                 | --                  | 0<br>(0 - 0)         | 0<br>(0 - 1)           | 0<br>(0 - 1)           |
| Liver cancer due to other causes                                 | 4<br>(2 - 6)             | --                 | 0<br>(0 - 0)        | 1<br>(0 - 1)         | 2<br>(1 - 4)           | 1<br>(0 - 1)           |
| Larynx cancer                                                    | 0<br>(0 - 1)             | --                 | --                  | 0<br>(0 - 0)         | 0<br>(0 - 0)           | 0<br>(0 - 0)           |

Web Table 31- Fiji deaths with 95% UI by age, sex, and cause in 2013

| Cause                                         | Females, All Ages      | Females, 0-4 Years | Females, 5-14 Years | Females, 15-49 Years | Females, 50-69 Years | Females, 70-80 Years |
|-----------------------------------------------|------------------------|--------------------|---------------------|----------------------|----------------------|----------------------|
| Tracheal, bronchus and lung cancer            | 25<br>(20 - 33)        | --                 | --                  | 4<br>(3 - 6)         | 10<br>(7 - 14)       | 11<br>(8 - 15)       |
| Breast cancer                                 | 154<br>(117 - 203)     | --                 | --                  | 58<br>(39 - 82)      | 67<br>(50 - 88)      | 29<br>(23 - 38)      |
| Cervical cancer                               | 57<br>(33 - 78)        | --                 | --                  | 18<br>(10 - 28)      | 25<br>(15 - 35)      | 14<br>(9 - 20)       |
| Uterine cancer                                | 18<br>(8 - 27)         | --                 | --                  | 3<br>(1 - 4)         | 12<br>(5 - 19)       | 3<br>(2 - 5)         |
| Prostate cancer                               | --                     | --                 | --                  | --                   | --                   | --                   |
| Colon and rectum cancer                       | 35<br>(27 - 45)        | --                 | --                  | 7<br>(5 - 10)        | 16<br>(12 - 21)      | 12<br>(9 - 16)       |
| Lip and oral cavity cancer                    | 0<br>(0 - 0)           | --                 | --                  | 0<br>(0 - 0)         | 0<br>(0 - 0)         | 0<br>(0 - 0)         |
| Nasopharynx cancer                            | 2<br>(1 - 4)           | --                 | 0<br>(0 - 0)        | 1<br>(1 - 2)         | 1<br>(1 - 2)         | 0<br>(0 - 0)         |
| Other pharynx cancer                          | 0<br>(0 - 1)           | --                 | --                  | 0<br>(0 - 0)         | 0<br>(0 - 0)         | 0<br>(0 - 0)         |
| Gallbladder and biliary tract cancer          | 3<br>(2 - 4)           | --                 | --                  | 1<br>(0 - 1)         | 2<br>(1 - 3)         | 0<br>(0 - 1)         |
| Pancreatic cancer                             | 8<br>(6 - 11)          | --                 | --                  | 1<br>(1 - 2)         | 4<br>(3 - 5)         | 3<br>(2 - 4)         |
| Malignant skin melanoma                       | 1<br>(1 - 2)           | --                 | --                  | 0<br>(0 - 1)         | 0<br>(0 - 0)         | 1<br>(0 - 1)         |
| Non-melanoma skin cancer                      | 1<br>(0 - 1)           | --                 | --                  | 0<br>(0 - 0)         | 0<br>(0 - 0)         | 0<br>(0 - 1)         |
| Ovarian cancer                                | 1<br>(1 - 2)           | --                 | --                  | 1<br>(0 - 1)         | 1<br>(0 - 1)         | 0<br>(0 - 0)         |
| Testicular cancer                             | --                     | --                 | --                  | --                   | --                   | --                   |
| Kidney cancer                                 | 1<br>(1 - 2)           | 0<br>(0 - 0)       | 0<br>(0 - 0)        | 0<br>(0 - 0)         | 1<br>(0 - 1)         | 0<br>(0 - 0)         |
| Bladder cancer                                | 1<br>(0 - 1)           | --                 | --                  | 0<br>(0 - 0)         | 0<br>(0 - 1)         | 0<br>(0 - 0)         |
| Brain and nervous system cancer               | 1<br>(1 - 1)           | 0<br>(0 - 0)       | 0<br>(0 - 0)        | 0<br>(0 - 1)         | 0<br>(0 - 0)         | 0<br>(0 - 0)         |
| Thyroid cancer                                | 1<br>(0 - 1)           | --                 | 0<br>(0 - 0)        | 0<br>(0 - 0)         | 0<br>(0 - 1)         | 0<br>(0 - 0)         |
| Mesothelioma                                  | 0<br>(0 - 0)           | --                 | --                  | 0<br>(0 - 0)         | 0<br>(0 - 0)         | 0<br>(0 - 0)         |
| Hodgkin lymphoma                              | 1<br>(1 - 1)           | 0<br>(0 - 0)       | 0<br>(0 - 0)        | 0<br>(0 - 1)         | 0<br>(0 - 0)         | 0<br>(0 - 0)         |
| Non-Hodgkin lymphoma                          | 5<br>(3 - 7)           | 0<br>(0 - 1)       | 0<br>(0 - 0)        | 2<br>(1 - 3)         | 1<br>(1 - 2)         | 2<br>(1 - 2)         |
| Multiple myeloma                              | 3<br>(2 - 4)           | --                 | --                  | 0<br>(0 - 0)         | 2<br>(1 - 3)         | 1<br>(1 - 1)         |
| Leukemia                                      | 16<br>(12 - 21)        | 1<br>(0 - 2)       | 2<br>(1 - 2)        | 8<br>(5 - 11)        | 3<br>(2 - 4)         | 2<br>(2 - 3)         |
| Other neoplasms                               | 21<br>(10 - 32)        | 1<br>(0 - 2)       | 1<br>(0 - 2)        | 8<br>(3 - 14)        | 7<br>(3 - 11)        | 3<br>(1 - 5)         |
| Cardiovascular diseases                       | 1,126<br>(910 - 1,417) | 8<br>(4 - 16)      | 8<br>(5 - 12)       | 167<br>(117 - 234)   | 428<br>(333 - 560)   | 516<br>(439 - 612)   |
| Rheumatic heart disease                       | 32<br>(21 - 45)        | 1<br>(0 - 1)       | 2<br>(1 - 4)        | 18<br>(11 - 27)      | 6<br>(4 - 10)        | 4<br>(3 - 6)         |
| Ischemic heart disease                        | 611<br>(475 - 775)     | 1<br>(0 - 3)       | 2<br>(1 - 3)        | 72<br>(47 - 103)     | 243<br>(182 - 317)   | 294<br>(237 - 354)   |
| Cerebrovascular disease                       | 330<br>(253 - 478)     | 3<br>(1 - 6)       | 2<br>(1 - 4)        | 43<br>(29 - 64)      | 115<br>(80 - 182)    | 166<br>(131 - 227)   |
| Ischemic stroke                               | 99<br>(72 - 150)       | 0<br>(0 - 1)       | 0<br>(0 - 0)        | 9<br>(5 - 14)        | 23<br>(15 - 39)      | 66<br>(49 - 98)      |
| Hemorrhagic stroke                            | 232<br>(175 - 335)     | 3<br>(1 - 6)       | 2<br>(1 - 3)        | 34<br>(23 - 52)      | 92<br>(64 - 147)     | 100<br>(77 - 140)    |
| Hypertensive heart disease                    | 55<br>(30 - 78)        | 0<br>(0 - 0)       | 0<br>(0 - 0)        | 9<br>(5 - 15)        | 21<br>(11 - 32)      | 25<br>(13 - 35)      |
| Cardiomyopathy and myocarditis                | 17<br>(12 - 25)        | 1<br>(0 - 3)       | 1<br>(0 - 2)        | 6<br>(4 - 10)        | 6<br>(4 - 9)         | 2<br>(1 - 4)         |
| Atrial fibrillation and flutter               | 6<br>(4 - 9)           | --                 | --                  | 1<br>(0 - 1)         | 2<br>(1 - 2)         | 4<br>(2 - 6)         |
| Aortic aneurysm                               | 9<br>(6 - 15)          | --                 | --                  | 2<br>(1 - 3)         | 4<br>(2 - 7)         | 4<br>(2 - 6)         |
| Peripheral vascular disease                   | 2<br>(1 - 3)           | --                 | --                  | 0<br>(0 - 0)         | 0<br>(0 - 1)         | 1<br>(1 - 2)         |
| Endocarditis                                  | 8<br>(5 - 13)          | 0<br>(0 - 1)       | 0<br>(0 - 0)        | 3<br>(2 - 5)         | 2<br>(1 - 2)         | 3<br>(2 - 5)         |
| Other cardiovascular and circulatory diseases | 56<br>(38 - 77)        | 1<br>(1 - 3)       | 1<br>(0 - 1)        | 12<br>(7 - 18)       | 29<br>(19 - 42)      | 12<br>(8 - 17)       |
| Chronic respiratory diseases                  | 117<br>(92 - 161)      | 2<br>(1 - 4)       | 1<br>(0 - 1)        | 20<br>(13 - 30)      | 37<br>(28 - 53)      | 57<br>(45 - 78)      |
| Chronic obstructive pulmonary disease         | 60<br>(42 - 97)        | 1<br>(1 - 3)       | 0<br>(0 - 0)        | 7<br>(4 - 13)        | 18<br>(12 - 32)      | 33<br>(23 - 51)      |

Web Table 31- Fiji deaths with 95% UI by age, sex, and cause in 2013

| Cause                                               | Females, All Ages | Females, 0-4 Years | Females, 5-14 Years | Females, 15-49 Years | Females, 50-69 Years | Females, 70-80 Years |
|-----------------------------------------------------|-------------------|--------------------|---------------------|----------------------|----------------------|----------------------|
| Pneumoconiosis                                      | 0<br>(0 - 1)      | 0<br>(0 - 0)       | 0<br>(0 - 0)        | 0<br>(0 - 0)         | 0<br>(0 - 0)         | 0<br>(0 - 1)         |
| Silicosis                                           | 0<br>(0 - 0)      | 0<br>(0 - 0)       | 0<br>(0 - 0)        | 0<br>(0 - 0)         | 0<br>(0 - 0)         | 0<br>(0 - 0)         |
| Asbestosis                                          | 0<br>(0 - 0)      | 0<br>(0 - 0)       | 0<br>(0 - 0)        | 0<br>(0 - 0)         | 0<br>(0 - 0)         | 0<br>(0 - 0)         |
| Coal workers pneumoconiosis                         | 0<br>(0 - 0)      | 0<br>(0 - 0)       | 0<br>(0 - 0)        | 0<br>(0 - 0)         | 0<br>(0 - 0)         | 0<br>(0 - 0)         |
| Other pneumoconiosis                                | 0<br>(0 - 1)      | 0<br>(0 - 0)       | 0<br>(0 - 0)        | 0<br>(0 - 0)         | 0<br>(0 - 0)         | 0<br>(0 - 0)         |
| Asthma                                              | 45<br>(24 - 62)   | 0<br>(0 - 1)       | 0<br>(0 - 0)        | 10<br>(6 - 15)       | 17<br>(9 - 25)       | 17<br>(8 - 25)       |
| Interstitial lung disease and pulmonary sarcoidosis | 6<br>(3 - 11)     | 0<br>(0 - 0)       | 0<br>(0 - 0)        | 1<br>(0 - 1)         | 1<br>(0 - 2)         | 4<br>(2 - 8)         |
| Other chronic respiratory diseases                  | 6<br>(4 - 11)     | 0<br>(0 - 0)       | 0<br>(0 - 0)        | 2<br>(1 - 5)         | 1<br>(0 - 2)         | 3<br>(2 - 5)         |
| Cirrhosis                                           | 25<br>(19 - 33)   | 0<br>(0 - 0)       | 1<br>(0 - 1)        | 10<br>(6 - 14)       | 9<br>(7 - 13)        | 5<br>(4 - 7)         |
| Cirrhosis due to hepatitis B                        | 14<br>(10 - 20)   | 0<br>(0 - 0)       | 0<br>(0 - 0)        | 5<br>(3 - 8)         | 6<br>(4 - 8)         | 3<br>(2 - 4)         |
| Cirrhosis due to hepatitis C                        | 6<br>(3 - 9)      | 0<br>(0 - 0)       | 0<br>(0 - 0)        | 2<br>(1 - 4)         | 2<br>(1 - 4)         | 1<br>(1 - 2)         |
| Cirrhosis due to alcohol use                        | 2<br>(1 - 4)      | --                 | --                  | 1<br>(0 - 1)         | 1<br>(0 - 2)         | 1<br>(0 - 1)         |
| Cirrhosis due to other causes                       | 3<br>(2 - 4)      | 0<br>(0 - 0)       | 0<br>(0 - 1)        | 1<br>(1 - 2)         | 1<br>(0 - 1)         | 0<br>(0 - 0)         |
| Digestive diseases                                  | 52<br>(39 - 79)   | 0<br>(0 - 1)       | 1<br>(1 - 2)        | 12<br>(8 - 20)       | 20<br>(14 - 30)      | 18<br>(13 - 26)      |
| Peptic ulcer disease                                | 10<br>(7 - 15)    | 0<br>(0 - 0)       | 0<br>(0 - 0)        | 2<br>(1 - 3)         | 4<br>(2 - 7)         | 4<br>(2 - 7)         |
| Gastritis and duodenitis                            | 0<br>(0 - 0)      | 0<br>(0 - 0)       | 0<br>(0 - 0)        | 0<br>(0 - 0)         | 0<br>(0 - 0)         | 0<br>(0 - 0)         |
| Appendicitis                                        | 7<br>(4 - 11)     | 0<br>(0 - 0)       | 0<br>(0 - 1)        | 2<br>(1 - 4)         | 3<br>(2 - 5)         | 1<br>(1 - 2)         |
| Paralytic ileus and intestinal obstruction          | 10<br>(6 - 21)    | 0<br>(0 - 0)       | 0<br>(0 - 0)        | 2<br>(1 - 4)         | 5<br>(3 - 10)        | 3<br>(2 - 7)         |
| Inguinal, femoral, and abdominal hernia             | 0<br>(0 - 1)      | 0<br>(0 - 0)       | 0<br>(0 - 0)        | 0<br>(0 - 0)         | 0<br>(0 - 0)         | 0<br>(0 - 0)         |
| Inflammatory bowel disease                          | 2<br>(1 - 3)      | 0<br>(0 - 0)       | 0<br>(0 - 0)        | 0<br>(0 - 0)         | 0<br>(0 - 1)         | 1<br>(1 - 2)         |
| Vascular intestinal disorders                       | 1<br>(0 - 3)      | 0<br>(0 - 0)       | 0<br>(0 - 0)        | 1<br>(0 - 2)         | 0<br>(0 - 0)         | 0<br>(0 - 1)         |
| Gallbladder and biliary diseases                    | 9<br>(6 - 12)     | 0<br>(0 - 0)       | 0<br>(0 - 0)        | 2<br>(1 - 3)         | 3<br>(2 - 5)         | 4<br>(2 - 5)         |
| Pancreatitis                                        | 3<br>(2 - 4)      | 0<br>(0 - 0)       | 0<br>(0 - 0)        | 1<br>(0 - 1)         | 1<br>(0 - 1)         | 1<br>(1 - 2)         |
| Other digestive diseases                            | 10<br>(7 - 16)    | 0<br>(0 - 0)       | 0<br>(0 - 0)        | 3<br>(2 - 4)         | 4<br>(2 - 6)         | 3<br>(2 - 5)         |
| Neurological disorders                              | 46<br>(36 - 58)   | 1<br>(0 - 2)       | 0<br>(0 - 1)        | 3<br>(2 - 5)         | 6<br>(5 - 9)         | 35<br>(27 - 45)      |
| Alzheimer disease and other dementias               | 39<br>(31 - 49)   | --                 | --                  | 0<br>(0 - 0)         | 4<br>(3 - 6)         | 34<br>(26 - 45)      |
| Parkinson disease                                   | 0<br>(0 - 0)      | --                 | --                  | 0<br>(0 - 0)         | 0<br>(0 - 0)         | 0<br>(0 - 0)         |
| Epilepsy                                            | 5<br>(3 - 7)      | 1<br>(0 - 2)       | 0<br>(0 - 1)        | 3<br>(2 - 5)         | 1<br>(0 - 1)         | 0<br>(0 - 0)         |
| Multiple sclerosis                                  | 0<br>(0 - 0)      | --                 | --                  | 0<br>(0 - 0)         | 0<br>(0 - 0)         | 0<br>(0 - 0)         |
| Other neurological disorders                        | 2<br>(2 - 3)      | 0<br>(0 - 1)       | 0<br>(0 - 0)        | 0<br>(0 - 0)         | 1<br>(1 - 1)         | 1<br>(0 - 1)         |
| Mental and substance use disorders                  | 2<br>(1 - 2)      | 0<br>(0 - 0)       | 0<br>(0 - 0)        | 1<br>(1 - 2)         | 0<br>(0 - 0)         | 0<br>(0 - 0)         |
| Schizophrenia                                       | 0<br>(0 - 0)      | --                 | --                  | 0<br>(0 - 0)         | 0<br>(0 - 0)         | 0<br>(0 - 0)         |
| Alcohol use disorders                               | 0<br>(0 - 1)      | --                 | --                  | 0<br>(0 - 0)         | 0<br>(0 - 0)         | 0<br>(0 - 0)         |
| Drug use disorders                                  | 1<br>(1 - 1)      | 0<br>(0 - 0)       | --                  | 1<br>(1 - 1)         | 0<br>(0 - 0)         | 0<br>(0 - 0)         |
| Opioid use disorders                                | 0<br>(0 - 0)      | 0<br>(0 - 0)       | --                  | 0<br>(0 - 0)         | 0<br>(0 - 0)         | 0<br>(0 - 0)         |
| Cocaine use disorders                               | 0<br>(0 - 0)      | 0<br>(0 - 0)       | --                  | 0<br>(0 - 0)         | 0<br>(0 - 0)         | 0<br>(0 - 0)         |
| Amphetamine use disorders                           | 0<br>(0 - 0)      | 0<br>(0 - 0)       | --                  | 0<br>(0 - 0)         | 0<br>(0 - 0)         | 0<br>(0 - 0)         |
| Other drug use disorders                            | 1<br>(0 - 1)      | 0<br>(0 - 0)       | --                  | 0<br>(0 - 1)         | 0<br>(0 - 0)         | 0<br>(0 - 0)         |
| Eating disorders                                    | 0<br>(0 - 0)      | --                 | 0<br>(0 - 0)        | 0<br>(0 - 0)         | --                   | --                   |
| Anorexia nervosa                                    | 0<br>(0 - 0)      | --                 | 0<br>(0 - 0)        | 0<br>(0 - 0)         | --                   | --                   |

Web Table 31- Fiji deaths with 95% UI by age, sex, and cause in 2013

| Cause                                               | Females, All Ages    | Females, 0-4 Years | Females, 5-14 Years | Females, 15-49 Years | Females, 50-69 Years | Females, 70-80 Years |
|-----------------------------------------------------|----------------------|--------------------|---------------------|----------------------|----------------------|----------------------|
| Diabetes, urogenital, blood, and endocrine diseases | 999<br>(777 - 1,249) | 7<br>(3 - 11)      | 3<br>(2 - 4)        | 121<br>(84 - 168)    | 493<br>(378 - 626)   | 376<br>(299 - 451)   |
| Diabetes mellitus                                   | 860<br>(657 - 1,086) | 2<br>(1 - 4)       | 0<br>(0 - 1)        | 83<br>(54 - 117)     | 439<br>(326 - 560)   | 336<br>(259 - 408)   |
| Acute glomerulonephritis                            | 0<br>(0 - 0)         | 0<br>(0 - 0)       | 0<br>(0 - 0)        | 0<br>(0 - 0)         | 0<br>(0 - 0)         | 0<br>(0 - 0)         |
| Chronic kidney disease                              | 97<br>(72 - 154)     | 1<br>(0 - 2)       | 1<br>(0 - 1)        | 25<br>(17 - 42)      | 41<br>(29 - 69)      | 29<br>(21 - 45)      |
| Chronic kidney disease due to diabetes mellitus     | 15<br>(10 - 21)      | 0<br>(0 - 0)       | 0<br>(0 - 0)        | 3<br>(2 - 5)         | 8<br>(5 - 11)        | 4<br>(2 - 5)         |
| Chronic kidney disease due to hypertension          | 26<br>(15 - 43)      | 0<br>(0 - 0)       | 0<br>(0 - 0)        | 7<br>(4 - 12)        | 12<br>(7 - 21)       | 6<br>(3 - 11)        |
| Chronic kidney disease due to glomerulonephritis    | 9<br>(6 - 13)        | 0<br>(0 - 0)       | 0<br>(0 - 0)        | 2<br>(1 - 3)         | 3<br>(1 - 4)         | 4<br>(2 - 6)         |
| Chronic kidney disease due to other causes          | 48<br>(30 - 93)      | 1<br>(0 - 2)       | 0<br>(0 - 1)        | 13<br>(7 - 26)       | 19<br>(10 - 39)      | 15<br>(9 - 28)       |
| Urinary diseases and male infertility               | 20<br>(12 - 29)      | 1<br>(1 - 3)       | 0<br>(0 - 0)        | 6<br>(3 - 10)        | 7<br>(4 - 10)        | 6<br>(3 - 9)         |
| Interstitial nephritis and urinary tract infections | 15<br>(9 - 21)       | 1<br>(0 - 2)       | 0<br>(0 - 0)        | 5<br>(3 - 8)         | 5<br>(3 - 7)         | 4<br>(2 - 7)         |
| Urolithiasis                                        | 0<br>(0 - 0)         | --                 | 0<br>(0 - 0)        | 0<br>(0 - 0)         | 0<br>(0 - 0)         | 0<br>(0 - 0)         |
| Other urinary diseases                              | 5<br>(3 - 8)         | 0<br>(0 - 1)       | 0<br>(0 - 0)        | 1<br>(1 - 3)         | 2<br>(1 - 3)         | 1<br>(1 - 2)         |
| Gynecological diseases                              | 1<br>(0 - 1)         | --                 | --                  | 0<br>(0 - 1)         | 0<br>(0 - 0)         | 0<br>(0 - 0)         |
| Uterine fibroids                                    | 0<br>(0 - 0)         | --                 | --                  | 0<br>(0 - 0)         | 0<br>(0 - 0)         | 0<br>(0 - 0)         |
| Polycystic ovarian syndrome                         | 0<br>(0 - 0)         | --                 | --                  | 0<br>(0 - 0)         | 0<br>(0 - 0)         | --                   |
| Endometriosis                                       | 0<br>(0 - 0)         | --                 | --                  | 0<br>(0 - 0)         | 0<br>(0 - 0)         | --                   |
| Genital prolapse                                    | 0<br>(0 - 0)         | --                 | --                  | 0<br>(0 - 0)         | 0<br>(0 - 0)         | 0<br>(0 - 0)         |
| Other gynecological diseases                        | 0<br>(0 - 1)         | --                 | --                  | 0<br>(0 - 0)         | 0<br>(0 - 0)         | 0<br>(0 - 0)         |
| Hemoglobinopathies and hemolytic anemias            | 8<br>(5 - 12)        | 2<br>(1 - 3)       | 1<br>(1 - 2)        | 4<br>(2 - 6)         | 1<br>(0 - 1)         | 1<br>(1 - 2)         |
| Thalassemias                                        | 5<br>(3 - 7)         | 1<br>(1 - 3)       | 1<br>(0 - 2)        | 2<br>(1 - 4)         | 0<br>(0 - 0)         | 0<br>(0 - 0)         |
| Sickle cell disorders                               | 0<br>(0 - 0)         | 0<br>(0 - 0)       | 0<br>(0 - 0)        | 0<br>(0 - 0)         | 0<br>(0 - 0)         | 0<br>(0 - 0)         |
| G6PD deficiency                                     | 0<br>(0 - 0)         | 0<br>(0 - 0)       | 0<br>(0 - 0)        | 0<br>(0 - 0)         | 0<br>(0 - 0)         | 0<br>(0 - 0)         |
| Other hemoglobinopathies and hemolytic anemias      | 4<br>(2 - 5)         | 0<br>(0 - 0)       | 0<br>(0 - 0)        | 1<br>(1 - 2)         | 1<br>(0 - 1)         | 1<br>(1 - 2)         |
| Endocrine, metabolic, blood, and immune disorders   | 12<br>(7 - 16)       | 1<br>(0 - 1)       | 0<br>(0 - 0)        | 2<br>(1 - 4)         | 5<br>(3 - 7)         | 4<br>(2 - 6)         |
| Musculoskeletal disorders                           | 10<br>(6 - 15)       | --                 | 1<br>(0 - 1)        | 4<br>(2 - 6)         | 3<br>(2 - 5)         | 2<br>(1 - 4)         |
| Rheumatoid arthritis                                | 3<br>(2 - 6)         | --                 | 0<br>(0 - 0)        | 1<br>(0 - 1)         | 1<br>(1 - 2)         | 1<br>(1 - 2)         |
| Other musculoskeletal disorders                     | 6<br>(4 - 10)        | --                 | 1<br>(0 - 1)        | 3<br>(2 - 5)         | 2<br>(1 - 3)         | 1<br>(0 - 2)         |
| Other non-communicable diseases                     | 73<br>(48 - 107)     | 50<br>(28 - 80)    | 4<br>(2 - 6)        | 9<br>(6 - 13)        | 5<br>(3 - 7)         | 6<br>(4 - 9)         |
| Congenital anomalies                                | 61<br>(38 - 94)      | 46<br>(26 - 75)    | 4<br>(2 - 6)        | 7<br>(4 - 10)        | 2<br>(2 - 4)         | 2<br>(1 - 3)         |
| Neural tube defects                                 | 3<br>(1 - 8)         | 3<br>(1 - 8)       | 0<br>(0 - 0)        | 0<br>(0 - 1)         | 0<br>(0 - 0)         | 0<br>(0 - 0)         |
| Congenital heart anomalies                          | 32<br>(19 - 52)      | 26<br>(13 - 44)    | 2<br>(1 - 4)        | 3<br>(2 - 5)         | 1<br>(0 - 1)         | 1<br>(0 - 1)         |
| Cleft lip and cleft palate                          | 0<br>(0 - 1)         | 0<br>(0 - 1)       | --                  | --                   | --                   | --                   |
| Down syndrome                                       | 3<br>(1 - 5)         | 2<br>(1 - 4)       | 0<br>(0 - 0)        | 0<br>(0 - 1)         | 0<br>(0 - 0)         | 0<br>(0 - 0)         |
| Chromosomal unbalanced rearrangements               | 2<br>(1 - 4)         | 2<br>(1 - 4)       | 0<br>(0 - 0)        | 0<br>(0 - 0)         | 0<br>(0 - 0)         | 0<br>(0 - 0)         |
| Other congenital anomalies                          | 20<br>(13 - 31)      | 14<br>(7 - 24)     | 1<br>(1 - 2)        | 2<br>(1 - 4)         | 2<br>(1 - 2)         | 1<br>(1 - 2)         |
| Skin and subcutaneous diseases                      | 9<br>(6 - 14)        | 0<br>(0 - 1)       | 0<br>(0 - 0)        | 2<br>(1 - 3)         | 2<br>(1 - 3)         | 4<br>(2 - 7)         |
| Cellulitis                                          | 2<br>(1 - 3)         | 0<br>(0 - 0)       | 0<br>(0 - 0)        | 1<br>(0 - 1)         | 0<br>(0 - 1)         | 1<br>(0 - 1)         |
| Pyoderma                                            | 4<br>(2 - 6)         | 0<br>(0 - 1)       | 0<br>(0 - 0)        | 1<br>(0 - 1)         | 1<br>(1 - 2)         | 1<br>(1 - 2)         |
| Decubitus ulcer                                     | 3<br>(2 - 5)         | 0<br>(0 - 0)       | 0<br>(0 - 0)        | 0<br>(0 - 1)         | 0<br>(0 - 1)         | 2<br>(1 - 3)         |
| Other skin and subcutaneous diseases                | 0<br>(0 - 0)         | 0<br>(0 - 0)       | 0<br>(0 - 0)        | 0<br>(0 - 0)         | 0<br>(0 - 0)         | 0<br>(0 - 0)         |

Web Table 31- Fiji deaths with 95% UI by age, sex, and cause in 2013

| Cause                                           | Females, All Ages  | Females, 0-4 Years | Females, 5-14 Years | Females, 15-49 Years | Females, 50-69 Years | Females, 70-80 Years |
|-------------------------------------------------|--------------------|--------------------|---------------------|----------------------|----------------------|----------------------|
| Sudden infant death syndrome                    | 3<br>(1 - 10)      | 3<br>(1 - 10)      | --                  | --                   | --                   | --                   |
| Injuries                                        | 137<br>(102 - 180) | 17<br>(8 - 31)     | 9<br>(6 - 13)       | 60<br>(43 - 84)      | 25<br>(19 - 34)      | 26<br>(19 - 33)      |
| Transport injuries                              | 36<br>(26 - 48)    | 3<br>(2 - 7)       | 3<br>(2 - 5)        | 16<br>(11 - 23)      | 7<br>(5 - 10)        | 5<br>(4 - 7)         |
| Road injuries                                   | 31<br>(22 - 41)    | 3<br>(1 - 6)       | 3<br>(2 - 5)        | 14<br>(9 - 21)       | 6<br>(4 - 9)         | 4<br>(3 - 6)         |
| Pedestrian road injuries                        | 8<br>(5 - 11)      | 1<br>(0 - 2)       | 1<br>(0 - 1)        | 3<br>(2 - 5)         | 2<br>(1 - 2)         | 1<br>(1 - 2)         |
| Cyclist road injuries                           | 2<br>(1 - 2)       | 0<br>(0 - 0)       | 0<br>(0 - 0)        | 1<br>(0 - 1)         | 0<br>(0 - 1)         | 0<br>(0 - 0)         |
| Motorcyclist road injuries                      | 3<br>(2 - 4)       | 0<br>(0 - 0)       | 0<br>(0 - 1)        | 1<br>(1 - 2)         | 1<br>(0 - 1)         | 0<br>(0 - 0)         |
| Motor vehicle road injuries                     | 18<br>(13 - 24)    | 2<br>(1 - 4)       | 2<br>(1 - 3)        | 8<br>(5 - 12)        | 4<br>(2 - 5)         | 3<br>(2 - 4)         |
| Other road injuries                             | 1<br>(0 - 1)       | 0<br>(0 - 0)       | 0<br>(0 - 0)        | 0<br>(0 - 0)         | 0<br>(0 - 0)         | 0<br>(0 - 0)         |
| Other transport injuries                        | 5<br>(3 - 7)       | 1<br>(0 - 1)       | 0<br>(0 - 0)        | 2<br>(1 - 3)         | 1<br>(1 - 2)         | 1<br>(1 - 1)         |
| Unintentional injuries                          | 80<br>(56 - 107)   | 13<br>(6 - 23)     | 5<br>(3 - 7)        | 31<br>(20 - 44)      | 13<br>(9 - 19)       | 18<br>(12 - 24)      |
| Falls                                           | 9<br>(5 - 13)      | 0<br>(0 - 1)       | 0<br>(0 - 0)        | 2<br>(1 - 3)         | 1<br>(1 - 2)         | 6<br>(3 - 9)         |
| Drowning                                        | 16<br>(8 - 25)     | 5<br>(2 - 11)      | 2<br>(1 - 3)        | 5<br>(2 - 8)         | 3<br>(1 - 4)         | 2<br>(1 - 3)         |
| Fire, heat, and hot substances                  | 21<br>(12 - 31)    | 3<br>(1 - 5)       | 1<br>(1 - 2)        | 11<br>(6 - 18)       | 3<br>(2 - 5)         | 3<br>(2 - 5)         |
| Poisonings                                      | 1<br>(0 - 1)       | 0<br>(0 - 0)       | 0<br>(0 - 0)        | 0<br>(0 - 0)         | 0<br>(0 - 0)         | 0<br>(0 - 0)         |
| Exposure to mechanical forces                   | 11<br>(7 - 17)     | 1<br>(1 - 2)       | 1<br>(0 - 1)        | 6<br>(4 - 11)        | 2<br>(1 - 3)         | 1<br>(1 - 1)         |
| Unintentional firearm injuries                  | 1<br>(0 - 1)       | 0<br>(0 - 0)       | 0<br>(0 - 0)        | 0<br>(0 - 0)         | 0<br>(0 - 0)         | 0<br>(0 - 0)         |
| Unintentional suffocation                       | 6<br>(4 - 12)      | 0<br>(0 - 1)       | 1<br>(0 - 1)        | 5<br>(3 - 9)         | 1<br>(0 - 2)         | 0<br>(0 - 0)         |
| Other exposure to mechanical forces             | 3<br>(2 - 5)       | 1<br>(0 - 1)       | 0<br>(0 - 0)        | 1<br>(1 - 2)         | 1<br>(0 - 1)         | 1<br>(1 - 1)         |
| Adverse effects of medical treatment            | 11<br>(7 - 16)     | 1<br>(0 - 2)       | 0<br>(0 - 0)        | 3<br>(2 - 5)         | 3<br>(2 - 5)         | 4<br>(2 - 7)         |
| Animal contact                                  | 1<br>(1 - 3)       | 0<br>(0 - 0)       | 0<br>(0 - 0)        | 1<br>(0 - 2)         | 0<br>(0 - 0)         | 0<br>(0 - 0)         |
| Venomous animal contact                         | 1<br>(0 - 1)       | 0<br>(0 - 0)       | 0<br>(0 - 0)        | 0<br>(0 - 1)         | 0<br>(0 - 0)         | 0<br>(0 - 0)         |
| Non-venomous animal contact                     | 1<br>(0 - 2)       | 0<br>(0 - 0)       | 0<br>(0 - 0)        | 0<br>(0 - 1)         | 0<br>(0 - 0)         | 0<br>(0 - 0)         |
| Foreign body                                    | 5<br>(3 - 9)       | 2<br>(1 - 4)       | 1<br>(0 - 2)        | 0<br>(0 - 0)         | 1<br>(0 - 1)         | 2<br>(1 - 3)         |
| Pulmonary aspiration and foreign body in airway | 5<br>(3 - 9)       | 2<br>(1 - 4)       | 1<br>(0 - 2)        | 0<br>(0 - 0)         | 1<br>(0 - 1)         | 2<br>(1 - 3)         |
| Foreign body in other body part                 | 0<br>(0 - 0)       | 0<br>(0 - 0)       | 0<br>(0 - 0)        | 0<br>(0 - 0)         | 0<br>(0 - 0)         | 0<br>(0 - 0)         |
| Other unintentional injuries                    | 5<br>(3 - 6)       | 0<br>(0 - 1)       | 0<br>(0 - 0)        | 2<br>(1 - 3)         | 1<br>(1 - 2)         | 1<br>(0 - 1)         |
| Self-harm and interpersonal violence            | 22<br>(16 - 30)    | 1<br>(0 - 2)       | 1<br>(0 - 2)        | 14<br>(9 - 20)       | 4<br>(3 - 6)         | 3<br>(2 - 4)         |
| Self-harm                                       | 16<br>(11 - 22)    | --                 | 1<br>(0 - 1)        | 9<br>(6 - 14)        | 3<br>(2 - 5)         | 2<br>(1 - 4)         |
| Interpersonal violence                          | 6<br>(4 - 9)       | 1<br>(0 - 2)       | 0<br>(0 - 0)        | 4<br>(2 - 7)         | 1<br>(0 - 1)         | 0<br>(0 - 1)         |
| Assault by firearm                              | 1<br>(1 - 2)       | 0<br>(0 - 0)       | 0<br>(0 - 0)        | 1<br>(0 - 1)         | 0<br>(0 - 0)         | 0<br>(0 - 0)         |
| Assault by sharp object                         | 2<br>(1 - 4)       | 0<br>(0 - 0)       | 0<br>(0 - 0)        | 2<br>(1 - 3)         | 0<br>(0 - 0)         | 0<br>(0 - 0)         |
| Assault by other means                          | 3<br>(1 - 4)       | 0<br>(0 - 1)       | 0<br>(0 - 0)        | 1<br>(1 - 2)         | 1<br>(0 - 1)         | 0<br>(0 - 1)         |

Web Table 31- Finland deaths with 95% UI by age, sex, and cause in 2013

| Cause                                                             | Both Sexes, All Ages        | Both Sexes, 0-4 Years | Both Sexes, 5-14 Years | Both Sexes, 15-49 Years  | Both Sexes, 50-69 Years     | Both Sexes, 70-80 Years     |
|-------------------------------------------------------------------|-----------------------------|-----------------------|------------------------|--------------------------|-----------------------------|-----------------------------|
| All causes                                                        | 53,062<br>(50,905 - 55,439) | 181<br>(142 - 232)    | 58<br>(50 - 67)        | 2,533<br>(2,360 - 2,700) | 11,004<br>(10,365 - 11,655) | 39,286<br>(37,876 - 40,932) |
| Communicable, maternal, neonatal, and nutritional diseases        | 1,399<br>(1,056 - 2,713)    | 71<br>(54 - 92)       | 3<br>(3 - 4)           | 49<br>(42 - 61)          | 155<br>(125 - 230)          | 1,120<br>(791 - 2,360)      |
| HIV/AIDS and tuberculosis                                         | 89<br>(74 - 122)            | 0<br>(0 - 0)          | 0<br>(0 - 0)           | 7<br>(6 - 9)             | 16<br>(13 - 24)             | 65<br>(52 - 89)             |
| Tuberculosis                                                      | 81<br>(66 - 114)            | 0<br>(0 - 0)          | 0<br>(0 - 0)           | 2<br>(2 - 3)             | 14<br>(11 - 22)             | 65<br>(52 - 88)             |
| HIV/AIDS                                                          | 7<br>(5 - 10)               | 0<br>(0 - 0)          | 0<br>(0 - 0)           | 5<br>(4 - 7)             | 2<br>(1 - 3)                | 0<br>(0 - 1)                |
| HIV/AIDS resulting in mycobacterial infection                     | 0<br>(0 - 1)                | 0<br>(0 - 0)          | 0<br>(0 - 0)           | 0<br>(0 - 0)             | 0<br>(0 - 0)                | 0<br>(0 - 0)                |
| HIV/AIDS resulting in other diseases                              | 7<br>(5 - 9)                | 0<br>(0 - 0)          | 0<br>(0 - 0)           | 5<br>(3 - 6)             | 2<br>(1 - 3)                | 0<br>(0 - 1)                |
| Diarrhea, lower respiratory, and other common infectious diseases | 1,146<br>(807 - 2,453)      | 7<br>(5 - 9)          | 2<br>(2 - 3)           | 30<br>(24 - 40)          | 117<br>(89 - 188)           | 991<br>(665 - 2,226)        |
| Diarrheal diseases                                                | 76<br>(54 - 108)            | 1<br>(0 - 1)          | 0<br>(0 - 0)           | 1<br>(1 - 2)             | 6<br>(4 - 7)                | 67<br>(47 - 100)            |
| Intestinal infectious diseases                                    | 4<br>(2 - 9)                | 1<br>(0 - 2)          | 1<br>(0 - 1)           | 1<br>(0 - 3)             | 1<br>(0 - 2)                | 1<br>(0 - 2)                |
| Typhoid fever                                                     | 3<br>(1 - 7)                | 0<br>(0 - 1)          | 0<br>(0 - 1)           | 1<br>(0 - 3)             | 0<br>(0 - 1)                | 0<br>(0 - 1)                |
| Paratyphoid fever                                                 | 1<br>(0 - 2)                | 0<br>(0 - 0)          | 0<br>(0 - 0)           | 0<br>(0 - 1)             | 0<br>(0 - 0)                | 0<br>(0 - 0)                |
| Other intestinal infectious diseases                              | 1<br>(0 - 3)                | 0<br>(0 - 1)          | 0<br>(0 - 0)           | 0<br>(0 - 1)             | 0<br>(0 - 1)                | 0<br>(0 - 2)                |
| Lower respiratory infections                                      | 1,022<br>(685 - 2,324)      | 2<br>(2 - 4)          | 1<br>(0 - 1)           | 19<br>(14 - 31)          | 99<br>(72 - 171)            | 901<br>(579 - 2,129)        |
| Upper respiratory infections                                      | 1<br>(0 - 3)                | 0<br>(0 - 0)          | 0<br>(0 - 0)           | 0<br>(0 - 0)             | 0<br>(0 - 1)                | 1<br>(0 - 2)                |
| Otitis media                                                      | 1<br>(1 - 1)                | 0<br>(0 - 0)          | 0<br>(0 - 0)           | 0<br>(0 - 0)             | 0<br>(0 - 0)                | 0<br>(0 - 0)                |
| Meningitis                                                        | 23<br>(20 - 28)             | 2<br>(1 - 2)          | 0<br>(0 - 1)           | 3<br>(3 - 4)             | 7<br>(6 - 9)                | 10<br>(8 - 14)              |
| Pneumococcal meningitis                                           | 4<br>(3 - 6)                | 0<br>(0 - 0)          | 0<br>(0 - 0)           | 1<br>(0 - 1)             | 1<br>(1 - 2)                | 2<br>(1 - 3)                |
| H influenzae type B meningitis                                    | 3<br>(2 - 3)                | 0<br>(0 - 1)          | 0<br>(0 - 0)           | 0<br>(0 - 1)             | 1<br>(0 - 1)                | 1<br>(1 - 1)                |
| Meningococcal meningitis                                          | 8<br>(6 - 10)               | 1<br>(0 - 1)          | 0<br>(0 - 0)           | 1<br>(1 - 1)             | 2<br>(1 - 3)                | 4<br>(2 - 5)                |
| Other meningitis                                                  | 9<br>(6 - 11)               | 0<br>(0 - 1)          | 0<br>(0 - 0)           | 1<br>(1 - 2)             | 3<br>(2 - 4)                | 4<br>(3 - 5)                |
| Encephalitis                                                      | 14<br>(7 - 19)              | 1<br>(0 - 1)          | 0<br>(0 - 1)           | 3<br>(2 - 4)             | 4<br>(2 - 5)                | 6<br>(3 - 10)               |
| Diphtheria                                                        | 0<br>(0 - 0)                | 0<br>(0 - 0)          | 0<br>(0 - 0)           | 0<br>(0 - 0)             | 0<br>(0 - 0)                | --                          |
| Whooping cough                                                    | 0<br>(0 - 0)                | 0<br>(0 - 0)          | 0<br>(0 - 0)           | 0<br>(0 - 0)             | 0<br>(0 - 0)                | --                          |
| Tetanus                                                           | 1<br>(0 - 1)                | 0<br>(0 - 0)          | 0<br>(0 - 0)           | 0<br>(0 - 0)             | 0<br>(0 - 0)                | 0<br>(0 - 0)                |
| Measles                                                           | 0<br>(0 - 0)                | 0<br>(0 - 0)          | 0<br>(0 - 0)           | 0<br>(0 - 0)             | 0<br>(0 - 0)                | --                          |
| Varicella and herpes zoster                                       | 5<br>(1 - 16)               | 0<br>(0 - 1)          | 0<br>(0 - 0)           | 0<br>(0 - 1)             | 0<br>(0 - 1)                | 4<br>(0 - 14)               |
| Neglected tropical diseases and malaria                           | 4<br>(3 - 5)                | 0<br>(0 - 0)          | 0<br>(0 - 0)           | 1<br>(1 - 1)             | 2<br>(1 - 2)                | 1<br>(1 - 2)                |
| Cysticercosis                                                     | 0<br>(0 - 0)                | 0<br>(0 - 0)          | 0<br>(0 - 0)           | 0<br>(0 - 0)             | 0<br>(0 - 0)                | 0<br>(0 - 0)                |
| Cystic echinococcosis                                             | 0<br>(0 - 0)                | 0<br>(0 - 0)          | 0<br>(0 - 0)           | 0<br>(0 - 0)             | 0<br>(0 - 0)                | 0<br>(0 - 0)                |
| Dengue                                                            | 1<br>(0 - 1)                | 0<br>(0 - 0)          | 0<br>(0 - 0)           | 0<br>(0 - 0)             | 0<br>(0 - 0)                | 0<br>(0 - 0)                |
| Rabies                                                            | 1<br>(0 - 1)                | 0<br>(0 - 0)          | 0<br>(0 - 0)           | 0<br>(0 - 0)             | 0<br>(0 - 0)                | 0<br>(0 - 0)                |
| Other neglected tropical diseases                                 | 3<br>(2 - 3)                | 0<br>(0 - 0)          | 0<br>(0 - 0)           | 1<br>(0 - 1)             | 1<br>(1 - 1)                | 1<br>(0 - 1)                |
| Maternal disorders                                                | 2<br>(2 - 3)                | --                    | 0<br>(0 - 0)           | 2<br>(2 - 3)             | --                          | --                          |
| Maternal hemorrhage                                               | 0<br>(0 - 0)                | --                    | 0<br>(0 - 0)           | 0<br>(0 - 0)             | --                          | --                          |
| Maternal sepsis and other maternal infections                     | 0<br>(0 - 0)                | --                    | 0<br>(0 - 0)           | 0<br>(0 - 0)             | --                          | --                          |
| Maternal hypertensive disorders                                   | 0<br>(0 - 0)                | --                    | 0<br>(0 - 0)           | 0<br>(0 - 0)             | --                          | --                          |
| Maternal obstructed labor                                         | 0<br>(0 - 0)                | --                    | 0<br>(0 - 0)           | 0<br>(0 - 0)             | --                          | --                          |
| Maternal abortive outcome                                         | 0<br>(0 - 1)                | --                    | 0<br>(0 - 0)           | 0<br>(0 - 1)             | --                          | --                          |
| Indirect maternal deaths                                          | 0<br>(0 - 0)                | --                    | 0<br>(0 - 0)           | 0<br>(0 - 0)             | --                          | --                          |

Web Table 31- Finland deaths with 95% UI by age, sex, and cause in 2013

| Cause                                                            | Both Sexes, All Ages        | Both Sexes, 0-4 Years | Both Sexes, 5-14 Years | Both Sexes, 15-49 Years  | Both Sexes, 50-69 Years   | Both Sexes, 70-80 Years     |
|------------------------------------------------------------------|-----------------------------|-----------------------|------------------------|--------------------------|---------------------------|-----------------------------|
| Late maternal deaths                                             | 0<br>(0 - 0)                | --                    | 0<br>(0 - 0)           | 0<br>(0 - 0)             | --                        | --                          |
| Maternal deaths aggravated by HIV/AIDS                           | 0<br>(0 - 0)                | --                    | --                     | 0<br>(0 - 0)             | --                        | --                          |
| Other maternal disorders                                         | 0<br>(0 - 1)                | --                    | 0<br>(0 - 0)           | 0<br>(0 - 1)             | --                        | --                          |
| Neonatal disorders                                               | 62<br>(47 - 82)             | 62<br>(47 - 82)       | --                     | --                       | --                        | --                          |
| Neonatal preterm birth complications                             | 31<br>(21 - 43)             | 31<br>(21 - 43)       | --                     | --                       | --                        | --                          |
| Neonatal encephalopathy due to birth asphyxia and trauma         | 12<br>(7 - 17)              | 12<br>(7 - 17)        | --                     | --                       | --                        | --                          |
| Neonatal sepsis and other neonatal infections                    | 2<br>(0 - 4)                | 2<br>(0 - 4)          | --                     | --                       | --                        | --                          |
| Hemolytic disease and other neonatal jaundice                    | 0<br>(0 - 0)                | 0<br>(0 - 0)          | --                     | --                       | --                        | --                          |
| Other neonatal disorders                                         | 18<br>(12 - 26)             | 18<br>(12 - 26)       | --                     | --                       | --                        | --                          |
| Nutritional deficiencies                                         | 31<br>(23 - 38)             | 0<br>(0 - 0)          | 0<br>(0 - 0)           | 3<br>(2 - 4)             | 5<br>(4 - 7)              | 22<br>(16 - 29)             |
| Protein-energy malnutrition                                      | 3<br>(1 - 5)                | 0<br>(0 - 0)          | 0<br>(0 - 0)           | 0<br>(0 - 0)             | 0<br>(0 - 1)              | 2<br>(1 - 4)                |
| Iodine deficiency                                                | 0<br>(0 - 2)                | 0<br>(0 - 0)          | 0<br>(0 - 0)           | 0<br>(0 - 0)             | 0<br>(0 - 0)              | 0<br>(0 - 2)                |
| Iron-deficiency anemia                                           | 21<br>(16 - 28)             | 0<br>(0 - 0)          | 0<br>(0 - 0)           | 2<br>(2 - 3)             | 3<br>(2 - 4)              | 17<br>(12 - 23)             |
| Other nutritional deficiencies                                   | 6<br>(3 - 9)                | 0<br>(0 - 0)          | 0<br>(0 - 0)           | 0<br>(0 - 1)             | 2<br>(1 - 3)              | 3<br>(2 - 5)                |
| Other communicable, maternal, neonatal, and nutritional diseases | 64<br>(49 - 80)             | 2<br>(1 - 3)          | 1<br>(0 - 1)           | 6<br>(4 - 7)             | 16<br>(11 - 20)           | 41<br>(30 - 53)             |
| Sexually transmitted diseases excluding HIV                      | 6<br>(3 - 10)               | 1<br>(0 - 2)          | 0<br>(0 - 0)           | 0<br>(0 - 0)             | 1<br>(0 - 1)              | 4<br>(2 - 8)                |
| Syphilis                                                         | 4<br>(2 - 8)                | 1<br>(0 - 2)          | 0<br>(0 - 0)           | 0<br>(0 - 0)             | 0<br>(0 - 1)              | 3<br>(1 - 6)                |
| Chlamydial infection                                             | 0<br>(0 - 0)                | --                    | 0<br>(0 - 0)           | 0<br>(0 - 0)             | 0<br>(0 - 0)              | 0<br>(0 - 0)                |
| Gonococcal infection                                             | 1<br>(0 - 1)                | --                    | 0<br>(0 - 0)           | 0<br>(0 - 0)             | 0<br>(0 - 0)              | 0<br>(0 - 1)                |
| Other sexually transmitted diseases                              | 0<br>(0 - 1)                | --                    | 0<br>(0 - 0)           | 0<br>(0 - 0)             | 0<br>(0 - 0)              | 0<br>(0 - 0)                |
| Hepatitis                                                        | 2<br>(2 - 3)                | 0<br>(0 - 0)          | 0<br>(0 - 0)           | 1<br>(0 - 1)             | 1<br>(0 - 1)              | 1<br>(1 - 1)                |
| Acute hepatitis A                                                | 1<br>(0 - 1)                | 0<br>(0 - 0)          | 0<br>(0 - 0)           | 0<br>(0 - 0)             | 0<br>(0 - 0)              | 0<br>(0 - 0)                |
| Acute hepatitis B                                                | 1<br>(1 - 2)                | 0<br>(0 - 0)          | 0<br>(0 - 0)           | 0<br>(0 - 0)             | 0<br>(0 - 1)              | 1<br>(0 - 1)                |
| Acute hepatitis C                                                | 0<br>(0 - 1)                | --                    | 0<br>(0 - 0)           | 0<br>(0 - 0)             | 0<br>(0 - 0)              | 0<br>(0 - 0)                |
| Other infectious diseases                                        | 57<br>(40 - 71)             | 1<br>(1 - 1)          | 0<br>(0 - 1)           | 5<br>(3 - 6)             | 15<br>(10 - 19)           | 36<br>(24 - 47)             |
| Non-communicable diseases                                        | 48,316<br>(45,877 - 50,588) | 95<br>(74 - 121)      | 33<br>(28 - 39)        | 1,567<br>(1,389 - 1,688) | 9,901<br>(9,328 - 10,498) | 36,721<br>(34,862 - 38,369) |
| Neoplasms                                                        | 12,204<br>(11,262 - 13,112) | 8<br>(6 - 11)         | 17<br>(14 - 21)        | 466<br>(423 - 506)       | 4,014<br>(3,733 - 4,296)  | 7,699<br>(7,014 - 8,360)    |
| Esophageal cancer                                                | 248<br>(213 - 282)          | --                    | --                     | 6<br>(5 - 8)             | 103<br>(81 - 120)         | 139<br>(119 - 162)          |
| Stomach cancer                                                   | 632<br>(538 - 759)          | --                    | --                     | 25<br>(20 - 30)          | 180<br>(158 - 209)        | 427<br>(348 - 536)          |
| Liver cancer                                                     | 395<br>(271 - 503)          | --                    | 0<br>(0 - 1)           | 10<br>(7 - 14)           | 125<br>(86 - 158)         | 259<br>(172 - 342)          |
| Liver cancer due to hepatitis B                                  | 84<br>(52 - 131)            | --                    | 0<br>(0 - 0)           | 4<br>(2 - 6)             | 34<br>(19 - 57)           | 46<br>(27 - 73)             |
| Liver cancer due to hepatitis C                                  | 202<br>(130 - 286)          | --                    | 0<br>(0 - 0)           | 4<br>(2 - 7)             | 63<br>(38 - 92)           | 135<br>(84 - 194)           |
| Liver cancer due to alcohol use                                  | 88<br>(42 - 148)            | --                    | --                     | 1<br>(0 - 2)             | 22<br>(9 - 42)            | 65<br>(33 - 108)            |
| Liver cancer due to other causes                                 | 20<br>(9 - 35)              | --                    | 0<br>(0 - 0)           | 1<br>(0 - 2)             | 6<br>(2 - 10)             | 13<br>(6 - 25)              |
| Larynx cancer                                                    | 45<br>(35 - 57)             | --                    | --                     | 2<br>(1 - 2)             | 20<br>(15 - 26)           | 23<br>(18 - 31)             |
| Tracheal, bronchus and lung cancer                               | 2,327<br>(2,066 - 2,568)    | --                    | --                     | 45<br>(38 - 53)          | 933<br>(832 - 1,037)      | 1,349<br>(1,175 - 1,511)    |
| Breast cancer                                                    | 837<br>(577 - 976)          | --                    | --                     | 69<br>(55 - 87)          | 351<br>(251 - 415)        | 416<br>(269 - 502)          |
| Cervical cancer                                                  | 71<br>(56 - 93)             | --                    | --                     | 7<br>(5 - 9)             | 22<br>(17 - 29)           | 42<br>(31 - 57)             |
| Uterine cancer                                                   | 161<br>(96 - 201)           | --                    | --                     | 3<br>(2 - 4)             | 46<br>(30 - 58)           | 112<br>(61 - 147)           |
| Prostate cancer                                                  | 1,022<br>(812 - 1,480)      | --                    | --                     | 2<br>(1 - 3)             | 175<br>(130 - 251)        | 846<br>(652 - 1,254)        |

Web Table 31- Finland deaths with 95% UI by age, sex, and cause in 2013

| Cause                                         | Both Sexes, All Ages        | Both Sexes, 0-4 Years | Both Sexes, 5-14 Years | Both Sexes, 15-49 Years | Both Sexes, 50-69 Years  | Both Sexes, 70-80 Years     |
|-----------------------------------------------|-----------------------------|-----------------------|------------------------|-------------------------|--------------------------|-----------------------------|
| Colon and rectum cancer                       | 1,554<br>(1,399 - 1,732)    | --                    | --                     | 38<br>(33 - 43)         | 427<br>(388 - 464)       | 1,089<br>(953 - 1,242)      |
| Lip and oral cavity cancer                    | 114<br>(87 - 130)           | --                    | --                     | 8<br>(6 - 10)           | 42<br>(29 - 49)          | 63<br>(51 - 77)             |
| Nasopharynx cancer                            | 13<br>(10 - 21)             | --                    | 0<br>(0 - 0)           | 2<br>(1 - 3)            | 6<br>(4 - 10)            | 5<br>(3 - 8)                |
| Other pharynx cancer                          | 49<br>(35 - 61)             | --                    | --                     | 3<br>(2 - 4)            | 29<br>(19 - 38)          | 17<br>(13 - 22)             |
| Gallbladder and biliary tract cancer          | 230<br>(176 - 299)          | --                    | --                     | 4<br>(3 - 5)            | 62<br>(49 - 78)          | 163<br>(119 - 218)          |
| Pancreatic cancer                             | 1,072<br>(975 - 1,171)      | --                    | --                     | 23<br>(19 - 27)         | 373<br>(335 - 411)       | 675<br>(596 - 762)          |
| Malignant skin melanoma                       | 203<br>(133 - 307)          | --                    | --                     | 23<br>(15 - 35)         | 79<br>(51 - 123)         | 101<br>(65 - 143)           |
| Non-melanoma skin cancer                      | 54<br>(40 - 72)             | --                    | --                     | 1<br>(1 - 1)            | 6<br>(5 - 9)             | 47<br>(34 - 63)             |
| Ovarian cancer                                | 309<br>(251 - 361)          | --                    | --                     | 15<br>(12 - 19)         | 131<br>(107 - 155)       | 163<br>(121 - 204)          |
| Testicular cancer                             | 7<br>(5 - 9)                | --                    | --                     | 4<br>(3 - 5)            | 2<br>(1 - 2)             | 2<br>(1 - 2)                |
| Kidney cancer                                 | 351<br>(298 - 411)          | 0<br>(0 - 0)          | 0<br>(0 - 0)           | 10<br>(8 - 13)          | 130<br>(111 - 151)       | 211<br>(168 - 266)          |
| Bladder cancer                                | 251<br>(209 - 293)          | --                    | --                     | 2<br>(2 - 3)            | 51<br>(41 - 59)          | 198<br>(154 - 237)          |
| Brain and nervous system cancer               | 347<br>(278 - 399)          | 2<br>(1 - 3)          | 6<br>(4 - 8)           | 54<br>(45 - 64)         | 164<br>(132 - 192)       | 121<br>(87 - 145)           |
| Thyroid cancer                                | 55<br>(43 - 66)             | --                    | 0<br>(0 - 0)           | 3<br>(2 - 3)            | 16<br>(13 - 20)          | 36<br>(27 - 46)             |
| Mesothelioma                                  | 97<br>(63 - 129)            | --                    | --                     | 2<br>(1 - 3)            | 44<br>(28 - 62)          | 50<br>(30 - 71)             |
| Hodgkin lymphoma                              | 29<br>(24 - 43)             | 0<br>(0 - 0)          | 0<br>(0 - 1)           | 8<br>(6 - 11)           | 10<br>(7 - 14)           | 11<br>(9 - 17)              |
| Non-Hodgkin lymphoma                          | 479<br>(317 - 617)          | 0<br>(0 - 1)          | 1<br>(1 - 2)           | 24<br>(16 - 33)         | 144<br>(97 - 191)        | 309<br>(196 - 396)          |
| Multiple myeloma                              | 286<br>(206 - 401)          | --                    | --                     | 6<br>(4 - 9)            | 84<br>(59 - 121)         | 196<br>(136 - 278)          |
| Leukemia                                      | 408<br>(351 - 455)          | 2<br>(1 - 3)          | 6<br>(4 - 7)           | 27<br>(23 - 31)         | 106<br>(92 - 119)        | 268<br>(227 - 309)          |
| Other neoplasms                               | 559<br>(391 - 673)          | 3<br>(2 - 5)          | 4<br>(3 - 5)           | 38<br>(27 - 47)         | 153<br>(109 - 186)       | 360<br>(233 - 447)          |
| Cardiovascular diseases                       | 21,531<br>(20,011 - 23,316) | 1<br>(1 - 1)          | 2<br>(1 - 2)           | 355<br>(312 - 394)      | 3,462<br>(3,181 - 3,832) | 17,711<br>(16,381 - 19,312) |
| Rheumatic heart disease                       | 69<br>(53 - 113)            | 0<br>(0 - 0)          | 0<br>(0 - 0)           | 2<br>(1 - 3)            | 14<br>(10 - 25)          | 53<br>(39 - 87)             |
| Ischemic heart disease                        | 12,600<br>(11,425 - 14,079) | 0<br>(0 - 0)          | 0<br>(0 - 0)           | 157<br>(134 - 191)      | 2,113<br>(1,892 - 2,486) | 10,330<br>(9,237 - 11,552)  |
| Cerebrovascular disease                       | 5,446<br>(4,697 - 6,741)    | 0<br>(0 - 0)          | 0<br>(0 - 0)           | 93<br>(71 - 114)        | 701<br>(578 - 857)       | 4,652<br>(4,003 - 5,842)    |
| Ischemic stroke                               | 3,772<br>(3,220 - 4,851)    | 0<br>(0 - 0)          | 0<br>(0 - 0)           | 10<br>(7 - 14)          | 269<br>(208 - 345)       | 3,493<br>(2,968 - 4,483)    |
| Hemorrhagic stroke                            | 1,674<br>(1,376 - 2,146)    | 0<br>(0 - 0)          | 0<br>(0 - 0)           | 83<br>(64 - 101)        | 432<br>(347 - 536)       | 1,159<br>(916 - 1,543)      |
| Hypertensive heart disease                    | 573<br>(335 - 773)          | 0<br>(0 - 0)          | 0<br>(0 - 0)           | 8<br>(4 - 11)           | 79<br>(45 - 114)         | 486<br>(275 - 669)          |
| Cardiomyopathy and myocarditis                | 518<br>(371 - 609)          | 1<br>(1 - 1)          | 1<br>(1 - 1)           | 60<br>(45 - 74)         | 238<br>(173 - 292)       | 218<br>(147 - 270)          |
| Atrial fibrillation and flutter               | 435<br>(325 - 566)          | --                    | --                     | 0<br>(0 - 0)            | 21<br>(16 - 27)          | 413<br>(304 - 543)          |
| Aortic aneurysm                               | 575<br>(459 - 703)          | --                    | --                     | 12<br>(8 - 14)          | 136<br>(108 - 162)       | 428<br>(339 - 537)          |
| Peripheral vascular disease                   | 327<br>(252 - 416)          | --                    | --                     | 0<br>(0 - 0)            | 17<br>(13 - 21)          | 310<br>(237 - 400)          |
| Endocarditis                                  | 43<br>(29 - 57)             | 0<br>(0 - 0)          | 0<br>(0 - 0)           | 4<br>(3 - 6)            | 11<br>(7 - 16)           | 28<br>(18 - 36)             |
| Other cardiovascular and circulatory diseases | 945<br>(610 - 1,190)        | 0<br>(0 - 0)          | 0<br>(0 - 0)           | 19<br>(11 - 24)         | 133<br>(84 - 163)        | 793<br>(509 - 1,033)        |
| Chronic respiratory diseases                  | 1,742<br>(1,417 - 1,931)    | 0<br>(0 - 1)          | 0<br>(0 - 1)           | 20<br>(16 - 23)         | 334<br>(272 - 378)       | 1,388<br>(1,106 - 1,557)    |
| Chronic obstructive pulmonary disease         | 1,320<br>(1,070 - 1,497)    | 0<br>(0 - 0)          | 0<br>(0 - 0)           | 9<br>(6 - 11)           | 258<br>(207 - 297)       | 1,054<br>(840 - 1,211)      |
| Pneumoconiosis                                | 42<br>(26 - 58)             | 0<br>(0 - 0)          | 0<br>(0 - 0)           | 2<br>(1 - 2)            | 9<br>(5 - 13)            | 31<br>(18 - 45)             |
| Silicosis                                     | 4<br>(2 - 5)                | 0<br>(0 - 0)          | 0<br>(0 - 0)           | 0<br>(0 - 1)            | 1<br>(0 - 1)             | 2<br>(1 - 3)                |
| Asbestosis                                    | 29<br>(18 - 40)             | 0<br>(0 - 0)          | 0<br>(0 - 0)           | 0<br>(0 - 1)            | 5<br>(3 - 8)             | 23<br>(13 - 33)             |
| Coal workers pneumoconiosis                   | 1<br>(1 - 1)                | 0<br>(0 - 0)          | 0<br>(0 - 0)           | 0<br>(0 - 0)            | 0<br>(0 - 0)             | 1<br>(0 - 1)                |
| Other pneumoconiosis                          | 9<br>(5 - 12)               | 0<br>(0 - 0)          | 0<br>(0 - 0)           | 1<br>(0 - 1)            | 3<br>(2 - 4)             | 5<br>(3 - 8)                |



Web Table 31- Finland deaths with 95% UI by age, sex, and cause in 2013

| Cause                                               | Both Sexes, All Ages     | Both Sexes, 0-4 Years | Both Sexes, 5-14 Years | Both Sexes, 15-49 Years | Both Sexes, 50-69 Years | Both Sexes, 70-80 Years  |
|-----------------------------------------------------|--------------------------|-----------------------|------------------------|-------------------------|-------------------------|--------------------------|
| Asthma                                              | 109<br>(74 - 145)        | 0<br>(0 - 0)          | 0<br>(0 - 0)           | 5<br>(3 - 6)            | 16<br>(10 - 20)         | 88<br>(58 - 123)         |
| Interstitial lung disease and pulmonary sarcoidosis | 259<br>(168 - 336)       | 0<br>(0 - 0)          | 0<br>(0 - 0)           | 3<br>(2 - 4)            | 47<br>(31 - 64)         | 208<br>(131 - 274)       |
| Other chronic respiratory diseases                  | 13<br>(10 - 17)          | 0<br>(0 - 0)          | 0<br>(0 - 0)           | 2<br>(1 - 2)            | 4<br>(3 - 5)            | 7<br>(5 - 10)            |
| Cirrhosis                                           | 1,111<br>(1,020 - 1,208) | 0<br>(0 - 0)          | 0<br>(0 - 0)           | 188<br>(163 - 213)      | 703<br>(633 - 776)      | 220<br>(194 - 246)       |
| Cirrhosis due to hepatitis B                        | 108<br>(66 - 151)        | 0<br>(0 - 0)          | 0<br>(0 - 0)           | 17<br>(10 - 26)         | 67<br>(40 - 97)         | 24<br>(16 - 36)          |
| Cirrhosis due to hepatitis C                        | 542<br>(370 - 729)       | 0<br>(0 - 0)          | 0<br>(0 - 0)           | 92<br>(56 - 126)        | 343<br>(224 - 482)      | 107<br>(76 - 139)        |
| Cirrhosis due to alcohol use                        | 341<br>(146 - 526)       | --<br>(0 - 0)         | --<br>(0 - 0)          | 48<br>(16 - 88)         | 220<br>(87 - 350)       | 72<br>(39 - 100)         |
| Cirrhosis due to other causes                       | 120<br>(65 - 178)        | 0<br>(0 - 0)          | 0<br>(0 - 0)           | 31<br>(16 - 45)         | 73<br>(37 - 112)        | 16<br>(9 - 24)           |
| Digestive diseases                                  | 1,271<br>(1,088 - 1,412) | 0<br>(0 - 1)          | 1<br>(0 - 1)           | 50<br>(36 - 59)         | 263<br>(177 - 302)      | 957<br>(833 - 1,098)     |
| Peptic ulcer disease                                | 198<br>(155 - 244)       | 0<br>(0 - 0)          | 0<br>(0 - 0)           | 6<br>(3 - 8)            | 49<br>(32 - 62)         | 143<br>(109 - 188)       |
| Gastritis and duodenitis                            | 19<br>(9 - 26)           | 0<br>(0 - 0)          | 0<br>(0 - 0)           | 2<br>(1 - 2)            | 7<br>(3 - 11)           | 9<br>(5 - 14)            |
| Appendicitis                                        | 12<br>(9 - 18)           | 0<br>(0 - 0)          | 0<br>(0 - 0)           | 1<br>(1 - 2)            | 3<br>(2 - 5)            | 8<br>(5 - 12)            |
| Paralytic ileus and intestinal obstruction          | 216<br>(143 - 323)       | 0<br>(0 - 0)          | 0<br>(0 - 0)           | 6<br>(3 - 8)            | 35<br>(20 - 52)         | 175<br>(113 - 265)       |
| Inguinal, femoral, and abdominal hernia             | 36<br>(19 - 50)          | 0<br>(0 - 0)          | 0<br>(0 - 0)           | 1<br>(0 - 1)            | 5<br>(3 - 8)            | 30<br>(15 - 44)          |
| Inflammatory bowel disease                          | 33<br>(24 - 46)          | 0<br>(0 - 0)          | 0<br>(0 - 0)           | 1<br>(1 - 2)            | 7<br>(5 - 9)            | 25<br>(17 - 36)          |
| Vascular intestinal disorders                       | 232<br>(145 - 358)       | 0<br>(0 - 0)          | 0<br>(0 - 0)           | 1<br>(1 - 2)            | 30<br>(16 - 49)         | 201<br>(126 - 315)       |
| Gallbladder and biliary diseases                    | 173<br>(130 - 223)       | 0<br>(0 - 0)          | 0<br>(0 - 0)           | 2<br>(1 - 2)            | 16<br>(11 - 21)         | 155<br>(116 - 206)       |
| Pancreatitis                                        | 157<br>(104 - 191)       | 0<br>(0 - 0)          | 0<br>(0 - 0)           | 27<br>(19 - 33)         | 74<br>(44 - 93)         | 56<br>(35 - 74)          |
| Other digestive diseases                            | 195<br>(136 - 239)       | 0<br>(0 - 0)          | 0<br>(0 - 0)           | 4<br>(2 - 6)            | 35<br>(18 - 45)         | 155<br>(109 - 195)       |
| Neurological disorders                              | 7,916<br>(6,353 - 9,388) | 3<br>(2 - 4)          | 2<br>(1 - 2)           | 64<br>(51 - 75)         | 418<br>(362 - 473)      | 7,429<br>(5,874 - 8,885) |
| Alzheimer disease and other dementias               | 6,912<br>(5,364 - 8,349) | --<br>(0 - 0)         | --<br>(0 - 0)          | 0<br>(0 - 1)            | 178<br>(140 - 220)      | 6,733<br>(5,169 - 8,160) |
| Parkinson disease                                   | 538<br>(394 - 655)       | --<br>(0 - 0)         | --<br>(0 - 0)          | 1<br>(0 - 1)            | 38<br>(29 - 47)         | 499<br>(357 - 614)       |
| Epilepsy                                            | 72<br>(47 - 90)          | 1<br>(0 - 1)          | 1<br>(1 - 1)           | 30<br>(20 - 38)         | 26<br>(17 - 34)         | 15<br>(8 - 22)           |
| Multiple sclerosis                                  | 64<br>(43 - 88)          | --<br>(0 - 0)         | --<br>(0 - 0)          | 12<br>(8 - 17)          | 32<br>(20 - 45)         | 20<br>(13 - 32)          |
| Other neurological disorders                        | 330<br>(278 - 370)       | 3<br>(2 - 4)          | 1<br>(1 - 1)           | 20<br>(17 - 24)         | 144<br>(121 - 167)      | 162<br>(135 - 188)       |
| Mental and substance use disorders                  | 835<br>(580 - 966)       | 0<br>(0 - 0)          | 0<br>(0 - 0)           | 324<br>(247 - 376)      | 411<br>(251 - 496)      | 100<br>(63 - 123)        |
| Schizophrenia                                       | 45<br>(27 - 60)          | --<br>(0 - 0)         | --<br>(0 - 0)          | 3<br>(2 - 4)            | 12<br>(7 - 16)          | 30<br>(17 - 43)          |
| Alcohol use disorders                               | 529<br>(301 - 644)       | --<br>(0 - 0)         | --<br>(0 - 0)          | 153<br>(99 - 194)       | 325<br>(171 - 410)      | 52<br>(23 - 68)          |
| Drug use disorders                                  | 260<br>(191 - 298)       | 0<br>(0 - 0)          | --<br>(0 - 0)          | 168<br>(106 - 199)      | 74<br>(60 - 88)         | 18<br>(14 - 22)          |
| Opioid use disorders                                | 94<br>(67 - 108)         | 0<br>(0 - 0)          | --<br>(0 - 0)          | 62<br>(38 - 74)         | 25<br>(19 - 30)         | 7<br>(5 - 8)             |
| Cocaine use disorders                               | 7<br>(5 - 9)             | 0<br>(0 - 0)          | --<br>(0 - 0)          | 5<br>(3 - 6)            | 2<br>(1 - 2)            | 0<br>(0 - 1)             |
| Amphetamine use disorders                           | 7<br>(6 - 9)             | 0<br>(0 - 0)          | --<br>(0 - 0)          | 5<br>(3 - 6)            | 2<br>(2 - 3)            | 1<br>(0 - 1)             |
| Other drug use disorders                            | 152<br>(112 - 174)       | 0<br>(0 - 0)          | --<br>(0 - 0)          | 96<br>(61 - 115)        | 45<br>(36 - 55)         | 10<br>(8 - 13)           |
| Eating disorders                                    | 1<br>(0 - 1)             | --<br>(0 - 0)         | 0<br>(0 - 0)           | 1<br>(0 - 1)            | --<br>(0 - 0)           | --<br>(0 - 0)            |
| Anorexia nervosa                                    | 1<br>(0 - 1)             | --<br>(0 - 0)         | 0<br>(0 - 0)           | 1<br>(0 - 1)            | --<br>(0 - 0)           | --<br>(0 - 0)            |
| Diabetes, urogenital, blood, and endocrine diseases | 1,274<br>(1,134 - 1,539) | 5<br>(3 - 7)          | 3<br>(2 - 4)           | 58<br>(50 - 66)         | 203<br>(183 - 229)      | 1,004<br>(870 - 1,270)   |
| Diabetes mellitus                                   | 405<br>(358 - 491)       | 0<br>(0 - 0)          | 0<br>(0 - 0)           | 31<br>(27 - 36)         | 100<br>(87 - 116)       | 274<br>(232 - 353)       |
| Acute glomerulonephritis                            | 1<br>(1 - 3)             | 0<br>(0 - 0)          | 0<br>(0 - 0)           | 0<br>(0 - 0)            | 0<br>(0 - 1)            | 1<br>(0 - 2)             |
| Chronic kidney disease                              | 438<br>(340 - 514)       | 0<br>(0 - 1)          | 0<br>(0 - 0)           | 11<br>(9 - 13)          | 51<br>(42 - 63)         | 376<br>(283 - 451)       |
| Chronic kidney disease due to diabetes mellitus     | 108<br>(80 - 144)        | 0<br>(0 - 0)          | 0<br>(0 - 0)           | 4<br>(3 - 6)            | 21<br>(16 - 29)         | 83<br>(56 - 111)         |

Web Table 31- Finland deaths with 95% UI by age, sex, and cause in 2013

| Cause                                               | Both Sexes, All Ages     | Both Sexes, 0-4 Years | Both Sexes, 5-14 Years | Both Sexes, 15-49 Years | Both Sexes, 50-69 Years | Both Sexes, 70-80 Years  |
|-----------------------------------------------------|--------------------------|-----------------------|------------------------|-------------------------|-------------------------|--------------------------|
| Chronic kidney disease due to hypertension          | 104<br>(62 - 138)        | 0<br>(0 - 0)          | 0<br>(0 - 0)           | 0<br>(0 - 1)            | 5<br>(3 - 7)            | 99<br>(58 - 131)         |
| Chronic kidney disease due to glomerulonephritis    | 16<br>(11 - 23)          | 0<br>(0 - 0)          | 0<br>(0 - 0)           | 1<br>(1 - 1)            | 4<br>(3 - 6)            | 11<br>(7 - 16)           |
| Chronic kidney disease due to other causes          | 210<br>(134 - 271)       | 0<br>(0 - 0)          | 0<br>(0 - 0)           | 5<br>(4 - 7)            | 21<br>(15 - 30)         | 183<br>(113 - 243)       |
| Urinary diseases and male infertility               | 323<br>(226 - 568)       | 0<br>(0 - 0)          | 0<br>(0 - 0)           | 3<br>(2 - 4)            | 24<br>(19 - 35)         | 296<br>(203 - 535)       |
| Interstitial nephritis and urinary tract infections | 306<br>(211 - 546)       | 0<br>(0 - 0)          | 0<br>(0 - 0)           | 2<br>(2 - 4)            | 20<br>(16 - 31)         | 283<br>(192 - 517)       |
| Urolithiasis                                        | 4<br>(2 - 8)             | --                    | 0<br>(0 - 0)           | 0<br>(0 - 0)            | 1<br>(1 - 1)            | 3<br>(2 - 7)             |
| Other urinary diseases                              | 13<br>(7 - 20)           | 0<br>(0 - 0)          | 0<br>(0 - 0)           | 0<br>(0 - 0)            | 3<br>(2 - 4)            | 10<br>(5 - 16)           |
| Gynecological diseases                              | 1<br>(1 - 2)             | --                    | --                     | 0<br>(0 - 0)            | 0<br>(0 - 0)            | 0<br>(0 - 1)             |
| Uterine fibroids                                    | 0<br>(0 - 1)             | --                    | --                     | 0<br>(0 - 0)            | 0<br>(0 - 0)            | 0<br>(0 - 0)             |
| Polycystic ovarian syndrome                         | 0<br>(0 - 0)             | --                    | --                     | 0<br>(0 - 0)            | 0<br>(0 - 0)            | --                       |
| Endometriosis                                       | 0<br>(0 - 0)             | --                    | --                     | 0<br>(0 - 0)            | 0<br>(0 - 0)            | --                       |
| Genital prolapse                                    | 0<br>(0 - 0)             | --                    | --                     | 0<br>(0 - 0)            | 0<br>(0 - 0)            | 0<br>(0 - 0)             |
| Other gynecological diseases                        | 0<br>(0 - 1)             | --                    | --                     | 0<br>(0 - 0)            | 0<br>(0 - 0)            | 0<br>(0 - 0)             |
| Hemoglobinopathies and hemolytic anemias            | 14<br>(9 - 19)           | 0<br>(0 - 0)          | 0<br>(0 - 1)           | 2<br>(1 - 3)            | 3<br>(2 - 4)            | 9<br>(6 - 13)            |
| Thalassemias                                        | 0<br>(0 - 1)             | 0<br>(0 - 0)          | 0<br>(0 - 0)           | 0<br>(0 - 0)            | 0<br>(0 - 0)            | 0<br>(0 - 0)             |
| Sickle cell disorders                               | 2<br>(2 - 3)             | 0<br>(0 - 0)          | 0<br>(0 - 0)           | 1<br>(0 - 1)            | 1<br>(1 - 1)            | 0<br>(0 - 0)             |
| G6PD deficiency                                     | 0<br>(0 - 0)             | 0<br>(0 - 0)          | 0<br>(0 - 0)           | 0<br>(0 - 0)            | 0<br>(0 - 0)            | 0<br>(0 - 0)             |
| Other hemoglobinopathies and hemolytic anemias      | 12<br>(7 - 16)           | 0<br>(0 - 0)          | 0<br>(0 - 0)           | 1<br>(1 - 1)            | 2<br>(1 - 2)            | 9<br>(5 - 13)            |
| Endocrine, metabolic, blood, and immune disorders   | 91<br>(58 - 108)         | 4<br>(2 - 6)          | 2<br>(1 - 3)           | 11<br>(6 - 14)          | 26<br>(15 - 32)         | 47<br>(30 - 62)          |
| Musculoskeletal disorders                           | 195<br>(160 - 254)       | --                    | 0<br>(0 - 0)           | 6<br>(5 - 8)            | 45<br>(36 - 67)         | 144<br>(113 - 185)       |
| Rheumatoid arthritis                                | 108<br>(84 - 143)        | --                    | 0<br>(0 - 0)           | 2<br>(2 - 3)            | 26<br>(19 - 41)         | 80<br>(59 - 110)         |
| Other musculoskeletal disorders                     | 86<br>(67 - 116)         | --                    | 0<br>(0 - 0)           | 4<br>(3 - 5)            | 19<br>(15 - 27)         | 63<br>(46 - 90)          |
| Other non-communicable diseases                     | 237<br>(204 - 270)       | 77<br>(59 - 100)      | 8<br>(6 - 10)          | 36<br>(30 - 41)         | 47<br>(39 - 55)         | 70<br>(50 - 88)          |
| Congenital anomalies                                | 168<br>(143 - 198)       | 65<br>(49 - 86)       | 7<br>(6 - 10)          | 34<br>(29 - 40)         | 38<br>(32 - 46)         | 24<br>(19 - 30)          |
| Neural tube defects                                 | 2<br>(1 - 2)             | 1<br>(0 - 1)          | 0<br>(0 - 0)           | 1<br>(0 - 1)            | 0<br>(0 - 0)            | 0<br>(0 - 0)             |
| Congenital heart anomalies                          | 56<br>(46 - 70)          | 23<br>(17 - 33)       | 3<br>(2 - 4)           | 15<br>(12 - 18)         | 9<br>(7 - 12)           | 6<br>(4 - 8)             |
| Cleft lip and cleft palate                          | 0<br>(0 - 0)             | 0<br>(0 - 0)          | --                     | --                      | --                      | --                       |
| Down syndrome                                       | 22<br>(14 - 28)          | 0<br>(0 - 1)          | 0<br>(0 - 0)           | 4<br>(3 - 6)            | 16<br>(10 - 22)         | 1<br>(0 - 1)             |
| Chromosomal unbalanced rearrangements               | 14<br>(10 - 21)          | 11<br>(7 - 18)        | 1<br>(0 - 1)           | 2<br>(1 - 2)            | 1<br>(0 - 1)            | 0<br>(0 - 0)             |
| Other congenital anomalies                          | 75<br>(61 - 90)          | 29<br>(21 - 40)       | 4<br>(3 - 5)           | 13<br>(10 - 16)         | 12<br>(9 - 17)          | 17<br>(13 - 21)          |
| Skin and subcutaneous diseases                      | 56<br>(31 - 73)          | 0<br>(0 - 0)          | 0<br>(0 - 0)           | 1<br>(1 - 2)            | 9<br>(5 - 12)           | 46<br>(25 - 62)          |
| Cellulitis                                          | 5<br>(2 - 8)             | 0<br>(0 - 0)          | 0<br>(0 - 0)           | 0<br>(0 - 0)            | 1<br>(0 - 1)            | 4<br>(1 - 6)             |
| Pyoderma                                            | 45<br>(24 - 58)          | 0<br>(0 - 0)          | 0<br>(0 - 0)           | 1<br>(0 - 1)            | 7<br>(3 - 8)            | 37<br>(20 - 50)          |
| Decubitus ulcer                                     | 4<br>(2 - 6)             | 0<br>(0 - 0)          | 0<br>(0 - 0)           | 0<br>(0 - 0)            | 1<br>(0 - 1)            | 3<br>(1 - 6)             |
| Other skin and subcutaneous diseases                | 3<br>(1 - 6)             | 0<br>(0 - 0)          | 0<br>(0 - 0)           | 0<br>(0 - 0)            | 0<br>(0 - 1)            | 2<br>(1 - 6)             |
| Sudden infant death syndrome                        | 13<br>(7 - 20)           | 13<br>(7 - 20)        | --                     | --                      | --                      | --                       |
| Injuries                                            | 3,347<br>(2,989 - 3,813) | 15<br>(11 - 21)       | 22<br>(18 - 26)        | 917<br>(827 - 1,079)    | 948<br>(846 - 1,143)    | 1,445<br>(1,159 - 1,709) |
| Transport injuries                                  | 380<br>(345 - 442)       | 3<br>(2 - 5)          | 10<br>(7 - 12)         | 157<br>(138 - 180)      | 108<br>(94 - 131)       | 102<br>(87 - 131)        |
| Road injuries                                       | 333<br>(297 - 386)       | 3<br>(2 - 4)          | 9<br>(7 - 11)          | 138<br>(118 - 158)      | 89<br>(76 - 108)        | 95<br>(81 - 122)         |
| Pedestrian road injuries                            | 54<br>(38 - 81)          | 1<br>(1 - 2)          | 2<br>(2 - 3)           | 9<br>(5 - 14)           | 15<br>(10 - 23)         | 27<br>(18 - 42)          |

Web Table 31- Finland deaths with 95% UI by age, sex, and cause in 2013

| Cause                                           | Both Sexes, All Ages     | Both Sexes, 0-4 Years | Both Sexes, 5-14 Years | Both Sexes, 15-49 Years | Both Sexes, 50-69 Years | Both Sexes, 70-80 Years |
|-------------------------------------------------|--------------------------|-----------------------|------------------------|-------------------------|-------------------------|-------------------------|
| Cyclist road injuries                           | 40<br>(30 - 61)          | 0<br>(0 - 0)          | 2<br>(1 - 3)           | 5<br>(4 - 8)            | 14<br>(10 - 21)         | 18<br>(13 - 30)         |
| Motorcyclist road injuries                      | 32<br>(19 - 45)          | 0<br>(0 - 0)          | 1<br>(0 - 1)           | 23<br>(13 - 33)         | 5<br>(3 - 8)            | 3<br>(2 - 5)            |
| Motor vehicle road injuries                     | 205<br>(163 - 240)       | 2<br>(1 - 3)          | 3<br>(2 - 5)           | 100<br>(80 - 117)       | 54<br>(42 - 67)         | 46<br>(33 - 58)         |
| Other road injuries                             | 2<br>(1 - 3)             | 0<br>(0 - 0)          | 0<br>(0 - 1)           | 1<br>(0 - 1)            | 1<br>(0 - 1)            | 0<br>(0 - 1)            |
| Other transport injuries                        | 47<br>(35 - 66)          | 0<br>(0 - 1)          | 1<br>(1 - 2)           | 20<br>(14 - 29)         | 19<br>(13 - 28)         | 7<br>(5 - 11)           |
| Unintentional injuries                          | 1,819<br>(1,467 - 2,102) | 10<br>(7 - 14)        | 8<br>(7 - 11)          | 190<br>(165 - 231)      | 430<br>(349 - 486)      | 1,181<br>(896 - 1,430)  |
| Falls                                           | 1,321<br>(975 - 1,607)   | 1<br>(1 - 2)          | 1<br>(1 - 1)           | 61<br>(46 - 74)         | 227<br>(150 - 273)      | 1,031<br>(760 - 1,294)  |
| Drowning                                        | 161<br>(107 - 231)       | 4<br>(2 - 7)          | 4<br>(3 - 7)           | 51<br>(36 - 79)         | 69<br>(43 - 99)         | 32<br>(20 - 45)         |
| Fire, heat, and hot substances                  | 77<br>(58 - 98)          | 1<br>(1 - 2)          | 1<br>(1 - 1)           | 20<br>(16 - 27)         | 31<br>(22 - 41)         | 24<br>(17 - 31)         |
| Poisonings                                      | 44<br>(35 - 72)          | 0<br>(0 - 0)          | 0<br>(0 - 0)           | 18<br>(14 - 28)         | 19<br>(14 - 34)         | 7<br>(5 - 10)           |
| Exposure to mechanical forces                   | 39<br>(34 - 55)          | 1<br>(1 - 2)          | 1<br>(1 - 2)           | 14<br>(12 - 20)         | 14<br>(11 - 21)         | 8<br>(6 - 11)           |
| Unintentional firearm injuries                  | 1<br>(1 - 2)             | 0<br>(0 - 0)          | 0<br>(0 - 0)           | 1<br>(1 - 1)            | 0<br>(0 - 0)            | 0<br>(0 - 0)            |
| Unintentional suffocation                       | 7<br>(5 - 14)            | 1<br>(0 - 2)          | 1<br>(0 - 1)           | 1<br>(1 - 2)            | 2<br>(2 - 5)            | 2<br>(1 - 4)            |
| Other exposure to mechanical forces             | 31<br>(26 - 41)          | 0<br>(0 - 1)          | 1<br>(0 - 1)           | 12<br>(10 - 17)         | 12<br>(9 - 16)          | 6<br>(4 - 8)            |
| Adverse effects of medical treatment            | 22<br>(8 - 36)           | 0<br>(0 - 0)          | 0<br>(0 - 0)           | 2<br>(1 - 3)            | 6<br>(2 - 9)            | 15<br>(4 - 26)          |
| Animal contact                                  | 5<br>(3 - 8)             | 0<br>(0 - 0)          | 0<br>(0 - 0)           | 1<br>(1 - 2)            | 2<br>(1 - 4)            | 2<br>(1 - 3)            |
| Venomous animal contact                         | 1<br>(1 - 2)             | 0<br>(0 - 0)          | 0<br>(0 - 0)           | 0<br>(0 - 0)            | 1<br>(0 - 1)            | 0<br>(0 - 1)            |
| Non-venomous animal contact                     | 3<br>(3 - 6)             | 0<br>(0 - 0)          | 0<br>(0 - 0)           | 1<br>(0 - 1)            | 1<br>(1 - 3)            | 1<br>(1 - 3)            |
| Foreign body                                    | 105<br>(76 - 150)        | 1<br>(1 - 2)          | 0<br>(0 - 0)           | 13<br>(9 - 19)          | 44<br>(32 - 68)         | 47<br>(31 - 64)         |
| Pulmonary aspiration and foreign body in airway | 103<br>(73 - 148)        | 1<br>(1 - 2)          | 0<br>(0 - 0)           | 13<br>(9 - 19)          | 43<br>(31 - 67)         | 46<br>(30 - 64)         |
| Foreign body in other body part                 | 2<br>(1 - 3)             | 0<br>(0 - 0)          | 0<br>(0 - 0)           | 0<br>(0 - 1)            | 1<br>(0 - 1)            | 1<br>(1 - 2)            |
| Other unintentional injuries                    | 45<br>(35 - 56)          | 1<br>(1 - 1)          | 0<br>(0 - 1)           | 10<br>(7 - 14)          | 18<br>(12 - 26)         | 15<br>(10 - 21)         |
| Self-harm and interpersonal violence            | 1,147<br>(998 - 1,578)   | 2<br>(2 - 3)          | 4<br>(3 - 5)           | 569<br>(497 - 728)      | 410<br>(347 - 584)      | 162<br>(133 - 245)      |
| Self-harm                                       | 1,043<br>(907 - 1,435)   | --                    | 2<br>(1 - 3)           | 510<br>(444 - 657)      | 377<br>(317 - 540)      | 155<br>(126 - 229)      |
| Interpersonal violence                          | 104<br>(84 - 151)        | 2<br>(2 - 3)          | 2<br>(1 - 2)           | 60<br>(47 - 87)         | 33<br>(25 - 53)         | 8<br>(6 - 11)           |
| Assault by firearm                              | 20<br>(14 - 34)          | 0<br>(0 - 0)          | 1<br>(0 - 1)           | 13<br>(8 - 22)          | 5<br>(3 - 9)            | 1<br>(1 - 2)            |
| Assault by sharp object                         | 43<br>(31 - 70)          | 0<br>(0 - 1)          | 0<br>(0 - 1)           | 28<br>(20 - 46)         | 13<br>(9 - 22)          | 2<br>(1 - 3)            |
| Assault by other means                          | 40<br>(30 - 60)          | 2<br>(1 - 3)          | 1<br>(0 - 1)           | 19<br>(13 - 28)         | 15<br>(10 - 23)         | 5<br>(3 - 7)            |

Web Table 31- Finland deaths with 95% UI by age, sex, and cause in 2013

| Cause                                                             | Males, All Ages             | Males, 0-4 Years  | Males, 5-14 Years | Males, 15-49 Years       | Males, 50-69 Years       | Males, 70-80 Years          |
|-------------------------------------------------------------------|-----------------------------|-------------------|-------------------|--------------------------|--------------------------|-----------------------------|
| All causes                                                        | 26,916<br>(25,209 - 28,437) | 101<br>(78 - 131) | 32<br>(27 - 38)   | 1,826<br>(1,668 - 1,975) | 7,535<br>(6,931 - 8,076) | 17,422<br>(16,471 - 18,253) |
| Communicable, maternal, neonatal, and nutritional diseases        | 703<br>(502 - 1,364)        | 41<br>(31 - 54)   | 2<br>(1 - 2)      | 32<br>(26 - 42)          | 105<br>(80 - 168)        | 523<br>(336 - 1,127)        |
| HIV/AIDS and tuberculosis                                         | 45<br>(37 - 64)             | 0<br>(0 - 0)      | 0<br>(0 - 0)      | 6<br>(4 - 7)             | 10<br>(8 - 17)           | 29<br>(22 - 43)             |
| Tuberculosis                                                      | 39<br>(31 - 59)             | 0<br>(0 - 0)      | 0<br>(0 - 0)      | 2<br>(1 - 2)             | 9<br>(6 - 16)            | 29<br>(22 - 42)             |
| HIV/AIDS                                                          | 6<br>(4 - 8)                | 0<br>(0 - 0)      | 0<br>(0 - 0)      | 4<br>(3 - 5)             | 2<br>(1 - 3)             | 0<br>(0 - 1)                |
| HIV/AIDS resulting in mycobacterial infection                     | 0<br>(0 - 0)                | 0<br>(0 - 0)      | 0<br>(0 - 0)      | 0<br>(0 - 0)             | 0<br>(0 - 0)             | 0<br>(0 - 0)                |
| HIV/AIDS resulting in other diseases                              | 6<br>(4 - 8)                | 0<br>(0 - 0)      | 0<br>(0 - 0)      | 4<br>(3 - 5)             | 1<br>(1 - 3)             | 0<br>(0 - 1)                |
| Diarrhea, lower respiratory, and other common infectious diseases | 575<br>(376 - 1,243)        | 4<br>(3 - 5)      | 1<br>(1 - 2)      | 20<br>(15 - 30)          | 81<br>(58 - 141)         | 468<br>(284 - 1,078)        |
| Diarrheal diseases                                                | 28<br>(19 - 43)             | 0<br>(0 - 1)      | 0<br>(0 - 0)      | 1<br>(1 - 1)             | 3<br>(2 - 5)             | 24<br>(14 - 39)             |
| Intestinal infectious diseases                                    | 2<br>(1 - 5)                | 0<br>(0 - 1)      | 0<br>(0 - 1)      | 1<br>(0 - 2)             | 0<br>(0 - 1)             | 0<br>(0 - 1)                |
| Typhoid fever                                                     | 1<br>(0 - 3)                | 0<br>(0 - 0)      | 0<br>(0 - 1)      | 1<br>(0 - 1)             | 0<br>(0 - 1)             | 0<br>(0 - 0)                |
| Paratyphoid fever                                                 | 0<br>(0 - 1)                | 0<br>(0 - 0)      | 0<br>(0 - 0)      | 0<br>(0 - 0)             | 0<br>(0 - 0)             | 0<br>(0 - 0)                |
| Other intestinal infectious diseases                              | 0<br>(0 - 2)                | 0<br>(0 - 1)      | 0<br>(0 - 0)      | 0<br>(0 - 1)             | 0<br>(0 - 1)             | 0<br>(0 - 1)                |
| Lower respiratory infections                                      | 521<br>(323 - 1,195)        | 1<br>(1 - 2)      | 0<br>(0 - 1)      | 14<br>(9 - 24)           | 71<br>(48 - 131)         | 435<br>(250 - 1,045)        |
| Upper respiratory infections                                      | 1<br>(0 - 2)                | 0<br>(0 - 0)      | 0<br>(0 - 0)      | 0<br>(0 - 0)             | 0<br>(0 - 1)             | 0<br>(0 - 1)                |
| Otitis media                                                      | 0<br>(0 - 1)                | 0<br>(0 - 0)      | 0<br>(0 - 0)      | 0<br>(0 - 0)             | 0<br>(0 - 0)             | 0<br>(0 - 0)                |
| Meningitis                                                        | 14<br>(12 - 16)             | 1<br>(1 - 2)      | 0<br>(0 - 0)      | 2<br>(2 - 3)             | 5<br>(4 - 6)             | 5<br>(4 - 7)                |
| Pneumococcal meningitis                                           | 2<br>(2 - 3)                | 0<br>(0 - 0)      | 0<br>(0 - 0)      | 0<br>(0 - 1)             | 1<br>(0 - 1)             | 1<br>(0 - 2)                |
| H influenzae type B meningitis                                    | 2<br>(1 - 2)                | 0<br>(0 - 1)      | 0<br>(0 - 0)      | 0<br>(0 - 0)             | 0<br>(0 - 1)             | 0<br>(0 - 1)                |
| Meningococcal meningitis                                          | 5<br>(3 - 6)                | 0<br>(0 - 1)      | 0<br>(0 - 0)      | 1<br>(1 - 1)             | 1<br>(1 - 2)             | 2<br>(1 - 3)                |
| Other meningitis                                                  | 5<br>(4 - 7)                | 0<br>(0 - 1)      | 0<br>(0 - 0)      | 1<br>(1 - 1)             | 2<br>(1 - 3)             | 2<br>(1 - 3)                |
| Encephalitis                                                      | 7<br>(4 - 10)               | 0<br>(0 - 1)      | 0<br>(0 - 0)      | 2<br>(1 - 2)             | 2<br>(1 - 3)             | 3<br>(1 - 4)                |
| Diphtheria                                                        | 0<br>(0 - 0)                | 0<br>(0 - 0)      | 0<br>(0 - 0)      | 0<br>(0 - 0)             | 0<br>(0 - 0)             | --                          |
| Whooping cough                                                    | 0<br>(0 - 0)                | 0<br>(0 - 0)      | 0<br>(0 - 0)      | 0<br>(0 - 0)             | 0<br>(0 - 0)             | --                          |
| Tetanus                                                           | 0<br>(0 - 0)                | 0<br>(0 - 0)      | 0<br>(0 - 0)      | 0<br>(0 - 0)             | 0<br>(0 - 0)             | 0<br>(0 - 0)                |
| Measles                                                           | 0<br>(0 - 0)                | 0<br>(0 - 0)      | 0<br>(0 - 0)      | 0<br>(0 - 0)             | 0<br>(0 - 0)             | --                          |
| Varicella and herpes zoster                                       | 2<br>(0 - 7)                | 0<br>(0 - 0)      | 0<br>(0 - 0)      | 0<br>(0 - 1)             | 0<br>(0 - 1)             | 1<br>(0 - 7)                |
| Neglected tropical diseases and malaria                           | 2<br>(2 - 3)                | 0<br>(0 - 0)      | 0<br>(0 - 0)      | 1<br>(1 - 1)             | 1<br>(1 - 1)             | 1<br>(0 - 1)                |
| Cysticercosis                                                     | 0<br>(0 - 0)                | 0<br>(0 - 0)      | 0<br>(0 - 0)      | 0<br>(0 - 0)             | 0<br>(0 - 0)             | 0<br>(0 - 0)                |
| Cystic echinococcosis                                             | 0<br>(0 - 0)                | 0<br>(0 - 0)      | 0<br>(0 - 0)      | 0<br>(0 - 0)             | 0<br>(0 - 0)             | 0<br>(0 - 0)                |
| Dengue                                                            | 0<br>(0 - 0)                | 0<br>(0 - 0)      | 0<br>(0 - 0)      | 0<br>(0 - 0)             | 0<br>(0 - 0)             | 0<br>(0 - 0)                |
| Rabies                                                            | 0<br>(0 - 0)                | 0<br>(0 - 0)      | 0<br>(0 - 0)      | 0<br>(0 - 0)             | 0<br>(0 - 0)             | 0<br>(0 - 0)                |
| Other neglected tropical diseases                                 | 2<br>(1 - 2)                | 0<br>(0 - 0)      | 0<br>(0 - 0)      | 0<br>(0 - 0)             | 1<br>(0 - 1)             | 1<br>(0 - 1)                |
| Maternal disorders                                                | --                          | --                | --                | --                       | --                       | --                          |
| Maternal hemorrhage                                               | --                          | --                | --                | --                       | --                       | --                          |
| Maternal sepsis and other maternal infections                     | --                          | --                | --                | --                       | --                       | --                          |
| Maternal hypertensive disorders                                   | --                          | --                | --                | --                       | --                       | --                          |
| Maternal obstructed labor                                         | --                          | --                | --                | --                       | --                       | --                          |
| Maternal abortive outcome                                         | --                          | --                | --                | --                       | --                       | --                          |
| Indirect maternal deaths                                          | --                          | --                | --                | --                       | --                       | --                          |

Web Table 31- Finland deaths with 95% UI by age, sex, and cause in 2013

| Cause                                                            | Males, All Ages             | Males, 0-4 Years | Males, 5-14 Years | Males, 15-49 Years     | Males, 50-69 Years       | Males, 70-80 Years          |
|------------------------------------------------------------------|-----------------------------|------------------|-------------------|------------------------|--------------------------|-----------------------------|
| Late maternal deaths                                             | --                          | --               | --                | --                     | --                       | --                          |
| Maternal deaths aggravated by HIV/AIDS                           | --                          | --               | --                | --                     | --                       | --                          |
| Other maternal disorders                                         | --                          | --               | --                | --                     | --                       | --                          |
| Neonatal disorders                                               | 36<br>(27 - 48)             | 36<br>(27 - 48)  | --                | --                     | --                       | --                          |
| Neonatal preterm birth complications                             | 19<br>(12 - 27)             | 19<br>(12 - 27)  | --                | --                     | --                       | --                          |
| Neonatal encephalopathy due to birth asphyxia and trauma         | 5<br>(3 - 8)                | 5<br>(3 - 8)     | --                | --                     | --                       | --                          |
| Neonatal sepsis and other neonatal infections                    | 1<br>(0 - 2)                | 1<br>(0 - 2)     | --                | --                     | --                       | --                          |
| Hemolytic disease and other neonatal jaundice                    | 0<br>(0 - 0)                | 0<br>(0 - 0)     | --                | --                     | --                       | --                          |
| Other neonatal disorders                                         | 11<br>(7 - 18)              | 11<br>(7 - 18)   | --                | --                     | --                       | --                          |
| Nutritional deficiencies                                         | 13<br>(7 - 17)              | 0<br>(0 - 0)     | 0<br>(0 - 0)      | 2<br>(1 - 3)           | 3<br>(2 - 5)             | 8<br>(4 - 11)               |
| Protein-energy malnutrition                                      | 1<br>(0 - 2)                | 0<br>(0 - 0)     | 0<br>(0 - 0)      | 0<br>(0 - 0)           | 0<br>(0 - 0)             | 1<br>(0 - 2)                |
| Iodine deficiency                                                | 0<br>(0 - 1)                | 0<br>(0 - 0)     | 0<br>(0 - 0)      | 0<br>(0 - 0)           | 0<br>(0 - 0)             | 0<br>(0 - 1)                |
| Iron-deficiency anemia                                           | 8<br>(4 - 11)               | 0<br>(0 - 0)     | 0<br>(0 - 0)      | 2<br>(1 - 2)           | 1<br>(1 - 2)             | 5<br>(2 - 7)                |
| Other nutritional deficiencies                                   | 4<br>(2 - 6)                | 0<br>(0 - 0)     | 0<br>(0 - 0)      | 0<br>(0 - 1)           | 2<br>(1 - 3)             | 2<br>(1 - 3)                |
| Other communicable, maternal, neonatal, and nutritional diseases | 31<br>(21 - 42)             | 1<br>(0 - 2)     | 0<br>(0 - 0)      | 4<br>(3 - 5)           | 9<br>(6 - 13)            | 17<br>(10 - 24)             |
| Sexually transmitted diseases excluding HIV                      | 1<br>(0 - 2)                | 0<br>(0 - 1)     | 0<br>(0 - 0)      | 0<br>(0 - 0)           | 0<br>(0 - 0)             | 0<br>(0 - 1)                |
| Syphilis                                                         | 1<br>(0 - 2)                | 0<br>(0 - 1)     | 0<br>(0 - 0)      | 0<br>(0 - 0)           | 0<br>(0 - 0)             | 0<br>(0 - 1)                |
| Chlamydial infection                                             | --                          | --               | --                | --                     | --                       | --                          |
| Gonococcal infection                                             | 0<br>(0 - 0)                | --               | 0<br>(0 - 0)      | 0<br>(0 - 0)           | 0<br>(0 - 0)             | 0<br>(0 - 0)                |
| Other sexually transmitted diseases                              | 0<br>(0 - 0)                | --               | 0<br>(0 - 0)      | 0<br>(0 - 0)           | 0<br>(0 - 0)             | 0<br>(0 - 0)                |
| Hepatitis                                                        | 1<br>(1 - 1)                | 0<br>(0 - 0)     | 0<br>(0 - 0)      | 0<br>(0 - 0)           | 0<br>(0 - 0)             | 0<br>(0 - 0)                |
| Acute hepatitis A                                                | 0<br>(0 - 0)                | 0<br>(0 - 0)     | 0<br>(0 - 0)      | 0<br>(0 - 0)           | 0<br>(0 - 0)             | 0<br>(0 - 0)                |
| Acute hepatitis B                                                | 1<br>(0 - 1)                | 0<br>(0 - 0)     | 0<br>(0 - 0)      | 0<br>(0 - 0)           | 0<br>(0 - 0)             | 0<br>(0 - 0)                |
| Acute hepatitis C                                                | 0<br>(0 - 0)                | --               | 0<br>(0 - 0)      | 0<br>(0 - 0)           | 0<br>(0 - 0)             | 0<br>(0 - 0)                |
| Other infectious diseases                                        | 30<br>(18 - 40)             | 1<br>(0 - 1)     | 0<br>(0 - 0)      | 3<br>(2 - 5)           | 9<br>(5 - 13)            | 17<br>(10 - 24)             |
| Non-communicable diseases                                        | 23,960<br>(22,398 - 25,448) | 51<br>(39 - 66)  | 16<br>(13 - 20)   | 1,060<br>(908 - 1,169) | 6,689<br>(6,163 - 7,199) | 16,145<br>(15,177 - 17,010) |
| Neoplasms                                                        | 6,770<br>(6,201 - 7,354)    | 4<br>(3 - 6)     | 9<br>(7 - 11)     | 221<br>(193 - 249)     | 2,352<br>(2,151 - 2,567) | 4,184<br>(3,792 - 4,642)    |
| Esophageal cancer                                                | 170<br>(137 - 198)          | --               | --                | 5<br>(4 - 7)           | 85<br>(63 - 102)         | 80<br>(65 - 99)             |
| Stomach cancer                                                   | 329<br>(289 - 372)          | --               | --                | 13<br>(10 - 16)        | 112<br>(97 - 129)        | 204<br>(171 - 240)          |
| Liver cancer                                                     | 226<br>(133 - 308)          | --               | 0<br>(0 - 0)      | 6<br>(4 - 9)           | 86<br>(52 - 118)         | 134<br>(75 - 197)           |
| Liver cancer due to hepatitis B                                  | 51<br>(19 - 109)            | --               | 0<br>(0 - 0)      | 2<br>(1 - 5)           | 23<br>(8 - 47)           | 25<br>(9 - 55)              |
| Liver cancer due to hepatitis C                                  | 119<br>(57 - 191)           | --               | 0<br>(0 - 0)      | 3<br>(1 - 4)           | 45<br>(21 - 74)          | 71<br>(31 - 118)            |
| Liver cancer due to alcohol use                                  | 53<br>(18 - 108)            | --               | --                | 1<br>(0 - 2)           | 16<br>(5 - 31)           | 36<br>(12 - 75)             |
| Liver cancer due to other causes                                 | 4<br>(1 - 8)                | --               | 0<br>(0 - 0)      | 0<br>(0 - 0)           | 1<br>(0 - 3)             | 2<br>(1 - 5)                |
| Larynx cancer                                                    | 40<br>(29 - 52)             | --               | --                | 1<br>(1 - 2)           | 18<br>(13 - 23)          | 20<br>(15 - 27)             |
| Tracheal, bronchus and lung cancer                               | 1,693<br>(1,519 - 1,884)    | --               | --                | 29<br>(23 - 35)        | 690<br>(609 - 777)       | 974<br>(869 - 1,101)        |
| Breast cancer                                                    | 5<br>(3 - 15)               | --               | --                | 1<br>(0 - 1)           | 2<br>(1 - 5)             | 3<br>(1 - 8)                |
| Cervical cancer                                                  | --                          | --               | --                | --                     | --                       | --                          |
| Uterine cancer                                                   | --                          | --               | --                | --                     | --                       | --                          |
| Prostate cancer                                                  | 1,022<br>(812 - 1,480)      | --               | --                | 2<br>(1 - 3)           | 175<br>(130 - 251)       | 846<br>(652 - 1,254)        |

Web Table 31- Finland deaths with 95% UI by age, sex, and cause in 2013

| Cause                                         | Males, All Ages            | Males, 0-4 Years | Males, 5-14 Years | Males, 15-49 Years | Males, 50-69 Years       | Males, 70-80 Years       |
|-----------------------------------------------|----------------------------|------------------|-------------------|--------------------|--------------------------|--------------------------|
| Colon and rectum cancer                       | 828<br>(741 - 926)         | --               | --                | 20<br>(17 - 25)    | 266<br>(237 - 298)       | 541<br>(472 - 622)       |
| Lip and oral cavity cancer                    | 69<br>(44 - 81)            | --               | --                | 5<br>(3 - 7)       | 32<br>(18 - 39)          | 32<br>(21 - 41)          |
| Nasopharynx cancer                            | 9<br>(7 - 14)              | --               | 0<br>(0 - 0)      | 1<br>(1 - 2)       | 5<br>(3 - 7)             | 3<br>(2 - 5)             |
| Other pharynx cancer                          | 40<br>(26 - 51)            | --               | --                | 2<br>(1 - 3)       | 25<br>(15 - 33)          | 13<br>(8 - 18)           |
| Gallbladder and biliary tract cancer          | 83<br>(53 - 114)           | --               | --                | 2<br>(1 - 3)       | 27<br>(16 - 37)          | 54<br>(35 - 77)          |
| Pancreatic cancer                             | 523<br>(474 - 577)         | --               | --                | 14<br>(11 - 17)    | 222<br>(194 - 251)       | 288<br>(253 - 326)       |
| Malignant skin melanoma                       | 127<br>(65 - 214)          | --               | --                | 15<br>(8 - 26)     | 54<br>(27 - 95)          | 58<br>(28 - 97)          |
| Non-melanoma skin cancer                      | 27<br>(16 - 42)            | --               | --                | 0<br>(0 - 1)       | 4<br>(2 - 6)             | 23<br>(14 - 36)          |
| Ovarian cancer                                | --                         | --               | --                | --                 | --                       | --                       |
| Testicular cancer                             | 7<br>(5 - 9)               | --               | --                | 4<br>(3 - 5)       | 2<br>(1 - 2)             | 2<br>(1 - 2)             |
| Kidney cancer                                 | 218<br>(184 - 253)         | 0<br>(0 - 0)     | 0<br>(0 - 0)      | 7<br>(5 - 10)      | 92<br>(75 - 110)         | 118<br>(95 - 147)        |
| Bladder cancer                                | 185<br>(139 - 219)         | --               | --                | 2<br>(1 - 2)       | 41<br>(31 - 48)          | 143<br>(105 - 174)       |
| Brain and nervous system cancer               | 181<br>(137 - 224)         | 1<br>(1 - 2)     | 3<br>(2 - 4)      | 31<br>(23 - 39)    | 91<br>(68 - 115)         | 56<br>(38 - 71)          |
| Thyroid cancer                                | 22<br>(18 - 26)            | --               | 0<br>(0 - 0)      | 1<br>(1 - 2)       | 8<br>(6 - 10)            | 12<br>(9 - 16)           |
| Mesothelioma                                  | 78<br>(48 - 108)           | --               | --                | 2<br>(1 - 3)       | 38<br>(21 - 55)          | 39<br>(19 - 60)          |
| Hodgkin lymphoma                              | 17<br>(12 - 26)            | 0<br>(0 - 0)     | 0<br>(0 - 0)      | 5<br>(3 - 7)       | 6<br>(4 - 10)            | 6<br>(4 - 9)             |
| Non-Hodgkin lymphoma                          | 256<br>(124 - 328)         | 0<br>(0 - 0)     | 1<br>(0 - 1)      | 15<br>(7 - 21)     | 88<br>(42 - 118)         | 153<br>(72 - 207)        |
| Multiple myeloma                              | 141<br>(80 - 231)          | --               | --                | 3<br>(2 - 6)       | 46<br>(25 - 77)          | 92<br>(50 - 148)         |
| Leukemia                                      | 232<br>(203 - 264)         | 1<br>(1 - 2)     | 3<br>(2 - 4)      | 16<br>(13 - 19)    | 65<br>(56 - 76)          | 146<br>(123 - 174)       |
| Other neoplasms                               | 243<br>(154 - 304)         | 2<br>(1 - 2)     | 2<br>(1 - 3)      | 20<br>(13 - 25)    | 75<br>(45 - 94)          | 145<br>(83 - 193)        |
| Cardiovascular diseases                       | 10,531<br>(9,704 - 11,377) | 1<br>(0 - 1)     | 1<br>(1 - 1)      | 274<br>(236 - 312) | 2,671<br>(2,436 - 2,915) | 7,584<br>(6,959 - 8,233) |
| Rheumatic heart disease                       | 21<br>(14 - 41)            | 0<br>(0 - 0)     | 0<br>(0 - 0)      | 1<br>(1 - 2)       | 6<br>(4 - 13)            | 14<br>(8 - 27)           |
| Ischemic heart disease                        | 6,466<br>(5,787 - 7,175)   | 0<br>(0 - 0)     | 0<br>(0 - 0)      | 133<br>(110 - 162) | 1,709<br>(1,533 - 1,949) | 4,624<br>(4,065 - 5,161) |
| Cerebrovascular disease                       | 2,452<br>(1,914 - 3,002)   | 0<br>(0 - 0)     | 0<br>(0 - 0)      | 62<br>(41 - 80)    | 479<br>(354 - 601)       | 1,910<br>(1,485 - 2,372) |
| Ischemic stroke                               | 1,610<br>(1,218 - 2,001)   | 0<br>(0 - 0)     | 0<br>(0 - 0)      | 7<br>(4 - 10)      | 195<br>(136 - 255)       | 1,407<br>(1,075 - 1,769) |
| Hemorrhagic stroke                            | 842<br>(587 - 1,075)       | 0<br>(0 - 0)     | 0<br>(0 - 0)      | 55<br>(37 - 71)    | 284<br>(192 - 368)       | 503<br>(347 - 664)       |
| Hypertensive heart disease                    | 189<br>(105 - 271)         | 0<br>(0 - 0)     | 0<br>(0 - 0)      | 6<br>(3 - 10)      | 56<br>(28 - 89)          | 127<br>(69 - 186)        |
| Cardiomyopathy and myocarditis                | 364<br>(240 - 454)         | 0<br>(0 - 1)     | 0<br>(0 - 1)      | 48<br>(33 - 62)    | 189<br>(127 - 243)       | 127<br>(73 - 169)        |
| Atrial fibrillation and flutter               | 130<br>(93 - 179)          | --               | --                | 0<br>(0 - 0)       | 14<br>(9 - 19)           | 116<br>(81 - 162)        |
| Aortic aneurysm                               | 379<br>(303 - 449)         | --               | --                | 9<br>(6 - 12)      | 110<br>(84 - 133)        | 259<br>(205 - 316)       |
| Peripheral vascular disease                   | 128<br>(95 - 169)          | --               | --                | 0<br>(0 - 0)       | 12<br>(9 - 17)           | 116<br>(85 - 156)        |
| Endocarditis                                  | 24<br>(15 - 36)            | 0<br>(0 - 0)     | 0<br>(0 - 0)      | 3<br>(2 - 5)       | 8<br>(4 - 12)            | 13<br>(8 - 20)           |
| Other cardiovascular and circulatory diseases | 378<br>(247 - 458)         | 0<br>(0 - 0)     | 0<br>(0 - 0)      | 12<br>(7 - 15)     | 87<br>(49 - 107)         | 280<br>(188 - 354)       |
| Chronic respiratory diseases                  | 1,184<br>(949 - 1,348)     | 0<br>(0 - 0)     | 0<br>(0 - 0)      | 12<br>(9 - 15)     | 240<br>(193 - 285)       | 932<br>(748 - 1,074)     |
| Chronic obstructive pulmonary disease         | 954<br>(748 - 1,110)       | 0<br>(0 - 0)     | 0<br>(0 - 0)      | 5<br>(4 - 7)       | 191<br>(153 - 229)       | 758<br>(598 - 895)       |
| Pneumoconiosis                                | 41<br>(25 - 57)            | 0<br>(0 - 0)     | 0<br>(0 - 0)      | 2<br>(1 - 2)       | 9<br>(5 - 13)            | 30<br>(17 - 44)          |
| Silicosis                                     | 3<br>(2 - 5)               | 0<br>(0 - 0)     | 0<br>(0 - 0)      | 0<br>(0 - 1)       | 1<br>(0 - 1)             | 2<br>(1 - 3)             |
| Asbestosis                                    | 29<br>(18 - 40)            | 0<br>(0 - 0)     | 0<br>(0 - 0)      | 0<br>(0 - 1)       | 5<br>(3 - 8)             | 23<br>(13 - 33)          |
| Coal workers pneumoconiosis                   | 1<br>(0 - 1)               | 0<br>(0 - 0)     | 0<br>(0 - 0)      | 0<br>(0 - 0)       | 0<br>(0 - 0)             | 1<br>(0 - 1)             |
| Other pneumoconiosis                          | 8<br>(5 - 11)              | 0<br>(0 - 0)     | 0<br>(0 - 0)      | 1<br>(0 - 1)       | 3<br>(2 - 4)             | 5<br>(2 - 7)             |

Web Table 31- Finland deaths with 95% UI by age, sex, and cause in 2013

| Cause                                               | Males, All Ages          | Males, 0-4 Years | Males, 5-14 Years | Males, 15-49 Years | Males, 50-69 Years | Males, 70-80 Years       |
|-----------------------------------------------------|--------------------------|------------------|-------------------|--------------------|--------------------|--------------------------|
| Asthma                                              | 32<br>(23 - 43)          | 0<br>(0 - 0)     | 0<br>(0 - 0)      | 2<br>(2 - 3)       | 5<br>(4 - 7)       | 25<br>(17 - 35)          |
| Interstitial lung disease and pulmonary sarcoidosis | 149<br>(89 - 204)        | 0<br>(0 - 0)     | 0<br>(0 - 0)      | 2<br>(1 - 3)       | 31<br>(18 - 45)    | 115<br>(66 - 162)        |
| Other chronic respiratory diseases                  | 8<br>(6 - 10)            | 0<br>(0 - 0)     | 0<br>(0 - 0)      | 1<br>(1 - 2)       | 3<br>(2 - 4)       | 4<br>(2 - 5)             |
| Cirrhosis                                           | 802<br>(715 - 887)       | 0<br>(0 - 0)     | 0<br>(0 - 0)      | 143<br>(119 - 167) | 532<br>(465 - 600) | 127<br>(110 - 146)       |
| Cirrhosis due to hepatitis B                        | 69<br>(32 - 112)         | 0<br>(0 - 0)     | 0<br>(0 - 0)      | 12<br>(5 - 22)     | 46<br>(21 - 75)    | 11<br>(6 - 17)           |
| Cirrhosis due to hepatitis C                        | 356<br>(196 - 551)       | 0<br>(0 - 0)     | 0<br>(0 - 0)      | 64<br>(28 - 97)    | 238<br>(126 - 376) | 54<br>(32 - 85)          |
| Cirrhosis due to alcohol use                        | 292<br>(87 - 478)        | --               | --                | 44<br>(11 - 83)    | 195<br>(57 - 327)  | 53<br>(18 - 80)          |
| Cirrhosis due to other causes                       | 85<br>(33 - 140)         | 0<br>(0 - 0)     | 0<br>(0 - 0)      | 23<br>(10 - 36)    | 53<br>(19 - 92)    | 9<br>(4 - 16)            |
| Digestive diseases                                  | 597<br>(459 - 678)       | 0<br>(0 - 0)     | 0<br>(0 - 0)      | 39<br>(26 - 47)    | 188<br>(121 - 223) | 369<br>(305 - 433)       |
| Peptic ulcer disease                                | 99<br>(71 - 127)         | 0<br>(0 - 0)     | 0<br>(0 - 0)      | 4<br>(2 - 6)       | 36<br>(22 - 47)    | 59<br>(41 - 81)          |
| Gastritis and duodenitis                            | 12<br>(5 - 17)           | 0<br>(0 - 0)     | 0<br>(0 - 0)      | 1<br>(1 - 2)       | 6<br>(2 - 9)       | 5<br>(2 - 7)             |
| Appendicitis                                        | 7<br>(4 - 11)            | 0<br>(0 - 0)     | 0<br>(0 - 0)      | 1<br>(1 - 1)       | 2<br>(1 - 3)       | 4<br>(2 - 6)             |
| Paralytic ileus and intestinal obstruction          | 95<br>(54 - 148)         | 0<br>(0 - 0)     | 0<br>(0 - 0)      | 4<br>(2 - 6)       | 23<br>(12 - 37)    | 68<br>(39 - 109)         |
| Inguinal, femoral, and abdominal hernia             | 18<br>(8 - 27)           | 0<br>(0 - 0)     | 0<br>(0 - 0)      | 0<br>(0 - 1)       | 4<br>(2 - 6)       | 14<br>(6 - 22)           |
| Inflammatory bowel disease                          | 13<br>(9 - 19)           | 0<br>(0 - 0)     | 0<br>(0 - 0)      | 1<br>(0 - 1)       | 4<br>(2 - 6)       | 8<br>(5 - 13)            |
| Vascular intestinal disorders                       | 92<br>(41 - 176)         | 0<br>(0 - 0)     | 0<br>(0 - 0)      | 1<br>(0 - 1)       | 18<br>(7 - 37)     | 73<br>(31 - 140)         |
| Gallbladder and biliary diseases                    | 70<br>(49 - 95)          | 0<br>(0 - 0)     | 0<br>(0 - 0)      | 1<br>(0 - 1)       | 10<br>(6 - 13)     | 59<br>(40 - 83)          |
| Pancreatitis                                        | 113<br>(69 - 141)        | 0<br>(0 - 0)     | 0<br>(0 - 0)      | 23<br>(15 - 28)    | 61<br>(35 - 79)    | 29<br>(16 - 41)          |
| Other digestive diseases                            | 78<br>(40 - 102)         | 0<br>(0 - 0)     | 0<br>(0 - 0)      | 3<br>(1 - 5)       | 25<br>(10 - 33)    | 50<br>(28 - 68)          |
| Neurological disorders                              | 2,709<br>(2,007 - 3,380) | 2<br>(1 - 2)     | 1<br>(0 - 1)      | 40<br>(31 - 49)    | 220<br>(183 - 261) | 2,447<br>(1,774 - 3,116) |
| Alzheimer disease and other dementias               | 2,183<br>(1,485 - 2,865) | --               | --                | 0<br>(0 - 1)       | 87<br>(58 - 119)   | 2,096<br>(1,404 - 2,777) |
| Parkinson disease                                   | 289<br>(214 - 359)       | --               | --                | 0<br>(0 - 0)       | 25<br>(18 - 32)    | 264<br>(195 - 333)       |
| Epilepsy                                            | 47<br>(29 - 60)          | 0<br>(0 - 0)     | 0<br>(0 - 1)      | 21<br>(14 - 28)    | 18<br>(11 - 25)    | 7<br>(4 - 10)            |
| Multiple sclerosis                                  | 27<br>(13 - 48)          | --               | --                | 6<br>(3 - 10)      | 13<br>(6 - 23)     | 8<br>(4 - 16)            |
| Other neurological disorders                        | 163<br>(126 - 197)       | 1<br>(1 - 2)     | 0<br>(0 - 0)      | 13<br>(10 - 17)    | 76<br>(58 - 98)    | 72<br>(52 - 89)          |
| Mental and substance use disorders                  | 646<br>(427 - 763)       | 0<br>(0 - 0)     | 0<br>(0 - 0)      | 268<br>(195 - 322) | 316<br>(179 - 392) | 62<br>(35 - 79)          |
| Schizophrenia                                       | 19<br>(11 - 29)          | --               | --                | 2<br>(1 - 3)       | 7<br>(4 - 11)      | 11<br>(5 - 18)           |
| Alcohol use disorders                               | 436<br>(232 - 550)       | --               | --                | 127<br>(79 - 167)  | 266<br>(130 - 337) | 43<br>(17 - 58)          |
| Drug use disorders                                  | 191<br>(117 - 227)       | 0<br>(0 - 0)     | --                | 140<br>(76 - 170)  | 43<br>(31 - 56)    | 8<br>(5 - 10)            |
| Opioid use disorders                                | 70<br>(43 - 84)          | 0<br>(0 - 0)     | --                | 52<br>(27 - 64)    | 15<br>(10 - 19)    | 3<br>(2 - 4)             |
| Cocaine use disorders                               | 5<br>(3 - 6)             | 0<br>(0 - 0)     | --                | 4<br>(2 - 5)       | 1<br>(1 - 1)       | 0<br>(0 - 0)             |
| Amphetamine use disorders                           | 5<br>(3 - 6)             | 0<br>(0 - 0)     | --                | 3<br>(2 - 4)       | 1<br>(1 - 1)       | 0<br>(0 - 0)             |
| Other drug use disorders                            | 111<br>(69 - 132)        | 0<br>(0 - 0)     | --                | 80<br>(45 - 99)    | 27<br>(19 - 35)    | 4<br>(3 - 6)             |
| Eating disorders                                    | 0<br>(0 - 0)             | --               | 0<br>(0 - 0)      | 0<br>(0 - 0)       | --                 | --                       |
| Anorexia nervosa                                    | 0<br>(0 - 0)             | --               | 0<br>(0 - 0)      | 0<br>(0 - 0)       | --                 | --                       |
| Diabetes, urogenital, blood, and endocrine diseases | 557<br>(495 - 631)       | 3<br>(2 - 4)     | 2<br>(1 - 3)      | 41<br>(33 - 47)    | 130<br>(112 - 148) | 382<br>(329 - 442)       |
| Diabetes mellitus                                   | 215<br>(189 - 242)       | 0<br>(0 - 0)     | 0<br>(0 - 0)      | 24<br>(20 - 29)    | 72<br>(60 - 85)    | 119<br>(100 - 141)       |
| Acute glomerulonephritis                            | 1<br>(0 - 2)             | 0<br>(0 - 0)     | 0<br>(0 - 0)      | 0<br>(0 - 0)       | 0<br>(0 - 1)       | 0<br>(0 - 1)             |
| Chronic kidney disease                              | 206<br>(167 - 250)       | 0<br>(0 - 0)     | 0<br>(0 - 0)      | 6<br>(5 - 8)       | 32<br>(24 - 43)    | 167<br>(131 - 208)       |
| Chronic kidney disease due to diabetes mellitus     | 58<br>(39 - 94)          | 0<br>(0 - 0)     | 0<br>(0 - 0)      | 2<br>(2 - 4)       | 14<br>(9 - 22)     | 42<br>(26 - 71)          |

Web Table 31- Finland deaths with 95% UI by age, sex, and cause in 2013

| Cause                                               | Males, All Ages          | Males, 0-4 Years | Males, 5-14 Years | Males, 15-49 Years | Males, 50-69 Years | Males, 70-80 Years |
|-----------------------------------------------------|--------------------------|------------------|-------------------|--------------------|--------------------|--------------------|
| Chronic kidney disease due to hypertension          | 43<br>(21 - 62)          | 0<br>(0 - 0)     | 0<br>(0 - 0)      | 0<br>(0 - 0)       | 3<br>(1 - 6)       | 39<br>(19 - 57)    |
| Chronic kidney disease due to glomerulonephritis    | 9<br>(6 - 14)            | 0<br>(0 - 0)     | 0<br>(0 - 0)      | 1<br>(0 - 1)       | 3<br>(1 - 4)       | 6<br>(4 - 10)      |
| Chronic kidney disease due to other causes          | 95<br>(58 - 129)         | 0<br>(0 - 0)     | 0<br>(0 - 0)      | 3<br>(2 - 5)       | 12<br>(7 - 20)     | 80<br>(47 - 110)   |
| Urinary diseases and male infertility               | 86<br>(65 - 136)         | 0<br>(0 - 0)     | 0<br>(0 - 0)      | 1<br>(1 - 2)       | 9<br>(7 - 13)      | 75<br>(55 - 125)   |
| Interstitial nephritis and urinary tract infections | 76<br>(57 - 124)         | 0<br>(0 - 0)     | 0<br>(0 - 0)      | 1<br>(1 - 1)       | 7<br>(5 - 10)      | 68<br>(50 - 115)   |
| Urolithiasis                                        | 2<br>(1 - 2)             | --               | 0<br>(0 - 0)      | 0<br>(0 - 0)       | 0<br>(0 - 1)       | 1<br>(1 - 2)       |
| Other urinary diseases                              | 8<br>(4 - 13)            | 0<br>(0 - 0)     | 0<br>(0 - 0)      | 0<br>(0 - 0)       | 2<br>(1 - 3)       | 6<br>(2 - 10)      |
| Gynecological diseases                              | --                       | --               | --                | --                 | --                 | --                 |
| Uterine fibroids                                    | --                       | --               | --                | --                 | --                 | --                 |
| Polycystic ovarian syndrome                         | --                       | --               | --                | --                 | --                 | --                 |
| Endometriosis                                       | --                       | --               | --                | --                 | --                 | --                 |
| Genital prolapse                                    | --                       | --               | --                | --                 | --                 | --                 |
| Other gynecological diseases                        | --                       | --               | --                | --                 | --                 | --                 |
| Hemoglobinopathies and hemolytic anemias            | 6<br>(4 - 9)             | 0<br>(0 - 0)     | 0<br>(0 - 0)      | 1<br>(1 - 2)       | 1<br>(1 - 2)       | 3<br>(2 - 5)       |
| Thalassemias                                        | 0<br>(0 - 0)             | 0<br>(0 - 0)     | 0<br>(0 - 0)      | 0<br>(0 - 0)       | 0<br>(0 - 0)       | 0<br>(0 - 0)       |
| Sickle cell disorders                               | 1<br>(1 - 2)             | 0<br>(0 - 0)     | 0<br>(0 - 0)      | 0<br>(0 - 1)       | 0<br>(0 - 1)       | 0<br>(0 - 0)       |
| G6PD deficiency                                     | 0<br>(0 - 0)             | 0<br>(0 - 0)     | 0<br>(0 - 0)      | 0<br>(0 - 0)       | 0<br>(0 - 0)       | 0<br>(0 - 0)       |
| Other hemoglobinopathies and hemolytic anemias      | 5<br>(3 - 7)             | 0<br>(0 - 0)     | 0<br>(0 - 0)      | 1<br>(0 - 1)       | 1<br>(0 - 1)       | 3<br>(2 - 5)       |
| Endocrine, metabolic, blood, and immune disorders   | 44<br>(21 - 55)          | 3<br>(1 - 4)     | 1<br>(1 - 2)      | 7<br>(3 - 10)      | 15<br>(7 - 21)     | 18<br>(8 - 24)     |
| Musculoskeletal disorders                           | 53<br>(42 - 85)          | --               | 0<br>(0 - 0)      | 2<br>(2 - 3)       | 16<br>(12 - 26)    | 35<br>(26 - 56)    |
| Rheumatoid arthritis                                | 26<br>(18 - 44)          | --               | 0<br>(0 - 0)      | 1<br>(1 - 1)       | 9<br>(5 - 16)      | 17<br>(11 - 28)    |
| Other musculoskeletal disorders                     | 27<br>(19 - 42)          | --               | 0<br>(0 - 0)      | 1<br>(1 - 2)       | 7<br>(5 - 12)      | 19<br>(12 - 30)    |
| Other non-communicable diseases                     | 111<br>(96 - 129)        | 41<br>(31 - 54)  | 4<br>(3 - 5)      | 19<br>(16 - 23)    | 24<br>(19 - 29)    | 23<br>(16 - 29)    |
| Congenital anomalies                                | 83<br>(70 - 100)         | 33<br>(24 - 45)  | 3<br>(3 - 5)      | 18<br>(15 - 22)    | 19<br>(15 - 24)    | 9<br>(7 - 11)      |
| Neural tube defects                                 | 1<br>(0 - 1)             | 0<br>(0 - 0)     | 0<br>(0 - 0)      | 0<br>(0 - 0)       | 0<br>(0 - 0)       | 0<br>(0 - 0)       |
| Congenital heart anomalies                          | 28<br>(22 - 38)          | 13<br>(9 - 19)   | 1<br>(1 - 2)      | 8<br>(6 - 10)      | 5<br>(3 - 7)       | 2<br>(1 - 3)       |
| Cleft lip and cleft palate                          | 0<br>(0 - 0)             | 0<br>(0 - 0)     | --                | --                 | --                 | --                 |
| Down syndrome                                       | 10<br>(6 - 15)           | 0<br>(0 - 0)     | 0<br>(0 - 0)      | 2<br>(1 - 3)       | 8<br>(4 - 11)      | 0<br>(0 - 1)       |
| Chromosomal unbalanced rearrangements               | 7<br>(4 - 10)            | 5<br>(3 - 8)     | 0<br>(0 - 1)      | 1<br>(1 - 1)       | 0<br>(0 - 0)       | 0<br>(0 - 0)       |
| Other congenital anomalies                          | 37<br>(30 - 46)          | 15<br>(10 - 22)  | 2<br>(1 - 3)      | 7<br>(5 - 10)      | 6<br>(4 - 10)      | 7<br>(5 - 9)       |
| Skin and subcutaneous diseases                      | 20<br>(9 - 26)           | 0<br>(0 - 0)     | 0<br>(0 - 0)      | 1<br>(0 - 1)       | 5<br>(3 - 6)       | 14<br>(7 - 20)     |
| Cellulitis                                          | 2<br>(1 - 4)             | 0<br>(0 - 0)     | 0<br>(0 - 0)      | 0<br>(0 - 0)       | 1<br>(0 - 1)       | 1<br>(1 - 3)       |
| Pyoderma                                            | 17<br>(8 - 22)           | 0<br>(0 - 0)     | 0<br>(0 - 0)      | 1<br>(0 - 1)       | 4<br>(2 - 5)       | 12<br>(6 - 17)     |
| Decubitus ulcer                                     | 1<br>(0 - 1)             | 0<br>(0 - 0)     | 0<br>(0 - 0)      | 0<br>(0 - 0)       | 0<br>(0 - 0)       | 0<br>(0 - 1)       |
| Other skin and subcutaneous diseases                | 1<br>(0 - 2)             | 0<br>(0 - 0)     | 0<br>(0 - 0)      | 0<br>(0 - 0)       | 0<br>(0 - 1)       | 0<br>(0 - 1)       |
| Sudden infant death syndrome                        | 7<br>(4 - 12)            | 7<br>(4 - 12)    | --                | --                 | --                 | --                 |
| Injuries                                            | 2,254<br>(1,950 - 2,578) | 9<br>(6 - 13)    | 14<br>(11 - 17)   | 734<br>(650 - 875) | 742<br>(643 - 883) | 755<br>(566 - 900) |
| Transport injuries                                  | 279<br>(248 - 311)       | 2<br>(1 - 3)     | 6<br>(4 - 7)      | 125<br>(106 - 145) | 81<br>(70 - 94)    | 66<br>(55 - 80)    |
| Road injuries                                       | 238<br>(204 - 270)       | 2<br>(1 - 3)     | 5<br>(4 - 7)      | 107<br>(87 - 126)  | 64<br>(53 - 77)    | 60<br>(50 - 74)    |
| Pedestrian road injuries                            | 32<br>(15 - 51)          | 1<br>(0 - 1)     | 1<br>(1 - 2)      | 6<br>(2 - 11)      | 10<br>(5 - 17)     | 13<br>(6 - 21)     |



Web Table 31- Finland deaths with 95% UI by age, sex, and cause in 2013

| Cause                                           | Males, All Ages        | Males, 0-4 Years | Males, 5-14 Years | Males, 15-49 Years | Males, 50-69 Years | Males, 70-80 Years |
|-------------------------------------------------|------------------------|------------------|-------------------|--------------------|--------------------|--------------------|
| Cyclist road injuries                           | 27<br>(17 - 43)        | 0<br>(0 - 0)     | 1<br>(1 - 2)      | 4<br>(2 - 6)       | 10<br>(6 - 16)     | 12<br>(7 - 20)     |
| Motorcyclist road injuries                      | 29<br>(16 - 42)        | 0<br>(0 - 0)     | 1<br>(0 - 1)      | 21<br>(11 - 31)    | 5<br>(3 - 8)       | 3<br>(2 - 5)       |
| Motor vehicle road injuries                     | 150<br>(113 - 180)     | 1<br>(0 - 2)     | 2<br>(1 - 3)      | 76<br>(58 - 93)    | 38<br>(27 - 49)    | 32<br>(21 - 43)    |
| Other road injuries                             | 1<br>(0 - 2)           | 0<br>(0 - 0)     | 0<br>(0 - 0)      | 0<br>(0 - 0)       | 1<br>(0 - 1)       | 0<br>(0 - 1)       |
| Other transport injuries                        | 41<br>(30 - 59)        | 0<br>(0 - 0)     | 1<br>(0 - 1)      | 18<br>(12 - 26)    | 17<br>(11 - 25)    | 5<br>(3 - 9)       |
| Unintentional injuries                          | 1,089<br>(815 - 1,257) | 6<br>(4 - 9)     | 6<br>(4 - 8)      | 162<br>(137 - 200) | 350<br>(275 - 405) | 565<br>(372 - 695) |
| Falls                                           | 720<br>(457 - 877)     | 1<br>(0 - 1)     | 1<br>(0 - 1)      | 54<br>(38 - 66)    | 189<br>(122 - 232) | 476<br>(294 - 602) |
| Drowning                                        | 138<br>(86 - 202)      | 3<br>(1 - 5)     | 3<br>(2 - 5)      | 45<br>(30 - 70)    | 61<br>(36 - 87)    | 26<br>(15 - 38)    |
| Fire, heat, and hot substances                  | 56<br>(41 - 75)        | 1<br>(0 - 1)     | 0<br>(0 - 1)      | 16<br>(12 - 23)    | 24<br>(17 - 34)    | 14<br>(9 - 20)     |
| Poisonings                                      | 33<br>(25 - 58)        | 0<br>(0 - 0)     | 0<br>(0 - 0)      | 14<br>(10 - 24)    | 14<br>(10 - 28)    | 4<br>(3 - 7)       |
| Exposure to mechanical forces                   | 33<br>(28 - 47)        | 1<br>(0 - 1)     | 1<br>(1 - 2)      | 13<br>(11 - 18)    | 13<br>(10 - 20)    | 5<br>(4 - 7)       |
| Unintentional firearm injuries                  | 1<br>(1 - 2)           | 0<br>(0 - 0)     | 0<br>(0 - 0)      | 1<br>(0 - 1)       | 0<br>(0 - 0)       | 0<br>(0 - 0)       |
| Unintentional suffocation                       | 4<br>(3 - 10)          | 0<br>(0 - 1)     | 0<br>(0 - 1)      | 1<br>(1 - 2)       | 2<br>(1 - 5)       | 1<br>(0 - 2)       |
| Other exposure to mechanical forces             | 27<br>(23 - 37)        | 0<br>(0 - 0)     | 0<br>(0 - 1)      | 11<br>(9 - 16)     | 11<br>(8 - 15)     | 4<br>(3 - 6)       |
| Adverse effects of medical treatment            | 9<br>(3 - 14)          | 0<br>(0 - 0)     | 0<br>(0 - 0)      | 1<br>(0 - 1)       | 3<br>(1 - 5)       | 5<br>(2 - 9)       |
| Animal contact                                  | 3<br>(2 - 6)           | 0<br>(0 - 0)     | 0<br>(0 - 0)      | 1<br>(0 - 1)       | 2<br>(1 - 3)       | 1<br>(1 - 2)       |
| Venomous animal contact                         | 1<br>(1 - 2)           | 0<br>(0 - 0)     | 0<br>(0 - 0)      | 0<br>(0 - 0)       | 0<br>(0 - 1)       | 0<br>(0 - 0)       |
| Non-venomous animal contact                     | 2<br>(2 - 5)           | 0<br>(0 - 0)     | 0<br>(0 - 0)      | 0<br>(0 - 1)       | 1<br>(1 - 2)       | 1<br>(1 - 2)       |
| Foreign body                                    | 64<br>(38 - 103)       | 1<br>(0 - 1)     | 0<br>(0 - 0)      | 9<br>(6 - 15)      | 30<br>(18 - 50)    | 24<br>(12 - 38)    |
| Pulmonary aspiration and foreign body in airway | 63<br>(38 - 102)       | 1<br>(0 - 1)     | 0<br>(0 - 0)      | 9<br>(5 - 14)      | 30<br>(18 - 50)    | 23<br>(12 - 38)    |
| Foreign body in other body part                 | 1<br>(0 - 1)           | 0<br>(0 - 0)     | 0<br>(0 - 0)      | 0<br>(0 - 0)       | 0<br>(0 - 0)       | 0<br>(0 - 0)       |
| Other unintentional injuries                    | 34<br>(26 - 45)        | 1<br>(0 - 1)     | 0<br>(0 - 1)      | 8<br>(6 - 12)      | 15<br>(9 - 24)     | 10<br>(6 - 15)     |
| Self-harm and interpersonal violence            | 885<br>(747 - 1,212)   | 1<br>(1 - 2)     | 2<br>(1 - 3)      | 448<br>(380 - 593) | 310<br>(250 - 454) | 124<br>(95 - 188)  |
| Self-harm                                       | 811<br>(680 - 1,130)   | --               | 1<br>(1 - 2)      | 404<br>(340 - 546) | 286<br>(229 - 422) | 120<br>(91 - 182)  |
| Interpersonal violence                          | 74<br>(54 - 116)       | 1<br>(1 - 2)     | 1<br>(0 - 1)      | 43<br>(30 - 68)    | 25<br>(17 - 43)    | 4<br>(3 - 7)       |
| Assault by firearm                              | 12<br>(6 - 24)         | 0<br>(0 - 0)     | 0<br>(0 - 0)      | 9<br>(4 - 17)      | 3<br>(1 - 6)       | 0<br>(0 - 1)       |
| Assault by sharp object                         | 33<br>(21 - 56)        | 0<br>(0 - 0)     | 0<br>(0 - 0)      | 22<br>(13 - 36)    | 10<br>(6 - 19)     | 1<br>(1 - 2)       |
| Assault by other means                          | 28<br>(18 - 47)        | 1<br>(1 - 2)     | 0<br>(0 - 0)      | 13<br>(7 - 21)     | 12<br>(7 - 20)     | 3<br>(2 - 4)       |

Web Table 31- Finland deaths with 95% UI by age, sex, and cause in 2013

| Cause                                                              | Females, All Ages           | Females, 0-4 Years | Females, 5-14 Years | Females, 15-49 Years | Females, 50-69 Years     | Females, 70-80 Years        |
|--------------------------------------------------------------------|-----------------------------|--------------------|---------------------|----------------------|--------------------------|-----------------------------|
| All causes                                                         | 26,146<br>(24,483 - 27,950) | 80<br>(62 - 102)   | 26<br>(23 - 31)     | 707<br>(632 - 787)   | 3,469<br>(3,170 - 3,791) | 21,864<br>(20,584 - 23,274) |
| Communicable, maternal, neonatal, and nutritional diseases         | 696<br>(492 - 1,512)        | 29<br>(22 - 39)    | 2<br>(1 - 2)        | 17<br>(15 - 20)      | 50<br>(40 - 71)          | 598<br>(397 - 1,387)        |
| HIV/AIDS and tuberculosis                                          | 44<br>(33 - 62)             | 0<br>(0 - 0)       | 0<br>(0 - 0)        | 2<br>(1 - 3)         | 6<br>(4 - 8)             | 36<br>(26 - 53)             |
| Tuberculosis                                                       | 42<br>(31 - 60)             | 0<br>(0 - 0)       | 0<br>(0 - 0)        | 1<br>(1 - 1)         | 5<br>(4 - 8)             | 36<br>(26 - 53)             |
| HIV/AIDS                                                           | 2<br>(1 - 2)                | 0<br>(0 - 0)       | 0<br>(0 - 0)        | 1<br>(1 - 2)         | 0<br>(0 - 1)             | 0<br>(0 - 0)                |
| HIV/AIDS resulting in mycobacterial infection                      | 0<br>(0 - 0)                | 0<br>(0 - 0)       | 0<br>(0 - 0)        | 0<br>(0 - 0)         | 0<br>(0 - 0)             | 0<br>(0 - 0)                |
| HIV/AIDS resulting in other diseases                               | 2<br>(1 - 2)                | 0<br>(0 - 0)       | 0<br>(0 - 0)        | 1<br>(1 - 2)         | 0<br>(0 - 1)             | 0<br>(0 - 0)                |
| Diarrrhea, lower respiratory, and other common infectious diseases | 571<br>(369 - 1,397)        | 3<br>(2 - 4)       | 1<br>(1 - 2)        | 9<br>(7 - 12)        | 36<br>(26 - 55)          | 522<br>(325 - 1,315)        |
| Diarrheal diseases                                                 | 47<br>(29 - 77)             | 0<br>(0 - 1)       | 0<br>(0 - 0)        | 0<br>(0 - 1)         | 3<br>(2 - 4)             | 44<br>(26 - 74)             |
| Intestinal infectious diseases                                     | 2<br>(1 - 5)                | 0<br>(0 - 1)       | 0<br>(0 - 1)        | 1<br>(0 - 2)         | 0<br>(0 - 1)             | 0<br>(0 - 1)                |
| Typhoid fever                                                      | 2<br>(1 - 4)                | 0<br>(0 - 1)       | 0<br>(0 - 1)        | 1<br>(0 - 1)         | 0<br>(0 - 1)             | 0<br>(0 - 1)                |
| Paratyphoid fever                                                  | 0<br>(0 - 1)                | 0<br>(0 - 0)       | 0<br>(0 - 0)        | 0<br>(0 - 0)         | 0<br>(0 - 0)             | 0<br>(0 - 0)                |
| Other intestinal infectious diseases                               | 0<br>(0 - 2)                | 0<br>(0 - 1)       | 0<br>(0 - 0)        | 0<br>(0 - 0)         | 0<br>(0 - 0)             | 0<br>(0 - 1)                |
| Lower respiratory infections                                       | 501<br>(305 - 1,323)        | 1<br>(1 - 2)       | 0<br>(0 - 0)        | 5<br>(4 - 8)         | 28<br>(20 - 47)          | 466<br>(274 - 1,263)        |
| Upper respiratory infections                                       | 1<br>(0 - 2)                | 0<br>(0 - 0)       | 0<br>(0 - 0)        | 0<br>(0 - 0)         | 0<br>(0 - 0)             | 0<br>(0 - 2)                |
| Otitis media                                                       | 0<br>(0 - 0)                | 0<br>(0 - 0)       | 0<br>(0 - 0)        | 0<br>(0 - 0)         | 0<br>(0 - 0)             | 0<br>(0 - 0)                |
| Meningitis                                                         | 9<br>(7 - 13)               | 1<br>(0 - 1)       | 0<br>(0 - 0)        | 1<br>(1 - 1)         | 2<br>(2 - 3)             | 5<br>(4 - 8)                |
| Pneumococcal meningitis                                            | 2<br>(1 - 3)                | 0<br>(0 - 0)       | 0<br>(0 - 0)        | 0<br>(0 - 0)         | 0<br>(0 - 1)             | 1<br>(1 - 2)                |
| H influenzae type B meningitis                                     | 1<br>(1 - 1)                | 0<br>(0 - 0)       | 0<br>(0 - 0)        | 0<br>(0 - 0)         | 0<br>(0 - 0)             | 0<br>(0 - 1)                |
| Meningococcal meningitis                                           | 3<br>(2 - 4)                | 0<br>(0 - 0)       | 0<br>(0 - 0)        | 0<br>(0 - 0)         | 1<br>(0 - 1)             | 2<br>(1 - 3)                |
| Other meningitis                                                   | 3<br>(2 - 5)                | 0<br>(0 - 0)       | 0<br>(0 - 0)        | 0<br>(0 - 1)         | 1<br>(0 - 2)             | 2<br>(1 - 3)                |
| Encephalitis                                                       | 7<br>(3 - 10)               | 0<br>(0 - 1)       | 0<br>(0 - 0)        | 1<br>(0 - 2)         | 2<br>(1 - 3)             | 3<br>(1 - 6)                |
| Diphtheria                                                         | 0<br>(0 - 0)                | 0<br>(0 - 0)       | 0<br>(0 - 0)        | 0<br>(0 - 0)         | 0<br>(0 - 0)             | --                          |
| Whooping cough                                                     | 0<br>(0 - 0)                | 0<br>(0 - 0)       | 0<br>(0 - 0)        | 0<br>(0 - 0)         | 0<br>(0 - 0)             | --                          |
| Tetanus                                                            | 0<br>(0 - 0)                | 0<br>(0 - 0)       | 0<br>(0 - 0)        | 0<br>(0 - 0)         | 0<br>(0 - 0)             | 0<br>(0 - 0)                |
| Measles                                                            | 0<br>(0 - 0)                | 0<br>(0 - 0)       | 0<br>(0 - 0)        | 0<br>(0 - 0)         | 0<br>(0 - 0)             | --                          |
| Varicella and herpes zoster                                        | 3<br>(0 - 13)               | 0<br>(0 - 0)       | 0<br>(0 - 0)        | 0<br>(0 - 0)         | 0<br>(0 - 1)             | 2<br>(0 - 12)               |
| Neglected tropical diseases and malaria                            | 2<br>(1 - 2)                | 0<br>(0 - 0)       | 0<br>(0 - 0)        | 0<br>(0 - 1)         | 1<br>(0 - 1)             | 1<br>(0 - 1)                |
| Cysticercosis                                                      | 0<br>(0 - 0)                | 0<br>(0 - 0)       | 0<br>(0 - 0)        | 0<br>(0 - 0)         | 0<br>(0 - 0)             | 0<br>(0 - 0)                |
| Cystic echinococcosis                                              | 0<br>(0 - 0)                | 0<br>(0 - 0)       | 0<br>(0 - 0)        | 0<br>(0 - 0)         | 0<br>(0 - 0)             | 0<br>(0 - 0)                |
| Dengue                                                             | 0<br>(0 - 1)                | 0<br>(0 - 0)       | 0<br>(0 - 0)        | 0<br>(0 - 0)         | 0<br>(0 - 0)             | 0<br>(0 - 0)                |
| Rabies                                                             | 0<br>(0 - 0)                | 0<br>(0 - 0)       | 0<br>(0 - 0)        | 0<br>(0 - 0)         | 0<br>(0 - 0)             | 0<br>(0 - 0)                |
| Other neglected tropical diseases                                  | 1<br>(0 - 1)                | 0<br>(0 - 0)       | 0<br>(0 - 0)        | 0<br>(0 - 0)         | 0<br>(0 - 1)             | 0<br>(0 - 1)                |
| Maternal disorders                                                 | 2<br>(2 - 3)                | --                 | 0<br>(0 - 0)        | 2<br>(2 - 3)         | --                       | --                          |
| Maternal hemorrhage                                                | 0<br>(0 - 0)                | --                 | 0<br>(0 - 0)        | 0<br>(0 - 0)         | --                       | --                          |
| Maternal sepsis and other maternal infections                      | 0<br>(0 - 0)                | --                 | 0<br>(0 - 0)        | 0<br>(0 - 0)         | --                       | --                          |
| Maternal hypertensive disorders                                    | 0<br>(0 - 0)                | --                 | 0<br>(0 - 0)        | 0<br>(0 - 0)         | --                       | --                          |
| Maternal obstructed labor                                          | 0<br>(0 - 0)                | --                 | 0<br>(0 - 0)        | 0<br>(0 - 0)         | --                       | --                          |
| Maternal abortive outcome                                          | 0<br>(0 - 1)                | --                 | 0<br>(0 - 0)        | 0<br>(0 - 1)         | --                       | --                          |
| Indirect maternal deaths                                           | 0<br>(0 - 0)                | --                 | 0<br>(0 - 0)        | 0<br>(0 - 0)         | --                       | --                          |

Web Table 31- Finland deaths with 95% UI by age, sex, and cause in 2013

| Cause                                                            | Females, All Ages           | Females, 0-4 Years | Females, 5-14 Years | Females, 15-49 Years | Females, 50-69 Years     | Females, 70-80 Years        |
|------------------------------------------------------------------|-----------------------------|--------------------|---------------------|----------------------|--------------------------|-----------------------------|
| Late maternal deaths                                             | 0<br>(0 - 0)                | --                 | 0<br>(0 - 0)        | 0<br>(0 - 0)         | --                       | --                          |
| Maternal deaths aggravated by HIV/AIDS                           | 0<br>(0 - 0)                | --                 | --                  | 0<br>(0 - 0)         | --                       | --                          |
| Other maternal disorders                                         | 0<br>(0 - 1)                | --                 | 0<br>(0 - 0)        | 0<br>(0 - 1)         | --                       | --                          |
| Neonatal disorders                                               | 26<br>(19 - 35)             | 26<br>(19 - 35)    | --                  | --                   | --                       | --                          |
| Neonatal preterm birth complications                             | 12<br>(7 - 18)              | 12<br>(7 - 18)     | --                  | --                   | --                       | --                          |
| Neonatal encephalopathy due to birth asphyxia and trauma         | 6<br>(3 - 10)               | 6<br>(3 - 10)      | --                  | --                   | --                       | --                          |
| Neonatal sepsis and other neonatal infections                    | 1<br>(0 - 2)                | 1<br>(0 - 2)       | --                  | --                   | --                       | --                          |
| Hemolytic disease and other neonatal jaundice                    | 0<br>(0 - 0)                | 0<br>(0 - 0)       | --                  | --                   | --                       | --                          |
| Other neonatal disorders                                         | 7<br>(4 - 11)               | 7<br>(4 - 11)      | --                  | --                   | --                       | --                          |
| Nutritional deficiencies                                         | 18<br>(13 - 24)             | 0<br>(0 - 0)       | 0<br>(0 - 0)        | 1<br>(1 - 1)         | 2<br>(1 - 2)             | 15<br>(10 - 21)             |
| Protein-energy malnutrition                                      | 2<br>(1 - 3)                | 0<br>(0 - 0)       | 0<br>(0 - 0)        | 0<br>(0 - 0)         | 0<br>(0 - 0)             | 1<br>(0 - 3)                |
| Iodine deficiency                                                | 0<br>(0 - 1)                | 0<br>(0 - 0)       | 0<br>(0 - 0)        | 0<br>(0 - 0)         | 0<br>(0 - 0)             | 0<br>(0 - 1)                |
| Iron-deficiency anemia                                           | 14<br>(9 - 20)              | 0<br>(0 - 0)       | 0<br>(0 - 0)        | 1<br>(0 - 1)         | 1<br>(1 - 2)             | 12<br>(8 - 18)              |
| Other nutritional deficiencies                                   | 2<br>(1 - 4)                | 0<br>(0 - 0)       | 0<br>(0 - 0)        | 0<br>(0 - 0)         | 1<br>(0 - 1)             | 1<br>(0 - 3)                |
| Other communicable, maternal, neonatal, and nutritional diseases | 33<br>(24 - 44)             | 1<br>(0 - 1)       | 0<br>(0 - 0)        | 2<br>(1 - 3)         | 7<br>(4 - 9)             | 24<br>(16 - 34)             |
| Sexually transmitted diseases excluding HIV                      | 5<br>(2 - 8)                | 0<br>(0 - 1)       | 0<br>(0 - 0)        | 0<br>(0 - 0)         | 1<br>(0 - 1)             | 4<br>(2 - 7)                |
| Syphilis                                                         | 4<br>(2 - 7)                | 0<br>(0 - 1)       | 0<br>(0 - 0)        | 0<br>(0 - 0)         | 0<br>(0 - 1)             | 3<br>(1 - 6)                |
| Chlamydial infection                                             | 0<br>(0 - 0)                | --                 | 0<br>(0 - 0)        | 0<br>(0 - 0)         | 0<br>(0 - 0)             | 0<br>(0 - 0)                |
| Gonococcal infection                                             | 1<br>(0 - 1)                | --                 | 0<br>(0 - 0)        | 0<br>(0 - 0)         | 0<br>(0 - 0)             | 0<br>(0 - 1)                |
| Other sexually transmitted diseases                              | 0<br>(0 - 0)                | --                 | 0<br>(0 - 0)        | 0<br>(0 - 0)         | 0<br>(0 - 0)             | 0<br>(0 - 0)                |
| Hepatitis                                                        | 1<br>(1 - 2)                | 0<br>(0 - 0)       | 0<br>(0 - 0)        | 0<br>(0 - 0)         | 0<br>(0 - 0)             | 1<br>(0 - 1)                |
| Acute hepatitis A                                                | 0<br>(0 - 1)                | 0<br>(0 - 0)       | 0<br>(0 - 0)        | 0<br>(0 - 0)         | 0<br>(0 - 0)             | 0<br>(0 - 0)                |
| Acute hepatitis B                                                | 1<br>(0 - 1)                | 0<br>(0 - 0)       | 0<br>(0 - 0)        | 0<br>(0 - 0)         | 0<br>(0 - 0)             | 0<br>(0 - 1)                |
| Acute hepatitis C                                                | 0<br>(0 - 0)                | --                 | 0<br>(0 - 0)        | 0<br>(0 - 0)         | 0<br>(0 - 0)             | 0<br>(0 - 0)                |
| Other infectious diseases                                        | 27<br>(17 - 37)             | 0<br>(0 - 0)       | 0<br>(0 - 0)        | 2<br>(1 - 2)         | 6<br>(4 - 8)             | 20<br>(11 - 28)             |
| Non-communicable diseases                                        | 24,356<br>(22,531 - 26,061) | 45<br>(34 - 58)    | 17<br>(14 - 20)     | 507<br>(446 - 569)   | 3,212<br>(2,935 - 3,512) | 20,576<br>(19,077 - 21,938) |
| Neoplasms                                                        | 5,434<br>(4,614 - 6,058)    | 4<br>(3 - 5)       | 8<br>(7 - 10)       | 244<br>(211 - 276)   | 1,662<br>(1,410 - 1,841) | 3,515<br>(2,927 - 3,980)    |
| Esophageal cancer                                                | 78<br>(65 - 94)             | --                 | --                  | 1<br>(1 - 1)         | 18<br>(14 - 22)          | 59<br>(47 - 72)             |
| Stomach cancer                                                   | 303<br>(217 - 425)          | --                 | --                  | 12<br>(9 - 16)       | 68<br>(51 - 91)          | 223<br>(152 - 324)          |
| Liver cancer                                                     | 168<br>(111 - 218)          | --                 | 0<br>(0 - 0)        | 5<br>(3 - 6)         | 39<br>(26 - 50)          | 125<br>(75 - 172)           |
| Liver cancer due to hepatitis B                                  | 34<br>(10 - 65)             | --                 | 0<br>(0 - 0)        | 1<br>(0 - 3)         | 11<br>(3 - 21)           | 21<br>(5 - 45)              |
| Liver cancer due to hepatitis C                                  | 83<br>(44 - 131)            | --                 | 0<br>(0 - 0)        | 2<br>(0 - 4)         | 18<br>(9 - 30)           | 64<br>(30 - 104)            |
| Liver cancer due to alcohol use                                  | 35<br>(16 - 60)             | --                 | --                  | 0<br>(0 - 1)         | 6<br>(2 - 13)            | 29<br>(14 - 51)             |
| Liver cancer due to other causes                                 | 16<br>(6 - 31)              | --                 | 0<br>(0 - 0)        | 1<br>(0 - 2)         | 4<br>(1 - 8)             | 11<br>(4 - 24)              |
| Larynx cancer                                                    | 6<br>(4 - 8)                | --                 | --                  | 0<br>(0 - 0)         | 2<br>(2 - 4)             | 3<br>(2 - 5)                |
| Tracheal, bronchus and lung cancer                               | 635<br>(406 - 763)          | --                 | --                  | 17<br>(12 - 22)      | 243<br>(156 - 294)       | 375<br>(218 - 472)          |
| Breast cancer                                                    | 831<br>(568 - 971)          | --                 | --                  | 69<br>(54 - 87)      | 349<br>(247 - 411)       | 414<br>(264 - 499)          |
| Cervical cancer                                                  | 71<br>(56 - 93)             | --                 | --                  | 7<br>(5 - 9)         | 22<br>(17 - 29)          | 42<br>(31 - 57)             |
| Uterine cancer                                                   | 161<br>(96 - 201)           | --                 | --                  | 3<br>(2 - 4)         | 46<br>(30 - 58)          | 112<br>(61 - 147)           |
| Prostate cancer                                                  | --                          | --                 | --                  | --                   | --                       | --                          |

Web Table 31- Finland deaths with 95% UI by age, sex, and cause in 2013

| Cause                                         | Females, All Ages          | Females, 0-4 Years | Females, 5-14 Years | Females, 15-49 Years | Females, 50-69 Years | Females, 70-80 Years       |
|-----------------------------------------------|----------------------------|--------------------|---------------------|----------------------|----------------------|----------------------------|
| Colon and rectum cancer                       | 726<br>(61 - 873)          | --                 | --                  | 17<br>(14 - 21)      | 161<br>(137 - 184)   | 548<br>(442 - 684)         |
| Lip and oral cavity cancer                    | 45<br>(35 - 55)            | --                 | --                  | 3<br>(2 - 3)         | 11<br>(8 - 13)       | 31<br>(23 - 41)            |
| Nasopharynx cancer                            | 4<br>(3 - 11)              | --                 | 0<br>(0 - 0)        | 1<br>(0 - 2)         | 2<br>(1 - 5)         | 2<br>(1 - 5)               |
| Other pharynx cancer                          | 10<br>(8 - 12)             | --                 | --                  | 1<br>(0 - 1)         | 4<br>(3 - 6)         | 4<br>(3 - 6)               |
| Gallbladder and biliary tract cancer          | 147<br>(104 - 206)         | --                 | --                  | 2<br>(2 - 3)         | 35<br>(27 - 48)      | 109<br>(73 - 157)          |
| Pancreatic cancer                             | 548<br>(465 - 637)         | --                 | --                  | 9<br>(7 - 11)        | 152<br>(127 - 175)   | 388<br>(318 - 461)         |
| Malignant skin melanoma                       | 76<br>(50 - 103)           | --                 | --                  | 9<br>(6 - 12)        | 25<br>(17 - 35)      | 42<br>(27 - 58)            |
| Non-melanoma skin cancer                      | 27<br>(19 - 37)            | --                 | --                  | 0<br>(0 - 1)         | 2<br>(2 - 3)         | 24<br>(17 - 34)            |
| Ovarian cancer                                | 309<br>(251 - 361)         | --                 | --                  | 15<br>(12 - 19)      | 131<br>(107 - 155)   | 163<br>(121 - 204)         |
| Testicular cancer                             | --                         | --                 | --                  | --                   | --                   | --                         |
| Kidney cancer                                 | 134<br>(90 - 187)          | 0<br>(0 - 0)       | 0<br>(0 - 0)        | 3<br>(2 - 4)         | 38<br>(28 - 51)      | 92<br>(56 - 140)           |
| Bladder cancer                                | 66<br>(41 - 91)            | --                 | --                  | 1<br>(0 - 1)         | 10<br>(7 - 15)       | 56<br>(34 - 80)            |
| Brain and nervous system cancer               | 166<br>(113 - 199)         | 1<br>(0 - 1)       | 3<br>(2 - 4)        | 24<br>(18 - 29)      | 74<br>(50 - 90)      | 65<br>(38 - 85)            |
| Thyroid cancer                                | 33<br>(23 - 43)            | --                 | 0<br>(0 - 0)        | 1<br>(1 - 2)         | 8<br>(6 - 11)        | 24<br>(16 - 32)            |
| Mesothelioma                                  | 18<br>(12 - 25)            | --                 | --                  | 0<br>(0 - 1)         | 6<br>(4 - 9)         | 11<br>(7 - 17)             |
| Hodgkin lymphoma                              | 13<br>(9 - 19)             | 0<br>(0 - 0)       | 0<br>(0 - 0)        | 3<br>(2 - 5)         | 4<br>(2 - 6)         | 6<br>(4 - 9)               |
| Non-Hodgkin lymphoma                          | 222<br>(93 - 332)          | 0<br>(0 - 0)       | 0<br>(0 - 1)        | 9<br>(5 - 15)        | 57<br>(26 - 88)      | 156<br>(62 - 233)          |
| Multiple myeloma                              | 145<br>(91 - 237)          | --                 | --                  | 3<br>(1 - 4)         | 39<br>(23 - 65)      | 104<br>(63 - 173)          |
| Leukemia                                      | 177<br>(131 - 211)         | 1<br>(1 - 2)       | 3<br>(2 - 4)        | 12<br>(9 - 15)       | 40<br>(31 - 49)      | 121<br>(83 - 150)          |
| Other neoplasms                               | 316<br>(206 - 398)         | 2<br>(1 - 3)       | 2<br>(1 - 3)        | 19<br>(13 - 25)      | 78<br>(54 - 99)      | 215<br>(126 - 284)         |
| Cardiovascular diseases                       | 11,000<br>(9,658 - 12,873) | 0<br>(0 - 1)       | 1<br>(1 - 1)        | 81<br>(65 - 105)     | 791<br>(658 - 1,117) | 10,127<br>(8,835 - 11,705) |
| Rheumatic heart disease                       | 48<br>(34 - 82)            | 0<br>(0 - 0)       | 0<br>(0 - 0)        | 1<br>(1 - 1)         | 8<br>(5 - 14)        | 39<br>(27 - 68)            |
| Ischemic heart disease                        | 6,135<br>(5,178 - 7,371)   | 0<br>(0 - 0)       | 0<br>(0 - 0)        | 24<br>(18 - 35)      | 404<br>(321 - 632)   | 5,706<br>(4,763 - 6,797)   |
| Cerebrovascular disease                       | 2,995<br>(2,426 - 4,231)   | 0<br>(0 - 0)       | 0<br>(0 - 0)        | 31<br>(24 - 45)      | 221<br>(172 - 355)   | 2,742<br>(2,203 - 3,866)   |
| Ischemic stroke                               | 2,162<br>(1,715 - 3,143)   | 0<br>(0 - 0)       | 0<br>(0 - 0)        | 3<br>(2 - 5)         | 73<br>(52 - 127)     | 2,086<br>(1,649 - 3,004)   |
| Hemorrhagic stroke                            | 832<br>(637 - 1,256)       | 0<br>(0 - 0)       | 0<br>(0 - 0)        | 28<br>(22 - 41)      | 148<br>(112 - 236)   | 656<br>(476 - 1,014)       |
| Hypertensive heart disease                    | 384<br>(190 - 558)         | 0<br>(0 - 0)       | 0<br>(0 - 0)        | 2<br>(1 - 3)         | 23<br>(12 - 32)      | 360<br>(176 - 531)         |
| Cardiomyopathy and myocarditis                | 154<br>(107 - 192)         | 0<br>(0 - 1)       | 0<br>(0 - 1)        | 12<br>(9 - 16)       | 49<br>(34 - 67)      | 91<br>(58 - 120)           |
| Atrial fibrillation and flutter               | 305<br>(204 - 431)         | --                 | --                  | 0<br>(0 - 0)         | 7<br>(5 - 10)        | 297<br>(197 - 424)         |
| Aortic aneurysm                               | 196<br>(119 - 303)         | --                 | --                  | 2<br>(1 - 3)         | 25<br>(15 - 39)      | 169<br>(100 - 264)         |
| Peripheral vascular disease                   | 199<br>(136 - 280)         | --                 | --                  | 0<br>(0 - 0)         | 5<br>(3 - 7)         | 195<br>(132 - 275)         |
| Endocarditis                                  | 19<br>(10 - 27)            | 0<br>(0 - 0)       | 0<br>(0 - 0)        | 1<br>(0 - 1)         | 3<br>(2 - 5)         | 15<br>(8 - 22)             |
| Other cardiovascular and circulatory diseases | 566<br>(319 - 763)         | 0<br>(0 - 0)       | 0<br>(0 - 0)        | 7<br>(4 - 10)        | 46<br>(28 - 62)      | 513<br>(283 - 709)         |
| Chronic respiratory diseases                  | 559<br>(386 - 662)         | 0<br>(0 - 0)       | 0<br>(0 - 0)        | 8<br>(6 - 10)        | 94<br>(62 - 113)     | 456<br>(315 - 556)         |
| Chronic obstructive pulmonary disease         | 366<br>(252 - 461)         | 0<br>(0 - 0)       | 0<br>(0 - 0)        | 3<br>(2 - 5)         | 66<br>(43 - 83)      | 296<br>(202 - 381)         |
| Pneumoconiosis                                | 1<br>(1 - 2)               | 0<br>(0 - 0)       | 0<br>(0 - 0)        | 0<br>(0 - 0)         | 0<br>(0 - 0)         | 1<br>(0 - 1)               |
| Silicosis                                     | 0<br>(0 - 0)               | 0<br>(0 - 0)       | 0<br>(0 - 0)        | 0<br>(0 - 0)         | 0<br>(0 - 0)         | 0<br>(0 - 0)               |
| Asbestosis                                    | 0<br>(0 - 0)               | 0<br>(0 - 0)       | 0<br>(0 - 0)        | 0<br>(0 - 0)         | 0<br>(0 - 0)         | 0<br>(0 - 0)               |
| Coal workers pneumoconiosis                   | 0<br>(0 - 0)               | 0<br>(0 - 0)       | 0<br>(0 - 0)        | 0<br>(0 - 0)         | 0<br>(0 - 0)         | 0<br>(0 - 0)               |
| Other pneumoconiosis                          | 1<br>(0 - 1)               | 0<br>(0 - 0)       | 0<br>(0 - 0)        | 0<br>(0 - 0)         | 0<br>(0 - 0)         | 1<br>(0 - 1)               |

Web Table 31- Finland deaths with 95% UI by age, sex, and cause in 2013

| Cause                                               | Females, All Ages        | Females, 0-4 Years | Females, 5-14 Years | Females, 15-49 Years | Females, 50-69 Years | Females, 70-80 Years     |
|-----------------------------------------------------|--------------------------|--------------------|---------------------|----------------------|----------------------|--------------------------|
| Asthma                                              | 76<br>(42 - 113)         | 0<br>(0 - 0)       | 0<br>(0 - 0)        | 3<br>(2 - 3)         | 10<br>(5 - 15)       | 63<br>(34 - 97)          |
| Interstitial lung disease and pulmonary sarcoidosis | 110<br>(53 - 170)        | 0<br>(0 - 0)       | 0<br>(0 - 0)        | 1<br>(1 - 2)         | 16<br>(8 - 26)       | 93<br>(42 - 146)         |
| Other chronic respiratory diseases                  | 6<br>(3 - 8)             | 0<br>(0 - 0)       | 0<br>(0 - 0)        | 0<br>(0 - 1)         | 2<br>(1 - 2)         | 4<br>(2 - 6)             |
| Cirrhosis                                           | 310<br>(266 - 348)       | 0<br>(0 - 0)       | 0<br>(0 - 0)        | 45<br>(37 - 55)      | 171<br>(146 - 198)   | 93<br>(77 - 112)         |
| Cirrhosis due to hepatitis B                        | 38<br>(20 - 68)          | 0<br>(0 - 0)       | 0<br>(0 - 0)        | 5<br>(2 - 8)         | 21<br>(10 - 36)      | 13<br>(6 - 25)           |
| Cirrhosis due to hepatitis C                        | 186<br>(120 - 243)       | 0<br>(0 - 0)       | 0<br>(0 - 0)        | 28<br>(19 - 38)      | 105<br>(66 - 139)    | 53<br>(27 - 74)          |
| Cirrhosis due to alcohol use                        | 49<br>(23 - 87)          | --                 | --                  | 5<br>(2 - 8)         | 25<br>(12 - 44)      | 19<br>(9 - 37)           |
| Cirrhosis due to other causes                       | 36<br>(17 - 63)          | 0<br>(0 - 0)       | 0<br>(0 - 0)        | 8<br>(4 - 13)        | 20<br>(8 - 36)       | 8<br>(3 - 15)            |
| Digestive diseases                                  | 674<br>(559 - 803)       | 0<br>(0 - 0)       | 0<br>(0 - 0)        | 11<br>(8 - 14)       | 74<br>(51 - 91)      | 588<br>(481 - 715)       |
| Peptic ulcer disease                                | 98<br>(68 - 142)         | 0<br>(0 - 0)       | 0<br>(0 - 0)        | 1<br>(1 - 2)         | 13<br>(8 - 18)       | 84<br>(56 - 126)         |
| Gastritis and duodenitis                            | 7<br>(2 - 11)            | 0<br>(0 - 0)       | 0<br>(0 - 0)        | 0<br>(0 - 1)         | 2<br>(1 - 3)         | 5<br>(1 - 8)             |
| Appendicitis                                        | 5<br>(3 - 9)             | 0<br>(0 - 0)       | 0<br>(0 - 0)        | 0<br>(0 - 0)         | 1<br>(1 - 2)         | 4<br>(2 - 7)             |
| Paralytic ileus and intestinal obstruction          | 121<br>(68 - 211)        | 0<br>(0 - 0)       | 0<br>(0 - 0)        | 2<br>(1 - 3)         | 12<br>(6 - 20)       | 107<br>(59 - 187)        |
| Inguinal, femoral, and abdominal hernia             | 19<br>(8 - 32)           | 0<br>(0 - 0)       | 0<br>(0 - 0)        | 0<br>(0 - 0)         | 2<br>(1 - 3)         | 17<br>(6 - 29)           |
| Inflammatory bowel disease                          | 20<br>(12 - 31)          | 0<br>(0 - 0)       | 0<br>(0 - 0)        | 1<br>(0 - 1)         | 3<br>(2 - 4)         | 17<br>(9 - 27)           |
| Vascular intestinal disorders                       | 140<br>(72 - 238)        | 0<br>(0 - 0)       | 0<br>(0 - 0)        | 0<br>(0 - 1)         | 12<br>(6 - 19)       | 128<br>(66 - 222)        |
| Gallbladder and biliary diseases                    | 103<br>(67 - 148)        | 0<br>(0 - 0)       | 0<br>(0 - 0)        | 1<br>(0 - 1)         | 7<br>(4 - 9)         | 96<br>(62 - 140)         |
| Pancreatitis                                        | 44<br>(27 - 63)          | 0<br>(0 - 0)       | 0<br>(0 - 0)        | 5<br>(3 - 6)         | 13<br>(7 - 18)       | 27<br>(15 - 41)          |
| Other digestive diseases                            | 116<br>(76 - 158)        | 0<br>(0 - 0)       | 0<br>(0 - 0)        | 1<br>(0 - 1)         | 10<br>(6 - 14)       | 105<br>(67 - 144)        |
| Neurological disorders                              | 5,207<br>(3,926 - 6,464) | 2<br>(1 - 2)       | 1<br>(1 - 1)        | 23<br>(18 - 29)      | 198<br>(155 - 239)   | 4,983<br>(3,733 - 6,218) |
| Alzheimer disease and other dementias               | 4,729<br>(3,436 - 5,953) | --                 | --                  | 0<br>(0 - 1)         | 91<br>(59 - 124)     | 4,637<br>(3,356 - 5,857) |
| Parkinson disease                                   | 249<br>(125 - 343)       | --                 | --                  | 0<br>(0 - 0)         | 13<br>(8 - 18)       | 236<br>(116 - 328)       |
| Epilepsy                                            | 25<br>(14 - 34)          | 0<br>(0 - 0)       | 0<br>(0 - 1)        | 9<br>(5 - 11)        | 8<br>(4 - 11)        | 8<br>(3 - 14)            |
| Multiple sclerosis                                  | 37<br>(19 - 52)          | --                 | --                  | 7<br>(4 - 10)        | 18<br>(9 - 26)       | 12<br>(7 - 19)           |
| Other neurological disorders                        | 167<br>(141 - 194)       | 1<br>(1 - 2)       | 0<br>(0 - 1)        | 7<br>(6 - 9)         | 68<br>(56 - 81)      | 90<br>(73 - 109)         |
| Mental and substance use disorders                  | 189<br>(124 - 239)       | 0<br>(0 - 0)       | 0<br>(0 - 0)        | 56<br>(40 - 71)      | 95<br>(55 - 128)     | 38<br>(23 - 53)          |
| Schizophrenia                                       | 26<br>(12 - 38)          | --                 | --                  | 1<br>(1 - 2)         | 5<br>(2 - 8)         | 20<br>(8 - 31)           |
| Alcohol use disorders                               | 93<br>(33 - 138)         | --                 | --                  | 26<br>(10 - 42)      | 59<br>(20 - 90)      | 8<br>(2 - 13)            |
| Drug use disorders                                  | 70<br>(58 - 83)          | 0<br>(0 - 0)       | --                  | 28<br>(23 - 36)      | 31<br>(24 - 39)      | 10<br>(7 - 14)           |
| Opioid use disorders                                | 24<br>(20 - 29)          | 0<br>(0 - 0)       | --                  | 10<br>(8 - 13)       | 10<br>(7 - 13)       | 4<br>(3 - 5)             |
| Cocaine use disorders                               | 2<br>(2 - 3)             | 0<br>(0 - 0)       | --                  | 1<br>(1 - 2)         | 1<br>(1 - 2)         | 0<br>(0 - 0)             |
| Amphetamine use disorders                           | 3<br>(2 - 4)             | 0<br>(0 - 0)       | --                  | 1<br>(1 - 2)         | 1<br>(1 - 2)         | 0<br>(0 - 1)             |
| Other drug use disorders                            | 41<br>(33 - 49)          | 0<br>(0 - 0)       | --                  | 16<br>(13 - 20)      | 19<br>(14 - 24)      | 6<br>(4 - 8)             |
| Eating disorders                                    | 1<br>(0 - 1)             | --                 | 0<br>(0 - 0)        | 1<br>(0 - 1)         | --                   | --                       |
| Anorexia nervosa                                    | 1<br>(0 - 1)             | --                 | 0<br>(0 - 0)        | 1<br>(0 - 1)         | --                   | --                       |
| Diabetes, urogenital, blood, and endocrine diseases | 717<br>(590 - 975)       | 2<br>(1 - 3)       | 1<br>(1 - 2)        | 18<br>(15 - 21)      | 74<br>(63 - 92)      | 622<br>(499 - 867)       |
| Diabetes mellitus                                   | 191<br>(154 - 282)       | 0<br>(0 - 0)       | 0<br>(0 - 0)        | 7<br>(6 - 9)         | 28<br>(22 - 38)      | 155<br>(121 - 236)       |
| Acute glomerulonephritis                            | 1<br>(0 - 1)             | 0<br>(0 - 0)       | 0<br>(0 - 0)        | 0<br>(0 - 0)         | 0<br>(0 - 0)         | 0<br>(0 - 1)             |
| Chronic kidney disease                              | 232<br>(153 - 294)       | 0<br>(0 - 0)       | 0<br>(0 - 0)        | 4<br>(3 - 5)         | 19<br>(15 - 25)      | 209<br>(132 - 270)       |
| Chronic kidney disease due to diabetes mellitus     | 50<br>(34 - 68)          | 0<br>(0 - 0)       | 0<br>(0 - 0)        | 2<br>(1 - 2)         | 7<br>(5 - 9)         | 41<br>(26 - 59)          |

Web Table 31- Finland deaths with 95% UI by age, sex, and cause in 2013

| Cause                                               | Females, All Ages      | Females, 0-4 Years | Females, 5-14 Years | Females, 15-49 Years | Females, 50-69 Years | Females, 70-80 Years |
|-----------------------------------------------------|------------------------|--------------------|---------------------|----------------------|----------------------|----------------------|
| Chronic kidney disease due to hypertension          | 61<br>(29 - 92)        | 0<br>(0 - 0)       | 0<br>(0 - 0)        | 0<br>(0 - 0)         | 2<br>(1 - 3)         | 59<br>(28 - 89)      |
| Chronic kidney disease due to glomerulonephritis    | 6<br>(4 - 10)          | 0<br>(0 - 0)       | 0<br>(0 - 0)        | 0<br>(0 - 0)         | 1<br>(1 - 2)         | 5<br>(3 - 8)         |
| Chronic kidney disease due to other causes          | 115<br>(58 - 164)      | 0<br>(0 - 0)       | 0<br>(0 - 0)        | 2<br>(1 - 3)         | 9<br>(6 - 14)        | 104<br>(50 - 153)    |
| Urinary diseases and male infertility               | 237<br>(148 - 467)     | 0<br>(0 - 0)       | 0<br>(0 - 0)        | 2<br>(1 - 3)         | 14<br>(10 - 25)      | 221<br>(135 - 447)   |
| Interstitial nephritis and urinary tract infections | 230<br>(143 - 455)     | 0<br>(0 - 0)       | 0<br>(0 - 0)        | 1<br>(1 - 2)         | 13<br>(9 - 23)       | 215<br>(131 - 435)   |
| Urolithiasis                                        | 3<br>(1 - 6)           | --                 | 0<br>(0 - 0)        | 0<br>(0 - 0)         | 0<br>(0 - 1)         | 2<br>(1 - 5)         |
| Other urinary diseases                              | 5<br>(2 - 9)           | 0<br>(0 - 0)       | 0<br>(0 - 0)        | 0<br>(0 - 0)         | 1<br>(0 - 2)         | 4<br>(1 - 8)         |
| Gynecological diseases                              | 1<br>(1 - 2)           | --                 | --                  | 0<br>(0 - 0)         | 0<br>(0 - 0)         | 0<br>(0 - 1)         |
| Uterine fibroids                                    | 0<br>(0 - 1)           | --                 | --                  | 0<br>(0 - 0)         | 0<br>(0 - 0)         | 0<br>(0 - 0)         |
| Polycystic ovarian syndrome                         | 0<br>(0 - 0)           | --                 | --                  | 0<br>(0 - 0)         | 0<br>(0 - 0)         | --                   |
| Endometriosis                                       | 0<br>(0 - 0)           | --                 | --                  | 0<br>(0 - 0)         | 0<br>(0 - 0)         | --                   |
| Genital prolapse                                    | 0<br>(0 - 0)           | --                 | --                  | 0<br>(0 - 0)         | 0<br>(0 - 0)         | 0<br>(0 - 0)         |
| Other gynecological diseases                        | 0<br>(0 - 1)           | --                 | --                  | 0<br>(0 - 0)         | 0<br>(0 - 0)         | 0<br>(0 - 0)         |
| Hemoglobinopathies and hemolytic anemias            | 8<br>(5 - 13)          | 0<br>(0 - 0)       | 0<br>(0 - 0)        | 0<br>(0 - 1)         | 2<br>(1 - 2)         | 6<br>(3 - 10)        |
| Thalassemias                                        | 0<br>(0 - 0)           | 0<br>(0 - 0)       | 0<br>(0 - 0)        | 0<br>(0 - 0)         | 0<br>(0 - 0)         | 0<br>(0 - 0)         |
| Sickle cell disorders                               | 1<br>(1 - 2)           | 0<br>(0 - 0)       | 0<br>(0 - 0)        | 0<br>(0 - 0)         | 1<br>(0 - 1)         | 0<br>(0 - 0)         |
| G6PD deficiency                                     | 0<br>(0 - 0)           | 0<br>(0 - 0)       | 0<br>(0 - 0)        | 0<br>(0 - 0)         | 0<br>(0 - 0)         | 0<br>(0 - 0)         |
| Other hemoglobinopathies and hemolytic anemias      | 7<br>(4 - 11)          | 0<br>(0 - 0)       | 0<br>(0 - 0)        | 0<br>(0 - 0)         | 1<br>(1 - 2)         | 6<br>(3 - 9)         |
| Endocrine, metabolic, blood, and immune disorders   | 47<br>(31 - 61)        | 1<br>(1 - 2)       | 1<br>(1 - 1)        | 4<br>(2 - 5)         | 11<br>(6 - 14)       | 30<br>(19 - 43)      |
| Musculoskeletal disorders                           | 141<br>(110 - 186)     | --                 | 0<br>(0 - 0)        | 4<br>(3 - 5)         | 29<br>(22 - 45)      | 108<br>(79 - 146)    |
| Rheumatoid arthritis                                | 82<br>(60 - 112)       | --                 | 0<br>(0 - 0)        | 1<br>(1 - 2)         | 17<br>(13 - 28)      | 63<br>(42 - 90)      |
| Other musculoskeletal disorders                     | 59<br>(42 - 87)        | --                 | 0<br>(0 - 0)        | 2<br>(2 - 3)         | 12<br>(9 - 17)       | 45<br>(29 - 70)      |
| Other non-communicable diseases                     | 126<br>(104 - 149)     | 37<br>(27 - 49)    | 4<br>(3 - 5)        | 16<br>(13 - 21)      | 23<br>(17 - 28)      | 47<br>(31 - 63)      |
| Congenital anomalies                                | 85<br>(70 - 103)       | 31<br>(23 - 42)    | 4<br>(3 - 5)        | 16<br>(12 - 20)      | 19<br>(14 - 25)      | 15<br>(11 - 20)      |
| Neural tube defects                                 | 1<br>(1 - 1)           | 0<br>(0 - 1)       | 0<br>(0 - 0)        | 0<br>(0 - 0)         | 0<br>(0 - 0)         | 0<br>(0 - 0)         |
| Congenital heart anomalies                          | 28<br>(22 - 35)        | 11<br>(7 - 15)     | 2<br>(1 - 2)        | 7<br>(5 - 9)         | 4<br>(3 - 6)         | 4<br>(3 - 6)         |
| Cleft lip and cleft palate                          | 0<br>(0 - 0)           | 0<br>(0 - 0)       | --                  | --                   | --                   | --                   |
| Down syndrome                                       | 11<br>(7 - 16)         | 0<br>(0 - 1)       | 0<br>(0 - 0)        | 2<br>(1 - 3)         | 8<br>(5 - 12)        | 0<br>(0 - 0)         |
| Chromosomal unbalanced rearrangements               | 8<br>(5 - 12)          | 6<br>(4 - 10)      | 0<br>(0 - 1)        | 1<br>(0 - 1)         | 0<br>(0 - 1)         | 0<br>(0 - 0)         |
| Other congenital anomalies                          | 38<br>(29 - 47)        | 14<br>(9 - 19)     | 2<br>(1 - 3)        | 6<br>(4 - 8)         | 6<br>(4 - 9)         | 10<br>(7 - 14)       |
| Skin and subcutaneous diseases                      | 36<br>(19 - 51)        | 0<br>(0 - 0)       | 0<br>(0 - 0)        | 0<br>(0 - 1)         | 4<br>(2 - 5)         | 32<br>(17 - 46)      |
| Cellulitis                                          | 3<br>(1 - 5)           | 0<br>(0 - 0)       | 0<br>(0 - 0)        | 0<br>(0 - 0)         | 0<br>(0 - 1)         | 2<br>(1 - 5)         |
| Pyoderma                                            | 28<br>(14 - 40)        | 0<br>(0 - 0)       | 0<br>(0 - 0)        | 0<br>(0 - 0)         | 3<br>(1 - 4)         | 25<br>(12 - 37)      |
| Decubitus ulcer                                     | 3<br>(2 - 6)           | 0<br>(0 - 0)       | 0<br>(0 - 0)        | 0<br>(0 - 0)         | 0<br>(0 - 1)         | 3<br>(1 - 5)         |
| Other skin and subcutaneous diseases                | 2<br>(1 - 5)           | 0<br>(0 - 0)       | 0<br>(0 - 0)        | 0<br>(0 - 0)         | 0<br>(0 - 0)         | 2<br>(0 - 5)         |
| Sudden infant death syndrome                        | 5<br>(2 - 10)          | 5<br>(2 - 10)      | --                  | --                   | --                   | --                   |
| Injuries                                            | 1,093<br>(895 - 1,363) | 6<br>(4 - 8)       | 8<br>(6 - 10)       | 183<br>(158 - 224)   | 207<br>(173 - 271)   | 690<br>(504 - 912)   |
| Transport injuries                                  | 101<br>(84 - 161)      | 1<br>(1 - 2)       | 4<br>(3 - 6)        | 33<br>(26 - 47)      | 27<br>(21 - 47)      | 36<br>(27 - 60)      |
| Road injuries                                       | 95<br>(78 - 152)       | 1<br>(1 - 2)       | 4<br>(3 - 6)        | 30<br>(24 - 43)      | 25<br>(19 - 43)      | 35<br>(26 - 57)      |
| Pedestrian road injuries                            | 22<br>(15 - 42)        | 0<br>(0 - 0)       | 1<br>(1 - 2)        | 3<br>(2 - 5)         | 5<br>(3 - 9)         | 14<br>(8 - 26)       |

Web Table 31- Finland deaths with 95% UI by age, sex, and cause in 2013

| Cause                                           | Females, All Ages  | Females, 0-4 Years | Females, 5-14 Years | Females, 15-49 Years | Females, 50-69 Years | Females, 70-80 Years |
|-------------------------------------------------|--------------------|--------------------|---------------------|----------------------|----------------------|----------------------|
| Cyclist road injuries                           | 13<br>(9 - 23)     | 0<br>(0 - 0)       | 1<br>(0 - 1)        | 2<br>(1 - 2)         | 4<br>(3 - 8)         | 6<br>(4 - 12)        |
| Motorcyclist road injuries                      | 3<br>(1 - 5)       | 0<br>(0 - 0)       | 0<br>(0 - 0)        | 2<br>(1 - 4)         | 0<br>(0 - 1)         | 0<br>(0 - 1)         |
| Motor vehicle road injuries                     | 55<br>(44 - 86)    | 1<br>(1 - 1)       | 2<br>(1 - 2)        | 23<br>(18 - 33)      | 16<br>(11 - 26)      | 14<br>(9 - 23)       |
| Other road injuries                             | 1<br>(1 - 2)       | 0<br>(0 - 0)       | 0<br>(0 - 1)        | 1<br>(0 - 1)         | 0<br>(0 - 0)         | 0<br>(0 - 0)         |
| Other transport injuries                        | 6<br>(4 - 11)      | 0<br>(0 - 0)       | 0<br>(0 - 1)        | 2<br>(1 - 4)         | 2<br>(1 - 4)         | 1<br>(1 - 3)         |
| Unintentional injuries                          | 730<br>(540 - 948) | 4<br>(3 - 5)       | 2<br>(2 - 3)        | 28<br>(24 - 34)      | 80<br>(63 - 95)      | 616<br>(431 - 834)   |
| Falls                                           | 601<br>(417 - 825) | 0<br>(0 - 0)       | 0<br>(0 - 0)        | 7<br>(5 - 9)         | 39<br>(26 - 50)      | 555<br>(378 - 777)   |
| Drowning                                        | 23<br>(16 - 33)    | 1<br>(1 - 3)       | 1<br>(1 - 2)        | 6<br>(4 - 9)         | 9<br>(6 - 12)        | 6<br>(4 - 8)         |
| Fire, heat, and hot substances                  | 21<br>(14 - 27)    | 0<br>(0 - 1)       | 0<br>(0 - 1)        | 4<br>(3 - 5)         | 6<br>(4 - 8)         | 10<br>(6 - 14)       |
| Poisonings                                      | 11<br>(8 - 18)     | 0<br>(0 - 0)       | 0<br>(0 - 0)        | 4<br>(3 - 6)         | 4<br>(3 - 8)         | 3<br>(2 - 5)         |
| Exposure to mechanical forces                   | 7<br>(5 - 10)      | 1<br>(0 - 1)       | 0<br>(0 - 1)        | 1<br>(1 - 2)         | 2<br>(1 - 2)         | 3<br>(2 - 5)         |
| Unintentional firearm injuries                  | 0<br>(0 - 0)       | 0<br>(0 - 0)       | 0<br>(0 - 0)        | 0<br>(0 - 0)         | 0<br>(0 - 0)         | 0<br>(0 - 0)         |
| Unintentional suffocation                       | 2<br>(2 - 5)       | 0<br>(0 - 1)       | 0<br>(0 - 0)        | 0<br>(0 - 0)         | 1<br>(0 - 1)         | 1<br>(1 - 2)         |
| Other exposure to mechanical forces             | 4<br>(3 - 6)       | 0<br>(0 - 0)       | 0<br>(0 - 0)        | 1<br>(1 - 1)         | 1<br>(1 - 1)         | 2<br>(1 - 3)         |
| Adverse effects of medical treatment            | 14<br>(4 - 23)     | 0<br>(0 - 0)       | 0<br>(0 - 0)        | 1<br>(1 - 2)         | 3<br>(1 - 5)         | 10<br>(2 - 18)       |
| Animal contact                                  | 1<br>(1 - 4)       | 0<br>(0 - 0)       | 0<br>(0 - 0)        | 0<br>(0 - 1)         | 0<br>(0 - 1)         | 1<br>(0 - 2)         |
| Venomous animal contact                         | 0<br>(0 - 1)       | 0<br>(0 - 0)       | 0<br>(0 - 0)        | 0<br>(0 - 0)         | 0<br>(0 - 0)         | 0<br>(0 - 0)         |
| Non-venomous animal contact                     | 1<br>(1 - 3)       | 0<br>(0 - 0)       | 0<br>(0 - 0)        | 0<br>(0 - 1)         | 0<br>(0 - 1)         | 0<br>(0 - 1)         |
| Foreign body                                    | 41<br>(27 - 63)    | 1<br>(0 - 1)       | 0<br>(0 - 0)        | 4<br>(2 - 6)         | 14<br>(9 - 23)       | 23<br>(14 - 37)      |
| Pulmonary aspiration and foreign body in airway | 40<br>(25 - 62)    | 1<br>(0 - 1)       | 0<br>(0 - 0)        | 4<br>(2 - 6)         | 14<br>(9 - 22)       | 22<br>(13 - 36)      |
| Foreign body in other body part                 | 1<br>(1 - 2)       | 0<br>(0 - 0)       | 0<br>(0 - 0)        | 0<br>(0 - 0)         | 0<br>(0 - 0)         | 1<br>(0 - 2)         |
| Other unintentional injuries                    | 10<br>(4 - 15)     | 0<br>(0 - 0)       | 0<br>(0 - 0)        | 1<br>(1 - 2)         | 3<br>(1 - 4)         | 6<br>(2 - 9)         |
| Self-harm and interpersonal violence            | 262<br>(222 - 361) | 1<br>(1 - 2)       | 1<br>(1 - 2)        | 122<br>(104 - 159)   | 100<br>(80 - 152)    | 38<br>(30 - 55)      |
| Self-harm                                       | 232<br>(195 - 333) | --                 | 1<br>(0 - 1)        | 105<br>(88 - 139)    | 92<br>(72 - 140)     | 35<br>(27 - 51)      |
| Interpersonal violence                          | 30<br>(23 - 45)    | 1<br>(1 - 2)       | 1<br>(1 - 1)        | 16<br>(12 - 25)      | 8<br>(6 - 13)        | 3<br>(2 - 5)         |
| Assault by firearm                              | 8<br>(5 - 13)      | 0<br>(0 - 0)       | 0<br>(0 - 1)        | 4<br>(2 - 7)         | 2<br>(1 - 5)         | 1<br>(0 - 2)         |
| Assault by sharp object                         | 10<br>(7 - 17)     | 0<br>(0 - 0)       | 0<br>(0 - 0)        | 6<br>(4 - 11)        | 3<br>(2 - 5)         | 1<br>(0 - 1)         |
| Assault by other means                          | 12<br>(8 - 18)     | 1<br>(0 - 1)       | 0<br>(0 - 1)        | 6<br>(4 - 9)         | 3<br>(2 - 5)         | 2<br>(1 - 3)         |

Web Table 31- France deaths with 95% UI by age, sex, and cause in 2013

| Cause                                                              | Both Sexes, All Ages           | Both Sexes, 0-4 Years    | Both Sexes, 5-14 Years | Both Sexes, 15-49 Years     | Both Sexes, 50-69 Years        | Both Sexes, 70-80 Years        |
|--------------------------------------------------------------------|--------------------------------|--------------------------|------------------------|-----------------------------|--------------------------------|--------------------------------|
| All causes                                                         | 591,904<br>(574,048 - 611,581) | 2,967<br>(2,420 - 3,654) | 698<br>(620 - 791)     | 29,617<br>(28,180 - 31,145) | 105,986<br>(101,337 - 110,985) | 452,636<br>(439,795 - 466,110) |
| Communicable, maternal, neonatal, and nutritional diseases         | 35,988<br>(30,204 - 42,023)    | 1,236<br>(960 - 1,567)   | 49<br>(36 - 67)        | 1,251<br>(1,038 - 1,521)    | 2,769<br>(2,316 - 3,248)       | 30,683<br>(25,278 - 36,567)    |
| HIV/AIDS and tuberculosis                                          | 2,487<br>(1,997 - 3,136)       | 2<br>(1 - 4)             | 1<br>(1 - 1)           | 602<br>(417 - 889)          | 568<br>(333 - 873)             | 1,314<br>(1,046 - 1,659)       |
| Tuberculosis                                                       | 1,419<br>(1,151 - 1,762)       | 1<br>(1 - 2)             | 1<br>(0 - 1)           | 39<br>(33 - 49)             | 138<br>(114 - 203)             | 1,240<br>(978 - 1,560)         |
| HIV/AIDS                                                           | 1,068<br>(658 - 1,636)         | 1<br>(0 - 3)             | 0<br>(0 - 1)           | 563<br>(378 - 846)          | 430<br>(201 - 739)             | 74<br>(15 - 156)               |
| HIV/AIDS resulting in mycobacterial infection                      | 58<br>(34 - 93)                | 0<br>(0 - 0)             | 0<br>(0 - 0)           | 29<br>(19 - 45)             | 24<br>(11 - 43)                | 5<br>(1 - 10)                  |
| HIV/AIDS resulting in other diseases                               | 1,010<br>(622 - 1,551)         | 1<br>(0 - 3)             | 0<br>(0 - 1)           | 533<br>(359 - 804)          | 406<br>(189 - 700)             | 69<br>(14 - 146)               |
| Diarrrhea, lower respiratory, and other common infectious diseases | 26,290<br>(21,013 - 32,122)    | 147<br>(104 - 194)       | 39<br>(26 - 57)        | 444<br>(367 - 530)          | 1,756<br>(1,350 - 2,119)       | 23,904<br>(18,825 - 29,675)    |
| Diarrrheal diseases                                                | 2,598<br>(1,778 - 3,716)       | 34<br>(22 - 51)          | 3<br>(2 - 4)           | 42<br>(34 - 52)             | 150<br>(119 - 188)             | 2,370<br>(1,564 - 3,470)       |
| Intestinal infectious diseases                                     | 77<br>(28 - 164)               | 12<br>(4 - 26)           | 13<br>(4 - 30)         | 28<br>(8 - 70)              | 11<br>(3 - 26)                 | 13<br>(4 - 29)                 |
| Typhoid fever                                                      | 57<br>(18 - 128)               | 8<br>(3 - 18)            | 10<br>(3 - 23)         | 22<br>(5 - 54)              | 8<br>(2 - 20)                  | 9<br>(3 - 23)                  |
| Paratyphoid fever                                                  | 14<br>(4 - 32)                 | 3<br>(1 - 6)             | 3<br>(1 - 7)           | 5<br>(1 - 13)               | 2<br>(0 - 4)                   | 2<br>(0 - 4)                   |
| Other intestinal infectious diseases                               | 7<br>(2 - 13)                  | 1<br>(0 - 5)             | 0<br>(0 - 2)           | 1<br>(0 - 5)                | 1<br>(0 - 5)                   | 2<br>(0 - 6)                   |
| Lower respiratory infections                                       | 22,954<br>(17,912 - 28,855)    | 50<br>(33 - 70)          | 11<br>(8 - 15)         | 297<br>(230 - 363)          | 1,464<br>(1,081 - 1,810)       | 21,132<br>(16,375 - 26,868)    |
| Upper respiratory infections                                       | 13<br>(4 - 37)                 | 0<br>(0 - 0)             | 0<br>(0 - 0)           | 1<br>(0 - 2)                | 2<br>(1 - 6)                   | 9<br>(1 - 33)                  |
| Otitis media                                                       | 20<br>(16 - 26)                | 2<br>(1 - 3)             | 1<br>(1 - 1)           | 3<br>(2 - 3)                | 3<br>(2 - 3)                   | 12<br>(8 - 17)                 |
| Meningitis                                                         | 300<br>(262 - 348)             | 31<br>(21 - 42)          | 4<br>(3 - 5)           | 29<br>(25 - 34)             | 63<br>(53 - 74)                | 173<br>(142 - 215)             |
| Pneumococcal meningitis                                            | 46<br>(33 - 62)                | 2<br>(1 - 4)             | 0<br>(0 - 1)           | 4<br>(2 - 5)                | 10<br>(6 - 16)                 | 29<br>(19 - 44)                |
| H influenzae type B meningitis                                     | 37<br>(27 - 48)                | 8<br>(4 - 13)            | 1<br>(0 - 1)           | 3<br>(2 - 5)                | 7<br>(4 - 10)                  | 18<br>(10 - 27)                |
| Meningococcal meningitis                                           | 70<br>(48 - 98)                | 5<br>(3 - 8)             | 1<br>(0 - 1)           | 8<br>(5 - 11)               | 14<br>(7 - 21)                 | 43<br>(24 - 66)                |
| Other meningitis                                                   | 147<br>(120 - 178)             | 15<br>(10 - 22)          | 2<br>(1 - 3)           | 14<br>(11 - 18)             | 32<br>(24 - 41)                | 83<br>(62 - 111)               |
| Encephalitis                                                       | 236<br>(164 - 320)             | 11<br>(7 - 17)           | 5<br>(3 - 8)           | 34<br>(22 - 48)             | 55<br>(37 - 76)                | 130<br>(83 - 194)              |
| Diphtheria                                                         | 1<br>(0 - 3)                   | 0<br>(0 - 1)             | 0<br>(0 - 1)           | 0<br>(0 - 1)                | 0<br>(0 - 1)                   | --                             |
| Whooping cough                                                     | 6<br>(4 - 12)                  | 2<br>(1 - 7)             | 1<br>(0 - 1)           | 3<br>(2 - 3)                | 1<br>(1 - 1)                   | --                             |
| Tetanus                                                            | 15<br>(10 - 34)                | 0<br>(0 - 1)             | 1<br>(0 - 1)           | 2<br>(1 - 3)                | 3<br>(2 - 5)                   | 9<br>(4 - 28)                  |
| Measles                                                            | 1<br>(0 - 1)                   | 1<br>(0 - 1)             | 0<br>(0 - 0)           | 0<br>(0 - 0)                | 0<br>(0 - 0)                   | --                             |
| Varicella and herpes zoster                                        | 70<br>(14 - 244)               | 3<br>(0 - 9)             | 1<br>(0 - 3)           | 5<br>(1 - 10)               | 5<br>(1 - 14)                  | 56<br>(4 - 228)                |
| Neglected tropical diseases and malaria                            | 66<br>(39 - 79)                | 2<br>(1 - 3)             | 2<br>(1 - 3)           | 12<br>(8 - 13)              | 18<br>(11 - 23)                | 32<br>(19 - 42)                |
| Leishmaniasis                                                      | 1<br>(1 - 1)                   | 0<br>(0 - 0)             | 0<br>(0 - 0)           | 0<br>(0 - 0)                | 0<br>(0 - 0)                   | 0<br>(0 - 0)                   |
| Visceral leishmaniasis                                             | 1<br>(1 - 1)                   | 0<br>(0 - 0)             | 0<br>(0 - 0)           | 0<br>(0 - 0)                | 0<br>(0 - 0)                   | 0<br>(0 - 0)                   |
| Cysticercosis                                                      | 1<br>(1 - 1)                   | 0<br>(0 - 0)             | 0<br>(0 - 0)           | 0<br>(0 - 0)                | 0<br>(0 - 0)                   | 0<br>(0 - 0)                   |
| Cystic echinococcosis                                              | 6<br>(5 - 6)                   | 0<br>(0 - 0)             | 0<br>(0 - 0)           | 1<br>(1 - 1)                | 2<br>(2 - 2)                   | 3<br>(2 - 3)                   |
| Dengue                                                             | 6<br>(4 - 7)                   | 0<br>(0 - 1)             | 1<br>(0 - 1)           | 3<br>(2 - 3)                | 2<br>(1 - 2)                   | 1<br>(1 - 1)                   |
| Rabies                                                             | 5<br>(3 - 7)                   | 0<br>(0 - 0)             | 1<br>(0 - 1)           | 2<br>(1 - 3)                | 1<br>(1 - 2)                   | 1<br>(0 - 1)                   |
| Other neglected tropical diseases                                  | 47<br>(24 - 59)                | 1<br>(1 - 2)             | 1<br>(0 - 1)           | 5<br>(3 - 6)                | 13<br>(7 - 17)                 | 27<br>(14 - 37)                |
| Maternal disorders                                                 | 70<br>(55 - 88)                | --                       | 0<br>(0 - 0)           | 70<br>(55 - 87)             | --                             | --                             |
| Maternal hemorrhage                                                | 10<br>(7 - 13)                 | --                       | 0<br>(0 - 0)           | 10<br>(7 - 13)              | --                             | --                             |
| Maternal sepsis and other maternal infections                      | 4<br>(2 - 6)                   | --                       | 0<br>(0 - 0)           | 4<br>(2 - 6)                | --                             | --                             |
| Maternal hypertensive disorders                                    | 7<br>(4 - 10)                  | --                       | 0<br>(0 - 0)           | 7<br>(4 - 10)               | --                             | --                             |
| Maternal obstructed labor                                          | 5<br>(3 - 7)                   | --                       | 0<br>(0 - 0)           | 5<br>(3 - 7)                | --                             | --                             |



Web Table 31- France deaths with 95% UI by age, sex, and cause in 2013

| Cause                                                            | Both Sexes, All Ages           | Both Sexes, 0-4 Years    | Both Sexes, 5-14 Years | Both Sexes, 15-49 Years     | Both Sexes, 50-69 Years     | Both Sexes, 70-80 Years        |
|------------------------------------------------------------------|--------------------------------|--------------------------|------------------------|-----------------------------|-----------------------------|--------------------------------|
| Maternal abortive outcome                                        | 9<br>(6 - 12)                  | --                       | 0<br>(0 - 0)           | 9<br>(6 - 12)               | --                          | --                             |
| Indirect maternal deaths                                         | 12<br>(8 - 16)                 | --                       | 0<br>(0 - 0)           | 12<br>(8 - 16)              | --                          | --                             |
| Late maternal deaths                                             | 8<br>(5 - 11)                  | --                       | 0<br>(0 - 0)           | 7<br>(5 - 11)               | --                          | --                             |
| Maternal deaths aggravated by HIV/AIDS                           | 0<br>(0 - 0)                   | --                       | --                     | 0<br>(0 - 0)                | --                          | --                             |
| Other maternal disorders                                         | 16<br>(12 - 20)                | --                       | 0<br>(0 - 0)           | 16<br>(12 - 20)             | --                          | --                             |
| Neonatal disorders                                               | 1,057<br>(823 - 1,353)         | 1,057<br>(823 - 1,353)   | --                     | --                          | --                          | --                             |
| Neonatal preterm birth complications                             | 335<br>(234 - 474)             | 335<br>(234 - 474)       | --                     | --                          | --                          | --                             |
| Neonatal encephalopathy due to birth asphyxia and trauma         | 318<br>(225 - 425)             | 318<br>(225 - 425)       | --                     | --                          | --                          | --                             |
| Neonatal sepsis and other neonatal infections                    | 111<br>(59 - 211)              | 111<br>(59 - 211)        | --                     | --                          | --                          | --                             |
| Hemolytic disease and other neonatal jaundice                    | 6<br>(3 - 12)                  | 6<br>(3 - 12)            | --                     | --                          | --                          | --                             |
| Other neonatal disorders                                         | 288<br>(131 - 423)             | 288<br>(131 - 423)       | --                     | --                          | --                          | --                             |
| Nutritional deficiencies                                         | 4,886<br>(3,600 - 6,297)       | 3<br>(2 - 5)             | 1<br>(1 - 2)           | 50<br>(37 - 67)             | 170<br>(122 - 214)          | 4,661<br>(3,387 - 6,053)       |
| Protein-energy malnutrition                                      | 3,185<br>(2,082 - 4,358)       | 1<br>(1 - 2)             | 0<br>(0 - 1)           | 17<br>(10 - 26)             | 93<br>(56 - 125)            | 3,073<br>(2,023 - 4,247)       |
| Iodine deficiency                                                | 4<br>(0 - 21)                  | 0<br>(0 - 0)             | 0<br>(0 - 0)           | 0<br>(0 - 1)                | 1<br>(0 - 3)                | 3<br>(0 - 20)                  |
| Iron-deficiency anemia                                           | 1,535<br>(841 - 2,495)         | 1<br>(0 - 2)             | 0<br>(0 - 1)           | 26<br>(16 - 37)             | 61<br>(37 - 93)             | 1,447<br>(772 - 2,381)         |
| Other nutritional deficiencies                                   | 162<br>(83 - 274)              | 1<br>(0 - 1)             | 1<br>(0 - 1)           | 7<br>(4 - 11)               | 15<br>(8 - 25)              | 138<br>(66 - 248)              |
| Other communicable, maternal, neonatal, and nutritional diseases | 1,131<br>(803 - 1,364)         | 24<br>(15 - 35)          | 5<br>(4 - 7)           | 73<br>(55 - 87)             | 256<br>(179 - 312)          | 772<br>(522 - 966)             |
| Sexually transmitted diseases excluding HIV                      | 43<br>(29 - 59)                | 5<br>(0 - 14)            | 1<br>(0 - 1)           | 3<br>(2 - 4)                | 5<br>(4 - 8)                | 29<br>(18 - 43)                |
| Syphilis                                                         | 33<br>(22 - 47)                | 5<br>(0 - 14)            | 0<br>(0 - 1)           | 1<br>(1 - 2)                | 3<br>(2 - 5)                | 23<br>(15 - 34)                |
| Chlamydial infection                                             | 2<br>(2 - 3)                   | --                       | 0<br>(0 - 0)           | 0<br>(0 - 1)                | 0<br>(0 - 1)                | 1<br>(1 - 2)                   |
| Gonococcal infection                                             | 5<br>(4 - 6)                   | --                       | 0<br>(0 - 0)           | 1<br>(0 - 1)                | 1<br>(1 - 1)                | 3<br>(2 - 5)                   |
| Other sexually transmitted diseases                              | 3<br>(2 - 3)                   | --                       | 0<br>(0 - 0)           | 1<br>(0 - 1)                | 1<br>(0 - 1)                | 1<br>(1 - 2)                   |
| Hepatitis                                                        | 76<br>(61 - 95)                | 1<br>(0 - 1)             | 1<br>(1 - 1)           | 12<br>(10 - 16)             | 19<br>(14 - 24)             | 43<br>(30 - 61)                |
| Acute hepatitis A                                                | 16<br>(5 - 29)                 | 0<br>(0 - 1)             | 1<br>(0 - 1)           | 5<br>(2 - 8)                | 4<br>(1 - 8)                | 6<br>(2 - 15)                  |
| Acute hepatitis B                                                | 52<br>(35 - 72)                | 0<br>(0 - 0)             | 0<br>(0 - 0)           | 7<br>(4 - 10)               | 13<br>(8 - 19)              | 32<br>(20 - 48)                |
| Acute hepatitis C                                                | 8<br>(1 - 18)                  | --                       | 0<br>(0 - 0)           | 1<br>(0 - 3)                | 2<br>(0 - 4)                | 5<br>(1 - 12)                  |
| Other infectious diseases                                        | 1,012<br>(695 - 1,253)         | 18<br>(12 - 25)          | 4<br>(3 - 6)           | 57<br>(40 - 72)             | 233<br>(153 - 287)          | 700<br>(451 - 905)             |
| Non-communicable diseases                                        | 507,760<br>(490,159 - 526,788) | 1,430<br>(1,130 - 1,798) | 401<br>(351 - 463)     | 18,521<br>(17,455 - 19,695) | 94,328<br>(90,081 - 98,888) | 393,081<br>(379,249 - 407,346) |
| Neoplasms                                                        | 181,890<br>(170,086 - 192,066) | 117<br>(86 - 158)        | 216<br>(182 - 259)     | 9,224<br>(8,562 - 9,966)    | 57,607<br>(54,503 - 60,955) | 114,726<br>(104,474 - 122,652) |
| Esophageal cancer                                                | 4,913<br>(4,205 - 7,155)       | --                       | --                     | 256<br>(179 - 500)          | 2,262<br>(1,818 - 3,616)    | 2,395<br>(2,036 - 3,130)       |
| Stomach cancer                                                   | 7,896<br>(6,622 - 9,349)       | --                       | --                     | 268<br>(225 - 320)          | 1,718<br>(1,494 - 1,943)    | 5,910<br>(4,797 - 7,258)       |
| Liver cancer                                                     | 8,747<br>(6,621 - 11,038)      | --                       | 3<br>(2 - 4)           | 306<br>(226 - 406)          | 3,299<br>(2,503 - 4,466)    | 5,139<br>(3,555 - 6,726)       |
| Liver cancer due to hepatitis B                                  | 1,980<br>(1,112 - 3,118)       | --                       | 1<br>(0 - 2)           | 125<br>(74 - 195)           | 1,000<br>(466 - 1,609)      | 854<br>(466 - 1,369)           |
| Liver cancer due to hepatitis C                                  | 4,279<br>(2,555 - 5,929)       | --                       | 1<br>(0 - 1)           | 115<br>(45 - 193)           | 1,485<br>(755 - 2,342)      | 2,678<br>(1,506 - 3,831)       |
| Liver cancer due to alcohol use                                  | 2,126<br>(1,218 - 3,230)       | --                       | --                     | 47<br>(21 - 93)             | 693<br>(342 - 1,320)        | 1,387<br>(779 - 2,241)         |
| Liver cancer due to other causes                                 | 361<br>(176 - 621)             | --                       | 1<br>(0 - 1)           | 19<br>(10 - 32)             | 121<br>(56 - 211)           | 220<br>(90 - 422)              |
| Larynx cancer                                                    | 1,681<br>(1,366 - 2,595)       | --                       | --                     | 116<br>(79 - 215)           | 836<br>(650 - 1,351)        | 728<br>(571 - 1,049)           |
| Tracheal, bronchus and lung cancer                               | 36,412<br>(31,100 - 40,334)    | --                       | --                     | 1,980<br>(1,577 - 2,328)    | 16,795<br>(14,393 - 18,810) | 17,638<br>(14,767 - 19,920)    |
| Breast cancer                                                    | 13,668<br>(9,808 - 16,111)     | --                       | --                     | 1,281<br>(1,062 - 1,559)    | 4,672<br>(3,920 - 5,559)    | 7,715<br>(4,766 - 9,719)       |
| Cervical cancer                                                  | 1,952<br>(1,562 - 2,420)       | --                       | --                     | 281<br>(216 - 353)          | 604<br>(491 - 774)          | 1,067<br>(772 - 1,459)         |

Web Table 31- France deaths with 95% UI by age, sex, and cause in 2013

| Cause                                         | Both Sexes, All Ages           | Both Sexes, 0-4 Years | Both Sexes, 5-14 Years | Both Sexes, 15-49 Years  | Both Sexes, 50-69 Years     | Both Sexes, 70-80 Years        |
|-----------------------------------------------|--------------------------------|-----------------------|------------------------|--------------------------|-----------------------------|--------------------------------|
| Uterine cancer                                | 1,667<br>(1,181 - 2,109)       | --                    | --                     | 24<br>(17 - 34)          | 434<br>(334 - 561)          | 1,209<br>(784 - 1,631)         |
| Prostate cancer                               | 13,948<br>(10,574 - 21,151)    | --                    | --                     | 21<br>(13 - 31)          | 1,588<br>(1,175 - 2,353)    | 12,340<br>(9,018 - 19,081)     |
| Colon and rectum cancer                       | 23,228<br>(20,362 - 26,381)    | --                    | --                     | 591<br>(516 - 669)       | 5,201<br>(4,692 - 5,708)    | 17,436<br>(14,786 - 20,429)    |
| Lip and oral cavity cancer                    | 2,444<br>(2,154 - 2,796)       | --                    | --                     | 220<br>(169 - 294)       | 1,208<br>(1,021 - 1,428)    | 1,016<br>(830 - 1,217)         |
| Nasopharynx cancer                            | 373<br>(278 - 704)             | --                    | 1<br>(0 - 2)           | 63<br>(40 - 135)         | 208<br>(143 - 408)          | 100<br>(69 - 173)              |
| Other pharynx cancer                          | 2,240<br>(1,879 - 3,189)       | --                    | --                     | 212<br>(151 - 375)       | 1,376<br>(1,098 - 2,026)    | 652<br>(507 - 868)             |
| Gallbladder and biliary tract cancer          | 2,342<br>(1,809 - 3,613)       | --                    | --                     | 37<br>(27 - 62)          | 453<br>(341 - 778)          | 1,851<br>(1,380 - 2,773)       |
| Pancreatic cancer                             | 10,987<br>(9,777 - 12,111)     | --                    | --                     | 368<br>(312 - 431)       | 3,538<br>(3,120 - 3,930)    | 7,082<br>(6,168 - 8,117)       |
| Malignant skin melanoma                       | 2,057<br>(1,233 - 2,632)       | --                    | --                     | 323<br>(200 - 427)       | 703<br>(417 - 917)          | 1,032<br>(613 - 1,378)         |
| Non-melanoma skin cancer                      | 901<br>(659 - 1,218)           | --                    | --                     | 18<br>(13 - 25)          | 91<br>(65 - 130)            | 792<br>(570 - 1,065)           |
| Ovarian cancer                                | 4,341<br>(3,493 - 5,280)       | --                    | --                     | 220<br>(175 - 301)       | 1,500<br>(1,251 - 1,801)    | 2,621<br>(1,823 - 3,497)       |
| Testicular cancer                             | 109<br>(73 - 144)              | --                    | --                     | 59<br>(38 - 81)          | 23<br>(15 - 33)             | 26<br>(17 - 39)                |
| Kidney cancer                                 | 4,384<br>(3,614 - 5,265)       | 4<br>(2 - 6)          | 4<br>(3 - 6)           | 168<br>(134 - 210)       | 1,429<br>(1,179 - 1,695)    | 2,779<br>(2,103 - 3,603)       |
| Bladder cancer                                | 6,012<br>(4,513 - 7,165)       | --                    | --                     | 75<br>(59 - 94)          | 1,193<br>(957 - 1,395)      | 4,743<br>(3,493 - 5,868)       |
| Brain and nervous system cancer               | 3,567<br>(2,767 - 4,133)       | 26<br>(15 - 42)       | 62<br>(45 - 79)        | 564<br>(452 - 660)       | 1,605<br>(1,282 - 1,877)    | 1,310<br>(866 - 1,657)         |
| Thyroid cancer                                | 546<br>(441 - 736)             | --                    | 0<br>(0 - 1)           | 27<br>(20 - 37)          | 142<br>(112 - 200)          | 376<br>(285 - 504)             |
| Mesothelioma                                  | 1,449<br>(1,085 - 2,152)       | --                    | --                     | 46<br>(30 - 80)          | 492<br>(357 - 785)          | 911<br>(624 - 1,418)           |
| Hodgkin lymphoma                              | 319<br>(220 - 384)             | 0<br>(0 - 1)          | 2<br>(1 - 3)           | 85<br>(61 - 110)         | 84<br>(62 - 109)            | 148<br>(92 - 192)              |
| Non-Hodgkin lymphoma                          | 5,971<br>(3,363 - 7,637)       | 6<br>(3 - 10)         | 15<br>(8 - 24)         | 328<br>(193 - 443)       | 1,518<br>(848 - 1,871)      | 4,104<br>(2,077 - 5,585)       |
| Multiple myeloma                              | 3,475<br>(2,462 - 4,909)       | --                    | --                     | 78<br>(54 - 119)         | 881<br>(637 - 1,318)        | 2,517<br>(1,697 - 3,606)       |
| Leukemia                                      | 6,472<br>(5,525 - 7,284)       | 28<br>(17 - 44)       | 53<br>(41 - 68)        | 396<br>(348 - 446)       | 1,276<br>(1,120 - 1,436)    | 4,719<br>(3,837 - 5,497)       |
| Other neoplasms                               | 9,788<br>(8,283 - 12,338)      | 53<br>(37 - 76)       | 76<br>(59 - 100)       | 814<br>(669 - 1,063)     | 2,478<br>(1,936 - 3,488)    | 6,367<br>(4,780 - 8,110)       |
| Cardiovascular diseases                       | 179,134<br>(166,270 - 198,085) | 45<br>(33 - 58)       | 28<br>(23 - 35)        | 3,289<br>(2,871 - 3,652) | 18,083<br>(16,544 - 19,725) | 157,689<br>(144,865 - 175,071) |
| Rheumatic heart disease                       | 1,918<br>(1,023 - 2,477)       | 1<br>(0 - 1)          | 2<br>(1 - 2)           | 59<br>(36 - 75)          | 268<br>(181 - 335)          | 1,589<br>(782 - 2,128)         |
| Ischemic heart disease                        | 83,779<br>(73,813 - 100,849)   | 2<br>(1 - 3)          | 4<br>(3 - 5)           | 1,676<br>(1,390 - 1,911) | 9,433<br>(8,376 - 10,806)   | 72,665<br>(63,023 - 89,313)    |
| Cerebrovascular disease                       | 49,082<br>(42,019 - 59,935)    | 9<br>(6 - 12)         | 10<br>(8 - 13)         | 782<br>(633 - 937)       | 4,119<br>(3,410 - 4,837)    | 44,161<br>(37,313 - 54,571)    |
| Ischemic stroke                               | 27,481<br>(22,373 - 36,083)    | 0<br>(0 - 1)          | 0<br>(0 - 1)           | 86<br>(58 - 113)         | 1,243<br>(886 - 1,564)      | 26,151<br>(21,144 - 34,679)    |
| Hemorrhagic stroke                            | 21,601<br>(17,144 - 26,533)    | 8<br>(6 - 11)         | 10<br>(8 - 13)         | 696<br>(563 - 835)       | 2,877<br>(2,386 - 3,408)    | 18,010<br>(13,865 - 22,678)    |
| Hypertensive heart disease                    | 4,991<br>(3,598 - 7,062)       | 0<br>(0 - 0)          | 1<br>(0 - 1)           | 28<br>(20 - 40)          | 272<br>(200 - 427)          | 4,690<br>(3,321 - 6,683)       |
| Cardiomyopathy and myocarditis                | 6,119<br>(4,547 - 7,663)       | 24<br>(16 - 32)       | 7<br>(5 - 10)          | 207<br>(158 - 258)       | 782<br>(609 - 989)          | 5,100<br>(3,688 - 6,602)       |
| Atrial fibrillation and flutter               | 7,541<br>(5,547 - 10,043)      | --                    | --                     | 11<br>(9 - 14)           | 217<br>(168 - 268)          | 7,313<br>(5,334 - 9,787)       |
| Aortic aneurysm                               | 3,389<br>(2,762 - 4,138)       | --                    | --                     | 79<br>(63 - 99)          | 632<br>(500 - 757)          | 2,678<br>(2,142 - 3,359)       |
| Peripheral vascular disease                   | 1,128<br>(847 - 1,469)         | --                    | --                     | 10<br>(8 - 13)           | 87<br>(69 - 108)            | 1,031<br>(752 - 1,373)         |
| Endocarditis                                  | 1,036<br>(771 - 1,571)         | 1<br>(1 - 2)          | 1<br>(1 - 2)           | 51<br>(36 - 77)          | 199<br>(140 - 317)          | 784<br>(570 - 1,215)           |
| Other cardiovascular and circulatory diseases | 20,151<br>(15,227 - 25,417)    | 8<br>(5 - 12)         | 3<br>(2 - 5)           | 386<br>(269 - 476)       | 2,075<br>(1,491 - 2,538)    | 17,679<br>(12,926 - 22,917)    |
| Chronic respiratory diseases                  | 25,078<br>(22,220 - 30,530)    | 11<br>(8 - 15)        | 7<br>(6 - 9)           | 299<br>(259 - 353)       | 2,546<br>(2,234 - 3,005)    | 22,214<br>(19,465 - 27,390)    |
| Chronic obstructive pulmonary disease         | 19,856<br>(17,270 - 25,002)    | 5<br>(3 - 7)          | 3<br>(2 - 3)           | 136<br>(110 - 169)       | 1,824<br>(1,535 - 2,165)    | 17,889<br>(15,443 - 22,649)    |
| Pneumoconiosis                                | 1,244<br>(821 - 1,815)         | 0<br>(0 - 0)          | 0<br>(0 - 1)           | 12<br>(8 - 17)           | 157<br>(93 - 251)           | 1,075<br>(674 - 1,592)         |
| Silicosis                                     | 415<br>(261 - 615)             | 0<br>(0 - 0)          | 0<br>(0 - 0)           | 4<br>(3 - 6)             | 36<br>(20 - 60)             | 375<br>(226 - 564)             |
| Asbestosis                                    | 381<br>(253 - 566)             | 0<br>(0 - 0)          | 0<br>(0 - 0)           | 3<br>(2 - 5)             | 60<br>(35 - 99)             | 318<br>(199 - 475)             |

Web Table 31- France deaths with 95% UI by age, sex, and cause in 2013

| Cause                                               | Both Sexes, All Ages        | Both Sexes, 0-4 Years | Both Sexes, 5-14 Years | Both Sexes, 15-49 Years  | Both Sexes, 50-69 Years  | Both Sexes, 70-80 Years     |
|-----------------------------------------------------|-----------------------------|-----------------------|------------------------|--------------------------|--------------------------|-----------------------------|
| Coal workers pneumoconiosis                         | 83<br>(54 - 125)            | 0<br>(0 - 0)          | 0<br>(0 - 0)           | 1<br>(1 - 2)             | 9<br>(5 - 15)            | 72<br>(45 - 109)            |
| Other pneumoconiosis                                | 365<br>(242 - 538)          | 0<br>(0 - 0)          | 0<br>(0 - 0)           | 4<br>(2 - 5)             | 51<br>(31 - 82)          | 310<br>(189 - 466)          |
| Asthma                                              | 1,223<br>(900 - 1,686)      | 1<br>(0 - 1)          | 2<br>(2 - 3)           | 94<br>(77 - 112)         | 242<br>(190 - 308)       | 884<br>(601 - 1,307)        |
| Interstitial lung disease and pulmonary sarcoidosis | 2,370<br>(1,544 - 3,450)    | 1<br>(1 - 2)          | 1<br>(0 - 1)           | 35<br>(23 - 50)          | 248<br>(155 - 336)       | 2,085<br>(1,333 - 3,144)    |
| Other chronic respiratory diseases                  | 384<br>(291 - 500)          | 4<br>(3 - 6)          | 1<br>(1 - 1)           | 23<br>(17 - 30)          | 76<br>(56 - 100)         | 280<br>(204 - 386)          |
| Cirrhosis                                           | 11,100<br>(10,140 - 12,079) | 2<br>(2 - 3)          | 2<br>(2 - 3)           | 1,379<br>(1,204 - 1,573) | 5,171<br>(4,581 - 5,756) | 4,545<br>(4,032 - 5,176)    |
| Cirrhosis due to hepatitis B                        | 1,071<br>(619 - 1,629)      | 0<br>(0 - 0)          | 0<br>(0 - 0)           | 127<br>(68 - 200)        | 483<br>(272 - 738)       | 461<br>(264 - 720)          |
| Cirrhosis due to hepatitis C                        | 5,106<br>(3,298 - 6,647)    | 0<br>(0 - 0)          | 1<br>(0 - 1)           | 624<br>(371 - 872)       | 2,345<br>(1,393 - 3,206) | 2,136<br>(1,483 - 2,804)    |
| Cirrhosis due to alcohol use                        | 3,828<br>(2,398 - 5,374)    | --                    | --                     | 402<br>(161 - 639)       | 1,792<br>(999 - 2,606)   | 1,634<br>(1,046 - 2,287)    |
| Cirrhosis due to other causes                       | 1,095<br>(569 - 1,717)      | 2<br>(1 - 3)          | 2<br>(1 - 2)           | 226<br>(126 - 350)       | 551<br>(270 - 897)       | 314<br>(151 - 539)          |
| Digestive diseases                                  | 16,230<br>(14,099 - 20,247) | 6<br>(4 - 9)          | 6<br>(5 - 7)           | 354<br>(288 - 406)       | 1,674<br>(1,471 - 1,924) | 14,190<br>(12,160 - 18,049) |
| Peptic ulcer disease                                | 1,544<br>(1,149 - 2,055)    | 0<br>(0 - 0)          | 0<br>(0 - 1)           | 41<br>(29 - 53)          | 198<br>(146 - 254)       | 1,304<br>(945 - 1,795)      |
| Gastritis and duodenitis                            | 65<br>(40 - 129)            | 0<br>(0 - 0)          | 0<br>(0 - 1)           | 4<br>(2 - 6)             | 9<br>(6 - 17)            | 52<br>(30 - 108)            |
| Appendicitis                                        | 225<br>(154 - 353)          | 0<br>(0 - 1)          | 1<br>(1 - 1)           | 13<br>(9 - 17)           | 33<br>(23 - 48)          | 178<br>(115 - 295)          |
| Paralytic ileus and intestinal obstruction          | 4,425<br>(3,026 - 6,533)    | 2<br>(1 - 3)          | 2<br>(1 - 2)           | 65<br>(41 - 90)          | 320<br>(204 - 446)       | 4,036<br>(2,717 - 6,108)    |
| Inguinal, femoral, and abdominal hernia             | 605<br>(343 - 960)          | 0<br>(0 - 0)          | 0<br>(0 - 1)           | 5<br>(3 - 7)             | 54<br>(34 - 81)          | 545<br>(297 - 891)          |
| Inflammatory bowel disease                          | 1,244<br>(809 - 2,265)      | 1<br>(1 - 2)          | 0<br>(0 - 1)           | 26<br>(20 - 37)          | 120<br>(86 - 201)        | 1,096<br>(686 - 2,041)      |
| Vascular intestinal disorders                       | 3,201<br>(1,913 - 5,045)    | 0<br>(0 - 0)          | 0<br>(0 - 1)           | 33<br>(18 - 57)          | 331<br>(186 - 522)       | 2,836<br>(1,668 - 4,559)    |
| Gallbladder and biliary diseases                    | 1,879<br>(1,323 - 2,568)    | 0<br>(0 - 0)          | 0<br>(0 - 1)           | 18<br>(13 - 22)          | 130<br>(96 - 168)        | 1,730<br>(1,193 - 2,411)    |
| Pancreatitis                                        | 1,196<br>(834 - 1,578)      | 0<br>(0 - 0)          | 0<br>(0 - 1)           | 114<br>(81 - 143)        | 284<br>(195 - 372)       | 797<br>(532 - 1,096)        |
| Other digestive diseases                            | 1,846<br>(1,272 - 2,459)    | 1<br>(1 - 2)          | 1<br>(1 - 1)           | 36<br>(23 - 45)          | 194<br>(140 - 244)       | 1,615<br>(1,079 - 2,218)    |
| Neurological disorders                              | 50,283<br>(37,741 - 60,434) | 75<br>(52 - 99)       | 30<br>(24 - 38)        | 760<br>(621 - 868)       | 2,779<br>(2,368 - 3,145) | 46,639<br>(34,425 - 56,686) |
| Alzheimer disease and other dementias               | 38,834<br>(27,391 - 48,959) | --                    | --                     | 2<br>(0 - 5)             | 675<br>(496 - 882)       | 38,158<br>(26,722 - 48,230) |
| Parkinson disease                                   | 5,855<br>(4,164 - 7,377)    | --                    | --                     | 8<br>(6 - 10)            | 290<br>(224 - 349)       | 5,558<br>(3,903 - 7,058)    |
| Epilepsy                                            | 1,553<br>(1,108 - 1,924)    | 12<br>(7 - 18)        | 12<br>(8 - 17)         | 332<br>(245 - 400)       | 354<br>(265 - 427)       | 843<br>(543 - 1,165)        |
| Multiple sclerosis                                  | 748<br>(427 - 929)          | --                    | --                     | 154<br>(95 - 204)        | 373<br>(210 - 498)       | 222<br>(108 - 306)          |
| Other neurological disorders                        | 3,292<br>(2,763 - 3,743)    | 63<br>(43 - 85)       | 18<br>(14 - 23)        | 265<br>(209 - 308)       | 1,087<br>(884 - 1,249)   | 1,859<br>(1,557 - 2,218)    |
| Mental and substance use disorders                  | 5,497<br>(3,997 - 6,812)    | 1<br>(1 - 2)          | 0<br>(0 - 1)           | 2,114<br>(1,662 - 2,662) | 2,046<br>(1,278 - 2,672) | 1,335<br>(970 - 1,656)      |
| Schizophrenia                                       | 317<br>(93 - 507)           | --                    | --                     | 33<br>(10 - 52)          | 74<br>(27 - 113)         | 210<br>(47 - 374)           |
| Alcohol use disorders                               | 3,609<br>(2,284 - 4,967)    | --                    | --                     | 1,235<br>(783 - 1,687)   | 1,787<br>(1,076 - 2,457) | 587<br>(409 - 930)          |
| Drug use disorders                                  | 1,562<br>(1,340 - 1,824)    | 1<br>(1 - 2)          | --                     | 838<br>(696 - 1,017)     | 185<br>(140 - 219)       | 538<br>(410 - 692)          |
| Opioid use disorders                                | 575<br>(488 - 677)          | 0<br>(0 - 1)          | --                     | 311<br>(254 - 392)       | 61<br>(46 - 74)          | 202<br>(147 - 271)          |
| Cocaine use disorders                               | 42<br>(35 - 50)             | 0<br>(0 - 0)          | --                     | 25<br>(20 - 31)          | 4<br>(3 - 6)             | 13<br>(9 - 18)              |
| Amphetamine use disorders                           | 44<br>(36 - 52)             | 0<br>(0 - 0)          | --                     | 23<br>(18 - 29)          | 6<br>(5 - 7)             | 15<br>(10 - 22)             |
| Other drug use disorders                            | 902<br>(767 - 1,048)        | 1<br>(0 - 1)          | --                     | 479<br>(397 - 595)       | 113<br>(86 - 136)        | 308<br>(234 - 400)          |
| Eating disorders                                    | 9<br>(6 - 13)               | --                    | 0<br>(0 - 1)           | 8<br>(6 - 12)            | --                       | --                          |
| Anorexia nervosa                                    | 9<br>(6 - 13)               | --                    | 0<br>(0 - 1)           | 8<br>(6 - 12)            | --                       | --                          |
| Diabetes, urogenital, blood, and endocrine diseases | 30,789<br>(27,194 - 33,893) | 108<br>(71 - 144)     | 50<br>(38 - 64)        | 723<br>(609 - 811)       | 3,668<br>(3,248 - 4,024) | 26,240<br>(22,918 - 29,324) |
| Diabetes mellitus                                   | 12,678<br>(10,865 - 14,543) | 3<br>(2 - 5)          | 2<br>(1 - 3)           | 228<br>(194 - 262)       | 1,735<br>(1,527 - 1,966) | 10,709<br>(8,971 - 12,556)  |
| Acute glomerulonephritis                            | 8<br>(6 - 10)               | 0<br>(0 - 1)          | 1<br>(0 - 1)           | 2<br>(1 - 3)             | 1<br>(1 - 2)             | 3<br>(1 - 6)                |

Web Table 31- France deaths with 95% UI by age, sex, and cause in 2013

| Cause                                               | Both Sexes, All Ages        | Both Sexes, 0-4 Years  | Both Sexes, 5-14 Years | Both Sexes, 15-49 Years   | Both Sexes, 50-69 Years   | Both Sexes, 70-80 Years     |
|-----------------------------------------------------|-----------------------------|------------------------|------------------------|---------------------------|---------------------------|-----------------------------|
| Chronic kidney disease                              | 9,275<br>(7,681 - 11,064)   | 3<br>(2 - 5)           | 2<br>(2 - 3)           | 100<br>(85 - 122)         | 709<br>(601 - 839)        | 8,460<br>(6,891 - 10,175)   |
| Chronic kidney disease due to diabetes mellitus     | 1,373<br>(908 - 2,027)      | 0<br>(0 - 1)           | 1<br>(0 - 1)           | 24<br>(16 - 36)           | 170<br>(103 - 238)        | 1,179<br>(766 - 1,809)      |
| Chronic kidney disease due to hypertension          | 4,286<br>(3,231 - 5,499)    | 1<br>(0 - 1)           | 1<br>(0 - 1)           | 34<br>(25 - 51)           | 273<br>(206 - 384)        | 3,979<br>(2,932 - 5,117)    |
| Chronic kidney disease due to glomerulonephritis    | 117<br>(80 - 181)           | 0<br>(0 - 1)           | 0<br>(0 - 1)           | 5<br>(3 - 6)              | 15<br>(10 - 21)           | 96<br>(61 - 160)            |
| Chronic kidney disease due to other causes          | 3,499<br>(2,124 - 4,818)    | 2<br>(1 - 3)           | 1<br>(0 - 1)           | 38<br>(25 - 52)           | 252<br>(161 - 348)        | 3,207<br>(1,884 - 4,498)    |
| Urinary diseases and male infertility               | 3,552<br>(2,431 - 4,540)    | 3<br>(2 - 3)           | 1<br>(0 - 1)           | 35<br>(24 - 43)           | 222<br>(158 - 263)        | 3,291<br>(2,234 - 4,283)    |
| Interstitial nephritis and urinary tract infections | 3,081<br>(1,991 - 3,978)    | 2<br>(1 - 2)           | 0<br>(0 - 0)           | 26<br>(16 - 32)           | 169<br>(112 - 204)        | 2,884<br>(1,852 - 3,769)    |
| Urolithiasis                                        | 98<br>(63 - 156)            | --                     | 0<br>(0 - 0)           | 4<br>(3 - 6)              | 14<br>(9 - 21)            | 80<br>(47 - 134)            |
| Other urinary diseases                              | 374<br>(232 - 652)          | 1<br>(1 - 1)           | 0<br>(0 - 0)           | 5<br>(4 - 8)              | 40<br>(27 - 61)           | 327<br>(190 - 589)          |
| Gynecological diseases                              | 23<br>(13 - 61)             | --                     | --                     | 2<br>(1 - 4)              | 2<br>(2 - 6)              | 18<br>(9 - 51)              |
| Uterine fibroids                                    | 7<br>(4 - 18)               | --                     | --                     | 1<br>(0 - 1)              | 1<br>(0 - 2)              | 5<br>(3 - 15)               |
| Polycystic ovarian syndrome                         | 0<br>(0 - 0)                | --                     | --                     | 0<br>(0 - 0)              | 0<br>(0 - 0)              | --                          |
| Endometriosis                                       | 0<br>(0 - 1)                | --                     | --                     | 0<br>(0 - 1)              | 0<br>(0 - 0)              | --                          |
| Genital prolapse                                    | 5<br>(3 - 15)               | --                     | --                     | 0<br>(0 - 0)              | 0<br>(0 - 1)              | 5<br>(2 - 13)               |
| Other gynecological diseases                        | 10<br>(6 - 28)              | --                     | --                     | 1<br>(1 - 2)              | 1<br>(1 - 2)              | 8<br>(4 - 23)               |
| Hemoglobinopathies and hemolytic anemias            | 753<br>(504 - 1,208)        | 6<br>(4 - 9)           | 5<br>(3 - 9)           | 29<br>(22 - 44)           | 95<br>(71 - 140)          | 618<br>(389 - 1,012)        |
| Thalassemias                                        | 4<br>(3 - 5)                | 1<br>(0 - 1)           | 1<br>(0 - 1)           | 2<br>(2 - 3)              | 0<br>(0 - 0)              | 0<br>(0 - 0)                |
| Sickle cell disorders                               | 111<br>(85 - 165)           | 4<br>(2 - 6)           | 3<br>(2 - 6)           | 18<br>(14 - 27)           | 54<br>(40 - 79)           | 32<br>(22 - 50)             |
| G6PD deficiency                                     | 2<br>(1 - 3)                | 0<br>(0 - 0)           | 0<br>(0 - 0)           | 0<br>(0 - 0)              | 1<br>(0 - 1)              | 1<br>(1 - 2)                |
| Other hemoglobinopathies and hemolytic anemias      | 637<br>(408 - 1,036)        | 2<br>(1 - 3)           | 1<br>(1 - 2)           | 9<br>(7 - 13)             | 40<br>(30 - 61)           | 585<br>(366 - 953)          |
| Endocrine, metabolic, blood, and immune disorders   | 4,500<br>(3,387 - 5,654)    | 93<br>(56 - 125)       | 39<br>(28 - 52)        | 326<br>(223 - 396)        | 901<br>(628 - 1,070)      | 3,141<br>(2,250 - 4,266)    |
| Musculoskeletal disorders                           | 3,155<br>(2,210 - 4,005)    | --                     | 4<br>(3 - 5)           | 77<br>(62 - 90)           | 336<br>(262 - 403)        | 2,739<br>(1,824 - 3,552)    |
| Rheumatoid arthritis                                | 512<br>(347 - 746)          | --                     | 1<br>(0 - 1)           | 6<br>(5 - 9)              | 65<br>(46 - 92)           | 440<br>(275 - 664)          |
| Other musculoskeletal disorders                     | 2,643<br>(1,782 - 3,391)    | --                     | 3<br>(2 - 4)           | 70<br>(56 - 82)           | 271<br>(202 - 326)        | 2,298<br>(1,470 - 3,035)    |
| Other non-communicable diseases                     | 4,605<br>(3,831 - 5,916)    | 1,064<br>(814 - 1,409) | 56<br>(44 - 70)        | 302<br>(228 - 348)        | 417<br>(331 - 477)        | 2,765<br>(2,034 - 3,949)    |
| Congenital anomalies                                | 1,710<br>(1,403 - 1,975)    | 744<br>(582 - 936)     | 55<br>(43 - 69)        | 284<br>(206 - 331)        | 306<br>(197 - 363)        | 321<br>(210 - 412)          |
| Neural tube defects                                 | 26<br>(18 - 37)             | 19<br>(12 - 31)        | 1<br>(1 - 1)           | 3<br>(2 - 4)              | 2<br>(1 - 2)              | 1<br>(1 - 1)                |
| Congenital heart anomalies                          | 624<br>(502 - 736)          | 317<br>(238 - 412)     | 24<br>(17 - 31)        | 125<br>(89 - 148)         | 88<br>(62 - 114)          | 69<br>(44 - 95)             |
| Cleft lip and cleft palate                          | 1<br>(0 - 1)                | 1<br>(0 - 1)           | --                     | --                        | --                        | --                          |
| Down syndrome                                       | 193<br>(109 - 258)          | 26<br>(13 - 39)        | 3<br>(1 - 4)           | 44<br>(25 - 61)           | 109<br>(54 - 157)         | 12<br>(6 - 18)              |
| Chromosomal unbalanced rearrangements               | 84<br>(62 - 111)            | 53<br>(35 - 77)        | 3<br>(2 - 4)           | 11<br>(7 - 15)            | 14<br>(9 - 18)            | 2<br>(1 - 4)                |
| Other congenital anomalies                          | 783<br>(631 - 924)          | 328<br>(248 - 436)     | 25<br>(18 - 34)        | 100<br>(75 - 121)         | 93<br>(64 - 122)          | 237<br>(150 - 306)          |
| Skin and subcutaneous diseases                      | 2,576<br>(1,876 - 3,845)    | 2<br>(1 - 3)           | 1<br>(1 - 1)           | 18<br>(15 - 23)           | 111<br>(93 - 139)         | 2,444<br>(1,744 - 3,681)    |
| Cellulitis                                          | 107<br>(42 - 243)           | 0<br>(0 - 1)           | 0<br>(0 - 0)           | 4<br>(2 - 7)              | 15<br>(6 - 29)            | 88<br>(30 - 216)            |
| Pyoderma                                            | 653<br>(416 - 989)          | 1<br>(0 - 1)           | 0<br>(0 - 0)           | 7<br>(5 - 9)              | 47<br>(34 - 61)           | 599<br>(365 - 928)          |
| Decubitus ulcer                                     | 1,603<br>(1,088 - 2,703)    | 0<br>(0 - 0)           | 0<br>(0 - 0)           | 4<br>(3 - 5)              | 39<br>(29 - 56)           | 1,559<br>(1,047 - 2,652)    |
| Other skin and subcutaneous diseases                | 213<br>(94 - 487)           | 0<br>(0 - 1)           | 0<br>(0 - 0)           | 4<br>(3 - 5)              | 11<br>(7 - 16)            | 198<br>(79 - 475)           |
| Sudden infant death syndrome                        | 319<br>(186 - 589)          | 319<br>(186 - 589)     | --                     | --                        | --                        | --                          |
| Injuries                                            | 48,156<br>(43,448 - 56,208) | 301<br>(228 - 394)     | 248<br>(214 - 289)     | 9,846<br>(9,052 - 10,624) | 8,890<br>(8,099 - 10,047) | 28,871<br>(24,785 - 36,145) |
| Transport injuries                                  | 5,683<br>(5,111 - 6,251)    | 74<br>(54 - 101)       | 123<br>(101 - 149)     | 2,844<br>(2,550 - 3,131)  | 1,209<br>(1,059 - 1,396)  | 1,432<br>(1,196 - 1,675)    |

Web Table 31- France deaths with 95% UI by age, sex, and cause in 2013

| Cause                                           | Both Sexes, All Ages        | Both Sexes, 0-4 Years | Both Sexes, 5-14 Years | Both Sexes, 15-49 Years  | Both Sexes, 50-69 Years  | Both Sexes, 70-80 Years     |
|-------------------------------------------------|-----------------------------|-----------------------|------------------------|--------------------------|--------------------------|-----------------------------|
| Road injuries                                   | 5,287<br>(4,784 - 5,826)    | 72<br>(52 - 97)       | 118<br>(96 - 142)      | 2,686<br>(2,420 - 2,961) | 1,032<br>(910 - 1,218)   | 1,380<br>(1,155 - 1,622)    |
| Pedestrian road injuries                        | 817<br>(399 - 1,192)        | 16<br>(6 - 28)        | 27<br>(12 - 44)        | 165<br>(72 - 277)        | 177<br>(80 - 275)        | 433<br>(207 - 630)          |
| Cyclist road injuries                           | 384<br>(188 - 499)          | 5<br>(2 - 10)         | 20<br>(10 - 30)        | 110<br>(49 - 149)        | 117<br>(58 - 161)        | 132<br>(65 - 189)           |
| Motorcyclist road injuries                      | 1,049<br>(770 - 1,660)      | 1<br>(1 - 2)          | 8<br>(5 - 14)          | 848<br>(610 - 1,321)     | 129<br>(81 - 223)        | 62<br>(36 - 129)            |
| Motor vehicle road injuries                     | 3,017<br>(2,510 - 3,627)    | 48<br>(34 - 66)       | 62<br>(45 - 86)        | 1,557<br>(1,129 - 1,836) | 604<br>(486 - 814)       | 746<br>(558 - 1,020)        |
| Other road injuries                             | 19<br>(12 - 33)             | 1<br>(0 - 2)          | 1<br>(1 - 2)           | 6<br>(4 - 10)            | 5<br>(3 - 10)            | 6<br>(3 - 14)               |
| Other transport injuries                        | 395<br>(260 - 509)          | 3<br>(1 - 5)          | 6<br>(3 - 9)           | 157<br>(95 - 214)        | 177<br>(115 - 234)       | 53<br>(28 - 81)             |
| Unintentional injuries                          | 29,761<br>(25,544 - 36,411) | 201<br>(146 - 280)    | 87<br>(72 - 111)       | 1,625<br>(1,458 - 1,890) | 3,690<br>(3,283 - 4,343) | 24,158<br>(20,244 - 30,636) |
| Falls                                           | 16,708<br>(13,512 - 21,984) | 19<br>(13 - 27)       | 12<br>(8 - 17)         | 415<br>(328 - 494)       | 1,509<br>(1,231 - 1,818) | 14,752<br>(11,674 - 19,846) |
| Drowning                                        | 954<br>(614 - 1,220)        | 52<br>(34 - 85)       | 32<br>(22 - 55)        | 278<br>(174 - 373)       | 290<br>(166 - 393)       | 302<br>(189 - 398)          |
| Fire, heat, and hot substances                  | 867<br>(714 - 1,176)        | 23<br>(14 - 35)       | 9<br>(6 - 13)          | 124<br>(87 - 158)        | 134<br>(95 - 170)        | 577<br>(424 - 864)          |
| Poisonings                                      | 649<br>(462 - 1,126)        | 5<br>(3 - 8)          | 3<br>(2 - 4)           | 56<br>(42 - 71)          | 73<br>(53 - 92)          | 511<br>(333 - 981)          |
| Exposure to mechanical forces                   | 434<br>(349 - 488)          | 21<br>(14 - 31)       | 11<br>(9 - 15)         | 126<br>(102 - 147)       | 131<br>(104 - 159)       | 146<br>(91 - 180)           |
| Unintentional firearm injuries                  | 44<br>(35 - 54)             | 1<br>(1 - 1)          | 3<br>(2 - 4)           | 18<br>(13 - 23)          | 14<br>(10 - 19)          | 9<br>(6 - 13)               |
| Unintentional suffocation                       | 59<br>(36 - 81)             | 14<br>(8 - 22)        | 2<br>(1 - 4)           | 6<br>(4 - 8)             | 6<br>(4 - 8)             | 31<br>(12 - 50)             |
| Other exposure to mechanical forces             | 331<br>(252 - 378)          | 6<br>(4 - 10)         | 6<br>(4 - 9)           | 102<br>(80 - 123)        | 111<br>(87 - 138)        | 105<br>(62 - 134)           |
| Adverse effects of medical treatment            | 3,728<br>(2,818 - 5,755)    | 10<br>(7 - 19)        | 6<br>(4 - 10)          | 268<br>(184 - 475)       | 798<br>(563 - 1,339)     | 2,646<br>(1,941 - 4,128)    |
| Animal contact                                  | 70<br>(48 - 136)            | 1<br>(1 - 2)          | 1<br>(1 - 2)           | 10<br>(7 - 18)           | 21<br>(15 - 39)          | 37<br>(21 - 88)             |
| Venomous animal contact                         | 20<br>(14 - 37)             | 0<br>(0 - 1)          | 0<br>(0 - 1)           | 4<br>(3 - 8)             | 9<br>(6 - 18)            | 6<br>(3 - 13)               |
| Non-venomous animal contact                     | 50<br>(32 - 103)            | 1<br>(1 - 2)          | 1<br>(0 - 1)           | 6<br>(4 - 10)            | 12<br>(8 - 23)           | 31<br>(17 - 74)             |
| Foreign body                                    | 5,983<br>(4,243 - 9,226)    | 64<br>(37 - 121)      | 10<br>(7 - 17)         | 245<br>(164 - 344)       | 609<br>(415 - 845)       | 5,056<br>(3,524 - 8,006)    |
| Pulmonary aspiration and foreign body in airway | 5,966<br>(4,229 - 9,215)    | 63<br>(37 - 121)      | 10<br>(6 - 16)         | 242<br>(161 - 341)       | 606<br>(413 - 843)       | 5,045<br>(3,517 - 8,001)    |
| Foreign body in other body part                 | 17<br>(10 - 29)             | 0<br>(0 - 1)          | 1<br>(0 - 1)           | 3<br>(2 - 4)             | 3<br>(2 - 4)             | 10<br>(5 - 21)              |
| Other unintentional injuries                    | 368<br>(290 - 465)          | 7<br>(4 - 11)         | 4<br>(2 - 6)           | 102<br>(73 - 148)        | 124<br>(80 - 194)        | 131<br>(92 - 185)           |
| Self-harm and interpersonal violence            | 12,712<br>(11,350 - 15,196) | 26<br>(18 - 37)       | 38<br>(28 - 50)        | 5,377<br>(4,497 - 6,155) | 3,991<br>(3,427 - 4,638) | 3,281<br>(2,705 - 4,696)    |
| Self-harm                                       | 12,084<br>(10,787 - 14,523) | --                    | 21<br>(14 - 30)        | 5,058<br>(4,238 - 5,833) | 3,844<br>(3,291 - 4,473) | 3,160<br>(2,579 - 4,600)    |
| Interpersonal violence                          | 628<br>(465 - 823)          | 26<br>(18 - 37)       | 17<br>(12 - 25)        | 318<br>(237 - 428)       | 146<br>(107 - 198)       | 121<br>(81 - 153)           |
| Assault by firearm                              | 295<br>(202 - 416)          | 5<br>(2 - 8)          | 7<br>(4 - 11)          | 167<br>(113 - 247)       | 75<br>(48 - 109)         | 42<br>(22 - 58)             |
| Assault by sharp object                         | 137<br>(79 - 201)           | 3<br>(2 - 5)          | 2<br>(1 - 4)           | 79<br>(44 - 119)         | 31<br>(17 - 46)          | 22<br>(12 - 32)             |
| Assault by other means                          | 197<br>(138 - 273)          | 18<br>(12 - 26)       | 8<br>(5 - 12)          | 72<br>(47 - 111)         | 41<br>(27 - 64)          | 58<br>(38 - 82)             |
| Forces of nature, war, and legal intervention   | 0<br>(0 - 0)                | 0<br>(0 - 0)          | --                     | --                       | --                       | 0<br>(0 - 0)                |
| Exposure to forces of nature                    | 0<br>(0 - 0)                | 0<br>(0 - 0)          | --                     | --                       | --                       | 0<br>(0 - 0)                |

Web Table 31- France deaths with 95% UI by age, sex, and cause in 2013

| Cause                                                             | Males, All Ages                | Males, 0-4 Years         | Males, 5-14 Years  | Males, 15-49 Years          | Males, 50-69 Years          | Males, 70-80 Years             |
|-------------------------------------------------------------------|--------------------------------|--------------------------|--------------------|-----------------------------|-----------------------------|--------------------------------|
| All causes                                                        | 298,209<br>(284,580 - 312,147) | 1,674<br>(1,348 - 2,064) | 407<br>(356 - 467) | 20,232<br>(18,865 - 21,623) | 71,933<br>(67,616 - 76,415) | 203,963<br>(196,073 - 212,060) |
| Communicable, maternal, neonatal, and nutritional diseases        | 15,989<br>(13,104 - 19,373)    | 701<br>(542 - 898)       | 26<br>(18 - 37)    | 826<br>(654 - 1,080)        | 1,930<br>(1,540 - 2,378)    | 12,506<br>(9,853 - 15,901)     |
| HIV/AIDS and tuberculosis                                         | 1,561<br>(1,179 - 2,079)       | 1<br>(1 - 2)             | 0<br>(0 - 1)       | 460<br>(305 - 704)          | 448<br>(253 - 714)          | 651<br>(500 - 865)             |
| Tuberculosis                                                      | 722<br>(577 - 977)             | 0<br>(0 - 1)             | 0<br>(0 - 0)       | 27<br>(22 - 36)             | 101<br>(80 - 155)           | 592<br>(456 - 799)             |
| HIV/AIDS                                                          | 839<br>(486 - 1,335)           | 1<br>(0 - 1)             | 0<br>(0 - 0)       | 432<br>(277 - 673)          | 346<br>(156 - 614)          | 59<br>(11 - 125)               |
| HIV/AIDS resulting in mycobacterial infection                     | 48<br>(27 - 79)                | 0<br>(0 - 0)             | 0<br>(0 - 0)       | 24<br>(15 - 39)             | 20<br>(9 - 38)              | 4<br>(1 - 9)                   |
| HIV/AIDS resulting in other diseases                              | 791<br>(458 - 1,258)           | 1<br>(0 - 1)             | 0<br>(0 - 0)       | 409<br>(262 - 635)          | 326<br>(147 - 578)          | 55<br>(11 - 118)               |
| Diarrhea, lower respiratory, and other common infectious diseases | 11,656<br>(8,973 - 14,996)     | 83<br>(56 - 114)         | 21<br>(13 - 31)    | 284<br>(226 - 358)          | 1,205<br>(873 - 1,533)      | 10,603<br>(7,579 - 13,312)     |
| Diarrheal diseases                                                | 941<br>(614 - 1,456)           | 20<br>(11 - 34)          | 1<br>(1 - 2)       | 25<br>(18 - 35)             | 88<br>(64 - 119)            | 807<br>(478 - 1,311)           |
| Intestinal infectious diseases                                    | 43<br>(14 - 102)               | 7<br>(2 - 15)            | 7<br>(2 - 17)      | 17<br>(3 - 47)              | 6<br>(2 - 16)               | 6<br>(2 - 15)                  |
| Typhoid fever                                                     | 31<br>(9 - 75)                 | 4<br>(1 - 10)            | 5<br>(1 - 13)      | 13<br>(2 - 37)              | 5<br>(1 - 13)               | 4<br>(1 - 11)                  |
| Paratyphoid fever                                                 | 8<br>(2 - 21)                  | 1<br>(0 - 4)             | 2<br>(0 - 4)       | 3<br>(1 - 10)               | 1<br>(0 - 3)                | 1<br>(0 - 3)                   |
| Other intestinal infectious diseases                              | 3<br>(1 - 9)                   | 1<br>(0 - 4)             | 0<br>(0 - 2)       | 1<br>(0 - 4)                | 1<br>(0 - 3)                | 1<br>(0 - 4)                   |
| Lower respiratory infections                                      | 10,347<br>(7,661 - 13,681)     | 28<br>(17 - 44)          | 6<br>(4 - 9)       | 197<br>(148 - 253)          | 1,032<br>(716 - 1,357)      | 9,084<br>(6,529 - 12,314)      |
| Upper respiratory infections                                      | 6<br>(1 - 19)                  | 0<br>(0 - 0)             | 0<br>(0 - 0)       | 1<br>(0 - 2)                | 2<br>(0 - 5)                | 4<br>(0 - 16)                  |
| Otitis media                                                      | 8<br>(6 - 11)                  | 1<br>(0 - 2)             | 0<br>(0 - 0)       | 1<br>(1 - 2)                | 1<br>(1 - 2)                | 4<br>(2 - 6)                   |
| Meningitis                                                        | 156<br>(133 - 183)             | 17<br>(10 - 27)          | 2<br>(2 - 3)       | 19<br>(16 - 23)             | 39<br>(32 - 48)             | 78<br>(60 - 100)               |
| Pneumococcal meningitis                                           | 23<br>(13 - 34)                | 1<br>(1 - 2)             | 0<br>(0 - 0)       | 2<br>(1 - 4)                | 6<br>(3 - 11)               | 13<br>(7 - 22)                 |
| H influenzae type B meningitis                                    | 20<br>(13 - 27)                | 4<br>(1 - 9)             | 0<br>(0 - 1)       | 2<br>(1 - 4)                | 4<br>(2 - 8)                | 8<br>(4 - 14)                  |
| Meningococcal meningitis                                          | 34<br>(20 - 51)                | 3<br>(1 - 6)             | 0<br>(0 - 1)       | 5<br>(3 - 7)                | 8<br>(2 - 15)               | 18<br>(7 - 31)                 |
| Other meningitis                                                  | 79<br>(62 - 101)               | 9<br>(5 - 15)            | 1<br>(1 - 2)       | 10<br>(7 - 13)              | 21<br>(14 - 29)             | 39<br>(26 - 53)                |
| Encephalitis                                                      | 118<br>(75 - 172)              | 6<br>(3 - 10)            | 3<br>(1 - 5)       | 18<br>(11 - 29)             | 33<br>(20 - 47)             | 58<br>(31 - 93)                |
| Diphtheria                                                        | 1<br>(0 - 2)                   | 0<br>(0 - 1)             | 0<br>(0 - 0)       | 0<br>(0 - 1)                | 0<br>(0 - 1)                | --                             |
| Whooping cough                                                    | 3<br>(2 - 5)                   | 1<br>(0 - 3)             | 0<br>(0 - 1)       | 1<br>(1 - 2)                | 0<br>(0 - 0)                | --                             |
| Tetanus                                                           | 5<br>(3 - 13)                  | 0<br>(0 - 0)             | 0<br>(0 - 0)       | 1<br>(0 - 2)                | 1<br>(1 - 2)                | 2<br>(1 - 10)                  |
| Measles                                                           | 0<br>(0 - 1)                   | 0<br>(0 - 1)             | 0<br>(0 - 0)       | 0<br>(0 - 0)                | 0<br>(0 - 0)                | --                             |
| Varicella and herpes zoster                                       | 27<br>(4 - 103)                | 2<br>(0 - 7)             | 0<br>(0 - 2)       | 2<br>(0 - 6)                | 2<br>(0 - 8)                | 20<br>(0 - 97)                 |
| Neglected tropical diseases and malaria                           | 40<br>(22 - 50)                | 1<br>(1 - 2)             | 1<br>(1 - 1)       | 6<br>(5 - 8)                | 12<br>(7 - 16)              | 19<br>(10 - 28)                |
| Leishmaniasis                                                     | 1<br>(0 - 1)                   | 0<br>(0 - 0)             | 0<br>(0 - 0)       | 0<br>(0 - 0)                | 0<br>(0 - 0)                | 0<br>(0 - 0)                   |
| Visceral leishmaniasis                                            | 1<br>(0 - 1)                   | 0<br>(0 - 0)             | 0<br>(0 - 0)       | 0<br>(0 - 0)                | 0<br>(0 - 0)                | 0<br>(0 - 0)                   |
| Cysticercosis                                                     | 0<br>(0 - 0)                   | 0<br>(0 - 0)             | 0<br>(0 - 0)       | 0<br>(0 - 0)                | 0<br>(0 - 0)                | 0<br>(0 - 0)                   |
| Cystic echinococcosis                                             | 3<br>(2 - 3)                   | 0<br>(0 - 0)             | 0<br>(0 - 0)       | 1<br>(1 - 1)                | 1<br>(1 - 1)                | 1<br>(1 - 1)                   |
| Dengue                                                            | 3<br>(2 - 3)                   | 0<br>(0 - 0)             | 0<br>(0 - 0)       | 1<br>(1 - 1)                | 1<br>(0 - 1)                | 0<br>(0 - 1)                   |
| Rabies                                                            | 2<br>(1 - 3)                   | 0<br>(0 - 0)             | 0<br>(0 - 0)       | 1<br>(0 - 1)                | 1<br>(0 - 1)                | 0<br>(0 - 0)                   |
| Other neglected tropical diseases                                 | 30<br>(14 - 40)                | 1<br>(0 - 2)             | 0<br>(0 - 1)       | 3<br>(2 - 4)                | 9<br>(5 - 13)               | 17<br>(8 - 25)                 |
| Maternal disorders                                                | --                             | --                       | --                 | --                          | --                          | --                             |
| Maternal hemorrhage                                               | --                             | --                       | --                 | --                          | --                          | --                             |
| Maternal sepsis and other maternal infections                     | --                             | --                       | --                 | --                          | --                          | --                             |
| Maternal hypertensive disorders                                   | --                             | --                       | --                 | --                          | --                          | --                             |
| Maternal obstructed labor                                         | --                             | --                       | --                 | --                          | --                          | --                             |

Web Table 31- France deaths with 95% UI by age, sex, and cause in 2013

| Cause                                                            | Males, All Ages                | Males, 0-4 Years     | Males, 5-14 Years  | Males, 15-49 Years          | Males, 50-69 Years          | Males, 70-80 Years             |
|------------------------------------------------------------------|--------------------------------|----------------------|--------------------|-----------------------------|-----------------------------|--------------------------------|
| Maternal abortive outcome                                        | --                             | --                   | --                 | --                          | --                          | --                             |
| Indirect maternal deaths                                         | --                             | --                   | --                 | --                          | --                          | --                             |
| Late maternal deaths                                             | --                             | --                   | --                 | --                          | --                          | --                             |
| Maternal deaths aggravated by HIV/AIDS                           | --                             | --                   | --                 | --                          | --                          | --                             |
| Other maternal disorders                                         | --                             | --                   | --                 | --                          | --                          | --                             |
| Neonatal disorders                                               | 601<br>(466 - 770)             | 601<br>(466 - 770)   | --                 | --                          | --                          | --                             |
| Neonatal preterm birth complications                             | 198<br>(118 - 294)             | 198<br>(118 - 294)   | --                 | --                          | --                          | --                             |
| Neonatal encephalopathy due to birth asphyxia and trauma         | 175<br>(110 - 248)             | 175<br>(110 - 248)   | --                 | --                          | --                          | --                             |
| Neonatal sepsis and other neonatal infections                    | 62<br>(29 - 146)               | 62<br>(29 - 146)     | --                 | --                          | --                          | --                             |
| Hemolytic disease and other neonatal jaundice                    | 3<br>(1 - 7)                   | 3<br>(1 - 7)         | --                 | --                          | --                          | --                             |
| Other neonatal disorders                                         | 162<br>(65 - 246)              | 162<br>(65 - 246)    | --                 | --                          | --                          | --                             |
| Nutritional deficiencies                                         | 1,541<br>(892 - 2,260)         | 2<br>(1 - 3)         | 1<br>(0 - 1)       | 29<br>(17 - 46)             | 108<br>(63 - 152)           | 1,402<br>(815 - 2,055)         |
| Protein-energy malnutrition                                      | 1,018<br>(522 - 1,586)         | 1<br>(0 - 2)         | 0<br>(0 - 0)       | 11<br>(5 - 20)              | 63<br>(33 - 93)             | 943<br>(472 - 1,486)           |
| Iodine deficiency                                                | 2<br>(0 - 9)                   | 0<br>(0 - 0)         | 0<br>(0 - 0)       | 0<br>(0 - 1)                | 0<br>(0 - 2)                | 1<br>(0 - 8)                   |
| Iron-deficiency anemia                                           | 457<br>(171 - 853)             | 0<br>(0 - 1)         | 0<br>(0 - 0)       | 14<br>(6 - 23)              | 34<br>(14 - 56)             | 408<br>(149 - 790)             |
| Other nutritional deficiencies                                   | 64<br>(23 - 133)               | 0<br>(0 - 1)         | 0<br>(0 - 1)       | 4<br>(2 - 7)                | 10<br>(4 - 19)              | 49<br>(16 - 113)               |
| Other communicable, maternal, neonatal, and nutritional diseases | 591<br>(367 - 748)             | 13<br>(8 - 21)       | 3<br>(2 - 4)       | 47<br>(33 - 61)             | 157<br>(95 - 206)           | 371<br>(209 - 501)             |
| Sexually transmitted diseases excluding HIV                      | 10<br>(5 - 19)                 | 2<br>(0 - 7)         | 0<br>(0 - 1)       | 1<br>(1 - 2)                | 2<br>(1 - 4)                | 4<br>(1 - 10)                  |
| Syphilis                                                         | 8<br>(3 - 16)                  | 2<br>(0 - 7)         | 0<br>(0 - 1)       | 1<br>(0 - 1)                | 3<br>(1 - 3)                | 3<br>(1 - 9)                   |
| Chlamydial infection                                             | --                             | --                   | --                 | --                          | --                          | --                             |
| Gonococcal infection                                             | 1<br>(1 - 2)                   | --                   | 0<br>(0 - 0)       | 0<br>(0 - 0)                | 0<br>(0 - 1)                | 0<br>(0 - 1)                   |
| Other sexually transmitted diseases                              | 1<br>(0 - 1)                   | --                   | 0<br>(0 - 0)       | 0<br>(0 - 0)                | 0<br>(0 - 0)                | 0<br>(0 - 0)                   |
| Hepatitis                                                        | 45<br>(35 - 59)                | 0<br>(0 - 1)         | 0<br>(0 - 1)       | 8<br>(6 - 12)               | 12<br>(8 - 17)              | 24<br>(15 - 37)                |
| Acute hepatitis A                                                | 9<br>(3 - 17)                  | 0<br>(0 - 1)         | 0<br>(0 - 0)       | 3<br>(1 - 5)                | 2<br>(1 - 5)                | 3<br>(1 - 8)                   |
| Acute hepatitis B                                                | 33<br>(21 - 45)                | 0<br>(0 - 0)         | 0<br>(0 - 0)       | 5<br>(3 - 8)                | 9<br>(5 - 13)               | 18<br>(10 - 29)                |
| Acute hepatitis C                                                | 4<br>(1 - 11)                  | --                   | 0<br>(0 - 0)       | 1<br>(0 - 2)                | 1<br>(0 - 3)                | 2<br>(0 - 7)                   |
| Other infectious diseases                                        | 536<br>(307 - 691)             | 11<br>(6 - 16)       | 2<br>(1 - 3)       | 37<br>(24 - 51)             | 143<br>(81 - 191)           | 343<br>(180 - 471)             |
| Non-communicable diseases                                        | 255,450<br>(243,221 - 267,920) | 796<br>(619 - 1,017) | 219<br>(186 - 259) | 11,786<br>(10,853 - 12,898) | 63,818<br>(60,045 - 67,839) | 178,831<br>(170,960 - 187,083) |
| Neoplasms                                                        | 107,829<br>(100,951 - 116,223) | 60<br>(41 - 86)      | 120<br>(97 - 149)  | 5,010<br>(4,463 - 5,760)    | 38,157<br>(35,218 - 41,368) | 64,482<br>(59,713 - 70,125)    |
| Esophageal cancer                                                | 4,006<br>(3,343 - 6,227)       | --                   | --                 | 226<br>(153 - 468)          | 1,986<br>(1,557 - 3,315)    | 1,794<br>(1,470 - 2,483)       |
| Stomach cancer                                                   | 4,629<br>(3,935 - 5,447)       | --                   | --                 | 187<br>(151 - 230)          | 1,269<br>(1,093 - 1,451)    | 3,173<br>(2,536 - 3,933)       |
| Liver cancer                                                     | 6,488<br>(4,475 - 8,649)       | --                   | 2<br>(1 - 3)       | 233<br>(154 - 329)          | 2,789<br>(2,003 - 3,941)    | 3,464<br>(2,150 - 4,768)       |
| Liver cancer due to hepatitis B                                  | 1,573<br>(487 - 2,751)         | --                   | 1<br>(0 - 2)       | 101<br>(43 - 169)           | 861<br>(240 - 1,484)        | 610<br>(140 - 1,143)           |
| Liver cancer due to hepatitis C                                  | 3,217<br>(1,692 - 4,840)       | --                   | 0<br>(0 - 1)       | 84<br>(19 - 161)            | 1,255<br>(520 - 2,130)      | 1,877<br>(1,024 - 2,764)       |
| Liver cancer due to alcohol use                                  | 1,571<br>(743 - 2,672)         | --                   | --                 | 40<br>(14 - 88)             | 610<br>(268 - 1,242)        | 922<br>(444 - 1,574)           |
| Liver cancer due to other causes                                 | 127<br>(37 - 268)              | --                   | 0<br>(0 - 1)       | 8<br>(3 - 17)               | 63<br>(16 - 139)            | 56<br>(15 - 121)               |
| Larynx cancer                                                    | 1,494<br>(1,180 - 2,389)       | --                   | --                 | 102<br>(66 - 203)           | 757<br>(570 - 1,262)        | 634<br>(479 - 950)             |
| Tracheal, bronchus and lung cancer                               | 28,391<br>(25,973 - 31,159)    | --                   | --                 | 1,371<br>(1,129 - 1,640)    | 13,630<br>(12,313 - 15,216) | 13,390<br>(11,870 - 15,096)    |
| Breast cancer                                                    | 202<br>(60 - 326)              | --                   | --                 | 10<br>(3 - 17)              | 65<br>(19 - 105)            | 127<br>(35 - 217)              |
| Cervical cancer                                                  | --                             | --                   | --                 | --                          | --                          | --                             |

Web Table 31- France deaths with 95% UI by age, sex, and cause in 2013

| Cause                                         | Males, All Ages             | Males, 0-4 Years | Males, 5-14 Years | Males, 15-49 Years       | Males, 50-69 Years          | Males, 70-80 Years          |
|-----------------------------------------------|-----------------------------|------------------|-------------------|--------------------------|-----------------------------|-----------------------------|
| Uterine cancer                                | --                          | --               | --                | --                       | --                          | --                          |
| Prostate cancer                               | 13,948<br>(10,574 - 21,151) | --               | --                | 21<br>(13 - 31)          | 1,588<br>(1,175 - 2,353)    | 12,340<br>(9,018 - 19,081)  |
| Colon and rectum cancer                       | 12,130<br>(10,547 - 13,912) | --               | --                | 334<br>(277 - 395)       | 3,335<br>(2,916 - 3,755)    | 8,461<br>(7,119 - 9,960)    |
| Lip and oral cavity cancer                    | 1,856<br>(1,581 - 2,180)    | --               | --                | 170<br>(122 - 248)       | 1,015<br>(830 - 1,237)      | 670<br>(517 - 848)          |
| Nasopharynx cancer                            | 293<br>(216 - 590)          | --               | 1<br>(0 - 1)      | 50<br>(29 - 117)         | 175<br>(117 - 359)          | 67<br>(46 - 117)            |
| Other pharynx cancer                          | 1,970<br>(1,601 - 2,941)    | --               | --                | 180<br>(120 - 338)       | 1,245<br>(966 - 1,895)      | 545<br>(408 - 762)          |
| Gallbladder and biliary tract cancer          | 793<br>(586 - 1,352)        | --               | --                | 19<br>(13 - 32)          | 209<br>(144 - 392)          | 564<br>(404 - 958)          |
| Pancreatic cancer                             | 5,556<br>(4,884 - 6,260)    | --               | --                | 243<br>(195 - 302)       | 2,262<br>(1,926 - 2,589)    | 3,051<br>(2,591 - 3,586)    |
| Malignant skin melanoma                       | 1,075<br>(425 - 1,543)      | --               | --                | 188<br>(75 - 282)        | 397<br>(156 - 580)          | 490<br>(193 - 738)          |
| Non-melanoma skin cancer                      | 455<br>(273 - 706)          | --               | --                | 12<br>(7 - 18)           | 62<br>(36 - 98)             | 382<br>(224 - 601)          |
| Ovarian cancer                                | --                          | --               | --                | --                       | --                          | --                          |
| Testicular cancer                             | 109<br>(73 - 144)           | --               | --                | 59<br>(38 - 81)          | 23<br>(15 - 33)             | 26<br>(17 - 39)             |
| Kidney cancer                                 | 2,975<br>(2,436 - 3,663)    | 2<br>(1 - 4)     | 2<br>(1 - 4)      | 120<br>(90 - 158)        | 1,072<br>(858 - 1,316)      | 1,779<br>(1,293 - 2,376)    |
| Bladder cancer                                | 4,487<br>(3,149 - 5,474)    | --               | --                | 57<br>(43 - 74)          | 1,008<br>(753 - 1,200)      | 3,421<br>(2,286 - 4,370)    |
| Brain and nervous system cancer               | 1,989<br>(1,353 - 2,418)    | 14<br>(7 - 26)   | 35<br>(23 - 49)   | 349<br>(249 - 433)       | 958<br>(674 - 1,182)        | 633<br>(371 - 870)          |
| Thyroid cancer                                | 190<br>(157 - 226)          | --               | 0<br>(0 - 0)      | 17<br>(12 - 23)          | 71<br>(55 - 89)             | 102<br>(77 - 134)           |
| Mesothelioma                                  | 1,117<br>(746 - 1,764)      | --               | --                | 34<br>(19 - 65)          | 392<br>(260 - 664)          | 691<br>(406 - 1,125)        |
| Hodgkin lymphoma                              | 179<br>(108 - 233)          | 0<br>(0 - 0)     | 1<br>(0 - 2)      | 52<br>(31 - 74)          | 54<br>(34 - 75)             | 72<br>(41 - 100)            |
| Non-Hodgkin lymphoma                          | 3,288<br>(1,170 - 4,449)    | 4<br>(1 - 7)     | 11<br>(4 - 18)    | 210<br>(88 - 287)        | 974<br>(370 - 1,258)        | 2,090<br>(661 - 3,077)      |
| Multiple myeloma                              | 1,711<br>(931 - 2,677)      | --               | --                | 45<br>(26 - 82)          | 477<br>(272 - 792)          | 1,189<br>(621 - 1,846)      |
| Leukemia                                      | 3,501<br>(3,020 - 4,022)    | 14<br>(7 - 23)   | 32<br>(23 - 43)   | 226<br>(186 - 263)       | 780<br>(662 - 917)          | 2,449<br>(2,049 - 2,935)    |
| Other neoplasms                               | 4,999<br>(3,943 - 6,926)    | 26<br>(15 - 43)  | 37<br>(24 - 56)   | 496<br>(373 - 723)       | 1,564<br>(1,070 - 2,550)    | 2,875<br>(1,975 - 4,002)    |
| Cardiovascular diseases                       | 76,983<br>(70,911 - 82,974) | 24<br>(17 - 32)  | 15<br>(11 - 19)   | 2,378<br>(2,057 - 2,686) | 13,089<br>(11,558 - 14,604) | 61,477<br>(56,296 - 66,543) |
| Rheumatic heart disease                       | 592<br>(253 - 876)          | 0<br>(0 - 0)     | 1<br>(0 - 1)      | 30<br>(15 - 45)          | 118<br>(58 - 167)           | 443<br>(166 - 715)          |
| Ischemic heart disease                        | 37,168<br>(32,481 - 42,330) | 1<br>(1 - 2)     | 2<br>(1 - 3)      | 1,367<br>(1,127 - 1,598) | 7,287<br>(6,205 - 8,272)    | 28,511<br>(24,300 - 33,085) |
| Cerebrovascular disease                       | 20,434<br>(15,447 - 24,586) | 5<br>(3 - 8)     | 6<br>(4 - 8)      | 466<br>(345 - 603)       | 2,666<br>(1,990 - 3,317)    | 17,292<br>(13,111 - 21,262) |
| Ischemic stroke                               | 10,915<br>(7,877 - 13,896)  | 0<br>(0 - 0)     | 0<br>(0 - 0)      | 55<br>(33 - 79)          | 872<br>(551 - 1,160)        | 9,987<br>(7,190 - 12,784)   |
| Hemorrhagic stroke                            | 9,519<br>(6,647 - 12,322)   | 5<br>(3 - 7)     | 5<br>(4 - 7)      | 410<br>(302 - 531)       | 1,794<br>(1,323 - 2,228)    | 7,305<br>(4,812 - 9,737)    |
| Hypertensive heart disease                    | 1,541<br>(999 - 2,442)      | 0<br>(0 - 0)     | 0<br>(0 - 0)      | 17<br>(11 - 29)          | 175<br>(121 - 309)          | 1,348<br>(842 - 2,180)      |
| Cardiomyopathy and myocarditis                | 2,944<br>(1,991 - 3,857)    | 12<br>(8 - 17)   | 4<br>(2 - 5)      | 153<br>(105 - 205)       | 596<br>(426 - 778)          | 2,179<br>(1,389 - 3,008)    |
| Atrial fibrillation and flutter               | 2,458<br>(1,594 - 3,442)    | --               | --                | 8<br>(6 - 11)            | 142<br>(102 - 188)          | 2,308<br>(1,464 - 3,290)    |
| Aortic aneurysm                               | 2,259<br>(1,752 - 2,686)    | --               | --                | 61<br>(46 - 77)          | 526<br>(391 - 639)          | 1,672<br>(1,266 - 2,060)    |
| Peripheral vascular disease                   | 454<br>(331 - 610)          | --               | --                | 7<br>(5 - 9)             | 68<br>(50 - 88)             | 379<br>(264 - 531)          |
| Endocarditis                                  | 544<br>(351 - 899)          | 1<br>(0 - 1)     | 1<br>(0 - 1)      | 36<br>(23 - 59)          | 136<br>(83 - 235)           | 371<br>(222 - 635)          |
| Other cardiovascular and circulatory diseases | 8,589<br>(6,309 - 10,787)   | 5<br>(3 - 7)     | 2<br>(1 - 2)      | 232<br>(157 - 293)       | 1,376<br>(964 - 1,728)      | 6,974<br>(4,988 - 9,102)    |
| Chronic respiratory diseases                  | 15,385<br>(13,298 - 19,735) | 6<br>(4 - 9)     | 4<br>(3 - 5)      | 188<br>(153 - 231)       | 1,864<br>(1,563 - 2,285)    | 13,323<br>(11,403 - 17,306) |
| Chronic obstructive pulmonary disease         | 11,802<br>(9,969 - 15,557)  | 3<br>(2 - 5)     | 1<br>(1 - 2)      | 88<br>(69 - 113)         | 1,383<br>(1,143 - 1,716)    | 10,327<br>(8,681 - 13,851)  |
| Pneumoconiosis                                | 1,170<br>(754 - 1,746)      | 0<br>(0 - 0)     | 0<br>(0 - 0)      | 10<br>(7 - 15)           | 150<br>(86 - 244)           | 1,010<br>(614 - 1,517)      |
| Silicosis                                     | 411<br>(257 - 611)          | 0<br>(0 - 0)     | 0<br>(0 - 0)      | 4<br>(2 - 5)             | 36<br>(20 - 60)             | 372<br>(224 - 561)          |
| Asbestosis                                    | 365<br>(237 - 550)          | 0<br>(0 - 0)     | 0<br>(0 - 0)      | 3<br>(2 - 4)             | 59<br>(34 - 98)             | 303<br>(187 - 459)          |



Web Table 31- France deaths with 95% UI by age, sex, and cause in 2013

| Cause                                               | Males, All Ages             | Males, 0-4 Years | Males, 5-14 Years | Males, 15-49 Years       | Males, 50-69 Years       | Males, 70-80 Years          |
|-----------------------------------------------------|-----------------------------|------------------|-------------------|--------------------------|--------------------------|-----------------------------|
| Coal workers pneumoconiosis                         | 82<br>(52 - 123)            | 0<br>(0 - 0)     | 0<br>(0 - 0)      | 1<br>(1 - 1)             | 9<br>(5 - 15)            | 72<br>(44 - 109)            |
| Other pneumoconiosis                                | 313<br>(186 - 487)          | 0<br>(0 - 0)     | 0<br>(0 - 0)      | 3<br>(2 - 5)             | 46<br>(26 - 77)          | 264<br>(144 - 418)          |
| Asthma                                              | 437<br>(322 - 564)          | 0<br>(0 - 1)     | 2<br>(1 - 2)      | 51<br>(38 - 65)          | 113<br>(83 - 151)        | 271<br>(180 - 371)          |
| Interstitial lung disease and pulmonary sarcoidosis | 1,727<br>(1,027 - 2,684)    | 0<br>(0 - 1)     | 0<br>(0 - 1)      | 20<br>(12 - 32)          | 162<br>(83 - 237)        | 1,544<br>(905 - 2,474)      |
| Other chronic respiratory diseases                  | 248<br>(176 - 346)          | 2<br>(1 - 4)     | 1<br>(0 - 1)      | 18<br>(13 - 25)          | 56<br>(39 - 79)          | 171<br>(108 - 258)          |
| Cirrhosis                                           | 7,250<br>(6,456 - 8,016)    | 1<br>(1 - 2)     | 1<br>(1 - 2)      | 1,005<br>(838 - 1,181)   | 3,734<br>(3,209 - 4,281) | 2,508<br>(2,161 - 2,927)    |
| Cirrhosis due to hepatitis B                        | 627<br>(341 - 993)          | 0<br>(0 - 0)     | 0<br>(0 - 0)      | 86<br>(41 - 154)         | 320<br>(169 - 522)       | 221<br>(115 - 347)          |
| Cirrhosis due to hepatitis C                        | 2,941<br>(1,540 - 4,235)    | 0<br>(0 - 0)     | 0<br>(0 - 1)      | 423<br>(182 - 655)       | 1,530<br>(679 - 2,306)   | 987<br>(582 - 1,420)        |
| Cirrhosis due to alcohol use                        | 3,042<br>(1,927 - 4,309)    | --               | --                | 352<br>(146 - 573)       | 1,536<br>(853 - 2,287)   | 1,153<br>(761 - 1,584)      |
| Cirrhosis due to other causes                       | 640<br>(180 - 1,156)        | 1<br>(1 - 2)     | 1<br>(0 - 1)      | 143<br>(54 - 257)        | 348<br>(86 - 642)        | 147<br>(34 - 295)           |
| Digestive diseases                                  | 6,712<br>(5,701 - 8,121)    | 4<br>(2 - 5)     | 3<br>(2 - 4)      | 244<br>(188 - 294)       | 1,089<br>(905 - 1,292)   | 5,373<br>(4,470 - 6,698)    |
| Peptic ulcer disease                                | 709<br>(495 - 1,006)        | 0<br>(0 - 0)     | 0<br>(0 - 0)      | 30<br>(20 - 41)          | 138<br>(93 - 190)        | 541<br>(355 - 799)          |
| Gastritis and duodenitis                            | 30<br>(17 - 67)             | 0<br>(0 - 0)     | 0<br>(0 - 0)      | 3<br>(1 - 5)             | 6<br>(4 - 14)            | 21<br>(10 - 50)             |
| Appendicitis                                        | 110<br>(67 - 184)           | 0<br>(0 - 0)     | 0<br>(0 - 1)      | 8<br>(4 - 11)            | 20<br>(12 - 33)          | 82<br>(45 - 147)            |
| Paralytic ileus and intestinal obstruction          | 1,650<br>(969 - 2,520)      | 1<br>(1 - 2)     | 1<br>(1 - 2)      | 41<br>(21 - 63)          | 192<br>(101 - 287)       | 1,415<br>(811 - 2,219)      |
| Inguinal, femoral, and abdominal hernia             | 268<br>(133 - 478)          | 0<br>(0 - 0)     | 0<br>(0 - 0)      | 3<br>(1 - 5)             | 33<br>(16 - 51)          | 232<br>(109 - 418)          |
| Inflammatory bowel disease                          | 461<br>(278 - 883)          | 1<br>(0 - 1)     | 0<br>(0 - 0)      | 14<br>(9 - 23)           | 70<br>(44 - 129)         | 375<br>(213 - 756)          |
| Vascular intestinal disorders                       | 1,318<br>(568 - 2,405)      | 0<br>(0 - 0)     | 0<br>(0 - 0)      | 22<br>(8 - 45)           | 222<br>(97 - 409)        | 1,074<br>(457 - 1,995)      |
| Gallbladder and biliary diseases                    | 773<br>(504 - 1,114)        | 0<br>(0 - 0)     | 0<br>(0 - 0)      | 9<br>(6 - 13)            | 78<br>(51 - 106)         | 685<br>(437 - 1,011)        |
| Pancreatitis                                        | 647<br>(393 - 906)          | 0<br>(0 - 0)     | 0<br>(0 - 0)      | 92<br>(62 - 122)         | 207<br>(129 - 283)       | 348<br>(195 - 537)          |
| Other digestive diseases                            | 746<br>(451 - 1,063)        | 1<br>(0 - 1)     | 0<br>(0 - 1)      | 23<br>(12 - 31)          | 122<br>(75 - 167)        | 600<br>(349 - 887)          |
| Neurological disorders                              | 20,216<br>(15,934 - 24,494) | 45<br>(29 - 63)  | 18<br>(14 - 24)   | 499<br>(385 - 592)       | 1,581<br>(1,257 - 1,842) | 18,073<br>(13,949 - 22,181) |
| Alzheimer disease and other dementias               | 14,128<br>(9,872 - 18,292)  | --               | --                | 1<br>(0 - 3)             | 366<br>(242 - 507)       | 13,761<br>(9,542 - 17,924)  |
| Parkinson disease                                   | 3,182<br>(2,222 - 4,193)    | --               | --                | 6<br>(4 - 8)             | 191<br>(145 - 238)       | 2,985<br>(2,055 - 3,970)    |
| Epilepsy                                            | 855<br>(601 - 1,051)        | 7<br>(4 - 10)    | 7<br>(4 - 11)     | 238<br>(168 - 303)       | 246<br>(176 - 312)       | 357<br>(229 - 491)          |
| Multiple sclerosis                                  | 299<br>(117 - 420)          | --               | --                | 75<br>(30 - 116)         | 159<br>(59 - 242)        | 65<br>(23 - 103)            |
| Other neurological disorders                        | 1,751<br>(1,306 - 2,084)    | 38<br>(23 - 55)  | 11<br>(8 - 16)    | 180<br>(129 - 220)       | 618<br>(433 - 745)       | 904<br>(678 - 1,184)        |
| Mental and substance use disorders                  | 4,101<br>(2,791 - 5,346)    | 1<br>(0 - 1)     | 0<br>(0 - 0)      | 1,802<br>(1,368 - 2,318) | 1,565<br>(865 - 2,150)   | 734<br>(530 - 1,026)        |
| Schizophrenia                                       | 135<br>(44 - 211)           | --               | --                | 25<br>(7 - 42)           | 46<br>(15 - 74)          | 64<br>(17 - 117)            |
| Alcohol use disorders                               | 2,922<br>(1,686 - 4,294)    | --               | --                | 1,071<br>(619 - 1,514)   | 1,421<br>(752 - 2,054)   | 430<br>(288 - 735)          |
| Drug use disorders                                  | 1,043<br>(862 - 1,263)      | 1<br>(0 - 1)     | --                | 704<br>(560 - 884)       | 99<br>(62 - 130)         | 239<br>(163 - 337)          |
| Opioid use disorders                                | 389<br>(316 - 482)          | 0<br>(0 - 0)     | --                | 264<br>(206 - 346)       | 33<br>(21 - 44)          | 91<br>(59 - 133)            |
| Cocaine use disorders                               | 25<br>(20 - 32)             | 0<br>(0 - 0)     | --                | 19<br>(15 - 25)          | 2<br>(1 - 3)             | 4<br>(3 - 7)                |
| Amphetamine use disorders                           | 25<br>(19 - 31)             | 0<br>(0 - 0)     | --                | 17<br>(13 - 23)          | 2<br>(1 - 3)             | 5<br>(3 - 8)                |
| Other drug use disorders                            | 604<br>(495 - 728)          | 0<br>(0 - 1)     | --                | 404<br>(320 - 523)       | 61<br>(39 - 81)          | 139<br>(93 - 193)           |
| Eating disorders                                    | 2<br>(1 - 3)                | --               | 0<br>(0 - 0)      | 2<br>(1 - 3)             | --                       | --                          |
| Anorexia nervosa                                    | 2<br>(1 - 3)                | --               | 0<br>(0 - 0)      | 2<br>(1 - 3)             | --                       | --                          |
| Diabetes, urogenital, blood, and endocrine diseases | 14,029<br>(12,567 - 15,609) | 60<br>(36 - 86)  | 27<br>(19 - 38)   | 461<br>(381 - 539)       | 2,361<br>(2,024 - 2,670) | 11,121<br>(9,772 - 12,595)  |
| Diabetes mellitus                                   | 5,727<br>(4,932 - 6,643)    | 2<br>(1 - 3)     | 1<br>(1 - 1)      | 161<br>(131 - 192)       | 1,162<br>(987 - 1,356)   | 4,401<br>(3,668 - 5,260)    |
| Acute glomerulonephritis                            | 4<br>(3 - 5)                | 0<br>(0 - 0)     | 0<br>(0 - 0)      | 1<br>(1 - 1)             | 1<br>(0 - 1)             | 1<br>(1 - 3)                |

Web Table 31- France deaths with 95% UI by age, sex, and cause in 2013

| Cause                                               | Males, All Ages             | Males, 0-4 Years   | Males, 5-14 Years  | Males, 15-49 Years       | Males, 50-69 Years       | Males, 70-80 Years          |
|-----------------------------------------------------|-----------------------------|--------------------|--------------------|--------------------------|--------------------------|-----------------------------|
| Chronic kidney disease                              | 4,555<br>(3,733 - 5,642)    | 2<br>(1 - 3)       | 1<br>(1 - 2)       | 62<br>(49 - 79)          | 465<br>(367 - 572)       | 4,024<br>(3,207 - 5,062)    |
| Chronic kidney disease due to diabetes mellitus     | 728<br>(377 - 1,297)        | 0<br>(0 - 0)       | 0<br>(0 - 0)       | 14<br>(7 - 24)           | 111<br>(42 - 168)        | 602<br>(292 - 1,159)        |
| Chronic kidney disease due to hypertension          | 2,021<br>(1,338 - 2,864)    | 0<br>(0 - 1)       | 0<br>(0 - 0)       | 22<br>(15 - 37)          | 178<br>(113 - 265)       | 1,820<br>(1,204 - 2,553)    |
| Chronic kidney disease due to glomerulonephritis    | 57<br>(33 - 102)            | 0<br>(0 - 1)       | 0<br>(0 - 0)       | 3<br>(2 - 4)             | 9<br>(5 - 13)            | 45<br>(24 - 86)             |
| Chronic kidney disease due to other causes          | 1,749<br>(1,011 - 2,479)    | 1<br>(0 - 2)       | 0<br>(0 - 1)       | 23<br>(12 - 36)          | 167<br>(91 - 253)        | 1,557<br>(854 - 2,281)      |
| Urinary diseases and male infertility               | 1,429<br>(912 - 1,897)      | 2<br>(1 - 2)       | 0<br>(0 - 0)       | 16<br>(9 - 20)           | 122<br>(78 - 153)        | 1,290<br>(815 - 1,767)      |
| Interstitial nephritis and urinary tract infections | 1,086<br>(653 - 1,484)      | 1<br>(1 - 2)       | 0<br>(0 - 0)       | 10<br>(6 - 14)           | 83<br>(48 - 109)         | 993<br>(594 - 1,385)        |
| Urolithiasis                                        | 36<br>(21 - 61)             | --                 | 0<br>(0 - 0)       | 2<br>(1 - 3)             | 6<br>(4 - 11)            | 28<br>(15 - 50)             |
| Other urinary diseases                              | 306<br>(178 - 560)          | 1<br>(0 - 1)       | 0<br>(0 - 0)       | 3<br>(2 - 6)             | 33<br>(20 - 52)          | 269<br>(144 - 504)          |
| Gynecological diseases                              | --                          | --                 | --                 | --                       | --                       | --                          |
| Uterine fibroids                                    | --                          | --                 | --                 | --                       | --                       | --                          |
| Polycystic ovarian syndrome                         | --                          | --                 | --                 | --                       | --                       | --                          |
| Endometriosis                                       | --                          | --                 | --                 | --                       | --                       | --                          |
| Genital prolapse                                    | --                          | --                 | --                 | --                       | --                       | --                          |
| Other gynecological diseases                        | --                          | --                 | --                 | --                       | --                       | --                          |
| Hemoglobinopathies and hemolytic anemias            | 366<br>(229 - 634)          | 3<br>(1 - 5)       | 3<br>(1 - 5)       | 17<br>(11 - 27)          | 52<br>(34 - 86)          | 292<br>(172 - 524)          |
| Thalassemias                                        | 2<br>(1 - 3)                | 0<br>(0 - 1)       | 0<br>(0 - 1)       | 1<br>(1 - 2)             | 0<br>(0 - 0)             | 0<br>(0 - 0)                |
| Sickle cell disorders                               | 59<br>(39 - 95)             | 2<br>(1 - 3)       | 2<br>(1 - 3)       | 10<br>(6 - 16)           | 29<br>(19 - 48)          | 16<br>(10 - 28)             |
| G6PD deficiency                                     | 1<br>(1 - 2)                | 0<br>(0 - 0)       | 0<br>(0 - 0)       | 0<br>(0 - 0)             | 0<br>(0 - 1)             | 1<br>(0 - 1)                |
| Other hemoglobinopathies and hemolytic anemias      | 304<br>(183 - 540)          | 1<br>(0 - 1)       | 0<br>(0 - 1)       | 5<br>(3 - 9)             | 23<br>(14 - 37)          | 276<br>(162 - 497)          |
| Endocrine, metabolic, blood, and immune disorders   | 1,948<br>(1,393 - 2,744)    | 52<br>(29 - 76)    | 21<br>(14 - 31)    | 205<br>(130 - 277)       | 558<br>(332 - 706)       | 1,112<br>(751 - 1,778)      |
| Musculoskeletal disorders                           | 1,031<br>(465 - 1,373)      | --                 | 1<br>(1 - 2)       | 29<br>(14 - 36)          | 148<br>(74 - 187)        | 853<br>(368 - 1,169)        |
| Rheumatoid arthritis                                | 105<br>(50 - 174)           | --                 | 0<br>(0 - 1)       | 3<br>(1 - 4)             | 21<br>(11 - 36)          | 81<br>(36 - 140)            |
| Other musculoskeletal disorders                     | 926<br>(408 - 1,241)        | --                 | 1<br>(0 - 2)       | 26<br>(13 - 33)          | 127<br>(61 - 161)        | 772<br>(321 - 1,076)        |
| Other non-communicable diseases                     | 1,913<br>(1,621 - 2,309)    | 596<br>(450 - 795) | 30<br>(22 - 39)    | 172<br>(126 - 204)       | 229<br>(172 - 269)       | 887<br>(645 - 1,254)        |
| Congenital anomalies                                | 897<br>(740 - 1,055)        | 407<br>(309 - 531) | 29<br>(21 - 38)    | 161<br>(116 - 192)       | 164<br>(104 - 200)       | 137<br>(92 - 180)           |
| Neural tube defects                                 | 12<br>(8 - 19)              | 9<br>(5 - 16)      | 0<br>(0 - 1)       | 2<br>(1 - 2)             | 1<br>(0 - 1)             | 0<br>(0 - 1)                |
| Congenital heart anomalies                          | 340<br>(273 - 418)          | 180<br>(128 - 244) | 13<br>(7 - 18)     | 73<br>(48 - 91)          | 49<br>(33 - 70)          | 26<br>(16 - 39)             |
| Cleft lip and cleft palate                          | 0<br>(0 - 1)                | 0<br>(0 - 1)       | --                 | --                       | --                       | --                          |
| Down syndrome                                       | 100<br>(42 - 141)           | 14<br>(5 - 24)     | 2<br>(0 - 3)       | 23<br>(9 - 34)           | 55<br>(20 - 84)          | 7<br>(2 - 12)               |
| Chromosomal unbalanced rearrangements               | 37<br>(23 - 53)             | 22<br>(12 - 35)    | 1<br>(1 - 2)       | 6<br>(3 - 8)             | 7<br>(5 - 11)            | 1<br>(0 - 2)                |
| Other congenital anomalies                          | 407<br>(327 - 502)          | 182<br>(130 - 261) | 14<br>(8 - 21)     | 57<br>(40 - 75)          | 51<br>(32 - 74)          | 102<br>(68 - 137)           |
| Skin and subcutaneous diseases                      | 828<br>(595 - 1,205)        | 1<br>(1 - 1)       | 0<br>(0 - 1)       | 11<br>(9 - 15)           | 65<br>(51 - 84)          | 750<br>(516 - 1,116)        |
| Cellulitis                                          | 49<br>(19 - 123)            | 0<br>(0 - 0)       | 0<br>(0 - 0)       | 2<br>(1 - 5)             | 9<br>(4 - 19)            | 37<br>(12 - 104)            |
| Pyoderma                                            | 226<br>(143 - 360)          | 0<br>(0 - 1)       | 0<br>(0 - 0)       | 5<br>(3 - 7)             | 30<br>(19 - 41)          | 191<br>(111 - 318)          |
| Decubitus ulcer                                     | 489<br>(321 - 740)          | 0<br>(0 - 0)       | 0<br>(0 - 0)       | 2<br>(1 - 3)             | 22<br>(14 - 31)          | 465<br>(296 - 712)          |
| Other skin and subcutaneous diseases                | 65<br>(27 - 150)            | 0<br>(0 - 0)       | 0<br>(0 - 0)       | 2<br>(1 - 3)             | 5<br>(3 - 8)             | 57<br>(20 - 142)            |
| Sudden infant death syndrome                        | 188<br>(104 - 351)          | 188<br>(104 - 351) | --                 | --                       | --                       | --                          |
| Injuries                                            | 26,770<br>(24,186 - 30,722) | 177<br>(126 - 247) | 163<br>(138 - 194) | 7,620<br>(6,700 - 8,308) | 6,185<br>(5,386 - 7,009) | 12,626<br>(10,714 - 15,755) |
| Transport injuries                                  | 4,084<br>(3,602 - 4,513)    | 42<br>(28 - 60)    | 77<br>(60 - 99)    | 2,306<br>(1,974 - 2,568) | 857<br>(730 - 1,008)     | 803<br>(669 - 951)          |

Web Table 31- France deaths with 95% UI by age, sex, and cause in 2013

| Cause                                           | Males, All Ages             | Males, 0-4 Years  | Males, 5-14 Years | Males, 15-49 Years       | Males, 50-69 Years       | Males, 70-80 Years        |
|-------------------------------------------------|-----------------------------|-------------------|-------------------|--------------------------|--------------------------|---------------------------|
| Road injuries                                   | 3,740<br>(3,335 - 4,130)    | 40<br>(27 - 58)   | 73<br>(57 - 95)   | 2,170<br>(1,882 - 2,414) | 695<br>(584 - 813)       | 762<br>(640 - 905)        |
| Pedestrian road injuries                        | 410<br>(167 - 696)          | 9<br>(3 - 18)     | 15<br>(6 - 28)    | 116<br>(41 - 215)        | 99<br>(37 - 179)         | 171<br>(66 - 303)         |
| Cyclist road injuries                           | 286<br>(110 - 398)          | 5<br>(2 - 9)      | 16<br>(7 - 25)    | 85<br>(31 - 125)         | 84<br>(31 - 125)         | 96<br>(35 - 149)          |
| Motorcyclist road injuries                      | 973<br>(697 - 1,565)        | 1<br>(0 - 2)      | 7<br>(3 - 13)     | 791<br>(563 - 1,247)     | 121<br>(70 - 214)        | 54<br>(30 - 120)          |
| Motor vehicle road injuries                     | 2,064<br>(1,537 - 2,537)    | 25<br>(16 - 38)   | 35<br>(22 - 53)   | 1,176<br>(761 - 1,462)   | 389<br>(292 - 519)       | 439<br>(309 - 612)        |
| Other road injuries                             | 7<br>(3 - 12)               | 1<br>(0 - 1)      | 1<br>(0 - 1)      | 3<br>(1 - 5)             | 2<br>(1 - 3)             | 2<br>(1 - 4)              |
| Other transport injuries                        | 344<br>(213 - 455)          | 2<br>(1 - 3)      | 4<br>(2 - 7)      | 136<br>(76 - 190)        | 162<br>(101 - 220)       | 40<br>(17 - 67)           |
| Unintentional injuries                          | 13,325<br>(11,307 - 16,232) | 121<br>(82 - 178) | 59<br>(47 - 78)   | 1,159<br>(978 - 1,315)   | 2,539<br>(2,213 - 2,975) | 9,447<br>(7,687 - 12,289) |
| Falls                                           | 6,744<br>(5,191 - 8,430)    | 13<br>(8 - 20)    | 9<br>(6 - 13)     | 345<br>(257 - 422)       | 1,237<br>(984 - 1,546)   | 5,139<br>(3,731 - 6,721)  |
| Drowning                                        | 686<br>(430 - 887)          | 34<br>(21 - 58)   | 23<br>(15 - 40)   | 231<br>(141 - 322)       | 211<br>(119 - 295)       | 186<br>(106 - 258)        |
| Fire, heat, and hot substances                  | 419<br>(309 - 566)          | 13<br>(7 - 24)    | 5<br>(3 - 8)      | 89<br>(57 - 120)         | 89<br>(58 - 119)         | 222<br>(150 - 346)        |
| Poisonings                                      | 176<br>(109 - 219)          | 3<br>(1 - 4)      | 1<br>(1 - 2)      | 37<br>(24 - 50)          | 43<br>(26 - 57)          | 92<br>(51 - 129)          |
| Exposure to mechanical forces                   | 352<br>(283 - 400)          | 13<br>(8 - 21)    | 8<br>(6 - 11)     | 112<br>(90 - 133)        | 116<br>(92 - 142)        | 102<br>(62 - 126)         |
| Unintentional firearm injuries                  | 38<br>(29 - 47)             | 0<br>(0 - 1)      | 2<br>(1 - 3)      | 16<br>(11 - 21)          | 12<br>(8 - 17)           | 8<br>(5 - 11)             |
| Unintentional suffocation                       | 30<br>(17 - 41)             | 8<br>(4 - 16)     | 2<br>(1 - 3)      | 4<br>(2 - 5)             | 4<br>(2 - 6)             | 12<br>(4 - 21)            |
| Other exposure to mechanical forces             | 284<br>(211 - 327)          | 4<br>(2 - 6)      | 4<br>(3 - 6)      | 93<br>(73 - 112)         | 100<br>(78 - 125)        | 83<br>(47 - 105)          |
| Adverse effects of medical treatment            | 1,556<br>(1,137 - 2,578)    | 5<br>(3 - 11)     | 3<br>(2 - 6)      | 78<br>(52 - 144)         | 352<br>(235 - 640)       | 1,118<br>(763 - 1,855)    |
| Animal contact                                  | 35<br>(26 - 66)             | 1<br>(0 - 1)      | 0<br>(0 - 1)      | 6<br>(4 - 13)            | 15<br>(11 - 31)          | 12<br>(8 - 24)            |
| Venomous animal contact                         | 14<br>(10 - 30)             | 0<br>(0 - 0)      | 0<br>(0 - 0)      | 3<br>(2 - 6)             | 7<br>(4 - 14)            | 4<br>(2 - 8)              |
| Non-venomous animal contact                     | 21<br>(15 - 37)             | 0<br>(0 - 1)      | 0<br>(0 - 0)      | 3<br>(2 - 7)             | 8<br>(5 - 16)            | 9<br>(5 - 16)             |
| Foreign body                                    | 3,054<br>(1,818 - 5,640)    | 35<br>(18 - 76)   | 6<br>(4 - 11)     | 166<br>(89 - 250)        | 361<br>(187 - 537)       | 2,487<br>(1,469 - 4,823)  |
| Pulmonary aspiration and foreign body in airway | 3,047<br>(1,812 - 5,635)    | 35<br>(18 - 75)   | 6<br>(3 - 10)     | 164<br>(88 - 248)        | 359<br>(186 - 535)       | 2,484<br>(1,465 - 4,821)  |
| Foreign body in other body part                 | 7<br>(4 - 11)               | 0<br>(0 - 0)      | 0<br>(0 - 1)      | 2<br>(1 - 2)             | 2<br>(1 - 2)             | 3<br>(2 - 6)              |
| Other unintentional injuries                    | 305<br>(233 - 393)          | 5<br>(2 - 9)      | 3<br>(1 - 6)      | 94<br>(66 - 140)         | 115<br>(70 - 182)        | 88<br>(57 - 132)          |
| Self-harm and interpersonal violence            | 9,361<br>(7,934 - 11,357)   | 14<br>(8 - 21)    | 26<br>(18 - 37)   | 4,155<br>(3,257 - 4,860) | 2,790<br>(2,207 - 3,372) | 2,376<br>(1,843 - 3,624)  |
| Self-harm                                       | 8,959<br>(7,536 - 10,931)   | --                | 17<br>(10 - 25)   | 3,929<br>(3,042 - 4,641) | 2,693<br>(2,113 - 3,270) | 2,320<br>(1,791 - 3,578)  |
| Interpersonal violence                          | 402<br>(260 - 577)          | 14<br>(8 - 21)    | 9<br>(6 - 16)     | 226<br>(145 - 326)       | 97<br>(61 - 146)         | 56<br>(31 - 80)           |
| Assault by firearm                              | 204<br>(108 - 308)          | 3<br>(1 - 6)      | 4<br>(2 - 8)      | 123<br>(68 - 193)        | 52<br>(28 - 82)          | 22<br>(9 - 34)            |
| Assault by sharp object                         | 90<br>(42 - 155)            | 2<br>(1 - 3)      | 1<br>(0 - 2)      | 56<br>(26 - 96)          | 20<br>(8 - 35)           | 11<br>(5 - 19)            |
| Assault by other means                          | 108<br>(64 - 177)           | 10<br>(5 - 15)    | 4<br>(2 - 7)      | 46<br>(25 - 81)          | 25<br>(14 - 46)          | 23<br>(13 - 40)           |
| Forces of nature, war, and legal intervention   | 0<br>(0 - 0)                | 0<br>(0 - 0)      | --                | --                       | --                       | 0<br>(0 - 0)              |
| Exposure to forces of nature                    | 0<br>(0 - 0)                | 0<br>(0 - 0)      | --                | --                       | --                       | 0<br>(0 - 0)              |

Web Table 31- France deaths with 95% UI by age, sex, and cause in 2013

| Cause                                                             | Females, All Ages              | Females, 0-4 Years       | Females, 5-14 Years | Females, 15-49 Years      | Females, 50-69 Years        | Females, 70-80 Years           |
|-------------------------------------------------------------------|--------------------------------|--------------------------|---------------------|---------------------------|-----------------------------|--------------------------------|
| All causes                                                        | 293,695<br>(280,077 - 307,227) | 1,293<br>(1,035 - 1,603) | 291<br>(260 - 327)  | 9,385<br>(8,686 - 10,129) | 34,054<br>(31,854 - 36,263) | 248,673<br>(238,004 - 259,298) |
| Communicable, maternal, neonatal, and nutritional diseases        | 19,999<br>(15,813 - 25,349)    | 534<br>(404 - 699)       | 23<br>(17 - 33)     | 425<br>(361 - 505)        | 840<br>(698 - 973)          | 18,177<br>(14,088 - 23,492)    |
| HIV/AIDS and tuberculosis                                         | 926<br>(699 - 1,201)           | 1<br>(1 - 2)             | 1<br>(0 - 1)        | 142<br>(94 - 223)         | 120<br>(72 - 188)           | 663<br>(452 - 928)             |
| Tuberculosis                                                      | 697<br>(485 - 967)             | 1<br>(0 - 1)             | 0<br>(0 - 1)        | 12<br>(9 - 15)            | 37<br>(28 - 60)             | 648<br>(437 - 914)             |
| HIV/AIDS                                                          | 229<br>(139 - 366)             | 1<br>(0 - 1)             | 0<br>(0 - 0)        | 130<br>(83 - 211)         | 84<br>(40 - 150)            | 15<br>(2 - 34)                 |
| HIV/AIDS resulting in mycobacterial infection                     | 10<br>(6 - 16)                 | 0<br>(0 - 0)             | 0<br>(0 - 0)        | 5<br>(3 - 9)              | 4<br>(2 - 7)                | 1<br>(0 - 2)                   |
| HIV/AIDS resulting in other diseases                              | 219<br>(134 - 351)             | 1<br>(0 - 1)             | 0<br>(0 - 0)        | 125<br>(79 - 204)         | 80<br>(38 - 143)            | 14<br>(2 - 32)                 |
| Diarrhea, lower respiratory, and other common infectious diseases | 14,634<br>(10,724 - 19,627)    | 64<br>(45 - 87)          | 18<br>(12 - 28)     | 160<br>(124 - 193)        | 551<br>(426 - 662)          | 13,841<br>(9,929 - 18,806)     |
| Diarrheal diseases                                                | 1,656<br>(960 - 2,706)         | 14<br>(8 - 23)           | 1<br>(1 - 2)        | 17<br>(12 - 23)           | 62<br>(45 - 84)             | 1,563<br>(869 - 2,618)         |
| Intestinal infectious diseases                                    | 34<br>(12 - 76)                | 5<br>(2 - 14)            | 6<br>(2 - 15)       | 11<br>(3 - 29)            | 5<br>(1 - 12)               | 7<br>(2 - 18)                  |
| Typhoid fever                                                     | 25<br>(7 - 61)                 | 4<br>(1 - 10)            | 5<br>(1 - 12)       | 9<br>(2 - 24)             | 4<br>(1 - 9)                | 5<br>(1 - 14)                  |
| Paratyphoid fever                                                 | 6<br>(2 - 14)                  | 1<br>(0 - 4)             | 1<br>(0 - 3)        | 2<br>(0 - 5)              | 1<br>(0 - 2)                | 1<br>(0 - 2)                   |
| Other intestinal infectious diseases                              | 3<br>(0 - 8)                   | 1<br>(0 - 3)             | 0<br>(0 - 1)        | 1<br>(0 - 3)              | 1<br>(0 - 3)                | 1<br>(0 - 5)                   |
| Lower respiratory infections                                      | 12,607<br>(8,974 - 17,751)     | 22<br>(13 - 33)          | 6<br>(4 - 8)        | 100<br>(71 - 124)         | 432<br>(313 - 538)          | 12,047<br>(8,416 - 17,160)     |
| Upper respiratory infections                                      | 6<br>(1 - 26)                  | 0<br>(0 - 0)             | 0<br>(0 - 0)        | 0<br>(0 - 1)              | 1<br>(0 - 2)                | 5<br>(0 - 25)                  |
| Otitis media                                                      | 12<br>(8 - 17)                 | 1<br>(0 - 1)             | 0<br>(0 - 0)        | 1<br>(1 - 1)              | 1<br>(1 - 2)                | 8<br>(5 - 13)                  |
| Meningitis                                                        | 144<br>(118 - 186)             | 13<br>(9 - 18)           | 2<br>(1 - 2)        | 10<br>(8 - 12)            | 24<br>(18 - 30)             | 96<br>(72 - 135)               |
| Pneumococcal meningitis                                           | 23<br>(13 - 36)                | 1<br>(1 - 2)             | 0<br>(0 - 0)        | 1<br>(1 - 2)              | 4<br>(2 - 7)                | 16<br>(7 - 28)                 |
| H influenzae type B meningitis                                    | 17<br>(11 - 26)                | 4<br>(2 - 6)             | 0<br>(0 - 1)        | 1<br>(1 - 2)              | 2<br>(1 - 4)                | 10<br>(4 - 18)                 |
| Meningococcal meningitis                                          | 36<br>(22 - 56)                | 2<br>(1 - 4)             | 0<br>(0 - 1)        | 3<br>(2 - 4)              | 6<br>(2 - 9)                | 25<br>(13 - 43)                |
| Other meningitis                                                  | 68<br>(49 - 91)                | 6<br>(4 - 9)             | 1<br>(1 - 1)        | 5<br>(2 - 7)              | 11<br>(7 - 16)              | 45<br>(29 - 66)                |
| Encephalitis                                                      | 117<br>(73 - 176)              | 5<br>(3 - 9)             | 2<br>(1 - 4)        | 15<br>(9 - 23)            | 22<br>(14 - 34)             | 72<br>(39 - 122)               |
| Diphtheria                                                        | 0<br>(0 - 1)                   | 0<br>(0 - 1)             | 0<br>(0 - 0)        | 0<br>(0 - 1)              | 0<br>(0 - 1)                | --                             |
| Whooping cough                                                    | 3<br>(2 - 8)                   | 1<br>(0 - 6)             | 0<br>(0 - 0)        | 1<br>(1 - 2)              | 0<br>(0 - 0)                | --                             |
| Tetanus                                                           | 11<br>(6 - 23)                 | 0<br>(0 - 0)             | 0<br>(0 - 0)        | 1<br>(1 - 2)              | 2<br>(1 - 3)                | 7<br>(3 - 19)                  |
| Measles                                                           | 0<br>(0 - 1)                   | 0<br>(0 - 1)             | 0<br>(0 - 0)        | 0<br>(0 - 0)              | 0<br>(0 - 0)                | --                             |
| Varicella and herpes zoster                                       | 43<br>(5 - 209)                | 1<br>(0 - 6)             | 0<br>(0 - 2)        | 2<br>(0 - 7)              | 3<br>(0 - 9)                | 36<br>(0 - 203)                |
| Neglected tropical diseases and malaria                           | 26<br>(15 - 34)                | 1<br>(0 - 1)             | 1<br>(1 - 1)        | 5<br>(3 - 6)              | 6<br>(4 - 8)                | 13<br>(6 - 20)                 |
| Leishmaniasis                                                     | 0<br>(0 - 0)                   | 0<br>(0 - 0)             | 0<br>(0 - 0)        | 0<br>(0 - 0)              | 0<br>(0 - 0)                | 0<br>(0 - 0)                   |
| Visceral leishmaniasis                                            | 0<br>(0 - 0)                   | 0<br>(0 - 0)             | 0<br>(0 - 0)        | 0<br>(0 - 0)              | 0<br>(0 - 0)                | 0<br>(0 - 0)                   |
| Cysticercosis                                                     | 0<br>(0 - 0)                   | 0<br>(0 - 0)             | 0<br>(0 - 0)        | 0<br>(0 - 0)              | 0<br>(0 - 0)                | 0<br>(0 - 0)                   |
| Cystic echinococcosis                                             | 3<br>(3 - 3)                   | 0<br>(0 - 0)             | 0<br>(0 - 0)        | 0<br>(0 - 1)              | 1<br>(1 - 1)                | 2<br>(1 - 2)                   |
| Dengue                                                            | 3<br>(2 - 4)                   | 0<br>(0 - 0)             | 0<br>(0 - 0)        | 1<br>(1 - 2)              | 1<br>(0 - 1)                | 1<br>(0 - 1)                   |
| Rabies                                                            | 3<br>(1 - 3)                   | 0<br>(0 - 0)             | 0<br>(0 - 0)        | 1<br>(1 - 1)              | 1<br>(0 - 1)                | 0<br>(0 - 1)                   |
| Other neglected tropical diseases                                 | 17<br>(6 - 24)                 | 0<br>(0 - 1)             | 0<br>(0 - 1)        | 2<br>(1 - 3)              | 4<br>(1 - 6)                | 10<br>(4 - 17)                 |
| Maternal disorders                                                | 70<br>(55 - 88)                | --                       | 0<br>(0 - 0)        | 70<br>(55 - 87)           | --                          | --                             |
| Maternal hemorrhage                                               | 10<br>(7 - 13)                 | --                       | 0<br>(0 - 0)        | 10<br>(7 - 13)            | --                          | --                             |
| Maternal sepsis and other maternal infections                     | 4<br>(2 - 6)                   | --                       | 0<br>(0 - 0)        | 4<br>(2 - 6)              | --                          | --                             |
| Maternal hypertensive disorders                                   | 7<br>(4 - 10)                  | --                       | 0<br>(0 - 0)        | 7<br>(4 - 10)             | --                          | --                             |
| Maternal obstructed labor                                         | 5<br>(3 - 7)                   | --                       | 0<br>(0 - 0)        | 5<br>(3 - 7)              | --                          | --                             |

Web Table 31- France deaths with 95% UI by age, sex, and cause in 2013

| Cause                                                            | Females, All Ages              | Females, 0-4 Years | Females, 5-14 Years | Females, 15-49 Years     | Females, 50-69 Years        | Females, 70-80 Years           |
|------------------------------------------------------------------|--------------------------------|--------------------|---------------------|--------------------------|-----------------------------|--------------------------------|
| Maternal abortive outcome                                        | 9<br>(6 - 12)                  | --                 | 0<br>(0 - 0)        | 9<br>(6 - 12)            | --                          | --                             |
| Indirect maternal deaths                                         | 12<br>(8 - 16)                 | --                 | 0<br>(0 - 0)        | 12<br>(8 - 16)           | --                          | --                             |
| Late maternal deaths                                             | 8<br>(5 - 11)                  | --                 | 0<br>(0 - 0)        | 7<br>(5 - 11)            | --                          | --                             |
| Maternal deaths aggravated by HIV/AIDS                           | 0<br>(0 - 0)                   | --                 | --                  | 0<br>(0 - 0)             | --                          | --                             |
| Other maternal disorders                                         | 16<br>(12 - 20)                | --                 | 0<br>(0 - 0)        | 16<br>(12 - 20)          | --                          | --                             |
| Neonatal disorders                                               | 456<br>(342 - 606)             | 456<br>(342 - 606) | --                  | --                       | --                          | --                             |
| Neonatal preterm birth complications                             | 137<br>(85 - 208)              | 137<br>(85 - 208)  | --                  | --                       | --                          | --                             |
| Neonatal encephalopathy due to birth asphyxia and trauma         | 142<br>(94 - 201)              | 142<br>(94 - 201)  | --                  | --                       | --                          | --                             |
| Neonatal sepsis and other neonatal infections                    | 49<br>(22 - 106)               | 49<br>(22 - 106)   | --                  | --                       | --                          | --                             |
| Hemolytic disease and other neonatal jaundice                    | 3<br>(1 - 7)                   | 3<br>(1 - 7)       | --                  | --                       | --                          | --                             |
| Other neonatal disorders                                         | 125<br>(49 - 195)              | 125<br>(49 - 195)  | --                  | --                       | --                          | --                             |
| Nutritional deficiencies                                         | 3,345<br>(2,389 - 4,604)       | 2<br>(1 - 2)       | 1<br>(0 - 1)        | 21<br>(16 - 26)          | 62<br>(48 - 77)             | 3,259<br>(2,309 - 4,514)       |
| Protein-energy malnutrition                                      | 2,167<br>(1,236 - 3,273)       | 1<br>(0 - 1)       | 0<br>(0 - 0)        | 6<br>(3 - 10)            | 30<br>(16 - 43)             | 2,130<br>(1,215 - 3,231)       |
| Iodine deficiency                                                | 3<br>(0 - 19)                  | 0<br>(0 - 0)       | 0<br>(0 - 0)        | 0<br>(0 - 0)             | 0<br>(0 - 2)                | 2<br>(0 - 18)                  |
| Iron-deficiency anemia                                           | 1,078<br>(460 - 1,889)         | 1<br>(0 - 1)       | 0<br>(0 - 0)        | 7<br>(2 - 18)            | 27<br>(14 - 42)             | 1,039<br>(436 - 1,846)         |
| Other nutritional deficiencies                                   | 97<br>(35 - 192)               | 0<br>(0 - 1)       | 0<br>(0 - 0)        | 3<br>(1 - 4)             | 5<br>(2 - 9)                | 89<br>(31 - 182)               |
| Other communicable, maternal, neonatal, and nutritional diseases | 540<br>(354 - 700)             | 10<br>(6 - 16)     | 3<br>(2 - 4)        | 26<br>(19 - 33)          | 100<br>(67 - 127)           | 401<br>(241 - 550)             |
| Sexually transmitted diseases excluding HIV                      | 33<br>(22 - 47)                | 2<br>(0 - 7)       | 0<br>(0 - 1)        | 2<br>(1 - 3)             | 3<br>(2 - 5)                | 25<br>(15 - 39)                |
| Syphilis                                                         | 25<br>(16 - 37)                | 2<br>(0 - 7)       | 0<br>(0 - 1)        | 1<br>(1 - 1)             | 2<br>(1 - 3)                | 20<br>(12 - 31)                |
| Chlamydial infection                                             | 2<br>(2 - 3)                   | --                 | 0<br>(0 - 0)        | 0<br>(0 - 1)             | 0<br>(0 - 1)                | 1<br>(1 - 2)                   |
| Gonococcal infection                                             | 4<br>(3 - 5)                   | --                 | 0<br>(0 - 0)        | 0<br>(0 - 1)             | 1<br>(0 - 1)                | 3<br>(2 - 4)                   |
| Other sexually transmitted diseases                              | 2<br>(1 - 3)                   | --                 | 0<br>(0 - 0)        | 0<br>(0 - 1)             | 0<br>(0 - 1)                | 1<br>(1 - 2)                   |
| Hepatitis                                                        | 30<br>(21 - 45)                | 0<br>(0 - 1)       | 0<br>(0 - 1)        | 4<br>(3 - 6)             | 6<br>(4 - 9)                | 19<br>(11 - 35)                |
| Acute hepatitis A                                                | 7<br>(2 - 14)                  | 0<br>(0 - 0)       | 0<br>(0 - 0)        | 2<br>(1 - 3)             | 2<br>(0 - 3)                | 3<br>(1 - 9)                   |
| Acute hepatitis B                                                | 20<br>(11 - 33)                | 0<br>(0 - 0)       | 0<br>(0 - 0)        | 2<br>(1 - 3)             | 4<br>(2 - 7)                | 14<br>(7 - 25)                 |
| Acute hepatitis C                                                | 3<br>(1 - 9)                   | --                 | 0<br>(0 - 0)        | 0<br>(0 - 1)             | 1<br>(0 - 2)                | 2<br>(0 - 7)                   |
| Other infectious diseases                                        | 476<br>(297 - 633)             | 8<br>(5 - 11)      | 2<br>(1 - 3)        | 20<br>(13 - 26)          | 90<br>(57 - 117)            | 357<br>(198 - 506)             |
| Non-communicable diseases                                        | 252,311<br>(238,020 - 265,511) | 634<br>(498 - 822) | 182<br>(158 - 211)  | 6,734<br>(6,124 - 7,330) | 30,510<br>(28,459 - 32,598) | 214,251<br>(202,676 - 224,861) |
| Neoplasms                                                        | 74,061<br>(63,044 - 81,382)    | 57<br>(41 - 77)    | 96<br>(79 - 115)    | 4,214<br>(3,782 - 4,629) | 19,450<br>(17,304 - 21,101) | 50,244<br>(41,237 - 56,350)    |
| Esophageal cancer                                                | 906<br>(770 - 1,071)           | --                 | --                  | 29<br>(22 - 39)          | 276<br>(227 - 335)          | 601<br>(481 - 749)             |
| Stomach cancer                                                   | 3,267<br>(2,286 - 4,491)       | --                 | --                  | 82<br>(58 - 111)         | 449<br>(328 - 590)          | 2,737<br>(1,847 - 3,855)       |
| Liver cancer                                                     | 2,259<br>(1,418 - 2,967)       | --                 | 1<br>(1 - 1)        | 74<br>(53 - 100)         | 510<br>(390 - 645)          | 1,675<br>(918 - 2,339)         |
| Liver cancer due to hepatitis B                                  | 407<br>(133 - 858)             | --                 | 0<br>(0 - 0)        | 24<br>(9 - 48)           | 139<br>(48 - 277)           | 244<br>(73 - 549)              |
| Liver cancer due to hepatitis C                                  | 1,062<br>(253 - 1,812)         | --                 | 0<br>(0 - 1)        | 31<br>(5 - 54)           | 230<br>(56 - 400)           | 801<br>(177 - 1,411)           |
| Liver cancer due to alcohol use                                  | 555<br>(201 - 1,139)           | --                 | --                  | 7<br>(3 - 14)            | 83<br>(37 - 158)            | 465<br>(148 - 995)             |
| Liver cancer due to other causes                                 | 234<br>(80 - 464)              | --                 | 0<br>(0 - 1)        | 11<br>(5 - 22)           | 58<br>(21 - 111)            | 164<br>(43 - 361)              |
| Larynx cancer                                                    | 187<br>(122 - 270)             | --                 | --                  | 15<br>(9 - 22)           | 79<br>(52 - 111)            | 94<br>(57 - 145)               |
| Tracheal, bronchus and lung cancer                               | 8,021<br>(4,156 - 10,044)      | --                 | --                  | 608<br>(325 - 796)       | 3,166<br>(1,599 - 3,969)    | 4,247<br>(1,993 - 5,675)       |
| Breast cancer                                                    | 13,466<br>(9,691 - 15,887)     | --                 | --                  | 1,271<br>(1,055 - 1,553) | 4,607<br>(3,852 - 5,530)    | 7,588<br>(4,690 - 9,606)       |
| Cervical cancer                                                  | 1,952<br>(1,562 - 2,420)       | --                 | --                  | 281<br>(216 - 353)       | 604<br>(491 - 774)          | 1,067<br>(772 - 1,459)         |

Web Table 31- France deaths with 95% UI by age, sex, and cause in 2013

| Cause                                         | Females, All Ages             | Females, 0-4 Years | Females, 5-14 Years | Females, 15-49 Years | Females, 50-69 Years     | Females, 70-80 Years         |
|-----------------------------------------------|-------------------------------|--------------------|---------------------|----------------------|--------------------------|------------------------------|
| Uterine cancer                                | 1,667<br>(1,181 - 2,109)      | --                 | --                  | 24<br>(17 - 34)      | 434<br>(334 - 561)       | 1,209<br>(784 - 1,631)       |
| Prostate cancer                               | --                            | --                 | --                  | --                   | --                       | --                           |
| Colon and rectum cancer                       | 11,098<br>(8,925 - 13,765)    | --                 | --                  | 257<br>(213 - 303)   | 1,866<br>(1,628 - 2,104) | 8,975<br>(6,863 - 11,497)    |
| Lip and oral cavity cancer                    | 588<br>(474 - 706)            | --                 | --                  | 50<br>(33 - 65)      | 193<br>(154 - 235)       | 346<br>(257 - 450)           |
| Nasopharynx cancer                            | 80<br>(47 - 203)              | --                 | 0<br>(0 - 1)        | 13<br>(7 - 34)       | 33<br>(17 - 88)          | 33<br>(17 - 81)              |
| Other pharynx cancer                          | 270<br>(207 - 340)            | --                 | --                  | 32<br>(21 - 48)      | 132<br>(98 - 174)        | 107<br>(77 - 142)            |
| Gallbladder and biliary tract cancer          | 1,549<br>(1,093 - 2,457)      | --                 | --                  | 19<br>(12 - 33)      | 244<br>(169 - 450)       | 1,287<br>(866 - 2,062)       |
| Pancreatic cancer                             | 5,432<br>(4,598 - 6,344)      | --                 | --                  | 125<br>(100 - 153)   | 1,276<br>(1,099 - 1,456) | 4,031<br>(3,282 - 4,878)     |
| Malignant skin melanoma                       | 982<br>(547 - 1,244)          | --                 | --                  | 135<br>(76 - 174)    | 306<br>(177 - 383)       | 542<br>(286 - 763)           |
| Non-melanoma skin cancer                      | 446<br>(321 - 615)            | --                 | --                  | 6<br>(5 - 8)         | 29<br>(22 - 38)          | 410<br>(287 - 577)           |
| Ovarian cancer                                | 4,341<br>(3,493 - 5,280)      | --                 | --                  | 220<br>(175 - 301)   | 1,500<br>(1,251 - 1,801) | 2,621<br>(1,823 - 3,497)     |
| Testicular cancer                             | --                            | --                 | --                  | --                   | --                       | --                           |
| Kidney cancer                                 | 1,409<br>(926 - 2,089)        | 2<br>(1 - 3)       | 2<br>(1 - 3)        | 47<br>(34 - 64)      | 357<br>(262 - 466)       | 1,000<br>(548 - 1,679)       |
| Bladder cancer                                | 1,525<br>(975 - 2,131)        | --                 | --                  | 18<br>(11 - 26)      | 185<br>(125 - 275)       | 1,322<br>(828 - 1,902)       |
| Brain and nervous system cancer               | 1,578<br>(1,165 - 1,942)      | 12<br>(7 - 20)     | 26<br>(18 - 36)     | 216<br>(169 - 277)   | 647<br>(515 - 872)       | 677<br>(398 - 930)           |
| Thyroid cancer                                | 356<br>(257 - 539)            | --                 | 0<br>(0 - 0)        | 10<br>(7 - 16)       | 71<br>(51 - 119)         | 274<br>(189 - 405)           |
| Mesothelioma                                  | 332<br>(236 - 554)            | --                 | --                  | 12<br>(7 - 20)       | 100<br>(69 - 161)        | 220<br>(139 - 375)           |
| Hodgkin lymphoma                              | 141<br>(89 - 185)             | 0<br>(0 - 0)       | 1<br>(0 - 2)        | 34<br>(23 - 46)      | 30<br>(20 - 43)          | 76<br>(40 - 112)             |
| Non-Hodgkin lymphoma                          | 2,684<br>(1,155 - 3,719)      | 3<br>(1 - 4)       | 5<br>(2 - 8)        | 118<br>(60 - 193)    | 544<br>(294 - 834)       | 2,014<br>(750 - 2,943)       |
| Multiple myeloma                              | 1,764<br>(1,103 - 2,833)      | --                 | --                  | 32<br>(20 - 55)      | 404<br>(252 - 668)       | 1,328<br>(796 - 2,206)       |
| Leukemia                                      | 2,971<br>(2,245 - 3,583)      | 14<br>(7 - 24)     | 22<br>(15 - 30)     | 169<br>(141 - 204)   | 495<br>(411 - 601)       | 2,271<br>(1,527 - 2,867)     |
| Other neoplasms                               | 4,789<br>(3,489 - 6,138)      | 26<br>(18 - 37)    | 39<br>(29 - 52)     | 318<br>(262 - 396)   | 914<br>(745 - 1,128)     | 3,492<br>(2,277 - 4,756)     |
| Cardiovascular diseases                       | 102,152<br>(90,561 - 121,562) | 21<br>(14 - 30)    | 14<br>(10 - 19)     | 911<br>(703 - 1,097) | 4,994<br>(4,242 - 6,854) | 96,212<br>(84,921 - 114,515) |
| Rheumatic heart disease                       | 1,326<br>(660 - 1,787)        | 0<br>(0 - 1)       | 1<br>(0 - 1)        | 29<br>(17 - 39)      | 150<br>(97 - 215)        | 1,146<br>(524 - 1,592)       |
| Ischemic heart disease                        | 46,612<br>(38,395 - 62,363)   | 1<br>(0 - 1)       | 2<br>(1 - 3)        | 309<br>(200 - 405)   | 2,145<br>(1,723 - 3,247) | 44,154<br>(35,979 - 58,739)  |
| Cerebrovascular disease                       | 28,648<br>(23,373 - 39,226)   | 4<br>(2 - 5)       | 5<br>(4 - 7)        | 316<br>(236 - 404)   | 1,454<br>(1,177 - 2,070) | 26,869<br>(21,790 - 37,185)  |
| Ischemic stroke                               | 16,566<br>(12,723 - 24,286)   | 0<br>(0 - 0)       | 0<br>(0 - 0)        | 31<br>(20 - 47)      | 371<br>(252 - 554)       | 16,164<br>(12,381 - 23,765)  |
| Hemorrhagic stroke                            | 12,082<br>(9,101 - 16,877)    | 3<br>(2 - 5)       | 5<br>(3 - 7)        | 286<br>(214 - 360)   | 1,083<br>(859 - 1,567)   | 10,705<br>(7,851 - 15,083)   |
| Hypertensive heart disease                    | 3,450<br>(2,134 - 5,148)      | 0<br>(0 - 0)       | 0<br>(0 - 1)        | 10<br>(7 - 15)       | 97<br>(65 - 163)         | 3,342<br>(2,037 - 5,008)     |
| Cardiomyopathy and myocarditis                | 3,176<br>(2,072 - 4,347)      | 12<br>(7 - 17)     | 4<br>(2 - 6)        | 54<br>(34 - 72)      | 186<br>(132 - 263)       | 2,921<br>(1,863 - 4,086)     |
| Atrial fibrillation and flutter               | 5,083<br>(3,345 - 7,265)      | --                 | --                  | 3<br>(2 - 5)         | 75<br>(55 - 101)         | 5,005<br>(3,278 - 7,187)     |
| Aortic aneurysm                               | 1,130<br>(696 - 1,776)        | --                 | --                  | 18<br>(11 - 27)      | 106<br>(63 - 162)        | 1,006<br>(613 - 1,593)       |
| Peripheral vascular disease                   | 674<br>(441 - 986)            | --                 | --                  | 3<br>(2 - 5)         | 19<br>(14 - 26)          | 651<br>(420 - 957)           |
| Endocarditis                                  | 492<br>(310 - 907)            | 0<br>(0 - 1)       | 1<br>(0 - 1)        | 14<br>(9 - 26)       | 64<br>(39 - 126)         | 413<br>(254 - 763)           |
| Other cardiovascular and circulatory diseases | 11,562<br>(7,695 - 15,751)    | 4<br>(2 - 6)       | 2<br>(1 - 3)        | 154<br>(94 - 208)    | 698<br>(454 - 961)       | 10,705<br>(7,052 - 14,860)   |
| Chronic respiratory diseases                  | 9,693<br>(7,856 - 12,998)     | 5<br>(3 - 7)       | 3<br>(2 - 4)        | 111<br>(93 - 136)    | 683<br>(561 - 815)       | 8,891<br>(7,061 - 11,979)    |
| Chronic obstructive pulmonary disease         | 8,055<br>(6,381 - 10,862)     | 2<br>(1 - 4)       | 1<br>(1 - 2)        | 48<br>(33 - 65)      | 441<br>(332 - 544)       | 7,563<br>(5,901 - 10,305)    |
| Pneumoconiosis                                | 74<br>(38 - 136)              | 0<br>(0 - 0)       | 0<br>(0 - 0)        | 2<br>(1 - 2)         | 7<br>(4 - 11)            | 65<br>(30 - 126)             |
| Silicosis                                     | 4<br>(2 - 9)                  | 0<br>(0 - 0)       | 0<br>(0 - 0)        | 0<br>(0 - 0)         | 1<br>(0 - 1)             | 3<br>(1 - 7)                 |
| Asbestosis                                    | 17<br>(8 - 32)                | 0<br>(0 - 0)       | 0<br>(0 - 0)        | 0<br>(0 - 0)         | 1<br>(0 - 1)             | 15<br>(7 - 30)               |

Web Table 31- France deaths with 95% UI by age, sex, and cause in 2013

| Cause                                               | Females, All Ages           | Females, 0-4 Years | Females, 5-14 Years | Females, 15-49 Years | Females, 50-69 Years     | Females, 70-80 Years        |
|-----------------------------------------------------|-----------------------------|--------------------|---------------------|----------------------|--------------------------|-----------------------------|
| Coal workers pneumoconiosis                         | 1<br>(1 - 2)                | 0<br>(0 - 0)       | 0<br>(0 - 0)        | 0<br>(0 - 0)         | 0<br>(0 - 1)             | 1<br>(0 - 1)                |
| Other pneumoconiosis                                | 52<br>(25 - 100)            | 0<br>(0 - 0)       | 0<br>(0 - 0)        | 1<br>(0 - 1)         | 5<br>(3 - 9)             | 46<br>(20 - 94)             |
| Asthma                                              | 786<br>(481 - 1,255)        | 0<br>(0 - 1)       | 1<br>(1 - 1)        | 43<br>(31 - 57)      | 129<br>(86 - 193)        | 613<br>(353 - 1,035)        |
| Interstitial lung disease and pulmonary sarcoidosis | 643<br>(281 - 1,117)        | 1<br>(0 - 1)       | 0<br>(0 - 1)        | 15<br>(8 - 22)       | 86<br>(43 - 138)         | 541<br>(217 - 983)          |
| Other chronic respiratory diseases                  | 135<br>(80 - 223)           | 2<br>(1 - 3)       | 0<br>(0 - 0)        | 5<br>(3 - 7)         | 20<br>(13 - 29)          | 109<br>(58 - 190)           |
| Cirrhosis                                           | 3,850<br>(3,379 - 4,395)    | 1<br>(1 - 2)       | 1<br>(1 - 2)        | 374<br>(315 - 439)   | 1,437<br>(1,243 - 1,653) | 2,037<br>(1,673 - 2,493)    |
| Cirrhosis due to hepatitis B                        | 444<br>(212 - 777)          | 0<br>(0 - 0)       | 0<br>(0 - 0)        | 41<br>(17 - 72)      | 163<br>(73 - 287)        | 240<br>(103 - 444)          |
| Cirrhosis due to hepatitis C                        | 2,165<br>(1,463 - 2,745)    | 0<br>(0 - 0)       | 0<br>(0 - 1)        | 200<br>(104 - 277)   | 815<br>(530 - 1,047)     | 1,149<br>(720 - 1,553)      |
| Cirrhosis due to alcohol use                        | 786<br>(375 - 1,329)        | --                 | --                  | 50<br>(14 - 106)     | 256<br>(114 - 472)       | 481<br>(216 - 835)          |
| Cirrhosis due to other causes                       | 455<br>(167 - 735)          | 1<br>(1 - 1)       | 1<br>(0 - 1)        | 83<br>(36 - 138)     | 203<br>(72 - 339)        | 166<br>(57 - 306)           |
| Digestive diseases                                  | 9,518<br>(7,762 - 12,807)   | 3<br>(2 - 4)       | 3<br>(2 - 4)        | 110<br>(91 - 130)    | 585<br>(493 - 723)       | 8,817<br>(7,061 - 11,998)   |
| Peptic ulcer disease                                | 834<br>(518 - 1,232)        | 0<br>(0 - 0)       | 0<br>(0 - 0)        | 11<br>(7 - 15)       | 60<br>(41 - 82)          | 763<br>(474 - 1,151)        |
| Gastritis and duodenitis                            | 35<br>(15 - 80)             | 0<br>(0 - 0)       | 0<br>(0 - 0)        | 1<br>(0 - 2)         | 3<br>(1 - 6)             | 31<br>(13 - 73)             |
| Appendicitis                                        | 115<br>(65 - 223)           | 0<br>(0 - 1)       | 1<br>(0 - 1)        | 5<br>(3 - 8)         | 13<br>(8 - 22)           | 96<br>(49 - 195)            |
| Paralytic ileus and intestinal obstruction          | 2,776<br>(1,621 - 4,850)    | 1<br>(0 - 1)       | 1<br>(0 - 1)        | 25<br>(14 - 40)      | 128<br>(74 - 206)        | 2,621<br>(1,520 - 4,629)    |
| Inguinal, femoral, and abdominal hernia             | 336<br>(132 - 600)          | 0<br>(0 - 0)       | 0<br>(0 - 0)        | 2<br>(1 - 3)         | 21<br>(11 - 36)          | 313<br>(115 - 567)          |
| Inflammatory bowel disease                          | 784<br>(433 - 1,585)        | 1<br>(0 - 1)       | 0<br>(0 - 0)        | 12<br>(8 - 19)       | 50<br>(33 - 92)          | 721<br>(388 - 1,489)        |
| Vascular intestinal disorders                       | 1,883<br>(822 - 3,520)      | 0<br>(0 - 0)       | 0<br>(0 - 0)        | 11<br>(5 - 20)       | 109<br>(51 - 182)        | 1,762<br>(761 - 3,337)      |
| Gallbladder and biliary diseases                    | 1,105<br>(674 - 1,786)      | 0<br>(0 - 0)       | 0<br>(0 - 0)        | 8<br>(6 - 11)        | 52<br>(35 - 85)          | 1,045<br>(627 - 1,695)      |
| Pancreatitis                                        | 550<br>(327 - 833)          | 0<br>(0 - 0)       | 0<br>(0 - 0)        | 22<br>(14 - 31)      | 78<br>(53 - 119)         | 450<br>(255 - 701)          |
| Other digestive diseases                            | 1,100<br>(659 - 1,591)      | 0<br>(0 - 1)       | 0<br>(0 - 1)        | 13<br>(9 - 17)       | 71<br>(50 - 92)          | 1,015<br>(591 - 1,500)      |
| Neurological disorders                              | 30,067<br>(19,198 - 39,847) | 30<br>(19 - 42)    | 12<br>(9 - 16)      | 261<br>(206 - 313)   | 1,198<br>(1,009 - 1,416) | 28,566<br>(17,809 - 38,431) |
| Alzheimer disease and other dementias               | 24,705<br>(14,498 - 34,651) | --                 | --                  | 1<br>(0 - 4)         | 308<br>(199 - 444)       | 24,396<br>(14,137 - 34,353) |
| Parkinson disease                                   | 2,673<br>(1,347 - 3,673)    | --                 | --                  | 2<br>(1 - 3)         | 98<br>(64 - 135)         | 2,572<br>(1,259 - 3,565)    |
| Epilepsy                                            | 698<br>(400 - 972)          | 5<br>(3 - 9)       | 5<br>(3 - 9)        | 94<br>(60 - 118)     | 108<br>(72 - 138)        | 486<br>(257 - 742)          |
| Multiple sclerosis                                  | 449<br>(218 - 593)          | --                 | --                  | 79<br>(44 - 117)     | 214<br>(105 - 305)       | 156<br>(63 - 229)           |
| Other neurological disorders                        | 1,541<br>(1,306 - 1,803)    | 25<br>(16 - 36)    | 7<br>(5 - 9)        | 85<br>(71 - 100)     | 470<br>(396 - 550)       | 955<br>(756 - 1,185)        |
| Mental and substance use disorders                  | 1,396<br>(909 - 1,969)      | 1<br>(0 - 1)       | 0<br>(0 - 1)        | 312<br>(220 - 454)   | 481<br>(265 - 807)       | 602<br>(383 - 835)          |
| Schizophrenia                                       | 182<br>(36 - 342)           | --                 | --                  | 8<br>(2 - 14)        | 29<br>(8 - 47)           | 146<br>(23 - 295)           |
| Alcohol use disorders                               | 687<br>(321 - 1,305)        | --                 | --                  | 164<br>(74 - 311)    | 366<br>(158 - 698)       | 157<br>(74 - 315)           |
| Drug use disorders                                  | 519<br>(413 - 654)          | 1<br>(0 - 1)       | --                  | 134<br>(106 - 164)   | 86<br>(68 - 109)         | 299<br>(206 - 425)          |
| Opioid use disorders                                | 186<br>(143 - 245)          | 0<br>(0 - 0)       | --                  | 47<br>(38 - 59)      | 28<br>(21 - 36)          | 111<br>(71 - 166)           |
| Cocaine use disorders                               | 17<br>(13 - 22)             | 0<br>(0 - 0)       | --                  | 6<br>(4 - 7)         | 3<br>(2 - 3)             | 8<br>(5 - 13)               |
| Amphetamine use disorders                           | 19<br>(15 - 25)             | 0<br>(0 - 0)       | --                  | 5<br>(4 - 7)         | 3<br>(3 - 5)             | 10<br>(6 - 16)              |
| Other drug use disorders                            | 297<br>(240 - 375)          | 0<br>(0 - 1)       | --                  | 75<br>(60 - 94)      | 52<br>(41 - 67)          | 169<br>(116 - 243)          |
| Eating disorders                                    | 7<br>(4 - 11)               | --                 | 0<br>(0 - 1)        | 7<br>(4 - 11)        | --                       | --                          |
| Anorexia nervosa                                    | 7<br>(4 - 11)               | --                 | 0<br>(0 - 1)        | 7<br>(4 - 11)        | --                       | --                          |
| Diabetes, urogenital, blood, and endocrine diseases | 16,760<br>(14,002 - 19,546) | 48<br>(29 - 66)    | 23<br>(17 - 31)     | 263<br>(203 - 308)   | 1,307<br>(1,116 - 1,495) | 15,119<br>(12,466 - 17,869) |
| Diabetes mellitus                                   | 6,951<br>(5,437 - 8,604)    | 1<br>(1 - 2)       | 1<br>(0 - 1)        | 68<br>(54 - 83)      | 573<br>(476 - 697)       | 6,307<br>(4,824 - 7,953)    |
| Acute glomerulonephritis                            | 4<br>(3 - 6)                | 0<br>(0 - 0)       | 0<br>(0 - 0)        | 1<br>(1 - 2)         | 1<br>(0 - 1)             | 2<br>(1 - 4)                |

Web Table 31- France deaths with 95% UI by age, sex, and cause in 2013

| Cause                                               | Females, All Ages           | Females, 0-4 Years | Females, 5-14 Years | Females, 15-49 Years     | Females, 50-69 Years     | Females, 70-80 Years        |
|-----------------------------------------------------|-----------------------------|--------------------|---------------------|--------------------------|--------------------------|-----------------------------|
| Chronic kidney disease                              | 4,721<br>(3,407 - 6,167)    | 1<br>(1 - 2)       | 1<br>(1 - 1)        | 38<br>(30 - 49)          | 244<br>(194 - 322)       | 4,436<br>(3,159 - 5,822)    |
| Chronic kidney disease due to diabetes mellitus     | 645<br>(349 - 1,045)        | 0<br>(0 - 0)       | 0<br>(0 - 0)        | 10<br>(6 - 14)           | 59<br>(34 - 87)          | 576<br>(301 - 960)          |
| Chronic kidney disease due to hypertension          | 2,266<br>(1,465 - 3,318)    | 0<br>(0 - 1)       | 0<br>(0 - 0)        | 12<br>(7 - 19)           | 95<br>(59 - 150)         | 2,159<br>(1,382 - 3,171)    |
| Chronic kidney disease due to glomerulonephritis    | 60<br>(33 - 115)            | 0<br>(0 - 0)       | 0<br>(0 - 0)        | 2<br>(1 - 3)             | 6<br>(3 - 9)             | 52<br>(27 - 104)            |
| Chronic kidney disease due to other causes          | 1,750<br>(838 - 2,867)      | 1<br>(0 - 1)       | 0<br>(0 - 1)        | 15<br>(8 - 22)           | 85<br>(42 - 135)         | 1,650<br>(748 - 2,740)      |
| Urinary diseases and male infertility               | 2,123<br>(1,175 - 3,077)    | 1<br>(1 - 2)       | 0<br>(0 - 1)        | 20<br>(12 - 26)          | 100<br>(64 - 127)        | 2,002<br>(1,070 - 2,943)    |
| Interstitial nephritis and urinary tract infections | 1,994<br>(1,068 - 2,905)    | 1<br>(0 - 1)       | 0<br>(0 - 0)        | 15<br>(9 - 20)           | 86<br>(52 - 110)         | 1,892<br>(983 - 2,806)      |
| Urolithiasis                                        | 61<br>(32 - 118)            | --                 | 0<br>(0 - 0)        | 2<br>(1 - 4)             | 7<br>(4 - 13)            | 52<br>(25 - 105)            |
| Other urinary diseases                              | 67<br>(32 - 179)            | 0<br>(0 - 1)       | 0<br>(0 - 0)        | 2<br>(1 - 4)             | 7<br>(4 - 13)            | 58<br>(24 - 166)            |
| Gynecological diseases                              | 23<br>(13 - 61)             | --                 | --                  | 2<br>(1 - 4)             | 2<br>(2 - 6)             | 18<br>(9 - 51)              |
| Uterine fibroids                                    | 7<br>(4 - 18)               | --                 | --                  | 1<br>(0 - 1)             | 1<br>(0 - 2)             | 5<br>(3 - 15)               |
| Polycystic ovarian syndrome                         | 0<br>(0 - 0)                | --                 | --                  | 0<br>(0 - 0)             | 0<br>(0 - 0)             | --                          |
| Endometriosis                                       | 0<br>(0 - 1)                | --                 | --                  | 0<br>(0 - 1)             | 0<br>(0 - 0)             | --                          |
| Genital prolapse                                    | 5<br>(3 - 15)               | --                 | --                  | 0<br>(0 - 0)             | 0<br>(0 - 1)             | 5<br>(2 - 13)               |
| Other gynecological diseases                        | 10<br>(6 - 28)              | --                 | --                  | 1<br>(1 - 2)             | 1<br>(1 - 2)             | 8<br>(4 - 23)               |
| Hemoglobinopathies and hemolytic anemias            | 386<br>(235 - 722)          | 3<br>(2 - 6)       | 3<br>(2 - 5)        | 13<br>(9 - 21)           | 42<br>(28 - 68)          | 325<br>(183 - 623)          |
| Thalassemias                                        | 2<br>(1 - 3)                | 0<br>(0 - 1)       | 0<br>(0 - 1)        | 1<br>(1 - 2)             | 0<br>(0 - 0)             | 0<br>(0 - 0)                |
| Sickle cell disorders                               | 52<br>(36 - 86)             | 2<br>(1 - 3)       | 2<br>(1 - 3)        | 8<br>(6 - 13)            | 24<br>(16 - 39)          | 16<br>(10 - 29)             |
| G6PD deficiency                                     | 1<br>(0 - 1)                | 0<br>(0 - 0)       | 0<br>(0 - 0)        | 0<br>(0 - 0)             | 0<br>(0 - 0)             | 0<br>(0 - 1)                |
| Other hemoglobinopathies and hemolytic anemias      | 332<br>(189 - 632)          | 1<br>(1 - 2)       | 1<br>(0 - 1)        | 4<br>(2 - 6)             | 18<br>(12 - 29)          | 309<br>(173 - 596)          |
| Endocrine, metabolic, blood, and immune disorders   | 2,552<br>(1,516 - 3,496)    | 41<br>(22 - 58)    | 18<br>(11 - 26)     | 121<br>(69 - 151)        | 343<br>(215 - 432)       | 2,028<br>(1,165 - 4,967)    |
| Musculoskeletal disorders                           | 2,124<br>(1,466 - 2,935)    | --                 | 2<br>(2 - 3)        | 48<br>(38 - 59)          | 188<br>(150 - 245)       | 1,886<br>(1,220 - 2,660)    |
| Rheumatoid arthritis                                | 407<br>(248 - 634)          | --                 | 0<br>(0 - 0)        | 4<br>(3 - 5)             | 44<br>(30 - 65)          | 359<br>(202 - 581)          |
| Other musculoskeletal disorders                     | 1,717<br>(1,140 - 2,378)    | --                 | 2<br>(1 - 3)        | 44<br>(35 - 54)          | 144<br>(113 - 186)       | 1,527<br>(926 - 2,168)      |
| Other non-communicable diseases                     | 2,691<br>(2,056 - 3,846)    | 468<br>(348 - 643) | 26<br>(19 - 34)     | 130<br>(96 - 159)        | 188<br>(141 - 224)       | 1,879<br>(1,269 - 3,046)    |
| Congenital anomalies                                | 812<br>(640 - 984)          | 337<br>(250 - 446) | 26<br>(18 - 34)     | 123<br>(85 - 152)        | 142<br>(91 - 177)        | 185<br>(102 - 265)          |
| Neural tube defects                                 | 14<br>(9 - 21)              | 10<br>(6 - 17)     | 0<br>(0 - 1)        | 2<br>(1 - 2)             | 1<br>(1 - 1)             | 1<br>(0 - 1)                |
| Congenital heart anomalies                          | 283<br>(218 - 351)          | 137<br>(97 - 186)  | 12<br>(8 - 16)      | 52<br>(36 - 65)          | 39<br>(26 - 53)          | 43<br>(25 - 64)             |
| Cleft lip and cleft palate                          | 0<br>(0 - 1)                | 0<br>(0 - 1)       | --                  | --                       | --                       | --                          |
| Down syndrome                                       | 93<br>(44 - 133)            | 12<br>(5 - 20)     | 1<br>(0 - 2)        | 21<br>(9 - 31)           | 54<br>(23 - 82)          | 5<br>(2 - 9)                |
| Chromosomal unbalanced rearrangements               | 46<br>(28 - 69)             | 32<br>(17 - 51)    | 1<br>(1 - 2)        | 6<br>(3 - 8)             | 6<br>(3 - 10)            | 1<br>(1 - 2)                |
| Other congenital anomalies                          | 375<br>(283 - 466)          | 146<br>(100 - 201) | 11<br>(7 - 15)      | 43<br>(30 - 55)          | 41<br>(26 - 57)          | 134<br>(73 - 195)           |
| Skin and subcutaneous diseases                      | 1,749<br>(1,151 - 2,935)    | 1<br>(1 - 1)       | 0<br>(0 - 1)        | 7<br>(5 - 10)            | 46<br>(36 - 65)          | 1,694<br>(1,095 - 2,859)    |
| Cellulitis                                          | 59<br>(19 - 178)            | 0<br>(0 - 0)       | 0<br>(0 - 0)        | 1<br>(1 - 3)             | 6<br>(2 - 15)            | 51<br>(14 - 169)            |
| Pyoderma                                            | 428<br>(223 - 725)          | 0<br>(0 - 1)       | 0<br>(0 - 0)        | 2<br>(1 - 3)             | 17<br>(11 - 24)          | 408<br>(205 - 705)          |
| Decubitus ulcer                                     | 1,114<br>(678 - 1,967)      | 0<br>(0 - 0)       | 0<br>(0 - 0)        | 2<br>(1 - 2)             | 18<br>(11 - 29)          | 1,094<br>(658 - 1,948)      |
| Other skin and subcutaneous diseases                | 149<br>(41 - 387)           | 0<br>(0 - 0)       | 0<br>(0 - 0)        | 2<br>(1 - 3)             | 5<br>(3 - 11)            | 141<br>(34 - 380)           |
| Sudden infant death syndrome                        | 130<br>(61 - 272)           | 130<br>(61 - 272)  | --                  | --                       | --                       | --                          |
| Injuries                                            | 21,386<br>(17,789 - 27,823) | 124<br>(96 - 168)  | 86<br>(71 - 105)    | 2,226<br>(1,990 - 2,679) | 2,704<br>(2,376 - 3,403) | 16,245<br>(12,908 - 22,043) |
| Transport injuries                                  | 1,599<br>(1,324 - 2,127)    | 33<br>(22 - 46)    | 46<br>(35 - 62)     | 538<br>(458 - 717)       | 352<br>(285 - 548)       | 630<br>(444 - 844)          |



Web Table 31- France deaths with 95% UI by age, sex, and cause in 2013

| Cause                                           | Females, All Ages           | Females, 0-4 Years | Females, 5-14 Years | Females, 15-49 Years     | Females, 50-69 Years     | Females, 70-80 Years        |
|-------------------------------------------------|-----------------------------|--------------------|---------------------|--------------------------|--------------------------|-----------------------------|
| Road injuries                                   | 1,547<br>(1,284 - 2,077)    | 32<br>(22 - 44)    | 44<br>(33 - 59)     | 517<br>(439 - 692)       | 337<br>(273 - 529)       | 617<br>(437 - 825)          |
| Pedestrian road injuries                        | 407<br>(155 - 584)          | 7<br>(2 - 13)      | 11<br>(4 - 19)      | 50<br>(15 - 76)          | 78<br>(28 - 116)         | 261<br>(97 - 397)           |
| Cyclist road injuries                           | 99<br>(55 - 140)            | 1<br>(0 - 2)       | 4<br>(2 - 7)        | 25<br>(13 - 35)          | 33<br>(16 - 49)          | 36<br>(17 - 63)             |
| Motorcyclist road injuries                      | 76<br>(42 - 166)            | 0<br>(0 - 1)       | 1<br>(1 - 3)        | 58<br>(32 - 133)         | 8<br>(3 - 17)            | 8<br>(3 - 18)               |
| Motor vehicle road injuries                     | 953<br>(764 - 1,466)        | 23<br>(16 - 36)    | 27<br>(18 - 43)     | 380<br>(300 - 533)       | 215<br>(155 - 395)       | 308<br>(207 - 494)          |
| Other road injuries                             | 12<br>(7 - 25)              | 0<br>(0 - 1)       | 1<br>(0 - 1)        | 3<br>(2 - 6)             | 3<br>(2 - 8)             | 4<br>(2 - 11)               |
| Other transport injuries                        | 52<br>(32 - 82)             | 1<br>(0 - 2)       | 2<br>(1 - 3)        | 21<br>(13 - 34)          | 15<br>(8 - 25)           | 13<br>(6 - 24)              |
| Unintentional injuries                          | 16,436<br>(12,976 - 22,325) | 79<br>(57 - 118)   | 28<br>(23 - 36)     | 466<br>(383 - 655)       | 1,151<br>(959 - 1,525)   | 14,710<br>(11,415 - 20,269) |
| Falls                                           | 9,964<br>(7,074 - 14,529)   | 6<br>(4 - 9)       | 3<br>(2 - 4)        | 70<br>(56 - 88)          | 273<br>(181 - 342)       | 9,612<br>(6,766 - 14,157)   |
| Drowning                                        | 268<br>(159 - 356)          | 17<br>(10 - 29)    | 8<br>(5 - 14)       | 47<br>(27 - 66)          | 79<br>(40 - 113)         | 116<br>(69 - 162)           |
| Fire, heat, and hot substances                  | 448<br>(329 - 693)          | 9<br>(6 - 15)      | 4<br>(2 - 6)        | 35<br>(24 - 45)          | 45<br>(31 - 57)          | 355<br>(234 - 587)          |
| Poisonings                                      | 473<br>(289 - 977)          | 3<br>(1 - 4)       | 2<br>(1 - 2)        | 19<br>(12 - 27)          | 30<br>(18 - 42)          | 419<br>(243 - 907)          |
| Exposure to mechanical forces                   | 83<br>(58 - 104)            | 8<br>(5 - 12)      | 3<br>(2 - 4)        | 14<br>(11 - 17)          | 15<br>(11 - 18)          | 43<br>(24 - 63)             |
| Unintentional firearm injuries                  | 7<br>(6 - 8)                | 0<br>(0 - 1)       | 1<br>(0 - 1)        | 2<br>(2 - 3)             | 2<br>(1 - 2)             | 2<br>(1 - 3)                |
| Unintentional suffocation                       | 30<br>(11 - 48)             | 5<br>(2 - 10)      | 1<br>(0 - 1)        | 2<br>(1 - 3)             | 2<br>(1 - 4)             | 20<br>(4 - 36)              |
| Other exposure to mechanical forces             | 46<br>(31 - 57)             | 2<br>(1 - 3)       | 2<br>(1 - 3)        | 10<br>(7 - 12)           | 11<br>(7 - 14)           | 22<br>(12 - 31)             |
| Adverse effects of medical treatment            | 2,172<br>(1,503 - 3,635)    | 5<br>(3 - 9)       | 3<br>(2 - 5)        | 190<br>(124 - 368)       | 446<br>(304 - 787)       | 1,528<br>(967 - 2,664)      |
| Animal contact                                  | 35<br>(15 - 95)             | 1<br>(0 - 1)       | 1<br>(0 - 1)        | 4<br>(2 - 8)             | 6<br>(3 - 14)            | 25<br>(9 - 72)              |
| Venomous animal contact                         | 6<br>(2 - 14)               | 0<br>(0 - 0)       | 0<br>(0 - 0)        | 1<br>(1 - 3)             | 2<br>(1 - 4)             | 2<br>(1 - 7)                |
| Non-venomous animal contact                     | 29<br>(12 - 80)             | 0<br>(0 - 1)       | 0<br>(0 - 1)        | 2<br>(1 - 5)             | 4<br>(2 - 9)             | 22<br>(8 - 65)              |
| Foreign body                                    | 2,929<br>(1,706 - 4,794)    | 29<br>(16 - 61)    | 4<br>(3 - 8)        | 80<br>(49 - 136)         | 248<br>(155 - 386)       | 2,569<br>(1,448 - 4,238)    |
| Pulmonary aspiration and foreign body in airway | 2,919<br>(1,694 - 4,785)    | 29<br>(15 - 60)    | 4<br>(2 - 7)        | 78<br>(48 - 135)         | 247<br>(154 - 385)       | 2,562<br>(1,443 - 4,235)    |
| Foreign body in other body part                 | 10<br>(5 - 21)              | 0<br>(0 - 0)       | 0<br>(0 - 0)        | 1<br>(1 - 2)             | 1<br>(1 - 2)             | 7<br>(2 - 18)               |
| Other unintentional injuries                    | 64<br>(42 - 107)            | 2<br>(1 - 4)       | 1<br>(0 - 1)        | 8<br>(5 - 12)            | 10<br>(6 - 16)           | 43<br>(24 - 81)             |
| Self-harm and interpersonal violence            | 3,351<br>(2,953 - 4,145)    | 12<br>(8 - 18)     | 11<br>(8 - 16)      | 1,222<br>(1,047 - 1,477) | 1,201<br>(1,014 - 1,542) | 905<br>(710 - 1,303)        |
| Self-harm                                       | 3,125<br>(2,734 - 3,940)    | --                 | 4<br>(3 - 7)        | 1,129<br>(958 - 1,378)   | 1,151<br>(960 - 1,494)   | 840<br>(656 - 1,256)        |
| Interpersonal violence                          | 227<br>(153 - 298)          | 12<br>(8 - 18)     | 7<br>(5 - 11)       | 93<br>(63 - 128)         | 50<br>(35 - 66)          | 65<br>(37 - 88)             |
| Assault by firearm                              | 91<br>(55 - 137)            | 2<br>(1 - 4)       | 2<br>(1 - 4)        | 44<br>(29 - 69)          | 23<br>(14 - 36)          | 20<br>(9 - 32)              |
| Assault by sharp object                         | 47<br>(25 - 67)             | 1<br>(1 - 3)       | 1<br>(0 - 2)        | 23<br>(12 - 35)          | 11<br>(5 - 17)           | 10<br>(5 - 17)              |
| Assault by other means                          | 89<br>(54 - 128)            | 9<br>(6 - 13)      | 4<br>(2 - 6)        | 26<br>(15 - 40)          | 16<br>(9 - 24)           | 35<br>(19 - 52)             |
| Forces of nature, war, and legal intervention   | 0<br>(0 - 0)                | 0<br>(0 - 0)       | --                  | --                       | --                       | 0<br>(0 - 0)                |
| Exposure to forces of nature                    | 0<br>(0 - 0)                | 0<br>(0 - 0)       | --                  | --                       | --                       | 0<br>(0 - 0)                |

Web Table 31- Gabon deaths with 95% UI by age, sex, and cause in 2013

| Cause                                                             | Both Sexes, All Ages        | Both Sexes, 0-4 Years    | Both Sexes, 5-14 Years | Both Sexes, 15-49 Years  | Both Sexes, 50-69 Years  | Both Sexes, 70-80 Years  |
|-------------------------------------------------------------------|-----------------------------|--------------------------|------------------------|--------------------------|--------------------------|--------------------------|
| All causes                                                        | 18,959<br>(17,299 - 20,636) | 3,179<br>(2,655 - 3,752) | 378<br>(331 - 434)     | 5,298<br>(4,795 - 5,880) | 4,291<br>(3,612 - 4,978) | 5,813<br>(5,175 - 6,370) |
| Communicable, maternal, neonatal, and nutritional diseases        | 8,386<br>(7,476 - 9,211)    | 2,367<br>(1,931 - 2,858) | 209<br>(167 - 259)     | 3,050<br>(2,619 - 3,409) | 1,377<br>(1,082 - 1,610) | 1,383<br>(955 - 1,707)   |
| HIV/AIDS and tuberculosis                                         | 3,416<br>(2,830 - 3,839)    | 28<br>(21 - 38)          | 48<br>(34 - 65)        | 2,318<br>(1,891 - 2,680) | 773<br>(591 - 922)       | 248<br>(148 - 318)       |
| Tuberculosis                                                      | 623<br>(299 - 826)          | 12<br>(7 - 19)           | 3<br>(2 - 5)           | 229<br>(117 - 317)       | 219<br>(95 - 309)        | 159<br>(66 - 219)        |
| HIV/AIDS                                                          | 2,793<br>(2,291 - 3,203)    | 16<br>(11 - 24)          | 45<br>(31 - 62)        | 2,089<br>(1,665 - 2,444) | 553<br>(409 - 685)       | 90<br>(57 - 131)         |
| HIV/AIDS resulting in mycobacterial infection                     | 188<br>(141 - 238)          | 1<br>(1 - 1)             | 2<br>(1 - 3)           | 139<br>(103 - 179)       | 39<br>(27 - 52)          | 7<br>(4 - 10)            |
| HIV/AIDS resulting in other diseases                              | 2,605<br>(2,133 - 2,992)    | 16<br>(11 - 22)          | 43<br>(29 - 58)        | 1,950<br>(1,549 - 2,294) | 515<br>(377 - 635)       | 83<br>(53 - 121)         |
| Diarrhea, lower respiratory, and other common infectious diseases | 2,410<br>(1,729 - 3,006)    | 772<br>(460 - 1,209)     | 76<br>(50 - 107)       | 313<br>(233 - 417)       | 400<br>(263 - 530)       | 849<br>(561 - 1,095)     |
| Diarrheal diseases                                                | 423<br>(259 - 650)          | 118<br>(49 - 245)        | 13<br>(5 - 26)         | 65<br>(33 - 116)         | 81<br>(40 - 138)         | 147<br>(78 - 253)        |
| Intestinal infectious diseases                                    | 60<br>(28 - 114)            | 22<br>(9 - 48)           | 15<br>(7 - 29)         | 18<br>(8 - 35)           | 3<br>(1 - 6)             | 1<br>(1 - 3)             |
| Typhoid fever                                                     | 45<br>(21 - 84)             | 16<br>(6 - 35)           | 12<br>(5 - 22)         | 14<br>(6 - 27)           | 2<br>(1 - 4)             | 1<br>(0 - 2)             |
| Paratyphoid fever                                                 | 14<br>(6 - 28)              | 6<br>(2 - 12)            | 4<br>(2 - 7)           | 4<br>(2 - 9)             | 1<br>(0 - 1)             | 0<br>(0 - 1)             |
| Other intestinal infectious diseases                              | 1<br>(0 - 5)                | 1<br>(0 - 4)             | 0<br>(0 - 1)           | 0<br>(0 - 2)             | 0<br>(0 - 0)             | 0<br>(0 - 1)             |
| Lower respiratory infections                                      | 1,658<br>(1,084 - 2,146)    | 495<br>(246 - 854)       | 28<br>(16 - 43)        | 169<br>(118 - 230)       | 287<br>(161 - 392)       | 680<br>(388 - 911)       |
| Upper respiratory infections                                      | 1<br>(1 - 2)                | 0<br>(0 - 1)             | 0<br>(0 - 0)           | 0<br>(0 - 1)             | 0<br>(0 - 1)             | 0<br>(0 - 1)             |
| Otitis media                                                      | 1<br>(1 - 1)                | 0<br>(0 - 1)             | 0<br>(0 - 0)           | 0<br>(0 - 0)             | 0<br>(0 - 0)             | 0<br>(0 - 0)             |
| Meningitis                                                        | 177<br>(123 - 252)          | 66<br>(35 - 110)         | 13<br>(7 - 23)         | 53<br>(33 - 87)          | 26<br>(15 - 44)          | 18<br>(11 - 29)          |
| Pneumococcal meningitis                                           | 60<br>(41 - 88)             | 18<br>(9 - 30)           | 5<br>(3 - 10)          | 20<br>(12 - 34)          | 10<br>(5 - 17)           | 7<br>(4 - 12)            |
| H influenzae type B meningitis                                    | 42<br>(26 - 63)             | 27<br>(14 - 46)          | 3<br>(2 - 6)           | 7<br>(4 - 12)            | 3<br>(1 - 6)             | 2<br>(1 - 3)             |
| Meningococcal meningitis                                          | 26<br>(16 - 39)             | 8<br>(4 - 14)            | 2<br>(1 - 3)           | 8<br>(4 - 15)            | 5<br>(3 - 9)             | 4<br>(2 - 6)             |
| Other meningitis                                                  | 49<br>(35 - 74)             | 14<br>(7 - 24)           | 3<br>(1 - 5)           | 18<br>(10 - 32)          | 9<br>(5 - 14)            | 6<br>(3 - 9)             |
| Encephalitis                                                      | 18<br>(9 - 30)              | 8<br>(3 - 16)            | 2<br>(1 - 3)           | 5<br>(2 - 11)            | 2<br>(1 - 3)             | 1<br>(1 - 2)             |
| Diphtheria                                                        | 1<br>(0 - 7)                | 1<br>(0 - 6)             | 0<br>(0 - 1)           | 0<br>(0 - 1)             | 0<br>(0 - 0)             | 0<br>(0 - 0)             |
| Whooping cough                                                    | 26<br>(0 - 125)             | 25<br>(0 - 120)          | 1<br>(0 - 5)           | 0<br>(0 - 1)             | 0<br>(0 - 0)             | 0<br>(0 - 0)             |
| Tetanus                                                           | 2<br>(1 - 6)                | 1<br>(0 - 3)             | 0<br>(0 - 0)           | 1<br>(0 - 1)             | 0<br>(0 - 1)             | 0<br>(0 - 1)             |
| Measles                                                           | 40<br>(1 - 259)             | 36<br>(1 - 230)          | 4<br>(0 - 24)          | 1<br>(0 - 5)             | 0<br>(0 - 0)             | 0<br>(0 - 0)             |
| Varicella and herpes zoster                                       | 2<br>(1 - 4)                | 1<br>(0 - 2)             | 0<br>(0 - 0)           | 0<br>(0 - 1)             | 0<br>(0 - 1)             | 1<br>(0 - 2)             |
| Neglected tropical diseases and malaria                           | 990<br>(599 - 1,577)        | 491<br>(152 - 1,036)     | 69<br>(36 - 132)       | 196<br>(101 - 302)       | 121<br>(52 - 228)        | 113<br>(45 - 217)        |
| Malaria                                                           | 919<br>(531 - 1,515)        | 482<br>(140 - 1,031)     | 62<br>(28 - 125)       | 159<br>(65 - 263)        | 109<br>(39 - 215)        | 107<br>(39 - 211)        |
| Leishmaniasis                                                     | 1<br>(1 - 1)                | 0<br>(0 - 1)             | 0<br>(0 - 0)           | 0<br>(0 - 0)             | 0<br>(0 - 0)             | 0<br>(0 - 0)             |
| Visceral leishmaniasis                                            | 1<br>(1 - 1)                | 0<br>(0 - 1)             | 0<br>(0 - 0)           | 0<br>(0 - 0)             | 0<br>(0 - 0)             | 0<br>(0 - 0)             |
| African trypanosomiasis                                           | 43<br>(18 - 81)             | 3<br>(1 - 6)             | 5<br>(2 - 9)           | 26<br>(11 - 49)          | 7<br>(3 - 13)            | 2<br>(1 - 4)             |
| Schistosomiasis                                                   | 11<br>(8 - 15)              | 0<br>(0 - 0)             | 0<br>(0 - 0)           | 4<br>(3 - 6)             | 4<br>(3 - 6)             | 2<br>(1 - 4)             |
| Cysticercosis                                                     | 1<br>(1 - 1)                | 0<br>(0 - 0)             | 0<br>(0 - 0)           | 0<br>(0 - 1)             | 0<br>(0 - 0)             | 0<br>(0 - 0)             |
| Cystic echinococcosis                                             | 1<br>(1 - 1)                | 0<br>(0 - 0)             | 0<br>(0 - 0)           | 0<br>(0 - 0)             | 0<br>(0 - 0)             | 0<br>(0 - 0)             |
| Dengue                                                            | 1<br>(1 - 2)                | 0<br>(0 - 1)             | 0<br>(0 - 0)           | 1<br>(0 - 1)             | 0<br>(0 - 0)             | 0<br>(0 - 0)             |
| Yellow fever                                                      | 3<br>(2 - 4)                | 0<br>(0 - 1)             | 1<br>(0 - 1)           | 1<br>(1 - 3)             | 0<br>(0 - 1)             | 0<br>(0 - 0)             |
| Rabies                                                            | 2<br>(1 - 3)                | 0<br>(0 - 1)             | 1<br>(0 - 1)           | 1<br>(1 - 2)             | 0<br>(0 - 0)             | 0<br>(0 - 0)             |
| Intestinal nematode infections                                    | 2<br>(0 - 8)                | 1<br>(0 - 7)             | 0<br>(0 - 2)           | 0<br>(0 - 2)             | 0<br>(0 - 1)             | 0<br>(0 - 1)             |
| Ascariasis                                                        | 2<br>(0 - 8)                | 1<br>(0 - 7)             | 0<br>(0 - 2)           | 0<br>(0 - 2)             | 0<br>(0 - 1)             | 0<br>(0 - 1)             |

Web Table 31- Gabon deaths with 95% UI by age, sex, and cause in 2013

| Cause                                                            | Both Sexes, All Ages      | Both Sexes, 0-4 Years | Both Sexes, 5-14 Years | Both Sexes, 15-49 Years  | Both Sexes, 50-69 Years  | Both Sexes, 70-80 Years  |
|------------------------------------------------------------------|---------------------------|-----------------------|------------------------|--------------------------|--------------------------|--------------------------|
| Other neglected tropical diseases                                | 7<br>(3 - 11)             | 2<br>(1 - 5)          | 0<br>(0 - 1)           | 2<br>(1 - 4)             | 1<br>(0 - 2)             | 1<br>(1 - 2)             |
| Maternal disorders                                               | 144<br>(99 - 199)         | --                    | 0<br>(0 - 1)           | 144<br>(99 - 199)        | --                       | --                       |
| Maternal hemorrhage                                              | 20<br>(13 - 29)           | --                    | 0<br>(0 - 0)           | 20<br>(13 - 29)          | --                       | --                       |
| Maternal sepsis and other maternal infections                    | 13<br>(7 - 21)            | --                    | 0<br>(0 - 0)           | 13<br>(7 - 21)           | --                       | --                       |
| Maternal hypertensive disorders                                  | 15<br>(10 - 23)           | --                    | 0<br>(0 - 0)           | 15<br>(10 - 23)          | --                       | --                       |
| Maternal obstructed labor                                        | 8<br>(5 - 12)             | --                    | 0<br>(0 - 0)           | 8<br>(5 - 12)            | --                       | --                       |
| Maternal abortive outcome                                        | 24<br>(14 - 36)           | --                    | 0<br>(0 - 0)           | 24<br>(14 - 36)          | --                       | --                       |
| Indirect maternal deaths                                         | 11<br>(7 - 18)            | --                    | 0<br>(0 - 0)           | 11<br>(7 - 18)           | --                       | --                       |
| Late maternal deaths                                             | 24<br>(10 - 47)           | --                    | 0<br>(0 - 0)           | 24<br>(10 - 47)          | --                       | --                       |
| Maternal deaths aggravated by HIV/AIDS                           | 1<br>(1 - 2)              | --                    | --                     | 1<br>(1 - 2)             | --                       | --                       |
| Other maternal disorders                                         | 28<br>(16 - 43)           | --                    | 0<br>(0 - 0)           | 28<br>(16 - 43)          | --                       | --                       |
| Neonatal disorders                                               | 825<br>(488 - 1,164)      | 825<br>(488 - 1,164)  | --                     | --                       | --                       | --                       |
| Neonatal preterm birth complications                             | 245<br>(110 - 458)        | 245<br>(110 - 458)    | --                     | --                       | --                       | --                       |
| Neonatal encephalopathy due to birth asphyxia and trauma         | 290<br>(118 - 626)        | 290<br>(118 - 626)    | --                     | --                       | --                       | --                       |
| Neonatal sepsis and other neonatal infections                    | 152<br>(58 - 300)         | 152<br>(58 - 300)     | --                     | --                       | --                       | --                       |
| Hemolytic disease and other neonatal jaundice                    | 5<br>(1 - 13)             | 5<br>(1 - 13)         | --                     | --                       | --                       | --                       |
| Other neonatal disorders                                         | 133<br>(53 - 286)         | 133<br>(53 - 286)     | --                     | --                       | --                       | --                       |
| Nutritional deficiencies                                         | 452<br>(230 - 660)        | 169<br>(63 - 300)     | 10<br>(5 - 16)         | 51<br>(29 - 92)          | 65<br>(32 - 102)         | 157<br>(78 - 249)        |
| Protein-energy malnutrition                                      | 310<br>(104 - 486)        | 130<br>(38 - 248)     | 8<br>(3 - 13)          | 24<br>(8 - 54)           | 42<br>(13 - 78)          | 107<br>(30 - 188)        |
| Iodine deficiency                                                | 4<br>(1 - 15)             | 2<br>(0 - 11)         | 0<br>(0 - 1)           | 1<br>(0 - 2)             | 1<br>(0 - 2)             | 1<br>(0 - 4)             |
| Iron-deficiency anemia                                           | 130<br>(65 - 260)         | 35<br>(6 - 100)       | 2<br>(1 - 5)           | 26<br>(11 - 54)          | 21<br>(8 - 44)           | 47<br>(20 - 91)          |
| Other nutritional deficiencies                                   | 7<br>(3 - 16)             | 3<br>(0 - 8)          | 0<br>(0 - 0)           | 1<br>(0 - 3)             | 1<br>(0 - 2)             | 2<br>(1 - 4)             |
| Other communicable, maternal, neonatal, and nutritional diseases | 151<br>(94 - 237)         | 82<br>(36 - 166)      | 6<br>(3 - 10)          | 28<br>(16 - 42)          | 19<br>(10 - 31)          | 16<br>(8 - 30)           |
| Sexually transmitted diseases excluding HIV                      | 64<br>(23 - 131)          | 52<br>(14 - 117)      | 3<br>(1 - 5)           | 4<br>(2 - 8)             | 3<br>(1 - 5)             | 3<br>(1 - 5)             |
| Syphilis                                                         | 60<br>(20 - 126)          | 52<br>(14 - 117)      | 2<br>(1 - 5)           | 2<br>(1 - 4)             | 2<br>(1 - 3)             | 2<br>(1 - 4)             |
| Chlamydial infection                                             | 1<br>(0 - 2)              | --                    | 0<br>(0 - 0)           | 1<br>(0 - 1)             | 0<br>(0 - 1)             | 0<br>(0 - 0)             |
| Gonococcal infection                                             | 2<br>(1 - 3)              | --                    | 0<br>(0 - 0)           | 1<br>(0 - 2)             | 0<br>(0 - 1)             | 0<br>(0 - 1)             |
| Other sexually transmitted diseases                              | 1<br>(1 - 2)              | --                    | 0<br>(0 - 0)           | 1<br>(0 - 2)             | 0<br>(0 - 1)             | 0<br>(0 - 0)             |
| Hepatitis                                                        | 20<br>(12 - 48)           | 3<br>(1 - 8)          | 1<br>(0 - 2)           | 8<br>(5 - 16)            | 5<br>(3 - 15)            | 3<br>(1 - 10)            |
| Acute hepatitis A                                                | 1<br>(0 - 4)              | 1<br>(0 - 2)          | 0<br>(0 - 0)           | 0<br>(0 - 1)             | 0<br>(0 - 0)             | 0<br>(0 - 0)             |
| Acute hepatitis B                                                | 12<br>(7 - 32)            | 3<br>(1 - 6)          | 0<br>(0 - 1)           | 3<br>(1 - 6)             | 4<br>(2 - 11)            | 2<br>(1 - 9)             |
| Acute hepatitis C                                                | 1<br>(0 - 3)              | --                    | 0<br>(0 - 0)           | 0<br>(0 - 1)             | 0<br>(0 - 1)             | 0<br>(0 - 1)             |
| Acute hepatitis E                                                | 5<br>(3 - 12)             | 0<br>(0 - 0)          | 0<br>(0 - 1)           | 4<br>(2 - 8)             | 1<br>(0 - 2)             | 0<br>(0 - 1)             |
| Other infectious diseases                                        | 67<br>(24 - 118)          | 26<br>(8 - 68)        | 3<br>(1 - 5)           | 16<br>(4 - 29)           | 11<br>(4 - 21)           | 11<br>(4 - 23)           |
| Non-communicable diseases                                        | 8,856<br>(7,649 - 10,072) | 581<br>(341 - 838)    | 77<br>(57 - 99)        | 1,265<br>(1,046 - 1,540) | 2,684<br>(2,141 - 3,242) | 4,249<br>(3,704 - 4,812) |
| Neoplasms                                                        | 1,219<br>(994 - 1,458)    | 16<br>(8 - 26)        | 12<br>(8 - 16)         | 206<br>(161 - 265)       | 511<br>(394 - 634)       | 473<br>(396 - 567)       |
| Esophageal cancer                                                | 74<br>(54 - 100)          | --                    | --                     | 10<br>(6 - 14)           | 37<br>(25 - 52)          | 27<br>(20 - 38)          |
| Stomach cancer                                                   | 111<br>(86 - 144)         | --                    | --                     | 18<br>(13 - 25)          | 48<br>(35 - 64)          | 46<br>(34 - 60)          |
| Liver cancer                                                     | 99<br>(64 - 149)          | --                    | 0<br>(0 - 1)           | 14<br>(7 - 28)           | 45<br>(27 - 71)          | 39<br>(25 - 57)          |
| Liver cancer due to hepatitis B                                  | 25<br>(13 - 41)           | --                    | 0<br>(0 - 0)           | 6<br>(3 - 11)            | 12<br>(6 - 22)           | 7<br>(4 - 13)            |

Web Table 31- Gabon deaths with 95% UI by age, sex, and cause in 2013

| Cause                                | Both Sexes, All Ages     | Both Sexes, 0-4 Years | Both Sexes, 5-14 Years | Both Sexes, 15-49 Years | Both Sexes, 50-69 Years | Both Sexes, 70-80 Years  |
|--------------------------------------|--------------------------|-----------------------|------------------------|-------------------------|-------------------------|--------------------------|
| Liver cancer due to hepatitis C      | 46<br>(27 - 76)          | --                    | 0<br>(0 - 0)           | 5<br>(2 - 11)           | 21<br>(11 - 37)         | 20<br>(12 - 33)          |
| Liver cancer due to alcohol use      | 14<br>(9 - 24)           | --                    | --                     | 1<br>(0 - 2)            | 6<br>(3 - 11)           | 7<br>(4 - 12)            |
| Liver cancer due to other causes     | 14<br>(7 - 22)           | --                    | 0<br>(0 - 0)           | 3<br>(2 - 6)            | 6<br>(3 - 10)           | 5<br>(2 - 8)             |
| Larynx cancer                        | 14<br>(11 - 20)          | --                    | --                     | 2<br>(1 - 3)            | 7<br>(5 - 11)           | 5<br>(4 - 7)             |
| Tracheal, bronchus and lung cancer   | 106<br>(83 - 132)        | --                    | --                     | 11<br>(7 - 16)          | 55<br>(41 - 70)         | 40<br>(30 - 58)          |
| Breast cancer                        | 113<br>(77 - 150)        | --                    | --                     | 28<br>(19 - 41)         | 54<br>(33 - 74)         | 32<br>(22 - 43)          |
| Cervical cancer                      | 103<br>(68 - 143)        | --                    | --                     | 30<br>(19 - 44)         | 47<br>(28 - 70)         | 25<br>(17 - 37)          |
| Uterine cancer                       | 11<br>(7 - 18)           | --                    | --                     | 1<br>(1 - 2)            | 5<br>(3 - 10)           | 4<br>(2 - 8)             |
| Prostate cancer                      | 78<br>(45 - 146)         | --                    | --                     | 1<br>(0 - 3)            | 19<br>(9 - 43)          | 57<br>(35 - 102)         |
| Colon and rectum cancer              | 99<br>(80 - 120)         | --                    | --                     | 10<br>(8 - 13)          | 38<br>(29 - 47)         | 50<br>(40 - 63)          |
| Lip and oral cavity cancer           | 19<br>(14 - 25)          | --                    | --                     | 4<br>(2 - 6)            | 9<br>(6 - 12)           | 6<br>(5 - 9)             |
| Nasopharynx cancer                   | 4<br>(3 - 5)             | --                    | 0<br>(0 - 0)           | 1<br>(1 - 2)            | 2<br>(1 - 3)            | 1<br>(1 - 1)             |
| Other pharynx cancer                 | 9<br>(6 - 11)            | --                    | --                     | 1<br>(1 - 2)            | 5<br>(3 - 7)            | 2<br>(2 - 3)             |
| Gallbladder and biliary tract cancer | 24<br>(14 - 37)          | --                    | --                     | 2<br>(1 - 3)            | 10<br>(6 - 16)          | 12<br>(7 - 20)           |
| Pancreatic cancer                    | 45<br>(36 - 55)          | --                    | --                     | 4<br>(3 - 5)            | 20<br>(15 - 25)         | 22<br>(17 - 28)          |
| Malignant skin melanoma              | 7<br>(4 - 13)            | --                    | --                     | 2<br>(1 - 4)            | 3<br>(2 - 4)            | 2<br>(2 - 4)             |
| Non-melanoma skin cancer             | 6<br>(4 - 9)             | --                    | --                     | 1<br>(1 - 2)            | 2<br>(1 - 3)            | 3<br>(2 - 5)             |
| Ovarian cancer                       | 29<br>(18 - 41)          | --                    | --                     | 6<br>(3 - 10)           | 15<br>(9 - 22)          | 8<br>(5 - 12)            |
| Testicular cancer                    | 2<br>(1 - 3)             | --                    | --                     | 1<br>(1 - 2)            | 0<br>(0 - 0)            | 0<br>(0 - 0)             |
| Kidney cancer                        | 26<br>(18 - 35)          | 1<br>(0 - 2)          | 0<br>(0 - 1)           | 4<br>(2 - 6)            | 12<br>(8 - 18)          | 8<br>(6 - 11)            |
| Bladder cancer                       | 35<br>(26 - 44)          | --                    | --                     | 3<br>(2 - 4)            | 13<br>(9 - 18)          | 19<br>(14 - 25)          |
| Brain and nervous system cancer      | 19<br>(14 - 31)          | 1<br>(0 - 2)          | 1<br>(1 - 2)           | 6<br>(4 - 13)           | 7<br>(5 - 11)           | 4<br>(2 - 5)             |
| Thyroid cancer                       | 5<br>(3 - 6)             | --                    | 0<br>(0 - 0)           | 1<br>(0 - 1)            | 2<br>(1 - 3)            | 2<br>(1 - 3)             |
| Mesothelioma                         | 2<br>(1 - 3)             | --                    | --                     | 0<br>(0 - 0)            | 1<br>(1 - 1)            | 1<br>(0 - 1)             |
| Hodgkin lymphoma                     | 6<br>(3 - 8)             | 0<br>(0 - 1)          | 0<br>(0 - 1)           | 3<br>(1 - 5)            | 1<br>(1 - 2)            | 1<br>(1 - 1)             |
| Non-Hodgkin lymphoma                 | 58<br>(41 - 83)          | 2<br>(1 - 5)          | 2<br>(1 - 3)           | 15<br>(10 - 28)         | 20<br>(13 - 29)         | 18<br>(13 - 25)          |
| Multiple myeloma                     | 12<br>(9 - 17)           | --                    | --                     | 1<br>(1 - 3)            | 6<br>(4 - 8)            | 5<br>(4 - 7)             |
| Leukemia                             | 21<br>(17 - 27)          | 2<br>(1 - 4)          | 2<br>(2 - 4)           | 7<br>(5 - 10)           | 5<br>(4 - 6)            | 5<br>(4 - 7)             |
| Other neoplasms                      | 85<br>(59 - 128)         | 9<br>(4 - 17)         | 5<br>(3 - 7)           | 20<br>(12 - 40)         | 25<br>(17 - 40)         | 26<br>(18 - 37)          |
| Cardiovascular diseases              | 4,038<br>(3,445 - 4,711) | 30<br>(18 - 47)       | 9<br>(6 - 12)          | 436<br>(345 - 547)      | 1,232<br>(981 - 1,510)  | 2,331<br>(1,994 - 2,704) |
| Rheumatic heart disease              | 61<br>(43 - 85)          | 1<br>(0 - 1)          | 1<br>(1 - 1)           | 19<br>(13 - 28)         | 20<br>(13 - 29)         | 20<br>(14 - 29)          |
| Ischemic heart disease               | 1,022<br>(815 - 1,255)   | 1<br>(0 - 2)          | 0<br>(0 - 1)           | 106<br>(75 - 144)       | 334<br>(255 - 433)      | 581<br>(455 - 732)       |
| Cerebrovascular disease              | 2,239<br>(1,852 - 2,756) | 10<br>(5 - 17)        | 4<br>(2 - 6)           | 211<br>(160 - 275)      | 664<br>(515 - 847)      | 1,351<br>(1,120 - 1,659) |
| Ischemic stroke                      | 1,120<br>(832 - 1,391)   | 1<br>(0 - 3)          | 1<br>(0 - 1)           | 39<br>(13 - 82)         | 247<br>(151 - 351)      | 832<br>(645 - 1,020)     |
| Hemorrhagic stroke                   | 1,119<br>(867 - 1,517)   | 8<br>(4 - 14)         | 3<br>(2 - 5)           | 172<br>(121 - 235)      | 418<br>(309 - 562)      | 519<br>(383 - 754)       |
| Hypertensive heart disease           | 268<br>(159 - 413)       | 0<br>(0 - 1)          | 0<br>(0 - 0)           | 17<br>(7 - 27)          | 69<br>(38 - 103)        | 181<br>(108 - 301)       |
| Cardiomyopathy and myocarditis       | 138<br>(84 - 186)        | 12<br>(5 - 21)        | 2<br>(1 - 3)           | 35<br>(15 - 52)         | 41<br>(24 - 58)         | 48<br>(31 - 75)          |
| Atrial fibrillation and flutter      | 4<br>(2 - 7)             | --                    | --                     | 0<br>(0 - 0)            | 1<br>(0 - 1)            | 3<br>(1 - 5)             |
| Aortic aneurysm                      | 45<br>(29 - 63)          | --                    | --                     | 6<br>(2 - 8)            | 16<br>(9 - 22)          | 24<br>(17 - 34)          |
| Peripheral vascular disease          | 6<br>(3 - 8)             | --                    | --                     | 0<br>(0 - 0)            | 1<br>(1 - 2)            | 4<br>(3 - 6)             |

Web Table 31- Gabon deaths with 95% UI by age, sex, and cause in 2013

| Cause                                               | Both Sexes, All Ages | Both Sexes, 0-4 Years | Both Sexes, 5-14 Years | Both Sexes, 15-49 Years | Both Sexes, 50-69 Years | Both Sexes, 70-80 Years |
|-----------------------------------------------------|----------------------|-----------------------|------------------------|-------------------------|-------------------------|-------------------------|
| Endocarditis                                        | 20<br>(13 - 27)      | 1<br>(1 - 2)          | 0<br>(0 - 0)           | 4<br>(2 - 6)            | 5<br>(3 - 8)            | 9<br>(6 - 14)           |
| Other cardiovascular and circulatory diseases       | 235<br>(159 - 308)   | 6<br>(3 - 10)         | 1<br>(1 - 2)           | 38<br>(19 - 52)         | 80<br>(50 - 110)        | 110<br>(70 - 156)       |
| Chronic respiratory diseases                        | 789<br>(629 - 967)   | 23<br>(13 - 38)       | 4<br>(3 - 6)           | 74<br>(55 - 95)         | 223<br>(167 - 287)      | 464<br>(370 - 581)      |
| Chronic obstructive pulmonary disease               | 550<br>(432 - 691)   | 10<br>(5 - 18)        | 1<br>(1 - 2)           | 34<br>(24 - 45)         | 155<br>(114 - 203)      | 350<br>(272 - 445)      |
| Pneumoconiosis                                      | 24<br>(15 - 37)      | 0<br>(0 - 1)          | 0<br>(0 - 0)           | 5<br>(3 - 7)            | 9<br>(5 - 14)           | 10<br>(6 - 16)          |
| Silicosis                                           | 6<br>(3 - 10)        | 0<br>(0 - 0)          | 0<br>(0 - 0)           | 1<br>(0 - 2)            | 2<br>(1 - 4)            | 3<br>(1 - 5)            |
| Asbestosis                                          | 3<br>(1 - 5)         | 0<br>(0 - 0)          | 0<br>(0 - 0)           | 1<br>(0 - 1)            | 1<br>(1 - 2)            | 1<br>(0 - 2)            |
| Coal workers pneumoconiosis                         | 2<br>(1 - 4)         | 0<br>(0 - 0)          | 0<br>(0 - 0)           | 0<br>(0 - 1)            | 1<br>(0 - 2)            | 1<br>(0 - 2)            |
| Other pneumoconiosis                                | 13<br>(8 - 20)       | 0<br>(0 - 0)          | 0<br>(0 - 0)           | 3<br>(2 - 5)            | 5<br>(3 - 8)            | 6<br>(3 - 9)            |
| Asthma                                              | 103<br>(66 - 139)    | 5<br>(2 - 10)         | 2<br>(1 - 3)           | 23<br>(15 - 32)         | 31<br>(19 - 45)         | 42<br>(25 - 63)         |
| Interstitial lung disease and pulmonary sarcoidosis | 85<br>(50 - 149)     | 1<br>(0 - 3)          | 0<br>(0 - 1)           | 6<br>(3 - 14)           | 24<br>(13 - 46)         | 53<br>(30 - 88)         |
| Other chronic respiratory diseases                  | 25<br>(18 - 35)      | 7<br>(3 - 11)         | 1<br>(0 - 1)           | 6<br>(4 - 8)            | 4<br>(2 - 6)            | 8<br>(5 - 13)           |
| Cirrhosis                                           | 382<br>(300 - 467)   | 3<br>(1 - 5)          | 2<br>(1 - 3)           | 102<br>(77 - 134)       | 172<br>(127 - 220)      | 103<br>(80 - 132)       |
| Cirrhosis due to hepatitis B                        | 90<br>(52 - 130)     | 0<br>(0 - 0)          | 0<br>(0 - 0)           | 21<br>(12 - 33)         | 40<br>(23 - 60)         | 28<br>(15 - 43)         |
| Cirrhosis due to hepatitis C                        | 124<br>(87 - 163)    | 0<br>(0 - 1)          | 1<br>(0 - 1)           | 35<br>(23 - 50)         | 58<br>(37 - 81)         | 30<br>(21 - 42)         |
| Cirrhosis due to alcohol use                        | 127<br>(89 - 171)    | --                    | --                     | 30<br>(20 - 43)         | 59<br>(39 - 85)         | 38<br>(25 - 54)         |
| Cirrhosis due to other causes                       | 41<br>(27 - 58)      | 2<br>(1 - 4)          | 1<br>(1 - 2)           | 16<br>(10 - 24)         | 14<br>(8 - 22)          | 7<br>(4 - 10)           |
| Digestive diseases                                  | 416<br>(305 - 577)   | 14<br>(6 - 26)        | 5<br>(4 - 8)           | 99<br>(69 - 139)        | 124<br>(84 - 180)       | 174<br>(125 - 250)      |
| Peptic ulcer disease                                | 94<br>(60 - 144)     | 1<br>(0 - 2)          | 0<br>(0 - 1)           | 21<br>(12 - 36)         | 32<br>(19 - 51)         | 40<br>(24 - 63)         |
| Gastritis and duodenitis                            | 16<br>(9 - 28)       | 1<br>(0 - 1)          | 0<br>(0 - 1)           | 4<br>(2 - 7)            | 4<br>(2 - 8)            | 6<br>(3 - 14)           |
| Appendicitis                                        | 20<br>(11 - 36)      | 1<br>(0 - 3)          | 1<br>(0 - 2)           | 7<br>(4 - 13)           | 5<br>(3 - 10)           | 5<br>(3 - 10)           |
| Paralytic ileus and intestinal obstruction          | 103<br>(65 - 159)    | 4<br>(1 - 8)          | 2<br>(1 - 3)           | 14<br>(8 - 22)          | 27<br>(16 - 44)         | 57<br>(35 - 89)         |
| Inguinal, femoral, and abdominal hernia             | 6<br>(4 - 11)        | 0<br>(0 - 0)          | 0<br>(0 - 0)           | 1<br>(0 - 2)            | 2<br>(1 - 3)            | 3<br>(2 - 6)            |
| Inflammatory bowel disease                          | 35<br>(18 - 84)      | 4<br>(1 - 8)          | 1<br>(0 - 1)           | 11<br>(4 - 26)          | 9<br>(4 - 22)           | 11<br>(6 - 29)          |
| Vascular intestinal disorders                       | 5<br>(2 - 8)         | 0<br>(0 - 0)          | 0<br>(0 - 0)           | 1<br>(0 - 2)            | 1<br>(1 - 3)            | 2<br>(1 - 5)            |
| Gallbladder and biliary diseases                    | 37<br>(25 - 52)      | 0<br>(0 - 1)          | 0<br>(0 - 0)           | 6<br>(3 - 9)            | 12<br>(7 - 18)          | 18<br>(11 - 27)         |
| Pancreatitis                                        | 43<br>(24 - 74)      | 0<br>(0 - 1)          | 0<br>(0 - 0)           | 20<br>(7 - 36)          | 13<br>(8 - 24)          | 9<br>(6 - 16)           |
| Other digestive diseases                            | 58<br>(39 - 88)      | 3<br>(1 - 6)          | 1<br>(0 - 1)           | 15<br>(8 - 24)          | 18<br>(11 - 28)         | 21<br>(13 - 34)         |
| Neurological disorders                              | 301<br>(239 - 362)   | 12<br>(4 - 24)        | 6<br>(3 - 9)           | 46<br>(19 - 70)         | 27<br>(20 - 35)         | 210<br>(169 - 253)      |
| Alzheimer disease and other dementias               | 214<br>(173 - 257)   | --                    | --                     | 0<br>(0 - 0)            | 15<br>(11 - 20)         | 199<br>(160 - 242)      |
| Parkinson disease                                   | 3<br>(2 - 5)         | --                    | --                     | 0<br>(0 - 0)            | 1<br>(1 - 4)            | 2<br>(1 - 4)            |
| Epilepsy                                            | 68<br>(30 - 98)      | 10<br>(2 - 20)        | 5<br>(2 - 8)           | 42<br>(15 - 65)         | 7<br>(4 - 11)           | 5<br>(3 - 7)            |
| Multiple sclerosis                                  | 1<br>(0 - 1)         | --                    | --                     | 0<br>(0 - 0)            | 0<br>(0 - 0)            | 0<br>(0 - 0)            |
| Other neurological disorders                        | 15<br>(9 - 23)       | 3<br>(1 - 5)          | 1<br>(0 - 1)           | 4<br>(2 - 8)            | 4<br>(2 - 6)            | 3<br>(2 - 5)            |
| Mental and substance use disorders                  | 103<br>(69 - 138)    | 4<br>(1 - 9)          | 0<br>(0 - 0)           | 68<br>(43 - 95)         | 25<br>(16 - 36)         | 6<br>(5 - 9)            |
| Schizophrenia                                       | 2<br>(1 - 3)         | --                    | --                     | 1<br>(0 - 2)            | 1<br>(0 - 1)            | 0<br>(0 - 1)            |
| Alcohol use disorders                               | 64<br>(34 - 92)      | --                    | --                     | 40<br>(19 - 60)         | 20<br>(11 - 31)         | 4<br>(2 - 7)            |
| Drug use disorders                                  | 36<br>(24 - 54)      | 4<br>(1 - 9)          | --                     | 27<br>(17 - 45)         | 4<br>(3 - 5)            | 2<br>(1 - 3)            |
| Opioid use disorders                                | 4<br>(2 - 6)         | 0<br>(0 - 1)          | --                     | 3<br>(2 - 5)            | 0<br>(0 - 1)            | 0<br>(0 - 0)            |
| Cocaine use disorders                               | 0<br>(0 - 0)         | 0<br>(0 - 0)          | --                     | 0<br>(0 - 0)            | 0<br>(0 - 0)            | 0<br>(0 - 0)            |

Web Table 31- Gabon deaths with 95% UI by age, sex, and cause in 2013

| Cause                                               | Both Sexes, All Ages   | Both Sexes, 0-4 Years | Both Sexes, 5-14 Years | Both Sexes, 15-49 Years | Both Sexes, 50-69 Years | Both Sexes, 70-80 Years |
|-----------------------------------------------------|------------------------|-----------------------|------------------------|-------------------------|-------------------------|-------------------------|
| Amphetamine use disorders                           | 0<br>(0 - 0)           | 0<br>(0 - 0)          | --                     | 0<br>(0 - 0)            | 0<br>(0 - 0)            | 0<br>(0 - 0)            |
| Other drug use disorders                            | 32<br>(21 - 47)        | 4<br>(1 - 7)          | --                     | 24<br>(15 - 40)         | 3<br>(2 - 5)            | 1<br>(1 - 2)            |
| Eating disorders                                    | 1<br>(1 - 1)           | --                    | 0<br>(0 - 0)           | 1<br>(0 - 1)            | --                      | --                      |
| Anorexia nervosa                                    | 1<br>(1 - 1)           | --                    | 0<br>(0 - 0)           | 1<br>(0 - 1)            | --                      | --                      |
| Diabetes, urogenital, blood, and endocrine diseases | 1,120<br>(891 - 1,361) | 97<br>(59 - 148)      | 24<br>(17 - 36)        | 198<br>(156 - 255)      | 348<br>(256 - 456)      | 452<br>(337 - 573)      |
| Diabetes mellitus                                   | 527<br>(380 - 650)     | 3<br>(2 - 6)          | 1<br>(1 - 1)           | 57<br>(39 - 75)         | 211<br>(147 - 276)      | 254<br>(183 - 320)      |
| Acute glomerulonephritis                            | 2<br>(1 - 4)           | 0<br>(0 - 1)          | 0<br>(0 - 0)           | 1<br>(0 - 2)            | 0<br>(0 - 1)            | 0<br>(0 - 1)            |
| Chronic kidney disease                              | 242<br>(140 - 419)     | 9<br>(4 - 17)         | 4<br>(2 - 5)           | 53<br>(31 - 88)         | 68<br>(37 - 136)        | 108<br>(61 - 183)       |
| Chronic kidney disease due to diabetes mellitus     | 2<br>(1 - 5)           | 0<br>(0 - 0)          | 0<br>(0 - 0)           | 0<br>(0 - 1)            | 1<br>(0 - 2)            | 1<br>(0 - 2)            |
| Chronic kidney disease due to hypertension          | 113<br>(71 - 168)      | 2<br>(1 - 4)          | 1<br>(0 - 1)           | 17<br>(10 - 26)         | 35<br>(20 - 54)         | 59<br>(36 - 91)         |
| Chronic kidney disease due to glomerulonephritis    | 45<br>(27 - 67)        | 4<br>(2 - 6)          | 1<br>(1 - 2)           | 16<br>(8 - 26)          | 11<br>(6 - 18)          | 13<br>(8 - 21)          |
| Chronic kidney disease due to other causes          | 82<br>(34 - 198)       | 3<br>(1 - 8)          | 1<br>(1 - 2)           | 21<br>(10 - 42)         | 22<br>(6 - 68)          | 35<br>(12 - 79)         |
| Urinary diseases and male infertility               | 104<br>(78 - 139)      | 7<br>(3 - 14)         | 1<br>(1 - 1)           | 20<br>(13 - 27)         | 28<br>(19 - 39)         | 49<br>(33 - 71)         |
| Interstitial nephritis and urinary tract infections | 72<br>(53 - 95)        | 4<br>(2 - 10)         | 1<br>(0 - 1)           | 11<br>(6 - 17)          | 18<br>(12 - 26)         | 37<br>(25 - 53)         |
| Urolithiasis                                        | 3<br>(2 - 5)           | --                    | 0<br>(0 - 0)           | 1<br>(0 - 1)            | 1<br>(0 - 2)            | 1<br>(1 - 2)            |
| Other urinary diseases                              | 29<br>(18 - 45)        | 2<br>(1 - 5)          | 0<br>(0 - 1)           | 7<br>(4 - 13)           | 8<br>(5 - 14)           | 11<br>(6 - 18)          |
| Gynecological diseases                              | 1<br>(0 - 1)           | --                    | --                     | 0<br>(0 - 1)            | 0<br>(0 - 0)            | 0<br>(0 - 0)            |
| Uterine fibroids                                    | 0<br>(0 - 0)           | --                    | --                     | 0<br>(0 - 0)            | 0<br>(0 - 0)            | 0<br>(0 - 0)            |
| Polycystic ovarian syndrome                         | 0<br>(0 - 0)           | --                    | --                     | 0<br>(0 - 0)            | 0<br>(0 - 0)            | --                      |
| Endometriosis                                       | 0<br>(0 - 0)           | --                    | --                     | 0<br>(0 - 0)            | 0<br>(0 - 0)            | --                      |
| Genital prolapse                                    | 0<br>(0 - 0)           | --                    | --                     | 0<br>(0 - 0)            | 0<br>(0 - 0)            | 0<br>(0 - 0)            |
| Other gynecological diseases                        | 0<br>(0 - 0)           | --                    | --                     | 0<br>(0 - 0)            | 0<br>(0 - 0)            | 0<br>(0 - 0)            |
| Hemoglobinopathies and hemolytic anemias            | 105<br>(57 - 163)      | 40<br>(17 - 70)       | 13<br>(6 - 22)         | 35<br>(17 - 57)         | 10<br>(6 - 16)          | 7<br>(4 - 11)           |
| Thalassemias                                        | 0<br>(0 - 0)           | 0<br>(0 - 0)          | 0<br>(0 - 0)           | 0<br>(0 - 0)            | 0<br>(0 - 0)            | 0<br>(0 - 0)            |
| Sickle cell disorders                               | 95<br>(50 - 150)       | 38<br>(16 - 67)       | 13<br>(6 - 22)         | 34<br>(17 - 56)         | 9<br>(5 - 15)           | 1<br>(0 - 1)            |
| G6PD deficiency                                     | 1<br>(1 - 1)           | 0<br>(0 - 1)          | 0<br>(0 - 0)           | 0<br>(0 - 0)            | 0<br>(0 - 0)            | 0<br>(0 - 0)            |
| Other hemoglobinopathies and hemolytic anemias      | 8<br>(5 - 14)          | 1<br>(0 - 3)          | 0<br>(0 - 0)           | 0<br>(0 - 1)            | 1<br>(0 - 1)            | 6<br>(3 - 9)            |
| Endocrine, metabolic, blood, and immune disorders   | 139<br>(100 - 241)     | 38<br>(20 - 76)       | 6<br>(3 - 9)           | 32<br>(20 - 66)         | 29<br>(19 - 51)         | 34<br>(23 - 52)         |
| Musculoskeletal disorders                           | 34<br>(21 - 46)        | --                    | 1<br>(1 - 2)           | 13<br>(6 - 19)          | 10<br>(6 - 14)          | 9<br>(6 - 14)           |
| Rheumatoid arthritis                                | 5<br>(2 - 8)           | --                    | 0<br>(0 - 0)           | 1<br>(0 - 1)            | 2<br>(1 - 3)            | 2<br>(1 - 4)            |
| Other musculoskeletal disorders                     | 29<br>(18 - 40)        | --                    | 1<br>(1 - 2)           | 13<br>(6 - 18)          | 8<br>(5 - 12)           | 7<br>(5 - 11)           |
| Other non-communicable diseases                     | 454<br>(237 - 681)     | 381<br>(176 - 600)    | 12<br>(6 - 22)         | 22<br>(13 - 36)         | 13<br>(9 - 18)          | 26<br>(17 - 39)         |
| Congenital anomalies                                | 391<br>(184 - 616)     | 359<br>(164 - 576)    | 11<br>(5 - 21)         | 14<br>(7 - 28)          | 3<br>(2 - 6)            | 3<br>(2 - 4)            |
| Neural tube defects                                 | 39<br>(8 - 116)        | 38<br>(8 - 114)       | 0<br>(0 - 1)           | 1<br>(0 - 1)            | 0<br>(0 - 0)            | 0<br>(0 - 0)            |
| Congenital heart anomalies                          | 198<br>(92 - 338)      | 180<br>(82 - 308)     | 7<br>(3 - 13)          | 8<br>(4 - 17)           | 1<br>(1 - 3)            | 1<br>(1 - 2)            |
| Cleft lip and cleft palate                          | 1<br>(0 - 4)           | 1<br>(0 - 4)          | --                     | --                      | --                      | --                      |
| Down syndrome                                       | 22<br>(7 - 40)         | 19<br>(6 - 35)        | 1<br>(0 - 2)           | 2<br>(1 - 3)            | 0<br>(0 - 1)            | 0<br>(0 - 0)            |
| Chromosomal unbalanced rearrangements               | 16<br>(6 - 34)         | 15<br>(5 - 33)        | 0<br>(0 - 1)           | 1<br>(0 - 1)            | 0<br>(0 - 0)            | 0<br>(0 - 0)            |
| Other congenital anomalies                          | 114<br>(50 - 206)      | 106<br>(45 - 191)     | 3<br>(1 - 6)           | 3<br>(2 - 7)            | 1<br>(1 - 2)            | 1<br>(1 - 2)            |
| Skin and subcutaneous diseases                      | 48<br>(35 - 63)        | 6<br>(3 - 11)         | 1<br>(1 - 1)           | 8<br>(5 - 11)           | 10<br>(7 - 14)          | 23<br>(13 - 36)         |

Web Table 31- Gabon deaths with 95% UI by age, sex, and cause in 2013

| Cause                                           | Both Sexes, All Ages     | Both Sexes, 0-4 Years | Both Sexes, 5-14 Years | Both Sexes, 15-49 Years | Both Sexes, 50-69 Years | Both Sexes, 70-80 Years |
|-------------------------------------------------|--------------------------|-----------------------|------------------------|-------------------------|-------------------------|-------------------------|
| Cellulitis                                      | 9<br>(5 - 14)            | 1<br>(0 - 3)          | 0<br>(0 - 0)           | 2<br>(1 - 3)            | 2<br>(1 - 4)            | 4<br>(2 - 6)            |
| Pyoderma                                        | 27<br>(20 - 36)          | 5<br>(2 - 8)          | 0<br>(0 - 1)           | 4<br>(3 - 6)            | 6<br>(4 - 9)            | 12<br>(7 - 19)          |
| Decubitus ulcer                                 | 9<br>(5 - 14)            | 0<br>(0 - 0)          | 0<br>(0 - 0)           | 1<br>(0 - 1)            | 1<br>(1 - 2)            | 7<br>(3 - 12)           |
| Other skin and subcutaneous diseases            | 3<br>(2 - 4)             | 0<br>(0 - 1)          | 0<br>(0 - 0)           | 1<br>(0 - 1)            | 1<br>(0 - 1)            | 1<br>(0 - 2)            |
| Sudden infant death syndrome                    | 15<br>(3 - 45)           | 15<br>(3 - 45)        | --                     | --                      | --                      | --                      |
| Injuries                                        | 1,717<br>(1,240 - 2,311) | 231<br>(130 - 343)    | 92<br>(67 - 122)       | 984<br>(674 - 1,407)    | 229<br>(152 - 326)      | 181<br>(135 - 240)      |
| Transport injuries                              | 724<br>(387 - 1,263)     | 58<br>(23 - 111)      | 44<br>(22 - 70)        | 461<br>(246 - 834)      | 102<br>(48 - 187)       | 60<br>(26 - 103)        |
| Road injuries                                   | 686<br>(371 - 1,160)     | 52<br>(21 - 99)       | 41<br>(21 - 65)        | 439<br>(238 - 769)      | 96<br>(46 - 171)        | 57<br>(25 - 95)         |
| Pedestrian road injuries                        | 243<br>(118 - 413)       | 25<br>(8 - 50)        | 19<br>(9 - 32)         | 131<br>(57 - 234)       | 39<br>(18 - 70)         | 28<br>(13 - 49)         |
| Cyclist road injuries                           | 66<br>(28 - 119)         | 5<br>(1 - 13)         | 7<br>(2 - 12)          | 35<br>(14 - 65)         | 13<br>(5 - 25)          | 6<br>(2 - 12)           |
| Motorcyclist road injuries                      | 121<br>(54 - 231)        | 3<br>(1 - 7)          | 2<br>(1 - 5)           | 102<br>(44 - 200)       | 10<br>(4 - 19)          | 3<br>(1 - 6)            |
| Motor vehicle road injuries                     | 255<br>(121 - 464)       | 18<br>(7 - 38)        | 13<br>(6 - 22)         | 170<br>(78 - 318)       | 34<br>(14 - 64)         | 19<br>(8 - 34)          |
| Other road injuries                             | 2<br>(1 - 5)             | 0<br>(0 - 1)          | 0<br>(0 - 0)           | 1<br>(0 - 3)            | 0<br>(0 - 1)            | 0<br>(0 - 1)            |
| Other transport injuries                        | 38<br>(13 - 123)         | 5<br>(1 - 17)         | 3<br>(1 - 8)           | 22<br>(7 - 77)          | 5<br>(2 - 18)           | 3<br>(1 - 8)            |
| Unintentional injuries                          | 641<br>(447 - 815)       | 167<br>(82 - 262)     | 43<br>(29 - 56)        | 246<br>(149 - 334)      | 83<br>(56 - 112)        | 102<br>(76 - 132)       |
| Falls                                           | 135<br>(73 - 231)        | 12<br>(4 - 25)        | 4<br>(2 - 8)           | 46<br>(18 - 97)         | 25<br>(12 - 46)         | 48<br>(30 - 73)         |
| Drowning                                        | 137<br>(60 - 215)        | 42<br>(12 - 80)       | 19<br>(10 - 29)        | 61<br>(23 - 110)        | 10<br>(6 - 15)          | 5<br>(4 - 8)            |
| Fire, heat, and hot substances                  | 69<br>(25 - 103)         | 22<br>(5 - 43)        | 4<br>(2 - 7)           | 23<br>(7 - 35)          | 9<br>(4 - 13)           | 11<br>(6 - 16)          |
| Poisonings                                      | 28<br>(19 - 42)          | 5<br>(2 - 10)         | 1<br>(1 - 2)           | 15<br>(10 - 25)         | 4<br>(3 - 6)            | 2<br>(2 - 4)            |
| Exposure to mechanical forces                   | 95<br>(52 - 177)         | 17<br>(7 - 40)        | 7<br>(4 - 13)          | 56<br>(27 - 103)        | 11<br>(6 - 22)          | 4<br>(3 - 9)            |
| Unintentional firearm injuries                  | 21<br>(12 - 32)          | 2<br>(1 - 3)          | 1<br>(1 - 2)           | 15<br>(8 - 25)          | 2<br>(1 - 3)            | 1<br>(0 - 1)            |
| Unintentional suffocation                       | 9<br>(2 - 32)            | 5<br>(1 - 20)         | 1<br>(0 - 2)           | 2<br>(1 - 7)            | 1<br>(0 - 2)            | 0<br>(0 - 1)            |
| Other exposure to mechanical forces             | 64<br>(29 - 132)         | 10<br>(4 - 24)        | 5<br>(2 - 10)          | 38<br>(14 - 79)         | 8<br>(4 - 18)           | 3<br>(2 - 7)            |
| Adverse effects of medical treatment            | 55<br>(29 - 83)          | 12<br>(4 - 24)        | 1<br>(1 - 2)           | 13<br>(5 - 23)          | 12<br>(6 - 19)          | 17<br>(10 - 27)         |
| Animal contact                                  | 15<br>(8 - 35)           | 4<br>(2 - 11)         | 2<br>(1 - 4)           | 4<br>(2 - 9)            | 3<br>(1 - 6)            | 2<br>(1 - 5)            |
| Venomous animal contact                         | 9<br>(4 - 23)            | 3<br>(1 - 9)          | 1<br>(0 - 3)           | 3<br>(1 - 7)            | 2<br>(1 - 4)            | 1<br>(0 - 3)            |
| Non-venomous animal contact                     | 5<br>(3 - 12)            | 1<br>(0 - 3)          | 0<br>(0 - 1)           | 2<br>(1 - 4)            | 1<br>(0 - 2)            | 1<br>(0 - 2)            |
| Foreign body                                    | 84<br>(34 - 152)         | 49<br>(15 - 96)       | 3<br>(1 - 5)           | 13<br>(5 - 26)          | 7<br>(3 - 13)           | 12<br>(7 - 19)          |
| Pulmonary aspiration and foreign body in airway | 83<br>(33 - 150)         | 48<br>(15 - 96)       | 3<br>(1 - 5)           | 13<br>(4 - 26)          | 7<br>(3 - 12)           | 12<br>(6 - 19)          |
| Foreign body in other body part                 | 1<br>(1 - 2)             | 0<br>(0 - 1)          | 0<br>(0 - 0)           | 0<br>(0 - 1)            | 0<br>(0 - 0)            | 0<br>(0 - 0)            |
| Other unintentional injuries                    | 23<br>(12 - 35)          | 3<br>(1 - 6)          | 2<br>(1 - 2)           | 14<br>(6 - 22)          | 3<br>(2 - 5)            | 2<br>(1 - 3)            |
| Self-harm and interpersonal violence            | 352<br>(178 - 502)       | 6<br>(3 - 14)         | 6<br>(3 - 9)           | 277<br>(133 - 413)      | 44<br>(25 - 66)         | 19<br>(12 - 27)         |
| Self-harm                                       | 226<br>(104 - 354)       | --                    | 3<br>(1 - 5)           | 170<br>(72 - 281)       | 36<br>(20 - 56)         | 17<br>(10 - 25)         |
| Interpersonal violence                          | 126<br>(58 - 195)        | 6<br>(3 - 14)         | 3<br>(1 - 5)           | 107<br>(47 - 172)       | 8<br>(4 - 13)           | 2<br>(1 - 3)            |
| Assault by firearm                              | 45<br>(13 - 83)          | 1<br>(0 - 3)          | 1<br>(0 - 1)           | 41<br>(10 - 77)         | 3<br>(1 - 5)            | 0<br>(0 - 1)            |
| Assault by sharp object                         | 32<br>(10 - 74)          | 1<br>(0 - 2)          | 0<br>(0 - 1)           | 28<br>(8 - 68)          | 2<br>(1 - 4)            | 0<br>(0 - 1)            |
| Assault by other means                          | 48<br>(20 - 88)          | 5<br>(2 - 10)         | 2<br>(1 - 3)           | 38<br>(12 - 74)         | 4<br>(1 - 6)            | 1<br>(0 - 2)            |

Web Table 31- Gabon deaths with 95% UI by age, sex, and cause in 2013

| Cause                                                             | Males, All Ages             | Males, 0-4 Years         | Males, 5-14 Years  | Males, 15-49 Years       | Males, 50-69 Years       | Males, 70-80 Years       |
|-------------------------------------------------------------------|-----------------------------|--------------------------|--------------------|--------------------------|--------------------------|--------------------------|
| All causes                                                        | 11,446<br>(10,139 - 12,677) | 1,731<br>(1,459 - 2,042) | 215<br>(186 - 248) | 3,902<br>(3,425 - 4,465) | 2,758<br>(2,257 - 3,256) | 2,840<br>(2,430 - 3,081) |
| Communicable, maternal, neonatal, and nutritional diseases        | 5,412<br>(4,682 - 6,048)    | 1,321<br>(1,074 - 1,600) | 116<br>(90 - 148)  | 2,242<br>(1,833 - 2,568) | 994<br>(771 - 1,185)     | 738<br>(492 - 925)       |
| HIV/AIDS and tuberculosis                                         | 2,730<br>(2,181 - 3,106)    | 16<br>(11 - 22)          | 24<br>(17 - 32)    | 1,849<br>(1,449 - 2,159) | 646<br>(494 - 788)       | 195<br>(117 - 260)       |
| Tuberculosis                                                      | 497<br>(218 - 697)          | 8<br>(4 - 14)            | 2<br>(1 - 4)       | 194<br>(87 - 284)        | 176<br>(69 - 261)        | 118<br>(46 - 176)        |
| HIV/AIDS                                                          | 2,233<br>(1,778 - 2,582)    | 8<br>(5 - 11)            | 22<br>(15 - 30)    | 1,655<br>(1,239 - 1,987) | 471<br>(348 - 589)       | 77<br>(48 - 116)         |
| HIV/AIDS resulting in mycobacterial infection                     | 159<br>(118 - 204)          | 0<br>(0 - 1)             | 1<br>(1 - 2)       | 117<br>(84 - 152)        | 34<br>(24 - 46)          | 6<br>(4 - 9)             |
| HIV/AIDS resulting in other diseases                              | 2,074<br>(1,663 - 2,409)    | 7<br>(5 - 11)            | 20<br>(14 - 28)    | 1,538<br>(1,155 - 1,843) | 436<br>(325 - 546)       | 71<br>(44 - 107)         |
| Diarrhea, lower respiratory, and other common infectious diseases | 1,358<br>(934 - 1,781)      | 428<br>(218 - 707)       | 45<br>(28 - 68)    | 223<br>(151 - 322)       | 243<br>(153 - 352)       | 420<br>(270 - 565)       |
| Diarrheal diseases                                                | 231<br>(112 - 404)          | 64<br>(18 - 169)         | 8<br>(3 - 19)      | 45<br>(20 - 98)          | 46<br>(18 - 99)          | 69<br>(29 - 141)         |
| Intestinal infectious diseases                                    | 30<br>(12 - 62)             | 10<br>(3 - 22)           | 8<br>(3 - 16)      | 10<br>(3 - 21)           | 1<br>(0 - 3)             | 1<br>(0 - 1)             |
| Typhoid fever                                                     | 22<br>(9 - 45)              | 7<br>(2 - 16)            | 6<br>(2 - 12)      | 7<br>(2 - 16)            | 1<br>(0 - 2)             | 0<br>(0 - 1)             |
| Paratyphoid fever                                                 | 7<br>(3 - 16)               | 3<br>(1 - 7)             | 2<br>(1 - 5)       | 2<br>(1 - 5)             | 0<br>(0 - 1)             | 0<br>(0 - 0)             |
| Other intestinal infectious diseases                              | 1<br>(0 - 4)                | 0<br>(0 - 3)             | 0<br>(0 - 1)       | 0<br>(0 - 1)             | 0<br>(0 - 0)             | 0<br>(0 - 0)             |
| Lower respiratory infections                                      | 937<br>(589 - 1,272)        | 274<br>(117 - 502)       | 17<br>(9 - 29)     | 126<br>(80 - 185)        | 179<br>(100 - 266)       | 341<br>(194 - 479)       |
| Upper respiratory infections                                      | 1<br>(0 - 1)                | 0<br>(0 - 1)             | 0<br>(0 - 0)       | 0<br>(0 - 1)             | 0<br>(0 - 0)             | 0<br>(0 - 0)             |
| Otitis media                                                      | 1<br>(0 - 1)                | 0<br>(0 - 0)             | 0<br>(0 - 0)       | 0<br>(0 - 0)             | 0<br>(0 - 0)             | 0<br>(0 - 0)             |
| Meningitis                                                        | 111<br>(69 - 179)           | 42<br>(19 - 83)          | 8<br>(4 - 17)      | 37<br>(20 - 72)          | 15<br>(7 - 30)           | 8<br>(4 - 17)            |
| Pneumococcal meningitis                                           | 38<br>(23 - 60)             | 11<br>(5 - 23)           | 3<br>(1 - 7)       | 14<br>(7 - 27)           | 6<br>(3 - 12)            | 3<br>(2 - 6)             |
| H influenzae type B meningitis                                    | 27<br>(14 - 46)             | 18<br>(7 - 35)           | 2<br>(1 - 5)       | 5<br>(2 - 10)            | 2<br>(1 - 4)             | 1<br>(0 - 2)             |
| Meningococcal meningitis                                          | 16<br>(9 - 28)              | 5<br>(2 - 10)            | 1<br>(0 - 2)       | 6<br>(2 - 12)            | 3<br>(1 - 6)             | 2<br>(1 - 3)             |
| Other meningitis                                                  | 30<br>(18 - 52)             | 8<br>(3 - 18)            | 2<br>(1 - 4)       | 13<br>(6 - 26)           | 5<br>(2 - 11)            | 3<br>(1 - 6)             |
| Encephalitis                                                      | 11<br>(5 - 22)              | 5<br>(1 - 13)            | 1<br>(0 - 2)       | 3<br>(1 - 8)             | 1<br>(0 - 2)             | 1<br>(0 - 1)             |
| Diphtheria                                                        | 1<br>(0 - 5)                | 1<br>(0 - 5)             | 0<br>(0 - 1)       | 0<br>(0 - 0)             | 0<br>(0 - 0)             | 0<br>(0 - 0)             |
| Whooping cough                                                    | 12<br>(0 - 57)              | 12<br>(0 - 54)           | 0<br>(0 - 2)       | 0<br>(0 - 0)             | 0<br>(0 - 0)             | 0<br>(0 - 0)             |
| Tetanus                                                           | 1<br>(1 - 4)                | 1<br>(0 - 2)             | 0<br>(0 - 0)       | 0<br>(0 - 1)             | 0<br>(0 - 1)             | 0<br>(0 - 0)             |
| Measles                                                           | 21<br>(0 - 126)             | 19<br>(0 - 113)          | 2<br>(0 - 12)      | 0<br>(0 - 2)             | 0<br>(0 - 0)             | 0<br>(0 - 0)             |
| Varicella and herpes zoster                                       | 1<br>(0 - 2)                | 0<br>(0 - 1)             | 0<br>(0 - 0)       | 0<br>(0 - 0)             | 0<br>(0 - 0)             | 0<br>(0 - 1)             |
| Neglected tropical diseases and malaria                           | 496<br>(267 - 863)          | 242<br>(58 - 589)        | 38<br>(17 - 79)    | 116<br>(61 - 192)        | 56<br>(26 - 104)         | 44<br>(17 - 93)          |
| Malaria                                                           | 457<br>(225 - 817)          | 237<br>(52 - 587)        | 34<br>(13 - 75)    | 96<br>(42 - 169)         | 49<br>(20 - 99)          | 41<br>(15 - 90)          |
| Leishmaniasis                                                     | 1<br>(0 - 1)                | 0<br>(0 - 0)             | 0<br>(0 - 0)       | 0<br>(0 - 0)             | 0<br>(0 - 0)             | 0<br>(0 - 0)             |
| Visceral leishmaniasis                                            | 1<br>(0 - 1)                | 0<br>(0 - 0)             | 0<br>(0 - 0)       | 0<br>(0 - 0)             | 0<br>(0 - 0)             | 0<br>(0 - 0)             |
| African trypanosomiasis                                           | 22<br>(9 - 41)              | 2<br>(0 - 4)             | 3<br>(1 - 5)       | 14<br>(5 - 26)           | 3<br>(1 - 6)             | 1<br>(0 - 2)             |
| Schistosomiasis                                                   | 7<br>(5 - 10)               | 0<br>(0 - 0)             | 0<br>(0 - 0)       | 3<br>(2 - 5)             | 3<br>(1 - 4)             | 1<br>(1 - 2)             |
| Cysticercosis                                                     | 0<br>(0 - 0)                | 0<br>(0 - 0)             | 0<br>(0 - 0)       | 0<br>(0 - 0)             | 0<br>(0 - 0)             | 0<br>(0 - 0)             |
| Cystic echinococcosis                                             | 0<br>(0 - 0)                | 0<br>(0 - 0)             | 0<br>(0 - 0)       | 0<br>(0 - 0)             | 0<br>(0 - 0)             | 0<br>(0 - 0)             |
| Dengue                                                            | 1<br>(0 - 2)                | 0<br>(0 - 1)             | 0<br>(0 - 0)       | 0<br>(0 - 1)             | 0<br>(0 - 0)             | 0<br>(0 - 0)             |
| Yellow fever                                                      | 2<br>(1 - 3)                | 0<br>(0 - 1)             | 0<br>(0 - 1)       | 1<br>(0 - 2)             | 0<br>(0 - 0)             | 0<br>(0 - 0)             |
| Rabies                                                            | 1<br>(1 - 2)                | 0<br>(0 - 1)             | 0<br>(0 - 1)       | 1<br>(0 - 1)             | 0<br>(0 - 0)             | 0<br>(0 - 0)             |
| Intestinal nematode infections                                    | 1<br>(0 - 6)                | 1<br>(0 - 5)             | 0<br>(0 - 1)       | 0<br>(0 - 1)             | 0<br>(0 - 0)             | 0<br>(0 - 0)             |
| Ascariasis                                                        | 1<br>(0 - 6)                | 1<br>(0 - 5)             | 0<br>(0 - 1)       | 0<br>(0 - 1)             | 0<br>(0 - 0)             | 0<br>(0 - 0)             |



Web Table 31- Gabon deaths with 95% UI by age, sex, and cause in 2013

| Cause                                                            | Males, All Ages          | Males, 0-4 Years   | Males, 5-14 Years | Males, 15-49 Years   | Males, 50-69 Years       | Males, 70-80 Years       |
|------------------------------------------------------------------|--------------------------|--------------------|-------------------|----------------------|--------------------------|--------------------------|
| Other neglected tropical diseases                                | 4<br>(2 - 7)             | 1<br>(0 - 3)       | 0<br>(0 - 1)      | 1<br>(0 - 3)         | 1<br>(0 - 1)             | 0<br>(0 - 1)             |
| Maternal disorders                                               | --                       | --                 | --                | --                   | --                       | --                       |
| Maternal hemorrhage                                              | --                       | --                 | --                | --                   | --                       | --                       |
| Maternal sepsis and other maternal infections                    | --                       | --                 | --                | --                   | --                       | --                       |
| Maternal hypertensive disorders                                  | --                       | --                 | --                | --                   | --                       | --                       |
| Maternal obstructed labor                                        | --                       | --                 | --                | --                   | --                       | --                       |
| Maternal abortive outcome                                        | --                       | --                 | --                | --                   | --                       | --                       |
| Indirect maternal deaths                                         | --                       | --                 | --                | --                   | --                       | --                       |
| Late maternal deaths                                             | --                       | --                 | --                | --                   | --                       | --                       |
| Maternal deaths aggravated by HIV/AIDS                           | --                       | --                 | --                | --                   | --                       | --                       |
| Other maternal disorders                                         | --                       | --                 | --                | --                   | --                       | --                       |
| Neonatal disorders                                               | 494<br>(311 - 700)       | 494<br>(311 - 700) | --                | --                   | --                       | --                       |
| Neonatal preterm birth complications                             | 146<br>(56 - 301)        | 146<br>(56 - 301)  | --                | --                   | --                       | --                       |
| Neonatal encephalopathy due to birth asphyxia and trauma         | 169<br>(55 - 381)        | 169<br>(55 - 381)  | --                | --                   | --                       | --                       |
| Neonatal sepsis and other neonatal infections                    | 98<br>(30 - 229)         | 98<br>(30 - 229)   | --                | --                   | --                       | --                       |
| Hemolytic disease and other neonatal jaundice                    | 4<br>(0 - 12)            | 4<br>(0 - 12)      | --                | --                   | --                       | --                       |
| Other neonatal disorders                                         | 77<br>(25 - 196)         | 77<br>(25 - 196)   | --                | --                   | --                       | --                       |
| Nutritional deficiencies                                         | 250<br>(86 - 432)        | 98<br>(28 - 199)   | 6<br>(2 - 12)     | 36<br>(14 - 78)      | 39<br>(12 - 76)          | 72<br>(20 - 141)         |
| Protein-energy malnutrition                                      | 168<br>(39 - 311)        | 67<br>(10 - 152)   | 5<br>(1 - 10)     | 19<br>(4 - 49)       | 27<br>(6 - 58)           | 51<br>(9 - 112)          |
| Iodine deficiency                                                | 2<br>(0 - 12)            | 1<br>(0 - 11)      | 0<br>(0 - 0)      | 0<br>(0 - 2)         | 0<br>(0 - 1)             | 0<br>(0 - 2)             |
| Iron-deficiency anemia                                           | 76<br>(21 - 186)         | 28<br>(2 - 93)     | 1<br>(0 - 4)      | 16<br>(3 - 42)       | 12<br>(2 - 31)           | 20<br>(4 - 52)           |
| Other nutritional deficiencies                                   | 4<br>(1 - 12)            | 2<br>(0 - 7)       | 0<br>(0 - 0)      | 1<br>(0 - 3)         | 0<br>(0 - 1)             | 1<br>(0 - 2)             |
| Other communicable, maternal, neonatal, and nutritional diseases | 84<br>(48 - 140)         | 44<br>(17 - 89)    | 3<br>(2 - 6)      | 19<br>(9 - 31)       | 10<br>(5 - 20)           | 8<br>(3 - 17)            |
| Sexually transmitted diseases excluding HIV                      | 30<br>(9 - 63)           | 26<br>(6 - 58)     | 1<br>(0 - 3)      | 1<br>(0 - 5)         | 1<br>(0 - 2)             | 1<br>(0 - 2)             |
| Syphilis                                                         | 29<br>(9 - 62)           | 26<br>(6 - 58)     | 1<br>(0 - 3)      | 1<br>(0 - 3)         | 1<br>(0 - 2)             | 1<br>(0 - 2)             |
| Chlamydial infection                                             | --                       | --                 | --                | --                   | --                       | --                       |
| Gonococcal infection                                             | 1<br>(0 - 2)             | --                 | 0<br>(0 - 0)      | 0<br>(0 - 1)         | 0<br>(0 - 0)             | 0<br>(0 - 0)             |
| Other sexually transmitted diseases                              | 0<br>(0 - 1)             | --                 | 0<br>(0 - 0)      | 0<br>(0 - 1)         | 0<br>(0 - 0)             | 0<br>(0 - 0)             |
| Hepatitis                                                        | 13<br>(7 - 35)           | 2<br>(1 - 6)       | 1<br>(0 - 2)      | 6<br>(3 - 12)        | 3<br>(1 - 9)             | 1<br>(1 - 6)             |
| Acute hepatitis A                                                | 1<br>(0 - 2)             | 0<br>(0 - 1)       | 0<br>(0 - 0)      | 0<br>(0 - 1)         | 0<br>(0 - 0)             | 0<br>(0 - 0)             |
| Acute hepatitis B                                                | 8<br>(4 - 22)            | 2<br>(1 - 5)       | 0<br>(0 - 1)      | 2<br>(1 - 5)         | 2<br>(1 - 7)             | 1<br>(1 - 5)             |
| Acute hepatitis C                                                | 0<br>(0 - 2)             | --                 | 0<br>(0 - 0)      | 0<br>(0 - 1)         | 0<br>(0 - 1)             | 0<br>(0 - 0)             |
| Acute hepatitis E                                                | 3<br>(1 - 8)             | 0<br>(0 - 0)       | 0<br>(0 - 0)      | 3<br>(1 - 6)         | 1<br>(0 - 1)             | 0<br>(0 - 0)             |
| Other infectious diseases                                        | 41<br>(10 - 80)          | 16<br>(3 - 48)     | 2<br>(0 - 4)      | 12<br>(2 - 23)       | 7<br>(1 - 15)            | 6<br>(1 - 14)            |
| Non-communicable diseases                                        | 4,817<br>(3,934 - 5,686) | 287<br>(153 - 434) | 41<br>(29 - 55)   | 861<br>(669 - 1,110) | 1,613<br>(1,210 - 2,047) | 2,015<br>(1,656 - 2,310) |
| Neoplasms                                                        | 613<br>(477 - 769)       | 9<br>(4 - 16)      | 7<br>(5 - 10)     | 93<br>(64 - 135)     | 255<br>(191 - 333)       | 249<br>(199 - 308)       |
| Esophageal cancer                                                | 59<br>(41 - 82)          | --                 | --                | 9<br>(6 - 14)        | 31<br>(20 - 46)          | 19<br>(13 - 27)          |
| Stomach cancer                                                   | 72<br>(53 - 100)         | --                 | --                | 13<br>(8 - 19)       | 32<br>(22 - 47)          | 28<br>(20 - 39)          |
| Liver cancer                                                     | 54<br>(31 - 93)          | --                 | 0<br>(0 - 1)      | 9<br>(4 - 21)        | 26<br>(14 - 46)          | 19<br>(11 - 31)          |
| Liver cancer due to hepatitis B                                  | 16<br>(7 - 32)           | --                 | 0<br>(0 - 0)      | 4<br>(1 - 9)         | 8<br>(3 - 16)            | 4<br>(2 - 9)             |

Web Table 31- Gabon deaths with 95% UI by age, sex, and cause in 2013

| Cause                                | Males, All Ages          | Males, 0-4 Years | Males, 5-14 Years | Males, 15-49 Years | Males, 50-69 Years | Males, 70-80 Years     |
|--------------------------------------|--------------------------|------------------|-------------------|--------------------|--------------------|------------------------|
| Liver cancer due to hepatitis C      | 24<br>(12 - 45)          | --               | 0<br>(0 - 0)      | 3<br>(1 - 8)       | 12<br>(5 - 23)     | 9<br>(5 - 17)          |
| Liver cancer due to alcohol use      | 9<br>(5 - 17)            | --               | --                | 1<br>(0 - 2)       | 4<br>(2 - 8)       | 4<br>(2 - 8)           |
| Liver cancer due to other causes     | 6<br>(2 - 10)            | --               | 0<br>(0 - 0)      | 1<br>(1 - 3)       | 2<br>(1 - 5)       | 1<br>(1 - 3)           |
| Larynx cancer                        | 13<br>(9 - 19)           | --               | --                | 2<br>(1 - 3)       | 7<br>(4 - 10)      | 5<br>(3 - 7)           |
| Tracheal, bronchus and lung cancer   | 77<br>(59 - 98)          | --               | --                | 9<br>(4 - 13)      | 41<br>(29 - 55)    | 27<br>(21 - 36)        |
| Breast cancer                        | 1<br>(1 - 3)             | --               | --                | 0<br>(0 - 1)       | 1<br>(0 - 1)       | 0<br>(0 - 1)           |
| Cervical cancer                      | --                       | --               | --                | --                 | --                 | --                     |
| Uterine cancer                       | --                       | --               | --                | --                 | --                 | --                     |
| Prostate cancer                      | 78<br>(45 - 146)         | --               | --                | 1<br>(0 - 3)       | 19<br>(9 - 43)     | 57<br>(35 - 102)       |
| Colon and rectum cancer              | 50<br>(38 - 62)          | --               | --                | 6<br>(4 - 8)       | 20<br>(14 - 27)    | 24<br>(19 - 31)        |
| Lip and oral cavity cancer           | 13<br>(8 - 17)           | --               | --                | 3<br>(1 - 5)       | 6<br>(4 - 9)       | 4<br>(2 - 5)           |
| Nasopharynx cancer                   | 2<br>(2 - 4)             | --               | 0<br>(0 - 0)      | 1<br>(0 - 1)       | 1<br>(1 - 2)       | 1<br>(0 - 1)           |
| Other pharynx cancer                 | 7<br>(5 - 9)             | --               | --                | 1<br>(1 - 2)       | 4<br>(2 - 6)       | 2<br>(1 - 3)           |
| Gallbladder and biliary tract cancer | 6<br>(3 - 10)            | --               | --                | 0<br>(0 - 1)       | 3<br>(1 - 5)       | 3<br>(1 - 5)           |
| Pancreatic cancer                    | 22<br>(17 - 28)          | --               | --                | 2<br>(2 - 3)       | 10<br>(7 - 14)     | 10<br>(7 - 13)         |
| Malignant skin melanoma              | 4<br>(2 - 10)            | --               | --                | 1<br>(0 - 4)       | 1<br>(1 - 3)       | 1<br>(1 - 3)           |
| Non-melanoma skin cancer             | 3<br>(2 - 5)             | --               | --                | 1<br>(0 - 1)       | 1<br>(1 - 2)       | 2<br>(1 - 3)           |
| Ovarian cancer                       | --                       | --               | --                | --                 | --                 | --                     |
| Testicular cancer                    | 2<br>(1 - 3)             | --               | --                | 1<br>(1 - 2)       | 0<br>(0 - 0)       | 0<br>(0 - 0)           |
| Kidney cancer                        | 16<br>(10 - 25)          | 1<br>(0 - 1)     | 0<br>(0 - 0)      | 3<br>(1 - 5)       | 8<br>(4 - 13)      | 5<br>(3 - 7)           |
| Bladder cancer                       | 26<br>(18 - 34)          | --               | --                | 2<br>(1 - 3)       | 10<br>(6 - 14)     | 14<br>(10 - 19)        |
| Brain and nervous system cancer      | 10<br>(6 - 21)           | 1<br>(0 - 1)     | 1<br>(0 - 1)      | 3<br>(2 - 10)      | 3<br>(2 - 7)       | 1<br>(1 - 3)           |
| Thyroid cancer                       | 2<br>(1 - 2)             | --               | 0<br>(0 - 0)      | 0<br>(0 - 1)       | 1<br>(0 - 1)       | 1<br>(0 - 1)           |
| Mesothelioma                         | 1<br>(1 - 2)             | --               | --                | 0<br>(0 - 0)       | 1<br>(0 - 1)       | 1<br>(0 - 1)           |
| Hodgkin lymphoma                     | 3<br>(2 - 6)             | 0<br>(0 - 0)     | 0<br>(0 - 1)      | 2<br>(1 - 3)       | 1<br>(0 - 1)       | 0<br>(0 - 1)           |
| Non-Hodgkin lymphoma                 | 34<br>(22 - 54)          | 1<br>(0 - 3)     | 2<br>(1 - 3)      | 10<br>(5 - 21)     | 12<br>(7 - 18)     | 10<br>(7 - 14)         |
| Multiple myeloma                     | 6<br>(4 - 10)            | --               | --                | 1<br>(0 - 2)       | 3<br>(2 - 5)       | 2<br>(1 - 3)           |
| Leukemia                             | 11<br>(8 - 16)           | 1<br>(0 - 2)     | 1<br>(1 - 2)      | 4<br>(2 - 6)       | 2<br>(2 - 3)       | 3<br>(2 - 3)           |
| Other neoplasms                      | 41<br>(25 - 77)          | 5<br>(2 - 11)    | 3<br>(1 - 4)      | 11<br>(5 - 28)     | 12<br>(7 - 23)     | 11<br>(7 - 16)         |
| Cardiovascular diseases              | 2,103<br>(1,679 - 2,507) | 16<br>(8 - 28)   | 5<br>(3 - 7)      | 323<br>(240 - 420) | 759<br>(572 - 974) | 1,000<br>(817 - 1,159) |
| Rheumatic heart disease              | 26<br>(16 - 42)          | 0<br>(0 - 1)     | 0<br>(0 - 1)      | 11<br>(6 - 18)     | 8<br>(5 - 14)      | 6<br>(4 - 10)          |
| Ischemic heart disease               | 593<br>(442 - 781)       | 1<br>(0 - 2)     | 0<br>(0 - 0)      | 90<br>(58 - 129)   | 238<br>(167 - 339) | 265<br>(199 - 354)     |
| Cerebrovascular disease              | 1,180<br>(920 - 1,463)   | 6<br>(3 - 13)    | 2<br>(1 - 4)      | 158<br>(111 - 218) | 408<br>(296 - 543) | 605<br>(483 - 736)     |
| Ischemic stroke                      | 574<br>(385 - 776)       | 1<br>(0 - 3)     | 0<br>(0 - 1)      | 31<br>(8 - 73)     | 163<br>(86 - 253)  | 379<br>(271 - 483)     |
| Hemorrhagic stroke                   | 606<br>(418 - 836)       | 5<br>(2 - 11)    | 2<br>(1 - 3)      | 127<br>(79 - 186)  | 246<br>(157 - 352) | 226<br>(157 - 330)     |
| Hypertensive heart disease           | 88<br>(39 - 138)         | 0<br>(0 - 0)     | 0<br>(0 - 0)      | 10<br>(2 - 19)     | 31<br>(11 - 51)    | 47<br>(24 - 78)        |
| Cardiomyopathy and myocarditis       | 73<br>(32 - 110)         | 6<br>(2 - 11)    | 1<br>(0 - 2)      | 24<br>(7 - 41)     | 25<br>(10 - 39)    | 18<br>(10 - 28)        |
| Atrial fibrillation and flutter      | 1<br>(1 - 2)             | --               | --                | 0<br>(0 - 0)       | 0<br>(0 - 1)       | 1<br>(0 - 2)           |
| Aortic aneurysm                      | 29<br>(18 - 41)          | --               | --                | 4<br>(1 - 6)       | 11<br>(6 - 17)     | 13<br>(9 - 20)         |
| Peripheral vascular disease          | 3<br>(1 - 5)             | --               | --                | 0<br>(0 - 0)       | 1<br>(0 - 2)       | 2<br>(1 - 3)           |

Web Table 31- Gabon deaths with 95% UI by age, sex, and cause in 2013

| Cause                                               | Males, All Ages    | Males, 0-4 Years | Males, 5-14 Years | Males, 15-49 Years | Males, 50-69 Years | Males, 70-80 Years |
|-----------------------------------------------------|--------------------|------------------|-------------------|--------------------|--------------------|--------------------|
| Endocarditis                                        | 10<br>(6 - 17)     | 1<br>(0 - 1)     | 0<br>(0 - 0)      | 2<br>(1 - 4)       | 3<br>(2 - 6)       | 4<br>(2 - 7)       |
| Other cardiovascular and circulatory diseases       | 100<br>(66 - 136)  | 3<br>(1 - 6)     | 1<br>(0 - 1)      | 24<br>(10 - 35)    | 34<br>(20 - 50)    | 39<br>(25 - 56)    |
| Chronic respiratory diseases                        | 489<br>(363 - 611) | 13<br>(6 - 25)   | 2<br>(1 - 4)      | 49<br>(33 - 68)    | 147<br>(100 - 201) | 277<br>(206 - 350) |
| Chronic obstructive pulmonary disease               | 353<br>(260 - 450) | 6<br>(3 - 13)    | 1<br>(0 - 1)      | 24<br>(16 - 35)    | 105<br>(71 - 144)  | 217<br>(160 - 280) |
| Pneumoconiosis                                      | 23<br>(14 - 36)    | 0<br>(0 - 0)     | 0<br>(0 - 0)      | 4<br>(2 - 7)       | 9<br>(5 - 14)      | 10<br>(6 - 16)     |
| Silicosis                                           | 6<br>(3 - 10)      | 0<br>(0 - 0)     | 0<br>(0 - 0)      | 1<br>(0 - 2)       | 2<br>(1 - 4)       | 3<br>(1 - 5)       |
| Asbestosis                                          | 3<br>(1 - 5)       | 0<br>(0 - 0)     | 0<br>(0 - 0)      | 1<br>(0 - 1)       | 1<br>(1 - 2)       | 1<br>(0 - 2)       |
| Coal workers pneumoconiosis                         | 2<br>(1 - 4)       | 0<br>(0 - 0)     | 0<br>(0 - 0)      | 0<br>(0 - 1)       | 1<br>(0 - 2)       | 1<br>(0 - 2)       |
| Other pneumoconiosis                                | 13<br>(7 - 19)     | 0<br>(0 - 0)     | 0<br>(0 - 0)      | 3<br>(1 - 4)       | 4<br>(2 - 8)       | 5<br>(3 - 9)       |
| Asthma                                              | 52<br>(34 - 74)    | 2<br>(1 - 6)     | 1<br>(1 - 2)      | 14<br>(9 - 20)     | 16<br>(9 - 25)     | 19<br>(11 - 29)    |
| Interstitial lung disease and pulmonary sarcoidosis | 47<br>(23 - 100)   | 0<br>(0 - 2)     | 0<br>(0 - 0)      | 4<br>(1 - 10)      | 15<br>(6 - 35)     | 28<br>(14 - 54)    |
| Other chronic respiratory diseases                  | 14<br>(9 - 20)     | 4<br>(2 - 7)     | 0<br>(0 - 1)      | 4<br>(2 - 6)       | 2<br>(1 - 4)       | 4<br>(2 - 6)       |
| Cirrhosis                                           | 267<br>(202 - 342) | 2<br>(0 - 3)     | 1<br>(1 - 2)      | 84<br>(58 - 116)   | 122<br>(85 - 165)  | 58<br>(42 - 77)    |
| Cirrhosis due to hepatitis B                        | 53<br>(23 - 92)    | 0<br>(0 - 0)     | 0<br>(0 - 0)      | 17<br>(8 - 29)     | 25<br>(9 - 44)     | 12<br>(4 - 22)     |
| Cirrhosis due to hepatitis C                        | 91<br>(58 - 129)   | 0<br>(0 - 1)     | 0<br>(0 - 1)      | 28<br>(17 - 42)    | 42<br>(24 - 63)    | 21<br>(13 - 30)    |
| Cirrhosis due to alcohol use                        | 96<br>(65 - 136)   | --               | --                | 27<br>(17 - 40)    | 47<br>(30 - 71)    | 22<br>(14 - 33)    |
| Cirrhosis due to other causes                       | 26<br>(16 - 41)    | 1<br>(0 - 3)     | 1<br>(0 - 1)      | 13<br>(7 - 20)     | 9<br>(4 - 16)      | 3<br>(1 - 5)       |
| Digestive diseases                                  | 243<br>(157 - 360) | 8<br>(3 - 18)    | 3<br>(2 - 5)      | 73<br>(46 - 113)   | 76<br>(46 - 121)   | 83<br>(52 - 128)   |
| Peptic ulcer disease                                | 63<br>(35 - 110)   | 0<br>(0 - 1)     | 0<br>(0 - 1)      | 17<br>(9 - 31)     | 23<br>(12 - 41)    | 23<br>(12 - 42)    |
| Gastritis and duodenitis                            | 9<br>(4 - 17)      | 0<br>(0 - 1)     | 0<br>(0 - 0)      | 3<br>(1 - 6)       | 3<br>(1 - 5)       | 3<br>(1 - 7)       |
| Appendicitis                                        | 12<br>(6 - 25)     | 1<br>(0 - 2)     | 1<br>(0 - 1)      | 5<br>(2 - 11)      | 3<br>(1 - 7)       | 3<br>(1 - 6)       |
| Paralytic ileus and intestinal obstruction          | 46<br>(25 - 92)    | 2<br>(1 - 5)     | 1<br>(0 - 2)      | 8<br>(4 - 16)      | 13<br>(7 - 27)     | 22<br>(11 - 44)    |
| Inguinal, femoral, and abdominal hernia             | 4<br>(2 - 8)       | 0<br>(0 - 0)     | 0<br>(0 - 0)      | 1<br>(0 - 2)       | 1<br>(1 - 2)       | 2<br>(1 - 4)       |
| Inflammatory bowel disease                          | 19<br>(8 - 49)     | 2<br>(0 - 6)     | 0<br>(0 - 1)      | 7<br>(2 - 18)      | 5<br>(2 - 13)      | 5<br>(2 - 13)      |
| Vascular intestinal disorders                       | 3<br>(1 - 6)       | 0<br>(0 - 0)     | 0<br>(0 - 0)      | 1<br>(0 - 1)       | 1<br>(0 - 2)       | 1<br>(0 - 3)       |
| Gallbladder and biliary diseases                    | 19<br>(11 - 31)    | 0<br>(0 - 1)     | 0<br>(0 - 0)      | 4<br>(1 - 7)       | 6<br>(3 - 11)      | 9<br>(4 - 15)      |
| Pancreatitis                                        | 32<br>(15 - 60)    | 0<br>(0 - 1)     | 0<br>(0 - 0)      | 17<br>(6 - 33)     | 10<br>(5 - 19)     | 5<br>(3 - 10)      |
| Other digestive diseases                            | 35<br>(17 - 60)    | 2<br>(0 - 4)     | 1<br>(0 - 1)      | 11<br>(3 - 20)     | 11<br>(5 - 21)     | 10<br>(5 - 19)     |
| Neurological disorders                              | 146<br>(105 - 188) | 7<br>(2 - 16)    | 3<br>(1 - 6)      | 31<br>(10 - 52)    | 14<br>(9 - 19)     | 91<br>(68 - 119)   |
| Alzheimer disease and other dementias               | 93<br>(69 - 121)   | --               | --                | 0<br>(0 - 0)       | 7<br>(5 - 10)      | 86<br>(63 - 114)   |
| Parkinson disease                                   | 2<br>(1 - 3)       | --               | --                | 0<br>(0 - 0)       | 0<br>(0 - 1)       | 1<br>(1 - 3)       |
| Epilepsy                                            | 42<br>(14 - 68)    | 5<br>(1 - 14)    | 3<br>(1 - 5)      | 27<br>(8 - 48)     | 4<br>(2 - 7)       | 2<br>(1 - 4)       |
| Multiple sclerosis                                  | 0<br>(0 - 0)       | --               | --                | 0<br>(0 - 0)       | 0<br>(0 - 0)       | 0<br>(0 - 0)       |
| Other neurological disorders                        | 9<br>(4 - 16)      | 2<br>(0 - 4)     | 1<br>(0 - 1)      | 3<br>(1 - 6)       | 2<br>(1 - 3)       | 2<br>(1 - 2)       |
| Mental and substance use disorders                  | 89<br>(56 - 124)   | 3<br>(1 - 7)     | 0<br>(0 - 0)      | 60<br>(36 - 87)    | 21<br>(13 - 32)    | 5<br>(3 - 7)       |
| Schizophrenia                                       | 1<br>(0 - 2)       | --               | --                | 1<br>(0 - 1)       | 0<br>(0 - 1)       | 0<br>(0 - 0)       |
| Alcohol use disorders                               | 58<br>(28 - 86)    | --               | --                | 37<br>(16 - 57)    | 18<br>(9 - 29)     | 4<br>(2 - 6)       |
| Drug use disorders                                  | 30<br>(18 - 48)    | 3<br>(1 - 7)     | --                | 23<br>(13 - 42)    | 3<br>(2 - 4)       | 1<br>(1 - 2)       |
| Opioid use disorders                                | 3<br>(2 - 5)       | 0<br>(0 - 1)     | --                | 2<br>(1 - 5)       | 0<br>(0 - 0)       | 0<br>(0 - 0)       |
| Cocaine use disorders                               | 0<br>(0 - 0)       | 0<br>(0 - 0)     | --                | 0<br>(0 - 0)       | 0<br>(0 - 0)       | 0<br>(0 - 0)       |

Web Table 31- Gabon deaths with 95% UI by age, sex, and cause in 2013

| Cause                                               | Males, All Ages    | Males, 0-4 Years  | Males, 5-14 Years | Males, 15-49 Years | Males, 50-69 Years | Males, 70-80 Years |
|-----------------------------------------------------|--------------------|-------------------|-------------------|--------------------|--------------------|--------------------|
| Amphetamine use disorders                           | 0<br>(0 - 0)       | 0<br>(0 - 0)      | --                | 0<br>(0 - 0)       | 0<br>(0 - 0)       | 0<br>(0 - 0)       |
| Other drug use disorders                            | 26<br>(16 - 42)    | 3<br>(1 - 7)      | --                | 20<br>(12 - 37)    | 3<br>(2 - 4)       | 1<br>(1 - 1)       |
| Eating disorders                                    | 0<br>(0 - 0)       | --                | 0<br>(0 - 0)      | 0<br>(0 - 0)       | --                 | --                 |
| Anorexia nervosa                                    | 0<br>(0 - 0)       | --                | 0<br>(0 - 0)      | 0<br>(0 - 0)       | --                 | --                 |
| Diabetes, urogenital, blood, and endocrine diseases | 638<br>(484 - 821) | 48<br>(26 - 81)   | 12<br>(7 - 20)    | 129<br>(92 - 176)  | 208<br>(143 - 284) | 241<br>(174 - 315) |
| Diabetes mellitus                                   | 338<br>(230 - 441) | 3<br>(1 - 5)      | 1<br>(0 - 1)      | 44<br>(28 - 61)    | 139<br>(89 - 192)  | 151<br>(100 - 203) |
| Acute glomerulonephritis                            | 1<br>(0 - 2)       | 0<br>(0 - 0)      | 0<br>(0 - 0)      | 0<br>(0 - 1)       | 0<br>(0 - 0)       | 0<br>(0 - 0)       |
| Chronic kidney disease                              | 121<br>(63 - 210)  | 5<br>(2 - 9)      | 2<br>(1 - 3)      | 36<br>(16 - 61)    | 33<br>(15 - 68)    | 46<br>(23 - 80)    |
| Chronic kidney disease due to diabetes mellitus     | 1<br>(0 - 4)       | 0<br>(0 - 0)      | 0<br>(0 - 0)      | 0<br>(0 - 1)       | 0<br>(0 - 0)       | 0<br>(0 - 1)       |
| Chronic kidney disease due to hypertension          | 54<br>(32 - 78)    | 1<br>(0 - 2)      | 0<br>(0 - 1)      | 10<br>(5 - 18)     | 17<br>(9 - 27)     | 25<br>(15 - 38)    |
| Chronic kidney disease due to glomerulonephritis    | 24<br>(10 - 40)    | 2<br>(1 - 4)      | 1<br>(0 - 1)      | 10<br>(3 - 19)     | 5<br>(2 - 10)      | 6<br>(2 - 10)      |
| Chronic kidney disease due to other causes          | 42<br>(13 - 97)    | 2<br>(0 - 5)      | 1<br>(0 - 1)      | 15<br>(4 - 31)     | 10<br>(1 - 31)     | 14<br>(3 - 35)     |
| Urinary diseases and male infertility               | 63<br>(40 - 91)    | 4<br>(2 - 11)     | 1<br>(0 - 1)      | 13<br>(5 - 21)     | 17<br>(9 - 27)     | 28<br>(17 - 43)    |
| Interstitial nephritis and urinary tract infections | 40<br>(24 - 59)    | 3<br>(1 - 8)      | 0<br>(0 - 1)      | 7<br>(3 - 13)      | 10<br>(5 - 17)     | 19<br>(12 - 30)    |
| Urolithiasis                                        | 1<br>(0 - 2)       | --                | 0<br>(0 - 0)      | 0<br>(0 - 1)       | 0<br>(0 - 1)       | 0<br>(0 - 1)       |
| Other urinary diseases                              | 22<br>(12 - 37)    | 1<br>(0 - 4)      | 0<br>(0 - 0)      | 6<br>(2 - 11)      | 6<br>(3 - 12)      | 8<br>(4 - 15)      |
| Gynecological diseases                              | --                 | --                | --                | --                 | --                 | --                 |
| Uterine fibroids                                    | --                 | --                | --                | --                 | --                 | --                 |
| Polycystic ovarian syndrome                         | --                 | --                | --                | --                 | --                 | --                 |
| Endometriosis                                       | --                 | --                | --                | --                 | --                 | --                 |
| Genital prolapse                                    | --                 | --                | --                | --                 | --                 | --                 |
| Other gynecological diseases                        | --                 | --                | --                | --                 | --                 | --                 |
| Hemoglobinopathies and hemolytic anemias            | 50<br>(23 - 92)    | 18<br>(7 - 38)    | 6<br>(2 - 14)     | 18<br>(7 - 36)     | 5<br>(2 - 9)       | 3<br>(2 - 6)       |
| Thalassemias                                        | 0<br>(0 - 0)       | 0<br>(0 - 0)      | 0<br>(0 - 0)      | 0<br>(0 - 0)       | 0<br>(0 - 0)       | 0<br>(0 - 0)       |
| Sickle cell disorders                               | 46<br>(20 - 87)    | 17<br>(7 - 37)    | 6<br>(2 - 13)     | 18<br>(7 - 35)     | 4<br>(2 - 8)       | 0<br>(0 - 1)       |
| G6PD deficiency                                     | 1<br>(0 - 1)       | 0<br>(0 - 0)      | 0<br>(0 - 0)      | 0<br>(0 - 0)       | 0<br>(0 - 0)       | 0<br>(0 - 0)       |
| Other hemoglobinopathies and hemolytic anemias      | 4<br>(2 - 6)       | 0<br>(0 - 1)      | 0<br>(0 - 0)      | 0<br>(0 - 1)       | 0<br>(0 - 1)       | 3<br>(2 - 5)       |
| Endocrine, metabolic, blood, and immune disorders   | 64<br>(37 - 143)   | 18<br>(7 - 42)    | 3<br>(1 - 6)      | 17<br>(8 - 45)     | 14<br>(7 - 28)     | 13<br>(7 - 23)     |
| Musculoskeletal disorders                           | 17<br>(10 - 27)    | --                | 1<br>(0 - 1)      | 7<br>(3 - 12)      | 5<br>(3 - 8)       | 4<br>(3 - 7)       |
| Rheumatoid arthritis                                | 2<br>(1 - 3)       | --                | 0<br>(0 - 0)      | 0<br>(0 - 1)       | 1<br>(0 - 1)       | 1<br>(0 - 1)       |
| Other musculoskeletal disorders                     | 15<br>(9 - 25)     | --                | 1<br>(0 - 1)      | 7<br>(3 - 11)      | 4<br>(3 - 7)       | 4<br>(2 - 6)       |
| Other non-communicable diseases                     | 212<br>(99 - 356)  | 181<br>(76 - 314) | 6<br>(3 - 12)     | 12<br>(6 - 22)     | 6<br>(4 - 9)       | 7<br>(5 - 11)      |
| Congenital anomalies                                | 184<br>(78 - 320)  | 168<br>(69 - 294) | 5<br>(2 - 12)     | 7<br>(3 - 17)      | 2<br>(1 - 3)       | 1<br>(1 - 2)       |
| Neural tube defects                                 | 18<br>(3 - 56)     | 17<br>(2 - 55)    | 0<br>(0 - 1)      | 0<br>(0 - 1)       | 0<br>(0 - 0)       | 0<br>(0 - 0)       |
| Congenital heart anomalies                          | 95<br>(40 - 180)   | 87<br>(35 - 165)  | 3<br>(1 - 7)      | 4<br>(2 - 10)      | 1<br>(0 - 2)       | 0<br>(0 - 1)       |
| Cleft lip and cleft palate                          | 1<br>(0 - 3)       | 1<br>(0 - 3)      | --                | --                 | --                 | --                 |
| Down syndrome                                       | 10<br>(3 - 24)     | 9<br>(2 - 22)     | 0<br>(0 - 1)      | 1<br>(0 - 2)       | 0<br>(0 - 0)       | 0<br>(0 - 0)       |
| Chromosomal unbalanced rearrangements               | 4<br>(1 - 12)      | 4<br>(1 - 11)     | 0<br>(0 - 0)      | 0<br>(0 - 0)       | 0<br>(0 - 0)       | 0<br>(0 - 0)       |
| Other congenital anomalies                          | 55<br>(19 - 118)   | 51<br>(16 - 110)  | 1<br>(0 - 3)      | 2<br>(1 - 4)       | 1<br>(0 - 1)       | 1<br>(0 - 1)       |
| Skin and subcutaneous diseases                      | 18<br>(12 - 24)    | 3<br>(1 - 6)      | 0<br>(0 - 1)      | 4<br>(2 - 7)       | 4<br>(3 - 6)       | 6<br>(4 - 10)      |

Web Table 31- Gabon deaths with 95% UI by age, sex, and cause in 2013

| Cause                                           | Males, All Ages        | Males, 0-4 Years  | Males, 5-14 Years | Males, 15-49 Years   | Males, 50-69 Years | Males, 70-80 Years |
|-------------------------------------------------|------------------------|-------------------|-------------------|----------------------|--------------------|--------------------|
| Cellulitis                                      | 4<br>(2 - 7)           | 1<br>(0 - 2)      | 0<br>(0 - 0)      | 1<br>(0 - 2)         | 1<br>(0 - 2)       | 1<br>(1 - 2)       |
| Pyoderma                                        | 11<br>(7 - 15)         | 2<br>(1 - 4)      | 0<br>(0 - 0)      | 3<br>(1 - 4)         | 3<br>(2 - 4)       | 3<br>(2 - 6)       |
| Decubitus ulcer                                 | 3<br>(2 - 5)           | 0<br>(0 - 0)      | 0<br>(0 - 0)      | 1<br>(0 - 1)         | 1<br>(0 - 1)       | 2<br>(1 - 3)       |
| Other skin and subcutaneous diseases            | 1<br>(0 - 2)           | 0<br>(0 - 0)      | 0<br>(0 - 0)      | 0<br>(0 - 1)         | 0<br>(0 - 0)       | 0<br>(0 - 0)       |
| Sudden infant death syndrome                    | 10<br>(1 - 38)         | 10<br>(1 - 38)    | --                | --                   | --                 | --                 |
| Injuries                                        | 1,217<br>(799 - 1,779) | 122<br>(56 - 202) | 58<br>(36 - 83)   | 799<br>(504 - 1,190) | 151<br>(84 - 241)  | 87<br>(55 - 131)   |
| Transport injuries                              | 513<br>(241 - 965)     | 29<br>(7 - 62)    | 26<br>(10 - 47)   | 368<br>(173 - 708)   | 62<br>(24 - 125)   | 29<br>(11 - 56)    |
| Road injuries                                   | 489<br>(230 - 896)     | 26<br>(7 - 59)    | 24<br>(10 - 45)   | 352<br>(166 - 650)   | 59<br>(23 - 116)   | 28<br>(11 - 53)    |
| Pedestrian road injuries                        | 159<br>(56 - 306)      | 13<br>(3 - 33)    | 11<br>(4 - 22)    | 100<br>(32 - 197)    | 23<br>(7 - 47)     | 13<br>(4 - 27)     |
| Cyclist road injuries                           | 47<br>(16 - 94)        | 3<br>(0 - 9)      | 5<br>(1 - 10)     | 27<br>(9 - 56)       | 8<br>(2 - 19)      | 4<br>(1 - 9)       |
| Motorcyclist road injuries                      | 105<br>(41 - 212)      | 2<br>(0 - 6)      | 2<br>(1 - 4)      | 92<br>(36 - 187)     | 7<br>(2 - 16)      | 2<br>(1 - 5)       |
| Motor vehicle road injuries                     | 176<br>(63 - 343)      | 8<br>(2 - 21)     | 7<br>(2 - 15)     | 132<br>(47 - 265)    | 20<br>(6 - 44)     | 9<br>(2 - 20)      |
| Other road injuries                             | 2<br>(0 - 4)           | 0<br>(0 - 0)      | 0<br>(0 - 0)      | 1<br>(0 - 2)         | 0<br>(0 - 1)       | 0<br>(0 - 0)       |
| Other transport injuries                        | 23<br>(6 - 85)         | 2<br>(0 - 7)      | 1<br>(0 - 4)      | 16<br>(4 - 60)       | 3<br>(1 - 11)      | 1<br>(0 - 4)       |
| Unintentional injuries                          | 423<br>(266 - 554)     | 90<br>(38 - 153)  | 28<br>(18 - 40)   | 204<br>(114 - 284)   | 56<br>(34 - 81)    | 45<br>(31 - 64)    |
| Falls                                           | 89<br>(41 - 175)       | 7<br>(2 - 18)     | 3<br>(1 - 6)      | 40<br>(14 - 90)      | 18<br>(8 - 38)     | 20<br>(10 - 36)    |
| Drowning                                        | 103<br>(44 - 177)      | 25<br>(7 - 55)    | 14<br>(7 - 23)    | 53<br>(19 - 102)     | 8<br>(4 - 12)      | 3<br>(2 - 5)       |
| Fire, heat, and hot substances                  | 39<br>(13 - 61)        | 12<br>(3 - 24)    | 2<br>(1 - 4)      | 16<br>(4 - 26)       | 5<br>(2 - 8)       | 5<br>(3 - 7)       |
| Poisonings                                      | 19<br>(11 - 32)        | 3<br>(1 - 7)      | 1<br>(0 - 1)      | 12<br>(6 - 21)       | 3<br>(1 - 5)       | 1<br>(1 - 2)       |
| Exposure to mechanical forces                   | 76<br>(39 - 141)       | 10<br>(3 - 23)    | 5<br>(2 - 8)      | 50<br>(24 - 92)      | 9<br>(5 - 17)      | 2<br>(1 - 4)       |
| Unintentional firearm injuries                  | 17<br>(9 - 28)         | 1<br>(0 - 2)      | 1<br>(0 - 2)      | 14<br>(6 - 23)       | 1<br>(1 - 3)       | 1<br>(0 - 1)       |
| Unintentional suffocation                       | 6<br>(1 - 16)          | 3<br>(0 - 12)     | 0<br>(0 - 1)      | 2<br>(0 - 4)         | 0<br>(0 - 1)       | 0<br>(0 - 1)       |
| Other exposure to mechanical forces             | 52<br>(22 - 100)       | 5<br>(2 - 12)     | 3<br>(1 - 6)      | 35<br>(12 - 70)      | 7<br>(3 - 14)      | 2<br>(1 - 3)       |
| Adverse effects of medical treatment            | 29<br>(13 - 49)        | 7<br>(2 - 16)     | 1<br>(0 - 1)      | 8<br>(2 - 16)        | 6<br>(2 - 12)      | 7<br>(4 - 13)      |
| Animal contact                                  | 6<br>(3 - 13)          | 1<br>(0 - 3)      | 1<br>(0 - 2)      | 2<br>(1 - 5)         | 1<br>(1 - 3)       | 1<br>(0 - 1)       |
| Venomous animal contact                         | 3<br>(2 - 7)           | 1<br>(0 - 2)      | 0<br>(0 - 1)      | 1<br>(1 - 3)         | 1<br>(0 - 1)       | 0<br>(0 - 1)       |
| Non-venomous animal contact                     | 3<br>(1 - 7)           | 1<br>(0 - 2)      | 0<br>(0 - 1)      | 1<br>(0 - 3)         | 1<br>(0 - 1)       | 0<br>(0 - 1)       |
| Foreign body                                    | 44<br>(13 - 99)        | 24<br>(5 - 57)    | 2<br>(1 - 3)      | 10<br>(2 - 22)       | 4<br>(1 - 9)       | 5<br>(2 - 10)      |
| Pulmonary aspiration and foreign body in airway | 43<br>(12 - 97)        | 24<br>(5 - 57)    | 2<br>(0 - 3)      | 9<br>(2 - 21)        | 4<br>(1 - 9)       | 5<br>(2 - 10)      |
| Foreign body in other body part                 | 1<br>(0 - 2)           | 0<br>(0 - 1)      | 0<br>(0 - 0)      | 0<br>(0 - 1)         | 0<br>(0 - 0)       | 0<br>(0 - 0)       |
| Other unintentional injuries                    | 18<br>(7 - 28)         | 2<br>(1 - 4)      | 1<br>(0 - 2)      | 12<br>(5 - 20)       | 2<br>(1 - 4)       | 1<br>(0 - 1)       |
| Self-harm and interpersonal violence            | 281<br>(126 - 433)     | 3<br>(1 - 7)      | 4<br>(1 - 6)      | 227<br>(92 - 363)    | 33<br>(17 - 55)    | 13<br>(7 - 21)     |
| Self-harm                                       | 177<br>(77 - 304)      | --                | 2<br>(1 - 4)      | 135<br>(51 - 246)    | 27<br>(13 - 47)    | 12<br>(6 - 20)     |
| Interpersonal violence                          | 104<br>(38 - 171)      | 3<br>(1 - 7)      | 2<br>(0 - 3)      | 92<br>(31 - 155)     | 6<br>(2 - 11)      | 1<br>(0 - 2)       |
| Assault by firearm                              | 39<br>(6 - 74)         | 0<br>(0 - 1)      | 0<br>(0 - 1)      | 36<br>(5 - 69)       | 2<br>(0 - 4)       | 0<br>(0 - 0)       |
| Assault by sharp object                         | 25<br>(4 - 67)         | 0<br>(0 - 1)      | 0<br>(0 - 1)      | 23<br>(3 - 63)       | 2<br>(0 - 4)       | 0<br>(0 - 0)       |
| Assault by other means                          | 39<br>(10 - 78)        | 3<br>(1 - 6)      | 1<br>(0 - 2)      | 32<br>(8 - 68)       | 3<br>(1 - 5)       | 1<br>(0 - 1)       |

Web Table 31- Gabon deaths with 95% UI by age, sex, and cause in 2013

| Cause                                                             | Females, All Ages        | Females, 0-4 Years       | Females, 5-14 Years | Females, 15-49 Years     | Females, 50-69 Years     | Females, 70-80 Years     |
|-------------------------------------------------------------------|--------------------------|--------------------------|---------------------|--------------------------|--------------------------|--------------------------|
| All causes                                                        | 7,513<br>(6,352 - 8,676) | 1,448<br>(1,161 - 1,712) | 164<br>(136 - 198)  | 1,396<br>(1,202 - 1,624) | 1,533<br>(1,069 - 1,925) | 2,973<br>(2,346 - 3,447) |
| Communicable, maternal, neonatal, and nutritional diseases        | 2,974<br>(2,550 - 3,476) | 1,045<br>(770 - 1,329)   | 94<br>(69 - 122)    | 807<br>(660 - 960)       | 383<br>(265 - 518)       | 645<br>(409 - 877)       |
| HIV/AIDS and tuberculosis                                         | 686<br>(495 - 870)       | 13<br>(9 - 18)           | 24<br>(17 - 33)     | 469<br>(335 - 605)       | 126<br>(81 - 176)        | 53<br>(28 - 78)          |
| Tuberculosis                                                      | 125<br>(62 - 179)        | 4<br>(2 - 8)             | 1<br>(1 - 2)        | 35<br>(22 - 53)          | 44<br>(18 - 68)          | 41<br>(17 - 64)          |
| HIV/AIDS                                                          | 560<br>(376 - 748)       | 8<br>(6 - 12)            | 23<br>(16 - 32)     | 434<br>(297 - 573)       | 83<br>(45 - 129)         | 12<br>(5 - 22)           |
| HIV/AIDS resulting in mycobacterial infection                     | 29<br>(18 - 41)          | 0<br>(0 - 1)             | 1<br>(1 - 1)        | 22<br>(14 - 31)          | 4<br>(2 - 7)             | 1<br>(0 - 1)             |
| HIV/AIDS resulting in other diseases                              | 532<br>(357 - 708)       | 8<br>(5 - 12)            | 22<br>(15 - 30)     | 411<br>(281 - 545)       | 78<br>(42 - 122)         | 12<br>(5 - 21)           |
| Diarrhea, lower respiratory, and other common infectious diseases | 1,051<br>(687 - 1,421)   | 344<br>(176 - 574)       | 31<br>(18 - 47)     | 90<br>(58 - 131)         | 157<br>(88 - 238)        | 429<br>(246 - 627)       |
| Diarrheal diseases                                                | 192<br>(115 - 338)       | 54<br>(14 - 134)         | 5<br>(2 - 11)       | 20<br>(9 - 38)           | 35<br>(15 - 73)          | 78<br>(36 - 174)         |
| Intestinal infectious diseases                                    | 30<br>(13 - 58)          | 12<br>(4 - 27)           | 8<br>(3 - 15)       | 9<br>(3 - 18)            | 2<br>(1 - 3)             | 1<br>(0 - 2)             |
| Typhoid fever                                                     | 23<br>(10 - 44)          | 9<br>(3 - 20)            | 6<br>(2 - 12)       | 7<br>(3 - 14)            | 1<br>(0 - 3)             | 1<br>(0 - 1)             |
| Paratyphoid fever                                                 | 7<br>(3 - 14)            | 3<br>(1 - 7)             | 2<br>(1 - 4)        | 2<br>(1 - 4)             | 0<br>(0 - 1)             | 0<br>(0 - 0)             |
| Other intestinal infectious diseases                              | 0<br>(0 - 3)             | 0<br>(0 - 2)             | 0<br>(0 - 0)        | 0<br>(0 - 1)             | 0<br>(0 - 0)             | 0<br>(0 - 0)             |
| Lower respiratory infections                                      | 721<br>(418 - 1,045)     | 220<br>(87 - 416)        | 11<br>(5 - 18)      | 43<br>(22 - 67)          | 108<br>(47 - 172)        | 339<br>(161 - 521)       |
| Upper respiratory infections                                      | 0<br>(0 - 1)             | 0<br>(0 - 0)             | 0<br>(0 - 0)        | 0<br>(0 - 0)             | 0<br>(0 - 0)             | 0<br>(0 - 0)             |
| Otitis media                                                      | 0<br>(0 - 1)             | 0<br>(0 - 0)             | 0<br>(0 - 0)        | 0<br>(0 - 0)             | 0<br>(0 - 0)             | 0<br>(0 - 0)             |
| Meningitis                                                        | 65<br>(38 - 99)          | 23<br>(7 - 46)           | 5<br>(2 - 9)        | 16<br>(8 - 28)           | 11<br>(5 - 20)           | 10<br>(5 - 17)           |
| Pneumococcal meningitis                                           | 22<br>(13 - 35)          | 6<br>(2 - 12)            | 2<br>(1 - 4)        | 6<br>(3 - 11)            | 4<br>(2 - 8)             | 4<br>(2 - 7)             |
| H influenzae type B meningitis                                    | 15<br>(7 - 25)           | 9<br>(2 - 18)            | 1<br>(1 - 3)        | 2<br>(1 - 4)             | 1<br>(0 - 2)             | 1<br>(0 - 2)             |
| Meningococcal meningitis                                          | 10<br>(5 - 16)           | 3<br>(1 - 5)             | 1<br>(0 - 1)        | 3<br>(1 - 5)             | 2<br>(1 - 4)             | 2<br>(1 - 4)             |
| Other meningitis                                                  | 19<br>(11 - 29)          | 5<br>(1 - 12)            | 1<br>(0 - 2)        | 5<br>(2 - 9)             | 4<br>(2 - 7)             | 3<br>(1 - 6)             |
| Encephalitis                                                      | 7<br>(4 - 12)            | 3<br>(1 - 7)             | 1<br>(0 - 1)        | 2<br>(1 - 3)             | 1<br>(0 - 1)             | 1<br>(0 - 1)             |
| Diphtheria                                                        | 1<br>(0 - 4)             | 0<br>(0 - 4)             | 0<br>(0 - 0)        | 0<br>(0 - 0)             | 0<br>(0 - 0)             | 0<br>(0 - 0)             |
| Whooping cough                                                    | 14<br>(0 - 68)           | 13<br>(0 - 66)           | 1<br>(0 - 3)        | 0<br>(0 - 1)             | 0<br>(0 - 0)             | 0<br>(0 - 0)             |
| Tetanus                                                           | 1<br>(0 - 2)             | 0<br>(0 - 2)             | 0<br>(0 - 0)        | 0<br>(0 - 0)             | 0<br>(0 - 0)             | 0<br>(0 - 0)             |
| Measles                                                           | 19<br>(0 - 123)          | 17<br>(0 - 109)          | 2<br>(0 - 12)       | 0<br>(0 - 2)             | 0<br>(0 - 0)             | 0<br>(0 - 0)             |
| Varicella and herpes zoster                                       | 1<br>(0 - 2)             | 0<br>(0 - 1)             | 0<br>(0 - 0)        | 0<br>(0 - 0)             | 0<br>(0 - 0)             | 0<br>(0 - 2)             |
| Neglected tropical diseases and malaria                           | 494<br>(233 - 895)       | 249<br>(43 - 596)        | 32<br>(9 - 67)      | 79<br>(25 - 157)         | 65<br>(16 - 163)         | 69<br>(13 - 174)         |
| Malaria                                                           | 462<br>(200 - 864)       | 245<br>(38 - 593)        | 28<br>(6 - 65)      | 64<br>(11 - 140)         | 59<br>(10 - 158)         | 66<br>(9 - 171)          |
| Leishmaniasis                                                     | 0<br>(0 - 1)             | 0<br>(0 - 0)             | 0<br>(0 - 0)        | 0<br>(0 - 0)             | 0<br>(0 - 0)             | 0<br>(0 - 0)             |
| Visceral leishmaniasis                                            | 0<br>(0 - 1)             | 0<br>(0 - 0)             | 0<br>(0 - 0)        | 0<br>(0 - 0)             | 0<br>(0 - 0)             | 0<br>(0 - 0)             |
| African trypanosomiasis                                           | 21<br>(9 - 40)           | 1<br>(0 - 3)             | 2<br>(1 - 4)        | 12<br>(5 - 23)           | 4<br>(1 - 7)             | 1<br>(1 - 3)             |
| Schistosomiasis                                                   | 4<br>(2 - 6)             | 0<br>(0 - 0)             | 0<br>(0 - 0)        | 1<br>(1 - 2)             | 1<br>(1 - 2)             | 1<br>(1 - 2)             |
| Cysticercosis                                                     | 0<br>(0 - 0)             | 0<br>(0 - 0)             | 0<br>(0 - 0)        | 0<br>(0 - 0)             | 0<br>(0 - 0)             | 0<br>(0 - 0)             |
| Cystic echinococcosis                                             | 0<br>(0 - 0)             | 0<br>(0 - 0)             | 0<br>(0 - 0)        | 0<br>(0 - 0)             | 0<br>(0 - 0)             | 0<br>(0 - 0)             |
| Dengue                                                            | 0<br>(0 - 1)             | 0<br>(0 - 0)             | 0<br>(0 - 0)        | 0<br>(0 - 0)             | 0<br>(0 - 0)             | 0<br>(0 - 0)             |
| Yellow fever                                                      | 1<br>(0 - 1)             | 0<br>(0 - 0)             | 0<br>(0 - 0)        | 0<br>(0 - 1)             | 0<br>(0 - 0)             | 0<br>(0 - 0)             |
| Rabies                                                            | 1<br>(1 - 2)             | 0<br>(0 - 0)             | 0<br>(0 - 0)        | 0<br>(0 - 1)             | 0<br>(0 - 0)             | 0<br>(0 - 0)             |
| Intestinal nematode infections                                    | 1<br>(0 - 6)             | 1<br>(0 - 4)             | 0<br>(0 - 1)        | 0<br>(0 - 1)             | 0<br>(0 - 0)             | 0<br>(0 - 0)             |
| Ascariasis                                                        | 1<br>(0 - 6)             | 1<br>(0 - 4)             | 0<br>(0 - 1)        | 0<br>(0 - 1)             | 0<br>(0 - 0)             | 0<br>(0 - 0)             |

Web Table 31- Gabon deaths with 95% UI by age, sex, and cause in 2013

| Cause                                                            | Females, All Ages        | Females, 0-4 Years | Females, 5-14 Years | Females, 15-49 Years | Females, 50-69 Years   | Females, 70-80 Years     |
|------------------------------------------------------------------|--------------------------|--------------------|---------------------|----------------------|------------------------|--------------------------|
| Other neglected tropical diseases                                | 3<br>(1 - 5)             | 1<br>(0 - 3)       | 0<br>(0 - 0)        | 1<br>(0 - 1)         | 0<br>(0 - 1)           | 0<br>(0 - 1)             |
| Maternal disorders                                               | 144<br>(99 - 199)        | --                 | 0<br>(0 - 1)        | 144<br>(99 - 199)    | --                     | --                       |
| Maternal hemorrhage                                              | 20<br>(13 - 29)          | --                 | 0<br>(0 - 0)        | 20<br>(13 - 29)      | --                     | --                       |
| Maternal sepsis and other maternal infections                    | 13<br>(7 - 21)           | --                 | 0<br>(0 - 0)        | 13<br>(7 - 21)       | --                     | --                       |
| Maternal hypertensive disorders                                  | 15<br>(10 - 23)          | --                 | 0<br>(0 - 0)        | 15<br>(10 - 23)      | --                     | --                       |
| Maternal obstructed labor                                        | 8<br>(5 - 12)            | --                 | 0<br>(0 - 0)        | 8<br>(5 - 12)        | --                     | --                       |
| Maternal abortive outcome                                        | 24<br>(14 - 36)          | --                 | 0<br>(0 - 0)        | 24<br>(14 - 36)      | --                     | --                       |
| Indirect maternal deaths                                         | 11<br>(7 - 18)           | --                 | 0<br>(0 - 0)        | 11<br>(7 - 18)       | --                     | --                       |
| Late maternal deaths                                             | 24<br>(10 - 47)          | --                 | 0<br>(0 - 0)        | 24<br>(10 - 47)      | --                     | --                       |
| Maternal deaths aggravated by HIV/AIDS                           | 1<br>(1 - 2)             | --                 | --                  | 1<br>(1 - 2)         | --                     | --                       |
| Other maternal disorders                                         | 28<br>(16 - 43)          | --                 | 0<br>(0 - 0)        | 28<br>(16 - 43)      | --                     | --                       |
| Neonatal disorders                                               | 331<br>(145 - 502)       | 331<br>(145 - 502) | --                  | --                   | --                     | --                       |
| Neonatal preterm birth complications                             | 99<br>(26 - 218)         | 99<br>(26 - 218)   | --                  | --                   | --                     | --                       |
| Neonatal encephalopathy due to birth asphyxia and trauma         | 121<br>(27 - 297)        | 121<br>(27 - 297)  | --                  | --                   | --                     | --                       |
| Neonatal sepsis and other neonatal infections                    | 53<br>(15 - 120)         | 53<br>(15 - 120)   | --                  | --                   | --                     | --                       |
| Hemolytic disease and other neonatal jaundice                    | 2<br>(0 - 4)             | 2<br>(0 - 4)       | --                  | --                   | --                     | --                       |
| Other neonatal disorders                                         | 57<br>(15 - 148)         | 57<br>(15 - 148)   | --                  | --                   | --                     | --                       |
| Nutritional deficiencies                                         | 201<br>(111 - 308)       | 71<br>(27 - 144)   | 4<br>(2 - 6)        | 16<br>(9 - 24)       | 26<br>(13 - 41)        | 85<br>(41 - 136)         |
| Protein-energy malnutrition                                      | 142<br>(53 - 247)        | 63<br>(21 - 132)   | 3<br>(1 - 5)        | 5<br>(1 - 11)        | 16<br>(5 - 30)         | 56<br>(16 - 101)         |
| Iodine deficiency                                                | 2<br>(0 - 6)             | 1<br>(0 - 4)       | 0<br>(0 - 0)        | 0<br>(0 - 1)         | 0<br>(0 - 2)           | 1<br>(0 - 3)             |
| Iron-deficiency anemia                                           | 55<br>(21 - 110)         | 7<br>(1 - 30)      | 1<br>(0 - 2)        | 10<br>(4 - 18)       | 10<br>(3 - 20)         | 27<br>(8 - 59)           |
| Other nutritional deficiencies                                   | 3<br>(1 - 7)             | 1<br>(0 - 3)       | 0<br>(0 - 0)        | 0<br>(0 - 1)         | 0<br>(0 - 1)           | 1<br>(0 - 3)             |
| Other communicable, maternal, neonatal, and nutritional diseases | 67<br>(40 - 112)         | 38<br>(15 - 79)    | 3<br>(1 - 5)        | 10<br>(6 - 15)       | 8<br>(4 - 16)          | 8<br>(4 - 17)            |
| Sexually transmitted diseases excluding HIV                      | 34<br>(13 - 70)          | 26<br>(6 - 60)     | 1<br>(0 - 3)        | 3<br>(1 - 5)         | 2<br>(1 - 4)           | 2<br>(1 - 4)             |
| Syphilis                                                         | 31<br>(11 - 66)          | 26<br>(6 - 60)     | 1<br>(0 - 3)        | 1<br>(0 - 2)         | 1<br>(0 - 2)           | 1<br>(0 - 3)             |
| Chlamydial infection                                             | 1<br>(0 - 2)             | --                 | 0<br>(0 - 0)        | 1<br>(0 - 1)         | 0<br>(0 - 1)           | 0<br>(0 - 0)             |
| Gonococcal infection                                             | 1<br>(1 - 2)             | --                 | 0<br>(0 - 0)        | 1<br>(0 - 1)         | 0<br>(0 - 1)           | 0<br>(0 - 1)             |
| Other sexually transmitted diseases                              | 1<br>(0 - 2)             | --                 | 0<br>(0 - 0)        | 1<br>(0 - 1)         | 0<br>(0 - 1)           | 0<br>(0 - 0)             |
| Hepatitis                                                        | 7<br>(4 - 18)            | 1<br>(1 - 3)       | 0<br>(0 - 1)        | 2<br>(1 - 5)         | 2<br>(1 - 6)           | 1<br>(1 - 5)             |
| Acute hepatitis A                                                | 1<br>(0 - 2)             | 0<br>(0 - 1)       | 0<br>(0 - 0)        | 0<br>(0 - 0)         | 0<br>(0 - 0)           | 0<br>(0 - 0)             |
| Acute hepatitis B                                                | 4<br>(2 - 11)            | 1<br>(0 - 2)       | 0<br>(0 - 0)        | 1<br>(0 - 2)         | 1<br>(1 - 4)           | 1<br>(0 - 4)             |
| Acute hepatitis C                                                | 0<br>(0 - 1)             | --                 | 0<br>(0 - 0)        | 0<br>(0 - 0)         | 0<br>(0 - 0)           | 0<br>(0 - 0)             |
| Acute hepatitis E                                                | 2<br>(1 - 5)             | 0<br>(0 - 0)       | 0<br>(0 - 0)        | 1<br>(1 - 3)         | 0<br>(0 - 1)           | 0<br>(0 - 0)             |
| Other infectious diseases                                        | 26<br>(8 - 52)           | 11<br>(2 - 32)     | 1<br>(0 - 3)        | 4<br>(1 - 9)         | 4<br>(1 - 10)          | 5<br>(1 - 13)            |
| Non-communicable diseases                                        | 4,039<br>(3,104 - 4,904) | 294<br>(142 - 515) | 36<br>(23 - 50)     | 404<br>(298 - 540)   | 1,071<br>(707 - 1,404) | 2,234<br>(1,776 - 2,677) |
| Neoplasms                                                        | 606<br>(431 - 777)       | 7<br>(3 - 13)      | 5<br>(3 - 8)        | 113<br>(79 - 153)    | 256<br>(167 - 341)     | 224<br>(164 - 290)       |
| Esophageal cancer                                                | 14<br>(8 - 28)           | --                 | --                  | 1<br>(0 - 2)         | 6<br>(3 - 11)          | 8<br>(4 - 16)            |
| Stomach cancer                                                   | 39<br>(25 - 58)          | --                 | --                  | 5<br>(3 - 8)         | 16<br>(9 - 25)         | 18<br>(11 - 29)          |
| Liver cancer                                                     | 45<br>(26 - 67)          | --                 | 0<br>(0 - 0)        | 5<br>(3 - 9)         | 19<br>(10 - 30)        | 21<br>(11 - 32)          |
| Liver cancer due to hepatitis B                                  | 9<br>(4 - 18)            | --                 | 0<br>(0 - 0)        | 2<br>(1 - 3)         | 5<br>(2 - 9)           | 3<br>(1 - 7)             |

Web Table 31- Gabon deaths with 95% UI by age, sex, and cause in 2013

| Cause                                | Females, All Ages        | Females, 0-4 Years | Females, 5-14 Years | Females, 15-49 Years | Females, 50-69 Years | Females, 70-80 Years     |
|--------------------------------------|--------------------------|--------------------|---------------------|----------------------|----------------------|--------------------------|
| Liver cancer due to hepatitis C      | 22<br>(11 - 36)          | --                 | 0<br>(0 - 0)        | 2<br>(0 - 4)         | 9<br>(4 - 16)        | 11<br>(6 - 19)           |
| Liver cancer due to alcohol use      | 5<br>(2 - 10)            | --                 | --                  | 0<br>(0 - 1)         | 2<br>(1 - 4)         | 3<br>(1 - 6)             |
| Liver cancer due to other causes     | 9<br>(4 - 16)            | --                 | 0<br>(0 - 0)        | 2<br>(1 - 3)         | 4<br>(1 - 8)         | 3<br>(1 - 6)             |
| Larynx cancer                        | 1<br>(1 - 3)             | --                 | --                  | 0<br>(0 - 0)         | 1<br>(0 - 1)         | 0<br>(0 - 1)             |
| Tracheal, bronchus and lung cancer   | 29<br>(18 - 51)          | --                 | --                  | 3<br>(2 - 4)         | 14<br>(8 - 24)       | 12<br>(7 - 24)           |
| Breast cancer                        | 111<br>(76 - 149)        | --                 | --                  | 27<br>(18 - 41)      | 53<br>(33 - 73)      | 31<br>(21 - 42)          |
| Cervical cancer                      | 103<br>(68 - 143)        | --                 | --                  | 30<br>(19 - 44)      | 47<br>(28 - 70)      | 25<br>(17 - 37)          |
| Uterine cancer                       | 11<br>(7 - 18)           | --                 | --                  | 1<br>(1 - 2)         | 5<br>(3 - 10)        | 4<br>(2 - 8)             |
| Prostate cancer                      | --                       | --                 | --                  | --                   | --                   | --                       |
| Colon and rectum cancer              | 49<br>(34 - 65)          | --                 | --                  | 5<br>(3 - 7)         | 18<br>(12 - 26)      | 26<br>(17 - 37)          |
| Lip and oral cavity cancer           | 7<br>(4 - 10)            | --                 | --                  | 1<br>(0 - 2)         | 3<br>(1 - 5)         | 3<br>(2 - 4)             |
| Nasopharynx cancer                   | 2<br>(1 - 2)             | --                 | 0<br>(0 - 0)        | 1<br>(0 - 1)         | 1<br>(0 - 1)         | 0<br>(0 - 1)             |
| Other pharynx cancer                 | 2<br>(1 - 3)             | --                 | --                  | 0<br>(0 - 1)         | 1<br>(1 - 2)         | 1<br>(0 - 1)             |
| Gallbladder and biliary tract cancer | 17<br>(8 - 29)           | --                 | --                  | 1<br>(0 - 2)         | 8<br>(3 - 13)        | 9<br>(4 - 16)            |
| Pancreatic cancer                    | 23<br>(16 - 30)          | --                 | --                  | 1<br>(1 - 2)         | 9<br>(6 - 13)        | 12<br>(8 - 17)           |
| Malignant skin melanoma              | 3<br>(2 - 4)             | --                 | --                  | 1<br>(0 - 1)         | 1<br>(1 - 2)         | 1<br>(1 - 2)             |
| Non-melanoma skin cancer             | 3<br>(1 - 4)             | --                 | --                  | 0<br>(0 - 1)         | 1<br>(0 - 1)         | 2<br>(1 - 3)             |
| Ovarian cancer                       | 29<br>(18 - 41)          | --                 | --                  | 6<br>(3 - 10)        | 15<br>(9 - 22)       | 8<br>(5 - 12)            |
| Testicular cancer                    | --                       | --                 | --                  | --                   | --                   | --                       |
| Kidney cancer                        | 9<br>(6 - 14)            | 1<br>(0 - 1)       | 0<br>(0 - 0)        | 1<br>(1 - 2)         | 4<br>(2 - 7)         | 3<br>(2 - 5)             |
| Bladder cancer                       | 9<br>(5 - 13)            | --                 | --                  | 1<br>(0 - 1)         | 3<br>(2 - 5)         | 5<br>(3 - 8)             |
| Brain and nervous system cancer      | 9<br>(6 - 12)            | 1<br>(0 - 1)       | 1<br>(0 - 1)        | 3<br>(2 - 4)         | 3<br>(2 - 5)         | 2<br>(1 - 3)             |
| Thyroid cancer                       | 3<br>(2 - 4)             | --                 | 0<br>(0 - 0)        | 0<br>(0 - 0)         | 1<br>(1 - 2)         | 2<br>(1 - 2)             |
| Mesothelioma                         | 1<br>(0 - 1)             | --                 | --                  | 0<br>(0 - 0)         | 0<br>(0 - 0)         | 0<br>(0 - 0)             |
| Hodgkin lymphoma                     | 2<br>(1 - 3)             | 0<br>(0 - 0)       | 0<br>(0 - 0)        | 1<br>(1 - 2)         | 1<br>(0 - 1)         | 0<br>(0 - 1)             |
| Non-Hodgkin lymphoma                 | 24<br>(13 - 34)          | 1<br>(0 - 2)       | 1<br>(0 - 1)        | 5<br>(3 - 8)         | 9<br>(4 - 14)        | 9<br>(4 - 14)            |
| Multiple myeloma                     | 7<br>(4 - 10)            | --                 | --                  | 1<br>(0 - 1)         | 3<br>(2 - 5)         | 3<br>(2 - 4)             |
| Leukemia                             | 10<br>(8 - 14)           | 1<br>(0 - 2)       | 1<br>(1 - 2)        | 3<br>(2 - 4)         | 3<br>(2 - 4)         | 3<br>(2 - 4)             |
| Other neoplasms                      | 44<br>(29 - 63)          | 4<br>(2 - 8)       | 2<br>(1 - 4)        | 9<br>(5 - 13)        | 13<br>(8 - 21)       | 15<br>(8 - 24)           |
| Cardiovascular diseases              | 1,935<br>(1,429 - 2,463) | 14<br>(6 - 25)     | 4<br>(2 - 6)        | 113<br>(68 - 162)    | 473<br>(302 - 649)   | 1,332<br>(1,037 - 1,657) |
| Rheumatic heart disease              | 35<br>(21 - 52)          | 0<br>(0 - 1)       | 0<br>(0 - 1)        | 9<br>(5 - 14)        | 12<br>(6 - 19)       | 14<br>(8 - 22)           |
| Ischemic heart disease               | 429<br>(263 - 612)       | 0<br>(0 - 1)       | 0<br>(0 - 0)        | 16<br>(7 - 26)       | 97<br>(52 - 144)     | 316<br>(198 - 454)       |
| Cerebrovascular disease              | 1,060<br>(764 - 1,470)   | 3<br>(1 - 7)       | 1<br>(1 - 3)        | 53<br>(33 - 87)      | 256<br>(162 - 379)   | 746<br>(551 - 999)       |
| Ischemic stroke                      | 546<br>(362 - 750)       | 0<br>(0 - 1)       | 0<br>(0 - 0)        | 8<br>(3 - 17)        | 84<br>(44 - 137)     | 453<br>(309 - 612)       |
| Hemorrhagic stroke                   | 514<br>(310 - 826)       | 3<br>(1 - 6)       | 1<br>(1 - 2)        | 45<br>(28 - 77)      | 172<br>(100 - 276)   | 293<br>(167 - 497)       |
| Hypertensive heart disease           | 179<br>(90 - 317)        | 0<br>(0 - 1)       | 0<br>(0 - 0)        | 7<br>(3 - 11)        | 38<br>(17 - 66)      | 134<br>(66 - 261)        |
| Cardiomyopathy and myocarditis       | 65<br>(39 - 97)          | 6<br>(2 - 12)      | 1<br>(0 - 2)        | 11<br>(4 - 18)       | 16<br>(8 - 26)       | 30<br>(16 - 56)          |
| Atrial fibrillation and flutter      | 3<br>(1 - 5)             | --                 | --                  | 0<br>(0 - 0)         | 0<br>(0 - 1)         | 2<br>(1 - 5)             |
| Aortic aneurysm                      | 17<br>(7 - 29)           | --                 | --                  | 1<br>(0 - 3)         | 5<br>(2 - 8)         | 11<br>(5 - 18)           |
| Peripheral vascular disease          | 3<br>(1 - 4)             | --                 | --                  | 0<br>(0 - 0)         | 1<br>(0 - 1)         | 2<br>(1 - 3)             |



Web Table 31- Gabon deaths with 95% UI by age, sex, and cause in 2013

| Cause                                               | Females, All Ages  | Females, 0-4 Years | Females, 5-14 Years | Females, 15-49 Years | Females, 50-69 Years | Females, 70-80 Years |
|-----------------------------------------------------|--------------------|--------------------|---------------------|----------------------|----------------------|----------------------|
| Endocarditis                                        | 10<br>(4 - 15)     | 1<br>(0 - 2)       | 0<br>(0 - 0)        | 2<br>(0 - 3)         | 2<br>(1 - 4)         | 5<br>(2 - 9)         |
| Other cardiovascular and circulatory diseases       | 135<br>(65 - 195)  | 3<br>(1 - 6)       | 1<br>(0 - 1)        | 14<br>(6 - 23)       | 46<br>(21 - 71)      | 71<br>(37 - 109)     |
| Chronic respiratory diseases                        | 300<br>(215 - 447) | 10<br>(5 - 19)     | 2<br>(1 - 3)        | 25<br>(17 - 34)      | 76<br>(47 - 113)     | 188<br>(134 - 295)   |
| Chronic obstructive pulmonary disease               | 198<br>(131 - 304) | 4<br>(2 - 9)       | 0<br>(0 - 1)        | 10<br>(5 - 16)       | 50<br>(29 - 80)      | 133<br>(87 - 206)    |
| Pneumoconiosis                                      | 1<br>(0 - 1)       | 0<br>(0 - 0)       | 0<br>(0 - 0)        | 0<br>(0 - 0)         | 0<br>(0 - 0)         | 0<br>(0 - 1)         |
| Silicosis                                           | 0<br>(0 - 0)       | 0<br>(0 - 0)       | 0<br>(0 - 0)        | 0<br>(0 - 0)         | 0<br>(0 - 0)         | 0<br>(0 - 0)         |
| Asbestosis                                          | 0<br>(0 - 0)       | 0<br>(0 - 0)       | 0<br>(0 - 0)        | 0<br>(0 - 0)         | 0<br>(0 - 0)         | 0<br>(0 - 0)         |
| Coal workers pneumoconiosis                         | 0<br>(0 - 0)       | 0<br>(0 - 0)       | 0<br>(0 - 0)        | 0<br>(0 - 0)         | 0<br>(0 - 0)         | 0<br>(0 - 0)         |
| Other pneumoconiosis                                | 1<br>(0 - 1)       | 0<br>(0 - 0)       | 0<br>(0 - 0)        | 0<br>(0 - 0)         | 0<br>(0 - 0)         | 0<br>(0 - 0)         |
| Asthma                                              | 52<br>(19 - 86)    | 3<br>(1 - 6)       | 1<br>(0 - 1)        | 10<br>(4 - 15)       | 15<br>(5 - 27)       | 24<br>(8 - 41)       |
| Interstitial lung disease and pulmonary sarcoidosis | 38<br>(16 - 76)    | 1<br>(0 - 2)       | 0<br>(0 - 0)        | 3<br>(1 - 6)         | 9<br>(4 - 19)        | 26<br>(10 - 54)      |
| Other chronic respiratory diseases                  | 12<br>(7 - 20)     | 3<br>(1 - 6)       | 0<br>(0 - 1)        | 2<br>(1 - 4)         | 2<br>(1 - 3)         | 5<br>(2 - 9)         |
| Cirrhosis                                           | 115<br>(79 - 152)  | 1<br>(0 - 3)       | 1<br>(0 - 1)        | 18<br>(12 - 26)      | 49<br>(31 - 70)      | 45<br>(31 - 64)      |
| Cirrhosis due to hepatitis B                        | 36<br>(19 - 58)    | 0<br>(0 - 0)       | 0<br>(0 - 0)        | 4<br>(2 - 7)         | 15<br>(7 - 26)       | 16<br>(8 - 27)       |
| Cirrhosis due to hepatitis C                        | 33<br>(9 - 58)     | 0<br>(0 - 0)       | 0<br>(0 - 0)        | 7<br>(3 - 13)        | 16<br>(3 - 30)       | 10<br>(2 - 18)       |
| Cirrhosis due to alcohol use                        | 31<br>(15 - 49)    | --                 | --                  | 3<br>(1 - 5)         | 12<br>(6 - 21)       | 16<br>(7 - 25)       |
| Cirrhosis due to other causes                       | 14<br>(8 - 23)     | 1<br>(0 - 2)       | 1<br>(0 - 1)        | 4<br>(2 - 6)         | 5<br>(2 - 10)        | 4<br>(2 - 7)         |
| Digestive diseases                                  | 173<br>(121 - 249) | 6<br>(2 - 12)      | 2<br>(1 - 3)        | 26<br>(18 - 38)      | 48<br>(29 - 72)      | 91<br>(60 - 140)     |
| Peptic ulcer disease                                | 31<br>(18 - 51)    | 0<br>(0 - 1)       | 0<br>(0 - 0)        | 4<br>(2 - 6)         | 9<br>(5 - 17)        | 17<br>(9 - 31)       |
| Gastritis and duodenitis                            | 7<br>(3 - 16)      | 0<br>(0 - 1)       | 0<br>(0 - 0)        | 1<br>(1 - 2)         | 2<br>(1 - 4)         | 3<br>(1 - 10)        |
| Appendicitis                                        | 8<br>(4 - 14)      | 1<br>(0 - 2)       | 0<br>(0 - 1)        | 2<br>(1 - 4)         | 2<br>(1 - 4)         | 2<br>(1 - 5)         |
| Paralytic ileus and intestinal obstruction          | 57<br>(31 - 87)    | 2<br>(0 - 4)       | 1<br>(0 - 1)        | 6<br>(3 - 9)         | 14<br>(7 - 24)       | 35<br>(19 - 56)      |
| Inguinal, femoral, and abdominal hernia             | 2<br>(1 - 4)       | 0<br>(0 - 0)       | 0<br>(0 - 0)        | 0<br>(0 - 0)         | 1<br>(0 - 1)         | 1<br>(0 - 3)         |
| Inflammatory bowel disease                          | 15<br>(8 - 46)     | 2<br>(0 - 4)       | 0<br>(0 - 1)        | 4<br>(2 - 10)        | 4<br>(2 - 13)        | 6<br>(2 - 20)        |
| Vascular intestinal disorders                       | 2<br>(1 - 4)       | 0<br>(0 - 0)       | 0<br>(0 - 0)        | 0<br>(0 - 0)         | 1<br>(0 - 1)         | 1<br>(0 - 2)         |
| Gallbladder and biliary diseases                    | 18<br>(11 - 28)    | 0<br>(0 - 0)       | 0<br>(0 - 0)        | 2<br>(1 - 4)         | 6<br>(3 - 10)        | 10<br>(5 - 16)       |
| Pancreatitis                                        | 11<br>(5 - 21)     | 0<br>(0 - 0)       | 0<br>(0 - 0)        | 3<br>(1 - 6)         | 4<br>(2 - 7)         | 4<br>(2 - 8)         |
| Other digestive diseases                            | 23<br>(14 - 37)    | 1<br>(0 - 3)       | 0<br>(0 - 1)        | 4<br>(2 - 6)         | 7<br>(4 - 12)        | 11<br>(6 - 19)       |
| Neurological disorders                              | 155<br>(115 - 200) | 5<br>(2 - 12)      | 2<br>(1 - 4)        | 15<br>(7 - 25)       | 13<br>(8 - 18)       | 118<br>(86 - 155)    |
| Alzheimer disease and other dementias               | 121<br>(88 - 159)  | --                 | --                  | 0<br>(0 - 0)         | 8<br>(5 - 11)        | 113<br>(82 - 149)    |
| Parkinson disease                                   | 1<br>(1 - 3)       | --                 | --                  | 0<br>(0 - 0)         | 0<br>(0 - 1)         | 1<br>(1 - 2)         |
| Epilepsy                                            | 26<br>(13 - 38)    | 4<br>(1 - 10)      | 2<br>(1 - 4)        | 14<br>(6 - 23)       | 3<br>(2 - 5)         | 2<br>(1 - 4)         |
| Multiple sclerosis                                  | 0<br>(0 - 1)       | --                 | --                  | 0<br>(0 - 0)         | 0<br>(0 - 0)         | 0<br>(0 - 0)         |
| Other neurological disorders                        | 6<br>(4 - 9)       | 1<br>(1 - 2)       | 0<br>(0 - 0)        | 1<br>(1 - 2)         | 2<br>(1 - 3)         | 2<br>(1 - 3)         |
| Mental and substance use disorders                  | 14<br>(9 - 20)     | 1<br>(0 - 2)       | 0<br>(0 - 0)        | 8<br>(5 - 11)        | 4<br>(2 - 6)         | 1<br>(1 - 2)         |
| Schizophrenia                                       | 1<br>(0 - 2)       | --                 | --                  | 0<br>(0 - 1)         | 0<br>(0 - 1)         | 0<br>(0 - 0)         |
| Alcohol use disorders                               | 6<br>(2 - 10)      | --                 | --                  | 3<br>(1 - 5)         | 2<br>(1 - 5)         | 1<br>(0 - 1)         |
| Drug use disorders                                  | 6<br>(4 - 9)       | 1<br>(0 - 2)       | --                  | 4<br>(3 - 6)         | 1<br>(0 - 2)         | 1<br>(0 - 1)         |
| Opioid use disorders                                | 1<br>(0 - 1)       | 0<br>(0 - 0)       | --                  | 0<br>(0 - 1)         | 0<br>(0 - 0)         | 0<br>(0 - 0)         |
| Cocaine use disorders                               | 0<br>(0 - 0)       | 0<br>(0 - 0)       | --                  | 0<br>(0 - 0)         | 0<br>(0 - 0)         | 0<br>(0 - 0)         |

Web Table 31- Gabon deaths with 95% UI by age, sex, and cause in 2013

| Cause                                               | Females, All Ages  | Females, 0-4 Years | Females, 5-14 Years | Females, 15-49 Years | Females, 50-69 Years | Females, 70-80 Years |
|-----------------------------------------------------|--------------------|--------------------|---------------------|----------------------|----------------------|----------------------|
| Amphetamine use disorders                           | 0<br>(0 - 0)       | 0<br>(0 - 0)       | --                  | 0<br>(0 - 0)         | 0<br>(0 - 0)         | 0<br>(0 - 0)         |
| Other drug use disorders                            | 6<br>(4 - 8)       | 1<br>(0 - 1)       | --                  | 4<br>(2 - 5)         | 1<br>(0 - 2)         | 0<br>(0 - 1)         |
| Eating disorders                                    | 1<br>(0 - 1)       | --                 | 0<br>(0 - 0)        | 1<br>(0 - 1)         | --                   | --                   |
| Anorexia nervosa                                    | 1<br>(0 - 1)       | --                 | 0<br>(0 - 0)        | 1<br>(0 - 1)         | --                   | --                   |
| Diabetes, urogenital, blood, and endocrine diseases | 482<br>(344 - 653) | 49<br>(25 - 86)    | 12<br>(7 - 18)      | 69<br>(48 - 101)     | 140<br>(89 - 208)    | 211<br>(145 - 288)   |
| Diabetes mellitus                                   | 190<br>(122 - 264) | 1<br>(0 - 1)       | 0<br>(0 - 1)        | 13<br>(8 - 18)       | 72<br>(42 - 106)     | 104<br>(67 - 146)    |
| Acute glomerulonephritis                            | 1<br>(1 - 2)       | 0<br>(0 - 0)       | 0<br>(0 - 0)        | 0<br>(0 - 1)         | 0<br>(0 - 0)         | 0<br>(0 - 0)         |
| Chronic kidney disease                              | 121<br>(55 - 247)  | 4<br>(1 - 9)       | 2<br>(1 - 3)        | 17<br>(7 - 39)       | 35<br>(15 - 79)      | 62<br>(27 - 117)     |
| Chronic kidney disease due to diabetes mellitus     | 1<br>(0 - 2)       | 0<br>(0 - 0)       | 0<br>(0 - 0)        | 0<br>(0 - 1)         | 0<br>(0 - 1)         | 0<br>(0 - 1)         |
| Chronic kidney disease due to hypertension          | 59<br>(28 - 103)   | 1<br>(0 - 2)       | 0<br>(0 - 1)        | 6<br>(3 - 12)        | 17<br>(8 - 32)       | 34<br>(16 - 60)      |
| Chronic kidney disease due to glomerulonephritis    | 21<br>(10 - 34)    | 2<br>(1 - 3)       | 1<br>(0 - 1)        | 5<br>(2 - 10)        | 6<br>(2 - 11)        | 7<br>(3 - 14)        |
| Chronic kidney disease due to other causes          | 40<br>(10 - 109)   | 2<br>(0 - 5)       | 1<br>(0 - 2)        | 5<br>(1 - 19)        | 12<br>(2 - 40)       | 20<br>(4 - 54)       |
| Urinary diseases and male infertility               | 40<br>(27 - 58)    | 2<br>(1 - 5)       | 0<br>(0 - 1)        | 6<br>(4 - 10)        | 11<br>(6 - 17)       | 21<br>(12 - 34)      |
| Interstitial nephritis and urinary tract infections | 32<br>(21 - 46)    | 1<br>(0 - 3)       | 0<br>(0 - 0)        | 4<br>(2 - 7)         | 8<br>(5 - 13)        | 18<br>(10 - 29)      |
| Urolithiasis                                        | 2<br>(1 - 4)       | --                 | 0<br>(0 - 0)        | 0<br>(0 - 1)         | 1<br>(0 - 1)         | 1<br>(0 - 1)         |
| Other urinary diseases                              | 7<br>(4 - 12)      | 1<br>(0 - 2)       | 0<br>(0 - 0)        | 2<br>(1 - 3)         | 2<br>(1 - 4)         | 2<br>(1 - 5)         |
| Gynecological diseases                              | 1<br>(0 - 1)       | --                 | --                  | 0<br>(0 - 1)         | 0<br>(0 - 0)         | 0<br>(0 - 0)         |
| Uterine fibroids                                    | 0<br>(0 - 0)       | --                 | --                  | 0<br>(0 - 0)         | 0<br>(0 - 0)         | 0<br>(0 - 0)         |
| Polycystic ovarian syndrome                         | 0<br>(0 - 0)       | --                 | --                  | 0<br>(0 - 0)         | 0<br>(0 - 0)         | --                   |
| Endometriosis                                       | 0<br>(0 - 0)       | --                 | --                  | 0<br>(0 - 0)         | 0<br>(0 - 0)         | --                   |
| Genital prolapse                                    | 0<br>(0 - 0)       | --                 | --                  | 0<br>(0 - 0)         | 0<br>(0 - 0)         | 0<br>(0 - 0)         |
| Other gynecological diseases                        | 0<br>(0 - 0)       | --                 | --                  | 0<br>(0 - 0)         | 0<br>(0 - 0)         | 0<br>(0 - 0)         |
| Hemoglobinopathies and hemolytic anemias            | 54<br>(22 - 97)    | 22<br>(7 - 45)     | 7<br>(3 - 12)       | 17<br>(7 - 29)       | 6<br>(2 - 11)        | 3<br>(1 - 7)         |
| Thalassemias                                        | 0<br>(0 - 0)       | 0<br>(0 - 0)       | 0<br>(0 - 0)        | 0<br>(0 - 0)         | 0<br>(0 - 0)         | 0<br>(0 - 0)         |
| Sickle cell disorders                               | 49<br>(20 - 88)    | 21<br>(6 - 44)     | 7<br>(3 - 12)       | 16<br>(6 - 29)       | 5<br>(2 - 10)        | 0<br>(0 - 1)         |
| G6PD deficiency                                     | 0<br>(0 - 1)       | 0<br>(0 - 0)       | 0<br>(0 - 0)        | 0<br>(0 - 0)         | 0<br>(0 - 0)         | 0<br>(0 - 0)         |
| Other hemoglobinopathies and hemolytic anemias      | 5<br>(2 - 9)       | 1<br>(0 - 2)       | 0<br>(0 - 0)        | 0<br>(0 - 0)         | 0<br>(0 - 1)         | 3<br>(1 - 6)         |
| Endocrine, metabolic, blood, and immune disorders   | 75<br>(45 - 133)   | 20<br>(8 - 44)     | 3<br>(1 - 5)        | 15<br>(8 - 29)       | 16<br>(9 - 29)       | 21<br>(12 - 37)      |
| Musculoskeletal disorders                           | 17<br>(8 - 26)     | --                 | 1<br>(0 - 1)        | 6<br>(3 - 11)        | 5<br>(2 - 8)         | 5<br>(2 - 8)         |
| Rheumatoid arthritis                                | 3<br>(1 - 6)       | --                 | 0<br>(0 - 0)        | 0<br>(0 - 1)         | 1<br>(0 - 2)         | 2<br>(1 - 3)         |
| Other musculoskeletal disorders                     | 14<br>(7 - 21)     | --                 | 1<br>(0 - 1)        | 6<br>(3 - 10)        | 4<br>(2 - 6)         | 3<br>(2 - 6)         |
| Other non-communicable diseases                     | 242<br>(115 - 447) | 199<br>(77 - 398)  | 6<br>(2 - 12)       | 10<br>(6 - 18)       | 8<br>(5 - 11)        | 18<br>(10 - 31)      |
| Congenital anomalies                                | 207<br>(85 - 414)  | 191<br>(74 - 388)  | 6<br>(2 - 12)       | 7<br>(3 - 14)        | 2<br>(1 - 3)         | 2<br>(1 - 3)         |
| Neural tube defects                                 | 21<br>(3 - 85)     | 21<br>(3 - 84)     | 0<br>(0 - 1)        | 0<br>(0 - 1)         | 0<br>(0 - 0)         | 0<br>(0 - 0)         |
| Congenital heart anomalies                          | 103<br>(38 - 200)  | 94<br>(31 - 188)   | 3<br>(1 - 8)        | 4<br>(1 - 9)         | 1<br>(0 - 1)         | 1<br>(0 - 1)         |
| Cleft lip and cleft palate                          | 1<br>(0 - 3)       | 1<br>(0 - 3)       | --                  | --                   | --                   | --                   |
| Down syndrome                                       | 11<br>(3 - 25)     | 10<br>(2 - 23)     | 1<br>(0 - 1)        | 1<br>(0 - 2)         | 0<br>(0 - 0)         | 0<br>(0 - 0)         |
| Chromosomal unbalanced rearrangements               | 12<br>(4 - 29)     | 11<br>(3 - 28)     | 0<br>(0 - 0)        | 0<br>(0 - 1)         | 0<br>(0 - 0)         | 0<br>(0 - 0)         |
| Other congenital anomalies                          | 60<br>(21 - 129)   | 55<br>(18 - 123)   | 1<br>(0 - 3)        | 2<br>(1 - 4)         | 1<br>(0 - 1)         | 1<br>(0 - 1)         |
| Skin and subcutaneous diseases                      | 29<br>(19 - 44)    | 3<br>(1 - 6)       | 0<br>(0 - 1)        | 3<br>(2 - 5)         | 6<br>(3 - 9)         | 16<br>(9 - 29)       |

Web Table 31- Gabon deaths with 95% UI by age, sex, and cause in 2013

| Cause                                           | Females, All Ages  | Females, 0-4 Years | Females, 5-14 Years | Females, 15-49 Years | Females, 50-69 Years | Females, 70-80 Years |
|-------------------------------------------------|--------------------|--------------------|---------------------|----------------------|----------------------|----------------------|
| Cellulitis                                      | 5<br>(2 - 8)       | 1<br>(0 - 1)       | 0<br>(0 - 0)        | 1<br>(0 - 1)         | 1<br>(0 - 2)         | 2<br>(1 - 5)         |
| Pyoderma                                        | 16<br>(10 - 24)    | 2<br>(1 - 5)       | 0<br>(0 - 0)        | 2<br>(1 - 3)         | 4<br>(2 - 6)         | 8<br>(4 - 15)        |
| Decubitus ulcer                                 | 6<br>(3 - 11)      | 0<br>(0 - 0)       | 0<br>(0 - 0)        | 0<br>(0 - 0)         | 1<br>(0 - 1)         | 5<br>(2 - 10)        |
| Other skin and subcutaneous diseases            | 2<br>(1 - 4)       | 0<br>(0 - 1)       | 0<br>(0 - 0)        | 0<br>(0 - 1)         | 0<br>(0 - 1)         | 1<br>(0 - 2)         |
| Sudden infant death syndrome                    | 5<br>(0 - 24)      | 5<br>(0 - 24)      | --                  | --                   | --                   | --                   |
| Injuries                                        | 500<br>(352 - 688) | 109<br>(53 - 191)  | 34<br>(21 - 51)     | 185<br>(119 - 272)   | 78<br>(46 - 125)     | 94<br>(63 - 133)     |
| Transport injuries                              | 211<br>(70 - 413)  | 29<br>(8 - 70)     | 18<br>(6 - 33)      | 93<br>(30 - 192)     | 40<br>(12 - 85)      | 31<br>(9 - 60)       |
| Road injuries                                   | 197<br>(65 - 369)  | 26<br>(8 - 61)     | 17<br>(6 - 30)      | 87<br>(28 - 173)     | 37<br>(11 - 77)      | 30<br>(8 - 56)       |
| Pedestrian road injuries                        | 84<br>(26 - 179)   | 12<br>(3 - 31)     | 8<br>(2 - 17)       | 31<br>(9 - 73)       | 17<br>(5 - 36)       | 16<br>(5 - 33)       |
| Cyclist road injuries                           | 19<br>(5 - 36)     | 2<br>(0 - 6)       | 2<br>(1 - 4)        | 8<br>(2 - 17)        | 4<br>(1 - 10)        | 2<br>(1 - 5)         |
| Motorcyclist road injuries                      | 15<br>(4 - 35)     | 1<br>(0 - 3)       | 1<br>(0 - 1)        | 10<br>(3 - 24)       | 2<br>(1 - 5)         | 1<br>(0 - 3)         |
| Motor vehicle road injuries                     | 78<br>(25 - 164)   | 10<br>(3 - 26)     | 6<br>(2 - 13)       | 38<br>(12 - 85)      | 14<br>(4 - 31)       | 10<br>(3 - 22)       |
| Other road injuries                             | 1<br>(0 - 2)       | 0<br>(0 - 0)       | 0<br>(0 - 0)        | 0<br>(0 - 1)         | 0<br>(0 - 0)         | 0<br>(0 - 0)         |
| Other transport injuries                        | 14<br>(3 - 56)     | 3<br>(1 - 12)      | 1<br>(0 - 4)        | 6<br>(1 - 25)        | 2<br>(1 - 10)        | 1<br>(0 - 5)         |
| Unintentional injuries                          | 218<br>(146 - 299) | 77<br>(29 - 140)   | 14<br>(8 - 21)      | 42<br>(27 - 59)      | 28<br>(17 - 40)      | 57<br>(40 - 82)      |
| Falls                                           | 46<br>(25 - 76)    | 5<br>(1 - 13)      | 1<br>(0 - 2)        | 6<br>(2 - 10)        | 6<br>(3 - 11)        | 28<br>(14 - 48)      |
| Drowning                                        | 34<br>(14 - 59)    | 17<br>(4 - 38)     | 5<br>(2 - 9)        | 8<br>(3 - 13)        | 3<br>(2 - 5)         | 2<br>(1 - 4)         |
| Fire, heat, and hot substances                  | 29<br>(10 - 50)    | 11<br>(2 - 25)     | 2<br>(1 - 4)        | 7<br>(2 - 12)        | 4<br>(2 - 6)         | 6<br>(2 - 11)        |
| Poisonings                                      | 9<br>(5 - 17)      | 2<br>(1 - 6)       | 0<br>(0 - 1)        | 4<br>(2 - 7)         | 1<br>(1 - 3)         | 1<br>(1 - 3)         |
| Exposure to mechanical forces                   | 19<br>(10 - 50)    | 8<br>(2 - 21)      | 2<br>(1 - 5)        | 6<br>(3 - 15)        | 2<br>(1 - 6)         | 2<br>(1 - 5)         |
| Unintentional firearm injuries                  | 4<br>(2 - 6)       | 1<br>(0 - 2)       | 0<br>(0 - 1)        | 2<br>(1 - 3)         | 0<br>(0 - 1)         | 0<br>(0 - 0)         |
| Unintentional suffocation                       | 3<br>(1 - 11)      | 2<br>(0 - 8)       | 0<br>(0 - 1)        | 1<br>(0 - 2)         | 0<br>(0 - 0)         | 0<br>(0 - 0)         |
| Other exposure to mechanical forces             | 12<br>(6 - 40)     | 5<br>(1 - 15)      | 2<br>(1 - 5)        | 3<br>(1 - 12)        | 2<br>(1 - 5)         | 1<br>(1 - 4)         |
| Adverse effects of medical treatment            | 26<br>(13 - 40)    | 5<br>(2 - 12)      | 1<br>(0 - 1)        | 5<br>(2 - 9)         | 6<br>(2 - 10)        | 10<br>(4 - 18)       |
| Animal contact                                  | 8<br>(4 - 27)      | 3<br>(1 - 10)      | 1<br>(0 - 3)        | 2<br>(1 - 6)         | 1<br>(1 - 5)         | 1<br>(0 - 4)         |
| Venomous animal contact                         | 6<br>(2 - 19)      | 2<br>(0 - 8)       | 1<br>(0 - 2)        | 1<br>(1 - 5)         | 1<br>(0 - 3)         | 1<br>(0 - 2)         |
| Non-venomous animal contact                     | 2<br>(1 - 8)       | 1<br>(0 - 2)       | 0<br>(0 - 1)        | 1<br>(0 - 2)         | 0<br>(0 - 1)         | 0<br>(0 - 2)         |
| Foreign body                                    | 40<br>(14 - 96)    | 25<br>(6 - 67)     | 1<br>(0 - 3)        | 4<br>(1 - 9)         | 3<br>(1 - 7)         | 7<br>(3 - 15)        |
| Pulmonary aspiration and foreign body in airway | 39<br>(14 - 96)    | 25<br>(6 - 67)     | 1<br>(0 - 3)        | 4<br>(1 - 9)         | 3<br>(1 - 7)         | 7<br>(3 - 15)        |
| Foreign body in other body part                 | 0<br>(0 - 1)       | 0<br>(0 - 0)       | 0<br>(0 - 0)        | 0<br>(0 - 0)         | 0<br>(0 - 0)         | 0<br>(0 - 0)         |
| Other unintentional injuries                    | 6<br>(2 - 10)      | 1<br>(0 - 3)       | 0<br>(0 - 1)        | 2<br>(1 - 3)         | 1<br>(0 - 2)         | 1<br>(0 - 2)         |
| Self-harm and interpersonal violence            | 71<br>(44 - 101)   | 3<br>(1 - 8)       | 2<br>(1 - 4)        | 50<br>(27 - 73)      | 11<br>(6 - 16)       | 6<br>(3 - 9)         |
| Self-harm                                       | 49<br>(25 - 72)    | --                 | 1<br>(0 - 2)        | 35<br>(15 - 54)      | 9<br>(5 - 14)        | 5<br>(3 - 8)         |
| Interpersonal violence                          | 22<br>(12 - 37)    | 3<br>(1 - 8)       | 1<br>(0 - 3)        | 15<br>(7 - 26)       | 2<br>(1 - 3)         | 1<br>(0 - 2)         |
| Assault by firearm                              | 6<br>(2 - 13)      | 1<br>(0 - 2)       | 0<br>(0 - 1)        | 4<br>(2 - 9)         | 1<br>(0 - 1)         | 0<br>(0 - 0)         |
| Assault by sharp object                         | 7<br>(3 - 13)      | 1<br>(0 - 1)       | 0<br>(0 - 1)        | 5<br>(2 - 10)        | 0<br>(0 - 1)         | 0<br>(0 - 1)         |
| Assault by other means                          | 9<br>(4 - 17)      | 2<br>(1 - 5)       | 1<br>(0 - 2)        | 5<br>(2 - 10)        | 1<br>(0 - 2)         | 0<br>(0 - 1)         |

Web Table 31- Georgia deaths with 95% UI by age, sex, and cause in 2013

| Cause                                                             | Both Sexes, All Ages        | Both Sexes, 0-4 Years    | Both Sexes, 5-14 Years | Both Sexes, 15-49 Years  | Both Sexes, 50-69 Years     | Both Sexes, 70-80 Years     |
|-------------------------------------------------------------------|-----------------------------|--------------------------|------------------------|--------------------------|-----------------------------|-----------------------------|
| All causes                                                        | 54,346<br>(51,408 - 57,730) | 1,229<br>(1,111 - 1,368) | 179<br>(164 - 196)     | 4,285<br>(3,855 - 4,817) | 13,451<br>(12,299 - 14,557) | 35,202<br>(33,732 - 37,078) |
| Communicable, maternal, neonatal, and nutritional diseases        | 2,011<br>(1,835 - 2,173)    | 959<br>(850 - 1,072)     | 34<br>(29 - 41)        | 267<br>(237 - 299)       | 268<br>(234 - 308)          | 483<br>(393 - 567)          |
| HIV/AIDS and tuberculosis                                         | 205<br>(175 - 261)          | 1<br>(1 - 2)             | 1<br>(1 - 1)           | 104<br>(86 - 129)        | 73<br>(59 - 101)            | 27<br>(22 - 36)             |
| Tuberculosis                                                      | 195<br>(164 - 249)          | 1<br>(1 - 2)             | 1<br>(1 - 1)           | 96<br>(78 - 120)         | 71<br>(57 - 99)             | 26<br>(21 - 35)             |
| HIV/AIDS                                                          | 11<br>(8 - 14)              | 0<br>(0 - 0)             | 0<br>(0 - 0)           | 8<br>(6 - 10)            | 2<br>(1 - 3)                | 0<br>(0 - 1)                |
| HIV/AIDS resulting in mycobacterial infection                     | 1<br>(0 - 1)                | 0<br>(0 - 0)             | 0<br>(0 - 0)           | 0<br>(0 - 1)             | 0<br>(0 - 0)                | 0<br>(0 - 0)                |
| HIV/AIDS resulting in other diseases                              | 10<br>(7 - 13)              | 0<br>(0 - 0)             | 0<br>(0 - 0)           | 7<br>(6 - 9)             | 2<br>(1 - 3)                | 0<br>(0 - 1)                |
| Diarrhea, lower respiratory, and other common infectious diseases | 787<br>(703 - 892)          | 203<br>(164 - 252)       | 27<br>(21 - 34)        | 92<br>(77 - 112)         | 145<br>(120 - 172)          | 321<br>(263 - 386)          |
| Diarrheal diseases                                                | 31<br>(25 - 40)             | 20<br>(14 - 28)          | 1<br>(1 - 1)           | 3<br>(2 - 4)             | 3<br>(2 - 4)                | 5<br>(3 - 7)                |
| Intestinal infectious diseases                                    | 5<br>(2 - 9)                | 1<br>(1 - 3)             | 1<br>(0 - 2)           | 2<br>(1 - 3)             | 1<br>(0 - 2)                | 1<br>(0 - 2)                |
| Typhoid fever                                                     | 3<br>(2 - 6)                | 1<br>(0 - 2)             | 1<br>(0 - 1)           | 1<br>(0 - 2)             | 0<br>(0 - 1)                | 0<br>(0 - 1)                |
| Paratyphoid fever                                                 | 1<br>(0 - 2)                | 0<br>(0 - 1)             | 0<br>(0 - 0)           | 0<br>(0 - 1)             | 0<br>(0 - 0)                | 0<br>(0 - 0)                |
| Other intestinal infectious diseases                              | 1<br>(0 - 4)                | 0<br>(0 - 2)             | 0<br>(0 - 0)           | 0<br>(0 - 2)             | 0<br>(0 - 2)                | 0<br>(0 - 2)                |
| Lower respiratory infections                                      | 663<br>(581 - 761)          | 157<br>(121 - 200)       | 19<br>(14 - 26)        | 69<br>(56 - 87)          | 123<br>(100 - 150)          | 295<br>(240 - 360)          |
| Upper respiratory infections                                      | 3<br>(1 - 5)                | 0<br>(0 - 0)             | 0<br>(0 - 0)           | 0<br>(0 - 1)             | 1<br>(0 - 2)                | 1<br>(0 - 4)                |
| Otitis media                                                      | 1<br>(1 - 2)                | 0<br>(0 - 0)             | 0<br>(0 - 0)           | 0<br>(0 - 0)             | 0<br>(0 - 0)                | 1<br>(0 - 1)                |
| Meningitis                                                        | 44<br>(39 - 52)             | 12<br>(8 - 18)           | 4<br>(3 - 5)           | 12<br>(10 - 14)          | 10<br>(8 - 12)              | 7<br>(6 - 9)                |
| Pneumococcal meningitis                                           | 12<br>(10 - 14)             | 2<br>(2 - 3)             | 1<br>(1 - 1)           | 3<br>(3 - 4)             | 3<br>(2 - 4)                | 2<br>(2 - 3)                |
| H influenzae type B meningitis                                    | 11<br>(9 - 15)              | 6<br>(4 - 9)             | 1<br>(1 - 2)           | 2<br>(2 - 3)             | 1<br>(1 - 2)                | 1<br>(1 - 1)                |
| Meningococcal meningitis                                          | 10<br>(8 - 12)              | 3<br>(2 - 4)             | 1<br>(1 - 1)           | 3<br>(2 - 3)             | 2<br>(1 - 3)                | 2<br>(1 - 2)                |
| Other meningitis                                                  | 11<br>(9 - 14)              | 1<br>(1 - 2)             | 1<br>(0 - 1)           | 3<br>(2 - 4)             | 4<br>(3 - 5)                | 3<br>(2 - 3)                |
| Encephalitis                                                      | 28<br>(21 - 34)             | 8<br>(5 - 12)            | 2<br>(1 - 2)           | 5<br>(4 - 7)             | 6<br>(4 - 8)                | 7<br>(5 - 10)               |
| Diphtheria                                                        | 1<br>(0 - 2)                | 0<br>(0 - 2)             | 0<br>(0 - 0)           | 0<br>(0 - 1)             | 0<br>(0 - 1)                | --                          |
| Whooping cough                                                    | 3<br>(1 - 13)               | 3<br>(1 - 12)            | 0<br>(0 - 0)           | 0<br>(0 - 0)             | 0<br>(0 - 0)                | --                          |
| Tetanus                                                           | 1<br>(1 - 1)                | 0<br>(0 - 0)             | 0<br>(0 - 0)           | 0<br>(0 - 0)             | 0<br>(0 - 0)                | 0<br>(0 - 0)                |
| Measles                                                           | 2<br>(0 - 7)                | 2<br>(0 - 6)             | 0<br>(0 - 1)           | 0<br>(0 - 0)             | 0<br>(0 - 0)                | --                          |
| Varicella and herpes zoster                                       | 6<br>(2 - 16)               | 1<br>(0 - 2)             | 0<br>(0 - 0)           | 1<br>(0 - 1)             | 1<br>(0 - 1)                | 4<br>(0 - 14)               |
| Neglected tropical diseases and malaria                           | 30<br>(24 - 38)             | 6<br>(4 - 9)             | 2<br>(1 - 3)           | 10<br>(7 - 13)           | 8<br>(5 - 11)               | 5<br>(3 - 7)                |
| Leishmaniasis                                                     | 23<br>(17 - 30)             | 5<br>(3 - 8)             | 1<br>(1 - 2)           | 7<br>(5 - 10)            | 6<br>(4 - 9)                | 3<br>(1 - 5)                |
| Visceral leishmaniasis                                            | 23<br>(17 - 30)             | 5<br>(3 - 8)             | 1<br>(1 - 2)           | 7<br>(5 - 10)            | 6<br>(4 - 9)                | 3<br>(1 - 5)                |
| Cysticercosis                                                     | 0<br>(0 - 0)                | 0<br>(0 - 0)             | 0<br>(0 - 0)           | 0<br>(0 - 0)             | 0<br>(0 - 0)                | 0<br>(0 - 0)                |
| Cystic echinococcosis                                             | 1<br>(1 - 1)                | 0<br>(0 - 0)             | 0<br>(0 - 0)           | 0<br>(0 - 0)             | 0<br>(0 - 0)                | 0<br>(0 - 0)                |
| Dengue                                                            | 0<br>(0 - 1)                | 0<br>(0 - 0)             | 0<br>(0 - 0)           | 0<br>(0 - 0)             | 0<br>(0 - 0)                | 0<br>(0 - 0)                |
| Rabies                                                            | 2<br>(2 - 4)                | 0<br>(0 - 0)             | 0<br>(0 - 1)           | 1<br>(1 - 2)             | 0<br>(0 - 1)                | 0<br>(0 - 0)                |
| Intestinal nematode infections                                    | 1<br>(0 - 4)                | 0<br>(0 - 2)             | 0<br>(0 - 0)           | 0<br>(0 - 1)             | 0<br>(0 - 1)                | 0<br>(0 - 2)                |
| Ascariasis                                                        | 1<br>(0 - 4)                | 0<br>(0 - 2)             | 0<br>(0 - 0)           | 0<br>(0 - 1)             | 0<br>(0 - 1)                | 0<br>(0 - 2)                |
| Other neglected tropical diseases                                 | 3<br>(2 - 4)                | 1<br>(0 - 2)             | 0<br>(0 - 0)           | 1<br>(1 - 1)             | 0<br>(0 - 1)                | 1<br>(0 - 1)                |
| Maternal disorders                                                | 18<br>(14 - 23)             | --                       | 0<br>(0 - 0)           | 18<br>(14 - 23)          | --                          | --                          |
| Maternal hemorrhage                                               | 2<br>(1 - 3)                | --                       | 0<br>(0 - 0)           | 2<br>(1 - 3)             | --                          | --                          |
| Maternal sepsis and other maternal infections                     | 2<br>(1 - 2)                | --                       | 0<br>(0 - 0)           | 2<br>(1 - 2)             | --                          | --                          |

Web Table 31- Georgia deaths with 95% UI by age, sex, and cause in 2013

| Cause                                                            | Both Sexes, All Ages        | Both Sexes, 0-4 Years | Both Sexes, 5-14 Years | Both Sexes, 15-49 Years  | Both Sexes, 50-69 Years     | Both Sexes, 70-80 Years     |
|------------------------------------------------------------------|-----------------------------|-----------------------|------------------------|--------------------------|-----------------------------|-----------------------------|
| Maternal hypertensive disorders                                  | 2<br>(2 - 3)                | --                    | 0<br>(0 - 0)           | 2<br>(2 - 3)             | --                          | --                          |
| Maternal obstructed labor                                        | 2<br>(1 - 2)                | --                    | 0<br>(0 - 0)           | 2<br>(1 - 2)             | --                          | --                          |
| Maternal abortive outcome                                        | 2<br>(2 - 3)                | --                    | 0<br>(0 - 0)           | 2<br>(2 - 3)             | --                          | --                          |
| Indirect maternal deaths                                         | 3<br>(2 - 4)                | --                    | 0<br>(0 - 0)           | 3<br>(2 - 4)             | --                          | --                          |
| Late maternal deaths                                             | 2<br>(1 - 3)                | --                    | 0<br>(0 - 0)           | 2<br>(1 - 3)             | --                          | --                          |
| Maternal deaths aggravated by HIV/AIDS                           | 0<br>(0 - 0)                | --                    | --                     | 0<br>(0 - 0)             | --                          | --                          |
| Other maternal disorders                                         | 3<br>(2 - 4)                | --                    | 0<br>(0 - 0)           | 3<br>(2 - 4)             | --                          | --                          |
| Neonatal disorders                                               | 727<br>(634 - 828)          | 727<br>(634 - 828)    | --                     | --                       | --                          | --                          |
| Neonatal preterm birth complications                             | 205<br>(128 - 284)          | 205<br>(128 - 284)    | --                     | --                       | --                          | --                          |
| Neonatal encephalopathy due to birth asphyxia and trauma         | 274<br>(175 - 435)          | 274<br>(175 - 435)    | --                     | --                       | --                          | --                          |
| Neonatal sepsis and other neonatal infections                    | 74<br>(41 - 123)            | 74<br>(41 - 123)      | --                     | --                       | --                          | --                          |
| Hemolytic disease and other neonatal jaundice                    | 1<br>(0 - 2)                | 1<br>(0 - 2)          | --                     | --                       | --                          | --                          |
| Other neonatal disorders                                         | 174<br>(60 - 269)           | 174<br>(60 - 269)     | --                     | --                       | --                          | --                          |
| Nutritional deficiencies                                         | 157<br>(66 - 195)           | 6<br>(3 - 8)          | 2<br>(1 - 3)           | 33<br>(17 - 42)          | 26<br>(14 - 34)             | 90<br>(28 - 117)            |
| Protein-energy malnutrition                                      | 2<br>(1 - 3)                | 0<br>(0 - 1)          | 0<br>(0 - 0)           | 1<br>(0 - 1)             | 0<br>(0 - 1)                | 0<br>(0 - 0)                |
| Iodine deficiency                                                | 1<br>(0 - 3)                | 0<br>(0 - 1)          | 0<br>(0 - 0)           | 0<br>(0 - 0)             | 0<br>(0 - 1)                | 0<br>(0 - 2)                |
| Iron-deficiency anemia                                           | 150<br>(61 - 186)           | 5<br>(2 - 7)          | 1<br>(1 - 2)           | 31<br>(16 - 39)          | 24<br>(12 - 31)             | 89<br>(28 - 115)            |
| Other nutritional deficiencies                                   | 5<br>(2 - 9)                | 1<br>(0 - 1)          | 0<br>(0 - 1)           | 1<br>(0 - 2)             | 2<br>(1 - 4)                | 1<br>(0 - 2)                |
| Other communicable, maternal, neonatal, and nutritional diseases | 86<br>(60 - 104)            | 16<br>(10 - 24)       | 3<br>(2 - 3)           | 11<br>(9 - 13)           | 16<br>(12 - 20)             | 41<br>(22 - 56)             |
| Sexually transmitted diseases excluding HIV                      | 8<br>(3 - 16)               | 5<br>(0 - 11)         | 0<br>(0 - 1)           | 1<br>(1 - 1)             | 1<br>(1 - 2)                | 1<br>(1 - 2)                |
| Syphilis                                                         | 7<br>(2 - 15)               | 5<br>(0 - 11)         | 0<br>(0 - 1)           | 0<br>(0 - 1)             | 1<br>(1 - 1)                | 1<br>(1 - 2)                |
| Chlamydial infection                                             | 0<br>(0 - 0)                | --                    | 0<br>(0 - 0)           | 0<br>(0 - 0)             | 0<br>(0 - 0)                | 0<br>(0 - 0)                |
| Gonococcal infection                                             | 1<br>(0 - 1)                | --                    | 0<br>(0 - 0)           | 0<br>(0 - 0)             | 0<br>(0 - 0)                | 0<br>(0 - 0)                |
| Other sexually transmitted diseases                              | 0<br>(0 - 0)                | --                    | 0<br>(0 - 0)           | 0<br>(0 - 0)             | 0<br>(0 - 0)                | 0<br>(0 - 0)                |
| Hepatitis                                                        | 11<br>(9 - 13)              | 2<br>(1 - 4)          | 1<br>(0 - 1)           | 4<br>(3 - 5)             | 3<br>(2 - 4)                | 2<br>(1 - 2)                |
| Acute hepatitis A                                                | 1<br>(0 - 2)                | 0<br>(0 - 1)          | 0<br>(0 - 0)           | 0<br>(0 - 1)             | 0<br>(0 - 0)                | 0<br>(0 - 0)                |
| Acute hepatitis B                                                | 8<br>(6 - 10)               | 2<br>(1 - 3)          | 0<br>(0 - 1)           | 2<br>(1 - 3)             | 2<br>(1 - 3)                | 2<br>(1 - 2)                |
| Acute hepatitis C                                                | 1<br>(0 - 2)                | --                    | 0<br>(0 - 0)           | 0<br>(0 - 1)             | 0<br>(0 - 0)                | 0<br>(0 - 0)                |
| Acute hepatitis E                                                | 1<br>(1 - 2)                | 0<br>(0 - 0)          | 0<br>(0 - 0)           | 1<br>(1 - 2)             | 0<br>(0 - 0)                | 0<br>(0 - 0)                |
| Other infectious diseases                                        | 66<br>(41 - 83)             | 9<br>(6 - 12)         | 2<br>(1 - 2)           | 6<br>(4 - 8)             | 12<br>(8 - 15)              | 37<br>(19 - 53)             |
| Non-communicable diseases                                        | 50,225<br>(47,369 - 53,345) | 188<br>(149 - 235)    | 78<br>(68 - 87)        | 2,965<br>(2,625 - 3,362) | 12,654<br>(11,556 - 13,683) | 34,339<br>(32,890 - 36,198) |
| Neoplasms                                                        | 6,213<br>(5,606 - 6,737)    | 27<br>(18 - 39)       | 29<br>(25 - 34)        | 714<br>(630 - 805)       | 2,917<br>(2,599 - 3,211)    | 2,526<br>(2,276 - 2,738)    |
| Esophageal cancer                                                | 78<br>(63 - 109)            | --                    | --                     | 7<br>(5 - 9)             | 40<br>(32 - 57)             | 31<br>(24 - 43)             |
| Stomach cancer                                                   | 654<br>(573 - 741)          | --                    | --                     | 52<br>(44 - 62)          | 241<br>(209 - 275)          | 361<br>(302 - 429)          |
| Liver cancer                                                     | 496<br>(438 - 556)          | --                    | 1<br>(0 - 1)           | 33<br>(28 - 39)          | 215<br>(183 - 250)          | 247<br>(212 - 289)          |
| Liver cancer due to hepatitis B                                  | 170<br>(139 - 203)          | --                    | 0<br>(0 - 0)           | 14<br>(12 - 18)          | 86<br>(69 - 105)            | 70<br>(53 - 88)             |
| Liver cancer due to hepatitis C                                  | 178<br>(145 - 212)          | --                    | 0<br>(0 - 0)           | 10<br>(8 - 13)           | 74<br>(60 - 91)             | 94<br>(74 - 117)            |
| Liver cancer due to alcohol use                                  | 106<br>(79 - 134)           | --                    | --                     | 4<br>(3 - 6)             | 40<br>(28 - 52)             | 63<br>(46 - 82)             |
| Liver cancer due to other causes                                 | 42<br>(29 - 57)             | --                    | 0<br>(0 - 0)           | 4<br>(3 - 6)             | 16<br>(11 - 22)             | 21<br>(13 - 30)             |
| Larynx cancer                                                    | 182<br>(146 - 266)          | --                    | --                     | 15<br>(12 - 25)          | 102<br>(81 - 156)           | 64<br>(50 - 85)             |

Web Table 31- Georgia deaths with 95% UI by age, sex, and cause in 2013

| Cause                                         | Both Sexes, All Ages        | Both Sexes, 0-4 Years | Both Sexes, 5-14 Years | Both Sexes, 15-49 Years  | Both Sexes, 50-69 Years  | Both Sexes, 70-80 Years     |
|-----------------------------------------------|-----------------------------|-----------------------|------------------------|--------------------------|--------------------------|-----------------------------|
| Tracheal, bronchus and lung cancer            | 1,143<br>(1,019 - 1,276)    | --                    | --                     | 88<br>(73 - 105)         | 649<br>(565 - 737)       | 406<br>(353 - 468)          |
| Breast cancer                                 | 532<br>(456 - 633)          | --                    | --                     | 110<br>(89 - 134)        | 248<br>(201 - 311)       | 174<br>(145 - 212)          |
| Cervical cancer                               | 166<br>(136 - 210)          | --                    | --                     | 47<br>(35 - 59)          | 79<br>(61 - 103)         | 41<br>(33 - 57)             |
| Uterine cancer                                | 132<br>(69 - 170)           | --                    | --                     | 18<br>(9 - 23)           | 68<br>(34 - 91)          | 47<br>(25 - 61)             |
| Prostate cancer                               | 304<br>(129 - 430)          | --                    | --                     | 5<br>(3 - 8)             | 88<br>(39 - 125)         | 211<br>(86 - 310)           |
| Colon and rectum cancer                       | 397<br>(358 - 444)          | --                    | --                     | 39<br>(34 - 45)          | 184<br>(161 - 210)       | 174<br>(154 - 198)          |
| Lip and oral cavity cancer                    | 93<br>(75 - 122)            | --                    | --                     | 10<br>(8 - 14)           | 50<br>(38 - 66)          | 33<br>(27 - 43)             |
| Nasopharynx cancer                            | 18<br>(15 - 22)             | --                    | 0<br>(0 - 0)           | 6<br>(5 - 7)             | 8<br>(7 - 11)            | 4<br>(3 - 5)                |
| Other pharynx cancer                          | 50<br>(40 - 58)             | --                    | --                     | 4<br>(3 - 5)             | 31<br>(24 - 38)          | 14<br>(11 - 17)             |
| Gallbladder and biliary tract cancer          | 143<br>(86 - 174)           | --                    | --                     | 9<br>(5 - 11)            | 66<br>(40 - 81)          | 68<br>(38 - 86)             |
| Pancreatic cancer                             | 288<br>(259 - 322)          | --                    | --                     | 20<br>(17 - 24)          | 130<br>(112 - 150)       | 138<br>(120 - 158)          |
| Malignant skin melanoma                       | 100<br>(67 - 143)           | --                    | --                     | 9<br>(6 - 13)            | 51<br>(32 - 74)          | 40<br>(27 - 56)             |
| Non-melanoma skin cancer                      | 35<br>(19 - 47)             | --                    | --                     | 3<br>(2 - 4)             | 9<br>(5 - 12)            | 23<br>(12 - 34)             |
| Ovarian cancer                                | 118<br>(99 - 140)           | --                    | --                     | 20<br>(16 - 24)          | 66<br>(53 - 83)          | 32<br>(26 - 39)             |
| Testicular cancer                             | 23<br>(13 - 30)             | --                    | --                     | 13<br>(8 - 18)           | 7<br>(4 - 11)            | 3<br>(1 - 5)                |
| Kidney cancer                                 | 164<br>(144 - 185)          | 1<br>(0 - 1)          | 1<br>(0 - 1)           | 15<br>(13 - 19)          | 99<br>(84 - 114)         | 49<br>(42 - 56)             |
| Bladder cancer                                | 159<br>(140 - 190)          | --                    | --                     | 5<br>(4 - 6)             | 60<br>(50 - 74)          | 94<br>(81 - 114)            |
| Brain and nervous system cancer               | 299<br>(210 - 353)          | 3<br>(2 - 5)          | 4<br>(3 - 6)           | 66<br>(49 - 86)          | 158<br>(100 - 195)       | 68<br>(44 - 82)             |
| Thyroid cancer                                | 22<br>(17 - 26)             | --                    | 0<br>(0 - 0)           | 2<br>(2 - 3)             | 9<br>(8 - 11)            | 11<br>(8 - 13)              |
| Mesothelioma                                  | 5<br>(4 - 6)                | --                    | --                     | 1<br>(1 - 2)             | 2<br>(2 - 2)             | 2<br>(2 - 2)                |
| Hodgkin lymphoma                              | 46<br>(39 - 61)             | 1<br>(0 - 2)          | 1<br>(1 - 1)           | 12<br>(10 - 17)          | 20<br>(16 - 29)          | 12<br>(9 - 17)              |
| Non-Hodgkin lymphoma                          | 115<br>(75 - 138)           | 3<br>(2 - 4)          | 2<br>(1 - 3)           | 21<br>(14 - 26)          | 50<br>(30 - 63)          | 40<br>(22 - 50)             |
| Multiple myeloma                              | 26<br>(20 - 30)             | --                    | --                     | 5<br>(4 - 6)             | 13<br>(9 - 16)           | 8<br>(6 - 9)                |
| Leukemia                                      | 157<br>(142 - 174)          | 8<br>(6 - 12)         | 13<br>(11 - 16)        | 40<br>(35 - 47)          | 57<br>(49 - 66)          | 39<br>(34 - 45)             |
| Other neoplasms                               | 268<br>(222 - 300)          | 11<br>(6 - 18)        | 8<br>(6 - 10)          | 40<br>(31 - 48)          | 115<br>(91 - 136)        | 93<br>(73 - 110)            |
| Cardiovascular diseases                       | 33,831<br>(31,792 - 36,799) | 10<br>(8 - 14)        | 16<br>(13 - 19)        | 1,455<br>(1,262 - 1,715) | 7,122<br>(6,440 - 7,990) | 25,227<br>(23,925 - 27,249) |
| Rheumatic heart disease                       | 187<br>(102 - 238)          | 2<br>(1 - 4)          | 7<br>(4 - 9)           | 56<br>(34 - 72)          | 93<br>(42 - 131)         | 29<br>(18 - 39)             |
| Ischemic heart disease                        | 18,386<br>(16,512 - 22,855) | 1<br>(1 - 2)          | 3<br>(2 - 4)           | 902<br>(762 - 1,120)     | 3,497<br>(2,975 - 4,845) | 13,983<br>(12,673 - 16,937) |
| Cerebrovascular disease                       | 12,821<br>(11,039 - 14,141) | 2<br>(1 - 3)          | 3<br>(2 - 4)           | 381<br>(311 - 479)       | 2,660<br>(2,260 - 3,048) | 9,774<br>(8,299 - 10,864)   |
| Ischemic stroke                               | 4,850<br>(4,108 - 6,266)    | 1<br>(0 - 1)          | 1<br>(1 - 2)           | 52<br>(38 - 74)          | 699<br>(553 - 951)       | 4,097<br>(3,433 - 5,263)    |
| Hemorrhagic stroke                            | 7,971<br>(5,856 - 9,125)    | 1<br>(1 - 2)          | 2<br>(1 - 2)           | 330<br>(270 - 413)       | 1,961<br>(1,579 - 2,257) | 5,677<br>(3,943 - 6,614)    |
| Hypertensive heart disease                    | 1,132<br>(785 - 1,425)      | 0<br>(0 - 1)          | 0<br>(0 - 0)           | 25<br>(17 - 33)          | 176<br>(115 - 228)       | 930<br>(630 - 1,205)        |
| Cardiomyopathy and myocarditis                | 135<br>(63 - 172)           | 2<br>(1 - 3)          | 1<br>(1 - 1)           | 8<br>(5 - 10)            | 37<br>(20 - 46)          | 88<br>(36 - 119)            |
| Atrial fibrillation and flutter               | 0<br>(0 - 0)                | --                    | --                     | 0<br>(0 - 0)             | 0<br>(0 - 0)             | 0<br>(0 - 0)                |
| Aortic aneurysm                               | 43<br>(31 - 53)             | --                    | --                     | 3<br>(2 - 4)             | 13<br>(9 - 15)           | 27<br>(18 - 35)             |
| Peripheral vascular disease                   | 3<br>(2 - 4)                | --                    | --                     | 0<br>(0 - 0)             | 1<br>(1 - 2)             | 2<br>(1 - 2)                |
| Endocarditis                                  | 95<br>(57 - 128)            | 1<br>(1 - 1)          | 0<br>(0 - 0)           | 5<br>(3 - 7)             | 25<br>(13 - 37)          | 64<br>(36 - 89)             |
| Other cardiovascular and circulatory diseases | 1,028<br>(137 - 1,272)      | 2<br>(1 - 3)          | 2<br>(0 - 3)           | 73<br>(12 - 96)          | 619<br>(72 - 790)        | 332<br>(45 - 424)           |
| Chronic respiratory diseases                  | 4,041<br>(1,811 - 4,734)    | 14<br>(6 - 20)        | 5<br>(3 - 7)           | 142<br>(76 - 177)        | 1,128<br>(478 - 1,381)   | 2,751<br>(1,237 - 3,240)    |
| Chronic obstructive pulmonary disease         | 2,766<br>(1,177 - 3,431)    | 9<br>(3 - 13)         | 3<br>(1 - 4)           | 96<br>(47 - 123)         | 842<br>(333 - 1,059)     | 1,817<br>(769 - 2,307)      |

Web Table 31- Georgia deaths with 95% UI by age, sex, and cause in 2013

| Cause                                               | Both Sexes, All Ages     | Both Sexes, 0-4 Years | Both Sexes, 5-14 Years | Both Sexes, 15-49 Years | Both Sexes, 50-69 Years | Both Sexes, 70-80 Years  |
|-----------------------------------------------------|--------------------------|-----------------------|------------------------|-------------------------|-------------------------|--------------------------|
| Pneumoconiosis                                      | 371<br>(132 - 557)       | 0<br>(0 - 0)          | 0<br>(0 - 0)           | 10<br>(4 - 16)          | 127<br>(44 - 197)       | 233<br>(82 - 362)        |
| Silicosis                                           | 38<br>(15 - 65)          | 0<br>(0 - 0)          | 0<br>(0 - 0)           | 3<br>(1 - 5)            | 27<br>(10 - 47)         | 8<br>(3 - 14)            |
| Asbestosis                                          | 112<br>(41 - 174)        | 0<br>(0 - 0)          | 0<br>(0 - 0)           | 2<br>(1 - 3)            | 22<br>(9 - 36)          | 88<br>(31 - 139)         |
| Coal workers pneumoconiosis                         | 135<br>(47 - 207)        | 0<br>(0 - 0)          | 0<br>(0 - 0)           | 2<br>(1 - 3)            | 42<br>(14 - 66)         | 90<br>(32 - 146)         |
| Other pneumoconiosis                                | 86<br>(28 - 140)         | 0<br>(0 - 0)          | 0<br>(0 - 0)           | 3<br>(1 - 5)            | 36<br>(10 - 61)         | 47<br>(15 - 81)          |
| Asthma                                              | 119<br>(66 - 153)        | 3<br>(1 - 5)          | 2<br>(1 - 3)           | 9<br>(6 - 11)           | 29<br>(16 - 39)         | 76<br>(42 - 104)         |
| Interstitial lung disease and pulmonary sarcoidosis | 596<br>(235 - 861)       | 0<br>(0 - 0)          | 0<br>(0 - 0)           | 2<br>(1 - 3)            | 73<br>(24 - 111)        | 520<br>(203 - 765)       |
| Other chronic respiratory diseases                  | 189<br>(102 - 253)       | 2<br>(1 - 3)          | 0<br>(0 - 0)           | 25<br>(15 - 34)         | 56<br>(26 - 79)         | 105<br>(53 - 153)        |
| Cirrhosis                                           | 1,326<br>(1,181 - 1,503) | 1<br>(0 - 1)          | 1<br>(1 - 2)           | 257<br>(208 - 316)      | 574<br>(498 - 670)      | 492<br>(436 - 553)       |
| Cirrhosis due to hepatitis B                        | 556<br>(435 - 733)       | 0<br>(0 - 0)          | 0<br>(0 - 1)           | 106<br>(69 - 156)       | 239<br>(178 - 327)      | 210<br>(153 - 270)       |
| Cirrhosis due to hepatitis C                        | 281<br>(170 - 418)       | 0<br>(0 - 0)          | 0<br>(0 - 0)           | 55<br>(25 - 94)         | 118<br>(60 - 194)       | 107<br>(73 - 150)        |
| Cirrhosis due to alcohol use                        | 383<br>(277 - 506)       | --                    | --                     | 62<br>(36 - 92)         | 172<br>(114 - 243)      | 149<br>(113 - 194)       |
| Cirrhosis due to other causes                       | 106<br>(68 - 153)        | 1<br>(0 - 1)          | 1<br>(1 - 1)           | 35<br>(21 - 54)         | 44<br>(24 - 68)         | 26<br>(16 - 39)          |
| Digestive diseases                                  | 376<br>(334 - 442)       | 3<br>(2 - 5)          | 2<br>(2 - 3)           | 49<br>(41 - 66)         | 130<br>(110 - 165)      | 192<br>(168 - 217)       |
| Peptic ulcer disease                                | 195<br>(165 - 247)       | 0<br>(0 - 0)          | 0<br>(0 - 0)           | 25<br>(20 - 36)         | 75<br>(62 - 102)        | 96<br>(78 - 116)         |
| Gastritis and duodenitis                            | 7<br>(4 - 10)            | 0<br>(0 - 1)          | 0<br>(0 - 0)           | 1<br>(1 - 2)            | 2<br>(1 - 3)            | 4<br>(2 - 5)             |
| Appendicitis                                        | 9<br>(6 - 11)            | 0<br>(0 - 0)          | 0<br>(0 - 0)           | 2<br>(1 - 3)            | 3<br>(2 - 4)            | 3<br>(2 - 5)             |
| Paralytic ileus and intestinal obstruction          | 78<br>(57 - 108)         | 1<br>(1 - 2)          | 1<br>(1 - 1)           | 8<br>(6 - 13)           | 19<br>(12 - 28)         | 50<br>(34 - 68)          |
| Inguinal, femoral, and abdominal hernia             | 14<br>(9 - 21)           | 0<br>(0 - 1)          | 0<br>(0 - 1)           | 1<br>(1 - 2)            | 4<br>(3 - 6)            | 8<br>(5 - 12)            |
| Inflammatory bowel disease                          | 8<br>(5 - 14)            | 0<br>(0 - 0)          | 0<br>(0 - 0)           | 1<br>(1 - 2)            | 2<br>(2 - 5)            | 4<br>(3 - 7)             |
| Vascular intestinal disorders                       | 4<br>(2 - 6)             | 0<br>(0 - 0)          | 0<br>(0 - 0)           | 1<br>(0 - 1)            | 1<br>(1 - 2)            | 2<br>(1 - 4)             |
| Gallbladder and biliary diseases                    | 21<br>(16 - 27)          | 0<br>(0 - 0)          | 0<br>(0 - 0)           | 3<br>(2 - 4)            | 8<br>(6 - 10)           | 11<br>(7 - 14)           |
| Pancreatitis                                        | 16<br>(10 - 20)          | 0<br>(0 - 0)          | 0<br>(0 - 0)           | 3<br>(2 - 4)            | 7<br>(4 - 10)           | 6<br>(4 - 8)             |
| Other digestive diseases                            | 24<br>(15 - 30)          | 0<br>(0 - 1)          | 0<br>(0 - 0)           | 5<br>(3 - 7)            | 9<br>(6 - 13)           | 9<br>(6 - 12)            |
| Neurological disorders                              | 2,462<br>(2,099 - 2,899) | 5<br>(2 - 10)         | 4<br>(3 - 5)           | 25<br>(20 - 33)         | 118<br>(91 - 147)       | 2,310<br>(1,952 - 2,734) |
| Alzheimer disease and other dementias               | 2,385<br>(2,027 - 2,820) | --                    | --                     | 0<br>(0 - 1)            | 102<br>(76 - 128)       | 2,284<br>(1,926 - 2,708) |
| Parkinson disease                                   | 19<br>(14 - 22)          | --                    | --                     | 1<br>(0 - 1)            | 4<br>(3 - 5)            | 14<br>(11 - 17)          |
| Epilepsy                                            | 44<br>(35 - 63)          | 4<br>(2 - 9)          | 3<br>(2 - 5)           | 21<br>(17 - 29)         | 10<br>(7 - 15)          | 5<br>(3 - 7)             |
| Multiple sclerosis                                  | 8<br>(4 - 12)            | --                    | --                     | 1<br>(1 - 2)            | 1<br>(0 - 2)            | 6<br>(3 - 8)             |
| Other neurological disorders                        | 6<br>(5 - 7)             | 1<br>(0 - 1)          | 0<br>(0 - 1)           | 1<br>(1 - 2)            | 2<br>(1 - 2)            | 2<br>(1 - 2)             |
| Mental and substance use disorders                  | 251<br>(96 - 322)        | 1<br>(0 - 1)          | 0<br>(0 - 0)           | 151<br>(48 - 205)       | 81<br>(36 - 104)        | 19<br>(10 - 24)          |
| Schizophrenia                                       | 6<br>(4 - 9)             | --                    | --                     | 2<br>(2 - 4)            | 2<br>(1 - 4)            | 1<br>(1 - 2)             |
| Alcohol use disorders                               | 216<br>(60 - 284)        | --                    | --                     | 132<br>(28 - 183)       | 71<br>(26 - 94)         | 13<br>(5 - 18)           |
| Drug use disorders                                  | 29<br>(25 - 35)          | 1<br>(0 - 1)          | --                     | 17<br>(13 - 22)         | 7<br>(6 - 9)            | 5<br>(4 - 6)             |
| Opioid use disorders                                | 6<br>(5 - 8)             | 0<br>(0 - 0)          | --                     | 4<br>(3 - 5)            | 1<br>(1 - 2)            | 1<br>(1 - 1)             |
| Cocaine use disorders                               | 1<br>(1 - 1)             | 0<br>(0 - 0)          | --                     | 0<br>(0 - 1)            | 0<br>(0 - 0)            | 0<br>(0 - 0)             |
| Amphetamine use disorders                           | 1<br>(1 - 1)             | 0<br>(0 - 0)          | --                     | 0<br>(0 - 1)            | 0<br>(0 - 0)            | 0<br>(0 - 0)             |
| Other drug use disorders                            | 21<br>(18 - 26)          | 0<br>(0 - 1)          | --                     | 12<br>(10 - 16)         | 5<br>(4 - 7)            | 3<br>(3 - 5)             |
| Eating disorders                                    | 0<br>(0 - 0)             | --                    | 0<br>(0 - 0)           | 0<br>(0 - 0)            | --                      | --                       |
| Anorexia nervosa                                    | 0<br>(0 - 0)             | --                    | 0<br>(0 - 0)           | 0<br>(0 - 0)            | --                      | --                       |

Web Table 31- Georgia deaths with 95% UI by age, sex, and cause in 2013

| Cause                                               | Both Sexes, All Ages     | Both Sexes, 0-4 Years | Both Sexes, 5-14 Years | Both Sexes, 15-49 Years | Both Sexes, 50-69 Years | Both Sexes, 70-80 Years |
|-----------------------------------------------------|--------------------------|-----------------------|------------------------|-------------------------|-------------------------|-------------------------|
| Diabetes, urogenital, blood, and endocrine diseases | 1,508<br>(1,363 - 1,652) | 17<br>(12 - 23)       | 9<br>(6 - 10)          | 147<br>(126 - 172)      | 565<br>(494 - 644)      | 770<br>(688 - 857)      |
| Diabetes mellitus                                   | 827<br>(737 - 934)       | 2<br>(1 - 3)          | 1<br>(1 - 1)           | 46<br>(39 - 55)         | 333<br>(287 - 389)      | 445<br>(386 - 512)      |
| Acute glomerulonephritis                            | 8<br>(6 - 14)            | 0<br>(0 - 0)          | 0<br>(0 - 0)           | 2<br>(2 - 4)            | 3<br>(2 - 4)            | 3<br>(2 - 5)            |
| Chronic kidney disease                              | 452<br>(390 - 523)       | 2<br>(1 - 3)          | 3<br>(2 - 3)           | 59<br>(49 - 82)         | 159<br>(131 - 194)      | 229<br>(182 - 272)      |
| Chronic kidney disease due to diabetes mellitus     | 87<br>(29 - 110)         | 0<br>(0 - 0)          | 0<br>(0 - 0)           | 6<br>(3 - 8)            | 35<br>(12 - 47)         | 46<br>(10 - 61)         |
| Chronic kidney disease due to hypertension          | 71<br>(30 - 96)          | 1<br>(0 - 1)          | 0<br>(0 - 1)           | 10<br>(4 - 14)          | 22<br>(10 - 32)         | 37<br>(14 - 52)         |
| Chronic kidney disease due to glomerulonephritis    | 91<br>(72 - 127)         | 0<br>(0 - 1)          | 1<br>(1 - 1)           | 17<br>(13 - 25)         | 32<br>(24 - 46)         | 41<br>(31 - 58)         |
| Chronic kidney disease due to other causes          | 203<br>(155 - 313)       | 1<br>(0 - 1)          | 1<br>(1 - 2)           | 27<br>(20 - 46)         | 70<br>(49 - 117)        | 105<br>(76 - 151)       |
| Urinary diseases and male infertility               | 67<br>(56 - 94)          | 0<br>(0 - 1)          | 0<br>(0 - 1)           | 10<br>(8 - 15)          | 24<br>(19 - 37)         | 32<br>(26 - 44)         |
| Interstitial nephritis and urinary tract infections | 45<br>(34 - 68)          | 0<br>(0 - 0)          | 0<br>(0 - 0)           | 8<br>(6 - 12)           | 16<br>(12 - 27)         | 20<br>(15 - 30)         |
| Urolithiasis                                        | 2<br>(2 - 3)             | --                    | 0<br>(0 - 0)           | 0<br>(0 - 1)            | 1<br>(0 - 1)            | 1<br>(1 - 2)            |
| Other urinary diseases                              | 20<br>(10 - 26)          | 0<br>(0 - 0)          | 0<br>(0 - 0)           | 2<br>(1 - 3)            | 7<br>(3 - 10)           | 11<br>(5 - 16)          |
| Gynecological diseases                              | 0<br>(0 - 0)             | --                    | --                     | 0<br>(0 - 0)            | 0<br>(0 - 0)            | 0<br>(0 - 0)            |
| Uterine fibroids                                    | 0<br>(0 - 0)             | --                    | --                     | 0<br>(0 - 0)            | 0<br>(0 - 0)            | 0<br>(0 - 0)            |
| Polycystic ovarian syndrome                         | 0<br>(0 - 0)             | --                    | --                     | 0<br>(0 - 0)            | 0<br>(0 - 0)            | --                      |
| Endometriosis                                       | 0<br>(0 - 0)             | --                    | --                     | 0<br>(0 - 0)            | 0<br>(0 - 0)            | --                      |
| Genital prolapse                                    | 0<br>(0 - 0)             | --                    | --                     | 0<br>(0 - 0)            | 0<br>(0 - 0)            | 0<br>(0 - 0)            |
| Other gynecological diseases                        | 0<br>(0 - 0)             | --                    | --                     | 0<br>(0 - 0)            | 0<br>(0 - 0)            | 0<br>(0 - 0)            |
| Hemoglobinopathies and hemolytic anemias            | 76<br>(48 - 102)         | 5<br>(3 - 8)          | 1<br>(1 - 2)           | 12<br>(8 - 17)          | 16<br>(9 - 24)          | 41<br>(25 - 60)         |
| Thalassemias                                        | 9<br>(6 - 12)            | 4<br>(3 - 6)          | 1<br>(1 - 2)           | 4<br>(2 - 5)            | 0<br>(0 - 0)            | 0<br>(0 - 0)            |
| Sickle cell disorders                               | 1<br>(1 - 1)             | 0<br>(0 - 0)          | 0<br>(0 - 0)           | 0<br>(0 - 1)            | 0<br>(0 - 1)            | 0<br>(0 - 0)            |
| G6PD deficiency                                     | 1<br>(1 - 1)             | 0<br>(0 - 0)          | 0<br>(0 - 0)           | 0<br>(0 - 0)            | 0<br>(0 - 1)            | 0<br>(0 - 0)            |
| Other hemoglobinopathies and hemolytic anemias      | 65<br>(40 - 89)          | 1<br>(0 - 1)          | 0<br>(0 - 0)           | 8<br>(5 - 11)           | 16<br>(9 - 22)          | 41<br>(24 - 60)         |
| Endocrine, metabolic, blood, and immune disorders   | 77<br>(26 - 97)          | 8<br>(3 - 12)         | 3<br>(1 - 4)           | 17<br>(5 - 22)          | 31<br>(8 - 42)          | 19<br>(6 - 25)          |
| Musculoskeletal disorders                           | 33<br>(26 - 39)          | --                    | 2<br>(1 - 2)           | 9<br>(7 - 11)           | 10<br>(8 - 13)          | 12<br>(9 - 15)          |
| Rheumatoid arthritis                                | 6<br>(4 - 8)             | --                    | 0<br>(0 - 0)           | 2<br>(1 - 2)            | 2<br>(1 - 3)            | 2<br>(1 - 3)            |
| Other musculoskeletal disorders                     | 27<br>(21 - 32)          | --                    | 2<br>(1 - 2)           | 8<br>(6 - 9)            | 8<br>(6 - 10)           | 9<br>(7 - 12)           |
| Other non-communicable diseases                     | 184<br>(143 - 222)       | 110<br>(81 - 144)     | 9<br>(7 - 11)          | 15<br>(10 - 18)         | 9<br>(5 - 11)           | 40<br>(17 - 52)         |
| Congenital anomalies                                | 174<br>(135 - 210)       | 108<br>(80 - 142)     | 9<br>(6 - 11)          | 13<br>(9 - 16)          | 7<br>(4 - 8)            | 37<br>(16 - 48)         |
| Neural tube defects                                 | 3<br>(2 - 5)             | 2<br>(1 - 4)          | 0<br>(0 - 0)           | 0<br>(0 - 0)            | 0<br>(0 - 0)            | 0<br>(0 - 0)            |
| Congenital heart anomalies                          | 101<br>(73 - 123)        | 51<br>(36 - 71)       | 6<br>(4 - 8)           | 8<br>(5 - 10)           | 3<br>(2 - 3)            | 33<br>(13 - 43)         |
| Cleft lip and cleft palate                          | 1<br>(1 - 2)             | 1<br>(1 - 2)          | --                     | --                      | --                      | --                      |
| Down syndrome                                       | 5<br>(3 - 7)             | 4<br>(2 - 6)          | 0<br>(0 - 1)           | 0<br>(0 - 0)            | 0<br>(0 - 0)            | 0<br>(0 - 0)            |
| Chromosomal unbalanced rearrangements               | 3<br>(2 - 4)             | 1<br>(1 - 2)          | 0<br>(0 - 0)           | 1<br>(1 - 1)            | 0<br>(0 - 0)            | 0<br>(0 - 0)            |
| Other congenital anomalies                          | 61<br>(46 - 79)          | 48<br>(33 - 67)       | 2<br>(1 - 3)           | 3<br>(2 - 4)            | 4<br>(2 - 4)            | 4<br>(2 - 6)            |
| Skin and subcutaneous diseases                      | 10<br>(2 - 12)           | 1<br>(0 - 2)          | 1<br>(0 - 1)           | 2<br>(1 - 3)            | 3<br>(1 - 3)            | 3<br>(1 - 4)            |
| Cellulitis                                          | 2<br>(0 - 3)             | 0<br>(0 - 0)          | 0<br>(0 - 0)           | 0<br>(0 - 0)            | 1<br>(0 - 1)            | 1<br>(0 - 1)            |
| Pyoderma                                            | 6<br>(1 - 8)             | 1<br>(0 - 1)          | 0<br>(0 - 0)           | 1<br>(0 - 2)            | 2<br>(0 - 2)            | 2<br>(0 - 3)            |
| Decubitus ulcer                                     | 1<br>(0 - 2)             | 0<br>(0 - 0)          | 0<br>(0 - 0)           | 0<br>(0 - 1)            | 0<br>(0 - 0)            | 0<br>(0 - 0)            |
| Other skin and subcutaneous diseases                | 1<br>(0 - 1)             | 0<br>(0 - 0)          | 0<br>(0 - 0)           | 0<br>(0 - 0)            | 0<br>(0 - 0)            | 0<br>(0 - 0)            |



Web Table 31- Georgia deaths with 95% UI by age, sex, and cause in 2013

| Cause                                           | Both Sexes, All Ages     | Both Sexes, 0-4 Years | Both Sexes, 5-14 Years | Both Sexes, 15-49 Years | Both Sexes, 50-69 Years | Both Sexes, 70-80 Years |
|-------------------------------------------------|--------------------------|-----------------------|------------------------|-------------------------|-------------------------|-------------------------|
| Sudden infant death syndrome                    | 0<br>(0 - 1)             | 0<br>(0 - 1)          | --                     | --                      | --                      | --                      |
| Injuries                                        | 2,110<br>(1,909 - 2,364) | 82<br>(60 - 118)      | 67<br>(59 - 75)        | 1,052<br>(932 - 1,217)  | 529<br>(464 - 608)      | 380<br>(334 - 419)      |
| Transport injuries                              | 694<br>(602 - 823)       | 11<br>(8 - 16)        | 22<br>(16 - 27)        | 407<br>(344 - 490)      | 163<br>(133 - 210)      | 92<br>(77 - 107)        |
| Road injuries                                   | 633<br>(546 - 765)       | 9<br>(6 - 13)         | 20<br>(16 - 25)        | 362<br>(304 - 447)      | 156<br>(127 - 204)      | 86<br>(73 - 101)        |
| Pedestrian road injuries                        | 153<br>(106 - 204)       | 2<br>(1 - 4)          | 5<br>(3 - 9)           | 58<br>(36 - 85)         | 51<br>(36 - 69)         | 36<br>(26 - 46)         |
| Cyclist road injuries                           | 36<br>(28 - 46)          | 2<br>(1 - 3)          | 3<br>(2 - 5)           | 14<br>(10 - 19)         | 10<br>(8 - 14)          | 7<br>(5 - 9)            |
| Motorcyclist road injuries                      | 75<br>(51 - 103)         | 0<br>(0 - 1)          | 1<br>(1 - 1)           | 62<br>(41 - 86)         | 9<br>(6 - 14)           | 3<br>(2 - 5)            |
| Motor vehicle road injuries                     | 356<br>(291 - 473)       | 4<br>(3 - 6)          | 10<br>(8 - 12)         | 223<br>(178 - 295)      | 83<br>(63 - 120)        | 37<br>(29 - 47)         |
| Other road injuries                             | 13<br>(6 - 18)           | 0<br>(0 - 1)          | 1<br>(0 - 1)           | 5<br>(2 - 7)            | 3<br>(1 - 5)            | 4<br>(2 - 6)            |
| Other transport injuries                        | 61<br>(39 - 78)          | 2<br>(1 - 4)          | 2<br>(1 - 2)           | 45<br>(28 - 60)         | 7<br>(4 - 9)            | 5<br>(4 - 7)            |
| Unintentional injuries                          | 971<br>(858 - 1,100)     | 69<br>(50 - 102)      | 41<br>(34 - 51)        | 401<br>(340 - 486)      | 241<br>(202 - 276)      | 218<br>(177 - 249)      |
| Falls                                           | 274<br>(192 - 323)       | 11<br>(7 - 17)        | 6<br>(4 - 8)           | 126<br>(75 - 160)       | 69<br>(50 - 85)         | 62<br>(47 - 74)         |
| Drowning                                        | 201<br>(153 - 308)       | 15<br>(9 - 31)        | 17<br>(12 - 28)        | 118<br>(85 - 179)       | 35<br>(25 - 58)         | 16<br>(12 - 25)         |
| Fire, heat, and hot substances                  | 198<br>(163 - 258)       | 21<br>(13 - 38)       | 5<br>(4 - 8)           | 62<br>(47 - 88)         | 48<br>(36 - 64)         | 61<br>(47 - 79)         |
| Poisonings                                      | 37<br>(28 - 65)          | 4<br>(2 - 6)          | 1<br>(1 - 2)           | 17<br>(12 - 33)         | 9<br>(6 - 16)           | 6<br>(4 - 10)           |
| Exposure to mechanical forces                   | 67<br>(55 - 78)          | 4<br>(3 - 5)          | 3<br>(2 - 4)           | 37<br>(27 - 45)         | 15<br>(12 - 19)         | 8<br>(6 - 10)           |
| Unintentional firearm injuries                  | 19<br>(15 - 24)          | 0<br>(0 - 1)          | 0<br>(0 - 0)           | 11<br>(8 - 15)          | 5<br>(3 - 7)            | 3<br>(2 - 4)            |
| Unintentional suffocation                       | 19<br>(9 - 24)           | 1<br>(0 - 1)          | 1<br>(0 - 1)           | 15<br>(5 - 20)          | 2<br>(1 - 3)            | 1<br>(0 - 1)            |
| Other exposure to mechanical forces             | 29<br>(25 - 41)          | 3<br>(2 - 4)          | 2<br>(1 - 3)           | 12<br>(9 - 17)          | 8<br>(6 - 12)           | 4<br>(3 - 7)            |
| Adverse effects of medical treatment            | 102<br>(55 - 140)        | 5<br>(2 - 8)          | 1<br>(0 - 1)           | 6<br>(3 - 9)            | 44<br>(23 - 62)         | 47<br>(24 - 67)         |
| Animal contact                                  | 15<br>(10 - 21)          | 4<br>(2 - 7)          | 3<br>(2 - 4)           | 3<br>(2 - 4)            | 4<br>(3 - 7)            | 2<br>(1 - 3)            |
| Venomous animal contact                         | 9<br>(6 - 13)            | 3<br>(2 - 5)          | 2<br>(1 - 4)           | 1<br>(1 - 2)            | 2<br>(1 - 2)            | 1<br>(0 - 1)            |
| Non-venomous animal contact                     | 6<br>(4 - 9)             | 1<br>(0 - 1)          | 0<br>(0 - 0)           | 1<br>(1 - 2)            | 3<br>(2 - 4)            | 1<br>(1 - 2)            |
| Foreign body                                    | 28<br>(16 - 38)          | 5<br>(3 - 9)          | 2<br>(1 - 3)           | 8<br>(4 - 11)           | 6<br>(3 - 8)            | 7<br>(4 - 10)           |
| Pulmonary aspiration and foreign body in airway | 27<br>(15 - 37)          | 5<br>(3 - 8)          | 2<br>(1 - 3)           | 7<br>(4 - 10)           | 6<br>(3 - 8)            | 7<br>(4 - 10)           |
| Foreign body in other body part                 | 1<br>(1 - 1)             | 0<br>(0 - 0)          | 0<br>(0 - 0)           | 0<br>(0 - 0)            | 0<br>(0 - 0)            | 0<br>(0 - 0)            |
| Other unintentional injuries                    | 48<br>(37 - 61)          | 1<br>(0 - 2)          | 3<br>(2 - 5)           | 25<br>(17 - 36)         | 11<br>(7 - 17)          | 8<br>(6 - 11)           |
| Self-harm and interpersonal violence            | 445<br>(383 - 542)       | 2<br>(1 - 3)          | 4<br>(3 - 6)           | 244<br>(203 - 311)      | 125<br>(101 - 157)      | 71<br>(57 - 84)         |
| Self-harm                                       | 298<br>(253 - 352)       | --                    | 2<br>(1 - 3)           | 140<br>(114 - 172)      | 95<br>(78 - 117)        | 60<br>(48 - 73)         |
| Interpersonal violence                          | 148<br>(108 - 221)       | 2<br>(1 - 3)          | 2<br>(1 - 3)           | 104<br>(74 - 157)       | 29<br>(19 - 48)         | 11<br>(7 - 18)          |
| Assault by firearm                              | 84<br>(57 - 137)         | 0<br>(0 - 1)          | 1<br>(0 - 1)           | 61<br>(39 - 101)        | 18<br>(11 - 32)         | 4<br>(2 - 8)            |
| Assault by sharp object                         | 23<br>(12 - 40)          | 0<br>(0 - 1)          | 0<br>(0 - 1)           | 17<br>(9 - 30)          | 3<br>(1 - 7)            | 2<br>(1 - 3)            |
| Assault by other means                          | 41<br>(22 - 64)          | 1<br>(1 - 2)          | 1<br>(1 - 2)           | 25<br>(13 - 43)         | 8<br>(4 - 14)           | 5<br>(3 - 8)            |

Web Table 31- Georgia deaths with 95% UI by age, sex, and cause in 2013

| Cause                                                             | Males, All Ages             | Males, 0-4 Years   | Males, 5-14 Years  | Males, 15-49 Years       | Males, 50-69 Years        | Males, 70-80 Years          |
|-------------------------------------------------------------------|-----------------------------|--------------------|--------------------|--------------------------|---------------------------|-----------------------------|
| All causes                                                        | 29,974<br>(27,468 - 32,089) | 716<br>(630 - 814) | 115<br>(103 - 126) | 3,236<br>(2,810 - 3,782) | 9,211<br>(8,207 - 10,091) | 16,696<br>(15,632 - 17,251) |
| Communicable, maternal, neonatal, and nutritional diseases        | 1,202<br>(1,084 - 1,315)    | 558<br>(494 - 628) | 19<br>(15 - 25)    | 187<br>(160 - 218)       | 200<br>(170 - 239)        | 238<br>(190 - 284)          |
| HIV/AIDS and tuberculosis                                         | 171<br>(140 - 231)          | 1<br>(0 - 1)       | 0<br>(0 - 0)       | 88<br>(71 - 113)         | 63<br>(50 - 92)           | 19<br>(15 - 28)             |
| Tuberculosis                                                      | 163<br>(132 - 222)          | 1<br>(0 - 1)       | 0<br>(0 - 0)       | 82<br>(66 - 108)         | 61<br>(48 - 90)           | 19<br>(14 - 28)             |
| HIV/AIDS                                                          | 8<br>(6 - 10)               | 0<br>(0 - 0)       | 0<br>(0 - 0)       | 6<br>(4 - 7)             | 2<br>(1 - 3)              | 0<br>(0 - 1)                |
| HIV/AIDS resulting in mycobacterial infection                     | 1<br>(0 - 1)                | 0<br>(0 - 0)       | 0<br>(0 - 0)       | 0<br>(0 - 0)             | 0<br>(0 - 0)              | 0<br>(0 - 0)                |
| HIV/AIDS resulting in other diseases                              | 7<br>(5 - 9)                | 0<br>(0 - 0)       | 0<br>(0 - 0)       | 5<br>(4 - 7)             | 2<br>(1 - 2)              | 0<br>(0 - 1)                |
| Diarrhea, lower respiratory, and other common infectious diseases | 466<br>(401 - 559)          | 116<br>(86 - 152)  | 15<br>(11 - 21)    | 64<br>(50 - 81)          | 104<br>(81 - 128)         | 167<br>(130 - 211)          |
| Diarrheal diseases                                                | 19<br>(13 - 26)             | 12<br>(7 - 19)     | 0<br>(0 - 1)       | 2<br>(1 - 3)             | 2<br>(2 - 3)              | 3<br>(2 - 4)                |
| Intestinal infectious diseases                                    | 3<br>(1 - 5)                | 1<br>(0 - 2)       | 0<br>(0 - 1)       | 1<br>(0 - 2)             | 0<br>(0 - 1)              | 0<br>(0 - 1)                |
| Typhoid fever                                                     | 2<br>(1 - 3)                | 0<br>(0 - 1)       | 0<br>(0 - 1)       | 1<br>(0 - 1)             | 0<br>(0 - 1)              | 0<br>(0 - 0)                |
| Paratyphoid fever                                                 | 1<br>(0 - 1)                | 0<br>(0 - 0)       | 0<br>(0 - 0)       | 0<br>(0 - 0)             | 0<br>(0 - 0)              | 0<br>(0 - 0)                |
| Other intestinal infectious diseases                              | 0<br>(0 - 3)                | 0<br>(0 - 1)       | 0<br>(0 - 0)       | 0<br>(0 - 1)             | 0<br>(0 - 1)              | 0<br>(0 - 1)                |
| Lower respiratory infections                                      | 392<br>(331 - 479)          | 88<br>(61 - 121)   | 10<br>(7 - 16)     | 49<br>(36 - 65)          | 90<br>(68 - 114)          | 155<br>(119 - 199)          |
| Upper respiratory infections                                      | 2<br>(0 - 3)                | 0<br>(0 - 0)       | 0<br>(0 - 0)       | 0<br>(0 - 1)             | 0<br>(0 - 1)              | 1<br>(0 - 2)                |
| Otitis media                                                      | 1<br>(1 - 1)                | 0<br>(0 - 0)       | 0<br>(0 - 0)       | 0<br>(0 - 0)             | 0<br>(0 - 0)              | 0<br>(0 - 0)                |
| Meningitis                                                        | 28<br>(23 - 34)             | 8<br>(5 - 13)      | 2<br>(2 - 3)       | 8<br>(6 - 9)             | 7<br>(5 - 8)              | 4<br>(3 - 5)                |
| Pneumococcal meningitis                                           | 7<br>(6 - 9)                | 2<br>(1 - 3)       | 1<br>(0 - 1)       | 2<br>(2 - 3)             | 2<br>(1 - 3)              | 1<br>(1 - 2)                |
| H influenzae type B meningitis                                    | 7<br>(5 - 10)               | 4<br>(2 - 6)       | 1<br>(0 - 1)       | 1<br>(1 - 2)             | 1<br>(1 - 1)              | 1<br>(0 - 1)                |
| Meningococcal meningitis                                          | 6<br>(5 - 8)                | 2<br>(1 - 3)       | 1<br>(0 - 1)       | 2<br>(1 - 2)             | 1<br>(1 - 2)              | 1<br>(1 - 1)                |
| Other meningitis                                                  | 7<br>(5 - 9)                | 1<br>(0 - 2)       | 0<br>(0 - 1)       | 2<br>(1 - 3)             | 2<br>(2 - 4)              | 1<br>(1 - 2)                |
| Encephalitis                                                      | 17<br>(12 - 22)             | 5<br>(2 - 8)       | 1<br>(1 - 2)       | 4<br>(2 - 6)             | 4<br>(2 - 6)              | 3<br>(2 - 5)                |
| Diphtheria                                                        | 0<br>(0 - 2)                | 0<br>(0 - 1)       | 0<br>(0 - 0)       | 0<br>(0 - 0)             | 0<br>(0 - 1)              | --                          |
| Whooping cough                                                    | 2<br>(1 - 9)                | 2<br>(0 - 8)       | 0<br>(0 - 0)       | 0<br>(0 - 0)             | 0<br>(0 - 0)              | --                          |
| Tetanus                                                           | 0<br>(0 - 1)                | 0<br>(0 - 0)       | 0<br>(0 - 0)       | 0<br>(0 - 0)             | 0<br>(0 - 0)              | 0<br>(0 - 0)                |
| Measles                                                           | 1<br>(0 - 3)                | 1<br>(0 - 3)       | 0<br>(0 - 0)       | 0<br>(0 - 0)             | 0<br>(0 - 0)              | --                          |
| Varicella and herpes zoster                                       | 2<br>(1 - 7)                | 0<br>(0 - 1)       | 0<br>(0 - 0)       | 0<br>(0 - 1)             | 0<br>(0 - 1)              | 1<br>(0 - 6)                |
| Neglected tropical diseases and malaria                           | 19<br>(14 - 25)             | 4<br>(2 - 7)       | 1<br>(1 - 2)       | 6<br>(5 - 9)             | 5<br>(3 - 8)              | 2<br>(1 - 3)                |
| Leishmaniasis                                                     | 14<br>(10 - 20)             | 3<br>(2 - 6)       | 1<br>(1 - 1)       | 5<br>(3 - 7)             | 4<br>(2 - 7)              | 1<br>(1 - 2)                |
| Visceral leishmaniasis                                            | 14<br>(10 - 20)             | 3<br>(2 - 6)       | 1<br>(1 - 1)       | 5<br>(3 - 7)             | 4<br>(2 - 7)              | 1<br>(1 - 2)                |
| Cysticercosis                                                     | 0<br>(0 - 0)                | 0<br>(0 - 0)       | 0<br>(0 - 0)       | 0<br>(0 - 0)             | 0<br>(0 - 0)              | 0<br>(0 - 0)                |
| Cystic echinococcosis                                             | 1<br>(1 - 1)                | 0<br>(0 - 0)       | 0<br>(0 - 0)       | 0<br>(0 - 0)             | 0<br>(0 - 0)              | 0<br>(0 - 0)                |
| Dengue                                                            | 0<br>(0 - 0)                | 0<br>(0 - 0)       | 0<br>(0 - 0)       | 0<br>(0 - 0)             | 0<br>(0 - 0)              | 0<br>(0 - 0)                |
| Rabies                                                            | 2<br>(1 - 3)                | 0<br>(0 - 0)       | 0<br>(0 - 0)       | 1<br>(1 - 2)             | 0<br>(0 - 0)              | 0<br>(0 - 0)                |
| Intestinal nematode infections                                    | 0<br>(0 - 3)                | 0<br>(0 - 1)       | 0<br>(0 - 0)       | 0<br>(0 - 0)             | 0<br>(0 - 1)              | 0<br>(0 - 1)                |
| Ascariasis                                                        | 0<br>(0 - 3)                | 0<br>(0 - 1)       | 0<br>(0 - 0)       | 0<br>(0 - 0)             | 0<br>(0 - 1)              | 0<br>(0 - 1)                |
| Other neglected tropical diseases                                 | 1<br>(1 - 2)                | 0<br>(0 - 1)       | 0<br>(0 - 0)       | 0<br>(0 - 1)             | 0<br>(0 - 0)              | 0<br>(0 - 1)                |
| Maternal disorders                                                | --                          | --                 | --                 | --                       | --                        | --                          |
| Maternal hemorrhage                                               | --                          | --                 | --                 | --                       | --                        | --                          |
| Maternal sepsis and other maternal infections                     | --                          | --                 | --                 | --                       | --                        | --                          |

Web Table 31- Georgia deaths with 95% UI by age, sex, and cause in 2013

| Cause                                                            | Males, All Ages             | Males, 0-4 Years   | Males, 5-14 Years | Males, 15-49 Years       | Males, 50-69 Years       | Males, 70-80 Years          |
|------------------------------------------------------------------|-----------------------------|--------------------|-------------------|--------------------------|--------------------------|-----------------------------|
| Maternal hypertensive disorders                                  | --                          | --                 | --                | --                       | --                       | --                          |
| Maternal obstructed labor                                        | --                          | --                 | --                | --                       | --                       | --                          |
| Maternal abortive outcome                                        | --                          | --                 | --                | --                       | --                       | --                          |
| Indirect maternal deaths                                         | --                          | --                 | --                | --                       | --                       | --                          |
| Late maternal deaths                                             | --                          | --                 | --                | --                       | --                       | --                          |
| Maternal deaths aggravated by HIV/AIDS                           | --                          | --                 | --                | --                       | --                       | --                          |
| Other maternal disorders                                         | --                          | --                 | --                | --                       | --                       | --                          |
| Neonatal disorders                                               | 427<br>(374 - 481)          | 427<br>(374 - 481) | --                | --                       | --                       | --                          |
| Neonatal preterm birth complications                             | 122<br>(68 - 185)           | 122<br>(68 - 185)  | --                | --                       | --                       | --                          |
| Neonatal encephalopathy due to birth asphyxia and trauma         | 162<br>(94 - 272)           | 162<br>(94 - 272)  | --                | --                       | --                       | --                          |
| Neonatal sepsis and other neonatal infections                    | 38<br>(16 - 74)             | 38<br>(16 - 74)    | --                | --                       | --                       | --                          |
| Hemolytic disease and other neonatal jaundice                    | 1<br>(0 - 1)                | 1<br>(0 - 1)       | --                | --                       | --                       | --                          |
| Other neonatal disorders                                         | 105<br>(30 - 180)           | 105<br>(30 - 180)  | --                | --                       | --                       | --                          |
| Nutritional deficiencies                                         | 72<br>(26 - 97)             | 3<br>(1 - 5)       | 1<br>(0 - 1)      | 20<br>(8 - 29)           | 17<br>(7 - 24)           | 30<br>(10 - 45)             |
| Protein-energy malnutrition                                      | 1<br>(0 - 2)                | 0<br>(0 - 0)       | 0<br>(0 - 0)      | 0<br>(0 - 1)             | 0<br>(0 - 0)             | 0<br>(0 - 0)                |
| Iodine deficiency                                                | 1<br>(0 - 2)                | 0<br>(0 - 0)       | 0<br>(0 - 0)      | 0<br>(0 - 0)             | 0<br>(0 - 1)             | 0<br>(0 - 2)                |
| Iron-deficiency anemia                                           | 67<br>(24 - 90)             | 2<br>(1 - 4)       | 1<br>(0 - 1)      | 19<br>(7 - 27)           | 15<br>(6 - 21)           | 29<br>(9 - 44)              |
| Other nutritional deficiencies                                   | 4<br>(1 - 7)                | 0<br>(0 - 1)       | 0<br>(0 - 0)      | 1<br>(0 - 2)             | 2<br>(1 - 4)             | 0<br>(0 - 1)                |
| Other communicable, maternal, neonatal, and nutritional diseases | 49<br>(35 - 60)             | 9<br>(5 - 13)      | 2<br>(1 - 2)      | 8<br>(6 - 11)            | 10<br>(7 - 14)           | 20<br>(11 - 27)             |
| Sexually transmitted diseases excluding HIV                      | 4<br>(1 - 8)                | 2<br>(0 - 6)       | 0<br>(0 - 0)      | 0<br>(0 - 1)             | 1<br>(0 - 1)             | 1<br>(0 - 1)                |
| Syphilis                                                         | 4<br>(1 - 7)                | 2<br>(0 - 6)       | 0<br>(0 - 0)      | 0<br>(0 - 0)             | 0<br>(0 - 1)             | 1<br>(0 - 1)                |
| Chlamydial infection                                             | --                          | --                 | --                | --                       | --                       | --                          |
| Gonococcal infection                                             | 0<br>(0 - 0)                | --                 | 0<br>(0 - 0)      | 0<br>(0 - 0)             | 0<br>(0 - 0)             | 0<br>(0 - 0)                |
| Other sexually transmitted diseases                              | 0<br>(0 - 0)                | --                 | 0<br>(0 - 0)      | 0<br>(0 - 0)             | 0<br>(0 - 0)             | 0<br>(0 - 0)                |
| Hepatitis                                                        | 9<br>(7 - 11)               | 2<br>(1 - 3)       | 0<br>(0 - 1)      | 3<br>(2 - 4)             | 2<br>(2 - 3)             | 1<br>(1 - 2)                |
| Acute hepatitis A                                                | 1<br>(0 - 2)                | 0<br>(0 - 1)       | 0<br>(0 - 0)      | 0<br>(0 - 1)             | 0<br>(0 - 0)             | 0<br>(0 - 0)                |
| Acute hepatitis B                                                | 7<br>(5 - 9)                | 1<br>(1 - 3)       | 0<br>(0 - 0)      | 2<br>(1 - 3)             | 2<br>(1 - 3)             | 1<br>(1 - 2)                |
| Acute hepatitis C                                                | 1<br>(0 - 1)                | --                 | 0<br>(0 - 0)      | 0<br>(0 - 1)             | 0<br>(0 - 0)             | 0<br>(0 - 0)                |
| Acute hepatitis E                                                | 1<br>(1 - 2)                | 0<br>(0 - 0)       | 0<br>(0 - 0)      | 1<br>(0 - 1)             | 0<br>(0 - 0)             | 0<br>(0 - 0)                |
| Other infectious diseases                                        | 35<br>(22 - 46)             | 5<br>(3 - 7)       | 1<br>(1 - 1)      | 5<br>(3 - 7)             | 7<br>(5 - 11)            | 18<br>(9 - 25)              |
| Non-communicable diseases                                        | 27,115<br>(24,864 - 28,932) | 109<br>(81 - 143)  | 47<br>(40 - 54)   | 2,141<br>(1,821 - 2,558) | 8,595<br>(7,655 - 9,446) | 16,224<br>(15,205 - 16,769) |
| Neoplasms                                                        | 3,653<br>(3,174 - 4,024)    | 14<br>(9 - 22)     | 18<br>(15 - 21)   | 352<br>(296 - 425)       | 1,816<br>(1,575 - 2,042) | 1,453<br>(1,264 - 1,606)    |
| Esophageal cancer                                                | 63<br>(48 - 93)             | --                 | --                | 6<br>(4 - 8)             | 34<br>(26 - 51)          | 23<br>(16 - 35)             |
| Stomach cancer                                                   | 399<br>(337 - 467)          | --                 | --                | 35<br>(27 - 43)          | 163<br>(135 - 192)       | 201<br>(159 - 250)          |
| Liver cancer                                                     | 305<br>(259 - 353)          | --                 | 1<br>(0 - 1)      | 21<br>(17 - 27)          | 158<br>(127 - 189)       | 125<br>(98 - 151)           |
| Liver cancer due to hepatitis B                                  | 119<br>(92 - 146)           | --                 | 0<br>(0 - 0)      | 10<br>(8 - 14)           | 67<br>(51 - 85)          | 42<br>(30 - 56)             |
| Liver cancer due to hepatitis C                                  | 105<br>(78 - 134)           | --                 | 0<br>(0 - 0)      | 6<br>(5 - 9)             | 53<br>(40 - 70)          | 45<br>(30 - 62)             |
| Liver cancer due to alcohol use                                  | 67<br>(47 - 88)             | --                 | --                | 3<br>(2 - 5)             | 31<br>(20 - 42)          | 34<br>(22 - 46)             |
| Liver cancer due to other causes                                 | 13<br>(8 - 19)              | --                 | 0<br>(0 - 0)      | 2<br>(1 - 2)             | 7<br>(4 - 11)            | 4<br>(2 - 7)                |
| Larynx cancer                                                    | 166<br>(132 - 245)          | --                 | --                | 14<br>(10 - 24)          | 96<br>(76 - 146)         | 56<br>(42 - 76)             |

Web Table 31- Georgia deaths with 95% UI by age, sex, and cause in 2013

| Cause                                         | Males, All Ages             | Males, 0-4 Years | Males, 5-14 Years | Males, 15-49 Years     | Males, 50-69 Years       | Males, 70-80 Years          |
|-----------------------------------------------|-----------------------------|------------------|-------------------|------------------------|--------------------------|-----------------------------|
| Tracheal, bronchus and lung cancer            | 843<br>(728 - 956)          | --               | --                | 65<br>(51 - 82)        | 479<br>(401 - 560)       | 298<br>(251 - 354)          |
| Breast cancer                                 | 2<br>(0 - 3)                | --               | --                | 0<br>(0 - 1)           | 0<br>(0 - 1)             | 1<br>(0 - 2)                |
| Cervical cancer                               | --                          | --               | --                | --                     | --                       | --                          |
| Uterine cancer                                | --                          | --               | --                | --                     | --                       | --                          |
| Prostate cancer                               | 304<br>(129 - 430)          | --               | --                | 5<br>(3 - 8)           | 88<br>(39 - 125)         | 211<br>(86 - 310)           |
| Colon and rectum cancer                       | 246<br>(212 - 284)          | --               | --                | 22<br>(18 - 28)        | 121<br>(101 - 144)       | 103<br>(86 - 122)           |
| Lip and oral cavity cancer                    | 75<br>(55 - 103)            | --               | --                | 8<br>(6 - 12)          | 43<br>(31 - 59)          | 24<br>(17 - 33)             |
| Nasopharynx cancer                            | 15<br>(12 - 18)             | --               | 0<br>(0 - 0)      | 6<br>(4 - 7)           | 7<br>(5 - 9)             | 2<br>(2 - 3)                |
| Other pharynx cancer                          | 44<br>(32 - 52)             | --               | --                | 4<br>(3 - 5)           | 28<br>(21 - 35)          | 11<br>(9 - 14)              |
| Gallbladder and biliary tract cancer          | 65<br>(35 - 80)             | --               | --                | 2<br>(1 - 3)           | 34<br>(20 - 44)          | 28<br>(14 - 36)             |
| Pancreatic cancer                             | 169<br>(145 - 195)          | --               | --                | 14<br>(11 - 18)        | 87<br>(71 - 105)         | 68<br>(56 - 82)             |
| Malignant skin melanoma                       | 69<br>(35 - 108)            | --               | --                | 7<br>(3 - 11)          | 37<br>(18 - 60)          | 25<br>(12 - 41)             |
| Non-melanoma skin cancer                      | 15<br>(8 - 20)              | --               | --                | 2<br>(1 - 2)           | 5<br>(3 - 8)             | 8<br>(4 - 12)               |
| Ovarian cancer                                | --                          | --               | --                | --                     | --                       | --                          |
| Testicular cancer                             | 23<br>(13 - 30)             | --               | --                | 13<br>(8 - 18)         | 7<br>(4 - 11)            | 3<br>(1 - 5)                |
| Kidney cancer                                 | 130<br>(110 - 148)          | 1<br>(0 - 1)     | 0<br>(0 - 0)      | 12<br>(10 - 16)        | 82<br>(67 - 97)          | 34<br>(28 - 40)             |
| Bladder cancer                                | 137<br>(117 - 166)          | --               | --                | 4<br>(3 - 6)           | 54<br>(45 - 68)          | 78<br>(66 - 97)             |
| Brain and nervous system cancer               | 187<br>(105 - 239)          | 1<br>(0 - 1)     | 3<br>(2 - 4)      | 38<br>(22 - 59)        | 115<br>(59 - 152)        | 29<br>(15 - 41)             |
| Thyroid cancer                                | 9<br>(7 - 11)               | --               | 0<br>(0 - 0)      | 1<br>(0 - 1)           | 5<br>(4 - 7)             | 3<br>(2 - 4)                |
| Mesothelioma                                  | 3<br>(3 - 4)                | --               | --                | 1<br>(1 - 1)           | 1<br>(1 - 2)             | 1<br>(1 - 1)                |
| Hodgkin lymphoma                              | 31<br>(25 - 45)             | 1<br>(0 - 2)     | 1<br>(0 - 1)      | 7<br>(5 - 11)          | 16<br>(12 - 24)          | 7<br>(6 - 12)               |
| Non-Hodgkin lymphoma                          | 84<br>(50 - 106)            | 1<br>(1 - 2)     | 1<br>(1 - 2)      | 15<br>(9 - 19)         | 38<br>(21 - 50)          | 29<br>(15 - 39)             |
| Multiple myeloma                              | 17<br>(12 - 21)             | --               | --                | 3<br>(2 - 4)           | 10<br>(6 - 12)           | 4<br>(3 - 5)                |
| Leukemia                                      | 88<br>(77 - 102)            | 4<br>(2 - 7)     | 7<br>(6 - 10)     | 23<br>(19 - 28)        | 31<br>(26 - 38)          | 23<br>(19 - 28)             |
| Other neoplasms                               | 167<br>(137 - 195)          | 7<br>(4 - 12)    | 5<br>(3 - 6)      | 24<br>(18 - 30)        | 75<br>(60 - 93)          | 56<br>(42 - 70)             |
| Cardiovascular diseases                       | 17,199<br>(15,598 - 19,181) | 5<br>(4 - 8)     | 9<br>(7 - 11)     | 1,142<br>(961 - 1,377) | 4,772<br>(4,196 - 5,458) | 11,270<br>(10,375 - 12,423) |
| Rheumatic heart disease                       | 143<br>(64 - 194)           | 1<br>(0 - 2)     | 5<br>(2 - 6)      | 40<br>(21 - 56)        | 78<br>(28 - 116)         | 19<br>(8 - 29)              |
| Ischemic heart disease                        | 9,660<br>(8,373 - 12,427)   | 1<br>(0 - 1)     | 1<br>(1 - 3)      | 745<br>(615 - 952)     | 2,517<br>(2,105 - 3,497) | 6,396<br>(5,577 - 8,137)    |
| Cerebrovascular disease                       | 6,300<br>(5,252 - 7,361)    | 1<br>(1 - 2)     | 1<br>(1 - 2)      | 275<br>(209 - 370)     | 1,721<br>(1,395 - 2,057) | 4,301<br>(3,581 - 5,017)    |
| Ischemic stroke                               | 2,413<br>(1,868 - 3,380)    | 0<br>(0 - 0)     | 1<br>(0 - 1)      | 40<br>(27 - 61)        | 503<br>(367 - 739)       | 1,869<br>(1,442 - 2,654)    |
| Hemorrhagic stroke                            | 3,887<br>(2,776 - 4,629)    | 1<br>(0 - 1)     | 1<br>(0 - 1)      | 235<br>(178 - 317)     | 1,218<br>(909 - 1,459)   | 2,432<br>(1,639 - 2,973)    |
| Hypertensive heart disease                    | 382<br>(233 - 541)          | 0<br>(0 - 0)     | 0<br>(0 - 0)      | 16<br>(10 - 23)        | 97<br>(57 - 143)         | 269<br>(162 - 394)          |
| Cardiomyopathy and myocarditis                | 59<br>(25 - 83)             | 1<br>(0 - 1)     | 0<br>(0 - 1)      | 3<br>(2 - 5)           | 18<br>(8 - 25)           | 36<br>(14 - 55)             |
| Atrial fibrillation and flutter               | 0<br>(0 - 0)                | --               | --                | 0<br>(0 - 0)           | 0<br>(0 - 0)             | 0<br>(0 - 0)                |
| Aortic aneurysm                               | 27<br>(18 - 33)             | --               | --                | 2<br>(2 - 3)           | 11<br>(7 - 13)           | 14<br>(9 - 18)              |
| Peripheral vascular disease                   | 2<br>(2 - 3)                | --               | --                | 0<br>(0 - 0)           | 1<br>(1 - 1)             | 1<br>(1 - 1)                |
| Endocarditis                                  | 57<br>(31 - 81)             | 1<br>(0 - 1)     | 0<br>(0 - 0)      | 1<br>(0 - 1)           | 24<br>(13 - 36)          | 31<br>(15 - 48)             |
| Other cardiovascular and circulatory diseases | 568<br>(77 - 721)           | 1<br>(0 - 2)     | 1<br>(0 - 2)      | 59<br>(9 - 80)         | 306<br>(37 - 402)        | 202<br>(28 - 267)           |
| Chronic respiratory diseases                  | 2,782<br>(1,126 - 3,344)    | 9<br>(3 - 14)    | 3<br>(2 - 4)      | 106<br>(50 - 139)      | 941<br>(364 - 1,179)     | 1,723<br>(693 - 2,093)      |
| Chronic obstructive pulmonary disease         | 1,961<br>(739 - 2,496)      | 6<br>(2 - 9)     | 2<br>(1 - 2)      | 73<br>(31 - 98)        | 682<br>(249 - 893)       | 1,199<br>(444 - 1,540)      |

Web Table 31- Georgia deaths with 95% UI by age, sex, and cause in 2013

| Cause                                               | Males, All Ages        | Males, 0-4 Years | Males, 5-14 Years | Males, 15-49 Years | Males, 50-69 Years | Males, 70-80 Years   |
|-----------------------------------------------------|------------------------|------------------|-------------------|--------------------|--------------------|----------------------|
| Pneumoconiosis                                      | 370<br>(131 - 557)     | 0<br>(0 - 0)     | 0<br>(0 - 0)      | 10<br>(4 - 15)     | 127<br>(44 - 197)  | 233<br>(82 - 361)    |
| Silicosis                                           | 38<br>(15 - 65)        | 0<br>(0 - 0)     | 0<br>(0 - 0)      | 3<br>(1 - 5)       | 27<br>(10 - 47)    | 8<br>(3 - 14)        |
| Asbestosis                                          | 112<br>(41 - 174)      | 0<br>(0 - 0)     | 0<br>(0 - 0)      | 2<br>(1 - 3)       | 22<br>(9 - 36)     | 88<br>(31 - 139)     |
| Coal workers pneumoconiosis                         | 134<br>(47 - 207)      | 0<br>(0 - 0)     | 0<br>(0 - 0)      | 2<br>(1 - 3)       | 42<br>(14 - 65)    | 90<br>(32 - 146)     |
| Other pneumoconiosis                                | 85<br>(28 - 139)       | 0<br>(0 - 0)     | 0<br>(0 - 0)      | 3<br>(1 - 4)       | 35<br>(10 - 61)    | 47<br>(15 - 81)      |
| Asthma                                              | 62<br>(28 - 80)        | 2<br>(1 - 3)     | 1<br>(1 - 2)      | 5<br>(3 - 7)       | 17<br>(7 - 23)     | 37<br>(16 - 51)      |
| Interstitial lung disease and pulmonary sarcoidosis | 281<br>(83 - 416)      | 0<br>(0 - 0)     | 0<br>(0 - 0)      | 1<br>(0 - 2)       | 66<br>(19 - 101)   | 214<br>(62 - 327)    |
| Other chronic respiratory diseases                  | 107<br>(47 - 144)      | 1<br>(1 - 2)     | 0<br>(0 - 0)      | 16<br>(7 - 22)     | 50<br>(20 - 72)    | 40<br>(17 - 60)      |
| Cirrhosis                                           | 992<br>(851 - 1,153)   | 1<br>(0 - 1)     | 1<br>(1 - 1)      | 232<br>(183 - 291) | 472<br>(392 - 564) | 287<br>(243 - 335)   |
| Cirrhosis due to hepatitis B                        | 399<br>(282 - 575)     | 0<br>(0 - 0)     | 0<br>(0 - 1)      | 94<br>(57 - 143)   | 193<br>(133 - 282) | 112<br>(64 - 162)    |
| Cirrhosis due to hepatitis C                        | 175<br>(64 - 310)      | 0<br>(0 - 0)     | 0<br>(0 - 0)      | 47<br>(16 - 87)    | 82<br>(23 - 160)   | 45<br>(19 - 77)      |
| Cirrhosis due to alcohol use                        | 337<br>(225 - 464)     | --               | --                | 60<br>(34 - 90)    | 162<br>(103 - 233) | 116<br>(80 - 158)    |
| Cirrhosis due to other causes                       | 81<br>(43 - 130)       | 0<br>(0 - 1)     | 1<br>(0 - 1)      | 30<br>(16 - 49)    | 35<br>(16 - 60)    | 14<br>(7 - 24)       |
| Digestive diseases                                  | 243<br>(209 - 309)     | 2<br>(1 - 3)     | 2<br>(1 - 2)      | 37<br>(29 - 52)    | 92<br>(75 - 126)   | 110<br>(93 - 134)    |
| Peptic ulcer disease                                | 140<br>(115 - 192)     | 0<br>(0 - 0)     | 0<br>(0 - 0)      | 20<br>(15 - 31)    | 59<br>(46 - 86)    | 61<br>(47 - 78)      |
| Gastritis and duodenitis                            | 4<br>(2 - 6)           | 0<br>(0 - 0)     | 0<br>(0 - 0)      | 1<br>(1 - 2)       | 1<br>(1 - 2)       | 2<br>(1 - 3)         |
| Appendicitis                                        | 5<br>(3 - 8)           | 0<br>(0 - 0)     | 0<br>(0 - 0)      | 1<br>(1 - 2)       | 2<br>(1 - 3)       | 2<br>(1 - 3)         |
| Paralytic ileus and intestinal obstruction          | 42<br>(25 - 67)        | 1<br>(0 - 1)     | 1<br>(1 - 1)      | 5<br>(3 - 8)       | 10<br>(6 - 18)     | 26<br>(15 - 39)      |
| Inguinal, femoral, and abdominal hernia             | 7<br>(4 - 10)          | 0<br>(0 - 1)     | 0<br>(0 - 0)      | 1<br>(1 - 2)       | 2<br>(1 - 2)       | 4<br>(2 - 6)         |
| Inflammatory bowel disease                          | 5<br>(3 - 11)          | 0<br>(0 - 0)     | 0<br>(0 - 0)      | 1<br>(0 - 1)       | 2<br>(1 - 4)       | 3<br>(2 - 6)         |
| Vascular intestinal disorders                       | 2<br>(1 - 3)           | 0<br>(0 - 0)     | 0<br>(0 - 0)      | 0<br>(0 - 1)       | 1<br>(0 - 1)       | 1<br>(0 - 1)         |
| Gallbladder and biliary diseases                    | 10<br>(8 - 14)         | 0<br>(0 - 0)     | 0<br>(0 - 0)      | 2<br>(1 - 3)       | 4<br>(3 - 6)       | 4<br>(3 - 6)         |
| Pancreatitis                                        | 10<br>(5 - 14)         | 0<br>(0 - 0)     | 0<br>(0 - 0)      | 2<br>(1 - 3)       | 5<br>(3 - 8)       | 2<br>(1 - 4)         |
| Other digestive diseases                            | 17<br>(9 - 23)         | 0<br>(0 - 0)     | 0<br>(0 - 0)      | 4<br>(2 - 6)       | 7<br>(4 - 10)      | 5<br>(2 - 8)         |
| Neurological disorders                              | 1,026<br>(794 - 1,240) | 3<br>(1 - 6)     | 2<br>(2 - 4)      | 16<br>(12 - 23)    | 64<br>(44 - 87)    | 940<br>(712 - 1,146) |
| Alzheimer disease and other dementias               | 979<br>(748 - 1,190)   | --               | --                | 0<br>(0 - 1)       | 53<br>(33 - 74)    | 926<br>(699 - 1,131) |
| Parkinson disease                                   | 10<br>(8 - 13)         | --               | --                | 0<br>(0 - 0)       | 2<br>(2 - 3)       | 8<br>(6 - 10)        |
| Epilepsy                                            | 28<br>(21 - 44)        | 2<br>(1 - 6)     | 2<br>(1 - 3)      | 14<br>(10 - 21)    | 7<br>(5 - 11)      | 3<br>(2 - 5)         |
| Multiple sclerosis                                  | 4<br>(1 - 7)           | --               | --                | 1<br>(0 - 1)       | 1<br>(0 - 1)       | 3<br>(1 - 5)         |
| Other neurological disorders                        | 4<br>(3 - 4)           | 0<br>(0 - 0)     | 0<br>(0 - 0)      | 1<br>(1 - 1)       | 1<br>(1 - 1)       | 1<br>(1 - 1)         |
| Mental and substance use disorders                  | 230<br>(74 - 302)      | 0<br>(0 - 0)     | 0<br>(0 - 0)      | 143<br>(41 - 197)  | 72<br>(28 - 96)    | 14<br>(6 - 19)       |
| Schizophrenia                                       | 4<br>(3 - 7)           | --               | --                | 2<br>(1 - 3)       | 2<br>(1 - 3)       | 1<br>(0 - 1)         |
| Alcohol use disorders                               | 206<br>(51 - 276)      | --               | --                | 128<br>(24 - 179)  | 66<br>(21 - 89)    | 12<br>(4 - 16)       |
| Drug use disorders                                  | 20<br>(16 - 25)        | 0<br>(0 - 0)     | --                | 13<br>(10 - 18)    | 5<br>(3 - 6)       | 2<br>(1 - 3)         |
| Opioid use disorders                                | 4<br>(3 - 6)           | 0<br>(0 - 0)     | --                | 3<br>(2 - 4)       | 1<br>(1 - 1)       | 0<br>(0 - 1)         |
| Cocaine use disorders                               | 0<br>(0 - 1)           | 0<br>(0 - 0)     | --                | 0<br>(0 - 0)       | 0<br>(0 - 0)       | 0<br>(0 - 0)         |
| Amphetamine use disorders                           | 0<br>(0 - 1)           | 0<br>(0 - 0)     | --                | 0<br>(0 - 0)       | 0<br>(0 - 0)       | 0<br>(0 - 0)         |
| Other drug use disorders                            | 15<br>(12 - 19)        | 0<br>(0 - 0)     | --                | 10<br>(7 - 13)     | 3<br>(2 - 5)       | 1<br>(1 - 2)         |
| Eating disorders                                    | 0<br>(0 - 0)           | --               | 0<br>(0 - 0)      | 0<br>(0 - 0)       | --                 | --                   |
| Anorexia nervosa                                    | 0<br>(0 - 0)           | --               | 0<br>(0 - 0)      | 0<br>(0 - 0)       | --                 | --                   |

Web Table 31- Georgia deaths with 95% UI by age, sex, and cause in 2013

| Cause                                               | Males, All Ages    | Males, 0-4 Years | Males, 5-14 Years | Males, 15-49 Years | Males, 50-69 Years | Males, 70-80 Years |
|-----------------------------------------------------|--------------------|------------------|-------------------|--------------------|--------------------|--------------------|
| Diabetes, urogenital, blood, and endocrine diseases | 874<br>(763 - 984) | 10<br>(6 - 14)   | 5<br>(4 - 7)      | 96<br>(79 - 120)   | 352<br>(298 - 406) | 410<br>(356 - 472) |
| Diabetes mellitus                                   | 446<br>(383 - 516) | 1<br>(1 - 1)     | 1<br>(1 - 1)      | 30<br>(24 - 39)    | 196<br>(161 - 236) | 219<br>(181 - 259) |
| Acute glomerulonephritis                            | 5<br>(3 - 10)      | 0<br>(0 - 0)     | 0<br>(0 - 0)      | 2<br>(1 - 3)       | 2<br>(1 - 4)       | 2<br>(1 - 3)       |
| Chronic kidney disease                              | 285<br>(237 - 347) | 1<br>(1 - 2)     | 1<br>(1 - 2)      | 39<br>(29 - 57)    | 101<br>(78 - 136)  | 143<br>(115 - 176) |
| Chronic kidney disease due to diabetes mellitus     | 51<br>(7 - 70)     | 0<br>(0 - 0)     | 0<br>(0 - 0)      | 4<br>(1 - 6)       | 21<br>(3 - 31)     | 26<br>(2 - 37)     |
| Chronic kidney disease due to hypertension          | 51<br>(17 - 68)    | 1<br>(0 - 1)     | 0<br>(0 - 0)      | 8<br>(3 - 11)      | 15<br>(5 - 22)     | 27<br>(8 - 38)     |
| Chronic kidney disease due to glomerulonephritis    | 59<br>(43 - 89)    | 0<br>(0 - 0)     | 0<br>(0 - 1)      | 11<br>(7 - 18)     | 21<br>(14 - 34)    | 26<br>(18 - 42)    |
| Chronic kidney disease due to other causes          | 125<br>(88 - 223)  | 0<br>(0 - 1)     | 1<br>(0 - 1)      | 16<br>(10 - 30)    | 44<br>(27 - 86)    | 64<br>(41 - 112)   |
| Urinary diseases and male infertility               | 42<br>(33 - 62)    | 0<br>(0 - 1)     | 0<br>(0 - 0)      | 6<br>(4 - 9)       | 14<br>(11 - 24)    | 21<br>(16 - 30)    |
| Interstitial nephritis and urinary tract infections | 24<br>(16 - 41)    | 0<br>(0 - 0)     | 0<br>(0 - 0)      | 4<br>(3 - 7)       | 9<br>(6 - 16)      | 11<br>(7 - 19)     |
| Urolithiasis                                        | 2<br>(1 - 2)       | --               | 0<br>(0 - 0)      | 0<br>(0 - 0)       | 0<br>(0 - 1)       | 1<br>(0 - 1)       |
| Other urinary diseases                              | 16<br>(8 - 23)     | 0<br>(0 - 0)     | 0<br>(0 - 0)      | 1<br>(1 - 2)       | 5<br>(3 - 8)       | 9<br>(4 - 14)      |
| Gynecological diseases                              | --                 | --               | --                | --                 | --                 | --                 |
| Uterine fibroids                                    | --                 | --               | --                | --                 | --                 | --                 |
| Polycystic ovarian syndrome                         | --                 | --               | --                | --                 | --                 | --                 |
| Endometriosis                                       | --                 | --               | --                | --                 | --                 | --                 |
| Genital prolapse                                    | --                 | --               | --                | --                 | --                 | --                 |
| Other gynecological diseases                        | --                 | --               | --                | --                 | --                 | --                 |
| Hemoglobinopathies and hemolytic anemias            | 41<br>(22 - 58)    | 2<br>(1 - 4)     | 1<br>(0 - 1)      | 8<br>(4 - 12)      | 13<br>(7 - 20)     | 17<br>(8 - 25)     |
| Thalassemias                                        | 5<br>(3 - 7)       | 2<br>(1 - 3)     | 1<br>(0 - 1)      | 2<br>(1 - 4)       | 0<br>(0 - 0)       | 0<br>(0 - 0)       |
| Sickle cell disorders                               | 1<br>(0 - 1)       | 0<br>(0 - 0)     | 0<br>(0 - 0)      | 0<br>(0 - 0)       | 0<br>(0 - 1)       | 0<br>(0 - 0)       |
| G6PD deficiency                                     | 1<br>(0 - 1)       | 0<br>(0 - 0)     | 0<br>(0 - 0)      | 0<br>(0 - 0)       | 0<br>(0 - 1)       | 0<br>(0 - 0)       |
| Other hemoglobinopathies and hemolytic anemias      | 35<br>(18 - 49)    | 0<br>(0 - 0)     | 0<br>(0 - 0)      | 5<br>(3 - 8)       | 13<br>(7 - 19)     | 16<br>(8 - 25)     |
| Endocrine, metabolic, blood, and immune disorders   | 54<br>(15 - 70)    | 6<br>(2 - 9)     | 2<br>(1 - 4)      | 11<br>(3 - 16)     | 26<br>(7 - 36)     | 9<br>(2 - 13)      |
| Musculoskeletal disorders                           | 18<br>(13 - 23)    | --               | 1<br>(1 - 1)      | 5<br>(4 - 7)       | 6<br>(4 - 8)       | 6<br>(4 - 8)       |
| Rheumatoid arthritis                                | 3<br>(2 - 4)       | --               | 0<br>(0 - 0)      | 1<br>(1 - 1)       | 1<br>(1 - 2)       | 1<br>(0 - 1)       |
| Other musculoskeletal disorders                     | 15<br>(10 - 20)    | --               | 1<br>(0 - 1)      | 4<br>(3 - 6)       | 5<br>(4 - 7)       | 5<br>(3 - 7)       |
| Other non-communicable diseases                     | 97<br>(74 - 123)   | 65<br>(44 - 89)  | 5<br>(4 - 7)      | 10<br>(7 - 13)     | 6<br>(3 - 8)       | 11<br>(7 - 13)     |
| Congenital anomalies                                | 92<br>(69 - 117)   | 64<br>(44 - 88)  | 5<br>(3 - 7)      | 9<br>(6 - 11)      | 4<br>(3 - 6)       | 9<br>(6 - 12)      |
| Neural tube defects                                 | 2<br>(1 - 3)       | 1<br>(1 - 3)     | 0<br>(0 - 0)      | 0<br>(0 - 0)       | 0<br>(0 - 0)       | 0<br>(0 - 0)       |
| Congenital heart anomalies                          | 49<br>(35 - 64)    | 31<br>(19 - 46)  | 4<br>(2 - 5)      | 6<br>(4 - 8)       | 2<br>(1 - 3)       | 2<br>(4 - 8)       |
| Cleft lip and cleft palate                          | 1<br>(0 - 1)       | 1<br>(0 - 1)     | --                | --                 | --                 | --                 |
| Down syndrome                                       | 2<br>(1 - 4)       | 2<br>(1 - 3)     | 0<br>(0 - 0)      | 0<br>(0 - 0)       | 0<br>(0 - 0)       | 0<br>(0 - 0)       |
| Chromosomal unbalanced rearrangements               | 1<br>(1 - 2)       | 1<br>(0 - 1)     | 0<br>(0 - 0)      | 0<br>(0 - 0)       | 0<br>(0 - 0)       | 0<br>(0 - 0)       |
| Other congenital anomalies                          | 37<br>(25 - 51)    | 29<br>(19 - 43)  | 1<br>(0 - 2)      | 2<br>(1 - 3)       | 2<br>(1 - 3)       | 2<br>(1 - 4)       |
| Skin and subcutaneous diseases                      | 5<br>(1 - 7)       | 1<br>(0 - 1)     | 0<br>(0 - 0)      | 1<br>(0 - 2)       | 2<br>(0 - 2)       | 1<br>(0 - 2)       |
| Cellulitis                                          | 1<br>(0 - 2)       | 0<br>(0 - 0)     | 0<br>(0 - 0)      | 0<br>(0 - 0)       | 0<br>(0 - 1)       | 0<br>(0 - 1)       |
| Pyoderma                                            | 3<br>(1 - 4)       | 0<br>(0 - 1)     | 0<br>(0 - 0)      | 1<br>(0 - 1)       | 1<br>(0 - 2)       | 1<br>(0 - 1)       |
| Decubitus ulcer                                     | 1<br>(0 - 1)       | 0<br>(0 - 0)     | 0<br>(0 - 0)      | 0<br>(0 - 0)       | 0<br>(0 - 0)       | 0<br>(0 - 0)       |
| Other skin and subcutaneous diseases                | 0<br>(0 - 0)       | 0<br>(0 - 0)     | 0<br>(0 - 0)      | 0<br>(0 - 0)       | 0<br>(0 - 0)       | 0<br>(0 - 0)       |

Web Table 31- Georgia deaths with 95% UI by age, sex, and cause in 2013

| Cause                                           | Males, All Ages          | Males, 0-4 Years | Males, 5-14 Years | Males, 15-49 Years   | Males, 50-69 Years | Males, 70-80 Years |
|-------------------------------------------------|--------------------------|------------------|-------------------|----------------------|--------------------|--------------------|
| Sudden infant death syndrome                    | 0<br>(0 - 1)             | 0<br>(0 - 1)     | --                | --                   | --                 | --                 |
| Injuries                                        | 1,637<br>(1,471 - 1,912) | 49<br>(33 - 75)  | 48<br>(42 - 56)   | 908<br>(791 - 1,070) | 416<br>(354 - 492) | 235<br>(201 - 263) |
| Transport injuries                              | 559<br>(471 - 693)       | 7<br>(4 - 10)    | 15<br>(11 - 19)   | 354<br>(291 - 439)   | 127<br>(101 - 172) | 57<br>(46 - 73)    |
| Road injuries                                   | 510<br>(429 - 657)       | 5<br>(3 - 8)     | 14<br>(10 - 18)   | 315<br>(259 - 399)   | 122<br>(97 - 167)  | 54<br>(43 - 68)    |
| Pedestrian road injuries                        | 121<br>(78 - 169)        | 1<br>(1 - 3)     | 4<br>(2 - 7)      | 48<br>(27 - 74)      | 44<br>(29 - 62)    | 24<br>(16 - 33)    |
| Cyclist road injuries                           | 31<br>(23 - 41)          | 1<br>(1 - 2)     | 3<br>(2 - 4)      | 13<br>(9 - 18)       | 8<br>(6 - 12)      | 6<br>(4 - 9)       |
| Motorcyclist road injuries                      | 71<br>(48 - 99)          | 0<br>(0 - 1)     | 1<br>(0 - 1)      | 59<br>(40 - 84)      | 8<br>(5 - 13)      | 2<br>(1 - 4)       |
| Motor vehicle road injuries                     | 274<br>(214 - 381)       | 2<br>(1 - 4)     | 6<br>(4 - 8)      | 190<br>(147 - 261)   | 58<br>(40 - 89)    | 18<br>(12 - 27)    |
| Other road injuries                             | 12<br>(5 - 17)           | 0<br>(0 - 1)     | 1<br>(0 - 1)      | 5<br>(2 - 7)         | 3<br>(1 - 5)       | 3<br>(2 - 6)       |
| Other transport injuries                        | 50<br>(29 - 65)          | 2<br>(1 - 3)     | 1<br>(0 - 2)      | 39<br>(22 - 52)      | 5<br>(3 - 7)       | 4<br>(2 - 5)       |
| Unintentional injuries                          | 728<br>(625 - 861)       | 42<br>(27 - 65)  | 30<br>(25 - 39)   | 341<br>(282 - 425)   | 188<br>(154 - 224) | 127<br>(102 - 146) |
| Falls                                           | 235<br>(151 - 284)       | 7<br>(4 - 12)    | 5<br>(3 - 6)      | 119<br>(66 - 154)    | 62<br>(42 - 78)    | 42<br>(29 - 53)    |
| Drowning                                        | 170<br>(125 - 267)       | 10<br>(5 - 21)   | 13<br>(9 - 22)    | 108<br>(77 - 167)    | 29<br>(19 - 50)    | 11<br>(7 - 18)     |
| Fire, heat, and hot substances                  | 110<br>(79 - 168)        | 10<br>(5 - 22)   | 3<br>(2 - 4)      | 44<br>(28 - 71)      | 31<br>(20 - 49)    | 23<br>(15 - 35)    |
| Poisonings                                      | 21<br>(15 - 50)          | 1<br>(1 - 3)     | 1<br>(0 - 1)      | 11<br>(7 - 27)       | 6<br>(4 - 13)      | 3<br>(2 - 6)       |
| Exposure to mechanical forces                   | 45<br>(38 - 60)          | 2<br>(1 - 3)     | 2<br>(1 - 3)      | 24<br>(19 - 31)      | 13<br>(10 - 17)    | 5<br>(4 - 8)       |
| Unintentional firearm injuries                  | 16<br>(12 - 21)          | 0<br>(0 - 0)     | 0<br>(0 - 0)      | 10<br>(7 - 14)       | 4<br>(3 - 6)       | 2<br>(1 - 3)       |
| Unintentional suffocation                       | 7<br>(4 - 9)             | 0<br>(0 - 1)     | 0<br>(0 - 1)      | 4<br>(2 - 6)         | 1<br>(1 - 2)       | 1<br>(0 - 1)       |
| Other exposure to mechanical forces             | 23<br>(19 - 34)          | 1<br>(1 - 2)     | 1<br>(1 - 2)      | 10<br>(8 - 15)       | 7<br>(5 - 11)      | 3<br>(2 - 5)       |
| Adverse effects of medical treatment            | 71<br>(35 - 101)         | 3<br>(1 - 5)     | 0<br>(0 - 1)      | 4<br>(2 - 6)         | 33<br>(16 - 49)    | 30<br>(13 - 45)    |
| Animal contact                                  | 11<br>(7 - 15)           | 3<br>(2 - 6)     | 3<br>(1 - 4)      | 2<br>(1 - 3)         | 2<br>(1 - 3)       | 1<br>(1 - 2)       |
| Venomous animal contact                         | 8<br>(5 - 11)            | 3<br>(1 - 5)     | 2<br>(1 - 4)      | 1<br>(1 - 2)         | 1<br>(1 - 2)       | 0<br>(0 - 1)       |
| Non-venomous animal contact                     | 3<br>(2 - 5)             | 0<br>(0 - 1)     | 0<br>(0 - 0)      | 1<br>(0 - 1)         | 1<br>(1 - 2)       | 1<br>(0 - 1)       |
| Foreign body                                    | 23<br>(11 - 33)          | 4<br>(2 - 7)     | 2<br>(1 - 3)      | 7<br>(3 - 10)        | 4<br>(2 - 7)       | 6<br>(3 - 9)       |
| Pulmonary aspiration and foreign body in airway | 23<br>(11 - 32)          | 4<br>(2 - 7)     | 2<br>(1 - 3)      | 7<br>(3 - 9)         | 4<br>(2 - 6)       | 6<br>(3 - 9)       |
| Foreign body in other body part                 | 0<br>(0 - 1)             | 0<br>(0 - 0)     | 0<br>(0 - 0)      | 0<br>(0 - 0)         | 0<br>(0 - 0)       | 0<br>(0 - 0)       |
| Other unintentional injuries                    | 40<br>(30 - 53)          | 1<br>(0 - 1)     | 3<br>(1 - 5)      | 23<br>(15 - 34)      | 9<br>(5 - 15)      | 5<br>(3 - 8)       |
| Self-harm and interpersonal violence            | 369<br>(303 - 469)       | 1<br>(0 - 2)     | 3<br>(2 - 5)      | 214<br>(172 - 281)   | 101<br>(79 - 134)  | 51<br>(38 - 65)    |
| Self-harm                                       | 243<br>(193 - 293)       | --               | 2<br>(1 - 3)      | 121<br>(93 - 153)    | 77<br>(59 - 97)    | 43<br>(32 - 55)    |
| Interpersonal violence                          | 127<br>(88 - 201)        | 1<br>(0 - 2)     | 2<br>(1 - 3)      | 92<br>(63 - 145)     | 24<br>(15 - 44)    | 7<br>(4 - 15)      |
| Assault by firearm                              | 75<br>(48 - 129)         | 0<br>(0 - 0)     | 0<br>(0 - 1)      | 56<br>(34 - 96)      | 15<br>(8 - 29)     | 3<br>(1 - 7)       |
| Assault by sharp object                         | 20<br>(9 - 36)           | 0<br>(0 - 0)     | 0<br>(0 - 1)      | 15<br>(7 - 27)       | 3<br>(1 - 6)       | 1<br>(1 - 3)       |
| Assault by other means                          | 32<br>(15 - 56)          | 1<br>(0 - 1)     | 1<br>(0 - 1)      | 21<br>(10 - 39)      | 7<br>(3 - 13)      | 3<br>(1 - 6)       |

Web Table 31- Georgia deaths with 95% UI by age, sex, and cause in 2013

| Cause                                                             | Females, All Ages           | Females, 0-4 Years | Females, 5-14 Years | Females, 15-49 Years   | Females, 50-69 Years     | Females, 70-80 Years        |
|-------------------------------------------------------------------|-----------------------------|--------------------|---------------------|------------------------|--------------------------|-----------------------------|
| All causes                                                        | 24,371<br>(22,787 - 26,836) | 513<br>(449 - 585) | 64<br>(57 - 75)     | 1,048<br>(918 - 1,179) | 4,240<br>(3,647 - 4,932) | 18,506<br>(17,679 - 20,143) |
| Communicable, maternal, neonatal, and nutritional diseases        | 808<br>(684 - 912)          | 401<br>(339 - 474) | 15<br>(12 - 18)     | 79<br>(70 - 89)        | 68<br>(54 - 82)          | 246<br>(171 - 308)          |
| HIV/AIDS and tuberculosis                                         | 34<br>(27 - 42)             | 1<br>(0 - 1)       | 0<br>(0 - 1)        | 16<br>(12 - 19)        | 10<br>(7 - 13)           | 8<br>(5 - 11)               |
| Tuberculosis                                                      | 32<br>(24 - 39)             | 1<br>(0 - 1)       | 0<br>(0 - 1)        | 13<br>(10 - 17)        | 9<br>(7 - 13)            | 8<br>(5 - 11)               |
| HIV/AIDS                                                          | 3<br>(2 - 4)                | 0<br>(0 - 0)       | 0<br>(0 - 0)        | 2<br>(2 - 3)           | 0<br>(0 - 1)             | 0<br>(0 - 0)                |
| HIV/AIDS resulting in mycobacterial infection                     | 0<br>(0 - 0)                | 0<br>(0 - 0)       | 0<br>(0 - 0)        | 0<br>(0 - 0)           | 0<br>(0 - 0)             | 0<br>(0 - 0)                |
| HIV/AIDS resulting in other diseases                              | 3<br>(2 - 4)                | 0<br>(0 - 0)       | 0<br>(0 - 0)        | 2<br>(2 - 3)           | 0<br>(0 - 1)             | 0<br>(0 - 0)                |
| Diarrhea, lower respiratory, and other common infectious diseases | 321<br>(267 - 383)          | 88<br>(69 - 111)   | 12<br>(9 - 15)      | 28<br>(23 - 34)        | 41<br>(31 - 52)          | 154<br>(110 - 207)          |
| Diarrheal diseases                                                | 13<br>(9 - 18)              | 8<br>(5 - 14)      | 0<br>(0 - 1)        | 1<br>(1 - 1)           | 1<br>(1 - 1)             | 2<br>(1 - 4)                |
| Intestinal infectious diseases                                    | 2<br>(1 - 5)                | 1<br>(0 - 2)       | 0<br>(0 - 1)        | 1<br>(0 - 2)           | 0<br>(0 - 1)             | 0<br>(0 - 1)                |
| Typhoid fever                                                     | 2<br>(1 - 3)                | 0<br>(0 - 1)       | 0<br>(0 - 1)        | 0<br>(0 - 1)           | 0<br>(0 - 0)             | 0<br>(0 - 0)                |
| Paratyphoid fever                                                 | 1<br>(0 - 1)                | 0<br>(0 - 0)       | 0<br>(0 - 0)        | 0<br>(0 - 0)           | 0<br>(0 - 0)             | 0<br>(0 - 0)                |
| Other intestinal infectious diseases                              | 0<br>(0 - 2)                | 0<br>(0 - 1)       | 0<br>(0 - 0)        | 0<br>(0 - 1)           | 0<br>(0 - 1)             | 0<br>(0 - 1)                |
| Lower respiratory infections                                      | 271<br>(219 - 331)          | 69<br>(50 - 91)    | 9<br>(6 - 12)       | 20<br>(16 - 26)        | 34<br>(25 - 45)          | 140<br>(98 - 191)           |
| Upper respiratory infections                                      | 1<br>(0 - 3)                | 0<br>(0 - 0)       | 0<br>(0 - 0)        | 0<br>(0 - 0)           | 0<br>(0 - 1)             | 1<br>(0 - 3)                |
| Otitis media                                                      | 1<br>(0 - 1)                | 0<br>(0 - 0)       | 0<br>(0 - 0)        | 0<br>(0 - 0)           | 0<br>(0 - 0)             | 0<br>(0 - 0)                |
| Meningitis                                                        | 16<br>(14 - 19)             | 4<br>(3 - 6)       | 1<br>(1 - 2)        | 4<br>(3 - 5)           | 3<br>(2 - 4)             | 4<br>(3 - 5)                |
| Pneumococcal meningitis                                           | 4<br>(3 - 5)                | 1<br>(1 - 1)       | 0<br>(0 - 1)        | 1<br>(1 - 2)           | 1<br>(1 - 1)             | 1<br>(1 - 2)                |
| H influenzae type B meningitis                                    | 4<br>(3 - 5)                | 2<br>(1 - 3)       | 0<br>(0 - 1)        | 1<br>(0 - 1)           | 0<br>(0 - 1)             | 0<br>(0 - 1)                |
| Meningococcal meningitis                                          | 3<br>(3 - 4)                | 1<br>(1 - 1)       | 0<br>(0 - 1)        | 1<br>(1 - 1)           | 1<br>(0 - 1)             | 1<br>(0 - 1)                |
| Other meningitis                                                  | 4<br>(3 - 6)                | 0<br>(0 - 1)       | 0<br>(0 - 0)        | 1<br>(1 - 2)           | 1<br>(1 - 2)             | 1<br>(1 - 2)                |
| Encephalitis                                                      | 11<br>(7 - 14)              | 3<br>(2 - 5)       | 1<br>(0 - 1)        | 1<br>(1 - 2)           | 2<br>(1 - 3)             | 4<br>(2 - 7)                |
| Diphtheria                                                        | 0<br>(0 - 1)                | 0<br>(0 - 1)       | 0<br>(0 - 0)        | 0<br>(0 - 0)           | 0<br>(0 - 0)             | --                          |
| Whooping cough                                                    | 2<br>(0 - 7)                | 1<br>(0 - 7)       | 0<br>(0 - 0)        | 0<br>(0 - 0)           | 0<br>(0 - 0)             | --                          |
| Tetanus                                                           | 0<br>(0 - 1)                | 0<br>(0 - 0)       | 0<br>(0 - 0)        | 0<br>(0 - 0)           | 0<br>(0 - 0)             | 0<br>(0 - 0)                |
| Measles                                                           | 1<br>(0 - 3)                | 1<br>(0 - 3)       | 0<br>(0 - 0)        | 0<br>(0 - 0)           | 0<br>(0 - 0)             | --                          |
| Varicella and herpes zoster                                       | 3<br>(1 - 14)               | 0<br>(0 - 1)       | 0<br>(0 - 0)        | 0<br>(0 - 1)           | 0<br>(0 - 1)             | 3<br>(0 - 13)               |
| Neglected tropical diseases and malaria                           | 11<br>(8 - 15)              | 2<br>(1 - 4)       | 0<br>(0 - 1)        | 3<br>(2 - 5)           | 3<br>(1 - 5)             | 3<br>(1 - 5)                |
| Leishmaniasis                                                     | 8<br>(6 - 12)               | 1<br>(1 - 3)       | 0<br>(0 - 1)        | 2<br>(1 - 4)           | 2<br>(1 - 4)             | 2<br>(1 - 4)                |
| Visceral leishmaniasis                                            | 8<br>(6 - 12)               | 1<br>(1 - 3)       | 0<br>(0 - 1)        | 2<br>(1 - 4)           | 2<br>(1 - 4)             | 2<br>(1 - 4)                |
| Cysticercosis                                                     | 0<br>(0 - 0)                | 0<br>(0 - 0)       | 0<br>(0 - 0)        | 0<br>(0 - 0)           | 0<br>(0 - 0)             | 0<br>(0 - 0)                |
| Cystic echinococcosis                                             | 1<br>(0 - 1)                | 0<br>(0 - 0)       | 0<br>(0 - 0)        | 0<br>(0 - 0)           | 0<br>(0 - 0)             | 0<br>(0 - 0)                |
| Dengue                                                            | 0<br>(0 - 0)                | 0<br>(0 - 0)       | 0<br>(0 - 0)        | 0<br>(0 - 0)           | 0<br>(0 - 0)             | 0<br>(0 - 0)                |
| Rabies                                                            | 1<br>(1 - 1)                | 0<br>(0 - 0)       | 0<br>(0 - 0)        | 0<br>(0 - 0)           | 0<br>(0 - 0)             | 0<br>(0 - 0)                |
| Intestinal nematode infections                                    | 0<br>(0 - 3)                | 0<br>(0 - 1)       | 0<br>(0 - 0)        | 0<br>(0 - 0)           | 0<br>(0 - 0)             | 0<br>(0 - 1)                |
| Ascariasis                                                        | 0<br>(0 - 3)                | 0<br>(0 - 1)       | 0<br>(0 - 0)        | 0<br>(0 - 0)           | 0<br>(0 - 0)             | 0<br>(0 - 1)                |
| Other neglected tropical diseases                                 | 1<br>(1 - 2)                | 0<br>(0 - 1)       | 0<br>(0 - 0)        | 0<br>(0 - 0)           | 0<br>(0 - 0)             | 0<br>(0 - 0)                |
| Maternal disorders                                                | 18<br>(14 - 23)             | --                 | 0<br>(0 - 0)        | 18<br>(14 - 23)        | --                       | --                          |
| Maternal hemorrhage                                               | 2<br>(1 - 3)                | --                 | 0<br>(0 - 0)        | 2<br>(1 - 3)           | --                       | --                          |
| Maternal sepsis and other maternal infections                     | 2<br>(1 - 2)                | --                 | 0<br>(0 - 0)        | 2<br>(1 - 2)           | --                       | --                          |



Web Table 31- Georgia deaths with 95% UI by age, sex, and cause in 2013

| Cause                                                            | Females, All Ages           | Females, 0-4 Years | Females, 5-14 Years | Females, 15-49 Years | Females, 50-69 Years     | Females, 70-80 Years        |
|------------------------------------------------------------------|-----------------------------|--------------------|---------------------|----------------------|--------------------------|-----------------------------|
| Maternal hypertensive disorders                                  | 2<br>(2 - 3)                | --                 | 0<br>(0 - 0)        | 2<br>(2 - 3)         | --                       | --                          |
| Maternal obstructed labor                                        | 2<br>(1 - 2)                | --                 | 0<br>(0 - 0)        | 2<br>(1 - 2)         | --                       | --                          |
| Maternal abortive outcome                                        | 2<br>(2 - 3)                | --                 | 0<br>(0 - 0)        | 2<br>(2 - 3)         | --                       | --                          |
| Indirect maternal deaths                                         | 3<br>(2 - 4)                | --                 | 0<br>(0 - 0)        | 3<br>(2 - 4)         | --                       | --                          |
| Late maternal deaths                                             | 2<br>(1 - 3)                | --                 | 0<br>(0 - 0)        | 2<br>(1 - 3)         | --                       | --                          |
| Maternal deaths aggravated by HIV/AIDS                           | 0<br>(0 - 0)                | --                 | --                  | 0<br>(0 - 0)         | --                       | --                          |
| Other maternal disorders                                         | 3<br>(2 - 4)                | --                 | 0<br>(0 - 0)        | 3<br>(2 - 4)         | --                       | --                          |
| Neonatal disorders                                               | 301<br>(247 - 365)          | 301<br>(247 - 365) | --                  | --                   | --                       | --                          |
| Neonatal preterm birth complications                             | 83<br>(42 - 126)            | 83<br>(42 - 126)   | --                  | --                   | --                       | --                          |
| Neonatal encephalopathy due to birth asphyxia and trauma         | 113<br>(68 - 188)           | 113<br>(68 - 188)  | --                  | --                   | --                       | --                          |
| Neonatal sepsis and other neonatal infections                    | 36<br>(16 - 67)             | 36<br>(16 - 67)    | --                  | --                   | --                       | --                          |
| Hemolytic disease and other neonatal jaundice                    | 0<br>(0 - 1)                | 0<br>(0 - 1)       | --                  | --                   | --                       | --                          |
| Other neonatal disorders                                         | 69<br>(22 - 118)            | 69<br>(22 - 118)   | --                  | --                   | --                       | --                          |
| Nutritional deficiencies                                         | 85<br>(23 - 108)            | 3<br>(1 - 4)       | 1<br>(0 - 1)        | 12<br>(5 - 15)       | 9<br>(3 - 12)            | 60<br>(12 - 80)             |
| Protein-energy malnutrition                                      | 1<br>(0 - 1)                | 0<br>(0 - 0)       | 0<br>(0 - 0)        | 0<br>(0 - 0)         | 0<br>(0 - 0)             | 0<br>(0 - 0)                |
| Iodine deficiency                                                | 0<br>(0 - 2)                | 0<br>(0 - 0)       | 0<br>(0 - 0)        | 0<br>(0 - 0)         | 0<br>(0 - 0)             | 0<br>(0 - 1)                |
| Iron-deficiency anemia                                           | 83<br>(22 - 106)            | 2<br>(1 - 4)       | 1<br>(0 - 1)        | 12<br>(5 - 15)       | 8<br>(3 - 11)            | 60<br>(12 - 80)             |
| Other nutritional deficiencies                                   | 1<br>(0 - 3)                | 0<br>(0 - 1)       | 0<br>(0 - 0)        | 0<br>(0 - 1)         | 0<br>(0 - 1)             | 0<br>(0 - 1)                |
| Other communicable, maternal, neonatal, and nutritional diseases | 37<br>(22 - 52)             | 7<br>(4 - 11)      | 1<br>(1 - 1)        | 2<br>(2 - 3)         | 6<br>(4 - 8)             | 21<br>(9 - 34)              |
| Sexually transmitted diseases excluding HIV                      | 4<br>(2 - 8)                | 2<br>(0 - 6)       | 0<br>(0 - 0)        | 0<br>(0 - 1)         | 1<br>(0 - 1)             | 1<br>(0 - 1)                |
| Syphilis                                                         | 4<br>(1 - 7)                | 2<br>(0 - 6)       | 0<br>(0 - 0)        | 0<br>(0 - 0)         | 0<br>(0 - 0)             | 1<br>(0 - 1)                |
| Chlamydial infection                                             | 0<br>(0 - 0)                | --                 | 0<br>(0 - 0)        | 0<br>(0 - 0)         | 0<br>(0 - 0)             | 0<br>(0 - 0)                |
| Gonococcal infection                                             | 0<br>(0 - 0)                | --                 | 0<br>(0 - 0)        | 0<br>(0 - 0)         | 0<br>(0 - 0)             | 0<br>(0 - 0)                |
| Other sexually transmitted diseases                              | 0<br>(0 - 0)                | --                 | 0<br>(0 - 0)        | 0<br>(0 - 0)         | 0<br>(0 - 0)             | 0<br>(0 - 0)                |
| Hepatitis                                                        | 2<br>(2 - 2)                | 0<br>(0 - 1)       | 0<br>(0 - 0)        | 1<br>(0 - 1)         | 0<br>(0 - 1)             | 0<br>(0 - 1)                |
| Acute hepatitis A                                                | 0<br>(0 - 0)                | 0<br>(0 - 0)       | 0<br>(0 - 0)        | 0<br>(0 - 0)         | 0<br>(0 - 0)             | 0<br>(0 - 0)                |
| Acute hepatitis B                                                | 1<br>(1 - 2)                | 0<br>(0 - 0)       | 0<br>(0 - 0)        | 0<br>(0 - 0)         | 0<br>(0 - 1)             | 0<br>(0 - 1)                |
| Acute hepatitis C                                                | 0<br>(0 - 0)                | --                 | 0<br>(0 - 0)        | 0<br>(0 - 0)         | 0<br>(0 - 0)             | 0<br>(0 - 0)                |
| Acute hepatitis E                                                | 0<br>(0 - 1)                | 0<br>(0 - 0)       | 0<br>(0 - 0)        | 0<br>(0 - 0)         | 0<br>(0 - 0)             | 0<br>(0 - 0)                |
| Other infectious diseases                                        | 31<br>(16 - 45)             | 4<br>(3 - 6)       | 1<br>(0 - 1)        | 1<br>(1 - 2)         | 5<br>(3 - 7)             | 20<br>(8 - 32)              |
| Non-communicable diseases                                        | 23,110<br>(21,613 - 25,467) | 79<br>(61 - 101)   | 31<br>(26 - 37)     | 825<br>(713 - 934)   | 4,059<br>(3,484 - 4,715) | 18,115<br>(17,311 - 19,690) |
| Neoplasms                                                        | 2,560<br>(2,222 - 2,952)    | 13<br>(9 - 18)     | 12<br>(9 - 14)      | 362<br>(309 - 417)   | 1,100<br>(911 - 1,296)   | 1,073<br>(935 - 1,229)      |
| Esophageal cancer                                                | 15<br>(12 - 19)             | --                 | --                  | 1<br>(1 - 2)         | 6<br>(4 - 7)             | 8<br>(7 - 11)               |
| Stomach cancer                                                   | 256<br>(210 - 316)          | --                 | --                  | 17<br>(14 - 22)      | 79<br>(64 - 98)          | 160<br>(122 - 207)          |
| Liver cancer                                                     | 192<br>(160 - 230)          | --                 | 0<br>(0 - 0)        | 12<br>(9 - 15)       | 57<br>(45 - 72)          | 123<br>(97 - 153)           |
| Liver cancer due to hepatitis B                                  | 51<br>(35 - 67)             | --                 | 0<br>(0 - 0)        | 4<br>(3 - 5)         | 19<br>(13 - 25)          | 28<br>(18 - 39)             |
| Liver cancer due to hepatitis C                                  | 73<br>(54 - 97)             | --                 | 0<br>(0 - 0)        | 4<br>(3 - 5)         | 20<br>(14 - 27)          | 49<br>(35 - 66)             |
| Liver cancer due to alcohol use                                  | 39<br>(24 - 57)             | --                 | --                  | 1<br>(1 - 2)         | 9<br>(5 - 13)            | 29<br>(17 - 44)             |
| Liver cancer due to other causes                                 | 29<br>(17 - 43)             | --                 | 0<br>(0 - 0)        | 3<br>(2 - 4)         | 9<br>(5 - 14)            | 17<br>(10 - 26)             |
| Larynx cancer                                                    | 16<br>(8 - 30)              | --                 | --                  | 2<br>(1 - 3)         | 6<br>(3 - 11)            | 8<br>(5 - 16)               |

Web Table 31- Georgia deaths with 95% UI by age, sex, and cause in 2013

| Cause                                         | Females, All Ages           | Females, 0-4 Years | Females, 5-14 Years | Females, 15-49 Years | Females, 50-69 Years     | Females, 70-80 Years        |
|-----------------------------------------------|-----------------------------|--------------------|---------------------|----------------------|--------------------------|-----------------------------|
| Tracheal, bronchus and lung cancer            | 300<br>(245 - 362)          | --                 | --                  | 22<br>(18 - 27)      | 169<br>(127 - 212)       | 108<br>(87 - 132)           |
| Breast cancer                                 | 530<br>(453 - 631)          | --                 | --                  | 110<br>(89 - 133)    | 248<br>(200 - 310)       | 172<br>(143 - 211)          |
| Cervical cancer                               | 166<br>(136 - 210)          | --                 | --                  | 47<br>(35 - 59)      | 79<br>(61 - 103)         | 41<br>(33 - 57)             |
| Uterine cancer                                | 132<br>(69 - 170)           | --                 | --                  | 18<br>(9 - 23)       | 68<br>(34 - 91)          | 47<br>(25 - 61)             |
| Prostate cancer                               | --                          | --                 | --                  | --                   | --                       | --                          |
| Colon and rectum cancer                       | 151<br>(129 - 179)          | --                 | --                  | 17<br>(14 - 20)      | 63<br>(51 - 78)          | 71<br>(59 - 87)             |
| Lip and oral cavity cancer                    | 18<br>(14 - 26)             | --                 | --                  | 2<br>(2 - 3)         | 7<br>(5 - 10)            | 9<br>(7 - 13)               |
| Nasopharynx cancer                            | 4<br>(2 - 6)                | --                 | 0<br>(0 - 0)        | 0<br>(0 - 0)         | 1<br>(1 - 3)             | 2<br>(1 - 2)                |
| Other pharynx cancer                          | 6<br>(5 - 8)                | --                 | --                  | 0<br>(0 - 0)         | 3<br>(2 - 4)             | 3<br>(2 - 4)                |
| Gallbladder and biliary tract cancer          | 78<br>(39 - 102)            | --                 | --                  | 6<br>(3 - 8)         | 32<br>(16 - 43)          | 40<br>(19 - 55)             |
| Pancreatic cancer                             | 120<br>(101 - 143)          | --                 | --                  | 6<br>(5 - 7)         | 43<br>(34 - 54)          | 70<br>(58 - 87)             |
| Malignant skin melanoma                       | 31<br>(26 - 38)             | --                 | --                  | 3<br>(2 - 3)         | 14<br>(11 - 17)          | 15<br>(12 - 19)             |
| Non-melanoma skin cancer                      | 20<br>(9 - 30)              | --                 | --                  | 1<br>(1 - 1)         | 3<br>(2 - 5)             | 15<br>(7 - 24)              |
| Ovarian cancer                                | 118<br>(99 - 140)           | --                 | --                  | 20<br>(16 - 24)      | 66<br>(53 - 83)          | 32<br>(26 - 39)             |
| Testicular cancer                             | --                          | --                 | --                  | --                   | --                       | --                          |
| Kidney cancer                                 | 35<br>(29 - 41)             | 0<br>(0 - 0)       | 0<br>(0 - 0)        | 3<br>(2 - 3)         | 17<br>(13 - 21)          | 15<br>(12 - 18)             |
| Bladder cancer                                | 22<br>(15 - 32)             | --                 | --                  | 0<br>(0 - 0)         | 6<br>(4 - 9)             | 16<br>(10 - 23)             |
| Brain and nervous system cancer               | 113<br>(71 - 134)           | 2<br>(1 - 4)       | 1<br>(1 - 2)        | 28<br>(21 - 34)      | 42<br>(27 - 53)          | 39<br>(20 - 48)             |
| Thyroid cancer                                | 13<br>(8 - 16)              | --                 | 0<br>(0 - 0)        | 1<br>(1 - 2)         | 4<br>(2 - 5)             | 7<br>(5 - 10)               |
| Mesothelioma                                  | 2<br>(2 - 3)                | --                 | --                  | 0<br>(0 - 0)         | 1<br>(0 - 1)             | 1<br>(1 - 2)                |
| Hodgkin lymphoma                              | 14<br>(12 - 19)             | 0<br>(0 - 1)       | 0<br>(0 - 0)        | 5<br>(4 - 7)         | 5<br>(4 - 6)             | 4<br>(3 - 6)                |
| Non-Hodgkin lymphoma                          | 31<br>(19 - 38)             | 2<br>(1 - 3)       | 1<br>(0 - 1)        | 6<br>(4 - 8)         | 12<br>(7 - 16)           | 11<br>(6 - 14)              |
| Multiple myeloma                              | 9<br>(6 - 11)               | --                 | --                  | 2<br>(1 - 2)         | 3<br>(2 - 5)             | 4<br>(2 - 5)                |
| Leukemia                                      | 69<br>(59 - 80)             | 4<br>(3 - 6)       | 6<br>(5 - 8)        | 17<br>(14 - 21)      | 26<br>(20 - 32)          | 16<br>(13 - 19)             |
| Other neoplasms                               | 101<br>(71 - 124)           | 4<br>(2 - 7)       | 3<br>(2 - 5)        | 17<br>(11 - 21)      | 40<br>(26 - 53)          | 37<br>(25 - 48)             |
| Cardiovascular diseases                       | 16,632<br>(15,548 - 18,458) | 5<br>(3 - 7)       | 7<br>(4 - 9)        | 312<br>(264 - 377)   | 2,350<br>(2,001 - 2,784) | 13,957<br>(13,145 - 15,343) |
| Rheumatic heart disease                       | 44<br>(33 - 63)             | 1<br>(0 - 1)       | 2<br>(1 - 3)        | 16<br>(10 - 21)      | 15<br>(11 - 23)          | 10<br>(7 - 15)              |
| Ischemic heart disease                        | 8,726<br>(7,650 - 10,952)   | 1<br>(0 - 1)       | 1<br>(1 - 2)        | 157<br>(127 - 208)   | 980<br>(762 - 1,454)     | 7,587<br>(6,709 - 9,361)    |
| Cerebrovascular disease                       | 6,520<br>(5,090 - 7,533)    | 1<br>(1 - 1)       | 2<br>(1 - 2)        | 106<br>(82 - 132)    | 939<br>(725 - 1,156)     | 5,473<br>(4,274 - 6,323)    |
| Ischemic stroke                               | 2,437<br>(1,913 - 3,196)    | 0<br>(0 - 1)       | 1<br>(0 - 1)        | 12<br>(7 - 16)       | 196<br>(134 - 266)       | 2,228<br>(1,731 - 2,937)    |
| Hemorrhagic stroke                            | 4,084<br>(2,670 - 4,974)    | 1<br>(0 - 1)       | 1<br>(1 - 2)        | 94<br>(73 - 117)     | 744<br>(558 - 929)       | 3,244<br>(2,008 - 3,999)    |
| Hypertensive heart disease                    | 750<br>(440 - 1,004)        | 0<br>(0 - 1)       | 0<br>(0 - 0)        | 9<br>(6 - 13)        | 79<br>(46 - 109)         | 661<br>(384 - 905)          |
| Cardiomyopathy and myocarditis                | 76<br>(32 - 101)            | 1<br>(0 - 2)       | 0<br>(0 - 1)        | 5<br>(2 - 6)         | 19<br>(10 - 25)          | 51<br>(18 - 73)             |
| Atrial fibrillation and flutter               | 0<br>(0 - 0)                | --                 | --                  | 0<br>(0 - 0)         | 0<br>(0 - 0)             | 0<br>(0 - 0)                |
| Aortic aneurysm                               | 16<br>(9 - 23)              | --                 | --                  | 1<br>(0 - 1)         | 2<br>(1 - 3)             | 13<br>(7 - 19)              |
| Peripheral vascular disease                   | 1<br>(1 - 1)                | --                 | --                  | 0<br>(0 - 0)         | 0<br>(0 - 0)             | 1<br>(0 - 1)                |
| Endocarditis                                  | 38<br>(18 - 54)             | 0<br>(0 - 0)       | 0<br>(0 - 0)        | 4<br>(2 - 6)         | 1<br>(0 - 2)             | 32<br>(15 - 47)             |
| Other cardiovascular and circulatory diseases | 460<br>(44 - 613)           | 1<br>(0 - 2)       | 1<br>(0 - 1)        | 15<br>(2 - 20)       | 313<br>(29 - 432)        | 130<br>(12 - 184)           |
| Chronic respiratory diseases                  | 1,259<br>(574 - 1,550)      | 5<br>(2 - 8)       | 2<br>(1 - 3)        | 36<br>(21 - 45)      | 187<br>(87 - 237)        | 1,028<br>(463 - 1,300)      |
| Chronic obstructive pulmonary disease         | 805<br>(376 - 1,091)        | 3<br>(1 - 5)       | 1<br>(0 - 1)        | 23<br>(13 - 29)      | 160<br>(76 - 207)        | 618<br>(282 - 869)          |

Web Table 31- Georgia deaths with 95% UI by age, sex, and cause in 2013

| Cause                                               | Females, All Ages        | Females, 0-4 Years | Females, 5-14 Years | Females, 15-49 Years | Females, 50-69 Years | Females, 70-80 Years     |
|-----------------------------------------------------|--------------------------|--------------------|---------------------|----------------------|----------------------|--------------------------|
| Pneumoconiosis                                      | 1<br>(0 - 1)             | 0<br>(0 - 0)       | 0<br>(0 - 0)        | 0<br>(0 - 0)         | 0<br>(0 - 0)         | 0<br>(0 - 0)             |
| Silicosis                                           | 0<br>(0 - 0)             | 0<br>(0 - 0)       | 0<br>(0 - 0)        | 0<br>(0 - 0)         | 0<br>(0 - 0)         | 0<br>(0 - 0)             |
| Asbestosis                                          | 0<br>(0 - 0)             | 0<br>(0 - 0)       | 0<br>(0 - 0)        | 0<br>(0 - 0)         | 0<br>(0 - 0)         | 0<br>(0 - 0)             |
| Coal workers pneumoconiosis                         | 0<br>(0 - 0)             | 0<br>(0 - 0)       | 0<br>(0 - 0)        | 0<br>(0 - 0)         | 0<br>(0 - 0)         | 0<br>(0 - 0)             |
| Other pneumoconiosis                                | 1<br>(0 - 1)             | 0<br>(0 - 0)       | 0<br>(0 - 0)        | 0<br>(0 - 0)         | 0<br>(0 - 0)         | 0<br>(0 - 0)             |
| Asthma                                              | 57<br>(23 - 89)          | 1<br>(1 - 2)       | 1<br>(1 - 1)        | 3<br>(2 - 5)         | 13<br>(5 - 21)       | 39<br>(14 - 62)          |
| Interstitial lung disease and pulmonary sarcoidosis | 314<br>(104 - 504)       | 0<br>(0 - 0)       | 0<br>(0 - 0)        | 0<br>(0 - 1)         | 7<br>(2 - 14)        | 306<br>(100 - 492)       |
| Other chronic respiratory diseases                  | 82<br>(36 - 132)         | 1<br>(0 - 1)       | 0<br>(0 - 0)        | 10<br>(5 - 14)       | 6<br>(2 - 10)        | 65<br>(28 - 110)         |
| Cirrhosis                                           | 334<br>(284 - 393)       | 0<br>(0 - 0)       | 0<br>(0 - 0)        | 26<br>(21 - 31)      | 102<br>(83 - 126)    | 206<br>(169 - 248)       |
| Cirrhosis due to hepatitis B                        | 157<br>(107 - 208)       | 0<br>(0 - 0)       | 0<br>(0 - 0)        | 12<br>(7 - 16)       | 46<br>(30 - 66)      | 98<br>(66 - 135)         |
| Cirrhosis due to hepatitis C                        | 106<br>(62 - 155)        | 0<br>(0 - 0)       | 0<br>(0 - 0)        | 8<br>(3 - 12)        | 36<br>(18 - 57)      | 62<br>(33 - 93)          |
| Cirrhosis due to alcohol use                        | 45<br>(24 - 69)          | --                 | --                  | 2<br>(1 - 3)         | 11<br>(6 - 17)       | 33<br>(17 - 51)          |
| Cirrhosis due to other causes                       | 26<br>(14 - 38)          | 0<br>(0 - 0)       | 0<br>(0 - 0)        | 4<br>(3 - 6)         | 9<br>(5 - 14)        | 12<br>(6 - 19)           |
| Digestive diseases                                  | 133<br>(108 - 157)       | 1<br>(1 - 2)       | 1<br>(1 - 1)        | 12<br>(10 - 15)      | 37<br>(29 - 47)      | 82<br>(63 - 98)          |
| Peptic ulcer disease                                | 55<br>(39 - 71)          | 0<br>(0 - 0)       | 0<br>(0 - 0)        | 5<br>(3 - 6)         | 16<br>(12 - 22)      | 35<br>(23 - 46)          |
| Gastritis and duodenitis                            | 3<br>(1 - 5)             | 0<br>(0 - 0)       | 0<br>(0 - 0)        | 0<br>(0 - 0)         | 1<br>(0 - 1)         | 2<br>(1 - 3)             |
| Appendicitis                                        | 3<br>(2 - 5)             | 0<br>(0 - 0)       | 0<br>(0 - 0)        | 1<br>(0 - 1)         | 1<br>(1 - 2)         | 1<br>(1 - 2)             |
| Paralytic ileus and intestinal obstruction          | 36<br>(21 - 54)          | 1<br>(0 - 1)       | 0<br>(0 - 0)        | 3<br>(2 - 5)         | 8<br>(5 - 13)        | 24<br>(13 - 36)          |
| Inguinal, femoral, and abdominal hernia             | 7<br>(4 - 12)            | 0<br>(0 - 0)       | 0<br>(0 - 0)        | 0<br>(0 - 0)         | 2<br>(1 - 4)         | 4<br>(2 - 8)             |
| Inflammatory bowel disease                          | 2<br>(1 - 4)             | 0<br>(0 - 0)       | 0<br>(0 - 0)        | 0<br>(0 - 1)         | 1<br>(0 - 1)         | 1<br>(1 - 2)             |
| Vascular intestinal disorders                       | 2<br>(1 - 3)             | 0<br>(0 - 0)       | 0<br>(0 - 0)        | 0<br>(0 - 0)         | 0<br>(0 - 1)         | 1<br>(0 - 3)             |
| Gallbladder and biliary diseases                    | 11<br>(6 - 16)           | 0<br>(0 - 0)       | 0<br>(0 - 0)        | 1<br>(1 - 1)         | 4<br>(2 - 5)         | 6<br>(3 - 9)             |
| Pancreatitis                                        | 6<br>(3 - 9)             | 0<br>(0 - 0)       | 0<br>(0 - 0)        | 1<br>(0 - 1)         | 2<br>(1 - 2)         | 4<br>(2 - 6)             |
| Other digestive diseases                            | 7<br>(5 - 9)             | 0<br>(0 - 0)       | 0<br>(0 - 0)        | 1<br>(1 - 1)         | 2<br>(2 - 3)         | 3<br>(2 - 5)             |
| Neurological disorders                              | 1,436<br>(1,157 - 1,768) | 2<br>(1 - 4)       | 1<br>(1 - 2)        | 9<br>(7 - 12)        | 54<br>(39 - 74)      | 1,370<br>(1,100 - 1,694) |
| Alzheimer disease and other dementias               | 1,407<br>(1,131 - 1,733) | --                 | --                  | 0<br>(0 - 0)         | 49<br>(34 - 68)      | 1,358<br>(1,087 - 1,682) |
| Parkinson disease                                   | 8<br>(5 - 11)            | --                 | --                  | 0<br>(0 - 0)         | 1<br>(1 - 2)         | 6<br>(3 - 9)             |
| Epilepsy                                            | 15<br>(12 - 22)          | 2<br>(1 - 4)       | 1<br>(1 - 2)        | 7<br>(5 - 10)        | 3<br>(2 - 5)         | 2<br>(1 - 3)             |
| Multiple sclerosis                                  | 4<br>(2 - 6)             | --                 | --                  | 1<br>(0 - 1)         | 1<br>(0 - 1)         | 3<br>(1 - 5)             |
| Other neurological disorders                        | 2<br>(2 - 3)             | 0<br>(0 - 1)       | 0<br>(0 - 0)        | 0<br>(0 - 0)         | 0<br>(0 - 1)         | 1<br>(1 - 1)             |
| Mental and substance use disorders                  | 21<br>(15 - 30)          | 0<br>(0 - 1)       | 0<br>(0 - 0)        | 8<br>(5 - 11)        | 8<br>(5 - 13)        | 5<br>(3 - 7)             |
| Schizophrenia                                       | 1<br>(1 - 2)             | --                 | --                  | 1<br>(0 - 1)         | 1<br>(0 - 1)         | 0<br>(0 - 0)             |
| Alcohol use disorders                               | 10<br>(5 - 19)           | --                 | --                  | 3<br>(2 - 7)         | 5<br>(2 - 10)        | 2<br>(1 - 3)             |
| Drug use disorders                                  | 9<br>(8 - 11)            | 0<br>(0 - 1)       | --                  | 3<br>(3 - 4)         | 3<br>(2 - 4)         | 3<br>(2 - 4)             |
| Opioid use disorders                                | 2<br>(2 - 2)             | 0<br>(0 - 0)       | --                  | 1<br>(1 - 1)         | 1<br>(0 - 1)         | 1<br>(0 - 1)             |
| Cocaine use disorders                               | 0<br>(0 - 0)             | 0<br>(0 - 0)       | --                  | 0<br>(0 - 0)         | 0<br>(0 - 0)         | 0<br>(0 - 0)             |
| Amphetamine use disorders                           | 0<br>(0 - 0)             | 0<br>(0 - 0)       | --                  | 0<br>(0 - 0)         | 0<br>(0 - 0)         | 0<br>(0 - 0)             |
| Other drug use disorders                            | 7<br>(6 - 8)             | 0<br>(0 - 1)       | --                  | 2<br>(2 - 3)         | 2<br>(1 - 3)         | 2<br>(1 - 3)             |
| Eating disorders                                    | 0<br>(0 - 0)             | --                 | 0<br>(0 - 0)        | 0<br>(0 - 0)         | --                   | --                       |
| Anorexia nervosa                                    | 0<br>(0 - 0)             | --                 | 0<br>(0 - 0)        | 0<br>(0 - 0)         | --                   | --                       |

Web Table 31- Georgia deaths with 95% UI by age, sex, and cause in 2013

| Cause                                               | Females, All Ages  | Females, 0-4 Years | Females, 5-14 Years | Females, 15-49 Years | Females, 50-69 Years | Females, 70-80 Years |
|-----------------------------------------------------|--------------------|--------------------|---------------------|----------------------|----------------------|----------------------|
| Diabetes, urogenital, blood, and endocrine diseases | 634<br>(523 - 744) | 7<br>(5 - 10)      | 3<br>(2 - 4)        | 51<br>(42 - 61)      | 213<br>(169 - 262)   | 360<br>(281 - 434)   |
| Diabetes mellitus                                   | 381<br>(316 - 460) | 1<br>(1 - 3)       | 0<br>(0 - 1)        | 16<br>(12 - 20)      | 137<br>(105 - 173)   | 226<br>(179 - 285)   |
| Acute glomerulonephritis                            | 3<br>(2 - 4)       | 0<br>(0 - 0)       | 0<br>(0 - 0)        | 1<br>(0 - 1)         | 1<br>(0 - 1)         | 1<br>(1 - 2)         |
| Chronic kidney disease                              | 167<br>(124 - 201) | 1<br>(0 - 1)       | 1<br>(1 - 2)        | 20<br>(16 - 27)      | 58<br>(43 - 75)      | 87<br>(53 - 110)     |
| Chronic kidney disease due to diabetes mellitus     | 36<br>(10 - 49)    | 0<br>(0 - 0)       | 0<br>(0 - 0)        | 2<br>(1 - 3)         | 14<br>(4 - 20)       | 21<br>(4 - 29)       |
| Chronic kidney disease due to hypertension          | 20<br>(8 - 34)     | 0<br>(0 - 0)       | 0<br>(0 - 0)        | 2<br>(1 - 4)         | 7<br>(3 - 13)        | 10<br>(4 - 18)       |
| Chronic kidney disease due to glomerulonephritis    | 33<br>(23 - 46)    | 0<br>(0 - 0)       | 1<br>(0 - 1)        | 6<br>(4 - 8)         | 11<br>(7 - 17)       | 15<br>(9 - 23)       |
| Chronic kidney disease due to other causes          | 78<br>(52 - 106)   | 0<br>(0 - 0)       | 0<br>(0 - 1)        | 10<br>(7 - 16)       | 26<br>(15 - 38)      | 41<br>(19 - 60)      |
| Urinary diseases and male infertility               | 25<br>(20 - 36)    | 0<br>(0 - 0)       | 0<br>(0 - 0)        | 4<br>(3 - 7)         | 9<br>(7 - 15)        | 11<br>(8 - 16)       |
| Interstitial nephritis and urinary tract infections | 21<br>(16 - 31)    | 0<br>(0 - 0)       | 0<br>(0 - 0)        | 4<br>(3 - 6)         | 8<br>(5 - 13)        | 9<br>(7 - 13)        |
| Urolithiasis                                        | 1<br>(0 - 1)       | --                 | 0<br>(0 - 0)        | 0<br>(0 - 0)         | 0<br>(0 - 1)         | 0<br>(0 - 1)         |
| Other urinary diseases                              | 3<br>(2 - 5)       | 0<br>(0 - 0)       | 0<br>(0 - 0)        | 1<br>(0 - 1)         | 1<br>(1 - 2)         | 1<br>(1 - 2)         |
| Gynecological diseases                              | 0<br>(0 - 0)       | --                 | --                  | 0<br>(0 - 0)         | 0<br>(0 - 0)         | 0<br>(0 - 0)         |
| Uterine fibroids                                    | 0<br>(0 - 0)       | --                 | --                  | 0<br>(0 - 0)         | 0<br>(0 - 0)         | 0<br>(0 - 0)         |
| Polycystic ovarian syndrome                         | 0<br>(0 - 0)       | --                 | --                  | 0<br>(0 - 0)         | 0<br>(0 - 0)         | --                   |
| Endometriosis                                       | 0<br>(0 - 0)       | --                 | --                  | 0<br>(0 - 0)         | 0<br>(0 - 0)         | --                   |
| Genital prolapse                                    | 0<br>(0 - 0)       | --                 | --                  | 0<br>(0 - 0)         | 0<br>(0 - 0)         | 0<br>(0 - 0)         |
| Other gynecological diseases                        | 0<br>(0 - 0)       | --                 | --                  | 0<br>(0 - 0)         | 0<br>(0 - 0)         | 0<br>(0 - 0)         |
| Hemoglobinopathies and hemolytic anemias            | 35<br>(19 - 53)    | 3<br>(2 - 5)       | 1<br>(0 - 1)        | 4<br>(2 - 6)         | 3<br>(1 - 5)         | 25<br>(12 - 39)      |
| Thalassemias                                        | 4<br>(3 - 6)       | 2<br>(1 - 4)       | 1<br>(0 - 1)        | 1<br>(1 - 2)         | 0<br>(0 - 0)         | 0<br>(0 - 0)         |
| Sickle cell disorders                               | 0<br>(0 - 0)       | 0<br>(0 - 0)       | 0<br>(0 - 0)        | 0<br>(0 - 0)         | 0<br>(0 - 0)         | 0<br>(0 - 0)         |
| G6PD deficiency                                     | 0<br>(0 - 0)       | 0<br>(0 - 0)       | 0<br>(0 - 0)        | 0<br>(0 - 0)         | 0<br>(0 - 0)         | 0<br>(0 - 0)         |
| Other hemoglobinopathies and hemolytic anemias      | 31<br>(16 - 47)    | 1<br>(0 - 1)       | 0<br>(0 - 0)        | 3<br>(1 - 4)         | 3<br>(1 - 4)         | 25<br>(12 - 39)      |
| Endocrine, metabolic, blood, and immune disorders   | 23<br>(7 - 31)     | 2<br>(1 - 4)       | 1<br>(0 - 1)        | 5<br>(2 - 7)         | 5<br>(1 - 7)         | 10<br>(3 - 15)       |
| Musculoskeletal disorders                           | 15<br>(12 - 18)    | --                 | 1<br>(1 - 1)        | 4<br>(3 - 5)         | 4<br>(3 - 5)         | 6<br>(4 - 8)         |
| Rheumatoid arthritis                                | 3<br>(2 - 4)       | --                 | 0<br>(0 - 0)        | 1<br>(0 - 1)         | 1<br>(0 - 1)         | 1<br>(1 - 2)         |
| Other musculoskeletal disorders                     | 12<br>(9 - 14)     | --                 | 1<br>(0 - 1)        | 3<br>(2 - 4)         | 3<br>(2 - 4)         | 4<br>(3 - 6)         |
| Other non-communicable diseases                     | 87<br>(56 - 107)   | 45<br>(29 - 63)    | 4<br>(3 - 5)        | 5<br>(3 - 6)         | 3<br>(2 - 4)         | 30<br>(9 - 41)       |
| Congenital anomalies                                | 82<br>(54 - 102)   | 44<br>(29 - 62)    | 4<br>(2 - 5)        | 4<br>(3 - 5)         | 2<br>(1 - 3)         | 28<br>(8 - 39)       |
| Neural tube defects                                 | 1<br>(1 - 2)       | 1<br>(0 - 2)       | 0<br>(0 - 0)        | 0<br>(0 - 0)         | 0<br>(0 - 0)         | 0<br>(0 - 0)         |
| Congenital heart anomalies                          | 52<br>(30 - 67)    | 21<br>(12 - 30)    | 3<br>(2 - 4)        | 2<br>(1 - 2)         | 0<br>(0 - 1)         | 26<br>(8 - 37)       |
| Cleft lip and cleft palate                          | 1<br>(0 - 1)       | 1<br>(0 - 1)       | --                  | --                   | --                   | --                   |
| Down syndrome                                       | 2<br>(1 - 4)       | 2<br>(1 - 4)       | 0<br>(0 - 0)        | 0<br>(0 - 0)         | 0<br>(0 - 0)         | 0<br>(0 - 0)         |
| Chromosomal unbalanced rearrangements               | 2<br>(1 - 2)       | 0<br>(0 - 1)       | 0<br>(0 - 0)        | 1<br>(1 - 1)         | 0<br>(0 - 0)         | 0<br>(0 - 0)         |
| Other congenital anomalies                          | 24<br>(16 - 34)    | 19<br>(11 - 29)    | 1<br>(0 - 1)        | 1<br>(1 - 2)         | 1<br>(1 - 2)         | 2<br>(1 - 2)         |
| Skin and subcutaneous diseases                      | 4<br>(1 - 5)       | 1<br>(0 - 1)       | 0<br>(0 - 0)        | 1<br>(0 - 1)         | 1<br>(0 - 1)         | 2<br>(0 - 2)         |
| Cellulitis                                          | 1<br>(0 - 1)       | 0<br>(0 - 0)       | 0<br>(0 - 0)        | 0<br>(0 - 0)         | 0<br>(0 - 0)         | 0<br>(0 - 1)         |
| Pyoderma                                            | 3<br>(1 - 3)       | 0<br>(0 - 1)       | 0<br>(0 - 0)        | 0<br>(0 - 1)         | 1<br>(0 - 1)         | 1<br>(0 - 2)         |
| Decubitus ulcer                                     | 1<br>(0 - 1)       | 0<br>(0 - 0)       | 0<br>(0 - 0)        | 0<br>(0 - 0)         | 0<br>(0 - 0)         | 0<br>(0 - 0)         |
| Other skin and subcutaneous diseases                | 0<br>(0 - 1)       | 0<br>(0 - 0)       | 0<br>(0 - 0)        | 0<br>(0 - 0)         | 0<br>(0 - 0)         | 0<br>(0 - 0)         |

Web Table 31- Georgia deaths with 95% UI by age, sex, and cause in 2013

| Cause                                           | Females, All Ages  | Females, 0-4 Years | Females, 5-14 Years | Females, 15-49 Years | Females, 50-69 Years | Females, 70-80 Years |
|-------------------------------------------------|--------------------|--------------------|---------------------|----------------------|----------------------|----------------------|
| Sudden infant death syndrome                    | 0<br>(0 - 1)       | 0<br>(0 - 1)       | --                  | --                   | --                   | --                   |
| Injuries                                        | 453<br>(394 - 516) | 33<br>(25 - 46)    | 18<br>(15 - 22)     | 144<br>(122 - 165)   | 113<br>(94 - 135)    | 145<br>(116 - 173)   |
| Transport injuries                              | 135<br>(111 - 158) | 4<br>(3 - 7)       | 7<br>(4 - 9)        | 53<br>(43 - 64)      | 36<br>(27 - 47)      | 34<br>(25 - 43)      |
| Road injuries                                   | 123<br>(102 - 145) | 4<br>(2 - 6)       | 6<br>(4 - 8)        | 47<br>(38 - 56)      | 34<br>(26 - 45)      | 33<br>(24 - 41)      |
| Pedestrian road injuries                        | 32<br>(21 - 41)    | 1<br>(1 - 2)       | 1<br>(1 - 2)        | 10<br>(7 - 14)       | 7<br>(4 - 10)        | 12<br>(7 - 17)       |
| Cyclist road injuries                           | 5<br>(3 - 6)       | 0<br>(0 - 1)       | 1<br>(0 - 1)        | 1<br>(1 - 2)         | 2<br>(1 - 3)         | 1<br>(0 - 1)         |
| Motorcyclist road injuries                      | 3<br>(2 - 5)       | 0<br>(0 - 0)       | 0<br>(0 - 0)        | 2<br>(1 - 3)         | 0<br>(0 - 1)         | 0<br>(0 - 1)         |
| Motor vehicle road injuries                     | 82<br>(66 - 99)    | 2<br>(1 - 3)       | 4<br>(3 - 5)        | 32<br>(26 - 40)      | 25<br>(19 - 33)      | 19<br>(13 - 25)      |
| Other road injuries                             | 1<br>(1 - 1)       | 0<br>(0 - 0)       | 0<br>(0 - 0)        | 0<br>(0 - 1)         | 0<br>(0 - 0)         | 0<br>(0 - 0)         |
| Other transport injuries                        | 12<br>(8 - 15)     | 1<br>(0 - 1)       | 0<br>(0 - 1)        | 7<br>(4 - 9)         | 2<br>(1 - 3)         | 2<br>(1 - 3)         |
| Unintentional injuries                          | 242<br>(198 - 282) | 28<br>(20 - 41)    | 11<br>(8 - 14)      | 60<br>(48 - 71)      | 53<br>(41 - 66)      | 91<br>(69 - 112)     |
| Falls                                           | 38<br>(30 - 53)    | 3<br>(2 - 6)       | 1<br>(1 - 2)        | 7<br>(5 - 10)        | 8<br>(6 - 12)        | 20<br>(14 - 27)      |
| Drowning                                        | 31<br>(25 - 51)    | 6<br>(3 - 11)      | 4<br>(3 - 6)        | 10<br>(7 - 16)       | 6<br>(4 - 10)        | 6<br>(4 - 8)         |
| Fire, heat, and hot substances                  | 88<br>(60 - 109)   | 11<br>(7 - 18)     | 3<br>(2 - 4)        | 19<br>(12 - 25)      | 17<br>(11 - 23)      | 38<br>(24 - 52)      |
| Poisonings                                      | 15<br>(10 - 21)    | 2<br>(1 - 4)       | 1<br>(0 - 1)        | 6<br>(4 - 8)         | 3<br>(2 - 4)         | 3<br>(2 - 5)         |
| Exposure to mechanical forces                   | 22<br>(12 - 27)    | 2<br>(1 - 3)       | 1<br>(1 - 1)        | 13<br>(5 - 18)       | 3<br>(2 - 4)         | 2<br>(2 - 3)         |
| Unintentional firearm injuries                  | 3<br>(2 - 3)       | 0<br>(0 - 0)       | 0<br>(0 - 0)        | 1<br>(1 - 1)         | 1<br>(0 - 1)         | 1<br>(0 - 1)         |
| Unintentional suffocation                       | 12<br>(4 - 17)     | 0<br>(0 - 1)       | 0<br>(0 - 0)        | 11<br>(3 - 15)       | 1<br>(0 - 1)         | 0<br>(0 - 0)         |
| Other exposure to mechanical forces             | 6<br>(5 - 8)       | 2<br>(1 - 3)       | 1<br>(0 - 1)        | 2<br>(1 - 2)         | 1<br>(1 - 2)         | 1<br>(1 - 2)         |
| Adverse effects of medical treatment            | 31<br>(15 - 45)    | 2<br>(1 - 4)       | 0<br>(0 - 0)        | 2<br>(1 - 3)         | 11<br>(5 - 15)       | 17<br>(7 - 25)       |
| Animal contact                                  | 4<br>(2 - 7)       | 0<br>(0 - 1)       | 0<br>(0 - 0)        | 1<br>(0 - 1)         | 2<br>(1 - 4)         | 1<br>(0 - 1)         |
| Venomous animal contact                         | 1<br>(0 - 2)       | 0<br>(0 - 0)       | 0<br>(0 - 0)        | 0<br>(0 - 1)         | 0<br>(0 - 1)         | 0<br>(0 - 1)         |
| Non-venomous animal contact                     | 3<br>(1 - 5)       | 0<br>(0 - 1)       | 0<br>(0 - 0)        | 0<br>(0 - 1)         | 2<br>(1 - 3)         | 1<br>(0 - 1)         |
| Foreign body                                    | 5<br>(3 - 8)       | 1<br>(1 - 2)       | 0<br>(0 - 0)        | 1<br>(1 - 2)         | 1<br>(1 - 2)         | 1<br>(1 - 2)         |
| Pulmonary aspiration and foreign body in airway | 5<br>(3 - 7)       | 1<br>(1 - 2)       | 0<br>(0 - 0)        | 1<br>(1 - 2)         | 1<br>(1 - 2)         | 1<br>(1 - 2)         |
| Foreign body in other body part                 | 0<br>(0 - 1)       | 0<br>(0 - 0)       | 0<br>(0 - 0)        | 0<br>(0 - 0)         | 0<br>(0 - 0)         | 0<br>(0 - 0)         |
| Other unintentional injuries                    | 8<br>(6 - 10)      | 0<br>(0 - 1)       | 0<br>(0 - 1)        | 2<br>(1 - 3)         | 2<br>(1 - 3)         | 3<br>(2 - 5)         |
| Self-harm and interpersonal violence            | 76<br>(63 - 92)    | 1<br>(0 - 1)       | 1<br>(1 - 2)        | 31<br>(24 - 38)      | 24<br>(18 - 31)      | 20<br>(15 - 27)      |
| Self-harm                                       | 55<br>(45 - 70)    | --                 | 0<br>(0 - 1)        | 19<br>(15 - 24)      | 19<br>(14 - 26)      | 16<br>(12 - 23)      |
| Interpersonal violence                          | 21<br>(13 - 28)    | 1<br>(0 - 1)       | 1<br>(0 - 1)        | 11<br>(7 - 16)       | 5<br>(3 - 7)         | 3<br>(2 - 6)         |
| Assault by firearm                              | 9<br>(6 - 14)      | 0<br>(0 - 0)       | 0<br>(0 - 1)        | 5<br>(3 - 8)         | 3<br>(2 - 4)         | 1<br>(1 - 3)         |
| Assault by sharp object                         | 3<br>(2 - 5)       | 0<br>(0 - 0)       | 0<br>(0 - 0)        | 2<br>(1 - 4)         | 0<br>(0 - 1)         | 0<br>(0 - 1)         |
| Assault by other means                          | 8<br>(4 - 12)      | 1<br>(0 - 1)       | 0<br>(0 - 1)        | 4<br>(2 - 6)         | 2<br>(1 - 3)         | 2<br>(1 - 3)         |

Web Table 31- Germany deaths with 95% UI by age, sex, and cause in 2013

| Cause                                                             | Both Sexes, All Ages           | Both Sexes, 0-4 Years    | Both Sexes, 5-14 Years | Both Sexes, 15-49 Years     | Both Sexes, 50-69 Years        | Both Sexes, 70-80 Years        |
|-------------------------------------------------------------------|--------------------------------|--------------------------|------------------------|-----------------------------|--------------------------------|--------------------------------|
| All causes                                                        | 920,441<br>(906,082 - 933,929) | 2,539<br>(2,240 - 2,893) | 610<br>(568 - 658)     | 33,887<br>(33,069 - 34,687) | 145,142<br>(142,072 - 148,104) | 738,262<br>(727,183 - 748,329) |
| Communicable, maternal, neonatal, and nutritional diseases        | 37,881<br>(30,882 - 43,182)    | 1,171<br>(966 - 1,381)   | 41<br>(33 - 49)        | 1,061<br>(950 - 1,170)      | 3,318<br>(2,611 - 3,769)       | 32,290<br>(25,837 - 37,470)    |
| HIV/AIDS and tuberculosis                                         | 1,042<br>(830 - 1,394)         | 1<br>(0 - 1)             | 1<br>(0 - 1)           | 315<br>(241 - 399)          | 307<br>(201 - 449)             | 419<br>(339 - 631)             |
| Tuberculosis                                                      | 508<br>(430 - 808)             | 0<br>(0 - 0)             | 1<br>(0 - 1)           | 30<br>(25 - 43)             | 97<br>(81 - 168)               | 380<br>(311 - 599)             |
| HIV/AIDS                                                          | 535<br>(354 - 752)             | 0<br>(0 - 1)             | 0<br>(0 - 0)           | 285<br>(213 - 365)          | 210<br>(111 - 333)             | 39<br>(6 - 77)                 |
| HIV/AIDS resulting in mycobacterial infection                     | 28<br>(18 - 42)                | 0<br>(0 - 0)             | 0<br>(0 - 0)           | 15<br>(10 - 20)             | 12<br>(6 - 19)                 | 2<br>(0 - 5)                   |
| HIV/AIDS resulting in other diseases                              | 506<br>(336 - 712)             | 0<br>(0 - 1)             | 0<br>(0 - 0)           | 270<br>(201 - 345)          | 199<br>(105 - 315)             | 37<br>(5 - 72)                 |
| Diarrhea, lower respiratory, and other common infectious diseases | 32,300<br>(25,326 - 37,620)    | 93<br>(68 - 117)         | 31<br>(25 - 38)        | 544<br>(434 - 628)          | 2,586<br>(1,893 - 2,990)       | 29,046<br>(22,584 - 34,247)    |
| Diarrheal diseases                                                | 4,080<br>(3,037 - 5,319)       | 12<br>(9 - 17)           | 3<br>(2 - 4)           | 43<br>(35 - 51)             | 240<br>(197 - 289)             | 3,783<br>(2,726 - 5,035)       |
| Intestinal infectious diseases                                    | 17<br>(8 - 31)                 | 3<br>(1 - 6)             | 2<br>(1 - 4)           | 6<br>(2 - 12)               | 3<br>(1 - 7)                   | 4<br>(2 - 9)                   |
| Typhoid fever                                                     | 8<br>(3 - 17)                  | 1<br>(0 - 2)             | 1<br>(0 - 3)           | 3<br>(1 - 7)                | 1<br>(0 - 3)                   | 1<br>(0 - 3)                   |
| Paratyphoid fever                                                 | 2<br>(1 - 5)                   | 0<br>(0 - 1)             | 0<br>(0 - 1)           | 1<br>(0 - 2)                | 0<br>(0 - 1)                   | 0<br>(0 - 1)                   |
| Other intestinal infectious diseases                              | 8<br>(3 - 15)                  | 1<br>(0 - 5)             | 0<br>(0 - 2)           | 2<br>(0 - 5)                | 2<br>(0 - 5)                   | 3<br>(0 - 7)                   |
| Lower respiratory infections                                      | 27,487<br>(20,679 - 32,526)    | 38<br>(26 - 52)          | 12<br>(9 - 16)         | 397<br>(294 - 475)          | 2,194<br>(1,508 - 2,593)       | 24,846<br>(18,801 - 29,825)    |
| Upper respiratory infections                                      | 17<br>(5 - 43)                 | 0<br>(0 - 0)             | 0<br>(0 - 0)           | 1<br>(0 - 3)                | 3<br>(1 - 8)                   | 13<br>(2 - 39)                 |
| Otitis media                                                      | 27<br>(22 - 32)                | 3<br>(2 - 4)             | 1<br>(1 - 1)           | 3<br>(3 - 4)                | 4<br>(3 - 5)                   | 16<br>(12 - 21)                |
| Meningitis                                                        | 344<br>(286 - 380)             | 24<br>(17 - 33)          | 5<br>(4 - 7)           | 43<br>(35 - 49)             | 69<br>(60 - 80)                | 202<br>(157 - 232)             |
| Pneumococcal meningitis                                           | 63<br>(43 - 87)                | 3<br>(2 - 5)             | 1<br>(0 - 1)           | 7<br>(4 - 10)               | 12<br>(6 - 18)                 | 40<br>(25 - 62)                |
| H influenzae type B meningitis                                    | 38<br>(28 - 49)                | 7<br>(4 - 10)            | 1<br>(1 - 1)           | 5<br>(3 - 7)                | 7<br>(4 - 11)                  | 18<br>(9 - 26)                 |
| Meningococcal meningitis                                          | 109<br>(81 - 138)              | 7<br>(5 - 11)            | 2<br>(1 - 3)           | 14<br>(9 - 19)              | 21<br>(14 - 30)                | 65<br>(42 - 86)                |
| Other meningitis                                                  | 134<br>(93 - 168)              | 6<br>(4 - 10)            | 1<br>(1 - 2)           | 18<br>(13 - 23)             | 29<br>(19 - 42)                | 78<br>(46 - 103)               |
| Encephalitis                                                      | 238<br>(121 - 303)             | 8<br>(5 - 12)            | 5<br>(3 - 8)           | 39<br>(23 - 53)             | 63<br>(35 - 80)                | 123<br>(47 - 178)              |
| Diphtheria                                                        | 1<br>(0 - 3)                   | 0<br>(0 - 1)             | 0<br>(0 - 0)           | 0<br>(0 - 2)                | 0<br>(0 - 2)                   | --                             |
| Whooping cough                                                    | 6<br>(4 - 7)                   | 1<br>(0 - 2)             | 1<br>(0 - 1)           | 3<br>(3 - 4)                | 1<br>(1 - 1)                   | --                             |
| Tetanus                                                           | 8<br>(4 - 10)                  | 0<br>(0 - 0)             | 1<br>(0 - 1)           | 3<br>(1 - 4)                | 2<br>(1 - 3)                   | 2<br>(1 - 3)                   |
| Measles                                                           | 2<br>(1 - 4)                   | 2<br>(1 - 3)             | 0<br>(0 - 1)           | 0<br>(0 - 0)                | 0<br>(0 - 0)                   | --                             |
| Varicella and herpes zoster                                       | 73<br>(17 - 244)               | 2<br>(0 - 7)             | 1<br>(0 - 2)           | 5<br>(2 - 12)               | 6<br>(1 - 16)                  | 58<br>(4 - 230)                |
| Neglected tropical diseases and malaria                           | 59<br>(50 - 67)                | 2<br>(1 - 2)             | 2<br>(2 - 3)           | 13<br>(10 - 14)             | 16<br>(13 - 19)                | 27<br>(21 - 34)                |
| Cysticercosis                                                     | 1<br>(1 - 1)                   | 0<br>(0 - 0)             | 0<br>(0 - 0)           | 0<br>(0 - 0)                | 0<br>(0 - 0)                   | 1<br>(0 - 1)                   |
| Cystic echinococcosis                                             | 7<br>(6 - 7)                   | 0<br>(0 - 0)             | 0<br>(0 - 0)           | 1<br>(1 - 1)                | 2<br>(2 - 2)                   | 4<br>(3 - 4)                   |
| Dengue                                                            | 9<br>(8 - 17)                  | 0<br>(0 - 1)             | 1<br>(1 - 1)           | 4<br>(3 - 4)                | 2<br>(2 - 4)                   | 2<br>(1 - 7)                   |
| Rabies                                                            | 7<br>(4 - 8)                   | 0<br>(0 - 0)             | 1<br>(0 - 1)           | 3<br>(2 - 4)                | 2<br>(1 - 2)                   | 1<br>(1 - 1)                   |
| Other neglected tropical diseases                                 | 35<br>(26 - 42)                | 1<br>(0 - 1)             | 1<br>(0 - 1)           | 5<br>(3 - 6)                | 9<br>(6 - 12)                  | 20<br>(14 - 26)                |
| Maternal disorders                                                | 46<br>(36 - 56)                | --                       | 0<br>(0 - 0)           | 46<br>(36 - 56)             | --                             | --                             |
| Maternal hemorrhage                                               | 5<br>(3 - 7)                   | --                       | 0<br>(0 - 0)           | 5<br>(3 - 7)                | --                             | --                             |
| Maternal sepsis and other maternal infections                     | 5<br>(3 - 7)                   | --                       | 0<br>(0 - 0)           | 5<br>(3 - 7)                | --                             | --                             |
| Maternal hypertensive disorders                                   | 5<br>(3 - 6)                   | --                       | 0<br>(0 - 0)           | 5<br>(3 - 6)                | --                             | --                             |
| Maternal obstructed labor                                         | 4<br>(3 - 5)                   | --                       | 0<br>(0 - 0)           | 4<br>(3 - 5)                | --                             | --                             |
| Maternal abortive outcome                                         | 9<br>(6 - 12)                  | --                       | 0<br>(0 - 0)           | 9<br>(6 - 12)               | --                             | --                             |
| Indirect maternal deaths                                          | 5<br>(4 - 7)                   | --                       | 0<br>(0 - 0)           | 5<br>(4 - 7)                | --                             | --                             |

Web Table 31- Germany deaths with 95% UI by age, sex, and cause in 2013

| Cause                                                            | Both Sexes, All Ages           | Both Sexes, 0-4 Years    | Both Sexes, 5-14 Years | Both Sexes, 15-49 Years     | Both Sexes, 50-69 Years        | Both Sexes, 70-80 Years        |
|------------------------------------------------------------------|--------------------------------|--------------------------|------------------------|-----------------------------|--------------------------------|--------------------------------|
| Late maternal deaths                                             | 3<br>(2 - 5)                   | --                       | 0<br>(0 - 0)           | 3<br>(2 - 5)                | --                             | --                             |
| Maternal deaths aggravated by HIV/AIDS                           | 0<br>(0 - 0)                   | --                       | --                     | 0<br>(0 - 0)                | --                             | --                             |
| Other maternal disorders                                         | 10<br>(7 - 13)                 | --                       | 0<br>(0 - 0)           | 10<br>(7 - 13)              | --                             | --                             |
| Neonatal disorders                                               | 1,056<br>(868 - 1,246)         | 1,056<br>(868 - 1,246)   | --                     | --                          | --                             | --                             |
| Neonatal preterm birth complications                             | 658<br>(529 - 800)             | 658<br>(529 - 800)       | --                     | --                          | --                             | --                             |
| Neonatal encephalopathy due to birth asphyxia and trauma         | 202<br>(122 - 258)             | 202<br>(122 - 258)       | --                     | --                          | --                             | --                             |
| Neonatal sepsis and other neonatal infections                    | 60<br>(33 - 104)               | 60<br>(33 - 104)         | --                     | --                          | --                             | --                             |
| Hemolytic disease and other neonatal jaundice                    | 4<br>(2 - 9)                   | 4<br>(2 - 9)             | --                     | --                          | --                             | --                             |
| Other neonatal disorders                                         | 133<br>(83 - 173)              | 133<br>(83 - 173)        | --                     | --                          | --                             | --                             |
| Nutritional deficiencies                                         | 2,277<br>(1,736 - 2,803)       | 2<br>(1 - 3)             | 2<br>(1 - 2)           | 64<br>(52 - 93)             | 137<br>(106 - 189)             | 2,072<br>(1,551 - 2,539)       |
| Protein-energy malnutrition                                      | 386<br>(146 - 655)             | 1<br>(0 - 1)             | 1<br>(0 - 1)           | 5<br>(2 - 9)                | 18<br>(8 - 29)                 | 362<br>(131 - 618)             |
| Iodine deficiency                                                | 7<br>(0 - 35)                  | 0<br>(0 - 0)             | 0<br>(0 - 0)           | 0<br>(0 - 1)                | 1<br>(0 - 4)                   | 5<br>(0 - 34)                  |
| Iron-deficiency anemia                                           | 1,743<br>(1,285 - 2,234)       | 1<br>(0 - 1)             | 1<br>(0 - 1)           | 53<br>(42 - 79)             | 99<br>(75 - 137)               | 1,591<br>(1,138 - 2,040)       |
| Other nutritional deficiencies                                   | 140<br>(68 - 254)              | 1<br>(0 - 1)             | 1<br>(0 - 1)           | 6<br>(3 - 10)               | 19<br>(10 - 34)                | 114<br>(52 - 217)              |
| Other communicable, maternal, neonatal, and nutritional diseases | 1,101<br>(839 - 1,273)         | 18<br>(11 - 27)          | 6<br>(4 - 7)           | 79<br>(61 - 92)             | 273<br>(203 - 318)             | 725<br>(539 - 875)             |
| Sexually transmitted diseases excluding HIV                      | 45<br>(33 - 65)                | 6<br>(0 - 15)            | 1<br>(0 - 1)           | 6<br>(4 - 8)                | 9<br>(7 - 15)                  | 23<br>(16 - 35)                |
| Syphilis                                                         | 33<br>(23 - 50)                | 6<br>(0 - 15)            | 1<br>(0 - 1)           | 3<br>(2 - 3)                | 6<br>(4 - 9)                   | 18<br>(13 - 28)                |
| Chlamydial infection                                             | 3<br>(2 - 4)                   | --                       | 0<br>(0 - 0)           | 1<br>(1 - 1)                | 1<br>(1 - 1)                   | 1<br>(1 - 2)                   |
| Gonococcal infection                                             | 6<br>(4 - 8)                   | --                       | 0<br>(0 - 0)           | 1<br>(1 - 2)                | 2<br>(1 - 3)                   | 3<br>(2 - 4)                   |
| Other sexually transmitted diseases                              | 3<br>(3 - 5)                   | --                       | 0<br>(0 - 0)           | 1<br>(1 - 1)                | 1<br>(1 - 2)                   | 1<br>(1 - 2)                   |
| Hepatitis                                                        | 241<br>(204 - 284)             | 1<br>(0 - 1)             | 1<br>(1 - 1)           | 27<br>(21 - 34)             | 72<br>(58 - 87)                | 141<br>(110 - 179)             |
| Acute hepatitis A                                                | 53<br>(17 - 107)               | 1<br>(0 - 1)             | 1<br>(0 - 1)           | 10<br>(4 - 18)              | 17<br>(5 - 34)                 | 25<br>(6 - 57)                 |
| Acute hepatitis B                                                | 185<br>(128 - 243)             | 0<br>(0 - 1)             | 0<br>(0 - 0)           | 16<br>(9 - 24)              | 54<br>(36 - 73)                | 114<br>(76 - 157)              |
| Acute hepatitis C                                                | 4<br>(1 - 9)                   | --                       | 0<br>(0 - 0)           | 0<br>(0 - 1)                | 1<br>(0 - 3)                   | 2<br>(0 - 6)                   |
| Other infectious diseases                                        | 815<br>(561 - 965)             | 11<br>(7 - 15)           | 4<br>(3 - 5)           | 47<br>(30 - 57)             | 192<br>(124 - 231)             | 561<br>(379 - 714)             |
| Non-communicable diseases                                        | 844,723<br>(830,455 - 860,111) | 1,207<br>(1,028 - 1,425) | 384<br>(350 - 420)     | 24,721<br>(23,945 - 25,565) | 134,174<br>(131,243 - 137,074) | 684,236<br>(672,733 - 696,983) |
| Neoplasms                                                        | 240,593<br>(225,921 - 250,472) | 89<br>(67 - 113)         | 184<br>(160 - 208)     | 10,902<br>(10,381 - 11,689) | 67,562<br>(64,930 - 69,829)    | 161,856<br>(148,558 - 170,577) |
| Esophageal cancer                                                | 5,590<br>(4,979 - 6,454)       | --                       | --                     | 316<br>(251 - 483)          | 2,427<br>(2,128 - 2,936)       | 2,846<br>(2,350 - 3,208)       |
| Stomach cancer                                                   | 13,974<br>(12,037 - 16,236)    | --                       | --                     | 557<br>(478 - 647)          | 2,992<br>(2,684 - 3,363)       | 10,424<br>(8,732 - 12,420)     |
| Liver cancer                                                     | 7,444<br>(5,328 - 9,017)       | --                       | 3<br>(2 - 4)           | 242<br>(185 - 323)          | 2,312<br>(1,675 - 2,803)       | 4,887<br>(3,278 - 6,199)       |
| Liver cancer due to hepatitis B                                  | 1,072<br>(675 - 1,569)         | --                       | 1<br>(1 - 2)           | 70<br>(46 - 100)            | 454<br>(249 - 662)             | 547<br>(326 - 853)             |
| Liver cancer due to hepatitis C                                  | 3,320<br>(2,235 - 4,292)       | --                       | 0<br>(0 - 1)           | 83<br>(56 - 117)            | 967<br>(652 - 1,253)           | 2,270<br>(1,413 - 3,065)       |
| Liver cancer due to alcohol use                                  | 2,463<br>(1,642 - 3,299)       | --                       | --                     | 58<br>(38 - 84)             | 710<br>(495 - 949)             | 1,695<br>(1,067 - 2,335)       |
| Liver cancer due to other causes                                 | 590<br>(362 - 817)             | --                       | 1<br>(1 - 2)           | 32<br>(22 - 44)             | 181<br>(116 - 247)             | 375<br>(209 - 553)             |
| Larynx cancer                                                    | 1,474<br>(1,065 - 1,755)       | --                       | --                     | 93<br>(71 - 144)            | 638<br>(459 - 783)             | 744<br>(502 - 908)             |
| Tracheal, bronchus and lung cancer                               | 47,331<br>(41,306 - 50,717)    | --                       | --                     | 17,636<br>(14,885 - 19,945) | 17,633<br>(15,180 - 19,103)    | 27,963<br>(24,260 - 30,508)    |
| Breast cancer                                                    | 18,478<br>(13,382 - 20,836)    | --                       | --                     | 5,066<br>(4,742 - 6,727)    | 5,827<br>(4,742 - 6,722)       | 11,145<br>(7,323 - 13,097)     |
| Cervical cancer                                                  | 2,588<br>(2,167 - 3,418)       | --                       | --                     | 397<br>(324 - 525)          | 818<br>(679 - 1,109)           | 1,374<br>(1,052 - 1,879)       |
| Uterine cancer                                                   | 2,275<br>(1,889 - 2,912)       | --                       | --                     | 40<br>(31 - 56)             | 524<br>(428 - 717)             | 1,711<br>(1,358 - 2,194)       |
| Prostate cancer                                                  | 17,085<br>(13,663 - 24,947)    | --                       | --                     | 41<br>(27 - 65)             | 2,215<br>(1,651 - 3,154)       | 14,829<br>(11,603 - 21,973)    |

Web Table 31- Germany deaths with 95% UI by age, sex, and cause in 2013

| Cause                                         | Both Sexes, All Ages           | Both Sexes, 0-4 Years | Both Sexes, 5-14 Years | Both Sexes, 15-49 Years  | Both Sexes, 50-69 Years     | Both Sexes, 70-80 Years        |
|-----------------------------------------------|--------------------------------|-----------------------|------------------------|--------------------------|-----------------------------|--------------------------------|
| Colon and rectum cancer                       | 32,642<br>(29,901 - 35,619)    | --                    | --                     | 900<br>(810 - 994)       | 7,097<br>(6,633 - 7,538)    | 24,646<br>(22,082 - 27,589)    |
| Lip and oral cavity cancer                    | 2,762<br>(2,352 - 3,033)       | --                    | --                     | 265<br>(223 - 316)       | 1,314<br>(1,046 - 1,500)    | 1,182<br>(1,002 - 1,356)       |
| Nasopharynx cancer                            | 251<br>(197 - 439)             | --                    | 1<br>(0 - 1)           | 40<br>(26 - 84)          | 123<br>(91 - 215)           | 87<br>(64 - 141)               |
| Other pharynx cancer                          | 2,535<br>(1,783 - 2,939)       | --                    | --                     | 255<br>(205 - 351)       | 1,484<br>(992 - 1,780)      | 796<br>(517 - 969)             |
| Gallbladder and biliary tract cancer          | 4,715<br>(3,889 - 7,286)       | --                    | --                     | 81<br>(64 - 119)         | 934<br>(780 - 1,423)        | 3,700<br>(2,945 - 5,746)       |
| Pancreatic cancer                             | 17,758<br>(16,435 - 19,012)    | --                    | --                     | 507<br>(446 - 571)       | 4,992<br>(4,609 - 5,365)    | 12,258<br>(11,098 - 13,360)    |
| Malignant skin melanoma                       | 3,217<br>(2,186 - 4,634)       | --                    | --                     | 419<br>(298 - 659)       | 1,035<br>(688 - 1,649)      | 1,763<br>(1,138 - 2,403)       |
| Non-melanoma skin cancer                      | 818<br>(605 - 1,077)           | --                    | --                     | 20<br>(14 - 28)          | 99<br>(70 - 139)            | 698<br>(517 - 931)             |
| Ovarian cancer                                | 6,424<br>(5,426 - 7,410)       | --                    | --                     | 351<br>(292 - 436)       | 1,951<br>(1,664 - 2,319)    | 4,122<br>(3,264 - 4,991)       |
| Testicular cancer                             | 220<br>(173 - 320)             | --                    | --                     | 121<br>(90 - 181)        | 49<br>(34 - 67)             | 50<br>(34 - 80)                |
| Kidney cancer                                 | 7,961<br>(6,801 - 9,275)       | 2<br>(1 - 3)          | 3<br>(2 - 4)           | 239<br>(195 - 288)       | 2,296<br>(1,995 - 2,635)    | 5,421<br>(4,287 - 6,650)       |
| Bladder cancer                                | 7,491<br>(6,444 - 8,863)       | --                    | --                     | 88<br>(72 - 107)         | 1,163<br>(999 - 1,522)      | 6,240<br>(5,275 - 7,406)       |
| Brain and nervous system cancer               | 5,877<br>(4,659 - 6,622)       | 23<br>(15 - 33)       | 62<br>(50 - 78)        | 854<br>(709 - 1,026)     | 2,318<br>(1,981 - 2,751)    | 2,622<br>(1,729 - 3,182)       |
| Thyroid cancer                                | 872<br>(736 - 1,173)           | --                    | 0<br>(0 - 1)           | 37<br>(28 - 51)          | 221<br>(181 - 304)          | 614<br>(504 - 830)             |
| Mesothelioma                                  | 1,485<br>(964 - 1,938)         | --                    | --                     | 41<br>(28 - 67)          | 445<br>(315 - 703)          | 999<br>(520 - 1,335)           |
| Hodgkin lymphoma                              | 442<br>(369 - 732)             | 0<br>(0 - 1)          | 2<br>(1 - 3)           | 88<br>(71 - 155)         | 115<br>(88 - 213)           | 238<br>(186 - 363)             |
| Non-Hodgkin lymphoma                          | 6,959<br>(4,468 - 8,446)       | 4<br>(2 - 6)          | 11<br>(7 - 18)         | 360<br>(222 - 540)       | 1,664<br>(1,034 - 2,287)    | 4,919<br>(2,886 - 6,066)       |
| Multiple myeloma                              | 4,204<br>(2,840 - 5,806)       | --                    | --                     | 118<br>(81 - 192)        | 1,129<br>(786 - 1,679)      | 2,957<br>(1,933 - 3,998)       |
| Leukemia                                      | 8,080<br>(7,288 - 8,800)       | 20<br>(13 - 28)       | 47<br>(38 - 57)        | 478<br>(432 - 524)       | 1,611<br>(1,467 - 1,757)    | 5,923<br>(5,222 - 6,620)       |
| Other neoplasms                               | 9,641<br>(7,690 - 11,021)      | 41<br>(30 - 53)       | 55<br>(43 - 67)        | 713<br>(607 - 878)       | 2,134<br>(1,870 - 2,667)    | 6,698<br>(4,849 - 7,982)       |
| Cardiovascular diseases                       | 362,125<br>(342,510 - 395,994) | 25<br>(18 - 31)       | 24<br>(19 - 29)        | 5,463<br>(4,916 - 5,955) | 36,084<br>(34,098 - 40,120) | 320,528<br>(302,164 - 350,908) |
| Rheumatic heart disease                       | 2,552<br>(1,300 - 3,235)       | 0<br>(0 - 1)          | 1<br>(0 - 1)           | 56<br>(38 - 71)          | 285<br>(223 - 415)          | 2,210<br>(1,008 - 2,899)       |
| Ischemic heart disease                        | 198,375<br>(182,003 - 232,601) | 1<br>(1 - 2)          | 3<br>(2 - 3)           | 2,894<br>(2,557 - 3,280) | 21,511<br>(19,731 - 25,435) | 173,965<br>(158,510 - 204,883) |
| Cerebrovascular disease                       | 81,985<br>(71,442 - 101,936)   | 3<br>(2 - 4)          | 6<br>(4 - 7)           | 962<br>(740 - 1,147)     | 6,284<br>(5,251 - 7,419)    | 74,731<br>(64,657 - 93,907)    |
| Ischemic stroke                               | 52,987<br>(43,056 - 68,993)    | 0<br>(0 - 1)          | 1<br>(0 - 1)           | 167<br>(110 - 218)       | 2,536<br>(1,844 - 3,179)    | 50,283<br>(40,874 - 66,097)    |
| Hemorrhagic stroke                            | 28,998<br>(23,562 - 38,360)    | 2<br>(2 - 3)          | 5<br>(4 - 6)           | 794<br>(612 - 944)       | 3,748<br>(3,074 - 4,612)    | 24,448<br>(19,382 - 33,233)    |
| Hypertensive heart disease                    | 19,162<br>(12,457 - 24,266)    | 0<br>(0 - 1)          | 1<br>(0 - 1)           | 120<br>(89 - 189)        | 1,057<br>(801 - 1,620)      | 17,984<br>(11,161 - 23,266)    |
| Cardiomyopathy and myocarditis                | 8,475<br>(6,890 - 10,414)      | 13<br>(10 - 17)       | 9<br>(7 - 11)          | 485<br>(388 - 626)       | 1,838<br>(1,518 - 2,400)    | 6,130<br>(4,892 - 7,564)       |
| Atrial fibrillation and flutter               | 16,010<br>(12,643 - 19,654)    | --                    | --                     | 46<br>(36 - 57)          | 635<br>(506 - 750)          | 15,330<br>(12,023 - 18,999)    |
| Aortic aneurysm                               | 4,769<br>(3,932 - 5,948)       | --                    | --                     | 162<br>(111 - 190)       | 817<br>(647 - 950)          | 3,791<br>(3,066 - 4,896)       |
| Peripheral vascular disease                   | 6,348<br>(5,174 - 7,628)       | --                    | --                     | 27<br>(20 - 34)          | 673<br>(534 - 787)          | 5,648<br>(4,491 - 6,901)       |
| Endocarditis                                  | 1,192<br>(836 - 1,576)         | 1<br>(1 - 2)          | 1<br>(1 - 1)           | 60<br>(43 - 86)          | 225<br>(158 - 314)          | 904<br>(613 - 1,204)           |
| Other cardiovascular and circulatory diseases | 23,256<br>(15,182 - 27,830)    | 6<br>(3 - 8)          | 4<br>(3 - 6)           | 652<br>(386 - 781)       | 2,758<br>(1,910 - 3,276)    | 19,836<br>(12,439 - 24,294)    |
| Chronic respiratory diseases                  | 46,075<br>(41,145 - 51,121)    | 7<br>(5 - 10)         | 8<br>(7 - 9)           | 503<br>(436 - 577)       | 5,988<br>(4,807 - 6,598)    | 39,570<br>(35,404 - 44,443)    |
| Chronic obstructive pulmonary disease         | 38,945<br>(34,005 - 43,499)    | 4<br>(3 - 6)          | 3<br>(2 - 4)           | 298<br>(240 - 348)       | 4,913<br>(3,841 - 5,516)    | 33,726<br>(29,237 - 38,172)    |
| Pneumoconiosis                                | 1,349<br>(925 - 1,937)         | 0<br>(0 - 0)          | 1<br>(0 - 1)           | 19<br>(13 - 26)          | 140<br>(97 - 210)           | 1,189<br>(791 - 1,728)         |
| Silicosis                                     | 333<br>(216 - 494)             | 0<br>(0 - 0)          | 0<br>(0 - 0)           | 5<br>(4 - 8)             | 21<br>(13 - 32)             | 307<br>(194 - 464)             |
| Asbestosis                                    | 430<br>(290 - 620)             | 0<br>(0 - 0)          | 0<br>(0 - 0)           | 5<br>(3 - 7)             | 55<br>(38 - 84)             | 370<br>(240 - 539)             |
| Coal workers pneumoconiosis                   | 83<br>(54 - 124)               | 0<br>(0 - 0)          | 0<br>(0 - 0)           | 2<br>(1 - 3)             | 3<br>(2 - 5)                | 78<br>(49 - 117)               |
| Other pneumoconiosis                          | 503<br>(342 - 728)             | 0<br>(0 - 0)          | 0<br>(0 - 0)           | 7<br>(5 - 10)            | 62<br>(43 - 91)             | 434<br>(280 - 633)             |



Web Table 31- Germany deaths with 95% UI by age, sex, and cause in 2013

| Cause                                               | Both Sexes, All Ages         | Both Sexes, 0-4 Years | Both Sexes, 5-14 Years | Both Sexes, 15-49 Years  | Both Sexes, 50-69 Years  | Both Sexes, 70-80 Years     |
|-----------------------------------------------------|------------------------------|-----------------------|------------------------|--------------------------|--------------------------|-----------------------------|
| Asthma                                              | 1,552<br>(1,172 - 2,247)     | 0<br>(0 - 1)          | 3<br>(2 - 3)           | 104<br>(84 - 128)        | 362<br>(276 - 464)       | 1,083<br>(767 - 1,654)      |
| Interstitial lung disease and pulmonary sarcoidosis | 3,965<br>(2,554 - 5,335)     | 1<br>(0 - 1)          | 1<br>(0 - 1)           | 62<br>(41 - 82)          | 516<br>(335 - 687)       | 3,385<br>(2,145 - 4,632)    |
| Other chronic respiratory diseases                  | 264<br>(210 - 327)           | 2<br>(1 - 2)          | 1<br>(0 - 1)           | 20<br>(15 - 26)          | 55<br>(41 - 70)          | 187<br>(144 - 240)          |
| Cirrhosis                                           | 18,672<br>(17,500 - 19,700)  | 1<br>(1 - 2)          | 2<br>(2 - 2)           | 2,319<br>(2,100 - 2,562) | 7,906<br>(7,311 - 8,460) | 8,443<br>(7,629 - 9,250)    |
| Cirrhosis due to hepatitis B                        | 2,071<br>(1,380 - 2,923)     | 0<br>(0 - 0)          | 0<br>(0 - 0)           | 257<br>(144 - 420)       | 871<br>(552 - 1,245)     | 943<br>(617 - 1,406)        |
| Cirrhosis due to hepatitis C                        | 8,765<br>(6,459 - 11,016)    | 0<br>(0 - 0)          | 1<br>(0 - 1)           | 1,064<br>(555 - 1,484)   | 3,636<br>(2,241 - 4,807) | 4,064<br>(3,059 - 5,051)    |
| Cirrhosis due to alcohol use                        | 6,055<br>(4,093 - 8,054)     | --                    | --                     | 620<br>(288 - 998)       | 2,561<br>(1,639 - 3,647) | 2,874<br>(1,970 - 3,929)    |
| Cirrhosis due to other causes                       | 1,781<br>(973 - 2,964)       | 1<br>(1 - 2)          | 1<br>(1 - 2)           | 378<br>(192 - 651)       | 839<br>(414 - 1,460)     | 562<br>(302 - 936)          |
| Digestive diseases                                  | 23,301<br>(18,688 - 25,777)  | 6<br>(4 - 9)          | 6<br>(5 - 8)           | 625<br>(523 - 698)       | 2,854<br>(2,274 - 3,127) | 19,810<br>(15,791 - 22,164) |
| Peptic ulcer disease                                | 3,316<br>(2,257 - 4,181)     | 0<br>(0 - 0)          | 0<br>(0 - 1)           | 92<br>(69 - 117)         | 463<br>(342 - 564)       | 2,761<br>(1,809 - 3,584)    |
| Gastritis and duodenitis                            | 333<br>(160 - 468)           | 0<br>(0 - 0)          | 0<br>(0 - 1)           | 17<br>(9 - 23)           | 46<br>(24 - 62)          | 269<br>(122 - 400)          |
| Appendicitis                                        | 273<br>(168 - 377)           | 0<br>(0 - 0)          | 1<br>(0 - 1)           | 12<br>(8 - 16)           | 44<br>(28 - 59)          | 217<br>(125 - 313)          |
| Paralytic ileus and intestinal obstruction          | 4,653<br>(2,793 - 6,405)     | 2<br>(1 - 3)          | 2<br>(1 - 3)           | 80<br>(54 - 121)         | 470<br>(314 - 686)       | 4,099<br>(2,350 - 5,683)    |
| Inguinal, femoral, and abdominal hernia             | 465<br>(236 - 651)           | 0<br>(0 - 0)          | 0<br>(0 - 1)           | 6<br>(3 - 8)             | 43<br>(26 - 59)          | 415<br>(203 - 591)          |
| Inflammatory bowel disease                          | 1,709<br>(1,195 - 2,438)     | 2<br>(1 - 3)          | 1<br>(0 - 1)           | 64<br>(43 - 80)          | 206<br>(141 - 255)       | 1,436<br>(994 - 2,166)      |
| Vascular intestinal disorders                       | 5,395<br>(3,531 - 7,970)     | 0<br>(0 - 1)          | 0<br>(0 - 1)           | 54<br>(30 - 89)          | 558<br>(331 - 859)       | 4,782<br>(3,150 - 7,205)    |
| Gallbladder and biliary diseases                    | 2,252<br>(1,459 - 2,832)     | 0<br>(0 - 0)          | 0<br>(0 - 1)           | 27<br>(20 - 33)          | 187<br>(141 - 227)       | 2,037<br>(1,285 - 2,599)    |
| Pancreatitis                                        | 1,846<br>(1,287 - 2,375)     | 0<br>(0 - 0)          | 0<br>(0 - 1)           | 205<br>(150 - 251)       | 470<br>(323 - 585)       | 1,170<br>(784 - 1,591)      |
| Other digestive diseases                            | 3,060<br>(1,944 - 3,830)     | 1<br>(0 - 1)          | 1<br>(0 - 1)           | 68<br>(38 - 83)          | 368<br>(228 - 439)       | 2,623<br>(1,638 - 3,348)    |
| Neurological disorders                              | 88,520<br>(71,178 - 104,741) | 65<br>(47 - 84)       | 37<br>(28 - 44)        | 988<br>(783 - 1,119)     | 4,065<br>(3,500 - 4,506) | 83,366<br>(65,662 - 99,707) |
| Alzheimer disease and other dementias               | 73,738<br>(55,979 - 89,846)  | --                    | --                     | 8<br>(1 - 17)            | 1,381<br>(1,053 - 1,705) | 72,349<br>(54,515 - 88,344) |
| Parkinson disease                                   | 8,219<br>(6,433 - 9,824)     | --                    | --                     | 11<br>(9 - 13)           | 425<br>(358 - 510)       | 7,783<br>(6,066 - 9,351)    |
| Epilepsy                                            | 1,807<br>(956 - 2,444)       | 15<br>(9 - 23)        | 19<br>(12 - 26)        | 384<br>(251 - 473)       | 431<br>(262 - 546)       | 957<br>(398 - 1,452)        |
| Multiple sclerosis                                  | 1,351<br>(815 - 1,712)       | --                    | --                     | 237<br>(152 - 342)       | 661<br>(379 - 892)       | 453<br>(255 - 599)          |
| Other neurological disorders                        | 3,405<br>(2,803 - 3,724)     | 49<br>(35 - 66)       | 17<br>(13 - 21)        | 347<br>(275 - 392)       | 1,168<br>(968 - 1,307)   | 1,824<br>(1,476 - 2,054)    |
| Mental and substance use disorders                  | 6,685<br>(4,630 - 8,124)     | 0<br>(0 - 0)          | 0<br>(0 - 1)           | 2,326<br>(1,903 - 2,884) | 3,020<br>(1,811 - 3,762) | 1,338<br>(844 - 1,616)      |
| Schizophrenia                                       | 171<br>(115 - 318)           | --                    | --                     | 21<br>(13 - 45)          | 51<br>(33 - 99)          | 99<br>(62 - 197)            |
| Alcohol use disorders                               | 5,055<br>(2,935 - 6,405)     | --                    | --                     | 1,227<br>(862 - 1,819)   | 2,734<br>(1,497 - 3,442) | 1,094<br>(551 - 1,359)      |
| Drug use disorders                                  | 1,449<br>(1,223 - 1,610)     | 0<br>(0 - 0)          | --                     | 1,068<br>(860 - 1,231)   | 235<br>(172 - 279)       | 146<br>(121 - 180)          |
| Opioid use disorders                                | 529<br>(447 - 599)           | 0<br>(0 - 0)          | --                     | 396<br>(318 - 466)       | 79<br>(57 - 96)          | 54<br>(44 - 67)             |
| Cocaine use disorders                               | 41<br>(33 - 47)              | 0<br>(0 - 0)          | --                     | 32<br>(24 - 38)          | 5<br>(4 - 7)             | 4<br>(3 - 5)                |
| Amphetamine use disorders                           | 40<br>(33 - 46)              | 0<br>(0 - 0)          | --                     | 28<br>(22 - 34)          | 7<br>(5 - 9)             | 4<br>(3 - 6)                |
| Other drug use disorders                            | 839<br>(705 - 940)           | 0<br>(0 - 0)          | --                     | 612<br>(492 - 710)       | 143<br>(106 - 171)       | 84<br>(70 - 106)            |
| Eating disorders                                    | 11<br>(7 - 16)               | --                    | 0<br>(0 - 1)           | 10<br>(6 - 15)           | --                       | --                          |
| Anorexia nervosa                                    | 11<br>(7 - 16)               | --                    | 0<br>(0 - 1)           | 10<br>(6 - 15)           | --                       | --                          |
| Diabetes, urogenital, blood, and endocrine diseases | 53,348<br>(42,633 - 58,736)  | 75<br>(52 - 93)       | 47<br>(36 - 56)        | 1,194<br>(1,005 - 1,309) | 5,860<br>(5,319 - 6,344) | 46,173<br>(35,591 - 51,500) |
| Diabetes mellitus                                   | 20,727<br>(18,359 - 23,860)  | 2<br>(2 - 3)          | 2<br>(1 - 2)           | 409<br>(359 - 462)       | 2,604<br>(2,342 - 2,904) | 17,711<br>(15,452 - 20,494) |
| Acute glomerulonephritis                            | 17<br>(12 - 21)              | 0<br>(0 - 0)          | 1<br>(0 - 1)           | 3<br>(2 - 4)             | 3<br>(2 - 4)             | 10<br>(6 - 14)              |
| Chronic kidney disease                              | 22,251<br>(12,713 - 26,156)  | 4<br>(2 - 5)          | 3<br>(2 - 4)           | 183<br>(158 - 240)       | 1,511<br>(1,309 - 1,756) | 20,551<br>(11,044 - 24,419) |
| Chronic kidney disease due to diabetes mellitus     | 5,867<br>(3,464 - 7,542)     | 0<br>(0 - 0)          | 1<br>(0 - 1)           | 71<br>(55 - 107)         | 589<br>(438 - 836)       | 5,207<br>(2,881 - 6,803)    |

Web Table 31- Germany deaths with 95% UI by age, sex, and cause in 2013

| Cause                                               | Both Sexes, All Ages        | Both Sexes, 0-4 Years | Both Sexes, 5-14 Years | Both Sexes, 15-49 Years  | Both Sexes, 50-69 Years  | Both Sexes, 70-80 Years     |
|-----------------------------------------------------|-----------------------------|-----------------------|------------------------|--------------------------|--------------------------|-----------------------------|
| Chronic kidney disease due to hypertension          | 6,230<br>(3,447 - 8,184)    | 1<br>(0 - 1)          | 1<br>(0 - 1)           | 33<br>(22 - 53)          | 305<br>(197 - 407)       | 5,890<br>(3,170 - 7,829)    |
| Chronic kidney disease due to glomerulonephritis    | 126<br>(73 - 164)           | 0<br>(0 - 1)          | 0<br>(0 - 1)           | 7<br>(5 - 9)             | 21<br>(13 - 28)          | 97<br>(52 - 134)            |
| Chronic kidney disease due to other causes          | 10,029<br>(3,999 - 13,261)  | 2<br>(1 - 3)          | 1<br>(1 - 2)           | 72<br>(51 - 103)         | 596<br>(378 - 809)       | 9,357<br>(3,403 - 12,588)   |
| Urinary diseases and male infertility               | 5,288<br>(3,014 - 6,610)    | 1<br>(1 - 2)          | 1<br>(0 - 1)           | 71<br>(52 - 82)          | 428<br>(322 - 499)       | 4,786<br>(2,590 - 6,100)    |
| Interstitial nephritis and urinary tract infections | 4,399<br>(2,363 - 5,604)    | 1<br>(1 - 1)          | 0<br>(0 - 0)           | 50<br>(37 - 59)          | 320<br>(242 - 382)       | 4,027<br>(2,053 - 5,229)    |
| Urolithiasis                                        | 122<br>(84 - 217)           | --                    | 0<br>(0 - 0)           | 4<br>(3 - 6)             | 17<br>(12 - 33)          | 100<br>(65 - 187)           |
| Other urinary diseases                              | 767<br>(402 - 1,163)        | 0<br>(0 - 0)          | 0<br>(0 - 0)           | 17<br>(10 - 22)          | 90<br>(51 - 118)         | 659<br>(330 - 1,034)        |
| Gynecological diseases                              | 20<br>(14 - 34)             | --                    | --                     | 3<br>(2 - 4)             | 3<br>(2 - 5)             | 14<br>(9 - 25)              |
| Uterine fibroids                                    | 6<br>(4 - 10)               | --                    | --                     | 1<br>(0 - 1)             | 1<br>(1 - 1)             | 4<br>(3 - 7)                |
| Polycystic ovarian syndrome                         | 0<br>(0 - 0)                | --                    | --                     | 0<br>(0 - 0)             | 0<br>(0 - 0)             | --                          |
| Endometriosis                                       | 0<br>(0 - 1)                | --                    | --                     | 0<br>(0 - 1)             | 0<br>(0 - 0)             | --                          |
| Genital prolapse                                    | 4<br>(3 - 8)                | --                    | --                     | 0<br>(0 - 0)             | 0<br>(0 - 1)             | 4<br>(2 - 6)                |
| Other gynecological diseases                        | 9<br>(6 - 15)               | --                    | --                     | 1<br>(1 - 2)             | 1<br>(1 - 2)             | 6<br>(4 - 11)               |
| Hemoglobinopathies and hemolytic anemias            | 402<br>(237 - 550)          | 7<br>(4 - 10)         | 5<br>(3 - 8)           | 31<br>(21 - 44)          | 69<br>(47 - 92)          | 289<br>(158 - 423)          |
| Thalassemias                                        | 7<br>(5 - 10)               | 1<br>(1 - 2)          | 1<br>(1 - 2)           | 4<br>(3 - 6)             | 0<br>(0 - 0)             | 0<br>(0 - 0)                |
| Sickle cell disorders                               | 38<br>(25 - 49)             | 3<br>(2 - 4)          | 2<br>(2 - 3)           | 9<br>(6 - 13)            | 16<br>(11 - 21)          | 7<br>(4 - 10)               |
| G6PD deficiency                                     | 2<br>(1 - 3)                | 0<br>(0 - 0)          | 0<br>(0 - 0)           | 1<br>(0 - 1)             | 1<br>(1 - 1)             | 1<br>(0 - 1)                |
| Other hemoglobinopathies and hemolytic anemias      | 355<br>(206 - 495)          | 3<br>(2 - 4)          | 2<br>(1 - 2)           | 17<br>(11 - 25)          | 52<br>(36 - 70)          | 281<br>(154 - 413)          |
| Endocrine, metabolic, blood, and immune disorders   | 4,643<br>(3,420 - 5,410)    | 61<br>(40 - 76)       | 35<br>(25 - 44)        | 493<br>(309 - 577)       | 1,242<br>(858 - 1,458)   | 2,812<br>(2,037 - 3,470)    |
| Musculoskeletal disorders                           | 1,809<br>(1,423 - 2,299)    | --                    | 2<br>(1 - 2)           | 69<br>(54 - 80)          | 338<br>(269 - 433)       | 1,400<br>(1,075 - 1,793)    |
| Rheumatoid arthritis                                | 501<br>(371 - 825)          | --                    | 0<br>(0 - 1)           | 8<br>(6 - 13)            | 82<br>(59 - 144)         | 411<br>(293 - 681)          |
| Other musculoskeletal disorders                     | 1,308<br>(973 - 1,544)      | --                    | 1<br>(1 - 2)           | 61<br>(46 - 71)          | 256<br>(195 - 303)       | 989<br>(707 - 1,206)        |
| Other non-communicable diseases                     | 3,595<br>(2,595 - 4,021)    | 938<br>(780 - 1,158)  | 75<br>(63 - 89)        | 332<br>(280 - 367)       | 498<br>(342 - 549)       | 1,751<br>(800 - 2,147)      |
| Congenital anomalies                                | 1,773<br>(1,563 - 1,959)    | 743<br>(625 - 886)    | 74<br>(62 - 88)        | 301<br>(256 - 335)       | 330<br>(247 - 369)       | 325<br>(228 - 392)          |
| Neural tube defects                                 | 35<br>(27 - 46)             | 19<br>(12 - 29)       | 2<br>(1 - 3)           | 10<br>(7 - 13)           | 3<br>(2 - 4)             | 2<br>(1 - 2)                |
| Congenital heart anomalies                          | 510<br>(435 - 589)          | 260<br>(207 - 328)    | 26<br>(20 - 34)        | 104<br>(87 - 120)        | 60<br>(46 - 82)          | 60<br>(42 - 76)             |
| Cleft lip and cleft palate                          | 1<br>(0 - 1)                | 1<br>(0 - 1)          | --                     | --                       | --                       | --                          |
| Down syndrome                                       | 326<br>(237 - 384)          | 34<br>(21 - 49)       | 6<br>(4 - 9)           | 73<br>(51 - 90)          | 194<br>(131 - 235)       | 20<br>(12 - 28)             |
| Chromosomal unbalanced rearrangements               | 121<br>(90 - 166)           | 101<br>(74 - 142)     | 5<br>(3 - 7)           | 9<br>(7 - 11)            | 4<br>(3 - 7)             | 2<br>(1 - 3)                |
| Other congenital anomalies                          | 781<br>(655 - 892)          | 329<br>(257 - 405)    | 36<br>(28 - 44)        | 105<br>(84 - 125)        | 69<br>(48 - 93)          | 243<br>(166 - 297)          |
| Skin and subcutaneous diseases                      | 1,628<br>(674 - 2,001)      | 2<br>(1 - 2)          | 1<br>(0 - 1)           | 31<br>(16 - 37)          | 169<br>(91 - 196)        | 1,426<br>(561 - 1,804)      |
| Cellulitis                                          | 133<br>(51 - 194)           | 0<br>(0 - 0)          | 0<br>(0 - 0)           | 4<br>(2 - 6)             | 25<br>(13 - 36)          | 104<br>(35 - 158)           |
| Pyoderma                                            | 768<br>(355 - 962)          | 1<br>(0 - 1)          | 0<br>(0 - 0)           | 19<br>(10 - 25)          | 93<br>(54 - 113)         | 654<br>(285 - 844)          |
| Decubitus ulcer                                     | 656<br>(206 - 859)          | 0<br>(0 - 0)          | 0<br>(0 - 0)           | 4<br>(2 - 6)             | 43<br>(20 - 54)          | 608<br>(187 - 810)          |
| Other skin and subcutaneous diseases                | 71<br>(28 - 125)            | 0<br>(0 - 1)          | 0<br>(0 - 0)           | 3<br>(2 - 4)             | 7<br>(4 - 11)            | 60<br>(21 - 113)            |
| Sudden infant death syndrome                        | 194<br>(117 - 358)          | 194<br>(117 - 358)    | --                     | --                       | --                       | --                          |
| Injuries                                            | 37,837<br>(32,853 - 41,347) | 161<br>(129 - 199)    | 185<br>(163 - 217)     | 8,105<br>(7,499 - 8,705) | 7,649<br>(6,906 - 8,373) | 21,736<br>(17,307 - 24,888) |
| Transport injuries                                  | 5,454<br>(5,081 - 6,203)    | 32<br>(23 - 42)       | 83<br>(69 - 99)        | 2,388<br>(2,182 - 2,610) | 1,252<br>(1,124 - 1,407) | 1,700<br>(1,492 - 2,113)    |
| Road injuries                                       | 5,046<br>(4,682 - 5,785)    | 29<br>(21 - 38)       | 75<br>(63 - 91)        | 2,213<br>(2,028 - 2,425) | 1,128<br>(1,005 - 1,285) | 1,601<br>(1,412 - 2,012)    |
| Pedestrian road injuries                            | 1,079<br>(807 - 1,606)      | 12<br>(8 - 18)        | 26<br>(18 - 35)        | 215<br>(126 - 340)       | 227<br>(154 - 344)       | 599<br>(448 - 912)          |

Web Table 31- Germany deaths with 95% UI by age, sex, and cause in 2013

| Cause                                           | Both Sexes, All Ages        | Both Sexes, 0-4 Years | Both Sexes, 5-14 Years | Both Sexes, 15-49 Years  | Both Sexes, 50-69 Years  | Both Sexes, 70-80 Years     |
|-------------------------------------------------|-----------------------------|-----------------------|------------------------|--------------------------|--------------------------|-----------------------------|
| Cyclist road injuries                           | 624<br>(457 - 779)          | 2<br>(1 - 3)          | 16<br>(11 - 23)        | 113<br>(74 - 141)        | 174<br>(127 - 226)       | 318<br>(229 - 416)          |
| Motorcyclist road injuries                      | 700<br>(435 - 881)          | 1<br>(0 - 1)          | 2<br>(1 - 4)           | 499<br>(316 - 629)       | 141<br>(76 - 191)        | 57<br>(32 - 82)             |
| Motor vehicle road injuries                     | 2,618<br>(2,200 - 3,170)    | 14<br>(9 - 19)        | 29<br>(22 - 40)        | 1,378<br>(1,184 - 1,635) | 578<br>(473 - 736)       | 618<br>(470 - 817)          |
| Other road injuries                             | 25<br>(16 - 37)             | 0<br>(0 - 1)          | 1<br>(1 - 2)           | 8<br>(5 - 11)            | 7<br>(4 - 12)            | 8<br>(5 - 16)               |
| Other transport injuries                        | 409<br>(309 - 506)          | 3<br>(2 - 5)          | 7<br>(5 - 10)          | 175<br>(132 - 230)       | 124<br>(88 - 161)        | 99<br>(68 - 138)            |
| Unintentional injuries                          | 20,322<br>(15,550 - 23,531) | 108<br>(85 - 141)     | 71<br>(60 - 92)        | 1,204<br>(1,067 - 1,385) | 2,576<br>(2,086 - 2,878) | 16,362<br>(11,950 - 19,484) |
| Falls                                           | 13,334<br>(9,566 - 15,915)  | 12<br>(9 - 17)        | 8<br>(5 - 11)          | 422<br>(353 - 523)       | 1,316<br>(949 - 1,500)   | 11,576<br>(8,157 - 14,097)  |
| Drowning                                        | 482<br>(400 - 777)          | 28<br>(16 - 62)       | 24<br>(16 - 48)        | 142<br>(113 - 239)       | 133<br>(104 - 198)       | 156<br>(122 - 222)          |
| Fire, heat, and hot substances                  | 673<br>(464 - 812)          | 13<br>(9 - 20)        | 8<br>(6 - 11)          | 102<br>(81 - 134)        | 142<br>(99 - 177)        | 409<br>(256 - 529)          |
| Poisonings                                      | 179<br>(143 - 277)          | 1<br>(1 - 2)          | 1<br>(1 - 2)           | 37<br>(30 - 58)          | 34<br>(27 - 50)          | 106<br>(78 - 184)           |
| Exposure to mechanical forces                   | 476<br>(420 - 535)          | 14<br>(10 - 20)       | 12<br>(9 - 15)         | 160<br>(137 - 205)       | 136<br>(115 - 161)       | 154<br>(106 - 185)          |
| Unintentional firearm injuries                  | 18<br>(15 - 21)             | 0<br>(0 - 0)          | 1<br>(1 - 1)           | 8<br>(6 - 10)            | 5<br>(4 - 7)             | 4<br>(3 - 5)                |
| Unintentional suffocation                       | 87<br>(55 - 114)            | 8<br>(4 - 12)         | 3<br>(2 - 5)           | 13<br>(8 - 17)           | 11<br>(7 - 15)           | 51<br>(29 - 74)             |
| Other exposure to mechanical forces             | 371<br>(330 - 422)          | 6<br>(4 - 9)          | 8<br>(6 - 11)          | 139<br>(117 - 188)       | 120<br>(100 - 146)       | 99<br>(60 - 121)            |
| Adverse effects of medical treatment            | 1,830<br>(789 - 2,650)      | 8<br>(4 - 13)         | 5<br>(2 - 7)           | 101<br>(52 - 137)        | 341<br>(171 - 472)       | 1,375<br>(539 - 2,065)      |
| Animal contact                                  | 54<br>(32 - 70)             | 1<br>(0 - 1)          | 1<br>(0 - 1)           | 9<br>(6 - 12)            | 21<br>(12 - 27)          | 23<br>(14 - 31)             |
| Venomous animal contact                         | 21<br>(11 - 28)             | 0<br>(0 - 0)          | 0<br>(0 - 1)           | 5<br>(3 - 7)             | 11<br>(6 - 14)           | 5<br>(2 - 7)                |
| Non-venomous animal contact                     | 34<br>(20 - 43)             | 0<br>(0 - 1)          | 0<br>(0 - 1)           | 4<br>(3 - 6)             | 10<br>(5 - 13)           | 18<br>(11 - 25)             |
| Foreign body                                    | 3,088<br>(1,956 - 4,077)    | 28<br>(16 - 38)       | 8<br>(6 - 11)          | 179<br>(118 - 258)       | 406<br>(260 - 551)       | 2,466<br>(1,510 - 3,313)    |
| Pulmonary aspiration and foreign body in airway | 3,071<br>(1,942 - 4,064)    | 28<br>(16 - 38)       | 8<br>(5 - 11)          | 176<br>(115 - 255)       | 404<br>(258 - 549)       | 2,456<br>(1,503 - 3,303)    |
| Foreign body in other body part                 | 18<br>(11 - 27)             | 0<br>(0 - 0)          | 1<br>(0 - 1)           | 4<br>(3 - 5)             | 2<br>(2 - 3)             | 11<br>(5 - 19)              |
| Other unintentional injuries                    | 204<br>(153 - 248)          | 2<br>(1 - 4)          | 4<br>(2 - 6)           | 52<br>(39 - 68)          | 49<br>(34 - 68)          | 97<br>(52 - 135)            |
| Self-harm and interpersonal violence            | 12,061<br>(10,528 - 14,512) | 21<br>(15 - 29)       | 32<br>(24 - 43)        | 4,513<br>(3,696 - 5,107) | 3,821<br>(3,335 - 4,679) | 3,674<br>(3,130 - 4,823)    |
| Self-harm                                       | 11,499<br>(9,944 - 13,813)  | --                    | 19<br>(13 - 27)        | 4,230<br>(3,374 - 4,760) | 3,685<br>(3,174 - 4,518) | 3,565<br>(3,034 - 4,712)    |
| Interpersonal violence                          | 562<br>(465 - 834)          | 21<br>(15 - 29)       | 13<br>(9 - 18)         | 283<br>(233 - 448)       | 136<br>(108 - 232)       | 109<br>(72 - 132)           |
| Assault by firearm                              | 127<br>(87 - 231)           | 1<br>(1 - 2)          | 2<br>(1 - 3)           | 73<br>(49 - 136)         | 31<br>(20 - 60)          | 21<br>(13 - 33)             |
| Assault by sharp object                         | 197<br>(146 - 316)          | 2<br>(2 - 4)          | 3<br>(2 - 6)           | 117<br>(85 - 199)        | 48<br>(33 - 82)          | 26<br>(17 - 36)             |
| Assault by other means                          | 238<br>(177 - 333)          | 17<br>(12 - 23)       | 8<br>(5 - 11)          | 93<br>(68 - 142)         | 58<br>(42 - 96)          | 62<br>(39 - 79)             |
| Forces of nature, war, and legal intervention   | 0<br>(0 - 0)                | 0<br>(0 - 0)          | --                     | --                       | --                       | 0<br>(0 - 0)                |
| Exposure to forces of nature                    | 0<br>(0 - 0)                | 0<br>(0 - 0)          | --                     | --                       | --                       | 0<br>(0 - 0)                |

Web Table 31- Germany deaths with 95% UI by age, sex, and cause in 2013

| Cause                                                              | Males, All Ages                | Males, 0-4 Years         | Males, 5-14 Years  | Males, 15-49 Years          | Males, 50-69 Years          | Males, 70-80 Years             |
|--------------------------------------------------------------------|--------------------------------|--------------------------|--------------------|-----------------------------|-----------------------------|--------------------------------|
| All causes                                                         | 445,523<br>(436,536 - 455,183) | 1,428<br>(1,231 - 1,644) | 347<br>(315 - 380) | 22,591<br>(21,941 - 23,310) | 94,705<br>(92,229 - 97,377) | 326,452<br>(320,612 - 332,685) |
| Communicable, maternal, neonatal, and nutritional diseases         | 17,540<br>(13,748 - 20,385)    | 658<br>(536 - 777)       | 21<br>(16 - 26)    | 698<br>(606 - 796)          | 2,207<br>(1,678 - 2,597)    | 13,956<br>(10,756 - 16,814)    |
| HIV/AIDS and tuberculosis                                          | 747<br>(577 - 1,067)           | 0<br>(0 - 0)             | 0<br>(0 - 0)       | 251<br>(186 - 325)          | 247<br>(157 - 368)          | 248<br>(192 - 422)             |
| Tuberculosis                                                       | 312<br>(258 - 565)             | 0<br>(0 - 0)             | 0<br>(0 - 0)       | 23<br>(18 - 35)             | 72<br>(58 - 136)            | 216<br>(170 - 391)             |
| HIV/AIDS                                                           | 435<br>(285 - 623)             | 0<br>(0 - 0)             | 0<br>(0 - 0)       | 228<br>(166 - 298)          | 175<br>(89 - 281)           | 32<br>(5 - 63)                 |
| HIV/AIDS resulting in mycobacterial infection                      | 24<br>(15 - 36)                | 0<br>(0 - 0)             | 0<br>(0 - 0)       | 12<br>(8 - 17)              | 10<br>(5 - 17)              | 2<br>(0 - 4)                   |
| HIV/AIDS resulting in other diseases                               | 411<br>(269 - 588)             | 0<br>(0 - 0)             | 0<br>(0 - 0)       | 216<br>(157 - 282)          | 165<br>(84 - 265)           | 30<br>(4 - 59)                 |
| Diarrrhea, lower respiratory, and other common infectious diseases | 14,940<br>(11,080 - 17,844)    | 53<br>(36 - 70)          | 16<br>(12 - 20)    | 353<br>(269 - 424)          | 1,709<br>(1,200 - 2,065)    | 12,809<br>(9,500 - 15,730)     |
| Diarrheal diseases                                                 | 1,498<br>(1,072 - 2,068)       | 8<br>(5 - 12)            | 1<br>(1 - 2)       | 24<br>(19 - 31)             | 138<br>(108 - 179)          | 1,327<br>(907 - 1,895)         |
| Intestinal infectious diseases                                     | 9<br>(4 - 17)                  | 1<br>(0 - 4)             | 1<br>(0 - 3)       | 3<br>(1 - 7)                | 2<br>(0 - 5)                | 2<br>(1 - 5)                   |
| Typhoid fever                                                      | 4<br>(1 - 9)                   | 0<br>(0 - 1)             | 1<br>(0 - 1)       | 2<br>(1 - 4)                | 1<br>(0 - 1)                | 1<br>(0 - 1)                   |
| Paratyphoid fever                                                  | 1<br>(0 - 3)                   | 0<br>(0 - 0)             | 0<br>(0 - 0)       | 0<br>(0 - 1)                | 0<br>(0 - 0)                | 0<br>(0 - 0)                   |
| Other intestinal infectious diseases                               | 4<br>(1 - 10)                  | 1<br>(0 - 3)             | 0<br>(0 - 1)       | 1<br>(0 - 4)                | 1<br>(0 - 4)                | 1<br>(0 - 5)                   |
| Lower respiratory infections                                       | 13,082<br>(9,381 - 15,985)     | 22<br>(13 - 32)          | 6<br>(4 - 9)       | 267<br>(184 - 336)          | 1,484<br>(972 - 1,836)      | 11,303<br>(8,123 - 14,135)     |
| Upper respiratory infections                                       | 9<br>(2 - 25)                  | 0<br>(0 - 0)             | 0<br>(0 - 0)       | 1<br>(0 - 2)                | 2<br>(0 - 6)                | 6<br>(0 - 22)                  |
| Otitis media                                                       | 13<br>(10 - 17)                | 1<br>(1 - 2)             | 0<br>(0 - 1)       | 2<br>(1 - 2)                | 3<br>(2 - 3)                | 7<br>(5 - 10)                  |
| Meningitis                                                         | 173<br>(145 - 198)             | 13<br>(8 - 22)           | 3<br>(2 - 4)       | 27<br>(21 - 32)             | 41<br>(34 - 49)             | 89<br>(68 - 108)               |
| Pneumococcal meningitis                                            | 30<br>(17 - 43)                | 2<br>(1 - 3)             | 0<br>(0 - 1)       | 4<br>(2 - 7)                | 7<br>(2 - 12)               | 17<br>(9 - 25)                 |
| H influenzae type B meningitis                                     | 20<br>(12 - 30)                | 4<br>(2 - 7)             | 1<br>(0 - 1)       | 3<br>(2 - 5)                | 5<br>(2 - 8)                | 8<br>(3 - 14)                  |
| Meningococcal meningitis                                           | 55<br>(37 - 74)                | 4<br>(2 - 7)             | 1<br>(1 - 2)       | 8<br>(5 - 12)               | 12<br>(6 - 18)              | 30<br>(17 - 44)                |
| Other meningitis                                                   | 68<br>(45 - 90)                | 4<br>(2 - 7)             | 1<br>(0 - 1)       | 11<br>(8 - 15)              | 18<br>(10 - 27)             | 35<br>(18 - 50)                |
| Encephalitis                                                       | 119<br>(59 - 153)              | 4<br>(2 - 7)             | 3<br>(2 - 5)       | 23<br>(13 - 35)             | 34<br>(18 - 50)             | 54<br>(20 - 76)                |
| Diphtheria                                                         | 1<br>(0 - 3)                   | 0<br>(0 - 1)             | 0<br>(0 - 0)       | 0<br>(0 - 1)                | 0<br>(0 - 2)                | --                             |
| Whooping cough                                                     | 3<br>(2 - 4)                   | 0<br>(0 - 1)             | 0<br>(0 - 0)       | 2<br>(1 - 2)                | 1<br>(0 - 1)                | --                             |
| Tetanus                                                            | 4<br>(1 - 5)                   | 0<br>(0 - 0)             | 0<br>(0 - 0)       | 2<br>(0 - 2)                | 1<br>(0 - 1)                | 1<br>(0 - 1)                   |
| Measles                                                            | 1<br>(0 - 2)                   | 1<br>(0 - 2)             | 0<br>(0 - 0)       | 0<br>(0 - 0)                | 0<br>(0 - 0)                | --                             |
| Varicella and herpes zoster                                        | 28<br>(5 - 95)                 | 1<br>(0 - 5)             | 0<br>(0 - 2)       | 3<br>(0 - 7)                | 3<br>(0 - 10)               | 20<br>(0 - 88)                 |
| Neglected tropical diseases and malaria                            | 32<br>(26 - 38)                | 1<br>(1 - 1)             | 1<br>(1 - 1)       | 7<br>(5 - 8)                | 10<br>(8 - 12)              | 14<br>(10 - 19)                |
| Cysticercosis                                                      | 1<br>(1 - 1)                   | 0<br>(0 - 0)             | 0<br>(0 - 0)       | 0<br>(0 - 0)                | 0<br>(0 - 0)                | 0<br>(0 - 0)                   |
| Cystic echinococcosis                                              | 3<br>(3 - 3)                   | 0<br>(0 - 0)             | 0<br>(0 - 0)       | 1<br>(1 - 1)                | 1<br>(1 - 1)                | 1<br>(1 - 2)                   |
| Dengue                                                             | 4<br>(4 - 8)                   | 0<br>(0 - 0)             | 0<br>(0 - 1)       | 2<br>(1 - 2)                | 1<br>(1 - 2)                | 1<br>(0 - 3)                   |
| Rabies                                                             | 3<br>(2 - 4)                   | 0<br>(0 - 0)             | 0<br>(0 - 0)       | 2<br>(1 - 2)                | 1<br>(0 - 1)                | 0<br>(0 - 1)                   |
| Other neglected tropical diseases                                  | 21<br>(15 - 26)                | 0<br>(0 - 1)             | 0<br>(0 - 1)       | 3<br>(2 - 4)                | 6<br>(4 - 9)                | 11<br>(7 - 16)                 |
| Maternal disorders                                                 | --                             | --                       | --                 | --                          | --                          | --                             |
| Maternal hemorrhage                                                | --                             | --                       | --                 | --                          | --                          | --                             |
| Maternal sepsis and other maternal infections                      | --                             | --                       | --                 | --                          | --                          | --                             |
| Maternal hypertensive disorders                                    | --                             | --                       | --                 | --                          | --                          | --                             |
| Maternal obstructed labor                                          | --                             | --                       | --                 | --                          | --                          | --                             |
| Maternal abortive outcome                                          | --                             | --                       | --                 | --                          | --                          | --                             |
| Indirect maternal deaths                                           | --                             | --                       | --                 | --                          | --                          | --                             |

Web Table 31- Germany deaths with 95% UI by age, sex, and cause in 2013

| Cause                                                            | Males, All Ages                | Males, 0-4 Years   | Males, 5-14 Years  | Males, 15-49 Years          | Males, 50-69 Years          | Males, 70-80 Years             |
|------------------------------------------------------------------|--------------------------------|--------------------|--------------------|-----------------------------|-----------------------------|--------------------------------|
| Late maternal deaths                                             | --                             | --                 | --                 | --                          | --                          | --                             |
| Maternal deaths aggravated by HIV/AIDS                           | --                             | --                 | --                 | --                          | --                          | --                             |
| Other maternal disorders                                         | --                             | --                 | --                 | --                          | --                          | --                             |
| Neonatal disorders                                               | 593<br>(484 - 702)             | 593<br>(484 - 702) | --                 | --                          | --                          | --                             |
| Neonatal preterm birth complications                             | 374<br>(289 - 462)             | 374<br>(289 - 462) | --                 | --                          | --                          | --                             |
| Neonatal encephalopathy due to birth asphyxia and trauma         | 108<br>(55 - 145)              | 108<br>(55 - 145)  | --                 | --                          | --                          | --                             |
| Neonatal sepsis and other neonatal infections                    | 35<br>(13 - 75)                | 35<br>(13 - 75)    | --                 | --                          | --                          | --                             |
| Hemolytic disease and other neonatal jaundice                    | 2<br>(1 - 5)                   | 2<br>(1 - 5)       | --                 | --                          | --                          | --                             |
| Other neonatal disorders                                         | 74<br>(42 - 102)               | 74<br>(42 - 102)   | --                 | --                          | --                          | --                             |
| Nutritional deficiencies                                         | 669<br>(392 - 1,011)           | 1<br>(1 - 2)       | 1<br>(0 - 1)       | 36<br>(24 - 64)             | 80<br>(55 - 130)            | 551<br>(306 - 826)             |
| Protein-energy malnutrition                                      | 124<br>(36 - 235)              | 0<br>(0 - 1)       | 0<br>(0 - 0)       | 3<br>(1 - 6)                | 10<br>(3 - 18)              | 110<br>(31 - 210)              |
| Iodine deficiency                                                | 2<br>(0 - 12)                  | 0<br>(0 - 0)       | 0<br>(0 - 0)       | 0<br>(0 - 1)                | 1<br>(0 - 4)                | 2<br>(0 - 11)                  |
| Iron-deficiency anemia                                           | 482<br>(268 - 774)             | 0<br>(0 - 0)       | 0<br>(0 - 0)       | 29<br>(19 - 54)             | 55<br>(34 - 93)             | 398<br>(207 - 634)             |
| Other nutritional deficiencies                                   | 61<br>(25 - 119)               | 0<br>(0 - 1)       | 0<br>(0 - 0)       | 4<br>(2 - 7)                | 14<br>(6 - 29)              | 42<br>(16 - 87)                |
| Other communicable, maternal, neonatal, and nutritional diseases | 559<br>(388 - 678)             | 10<br>(6 - 16)     | 3<br>(2 - 4)       | 51<br>(37 - 62)             | 161<br>(113 - 198)          | 333<br>(213 - 438)             |
| Sexually transmitted diseases excluding HIV                      | 13<br>(8 - 26)                 | 3<br>(0 - 8)       | 0<br>(0 - 1)       | 2<br>(1 - 3)                | 3<br>(2 - 7)                | 5<br>(2 - 13)                  |
| Syphilis                                                         | 11<br>(6 - 21)                 | 3<br>(0 - 8)       | 0<br>(0 - 1)       | 1<br>(0 - 1)                | 2<br>(1 - 5)                | 4<br>(2 - 11)                  |
| Chlamydial infection                                             | --                             | --                 | --                 | --                          | --                          | --                             |
| Gonococcal infection                                             | 2<br>(1 - 3)                   | --                 | 0<br>(0 - 0)       | 0<br>(0 - 1)                | 1<br>(0 - 1)                | 1<br>(0 - 2)                   |
| Other sexually transmitted diseases                              | 1<br>(1 - 2)                   | --                 | 0<br>(0 - 0)       | 0<br>(0 - 1)                | 0<br>(0 - 1)                | 0<br>(0 - 1)                   |
| Hepatitis                                                        | 129<br>(108 - 152)             | 1<br>(0 - 1)       | 0<br>(0 - 1)       | 19<br>(14 - 26)             | 48<br>(37 - 61)             | 60<br>(45 - 80)                |
| Acute hepatitis A                                                | 26<br>(8 - 55)                 | 0<br>(0 - 1)       | 0<br>(0 - 0)       | 6<br>(2 - 12)               | 11<br>(3 - 23)              | 9<br>(2 - 23)                  |
| Acute hepatitis B                                                | 101<br>(69 - 130)              | 0<br>(0 - 0)       | 0<br>(0 - 0)       | 12<br>(7 - 19)              | 37<br>(24 - 51)             | 51<br>(32 - 71)                |
| Acute hepatitis C                                                | 2<br>(0 - 5)                   | --                 | 0<br>(0 - 0)       | 0<br>(0 - 1)                | 1<br>(0 - 2)                | 1<br>(0 - 3)                   |
| Other infectious diseases                                        | 417<br>(248 - 537)             | 7<br>(4 - 10)      | 2<br>(1 - 3)       | 30<br>(18 - 40)             | 110<br>(62 - 142)           | 268<br>(150 - 370)             |
| Non-communicable diseases                                        | 405,583<br>(396,659 - 415,209) | 678<br>(570 - 805) | 213<br>(188 - 237) | 15,537<br>(14,852 - 16,281) | 86,869<br>(84,505 - 89,365) | 302,287<br>(295,794 - 309,334) |
| Neoplasms                                                        | 134,043<br>(127,375 - 141,795) | 47<br>(33 - 64)    | 106<br>(90 - 124)  | 5,567<br>(5,168 - 6,192)    | 40,633<br>(38,937 - 42,940) | 87,690<br>(81,921 - 93,690)    |
| Esophageal cancer                                                | 4,389<br>(3,780 - 5,241)       | --                 | --                 | 278<br>(213 - 449)          | 2,042<br>(1,745 - 2,585)    | 2,070<br>(1,598 - 2,401)       |
| Stomach cancer                                                   | 7,751<br>(6,972 - 8,700)       | --                 | --                 | 344<br>(296 - 402)          | 2,014<br>(1,811 - 2,224)    | 5,393<br>(4,635 - 6,272)       |
| Liver cancer                                                     | 4,842<br>(2,990 - 6,126)       | --                 | 2<br>(1 - 3)       | 163<br>(108 - 239)          | 1,745<br>(1,137 - 2,211)    | 2,931<br>(1,682 - 3,955)       |
| Liver cancer due to hepatitis B                                  | 773<br>(408 - 1,227)           | --                 | 1<br>(1 - 2)       | 52<br>(30 - 83)             | 357<br>(158 - 541)          | 364<br>(180 - 632)             |
| Liver cancer due to hepatitis C                                  | 2,166<br>(1,203 - 3,046)       | --                 | 0<br>(0 - 1)       | 58<br>(33 - 88)             | 746<br>(442 - 1,038)        | 1,362<br>(699 - 2,022)         |
| Liver cancer due to alcohol use                                  | 1,731<br>(1,052 - 2,421)       | --                 | --                 | 44<br>(26 - 70)             | 572<br>(364 - 815)          | 1,116<br>(621 - 1,666)         |
| Liver cancer due to other causes                                 | 171<br>(83 - 270)              | --                 | 1<br>(0 - 1)       | 10<br>(5 - 16)              | 71<br>(34 - 113)            | 90<br>(39 - 154)               |
| Larynx cancer                                                    | 1,311<br>(915 - 1,575)         | --                 | --                 | 80<br>(59 - 130)            | 576<br>(405 - 723)          | 655<br>(421 - 805)             |
| Tracheal, bronchus and lung cancer                               | 33,434<br>(31,449 - 35,392)    | --                 | --                 | 1,028<br>(880 - 1,198)      | 12,434<br>(11,579 - 13,345) | 19,972<br>(18,446 - 21,623)    |
| Breast cancer                                                    | 214<br>(124 - 636)             | --                 | --                 | 15<br>(8 - 43)              | 67<br>(36 - 209)            | 132<br>(72 - 396)              |
| Cervical cancer                                                  | --                             | --                 | --                 | --                          | --                          | --                             |
| Uterine cancer                                                   | --                             | --                 | --                 | --                          | --                          | --                             |
| Prostate cancer                                                  | 17,085<br>(13,663 - 24,947)    | --                 | --                 | 41<br>(27 - 65)             | 2,215<br>(1,651 - 3,154)    | 14,829<br>(11,603 - 21,973)    |

Web Table 31- Germany deaths with 95% UI by age, sex, and cause in 2013

| Cause                                         | Males, All Ages                | Males, 0-4 Years | Males, 5-14 Years | Males, 15-49 Years       | Males, 50-69 Years          | Males, 70-80 Years             |
|-----------------------------------------------|--------------------------------|------------------|-------------------|--------------------------|-----------------------------|--------------------------------|
| Colon and rectum cancer                       | 17,290<br>(15,907 - 18,828)    | --               | --                | 543<br>(474 - 618)       | 4,612<br>(4,265 - 4,950)    | 12,134<br>(10,888 - 13,458)    |
| Lip and oral cavity cancer                    | 2,046<br>(1,661 - 2,284)       | --               | --                | 206<br>(166 - 252)       | 1,081<br>(823 - 1,254)      | 758<br>(600 - 894)             |
| Nasopharynx cancer                            | 182<br>(141 - 331)             | --               | 0<br>(0 - 1)      | 29<br>(18 - 67)          | 97<br>(69 - 178)            | 55<br>(40 - 88)                |
| Other pharynx cancer                          | 2,146<br>(1,431 - 2,531)       | --               | --                | 218<br>(169 - 316)       | 1,299<br>(824 - 1,580)      | 629<br>(369 - 793)             |
| Gallbladder and biliary tract cancer          | 1,609<br>(1,249 - 2,539)       | --               | --                | 40<br>(28 - 59)          | 404<br>(307 - 637)          | 1,164<br>(889 - 1,802)         |
| Pancreatic cancer                             | 8,835<br>(8,146 - 9,546)       | --               | --                | 328<br>(276 - 382)       | 3,037<br>(2,768 - 3,315)    | 5,469<br>(4,889 - 6,127)       |
| Malignant skin melanoma                       | 1,865<br>(952 - 3,226)         | --               | --                | 249<br>(137 - 473)       | 656<br>(343 - 1,205)        | 960<br>(460 - 1,550)           |
| Non-melanoma skin cancer                      | 431<br>(259 - 652)             | --               | --                | 14<br>(8 - 21)           | 69<br>(41 - 107)            | 348<br>(205 - 532)             |
| Ovarian cancer                                | --                             | --               | --                | --                       | --                          | --                             |
| Testicular cancer                             | 220<br>(173 - 320)             | --               | --                | 121<br>(90 - 181)        | 49<br>(34 - 67)             | 50<br>(34 - 80)                |
| Kidney cancer                                 | 5,167<br>(4,435 - 5,889)       | 1<br>(0 - 2)     | 1<br>(1 - 2)      | 167<br>(131 - 210)       | 1,671<br>(1,434 - 1,920)    | 3,327<br>(2,673 - 3,970)       |
| Bladder cancer                                | 5,287<br>(4,499 - 6,338)       | --               | --                | 57<br>(45 - 72)          | 875<br>(741 - 1,179)        | 4,355<br>(3,601 - 5,237)       |
| Brain and nervous system cancer               | 3,306<br>(2,436 - 3,943)       | 13<br>(8 - 21)   | 36<br>(27 - 49)   | 550<br>(426 - 702)       | 1,404<br>(1,104 - 1,816)    | 1,304<br>(802 - 1,699)         |
| Thyroid cancer                                | 368<br>(315 - 440)             | --               | 0<br>(0 - 0)      | 22<br>(16 - 30)          | 120<br>(96 - 151)           | 226<br>(186 - 277)             |
| Mesothelioma                                  | 1,179<br>(677 - 1,623)         | --               | --                | 28<br>(17 - 55)          | 358<br>(226 - 610)          | 793<br>(340 - 1,148)           |
| Hodgkin lymphoma                              | 249<br>(198 - 454)             | 0<br>(0 - 0)     | 1<br>(0 - 2)      | 54<br>(39 - 100)         | 123<br>(51 - 133)           | 123<br>(88 - 208)              |
| Non-Hodgkin lymphoma                          | 3,860<br>(1,738 - 4,893)       | 2<br>(1 - 4)     | 8<br>(3 - 13)     | 238<br>(116 - 358)       | 1,051<br>(494 - 1,453)      | 2,560<br>(1,086 - 3,304)       |
| Multiple myeloma                              | 2,236<br>(1,230 - 3,455)       | --               | --                | 72<br>(43 - 136)         | 637<br>(363 - 1,078)        | 1,526<br>(811 - 2,292)         |
| Leukemia                                      | 4,540<br>(4,127 - 5,003)       | 10<br>(6 - 16)   | 29<br>(22 - 37)   | 284<br>(249 - 319)       | 998<br>(887 - 1,112)        | 3,220<br>(2,839 - 3,663)       |
| Other neoplasms                               | 4,203<br>(2,876 - 5,143)       | 21<br>(11 - 30)  | 29<br>(16 - 40)   | 397<br>(294 - 538)       | 1,051<br>(810 - 1,383)      | 2,705<br>(1,629 - 3,365)       |
| Cardiovascular diseases                       | 154,148<br>(146,085 - 162,448) | 13<br>(9 - 17)   | 13<br>(10 - 16)   | 3,987<br>(3,580 - 4,380) | 25,819<br>(24,358 - 27,340) | 124,316<br>(117,059 - 131,913) |
| Rheumatic heart disease                       | 765<br>(320 - 1,058)           | 0<br>(0 - 0)     | 0<br>(0 - 1)      | 31<br>(17 - 43)          | 131<br>(80 - 182)           | 603<br>(211 - 887)             |
| Ischemic heart disease                        | 87,029<br>(79,063 - 98,993)    | 1<br>(0 - 1)     | 1<br>(1 - 2)      | 2,352<br>(2,036 - 2,680) | 16,121<br>(14,757 - 18,179) | 68,554<br>(61,413 - 78,363)    |
| Cerebrovascular disease                       | 34,819<br>(27,813 - 42,326)    | 2<br>(1 - 2)     | 3<br>(2 - 4)      | 539<br>(390 - 706)       | 4,069<br>(2,970 - 5,024)    | 30,207<br>(24,058 - 37,153)    |
| Ischemic stroke                               | 21,498<br>(16,124 - 27,297)    | 0<br>(0 - 0)     | 0<br>(0 - 1)      | 106<br>(61 - 153)        | 1,755<br>(1,143 - 2,313)    | 19,636<br>(14,812 - 24,957)    |
| Hemorrhagic stroke                            | 13,321<br>(8,839 - 17,994)     | 1<br>(1 - 2)     | 3<br>(2 - 3)      | 433<br>(315 - 559)       | 2,313<br>(1,662 - 2,990)    | 10,570<br>(6,640 - 14,726)     |
| Hypertensive heart disease                    | 5,422<br>(3,344 - 7,692)       | 0<br>(0 - 0)     | 0<br>(0 - 1)      | 84<br>(58 - 138)         | 683<br>(486 - 1,082)        | 4,655<br>(2,739 - 6,778)       |
| Cardiomyopathy and myocarditis                | 4,997<br>(3,758 - 6,681)       | 7<br>(5 - 9)     | 5<br>(4 - 7)      | 385<br>(289 - 517)       | 1,436<br>(1,115 - 2,007)    | 3,165<br>(2,234 - 4,279)       |
| Atrial fibrillation and flutter               | 5,305<br>(4,075 - 6,745)       | --               | --                | 32<br>(23 - 42)          | 410<br>(299 - 506)          | 4,863<br>(3,705 - 6,269)       |
| Aortic aneurysm                               | 2,941<br>(2,460 - 3,556)       | --               | --                | 125<br>(75 - 149)        | 616<br>(462 - 709)          | 2,201<br>(1,821 - 2,857)       |
| Peripheral vascular disease                   | 2,954<br>(2,309 - 3,647)       | --               | --                | 19<br>(14 - 26)          | 499<br>(371 - 603)          | 2,436<br>(1,871 - 3,103)       |
| Endocarditis                                  | 635<br>(388 - 972)             | 1<br>(0 - 1)     | 1<br>(0 - 1)      | 44<br>(28 - 69)          | 150<br>(87 - 237)           | 440<br>(257 - 696)             |
| Other cardiovascular and circulatory diseases | 9,281<br>(5,547 - 10,895)      | 3<br>(2 - 4)     | 2<br>(1 - 3)      | 377<br>(210 - 459)       | 1,707<br>(981 - 2,021)      | 7,192<br>(4,370 - 8,641)       |
| Chronic respiratory diseases                  | 27,833<br>(24,520 - 33,198)    | 4<br>(3 - 6)     | 4<br>(3 - 5)      | 305<br>(247 - 365)       | 4,001<br>(3,322 - 4,841)    | 23,519<br>(20,622 - 28,334)    |
| Chronic obstructive pulmonary disease         | 23,004<br>(19,892 - 27,604)    | 2<br>(1 - 3)     | 1<br>(1 - 2)      | 185<br>(143 - 228)       | 3,370<br>(2,739 - 3,998)    | 19,445<br>(16,654 - 23,687)    |
| Pneumoconiosis                                | 1,286<br>(848 - 1,877)         | 0<br>(0 - 0)     | 0<br>(0 - 1)      | 17<br>(11 - 24)          | 135<br>(93 - 206)           | 1,134<br>(729 - 1,678)         |
| Silicosis                                     | 329<br>(212 - 492)             | 0<br>(0 - 0)     | 0<br>(0 - 0)      | 5<br>(3 - 7)             | 20<br>(13 - 32)             | 304<br>(190 - 462)             |
| Asbestosis                                    | 424<br>(285 - 616)             | 0<br>(0 - 0)     | 0<br>(0 - 0)      | 4<br>(3 - 6)             | 55<br>(37 - 83)             | 365<br>(236 - 535)             |
| Coal workers pneumoconiosis                   | 83<br>(53 - 123)               | 0<br>(0 - 0)     | 0<br>(0 - 0)      | 2<br>(1 - 2)             | 3<br>(2 - 5)                | 78<br>(49 - 117)               |
| Other pneumoconiosis                          | 450<br>(288 - 665)             | 0<br>(0 - 0)     | 0<br>(0 - 0)      | 6<br>(4 - 9)             | 57<br>(38 - 87)             | 387<br>(239 - 583)             |

Web Table 31- Germany deaths with 95% UI by age, sex, and cause in 2013

| Cause                                               | Males, All Ages             | Males, 0-4 Years | Males, 5-14 Years | Males, 15-49 Years       | Males, 50-69 Years       | Males, 70-80 Years          |
|-----------------------------------------------------|-----------------------------|------------------|-------------------|--------------------------|--------------------------|-----------------------------|
| Asthma                                              | 592<br>(484 - 745)          | 0<br>(0 - 1)     | 1<br>(1 - 2)      | 51<br>(39 - 63)          | 162<br>(129 - 206)       | 377<br>(287 - 482)          |
| Interstitial lung disease and pulmonary sarcoidosis | 2,787<br>(1,656 - 4,213)    | 0<br>(0 - 1)     | 0<br>(0 - 1)      | 36<br>(22 - 53)          | 301<br>(169 - 436)       | 2,450<br>(1,427 - 3,804)    |
| Other chronic respiratory diseases                  | 163<br>(129 - 209)          | 1<br>(1 - 1)     | 0<br>(0 - 1)      | 15<br>(11 - 22)          | 34<br>(25 - 47)          | 112<br>(84 - 152)           |
| Cirrhosis                                           | 11,932<br>(11,137 - 12,698) | 1<br>(0 - 1)     | 1<br>(1 - 1)      | 1,696<br>(1,498 - 1,901) | 5,615<br>(5,129 - 6,090) | 4,619<br>(4,131 - 5,122)    |
| Cirrhosis due to hepatitis B                        | 1,083<br>(551 - 1,730)      | 0<br>(0 - 0)     | 0<br>(0 - 0)      | 157<br>(76 - 266)        | 511<br>(263 - 846)       | 415<br>(174 - 696)          |
| Cirrhosis due to hepatitis C                        | 5,085<br>(3,267 - 7,031)    | 0<br>(0 - 0)     | 0<br>(0 - 1)      | 754<br>(380 - 1,131)     | 2,437<br>(1,404 - 3,496) | 1,894<br>(1,139 - 2,666)    |
| Cirrhosis due to alcohol use                        | 4,689<br>(2,675 - 6,593)    | --               | --                | 532<br>(190 - 879)       | 2,130<br>(1,128 - 3,133) | 2,027<br>(1,207 - 2,877)    |
| Cirrhosis due to other causes                       | 1,075<br>(438 - 1,974)      | 1<br>(0 - 1)     | 1<br>(0 - 1)      | 253<br>(100 - 465)       | 538<br>(199 - 1,054)     | 283<br>(100 - 495)          |
| Digestive diseases                                  | 9,643<br>(7,419 - 10,803)   | 3<br>(2 - 5)     | 3<br>(2 - 4)      | 439<br>(353 - 501)       | 1,810<br>(1,399 - 2,041) | 7,387<br>(5,578 - 8,443)    |
| Peptic ulcer disease                                | 1,496<br>(1,015 - 1,940)    | 0<br>(0 - 0)     | 0<br>(0 - 0)      | 68<br>(49 - 91)          | 312<br>(217 - 400)       | 1,116<br>(729 - 1,511)      |
| Gastritis and duodenitis                            | 137<br>(61 - 210)           | 0<br>(0 - 0)     | 0<br>(0 - 0)      | 13<br>(6 - 19)           | 33<br>(15 - 48)          | 91<br>(37 - 146)            |
| Appendicitis                                        | 136<br>(80 - 203)           | 0<br>(0 - 0)     | 0<br>(0 - 1)      | 8<br>(5 - 11)            | 29<br>(18 - 42)          | 99<br>(52 - 151)            |
| Paralytic ileus and intestinal obstruction          | 1,828<br>(1,019 - 2,700)    | 1<br>(1 - 2)     | 1<br>(1 - 2)      | 48<br>(26 - 83)          | 279<br>(163 - 457)       | 1,499<br>(810 - 2,172)      |
| Inguinal, femoral, and abdominal hernia             | 208<br>(98 - 317)           | 0<br>(0 - 0)     | 0<br>(0 - 0)      | 4<br>(2 - 6)             | 25<br>(12 - 38)          | 179<br>(80 - 284)           |
| Inflammatory bowel disease                          | 631<br>(429 - 923)          | 1<br>(0 - 1)     | 0<br>(0 - 1)      | 36<br>(21 - 48)          | 113<br>(69 - 153)        | 480<br>(310 - 746)          |
| Vascular intestinal disorders                       | 2,058<br>(934 - 3,671)      | 0<br>(0 - 1)     | 0<br>(0 - 1)      | 34<br>(13 - 68)          | 340<br>(151 - 623)       | 1,684<br>(762 - 2,997)      |
| Gallbladder and biliary diseases                    | 928<br>(580 - 1,233)        | 0<br>(0 - 0)     | 0<br>(0 - 0)      | 16<br>(10 - 20)          | 113<br>(78 - 146)        | 799<br>(487 - 1,093)        |
| Pancreatitis                                        | 1,031<br>(650 - 1,381)      | 0<br>(0 - 0)     | 0<br>(0 - 0)      | 167<br>(115 - 213)       | 343<br>(212 - 460)       | 520<br>(306 - 737)          |
| Other digestive diseases                            | 1,189<br>(524 - 1,576)      | 0<br>(0 - 1)     | 0<br>(0 - 0)      | 46<br>(21 - 60)          | 223<br>(109 - 284)       | 919<br>(385 - 1,273)        |
| Neurological disorders                              | 37,284<br>(27,718 - 45,906) | 36<br>(23 - 49)  | 21<br>(15 - 26)   | 628<br>(470 - 735)       | 2,338<br>(1,952 - 2,691) | 34,262<br>(24,603 - 42,770) |
| Alzheimer disease and other dementias               | 29,201<br>(19,344 - 37,992) | --               | --                | 4<br>(1 - 10)            | 782<br>(537 - 1,026)     | 28,415<br>(18,566 - 37,173) |
| Parkinson disease                                   | 4,653<br>(3,625 - 5,678)    | --               | --                | 7<br>(5 - 10)            | 295<br>(234 - 354)       | 4,350<br>(3,320 - 5,376)    |
| Epilepsy                                            | 1,013<br>(564 - 1,293)      | 9<br>(5 - 14)    | 11<br>(6 - 15)    | 270<br>(173 - 336)       | 301<br>(176 - 391)       | 424<br>(189 - 617)          |
| Multiple sclerosis                                  | 552<br>(230 - 878)          | --               | --                | 108<br>(46 - 182)        | 284<br>(101 - 460)       | 160<br>(60 - 247)           |
| Other neurological disorders                        | 1,865<br>(1,308 - 2,127)    | 27<br>(17 - 38)  | 10<br>(7 - 14)    | 238<br>(168 - 283)       | 676<br>(504 - 819)       | 913<br>(605 - 1,090)        |
| Mental and substance use disorders                  | 5,193<br>(3,302 - 6,286)    | 0<br>(0 - 0)     | 0<br>(0 - 0)      | 1,905<br>(1,501 - 2,457) | 2,374<br>(1,252 - 2,952) | 915<br>(465 - 1,132)        |
| Schizophrenia                                       | 76<br>(47 - 160)            | --               | --                | 15<br>(9 - 34)           | 30<br>(18 - 68)          | 31<br>(17 - 71)             |
| Alcohol use disorders                               | 3,991<br>(2,129 - 5,004)    | --               | --                | 987<br>(628 - 1,521)     | 2,187<br>(1,087 - 2,748) | 816<br>(339 - 1,019)        |
| Drug use disorders                                  | 1,124<br>(925 - 1,277)      | 0<br>(0 - 0)     | --                | 900<br>(712 - 1,052)     | 156<br>(100 - 198)       | 68<br>(53 - 93)             |
| Opioid use disorders                                | 416<br>(337 - 486)          | 0<br>(0 - 0)     | --                | 336<br>(258 - 405)       | 54<br>(33 - 69)          | 25<br>(19 - 35)             |
| Cocaine use disorders                               | 29<br>(22 - 35)             | 0<br>(0 - 0)     | --                | 24<br>(18 - 30)          | 3<br>(2 - 4)             | 1<br>(1 - 2)                |
| Amphetamine use disorders                           | 27<br>(21 - 33)             | 0<br>(0 - 0)     | --                | 22<br>(16 - 27)          | 4<br>(2 - 5)             | 1<br>(1 - 2)                |
| Other drug use disorders                            | 653<br>(535 - 748)          | 0<br>(0 - 0)     | --                | 518<br>(406 - 614)       | 96<br>(64 - 122)         | 40<br>(30 - 55)             |
| Eating disorders                                    | 2<br>(1 - 3)                | --               | 0<br>(0 - 0)      | 2<br>(1 - 3)             | --                       | --                          |
| Anorexia nervosa                                    | 2<br>(1 - 3)                | --               | 0<br>(0 - 0)      | 2<br>(1 - 3)             | --                       | --                          |
| Diabetes, urogenital, blood, and endocrine diseases | 23,200<br>(19,576 - 25,488) | 44<br>(27 - 59)  | 25<br>(17 - 33)   | 789<br>(631 - 889)       | 3,845<br>(3,415 - 4,255) | 18,497<br>(15,089 - 20,663) |
| Diabetes mellitus                                   | 8,910<br>(8,033 - 9,848)    | 1<br>(1 - 2)     | 1<br>(1 - 1)      | 301<br>(255 - 348)       | 1,823<br>(1,617 - 2,037) | 6,783<br>(5,949 - 7,693)    |
| Acute glomerulonephritis                            | 10<br>(6 - 13)              | 0<br>(0 - 0)     | 0<br>(0 - 0)      | 2<br>(1 - 2)             | 2<br>(1 - 3)             | 6<br>(3 - 9)                |
| Chronic kidney disease                              | 9,674<br>(6,748 - 11,259)   | 2<br>(1 - 3)     | 1<br>(1 - 2)      | 115<br>(93 - 176)        | 996<br>(832 - 1,219)     | 8,560<br>(5,619 - 10,143)   |
| Chronic kidney disease due to diabetes mellitus     | 2,721<br>(1,440 - 4,216)    | 0<br>(0 - 0)     | 0<br>(0 - 1)      | 45<br>(30 - 78)          | 394<br>(250 - 630)       | 2,281<br>(1,093 - 3,602)    |

Web Table 31- Germany deaths with 95% UI by age, sex, and cause in 2013

| Cause                                               | Males, All Ages             | Males, 0-4 Years   | Males, 5-14 Years | Males, 15-49 Years       | Males, 50-69 Years       | Males, 70-80 Years         |
|-----------------------------------------------------|-----------------------------|--------------------|-------------------|--------------------------|--------------------------|----------------------------|
| Chronic kidney disease due to hypertension          | 2,645<br>(1,135 - 3,431)    | 0<br>(0 - 1)       | 0<br>(0 - 0)      | 22<br>(11 - 39)          | 193<br>(89 - 269)        | 2,429<br>(1,016 - 3,191)   |
| Chronic kidney disease due to glomerulonephritis    | 67<br>(35 - 89)             | 0<br>(0 - 0)       | 0<br>(0 - 0)      | 4<br>(2 - 5)             | 14<br>(8 - 19)           | 49<br>(24 - 69)            |
| Chronic kidney disease due to other causes          | 4,242<br>(2,192 - 5,703)    | 1<br>(1 - 2)       | 1<br>(0 - 1)      | 44<br>(26 - 76)          | 395<br>(227 - 597)       | 3,800<br>(1,840 - 5,194)   |
| Urinary diseases and male infertility               | 2,208<br>(1,160 - 2,742)    | 1<br>(0 - 1)       | 0<br>(0 - 1)      | 36<br>(22 - 43)          | 240<br>(146 - 286)       | 1,931<br>(973 - 2,459)     |
| Interstitial nephritis and urinary tract infections | 1,727<br>(864 - 2,226)      | 1<br>(0 - 1)       | 0<br>(0 - 0)      | 21<br>(13 - 27)          | 163<br>(100 - 205)       | 1,542<br>(749 - 2,018)     |
| Urolithiasis                                        | 47<br>(28 - 97)             | --                 | 0<br>(0 - 0)      | 2<br>(1 - 3)             | 8<br>(4 - 16)            | 38<br>(21 - 79)            |
| Other urinary diseases                              | 435<br>(190 - 677)          | 0<br>(0 - 0)       | 0<br>(0 - 0)      | 13<br>(6 - 18)           | 70<br>(33 - 96)          | 352<br>(151 - 568)         |
| Gynecological diseases                              | --                          | --                 | --                | --                       | --                       | --                         |
| Uterine fibroids                                    | --                          | --                 | --                | --                       | --                       | --                         |
| Polycystic ovarian syndrome                         | --                          | --                 | --                | --                       | --                       | --                         |
| Endometriosis                                       | --                          | --                 | --                | --                       | --                       | --                         |
| Genital prolapse                                    | --                          | --                 | --                | --                       | --                       | --                         |
| Other gynecological diseases                        | --                          | --                 | --                | --                       | --                       | --                         |
| Hemoglobinopathies and hemolytic anemias            | 196<br>(111 - 280)          | 3<br>(2 - 5)       | 3<br>(1 - 4)      | 22<br>(13 - 33)          | 32<br>(18 - 48)          | 137<br>(76 - 199)          |
| Thalassemias                                        | 4<br>(2 - 6)                | 1<br>(0 - 1)       | 1<br>(0 - 1)      | 3<br>(1 - 4)             | 0<br>(0 - 0)             | 0<br>(0 - 0)               |
| Sickle cell disorders                               | 20<br>(11 - 29)             | 1<br>(1 - 2)       | 1<br>(1 - 2)      | 6<br>(4 - 9)             | 8<br>(4 - 11)            | 3<br>(2 - 5)               |
| G6PD deficiency                                     | 1<br>(1 - 2)                | 0<br>(0 - 0)       | 0<br>(0 - 0)      | 0<br>(0 - 1)             | 0<br>(0 - 1)             | 0<br>(0 - 1)               |
| Other hemoglobinopathies and hemolytic anemias      | 171<br>(96 - 247)           | 1<br>(1 - 2)       | 1<br>(0 - 1)      | 13<br>(7 - 20)           | 23<br>(14 - 36)          | 133<br>(74 - 194)          |
| Endocrine, metabolic, blood, and immune disorders   | 2,203<br>(1,455 - 2,711)    | 37<br>(21 - 50)    | 20<br>(12 - 27)   | 314<br>(179 - 392)       | 752<br>(455 - 965)       | 1,080<br>(715 - 1,475)     |
| Musculoskeletal disorders                           | 653<br>(406 - 790)          | --                 | 1<br>(0 - 1)      | 32<br>(17 - 40)          | 154<br>(102 - 195)       | 465<br>(269 - 584)         |
| Rheumatoid arthritis                                | 131<br>(83 - 232)           | --                 | 0<br>(0 - 0)      | 4<br>(2 - 7)             | 32<br>(17 - 61)          | 95<br>(57 - 171)           |
| Other musculoskeletal disorders                     | 522<br>(298 - 642)          | --                 | 1<br>(0 - 1)      | 28<br>(14 - 35)          | 123<br>(73 - 152)        | 371<br>(198 - 478)         |
| Other non-communicable diseases                     | 1,653<br>(1,306 - 1,851)    | 529<br>(437 - 648) | 39<br>(30 - 48)   | 190<br>(155 - 215)       | 279<br>(189 - 315)       | 615<br>(265 - 750)         |
| Congenital anomalies                                | 942<br>(822 - 1,044)        | 418<br>(338 - 505) | 39<br>(30 - 48)   | 170<br>(140 - 194)       | 180<br>(140 - 205)       | 136<br>(97 - 163)          |
| Neural tube defects                                 | 17<br>(11 - 21)             | 9<br>(6 - 13)      | 1<br>(0 - 1)      | 5<br>(3 - 6)             | 1<br>(1 - 2)             | 1<br>(0 - 1)               |
| Congenital heart anomalies                          | 285<br>(238 - 343)          | 150<br>(114 - 197) | 16<br>(10 - 22)   | 60<br>(48 - 73)          | 37<br>(26 - 56)          | 23<br>(15 - 31)            |
| Cleft lip and cleft palate                          | 0<br>(0 - 1)                | 0<br>(0 - 1)       | --                | --                       | --                       | --                         |
| Down syndrome                                       | 170<br>(106 - 208)          | 19<br>(9 - 31)     | 3<br>(1 - 5)      | 38<br>(22 - 49)          | 100<br>(58 - 125)        | 10<br>(5 - 16)             |
| Chromosomal unbalanced rearrangements               | 57<br>(40 - 77)             | 47<br>(31 - 66)    | 2<br>(1 - 3)      | 4<br>(3 - 5)             | 3<br>(2 - 4)             | 1<br>(1 - 1)               |
| Other congenital anomalies                          | 414<br>(337 - 484)          | 193<br>(145 - 247) | 17<br>(11 - 24)   | 63<br>(46 - 79)          | 39<br>(24 - 59)          | 102<br>(68 - 125)          |
| Skin and subcutaneous diseases                      | 600<br>(223 - 729)          | 1<br>(0 - 1)       | 0<br>(0 - 1)      | 20<br>(10 - 26)          | 99<br>(46 - 120)         | 479<br>(166 - 607)         |
| Cellulitis                                          | 65<br>(23 - 101)            | 0<br>(0 - 0)       | 0<br>(0 - 0)      | 3<br>(1 - 4)             | 16<br>(7 - 25)           | 46<br>(14 - 81)            |
| Pyoderma                                            | 313<br>(131 - 399)          | 0<br>(0 - 1)       | 0<br>(0 - 0)      | 14<br>(7 - 19)           | 56<br>(26 - 70)          | 243<br>(91 - 322)          |
| Decubitus ulcer                                     | 199<br>(59 - 269)           | 0<br>(0 - 0)       | 0<br>(0 - 0)      | 2<br>(1 - 3)             | 24<br>(9 - 33)           | 172<br>(50 - 240)          |
| Other skin and subcutaneous diseases                | 24<br>(8 - 41)              | 0<br>(0 - 0)       | 0<br>(0 - 0)      | 1<br>(1 - 2)             | 3<br>(1 - 5)             | 19<br>(6 - 36)             |
| Sudden infant death syndrome                        | 111<br>(65 - 222)           | 111<br>(65 - 222)  | --                | --                       | --                       | --                         |
| Injuries                                            | 22,401<br>(19,034 - 24,465) | 92<br>(70 - 120)   | 114<br>(99 - 133) | 6,357<br>(5,701 - 6,913) | 5,629<br>(4,889 - 6,246) | 10,209<br>(7,853 - 11,786) |
| Transport injuries                                  | 3,873<br>(3,574 - 4,152)    | 18<br>(12 - 26)    | 48<br>(37 - 59)   | 1,884<br>(1,693 - 2,060) | 939<br>(832 - 1,046)     | 985<br>(861 - 1,124)       |
| Road injuries                                       | 3,556<br>(3,276 - 3,816)    | 16<br>(10 - 23)    | 43<br>(33 - 53)   | 1,737<br>(1,557 - 1,902) | 838<br>(736 - 939)       | 923<br>(808 - 1,058)       |
| Pedestrian road injuries                            | 611<br>(339 - 973)          | 7<br>(4 - 11)      | 15<br>(9 - 22)    | 164<br>(84 - 296)        | 152<br>(82 - 249)        | 273<br>(154 - 426)         |



Web Table 31- Germany deaths with 95% UI by age, sex, and cause in 2013

| Cause                                           | Males, All Ages           | Males, 0-4 Years | Males, 5-14 Years | Males, 15-49 Years       | Males, 50-69 Years       | Males, 70-80 Years       |
|-------------------------------------------------|---------------------------|------------------|-------------------|--------------------------|--------------------------|--------------------------|
| Cyclist road injuries                           | 442<br>(288 - 580)        | 1<br>(0 - 2)     | 11<br>(6 - 17)    | 83<br>(48 - 111)         | 128<br>(83 - 174)        | 218<br>(136 - 295)       |
| Motorcyclist road injuries                      | 646<br>(371 - 821)        | 1<br>(0 - 1)     | 2<br>(1 - 3)      | 459<br>(269 - 588)       | 133<br>(66 - 184)        | 52<br>(27 - 77)          |
| Motor vehicle road injuries                     | 1,843<br>(1,438 - 2,302)  | 7<br>(4 - 11)    | 14<br>(9 - 21)    | 1,028<br>(839 - 1,252)   | 421<br>(318 - 553)       | 374<br>(251 - 519)       |
| Other road injuries                             | 13<br>(6 - 23)            | 0<br>(0 - 0)     | 0<br>(0 - 1)      | 3<br>(1 - 4)             | 5<br>(2 - 9)             | 5<br>(2 - 11)            |
| Other transport injuries                        | 317<br>(231 - 406)        | 2<br>(1 - 4)     | 5<br>(3 - 7)      | 147<br>(106 - 201)       | 101<br>(65 - 136)        | 62<br>(38 - 87)          |
| Unintentional injuries                          | 9,618<br>(6,995 - 11,175) | 65<br>(48 - 89)  | 47<br>(38 - 62)   | 956<br>(842 - 1,132)     | 1,847<br>(1,458 - 2,085) | 6,704<br>(4,393 - 8,116) |
| Falls                                           | 5,887<br>(3,854 - 7,066)  | 8<br>(5 - 12)    | 6<br>(3 - 8)      | 352<br>(283 - 444)       | 979<br>(671 - 1,145)     | 4,543<br>(2,753 - 5,710) |
| Drowning                                        | 345<br>(268 - 572)        | 18<br>(9 - 42)   | 17<br>(11 - 35)   | 120<br>(93 - 206)        | 101<br>(74 - 160)        | 89<br>(61 - 127)         |
| Fire, heat, and hot substances                  | 347<br>(237 - 429)        | 7<br>(4 - 13)    | 5<br>(3 - 7)      | 73<br>(56 - 106)         | 92<br>(60 - 120)         | 170<br>(107 - 226)       |
| Poisonings                                      | 88<br>(69 - 143)          | 1<br>(0 - 1)     | 1<br>(0 - 1)      | 28<br>(21 - 44)          | 21<br>(15 - 33)          | 38<br>(28 - 64)          |
| Exposure to mechanical forces                   | 373<br>(330 - 428)        | 8<br>(5 - 12)    | 8<br>(6 - 11)     | 144<br>(124 - 190)       | 120<br>(101 - 143)       | 93<br>(61 - 113)         |
| Unintentional firearm injuries                  | 13<br>(11 - 17)           | 0<br>(0 - 0)     | 0<br>(0 - 1)      | 6<br>(5 - 8)             | 4<br>(3 - 5)             | 3<br>(2 - 4)             |
| Unintentional suffocation                       | 52<br>(29 - 67)           | 5<br>(2 - 8)     | 3<br>(1 - 4)      | 11<br>(6 - 15)           | 8<br>(4 - 12)            | 25<br>(13 - 38)          |
| Other exposure to mechanical forces             | 308<br>(271 - 356)        | 3<br>(2 - 5)     | 5<br>(4 - 7)      | 127<br>(107 - 177)       | 107<br>(89 - 132)        | 65<br>(37 - 78)          |
| Adverse effects of medical treatment            | 837<br>(343 - 1,222)      | 5<br>(2 - 7)     | 2<br>(1 - 3)      | 57<br>(26 - 81)          | 210<br>(96 - 298)        | 563<br>(206 - 870)       |
| Animal contact                                  | 35<br>(19 - 43)           | 0<br>(0 - 1)     | 0<br>(0 - 1)      | 6<br>(3 - 9)             | 14<br>(7 - 18)           | 14<br>(8 - 19)           |
| Venomous animal contact                         | 14<br>(7 - 19)            | 0<br>(0 - 0)     | 0<br>(0 - 0)      | 4<br>(2 - 5)             | 7<br>(3 - 10)            | 3<br>(2 - 5)             |
| Non-venomous animal contact                     | 21<br>(12 - 26)           | 0<br>(0 - 0)     | 0<br>(0 - 0)      | 3<br>(1 - 4)             | 7<br>(3 - 10)            | 11<br>(6 - 15)           |
| Foreign body                                    | 1,566<br>(765 - 2,199)    | 16<br>(8 - 24)   | 5<br>(2 - 7)      | 128<br>(72 - 196)        | 268<br>(139 - 394)       | 1,149<br>(524 - 1,658)   |
| Pulmonary aspiration and foreign body in airway | 1,560<br>(755 - 2,195)    | 16<br>(8 - 24)   | 4<br>(2 - 7)      | 126<br>(70 - 194)        | 267<br>(138 - 392)       | 1,147<br>(521 - 1,656)   |
| Foreign body in other body part                 | 6<br>(3 - 8)              | 0<br>(0 - 0)     | 0<br>(0 - 1)      | 2<br>(1 - 3)             | 1<br>(1 - 2)             | 2<br>(1 - 3)             |
| Other unintentional injuries                    | 140<br>(115 - 173)        | 1<br>(1 - 3)     | 3<br>(2 - 6)      | 47<br>(35 - 63)          | 43<br>(29 - 62)          | 46<br>(32 - 62)          |
| Self-harm and interpersonal violence            | 8,910<br>(7,182 - 11,150) | 10<br>(6 - 16)   | 19<br>(14 - 28)   | 3,517<br>(2,732 - 4,134) | 2,843<br>(2,238 - 3,531) | 2,520<br>(2,000 - 3,311) |
| Self-harm                                       | 8,587<br>(6,811 - 10,602) | --               | 13<br>(9 - 21)    | 3,342<br>(2,501 - 3,910) | 2,756<br>(2,157 - 3,438) | 2,476<br>(1,955 - 3,257) |
| Interpersonal violence                          | 323<br>(255 - 577)        | 10<br>(6 - 16)   | 6<br>(4 - 9)      | 176<br>(132 - 315)       | 87<br>(62 - 176)         | 44<br>(28 - 73)          |
| Assault by firearm                              | 84<br>(46 - 178)          | 1<br>(0 - 1)     | 1<br>(0 - 2)      | 52<br>(28 - 109)         | 21<br>(11 - 47)          | 10<br>(5 - 18)           |
| Assault by sharp object                         | 115<br>(74 - 223)         | 1<br>(1 - 3)     | 1<br>(1 - 3)      | 71<br>(43 - 141)         | 30<br>(19 - 60)          | 12<br>(6 - 21)           |
| Assault by other means                          | 124<br>(83 - 211)         | 8<br>(5 - 13)    | 4<br>(2 - 6)      | 53<br>(33 - 98)          | 36<br>(22 - 73)          | 23<br>(13 - 37)          |
| Forces of nature, war, and legal intervention   | 0<br>(0 - 0)              | 0<br>(0 - 0)     | --                | --                       | --                       | 0<br>(0 - 0)             |
| Exposure to forces of nature                    | 0<br>(0 - 0)              | 0<br>(0 - 0)     | --                | --                       | --                       | 0<br>(0 - 0)             |

Web Table 31- Germany deaths with 95% UI by age, sex, and cause in 2013

| Cause                                                             | Females, All Ages              | Females, 0-4 Years     | Females, 5-14 Years | Females, 15-49 Years        | Females, 50-69 Years        | Females, 70-80 Years           |
|-------------------------------------------------------------------|--------------------------------|------------------------|---------------------|-----------------------------|-----------------------------|--------------------------------|
| All causes                                                        | 474,917<br>(463,963 - 486,195) | 1,111<br>(953 - 1,297) | 263<br>(243 - 285)  | 11,295<br>(10,876 - 11,714) | 50,437<br>(48,855 - 52,060) | 411,811<br>(402,837 - 420,962) |
| Communicable, maternal, neonatal, and nutritional diseases        | 20,342<br>(15,873 - 24,448)    | 513<br>(406 - 626)     | 20<br>(15 - 24)     | 363<br>(307 - 407)          | 1,112<br>(826 - 1,289)      | 18,334<br>(14,169 - 22,420)    |
| HIV/AIDS and tuberculosis                                         | 295<br>(234 - 384)             | 0<br>(0 - 0)           | 0<br>(0 - 0)        | 64<br>(45 - 88)             | 60<br>(41 - 86)             | 171<br>(129 - 235)             |
| Tuberculosis                                                      | 196<br>(152 - 273)             | 0<br>(0 - 0)           | 0<br>(0 - 0)        | 7<br>(6 - 10)               | 24<br>(19 - 38)             | 164<br>(121 - 229)             |
| HIV/AIDS                                                          | 99<br>(62 - 150)               | 0<br>(0 - 0)           | 0<br>(0 - 0)        | 56<br>(38 - 81)             | 36<br>(18 - 61)             | 7<br>(1 - 15)                  |
| HIV/AIDS resulting in mycobacterial infection                     | 4<br>(2 - 6)                   | 0<br>(0 - 0)           | 0<br>(0 - 0)        | 2<br>(1 - 3)                | 2<br>(1 - 3)                | 0<br>(0 - 1)                   |
| HIV/AIDS resulting in other diseases                              | 95<br>(59 - 144)               | 0<br>(0 - 0)           | 0<br>(0 - 0)        | 54<br>(37 - 78)             | 34<br>(17 - 58)             | 7<br>(1 - 15)                  |
| Diarrhea, lower respiratory, and other common infectious diseases | 17,360<br>(13,000 - 21,338)    | 40<br>(29 - 52)        | 15<br>(11 - 19)     | 191<br>(145 - 224)          | 877<br>(601 - 1,042)        | 16,237<br>(12,062 - 20,153)    |
| Diarrheal diseases                                                | 2,582<br>(1,692 - 3,824)       | 5<br>(3 - 7)           | 1<br>(1 - 2)        | 18<br>(14 - 24)             | 102<br>(77 - 133)           | 2,456<br>(1,567 - 3,691)       |
| Intestinal infectious diseases                                    | 8<br>(3 - 15)                  | 1<br>(0 - 3)           | 1<br>(0 - 2)        | 2<br>(1 - 6)                | 1<br>(0 - 4)                | 2<br>(1 - 6)                   |
| Typhoid fever                                                     | 4<br>(1 - 9)                   | 0<br>(0 - 1)           | 1<br>(0 - 1)        | 2<br>(0 - 3)                | 1<br>(0 - 1)                | 1<br>(0 - 2)                   |
| Paratyphoid fever                                                 | 1<br>(0 - 2)                   | 0<br>(0 - 0)           | 0<br>(0 - 0)        | 0<br>(0 - 1)                | 0<br>(0 - 0)                | 0<br>(0 - 0)                   |
| Other intestinal infectious diseases                              | 3<br>(1 - 9)                   | 0<br>(0 - 3)           | 0<br>(0 - 1)        | 1<br>(0 - 3)                | 1<br>(0 - 4)                | 1<br>(0 - 5)                   |
| Lower respiratory infections                                      | 14,405<br>(10,297 - 18,421)    | 16<br>(11 - 23)        | 6<br>(4 - 9)        | 130<br>(90 - 160)           | 710<br>(446 - 859)          | 13,542<br>(9,755 - 17,543)     |
| Upper respiratory infections                                      | 9<br>(1 - 33)                  | 0<br>(0 - 0)           | 0<br>(0 - 0)        | 0<br>(0 - 1)                | 1<br>(0 - 3)                | 7<br>(0 - 32)                  |
| Otitis media                                                      | 14<br>(10 - 18)                | 1<br>(1 - 2)           | 0<br>(0 - 0)        | 2<br>(1 - 2)                | 2<br>(1 - 2)                | 9<br>(6 - 13)                  |
| Meningitis                                                        | 170<br>(133 - 198)             | 11<br>(7 - 15)         | 2<br>(2 - 3)        | 16<br>(12 - 19)             | 28<br>(22 - 34)             | 113<br>(84 - 139)              |
| Pneumococcal meningitis                                           | 33<br>(18 - 52)                | 1<br>(1 - 2)           | 0<br>(0 - 1)        | 2<br>(1 - 4)                | 5<br>(2 - 8)                | 24<br>(11 - 43)                |
| H influenzae type B meningitis                                    | 18<br>(12 - 26)                | 3<br>(2 - 4)           | 0<br>(0 - 1)        | 2<br>(1 - 3)                | 3<br>(1 - 4)                | 11<br>(5 - 18)                 |
| Meningococcal meningitis                                          | 54<br>(31 - 76)                | 4<br>(2 - 6)           | 1<br>(0 - 2)        | 5<br>(3 - 8)                | 9<br>(4 - 17)               | 35<br>(14 - 54)                |
| Other meningitis                                                  | 65<br>(34 - 91)                | 3<br>(1 - 4)           | 1<br>(0 - 1)        | 7<br>(4 - 9)                | 11<br>(4 - 17)              | 44<br>(20 - 67)                |
| Encephalitis                                                      | 119<br>(49 - 164)              | 4<br>(2 - 6)           | 2<br>(1 - 4)        | 16<br>(8 - 21)              | 28<br>(13 - 39)             | 69<br>(20 - 107)               |
| Diphtheria                                                        | 0<br>(0 - 1)                   | 0<br>(0 - 0)           | 0<br>(0 - 0)        | 0<br>(0 - 1)                | 0<br>(0 - 1)                | --                             |
| Whooping cough                                                    | 3<br>(2 - 3)                   | 0<br>(0 - 1)           | 0<br>(0 - 0)        | 2<br>(1 - 2)                | 1<br>(0 - 1)                | --                             |
| Tetanus                                                           | 4<br>(2 - 5)                   | 0<br>(0 - 0)           | 0<br>(0 - 0)        | 1<br>(0 - 2)                | 1<br>(0 - 1)                | 1<br>(1 - 2)                   |
| Measles                                                           | 1<br>(0 - 2)                   | 1<br>(0 - 2)           | 0<br>(0 - 0)        | 0<br>(0 - 0)                | 0<br>(0 - 0)                | --                             |
| Varicella and herpes zoster                                       | 45<br>(6 - 205)                | 1<br>(0 - 5)           | 0<br>(0 - 2)        | 3<br>(0 - 7)                | 3<br>(0 - 11)               | 38<br>(0 - 198)                |
| Neglected tropical diseases and malaria                           | 27<br>(21 - 32)                | 1<br>(0 - 1)           | 1<br>(1 - 1)        | 6<br>(4 - 7)                | 6<br>(5 - 8)                | 13<br>(10 - 18)                |
| Cysticercosis                                                     | 1<br>(1 - 1)                   | 0<br>(0 - 0)           | 0<br>(0 - 0)        | 0<br>(0 - 0)                | 0<br>(0 - 0)                | 0<br>(0 - 0)                   |
| Cystic echinococcosis                                             | 4<br>(3 - 4)                   | 0<br>(0 - 0)           | 0<br>(0 - 0)        | 0<br>(0 - 0)                | 1<br>(1 - 1)                | 2<br>(2 - 2)                   |
| Dengue                                                            | 5<br>(4 - 10)                  | 0<br>(0 - 1)           | 0<br>(0 - 1)        | 2<br>(1 - 2)                | 1<br>(1 - 2)                | 1<br>(1 - 4)                   |
| Rabies                                                            | 4<br>(2 - 4)                   | 0<br>(0 - 0)           | 0<br>(0 - 0)        | 2<br>(1 - 2)                | 1<br>(1 - 1)                | 1<br>(0 - 1)                   |
| Other neglected tropical diseases                                 | 14<br>(7 - 19)                 | 0<br>(0 - 1)           | 0<br>(0 - 0)        | 2<br>(1 - 2)                | 3<br>(1 - 4)                | 9<br>(4 - 13)                  |
| Maternal disorders                                                | 46<br>(36 - 56)                | --                     | 0<br>(0 - 0)        | 46<br>(36 - 56)             | --                          | --                             |
| Maternal hemorrhage                                               | 5<br>(3 - 7)                   | --                     | 0<br>(0 - 0)        | 5<br>(3 - 7)                | --                          | --                             |
| Maternal sepsis and other maternal infections                     | 5<br>(3 - 7)                   | --                     | 0<br>(0 - 0)        | 5<br>(3 - 7)                | --                          | --                             |
| Maternal hypertensive disorders                                   | 5<br>(3 - 6)                   | --                     | 0<br>(0 - 0)        | 5<br>(3 - 6)                | --                          | --                             |
| Maternal obstructed labor                                         | 4<br>(3 - 5)                   | --                     | 0<br>(0 - 0)        | 4<br>(3 - 5)                | --                          | --                             |
| Maternal abortive outcome                                         | 9<br>(6 - 12)                  | --                     | 0<br>(0 - 0)        | 9<br>(6 - 12)               | --                          | --                             |
| Indirect maternal deaths                                          | 5<br>(4 - 7)                   | --                     | 0<br>(0 - 0)        | 5<br>(4 - 7)                | --                          | --                             |

Web Table 31- Germany deaths with 95% UI by age, sex, and cause in 2013

| Cause                                                            | Females, All Ages              | Females, 0-4 Years | Females, 5-14 Years | Females, 15-49 Years     | Females, 50-69 Years        | Females, 70-80 Years           |
|------------------------------------------------------------------|--------------------------------|--------------------|---------------------|--------------------------|-----------------------------|--------------------------------|
| Late maternal deaths                                             | 3<br>(2 - 5)                   | --                 | 0<br>(0 - 0)        | 3<br>(2 - 5)             | --                          | --                             |
| Maternal deaths aggravated by HIV/AIDS                           | 0<br>(0 - 0)                   | --                 | --                  | 0<br>(0 - 0)             | --                          | --                             |
| Other maternal disorders                                         | 10<br>(7 - 13)                 | --                 | 0<br>(0 - 0)        | 10<br>(7 - 13)           | --                          | --                             |
| Neonatal disorders                                               | 463<br>(362 - 572)             | 463<br>(362 - 572) | --                  | --                       | --                          | --                             |
| Neonatal preterm birth complications                             | 283<br>(207 - 358)             | 283<br>(207 - 358) | --                  | --                       | --                          | --                             |
| Neonatal encephalopathy due to birth asphyxia and trauma         | 94<br>(51 - 127)               | 94<br>(51 - 127)   | --                  | --                       | --                          | --                             |
| Neonatal sepsis and other neonatal infections                    | 25<br>(11 - 50)                | 25<br>(11 - 50)    | --                  | --                       | --                          | --                             |
| Hemolytic disease and other neonatal jaundice                    | 2<br>(1 - 6)                   | 2<br>(1 - 6)       | --                  | --                       | --                          | --                             |
| Other neonatal disorders                                         | 59<br>(30 - 83)                | 59<br>(30 - 83)    | --                  | --                       | --                          | --                             |
| Nutritional deficiencies                                         | 1,608<br>(1,170 - 2,043)       | 1<br>(1 - 2)       | 1<br>(1 - 1)        | 28<br>(23 - 35)          | 57<br>(47 - 69)             | 1,521<br>(1,083 - 1,958)       |
| Protein-energy malnutrition                                      | 263<br>(64 - 520)              | 0<br>(0 - 0)       | 0<br>(0 - 0)        | 2<br>(1 - 4)             | 7<br>(2 - 14)               | 252<br>(60 - 504)              |
| Iodine deficiency                                                | 4<br>(0 - 32)                  | 0<br>(0 - 0)       | 0<br>(0 - 0)        | 0<br>(0 - 1)             | 0<br>(0 - 2)                | 4<br>(0 - 31)                  |
| Iron-deficiency anemia                                           | 1,262<br>(851 - 1,679)         | 1<br>(0 - 1)       | 0<br>(0 - 1)        | 24<br>(18 - 29)          | 44<br>(32 - 56)             | 1,193<br>(795 - 1,606)         |
| Other nutritional deficiencies                                   | 79<br>(27 - 181)               | 0<br>(0 - 1)       | 0<br>(0 - 0)        | 2<br>(1 - 4)             | 5<br>(2 - 10)               | 71<br>(23 - 168)               |
| Other communicable, maternal, neonatal, and nutritional diseases | 542<br>(391 - 669)             | 8<br>(4 - 13)      | 2<br>(2 - 3)        | 28<br>(21 - 34)          | 112<br>(78 - 138)           | 392<br>(273 - 523)             |
| Sexually transmitted diseases excluding HIV                      | 32<br>(23 - 44)                | 3<br>(0 - 7)       | 0<br>(0 - 1)        | 4<br>(3 - 6)             | 6<br>(4 - 9)                | 18<br>(12 - 27)                |
| Syphilis                                                         | 22<br>(16 - 32)                | 3<br>(0 - 7)       | 0<br>(0 - 1)        | 2<br>(1 - 2)             | 3<br>(2 - 5)                | 14<br>(9 - 21)                 |
| Chlamydial infection                                             | 3<br>(2 - 4)                   | --                 | 0<br>(0 - 0)        | 1<br>(1 - 1)             | 1<br>(1 - 1)                | 1<br>(1 - 2)                   |
| Gonococcal infection                                             | 4<br>(3 - 6)                   | --                 | 0<br>(0 - 0)        | 1<br>(1 - 1)             | 1<br>(1 - 2)                | 2<br>(1 - 3)                   |
| Other sexually transmitted diseases                              | 3<br>(2 - 4)                   | --                 | 0<br>(0 - 0)        | 1<br>(1 - 1)             | 1<br>(1 - 1)                | 1<br>(1 - 1)                   |
| Hepatitis                                                        | 112<br>(82 - 150)              | 0<br>(0 - 0)       | 0<br>(0 - 1)        | 8<br>(5 - 11)            | 23<br>(16 - 33)             | 80<br>(53 - 115)               |
| Acute hepatitis A                                                | 27<br>(8 - 56)                 | 0<br>(0 - 0)       | 0<br>(0 - 0)        | 4<br>(1 - 6)             | 6<br>(2 - 13)               | 16<br>(4 - 39)                 |
| Acute hepatitis B                                                | 84<br>(51 - 121)               | 0<br>(0 - 0)       | 0<br>(0 - 0)        | 4<br>(2 - 7)             | 17<br>(10 - 25)             | 63<br>(35 - 97)                |
| Acute hepatitis C                                                | 2<br>(0 - 6)                   | --                 | 0<br>(0 - 0)        | 0<br>(0 - 0)             | 0<br>(0 - 1)                | 1<br>(0 - 5)                   |
| Other infectious diseases                                        | 398<br>(252 - 524)             | 4<br>(3 - 6)       | 2<br>(1 - 2)        | 16<br>(10 - 21)          | 82<br>(49 - 104)            | 294<br>(180 - 423)             |
| Non-communicable diseases                                        | 439,140<br>(427,752 - 450,877) | 529<br>(441 - 653) | 172<br>(154 - 189)  | 9,185<br>(8,807 - 9,556) | 47,305<br>(45,807 - 48,846) | 381,949<br>(372,372 - 392,032) |
| Neoplasms                                                        | 106,549<br>(92,700 - 114,130)  | 41<br>(31 - 54)    | 78<br>(65 - 92)     | 5,336<br>(4,999 - 5,742) | 26,929<br>(24,007 - 28,436) | 74,166<br>(62,745 - 80,663)    |
| Esophageal cancer                                                | 1,201<br>(1,059 - 1,347)       | --                 | --                  | 39<br>(30 - 49)          | 386<br>(332 - 447)          | 777<br>(667 - 898)             |
| Stomach cancer                                                   | 6,222<br>(4,563 - 8,427)       | --                 | --                  | 213<br>(154 - 278)       | 978<br>(743 - 1,267)        | 5,032<br>(3,578 - 6,936)       |
| Liver cancer                                                     | 2,602<br>(1,595 - 3,204)       | --                 | 1<br>(0 - 1)        | 79<br>(58 - 101)         | 567<br>(363 - 684)          | 1,956<br>(1,148 - 2,526)       |
| Liver cancer due to hepatitis B                                  | 299<br>(147 - 487)             | --                 | 0<br>(0 - 0)        | 18<br>(11 - 27)          | 97<br>(47 - 165)            | 183<br>(83 - 306)              |
| Liver cancer due to hepatitis C                                  | 1,154<br>(634 - 1,668)         | --                 | 0<br>(0 - 0)        | 25<br>(14 - 38)          | 221<br>(134 - 313)          | 908<br>(452 - 1,344)           |
| Liver cancer due to alcohol use                                  | 732<br>(413 - 1,070)           | --                 | --                  | 14<br>(7 - 22)           | 139<br>(82 - 203)           | 579<br>(311 - 891)             |
| Liver cancer due to other causes                                 | 418<br>(207 - 631)             | --                 | 0<br>(0 - 1)        | 22<br>(14 - 32)          | 110<br>(62 - 167)           | 285<br>(125 - 463)             |
| Larynx cancer                                                    | 163<br>(109 - 229)             | --                 | --                  | 13<br>(8 - 20)           | 62<br>(40 - 88)             | 89<br>(57 - 131)               |
| Tracheal, bronchus and lung cancer                               | 13,897<br>(8,535 - 16,412)     | --                 | --                  | 707<br>(513 - 848)       | 5,200<br>(2,965 - 6,201)    | 7,990<br>(4,716 - 9,746)       |
| Breast cancer                                                    | 18,264<br>(13,081 - 20,642)    | --                 | --                  | 1,491<br>(1,246 - 1,802) | 5,760<br>(4,607 - 6,615)    | 11,013<br>(7,141 - 12,989)     |
| Cervical cancer                                                  | 2,588<br>(2,167 - 3,418)       | --                 | --                  | 397<br>(324 - 525)       | 818<br>(679 - 1,109)        | 1,374<br>(1,052 - 1,879)       |
| Uterine cancer                                                   | 2,275<br>(1,889 - 2,912)       | --                 | --                  | 40<br>(31 - 56)          | 524<br>(428 - 717)          | 1,711<br>(1,358 - 2,194)       |
| Prostate cancer                                                  | --                             | --                 | --                  | --                       | --                          | --                             |

Web Table 31- Germany deaths with 95% UI by age, sex, and cause in 2013

| Cause                                         | Females, All Ages              | Females, 0-4 Years | Females, 5-14 Years | Females, 15-49 Years     | Females, 50-69 Years       | Females, 70-80 Years           |
|-----------------------------------------------|--------------------------------|--------------------|---------------------|--------------------------|----------------------------|--------------------------------|
| Colon and rectum cancer                       | 15,352<br>(13,237 - 17,844)    | --                 | --                  | 356<br>(305 - 404)       | 2,485<br>(2,205 - 2,714)   | 12,511<br>(10,550 - 14,944)    |
| Lip and oral cavity cancer                    | 716<br>(584 - 855)             | --                 | --                  | 59<br>(40 - 76)          | 233<br>(187 - 280)         | 424<br>(322 - 541)             |
| Nasopharynx cancer                            | 69<br>(40 - 158)               | --                 | 0<br>(0 - 1)        | 11<br>(6 - 28)           | 26<br>(15 - 63)            | 32<br>(17 - 71)                |
| Other pharynx cancer                          | 388<br>(292 - 512)             | --                 | --                  | 37<br>(24 - 53)          | 185<br>(132 - 268)         | 167<br>(118 - 223)             |
| Gallbladder and biliary tract cancer          | 3,106<br>(2,374 - 5,048)       | --                 | --                  | 41<br>(29 - 70)          | 529<br>(419 - 892)         | 2,536<br>(1,874 - 4,136)       |
| Pancreatic cancer                             | 8,924<br>(7,890 - 9,979)       | --                 | --                  | 179<br>(150 - 215)       | 1,955<br>(1,721 - 2,173)   | 6,789<br>(5,879 - 7,795)       |
| Malignant skin melanoma                       | 1,352<br>(897 - 1,778)         | --                 | --                  | 170<br>(126 - 239)       | 379<br>(279 - 553)         | 803<br>(486 - 1,048)           |
| Non-melanoma skin cancer                      | 387<br>(276 - 507)             | --                 | --                  | 7<br>(5 - 9)             | 30<br>(23 - 38)            | 350<br>(245 - 465)             |
| Ovarian cancer                                | 6,424<br>(5,426 - 7,410)       | --                 | --                  | 351<br>(292 - 436)       | 1,951<br>(1,664 - 2,319)   | 4,122<br>(3,264 - 4,991)       |
| Testicular cancer                             | --                             | --                 | --                  | --                       | --                         | --                             |
| Kidney cancer                                 | 2,794<br>(1,956 - 3,809)       | 1<br>(0 - 1)       | 2<br>(1 - 3)        | 72<br>(50 - 99)          | 626<br>(475 - 819)         | 2,093<br>(1,271 - 3,181)       |
| Bladder cancer                                | 2,204<br>(1,552 - 3,209)       | --                 | --                  | 32<br>(20 - 44)          | 288<br>(208 - 437)         | 1,885<br>(1,294 - 2,741)       |
| Brain and nervous system cancer               | 2,571<br>(1,785 - 2,989)       | 10<br>(6 - 15)     | 26<br>(20 - 34)     | 304<br>(246 - 390)       | 914<br>(714 - 1,161)       | 1,318<br>(734 - 1,669)         |
| Thyroid cancer                                | 504<br>(393 - 776)             | --                 | 0<br>(0 - 0)        | 15<br>(11 - 24)          | 102<br>(78 - 170)          | 387<br>(292 - 594)             |
| Mesothelioma                                  | 306<br>(182 - 389)             | --                 | --                  | 13<br>(8 - 18)           | 88<br>(57 - 120)           | 206<br>(104 - 282)             |
| Hodgkin lymphoma                              | 194<br>(152 - 340)             | 0<br>(0 - 0)       | 1<br>(0 - 2)        | 34<br>(26 - 62)          | 43<br>(30 - 80)            | 115<br>(84 - 188)              |
| Non-Hodgkin lymphoma                          | 3,099<br>(1,344 - 4,360)       | 1<br>(1 - 3)       | 4<br>(2 - 6)        | 122<br>(67 - 214)        | 613<br>(319 - 985)         | 2,359<br>(965 - 3,274)         |
| Multiple myeloma                              | 1,968<br>(1,198 - 3,070)       | --                 | --                  | 45<br>(28 - 78)          | 492<br>(308 - 818)         | 1,431<br>(821 - 2,195)         |
| Leukemia                                      | 3,539<br>(2,909 - 4,082)       | 9<br>(5 - 15)      | 19<br>(14 - 25)     | 195<br>(168 - 224)       | 613<br>(525 - 702)         | 2,703<br>(2,115 - 3,209)       |
| Other neoplasms                               | 5,438<br>(3,945 - 6,592)       | 20<br>(15 - 27)    | 26<br>(19 - 33)     | 315<br>(261 - 388)       | 1,083<br>(899 - 1,366)     | 3,993<br>(2,574 - 5,048)       |
| Cardiovascular diseases                       | 207,976<br>(190,559 - 239,843) | 12<br>(8 - 16)     | 11<br>(7 - 14)      | 1,476<br>(1,167 - 1,775) | 10,266<br>(8,976 - 13,947) | 196,212<br>(179,645 - 224,119) |
| Rheumatic heart disease                       | 1,787<br>(842 - 2,339)         | 0<br>(0 - 0)       | 0<br>(0 - 1)        | 25<br>(16 - 34)          | 154<br>(116 - 270)         | 1,607<br>(697 - 2,166)         |
| Ischemic heart disease                        | 111,346<br>(96,948 - 139,737)  | 1<br>(0 - 1)       | 1<br>(1 - 2)        | 542<br>(413 - 767)       | 5,391<br>(4,523 - 8,437)   | 105,411<br>(91,646 - 131,553)  |
| Cerebrovascular disease                       | 47,166<br>(39,345 - 66,591)    | 1<br>(1 - 2)       | 3<br>(2 - 4)        | 423<br>(297 - 514)       | 2,215<br>(1,837 - 3,237)   | 44,524<br>(36,708 - 63,274)    |
| Ischemic stroke                               | 31,489<br>(24,205 - 46,501)    | 0<br>(0 - 0)       | 0<br>(0 - 1)        | 61<br>(35 - 83)          | 780<br>(503 - 1,240)       | 30,646<br>(23,610 - 45,380)    |
| Hemorrhagic stroke                            | 15,677<br>(11,995 - 24,147)    | 1<br>(1 - 1)       | 2<br>(2 - 3)        | 361<br>(253 - 439)       | 1,435<br>(1,178 - 2,125)   | 13,878<br>(10,244 - 22,006)    |
| Hypertensive heart disease                    | 13,740<br>(7,623 - 18,505)     | 0<br>(0 - 0)       | 0<br>(0 - 1)        | 36<br>(25 - 61)          | 375<br>(254 - 671)         | 13,329<br>(7,258 - 18,044)     |
| Cardiomyopathy and myocarditis                | 3,478<br>(2,584 - 4,663)       | 6<br>(4 - 8)       | 4<br>(3 - 5)        | 101<br>(75 - 140)        | 403<br>(315 - 563)         | 2,965<br>(2,143 - 4,042)       |
| Atrial fibrillation and flutter               | 10,706<br>(7,829 - 14,040)     | --                 | --                  | 14<br>(10 - 18)          | 225<br>(172 - 294)         | 10,467<br>(7,608 - 13,807)     |
| Aortic aneurysm                               | 1,828<br>(1,140 - 2,821)       | --                 | --                  | 37<br>(23 - 57)          | 201<br>(117 - 297)         | 1,590<br>(978 - 2,494)         |
| Peripheral vascular disease                   | 3,393<br>(2,474 - 4,390)       | --                 | --                  | 7<br>(5 - 11)            | 174<br>(133 - 227)         | 3,212<br>(2,299 - 4,190)       |
| Endocarditis                                  | 557<br>(330 - 783)             | 1<br>(0 - 1)       | 0<br>(0 - 0)        | 16<br>(10 - 24)          | 76<br>(48 - 121)           | 464<br>(264 - 663)             |
| Other cardiovascular and circulatory diseases | 13,975<br>(8,129 - 17,811)     | 3<br>(1 - 4)       | 2<br>(1 - 3)        | 275<br>(148 - 348)       | 1,052<br>(726 - 1,413)     | 12,643<br>(7,211 - 16,344)     |
| Chronic respiratory diseases                  | 18,243<br>(13,938 - 21,116)    | 3<br>(2 - 5)       | 4<br>(3 - 5)        | 198<br>(164 - 234)       | 1,986<br>(1,231 - 2,288)   | 16,051<br>(12,434 - 18,864)    |
| Chronic obstructive pulmonary disease         | 15,941<br>(12,067 - 18,797)    | 2<br>(1 - 3)       | 2<br>(1 - 3)        | 113<br>(85 - 145)        | 1,544<br>(902 - 1,858)     | 14,281<br>(11,032 - 17,008)    |
| Pneumoconiosis                                | 63<br>(35 - 106)               | 0<br>(0 - 0)       | 0<br>(0 - 0)        | 2<br>(2 - 3)             | 5<br>(3 - 9)               | 55<br>(28 - 95)                |
| Silicosis                                     | 4<br>(2 - 6)                   | 0<br>(0 - 0)       | 0<br>(0 - 0)        | 0<br>(0 - 1)             | 0<br>(0 - 0)               | 3<br>(1 - 6)                   |
| Asbestosis                                    | 6<br>(3 - 9)                   | 0<br>(0 - 0)       | 0<br>(0 - 0)        | 0<br>(0 - 1)             | 0<br>(0 - 1)               | 5<br>(2 - 9)                   |
| Coal workers pneumoconiosis                   | 1<br>(1 - 1)                   | 0<br>(0 - 0)       | 0<br>(0 - 0)        | 0<br>(0 - 1)             | 0<br>(0 - 0)               | 0<br>(0 - 0)                   |
| Other pneumoconiosis                          | 53<br>(29 - 90)                | 0<br>(0 - 0)       | 0<br>(0 - 0)        | 1<br>(1 - 1)             | 5<br>(2 - 8)               | 47<br>(24 - 83)                |

Web Table 31- Germany deaths with 95% UI by age, sex, and cause in 2013

| Cause                                               | Females, All Ages           | Females, 0-4 Years | Females, 5-14 Years | Females, 15-49 Years | Females, 50-69 Years     | Females, 70-80 Years        |
|-----------------------------------------------------|-----------------------------|--------------------|---------------------|----------------------|--------------------------|-----------------------------|
| Asthma                                              | 960<br>(589 - 1,547)        | 0<br>(0 - 0)       | 1<br>(1 - 2)        | 53<br>(35 - 74)      | 200<br>(122 - 303)       | 706<br>(400 - 1,279)        |
| Interstitial lung disease and pulmonary sarcoidosis | 1,177<br>(513 - 1,925)      | 0<br>(0 - 1)       | 0<br>(0 - 1)        | 26<br>(13 - 38)      | 216<br>(101 - 345)       | 935<br>(372 - 1,609)        |
| Other chronic respiratory diseases                  | 101<br>(59 - 157)           | 1<br>(0 - 1)       | 0<br>(0 - 1)        | 4<br>(3 - 6)         | 21<br>(10 - 32)          | 75<br>(43 - 122)            |
| Cirrhosis                                           | 6,740<br>(5,922 - 7,406)    | 1<br>(1 - 1)       | 1<br>(1 - 1)        | 624<br>(535 - 715)   | 2,291<br>(1,999 - 2,538) | 3,824<br>(3,217 - 4,403)    |
| Cirrhosis due to hepatitis B                        | 988<br>(521 - 1,629)        | 0<br>(0 - 0)       | 0<br>(0 - 0)        | 101<br>(42 - 216)    | 360<br>(170 - 648)       | 527<br>(271 - 891)          |
| Cirrhosis due to hepatitis C                        | 3,680<br>(2,613 - 4,949)    | 0<br>(0 - 0)       | 0<br>(0 - 1)        | 310<br>(98 - 483)    | 1,199<br>(656 - 1,731)   | 2,171<br>(1,506 - 2,916)    |
| Cirrhosis due to alcohol use                        | 1,367<br>(634 - 2,123)      | --                 | --                  | 88<br>(22 - 188)     | 431<br>(165 - 757)       | 847<br>(392 - 1,463)        |
| Cirrhosis due to other causes                       | 706<br>(278 - 1,245)        | 1<br>(0 - 1)       | 1<br>(0 - 1)        | 124<br>(55 - 230)    | 301<br>(108 - 580)       | 279<br>(84 - 514)           |
| Digestive diseases                                  | 13,658<br>(10,194 - 15,785) | 3<br>(2 - 4)       | 3<br>(2 - 4)        | 186<br>(148 - 216)   | 1,044<br>(782 - 1,191)   | 12,422<br>(9,169 - 14,480)  |
| Peptic ulcer disease                                | 1,821<br>(1,016 - 2,545)    | 0<br>(0 - 0)       | 0<br>(0 - 0)        | 24<br>(16 - 33)      | 151<br>(95 - 200)        | 1,645<br>(890 - 2,340)      |
| Gastritis and duodenitis                            | 196<br>(68 - 322)           | 0<br>(0 - 0)       | 0<br>(0 - 0)        | 4<br>(2 - 6)         | 13<br>(5 - 20)           | 179<br>(60 - 302)           |
| Appendicitis                                        | 137<br>(64 - 217)           | 0<br>(0 - 0)       | 0<br>(0 - 1)        | 4<br>(2 - 6)         | 15<br>(8 - 22)           | 117<br>(51 - 195)           |
| Paralytic ileus and intestinal obstruction          | 2,825<br>(1,327 - 4,467)    | 1<br>(0 - 1)       | 1<br>(1 - 1)        | 32<br>(18 - 52)      | 191<br>(99 - 314)        | 2,599<br>(1,177 - 4,099)    |
| Inguinal, femoral, and abdominal hernia             | 256<br>(92 - 417)           | 0<br>(0 - 0)       | 0<br>(0 - 0)        | 2<br>(1 - 4)         | 18<br>(9 - 28)           | 236<br>(78 - 395)           |
| Inflammatory bowel disease                          | 1,078<br>(616 - 1,749)      | 1<br>(0 - 1)       | 0<br>(0 - 1)        | 28<br>(16 - 38)      | 93<br>(54 - 127)         | 956<br>(535 - 1,607)        |
| Vascular intestinal disorders                       | 3,336<br>(1,873 - 5,662)    | 0<br>(0 - 0)       | 0<br>(0 - 0)        | 20<br>(10 - 37)      | 218<br>(113 - 330)       | 3,098<br>(1,695 - 5,337)    |
| Gallbladder and biliary diseases                    | 1,324<br>(734 - 1,793)      | 0<br>(0 - 0)       | 0<br>(0 - 0)        | 11<br>(7 - 15)       | 74<br>(51 - 102)         | 1,238<br>(669 - 1,698)      |
| Pancreatitis                                        | 815<br>(480 - 1,247)        | 0<br>(0 - 0)       | 0<br>(0 - 0)        | 39<br>(25 - 54)      | 127<br>(80 - 185)        | 650<br>(364 - 1,017)        |
| Other digestive diseases                            | 1,871<br>(1,154 - 2,475)    | 0<br>(0 - 1)       | 0<br>(0 - 0)        | 21<br>(15 - 27)      | 145<br>(94 - 181)        | 1,704<br>(1,035 - 2,296)    |
| Neurological disorders                              | 51,236<br>(38,184 - 64,085) | 29<br>(20 - 38)    | 16<br>(11 - 20)     | 361<br>(273 - 432)   | 1,727<br>(1,397 - 2,018) | 49,104<br>(36,041 - 61,939) |
| Alzheimer disease and other dementias               | 44,537<br>(31,040 - 57,581) | --                 | --                  | 4<br>(0 - 9)         | 599<br>(393 - 818)       | 43,934<br>(30,408 - 56,918) |
| Parkinson disease                                   | 3,567<br>(2,138 - 4,868)    | --                 | --                  | 4<br>(3 - 5)         | 130<br>(94 - 186)        | 3,433<br>(2,032 - 4,697)    |
| Epilepsy                                            | 793<br>(315 - 1,220)        | 7<br>(4 - 10)      | 9<br>(5 - 13)       | 115<br>(63 - 154)    | 130<br>(67 - 181)        | 533<br>(166 - 905)          |
| Multiple sclerosis                                  | 799<br>(396 - 1,019)        | --                 | --                  | 129<br>(71 - 185)    | 377<br>(190 - 511)       | 293<br>(125 - 406)          |
| Other neurological disorders                        | 1,540<br>(1,349 - 1,707)    | 22<br>(15 - 30)    | 7<br>(5 - 9)        | 109<br>(92 - 126)    | 491<br>(423 - 556)       | 910<br>(773 - 1,047)        |
| Mental and substance use disorders                  | 1,492<br>(895 - 2,393)      | 0<br>(0 - 0)       | 0<br>(0 - 1)        | 422<br>(302 - 674)   | 646<br>(333 - 1,100)     | 423<br>(245 - 643)          |
| Schizophrenia                                       | 95<br>(62 - 191)            | --                 | --                  | 6<br>(4 - 13)        | 21<br>(13 - 42)          | 68<br>(41 - 142)            |
| Alcohol use disorders                               | 1,064<br>(461 - 1,926)      | --                 | --                  | 240<br>(119 - 495)   | 547<br>(223 - 997)       | 277<br>(104 - 465)          |
| Drug use disorders                                  | 325<br>(281 - 363)          | 0<br>(0 - 0)       | --                  | 168<br>(142 - 198)   | 79<br>(66 - 94)          | 78<br>(60 - 100)            |
| Opioid use disorders                                | 114<br>(97 - 129)           | 0<br>(0 - 0)       | --                  | 60<br>(49 - 72)      | 26<br>(20 - 31)          | 28<br>(21 - 38)             |
| Cocaine use disorders                               | 12<br>(10 - 14)             | 0<br>(0 - 0)       | --                  | 7<br>(6 - 9)         | 2<br>(2 - 3)             | 2<br>(2 - 3)                |
| Amphetamine use disorders                           | 13<br>(11 - 15)             | 0<br>(0 - 0)       | --                  | 7<br>(5 - 9)         | 3<br>(2 - 4)             | 3<br>(2 - 4)                |
| Other drug use disorders                            | 186<br>(161 - 210)          | 0<br>(0 - 0)       | --                  | 94<br>(79 - 112)     | 48<br>(39 - 57)          | 45<br>(34 - 58)             |
| Eating disorders                                    | 9<br>(5 - 13)               | --                 | 0<br>(0 - 1)        | 8<br>(4 - 13)        | --                       | --                          |
| Anorexia nervosa                                    | 9<br>(5 - 13)               | --                 | 0<br>(0 - 1)        | 8<br>(4 - 13)        | --                       | --                          |
| Diabetes, urogenital, blood, and endocrine diseases | 30,148<br>(21,460 - 34,950) | 31<br>(20 - 39)    | 21<br>(15 - 27)     | 405<br>(315 - 454)   | 2,014<br>(1,757 - 2,353) | 27,677<br>(19,076 - 32,487) |
| Diabetes mellitus                                   | 11,818<br>(9,673 - 14,444)  | 1<br>(1 - 2)       | 1<br>(0 - 1)        | 108<br>(89 - 130)    | 781<br>(661 - 1,041)     | 10,927<br>(8,782 - 13,492)  |
| Acute glomerulonephritis                            | 7<br>(5 - 10)               | 0<br>(0 - 0)       | 0<br>(0 - 0)        | 2<br>(1 - 2)         | 1<br>(1 - 2)             | 4<br>(2 - 7)                |
| Chronic kidney disease                              | 12,578<br>(5,507 - 16,053)  | 2<br>(1 - 2)       | 2<br>(1 - 2)        | 68<br>(55 - 82)      | 515<br>(405 - 624)       | 11,992<br>(4,955 - 15,424)  |
| Chronic kidney disease due to diabetes mellitus     | 3,147<br>(1,648 - 4,399)    | 0<br>(0 - 0)       | 0<br>(0 - 0)        | 26<br>(19 - 35)      | 195<br>(135 - 259)       | 2,926<br>(1,466 - 4,166)    |

Web Table 31- Germany deaths with 95% UI by age, sex, and cause in 2013

| Cause                                               | Females, All Ages           | Females, 0-4 Years | Females, 5-14 Years | Females, 15-49 Years     | Females, 50-69 Years     | Females, 70-80 Years       |
|-----------------------------------------------------|-----------------------------|--------------------|---------------------|--------------------------|--------------------------|----------------------------|
| Chronic kidney disease due to hypertension          | 3,585<br>(1,547 - 5,346)    | 0<br>(0 - 1)       | 0<br>(0 - 0)        | 11<br>(6 - 19)           | 112<br>(59 - 181)        | 3,461<br>(1,459 - 5,217)   |
| Chronic kidney disease due to glomerulonephritis    | 59<br>(30 - 89)             | 0<br>(0 - 0)       | 0<br>(0 - 0)        | 3<br>(2 - 4)             | 7<br>(4 - 11)            | 48<br>(22 - 77)            |
| Chronic kidney disease due to other causes          | 5,787<br>(1,360 - 8,795)    | 1<br>(0 - 1)       | 1<br>(0 - 1)        | 28<br>(16 - 38)          | 201<br>(107 - 282)       | 5,556<br>(1,235 - 8,552)   |
| Urinary diseases and male infertility               | 3,079<br>(1,479 - 4,161)    | 0<br>(0 - 1)       | 0<br>(0 - 1)        | 35<br>(25 - 45)          | 188<br>(144 - 250)       | 2,855<br>(1,280 - 3,924)   |
| Interstitial nephritis and urinary tract infections | 2,672<br>(1,204 - 3,661)    | 0<br>(0 - 1)       | 0<br>(0 - 0)        | 29<br>(20 - 37)          | 157<br>(115 - 208)       | 2,486<br>(1,059 - 3,481)   |
| Urolithiasis                                        | 75<br>(45 - 150)            | --                 | 0<br>(0 - 0)        | 2<br>(1 - 4)             | 10<br>(6 - 22)           | 63<br>(34 - 129)           |
| Other urinary diseases                              | 332<br>(131 - 658)          | 0<br>(0 - 0)       | 0<br>(0 - 0)        | 4<br>(2 - 7)             | 21<br>(11 - 31)          | 307<br>(113 - 630)         |
| Gynecological diseases                              | 20<br>(14 - 34)             | --                 | --                  | 3<br>(2 - 4)             | 3<br>(2 - 5)             | 14<br>(9 - 25)             |
| Uterine fibroids                                    | 6<br>(4 - 10)               | --                 | --                  | 1<br>(0 - 1)             | 1<br>(1 - 1)             | 4<br>(3 - 7)               |
| Polycystic ovarian syndrome                         | 0<br>(0 - 0)                | --                 | --                  | 0<br>(0 - 0)             | 0<br>(0 - 0)             | --                         |
| Endometriosis                                       | 0<br>(0 - 1)                | --                 | --                  | 0<br>(0 - 1)             | 0<br>(0 - 0)             | --                         |
| Genital prolapse                                    | 4<br>(3 - 8)                | --                 | --                  | 0<br>(0 - 0)             | 0<br>(0 - 1)             | 4<br>(2 - 6)               |
| Other gynecological diseases                        | 9<br>(6 - 15)               | --                 | --                  | 1<br>(1 - 2)             | 1<br>(1 - 2)             | 6<br>(4 - 11)              |
| Hemoglobinopathies and hemolytic anemias            | 206<br>(97 - 327)           | 4<br>(2 - 6)       | 3<br>(2 - 4)        | 9<br>(5 - 14)            | 38<br>(22 - 54)          | 153<br>(64 - 265)          |
| Thalassemias                                        | 3<br>(2 - 4)                | 1<br>(0 - 1)       | 1<br>(0 - 1)        | 2<br>(1 - 2)             | 0<br>(0 - 0)             | 0<br>(0 - 0)               |
| Sickle cell disorders                               | 18<br>(10 - 25)             | 1<br>(1 - 2)       | 1<br>(1 - 2)        | 3<br>(2 - 4)             | 8<br>(5 - 12)            | 4<br>(2 - 7)               |
| G6PD deficiency                                     | 1<br>(1 - 1)                | 0<br>(0 - 0)       | 0<br>(0 - 0)        | 0<br>(0 - 0)             | 0<br>(0 - 1)             | 0<br>(0 - 0)               |
| Other hemoglobinopathies and hemolytic anemias      | 184<br>(85 - 299)           | 2<br>(1 - 3)       | 1<br>(0 - 1)        | 5<br>(2 - 7)             | 29<br>(17 - 42)          | 148<br>(62 - 259)          |
| Endocrine, metabolic, blood, and immune disorders   | 2,440<br>(1,545 - 3,062)    | 24<br>(14 - 32)    | 15<br>(10 - 21)     | 180<br>(105 - 218)       | 490<br>(306 - 612)       | 1,731<br>(1,059 - 2,303)   |
| Musculoskeletal disorders                           | 1,156<br>(923 - 1,591)      | --                 | 1<br>(1 - 1)        | 37<br>(30 - 45)          | 183<br>(150 - 245)       | 935<br>(716 - 1,312)       |
| Rheumatoid arthritis                                | 370<br>(262 - 728)          | --                 | 0<br>(0 - 0)        | 4<br>(3 - 7)             | 50<br>(37 - 92)          | 316<br>(212 - 599)         |
| Other musculoskeletal disorders                     | 786<br>(608 - 992)          | --                 | 1<br>(1 - 1)        | 33<br>(25 - 40)          | 133<br>(108 - 162)       | 619<br>(455 - 807)         |
| Other non-communicable diseases                     | 1,942<br>(1,260 - 2,294)    | 409<br>(326 - 539) | 36<br>(28 - 45)     | 141<br>(113 - 163)       | 219<br>(146 - 252)       | 1,136<br>(468 - 1,486)     |
| Congenital anomalies                                | 831<br>(705 - 955)          | 325<br>(260 - 414) | 36<br>(28 - 45)     | 131<br>(106 - 151)       | 150<br>(103 - 178)       | 189<br>(112 - 245)         |
| Neural tube defects                                 | 19<br>(14 - 25)             | 10<br>(6 - 16)     | 1<br>(1 - 2)        | 6<br>(4 - 7)             | 1<br>(1 - 2)             | 1<br>(0 - 1)               |
| Congenital heart anomalies                          | 225<br>(184 - 264)          | 111<br>(82 - 144)  | 10<br>(7 - 14)      | 43<br>(33 - 53)          | 24<br>(15 - 34)          | 37<br>(23 - 51)            |
| Cleft lip and cleft palate                          | 0<br>(0 - 0)                | 0<br>(0 - 0)       | --                  | --                       | --                       | --                         |
| Down syndrome                                       | 157<br>(103 - 194)          | 15<br>(8 - 24)     | 3<br>(1 - 5)        | 36<br>(21 - 48)          | 94<br>(58 - 119)         | 10<br>(5 - 15)             |
| Chromosomal unbalanced rearrangements               | 64<br>(42 - 99)             | 54<br>(34 - 86)    | 3<br>(2 - 5)        | 5<br>(3 - 7)             | 2<br>(1 - 3)             | 1<br>(0 - 1)               |
| Other congenital anomalies                          | 367<br>(293 - 435)          | 136<br>(101 - 179) | 18<br>(13 - 23)     | 42<br>(32 - 51)          | 30<br>(19 - 44)          | 141<br>(79 - 185)          |
| Skin and subcutaneous diseases                      | 1,028<br>(377 - 1,369)      | 1<br>(0 - 1)       | 0<br>(0 - 1)        | 11<br>(5 - 14)           | 70<br>(36 - 85)          | 946<br>(337 - 1,284)       |
| Cellulitis                                          | 69<br>(23 - 117)            | 0<br>(0 - 0)       | 0<br>(0 - 0)        | 2<br>(1 - 3)             | 9<br>(4 - 14)            | 58<br>(17 - 105)           |
| Pyoderma                                            | 455<br>(174 - 634)          | 0<br>(0 - 1)       | 0<br>(0 - 0)        | 6<br>(3 - 8)             | 38<br>(20 - 48)          | 411<br>(155 - 585)         |
| Decubitus ulcer                                     | 457<br>(144 - 644)          | 0<br>(0 - 0)       | 0<br>(0 - 0)        | 2<br>(1 - 3)             | 19<br>(8 - 25)           | 436<br>(135 - 622)         |
| Other skin and subcutaneous diseases                | 48<br>(13 - 95)             | 0<br>(0 - 0)       | 0<br>(0 - 0)        | 1<br>(1 - 2)             | 4<br>(2 - 8)             | 42<br>(9 - 90)             |
| Sudden infant death syndrome                        | 83<br>(38 - 184)            | 83<br>(38 - 184)   | --                  | --                       | --                       | --                         |
| Injuries                                            | 15,436<br>(12,188 - 18,219) | 69<br>(55 - 85)    | 71<br>(61 - 90)     | 1,748<br>(1,587 - 1,979) | 2,020<br>(1,720 - 2,446) | 11,527<br>(8,414 - 14,107) |
| Transport injuries                                  | 1,581<br>(1,356 - 2,343)    | 14<br>(10 - 21)    | 35<br>(27 - 52)     | 504<br>(439 - 664)       | 313<br>(255 - 457)       | 715<br>(565 - 1,174)       |
| Road injuries                                       | 1,489<br>(1,276 - 2,242)    | 13<br>(9 - 19)     | 33<br>(25 - 49)     | 476<br>(416 - 639)       | 289<br>(234 - 430)       | 678<br>(532 - 1,130)       |
| Pedestrian road injuries                            | 468<br>(320 - 767)          | 5<br>(3 - 8)       | 11<br>(7 - 17)      | 51<br>(29 - 73)          | 76<br>(47 - 119)         | 325<br>(222 - 574)         |

Web Table 31- Germany deaths with 95% UI by age, sex, and cause in 2013

| Cause                                           | Females, All Ages          | Females, 0-4 Years | Females, 5-14 Years | Females, 15-49 Years | Females, 50-69 Years | Females, 70-80 Years      |
|-------------------------------------------------|----------------------------|--------------------|---------------------|----------------------|----------------------|---------------------------|
| Cyclist road injuries                           | 182<br>(122 - 295)         | 1<br>(0 - 1)       | 5<br>(3 - 9)        | 30<br>(18 - 41)      | 46<br>(28 - 68)      | 100<br>(66 - 176)         |
| Motorcyclist road injuries                      | 54<br>(22 - 99)            | 0<br>(0 - 0)       | 1<br>(0 - 1)        | 40<br>(16 - 75)      | 8<br>(3 - 15)        | 5<br>(2 - 10)             |
| Motor vehicle road injuries                     | 774<br>(627 - 1,171)       | 7<br>(4 - 11)      | 15<br>(10 - 23)     | 350<br>(296 - 487)   | 158<br>(122 - 244)   | 244<br>(160 - 413)        |
| Other road injuries                             | 12<br>(7 - 21)             | 0<br>(0 - 0)       | 1<br>(0 - 2)        | 5<br>(3 - 8)         | 2<br>(1 - 4)         | 3<br>(1 - 8)              |
| Other transport injuries                        | 92<br>(55 - 143)           | 1<br>(1 - 2)       | 2<br>(1 - 4)        | 28<br>(17 - 42)      | 23<br>(13 - 38)      | 37<br>(19 - 64)           |
| Unintentional injuries                          | 10,703<br>(7,496 - 13,217) | 44<br>(34 - 58)    | 24<br>(20 - 30)     | 248<br>(206 - 280)   | 729<br>(552 - 846)   | 9,658<br>(6,532 - 12,099) |
| Falls                                           | 7,447<br>(4,880 - 9,637)   | 4<br>(3 - 6)       | 2<br>(2 - 3)        | 70<br>(55 - 92)      | 337<br>(223 - 399)   | 7,033<br>(4,564 - 9,252)  |
| Drowning                                        | 137<br>(112 - 226)         | 10<br>(6 - 21)     | 7<br>(4 - 14)       | 22<br>(17 - 38)      | 32<br>(24 - 49)      | 67<br>(50 - 99)           |
| Fire, heat, and hot substances                  | 326<br>(189 - 431)         | 6<br>(4 - 9)       | 3<br>(2 - 5)        | 28<br>(19 - 36)      | 50<br>(31 - 64)      | 239<br>(126 - 335)        |
| Poisonings                                      | 91<br>(63 - 170)           | 0<br>(0 - 1)       | 1<br>(0 - 1)        | 9<br>(7 - 17)        | 13<br>(9 - 22)       | 68<br>(44 - 135)          |
| Exposure to mechanical forces                   | 103<br>(75 - 128)          | 6<br>(4 - 9)       | 4<br>(3 - 5)        | 15<br>(12 - 18)      | 16<br>(13 - 20)      | 62<br>(38 - 83)           |
| Unintentional firearm injuries                  | 5<br>(4 - 6)               | 0<br>(0 - 0)       | 0<br>(0 - 1)        | 2<br>(1 - 2)         | 1<br>(1 - 1)         | 1<br>(1 - 2)              |
| Unintentional suffocation                       | 35<br>(14 - 57)            | 3<br>(1 - 5)       | 1<br>(0 - 1)        | 2<br>(1 - 3)         | 3<br>(1 - 4)         | 26<br>(9 - 47)            |
| Other exposure to mechanical forces             | 64<br>(44 - 77)            | 3<br>(2 - 5)       | 3<br>(2 - 4)        | 11<br>(9 - 14)       | 12<br>(9 - 15)       | 34<br>(18 - 45)           |
| Adverse effects of medical treatment            | 993<br>(353 - 1,518)       | 4<br>(2 - 6)       | 2<br>(1 - 4)        | 43<br>(20 - 61)      | 131<br>(54 - 189)    | 812<br>(261 - 1,288)      |
| Animal contact                                  | 19<br>(7 - 31)             | 0<br>(0 - 1)       | 0<br>(0 - 1)        | 3<br>(1 - 5)         | 7<br>(2 - 10)        | 9<br>(3 - 16)             |
| Venomous animal contact                         | 7<br>(2 - 11)              | 0<br>(0 - 0)       | 0<br>(0 - 0)        | 1<br>(0 - 2)         | 4<br>(1 - 6)         | 2<br>(0 - 4)              |
| Non-venomous animal contact                     | 13<br>(4 - 21)             | 0<br>(0 - 0)       | 0<br>(0 - 0)        | 2<br>(1 - 3)         | 3<br>(1 - 5)         | 8<br>(2 - 13)             |
| Foreign body                                    | 1,523<br>(839 - 2,325)     | 12<br>(6 - 18)     | 4<br>(2 - 6)        | 52<br>(31 - 77)      | 138<br>(83 - 205)    | 1,317<br>(688 - 2,072)    |
| Pulmonary aspiration and foreign body in airway | 1,511<br>(829 - 2,311)     | 12<br>(6 - 18)     | 3<br>(2 - 5)        | 50<br>(29 - 74)      | 137<br>(82 - 204)    | 1,309<br>(678 - 2,068)    |
| Foreign body in other body part                 | 12<br>(6 - 20)             | 0<br>(0 - 0)       | 0<br>(0 - 0)        | 2<br>(1 - 2)         | 1<br>(1 - 1)         | 8<br>(3 - 17)             |
| Other unintentional injuries                    | 64<br>(14 - 97)            | 1<br>(0 - 2)       | 1<br>(0 - 1)        | 5<br>(2 - 7)         | 6<br>(2 - 9)         | 52<br>(9 - 84)            |
| Self-harm and interpersonal violence            | 3,151<br>(2,759 - 4,115)   | 11<br>(7 - 15)     | 12<br>(10 - 17)     | 996<br>(851 - 1,130) | 978<br>(828 - 1,407) | 1,154<br>(934 - 1,692)    |
| Self-harm                                       | 2,912<br>(2,553 - 3,849)   | --                 | 6<br>(4 - 8)        | 888<br>(729 - 1,017) | 929<br>(780 - 1,354) | 1,089<br>(879 - 1,631)    |
| Interpersonal violence                          | 239<br>(164 - 313)         | 11<br>(7 - 15)     | 7<br>(5 - 10)       | 108<br>(79 - 155)    | 50<br>(36 - 71)      | 64<br>(35 - 84)           |
| Assault by firearm                              | 44<br>(25 - 70)            | 0<br>(0 - 1)       | 1<br>(0 - 1)        | 21<br>(12 - 36)      | 10<br>(6 - 18)       | 11<br>(5 - 19)            |
| Assault by sharp object                         | 81<br>(53 - 125)           | 1<br>(1 - 2)       | 2<br>(1 - 3)        | 47<br>(30 - 74)      | 17<br>(11 - 27)      | 14<br>(7 - 21)            |
| Assault by other means                          | 114<br>(70 - 150)          | 9<br>(6 - 13)      | 4<br>(3 - 6)        | 40<br>(25 - 58)      | 22<br>(14 - 33)      | 39<br>(20 - 54)           |
| Forces of nature, war, and legal intervention   | 0<br>(0 - 0)               | 0<br>(0 - 0)       | --                  | --                   | --                   | 0<br>(0 - 0)              |
| Exposure to forces of nature                    | 0<br>(0 - 0)               | 0<br>(0 - 0)       | --                  | --                   | --                   | 0<br>(0 - 0)              |

Web Table 31- Ghana deaths with 95% UI by age, sex, and cause in 2013

| Cause                                                             | Both Sexes, All Ages           | Both Sexes, 0-4 Years       | Both Sexes, 5-14 Years   | Both Sexes, 15-49 Years     | Both Sexes, 50-69 Years     | Both Sexes, 70-80 Years     |
|-------------------------------------------------------------------|--------------------------------|-----------------------------|--------------------------|-----------------------------|-----------------------------|-----------------------------|
| All causes                                                        | 187,019<br>(172,506 - 201,967) | 56,588<br>(49,400 - 65,169) | 6,576<br>(5,809 - 7,508) | 43,394<br>(38,288 - 48,594) | 38,289<br>(33,480 - 43,922) | 42,172<br>(39,133 - 46,281) |
| Communicable, maternal, neonatal, and nutritional diseases        | 94,901<br>(85,442 - 104,645)   | 47,111<br>(40,421 - 55,376) | 3,861<br>(3,212 - 4,518) | 22,465<br>(19,814 - 25,866) | 10,453<br>(8,929 - 12,078)  | 11,011<br>(8,723 - 13,169)  |
| HIV/AIDS and tuberculosis                                         | 18,344<br>(14,647 - 23,310)    | 403<br>(274 - 587)          | 989<br>(774 - 1,238)     | 12,611<br>(9,618 - 17,006)  | 3,337<br>(2,600 - 4,348)    | 1,004<br>(802 - 1,304)      |
| Tuberculosis                                                      | 3,629<br>(2,962 - 4,525)       | 128<br>(80 - 192)           | 62<br>(43 - 86)          | 1,381<br>(1,052 - 1,769)    | 1,269<br>(977 - 1,711)      | 789<br>(619 - 1,042)        |
| HIV/AIDS                                                          | 14,715<br>(11,072 - 19,639)    | 275<br>(161 - 461)          | 927<br>(712 - 1,178)     | 11,230<br>(8,126 - 15,740)  | 2,068<br>(1,430 - 2,882)    | 215<br>(138 - 316)          |
| HIV/AIDS resulting in mycobacterial infection                     | 863<br>(613 - 1,233)           | 15<br>(8 - 26)              | 48<br>(35 - 65)          | 656<br>(450 - 981)          | 129<br>(83 - 186)           | 14<br>(9 - 22)              |
| HIV/AIDS resulting in other diseases                              | 13,852<br>(10,460 - 18,544)    | 260<br>(152 - 435)          | 878<br>(673 - 1,114)     | 10,574<br>(7,668 - 14,808)  | 1,939<br>(1,337 - 2,701)    | 201<br>(129 - 295)          |
| Diarrhea, lower respiratory, and other common infectious diseases | 27,541<br>(20,726 - 32,068)    | 11,017<br>(8,059 - 14,329)  | 1,380<br>(930 - 1,842)   | 4,207<br>(3,044 - 5,530)    | 4,367<br>(2,843 - 5,544)    | 6,569<br>(4,501 - 8,279)    |
| Diarrheal diseases                                                | 4,110<br>(2,962 - 5,776)       | 2,245<br>(1,159 - 3,836)    | 129<br>(73 - 214)        | 731<br>(516 - 1,022)        | 462<br>(305 - 688)          | 543<br>(366 - 795)          |
| Intestinal infectious diseases                                    | 1,075<br>(564 - 1,868)         | 336<br>(158 - 645)          | 291<br>(142 - 518)       | 374<br>(174 - 693)          | 52<br>(24 - 98)             | 21<br>(9 - 39)              |
| Typhoid fever                                                     | 722<br>(363 - 1,288)           | 213<br>(96 - 412)           | 198<br>(94 - 355)        | 259<br>(118 - 495)          | 37<br>(16 - 71)             | 14<br>(6 - 26)              |
| Paratyphoid fever                                                 | 316<br>(147 - 582)             | 103<br>(41 - 210)           | 90<br>(35 - 184)         | 106<br>(44 - 210)           | 13<br>(5 - 28)              | 5<br>(2 - 10)               |
| Other intestinal infectious diseases                              | 36<br>(21 - 57)                | 19<br>(9 - 36)              | 4<br>(1 - 10)            | 9<br>(3 - 18)               | 3<br>(0 - 8)                | 2<br>(0 - 6)                |
| Lower respiratory infections                                      | 16,855<br>(12,183 - 20,148)    | 6,090<br>(4,243 - 8,222)    | 419<br>(267 - 612)       | 1,628<br>(1,063 - 2,260)    | 3,192<br>(1,851 - 4,192)    | 5,527<br>(3,474 - 7,197)    |
| Upper respiratory infections                                      | 21<br>(11 - 36)                | 7<br>(1 - 18)               | 1<br>(0 - 3)             | 6<br>(2 - 12)               | 4<br>(1 - 10)               | 4<br>(1 - 10)               |
| Otitis media                                                      | 13<br>(11 - 16)                | 2<br>(1 - 2)                | 1<br>(0 - 1)             | 2<br>(1 - 2)                | 3<br>(3 - 4)                | 6<br>(4 - 8)                |
| Meningitis                                                        | 3,989<br>(2,783 - 4,998)       | 1,284<br>(787 - 1,971)      | 396<br>(188 - 616)       | 1,311<br>(821 - 1,816)      | 575<br>(370 - 805)          | 424<br>(295 - 611)          |
| Pneumococcal meningitis                                           | 1,037<br>(705 - 1,488)         | 285<br>(144 - 552)          | 112<br>(48 - 200)        | 364<br>(196 - 556)          | 163<br>(104 - 244)          | 113<br>(69 - 171)           |
| H influenzae type B meningitis                                    | 634<br>(419 - 917)             | 335<br>(179 - 568)          | 71<br>(30 - 135)         | 147<br>(80 - 224)           | 51<br>(23 - 94)             | 31<br>(15 - 52)             |
| Meningococcal meningitis                                          | 1,735<br>(1,215 - 2,268)       | 550<br>(319 - 842)          | 174<br>(80 - 285)        | 577<br>(365 - 857)          | 246<br>(145 - 367)          | 188<br>(119 - 291)          |
| Other meningitis                                                  | 583<br>(387 - 819)             | 113<br>(58 - 192)           | 39<br>(19 - 70)          | 223<br>(125 - 369)          | 115<br>(56 - 214)           | 93<br>(51 - 149)            |
| Encephalitis                                                      | 284<br>(217 - 362)             | 51<br>(31 - 83)             | 33<br>(20 - 52)          | 99<br>(69 - 138)            | 62<br>(42 - 88)             | 37<br>(25 - 51)             |
| Diphtheria                                                        | 12<br>(1 - 56)                 | 9<br>(0 - 52)               | 2<br>(0 - 10)            | 1<br>(0 - 3)                | 0<br>(0 - 1)                | --                          |
| Whooping cough                                                    | 114<br>(0 - 557)               | 107<br>(0 - 520)            | 6<br>(0 - 29)            | 1<br>(0 - 6)                | 0<br>(0 - 1)                | --                          |
| Tetanus                                                           | 237<br>(90 - 377)              | 175<br>(57 - 306)           | 10<br>(3 - 20)           | 36<br>(13 - 75)             | 12<br>(6 - 25)              | 4<br>(2 - 7)                |
| Measles                                                           | 814<br>(345 - 1,649)           | 706<br>(291 - 1,463)        | 92<br>(38 - 185)         | 15<br>(6 - 31)              | 0<br>(0 - 1)                | --                          |
| Varicella and herpes zoster                                       | 18<br>(8 - 36)                 | 6<br>(1 - 18)               | 1<br>(0 - 5)             | 4<br>(1 - 9)                | 2<br>(0 - 4)                | 5<br>(0 - 18)               |
| Neglected tropical diseases and malaria                           | 16,771<br>(11,772 - 23,222)    | 10,802<br>(6,302 - 16,628)  | 1,009<br>(566 - 1,579)   | 1,767<br>(1,114 - 2,657)    | 1,340<br>(720 - 2,227)      | 1,853<br>(803 - 3,477)      |
| Malaria                                                           | 16,415<br>(11,390 - 22,881)    | 10,737<br>(6,244 - 16,580)  | 953<br>(513 - 1,531)     | 1,648<br>(1,006 - 2,535)    | 1,263<br>(644 - 2,153)      | 1,813<br>(764 - 3,437)      |
| Leishmaniasis                                                     | 1<br>(0 - 1)                   | 0<br>(0 - 0)                | 0<br>(0 - 0)             | 0<br>(0 - 0)                | 0<br>(0 - 0)                | 0<br>(0 - 0)                |
| Visceral leishmaniasis                                            | 1<br>(0 - 1)                   | 0<br>(0 - 0)                | 0<br>(0 - 0)             | 0<br>(0 - 0)                | 0<br>(0 - 0)                | 0<br>(0 - 0)                |
| Schistosomiasis                                                   | 97<br>(72 - 127)               | 1<br>(1 - 3)                | 3<br>(1 - 4)             | 38<br>(25 - 53)             | 36<br>(23 - 52)             | 19<br>(11 - 30)             |
| Cysticercosis                                                     | 7<br>(6 - 8)                   | 0<br>(0 - 1)                | 0<br>(0 - 0)             | 4<br>(3 - 5)                | 1<br>(1 - 2)                | 0<br>(0 - 1)                |
| Cystic echinococcosis                                             | 8<br>(7 - 9)                   | 1<br>(1 - 2)                | 1<br>(1 - 1)             | 4<br>(3 - 4)                | 1<br>(1 - 2)                | 1<br>(1 - 1)                |
| Dengue                                                            | 20<br>(13 - 30)                | 8<br>(4 - 14)               | 5<br>(3 - 7)             | 6<br>(4 - 11)               | 1<br>(1 - 3)                | 1<br>(0 - 1)                |
| Yellow fever                                                      | 10<br>(7 - 14)                 | 1<br>(0 - 2)                | 2<br>(1 - 4)             | 6<br>(3 - 9)                | 1<br>(0 - 2)                | 0<br>(0 - 1)                |
| Rabies                                                            | 170<br>(102 - 234)             | 26<br>(12 - 54)             | 40<br>(22 - 69)          | 55<br>(34 - 74)             | 33<br>(17 - 49)             | 16<br>(6 - 29)              |
| Intestinal nematode infections                                    | 33<br>(15 - 58)                | 25<br>(10 - 49)             | 4<br>(0 - 12)            | 2<br>(0 - 9)                | 1<br>(0 - 7)                | 1<br>(0 - 6)                |
| Ascariasis                                                        | 33<br>(15 - 58)                | 25<br>(10 - 49)             | 4<br>(0 - 12)            | 2<br>(0 - 9)                | 1<br>(0 - 7)                | 1<br>(0 - 6)                |
| Other neglected tropical diseases                                 | 11<br>(9 - 15)                 | 3<br>(2 - 4)                | 1<br>(0 - 1)             | 4<br>(3 - 5)                | 2<br>(1 - 2)                | 2<br>(1 - 3)                |



Web Table 31- Ghana deaths with 95% UI by age, sex, and cause in 2013

| Cause                                                            | Both Sexes, All Ages        | Both Sexes, 0-4 Years       | Both Sexes, 5-14 Years   | Both Sexes, 15-49 Years     | Both Sexes, 50-69 Years     | Both Sexes, 70-80 Years     |
|------------------------------------------------------------------|-----------------------------|-----------------------------|--------------------------|-----------------------------|-----------------------------|-----------------------------|
| Maternal disorders                                               | 2,343<br>(1,545 - 3,277)    | --                          | 12<br>(5 - 27)           | 2,330<br>(1,532 - 3,263)    | --                          | --                          |
| Maternal hemorrhage                                              | 387<br>(234 - 609)          | --                          | 1<br>(0 - 3)             | 386<br>(233 - 608)          | --                          | --                          |
| Maternal sepsis and other maternal infections                    | 130<br>(72 - 210)           | --                          | 1<br>(0 - 2)             | 129<br>(71 - 209)           | --                          | --                          |
| Maternal hypertensive disorders                                  | 183<br>(98 - 283)           | --                          | 1<br>(0 - 2)             | 182<br>(98 - 282)           | --                          | --                          |
| Maternal obstructed labor                                        | 146<br>(85 - 235)           | --                          | 1<br>(0 - 1)             | 146<br>(84 - 233)           | --                          | --                          |
| Maternal abortive outcome                                        | 394<br>(248 - 578)          | --                          | 2<br>(1 - 5)             | 391<br>(247 - 573)          | --                          | --                          |
| Indirect maternal deaths                                         | 260<br>(153 - 384)          | --                          | 1<br>(0 - 2)             | 258<br>(153 - 382)          | --                          | --                          |
| Late maternal deaths                                             | 328<br>(185 - 522)          | --                          | 3<br>(1 - 7)             | 325<br>(184 - 518)          | --                          | --                          |
| Maternal deaths aggravated by HIV/AIDS                           | 10<br>(5 - 16)              | --                          | --                       | 10<br>(5 - 16)              | --                          | --                          |
| Other maternal disorders                                         | 501<br>(301 - 714)          | --                          | 3<br>(1 - 6)             | 499<br>(298 - 709)          | --                          | --                          |
| Neonatal disorders                                               | 19,155<br>(16,225 - 22,330) | 19,155<br>(16,225 - 22,330) | --                       | --                          | --                          | --                          |
| Neonatal preterm birth complications                             | 6,086<br>(3,598 - 8,966)    | 6,086<br>(3,598 - 8,966)    | --                       | --                          | --                          | --                          |
| Neonatal encephalopathy due to birth asphyxia and trauma         | 4,806<br>(2,972 - 7,296)    | 4,806<br>(2,972 - 7,296)    | --                       | --                          | --                          | --                          |
| Neonatal sepsis and other neonatal infections                    | 6,561<br>(4,085 - 9,565)    | 6,561<br>(4,085 - 9,565)    | --                       | --                          | --                          | --                          |
| Hemolytic disease and other neonatal jaundice                    | 180<br>(75 - 375)           | 180<br>(75 - 375)           | --                       | --                          | --                          | --                          |
| Other neonatal disorders                                         | 1,521<br>(749 - 2,558)      | 1,521<br>(749 - 2,558)      | --                       | --                          | --                          | --                          |
| Nutritional deficiencies                                         | 9,414<br>(6,071 - 12,140)   | 5,304<br>(3,035 - 7,751)    | 414<br>(224 - 599)       | 1,232<br>(732 - 1,663)      | 1,112<br>(704 - 1,452)      | 1,353<br>(937 - 1,826)      |
| Protein-energy malnutrition                                      | 6,880<br>(4,362 - 9,309)    | 4,888<br>(2,872 - 7,042)    | 300<br>(158 - 455)       | 452<br>(219 - 667)          | 546<br>(296 - 773)          | 694<br>(383 - 1,052)        |
| Iodine deficiency                                                | 50<br>(9 - 151)             | 16<br>(0 - 101)             | 4<br>(0 - 24)            | 11<br>(1 - 38)              | 10<br>(0 - 47)              | 9<br>(0 - 47)               |
| Iron-deficiency anemia                                           | 2,415<br>(1,286 - 3,449)    | 393<br>(100 - 923)          | 108<br>(36 - 189)        | 749<br>(405 - 1,051)        | 525<br>(263 - 775)          | 640<br>(352 - 1,023)        |
| Other nutritional deficiencies                                   | 69<br>(29 - 108)            | 7<br>(2 - 18)               | 2<br>(1 - 3)             | 20<br>(5 - 37)              | 31<br>(12 - 56)             | 10<br>(4 - 18)              |
| Other communicable, maternal, neonatal, and nutritional diseases | 1,334<br>(968 - 1,804)      | 430<br>(155 - 811)          | 57<br>(31 - 93)          | 317<br>(244 - 400)          | 298<br>(223 - 412)          | 231<br>(160 - 375)          |
| Sexually transmitted diseases excluding HIV                      | 360<br>(63 - 764)           | 278<br>(0 - 648)            | 25<br>(2 - 56)           | 26<br>(17 - 40)             | 15<br>(8 - 28)              | 16<br>(8 - 31)              |
| Syphilis                                                         | 337<br>(40 - 736)           | 278<br>(0 - 648)            | 24<br>(1 - 55)           | 12<br>(8 - 20)              | 10<br>(5 - 19)              | 13<br>(6 - 24)              |
| Chlamydial infection                                             | 4<br>(2 - 6)                | --                          | 0<br>(0 - 0)             | 2<br>(1 - 4)                | 1<br>(0 - 2)                | 0<br>(0 - 1)                |
| Gonococcal infection                                             | 11<br>(8 - 17)              | --                          | 0<br>(0 - 1)             | 6<br>(4 - 10)               | 3<br>(1 - 5)                | 2<br>(1 - 4)                |
| Other sexually transmitted diseases                              | 8<br>(6 - 13)               | --                          | 0<br>(0 - 1)             | 5<br>(3 - 8)                | 2<br>(1 - 3)                | 1<br>(0 - 2)                |
| Hepatitis                                                        | 652<br>(532 - 797)          | 56<br>(32 - 92)             | 19<br>(13 - 29)          | 242<br>(185 - 311)          | 210<br>(154 - 288)          | 125<br>(89 - 178)           |
| Acute hepatitis A                                                | 32<br>(9 - 67)              | 13<br>(4 - 29)              | 4<br>(1 - 9)             | 12<br>(3 - 27)              | 3<br>(1 - 7)                | 1<br>(0 - 2)                |
| Acute hepatitis B                                                | 438<br>(328 - 571)          | 41<br>(20 - 70)             | 9<br>(5 - 16)            | 110<br>(65 - 163)           | 169<br>(119 - 238)          | 110<br>(77 - 161)           |
| Acute hepatitis C                                                | 27<br>(5 - 64)              | --                          | 1<br>(0 - 3)             | 10<br>(2 - 25)              | 10<br>(2 - 27)              | 6<br>(1 - 16)               |
| Acute hepatitis E                                                | 154<br>(92 - 238)           | 2<br>(0 - 4)                | 5<br>(2 - 9)             | 111<br>(68 - 167)           | 28<br>(11 - 55)             | 8<br>(3 - 21)               |
| Other infectious diseases                                        | 322<br>(212 - 515)          | 97<br>(44 - 189)            | 12<br>(6 - 22)           | 49<br>(31 - 73)             | 74<br>(38 - 154)            | 91<br>(41 - 211)            |
| Non-communicable diseases                                        | 78,907<br>(69,021 - 89,081) | 7,631<br>(4,325 - 11,990)   | 1,743<br>(1,142 - 2,815) | 15,139<br>(12,376 - 18,320) | 25,465<br>(21,779 - 29,718) | 28,929<br>(26,026 - 32,278) |
| Neoplasms                                                        | 9,589<br>(7,874 - 12,007)   | 169<br>(97 - 286)           | 199<br>(132 - 286)       | 2,483<br>(1,996 - 2,996)    | 3,980<br>(3,195 - 5,092)    | 2,758<br>(2,223 - 3,723)    |
| Esophageal cancer                                                | 255<br>(186 - 355)          | --                          | --                       | 32<br>(22 - 48)             | 144<br>(101 - 203)          | 79<br>(54 - 126)            |
| Stomach cancer                                                   | 882<br>(713 - 1,108)        | --                          | --                       | 184<br>(140 - 247)          | 454<br>(352 - 594)          | 244<br>(185 - 337)          |
| Liver cancer                                                     | 1,888<br>(1,523 - 2,303)    | --                          | 6<br>(3 - 10)            | 616<br>(430 - 859)          | 768<br>(588 - 998)          | 498<br>(376 - 651)          |
| Liver cancer due to hepatitis B                                  | 653<br>(275 - 1,182)        | --                          | 3<br>(1 - 5)             | 297<br>(143 - 483)          | 220<br>(53 - 496)           | 133<br>(49 - 285)           |
| Liver cancer due to hepatitis C                                  | 679<br>(401 - 982)          | --                          | 0<br>(0 - 1)             | 130<br>(40 - 237)           | 320<br>(164 - 491)          | 228<br>(142 - 323)          |

Web Table 31- Ghana deaths with 95% UI by age, sex, and cause in 2013

| Cause                                | Both Sexes, All Ages        | Both Sexes, 0-4 Years | Both Sexes, 5-14 Years | Both Sexes, 15-49 Years  | Both Sexes, 50-69 Years     | Both Sexes, 70-80 Years     |
|--------------------------------------|-----------------------------|-----------------------|------------------------|--------------------------|-----------------------------|-----------------------------|
| Liver cancer due to alcohol use      | 264<br>(161 - 470)          | --                    | --                     | 58<br>(28 - 124)         | 119<br>(65 - 229)           | 87<br>(53 - 137)            |
| Liver cancer due to other causes     | 292<br>(180 - 453)          | --                    | 3<br>(1 - 5)           | 132<br>(70 - 226)        | 108<br>(59 - 182)           | 50<br>(31 - 78)             |
| Larynx cancer                        | 13<br>(8 - 34)              | --                    | --                     | 3<br>(2 - 5)             | 5<br>(3 - 13)               | 5<br>(3 - 16)               |
| Tracheal, bronchus and lung cancer   | 334<br>(271 - 463)          | --                    | --                     | 37<br>(28 - 51)          | 165<br>(130 - 223)          | 131<br>(101 - 193)          |
| Breast cancer                        | 669<br>(481 - 902)          | --                    | --                     | 318<br>(218 - 417)       | 266<br>(185 - 398)          | 86<br>(59 - 141)            |
| Cervical cancer                      | 1,381<br>(908 - 1,966)      | --                    | --                     | 391<br>(247 - 557)       | 706<br>(445 - 1,094)        | 283<br>(165 - 464)          |
| Uterine cancer                       | 187<br>(123 - 317)          | --                    | --                     | 29<br>(17 - 48)          | 106<br>(65 - 178)           | 52<br>(29 - 106)            |
| Prostate cancer                      | 816<br>(555 - 1,360)        | --                    | --                     | 15<br>(8 - 29)           | 264<br>(163 - 460)          | 536<br>(361 - 909)          |
| Colon and rectum cancer              | 628<br>(526 - 742)          | --                    | --                     | 151<br>(120 - 189)       | 222<br>(182 - 271)          | 255<br>(200 - 328)          |
| Lip and oral cavity cancer           | 49<br>(32 - 83)             | --                    | --                     | 14<br>(9 - 21)           | 22<br>(12 - 41)             | 13<br>(8 - 24)              |
| Nasopharynx cancer                   | 13<br>(10 - 19)             | --                    | 1<br>(0 - 1)           | 6<br>(4 - 9)             | 4<br>(3 - 7)                | 2<br>(1 - 4)                |
| Other pharynx cancer                 | 13<br>(10 - 23)             | --                    | --                     | 5<br>(3 - 7)             | 4<br>(3 - 7)                | 4<br>(3 - 10)               |
| Gallbladder and biliary tract cancer | 114<br>(77 - 177)           | --                    | --                     | 21<br>(14 - 28)          | 59<br>(37 - 96)             | 34<br>(20 - 62)             |
| Pancreatic cancer                    | 438<br>(360 - 555)          | --                    | --                     | 61<br>(47 - 78)          | 232<br>(181 - 300)          | 146<br>(112 - 195)          |
| Malignant skin melanoma              | 23<br>(18 - 35)             | --                    | --                     | 7<br>(5 - 11)            | 11<br>(8 - 16)              | 5<br>(4 - 8)                |
| Non-melanoma skin cancer             | 22<br>(16 - 36)             | --                    | --                     | 5<br>(4 - 7)             | 4<br>(3 - 7)                | 13<br>(8 - 23)              |
| Ovarian cancer                       | 191<br>(130 - 285)          | --                    | --                     | 42<br>(28 - 61)          | 113<br>(72 - 176)           | 35<br>(22 - 58)             |
| Testicular cancer                    | 6<br>(3 - 10)               | --                    | --                     | 4<br>(2 - 8)             | 1<br>(0 - 2)                | 1<br>(0 - 1)                |
| Kidney cancer                        | 53<br>(41 - 69)             | 10<br>(4 - 20)        | 5<br>(3 - 8)           | 11<br>(8 - 15)           | 18<br>(14 - 26)             | 9<br>(6 - 12)               |
| Bladder cancer                       | 189<br>(146 - 274)          | --                    | --                     | 41<br>(29 - 55)          | 64<br>(46 - 99)             | 85<br>(61 - 134)            |
| Brain and nervous system cancer      | 132<br>(102 - 191)          | 3<br>(1 - 6)          | 11<br>(7 - 17)         | 75<br>(56 - 100)         | 32<br>(23 - 53)             | 10<br>(7 - 21)              |
| Thyroid cancer                       | 23<br>(15 - 35)             | --                    | 0<br>(0 - 1)           | 2<br>(2 - 3)             | 13<br>(8 - 22)              | 7<br>(4 - 11)               |
| Mesothelioma                         | 11<br>(9 - 15)              | --                    | --                     | 3<br>(2 - 4)             | 5<br>(3 - 7)                | 3<br>(2 - 5)                |
| Hodgkin lymphoma                     | 44<br>(34 - 58)             | 5<br>(2 - 9)          | 5<br>(2 - 10)          | 18<br>(13 - 24)          | 8<br>(5 - 11)               | 9<br>(5 - 17)               |
| Non-Hodgkin lymphoma                 | 412<br>(283 - 679)          | 44<br>(20 - 88)       | 80<br>(43 - 136)       | 146<br>(99 - 232)        | 102<br>(65 - 183)           | 40<br>(25 - 73)             |
| Multiple myeloma                     | 51<br>(26 - 89)             | --                    | --                     | 10<br>(6 - 15)           | 30<br>(14 - 53)             | 12<br>(4 - 24)              |
| Leukemia                             | 178<br>(146 - 221)          | 27<br>(13 - 51)       | 32<br>(21 - 45)        | 85<br>(65 - 109)         | 16<br>(13 - 22)             | 18<br>(14 - 26)             |
| Other neoplasms                      | 573<br>(404 - 881)          | 80<br>(42 - 142)      | 60<br>(35 - 92)        | 149<br>(104 - 214)       | 141<br>(94 - 236)           | 143<br>(86 - 260)           |
| Cardiovascular diseases              | 34,266<br>(27,894 - 40,097) | 610<br>(413 - 895)    | 220<br>(151 - 308)     | 4,816<br>(3,646 - 6,090) | 12,527<br>(10,039 - 15,001) | 16,094<br>(12,935 - 18,853) |
| Rheumatic heart disease              | 162<br>(125 - 239)          | 13<br>(5 - 28)        | 7<br>(4 - 12)          | 40<br>(27 - 64)          | 36<br>(26 - 55)             | 66<br>(48 - 100)            |
| Ischemic heart disease               | 9,904<br>(7,713 - 11,776)   | 44<br>(20 - 90)       | 34<br>(20 - 53)        | 1,421<br>(1,016 - 1,842) | 3,825<br>(2,933 - 4,657)    | 4,581<br>(3,493 - 5,527)    |
| Cerebrovascular disease              | 15,834<br>(11,727 - 19,028) | 156<br>(98 - 234)     | 65<br>(40 - 95)        | 1,741<br>(1,177 - 2,251) | 5,659<br>(4,238 - 7,046)    | 8,213<br>(6,018 - 9,932)    |
| Ischemic stroke                      | 11,435<br>(8,183 - 13,912)  | 20<br>(10 - 36)       | 8<br>(4 - 13)          | 439<br>(257 - 630)       | 3,926<br>(2,767 - 4,956)    | 7,041<br>(5,008 - 8,633)    |
| Hemorrhagic stroke                   | 4,400<br>(3,300 - 5,484)    | 136<br>(86 - 203)     | 57<br>(36 - 84)        | 1,302<br>(901 - 1,677)   | 1,733<br>(1,264 - 2,265)    | 1,172<br>(856 - 1,548)      |
| Hypertensive heart disease           | 2,977<br>(2,152 - 4,315)    | 13<br>(5 - 29)        | 4<br>(2 - 7)           | 427<br>(295 - 619)       | 1,025<br>(696 - 1,524)      | 1,507<br>(1,052 - 2,244)    |
| Cardiomyopathy and myocarditis       | 2,092<br>(1,424 - 2,625)    | 106<br>(63 - 174)     | 46<br>(28 - 72)        | 486<br>(332 - 652)       | 703<br>(439 - 943)          | 751<br>(465 - 1,046)        |
| Atrial fibrillation and flutter      | 2<br>(2 - 3)                | --                    | --                     | 1<br>(0 - 1)             | 1<br>(0 - 1)                | 1<br>(1 - 1)                |
| Aortic aneurysm                      | 312<br>(229 - 446)          | --                    | --                     | 48<br>(33 - 73)          | 136<br>(96 - 201)           | 127<br>(88 - 189)           |
| Peripheral vascular disease          | 19<br>(14 - 24)             | --                    | --                     | 1<br>(1 - 2)             | 8<br>(5 - 11)               | 10<br>(7 - 13)              |
| Endocarditis                         | 520<br>(374 - 741)          | 119<br>(68 - 194)     | 15<br>(9 - 24)         | 129<br>(87 - 188)        | 119<br>(80 - 177)           | 138<br>(92 - 200)           |

Web Table 31- Ghana deaths with 95% UI by age, sex, and cause in 2013

| Cause                                               | Both Sexes, All Ages     | Both Sexes, 0-4 Years | Both Sexes, 5-14 Years | Both Sexes, 15-49 Years  | Both Sexes, 50-69 Years  | Both Sexes, 70-80 Years  |
|-----------------------------------------------------|--------------------------|-----------------------|------------------------|--------------------------|--------------------------|--------------------------|
| Other cardiovascular and circulatory diseases       | 2,443<br>(1,829 - 3,231) | 158<br>(97 - 246)     | 49<br>(32 - 72)        | 522<br>(369 - 699)       | 1,014<br>(698 - 1,395)   | 700<br>(501 - 1,056)     |
| Chronic respiratory diseases                        | 4,567<br>(3,937 - 5,530) | 132<br>(78 - 215)     | 33<br>(24 - 44)        | 502<br>(396 - 632)       | 1,421<br>(1,154 - 1,733) | 2,478<br>(2,071 - 3,196) |
| Chronic obstructive pulmonary disease               | 2,785<br>(2,338 - 3,444) | 66<br>(39 - 107)      | 15<br>(11 - 21)        | 157<br>(115 - 207)       | 850<br>(663 - 1,054)     | 1,698<br>(1,400 - 2,197) |
| Pneumoconiosis                                      | 166<br>(111 - 238)       | 1<br>(0 - 1)          | 1<br>(1 - 1)           | 35<br>(22 - 52)          | 97<br>(62 - 143)         | 33<br>(20 - 51)          |
| Silicosis                                           | 24<br>(16 - 36)          | 0<br>(0 - 0)          | 0<br>(0 - 0)           | 5<br>(3 - 8)             | 7<br>(4 - 11)            | 11<br>(7 - 18)           |
| Asbestosis                                          | 12<br>(8 - 18)           | 0<br>(0 - 0)          | 0<br>(0 - 0)           | 3<br>(2 - 4)             | 8<br>(5 - 12)            | 1<br>(1 - 2)             |
| Coal workers pneumoconiosis                         | 51<br>(32 - 75)          | 0<br>(0 - 0)          | 0<br>(0 - 0)           | 3<br>(2 - 4)             | 44<br>(27 - 67)          | 4<br>(2 - 7)             |
| Other pneumoconiosis                                | 79<br>(54 - 114)         | 0<br>(0 - 0)          | 0<br>(0 - 0)           | 24<br>(16 - 37)          | 38<br>(25 - 58)          | 16<br>(10 - 26)          |
| Asthma                                              | 788<br>(562 - 997)       | 46<br>(22 - 86)       | 10<br>(6 - 14)         | 190<br>(133 - 247)       | 245<br>(163 - 336)       | 297<br>(189 - 425)       |
| Interstitial lung disease and pulmonary sarcoidosis | 552<br>(378 - 855)       | 1<br>(0 - 2)          | 1<br>(1 - 1)           | 22<br>(12 - 38)          | 173<br>(112 - 265)       | 356<br>(222 - 583)       |
| Other chronic respiratory diseases                  | 275<br>(214 - 361)       | 19<br>(10 - 31)       | 7<br>(4 - 10)          | 99<br>(74 - 129)         | 56<br>(39 - 79)          | 95<br>(63 - 150)         |
| Cirrhosis                                           | 4,418<br>(3,662 - 5,262) | 103<br>(49 - 186)     | 44<br>(31 - 60)        | 1,425<br>(1,087 - 1,858) | 1,905<br>(1,520 - 2,354) | 941<br>(748 - 1,214)     |
| Cirrhosis due to hepatitis B                        | 1,238<br>(699 - 1,808)   | 6<br>(2 - 14)         | 9<br>(4 - 15)          | 433<br>(236 - 671)       | 546<br>(296 - 825)       | 244<br>(124 - 393)       |
| Cirrhosis due to hepatitis C                        | 1,049<br>(564 - 1,644)   | 4<br>(1 - 11)         | 5<br>(2 - 12)          | 288<br>(138 - 486)       | 460<br>(225 - 764)       | 292<br>(152 - 460)       |
| Cirrhosis due to alcohol use                        | 1,512<br>(1,088 - 2,023) | --                    | --                     | 442<br>(279 - 685)       | 722<br>(499 - 987)       | 347<br>(243 - 487)       |
| Cirrhosis due to other causes                       | 619<br>(453 - 843)       | 92<br>(44 - 170)      | 29<br>(18 - 41)        | 263<br>(169 - 387)       | 178<br>(110 - 268)       | 57<br>(35 - 89)          |
| Digestive diseases                                  | 3,555<br>(2,917 - 4,314) | 123<br>(71 - 199)     | 93<br>(66 - 127)       | 973<br>(733 - 1,270)     | 1,170<br>(917 - 1,490)   | 1,196<br>(921 - 1,578)   |
| Peptic ulcer disease                                | 623<br>(472 - 807)       | 10<br>(4 - 21)        | 13<br>(7 - 21)         | 157<br>(102 - 226)       | 207<br>(140 - 282)       | 237<br>(166 - 334)       |
| Gastritis and duodenitis                            | 137<br>(74 - 290)        | 7<br>(2 - 13)         | 4<br>(2 - 7)           | 31<br>(18 - 52)          | 39<br>(19 - 82)          | 57<br>(23 - 157)         |
| Appendicitis                                        | 219<br>(135 - 315)       | 11<br>(5 - 23)        | 11<br>(6 - 16)         | 59<br>(39 - 84)          | 55<br>(33 - 84)          | 83<br>(41 - 142)         |
| Paralytic ileus and intestinal obstruction          | 1,141<br>(859 - 1,600)   | 41<br>(19 - 75)       | 31<br>(19 - 46)        | 263<br>(166 - 388)       | 430<br>(308 - 614)       | 377<br>(251 - 591)       |
| Inguinal, femoral, and abdominal hernia             | 69<br>(42 - 104)         | 1<br>(0 - 2)          | 1<br>(0 - 1)           | 17<br>(10 - 27)          | 25<br>(13 - 40)          | 25<br>(15 - 40)          |
| Inflammatory bowel disease                          | 211<br>(148 - 348)       | 21<br>(9 - 40)        | 4<br>(2 - 7)           | 60<br>(41 - 97)          | 64<br>(40 - 106)         | 62<br>(36 - 117)         |
| Vascular intestinal disorders                       | 36<br>(13 - 74)          | 5<br>(1 - 13)         | 2<br>(1 - 6)           | 15<br>(5 - 31)           | 7<br>(2 - 16)            | 7<br>(3 - 15)            |
| Gallbladder and biliary diseases                    | 295<br>(208 - 396)       | 5<br>(2 - 10)         | 10<br>(7 - 15)         | 67<br>(39 - 95)          | 90<br>(58 - 127)         | 123<br>(81 - 181)        |
| Pancreatitis                                        | 369<br>(267 - 510)       | 2<br>(1 - 4)          | 3<br>(2 - 5)           | 159<br>(101 - 236)       | 114<br>(77 - 169)        | 91<br>(60 - 138)         |
| Other digestive diseases                            | 454<br>(338 - 606)       | 21<br>(10 - 38)       | 13<br>(9 - 20)         | 146<br>(99 - 203)        | 140<br>(95 - 200)        | 134<br>(87 - 212)        |
| Neurological disorders                              | 1,991<br>(1,666 - 2,344) | 141<br>(76 - 248)     | 44<br>(27 - 73)        | 313<br>(222 - 426)       | 194<br>(156 - 239)       | 1,300<br>(1,056 - 1,605) |
| Alzheimer disease and other dementias               | 1,311<br>(1,070 - 1,625) | --                    | --                     | 1<br>(0 - 2)             | 104<br>(79 - 134)        | 1,206<br>(971 - 1,502)   |
| Parkinson disease                                   | 7<br>(5 - 16)            | --                    | --                     | 1<br>(1 - 2)             | 1<br>(1 - 2)             | 5<br>(2 - 13)            |
| Epilepsy                                            | 501<br>(370 - 675)       | 112<br>(55 - 213)     | 33<br>(19 - 59)        | 255<br>(176 - 356)       | 41<br>(28 - 59)          | 59<br>(36 - 94)          |
| Multiple sclerosis                                  | 3<br>(1 - 12)            | --                    | --                     | 1<br>(1 - 5)             | 1<br>(0 - 5)             | 0<br>(0 - 2)             |
| Other neurological disorders                        | 169<br>(112 - 222)       | 29<br>(15 - 52)       | 11<br>(6 - 16)         | 54<br>(30 - 76)          | 46<br>(32 - 61)          | 29<br>(21 - 39)          |
| Mental and substance use disorders                  | 2,024<br>(1,511 - 2,602) | 39<br>(12 - 84)       | 0<br>(0 - 0)           | 1,350<br>(981 - 1,828)   | 464<br>(306 - 603)       | 170<br>(123 - 221)       |
| Schizophrenia                                       | 6<br>(4 - 10)            | --                    | --                     | 3<br>(2 - 5)             | 2<br>(1 - 5)             | 1<br>(1 - 1)             |
| Alcohol use disorders                               | 833<br>(434 - 1,101)     | --                    | --                     | 401<br>(208 - 562)       | 324<br>(165 - 456)       | 108<br>(53 - 155)        |
| Drug use disorders                                  | 1,183<br>(869 - 1,592)   | 39<br>(12 - 84)       | --                     | 945<br>(663 - 1,328)     | 137<br>(104 - 180)       | 62<br>(45 - 86)          |
| Opioid use disorders                                | 125<br>(89 - 175)        | 4<br>(1 - 10)         | --                     | 102<br>(69 - 149)        | 13<br>(9 - 17)           | 6<br>(5 - 9)             |
| Cocaine use disorders                               | 5<br>(3 - 6)             | 0<br>(0 - 0)          | --                     | 4<br>(3 - 6)             | 0<br>(0 - 1)             | 0<br>(0 - 0)             |
| Amphetamine use disorders                           | 3<br>(2 - 4)             | 0<br>(0 - 0)          | --                     | 2<br>(2 - 4)             | 0<br>(0 - 1)             | 0<br>(0 - 0)             |

Web Table 31- Ghana deaths with 95% UI by age, sex, and cause in 2013

| Cause                                               | Both Sexes, All Ages       | Both Sexes, 0-4 Years    | Both Sexes, 5-14 Years | Both Sexes, 15-49 Years  | Both Sexes, 50-69 Years  | Both Sexes, 70-80 Years  |
|-----------------------------------------------------|----------------------------|--------------------------|------------------------|--------------------------|--------------------------|--------------------------|
| Other drug use disorders                            | 1,050<br>(767 - 1,415)     | 35<br>(11 - 74)          | --                     | 837<br>(589 - 1,178)     | 124<br>(94 - 163)        | 55<br>(40 - 76)          |
| Eating disorders                                    | 2<br>(1 - 2)               | --                       | 0<br>(0 - 0)           | 1<br>(1 - 2)             | --                       | --                       |
| Anorexia nervosa                                    | 2<br>(1 - 2)               | --                       | 0<br>(0 - 0)           | 1<br>(1 - 2)             | --                       | --                       |
| Diabetes, urogenital, blood, and endocrine diseases | 13,568<br>(9,863 - 20,478) | 2,897<br>(1,058 - 6,158) | 903<br>(345 - 2,076)   | 2,751<br>(1,968 - 4,138) | 3,438<br>(2,828 - 4,271) | 3,580<br>(2,970 - 4,570) |
| Diabetes mellitus                                   | 4,636<br>(3,890 - 5,642)   | 41<br>(26 - 62)          | 19<br>(12 - 28)        | 494<br>(381 - 617)       | 1,962<br>(1,583 - 2,454) | 2,120<br>(1,688 - 2,756) |
| Acute glomerulonephritis                            | 18<br>(11 - 32)            | 1<br>(1 - 2)             | 1<br>(1 - 2)           | 7<br>(5 - 11)            | 7<br>(3 - 15)            | 1<br>(1 - 3)             |
| Chronic kidney disease                              | 1,809<br>(1,505 - 2,251)   | 100<br>(60 - 159)        | 69<br>(48 - 95)        | 650<br>(496 - 845)       | 510<br>(399 - 670)       | 481<br>(371 - 713)       |
| Chronic kidney disease due to diabetes mellitus     | 33<br>(20 - 92)            | 1<br>(0 - 1)             | 1<br>(1 - 2)           | 2<br>(1 - 4)             | 29<br>(16 - 81)          | 1<br>(1 - 2)             |
| Chronic kidney disease due to hypertension          | 641<br>(496 - 925)         | 12<br>(6 - 21)           | 5<br>(3 - 9)           | 185<br>(134 - 259)       | 215<br>(155 - 303)       | 223<br>(161 - 361)       |
| Chronic kidney disease due to glomerulonephritis    | 605<br>(472 - 766)         | 51<br>(31 - 82)          | 36<br>(24 - 50)        | 279<br>(203 - 371)       | 124<br>(83 - 175)        | 116<br>(79 - 165)        |
| Chronic kidney disease due to other causes          | 530<br>(391 - 727)         | 36<br>(17 - 67)          | 27<br>(16 - 42)        | 184<br>(117 - 269)       | 142<br>(90 - 215)        | 140<br>(83 - 243)        |
| Urinary diseases and male infertility               | 1,399<br>(1,137 - 1,796)   | 138<br>(75 - 247)        | 21<br>(14 - 33)        | 338<br>(254 - 447)       | 406<br>(305 - 574)       | 495<br>(362 - 698)       |
| Interstitial nephritis and urinary tract infections | 1,180<br>(934 - 1,550)     | 130<br>(70 - 229)        | 18<br>(12 - 29)        | 280<br>(209 - 375)       | 333<br>(240 - 489)       | 419<br>(299 - 619)       |
| Urolithiasis                                        | 9<br>(5 - 16)              | --                       | 1<br>(0 - 1)           | 3<br>(1 - 4)             | 4<br>(2 - 9)             | 2<br>(1 - 4)             |
| Other urinary diseases                              | 210<br>(127 - 296)         | 8<br>(4 - 17)            | 2<br>(1 - 4)           | 56<br>(31 - 86)          | 70<br>(41 - 105)         | 74<br>(33 - 129)         |
| Gynecological diseases                              | 6<br>(4 - 14)              | --                       | --                     | 3<br>(2 - 6)             | 2<br>(1 - 5)             | 1<br>(0 - 4)             |
| Uterine fibroids                                    | 1<br>(1 - 3)               | --                       | --                     | 1<br>(0 - 1)             | 0<br>(0 - 1)             | 0<br>(0 - 1)             |
| Polycystic ovarian syndrome                         | 0<br>(0 - 0)               | --                       | --                     | 0<br>(0 - 0)             | 0<br>(0 - 0)             | --                       |
| Endometriosis                                       | 1<br>(0 - 1)               | --                       | --                     | 1<br>(0 - 1)             | 0<br>(0 - 0)             | --                       |
| Genital prolapse                                    | 1<br>(1 - 3)               | --                       | --                     | 0<br>(0 - 1)             | 0<br>(0 - 1)             | 0<br>(0 - 1)             |
| Other gynecological diseases                        | 3<br>(2 - 7)               | --                       | --                     | 2<br>(1 - 3)             | 1<br>(0 - 3)             | 1<br>(0 - 2)             |
| Hemoglobinopathies and hemolytic anemias            | 4,338<br>(1,239 - 10,339)  | 2,400<br>(559 - 5,676)   | 751<br>(187 - 1,927)   | 936<br>(330 - 2,263)     | 182<br>(73 - 436)        | 70<br>(36 - 125)         |
| Thalassemias                                        | 6<br>(1 - 14)              | 4<br>(1 - 11)            | 1<br>(0 - 2)           | 1<br>(0 - 2)             | 0<br>(0 - 0)             | 0<br>(0 - 0)             |
| Sickle cell disorders                               | 4,236<br>(1,196 - 10,129)  | 2,361<br>(547 - 5,586)   | 746<br>(186 - 1,916)   | 926<br>(327 - 2,237)     | 175<br>(69 - 422)        | 27<br>(14 - 49)          |
| G6PD deficiency                                     | 15<br>(5 - 37)             | 8<br>(2 - 21)            | 2<br>(0 - 4)           | 3<br>(1 - 7)             | 1<br>(0 - 2)             | 1<br>(1 - 2)             |
| Other hemoglobinopathies and hemolytic anemias      | 82<br>(39 - 169)           | 26<br>(7 - 71)           | 2<br>(1 - 6)           | 6<br>(2 - 17)            | 6<br>(3 - 13)            | 41<br>(21 - 75)          |
| Endocrine, metabolic, blood, and immune disorders   | 1,361<br>(991 - 1,706)     | 217<br>(126 - 330)       | 42<br>(24 - 66)        | 322<br>(222 - 435)       | 369<br>(256 - 497)       | 411<br>(290 - 593)       |
| Musculoskeletal disorders                           | 292<br>(230 - 399)         | --                       | 22<br>(15 - 30)        | 101<br>(77 - 130)        | 93<br>(69 - 134)         | 76<br>(52 - 124)         |
| Rheumatoid arthritis                                | 27<br>(18 - 45)            | --                       | 2<br>(1 - 3)           | 4<br>(3 - 6)             | 5<br>(3 - 8)             | 16<br>(9 - 31)           |
| Other musculoskeletal disorders                     | 264<br>(209 - 357)         | --                       | 20<br>(13 - 28)        | 96<br>(74 - 125)         | 88<br>(65 - 127)         | 60<br>(41 - 97)          |
| Other non-communicable diseases                     | 4,637<br>(3,031 - 7,201)   | 3,416<br>(1,874 - 5,850) | 185<br>(108 - 308)     | 424<br>(297 - 555)       | 274<br>(196 - 378)       | 337<br>(240 - 475)       |
| Congenital anomalies                                | 3,627<br>(2,022 - 6,283)   | 3,219<br>(1,691 - 5,675) | 165<br>(92 - 293)      | 168<br>(108 - 262)       | 39<br>(28 - 53)          | 36<br>(26 - 49)          |
| Neural tube defects                                 | 483<br>(122 - 1,077)       | 453<br>(111 - 1,039)     | 14<br>(4 - 29)         | 14<br>(5 - 28)           | 1<br>(0 - 3)             | 1<br>(0 - 2)             |
| Congenital heart anomalies                          | 1,578<br>(961 - 2,612)     | 1,386<br>(806 - 2,367)   | 81<br>(47 - 141)       | 76<br>(47 - 128)         | 19<br>(13 - 29)          | 15<br>(10 - 23)          |
| Cleft lip and cleft palate                          | 10<br>(1 - 29)             | 10<br>(1 - 29)           | --                     | --                       | --                       | --                       |
| Down syndrome                                       | 535<br>(220 - 1,060)       | 469<br>(175 - 957)       | 28<br>(12 - 60)        | 31<br>(16 - 56)          | 7<br>(3 - 12)            | 1<br>(0 - 3)             |
| Chromosomal unbalanced rearrangements               | 144<br>(54 - 309)          | 130<br>(45 - 289)        | 5<br>(2 - 10)          | 8<br>(4 - 14)            | 1<br>(1 - 1)             | 1<br>(1 - 2)             |
| Other congenital anomalies                          | 877<br>(324 - 2,598)       | 772<br>(253 - 2,394)     | 37<br>(14 - 107)       | 39<br>(22 - 81)          | 11<br>(7 - 17)           | 18<br>(12 - 25)          |
| Skin and subcutaneous diseases                      | 959<br>(682 - 1,272)       | 147<br>(75 - 253)        | 19<br>(10 - 31)        | 256<br>(151 - 369)       | 235<br>(162 - 334)       | 302<br>(206 - 433)       |
| Cellulitis                                          | 191<br>(104 - 284)         | 20<br>(8 - 39)           | 5<br>(2 - 9)           | 38<br>(18 - 59)          | 54<br>(25 - 87)          | 73<br>(32 - 134)         |

Web Table 31- Ghana deaths with 95% UI by age, sex, and cause in 2013

| Cause                                           | Both Sexes, All Ages        | Both Sexes, 0-4 Years    | Both Sexes, 5-14 Years | Both Sexes, 15-49 Years  | Both Sexes, 50-69 Years  | Both Sexes, 70-80 Years  |
|-------------------------------------------------|-----------------------------|--------------------------|------------------------|--------------------------|--------------------------|--------------------------|
| Pyoderma                                        | 697<br>(474 - 989)          | 117<br>(59 - 206)        | 11<br>(6 - 19)         | 189<br>(113 - 276)       | 176<br>(113 - 273)       | 204<br>(124 - 313)       |
| Decubitus ulcer                                 | 29<br>(18 - 45)             | 1<br>(0 - 2)             | 1<br>(1 - 2)           | 7<br>(4 - 12)            | 3<br>(1 - 4)             | 17<br>(9 - 31)           |
| Other skin and subcutaneous diseases            | 43<br>(22 - 78)             | 10<br>(3 - 22)           | 1<br>(1 - 3)           | 21<br>(10 - 40)          | 3<br>(1 - 8)             | 7<br>(2 - 26)            |
| Sudden infant death syndrome                    | 50<br>(17 - 119)            | 50<br>(17 - 119)         | --                     | --                       | --                       | --                       |
| Injuries                                        | 13,210<br>(11,310 - 15,524) | 1,845<br>(1,217 - 2,668) | 972<br>(729 - 1,281)   | 5,790<br>(4,583 - 7,261) | 2,371<br>(1,955 - 2,936) | 2,233<br>(1,808 - 2,967) |
| Transport injuries                              | 6,141<br>(5,083 - 7,373)    | 634<br>(383 - 993)       | 482<br>(331 - 667)     | 3,273<br>(2,453 - 4,217) | 1,104<br>(885 - 1,394)   | 647<br>(502 - 915)       |
| Road injuries                                   | 5,854<br>(4,844 - 7,022)    | 562<br>(338 - 881)       | 452<br>(311 - 627)     | 3,209<br>(2,405 - 4,139) | 1,042<br>(831 - 1,320)   | 587<br>(453 - 837)       |
| Pedestrian road injuries                        | 1,834<br>(1,409 - 2,357)    | 201<br>(110 - 341)       | 179<br>(119 - 262)     | 807<br>(546 - 1,134)     | 388<br>(282 - 538)       | 260<br>(185 - 408)       |
| Cyclist road injuries                           | 357<br>(275 - 457)          | 40<br>(17 - 79)          | 40<br>(25 - 62)        | 146<br>(96 - 206)        | 94<br>(69 - 127)         | 38<br>(27 - 53)          |
| Motorcyclist road injuries                      | 339<br>(237 - 466)          | 24<br>(12 - 44)          | 16<br>(9 - 25)         | 227<br>(148 - 333)       | 52<br>(34 - 74)          | 20<br>(13 - 30)          |
| Motor vehicle road injuries                     | 3,263<br>(2,617 - 4,050)    | 281<br>(163 - 448)       | 206<br>(130 - 298)     | 2,017<br>(1,505 - 2,658) | 497<br>(375 - 635)       | 262<br>(192 - 365)       |
| Other road injuries                             | 60<br>(36 - 88)             | 16<br>(7 - 34)           | 11<br>(6 - 21)         | 13<br>(5 - 21)           | 11<br>(6 - 18)           | 8<br>(4 - 14)            |
| Other transport injuries                        | 287<br>(228 - 362)          | 72<br>(41 - 123)         | 30<br>(18 - 45)        | 64<br>(45 - 84)          | 62<br>(43 - 85)          | 60<br>(42 - 83)          |
| Unintentional injuries                          | 5,010<br>(4,225 - 5,974)    | 1,136<br>(757 - 1,681)   | 431<br>(308 - 582)     | 1,309<br>(1,033 - 1,636) | 842<br>(694 - 1,033)     | 1,291<br>(1,012 - 1,758) |
| Falls                                           | 1,291<br>(1,004 - 1,733)    | 130<br>(73 - 220)        | 62<br>(38 - 99)        | 317<br>(222 - 430)       | 214<br>(157 - 288)       | 568<br>(372 - 908)       |
| Drowning                                        | 790<br>(555 - 1,235)        | 301<br>(158 - 582)       | 138<br>(81 - 224)      | 224<br>(152 - 336)       | 80<br>(54 - 131)         | 48<br>(33 - 80)          |
| Fire, heat, and hot substances                  | 491<br>(361 - 639)          | 135<br>(74 - 235)        | 39<br>(26 - 60)        | 138<br>(95 - 190)        | 81<br>(56 - 110)         | 97<br>(67 - 135)         |
| Poisonings                                      | 157<br>(114 - 211)          | 43<br>(21 - 78)          | 14<br>(9 - 22)         | 56<br>(37 - 81)          | 30<br>(22 - 44)          | 14<br>(10 - 20)          |
| Exposure to mechanical forces                   | 621<br>(490 - 787)          | 158<br>(88 - 272)        | 65<br>(39 - 102)       | 214<br>(158 - 289)       | 112<br>(83 - 149)        | 72<br>(52 - 98)          |
| Unintentional firearm injuries                  | 190<br>(143 - 251)          | 32<br>(15 - 63)          | 11<br>(6 - 18)         | 97<br>(63 - 139)         | 33<br>(22 - 47)          | 18<br>(12 - 26)          |
| Unintentional suffocation                       | 70<br>(39 - 160)            | 31<br>(10 - 89)          | 10<br>(5 - 20)         | 19<br>(10 - 45)          | 6<br>(4 - 17)            | 4<br>(2 - 10)            |
| Other exposure to mechanical forces             | 361<br>(268 - 465)          | 95<br>(47 - 175)         | 44<br>(24 - 77)        | 99<br>(69 - 136)         | 73<br>(49 - 103)         | 50<br>(33 - 74)          |
| Adverse effects of medical treatment            | 786<br>(565 - 1,013)        | 129<br>(74 - 224)        | 28<br>(17 - 45)        | 161<br>(108 - 221)       | 196<br>(131 - 279)       | 273<br>(169 - 413)       |
| Animal contact                                  | 166<br>(113 - 267)          | 26<br>(14 - 47)          | 18<br>(10 - 31)        | 47<br>(28 - 78)          | 34<br>(21 - 56)          | 41<br>(26 - 73)          |
| Venomous animal contact                         | 66<br>(41 - 114)            | 12<br>(6 - 24)           | 8<br>(4 - 15)          | 23<br>(13 - 40)          | 11<br>(6 - 21)           | 12<br>(7 - 25)           |
| Non-venomous animal contact                     | 99<br>(67 - 160)            | 14<br>(7 - 24)           | 10<br>(6 - 18)         | 24<br>(13 - 40)          | 23<br>(13 - 38)          | 28<br>(16 - 52)          |
| Foreign body                                    | 453<br>(315 - 638)          | 162<br>(96 - 257)        | 34<br>(21 - 55)        | 67<br>(41 - 97)          | 62<br>(42 - 86)          | 127<br>(83 - 204)        |
| Pulmonary aspiration and foreign body in airway | 431<br>(294 - 612)          | 157<br>(92 - 249)        | 32<br>(19 - 53)        | 64<br>(38 - 94)          | 56<br>(36 - 79)          | 122<br>(78 - 198)        |
| Foreign body in other body part                 | 22<br>(16 - 34)             | 5<br>(3 - 9)             | 2<br>(1 - 4)           | 3<br>(2 - 5)             | 6<br>(4 - 10)            | 5<br>(3 - 9)             |
| Other unintentional injuries                    | 255<br>(208 - 324)          | 52<br>(32 - 83)          | 33<br>(22 - 47)        | 86<br>(63 - 112)         | 34<br>(24 - 48)          | 51<br>(35 - 75)          |
| Self-harm and interpersonal violence            | 2,059<br>(1,584 - 2,963)    | 75<br>(36 - 142)         | 58<br>(35 - 93)        | 1,207<br>(881 - 1,730)   | 424<br>(309 - 679)       | 294<br>(198 - 495)       |
| Self-harm                                       | 1,322<br>(1,000 - 2,013)    | --                       | 24<br>(10 - 46)        | 688<br>(468 - 1,020)     | 343<br>(247 - 572)       | 268<br>(179 - 456)       |
| Interpersonal violence                          | 737<br>(539 - 1,105)        | 75<br>(36 - 142)         | 35<br>(20 - 56)        | 519<br>(349 - 765)       | 81<br>(52 - 148)         | 27<br>(14 - 56)          |
| Assault by firearm                              | 406<br>(263 - 672)          | 16<br>(7 - 32)           | 6<br>(3 - 12)          | 339<br>(212 - 551)       | 37<br>(21 - 72)          | 8<br>(4 - 17)            |
| Assault by sharp object                         | 149<br>(100 - 242)          | 23<br>(10 - 47)          | 10<br>(6 - 20)         | 81<br>(50 - 131)         | 27<br>(15 - 53)          | 8<br>(4 - 18)            |
| Assault by other means                          | 181<br>(123 - 285)          | 36<br>(17 - 68)          | 18<br>(11 - 29)        | 99<br>(55 - 157)         | 18<br>(10 - 34)          | 11<br>(6 - 24)           |
| Forces of nature, war, and legal intervention   | 0<br>(0 - 0)                | 0<br>(0 - 0)             | --                     | --                       | --                       | --                       |
| Exposure to forces of nature                    | 0<br>(0 - 0)                | 0<br>(0 - 0)             | --                     | --                       | --                       | --                       |

Web Table 31- Ghana deaths with 95% UI by age, sex, and cause in 2013

| Cause                                                             | Males, All Ages              | Males, 0-4 Years            | Males, 5-14 Years        | Males, 15-49 Years          | Males, 50-69 Years          | Males, 70-80 Years          |
|-------------------------------------------------------------------|------------------------------|-----------------------------|--------------------------|-----------------------------|-----------------------------|-----------------------------|
| All causes                                                        | 98,058<br>(88,669 - 108,337) | 31,060<br>(27,232 - 36,066) | 3,647<br>(3,180 - 4,238) | 23,821<br>(19,796 - 28,664) | 21,368<br>(17,830 - 24,506) | 18,161<br>(16,796 - 19,142) |
| Communicable, maternal, neonatal, and nutritional diseases        | 49,427<br>(43,304 - 55,356)  | 25,902<br>(21,603 - 30,565) | 2,071<br>(1,631 - 2,509) | 10,389<br>(8,607 - 12,329)  | 5,950<br>(4,751 - 7,033)    | 5,114<br>(3,786 - 6,275)    |
| HIV/AIDS and tuberculosis                                         | 9,661<br>(7,697 - 12,197)    | 240<br>(166 - 341)          | 515<br>(404 - 643)       | 6,159<br>(4,554 - 8,374)    | 2,075<br>(1,592 - 2,753)    | 673<br>(517 - 910)          |
| Tuberculosis                                                      | 2,359<br>(1,804 - 3,219)     | 99<br>(57 - 155)            | 39<br>(24 - 61)          | 769<br>(527 - 1,094)        | 904<br>(644 - 1,304)        | 548<br>(400 - 782)          |
| HIV/AIDS                                                          | 7,302<br>(5,449 - 9,719)     | 141<br>(82 - 235)           | 475<br>(365 - 605)       | 5,390<br>(3,775 - 7,641)    | 1,171<br>(773 - 1,659)      | 125<br>(75 - 185)           |
| HIV/AIDS resulting in mycobacterial infection                     | 485<br>(337 - 683)           | 9<br>(5 - 15)               | 28<br>(20 - 37)          | 357<br>(236 - 529)          | 82<br>(52 - 121)            | 9<br>(5 - 14)               |
| HIV/AIDS resulting in other diseases                              | 6,817<br>(5,095 - 9,129)     | 132<br>(76 - 220)           | 447<br>(343 - 568)       | 5,033<br>(3,510 - 7,177)    | 1,088<br>(719 - 1,540)      | 116<br>(69 - 172)           |
| Diarrhea, lower respiratory, and other common infectious diseases | 15,276<br>(11,090 - 18,599)  | 6,111<br>(4,043 - 8,565)    | 787<br>(484 - 1,108)     | 2,510<br>(1,700 - 3,558)    | 2,628<br>(1,618 - 3,539)    | 3,239<br>(2,085 - 4,201)    |
| Diarrheal diseases                                                | 2,353<br>(1,487 - 3,686)     | 1,334<br>(533 - 2,643)      | 70<br>(30 - 141)         | 402<br>(251 - 653)          | 283<br>(159 - 464)          | 266<br>(158 - 429)          |
| Intestinal infectious diseases                                    | 563<br>(282 - 1,007)         | 171<br>(72 - 336)           | 157<br>(72 - 294)        | 203<br>(85 - 422)           | 25<br>(11 - 49)             | 7<br>(3 - 14)               |
| Typhoid fever                                                     | 376<br>(179 - 691)           | 107<br>(44 - 227)           | 107<br>(47 - 206)        | 141<br>(57 - 298)           | 17<br>(7 - 34)              | 4<br>(2 - 9)                |
| Paratyphoid fever                                                 | 165<br>(68 - 337)            | 51<br>(17 - 117)            | 48<br>(16 - 111)         | 57<br>(15 - 145)            | 7<br>(1 - 16)               | 2<br>(1 - 5)                |
| Other intestinal infectious diseases                              | 22<br>(11 - 39)              | 12<br>(4 - 25)              | 2<br>(0 - 8)             | 5<br>(1 - 13)               | 1<br>(0 - 6)                | 1<br>(0 - 4)                |
| Lower respiratory infections                                      | 9,309<br>(6,328 - 11,671)    | 3,323<br>(2,089 - 4,960)    | 236<br>(130 - 390)       | 1,032<br>(595 - 1,554)      | 1,933<br>(1,026 - 2,765)    | 2,785<br>(1,625 - 3,728)    |
| Upper respiratory infections                                      | 11<br>(4 - 23)               | 4<br>(0 - 14)               | 0<br>(0 - 2)             | 3<br>(1 - 8)                | 2<br>(0 - 7)                | 2<br>(0 - 5)                |
| Otitis media                                                      | 6<br>(5 - 7)                 | 1<br>(0 - 1)                | 0<br>(0 - 0)             | 1<br>(1 - 1)                | 2<br>(1 - 2)                | 2<br>(2 - 3)                |
| Meningitis                                                        | 2,227<br>(1,421 - 3,024)     | 691<br>(339 - 1,283)        | 248<br>(101 - 428)       | 777<br>(422 - 1,205)        | 349<br>(202 - 521)          | 161<br>(89 - 268)           |
| Pneumococcal meningitis                                           | 569<br>(335 - 910)           | 157<br>(61 - 360)           | 69<br>(25 - 147)         | 199<br>(90 - 351)           | 101<br>(51 - 177)           | 42<br>(17 - 82)             |
| H influenzae type B meningitis                                    | 367<br>(221 - 593)           | 182<br>(78 - 374)           | 44<br>(10 - 103)         | 92<br>(35 - 161)            | 35<br>(11 - 74)             | 14<br>(3 - 28)              |
| Meningococcal meningitis                                          | 953<br>(594 - 1,327)         | 292<br>(128 - 542)          | 111<br>(48 - 205)        | 342<br>(186 - 559)          | 139<br>(66 - 231)           | 69<br>(38 - 120)            |
| Other meningitis                                                  | 338<br>(191 - 517)           | 60<br>(22 - 133)            | 24<br>(9 - 50)           | 144<br>(67 - 260)           | 73<br>(28 - 147)            | 36<br>(14 - 67)             |
| Encephalitis                                                      | 151<br>(105 - 211)           | 32<br>(16 - 62)             | 22<br>(11 - 37)          | 58<br>(34 - 88)             | 26<br>(16 - 37)             | 13<br>(8 - 19)              |
| Diphtheria                                                        | 7<br>(0 - 42)                | 5<br>(0 - 42)               | 1<br>(0 - 7)             | 1<br>(0 - 2)                | 0<br>(0 - 1)                | --                          |
| Whooping cough                                                    | 55<br>(0 - 274)              | 52<br>(0 - 256)             | 3<br>(0 - 13)            | 1<br>(0 - 3)                | 0<br>(0 - 0)                | --                          |
| Tetanus                                                           | 160<br>(47 - 296)            | 122<br>(32 - 247)           | 5<br>(1 - 12)            | 25<br>(7 - 63)              | 7<br>(2 - 21)               | 1<br>(0 - 4)                |
| Measles                                                           | 426<br>(162 - 879)           | 373<br>(138 - 782)          | 46<br>(19 - 93)          | 6<br>(2 - 13)               | 0<br>(0 - 0)                | --                          |
| Varicella and herpes zoster                                       | 8<br>(3 - 19)                | 3<br>(0 - 13)               | 1<br>(0 - 4)             | 2<br>(0 - 6)                | 1<br>(0 - 3)                | 2<br>(0 - 8)                |
| Neglected tropical diseases and malaria                           | 8,037<br>(5,100 - 11,861)    | 5,455<br>(2,890 - 8,793)    | 509<br>(256 - 892)       | 848<br>(456 - 1,534)        | 589<br>(305 - 1,064)        | 636<br>(260 - 1,424)        |
| Malaria                                                           | 7,843<br>(4,899 - 11,682)    | 5,416<br>(2,838 - 8,764)    | 471<br>(217 - 851)       | 786<br>(397 - 1,469)        | 547<br>(264 - 1,013)        | 624<br>(247 - 1,414)        |
| Leishmaniasis                                                     | 0<br>(0 - 1)                 | 0<br>(0 - 0)                | 0<br>(0 - 0)             | 0<br>(0 - 0)                | 0<br>(0 - 0)                | 0<br>(0 - 0)                |
| Visceral leishmaniasis                                            | 0<br>(0 - 1)                 | 0<br>(0 - 0)                | 0<br>(0 - 0)             | 0<br>(0 - 0)                | 0<br>(0 - 0)                | 0<br>(0 - 0)                |
| Schistosomiasis                                                   | 54<br>(37 - 75)              | 1<br>(0 - 2)                | 2<br>(1 - 3)             | 23<br>(13 - 35)             | 20<br>(11 - 32)             | 9<br>(4 - 14)               |
| Cysticercosis                                                     | 3<br>(2 - 4)                 | 0<br>(0 - 0)                | 0<br>(0 - 0)             | 2<br>(1 - 3)                | 1<br>(1 - 1)                | 0<br>(0 - 0)                |
| Cystic echinococcosis                                             | 4<br>(3 - 4)                 | 0<br>(0 - 1)                | 1<br>(0 - 1)             | 2<br>(1 - 2)                | 1<br>(0 - 1)                | 0<br>(0 - 0)                |
| Dengue                                                            | 13<br>(7 - 20)               | 5<br>(2 - 11)               | 3<br>(1 - 5)             | 4<br>(2 - 7)                | 1<br>(0 - 2)                | 0<br>(0 - 1)                |
| Yellow fever                                                      | 7<br>(4 - 11)                | 1<br>(0 - 2)                | 1<br>(0 - 4)             | 4<br>(2 - 7)                | 1<br>(0 - 2)                | 0<br>(0 - 1)                |
| Rabies                                                            | 91<br>(45 - 142)             | 17<br>(6 - 40)              | 29<br>(14 - 56)          | 26<br>(12 - 40)             | 18<br>(8 - 31)              | 1<br>(0 - 3)                |
| Intestinal nematode infections                                    | 17<br>(6 - 37)               | 13<br>(4 - 32)              | 2<br>(0 - 8)             | 1<br>(0 - 6)                | 0<br>(0 - 4)                | 0<br>(0 - 3)                |
| Ascariasis                                                        | 17<br>(6 - 37)               | 13<br>(4 - 32)              | 2<br>(0 - 8)             | 1<br>(0 - 6)                | 0<br>(0 - 4)                | 0<br>(0 - 3)                |
| Other neglected tropical diseases                                 | 6<br>(4 - 8)                 | 1<br>(1 - 3)                | 0<br>(0 - 1)             | 2<br>(1 - 3)                | 1<br>(1 - 2)                | 1<br>(1 - 2)                |

Web Table 31- Ghana deaths with 95% UI by age, sex, and cause in 2013

| Cause                                                            | Males, All Ages             | Males, 0-4 Years           | Males, 5-14 Years    | Males, 15-49 Years        | Males, 50-69 Years          | Males, 70-80 Years          |
|------------------------------------------------------------------|-----------------------------|----------------------------|----------------------|---------------------------|-----------------------------|-----------------------------|
| Maternal disorders                                               | --                          | --                         | --                   | --                        | --                          | --                          |
| Maternal hemorrhage                                              | --                          | --                         | --                   | --                        | --                          | --                          |
| Maternal sepsis and other maternal infections                    | --                          | --                         | --                   | --                        | --                          | --                          |
| Maternal hypertensive disorders                                  | --                          | --                         | --                   | --                        | --                          | --                          |
| Maternal obstructed labor                                        | --                          | --                         | --                   | --                        | --                          | --                          |
| Maternal abortive outcome                                        | --                          | --                         | --                   | --                        | --                          | --                          |
| Indirect maternal deaths                                         | --                          | --                         | --                   | --                        | --                          | --                          |
| Late maternal deaths                                             | --                          | --                         | --                   | --                        | --                          | --                          |
| Maternal deaths aggravated by HIV/AIDS                           | --                          | --                         | --                   | --                        | --                          | --                          |
| Other maternal disorders                                         | --                          | --                         | --                   | --                        | --                          | --                          |
| Neonatal disorders                                               | 11,042<br>(9,508 - 12,718)  | 11,042<br>(9,508 - 12,718) | --                   | --                        | --                          | --                          |
| Neonatal preterm birth complications                             | 3,441<br>(1,652 - 5,641)    | 3,441<br>(1,652 - 5,641)   | --                   | --                        | --                          | --                          |
| Neonatal encephalopathy due to birth asphyxia and trauma         | 2,708<br>(1,356 - 4,613)    | 2,708<br>(1,356 - 4,613)   | --                   | --                        | --                          | --                          |
| Neonatal sepsis and other neonatal infections                    | 3,871<br>(1,851 - 6,382)    | 3,871<br>(1,851 - 6,382)   | --                   | --                        | --                          | --                          |
| Hemolytic disease and other neonatal jaundice                    | 115<br>(37 - 279)           | 115<br>(37 - 279)          | --                   | --                        | --                          | --                          |
| Other neonatal disorders                                         | 908<br>(370 - 1,752)        | 908<br>(370 - 1,752)       | --                   | --                        | --                          | --                          |
| Nutritional deficiencies                                         | 4,759<br>(2,304 - 7,009)    | 2,835<br>(1,276 - 4,736)   | 228<br>(95 - 382)    | 688<br>(272 - 1,038)      | 533<br>(220 - 792)          | 476<br>(228 - 720)          |
| Protein-energy malnutrition                                      | 3,562<br>(1,722 - 5,526)    | 2,582<br>(1,151 - 4,331)   | 164<br>(67 - 289)    | 328<br>(114 - 548)        | 272<br>(98 - 448)           | 217<br>(79 - 381)           |
| Iodine deficiency                                                | 19<br>(1 - 69)              | 6<br>(0 - 44)              | 2<br>(0 - 15)        | 6<br>(0 - 26)             | 3<br>(0 - 18)               | 2<br>(0 - 13)               |
| Iron-deficiency anemia                                           | 1,148<br>(372 - 1,975)      | 246<br>(39 - 659)          | 61<br>(13 - 123)     | 337<br>(90 - 580)         | 251<br>(68 - 435)           | 253<br>(87 - 432)           |
| Other nutritional deficiencies                                   | 30<br>(7 - 57)              | 1<br>(0 - 2)               | 1<br>(0 - 2)         | 17<br>(3 - 34)            | 7<br>(1 - 15)               | 5<br>(1 - 10)               |
| Other communicable, maternal, neonatal, and nutritional diseases | 652<br>(448 - 914)          | 220<br>(75 - 426)          | 32<br>(17 - 53)      | 184<br>(127 - 261)        | 126<br>(85 - 185)           | 90<br>(55 - 152)            |
| Sexually transmitted diseases excluding HIV                      | 184<br>(37 - 399)           | 140<br>(0 - 341)           | 12<br>(1 - 28)       | 16<br>(8 - 29)            | 8<br>(4 - 19)               | 8<br>(3 - 20)               |
| Syphilis                                                         | 172<br>(25 - 388)           | 140<br>(0 - 341)           | 12<br>(1 - 27)       | 8<br>(4 - 15)             | 6<br>(3 - 14)               | 7<br>(2 - 17)               |
| Chlamydial infection                                             | --                          | --                         | --                   | --                        | --                          | --                          |
| Gonococcal infection                                             | 7<br>(4 - 12)               | --                         | 0<br>(0 - 1)         | 4<br>(2 - 7)              | 1<br>(1 - 3)                | 1<br>(0 - 2)                |
| Other sexually transmitted diseases                              | 5<br>(3 - 9)                | --                         | 0<br>(0 - 1)         | 3<br>(2 - 6)              | 1<br>(0 - 2)                | 0<br>(0 - 1)                |
| Hepatitis                                                        | 306<br>(226 - 401)          | 33<br>(14 - 66)            | 14<br>(8 - 23)       | 139<br>(96 - 200)         | 79<br>(53 - 110)            | 41<br>(26 - 66)             |
| Acute hepatitis A                                                | 17<br>(5 - 39)              | 7<br>(1 - 17)              | 3<br>(1 - 6)         | 7<br>(2 - 17)             | 1<br>(0 - 2)                | 0<br>(0 - 0)                |
| Acute hepatitis B                                                | 199<br>(134 - 274)          | 25<br>(10 - 51)            | 7<br>(3 - 14)        | 67<br>(35 - 108)          | 63<br>(41 - 91)             | 36<br>(22 - 60)             |
| Acute hepatitis C                                                | 12<br>(2 - 31)              | --                         | 1<br>(0 - 2)         | 6<br>(1 - 16)             | 4<br>(1 - 10)               | 2<br>(0 - 6)                |
| Acute hepatitis E                                                | 77<br>(39 - 126)            | 1<br>(0 - 2)               | 3<br>(1 - 7)         | 60<br>(30 - 99)           | 11<br>(4 - 23)              | 3<br>(1 - 7)                |
| Other infectious diseases                                        | 162<br>(92 - 287)           | 47<br>(15 - 105)           | 6<br>(2 - 13)        | 29<br>(15 - 52)           | 39<br>(17 - 89)             | 41<br>(15 - 102)            |
| Non-communicable diseases                                        | 40,440<br>(33,609 - 48,031) | 4,032<br>(2,072 - 7,499)   | 978<br>(565 - 1,757) | 9,180<br>(7,000 - 12,168) | 14,030<br>(11,259 - 16,422) | 12,220<br>(10,869 - 13,566) |
| Neoplasms                                                        | 4,492<br>(3,589 - 5,576)    | 128<br>(65 - 234)          | 115<br>(68 - 180)    | 1,124<br>(814 - 1,518)    | 1,685<br>(1,315 - 2,143)    | 1,442<br>(1,177 - 1,913)    |
| Esophageal cancer                                                | 185<br>(136 - 252)          | --                         | --                   | 24<br>(15 - 35)           | 109<br>(75 - 157)           | 53<br>(37 - 75)             |
| Stomach cancer                                                   | 481<br>(370 - 625)          | --                         | --                   | 116<br>(79 - 166)         | 240<br>(176 - 324)          | 124<br>(93 - 164)           |
| Liver cancer                                                     | 1,371<br>(1,069 - 1,743)    | --                         | 5<br>(2 - 10)        | 515<br>(341 - 742)        | 521<br>(379 - 708)          | 330<br>(241 - 450)          |
| Liver cancer due to hepatitis B                                  | 487<br>(171 - 941)          | --                         | 3<br>(1 - 5)         | 258<br>(115 - 437)        | 138<br>(17 - 368)           | 89<br>(18 - 200)            |
| Liver cancer due to hepatitis C                                  | 486<br>(236 - 769)          | --                         | 0<br>(0 - 1)         | 103<br>(15 - 212)         | 230<br>(89 - 392)           | 153<br>(80 - 237)           |

Web Table 31- Ghana deaths with 95% UI by age, sex, and cause in 2013

| Cause                                | Males, All Ages             | Males, 0-4 Years   | Males, 5-14 Years | Males, 15-49 Years       | Males, 50-69 Years       | Males, 70-80 Years       |
|--------------------------------------|-----------------------------|--------------------|-------------------|--------------------------|--------------------------|--------------------------|
| Liver cancer due to alcohol use      | 215<br>(121 - 420)          | --                 | --                | 52<br>(23 - 119)         | 96<br>(45 - 203)         | 66<br>(35 - 117)         |
| Liver cancer due to other causes     | 183<br>(89 - 317)           | --                 | 2<br>(1 - 4)      | 102<br>(45 - 195)        | 57<br>(22 - 110)         | 22<br>(11 - 37)          |
| Larynx cancer                        | 10<br>(5 - 31)              | --                 | --                | 2<br>(1 - 4)             | 3<br>(1 - 11)            | 5<br>(2 - 16)            |
| Tracheal, bronchus and lung cancer   | 148<br>(121 - 179)          | --                 | --                | 16<br>(11 - 22)          | 80<br>(62 - 102)         | 52<br>(42 - 64)          |
| Breast cancer                        | 9<br>(5 - 14)               | --                 | --                | 3<br>(2 - 5)             | 4<br>(2 - 8)             | 1<br>(1 - 3)             |
| Cervical cancer                      | --                          | --                 | --                | --                       | --                       | --                       |
| Uterine cancer                       | --                          | --                 | --                | --                       | --                       | --                       |
| Prostate cancer                      | 816<br>(555 - 1,360)        | --                 | --                | 15<br>(8 - 29)           | 264<br>(163 - 460)       | 536<br>(361 - 909)       |
| Colon and rectum cancer              | 333<br>(273 - 400)          | --                 | --                | 84<br>(60 - 116)         | 137<br>(107 - 170)       | 112<br>(89 - 140)        |
| Lip and oral cavity cancer           | 23<br>(15 - 42)             | --                 | --                | 5<br>(3 - 9)             | 9<br>(5 - 17)            | 9<br>(5 - 17)            |
| Nasopharynx cancer                   | 6<br>(5 - 9)                | --                 | 0<br>(0 - 1)      | 4<br>(3 - 6)             | 2<br>(1 - 3)             | 0<br>(0 - 1)             |
| Other pharynx cancer                 | 7<br>(5 - 15)               | --                 | --                | 3<br>(2 - 5)             | 1<br>(1 - 3)             | 3<br>(2 - 8)             |
| Gallbladder and biliary tract cancer | 12<br>(8 - 24)              | --                 | --                | 3<br>(2 - 5)             | 5<br>(3 - 10)            | 4<br>(2 - 9)             |
| Pancreatic cancer                    | 184<br>(145 - 224)          | --                 | --                | 37<br>(25 - 54)          | 96<br>(72 - 123)         | 51<br>(38 - 66)          |
| Malignant skin melanoma              | 11<br>(6 - 20)              | --                 | --                | 4<br>(2 - 7)             | 4<br>(3 - 8)             | 3<br>(1 - 5)             |
| Non-melanoma skin cancer             | 9<br>(6 - 16)               | --                 | --                | 2<br>(1 - 4)             | 3<br>(2 - 5)             | 4<br>(2 - 8)             |
| Ovarian cancer                       | --                          | --                 | --                | --                       | --                       | --                       |
| Testicular cancer                    | 6<br>(3 - 10)               | --                 | --                | 4<br>(2 - 8)             | 1<br>(0 - 2)             | 1<br>(0 - 1)             |
| Kidney cancer                        | 26<br>(20 - 36)             | 6<br>(2 - 15)      | 2<br>(1 - 4)      | 3<br>(2 - 5)             | 9<br>(6 - 12)            | 6<br>(4 - 8)             |
| Bladder cancer                       | 107<br>(83 - 151)           | --                 | --                | 26<br>(17 - 38)          | 33<br>(22 - 57)          | 48<br>(35 - 69)          |
| Brain and nervous system cancer      | 66<br>(44 - 111)            | 1<br>(0 - 3)       | 8<br>(4 - 14)     | 32<br>(20 - 52)          | 19<br>(12 - 34)          | 6<br>(3 - 13)            |
| Thyroid cancer                       | 3<br>(2 - 5)                | --                 | 0<br>(0 - 0)      | 1<br>(1 - 2)             | 1<br>(0 - 1)             | 1<br>(0 - 2)             |
| Mesothelioma                         | 6<br>(4 - 8)                | --                 | --                | 1<br>(1 - 2)             | 2<br>(1 - 4)             | 3<br>(1 - 4)             |
| Hodgkin lymphoma                     | 25<br>(18 - 35)             | 3<br>(1 - 7)       | 3<br>(1 - 7)      | 12<br>(7 - 18)           | 6<br>(3 - 9)             | 2<br>(1 - 4)             |
| Non-Hodgkin lymphoma                 | 249<br>(159 - 426)          | 33<br>(11 - 73)    | 51<br>(23 - 95)   | 82<br>(51 - 144)         | 55<br>(33 - 105)         | 29<br>(18 - 53)          |
| Multiple myeloma                     | 16<br>(9 - 30)              | --                 | --                | 4<br>(2 - 7)             | 11<br>(5 - 22)           | 1<br>(1 - 3)             |
| Leukemia                             | 127<br>(95 - 164)           | 26<br>(12 - 50)    | 22<br>(13 - 35)   | 62<br>(43 - 86)          | 9<br>(6 - 12)            | 9<br>(7 - 12)            |
| Other neoplasms                      | 256<br>(177 - 413)          | 59<br>(26 - 116)   | 24<br>(12 - 41)   | 63<br>(42 - 102)         | 62<br>(38 - 107)         | 49<br>(30 - 85)          |
| Cardiovascular diseases              | 16,021<br>(13,335 - 18,570) | 343<br>(197 - 549) | 138<br>(83 - 211) | 2,852<br>(2,149 - 3,778) | 6,776<br>(5,400 - 8,080) | 5,912<br>(5,165 - 6,768) |
| Rheumatic heart disease              | 74<br>(51 - 138)            | 10<br>(3 - 24)     | 3<br>(1 - 6)      | 21<br>(12 - 44)          | 19<br>(12 - 36)          | 22<br>(14 - 41)          |
| Ischemic heart disease               | 5,120<br>(4,052 - 6,373)    | 33<br>(11 - 78)    | 24<br>(13 - 41)   | 965<br>(680 - 1,324)     | 2,310<br>(1,750 - 2,920) | 1,788<br>(1,420 - 2,245) |
| Cerebrovascular disease              | 7,059<br>(5,732 - 8,417)    | 97<br>(54 - 158)   | 44<br>(24 - 69)   | 942<br>(653 - 1,319)     | 3,004<br>(2,287 - 3,712) | 2,972<br>(2,452 - 3,553) |
| Ischemic stroke                      | 5,093<br>(4,008 - 6,156)    | 8<br>(3 - 16)      | 6<br>(3 - 10)     | 298<br>(175 - 452)       | 2,206<br>(1,601 - 2,779) | 2,576<br>(2,120 - 3,090) |
| Hemorrhagic stroke                   | 1,965<br>(1,419 - 2,686)    | 89<br>(50 - 145)   | 38<br>(21 - 61)   | 644<br>(438 - 904)       | 798<br>(523 - 1,148)     | 396<br>(255 - 593)       |
| Hypertensive heart disease           | 1,066<br>(683 - 1,722)      | 8<br>(3 - 18)      | 2<br>(1 - 5)      | 240<br>(144 - 379)       | 414<br>(239 - 711)       | 401<br>(235 - 702)       |
| Cardiomyopathy and myocarditis       | 1,170<br>(744 - 1,547)      | 39<br>(19 - 77)    | 28<br>(14 - 51)   | 281<br>(180 - 407)       | 505<br>(292 - 721)       | 317<br>(177 - 474)       |
| Atrial fibrillation and flutter      | 1<br>(1 - 1)                | --                 | --                | 0<br>(0 - 1)             | 0<br>(0 - 1)             | 0<br>(0 - 0)             |
| Aortic aneurysm                      | 163<br>(120 - 269)          | --                 | --                | 25<br>(17 - 43)          | 83<br>(57 - 140)         | 55<br>(37 - 94)          |
| Peripheral vascular disease          | 10<br>(7 - 14)              | --                 | --                | 1<br>(0 - 1)             | 3<br>(2 - 4)             | 7<br>(5 - 10)            |
| Endocarditis                         | 340<br>(222 - 528)          | 74<br>(36 - 142)   | 9<br>(5 - 17)     | 82<br>(48 - 131)         | 93<br>(56 - 149)         | 82<br>(49 - 134)         |



Web Table 31- Ghana deaths with 95% UI by age, sex, and cause in 2013

| Cause                                               | Males, All Ages          | Males, 0-4 Years | Males, 5-14 Years | Males, 15-49 Years     | Males, 50-69 Years       | Males, 70-80 Years       |
|-----------------------------------------------------|--------------------------|------------------|-------------------|------------------------|--------------------------|--------------------------|
| Other cardiovascular and circulatory diseases       | 1,019<br>(769 - 1,473)   | 82<br>(42 - 144) | 28<br>(17 - 44)   | 296<br>(199 - 437)     | 346<br>(235 - 522)       | 268<br>(183 - 401)       |
| Chronic respiratory diseases                        | 2,831<br>(2,284 - 3,412) | 83<br>(40 - 159) | 19<br>(11 - 26)   | 307<br>(217 - 415)     | 927<br>(696 - 1,178)     | 1,495<br>(1,205 - 1,844) |
| Chronic obstructive pulmonary disease               | 1,806<br>(1,445 - 2,225) | 41<br>(19 - 79)  | 7<br>(4 - 11)     | 102<br>(69 - 143)      | 546<br>(393 - 710)       | 1,110<br>(873 - 1,387)   |
| Pneumoconiosis                                      | 162<br>(107 - 235)       | 0<br>(0 - 1)     | 0<br>(0 - 1)      | 34<br>(21 - 51)        | 96<br>(60 - 142)         | 32<br>(20 - 50)          |
| Silicosis                                           | 24<br>(15 - 36)          | 0<br>(0 - 0)     | 0<br>(0 - 0)      | 5<br>(3 - 8)           | 7<br>(4 - 11)            | 11<br>(7 - 18)           |
| Asbestosis                                          | 12<br>(7 - 18)           | 0<br>(0 - 0)     | 0<br>(0 - 0)      | 3<br>(2 - 4)           | 8<br>(5 - 12)            | 1<br>(1 - 2)             |
| Coal workers pneumoconiosis                         | 51<br>(32 - 75)          | 0<br>(0 - 0)     | 0<br>(0 - 0)      | 3<br>(1 - 4)           | 44<br>(27 - 67)          | 4<br>(2 - 7)             |
| Other pneumoconiosis                                | 76<br>(51 - 111)         | 0<br>(0 - 0)     | 0<br>(0 - 0)      | 23<br>(14 - 35)        | 37<br>(24 - 57)          | 16<br>(9 - 25)           |
| Asthma                                              | 352<br>(248 - 458)       | 30<br>(10 - 65)  | 6<br>(3 - 9)      | 108<br>(69 - 151)      | 111<br>(70 - 157)        | 98<br>(63 - 143)         |
| Interstitial lung disease and pulmonary sarcoidosis | 374<br>(243 - 559)       | 0<br>(0 - 1)     | 0<br>(0 - 1)      | 10<br>(4 - 18)         | 140<br>(85 - 222)        | 224<br>(133 - 353)       |
| Other chronic respiratory diseases                  | 137<br>(103 - 182)       | 12<br>(5 - 23)   | 5<br>(3 - 8)      | 54<br>(35 - 80)        | 35<br>(23 - 52)          | 32<br>(20 - 49)          |
| Cirrhosis                                           | 3,022<br>(2,389 - 3,719) | 66<br>(24 - 141) | 28<br>(17 - 42)   | 1,072<br>(771 - 1,494) | 1,361<br>(1,016 - 1,712) | 495<br>(383 - 633)       |
| Cirrhosis due to hepatitis B                        | 859<br>(405 - 1,387)     | 4<br>(1 - 11)    | 6<br>(2 - 11)     | 318<br>(148 - 534)     | 396<br>(167 - 666)       | 134<br>(38 - 244)        |
| Cirrhosis due to hepatitis C                        | 558<br>(200 - 1,115)     | 3<br>(1 - 11)    | 5<br>(2 - 10)     | 190<br>(68 - 404)      | 246<br>(72 - 540)        | 114<br>(30 - 209)        |
| Cirrhosis due to alcohol use                        | 1,200<br>(798 - 1,709)   | --               | --                | 385<br>(219 - 626)     | 596<br>(385 - 864)       | 219<br>(144 - 314)       |
| Cirrhosis due to other causes                       | 406<br>(250 - 609)       | 58<br>(21 - 121) | 17<br>(9 - 27)    | 179<br>(97 - 305)      | 123<br>(62 - 205)        | 28<br>(15 - 48)          |
| Digestive diseases                                  | 1,926<br>(1,491 - 2,424) | 65<br>(28 - 121) | 50<br>(30 - 77)   | 650<br>(447 - 933)     | 689<br>(508 - 895)       | 472<br>(358 - 603)       |
| Peptic ulcer disease                                | 357<br>(232 - 499)       | 5<br>(2 - 16)    | 7<br>(3 - 12)     | 106<br>(62 - 171)      | 137<br>(80 - 205)        | 102<br>(62 - 154)        |
| Gastritis and duodenitis                            | 59<br>(28 - 117)         | 3<br>(1 - 8)     | 2<br>(1 - 4)      | 15<br>(7 - 27)         | 22<br>(10 - 49)          | 18<br>(7 - 42)           |
| Appendicitis                                        | 75<br>(46 - 115)         | 3<br>(1 - 7)     | 4<br>(2 - 7)      | 23<br>(12 - 39)        | 23<br>(13 - 37)          | 22<br>(11 - 39)          |
| Paralytic ileus and intestinal obstruction          | 624<br>(426 - 946)       | 21<br>(7 - 45)   | 17<br>(9 - 29)    | 179<br>(98 - 287)      | 254<br>(163 - 394)       | 152<br>(91 - 252)        |
| Inguinal, femoral, and abdominal hernia             | 50<br>(25 - 80)          | 0<br>(0 - 1)     | 0<br>(0 - 1)      | 13<br>(7 - 23)         | 20<br>(9 - 34)           | 16<br>(7 - 28)           |
| Inflammatory bowel disease                          | 112<br>(69 - 198)        | 13<br>(4 - 29)   | 2<br>(1 - 4)      | 31<br>(17 - 56)        | 40<br>(21 - 73)          | 26<br>(13 - 54)          |
| Vascular intestinal disorders                       | 32<br>(11 - 67)          | 5<br>(1 - 13)    | 2<br>(1 - 6)      | 12<br>(4 - 28)         | 6<br>(2 - 15)            | 6<br>(2 - 15)            |
| Gallbladder and biliary diseases                    | 141<br>(73 - 200)        | 2<br>(1 - 3)     | 5<br>(3 - 9)      | 41<br>(19 - 65)        | 42<br>(18 - 68)          | 51<br>(27 - 82)          |
| Pancreatitis                                        | 232<br>(145 - 337)       | 0<br>(0 - 1)     | 2<br>(1 - 3)      | 140<br>(84 - 216)      | 52<br>(27 - 82)          | 38<br>(22 - 60)          |
| Other digestive diseases                            | 246<br>(165 - 340)       | 13<br>(4 - 28)   | 9<br>(4 - 15)     | 91<br>(55 - 141)       | 93<br>(56 - 139)         | 41<br>(24 - 64)          |
| Neurological disorders                              | 938<br>(744 - 1,135)     | 83<br>(37 - 161) | 22<br>(10 - 42)   | 169<br>(106 - 243)     | 106<br>(78 - 134)        | 559<br>(441 - 680)       |
| Alzheimer disease and other dementias               | 583<br>(462 - 710)       | --               | --                | 0<br>(0 - 1)           | 58<br>(39 - 77)          | 525<br>(410 - 646)       |
| Parkinson disease                                   | 5<br>(3 - 11)            | --               | --                | 1<br>(1 - 1)           | 0<br>(0 - 1)             | 4<br>(2 - 10)            |
| Epilepsy                                            | 251<br>(161 - 372)       | 66<br>(24 - 142) | 15<br>(7 - 33)    | 130<br>(81 - 193)      | 23<br>(14 - 34)          | 17<br>(10 - 26)          |
| Multiple sclerosis                                  | 1<br>(0 - 1)             | --               | --                | 0<br>(0 - 1)           | 0<br>(0 - 0)             | 0<br>(0 - 0)             |
| Other neurological disorders                        | 99<br>(41 - 141)         | 17<br>(5 - 38)   | 7<br>(2 - 11)     | 38<br>(15 - 58)        | 24<br>(11 - 36)          | 13<br>(6 - 19)           |
| Mental and substance use disorders                  | 1,716<br>(1,207 - 2,276) | 31<br>(6 - 73)   | 0<br>(0 - 0)      | 1,201<br>(827 - 1,688) | 360<br>(199 - 495)       | 125<br>(69 - 171)        |
| Schizophrenia                                       | 1<br>(1 - 2)             | --               | --                | 1<br>(0 - 1)           | 0<br>(0 - 1)             | 0<br>(0 - 0)             |
| Alcohol use disorders                               | 706<br>(319 - 959)       | --               | --                | 326<br>(149 - 473)     | 280<br>(118 - 407)       | 100<br>(45 - 146)        |
| Drug use disorders                                  | 1,009<br>(694 - 1,419)   | 31<br>(6 - 73)   | --                | 874<br>(587 - 1,259)   | 79<br>(54 - 108)         | 25<br>(17 - 35)          |
| Opioid use disorders                                | 108<br>(72 - 157)        | 4<br>(1 - 9)     | --                | 95<br>(62 - 141)       | 7<br>(5 - 11)            | 3<br>(2 - 4)             |
| Cocaine use disorders                               | 4<br>(2 - 6)             | 0<br>(0 - 0)     | --                | 3<br>(2 - 5)           | 0<br>(0 - 0)             | 0<br>(0 - 0)             |
| Amphetamine use disorders                           | 3<br>(2 - 4)             | 0<br>(0 - 0)     | --                | 2<br>(1 - 3)           | 0<br>(0 - 0)             | 0<br>(0 - 0)             |

Web Table 31- Ghana deaths with 95% UI by age, sex, and cause in 2013

| Cause                                               | Males, All Ages           | Males, 0-4 Years       | Males, 5-14 Years    | Males, 15-49 Years     | Males, 50-69 Years       | Males, 70-80 Years       |
|-----------------------------------------------------|---------------------------|------------------------|----------------------|------------------------|--------------------------|--------------------------|
| Other drug use disorders                            | 895<br>(617 - 1,264)      | 28<br>(5 - 65)         | --                   | 774<br>(523 - 1,118)   | 71<br>(49 - 96)          | 22<br>(15 - 31)          |
| Eating disorders                                    | 0<br>(0 - 0)              | --                     | 0<br>(0 - 0)         | 0<br>(0 - 0)           | --                       | --                       |
| Anorexia nervosa                                    | 0<br>(0 - 0)              | --                     | 0<br>(0 - 0)         | 0<br>(0 - 0)           | --                       | --                       |
| Diabetes, urogenital, blood, and endocrine diseases | 7,321<br>(4,707 - 12,140) | 1,657<br>(338 - 4,511) | 509<br>(120 - 1,377) | 1,614<br>(953 - 2,951) | 1,978<br>(1,542 - 2,496) | 1,563<br>(1,303 - 1,876) |
| Diabetes mellitus                                   | 2,186<br>(1,766 - 2,633)  | 31<br>(19 - 50)        | 8<br>(5 - 13)        | 244<br>(168 - 341)     | 1,092<br>(820 - 1,397)   | 811<br>(629 - 1,016)     |
| Acute glomerulonephritis                            | 7<br>(4 - 14)             | 1<br>(0 - 2)           | 0<br>(0 - 1)         | 2<br>(1 - 4)           | 3<br>(1 - 7)             | 1<br>(0 - 1)             |
| Chronic kidney disease                              | 1,132<br>(886 - 1,460)    | 56<br>(27 - 104)       | 48<br>(29 - 71)      | 448<br>(313 - 626)     | 317<br>(234 - 428)       | 263<br>(197 - 361)       |
| Chronic kidney disease due to diabetes mellitus     | 21<br>(11 - 68)           | 0<br>(0 - 1)           | 0<br>(0 - 1)         | 1<br>(1 - 3)           | 19<br>(9 - 62)           | 1<br>(0 - 1)             |
| Chronic kidney disease due to hypertension          | 296<br>(200 - 451)        | 6<br>(3 - 11)          | 3<br>(1 - 6)         | 98<br>(57 - 157)       | 102<br>(60 - 158)        | 87<br>(52 - 143)         |
| Chronic kidney disease due to glomerulonephritis    | 464<br>(335 - 623)        | 29<br>(13 - 52)        | 29<br>(18 - 43)      | 210<br>(141 - 302)     | 101<br>(62 - 151)        | 96<br>(60 - 137)         |
| Chronic kidney disease due to other causes          | 351<br>(236 - 489)        | 22<br>(8 - 46)         | 16<br>(7 - 29)       | 138<br>(75 - 219)      | 96<br>(50 - 153)         | 80<br>(39 - 141)         |
| Urinary diseases and male infertility               | 882<br>(690 - 1,144)      | 91<br>(41 - 177)       | 10<br>(6 - 15)       | 224<br>(155 - 319)     | 249<br>(176 - 367)       | 308<br>(214 - 443)       |
| Interstitial nephritis and urinary tract infections | 718<br>(547 - 965)        | 84<br>(36 - 172)       | 8<br>(5 - 12)        | 175<br>(119 - 261)     | 201<br>(135 - 311)       | 249<br>(165 - 374)       |
| Urolithiasis                                        | 4<br>(2 - 6)              | --                     | 1<br>(0 - 1)         | 2<br>(1 - 3)           | 1<br>(0 - 1)             | 1<br>(0 - 1)             |
| Other urinary diseases                              | 160<br>(75 - 239)         | 6<br>(2 - 15)          | 1<br>(1 - 2)         | 46<br>(21 - 77)        | 47<br>(21 - 77)          | 59<br>(20 - 112)         |
| Gynecological diseases                              | --                        | --                     | --                   | --                     | --                       | --                       |
| Uterine fibroids                                    | --                        | --                     | --                   | --                     | --                       | --                       |
| Polycystic ovarian syndrome                         | --                        | --                     | --                   | --                     | --                       | --                       |
| Endometriosis                                       | --                        | --                     | --                   | --                     | --                       | --                       |
| Genital prolapse                                    | --                        | --                     | --                   | --                     | --                       | --                       |
| Other gynecological diseases                        | --                        | --                     | --                   | --                     | --                       | --                       |
| Hemoglobinopathies and hemolytic anemias            | 2,401<br>(172 - 7,296)    | 1,372<br>(75 - 4,281)  | 417<br>(24 - 1,308)  | 492<br>(38 - 1,724)    | 90<br>(14 - 335)         | 29<br>(12 - 79)          |
| Thalassemias                                        | 3<br>(0 - 10)             | 3<br>(0 - 8)           | 0<br>(0 - 1)         | 0<br>(0 - 2)           | 0<br>(0 - 0)             | 0<br>(0 - 0)             |
| Sickle cell disorders                               | 2,353<br>(159 - 7,140)    | 1,354<br>(74 - 4,214)  | 415<br>(24 - 1,300)  | 486<br>(38 - 1,703)    | 87<br>(13 - 323)         | 11<br>(4 - 30)           |
| G6PD deficiency                                     | 8<br>(1 - 26)             | 5<br>(0 - 15)          | 1<br>(0 - 3)         | 2<br>(0 - 6)           | 0<br>(0 - 2)             | 1<br>(0 - 2)             |
| Other hemoglobinopathies and hemolytic anemias      | 36<br>(9 - 110)           | 10<br>(0 - 36)         | 1<br>(0 - 4)         | 4<br>(0 - 14)          | 3<br>(1 - 10)            | 17<br>(7 - 48)           |
| Endocrine, metabolic, blood, and immune disorders   | 713<br>(371 - 924)        | 106<br>(51 - 184)      | 26<br>(12 - 47)      | 205<br>(100 - 300)     | 226<br>(111 - 328)       | 151<br>(69 - 230)        |
| Musculoskeletal disorders                           | 134<br>(96 - 186)         | --                     | 11<br>(6 - 17)       | 49<br>(32 - 69)        | 45<br>(31 - 67)          | 29<br>(20 - 45)          |
| Rheumatoid arthritis                                | 8<br>(4 - 11)             | --                     | 1<br>(0 - 2)         | 2<br>(1 - 3)           | 2<br>(1 - 4)             | 3<br>(1 - 5)             |
| Other musculoskeletal disorders                     | 127<br>(91 - 176)         | --                     | 10<br>(6 - 16)       | 47<br>(31 - 67)        | 43<br>(29 - 64)          | 27<br>(19 - 41)          |
| Other non-communicable diseases                     | 2,037<br>(1,257 - 3,694)  | 1,577<br>(854 - 3,168) | 85<br>(44 - 157)     | 143<br>(97 - 201)      | 104<br>(67 - 140)        | 127<br>(79 - 179)        |
| Congenital anomalies                                | 1,677<br>(929 - 3,350)    | 1,494<br>(777 - 3,104) | 77<br>(37 - 150)     | 76<br>(50 - 119)       | 16<br>(11 - 24)          | 14<br>(9 - 20)           |
| Neural tube defects                                 | 241<br>(43 - 596)         | 225<br>(37 - 568)      | 7<br>(1 - 18)        | 7<br>(2 - 18)          | 1<br>(0 - 2)             | 0<br>(0 - 1)             |
| Congenital heart anomalies                          | 736<br>(396 - 1,309)      | 639<br>(319 - 1,172)   | 43<br>(21 - 78)      | 40<br>(23 - 65)        | 9<br>(5 - 13)            | 5<br>(3 - 8)             |
| Cleft lip and cleft palate                          | 5<br>(1 - 17)             | 5<br>(1 - 17)          | --                   | --                     | --                       | --                       |
| Down syndrome                                       | 165<br>(57 - 389)         | 152<br>(49 - 375)      | 5<br>(2 - 9)         | 6<br>(3 - 11)          | 2<br>(1 - 3)             | 0<br>(0 - 1)             |
| Chromosomal unbalanced rearrangements               | 59<br>(20 - 143)          | 53<br>(16 - 136)       | 2<br>(1 - 5)         | 3<br>(1 - 5)           | 0<br>(0 - 1)             | 0<br>(0 - 1)             |
| Other congenital anomalies                          | 471<br>(138 - 1,572)      | 419<br>(104 - 1,478)   | 19<br>(5 - 62)       | 20<br>(10 - 38)        | 5<br>(3 - 8)             | 7<br>(5 - 11)            |
| Skin and subcutaneous diseases                      | 338<br>(195 - 441)        | 61<br>(27 - 125)       | 9<br>(3 - 16)        | 67<br>(37 - 94)        | 88<br>(51 - 124)         | 114<br>(66 - 166)        |
| Cellulitis                                          | 83<br>(34 - 129)          | 11<br>(3 - 25)         | 3<br>(1 - 6)         | 11<br>(4 - 19)         | 34<br>(14 - 59)          | 23<br>(7 - 44)           |

Web Table 31- Ghana deaths with 95% UI by age, sex, and cause in 2013

| Cause                                           | Males, All Ages           | Males, 0-4 Years       | Males, 5-14 Years  | Males, 15-49 Years       | Males, 50-69 Years       | Males, 70-80 Years   |
|-------------------------------------------------|---------------------------|------------------------|--------------------|--------------------------|--------------------------|----------------------|
| Pyoderma                                        | 238<br>(139 - 336)        | 49<br>(20 - 107)       | 4<br>(2 - 9)       | 54<br>(32 - 79)          | 52<br>(29 - 83)          | 79<br>(43 - 120)     |
| Decubitus ulcer                                 | 15<br>(8 - 28)            | 0<br>(0 - 1)           | 0<br>(0 - 1)       | 1<br>(1 - 3)             | 1<br>(0 - 1)             | 12<br>(5 - 24)       |
| Other skin and subcutaneous diseases            | 3<br>(1 - 5)              | 1<br>(0 - 1)           | 0<br>(0 - 1)       | 1<br>(0 - 1)             | 1<br>(0 - 1)             | 0<br>(0 - 1)         |
| Sudden infant death syndrome                    | 22<br>(6 - 55)            | 22<br>(6 - 55)         | --                 | --                       | --                       | --                   |
| Injuries                                        | 8,190<br>(6,611 - 10,083) | 1,127<br>(647 - 1,782) | 598<br>(394 - 824) | 4,252<br>(3,165 - 5,560) | 1,387<br>(1,088 - 1,744) | 827<br>(686 - 1,045) |
| Transport injuries                              | 4,085<br>(3,159 - 5,133)  | 414<br>(219 - 720)     | 306<br>(183 - 447) | 2,420<br>(1,687 - 3,282) | 636<br>(468 - 818)       | 309<br>(236 - 413)   |
| Road injuries                                   | 3,929<br>(3,026 - 4,941)  | 368<br>(187 - 652)     | 287<br>(173 - 421) | 2,386<br>(1,661 - 3,240) | 608<br>(446 - 779)       | 280<br>(214 - 375)   |
| Pedestrian road injuries                        | 1,128<br>(754 - 1,551)    | 132<br>(61 - 260)      | 112<br>(63 - 177)  | 571<br>(329 - 865)       | 202<br>(130 - 293)       | 111<br>(71 - 167)    |
| Cyclist road injuries                           | 265<br>(189 - 364)        | 27<br>(9 - 60)         | 28<br>(16 - 46)    | 124<br>(76 - 182)        | 59<br>(39 - 85)          | 27<br>(18 - 41)      |
| Motorcyclist road injuries                      | 261<br>(165 - 389)        | 19<br>(8 - 38)         | 13<br>(7 - 22)     | 177<br>(104 - 278)       | 39<br>(23 - 60)          | 13<br>(7 - 20)       |
| Motor vehicle road injuries                     | 2,236<br>(1,622 - 2,982)  | 178<br>(87 - 312)      | 125<br>(67 - 201)  | 1,506<br>(1,037 - 2,116) | 301<br>(207 - 408)       | 126<br>(87 - 173)    |
| Other road injuries                             | 39<br>(19 - 63)           | 12<br>(4 - 28)         | 9<br>(3 - 18)      | 9<br>(3 - 15)            | 6<br>(3 - 10)            | 4<br>(2 - 7)         |
| Other transport injuries                        | 156<br>(111 - 210)        | 46<br>(22 - 87)        | 19<br>(10 - 31)    | 34<br>(21 - 49)          | 29<br>(18 - 42)          | 29<br>(18 - 42)      |
| Unintentional injuries                          | 2,648<br>(2,089 - 3,328)  | 672<br>(379 - 1,105)   | 256<br>(162 - 374) | 887<br>(650 - 1,179)     | 460<br>(351 - 578)       | 373<br>(291 - 484)   |
| Falls                                           | 602<br>(442 - 813)        | 77<br>(33 - 145)       | 36<br>(18 - 63)    | 233<br>(146 - 348)       | 143<br>(96 - 213)        | 112<br>(69 - 199)    |
| Drowning                                        | 518<br>(331 - 882)        | 194<br>(82 - 420)      | 90<br>(44 - 163)   | 161<br>(100 - 264)       | 49<br>(30 - 84)          | 24<br>(15 - 37)      |
| Fire, heat, and hot substances                  | 256<br>(168 - 361)        | 71<br>(33 - 139)       | 20<br>(11 - 33)    | 83<br>(51 - 123)         | 43<br>(25 - 66)          | 38<br>(22 - 56)      |
| Poisonings                                      | 101<br>(65 - 155)         | 25<br>(9 - 55)         | 9<br>(5 - 16)      | 41<br>(25 - 66)          | 19<br>(12 - 30)          | 7<br>(4 - 12)        |
| Exposure to mechanical forces                   | 391<br>(292 - 526)        | 95<br>(47 - 172)       | 42<br>(24 - 68)    | 163<br>(113 - 232)       | 63<br>(43 - 87)          | 28<br>(21 - 38)      |
| Unintentional firearm injuries                  | 130<br>(87 - 181)         | 23<br>(8 - 54)         | 7<br>(3 - 13)      | 73<br>(44 - 115)         | 19<br>(11 - 30)          | 8<br>(4 - 12)        |
| Unintentional suffocation                       | 52<br>(26 - 139)          | 20<br>(5 - 72)         | 7<br>(3 - 16)      | 18<br>(9 - 43)           | 5<br>(2 - 14)            | 2<br>(1 - 6)         |
| Other exposure to mechanical forces             | 210<br>(147 - 283)        | 52<br>(23 - 98)        | 28<br>(13 - 49)    | 72<br>(48 - 103)         | 39<br>(25 - 58)          | 19<br>(12 - 27)      |
| Adverse effects of medical treatment            | 361<br>(234 - 496)        | 77<br>(36 - 147)       | 15<br>(8 - 27)     | 82<br>(45 - 127)         | 87<br>(47 - 137)         | 100<br>(53 - 170)    |
| Animal contact                                  | 67<br>(44 - 93)           | 14<br>(6 - 26)         | 8<br>(4 - 16)      | 16<br>(9 - 24)           | 13<br>(8 - 19)           | 16<br>(10 - 25)      |
| Venomous animal contact                         | 25<br>(16 - 38)           | 4<br>(2 - 9)           | 3<br>(1 - 6)       | 8<br>(4 - 13)            | 4<br>(2 - 7)             | 6<br>(3 - 12)        |
| Non-venomous animal contact                     | 42<br>(26 - 59)           | 10<br>(4 - 19)         | 6<br>(3 - 11)      | 8<br>(5 - 13)            | 9<br>(5 - 14)            | 10<br>(5 - 16)       |
| Foreign body                                    | 208<br>(115 - 324)        | 88<br>(43 - 158)       | 16<br>(9 - 26)     | 47<br>(22 - 75)          | 28<br>(16 - 43)          | 30<br>(16 - 48)      |
| Pulmonary aspiration and foreign body in airway | 195<br>(100 - 310)        | 83<br>(39 - 151)       | 14<br>(7 - 24)     | 45<br>(21 - 73)          | 24<br>(12 - 38)          | 29<br>(14 - 46)      |
| Foreign body in other body part                 | 13<br>(8 - 24)            | 4<br>(2 - 8)           | 2<br>(1 - 3)       | 2<br>(1 - 3)             | 4<br>(2 - 8)             | 2<br>(1 - 3)         |
| Other unintentional injuries                    | 144<br>(114 - 181)        | 32<br>(17 - 53)        | 20<br>(12 - 31)    | 61<br>(42 - 84)          | 15<br>(10 - 21)          | 17<br>(13 - 23)      |
| Self-harm and interpersonal violence            | 1,457<br>(1,065 - 2,153)  | 41<br>(17 - 89)        | 36<br>(18 - 65)    | 945<br>(650 - 1,414)     | 291<br>(199 - 477)       | 144<br>(90 - 245)    |
| Self-harm                                       | 917<br>(639 - 1,493)      | --                     | 18<br>(6 - 40)     | 538<br>(337 - 857)       | 229<br>(152 - 400)       | 132<br>(78 - 224)    |
| Interpersonal violence                          | 540<br>(348 - 886)        | 41<br>(17 - 89)        | 18<br>(8 - 33)     | 407<br>(246 - 647)       | 61<br>(36 - 118)         | 13<br>(6 - 28)       |
| Assault by firearm                              | 352<br>(214 - 606)        | 5<br>(2 - 15)          | 2<br>(0 - 4)       | 313<br>(184 - 527)       | 27<br>(13 - 57)          | 5<br>(2 - 12)        |
| Assault by sharp object                         | 79<br>(44 - 156)          | 15<br>(5 - 35)         | 7<br>(3 - 15)      | 31<br>(13 - 64)          | 24<br>(12 - 49)          | 3<br>(1 - 7)         |
| Assault by other means                          | 108<br>(57 - 201)         | 20<br>(9 - 44)         | 9<br>(5 - 18)      | 64<br>(26 - 121)         | 10<br>(5 - 21)           | 5<br>(2 - 11)        |
| Forces of nature, war, and legal intervention   | 0<br>(0 - 0)              | 0<br>(0 - 0)           | --                 | --                       | --                       | --                   |
| Exposure to forces of nature                    | 0<br>(0 - 0)              | 0<br>(0 - 0)           | --                 | --                       | --                       | --                   |

Web Table 31- Ghana deaths with 95% UI by age, sex, and cause in 2013

| Cause                                                             | Females, All Ages           | Females, 0-4 Years          | Females, 5-14 Years      | Females, 15-49 Years        | Females, 50-69 Years        | Females, 70-80 Years        |
|-------------------------------------------------------------------|-----------------------------|-----------------------------|--------------------------|-----------------------------|-----------------------------|-----------------------------|
| All causes                                                        | 88,961<br>(79,152 - 99,889) | 25,527<br>(21,601 - 30,259) | 2,929<br>(2,461 - 3,448) | 19,572<br>(16,668 - 21,792) | 16,921<br>(13,579 - 21,810) | 24,012<br>(21,203 - 27,828) |
| Communicable, maternal, neonatal, and nutritional diseases        | 45,474<br>(40,266 - 51,390) | 21,209<br>(17,566 - 25,497) | 1,790<br>(1,420 - 2,201) | 12,076<br>(10,363 - 14,108) | 4,503<br>(3,582 - 5,746)    | 5,897<br>(4,372 - 7,827)    |
| HIV/AIDS and tuberculosis                                         | 8,683<br>(6,453 - 11,694)   | 163<br>(107 - 259)          | 474<br>(370 - 597)       | 6,452<br>(4,616 - 9,153)    | 1,262<br>(871 - 1,763)      | 332<br>(224 - 470)          |
| Tuberculosis                                                      | 1,270<br>(945 - 1,681)      | 29<br>(14 - 51)             | 23<br>(14 - 34)          | 612<br>(418 - 829)          | 364<br>(244 - 559)          | 241<br>(158 - 353)          |
| HIV/AIDS                                                          | 7,413<br>(5,136 - 10,470)   | 135<br>(79 - 225)           | 451<br>(346 - 573)       | 5,840<br>(3,904 - 8,586)    | 897<br>(544 - 1,379)        | 90<br>(42 - 163)            |
| HIV/AIDS resulting in mycobacterial infection                     | 378<br>(247 - 572)          | 6<br>(3 - 11)               | 20<br>(15 - 27)          | 299<br>(192 - 471)          | 47<br>(27 - 75)             | 5<br>(2 - 9)                |
| HIV/AIDS resulting in other diseases                              | 7,035<br>(4,868 - 9,958)    | 128<br>(75 - 214)           | 431<br>(330 - 546)       | 5,541<br>(3,716 - 8,154)    | 850<br>(515 - 1,302)        | 85<br>(40 - 153)            |
| Diarrhea, lower respiratory, and other common infectious diseases | 12,265<br>(9,275 - 15,223)  | 4,906<br>(3,343 - 6,632)    | 593<br>(368 - 824)       | 1,697<br>(1,140 - 2,231)    | 1,739<br>(1,077 - 2,580)    | 3,330<br>(2,171 - 4,759)    |
| Diarrheal diseases                                                | 1,756<br>(1,138 - 2,788)    | 912<br>(362 - 1,883)        | 59<br>(27 - 116)         | 330<br>(213 - 481)          | 179<br>(98 - 315)           | 277<br>(150 - 496)          |
| Intestinal infectious diseases                                    | 512<br>(264 - 900)          | 165<br>(75 - 317)           | 134<br>(60 - 246)        | 171<br>(75 - 331)           | 27<br>(10 - 55)             | 13<br>(5 - 27)              |
| Typhoid fever                                                     | 346<br>(173 - 636)          | 106<br>(44 - 214)           | 92<br>(39 - 176)         | 118<br>(48 - 240)           | 20<br>(7 - 43)              | 10<br>(4 - 19)              |
| Paratyphoid fever                                                 | 151<br>(65 - 280)           | 52<br>(18 - 108)            | 41<br>(15 - 90)          | 49<br>(19 - 101)            | 6<br>(2 - 15)               | 3<br>(1 - 7)                |
| Other intestinal infectious diseases                              | 15<br>(6 - 27)              | 7<br>(2 - 16)               | 1<br>(0 - 5)             | 4<br>(1 - 10)               | 1<br>(0 - 5)                | 1<br>(0 - 6)                |
| Lower respiratory infections                                      | 7,546<br>(5,362 - 9,644)    | 2,767<br>(1,731 - 4,142)    | 183<br>(95 - 297)        | 596<br>(382 - 865)          | 1,259<br>(671 - 1,923)      | 2,742<br>(1,608 - 3,998)    |
| Upper respiratory infections                                      | 10<br>(4 - 21)              | 3<br>(0 - 11)               | 0<br>(0 - 2)             | 2<br>(0 - 6)                | 2<br>(0 - 6)                | 2<br>(0 - 9)                |
| Otitis media                                                      | 7<br>(5 - 10)               | 1<br>(0 - 1)                | 0<br>(0 - 0)             | 1<br>(1 - 1)                | 2<br>(1 - 3)                | 4<br>(2 - 5)                |
| Meningitis                                                        | 1,763<br>(1,222 - 2,299)    | 593<br>(318 - 994)          | 148<br>(63 - 244)        | 534<br>(309 - 786)          | 227<br>(128 - 368)          | 262<br>(160 - 417)          |
| Pneumococcal meningitis                                           | 468<br>(298 - 669)          | 128<br>(61 - 232)           | 43<br>(15 - 81)          | 164<br>(71 - 280)           | 62<br>(28 - 113)            | 70<br>(35 - 121)            |
| H influenzae type B meningitis                                    | 267<br>(155 - 414)          | 154<br>(73 - 281)           | 27<br>(8 - 52)           | 55<br>(28 - 98)             | 16<br>(6 - 32)              | 17<br>(7 - 31)              |
| Meningococcal meningitis                                          | 782<br>(536 - 1,071)        | 259<br>(125 - 442)          | 63<br>(26 - 111)         | 235<br>(130 - 387)          | 107<br>(51 - 193)           | 119<br>(64 - 207)           |
| Other meningitis                                                  | 245<br>(134 - 414)          | 53<br>(20 - 107)            | 15<br>(4 - 30)           | 80<br>(33 - 164)            | 42<br>(15 - 93)             | 56<br>(22 - 104)            |
| Encephalitis                                                      | 133<br>(89 - 186)           | 19<br>(11 - 34)             | 12<br>(7 - 20)           | 41<br>(23 - 65)             | 36<br>(19 - 59)             | 24<br>(14 - 37)             |
| Diphtheria                                                        | 5<br>(0 - 31)               | 4<br>(0 - 31)               | 1<br>(0 - 6)             | 0<br>(0 - 2)                | 0<br>(0 - 1)                | 0<br>-                      |
| Whooping cough                                                    | 60<br>(0 - 297)             | 56<br>(0 - 283)             | 3<br>(0 - 15)            | 1<br>(0 - 3)                | 0<br>(0 - 0)                | 0<br>-                      |
| Tetanus                                                           | 77<br>(28 - 131)            | 52<br>(15 - 105)            | 6<br>(1 - 11)            | 11<br>(5 - 18)              | 5<br>(2 - 11)               | 2<br>(1 - 5)                |
| Measles                                                           | 388<br>(152 - 809)          | 333<br>(128 - 704)          | 47<br>(18 - 101)         | 8<br>(4 - 18)               | 0<br>(0 - 0)                | 0<br>-                      |
| Varicella and herpes zoster                                       | 9<br>(3 - 24)               | 3<br>(0 - 10)               | 1<br>(0 - 3)             | 2<br>(0 - 6)                | 1<br>(0 - 3)                | 3<br>(0 - 16)               |
| Neglected tropical diseases and malaria                           | 8,734<br>(5,638 - 12,408)   | 5,347<br>(2,967 - 8,556)    | 499<br>(159 - 938)       | 919<br>(361 - 1,601)        | 750<br>(240 - 1,536)        | 1,218<br>(345 - 2,783)      |
| Malaria                                                           | 8,572<br>(5,486 - 12,246)   | 5,321<br>(2,934 - 8,531)    | 482<br>(141 - 925)       | 863<br>(307 - 1,550)        | 717<br>(204 - 1,507)        | 1,189<br>(315 - 2,746)      |
| Leishmaniasis                                                     | 0<br>(0 - 0)                | 0<br>(0 - 0)                | 0<br>(0 - 0)             | 0<br>(0 - 0)                | 0<br>(0 - 0)                | 0<br>(0 - 0)                |
| Visceral leishmaniasis                                            | 0<br>(0 - 0)                | 0<br>(0 - 0)                | 0<br>(0 - 0)             | 0<br>(0 - 0)                | 0<br>(0 - 0)                | 0<br>(0 - 0)                |
| Schistosomiasis                                                   | 43<br>(28 - 63)             | 1<br>(0 - 1)                | 1<br>(0 - 2)             | 16<br>(9 - 25)              | 16<br>(8 - 26)              | 11<br>(5 - 19)              |
| Cysticercosis                                                     | 4<br>(3 - 5)                | 0<br>(0 - 0)                | 0<br>(0 - 0)             | 2<br>(2 - 3)                | 1<br>(1 - 1)                | 0<br>(0 - 0)                |
| Cystic echinococcosis                                             | 4<br>(3 - 5)                | 1<br>(0 - 1)                | 1<br>(0 - 1)             | 2<br>(1 - 2)                | 1<br>(1 - 1)                | 0<br>(0 - 1)                |
| Dengue                                                            | 7<br>(4 - 16)               | 2<br>(1 - 4)                | 2<br>(1 - 3)             | 3<br>(1 - 6)                | 1<br>(0 - 2)                | 0<br>(0 - 1)                |
| Yellow fever                                                      | 3<br>(2 - 5)                | 0<br>(0 - 1)                | 1<br>(0 - 2)             | 2<br>(1 - 3)                | 0<br>(0 - 1)                | 0<br>(0 - 1)                |
| Rabies                                                            | 79<br>(41 - 108)            | 9<br>(4 - 19)               | 11<br>(5 - 20)           | 29<br>(17 - 42)             | 14<br>(6 - 24)              | 15<br>(6 - 28)              |
| Intestinal nematode infections                                    | 16<br>(5 - 32)              | 12<br>(3 - 28)              | 2<br>(0 - 8)             | 1<br>(0 - 6)                | 0<br>(0 - 4)                | 0<br>(0 - 4)                |
| Ascariasis                                                        | 16<br>(5 - 32)              | 12<br>(3 - 28)              | 2<br>(0 - 8)             | 1<br>(0 - 6)                | 0<br>(0 - 4)                | 0<br>(0 - 4)                |
| Other neglected tropical diseases                                 | 5<br>(4 - 8)                | 1<br>(1 - 2)                | 0<br>(0 - 1)             | 2<br>(1 - 3)                | 1<br>(0 - 1)                | 1<br>(1 - 2)                |

Web Table 31- Ghana deaths with 95% UI by age, sex, and cause in 2013

| Cause                                                            | Females, All Ages           | Females, 0-4 Years        | Females, 5-14 Years  | Females, 15-49 Years     | Females, 50-69 Years       | Females, 70-80 Years        |
|------------------------------------------------------------------|-----------------------------|---------------------------|----------------------|--------------------------|----------------------------|-----------------------------|
| Maternal disorders                                               | 2,343<br>(1,545 - 3,277)    | --                        | 12<br>(5 - 27)       | 2,330<br>(1,532 - 3,263) | --                         | --                          |
| Maternal hemorrhage                                              | 387<br>(234 - 609)          | --                        | 1<br>(0 - 3)         | 386<br>(233 - 608)       | --                         | --                          |
| Maternal sepsis and other maternal infections                    | 130<br>(72 - 210)           | --                        | 1<br>(0 - 2)         | 129<br>(71 - 209)        | --                         | --                          |
| Maternal hypertensive disorders                                  | 183<br>(98 - 283)           | --                        | 1<br>(0 - 2)         | 182<br>(98 - 282)        | --                         | --                          |
| Maternal obstructed labor                                        | 146<br>(85 - 235)           | --                        | 1<br>(0 - 1)         | 146<br>(84 - 233)        | --                         | --                          |
| Maternal abortive outcome                                        | 394<br>(248 - 578)          | --                        | 2<br>(1 - 5)         | 391<br>(247 - 573)       | --                         | --                          |
| Indirect maternal deaths                                         | 260<br>(153 - 384)          | --                        | 1<br>(0 - 2)         | 258<br>(153 - 382)       | --                         | --                          |
| Late maternal deaths                                             | 328<br>(185 - 522)          | --                        | 3<br>(1 - 7)         | 325<br>(184 - 518)       | --                         | --                          |
| Maternal deaths aggravated by HIV/AIDS                           | 10<br>(5 - 16)              | --                        | --                   | 10<br>(5 - 16)           | --                         | --                          |
| Other maternal disorders                                         | 501<br>(301 - 714)          | --                        | 3<br>(1 - 6)         | 499<br>(298 - 709)       | --                         | --                          |
| Neonatal disorders                                               | 8,113<br>(6,586 - 10,270)   | 8,113<br>(6,586 - 10,270) | --                   | --                       | --                         | --                          |
| Neonatal preterm birth complications                             | 2,646<br>(1,288 - 4,489)    | 2,646<br>(1,288 - 4,489)  | --                   | --                       | --                         | --                          |
| Neonatal encephalopathy due to birth asphyxia and trauma         | 2,099<br>(987 - 3,609)      | 2,099<br>(987 - 3,609)    | --                   | --                       | --                         | --                          |
| Neonatal sepsis and other neonatal infections                    | 2,691<br>(1,396 - 4,406)    | 2,691<br>(1,396 - 4,406)  | --                   | --                       | --                         | --                          |
| Hemolytic disease and other neonatal jaundice                    | 65<br>(17 - 197)            | 65<br>(17 - 197)          | --                   | --                       | --                         | --                          |
| Other neonatal disorders                                         | 613<br>(265 - 1,146)        | 613<br>(265 - 1,146)      | --                   | --                       | --                         | --                          |
| Nutritional deficiencies                                         | 4,655<br>(3,166 - 6,190)    | 2,469<br>(1,385 - 3,688)  | 186<br>(97 - 296)    | 544<br>(345 - 750)       | 579<br>(339 - 885)         | 876<br>(514 - 1,368)        |
| Protein-energy malnutrition                                      | 3,317<br>(2,022 - 4,664)    | 2,306<br>(1,285 - 3,475)  | 136<br>(66 - 231)    | 124<br>(46 - 233)        | 274<br>(124 - 490)         | 478<br>(204 - 844)          |
| Iodine deficiency                                                | 31<br>(2 - 112)             | 10<br>(0 - 77)            | 2<br>(0 - 17)        | 5<br>(0 - 24)            | 7<br>(0 - 42)              | 7<br>(0 - 45)               |
| Iron-deficiency anemia                                           | 1,267<br>(645 - 1,967)      | 147<br>(27 - 413)         | 47<br>(15 - 92)      | 411<br>(234 - 583)       | 274<br>(120 - 480)         | 387<br>(173 - 706)          |
| Other nutritional deficiencies                                   | 39<br>(15 - 76)             | 6<br>(1 - 18)             | 1<br>(0 - 2)         | 3<br>(1 - 6)             | 23<br>(8 - 49)             | 5<br>(2 - 12)               |
| Other communicable, maternal, neonatal, and nutritional diseases | 681<br>(472 - 946)          | 210<br>(70 - 419)         | 25<br>(10 - 47)      | 133<br>(91 - 178)        | 173<br>(112 - 270)         | 141<br>(86 - 250)           |
| Sexually transmitted diseases excluding HIV                      | 176<br>(27 - 380)           | 138<br>(0 - 323)          | 13<br>(1 - 30)       | 10<br>(6 - 18)           | 6<br>(2 - 15)              | 8<br>(3 - 19)               |
| Syphilis                                                         | 164<br>(16 - 369)           | 138<br>(0 - 323)          | 13<br>(0 - 30)       | 4<br>(2 - 7)             | 3<br>(1 - 8)               | 6<br>(2 - 14)               |
| Chlamydial infection                                             | 4<br>(2 - 6)                | --                        | 0<br>(0 - 0)         | 2<br>(1 - 4)             | 1<br>(0 - 2)               | 0<br>(0 - 1)                |
| Gonococcal infection                                             | 4<br>(3 - 7)                | --                        | 0<br>(0 - 0)         | 2<br>(1 - 4)             | 1<br>(0 - 3)               | 1<br>(0 - 2)                |
| Other sexually transmitted diseases                              | 3<br>(2 - 5)                | --                        | 0<br>(0 - 0)         | 2<br>(1 - 3)             | 1<br>(0 - 2)               | 0<br>(0 - 1)                |
| Hepatitis                                                        | 346<br>(254 - 469)          | 23<br>(12 - 38)           | 6<br>(3 - 9)         | 103<br>(69 - 144)        | 131<br>(85 - 201)          | 84<br>(52 - 134)            |
| Acute hepatitis A                                                | 15<br>(4 - 31)              | 6<br>(2 - 14)             | 1<br>(0 - 3)         | 4<br>(1 - 11)            | 2<br>(0 - 5)               | 0<br>(0 - 1)                |
| Acute hepatitis B                                                | 239<br>(163 - 345)          | 15<br>(7 - 27)            | 2<br>(1 - 4)         | 43<br>(20 - 74)          | 105<br>(64 - 171)          | 73<br>(45 - 119)            |
| Acute hepatitis C                                                | 15<br>(3 - 39)              | --                        | 0<br>(0 - 1)         | 4<br>(1 - 10)            | 7<br>(1 - 18)              | 4<br>(1 - 13)               |
| Acute hepatitis E                                                | 77<br>(41 - 129)            | 1<br>(0 - 2)              | 2<br>(1 - 3)         | 52<br>(29 - 84)          | 17<br>(5 - 39)             | 6<br>(1 - 17)               |
| Other infectious diseases                                        | 160<br>(91 - 293)           | 49<br>(18 - 120)          | 6<br>(2 - 15)        | 20<br>(12 - 33)          | 35<br>(13 - 86)            | 50<br>(16 - 138)            |
| Non-communicable diseases                                        | 38,468<br>(31,650 - 46,115) | 3,599<br>(2,042 - 5,645)  | 766<br>(500 - 1,212) | 5,959<br>(4,370 - 7,423) | 11,435<br>(8,617 - 15,013) | 16,709<br>(13,741 - 19,896) |
| Neoplasms                                                        | 5,097<br>(3,760 - 7,017)    | 42<br>(23 - 67)           | 85<br>(52 - 123)     | 1,359<br>(975 - 1,728)   | 2,296<br>(1,663 - 3,258)   | 1,316<br>(947 - 1,985)      |
| Esophageal cancer                                                | 70<br>(37 - 136)            | --                        | --                   | 9<br>(4 - 16)            | 35<br>(17 - 67)            | 26<br>(12 - 69)             |
| Stomach cancer                                                   | 401<br>(279 - 598)          | --                        | --                   | 68<br>(43 - 103)         | 214<br>(140 - 331)         | 119<br>(74 - 201)           |
| Liver cancer                                                     | 517<br>(351 - 755)          | --                        | 1<br>(0 - 1)         | 101<br>(65 - 149)        | 247<br>(155 - 394)         | 168<br>(102 - 266)          |
| Liver cancer due to hepatitis B                                  | 166<br>(60 - 308)           | --                        | 0<br>(0 - 1)         | 39<br>(19 - 65)          | 83<br>(24 - 168)           | 44<br>(14 - 93)             |
| Liver cancer due to hepatitis C                                  | 193<br>(103 - 303)          | --                        | 0<br>(0 - 0)         | 27<br>(13 - 48)          | 90<br>(38 - 156)           | 75<br>(40 - 124)            |

Web Table 31- Ghana deaths with 95% UI by age, sex, and cause in 2013

| Cause                                | Females, All Ages           | Females, 0-4 Years | Females, 5-14 Years | Females, 15-49 Years     | Females, 50-69 Years     | Females, 70-80 Years       |
|--------------------------------------|-----------------------------|--------------------|---------------------|--------------------------|--------------------------|----------------------------|
| Liver cancer due to alcohol use      | 49<br>(21 - 92)             | --                 | --                  | 5<br>(2 - 11)            | 23<br>(9 - 49)           | 21<br>(8 - 41)             |
| Liver cancer due to other causes     | 109<br>(55 - 198)           | --                 | 0<br>(0 - 1)        | 30<br>(15 - 52)          | 51<br>(21 - 106)         | 28<br>(12 - 53)            |
| Larynx cancer                        | 3<br>(1 - 5)                | --                 | --                  | 1<br>(0 - 2)             | 2<br>(1 - 3)             | 0<br>(0 - 1)               |
| Tracheal, bronchus and lung cancer   | 186<br>(131 - 300)          | --                 | --                  | 21<br>(14 - 32)          | 85<br>(57 - 138)         | 79<br>(52 - 136)           |
| Breast cancer                        | 661<br>(471 - 892)          | --                 | --                  | 315<br>(215 - 415)       | 262<br>(182 - 392)       | 84<br>(58 - 140)           |
| Cervical cancer                      | 1,381<br>(908 - 1,966)      | --                 | --                  | 391<br>(247 - 557)       | 706<br>(445 - 1,094)     | 283<br>(165 - 464)         |
| Uterine cancer                       | 187<br>(123 - 317)          | --                 | --                  | 29<br>(17 - 48)          | 106<br>(65 - 178)        | 52<br>(29 - 106)           |
| Prostate cancer                      | --                          | --                 | --                  | --                       | --                       | --                         |
| Colon and rectum cancer              | 295<br>(218 - 400)          | --                 | --                  | 67<br>(49 - 87)          | 86<br>(60 - 125)         | 142<br>(95 - 210)          |
| Lip and oral cavity cancer           | 26<br>(14 - 49)             | --                 | --                  | 9<br>(5 - 14)            | 13<br>(5 - 28)           | 5<br>(2 - 9)               |
| Nasopharynx cancer                   | 7<br>(5 - 11)               | --                 | 0<br>(0 - 1)        | 2<br>(1 - 4)             | 3<br>(1 - 5)             | 2<br>(1 - 3)               |
| Other pharynx cancer                 | 6<br>(4 - 9)                | --                 | --                  | 2<br>(1 - 3)             | 3<br>(2 - 5)             | 2<br>(1 - 3)               |
| Gallbladder and biliary tract cancer | 102<br>(67 - 163)           | --                 | --                  | 17<br>(11 - 25)          | 55<br>(33 - 88)          | 30<br>(17 - 54)            |
| Pancreatic cancer                    | 255<br>(186 - 363)          | --                 | --                  | 24<br>(17 - 32)          | 136<br>(92 - 195)        | 95<br>(65 - 143)           |
| Malignant skin melanoma              | 13<br>(9 - 18)              | --                 | --                  | 3<br>(2 - 5)             | 7<br>(4 - 10)            | 2<br>(2 - 4)               |
| Non-melanoma skin cancer             | 13<br>(8 - 23)              | --                 | --                  | 3<br>(2 - 5)             | 2<br>(1 - 3)             | 9<br>(4 - 17)              |
| Ovarian cancer                       | 191<br>(130 - 285)          | --                 | --                  | 42<br>(28 - 61)          | 113<br>(72 - 176)        | 35<br>(22 - 58)            |
| Testicular cancer                    | --                          | --                 | --                  | --                       | --                       | --                         |
| Kidney cancer                        | 27<br>(18 - 39)             | 4<br>(1 - 9)       | 3<br>(1 - 5)        | 8<br>(5 - 12)            | 9<br>(5 - 17)            | 3<br>(2 - 5)               |
| Bladder cancer                       | 82<br>(54 - 145)            | --                 | --                  | 14<br>(8 - 23)           | 31<br>(18 - 55)          | 37<br>(20 - 75)            |
| Brain and nervous system cancer      | 66<br>(47 - 88)             | 2<br>(1 - 5)       | 3<br>(2 - 5)        | 43<br>(28 - 59)          | 14<br>(9 - 22)           | 4<br>(3 - 9)               |
| Thyroid cancer                       | 20<br>(13 - 32)             | --                 | 0<br>(0 - 0)        | 1<br>(1 - 2)             | 13<br>(7 - 22)           | 6<br>(4 - 10)              |
| Mesothelioma                         | 5<br>(4 - 8)                | --                 | --                  | 2<br>(1 - 3)             | 3<br>(2 - 5)             | 1<br>(0 - 1)               |
| Hodgkin lymphoma                     | 19<br>(13 - 29)             | 2<br>(1 - 3)       | 2<br>(1 - 5)        | 6<br>(4 - 10)            | 2<br>(1 - 4)             | 7<br>(3 - 14)              |
| Non-Hodgkin lymphoma                 | 162<br>(102 - 291)          | 11<br>(5 - 22)     | 29<br>(13 - 55)     | 64<br>(38 - 106)         | 47<br>(25 - 102)         | 11<br>(6 - 28)             |
| Multiple myeloma                     | 35<br>(16 - 65)             | --                 | --                  | 6<br>(4 - 9)             | 19<br>(8 - 37)           | 10<br>(4 - 22)             |
| Leukemia                             | 52<br>(37 - 68)             | 1<br>(1 - 3)       | 10<br>(6 - 16)      | 23<br>(15 - 31)          | 8<br>(5 - 12)            | 10<br>(6 - 16)             |
| Other neoplasms                      | 317<br>(206 - 530)          | 21<br>(10 - 39)    | 36<br>(19 - 59)     | 86<br>(53 - 133)         | 80<br>(47 - 145)         | 93<br>(48 - 191)           |
| Cardiovascular diseases              | 18,245<br>(11,729 - 23,571) | 267<br>(152 - 427) | 82<br>(47 - 132)    | 1,964<br>(1,187 - 2,775) | 5,751<br>(3,473 - 8,015) | 10,182<br>(6,781 - 12,956) |
| Rheumatic heart disease              | 88<br>(56 - 127)            | 3<br>(1 - 7)       | 4<br>(2 - 8)        | 19<br>(11 - 30)          | 18<br>(9 - 29)           | 45<br>(27 - 67)            |
| Ischemic heart disease               | 4,784<br>(2,941 - 6,418)    | 11<br>(4 - 25)     | 9<br>(4 - 20)       | 456<br>(250 - 756)       | 1,515<br>(876 - 2,175)   | 2,793<br>(1,761 - 3,674)   |
| Cerebrovascular disease              | 8,776<br>(4,863 - 11,727)   | 59<br>(31 - 101)   | 22<br>(10 - 37)     | 799<br>(407 - 1,146)     | 2,655<br>(1,344 - 3,883) | 5,241<br>(2,976 - 6,914)   |
| Ischemic stroke                      | 6,341<br>(3,364 - 8,582)    | 12<br>(5 - 26)     | 2<br>(1 - 5)        | 142<br>(57 - 228)        | 1,720<br>(817 - 2,573)   | 4,465<br>(2,446 - 5,962)   |
| Hemorrhagic stroke                   | 2,435<br>(1,380 - 3,305)    | 47<br>(25 - 80)    | 19<br>(9 - 33)      | 658<br>(341 - 939)       | 934<br>(492 - 1,377)     | 776<br>(459 - 1,083)       |
| Hypertensive heart disease           | 1,912<br>(1,273 - 2,882)    | 5<br>(1 - 14)      | 2<br>(1 - 3)        | 187<br>(112 - 297)       | 611<br>(366 - 964)       | 1,106<br>(706 - 1,710)     |
| Cardiomyopathy and myocarditis       | 923<br>(515 - 1,293)        | 67<br>(33 - 124)   | 18<br>(10 - 33)     | 205<br>(115 - 321)       | 199<br>(97 - 303)        | 434<br>(225 - 680)         |
| Atrial fibrillation and flutter      | 1<br>(1 - 2)                | --                 | --                  | 0<br>(0 - 0)             | 0<br>(0 - 0)             | 1<br>(0 - 1)               |
| Aortic aneurysm                      | 148<br>(83 - 261)           | --                 | --                  | 23<br>(12 - 44)          | 53<br>(26 - 103)         | 72<br>(40 - 126)           |
| Peripheral vascular disease          | 9<br>(5 - 13)               | --                 | --                  | 1<br>(0 - 1)             | 6<br>(3 - 9)             | 3<br>(2 - 4)               |
| Endocarditis                         | 180<br>(88 - 294)           | 45<br>(20 - 87)    | 6<br>(2 - 10)       | 48<br>(23 - 79)          | 26<br>(12 - 47)          | 56<br>(26 - 99)            |

Web Table 31- Ghana deaths with 95% UI by age, sex, and cause in 2013

| Cause                                               | Females, All Ages        | Females, 0-4 Years | Females, 5-14 Years | Females, 15-49 Years | Females, 50-69 Years | Females, 70-80 Years |
|-----------------------------------------------------|--------------------------|--------------------|---------------------|----------------------|----------------------|----------------------|
| Other cardiovascular and circulatory diseases       | 1,424<br>(879 - 1,993)   | 76<br>(40 - 138)   | 21<br>(11 - 37)     | 226<br>(130 - 341)   | 668<br>(381 - 990)   | 432<br>(274 - 698)   |
| Chronic respiratory diseases                        | 1,736<br>(1,339 - 2,489) | 50<br>(25 - 81)    | 15<br>(10 - 21)     | 195<br>(138 - 252)   | 494<br>(349 - 720)   | 983<br>(716 - 1,576) |
| Chronic obstructive pulmonary disease               | 980<br>(696 - 1,471)     | 25<br>(12 - 44)    | 8<br>(5 - 12)       | 55<br>(33 - 79)      | 303<br>(203 - 461)   | 588<br>(396 - 949)   |
| Pneumoconiosis                                      | 4<br>(3 - 6)             | 0<br>(0 - 1)       | 0<br>(0 - 1)        | 2<br>(1 - 2)         | 1<br>(1 - 2)         | 0<br>(0 - 1)         |
| Silicosis                                           | 0<br>(0 - 1)             | 0<br>(0 - 0)       | 0<br>(0 - 0)        | 0<br>(0 - 0)         | 0<br>(0 - 0)         | 0<br>(0 - 0)         |
| Asbestosis                                          | 0<br>(0 - 1)             | 0<br>(0 - 0)       | 0<br>(0 - 0)        | 0<br>(0 - 0)         | 0<br>(0 - 0)         | 0<br>(0 - 0)         |
| Coal workers pneumoconiosis                         | 0<br>(0 - 1)             | 0<br>(0 - 0)       | 0<br>(0 - 0)        | 0<br>(0 - 0)         | 0<br>(0 - 0)         | 0<br>(0 - 0)         |
| Other pneumoconiosis                                | 3<br>(2 - 4)             | 0<br>(0 - 0)       | 0<br>(0 - 0)        | 1<br>(1 - 2)         | 1<br>(1 - 2)         | 0<br>(0 - 1)         |
| Asthma                                              | 436<br>(268 - 630)       | 17<br>(7 - 32)     | 4<br>(2 - 6)        | 82<br>(49 - 114)     | 134<br>(73 - 214)    | 199<br>(108 - 332)   |
| Interstitial lung disease and pulmonary sarcoidosis | 178<br>(91 - 401)        | 0<br>(0 - 1)       | 0<br>(0 - 1)        | 12<br>(6 - 24)       | 33<br>(16 - 72)      | 132<br>(59 - 307)    |
| Other chronic respiratory diseases                  | 138<br>(91 - 207)        | 7<br>(3 - 12)      | 2<br>(1 - 3)        | 45<br>(29 - 63)      | 22<br>(12 - 37)      | 63<br>(35 - 114)     |
| Cirrhosis                                           | 1,396<br>(1,055 - 1,868) | 37<br>(14 - 71)    | 16<br>(10 - 24)     | 353<br>(255 - 467)   | 545<br>(378 - 800)   | 446<br>(300 - 683)   |
| Cirrhosis due to hepatitis B                        | 380<br>(145 - 628)       | 2<br>(0 - 5)       | 3<br>(1 - 8)        | 115<br>(43 - 204)    | 149<br>(54 - 267)    | 110<br>(36 - 204)    |
| Cirrhosis due to hepatitis C                        | 491<br>(192 - 920)       | 1<br>(0 - 4)       | 1<br>(0 - 5)        | 97<br>(20 - 208)     | 214<br>(82 - 419)    | 178<br>(77 - 337)    |
| Cirrhosis due to alcohol use                        | 312<br>(173 - 529)       | --                 | --                  | 57<br>(28 - 108)     | 126<br>(65 - 230)    | 129<br>(64 - 237)    |
| Cirrhosis due to other causes                       | 213<br>(128 - 325)       | 34<br>(13 - 67)    | 12<br>(6 - 19)      | 83<br>(43 - 138)     | 55<br>(24 - 99)      | 29<br>(12 - 55)      |
| Digestive diseases                                  | 1,629<br>(1,206 - 2,257) | 58<br>(30 - 100)   | 43<br>(27 - 63)     | 324<br>(221 - 430)   | 481<br>(324 - 719)   | 723<br>(496 - 1,081) |
| Peptic ulcer disease                                | 266<br>(170 - 405)       | 5<br>(2 - 10)      | 6<br>(3 - 11)       | 51<br>(30 - 80)      | 70<br>(39 - 115)     | 135<br>(76 - 227)    |
| Gastritis and duodenitis                            | 78<br>(29 - 206)         | 3<br>(1 - 7)       | 2<br>(1 - 5)        | 16<br>(7 - 33)       | 17<br>(5 - 48)       | 39<br>(11 - 135)     |
| Appendicitis                                        | 145<br>(72 - 230)        | 8<br>(3 - 19)      | 6<br>(3 - 12)       | 37<br>(21 - 57)      | 32<br>(14 - 59)      | 61<br>(24 - 114)     |
| Paralytic ileus and intestinal obstruction          | 518<br>(335 - 822)       | 20<br>(7 - 41)     | 14<br>(7 - 23)      | 84<br>(46 - 129)     | 175<br>(100 - 296)   | 224<br>(127 - 401)   |
| Inguinal, femoral, and abdominal hernia             | 19<br>(10 - 31)          | 1<br>(0 - 2)       | 0<br>(0 - 1)        | 4<br>(2 - 7)         | 5<br>(2 - 9)         | 9<br>(5 - 18)        |
| Inflammatory bowel disease                          | 99<br>(57 - 199)         | 8<br>(3 - 18)      | 2<br>(1 - 4)        | 29<br>(16 - 54)      | 23<br>(12 - 49)      | 36<br>(17 - 84)      |
| Vascular intestinal disorders                       | 5<br>(1 - 14)            | 0<br>(0 - 0)       | 0<br>(0 - 0)        | 2<br>(1 - 8)         | 1<br>(0 - 4)         | 1<br>(0 - 3)         |
| Gallbladder and biliary diseases                    | 154<br>(98 - 239)        | 4<br>(1 - 8)       | 5<br>(3 - 8)        | 26<br>(15 - 38)      | 48<br>(25 - 83)      | 72<br>(39 - 130)     |
| Pancreatitis                                        | 137<br>(81 - 226)        | 2<br>(1 - 3)       | 2<br>(1 - 3)        | 19<br>(10 - 31)      | 62<br>(34 - 112)     | 53<br>(27 - 95)      |
| Other digestive diseases                            | 209<br>(140 - 323)       | 8<br>(3 - 17)      | 5<br>(3 - 9)        | 55<br>(35 - 81)      | 47<br>(27 - 80)      | 93<br>(50 - 166)     |
| Neurological disorders                              | 1,053<br>(799 - 1,361)   | 58<br>(29 - 113)   | 22<br>(12 - 40)     | 144<br>(89 - 219)    | 88<br>(62 - 126)     | 741<br>(525 - 1,017) |
| Alzheimer disease and other dementias               | 728<br>(518 - 992)       | --                 | --                  | 0<br>(0 - 1)         | 46<br>(31 - 68)      | 681<br>(474 - 942)   |
| Parkinson disease                                   | 2<br>(1 - 6)             | --                 | --                  | 1<br>(0 - 1)         | 1<br>(0 - 1)         | 1<br>(0 - 3)         |
| Epilepsy                                            | 250<br>(163 - 367)       | 46<br>(20 - 100)   | 18<br>(8 - 34)      | 125<br>(73 - 197)    | 18<br>(9 - 32)       | 43<br>(21 - 79)      |
| Multiple sclerosis                                  | 2<br>(1 - 11)            | --                 | --                  | 1<br>(0 - 5)         | 1<br>(0 - 4)         | 0<br>(0 - 2)         |
| Other neurological disorders                        | 70<br>(54 - 100)         | 12<br>(7 - 19)     | 4<br>(3 - 7)        | 16<br>(11 - 24)      | 22<br>(15 - 32)      | 16<br>(11 - 24)      |
| Mental and substance use disorders                  | 307<br>(218 - 448)       | 8<br>(3 - 14)      | 0<br>(0 - 0)        | 150<br>(100 - 220)   | 104<br>(70 - 168)    | 45<br>(30 - 69)      |
| Schizophrenia                                       | 5<br>(3 - 9)             | --                 | --                  | 2<br>(2 - 4)         | 2<br>(1 - 4)         | 1<br>(0 - 1)         |
| Alcohol use disorders                               | 128<br>(54 - 243)        | --                 | --                  | 75<br>(29 - 132)     | 44<br>(20 - 93)      | 8<br>(4 - 18)        |
| Drug use disorders                                  | 174<br>(123 - 236)       | 8<br>(3 - 14)      | --                  | 71<br>(47 - 99)      | 58<br>(37 - 87)      | 37<br>(23 - 57)      |
| Opioid use disorders                                | 17<br>(12 - 23)          | 1<br>(0 - 2)       | --                  | 7<br>(5 - 10)        | 5<br>(3 - 8)         | 4<br>(2 - 6)         |
| Cocaine use disorders                               | 1<br>(1 - 1)             | 0<br>(0 - 0)       | --                  | 0<br>(0 - 1)         | 0<br>(0 - 0)         | 0<br>(0 - 0)         |
| Amphetamine use disorders                           | 1<br>(1 - 1)             | 0<br>(0 - 0)       | --                  | 0<br>(0 - 0)         | 0<br>(0 - 0)         | 0<br>(0 - 0)         |

Web Table 31- Ghana deaths with 95% UI by age, sex, and cause in 2013

| Cause                                               | Females, All Ages        | Females, 0-4 Years     | Females, 5-14 Years | Females, 15-49 Years   | Females, 50-69 Years     | Females, 70-80 Years     |
|-----------------------------------------------------|--------------------------|------------------------|---------------------|------------------------|--------------------------|--------------------------|
| Other drug use disorders                            | 155<br>(110 - 211)       | 7<br>(3 - 12)          | --                  | 63<br>(42 - 88)        | 53<br>(34 - 79)          | 32<br>(20 - 51)          |
| Eating disorders                                    | 1<br>(1 - 2)             | --                     | 0<br>(0 - 0)        | 1<br>(1 - 2)           | --                       | --                       |
| Anorexia nervosa                                    | 1<br>(1 - 2)             | --                     | 0<br>(0 - 0)        | 1<br>(1 - 2)           | --                       | --                       |
| Diabetes, urogenital, blood, and endocrine diseases | 6,247<br>(4,591 - 9,512) | 1,240<br>(589 - 2,766) | 393<br>(199 - 842)  | 1,137<br>(776 - 1,606) | 1,460<br>(1,043 - 2,092) | 2,017<br>(1,490 - 2,880) |
| Diabetes mellitus                                   | 2,450<br>(1,849 - 3,380) | 10<br>(5 - 18)         | 11<br>(5 - 19)      | 250<br>(175 - 327)     | 870<br>(606 - 1,244)     | 1,309<br>(930 - 1,866)   |
| Acute glomerulonephritis                            | 11<br>(7 - 21)           | 0<br>(0 - 1)           | 1<br>(0 - 1)        | 5<br>(3 - 8)           | 4<br>(2 - 10)            | 1<br>(0 - 2)             |
| Chronic kidney disease                              | 677<br>(505 - 993)       | 44<br>(24 - 71)        | 21<br>(13 - 32)     | 203<br>(140 - 281)     | 192<br>(126 - 297)       | 217<br>(140 - 409)       |
| Chronic kidney disease due to diabetes mellitus     | 12<br>(6 - 25)           | 0<br>(0 - 0)           | 1<br>(0 - 1)        | 1<br>(0 - 1)           | 10<br>(4 - 23)           | 0<br>(0 - 1)             |
| Chronic kidney disease due to hypertension          | 345<br>(232 - 532)       | 6<br>(3 - 13)          | 3<br>(1 - 5)        | 87<br>(53 - 129)       | 114<br>(70 - 178)        | 136<br>(86 - 249)        |
| Chronic kidney disease due to glomerulonephritis    | 141<br>(98 - 210)        | 23<br>(12 - 36)        | 7<br>(4 - 11)       | 69<br>(42 - 104)       | 23<br>(11 - 41)          | 20<br>(7 - 46)           |
| Chronic kidney disease due to other causes          | 179<br>(101 - 304)       | 15<br>(6 - 29)         | 11<br>(6 - 20)      | 46<br>(24 - 81)        | 46<br>(19 - 98)          | 61<br>(24 - 140)         |
| Urinary diseases and male infertility               | 517<br>(366 - 793)       | 47<br>(23 - 98)        | 12<br>(6 - 21)      | 114<br>(73 - 166)      | 157<br>(96 - 271)        | 187<br>(109 - 334)       |
| Interstitial nephritis and urinary tract infections | 462<br>(329 - 710)       | 46<br>(22 - 95)        | 10<br>(5 - 19)      | 104<br>(67 - 150)      | 132<br>(79 - 229)        | 170<br>(100 - 306)       |
| Urolithiasis                                        | 5<br>(2 - 12)            | --                     | 0<br>(0 - 1)        | 1<br>(0 - 1)           | 3<br>(1 - 8)             | 1<br>(0 - 3)             |
| Other urinary diseases                              | 50<br>(29 - 90)          | 2<br>(1 - 4)           | 1<br>(0 - 2)        | 9<br>(4 - 19)          | 23<br>(11 - 46)          | 15<br>(7 - 32)           |
| Gynecological diseases                              | 6<br>(4 - 14)            | --                     | --                  | 3<br>(2 - 6)           | 2<br>(1 - 5)             | 1<br>(0 - 4)             |
| Uterine fibroids                                    | 1<br>(1 - 3)             | --                     | --                  | 1<br>(0 - 1)           | 0<br>(0 - 1)             | 0<br>(0 - 1)             |
| Polycystic ovarian syndrome                         | 0<br>(0 - 0)             | --                     | --                  | 0<br>(0 - 0)           | 0<br>(0 - 0)             | --                       |
| Endometriosis                                       | 1<br>(0 - 1)             | --                     | --                  | 1<br>(0 - 1)           | 0<br>(0 - 0)             | --                       |
| Genital prolapse                                    | 1<br>(1 - 3)             | --                     | --                  | 0<br>(0 - 1)           | 0<br>(0 - 1)             | 0<br>(0 - 1)             |
| Other gynecological diseases                        | 3<br>(2 - 7)             | --                     | --                  | 2<br>(1 - 3)           | 1<br>(0 - 3)             | 1<br>(0 - 2)             |
| Hemoglobinopathies and hemolytic anemias            | 1,938<br>(909 - 4,113)   | 1,027<br>(407 - 2,550) | 334<br>(138 - 785)  | 444<br>(229 - 831)     | 92<br>(49 - 155)         | 41<br>(17 - 74)          |
| Thalassemias                                        | 2<br>(1 - 5)             | 2<br>(1 - 4)           | 0<br>(0 - 1)        | 0<br>(0 - 1)           | 0<br>(0 - 0)             | 0<br>(0 - 0)             |
| Sickle cell disorders                               | 1,883<br>(875 - 4,011)   | 1,006<br>(397 - 2,491) | 332<br>(137 - 781)  | 440<br>(227 - 824)     | 88<br>(47 - 148)         | 17<br>(6 - 33)           |
| G6PD deficiency                                     | 7<br>(3 - 15)            | 4<br>(1 - 10)          | 1<br>(0 - 2)        | 1<br>(1 - 2)           | 0<br>(0 - 1)             | 1<br>(0 - 1)             |
| Other hemoglobinopathies and hemolytic anemias      | 46<br>(25 - 77)          | 16<br>(6 - 46)         | 1<br>(0 - 2)        | 2<br>(1 - 4)           | 4<br>(2 - 6)             | 23<br>(10 - 44)          |
| Endocrine, metabolic, blood, and immune disorders   | 647<br>(454 - 995)       | 112<br>(60 - 191)      | 16<br>(7 - 30)      | 117<br>(73 - 181)      | 142<br>(83 - 244)        | 261<br>(154 - 449)       |
| Musculoskeletal disorders                           | 157<br>(105 - 243)       | --                     | 11<br>(6 - 16)      | 52<br>(34 - 74)        | 48<br>(30 - 79)          | 47<br>(26 - 89)          |
| Rheumatoid arthritis                                | 20<br>(11 - 37)          | --                     | 1<br>(0 - 2)        | 3<br>(1 - 4)           | 3<br>(1 - 5)             | 13<br>(6 - 28)           |
| Other musculoskeletal disorders                     | 137<br>(92 - 211)        | --                     | 10<br>(6 - 15)      | 49<br>(32 - 71)        | 45<br>(28 - 74)          | 33<br>(18 - 64)          |
| Other non-communicable diseases                     | 2,600<br>(1,519 - 4,211) | 1,840<br>(822 - 3,368) | 99<br>(49 - 188)    | 281<br>(176 - 402)     | 170<br>(111 - 268)       | 210<br>(132 - 331)       |
| Congenital anomalies                                | 1,950<br>(885 - 3,595)   | 1,725<br>(724 - 3,267) | 89<br>(38 - 178)    | 92<br>(45 - 172)       | 22<br>(14 - 34)          | 22<br>(14 - 34)          |
| Neural tube defects                                 | 242<br>(43 - 711)        | 227<br>(36 - 687)      | 7<br>(1 - 19)       | 6<br>(2 - 17)          | 1<br>(0 - 1)             | 0<br>(0 - 1)             |
| Congenital heart anomalies                          | 842<br>(381 - 1,663)     | 747<br>(313 - 1,513)   | 38<br>(15 - 80)     | 37<br>(16 - 78)        | 10<br>(6 - 18)           | 10<br>(6 - 17)           |
| Cleft lip and cleft palate                          | 5<br>(0 - 15)            | 5<br>(0 - 15)          | --                  | --                     | --                       | --                       |
| Down syndrome                                       | 371<br>(118 - 850)       | 317<br>(89 - 749)      | 23<br>(8 - 55)      | 24<br>(11 - 50)        | 5<br>(2 - 10)            | 1<br>(0 - 3)             |
| Chromosomal unbalanced rearrangements               | 86<br>(23 - 198)         | 77<br>(19 - 185)       | 3<br>(1 - 6)        | 5<br>(2 - 11)          | 0<br>(0 - 1)             | 1<br>(0 - 1)             |
| Other congenital anomalies                          | 406<br>(136 - 1,296)     | 352<br>(100 - 1,184)   | 18<br>(6 - 54)      | 19<br>(8 - 48)         | 6<br>(3 - 10)            | 10<br>(6 - 17)           |
| Skin and subcutaneous diseases                      | 621<br>(419 - 868)       | 86<br>(41 - 162)       | 11<br>(6 - 19)      | 190<br>(100 - 297)     | 147<br>(92 - 238)        | 188<br>(114 - 305)       |
| Cellulitis                                          | 108<br>(48 - 174)        | 8<br>(3 - 22)          | 2<br>(1 - 4)        | 27<br>(10 - 46)        | 19<br>(7 - 36)           | 51<br>(19 - 100)         |



Web Table 31- Ghana deaths with 95% UI by age, sex, and cause in 2013

| Cause                                           | Females, All Ages        | Females, 0-4 Years   | Females, 5-14 Years | Females, 15-49 Years     | Females, 50-69 Years | Females, 70-80 Years     |
|-------------------------------------------------|--------------------------|----------------------|---------------------|--------------------------|----------------------|--------------------------|
| Pyoderma                                        | 459<br>(297 - 684)       | 68<br>(32 - 131)     | 7<br>(3 - 12)       | 136<br>(72 - 218)        | 124<br>(74 - 209)    | 125<br>(66 - 227)        |
| Decubitus ulcer                                 | 14<br>(8 - 24)           | 1<br>(0 - 1)         | 1<br>(0 - 2)        | 6<br>(2 - 10)            | 2<br>(1 - 4)         | 5<br>(2 - 12)            |
| Other skin and subcutaneous diseases            | 40<br>(20 - 75)          | 9<br>(3 - 22)        | 1<br>(0 - 2)        | 21<br>(9 - 39)           | 2<br>(1 - 7)         | 7<br>(2 - 25)            |
| Sudden infant death syndrome                    | 29<br>(5 - 88)           | 29<br>(5 - 88)       | --                  | --                       | --                   | --                       |
| Injuries                                        | 5,020<br>(3,967 - 6,340) | 718<br>(468 - 1,072) | 374<br>(259 - 530)  | 1,538<br>(1,096 - 1,997) | 984<br>(709 - 1,418) | 1,406<br>(1,030 - 2,056) |
| Transport injuries                              | 2,056<br>(1,554 - 2,686) | 220<br>(117 - 384)   | 177<br>(107 - 276)  | 853<br>(586 - 1,172)     | 468<br>(317 - 716)   | 338<br>(223 - 552)       |
| Road injuries                                   | 1,925<br>(1,455 - 2,528) | 195<br>(102 - 340)   | 165<br>(101 - 258)  | 823<br>(564 - 1,128)     | 435<br>(294 - 665)   | 307<br>(201 - 513)       |
| Pedestrian road injuries                        | 706<br>(508 - 981)       | 69<br>(32 - 127)     | 67<br>(37 - 111)    | 236<br>(144 - 345)       | 186<br>(117 - 307)   | 149<br>(92 - 275)        |
| Cyclist road injuries                           | 92<br>(64 - 131)         | 13<br>(4 - 27)       | 12<br>(6 - 21)      | 22<br>(12 - 33)          | 35<br>(21 - 57)      | 11<br>(6 - 18)           |
| Motorcyclist road injuries                      | 79<br>(48 - 121)         | 5<br>(2 - 10)        | 3<br>(1 - 6)        | 51<br>(29 - 83)          | 13<br>(7 - 21)       | 7<br>(4 - 14)            |
| Motor vehicle road injuries                     | 1,027<br>(738 - 1,394)   | 104<br>(53 - 187)    | 81<br>(46 - 128)    | 510<br>(339 - 710)       | 196<br>(128 - 308)   | 136<br>(83 - 232)        |
| Other road injuries                             | 21<br>(10 - 37)          | 4<br>(1 - 10)        | 3<br>(1 - 6)        | 4<br>(2 - 8)             | 5<br>(2 - 11)        | 4<br>(2 - 9)             |
| Other transport injuries                        | 131<br>(91 - 181)        | 26<br>(13 - 48)      | 11<br>(5 - 21)      | 30<br>(18 - 45)          | 33<br>(20 - 54)      | 31<br>(18 - 51)          |
| Unintentional injuries                          | 2,362<br>(1,892 - 3,005) | 464<br>(300 - 707)   | 175<br>(118 - 251)  | 423<br>(302 - 547)       | 382<br>(277 - 541)   | 918<br>(649 - 1,359)     |
| Falls                                           | 689<br>(468 - 1,058)     | 53<br>(28 - 101)     | 26<br>(14 - 44)     | 84<br>(52 - 119)         | 71<br>(45 - 114)     | 455<br>(269 - 790)       |
| Drowning                                        | 272<br>(179 - 453)       | 106<br>(51 - 220)    | 49<br>(24 - 83)     | 62<br>(36 - 102)         | 31<br>(18 - 59)      | 24<br>(13 - 50)          |
| Fire, heat, and hot substances                  | 236<br>(156 - 329)       | 65<br>(32 - 131)     | 19<br>(10 - 32)     | 55<br>(33 - 83)          | 37<br>(23 - 59)      | 59<br>(35 - 94)          |
| Poisonings                                      | 56<br>(31 - 85)          | 18<br>(7 - 41)       | 5<br>(2 - 10)       | 14<br>(8 - 22)           | 11<br>(7 - 18)       | 7<br>(4 - 12)            |
| Exposure to mechanical forces                   | 230<br>(169 - 311)       | 63<br>(35 - 109)     | 23<br>(13 - 38)     | 52<br>(36 - 74)          | 49<br>(32 - 74)      | 43<br>(29 - 66)          |
| Unintentional firearm injuries                  | 60<br>(43 - 85)          | 9<br>(4 - 18)        | 4<br>(2 - 7)        | 24<br>(14 - 37)          | 14<br>(8 - 24)       | 10<br>(6 - 18)           |
| Unintentional suffocation                       | 18<br>(8 - 52)           | 11<br>(3 - 34)       | 3<br>(1 - 7)        | 1<br>(1 - 3)             | 2<br>(1 - 6)         | 2<br>(1 - 6)             |
| Other exposure to mechanical forces             | 152<br>(106 - 206)       | 44<br>(21 - 80)      | 17<br>(8 - 31)      | 27<br>(17 - 41)          | 33<br>(20 - 53)      | 31<br>(20 - 50)          |
| Adverse effects of medical treatment            | 425<br>(264 - 606)       | 52<br>(24 - 102)     | 13<br>(7 - 23)      | 78<br>(45 - 119)         | 108<br>(60 - 183)    | 174<br>(92 - 302)        |
| Animal contact                                  | 99<br>(48 - 189)         | 12<br>(5 - 27)       | 9<br>(3 - 20)       | 32<br>(13 - 60)          | 21<br>(9 - 41)       | 24<br>(11 - 54)          |
| Venomous animal contact                         | 41<br>(17 - 82)          | 8<br>(3 - 19)        | 5<br>(2 - 12)       | 15<br>(5 - 31)           | 7<br>(3 - 16)        | 6<br>(2 - 15)            |
| Non-venomous animal contact                     | 57<br>(25 - 114)         | 4<br>(1 - 10)        | 4<br>(1 - 10)       | 16<br>(6 - 31)           | 14<br>(5 - 28)       | 19<br>(8 - 42)           |
| Foreign body                                    | 245<br>(145 - 400)       | 75<br>(37 - 132)     | 18<br>(10 - 35)     | 20<br>(11 - 33)          | 34<br>(18 - 55)      | 97<br>(54 - 167)         |
| Pulmonary aspiration and foreign body in airway | 236<br>(137 - 391)       | 74<br>(36 - 131)     | 18<br>(9 - 34)      | 19<br>(10 - 31)          | 32<br>(17 - 53)      | 93<br>(51 - 164)         |
| Foreign body in other body part                 | 9<br>(5 - 15)            | 1<br>(1 - 2)         | 1<br>(0 - 1)        | 1<br>(1 - 2)             | 2<br>(1 - 4)         | 4<br>(2 - 7)             |
| Other unintentional injuries                    | 110<br>(78 - 165)        | 20<br>(10 - 35)      | 13<br>(7 - 23)      | 25<br>(16 - 40)          | 19<br>(11 - 31)      | 34<br>(20 - 56)          |
| Self-harm and interpersonal violence            | 602<br>(428 - 896)       | 34<br>(15 - 69)      | 22<br>(13 - 36)     | 262<br>(172 - 376)       | 134<br>(80 - 238)    | 150<br>(87 - 265)        |
| Self-harm                                       | 405<br>(276 - 646)       | --                   | 5<br>(2 - 11)       | 150<br>(95 - 224)        | 114<br>(66 - 203)    | 136<br>(75 - 239)        |
| Interpersonal violence                          | 197<br>(131 - 310)       | 34<br>(15 - 69)      | 17<br>(9 - 29)      | 113<br>(65 - 180)        | 20<br>(11 - 40)      | 14<br>(6 - 35)           |
| Assault by firearm                              | 54<br>(30 - 98)          | 10<br>(4 - 23)       | 5<br>(2 - 10)       | 27<br>(12 - 49)          | 9<br>(4 - 20)        | 3<br>(1 - 8)             |
| Assault by sharp object                         | 70<br>(41 - 125)         | 8<br>(3 - 19)        | 4<br>(2 - 7)        | 51<br>(27 - 88)          | 3<br>(1 - 7)         | 5<br>(2 - 13)            |
| Assault by other means                          | 73<br>(46 - 118)         | 15<br>(7 - 31)       | 8<br>(4 - 16)       | 35<br>(18 - 57)          | 8<br>(4 - 16)        | 6<br>(3 - 16)            |
| Forces of nature, war, and legal intervention   | 0<br>(0 - 0)             | 0<br>(0 - 0)         | --                  | --                       | --                   | --                       |
| Exposure to forces of nature                    | 0<br>(0 - 0)             | 0<br>(0 - 0)         | --                  | --                       | --                   | --                       |

Web Table 31- Greece deaths with 95% UI by age, sex, and cause in 2013

| Cause                                                             | Both Sexes, All Ages           | Both Sexes, 0-4 Years | Both Sexes, 5-14 Years | Both Sexes, 15-49 Years  | Both Sexes, 50-69 Years     | Both Sexes, 70-80 Years        |
|-------------------------------------------------------------------|--------------------------------|-----------------------|------------------------|--------------------------|-----------------------------|--------------------------------|
| All causes                                                        | 135,953<br>(131,842 - 140,465) | 442<br>(389 - 504)    | 117<br>(108 - 126)     | 5,278<br>(4,970 - 5,623) | 18,447<br>(17,501 - 19,450) | 111,669<br>(108,839 - 115,016) |
| Communicable, maternal, neonatal, and nutritional diseases        | 4,731<br>(4,027 - 5,567)       | 196<br>(167 - 227)    | 10<br>(8 - 13)         | 146<br>(130 - 164)       | 340<br>(298 - 383)          | 4,039<br>(3,359 - 4,874)       |
| HIV/AIDS and tuberculosis                                         | 248<br>(167 - 296)             | 0<br>(0 - 0)          | 0<br>(0 - 0)           | 20<br>(16 - 26)          | 29<br>(24 - 34)             | 199<br>(115 - 247)             |
| Tuberculosis                                                      | 234<br>(150 - 283)             | 0<br>(0 - 0)          | 0<br>(0 - 0)           | 11<br>(9 - 12)           | 25<br>(21 - 30)             | 199<br>(114 - 246)             |
| HIV/AIDS                                                          | 14<br>(9 - 20)                 | 0<br>(0 - 0)          | 0<br>(0 - 0)           | 9<br>(5 - 15)            | 4<br>(2 - 7)                | 1<br>(0 - 1)                   |
| HIV/AIDS resulting in mycobacterial infection                     | 1<br>(0 - 1)                   | 0<br>(0 - 0)          | 0<br>(0 - 0)           | 0<br>(0 - 1)             | 0<br>(0 - 0)                | 0<br>(0 - 0)                   |
| HIV/AIDS resulting in other diseases                              | 13<br>(9 - 19)                 | 0<br>(0 - 0)          | 0<br>(0 - 0)           | 9<br>(5 - 14)            | 4<br>(2 - 6)                | 1<br>(0 - 1)                   |
| Diarrhea, lower respiratory, and other common infectious diseases | 3,876<br>(3,173 - 4,724)       | 24<br>(17 - 30)       | 8<br>(6 - 12)          | 86<br>(69 - 102)         | 255<br>(213 - 296)          | 3,503<br>(2,820 - 4,345)       |
| Diarrheal diseases                                                | 24<br>(17 - 33)                | 1<br>(0 - 1)          | 0<br>(0 - 0)           | 1<br>(1 - 1)             | 2<br>(2 - 3)                | 21<br>(14 - 30)                |
| Intestinal infectious diseases                                    | 14<br>(5 - 33)                 | 2<br>(1 - 5)          | 2<br>(1 - 6)           | 6<br>(2 - 14)            | 2<br>(1 - 5)                | 2<br>(1 - 5)                   |
| Typhoid fever                                                     | 11<br>(3 - 25)                 | 1<br>(0 - 3)          | 2<br>(1 - 4)           | 4<br>(1 - 11)            | 1<br>(0 - 4)                | 1<br>(0 - 3)                   |
| Paratyphoid fever                                                 | 3<br>(1 - 6)                   | 1<br>(0 - 1)          | 1<br>(0 - 1)           | 1<br>(0 - 3)             | 0<br>(0 - 1)                | 0<br>(0 - 1)                   |
| Other intestinal infectious diseases                              | 1<br>(0 - 4)                   | 0<br>(0 - 2)          | 0<br>(0 - 1)           | 0<br>(0 - 3)             | 0<br>(0 - 2)                | 0<br>(0 - 2)                   |
| Lower respiratory infections                                      | 3,731<br>(3,036 - 4,567)       | 16<br>(12 - 21)       | 4<br>(3 - 5)           | 64<br>(49 - 76)          | 231<br>(192 - 272)          | 3,416<br>(2,733 - 4,243)       |
| Upper respiratory infections                                      | 3<br>(1 - 8)                   | 0<br>(0 - 0)          | 0<br>(0 - 0)           | 0<br>(0 - 0)             | 0<br>(0 - 1)                | 2<br>(0 - 8)                   |
| Otitis media                                                      | 1<br>(1 - 1)                   | 0<br>(0 - 0)          | 0<br>(0 - 0)           | 0<br>(0 - 1)             | 0<br>(0 - 0)                | 0<br>(0 - 0)                   |
| Meningitis                                                        | 68<br>(49 - 78)                | 3<br>(2 - 4)          | 1<br>(1 - 1)           | 9<br>(7 - 11)            | 13<br>(9 - 16)              | 41<br>(29 - 50)                |
| Pneumococcal meningitis                                           | 12<br>(8 - 17)                 | 0<br>(0 - 1)          | 0<br>(0 - 0)           | 2<br>(1 - 2)             | 2<br>(1 - 3)                | 8<br>(4 - 12)                  |
| H influenzae type B meningitis                                    | 6<br>(4 - 8)                   | 1<br>(0 - 1)          | 0<br>(0 - 0)           | 1<br>(0 - 1)             | 1<br>(1 - 2)                | 3<br>(2 - 5)                   |
| Meningococcal meningitis                                          | 26<br>(19 - 32)                | 1<br>(1 - 2)          | 0<br>(0 - 1)           | 3<br>(3 - 5)             | 5<br>(4 - 7)                | 15<br>(11 - 21)                |
| Other meningitis                                                  | 24<br>(16 - 29)                | 1<br>(0 - 1)          | 0<br>(0 - 0)           | 3<br>(2 - 4)             | 5<br>(3 - 7)                | 14<br>(9 - 20)                 |
| Encephalitis                                                      | 20<br>(15 - 26)                | 1<br>(1 - 1)          | 0<br>(0 - 1)           | 4<br>(3 - 5)             | 4<br>(3 - 5)                | 10<br>(7 - 15)                 |
| Diphtheria                                                        | 0<br>(0 - 0)                   | 0<br>(0 - 0)          | 0<br>(0 - 0)           | 0<br>(0 - 0)             | 0<br>(0 - 0)                | --                             |
| Whooping cough                                                    | 1<br>(1 - 1)                   | 0<br>(0 - 0)          | 0<br>(0 - 0)           | 1<br>(0 - 1)             | 0<br>(0 - 0)                | --                             |
| Tetanus                                                           | 3<br>(2 - 4)                   | 0<br>(0 - 0)          | 0<br>(0 - 0)           | 1<br>(0 - 1)             | 1<br>(0 - 1)                | 1<br>(1 - 2)                   |
| Measles                                                           | 0<br>(0 - 0)                   | 0<br>(0 - 0)          | 0<br>(0 - 0)           | 0<br>(0 - 0)             | 0<br>(0 - 0)                | --                             |
| Varicella and herpes zoster                                       | 10<br>(3 - 33)                 | 0<br>(0 - 1)          | 0<br>(0 - 0)           | 1<br>(0 - 2)             | 1<br>(0 - 2)                | 8<br>(1 - 31)                  |
| Neglected tropical diseases and malaria                           | 19<br>(16 - 21)                | 0<br>(0 - 1)          | 0<br>(0 - 1)           | 4<br>(4 - 5)             | 5<br>(4 - 6)                | 9<br>(7 - 10)                  |
| Leishmaniasis                                                     | 4<br>(3 - 6)                   | 0<br>(0 - 0)          | 0<br>(0 - 0)           | 1<br>(1 - 2)             | 1<br>(1 - 2)                | 1<br>(1 - 2)                   |
| Visceral leishmaniasis                                            | 4<br>(3 - 6)                   | 0<br>(0 - 0)          | 0<br>(0 - 0)           | 1<br>(1 - 2)             | 1<br>(1 - 2)                | 1<br>(1 - 2)                   |
| Cysticercosis                                                     | 0<br>(0 - 0)                   | 0<br>(0 - 0)          | 0<br>(0 - 0)           | 0<br>(0 - 0)             | 0<br>(0 - 0)                | 0<br>(0 - 0)                   |
| Cystic echinococcosis                                             | 9<br>(8 - 9)                   | 0<br>(0 - 0)          | 0<br>(0 - 0)           | 2<br>(1 - 2)             | 2<br>(2 - 2)                | 5<br>(4 - 5)                   |
| Dengue                                                            | 1<br>(1 - 2)                   | 0<br>(0 - 0)          | 0<br>(0 - 0)           | 1<br>(0 - 1)             | 0<br>(0 - 0)                | 0<br>(0 - 1)                   |
| Rabies                                                            | 1<br>(0 - 1)                   | 0<br>(0 - 0)          | 0<br>(0 - 0)           | 0<br>(0 - 1)             | 0<br>(0 - 0)                | 0<br>(0 - 0)                   |
| Other neglected tropical diseases                                 | 4<br>(2 - 4)                   | 0<br>(0 - 0)          | 0<br>(0 - 0)           | 1<br>(0 - 1)             | 1<br>(0 - 1)                | 2<br>(1 - 3)                   |
| Maternal disorders                                                | 10<br>(8 - 12)                 | --                    | 0<br>(0 - 0)           | 10<br>(8 - 12)           | --                          | --                             |
| Maternal hemorrhage                                               | 1<br>(1 - 2)                   | --                    | 0<br>(0 - 0)           | 1<br>(1 - 2)             | --                          | --                             |
| Maternal sepsis and other maternal infections                     | 1<br>(1 - 1)                   | --                    | 0<br>(0 - 0)           | 1<br>(1 - 1)             | --                          | --                             |
| Maternal hypertensive disorders                                   | 1<br>(1 - 2)                   | --                    | 0<br>(0 - 0)           | 1<br>(1 - 2)             | --                          | --                             |
| Maternal obstructed labor                                         | 1<br>(1 - 1)                   | --                    | 0<br>(0 - 0)           | 1<br>(1 - 1)             | --                          | --                             |

Web Table 31- Greece deaths with 95% UI by age, sex, and cause in 2013

| Cause                                                            | Both Sexes, All Ages           | Both Sexes, 0-4 Years | Both Sexes, 5-14 Years | Both Sexes, 15-49 Years  | Both Sexes, 50-69 Years     | Both Sexes, 70-80 Years        |
|------------------------------------------------------------------|--------------------------------|-----------------------|------------------------|--------------------------|-----------------------------|--------------------------------|
| Maternal abortive outcome                                        | 2<br>(1 - 3)                   | --                    | 0<br>(0 - 0)           | 2<br>(1 - 3)             | --                          | --                             |
| Indirect maternal deaths                                         | 1<br>(1 - 2)                   | --                    | 0<br>(0 - 0)           | 1<br>(1 - 2)             | --                          | --                             |
| Late maternal deaths                                             | 1<br>(0 - 1)                   | --                    | 0<br>(0 - 0)           | 1<br>(0 - 1)             | --                          | --                             |
| Maternal deaths aggravated by HIV/AIDS                           | 0<br>(0 - 0)                   | --                    | --                     | 0<br>(0 - 0)             | --                          | --                             |
| Other maternal disorders                                         | 2<br>(1 - 3)                   | --                    | 0<br>(0 - 0)           | 2<br>(1 - 3)             | --                          | --                             |
| Neonatal disorders                                               | 169<br>(144 - 199)             | 169<br>(144 - 199)    | --                     | --                       | --                          | --                             |
| Neonatal preterm birth complications                             | 137<br>(113 - 165)             | 137<br>(113 - 165)    | --                     | --                       | --                          | --                             |
| Neonatal encephalopathy due to birth asphyxia and trauma         | 27<br>(18 - 40)                | 27<br>(18 - 40)       | --                     | --                       | --                          | --                             |
| Neonatal sepsis and other neonatal infections                    | 3<br>(0 - 9)                   | 3<br>(0 - 9)          | --                     | --                       | --                          | --                             |
| Hemolytic disease and other neonatal jaundice                    | 0<br>(0 - 1)                   | 0<br>(0 - 1)          | --                     | --                       | --                          | --                             |
| Other neonatal disorders                                         | 2<br>(1 - 3)                   | 2<br>(1 - 3)          | --                     | --                       | --                          | --                             |
| Nutritional deficiencies                                         | 202<br>(157 - 308)             | 1<br>(0 - 1)          | 0<br>(0 - 1)           | 8<br>(7 - 13)            | 13<br>(10 - 20)             | 179<br>(136 - 277)             |
| Protein-energy malnutrition                                      | 3<br>(1 - 8)                   | 0<br>(0 - 0)          | 0<br>(0 - 0)           | 1<br>(0 - 1)             | 0<br>(0 - 1)                | 2<br>(0 - 6)                   |
| Iodine deficiency                                                | 1<br>(0 - 4)                   | 0<br>(0 - 0)          | 0<br>(0 - 0)           | 0<br>(0 - 0)             | 0<br>(0 - 1)                | 1<br>(0 - 4)                   |
| Iron-deficiency anemia                                           | 194<br>(151 - 294)             | 0<br>(0 - 0)          | 0<br>(0 - 0)           | 7<br>(6 - 11)            | 12<br>(10 - 19)             | 174<br>(133 - 269)             |
| Other nutritional deficiencies                                   | 5<br>(2 - 10)                  | 0<br>(0 - 0)          | 0<br>(0 - 0)           | 1<br>(0 - 1)             | 1<br>(0 - 1)                | 3<br>(1 - 7)                   |
| Other communicable, maternal, neonatal, and nutritional diseases | 208<br>(166 - 264)             | 2<br>(1 - 4)          | 1<br>(1 - 1)           | 18<br>(14 - 21)          | 38<br>(31 - 47)             | 149<br>(112 - 201)             |
| Sexually transmitted diseases excluding HIV                      | 5<br>(3 - 8)                   | 1<br>(0 - 3)          | 0<br>(0 - 0)           | 1<br>(0 - 1)             | 1<br>(1 - 1)                | 2<br>(1 - 4)                   |
| Syphilis                                                         | 4<br>(2 - 6)                   | 1<br>(0 - 3)          | 0<br>(0 - 0)           | 0<br>(0 - 0)             | 1<br>(0 - 1)                | 2<br>(1 - 3)                   |
| Chlamydial infection                                             | 0<br>(0 - 0)                   | --                    | 0<br>(0 - 0)           | 0<br>(0 - 0)             | 0<br>(0 - 0)                | 0<br>(0 - 0)                   |
| Gonococcal infection                                             | 1<br>(0 - 1)                   | --                    | 0<br>(0 - 0)           | 0<br>(0 - 0)             | 0<br>(0 - 0)                | 0<br>(0 - 0)                   |
| Other sexually transmitted diseases                              | 0<br>(0 - 0)                   | --                    | 0<br>(0 - 0)           | 0<br>(0 - 0)             | 0<br>(0 - 0)                | 0<br>(0 - 0)                   |
| Hepatitis                                                        | 162<br>(127 - 214)             | 1<br>(0 - 1)          | 1<br>(0 - 1)           | 13<br>(10 - 17)          | 29<br>(23 - 37)             | 119<br>(86 - 169)              |
| Acute hepatitis A                                                | 30<br>(9 - 62)                 | 0<br>(0 - 1)          | 0<br>(0 - 1)           | 5<br>(2 - 8)             | 6<br>(2 - 12)               | 19<br>(5 - 44)                 |
| Acute hepatitis B                                                | 124<br>(86 - 169)              | 0<br>(0 - 0)          | 0<br>(0 - 0)           | 8<br>(4 - 12)            | 22<br>(15 - 31)             | 94<br>(62 - 137)               |
| Acute hepatitis C                                                | 8<br>(1 - 22)                  | --                    | 0<br>(0 - 0)           | 0<br>(0 - 1)             | 1<br>(0 - 3)                | 7<br>(1 - 20)                  |
| Other infectious diseases                                        | 41<br>(26 - 51)                | 0<br>(0 - 1)          | 0<br>(0 - 0)           | 4<br>(3 - 5)             | 9<br>(6 - 11)               | 27<br>(16 - 36)                |
| Non-communicable diseases                                        | 126,803<br>(123,011 - 131,230) | 215<br>(187 - 249)    | 67<br>(61 - 74)        | 3,634<br>(3,413 - 3,872) | 17,202<br>(16,332 - 18,126) | 105,685<br>(102,851 - 109,041) |
| Neoplasms                                                        | 32,171<br>(29,805 - 34,060)    | 13<br>(9 - 17)        | 33<br>(29 - 38)        | 1,503<br>(1,397 - 1,623) | 8,389<br>(7,844 - 8,932)    | 22,232<br>(20,298 - 23,762)    |
| Esophageal cancer                                                | 258<br>(227 - 321)             | --                    | --                     | 13<br>(10 - 16)          | 77<br>(64 - 93)             | 168<br>(144 - 218)             |
| Stomach cancer                                                   | 2,130<br>(1,813 - 2,501)       | --                    | --                     | 79<br>(67 - 93)          | 405<br>(353 - 457)          | 1,646<br>(1,352 - 1,983)       |
| Liver cancer                                                     | 792<br>(514 - 1,334)           | --                    | 0<br>(0 - 0)           | 25<br>(17 - 40)          | 228<br>(149 - 373)          | 539<br>(329 - 952)             |
| Liver cancer due to hepatitis B                                  | 277<br>(144 - 479)             | --                    | 0<br>(0 - 0)           | 15<br>(10 - 26)          | 107<br>(55 - 194)           | 154<br>(74 - 281)              |
| Liver cancer due to hepatitis C                                  | 323<br>(185 - 583)             | --                    | 0<br>(0 - 0)           | 6<br>(3 - 12)            | 78<br>(44 - 143)            | 239<br>(134 - 445)             |
| Liver cancer due to alcohol use                                  | 159<br>(67 - 310)              | --                    | --                     | 2<br>(1 - 4)             | 34<br>(14 - 65)             | 123<br>(50 - 252)              |
| Liver cancer due to other causes                                 | 34<br>(14 - 86)                | --                    | 0<br>(0 - 0)           | 2<br>(1 - 3)             | 9<br>(4 - 19)               | 23<br>(9 - 64)                 |
| Larynx cancer                                                    | 399<br>(296 - 498)             | --                    | --                     | 16<br>(12 - 21)          | 135<br>(95 - 168)           | 248<br>(188 - 323)             |
| Tracheal, bronchus and lung cancer                               | 7,795<br>(7,122 - 8,397)       | --                    | --                     | 287<br>(248 - 327)       | 2,916<br>(2,623 - 3,184)    | 4,592<br>(4,142 - 5,056)       |
| Breast cancer                                                    | 2,560<br>(1,646 - 3,002)       | --                    | --                     | 217<br>(179 - 268)       | 713<br>(524 - 822)          | 1,630<br>(896 - 2,003)         |
| Cervical cancer                                                  | 457<br>(336 - 569)             | --                    | --                     | 56<br>(45 - 71)          | 110<br>(80 - 137)           | 290<br>(201 - 393)             |

Web Table 31- Greece deaths with 95% UI by age, sex, and cause in 2013

| Cause                                         | Both Sexes, All Ages        | Both Sexes, 0-4 Years | Both Sexes, 5-14 Years | Both Sexes, 15-49 Years  | Both Sexes, 50-69 Years  | Both Sexes, 70-80 Years     |
|-----------------------------------------------|-----------------------------|-----------------------|------------------------|--------------------------|--------------------------|-----------------------------|
| Uterine cancer                                | 233<br>(190 - 296)          | --                    | --                     | 6<br>(4 - 8)             | 59<br>(46 - 79)          | 168<br>(129 - 220)          |
| Prostate cancer                               | 2,198<br>(1,557 - 2,993)    | --                    | --                     | 4<br>(3 - 6)             | 190<br>(139 - 259)       | 2,005<br>(1,387 - 2,754)    |
| Colon and rectum cancer                       | 3,789<br>(3,395 - 4,235)    | --                    | --                     | 107<br>(95 - 120)        | 708<br>(647 - 769)       | 2,975<br>(2,618 - 3,417)    |
| Lip and oral cavity cancer                    | 251<br>(216 - 287)          | --                    | --                     | 18<br>(15 - 23)          | 69<br>(57 - 81)          | 164<br>(136 - 195)          |
| Nasopharynx cancer                            | 82<br>(61 - 102)            | --                    | 0<br>(0 - 0)           | 15<br>(11 - 21)          | 31<br>(22 - 40)          | 36<br>(24 - 50)             |
| Other pharynx cancer                          | 98<br>(74 - 115)            | --                    | --                     | 10<br>(8 - 13)           | 42<br>(31 - 53)          | 45<br>(34 - 57)             |
| Gallbladder and biliary tract cancer          | 530<br>(330 - 703)          | --                    | --                     | 8<br>(6 - 11)            | 93<br>(61 - 121)         | 429<br>(259 - 592)          |
| Pancreatic cancer                             | 2,112<br>(1,916 - 2,313)    | --                    | --                     | 69<br>(59 - 80)          | 555<br>(501 - 612)       | 1,489<br>(1,320 - 1,678)    |
| Malignant skin melanoma                       | 272<br>(171 - 364)          | --                    | --                     | 44<br>(27 - 60)          | 72<br>(43 - 95)          | 156<br>(95 - 212)           |
| Non-melanoma skin cancer                      | 246<br>(178 - 337)          | --                    | --                     | 7<br>(5 - 10)            | 23<br>(16 - 33)          | 216<br>(154 - 299)          |
| Ovarian cancer                                | 738<br>(557 - 887)          | --                    | --                     | 57<br>(46 - 70)          | 244<br>(196 - 288)       | 437<br>(276 - 564)          |
| Testicular cancer                             | 24<br>(16 - 31)             | --                    | --                     | 11<br>(7 - 15)           | 4<br>(2 - 5)             | 8<br>(5 - 12)               |
| Kidney cancer                                 | 633<br>(542 - 748)          | 0<br>(0 - 0)          | 0<br>(0 - 0)           | 26<br>(21 - 32)          | 205<br>(174 - 244)       | 402<br>(323 - 503)          |
| Bladder cancer                                | 1,561<br>(1,231 - 1,837)    | --                    | --                     | 15<br>(12 - 18)          | 246<br>(205 - 288)       | 1,300<br>(1,007 - 1,567)    |
| Brain and nervous system cancer               | 1,277<br>(987 - 1,486)      | 6<br>(3 - 8)          | 13<br>(10 - 17)        | 157<br>(131 - 187)       | 472<br>(395 - 565)       | 629<br>(420 - 784)          |
| Thyroid cancer                                | 147<br>(115 - 187)          | --                    | 0<br>(0 - 0)           | 5<br>(4 - 6)             | 26<br>(19 - 32)          | 116<br>(89 - 153)           |
| Mesothelioma                                  | 58<br>(45 - 91)             | --                    | --                     | 4<br>(3 - 6)             | 20<br>(15 - 31)          | 34<br>(24 - 57)             |
| Hodgkin lymphoma                              | 259<br>(135 - 314)          | 0<br>(0 - 0)          | 1<br>(0 - 1)           | 33<br>(20 - 40)          | 64<br>(38 - 79)          | 161<br>(73 - 208)           |
| Non-Hodgkin lymphoma                          | 463<br>(281 - 582)          | 1<br>(0 - 1)          | 2<br>(1 - 3)           | 35<br>(24 - 47)          | 109<br>(72 - 141)        | 316<br>(179 - 422)          |
| Multiple myeloma                              | 315<br>(218 - 458)          | --                    | --                     | 9<br>(6 - 13)            | 83<br>(57 - 126)         | 222<br>(146 - 325)          |
| Leukemia                                      | 1,468<br>(1,274 - 1,668)    | 4<br>(3 - 6)          | 12<br>(10 - 15)        | 86<br>(75 - 97)          | 250<br>(217 - 284)       | 1,116<br>(940 - 1,315)      |
| Other neoplasms                               | 1,025<br>(874 - 1,348)      | 2<br>(1 - 3)          | 5<br>(3 - 6)           | 82<br>(69 - 99)          | 239<br>(205 - 300)       | 697<br>(574 - 975)          |
| Cardiovascular diseases                       | 64,489<br>(61,004 - 68,645) | 2<br>(1 - 2)          | 4<br>(3 - 5)           | 1,373<br>(1,266 - 1,494) | 6,434<br>(5,962 - 6,998) | 56,676<br>(53,406 - 60,362) |
| Rheumatic heart disease                       | 50<br>(36 - 98)             | 0<br>(0 - 0)          | 0<br>(0 - 0)           | 4<br>(3 - 9)             | 10<br>(7 - 21)           | 35<br>(24 - 70)             |
| Ischemic heart disease                        | 35,146<br>(31,610 - 38,430) | 0<br>(0 - 0)          | 1<br>(1 - 1)           | 997<br>(900 - 1,092)     | 4,360<br>(3,965 - 4,768) | 29,788<br>(26,410 - 32,655) |
| Cerebrovascular disease                       | 22,211<br>(19,590 - 27,058) | 1<br>(1 - 1)          | 2<br>(2 - 3)           | 231<br>(194 - 279)       | 1,376<br>(1,165 - 1,692) | 20,601<br>(18,094 - 25,105) |
| Ischemic stroke                               | 13,667<br>(11,514 - 17,393) | 0<br>(0 - 0)          | 0<br>(0 - 0)           | 21<br>(16 - 29)          | 425<br>(318 - 580)       | 13,221<br>(11,152 - 16,774) |
| Hemorrhagic stroke                            | 8,544<br>(6,997 - 11,030)   | 1<br>(0 - 1)          | 2<br>(2 - 3)           | 210<br>(175 - 257)       | 951<br>(794 - 1,169)     | 7,380<br>(5,886 - 9,736)    |
| Hypertensive heart disease                    | 1,976<br>(1,024 - 2,859)    | 0<br>(0 - 0)          | 0<br>(0 - 0)           | 9<br>(7 - 12)            | 97<br>(57 - 136)         | 1,870<br>(947 - 2,735)      |
| Cardiomyopathy and myocarditis                | 940<br>(694 - 1,629)        | 0<br>(0 - 1)          | 0<br>(0 - 1)           | 30<br>(23 - 45)          | 121<br>(91 - 196)        | 789<br>(566 - 1,392)        |
| Atrial fibrillation and flutter               | 1,299<br>(918 - 1,799)      | --                    | --                     | 6<br>(5 - 8)             | 60<br>(46 - 79)          | 1,233<br>(859 - 1,719)      |
| Aortic aneurysm                               | 990<br>(790 - 1,175)        | --                    | --                     | 47<br>(39 - 61)          | 222<br>(182 - 266)       | 722<br>(559 - 871)          |
| Peripheral vascular disease                   | 38<br>(28 - 53)             | --                    | --                     | 0<br>(0 - 0)             | 3<br>(2 - 4)             | 35<br>(25 - 50)             |
| Endocarditis                                  | 176<br>(105 - 241)          | 0<br>(0 - 0)          | 0<br>(0 - 0)           | 10<br>(7 - 13)           | 27<br>(17 - 37)          | 138<br>(80 - 194)           |
| Other cardiovascular and circulatory diseases | 1,662<br>(1,273 - 2,113)    | 0<br>(0 - 0)          | 0<br>(0 - 1)           | 39<br>(30 - 50)          | 158<br>(125 - 200)       | 1,465<br>(1,087 - 1,913)    |
| Chronic respiratory diseases                  | 9,175<br>(6,197 - 10,433)   | 1<br>(1 - 1)          | 1<br>(0 - 1)           | 71<br>(44 - 84)          | 654<br>(361 - 760)       | 8,448<br>(5,728 - 9,656)    |
| Chronic obstructive pulmonary disease         | 8,080<br>(5,239 - 9,314)    | 0<br>(0 - 1)          | 0<br>(0 - 0)           | 49<br>(29 - 60)          | 556<br>(310 - 649)       | 7,474<br>(4,842 - 8,692)    |
| Pneumoconiosis                                | 307<br>(185 - 518)          | 0<br>(0 - 0)          | 0<br>(0 - 0)           | 8<br>(5 - 12)            | 34<br>(19 - 56)          | 265<br>(155 - 460)          |
| Silicosis                                     | 2<br>(1 - 3)                | 0<br>(0 - 0)          | 0<br>(0 - 0)           | 1<br>(1 - 2)             | 0<br>(0 - 1)             | 0<br>(0 - 1)                |
| Asbestosis                                    | 112<br>(65 - 196)           | 0<br>(0 - 0)          | 0<br>(0 - 0)           | 3<br>(2 - 4)             | 12<br>(6 - 20)           | 98<br>(54 - 173)            |

Web Table 31- Greece deaths with 95% UI by age, sex, and cause in 2013

| Cause                                               | Both Sexes, All Ages       | Both Sexes, 0-4 Years | Both Sexes, 5-14 Years | Both Sexes, 15-49 Years | Both Sexes, 50-69 Years | Both Sexes, 70-80 Years    |
|-----------------------------------------------------|----------------------------|-----------------------|------------------------|-------------------------|-------------------------|----------------------------|
| Coal workers pneumoconiosis                         | 26<br>(15 - 48)            | 0<br>(0 - 0)          | 0<br>(0 - 0)           | 1<br>(0 - 1)            | 1<br>(0 - 1)            | 25<br>(13 - 46)            |
| Other pneumoconiosis                                | 167<br>(99 - 277)          | 0<br>(0 - 0)          | 0<br>(0 - 0)           | 4<br>(2 - 6)            | 21<br>(12 - 34)         | 143<br>(81 - 245)          |
| Asthma                                              | 43<br>(29 - 71)            | 0<br>(0 - 0)          | 0<br>(0 - 0)           | 3<br>(2 - 4)            | 7<br>(4 - 10)           | 34<br>(22 - 60)            |
| Interstitial lung disease and pulmonary sarcoidosis | 721<br>(457 - 1,126)       | 0<br>(0 - 0)          | 0<br>(0 - 0)           | 8<br>(4 - 11)           | 54<br>(20 - 86)         | 659<br>(425 - 1,062)       |
| Other chronic respiratory diseases                  | 23<br>(14 - 32)            | 0<br>(0 - 0)          | 0<br>(0 - 0)           | 3<br>(2 - 5)            | 4<br>(2 - 5)            | 15<br>(9 - 23)             |
| Cirrhosis                                           | 1,176<br>(1,080 - 1,280)   | 0<br>(0 - 0)          | 0<br>(0 - 0)           | 115<br>(100 - 132)      | 398<br>(356 - 442)      | 663<br>(588 - 749)         |
| Cirrhosis due to hepatitis B                        | 168<br>(104 - 258)         | 0<br>(0 - 0)          | 0<br>(0 - 0)           | 17<br>(8 - 31)          | 58<br>(31 - 100)        | 93<br>(54 - 135)           |
| Cirrhosis due to hepatitis C                        | 477<br>(324 - 729)         | 0<br>(0 - 0)          | 0<br>(0 - 0)           | 38<br>(21 - 67)         | 142<br>(86 - 243)       | 297<br>(198 - 433)         |
| Cirrhosis due to alcohol use                        | 399<br>(218 - 551)         | --                    | --                     | 34<br>(18 - 55)         | 145<br>(74 - 215)       | 220<br>(121 - 307)         |
| Cirrhosis due to other causes                       | 132<br>(68 - 203)          | 0<br>(0 - 0)          | 0<br>(0 - 0)           | 26<br>(11 - 41)         | 52<br>(26 - 85)         | 53<br>(28 - 85)            |
| Digestive diseases                                  | 2,525<br>(2,027 - 2,863)   | 1<br>(0 - 1)          | 1<br>(1 - 1)           | 63<br>(48 - 72)         | 253<br>(198 - 287)      | 2,207<br>(1,774 - 2,532)   |
| Peptic ulcer disease                                | 629<br>(389 - 871)         | 0<br>(0 - 0)          | 0<br>(0 - 0)           | 14<br>(9 - 20)          | 67<br>(42 - 92)         | 548<br>(333 - 770)         |
| Gastritis and duodenitis                            | 3<br>(2 - 5)               | 0<br>(0 - 0)          | 0<br>(0 - 0)           | 1<br>(0 - 1)            | 1<br>(0 - 1)            | 2<br>(1 - 3)               |
| Appendicitis                                        | 27<br>(14 - 47)            | 0<br>(0 - 0)          | 0<br>(0 - 0)           | 3<br>(2 - 4)            | 5<br>(3 - 8)            | 19<br>(9 - 37)             |
| Paralytic ileus and intestinal obstruction          | 594<br>(362 - 831)         | 0<br>(0 - 0)          | 0<br>(0 - 0)           | 9<br>(6 - 12)           | 42<br>(26 - 58)         | 543<br>(329 - 760)         |
| Inguinal, femoral, and abdominal hernia             | 29<br>(14 - 69)            | 0<br>(0 - 0)          | 0<br>(0 - 0)           | 1<br>(0 - 1)            | 4<br>(2 - 9)            | 24<br>(11 - 61)            |
| Inflammatory bowel disease                          | 46<br>(31 - 80)            | 0<br>(0 - 0)          | 0<br>(0 - 0)           | 2<br>(1 - 2)            | 4<br>(3 - 6)            | 41<br>(26 - 72)            |
| Vascular intestinal disorders                       | 335<br>(202 - 553)         | 0<br>(0 - 0)          | 0<br>(0 - 0)           | 5<br>(3 - 9)            | 30<br>(17 - 50)         | 300<br>(178 - 506)         |
| Gallbladder and biliary diseases                    | 312<br>(227 - 401)         | 0<br>(0 - 0)          | 0<br>(0 - 0)           | 4<br>(3 - 5)            | 23<br>(17 - 29)         | 284<br>(205 - 372)         |
| Pancreatitis                                        | 455<br>(330 - 609)         | 0<br>(0 - 0)          | 0<br>(0 - 0)           | 21<br>(15 - 27)         | 65<br>(46 - 83)         | 368<br>(261 - 507)         |
| Other digestive diseases                            | 94<br>(72 - 123)           | 0<br>(0 - 0)          | 0<br>(0 - 0)           | 3<br>(2 - 4)            | 13<br>(10 - 17)         | 78<br>(58 - 105)           |
| Neurological disorders                              | 10,935<br>(8,550 - 13,478) | 5<br>(4 - 7)          | 4<br>(3 - 5)           | 93<br>(78 - 108)        | 415<br>(332 - 493)      | 10,419<br>(8,009 - 13,001) |
| Alzheimer disease and other dementias               | 9,760<br>(7,351 - 12,301)  | --                    | --                     | 1<br>(0 - 2)            | 210<br>(143 - 284)      | 9,549<br>(7,132 - 12,133)  |
| Parkinson disease                                   | 588<br>(383 - 717)         | --                    | --                     | 1<br>(1 - 2)            | 36<br>(28 - 45)         | 550<br>(348 - 677)         |
| Epilepsy                                            | 86<br>(65 - 101)           | 1<br>(0 - 1)          | 1<br>(1 - 2)           | 27<br>(20 - 32)         | 19<br>(15 - 23)         | 38<br>(27 - 49)            |
| Multiple sclerosis                                  | 87<br>(48 - 112)           | --                    | --                     | 25<br>(14 - 34)         | 37<br>(19 - 49)         | 25<br>(12 - 35)            |
| Other neurological disorders                        | 415<br>(361 - 506)         | 5<br>(4 - 6)          | 3<br>(2 - 4)           | 38<br>(32 - 46)         | 112<br>(94 - 131)       | 257<br>(211 - 331)         |
| Mental and substance use disorders                  | 283<br>(165 - 330)         | 0<br>(0 - 0)          | 0<br>(0 - 0)           | 244<br>(128 - 287)      | 25<br>(19 - 32)         | 14<br>(11 - 19)            |
| Schizophrenia                                       | 2<br>(1 - 6)               | --                    | --                     | 1<br>(0 - 2)            | 1<br>(0 - 2)            | 1<br>(0 - 2)               |
| Alcohol use disorders                               | 30<br>(20 - 42)            | --                    | --                     | 7<br>(5 - 11)           | 15<br>(10 - 21)         | 8<br>(5 - 12)              |
| Drug use disorders                                  | 250<br>(129 - 293)         | 0<br>(0 - 0)          | --                     | 235<br>(119 - 278)      | 9<br>(5 - 12)           | 6<br>(4 - 7)               |
| Opioid use disorders                                | 94<br>(48 - 112)           | 0<br>(0 - 0)          | --                     | 89<br>(45 - 107)        | 3<br>(2 - 4)            | 2<br>(2 - 3)               |
| Cocaine use disorders                               | 7<br>(4 - 9)               | 0<br>(0 - 0)          | --                     | 7<br>(4 - 9)            | 0<br>(0 - 0)            | 0<br>(0 - 0)               |
| Amphetamine use disorders                           | 7<br>(4 - 8)               | 0<br>(0 - 0)          | --                     | 6<br>(3 - 8)            | 0<br>(0 - 0)            | 0<br>(0 - 0)               |
| Other drug use disorders                            | 142<br>(75 - 167)          | 0<br>(0 - 0)          | --                     | 133<br>(70 - 158)       | 6<br>(3 - 7)            | 3<br>(2 - 4)               |
| Eating disorders                                    | 1<br>(1 - 2)               | --                    | 0<br>(0 - 0)           | 1<br>(1 - 2)            | --                      | --                         |
| Anorexia nervosa                                    | 1<br>(1 - 2)               | --                    | 0<br>(0 - 0)           | 1<br>(1 - 2)            | --                      | --                         |
| Diabetes, urogenital, blood, and endocrine diseases | 5,550<br>(4,826 - 8,300)   | 5<br>(4 - 7)          | 5<br>(4 - 6)           | 137<br>(119 - 188)      | 597<br>(519 - 869)      | 4,806<br>(4,136 - 7,229)   |
| Diabetes mellitus                                   | 1,572<br>(1,380 - 1,870)   | 0<br>(0 - 0)          | 0<br>(0 - 0)           | 26<br>(22 - 31)         | 225<br>(197 - 269)      | 1,321<br>(1,139 - 1,579)   |
| Acute glomerulonephritis                            | 1<br>(1 - 2)               | 0<br>(0 - 0)          | 0<br>(0 - 0)           | 0<br>(0 - 1)            | 0<br>(0 - 0)            | 0<br>(0 - 1)               |

Web Table 31- Greece deaths with 95% UI by age, sex, and cause in 2013

| Cause                                               | Both Sexes, All Ages     | Both Sexes, 0-4 Years | Both Sexes, 5-14 Years | Both Sexes, 15-49 Years  | Both Sexes, 50-69 Years | Both Sexes, 70-80 Years  |
|-----------------------------------------------------|--------------------------|-----------------------|------------------------|--------------------------|-------------------------|--------------------------|
| Chronic kidney disease                              | 3,269<br>(2,644 - 5,826) | 0<br>(0 - 0)          | 1<br>(1 - 1)           | 63<br>(50 - 117)         | 280<br>(221 - 547)      | 2,925<br>(2,329 - 5,164) |
| Chronic kidney disease due to diabetes mellitus     | 413<br>(247 - 887)       | 0<br>(0 - 0)          | 0<br>(0 - 0)           | 10<br>(6 - 22)           | 38<br>(22 - 88)         | 364<br>(212 - 786)       |
| Chronic kidney disease due to hypertension          | 1,441<br>(1,103 - 2,170) | 0<br>(0 - 0)          | 0<br>(0 - 0)           | 17<br>(12 - 27)          | 108<br>(83 - 179)       | 1,316<br>(993 - 1,976)   |
| Chronic kidney disease due to glomerulonephritis    | 6<br>(3 - 11)            | 0<br>(0 - 0)          | 0<br>(0 - 0)           | 1<br>(1 - 2)             | 1<br>(1 - 2)            | 4<br>(2 - 8)             |
| Chronic kidney disease due to other causes          | 1,410<br>(937 - 3,269)   | 0<br>(0 - 0)          | 0<br>(0 - 1)           | 36<br>(24 - 76)          | 132<br>(87 - 311)       | 1,241<br>(801 - 2,893)   |
| Urinary diseases and male infertility               | 176<br>(120 - 349)       | 0<br>(0 - 0)          | 0<br>(0 - 0)           | 2<br>(2 - 4)             | 10<br>(8 - 17)          | 163<br>(109 - 328)       |
| Interstitial nephritis and urinary tract infections | 164<br>(111 - 329)       | 0<br>(0 - 0)          | 0<br>(0 - 0)           | 1<br>(1 - 2)             | 8<br>(6 - 14)           | 154<br>(103 - 315)       |
| Urolithiasis                                        | 1<br>(1 - 3)             | --                    | 0<br>(0 - 0)           | 0<br>(0 - 1)             | 0<br>(0 - 1)            | 0<br>(0 - 1)             |
| Other urinary diseases                              | 11<br>(4 - 22)           | 0<br>(0 - 0)          | 0<br>(0 - 0)           | 0<br>(0 - 1)             | 2<br>(1 - 3)            | 9<br>(3 - 19)            |
| Gynecological diseases                              | 1<br>(1 - 1)             | --                    | --                     | 0<br>(0 - 0)             | 0<br>(0 - 0)            | 0<br>(0 - 1)             |
| Uterine fibroids                                    | 0<br>(0 - 0)             | --                    | --                     | 0<br>(0 - 0)             | 0<br>(0 - 0)            | 0<br>(0 - 0)             |
| Polycystic ovarian syndrome                         | 0<br>(0 - 0)             | --                    | --                     | 0<br>(0 - 0)             | 0<br>(0 - 0)            | --                       |
| Endometriosis                                       | 0<br>(0 - 0)             | --                    | --                     | 0<br>(0 - 0)             | 0<br>(0 - 0)            | --                       |
| Genital prolapse                                    | 0<br>(0 - 0)             | --                    | --                     | 0<br>(0 - 0)             | 0<br>(0 - 0)            | 0<br>(0 - 0)             |
| Other gynecological diseases                        | 0<br>(0 - 1)             | --                    | --                     | 0<br>(0 - 0)             | 0<br>(0 - 0)            | 0<br>(0 - 0)             |
| Hemoglobinopathies and hemolytic anemias            | 61<br>(41 - 95)          | 0<br>(0 - 1)          | 1<br>(1 - 2)           | 17<br>(11 - 26)          | 10<br>(7 - 15)          | 33<br>(21 - 54)          |
| Thalassemias                                        | 10<br>(7 - 15)           | 0<br>(0 - 1)          | 1<br>(1 - 1)           | 9<br>(6 - 14)            | 0<br>(0 - 0)            | 0<br>(0 - 0)             |
| Sickle cell disorders                               | 14<br>(10 - 21)          | 0<br>(0 - 0)          | 0<br>(0 - 0)           | 5<br>(3 - 8)             | 6<br>(4 - 9)            | 2<br>(2 - 4)             |
| G6PD deficiency                                     | 1<br>(1 - 2)             | 0<br>(0 - 0)          | 0<br>(0 - 0)           | 1<br>(0 - 1)             | 0<br>(0 - 0)            | 0<br>(0 - 1)             |
| Other hemoglobinopathies and hemolytic anemias      | 36<br>(24 - 59)          | 0<br>(0 - 0)          | 0<br>(0 - 0)           | 2<br>(2 - 4)             | 4<br>(2 - 6)            | 30<br>(19 - 49)          |
| Endocrine, metabolic, blood, and immune disorders   | 471<br>(186 - 597)       | 5<br>(3 - 6)          | 2<br>(2 - 3)           | 29<br>(16 - 35)          | 71<br>(31 - 90)         | 364<br>(128 - 483)       |
| Musculoskeletal disorders                           | 140<br>(93 - 171)        | --                    | 0<br>(0 - 0)           | 8<br>(6 - 9)             | 20<br>(15 - 24)         | 112<br>(70 - 141)        |
| Rheumatoid arthritis                                | 32<br>(19 - 43)          | --                    | 0<br>(0 - 0)           | 1<br>(1 - 1)             | 5<br>(3 - 6)            | 26<br>(15 - 37)          |
| Other musculoskeletal disorders                     | 109<br>(73 - 132)        | --                    | 0<br>(0 - 0)           | 7<br>(5 - 8)             | 16<br>(12 - 19)         | 86<br>(54 - 109)         |
| Other non-communicable diseases                     | 359<br>(320 - 404)       | 188<br>(161 - 219)    | 18<br>(15 - 22)        | 27<br>(23 - 33)          | 17<br>(14 - 19)         | 109<br>(82 - 140)        |
| Congenital anomalies                                | 244<br>(212 - 280)       | 180<br>(154 - 211)    | 18<br>(14 - 22)        | 25<br>(20 - 30)          | 9<br>(7 - 11)           | 12<br>(10 - 17)          |
| Neural tube defects                                 | 9<br>(6 - 14)            | 7<br>(5 - 11)         | 1<br>(0 - 1)           | 1<br>(1 - 1)             | 0<br>(0 - 0)            | 0<br>(0 - 0)             |
| Congenital heart anomalies                          | 141<br>(110 - 171)       | 106<br>(78 - 130)     | 12<br>(9 - 15)         | 17<br>(13 - 22)          | 4<br>(3 - 6)            | 2<br>(1 - 3)             |
| Cleft lip and cleft palate                          | 0<br>(0 - 2)             | 0<br>(0 - 2)          | --                     | --                       | --                      | --                       |
| Down syndrome                                       | 25<br>(11 - 51)          | 17<br>(6 - 37)        | 1<br>(1 - 3)           | 3<br>(2 - 5)             | 2<br>(1 - 3)            | 2<br>(1 - 4)             |
| Chromosomal unbalanced rearrangements               | 7<br>(5 - 11)            | 5<br>(3 - 8)          | 0<br>(0 - 1)           | 1<br>(1 - 1)             | 0<br>(0 - 1)            | 0<br>(0 - 1)             |
| Other congenital anomalies                          | 61<br>(44 - 79)          | 45<br>(31 - 59)       | 4<br>(2 - 5)           | 3<br>(2 - 4)             | 2<br>(1 - 3)            | 8<br>(5 - 11)            |
| Skin and subcutaneous diseases                      | 108<br>(78 - 138)        | 0<br>(0 - 0)          | 0<br>(0 - 0)           | 3<br>(2 - 3)             | 8<br>(6 - 10)           | 97<br>(68 - 127)         |
| Cellulitis                                          | 30<br>(16 - 48)          | 0<br>(0 - 0)          | 0<br>(0 - 0)           | 1<br>(0 - 1)             | 3<br>(2 - 4)            | 27<br>(14 - 44)          |
| Pyoderma                                            | 59<br>(40 - 80)          | 0<br>(0 - 0)          | 0<br>(0 - 0)           | 1<br>(1 - 1)             | 4<br>(3 - 6)            | 53<br>(35 - 74)          |
| Decubitus ulcer                                     | 15<br>(9 - 24)           | 0<br>(0 - 0)          | 0<br>(0 - 0)           | 0<br>(0 - 0)             | 1<br>(0 - 1)            | 14<br>(8 - 23)           |
| Other skin and subcutaneous diseases                | 4<br>(2 - 8)             | 0<br>(0 - 0)          | 0<br>(0 - 0)           | 1<br>(0 - 1)             | 1<br>(0 - 1)            | 3<br>(1 - 6)             |
| Sudden infant death syndrome                        | 8<br>(4 - 15)            | 8<br>(4 - 15)         | --                     | --                       | --                      | --                       |
| Injuries                                            | 4,418<br>(4,068 - 5,027) | 30<br>(23 - 39)       | 40<br>(35 - 45)        | 1,499<br>(1,380 - 1,616) | 905<br>(823 - 1,011)    | 1,945<br>(1,711 - 2,408) |
| Transport injuries                                  | 1,713<br>(1,572 - 1,904) | 7<br>(5 - 9)          | 23<br>(19 - 27)        | 862<br>(786 - 937)       | 351<br>(307 - 404)      | 471<br>(404 - 570)       |

Web Table 31- Greece deaths with 95% UI by age, sex, and cause in 2013

| Cause                                           | Both Sexes, All Ages     | Both Sexes, 0-4 Years | Both Sexes, 5-14 Years | Both Sexes, 15-49 Years | Both Sexes, 50-69 Years | Both Sexes, 70-80 Years  |
|-------------------------------------------------|--------------------------|-----------------------|------------------------|-------------------------|-------------------------|--------------------------|
| Road injuries                                   | 1,683<br>(1,544 - 1,874) | 7<br>(5 - 9)          | 23<br>(19 - 27)        | 844<br>(769 - 919)      | 344<br>(301 - 396)      | 466<br>(400 - 563)       |
| Pedestrian road injuries                        | 312<br>(222 - 460)       | 2<br>(1 - 3)          | 6<br>(4 - 8)           | 80<br>(49 - 125)        | 62<br>(40 - 95)         | 163<br>(116 - 244)       |
| Cyclist road injuries                           | 107<br>(58 - 137)        | 0<br>(0 - 1)          | 3<br>(1 - 4)           | 45<br>(22 - 60)         | 25<br>(13 - 35)         | 33<br>(19 - 47)          |
| Motorcyclist road injuries                      | 414<br>(237 - 523)       | 1<br>(0 - 1)          | 3<br>(2 - 5)           | 246<br>(140 - 315)      | 72<br>(37 - 99)         | 92<br>(49 - 129)         |
| Motor vehicle road injuries                     | 703<br>(564 - 991)       | 3<br>(2 - 5)          | 9<br>(6 - 12)          | 409<br>(324 - 565)      | 149<br>(111 - 218)      | 132<br>(96 - 201)        |
| Other road injuries                             | 147<br>(48 - 214)        | 1<br>(0 - 1)          | 2<br>(1 - 4)           | 64<br>(18 - 100)        | 35<br>(10 - 59)         | 45<br>(15 - 73)          |
| Other transport injuries                        | 30<br>(22 - 40)          | 0<br>(0 - 0)          | 1<br>(0 - 1)           | 17<br>(12 - 24)         | 7<br>(5 - 10)           | 5<br>(3 - 8)             |
| Unintentional injuries                          | 2,069<br>(1,822 - 2,578) | 22<br>(16 - 31)       | 14<br>(12 - 17)        | 344<br>(304 - 401)      | 378<br>(334 - 442)      | 1,310<br>(1,103 - 1,734) |
| Falls                                           | 642<br>(506 - 1,001)     | 1<br>(1 - 2)          | 1<br>(1 - 2)           | 79<br>(65 - 109)        | 101<br>(83 - 137)       | 459<br>(335 - 776)       |
| Drowning                                        | 357<br>(248 - 443)       | 3<br>(2 - 5)          | 6<br>(5 - 9)           | 101<br>(72 - 135)       | 88<br>(59 - 113)        | 159<br>(103 - 207)       |
| Fire, heat, and hot substances                  | 149<br>(120 - 188)       | 1<br>(1 - 2)          | 1<br>(1 - 1)           | 22<br>(16 - 27)         | 22<br>(17 - 27)         | 103<br>(81 - 140)        |
| Poisonings                                      | 51<br>(36 - 60)          | 0<br>(0 - 1)          | 0<br>(0 - 1)           | 21<br>(12 - 26)         | 11<br>(8 - 14)          | 18<br>(13 - 25)          |
| Exposure to mechanical forces                   | 92<br>(70 - 105)         | 1<br>(1 - 1)          | 2<br>(1 - 2)           | 46<br>(37 - 56)         | 27<br>(19 - 33)         | 16<br>(11 - 20)          |
| Unintentional firearm injuries                  | 12<br>(9 - 14)           | 0<br>(0 - 0)          | 0<br>(0 - 1)           | 7<br>(5 - 9)            | 3<br>(2 - 4)            | 2<br>(1 - 3)             |
| Unintentional suffocation                       | 2<br>(1 - 3)             | 0<br>(0 - 0)          | 0<br>(0 - 0)           | 1<br>(1 - 1)            | 0<br>(0 - 1)            | 0<br>(0 - 1)             |
| Other exposure to mechanical forces             | 79<br>(56 - 91)          | 1<br>(0 - 1)          | 1<br>(1 - 2)           | 39<br>(30 - 48)         | 24<br>(16 - 30)         | 14<br>(8 - 18)           |
| Adverse effects of medical treatment            | 445<br>(311 - 725)       | 1<br>(1 - 3)          | 1<br>(0 - 1)           | 25<br>(19 - 38)         | 71<br>(51 - 113)        | 347<br>(231 - 593)       |
| Animal contact                                  | 5<br>(4 - 10)            | 0<br>(0 - 0)          | 0<br>(0 - 0)           | 1<br>(1 - 3)            | 1<br>(1 - 3)            | 2<br>(1 - 4)             |
| Venomous animal contact                         | 3<br>(2 - 7)             | 0<br>(0 - 0)          | 0<br>(0 - 0)           | 1<br>(1 - 2)            | 1<br>(1 - 2)            | 1<br>(1 - 3)             |
| Non-venomous animal contact                     | 2<br>(1 - 3)             | 0<br>(0 - 0)          | 0<br>(0 - 0)           | 0<br>(0 - 1)            | 0<br>(0 - 1)            | 1<br>(0 - 1)             |
| Foreign body                                    | 322<br>(191 - 422)       | 14<br>(10 - 21)       | 3<br>(2 - 4)           | 46<br>(33 - 74)         | 56<br>(36 - 77)         | 204<br>(103 - 292)       |
| Pulmonary aspiration and foreign body in airway | 321<br>(190 - 420)       | 14<br>(10 - 21)       | 2<br>(2 - 3)           | 45<br>(32 - 74)         | 55<br>(36 - 76)         | 204<br>(103 - 291)       |
| Foreign body in other body part                 | 1<br>(1 - 2)             | 0<br>(0 - 0)          | 0<br>(0 - 0)           | 1<br>(0 - 1)            | 0<br>(0 - 0)            | 0<br>(0 - 0)             |
| Other unintentional injuries                    | 6<br>(5 - 11)            | 0<br>(0 - 0)          | 0<br>(0 - 0)           | 3<br>(2 - 4)            | 1<br>(1 - 2)            | 2<br>(1 - 5)             |
| Self-harm and interpersonal violence            | 636<br>(548 - 731)       | 1<br>(1 - 1)          | 2<br>(2 - 3)           | 293<br>(239 - 338)      | 176<br>(147 - 206)      | 164<br>(139 - 210)       |
| Self-harm                                       | 485<br>(421 - 577)       | --                    | 1<br>(1 - 1)           | 207<br>(165 - 242)      | 142<br>(116 - 167)      | 134<br>(111 - 184)       |
| Interpersonal violence                          | 151<br>(101 - 184)       | 1<br>(1 - 1)          | 1<br>(1 - 2)           | 86<br>(55 - 108)        | 34<br>(22 - 45)         | 29<br>(19 - 37)          |
| Assault by firearm                              | 65<br>(41 - 95)          | 0<br>(0 - 0)          | 1<br>(0 - 1)           | 44<br>(26 - 64)         | 15<br>(9 - 23)          | 6<br>(3 - 10)            |
| Assault by sharp object                         | 41<br>(23 - 58)          | 0<br>(0 - 0)          | 0<br>(0 - 0)           | 23<br>(12 - 35)         | 10<br>(5 - 15)          | 8<br>(4 - 11)            |
| Assault by other means                          | 45<br>(27 - 58)          | 1<br>(0 - 1)          | 0<br>(0 - 1)           | 19<br>(10 - 26)         | 9<br>(5 - 13)           | 16<br>(10 - 20)          |

Web Table 31- Greece deaths with 95% UI by age, sex, and cause in 2013

| Cause                                                             | Males, All Ages             | Males, 0-4 Years   | Males, 5-14 Years | Males, 15-49 Years       | Males, 50-69 Years          | Males, 70-80 Years          |
|-------------------------------------------------------------------|-----------------------------|--------------------|-------------------|--------------------------|-----------------------------|-----------------------------|
| All causes                                                        | 67,253<br>(64,124 - 70,364) | 240<br>(208 - 278) | 68<br>(62 - 75)   | 3,760<br>(3,456 - 4,064) | 12,546<br>(11,644 - 13,455) | 50,640<br>(48,735 - 52,542) |
| Communicable, maternal, neonatal, and nutritional diseases        | 2,195<br>(1,809 - 2,744)    | 108<br>(92 - 128)  | 6<br>(4 - 8)      | 92<br>(79 - 107)         | 224<br>(189 - 263)          | 1,765<br>(1,393 - 2,300)    |
| HIV/AIDS and tuberculosis                                         | 134<br>(103 - 160)          | 0<br>(0 - 0)       | 0<br>(0 - 0)      | 13<br>(10 - 19)          | 22<br>(17 - 27)             | 99<br>(66 - 124)            |
| Tuberculosis                                                      | 124<br>(89 - 150)           | 0<br>(0 - 0)       | 0<br>(0 - 0)      | 7<br>(5 - 8)             | 19<br>(15 - 23)             | 99<br>(65 - 124)            |
| HIV/AIDS                                                          | 10<br>(7 - 15)              | 0<br>(0 - 0)       | 0<br>(0 - 0)      | 7<br>(4 - 11)            | 3<br>(2 - 5)                | 1<br>(0 - 1)                |
| HIV/AIDS resulting in mycobacterial infection                     | 1<br>(0 - 1)                | 0<br>(0 - 0)       | 0<br>(0 - 0)      | 0<br>(0 - 1)             | 0<br>(0 - 0)                | 0<br>(0 - 0)                |
| HIV/AIDS resulting in other diseases                              | 10<br>(6 - 14)              | 0<br>(0 - 0)       | 0<br>(0 - 0)      | 6<br>(4 - 11)            | 3<br>(1 - 5)                | 0<br>(0 - 1)                |
| Diarrhea, lower respiratory, and other common infectious diseases | 1,788<br>(1,412 - 2,327)    | 13<br>(9 - 17)     | 5<br>(3 - 7)      | 58<br>(45 - 71)          | 167<br>(133 - 204)          | 1,545<br>(1,188 - 2,074)    |
| Diarrheal diseases                                                | 11<br>(7 - 15)              | 0<br>(0 - 1)       | 0<br>(0 - 0)      | 1<br>(0 - 1)             | 1<br>(1 - 2)                | 9<br>(5 - 13)               |
| Intestinal infectious diseases                                    | 8<br>(2 - 18)               | 1<br>(0 - 3)       | 1<br>(0 - 3)      | 3<br>(1 - 9)             | 1<br>(0 - 3)                | 1<br>(0 - 3)                |
| Typhoid fever                                                     | 6<br>(2 - 14)               | 1<br>(0 - 2)       | 1<br>(0 - 2)      | 2<br>(0 - 7)             | 1<br>(0 - 2)                | 1<br>(0 - 2)                |
| Paratyphoid fever                                                 | 2<br>(0 - 4)                | 0<br>(0 - 1)       | 0<br>(0 - 1)      | 1<br>(0 - 2)             | 0<br>(0 - 0)                | 0<br>(0 - 1)                |
| Other intestinal infectious diseases                              | 1<br>(0 - 3)                | 0<br>(0 - 1)       | 0<br>(0 - 0)      | 0<br>(0 - 2)             | 0<br>(0 - 1)                | 0<br>(0 - 1)                |
| Lower respiratory infections                                      | 1,715<br>(1,343 - 2,258)    | 9<br>(5 - 12)      | 2<br>(1 - 3)      | 44<br>(33 - 55)          | 153<br>(120 - 189)          | 1,508<br>(1,156 - 2,036)    |
| Upper respiratory infections                                      | 2<br>(0 - 5)                | 0<br>(0 - 0)       | 0<br>(0 - 0)      | 0<br>(0 - 0)             | 0<br>(0 - 1)                | 1<br>(0 - 4)                |
| Otitis media                                                      | 1<br>(0 - 1)                | 0<br>(0 - 0)       | 0<br>(0 - 0)      | 0<br>(0 - 0)             | 0<br>(0 - 0)                | 0<br>(0 - 0)                |
| Meningitis                                                        | 36<br>(24 - 42)             | 2<br>(1 - 3)       | 1<br>(0 - 1)      | 7<br>(5 - 8)             | 8<br>(6 - 10)               | 19<br>(12 - 23)             |
| Pneumococcal meningitis                                           | 6<br>(4 - 9)                | 0<br>(0 - 0)       | 0<br>(0 - 0)      | 1<br>(1 - 2)             | 1<br>(1 - 2)                | 3<br>(2 - 6)                |
| H influenzae type B meningitis                                    | 4<br>(2 - 5)                | 0<br>(0 - 1)       | 0<br>(0 - 0)      | 1<br>(0 - 1)             | 1<br>(0 - 1)                | 2<br>(1 - 3)                |
| Meningococcal meningitis                                          | 13<br>(9 - 18)              | 1<br>(0 - 1)       | 0<br>(0 - 0)      | 2<br>(2 - 3)             | 3<br>(2 - 5)                | 7<br>(3 - 11)               |
| Other meningitis                                                  | 13<br>(8 - 16)              | 0<br>(0 - 1)       | 0<br>(0 - 0)      | 2<br>(1 - 3)             | 3<br>(2 - 4)                | 7<br>(4 - 10)               |
| Encephalitis                                                      | 9<br>(6 - 14)               | 0<br>(0 - 1)       | 0<br>(0 - 0)      | 2<br>(2 - 4)             | 2<br>(1 - 3)                | 4<br>(2 - 7)                |
| Diphtheria                                                        | 0<br>(0 - 0)                | 0<br>(0 - 0)       | 0<br>(0 - 0)      | 0<br>(0 - 0)             | 0<br>(0 - 0)                | --                          |
| Whooping cough                                                    | 0<br>(0 - 0)                | 0<br>(0 - 0)       | 0<br>(0 - 0)      | 0<br>(0 - 0)             | 0<br>(0 - 0)                | --                          |
| Tetanus                                                           | 2<br>(1 - 3)                | 0<br>(0 - 0)       | 0<br>(0 - 0)      | 0<br>(0 - 0)             | 1<br>(0 - 1)                | 1<br>(0 - 2)                |
| Measles                                                           | 0<br>(0 - 0)                | 0<br>(0 - 0)       | 0<br>(0 - 0)      | 0<br>(0 - 0)             | 0<br>(0 - 0)                | --                          |
| Varicella and herpes zoster                                       | 5<br>(1 - 18)               | 0<br>(0 - 1)       | 0<br>(0 - 0)      | 0<br>(0 - 1)             | 0<br>(0 - 1)                | 3<br>(0 - 17)               |
| Neglected tropical diseases and malaria                           | 11<br>(9 - 12)              | 0<br>(0 - 0)       | 0<br>(0 - 0)      | 3<br>(2 - 3)             | 3<br>(3 - 4)                | 4<br>(3 - 5)                |
| Leishmaniasis                                                     | 3<br>(2 - 5)                | 0<br>(0 - 0)       | 0<br>(0 - 0)      | 1<br>(1 - 1)             | 1<br>(1 - 2)                | 1<br>(1 - 1)                |
| Visceral leishmaniasis                                            | 3<br>(2 - 5)                | 0<br>(0 - 0)       | 0<br>(0 - 0)      | 1<br>(1 - 1)             | 1<br>(1 - 2)                | 1<br>(1 - 1)                |
| Cysticercosis                                                     | 0<br>(0 - 0)                | 0<br>(0 - 0)       | 0<br>(0 - 0)      | 0<br>(0 - 0)             | 0<br>(0 - 0)                | 0<br>(0 - 0)                |
| Cystic echinococcosis                                             | 4<br>(4 - 4)                | 0<br>(0 - 0)       | 0<br>(0 - 0)      | 1<br>(1 - 1)             | 1<br>(1 - 1)                | 2<br>(2 - 2)                |
| Dengue                                                            | 1<br>(1 - 1)                | 0<br>(0 - 0)       | 0<br>(0 - 0)      | 0<br>(0 - 0)             | 0<br>(0 - 0)                | 0<br>(0 - 0)                |
| Rabies                                                            | 0<br>(0 - 1)                | 0<br>(0 - 0)       | 0<br>(0 - 0)      | 0<br>(0 - 0)             | 0<br>(0 - 0)                | 0<br>(0 - 0)                |
| Other neglected tropical diseases                                 | 2<br>(1 - 3)                | 0<br>(0 - 0)       | 0<br>(0 - 0)      | 0<br>(0 - 0)             | 0<br>(0 - 1)                | 1<br>(1 - 2)                |
| Maternal disorders                                                | --                          | --                 | --                | --                       | --                          | --                          |
| Maternal hemorrhage                                               | --                          | --                 | --                | --                       | --                          | --                          |
| Maternal sepsis and other maternal infections                     | --                          | --                 | --                | --                       | --                          | --                          |
| Maternal hypertensive disorders                                   | --                          | --                 | --                | --                       | --                          | --                          |
| Maternal obstructed labor                                         | --                          | --                 | --                | --                       | --                          | --                          |



Web Table 31- Greece deaths with 95% UI by age, sex, and cause in 2013

| Cause                                                            | Males, All Ages             | Males, 0-4 Years  | Males, 5-14 Years | Males, 15-49 Years       | Males, 50-69 Years          | Males, 70-80 Years          |
|------------------------------------------------------------------|-----------------------------|-------------------|-------------------|--------------------------|-----------------------------|-----------------------------|
| Maternal abortive outcome                                        | --                          | --                | --                | --                       | --                          | --                          |
| Indirect maternal deaths                                         | --                          | --                | --                | --                       | --                          | --                          |
| Late maternal deaths                                             | --                          | --                | --                | --                       | --                          | --                          |
| Maternal deaths aggravated by HIV/AIDS                           | --                          | --                | --                | --                       | --                          | --                          |
| Other maternal disorders                                         | --                          | --                | --                | --                       | --                          | --                          |
| Neonatal disorders                                               | 94<br>(80 - 111)            | 94<br>(80 - 111)  | --                | --                       | --                          | --                          |
| Neonatal preterm birth complications                             | 75<br>(60 - 91)             | 75<br>(60 - 91)   | --                | --                       | --                          | --                          |
| Neonatal encephalopathy due to birth asphyxia and trauma         | 17<br>(11 - 26)             | 17<br>(11 - 26)   | --                | --                       | --                          | --                          |
| Neonatal sepsis and other neonatal infections                    | 1<br>(0 - 4)                | 1<br>(0 - 4)      | --                | --                       | --                          | --                          |
| Hemolytic disease and other neonatal jaundice                    | 0<br>(0 - 0)                | 0<br>(0 - 0)      | --                | --                       | --                          | --                          |
| Other neonatal disorders                                         | 1<br>(0 - 2)                | 1<br>(0 - 2)      | --                | --                       | --                          | --                          |
| Nutritional deficiencies                                         | 64<br>(44 - 138)            | 0<br>(0 - 1)      | 0<br>(0 - 0)      | 5<br>(3 - 9)             | 7<br>(5 - 14)               | 52<br>(34 - 115)            |
| Protein-energy malnutrition                                      | 1<br>(1 - 5)                | 0<br>(0 - 0)      | 0<br>(0 - 0)      | 0<br>(0 - 1)             | 0<br>(0 - 1)                | 1<br>(0 - 3)                |
| Iodine deficiency                                                | 0<br>(0 - 2)                | 0<br>(0 - 0)      | 0<br>(0 - 0)      | 0<br>(0 - 0)             | 0<br>(0 - 0)                | 0<br>(0 - 2)                |
| Iron-deficiency anemia                                           | 60<br>(41 - 128)            | 0<br>(0 - 0)      | 0<br>(0 - 0)      | 4<br>(3 - 8)             | 7<br>(4 - 13)               | 49<br>(32 - 109)            |
| Other nutritional deficiencies                                   | 2<br>(1 - 6)                | 0<br>(0 - 0)      | 0<br>(0 - 0)      | 0<br>(0 - 1)             | 0<br>(0 - 1)                | 1<br>(0 - 4)                |
| Other communicable, maternal, neonatal, and nutritional diseases | 104<br>(85 - 128)           | 1<br>(1 - 2)      | 1<br>(0 - 1)      | 13<br>(10 - 17)          | 25<br>(19 - 32)             | 65<br>(48 - 88)             |
| Sexually transmitted diseases excluding HIV                      | 2<br>(1 - 3)                | 1<br>(0 - 1)      | 0<br>(0 - 0)      | 0<br>(0 - 0)             | 0<br>(0 - 1)                | 1<br>(0 - 1)                |
| Syphilis                                                         | 2<br>(1 - 3)                | 1<br>(0 - 1)      | 0<br>(0 - 0)      | 0<br>(0 - 0)             | 0<br>(0 - 1)                | 1<br>(0 - 1)                |
| Chlamydial infection                                             | --                          | --                | --                | --                       | --                          | --                          |
| Gonococcal infection                                             | 0<br>(0 - 0)                | --                | 0<br>(0 - 0)      | 0<br>(0 - 0)             | 0<br>(0 - 0)                | 0<br>(0 - 0)                |
| Other sexually transmitted diseases                              | 0<br>(0 - 0)                | --                | 0<br>(0 - 0)      | 0<br>(0 - 0)             | 0<br>(0 - 0)                | 0<br>(0 - 0)                |
| Hepatitis                                                        | 82<br>(64 - 106)            | 0<br>(0 - 1)      | 0<br>(0 - 0)      | 10<br>(7 - 13)           | 20<br>(14 - 27)             | 52<br>(37 - 75)             |
| Acute hepatitis A                                                | 14<br>(4 - 29)              | 0<br>(0 - 0)      | 0<br>(0 - 0)      | 3<br>(1 - 6)             | 4<br>(1 - 8)                | 7<br>(1 - 17)               |
| Acute hepatitis B                                                | 64<br>(44 - 88)             | 0<br>(0 - 0)      | 0<br>(0 - 0)      | 6<br>(3 - 10)            | 15<br>(10 - 22)             | 43<br>(27 - 64)             |
| Acute hepatitis C                                                | 4<br>(1 - 12)               | --                | 0<br>(0 - 0)      | 0<br>(0 - 1)             | 1<br>(0 - 2)                | 3<br>(0 - 10)               |
| Other infectious diseases                                        | 20<br>(12 - 26)             | 0<br>(0 - 0)      | 0<br>(0 - 0)      | 3<br>(2 - 4)             | 5<br>(3 - 6)                | 12<br>(6 - 17)              |
| Non-communicable diseases                                        | 61,955<br>(59,201 - 64,838) | 114<br>(97 - 134) | 36<br>(32 - 42)   | 2,400<br>(2,209 - 2,605) | 11,631<br>(10,817 - 12,471) | 47,773<br>(46,001 - 49,676) |
| Neoplasms                                                        | 19,007<br>(17,617 - 20,430) | 6<br>(4 - 9)      | 19<br>(15 - 23)   | 772<br>(698 - 856)       | 5,430<br>(5,019 - 5,896)    | 12,780<br>(11,731 - 13,823) |
| Esophageal cancer                                                | 192<br>(163 - 248)          | --                | --                | 11<br>(8 - 14)           | 66<br>(54 - 81)             | 115<br>(93 - 164)           |
| Stomach cancer                                                   | 1,215<br>(1,041 - 1,418)    | --                | --                | 48<br>(40 - 58)          | 280<br>(244 - 321)          | 887<br>(723 - 1,079)        |
| Liver cancer                                                     | 583<br>(339 - 1,084)        | --                | 0<br>(0 - 0)      | 19<br>(12 - 33)          | 184<br>(110 - 324)          | 379<br>(196 - 757)          |
| Liver cancer due to hepatitis B                                  | 209<br>(89 - 408)           | --                | 0<br>(0 - 0)      | 12<br>(7 - 22)           | 88<br>(39 - 172)            | 109<br>(40 - 237)           |
| Liver cancer due to hepatitis C                                  | 235<br>(117 - 469)          | --                | 0<br>(0 - 0)      | 5<br>(2 - 9)             | 63<br>(31 - 128)            | 167<br>(79 - 347)           |
| Liver cancer due to alcohol use                                  | 127<br>(40 - 278)           | --                | --                | 2<br>(1 - 4)             | 29<br>(10 - 61)             | 96<br>(28 - 221)            |
| Liver cancer due to other causes                                 | 12<br>(3 - 29)              | --                | 0<br>(0 - 0)      | 1<br>(0 - 1)             | 4<br>(1 - 11)               | 7<br>(2 - 18)               |
| Larynx cancer                                                    | 362<br>(260 - 463)          | --                | --                | 14<br>(10 - 19)          | 127<br>(86 - 159)           | 221<br>(161 - 295)          |
| Tracheal, bronchus and lung cancer                               | 6,309<br>(5,758 - 6,846)    | --                | --                | 211<br>(177 - 249)       | 2,448<br>(2,208 - 2,685)    | 3,649<br>(3,263 - 4,053)    |
| Breast cancer                                                    | 54<br>(12 - 81)             | --                | --                | 3<br>(1 - 6)             | 13<br>(3 - 20)              | 38<br>(8 - 62)              |
| Cervical cancer                                                  | --                          | --                | --                | --                       | --                          | --                          |

Web Table 31- Greece deaths with 95% UI by age, sex, and cause in 2013

| Cause                                         | Males, All Ages             | Males, 0-4 Years | Males, 5-14 Years | Males, 15-49 Years     | Males, 50-69 Years       | Males, 70-80 Years          |
|-----------------------------------------------|-----------------------------|------------------|-------------------|------------------------|--------------------------|-----------------------------|
| Uterine cancer                                | --                          | --               | --                | --                     | --                       | --                          |
| Prostate cancer                               | 2,198<br>(1,557 - 2,993)    | --               | --                | 4<br>(3 - 6)           | 190<br>(139 - 259)       | 2,005<br>(1,387 - 2,754)    |
| Colon and rectum cancer                       | 1,932<br>(1,698 - 2,185)    | --               | --                | 57<br>(48 - 67)        | 419<br>(373 - 468)       | 1,456<br>(1,240 - 1,697)    |
| Lip and oral cavity cancer                    | 171<br>(142 - 203)          | --               | --                | 15<br>(11 - 19)        | 57<br>(45 - 69)          | 100<br>(77 - 127)           |
| Nasopharynx cancer                            | 55<br>(42 - 70)             | --               | 0<br>(0 - 0)      | 12<br>(8 - 17)         | 23<br>(17 - 32)          | 20<br>(14 - 27)             |
| Other pharynx cancer                          | 77<br>(55 - 93)             | --               | --                | 9<br>(6 - 11)          | 37<br>(26 - 47)          | 31<br>(21 - 42)             |
| Gallbladder and biliary tract cancer          | 191<br>(100 - 256)          | --               | --                | 4<br>(2 - 6)           | 44<br>(23 - 63)          | 143<br>(72 - 198)           |
| Pancreatic cancer                             | 1,054<br>(949 - 1,171)      | --               | --                | 46<br>(38 - 56)        | 354<br>(312 - 401)       | 654<br>(565 - 754)          |
| Malignant skin melanoma                       | 134<br>(60 - 209)           | --               | --                | 25<br>(11 - 40)        | 39<br>(16 - 60)          | 70<br>(32 - 117)            |
| Non-melanoma skin cancer                      | 119<br>(72 - 181)           | --               | --                | 5<br>(3 - 9)           | 18<br>(10 - 27)          | 96<br>(56 - 151)            |
| Ovarian cancer                                | --                          | --               | --                | --                     | --                       | --                          |
| Testicular cancer                             | 24<br>(16 - 31)             | --               | --                | 11<br>(7 - 15)         | 4<br>(2 - 5)             | 8<br>(5 - 12)               |
| Kidney cancer                                 | 403<br>(340 - 480)          | 0<br>(0 - 0)     | 0<br>(0 - 0)      | 18<br>(14 - 24)        | 149<br>(121 - 181)       | 235<br>(185 - 306)          |
| Bladder cancer                                | 1,263<br>(945 - 1,513)      | --               | --                | 11<br>(8 - 14)         | 214<br>(171 - 254)       | 1,037<br>(758 - 1,278)      |
| Brain and nervous system cancer               | 692<br>(505 - 840)          | 3<br>(1 - 5)     | 7<br>(5 - 10)     | 94<br>(73 - 121)       | 285<br>(221 - 364)       | 303<br>(186 - 405)          |
| Thyroid cancer                                | 40<br>(29 - 50)             | --               | 0<br>(0 - 0)      | 3<br>(2 - 4)           | 12<br>(9 - 16)           | 25<br>(17 - 33)             |
| Mesothelioma                                  | 33<br>(24 - 60)             | --               | --                | 3<br>(2 - 5)           | 13<br>(9 - 23)           | 17<br>(11 - 34)             |
| Hodgkin lymphoma                              | 140<br>(71 - 172)           | 0<br>(0 - 0)     | 0<br>(0 - 1)      | 21<br>(11 - 27)        | 42<br>(22 - 54)          | 77<br>(33 - 101)            |
| Non-Hodgkin lymphoma                          | 251<br>(128 - 326)          | 0<br>(0 - 1)     | 1<br>(1 - 2)      | 23<br>(14 - 33)        | 67<br>(33 - 89)          | 159<br>(73 - 224)           |
| Multiple myeloma                              | 161<br>(91 - 259)           | --               | --                | 5<br>(3 - 9)           | 46<br>(26 - 81)          | 110<br>(60 - 178)           |
| Leukemia                                      | 826<br>(717 - 951)          | 2<br>(1 - 3)     | 7<br>(5 - 9)      | 49<br>(41 - 58)        | 157<br>(130 - 186)       | 611<br>(506 - 729)          |
| Other neoplasms                               | 528<br>(423 - 747)          | 1<br>(1 - 2)     | 2<br>(1 - 3)      | 49<br>(37 - 62)        | 142<br>(112 - 193)       | 333<br>(244 - 518)          |
| Cardiovascular diseases                       | 27,909<br>(26,157 - 29,680) | 1<br>(1 - 1)     | 2<br>(2 - 3)      | 1,062<br>(967 - 1,159) | 4,619<br>(4,232 - 4,990) | 22,225<br>(20,767 - 23,712) |
| Rheumatic heart disease                       | 10<br>(6 - 22)              | 0<br>(0 - 0)     | 0<br>(0 - 0)      | 2<br>(1 - 3)           | 2<br>(1 - 5)             | 6<br>(3 - 14)               |
| Ischemic heart disease                        | 16,030<br>(14,155 - 17,732) | 0<br>(0 - 0)     | 0<br>(0 - 1)      | 818<br>(729 - 904)     | 3,284<br>(2,942 - 3,588) | 11,927<br>(10,359 - 13,399) |
| Cerebrovascular disease                       | 8,827<br>(7,354 - 10,479)   | 0<br>(0 - 1)     | 1<br>(1 - 2)      | 143<br>(110 - 183)     | 862<br>(680 - 1,048)     | 7,820<br>(6,458 - 9,317)    |
| Ischemic stroke                               | 5,211<br>(4,067 - 6,535)    | 0<br>(0 - 0)     | 0<br>(0 - 0)      | 14<br>(8 - 20)         | 278<br>(199 - 376)       | 4,919<br>(3,843 - 6,229)    |
| Hemorrhagic stroke                            | 3,615<br>(2,535 - 4,767)    | 0<br>(0 - 1)     | 1<br>(1 - 1)      | 129<br>(100 - 166)     | 584<br>(436 - 725)       | 2,901<br>(1,956 - 3,995)    |
| Hypertensive heart disease                    | 699<br>(305 - 1,149)        | 0<br>(0 - 0)     | 0<br>(0 - 0)      | 6<br>(3 - 8)           | 60<br>(30 - 91)          | 634<br>(265 - 1,065)        |
| Cardiomyopathy and myocarditis                | 406<br>(263 - 731)          | 0<br>(0 - 0)     | 0<br>(0 - 0)      | 23<br>(17 - 36)        | 82<br>(57 - 138)         | 301<br>(176 - 573)          |
| Atrial fibrillation and flutter               | 473<br>(301 - 697)          | --               | --                | 4<br>(3 - 6)           | 38<br>(26 - 53)          | 431<br>(269 - 650)          |
| Aortic aneurysm                               | 743<br>(588 - 894)          | --               | --                | 36<br>(29 - 48)        | 183<br>(145 - 224)       | 524<br>(403 - 652)          |
| Peripheral vascular disease                   | 18<br>(12 - 27)             | --               | --                | 0<br>(0 - 0)           | 2<br>(2 - 3)             | 16<br>(10 - 25)             |
| Endocarditis                                  | 77<br>(45 - 111)            | 0<br>(0 - 0)     | 0<br>(0 - 0)      | 7<br>(4 - 10)          | 14<br>(8 - 21)           | 57<br>(31 - 84)             |
| Other cardiovascular and circulatory diseases | 625<br>(485 - 803)          | 0<br>(0 - 0)     | 0<br>(0 - 0)      | 24<br>(19 - 32)        | 91<br>(69 - 119)         | 510<br>(380 - 673)          |
| Chronic respiratory diseases                  | 5,005<br>(3,448 - 5,799)    | 0<br>(0 - 1)     | 0<br>(0 - 0)      | 46<br>(28 - 56)        | 465<br>(267 - 555)       | 4,494<br>(3,142 - 5,246)    |
| Chronic obstructive pulmonary disease         | 4,079<br>(2,680 - 4,835)    | 0<br>(0 - 0)     | 0<br>(0 - 0)      | 29<br>(17 - 38)        | 404<br>(229 - 483)       | 3,646<br>(2,413 - 4,387)    |
| Pneumoconiosis                                | 306<br>(184 - 516)          | 0<br>(0 - 0)     | 0<br>(0 - 0)      | 7<br>(5 - 12)          | 33<br>(19 - 55)          | 265<br>(154 - 460)          |
| Silicosis                                     | 2<br>(1 - 3)                | 0<br>(0 - 0)     | 0<br>(0 - 0)      | 1<br>(1 - 2)           | 0<br>(0 - 1)             | 0<br>(0 - 1)                |
| Asbestosis                                    | 112<br>(65 - 196)           | 0<br>(0 - 0)     | 0<br>(0 - 0)      | 2<br>(1 - 4)           | 12<br>(6 - 20)           | 98<br>(54 - 173)            |

Web Table 31- Greece deaths with 95% UI by age, sex, and cause in 2013

| Cause                                               | Males, All Ages          | Males, 0-4 Years | Males, 5-14 Years | Males, 15-49 Years | Males, 50-69 Years | Males, 70-80 Years       |
|-----------------------------------------------------|--------------------------|------------------|-------------------|--------------------|--------------------|--------------------------|
| Coal workers pneumoconiosis                         | 26<br>(14 - 48)          | 0<br>(0 - 0)     | 0<br>(0 - 0)      | 1<br>(0 - 1)       | 1<br>(0 - 1)       | 25<br>(13 - 46)          |
| Other pneumoconiosis                                | 166<br>(98 - 275)        | 0<br>(0 - 0)     | 0<br>(0 - 0)      | 3<br>(2 - 5)       | 20<br>(11 - 34)    | 142<br>(81 - 245)        |
| Asthma                                              | 13<br>(7 - 18)           | 0<br>(0 - 0)     | 0<br>(0 - 0)      | 1<br>(1 - 1)       | 2<br>(1 - 3)       | 9<br>(5 - 14)            |
| Interstitial lung disease and pulmonary sarcoidosis | 590<br>(384 - 1,027)     | 0<br>(0 - 0)     | 0<br>(0 - 0)      | 5<br>(3 - 8)       | 24<br>(10 - 35)    | 561<br>(356 - 999)       |
| Other chronic respiratory diseases                  | 18<br>(11 - 26)          | 0<br>(0 - 0)     | 0<br>(0 - 0)      | 3<br>(2 - 4)       | 2<br>(1 - 3)       | 13<br>(7 - 21)           |
| Cirrhosis                                           | 805<br>(727 - 888)       | 0<br>(0 - 0)     | 0<br>(0 - 0)      | 97<br>(82 - 113)   | 328<br>(290 - 371) | 379<br>(327 - 436)       |
| Cirrhosis due to hepatitis B                        | 110<br>(50 - 194)        | 0<br>(0 - 0)     | 0<br>(0 - 0)      | 15<br>(6 - 28)     | 48<br>(20 - 90)    | 47<br>(22 - 81)          |
| Cirrhosis due to hepatitis C                        | 270<br>(125 - 481)       | 0<br>(0 - 0)     | 0<br>(0 - 0)      | 28<br>(12 - 56)    | 103<br>(47 - 197)  | 139<br>(55 - 235)        |
| Cirrhosis due to alcohol use                        | 331<br>(170 - 478)       | --               | --                | 32<br>(16 - 53)    | 135<br>(67 - 204)  | 164<br>(80 - 246)        |
| Cirrhosis due to other causes                       | 94<br>(44 - 158)         | 0<br>(0 - 0)     | 0<br>(0 - 0)      | 22<br>(8 - 37)     | 43<br>(18 - 74)    | 29<br>(13 - 57)          |
| Digestive diseases                                  | 1,107<br>(882 - 1,279)   | 0<br>(0 - 1)     | 1<br>(0 - 1)      | 44<br>(32 - 53)    | 164<br>(124 - 191) | 899<br>(713 - 1,061)     |
| Peptic ulcer disease                                | 321<br>(201 - 445)       | 0<br>(0 - 0)     | 0<br>(0 - 0)      | 11<br>(6 - 16)     | 50<br>(30 - 69)    | 261<br>(159 - 365)       |
| Gastritis and duodenitis                            | 2<br>(1 - 4)             | 0<br>(0 - 0)     | 0<br>(0 - 0)      | 0<br>(0 - 1)       | 0<br>(0 - 1)       | 1<br>(1 - 2)             |
| Appendicitis                                        | 13<br>(7 - 25)           | 0<br>(0 - 0)     | 0<br>(0 - 0)      | 2<br>(1 - 3)       | 3<br>(2 - 6)       | 8<br>(4 - 17)            |
| Paralytic ileus and intestinal obstruction          | 249<br>(129 - 367)       | 0<br>(0 - 0)     | 0<br>(0 - 0)      | 6<br>(3 - 9)       | 24<br>(13 - 38)    | 219<br>(112 - 326)       |
| Inguinal, femoral, and abdominal hernia             | 13<br>(5 - 37)           | 0<br>(0 - 0)     | 0<br>(0 - 0)      | 0<br>(0 - 1)       | 2<br>(1 - 5)       | 10<br>(3 - 32)           |
| Inflammatory bowel disease                          | 12<br>(8 - 22)           | 0<br>(0 - 0)     | 0<br>(0 - 0)      | 1<br>(1 - 2)       | 2<br>(1 - 4)       | 9<br>(5 - 17)            |
| Vascular intestinal disorders                       | 133<br>(56 - 256)        | 0<br>(0 - 0)     | 0<br>(0 - 0)      | 4<br>(1 - 8)       | 20<br>(8 - 39)     | 110<br>(46 - 214)        |
| Gallbladder and biliary diseases                    | 126<br>(87 - 176)        | 0<br>(0 - 0)     | 0<br>(0 - 0)      | 3<br>(2 - 3)       | 14<br>(9 - 19)     | 110<br>(73 - 157)        |
| Pancreatitis                                        | 195<br>(132 - 287)       | 0<br>(0 - 0)     | 0<br>(0 - 0)      | 16<br>(10 - 21)    | 41<br>(25 - 55)    | 139<br>(90 - 214)        |
| Other digestive diseases                            | 43<br>(29 - 65)          | 0<br>(0 - 0)     | 0<br>(0 - 0)      | 2<br>(1 - 3)       | 8<br>(5 - 12)      | 32<br>(20 - 51)          |
| Neurological disorders                              | 5,060<br>(3,802 - 6,445) | 3<br>(2 - 4)     | 2<br>(2 - 3)      | 54<br>(44 - 67)    | 228<br>(176 - 286) | 4,773<br>(3,535 - 6,181) |
| Alzheimer disease and other dementias               | 4,475<br>(3,220 - 5,844) | --               | --                | 0<br>(0 - 1)       | 116<br>(70 - 168)  | 4,358<br>(3,127 - 5,743) |
| Parkinson disease                                   | 292<br>(195 - 377)       | --               | --                | 1<br>(1 - 1)       | 22<br>(16 - 28)    | 269<br>(174 - 353)       |
| Epilepsy                                            | 47<br>(35 - 57)          | 0<br>(0 - 1)     | 1<br>(0 - 1)      | 17<br>(12 - 21)    | 12<br>(8 - 15)     | 17<br>(12 - 23)          |
| Multiple sclerosis                                  | 38<br>(17 - 62)          | --               | --                | 12<br>(5 - 20)     | 17<br>(7 - 28)     | 9<br>(4 - 15)            |
| Other neurological disorders                        | 208<br>(170 - 302)       | 2<br>(1 - 4)     | 2<br>(1 - 2)      | 24<br>(18 - 31)    | 61<br>(47 - 79)    | 119<br>(90 - 192)        |
| Mental and substance use disorders                  | 248<br>(129 - 293)       | 0<br>(0 - 0)     | 0<br>(0 - 0)      | 217<br>(103 - 259) | 21<br>(15 - 28)    | 9<br>(7 - 13)            |
| Schizophrenia                                       | 1<br>(0 - 3)             | --               | --                | 0<br>(0 - 1)       | 0<br>(0 - 1)       | 0<br>(0 - 1)             |
| Alcohol use disorders                               | 26<br>(17 - 38)          | --               | --                | 6<br>(3 - 8)       | 14<br>(9 - 20)     | 6<br>(4 - 10)            |
| Drug use disorders                                  | 220<br>(102 - 262)       | 0<br>(0 - 0)     | --                | 211<br>(97 - 252)  | 7<br>(3 - 10)      | 3<br>(1 - 4)             |
| Opioid use disorders                                | 83<br>(38 - 102)         | 0<br>(0 - 0)     | --                | 80<br>(36 - 98)    | 2<br>(1 - 3)       | 1<br>(0 - 1)             |
| Cocaine use disorders                               | 6<br>(3 - 8)             | 0<br>(0 - 0)     | --                | 6<br>(3 - 8)       | 0<br>(0 - 0)       | 0<br>(0 - 0)             |
| Amphetamine use disorders                           | 5<br>(3 - 7)             | 0<br>(0 - 0)     | --                | 5<br>(3 - 7)       | 0<br>(0 - 0)       | 0<br>(0 - 0)             |
| Other drug use disorders                            | 125<br>(59 - 150)        | 0<br>(0 - 0)     | --                | 120<br>(57 - 144)  | 4<br>(2 - 6)       | 2<br>(1 - 2)             |
| Eating disorders                                    | 0<br>(0 - 0)             | --               | 0<br>(0 - 0)      | 0<br>(0 - 0)       | --                 | --                       |
| Anorexia nervosa                                    | 0<br>(0 - 0)             | --               | 0<br>(0 - 0)      | 0<br>(0 - 0)       | --                 | --                       |
| Diabetes, urogenital, blood, and endocrine diseases | 2,588<br>(2,186 - 4,091) | 3<br>(2 - 5)     | 3<br>(2 - 3)      | 89<br>(73 - 125)   | 359<br>(304 - 541) | 2,135<br>(1,781 - 3,440) |
| Diabetes mellitus                                   | 714<br>(619 - 820)       | 0<br>(0 - 0)     | 0<br>(0 - 0)      | 18<br>(15 - 22)    | 136<br>(116 - 160) | 560<br>(468 - 662)       |
| Acute glomerulonephritis                            | 1<br>(0 - 1)             | 0<br>(0 - 0)     | 0<br>(0 - 0)      | 0<br>(0 - 0)       | 0<br>(0 - 0)       | 0<br>(0 - 0)             |

Web Table 31- Greece deaths with 95% UI by age, sex, and cause in 2013

| Cause                                               | Males, All Ages          | Males, 0-4 Years  | Males, 5-14 Years | Males, 15-49 Years       | Males, 50-69 Years | Males, 70-80 Years       |
|-----------------------------------------------------|--------------------------|-------------------|-------------------|--------------------------|--------------------|--------------------------|
| Chronic kidney disease                              | 1,546<br>(1,196 - 3,071) | 0<br>(0 - 0)      | 0<br>(0 - 1)      | 41<br>(30 - 81)          | 172<br>(130 - 356) | 1,333<br>(1,015 - 2,668) |
| Chronic kidney disease due to diabetes mellitus     | 210<br>(103 - 618)       | 0<br>(0 - 0)      | 0<br>(0 - 0)      | 6<br>(3 - 16)            | 24<br>(11 - 66)    | 180<br>(83 - 537)        |
| Chronic kidney disease due to hypertension          | 664<br>(448 - 1,103)     | 0<br>(0 - 0)      | 0<br>(0 - 0)      | 12<br>(8 - 21)           | 65<br>(45 - 120)   | 588<br>(390 - 968)       |
| Chronic kidney disease due to glomerulonephritis    | 3<br>(2 - 7)             | 0<br>(0 - 0)      | 0<br>(0 - 0)      | 1<br>(0 - 1)             | 1<br>(0 - 2)       | 2<br>(1 - 4)             |
| Chronic kidney disease due to other causes          | 668<br>(393 - 1,705)     | 0<br>(0 - 0)      | 0<br>(0 - 0)      | 22<br>(13 - 53)          | 82<br>(47 - 203)   | 564<br>(315 - 1,445)     |
| Urinary diseases and male infertility               | 67<br>(43 - 169)         | 0<br>(0 - 0)      | 0<br>(0 - 0)      | 1<br>(1 - 2)             | 5<br>(3 - 10)      | 61<br>(37 - 156)         |
| Interstitial nephritis and urinary tract infections | 57<br>(34 - 147)         | 0<br>(0 - 0)      | 0<br>(0 - 0)      | 1<br>(0 - 1)             | 4<br>(2 - 8)       | 53<br>(31 - 140)         |
| Urolithiasis                                        | 1<br>(0 - 2)             | --                | 0<br>(0 - 0)      | 0<br>(0 - 0)             | 0<br>(0 - 1)       | 0<br>(0 - 1)             |
| Other urinary diseases                              | 10<br>(3 - 21)           | 0<br>(0 - 0)      | 0<br>(0 - 0)      | 0<br>(0 - 0)             | 1<br>(1 - 3)       | 8<br>(3 - 18)            |
| Gynecological diseases                              | --                       | --                | --                | --                       | --                 | --                       |
| Uterine fibroids                                    | --                       | --                | --                | --                       | --                 | --                       |
| Polycystic ovarian syndrome                         | --                       | --                | --                | --                       | --                 | --                       |
| Endometriosis                                       | --                       | --                | --                | --                       | --                 | --                       |
| Genital prolapse                                    | --                       | --                | --                | --                       | --                 | --                       |
| Other gynecological diseases                        | --                       | --                | --                | --                       | --                 | --                       |
| Hemoglobinopathies and hemolytic anemias            | 35<br>(22 - 61)          | 0<br>(0 - 0)      | 1<br>(0 - 1)      | 11<br>(7 - 18)           | 5<br>(3 - 8)       | 19<br>(11 - 33)          |
| Thalassemias                                        | 6<br>(4 - 10)            | 0<br>(0 - 0)      | 0<br>(0 - 1)      | 5<br>(3 - 9)             | 0<br>(0 - 0)       | 0<br>(0 - 0)             |
| Sickle cell disorders                               | 8<br>(5 - 13)            | 0<br>(0 - 0)      | 0<br>(0 - 0)      | 3<br>(2 - 6)             | 3<br>(2 - 5)       | 1<br>(1 - 2)             |
| G6PD deficiency                                     | 1<br>(0 - 1)             | 0<br>(0 - 0)      | 0<br>(0 - 0)      | 0<br>(0 - 0)             | 0<br>(0 - 0)       | 0<br>(0 - 0)             |
| Other hemoglobinopathies and hemolytic anemias      | 21<br>(13 - 37)          | 0<br>(0 - 0)      | 0<br>(0 - 0)      | 2<br>(1 - 3)             | 2<br>(1 - 3)       | 18<br>(10 - 31)          |
| Endocrine, metabolic, blood, and immune disorders   | 225<br>(81 - 302)        | 3<br>(1 - 4)      | 1<br>(1 - 2)      | 18<br>(9 - 23)           | 41<br>(16 - 54)    | 162<br>(51 - 234)        |
| Musculoskeletal disorders                           | 47<br>(22 - 62)          | --                | 0<br>(0 - 0)      | 3<br>(2 - 4)             | 8<br>(4 - 10)      | 37<br>(16 - 50)          |
| Rheumatoid arthritis                                | 7<br>(3 - 12)            | --                | 0<br>(0 - 0)      | 0<br>(0 - 1)             | 1<br>(1 - 2)       | 6<br>(2 - 10)            |
| Other musculoskeletal disorders                     | 40<br>(18 - 52)          | --                | 0<br>(0 - 0)      | 3<br>(2 - 3)             | 6<br>(3 - 8)       | 31<br>(13 - 43)          |
| Other non-communicable diseases                     | 179<br>(158 - 206)       | 101<br>(85 - 119) | 10<br>(7 - 12)    | 17<br>(14 - 21)          | 10<br>(8 - 12)     | 43<br>(31 - 57)          |
| Congenital anomalies                                | 133<br>(114 - 154)       | 97<br>(82 - 116)  | 10<br>(7 - 12)    | 15<br>(12 - 20)          | 5<br>(4 - 7)       | 6<br>(5 - 9)             |
| Neural tube defects                                 | 3<br>(2 - 6)             | 2<br>(1 - 5)      | 0<br>(0 - 0)      | 0<br>(0 - 1)             | 0<br>(0 - 0)       | 0<br>(0 - 0)             |
| Congenital heart anomalies                          | 82<br>(64 - 100)         | 59<br>(44 - 75)   | 7<br>(5 - 9)      | 11<br>(8 - 15)           | 3<br>(2 - 5)       | 1<br>(1 - 2)             |
| Cleft lip and cleft palate                          | 0<br>(0 - 1)             | 0<br>(0 - 1)      | --                | --                       | --                 | --                       |
| Down syndrome                                       | 12<br>(5 - 30)           | 8<br>(3 - 22)     | 1<br>(0 - 2)      | 2<br>(1 - 4)             | 0<br>(0 - 1)       | 1<br>(0 - 3)             |
| Chromosomal unbalanced rearrangements               | 4<br>(3 - 5)             | 3<br>(2 - 4)      | 0<br>(0 - 0)      | 0<br>(0 - 1)             | 0<br>(0 - 1)       | 0<br>(0 - 0)             |
| Other congenital anomalies                          | 32<br>(23 - 44)          | 24<br>(16 - 35)   | 2<br>(1 - 3)      | 2<br>(1 - 3)             | 1<br>(1 - 2)       | 4<br>(2 - 5)             |
| Skin and subcutaneous diseases                      | 42<br>(29 - 56)          | 0<br>(0 - 0)      | 0<br>(0 - 0)      | 2<br>(1 - 2)             | 4<br>(3 - 6)       | 36<br>(24 - 50)          |
| Cellulitis                                          | 13<br>(6 - 23)           | 0<br>(0 - 0)      | 0<br>(0 - 0)      | 0<br>(0 - 1)             | 1<br>(1 - 2)       | 11<br>(5 - 20)           |
| Pyoderma                                            | 25<br>(15 - 36)          | 0<br>(0 - 0)      | 0<br>(0 - 0)      | 1<br>(0 - 1)             | 2<br>(1 - 3)       | 21<br>(12 - 32)          |
| Decubitus ulcer                                     | 3<br>(2 - 6)             | 0<br>(0 - 0)      | 0<br>(0 - 0)      | 0<br>(0 - 0)             | 0<br>(0 - 0)       | 3<br>(1 - 6)             |
| Other skin and subcutaneous diseases                | 2<br>(1 - 3)             | 0<br>(0 - 0)      | 0<br>(0 - 0)      | 0<br>(0 - 0)             | 0<br>(0 - 1)       | 1<br>(0 - 3)             |
| Sudden infant death syndrome                        | 4<br>(2 - 8)             | 4<br>(2 - 8)      | --                | --                       | --                 | --                       |
| Injuries                                            | 3,104<br>(2,831 - 3,427) | 17<br>(12 - 23)   | 26<br>(22 - 30)   | 1,268<br>(1,155 - 1,385) | 691<br>(619 - 770) | 1,102<br>(953 - 1,305)   |
| Transport injuries                                  | 1,315<br>(1,195 - 1,435) | 4<br>(3 - 6)      | 15<br>(12 - 18)   | 734<br>(662 - 808)       | 264<br>(228 - 301) | 297<br>(246 - 352)       |

Web Table 31- Greece deaths with 95% UI by age, sex, and cause in 2013

| Cause                                           | Males, All Ages          | Males, 0-4 Years | Males, 5-14 Years | Males, 15-49 Years | Males, 50-69 Years | Males, 70-80 Years |
|-------------------------------------------------|--------------------------|------------------|-------------------|--------------------|--------------------|--------------------|
| Road injuries                                   | 1,289<br>(1,170 - 1,408) | 4<br>(3 - 6)     | 14<br>(11 - 18)   | 719<br>(648 - 793) | 258<br>(222 - 294) | 294<br>(242 - 347) |
| Pedestrian road injuries                        | 206<br>(115 - 345)       | 1<br>(1 - 2)     | 3<br>(2 - 6)      | 62<br>(30 - 109)   | 42<br>(22 - 73)    | 97<br>(56 - 155)   |
| Cyclist road injuries                           | 78<br>(33 - 106)         | 0<br>(0 - 1)     | 2<br>(1 - 4)      | 36<br>(15 - 51)    | 18<br>(8 - 27)     | 21<br>(8 - 32)     |
| Motorcyclist road injuries                      | 347<br>(188 - 445)       | 0<br>(0 - 1)     | 3<br>(1 - 4)      | 222<br>(125 - 288) | 58<br>(28 - 82)    | 64<br>(31 - 91)    |
| Motor vehicle road injuries                     | 548<br>(422 - 790)       | 2<br>(1 - 3)     | 5<br>(3 - 8)      | 344<br>(266 - 485) | 114<br>(81 - 172)  | 84<br>(52 - 135)   |
| Other road injuries                             | 111<br>(26 - 168)        | 0<br>(0 - 1)     | 1<br>(0 - 3)      | 54<br>(11 - 87)    | 26<br>(6 - 46)     | 29<br>(6 - 53)     |
| Other transport injuries                        | 25<br>(17 - 34)          | 0<br>(0 - 0)     | 0<br>(0 - 0)      | 15<br>(10 - 21)    | 6<br>(4 - 9)       | 4<br>(2 - 6)       |
| Unintentional injuries                          | 1,277<br>(1,100 - 1,546) | 12<br>(8 - 18)   | 10<br>(8 - 12)    | 288<br>(250 - 338) | 282<br>(240 - 332) | 686<br>(565 - 880) |
| Falls                                           | 384<br>(316 - 591)       | 1<br>(0 - 1)     | 1<br>(1 - 2)      | 70<br>(58 - 97)    | 84<br>(68 - 115)   | 228<br>(169 - 387) |
| Drowning                                        | 258<br>(174 - 323)       | 2<br>(1 - 3)     | 4<br>(3 - 7)      | 86<br>(60 - 116)   | 63<br>(42 - 86)    | 103<br>(62 - 139)  |
| Fire, heat, and hot substances                  | 74<br>(53 - 93)          | 1<br>(0 - 2)     | 1<br>(0 - 1)      | 17<br>(12 - 22)    | 15<br>(10 - 20)    | 41<br>(28 - 55)    |
| Poisonings                                      | 35<br>(20 - 42)          | 0<br>(0 - 0)     | 0<br>(0 - 0)      | 17<br>(8 - 22)     | 8<br>(5 - 10)      | 9<br>(6 - 15)      |
| Exposure to mechanical forces                   | 85<br>(62 - 98)          | 0<br>(0 - 1)     | 2<br>(1 - 2)      | 44<br>(34 - 53)    | 25<br>(17 - 31)    | 14<br>(8 - 17)     |
| Unintentional firearm injuries                  | 11<br>(9 - 14)           | 0<br>(0 - 0)     | 0<br>(0 - 1)      | 6<br>(5 - 9)       | 2<br>(2 - 3)       | 2<br>(1 - 3)       |
| Unintentional suffocation                       | 1<br>(1 - 2)             | 0<br>(0 - 0)     | 0<br>(0 - 0)      | 0<br>(0 - 1)       | 0<br>(0 - 0)       | 0<br>(0 - 0)       |
| Other exposure to mechanical forces             | 74<br>(51 - 86)          | 0<br>(0 - 1)     | 1<br>(1 - 2)      | 37<br>(27 - 46)    | 23<br>(14 - 29)    | 12<br>(6 - 15)     |
| Adverse effects of medical treatment            | 215<br>(142 - 390)       | 1<br>(0 - 2)     | 0<br>(0 - 0)      | 17<br>(12 - 29)    | 47<br>(33 - 79)    | 150<br>(90 - 293)  |
| Animal contact                                  | 3<br>(2 - 8)             | 0<br>(0 - 0)     | 0<br>(0 - 0)      | 1<br>(1 - 2)       | 1<br>(1 - 2)       | 1<br>(1 - 3)       |
| Venomous animal contact                         | 3<br>(2 - 6)             | 0<br>(0 - 0)     | 0<br>(0 - 0)      | 1<br>(0 - 1)       | 1<br>(1 - 2)       | 1<br>(1 - 2)       |
| Non-venomous animal contact                     | 1<br>(0 - 2)             | 0<br>(0 - 0)     | 0<br>(0 - 0)      | 0<br>(0 - 0)       | 0<br>(0 - 1)       | 0<br>(0 - 1)       |
| Foreign body                                    | 219<br>(102 - 310)       | 8<br>(4 - 12)    | 1<br>(1 - 2)      | 34<br>(22 - 60)    | 38<br>(19 - 56)    | 138<br>(54 - 220)  |
| Pulmonary aspiration and foreign body in airway | 218<br>(101 - 310)       | 8<br>(4 - 12)    | 1<br>(1 - 2)      | 34<br>(21 - 60)    | 37<br>(18 - 56)    | 138<br>(54 - 220)  |
| Foreign body in other body part                 | 1<br>(0 - 1)             | 0<br>(0 - 0)     | 0<br>(0 - 0)      | 0<br>(0 - 0)       | 0<br>(0 - 0)       | 0<br>(0 - 0)       |
| Other unintentional injuries                    | 4<br>(3 - 6)             | 0<br>(0 - 0)     | 0<br>(0 - 0)      | 2<br>(1 - 3)       | 1<br>(1 - 1)       | 1<br>(1 - 1)       |
| Self-harm and interpersonal violence            | 512<br>(412 - 597)       | 1<br>(0 - 1)     | 1<br>(1 - 2)      | 246<br>(188 - 289) | 145<br>(111 - 173) | 119<br>(96 - 161)  |
| Self-harm                                       | 398<br>(316 - 474)       | --               | 1<br>(0 - 1)      | 176<br>(132 - 209) | 119<br>(90 - 143)  | 102<br>(80 - 149)  |
| Interpersonal violence                          | 115<br>(67 - 147)        | 1<br>(0 - 1)     | 1<br>(0 - 1)      | 71<br>(40 - 92)    | 26<br>(15 - 38)    | 16<br>(9 - 22)     |
| Assault by firearm                              | 55<br>(31 - 82)          | 0<br>(0 - 0)     | 0<br>(0 - 1)      | 38<br>(20 - 56)    | 12<br>(7 - 20)     | 5<br>(2 - 8)       |
| Assault by sharp object                         | 31<br>(14 - 48)          | 0<br>(0 - 0)     | 0<br>(0 - 0)      | 19<br>(8 - 30)     | 7<br>(3 - 12)      | 5<br>(2 - 8)       |
| Assault by other means                          | 28<br>(13 - 41)          | 0<br>(0 - 1)     | 0<br>(0 - 0)      | 14<br>(6 - 21)     | 7<br>(3 - 10)      | 7<br>(3 - 11)      |

Web Table 31- Greece deaths with 95% UI by age, sex, and cause in 2013

| Cause                                                             | Females, All Ages           | Females, 0-4 Years | Females, 5-14 Years | Females, 15-49 Years     | Females, 50-69 Years     | Females, 70-80 Years        |
|-------------------------------------------------------------------|-----------------------------|--------------------|---------------------|--------------------------|--------------------------|-----------------------------|
| All causes                                                        | 68,699<br>(65,786 - 71,974) | 202<br>(174 - 234) | 49<br>(45 - 53)     | 1,518<br>(1,384 - 1,673) | 5,901<br>(5,467 - 6,395) | 61,029<br>(58,678 - 63,670) |
| Communicable, maternal, neonatal, and nutritional diseases        | 2,537<br>(1,983 - 3,208)    | 88<br>(71 - 106)   | 5<br>(3 - 6)        | 54<br>(46 - 62)          | 116<br>(95 - 137)        | 2,274<br>(1,717 - 2,935)    |
| HIV/AIDS and tuberculosis                                         | 113<br>(53 - 155)           | 0<br>(0 - 0)       | 0<br>(0 - 0)        | 6<br>(5 - 8)             | 7<br>(6 - 9)             | 100<br>(40 - 141)           |
| Tuberculosis                                                      | 110<br>(48 - 152)           | 0<br>(0 - 0)       | 0<br>(0 - 0)        | 4<br>(3 - 5)             | 6<br>(5 - 8)             | 100<br>(40 - 141)           |
| HIV/AIDS                                                          | 3<br>(2 - 5)                | 0<br>(0 - 0)       | 0<br>(0 - 0)        | 2<br>(1 - 4)             | 1<br>(0 - 1)             | 0<br>(0 - 0)                |
| HIV/AIDS resulting in mycobacterial infection                     | 0<br>(0 - 0)                | 0<br>(0 - 0)       | 0<br>(0 - 0)        | 0<br>(0 - 0)             | 0<br>(0 - 0)             | 0<br>(0 - 0)                |
| HIV/AIDS resulting in other diseases                              | 3<br>(2 - 5)                | 0<br>(0 - 0)       | 0<br>(0 - 0)        | 2<br>(1 - 4)             | 1<br>(0 - 1)             | 0<br>(0 - 0)                |
| Diarrhea, lower respiratory, and other common infectious diseases | 2,088<br>(1,547 - 2,763)    | 11<br>(8 - 15)     | 4<br>(3 - 5)        | 28<br>(20 - 35)          | 88<br>(67 - 108)         | 1,957<br>(1,415 - 2,618)    |
| Diarrheal diseases                                                | 13<br>(8 - 21)              | 0<br>(0 - 0)       | 0<br>(0 - 0)        | 0<br>(0 - 0)             | 1<br>(0 - 1)             | 12<br>(7 - 20)              |
| Intestinal infectious diseases                                    | 6<br>(2 - 14)               | 1<br>(0 - 3)       | 1<br>(0 - 3)        | 3<br>(1 - 6)             | 1<br>(0 - 2)             | 1<br>(0 - 3)                |
| Typhoid fever                                                     | 5<br>(1 - 12)               | 1<br>(0 - 2)       | 1<br>(0 - 2)        | 2<br>(1 - 5)             | 1<br>(0 - 2)             | 1<br>(0 - 2)                |
| Paratyphoid fever                                                 | 1<br>(0 - 2)                | 0<br>(0 - 1)       | 0<br>(0 - 1)        | 0<br>(0 - 1)             | 0<br>(0 - 0)             | 0<br>(0 - 0)                |
| Other intestinal infectious diseases                              | 1<br>(0 - 3)                | 0<br>(0 - 1)       | 0<br>(0 - 0)        | 0<br>(0 - 1)             | 0<br>(0 - 1)             | 0<br>(0 - 2)                |
| Lower respiratory infections                                      | 2,016<br>(1,474 - 2,684)    | 8<br>(5 - 11)      | 2<br>(1 - 2)        | 20<br>(14 - 25)          | 78<br>(58 - 97)          | 1,908<br>(1,368 - 2,573)    |
| Upper respiratory infections                                      | 2<br>(0 - 6)                | 0<br>(0 - 0)       | 0<br>(0 - 0)        | 0<br>(0 - 0)             | 0<br>(0 - 0)             | 1<br>(0 - 6)                |
| Otitis media                                                      | 1<br>(1 - 1)                | 0<br>(0 - 0)       | 0<br>(0 - 0)        | 0<br>(0 - 0)             | 0<br>(0 - 0)             | 0<br>(0 - 0)                |
| Meningitis                                                        | 32<br>(21 - 40)             | 1<br>(1 - 2)       | 0<br>(0 - 1)        | 3<br>(2 - 3)             | 5<br>(3 - 6)             | 23<br>(14 - 30)             |
| Pneumococcal meningitis                                           | 6<br>(3 - 9)                | 0<br>(0 - 0)       | 0<br>(0 - 0)        | 0<br>(0 - 1)             | 1<br>(0 - 2)             | 5<br>(2 - 7)                |
| H influenzae type B meningitis                                    | 3<br>(2 - 4)                | 0<br>(0 - 1)       | 0<br>(0 - 0)        | 0<br>(0 - 0)             | 0<br>(0 - 1)             | 1<br>(1 - 3)                |
| Meningococcal meningitis                                          | 12<br>(8 - 18)              | 1<br>(0 - 1)       | 0<br>(0 - 0)        | 1<br>(1 - 1)             | 2<br>(1 - 3)             | 9<br>(5 - 13)               |
| Other meningitis                                                  | 11<br>(6 - 16)              | 0<br>(0 - 1)       | 0<br>(0 - 0)        | 1<br>(1 - 1)             | 2<br>(1 - 3)             | 8<br>(4 - 12)               |
| Encephalitis                                                      | 10<br>(7 - 16)              | 0<br>(0 - 1)       | 0<br>(0 - 0)        | 1<br>(1 - 2)             | 2<br>(1 - 3)             | 6<br>(3 - 10)               |
| Diphtheria                                                        | 0<br>(0 - 0)                | 0<br>(0 - 0)       | 0<br>(0 - 0)        | 0<br>(0 - 0)             | 0<br>(0 - 0)             | --                          |
| Whooping cough                                                    | 0<br>(0 - 1)                | 0<br>(0 - 0)       | 0<br>(0 - 0)        | 0<br>(0 - 0)             | 0<br>(0 - 0)             | --                          |
| Tetanus                                                           | 1<br>(1 - 2)                | 0<br>(0 - 0)       | 0<br>(0 - 0)        | 0<br>(0 - 0)             | 0<br>(0 - 0)             | 1<br>(0 - 1)                |
| Measles                                                           | 0<br>(0 - 0)                | 0<br>(0 - 0)       | 0<br>(0 - 0)        | 0<br>(0 - 0)             | 0<br>(0 - 0)             | --                          |
| Varicella and herpes zoster                                       | 6<br>(1 - 26)               | 0<br>(0 - 1)       | 0<br>(0 - 0)        | 0<br>(0 - 1)             | 0<br>(0 - 1)             | 5<br>(0 - 25)               |
| Neglected tropical diseases and malaria                           | 8<br>(6 - 9)                | 0<br>(0 - 0)       | 0<br>(0 - 0)        | 1<br>(1 - 2)             | 2<br>(1 - 2)             | 4<br>(4 - 5)                |
| Leishmaniasis                                                     | 1<br>(0 - 1)                | 0<br>(0 - 0)       | 0<br>(0 - 0)        | 0<br>(0 - 0)             | 0<br>(0 - 0)             | 0<br>(0 - 0)                |
| Visceral leishmaniasis                                            | 1<br>(0 - 1)                | 0<br>(0 - 0)       | 0<br>(0 - 0)        | 0<br>(0 - 0)             | 0<br>(0 - 0)             | 0<br>(0 - 0)                |
| Cysticercosis                                                     | 0<br>(0 - 0)                | 0<br>(0 - 0)       | 0<br>(0 - 0)        | 0<br>(0 - 0)             | 0<br>(0 - 0)             | 0<br>(0 - 0)                |
| Cystic echinococcosis                                             | 4<br>(4 - 5)                | 0<br>(0 - 0)       | 0<br>(0 - 0)        | 1<br>(0 - 1)             | 1<br>(1 - 1)             | 3<br>(3 - 3)                |
| Dengue                                                            | 1<br>(0 - 1)                | 0<br>(0 - 0)       | 0<br>(0 - 0)        | 0<br>(0 - 0)             | 0<br>(0 - 0)             | 0<br>(0 - 0)                |
| Rabies                                                            | 0<br>(0 - 1)                | 0<br>(0 - 0)       | 0<br>(0 - 0)        | 0<br>(0 - 0)             | 0<br>(0 - 0)             | 0<br>(0 - 0)                |
| Other neglected tropical diseases                                 | 2<br>(1 - 2)                | 0<br>(0 - 0)       | 0<br>(0 - 0)        | 0<br>(0 - 0)             | 0<br>(0 - 0)             | 1<br>(0 - 2)                |
| Maternal disorders                                                | 10<br>(8 - 12)              | --                 | 0<br>(0 - 0)        | 10<br>(8 - 12)           | --                       | --                          |
| Maternal hemorrhage                                               | 1<br>(1 - 2)                | --                 | 0<br>(0 - 0)        | 1<br>(1 - 2)             | --                       | --                          |
| Maternal sepsis and other maternal infections                     | 1<br>(1 - 1)                | --                 | 0<br>(0 - 0)        | 1<br>(1 - 1)             | --                       | --                          |
| Maternal hypertensive disorders                                   | 1<br>(1 - 2)                | --                 | 0<br>(0 - 0)        | 1<br>(1 - 2)             | --                       | --                          |
| Maternal obstructed labor                                         | 1<br>(1 - 1)                | --                 | 0<br>(0 - 0)        | 1<br>(1 - 1)             | --                       | --                          |

Web Table 31- Greece deaths with 95% UI by age, sex, and cause in 2013

| Cause                                                            | Females, All Ages           | Females, 0-4 Years | Females, 5-14 Years | Females, 15-49 Years     | Females, 50-69 Years     | Females, 70-80 Years        |
|------------------------------------------------------------------|-----------------------------|--------------------|---------------------|--------------------------|--------------------------|-----------------------------|
| Maternal abortive outcome                                        | 2<br>(1 - 3)                | --                 | 0<br>(0 - 0)        | 2<br>(1 - 3)             | --                       | --                          |
| Indirect maternal deaths                                         | 1<br>(1 - 2)                | --                 | 0<br>(0 - 0)        | 1<br>(1 - 2)             | --                       | --                          |
| Late maternal deaths                                             | 1<br>(0 - 1)                | --                 | 0<br>(0 - 0)        | 1<br>(0 - 1)             | --                       | --                          |
| Maternal deaths aggravated by HIV/AIDS                           | 0<br>(0 - 0)                | --                 | --                  | 0<br>(0 - 0)             | --                       | --                          |
| Other maternal disorders                                         | 2<br>(1 - 3)                | --                 | 0<br>(0 - 0)        | 2<br>(1 - 3)             | --                       | --                          |
| Neonatal disorders                                               | 75<br>(60 - 92)             | 75<br>(60 - 92)    | --                  | --                       | --                       | --                          |
| Neonatal preterm birth complications                             | 62<br>(47 - 78)             | 62<br>(47 - 78)    | --                  | --                       | --                       | --                          |
| Neonatal encephalopathy due to birth asphyxia and trauma         | 10<br>(6 - 18)              | 10<br>(6 - 18)     | --                  | --                       | --                       | --                          |
| Neonatal sepsis and other neonatal infections                    | 2<br>(0 - 6)                | 2<br>(0 - 6)       | --                  | --                       | --                       | --                          |
| Hemolytic disease and other neonatal jaundice                    | 0<br>(0 - 0)                | 0<br>(0 - 0)       | --                  | --                       | --                       | --                          |
| Other neonatal disorders                                         | 1<br>(0 - 1)                | 1<br>(0 - 1)       | --                  | --                       | --                       | --                          |
| Nutritional deficiencies                                         | 138<br>(103 - 209)          | 0<br>(0 - 0)       | 0<br>(0 - 0)        | 4<br>(3 - 5)             | 6<br>(5 - 8)             | 128<br>(94 - 195)           |
| Protein-energy malnutrition                                      | 1<br>(1 - 5)                | 0<br>(0 - 0)       | 0<br>(0 - 0)        | 0<br>(0 - 0)             | 0<br>(0 - 0)             | 1<br>(0 - 4)                |
| Iodine deficiency                                                | 0<br>(0 - 3)                | 0<br>(0 - 0)       | 0<br>(0 - 0)        | 0<br>(0 - 0)             | 0<br>(0 - 0)             | 0<br>(0 - 2)                |
| Iron-deficiency anemia                                           | 133<br>(99 - 200)           | 0<br>(0 - 0)       | 0<br>(0 - 0)        | 3<br>(2 - 4)             | 6<br>(4 - 8)             | 125<br>(91 - 189)           |
| Other nutritional deficiencies                                   | 2<br>(1 - 5)                | 0<br>(0 - 0)       | 0<br>(0 - 0)        | 0<br>(0 - 0)             | 0<br>(0 - 0)             | 2<br>(0 - 5)                |
| Other communicable, maternal, neonatal, and nutritional diseases | 104<br>(72 - 153)           | 1<br>(0 - 2)       | 0<br>(0 - 1)        | 5<br>(4 - 6)             | 13<br>(10 - 18)          | 84<br>(54 - 132)            |
| Sexually transmitted diseases excluding HIV                      | 3<br>(2 - 5)                | 1<br>(0 - 2)       | 0<br>(0 - 0)        | 0<br>(0 - 0)             | 0<br>(0 - 1)             | 2<br>(1 - 3)                |
| Syphilis                                                         | 2<br>(1 - 4)                | 1<br>(0 - 2)       | 0<br>(0 - 0)        | 0<br>(0 - 0)             | 0<br>(0 - 0)             | 1<br>(1 - 2)                |
| Chlamydial infection                                             | 0<br>(0 - 0)                | --                 | 0<br>(0 - 0)        | 0<br>(0 - 0)             | 0<br>(0 - 0)             | 0<br>(0 - 0)                |
| Gonococcal infection                                             | 0<br>(0 - 1)                | --                 | 0<br>(0 - 0)        | 0<br>(0 - 0)             | 0<br>(0 - 0)             | 0<br>(0 - 0)                |
| Other sexually transmitted diseases                              | 0<br>(0 - 0)                | --                 | 0<br>(0 - 0)        | 0<br>(0 - 0)             | 0<br>(0 - 0)             | 0<br>(0 - 0)                |
| Hepatitis                                                        | 80<br>(50 - 126)            | 0<br>(0 - 0)       | 0<br>(0 - 0)        | 3<br>(2 - 4)             | 9<br>(6 - 13)            | 67<br>(39 - 113)            |
| Acute hepatitis A                                                | 16<br>(4 - 36)              | 0<br>(0 - 0)       | 0<br>(0 - 0)        | 2<br>(1 - 3)             | 2<br>(1 - 5)             | 12<br>(3 - 30)              |
| Acute hepatitis B                                                | 60<br>(33 - 98)             | 0<br>(0 - 0)       | 0<br>(0 - 0)        | 1<br>(1 - 2)             | 7<br>(4 - 10)            | 52<br>(27 - 89)             |
| Acute hepatitis C                                                | 4<br>(0 - 14)               | --                 | 0<br>(0 - 0)        | 0<br>(0 - 0)             | 0<br>(0 - 1)             | 4<br>(0 - 13)               |
| Other infectious diseases                                        | 21<br>(11 - 29)             | 0<br>(0 - 0)       | 0<br>(0 - 0)        | 1<br>(1 - 2)             | 4<br>(2 - 5)             | 15<br>(8 - 22)              |
| Non-communicable diseases                                        | 64,849<br>(61,986 - 68,042) | 101<br>(83 - 119)  | 31<br>(27 - 34)     | 1,233<br>(1,119 - 1,372) | 5,571<br>(5,160 - 6,052) | 57,913<br>(55,555 - 60,465) |
| Neoplasms                                                        | 13,164<br>(11,184 - 14,513) | 6<br>(5 - 9)       | 15<br>(12 - 17)     | 731<br>(654 - 818)       | 2,959<br>(2,552 - 3,274) | 9,453<br>(7,891 - 10,519)   |
| Esophageal cancer                                                | 67<br>(54 - 81)             | --                 | --                  | 2<br>(2 - 3)             | 11<br>(9 - 14)           | 53<br>(42 - 67)             |
| Stomach cancer                                                   | 914<br>(656 - 1,257)        | --                 | --                  | 31<br>(22 - 41)          | 125<br>(92 - 165)        | 759<br>(530 - 1,065)        |
| Liver cancer                                                     | 210<br>(150 - 452)          | --                 | 0<br>(0 - 0)        | 6<br>(4 - 11)            | 43<br>(31 - 77)          | 160<br>(107 - 368)          |
| Liver cancer due to hepatitis B                                  | 68<br>(39 - 112)            | --                 | 0<br>(0 - 0)        | 3<br>(2 - 5)             | 20<br>(11 - 32)          | 45<br>(23 - 77)             |
| Liver cancer due to hepatitis C                                  | 88<br>(51 - 218)            | --                 | 0<br>(0 - 0)        | 2<br>(1 - 3)             | 14<br>(8 - 27)           | 72<br>(40 - 192)            |
| Liver cancer due to alcohol use                                  | 32<br>(15 - 73)             | --                 | --                  | 0<br>(0 - 1)             | 4<br>(2 - 9)             | 27<br>(12 - 64)             |
| Liver cancer due to other causes                                 | 21<br>(7 - 72)              | --                 | 0<br>(0 - 0)        | 1<br>(0 - 2)             | 5<br>(2 - 15)            | 16<br>(5 - 54)              |
| Larynx cancer                                                    | 37<br>(24 - 55)             | --                 | --                  | 2<br>(1 - 3)             | 9<br>(6 - 12)            | 27<br>(16 - 41)             |
| Tracheal, bronchus and lung cancer                               | 1,486<br>(1,134 - 1,743)    | --                 | --                  | 76<br>(56 - 94)          | 468<br>(323 - 555)       | 943<br>(713 - 1,164)        |
| Breast cancer                                                    | 2,505<br>(1,592 - 2,940)    | --                 | --                  | 213<br>(177 - 265)       | 700<br>(511 - 812)       | 1,592<br>(869 - 1,960)      |
| Cervical cancer                                                  | 457<br>(336 - 569)          | --                 | --                  | 56<br>(45 - 71)          | 110<br>(80 - 137)        | 290<br>(201 - 393)          |

Web Table 31- Greece deaths with 95% UI by age, sex, and cause in 2013

| Cause                                         | Females, All Ages           | Females, 0-4 Years | Females, 5-14 Years | Females, 15-49 Years | Females, 50-69 Years     | Females, 70-80 Years        |
|-----------------------------------------------|-----------------------------|--------------------|---------------------|----------------------|--------------------------|-----------------------------|
| Uterine cancer                                | 233<br>(190 - 296)          | --                 | --                  | 6<br>(4 - 8)         | 59<br>(46 - 79)          | 168<br>(129 - 220)          |
| Prostate cancer                               | --                          | --                 | --                  | --                   | --                       | --                          |
| Colon and rectum cancer                       | 1,857<br>(1,537 - 2,244)    | --                 | --                  | 50<br>(42 - 59)      | 289<br>(245 - 332)       | 1,518<br>(1,211 - 1,901)    |
| Lip and oral cavity cancer                    | 80<br>(62 - 102)            | --                 | --                  | 4<br>(3 - 5)         | 12<br>(9 - 15)           | 64<br>(48 - 84)             |
| Nasopharynx cancer                            | 27<br>(10 - 42)             | --                 | 0<br>(0 - 0)        | 3<br>(1 - 6)         | 7<br>(3 - 12)            | 16<br>(6 - 28)              |
| Other pharynx cancer                          | 21<br>(15 - 26)             | --                 | --                  | 2<br>(1 - 2)         | 5<br>(4 - 7)             | 14<br>(10 - 19)             |
| Gallbladder and biliary tract cancer          | 340<br>(193 - 489)          | --                 | --                  | 4<br>(3 - 6)         | 49<br>(32 - 68)          | 286<br>(154 - 436)          |
| Pancreatic cancer                             | 1,058<br>(894 - 1,235)      | --                 | --                  | 23<br>(18 - 27)      | 200<br>(168 - 233)       | 835<br>(687 - 1,001)        |
| Malignant skin melanoma                       | 138<br>(78 - 176)           | --                 | --                  | 19<br>(12 - 26)      | 33<br>(19 - 43)          | 86<br>(46 - 116)            |
| Non-melanoma skin cancer                      | 127<br>(81 - 182)           | --                 | --                  | 1<br>(1 - 2)         | 5<br>(4 - 7)             | 120<br>(75 - 174)           |
| Ovarian cancer                                | 738<br>(557 - 887)          | --                 | --                  | 57<br>(46 - 70)      | 244<br>(196 - 288)       | 437<br>(276 - 564)          |
| Testicular cancer                             | --                          | --                 | --                  | --                   | --                       | --                          |
| Kidney cancer                                 | 230<br>(169 - 311)          | 0<br>(0 - 0)       | 0<br>(0 - 0)        | 8<br>(6 - 10)        | 56<br>(41 - 77)          | 166<br>(111 - 242)          |
| Bladder cancer                                | 298<br>(198 - 419)          | --                 | --                  | 4<br>(2 - 5)         | 32<br>(21 - 47)          | 263<br>(173 - 375)          |
| Brain and nervous system cancer               | 585<br>(389 - 712)          | 3<br>(2 - 4)       | 6<br>(4 - 8)        | 63<br>(48 - 79)      | 187<br>(143 - 231)       | 326<br>(177 - 436)          |
| Thyroid cancer                                | 107<br>(81 - 150)           | --                 | 0<br>(0 - 0)        | 2<br>(2 - 3)         | 14<br>(9 - 18)           | 91<br>(66 - 132)            |
| Mesothelioma                                  | 25<br>(17 - 36)             | --                 | --                  | 1<br>(1 - 2)         | 7<br>(4 - 10)            | 17<br>(10 - 28)             |
| Hodgkin lymphoma                              | 118<br>(48 - 158)           | 0<br>(0 - 0)       | 0<br>(0 - 1)        | 12<br>(7 - 16)       | 22<br>(12 - 30)          | 83<br>(29 - 120)            |
| Non-Hodgkin lymphoma                          | 212<br>(90 - 309)           | 0<br>(0 - 0)       | 1<br>(0 - 1)        | 12<br>(6 - 19)       | 43<br>(19 - 63)          | 157<br>(58 - 241)           |
| Multiple myeloma                              | 153<br>(95 - 245)           | --                 | --                  | 4<br>(2 - 6)         | 38<br>(22 - 65)          | 112<br>(66 - 182)           |
| Leukemia                                      | 643<br>(488 - 788)          | 2<br>(1 - 3)       | 5<br>(4 - 7)        | 37<br>(29 - 45)      | 93<br>(72 - 112)         | 506<br>(366 - 647)          |
| Other neoplasms                               | 498<br>(402 - 673)          | 1<br>(1 - 2)       | 2<br>(2 - 3)        | 33<br>(26 - 43)      | 97<br>(79 - 124)         | 364<br>(274 - 519)          |
| Cardiovascular diseases                       | 36,580<br>(33,751 - 40,192) | 1<br>(1 - 1)       | 2<br>(2 - 3)        | 311<br>(256 - 375)   | 1,815<br>(1,594 - 2,283) | 34,450<br>(31,666 - 37,710) |
| Rheumatic heart disease                       | 40<br>(28 - 81)             | 0<br>(0 - 0)       | 0<br>(0 - 0)        | 3<br>(2 - 6)         | 8<br>(5 - 17)            | 29<br>(19 - 59)             |
| Ischemic heart disease                        | 19,116<br>(16,017 - 21,858) | 0<br>(0 - 0)       | 0<br>(0 - 1)        | 178<br>(139 - 219)   | 1,077<br>(930 - 1,378)   | 17,861<br>(14,901 - 20,412) |
| Cerebrovascular disease                       | 13,385<br>(11,290 - 17,757) | 0<br>(0 - 1)       | 1<br>(1 - 2)        | 89<br>(67 - 118)     | 513<br>(413 - 779)       | 12,781<br>(10,760 - 16,797) |
| Ischemic stroke                               | 8,456<br>(6,773 - 11,754)   | 0<br>(0 - 0)       | 0<br>(0 - 0)        | 8<br>(5 - 13)        | 147<br>(93 - 255)        | 8,302<br>(6,639 - 11,507)   |
| Hemorrhagic stroke                            | 4,929<br>(3,855 - 7,093)    | 0<br>(0 - 1)       | 1<br>(1 - 2)        | 81<br>(61 - 107)     | 367<br>(294 - 546)       | 4,479<br>(3,437 - 6,588)    |
| Hypertensive heart disease                    | 1,277<br>(578 - 1,871)      | 0<br>(0 - 0)       | 0<br>(0 - 0)        | 4<br>(3 - 6)         | 38<br>(21 - 52)          | 1,236<br>(550 - 1,827)      |
| Cardiomyopathy and myocarditis                | 534<br>(361 - 1,050)        | 0<br>(0 - 0)       | 0<br>(0 - 0)        | 7<br>(5 - 14)        | 39<br>(28 - 77)          | 488<br>(321 - 946)          |
| Atrial fibrillation and flutter               | 826<br>(511 - 1,244)        | --                 | --                  | 2<br>(1 - 3)         | 22<br>(15 - 32)          | 802<br>(491 - 1,217)        |
| Aortic aneurysm                               | 247<br>(137 - 361)          | --                 | --                  | 11<br>(6 - 16)       | 39<br>(22 - 58)          | 198<br>(106 - 297)          |
| Peripheral vascular disease                   | 20<br>(12 - 32)             | --                 | --                  | 0<br>(0 - 0)         | 1<br>(0 - 1)             | 19<br>(12 - 31)             |
| Endocarditis                                  | 98<br>(46 - 149)            | 0<br>(0 - 0)       | 0<br>(0 - 0)        | 3<br>(2 - 5)         | 13<br>(7 - 19)           | 82<br>(35 - 130)            |
| Other cardiovascular and circulatory diseases | 1,037<br>(704 - 1,396)      | 0<br>(0 - 0)       | 0<br>(0 - 0)        | 14<br>(10 - 21)      | 67<br>(48 - 98)          | 955<br>(632 - 1,304)        |
| Chronic respiratory diseases                  | 4,170<br>(2,311 - 5,079)    | 0<br>(0 - 1)       | 0<br>(0 - 1)        | 25<br>(13 - 31)      | 189<br>(73 - 229)        | 3,955<br>(2,218 - 4,844)    |
| Chronic obstructive pulmonary disease         | 4,001<br>(2,242 - 4,860)    | 0<br>(0 - 0)       | 0<br>(0 - 0)        | 20<br>(11 - 25)      | 152<br>(61 - 190)        | 3,828<br>(2,160 - 4,673)    |
| Pneumoconiosis                                | 2<br>(1 - 3)                | 0<br>(0 - 0)       | 0<br>(0 - 0)        | 1<br>(0 - 1)         | 1<br>(0 - 1)             | 0<br>(0 - 1)                |
| Silicosis                                     | 0<br>(0 - 0)                | 0<br>(0 - 0)       | 0<br>(0 - 0)        | 0<br>(0 - 0)         | 0<br>(0 - 0)             | 0<br>(0 - 0)                |
| Asbestosis                                    | 0<br>(0 - 0)                | 0<br>(0 - 0)       | 0<br>(0 - 0)        | 0<br>(0 - 0)         | 0<br>(0 - 0)             | 0<br>(0 - 0)                |



Web Table 31- Greece deaths with 95% UI by age, sex, and cause in 2013

| Cause                                               | Females, All Ages        | Females, 0-4 Years | Females, 5-14 Years | Females, 15-49 Years | Females, 50-69 Years | Females, 70-80 Years     |
|-----------------------------------------------------|--------------------------|--------------------|---------------------|----------------------|----------------------|--------------------------|
| Coal workers pneumoconiosis                         | 0<br>(0 - 0)             | 0<br>(0 - 0)       | 0<br>(0 - 0)        | 0<br>(0 - 0)         | 0<br>(0 - 0)         | 0<br>(0 - 0)             |
| Other pneumoconiosis                                | 1<br>(1 - 2)             | 0<br>(0 - 0)       | 0<br>(0 - 0)        | 0<br>(0 - 1)         | 1<br>(0 - 1)         | 0<br>(0 - 1)             |
| Asthma                                              | 31<br>(18 - 62)          | 0<br>(0 - 0)       | 0<br>(0 - 0)        | 1<br>(1 - 2)         | 5<br>(2 - 8)         | 25<br>(13 - 53)          |
| Interstitial lung disease and pulmonary sarcoidosis | 132<br>(29 - 260)        | 0<br>(0 - 0)       | 0<br>(0 - 0)        | 3<br>(1 - 5)         | 30<br>(6 - 57)       | 99<br>(20 - 208)         |
| Other chronic respiratory diseases                  | 5<br>(2 - 8)             | 0<br>(0 - 0)       | 0<br>(0 - 0)        | 1<br>(0 - 1)         | 1<br>(0 - 2)         | 3<br>(1 - 5)             |
| Cirrhosis                                           | 371<br>(315 - 431)       | 0<br>(0 - 0)       | 0<br>(0 - 0)        | 18<br>(15 - 22)      | 69<br>(58 - 81)      | 284<br>(231 - 339)       |
| Cirrhosis due to hepatitis B                        | 59<br>(29 - 100)         | 0<br>(0 - 0)       | 0<br>(0 - 0)        | 2<br>(1 - 5)         | 10<br>(5 - 19)       | 46<br>(23 - 81)          |
| Cirrhosis due to hepatitis C                        | 207<br>(132 - 281)       | 0<br>(0 - 0)       | 0<br>(0 - 0)        | 10<br>(5 - 14)       | 39<br>(24 - 54)      | 158<br>(98 - 222)        |
| Cirrhosis due to alcohol use                        | 68<br>(31 - 124)         | --                 | --                  | 2<br>(1 - 4)         | 11<br>(5 - 21)       | 56<br>(24 - 104)         |
| Cirrhosis due to other causes                       | 37<br>(14 - 66)          | 0<br>(0 - 0)       | 0<br>(0 - 0)        | 4<br>(1 - 8)         | 9<br>(3 - 18)        | 24<br>(7 - 45)           |
| Digestive diseases                                  | 1,417<br>(1,044 - 1,698) | 0<br>(0 - 0)       | 0<br>(0 - 1)        | 18<br>(14 - 22)      | 90<br>(65 - 109)     | 1,308<br>(965 - 1,575)   |
| Peptic ulcer disease                                | 308<br>(151 - 488)       | 0<br>(0 - 0)       | 0<br>(0 - 0)        | 3<br>(2 - 5)         | 18<br>(9 - 27)       | 287<br>(139 - 461)       |
| Gastritis and duodenitis                            | 1<br>(1 - 2)             | 0<br>(0 - 0)       | 0<br>(0 - 0)        | 0<br>(0 - 1)         | 0<br>(0 - 0)         | 1<br>(0 - 1)             |
| Appendicitis                                        | 13<br>(6 - 29)           | 0<br>(0 - 0)       | 0<br>(0 - 0)        | 1<br>(1 - 2)         | 1<br>(1 - 3)         | 11<br>(4 - 25)           |
| Paralytic ileus and intestinal obstruction          | 345<br>(184 - 551)       | 0<br>(0 - 0)       | 0<br>(0 - 0)        | 3<br>(2 - 5)         | 17<br>(8 - 27)       | 325<br>(170 - 521)       |
| Inguinal, femoral, and abdominal hernia             | 16<br>(8 - 39)           | 0<br>(0 - 0)       | 0<br>(0 - 0)        | 0<br>(0 - 1)         | 2<br>(1 - 4)         | 14<br>(6 - 34)           |
| Inflammatory bowel disease                          | 35<br>(18 - 65)          | 0<br>(0 - 0)       | 0<br>(0 - 0)        | 1<br>(0 - 1)         | 2<br>(1 - 3)         | 32<br>(17 - 62)          |
| Vascular intestinal disorders                       | 202<br>(103 - 387)       | 0<br>(0 - 0)       | 0<br>(0 - 0)        | 1<br>(1 - 3)         | 11<br>(6 - 19)       | 190<br>(95 - 368)        |
| Gallbladder and biliary diseases                    | 186<br>(112 - 265)       | 0<br>(0 - 0)       | 0<br>(0 - 0)        | 2<br>(1 - 2)         | 10<br>(6 - 14)       | 174<br>(104 - 251)       |
| Pancreatitis                                        | 259<br>(151 - 389)       | 0<br>(0 - 0)       | 0<br>(0 - 0)        | 5<br>(3 - 7)         | 24<br>(15 - 35)      | 229<br>(131 - 351)       |
| Other digestive diseases                            | 52<br>(32 - 75)          | 0<br>(0 - 0)       | 0<br>(0 - 0)        | 1<br>(1 - 2)         | 5<br>(3 - 7)         | 46<br>(28 - 68)          |
| Neurological disorders                              | 5,876<br>(3,957 - 7,958) | 3<br>(2 - 4)       | 2<br>(1 - 2)        | 39<br>(29 - 47)      | 186<br>(134 - 239)   | 5,646<br>(3,718 - 7,759) |
| Alzheimer disease and other dementias               | 5,285<br>(3,348 - 7,368) | --                 | --                  | 1<br>(0 - 1)         | 94<br>(47 - 141)     | 5,191<br>(3,256 - 7,278) |
| Parkinson disease                                   | 296<br>(130 - 403)       | --                 | --                  | 1<br>(0 - 1)         | 15<br>(9 - 20)       | 281<br>(118 - 387)       |
| Epilepsy                                            | 38<br>(24 - 51)          | 0<br>(0 - 0)       | 1<br>(0 - 1)        | 10<br>(7 - 13)       | 7<br>(5 - 9)         | 20<br>(12 - 30)          |
| Multiple sclerosis                                  | 50<br>(19 - 65)          | --                 | --                  | 13<br>(5 - 18)       | 20<br>(7 - 29)       | 16<br>(6 - 24)           |
| Other neurological disorders                        | 207<br>(168 - 249)       | 2<br>(2 - 3)       | 1<br>(1 - 2)        | 15<br>(12 - 18)      | 51<br>(41 - 62)      | 138<br>(105 - 179)       |
| Mental and substance use disorders                  | 35<br>(30 - 42)          | 0<br>(0 - 0)       | 0<br>(0 - 0)        | 27<br>(22 - 33)      | 4<br>(3 - 5)         | 5<br>(3 - 7)             |
| Schizophrenia                                       | 1<br>(0 - 3)             | --                 | --                  | 0<br>(0 - 1)         | 0<br>(0 - 1)         | 0<br>(0 - 1)             |
| Alcohol use disorders                               | 4<br>(2 - 7)             | --                 | --                  | 1<br>(1 - 3)         | 1<br>(0 - 2)         | 1<br>(1 - 2)             |
| Drug use disorders                                  | 30<br>(24 - 36)          | 0<br>(0 - 0)       | --                  | 24<br>(20 - 30)      | 2<br>(2 - 3)         | 3<br>(2 - 4)             |
| Opioid use disorders                                | 11<br>(9 - 13)           | 0<br>(0 - 0)       | --                  | 9<br>(7 - 11)        | 1<br>(1 - 1)         | 1<br>(1 - 2)             |
| Cocaine use disorders                               | 1<br>(1 - 2)             | 0<br>(0 - 0)       | --                  | 1<br>(1 - 1)         | 0<br>(0 - 0)         | 0<br>(0 - 0)             |
| Amphetamine use disorders                           | 1<br>(1 - 2)             | 0<br>(0 - 0)       | --                  | 1<br>(1 - 1)         | 0<br>(0 - 0)         | 0<br>(0 - 0)             |
| Other drug use disorders                            | 17<br>(14 - 20)          | 0<br>(0 - 0)       | --                  | 13<br>(11 - 17)      | 1<br>(1 - 2)         | 2<br>(1 - 3)             |
| Eating disorders                                    | 1<br>(1 - 1)             | --                 | 0<br>(0 - 0)        | 1<br>(1 - 1)         | --                   | --                       |
| Anorexia nervosa                                    | 1<br>(1 - 1)             | --                 | 0<br>(0 - 0)        | 1<br>(1 - 1)         | --                   | --                       |
| Diabetes, urogenital, blood, and endocrine diseases | 2,962<br>(2,461 - 4,442) | 2<br>(1 - 3)       | 2<br>(2 - 3)        | 49<br>(41 - 64)      | 238<br>(197 - 356)   | 2,670<br>(2,197 - 4,029) |
| Diabetes mellitus                                   | 858<br>(682 - 1,137)     | 0<br>(0 - 0)       | 0<br>(0 - 0)        | 8<br>(6 - 10)        | 89<br>(71 - 128)     | 761<br>(593 - 1,007)     |
| Acute glomerulonephritis                            | 1<br>(0 - 1)             | 0<br>(0 - 0)       | 0<br>(0 - 0)        | 0<br>(0 - 0)         | 0<br>(0 - 0)         | 0<br>(0 - 0)             |

Web Table 31- Greece deaths with 95% UI by age, sex, and cause in 2013

| Cause                                               | Females, All Ages        | Females, 0-4 Years | Females, 5-14 Years | Females, 15-49 Years | Females, 50-69 Years | Females, 70-80 Years     |
|-----------------------------------------------------|--------------------------|--------------------|---------------------|----------------------|----------------------|--------------------------|
| Chronic kidney disease                              | 1,723<br>(1,314 - 3,024) | 0<br>(0 - 0)       | 0<br>(0 - 1)        | 23<br>(18 - 37)      | 108<br>(81 - 207)    | 1,591<br>(1,198 - 2,800) |
| Chronic kidney disease due to diabetes mellitus     | 202<br>(107 - 335)       | 0<br>(0 - 0)       | 0<br>(0 - 0)        | 4<br>(2 - 6)         | 14<br>(8 - 25)       | 184<br>(97 - 310)        |
| Chronic kidney disease due to hypertension          | 776<br>(496 - 1,164)     | 0<br>(0 - 0)       | 0<br>(0 - 0)        | 5<br>(3 - 8)         | 43<br>(28 - 68)      | 728<br>(466 - 1,090)     |
| Chronic kidney disease due to glomerulonephritis    | 3<br>(1 - 6)             | 0<br>(0 - 0)       | 0<br>(0 - 0)        | 0<br>(0 - 1)         | 0<br>(0 - 1)         | 2<br>(1 - 5)             |
| Chronic kidney disease due to other causes          | 741<br>(428 - 1,845)     | 0<br>(0 - 0)       | 0<br>(0 - 1)        | 13<br>(9 - 26)       | 50<br>(28 - 129)     | 677<br>(374 - 1,664)     |
| Urinary diseases and male infertility               | 109<br>(71 - 216)        | 0<br>(0 - 0)       | 0<br>(0 - 0)        | 1<br>(1 - 2)         | 5<br>(4 - 8)         | 102<br>(65 - 207)        |
| Interstitial nephritis and urinary tract infections | 107<br>(69 - 213)        | 0<br>(0 - 0)       | 0<br>(0 - 0)        | 1<br>(1 - 1)         | 5<br>(4 - 8)         | 102<br>(64 - 206)        |
| Urolithiasis                                        | 1<br>(0 - 2)             | --                 | 0<br>(0 - 0)        | 0<br>(0 - 0)         | 0<br>(0 - 0)         | 0<br>(0 - 1)             |
| Other urinary diseases                              | 1<br>(1 - 2)             | 0<br>(0 - 0)       | 0<br>(0 - 0)        | 0<br>(0 - 0)         | 0<br>(0 - 0)         | 0<br>(0 - 1)             |
| Gynecological diseases                              | 1<br>(1 - 1)             | --                 | --                  | 0<br>(0 - 0)         | 0<br>(0 - 0)         | 0<br>(0 - 1)             |
| Uterine fibroids                                    | 0<br>(0 - 0)             | --                 | --                  | 0<br>(0 - 0)         | 0<br>(0 - 0)         | 0<br>(0 - 0)             |
| Polycystic ovarian syndrome                         | 0<br>(0 - 0)             | --                 | --                  | 0<br>(0 - 0)         | 0<br>(0 - 0)         | --                       |
| Endometriosis                                       | 0<br>(0 - 0)             | --                 | --                  | 0<br>(0 - 0)         | 0<br>(0 - 0)         | --                       |
| Genital prolapse                                    | 0<br>(0 - 0)             | --                 | --                  | 0<br>(0 - 0)         | 0<br>(0 - 0)         | 0<br>(0 - 0)             |
| Other gynecological diseases                        | 0<br>(0 - 1)             | --                 | --                  | 0<br>(0 - 0)         | 0<br>(0 - 0)         | 0<br>(0 - 0)             |
| Hemoglobinopathies and hemolytic anemias            | 25<br>(17 - 44)          | 0<br>(0 - 0)       | 1<br>(0 - 1)        | 6<br>(4 - 10)        | 5<br>(3 - 9)         | 14<br>(8 - 26)           |
| Thalassemias                                        | 4<br>(2 - 6)             | 0<br>(0 - 0)       | 0<br>(0 - 1)        | 3<br>(2 - 5)         | 0<br>(0 - 0)         | 0<br>(0 - 0)             |
| Sickle cell disorders                               | 6<br>(4 - 10)            | 0<br>(0 - 0)       | 0<br>(0 - 0)        | 2<br>(1 - 3)         | 3<br>(2 - 5)         | 1<br>(1 - 2)             |
| G6PD deficiency                                     | 1<br>(0 - 1)             | 0<br>(0 - 0)       | 0<br>(0 - 0)        | 0<br>(0 - 0)         | 0<br>(0 - 0)         | 0<br>(0 - 0)             |
| Other hemoglobinopathies and hemolytic anemias      | 15<br>(9 - 28)           | 0<br>(0 - 0)       | 0<br>(0 - 0)        | 1<br>(0 - 1)         | 2<br>(1 - 3)         | 13<br>(7 - 24)           |
| Endocrine, metabolic, blood, and immune disorders   | 246<br>(83 - 340)        | 2<br>(1 - 3)       | 1<br>(1 - 1)        | 11<br>(6 - 14)       | 30<br>(12 - 40)      | 202<br>(63 - 290)        |
| Musculoskeletal disorders                           | 93<br>(60 - 119)         | --                 | 0<br>(0 - 0)        | 5<br>(4 - 6)         | 13<br>(10 - 16)      | 75<br>(45 - 101)         |
| Rheumatoid arthritis                                | 25<br>(14 - 35)          | --                 | 0<br>(0 - 0)        | 0<br>(0 - 1)         | 4<br>(2 - 5)         | 20<br>(12 - 31)          |
| Other musculoskeletal disorders                     | 69<br>(44 - 90)          | --                 | 0<br>(0 - 0)        | 4<br>(3 - 5)         | 9<br>(7 - 12)        | 55<br>(33 - 76)          |
| Other non-communicable diseases                     | 180<br>(148 - 211)       | 88<br>(70 - 106)   | 9<br>(6 - 11)       | 10<br>(8 - 14)       | 7<br>(5 - 9)         | 66<br>(44 - 91)          |
| Congenital anomalies                                | 111<br>(90 - 132)        | 84<br>(66 - 101)   | 8<br>(6 - 11)       | 10<br>(7 - 13)       | 3<br>(2 - 4)         | 6<br>(4 - 9)             |
| Neural tube defects                                 | 6<br>(4 - 9)             | 5<br>(3 - 8)       | 0<br>(0 - 1)        | 0<br>(0 - 1)         | 0<br>(0 - 0)         | 0<br>(0 - 0)             |
| Congenital heart anomalies                          | 60<br>(43 - 76)          | 46<br>(32 - 60)    | 5<br>(4 - 7)        | 6<br>(4 - 9)         | 1<br>(0 - 2)         | 1<br>(0 - 1)             |
| Cleft lip and cleft palate                          | 0<br>(0 - 1)             | 0<br>(0 - 1)       | --                  | --                   | --                   | --                       |
| Down syndrome                                       | 13<br>(5 - 28)           | 9<br>(3 - 20)      | 1<br>(0 - 1)        | 1<br>(1 - 2)         | 2<br>(1 - 2)         | 1<br>(0 - 2)             |
| Chromosomal unbalanced rearrangements               | 4<br>(2 - 6)             | 3<br>(1 - 5)       | 0<br>(0 - 0)        | 0<br>(0 - 1)         | 0<br>(0 - 0)         | 0<br>(0 - 0)             |
| Other congenital anomalies                          | 28<br>(19 - 39)          | 20<br>(13 - 29)    | 2<br>(1 - 3)        | 1<br>(1 - 2)         | 1<br>(0 - 1)         | 4<br>(3 - 7)             |
| Skin and subcutaneous diseases                      | 65<br>(42 - 90)          | 0<br>(0 - 0)       | 0<br>(0 - 0)        | 1<br>(1 - 1)         | 4<br>(3 - 5)         | 60<br>(38 - 85)          |
| Cellulitis                                          | 17<br>(7 - 31)           | 0<br>(0 - 0)       | 0<br>(0 - 0)        | 0<br>(0 - 0)         | 1<br>(0 - 2)         | 16<br>(6 - 29)           |
| Pyoderma                                            | 34<br>(20 - 51)          | 0<br>(0 - 0)       | 0<br>(0 - 0)        | 0<br>(0 - 1)         | 2<br>(1 - 3)         | 32<br>(18 - 48)          |
| Decubitus ulcer                                     | 11<br>(6 - 20)           | 0<br>(0 - 0)       | 0<br>(0 - 0)        | 0<br>(0 - 0)         | 0<br>(0 - 1)         | 11<br>(5 - 19)           |
| Other skin and subcutaneous diseases                | 2<br>(1 - 6)             | 0<br>(0 - 0)       | 0<br>(0 - 0)        | 0<br>(0 - 0)         | 0<br>(0 - 1)         | 2<br>(0 - 5)             |
| Sudden infant death syndrome                        | 4<br>(1 - 11)            | 4<br>(1 - 11)      | --                  | --                   | --                   | --                       |
| Injuries                                            | 1,314<br>(1,125 - 1,733) | 13<br>(10 - 19)    | 14<br>(11 - 17)     | 230<br>(202 - 268)   | 214<br>(182 - 274)   | 843<br>(682 - 1,208)     |
| Transport injuries                                  | 399<br>(331 - 557)       | 3<br>(2 - 4)       | 8<br>(6 - 11)       | 127<br>(104 - 154)   | 87<br>(67 - 124)     | 173<br>(129 - 266)       |

Web Table 31- Greece deaths with 95% UI by age, sex, and cause in 2013

| Cause                                           | Females, All Ages    | Females, 0-4 Years | Females, 5-14 Years | Females, 15-49 Years | Females, 50-69 Years | Females, 70-80 Years |
|-------------------------------------------------|----------------------|--------------------|---------------------|----------------------|----------------------|----------------------|
| Road injuries                                   | 394<br>(327 - 553)   | 3<br>(2 - 4)       | 8<br>(6 - 11)       | 125<br>(103 - 151)   | 85<br>(66 - 123)     | 172<br>(129 - 265)   |
| Pedestrian road injuries                        | 106<br>(72 - 169)    | 1<br>(0 - 1)       | 2<br>(1 - 4)        | 17<br>(11 - 26)      | 20<br>(12 - 32)      | 66<br>(42 - 110)     |
| Cyclist road injuries                           | 29<br>(16 - 42)      | 0<br>(0 - 0)       | 1<br>(0 - 1)        | 9<br>(5 - 12)        | 7<br>(4 - 12)        | 12<br>(7 - 20)       |
| Motorcyclist road injuries                      | 67<br>(23 - 106)     | 0<br>(0 - 1)       | 1<br>(0 - 2)        | 24<br>(9 - 38)       | 13<br>(5 - 23)       | 29<br>(9 - 49)       |
| Motor vehicle road injuries                     | 155<br>(116 - 250)   | 1<br>(1 - 2)       | 4<br>(2 - 6)        | 65<br>(48 - 94)      | 36<br>(24 - 60)      | 49<br>(31 - 91)      |
| Other road injuries                             | 36<br>(12 - 61)      | 0<br>(0 - 0)       | 1<br>(0 - 1)        | 10<br>(3 - 18)       | 9<br>(2 - 17)        | 16<br>(5 - 33)       |
| Other transport injuries                        | 5<br>(3 - 8)         | 0<br>(0 - 0)       | 0<br>(0 - 1)        | 2<br>(1 - 4)         | 1<br>(1 - 2)         | 1<br>(1 - 2)         |
| Unintentional injuries                          | 792<br>(632 - 1,155) | 10<br>(7 - 15)     | 5<br>(4 - 6)        | 56<br>(48 - 71)      | 97<br>(81 - 126)     | 625<br>(477 - 961)   |
| Falls                                           | 258<br>(164 - 509)   | 0<br>(0 - 0)       | 0<br>(0 - 0)        | 9<br>(7 - 16)        | 17<br>(12 - 29)      | 231<br>(140 - 471)   |
| Drowning                                        | 99<br>(59 - 129)     | 1<br>(1 - 2)       | 2<br>(1 - 3)        | 15<br>(9 - 20)       | 24<br>(14 - 33)      | 56<br>(32 - 77)      |
| Fire, heat, and hot substances                  | 75<br>(55 - 111)     | 1<br>(0 - 1)       | 0<br>(0 - 0)        | 4<br>(3 - 6)         | 7<br>(5 - 10)        | 62<br>(43 - 96)      |
| Poisonings                                      | 17<br>(11 - 23)      | 0<br>(0 - 0)       | 0<br>(0 - 0)        | 4<br>(3 - 6)         | 3<br>(2 - 5)         | 8<br>(5 - 13)        |
| Exposure to mechanical forces                   | 7<br>(6 - 10)        | 0<br>(0 - 0)       | 0<br>(0 - 1)        | 2<br>(2 - 4)         | 2<br>(1 - 2)         | 2<br>(2 - 3)         |
| Unintentional firearm injuries                  | 1<br>(1 - 1)         | 0<br>(0 - 0)       | 0<br>(0 - 0)        | 0<br>(0 - 0)         | 0<br>(0 - 0)         | 0<br>(0 - 0)         |
| Unintentional suffocation                       | 1<br>(1 - 2)         | 0<br>(0 - 0)       | 0<br>(0 - 0)        | 0<br>(0 - 1)         | 0<br>(0 - 0)         | 0<br>(0 - 0)         |
| Other exposure to mechanical forces             | 5<br>(4 - 8)         | 0<br>(0 - 0)       | 0<br>(0 - 0)        | 2<br>(1 - 3)         | 1<br>(1 - 2)         | 2<br>(1 - 3)         |
| Adverse effects of medical treatment            | 230<br>(154 - 408)   | 1<br>(0 - 1)       | 0<br>(0 - 1)        | 8<br>(6 - 13)        | 24<br>(16 - 42)      | 197<br>(126 - 370)   |
| Animal contact                                  | 2<br>(1 - 4)         | 0<br>(0 - 0)       | 0<br>(0 - 0)        | 0<br>(0 - 1)         | 0<br>(0 - 1)         | 1<br>(0 - 2)         |
| Venomous animal contact                         | 1<br>(0 - 2)         | 0<br>(0 - 0)       | 0<br>(0 - 0)        | 0<br>(0 - 1)         | 0<br>(0 - 1)         | 0<br>(0 - 1)         |
| Non-venomous animal contact                     | 1<br>(0 - 2)         | 0<br>(0 - 0)       | 0<br>(0 - 0)        | 0<br>(0 - 1)         | 0<br>(0 - 1)         | 0<br>(0 - 1)         |
| Foreign body                                    | 103<br>(62 - 165)    | 6<br>(4 - 12)      | 1<br>(1 - 2)        | 12<br>(8 - 19)       | 18<br>(11 - 28)      | 66<br>(37 - 112)     |
| Pulmonary aspiration and foreign body in airway | 103<br>(62 - 164)    | 6<br>(4 - 12)      | 1<br>(1 - 2)        | 12<br>(8 - 19)       | 18<br>(11 - 28)      | 66<br>(37 - 112)     |
| Foreign body in other body part                 | 1<br>(0 - 1)         | 0<br>(0 - 0)       | 0<br>(0 - 0)        | 0<br>(0 - 0)         | 0<br>(0 - 0)         | 0<br>(0 - 0)         |
| Other unintentional injuries                    | 2<br>(1 - 7)         | 0<br>(0 - 0)       | 0<br>(0 - 0)        | 1<br>(0 - 1)         | 0<br>(0 - 1)         | 1<br>(1 - 4)         |
| Self-harm and interpersonal violence            | 124<br>(104 - 161)   | 0<br>(0 - 1)       | 1<br>(1 - 1)        | 47<br>(39 - 58)      | 31<br>(25 - 43)      | 45<br>(34 - 62)      |
| Self-harm                                       | 87<br>(73 - 122)     | --                 | 0<br>(0 - 0)        | 32<br>(26 - 41)      | 23<br>(18 - 36)      | 32<br>(24 - 49)      |
| Interpersonal violence                          | 36<br>(25 - 47)      | 0<br>(0 - 1)       | 0<br>(0 - 1)        | 15<br>(11 - 20)      | 8<br>(5 - 11)        | 13<br>(8 - 17)       |
| Assault by firearm                              | 10<br>(7 - 17)       | 0<br>(0 - 0)       | 0<br>(0 - 0)        | 6<br>(4 - 10)        | 2<br>(1 - 4)         | 2<br>(1 - 3)         |
| Assault by sharp object                         | 10<br>(6 - 13)       | 0<br>(0 - 0)       | 0<br>(0 - 0)        | 5<br>(2 - 7)         | 2<br>(1 - 3)         | 3<br>(1 - 4)         |
| Assault by other means                          | 17<br>(10 - 22)      | 0<br>(0 - 0)       | 0<br>(0 - 0)        | 5<br>(3 - 7)         | 3<br>(2 - 4)         | 8<br>(5 - 12)        |

Web Table 31- Grenada deaths with 95% UI by age, sex, and cause in 2013

| Cause                                                             | Both Sexes, All Ages | Both Sexes, 0-4 Years | Both Sexes, 5-14 Years | Both Sexes, 15-49 Years | Both Sexes, 50-69 Years | Both Sexes, 70-80 Years |
|-------------------------------------------------------------------|----------------------|-----------------------|------------------------|-------------------------|-------------------------|-------------------------|
| All causes                                                        | 852<br>(780 - 933)   | 27<br>(12 - 53)       | 6<br>(4 - 8)           | 130<br>(113 - 150)      | 212<br>(184 - 240)      | 477<br>(449 - 508)      |
| Communicable, maternal, neonatal, and nutritional diseases        | 95<br>(81 - 116)     | 18<br>(8 - 36)        | 1<br>(1 - 2)           | 21<br>(19 - 23)         | 13<br>(11 - 15)         | 42<br>(36 - 51)         |
| HIV/AIDS and tuberculosis                                         | 19<br>(16 - 22)      | 0<br>(0 - 0)          | 0<br>(0 - 0)           | 12<br>(10 - 14)         | 5<br>(3 - 6)            | 2<br>(1 - 2)            |
| Tuberculosis                                                      | 3<br>(2 - 4)         | 0<br>(0 - 0)          | 0<br>(0 - 0)           | 1<br>(1 - 1)            | 1<br>(1 - 1)            | 1<br>(1 - 1)            |
| HIV/AIDS                                                          | 16<br>(13 - 19)      | 0<br>(0 - 0)          | 0<br>(0 - 0)           | 11<br>(9 - 13)          | 4<br>(2 - 5)            | 1<br>(0 - 1)            |
| HIV/AIDS resulting in mycobacterial infection                     | 1<br>(1 - 1)         | 0<br>(0 - 0)          | 0<br>(0 - 0)           | 1<br>(0 - 1)            | 0<br>(0 - 0)            | 0<br>(0 - 0)            |
| HIV/AIDS resulting in other diseases                              | 15<br>(12 - 18)      | 0<br>(0 - 0)          | 0<br>(0 - 0)           | 11<br>(9 - 13)          | 3<br>(2 - 5)            | 0<br>(0 - 1)            |
| Diarrhea, lower respiratory, and other common infectious diseases | 49<br>(41 - 59)      | 4<br>(2 - 7)          | 1<br>(0 - 1)           | 5<br>(4 - 6)            | 6<br>(5 - 7)            | 34<br>(27 - 42)         |
| Diarrheal diseases                                                | 3<br>(3 - 5)         | 1<br>(0 - 2)          | 0<br>(0 - 0)           | 0<br>(0 - 0)            | 0<br>(0 - 1)            | 2<br>(1 - 2)            |
| Intestinal infectious diseases                                    | 1<br>(0 - 2)         | 0<br>(0 - 1)          | 0<br>(0 - 0)           | 0<br>(0 - 1)            | 0<br>(0 - 0)            | 0<br>(0 - 0)            |
| Typhoid fever                                                     | 1<br>(0 - 1)         | 0<br>(0 - 0)          | 0<br>(0 - 0)           | 0<br>(0 - 0)            | 0<br>(0 - 0)            | 0<br>(0 - 0)            |
| Paratyphoid fever                                                 | 0<br>(0 - 0)         | 0<br>(0 - 0)          | 0<br>(0 - 0)           | 0<br>(0 - 0)            | 0<br>(0 - 0)            | 0<br>(0 - 0)            |
| Other intestinal infectious diseases                              | 0<br>(0 - 0)         | 0<br>(0 - 0)          | 0<br>(0 - 0)           | 0<br>(0 - 0)            | 0<br>(0 - 0)            | 0<br>(0 - 0)            |
| Lower respiratory infections                                      | 42<br>(35 - 52)      | 2<br>(1 - 4)          | 0<br>(0 - 0)           | 4<br>(3 - 4)            | 5<br>(4 - 6)            | 31<br>(25 - 40)         |
| Upper respiratory infections                                      | 0<br>(0 - 0)         | 0<br>(0 - 0)          | 0<br>(0 - 0)           | 0<br>(0 - 0)            | 0<br>(0 - 0)            | 0<br>(0 - 0)            |
| Otitis media                                                      | 0<br>(0 - 0)         | 0<br>(0 - 0)          | 0<br>(0 - 0)           | 0<br>(0 - 0)            | 0<br>(0 - 0)            | 0<br>(0 - 0)            |
| Meningitis                                                        | 1<br>(1 - 2)         | 0<br>(0 - 0)          | 0<br>(0 - 0)           | 0<br>(0 - 0)            | 0<br>(0 - 0)            | 0<br>(0 - 0)            |
| Pneumococcal meningitis                                           | 0<br>(0 - 1)         | 0<br>(0 - 0)          | 0<br>(0 - 0)           | 0<br>(0 - 0)            | 0<br>(0 - 0)            | 0<br>(0 - 0)            |
| H influenzae type B meningitis                                    | 0<br>(0 - 0)         | 0<br>(0 - 0)          | 0<br>(0 - 0)           | 0<br>(0 - 0)            | 0<br>(0 - 0)            | 0<br>(0 - 0)            |
| Meningococcal meningitis                                          | 0<br>(0 - 0)         | 0<br>(0 - 0)          | 0<br>(0 - 0)           | 0<br>(0 - 0)            | 0<br>(0 - 0)            | 0<br>(0 - 0)            |
| Other meningitis                                                  | 1<br>(0 - 1)         | 0<br>(0 - 0)          | 0<br>(0 - 0)           | 0<br>(0 - 0)            | 0<br>(0 - 0)            | 0<br>(0 - 0)            |
| Encephalitis                                                      | 1<br>(1 - 1)         | 0<br>(0 - 0)          | 0<br>(0 - 0)           | 0<br>(0 - 1)            | 0<br>(0 - 0)            | 0<br>(0 - 0)            |
| Diphtheria                                                        | 0<br>(0 - 0)         | 0<br>(0 - 0)          | 0<br>(0 - 0)           | 0<br>(0 - 0)            | 0<br>(0 - 0)            | --                      |
| Whooping cough                                                    | 0<br>(0 - 0)         | 0<br>(0 - 0)          | 0<br>(0 - 0)           | 0<br>(0 - 0)            | 0<br>(0 - 0)            | --                      |
| Tetanus                                                           | 0<br>(0 - 0)         | 0<br>(0 - 0)          | 0<br>(0 - 0)           | 0<br>(0 - 0)            | 0<br>(0 - 0)            | 0<br>(0 - 0)            |
| Measles                                                           | 0<br>(0 - 0)         | 0<br>(0 - 0)          | 0<br>(0 - 0)           | 0<br>(0 - 0)            | 0<br>(0 - 0)            | --                      |
| Varicella and herpes zoster                                       | 0<br>(0 - 0)         | 0<br>(0 - 0)          | 0<br>(0 - 0)           | 0<br>(0 - 0)            | 0<br>(0 - 0)            | 0<br>(0 - 0)            |
| Neglected tropical diseases and malaria                           | 1<br>(0 - 1)         | 0<br>(0 - 0)          | 0<br>(0 - 0)           | 0<br>(0 - 0)            | 0<br>(0 - 0)            | 0<br>(0 - 0)            |
| Leishmaniasis                                                     | 0<br>(0 - 0)         | 0<br>(0 - 0)          | 0<br>(0 - 0)           | 0<br>(0 - 0)            | 0<br>(0 - 0)            | 0<br>(0 - 0)            |
| Visceral leishmaniasis                                            | 0<br>(0 - 0)         | 0<br>(0 - 0)          | 0<br>(0 - 0)           | 0<br>(0 - 0)            | 0<br>(0 - 0)            | 0<br>(0 - 0)            |
| Cysticercosis                                                     | 0<br>(0 - 0)         | 0<br>(0 - 0)          | 0<br>(0 - 0)           | 0<br>(0 - 0)            | 0<br>(0 - 0)            | 0<br>(0 - 0)            |
| Cystic echinococcosis                                             | 0<br>(0 - 0)         | 0<br>(0 - 0)          | 0<br>(0 - 0)           | 0<br>(0 - 0)            | 0<br>(0 - 0)            | 0<br>(0 - 0)            |
| Dengue                                                            | 0<br>(0 - 0)         | 0<br>(0 - 0)          | 0<br>(0 - 0)           | 0<br>(0 - 0)            | 0<br>(0 - 0)            | 0<br>(0 - 0)            |
| Rabies                                                            | 0<br>(0 - 0)         | 0<br>(0 - 0)          | 0<br>(0 - 0)           | 0<br>(0 - 0)            | 0<br>(0 - 0)            | 0<br>(0 - 0)            |
| Intestinal nematode infections                                    | 0<br>(0 - 0)         | 0<br>(0 - 0)          | 0<br>(0 - 0)           | 0<br>(0 - 0)            | 0<br>(0 - 0)            | 0<br>(0 - 0)            |
| Ascariasis                                                        | 0<br>(0 - 0)         | 0<br>(0 - 0)          | 0<br>(0 - 0)           | 0<br>(0 - 0)            | 0<br>(0 - 0)            | 0<br>(0 - 0)            |
| Other neglected tropical diseases                                 | 0<br>(0 - 0)         | 0<br>(0 - 0)          | 0<br>(0 - 0)           | 0<br>(0 - 0)            | 0<br>(0 - 0)            | 0<br>(0 - 0)            |
| Maternal disorders                                                | 1<br>(1 - 2)         | --                    | 0<br>(0 - 0)           | 1<br>(1 - 2)            | --                      | --                      |
| Maternal hemorrhage                                               | 0<br>(0 - 0)         | --                    | 0<br>(0 - 0)           | 0<br>(0 - 0)            | --                      | --                      |
| Maternal sepsis and other maternal infections                     | 0<br>(0 - 0)         | --                    | 0<br>(0 - 0)           | 0<br>(0 - 0)            | --                      | --                      |

Web Table 31- Grenada deaths with 95% UI by age, sex, and cause in 2013

| Cause                                                            | Both Sexes, All Ages | Both Sexes, 0-4 Years | Both Sexes, 5-14 Years | Both Sexes, 15-49 Years | Both Sexes, 50-69 Years | Both Sexes, 70-80 Years |
|------------------------------------------------------------------|----------------------|-----------------------|------------------------|-------------------------|-------------------------|-------------------------|
| Maternal hypertensive disorders                                  | 0<br>(0 - 0)         | --                    | 0<br>(0 - 0)           | 0<br>(0 - 0)            | --                      | --                      |
| Maternal obstructed labor                                        | 0<br>(0 - 0)         | --                    | 0<br>(0 - 0)           | 0<br>(0 - 0)            | --                      | --                      |
| Maternal abortive outcome                                        | 0<br>(0 - 0)         | --                    | 0<br>(0 - 0)           | 0<br>(0 - 0)            | --                      | --                      |
| Indirect maternal deaths                                         | 0<br>(0 - 0)         | --                    | 0<br>(0 - 0)           | 0<br>(0 - 0)            | --                      | --                      |
| Late maternal deaths                                             | 0<br>(0 - 0)         | --                    | 0<br>(0 - 0)           | 0<br>(0 - 0)            | --                      | --                      |
| Maternal deaths aggravated by HIV/AIDS                           | 0<br>(0 - 0)         | --                    | 0<br>(0 - 0)           | 0<br>(0 - 0)            | --                      | --                      |
| Other maternal disorders                                         | 0<br>(0 - 0)         | --                    | 0<br>(0 - 0)           | 0<br>(0 - 0)            | --                      | --                      |
| Neonatal disorders                                               | 13<br>(6 - 26)       | 13<br>(6 - 26)        | --                     | --                      | --                      | --                      |
| Neonatal preterm birth complications                             | 6<br>(2 - 12)        | 6<br>(2 - 12)         | --                     | --                      | --                      | --                      |
| Neonatal encephalopathy due to birth asphyxia and trauma         | 3<br>(1 - 7)         | 3<br>(1 - 7)          | --                     | --                      | --                      | --                      |
| Neonatal sepsis and other neonatal infections                    | 2<br>(1 - 6)         | 2<br>(1 - 6)          | --                     | --                      | --                      | --                      |
| Hemolytic disease and other neonatal jaundice                    | 0<br>(0 - 0)         | 0<br>(0 - 0)          | --                     | --                      | --                      | --                      |
| Other neonatal disorders                                         | 1<br>(1 - 3)         | 1<br>(1 - 3)          | --                     | --                      | --                      | --                      |
| Nutritional deficiencies                                         | 10<br>(8 - 13)       | 1<br>(0 - 2)          | 0<br>(0 - 0)           | 1<br>(1 - 2)            | 2<br>(1 - 2)            | 6<br>(5 - 8)            |
| Protein-energy malnutrition                                      | 4<br>(3 - 6)         | 1<br>(0 - 2)          | 0<br>(0 - 0)           | 0<br>(0 - 1)            | 1<br>(0 - 1)            | 2<br>(1 - 4)            |
| Iodine deficiency                                                | 0<br>(0 - 0)         | 0<br>(0 - 0)          | 0<br>(0 - 0)           | 0<br>(0 - 0)            | 0<br>(0 - 0)            | 0<br>(0 - 0)            |
| Iron-deficiency anemia                                           | 5<br>(3 - 7)         | 0<br>(0 - 0)          | 0<br>(0 - 0)           | 1<br>(1 - 1)            | 1<br>(1 - 1)            | 3<br>(2 - 5)            |
| Other nutritional deficiencies                                   | 1<br>(0 - 1)         | 0<br>(0 - 0)          | 0<br>(0 - 0)           | 0<br>(0 - 0)            | 0<br>(0 - 0)            | 0<br>(0 - 1)            |
| Other communicable, maternal, neonatal, and nutritional diseases | 3<br>(2 - 4)         | 0<br>(0 - 1)          | 0<br>(0 - 0)           | 1<br>(1 - 1)            | 1<br>(0 - 1)            | 1<br>(1 - 1)            |
| Sexually transmitted diseases excluding HIV                      | 0<br>(0 - 1)         | 0<br>(0 - 1)          | 0<br>(0 - 0)           | 0<br>(0 - 0)            | 0<br>(0 - 0)            | 0<br>(0 - 0)            |
| Syphilis                                                         | 0<br>(0 - 1)         | 0<br>(0 - 1)          | 0<br>(0 - 0)           | 0<br>(0 - 0)            | 0<br>(0 - 0)            | 0<br>(0 - 0)            |
| Chlamydial infection                                             | 0<br>(0 - 0)         | --                    | 0<br>(0 - 0)           | 0<br>(0 - 0)            | 0<br>(0 - 0)            | 0<br>(0 - 0)            |
| Gonococcal infection                                             | 0<br>(0 - 0)         | --                    | 0<br>(0 - 0)           | 0<br>(0 - 0)            | 0<br>(0 - 0)            | 0<br>(0 - 0)            |
| Other sexually transmitted diseases                              | 0<br>(0 - 0)         | --                    | 0<br>(0 - 0)           | 0<br>(0 - 0)            | 0<br>(0 - 0)            | 0<br>(0 - 0)            |
| Hepatitis                                                        | 0<br>(0 - 0)         | 0<br>(0 - 0)          | 0<br>(0 - 0)           | 0<br>(0 - 0)            | 0<br>(0 - 0)            | 0<br>(0 - 0)            |
| Acute hepatitis A                                                | 0<br>(0 - 0)         | 0<br>(0 - 0)          | 0<br>(0 - 0)           | 0<br>(0 - 0)            | 0<br>(0 - 0)            | 0<br>(0 - 0)            |
| Acute hepatitis B                                                | 0<br>(0 - 0)         | 0<br>(0 - 0)          | 0<br>(0 - 0)           | 0<br>(0 - 0)            | 0<br>(0 - 0)            | 0<br>(0 - 0)            |
| Acute hepatitis C                                                | 0<br>(0 - 0)         | --                    | 0<br>(0 - 0)           | 0<br>(0 - 0)            | 0<br>(0 - 0)            | 0<br>(0 - 0)            |
| Other infectious diseases                                        | 2<br>(1 - 3)         | 0<br>(0 - 0)          | 0<br>(0 - 0)           | 1<br>(0 - 1)            | 1<br>(0 - 1)            | 1<br>(0 - 1)            |
| Non-communicable diseases                                        | 684<br>(624 - 746)   | 7<br>(3 - 14)         | 2<br>(2 - 4)           | 68<br>(58 - 79)         | 186<br>(161 - 211)      | 421<br>(393 - 449)      |
| Neoplasms                                                        | 142<br>(123 - 159)   | 0<br>(0 - 1)          | 1<br>(0 - 1)           | 18<br>(15 - 21)         | 47<br>(40 - 55)         | 76<br>(65 - 85)         |
| Esophageal cancer                                                | 3<br>(3 - 4)         | --                    | --                     | 0<br>(0 - 0)            | 1<br>(1 - 2)            | 2<br>(1 - 2)            |
| Stomach cancer                                                   | 9<br>(8 - 10)        | --                    | --                     | 1<br>(1 - 1)            | 3<br>(2 - 3)            | 5<br>(4 - 6)            |
| Liver cancer                                                     | 5<br>(4 - 5)         | --                    | 0<br>(0 - 0)           | 1<br>(1 - 1)            | 2<br>(2 - 2)            | 2<br>(2 - 3)            |
| Liver cancer due to hepatitis B                                  | 1<br>(1 - 2)         | --                    | 0<br>(0 - 0)           | 0<br>(0 - 0)            | 0<br>(0 - 1)            | 0<br>(0 - 1)            |
| Liver cancer due to hepatitis C                                  | 2<br>(2 - 3)         | --                    | 0<br>(0 - 0)           | 0<br>(0 - 0)            | 1<br>(1 - 1)            | 1<br>(1 - 2)            |
| Liver cancer due to alcohol use                                  | 1<br>(1 - 1)         | --                    | --                     | 0<br>(0 - 0)            | 0<br>(0 - 0)            | 1<br>(0 - 1)            |
| Liver cancer due to other causes                                 | 0<br>(0 - 1)         | --                    | 0<br>(0 - 0)           | 0<br>(0 - 0)            | 0<br>(0 - 0)            | 0<br>(0 - 0)            |
| Larynx cancer                                                    | 1<br>(1 - 2)         | --                    | --                     | 0<br>(0 - 0)            | 1<br>(0 - 1)            | 1<br>(0 - 1)            |
| Tracheal, bronchus and lung cancer                               | 14<br>(12 - 15)      | --                    | --                     | 1<br>(1 - 2)            | 6<br>(5 - 7)            | 6<br>(5 - 7)            |

Web Table 31- Grenada deaths with 95% UI by age, sex, and cause in 2013

| Cause                                         | Both Sexes, All Ages | Both Sexes, 0-4 Years | Both Sexes, 5-14 Years | Both Sexes, 15-49 Years | Both Sexes, 50-69 Years | Both Sexes, 70-80 Years |
|-----------------------------------------------|----------------------|-----------------------|------------------------|-------------------------|-------------------------|-------------------------|
| Breast cancer                                 | 14<br>(11 - 17)      | --                    | --                     | 3<br>(2 - 4)            | 5<br>(4 - 7)            | 6<br>(4 - 7)            |
| Cervical cancer                               | 9<br>(7 - 11)        | --                    | --                     | 2<br>(1 - 3)            | 3<br>(2 - 4)            | 3<br>(3 - 5)            |
| Uterine cancer                                | 3<br>(2 - 4)         | --                    | --                     | 0<br>(0 - 0)            | 1<br>(1 - 2)            | 2<br>(1 - 3)            |
| Prostate cancer                               | 27<br>(16 - 35)      | --                    | --                     | 0<br>(0 - 0)            | 5<br>(3 - 7)            | 22<br>(13 - 29)         |
| Colon and rectum cancer                       | 16<br>(14 - 18)      | --                    | --                     | 1<br>(1 - 2)            | 5<br>(4 - 6)            | 9<br>(8 - 11)           |
| Lip and oral cavity cancer                    | 2<br>(1 - 2)         | --                    | --                     | 0<br>(0 - 0)            | 1<br>(1 - 1)            | 1<br>(1 - 1)            |
| Nasopharynx cancer                            | 1<br>(0 - 1)         | --                    | 0<br>(0 - 0)           | 0<br>(0 - 0)            | 0<br>(0 - 0)            | 0<br>(0 - 0)            |
| Other pharynx cancer                          | 1<br>(1 - 1)         | --                    | --                     | 0<br>(0 - 0)            | 0<br>(0 - 1)            | 0<br>(0 - 0)            |
| Gallbladder and biliary tract cancer          | 2<br>(1 - 3)         | --                    | --                     | 0<br>(0 - 0)            | 1<br>(0 - 1)            | 1<br>(1 - 2)            |
| Pancreatic cancer                             | 6<br>(5 - 7)         | --                    | --                     | 0<br>(0 - 1)            | 2<br>(2 - 3)            | 4<br>(3 - 4)            |
| Malignant skin melanoma                       | 1<br>(0 - 1)         | --                    | --                     | 0<br>(0 - 0)            | 0<br>(0 - 0)            | 0<br>(0 - 0)            |
| Non-melanoma skin cancer                      | 1<br>(0 - 1)         | --                    | --                     | 0<br>(0 - 0)            | 0<br>(0 - 0)            | 0<br>(0 - 1)            |
| Ovarian cancer                                | 4<br>(3 - 4)         | --                    | --                     | 1<br>(0 - 1)            | 1<br>(1 - 2)            | 2<br>(1 - 2)            |
| Testicular cancer                             | 0<br>(0 - 0)         | --                    | --                     | 0<br>(0 - 0)            | 0<br>(0 - 0)            | 0<br>(0 - 0)            |
| Kidney cancer                                 | 2<br>(2 - 2)         | 0<br>(0 - 0)          | 0<br>(0 - 0)           | 0<br>(0 - 0)            | 1<br>(1 - 1)            | 1<br>(1 - 1)            |
| Bladder cancer                                | 2<br>(2 - 3)         | --                    | --                     | 0<br>(0 - 0)            | 0<br>(0 - 1)            | 1<br>(1 - 2)            |
| Brain and nervous system cancer               | 2<br>(1 - 2)         | 0<br>(0 - 0)          | 0<br>(0 - 0)           | 1<br>(0 - 1)            | 1<br>(0 - 1)            | 0<br>(0 - 1)            |
| Thyroid cancer                                | 1<br>(0 - 1)         | --                    | 0<br>(0 - 0)           | 0<br>(0 - 0)            | 0<br>(0 - 0)            | 0<br>(0 - 0)            |
| Mesothelioma                                  | 0<br>(0 - 0)         | --                    | --                     | 0<br>(0 - 0)            | 0<br>(0 - 0)            | 0<br>(0 - 0)            |
| Hodgkin lymphoma                              | 0<br>(0 - 0)         | 0<br>(0 - 0)          | 0<br>(0 - 0)           | 0<br>(0 - 0)            | 0<br>(0 - 0)            | 0<br>(0 - 0)            |
| Non-Hodgkin lymphoma                          | 5<br>(4 - 7)         | 0<br>(0 - 0)          | 0<br>(0 - 0)           | 2<br>(1 - 2)            | 2<br>(1 - 3)            | 2<br>(1 - 2)            |
| Multiple myeloma                              | 2<br>(2 - 3)         | --                    | --                     | 0<br>(0 - 0)            | 1<br>(1 - 1)            | 1<br>(1 - 1)            |
| Leukemia                                      | 4<br>(3 - 4)         | 0<br>(0 - 0)          | 0<br>(0 - 0)           | 1<br>(1 - 1)            | 1<br>(1 - 1)            | 1<br>(1 - 1)            |
| Other neoplasms                               | 7<br>(6 - 9)         | 0<br>(0 - 0)          | 0<br>(0 - 0)           | 2<br>(2 - 2)            | 2<br>(2 - 3)            | 3<br>(2 - 3)            |
| Cardiovascular diseases                       | 296<br>(268 - 327)   | 0<br>(0 - 1)          | 0<br>(0 - 1)           | 21<br>(17 - 25)         | 199<br>(64 - 86)        | 199<br>(181 - 220)      |
| Rheumatic heart disease                       | 2<br>(1 - 2)         | 0<br>(0 - 0)          | 0<br>(0 - 0)           | 1<br>(0 - 1)            | 0<br>(0 - 0)            | 1<br>(0 - 1)            |
| Ischemic heart disease                        | 124<br>(107 - 149)   | 0<br>(0 - 0)          | 0<br>(0 - 0)           | 8<br>(7 - 11)           | 34<br>(28 - 40)         | 81<br>(70 - 101)        |
| Cerebrovascular disease                       | 110<br>(96 - 129)    | 0<br>(0 - 0)          | 0<br>(0 - 0)           | 6<br>(5 - 7)            | 27<br>(22 - 31)         | 78<br>(68 - 93)         |
| Ischemic stroke                               | 71<br>(62 - 85)      | 0<br>(0 - 0)          | 0<br>(0 - 0)           | 2<br>(1 - 2)            | 14<br>(11 - 17)         | 55<br>(48 - 67)         |
| Hemorrhagic stroke                            | 39<br>(32 - 49)      | 0<br>(0 - 0)          | 0<br>(0 - 0)           | 4<br>(3 - 5)            | 12<br>(10 - 15)         | 22<br>(17 - 29)         |
| Hypertensive heart disease                    | 29<br>(17 - 40)      | 0<br>(0 - 0)          | 0<br>(0 - 0)           | 1<br>(1 - 2)            | 7<br>(5 - 9)            | 21<br>(11 - 30)         |
| Cardiomyopathy and myocarditis                | 8<br>(7 - 10)        | 0<br>(0 - 0)          | 0<br>(0 - 0)           | 2<br>(1 - 2)            | 3<br>(2 - 3)            | 4<br>(3 - 5)            |
| Atrial fibrillation and flutter               | 4<br>(3 - 5)         | --                    | --                     | 0<br>(0 - 0)            | 0<br>(0 - 1)            | 3<br>(2 - 4)            |
| Aortic aneurysm                               | 3<br>(3 - 4)         | --                    | --                     | 0<br>(0 - 0)            | 1<br>(1 - 1)            | 2<br>(2 - 3)            |
| Peripheral vascular disease                   | 2<br>(2 - 3)         | --                    | --                     | 0<br>(0 - 0)            | 0<br>(0 - 0)            | 2<br>(2 - 3)            |
| Endocarditis                                  | 1<br>(1 - 1)         | 0<br>(0 - 0)          | 0<br>(0 - 0)           | 0<br>(0 - 0)            | 0<br>(0 - 0)            | 1<br>(0 - 1)            |
| Other cardiovascular and circulatory diseases | 12<br>(9 - 15)       | 0<br>(0 - 0)          | 0<br>(0 - 0)           | 2<br>(1 - 2)            | 3<br>(2 - 4)            | 7<br>(5 - 10)           |
| Chronic respiratory diseases                  | 26<br>(22 - 31)      | 0<br>(0 - 0)          | 0<br>(0 - 0)           | 3<br>(2 - 3)            | 6<br>(5 - 7)            | 17<br>(14 - 20)         |
| Chronic obstructive pulmonary disease         | 18<br>(15 - 21)      | 0<br>(0 - 0)          | 0<br>(0 - 0)           | 1<br>(1 - 1)            | 4<br>(3 - 5)            | 13<br>(11 - 16)         |
| Pneumoconiosis                                | 1<br>(0 - 1)         | 0<br>(0 - 0)          | 0<br>(0 - 0)           | 0<br>(0 - 0)            | 0<br>(0 - 0)            | 0<br>(0 - 0)            |

Web Table 31- Grenada deaths with 95% UI by age, sex, and cause in 2013

| Cause                                               | Both Sexes, All Ages | Both Sexes, 0-4 Years | Both Sexes, 5-14 Years | Both Sexes, 15-49 Years | Both Sexes, 50-69 Years | Both Sexes, 70-80 Years |
|-----------------------------------------------------|----------------------|-----------------------|------------------------|-------------------------|-------------------------|-------------------------|
| Silicosis                                           | 0<br>(0 - 0)         | 0<br>(0 - 0)          | 0<br>(0 - 0)           | 0<br>(0 - 0)            | 0<br>(0 - 0)            | 0<br>(0 - 0)            |
| Asbestosis                                          | 0<br>(0 - 0)         | 0<br>(0 - 0)          | 0<br>(0 - 0)           | 0<br>(0 - 0)            | 0<br>(0 - 0)            | 0<br>(0 - 0)            |
| Coal workers pneumoconiosis                         | 0<br>(0 - 0)         | 0<br>(0 - 0)          | 0<br>(0 - 0)           | 0<br>(0 - 0)            | 0<br>(0 - 0)            | 0<br>(0 - 0)            |
| Other pneumoconiosis                                | 0<br>(0 - 1)         | 0<br>(0 - 0)          | 0<br>(0 - 0)           | 0<br>(0 - 0)            | 0<br>(0 - 0)            | 0<br>(0 - 0)            |
| Asthma                                              | 5<br>(4 - 6)         | 0<br>(0 - 0)          | 0<br>(0 - 0)           | 1<br>(1 - 1)            | 1<br>(1 - 2)            | 2<br>(2 - 3)            |
| Interstitial lung disease and pulmonary sarcoidosis | 2<br>(1 - 3)         | 0<br>(0 - 0)          | 0<br>(0 - 0)           | 0<br>(0 - 0)            | 1<br>(0 - 1)            | 1<br>(1 - 2)            |
| Other chronic respiratory diseases                  | 1<br>(1 - 1)         | 0<br>(0 - 0)          | 0<br>(0 - 0)           | 0<br>(0 - 0)            | 0<br>(0 - 0)            | 0<br>(0 - 0)            |
| Cirrhosis                                           | 15<br>(13 - 17)      | 0<br>(0 - 0)          | 0<br>(0 - 0)           | 4<br>(3 - 5)            | 7<br>(6 - 8)            | 4<br>(3 - 4)            |
| Cirrhosis due to hepatitis B                        | 1<br>(1 - 2)         | 0<br>(0 - 0)          | 0<br>(0 - 0)           | 0<br>(0 - 1)            | 1<br>(0 - 1)            | 0<br>(0 - 0)            |
| Cirrhosis due to hepatitis C                        | 5<br>(3 - 6)         | 0<br>(0 - 0)          | 0<br>(0 - 0)           | 1<br>(1 - 2)            | 2<br>(1 - 3)            | 2<br>(1 - 2)            |
| Cirrhosis due to alcohol use                        | 6<br>(5 - 8)         | --                    | --                     | 2<br>(1 - 2)            | 3<br>(2 - 4)            | 2<br>(1 - 2)            |
| Cirrhosis due to other causes                       | 2<br>(2 - 3)         | 0<br>(0 - 0)          | 0<br>(0 - 0)           | 1<br>(1 - 2)            | 1<br>(1 - 1)            | 0<br>(0 - 1)            |
| Digestive diseases                                  | 18<br>(16 - 21)      | 0<br>(0 - 0)          | 0<br>(0 - 0)           | 3<br>(3 - 4)            | 5<br>(4 - 6)            | 10<br>(8 - 11)          |
| Peptic ulcer disease                                | 4<br>(4 - 6)         | 0<br>(0 - 0)          | 0<br>(0 - 0)           | 1<br>(1 - 1)            | 1<br>(1 - 2)            | 2<br>(2 - 3)            |
| Gastritis and duodenitis                            | 1<br>(1 - 2)         | 0<br>(0 - 0)          | 0<br>(0 - 0)           | 0<br>(0 - 0)            | 0<br>(0 - 1)            | 1<br>(0 - 1)            |
| Appendicitis                                        | 1<br>(0 - 1)         | 0<br>(0 - 0)          | 0<br>(0 - 0)           | 0<br>(0 - 0)            | 0<br>(0 - 0)            | 0<br>(0 - 0)            |
| Paralytic ileus and intestinal obstruction          | 3<br>(1 - 4)         | 0<br>(0 - 0)          | 0<br>(0 - 0)           | 0<br>(0 - 0)            | 1<br>(0 - 1)            | 2<br>(1 - 2)            |
| Inguinal, femoral, and abdominal hernia             | 1<br>(1 - 2)         | 0<br>(0 - 0)          | 0<br>(0 - 0)           | 0<br>(0 - 0)            | 0<br>(0 - 1)            | 1<br>(0 - 1)            |
| Inflammatory bowel disease                          | 2<br>(1 - 2)         | 0<br>(0 - 0)          | 0<br>(0 - 0)           | 0<br>(0 - 0)            | 0<br>(0 - 0)            | 1<br>(1 - 1)            |
| Vascular intestinal disorders                       | 1<br>(0 - 1)         | 0<br>(0 - 0)          | 0<br>(0 - 0)           | 0<br>(0 - 0)            | 0<br>(0 - 0)            | 0<br>(0 - 1)            |
| Gallbladder and biliary diseases                    | 1<br>(1 - 2)         | 0<br>(0 - 0)          | 0<br>(0 - 0)           | 0<br>(0 - 0)            | 0<br>(0 - 1)            | 1<br>(1 - 1)            |
| Pancreatitis                                        | 1<br>(1 - 2)         | 0<br>(0 - 0)          | 0<br>(0 - 0)           | 1<br>(0 - 1)            | 0<br>(0 - 1)            | 0<br>(0 - 0)            |
| Other digestive diseases                            | 3<br>(2 - 4)         | 0<br>(0 - 0)          | 0<br>(0 - 0)           | 0<br>(0 - 1)            | 1<br>(1 - 1)            | 2<br>(1 - 2)            |
| Neurological disorders                              | 36<br>(30 - 43)      | 0<br>(0 - 0)          | 0<br>(0 - 0)           | 2<br>(2 - 3)            | 3<br>(2 - 4)            | 31<br>(25 - 37)         |
| Alzheimer disease and other dementias               | 30<br>(24 - 36)      | --                    | --                     | 0<br>(0 - 0)            | 2<br>(1 - 2)            | 28<br>(23 - 34)         |
| Parkinson disease                                   | 2<br>(2 - 3)         | --                    | --                     | 0<br>(0 - 0)            | 0<br>(0 - 0)            | 2<br>(1 - 3)            |
| Epilepsy                                            | 3<br>(2 - 4)         | 0<br>(0 - 0)          | 0<br>(0 - 0)           | 2<br>(1 - 2)            | 1<br>(0 - 1)            | 1<br>(0 - 1)            |
| Multiple sclerosis                                  | 0<br>(0 - 0)         | --                    | --                     | 0<br>(0 - 0)            | 0<br>(0 - 0)            | 0<br>(0 - 0)            |
| Other neurological disorders                        | 1<br>(1 - 2)         | 0<br>(0 - 0)          | 0<br>(0 - 0)           | 0<br>(0 - 1)            | 0<br>(0 - 1)            | 0<br>(0 - 0)            |
| Mental and substance use disorders                  | 4<br>(3 - 4)         | 0<br>(0 - 0)          | 0<br>(0 - 0)           | 1<br>(1 - 2)            | 1<br>(1 - 2)            | 1<br>(1 - 1)            |
| Schizophrenia                                       | 0<br>(0 - 0)         | --                    | --                     | 0<br>(0 - 0)            | 0<br>(0 - 0)            | 0<br>(0 - 0)            |
| Alcohol use disorders                               | 2<br>(1 - 3)         | --                    | --                     | 1<br>(0 - 1)            | 1<br>(1 - 1)            | 0<br>(0 - 0)            |
| Drug use disorders                                  | 1<br>(1 - 2)         | 0<br>(0 - 0)          | --                     | 1<br>(0 - 1)            | 0<br>(0 - 0)            | 0<br>(0 - 0)            |
| Opioid use disorders                                | 0<br>(0 - 0)         | 0<br>(0 - 0)          | --                     | 0<br>(0 - 0)            | 0<br>(0 - 0)            | 0<br>(0 - 0)            |
| Cocaine use disorders                               | 0<br>(0 - 0)         | 0<br>(0 - 0)          | --                     | 0<br>(0 - 0)            | 0<br>(0 - 0)            | 0<br>(0 - 0)            |
| Amphetamine use disorders                           | 0<br>(0 - 0)         | 0<br>(0 - 0)          | --                     | 0<br>(0 - 0)            | 0<br>(0 - 0)            | 0<br>(0 - 0)            |
| Other drug use disorders                            | 1<br>(1 - 1)         | 0<br>(0 - 0)          | --                     | 0<br>(0 - 1)            | 0<br>(0 - 0)            | 0<br>(0 - 0)            |
| Eating disorders                                    | 0<br>(0 - 0)         | --                    | 0<br>(0 - 0)           | 0<br>(0 - 0)            | --                      | --                      |
| Anorexia nervosa                                    | 0<br>(0 - 0)         | --                    | 0<br>(0 - 0)           | 0<br>(0 - 0)            | --                      | --                      |
| Diabetes, urogenital, blood, and endocrine diseases | 128<br>(113 - 145)   | 1<br>(0 - 1)          | 0<br>(0 - 1)           | 13<br>(11 - 16)         | 39<br>(33 - 45)         | 75<br>(66 - 86)         |

Web Table 31- Grenada deaths with 95% UI by age, sex, and cause in 2013

| Cause                                               | Both Sexes, All Ages | Both Sexes, 0-4 Years | Both Sexes, 5-14 Years | Both Sexes, 15-49 Years | Both Sexes, 50-69 Years | Both Sexes, 70-80 Years |
|-----------------------------------------------------|----------------------|-----------------------|------------------------|-------------------------|-------------------------|-------------------------|
| Diabetes mellitus                                   | 89<br>(77 - 101)     | 0<br>(0 - 0)          | 0<br>(0 - 0)           | 5<br>(4 - 7)            | 28<br>(24 - 33)         | 55<br>(47 - 64)         |
| Acute glomerulonephritis                            | 0<br>(0 - 0)         | 0<br>(0 - 0)          | 0<br>(0 - 0)           | 0<br>(0 - 0)            | 0<br>(0 - 0)            | 0<br>(0 - 0)            |
| Chronic kidney disease                              | 24<br>(20 - 32)      | 0<br>(0 - 0)          | 0<br>(0 - 0)           | 4<br>(3 - 5)            | 7<br>(6 - 10)           | 12<br>(10 - 18)         |
| Chronic kidney disease due to diabetes mellitus     | 4<br>(2 - 6)         | 0<br>(0 - 0)          | 0<br>(0 - 0)           | 0<br>(0 - 1)            | 2<br>(1 - 3)            | 1<br>(1 - 2)            |
| Chronic kidney disease due to hypertension          | 13<br>(11 - 17)      | 0<br>(0 - 0)          | 0<br>(0 - 0)           | 2<br>(1 - 3)            | 4<br>(3 - 5)            | 8<br>(6 - 10)           |
| Chronic kidney disease due to glomerulonephritis    | 1<br>(0 - 1)         | 0<br>(0 - 0)          | 0<br>(0 - 0)           | 0<br>(0 - 0)            | 0<br>(0 - 0)            | 0<br>(0 - 0)            |
| Chronic kidney disease due to other causes          | 6<br>(4 - 11)        | 0<br>(0 - 0)          | 0<br>(0 - 0)           | 1<br>(1 - 2)            | 2<br>(1 - 3)            | 3<br>(2 - 6)            |
| Urinary diseases and male infertility               | 6<br>(4 - 7)         | 0<br>(0 - 0)          | 0<br>(0 - 0)           | 1<br>(0 - 1)            | 1<br>(1 - 2)            | 4<br>(3 - 5)            |
| Interstitial nephritis and urinary tract infections | 4<br>(3 - 5)         | 0<br>(0 - 0)          | 0<br>(0 - 0)           | 0<br>(0 - 0)            | 1<br>(1 - 1)            | 3<br>(2 - 4)            |
| Urolithiasis                                        | 0<br>(0 - 0)         | --                    | 0<br>(0 - 0)           | 0<br>(0 - 0)            | 0<br>(0 - 0)            | 0<br>(0 - 0)            |
| Other urinary diseases                              | 1<br>(1 - 2)         | 0<br>(0 - 0)          | 0<br>(0 - 0)           | 0<br>(0 - 0)            | 0<br>(0 - 0)            | 1<br>(0 - 1)            |
| Gynecological diseases                              | 0<br>(0 - 0)         | --                    | --                     | 0<br>(0 - 0)            | 0<br>(0 - 0)            | 0<br>(0 - 0)            |
| Uterine fibroids                                    | 0<br>(0 - 0)         | --                    | --                     | 0<br>(0 - 0)            | 0<br>(0 - 0)            | 0<br>(0 - 0)            |
| Polycystic ovarian syndrome                         | 0<br>(0 - 0)         | --                    | --                     | 0<br>(0 - 0)            | 0<br>(0 - 0)            | --                      |
| Endometriosis                                       | 0<br>(0 - 0)         | --                    | --                     | 0<br>(0 - 0)            | 0<br>(0 - 0)            | --                      |
| Genital prolapse                                    | 0<br>(0 - 0)         | --                    | --                     | 0<br>(0 - 0)            | 0<br>(0 - 0)            | 0<br>(0 - 0)            |
| Other gynecological diseases                        | 0<br>(0 - 0)         | --                    | --                     | 0<br>(0 - 0)            | 0<br>(0 - 0)            | 0<br>(0 - 0)            |
| Hemoglobinopathies and hemolytic anemias            | 2<br>(2 - 3)         | 0<br>(0 - 0)          | 0<br>(0 - 0)           | 1<br>(1 - 1)            | 0<br>(0 - 1)            | 0<br>(0 - 1)            |
| Thalassemias                                        | 0<br>(0 - 0)         | 0<br>(0 - 0)          | 0<br>(0 - 0)           | 0<br>(0 - 0)            | 0<br>(0 - 0)            | 0<br>(0 - 0)            |
| Sickle cell disorders                               | 2<br>(1 - 2)         | 0<br>(0 - 0)          | 0<br>(0 - 0)           | 1<br>(1 - 1)            | 0<br>(0 - 0)            | 0<br>(0 - 0)            |
| G6PD deficiency                                     | 0<br>(0 - 0)         | 0<br>(0 - 0)          | 0<br>(0 - 0)           | 0<br>(0 - 0)            | 0<br>(0 - 0)            | 0<br>(0 - 0)            |
| Other hemoglobinopathies and hemolytic anemias      | 0<br>(0 - 1)         | 0<br>(0 - 0)          | 0<br>(0 - 0)           | 0<br>(0 - 0)            | 0<br>(0 - 0)            | 0<br>(0 - 0)            |
| Endocrine, metabolic, blood, and immune disorders   | 7<br>(6 - 12)        | 0<br>(0 - 1)          | 0<br>(0 - 0)           | 2<br>(1 - 3)            | 2<br>(1 - 3)            | 3<br>(2 - 6)            |
| Musculoskeletal disorders                           | 4<br>(2 - 4)         | --                    | 0<br>(0 - 0)           | 1<br>(1 - 2)            | 1<br>(0 - 1)            | 1<br>(1 - 2)            |
| Rheumatoid arthritis                                | 0<br>(0 - 1)         | --                    | 0<br>(0 - 0)           | 0<br>(0 - 0)            | 0<br>(0 - 0)            | 0<br>(0 - 0)            |
| Other musculoskeletal disorders                     | 3<br>(2 - 4)         | --                    | 0<br>(0 - 0)           | 1<br>(1 - 2)            | 1<br>(0 - 1)            | 1<br>(1 - 1)            |
| Other non-communicable diseases                     | 16<br>(11 - 21)      | 5<br>(2 - 10)         | 1<br>(0 - 1)           | 2<br>(1 - 2)            | 1<br>(1 - 2)            | 7<br>(3 - 10)           |
| Congenital anomalies                                | 7<br>(4 - 12)        | 4<br>(2 - 9)          | 1<br>(0 - 1)           | 1<br>(1 - 1)            | 0<br>(0 - 1)            | 1<br>(0 - 1)            |
| Neural tube defects                                 | 0<br>(0 - 0)         | 0<br>(0 - 0)          | 0<br>(0 - 0)           | 0<br>(0 - 0)            | 0<br>(0 - 0)            | 0<br>(0 - 0)            |
| Congenital heart anomalies                          | 4<br>(2 - 6)         | 2<br>(1 - 4)          | 1<br>(0 - 1)           | 1<br>(1 - 1)            | 0<br>(0 - 0)            | 0<br>(0 - 0)            |
| Cleft lip and cleft palate                          | 0<br>(0 - 0)         | 0<br>(0 - 0)          | --                     | --                      | --                      | --                      |
| Down syndrome                                       | 0<br>(0 - 0)         | 0<br>(0 - 0)          | 0<br>(0 - 0)           | 0<br>(0 - 0)            | 0<br>(0 - 0)            | 0<br>(0 - 0)            |
| Chromosomal unbalanced rearrangements               | 0<br>(0 - 0)         | 0<br>(0 - 0)          | 0<br>(0 - 0)           | 0<br>(0 - 0)            | 0<br>(0 - 0)            | 0<br>(0 - 0)            |
| Other congenital anomalies                          | 3<br>(1 - 5)         | 2<br>(1 - 4)          | 0<br>(0 - 0)           | 0<br>(0 - 0)            | 0<br>(0 - 0)            | 0<br>(0 - 0)            |
| Skin and subcutaneous diseases                      | 8<br>(3 - 11)        | 0<br>(0 - 0)          | 0<br>(0 - 0)           | 0<br>(0 - 1)            | 1<br>(0 - 1)            | 6<br>(2 - 9)            |
| Cellulitis                                          | 0<br>(0 - 1)         | 0<br>(0 - 0)          | 0<br>(0 - 0)           | 0<br>(0 - 0)            | 0<br>(0 - 0)            | 0<br>(0 - 1)            |
| Pyoderma                                            | 1<br>(1 - 2)         | 0<br>(0 - 0)          | 0<br>(0 - 0)           | 0<br>(0 - 0)            | 0<br>(0 - 0)            | 1<br>(0 - 2)            |
| Decubitus ulcer                                     | 6<br>(2 - 8)         | 0<br>(0 - 0)          | 0<br>(0 - 0)           | 0<br>(0 - 0)            | 0<br>(0 - 1)            | 5<br>(2 - 7)            |
| Other skin and subcutaneous diseases                | 0<br>(0 - 0)         | 0<br>(0 - 0)          | 0<br>(0 - 0)           | 0<br>(0 - 0)            | 0<br>(0 - 0)            | 0<br>(0 - 0)            |
| Sudden infant death syndrome                        | 1<br>(0 - 2)         | 1<br>(0 - 2)          | --                     | --                      | --                      | --                      |



Web Table 31- Grenada deaths with 95% UI by age, sex, and cause in 2013

| Cause                                           | Both Sexes, All Ages | Both Sexes, 0-4 Years | Both Sexes, 5-14 Years | Both Sexes, 15-49 Years | Both Sexes, 50-69 Years | Both Sexes, 70-80 Years |
|-------------------------------------------------|----------------------|-----------------------|------------------------|-------------------------|-------------------------|-------------------------|
| Injuries                                        | 73<br>(62 - 84)      | 2<br>(1 - 3)          | 2<br>(1 - 3)           | 42<br>(34 - 50)         | 13<br>(11 - 16)         | 14<br>(12 - 16)         |
| Transport injuries                              | 19<br>(16 - 23)      | 0<br>(0 - 1)          | 1<br>(1 - 1)           | 11<br>(9 - 14)          | 4<br>(3 - 5)            | 3<br>(2 - 4)            |
| Road injuries                                   | 18<br>(15 - 21)      | 0<br>(0 - 0)          | 1<br>(0 - 1)           | 10<br>(8 - 13)          | 4<br>(3 - 4)            | 3<br>(2 - 3)            |
| Pedestrian road injuries                        | 4<br>(3 - 6)         | 0<br>(0 - 0)          | 0<br>(0 - 0)           | 2<br>(1 - 3)            | 1<br>(1 - 2)            | 1<br>(1 - 1)            |
| Cyclist road injuries                           | 1<br>(1 - 1)         | 0<br>(0 - 0)          | 0<br>(0 - 0)           | 1<br>(0 - 1)            | 0<br>(0 - 0)            | 0<br>(0 - 0)            |
| Motorcyclist road injuries                      | 2<br>(1 - 2)         | 0<br>(0 - 0)          | 0<br>(0 - 0)           | 1<br>(1 - 2)            | 0<br>(0 - 0)            | 0<br>(0 - 0)            |
| Motor vehicle road injuries                     | 11<br>(9 - 13)       | 0<br>(0 - 0)          | 0<br>(0 - 1)           | 7<br>(5 - 8)            | 2<br>(2 - 3)            | 1<br>(1 - 2)            |
| Other road injuries                             | 0<br>(0 - 0)         | 0<br>(0 - 0)          | 0<br>(0 - 0)           | 0<br>(0 - 0)            | 0<br>(0 - 0)            | 0<br>(0 - 0)            |
| Other transport injuries                        | 2<br>(1 - 2)         | 0<br>(0 - 0)          | 0<br>(0 - 0)           | 1<br>(1 - 1)            | 0<br>(0 - 0)            | 0<br>(0 - 0)            |
| Unintentional injuries                          | 29<br>(23 - 34)      | 1<br>(1 - 3)          | 1<br>(1 - 1)           | 12<br>(9 - 14)          | 5<br>(4 - 6)            | 9<br>(7 - 11)           |
| Falls                                           | 6<br>(5 - 7)         | 0<br>(0 - 0)          | 0<br>(0 - 0)           | 1<br>(1 - 2)            | 1<br>(1 - 1)            | 3<br>(2 - 4)            |
| Drowning                                        | 6<br>(4 - 9)         | 0<br>(0 - 1)          | 0<br>(0 - 1)           | 4<br>(3 - 6)            | 1<br>(1 - 1)            | 1<br>(0 - 1)            |
| Fire, heat, and hot substances                  | 3<br>(2 - 3)         | 0<br>(0 - 0)          | 0<br>(0 - 0)           | 1<br>(0 - 1)            | 0<br>(0 - 1)            | 1<br>(1 - 2)            |
| Poisonings                                      | 1<br>(0 - 1)         | 0<br>(0 - 0)          | 0<br>(0 - 0)           | 0<br>(0 - 0)            | 0<br>(0 - 0)            | 0<br>(0 - 0)            |
| Exposure to mechanical forces                   | 4<br>(3 - 5)         | 0<br>(0 - 0)          | 0<br>(0 - 0)           | 3<br>(2 - 4)            | 1<br>(1 - 1)            | 0<br>(0 - 0)            |
| Unintentional firearm injuries                  | 2<br>(1 - 3)         | 0<br>(0 - 0)          | 0<br>(0 - 0)           | 2<br>(1 - 3)            | 0<br>(0 - 1)            | 0<br>(0 - 0)            |
| Unintentional suffocation                       | 0<br>(0 - 1)         | 0<br>(0 - 0)          | 0<br>(0 - 0)           | 0<br>(0 - 0)            | 0<br>(0 - 0)            | 0<br>(0 - 0)            |
| Other exposure to mechanical forces             | 2<br>(1 - 2)         | 0<br>(0 - 0)          | 0<br>(0 - 0)           | 1<br>(1 - 1)            | 0<br>(0 - 0)            | 0<br>(0 - 0)            |
| Adverse effects of medical treatment            | 4<br>(2 - 5)         | 0<br>(0 - 0)          | 0<br>(0 - 0)           | 1<br>(0 - 1)            | 1<br>(1 - 1)            | 2<br>(1 - 3)            |
| Animal contact                                  | 1<br>(0 - 1)         | 0<br>(0 - 0)          | 0<br>(0 - 0)           | 0<br>(0 - 0)            | 0<br>(0 - 0)            | 0<br>(0 - 0)            |
| Venomous animal contact                         | 0<br>(0 - 0)         | 0<br>(0 - 0)          | 0<br>(0 - 0)           | 0<br>(0 - 0)            | 0<br>(0 - 0)            | 0<br>(0 - 0)            |
| Non-venomous animal contact                     | 0<br>(0 - 0)         | 0<br>(0 - 0)          | 0<br>(0 - 0)           | 0<br>(0 - 0)            | 0<br>(0 - 0)            | 0<br>(0 - 0)            |
| Foreign body                                    | 4<br>(2 - 5)         | 1<br>(0 - 1)          | 0<br>(0 - 0)           | 1<br>(1 - 1)            | 1<br>(0 - 1)            | 2<br>(1 - 2)            |
| Pulmonary aspiration and foreign body in airway | 4<br>(2 - 5)         | 1<br>(0 - 1)          | 0<br>(0 - 0)           | 1<br>(1 - 1)            | 1<br>(0 - 1)            | 2<br>(1 - 2)            |
| Foreign body in other body part                 | 0<br>(0 - 0)         | 0<br>(0 - 0)          | 0<br>(0 - 0)           | 0<br>(0 - 0)            | 0<br>(0 - 0)            | 0<br>(0 - 0)            |
| Other unintentional injuries                    | 1<br>(1 - 1)         | 0<br>(0 - 0)          | 0<br>(0 - 0)           | 0<br>(0 - 1)            | 0<br>(0 - 0)            | 0<br>(0 - 0)            |
| Self-harm and interpersonal violence            | 25<br>(20 - 31)      | 0<br>(0 - 0)          | 0<br>(0 - 1)           | 19<br>(14 - 24)         | 4<br>(3 - 5)            | 2<br>(1 - 2)            |
| Self-harm                                       | 11<br>(9 - 15)       | --                    | 0<br>(0 - 0)           | 8<br>(6 - 10)           | 2<br>(2 - 3)            | 1<br>(1 - 1)            |
| Interpersonal violence                          | 14<br>(9 - 18)       | 0<br>(0 - 0)          | 0<br>(0 - 0)           | 11<br>(7 - 15)          | 2<br>(1 - 3)            | 1<br>(0 - 1)            |
| Assault by firearm                              | 7<br>(4 - 10)        | 0<br>(0 - 0)          | 0<br>(0 - 0)           | 6<br>(4 - 9)            | 1<br>(0 - 1)            | 0<br>(0 - 0)            |
| Assault by sharp object                         | 4<br>(2 - 6)         | 0<br>(0 - 0)          | 0<br>(0 - 0)           | 3<br>(2 - 5)            | 1<br>(0 - 1)            | 0<br>(0 - 0)            |
| Assault by other means                          | 3<br>(2 - 4)         | 0<br>(0 - 0)          | 0<br>(0 - 0)           | 2<br>(1 - 2)            | 1<br>(0 - 1)            | 0<br>(0 - 1)            |

Web Table 31- Grenada deaths with 95% UI by age, sex, and cause in 2013

| Cause                                                             | Males, All Ages    | Males, 0-4 Years | Males, 5-14 Years | Males, 15-49 Years | Males, 50-69 Years | Males, 70-80 Years |
|-------------------------------------------------------------------|--------------------|------------------|-------------------|--------------------|--------------------|--------------------|
| All causes                                                        | 422<br>(367 - 475) | 15<br>(7 - 30)   | 3<br>(2 - 5)      | 87<br>(72 - 104)   | 123<br>(101 - 144) | 194<br>(175 - 210) |
| Communicable, maternal, neonatal, and nutritional diseases        | 50<br>(41 - 62)    | 10<br>(5 - 20)   | 1<br>(0 - 1)      | 13<br>(12 - 15)    | 9<br>(7 - 11)      | 17<br>(13 - 20)    |
| HIV/AIDS and tuberculosis                                         | 14<br>(11 - 16)    | 0<br>(0 - 0)     | 0<br>(0 - 0)      | 9<br>(7 - 10)      | 4<br>(3 - 5)       | 1<br>(1 - 1)       |
| Tuberculosis                                                      | 3<br>(2 - 3)       | 0<br>(0 - 0)     | 0<br>(0 - 0)      | 1<br>(1 - 1)       | 1<br>(1 - 1)       | 1<br>(1 - 1)       |
| HIV/AIDS                                                          | 11<br>(9 - 13)     | 0<br>(0 - 0)     | 0<br>(0 - 0)      | 8<br>(6 - 9)       | 3<br>(2 - 4)       | 0<br>(0 - 1)       |
| HIV/AIDS resulting in mycobacterial infection                     | 1<br>(1 - 1)       | 0<br>(0 - 0)     | 0<br>(0 - 0)      | 0<br>(0 - 1)       | 0<br>(0 - 0)       | 0<br>(0 - 0)       |
| HIV/AIDS resulting in other diseases                              | 10<br>(8 - 12)     | 0<br>(0 - 0)     | 0<br>(0 - 0)      | 7<br>(6 - 9)       | 3<br>(2 - 4)       | 0<br>(0 - 1)       |
| Diarrhea, lower respiratory, and other common infectious diseases | 22<br>(17 - 27)    | 2<br>(1 - 4)     | 0<br>(0 - 1)      | 3<br>(3 - 4)       | 4<br>(3 - 5)       | 12<br>(9 - 16)     |
| Diarrheal diseases                                                | 2<br>(1 - 2)       | 1<br>(0 - 1)     | 0<br>(0 - 0)      | 0<br>(0 - 0)       | 0<br>(0 - 0)       | 1<br>(0 - 1)       |
| Intestinal infectious diseases                                    | 0<br>(0 - 1)       | 0<br>(0 - 0)     | 0<br>(0 - 0)      | 0<br>(0 - 0)       | 0<br>(0 - 0)       | 0<br>(0 - 0)       |
| Typhoid fever                                                     | 0<br>(0 - 1)       | 0<br>(0 - 0)     | 0<br>(0 - 0)      | 0<br>(0 - 0)       | 0<br>(0 - 0)       | 0<br>(0 - 0)       |
| Paratyphoid fever                                                 | 0<br>(0 - 0)       | 0<br>(0 - 0)     | 0<br>(0 - 0)      | 0<br>(0 - 0)       | 0<br>(0 - 0)       | 0<br>(0 - 0)       |
| Other intestinal infectious diseases                              | 0<br>(0 - 0)       | 0<br>(0 - 0)     | 0<br>(0 - 0)      | 0<br>(0 - 0)       | 0<br>(0 - 0)       | 0<br>(0 - 0)       |
| Lower respiratory infections                                      | 18<br>(14 - 23)    | 1<br>(1 - 2)     | 0<br>(0 - 0)      | 2<br>(2 - 3)       | 3<br>(2 - 4)       | 11<br>(8 - 15)     |
| Upper respiratory infections                                      | 0<br>(0 - 0)       | 0<br>(0 - 0)     | 0<br>(0 - 0)      | 0<br>(0 - 0)       | 0<br>(0 - 0)       | 0<br>(0 - 0)       |
| Otitis media                                                      | 0<br>(0 - 0)       | 0<br>(0 - 0)     | 0<br>(0 - 0)      | 0<br>(0 - 0)       | 0<br>(0 - 0)       | 0<br>(0 - 0)       |
| Meningitis                                                        | 1<br>(1 - 1)       | 0<br>(0 - 0)     | 0<br>(0 - 0)      | 0<br>(0 - 0)       | 0<br>(0 - 0)       | 0<br>(0 - 0)       |
| Pneumococcal meningitis                                           | 0<br>(0 - 0)       | 0<br>(0 - 0)     | 0<br>(0 - 0)      | 0<br>(0 - 0)       | 0<br>(0 - 0)       | 0<br>(0 - 0)       |
| H influenzae type B meningitis                                    | 0<br>(0 - 0)       | 0<br>(0 - 0)     | 0<br>(0 - 0)      | 0<br>(0 - 0)       | 0<br>(0 - 0)       | 0<br>(0 - 0)       |
| Meningococcal meningitis                                          | 0<br>(0 - 0)       | 0<br>(0 - 0)     | 0<br>(0 - 0)      | 0<br>(0 - 0)       | 0<br>(0 - 0)       | 0<br>(0 - 0)       |
| Other meningitis                                                  | 0<br>(0 - 0)       | 0<br>(0 - 0)     | 0<br>(0 - 0)      | 0<br>(0 - 0)       | 0<br>(0 - 0)       | 0<br>(0 - 0)       |
| Encephalitis                                                      | 1<br>(0 - 1)       | 0<br>(0 - 0)     | 0<br>(0 - 0)      | 0<br>(0 - 0)       | 0<br>(0 - 0)       | 0<br>(0 - 0)       |
| Diphtheria                                                        | 0<br>(0 - 0)       | 0<br>(0 - 0)     | 0<br>(0 - 0)      | 0<br>(0 - 0)       | 0<br>(0 - 0)       | --                 |
| Whooping cough                                                    | 0<br>(0 - 0)       | 0<br>(0 - 0)     | 0<br>(0 - 0)      | 0<br>(0 - 0)       | 0<br>(0 - 0)       | --                 |
| Tetanus                                                           | 0<br>(0 - 0)       | 0<br>(0 - 0)     | 0<br>(0 - 0)      | 0<br>(0 - 0)       | 0<br>(0 - 0)       | 0<br>(0 - 0)       |
| Measles                                                           | 0<br>(0 - 0)       | 0<br>(0 - 0)     | 0<br>(0 - 0)      | 0<br>(0 - 0)       | 0<br>(0 - 0)       | --                 |
| Varicella and herpes zoster                                       | 0<br>(0 - 0)       | 0<br>(0 - 0)     | 0<br>(0 - 0)      | 0<br>(0 - 0)       | 0<br>(0 - 0)       | 0<br>(0 - 0)       |
| Neglected tropical diseases and malaria                           | 0<br>(0 - 0)       | 0<br>(0 - 0)     | 0<br>(0 - 0)      | 0<br>(0 - 0)       | 0<br>(0 - 0)       | 0<br>(0 - 0)       |
| Leishmaniasis                                                     | 0<br>(0 - 0)       | 0<br>(0 - 0)     | 0<br>(0 - 0)      | 0<br>(0 - 0)       | 0<br>(0 - 0)       | 0<br>(0 - 0)       |
| Visceral leishmaniasis                                            | 0<br>(0 - 0)       | 0<br>(0 - 0)     | 0<br>(0 - 0)      | 0<br>(0 - 0)       | 0<br>(0 - 0)       | 0<br>(0 - 0)       |
| Cysticercosis                                                     | 0<br>(0 - 0)       | 0<br>(0 - 0)     | 0<br>(0 - 0)      | 0<br>(0 - 0)       | 0<br>(0 - 0)       | 0<br>(0 - 0)       |
| Cystic echinococcosis                                             | 0<br>(0 - 0)       | 0<br>(0 - 0)     | 0<br>(0 - 0)      | 0<br>(0 - 0)       | 0<br>(0 - 0)       | 0<br>(0 - 0)       |
| Dengue                                                            | 0<br>(0 - 0)       | 0<br>(0 - 0)     | 0<br>(0 - 0)      | 0<br>(0 - 0)       | 0<br>(0 - 0)       | 0<br>(0 - 0)       |
| Rabies                                                            | 0<br>(0 - 0)       | 0<br>(0 - 0)     | 0<br>(0 - 0)      | 0<br>(0 - 0)       | 0<br>(0 - 0)       | 0<br>(0 - 0)       |
| Intestinal nematode infections                                    | 0<br>(0 - 0)       | 0<br>(0 - 0)     | 0<br>(0 - 0)      | 0<br>(0 - 0)       | 0<br>(0 - 0)       | 0<br>(0 - 0)       |
| Ascariasis                                                        | 0<br>(0 - 0)       | 0<br>(0 - 0)     | 0<br>(0 - 0)      | 0<br>(0 - 0)       | 0<br>(0 - 0)       | 0<br>(0 - 0)       |
| Other neglected tropical diseases                                 | 0<br>(0 - 0)       | 0<br>(0 - 0)     | 0<br>(0 - 0)      | 0<br>(0 - 0)       | 0<br>(0 - 0)       | 0<br>(0 - 0)       |
| Maternal disorders                                                | --                 | --               | --                | --                 | --                 | --                 |
| Maternal hemorrhage                                               | --                 | --               | --                | --                 | --                 | --                 |
| Maternal sepsis and other maternal infections                     | --                 | --               | --                | --                 | --                 | --                 |

Web Table 31- Grenada deaths with 95% UI by age, sex, and cause in 2013

| Cause                                                            | Males, All Ages    | Males, 0-4 Years | Males, 5-14 Years | Males, 15-49 Years | Males, 50-69 Years | Males, 70-80 Years |
|------------------------------------------------------------------|--------------------|------------------|-------------------|--------------------|--------------------|--------------------|
| Maternal hypertensive disorders                                  | --                 | --               | --                | --                 | --                 | --                 |
| Maternal obstructed labor                                        | --                 | --               | --                | --                 | --                 | --                 |
| Maternal abortive outcome                                        | --                 | --               | --                | --                 | --                 | --                 |
| Indirect maternal deaths                                         | --                 | --               | --                | --                 | --                 | --                 |
| Late maternal deaths                                             | --                 | --               | --                | --                 | --                 | --                 |
| Maternal deaths aggravated by HIV/AIDS                           | --                 | --               | --                | --                 | --                 | --                 |
| Other maternal disorders                                         | --                 | --               | --                | --                 | --                 | --                 |
| Neonatal disorders                                               | 7<br>(3 - 15)      | 7<br>(3 - 15)    | --                | --                 | --                 | --                 |
| Neonatal preterm birth complications                             | 3<br>(1 - 7)       | 3<br>(1 - 7)     | --                | --                 | --                 | --                 |
| Neonatal encephalopathy due to birth asphyxia and trauma         | 2<br>(1 - 4)       | 2<br>(1 - 4)     | --                | --                 | --                 | --                 |
| Neonatal sepsis and other neonatal infections                    | 1<br>(0 - 4)       | 1<br>(0 - 4)     | --                | --                 | --                 | --                 |
| Hemolytic disease and other neonatal jaundice                    | 0<br>(0 - 0)       | 0<br>(0 - 0)     | --                | --                 | --                 | --                 |
| Other neonatal disorders                                         | 1<br>(0 - 2)       | 1<br>(0 - 2)     | --                | --                 | --                 | --                 |
| Nutritional deficiencies                                         | 5<br>(3 - 7)       | 1<br>(0 - 1)     | 0<br>(0 - 0)      | 1<br>(0 - 1)       | 1<br>(1 - 1)       | 3<br>(2 - 4)       |
| Protein-energy malnutrition                                      | 2<br>(1 - 4)       | 0<br>(0 - 1)     | 0<br>(0 - 0)      | 0<br>(0 - 0)       | 0<br>(0 - 1)       | 1<br>(1 - 2)       |
| Iodine deficiency                                                | 0<br>(0 - 0)       | 0<br>(0 - 0)     | 0<br>(0 - 0)      | 0<br>(0 - 0)       | 0<br>(0 - 0)       | 0<br>(0 - 0)       |
| Iron-deficiency anemia                                           | 2<br>(1 - 4)       | 0<br>(0 - 0)     | 0<br>(0 - 0)      | 0<br>(0 - 1)       | 1<br>(0 - 1)       | 1<br>(1 - 2)       |
| Other nutritional deficiencies                                   | 0<br>(0 - 1)       | 0<br>(0 - 0)     | 0<br>(0 - 0)      | 0<br>(0 - 0)       | 0<br>(0 - 0)       | 0<br>(0 - 0)       |
| Other communicable, maternal, neonatal, and nutritional diseases | 2<br>(1 - 2)       | 0<br>(0 - 0)     | 0<br>(0 - 0)      | 1<br>(0 - 1)       | 0<br>(0 - 1)       | 0<br>(0 - 1)       |
| Sexually transmitted diseases excluding HIV                      | 0<br>(0 - 0)       | 0<br>(0 - 0)     | 0<br>(0 - 0)      | 0<br>(0 - 0)       | 0<br>(0 - 0)       | 0<br>(0 - 0)       |
| Syphilis                                                         | 0<br>(0 - 0)       | 0<br>(0 - 0)     | 0<br>(0 - 0)      | 0<br>(0 - 0)       | 0<br>(0 - 0)       | 0<br>(0 - 0)       |
| Chlamydial infection                                             | --                 | --               | --                | --                 | --                 | --                 |
| Gonococcal infection                                             | 0<br>(0 - 0)       | --               | 0<br>(0 - 0)      | 0<br>(0 - 0)       | 0<br>(0 - 0)       | 0<br>(0 - 0)       |
| Other sexually transmitted diseases                              | 0<br>(0 - 0)       | --               | 0<br>(0 - 0)      | 0<br>(0 - 0)       | 0<br>(0 - 0)       | 0<br>(0 - 0)       |
| Hepatitis                                                        | 0<br>(0 - 0)       | 0<br>(0 - 0)     | 0<br>(0 - 0)      | 0<br>(0 - 0)       | 0<br>(0 - 0)       | 0<br>(0 - 0)       |
| Acute hepatitis A                                                | 0<br>(0 - 0)       | 0<br>(0 - 0)     | 0<br>(0 - 0)      | 0<br>(0 - 0)       | 0<br>(0 - 0)       | 0<br>(0 - 0)       |
| Acute hepatitis B                                                | 0<br>(0 - 0)       | 0<br>(0 - 0)     | 0<br>(0 - 0)      | 0<br>(0 - 0)       | 0<br>(0 - 0)       | 0<br>(0 - 0)       |
| Acute hepatitis C                                                | 0<br>(0 - 0)       | --               | 0<br>(0 - 0)      | 0<br>(0 - 0)       | 0<br>(0 - 0)       | 0<br>(0 - 0)       |
| Other infectious diseases                                        | 1<br>(1 - 2)       | 0<br>(0 - 0)     | 0<br>(0 - 0)      | 1<br>(0 - 1)       | 0<br>(0 - 1)       | 0<br>(0 - 0)       |
| Non-communicable diseases                                        | 319<br>(275 - 357) | 4<br>(2 - 8)     | 1<br>(1 - 2)      | 38<br>(31 - 47)    | 104<br>(85 - 122)  | 171<br>(153 - 185) |
| Neoplasms                                                        | 74<br>(61 - 86)    | 0<br>(0 - 0)     | 0<br>(0 - 1)      | 8<br>(6 - 10)      | 25<br>(20 - 29)    | 41<br>(33 - 48)    |
| Esophageal cancer                                                | 2<br>(2 - 3)       | --               | --                | 0<br>(0 - 0)       | 1<br>(1 - 1)       | 1<br>(1 - 1)       |
| Stomach cancer                                                   | 5<br>(4 - 5)       | --               | --                | 0<br>(0 - 1)       | 2<br>(1 - 2)       | 2<br>(2 - 3)       |
| Liver cancer                                                     | 3<br>(2 - 3)       | --               | 0<br>(0 - 0)      | 0<br>(0 - 1)       | 1<br>(1 - 1)       | 1<br>(1 - 1)       |
| Liver cancer due to hepatitis B                                  | 1<br>(0 - 1)       | --               | 0<br>(0 - 0)      | 0<br>(0 - 0)       | 0<br>(0 - 1)       | 0<br>(0 - 0)       |
| Liver cancer due to hepatitis C                                  | 1<br>(1 - 2)       | --               | 0<br>(0 - 0)      | 0<br>(0 - 0)       | 1<br>(0 - 1)       | 1<br>(0 - 1)       |
| Liver cancer due to alcohol use                                  | 1<br>(0 - 1)       | --               | --                | 0<br>(0 - 0)       | 0<br>(0 - 0)       | 0<br>(0 - 0)       |
| Liver cancer due to other causes                                 | 0<br>(0 - 0)       | --               | 0<br>(0 - 0)      | 0<br>(0 - 0)       | 0<br>(0 - 0)       | 0<br>(0 - 0)       |
| Larynx cancer                                                    | 1<br>(1 - 2)       | --               | --                | 0<br>(0 - 0)       | 1<br>(0 - 1)       | 0<br>(0 - 1)       |
| Tracheal, bronchus and lung cancer                               | 10<br>(8 - 11)     | --               | --                | 1<br>(1 - 1)       | 5<br>(4 - 6)       | 4<br>(3 - 5)       |

Web Table 31- Grenada deaths with 95% UI by age, sex, and cause in 2013

| Cause                                         | Males, All Ages    | Males, 0-4 Years | Males, 5-14 Years | Males, 15-49 Years | Males, 50-69 Years | Males, 70-80 Years |
|-----------------------------------------------|--------------------|------------------|-------------------|--------------------|--------------------|--------------------|
| Breast cancer                                 | 0<br>(0 - 1)       | --               | --                | 0<br>(0 - 0)       | 0<br>(0 - 0)       | 0<br>(0 - 0)       |
| Cervical cancer                               | --                 | --               | --                | --                 | --                 | --                 |
| Uterine cancer                                | --                 | --               | --                | --                 | --                 | --                 |
| Prostate cancer                               | 27<br>(16 - 35)    | --               | --                | 0<br>(0 - 0)       | 5<br>(3 - 7)       | 22<br>(13 - 29)    |
| Colon and rectum cancer                       | 7<br>(6 - 9)       | --               | --                | 1<br>(1 - 1)       | 3<br>(2 - 3)       | 4<br>(3 - 5)       |
| Lip and oral cavity cancer                    | 1<br>(1 - 2)       | --               | --                | 0<br>(0 - 0)       | 1<br>(0 - 1)       | 0<br>(0 - 1)       |
| Nasopharynx cancer                            | 0<br>(0 - 0)       | --               | 0<br>(0 - 0)      | 0<br>(0 - 0)       | 0<br>(0 - 0)       | 0<br>(0 - 0)       |
| Other pharynx cancer                          | 1<br>(1 - 1)       | --               | --                | 0<br>(0 - 0)       | 0<br>(0 - 0)       | 0<br>(0 - 0)       |
| Gallbladder and biliary tract cancer          | 1<br>(0 - 1)       | --               | --                | 0<br>(0 - 0)       | 0<br>(0 - 0)       | 0<br>(0 - 1)       |
| Pancreatic cancer                             | 3<br>(2 - 4)       | --               | --                | 0<br>(0 - 0)       | 1<br>(1 - 2)       | 1<br>(1 - 2)       |
| Malignant skin melanoma                       | 0<br>(0 - 1)       | --               | --                | 0<br>(0 - 0)       | 0<br>(0 - 0)       | 0<br>(0 - 0)       |
| Non-melanoma skin cancer                      | 0<br>(0 - 0)       | --               | --                | 0<br>(0 - 0)       | 0<br>(0 - 0)       | 0<br>(0 - 0)       |
| Ovarian cancer                                | --                 | --               | --                | --                 | --                 | --                 |
| Testicular cancer                             | 0<br>(0 - 0)       | --               | --                | 0<br>(0 - 0)       | 0<br>(0 - 0)       | 0<br>(0 - 0)       |
| Kidney cancer                                 | 1<br>(1 - 1)       | 0<br>(0 - 0)     | 0<br>(0 - 0)      | 0<br>(0 - 0)       | 1<br>(0 - 1)       | 0<br>(0 - 0)       |
| Bladder cancer                                | 1<br>(1 - 2)       | --               | --                | 0<br>(0 - 0)       | 0<br>(0 - 0)       | 1<br>(1 - 1)       |
| Brain and nervous system cancer               | 1<br>(0 - 1)       | 0<br>(0 - 0)     | 0<br>(0 - 0)      | 0<br>(0 - 0)       | 0<br>(0 - 1)       | 0<br>(0 - 0)       |
| Thyroid cancer                                | 0<br>(0 - 0)       | --               | 0<br>(0 - 0)      | 0<br>(0 - 0)       | 0<br>(0 - 0)       | 0<br>(0 - 0)       |
| Mesothelioma                                  | 0<br>(0 - 0)       | --               | --                | 0<br>(0 - 0)       | 0<br>(0 - 0)       | 0<br>(0 - 0)       |
| Hodgkin lymphoma                              | 0<br>(0 - 0)       | 0<br>(0 - 0)     | 0<br>(0 - 0)      | 0<br>(0 - 0)       | 0<br>(0 - 0)       | 0<br>(0 - 0)       |
| Non-Hodgkin lymphoma                          | 3<br>(2 - 4)       | 0<br>(0 - 0)     | 0<br>(0 - 0)      | 1<br>(1 - 1)       | 1<br>(1 - 2)       | 1<br>(1 - 1)       |
| Multiple myeloma                              | 1<br>(1 - 2)       | --               | --                | 0<br>(0 - 0)       | 1<br>(0 - 1)       | 0<br>(0 - 1)       |
| Leukemia                                      | 2<br>(2 - 2)       | 0<br>(0 - 0)     | 0<br>(0 - 0)      | 1<br>(1 - 1)       | 0<br>(0 - 1)       | 0<br>(0 - 1)       |
| Other neoplasms                               | 4<br>(3 - 4)       | 0<br>(0 - 0)     | 0<br>(0 - 0)      | 1<br>(1 - 1)       | 1<br>(1 - 2)       | 1<br>(1 - 1)       |
| Cardiovascular diseases                       | 127<br>(110 - 144) | 0<br>(0 - 0)     | 0<br>(0 - 0)      | 13<br>(10 - 16)    | 44<br>(36 - 52)    | 70<br>(62 - 78)    |
| Rheumatic heart disease                       | 1<br>(0 - 1)       | 0<br>(0 - 0)     | 0<br>(0 - 0)      | 0<br>(0 - 0)       | 0<br>(0 - 0)       | 0<br>(0 - 0)       |
| Ischemic heart disease                        | 57<br>(47 - 70)    | 0<br>(0 - 0)     | 0<br>(0 - 0)      | 6<br>(4 - 8)       | 21<br>(17 - 26)    | 30<br>(25 - 37)    |
| Cerebrovascular disease                       | 46<br>(38 - 54)    | 0<br>(0 - 0)     | 0<br>(0 - 0)      | 4<br>(3 - 5)       | 15<br>(12 - 18)    | 28<br>(23 - 32)    |
| Ischemic stroke                               | 29<br>(24 - 35)    | 0<br>(0 - 0)     | 0<br>(0 - 0)      | 1<br>(1 - 1)       | 8<br>(6 - 10)      | 20<br>(16 - 24)    |
| Hemorrhagic stroke                            | 17<br>(12 - 21)    | 0<br>(0 - 0)     | 0<br>(0 - 0)      | 3<br>(2 - 3)       | 7<br>(5 - 9)       | 8<br>(5 - 10)      |
| Hypertensive heart disease                    | 9<br>(6 - 13)      | 0<br>(0 - 0)     | 0<br>(0 - 0)      | 1<br>(1 - 1)       | 3<br>(2 - 5)       | 5<br>(3 - 8)       |
| Cardiomyopathy and myocarditis                | 5<br>(3 - 6)       | 0<br>(0 - 0)     | 0<br>(0 - 0)      | 1<br>(1 - 1)       | 2<br>(1 - 2)       | 2<br>(1 - 2)       |
| Atrial fibrillation and flutter               | 1<br>(1 - 2)       | --               | --                | 0<br>(0 - 0)       | 0<br>(0 - 0)       | 1<br>(1 - 1)       |
| Aortic aneurysm                               | 2<br>(2 - 2)       | --               | --                | 0<br>(0 - 0)       | 1<br>(1 - 1)       | 1<br>(1 - 1)       |
| Peripheral vascular disease                   | 1<br>(1 - 1)       | --               | --                | 0<br>(0 - 0)       | 0<br>(0 - 0)       | 1<br>(0 - 1)       |
| Endocarditis                                  | 0<br>(0 - 1)       | 0<br>(0 - 0)     | 0<br>(0 - 0)      | 0<br>(0 - 0)       | 0<br>(0 - 0)       | 0<br>(0 - 0)       |
| Other cardiovascular and circulatory diseases | 5<br>(3 - 6)       | 0<br>(0 - 0)     | 0<br>(0 - 0)      | 1<br>(1 - 1)       | 2<br>(1 - 2)       | 3<br>(2 - 3)       |
| Chronic respiratory diseases                  | 17<br>(14 - 21)    | 0<br>(0 - 0)     | 0<br>(0 - 0)      | 2<br>(1 - 2)       | 4<br>(3 - 6)       | 11<br>(9 - 14)     |
| Chronic obstructive pulmonary disease         | 13<br>(10 - 15)    | 0<br>(0 - 0)     | 0<br>(0 - 0)      | 1<br>(0 - 1)       | 3<br>(2 - 4)       | 9<br>(7 - 11)      |
| Pneumoconiosis                                | 1<br>(0 - 1)       | 0<br>(0 - 0)     | 0<br>(0 - 0)      | 0<br>(0 - 0)       | 0<br>(0 - 0)       | 0<br>(0 - 0)       |

Web Table 31- Grenada deaths with 95% UI by age, sex, and cause in 2013

| Cause                                               | Males, All Ages | Males, 0-4 Years | Males, 5-14 Years | Males, 15-49 Years | Males, 50-69 Years | Males, 70-80 Years |
|-----------------------------------------------------|-----------------|------------------|-------------------|--------------------|--------------------|--------------------|
| Silicosis                                           | 0<br>(0-0)      | 0<br>(0-0)       | 0<br>(0-0)        | 0<br>(0-0)         | 0<br>(0-0)         | 0<br>(0-0)         |
| Asbestosis                                          | 0<br>(0-0)      | 0<br>(0-0)       | 0<br>(0-0)        | 0<br>(0-0)         | 0<br>(0-0)         | 0<br>(0-0)         |
| Coal workers pneumoconiosis                         | 0<br>(0-0)      | 0<br>(0-0)       | 0<br>(0-0)        | 0<br>(0-0)         | 0<br>(0-0)         | 0<br>(0-0)         |
| Other pneumoconiosis                                | 0<br>(0-1)      | 0<br>(0-0)       | 0<br>(0-0)        | 0<br>(0-0)         | 0<br>(0-0)         | 0<br>(0-0)         |
| Asthma                                              | 3<br>(2-3)      | 0<br>(0-0)       | 0<br>(0-0)        | 1<br>(0-1)         | 1<br>(1-1)         | 1<br>(1-2)         |
| Interstitial lung disease and pulmonary sarcoidosis | 1<br>(1-2)      | 0<br>(0-0)       | 0<br>(0-0)        | 0<br>(0-0)         | 0<br>(0-1)         | 1<br>(0-1)         |
| Other chronic respiratory diseases                  | 0<br>(0-1)      | 0<br>(0-0)       | 0<br>(0-0)        | 0<br>(0-0)         | 0<br>(0-0)         | 0<br>(0-0)         |
| Cirrhosis                                           | 10<br>(8-12)    | 0<br>(0-0)       | 0<br>(0-0)        | 3<br>(2-4)         | 5<br>(4-6)         | 2<br>(2-3)         |
| Cirrhosis due to hepatitis B                        | 1<br>(0-1)      | 0<br>(0-0)       | 0<br>(0-0)        | 0<br>(0-0)         | 0<br>(0-1)         | 0<br>(0-0)         |
| Cirrhosis due to hepatitis C                        | 2<br>(1-4)      | 0<br>(0-0)       | 0<br>(0-0)        | 1<br>(0-1)         | 1<br>(0-2)         | 1<br>(0-1)         |
| Cirrhosis due to alcohol use                        | 5<br>(4-7)      | --               | --                | 1<br>(1-2)         | 3<br>(2-4)         | 1<br>(1-2)         |
| Cirrhosis due to other causes                       | 2<br>(1-3)      | 0<br>(0-0)       | 0<br>(0-0)        | 1<br>(0-1)         | 1<br>(0-1)         | 0<br>(0-0)         |
| Digestive diseases                                  | 9<br>(8-11)     | 0<br>(0-0)       | 0<br>(0-0)        | 2<br>(2-3)         | 3<br>(2-4)         | 4<br>(3-5)         |
| Peptic ulcer disease                                | 3<br>(2-4)      | 0<br>(0-0)       | 0<br>(0-0)        | 1<br>(0-1)         | 1<br>(1-1)         | 1<br>(1-1)         |
| Gastritis and duodenitis                            | 1<br>(0-1)      | 0<br>(0-0)       | 0<br>(0-0)        | 0<br>(0-0)         | 0<br>(0-0)         | 0<br>(0-1)         |
| Appendicitis                                        | 0<br>(0-1)      | 0<br>(0-0)       | 0<br>(0-0)        | 0<br>(0-0)         | 0<br>(0-0)         | 0<br>(0-0)         |
| Paralytic ileus and intestinal obstruction          | 1<br>(0-2)      | 0<br>(0-0)       | 0<br>(0-0)        | 0<br>(0-0)         | 0<br>(0-1)         | 1<br>(0-1)         |
| Inguinal, femoral, and abdominal hernia             | 1<br>(0-1)      | 0<br>(0-0)       | 0<br>(0-0)        | 0<br>(0-0)         | 0<br>(0-0)         | 0<br>(0-1)         |
| Inflammatory bowel disease                          | 1<br>(1-1)      | 0<br>(0-0)       | 0<br>(0-0)        | 0<br>(0-0)         | 0<br>(0-0)         | 0<br>(0-1)         |
| Vascular intestinal disorders                       | 0<br>(0-1)      | 0<br>(0-0)       | 0<br>(0-0)        | 0<br>(0-0)         | 0<br>(0-0)         | 0<br>(0-0)         |
| Gallbladder and biliary diseases                    | 1<br>(0-1)      | 0<br>(0-0)       | 0<br>(0-0)        | 0<br>(0-0)         | 0<br>(0-0)         | 0<br>(0-0)         |
| Pancreatitis                                        | 1<br>(1-1)      | 0<br>(0-0)       | 0<br>(0-0)        | 0<br>(0-1)         | 0<br>(0-1)         | 0<br>(0-0)         |
| Other digestive diseases                            | 1<br>(1-1)      | 0<br>(0-0)       | 0<br>(0-0)        | 0<br>(0-0)         | 0<br>(0-1)         | 0<br>(0-1)         |
| Neurological disorders                              | 18<br>(14-22)   | 0<br>(0-0)       | 0<br>(0-0)        | 1<br>(1-2)         | 2<br>(1-2)         | 14<br>(11-18)      |
| Alzheimer disease and other dementias               | 14<br>(11-18)   | --               | --                | 0<br>(0-0)         | 1<br>(1-1)         | 13<br>(10-16)      |
| Parkinson disease                                   | 1<br>(1-1)      | --               | --                | 0<br>(0-0)         | 0<br>(0-0)         | 1<br>(1-1)         |
| Epilepsy                                            | 2<br>(1-2)      | 0<br>(0-0)       | 0<br>(0-0)        | 1<br>(1-1)         | 0<br>(0-1)         | 0<br>(0-0)         |
| Multiple sclerosis                                  | 0<br>(0-0)      | --               | --                | 0<br>(0-0)         | 0<br>(0-0)         | 0<br>(0-0)         |
| Other neurological disorders                        | 1<br>(1-1)      | 0<br>(0-0)       | 0<br>(0-0)        | 0<br>(0-0)         | 0<br>(0-0)         | 0<br>(0-0)         |
| Mental and substance use disorders                  | 3<br>(2-4)      | 0<br>(0-0)       | 0<br>(0-0)        | 1<br>(1-2)         | 1<br>(1-2)         | 1<br>(0-1)         |
| Schizophrenia                                       | 0<br>(0-0)      | --               | --                | 0<br>(0-0)         | 0<br>(0-0)         | 0<br>(0-0)         |
| Alcohol use disorders                               | 2<br>(1-2)      | --               | --                | 1<br>(0-1)         | 1<br>(0-1)         | 0<br>(0-0)         |
| Drug use disorders                                  | 1<br>(1-1)      | 0<br>(0-0)       | --                | 1<br>(0-1)         | 0<br>(0-0)         | 0<br>(0-0)         |
| Opioid use disorders                                | 0<br>(0-0)      | 0<br>(0-0)       | --                | 0<br>(0-0)         | 0<br>(0-0)         | 0<br>(0-0)         |
| Cocaine use disorders                               | 0<br>(0-0)      | 0<br>(0-0)       | --                | 0<br>(0-0)         | 0<br>(0-0)         | 0<br>(0-0)         |
| Amphetamine use disorders                           | 0<br>(0-0)      | 0<br>(0-0)       | --                | 0<br>(0-0)         | 0<br>(0-0)         | 0<br>(0-0)         |
| Other drug use disorders                            | 1<br>(0-1)      | 0<br>(0-0)       | --                | 0<br>(0-0)         | 0<br>(0-0)         | 0<br>(0-0)         |
| Eating disorders                                    | 0<br>(0-0)      | --               | 0<br>(0-0)        | 0<br>(0-0)         | --                 | --                 |
| Anorexia nervosa                                    | 0<br>(0-0)      | --               | 0<br>(0-0)        | 0<br>(0-0)         | --                 | --                 |
| Diabetes, urogenital, blood, and endocrine diseases | 52<br>(43-61)   | 0<br>(0-1)       | 0<br>(0-0)        | 7<br>(5-9)         | 19<br>(15-23)      | 26<br>(22-30)      |

Web Table 31- Grenada deaths with 95% UI by age, sex, and cause in 2013

| Cause                                               | Males, All Ages | Males, 0-4 Years | Males, 5-14 Years | Males, 15-49 Years | Males, 50-69 Years | Males, 70-80 Years |
|-----------------------------------------------------|-----------------|------------------|-------------------|--------------------|--------------------|--------------------|
| Diabetes mellitus                                   | 32<br>(26 - 38) | 0<br>(0 - 0)     | 0<br>(0 - 0)      | 3<br>(2 - 4)       | 13<br>(10 - 16)    | 16<br>(14 - 19)    |
| Acute glomerulonephritis                            | 0<br>(0 - 0)    | 0<br>(0 - 0)     | 0<br>(0 - 0)      | 0<br>(0 - 0)       | 0<br>(0 - 0)       | 0<br>(0 - 0)       |
| Chronic kidney disease                              | 12<br>(10 - 17) | 0<br>(0 - 0)     | 0<br>(0 - 0)      | 2<br>(2 - 3)       | 4<br>(3 - 6)       | 6<br>(4 - 9)       |
| Chronic kidney disease due to diabetes mellitus     | 2<br>(1 - 4)    | 0<br>(0 - 0)     | 0<br>(0 - 0)      | 0<br>(0 - 1)       | 1<br>(0 - 2)       | 1<br>(0 - 2)       |
| Chronic kidney disease due to hypertension          | 7<br>(5 - 9)    | 0<br>(0 - 0)     | 0<br>(0 - 0)      | 1<br>(1 - 2)       | 2<br>(1 - 3)       | 3<br>(2 - 5)       |
| Chronic kidney disease due to glomerulonephritis    | 0<br>(0 - 1)    | 0<br>(0 - 0)     | 0<br>(0 - 0)      | 0<br>(0 - 0)       | 0<br>(0 - 0)       | 0<br>(0 - 0)       |
| Chronic kidney disease due to other causes          | 3<br>(2 - 6)    | 0<br>(0 - 0)     | 0<br>(0 - 0)      | 1<br>(0 - 1)       | 1<br>(0 - 2)       | 2<br>(1 - 3)       |
| Urinary diseases and male infertility               | 3<br>(2 - 4)    | 0<br>(0 - 0)     | 0<br>(0 - 0)      | 0<br>(0 - 0)       | 1<br>(0 - 1)       | 2<br>(1 - 3)       |
| Interstitial nephritis and urinary tract infections | 2<br>(1 - 3)    | 0<br>(0 - 0)     | 0<br>(0 - 0)      | 0<br>(0 - 0)       | 1<br>(0 - 1)       | 2<br>(1 - 2)       |
| Urolithiasis                                        | 0<br>(0 - 0)    | --               | 0<br>(0 - 0)      | 0<br>(0 - 0)       | 0<br>(0 - 0)       | 0<br>(0 - 0)       |
| Other urinary diseases                              | 1<br>(0 - 1)    | 0<br>(0 - 0)     | 0<br>(0 - 0)      | 0<br>(0 - 0)       | 0<br>(0 - 0)       | 0<br>(0 - 1)       |
| Gynecological diseases                              | --              | --               | --                | --                 | --                 | --                 |
| Uterine fibroids                                    | --              | --               | --                | --                 | --                 | --                 |
| Polycystic ovarian syndrome                         | --              | --               | --                | --                 | --                 | --                 |
| Endometriosis                                       | --              | --               | --                | --                 | --                 | --                 |
| Genital prolapse                                    | --              | --               | --                | --                 | --                 | --                 |
| Other gynecological diseases                        | --              | --               | --                | --                 | --                 | --                 |
| Hemoglobinopathies and hemolytic anemias            | 1<br>(1 - 2)    | 0<br>(0 - 0)     | 0<br>(0 - 0)      | 1<br>(0 - 1)       | 0<br>(0 - 0)       | 0<br>(0 - 0)       |
| Thalassemias                                        | 0<br>(0 - 0)    | 0<br>(0 - 0)     | 0<br>(0 - 0)      | 0<br>(0 - 0)       | 0<br>(0 - 0)       | 0<br>(0 - 0)       |
| Sickle cell disorders                               | 1<br>(0 - 1)    | 0<br>(0 - 0)     | 0<br>(0 - 0)      | 0<br>(0 - 1)       | 0<br>(0 - 0)       | 0<br>(0 - 0)       |
| G6PD deficiency                                     | 0<br>(0 - 0)    | 0<br>(0 - 0)     | 0<br>(0 - 0)      | 0<br>(0 - 0)       | 0<br>(0 - 0)       | 0<br>(0 - 0)       |
| Other hemoglobinopathies and hemolytic anemias      | 0<br>(0 - 0)    | 0<br>(0 - 0)     | 0<br>(0 - 0)      | 0<br>(0 - 0)       | 0<br>(0 - 0)       | 0<br>(0 - 0)       |
| Endocrine, metabolic, blood, and immune disorders   | 3<br>(2 - 6)    | 0<br>(0 - 0)     | 0<br>(0 - 0)      | 1<br>(1 - 2)       | 1<br>(1 - 2)       | 1<br>(1 - 2)       |
| Musculoskeletal disorders                           | 1<br>(1 - 1)    | --               | 0<br>(0 - 0)      | 0<br>(0 - 1)       | 0<br>(0 - 0)       | 0<br>(0 - 0)       |
| Rheumatoid arthritis                                | 0<br>(0 - 0)    | --               | 0<br>(0 - 0)      | 0<br>(0 - 0)       | 0<br>(0 - 0)       | 0<br>(0 - 0)       |
| Other musculoskeletal disorders                     | 1<br>(1 - 1)    | --               | 0<br>(0 - 0)      | 0<br>(0 - 1)       | 0<br>(0 - 0)       | 0<br>(0 - 0)       |
| Other non-communicable diseases                     | 7<br>(5 - 10)   | 3<br>(1 - 6)     | 0<br>(0 - 0)      | 1<br>(1 - 1)       | 1<br>(0 - 1)       | 2<br>(1 - 3)       |
| Congenital anomalies                                | 4<br>(2 - 6)    | 2<br>(1 - 5)     | 0<br>(0 - 0)      | 1<br>(0 - 1)       | 0<br>(0 - 0)       | 0<br>(0 - 0)       |
| Neural tube defects                                 | 0<br>(0 - 0)    | 0<br>(0 - 0)     | 0<br>(0 - 0)      | 0<br>(0 - 0)       | 0<br>(0 - 0)       | 0<br>(0 - 0)       |
| Congenital heart anomalies                          | 2<br>(1 - 3)    | 1<br>(0 - 2)     | 0<br>(0 - 0)      | 0<br>(0 - 1)       | 0<br>(0 - 0)       | 0<br>(0 - 0)       |
| Cleft lip and cleft palate                          | 0<br>(0 - 0)    | 0<br>(0 - 0)     | --                | --                 | --                 | --                 |
| Down syndrome                                       | 0<br>(0 - 0)    | 0<br>(0 - 0)     | 0<br>(0 - 0)      | 0<br>(0 - 0)       | 0<br>(0 - 0)       | 0<br>(0 - 0)       |
| Chromosomal unbalanced rearrangements               | 0<br>(0 - 0)    | 0<br>(0 - 0)     | 0<br>(0 - 0)      | 0<br>(0 - 0)       | 0<br>(0 - 0)       | 0<br>(0 - 0)       |
| Other congenital anomalies                          | 2<br>(1 - 3)    | 1<br>(0 - 2)     | 0<br>(0 - 0)      | 0<br>(0 - 0)       | 0<br>(0 - 0)       | 0<br>(0 - 0)       |
| Skin and subcutaneous diseases                      | 2<br>(1 - 3)    | 0<br>(0 - 0)     | 0<br>(0 - 0)      | 0<br>(0 - 0)       | 1<br>(0 - 1)       | 2<br>(1 - 2)       |
| Cellulitis                                          | 0<br>(0 - 0)    | 0<br>(0 - 0)     | 0<br>(0 - 0)      | 0<br>(0 - 0)       | 0<br>(0 - 0)       | 0<br>(0 - 0)       |
| Pyoderma                                            | 1<br>(0 - 1)    | 0<br>(0 - 0)     | 0<br>(0 - 0)      | 0<br>(0 - 0)       | 0<br>(0 - 0)       | 0<br>(0 - 1)       |
| Decubitus ulcer                                     | 1<br>(1 - 2)    | 0<br>(0 - 0)     | 0<br>(0 - 0)      | 0<br>(0 - 0)       | 0<br>(0 - 0)       | 1<br>(0 - 2)       |
| Other skin and subcutaneous diseases                | 0<br>(0 - 0)    | 0<br>(0 - 0)     | 0<br>(0 - 0)      | 0<br>(0 - 0)       | 0<br>(0 - 0)       | 0<br>(0 - 0)       |
| Sudden infant death syndrome                        | 0<br>(0 - 1)    | 0<br>(0 - 1)     | --                | --                 | --                 | --                 |

Web Table 31- Grenada deaths with 95% UI by age, sex, and cause in 2013

| Cause                                           | Males, All Ages | Males, 0-4 Years | Males, 5-14 Years | Males, 15-49 Years | Males, 50-69 Years | Males, 70-80 Years |
|-------------------------------------------------|-----------------|------------------|-------------------|--------------------|--------------------|--------------------|
| Injuries                                        | 54<br>(45 - 65) | 1<br>(0 - 2)     | 1<br>(1 - 2)      | 35<br>(28 - 43)    | 10<br>(8 - 13)     | 6<br>(5 - 7)       |
| Transport injuries                              | 15<br>(12 - 18) | 0<br>(0 - 0)     | 0<br>(0 - 1)      | 9<br>(7 - 12)      | 3<br>(2 - 4)       | 2<br>(1 - 2)       |
| Road injuries                                   | 13<br>(11 - 17) | 0<br>(0 - 0)     | 0<br>(0 - 1)      | 9<br>(7 - 11)      | 3<br>(2 - 4)       | 1<br>(1 - 2)       |
| Pedestrian road injuries                        | 3<br>(2 - 4)    | 0<br>(0 - 0)     | 0<br>(0 - 0)      | 2<br>(1 - 2)       | 1<br>(1 - 1)       | 1<br>(0 - 1)       |
| Cyclist road injuries                           | 1<br>(1 - 1)    | 0<br>(0 - 0)     | 0<br>(0 - 0)      | 0<br>(0 - 1)       | 0<br>(0 - 0)       | 0<br>(0 - 0)       |
| Motorcyclist road injuries                      | 2<br>(1 - 2)    | 0<br>(0 - 0)     | 0<br>(0 - 0)      | 1<br>(1 - 2)       | 0<br>(0 - 0)       | 0<br>(0 - 0)       |
| Motor vehicle road injuries                     | 8<br>(6 - 10)   | 0<br>(0 - 0)     | 0<br>(0 - 0)      | 5<br>(4 - 7)       | 2<br>(1 - 2)       | 1<br>(0 - 1)       |
| Other road injuries                             | 0<br>(0 - 0)    | 0<br>(0 - 0)     | 0<br>(0 - 0)      | 0<br>(0 - 0)       | 0<br>(0 - 0)       | 0<br>(0 - 0)       |
| Other transport injuries                        | 1<br>(1 - 1)    | 0<br>(0 - 0)     | 0<br>(0 - 0)      | 1<br>(0 - 1)       | 0<br>(0 - 0)       | 0<br>(0 - 0)       |
| Unintentional injuries                          | 19<br>(15 - 23) | 1<br>(0 - 2)     | 1<br>(0 - 1)      | 10<br>(8 - 12)     | 4<br>(3 - 5)       | 4<br>(3 - 4)       |
| Falls                                           | 3<br>(2 - 4)    | 0<br>(0 - 0)     | 0<br>(0 - 0)      | 1<br>(1 - 1)       | 1<br>(1 - 1)       | 1<br>(1 - 1)       |
| Drowning                                        | 5<br>(4 - 8)    | 0<br>(0 - 0)     | 0<br>(0 - 1)      | 4<br>(2 - 5)       | 1<br>(1 - 1)       | 0<br>(0 - 0)       |
| Fire, heat, and hot substances                  | 1<br>(1 - 2)    | 0<br>(0 - 0)     | 0<br>(0 - 0)      | 0<br>(0 - 1)       | 0<br>(0 - 0)       | 0<br>(0 - 1)       |
| Poisonings                                      | 0<br>(0 - 1)    | 0<br>(0 - 0)     | 0<br>(0 - 0)      | 0<br>(0 - 0)       | 0<br>(0 - 0)       | 0<br>(0 - 0)       |
| Exposure to mechanical forces                   | 4<br>(3 - 5)    | 0<br>(0 - 0)     | 0<br>(0 - 0)      | 3<br>(2 - 4)       | 1<br>(0 - 1)       | 0<br>(0 - 0)       |
| Unintentional firearm injuries                  | 2<br>(1 - 3)    | 0<br>(0 - 0)     | 0<br>(0 - 0)      | 2<br>(1 - 2)       | 0<br>(0 - 1)       | 0<br>(0 - 0)       |
| Unintentional suffocation                       | 0<br>(0 - 1)    | 0<br>(0 - 0)     | 0<br>(0 - 0)      | 0<br>(0 - 0)       | 0<br>(0 - 0)       | 0<br>(0 - 0)       |
| Other exposure to mechanical forces             | 1<br>(1 - 2)    | 0<br>(0 - 0)     | 0<br>(0 - 0)      | 1<br>(1 - 1)       | 0<br>(0 - 0)       | 0<br>(0 - 0)       |
| Adverse effects of medical treatment            | 2<br>(1 - 2)    | 0<br>(0 - 0)     | 0<br>(0 - 0)      | 0<br>(0 - 1)       | 0<br>(0 - 1)       | 1<br>(0 - 1)       |
| Animal contact                                  | 0<br>(0 - 1)    | 0<br>(0 - 0)     | 0<br>(0 - 0)      | 0<br>(0 - 0)       | 0<br>(0 - 0)       | 0<br>(0 - 0)       |
| Venomous animal contact                         | 0<br>(0 - 0)    | 0<br>(0 - 0)     | 0<br>(0 - 0)      | 0<br>(0 - 0)       | 0<br>(0 - 0)       | 0<br>(0 - 0)       |
| Non-venomous animal contact                     | 0<br>(0 - 0)    | 0<br>(0 - 0)     | 0<br>(0 - 0)      | 0<br>(0 - 0)       | 0<br>(0 - 0)       | 0<br>(0 - 0)       |
| Foreign body                                    | 2<br>(1 - 3)    | 0<br>(0 - 1)     | 0<br>(0 - 0)      | 1<br>(0 - 1)       | 0<br>(0 - 1)       | 1<br>(0 - 1)       |
| Pulmonary aspiration and foreign body in airway | 2<br>(1 - 3)    | 0<br>(0 - 1)     | 0<br>(0 - 0)      | 1<br>(0 - 1)       | 0<br>(0 - 1)       | 1<br>(0 - 1)       |
| Foreign body in other body part                 | 0<br>(0 - 0)    | 0<br>(0 - 0)     | 0<br>(0 - 0)      | 0<br>(0 - 0)       | 0<br>(0 - 0)       | 0<br>(0 - 0)       |
| Other unintentional injuries                    | 1<br>(1 - 1)    | 0<br>(0 - 0)     | 0<br>(0 - 0)      | 0<br>(0 - 1)       | 0<br>(0 - 0)       | 0<br>(0 - 0)       |
| Self-harm and interpersonal violence            | 21<br>(16 - 26) | 0<br>(0 - 0)     | 0<br>(0 - 0)      | 16<br>(12 - 21)    | 3<br>(2 - 5)       | 1<br>(1 - 1)       |
| Self-harm                                       | 9<br>(7 - 12)   | --               | 0<br>(0 - 0)      | 7<br>(5 - 9)       | 2<br>(1 - 2)       | 1<br>(0 - 1)       |
| Interpersonal violence                          | 12<br>(7 - 16)  | 0<br>(0 - 0)     | 0<br>(0 - 0)      | 9<br>(6 - 13)      | 2<br>(1 - 3)       | 0<br>(0 - 1)       |
| Assault by firearm                              | 6<br>(4 - 9)    | 0<br>(0 - 0)     | 0<br>(0 - 0)      | 6<br>(3 - 8)       | 1<br>(0 - 1)       | 0<br>(0 - 0)       |
| Assault by sharp object                         | 3<br>(2 - 5)    | 0<br>(0 - 0)     | 0<br>(0 - 0)      | 3<br>(1 - 5)       | 0<br>(0 - 1)       | 0<br>(0 - 0)       |
| Assault by other means                          | 2<br>(1 - 3)    | 0<br>(0 - 0)     | 0<br>(0 - 0)      | 1<br>(1 - 2)       | 1<br>(0 - 1)       | 0<br>(0 - 0)       |

Web Table 31- Grenada deaths with 95% UI by age, sex, and cause in 2013

| Cause                                                             | Females, All Ages  | Females, 0-4 Years | Females, 5-14 Years | Females, 15-49 Years | Females, 50-69 Years | Females, 70-80 Years |
|-------------------------------------------------------------------|--------------------|--------------------|---------------------|----------------------|----------------------|----------------------|
| All causes                                                        | 430<br>(390 - 480) | 12<br>(6 - 23)     | 2<br>(2 - 3)        | 43<br>(35 - 52)      | 89<br>(74 - 106)     | 283<br>(264 - 310)   |
| Communicable, maternal, neonatal, and nutritional diseases        | 46<br>(38 - 56)    | 8<br>(4 - 15)      | 1<br>(0 - 1)        | 8<br>(6 - 9)         | 4<br>(3 - 5)         | 26<br>(20 - 33)      |
| HIV/AIDS and tuberculosis                                         | 5<br>(4 - 7)       | 0<br>(0 - 0)       | 0<br>(0 - 0)        | 4<br>(3 - 5)         | 1<br>(1 - 2)         | 0<br>(0 - 0)         |
| Tuberculosis                                                      | 0<br>(0 - 1)       | 0<br>(0 - 0)       | 0<br>(0 - 0)        | 0<br>(0 - 0)         | 0<br>(0 - 0)         | 0<br>(0 - 0)         |
| HIV/AIDS                                                          | 5<br>(4 - 6)       | 0<br>(0 - 0)       | 0<br>(0 - 0)        | 4<br>(3 - 5)         | 1<br>(1 - 1)         | 0<br>(0 - 0)         |
| HIV/AIDS resulting in mycobacterial infection                     | 0<br>(0 - 0)       | 0<br>(0 - 0)       | 0<br>(0 - 0)        | 0<br>(0 - 0)         | 0<br>(0 - 0)         | 0<br>(0 - 0)         |
| HIV/AIDS resulting in other diseases                              | 5<br>(4 - 6)       | 0<br>(0 - 0)       | 0<br>(0 - 0)        | 3<br>(3 - 4)         | 1<br>(1 - 1)         | 0<br>(0 - 0)         |
| Diarrhea, lower respiratory, and other common infectious diseases | 27<br>(21 - 35)    | 2<br>(1 - 3)       | 0<br>(0 - 1)        | 2<br>(1 - 2)         | 2<br>(2 - 3)         | 21<br>(16 - 28)      |
| Diarrheal diseases                                                | 2<br>(1 - 3)       | 0<br>(0 - 1)       | 0<br>(0 - 0)        | 0<br>(0 - 0)         | 0<br>(0 - 0)         | 1<br>(1 - 2)         |
| Intestinal infectious diseases                                    | 0<br>(0 - 1)       | 0<br>(0 - 0)       | 0<br>(0 - 0)        | 0<br>(0 - 0)         | 0<br>(0 - 0)         | 0<br>(0 - 0)         |
| Typhoid fever                                                     | 0<br>(0 - 1)       | 0<br>(0 - 0)       | 0<br>(0 - 0)        | 0<br>(0 - 0)         | 0<br>(0 - 0)         | 0<br>(0 - 0)         |
| Paratyphoid fever                                                 | 0<br>(0 - 0)       | 0<br>(0 - 0)       | 0<br>(0 - 0)        | 0<br>(0 - 0)         | 0<br>(0 - 0)         | 0<br>(0 - 0)         |
| Other intestinal infectious diseases                              | 0<br>(0 - 0)       | 0<br>(0 - 0)       | 0<br>(0 - 0)        | 0<br>(0 - 0)         | 0<br>(0 - 0)         | 0<br>(0 - 0)         |
| Lower respiratory infections                                      | 24<br>(19 - 32)    | 1<br>(0 - 2)       | 0<br>(0 - 0)        | 1<br>(1 - 1)         | 2<br>(1 - 2)         | 20<br>(15 - 27)      |
| Upper respiratory infections                                      | 0<br>(0 - 0)       | 0<br>(0 - 0)       | 0<br>(0 - 0)        | 0<br>(0 - 0)         | 0<br>(0 - 0)         | 0<br>(0 - 0)         |
| Otitis media                                                      | 0<br>(0 - 0)       | 0<br>(0 - 0)       | 0<br>(0 - 0)        | 0<br>(0 - 0)         | 0<br>(0 - 0)         | 0<br>(0 - 0)         |
| Meningitis                                                        | 0<br>(0 - 1)       | 0<br>(0 - 0)       | 0<br>(0 - 0)        | 0<br>(0 - 0)         | 0<br>(0 - 0)         | 0<br>(0 - 0)         |
| Pneumococcal meningitis                                           | 0<br>(0 - 0)       | 0<br>(0 - 0)       | 0<br>(0 - 0)        | 0<br>(0 - 0)         | 0<br>(0 - 0)         | 0<br>(0 - 0)         |
| H influenzae type B meningitis                                    | 0<br>(0 - 0)       | 0<br>(0 - 0)       | 0<br>(0 - 0)        | 0<br>(0 - 0)         | 0<br>(0 - 0)         | 0<br>(0 - 0)         |
| Meningococcal meningitis                                          | 0<br>(0 - 0)       | 0<br>(0 - 0)       | 0<br>(0 - 0)        | 0<br>(0 - 0)         | 0<br>(0 - 0)         | 0<br>(0 - 0)         |
| Other meningitis                                                  | 0<br>(0 - 0)       | 0<br>(0 - 0)       | 0<br>(0 - 0)        | 0<br>(0 - 0)         | 0<br>(0 - 0)         | 0<br>(0 - 0)         |
| Encephalitis                                                      | 0<br>(0 - 1)       | 0<br>(0 - 0)       | 0<br>(0 - 0)        | 0<br>(0 - 0)         | 0<br>(0 - 0)         | 0<br>(0 - 0)         |
| Diphtheria                                                        | 0<br>(0 - 0)       | 0<br>(0 - 0)       | 0<br>(0 - 0)        | 0<br>(0 - 0)         | 0<br>(0 - 0)         | --                   |
| Whooping cough                                                    | 0<br>(0 - 0)       | 0<br>(0 - 0)       | 0<br>(0 - 0)        | 0<br>(0 - 0)         | 0<br>(0 - 0)         | --                   |
| Tetanus                                                           | 0<br>(0 - 0)       | 0<br>(0 - 0)       | 0<br>(0 - 0)        | 0<br>(0 - 0)         | 0<br>(0 - 0)         | 0<br>(0 - 0)         |
| Measles                                                           | 0<br>(0 - 0)       | 0<br>(0 - 0)       | 0<br>(0 - 0)        | 0<br>(0 - 0)         | 0<br>(0 - 0)         | --                   |
| Varicella and herpes zoster                                       | 0<br>(0 - 0)       | 0<br>(0 - 0)       | 0<br>(0 - 0)        | 0<br>(0 - 0)         | 0<br>(0 - 0)         | 0<br>(0 - 0)         |
| Neglected tropical diseases and malaria                           | 0<br>(0 - 0)       | 0<br>(0 - 0)       | 0<br>(0 - 0)        | 0<br>(0 - 0)         | 0<br>(0 - 0)         | 0<br>(0 - 0)         |
| Leishmaniasis                                                     | 0<br>(0 - 0)       | 0<br>(0 - 0)       | 0<br>(0 - 0)        | 0<br>(0 - 0)         | 0<br>(0 - 0)         | 0<br>(0 - 0)         |
| Visceral leishmaniasis                                            | 0<br>(0 - 0)       | 0<br>(0 - 0)       | 0<br>(0 - 0)        | 0<br>(0 - 0)         | 0<br>(0 - 0)         | 0<br>(0 - 0)         |
| Cysticercosis                                                     | 0<br>(0 - 0)       | 0<br>(0 - 0)       | 0<br>(0 - 0)        | 0<br>(0 - 0)         | 0<br>(0 - 0)         | 0<br>(0 - 0)         |
| Cystic echinococcosis                                             | 0<br>(0 - 0)       | 0<br>(0 - 0)       | 0<br>(0 - 0)        | 0<br>(0 - 0)         | 0<br>(0 - 0)         | 0<br>(0 - 0)         |
| Dengue                                                            | 0<br>(0 - 0)       | 0<br>(0 - 0)       | 0<br>(0 - 0)        | 0<br>(0 - 0)         | 0<br>(0 - 0)         | 0<br>(0 - 0)         |
| Rabies                                                            | 0<br>(0 - 0)       | 0<br>(0 - 0)       | 0<br>(0 - 0)        | 0<br>(0 - 0)         | 0<br>(0 - 0)         | 0<br>(0 - 0)         |
| Intestinal nematode infections                                    | 0<br>(0 - 0)       | 0<br>(0 - 0)       | 0<br>(0 - 0)        | 0<br>(0 - 0)         | 0<br>(0 - 0)         | 0<br>(0 - 0)         |
| Ascariasis                                                        | 0<br>(0 - 0)       | 0<br>(0 - 0)       | 0<br>(0 - 0)        | 0<br>(0 - 0)         | 0<br>(0 - 0)         | 0<br>(0 - 0)         |
| Other neglected tropical diseases                                 | 0<br>(0 - 0)       | 0<br>(0 - 0)       | 0<br>(0 - 0)        | 0<br>(0 - 0)         | 0<br>(0 - 0)         | 0<br>(0 - 0)         |
| Maternal disorders                                                | 1<br>(1 - 2)       | --                 | 0<br>(0 - 0)        | 1<br>(1 - 2)         | --                   | --                   |
| Maternal hemorrhage                                               | 0<br>(0 - 0)       | --                 | 0<br>(0 - 0)        | 0<br>(0 - 0)         | --                   | --                   |
| Maternal sepsis and other maternal infections                     | 0<br>(0 - 0)       | --                 | 0<br>(0 - 0)        | 0<br>(0 - 0)         | --                   | --                   |



Web Table 31- Grenada deaths with 95% UI by age, sex, and cause in 2013

| Cause                                                            | Females, All Ages  | Females, 0-4 Years | Females, 5-14 Years | Females, 15-49 Years | Females, 50-69 Years | Females, 70-80 Years |
|------------------------------------------------------------------|--------------------|--------------------|---------------------|----------------------|----------------------|----------------------|
| Maternal hypertensive disorders                                  | 0<br>(0 - 0)       | --                 | 0<br>(0 - 0)        | 0<br>(0 - 0)         | --                   | --                   |
| Maternal obstructed labor                                        | 0<br>(0 - 0)       | --                 | 0<br>(0 - 0)        | 0<br>(0 - 0)         | --                   | --                   |
| Maternal abortive outcome                                        | 0<br>(0 - 0)       | --                 | 0<br>(0 - 0)        | 0<br>(0 - 0)         | --                   | --                   |
| Indirect maternal deaths                                         | 0<br>(0 - 0)       | --                 | 0<br>(0 - 0)        | 0<br>(0 - 0)         | --                   | --                   |
| Late maternal deaths                                             | 0<br>(0 - 0)       | --                 | 0<br>(0 - 0)        | 0<br>(0 - 0)         | --                   | --                   |
| Maternal deaths aggravated by HIV/AIDS                           | 0<br>(0 - 0)       | --                 | 0<br>(0 - 0)        | 0<br>(0 - 0)         | --                   | --                   |
| Other maternal disorders                                         | 0<br>(0 - 0)       | --                 | 0<br>(0 - 0)        | 0<br>(0 - 0)         | --                   | --                   |
| Neonatal disorders                                               | 5<br>(2 - 11)      | 5<br>(2 - 11)      | --                  | --                   | --                   | --                   |
| Neonatal preterm birth complications                             | 2<br>(1 - 5)       | 2<br>(1 - 5)       | --                  | --                   | --                   | --                   |
| Neonatal encephalopathy due to birth asphyxia and trauma         | 1<br>(1 - 3)       | 1<br>(1 - 3)       | --                  | --                   | --                   | --                   |
| Neonatal sepsis and other neonatal infections                    | 1<br>(0 - 2)       | 1<br>(0 - 2)       | --                  | --                   | --                   | --                   |
| Hemolytic disease and other neonatal jaundice                    | 0<br>(0 - 0)       | 0<br>(0 - 0)       | --                  | --                   | --                   | --                   |
| Other neonatal disorders                                         | 1<br>(0 - 1)       | 1<br>(0 - 1)       | --                  | --                   | --                   | --                   |
| Nutritional deficiencies                                         | 5<br>(4 - 7)       | 0<br>(0 - 1)       | 0<br>(0 - 0)        | 1<br>(0 - 1)         | 1<br>(0 - 1)         | 4<br>(3 - 5)         |
| Protein-energy malnutrition                                      | 2<br>(1 - 3)       | 0<br>(0 - 1)       | 0<br>(0 - 0)        | 0<br>(0 - 0)         | 0<br>(0 - 0)         | 1<br>(1 - 2)         |
| Iodine deficiency                                                | 0<br>(0 - 0)       | 0<br>(0 - 0)       | 0<br>(0 - 0)        | 0<br>(0 - 0)         | 0<br>(0 - 0)         | 0<br>(0 - 0)         |
| Iron-deficiency anemia                                           | 3<br>(2 - 4)       | 0<br>(0 - 0)       | 0<br>(0 - 0)        | 1<br>(0 - 1)         | 0<br>(0 - 1)         | 2<br>(1 - 3)         |
| Other nutritional deficiencies                                   | 0<br>(0 - 1)       | 0<br>(0 - 0)       | 0<br>(0 - 0)        | 0<br>(0 - 0)         | 0<br>(0 - 0)         | 0<br>(0 - 0)         |
| Other communicable, maternal, neonatal, and nutritional diseases | 1<br>(1 - 2)       | 0<br>(0 - 0)       | 0<br>(0 - 0)        | 0<br>(0 - 0)         | 0<br>(0 - 0)         | 0<br>(0 - 1)         |
| Sexually transmitted diseases excluding HIV                      | 0<br>(0 - 1)       | 0<br>(0 - 0)       | 0<br>(0 - 0)        | 0<br>(0 - 0)         | 0<br>(0 - 0)         | 0<br>(0 - 0)         |
| Syphilis                                                         | 0<br>(0 - 0)       | 0<br>(0 - 0)       | 0<br>(0 - 0)        | 0<br>(0 - 0)         | 0<br>(0 - 0)         | 0<br>(0 - 0)         |
| Chlamydial infection                                             | 0<br>(0 - 0)       | --                 | 0<br>(0 - 0)        | 0<br>(0 - 0)         | 0<br>(0 - 0)         | 0<br>(0 - 0)         |
| Gonococcal infection                                             | 0<br>(0 - 0)       | --                 | 0<br>(0 - 0)        | 0<br>(0 - 0)         | 0<br>(0 - 0)         | 0<br>(0 - 0)         |
| Other sexually transmitted diseases                              | 0<br>(0 - 0)       | --                 | 0<br>(0 - 0)        | 0<br>(0 - 0)         | 0<br>(0 - 0)         | 0<br>(0 - 0)         |
| Hepatitis                                                        | 0<br>(0 - 0)       | 0<br>(0 - 0)       | 0<br>(0 - 0)        | 0<br>(0 - 0)         | 0<br>(0 - 0)         | 0<br>(0 - 0)         |
| Acute hepatitis A                                                | 0<br>(0 - 0)       | 0<br>(0 - 0)       | 0<br>(0 - 0)        | 0<br>(0 - 0)         | 0<br>(0 - 0)         | 0<br>(0 - 0)         |
| Acute hepatitis B                                                | 0<br>(0 - 0)       | 0<br>(0 - 0)       | 0<br>(0 - 0)        | 0<br>(0 - 0)         | 0<br>(0 - 0)         | 0<br>(0 - 0)         |
| Acute hepatitis C                                                | 0<br>(0 - 0)       | --                 | 0<br>(0 - 0)        | 0<br>(0 - 0)         | 0<br>(0 - 0)         | 0<br>(0 - 0)         |
| Other infectious diseases                                        | 1<br>(0 - 1)       | 0<br>(0 - 0)       | 0<br>(0 - 0)        | 0<br>(0 - 0)         | 0<br>(0 - 0)         | 0<br>(0 - 1)         |
| Non-communicable diseases                                        | 365<br>(328 - 413) | 3<br>(1 - 6)       | 1<br>(1 - 2)        | 29<br>(23 - 36)      | 82<br>(69 - 98)      | 250<br>(230 - 275)   |
| Neoplasms                                                        | 68<br>(57 - 81)    | 0<br>(0 - 0)       | 0<br>(0 - 0)        | 10<br>(8 - 12)       | 22<br>(18 - 28)      | 35<br>(29 - 40)      |
| Esophageal cancer                                                | 1<br>(1 - 1)       | --                 | --                  | 0<br>(0 - 0)         | 0<br>(0 - 0)         | 1<br>(0 - 1)         |
| Stomach cancer                                                   | 4<br>(3 - 5)       | --                 | --                  | 0<br>(0 - 0)         | 1<br>(1 - 1)         | 3<br>(2 - 4)         |
| Liver cancer                                                     | 2<br>(2 - 3)       | --                 | 0<br>(0 - 0)        | 0<br>(0 - 0)         | 1<br>(1 - 1)         | 1<br>(1 - 2)         |
| Liver cancer due to hepatitis B                                  | 0<br>(0 - 1)       | --                 | 0<br>(0 - 0)        | 0<br>(0 - 0)         | 0<br>(0 - 0)         | 0<br>(0 - 0)         |
| Liver cancer due to hepatitis C                                  | 1<br>(1 - 1)       | --                 | 0<br>(0 - 0)        | 0<br>(0 - 0)         | 0<br>(0 - 0)         | 1<br>(0 - 1)         |
| Liver cancer due to alcohol use                                  | 0<br>(0 - 1)       | --                 | --                  | 0<br>(0 - 0)         | 0<br>(0 - 0)         | 0<br>(0 - 1)         |
| Liver cancer due to other causes                                 | 0<br>(0 - 1)       | --                 | 0<br>(0 - 0)        | 0<br>(0 - 0)         | 0<br>(0 - 0)         | 0<br>(0 - 0)         |
| Larynx cancer                                                    | 0<br>(0 - 0)       | --                 | --                  | 0<br>(0 - 0)         | 0<br>(0 - 0)         | 0<br>(0 - 0)         |
| Tracheal, bronchus and lung cancer                               | 4<br>(3 - 5)       | --                 | --                  | 1<br>(0 - 1)         | 1<br>(1 - 2)         | 2<br>(2 - 3)         |

Web Table 31- Grenada deaths with 95% UI by age, sex, and cause in 2013

| Cause                                         | Females, All Ages  | Females, 0-4 Years | Females, 5-14 Years | Females, 15-49 Years | Females, 50-69 Years | Females, 70-80 Years |
|-----------------------------------------------|--------------------|--------------------|---------------------|----------------------|----------------------|----------------------|
| Breast cancer                                 | 14<br>(11 - 17)    | --                 | --                  | 3<br>(2 - 4)         | 5<br>(4 - 7)         | 6<br>(4 - 7)         |
| Cervical cancer                               | 9<br>(7 - 11)      | --                 | --                  | 2<br>(1 - 3)         | 3<br>(2 - 4)         | 3<br>(3 - 5)         |
| Uterine cancer                                | 3<br>(2 - 4)       | --                 | --                  | 0<br>(0 - 0)         | 1<br>(1 - 2)         | 2<br>(1 - 3)         |
| Prostate cancer                               | --                 | --                 | --                  | --                   | --                   | --                   |
| Colon and rectum cancer                       | 8<br>(7 - 10)      | --                 | --                  | 1<br>(0 - 1)         | 2<br>(2 - 3)         | 6<br>(5 - 7)         |
| Lip and oral cavity cancer                    | 1<br>(0 - 1)       | --                 | --                  | 0<br>(0 - 0)         | 0<br>(0 - 0)         | 0<br>(0 - 1)         |
| Nasopharynx cancer                            | 0<br>(0 - 0)       | --                 | 0<br>(0 - 0)        | 0<br>(0 - 0)         | 0<br>(0 - 0)         | 0<br>(0 - 0)         |
| Other pharynx cancer                          | 0<br>(0 - 0)       | --                 | --                  | 0<br>(0 - 0)         | 0<br>(0 - 0)         | 0<br>(0 - 0)         |
| Gallbladder and biliary tract cancer          | 1<br>(1 - 2)       | --                 | --                  | 0<br>(0 - 0)         | 0<br>(0 - 1)         | 1<br>(1 - 1)         |
| Pancreatic cancer                             | 3<br>(3 - 4)       | --                 | --                  | 0<br>(0 - 0)         | 1<br>(1 - 1)         | 2<br>(2 - 3)         |
| Malignant skin melanoma                       | 0<br>(0 - 0)       | --                 | --                  | 0<br>(0 - 0)         | 0<br>(0 - 0)         | 0<br>(0 - 0)         |
| Non-melanoma skin cancer                      | 0<br>(0 - 0)       | --                 | --                  | 0<br>(0 - 0)         | 0<br>(0 - 0)         | 0<br>(0 - 0)         |
| Ovarian cancer                                | 4<br>(3 - 4)       | --                 | --                  | 1<br>(0 - 1)         | 1<br>(1 - 2)         | 2<br>(1 - 2)         |
| Testicular cancer                             | --                 | --                 | --                  | --                   | --                   | --                   |
| Kidney cancer                                 | 1<br>(1 - 1)       | 0<br>(0 - 0)       | 0<br>(0 - 0)        | 0<br>(0 - 0)         | 0<br>(0 - 0)         | 0<br>(0 - 1)         |
| Bladder cancer                                | 1<br>(1 - 1)       | --                 | --                  | 0<br>(0 - 0)         | 0<br>(0 - 0)         | 1<br>(0 - 1)         |
| Brain and nervous system cancer               | 1<br>(0 - 1)       | 0<br>(0 - 0)       | 0<br>(0 - 0)        | 0<br>(0 - 0)         | 0<br>(0 - 0)         | 0<br>(0 - 0)         |
| Thyroid cancer                                | 0<br>(0 - 1)       | --                 | 0<br>(0 - 0)        | 0<br>(0 - 0)         | 0<br>(0 - 0)         | 0<br>(0 - 0)         |
| Mesothelioma                                  | 0<br>(0 - 0)       | --                 | --                  | 0<br>(0 - 0)         | 0<br>(0 - 0)         | 0<br>(0 - 0)         |
| Hodgkin lymphoma                              | 0<br>(0 - 0)       | 0<br>(0 - 0)       | 0<br>(0 - 0)        | 0<br>(0 - 0)         | 0<br>(0 - 0)         | 0<br>(0 - 0)         |
| Non-Hodgkin lymphoma                          | 3<br>(2 - 3)       | 0<br>(0 - 0)       | 0<br>(0 - 0)        | 1<br>(0 - 1)         | 1<br>(0 - 1)         | 1<br>(1 - 1)         |
| Multiple myeloma                              | 1<br>(1 - 1)       | --                 | --                  | 0<br>(0 - 0)         | 0<br>(0 - 1)         | 1<br>(0 - 1)         |
| Leukemia                                      | 2<br>(1 - 2)       | 0<br>(0 - 0)       | 0<br>(0 - 0)        | 1<br>(0 - 1)         | 0<br>(0 - 1)         | 1<br>(1 - 1)         |
| Other neoplasms                               | 4<br>(3 - 5)       | 0<br>(0 - 0)       | 0<br>(0 - 0)        | 1<br>(1 - 1)         | 1<br>(1 - 2)         | 2<br>(1 - 2)         |
| Cardiovascular diseases                       | 169<br>(147 - 196) | 0<br>(0 - 0)       | 0<br>(0 - 0)        | 8<br>(6 - 10)        | 31<br>(25 - 39)      | 129<br>(113 - 148)   |
| Rheumatic heart disease                       | 1<br>(1 - 1)       | 0<br>(0 - 0)       | 0<br>(0 - 0)        | 0<br>(0 - 1)         | 0<br>(0 - 0)         | 0<br>(0 - 1)         |
| Ischemic heart disease                        | 66<br>(54 - 87)    | 0<br>(0 - 0)       | 0<br>(0 - 0)        | 3<br>(2 - 4)         | 12<br>(10 - 17)      | 51<br>(42 - 67)      |
| Cerebrovascular disease                       | 64<br>(53 - 82)    | 0<br>(0 - 0)       | 0<br>(0 - 0)        | 2<br>(2 - 3)         | 12<br>(9 - 16)       | 50<br>(41 - 63)      |
| Ischemic stroke                               | 42<br>(34 - 53)    | 0<br>(0 - 0)       | 0<br>(0 - 0)        | 1<br>(0 - 1)         | 6<br>(4 - 8)         | 35<br>(29 - 45)      |
| Hemorrhagic stroke                            | 22<br>(17 - 31)    | 0<br>(0 - 0)       | 0<br>(0 - 0)        | 2<br>(1 - 3)         | 6<br>(4 - 8)         | 15<br>(11 - 21)      |
| Hypertensive heart disease                    | 20<br>(10 - 29)    | 0<br>(0 - 0)       | 0<br>(0 - 0)        | 1<br>(0 - 1)         | 4<br>(2 - 5)         | 16<br>(7 - 24)       |
| Cardiomyopathy and myocarditis                | 4<br>(3 - 5)       | 0<br>(0 - 0)       | 0<br>(0 - 0)        | 1<br>(0 - 1)         | 1<br>(1 - 1)         | 2<br>(2 - 3)         |
| Atrial fibrillation and flutter               | 3<br>(2 - 4)       | --                 | --                  | 0<br>(0 - 0)         | 0<br>(0 - 0)         | 2<br>(1 - 3)         |
| Aortic aneurysm                               | 2<br>(1 - 2)       | --                 | --                  | 0<br>(0 - 0)         | 0<br>(0 - 1)         | 1<br>(1 - 2)         |
| Peripheral vascular disease                   | 2<br>(1 - 2)       | --                 | --                  | 0<br>(0 - 0)         | 0<br>(0 - 0)         | 2<br>(1 - 2)         |
| Endocarditis                                  | 1<br>(0 - 1)       | 0<br>(0 - 0)       | 0<br>(0 - 0)        | 0<br>(0 - 0)         | 0<br>(0 - 0)         | 0<br>(0 - 1)         |
| Other cardiovascular and circulatory diseases | 7<br>(5 - 10)      | 0<br>(0 - 0)       | 0<br>(0 - 0)        | 1<br>(1 - 1)         | 2<br>(1 - 2)         | 5<br>(3 - 6)         |
| Chronic respiratory diseases                  | 8<br>(7 - 12)      | 0<br>(0 - 0)       | 0<br>(0 - 0)        | 1<br>(1 - 1)         | 2<br>(1 - 2)         | 6<br>(4 - 8)         |
| Chronic obstructive pulmonary disease         | 5<br>(4 - 7)       | 0<br>(0 - 0)       | 0<br>(0 - 0)        | 0<br>(0 - 0)         | 1<br>(1 - 1)         | 4<br>(3 - 6)         |
| Pneumoconiosis                                | 0<br>(0 - 0)       | 0<br>(0 - 0)       | 0<br>(0 - 0)        | 0<br>(0 - 0)         | 0<br>(0 - 0)         | 0<br>(0 - 0)         |

Web Table 31- Grenada deaths with 95% UI by age, sex, and cause in 2013

| Cause                                               | Females, All Ages | Females, 0-4 Years | Females, 5-14 Years | Females, 15-49 Years | Females, 50-69 Years | Females, 70-80 Years |
|-----------------------------------------------------|-------------------|--------------------|---------------------|----------------------|----------------------|----------------------|
| Silicosis                                           | 0<br>(0 - 0)      | 0<br>(0 - 0)       | 0<br>(0 - 0)        | 0<br>(0 - 0)         | 0<br>(0 - 0)         | 0<br>(0 - 0)         |
| Asbestosis                                          | 0<br>(0 - 0)      | 0<br>(0 - 0)       | 0<br>(0 - 0)        | 0<br>(0 - 0)         | 0<br>(0 - 0)         | 0<br>(0 - 0)         |
| Coal workers pneumoconiosis                         | 0<br>(0 - 0)      | 0<br>(0 - 0)       | 0<br>(0 - 0)        | 0<br>(0 - 0)         | 0<br>(0 - 0)         | 0<br>(0 - 0)         |
| Other pneumoconiosis                                | 0<br>(0 - 0)      | 0<br>(0 - 0)       | 0<br>(0 - 0)        | 0<br>(0 - 0)         | 0<br>(0 - 0)         | 0<br>(0 - 0)         |
| Asthma                                              | 2<br>(1 - 3)      | 0<br>(0 - 0)       | 0<br>(0 - 0)        | 0<br>(0 - 1)         | 1<br>(0 - 1)         | 1<br>(1 - 2)         |
| Interstitial lung disease and pulmonary sarcoidosis | 1<br>(0 - 1)      | 0<br>(0 - 0)       | 0<br>(0 - 0)        | 0<br>(0 - 0)         | 0<br>(0 - 0)         | 0<br>(0 - 1)         |
| Other chronic respiratory diseases                  | 0<br>(0 - 0)      | 0<br>(0 - 0)       | 0<br>(0 - 0)        | 0<br>(0 - 0)         | 0<br>(0 - 0)         | 0<br>(0 - 0)         |
| Cirrhosis                                           | 5<br>(4 - 6)      | 0<br>(0 - 0)       | 0<br>(0 - 0)        | 1<br>(1 - 2)         | 2<br>(2 - 3)         | 2<br>(1 - 2)         |
| Cirrhosis due to hepatitis B                        | 0<br>(0 - 1)      | 0<br>(0 - 0)       | 0<br>(0 - 0)        | 0<br>(0 - 0)         | 0<br>(0 - 0)         | 0<br>(0 - 0)         |
| Cirrhosis due to hepatitis C                        | 3<br>(2 - 3)      | 0<br>(0 - 0)       | 0<br>(0 - 0)        | 1<br>(0 - 1)         | 1<br>(1 - 1)         | 1<br>(1 - 1)         |
| Cirrhosis due to alcohol use                        | 1<br>(1 - 2)      | --                 | --                  | 0<br>(0 - 0)         | 0<br>(0 - 1)         | 1<br>(0 - 1)         |
| Cirrhosis due to other causes                       | 1<br>(1 - 1)      | 0<br>(0 - 0)       | 0<br>(0 - 0)        | 0<br>(0 - 1)         | 0<br>(0 - 1)         | 0<br>(0 - 0)         |
| Digestive diseases                                  | 9<br>(7 - 11)     | 0<br>(0 - 0)       | 0<br>(0 - 0)        | 1<br>(1 - 1)         | 2<br>(1 - 2)         | 6<br>(5 - 7)         |
| Peptic ulcer disease                                | 2<br>(1 - 3)      | 0<br>(0 - 0)       | 0<br>(0 - 0)        | 0<br>(0 - 0)         | 0<br>(0 - 1)         | 1<br>(1 - 2)         |
| Gastritis and duodenitis                            | 1<br>(0 - 1)      | 0<br>(0 - 0)       | 0<br>(0 - 0)        | 0<br>(0 - 0)         | 0<br>(0 - 0)         | 0<br>(0 - 1)         |
| Appendicitis                                        | 0<br>(0 - 1)      | 0<br>(0 - 0)       | 0<br>(0 - 0)        | 0<br>(0 - 0)         | 0<br>(0 - 0)         | 0<br>(0 - 0)         |
| Paralytic ileus and intestinal obstruction          | 1<br>(1 - 2)      | 0<br>(0 - 0)       | 0<br>(0 - 0)        | 0<br>(0 - 0)         | 0<br>(0 - 0)         | 1<br>(0 - 2)         |
| Inguinal, femoral, and abdominal hernia             | 1<br>(0 - 1)      | 0<br>(0 - 0)       | 0<br>(0 - 0)        | 0<br>(0 - 0)         | 0<br>(0 - 0)         | 0<br>(0 - 1)         |
| Inflammatory bowel disease                          | 1<br>(1 - 1)      | 0<br>(0 - 0)       | 0<br>(0 - 0)        | 0<br>(0 - 0)         | 0<br>(0 - 0)         | 1<br>(0 - 1)         |
| Vascular intestinal disorders                       | 0<br>(0 - 1)      | 0<br>(0 - 0)       | 0<br>(0 - 0)        | 0<br>(0 - 0)         | 0<br>(0 - 0)         | 0<br>(0 - 1)         |
| Gallbladder and biliary diseases                    | 1<br>(1 - 1)      | 0<br>(0 - 0)       | 0<br>(0 - 0)        | 0<br>(0 - 0)         | 0<br>(0 - 0)         | 0<br>(0 - 1)         |
| Pancreatitis                                        | 0<br>(0 - 1)      | 0<br>(0 - 0)       | 0<br>(0 - 0)        | 0<br>(0 - 0)         | 0<br>(0 - 0)         | 0<br>(0 - 0)         |
| Other digestive diseases                            | 2<br>(1 - 3)      | 0<br>(0 - 0)       | 0<br>(0 - 0)        | 0<br>(0 - 0)         | 0<br>(0 - 1)         | 1<br>(1 - 2)         |
| Neurological disorders                              | 19<br>(14 - 23)   | 0<br>(0 - 0)       | 0<br>(0 - 0)        | 1<br>(0 - 1)         | 1<br>(1 - 1)         | 17<br>(12 - 21)      |
| Alzheimer disease and other dementias               | 16<br>(11 - 21)   | --                 | --                  | 0<br>(0 - 0)         | 1<br>(0 - 1)         | 15<br>(11 - 20)      |
| Parkinson disease                                   | 1<br>(1 - 2)      | --                 | --                  | 0<br>(0 - 0)         | 0<br>(0 - 0)         | 1<br>(1 - 2)         |
| Epilepsy                                            | 1<br>(1 - 1)      | 0<br>(0 - 0)       | 0<br>(0 - 0)        | 0<br>(0 - 1)         | 0<br>(0 - 0)         | 0<br>(0 - 0)         |
| Multiple sclerosis                                  | 0<br>(0 - 0)      | --                 | --                  | 0<br>(0 - 0)         | 0<br>(0 - 0)         | 0<br>(0 - 0)         |
| Other neurological disorders                        | 0<br>(0 - 0)      | 0<br>(0 - 0)       | 0<br>(0 - 0)        | 0<br>(0 - 0)         | 0<br>(0 - 0)         | 0<br>(0 - 0)         |
| Mental and substance use disorders                  | 1<br>(0 - 1)      | 0<br>(0 - 0)       | 0<br>(0 - 0)        | 0<br>(0 - 0)         | 0<br>(0 - 0)         | 0<br>(0 - 0)         |
| Schizophrenia                                       | 0<br>(0 - 0)      | --                 | --                  | 0<br>(0 - 0)         | 0<br>(0 - 0)         | 0<br>(0 - 0)         |
| Alcohol use disorders                               | 0<br>(0 - 0)      | --                 | --                  | 0<br>(0 - 0)         | 0<br>(0 - 0)         | 0<br>(0 - 0)         |
| Drug use disorders                                  | 0<br>(0 - 0)      | 0<br>(0 - 0)       | --                  | 0<br>(0 - 0)         | 0<br>(0 - 0)         | 0<br>(0 - 0)         |
| Opioid use disorders                                | 0<br>(0 - 0)      | 0<br>(0 - 0)       | --                  | 0<br>(0 - 0)         | 0<br>(0 - 0)         | 0<br>(0 - 0)         |
| Cocaine use disorders                               | 0<br>(0 - 0)      | 0<br>(0 - 0)       | --                  | 0<br>(0 - 0)         | 0<br>(0 - 0)         | 0<br>(0 - 0)         |
| Amphetamine use disorders                           | 0<br>(0 - 0)      | 0<br>(0 - 0)       | --                  | 0<br>(0 - 0)         | 0<br>(0 - 0)         | 0<br>(0 - 0)         |
| Other drug use disorders                            | 0<br>(0 - 0)      | 0<br>(0 - 0)       | --                  | 0<br>(0 - 0)         | 0<br>(0 - 0)         | 0<br>(0 - 0)         |
| Eating disorders                                    | 0<br>(0 - 0)      | --                 | 0<br>(0 - 0)        | 0<br>(0 - 0)         | --                   | --                   |
| Anorexia nervosa                                    | 0<br>(0 - 0)      | --                 | 0<br>(0 - 0)        | 0<br>(0 - 0)         | --                   | --                   |
| Diabetes, urogenital, blood, and endocrine diseases | 76<br>(63 - 90)   | 0<br>(0 - 1)       | 0<br>(0 - 0)        | 6<br>(5 - 8)         | 20<br>(16 - 25)      | 50<br>(42 - 59)      |

Web Table 31- Grenada deaths with 95% UI by age, sex, and cause in 2013

| Cause                                               | Females, All Ages | Females, 0-4 Years | Females, 5-14 Years | Females, 15-49 Years | Females, 50-69 Years | Females, 70-80 Years |
|-----------------------------------------------------|-------------------|--------------------|---------------------|----------------------|----------------------|----------------------|
| Diabetes mellitus                                   | 57<br>(46 - 68)   | 0<br>(0 - 0)       | 0<br>(0 - 0)        | 3<br>(2 - 3)         | 15<br>(12 - 19)      | 39<br>(31 - 47)      |
| Acute glomerulonephritis                            | 0<br>(0 - 0)      | 0<br>(0 - 0)       | 0<br>(0 - 0)        | 0<br>(0 - 0)         | 0<br>(0 - 0)         | 0<br>(0 - 0)         |
| Chronic kidney disease                              | 12<br>(9 - 16)    | 0<br>(0 - 0)       | 0<br>(0 - 0)        | 2<br>(1 - 2)         | 3<br>(2 - 5)         | 7<br>(5 - 10)        |
| Chronic kidney disease due to diabetes mellitus     | 2<br>(1 - 3)      | 0<br>(0 - 0)       | 0<br>(0 - 0)        | 0<br>(0 - 0)         | 1<br>(0 - 1)         | 1<br>(0 - 1)         |
| Chronic kidney disease due to hypertension          | 7<br>(5 - 10)     | 0<br>(0 - 0)       | 0<br>(0 - 0)        | 1<br>(1 - 1)         | 2<br>(1 - 2)         | 4<br>(3 - 6)         |
| Chronic kidney disease due to glomerulonephritis    | 0<br>(0 - 0)      | 0<br>(0 - 0)       | 0<br>(0 - 0)        | 0<br>(0 - 0)         | 0<br>(0 - 0)         | 0<br>(0 - 0)         |
| Chronic kidney disease due to other causes          | 3<br>(2 - 6)      | 0<br>(0 - 0)       | 0<br>(0 - 0)        | 1<br>(0 - 1)         | 1<br>(0 - 2)         | 2<br>(1 - 3)         |
| Urinary diseases and male infertility               | 2<br>(1 - 3)      | 0<br>(0 - 0)       | 0<br>(0 - 0)        | 0<br>(0 - 0)         | 0<br>(0 - 1)         | 2<br>(1 - 2)         |
| Interstitial nephritis and urinary tract infections | 2<br>(1 - 3)      | 0<br>(0 - 0)       | 0<br>(0 - 0)        | 0<br>(0 - 0)         | 0<br>(0 - 0)         | 1<br>(1 - 2)         |
| Urolithiasis                                        | 0<br>(0 - 0)      | --                 | 0<br>(0 - 0)        | 0<br>(0 - 0)         | 0<br>(0 - 0)         | 0<br>(0 - 0)         |
| Other urinary diseases                              | 0<br>(0 - 0)      | 0<br>(0 - 0)       | 0<br>(0 - 0)        | 0<br>(0 - 0)         | 0<br>(0 - 0)         | 0<br>(0 - 0)         |
| Gynecological diseases                              | 0<br>(0 - 0)      | --                 | --                  | 0<br>(0 - 0)         | 0<br>(0 - 0)         | 0<br>(0 - 0)         |
| Uterine fibroids                                    | 0<br>(0 - 0)      | --                 | --                  | 0<br>(0 - 0)         | 0<br>(0 - 0)         | 0<br>(0 - 0)         |
| Polycystic ovarian syndrome                         | 0<br>(0 - 0)      | --                 | --                  | 0<br>(0 - 0)         | 0<br>(0 - 0)         | --                   |
| Endometriosis                                       | 0<br>(0 - 0)      | --                 | --                  | 0<br>(0 - 0)         | 0<br>(0 - 0)         | --                   |
| Genital prolapse                                    | 0<br>(0 - 0)      | --                 | --                  | 0<br>(0 - 0)         | 0<br>(0 - 0)         | 0<br>(0 - 0)         |
| Other gynecological diseases                        | 0<br>(0 - 0)      | --                 | --                  | 0<br>(0 - 0)         | 0<br>(0 - 0)         | 0<br>(0 - 0)         |
| Hemoglobinopathies and hemolytic anemias            | 1<br>(1 - 2)      | 0<br>(0 - 0)       | 0<br>(0 - 0)        | 1<br>(0 - 1)         | 0<br>(0 - 0)         | 0<br>(0 - 0)         |
| Thalassemias                                        | 0<br>(0 - 0)      | 0<br>(0 - 0)       | 0<br>(0 - 0)        | 0<br>(0 - 0)         | 0<br>(0 - 0)         | 0<br>(0 - 0)         |
| Sickle cell disorders                               | 1<br>(1 - 1)      | 0<br>(0 - 0)       | 0<br>(0 - 0)        | 0<br>(0 - 1)         | 0<br>(0 - 0)         | 0<br>(0 - 0)         |
| G6PD deficiency                                     | 0<br>(0 - 0)      | 0<br>(0 - 0)       | 0<br>(0 - 0)        | 0<br>(0 - 0)         | 0<br>(0 - 0)         | 0<br>(0 - 0)         |
| Other hemoglobinopathies and hemolytic anemias      | 0<br>(0 - 0)      | 0<br>(0 - 0)       | 0<br>(0 - 0)        | 0<br>(0 - 0)         | 0<br>(0 - 0)         | 0<br>(0 - 0)         |
| Endocrine, metabolic, blood, and immune disorders   | 4<br>(3 - 7)      | 0<br>(0 - 0)       | 0<br>(0 - 0)        | 1<br>(1 - 1)         | 1<br>(1 - 1)         | 2<br>(1 - 4)         |
| Musculoskeletal disorders                           | 3<br>(1 - 3)      | --                 | 0<br>(0 - 0)        | 1<br>(1 - 1)         | 1<br>(0 - 1)         | 1<br>(0 - 1)         |
| Rheumatoid arthritis                                | 0<br>(0 - 0)      | --                 | 0<br>(0 - 0)        | 0<br>(0 - 0)         | 0<br>(0 - 0)         | 0<br>(0 - 0)         |
| Other musculoskeletal disorders                     | 2<br>(1 - 3)      | --                 | 0<br>(0 - 0)        | 1<br>(1 - 1)         | 0<br>(0 - 1)         | 1<br>(0 - 1)         |
| Other non-communicable diseases                     | 9<br>(5 - 12)     | 2<br>(1 - 5)       | 0<br>(0 - 0)        | 1<br>(0 - 1)         | 1<br>(0 - 1)         | 5<br>(2 - 8)         |
| Congenital anomalies                                | 3<br>(2 - 5)      | 2<br>(1 - 4)       | 0<br>(0 - 0)        | 0<br>(0 - 1)         | 0<br>(0 - 0)         | 0<br>(0 - 0)         |
| Neural tube defects                                 | 0<br>(0 - 0)      | 0<br>(0 - 0)       | 0<br>(0 - 0)        | 0<br>(0 - 0)         | 0<br>(0 - 0)         | 0<br>(0 - 0)         |
| Congenital heart anomalies                          | 2<br>(1 - 3)      | 1<br>(0 - 2)       | 0<br>(0 - 0)        | 0<br>(0 - 1)         | 0<br>(0 - 0)         | 0<br>(0 - 0)         |
| Cleft lip and cleft palate                          | 0<br>(0 - 0)      | 0<br>(0 - 0)       | --                  | --                   | --                   | --                   |
| Down syndrome                                       | 0<br>(0 - 0)      | 0<br>(0 - 0)       | 0<br>(0 - 0)        | 0<br>(0 - 0)         | 0<br>(0 - 0)         | 0<br>(0 - 0)         |
| Chromosomal unbalanced rearrangements               | 0<br>(0 - 0)      | 0<br>(0 - 0)       | 0<br>(0 - 0)        | 0<br>(0 - 0)         | 0<br>(0 - 0)         | 0<br>(0 - 0)         |
| Other congenital anomalies                          | 1<br>(1 - 2)      | 1<br>(0 - 1)       | 0<br>(0 - 0)        | 0<br>(0 - 0)         | 0<br>(0 - 0)         | 0<br>(0 - 0)         |
| Skin and subcutaneous diseases                      | 5<br>(2 - 8)      | 0<br>(0 - 0)       | 0<br>(0 - 0)        | 0<br>(0 - 0)         | 0<br>(0 - 1)         | 5<br>(1 - 7)         |
| Cellulitis                                          | 0<br>(0 - 0)      | 0<br>(0 - 0)       | 0<br>(0 - 0)        | 0<br>(0 - 0)         | 0<br>(0 - 0)         | 0<br>(0 - 0)         |
| Pyoderma                                            | 1<br>(0 - 1)      | 0<br>(0 - 0)       | 0<br>(0 - 0)        | 0<br>(0 - 0)         | 0<br>(0 - 0)         | 1<br>(0 - 1)         |
| Decubitus ulcer                                     | 4<br>(1 - 6)      | 0<br>(0 - 0)       | 0<br>(0 - 0)        | 0<br>(0 - 0)         | 0<br>(0 - 0)         | 4<br>(1 - 6)         |
| Other skin and subcutaneous diseases                | 0<br>(0 - 0)      | 0<br>(0 - 0)       | 0<br>(0 - 0)        | 0<br>(0 - 0)         | 0<br>(0 - 0)         | 0<br>(0 - 0)         |
| Sudden infant death syndrome                        | 0<br>(0 - 1)      | 0<br>(0 - 1)       | --                  | --                   | --                   | --                   |

Web Table 31- Grenada deaths with 95% UI by age, sex, and cause in 2013

| Cause                                           | Females, All Ages | Females, 0-4 Years | Females, 5-14 Years | Females, 15-49 Years | Females, 50-69 Years | Females, 70-80 Years |
|-------------------------------------------------|-------------------|--------------------|---------------------|----------------------|----------------------|----------------------|
| Injuries                                        | 18<br>(15 - 22)   | 1<br>(0 - 1)       | 1<br>(0 - 1)        | 6<br>(5 - 8)         | 3<br>(2 - 4)         | 8<br>(6 - 9)         |
| Transport injuries                              | 5<br>(4 - 6)      | 0<br>(0 - 0)       | 0<br>(0 - 0)        | 2<br>(1 - 3)         | 1<br>(1 - 1)         | 1<br>(1 - 2)         |
| Road injuries                                   | 4<br>(3 - 5)      | 0<br>(0 - 0)       | 0<br>(0 - 0)        | 2<br>(1 - 2)         | 1<br>(1 - 1)         | 1<br>(1 - 2)         |
| Pedestrian road injuries                        | 1<br>(1 - 2)      | 0<br>(0 - 0)       | 0<br>(0 - 0)        | 0<br>(0 - 1)         | 0<br>(0 - 0)         | 0<br>(0 - 0)         |
| Cyclist road injuries                           | 0<br>(0 - 0)      | 0<br>(0 - 0)       | 0<br>(0 - 0)        | 0<br>(0 - 0)         | 0<br>(0 - 0)         | 0<br>(0 - 0)         |
| Motorcyclist road injuries                      | 0<br>(0 - 0)      | 0<br>(0 - 0)       | 0<br>(0 - 0)        | 0<br>(0 - 0)         | 0<br>(0 - 0)         | 0<br>(0 - 0)         |
| Motor vehicle road injuries                     | 3<br>(2 - 3)      | 0<br>(0 - 0)       | 0<br>(0 - 0)        | 1<br>(1 - 2)         | 1<br>(0 - 1)         | 1<br>(1 - 1)         |
| Other road injuries                             | 0<br>(0 - 0)      | 0<br>(0 - 0)       | 0<br>(0 - 0)        | 0<br>(0 - 0)         | 0<br>(0 - 0)         | 0<br>(0 - 0)         |
| Other transport injuries                        | 0<br>(0 - 1)      | 0<br>(0 - 0)       | 0<br>(0 - 0)        | 0<br>(0 - 0)         | 0<br>(0 - 0)         | 0<br>(0 - 0)         |
| Unintentional injuries                          | 10<br>(7 - 12)    | 1<br>(0 - 1)       | 0<br>(0 - 0)        | 2<br>(1 - 2)         | 1<br>(1 - 2)         | 6<br>(4 - 7)         |
| Falls                                           | 3<br>(2 - 4)      | 0<br>(0 - 0)       | 0<br>(0 - 0)        | 0<br>(0 - 0)         | 0<br>(0 - 0)         | 2<br>(1 - 3)         |
| Drowning                                        | 1<br>(1 - 1)      | 0<br>(0 - 0)       | 0<br>(0 - 0)        | 0<br>(0 - 1)         | 0<br>(0 - 0)         | 0<br>(0 - 0)         |
| Fire, heat, and hot substances                  | 1<br>(1 - 2)      | 0<br>(0 - 0)       | 0<br>(0 - 0)        | 0<br>(0 - 0)         | 0<br>(0 - 0)         | 1<br>(0 - 1)         |
| Poisonings                                      | 0<br>(0 - 0)      | 0<br>(0 - 0)       | 0<br>(0 - 0)        | 0<br>(0 - 0)         | 0<br>(0 - 0)         | 0<br>(0 - 0)         |
| Exposure to mechanical forces                   | 1<br>(0 - 1)      | 0<br>(0 - 0)       | 0<br>(0 - 0)        | 0<br>(0 - 0)         | 0<br>(0 - 0)         | 0<br>(0 - 0)         |
| Unintentional firearm injuries                  | 0<br>(0 - 0)      | 0<br>(0 - 0)       | 0<br>(0 - 0)        | 0<br>(0 - 0)         | 0<br>(0 - 0)         | 0<br>(0 - 0)         |
| Unintentional suffocation                       | 0<br>(0 - 0)      | 0<br>(0 - 0)       | 0<br>(0 - 0)        | 0<br>(0 - 0)         | 0<br>(0 - 0)         | 0<br>(0 - 0)         |
| Other exposure to mechanical forces             | 0<br>(0 - 0)      | 0<br>(0 - 0)       | 0<br>(0 - 0)        | 0<br>(0 - 0)         | 0<br>(0 - 0)         | 0<br>(0 - 0)         |
| Adverse effects of medical treatment            | 2<br>(1 - 3)      | 0<br>(0 - 0)       | 0<br>(0 - 0)        | 0<br>(0 - 1)         | 0<br>(0 - 1)         | 1<br>(1 - 2)         |
| Animal contact                                  | 0<br>(0 - 0)      | 0<br>(0 - 0)       | 0<br>(0 - 0)        | 0<br>(0 - 0)         | 0<br>(0 - 0)         | 0<br>(0 - 0)         |
| Venomous animal contact                         | 0<br>(0 - 0)      | 0<br>(0 - 0)       | 0<br>(0 - 0)        | 0<br>(0 - 0)         | 0<br>(0 - 0)         | 0<br>(0 - 0)         |
| Non-venomous animal contact                     | 0<br>(0 - 0)      | 0<br>(0 - 0)       | 0<br>(0 - 0)        | 0<br>(0 - 0)         | 0<br>(0 - 0)         | 0<br>(0 - 0)         |
| Foreign body                                    | 2<br>(1 - 2)      | 0<br>(0 - 1)       | 0<br>(0 - 0)        | 0<br>(0 - 0)         | 0<br>(0 - 0)         | 1<br>(0 - 1)         |
| Pulmonary aspiration and foreign body in airway | 2<br>(1 - 2)      | 0<br>(0 - 1)       | 0<br>(0 - 0)        | 0<br>(0 - 0)         | 0<br>(0 - 0)         | 1<br>(0 - 1)         |
| Foreign body in other body part                 | 0<br>(0 - 0)      | 0<br>(0 - 0)       | 0<br>(0 - 0)        | 0<br>(0 - 0)         | 0<br>(0 - 0)         | 0<br>(0 - 0)         |
| Other unintentional injuries                    | 0<br>(0 - 0)      | 0<br>(0 - 0)       | 0<br>(0 - 0)        | 0<br>(0 - 0)         | 0<br>(0 - 0)         | 0<br>(0 - 0)         |
| Self-harm and interpersonal violence            | 4<br>(3 - 6)      | 0<br>(0 - 0)       | 0<br>(0 - 0)        | 3<br>(2 - 4)         | 1<br>(0 - 1)         | 0<br>(0 - 1)         |
| Self-harm                                       | 2<br>(1 - 3)      | --                 | 0<br>(0 - 0)        | 1<br>(1 - 2)         | 0<br>(0 - 0)         | 0<br>(0 - 0)         |
| Interpersonal violence                          | 2<br>(2 - 3)      | 0<br>(0 - 0)       | 0<br>(0 - 0)        | 2<br>(1 - 2)         | 0<br>(0 - 1)         | 0<br>(0 - 0)         |
| Assault by firearm                              | 0<br>(0 - 1)      | 0<br>(0 - 0)       | 0<br>(0 - 0)        | 0<br>(0 - 1)         | 0<br>(0 - 0)         | 0<br>(0 - 0)         |
| Assault by sharp object                         | 1<br>(1 - 1)      | 0<br>(0 - 0)       | 0<br>(0 - 0)        | 1<br>(0 - 1)         | 0<br>(0 - 0)         | 0<br>(0 - 0)         |
| Assault by other means                          | 1<br>(1 - 1)      | 0<br>(0 - 0)       | 0<br>(0 - 0)        | 0<br>(0 - 1)         | 0<br>(0 - 0)         | 0<br>(0 - 0)         |

Web Table 31- Guatemala deaths with 95% UI by age, sex, and cause in 2013

| Cause                                                             | Both Sexes, All Ages        | Both Sexes, 0-4 Years       | Both Sexes, 5-14 Years   | Both Sexes, 15-49 Years     | Both Sexes, 50-69 Years     | Both Sexes, 70-80 Years     |
|-------------------------------------------------------------------|-----------------------------|-----------------------------|--------------------------|-----------------------------|-----------------------------|-----------------------------|
| All causes                                                        | 79,851<br>(76,011 - 83,309) | 13,305<br>(12,107 - 14,673) | 1,969<br>(1,852 - 2,092) | 20,443<br>(19,037 - 21,915) | 15,102<br>(14,125 - 16,112) | 29,032<br>(27,956 - 30,074) |
| Communicable, maternal, neonatal, and nutritional diseases        | 24,620<br>(22,826 - 27,859) | 10,285<br>(9,306 - 11,371)  | 810<br>(706 - 926)       | 3,527<br>(3,091 - 4,207)    | 2,582<br>(2,243 - 3,370)    | 7,416<br>(6,561 - 9,076)    |
| HIV/AIDS and tuberculosis                                         | 1,093<br>(812 - 1,504)      | 24<br>(9 - 60)              | 13<br>(7 - 30)           | 715<br>(521 - 958)          | 218<br>(150 - 320)          | 123<br>(98 - 177)           |
| Tuberculosis                                                      | 444<br>(384 - 647)          | 8<br>(6 - 11)               | 8<br>(6 - 11)            | 199<br>(166 - 288)          | 122<br>(100 - 192)          | 107<br>(87 - 156)           |
| HIV/AIDS                                                          | 650<br>(384 - 1,011)        | 16<br>(1 - 51)              | 5<br>(0 - 21)            | 516<br>(329 - 749)          | 96<br>(42 - 176)            | 16<br>(6 - 33)              |
| HIV/AIDS resulting in mycobacterial infection                     | 39<br>(22 - 61)             | 1<br>(0 - 3)                | 0<br>(0 - 1)             | 30<br>(18 - 46)             | 6<br>(2 - 12)               | 1<br>(0 - 2)                |
| HIV/AIDS resulting in other diseases                              | 611<br>(362 - 955)          | 16<br>(1 - 48)              | 5<br>(0 - 20)            | 486<br>(311 - 703)          | 90<br>(39 - 165)            | 15<br>(5 - 31)              |
| Diarrhea, lower respiratory, and other common infectious diseases | 14,385<br>(13,143 - 15,848) | 5,478<br>(4,727 - 6,264)    | 640<br>(546 - 740)       | 1,814<br>(1,561 - 2,198)    | 1,695<br>(1,465 - 2,054)    | 4,759<br>(4,078 - 5,634)    |
| Diarrheal diseases                                                | 3,458<br>(2,889 - 4,068)    | 1,629<br>(1,179 - 2,174)    | 187<br>(140 - 243)       | 465<br>(383 - 552)          | 392<br>(313 - 483)          | 785<br>(565 - 1,074)        |
| Intestinal infectious diseases                                    | 295<br>(157 - 511)          | 119<br>(62 - 206)           | 94<br>(48 - 164)         | 71<br>(33 - 130)            | 7<br>(3 - 13)               | 3<br>(2 - 6)                |
| Typhoid fever                                                     | 224<br>(115 - 392)          | 88<br>(45 - 157)            | 74<br>(37 - 131)         | 55<br>(25 - 103)            | 5<br>(2 - 9)                | 2<br>(1 - 4)                |
| Paratyphoid fever                                                 | 61<br>(31 - 108)            | 26<br>(12 - 49)             | 20<br>(9 - 35)           | 15<br>(7 - 27)              | 1<br>(1 - 2)                | 1<br>(0 - 1)                |
| Other intestinal infectious diseases                              | 9<br>(3 - 18)               | 5<br>(1 - 14)               | 1<br>(0 - 4)             | 2<br>(0 - 6)                | 0<br>(0 - 3)                | 0<br>(0 - 3)                |
| Lower respiratory infections                                      | 10,062<br>(9,019 - 11,416)  | 3,452<br>(2,842 - 4,135)    | 302<br>(240 - 380)       | 1,142<br>(958 - 1,500)      | 1,245<br>(1,043 - 1,612)    | 3,921<br>(3,259 - 4,763)    |
| Upper respiratory infections                                      | 5<br>(3 - 9)                | 1<br>(0 - 4)                | 0<br>(0 - 1)             | 2<br>(0 - 3)                | 1<br>(0 - 2)                | 1<br>(0 - 4)                |
| Otitis media                                                      | 4<br>(3 - 4)                | 1<br>(1 - 1)                | 0<br>(0 - 1)             | 1<br>(1 - 1)                | 0<br>(0 - 1)                | 1<br>(1 - 1)                |
| Meningitis                                                        | 360<br>(250 - 424)          | 161<br>(102 - 216)          | 35<br>(21 - 44)          | 95<br>(65 - 111)            | 36<br>(25 - 43)             | 33<br>(22 - 41)             |
| Pneumococcal meningitis                                           | 117<br>(80 - 143)           | 46<br>(28 - 64)             | 13<br>(8 - 18)           | 33<br>(23 - 43)             | 13<br>(8 - 17)              | 12<br>(7 - 16)              |
| H influenzae type B meningitis                                    | 84<br>(57 - 111)            | 60<br>(36 - 85)             | 8<br>(5 - 11)            | 10<br>(7 - 14)              | 3<br>(2 - 4)                | 3<br>(2 - 4)                |
| Meningococcal meningitis                                          | 41<br>(28 - 51)             | 16<br>(9 - 24)              | 5<br>(2 - 7)             | 12<br>(8 - 16)              | 4<br>(2 - 6)                | 4<br>(2 - 6)                |
| Other meningitis                                                  | 118<br>(78 - 145)           | 39<br>(23 - 58)             | 9<br>(5 - 14)            | 39<br>(24 - 49)             | 15<br>(10 - 20)             | 14<br>(9 - 19)              |
| Encephalitis                                                      | 95<br>(73 - 135)            | 34<br>(20 - 55)             | 13<br>(8 - 22)           | 29<br>(21 - 42)             | 10<br>(8 - 14)              | 8<br>(5 - 12)               |
| Diphtheria                                                        | 4<br>(0 - 17)               | 3<br>(0 - 16)               | 1<br>(0 - 3)             | 0<br>(0 - 1)                | 0<br>(0 - 0)                | --                          |
| Whooping cough                                                    | 81<br>(21 - 224)            | 70<br>(16 - 212)            | 5<br>(2 - 11)            | 4<br>(2 - 7)                | 1<br>(1 - 2)                | --                          |
| Tetanus                                                           | 7<br>(5 - 10)               | 1<br>(1 - 2)                | 0<br>(0 - 1)             | 3<br>(2 - 4)                | 2<br>(1 - 3)                | 1<br>(1 - 3)                |
| Measles                                                           | 0<br>(0 - 0)                | 0<br>(0 - 0)                | 0<br>(0 - 0)             | 0<br>(0 - 0)                | 0<br>(0 - 0)                | --                          |
| Varicella and herpes zoster                                       | 15<br>(6 - 32)              | 6<br>(1 - 17)               | 1<br>(0 - 4)             | 3<br>(1 - 6)                | 1<br>(0 - 3)                | 5<br>(0 - 18)               |
| Neglected tropical diseases and malaria                           | 137<br>(107 - 236)          | 44<br>(30 - 71)             | 13<br>(10 - 21)          | 33<br>(27 - 47)             | 23<br>(14 - 55)             | 23<br>(14 - 54)             |
| Malaria                                                           | 27<br>(20 - 37)             | 6<br>(2 - 11)               | 1<br>(1 - 2)             | 8<br>(5 - 13)               | 6<br>(3 - 10)               | 7<br>(3 - 13)               |
| Chagas disease                                                    | 24<br>(9 - 98)              | 0<br>(0 - 1)                | 0<br>(0 - 1)             | 4<br>(2 - 15)               | 10<br>(3 - 40)              | 10<br>(3 - 41)              |
| Leishmaniasis                                                     | 2<br>(1 - 2)                | 1<br>(1 - 1)                | 0<br>(0 - 0)             | 0<br>(0 - 0)                | 0<br>(0 - 0)                | 0<br>(0 - 0)                |
| Visceral leishmaniasis                                            | 2<br>(1 - 2)                | 1<br>(1 - 1)                | 0<br>(0 - 0)             | 0<br>(0 - 0)                | 0<br>(0 - 0)                | 0<br>(0 - 0)                |
| Cysticercosis                                                     | 12<br>(11 - 13)             | 0<br>(0 - 1)                | 1<br>(1 - 1)             | 8<br>(7 - 9)                | 2<br>(2 - 2)                | 1<br>(1 - 1)                |
| Cystic echinococcosis                                             | 2<br>(2 - 2)                | 0<br>(0 - 0)                | 0<br>(0 - 0)             | 1<br>(1 - 1)                | 0<br>(0 - 0)                | 0<br>(0 - 0)                |
| Dengue                                                            | 22<br>(15 - 29)             | 8<br>(5 - 12)               | 4<br>(3 - 6)             | 5<br>(3 - 6)                | 2<br>(1 - 2)                | 3<br>(2 - 4)                |
| Rabies                                                            | 2<br>(2 - 5)                | 0<br>(0 - 0)                | 1<br>(0 - 2)             | 1<br>(1 - 2)                | 0<br>(0 - 1)                | 0<br>(0 - 0)                |
| Intestinal nematode infections                                    | 12<br>(3 - 26)              | 8<br>(1 - 21)               | 2<br>(0 - 7)             | 1<br>(0 - 5)                | 0<br>(0 - 3)                | 0<br>(0 - 4)                |
| Ascariasis                                                        | 12<br>(3 - 26)              | 8<br>(1 - 21)               | 2<br>(0 - 7)             | 1<br>(0 - 5)                | 0<br>(0 - 3)                | 0<br>(0 - 4)                |
| Other neglected tropical diseases                                 | 34<br>(25 - 73)             | 21<br>(13 - 45)             | 4<br>(3 - 8)             | 4<br>(3 - 7)                | 2<br>(2 - 4)                | 3<br>(2 - 5)                |
| Maternal disorders                                                | 423<br>(321 - 541)          | --                          | 2<br>(1 - 4)             | 421<br>(318 - 538)          | --                          | --                          |

Web Table 31- Guatemala deaths with 95% UI by age, sex, and cause in 2013

| Cause                                                            | Both Sexes, All Ages        | Both Sexes, 0-4 Years    | Both Sexes, 5-14 Years | Both Sexes, 15-49 Years  | Both Sexes, 50-69 Years     | Both Sexes, 70-80 Years     |
|------------------------------------------------------------------|-----------------------------|--------------------------|------------------------|--------------------------|-----------------------------|-----------------------------|
| Maternal hemorrhage                                              | 92<br>(68 - 121)            | --                       | 0<br>(0 - 1)           | 92<br>(67 - 121)         | --                          | --                          |
| Maternal sepsis and other maternal infections                    | 40<br>(28 - 55)             | --                       | 0<br>(0 - 1)           | 39<br>(28 - 55)          | --                          | --                          |
| Maternal hypertensive disorders                                  | 63<br>(44 - 84)             | --                       | 0<br>(0 - 1)           | 62<br>(44 - 84)          | --                          | --                          |
| Maternal obstructed labor                                        | 24<br>(16 - 34)             | --                       | 0<br>(0 - 0)           | 24<br>(16 - 34)          | --                          | --                          |
| Maternal abortive outcome                                        | 32<br>(22 - 45)             | --                       | 0<br>(0 - 0)           | 31<br>(21 - 44)          | --                          | --                          |
| Indirect maternal deaths                                         | 58<br>(32 - 82)             | --                       | 0<br>(0 - 1)           | 57<br>(32 - 82)          | --                          | --                          |
| Late maternal deaths                                             | 30<br>(16 - 47)             | --                       | 0<br>(0 - 0)           | 29<br>(16 - 47)          | --                          | --                          |
| Maternal deaths aggravated by HIV/AIDS                           | 0<br>(0 - 0)                | --                       | --                     | 0<br>(0 - 0)             | --                          | --                          |
| Other maternal disorders                                         | 85<br>(58 - 114)            | --                       | 0<br>(0 - 1)           | 85<br>(58 - 113)         | --                          | --                          |
| Neonatal disorders                                               | 3,749<br>(3,396 - 4,176)    | 3,749<br>(3,396 - 4,176) | --                     | --                       | --                          | --                          |
| Neonatal preterm birth complications                             | 1,869<br>(1,504 - 2,398)    | 1,869<br>(1,504 - 2,398) | --                     | --                       | --                          | --                          |
| Neonatal encephalopathy due to birth asphyxia and trauma         | 731<br>(493 - 957)          | 731<br>(493 - 957)       | --                     | --                       | --                          | --                          |
| Neonatal sepsis and other neonatal infections                    | 695<br>(405 - 1,043)        | 695<br>(405 - 1,043)     | --                     | --                       | --                          | --                          |
| Hemolytic disease and other neonatal jaundice                    | 16<br>(7 - 36)              | 16<br>(7 - 36)           | --                     | --                       | --                          | --                          |
| Other neonatal disorders                                         | 438<br>(310 - 583)          | 438<br>(310 - 583)       | --                     | --                       | --                          | --                          |
| Nutritional deficiencies                                         | 4,571<br>(3,870 - 6,554)    | 853<br>(627 - 1,105)     | 124<br>(98 - 173)      | 500<br>(405 - 806)       | 618<br>(487 - 1,043)        | 2,476<br>(1,980 - 3,556)    |
| Protein-energy malnutrition                                      | 4,044<br>(3,365 - 5,868)    | 779<br>(564 - 1,018)     | 101<br>(79 - 144)      | 386<br>(299 - 662)       | 528<br>(407 - 939)          | 2,250<br>(1,789 - 3,311)    |
| Iodine deficiency                                                | 2<br>(0 - 6)                | 1<br>(0 - 4)             | 0<br>(0 - 1)           | 1<br>(0 - 2)             | 0<br>(0 - 1)                | 0<br>(0 - 3)                |
| Iron-deficiency anemia                                           | 366<br>(180 - 626)          | 51<br>(16 - 115)         | 17<br>(9 - 31)         | 84<br>(43 - 147)         | 66<br>(30 - 124)            | 148<br>(70 - 264)           |
| Other nutritional deficiencies                                   | 158<br>(90 - 252)           | 22<br>(7 - 48)           | 5<br>(3 - 9)           | 30<br>(18 - 53)          | 23<br>(12 - 39)             | 78<br>(37 - 140)            |
| Other communicable, maternal, neonatal, and nutritional diseases | 261<br>(181 - 361)          | 136<br>(72 - 213)        | 17<br>(11 - 24)        | 44<br>(36 - 58)          | 29<br>(23 - 38)             | 35<br>(26 - 52)             |
| Sexually transmitted diseases excluding HIV                      | 102<br>(40 - 183)           | 87<br>(29 - 162)         | 7<br>(3 - 13)          | 3<br>(3 - 4)             | 2<br>(1 - 2)                | 3<br>(2 - 4)                |
| Syphilis                                                         | 98<br>(37 - 179)            | 87<br>(29 - 162)         | 7<br>(2 - 13)          | 2<br>(1 - 2)             | 1<br>(1 - 2)                | 2<br>(1 - 2)                |
| Chlamydial infection                                             | 1<br>(1 - 1)                | --                       | 0<br>(0 - 0)           | 0<br>(0 - 1)             | 0<br>(0 - 0)                | 0<br>(0 - 0)                |
| Gonococcal infection                                             | 1<br>(1 - 2)                | --                       | 0<br>(0 - 0)           | 1<br>(1 - 1)             | 0<br>(0 - 0)                | 0<br>(0 - 0)                |
| Other sexually transmitted diseases                              | 1<br>(1 - 1)                | --                       | 0<br>(0 - 0)           | 1<br>(1 - 1)             | 0<br>(0 - 0)                | 0<br>(0 - 0)                |
| Hepatitis                                                        | 28<br>(24 - 34)             | 4<br>(3 - 7)             | 1<br>(1 - 2)           | 11<br>(9 - 14)           | 7<br>(5 - 10)               | 4<br>(3 - 6)                |
| Acute hepatitis A                                                | 11<br>(5 - 17)              | 3<br>(2 - 6)             | 1<br>(1 - 2)           | 5<br>(2 - 8)             | 1<br>(0 - 3)                | 0<br>(0 - 1)                |
| Acute hepatitis B                                                | 13<br>(9 - 20)              | 1<br>(0 - 3)             | 0<br>(0 - 1)           | 4<br>(2 - 7)             | 5<br>(3 - 7)                | 3<br>(2 - 4)                |
| Acute hepatitis C                                                | 4<br>(1 - 8)                | --                       | 0<br>(0 - 0)           | 2<br>(0 - 4)             | 1<br>(0 - 3)                | 1<br>(0 - 2)                |
| Other infectious diseases                                        | 131<br>(97 - 204)           | 45<br>(27 - 83)          | 8<br>(6 - 13)          | 29<br>(22 - 42)          | 20<br>(15 - 29)             | 28<br>(20 - 46)             |
| Non-communicable diseases                                        | 43,122<br>(40,232 - 45,685) | 2,277<br>(1,878 - 2,693) | 603<br>(541 - 673)     | 8,392<br>(7,592 - 9,253) | 11,231<br>(10,299 - 12,095) | 20,619<br>(19,226 - 21,715) |
| Neoplasms                                                        | 8,495<br>(7,795 - 9,109)    | 146<br>(108 - 186)       | 177<br>(143 - 207)     | 1,719<br>(1,527 - 1,907) | 2,715<br>(2,449 - 2,963)    | 3,738<br>(3,388 - 4,040)    |
| Esophageal cancer                                                | 154<br>(109 - 188)          | --                       | --                     | 18<br>(13 - 22)          | 50<br>(35 - 62)             | 86<br>(58 - 110)            |
| Stomach cancer                                                   | 2,046<br>(1,857 - 2,243)    | --                       | --                     | 313<br>(272 - 353)       | 675<br>(594 - 763)          | 1,058<br>(934 - 1,193)      |
| Liver cancer                                                     | 730<br>(640 - 817)          | --                       | 6<br>(5 - 8)           | 118<br>(99 - 139)        | 282<br>(243 - 325)          | 323<br>(273 - 376)          |
| Liver cancer due to hepatitis B                                  | 178<br>(104 - 272)          | --                       | 2<br>(1 - 4)           | 44<br>(29 - 63)          | 74<br>(39 - 119)            | 58<br>(28 - 93)             |
| Liver cancer due to hepatitis C                                  | 364<br>(234 - 481)          | --                       | 1<br>(0 - 2)           | 47<br>(31 - 62)          | 145<br>(93 - 192)           | 171<br>(101 - 238)          |
| Liver cancer due to alcohol use                                  | 111<br>(72 - 169)           | --                       | --                     | 8<br>(4 - 12)            | 36<br>(22 - 55)             | 67<br>(40 - 109)            |
| Liver cancer due to other causes                                 | 77<br>(52 - 103)            | --                       | 3<br>(2 - 4)           | 19<br>(12 - 27)          | 28<br>(17 - 40)             | 27<br>(16 - 39)             |

Web Table 31- Guatemala deaths with 95% UI by age, sex, and cause in 2013

| Cause                                         | Both Sexes, All Ages        | Both Sexes, 0-4 Years | Both Sexes, 5-14 Years | Both Sexes, 15-49 Years  | Both Sexes, 50-69 Years  | Both Sexes, 70-80 Years  |
|-----------------------------------------------|-----------------------------|-----------------------|------------------------|--------------------------|--------------------------|--------------------------|
| Larynx cancer                                 | 59<br>(41 - 71)             | --                    | --                     | 9<br>(6 - 11)            | 21<br>(14 - 26)          | 29<br>(20 - 36)          |
| Tracheal, bronchus and lung cancer            | 620<br>(560 - 697)          | --                    | --                     | 96<br>(84 - 114)         | 214<br>(186 - 248)       | 309<br>(268 - 354)       |
| Breast cancer                                 | 311<br>(269 - 365)          | --                    | --                     | 99<br>(81 - 123)         | 128<br>(106 - 155)       | 85<br>(69 - 102)         |
| Cervical cancer                               | 787<br>(451 - 929)          | --                    | --                     | 281<br>(166 - 345)       | 300<br>(167 - 366)       | 206<br>(118 - 257)       |
| Uterine cancer                                | 112<br>(83 - 167)           | --                    | --                     | 16<br>(11 - 24)          | 54<br>(39 - 83)          | 42<br>(32 - 66)          |
| Prostate cancer                               | 594<br>(312 - 789)          | --                    | --                     | 9<br>(5 - 12)            | 95<br>(44 - 135)         | 490<br>(257 - 662)       |
| Colon and rectum cancer                       | 507<br>(459 - 556)          | --                    | --                     | 89<br>(79 - 100)         | 167<br>(148 - 186)       | 251<br>(218 - 288)       |
| Lip and oral cavity cancer                    | 91<br>(64 - 108)            | --                    | --                     | 16<br>(12 - 19)          | 29<br>(19 - 35)          | 47<br>(31 - 57)          |
| Nasopharynx cancer                            | 28<br>(23 - 34)             | --                    | 1<br>(0 - 1)           | 11<br>(9 - 13)           | 10<br>(7 - 12)           | 7<br>(6 - 9)             |
| Other pharynx cancer                          | 48<br>(36 - 54)             | --                    | --                     | 10<br>(8 - 11)           | 19<br>(14 - 22)          | 19<br>(14 - 23)          |
| Gallbladder and biliary tract cancer          | 217<br>(163 - 424)          | --                    | --                     | 20<br>(15 - 35)          | 84<br>(63 - 155)         | 113<br>(80 - 230)        |
| Pancreatic cancer                             | 282<br>(252 - 314)          | --                    | --                     | 36<br>(32 - 41)          | 108<br>(94 - 123)        | 138<br>(118 - 160)       |
| Malignant skin melanoma                       | 30<br>(22 - 38)             | --                    | --                     | 9<br>(7 - 13)            | 8<br>(6 - 9)             | 13<br>(9 - 17)           |
| Non-melanoma skin cancer                      | 65<br>(50 - 91)             | --                    | --                     | 9<br>(7 - 12)            | 15<br>(11 - 20)          | 42<br>(32 - 59)          |
| Ovarian cancer                                | 86<br>(74 - 100)            | --                    | --                     | 26<br>(21 - 32)          | 38<br>(31 - 45)          | 22<br>(18 - 27)          |
| Testicular cancer                             | 12<br>(4 - 21)              | --                    | --                     | 9<br>(2 - 16)            | 1<br>(0 - 2)             | 2<br>(1 - 4)             |
| Kidney cancer                                 | 114<br>(103 - 126)          | 2<br>(1 - 3)          | 1<br>(1 - 1)           | 21<br>(19 - 24)          | 46<br>(40 - 53)          | 44<br>(38 - 50)          |
| Bladder cancer                                | 54<br>(45 - 73)             | --                    | --                     | 4<br>(3 - 5)             | 13<br>(11 - 17)          | 37<br>(30 - 50)          |
| Brain and nervous system cancer               | 245<br>(111 - 295)          | 11<br>(5 - 18)        | 23<br>(11 - 31)        | 93<br>(44 - 115)         | 67<br>(28 - 85)          | 51<br>(22 - 64)          |
| Thyroid cancer                                | 49<br>(39 - 61)             | --                    | 0<br>(0 - 0)           | 9<br>(7 - 12)            | 18<br>(14 - 23)          | 22<br>(16 - 28)          |
| Mesothelioma                                  | 8<br>(7 - 9)                | --                    | --                     | 2<br>(2 - 2)             | 3<br>(3 - 4)             | 3<br>(2 - 3)             |
| Hodgkin lymphoma                              | 28<br>(6 - 39)              | 3<br>(1 - 6)          | 3<br>(1 - 5)           | 9<br>(2 - 13)            | 6<br>(1 - 8)             | 7<br>(1 - 10)            |
| Non-Hodgkin lymphoma                          | 179<br>(93 - 227)           | 19<br>(9 - 28)        | 9<br>(6 - 12)          | 45<br>(25 - 57)          | 50<br>(22 - 67)          | 57<br>(25 - 77)          |
| Multiple myeloma                              | 27<br>(21 - 32)             | --                    | --                     | 5<br>(4 - 6)             | 11<br>(8 - 13)           | 11<br>(9 - 14)           |
| Leukemia                                      | 551<br>(486 - 611)          | 62<br>(42 - 83)       | 100<br>(80 - 122)      | 219<br>(188 - 252)       | 85<br>(73 - 96)          | 85<br>(73 - 98)          |
| Other neoplasms                               | 461<br>(381 - 569)          | 48<br>(23 - 68)       | 33<br>(20 - 43)        | 119<br>(96 - 155)        | 121<br>(98 - 158)        | 140<br>(113 - 176)       |
| Cardiovascular diseases                       | 11,595<br>(10,285 - 12,605) | 186<br>(143 - 247)    | 82<br>(63 - 98)        | 1,470<br>(1,284 - 1,696) | 2,648<br>(2,297 - 2,954) | 7,208<br>(6,410 - 7,859) |
| Rheumatic heart disease                       | 82<br>(51 - 100)            | 2<br>(1 - 4)          | 3<br>(1 - 4)           | 25<br>(16 - 32)          | 21<br>(13 - 28)          | 32<br>(17 - 42)          |
| Ischemic heart disease                        | 6,968<br>(6,196 - 7,856)    | 35<br>(18 - 53)       | 25<br>(17 - 33)        | 792<br>(686 - 946)       | 1,566<br>(1,341 - 1,793) | 4,550<br>(3,979 - 5,111) |
| Cerebrovascular disease                       | 3,456<br>(2,704 - 3,976)    | 31<br>(19 - 42)       | 27<br>(18 - 34)        | 430<br>(330 - 509)       | 790<br>(624 - 923)       | 2,177<br>(1,696 - 2,559) |
| Ischemic stroke                               | 1,436<br>(1,143 - 1,880)    | 7<br>(4 - 14)         | 5<br>(4 - 9)           | 101<br>(78 - 135)        | 295<br>(232 - 385)       | 1,027<br>(795 - 1,387)   |
| Hemorrhagic stroke                            | 2,020<br>(1,373 - 2,432)    | 24<br>(13 - 34)       | 22<br>(14 - 28)        | 329<br>(240 - 393)       | 495<br>(361 - 592)       | 1,150<br>(703 - 1,449)   |
| Hypertensive heart disease                    | 177<br>(59 - 302)           | 1<br>(0 - 1)          | 1<br>(0 - 1)           | 16<br>(7 - 24)           | 35<br>(13 - 62)          | 125<br>(38 - 224)        |
| Cardiomyopathy and myocarditis                | 212<br>(181 - 294)          | 49<br>(35 - 75)       | 11<br>(8 - 15)         | 70<br>(57 - 100)         | 43<br>(34 - 59)          | 39<br>(31 - 55)          |
| Atrial fibrillation and flutter               | 10<br>(7 - 13)              | --                    | --                     | 1<br>(1 - 2)             | 2<br>(2 - 3)             | 6<br>(4 - 9)             |
| Aortic aneurysm                               | 55<br>(45 - 69)             | --                    | --                     | 9<br>(7 - 13)            | 12<br>(9 - 15)           | 34<br>(27 - 43)          |
| Peripheral vascular disease                   | 1<br>(1 - 2)                | --                    | --                     | 0<br>(0 - 0)             | 0<br>(0 - 0)             | 1<br>(1 - 1)             |
| Endocarditis                                  | 118<br>(88 - 157)           | 37<br>(25 - 53)       | 7<br>(5 - 10)          | 28<br>(20 - 37)          | 17<br>(12 - 23)          | 29<br>(21 - 44)          |
| Other cardiovascular and circulatory diseases | 517<br>(421 - 702)          | 32<br>(21 - 47)       | 8<br>(6 - 12)          | 100<br>(80 - 145)        | 161<br>(123 - 221)       | 216<br>(156 - 326)       |
| Chronic respiratory diseases                  | 2,895<br>(2,583 - 3,230)    | 174<br>(124 - 288)    | 28<br>(23 - 33)        | 258<br>(225 - 317)       | 499<br>(430 - 579)       | 1,936<br>(1,602 - 2,188) |



Web Table 31- Guatemala deaths with 95% UI by age, sex, and cause in 2013

| Cause                                               | Both Sexes, All Ages     | Both Sexes, 0-4 Years | Both Sexes, 5-14 Years | Both Sexes, 15-49 Years  | Both Sexes, 50-69 Years  | Both Sexes, 70-80 Years  |
|-----------------------------------------------------|--------------------------|-----------------------|------------------------|--------------------------|--------------------------|--------------------------|
| Chronic obstructive pulmonary disease               | 2,219<br>(1,964 - 2,495) | 116<br>(77 - 216)     | 15<br>(12 - 19)        | 165<br>(139 - 206)       | 347<br>(291 - 411)       | 1,575<br>(1,306 - 1,788) |
| Pneumoconiosis                                      | 43<br>(30 - 61)          | 1<br>(0 - 1)          | 1<br>(0 - 1)           | 7<br>(5 - 11)            | 13<br>(9 - 19)           | 21<br>(14 - 32)          |
| Silicosis                                           | 1<br>(1 - 1)             | 0<br>(0 - 0)          | 0<br>(0 - 0)           | 0<br>(0 - 1)             | 0<br>(0 - 0)             | 0<br>(0 - 0)             |
| Asbestosis                                          | 7<br>(5 - 10)            | 0<br>(0 - 0)          | 0<br>(0 - 0)           | 1<br>(1 - 1)             | 3<br>(2 - 4)             | 3<br>(2 - 5)             |
| Coal workers pneumoconiosis                         | 5<br>(4 - 8)             | 0<br>(0 - 0)          | 0<br>(0 - 0)           | 1<br>(0 - 1)             | 1<br>(1 - 2)             | 3<br>(2 - 5)             |
| Other pneumoconiosis                                | 30<br>(21 - 42)          | 0<br>(0 - 0)          | 0<br>(0 - 0)           | 5<br>(4 - 8)             | 9<br>(6 - 13)            | 15<br>(10 - 23)          |
| Asthma                                              | 357<br>(262 - 437)       | 34<br>(21 - 49)       | 8<br>(6 - 10)          | 50<br>(39 - 62)          | 77<br>(56 - 98)          | 188<br>(127 - 246)       |
| Interstitial lung disease and pulmonary sarcoidosis | 173<br>(129 - 245)       | 3<br>(2 - 6)          | 2<br>(1 - 4)           | 20<br>(14 - 31)          | 48<br>(35 - 70)          | 100<br>(69 - 147)        |
| Other chronic respiratory diseases                  | 103<br>(80 - 132)        | 20<br>(14 - 35)       | 2<br>(1 - 2)           | 16<br>(12 - 22)          | 14<br>(10 - 19)          | 52<br>(36 - 73)          |
| Cirrhosis                                           | 3,415<br>(3,112 - 3,729) | 23<br>(17 - 31)       | 20<br>(17 - 23)        | 1,321<br>(1,149 - 1,510) | 1,243<br>(1,120 - 1,374) | 808<br>(716 - 909)       |
| Cirrhosis due to hepatitis B                        | 138<br>(94 - 205)        | 0<br>(0 - 0)          | 1<br>(0 - 1)           | 55<br>(36 - 85)          | 52<br>(33 - 78)          | 30<br>(17 - 46)          |
| Cirrhosis due to hepatitis C                        | 1,296<br>(947 - 1,629)   | 1<br>(0 - 3)          | 4<br>(2 - 6)           | 405<br>(252 - 555)       | 499<br>(343 - 655)       | 386<br>(298 - 474)       |
| Cirrhosis due to alcohol use                        | 1,378<br>(1,103 - 1,716) | --                    | --                     | 525<br>(386 - 697)       | 525<br>(408 - 671)       | 329<br>(256 - 414)       |
| Cirrhosis due to other causes                       | 602<br>(422 - 798)       | 22<br>(16 - 29)       | 15<br>(12 - 19)        | 336<br>(230 - 452)       | 167<br>(96 - 251)        | 62<br>(41 - 87)          |
| Digestive diseases                                  | 2,434<br>(2,140 - 2,678) | 79<br>(49 - 107)      | 57<br>(41 - 68)        | 604<br>(507 - 696)       | 618<br>(543 - 705)       | 1,076<br>(932 - 1,213)   |
| Peptic ulcer disease                                | 1,057<br>(912 - 1,224)   | 4<br>(2 - 6)          | 6<br>(4 - 9)           | 206<br>(164 - 247)       | 285<br>(242 - 343)       | 557<br>(462 - 659)       |
| Gastritis and duodenitis                            | 127<br>(89 - 194)        | 1<br>(1 - 2)          | 1<br>(1 - 1)           | 26<br>(19 - 44)          | 36<br>(25 - 55)          | 63<br>(41 - 96)          |
| Appendicitis                                        | 170<br>(125 - 208)       | 9<br>(4 - 15)         | 14<br>(9 - 19)         | 73<br>(52 - 93)          | 37<br>(26 - 49)          | 36<br>(25 - 50)          |
| Paralytic ileus and intestinal obstruction          | 169<br>(39 - 271)        | 32<br>(9 - 55)        | 14<br>(4 - 23)         | 32<br>(6 - 53)           | 28<br>(5 - 49)           | 63<br>(11 - 113)         |
| Inguinal, femoral, and abdominal hernia             | 177<br>(133 - 296)       | 9<br>(4 - 18)         | 6<br>(4 - 11)          | 28<br>(20 - 47)          | 46<br>(33 - 79)          | 88<br>(60 - 153)         |
| Inflammatory bowel disease                          | 22<br>(17 - 30)          | 3<br>(2 - 6)          | 1<br>(1 - 2)           | 5<br>(4 - 6)             | 5<br>(4 - 8)             | 8<br>(6 - 11)            |
| Vascular intestinal disorders                       | 58<br>(35 - 99)          | 1<br>(0 - 2)          | 1<br>(0 - 3)           | 7<br>(4 - 13)            | 11<br>(6 - 18)           | 39<br>(23 - 67)          |
| Gallbladder and biliary diseases                    | 184<br>(140 - 227)       | 2<br>(1 - 4)          | 1<br>(1 - 2)           | 36<br>(26 - 46)          | 51<br>(39 - 66)          | 94<br>(64 - 124)         |
| Pancreatitis                                        | 339<br>(273 - 451)       | 7<br>(3 - 13)         | 7<br>(4 - 11)          | 161<br>(127 - 218)       | 86<br>(66 - 117)         | 78<br>(57 - 112)         |
| Other digestive diseases                            | 131<br>(99 - 166)        | 12<br>(6 - 23)        | 5<br>(4 - 8)           | 31<br>(21 - 39)          | 33<br>(25 - 41)          | 51<br>(37 - 68)          |
| Neurological disorders                              | 2,720<br>(2,238 - 3,181) | 66<br>(46 - 101)      | 43<br>(33 - 61)        | 257<br>(214 - 350)       | 203<br>(164 - 246)       | 2,152<br>(1,686 - 2,594) |
| Alzheimer disease and other dementias               | 2,115<br>(1,641 - 2,553) | --                    | --                     | 1<br>(0 - 2)             | 115<br>(78 - 154)        | 1,999<br>(1,532 - 2,441) |
| Parkinson disease                                   | 117<br>(94 - 147)        | --                    | --                     | 3<br>(3 - 4)             | 20<br>(16 - 27)          | 93<br>(72 - 120)         |
| Epilepsy                                            | 352<br>(296 - 479)       | 38<br>(21 - 66)       | 33<br>(24 - 48)        | 210<br>(172 - 296)       | 42<br>(34 - 52)          | 30<br>(24 - 38)          |
| Multiple sclerosis                                  | 16<br>(8 - 20)           | --                    | --                     | 8<br>(4 - 10)            | 5<br>(2 - 7)             | 3<br>(2 - 5)             |
| Other neurological disorders                        | 120<br>(103 - 165)       | 28<br>(20 - 43)       | 10<br>(8 - 14)         | 35<br>(29 - 49)          | 21<br>(17 - 28)          | 26<br>(21 - 37)          |
| Mental and substance use disorders                  | 2,142<br>(1,322 - 2,532) | 2<br>(1 - 4)          | 0<br>(0 - 0)           | 1,364<br>(819 - 1,668)   | 613<br>(408 - 752)       | 162<br>(94 - 203)        |
| Schizophrenia                                       | 3<br>(2 - 4)             | --                    | --                     | 2<br>(1 - 3)             | 1<br>(1 - 2)             | 0<br>(0 - 0)             |
| Alcohol use disorders                               | 1,727<br>(891 - 2,112)   | --                    | --                     | 1,160<br>(571 - 1,453)   | 441<br>(241 - 568)       | 126<br>(59 - 167)        |
| Drug use disorders                                  | 410<br>(327 - 582)       | 2<br>(1 - 4)          | --                     | 201<br>(151 - 367)       | 171<br>(128 - 218)       | 36<br>(27 - 47)          |
| Opioid use disorders                                | 86<br>(67 - 126)         | 1<br>(0 - 1)          | --                     | 44<br>(32 - 81)          | 33<br>(25 - 43)          | 8<br>(6 - 11)            |
| Cocaine use disorders                               | 10<br>(8 - 14)           | 0<br>(0 - 0)          | --                     | 6<br>(4 - 10)            | 3<br>(2 - 4)             | 1<br>(1 - 1)             |
| Amphetamine use disorders                           | 8<br>(6 - 11)            | 0<br>(0 - 0)          | --                     | 4<br>(3 - 7)             | 3<br>(2 - 4)             | 1<br>(0 - 1)             |
| Other drug use disorders                            | 307<br>(244 - 432)       | 2<br>(1 - 3)          | --                     | 148<br>(110 - 274)       | 131<br>(98 - 169)        | 26<br>(20 - 35)          |
| Eating disorders                                    | 1<br>(1 - 2)             | --                    | 0<br>(0 - 0)           | 1<br>(1 - 2)             | --                       | --                       |

Web Table 31- Guatemala deaths with 95% UI by age, sex, and cause in 2013

| Cause                                               | Both Sexes, All Ages     | Both Sexes, 0-4 Years  | Both Sexes, 5-14 Years | Both Sexes, 15-49 Years  | Both Sexes, 50-69 Years  | Both Sexes, 70-80 Years  |
|-----------------------------------------------------|--------------------------|------------------------|------------------------|--------------------------|--------------------------|--------------------------|
| Anorexia nervosa                                    | 1<br>(1 - 2)             | --                     | 0<br>(0 - 0)           | 1<br>(1 - 2)             | --                       | --                       |
| Diabetes, urogenital, blood, and endocrine diseases | 7,661<br>(6,746 - 8,628) | 293<br>(202 - 617)     | 120<br>(95 - 183)      | 1,269<br>(1,116 - 1,502) | 2,610<br>(2,050 - 2,923) | 3,370<br>(2,706 - 3,781) |
| Diabetes mellitus                                   | 4,136<br>(2,917 - 4,598) | 11<br>(8 - 15)         | 7<br>(5 - 10)          | 536<br>(410 - 622)       | 1,625<br>(1,127 - 1,847) | 1,957<br>(1,312 - 2,265) |
| Acute glomerulonephritis                            | 6<br>(4 - 7)             | 0<br>(0 - 1)           | 0<br>(0 - 1)           | 1<br>(1 - 2)             | 1<br>(1 - 2)             | 2<br>(1 - 3)             |
| Chronic kidney disease                              | 2,571<br>(1,986 - 2,941) | 91<br>(70 - 129)       | 49<br>(39 - 61)        | 508<br>(422 - 596)       | 797<br>(528 - 936)       | 1,125<br>(884 - 1,334)   |
| Chronic kidney disease due to diabetes mellitus     | 1,161<br>(844 - 1,365)   | 17<br>(12 - 31)        | 8<br>(5 - 13)          | 195<br>(151 - 245)       | 400<br>(258 - 486)       | 542<br>(386 - 665)       |
| Chronic kidney disease due to hypertension          | 333<br>(172 - 424)       | 15<br>(8 - 21)         | 7<br>(4 - 9)           | 88<br>(47 - 115)         | 94<br>(42 - 125)         | 130<br>(58 - 177)        |
| Chronic kidney disease due to glomerulonephritis    | 74<br>(49 - 94)          | 9<br>(6 - 13)          | 6<br>(4 - 8)           | 19<br>(12 - 25)          | 15<br>(9 - 21)           | 25<br>(14 - 36)          |
| Chronic kidney disease due to other causes          | 1,003<br>(733 - 1,300)   | 50<br>(34 - 84)        | 29<br>(20 - 39)        | 207<br>(149 - 276)       | 289<br>(157 - 399)       | 428<br>(281 - 601)       |
| Urinary diseases and male infertility               | 271<br>(178 - 321)       | 31<br>(22 - 43)        | 5<br>(3 - 7)           | 45<br>(29 - 55)          | 56<br>(34 - 69)          | 134<br>(81 - 170)        |
| Interstitial nephritis and urinary tract infections | 184<br>(113 - 226)       | 27<br>(19 - 37)        | 3<br>(2 - 4)           | 29<br>(17 - 37)          | 37<br>(21 - 48)          | 88<br>(47 - 118)         |
| Urolithiasis                                        | 11<br>(7 - 16)           | --                     | 0<br>(0 - 1)           | 3<br>(2 - 5)             | 3<br>(2 - 5)             | 4<br>(2 - 6)             |
| Other urinary diseases                              | 77<br>(50 - 104)         | 4<br>(2 - 8)           | 2<br>(1 - 2)           | 12<br>(8 - 16)           | 16<br>(9 - 22)           | 42<br>(26 - 62)          |
| Gynecological diseases                              | 5<br>(3 - 16)            | --                     | --                     | 4<br>(2 - 13)            | 0<br>(0 - 1)             | 0<br>(0 - 1)             |
| Uterine fibroids                                    | 1<br>(0 - 3)             | --                     | --                     | 1<br>(0 - 2)             | 0<br>(0 - 0)             | 0<br>(0 - 0)             |
| Polycystic ovarian syndrome                         | 0<br>(0 - 1)             | --                     | --                     | 0<br>(0 - 1)             | 0<br>(0 - 0)             | --                       |
| Endometriosis                                       | 1<br>(0 - 2)             | --                     | --                     | 1<br>(0 - 2)             | 0<br>(0 - 0)             | --                       |
| Genital prolapse                                    | 1<br>(0 - 2)             | --                     | --                     | 1<br>(0 - 2)             | 0<br>(0 - 0)             | 0<br>(0 - 0)             |
| Other gynecological diseases                        | 2<br>(1 - 7)             | --                     | --                     | 2<br>(1 - 6)             | 0<br>(0 - 1)             | 0<br>(0 - 1)             |
| Hemoglobinopathies and hemolytic anemias            | 259<br>(183 - 422)       | 54<br>(27 - 117)       | 36<br>(21 - 68)        | 86<br>(61 - 132)         | 53<br>(39 - 80)          | 30<br>(20 - 47)          |
| Thalassemias                                        | 5<br>(3 - 9)             | 2<br>(1 - 5)           | 1<br>(1 - 2)           | 2<br>(1 - 3)             | 0<br>(0 - 0)             | 0<br>(0 - 0)             |
| Sickle cell disorders                               | 112<br>(74 - 189)        | 29<br>(14 - 65)        | 23<br>(14 - 43)        | 49<br>(34 - 75)          | 11<br>(8 - 17)           | 1<br>(0 - 1)             |
| G6PD deficiency                                     | 14<br>(9 - 22)           | 3<br>(2 - 8)           | 2<br>(1 - 5)           | 5<br>(4 - 7)             | 3<br>(2 - 4)             | 0<br>(0 - 1)             |
| Other hemoglobinopathies and hemolytic anemias      | 128<br>(94 - 201)        | 19<br>(10 - 41)        | 10<br>(6 - 18)         | 31<br>(22 - 46)          | 39<br>(29 - 59)          | 29<br>(19 - 46)          |
| Endocrine, metabolic, blood, and immune disorders   | 414<br>(267 - 1,159)     | 105<br>(51 - 368)      | 22<br>(13 - 65)        | 87<br>(57 - 220)         | 77<br>(50 - 204)         | 122<br>(75 - 335)        |
| Musculoskeletal disorders                           | 125<br>(72 - 147)        | --                     | 6<br>(5 - 9)           | 35<br>(22 - 43)          | 28<br>(15 - 34)          | 56<br>(27 - 71)          |
| Rheumatoid arthritis                                | 45<br>(20 - 56)          | --                     | 1<br>(1 - 1)           | 5<br>(3 - 6)             | 12<br>(5 - 15)           | 27<br>(11 - 37)          |
| Other musculoskeletal disorders                     | 80<br>(50 - 98)          | --                     | 5<br>(4 - 8)           | 30<br>(19 - 37)          | 17<br>(10 - 21)          | 28<br>(15 - 39)          |
| Other non-communicable diseases                     | 1,639<br>(1,239 - 1,968) | 1,307<br>(958 - 1,620) | 70<br>(54 - 88)        | 94<br>(66 - 110)         | 55<br>(37 - 64)          | 113<br>(58 - 144)        |
| Congenital anomalies                                | 1,412<br>(1,051 - 1,742) | 1,235<br>(898 - 1,550) | 64<br>(49 - 81)        | 63<br>(47 - 75)          | 22<br>(18 - 25)          | 28<br>(20 - 34)          |
| Neural tube defects                                 | 153<br>(93 - 212)        | 146<br>(88 - 204)      | 3<br>(2 - 4)           | 2<br>(2 - 3)             | 0<br>(0 - 1)             | 2<br>(1 - 3)             |
| Congenital heart anomalies                          | 576<br>(400 - 749)       | 513<br>(340 - 683)     | 28<br>(21 - 38)        | 24<br>(16 - 29)          | 5<br>(4 - 7)             | 6<br>(4 - 8)             |
| Cleft lip and cleft palate                          | 10<br>(4 - 18)           | 10<br>(4 - 18)         | --                     | --                       | --                       | --                       |
| Down syndrome                                       | 121<br>(72 - 182)        | 101<br>(57 - 160)      | 8<br>(5 - 12)          | 9<br>(6 - 12)            | 3<br>(2 - 4)             | 0<br>(0 - 0)             |
| Chromosomal unbalanced rearrangements               | 24<br>(15 - 37)          | 21<br>(12 - 32)        | 1<br>(1 - 2)           | 2<br>(1 - 3)             | 0<br>(0 - 1)             | 0<br>(0 - 0)             |
| Other congenital anomalies                          | 528<br>(363 - 681)       | 445<br>(292 - 594)     | 23<br>(16 - 33)        | 26<br>(20 - 33)          | 13<br>(10 - 16)          | 20<br>(15 - 25)          |
| Skin and subcutaneous diseases                      | 191<br>(100 - 233)       | 36<br>(22 - 57)        | 6<br>(3 - 8)           | 31<br>(17 - 37)          | 33<br>(17 - 40)          | 85<br>(37 - 116)         |
| Cellulitis                                          | 29<br>(15 - 41)          | 8<br>(4 - 14)          | 1<br>(1 - 2)           | 6<br>(3 - 8)             | 5<br>(2 - 7)             | 9<br>(3 - 15)            |
| Pyoderma                                            | 97<br>(47 - 121)         | 27<br>(15 - 44)        | 4<br>(2 - 5)           | 15<br>(7 - 18)           | 15<br>(7 - 20)           | 36<br>(12 - 51)          |
| Decubitus ulcer                                     | 62<br>(34 - 82)          | 0<br>(0 - 1)           | 0<br>(0 - 1)           | 9<br>(6 - 12)            | 12<br>(8 - 16)           | 40<br>(20 - 58)          |

Web Table 31- Guatemala deaths with 95% UI by age, sex, and cause in 2013

| Cause                                           | Both Sexes, All Ages        | Both Sexes, 0-4 Years | Both Sexes, 5-14 Years | Both Sexes, 15-49 Years  | Both Sexes, 50-69 Years  | Both Sexes, 70-80 Years |
|-------------------------------------------------|-----------------------------|-----------------------|------------------------|--------------------------|--------------------------|-------------------------|
| Other skin and subcutaneous diseases            | 3<br>(2 - 5)                | 1<br>(0 - 2)          | 0<br>(0 - 1)           | 1<br>(1 - 2)             | 0<br>(0 - 1)             | 0<br>(0 - 1)            |
| Sudden infant death syndrome                    | 36<br>(6 - 77)              | 36<br>(6 - 77)        | --                     | --                       | --                       | --                      |
| Injuries                                        | 12,109<br>(10,587 - 13,385) | 744<br>(549 - 965)    | 557<br>(444 - 649)     | 8,524<br>(7,453 - 9,572) | 1,288<br>(1,096 - 1,492) | 996<br>(797 - 1,142)    |
| Transport injuries                              | 1,558<br>(972 - 1,807)      | 101<br>(41 - 142)     | 123<br>(71 - 155)      | 975<br>(607 - 1,168)     | 196<br>(133 - 234)       | 162<br>(93 - 198)       |
| Road injuries                                   | 1,531<br>(955 - 1,777)      | 98<br>(40 - 139)      | 121<br>(69 - 152)      | 962<br>(599 - 1,152)     | 192<br>(130 - 229)       | 158<br>(92 - 193)       |
| Pedestrian road injuries                        | 1,034<br>(624 - 1,248)      | 57<br>(22 - 82)       | 70<br>(36 - 93)        | 682<br>(419 - 841)       | 115<br>(70 - 146)        | 111<br>(62 - 140)       |
| Cyclist road injuries                           | 89<br>(51 - 118)            | 9<br>(3 - 16)         | 17<br>(9 - 25)         | 40<br>(25 - 53)          | 12<br>(7 - 16)           | 12<br>(7 - 18)          |
| Motorcyclist road injuries                      | 136<br>(82 - 214)           | 5<br>(2 - 8)          | 6<br>(3 - 10)          | 101<br>(60 - 167)        | 17<br>(10 - 27)          | 7<br>(4 - 11)           |
| Motor vehicle road injuries                     | 233<br>(131 - 306)          | 23<br>(9 - 35)        | 22<br>(12 - 31)        | 123<br>(66 - 173)        | 41<br>(27 - 52)          | 25<br>(13 - 35)         |
| Other road injuries                             | 38<br>(25 - 67)             | 5<br>(2 - 9)          | 6<br>(3 - 12)          | 16<br>(10 - 31)          | 8<br>(4 - 14)            | 4<br>(2 - 8)            |
| Other transport injuries                        | 27<br>(15 - 33)             | 3<br>(1 - 4)          | 3<br>(1 - 4)           | 13<br>(8 - 17)           | 4<br>(2 - 5)             | 4<br>(2 - 6)            |
| Unintentional injuries                          | 2,800<br>(2,397 - 3,192)    | 439<br>(307 - 605)    | 208<br>(168 - 256)     | 1,151<br>(980 - 1,470)   | 418<br>(322 - 482)       | 584<br>(401 - 705)      |
| Falls                                           | 434<br>(276 - 530)          | 10<br>(5 - 16)        | 11<br>(7 - 17)         | 86<br>(70 - 122)         | 101<br>(57 - 127)        | 225<br>(113 - 308)      |
| Drowning                                        | 535<br>(420 - 843)          | 54<br>(21 - 98)       | 74<br>(47 - 115)       | 320<br>(233 - 532)       | 53<br>(41 - 74)          | 34<br>(25 - 44)         |
| Fire, heat, and hot substances                  | 188<br>(125 - 241)          | 40<br>(22 - 63)       | 12<br>(8 - 18)         | 61<br>(41 - 78)          | 29<br>(19 - 37)          | 47<br>(26 - 69)         |
| Poisonings                                      | 130<br>(60 - 162)           | 6<br>(2 - 9)          | 5<br>(2 - 7)           | 78<br>(33 - 100)         | 22<br>(10 - 29)          | 20<br>(10 - 27)         |
| Exposure to mechanical forces                   | 413<br>(348 - 581)          | 20<br>(14 - 29)       | 29<br>(22 - 42)        | 269<br>(217 - 385)       | 62<br>(50 - 88)          | 33<br>(26 - 48)         |
| Unintentional firearm injuries                  | 171<br>(64 - 215)           | 3<br>(2 - 4)          | 6<br>(2 - 8)           | 123<br>(42 - 163)        | 25<br>(9 - 35)           | 14<br>(7 - 20)          |
| Unintentional suffocation                       | 113<br>(83 - 216)           | 6<br>(3 - 12)         | 9<br>(5 - 18)          | 67<br>(47 - 132)         | 19<br>(12 - 35)          | 12<br>(7 - 27)          |
| Other exposure to mechanical forces             | 129<br>(103 - 236)          | 11<br>(6 - 17)        | 15<br>(10 - 22)        | 78<br>(57 - 167)         | 18<br>(14 - 30)          | 7<br>(5 - 10)           |
| Adverse effects of medical treatment            | 310<br>(212 - 381)          | 48<br>(25 - 75)       | 11<br>(7 - 15)         | 73<br>(50 - 89)          | 59<br>(36 - 77)          | 120<br>(72 - 160)       |
| Animal contact                                  | 32<br>(6 - 41)              | 6<br>(1 - 10)         | 5<br>(1 - 7)           | 9<br>(2 - 12)            | 6<br>(1 - 8)             | 6<br>(0 - 9)            |
| Venomous animal contact                         | 25<br>(4 - 33)              | 5<br>(1 - 8)          | 4<br>(1 - 6)           | 8<br>(2 - 11)            | 5<br>(1 - 7)             | 4<br>(0 - 6)            |
| Non-venomous animal contact                     | 7<br>(1 - 9)                | 1<br>(0 - 3)          | 1<br>(0 - 2)           | 1<br>(0 - 2)             | 1<br>(0 - 2)             | 2<br>(0 - 3)            |
| Foreign body                                    | 639<br>(451 - 960)          | 248<br>(163 - 404)    | 54<br>(37 - 83)        | 190<br>(134 - 297)       | 71<br>(48 - 108)         | 78<br>(50 - 113)        |
| Pulmonary aspiration and foreign body in airway | 635<br>(445 - 956)          | 247<br>(162 - 403)    | 53<br>(37 - 83)        | 188<br>(132 - 295)       | 69<br>(47 - 106)         | 78<br>(50 - 113)        |
| Foreign body in other body part                 | 5<br>(3 - 7)                | 1<br>(0 - 1)          | 1<br>(0 - 1)           | 1<br>(1 - 2)             | 2<br>(1 - 3)             | 0<br>(0 - 1)            |
| Other unintentional injuries                    | 118<br>(77 - 150)           | 7<br>(3 - 13)         | 7<br>(3 - 12)          | 67<br>(48 - 91)          | 16<br>(9 - 23)           | 21<br>(6 - 33)          |
| Self-harm and interpersonal violence            | 7,751<br>(6,282 - 8,977)    | 204<br>(95 - 338)     | 225<br>(138 - 306)     | 6,397<br>(5,174 - 7,364) | 674<br>(525 - 944)       | 250<br>(189 - 427)      |
| Self-harm                                       | 1,608<br>(1,324 - 2,553)    | --                    | 34<br>(23 - 56)        | 1,169<br>(953 - 1,841)   | 255<br>(198 - 423)       | 150<br>(110 - 323)      |
| Interpersonal violence                          | 6,143<br>(4,432 - 7,266)    | 204<br>(95 - 338)     | 191<br>(97 - 276)      | 5,229<br>(3,822 - 6,213) | 419<br>(289 - 619)       | 100<br>(62 - 158)       |
| Assault by firearm                              | 3,379<br>(1,328 - 4,939)    | 52<br>(14 - 111)      | 76<br>(22 - 138)       | 3,040<br>(1,205 - 4,462) | 187<br>(67 - 311)        | 24<br>(7 - 47)          |
| Assault by sharp object                         | 1,215<br>(743 - 2,274)      | 49<br>(24 - 93)       | 34<br>(18 - 67)        | 985<br>(571 - 1,896)     | 112<br>(62 - 213)        | 35<br>(19 - 65)         |
| Assault by other means                          | 1,549<br>(863 - 2,933)      | 104<br>(51 - 178)     | 81<br>(46 - 139)       | 1,204<br>(598 - 2,411)   | 119<br>(59 - 243)        | 41<br>(25 - 70)         |

Web Table 31- Guatemala deaths with 95% UI by age, sex, and cause in 2013

| Cause                                                             | Males, All Ages             | Males, 0-4 Years         | Males, 5-14 Years        | Males, 15-49 Years          | Males, 50-69 Years       | Males, 70-80 Years          |
|-------------------------------------------------------------------|-----------------------------|--------------------------|--------------------------|-----------------------------|--------------------------|-----------------------------|
| All causes                                                        | 44,560<br>(41,816 - 47,477) | 7,385<br>(6,590 - 8,305) | 1,104<br>(1,024 - 1,202) | 14,109<br>(12,876 - 15,566) | 7,958<br>(7,288 - 8,736) | 14,004<br>(13,377 - 14,704) |
| Communicable, maternal, neonatal, and nutritional diseases        | 12,846<br>(11,768 - 14,707) | 5,727<br>(5,084 - 6,471) | 421<br>(355 - 501)       | 1,785<br>(1,504 - 2,269)    | 1,350<br>(1,132 - 1,767) | 3,563<br>(2,993 - 4,410)    |
| HIV/AIDS and tuberculosis                                         | 746<br>(537 - 1,061)        | 13<br>(5 - 31)           | 7<br>(4 - 15)            | 487<br>(347 - 669)          | 154<br>(101 - 237)       | 86<br>(65 - 133)            |
| Tuberculosis                                                      | 281<br>(231 - 447)          | 5<br>(3 - 7)             | 4<br>(3 - 6)             | 125<br>(99 - 199)           | 76<br>(58 - 133)         | 71<br>(54 - 112)            |
| HIV/AIDS                                                          | 465<br>(271 - 733)          | 8<br>(1 - 26)            | 2<br>(0 - 11)            | 361<br>(229 - 540)          | 78<br>(32 - 146)         | 15<br>(5 - 30)              |
| HIV/AIDS resulting in mycobacterial infection                     | 30<br>(17 - 49)             | 0<br>(0 - 2)             | 0<br>(0 - 1)             | 23<br>(14 - 35)             | 5<br>(2 - 10)            | 1<br>(0 - 2)                |
| HIV/AIDS resulting in other diseases                              | 435<br>(255 - 685)          | 8<br>(1 - 25)            | 2<br>(0 - 10)            | 339<br>(214 - 506)          | 73<br>(30 - 137)         | 14<br>(4 - 28)              |
| Diarrhea, lower respiratory, and other common infectious diseases | 7,540<br>(6,666 - 8,463)    | 3,013<br>(2,486 - 3,655) | 335<br>(273 - 404)       | 1,004<br>(824 - 1,278)      | 861<br>(708 - 1,061)     | 2,328<br>(1,888 - 2,827)    |
| Diarrheal diseases                                                | 1,843<br>(1,454 - 2,315)    | 910<br>(600 - 1,313)     | 97<br>(65 - 140)         | 257<br>(197 - 333)          | 200<br>(148 - 269)       | 378<br>(243 - 574)          |
| Intestinal infectious diseases                                    | 151<br>(77 - 268)           | 62<br>(30 - 109)         | 53<br>(24 - 99)          | 33<br>(13 - 66)             | 3<br>(1 - 6)             | 2<br>(1 - 3)                |
| Typhoid fever                                                     | 115<br>(56 - 210)           | 46<br>(21 - 83)          | 41<br>(19 - 78)          | 25<br>(9 - 53)              | 2<br>(1 - 4)             | 1<br>(0 - 2)                |
| Paratyphoid fever                                                 | 31<br>(15 - 58)             | 13<br>(5 - 26)           | 11<br>(4 - 22)           | 7<br>(2 - 14)               | 1<br>(0 - 1)             | 0<br>(0 - 1)                |
| Other intestinal infectious diseases                              | 5<br>(1 - 13)               | 3<br>(0 - 9)             | 1<br>(0 - 3)             | 1<br>(0 - 4)                | 0<br>(0 - 2)             | 0<br>(0 - 2)                |
| Lower respiratory infections                                      | 5,242<br>(4,539 - 6,065)    | 1,900<br>(1,442 - 2,442) | 154<br>(110 - 212)       | 637<br>(499 - 884)          | 629<br>(491 - 825)       | 1,922<br>(1,515 - 2,408)    |
| Upper respiratory infections                                      | 3<br>(1 - 6)                | 1<br>(0 - 3)             | 0<br>(0 - 0)             | 1<br>(0 - 2)                | 0<br>(0 - 1)             | 1<br>(0 - 2)                |
| Otitis media                                                      | 2<br>(2 - 2)                | 0<br>(0 - 1)             | 0<br>(0 - 0)             | 1<br>(0 - 1)                | 0<br>(0 - 0)             | 0<br>(0 - 1)                |
| Meningitis                                                        | 195<br>(138 - 250)          | 82<br>(37 - 131)         | 19<br>(12 - 26)          | 54<br>(38 - 67)             | 21<br>(13 - 26)          | 19<br>(12 - 24)             |
| Pneumococcal meningitis                                           | 65<br>(44 - 84)             | 23<br>(11 - 39)          | 7<br>(4 - 10)            | 19<br>(13 - 27)             | 8<br>(4 - 11)            | 7<br>(4 - 10)               |
| H influenzae type B meningitis                                    | 43<br>(25 - 64)             | 30<br>(14 - 50)          | 4<br>(2 - 7)             | 6<br>(4 - 8)                | 2<br>(1 - 3)             | 2<br>(1 - 2)                |
| Meningococcal meningitis                                          | 21<br>(13 - 29)             | 8<br>(3 - 14)            | 2<br>(1 - 4)             | 7<br>(4 - 11)               | 2<br>(1 - 4)             | 2<br>(1 - 4)                |
| Other meningitis                                                  | 66<br>(44 - 85)             | 21<br>(9 - 38)           | 5<br>(2 - 9)             | 23<br>(14 - 30)             | 9<br>(5 - 13)            | 8<br>(4 - 11)               |
| Encephalitis                                                      | 51<br>(37 - 77)             | 18<br>(9 - 35)           | 8<br>(4 - 14)            | 16<br>(11 - 24)             | 5<br>(3 - 8)             | 4<br>(2 - 7)                |
| Diphtheria                                                        | 2<br>(0 - 11)               | 1<br>(0 - 10)            | 0<br>(0 - 3)             | 0<br>(0 - 1)                | 0<br>(0 - 0)             | --                          |
| Whooping cough                                                    | 39<br>(9 - 132)             | 34<br>(6 - 125)          | 2<br>(1 - 5)             | 2<br>(1 - 4)                | 0<br>(0 - 1)             | --                          |
| Tetanus                                                           | 5<br>(3 - 8)                | 1<br>(0 - 2)             | 0<br>(0 - 1)             | 2<br>(1 - 3)                | 1<br>(0 - 2)             | 1<br>(0 - 2)                |
| Measles                                                           | 0<br>(0 - 0)                | 0<br>(0 - 0)             | 0<br>(0 - 0)             | 0<br>(0 - 0)                | 0<br>(0 - 0)             | --                          |
| Varicella and herpes zoster                                       | 7<br>(2 - 18)               | 3<br>(0 - 11)            | 1<br>(0 - 3)             | 1<br>(0 - 3)                | 0<br>(0 - 2)             | 2<br>(0 - 10)               |
| Neglected tropical diseases and malaria                           | 74<br>(55 - 125)            | 24<br>(14 - 41)          | 7<br>(5 - 12)            | 18<br>(14 - 24)             | 12<br>(7 - 31)           | 12<br>(7 - 29)              |
| Malaria                                                           | 14<br>(10 - 21)             | 3<br>(1 - 6)             | 1<br>(0 - 1)             | 5<br>(3 - 8)                | 3<br>(1 - 5)             | 3<br>(1 - 7)                |
| Chagas disease                                                    | 13<br>(3 - 52)              | 0<br>(0 - 0)             | 0<br>(0 - 1)             | 1<br>(0 - 5)                | 6<br>(1 - 24)            | 5<br>(1 - 21)               |
| Leishmaniasis                                                     | 1<br>(1 - 1)                | 0<br>(0 - 1)             | 0<br>(0 - 0)             | 0<br>(0 - 0)                | 0<br>(0 - 0)             | 0<br>(0 - 0)                |
| Visceral leishmaniasis                                            | 1<br>(1 - 1)                | 0<br>(0 - 1)             | 0<br>(0 - 0)             | 0<br>(0 - 0)                | 0<br>(0 - 0)             | 0<br>(0 - 0)                |
| Cysticercosis                                                     | 6<br>(6 - 7)                | 0<br>(0 - 0)             | 0<br>(0 - 0)             | 5<br>(4 - 5)                | 1<br>(1 - 1)             | 0<br>(0 - 0)                |
| Cystic echinococcosis                                             | 1<br>(1 - 1)                | 0<br>(0 - 0)             | 0<br>(0 - 0)             | 1<br>(0 - 1)                | 0<br>(0 - 0)             | 0<br>(0 - 0)                |
| Dengue                                                            | 13<br>(7 - 17)              | 5<br>(2 - 8)             | 2<br>(1 - 3)             | 3<br>(1 - 3)                | 1<br>(0 - 1)             | 2<br>(1 - 3)                |
| Rabies                                                            | 1<br>(1 - 3)                | 0<br>(0 - 0)             | 0<br>(0 - 1)             | 1<br>(0 - 1)                | 0<br>(0 - 0)             | 0<br>(0 - 0)                |
| Intestinal nematode infections                                    | 6<br>(1 - 17)               | 4<br>(0 - 13)            | 1<br>(0 - 5)             | 1<br>(0 - 4)                | 0<br>(0 - 2)             | 0<br>(0 - 2)                |
| Ascariasis                                                        | 6<br>(1 - 17)               | 4<br>(0 - 13)            | 1<br>(0 - 5)             | 1<br>(0 - 4)                | 0<br>(0 - 2)             | 0<br>(0 - 2)                |
| Other neglected tropical diseases                                 | 18<br>(12 - 35)             | 11<br>(6 - 23)           | 2<br>(1 - 4)             | 2<br>(2 - 3)                | 1<br>(1 - 2)             | 1<br>(1 - 2)                |
| Maternal disorders                                                | --                          | --                       | --                       | --                          | --                       | --                          |

Web Table 31- Guatemala deaths with 95% UI by age, sex, and cause in 2013

| Cause                                                            | Males, All Ages             | Males, 0-4 Years         | Males, 5-14 Years  | Males, 15-49 Years       | Males, 50-69 Years       | Males, 70-80 Years        |
|------------------------------------------------------------------|-----------------------------|--------------------------|--------------------|--------------------------|--------------------------|---------------------------|
| Maternal hemorrhage                                              | --                          | --                       | --                 | --                       | --                       | --                        |
| Maternal sepsis and other maternal infections                    | --                          | --                       | --                 | --                       | --                       | --                        |
| Maternal hypertensive disorders                                  | --                          | --                       | --                 | --                       | --                       | --                        |
| Maternal obstructed labor                                        | --                          | --                       | --                 | --                       | --                       | --                        |
| Maternal abortive outcome                                        | --                          | --                       | --                 | --                       | --                       | --                        |
| Indirect maternal deaths                                         | --                          | --                       | --                 | --                       | --                       | --                        |
| Late maternal deaths                                             | --                          | --                       | --                 | --                       | --                       | --                        |
| Maternal deaths aggravated by HIV/AIDS                           | --                          | --                       | --                 | --                       | --                       | --                        |
| Other maternal disorders                                         | --                          | --                       | --                 | --                       | --                       | --                        |
| Neonatal disorders                                               | 2,166<br>(1,980 - 2,376)    | 2,166<br>(1,980 - 2,376) | --                 | --                       | --                       | --                        |
| Neonatal preterm birth complications                             | 1,097<br>(806 - 1,466)      | 1,097<br>(806 - 1,466)   | --                 | --                       | --                       | --                        |
| Neonatal encephalopathy due to birth asphyxia and trauma         | 403<br>(244 - 568)          | 403<br>(244 - 568)       | --                 | --                       | --                       | --                        |
| Neonatal sepsis and other neonatal infections                    | 407<br>(183 - 707)          | 407<br>(183 - 707)       | --                 | --                       | --                       | --                        |
| Hemolytic disease and other neonatal jaundice                    | 9<br>(3 - 18)               | 9<br>(3 - 18)            | --                 | --                       | --                       | --                        |
| Other neonatal disorders                                         | 250<br>(158 - 357)          | 250<br>(158 - 357)       | --                 | --                       | --                       | --                        |
| Nutritional deficiencies                                         | 2,187<br>(1,693 - 3,690)    | 442<br>(254 - 643)       | 64<br>(44 - 105)   | 251<br>(181 - 497)       | 309<br>(217 - 610)       | 1,121<br>(795 - 1,959)    |
| Protein-energy malnutrition                                      | 1,940<br>(1,487 - 3,381)    | 401<br>(228 - 594)       | 52<br>(36 - 87)    | 205<br>(141 - 424)       | 268<br>(182 - 546)       | 1,014<br>(722 - 1,820)    |
| Iodine deficiency                                                | 1<br>(0 - 3)                | 0<br>(0 - 3)             | 0<br>(0 - 1)       | 0<br>(0 - 1)             | 0<br>(0 - 1)             | 0<br>(0 - 1)              |
| Iron-deficiency anemia                                           | 170<br>(65 - 342)           | 28<br>(6 - 80)           | 9<br>(3 - 20)      | 33<br>(13 - 74)          | 30<br>(10 - 72)          | 71<br>(24 - 148)          |
| Other nutritional deficiencies                                   | 75<br>(30 - 147)            | 12<br>(3 - 30)           | 3<br>(1 - 5)       | 14<br>(5 - 31)           | 11<br>(4 - 24)           | 36<br>(10 - 78)           |
| Other communicable, maternal, neonatal, and nutritional diseases | 133<br>(93 - 194)           | 70<br>(36 - 116)         | 9<br>(6 - 13)      | 24<br>(19 - 35)          | 14<br>(10 - 20)          | 16<br>(11 - 29)           |
| Sexually transmitted diseases excluding HIV                      | 49<br>(19 - 89)             | 43<br>(15 - 79)          | 3<br>(1 - 6)       | 1<br>(1 - 2)             | 1<br>(0 - 1)             | 1<br>(0 - 2)              |
| Syphilis                                                         | 48<br>(18 - 88)             | 43<br>(15 - 79)          | 3<br>(1 - 6)       | 1<br>(0 - 1)             | 0<br>(0 - 1)             | 1<br>(0 - 1)              |
| Chlamydial infection                                             | --                          | --                       | --                 | --                       | --                       | --                        |
| Gonococcal infection                                             | 1<br>(0 - 1)                | --                       | 0<br>(0 - 0)       | 0<br>(0 - 0)             | 0<br>(0 - 0)             | 0<br>(0 - 0)              |
| Other sexually transmitted diseases                              | 0<br>(0 - 1)                | --                       | 0<br>(0 - 0)       | 0<br>(0 - 0)             | 0<br>(0 - 0)             | 0<br>(0 - 0)              |
| Hepatitis                                                        | 14<br>(11 - 18)             | 2<br>(1 - 4)             | 1<br>(0 - 1)       | 6<br>(5 - 8)             | 3<br>(2 - 5)             | 2<br>(1 - 2)              |
| Acute hepatitis A                                                | 5<br>(2 - 9)                | 2<br>(1 - 3)             | 1<br>(0 - 1)       | 3<br>(1 - 4)             | 0<br>(0 - 1)             | 0<br>(0 - 0)              |
| Acute hepatitis B                                                | 7<br>(4 - 11)               | 1<br>(0 - 2)             | 0<br>(0 - 0)       | 2<br>(1 - 4)             | 3<br>(1 - 4)             | 1<br>(1 - 2)              |
| Acute hepatitis C                                                | 2<br>(0 - 4)                | --                       | 0<br>(0 - 0)       | 1<br>(0 - 2)             | 0<br>(0 - 1)             | 0<br>(0 - 1)              |
| Other infectious diseases                                        | 70<br>(52 - 121)            | 24<br>(13 - 52)          | 4<br>(3 - 8)       | 17<br>(12 - 27)          | 10<br>(7 - 17)           | 14<br>(9 - 26)            |
| Non-communicable diseases                                        | 22,007<br>(20,217 - 23,804) | 1,239<br>(970 - 1,560)   | 326<br>(282 - 379) | 5,015<br>(4,348 - 5,724) | 5,613<br>(5,035 - 6,253) | 9,815<br>(8,976 - 10,559) |
| Neoplasms                                                        | 3,780<br>(3,265 - 4,201)    | 81<br>(53 - 110)         | 99<br>(76 - 121)   | 653<br>(553 - 754)       | 1,078<br>(922 - 1,224)   | 1,870<br>(1,553 - 2,112)  |
| Esophageal cancer                                                | 86<br>(50 - 114)            | --                       | --                 | 11<br>(7 - 14)           | 29<br>(17 - 40)          | 45<br>(25 - 65)           |
| Stomach cancer                                                   | 949<br>(837 - 1,067)        | --                       | --                 | 141<br>(119 - 166)       | 310<br>(261 - 366)       | 498<br>(414 - 581)        |
| Liver cancer                                                     | 337<br>(286 - 391)          | --                       | 4<br>(3 - 5)       | 57<br>(48 - 69)          | 126<br>(103 - 153)       | 149<br>(120 - 184)        |
| Liver cancer due to hepatitis B                                  | 97<br>(41 - 171)            | --                       | 2<br>(1 - 3)       | 25<br>(13 - 40)          | 39<br>(12 - 74)          | 32<br>(11 - 61)           |
| Liver cancer due to hepatitis C                                  | 172<br>(82 - 246)           | --                       | 1<br>(0 - 1)       | 22<br>(9 - 35)           | 66<br>(27 - 100)         | 84<br>(43 - 121)          |
| Liver cancer due to alcohol use                                  | 47<br>(25 - 76)             | --                       | --                 | 4<br>(2 - 7)             | 16<br>(8 - 26)           | 27<br>(13 - 47)           |
| Liver cancer due to other causes                                 | 21<br>(14 - 30)             | --                       | 2<br>(1 - 3)       | 7<br>(4 - 11)            | 6<br>(3 - 11)            | 6<br>(3 - 11)             |

Web Table 31- Guatemala deaths with 95% UI by age, sex, and cause in 2013

| Cause                                         | Males, All Ages          | Males, 0-4 Years  | Males, 5-14 Years | Males, 15-49 Years | Males, 50-69 Years       | Males, 70-80 Years       |
|-----------------------------------------------|--------------------------|-------------------|-------------------|--------------------|--------------------------|--------------------------|
| Larynx cancer                                 | 45<br>(30 - 56)          | --                | --                | 6<br>(5 - 9)       | 16<br>(10 - 20)          | 23<br>(15 - 30)          |
| Tracheal, bronchus and lung cancer            | 343<br>(297 - 396)       | --                | --                | 49<br>(41 - 60)    | 118<br>(98 - 145)        | 175<br>(144 - 210)       |
| Breast cancer                                 | 5<br>(3 - 13)            | --                | --                | 1<br>(1 - 3)       | 2<br>(1 - 5)             | 2<br>(1 - 5)             |
| Cervical cancer                               | --                       | --                | --                | --                 | --                       | --                       |
| Uterine cancer                                | --                       | --                | --                | --                 | --                       | --                       |
| Prostate cancer                               | 594<br>(312 - 789)       | --                | --                | 9<br>(5 - 12)      | 95<br>(44 - 135)         | 490<br>(257 - 662)       |
| Colon and rectum cancer                       | 224<br>(195 - 253)       | --                | --                | 47<br>(39 - 55)    | 74<br>(63 - 87)          | 103<br>(85 - 122)        |
| Lip and oral cavity cancer                    | 55<br>(34 - 70)          | --                | --                | 9<br>(6 - 12)      | 17<br>(10 - 23)          | 29<br>(18 - 37)          |
| Nasopharynx cancer                            | 16<br>(14 - 18)          | --                | 0<br>(0 - 0)      | 7<br>(6 - 8)       | 5<br>(4 - 6)             | 4<br>(3 - 4)             |
| Other pharynx cancer                          | 36<br>(26 - 43)          | --                | --                | 7<br>(5 - 9)       | 14<br>(10 - 18)          | 15<br>(10 - 18)          |
| Gallbladder and biliary tract cancer          | 68<br>(52 - 140)         | --                | --                | 7<br>(5 - 13)      | 24<br>(17 - 46)          | 37<br>(26 - 81)          |
| Pancreatic cancer                             | 117<br>(101 - 135)       | --                | --                | 18<br>(15 - 21)    | 45<br>(37 - 55)          | 54<br>(44 - 67)          |
| Malignant skin melanoma                       | 16<br>(8 - 23)           | --                | --                | 5<br>(3 - 8)       | 4<br>(2 - 5)             | 8<br>(3 - 11)            |
| Non-melanoma skin cancer                      | 29<br>(20 - 42)          | --                | --                | 5<br>(3 - 7)       | 8<br>(5 - 12)            | 16<br>(11 - 24)          |
| Ovarian cancer                                | --                       | --                | --                | --                 | --                       | --                       |
| Testicular cancer                             | 12<br>(4 - 21)           | --                | --                | 9<br>(2 - 16)      | 1<br>(0 - 2)             | 2<br>(1 - 4)             |
| Kidney cancer                                 | 58<br>(51 - 67)          | 1<br>(1 - 2)      | 0<br>(0 - 1)      | 11<br>(9 - 13)     | 23<br>(18 - 28)          | 23<br>(19 - 28)          |
| Bladder cancer                                | 30<br>(25 - 43)          | --                | --                | 2<br>(1 - 3)       | 7<br>(6 - 9)             | 21<br>(17 - 32)          |
| Brain and nervous system cancer               | 112<br>(35 - 152)        | 6<br>(1 - 11)     | 12<br>(3 - 18)    | 44<br>(13 - 61)    | 30<br>(7 - 43)           | 21<br>(5 - 30)           |
| Thyroid cancer                                | 13<br>(11 - 17)          | --                | 0<br>(0 - 0)      | 3<br>(2 - 4)       | 5<br>(3 - 6)             | 5<br>(4 - 8)             |
| Mesothelioma                                  | 4<br>(3 - 5)             | --                | --                | 1<br>(1 - 1)       | 2<br>(1 - 2)             | 1<br>(1 - 2)             |
| Hodgkin lymphoma                              | 14<br>(3 - 22)           | 2<br>(0 - 3)      | 2<br>(0 - 3)      | 5<br>(1 - 8)       | 3<br>(0 - 4)             | 3<br>(0 - 5)             |
| Non-Hodgkin lymphoma                          | 96<br>(50 - 125)         | 10<br>(4 - 17)    | 6<br>(3 - 8)      | 27<br>(14 - 36)    | 24<br>(11 - 34)          | 29<br>(12 - 41)          |
| Multiple myeloma                              | 13<br>(9 - 16)           | --                | --                | 3<br>(2 - 3)       | 5<br>(3 - 6)             | 5<br>(4 - 7)             |
| Leukemia                                      | 287<br>(250 - 326)       | 33<br>(20 - 50)   | 54<br>(40 - 71)   | 114<br>(93 - 139)  | 40<br>(33 - 48)          | 45<br>(37 - 55)          |
| Other neoplasms                               | 220<br>(162 - 261)       | 28<br>(12 - 43)   | 20<br>(11 - 26)   | 56<br>(44 - 70)    | 52<br>(39 - 65)          | 65<br>(46 - 82)          |
| Cardiovascular diseases                       | 5,480<br>(4,972 - 6,011) | 101<br>(77 - 130) | 43<br>(35 - 53)   | 780<br>(669 - 909) | 1,323<br>(1,162 - 1,499) | 3,234<br>(2,904 - 3,586) |
| Rheumatic heart disease                       | 33<br>(16 - 43)          | 1<br>(0 - 3)      | 1<br>(1 - 3)      | 9<br>(5 - 13)      | 8<br>(3 - 11)            | 13<br>(5 - 20)           |
| Ischemic heart disease                        | 3,522<br>(3,053 - 3,982) | 20<br>(10 - 29)   | 15<br>(10 - 19)   | 478<br>(394 - 567) | 868<br>(723 - 1,001)     | 2,141<br>(1,827 - 2,461) |
| Cerebrovascular disease                       | 1,460<br>(1,184 - 1,822) | 15<br>(10 - 21)   | 14<br>(10 - 18)   | 181<br>(140 - 236) | 345<br>(273 - 434)       | 905<br>(710 - 1,162)     |
| Ischemic stroke                               | 625<br>(447 - 892)       | 3<br>(1 - 6)      | 3<br>(1 - 5)      | 49<br>(34 - 71)    | 136<br>(97 - 192)        | 433<br>(292 - 647)       |
| Hemorrhagic stroke                            | 835<br>(570 - 1,108)     | 12<br>(7 - 17)    | 11<br>(7 - 15)    | 132<br>(97 - 175)  | 208<br>(141 - 271)       | 472<br>(284 - 661)       |
| Hypertensive heart disease                    | 51<br>(12 - 112)         | 0<br>(0 - 1)      | 0<br>(0 - 1)      | 4<br>(1 - 7)       | 14<br>(3 - 31)           | 33<br>(6 - 77)           |
| Cardiomyopathy and myocarditis                | 111<br>(89 - 155)        | 28<br>(19 - 42)   | 6<br>(4 - 8)      | 35<br>(26 - 52)    | 25<br>(19 - 38)          | 17<br>(12 - 26)          |
| Atrial fibrillation and flutter               | 4<br>(2 - 5)             | --                | --                | 0<br>(0 - 1)       | 1<br>(1 - 1)             | 2<br>(1 - 4)             |
| Aortic aneurysm                               | 35<br>(29 - 43)          | --                | --                | 5<br>(4 - 6)       | 8<br>(6 - 10)            | 23<br>(18 - 29)          |
| Peripheral vascular disease                   | 1<br>(1 - 1)             | --                | --                | 0<br>(0 - 0)       | 0<br>(0 - 0)             | 1<br>(0 - 1)             |
| Endocarditis                                  | 66<br>(44 - 97)          | 24<br>(14 - 37)   | 4<br>(2 - 6)      | 14<br>(9 - 22)     | 10<br>(6 - 15)           | 15<br>(9 - 25)           |
| Other cardiovascular and circulatory diseases | 199<br>(160 - 311)       | 13<br>(9 - 19)    | 4<br>(3 - 6)      | 52<br>(41 - 81)    | 45<br>(34 - 68)          | 85<br>(61 - 153)         |
| Chronic respiratory diseases                  | 1,522<br>(1,293 - 1,768) | 95<br>(61 - 167)  | 15<br>(11 - 19)   | 127<br>(105 - 166) | 268<br>(218 - 319)       | 1,017<br>(805 - 1,176)   |

Web Table 31- Guatemala deaths with 95% UI by age, sex, and cause in 2013

| Cause                                               | Males, All Ages          | Males, 0-4 Years | Males, 5-14 Years | Males, 15-49 Years     | Males, 50-69 Years | Males, 70-80 Years     |
|-----------------------------------------------------|--------------------------|------------------|-------------------|------------------------|--------------------|------------------------|
| Chronic obstructive pulmonary disease               | 1,175<br>(993 - 1,378)   | 65<br>(38 - 131) | 7<br>(6 - 10)     | 86<br>(70 - 115)       | 187<br>(150 - 226) | 831<br>(667 - 971)     |
| Pneumoconiosis                                      | 39<br>(27 - 57)          | 0<br>(0 - 1)     | 0<br>(0 - 1)      | 6<br>(4 - 10)          | 12<br>(8 - 18)     | 20<br>(12 - 31)        |
| Silicosis                                           | 1<br>(1 - 1)             | 0<br>(0 - 0)     | 0<br>(0 - 0)      | 0<br>(0 - 1)           | 0<br>(0 - 0)       | 0<br>(0 - 0)           |
| Asbestosis                                          | 7<br>(4 - 10)            | 0<br>(0 - 0)     | 0<br>(0 - 0)      | 1<br>(1 - 1)           | 3<br>(2 - 4)       | 3<br>(2 - 5)           |
| Coal workers pneumoconiosis                         | 5<br>(3 - 8)             | 0<br>(0 - 0)     | 0<br>(0 - 0)      | 1<br>(0 - 1)           | 1<br>(1 - 2)       | 3<br>(2 - 5)           |
| Other pneumoconiosis                                | 26<br>(18 - 39)          | 0<br>(0 - 0)     | 0<br>(0 - 0)      | 5<br>(3 - 7)           | 7<br>(5 - 11)      | 14<br>(9 - 22)         |
| Asthma                                              | 167<br>(126 - 206)       | 18<br>(10 - 31)  | 4<br>(3 - 6)      | 21<br>(16 - 28)        | 35<br>(25 - 46)    | 88<br>(61 - 118)       |
| Interstitial lung disease and pulmonary sarcoidosis | 95<br>(66 - 143)         | 2<br>(1 - 3)     | 1<br>(1 - 2)      | 8<br>(5 - 12)          | 28<br>(19 - 43)    | 56<br>(36 - 89)        |
| Other chronic respiratory diseases                  | 46<br>(35 - 64)          | 10<br>(6 - 18)   | 1<br>(1 - 1)      | 6<br>(5 - 9)           | 7<br>(4 - 10)      | 22<br>(14 - 34)        |
| Cirrhosis                                           | 2,284<br>(2,019 - 2,565) | 14<br>(9 - 20)   | 12<br>(9 - 14)    | 1,011<br>(847 - 1,198) | 795<br>(680 - 917) | 453<br>(388 - 530)     |
| Cirrhosis due to hepatitis B                        | 83<br>(46 - 122)         | 0<br>(0 - 0)     | 0<br>(0 - 1)      | 39<br>(21 - 59)        | 29<br>(16 - 43)    | 15<br>(7 - 25)         |
| Cirrhosis due to hepatitis C                        | 666<br>(371 - 919)       | 1<br>(0 - 2)     | 2<br>(1 - 3)      | 246<br>(74 - 374)      | 248<br>(131 - 354) | 170<br>(102 - 233)     |
| Cirrhosis due to alcohol use                        | 1,139<br>(879 - 1,439)   | --               | --                | 478<br>(344 - 648)     | 423<br>(315 - 549) | 238<br>(181 - 311)     |
| Cirrhosis due to other causes                       | 395<br>(252 - 551)       | 13<br>(8 - 19)   | 10<br>(7 - 12)    | 248<br>(155 - 359)     | 95<br>(45 - 149)   | 30<br>(15 - 47)        |
| Digestive diseases                                  | 1,219<br>(1,025 - 1,378) | 45<br>(25 - 67)  | 33<br>(22 - 41)   | 356<br>(289 - 426)     | 304<br>(252 - 360) | 480<br>(396 - 564)     |
| Peptic ulcer disease                                | 503<br>(409 - 598)       | 2<br>(1 - 4)     | 3<br>(2 - 5)      | 113<br>(83 - 144)      | 138<br>(109 - 175) | 246<br>(192 - 307)     |
| Gastritis and duodenitis                            | 61<br>(37 - 99)          | 1<br>(0 - 1)     | 0<br>(0 - 1)      | 14<br>(8 - 24)         | 17<br>(10 - 28)    | 29<br>(16 - 48)        |
| Appendicitis                                        | 89<br>(60 - 119)         | 5<br>(2 - 9)     | 8<br>(5 - 11)     | 41<br>(25 - 55)        | 19<br>(12 - 27)    | 17<br>(11 - 27)        |
| Paralytic ileus and intestinal obstruction          | 95<br>(18 - 150)         | 18<br>(5 - 34)   | 9<br>(2 - 16)     | 19<br>(3 - 34)         | 16<br>(2 - 28)     | 32<br>(5 - 59)         |
| Inguinal, femoral, and abdominal hernia             | 80<br>(53 - 133)         | 5<br>(2 - 10)    | 3<br>(2 - 6)      | 14<br>(9 - 24)         | 18<br>(11 - 31)    | 40<br>(25 - 71)        |
| Inflammatory bowel disease                          | 10<br>(7 - 15)           | 2<br>(1 - 5)     | 0<br>(0 - 1)      | 2<br>(2 - 3)           | 2<br>(1 - 2)       | 3<br>(2 - 5)           |
| Vascular intestinal disorders                       | 27<br>(10 - 57)          | 0<br>(0 - 1)     | 1<br>(0 - 3)      | 4<br>(2 - 9)           | 5<br>(2 - 11)      | 16<br>(6 - 35)         |
| Gallbladder and biliary diseases                    | 66<br>(48 - 85)          | 1<br>(1 - 3)     | 1<br>(0 - 1)      | 13<br>(9 - 18)         | 17<br>(12 - 23)    | 34<br>(22 - 47)        |
| Pancreatitis                                        | 223<br>(167 - 319)       | 4<br>(2 - 8)     | 4<br>(2 - 8)      | 118<br>(86 - 168)      | 56<br>(39 - 80)    | 41<br>(28 - 66)        |
| Other digestive diseases                            | 65<br>(32 - 88)          | 7<br>(2 - 15)    | 2<br>(1 - 4)      | 17<br>(8 - 24)         | 16<br>(8 - 21)     | 22<br>(10 - 32)        |
| Neurological disorders                              | 1,417<br>(1,069 - 1,773) | 37<br>(24 - 60)  | 24<br>(18 - 36)   | 146<br>(116 - 209)     | 117<br>(87 - 152)  | 1,093<br>(756 - 1,443) |
| Alzheimer disease and other dementias               | 1,077<br>(729 - 1,436)   | --               | --                | 0<br>(0 - 1)           | 67<br>(41 - 101)   | 1,010<br>(664 - 1,363) |
| Parkinson disease                                   | 65<br>(49 - 87)          | --               | --                | 2<br>(1 - 2)           | 12<br>(9 - 16)     | 52<br>(37 - 71)        |
| Epilepsy                                            | 195<br>(156 - 267)       | 21<br>(11 - 36)  | 18<br>(12 - 28)   | 117<br>(90 - 169)      | 23<br>(17 - 31)    | 16<br>(11 - 23)        |
| Multiple sclerosis                                  | 7<br>(2 - 10)            | --               | --                | 4<br>(1 - 5)           | 2<br>(1 - 3)       | 1<br>(0 - 2)           |
| Other neurological disorders                        | 73<br>(57 - 118)         | 16<br>(10 - 31)  | 7<br>(4 - 11)     | 23<br>(18 - 37)        | 12<br>(10 - 19)    | 14<br>(11 - 24)        |
| Mental and substance use disorders                  | 1,925<br>(1,147 - 2,297) | 1<br>(0 - 2)     | 0<br>(0 - 0)      | 1,246<br>(724 - 1,546) | 539<br>(344 - 670) | 139<br>(73 - 179)      |
| Schizophrenia                                       | 2<br>(1 - 3)             | --               | --                | 1<br>(1 - 1)           | 1<br>(0 - 1)       | 0<br>(0 - 0)           |
| Alcohol use disorders                               | 1,592<br>(777 - 1,947)   | --               | --                | 1,086<br>(501 - 1,373) | 391<br>(200 - 508) | 115<br>(49 - 153)      |
| Drug use disorders                                  | 331<br>(254 - 502)       | 1<br>(0 - 2)     | --                | 159<br>(111 - 326)     | 148<br>(106 - 195) | 24<br>(16 - 35)        |
| Opioid use disorders                                | 70<br>(53 - 111)         | 0<br>(0 - 0)     | --                | 35<br>(24 - 71)        | 29<br>(21 - 39)    | 5<br>(3 - 8)           |
| Cocaine use disorders                               | 7<br>(5 - 12)            | 0<br>(0 - 0)     | --                | 4<br>(3 - 8)           | 3<br>(2 - 4)       | 0<br>(0 - 1)           |
| Amphetamine use disorders                           | 6<br>(4 - 9)             | 0<br>(0 - 0)     | --                | 3<br>(2 - 6)           | 3<br>(2 - 4)       | 0<br>(0 - 1)           |
| Other drug use disorders                            | 249<br>(190 - 375)       | 1<br>(0 - 1)     | --                | 117<br>(82 - 245)      | 113<br>(81 - 150)  | 18<br>(12 - 25)        |
| Eating disorders                                    | 0<br>(0 - 0)             | --               | 0<br>(0 - 0)      | 0<br>(0 - 0)           | --                 | --                     |

Web Table 31- Guatemala deaths with 95% UI by age, sex, and cause in 2013

| Cause                                               | Males, All Ages          | Males, 0-4 Years   | Males, 5-14 Years | Males, 15-49 Years | Males, 50-69 Years     | Males, 70-80 Years       |
|-----------------------------------------------------|--------------------------|--------------------|-------------------|--------------------|------------------------|--------------------------|
| Anorexia nervosa                                    | 0<br>(0 - 0)             | --                 | 0<br>(0 - 0)      | 0<br>(0 - 0)       | --                     | --                       |
| Diabetes, urogenital, blood, and endocrine diseases | 3,476<br>(3,111 - 3,967) | 163<br>(108 - 366) | 61<br>(46 - 98)   | 637<br>(540 - 770) | 1,153<br>(970 - 1,341) | 1,462<br>(1,261 - 1,663) |
| Diabetes mellitus                                   | 1,696<br>(1,498 - 1,918) | 8<br>(6 - 11)      | 4<br>(3 - 6)      | 273<br>(225 - 330) | 673<br>(568 - 794)     | 738<br>(621 - 867)       |
| Acute glomerulonephritis                            | 3<br>(2 - 4)             | 0<br>(0 - 0)       | 0<br>(0 - 0)      | 1<br>(1 - 1)       | 1<br>(0 - 1)           | 1<br>(1 - 2)             |
| Chronic kidney disease                              | 1,299<br>(864 - 1,538)   | 51<br>(36 - 77)    | 24<br>(17 - 32)   | 257<br>(191 - 318) | 392<br>(210 - 487)     | 577<br>(380 - 709)       |
| Chronic kidney disease due to diabetes mellitus     | 517<br>(265 - 692)       | 9<br>(4 - 21)      | 3<br>(2 - 8)      | 94<br>(60 - 148)   | 179<br>(79 - 249)      | 233<br>(115 - 326)       |
| Chronic kidney disease due to hypertension          | 224<br>(80 - 304)        | 10<br>(4 - 16)     | 4<br>(2 - 6)      | 51<br>(18 - 71)    | 60<br>(17 - 89)        | 99<br>(33 - 142)         |
| Chronic kidney disease due to glomerulonephritis    | 37<br>(19 - 51)          | 5<br>(2 - 8)       | 3<br>(2 - 4)      | 8<br>(4 - 12)      | 9<br>(4 - 13)          | 13<br>(6 - 21)           |
| Chronic kidney disease due to other causes          | 521<br>(305 - 727)       | 28<br>(16 - 49)    | 14<br>(8 - 21)    | 104<br>(64 - 148)  | 144<br>(63 - 225)      | 232<br>(119 - 345)       |
| Urinary diseases and male infertility               | 145<br>(93 - 176)        | 18<br>(12 - 27)    | 3<br>(2 - 4)      | 20<br>(12 - 25)    | 28<br>(16 - 36)        | 77<br>(45 - 102)         |
| Interstitial nephritis and urinary tract infections | 79<br>(48 - 103)         | 15<br>(11 - 24)    | 2<br>(1 - 2)      | 11<br>(6 - 14)     | 13<br>(7 - 19)         | 38<br>(19 - 55)          |
| Urolithiasis                                        | 7<br>(4 - 11)            | --                 | 0<br>(0 - 0)      | 2<br>(1 - 2)       | 2<br>(1 - 4)           | 3<br>(2 - 5)             |
| Other urinary diseases                              | 59<br>(35 - 82)          | 2<br>(1 - 4)       | 1<br>(0 - 1)      | 8<br>(5 - 10)      | 12<br>(6 - 17)         | 36<br>(20 - 54)          |
| Gynecological diseases                              | --                       | --                 | --                | --                 | --                     | --                       |
| Uterine fibroids                                    | --                       | --                 | --                | --                 | --                     | --                       |
| Polycystic ovarian syndrome                         | --                       | --                 | --                | --                 | --                     | --                       |
| Endometriosis                                       | --                       | --                 | --                | --                 | --                     | --                       |
| Genital prolapse                                    | --                       | --                 | --                | --                 | --                     | --                       |
| Other gynecological diseases                        | --                       | --                 | --                | --                 | --                     | --                       |
| Hemoglobinopathies and hemolytic anemias            | 127<br>(77 - 206)        | 26<br>(12 - 63)    | 18<br>(9 - 35)    | 43<br>(26 - 67)    | 24<br>(15 - 38)        | 17<br>(11 - 28)          |
| Thalassemias                                        | 2<br>(1 - 4)             | 1<br>(0 - 3)       | 1<br>(0 - 1)      | 1<br>(0 - 1)       | 0<br>(0 - 0)           | 0<br>(0 - 0)             |
| Sickle cell disorders                               | 54<br>(31 - 92)          | 15<br>(7 - 37)     | 11<br>(6 - 22)    | 23<br>(14 - 36)    | 5<br>(3 - 7)           | 0<br>(0 - 1)             |
| G6PD deficiency                                     | 9<br>(5 - 15)            | 3<br>(1 - 6)       | 2<br>(1 - 3)      | 3<br>(2 - 5)       | 2<br>(1 - 2)           | 0<br>(0 - 1)             |
| Other hemoglobinopathies and hemolytic anemias      | 61<br>(39 - 97)          | 7<br>(3 - 16)      | 4<br>(2 - 8)      | 16<br>(10 - 25)    | 17<br>(11 - 29)        | 17<br>(11 - 27)          |
| Endocrine, metabolic, blood, and immune disorders   | 205<br>(122 - 635)       | 60<br>(26 - 228)   | 44<br>(6 - 38)    | 44<br>(27 - 123)   | 36<br>(21 - 107)       | 52<br>(28 - 172)         |
| Musculoskeletal disorders                           | 45<br>(21 - 59)          | --                 | 3<br>(2 - 5)      | 12<br>(6 - 15)     | 9<br>(4 - 12)          | 21<br>(8 - 30)           |
| Rheumatoid arthritis                                | 14<br>(5 - 21)           | --                 | 1<br>(0 - 1)      | 1<br>(1 - 2)       | 4<br>(1 - 6)           | 8<br>(2 - 14)            |
| Other musculoskeletal disorders                     | 31<br>(16 - 44)          | --                 | 3<br>(1 - 4)      | 10<br>(5 - 14)     | 6<br>(3 - 8)           | 13<br>(5 - 21)           |
| Other non-communicable diseases                     | 860<br>(621 - 1,078)     | 703<br>(490 - 904) | 37<br>(26 - 49)   | 47<br>(31 - 58)    | 26<br>(17 - 32)        | 47<br>(25 - 60)          |
| Congenital anomalies                                | 756<br>(539 - 960)       | 666<br>(458 - 868) | 34<br>(24 - 46)   | 30<br>(22 - 39)    | 12<br>(9 - 14)         | 14<br>(9 - 18)           |
| Neural tube defects                                 | 71<br>(38 - 114)         | 68<br>(36 - 111)   | 1<br>(1 - 2)      | 1<br>(1 - 2)       | 0<br>(0 - 0)           | 0<br>(0 - 1)             |
| Congenital heart anomalies                          | 314<br>(201 - 446)       | 281<br>(170 - 410) | 16<br>(10 - 24)   | 12<br>(8 - 15)     | 3<br>(2 - 5)           | 3<br>(2 - 5)             |
| Cleft lip and cleft palate                          | 4<br>(1 - 9)             | 4<br>(1 - 9)       | --                | --                 | --                     | --                       |
| Down syndrome                                       | 64<br>(31 - 113)         | 53<br>(22 - 101)   | 4<br>(2 - 7)      | 5<br>(3 - 8)       | 1<br>(1 - 2)           | 0<br>(0 - 0)             |
| Chromosomal unbalanced rearrangements               | 12<br>(7 - 19)           | 11<br>(6 - 18)     | 1<br>(0 - 1)      | 1<br>(0 - 1)       | 0<br>(0 - 0)           | 0<br>(0 - 0)             |
| Other congenital anomalies                          | 291<br>(170 - 398)       | 249<br>(133 - 353) | 13<br>(8 - 20)    | 12<br>(8 - 16)     | 7<br>(5 - 9)           | 10<br>(7 - 14)           |
| Skin and subcutaneous diseases                      | 83<br>(40 - 106)         | 16<br>(7 - 28)     | 3<br>(1 - 4)      | 17<br>(8 - 22)     | 15<br>(8 - 19)         | 33<br>(14 - 46)          |
| Cellulitis                                          | 15<br>(6 - 22)           | 4<br>(1 - 8)       | 0<br>(0 - 1)      | 4<br>(2 - 5)       | 3<br>(1 - 5)           | 4<br>(1 - 8)             |
| Pyoderma                                            | 44<br>(19 - 57)          | 11<br>(5 - 22)     | 2<br>(1 - 3)      | 8<br>(4 - 11)      | 7<br>(3 - 10)          | 15<br>(6 - 23)           |
| Decubitus ulcer                                     | 23<br>(13 - 33)          | 0<br>(0 - 0)       | 0<br>(0 - 0)      | 5<br>(3 - 7)       | 5<br>(3 - 7)           | 13<br>(7 - 21)           |



Web Table 31- Guatemala deaths with 95% UI by age, sex, and cause in 2013

| Cause                                           | Males, All Ages           | Males, 0-4 Years   | Males, 5-14 Years  | Males, 15-49 Years       | Males, 50-69 Years   | Males, 70-80 Years |
|-------------------------------------------------|---------------------------|--------------------|--------------------|--------------------------|----------------------|--------------------|
| Other skin and subcutaneous diseases            | 2<br>(1 - 2)              | 0<br>(0 - 1)       | 0<br>(0 - 0)       | 1<br>(0 - 1)             | 0<br>(0 - 0)         | 0<br>(0 - 0)       |
| Sudden infant death syndrome                    | 21<br>(3 - 47)            | 21<br>(3 - 47)     | --                 | --                       | --                   | --                 |
| Injuries                                        | 9,706<br>(8,460 - 10,929) | 419<br>(294 - 595) | 357<br>(284 - 423) | 7,309<br>(6,356 - 8,301) | 995<br>(824 - 1,216) | 626<br>(506 - 719) |
| Transport injuries                              | 1,224<br>(740 - 1,451)    | 61<br>(25 - 92)    | 82<br>(45 - 110)   | 828<br>(502 - 1,011)     | 143<br>(90 - 175)    | 111<br>(61 - 140)  |
| Road injuries                                   | 1,207<br>(725 - 1,434)    | 60<br>(24 - 90)    | 80<br>(44 - 107)   | 818<br>(494 - 999)       | 140<br>(88 - 172)    | 109<br>(60 - 137)  |
| Pedestrian road injuries                        | 822<br>(478 - 1,014)      | 37<br>(14 - 58)    | 48<br>(23 - 67)    | 575<br>(342 - 723)       | 90<br>(52 - 118)     | 73<br>(37 - 96)    |
| Cyclist road injuries                           | 68<br>(36 - 96)           | 8<br>(2 - 15)      | 14<br>(8 - 22)     | 26<br>(15 - 38)          | 10<br>(6 - 15)       | 10<br>(5 - 16)     |
| Motorcyclist road injuries                      | 124<br>(72 - 202)         | 4<br>(2 - 7)       | 5<br>(3 - 9)       | 94<br>(54 - 159)         | 15<br>(8 - 25)       | 5<br>(3 - 9)       |
| Motor vehicle road injuries                     | 161<br>(86 - 230)         | 8<br>(3 - 13)      | 8<br>(4 - 13)      | 109<br>(56 - 159)        | 19<br>(11 - 27)      | 18<br>(9 - 27)     |
| Other road injuries                             | 32<br>(20 - 62)           | 4<br>(2 - 7)       | 5<br>(2 - 10)      | 14<br>(8 - 29)           | 7<br>(4 - 13)        | 3<br>(2 - 6)       |
| Other transport injuries                        | 18<br>(11 - 22)           | 2<br>(1 - 3)       | 2<br>(1 - 3)       | 10<br>(6 - 13)           | 2<br>(1 - 3)         | 2<br>(1 - 4)       |
| Unintentional injuries                          | 1,915<br>(1,616 - 2,310)  | 241<br>(156 - 355) | 132<br>(105 - 172) | 918<br>(755 - 1,227)     | 298<br>(228 - 352)   | 324<br>(214 - 393) |
| Falls                                           | 285<br>(174 - 346)        | 8<br>(3 - 13)      | 10<br>(6 - 15)     | 74<br>(58 - 110)         | 77<br>(41 - 101)     | 116<br>(52 - 157)  |
| Drowning                                        | 423<br>(319 - 704)        | 26<br>(11 - 54)    | 47<br>(30 - 81)    | 284<br>(199 - 481)       | 42<br>(31 - 63)      | 23<br>(16 - 32)    |
| Fire, heat, and hot substances                  | 121<br>(73 - 162)         | 24<br>(11 - 43)    | 7<br>(4 - 11)      | 44<br>(27 - 60)          | 18<br>(10 - 26)      | 28<br>(13 - 45)    |
| Poisonings                                      | 87<br>(35 - 111)          | 3<br>(1 - 6)       | 3<br>(1 - 4)       | 56<br>(22 - 75)          | 15<br>(5 - 20)       | 10<br>(4 - 14)     |
| Exposure to mechanical forces                   | 308<br>(250 - 465)        | 9<br>(6 - 14)      | 17<br>(12 - 29)    | 216<br>(166 - 327)       | 48<br>(36 - 70)      | 18<br>(13 - 27)    |
| Unintentional firearm injuries                  | 138<br>(38 - 180)         | 2<br>(1 - 3)       | 4<br>(1 - 6)       | 103<br>(30 - 143)        | 20<br>(5 - 30)       | 9<br>(3 - 13)      |
| Unintentional suffocation                       | 78<br>(55 - 158)          | 4<br>(2 - 9)       | 6<br>(3 - 14)      | 48<br>(30 - 93)          | 14<br>(8 - 28)       | 5<br>(3 - 11)      |
| Other exposure to mechanical forces             | 92<br>(71 - 198)          | 3<br>(2 - 5)       | 7<br>(5 - 14)      | 64<br>(46 - 149)         | 14<br>(10 - 25)      | 4<br>(3 - 7)       |
| Adverse effects of medical treatment            | 157<br>(96 - 199)         | 27<br>(13 - 46)    | 6<br>(3 - 8)       | 36<br>(22 - 46)          | 29<br>(17 - 39)      | 60<br>(33 - 82)    |
| Animal contact                                  | 24<br>(3 - 32)            | 4<br>(0 - 8)       | 4<br>(1 - 6)       | 8<br>(1 - 11)            | 4<br>(0 - 6)         | 5<br>(0 - 7)       |
| Venomous animal contact                         | 19<br>(3 - 25)            | 3<br>(0 - 6)       | 3<br>(0 - 4)       | 7<br>(1 - 9)             | 3<br>(0 - 5)         | 3<br>(0 - 5)       |
| Non-venomous animal contact                     | 5<br>(1 - 7)              | 1<br>(0 - 2)       | 1<br>(0 - 2)       | 1<br>(0 - 2)             | 1<br>(0 - 1)         | 1<br>(0 - 2)       |
| Foreign body                                    | 432<br>(259 - 716)        | 138<br>(74 - 235)  | 36<br>(22 - 59)    | 147<br>(88 - 250)        | 54<br>(32 - 88)      | 57<br>(32 - 92)    |
| Pulmonary aspiration and foreign body in airway | 429<br>(256 - 712)        | 137<br>(74 - 235)  | 35<br>(21 - 59)    | 146<br>(87 - 249)        | 53<br>(30 - 86)      | 57<br>(32 - 91)    |
| Foreign body in other body part                 | 3<br>(2 - 6)              | 0<br>(0 - 1)       | 0<br>(0 - 1)       | 1<br>(1 - 1)             | 2<br>(1 - 3)         | 0<br>(0 - 0)       |
| Other unintentional injuries                    | 78<br>(59 - 108)          | 3<br>(1 - 6)       | 4<br>(2 - 8)       | 53<br>(36 - 78)          | 11<br>(6 - 18)       | 7<br>(4 - 12)      |
| Self-harm and interpersonal violence            | 6,567<br>(5,318 - 7,711)  | 117<br>(44 - 224)  | 142<br>(80 - 205)  | 5,563<br>(4,492 - 6,519) | 554<br>(412 - 801)   | 191<br>(139 - 338) |
| Self-harm                                       | 1,314<br>(1,051 - 2,113)  | --                 | 20<br>(11 - 36)    | 963<br>(757 - 1,532)     | 213<br>(158 - 338)   | 119<br>(84 - 249)  |
| Interpersonal violence                          | 5,253<br>(3,767 - 6,364)  | 117<br>(44 - 224)  | 123<br>(58 - 187)  | 4,600<br>(3,339 - 5,563) | 341<br>(218 - 554)   | 72<br>(40 - 126)   |
| Assault by firearm                              | 3,122<br>(1,229 - 4,563)  | 38<br>(8 - 90)     | 59<br>(14 - 112)   | 2,841<br>(1,131 - 4,152) | 163<br>(54 - 282)    | 21<br>(6 - 43)     |
| Assault by sharp object                         | 1,024<br>(563 - 2,028)    | 34<br>(14 - 73)    | 22<br>(9 - 48)     | 849<br>(446 - 1,732)     | 93<br>(46 - 193)     | 27<br>(13 - 56)    |
| Assault by other means                          | 1,106<br>(487 - 2,460)    | 45<br>(17 - 91)    | 42<br>(19 - 83)    | 911<br>(358 - 2,127)     | 85<br>(35 - 205)     | 24<br>(11 - 50)    |

Web Table 31- Guatemala deaths with 95% UI by age, sex, and cause in 2013

| Cause                                                             | Females, All Ages           | Females, 0-4 Years       | Females, 5-14 Years | Females, 15-49 Years     | Females, 50-69 Years     | Females, 70-80 Years        |
|-------------------------------------------------------------------|-----------------------------|--------------------------|---------------------|--------------------------|--------------------------|-----------------------------|
| All causes                                                        | 35,291<br>(32,224 - 37,655) | 5,920<br>(5,223 - 6,709) | 865<br>(799 - 940)  | 6,334<br>(5,644 - 7,049) | 7,144<br>(6,427 - 7,866) | 15,028<br>(14,179 - 15,877) |
| Communicable, maternal, neonatal, and nutritional diseases        | 11,774<br>(10,721 - 13,763) | 4,557<br>(3,989 - 5,264) | 389<br>(333 - 456)  | 1,742<br>(1,533 - 2,080) | 1,232<br>(1,036 - 1,724) | 3,854<br>(3,286 - 5,001)    |
| HIV/AIDS and tuberculosis                                         | 347<br>(262 - 484)          | 11<br>(4 - 28)           | 6<br>(3 - 14)       | 228<br>(167 - 318)       | 64<br>(46 - 96)          | 38<br>(27 - 55)             |
| Tuberculosis                                                      | 162<br>(132 - 220)          | 3<br>(2 - 5)             | 4<br>(2 - 5)        | 73<br>(56 - 97)          | 46<br>(34 - 70)          | 36<br>(26 - 52)             |
| HIV/AIDS                                                          | 185<br>(108 - 308)          | 8<br>(1 - 25)            | 2<br>(0 - 10)       | 155<br>(96 - 237)        | 18<br>(7 - 38)           | 2<br>(0 - 5)                |
| HIV/AIDS resulting in mycobacterial infection                     | 9<br>(5 - 15)               | 0<br>(0 - 1)             | 0<br>(0 - 0)        | 7<br>(4 - 12)            | 1<br>(0 - 2)             | 0<br>(0 - 0)                |
| HIV/AIDS resulting in other diseases                              | 176<br>(103 - 293)          | 8<br>(1 - 24)            | 2<br>(0 - 10)       | 147<br>(92 - 226)        | 17<br>(7 - 37)           | 2<br>(0 - 5)                |
| Diarrhea, lower respiratory, and other common infectious diseases | 6,845<br>(6,061 - 8,002)    | 2,465<br>(2,076 - 2,942) | 306<br>(253 - 365)  | 809<br>(674 - 1,016)     | 834<br>(677 - 1,113)     | 2,431<br>(1,946 - 3,162)    |
| Diarrheal diseases                                                | 1,615<br>(1,286 - 2,011)    | 719<br>(473 - 1,051)     | 90<br>(58 - 128)    | 207<br>(158 - 263)       | 192<br>(139 - 258)       | 407<br>(261 - 602)          |
| Intestinal infectious diseases                                    | 143<br>(74 - 251)           | 58<br>(29 - 104)         | 42<br>(20 - 73)     | 38<br>(17 - 69)          | 4<br>(2 - 8)             | 2<br>(1 - 4)                |
| Typhoid fever                                                     | 109<br>(54 - 194)           | 43<br>(20 - 77)          | 33<br>(15 - 58)     | 30<br>(13 - 55)          | 3<br>(1 - 6)             | 1<br>(1 - 2)                |
| Paratyphoid fever                                                 | 30<br>(15 - 55)             | 13<br>(6 - 27)           | 9<br>(4 - 17)       | 8<br>(3 - 15)            | 1<br>(0 - 2)             | 0<br>(0 - 1)                |
| Other intestinal infectious diseases                              | 4<br>(1 - 10)               | 2<br>(0 - 7)             | 0<br>(0 - 3)        | 1<br>(0 - 4)             | 0<br>(0 - 2)             | 0<br>(0 - 2)                |
| Lower respiratory infections                                      | 4,821<br>(4,143 - 5,954)    | 1,552<br>(1,120 - 1,967) | 148<br>(112 - 194)  | 505<br>(409 - 712)       | 616<br>(483 - 898)       | 1,999<br>(1,542 - 2,699)    |
| Upper respiratory infections                                      | 2<br>(1 - 5)                | 1<br>(0 - 2)             | 0<br>(0 - 0)        | 0<br>(0 - 1)             | 0<br>(0 - 1)             | 1<br>(0 - 3)                |
| Otitis media                                                      | 2<br>(1 - 2)                | 0<br>(0 - 1)             | 0<br>(0 - 0)        | 0<br>(0 - 1)             | 0<br>(0 - 0)             | 0<br>(0 - 1)                |
| Meningitis                                                        | 165<br>(113 - 204)          | 79<br>(48 - 116)         | 16<br>(9 - 22)      | 41<br>(26 - 50)          | 15<br>(11 - 19)          | 15<br>(9 - 19)              |
| Pneumococcal meningitis                                           | 53<br>(35 - 67)             | 22<br>(13 - 35)          | 6<br>(3 - 9)        | 14<br>(8 - 19)           | 5<br>(3 - 8)             | 5<br>(3 - 8)                |
| H influenzae type B meningitis                                    | 41<br>(27 - 60)             | 30<br>(17 - 48)          | 4<br>(2 - 6)        | 5<br>(3 - 7)             | 1<br>(1 - 2)             | 1<br>(1 - 2)                |
| Meningococcal meningitis                                          | 19<br>(14 - 26)             | 8<br>(4 - 14)            | 2<br>(1 - 4)        | 5<br>(3 - 8)             | 2<br>(1 - 3)             | 2<br>(1 - 3)                |
| Other meningitis                                                  | 52<br>(31 - 69)             | 19<br>(9 - 30)           | 4<br>(2 - 7)        | 17<br>(9 - 24)           | 7<br>(4 - 9)             | 6<br>(4 - 9)                |
| Encephalitis                                                      | 43<br>(32 - 66)             | 16<br>(9 - 29)           | 6<br>(3 - 11)       | 13<br>(8 - 21)           | 5<br>(3 - 8)             | 4<br>(2 - 6)                |
| Diphtheria                                                        | 2<br>(0 - 11)               | 1<br>(0 - 10)            | 0<br>(0 - 2)        | 0<br>(0 - 1)             | 0<br>(0 - 0)             | --                          |
| Whooping cough                                                    | 42<br>(8 - 138)             | 36<br>(5 - 130)          | 3<br>(1 - 6)        | 2<br>(1 - 4)             | 1<br>(0 - 1)             | --                          |
| Tetanus                                                           | 2<br>(2 - 4)                | 0<br>(0 - 0)             | 0<br>(0 - 0)        | 1<br>(1 - 1)             | 1<br>(0 - 1)             | 0<br>(0 - 1)                |
| Measles                                                           | 0<br>(0 - 0)                | 0<br>(0 - 0)             | 0<br>(0 - 0)        | 0<br>(0 - 0)             | 0<br>(0 - 0)             | --                          |
| Varicella and herpes zoster                                       | 8<br>(2 - 22)               | 3<br>(0 - 12)            | 1<br>(0 - 3)        | 1<br>(0 - 4)             | 1<br>(0 - 2)             | 3<br>(0 - 14)               |
| Neglected tropical diseases and malaria                           | 63<br>(47 - 130)            | 20<br>(12 - 36)          | 6<br>(4 - 11)       | 15<br>(12 - 26)          | 10<br>(7 - 26)           | 11<br>(6 - 34)              |
| Malaria                                                           | 13<br>(9 - 19)              | 3<br>(1 - 7)             | 1<br>(0 - 1)        | 4<br>(2 - 6)             | 3<br>(1 - 5)             | 3<br>(1 - 7)                |
| Chagas disease                                                    | 11<br>(3 - 54)              | 0<br>(0 - 1)             | 0<br>(0 - 1)        | 2<br>(1 - 11)            | 4<br>(1 - 19)            | 5<br>(1 - 25)               |
| Leishmaniasis                                                     | 1<br>(0 - 1)                | 1<br>(0 - 1)             | 0<br>(0 - 0)        | 0<br>(0 - 0)             | 0<br>(0 - 0)             | 0<br>(0 - 0)                |
| Visceral leishmaniasis                                            | 1<br>(0 - 1)                | 1<br>(0 - 1)             | 0<br>(0 - 0)        | 0<br>(0 - 0)             | 0<br>(0 - 0)             | 0<br>(0 - 0)                |
| Cysticercosis                                                     | 5<br>(5 - 6)                | 0<br>(0 - 0)             | 0<br>(0 - 0)        | 3<br>(3 - 4)             | 1<br>(1 - 1)             | 1<br>(0 - 1)                |
| Cystic echinococcosis                                             | 1<br>(1 - 1)                | 0<br>(0 - 0)             | 0<br>(0 - 0)        | 0<br>(0 - 0)             | 0<br>(0 - 0)             | 0<br>(0 - 0)                |
| Dengue                                                            | 9<br>(5 - 12)               | 3<br>(1 - 5)             | 2<br>(1 - 3)        | 3<br>(1 - 4)             | 1<br>(1 - 1)             | 1<br>(0 - 2)                |
| Rabies                                                            | 1<br>(1 - 2)                | 0<br>(0 - 0)             | 0<br>(0 - 1)        | 0<br>(0 - 1)             | 0<br>(0 - 0)             | 0<br>(0 - 0)                |
| Intestinal nematode infections                                    | 6<br>(1 - 16)               | 4<br>(0 - 14)            | 1<br>(0 - 5)        | 0<br>(0 - 3)             | 0<br>(0 - 1)             | 0<br>(0 - 3)                |
| Ascariasis                                                        | 6<br>(1 - 16)               | 4<br>(0 - 14)            | 1<br>(0 - 5)        | 0<br>(0 - 3)             | 0<br>(0 - 1)             | 0<br>(0 - 3)                |
| Other neglected tropical diseases                                 | 16<br>(11 - 35)             | 9<br>(5 - 21)            | 2<br>(1 - 4)        | 2<br>(1 - 4)             | 1<br>(1 - 3)             | 2<br>(1 - 3)                |
| Maternal disorders                                                | 423<br>(321 - 541)          | --                       | 2<br>(1 - 4)        | 421<br>(318 - 538)       | --                       | --                          |

Web Table 31- Guatemala deaths with 95% UI by age, sex, and cause in 2013

| Cause                                                            | Females, All Ages           | Females, 0-4 Years       | Females, 5-14 Years | Females, 15-49 Years     | Females, 50-69 Years     | Females, 70-80 Years       |
|------------------------------------------------------------------|-----------------------------|--------------------------|---------------------|--------------------------|--------------------------|----------------------------|
| Maternal hemorrhage                                              | 92<br>(68 - 121)            | --                       | 0<br>(0 - 1)        | 92<br>(67 - 121)         | --                       | --                         |
| Maternal sepsis and other maternal infections                    | 40<br>(28 - 55)             | --                       | 0<br>(0 - 1)        | 39<br>(28 - 55)          | --                       | --                         |
| Maternal hypertensive disorders                                  | 63<br>(44 - 84)             | --                       | 0<br>(0 - 1)        | 62<br>(44 - 84)          | --                       | --                         |
| Maternal obstructed labor                                        | 24<br>(16 - 34)             | --                       | 0<br>(0 - 0)        | 24<br>(16 - 34)          | --                       | --                         |
| Maternal abortive outcome                                        | 32<br>(22 - 45)             | --                       | 0<br>(0 - 0)        | 31<br>(21 - 44)          | --                       | --                         |
| Indirect maternal deaths                                         | 58<br>(32 - 82)             | --                       | 0<br>(0 - 1)        | 57<br>(32 - 82)          | --                       | --                         |
| Late maternal deaths                                             | 30<br>(16 - 47)             | --                       | 0<br>(0 - 0)        | 29<br>(16 - 47)          | --                       | --                         |
| Maternal deaths aggravated by HIV/AIDS                           | 0<br>(0 - 0)                | --                       | --                  | 0<br>(0 - 0)             | --                       | --                         |
| Other maternal disorders                                         | 85<br>(58 - 114)            | --                       | 0<br>(0 - 1)        | 85<br>(58 - 113)         | --                       | --                         |
| Neonatal disorders                                               | 1,583<br>(1,363 - 1,862)    | 1,583<br>(1,363 - 1,862) | --                  | --                       | --                       | --                         |
| Neonatal preterm birth complications                             | 772<br>(566 - 1,034)        | 772<br>(566 - 1,034)     | --                  | --                       | --                       | --                         |
| Neonatal encephalopathy due to birth asphyxia and trauma         | 328<br>(208 - 453)          | 328<br>(208 - 453)       | --                  | --                       | --                       | --                         |
| Neonatal sepsis and other neonatal infections                    | 288<br>(139 - 483)          | 288<br>(139 - 483)       | --                  | --                       | --                       | --                         |
| Hemolytic disease and other neonatal jaundice                    | 7<br>(2 - 24)               | 7<br>(2 - 24)            | --                  | --                       | --                       | --                         |
| Other neonatal disorders                                         | 188<br>(120 - 271)          | 188<br>(120 - 271)       | --                  | --                       | --                       | --                         |
| Nutritional deficiencies                                         | 2,384<br>(2,001 - 3,109)    | 411<br>(282 - 567)       | 60<br>(45 - 79)     | 249<br>(197 - 365)       | 308<br>(240 - 525)       | 1,356<br>(1,053 - 1,873)   |
| Protein-energy malnutrition                                      | 2,104<br>(1,711 - 2,797)    | 378<br>(258 - 522)       | 48<br>(35 - 68)     | 181<br>(133 - 281)       | 260<br>(194 - 465)       | 1,236<br>(937 - 1,737)     |
| Iodine deficiency                                                | 1<br>(0 - 5)                | 0<br>(0 - 3)             | 0<br>(0 - 1)        | 0<br>(0 - 1)             | 0<br>(0 - 1)             | 0<br>(0 - 2)               |
| Iron-deficiency anemia                                           | 196<br>(69 - 357)           | 23<br>(4 - 65)           | 9<br>(3 - 17)       | 51<br>(20 - 92)          | 35<br>(11 - 66)          | 77<br>(25 - 159)           |
| Other nutritional deficiencies                                   | 83<br>(33 - 141)            | 10<br>(2 - 28)           | 3<br>(1 - 5)        | 16<br>(8 - 29)           | 13<br>(4 - 22)           | 42<br>(14 - 86)            |
| Other communicable, maternal, neonatal, and nutritional diseases | 128<br>(87 - 179)           | 67<br>(34 - 106)         | 8<br>(5 - 12)       | 20<br>(15 - 27)          | 15<br>(11 - 22)          | 18<br>(13 - 30)            |
| Sexually transmitted diseases excluding HIV                      | 53<br>(21 - 95)             | 44<br>(15 - 83)          | 4<br>(1 - 7)        | 2<br>(2 - 3)             | 1<br>(1 - 2)             | 2<br>(1 - 2)               |
| Syphilis                                                         | 50<br>(19 - 93)             | 44<br>(15 - 83)          | 4<br>(1 - 7)        | 1<br>(1 - 1)             | 1<br>(0 - 1)             | 1<br>(1 - 2)               |
| Chlamydial infection                                             | 1<br>(1 - 1)                | --                       | 0<br>(0 - 0)        | 0<br>(0 - 1)             | 0<br>(0 - 0)             | 0<br>(0 - 0)               |
| Gonococcal infection                                             | 1<br>(1 - 1)                | --                       | 0<br>(0 - 0)        | 0<br>(0 - 1)             | 0<br>(0 - 0)             | 0<br>(0 - 0)               |
| Other sexually transmitted diseases                              | 1<br>(1 - 1)                | --                       | 0<br>(0 - 0)        | 0<br>(0 - 1)             | 0<br>(0 - 0)             | 0<br>(0 - 0)               |
| Hepatitis                                                        | 14<br>(11 - 18)             | 2<br>(1 - 4)             | 1<br>(0 - 1)        | 5<br>(4 - 7)             | 4<br>(2 - 6)             | 2<br>(1 - 4)               |
| Acute hepatitis A                                                | 6<br>(3 - 9)                | 2<br>(1 - 3)             | 0<br>(0 - 1)        | 3<br>(1 - 4)             | 1<br>(0 - 2)             | 0<br>(0 - 0)               |
| Acute hepatitis B                                                | 6<br>(3 - 10)               | 0<br>(0 - 1)             | 0<br>(0 - 0)        | 2<br>(1 - 3)             | 2<br>(1 - 4)             | 2<br>(1 - 3)               |
| Acute hepatitis C                                                | 2<br>(0 - 5)                | --                       | 0<br>(0 - 0)        | 1<br>(0 - 2)             | 1<br>(0 - 2)             | 0<br>(0 - 1)               |
| Other infectious diseases                                        | 61<br>(43 - 100)            | 21<br>(12 - 39)          | 4<br>(3 - 7)        | 12<br>(9 - 19)           | 10<br>(6 - 16)           | 14<br>(9 - 26)             |
| Non-communicable diseases                                        | 21,114<br>(19,198 - 23,043) | 1,038<br>(810 - 1,301)   | 277<br>(239 - 323)  | 3,378<br>(2,941 - 3,879) | 5,618<br>(4,975 - 6,237) | 10,804<br>(9,792 - 11,654) |
| Neoplasms                                                        | 4,715<br>(4,199 - 5,229)    | 66<br>(47 - 85)          | 78<br>(60 - 97)     | 1,066<br>(908 - 1,239)   | 1,636<br>(1,432 - 1,837) | 1,868<br>(1,665 - 2,082)   |
| Esophageal cancer                                                | 69<br>(44 - 82)             | --                       | --                  | 7<br>(5 - 9)             | 21<br>(14 - 25)          | 41<br>(25 - 51)            |
| Stomach cancer                                                   | 1,096<br>(947 - 1,256)      | --                       | --                  | 172<br>(142 - 206)       | 364<br>(306 - 432)       | 560<br>(463 - 671)         |
| Liver cancer                                                     | 393<br>(333 - 464)          | --                       | 2<br>(2 - 3)        | 61<br>(48 - 74)          | 156<br>(126 - 192)       | 174<br>(137 - 220)         |
| Liver cancer due to hepatitis B                                  | 81<br>(37 - 130)            | --                       | 1<br>(0 - 1)        | 19<br>(10 - 29)          | 35<br>(14 - 58)          | 26<br>(11 - 46)            |
| Liver cancer due to hepatitis C                                  | 192<br>(125 - 262)          | --                       | 0<br>(0 - 1)        | 25<br>(16 - 35)          | 79<br>(51 - 110)         | 88<br>(51 - 132)           |
| Liver cancer due to alcohol use                                  | 64<br>(36 - 110)            | --                       | --                  | 4<br>(2 - 7)             | 20<br>(11 - 36)          | 40<br>(20 - 73)            |
| Liver cancer due to other causes                                 | 56<br>(33 - 79)             | --                       | 1<br>(1 - 2)        | 13<br>(8 - 19)           | 21<br>(12 - 34)          | 20<br>(11 - 33)            |

Web Table 31- Guatemala deaths with 95% UI by age, sex, and cause in 2013

| Cause                                         | Females, All Ages        | Females, 0-4 Years | Females, 5-14 Years | Females, 15-49 Years | Females, 50-69 Years     | Females, 70-80 Years     |
|-----------------------------------------------|--------------------------|--------------------|---------------------|----------------------|--------------------------|--------------------------|
| Larynx cancer                                 | 13<br>(6 - 21)           | --                 | --                  | 2<br>(1 - 3)         | 5<br>(2 - 8)             | 6<br>(2 - 10)            |
| Tracheal, bronchus and lung cancer            | 278<br>(237 - 322)       | --                 | --                  | 47<br>(38 - 59)      | 96<br>(79 - 115)         | 134<br>(109 - 164)       |
| Breast cancer                                 | 307<br>(265 - 360)       | --                 | --                  | 98<br>(80 - 122)     | 126<br>(105 - 153)       | 83<br>(67 - 101)         |
| Cervical cancer                               | 787<br>(451 - 929)       | --                 | --                  | 281<br>(166 - 345)   | 300<br>(167 - 366)       | 206<br>(118 - 257)       |
| Uterine cancer                                | 112<br>(83 - 167)        | --                 | --                  | 16<br>(11 - 24)      | 54<br>(39 - 83)          | 42<br>(32 - 66)          |
| Prostate cancer                               | --                       | --                 | --                  | --                   | --                       | --                       |
| Colon and rectum cancer                       | 282<br>(244 - 327)       | --                 | --                  | 42<br>(36 - 50)      | 93<br>(78 - 109)         | 147<br>(122 - 182)       |
| Lip and oral cavity cancer                    | 36<br>(21 - 47)          | --                 | --                  | 6<br>(4 - 8)         | 12<br>(7 - 15)           | 18<br>(10 - 25)          |
| Nasopharynx cancer                            | 12<br>(7 - 17)           | --                 | 0<br>(0 - 0)        | 4<br>(2 - 6)         | 4<br>(3 - 7)             | 3<br>(2 - 5)             |
| Other pharynx cancer                          | 12<br>(10 - 14)          | --                 | --                  | 2<br>(2 - 3)         | 4<br>(3 - 5)             | 5<br>(4 - 6)             |
| Gallbladder and biliary tract cancer          | 148<br>(105 - 295)       | --                 | --                  | 13<br>(9 - 25)       | 60<br>(43 - 117)         | 75<br>(50 - 160)         |
| Pancreatic cancer                             | 164<br>(139 - 193)       | --                 | --                  | 18<br>(15 - 22)      | 63<br>(51 - 76)          | 84<br>(66 - 102)         |
| Malignant skin melanoma                       | 14<br>(12 - 16)          | --                 | --                  | 5<br>(4 - 6)         | 4<br>(3 - 5)             | 5<br>(4 - 7)             |
| Non-melanoma skin cancer                      | 36<br>(25 - 56)          | --                 | --                  | 4<br>(3 - 6)         | 7<br>(4 - 10)            | 26<br>(17 - 39)          |
| Ovarian cancer                                | 86<br>(74 - 100)         | --                 | --                  | 26<br>(21 - 32)      | 38<br>(31 - 45)          | 22<br>(18 - 27)          |
| Testicular cancer                             | --                       | --                 | --                  | --                   | --                       | --                       |
| Kidney cancer                                 | 56<br>(47 - 64)          | 1<br>(1 - 1)       | 0<br>(0 - 1)        | 10<br>(9 - 12)       | 24<br>(19 - 28)          | 21<br>(17 - 25)          |
| Bladder cancer                                | 24<br>(17 - 36)          | --                 | --                  | 2<br>(2 - 4)         | 6<br>(5 - 9)             | 15<br>(10 - 24)          |
| Brain and nervous system cancer               | 133<br>(57 - 157)        | 5<br>(2 - 8)       | 11<br>(5 - 15)      | 49<br>(23 - 60)      | 37<br>(14 - 46)          | 30<br>(11 - 37)          |
| Thyroid cancer                                | 36<br>(25 - 48)          | --                 | 0<br>(0 - 0)        | 6<br>(4 - 9)         | 13<br>(9 - 17)           | 16<br>(11 - 22)          |
| Mesothelioma                                  | 4<br>(3 - 5)             | --                 | --                  | 1<br>(1 - 1)         | 2<br>(1 - 2)             | 1<br>(1 - 2)             |
| Hodgkin lymphoma                              | 14<br>(3 - 19)           | 2<br>(0 - 3)       | 1<br>(0 - 2)        | 4<br>(1 - 6)         | 3<br>(1 - 4)             | 4<br>(1 - 6)             |
| Non-Hodgkin lymphoma                          | 84<br>(31 - 112)         | 9<br>(2 - 15)      | 3<br>(1 - 5)        | 18<br>(7 - 25)       | 26<br>(8 - 37)           | 28<br>(9 - 41)           |
| Multiple myeloma                              | 15<br>(10 - 18)          | --                 | --                  | 3<br>(2 - 3)         | 6<br>(4 - 8)             | 6<br>(4 - 8)             |
| Leukemia                                      | 264<br>(223 - 303)       | 29<br>(18 - 41)    | 46<br>(33 - 60)     | 104<br>(84 - 127)    | 45<br>(36 - 54)          | 40<br>(33 - 50)          |
| Other neoplasms                               | 241<br>(187 - 343)       | 20<br>(9 - 31)     | 14<br>(6 - 19)      | 63<br>(46 - 93)      | 69<br>(52 - 105)         | 75<br>(55 - 111)         |
| Cardiovascular diseases                       | 6,115<br>(4,917 - 7,085) | 86<br>(48 - 141)   | 39<br>(24 - 51)     | 690<br>(532 - 863)   | 1,325<br>(1,029 - 1,596) | 3,975<br>(3,211 - 4,531) |
| Rheumatic heart disease                       | 50<br>(28 - 67)          | 1<br>(0 - 1)       | 1<br>(1 - 2)        | 15<br>(9 - 22)       | 14<br>(8 - 20)           | 19<br>(9 - 27)           |
| Ischemic heart disease                        | 3,446<br>(2,806 - 4,298) | 15<br>(5 - 32)     | 10<br>(6 - 17)      | 314<br>(243 - 448)   | 698<br>(545 - 934)       | 2,409<br>(1,978 - 2,936) |
| Cerebrovascular disease                       | 1,996<br>(1,312 - 2,355) | 16<br>(6 - 26)     | 13<br>(6 - 18)      | 249<br>(153 - 308)   | 446<br>(303 - 544)       | 1,272<br>(820 - 1,532)   |
| Ischemic stroke                               | 811<br>(588 - 1,124)     | 3<br>(1 - 9)       | 3<br>(1 - 5)        | 52<br>(31 - 77)      | 159<br>(108 - 224)       | 594<br>(427 - 841)       |
| Hemorrhagic stroke                            | 1,185<br>(690 - 1,463)   | 13<br>(4 - 21)     | 11<br>(5 - 15)      | 197<br>(118 - 245)   | 287<br>(180 - 356)       | 678<br>(353 - 890)       |
| Hypertensive heart disease                    | 125<br>(44 - 205)        | 0<br>(0 - 1)       | 0<br>(0 - 0)        | 12<br>(5 - 18)       | 21<br>(8 - 34)           | 92<br>(28 - 162)         |
| Cardiomyopathy and myocarditis                | 101<br>(78 - 158)        | 22<br>(13 - 40)    | 5<br>(4 - 9)        | 35<br>(26 - 57)      | 17<br>(12 - 27)          | 22<br>(15 - 36)          |
| Atrial fibrillation and flutter               | 6<br>(4 - 9)             | --                 | --                  | 1<br>(1 - 1)         | 2<br>(1 - 2)             | 4<br>(2 - 6)             |
| Aortic aneurysm                               | 20<br>(12 - 32)          | --                 | --                  | 5<br>(3 - 8)         | 4<br>(2 - 7)             | 11<br>(6 - 19)           |
| Peripheral vascular disease                   | 1<br>(1 - 1)             | --                 | --                  | 0<br>(0 - 0)         | 0<br>(0 - 0)             | 0<br>(0 - 1)             |
| Endocarditis                                  | 52<br>(33 - 80)          | 13<br>(7 - 24)     | 4<br>(2 - 5)        | 13<br>(9 - 21)       | 8<br>(4 - 12)            | 14<br>(9 - 24)           |
| Other cardiovascular and circulatory diseases | 318<br>(236 - 455)       | 19<br>(10 - 32)    | 4<br>(3 - 7)        | 47<br>(34 - 75)      | 116<br>(81 - 175)        | 131<br>(88 - 206)        |
| Chronic respiratory diseases                  | 1,374<br>(1,158 - 1,621) | 79<br>(54 - 141)   | 13<br>(10 - 17)     | 131<br>(108 - 167)   | 231<br>(191 - 285)       | 920<br>(684 - 1,113)     |

Web Table 31- Guatemala deaths with 95% UI by age, sex, and cause in 2013

| Cause                                               | Females, All Ages        | Females, 0-4 Years | Females, 5-14 Years | Females, 15-49 Years | Females, 50-69 Years | Females, 70-80 Years   |
|-----------------------------------------------------|--------------------------|--------------------|---------------------|----------------------|----------------------|------------------------|
| Chronic obstructive pulmonary disease               | 1,044<br>(838 - 1,262)   | 52<br>(31 - 106)   | 8<br>(6 - 10)       | 80<br>(61 - 105)     | 161<br>(124 - 203)   | 745<br>(555 - 929)     |
| Pneumoconiosis                                      | 4<br>(3 - 6)             | 0<br>(0 - 0)       | 0<br>(0 - 0)        | 1<br>(1 - 2)         | 1<br>(1 - 2)         | 1<br>(1 - 3)           |
| Silicosis                                           | 0<br>(0 - 0)             | 0<br>(0 - 0)       | 0<br>(0 - 0)        | 0<br>(0 - 0)         | 0<br>(0 - 0)         | 0<br>(0 - 0)           |
| Asbestosis                                          | 0<br>(0 - 0)             | 0<br>(0 - 0)       | 0<br>(0 - 0)        | 0<br>(0 - 0)         | 0<br>(0 - 0)         | 0<br>(0 - 0)           |
| Coal workers pneumoconiosis                         | 0<br>(0 - 0)             | 0<br>(0 - 0)       | 0<br>(0 - 0)        | 0<br>(0 - 0)         | 0<br>(0 - 0)         | 0<br>(0 - 0)           |
| Other pneumoconiosis                                | 4<br>(2 - 5)             | 0<br>(0 - 0)       | 0<br>(0 - 0)        | 1<br>(1 - 1)         | 1<br>(1 - 2)         | 1<br>(1 - 3)           |
| Asthma                                              | 190<br>(121 - 270)       | 15<br>(8 - 24)     | 4<br>(2 - 5)        | 29<br>(20 - 40)      | 42<br>(25 - 60)      | 100<br>(53 - 155)      |
| Interstitial lung disease and pulmonary sarcoidosis | 78<br>(46 - 128)         | 2<br>(1 - 3)       | 1<br>(0 - 2)        | 12<br>(7 - 21)       | 20<br>(11 - 35)      | 44<br>(22 - 80)        |
| Other chronic respiratory diseases                  | 57<br>(38 - 85)          | 10<br>(6 - 21)     | 1<br>(0 - 1)        | 9<br>(6 - 14)        | 7<br>(4 - 11)        | 29<br>(16 - 50)        |
| Cirrhosis                                           | 1,131<br>(989 - 1,293)   | 9<br>(7 - 13)      | 8<br>(7 - 10)       | 310<br>(256 - 371)   | 448<br>(374 - 529)   | 355<br>(297 - 422)     |
| Cirrhosis due to hepatitis B                        | 55<br>(26 - 93)          | 0<br>(0 - 0)       | 0<br>(0 - 0)        | 17<br>(9 - 32)       | 23<br>(10 - 40)      | 15<br>(5 - 28)         |
| Cirrhosis due to hepatitis C                        | 630<br>(407 - 817)       | 1<br>(0 - 1)       | 2<br>(1 - 4)        | 159<br>(70 - 223)    | 251<br>(140 - 344)   | 217<br>(157 - 282)     |
| Cirrhosis due to alcohol use                        | 239<br>(128 - 372)       | --                 | --                  | 46<br>(23 - 88)      | 102<br>(50 - 174)    | 91<br>(48 - 144)       |
| Cirrhosis due to other causes                       | 207<br>(132 - 331)       | 8<br>(6 - 12)      | 6<br>(4 - 7)        | 88<br>(54 - 145)     | 73<br>(39 - 131)     | 32<br>(19 - 49)        |
| Digestive diseases                                  | 1,216<br>(1,039 - 1,400) | 34<br>(21 - 48)    | 24<br>(17 - 30)     | 248<br>(199 - 296)   | 314<br>(261 - 389)   | 595<br>(492 - 719)     |
| Peptic ulcer disease                                | 554<br>(453 - 678)       | 1<br>(1 - 2)       | 3<br>(2 - 4)        | 92<br>(71 - 117)     | 146<br>(116 - 192)   | 311<br>(245 - 395)     |
| Gastritis and duodenitis                            | 66<br>(36 - 125)         | 1<br>(0 - 1)       | 1<br>(0 - 1)        | 13<br>(7 - 26)       | 19<br>(10 - 36)      | 34<br>(16 - 64)        |
| Appendicitis                                        | 80<br>(51 - 106)         | 4<br>(2 - 8)       | 6<br>(4 - 10)       | 33<br>(20 - 47)      | 18<br>(11 - 27)      | 19<br>(11 - 30)        |
| Paralytic ileus and intestinal obstruction          | 75<br>(14 - 132)         | 14<br>(3 - 26)     | 5<br>(1 - 9)        | 12<br>(2 - 23)       | 13<br>(2 - 24)       | 31<br>(4 - 64)         |
| Inguinal, femoral, and abdominal hernia             | 97<br>(64 - 191)         | 4<br>(2 - 11)      | 3<br>(2 - 7)        | 14<br>(9 - 28)       | 28<br>(17 - 55)      | 48<br>(28 - 102)       |
| Inflammatory bowel disease                          | 12<br>(8 - 18)           | 1<br>(0 - 2)       | 1<br>(0 - 1)        | 2<br>(2 - 4)         | 3<br>(2 - 6)         | 5<br>(3 - 7)           |
| Vascular intestinal disorders                       | 31<br>(17 - 61)          | 0<br>(0 - 1)       | 0<br>(0 - 1)        | 3<br>(2 - 6)         | 6<br>(3 - 11)        | 23<br>(11 - 45)        |
| Gallbladder and biliary diseases                    | 118<br>(77 - 156)        | 1<br>(0 - 2)       | 1<br>(0 - 1)        | 23<br>(14 - 30)      | 34<br>(24 - 46)      | 60<br>(34 - 85)        |
| Pancreatitis                                        | 116<br>(79 - 169)        | 3<br>(1 - 7)       | 3<br>(2 - 4)        | 43<br>(29 - 63)      | 30<br>(20 - 45)      | 37<br>(23 - 57)        |
| Other digestive diseases                            | 67<br>(52 - 87)          | 5<br>(2 - 10)      | 3<br>(2 - 4)        | 13<br>(10 - 17)      | 17<br>(13 - 23)      | 28<br>(19 - 40)        |
| Neurological disorders                              | 1,304<br>(1,009 - 1,647) | 29<br>(20 - 47)    | 18<br>(13 - 28)     | 112<br>(85 - 161)    | 86<br>(65 - 110)     | 1,058<br>(780 - 1,391) |
| Alzheimer disease and other dementias               | 1,038<br>(759 - 1,369)   | --                 | --                  | 0<br>(0 - 1)         | 48<br>(28 - 68)      | 989<br>(705 - 1,322)   |
| Parkinson disease                                   | 51<br>(36 - 76)          | --                 | --                  | 1<br>(1 - 2)         | 9<br>(6 - 13)        | 41<br>(27 - 62)        |
| Epilepsy                                            | 158<br>(117 - 238)       | 17<br>(9 - 33)     | 15<br>(9 - 24)      | 93<br>(68 - 143)     | 18<br>(13 - 25)      | 14<br>(10 - 19)        |
| Multiple sclerosis                                  | 9<br>(4 - 12)            | --                 | --                  | 4<br>(2 - 6)         | 3<br>(1 - 5)         | 2<br>(1 - 3)           |
| Other neurological disorders                        | 48<br>(41 - 55)          | 12<br>(8 - 17)     | 4<br>(3 - 5)        | 12<br>(10 - 15)      | 8<br>(7 - 10)        | 12<br>(9 - 16)         |
| Mental and substance use disorders                  | 217<br>(139 - 325)       | 1<br>(0 - 3)       | 0<br>(0 - 0)        | 118<br>(76 - 183)    | 73<br>(45 - 113)     | 23<br>(15 - 32)        |
| Schizophrenia                                       | 1<br>(1 - 2)             | --                 | --                  | 1<br>(0 - 1)         | 0<br>(0 - 1)         | 0<br>(0 - 0)           |
| Alcohol use disorders                               | 136<br>(61 - 243)        | --                 | --                  | 74<br>(32 - 135)     | 50<br>(22 - 90)      | 12<br>(4 - 20)         |
| Drug use disorders                                  | 79<br>(62 - 96)          | 1<br>(0 - 3)       | --                  | 42<br>(32 - 55)      | 23<br>(17 - 30)      | 12<br>(8 - 17)         |
| Opioid use disorders                                | 16<br>(12 - 19)          | 0<br>(0 - 1)       | --                  | 9<br>(6 - 11)        | 4<br>(3 - 6)         | 2<br>(2 - 4)           |
| Cocaine use disorders                               | 3<br>(2 - 4)             | 0<br>(0 - 0)       | --                  | 2<br>(1 - 2)         | 1<br>(0 - 1)         | 0<br>(0 - 0)           |
| Amphetamine use disorders                           | 2<br>(2 - 3)             | 0<br>(0 - 0)       | --                  | 1<br>(1 - 2)         | 1<br>(0 - 1)         | 0<br>(0 - 0)           |
| Other drug use disorders                            | 58<br>(45 - 71)          | 1<br>(0 - 2)       | --                  | 31<br>(23 - 40)      | 18<br>(13 - 23)      | 8<br>(6 - 12)          |
| Eating disorders                                    | 1<br>(1 - 1)             | --                 | 0<br>(0 - 0)        | 1<br>(0 - 1)         | --                   | --                     |

Web Table 31- Guatemala deaths with 95% UI by age, sex, and cause in 2013

| Cause                                               | Females, All Ages        | Females, 0-4 Years | Females, 5-14 Years | Females, 15-49 Years | Females, 50-69 Years   | Females, 70-80 Years     |
|-----------------------------------------------------|--------------------------|--------------------|---------------------|----------------------|------------------------|--------------------------|
| Anorexia nervosa                                    | 1<br>(1 - 1)             | --                 | 0<br>(0 - 0)        | 1<br>(0 - 1)         | --                     | --                       |
| Diabetes, urogenital, blood, and endocrine diseases | 4,185<br>(3,217 - 4,914) | 130<br>(84 - 288)  | 59<br>(44 - 96)     | 632<br>(520 - 782)   | 1,456<br>(983 - 1,712) | 1,908<br>(1,319 - 2,255) |
| Diabetes mellitus                                   | 2,440<br>(1,213 - 2,845) | 3<br>(1 - 6)       | 3<br>(2 - 6)        | 264<br>(137 - 327)   | 952<br>(482 - 1,142)   | 1,219<br>(587 - 1,473)   |
| Acute glomerulonephritis                            | 3<br>(2 - 4)             | 0<br>(0 - 0)       | 0<br>(0 - 0)        | 1<br>(1 - 1)         | 1<br>(0 - 1)           | 1<br>(1 - 2)             |
| Chronic kidney disease                              | 1,271<br>(952 - 1,585)   | 41<br>(28 - 67)    | 25<br>(18 - 36)     | 252<br>(196 - 322)   | 406<br>(258 - 518)     | 548<br>(406 - 711)       |
| Chronic kidney disease due to diabetes mellitus     | 643<br>(473 - 777)       | 9<br>(5 - 15)      | 4<br>(3 - 6)        | 101<br>(76 - 132)    | 221<br>(143 - 282)     | 309<br>(223 - 402)       |
| Chronic kidney disease due to hypertension          | 109<br>(52 - 168)        | 5<br>(2 - 9)       | 3<br>(1 - 5)        | 37<br>(18 - 57)      | 33<br>(14 - 55)        | 31<br>(13 - 53)          |
| Chronic kidney disease due to glomerulonephritis    | 37<br>(24 - 49)          | 4<br>(3 - 7)       | 3<br>(2 - 4)        | 11<br>(7 - 16)       | 6<br>(4 - 9)           | 12<br>(7 - 20)           |
| Chronic kidney disease due to other causes          | 482<br>(316 - 729)       | 23<br>(12 - 46)    | 15<br>(9 - 25)      | 103<br>(64 - 157)    | 145<br>(65 - 227)      | 196<br>(109 - 332)       |
| Urinary diseases and male infertility               | 126<br>(72 - 160)        | 13<br>(8 - 23)     | 3<br>(1 - 4)        | 25<br>(14 - 33)      | 28<br>(14 - 38)        | 56<br>(26 - 82)          |
| Interstitial nephritis and urinary tract infections | 104<br>(56 - 136)        | 11<br>(6 - 20)     | 1<br>(1 - 2)        | 19<br>(10 - 25)      | 24<br>(12 - 32)        | 49<br>(22 - 72)          |
| Urolithiasis                                        | 4<br>(2 - 7)             | --                 | 0<br>(0 - 0)        | 2<br>(1 - 3)         | 1<br>(1 - 2)           | 1<br>(0 - 2)             |
| Other urinary diseases                              | 18<br>(10 - 29)          | 2<br>(1 - 4)       | 1<br>(0 - 1)        | 5<br>(3 - 8)         | 4<br>(2 - 6)           | 7<br>(3 - 13)            |
| Gynecological diseases                              | 5<br>(3 - 16)            | --                 | --                  | 4<br>(2 - 13)        | 0<br>(0 - 1)           | 0<br>(0 - 1)             |
| Uterine fibroids                                    | 1<br>(0 - 3)             | --                 | --                  | 1<br>(0 - 2)         | 0<br>(0 - 0)           | 0<br>(0 - 0)             |
| Polycystic ovarian syndrome                         | 0<br>(0 - 1)             | --                 | --                  | 0<br>(0 - 1)         | 0<br>(0 - 0)           | --                       |
| Endometriosis                                       | 1<br>(0 - 2)             | --                 | --                  | 1<br>(0 - 2)         | 0<br>(0 - 0)           | --                       |
| Genital prolapse                                    | 1<br>(0 - 2)             | --                 | --                  | 1<br>(0 - 2)         | 0<br>(0 - 0)           | 0<br>(0 - 0)             |
| Other gynecological diseases                        | 2<br>(1 - 7)             | --                 | --                  | 2<br>(1 - 6)         | 0<br>(0 - 1)           | 0<br>(0 - 1)             |
| Hemoglobinopathies and hemolytic anemias            | 132<br>(82 - 246)        | 28<br>(12 - 69)    | 18<br>(9 - 39)      | 44<br>(27 - 80)      | 29<br>(19 - 49)        | 13<br>(7 - 24)           |
| Thalassemias                                        | 3<br>(2 - 6)             | 1<br>(0 - 3)       | 1<br>(0 - 2)        | 1<br>(1 - 2)         | 0<br>(0 - 0)           | 0<br>(0 - 0)             |
| Sickle cell disorders                               | 58<br>(33 - 115)         | 14<br>(6 - 37)     | 11<br>(6 - 24)      | 26<br>(16 - 47)      | 6<br>(4 - 11)          | 0<br>(0 - 1)             |
| G6PD deficiency                                     | 5<br>(3 - 9)             | 1<br>(0 - 2)       | 1<br>(0 - 2)        | 2<br>(1 - 4)         | 1<br>(1 - 2)           | 0<br>(0 - 0)             |
| Other hemoglobinopathies and hemolytic anemias      | 66<br>(43 - 120)         | 12<br>(5 - 29)     | 5<br>(3 - 11)       | 15<br>(9 - 27)       | 22<br>(14 - 36)        | 12<br>(7 - 23)           |
| Endocrine, metabolic, blood, and immune disorders   | 209<br>(135 - 568)       | 45<br>(21 - 163)   | 10<br>(5 - 29)      | 43<br>(27 - 112)     | 41<br>(25 - 109)       | 70<br>(41 - 190)         |
| Musculoskeletal disorders                           | 80<br>(40 - 98)          | --                 | 3<br>(2 - 5)        | 23<br>(14 - 30)      | 19<br>(9 - 24)         | 35<br>(14 - 47)          |
| Rheumatoid arthritis                                | 31<br>(13 - 41)          | --                 | 0<br>(0 - 1)        | 4<br>(2 - 5)         | 8<br>(3 - 11)          | 19<br>(7 - 28)           |
| Other musculoskeletal disorders                     | 49<br>(27 - 61)          | --                 | 3<br>(2 - 4)        | 20<br>(11 - 25)      | 11<br>(5 - 14)         | 16<br>(7 - 23)           |
| Other non-communicable diseases                     | 778<br>(505 - 1,001)     | 604<br>(364 - 811) | 33<br>(23 - 44)     | 46<br>(32 - 57)      | 28<br>(18 - 35)        | 67<br>(32 - 93)          |
| Congenital anomalies                                | 655<br>(411 - 871)       | 569<br>(344 - 775) | 30<br>(20 - 41)     | 33<br>(23 - 41)      | 10<br>(8 - 13)         | 14<br>(9 - 19)           |
| Neural tube defects                                 | 82<br>(42 - 129)         | 78<br>(39 - 125)   | 2<br>(1 - 3)        | 1<br>(1 - 2)         | 0<br>(0 - 0)           | 1<br>(1 - 2)             |
| Congenital heart anomalies                          | 262<br>(145 - 387)       | 232<br>(122 - 356) | 13<br>(8 - 18)      | 12<br>(8 - 16)       | 2<br>(1 - 2)           | 3<br>(2 - 5)             |
| Cleft lip and cleft palate                          | 6<br>(1 - 12)            | 6<br>(1 - 12)      | --                  | --                   | --                     | --                       |
| Down syndrome                                       | 57<br>(30 - 97)          | 48<br>(23 - 88)    | 4<br>(2 - 7)        | 3<br>(2 - 5)         | 2<br>(1 - 3)           | 0<br>(0 - 0)             |
| Chromosomal unbalanced rearrangements               | 12<br>(6 - 22)           | 10<br>(5 - 19)     | 1<br>(0 - 1)        | 1<br>(1 - 2)         | 0<br>(0 - 0)           | 0<br>(0 - 0)             |
| Other congenital anomalies                          | 237<br>(142 - 330)       | 196<br>(109 - 287) | 10<br>(6 - 15)      | 15<br>(10 - 19)      | 7<br>(5 - 8)           | 9<br>(6 - 13)            |
| Skin and subcutaneous diseases                      | 108<br>(53 - 141)        | 20<br>(11 - 35)    | 3<br>(1 - 5)        | 14<br>(7 - 18)       | 18<br>(8 - 23)         | 53<br>(21 - 79)          |
| Cellulitis                                          | 14<br>(7 - 23)           | 4<br>(2 - 9)       | 1<br>(0 - 1)        | 2<br>(1 - 4)         | 2<br>(1 - 3)           | 5<br>(1 - 10)            |
| Pyoderma                                            | 53<br>(25 - 72)          | 15<br>(8 - 26)     | 2<br>(1 - 3)        | 6<br>(3 - 8)         | 8<br>(3 - 12)          | 21<br>(7 - 35)           |
| Decubitus ulcer                                     | 39<br>(19 - 55)          | 0<br>(0 - 0)       | 0<br>(0 - 0)        | 5<br>(3 - 6)         | 8<br>(4 - 10)          | 27<br>(12 - 42)          |

Web Table 31- Guatemala deaths with 95% UI by age, sex, and cause in 2013

| Cause                                           | Females, All Ages        | Females, 0-4 Years | Females, 5-14 Years | Females, 15-49 Years   | Females, 50-69 Years | Females, 70-80 Years |
|-------------------------------------------------|--------------------------|--------------------|---------------------|------------------------|----------------------|----------------------|
| Other skin and subcutaneous diseases            | 2<br>(1 - 3)             | 0<br>(0 - 1)       | 0<br>(0 - 0)        | 1<br>(0 - 1)           | 0<br>(0 - 0)         | 0<br>(0 - 0)         |
| Sudden infant death syndrome                    | 15<br>(2 - 44)           | 15<br>(2 - 44)     | --                  | --                     | --                   | --                   |
| Injuries                                        | 2,402<br>(1,870 - 2,797) | 324<br>(218 - 440) | 200<br>(143 - 252)  | 1,215<br>(918 - 1,465) | 293<br>(232 - 351)   | 370<br>(265 - 461)   |
| Transport injuries                              | 333<br>(197 - 409)       | 39<br>(14 - 60)    | 42<br>(21 - 58)     | 148<br>(92 - 186)      | 53<br>(34 - 69)      | 51<br>(28 - 66)      |
| Road injuries                                   | 324<br>(192 - 398)       | 38<br>(13 - 59)    | 41<br>(21 - 57)     | 144<br>(90 - 182)      | 52<br>(34 - 66)      | 49<br>(28 - 64)      |
| Pedestrian road injuries                        | 212<br>(119 - 261)       | 20<br>(6 - 32)     | 22<br>(10 - 32)     | 106<br>(65 - 135)      | 26<br>(14 - 34)      | 38<br>(20 - 50)      |
| Cyclist road injuries                           | 21<br>(12 - 28)          | 1<br>(0 - 3)       | 2<br>(1 - 4)        | 14<br>(8 - 19)         | 2<br>(1 - 3)         | 2<br>(1 - 2)         |
| Motorcyclist road injuries                      | 13<br>(7 - 21)           | 1<br>(0 - 2)       | 1<br>(1 - 2)        | 7<br>(4 - 12)          | 2<br>(1 - 3)         | 1<br>(1 - 3)         |
| Motor vehicle road injuries                     | 72<br>(38 - 95)          | 15<br>(5 - 25)     | 14<br>(7 - 21)      | 14<br>(7 - 21)         | 22<br>(14 - 29)      | 7<br>(3 - 11)        |
| Other road injuries                             | 6<br>(4 - 12)            | 1<br>(0 - 2)       | 1<br>(1 - 3)        | 2<br>(1 - 3)           | 1<br>(0 - 2)         | 1<br>(0 - 2)         |
| Other transport injuries                        | 9<br>(4 - 12)            | 1<br>(0 - 2)       | 1<br>(0 - 2)        | 4<br>(2 - 5)           | 1<br>(1 - 2)         | 2<br>(1 - 3)         |
| Unintentional injuries                          | 886<br>(694 - 1,052)     | 197<br>(126 - 296) | 75<br>(55 - 98)     | 233<br>(189 - 288)     | 120<br>(87 - 146)    | 260<br>(162 - 339)   |
| Falls                                           | 149<br>(77 - 212)        | 2<br>(1 - 4)       | 2<br>(1 - 3)        | 12<br>(8 - 16)         | 24<br>(13 - 34)      | 109<br>(51 - 172)    |
| Drowning                                        | 112<br>(63 - 167)        | 28<br>(8 - 56)     | 27<br>(13 - 45)     | 36<br>(25 - 60)        | 11<br>(7 - 14)       | 10<br>(6 - 14)       |
| Fire, heat, and hot substances                  | 68<br>(43 - 87)          | 16<br>(8 - 27)     | 6<br>(3 - 8)        | 16<br>(12 - 21)        | 11<br>(7 - 14)       | 19<br>(10 - 28)      |
| Poisonings                                      | 43<br>(17 - 59)          | 2<br>(1 - 4)       | 2<br>(1 - 3)        | 21<br>(7 - 31)         | 7<br>(3 - 10)        | 11<br>(5 - 16)       |
| Exposure to mechanical forces                   | 105<br>(85 - 161)        | 11<br>(7 - 17)     | 12<br>(8 - 17)      | 53<br>(41 - 86)        | 15<br>(11 - 22)      | 14<br>(10 - 27)      |
| Unintentional firearm injuries                  | 33<br>(16 - 42)          | 1<br>(1 - 2)       | 2<br>(1 - 3)        | 20<br>(9 - 27)         | 5<br>(3 - 7)         | 5<br>(3 - 9)         |
| Unintentional suffocation                       | 34<br>(24 - 87)          | 2<br>(1 - 4)       | 2<br>(1 - 6)        | 19<br>(12 - 48)        | 5<br>(3 - 11)        | 6<br>(3 - 19)        |
| Other exposure to mechanical forces             | 37<br>(29 - 46)          | 8<br>(4 - 13)      | 7<br>(5 - 11)       | 14<br>(11 - 19)        | 5<br>(4 - 7)         | 3<br>(2 - 4)         |
| Adverse effects of medical treatment            | 153<br>(92 - 195)        | 21<br>(10 - 38)    | 5<br>(3 - 8)        | 37<br>(22 - 49)        | 30<br>(15 - 41)      | 60<br>(31 - 87)      |
| Animal contact                                  | 8<br>(1 - 13)            | 2<br>(0 - 4)       | 1<br>(0 - 2)        | 2<br>(0 - 3)           | 2<br>(0 - 3)         | 2<br>(0 - 3)         |
| Venomous animal contact                         | 6<br>(1 - 10)            | 2<br>(0 - 4)       | 1<br>(0 - 2)        | 1<br>(0 - 2)           | 1<br>(0 - 2)         | 1<br>(0 - 2)         |
| Non-venomous animal contact                     | 2<br>(0 - 4)             | 0<br>(0 - 1)       | 0<br>(0 - 0)        | 0<br>(0 - 1)           | 0<br>(0 - 1)         | 1<br>(0 - 1)         |
| Foreign body                                    | 207<br>(130 - 352)       | 110<br>(62 - 209)  | 18<br>(11 - 30)     | 42<br>(28 - 71)        | 16<br>(11 - 28)      | 21<br>(12 - 32)      |
| Pulmonary aspiration and foreign body in airway | 206<br>(129 - 350)       | 110<br>(62 - 209)  | 17<br>(10 - 29)     | 42<br>(28 - 70)        | 16<br>(10 - 28)      | 20<br>(12 - 32)      |
| Foreign body in other body part                 | 1<br>(1 - 2)             | 0<br>(0 - 0)       | 0<br>(0 - 1)        | 1<br>(0 - 1)           | 0<br>(0 - 0)         | 0<br>(0 - 0)         |
| Other unintentional injuries                    | 40<br>(3 - 58)           | 5<br>(0 - 10)      | 3<br>(0 - 6)        | 14<br>(2 - 22)         | 5<br>(0 - 9)         | 14<br>(0 - 25)       |
| Self-harm and interpersonal violence            | 1,184<br>(813 - 1,485)   | 88<br>(31 - 166)   | 83<br>(44 - 129)    | 834<br>(573 - 1,056)   | 120<br>(85 - 173)    | 59<br>(40 - 108)     |
| Self-harm                                       | 294<br>(233 - 510)       | --                 | 14<br>(9 - 24)      | 206<br>(160 - 329)     | 42<br>(31 - 94)      | 31<br>(22 - 82)      |
| Interpersonal violence                          | 890<br>(494 - 1,186)     | 88<br>(31 - 166)   | 68<br>(29 - 115)    | 628<br>(348 - 850)     | 78<br>(43 - 115)     | 28<br>(14 - 50)      |
| Assault by firearm                              | 256<br>(75 - 456)        | 13<br>(2 - 31)     | 17<br>(4 - 37)      | 200<br>(57 - 372)      | 24<br>(6 - 49)       | 2<br>(1 - 6)         |
| Assault by sharp object                         | 191<br>(107 - 298)       | 15<br>(5 - 34)     | 12<br>(5 - 24)      | 136<br>(74 - 217)      | 20<br>(11 - 35)      | 8<br>(4 - 15)        |
| Assault by other means                          | 442<br>(268 - 704)       | 59<br>(21 - 116)   | 39<br>(18 - 73)     | 293<br>(173 - 493)     | 34<br>(18 - 60)      | 18<br>(8 - 32)       |

Web Table 31- Guinea deaths with 95% UI by age, sex, and cause in 2013

| Cause                                                             | Both Sexes, All Ages           | Both Sexes, 0-4 Years       | Both Sexes, 5-14 Years   | Both Sexes, 15-49 Years     | Both Sexes, 50-69 Years     | Both Sexes, 70-80 Years     |
|-------------------------------------------------------------------|--------------------------------|-----------------------------|--------------------------|-----------------------------|-----------------------------|-----------------------------|
| All causes                                                        | 110,013<br>(100,891 - 118,581) | 46,301<br>(42,449 - 50,249) | 4,939<br>(4,418 - 5,600) | 22,143<br>(19,754 - 24,732) | 20,346<br>(16,970 - 23,842) | 16,284<br>(14,464 - 18,082) |
| Communicable, maternal, neonatal, and nutritional diseases        | 69,496<br>(63,428 - 75,455)    | 41,408<br>(37,332 - 45,614) | 3,359<br>(2,847 - 4,128) | 13,087<br>(11,540 - 15,090) | 6,520<br>(5,496 - 7,641)    | 5,123<br>(4,048 - 6,031)    |
| HIV/AIDS and tuberculosis                                         | 9,904<br>(7,717 - 12,957)      | 647<br>(515 - 814)          | 389<br>(317 - 464)       | 6,027<br>(4,348 - 8,552)    | 2,104<br>(1,660 - 2,570)    | 736<br>(550 - 924)          |
| Tuberculosis                                                      | 3,479<br>(2,696 - 4,378)       | 191<br>(114 - 284)          | 94<br>(64 - 136)         | 1,317<br>(969 - 1,722)      | 1,233<br>(888 - 1,629)      | 643<br>(449 - 826)          |
| HIV/AIDS                                                          | 6,425<br>(4,343 - 9,729)       | 457<br>(330 - 603)          | 295<br>(229 - 365)       | 4,710<br>(2,916 - 7,542)    | 871<br>(574 - 1,243)        | 93<br>(53 - 145)            |
| HIV/AIDS resulting in mycobacterial infection                     | 393<br>(250 - 596)             | 27<br>(18 - 38)             | 16<br>(12 - 22)          | 287<br>(171 - 465)          | 56<br>(36 - 84)             | 6<br>(4 - 10)               |
| HIV/AIDS resulting in other diseases                              | 6,032<br>(4,064 - 9,050)       | 430<br>(311 - 566)          | 278<br>(216 - 343)       | 4,423<br>(2,724 - 7,069)    | 814<br>(538 - 1,165)        | 86<br>(49 - 134)            |
| Diarrhea, lower respiratory, and other common infectious diseases | 24,408<br>(19,357 - 30,147)    | 14,308<br>(10,285 - 18,839) | 1,546<br>(1,116 - 2,399) | 2,541<br>(1,977 - 3,163)    | 2,862<br>(2,108 - 3,735)    | 3,151<br>(2,302 - 3,958)    |
| Diarrheal diseases                                                | 5,512<br>(3,879 - 7,585)       | 2,617<br>(1,236 - 4,597)    | 351<br>(187 - 560)       | 852<br>(612 - 1,134)        | 873<br>(566 - 1,279)        | 819<br>(553 - 1,165)        |
| Intestinal infectious diseases                                    | 550<br>(276 - 934)             | 171<br>(70 - 305)           | 169<br>(81 - 294)        | 172<br>(81 - 302)           | 28<br>(13 - 52)             | 9<br>(4 - 17)               |
| Typhoid fever                                                     | 358<br>(170 - 629)             | 105<br>(40 - 200)           | 114<br>(52 - 206)        | 115<br>(52 - 205)           | 18<br>(8 - 34)              | 5<br>(3 - 10)               |
| Paratyphoid fever                                                 | 160<br>(75 - 287)              | 48<br>(17 - 97)             | 52<br>(22 - 102)         | 50<br>(20 - 98)             | 8<br>(3 - 17)               | 2<br>(1 - 5)                |
| Other intestinal infectious diseases                              | 32<br>(18 - 50)                | 17<br>(7 - 33)              | 4<br>(1 - 10)            | 7<br>(2 - 15)               | 3<br>(0 - 9)                | 1<br>(0 - 6)                |
| Lower respiratory infections                                      | 12,697<br>(9,365 - 15,782)     | 7,730<br>(5,007 - 10,404)   | 397<br>(247 - 575)       | 809<br>(594 - 1,063)        | 1,608<br>(1,066 - 2,174)    | 2,153<br>(1,445 - 2,812)    |
| Upper respiratory infections                                      | 17<br>(9 - 34)                 | 7<br>(1 - 20)               | 1<br>(0 - 3)             | 4<br>(1 - 7)                | 3<br>(1 - 8)                | 2<br>(0 - 6)                |
| Otitis media                                                      | 7<br>(5 - 8)                   | 2<br>(1 - 3)                | 1<br>(0 - 1)             | 1<br>(1 - 1)                | 2<br>(1 - 2)                | 2<br>(1 - 2)                |
| Meningitis                                                        | 2,856<br>(2,058 - 3,799)       | 1,519<br>(848 - 2,447)      | 311<br>(195 - 447)       | 578<br>(401 - 771)          | 303<br>(192 - 439)          | 146<br>(86 - 214)           |
| Pneumococcal meningitis                                           | 712<br>(500 - 989)             | 327<br>(162 - 557)          | 92<br>(50 - 154)         | 173<br>(112 - 256)          | 81<br>(42 - 137)            | 39<br>(20 - 62)             |
| H influenzae type B meningitis                                    | 491<br>(320 - 737)             | 342<br>(193 - 570)          | 50<br>(26 - 81)          | 64<br>(37 - 97)             | 25<br>(12 - 45)             | 10<br>(5 - 17)              |
| Meningococcal meningitis                                          | 1,302<br>(872 - 1,797)         | 706<br>(376 - 1,169)        | 139<br>(82 - 213)        | 249<br>(153 - 341)          | 139<br>(80 - 214)           | 69<br>(36 - 110)            |
| Other meningitis                                                  | 351<br>(244 - 491)             | 144<br>(72 - 256)           | 29<br>(14 - 52)          | 92<br>(58 - 140)            | 57<br>(28 - 95)             | 28<br>(15 - 46)             |
| Encephalitis                                                      | 119<br>(87 - 162)              | 48<br>(25 - 87)             | 15<br>(9 - 24)           | 28<br>(19 - 40)             | 18<br>(9 - 26)              | 10<br>(4 - 15)              |
| Diphtheria                                                        | 23<br>(1 - 99)                 | 17<br>(0 - 92)              | 4<br>(0 - 24)            | 1<br>(0 - 4)                | 0<br>(0 - 2)                | --                          |
| Whooping cough                                                    | 508<br>(1 - 2,375)             | 473<br>(1 - 2,218)          | 29<br>(0 - 148)          | 5<br>(0 - 26)               | 1<br>(0 - 3)                | --                          |
| Tetanus                                                           | 294<br>(195 - 468)             | 200<br>(120 - 344)          | 19<br>(9 - 43)           | 46<br>(27 - 93)             | 23<br>(12 - 50)             | 7<br>(3 - 18)               |
| Measles                                                           | 1,807<br>(51 - 9,429)          | 1,518<br>(43 - 7,709)       | 246<br>(6 - 1,392)       | 42<br>(1 - 252)             | 1<br>(0 - 7)                | --                          |
| Varicella and herpes zoster                                       | 18<br>(8 - 33)                 | 7<br>(1 - 20)               | 2<br>(0 - 6)             | 4<br>(1 - 9)                | 2<br>(0 - 5)                | 4<br>(0 - 12)               |
| Neglected tropical diseases and malaria                           | 15,175<br>(10,096 - 21,175)    | 11,690<br>(7,015 - 17,329)  | 1,010<br>(604 - 1,561)   | 1,134<br>(740 - 1,832)      | 796<br>(472 - 1,387)        | 545<br>(273 - 1,024)        |
| Malaria                                                           | 14,597<br>(9,576 - 20,495)     | 11,591<br>(6,925 - 17,263)  | 917<br>(506 - 1,474)     | 870<br>(507 - 1,557)        | 702<br>(380 - 1,295)        | 517<br>(245 - 994)          |
| Leishmaniasis                                                     | 0<br>(0 - 1)                   | 0<br>(0 - 0)                | 0<br>(0 - 0)             | 0<br>(0 - 0)                | 0<br>(0 - 0)                | 0<br>(0 - 0)                |
| Visceral leishmaniasis                                            | 0<br>(0 - 1)                   | 0<br>(0 - 0)                | 0<br>(0 - 0)             | 0<br>(0 - 0)                | 0<br>(0 - 0)                | 0<br>(0 - 0)                |
| African trypanosomiasis                                           | 301<br>(128 - 573)             | 16<br>(5 - 34)              | 38<br>(15 - 74)          | 186<br>(78 - 353)           | 51<br>(21 - 98)             | 11<br>(5 - 20)              |
| Schistosomiasis                                                   | 48<br>(35 - 64)                | 1<br>(0 - 2)                | 2<br>(1 - 3)             | 17<br>(12 - 25)             | 19<br>(12 - 29)             | 8<br>(5 - 12)               |
| Cysticercosis                                                     | 3<br>(1 - 10)                  | 0<br>(0 - 1)                | 0<br>(0 - 1)             | 2<br>(0 - 5)                | 1<br>(0 - 2)                | 0<br>(0 - 1)                |
| Cystic echinococcosis                                             | 6<br>(5 - 7)                   | 1<br>(0 - 2)                | 1<br>(1 - 2)             | 2<br>(2 - 3)                | 1<br>(1 - 1)                | 0<br>(0 - 0)                |
| Dengue                                                            | 7<br>(4 - 10)                  | 3<br>(1 - 5)                | 2<br>(1 - 3)             | 2<br>(1 - 3)                | 0<br>(0 - 1)                | 0<br>(0 - 0)                |
| Yellow fever                                                      | 22<br>(15 - 33)                | 2<br>(1 - 5)                | 5<br>(2 - 11)            | 12<br>(7 - 21)              | 3<br>(1 - 6)                | 1<br>(0 - 2)                |
| Rabies                                                            | 109<br>(63 - 161)              | 22<br>(7 - 46)              | 35<br>(18 - 60)          | 35<br>(23 - 52)             | 14<br>(7 - 21)              | 4<br>(1 - 7)                |
| Intestinal nematode infections                                    | 58<br>(27 - 96)                | 45<br>(19 - 82)             | 8<br>(2 - 21)            | 2<br>(0 - 9)                | 1<br>(0 - 7)                | 1<br>(0 - 4)                |
| Ascariasis                                                        | 58<br>(27 - 96)                | 45<br>(19 - 82)             | 8<br>(2 - 21)            | 2<br>(0 - 9)                | 1<br>(0 - 7)                | 1<br>(0 - 4)                |



Web Table 31- Guinea deaths with 95% UI by age, sex, and cause in 2013

| Cause                                                            | Both Sexes, All Ages        | Both Sexes, 0-4 Years      | Both Sexes, 5-14 Years | Both Sexes, 15-49 Years  | Both Sexes, 50-69 Years     | Both Sexes, 70-80 Years    |
|------------------------------------------------------------------|-----------------------------|----------------------------|------------------------|--------------------------|-----------------------------|----------------------------|
| Other neglected tropical diseases                                | 24<br>(17 - 45)             | 9<br>(5 - 18)              | 2<br>(1 - 5)           | 6<br>(4 - 12)            | 4<br>(3 - 7)                | 3<br>(2 - 5)               |
| Maternal disorders                                               | 2,720<br>(2,080 - 3,457)    | --                         | 28<br>(10 - 60)        | 2,693<br>(2,053 - 3,425) | --                          | --                         |
| Maternal hemorrhage                                              | 507<br>(344 - 711)          | --                         | 3<br>(1 - 6)           | 504<br>(341 - 709)       | --                          | --                         |
| Maternal sepsis and other maternal infections                    | 154<br>(92 - 235)           | --                         | 2<br>(0 - 4)           | 152<br>(91 - 234)        | --                          | --                         |
| Maternal hypertensive disorders                                  | 203<br>(118 - 294)          | --                         | 2<br>(1 - 4)           | 201<br>(117 - 292)       | --                          | --                         |
| Maternal obstructed labor                                        | 135<br>(81 - 202)           | --                         | 1<br>(0 - 2)           | 134<br>(81 - 200)        | --                          | --                         |
| Maternal abortive outcome                                        | 490<br>(351 - 660)          | --                         | 5<br>(2 - 12)          | 485<br>(347 - 655)       | --                          | --                         |
| Indirect maternal deaths                                         | 286<br>(190 - 415)          | --                         | 2<br>(1 - 5)           | 284<br>(188 - 412)       | --                          | --                         |
| Late maternal deaths                                             | 409<br>(239 - 598)          | --                         | 8<br>(2 - 18)          | 401<br>(233 - 590)       | --                          | --                         |
| Maternal deaths aggravated by HIV/AIDS                           | 17<br>(9 - 26)              | --                         | --                     | 17<br>(9 - 26)           | --                          | --                         |
| Other maternal disorders                                         | 516<br>(361 - 703)          | --                         | 5<br>(2 - 12)          | 510<br>(356 - 696)       | --                          | --                         |
| Neonatal disorders                                               | 10,818<br>(9,281 - 12,442)  | 10,818<br>(9,281 - 12,442) | --                     | --                       | --                          | --                         |
| Neonatal preterm birth complications                             | 3,878<br>(2,140 - 6,091)    | 3,878<br>(2,140 - 6,091)   | --                     | --                       | --                          | --                         |
| Neonatal encephalopathy due to birth asphyxia and trauma         | 3,275<br>(1,864 - 5,009)    | 3,275<br>(1,864 - 5,009)   | --                     | --                       | --                          | --                         |
| Neonatal sepsis and other neonatal infections                    | 2,645<br>(1,320 - 4,419)    | 2,645<br>(1,320 - 4,419)   | --                     | --                       | --                          | --                         |
| Hemolytic disease and other neonatal jaundice                    | 76<br>(30 - 168)            | 76<br>(30 - 168)           | --                     | --                       | --                          | --                         |
| Other neonatal disorders                                         | 944<br>(533 - 1,575)        | 944<br>(533 - 1,575)       | --                     | --                       | --                          | --                         |
| Nutritional deficiencies                                         | 4,722<br>(3,052 - 6,517)    | 2,757<br>(1,421 - 4,509)   | 269<br>(156 - 400)     | 540<br>(377 - 721)       | 588<br>(402 - 809)          | 568<br>(409 - 779)         |
| Protein-energy malnutrition                                      | 3,491<br>(2,091 - 5,198)    | 2,524<br>(1,296 - 4,126)   | 193<br>(108 - 296)     | 193<br>(106 - 345)       | 293<br>(182 - 451)          | 289<br>(180 - 447)         |
| Iodine deficiency                                                | 13<br>(2 - 41)              | 5<br>(0 - 33)              | 1<br>(0 - 7)           | 2<br>(0 - 8)             | 2<br>(0 - 11)               | 1<br>(0 - 8)               |
| Iron-deficiency anemia                                           | 1,199<br>(662 - 1,801)      | 225<br>(50 - 544)          | 74<br>(32 - 136)       | 340<br>(189 - 487)       | 285<br>(147 - 451)          | 275<br>(152 - 428)         |
| Other nutritional deficiencies                                   | 20<br>(10 - 35)             | 4<br>(1 - 10)              | 1<br>(0 - 2)           | 5<br>(2 - 9)             | 7<br>(2 - 14)               | 3<br>(2 - 6)               |
| Other communicable, maternal, neonatal, and nutritional diseases | 1,749<br>(1,164 - 2,577)    | 1,188<br>(673 - 1,937)     | 118<br>(65 - 191)      | 152<br>(105 - 211)       | 170<br>(111 - 248)          | 122<br>(73 - 187)          |
| Sexually transmitted diseases excluding HIV                      | 1,200<br>(660 - 2,014)      | 1,037<br>(537 - 1,775)     | 90<br>(44 - 159)       | 34<br>(21 - 65)          | 23<br>(12 - 49)             | 16<br>(7 - 34)             |
| Syphilis                                                         | 1,169<br>(631 - 1,984)      | 1,037<br>(537 - 1,775)     | 88<br>(42 - 157)       | 16<br>(10 - 33)          | 16<br>(8 - 33)              | 13<br>(6 - 27)             |
| Chlamydial infection                                             | 4<br>(2 - 7)                | --                         | 0<br>(0 - 0)           | 2<br>(1 - 4)             | 1<br>(0 - 3)                | 0<br>(0 - 1)               |
| Gonococcal infection                                             | 15<br>(10 - 30)             | --                         | 1<br>(1 - 2)           | 8<br>(5 - 16)            | 4<br>(2 - 9)                | 2<br>(1 - 4)               |
| Other sexually transmitted diseases                              | 12<br>(8 - 23)              | --                         | 1<br>(1 - 2)           | 7<br>(4 - 14)            | 3<br>(1 - 5)                | 1<br>(0 - 2)               |
| Hepatitis                                                        | 271<br>(143 - 383)          | 38<br>(14 - 70)            | 13<br>(6 - 19)         | 75<br>(42 - 112)         | 87<br>(45 - 137)            | 59<br>(30 - 93)            |
| Acute hepatitis A                                                | 18<br>(5 - 40)              | 11<br>(3 - 26)             | 3<br>(1 - 7)           | 3<br>(1 - 6)             | 1<br>(0 - 2)                | 0<br>(0 - 0)               |
| Acute hepatitis B                                                | 181<br>(93 - 278)           | 26<br>(9 - 53)             | 6<br>(2 - 11)          | 28<br>(13 - 50)          | 69<br>(34 - 112)            | 52<br>(25 - 83)            |
| Acute hepatitis C                                                | 8<br>(1 - 22)               | --                         | 1<br>(0 - 2)           | 2<br>(0 - 5)             | 3<br>(1 - 10)               | 2<br>(0 - 8)               |
| Acute hepatitis E                                                | 64<br>(33 - 105)            | 0<br>(0 - 1)               | 3<br>(1 - 5)           | 43<br>(23 - 69)          | 14<br>(6 - 28)              | 4<br>(2 - 11)              |
| Other infectious diseases                                        | 278<br>(183 - 428)          | 114<br>(52 - 230)          | 15<br>(6 - 28)         | 43<br>(23 - 77)          | 59<br>(31 - 112)            | 47<br>(21 - 102)           |
| Non-communicable diseases                                        | 33,998<br>(28,312 - 39,752) | 3,638<br>(2,049 - 6,208)   | 824<br>(563 - 1,157)   | 6,287<br>(4,976 - 7,681) | 12,742<br>(10,203 - 15,332) | 10,506<br>(9,106 - 12,094) |
| Neoplasms                                                        | 6,708<br>(5,435 - 8,205)    | 78<br>(43 - 122)           | 83<br>(58 - 110)       | 2,104<br>(1,631 - 2,674) | 3,058<br>(2,385 - 3,878)    | 1,385<br>(1,165 - 1,651)   |
| Esophageal cancer                                                | 93<br>(68 - 130)            | --                         | --                     | 21<br>(14 - 32)          | 41<br>(28 - 59)             | 31<br>(22 - 45)            |
| Stomach cancer                                                   | 694<br>(560 - 854)          | --                         | --                     | 222<br>(170 - 292)       | 352<br>(271 - 453)          | 121<br>(95 - 153)          |
| Liver cancer                                                     | 2,247<br>(1,735 - 2,914)    | --                         | 7<br>(4 - 11)          | 971<br>(696 - 1,344)     | 951<br>(701 - 1,256)        | 319<br>(238 - 433)         |
| Liver cancer due to hepatitis B                                  | 1,044<br>(719 - 1,471)      | --                         | 3<br>(1 - 5)           | 518<br>(332 - 753)       | 426<br>(254 - 623)          | 98<br>(59 - 150)           |

Web Table 31- Guinea deaths with 95% UI by age, sex, and cause in 2013

| Cause                                | Both Sexes, All Ages        | Both Sexes, 0-4 Years | Both Sexes, 5-14 Years | Both Sexes, 15-49 Years  | Both Sexes, 50-69 Years  | Both Sexes, 70-80 Years  |
|--------------------------------------|-----------------------------|-----------------------|------------------------|--------------------------|--------------------------|--------------------------|
| Liver cancer due to hepatitis C      | 654<br>(306 - 1,068)        | --                    | 0<br>(0 - 1)           | 211<br>(76 - 383)        | 307<br>(131 - 528)       | 136<br>(77 - 206)        |
| Liver cancer due to alcohol use      | 212<br>(122 - 343)          | --                    | --                     | 63<br>(31 - 112)         | 98<br>(52 - 174)         | 51<br>(26 - 85)          |
| Liver cancer due to other causes     | 337<br>(221 - 510)          | --                    | 4<br>(2 - 7)           | 180<br>(117 - 277)       | 120<br>(66 - 201)        | 34<br>(19 - 56)          |
| Larynx cancer                        | 17<br>(11 - 40)             | --                    | --                     | 3<br>(2 - 5)             | 10<br>(5 - 25)           | 5<br>(3 - 12)            |
| Tracheal, bronchus and lung cancer   | 347<br>(270 - 430)          | --                    | --                     | 108<br>(79 - 145)        | 191<br>(145 - 244)       | 48<br>(38 - 59)          |
| Breast cancer                        | 312<br>(220 - 476)          | --                    | --                     | 105<br>(76 - 153)        | 162<br>(106 - 258)       | 45<br>(31 - 68)          |
| Cervical cancer                      | 806<br>(548 - 1,164)        | --                    | --                     | 195<br>(135 - 285)       | 481<br>(300 - 724)       | 131<br>(80 - 204)        |
| Uterine cancer                       | 68<br>(41 - 102)            | --                    | --                     | 6<br>(4 - 9)             | 28<br>(16 - 47)          | 35<br>(17 - 54)          |
| Prostate cancer                      | 191<br>(122 - 302)          | --                    | --                     | 3<br>(2 - 5)             | 43<br>(26 - 72)          | 145<br>(91 - 230)        |
| Colon and rectum cancer              | 174<br>(141 - 210)          | --                    | --                     | 51<br>(39 - 64)          | 73<br>(56 - 93)          | 50<br>(41 - 61)          |
| Lip and oral cavity cancer           | 91<br>(59 - 124)            | --                    | --                     | 38<br>(21 - 58)          | 35<br>(23 - 48)          | 18<br>(13 - 25)          |
| Nasopharynx cancer                   | 33<br>(16 - 50)             | --                    | 1<br>(0 - 2)           | 11<br>(7 - 15)           | 17<br>(7 - 30)           | 4<br>(1 - 9)             |
| Other pharynx cancer                 | 36<br>(25 - 47)             | --                    | --                     | 7<br>(5 - 11)            | 21<br>(13 - 30)          | 8<br>(3 - 11)            |
| Gallbladder and biliary tract cancer | 62<br>(43 - 90)             | --                    | --                     | 14<br>(8 - 21)           | 31<br>(19 - 48)          | 17<br>(11 - 26)          |
| Pancreatic cancer                    | 116<br>(94 - 143)           | --                    | --                     | 20<br>(15 - 26)          | 68<br>(53 - 89)          | 27<br>(21 - 36)          |
| Malignant skin melanoma              | 37<br>(24 - 48)             | --                    | --                     | 7<br>(4 - 10)            | 14<br>(9 - 19)           | 16<br>(10 - 22)          |
| Non-melanoma skin cancer             | 11<br>(8 - 16)              | --                    | --                     | 2<br>(1 - 3)             | 4<br>(2 - 6)             | 5<br>(3 - 8)             |
| Ovarian cancer                       | 159<br>(103 - 228)          | --                    | --                     | 40<br>(25 - 60)          | 98<br>(60 - 150)         | 21<br>(13 - 31)          |
| Testicular cancer                    | 4<br>(2 - 6)                | --                    | --                     | 3<br>(2 - 5)             | 1<br>(0 - 1)             | 0<br>(0 - 1)             |
| Kidney cancer                        | 84<br>(60 - 112)            | 1<br>(0 - 2)          | 1<br>(1 - 2)           | 17<br>(11 - 26)          | 50<br>(33 - 71)          | 14<br>(10 - 20)          |
| Bladder cancer                       | 250<br>(189 - 313)          | --                    | --                     | 34<br>(20 - 50)          | 119<br>(87 - 158)        | 97<br>(73 - 127)         |
| Brain and nervous system cancer      | 96<br>(54 - 128)            | 1<br>(0 - 2)          | 2<br>(1 - 4)           | 12<br>(7 - 17)           | 25<br>(15 - 35)          | 55<br>(22 - 79)          |
| Thyroid cancer                       | 32<br>(14 - 46)             | --                    | 0<br>(0 - 1)           | 6<br>(2 - 9)             | 17<br>(7 - 27)           | 8<br>(3 - 12)            |
| Mesothelioma                         | 6<br>(5 - 8)                | --                    | --                     | 2<br>(1 - 2)             | 3<br>(2 - 5)             | 2<br>(1 - 2)             |
| Hodgkin lymphoma                     | 32<br>(20 - 43)             | 2<br>(1 - 4)          | 4<br>(2 - 7)           | 12<br>(7 - 18)           | 8<br>(5 - 12)            | 6<br>(3 - 11)            |
| Non-Hodgkin lymphoma                 | 211<br>(159 - 280)          | 8<br>(3 - 16)         | 17<br>(10 - 24)        | 77<br>(55 - 107)         | 62<br>(41 - 91)          | 48<br>(33 - 72)          |
| Multiple myeloma                     | 23<br>(16 - 35)             | --                    | --                     | 5<br>(4 - 7)             | 11<br>(7 - 18)           | 7<br>(4 - 12)            |
| Leukemia                             | 85<br>(69 - 104)            | 5<br>(2 - 9)          | 11<br>(7 - 15)         | 27<br>(20 - 34)          | 25<br>(18 - 34)          | 19<br>(14 - 24)          |
| Other neoplasms                      | 388<br>(302 - 559)          | 61<br>(31 - 100)      | 41<br>(24 - 62)        | 84<br>(61 - 128)         | 120<br>(80 - 192)        | 82<br>(58 - 124)         |
| Cardiovascular diseases              | 12,834<br>(10,088 - 15,640) | 310<br>(175 - 478)    | 116<br>(77 - 164)      | 1,472<br>(1,102 - 1,871) | 5,439<br>(4,142 - 6,707) | 5,498<br>(4,316 - 6,708) |
| Rheumatic heart disease              | 162<br>(94 - 401)           | 7<br>(2 - 17)         | 9<br>(4 - 19)          | 39<br>(20 - 113)         | 54<br>(26 - 153)         | 52<br>(32 - 102)         |
| Ischemic heart disease               | 3,380<br>(2,413 - 4,411)    | 12<br>(4 - 27)        | 14<br>(8 - 21)         | 370<br>(262 - 490)       | 1,483<br>(1,029 - 1,931) | 1,501<br>(1,017 - 2,050) |
| Cerebrovascular disease              | 6,261<br>(4,933 - 7,790)    | 101<br>(56 - 157)     | 38<br>(23 - 58)        | 601<br>(419 - 796)       | 2,627<br>(1,991 - 3,365) | 2,895<br>(2,318 - 3,665) |
| Ischemic stroke                      | 3,831<br>(2,577 - 4,868)    | 14<br>(4 - 30)        | 5<br>(2 - 11)          | 140<br>(84 - 205)        | 1,509<br>(924 - 2,052)   | 2,163<br>(1,482 - 2,677) |
| Hemorrhagic stroke                   | 2,430<br>(1,696 - 3,810)    | 87<br>(48 - 133)      | 33<br>(20 - 50)        | 461<br>(308 - 614)       | 1,118<br>(747 - 1,815)   | 731<br>(427 - 1,378)     |
| Hypertensive heart disease           | 849<br>(437 - 1,285)        | 4<br>(1 - 7)          | 2<br>(1 - 3)           | 81<br>(33 - 138)         | 344<br>(159 - 564)       | 419<br>(223 - 620)       |
| Cardiomyopathy and myocarditis       | 583<br>(372 - 749)          | 56<br>(21 - 109)      | 19<br>(10 - 30)        | 118<br>(75 - 164)        | 213<br>(122 - 302)       | 177<br>(98 - 261)        |
| Atrial fibrillation and flutter      | 1<br>(0 - 1)                | --                    | --                     | 0<br>(0 - 0)             | 0<br>(0 - 0)             | 0<br>(0 - 0)             |
| Aortic aneurysm                      | 107<br>(75 - 145)           | --                    | --                     | 13<br>(8 - 18)           | 51<br>(34 - 71)          | 43<br>(29 - 62)          |
| Peripheral vascular disease          | 4<br>(3 - 6)                | --                    | --                     | 0<br>(0 - 0)             | 2<br>(1 - 3)             | 2<br>(2 - 3)             |

Web Table 31- Guinea deaths with 95% UI by age, sex, and cause in 2013

| Cause                                               | Both Sexes, All Ages     | Both Sexes, 0-4 Years | Both Sexes, 5-14 Years | Both Sexes, 15-49 Years | Both Sexes, 50-69 Years | Both Sexes, 70-80 Years |
|-----------------------------------------------------|--------------------------|-----------------------|------------------------|-------------------------|-------------------------|-------------------------|
| Endocarditis                                        | 233<br>(161 - 328)       | 38<br>(14 - 73)       | 7<br>(4 - 11)          | 48<br>(32 - 72)         | 72<br>(46 - 116)        | 68<br>(45 - 109)        |
| Other cardiovascular and circulatory diseases       | 1,255<br>(931 - 2,209)   | 92<br>(49 - 155)      | 28<br>(17 - 44)        | 201<br>(140 - 345)      | 593<br>(409 - 981)      | 341<br>(226 - 714)      |
| Chronic respiratory diseases                        | 2,481<br>(1,886 - 4,133) | 125<br>(60 - 260)     | 36<br>(23 - 61)        | 270<br>(197 - 428)      | 973<br>(696 - 1,641)    | 1,077<br>(805 - 1,769)  |
| Chronic obstructive pulmonary disease               | 1,567<br>(1,141 - 2,719) | 58<br>(27 - 116)      | 15<br>(10 - 24)        | 95<br>(65 - 149)        | 618<br>(415 - 1,097)    | 780<br>(564 - 1,332)    |
| Pneumoconiosis                                      | 125<br>(77 - 237)        | 1<br>(0 - 4)          | 1<br>(1 - 3)           | 24<br>(14 - 41)         | 70<br>(39 - 133)        | 28<br>(14 - 60)         |
| Silicosis                                           | 23<br>(12 - 57)          | 0<br>(0 - 1)          | 0<br>(0 - 1)           | 5<br>(2 - 10)           | 7<br>(3 - 17)           | 11<br>(5 - 30)          |
| Asbestosis                                          | 9<br>(5 - 18)            | 0<br>(0 - 1)          | 0<br>(0 - 1)           | 2<br>(1 - 4)            | 5<br>(2 - 11)           | 1<br>(0 - 2)            |
| Coal workers pneumoconiosis                         | 39<br>(22 - 74)          | 0<br>(0 - 1)          | 0<br>(0 - 1)           | 2<br>(1 - 4)            | 32<br>(18 - 61)         | 4<br>(2 - 8)            |
| Other pneumoconiosis                                | 54<br>(33 - 89)          | 0<br>(0 - 1)          | 0<br>(0 - 1)           | 16<br>(9 - 25)          | 26<br>(14 - 44)         | 12<br>(7 - 23)          |
| Asthma                                              | 492<br>(337 - 883)       | 40<br>(15 - 94)       | 11<br>(7 - 24)         | 97<br>(68 - 177)        | 194<br>(125 - 350)      | 149<br>(92 - 263)       |
| Interstitial lung disease and pulmonary sarcoidosis | 135<br>(21 - 239)        | 1<br>(0 - 1)          | 1<br>(0 - 1)           | 6<br>(2 - 11)           | 52<br>(8 - 96)          | 76<br>(9 - 145)         |
| Other chronic respiratory diseases                  | 162<br>(110 - 292)       | 24<br>(11 - 54)       | 7<br>(4 - 12)          | 48<br>(33 - 78)         | 39<br>(22 - 78)         | 44<br>(25 - 94)         |
| Cirrhosis                                           | 1,720<br>(1,387 - 2,097) | 44<br>(17 - 84)       | 26<br>(18 - 36)        | 465<br>(343 - 614)      | 845<br>(647 - 1,073)    | 339<br>(259 - 429)      |
| Cirrhosis due to hepatitis B                        | 488<br>(286 - 781)       | 3<br>(1 - 7)          | 5<br>(2 - 9)           | 144<br>(88 - 242)       | 247<br>(136 - 405)      | 90<br>(43 - 145)        |
| Cirrhosis due to hepatitis C                        | 431<br>(247 - 640)       | 3<br>(1 - 8)          | 4<br>(1 - 9)           | 100<br>(45 - 156)       | 219<br>(117 - 348)      | 105<br>(58 - 169)       |
| Cirrhosis due to alcohol use                        | 540<br>(381 - 735)       | --                    | --                     | 128<br>(81 - 190)       | 293<br>(196 - 414)      | 120<br>(83 - 176)       |
| Cirrhosis due to other causes                       | 260<br>(190 - 352)       | 38<br>(15 - 72)       | 17<br>(10 - 24)        | 94<br>(62 - 129)        | 87<br>(54 - 137)        | 24<br>(15 - 38)         |
| Digestive diseases                                  | 1,920<br>(1,575 - 2,339) | 116<br>(46 - 237)     | 84<br>(58 - 113)       | 477<br>(366 - 607)      | 696<br>(532 - 881)      | 548<br>(436 - 681)      |
| Peptic ulcer disease                                | 482<br>(359 - 642)       | 13<br>(4 - 30)        | 12<br>(6 - 20)         | 113<br>(77 - 154)       | 192<br>(131 - 274)      | 151<br>(105 - 210)      |
| Gastritis and duodenitis                            | 91<br>(45 - 217)         | 8<br>(2 - 23)         | 6<br>(3 - 14)          | 21<br>(11 - 49)         | 29<br>(12 - 73)         | 27<br>(11 - 75)         |
| Appendicitis                                        | 152<br>(95 - 212)        | 17<br>(5 - 41)        | 17<br>(9 - 27)         | 42<br>(28 - 61)         | 43<br>(21 - 72)         | 34<br>(13 - 66)         |
| Paralytic ileus and intestinal obstruction          | 559<br>(363 - 746)       | 27<br>(8 - 57)        | 23<br>(12 - 35)        | 120<br>(66 - 178)       | 216<br>(131 - 300)      | 173<br>(115 - 257)      |
| Inguinal, femoral, and abdominal hernia             | 56<br>(34 - 88)          | 2<br>(1 - 4)          | 1<br>(1 - 3)           | 12<br>(7 - 21)          | 21<br>(12 - 33)         | 19<br>(11 - 32)         |
| Inflammatory bowel disease                          | 108<br>(69 - 149)        | 23<br>(7 - 56)        | 5<br>(3 - 9)           | 28<br>(16 - 39)         | 30<br>(15 - 46)         | 23<br>(11 - 34)         |
| Vascular intestinal disorders                       | 8<br>(4 - 16)            | 1<br>(0 - 2)          | 0<br>(0 - 1)           | 2<br>(1 - 3)            | 3<br>(1 - 6)            | 3<br>(1 - 6)            |
| Gallbladder and biliary diseases                    | 139<br>(97 - 182)        | 4<br>(2 - 8)          | 6<br>(2 - 10)          | 29<br>(17 - 41)         | 51<br>(32 - 77)         | 49<br>(31 - 71)         |
| Pancreatitis                                        | 116<br>(64 - 170)        | 1<br>(0 - 3)          | 2<br>(1 - 3)           | 49<br>(25 - 77)         | 42<br>(23 - 68)         | 22<br>(11 - 36)         |
| Other digestive diseases                            | 209<br>(155 - 286)       | 20<br>(7 - 52)        | 12<br>(7 - 18)         | 61<br>(43 - 86)         | 69<br>(47 - 99)         | 47<br>(29 - 73)         |
| Neurological disorders                              | 816<br>(685 - 975)       | 92<br>(44 - 164)      | 45<br>(25 - 70)        | 166<br>(116 - 234)      | 98<br>(75 - 126)        | 416<br>(343 - 505)      |
| Alzheimer disease and other dementias               | 428<br>(349 - 526)       | --                    | --                     | 0<br>(0 - 1)            | 48<br>(36 - 64)         | 379<br>(309 - 464)      |
| Parkinson disease                                   | 4<br>(3 - 8)             | --                    | --                     | 1<br>(0 - 1)            | 1<br>(0 - 2)            | 3<br>(2 - 6)            |
| Epilepsy                                            | 304<br>(219 - 413)       | 77<br>(34 - 144)      | 39<br>(19 - 64)        | 141<br>(95 - 208)       | 25<br>(15 - 41)         | 22<br>(13 - 35)         |
| Multiple sclerosis                                  | 1<br>(0 - 4)             | --                    | --                     | 0<br>(0 - 2)            | 0<br>(0 - 2)            | 0<br>(0 - 1)            |
| Other neurological disorders                        | 79<br>(57 - 104)         | 15<br>(7 - 36)        | 6<br>(4 - 9)           | 23<br>(15 - 32)         | 23<br>(16 - 31)         | 12<br>(8 - 16)          |
| Mental and substance use disorders                  | 410<br>(245 - 555)       | 15<br>(3 - 37)        | 0<br>(0 - 0)           | 273<br>(151 - 386)      | 95<br>(53 - 146)        | 27<br>(15 - 43)         |
| Schizophrenia                                       | 2<br>(1 - 2)             | --                    | --                     | 1<br>(0 - 1)            | 1<br>(0 - 1)            | 0<br>(0 - 0)            |
| Alcohol use disorders                               | 156<br>(64 - 282)        | --                    | --                     | 76<br>(32 - 138)        | 64<br>(25 - 118)        | 16<br>(5 - 32)          |
| Drug use disorders                                  | 252<br>(147 - 350)       | 15<br>(3 - 37)        | --                     | 196<br>(99 - 291)       | 30<br>(21 - 39)         | 11<br>(8 - 14)          |
| Opioid use disorders                                | 27<br>(15 - 38)          | 2<br>(0 - 4)          | --                     | 21<br>(10 - 32)         | 3<br>(2 - 4)            | 1<br>(1 - 2)            |
| Cocaine use disorders                               | 1<br>(1 - 1)             | 0<br>(0 - 0)          | --                     | 1<br>(0 - 1)            | 0<br>(0 - 0)            | 0<br>(0 - 0)            |

Web Table 31- Guinea deaths with 95% UI by age, sex, and cause in 2013

| Cause                                               | Both Sexes, All Ages     | Both Sexes, 0-4 Years    | Both Sexes, 5-14 Years | Both Sexes, 15-49 Years | Both Sexes, 50-69 Years  | Both Sexes, 70-80 Years |
|-----------------------------------------------------|--------------------------|--------------------------|------------------------|-------------------------|--------------------------|-------------------------|
| Amphetamine use disorders                           | 1<br>(0 - 1)             | 0<br>(0 - 0)             | --                     | 1<br>(0 - 1)            | 0<br>(0 - 0)             | 0<br>(0 - 0)            |
| Other drug use disorders                            | 224<br>(131 - 313)       | 14<br>(3 - 33)           | --                     | 173<br>(89 - 257)       | 27<br>(19 - 35)          | 10<br>(7 - 13)          |
| Eating disorders                                    | 0<br>(0 - 0)             | --                       | 0<br>(0 - 0)           | 0<br>(0 - 0)            | --                       | --                      |
| Anorexia nervosa                                    | 0<br>(0 - 0)             | --                       | 0<br>(0 - 0)           | 0<br>(0 - 0)            | --                       | --                      |
| Diabetes, urogenital, blood, and endocrine diseases | 4,402<br>(3,448 - 5,622) | 728<br>(367 - 1,355)     | 308<br>(158 - 539)     | 888<br>(640 - 1,275)    | 1,395<br>(1,076 - 1,760) | 1,083<br>(883 - 1,324)  |
| Diabetes mellitus                                   | 1,530<br>(1,219 - 1,906) | 18<br>(11 - 27)          | 8<br>(5 - 12)          | 171<br>(130 - 214)      | 749<br>(566 - 965)       | 585<br>(448 - 744)      |
| Acute glomerulonephritis                            | 16<br>(12 - 25)          | 2<br>(1 - 6)             | 2<br>(1 - 4)           | 5<br>(4 - 8)            | 5<br>(3 - 8)             | 1<br>(1 - 3)            |
| Chronic kidney disease                              | 707<br>(557 - 857)       | 61<br>(30 - 101)         | 35<br>(20 - 49)        | 207<br>(138 - 267)      | 223<br>(168 - 291)       | 181<br>(140 - 241)      |
| Chronic kidney disease due to diabetes mellitus     | 8<br>(4 - 13)            | 0<br>(0 - 0)             | 0<br>(0 - 0)           | 1<br>(0 - 1)            | 7<br>(3 - 11)            | 0<br>(0 - 1)            |
| Chronic kidney disease due to hypertension          | 234<br>(172 - 320)       | 6<br>(1 - 12)            | 3<br>(1 - 5)           | 46<br>(28 - 66)         | 95<br>(64 - 139)         | 84<br>(58 - 123)        |
| Chronic kidney disease due to glomerulonephritis    | 305<br>(224 - 384)       | 39<br>(20 - 63)          | 23<br>(14 - 32)        | 117<br>(76 - 154)       | 72<br>(48 - 104)         | 54<br>(37 - 76)         |
| Chronic kidney disease due to other causes          | 159<br>(92 - 221)        | 16<br>(5 - 34)           | 9<br>(3 - 16)          | 43<br>(24 - 73)         | 49<br>(27 - 82)          | 43<br>(23 - 68)         |
| Urinary diseases and male infertility               | 615<br>(428 - 770)       | 68<br>(30 - 128)         | 14<br>(8 - 22)         | 134<br>(76 - 186)       | 211<br>(139 - 290)       | 188<br>(134 - 249)      |
| Interstitial nephritis and urinary tract infections | 544<br>(368 - 691)       | 62<br>(25 - 122)         | 11<br>(6 - 19)         | 115<br>(62 - 159)       | 185<br>(121 - 254)       | 170<br>(122 - 226)      |
| Urolithiasis                                        | 8<br>(3 - 23)            | --                       | 1<br>(0 - 2)           | 2<br>(1 - 7)            | 3<br>(1 - 10)            | 1<br>(0 - 5)            |
| Other urinary diseases                              | 64<br>(37 - 92)          | 6<br>(2 - 14)            | 2<br>(1 - 4)           | 17<br>(9 - 27)          | 23<br>(10 - 38)          | 16<br>(8 - 29)          |
| Gynecological diseases                              | 7<br>(5 - 12)            | --                       | --                     | 4<br>(2 - 7)            | 3<br>(1 - 5)             | 1<br>(1 - 2)            |
| Uterine fibroids                                    | 2<br>(1 - 3)             | --                       | --                     | 1<br>(0 - 1)            | 1<br>(0 - 1)             | 0<br>(0 - 1)            |
| Polycystic ovarian syndrome                         | 0<br>(0 - 1)             | --                       | --                     | 0<br>(0 - 1)            | 0<br>(0 - 0)             | --                      |
| Endometriosis                                       | 1<br>(0 - 1)             | --                       | --                     | 1<br>(0 - 1)            | 0<br>(0 - 0)             | --                      |
| Genital prolapse                                    | 1<br>(1 - 2)             | --                       | --                     | 0<br>(0 - 1)            | 0<br>(0 - 1)             | 0<br>(0 - 0)            |
| Other gynecological diseases                        | 4<br>(2 - 6)             | --                       | --                     | 2<br>(1 - 4)            | 1<br>(1 - 3)             | 0<br>(0 - 1)            |
| Hemoglobinopathies and hemolytic anemias            | 1,078<br>(446 - 2,054)   | 467<br>(164 - 1,046)     | 227<br>(82 - 471)      | 268<br>(100 - 693)      | 86<br>(36 - 216)         | 30<br>(14 - 65)         |
| Thalassemias                                        | 4<br>(1 - 9)             | 3<br>(1 - 7)             | 1<br>(0 - 1)           | 1<br>(0 - 2)            | 0<br>(0 - 0)             | 0<br>(0 - 0)            |
| Sickle cell disorders                               | 1,034<br>(426 - 1,984)   | 455<br>(158 - 1,024)     | 225<br>(81 - 467)      | 264<br>(99 - 681)       | 81<br>(34 - 207)         | 9<br>(4 - 19)           |
| G6PD deficiency                                     | 4<br>(1 - 8)             | 2<br>(1 - 5)             | 0<br>(0 - 1)           | 1<br>(0 - 2)            | 0<br>(0 - 1)             | 0<br>(0 - 1)            |
| Other hemoglobinopathies and hemolytic anemias      | 36<br>(17 - 71)          | 8<br>(4 - 13)            | 1<br>(0 - 2)           | 3<br>(1 - 8)            | 4<br>(2 - 9)             | 21<br>(9 - 45)          |
| Endocrine, metabolic, blood, and immune disorders   | 448<br>(308 - 590)       | 111<br>(56 - 218)        | 23<br>(12 - 41)        | 100<br>(65 - 137)       | 119<br>(75 - 169)        | 96<br>(52 - 138)        |
| Musculoskeletal disorders                           | 113<br>(76 - 186)        | --                       | 13<br>(6 - 25)         | 37<br>(23 - 63)         | 39<br>(26 - 60)          | 25<br>(17 - 42)         |
| Rheumatoid arthritis                                | 15<br>(8 - 24)           | --                       | 1<br>(0 - 3)           | 3<br>(1 - 5)            | 5<br>(2 - 10)            | 6<br>(3 - 11)           |
| Other musculoskeletal disorders                     | 98<br>(66 - 168)         | --                       | 11<br>(5 - 23)         | 34<br>(21 - 60)         | 34<br>(22 - 54)          | 19<br>(12 - 33)         |
| Other non-communicable diseases                     | 2,594<br>(1,443 - 4,718) | 2,132<br>(1,022 - 4,196) | 114<br>(57 - 223)      | 136<br>(102 - 177)      | 105<br>(75 - 141)        | 108<br>(75 - 148)       |
| Congenital anomalies                                | 2,249<br>(1,107 - 4,395) | 2,042<br>(955 - 4,118)   | 104<br>(49 - 213)      | 73<br>(48 - 110)        | 19<br>(13 - 26)          | 12<br>(9 - 16)          |
| Neural tube defects                                 | 564<br>(167 - 1,536)     | 530<br>(152 - 1,480)     | 19<br>(5 - 52)         | 12<br>(4 - 30)          | 1<br>(0 - 3)             | 1<br>(0 - 2)            |
| Congenital heart anomalies                          | 884<br>(435 - 1,777)     | 792<br>(364 - 1,633)     | 46<br>(22 - 93)        | 31<br>(19 - 48)         | 9<br>(6 - 13)            | 5<br>(4 - 8)            |
| Cleft lip and cleft palate                          | 12<br>(2 - 40)           | 12<br>(2 - 40)           | --                     | --                      | --                       | --                      |
| Down syndrome                                       | 272<br>(83 - 622)        | 239<br>(61 - 578)        | 17<br>(7 - 37)         | 12<br>(7 - 22)          | 3<br>(2 - 6)             | 0<br>(0 - 1)            |
| Chromosomal unbalanced rearrangements               | 78<br>(21 - 200)         | 72<br>(18 - 191)         | 3<br>(1 - 7)           | 3<br>(1 - 5)            | 0<br>(0 - 1)             | 0<br>(0 - 0)            |
| Other congenital anomalies                          | 440<br>(120 - 1,581)     | 398<br>(91 - 1,486)      | 18<br>(5 - 62)         | 14<br>(7 - 27)          | 5<br>(3 - 7)             | 5<br>(3 - 8)            |
| Skin and subcutaneous diseases                      | 321<br>(230 - 405)       | 66<br>(29 - 110)         | 10<br>(6 - 13)         | 63<br>(38 - 86)         | 86<br>(57 - 119)         | 96<br>(63 - 134)        |

Web Table 31- Guinea deaths with 95% UI by age, sex, and cause in 2013

| Cause                                           | Both Sexes, All Ages     | Both Sexes, 0-4 Years  | Both Sexes, 5-14 Years | Both Sexes, 15-49 Years  | Both Sexes, 50-69 Years | Both Sexes, 70-80 Years |
|-------------------------------------------------|--------------------------|------------------------|------------------------|--------------------------|-------------------------|-------------------------|
| Cellulitis                                      | 138<br>(92 - 188)        | 24<br>(10 - 45)        | 5<br>(3 - 8)           | 25<br>(14 - 36)          | 37<br>(21 - 55)         | 46<br>(27 - 72)         |
| Pyoderma                                        | 169<br>(118 - 225)       | 39<br>(16 - 73)        | 4<br>(2 - 6)           | 34<br>(21 - 48)          | 47<br>(30 - 72)         | 45<br>(26 - 75)         |
| Decubitus ulcer                                 | 6<br>(3 - 9)             | 0<br>(0 - 0)           | 0<br>(0 - 0)           | 1<br>(1 - 2)             | 1<br>(0 - 1)            | 4<br>(2 - 6)            |
| Other skin and subcutaneous diseases            | 8<br>(4 - 13)            | 2<br>(0 - 7)           | 0<br>(0 - 1)           | 3<br>(1 - 5)             | 1<br>(1 - 2)            | 1<br>(0 - 3)            |
| Sudden infant death syndrome                    | 24<br>(8 - 64)           | 24<br>(8 - 64)         | --                     | --                       | --                      | --                      |
| Injuries                                        | 6,519<br>(5,052 - 8,038) | 1,255<br>(667 - 1,939) | 755<br>(520 - 977)     | 2,769<br>(2,104 - 3,500) | 1,085<br>(807 - 1,352)  | 655<br>(443 - 831)      |
| Transport injuries                              | 3,068<br>(2,281 - 3,915) | 355<br>(163 - 632)     | 358<br>(235 - 498)     | 1,594<br>(1,156 - 2,098) | 539<br>(373 - 709)      | 222<br>(144 - 305)      |
| Road injuries                                   | 2,948<br>(2,210 - 3,754) | 321<br>(148 - 561)     | 338<br>(224 - 469)     | 1,563<br>(1,131 - 2,059) | 518<br>(364 - 676)      | 208<br>(140 - 285)      |
| Pedestrian road injuries                        | 818<br>(530 - 1,134)     | 108<br>(44 - 218)      | 119<br>(71 - 179)      | 358<br>(214 - 524)       | 158<br>(94 - 224)       | 76<br>(47 - 110)        |
| Cyclist road injuries                           | 161<br>(103 - 220)       | 22<br>(8 - 49)         | 31<br>(18 - 50)        | 57<br>(37 - 83)          | 39<br>(20 - 56)         | 12<br>(6 - 18)          |
| Motorcyclist road injuries                      | 354<br>(231 - 542)       | 24<br>(10 - 48)        | 23<br>(13 - 37)        | 243<br>(153 - 388)       | 49<br>(29 - 76)         | 14<br>(8 - 23)          |
| Motor vehicle road injuries                     | 1,526<br>(1,156 - 1,947) | 147<br>(71 - 252)      | 147<br>(90 - 210)      | 880<br>(628 - 1,177)     | 255<br>(174 - 341)      | 97<br>(63 - 140)        |
| Other road injuries                             | 88<br>(53 - 129)         | 19<br>(6 - 40)         | 18<br>(8 - 32)         | 26<br>(14 - 48)          | 17<br>(9 - 28)          | 9<br>(5 - 15)           |
| Other transport injuries                        | 120<br>(64 - 173)        | 34<br>(11 - 66)        | 19<br>(8 - 33)         | 31<br>(20 - 51)          | 22<br>(9 - 34)          | 14<br>(3 - 23)          |
| Unintentional injuries                          | 2,814<br>(2,148 - 3,515) | 877<br>(457 - 1,353)   | 376<br>(256 - 506)     | 757<br>(568 - 1,001)     | 424<br>(319 - 537)      | 379<br>(249 - 505)      |
| Falls                                           | 611<br>(472 - 786)       | 95<br>(42 - 171)       | 46<br>(28 - 70)        | 167<br>(112 - 248)       | 126<br>(87 - 180)       | 176<br>(110 - 252)      |
| Drowning                                        | 631<br>(376 - 990)       | 256<br>(86 - 487)      | 143<br>(75 - 231)      | 167<br>(100 - 277)       | 46<br>(32 - 62)         | 18<br>(12 - 26)         |
| Fire, heat, and hot substances                  | 340<br>(211 - 496)       | 138<br>(51 - 250)      | 37<br>(20 - 57)        | 77<br>(53 - 108)         | 49<br>(30 - 71)         | 39<br>(22 - 60)         |
| Poisonings                                      | 148<br>(99 - 248)        | 50<br>(20 - 104)       | 15<br>(9 - 25)         | 51<br>(32 - 101)         | 24<br>(15 - 35)         | 8<br>(5 - 12)           |
| Exposure to mechanical forces                   | 411<br>(301 - 528)       | 112<br>(56 - 185)      | 58<br>(35 - 92)        | 154<br>(106 - 226)       | 63<br>(40 - 87)         | 24<br>(12 - 34)         |
| Unintentional firearm injuries                  | 165<br>(116 - 247)       | 34<br>(16 - 71)        | 16<br>(9 - 28)         | 85<br>(54 - 137)         | 23<br>(14 - 35)         | 8<br>(5 - 12)           |
| Unintentional suffocation                       | 28<br>(10 - 52)          | 15<br>(5 - 39)         | 4<br>(1 - 7)           | 5<br>(2 - 9)             | 2<br>(1 - 4)            | 1<br>(0 - 1)            |
| Other exposure to mechanical forces             | 218<br>(132 - 309)       | 62<br>(24 - 116)       | 38<br>(19 - 70)        | 64<br>(42 - 98)          | 38<br>(16 - 59)         | 15<br>(4 - 24)          |
| Adverse effects of medical treatment            | 212<br>(87 - 364)        | 56<br>(15 - 121)       | 12<br>(4 - 22)         | 42<br>(20 - 72)          | 52<br>(19 - 100)        | 51<br>(15 - 99)         |
| Animal contact                                  | 99<br>(56 - 141)         | 22<br>(9 - 42)         | 18<br>(10 - 31)        | 25<br>(13 - 38)          | 20<br>(9 - 31)          | 14<br>(5 - 22)          |
| Venomous animal contact                         | 56<br>(30 - 88)          | 14<br>(5 - 31)         | 10<br>(5 - 20)         | 15<br>(7 - 24)           | 10<br>(4 - 18)          | 7<br>(2 - 12)           |
| Non-venomous animal contact                     | 43<br>(19 - 61)          | 8<br>(3 - 16)          | 8<br>(3 - 14)          | 10<br>(4 - 15)           | 10<br>(3 - 16)          | 7<br>(2 - 12)           |
| Foreign body                                    | 188<br>(119 - 314)       | 110<br>(55 - 210)      | 15<br>(9 - 24)         | 19<br>(12 - 28)          | 17<br>(10 - 24)         | 27<br>(14 - 39)         |
| Pulmonary aspiration and foreign body in airway | 180<br>(112 - 306)       | 108<br>(53 - 208)      | 14<br>(8 - 23)         | 17<br>(11 - 27)          | 15<br>(9 - 21)          | 25<br>(13 - 37)         |
| Foreign body in other body part                 | 7<br>(4 - 10)            | 2<br>(1 - 4)           | 1<br>(1 - 2)           | 1<br>(1 - 2)             | 2<br>(1 - 3)            | 1<br>(0 - 2)            |
| Other unintentional injuries                    | 173<br>(129 - 217)       | 38<br>(19 - 62)        | 30<br>(19 - 43)        | 57<br>(40 - 77)          | 26<br>(18 - 36)         | 21<br>(13 - 29)         |
| Self-harm and interpersonal violence            | 637<br>(434 - 837)       | 23<br>(11 - 43)        | 22<br>(13 - 33)        | 418<br>(279 - 586)       | 121<br>(63 - 175)       | 54<br>(20 - 81)         |
| Self-harm                                       | 397<br>(213 - 577)       | --                     | 10<br>(3 - 20)         | 229<br>(136 - 374)       | 106<br>(49 - 160)       | 52<br>(17 - 79)         |
| Interpersonal violence                          | 241<br>(159 - 349)       | 23<br>(11 - 43)        | 12<br>(7 - 20)         | 188<br>(118 - 286)       | 15<br>(10 - 24)         | 2<br>(1 - 4)            |
| Assault by firearm                              | 121<br>(62 - 184)        | 6<br>(2 - 12)          | 3<br>(2 - 6)           | 105<br>(51 - 164)        | 7<br>(4 - 11)           | 1<br>(0 - 1)            |
| Assault by sharp object                         | 49<br>(29 - 85)          | 4<br>(1 - 9)           | 2<br>(1 - 4)           | 38<br>(21 - 72)          | 4<br>(2 - 8)            | 1<br>(0 - 1)            |
| Assault by other means                          | 71<br>(45 - 113)         | 13<br>(6 - 27)         | 7<br>(4 - 12)          | 46<br>(27 - 80)          | 4<br>(3 - 8)            | 1<br>(1 - 2)            |

Web Table 31- Guinea deaths with 95% UI by age, sex, and cause in 2013

| Cause                                                             | Males, All Ages             | Males, 0-4 Years            | Males, 5-14 Years        | Males, 15-49 Years         | Males, 50-69 Years         | Males, 70-80 Years       |
|-------------------------------------------------------------------|-----------------------------|-----------------------------|--------------------------|----------------------------|----------------------------|--------------------------|
| All causes                                                        | 55,496<br>(50,255 - 60,887) | 24,331<br>(21,496 - 26,975) | 2,508<br>(2,190 - 2,877) | 11,083<br>(9,261 - 13,380) | 10,241<br>(8,268 - 12,434) | 7,333<br>(6,415 - 8,178) |
| Communicable, maternal, neonatal, and nutritional diseases        | 34,180<br>(30,440 - 37,877) | 21,684<br>(18,718 - 24,531) | 1,607<br>(1,309 - 2,010) | 5,235<br>(4,345 - 6,554)   | 3,289<br>(2,699 - 3,977)   | 2,366<br>(1,866 - 2,871) |
| HIV/AIDS and tuberculosis                                         | 5,063<br>(3,772 - 6,858)    | 351<br>(270 - 443)          | 201<br>(159 - 248)       | 2,934<br>(1,958 - 4,350)   | 1,161<br>(866 - 1,530)     | 415<br>(295 - 552)       |
| Tuberculosis                                                      | 1,874<br>(1,374 - 2,509)    | 106<br>(59 - 173)           | 47<br>(29 - 73)          | 664<br>(450 - 968)         | 696<br>(471 - 974)         | 361<br>(241 - 491)       |
| HIV/AIDS                                                          | 3,190<br>(2,051 - 4,909)    | 245<br>(178 - 321)          | 155<br>(120 - 192)       | 2,270<br>(1,299 - 3,746)   | 465<br>(277 - 709)         | 55<br>(29 - 95)          |
| HIV/AIDS resulting in mycobacterial infection                     | 219<br>(132 - 344)          | 16<br>(11 - 22)             | 9<br>(7 - 13)            | 156<br>(89 - 262)          | 34<br>(20 - 53)            | 4<br>(2 - 7)             |
| HIV/AIDS resulting in other diseases                              | 2,970<br>(1,924 - 4,584)    | 228<br>(166 - 300)          | 145<br>(113 - 179)       | 2,114<br>(1,211 - 3,498)   | 432<br>(255 - 660)         | 51<br>(27 - 88)          |
| Diarrhea, lower respiratory, and other common infectious diseases | 12,665<br>(9,738 - 16,212)  | 7,590<br>(5,283 - 10,482)   | 789<br>(552 - 1,210)     | 1,355<br>(982 - 1,844)     | 1,446<br>(1,012 - 2,011)   | 1,485<br>(1,060 - 1,925) |
| Diarrheal diseases                                                | 2,697<br>(1,742 - 4,279)    | 1,305<br>(451 - 2,793)      | 182<br>(79 - 337)        | 424<br>(277 - 648)         | 424<br>(239 - 687)         | 362<br>(220 - 557)       |
| Intestinal infectious diseases                                    | 290<br>(142 - 508)          | 87<br>(34 - 173)            | 87<br>(39 - 156)         | 99<br>(44 - 185)           | 13<br>(6 - 25)             | 4<br>(2 - 8)             |
| Typhoid fever                                                     | 182<br>(80 - 328)           | 50<br>(16 - 109)            | 57<br>(25 - 110)         | 64<br>(26 - 122)           | 8<br>(3 - 15)              | 2<br>(1 - 4)             |
| Paratyphoid fever                                                 | 88<br>(38 - 167)            | 25<br>(8 - 58)              | 28<br>(10 - 58)          | 30<br>(10 - 66)            | 4<br>(1 - 9)               | 1<br>(0 - 2)             |
| Other intestinal infectious diseases                              | 20<br>(10 - 34)             | 11<br>(4 - 23)              | 2<br>(0 - 7)             | 5<br>(1 - 11)              | 1<br>(0 - 5)               | 1<br>(0 - 4)             |
| Lower respiratory infections                                      | 6,724<br>(4,839 - 8,769)    | 4,168<br>(2,547 - 5,945)    | 206<br>(110 - 339)       | 458<br>(305 - 684)         | 839<br>(519 - 1,242)       | 1,054<br>(643 - 1,483)   |
| Upper respiratory infections                                      | 9<br>(3 - 21)               | 4<br>(0 - 15)               | 1<br>(0 - 2)             | 2<br>(0 - 5)               | 2<br>(0 - 5)               | 1<br>(0 - 3)             |
| Otitis media                                                      | 3<br>(2 - 3)                | 1<br>(0 - 1)                | 0<br>(0 - 0)             | 0<br>(0 - 1)               | 1<br>(0 - 1)               | 1<br>(0 - 1)             |
| Meningitis                                                        | 1,494<br>(962 - 2,322)      | 830<br>(384 - 1,595)        | 160<br>(82 - 269)        | 302<br>(186 - 450)         | 146<br>(83 - 232)          | 56<br>(32 - 88)          |
| Pneumococcal meningitis                                           | 375<br>(229 - 613)          | 185<br>(65 - 398)           | 47<br>(21 - 90)          | 89<br>(47 - 163)           | 39<br>(17 - 72)            | 15<br>(6 - 30)           |
| H influenzae type B meningitis                                    | 256<br>(140 - 456)          | 177<br>(77 - 378)           | 25<br>(10 - 48)          | 36<br>(16 - 68)            | 13<br>(4 - 28)             | 5<br>(2 - 9)             |
| Meningococcal meningitis                                          | 677<br>(393 - 1,084)        | 385<br>(170 - 735)          | 74<br>(34 - 131)         | 128<br>(54 - 206)          | 65<br>(30 - 109)           | 25<br>(12 - 44)          |
| Other meningitis                                                  | 186<br>(113 - 300)          | 82<br>(28 - 186)            | 14<br>(5 - 29)           | 50<br>(24 - 85)            | 28<br>(11 - 52)            | 11<br>(4 - 23)           |
| Encephalitis                                                      | 69<br>(45 - 107)            | 30<br>(13 - 62)             | 9<br>(5 - 17)            | 18<br>(11 - 27)            | 8<br>(5 - 13)              | 4<br>(2 - 6)             |
| Diphtheria                                                        | 13<br>(0 - 81)              | 10<br>(0 - 77)              | 2<br>(0 - 15)            | 1<br>(0 - 3)               | 0<br>(0 - 1)               | --                       |
| Whooping cough                                                    | 242<br>(0 - 1,121)          | 227<br>(0 - 1,052)          | 13<br>(0 - 59)           | 3<br>(0 - 14)              | 0<br>(0 - 2)               | --                       |
| Tetanus                                                           | 176<br>(103 - 307)          | 126<br>(62 - 241)           | 10<br>(4 - 28)           | 26<br>(14 - 54)            | 12<br>(6 - 27)             | 3<br>(1 - 7)             |
| Measles                                                           | 939<br>(28 - 4,946)         | 800<br>(23 - 4,222)         | 118<br>(3 - 667)         | 20<br>(0 - 119)            | 1<br>(0 - 4)               | --                       |
| Varicella and herpes zoster                                       | 9<br>(3 - 22)               | 4<br>(0 - 15)               | 1<br>(0 - 4)             | 2<br>(0 - 6)               | 1<br>(0 - 3)               | 2<br>(0 - 6)             |
| Neglected tropical diseases and malaria                           | 6,901<br>(4,179 - 10,217)   | 5,362<br>(2,793 - 8,561)    | 424<br>(227 - 762)       | 580<br>(335 - 1,074)       | 346<br>(171 - 709)         | 188<br>(81 - 436)        |
| Malaria                                                           | 6,594<br>(3,882 - 9,881)    | 5,309<br>(2,725 - 8,523)    | 372<br>(170 - 713)       | 432<br>(203 - 889)         | 303<br>(127 - 670)         | 177<br>(70 - 427)        |
| Leishmaniasis                                                     | 0<br>(0 - 0)                | 0<br>(0 - 0)                | 0<br>(0 - 0)             | 0<br>(0 - 0)               | 0<br>(0 - 0)               | 0<br>(0 - 0)             |
| Visceral leishmaniasis                                            | 0<br>(0 - 0)                | 0<br>(0 - 0)                | 0<br>(0 - 0)             | 0<br>(0 - 0)               | 0<br>(0 - 0)               | 0<br>(0 - 0)             |
| African trypanosomiasis                                           | 160<br>(67 - 304)           | 8<br>(2 - 19)               | 19<br>(8 - 38)           | 104<br>(43 - 202)          | 23<br>(10 - 45)            | 4<br>(2 - 8)             |
| Schistosomiasis                                                   | 25<br>(17 - 36)             | 1<br>(0 - 1)                | 1<br>(0 - 2)             | 10<br>(6 - 16)             | 10<br>(5 - 15)             | 4<br>(2 - 6)             |
| Cysticercosis                                                     | 1<br>(0 - 4)                | 0<br>(0 - 0)                | 0<br>(0 - 0)             | 1<br>(0 - 2)               | 0<br>(0 - 1)               | 0<br>(0 - 0)             |
| Cystic echinococcosis                                             | 2<br>(2 - 3)                | 0<br>(0 - 1)                | 0<br>(0 - 1)             | 1<br>(1 - 1)               | 0<br>(0 - 0)               | 0<br>(0 - 0)             |
| Dengue                                                            | 4<br>(2 - 7)                | 2<br>(0 - 4)                | 1<br>(0 - 2)             | 1<br>(1 - 2)               | 0<br>(0 - 1)               | 0<br>(0 - 0)             |
| Yellow fever                                                      | 16<br>(9 - 26)              | 1<br>(0 - 4)                | 3<br>(1 - 9)             | 9<br>(4 - 17)              | 2<br>(0 - 4)               | 1<br>(0 - 2)             |
| Rabies                                                            | 59<br>(25 - 102)            | 14<br>(3 - 36)              | 22<br>(8 - 45)           | 17<br>(8 - 30)             | 5<br>(2 - 9)               | 0<br>(0 - 1)             |
| Intestinal nematode infections                                    | 28<br>(11 - 54)             | 22<br>(7 - 47)              | 4<br>(0 - 13)            | 1<br>(0 - 7)               | 0<br>(0 - 4)               | 0<br>(0 - 3)             |
| Ascariasis                                                        | 28<br>(11 - 54)             | 22<br>(7 - 47)              | 4<br>(0 - 13)            | 1<br>(0 - 7)               | 0<br>(0 - 4)               | 0<br>(0 - 3)             |

Web Table 31- Guinea deaths with 95% UI by age, sex, and cause in 2013

| Cause                                                            | Males, All Ages             | Males, 0-4 Years         | Males, 5-14 Years  | Males, 15-49 Years       | Males, 50-69 Years       | Males, 70-80 Years       |
|------------------------------------------------------------------|-----------------------------|--------------------------|--------------------|--------------------------|--------------------------|--------------------------|
| Other neglected tropical diseases                                | 11<br>(7 - 20)              | 4<br>(1 - 8)             | 1<br>(0 - 2)       | 3<br>(2 - 6)             | 2<br>(1 - 3)             | 1<br>(1 - 3)             |
| Maternal disorders                                               | --                          | --                       | --                 | --                       | --                       | --                       |
| Maternal hemorrhage                                              | --                          | --                       | --                 | --                       | --                       | --                       |
| Maternal sepsis and other maternal infections                    | --                          | --                       | --                 | --                       | --                       | --                       |
| Maternal hypertensive disorders                                  | --                          | --                       | --                 | --                       | --                       | --                       |
| Maternal obstructed labor                                        | --                          | --                       | --                 | --                       | --                       | --                       |
| Maternal abortive outcome                                        | --                          | --                       | --                 | --                       | --                       | --                       |
| Indirect maternal deaths                                         | --                          | --                       | --                 | --                       | --                       | --                       |
| Late maternal deaths                                             | --                          | --                       | --                 | --                       | --                       | --                       |
| Maternal deaths aggravated by HIV/AIDS                           | --                          | --                       | --                 | --                       | --                       | --                       |
| Other maternal disorders                                         | --                          | --                       | --                 | --                       | --                       | --                       |
| Neonatal disorders                                               | 6,324<br>(5,340 - 7,454)    | 6,324<br>(5,340 - 7,454) | --                 | --                       | --                       | --                       |
| Neonatal preterm birth complications                             | 2,208<br>(931 - 3,716)      | 2,208<br>(931 - 3,716)   | --                 | --                       | --                       | --                       |
| Neonatal encephalopathy due to birth asphyxia and trauma         | 1,825<br>(884 - 3,067)      | 1,825<br>(884 - 3,067)   | --                 | --                       | --                       | --                       |
| Neonatal sepsis and other neonatal infections                    | 1,693<br>(687 - 3,123)      | 1,693<br>(687 - 3,123)   | --                 | --                       | --                       | --                       |
| Hemolytic disease and other neonatal jaundice                    | 50<br>(15 - 137)            | 50<br>(15 - 137)         | --                 | --                       | --                       | --                       |
| Other neonatal disorders                                         | 547<br>(254 - 1,120)        | 547<br>(254 - 1,120)     | --                 | --                       | --                       | --                       |
| Nutritional deficiencies                                         | 2,350<br>(1,203 - 3,729)    | 1,450<br>(626 - 2,596)   | 134<br>(61 - 223)  | 272<br>(154 - 425)       | 260<br>(138 - 394)       | 234<br>(134 - 371)       |
| Protein-energy malnutrition                                      | 1,826<br>(878 - 3,057)      | 1,319<br>(573 - 2,404)   | 97<br>(42 - 173)   | 135<br>(62 - 265)        | 149<br>(71 - 264)        | 125<br>(55 - 244)        |
| Iodine deficiency                                                | 5<br>(0 - 20)               | 2<br>(0 - 15)            | 1<br>(0 - 3)       | 1<br>(0 - 5)             | 1<br>(0 - 5)             | 0<br>(0 - 3)             |
| Iron-deficiency anemia                                           | 511<br>(162 - 908)          | 128<br>(14 - 367)        | 36<br>(8 - 78)     | 132<br>(42 - 228)        | 108<br>(30 - 206)        | 107<br>(33 - 189)        |
| Other nutritional deficiencies                                   | 9<br>(3 - 17)               | 1<br>(0 - 3)             | 1<br>(0 - 1)       | 4<br>(1 - 7)             | 2<br>(1 - 4)             | 2<br>(0 - 3)             |
| Other communicable, maternal, neonatal, and nutritional diseases | 878<br>(551 - 1,345)        | 607<br>(323 - 1,016)     | 58<br>(32 - 94)    | 93<br>(56 - 152)         | 75<br>(44 - 131)         | 45<br>(26 - 85)          |
| Sexually transmitted diseases excluding HIV                      | 617<br>(322 - 1,043)        | 527<br>(258 - 913)       | 43<br>(21 - 74)    | 22<br>(12 - 52)          | 15<br>(6 - 37)           | 10<br>(4 - 26)           |
| Syphilis                                                         | 599<br>(309 - 1,013)        | 527<br>(258 - 913)       | 41<br>(19 - 71)    | 12<br>(6 - 28)           | 11<br>(5 - 27)           | 8<br>(3 - 21)            |
| Chlamydial infection                                             | --                          | --                       | --                 | --                       | --                       | --                       |
| Gonococcal infection                                             | 10<br>(6 - 25)              | --                       | 1<br>(0 - 2)       | 6<br>(3 - 13)            | 3<br>(1 - 6)             | 1<br>(0 - 3)             |
| Other sexually transmitted diseases                              | 8<br>(4 - 19)               | --                       | 1<br>(0 - 2)       | 5<br>(3 - 11)            | 1<br>(1 - 4)             | 0<br>(0 - 1)             |
| Hepatitis                                                        | 111<br>(63 - 172)           | 21<br>(6 - 43)           | 7<br>(3 - 13)      | 42<br>(22 - 72)          | 28<br>(15 - 47)          | 12<br>(7 - 21)           |
| Acute hepatitis A                                                | 9<br>(2 - 21)               | 5<br>(1 - 14)            | 2<br>(0 - 4)       | 2<br>(0 - 4)             | 0<br>(0 - 0)             | 0<br>(0 - 0)             |
| Acute hepatitis B                                                | 68<br>(37 - 108)            | 15<br>(4 - 35)           | 4<br>(1 - 7)       | 17<br>(8 - 32)           | 21<br>(11 - 36)          | 11<br>(6 - 18)           |
| Acute hepatitis C                                                | 3<br>(1 - 8)                | --                       | 0<br>(0 - 1)       | 1<br>(0 - 3)             | 1<br>(0 - 3)             | 0<br>(0 - 2)             |
| Acute hepatitis E                                                | 31<br>(14 - 58)             | 0<br>(0 - 1)             | 1<br>(1 - 3)       | 23<br>(10 - 43)          | 5<br>(2 - 14)            | 1<br>(0 - 3)             |
| Other infectious diseases                                        | 150<br>(82 - 272)           | 59<br>(20 - 127)         | 8<br>(2 - 20)      | 29<br>(12 - 62)          | 32<br>(12 - 75)          | 22<br>(8 - 54)           |
| Non-communicable diseases                                        | 17,074<br>(13,526 - 21,014) | 1,881<br>(1,001 - 3,700) | 429<br>(267 - 685) | 3,761<br>(2,797 - 4,926) | 6,323<br>(4,785 - 7,866) | 4,679<br>(3,970 - 5,412) |
| Neoplasms                                                        | 3,472<br>(2,707 - 4,390)    | 50<br>(27 - 87)          | 41<br>(26 - 56)    | 1,221<br>(869 - 1,695)   | 1,399<br>(1,038 - 1,780) | 761<br>(632 - 916)       |
| Esophageal cancer                                                | 50<br>(34 - 78)             | --                       | --                 | 18<br>(12 - 28)          | 16<br>(10 - 29)          | 16<br>(10 - 25)          |
| Stomach cancer                                                   | 388<br>(295 - 505)          | --                       | --                 | 144<br>(102 - 205)       | 164<br>(119 - 222)       | 80<br>(61 - 106)         |
| Liver cancer                                                     | 1,582<br>(1,140 - 2,145)    | --                       | 3<br>(1 - 7)       | 709<br>(463 - 1,045)     | 661<br>(448 - 919)       | 209<br>(144 - 299)       |
| Liver cancer due to hepatitis B                                  | 800<br>(488 - 1,224)        | --                       | 2<br>(0 - 4)       | 409<br>(224 - 638)       | 319<br>(162 - 512)       | 70<br>(33 - 117)         |

Web Table 31- Guinea deaths with 95% UI by age, sex, and cause in 2013

| Cause                                | Males, All Ages          | Males, 0-4 Years  | Males, 5-14 Years | Males, 15-49 Years   | Males, 50-69 Years       | Males, 70-84 Years       |
|--------------------------------------|--------------------------|-------------------|-------------------|----------------------|--------------------------|--------------------------|
| Liver cancer due to hepatitis C      | 449<br>(105 - 806)       | --                | 0<br>(0 - 0)      | 148<br>(28 - 300)    | 213<br>(43 - 396)        | 88<br>(29 - 151)         |
| Liver cancer due to alcohol use      | 166<br>(80 - 295)        | --                | --                | 52<br>(20 - 99)      | 76<br>(33 - 150)         | 38<br>(17 - 69)          |
| Liver cancer due to other causes     | 167<br>(91 - 295)        | --                | 2<br>(0 - 4)      | 100<br>(52 - 182)    | 53<br>(22 - 105)         | 13<br>(5 - 24)           |
| Larynx cancer                        | 15<br>(9 - 37)           | --                | --                | 3<br>(2 - 4)         | 8<br>(4 - 23)            | 4<br>(2 - 11)            |
| Tracheal, bronchus and lung cancer   | 272<br>(201 - 351)       | --                | --                | 87<br>(58 - 122)     | 145<br>(105 - 193)       | 41<br>(31 - 51)          |
| Breast cancer                        | 5<br>(3 - 7)             | --                | --                | 1<br>(1 - 2)         | 3<br>(1 - 5)             | 1<br>(0 - 2)             |
| Cervical cancer                      | --                       | --                | --                | --                   | --                       | --                       |
| Uterine cancer                       | --                       | --                | --                | --                   | --                       | --                       |
| Prostate cancer                      | 191<br>(122 - 302)       | --                | --                | 3<br>(2 - 5)         | 43<br>(26 - 72)          | 145<br>(91 - 230)        |
| Colon and rectum cancer              | 94<br>(73 - 118)         | --                | --                | 27<br>(20 - 37)      | 35<br>(25 - 46)          | 32<br>(25 - 40)          |
| Lip and oral cavity cancer           | 45<br>(27 - 62)          | --                | --                | 18<br>(9 - 28)       | 18<br>(11 - 26)          | 9<br>(6 - 13)            |
| Nasopharynx cancer                   | 11<br>(8 - 16)           | --                | 0<br>(0 - 1)      | 8<br>(5 - 12)        | 3<br>(2 - 4)             | 1<br>(0 - 1)             |
| Other pharynx cancer                 | 14<br>(10 - 18)          | --                | --                | 6<br>(4 - 9)         | 5<br>(3 - 8)             | 3<br>(2 - 4)             |
| Gallbladder and biliary tract cancer | 12<br>(9 - 18)           | --                | --                | 3<br>(2 - 5)         | 4<br>(2 - 7)             | 5<br>(3 - 8)             |
| Pancreatic cancer                    | 59<br>(44 - 77)          | --                | --                | 14<br>(10 - 20)      | 34<br>(25 - 46)          | 11<br>(8 - 14)           |
| Malignant skin melanoma              | 18<br>(8 - 27)           | --                | --                | 5<br>(2 - 8)         | 7<br>(3 - 11)            | 7<br>(3 - 11)            |
| Non-melanoma skin cancer             | 5<br>(4 - 9)             | --                | --                | 1<br>(1 - 2)         | 2<br>(1 - 4)             | 2<br>(1 - 4)             |
| Ovarian cancer                       | --                       | --                | --                | --                   | --                       | --                       |
| Testicular cancer                    | 4<br>(2 - 6)             | --                | --                | 3<br>(2 - 5)         | 1<br>(0 - 1)             | 0<br>(0 - 1)             |
| Kidney cancer                        | 57<br>(38 - 83)          | 0<br>(0 - 1)      | 1<br>(0 - 1)      | 13<br>(8 - 22)       | 33<br>(21 - 52)          | 9<br>(6 - 14)            |
| Bladder cancer                       | 193<br>(137 - 252)       | --                | --                | 24<br>(13 - 38)      | 89<br>(59 - 123)         | 80<br>(56 - 109)         |
| Brain and nervous system cancer      | 41<br>(17 - 61)          | 0<br>(0 - 1)      | 2<br>(1 - 3)      | 10<br>(5 - 14)       | 9<br>(4 - 14)            | 20<br>(5 - 34)           |
| Thyroid cancer                       | 13<br>(4 - 19)           | --                | 0<br>(0 - 1)      | 4<br>(1 - 6)         | 7<br>(3 - 11)            | 2<br>(1 - 4)             |
| Mesothelioma                         | 3<br>(2 - 5)             | --                | --                | 1<br>(0 - 1)         | 2<br>(1 - 2)             | 1<br>(1 - 2)             |
| Hodgkin lymphoma                     | 19<br>(10 - 27)          | 1<br>(0 - 3)      | 2<br>(1 - 6)      | 9<br>(5 - 14)        | 5<br>(2 - 9)             | 2<br>(1 - 3)             |
| Non-Hodgkin lymphoma                 | 135<br>(92 - 195)        | 3<br>(1 - 8)      | 7<br>(3 - 13)     | 48<br>(30 - 72)      | 40<br>(25 - 63)          | 36<br>(21 - 60)          |
| Multiple myeloma                     | 7<br>(4 - 10)            | --                | --                | 3<br>(2 - 5)         | 3<br>(1 - 5)             | 1<br>(0 - 2)             |
| Leukemia                             | 38<br>(29 - 47)          | 3<br>(1 - 7)      | 5<br>(3 - 8)      | 14<br>(10 - 20)      | 7<br>(5 - 10)            | 8<br>(6 - 10)            |
| Other neoplasms                      | 200<br>(141 - 296)       | 42<br>(21 - 76)   | 19<br>(11 - 29)   | 46<br>(28 - 75)      | 57<br>(32 - 103)         | 36<br>(22 - 59)          |
| Cardiovascular diseases              | 5,787<br>(4,655 - 6,970) | 155<br>(89 - 256) | 61<br>(37 - 93)   | 810<br>(596 - 1,089) | 2,609<br>(1,973 - 3,257) | 2,151<br>(1,797 - 2,492) |
| Rheumatic heart disease              | 58<br>(31 - 145)         | 4<br>(1 - 10)     | 3<br>(1 - 8)      | 16<br>(7 - 45)       | 20<br>(9 - 56)           | 15<br>(8 - 32)           |
| Ischemic heart disease               | 1,635<br>(1,233 - 2,128) | 8<br>(2 - 19)     | 9<br>(4 - 15)     | 226<br>(155 - 318)   | 812<br>(578 - 1,081)     | 580<br>(438 - 783)       |
| Cerebrovascular disease              | 2,898<br>(2,217 - 3,613) | 58<br>(29 - 96)   | 22<br>(13 - 36)   | 330<br>(222 - 469)   | 1,275<br>(916 - 1,675)   | 1,213<br>(945 - 1,477)   |
| Ischemic stroke                      | 1,772<br>(1,018 - 2,401) | 6<br>(2 - 14)     | 3<br>(1 - 6)      | 88<br>(39 - 143)     | 765<br>(386 - 1,126)     | 910<br>(558 - 1,186)     |
| Hemorrhagic stroke                   | 1,126<br>(721 - 1,703)   | 52<br>(24 - 86)   | 19<br>(10 - 31)   | 243<br>(161 - 348)   | 509<br>(300 - 824)       | 303<br>(155 - 561)       |
| Hypertensive heart disease           | 215<br>(87 - 394)        | 2<br>(0 - 4)      | 1<br>(0 - 1)      | 33<br>(9 - 76)       | 95<br>(38 - 183)         | 84<br>(35 - 150)         |
| Cardiomyopathy and myocarditis       | 291<br>(165 - 424)       | 21<br>(6 - 51)    | 9<br>(4 - 16)     | 62<br>(36 - 94)      | 131<br>(62 - 213)        | 68<br>(32 - 115)         |
| Atrial fibrillation and flutter      | 0<br>(0 - 0)             | --                | --                | 0<br>(0 - 0)         | 0<br>(0 - 0)             | 0<br>(0 - 0)             |
| Aortic aneurysm                      | 56<br>(38 - 79)          | --                | --                | 7<br>(4 - 10)        | 30<br>(20 - 44)          | 19<br>(12 - 30)          |
| Peripheral vascular disease          | 2<br>(1 - 3)             | --                | --                | 0<br>(0 - 0)         | 1<br>(0 - 1)             | 1<br>(1 - 2)             |



Web Table 31- Guinea deaths with 95% UI by age, sex, and cause in 2013

| Cause                                               | Males, All Ages        | Males, 0-4 Years | Males, 5-14 Years | Males, 15-49 Years | Males, 50-69 Years | Males, 70-80 Years   |
|-----------------------------------------------------|------------------------|------------------|-------------------|--------------------|--------------------|----------------------|
| Endocarditis                                        | 141<br>(87 - 220)      | 18<br>(6 - 42)   | 3<br>(2 - 6)      | 30<br>(18 - 49)    | 52<br>(30 - 91)    | 38<br>(23 - 65)      |
| Other cardiovascular and circulatory diseases       | 491<br>(326 - 1,061)   | 44<br>(20 - 85)  | 14<br>(7 - 26)    | 106<br>(67 - 189)  | 193<br>(118 - 439) | 133<br>(80 - 334)    |
| Chronic respiratory diseases                        | 1,367<br>(980 - 2,413) | 67<br>(27 - 156) | 17<br>(10 - 33)   | 153<br>(101 - 261) | 535<br>(357 - 955) | 595<br>(430 - 1,033) |
| Chronic obstructive pulmonary disease               | 898<br>(627 - 1,593)   | 33<br>(13 - 77)  | 7<br>(4 - 14)     | 55<br>(35 - 97)    | 341<br>(216 - 625) | 463<br>(323 - 812)   |
| Pneumoconiosis                                      | 122<br>(74 - 234)      | 1<br>(0 - 3)     | 1<br>(0 - 2)      | 23<br>(14 - 40)    | 69<br>(38 - 131)   | 28<br>(14 - 60)      |
| Silicosis                                           | 23<br>(12 - 56)        | 0<br>(0 - 1)     | 0<br>(0 - 1)      | 5<br>(2 - 10)      | 7<br>(3 - 17)      | 11<br>(5 - 30)       |
| Asbestosis                                          | 8<br>(4 - 18)          | 0<br>(0 - 1)     | 0<br>(0 - 1)      | 2<br>(1 - 4)       | 5<br>(2 - 11)      | 1<br>(0 - 2)         |
| Coal workers pneumoconiosis                         | 39<br>(22 - 74)        | 0<br>(0 - 1)     | 0<br>(0 - 1)      | 2<br>(1 - 4)       | 32<br>(18 - 61)    | 4<br>(2 - 8)         |
| Other pneumoconiosis                                | 52<br>(31 - 87)        | 0<br>(0 - 1)     | 0<br>(0 - 1)      | 15<br>(9 - 24)     | 25<br>(13 - 42)    | 12<br>(6 - 22)       |
| Asthma                                              | 187<br>(122 - 362)     | 18<br>(5 - 46)   | 4<br>(2 - 8)      | 46<br>(29 - 87)    | 70<br>(39 - 149)   | 49<br>(28 - 109)     |
| Interstitial lung disease and pulmonary sarcoidosis | 78<br>(10 - 150)       | 0<br>(0 - 1)     | 0<br>(0 - 0)      | 2<br>(1 - 5)       | 34<br>(4 - 72)     | 40<br>(4 - 84)       |
| Other chronic respiratory diseases                  | 81<br>(45 - 154)       | 15<br>(6 - 36)   | 4<br>(2 - 9)      | 26<br>(14 - 47)    | 21<br>(9 - 43)     | 15<br>(7 - 31)       |
| Cirrhosis                                           | 1,086<br>(831 - 1,397) | 26<br>(8 - 60)   | 14<br>(9 - 21)    | 333<br>(229 - 468) | 539<br>(393 - 720) | 174<br>(129 - 226)   |
| Cirrhosis due to hepatitis B                        | 324<br>(127 - 556)     | 2<br>(0 - 5)     | 3<br>(1 - 5)      | 107<br>(44 - 189)  | 163<br>(60 - 297)  | 50<br>(16 - 89)      |
| Cirrhosis due to hepatitis C                        | 193<br>(88 - 353)      | 2<br>(0 - 6)     | 1<br>(0 - 4)      | 52<br>(17 - 107)   | 101<br>(30 - 204)  | 37<br>(16 - 70)      |
| Cirrhosis due to alcohol use                        | 408<br>(266 - 606)     | --               | --                | 109<br>(63 - 173)  | 223<br>(137 - 335) | 76<br>(48 - 116)     |
| Cirrhosis due to other causes                       | 160<br>(102 - 235)     | 22<br>(7 - 52)   | 9<br>(5 - 15)     | 65<br>(36 - 101)   | 52<br>(25 - 89)    | 12<br>(6 - 20)       |
| Digestive diseases                                  | 1,076<br>(829 - 1,381) | 65<br>(23 - 144) | 46<br>(28 - 67)   | 315<br>(215 - 431) | 396<br>(283 - 540) | 254<br>(194 - 330)   |
| Peptic ulcer disease                                | 297<br>(201 - 432)     | 9<br>(2 - 25)    | 8<br>(3 - 15)     | 82<br>(49 - 123)   | 121<br>(73 - 192)  | 78<br>(49 - 120)     |
| Gastritis and duodenitis                            | 36<br>(18 - 86)        | 4<br>(1 - 12)    | 2<br>(1 - 6)      | 9<br>(4 - 24)      | 12<br>(5 - 31)     | 9<br>(3 - 24)        |
| Appendicitis                                        | 53<br>(26 - 86)        | 6<br>(1 - 18)    | 6<br>(3 - 12)     | 15<br>(8 - 26)     | 15<br>(6 - 29)     | 10<br>(3 - 21)       |
| Paralytic ileus and intestinal obstruction          | 331<br>(179 - 469)     | 16<br>(4 - 40)   | 14<br>(7 - 24)    | 88<br>(41 - 141)   | 132<br>(66 - 196)  | 81<br>(48 - 127)     |
| Inguinal, femoral, and abdominal hernia             | 44<br>(26 - 81)        | 1<br>(0 - 3)     | 1<br>(0 - 3)      | 10<br>(6 - 19)     | 17<br>(9 - 30)     | 15<br>(8 - 29)       |
| Inflammatory bowel disease                          | 55<br>(28 - 81)        | 13<br>(3 - 35)   | 2<br>(1 - 5)      | 14<br>(6 - 24)     | 16<br>(6 - 27)     | 10<br>(3 - 17)       |
| Vascular intestinal disorders                       | 5<br>(2 - 11)          | 1<br>(0 - 2)     | 0<br>(0 - 1)      | 1<br>(0 - 2)       | 1<br>(0 - 3)       | 1<br>(0 - 4)         |
| Gallbladder and biliary diseases                    | 58<br>(32 - 83)        | 1<br>(0 - 4)     | 3<br>(1 - 5)      | 15<br>(6 - 26)     | 18<br>(10 - 30)    | 20<br>(10 - 32)      |
| Pancreatitis                                        | 76<br>(36 - 120)       | 1<br>(0 - 3)     | 1<br>(1 - 2)      | 41<br>(18 - 69)    | 22<br>(11 - 40)    | 11<br>(4 - 19)       |
| Other digestive diseases                            | 119<br>(79 - 187)      | 13<br>(4 - 40)   | 7<br>(4 - 12)     | 39<br>(25 - 61)    | 41<br>(24 - 66)    | 19<br>(10 - 36)      |
| Neurological disorders                              | 412<br>(323 - 523)     | 48<br>(18 - 103) | 22<br>(11 - 38)   | 92<br>(59 - 143)   | 50<br>(35 - 66)    | 201<br>(158 - 258)   |
| Alzheimer disease and other dementias               | 211<br>(165 - 274)     | --               | --                | 0<br>(0 - 0)       | 26<br>(17 - 37)    | 185<br>(142 - 240)   |
| Parkinson disease                                   | 3<br>(2 - 6)           | --               | --                | 0<br>(0 - 0)       | 0<br>(0 - 1)       | 3<br>(1 - 5)         |
| Epilepsy                                            | 152<br>(97 - 235)      | 39<br>(14 - 91)  | 19<br>(7 - 35)    | 75<br>(43 - 122)   | 12<br>(7 - 20)     | 8<br>(5 - 14)        |
| Multiple sclerosis                                  | 0<br>(0 - 1)           | --               | --                | 0<br>(0 - 0)       | 0<br>(0 - 0)       | 0<br>(0 - 0)         |
| Other neurological disorders                        | 46<br>(24 - 65)        | 8<br>(3 - 29)    | 4<br>(2 - 6)      | 17<br>(9 - 25)     | 11<br>(6 - 17)     | 5<br>(3 - 8)         |
| Mental and substance use disorders                  | 342<br>(185 - 475)     | 12<br>(2 - 32)   | 0<br>(0 - 0)      | 244<br>(130 - 352) | 67<br>(34 - 111)   | 19<br>(8 - 34)       |
| Schizophrenia                                       | 0<br>(0 - 1)           | --               | --                | 0<br>(0 - 0)       | 0<br>(0 - 0)       | 0<br>(0 - 0)         |
| Alcohol use disorders                               | 122<br>(50 - 232)      | --               | --                | 59<br>(26 - 111)   | 49<br>(19 - 95)    | 14<br>(4 - 29)       |
| Drug use disorders                                  | 219<br>(113 - 319)     | 12<br>(2 - 32)   | --                | 185<br>(85 - 280)  | 18<br>(10 - 26)    | 5<br>(3 - 7)         |
| Opioid use disorders                                | 24<br>(12 - 35)        | 1<br>(0 - 4)     | --                | 20<br>(9 - 31)     | 2<br>(1 - 3)       | 1<br>(0 - 1)         |
| Cocaine use disorders                               | 1<br>(0 - 1)           | 0<br>(0 - 0)     | --                | 1<br>(0 - 1)       | 0<br>(0 - 0)       | 0<br>(0 - 0)         |

Web Table 31- Guinea deaths with 95% UI by age, sex, and cause in 2013

| Cause                                               | Males, All Ages          | Males, 0-4 Years       | Males, 5-14 Years | Males, 15-49 Years | Males, 50-69 Years | Males, 70-80 Years |
|-----------------------------------------------------|--------------------------|------------------------|-------------------|--------------------|--------------------|--------------------|
| Amphetamine use disorders                           | 1<br>(0 - 1)             | 0<br>(0 - 0)           | --                | 0<br>(0 - 1)       | 0<br>(0 - 0)       | 0<br>(0 - 0)       |
| Other drug use disorders                            | 194<br>(101 - 284)       | 10<br>(2 - 28)         | --                | 164<br>(76 - 248)  | 16<br>(9 - 23)     | 4<br>(2 - 6)       |
| Eating disorders                                    | 0<br>(0 - 0)             | --                     | 0<br>(0 - 0)      | 0<br>(0 - 0)       | --                 | --                 |
| Anorexia nervosa                                    | 0<br>(0 - 0)             | --                     | 0<br>(0 - 0)      | 0<br>(0 - 0)       | --                 | --                 |
| Diabetes, urogenital, blood, and endocrine diseases | 2,283<br>(1,559 - 3,380) | 441<br>(162 - 1,076)   | 173<br>(58 - 411) | 515<br>(309 - 910) | 674<br>(498 - 909) | 479<br>(385 - 588) |
| Diabetes mellitus                                   | 673<br>(525 - 847)       | 14<br>(8 - 22)         | 4<br>(2 - 6)      | 85<br>(58 - 118)   | 344<br>(247 - 465) | 227<br>(171 - 290) |
| Acute glomerulonephritis                            | 7<br>(4 - 16)            | 1<br>(0 - 4)           | 1<br>(0 - 2)      | 2<br>(1 - 5)       | 2<br>(1 - 4)       | 1<br>(0 - 2)       |
| Chronic kidney disease                              | 390<br>(288 - 498)       | 34<br>(15 - 62)        | 20<br>(10 - 29)   | 133<br>(79 - 186)  | 112<br>(77 - 153)  | 91<br>(66 - 124)   |
| Chronic kidney disease due to diabetes mellitus     | 4<br>(1 - 7)             | 0<br>(0 - 0)           | 0<br>(0 - 0)      | 0<br>(0 - 1)       | 4<br>(1 - 6)       | 0<br>(0 - 1)       |
| Chronic kidney disease due to hypertension          | 91<br>(52 - 135)         | 3<br>(0 - 7)           | 1<br>(0 - 2)      | 23<br>(9 - 38)     | 35<br>(19 - 59)    | 29<br>(16 - 52)    |
| Chronic kidney disease due to glomerulonephritis    | 210<br>(149 - 283)       | 22<br>(9 - 42)         | 15<br>(9 - 23)    | 81<br>(48 - 114)   | 51<br>(31 - 76)    | 42<br>(26 - 62)    |
| Chronic kidney disease due to other causes          | 85<br>(47 - 123)         | 9<br>(2 - 22)          | 3<br>(1 - 7)      | 29<br>(12 - 56)    | 23<br>(11 - 38)    | 20<br>(10 - 34)    |
| Urinary diseases and male infertility               | 369<br>(228 - 498)       | 46<br>(18 - 98)        | 7<br>(4 - 11)     | 86<br>(41 - 133)   | 117<br>(68 - 171)  | 113<br>(76 - 162)  |
| Interstitial nephritis and urinary tract infections | 323<br>(198 - 438)       | 42<br>(16 - 94)        | 6<br>(3 - 9)      | 72<br>(33 - 113)   | 102<br>(60 - 151)  | 100<br>(67 - 147)  |
| Urolithiasis                                        | 2<br>(1 - 4)             | --                     | 0<br>(0 - 0)      | 1<br>(0 - 2)       | 0<br>(0 - 1)       | 0<br>(0 - 1)       |
| Other urinary diseases                              | 45<br>(22 - 72)          | 4<br>(1 - 10)          | 1<br>(0 - 2)      | 13<br>(5 - 23)     | 15<br>(6 - 27)     | 12<br>(5 - 23)     |
| Gynecological diseases                              | --                       | --                     | --                | --                 | --                 | --                 |
| Uterine fibroids                                    | --                       | --                     | --                | --                 | --                 | --                 |
| Polycystic ovarian syndrome                         | --                       | --                     | --                | --                 | --                 | --                 |
| Endometriosis                                       | --                       | --                     | --                | --                 | --                 | --                 |
| Genital prolapse                                    | --                       | --                     | --                | --                 | --                 | --                 |
| Other gynecological diseases                        | --                       | --                     | --                | --                 | --                 | --                 |
| Hemoglobinopathies and hemolytic anemias            | 637<br>(102 - 1,708)     | 298<br>(53 - 899)      | 131<br>(17 - 381) | 154<br>(19 - 595)  | 41<br>(7 - 178)    | 13<br>(4 - 45)     |
| Thalassemias                                        | 3<br>(0 - 8)             | 2<br>(0 - 6)           | 0<br>(0 - 1)      | 0<br>(0 - 1)       | 0<br>(0 - 0)       | 0<br>(0 - 0)       |
| Sickle cell disorders                               | 614<br>(95 - 1,659)      | 291<br>(52 - 881)      | 129<br>(17 - 377) | 152<br>(18 - 585)  | 39<br>(6 - 171)    | 3<br>(1 - 12)      |
| G6PD deficiency                                     | 3<br>(1 - 7)             | 2<br>(0 - 4)           | 0<br>(0 - 1)      | 1<br>(0 - 2)       | 0<br>(0 - 1)       | 0<br>(0 - 1)       |
| Other hemoglobinopathies and hemolytic anemias      | 17<br>(5 - 54)           | 4<br>(1 - 9)           | 1<br>(0 - 2)      | 2<br>(0 - 7)       | 2<br>(0 - 7)       | 9<br>(3 - 32)      |
| Endocrine, metabolic, blood, and immune disorders   | 207<br>(116 - 282)       | 48<br>(24 - 93)        | 11<br>(6 - 20)    | 55<br>(27 - 84)    | 58<br>(26 - 88)    | 34<br>(15 - 53)    |
| Musculoskeletal disorders                           | 60<br>(34 - 126)         | --                     | 7<br>(3 - 20)     | 21<br>(11 - 46)    | 20<br>(11 - 38)    | 12<br>(6 - 24)     |
| Rheumatoid arthritis                                | 5<br>(2 - 9)             | --                     | 1<br>(0 - 2)      | 1<br>(0 - 2)       | 2<br>(1 - 3)       | 1<br>(0 - 3)       |
| Other musculoskeletal disorders                     | 55<br>(32 - 116)         | --                     | 7<br>(3 - 19)     | 20<br>(11 - 44)    | 18<br>(10 - 35)    | 10<br>(6 - 22)     |
| Other non-communicable diseases                     | 1,190<br>(632 - 2,655)   | 1,018<br>(476 - 2,440) | 49<br>(25 - 105)  | 56<br>(40 - 78)    | 34<br>(19 - 48)    | 33<br>(15 - 46)    |
| Congenital anomalies                                | 1,074<br>(527 - 2,535)   | 979<br>(445 - 2,409)   | 45<br>(22 - 102)  | 37<br>(24 - 55)    | 8<br>(5 - 11)      | 5<br>(4 - 7)       |
| Neural tube defects                                 | 272<br>(51 - 639)        | 256<br>(45 - 621)      | 8<br>(1 - 21)     | 7<br>(1 - 17)      | 1<br>(0 - 2)       | 0<br>(0 - 1)       |
| Congenital heart anomalies                          | 422<br>(189 - 1,019)     | 374<br>(154 - 937)     | 23<br>(11 - 54)   | 18<br>(11 - 27)    | 4<br>(3 - 6)       | 2<br>(1 - 3)       |
| Cleft lip and cleft palate                          | 6<br>(1 - 27)            | 6<br>(1 - 27)          | --                | --                 | --                 | --                 |
| Down syndrome                                       | 86<br>(17 - 271)         | 79<br>(11 - 263)       | 3<br>(1 - 6)      | 3<br>(2 - 6)       | 1<br>(0 - 1)       | 0<br>(0 - 0)       |
| Chromosomal unbalanced rearrangements               | 32<br>(8 - 100)          | 29<br>(6 - 96)         | 1<br>(0 - 4)      | 1<br>(0 - 2)       | 0<br>(0 - 0)       | 0<br>(0 - 0)       |
| Other congenital anomalies                          | 257<br>(48 - 1,070)      | 235<br>(34 - 1,015)    | 9<br>(2 - 36)     | 8<br>(4 - 15)      | 2<br>(1 - 3)       | 3<br>(1 - 4)       |
| Skin and subcutaneous diseases                      | 100<br>(39 - 130)        | 23<br>(8 - 41)         | 4<br>(2 - 5)      | 19<br>(8 - 28)     | 26<br>(9 - 38)     | 28<br>(9 - 41)     |

Web Table 31- Guinea deaths with 95% UI by age, sex, and cause in 2013

| Cause                                           | Males, All Ages          | Males, 0-4 Years     | Males, 5-14 Years  | Males, 15-49 Years       | Males, 50-69 Years | Males, 70-80 Years |
|-------------------------------------------------|--------------------------|----------------------|--------------------|--------------------------|--------------------|--------------------|
| Cellulitis                                      | 50<br>(18 - 70)          | 12<br>(4 - 23)       | 2<br>(1 - 4)       | 8<br>(3 - 13)            | 16<br>(5 - 24)     | 12<br>(4 - 19)     |
| Pyoderma                                        | 47<br>(19 - 65)          | 12<br>(3 - 23)       | 1<br>(0 - 2)       | 11<br>(4 - 16)           | 10<br>(4 - 18)     | 13<br>(5 - 21)     |
| Decubitus ulcer                                 | 3<br>(1 - 6)             | 0<br>(0 - 0)         | 0<br>(0 - 0)       | 0<br>(0 - 1)             | 0<br>(0 - 0)       | 2<br>(0 - 5)       |
| Other skin and subcutaneous diseases            | 1<br>(0 - 1)             | 0<br>(0 - 0)         | 0<br>(0 - 0)       | 0<br>(0 - 0)             | 0<br>(0 - 0)       | 0<br>(0 - 0)       |
| Sudden infant death syndrome                    | 16<br>(4 - 49)           | 16<br>(4 - 49)       | --                 | --                       | --                 | --                 |
| Injuries                                        | 4,242<br>(3,200 - 5,491) | 766<br>(387 - 1,312) | 472<br>(315 - 658) | 2,088<br>(1,522 - 2,811) | 628<br>(455 - 826) | 288<br>(212 - 372) |
| Transport injuries                              | 2,051<br>(1,444 - 2,765) | 219<br>(95 - 439)    | 222<br>(132 - 341) | 1,191<br>(820 - 1,666)   | 307<br>(204 - 428) | 112<br>(70 - 158)  |
| Road injuries                                   | 1,974<br>(1,390 - 2,660) | 196<br>(84 - 390)    | 208<br>(123 - 319) | 1,170<br>(800 - 1,641)   | 294<br>(197 - 411) | 105<br>(67 - 148)  |
| Pedestrian road injuries                        | 543<br>(317 - 826)       | 74<br>(25 - 171)     | 77<br>(39 - 132)   | 272<br>(140 - 433)       | 85<br>(48 - 136)   | 35<br>(21 - 56)    |
| Cyclist road injuries                           | 107<br>(67 - 160)        | 14<br>(4 - 38)       | 20<br>(10 - 38)    | 45<br>(27 - 71)          | 20<br>(11 - 30)    | 8<br>(4 - 13)      |
| Motorcyclist road injuries                      | 262<br>(150 - 446)       | 16<br>(5 - 36)       | 16<br>(7 - 29)     | 187<br>(99 - 339)        | 34<br>(19 - 57)    | 9<br>(5 - 15)      |
| Motor vehicle road injuries                     | 1,006<br>(709 - 1,380)   | 80<br>(34 - 166)     | 82<br>(45 - 126)   | 649<br>(436 - 928)       | 146<br>(92 - 216)  | 49<br>(29 - 73)    |
| Other road injuries                             | 56<br>(26 - 96)          | 13<br>(2 - 33)       | 13<br>(4 - 26)     | 17<br>(8 - 38)           | 9<br>(4 - 17)      | 4<br>(2 - 9)       |
| Other transport injuries                        | 77<br>(45 - 116)         | 22<br>(7 - 49)       | 13<br>(6 - 25)     | 21<br>(12 - 42)          | 12<br>(6 - 20)     | 8<br>(2 - 14)      |
| Unintentional injuries                          | 1,735<br>(1,301 - 2,283) | 534<br>(262 - 903)   | 237<br>(152 - 338) | 571<br>(392 - 797)       | 246<br>(176 - 328) | 147<br>(103 - 196) |
| Falls                                           | 377<br>(266 - 569)       | 64<br>(24 - 129)     | 30<br>(16 - 52)    | 136<br>(83 - 222)        | 85<br>(52 - 142)   | 62<br>(38 - 107)   |
| Drowning                                        | 454<br>(247 - 782)       | 176<br>(49 - 385)    | 100<br>(46 - 175)  | 138<br>(76 - 241)        | 30<br>(19 - 46)    | 11<br>(7 - 16)     |
| Fire, heat, and hot substances                  | 170<br>(99 - 272)        | 71<br>(20 - 150)     | 17<br>(8 - 30)     | 43<br>(26 - 72)          | 23<br>(12 - 38)    | 15<br>(8 - 26)     |
| Poisonings                                      | 107<br>(66 - 217)        | 34<br>(12 - 79)      | 10<br>(5 - 21)     | 42<br>(24 - 93)          | 16<br>(9 - 27)     | 5<br>(3 - 9)       |
| Exposure to mechanical forces                   | 294<br>(207 - 402)       | 72<br>(33 - 128)     | 40<br>(23 - 68)    | 128<br>(82 - 198)        | 41<br>(25 - 62)    | 12<br>(6 - 17)     |
| Unintentional firearm injuries                  | 128<br>(82 - 205)        | 25<br>(9 - 61)       | 11<br>(5 - 23)     | 71<br>(41 - 125)         | 16<br>(9 - 27)     | 5<br>(3 - 8)       |
| Unintentional suffocation                       | 20<br>(5 - 41)           | 10<br>(2 - 30)       | 3<br>(1 - 6)       | 5<br>(1 - 8)             | 2<br>(0 - 4)       | 0<br>(0 - 1)       |
| Other exposure to mechanical forces             | 146<br>(89 - 216)        | 37<br>(12 - 73)      | 26<br>(12 - 50)    | 52<br>(32 - 84)          | 24<br>(11 - 39)    | 7<br>(2 - 11)      |
| Adverse effects of medical treatment            | 99<br>(37 - 187)         | 33<br>(6 - 84)       | 6<br>(2 - 12)      | 21<br>(8 - 39)           | 21<br>(7 - 44)     | 19<br>(5 - 42)     |
| Animal contact                                  | 42<br>(21 - 60)          | 10<br>(4 - 21)       | 8<br>(4 - 15)      | 10<br>(4 - 16)           | 8<br>(3 - 14)      | 7<br>(1 - 11)      |
| Venomous animal contact                         | 17<br>(9 - 27)           | 4<br>(1 - 9)         | 3<br>(1 - 6)       | 5<br>(2 - 8)             | 3<br>(1 - 6)       | 3<br>(1 - 6)       |
| Non-venomous animal contact                     | 25<br>(8 - 39)           | 6<br>(2 - 13)        | 5<br>(2 - 10)      | 5<br>(2 - 9)             | 5<br>(1 - 8)       | 3<br>(1 - 6)       |
| Foreign body                                    | 85<br>(44 - 155)         | 52<br>(24 - 109)     | 7<br>(4 - 12)      | 12<br>(6 - 19)           | 7<br>(4 - 11)      | 7<br>(3 - 11)      |
| Pulmonary aspiration and foreign body in airway | 80<br>(40 - 151)         | 51<br>(23 - 108)     | 6<br>(3 - 11)      | 11<br>(5 - 18)           | 6<br>(3 - 10)      | 7<br>(3 - 10)      |
| Foreign body in other body part                 | 5<br>(2 - 7)             | 2<br>(1 - 3)         | 1<br>(0 - 1)       | 1<br>(0 - 2)             | 1<br>(0 - 2)       | 0<br>(0 - 1)       |
| Other unintentional injuries                    | 106<br>(78 - 141)        | 22<br>(10 - 41)      | 17<br>(10 - 27)    | 43<br>(28 - 61)          | 14<br>(9 - 21)     | 9<br>(6 - 13)      |
| Self-harm and interpersonal violence            | 456<br>(284 - 653)       | 13<br>(5 - 29)       | 13<br>(6 - 23)     | 325<br>(197 - 485)       | 76<br>(38 - 119)   | 29<br>(10 - 51)    |
| Self-harm                                       | 272<br>(142 - 445)       | --                   | 7<br>(2 - 16)      | 173<br>(90 - 308)        | 64<br>(27 - 108)   | 28<br>(9 - 50)     |
| Interpersonal violence                          | 184<br>(112 - 295)       | 13<br>(5 - 29)       | 7<br>(3 - 12)      | 152<br>(88 - 249)        | 11<br>(6 - 20)     | 1<br>(1 - 2)       |
| Assault by firearm                              | 103<br>(49 - 164)        | 3<br>(1 - 7)         | 2<br>(0 - 4)       | 94<br>(44 - 150)         | 5<br>(2 - 9)       | 0<br>(0 - 1)       |
| Assault by sharp object                         | 33<br>(16 - 70)          | 2<br>(0 - 6)         | 1<br>(0 - 3)       | 26<br>(10 - 61)          | 4<br>(2 - 7)       | 0<br>(0 - 1)       |
| Assault by other means                          | 47<br>(24 - 88)          | 8<br>(3 - 20)        | 4<br>(2 - 7)       | 32<br>(15 - 65)          | 3<br>(1 - 6)       | 1<br>(0 - 1)       |

Web Table 31- Guinea deaths with 95% UI by age, sex, and cause in 2013

| Cause                                                              | Females, All Ages           | Females, 0-4 Years          | Females, 5-14 Years      | Females, 15-49 Years       | Females, 50-69 Years       | Females, 70-80 Years      |
|--------------------------------------------------------------------|-----------------------------|-----------------------------|--------------------------|----------------------------|----------------------------|---------------------------|
| All causes                                                         | 54,517<br>(48,638 - 60,718) | 21,970<br>(19,282 - 24,810) | 2,431<br>(2,094 - 2,830) | 11,060<br>(9,863 - 12,257) | 10,105<br>(7,890 - 12,726) | 8,951<br>(7,467 - 10,576) |
| Communicable, maternal, neonatal, and nutritional diseases         | 35,316<br>(31,376 - 39,364) | 19,724<br>(16,819 - 22,731) | 1,752<br>(1,414 - 2,236) | 7,852<br>(6,892 - 8,924)   | 3,231<br>(2,494 - 4,070)   | 2,757<br>(2,061 - 3,490)  |
| HIV/AIDS and tuberculosis                                          | 4,841<br>(3,745 - 6,377)    | 297<br>(229 - 383)          | 188<br>(151 - 227)       | 3,093<br>(2,223 - 4,484)   | 943<br>(691 - 1,270)       | 320<br>(205 - 469)        |
| Tuberculosis                                                       | 1,605<br>(1,072 - 2,321)    | 84<br>(42 - 151)            | 48<br>(27 - 79)          | 653<br>(417 - 963)         | 538<br>(317 - 845)         | 283<br>(160 - 432)        |
| HIV/AIDS                                                           | 3,236<br>(2,104 - 4,951)    | 212<br>(152 - 282)          | 140<br>(109 - 173)       | 2,440<br>(1,498 - 3,929)   | 405<br>(234 - 623)         | 38<br>(16 - 66)           |
| HIV/AIDS resulting in mycobacterial infection                      | 174<br>(106 - 271)          | 11<br>(7 - 15)              | 7<br>(5 - 9)             | 131<br>(76 - 214)          | 23<br>(13 - 36)            | 2<br>(1 - 4)              |
| HIV/AIDS resulting in other diseases                               | 3,062<br>(1,989 - 4,666)    | 201<br>(144 - 266)          | 133<br>(104 - 164)       | 2,309<br>(1,414 - 3,723)   | 383<br>(222 - 588)         | 35<br>(15 - 62)           |
| Diarrrhea, lower respiratory, and other common infectious diseases | 11,743<br>(8,962 - 14,994)  | 6,717<br>(4,584 - 9,235)    | 757<br>(479 - 1,215)     | 1,186<br>(883 - 1,541)     | 1,416<br>(952 - 2,036)     | 1,666<br>(1,105 - 2,334)  |
| Diarrrheal diseases                                                | 2,815<br>(1,748 - 4,445)    | 1,311<br>(458 - 2,751)      | 169<br>(74 - 310)        | 428<br>(277 - 628)         | 449<br>(249 - 748)         | 458<br>(260 - 746)        |
| Intestinal infectious diseases                                     | 260<br>(127 - 463)          | 84<br>(33 - 164)            | 83<br>(36 - 149)         | 73<br>(32 - 140)           | 15<br>(6 - 32)             | 5<br>(2 - 10)             |
| Typhoid fever                                                      | 176<br>(81 - 315)           | 55<br>(20 - 112)            | 57<br>(24 - 106)         | 51<br>(21 - 99)            | 10<br>(4 - 23)             | 3<br>(1 - 7)              |
| Paratyphoid fever                                                  | 72<br>(30 - 137)            | 23<br>(7 - 48)              | 24<br>(9 - 54)           | 19<br>(7 - 44)             | 4<br>(1 - 9)               | 1<br>(0 - 3)              |
| Other intestinal infectious diseases                               | 12<br>(5 - 23)              | 7<br>(2 - 15)               | 1<br>(0 - 6)             | 3<br>(0 - 7)               | 1<br>(0 - 6)               | 1<br>(0 - 4)              |
| Lower respiratory infections                                       | 5,972<br>(4,177 - 7,841)    | 3,562<br>(2,081 - 5,291)    | 191<br>(102 - 315)       | 351<br>(241 - 485)         | 769<br>(463 - 1,123)       | 1,099<br>(695 - 1,606)    |
| Upper respiratory infections                                       | 8<br>(3 - 19)               | 3<br>(0 - 13)               | 0<br>(0 - 2)             | 2<br>(0 - 4)               | 2<br>(0 - 6)               | 1<br>(0 - 4)              |
| Otitis media                                                       | 4<br>(3 - 5)                | 1<br>(1 - 2)                | 0<br>(0 - 0)             | 0<br>(0 - 0)               | 1<br>(1 - 2)               | 1<br>(1 - 2)              |
| Meningitis                                                         | 1,362<br>(975 - 1,830)      | 689<br>(354 - 1,139)        | 150<br>(78 - 250)        | 275<br>(180 - 398)         | 157<br>(87 - 264)          | 90<br>(43 - 152)          |
| Pneumococcal meningitis                                            | 336<br>(215 - 485)          | 142<br>(63 - 270)           | 46<br>(20 - 88)          | 84<br>(49 - 131)           | 41<br>(16 - 83)            | 23<br>(10 - 43)           |
| H influenzae type B meningitis                                     | 235<br>(143 - 382)          | 164<br>(81 - 300)           | 25<br>(10 - 51)          | 28<br>(13 - 47)            | 12<br>(4 - 27)             | 6<br>(2 - 11)             |
| Meningococcal meningitis                                           | 626<br>(409 - 870)          | 321<br>(159 - 559)          | 65<br>(27 - 115)         | 122<br>(75 - 185)          | 74<br>(28 - 132)           | 44<br>(19 - 81)           |
| Other meningitis                                                   | 165<br>(104 - 247)          | 61<br>(25 - 123)            | 15<br>(6 - 30)           | 42<br>(21 - 74)            | 29<br>(11 - 56)            | 17<br>(7 - 34)            |
| Encephalitis                                                       | 50<br>(34 - 68)             | 18<br>(9 - 35)              | 6<br>(3 - 10)            | 10<br>(6 - 15)             | 9<br>(3 - 16)              | 6<br>(2 - 10)             |
| Diphtheria                                                         | 10<br>(0 - 57)              | 7<br>(0 - 52)               | 2<br>(0 - 17)            | 1<br>(0 - 2)               | 0<br>(0 - 1)               | --                        |
| Whooping cough                                                     | 266<br>(1 - 1,312)          | 247<br>(1 - 1,208)          | 17<br>(0 - 85)           | 2<br>(0 - 12)              | 0<br>(0 - 2)               | --                        |
| Tetanus                                                            | 118<br>(68 - 217)           | 74<br>(33 - 148)            | 8<br>(3 - 22)            | 20<br>(10 - 52)            | 11<br>(5 - 34)             | 4<br>(2 - 12)             |
| Measles                                                            | 868<br>(24 - 4,603)         | 717<br>(19 - 3,809)         | 128<br>(3 - 705)         | 22<br>(0 - 130)            | 1<br>(0 - 4)               | --                        |
| Varicella and herpes zoster                                        | 9<br>(3 - 20)               | 3<br>(0 - 13)               | 1<br>(0 - 4)             | 2<br>(0 - 4)               | 1<br>(0 - 4)               | 2<br>(0 - 9)              |
| Neglected tropical diseases and malaria                            | 8,274<br>(5,039 - 11,867)   | 6,327<br>(3,566 - 9,413)    | 586<br>(216 - 1,034)     | 554<br>(230 - 1,072)       | 450<br>(166 - 953)         | 358<br>(105 - 818)        |
| Malaria                                                            | 8,003<br>(4,779 - 11,599)   | 6,281<br>(3,525 - 9,357)    | 545<br>(169 - 997)       | 438<br>(128 - 961)         | 399<br>(115 - 901)         | 341<br>(87 - 802)         |
| Leishmaniasis                                                      | 0<br>(0 - 0)                | 0<br>(0 - 0)                | 0<br>(0 - 0)             | 0<br>(0 - 0)               | 0<br>(0 - 0)               | 0<br>(0 - 0)              |
| Visceral leishmaniasis                                             | 0<br>(0 - 0)                | 0<br>(0 - 0)                | 0<br>(0 - 0)             | 0<br>(0 - 0)               | 0<br>(0 - 0)               | 0<br>(0 - 0)              |
| African trypanosomiasis                                            | 141<br>(58 - 271)           | 7<br>(2 - 16)               | 19<br>(8 - 37)           | 81<br>(34 - 156)           | 28<br>(11 - 56)            | 6<br>(3 - 12)             |
| Schistosomiasis                                                    | 23<br>(15 - 34)             | 0<br>(0 - 1)                | 1<br>(0 - 2)             | 7<br>(4 - 11)              | 10<br>(5 - 17)             | 4<br>(2 - 8)              |
| Cysticercosis                                                      | 2<br>(0 - 6)                | 0<br>(0 - 0)                | 0<br>(0 - 1)             | 1<br>(0 - 3)               | 1<br>(0 - 1)               | 0<br>(0 - 0)              |
| Cystic echinococcosis                                              | 3<br>(3 - 4)                | 1<br>(0 - 1)                | 1<br>(0 - 1)             | 1<br>(1 - 1)               | 1<br>(0 - 1)               | 0<br>(0 - 0)              |
| Dengue                                                             | 2<br>(1 - 5)                | 1<br>(0 - 2)                | 1<br>(0 - 1)             | 1<br>(0 - 2)               | 0<br>(0 - 1)               | 0<br>(0 - 0)              |
| Yellow fever                                                       | 6<br>(4 - 12)               | 1<br>(0 - 2)                | 2<br>(0 - 4)             | 3<br>(1 - 7)               | 1<br>(0 - 2)               | 0<br>(0 - 1)              |
| Rabies                                                             | 50<br>(29 - 75)             | 8<br>(3 - 19)               | 13<br>(6 - 24)           | 17<br>(10 - 27)            | 8<br>(3 - 14)              | 3<br>(1 - 7)              |
| Intestinal nematode infections                                     | 30<br>(13 - 54)             | 23<br>(8 - 47)              | 4<br>(0 - 14)            | 1<br>(0 - 6)               | 1<br>(0 - 5)               | 0<br>(0 - 3)              |
| Ascariasis                                                         | 30<br>(13 - 54)             | 23<br>(8 - 47)              | 4<br>(0 - 14)            | 1<br>(0 - 6)               | 1<br>(0 - 5)               | 0<br>(0 - 3)              |

Web Table 31- Guinea deaths with 95% UI by age, sex, and cause in 2013

| Cause                                                            | Females, All Ages           | Females, 0-4 Years       | Females, 5-14 Years | Females, 15-49 Years     | Females, 50-69 Years     | Females, 70-80 Years     |
|------------------------------------------------------------------|-----------------------------|--------------------------|---------------------|--------------------------|--------------------------|--------------------------|
| Other neglected tropical diseases                                | 13<br>(8 - 29)              | 5<br>(2 - 13)            | 1<br>(1 - 3)        | 3<br>(2 - 6)             | 2<br>(1 - 4)             | 2<br>(1 - 3)             |
| Maternal disorders                                               | 2,720<br>(2,080 - 3,457)    | --                       | 28<br>(10 - 60)     | 2,693<br>(2,053 - 3,425) | --                       | --                       |
| Maternal hemorrhage                                              | 507<br>(344 - 711)          | --                       | 3<br>(1 - 6)        | 504<br>(341 - 709)       | --                       | --                       |
| Maternal sepsis and other maternal infections                    | 154<br>(92 - 235)           | --                       | 2<br>(0 - 4)        | 152<br>(91 - 234)        | --                       | --                       |
| Maternal hypertensive disorders                                  | 203<br>(118 - 294)          | --                       | 2<br>(1 - 4)        | 201<br>(117 - 292)       | --                       | --                       |
| Maternal obstructed labor                                        | 135<br>(81 - 202)           | --                       | 1<br>(0 - 2)        | 134<br>(81 - 200)        | --                       | --                       |
| Maternal abortive outcome                                        | 490<br>(351 - 660)          | --                       | 5<br>(2 - 12)       | 485<br>(347 - 655)       | --                       | --                       |
| Indirect maternal deaths                                         | 286<br>(190 - 415)          | --                       | 2<br>(1 - 5)        | 284<br>(188 - 412)       | --                       | --                       |
| Late maternal deaths                                             | 409<br>(239 - 598)          | --                       | 8<br>(2 - 18)       | 401<br>(233 - 590)       | --                       | --                       |
| Maternal deaths aggravated by HIV/AIDS                           | 17<br>(9 - 26)              | --                       | --                  | 17<br>(9 - 26)           | --                       | --                       |
| Other maternal disorders                                         | 516<br>(361 - 703)          | --                       | 5<br>(2 - 12)       | 510<br>(356 - 696)       | --                       | --                       |
| Neonatal disorders                                               | 4,494<br>(3,615 - 5,545)    | 4,494<br>(3,615 - 5,545) | --                  | --                       | --                       | --                       |
| Neonatal preterm birth complications                             | 1,670<br>(735 - 2,871)      | 1,670<br>(735 - 2,871)   | --                  | --                       | --                       | --                       |
| Neonatal encephalopathy due to birth asphyxia and trauma         | 1,449<br>(678 - 2,516)      | 1,449<br>(678 - 2,516)   | --                  | --                       | --                       | --                       |
| Neonatal sepsis and other neonatal infections                    | 952<br>(401 - 1,859)        | 952<br>(401 - 1,859)     | --                  | --                       | --                       | --                       |
| Hemolytic disease and other neonatal jaundice                    | 26<br>(8 - 81)              | 26<br>(8 - 81)           | --                  | --                       | --                       | --                       |
| Other neonatal disorders                                         | 397<br>(188 - 748)          | 397<br>(188 - 748)       | --                  | --                       | --                       | --                       |
| Nutritional deficiencies                                         | 2,372<br>(1,523 - 3,446)    | 1,307<br>(597 - 2,282)   | 135<br>(73 - 217)   | 268<br>(186 - 378)       | 327<br>(211 - 497)       | 335<br>(214 - 502)       |
| Protein-energy malnutrition                                      | 1,665<br>(876 - 2,634)      | 1,205<br>(534 - 2,173)   | 96<br>(46 - 165)    | 57<br>(26 - 124)         | 143<br>(71 - 262)        | 164<br>(81 - 289)        |
| Iodine deficiency                                                | 8<br>(1 - 31)               | 3<br>(0 - 26)            | 1<br>(0 - 6)        | 1<br>(0 - 6)             | 2<br>(0 - 9)             | 1<br>(0 - 6)             |
| Iron-deficiency anemia                                           | 687<br>(353 - 1,098)        | 96<br>(18 - 301)         | 38<br>(13 - 80)     | 208<br>(119 - 304)       | 177<br>(79 - 305)        | 168<br>(82 - 299)        |
| Other nutritional deficiencies                                   | 11<br>(4 - 23)              | 3<br>(0 - 8)             | 1<br>(0 - 1)        | 1<br>(0 - 3)             | 5<br>(1 - 11)            | 2<br>(1 - 4)             |
| Other communicable, maternal, neonatal, and nutritional diseases | 871<br>(555 - 1,316)        | 582<br>(325 - 975)       | 59<br>(30 - 105)    | 59<br>(37 - 83)          | 95<br>(49 - 158)         | 77<br>(36 - 134)         |
| Sexually transmitted diseases excluding HIV                      | 583<br>(319 - 979)          | 509<br>(267 - 876)       | 47<br>(21 - 90)     | 12<br>(6 - 20)           | 8<br>(3 - 20)            | 6<br>(2 - 16)            |
| Syphilis                                                         | 570<br>(306 - 968)          | 509<br>(267 - 876)       | 47<br>(20 - 89)     | 5<br>(2 - 8)             | 5<br>(2 - 11)            | 5<br>(1 - 11)            |
| Chlamydial infection                                             | 4<br>(2 - 7)                | --                       | 0<br>(0 - 0)        | 2<br>(1 - 4)             | 1<br>(0 - 3)             | 0<br>(0 - 1)             |
| Gonococcal infection                                             | 5<br>(3 - 8)                | --                       | 0<br>(0 - 0)        | 2<br>(1 - 4)             | 2<br>(1 - 4)             | 1<br>(0 - 2)             |
| Other sexually transmitted diseases                              | 4<br>(2 - 7)                | --                       | 0<br>(0 - 0)        | 2<br>(1 - 4)             | 1<br>(0 - 3)             | 0<br>(0 - 1)             |
| Hepatitis                                                        | 160<br>(74 - 249)           | 17<br>(5 - 35)           | 5<br>(2 - 10)       | 33<br>(16 - 53)          | 59<br>(26 - 105)         | 46<br>(20 - 79)          |
| Acute hepatitis A                                                | 9<br>(2 - 22)               | 6<br>(1 - 15)            | 2<br>(0 - 4)        | 1<br>(0 - 3)             | 1<br>(0 - 2)             | 0<br>(0 - 0)             |
| Acute hepatitis B                                                | 113<br>(48 - 188)           | 11<br>(3 - 25)           | 2<br>(1 - 5)        | 11<br>(4 - 23)           | 48<br>(19 - 88)          | 41<br>(17 - 71)          |
| Acute hepatitis C                                                | 5<br>(1 - 16)               | --                       | 0<br>(0 - 1)        | 1<br>(0 - 2)             | 2<br>(0 - 8)             | 2<br>(0 - 6)             |
| Acute hepatitis E                                                | 32<br>(16 - 59)             | 0<br>(0 - 1)             | 1<br>(0 - 2)        | 20<br>(9 - 35)           | 8<br>(3 - 19)            | 3<br>(1 - 9)             |
| Other infectious diseases                                        | 128<br>(69 - 241)           | 55<br>(20 - 149)         | 6<br>(2 - 17)       | 14<br>(8 - 24)           | 27<br>(10 - 61)          | 25<br>(7 - 64)           |
| Non-communicable diseases                                        | 16,924<br>(13,323 - 21,117) | 1,757<br>(880 - 3,309)   | 395<br>(266 - 542)  | 2,526<br>(1,955 - 3,133) | 6,418<br>(4,711 - 8,405) | 5,827<br>(4,658 - 7,159) |
| Neoplasms                                                        | 3,236<br>(2,409 - 4,331)    | 28<br>(14 - 48)          | 42<br>(25 - 65)     | 883<br>(669 - 1,142)     | 1,659<br>(1,157 - 2,343) | 624<br>(464 - 859)       |
| Esophageal cancer                                                | 43<br>(29 - 65)             | --                       | --                  | 3<br>(2 - 5)             | 24<br>(16 - 38)          | 16<br>(10 - 24)          |
| Stomach cancer                                                   | 306<br>(215 - 443)          | --                       | --                  | 78<br>(53 - 112)         | 188<br>(125 - 284)       | 41<br>(26 - 62)          |
| Liver cancer                                                     | 666<br>(465 - 932)          | --                       | 3<br>(2 - 6)        | 262<br>(176 - 382)       | 289<br>(176 - 452)       | 111<br>(66 - 181)        |
| Liver cancer due to hepatitis B                                  | 245<br>(126 - 393)          | --                       | 1<br>(0 - 2)        | 109<br>(57 - 172)        | 106<br>(43 - 190)        | 28<br>(13 - 52)          |

Web Table 31- Guinea deaths with 95% UI by age, sex, and cause in 2013

| Cause                                | Females, All Ages        | Females, 0-4 Years | Females, 5-14 Years | Females, 15-49 Years | Females, 50-69 Years     | Females, 70-80 Years     |
|--------------------------------------|--------------------------|--------------------|---------------------|----------------------|--------------------------|--------------------------|
| Liver cancer due to hepatitis C      | 205<br>(76 - 375)        | --                 | 0<br>(0 - 1)        | 62<br>(13 - 130)     | 94<br>(30 - 186)         | 49<br>(20 - 95)          |
| Liver cancer due to alcohol use      | 46<br>(23 - 83)          | --                 | --                  | 11<br>(5 - 20)       | 22<br>(10 - 42)          | 13<br>(5 - 28)           |
| Liver cancer due to other causes     | 170<br>(96 - 277)        | --                 | 2<br>(1 - 4)        | 80<br>(45 - 121)     | 67<br>(31 - 124)         | 21<br>(10 - 40)          |
| Larynx cancer                        | 3<br>(1 - 6)             | --                 | --                  | 1<br>(0 - 1)         | 2<br>(1 - 3)             | 1<br>(0 - 1)             |
| Tracheal, bronchus and lung cancer   | 75<br>(54 - 104)         | --                 | --                  | 21<br>(15 - 28)      | 46<br>(30 - 68)          | 8<br>(5 - 12)            |
| Breast cancer                        | 307<br>(215 - 471)       | --                 | --                  | 104<br>(75 - 152)    | 160<br>(104 - 255)       | 44<br>(30 - 68)          |
| Cervical cancer                      | 806<br>(548 - 1,164)     | --                 | --                  | 195<br>(135 - 285)   | 481<br>(300 - 724)       | 131<br>(80 - 204)        |
| Uterine cancer                       | 68<br>(41 - 102)         | --                 | --                  | 6<br>(4 - 9)         | 28<br>(16 - 47)          | 35<br>(17 - 54)          |
| Prostate cancer                      | --                       | --                 | --                  | --                   | --                       | --                       |
| Colon and rectum cancer              | 80<br>(59 - 107)         | --                 | --                  | 24<br>(16 - 32)      | 38<br>(26 - 54)          | 19<br>(13 - 25)          |
| Lip and oral cavity cancer           | 46<br>(25 - 70)          | --                 | --                  | 20<br>(9 - 36)       | 17<br>(9 - 27)           | 9<br>(6 - 14)            |
| Nasopharynx cancer                   | 22<br>(6 - 37)           | --                 | 0<br>(0 - 1)        | 3<br>(1 - 5)         | 15<br>(4 - 27)           | 4<br>(0 - 8)             |
| Other pharynx cancer                 | 22<br>(12 - 34)          | --                 | --                  | 2<br>(1 - 3)         | 16<br>(9 - 26)           | 5<br>(1 - 8)             |
| Gallbladder and biliary tract cancer | 50<br>(32 - 75)          | --                 | --                  | 11<br>(6 - 17)       | 27<br>(16 - 42)          | 12<br>(7 - 20)           |
| Pancreatic cancer                    | 57<br>(41 - 81)          | --                 | --                  | 6<br>(4 - 8)         | 34<br>(22 - 50)          | 17<br>(12 - 25)          |
| Malignant skin melanoma              | 18<br>(13 - 26)          | --                 | --                  | 2<br>(2 - 3)         | 9<br>(5 - 11)            | 7<br>(5 - 13)            |
| Non-melanoma skin cancer             | 6<br>(3 - 10)            | --                 | --                  | 1<br>(1 - 2)         | 1<br>(1 - 3)             | 3<br>(1 - 6)             |
| Ovarian cancer                       | 159<br>(103 - 228)       | --                 | --                  | 40<br>(25 - 60)      | 98<br>(60 - 150)         | 21<br>(13 - 31)          |
| Testicular cancer                    | --                       | --                 | --                  | --                   | --                       | --                       |
| Kidney cancer                        | 27<br>(18 - 39)          | 1<br>(0 - 2)       | 0<br>(0 - 1)        | 4<br>(3 - 6)         | 17<br>(10 - 27)          | 5<br>(3 - 9)             |
| Bladder cancer                       | 57<br>(36 - 89)          | --                 | --                  | 10<br>(5 - 17)       | 30<br>(17 - 48)          | 17<br>(11 - 28)          |
| Brain and nervous system cancer      | 54<br>(29 - 78)          | 0<br>(0 - 1)       | 0<br>(0 - 1)        | 2<br>(1 - 5)         | 16<br>(9 - 26)           | 35<br>(12 - 54)          |
| Thyroid cancer                       | 19<br>(8 - 30)           | --                 | 0<br>(0 - 0)        | 2<br>(1 - 4)         | 11<br>(4 - 19)           | 6<br>(2 - 9)             |
| Mesothelioma                         | 3<br>(2 - 4)             | --                 | --                  | 1<br>(0 - 1)         | 2<br>(1 - 3)             | 0<br>(0 - 1)             |
| Hodgkin lymphoma                     | 13<br>(7 - 20)           | 1<br>(0 - 2)       | 1<br>(0 - 3)        | 3<br>(2 - 5)         | 3<br>(1 - 5)             | 5<br>(2 - 10)            |
| Non-Hodgkin lymphoma                 | 76<br>(51 - 117)         | 5<br>(2 - 11)      | 9<br>(4 - 16)       | 29<br>(18 - 44)      | 22<br>(12 - 42)          | 12<br>(7 - 20)           |
| Multiple myeloma                     | 16<br>(11 - 27)          | --                 | --                  | 2<br>(1 - 3)         | 9<br>(5 - 15)            | 6<br>(3 - 10)            |
| Leukemia                             | 47<br>(36 - 62)          | 2<br>(1 - 4)       | 5<br>(3 - 8)        | 12<br>(9 - 17)       | 17<br>(12 - 26)          | 11<br>(7 - 16)           |
| Other neoplasms                      | 188<br>(127 - 293)       | 19<br>(8 - 37)     | 22<br>(9 - 40)      | 38<br>(24 - 59)      | 63<br>(39 - 109)         | 46<br>(28 - 77)          |
| Cardiovascular diseases              | 7,047<br>(4,399 - 9,740) | 155<br>(67 - 279)  | 55<br>(28 - 96)     | 661<br>(409 - 970)   | 2,830<br>(1,684 - 4,008) | 3,347<br>(2,175 - 4,523) |
| Rheumatic heart disease              | 103<br>(51 - 274)        | 3<br>(1 - 9)       | 6<br>(2 - 13)       | 24<br>(10 - 77)      | 34<br>(13 - 109)         | 37<br>(19 - 79)          |
| Ischemic heart disease               | 1,744<br>(792 - 2,689)   | 4<br>(1 - 13)      | 5<br>(2 - 10)       | 144<br>(68 - 218)    | 671<br>(277 - 1,037)     | 921<br>(437 - 1,385)     |
| Cerebrovascular disease              | 3,363<br>(2,233 - 4,868) | 43<br>(17 - 94)    | 16<br>(7 - 32)      | 270<br>(159 - 409)   | 1,352<br>(842 - 1,996)   | 1,681<br>(1,162 - 2,411) |
| Ischemic stroke                      | 2,058<br>(1,121 - 2,850) | 8<br>(2 - 22)      | 2<br>(1 - 6)        | 52<br>(25 - 102)     | 744<br>(345 - 1,146)     | 1,253<br>(727 - 1,725)   |
| Hemorrhagic stroke                   | 1,305<br>(768 - 2,438)   | 35<br>(14 - 74)    | 14<br>(6 - 27)      | 218<br>(112 - 328)   | 609<br>(341 - 1,146)     | 429<br>(227 - 982)       |
| Hypertensive heart disease           | 635<br>(288 - 1,019)     | 2<br>(0 - 5)       | 1<br>(0 - 2)        | 48<br>(16 - 86)      | 249<br>(92 - 440)        | 335<br>(160 - 511)       |
| Cardiomyopathy and myocarditis       | 292<br>(164 - 446)       | 35<br>(10 - 75)    | 10<br>(4 - 18)      | 56<br>(30 - 95)      | 82<br>(45 - 133)         | 109<br>(49 - 189)        |
| Atrial fibrillation and flutter      | 0<br>(0 - 1)             | --                 | --                  | 0<br>(0 - 0)         | 0<br>(0 - 0)             | 0<br>(0 - 0)             |
| Aortic aneurysm                      | 52<br>(26 - 85)          | --                 | --                  | 6<br>(3 - 10)        | 21<br>(10 - 38)          | 24<br>(13 - 41)          |
| Peripheral vascular disease          | 2<br>(1 - 4)             | --                 | --                  | 0<br>(0 - 0)         | 2<br>(1 - 2)             | 1<br>(0 - 1)             |

Web Table 31- Guinea deaths with 95% UI by age, sex, and cause in 2013

| Cause                                               | Females, All Ages      | Females, 0-4 Years | Females, 5-14 Years | Females, 15-49 Years | Females, 50-69 Years | Females, 70-80 Years |
|-----------------------------------------------------|------------------------|--------------------|---------------------|----------------------|----------------------|----------------------|
| Endocarditis                                        | 92<br>(48 - 157)       | 20<br>(4 - 43)     | 3<br>(1 - 7)        | 19<br>(9 - 32)       | 20<br>(10 - 39)      | 30<br>(15 - 64)      |
| Other cardiovascular and circulatory diseases       | 764<br>(531 - 1,345)   | 48<br>(21 - 92)    | 14<br>(7 - 26)      | 95<br>(59 - 170)     | 399<br>(253 - 666)   | 208<br>(131 - 393)   |
| Chronic respiratory diseases                        | 1,115<br>(780 - 2,098) | 58<br>(26 - 121)   | 19<br>(11 - 32)     | 117<br>(81 - 205)    | 438<br>(280 - 810)   | 482<br>(330 - 885)   |
| Chronic obstructive pulmonary disease               | 668<br>(436 - 1,340)   | 26<br>(11 - 52)    | 8<br>(5 - 14)       | 40<br>(24 - 73)      | 277<br>(163 - 565)   | 317<br>(197 - 627)   |
| Pneumoconiosis                                      | 3<br>(2 - 6)           | 0<br>(0 - 1)       | 1<br>(0 - 1)        | 1<br>(1 - 1)         | 1<br>(1 - 2)         | 0<br>(0 - 1)         |
| Silicosis                                           | 0<br>(0 - 0)           | 0<br>(0 - 0)       | 0<br>(0 - 0)        | 0<br>(0 - 0)         | 0<br>(0 - 0)         | 0<br>(0 - 0)         |
| Asbestosis                                          | 0<br>(0 - 0)           | 0<br>(0 - 0)       | 0<br>(0 - 0)        | 0<br>(0 - 0)         | 0<br>(0 - 0)         | 0<br>(0 - 0)         |
| Coal workers pneumoconiosis                         | 0<br>(0 - 0)           | 0<br>(0 - 0)       | 0<br>(0 - 0)        | 0<br>(0 - 0)         | 0<br>(0 - 0)         | 0<br>(0 - 0)         |
| Other pneumoconiosis                                | 2<br>(1 - 5)           | 0<br>(0 - 0)       | 0<br>(0 - 0)        | 1<br>(0 - 1)         | 1<br>(0 - 2)         | 0<br>(0 - 1)         |
| Asthma                                              | 304<br>(187 - 561)     | 22<br>(7 - 55)     | 7<br>(4 - 17)       | 51<br>(33 - 100)     | 124<br>(68 - 223)    | 100<br>(53 - 184)    |
| Interstitial lung disease and pulmonary sarcoidosis | 58<br>(8 - 112)        | 0<br>(0 - 1)       | 0<br>(0 - 1)        | 4<br>(1 - 8)         | 18<br>(3 - 36)       | 36<br>(4 - 74)       |
| Other chronic respiratory diseases                  | 81<br>(51 - 165)       | 10<br>(4 - 22)     | 3<br>(1 - 4)        | 22<br>(14 - 42)      | 18<br>(9 - 42)       | 29<br>(15 - 69)      |
| Cirrhosis                                           | 634<br>(437 - 878)     | 18<br>(6 - 39)     | 12<br>(7 - 19)      | 132<br>(90 - 185)    | 306<br>(195 - 454)   | 165<br>(105 - 249)   |
| Cirrhosis due to hepatitis B                        | 164<br>(60 - 303)      | 1<br>(0 - 3)       | 2<br>(0 - 6)        | 38<br>(13 - 79)      | 84<br>(28 - 162)     | 40<br>(12 - 80)      |
| Cirrhosis due to hepatitis C                        | 238<br>(73 - 413)      | 1<br>(0 - 5)       | 3<br>(0 - 7)        | 48<br>(2 - 100)      | 118<br>(35 - 223)    | 68<br>(33 - 112)     |
| Cirrhosis due to alcohol use                        | 132<br>(69 - 249)      | --                 | --                  | 18<br>(8 - 38)       | 69<br>(35 - 139)     | 44<br>(22 - 82)      |
| Cirrhosis due to other causes                       | 100<br>(58 - 165)      | 16<br>(5 - 35)     | 7<br>(4 - 13)       | 29<br>(14 - 48)      | 35<br>(16 - 70)      | 12<br>(6 - 26)       |
| Digestive diseases                                  | 845<br>(625 - 1,132)   | 51<br>(18 - 102)   | 38<br>(23 - 59)     | 162<br>(119 - 212)   | 300<br>(197 - 438)   | 294<br>(206 - 406)   |
| Peptic ulcer disease                                | 184<br>(114 - 276)     | 4<br>(1 - 11)      | 4<br>(2 - 9)        | 32<br>(18 - 49)      | 72<br>(39 - 121)     | 72<br>(41 - 119)     |
| Gastritis and duodenitis                            | 54<br>(19 - 156)       | 4<br>(1 - 13)      | 4<br>(1 - 10)       | 12<br>(4 - 31)       | 17<br>(5 - 51)       | 19<br>(5 - 58)       |
| Appendicitis                                        | 99<br>(51 - 149)       | 11<br>(3 - 29)     | 10<br>(5 - 18)      | 27<br>(16 - 41)      | 27<br>(11 - 53)      | 23<br>(7 - 50)       |
| Paralytic ileus and intestinal obstruction          | 228<br>(127 - 358)     | 11<br>(2 - 27)     | 9<br>(3 - 16)       | 32<br>(15 - 51)      | 85<br>(39 - 140)     | 92<br>(51 - 159)     |
| Inguinal, femoral, and abdominal hernia             | 11<br>(4 - 19)         | 1<br>(0 - 2)       | 0<br>(0 - 1)        | 2<br>(1 - 4)         | 3<br>(1 - 6)         | 4<br>(1 - 9)         |
| Inflammatory bowel disease                          | 53<br>(28 - 82)        | 9<br>(3 - 23)      | 2<br>(1 - 5)        | 14<br>(7 - 22)       | 15<br>(6 - 25)       | 13<br>(5 - 22)       |
| Vascular intestinal disorders                       | 3<br>(1 - 10)          | 0<br>(0 - 0)       | 0<br>(0 - 0)        | 1<br>(0 - 2)         | 1<br>(0 - 3)         | 1<br>(0 - 4)         |
| Gallbladder and biliary diseases                    | 82<br>(51 - 121)       | 3<br>(1 - 6)       | 3<br>(1 - 6)        | 13<br>(8 - 20)       | 33<br>(18 - 57)      | 30<br>(16 - 49)      |
| Pancreatitis                                        | 41<br>(18 - 73)        | 1<br>(0 - 2)       | 1<br>(0 - 2)        | 8<br>(5 - 13)        | 20<br>(7 - 41)       | 11<br>(4 - 23)       |
| Other digestive diseases                            | 89<br>(59 - 132)       | 7<br>(2 - 16)      | 4<br>(2 - 8)        | 21<br>(14 - 33)      | 29<br>(16 - 49)      | 28<br>(14 - 48)      |
| Neurological disorders                              | 404<br>(308 - 526)     | 44<br>(19 - 86)    | 23<br>(11 - 40)     | 74<br>(47 - 114)     | 48<br>(32 - 74)      | 215<br>(154 - 292)   |
| Alzheimer disease and other dementias               | 216<br>(153 - 297)     | --                 | --                  | 0<br>(0 - 0)         | 22<br>(14 - 32)      | 194<br>(136 - 268)   |
| Parkinson disease                                   | 1<br>(1 - 4)           | --                 | --                  | 0<br>(0 - 0)         | 1<br>(0 - 1)         | 1<br>(0 - 2)         |
| Epilepsy                                            | 152<br>(100 - 223)     | 38<br>(15 - 78)    | 20<br>(9 - 37)      | 67<br>(41 - 107)     | 13<br>(6 - 26)       | 13<br>(6 - 25)       |
| Multiple sclerosis                                  | 1<br>(0 - 3)           | --                 | --                  | 0<br>(0 - 1)         | 0<br>(0 - 1)         | 0<br>(0 - 1)         |
| Other neurological disorders                        | 34<br>(24 - 46)        | 6<br>(3 - 10)      | 3<br>(2 - 4)        | 6<br>(4 - 9)         | 12<br>(8 - 19)       | 6<br>(4 - 10)        |
| Mental and substance use disorders                  | 68<br>(39 - 104)       | 4<br>(1 - 7)       | 0<br>(0 - 0)        | 29<br>(14 - 47)      | 27<br>(13 - 46)      | 9<br>(6 - 13)        |
| Schizophrenia                                       | 1<br>(1 - 2)           | --                 | --                  | 1<br>(0 - 1)         | 0<br>(0 - 1)         | 0<br>(0 - 0)         |
| Alcohol use disorders                               | 34<br>(7 - 67)         | --                 | --                  | 17<br>(3 - 33)       | 15<br>(3 - 31)       | 2<br>(1 - 5)         |
| Drug use disorders                                  | 33<br>(24 - 45)        | 4<br>(1 - 7)       | --                  | 11<br>(8 - 17)       | 12<br>(8 - 18)       | 6<br>(4 - 9)         |
| Opioid use disorders                                | 3<br>(2 - 4)           | 0<br>(0 - 1)       | --                  | 1<br>(1 - 2)         | 1<br>(1 - 2)         | 1<br>(0 - 1)         |
| Cocaine use disorders                               | 0<br>(0 - 0)           | 0<br>(0 - 0)       | --                  | 0<br>(0 - 0)         | 0<br>(0 - 0)         | 0<br>(0 - 0)         |

Web Table 31- Guinea deaths with 95% UI by age, sex, and cause in 2013

| Cause                                               | Females, All Ages        | Females, 0-4 Years     | Females, 5-14 Years | Females, 15-49 Years | Females, 50-69 Years | Females, 70-80 Years |
|-----------------------------------------------------|--------------------------|------------------------|---------------------|----------------------|----------------------|----------------------|
| Amphetamine use disorders                           | 0<br>(0 - 0)             | 0<br>(0 - 0)           | --                  | 0<br>(0 - 0)         | 0<br>(0 - 0)         | 0<br>(0 - 0)         |
| Other drug use disorders                            | 29<br>(21 - 40)          | 3<br>(1 - 6)           | --                  | 10<br>(7 - 15)       | 11<br>(7 - 16)       | 5<br>(3 - 8)         |
| Eating disorders                                    | 0<br>(0 - 0)             | --                     | 0<br>(0 - 0)        | 0<br>(0 - 0)         | --                   | --                   |
| Anorexia nervosa                                    | 0<br>(0 - 0)             | --                     | 0<br>(0 - 0)        | 0<br>(0 - 0)         | --                   | --                   |
| Diabetes, urogenital, blood, and endocrine diseases | 2,118<br>(1,599 - 2,799) | 286<br>(134 - 525)     | 135<br>(78 - 227)   | 373<br>(275 - 495)   | 720<br>(494 - 1,004) | 604<br>(433 - 831)   |
| Diabetes mellitus                                   | 857<br>(598 - 1,193)     | 4<br>(2 - 7)           | 4<br>(2 - 8)        | 87<br>(61 - 119)     | 405<br>(267 - 599)   | 357<br>(241 - 511)   |
| Acute glomerulonephritis                            | 9<br>(6 - 12)            | 1<br>(0 - 2)           | 1<br>(0 - 2)        | 3<br>(2 - 5)         | 3<br>(1 - 5)         | 1<br>(0 - 2)         |
| Chronic kidney disease                              | 317<br>(221 - 424)       | 27<br>(11 - 52)        | 16<br>(8 - 25)      | 74<br>(49 - 100)     | 111<br>(69 - 169)    | 90<br>(58 - 134)     |
| Chronic kidney disease due to diabetes mellitus     | 4<br>(2 - 7)             | 0<br>(0 - 0)           | 0<br>(0 - 0)        | 0<br>(0 - 0)         | 4<br>(1 - 7)         | 0<br>(0 - 0)         |
| Chronic kidney disease due to hypertension          | 144<br>(92 - 217)        | 3<br>(1 - 7)           | 2<br>(1 - 4)        | 24<br>(11 - 38)      | 60<br>(35 - 97)      | 55<br>(34 - 89)      |
| Chronic kidney disease due to glomerulonephritis    | 95<br>(61 - 133)         | 18<br>(7 - 32)         | 8<br>(4 - 13)       | 36<br>(22 - 51)      | 22<br>(11 - 38)      | 12<br>(5 - 22)       |
| Chronic kidney disease due to other causes          | 75<br>(39 - 123)         | 7<br>(2 - 17)          | 6<br>(2 - 12)       | 14<br>(7 - 23)       | 26<br>(10 - 53)      | 23<br>(9 - 46)       |
| Urinary diseases and male infertility               | 246<br>(158 - 341)       | 22<br>(7 - 49)         | 7<br>(3 - 14)       | 48<br>(29 - 69)      | 94<br>(53 - 148)     | 75<br>(47 - 120)     |
| Interstitial nephritis and urinary tract infections | 221<br>(134 - 307)       | 20<br>(6 - 47)         | 6<br>(2 - 12)       | 42<br>(23 - 63)      | 83<br>(45 - 133)     | 70<br>(43 - 112)     |
| Urolithiasis                                        | 6<br>(2 - 21)            | --                     | 1<br>(0 - 2)        | 2<br>(0 - 6)         | 3<br>(1 - 10)        | 1<br>(0 - 5)         |
| Other urinary diseases                              | 19<br>(10 - 32)          | 2<br>(0 - 7)           | 1<br>(0 - 2)        | 4<br>(2 - 8)         | 8<br>(3 - 16)        | 4<br>(1 - 8)         |
| Gynecological diseases                              | 7<br>(5 - 12)            | --                     | --                  | 4<br>(2 - 7)         | 3<br>(1 - 5)         | 1<br>(1 - 2)         |
| Uterine fibroids                                    | 2<br>(1 - 3)             | --                     | --                  | 1<br>(0 - 1)         | 1<br>(0 - 1)         | 0<br>(0 - 1)         |
| Polycystic ovarian syndrome                         | 0<br>(0 - 1)             | --                     | --                  | 0<br>(0 - 1)         | 0<br>(0 - 0)         | --                   |
| Endometriosis                                       | 1<br>(0 - 1)             | --                     | --                  | 1<br>(0 - 1)         | 0<br>(0 - 0)         | --                   |
| Genital prolapse                                    | 1<br>(1 - 2)             | --                     | --                  | 0<br>(0 - 1)         | 0<br>(0 - 1)         | 0<br>(0 - 0)         |
| Other gynecological diseases                        | 4<br>(2 - 6)             | --                     | --                  | 2<br>(1 - 4)         | 1<br>(1 - 3)         | 0<br>(0 - 1)         |
| Hemoglobinopathies and hemolytic anemias            | 441<br>(244 - 825)       | 169<br>(64 - 391)      | 96<br>(45 - 187)    | 113<br>(62 - 209)    | 45<br>(23 - 76)      | 18<br>(6 - 35)       |
| Thalassemias                                        | 1<br>(1 - 2)             | 1<br>(0 - 2)           | 0<br>(0 - 0)        | 0<br>(0 - 0)         | 0<br>(0 - 0)         | 0<br>(0 - 0)         |
| Sickle cell disorders                               | 419<br>(228 - 795)       | 164<br>(61 - 381)      | 95<br>(44 - 186)    | 112<br>(61 - 207)    | 42<br>(22 - 72)      | 6<br>(2 - 13)        |
| G6PD deficiency                                     | 1<br>(0 - 2)             | 0<br>(0 - 1)           | 0<br>(0 - 0)        | 0<br>(0 - 0)         | 0<br>(0 - 0)         | 0<br>(0 - 0)         |
| Other hemoglobinopathies and hemolytic anemias      | 19<br>(9 - 31)           | 4<br>(2 - 8)           | 0<br>(0 - 1)        | 1<br>(0 - 2)         | 2<br>(1 - 4)         | 11<br>(4 - 23)       |
| Endocrine, metabolic, blood, and immune disorders   | 241<br>(148 - 384)       | 63<br>(25 - 138)       | 11<br>(5 - 25)      | 45<br>(28 - 77)      | 60<br>(34 - 101)     | 62<br>(29 - 97)      |
| Musculoskeletal disorders                           | 53<br>(33 - 83)          | --                     | 5<br>(3 - 9)        | 16<br>(9 - 27)       | 19<br>(11 - 33)      | 13<br>(7 - 24)       |
| Rheumatoid arthritis                                | 10<br>(5 - 19)           | --                     | 1<br>(0 - 2)        | 2<br>(1 - 3)         | 3<br>(1 - 8)         | 5<br>(2 - 9)         |
| Other musculoskeletal disorders                     | 43<br>(27 - 67)          | --                     | 4<br>(2 - 8)        | 14<br>(8 - 24)       | 16<br>(8 - 27)       | 8<br>(4 - 16)        |
| Other non-communicable diseases                     | 1,404<br>(694 - 2,909)   | 1,113<br>(429 - 2,555) | 65<br>(26 - 140)    | 80<br>(53 - 115)     | 71<br>(46 - 106)     | 75<br>(48 - 114)     |
| Congenital anomalies                                | 1,175<br>(467 - 2,732)   | 1,063<br>(396 - 2,503) | 59<br>(22 - 133)    | 36<br>(18 - 71)      | 11<br>(7 - 17)       | 7<br>(4 - 10)        |
| Neural tube defects                                 | 291<br>(61 - 978)        | 274<br>(53 - 938)      | 11<br>(2 - 36)      | 6<br>(2 - 17)        | 1<br>(0 - 2)         | 0<br>(0 - 1)         |
| Congenital heart anomalies                          | 462<br>(184 - 1,034)     | 417<br>(155 - 970)     | 23<br>(7 - 58)      | 13<br>(6 - 26)       | 5<br>(3 - 9)         | 3<br>(2 - 5)         |
| Cleft lip and cleft palate                          | 6<br>(0 - 19)            | 6<br>(0 - 19)          | --                  | --                   | --                   | --                   |
| Down syndrome                                       | 186<br>(51 - 458)        | 160<br>(36 - 417)      | 14<br>(5 - 35)      | 9<br>(4 - 18)        | 2<br>(1 - 5)         | 0<br>(0 - 1)         |
| Chromosomal unbalanced rearrangements               | 46<br>(9 - 123)          | 43<br>(8 - 118)        | 2<br>(0 - 4)        | 2<br>(1 - 3)         | 0<br>(0 - 0)         | 0<br>(0 - 0)         |
| Other congenital anomalies                          | 183<br>(46 - 680)        | 163<br>(36 - 627)      | 9<br>(2 - 33)       | 6<br>(2 - 16)        | 2<br>(1 - 5)         | 3<br>(2 - 5)         |
| Skin and subcutaneous diseases                      | 221<br>(155 - 297)       | 43<br>(17 - 79)        | 6<br>(3 - 9)        | 44<br>(27 - 63)      | 60<br>(37 - 91)      | 68<br>(42 - 106)     |



Web Table 31- Guinea deaths with 95% UI by age, sex, and cause in 2013

| Cause                                           | Females, All Ages        | Females, 0-4 Years | Females, 5-14 Years | Females, 15-49 Years | Females, 50-69 Years | Females, 70-80 Years |
|-------------------------------------------------|--------------------------|--------------------|---------------------|----------------------|----------------------|----------------------|
| Cellulitis                                      | 88<br>(55 - 133)         | 13<br>(4 - 29)     | 3<br>(2 - 5)        | 17<br>(9 - 27)       | 22<br>(11 - 39)      | 34<br>(17 - 59)      |
| Pyoderma                                        | 123<br>(82 - 176)        | 28<br>(10 - 56)    | 3<br>(1 - 5)        | 24<br>(14 - 36)      | 37<br>(23 - 60)      | 32<br>(16 - 60)      |
| Decubitus ulcer                                 | 3<br>(2 - 5)             | 0<br>(0 - 0)       | 0<br>(0 - 0)        | 1<br>(0 - 1)         | 1<br>(0 - 1)         | 1<br>(1 - 3)         |
| Other skin and subcutaneous diseases            | 7<br>(3 - 13)            | 2<br>(0 - 7)       | 0<br>(0 - 1)        | 3<br>(1 - 4)         | 1<br>(0 - 2)         | 1<br>(0 - 3)         |
| Sudden infant death syndrome                    | 8<br>(1 - 30)            | 8<br>(1 - 30)      | --                  | --                   | --                   | --                   |
| Injuries                                        | 2,277<br>(1,585 - 2,864) | 489<br>(250 - 763) | 284<br>(175 - 410)  | 681<br>(491 - 857)   | 456<br>(282 - 662)   | 367<br>(204 - 515)   |
| Transport injuries                              | 1,017<br>(698 - 1,349)   | 136<br>(54 - 268)  | 136<br>(76 - 219)   | 403<br>(267 - 545)   | 233<br>(136 - 358)   | 110<br>(59 - 173)    |
| Road injuries                                   | 974<br>(678 - 1,290)     | 124<br>(49 - 245)  | 130<br>(73 - 208)   | 393<br>(263 - 533)   | 223<br>(131 - 341)   | 103<br>(58 - 163)    |
| Pedestrian road injuries                        | 275<br>(165 - 386)       | 34<br>(13 - 73)    | 42<br>(21 - 70)     | 86<br>(50 - 129)     | 73<br>(36 - 115)     | 41<br>(20 - 65)      |
| Cyclist road injuries                           | 54<br>(30 - 79)          | 8<br>(2 - 20)      | 11<br>(5 - 21)      | 11<br>(7 - 19)       | 19<br>(6 - 33)       | 4<br>(1 - 9)         |
| Motorcyclist road injuries                      | 92<br>(52 - 138)         | 9<br>(3 - 20)      | 7<br>(3 - 14)       | 56<br>(31 - 88)      | 15<br>(6 - 26)       | 6<br>(2 - 12)        |
| Motor vehicle road injuries                     | 520<br>(361 - 702)       | 67<br>(27 - 133)   | 65<br>(34 - 111)    | 231<br>(152 - 317)   | 109<br>(63 - 169)    | 48<br>(26 - 77)      |
| Other road injuries                             | 33<br>(15 - 52)          | 6<br>(1 - 15)      | 6<br>(2 - 12)       | 9<br>(4 - 17)        | 8<br>(3 - 15)        | 4<br>(1 - 9)         |
| Other transport injuries                        | 43<br>(10 - 68)          | 12<br>(3 - 26)     | 6<br>(1 - 13)       | 9<br>(3 - 15)        | 10<br>(2 - 18)       | 6<br>(1 - 12)        |
| Unintentional injuries                          | 1,078<br>(689 - 1,402)   | 343<br>(171 - 548) | 139<br>(83 - 206)   | 186<br>(135 - 235)   | 178<br>(103 - 264)   | 232<br>(121 - 331)   |
| Falls                                           | 234<br>(135 - 329)       | 31<br>(12 - 60)    | 16<br>(6 - 30)      | 31<br>(19 - 45)      | 41<br>(24 - 66)      | 114<br>(52 - 180)    |
| Drowning                                        | 177<br>(90 - 278)        | 81<br>(29 - 158)   | 43<br>(20 - 76)     | 30<br>(18 - 45)      | 16<br>(8 - 26)       | 8<br>(4 - 13)        |
| Fire, heat, and hot substances                  | 170<br>(97 - 264)        | 67<br>(23 - 136)   | 20<br>(10 - 35)     | 33<br>(21 - 49)      | 26<br>(14 - 41)      | 24<br>(12 - 40)      |
| Poisonings                                      | 41<br>(16 - 73)          | 16<br>(5 - 43)     | 5<br>(2 - 10)       | 9<br>(5 - 14)        | 8<br>(2 - 15)        | 3<br>(1 - 6)         |
| Exposure to mechanical forces                   | 117<br>(72 - 156)        | 39<br>(18 - 70)    | 18<br>(9 - 29)      | 26<br>(17 - 36)      | 22<br>(11 - 33)      | 12<br>(5 - 18)       |
| Unintentional firearm injuries                  | 37<br>(25 - 51)          | 9<br>(3 - 19)      | 5<br>(2 - 9)        | 13<br>(8 - 21)       | 7<br>(4 - 12)        | 3<br>(2 - 5)         |
| Unintentional suffocation                       | 8<br>(1 - 19)            | 5<br>(1 - 15)      | 1<br>(0 - 3)        | 0<br>(0 - 1)         | 1<br>(0 - 1)         | 0<br>(0 - 1)         |
| Other exposure to mechanical forces             | 72<br>(32 - 104)         | 25<br>(10 - 48)    | 12<br>(5 - 21)      | 12<br>(7 - 19)       | 14<br>(4 - 23)       | 8<br>(2 - 14)        |
| Adverse effects of medical treatment            | 113<br>(41 - 193)        | 23<br>(6 - 53)     | 6<br>(2 - 12)       | 21<br>(8 - 36)       | 31<br>(10 - 68)      | 32<br>(7 - 67)       |
| Animal contact                                  | 57<br>(21 - 92)          | 12<br>(4 - 27)     | 10<br>(4 - 22)      | 15<br>(5 - 25)       | 12<br>(3 - 21)       | 8<br>(2 - 14)        |
| Venomous animal contact                         | 38<br>(16 - 71)          | 10<br>(3 - 24)     | 8<br>(3 - 17)       | 10<br>(3 - 19)       | 7<br>(2 - 13)        | 4<br>(1 - 8)         |
| Non-venomous animal contact                     | 18<br>(4 - 30)           | 2<br>(1 - 5)       | 3<br>(1 - 6)        | 5<br>(1 - 9)         | 5<br>(1 - 10)        | 4<br>(1 - 10)        |
| Foreign body                                    | 102<br>(58 - 196)        | 58<br>(23 - 136)   | 9<br>(4 - 16)       | 7<br>(4 - 14)        | 10<br>(5 - 15)       | 20<br>(9 - 32)       |
| Pulmonary aspiration and foreign body in airway | 100<br>(55 - 194)        | 57<br>(23 - 135)   | 8<br>(4 - 15)       | 7<br>(4 - 13)        | 9<br>(4 - 15)        | 19<br>(8 - 31)       |
| Foreign body in other body part                 | 3<br>(1 - 4)             | 1<br>(0 - 1)       | 0<br>(0 - 0)        | 0<br>(0 - 1)         | 1<br>(0 - 1)         | 1<br>(0 - 2)         |
| Other unintentional injuries                    | 67<br>(42 - 89)          | 16<br>(7 - 29)     | 13<br>(6 - 22)      | 14<br>(10 - 20)      | 12<br>(6 - 18)       | 12<br>(5 - 19)       |
| Self-harm and interpersonal violence            | 182<br>(105 - 240)       | 10<br>(4 - 20)     | 9<br>(4 - 15)       | 93<br>(59 - 128)     | 46<br>(17 - 73)      | 25<br>(6 - 41)       |
| Self-harm                                       | 125<br>(55 - 177)        | --                 | 3<br>(1 - 7)        | 56<br>(32 - 87)      | 42<br>(13 - 69)      | 24<br>(5 - 40)       |
| Interpersonal violence                          | 57<br>(34 - 80)          | 10<br>(4 - 20)     | 6<br>(3 - 11)       | 37<br>(21 - 56)      | 4<br>(2 - 7)         | 1<br>(0 - 2)         |
| Assault by firearm                              | 18<br>(8 - 28)           | 3<br>(1 - 7)       | 2<br>(1 - 3)        | 11<br>(5 - 20)       | 2<br>(1 - 3)         | 0<br>(0 - 0)         |
| Assault by sharp object                         | 16<br>(8 - 26)           | 2<br>(0 - 4)       | 1<br>(0 - 2)        | 12<br>(6 - 20)       | 1<br>(0 - 1)         | 0<br>(0 - 1)         |
| Assault by other means                          | 23<br>(14 - 36)          | 5<br>(2 - 10)      | 3<br>(1 - 6)        | 13<br>(7 - 21)       | 2<br>(1 - 3)         | 0<br>(0 - 1)         |

Web Table 31- Guinea-Bissau deaths with 95% UI by age, sex, and cause in 2013

| Cause                                                             | Both Sexes, All Ages        | Both Sexes, 0-4 Years     | Both Sexes, 5-14 Years | Both Sexes, 15-49 Years  | Both Sexes, 50-69 Years  | Both Sexes, 70-80 Years  |
|-------------------------------------------------------------------|-----------------------------|---------------------------|------------------------|--------------------------|--------------------------|--------------------------|
| All causes                                                        | 22,424<br>(19,399 - 26,714) | 9,579<br>(8,184 - 11,157) | 956<br>(811 - 1,136)   | 5,409<br>(4,526 - 6,670) | 3,982<br>(2,828 - 5,950) | 2,498<br>(1,914 - 3,351) |
| Communicable, maternal, neonatal, and nutritional diseases        | 14,804<br>(13,003 - 16,913) | 8,696<br>(7,387 - 10,257) | 659<br>(552 - 794)     | 3,413<br>(2,800 - 4,157) | 1,323<br>(951 - 1,878)   | 713<br>(493 - 987)       |
| HIV/AIDS and tuberculosis                                         | 3,190<br>(2,429 - 4,104)    | 267<br>(176 - 377)        | 177<br>(136 - 222)     | 2,007<br>(1,448 - 2,691) | 608<br>(460 - 795)       | 131<br>(91 - 175)        |
| Tuberculosis                                                      | 690<br>(497 - 984)          | 34<br>(20 - 54)           | 17<br>(12 - 26)        | 307<br>(220 - 422)       | 237<br>(148 - 381)       | 96<br>(60 - 138)         |
| HIV/AIDS                                                          | 2,500<br>(1,713 - 3,432)    | 234<br>(149 - 341)        | 160<br>(118 - 207)     | 1,700<br>(1,120 - 2,410) | 371<br>(256 - 491)       | 35<br>(23 - 52)          |
| HIV/AIDS resulting in mycobacterial infection                     | 154<br>(103 - 220)          | 14<br>(8 - 21)            | 9<br>(6 - 13)          | 105<br>(67 - 154)        | 24<br>(16 - 35)          | 2<br>(1 - 4)             |
| HIV/AIDS resulting in other diseases                              | 2,346<br>(1,615 - 3,207)    | 220<br>(141 - 322)        | 151<br>(111 - 195)     | 1,595<br>(1,046 - 2,261) | 347<br>(235 - 461)       | 33<br>(21 - 49)          |
| Diarrhea, lower respiratory, and other common infectious diseases | 4,474<br>(3,453 - 5,579)    | 2,667<br>(1,891 - 3,580)  | 301<br>(225 - 397)     | 563<br>(401 - 791)       | 503<br>(304 - 822)       | 440<br>(285 - 630)       |
| Diarrheal diseases                                                | 1,336<br>(869 - 1,919)      | 861<br>(488 - 1,320)      | 61<br>(31 - 108)       | 177<br>(103 - 288)       | 136<br>(66 - 262)        | 101<br>(50 - 183)        |
| Intestinal infectious diseases                                    | 81<br>(43 - 140)            | 23<br>(11 - 43)           | 27<br>(13 - 48)        | 26<br>(12 - 49)          | 4<br>(2 - 9)             | 1<br>(0 - 3)             |
| Typhoid fever                                                     | 52<br>(26 - 92)             | 13<br>(6 - 26)            | 18<br>(8 - 32)         | 17<br>(8 - 33)           | 3<br>(1 - 6)             | 1<br>(0 - 1)             |
| Paratyphoid fever                                                 | 23<br>(11 - 44)             | 7<br>(3 - 14)             | 8<br>(3 - 17)          | 7<br>(3 - 15)            | 1<br>(0 - 2)             | 0<br>(0 - 0)             |
| Other intestinal infectious diseases                              | 6<br>(1 - 12)               | 3<br>(0 - 8)              | 1<br>(0 - 4)           | 1<br>(0 - 5)             | 0<br>(0 - 3)             | 0<br>(0 - 2)             |
| Lower respiratory infections                                      | 2,008<br>(1,497 - 2,560)    | 1,121<br>(754 - 1,593)    | 83<br>(53 - 124)       | 195<br>(136 - 277)       | 297<br>(180 - 482)       | 313<br>(197 - 455)       |
| Upper respiratory infections                                      | 4<br>(2 - 6)                | 1<br>(0 - 4)              | 0<br>(0 - 1)           | 1<br>(0 - 2)             | 1<br>(0 - 2)             | 0<br>(0 - 1)             |
| Otitis media                                                      | 1<br>(1 - 2)                | 0<br>(0 - 1)              | 0<br>(0 - 0)           | 0<br>(0 - 0)             | 0<br>(0 - 1)             | 0<br>(0 - 0)             |
| Meningitis                                                        | 572<br>(415 - 760)          | 277<br>(162 - 433)        | 68<br>(43 - 102)       | 146<br>(97 - 209)        | 59<br>(32 - 99)          | 22<br>(11 - 37)          |
| Pneumococcal meningitis                                           | 149<br>(100 - 210)          | 61<br>(32 - 106)          | 19<br>(11 - 32)        | 43<br>(21 - 68)          | 18<br>(8 - 33)           | 7<br>(3 - 13)            |
| H influenzae type B meningitis                                    | 93<br>(55 - 142)            | 59<br>(29 - 104)          | 11<br>(5 - 20)         | 16<br>(9 - 27)           | 5<br>(2 - 10)            | 2<br>(1 - 3)             |
| Meningococcal meningitis                                          | 260<br>(187 - 357)          | 130<br>(76 - 204)         | 31<br>(18 - 51)        | 64<br>(39 - 95)          | 25<br>(13 - 44)          | 10<br>(5 - 18)           |
| Other meningitis                                                  | 70<br>(48 - 96)             | 26<br>(14 - 47)           | 6<br>(3 - 11)          | 22<br>(12 - 37)          | 11<br>(5 - 20)           | 4<br>(2 - 7)             |
| Encephalitis                                                      | 20<br>(14 - 33)             | 7<br>(4 - 13)             | 3<br>(1 - 8)           | 6<br>(3 - 11)            | 3<br>(2 - 5)             | 1<br>(1 - 2)             |
| Diphtheria                                                        | 2<br>(0 - 9)                | 1<br>(0 - 8)              | 0<br>(0 - 2)           | 0<br>(0 - 0)             | 0<br>(0 - 0)             | --<br>(0 - 0)            |
| Whooping cough                                                    | 15<br>(0 - 77)              | 13<br>(0 - 70)            | 1<br>(0 - 5)           | 0<br>(0 - 1)             | 0<br>(0 - 0)             | --<br>(0 - 0)            |
| Tetanus                                                           | 71<br>(29 - 128)            | 60<br>(21 - 119)          | 2<br>(1 - 4)           | 6<br>(2 - 11)            | 2<br>(1 - 5)             | 0<br>(0 - 1)             |
| Measles                                                           | 363<br>(136 - 760)          | 301<br>(110 - 632)        | 55<br>(21 - 117)       | 7<br>(3 - 15)            | 0<br>(0 - 0)             | --<br>(0 - 0)            |
| Varicella and herpes zoster                                       | 2<br>(1 - 3)                | 1<br>(0 - 2)              | 0<br>(0 - 1)           | 0<br>(0 - 1)             | 0<br>(0 - 0)             | 0<br>(0 - 1)             |
| Neglected tropical diseases and malaria                           | 3,578<br>(2,519 - 4,846)    | 3,246<br>(2,207 - 4,560)  | 105<br>(45 - 219)      | 109<br>(52 - 262)        | 75<br>(29 - 182)         | 44<br>(17 - 108)         |
| Malaria                                                           | 3,543<br>(2,481 - 4,805)    | 3,237<br>(2,192 - 4,554)  | 98<br>(41 - 213)       | 97<br>(43 - 249)         | 69<br>(24 - 174)         | 42<br>(15 - 105)         |
| Leishmaniasis                                                     | 0<br>(0 - 0)                | 0<br>(0 - 0)              | 0<br>(0 - 0)           | 0<br>(0 - 0)             | 0<br>(0 - 0)             | 0<br>(0 - 0)             |
| Visceral leishmaniasis                                            | 0<br>(0 - 0)                | 0<br>(0 - 0)              | 0<br>(0 - 0)           | 0<br>(0 - 0)             | 0<br>(0 - 0)             | 0<br>(0 - 0)             |
| Schistosomiasis                                                   | 10<br>(6 - 14)              | 0<br>(0 - 0)              | 0<br>(0 - 1)           | 4<br>(3 - 7)             | 4<br>(2 - 6)             | 1<br>(1 - 2)             |
| Cysticercosis                                                     | 1<br>(0 - 2)                | 0<br>(0 - 0)              | 0<br>(0 - 0)           | 0<br>(0 - 1)             | 0<br>(0 - 0)             | 0<br>(0 - 0)             |
| Cystic echinococcosis                                             | 1<br>(1 - 1)                | 0<br>(0 - 0)              | 0<br>(0 - 0)           | 0<br>(0 - 1)             | 0<br>(0 - 0)             | 0<br>(0 - 0)             |
| Dengue                                                            | 2<br>(1 - 3)                | 1<br>(0 - 2)              | 0<br>(0 - 1)           | 0<br>(0 - 1)             | 0<br>(0 - 0)             | 0<br>(0 - 0)             |
| Yellow fever                                                      | 0<br>(0 - 0)                | 0<br>(0 - 0)              | 0<br>(0 - 0)           | 0<br>(0 - 0)             | 0<br>(0 - 0)             | 0<br>(0 - 0)             |
| Rabies                                                            | 13<br>(6 - 21)              | 3<br>(1 - 6)              | 4<br>(2 - 8)           | 4<br>(2 - 7)             | 2<br>(1 - 3)             | 0<br>(0 - 1)             |
| Intestinal nematode infections                                    | 5<br>(1 - 14)               | 4<br>(0 - 12)             | 1<br>(0 - 5)           | 0<br>(0 - 3)             | 0<br>(0 - 1)             | 0<br>(0 - 1)             |
| Ascariasis                                                        | 5<br>(1 - 14)               | 4<br>(0 - 12)             | 1<br>(0 - 5)           | 0<br>(0 - 3)             | 0<br>(0 - 1)             | 0<br>(0 - 1)             |
| Other neglected tropical diseases                                 | 3<br>(1 - 5)                | 1<br>(0 - 2)              | 0<br>(0 - 1)           | 1<br>(0 - 2)             | 0<br>(0 - 1)             | 0<br>(0 - 1)             |

Web Table 31- Guinea-Bissau deaths with 95% UI by age, sex, and cause in 2013

| Cause                                                            | Both Sexes, All Ages     | Both Sexes, 0-4 Years    | Both Sexes, 5-14 Years | Both Sexes, 15-49 Years | Both Sexes, 50-69 Years  | Both Sexes, 70-80 Years  |
|------------------------------------------------------------------|--------------------------|--------------------------|------------------------|-------------------------|--------------------------|--------------------------|
| Maternal disorders                                               | 576<br>(401 - 800)       | --                       | 4<br>(2 - 10)          | 571<br>(397 - 794)      | --                       | --                       |
| Maternal hemorrhage                                              | 97<br>(58 - 145)         | --                       | 0<br>(0 - 1)           | 96<br>(58 - 144)        | --                       | --                       |
| Maternal sepsis and other maternal infections                    | 29<br>(17 - 47)          | --                       | 0<br>(0 - 1)           | 29<br>(16 - 47)         | --                       | --                       |
| Maternal hypertensive disorders                                  | 39<br>(23 - 61)          | --                       | 0<br>(0 - 1)           | 38<br>(22 - 60)         | --                       | --                       |
| Maternal obstructed labor                                        | 28<br>(16 - 45)          | --                       | 0<br>(0 - 0)           | 28<br>(16 - 45)         | --                       | --                       |
| Maternal abortive outcome                                        | 90<br>(59 - 130)         | --                       | 1<br>(0 - 1)           | 90<br>(58 - 129)        | --                       | --                       |
| Indirect maternal deaths                                         | 55<br>(29 - 87)          | --                       | 0<br>(0 - 1)           | 54<br>(28 - 87)         | --                       | --                       |
| Late maternal deaths                                             | 132<br>(78 - 197)        | --                       | 2<br>(1 - 4)           | 130<br>(76 - 195)       | --                       | --                       |
| Maternal deaths aggravated by HIV/AIDS                           | 8<br>(4 - 12)            | --                       | --                     | 8<br>(4 - 12)           | --                       | --                       |
| Other maternal disorders                                         | 97<br>(60 - 144)         | --                       | 1<br>(0 - 2)           | 97<br>(59 - 144)        | --                       | --                       |
| Neonatal disorders                                               | 1,849<br>(1,468 - 2,281) | 1,849<br>(1,468 - 2,281) | --                     | --                      | --                       | --                       |
| Neonatal preterm birth complications                             | 725<br>(420 - 1,158)     | 725<br>(420 - 1,158)     | --                     | --                      | --                       | --                       |
| Neonatal encephalopathy due to birth asphyxia and trauma         | 549<br>(318 - 841)       | 549<br>(318 - 841)       | --                     | --                      | --                       | --                       |
| Neonatal sepsis and other neonatal infections                    | 408<br>(191 - 718)       | 408<br>(191 - 718)       | --                     | --                      | --                       | --                       |
| Hemolytic disease and other neonatal jaundice                    | 14<br>(5 - 32)           | 14<br>(5 - 32)           | --                     | --                      | --                       | --                       |
| Other neonatal disorders                                         | 152<br>(82 - 265)        | 152<br>(82 - 265)        | --                     | --                      | --                       | --                       |
| Nutritional deficiencies                                         | 890<br>(595 - 1,262)     | 518<br>(296 - 823)       | 55<br>(35 - 82)        | 130<br>(82 - 194)       | 106<br>(59 - 175)        | 81<br>(52 - 119)         |
| Protein-energy malnutrition                                      | 654<br>(409 - 991)       | 460<br>(262 - 753)       | 41<br>(24 - 64)        | 50<br>(26 - 99)         | 58<br>(29 - 104)         | 45<br>(25 - 74)          |
| Iodine deficiency                                                | 7<br>(1 - 25)            | 3<br>(0 - 20)            | 1<br>(0 - 4)           | 1<br>(0 - 5)            | 1<br>(0 - 5)             | 1<br>(0 - 3)             |
| Iron-deficiency anemia                                           | 226<br>(106 - 366)       | 54<br>(13 - 131)         | 13<br>(5 - 24)         | 77<br>(40 - 121)        | 46<br>(18 - 72)          | 35<br>(16 - 58)          |
| Other nutritional deficiencies                                   | 4<br>(2 - 7)             | 1<br>(0 - 2)             | 0<br>(0 - 1)           | 1<br>(0 - 2)            | 1<br>(0 - 3)             | 0<br>(0 - 1)             |
| Other communicable, maternal, neonatal, and nutritional diseases | 247<br>(156 - 371)       | 148<br>(76 - 258)        | 17<br>(10 - 29)        | 34<br>(21 - 52)         | 30<br>(15 - 52)          | 17<br>(9 - 29)           |
| Sexually transmitted diseases excluding HIV                      | 145<br>(69 - 257)        | 121<br>(51 - 225)        | 12<br>(5 - 22)         | 6<br>(3 - 13)           | 4<br>(2 - 8)             | 2<br>(1 - 4)             |
| Syphilis                                                         | 139<br>(64 - 252)        | 121<br>(51 - 225)        | 12<br>(5 - 22)         | 3<br>(2 - 6)            | 2<br>(1 - 5)             | 2<br>(1 - 3)             |
| Chlamydial infection                                             | 1<br>(0 - 1)             | --                       | 0<br>(0 - 0)           | 1<br>(0 - 1)            | 0<br>(0 - 1)             | 0<br>(0 - 0)             |
| Gonococcal infection                                             | 3<br>(1 - 5)             | --                       | 0<br>(0 - 0)           | 2<br>(1 - 3)            | 1<br>(0 - 1)             | 0<br>(0 - 1)             |
| Other sexually transmitted diseases                              | 2<br>(1 - 4)             | --                       | 0<br>(0 - 0)           | 1<br>(1 - 3)            | 0<br>(0 - 1)             | 0<br>(0 - 0)             |
| Hepatitis                                                        | 52<br>(22 - 82)          | 7<br>(2 - 14)            | 3<br>(1 - 4)           | 18<br>(8 - 29)          | 16<br>(7 - 28)           | 9<br>(4 - 15)            |
| Acute hepatitis A                                                | 4<br>(1 - 8)             | 2<br>(0 - 5)             | 1<br>(0 - 2)           | 1<br>(0 - 2)            | 0<br>(0 - 0)             | 0<br>(0 - 0)             |
| Acute hepatitis B                                                | 34<br>(14 - 56)          | 5<br>(1 - 10)            | 1<br>(0 - 2)           | 7<br>(3 - 13)           | 13<br>(5 - 23)           | 8<br>(3 - 14)            |
| Acute hepatitis C                                                | 2<br>(0 - 5)             | --                       | 0<br>(0 - 0)           | 1<br>(0 - 2)            | 1<br>(0 - 2)             | 0<br>(0 - 1)             |
| Acute hepatitis E                                                | 13<br>(6 - 23)           | 0<br>(0 - 0)             | 0<br>(0 - 1)           | 10<br>(4 - 16)          | 2<br>(1 - 5)             | 1<br>(0 - 2)             |
| Other infectious diseases                                        | 50<br>(28 - 81)          | 21<br>(9 - 39)           | 3<br>(1 - 6)           | 9<br>(4 - 19)           | 10<br>(4 - 22)           | 7<br>(3 - 14)            |
| Non-communicable diseases                                        | 6,226<br>(4,606 - 8,537) | 674<br>(372 - 1,152)     | 146<br>(111 - 191)     | 1,270<br>(960 - 1,754)  | 2,448<br>(1,634 - 3,776) | 1,688<br>(1,255 - 2,279) |
| Neoplasms                                                        | 900<br>(630 - 1,314)     | 16<br>(9 - 26)           | 18<br>(13 - 25)        | 255<br>(181 - 378)      | 443<br>(291 - 680)       | 168<br>(123 - 231)       |
| Esophageal cancer                                                | 26<br>(16 - 44)          | --                       | --                     | 5<br>(3 - 8)            | 15<br>(9 - 27)           | 6<br>(3 - 10)            |
| Stomach cancer                                                   | 102<br>(70 - 150)        | --                       | --                     | 24<br>(16 - 35)         | 60<br>(39 - 94)          | 18<br>(12 - 25)          |
| Liver cancer                                                     | 239<br>(149 - 392)       | --                       | 1<br>(1 - 2)           | 84<br>(50 - 150)        | 115<br>(67 - 192)        | 39<br>(25 - 60)          |
| Liver cancer due to hepatitis B                                  | 109<br>(55 - 194)        | --                       | 0<br>(0 - 1)           | 47<br>(25 - 87)         | 50<br>(22 - 96)          | 12<br>(5 - 21)           |
| Liver cancer due to hepatitis C                                  | 69<br>(37 - 127)         | --                       | 0<br>(0 - 0)           | 15<br>(6 - 34)          | 38<br>(19 - 71)          | 17<br>(9 - 26)           |

Web Table 31- Guinea-Bissau deaths with 95% UI by age, sex, and cause in 2013

| Cause                                | Both Sexes, All Ages     | Both Sexes, 0-4 Years | Both Sexes, 5-14 Years | Both Sexes, 15-49 Years | Both Sexes, 50-69 Years | Both Sexes, 70-80 Years |
|--------------------------------------|--------------------------|-----------------------|------------------------|-------------------------|-------------------------|-------------------------|
| Liver cancer due to alcohol use      | 26<br>(14 - 45)          | --                    | --                     | 6<br>(3 - 11)           | 13<br>(6 - 25)          | 7<br>(4 - 11)           |
| Liver cancer due to other causes     | 36<br>(19 - 63)          | --                    | 0<br>(0 - 1)           | 16<br>(8 - 32)          | 15<br>(7 - 26)          | 4<br>(2 - 7)            |
| Larynx cancer                        | 4<br>(2 - 8)             | --                    | --                     | 1<br>(0 - 1)            | 2<br>(1 - 5)            | 1<br>(0 - 2)            |
| Tracheal, bronchus and lung cancer   | 40<br>(27 - 61)          | --                    | --                     | 5<br>(3 - 8)            | 25<br>(16 - 39)         | 10<br>(7 - 15)          |
| Breast cancer                        | 49<br>(30 - 87)          | --                    | --                     | 18<br>(11 - 36)         | 24<br>(14 - 43)         | 7<br>(4 - 11)           |
| Cervical cancer                      | 152<br>(98 - 234)        | --                    | --                     | 46<br>(30 - 75)         | 87<br>(50 - 143)        | 19<br>(11 - 30)         |
| Uterine cancer                       | 12<br>(6 - 20)           | --                    | --                     | 2<br>(1 - 4)            | 6<br>(3 - 12)           | 3<br>(1 - 5)            |
| Prostate cancer                      | 24<br>(15 - 41)          | --                    | --                     | 1<br>(0 - 1)            | 9<br>(5 - 15)           | 15<br>(10 - 25)         |
| Colon and rectum cancer              | 36<br>(26 - 52)          | --                    | --                     | 9<br>(7 - 13)           | 15<br>(10 - 24)         | 11<br>(8 - 15)          |
| Lip and oral cavity cancer           | 6<br>(3 - 9)             | --                    | --                     | 2<br>(1 - 3)            | 3<br>(2 - 4)            | 1<br>(1 - 2)            |
| Nasopharynx cancer                   | 2<br>(1 - 3)             | --                    | 0<br>(0 - 0)           | 1<br>(1 - 1)            | 1<br>(0 - 1)            | 0<br>(0 - 0)            |
| Other pharynx cancer                 | 2<br>(1 - 3)             | --                    | --                     | 1<br>(0 - 1)            | 1<br>(1 - 2)            | 0<br>(0 - 1)            |
| Gallbladder and biliary tract cancer | 10<br>(6 - 15)           | --                    | --                     | 2<br>(1 - 2)            | 6<br>(3 - 10)           | 2<br>(1 - 4)            |
| Pancreatic cancer                    | 17<br>(12 - 25)          | --                    | --                     | 3<br>(2 - 4)            | 10<br>(7 - 16)          | 4<br>(3 - 5)            |
| Malignant skin melanoma              | 2<br>(1 - 4)             | --                    | --                     | 1<br>(0 - 1)            | 1<br>(1 - 2)            | 0<br>(0 - 1)            |
| Non-melanoma skin cancer             | 2<br>(1 - 3)             | --                    | --                     | 1<br>(0 - 1)            | 1<br>(0 - 1)            | 1<br>(1 - 1)            |
| Ovarian cancer                       | 17<br>(9 - 31)           | --                    | --                     | 4<br>(2 - 8)            | 10<br>(5 - 20)          | 2<br>(1 - 4)            |
| Testicular cancer                    | 1<br>(0 - 1)             | --                    | --                     | 1<br>(0 - 1)            | 0<br>(0 - 0)            | 0<br>(0 - 0)            |
| Kidney cancer                        | 9<br>(6 - 14)            | 1<br>(0 - 2)          | 1<br>(0 - 1)           | 2<br>(1 - 3)            | 4<br>(2 - 8)            | 1<br>(1 - 2)            |
| Bladder cancer                       | 19<br>(13 - 29)          | --                    | --                     | 4<br>(3 - 7)            | 8<br>(5 - 14)           | 6<br>(4 - 10)           |
| Brain and nervous system cancer      | 8<br>(5 - 12)            | 0<br>(0 - 1)          | 1<br>(1 - 1)           | 4<br>(2 - 5)            | 2<br>(1 - 4)            | 1<br>(1 - 1)            |
| Thyroid cancer                       | 2<br>(1 - 4)             | --                    | 0<br>(0 - 0)           | 0<br>(0 - 1)            | 1<br>(1 - 2)            | 1<br>(0 - 1)            |
| Mesothelioma                         | 1<br>(1 - 2)             | --                    | --                     | 0<br>(0 - 0)            | 1<br>(0 - 1)            | 0<br>(0 - 0)            |
| Hodgkin lymphoma                     | 5<br>(3 - 7)             | 0<br>(0 - 1)          | 1<br>(0 - 1)           | 2<br>(1 - 3)            | 1<br>(1 - 2)            | 1<br>(0 - 2)            |
| Non-Hodgkin lymphoma                 | 36<br>(24 - 55)          | 4<br>(2 - 7)          | 6<br>(3 - 9)           | 13<br>(8 - 21)          | 9<br>(5 - 17)           | 4<br>(2 - 6)            |
| Multiple myeloma                     | 4<br>(3 - 7)             | --                    | --                     | 1<br>(0 - 1)            | 2<br>(1 - 4)            | 1<br>(1 - 2)            |
| Leukemia                             | 13<br>(10 - 18)          | 1<br>(0 - 2)          | 2<br>(2 - 3)           | 6<br>(4 - 8)            | 3<br>(2 - 4)            | 2<br>(1 - 3)            |
| Other neoplasms                      | 61<br>(41 - 105)         | 9<br>(5 - 18)         | 7<br>(4 - 12)          | 15<br>(9 - 30)          | 19<br>(10 - 36)         | 11<br>(7 - 17)          |
| Cardiovascular diseases              | 2,689<br>(1,867 - 3,996) | 73<br>(45 - 119)      | 30<br>(19 - 48)        | 415<br>(288 - 611)      | 1,201<br>(786 - 1,891)  | 970<br>(692 - 1,368)    |
| Rheumatic heart disease              | 31<br>(15 - 84)          | 2<br>(1 - 4)          | 2<br>(1 - 5)           | 10<br>(4 - 32)          | 10<br>(4 - 31)          | 7<br>(4 - 16)           |
| Ischemic heart disease               | 816<br>(515 - 1,285)     | 4<br>(1 - 9)          | 4<br>(2 - 7)           | 120<br>(75 - 190)       | 379<br>(227 - 621)      | 309<br>(197 - 488)      |
| Cerebrovascular disease              | 1,182<br>(817 - 1,742)   | 22<br>(13 - 37)       | 9<br>(5 - 15)          | 153<br>(103 - 232)      | 530<br>(340 - 835)      | 468<br>(328 - 664)      |
| Ischemic stroke                      | 748<br>(488 - 1,111)     | 4<br>(1 - 12)         | 2<br>(1 - 6)           | 43<br>(24 - 87)         | 331<br>(197 - 540)      | 368<br>(254 - 525)      |
| Hemorrhagic stroke                   | 434<br>(269 - 755)       | 18<br>(11 - 30)       | 7<br>(4 - 12)          | 110<br>(66 - 168)       | 199<br>(109 - 373)      | 100<br>(55 - 196)       |
| Hypertensive heart disease           | 165<br>(82 - 279)        | 1<br>(0 - 2)          | 0<br>(0 - 1)           | 21<br>(9 - 39)          | 71<br>(31 - 129)        | 71<br>(39 - 113)        |
| Cardiomyopathy and myocarditis       | 123<br>(79 - 181)        | 13<br>(6 - 28)        | 5<br>(3 - 8)           | 31<br>(19 - 48)         | 46<br>(24 - 77)         | 29<br>(16 - 46)         |
| Atrial fibrillation and flutter      | 0<br>(0 - 0)             | --                    | --                     | 0<br>(0 - 0)            | 0<br>(0 - 0)            | 0<br>(0 - 0)            |
| Aortic aneurysm                      | 24<br>(15 - 39)          | --                    | --                     | 4<br>(2 - 6)            | 12<br>(7 - 21)          | 8<br>(5 - 13)           |
| Peripheral vascular disease          | 1<br>(1 - 1)             | --                    | --                     | 0<br>(0 - 0)            | 0<br>(0 - 1)            | 0<br>(0 - 1)            |
| Endocarditis                         | 41<br>(26 - 66)          | 6<br>(3 - 12)         | 1<br>(1 - 2)           | 10<br>(6 - 16)          | 13<br>(7 - 23)          | 11<br>(6 - 19)          |

Web Table 31- Guinea-Bissau deaths with 95% UI by age, sex, and cause in 2013

| Cause                                               | Both Sexes, All Ages | Both Sexes, 0-4 Years | Both Sexes, 5-14 Years | Both Sexes, 15-49 Years | Both Sexes, 50-69 Years | Both Sexes, 70-80 Years |
|-----------------------------------------------------|----------------------|-----------------------|------------------------|-------------------------|-------------------------|-------------------------|
| Other cardiovascular and circulatory diseases       | 305<br>(178 - 589)   | 26<br>(13 - 51)       | 8<br>(4 - 16)          | 65<br>(37 - 130)        | 140<br>(75 - 269)       | 66<br>(38 - 146)        |
| Chronic respiratory diseases                        | 444<br>(304 - 727)   | 25<br>(13 - 50)       | 7<br>(5 - 13)          | 66<br>(46 - 111)        | 184<br>(113 - 317)      | 162<br>(110 - 259)      |
| Chronic obstructive pulmonary disease               | 265<br>(177 - 458)   | 11<br>(5 - 22)        | 3<br>(2 - 5)           | 22<br>(15 - 37)         | 115<br>(68 - 208)       | 114<br>(76 - 191)       |
| Pneumoconiosis                                      | 21<br>(12 - 42)      | 0<br>(0 - 1)          | 0<br>(0 - 1)           | 5<br>(3 - 9)            | 12<br>(6 - 24)          | 4<br>(2 - 8)            |
| Silicosis                                           | 3<br>(2 - 7)         | 0<br>(0 - 0)          | 0<br>(0 - 0)           | 1<br>(0 - 2)            | 1<br>(0 - 2)            | 1<br>(1 - 3)            |
| Asbestosis                                          | 2<br>(1 - 3)         | 0<br>(0 - 0)          | 0<br>(0 - 0)           | 0<br>(0 - 1)            | 1<br>(0 - 2)            | 0<br>(0 - 0)            |
| Coal workers pneumoconiosis                         | 6<br>(3 - 11)        | 0<br>(0 - 0)          | 0<br>(0 - 0)           | 0<br>(0 - 1)            | 5<br>(2 - 10)           | 0<br>(0 - 1)            |
| Other pneumoconiosis                                | 10<br>(6 - 21)       | 0<br>(0 - 0)          | 0<br>(0 - 0)           | 3<br>(2 - 7)            | 5<br>(3 - 10)           | 2<br>(1 - 4)            |
| Asthma                                              | 92<br>(62 - 146)     | 8<br>(3 - 18)         | 2<br>(1 - 5)           | 24<br>(16 - 39)         | 36<br>(21 - 62)         | 22<br>(13 - 34)         |
| Interstitial lung disease and pulmonary sarcoidosis | 29<br>(12 - 53)      | 0<br>(0 - 1)          | 0<br>(0 - 0)           | 2<br>(1 - 3)            | 12<br>(5 - 24)          | 15<br>(5 - 27)          |
| Other chronic respiratory diseases                  | 37<br>(24 - 69)      | 5<br>(3 - 12)         | 2<br>(1 - 3)           | 14<br>(9 - 25)          | 9<br>(5 - 18)           | 8<br>(4 - 14)           |
| Cirrhosis                                           | 302<br>(212 - 446)   | 8<br>(3 - 16)         | 5<br>(3 - 7)           | 101<br>(70 - 146)       | 145<br>(93 - 228)       | 44<br>(30 - 64)         |
| Cirrhosis due to hepatitis B                        | 78<br>(36 - 135)     | 0<br>(0 - 1)          | 1<br>(0 - 1)           | 24<br>(10 - 43)         | 40<br>(17 - 74)         | 13<br>(7 - 20)          |
| Cirrhosis due to hepatitis C                        | 67<br>(35 - 119)     | 1<br>(0 - 1)          | 1<br>(0 - 2)           | 23<br>(10 - 42)         | 32<br>(15 - 61)         | 11<br>(6 - 19)          |
| Cirrhosis due to alcohol use                        | 109<br>(61 - 182)    | --                    | --                     | 33<br>(18 - 56)         | 58<br>(31 - 101)        | 17<br>(10 - 28)         |
| Cirrhosis due to other causes                       | 48<br>(28 - 79)      | 7<br>(3 - 14)         | 3<br>(2 - 5)           | 20<br>(11 - 34)         | 14<br>(7 - 28)          | 3<br>(1 - 5)            |
| Digestive diseases                                  | 371<br>(268 - 516)   | 23<br>(11 - 44)       | 17<br>(12 - 25)        | 117<br>(82 - 166)       | 132<br>(83 - 205)       | 81<br>(56 - 115)        |
| Peptic ulcer disease                                | 92<br>(60 - 140)     | 3<br>(1 - 6)          | 2<br>(1 - 4)           | 29<br>(19 - 45)         | 37<br>(21 - 61)         | 21<br>(13 - 32)         |
| Gastritis and duodenitis                            | 14<br>(7 - 25)       | 1<br>(0 - 3)          | 1<br>(0 - 2)           | 4<br>(2 - 7)            | 4<br>(2 - 9)            | 3<br>(1 - 7)            |
| Appendicitis                                        | 36<br>(24 - 53)      | 4<br>(1 - 11)         | 4<br>(2 - 7)           | 13<br>(8 - 21)          | 9<br>(5 - 16)           | 6<br>(2 - 11)           |
| Paralytic ileus and intestinal obstruction          | 84<br>(51 - 127)     | 4<br>(1 - 7)          | 4<br>(2 - 6)           | 20<br>(11 - 32)         | 34<br>(18 - 57)         | 23<br>(14 - 38)         |
| Inguinal, femoral, and abdominal hernia             | 9<br>(5 - 15)        | 0<br>(0 - 1)          | 0<br>(0 - 1)           | 2<br>(1 - 4)            | 3<br>(2 - 6)            | 2<br>(1 - 4)            |
| Inflammatory bowel disease                          | 23<br>(11 - 34)      | 5<br>(2 - 10)         | 1<br>(1 - 2)           | 8<br>(3 - 12)           | 6<br>(2 - 11)           | 3<br>(1 - 6)            |
| Vascular intestinal disorders                       | 2<br>(1 - 3)         | 0<br>(0 - 0)          | 0<br>(0 - 0)           | 0<br>(0 - 1)            | 0<br>(0 - 1)            | 0<br>(0 - 1)            |
| Gallbladder and biliary diseases                    | 28<br>(18 - 42)      | 1<br>(0 - 2)          | 1<br>(1 - 2)           | 8<br>(5 - 12)           | 10<br>(6 - 17)          | 8<br>(4 - 12)           |
| Pancreatitis                                        | 25<br>(13 - 42)      | 0<br>(0 - 1)          | 0<br>(0 - 1)           | 13<br>(6 - 21)          | 9<br>(4 - 16)           | 3<br>(2 - 6)            |
| Other digestive diseases                            | 58<br>(38 - 85)      | 5<br>(2 - 12)         | 3<br>(2 - 5)           | 21<br>(13 - 32)         | 19<br>(10 - 32)         | 10<br>(6 - 15)          |
| Neurological disorders                              | 134<br>(103 - 176)   | 16<br>(8 - 33)        | 9<br>(5 - 14)          | 35<br>(23 - 53)         | 16<br>(10 - 25)         | 57<br>(42 - 76)         |
| Alzheimer disease and other dementias               | 59<br>(43 - 79)      | --                    | --                     | 0<br>(0 - 0)            | 7<br>(5 - 11)           | 52<br>(37 - 69)         |
| Parkinson disease                                   | 1<br>(0 - 1)         | --                    | --                     | 0<br>(0 - 0)            | 0<br>(0 - 0)            | 0<br>(0 - 1)            |
| Epilepsy                                            | 60<br>(40 - 87)      | 14<br>(6 - 29)        | 8<br>(4 - 13)          | 31<br>(19 - 47)         | 4<br>(2 - 8)            | 3<br>(2 - 5)            |
| Multiple sclerosis                                  | 0<br>(0 - 1)         | --                    | --                     | 0<br>(0 - 0)            | 0<br>(0 - 0)            | 0<br>(0 - 0)            |
| Other neurological disorders                        | 14<br>(10 - 23)      | 2<br>(1 - 9)          | 1<br>(1 - 2)           | 4<br>(3 - 7)            | 4<br>(3 - 7)            | 2<br>(1 - 3)            |
| Mental and substance use disorders                  | 86<br>(48 - 139)     | 3<br>(1 - 5)          | 0<br>(0 - 0)           | 61<br>(32 - 101)        | 18<br>(9 - 32)          | 4<br>(2 - 7)            |
| Schizophrenia                                       | 0<br>(0 - 1)         | --                    | --                     | 0<br>(0 - 0)            | 0<br>(0 - 0)            | 0<br>(0 - 0)            |
| Alcohol use disorders                               | 32<br>(12 - 60)      | --                    | --                     | 17<br>(7 - 32)          | 12<br>(4 - 23)          | 2<br>(1 - 5)            |
| Drug use disorders                                  | 54<br>(30 - 82)      | 3<br>(1 - 5)          | --                     | 43<br>(21 - 67)         | 6<br>(4 - 10)           | 2<br>(1 - 3)            |
| Opioid use disorders                                | 6<br>(3 - 9)         | 0<br>(0 - 1)          | --                     | 5<br>(2 - 8)            | 1<br>(0 - 1)            | 0<br>(0 - 0)            |
| Cocaine use disorders                               | 0<br>(0 - 0)         | 0<br>(0 - 0)          | --                     | 0<br>(0 - 0)            | 0<br>(0 - 0)            | 0<br>(0 - 0)            |
| Amphetamine use disorders                           | 0<br>(0 - 0)         | 0<br>(0 - 0)          | --                     | 0<br>(0 - 0)            | 0<br>(0 - 0)            | 0<br>(0 - 0)            |

Web Table 31- Guinea-Bissau deaths with 95% UI by age, sex, and cause in 2013

| Cause                                               | Both Sexes, All Ages | Both Sexes, 0-4 Years | Both Sexes, 5-14 Years | Both Sexes, 15-49 Years | Both Sexes, 50-69 Years | Both Sexes, 70-80 Years |
|-----------------------------------------------------|----------------------|-----------------------|------------------------|-------------------------|-------------------------|-------------------------|
| Other drug use disorders                            | 48<br>(26 - 72)      | 2<br>(1 - 5)          | --                     | 38<br>(19 - 59)         | 5<br>(3 - 9)            | 2<br>(1 - 2)            |
| Eating disorders                                    | 0<br>(0 - 0)         | --                    | 0<br>(0 - 0)           | 0<br>(0 - 0)            | --                      | --                      |
| Anorexia nervosa                                    | 0<br>(0 - 0)         | --                    | 0<br>(0 - 0)           | 0<br>(0 - 0)            | --                      | --                      |
| Diabetes, urogenital, blood, and endocrine diseases | 771<br>(570 - 1,060) | 91<br>(54 - 142)      | 33<br>(22 - 44)        | 182<br>(132 - 252)      | 283<br>(183 - 430)      | 183<br>(131 - 257)      |
| Diabetes mellitus                                   | 316<br>(217 - 468)   | 5<br>(3 - 7)          | 2<br>(1 - 3)           | 47<br>(33 - 69)         | 162<br>(102 - 250)      | 101<br>(68 - 146)       |
| Acute glomerulonephritis                            | 3<br>(2 - 5)         | 0<br>(0 - 1)          | 0<br>(0 - 1)           | 1<br>(1 - 2)            | 1<br>(0 - 2)            | 0<br>(0 - 0)            |
| Chronic kidney disease                              | 152<br>(101 - 217)   | 13<br>(7 - 22)        | 8<br>(5 - 12)          | 53<br>(35 - 77)         | 47<br>(27 - 76)         | 30<br>(19 - 45)         |
| Chronic kidney disease due to diabetes mellitus     | 2<br>(1 - 3)         | 0<br>(0 - 0)          | 0<br>(0 - 0)           | 0<br>(0 - 0)            | 1<br>(1 - 3)            | 0<br>(0 - 0)            |
| Chronic kidney disease due to hypertension          | 47<br>(27 - 76)      | 1<br>(0 - 3)          | 1<br>(0 - 1)           | 12<br>(6 - 19)          | 19<br>(10 - 33)         | 14<br>(8 - 23)          |
| Chronic kidney disease due to glomerulonephritis    | 64<br>(42 - 93)      | 8<br>(4 - 13)         | 5<br>(3 - 7)           | 29<br>(18 - 43)         | 14<br>(8 - 25)          | 8<br>(5 - 12)           |
| Chronic kidney disease due to other causes          | 39<br>(18 - 63)      | 4<br>(1 - 8)          | 2<br>(1 - 4)           | 12<br>(6 - 20)          | 12<br>(4 - 23)          | 8<br>(3 - 16)           |
| Urinary diseases and male infertility               | 126<br>(82 - 182)    | 14<br>(7 - 28)        | 3<br>(2 - 5)           | 34<br>(21 - 50)         | 43<br>(26 - 70)         | 31<br>(21 - 45)         |
| Interstitial nephritis and urinary tract infections | 104<br>(66 - 153)    | 12<br>(5 - 25)        | 2<br>(1 - 4)           | 27<br>(14 - 41)         | 35<br>(21 - 58)         | 27<br>(18 - 40)         |
| Urolithiasis                                        | 2<br>(1 - 8)         | --                    | 0<br>(0 - 1)           | 1<br>(0 - 3)            | 1<br>(0 - 3)            | 0<br>(0 - 1)            |
| Other urinary diseases                              | 19<br>(11 - 30)      | 2<br>(1 - 5)          | 1<br>(0 - 1)           | 6<br>(3 - 11)           | 7<br>(3 - 12)           | 4<br>(2 - 6)            |
| Gynecological diseases                              | 2<br>(1 - 3)         | --                    | --                     | 1<br>(1 - 2)            | 1<br>(0 - 1)            | 0<br>(0 - 0)            |
| Uterine fibroids                                    | 0<br>(0 - 1)         | --                    | --                     | 0<br>(0 - 0)            | 0<br>(0 - 0)            | 0<br>(0 - 0)            |
| Polycystic ovarian syndrome                         | 0<br>(0 - 0)         | --                    | --                     | 0<br>(0 - 0)            | 0<br>(0 - 0)            | --                      |
| Endometriosis                                       | 0<br>(0 - 0)         | --                    | --                     | 0<br>(0 - 0)            | 0<br>(0 - 0)            | --                      |
| Genital prolapse                                    | 0<br>(0 - 0)         | --                    | --                     | 0<br>(0 - 0)            | 0<br>(0 - 0)            | 0<br>(0 - 0)            |
| Other gynecological diseases                        | 1<br>(1 - 1)         | --                    | --                     | 1<br>(0 - 1)            | 0<br>(0 - 1)            | 0<br>(0 - 0)            |
| Hemoglobinopathies and hemolytic anemias            | 82<br>(36 - 131)     | 36<br>(10 - 68)       | 14<br>(6 - 23)         | 21<br>(9 - 37)          | 7<br>(3 - 13)           | 4<br>(2 - 9)            |
| Thalassemias                                        | 2<br>(1 - 4)         | 1<br>(0 - 3)          | 0<br>(0 - 1)           | 0<br>(0 - 1)            | 0<br>(0 - 0)            | 0<br>(0 - 0)            |
| Sickle cell disorders                               | 70<br>(29 - 115)     | 32<br>(8 - 62)        | 13<br>(6 - 21)         | 19<br>(9 - 34)          | 5<br>(2 - 10)           | 1<br>(0 - 2)            |
| G6PD deficiency                                     | 2<br>(1 - 3)         | 1<br>(0 - 1)          | 0<br>(0 - 0)           | 0<br>(0 - 1)            | 0<br>(0 - 1)            | 0<br>(0 - 0)            |
| Other hemoglobinopathies and hemolytic anemias      | 7<br>(4 - 12)        | 1<br>(1 - 3)          | 0<br>(0 - 0)           | 1<br>(0 - 1)            | 1<br>(1 - 3)            | 3<br>(1 - 7)            |
| Endocrine, metabolic, blood, and immune disorders   | 92<br>(55 - 163)     | 23<br>(11 - 56)       | 5<br>(3 - 13)          | 24<br>(13 - 45)         | 24<br>(13 - 40)         | 16<br>(9 - 26)          |
| Musculoskeletal disorders                           | 23<br>(12 - 35)      | --                    | 3<br>(1 - 4)           | 9<br>(4 - 14)           | 8<br>(4 - 13)           | 4<br>(2 - 6)            |
| Rheumatoid arthritis                                | 3<br>(1 - 4)         | --                    | 0<br>(0 - 1)           | 1<br>(0 - 1)            | 1<br>(0 - 2)            | 1<br>(0 - 2)            |
| Other musculoskeletal disorders                     | 21<br>(10 - 31)      | --                    | 2<br>(1 - 4)           | 8<br>(4 - 13)           | 7<br>(3 - 11)           | 3<br>(2 - 5)            |
| Other non-communicable diseases                     | 505<br>(235 - 973)   | 419<br>(172 - 856)    | 24<br>(10 - 50)        | 29<br>(17 - 46)         | 18<br>(10 - 30)         | 15<br>(10 - 23)         |
| Congenital anomalies                                | 448<br>(187 - 902)   | 404<br>(161 - 838)    | 22<br>(9 - 48)         | 16<br>(8 - 28)          | 3<br>(2 - 6)            | 2<br>(1 - 3)            |
| Neural tube defects                                 | 125<br>(34 - 327)    | 117<br>(30 - 301)     | 5<br>(1 - 15)          | 3<br>(1 - 9)            | 0<br>(0 - 1)            | 0<br>(0 - 0)            |
| Congenital heart anomalies                          | 165<br>(64 - 348)    | 146<br>(54 - 318)     | 9<br>(3 - 22)          | 6<br>(3 - 14)           | 2<br>(1 - 3)            | 1<br>(0 - 1)            |
| Cleft lip and cleft palate                          | 2<br>(0 - 7)         | 2<br>(0 - 7)          | --                     | --                      | --                      | --                      |
| Down syndrome                                       | 55<br>(13 - 133)     | 47<br>(9 - 123)       | 4<br>(1 - 8)           | 3<br>(1 - 5)            | 1<br>(0 - 1)            | 0<br>(0 - 0)            |
| Chromosomal unbalanced rearrangements               | 14<br>(3 - 43)       | 13<br>(3 - 40)        | 1<br>(0 - 2)           | 1<br>(0 - 1)            | 0<br>(0 - 0)            | 0<br>(0 - 0)            |
| Other congenital anomalies                          | 87<br>(18 - 355)     | 79<br>(14 - 339)      | 4<br>(1 - 15)          | 3<br>(1 - 8)            | 1<br>(0 - 2)            | 1<br>(0 - 1)            |
| Skin and subcutaneous diseases                      | 54<br>(33 - 78)      | 11<br>(5 - 20)        | 2<br>(1 - 3)           | 13<br>(7 - 20)          | 14<br>(8 - 25)          | 14<br>(8 - 20)          |
| Cellulitis                                          | 19<br>(10 - 29)      | 3<br>(1 - 6)          | 1<br>(1 - 1)           | 4<br>(2 - 7)            | 5<br>(2 - 10)           | 5<br>(3 - 9)            |

Web Table 31- Guinea-Bissau deaths with 95% UI by age, sex, and cause in 2013

| Cause                                           | Both Sexes, All Ages     | Both Sexes, 0-4 Years | Both Sexes, 5-14 Years | Both Sexes, 15-49 Years | Both Sexes, 50-69 Years | Both Sexes, 70-80 Years |
|-------------------------------------------------|--------------------------|-----------------------|------------------------|-------------------------|-------------------------|-------------------------|
| Pyoderma                                        | 33<br>(20 - 48)          | 8<br>(3 - 15)         | 1<br>(0 - 1)           | 8<br>(4 - 13)           | 9<br>(5 - 16)           | 8<br>(4 - 12)           |
| Decubitus ulcer                                 | 1<br>(0 - 1)             | 0<br>(0 - 0)          | 0<br>(0 - 0)           | 0<br>(0 - 0)            | 0<br>(0 - 0)            | 0<br>(0 - 1)            |
| Other skin and subcutaneous diseases            | 1<br>(0 - 2)             | 0<br>(0 - 1)          | 0<br>(0 - 0)           | 0<br>(0 - 1)            | 0<br>(0 - 0)            | 0<br>(0 - 0)            |
| Sudden infant death syndrome                    | 3<br>(1 - 9)             | 3<br>(1 - 9)          | --                     | --                      | --                      | --                      |
| Injuries                                        | 1,394<br>(1,079 - 1,811) | 209<br>(122 - 314)    | 151<br>(116 - 201)     | 726<br>(538 - 969)      | 211<br>(133 - 331)      | 97<br>(61 - 143)        |
| Transport injuries                              | 702<br>(529 - 935)       | 37<br>(20 - 62)       | 71<br>(50 - 99)        | 447<br>(324 - 598)      | 113<br>(72 - 180)       | 34<br>(23 - 49)         |
| Road injuries                                   | 678<br>(511 - 904)       | 31<br>(17 - 54)       | 67<br>(47 - 93)        | 440<br>(317 - 589)      | 109<br>(70 - 172)       | 32<br>(22 - 46)         |
| Pedestrian road injuries                        | 183<br>(126 - 254)       | 11<br>(5 - 21)        | 24<br>(15 - 36)        | 101<br>(65 - 147)       | 34<br>(20 - 57)         | 12<br>(8 - 19)          |
| Cyclist road injuries                           | 34<br>(24 - 50)          | 2<br>(1 - 5)          | 6<br>(4 - 10)          | 16<br>(10 - 25)         | 8<br>(4 - 14)           | 2<br>(1 - 3)            |
| Motorcyclist road injuries                      | 88<br>(56 - 134)         | 2<br>(1 - 4)          | 4<br>(3 - 7)           | 68<br>(41 - 107)        | 11<br>(6 - 19)          | 2<br>(1 - 3)            |
| Motor vehicle road injuries                     | 364<br>(268 - 488)       | 15<br>(8 - 26)        | 30<br>(19 - 43)        | 250<br>(178 - 342)      | 54<br>(33 - 88)         | 15<br>(10 - 22)         |
| Other road injuries                             | 9<br>(5 - 15)            | 1<br>(0 - 2)          | 2<br>(1 - 4)           | 4<br>(2 - 8)            | 2<br>(1 - 3)            | 1<br>(0 - 1)            |
| Other transport injuries                        | 24<br>(16 - 33)          | 6<br>(3 - 10)         | 4<br>(2 - 6)           | 8<br>(5 - 13)           | 4<br>(2 - 7)            | 2<br>(1 - 4)            |
| Unintentional injuries                          | 530<br>(374 - 698)       | 164<br>(82 - 251)     | 74<br>(52 - 102)       | 161<br>(115 - 223)      | 75<br>(44 - 124)        | 55<br>(30 - 85)         |
| Falls                                           | 106<br>(67 - 159)        | 17<br>(7 - 33)        | 9<br>(5 - 14)          | 34<br>(19 - 58)         | 22<br>(12 - 37)         | 25<br>(14 - 39)         |
| Drowning                                        | 128<br>(70 - 220)        | 49<br>(15 - 100)      | 30<br>(15 - 51)        | 38<br>(19 - 71)         | 9<br>(5 - 15)           | 3<br>(2 - 5)            |
| Fire, heat, and hot substances                  | 59<br>(24 - 89)          | 24<br>(6 - 45)        | 7<br>(3 - 11)          | 16<br>(8 - 24)          | 8<br>(4 - 14)           | 5<br>(2 - 9)            |
| Poisonings                                      | 30<br>(20 - 51)          | 9<br>(4 - 20)         | 3<br>(2 - 5)           | 12<br>(7 - 24)          | 4<br>(2 - 8)            | 1<br>(1 - 2)            |
| Exposure to mechanical forces                   | 75<br>(55 - 103)         | 20<br>(10 - 34)       | 11<br>(7 - 17)         | 31<br>(20 - 47)         | 11<br>(6 - 18)          | 3<br>(1 - 5)            |
| Unintentional firearm injuries                  | 29<br>(19 - 46)          | 5<br>(2 - 11)         | 3<br>(1 - 5)           | 17<br>(9 - 29)          | 4<br>(2 - 6)            | 1<br>(1 - 2)            |
| Unintentional suffocation                       | 5<br>(3 - 11)            | 3<br>(1 - 8)          | 1<br>(0 - 2)           | 1<br>(1 - 2)            | 0<br>(0 - 1)            | 0<br>(0 - 0)            |
| Other exposure to mechanical forces             | 41<br>(27 - 59)          | 11<br>(5 - 23)        | 7<br>(4 - 13)          | 13<br>(8 - 21)          | 7<br>(3 - 12)           | 2<br>(1 - 3)            |
| Adverse effects of medical treatment            | 40<br>(12 - 74)          | 11<br>(2 - 23)        | 2<br>(1 - 5)           | 9<br>(3 - 17)           | 10<br>(3 - 21)          | 8<br>(2 - 16)           |
| Animal contact                                  | 21<br>(9 - 33)           | 4<br>(1 - 8)          | 4<br>(1 - 6)           | 7<br>(3 - 12)           | 4<br>(1 - 8)            | 2<br>(1 - 4)            |
| Venomous animal contact                         | 13<br>(5 - 21)           | 3<br>(1 - 6)          | 2<br>(1 - 4)           | 5<br>(2 - 9)            | 2<br>(1 - 5)            | 1<br>(0 - 2)            |
| Non-venomous animal contact                     | 9<br>(3 - 14)            | 1<br>(0 - 3)          | 2<br>(0 - 3)           | 2<br>(1 - 4)            | 2<br>(0 - 4)            | 1<br>(0 - 2)            |
| Foreign body                                    | 42<br>(20 - 73)          | 25<br>(10 - 52)       | 4<br>(2 - 6)           | 5<br>(3 - 8)            | 4<br>(2 - 6)            | 5<br>(2 - 8)            |
| Pulmonary aspiration and foreign body in airway | 41<br>(19 - 72)          | 25<br>(10 - 51)       | 4<br>(2 - 6)           | 5<br>(2 - 8)            | 3<br>(2 - 6)            | 5<br>(2 - 8)            |
| Foreign body in other body part                 | 1<br>(1 - 2)             | 0<br>(0 - 1)          | 0<br>(0 - 0)           | 0<br>(0 - 0)            | 0<br>(0 - 1)            | 0<br>(0 - 0)            |
| Other unintentional injuries                    | 28<br>(13 - 43)          | 6<br>(2 - 11)         | 5<br>(2 - 9)           | 10<br>(5 - 17)          | 4<br>(2 - 8)            | 3<br>(1 - 5)            |
| Self-harm and interpersonal violence            | 162<br>(96 - 246)        | 8<br>(3 - 15)         | 6<br>(3 - 10)          | 117<br>(69 - 180)       | 23<br>(11 - 42)         | 8<br>(3 - 14)           |
| Self-harm                                       | 76<br>(41 - 136)         | --                    | 2<br>(1 - 4)           | 49<br>(26 - 93)         | 19<br>(9 - 34)          | 8<br>(3 - 13)           |
| Interpersonal violence                          | 86<br>(49 - 129)         | 8<br>(3 - 15)         | 4<br>(2 - 8)           | 69<br>(39 - 106)        | 5<br>(2 - 9)            | 1<br>(0 - 1)            |
| Assault by firearm                              | 37<br>(19 - 57)          | 2<br>(0 - 4)          | 1<br>(0 - 2)           | 31<br>(16 - 49)         | 2<br>(1 - 4)            | 0<br>(0 - 0)            |
| Assault by sharp object                         | 19<br>(8 - 33)           | 1<br>(0 - 3)          | 1<br>(0 - 2)           | 16<br>(7 - 29)          | 1<br>(0 - 2)            | 0<br>(0 - 0)            |
| Assault by other means                          | 30<br>(17 - 48)          | 4<br>(2 - 8)          | 2<br>(1 - 4)           | 21<br>(11 - 36)         | 2<br>(1 - 3)            | 0<br>(0 - 1)            |

Web Table 31- Guinea-Bissau deaths with 95% UI by age, sex, and cause in 2013

| Cause                                                             | Males, All Ages            | Males, 0-4 Years         | Males, 5-14 Years  | Males, 15-49 Years       | Males, 50-69 Years       | Males, 70-80 Years     |
|-------------------------------------------------------------------|----------------------------|--------------------------|--------------------|--------------------------|--------------------------|------------------------|
| All causes                                                        | 11,374<br>(9,887 - 13,578) | 5,106<br>(4,281 - 6,094) | 494<br>(412 - 603) | 2,580<br>(2,134 - 3,180) | 2,074<br>(1,490 - 3,115) | 1,121<br>(881 - 1,492) |
| Communicable, maternal, neonatal, and nutritional diseases        | 7,388<br>(6,410 - 8,550)   | 4,644<br>(3,862 - 5,560) | 328<br>(265 - 407) | 1,373<br>(1,080 - 1,719) | 702<br>(508 - 1,004)     | 342<br>(245 - 474)     |
| HIV/AIDS and tuberculosis                                         | 1,607<br>(1,218 - 2,068)   | 141<br>(93 - 199)        | 91<br>(71 - 115)   | 953<br>(675 - 1,256)     | 342<br>(248 - 458)       | 79<br>(55 - 110)       |
| Tuberculosis                                                      | 406<br>(286 - 591)         | 21<br>(11 - 35)          | 10<br>(6 - 16)     | 164<br>(113 - 243)       | 153<br>(94 - 245)        | 59<br>(37 - 90)        |
| HIV/AIDS                                                          | 1,200<br>(845 - 1,597)     | 120<br>(77 - 175)        | 82<br>(61 - 106)   | 789<br>(492 - 1,104)     | 190<br>(122 - 269)       | 20<br>(12 - 32)        |
| HIV/AIDS resulting in mycobacterial infection                     | 84<br>(55 - 121)           | 8<br>(5 - 12)            | 5<br>(4 - 7)       | 55<br>(33 - 83)          | 14<br>(9 - 21)           | 2<br>(1 - 3)           |
| HIV/AIDS resulting in other diseases                              | 1,116<br>(781 - 1,492)     | 112<br>(72 - 164)        | 77<br>(57 - 99)    | 734<br>(460 - 1,023)     | 176<br>(112 - 250)       | 18<br>(11 - 29)        |
| Diarrhea, lower respiratory, and other common infectious diseases | 2,377<br>(1,820 - 3,041)   | 1,467<br>(1,003 - 2,022) | 155<br>(109 - 213) | 286<br>(199 - 407)       | 261<br>(166 - 425)       | 207<br>(137 - 297)     |
| Diarrheal diseases                                                | 717<br>(417 - 1,128)       | 490<br>(223 - 878)       | 32<br>(13 - 68)    | 82<br>(44 - 143)         | 68<br>(29 - 136)         | 45<br>(21 - 84)        |
| Intestinal infectious diseases                                    | 42<br>(21 - 77)            | 11<br>(5 - 23)           | 14<br>(6 - 26)     | 15<br>(6 - 30)           | 2<br>(1 - 4)             | 0<br>(0 - 1)           |
| Typhoid fever                                                     | 27<br>(12 - 49)            | 6<br>(2 - 14)            | 9<br>(4 - 17)      | 10<br>(4 - 19)           | 1<br>(0 - 3)             | 0<br>(0 - 1)           |
| Paratyphoid fever                                                 | 12<br>(5 - 26)             | 3<br>(1 - 8)             | 4<br>(1 - 9)       | 4<br>(1 - 10)            | 0<br>(0 - 1)             | 0<br>(0 - 0)           |
| Other intestinal infectious diseases                              | 3<br>(0 - 8)               | 2<br>(0 - 6)             | 0<br>(0 - 3)       | 1<br>(0 - 4)             | 0<br>(0 - 2)             | 0<br>(0 - 1)           |
| Lower respiratory infections                                      | 1,065<br>(761 - 1,430)     | 609<br>(358 - 922)       | 43<br>(24 - 72)    | 104<br>(66 - 159)        | 157<br>(92 - 265)        | 152<br>(91 - 230)      |
| Upper respiratory infections                                      | 2<br>(1 - 4)               | 1<br>(0 - 3)             | 0<br>(0 - 1)       | 1<br>(0 - 1)             | 0<br>(0 - 1)             | 0<br>(0 - 0)           |
| Otitis media                                                      | 1<br>(0 - 1)               | 0<br>(0 - 0)             | 0<br>(0 - 0)       | 0<br>(0 - 0)             | 0<br>(0 - 0)             | 0<br>(0 - 0)           |
| Meningitis                                                        | 301<br>(197 - 443)         | 152<br>(71 - 280)        | 36<br>(19 - 62)    | 74<br>(44 - 113)         | 30<br>(15 - 53)          | 9<br>(4 - 15)          |
| Pneumococcal meningitis                                           | 76<br>(43 - 119)           | 34<br>(13 - 72)          | 11<br>(4 - 21)     | 21<br>(9 - 38)           | 8<br>(3 - 17)            | 2<br>(1 - 4)           |
| H influenzae type B meningitis                                    | 51<br>(26 - 93)            | 33<br>(13 - 70)          | 6<br>(2 - 13)      | 9<br>(4 - 17)            | 3<br>(1 - 6)             | 1<br>(0 - 2)           |
| Meningococcal meningitis                                          | 135<br>(79 - 205)          | 71<br>(29 - 131)         | 16<br>(7 - 31)     | 31<br>(17 - 52)          | 13<br>(5 - 24)           | 4<br>(2 - 7)           |
| Other meningitis                                                  | 39<br>(22 - 61)            | 14<br>(6 - 30)           | 4<br>(1 - 7)       | 13<br>(5 - 24)           | 6<br>(3 - 12)            | 2<br>(1 - 4)           |
| Encephalitis                                                      | 12<br>(7 - 22)             | 5<br>(2 - 10)            | 2<br>(1 - 5)       | 3<br>(2 - 7)             | 1<br>(1 - 3)             | 1<br>(0 - 1)           |
| Diphtheria                                                        | 1<br>(0 - 5)               | 1<br>(0 - 5)             | 0<br>(0 - 1)       | 0<br>(0 - 0)             | 0<br>(0 - 0)             | --<br>(0 - 0)          |
| Whooping cough                                                    | 7<br>(0 - 36)              | 6<br>(0 - 32)            | 0<br>(0 - 2)       | 0<br>(0 - 0)             | 0<br>(0 - 0)             | --<br>(0 - 0)          |
| Tetanus                                                           | 43<br>(14 - 82)            | 38<br>(10 - 78)          | 1<br>(0 - 2)       | 3<br>(1 - 7)             | 1<br>(0 - 3)             | 0<br>(0 - 0)           |
| Measles                                                           | 185<br>(65 - 399)          | 155<br>(53 - 339)        | 26<br>(10 - 54)    | 3<br>(1 - 7)             | 0<br>(0 - 0)             | --<br>(0 - 0)          |
| Varicella and herpes zoster                                       | 1<br>(0 - 2)               | 0<br>(0 - 1)             | 0<br>(0 - 0)       | 0<br>(0 - 1)             | 0<br>(0 - 0)             | 0<br>(0 - 1)           |
| Neglected tropical diseases and malaria                           | 1,765<br>(1,172 - 2,528)   | 1,618<br>(1,022 - 2,393) | 44<br>(16 - 99)    | 52<br>(21 - 132)         | 36<br>(11 - 96)          | 16<br>(5 - 44)         |
| Malaria                                                           | 1,747<br>(1,155 - 2,514)   | 1,613<br>(1,018 - 2,388) | 40<br>(14 - 96)    | 46<br>(17 - 124)         | 33<br>(9 - 92)           | 15<br>(4 - 44)         |
| Leishmaniasis                                                     | 0<br>(0 - 0)               | 0<br>(0 - 0)             | 0<br>(0 - 0)       | 0<br>(0 - 0)             | 0<br>(0 - 0)             | 0<br>(0 - 0)           |
| Visceral leishmaniasis                                            | 0<br>(0 - 0)               | 0<br>(0 - 0)             | 0<br>(0 - 0)       | 0<br>(0 - 0)             | 0<br>(0 - 0)             | 0<br>(0 - 0)           |
| Schistosomiasis                                                   | 5<br>(3 - 8)               | 0<br>(0 - 0)             | 0<br>(0 - 0)       | 2<br>(1 - 4)             | 2<br>(1 - 3)             | 1<br>(0 - 1)           |
| Cysticercosis                                                     | 0<br>(0 - 1)               | 0<br>(0 - 0)             | 0<br>(0 - 0)       | 0<br>(0 - 1)             | 0<br>(0 - 0)             | 0<br>(0 - 0)           |
| Cystic echinococcosis                                             | 0<br>(0 - 1)               | 0<br>(0 - 0)             | 0<br>(0 - 0)       | 0<br>(0 - 0)             | 0<br>(0 - 0)             | 0<br>(0 - 0)           |
| Dengue                                                            | 1<br>(0 - 2)               | 1<br>(0 - 1)             | 0<br>(0 - 1)       | 0<br>(0 - 0)             | 0<br>(0 - 0)             | 0<br>(0 - 0)           |
| Yellow fever                                                      | 0<br>(0 - 0)               | 0<br>(0 - 0)             | 0<br>(0 - 0)       | 0<br>(0 - 0)             | 0<br>(0 - 0)             | 0<br>(0 - 0)           |
| Rabies                                                            | 7<br>(2 - 13)              | 2<br>(0 - 5)             | 3<br>(1 - 6)       | 2<br>(1 - 3)             | 1<br>(0 - 1)             | 0<br>(0 - 0)           |
| Intestinal nematode infections                                    | 3<br>(0 - 9)               | 2<br>(0 - 8)             | 0<br>(0 - 3)       | 0<br>(0 - 1)             | 0<br>(0 - 0)             | 0<br>(0 - 0)           |
| Ascariasis                                                        | 3<br>(0 - 9)               | 2<br>(0 - 8)             | 0<br>(0 - 3)       | 0<br>(0 - 1)             | 0<br>(0 - 0)             | 0<br>(0 - 0)           |
| Other neglected tropical diseases                                 | 1<br>(1 - 3)               | 0<br>(0 - 1)             | 0<br>(0 - 0)       | 0<br>(0 - 1)             | 0<br>(0 - 0)             | 0<br>(0 - 0)           |



Web Table 31- Guinea-Bissau deaths with 95% UI by age, sex, and cause in 2013

| Cause                                                            | Males, All Ages          | Males, 0-4 Years       | Males, 5-14 Years | Males, 15-49 Years   | Males, 50-69 Years     | Males, 70-80 Years |
|------------------------------------------------------------------|--------------------------|------------------------|-------------------|----------------------|------------------------|--------------------|
| Maternal disorders                                               | --                       | --                     | --                | --                   | --                     | --                 |
| Maternal hemorrhage                                              | --                       | --                     | --                | --                   | --                     | --                 |
| Maternal sepsis and other maternal infections                    | --                       | --                     | --                | --                   | --                     | --                 |
| Maternal hypertensive disorders                                  | --                       | --                     | --                | --                   | --                     | --                 |
| Maternal obstructed labor                                        | --                       | --                     | --                | --                   | --                     | --                 |
| Maternal abortive outcome                                        | --                       | --                     | --                | --                   | --                     | --                 |
| Indirect maternal deaths                                         | --                       | --                     | --                | --                   | --                     | --                 |
| Late maternal deaths                                             | --                       | --                     | --                | --                   | --                     | --                 |
| Maternal deaths aggravated by HIV/AIDS                           | --                       | --                     | --                | --                   | --                     | --                 |
| Other maternal disorders                                         | --                       | --                     | --                | --                   | --                     | --                 |
| Neonatal disorders                                               | 1,068<br>(837 - 1,323)   | 1,068<br>(837 - 1,323) | --                | --                   | --                     | --                 |
| Neonatal preterm birth complications                             | 411<br>(197 - 717)       | 411<br>(197 - 717)     | --                | --                   | --                     | --                 |
| Neonatal encephalopathy due to birth asphyxia and trauma         | 293<br>(132 - 511)       | 293<br>(132 - 511)     | --                | --                   | --                     | --                 |
| Neonatal sepsis and other neonatal infections                    | 267<br>(105 - 515)       | 267<br>(105 - 515)     | --                | --                   | --                     | --                 |
| Hemolytic disease and other neonatal jaundice                    | 10<br>(3 - 27)           | 10<br>(3 - 27)         | --                | --                   | --                     | --                 |
| Other neonatal disorders                                         | 88<br>(38 - 178)         | 88<br>(38 - 178)       | --                | --                   | --                     | --                 |
| Nutritional deficiencies                                         | 447<br>(209 - 724)       | 274<br>(114 - 511)     | 28<br>(13 - 48)   | 62<br>(29 - 102)     | 49<br>(20 - 88)        | 34<br>(16 - 58)    |
| Protein-energy malnutrition                                      | 343<br>(154 - 614)       | 238<br>(95 - 464)      | 21<br>(9 - 38)    | 34<br>(14 - 69)      | 30<br>(12 - 62)        | 20<br>(8 - 42)     |
| Iodine deficiency                                                | 3<br>(0 - 13)            | 2<br>(0 - 11)          | 0<br>(0 - 2)      | 1<br>(0 - 3)         | 0<br>(0 - 1)           | 0<br>(0 - 1)       |
| Iron-deficiency anemia                                           | 98<br>(23 - 211)         | 34<br>(4 - 105)        | 6<br>(1 - 16)     | 27<br>(6 - 53)       | 18<br>(3 - 42)         | 13<br>(3 - 29)     |
| Other nutritional deficiencies                                   | 2<br>(1 - 4)             | 0<br>(0 - 1)           | 0<br>(0 - 0)      | 1<br>(0 - 2)         | 0<br>(0 - 1)           | 0<br>(0 - 1)       |
| Other communicable, maternal, neonatal, and nutritional diseases | 124<br>(75 - 192)        | 75<br>(38 - 133)       | 9<br>(5 - 15)     | 20<br>(11 - 34)      | 14<br>(7 - 26)         | 6<br>(3 - 12)      |
| Sexually transmitted diseases excluding HIV                      | 73<br>(35 - 131)         | 60<br>(26 - 114)       | 6<br>(3 - 10)     | 4<br>(2 - 10)        | 2<br>(1 - 6)           | 1<br>(0 - 3)       |
| Syphilis                                                         | 70<br>(33 - 129)         | 60<br>(26 - 114)       | 5<br>(2 - 10)     | 2<br>(1 - 5)         | 2<br>(1 - 4)           | 1<br>(0 - 2)       |
| Chlamydial infection                                             | --                       | --                     | --                | --                   | --                     | --                 |
| Gonococcal infection                                             | 2<br>(1 - 4)             | --                     | 0<br>(0 - 0)      | 1<br>(0 - 2)         | 0<br>(0 - 1)           | 0<br>(0 - 0)       |
| Other sexually transmitted diseases                              | 1<br>(1 - 3)             | --                     | 0<br>(0 - 0)      | 1<br>(0 - 2)         | 0<br>(0 - 1)           | 0<br>(0 - 0)       |
| Hepatitis                                                        | 23<br>(10 - 36)          | 4<br>(1 - 8)           | 2<br>(1 - 3)      | 10<br>(4 - 16)       | 5<br>(2 - 10)          | 2<br>(1 - 3)       |
| Acute hepatitis A                                                | 2<br>(0 - 5)             | 1<br>(0 - 3)           | 0<br>(0 - 1)      | 0<br>(0 - 1)         | 0<br>(0 - 0)           | 0<br>(0 - 0)       |
| Acute hepatitis B                                                | 14<br>(6 - 24)           | 3<br>(1 - 6)           | 1<br>(0 - 2)      | 4<br>(2 - 8)         | 4<br>(2 - 8)           | 2<br>(1 - 3)       |
| Acute hepatitis C                                                | 1<br>(0 - 2)             | --                     | 0<br>(0 - 0)      | 0<br>(0 - 1)         | 0<br>(0 - 1)           | 0<br>(0 - 0)       |
| Acute hepatitis E                                                | 6<br>(2 - 11)            | 0<br>(0 - 0)           | 0<br>(0 - 1)      | 5<br>(2 - 8)         | 1<br>(0 - 2)           | 0<br>(0 - 0)       |
| Other infectious diseases                                        | 28<br>(12 - 57)          | 11<br>(3 - 27)         | 2<br>(0 - 4)      | 6<br>(2 - 15)        | 6<br>(2 - 16)          | 3<br>(1 - 8)       |
| Non-communicable diseases                                        | 3,131<br>(2,347 - 4,299) | 340<br>(185 - 658)     | 77<br>(56 - 106)  | 730<br>(544 - 1,006) | 1,248<br>(846 - 1,930) | 737<br>(554 - 991) |
| Neoplasms                                                        | 414<br>(293 - 599)       | 10<br>(5 - 17)         | 10<br>(7 - 14)    | 126<br>(85 - 197)    | 185<br>(120 - 285)     | 83<br>(60 - 115)   |
| Esophageal cancer                                                | 20<br>(12 - 37)          | --                     | --                | 4<br>(3 - 7)         | 12<br>(6 - 22)         | 4<br>(2 - 8)       |
| Stomach cancer                                                   | 54<br>(38 - 78)          | --                     | --                | 15<br>(10 - 22)      | 29<br>(19 - 46)        | 10<br>(6 - 14)     |
| Liver cancer                                                     | 166<br>(102 - 283)       | --                     | 1<br>(0 - 1)      | 66<br>(38 - 127)     | 74<br>(42 - 127)       | 25<br>(15 - 39)    |
| Liver cancer due to hepatitis B                                  | 84<br>(39 - 156)         | --                     | 0<br>(0 - 1)      | 40<br>(20 - 77)      | 36<br>(14 - 68)        | 8<br>(3 - 15)      |
| Liver cancer due to hepatitis C                                  | 43<br>(18 - 87)          | --                     | 0<br>(0 - 0)      | 11<br>(2 - 29)       | 23<br>(9 - 46)         | 10<br>(4 - 18)     |

Web Table 31- Guinea-Bissau deaths with 95% UI by age, sex, and cause in 2013

| Cause                                | Males, All Ages        | Males, 0-4 Years | Males, 5-14 Years | Males, 15-49 Years | Males, 50-69 Years | Males, 70-80 Years |
|--------------------------------------|------------------------|------------------|-------------------|--------------------|--------------------|--------------------|
| Liver cancer due to alcohol use      | 20<br>(9 - 37)         | --               | --                | 5<br>(2 - 10)      | 10<br>(4 - 19)     | 5<br>(2 - 9)       |
| Liver cancer due to other causes     | 19<br>(9 - 36)         | --               | 0<br>(0 - 1)      | 11<br>(5 - 23)     | 6<br>(3 - 12)      | 2<br>(1 - 3)       |
| Larynx cancer                        | 3<br>(2 - 8)           | --               | --                | 1<br>(0 - 1)       | 2<br>(1 - 5)       | 1<br>(0 - 2)       |
| Tracheal, bronchus and lung cancer   | 26<br>(18 - 39)        | --               | --                | 3<br>(2 - 5)       | 16<br>(10 - 26)    | 6<br>(4 - 9)       |
| Breast cancer                        | 1<br>(0 - 1)           | --               | --                | 0<br>(0 - 0)       | 0<br>(0 - 1)       | 0<br>(0 - 0)       |
| Cervical cancer                      | --                     | --               | --                | --                 | --                 | --                 |
| Uterine cancer                       | --                     | --               | --                | --                 | --                 | --                 |
| Prostate cancer                      | 24<br>(15 - 41)        | --               | --                | 1<br>(0 - 1)       | 9<br>(5 - 15)      | 15<br>(10 - 25)    |
| Colon and rectum cancer              | 18<br>(13 - 25)        | --               | --                | 5<br>(4 - 7)       | 7<br>(5 - 12)      | 5<br>(4 - 7)       |
| Lip and oral cavity cancer           | 3<br>(2 - 5)           | --               | --                | 1<br>(0 - 1)       | 1<br>(1 - 3)       | 1<br>(0 - 1)       |
| Nasopharynx cancer                   | 1<br>(1 - 1)           | --               | 0<br>(0 - 0)      | 0<br>(0 - 1)       | 0<br>(0 - 1)       | 0<br>(0 - 0)       |
| Other pharynx cancer                 | 1<br>(1 - 2)           | --               | --                | 0<br>(0 - 1)       | 0<br>(0 - 1)       | 0<br>(0 - 0)       |
| Gallbladder and biliary tract cancer | 2<br>(1 - 3)           | --               | --                | 0<br>(0 - 1)       | 1<br>(0 - 1)       | 0<br>(0 - 1)       |
| Pancreatic cancer                    | 9<br>(6 - 13)          | --               | --                | 2<br>(1 - 3)       | 5<br>(3 - 8)       | 1<br>(1 - 2)       |
| Malignant skin melanoma              | 1<br>(1 - 3)           | --               | --                | 0<br>(0 - 1)       | 0<br>(0 - 1)       | 0<br>(0 - 1)       |
| Non-melanoma skin cancer             | 1<br>(1 - 2)           | --               | --                | 0<br>(0 - 0)       | 0<br>(0 - 1)       | 0<br>(0 - 1)       |
| Ovarian cancer                       | --                     | --               | --                | --                 | --                 | --                 |
| Testicular cancer                    | 1<br>(0 - 1)           | --               | --                | 1<br>(0 - 1)       | 0<br>(0 - 0)       | 0<br>(0 - 0)       |
| Kidney cancer                        | 4<br>(3 - 7)           | 1<br>(0 - 1)     | 0<br>(0 - 1)      | 1<br>(0 - 1)       | 2<br>(1 - 4)       | 1<br>(0 - 1)       |
| Bladder cancer                       | 11<br>(8 - 18)         | --               | --                | 3<br>(2 - 4)       | 5<br>(3 - 9)       | 4<br>(3 - 7)       |
| Brain and nervous system cancer      | 4<br>(2 - 6)           | 0<br>(0 - 0)     | 1<br>(0 - 1)      | 2<br>(1 - 3)       | 1<br>(1 - 2)       | 0<br>(0 - 1)       |
| Thyroid cancer                       | 0<br>(0 - 1)           | --               | 0<br>(0 - 0)      | 0<br>(0 - 0)       | 0<br>(0 - 0)       | 0<br>(0 - 0)       |
| Mesothelioma                         | 1<br>(0 - 1)           | --               | --                | 0<br>(0 - 0)       | 0<br>(0 - 1)       | 0<br>(0 - 0)       |
| Hodgkin lymphoma                     | 2<br>(1 - 4)           | 0<br>(0 - 1)     | 0<br>(0 - 1)      | 1<br>(1 - 2)       | 1<br>(0 - 1)       | 0<br>(0 - 0)       |
| Non-Hodgkin lymphoma                 | 21<br>(14 - 34)        | 2<br>(1 - 5)     | 3<br>(2 - 6)      | 8<br>(5 - 14)      | 5<br>(3 - 10)      | 2<br>(1 - 4)       |
| Multiple myeloma                     | 1<br>(1 - 3)           | --               | --                | 0<br>(0 - 1)       | 1<br>(0 - 2)       | 0<br>(0 - 0)       |
| Leukemia                             | 7<br>(5 - 9)           | 1<br>(0 - 1)     | 1<br>(1 - 2)      | 3<br>(2 - 5)       | 1<br>(1 - 2)       | 1<br>(1 - 1)       |
| Other neoplasms                      | 31<br>(20 - 55)        | 6<br>(3 - 12)    | 3<br>(2 - 6)      | 8<br>(4 - 16)      | 9<br>(4 - 19)      | 5<br>(3 - 9)       |
| Cardiovascular diseases              | 1,256<br>(915 - 1,806) | 37<br>(20 - 62)  | 16<br>(10 - 25)   | 226<br>(158 - 316) | 599<br>(406 - 935) | 378<br>(284 - 515) |
| Rheumatic heart disease              | 12<br>(6 - 32)         | 1<br>(0 - 2)     | 1<br>(0 - 2)      | 4<br>(2 - 11)      | 4<br>(2 - 13)      | 2<br>(1 - 5)       |
| Ischemic heart disease               | 410<br>(266 - 628)     | 2<br>(1 - 6)     | 3<br>(1 - 5)      | 72<br>(45 - 111)   | 214<br>(131 - 342) | 119<br>(78 - 175)  |
| Cerebrovascular disease              | 546<br>(367 - 820)     | 12<br>(6 - 21)   | 5<br>(3 - 8)      | 80<br>(49 - 121)   | 258<br>(161 - 417) | 190<br>(132 - 273) |
| Ischemic stroke                      | 336<br>(202 - 513)     | 1<br>(0 - 4)     | 1<br>(0 - 2)      | 24<br>(12 - 41)    | 163<br>(87 - 274)  | 147<br>(94 - 211)  |
| Hemorrhagic stroke                   | 210<br>(112 - 364)     | 11<br>(5 - 19)   | 4<br>(2 - 7)      | 57<br>(28 - 90)    | 95<br>(43 - 189)   | 43<br>(20 - 84)    |
| Hypertensive heart disease           | 48<br>(17 - 92)        | 0<br>(0 - 1)     | 0<br>(0 - 0)      | 9<br>(2 - 22)      | 22<br>(7 - 46)     | 16<br>(6 - 29)     |
| Cardiomyopathy and myocarditis       | 66<br>(38 - 104)       | 5<br>(1 - 13)    | 2<br>(1 - 4)      | 17<br>(9 - 26)     | 30<br>(14 - 56)    | 12<br>(5 - 21)     |
| Atrial fibrillation and flutter      | 0<br>(0 - 0)           | --               | --                | 0<br>(0 - 0)       | 0<br>(0 - 0)       | 0<br>(0 - 0)       |
| Aortic aneurysm                      | 13<br>(8 - 22)         | --               | --                | 2<br>(1 - 3)       | 8<br>(4 - 13)      | 4<br>(2 - 6)       |
| Peripheral vascular disease          | 0<br>(0 - 1)           | --               | --                | 0<br>(0 - 0)       | 0<br>(0 - 0)       | 0<br>(0 - 0)       |
| Endocarditis                         | 24<br>(14 - 41)        | 3<br>(1 - 6)     | 1<br>(0 - 1)      | 5<br>(3 - 9)       | 9<br>(5 - 17)      | 6<br>(3 - 11)      |

Web Table 31- Guinea-Bissau deaths with 95% UI by age, sex, and cause in 2013

| Cause                                               | Males, All Ages    | Males, 0-4 Years | Males, 5-14 Years | Males, 15-49 Years | Males, 50-69 Years | Males, 70-80 Years |
|-----------------------------------------------------|--------------------|------------------|-------------------|--------------------|--------------------|--------------------|
| Other cardiovascular and circulatory diseases       | 135<br>(74 - 259)  | 13<br>(5 - 27)   | 4<br>(2 - 8)      | 36<br>(19 - 65)    | 53<br>(27 - 108)   | 28<br>(15 - 62)    |
| Chronic respiratory diseases                        | 255<br>(170 - 456) | 13<br>(6 - 30)   | 4<br>(2 - 7)      | 37<br>(24 - 65)    | 108<br>(64 - 200)  | 93<br>(61 - 162)   |
| Chronic obstructive pulmonary disease               | 159<br>(104 - 286) | 6<br>(2 - 14)    | 1<br>(1 - 3)      | 13<br>(8 - 23)     | 68<br>(39 - 128)   | 71<br>(46 - 124)   |
| Pneumoconiosis                                      | 21<br>(11 - 41)    | 0<br>(0 - 1)     | 0<br>(0 - 0)      | 5<br>(3 - 9)       | 12<br>(6 - 24)     | 4<br>(2 - 8)       |
| Silicosis                                           | 3<br>(2 - 7)       | 0<br>(0 - 0)     | 0<br>(0 - 0)      | 1<br>(0 - 2)       | 1<br>(0 - 2)       | 1<br>(1 - 3)       |
| Asbestosis                                          | 2<br>(1 - 3)       | 0<br>(0 - 0)     | 0<br>(0 - 0)      | 0<br>(0 - 1)       | 1<br>(0 - 2)       | 0<br>(0 - 0)       |
| Coal workers pneumoconiosis                         | 6<br>(3 - 11)      | 0<br>(0 - 0)     | 0<br>(0 - 0)      | 0<br>(0 - 1)       | 5<br>(2 - 10)      | 0<br>(0 - 1)       |
| Other pneumoconiosis                                | 10<br>(5 - 20)     | 0<br>(0 - 0)     | 0<br>(0 - 0)      | 3<br>(2 - 6)       | 5<br>(2 - 10)      | 2<br>(1 - 4)       |
| Asthma                                              | 40<br>(25 - 74)    | 4<br>(1 - 9)     | 1<br>(0 - 2)      | 12<br>(7 - 21)     | 15<br>(8 - 29)     | 8<br>(4 - 16)      |
| Interstitial lung disease and pulmonary sarcoidosis | 18<br>(6 - 33)     | 0<br>(0 - 1)     | 0<br>(0 - 0)      | 1<br>(0 - 1)       | 8<br>(3 - 17)      | 8<br>(2 - 16)      |
| Other chronic respiratory diseases                  | 19<br>(11 - 39)    | 3<br>(1 - 8)     | 1<br>(1 - 2)      | 7<br>(4 - 14)      | 5<br>(2 - 11)      | 3<br>(1 - 6)       |
| Cirrhosis                                           | 205<br>(138 - 310) | 5<br>(1 - 11)    | 3<br>(2 - 4)      | 74<br>(49 - 112)   | 100<br>(61 - 162)  | 24<br>(16 - 37)    |
| Cirrhosis due to hepatitis B                        | 49<br>(7 - 101)    | 0<br>(0 - 1)     | 0<br>(0 - 1)      | 16<br>(2 - 33)     | 26<br>(4 - 58)     | 7<br>(1 - 15)      |
| Cirrhosis due to hepatitis C                        | 35<br>(12 - 78)    | 0<br>(0 - 1)     | 0<br>(0 - 1)      | 14<br>(4 - 29)     | 17<br>(4 - 40)     | 4<br>(1 - 10)      |
| Cirrhosis due to alcohol use                        | 89<br>(47 - 151)   | --               | --                | 30<br>(15 - 51)    | 48<br>(24 - 86)    | 12<br>(6 - 19)     |
| Cirrhosis due to other causes                       | 32<br>(18 - 54)    | 4<br>(1 - 10)    | 2<br>(1 - 3)      | 15<br>(7 - 25)     | 10<br>(4 - 19)     | 2<br>(1 - 3)       |
| Digestive diseases                                  | 213<br>(149 - 308) | 13<br>(5 - 28)   | 10<br>(6 - 15)    | 75<br>(48 - 111)   | 78<br>(49 - 125)   | 38<br>(25 - 54)    |
| Peptic ulcer disease                                | 61<br>(37 - 98)    | 2<br>(0 - 6)     | 2<br>(1 - 3)      | 21<br>(12 - 34)    | 25<br>(13 - 44)    | 11<br>(6 - 19)     |
| Gastritis and duodenitis                            | 6<br>(3 - 11)      | 1<br>(0 - 2)     | 0<br>(0 - 1)      | 2<br>(1 - 4)       | 2<br>(1 - 5)       | 1<br>(0 - 3)       |
| Appendicitis                                        | 14<br>(9 - 22)     | 2<br>(0 - 5)     | 2<br>(1 - 3)      | 5<br>(3 - 9)       | 4<br>(2 - 7)       | 2<br>(1 - 4)       |
| Paralytic ileus and intestinal obstruction          | 51<br>(26 - 79)    | 2<br>(1 - 5)     | 2<br>(1 - 4)      | 15<br>(7 - 24)     | 21<br>(10 - 36)    | 11<br>(6 - 19)     |
| Inguinal, femoral, and abdominal hernia             | 7<br>(4 - 14)      | 0<br>(0 - 1)     | 0<br>(0 - 1)      | 2<br>(1 - 4)       | 3<br>(1 - 6)       | 2<br>(1 - 4)       |
| Inflammatory bowel disease                          | 11<br>(4 - 18)     | 3<br>(1 - 7)     | 0<br>(0 - 1)      | 3<br>(1 - 6)       | 3<br>(1 - 6)       | 1<br>(0 - 3)       |
| Vascular intestinal disorders                       | 1<br>(0 - 2)       | 0<br>(0 - 0)     | 0<br>(0 - 0)      | 0<br>(0 - 1)       | 0<br>(0 - 1)       | 0<br>(0 - 0)       |
| Gallbladder and biliary diseases                    | 12<br>(6 - 19)     | 0<br>(0 - 1)     | 1<br>(0 - 1)      | 4<br>(2 - 7)       | 4<br>(2 - 7)       | 3<br>(2 - 6)       |
| Pancreatitis                                        | 18<br>(8 - 30)     | 0<br>(0 - 1)     | 0<br>(0 - 1)      | 11<br>(5 - 19)     | 5<br>(2 - 9)       | 2<br>(1 - 3)       |
| Other digestive diseases                            | 32<br>(19 - 54)    | 3<br>(1 - 9)     | 2<br>(1 - 4)      | 12<br>(7 - 21)     | 11<br>(5 - 20)     | 4<br>(2 - 7)       |
| Neurological disorders                              | 69<br>(51 - 94)    | 9<br>(3 - 21)    | 5<br>(2 - 8)      | 19<br>(12 - 29)    | 8<br>(5 - 13)      | 28<br>(20 - 38)    |
| Alzheimer disease and other dementias               | 30<br>(21 - 40)    | --               | --                | 0<br>(0 - 0)       | 4<br>(2 - 6)       | 26<br>(18 - 35)    |
| Parkinson disease                                   | 0<br>(0 - 1)       | --               | --                | 0<br>(0 - 0)       | 0<br>(0 - 0)       | 0<br>(0 - 1)       |
| Epilepsy                                            | 31<br>(19 - 49)    | 7<br>(2 - 19)    | 4<br>(2 - 7)      | 16<br>(9 - 25)     | 2<br>(1 - 4)       | 1<br>(1 - 2)       |
| Multiple sclerosis                                  | 0<br>(0 - 0)       | --               | --                | 0<br>(0 - 0)       | 0<br>(0 - 0)       | 0<br>(0 - 0)       |
| Other neurological disorders                        | 8<br>(5 - 18)      | 2<br>(1 - 8)     | 1<br>(0 - 2)      | 3<br>(2 - 5)       | 2<br>(1 - 3)       | 1<br>(1 - 1)       |
| Mental and substance use disorders                  | 72<br>(38 - 117)   | 2<br>(0 - 5)     | 0<br>(0 - 0)      | 54<br>(28 - 89)    | 13<br>(6 - 24)     | 3<br>(1 - 6)       |
| Schizophrenia                                       | 0<br>(0 - 0)       | --               | --                | 0<br>(0 - 0)       | 0<br>(0 - 0)       | 0<br>(0 - 0)       |
| Alcohol use disorders                               | 25<br>(10 - 47)    | --               | --                | 14<br>(6 - 26)     | 9<br>(3 - 19)      | 2<br>(0 - 4)       |
| Drug use disorders                                  | 47<br>(23 - 73)    | 2<br>(0 - 5)     | --                | 40<br>(18 - 65)    | 4<br>(2 - 6)       | 1<br>(0 - 1)       |
| Opioid use disorders                                | 5<br>(2 - 8)       | 0<br>(0 - 1)     | --                | 4<br>(2 - 7)       | 0<br>(0 - 1)       | 0<br>(0 - 0)       |
| Cocaine use disorders                               | 0<br>(0 - 0)       | 0<br>(0 - 0)     | --                | 0<br>(0 - 0)       | 0<br>(0 - 0)       | 0<br>(0 - 0)       |
| Amphetamine use disorders                           | 0<br>(0 - 0)       | 0<br>(0 - 0)     | --                | 0<br>(0 - 0)       | 0<br>(0 - 0)       | 0<br>(0 - 0)       |

Web Table 31- Guinea-Bissau deaths with 95% UI by age, sex, and cause in 2013

| Cause                                               | Males, All Ages    | Males, 0-4 Years  | Males, 5-14 Years | Males, 15-49 Years | Males, 50-69 Years | Males, 70-80 Years |
|-----------------------------------------------------|--------------------|-------------------|-------------------|--------------------|--------------------|--------------------|
| Other drug use disorders                            | 42<br>(21 - 65)    | 2<br>(0 - 4)      | --                | 36<br>(16 - 57)    | 3<br>(2 - 6)       | 1<br>(0 - 1)       |
| Eating disorders                                    | 0<br>(0 - 0)       | --                | 0<br>(0 - 0)      | 0<br>(0 - 0)       | --                 | --                 |
| Anorexia nervosa                                    | 0<br>(0 - 0)       | --                | 0<br>(0 - 0)      | 0<br>(0 - 0)       | --                 | --                 |
| Diabetes, urogenital, blood, and endocrine diseases | 406<br>(301 - 559) | 56<br>(29 - 94)   | 19<br>(12 - 28)   | 102<br>(71 - 143)  | 146<br>(97 - 225)  | 83<br>(60 - 116)   |
| Diabetes mellitus                                   | 153<br>(101 - 231) | 4<br>(2 - 6)      | 1<br>(1 - 2)      | 24<br>(15 - 36)    | 82<br>(50 - 135)   | 42<br>(27 - 62)    |
| Acute glomerulonephritis                            | 1<br>(1 - 3)       | 0<br>(0 - 1)      | 0<br>(0 - 1)      | 0<br>(0 - 1)       | 0<br>(0 - 1)       | 0<br>(0 - 0)       |
| Chronic kidney disease                              | 82<br>(56 - 120)   | 7<br>(3 - 13)     | 4<br>(3 - 7)      | 32<br>(20 - 48)    | 23<br>(14 - 40)    | 15<br>(9 - 23)     |
| Chronic kidney disease due to diabetes mellitus     | 1<br>(0 - 2)       | 0<br>(0 - 0)      | 0<br>(0 - 0)      | 0<br>(0 - 0)       | 1<br>(0 - 2)       | 0<br>(0 - 0)       |
| Chronic kidney disease due to hypertension          | 17<br>(10 - 29)    | 1<br>(0 - 2)      | 0<br>(0 - 0)      | 5<br>(2 - 9)       | 7<br>(3 - 13)      | 5<br>(2 - 8)       |
| Chronic kidney disease due to glomerulonephritis    | 44<br>(27 - 68)    | 4<br>(2 - 9)      | 3<br>(2 - 5)      | 19<br>(12 - 30)    | 10<br>(5 - 19)     | 6<br>(3 - 11)      |
| Chronic kidney disease due to other causes          | 20<br>(9 - 34)     | 2<br>(0 - 5)      | 1<br>(0 - 2)      | 8<br>(3 - 14)      | 6<br>(2 - 12)      | 4<br>(2 - 8)       |
| Urinary diseases and male infertility               | 76<br>(45 - 115)   | 10<br>(4 - 21)    | 2<br>(1 - 2)      | 22<br>(11 - 35)    | 25<br>(13 - 42)    | 18<br>(11 - 30)    |
| Interstitial nephritis and urinary tract infections | 63<br>(37 - 96)    | 8<br>(3 - 20)     | 1<br>(1 - 2)      | 17<br>(8 - 29)     | 20<br>(11 - 36)    | 16<br>(10 - 26)    |
| Urolithiasis                                        | 0<br>(0 - 1)       | --                | 0<br>(0 - 0)      | 0<br>(0 - 0)       | 0<br>(0 - 0)       | 0<br>(0 - 0)       |
| Other urinary diseases                              | 12<br>(6 - 21)     | 1<br>(0 - 3)      | 0<br>(0 - 1)      | 4<br>(2 - 8)       | 4<br>(2 - 8)       | 2<br>(1 - 5)       |
| Gynecological diseases                              | --                 | --                | --                | --                 | --                 | --                 |
| Uterine fibroids                                    | --                 | --                | --                | --                 | --                 | --                 |
| Polycystic ovarian syndrome                         | --                 | --                | --                | --                 | --                 | --                 |
| Endometriosis                                       | --                 | --                | --                | --                 | --                 | --                 |
| Genital prolapse                                    | --                 | --                | --                | --                 | --                 | --                 |
| Other gynecological diseases                        | --                 | --                | --                | --                 | --                 | --                 |
| Hemoglobinopathies and hemolytic anemias            | 50<br>(21 - 90)    | 25<br>(6 - 54)    | 9<br>(3 - 16)     | 11<br>(5 - 26)     | 3<br>(1 - 10)      | 2<br>(1 - 6)       |
| Thalassemias                                        | 1<br>(1 - 3)       | 1<br>(0 - 2)      | 0<br>(0 - 0)      | 0<br>(0 - 1)       | 0<br>(0 - 0)       | 0<br>(0 - 0)       |
| Sickle cell disorders                               | 44<br>(17 - 80)    | 22<br>(6 - 50)    | 8<br>(3 - 15)     | 10<br>(4 - 23)     | 3<br>(1 - 7)       | 0<br>(0 - 1)       |
| G6PD deficiency                                     | 1<br>(1 - 2)       | 1<br>(0 - 1)      | 0<br>(0 - 0)      | 0<br>(0 - 1)       | 0<br>(0 - 0)       | 0<br>(0 - 0)       |
| Other hemoglobinopathies and hemolytic anemias      | 4<br>(2 - 9)       | 1<br>(0 - 1)      | 0<br>(0 - 0)      | 1<br>(0 - 1)       | 1<br>(0 - 2)       | 1<br>(1 - 5)       |
| Endocrine, metabolic, blood, and immune disorders   | 43<br>(26 - 86)    | 10<br>(5 - 33)    | 3<br>(1 - 7)      | 12<br>(7 - 24)     | 12<br>(6 - 21)     | 6<br>(3 - 10)      |
| Musculoskeletal disorders                           | 12<br>(5 - 19)     | --                | 2<br>(1 - 3)      | 5<br>(2 - 8)       | 4<br>(2 - 7)       | 2<br>(1 - 3)       |
| Rheumatoid arthritis                                | 1<br>(0 - 1)       | --                | 0<br>(0 - 0)      | 0<br>(0 - 0)       | 0<br>(0 - 1)       | 0<br>(0 - 0)       |
| Other musculoskeletal disorders                     | 11<br>(5 - 18)     | --                | 1<br>(1 - 3)      | 5<br>(2 - 7)       | 4<br>(2 - 6)       | 2<br>(1 - 3)       |
| Other non-communicable diseases                     | 228<br>(104 - 529) | 195<br>(79 - 492) | 10<br>(4 - 26)    | 11<br>(7 - 17)     | 6<br>(3 - 11)      | 5<br>(2 - 8)       |
| Congenital anomalies                                | 207<br>(87 - 507)  | 188<br>(74 - 483) | 9<br>(4 - 25)     | 7<br>(4 - 12)      | 1<br>(1 - 3)       | 1<br>(1 - 1)       |
| Neural tube defects                                 | 56<br>(10 - 135)   | 52<br>(8 - 128)   | 2<br>(0 - 5)      | 2<br>(0 - 4)       | 0<br>(0 - 0)       | 0<br>(0 - 0)       |
| Congenital heart anomalies                          | 76<br>(25 - 192)   | 67<br>(20 - 175)  | 5<br>(2 - 13)     | 3<br>(2 - 6)       | 1<br>(0 - 1)       | 0<br>(0 - 1)       |
| Cleft lip and cleft palate                          | 1<br>(0 - 5)       | 1<br>(0 - 5)      | --                | --                 | --                 | --                 |
| Down syndrome                                       | 17<br>(3 - 63)     | 15<br>(2 - 61)    | 1<br>(0 - 2)      | 1<br>(0 - 1)       | 0<br>(0 - 0)       | 0<br>(0 - 0)       |
| Chromosomal unbalanced rearrangements               | 5<br>(1 - 20)      | 5<br>(1 - 19)     | 0<br>(0 - 1)      | 0<br>(0 - 0)       | 0<br>(0 - 0)       | 0<br>(0 - 0)       |
| Other congenital anomalies                          | 52<br>(7 - 244)    | 48<br>(5 - 232)   | 2<br>(0 - 10)     | 1<br>(1 - 4)       | 0<br>(0 - 1)       | 0<br>(0 - 1)       |
| Skin and subcutaneous diseases                      | 18<br>(7 - 26)     | 4<br>(1 - 8)      | 1<br>(0 - 1)      | 4<br>(2 - 6)       | 5<br>(2 - 8)       | 4<br>(1 - 7)       |
| Cellulitis                                          | 8<br>(3 - 12)      | 2<br>(1 - 4)      | 0<br>(0 - 1)      | 1<br>(1 - 2)       | 3<br>(1 - 5)       | 1<br>(0 - 3)       |

Web Table 31- Guinea-Bissau deaths with 95% UI by age, sex, and cause in 2013

| Cause                                           | Males, All Ages      | Males, 0-4 Years  | Males, 5-14 Years | Males, 15-49 Years | Males, 50-69 Years | Males, 70-80 Years |
|-------------------------------------------------|----------------------|-------------------|-------------------|--------------------|--------------------|--------------------|
| Pyoderma                                        | 10<br>(4 - 16)       | 3<br>(1 - 6)      | 0<br>(0 - 0)      | 3<br>(1 - 4)       | 2<br>(1 - 4)       | 2<br>(1 - 4)       |
| Decubitus ulcer                                 | 0                    | 0                 | 0                 | 0                  | 0                  | 0                  |
| Other skin and subcutaneous diseases            | 0<br>(0 - 0)         | 0<br>(0 - 0)      | 0<br>(0 - 0)      | 0<br>(0 - 0)       | 0<br>(0 - 0)       | 0<br>(0 - 0)       |
| Sudden infant death syndrome                    | 2<br>(1 - 7)         | 2<br>(1 - 7)      | --                | --                 | --                 | --                 |
| Injuries                                        | 855<br>(655 - 1,117) | 122<br>(61 - 204) | 90<br>(65 - 122)  | 477<br>(342 - 647) | 124<br>(80 - 189)  | 43<br>(30 - 60)    |
| Transport injuries                              | 439<br>(323 - 596)   | 22<br>(9 - 43)    | 41<br>(26 - 62)   | 292<br>(204 - 399) | 67<br>(42 - 105)   | 18<br>(12 - 26)    |
| Road injuries                                   | 425<br>(311 - 576)   | 18<br>(7 - 37)    | 38<br>(25 - 57)   | 287<br>(200 - 395) | 64<br>(41 - 102)   | 17<br>(11 - 24)    |
| Pedestrian road injuries                        | 110<br>(66 - 165)    | 7<br>(2 - 15)     | 14<br>(8 - 23)    | 65<br>(36 - 104)   | 18<br>(10 - 32)    | 5<br>(3 - 9)       |
| Cyclist road injuries                           | 23<br>(15 - 35)      | 2<br>(0 - 4)      | 4<br>(2 - 7)      | 12<br>(7 - 18)     | 5<br>(2 - 8)       | 1<br>(1 - 2)       |
| Motorcyclist road injuries                      | 60<br>(35 - 100)     | 1<br>(1 - 3)      | 3<br>(1 - 5)      | 47<br>(25 - 81)    | 8<br>(4 - 14)      | 1<br>(1 - 2)       |
| Motor vehicle road injuries                     | 226<br>(155 - 313)   | 7<br>(3 - 16)     | 16<br>(9 - 25)    | 162<br>(108 - 231) | 33<br>(20 - 54)    | 8<br>(5 - 12)      |
| Other road injuries                             | 6<br>(3 - 12)        | 1<br>(0 - 2)      | 1<br>(0 - 3)      | 2<br>(1 - 6)       | 1<br>(0 - 2)       | 0<br>(0 - 1)       |
| Other transport injuries                        | 15<br>(10 - 22)      | 4<br>(1 - 7)      | 3<br>(1 - 5)      | 5<br>(3 - 11)      | 2<br>(1 - 4)       | 1<br>(0 - 2)       |
| Unintentional injuries                          | 325<br>(243 - 446)   | 98<br>(46 - 168)  | 46<br>(32 - 67)   | 116<br>(79 - 172)  | 44<br>(27 - 70)    | 21<br>(13 - 31)    |
| Falls                                           | 67<br>(40 - 117)     | 11<br>(4 - 26)    | 6<br>(3 - 11)     | 27<br>(14 - 50)    | 15<br>(8 - 27)     | 9<br>(5 - 16)      |
| Drowning                                        | 92<br>(46 - 170)     | 33<br>(8 - 78)    | 21<br>(9 - 38)    | 30<br>(14 - 60)    | 6<br>(3 - 11)      | 2<br>(1 - 3)       |
| Fire, heat, and hot substances                  | 30<br>(13 - 50)      | 13<br>(3 - 28)    | 3<br>(1 - 5)      | 8<br>(4 - 13)      | 4<br>(2 - 7)       | 2<br>(1 - 4)       |
| Poisonings                                      | 22<br>(13 - 45)      | 6<br>(2 - 16)     | 2<br>(1 - 4)      | 10<br>(5 - 22)     | 3<br>(2 - 6)       | 1<br>(0 - 1)       |
| Exposure to mechanical forces                   | 54<br>(38 - 77)      | 12<br>(5 - 23)    | 8<br>(5 - 12)     | 25<br>(16 - 41)    | 7<br>(4 - 12)      | 2<br>(1 - 3)       |
| Unintentional firearm injuries                  | 23<br>(13 - 40)      | 4<br>(1 - 10)     | 2<br>(1 - 4)      | 14<br>(7 - 26)     | 3<br>(1 - 5)       | 1<br>(0 - 1)       |
| Unintentional suffocation                       | 4                    | 2                 | 1                 | 1                  | 0                  | 0                  |
| Other exposure to mechanical forces             | 27<br>(18 - 39)      | 7<br>(2 - 14)     | 5<br>(3 - 9)      | 11<br>(6 - 17)     | 4<br>(2 - 8)       | 1<br>(0 - 1)       |
| Adverse effects of medical treatment            | 19<br>(6 - 37)       | 6<br>(1 - 16)     | 1<br>(0 - 2)      | 5<br>(2 - 9)       | 4<br>(1 - 9)       | 3<br>(1 - 7)       |
| Animal contact                                  | 6<br>(3 - 11)        | 2<br>(0 - 4)      | 1<br>(0 - 3)      | 2<br>(1 - 3)       | 1<br>(0 - 2)       | 1<br>(0 - 1)       |
| Venomous animal contact                         | 2<br>(1 - 4)         | 1<br>(0 - 1)      | 0<br>(0 - 1)      | 1<br>(0 - 1)       | 0<br>(0 - 1)       | 0<br>(0 - 1)       |
| Non-venomous animal contact                     | 4                    | 1                 | 1                 | 1                  | 1                  | 0                  |
| Foreign body                                    | 18<br>(8 - 33)       | 11<br>(4 - 22)    | 2<br>(1 - 3)      | 3<br>(1 - 5)       | 2<br>(1 - 3)       | 1<br>(0 - 2)       |
| Pulmonary aspiration and foreign body in airway | 17<br>(7 - 32)       | 11<br>(3 - 22)    | 1<br>(1 - 3)      | 3<br>(1 - 5)       | 1<br>(1 - 2)       | 1<br>(0 - 2)       |
| Foreign body in other body part                 | 1                    | 0                 | 0                 | 0                  | 0                  | 0                  |
| Other unintentional injuries                    | 16<br>(7 - 28)       | 3<br>(1 - 7)      | 3<br>(1 - 5)      | 7<br>(3 - 13)      | 2<br>(1 - 4)       | 1<br>(0 - 2)       |
| Self-harm and interpersonal violence            | 91<br>(50 - 151)     | 2<br>(1 - 5)      | 3<br>(1 - 5)      | 68<br>(38 - 117)   | 13<br>(6 - 25)     | 4<br>(2 - 8)       |
| Self-harm                                       | 50<br>(24 - 102)     | --                | 1<br>(0 - 3)      | 34<br>(15 - 74)    | 11<br>(4 - 23)     | 4<br>(2 - 8)       |
| Interpersonal violence                          | 40<br>(23 - 65)      | 2<br>(1 - 5)      | 1<br>(1 - 3)      | 34<br>(19 - 55)    | 2<br>(1 - 4)       | 0<br>(0 - 0)       |
| Assault by firearm                              | 23<br>(11 - 38)      | 1<br>(0 - 1)      | 0<br>(0 - 1)      | 21<br>(10 - 35)    | 1<br>(0 - 2)       | 0<br>(0 - 0)       |
| Assault by sharp object                         | 6                    | 0                 | 0                 | 5                  | 1                  | 0                  |
| Assault by other means                          | 12<br>(5 - 24)       | 2<br>(1 - 4)      | 1<br>(0 - 2)      | 8<br>(3 - 18)      | 1<br>(0 - 1)       | 0<br>(0 - 0)       |

Web Table 31- Guinea-Bissau deaths with 95% UI by age, sex, and cause in 2013

| Cause                                                             | Females, All Ages          | Females, 0-4 Years       | Females, 5-14 Years | Females, 15-49 Years     | Females, 50-69 Years     | Females, 70-80 Years     |
|-------------------------------------------------------------------|----------------------------|--------------------------|---------------------|--------------------------|--------------------------|--------------------------|
| All causes                                                        | 11,050<br>(9,452 - 13,255) | 4,474<br>(3,675 - 5,324) | 462<br>(382 - 549)  | 2,829<br>(2,359 - 3,479) | 1,908<br>(1,330 - 2,823) | 1,377<br>(1,032 - 1,857) |
| Communicable, maternal, neonatal, and nutritional diseases        | 7,416<br>(6,402 - 8,582)   | 4,052<br>(3,295 - 4,942) | 332<br>(269 - 412)  | 2,041<br>(1,671 - 2,487) | 621<br>(435 - 893)       | 371<br>(233 - 534)       |
| HIV/AIDS and tuberculosis                                         | 1,584<br>(1,185 - 2,068)   | 126<br>(83 - 179)        | 85<br>(65 - 108)    | 1,054<br>(768 - 1,423)   | 266<br>(193 - 356)       | 52<br>(33 - 74)          |
| Tuberculosis                                                      | 284<br>(189 - 402)         | 13<br>(7 - 23)           | 8<br>(4 - 13)       | 143<br>(93 - 205)        | 84<br>(48 - 140)         | 36<br>(20 - 56)          |
| HIV/AIDS                                                          | 1,300<br>(914 - 1,797)     | 113<br>(72 - 166)        | 78<br>(58 - 101)    | 911<br>(625 - 1,290)     | 182<br>(112 - 264)       | 16<br>(7 - 25)           |
| HIV/AIDS resulting in mycobacterial infection                     | 70<br>(47 - 102)           | 6<br>(4 - 9)             | 4<br>(3 - 5)        | 50<br>(32 - 73)          | 10<br>(6 - 16)           | 1<br>(0 - 2)             |
| HIV/AIDS resulting in other diseases                              | 1,230<br>(866 - 1,702)     | 108<br>(69 - 158)        | 74<br>(55 - 96)     | 862<br>(591 - 1,216)     | 172<br>(106 - 248)       | 15<br>(7 - 23)           |
| Diarrhea, lower respiratory, and other common infectious diseases | 2,097<br>(1,572 - 2,702)   | 1,199<br>(805 - 1,697)   | 145<br>(99 - 196)   | 277<br>(190 - 401)       | 242<br>(131 - 408)       | 233<br>(132 - 359)       |
| Diarrheal diseases                                                | 619<br>(363 - 972)         | 371<br>(172 - 653)       | 29<br>(12 - 63)     | 94<br>(48 - 170)         | 68<br>(28 - 146)         | 56<br>(24 - 119)         |
| Intestinal infectious diseases                                    | 38<br>(19 - 65)            | 11<br>(5 - 22)           | 13<br>(6 - 24)      | 11<br>(5 - 21)           | 2<br>(1 - 5)             | 1<br>(0 - 2)             |
| Typhoid fever                                                     | 25<br>(12 - 44)            | 7<br>(3 - 14)            | 9<br>(4 - 17)       | 8<br>(3 - 15)            | 2<br>(0 - 4)             | 0<br>(0 - 1)             |
| Paratyphoid fever                                                 | 11<br>(5 - 20)             | 3<br>(1 - 8)             | 4<br>(2 - 9)        | 3<br>(1 - 6)             | 0<br>(0 - 1)             | 0<br>(0 - 0)             |
| Other intestinal infectious diseases                              | 2<br>(0 - 7)               | 1<br>(0 - 4)             | 0<br>(0 - 3)        | 1<br>(0 - 3)             | 0<br>(0 - 2)             | 0<br>(0 - 1)             |
| Lower respiratory infections                                      | 943<br>(672 - 1,252)       | 512<br>(299 - 805)       | 40<br>(22 - 66)     | 90<br>(60 - 137)         | 140<br>(73 - 240)        | 161<br>(88 - 253)        |
| Upper respiratory infections                                      | 2<br>(1 - 4)               | 1<br>(0 - 3)             | 0<br>(0 - 0)        | 0<br>(0 - 1)             | 0<br>(0 - 1)             | 0<br>(0 - 1)             |
| Otitis media                                                      | 1<br>(1 - 1)               | 0<br>(0 - 0)             | 0<br>(0 - 0)        | 0<br>(0 - 0)             | 0<br>(0 - 0)             | 0<br>(0 - 0)             |
| Meningitis                                                        | 271<br>(189 - 377)         | 125<br>(69 - 222)        | 31<br>(18 - 49)     | 72<br>(44 - 110)         | 29<br>(14 - 51)          | 14<br>(5 - 25)           |
| Pneumococcal meningitis                                           | 73<br>(46 - 111)           | 28<br>(14 - 53)          | 9<br>(4 - 17)       | 22<br>(9 - 39)           | 10<br>(4 - 20)           | 4<br>(2 - 10)            |
| H influenzae type B meningitis                                    | 42<br>(22 - 71)            | 26<br>(11 - 51)          | 5<br>(2 - 10)       | 8<br>(3 - 15)            | 2<br>(1 - 5)             | 1<br>(0 - 2)             |
| Meningococcal meningitis                                          | 125<br>(84 - 179)          | 59<br>(31 - 105)         | 15<br>(7 - 26)      | 33<br>(17 - 55)          | 12<br>(5 - 23)           | 6<br>(2 - 12)            |
| Other meningitis                                                  | 31<br>(18 - 48)            | 11<br>(5 - 23)           | 3<br>(1 - 6)        | 10<br>(3 - 20)           | 5<br>(1 - 11)            | 2<br>(1 - 5)             |
| Encephalitis                                                      | 8<br>(5 - 13)              | 3<br>(1 - 5)             | 1<br>(1 - 3)        | 2<br>(1 - 4)             | 2<br>(1 - 3)             | 1<br>(0 - 2)             |
| Diphtheria                                                        | 1<br>(0 - 6)               | 1<br>(0 - 6)             | 0<br>(0 - 1)        | 0<br>(0 - 0)             | 0<br>(0 - 0)             | --<br>(0 - 0)            |
| Whooping cough                                                    | 8<br>(0 - 41)              | 7<br>(0 - 38)            | 1<br>(0 - 3)        | 0<br>(0 - 0)             | 0<br>(0 - 0)             | --<br>(0 - 0)            |
| Tetanus                                                           | 28<br>(8 - 56)             | 23<br>(5 - 53)           | 1<br>(0 - 2)        | 2<br>(1 - 6)             | 1<br>(0 - 3)             | 0<br>(0 - 1)             |
| Measles                                                           | 178<br>(66 - 383)          | 145<br>(52 - 321)        | 29<br>(11 - 63)     | 4<br>(1 - 8)             | 0<br>(0 - 0)             | --<br>(0 - 0)            |
| Varicella and herpes zoster                                       | 1<br>(0 - 2)               | 0<br>(0 - 1)             | 0<br>(0 - 0)        | 0<br>(0 - 0)             | 0<br>(0 - 0)             | 0<br>(0 - 1)             |
| Neglected tropical diseases and malaria                           | 1,813<br>(1,177 - 2,519)   | 1,628<br>(1,021 - 2,313) | 61<br>(20 - 139)    | 57<br>(23 - 152)         | 39<br>(13 - 107)         | 28<br>(8 - 81)           |
| Malaria                                                           | 1,796<br>(1,158 - 2,502)   | 1,624<br>(1,014 - 2,311) | 59<br>(17 - 138)    | 51<br>(18 - 145)         | 36<br>(10 - 104)         | 26<br>(7 - 79)           |
| Leishmaniasis                                                     | 0<br>(0 - 0)               | 0<br>(0 - 0)             | 0<br>(0 - 0)        | 0<br>(0 - 0)             | 0<br>(0 - 0)             | 0<br>(0 - 0)             |
| Visceral leishmaniasis                                            | 0<br>(0 - 0)               | 0<br>(0 - 0)             | 0<br>(0 - 0)        | 0<br>(0 - 0)             | 0<br>(0 - 0)             | 0<br>(0 - 0)             |
| Schistosomiasis                                                   | 5<br>(3 - 7)               | 0<br>(0 - 0)             | 0<br>(0 - 0)        | 2<br>(1 - 3)             | 2<br>(1 - 3)             | 1<br>(0 - 1)             |
| Cysticercosis                                                     | 0<br>(0 - 1)               | 0<br>(0 - 0)             | 0<br>(0 - 0)        | 0<br>(0 - 1)             | 0<br>(0 - 0)             | 0<br>(0 - 0)             |
| Cystic echinococcosis                                             | 1<br>(0 - 1)               | 0<br>(0 - 0)             | 0<br>(0 - 0)        | 0<br>(0 - 0)             | 0<br>(0 - 0)             | 0<br>(0 - 0)             |
| Dengue                                                            | 1<br>(0 - 1)               | 0<br>(0 - 0)             | 0<br>(0 - 0)        | 0<br>(0 - 0)             | 0<br>(0 - 0)             | 0<br>(0 - 0)             |
| Yellow fever                                                      | 0<br>(0 - 0)               | 0<br>(0 - 0)             | 0<br>(0 - 0)        | 0<br>(0 - 0)             | 0<br>(0 - 0)             | 0<br>(0 - 0)             |
| Rabies                                                            | 6<br>(3 - 10)              | 1<br>(0 - 2)             | 2<br>(1 - 3)        | 2<br>(1 - 4)             | 1<br>(0 - 2)             | 0<br>(0 - 1)             |
| Intestinal nematode infections                                    | 3<br>(0 - 9)               | 2<br>(0 - 8)             | 0<br>(0 - 3)        | 0<br>(0 - 2)             | 0<br>(0 - 0)             | 0<br>(0 - 0)             |
| Ascariasis                                                        | 3<br>(0 - 9)               | 2<br>(0 - 8)             | 0<br>(0 - 3)        | 0<br>(0 - 2)             | 0<br>(0 - 0)             | 0<br>(0 - 0)             |
| Other neglected tropical diseases                                 | 2<br>(1 - 3)               | 1<br>(0 - 2)             | 0<br>(0 - 0)        | 0<br>(0 - 1)             | 0<br>(0 - 0)             | 0<br>(0 - 0)             |

Web Table 31- Guinea-Bissau deaths with 95% UI by age, sex, and cause in 2013

| Cause                                                            | Females, All Ages        | Females, 0-4 Years   | Females, 5-14 Years | Females, 15-49 Years | Females, 50-69 Years   | Females, 70-80 Years |
|------------------------------------------------------------------|--------------------------|----------------------|---------------------|----------------------|------------------------|----------------------|
| Maternal disorders                                               | 576<br>(401 - 800)       | --                   | 4<br>(2 - 10)       | 571<br>(397 - 794)   | --                     | --                   |
| Maternal hemorrhage                                              | 97<br>(58 - 145)         | --                   | 0<br>(0 - 1)        | 96<br>(58 - 144)     | --                     | --                   |
| Maternal sepsis and other maternal infections                    | 29<br>(17 - 47)          | --                   | 0<br>(0 - 1)        | 29<br>(16 - 47)      | --                     | --                   |
| Maternal hypertensive disorders                                  | 39<br>(23 - 61)          | --                   | 0<br>(0 - 1)        | 38<br>(22 - 60)      | --                     | --                   |
| Maternal obstructed labor                                        | 28<br>(16 - 45)          | --                   | 0<br>(0 - 0)        | 28<br>(16 - 45)      | --                     | --                   |
| Maternal abortive outcome                                        | 90<br>(59 - 130)         | --                   | 1<br>(0 - 1)        | 90<br>(58 - 129)     | --                     | --                   |
| Indirect maternal deaths                                         | 55<br>(29 - 87)          | --                   | 0<br>(0 - 1)        | 54<br>(28 - 87)      | --                     | --                   |
| Late maternal deaths                                             | 132<br>(78 - 197)        | --                   | 2<br>(1 - 4)        | 130<br>(76 - 195)    | --                     | --                   |
| Maternal deaths aggravated by HIV/AIDS                           | 8<br>(4 - 12)            | --                   | --                  | 8<br>(4 - 12)        | --                     | --                   |
| Other maternal disorders                                         | 97<br>(60 - 144)         | --                   | 1<br>(0 - 2)        | 97<br>(59 - 144)     | --                     | --                   |
| Neonatal disorders                                               | 781<br>(576 - 1,025)     | 781<br>(576 - 1,025) | --                  | --                   | --                     | --                   |
| Neonatal preterm birth complications                             | 314<br>(142 - 555)       | 314<br>(142 - 555)   | --                  | --                   | --                     | --                   |
| Neonatal encephalopathy due to birth asphyxia and trauma         | 257<br>(123 - 432)       | 257<br>(123 - 432)   | --                  | --                   | --                     | --                   |
| Neonatal sepsis and other neonatal infections                    | 142<br>(52 - 300)        | 142<br>(52 - 300)    | --                  | --                   | --                     | --                   |
| Hemolytic disease and other neonatal jaundice                    | 4<br>(1 - 12)            | 4<br>(1 - 12)        | --                  | --                   | --                     | --                   |
| Other neonatal disorders                                         | 64<br>(31 - 123)         | 64<br>(31 - 123)     | --                  | --                   | --                     | --                   |
| Nutritional deficiencies                                         | 443<br>(301 - 629)       | 244<br>(131 - 398)   | 27<br>(15 - 43)     | 68<br>(43 - 103)     | 57<br>(31 - 97)        | 47<br>(28 - 72)      |
| Protein-energy malnutrition                                      | 310<br>(189 - 466)       | 221<br>(115 - 358)   | 20<br>(10 - 34)     | 16<br>(6 - 40)       | 27<br>(12 - 53)        | 25<br>(11 - 44)      |
| Iodine deficiency                                                | 4<br>(0 - 16)            | 2<br>(0 - 13)        | 0<br>(0 - 3)        | 1<br>(0 - 3)         | 1<br>(0 - 2)           | 0<br>(0 - 2)         |
| Iron-deficiency anemia                                           | 127<br>(62 - 203)        | 20<br>(4 - 60)       | 7<br>(3 - 14)       | 51<br>(27 - 79)      | 28<br>(10 - 54)        | 21<br>(9 - 38)       |
| Other nutritional deficiencies                                   | 2<br>(1 - 5)             | 1<br>(0 - 2)         | 0<br>(0 - 0)        | 0<br>(0 - 1)         | 1<br>(0 - 2)           | 0<br>(0 - 1)         |
| Other communicable, maternal, neonatal, and nutritional diseases | 123<br>(74 - 190)        | 73<br>(35 - 130)     | 8<br>(4 - 15)       | 14<br>(7 - 22)       | 16<br>(7 - 31)         | 11<br>(5 - 20)       |
| Sexually transmitted diseases excluding HIV                      | 72<br>(33 - 131)         | 60<br>(24 - 116)     | 6<br>(3 - 12)       | 3<br>(1 - 5)         | 1<br>(0 - 3)           | 1<br>(0 - 2)         |
| Syphilis                                                         | 69<br>(30 - 129)         | 60<br>(24 - 116)     | 6<br>(2 - 11)       | 1<br>(0 - 2)         | 1<br>(0 - 2)           | 1<br>(0 - 2)         |
| Chlamydial infection                                             | 1<br>(0 - 1)             | --                   | 0<br>(0 - 0)        | 1<br>(0 - 1)         | 0<br>(0 - 1)           | 0<br>(0 - 1)         |
| Gonococcal infection                                             | 1<br>(0 - 2)             | --                   | 0<br>(0 - 0)        | 1<br>(0 - 1)         | 0<br>(0 - 1)           | 0<br>(0 - 0)         |
| Other sexually transmitted diseases                              | 1<br>(0 - 1)             | --                   | 0<br>(0 - 0)        | 1<br>(0 - 1)         | 0<br>(0 - 0)           | 0<br>(0 - 0)         |
| Hepatitis                                                        | 30<br>(10 - 51)          | 3<br>(1 - 7)         | 1<br>(0 - 2)        | 8<br>(3 - 14)        | 10<br>(4 - 20)         | 7<br>(2 - 13)        |
| Acute hepatitis A                                                | 2<br>(0 - 4)             | 1<br>(0 - 3)         | 0<br>(0 - 1)        | 0<br>(0 - 1)         | 0<br>(0 - 0)           | 0<br>(0 - 0)         |
| Acute hepatitis B                                                | 19<br>(7 - 35)           | 2<br>(1 - 5)         | 0<br>(0 - 1)        | 3<br>(1 - 6)         | 8<br>(3 - 16)          | 6<br>(2 - 11)        |
| Acute hepatitis C                                                | 1<br>(0 - 3)             | --                   | 0<br>(0 - 0)        | 0<br>(0 - 1)         | 0<br>(0 - 2)           | 0<br>(0 - 1)         |
| Acute hepatitis E                                                | 7<br>(3 - 14)            | 0<br>(0 - 0)         | 0<br>(0 - 0)        | 5<br>(2 - 9)         | 2<br>(0 - 4)           | 1<br>(0 - 2)         |
| Other infectious diseases                                        | 22<br>(12 - 39)          | 9<br>(4 - 23)        | 1<br>(0 - 3)        | 3<br>(1 - 6)         | 4<br>(1 - 11)          | 4<br>(1 - 10)        |
| Non-communicable diseases                                        | 3,094<br>(2,253 - 4,296) | 334<br>(156 - 601)   | 69<br>(49 - 97)     | 540<br>(398 - 762)   | 1,200<br>(768 - 1,841) | 951<br>(688 - 1,311) |
| Neoplasms                                                        | 486<br>(328 - 719)       | 6<br>(3 - 11)        | 9<br>(6 - 13)       | 129<br>(89 - 191)    | 258<br>(162 - 399)     | 84<br>(58 - 120)     |
| Esophageal cancer                                                | 6<br>(3 - 11)            | --                   | --                  | 1<br>(0 - 1)         | 3<br>(2 - 6)           | 2<br>(1 - 3)         |
| Stomach cancer                                                   | 48<br>(31 - 74)          | --                   | --                  | 9<br>(6 - 14)        | 31<br>(18 - 50)        | 8<br>(5 - 13)        |
| Liver cancer                                                     | 73<br>(42 - 129)         | --                   | 0<br>(0 - 0)        | 18<br>(9 - 33)       | 41<br>(21 - 77)        | 14<br>(8 - 24)       |
| Liver cancer due to hepatitis B                                  | 25<br>(9 - 56)           | --                   | 0<br>(0 - 0)        | 7<br>(3 - 15)        | 14<br>(4 - 35)         | 4<br>(1 - 9)         |
| Liver cancer due to hepatitis C                                  | 26<br>(13 - 49)          | --                   | 0<br>(0 - 0)        | 4<br>(2 - 8)         | 15<br>(6 - 31)         | 7<br>(3 - 13)        |

Web Table 31- Guinea-Bissau deaths with 95% UI by age, sex, and cause in 2013

| Cause                                | Females, All Ages      | Females, 0-4 Years | Females, 5-14 Years | Females, 15-49 Years | Females, 50-69 Years | Females, 70-80 Years |
|--------------------------------------|------------------------|--------------------|---------------------|----------------------|----------------------|----------------------|
| Liver cancer due to alcohol use      | 6<br>(3 - 12)          | --                 | --                  | 1<br>(0 - 2)         | 4<br>(1 - 8)         | 2<br>(1 - 3)         |
| Liver cancer due to other causes     | 17<br>(8 - 32)         | --                 | 0<br>(0 - 0)        | 5<br>(2 - 11)        | 9<br>(3 - 17)        | 3<br>(1 - 5)         |
| Larynx cancer                        | 0<br>(0 - 1)           | --                 | --                  | 0<br>(0 - 0)         | 0<br>(0 - 1)         | 0<br>(0 - 0)         |
| Tracheal, bronchus and lung cancer   | 14<br>(8 - 23)         | --                 | --                  | 2<br>(1 - 3)         | 8<br>(4 - 14)        | 4<br>(2 - 6)         |
| Breast cancer                        | 48<br>(29 - 86)        | --                 | --                  | 18<br>(11 - 35)      | 23<br>(13 - 42)      | 7<br>(4 - 11)        |
| Cervical cancer                      | 152<br>(98 - 234)      | --                 | --                  | 46<br>(30 - 75)      | 87<br>(50 - 143)     | 19<br>(11 - 30)      |
| Uterine cancer                       | 12<br>(6 - 20)         | --                 | --                  | 2<br>(1 - 4)         | 6<br>(3 - 12)        | 3<br>(1 - 5)         |
| Prostate cancer                      | --                     | --                 | --                  | --                   | --                   | --                   |
| Colon and rectum cancer              | 18<br>(12 - 27)        | --                 | --                  | 4<br>(3 - 6)         | 8<br>(5 - 13)        | 6<br>(4 - 9)         |
| Lip and oral cavity cancer           | 3<br>(2 - 5)           | --                 | --                  | 1<br>(0 - 2)         | 1<br>(1 - 2)         | 1<br>(0 - 1)         |
| Nasopharynx cancer                   | 1<br>(1 - 2)           | --                 | 0<br>(0 - 0)        | 0<br>(0 - 1)         | 0<br>(0 - 1)         | 0<br>(0 - 0)         |
| Other pharynx cancer                 | 1<br>(1 - 2)           | --                 | --                  | 0<br>(0 - 0)         | 1<br>(0 - 1)         | 0<br>(0 - 0)         |
| Gallbladder and biliary tract cancer | 8<br>(5 - 13)          | --                 | --                  | 1<br>(1 - 2)         | 5<br>(3 - 8)         | 2<br>(1 - 3)         |
| Pancreatic cancer                    | 8<br>(5 - 12)          | --                 | --                  | 1<br>(1 - 1)         | 5<br>(3 - 8)         | 2<br>(1 - 3)         |
| Malignant skin melanoma              | 1<br>(1 - 2)           | --                 | --                  | 0<br>(0 - 0)         | 1<br>(0 - 1)         | 0<br>(0 - 0)         |
| Non-melanoma skin cancer             | 1<br>(1 - 2)           | --                 | --                  | 0<br>(0 - 0)         | 0<br>(0 - 1)         | 0<br>(0 - 1)         |
| Ovarian cancer                       | 17<br>(9 - 31)         | --                 | --                  | 4<br>(2 - 8)         | 10<br>(5 - 20)       | 2<br>(1 - 4)         |
| Testicular cancer                    | --                     | --                 | --                  | --                   | --                   | --                   |
| Kidney cancer                        | 5<br>(3 - 8)           | 1<br>(0 - 1)       | 0<br>(0 - 1)        | 1<br>(0 - 2)         | 2<br>(1 - 4)         | 1<br>(0 - 1)         |
| Bladder cancer                       | 8<br>(5 - 13)          | --                 | --                  | 2<br>(1 - 3)         | 4<br>(2 - 6)         | 2<br>(1 - 4)         |
| Brain and nervous system cancer      | 4<br>(3 - 6)           | 0<br>(0 - 1)       | 0<br>(0 - 0)        | 2<br>(1 - 3)         | 1<br>(1 - 2)         | 0<br>(0 - 1)         |
| Thyroid cancer                       | 2<br>(1 - 3)           | --                 | 0<br>(0 - 0)        | 0<br>(0 - 0)         | 1<br>(1 - 2)         | 1<br>(0 - 1)         |
| Mesothelioma                         | 1<br>(0 - 1)           | --                 | --                  | 0<br>(0 - 0)         | 0<br>(0 - 1)         | 0<br>(0 - 0)         |
| Hodgkin lymphoma                     | 2<br>(1 - 4)           | 0<br>(0 - 0)       | 0<br>(0 - 1)        | 1<br>(0 - 1)         | 0<br>(0 - 1)         | 1<br>(0 - 1)         |
| Non-Hodgkin lymphoma                 | 15<br>(9 - 25)         | 2<br>(1 - 3)       | 3<br>(1 - 4)        | 5<br>(3 - 10)        | 4<br>(2 - 8)         | 1<br>(1 - 2)         |
| Multiple myeloma                     | 3<br>(2 - 4)           | --                 | --                  | 0<br>(0 - 0)         | 2<br>(1 - 3)         | 1<br>(0 - 1)         |
| Leukemia                             | 6<br>(5 - 9)           | 0<br>(0 - 0)       | 1<br>(1 - 2)        | 2<br>(1 - 4)         | 2<br>(1 - 3)         | 1<br>(1 - 2)         |
| Other neoplasms                      | 30<br>(19 - 55)        | 3<br>(1 - 7)       | 4<br>(2 - 7)        | 7<br>(4 - 15)        | 10<br>(5 - 19)       | 6<br>(4 - 10)        |
| Cardiovascular diseases              | 1,433<br>(931 - 2,304) | 36<br>(18 - 75)    | 14<br>(7 - 28)      | 189<br>(114 - 322)   | 602<br>(362 - 1,012) | 592<br>(401 - 874)   |
| Rheumatic heart disease              | 19<br>(9 - 63)         | 1<br>(0 - 2)       | 1<br>(0 - 3)        | 6<br>(2 - 24)        | 6<br>(2 - 23)        | 5<br>(3 - 12)        |
| Ischemic heart disease               | 405<br>(229 - 740)     | 1<br>(0 - 5)       | 2<br>(1 - 3)        | 48<br>(25 - 93)      | 165<br>(85 - 314)    | 190<br>(109 - 331)   |
| Cerebrovascular disease              | 636<br>(402 - 1,026)   | 10<br>(4 - 24)     | 4<br>(2 - 9)        | 73<br>(42 - 126)     | 271<br>(159 - 453)   | 278<br>(178 - 426)   |
| Ischemic stroke                      | 412<br>(243 - 692)     | 3<br>(1 - 10)      | 1<br>(0 - 4)        | 20<br>(8 - 62)       | 168<br>(87 - 300)    | 221<br>(141 - 344)   |
| Hemorrhagic stroke                   | 224<br>(127 - 460)     | 8<br>(3 - 17)      | 3<br>(2 - 7)        | 53<br>(31 - 90)      | 103<br>(51 - 222)    | 57<br>(28 - 134)     |
| Hypertensive heart disease           | 117<br>(57 - 197)      | 0<br>(0 - 1)       | 0<br>(0 - 0)        | 12<br>(5 - 20)       | 49<br>(20 - 91)      | 55<br>(29 - 92)      |
| Cardiomyopathy and myocarditis       | 57<br>(33 - 88)        | 8<br>(3 - 20)      | 2<br>(1 - 5)        | 15<br>(7 - 25)       | 16<br>(8 - 27)       | 17<br>(8 - 30)       |
| Atrial fibrillation and flutter      | 0<br>(0 - 0)           | --                 | --                  | 0<br>(0 - 0)         | 0<br>(0 - 0)         | 0<br>(0 - 0)         |
| Aortic aneurysm                      | 11<br>(5 - 20)         | --                 | --                  | 2<br>(1 - 4)         | 5<br>(2 - 9)         | 4<br>(2 - 8)         |
| Peripheral vascular disease          | 0<br>(0 - 1)           | --                 | --                  | 0<br>(0 - 0)         | 0<br>(0 - 1)         | 0<br>(0 - 0)         |
| Endocarditis                         | 17<br>(8 - 34)         | 4<br>(1 - 8)       | 1<br>(0 - 2)        | 4<br>(2 - 9)         | 4<br>(2 - 9)         | 5<br>(2 - 11)        |



Web Table 31- Guinea-Bissau deaths with 95% UI by age, sex, and cause in 2013

| Cause                                               | Females, All Ages  | Females, 0-4 Years | Females, 5-14 Years | Females, 15-49 Years | Females, 50-69 Years | Females, 70-80 Years |
|-----------------------------------------------------|--------------------|--------------------|---------------------|----------------------|----------------------|----------------------|
| Other cardiovascular and circulatory diseases       | 170<br>(97 - 352)  | 12<br>(5 - 30)     | 4<br>(2 - 8)        | 29<br>(15 - 70)      | 87<br>(45 - 180)     | 38<br>(20 - 86)      |
| Chronic respiratory diseases                        | 189<br>(125 - 305) | 11<br>(5 - 25)     | 4<br>(2 - 7)        | 29<br>(19 - 50)      | 76<br>(44 - 130)     | 69<br>(44 - 113)     |
| Chronic obstructive pulmonary disease               | 106<br>(67 - 193)  | 5<br>(2 - 10)      | 2<br>(1 - 3)        | 9<br>(5 - 17)        | 47<br>(26 - 93)      | 44<br>(27 - 75)      |
| Pneumoconiosis                                      | 1<br>(0 - 1)       | 0<br>(0 - 0)       | 0<br>(0 - 0)        | 0<br>(0 - 0)         | 0<br>(0 - 0)         | 0<br>(0 - 0)         |
| Silicosis                                           | 0<br>(0 - 0)       | 0<br>(0 - 0)       | 0<br>(0 - 0)        | 0<br>(0 - 0)         | 0<br>(0 - 0)         | 0<br>(0 - 0)         |
| Asbestosis                                          | 0<br>(0 - 0)       | 0<br>(0 - 0)       | 0<br>(0 - 0)        | 0<br>(0 - 0)         | 0<br>(0 - 0)         | 0<br>(0 - 0)         |
| Coal workers pneumoconiosis                         | 0<br>(0 - 0)       | 0<br>(0 - 0)       | 0<br>(0 - 0)        | 0<br>(0 - 0)         | 0<br>(0 - 0)         | 0<br>(0 - 0)         |
| Other pneumoconiosis                                | 0<br>(0 - 1)       | 0<br>(0 - 0)       | 0<br>(0 - 0)        | 0<br>(0 - 0)         | 0<br>(0 - 0)         | 0<br>(0 - 0)         |
| Asthma                                              | 52<br>(30 - 90)    | 4<br>(2 - 11)      | 1<br>(1 - 3)        | 12<br>(7 - 21)       | 21<br>(10 - 41)      | 14<br>(6 - 25)       |
| Interstitial lung disease and pulmonary sarcoidosis | 12<br>(5 - 22)     | 0<br>(0 - 1)       | 0<br>(0 - 0)        | 1<br>(0 - 2)         | 4<br>(2 - 8)         | 7<br>(2 - 13)        |
| Other chronic respiratory diseases                  | 18<br>(11 - 34)    | 2<br>(1 - 5)       | 1<br>(0 - 1)        | 7<br>(4 - 12)        | 4<br>(2 - 9)         | 5<br>(3 - 10)        |
| Cirrhosis                                           | 97<br>(66 - 144)   | 3<br>(1 - 6)       | 2<br>(1 - 3)        | 27<br>(18 - 41)      | 45<br>(27 - 73)      | 20<br>(12 - 32)      |
| Cirrhosis due to hepatitis B                        | 29<br>(10 - 52)    | 0<br>(0 - 0)       | 0<br>(0 - 1)        | 8<br>(3 - 16)        | 14<br>(4 - 28)       | 6<br>(2 - 12)        |
| Cirrhosis due to hepatitis C                        | 31<br>(12 - 59)    | 0<br>(0 - 1)       | 0<br>(0 - 1)        | 9<br>(2 - 18)        | 15<br>(6 - 31)       | 7<br>(3 - 12)        |
| Cirrhosis due to alcohol use                        | 20<br>(9 - 39)     | --                 | --                  | 4<br>(1 - 8)         | 11<br>(5 - 22)       | 6<br>(3 - 11)        |
| Cirrhosis due to other causes                       | 16<br>(9 - 28)     | 3<br>(1 - 6)       | 1<br>(1 - 2)        | 6<br>(3 - 12)        | 5<br>(2 - 10)        | 1<br>(1 - 3)         |
| Digestive diseases                                  | 157<br>(112 - 226) | 10<br>(5 - 21)     | 8<br>(5 - 11)       | 42<br>(29 - 62)      | 54<br>(32 - 88)      | 43<br>(27 - 64)      |
| Peptic ulcer disease                                | 31<br>(16 - 51)    | 1<br>(0 - 2)       | 1<br>(0 - 2)        | 8<br>(4 - 14)        | 12<br>(6 - 22)       | 10<br>(5 - 17)       |
| Gastritis and duodenitis                            | 8<br>(3 - 16)      | 1<br>(0 - 2)       | 1<br>(0 - 1)        | 2<br>(1 - 4)         | 2<br>(1 - 6)         | 2<br>(1 - 6)         |
| Appendicitis                                        | 22<br>(14 - 34)    | 3<br>(1 - 7)       | 2<br>(1 - 4)        | 8<br>(5 - 14)        | 5<br>(2 - 10)        | 4<br>(1 - 8)         |
| Paralytic ileus and intestinal obstruction          | 33<br>(18 - 55)    | 2<br>(0 - 4)       | 1<br>(1 - 2)        | 5<br>(3 - 9)         | 13<br>(6 - 24)       | 12<br>(6 - 23)       |
| Inguinal, femoral, and abdominal hernia             | 2<br>(1 - 3)       | 0<br>(0 - 0)       | 0<br>(0 - 0)        | 0<br>(0 - 1)         | 0<br>(0 - 1)         | 1<br>(0 - 1)         |
| Inflammatory bowel disease                          | 12<br>(4 - 19)     | 2<br>(1 - 5)       | 1<br>(0 - 1)        | 4<br>(1 - 7)         | 3<br>(1 - 6)         | 2<br>(0 - 4)         |
| Vascular intestinal disorders                       | 1<br>(0 - 2)       | 0<br>(0 - 0)       | 0<br>(0 - 0)        | 0<br>(0 - 0)         | 0<br>(0 - 1)         | 0<br>(0 - 1)         |
| Gallbladder and biliary diseases                    | 16<br>(10 - 25)    | 1<br>(0 - 1)       | 1<br>(0 - 1)        | 4<br>(2 - 6)         | 6<br>(3 - 12)        | 5<br>(2 - 8)         |
| Pancreatitis                                        | 8<br>(3 - 15)      | 0<br>(0 - 0)       | 0<br>(0 - 0)        | 2<br>(1 - 4)         | 4<br>(1 - 9)         | 2<br>(1 - 4)         |
| Other digestive diseases                            | 25<br>(16 - 38)    | 2<br>(1 - 5)       | 1<br>(1 - 2)        | 8<br>(5 - 13)        | 8<br>(4 - 14)        | 6<br>(3 - 10)        |
| Neurological disorders                              | 65<br>(46 - 89)    | 8<br>(3 - 16)      | 4<br>(2 - 8)        | 16<br>(8 - 27)       | 8<br>(5 - 12)        | 29<br>(19 - 43)      |
| Alzheimer disease and other dementias               | 30<br>(19 - 43)    | --                 | --                  | 0<br>(0 - 0)         | 3<br>(2 - 5)         | 26<br>(17 - 39)      |
| Parkinson disease                                   | 0<br>(0 - 0)       | --                 | --                  | 0<br>(0 - 0)         | 0<br>(0 - 0)         | 0<br>(0 - 0)         |
| Epilepsy                                            | 29<br>(16 - 46)    | 7<br>(2 - 15)      | 4<br>(2 - 7)        | 15<br>(7 - 26)       | 2<br>(1 - 4)         | 2<br>(1 - 4)         |
| Multiple sclerosis                                  | 0<br>(0 - 1)       | --                 | --                  | 0<br>(0 - 0)         | 0<br>(0 - 0)         | 0<br>(0 - 0)         |
| Other neurological disorders                        | 6<br>(4 - 8)       | 1<br>(1 - 2)       | 0<br>(0 - 1)        | 1<br>(1 - 2)         | 2<br>(1 - 3)         | 1<br>(1 - 1)         |
| Mental and substance use disorders                  | 14<br>(6 - 24)     | 1<br>(0 - 1)       | 0<br>(0 - 0)        | 7<br>(3 - 13)        | 5<br>(2 - 10)        | 1<br>(1 - 2)         |
| Schizophrenia                                       | 0<br>(0 - 1)       | --                 | --                  | 0<br>(0 - 0)         | 0<br>(0 - 0)         | 0<br>(0 - 0)         |
| Alcohol use disorders                               | 7<br>(1 - 15)      | --                 | --                  | 4<br>(1 - 9)         | 3<br>(0 - 6)         | 0<br>(0 - 1)         |
| Drug use disorders                                  | 7<br>(4 - 11)      | 1<br>(0 - 1)       | --                  | 3<br>(2 - 6)         | 2<br>(1 - 4)         | 1<br>(1 - 2)         |
| Opioid use disorders                                | 1<br>(0 - 1)       | 0<br>(0 - 0)       | --                  | 0<br>(0 - 1)         | 0<br>(0 - 0)         | 0<br>(0 - 0)         |
| Cocaine use disorders                               | 0<br>(0 - 0)       | 0<br>(0 - 0)       | --                  | 0<br>(0 - 0)         | 0<br>(0 - 0)         | 0<br>(0 - 0)         |
| Amphetamine use disorders                           | 0<br>(0 - 0)       | 0<br>(0 - 0)       | --                  | 0<br>(0 - 0)         | 0<br>(0 - 0)         | 0<br>(0 - 0)         |

Web Table 31- Guinea-Bissau deaths with 95% UI by age, sex, and cause in 2013

| Cause                                               | Females, All Ages  | Females, 0-4 Years | Females, 5-14 Years | Females, 15-49 Years | Females, 50-69 Years | Females, 70-80 Years |
|-----------------------------------------------------|--------------------|--------------------|---------------------|----------------------|----------------------|----------------------|
| Other drug use disorders                            | 6<br>(4 - 10)      | 1<br>(0 - 1)       | --                  | 3<br>(1 - 5)         | 2<br>(1 - 4)         | 1<br>(1 - 1)         |
| Eating disorders                                    | 0<br>(0 - 0)       | --                 | 0<br>(0 - 0)        | 0<br>(0 - 0)         | --                   | --                   |
| Anorexia nervosa                                    | 0<br>(0 - 0)       | --                 | 0<br>(0 - 0)        | 0<br>(0 - 0)         | --                   | --                   |
| Diabetes, urogenital, blood, and endocrine diseases | 365<br>(246 - 526) | 36<br>(19 - 59)    | 14<br>(8 - 21)      | 80<br>(56 - 113)     | 137<br>(83 - 217)    | 99<br>(64 - 146)     |
| Diabetes mellitus                                   | 163<br>(101 - 246) | 1<br>(0 - 1)       | 1<br>(0 - 2)        | 23<br>(15 - 34)      | 79<br>(46 - 126)     | 59<br>(34 - 90)      |
| Acute glomerulonephritis                            | 2<br>(1 - 2)       | 0<br>(0 - 0)       | 0<br>(0 - 0)        | 1<br>(0 - 1)         | 0<br>(0 - 1)         | 0<br>(0 - 0)         |
| Chronic kidney disease                              | 70<br>(37 - 111)   | 6<br>(3 - 11)      | 4<br>(2 - 6)        | 21<br>(11 - 34)      | 23<br>(10 - 42)      | 15<br>(8 - 27)       |
| Chronic kidney disease due to diabetes mellitus     | 1<br>(0 - 2)       | 0<br>(0 - 0)       | 0<br>(0 - 0)        | 0<br>(0 - 0)         | 1<br>(0 - 2)         | 0<br>(0 - 0)         |
| Chronic kidney disease due to hypertension          | 30<br>(15 - 52)    | 1<br>(0 - 2)       | 1<br>(0 - 1)        | 7<br>(3 - 13)        | 12<br>(6 - 23)       | 9<br>(5 - 17)        |
| Chronic kidney disease due to glomerulonephritis    | 20<br>(10 - 32)    | 3<br>(1 - 7)       | 2<br>(1 - 3)        | 10<br>(4 - 16)       | 4<br>(1 - 8)         | 2<br>(1 - 3)         |
| Chronic kidney disease due to other causes          | 19<br>(5 - 38)     | 2<br>(0 - 5)       | 1<br>(0 - 3)        | 5<br>(1 - 10)        | 6<br>(1 - 15)        | 4<br>(1 - 11)        |
| Urinary diseases and male infertility               | 50<br>(24 - 77)    | 5<br>(1 - 10)      | 2<br>(1 - 3)        | 13<br>(5 - 21)       | 18<br>(9 - 34)       | 13<br>(6 - 21)       |
| Interstitial nephritis and urinary tract infections | 41<br>(20 - 66)    | 4<br>(1 - 9)       | 1<br>(0 - 2)        | 10<br>(4 - 18)       | 15<br>(7 - 27)       | 11<br>(6 - 18)       |
| Urolithiasis                                        | 2<br>(0 - 7)       | --                 | 0<br>(0 - 1)        | 1<br>(0 - 3)         | 1<br>(0 - 3)         | 0<br>(0 - 1)         |
| Other urinary diseases                              | 7<br>(3 - 12)      | 1<br>(0 - 2)       | 0<br>(0 - 1)        | 2<br>(1 - 4)         | 3<br>(1 - 6)         | 1<br>(0 - 2)         |
| Gynecological diseases                              | 2<br>(1 - 3)       | --                 | --                  | 1<br>(1 - 2)         | 1<br>(0 - 1)         | 0<br>(0 - 0)         |
| Uterine fibroids                                    | 0<br>(0 - 1)       | --                 | --                  | 0<br>(0 - 0)         | 0<br>(0 - 0)         | 0<br>(0 - 0)         |
| Polycystic ovarian syndrome                         | 0<br>(0 - 0)       | --                 | --                  | 0<br>(0 - 0)         | 0<br>(0 - 0)         | --                   |
| Endometriosis                                       | 0<br>(0 - 0)       | --                 | --                  | 0<br>(0 - 0)         | 0<br>(0 - 0)         | --                   |
| Genital prolapse                                    | 0<br>(0 - 0)       | --                 | --                  | 0<br>(0 - 0)         | 0<br>(0 - 0)         | 0<br>(0 - 0)         |
| Other gynecological diseases                        | 1<br>(1 - 1)       | --                 | --                  | 1<br>(0 - 1)         | 0<br>(0 - 1)         | 0<br>(0 - 0)         |
| Hemoglobinopathies and hemolytic anemias            | 32<br>(7 - 72)     | 11<br>(2 - 32)     | 5<br>(1 - 12)       | 10<br>(2 - 23)       | 3<br>(1 - 7)         | 2<br>(1 - 5)         |
| Thalassemias                                        | 1<br>(0 - 2)       | 0<br>(0 - 1)       | 0<br>(0 - 0)        | 0<br>(0 - 0)         | 0<br>(0 - 0)         | 0<br>(0 - 0)         |
| Sickle cell disorders                               | 27<br>(6 - 64)     | 10<br>(2 - 28)     | 5<br>(1 - 12)       | 9<br>(2 - 22)        | 3<br>(1 - 5)         | 0<br>(0 - 1)         |
| G6PD deficiency                                     | 1<br>(0 - 2)       | 0<br>(0 - 1)       | 0<br>(0 - 0)        | 0<br>(0 - 1)         | 0<br>(0 - 0)         | 0<br>(0 - 0)         |
| Other hemoglobinopathies and hemolytic anemias      | 4<br>(1 - 6)       | 1<br>(0 - 2)       | 0<br>(0 - 0)        | 0<br>(0 - 1)         | 1<br>(0 - 1)         | 2<br>(0 - 4)         |
| Endocrine, metabolic, blood, and immune disorders   | 48<br>(24 - 88)    | 13<br>(5 - 30)     | 3<br>(1 - 6)        | 11<br>(5 - 26)       | 12<br>(5 - 23)       | 10<br>(4 - 18)       |
| Musculoskeletal disorders                           | 11<br>(5 - 19)     | --                 | 1<br>(0 - 2)        | 4<br>(2 - 8)         | 4<br>(2 - 7)         | 2<br>(1 - 4)         |
| Rheumatoid arthritis                                | 2<br>(1 - 3)       | --                 | 0<br>(0 - 0)        | 0<br>(0 - 1)         | 1<br>(0 - 1)         | 1<br>(0 - 1)         |
| Other musculoskeletal disorders                     | 9<br>(3 - 15)      | --                 | 1<br>(0 - 2)        | 4<br>(1 - 7)         | 3<br>(1 - 6)         | 1<br>(0 - 2)         |
| Other non-communicable diseases                     | 277<br>(106 - 540) | 224<br>(69 - 464)  | 14<br>(5 - 32)      | 18<br>(8 - 32)       | 11<br>(6 - 21)       | 10<br>(6 - 16)       |
| Congenital anomalies                                | 241<br>(76 - 496)  | 216<br>(65 - 451)  | 13<br>(4 - 31)      | 9<br>(3 - 19)        | 2<br>(1 - 3)         | 1<br>(1 - 2)         |
| Neural tube defects                                 | 70<br>(14 - 217)   | 65<br>(11 - 202)   | 3<br>(1 - 11)       | 2<br>(0 - 7)         | 0<br>(0 - 0)         | 0<br>(0 - 0)         |
| Congenital heart anomalies                          | 89<br>(25 - 206)   | 79<br>(20 - 185)   | 5<br>(1 - 13)       | 3<br>(1 - 9)         | 1<br>(0 - 2)         | 1<br>(0 - 1)         |
| Cleft lip and cleft palate                          | 1<br>(0 - 4)       | 1<br>(0 - 4)       | --                  | --                   | --                   | --                   |
| Down syndrome                                       | 38<br>(8 - 103)    | 32<br>(5 - 94)     | 3<br>(1 - 7)        | 2<br>(1 - 5)         | 0<br>(0 - 1)         | 0<br>(0 - 0)         |
| Chromosomal unbalanced rearrangements               | 9<br>(1 - 26)      | 8<br>(1 - 26)      | 0<br>(0 - 1)        | 0<br>(0 - 1)         | 0<br>(0 - 0)         | 0<br>(0 - 0)         |
| Other congenital anomalies                          | 35<br>(7 - 147)    | 31<br>(5 - 133)    | 2<br>(0 - 7)        | 1<br>(0 - 5)         | 0<br>(0 - 1)         | 0<br>(0 - 1)         |
| Skin and subcutaneous diseases                      | 35<br>(22 - 54)    | 7<br>(3 - 14)      | 1<br>(1 - 2)        | 8<br>(4 - 14)        | 10<br>(5 - 17)       | 9<br>(5 - 15)        |
| Cellulitis                                          | 1<br>(6 - 19)      | 1<br>(0 - 3)       | 0<br>(0 - 1)        | 3<br>(1 - 5)         | 3<br>(1 - 6)         | 4<br>(2 - 7)         |

Web Table 31- Guinea-Bissau deaths with 95% UI by age, sex, and cause in 2013

| Cause                                           | Females, All Ages  | Females, 0-4 Years | Females, 5-14 Years | Females, 15-49 Years | Females, 50-69 Years | Females, 70-80 Years |
|-------------------------------------------------|--------------------|--------------------|---------------------|----------------------|----------------------|----------------------|
| Pyoderma                                        | 23<br>(13 - 34)    | 5<br>(2 - 10)      | 1<br>(0 - 1)        | 5<br>(3 - 9)         | 7<br>(3 - 12)        | 5<br>(3 - 9)         |
| Decubitus ulcer                                 | 0<br>(0 - 1)       | 0<br>(0 - 0)       | 0<br>(0 - 0)        | 0<br>(0 - 0)         | 0<br>(0 - 0)         | 0<br>(0 - 0)         |
| Other skin and subcutaneous diseases            | 1<br>(0 - 2)       | 0<br>(0 - 1)       | 0<br>(0 - 0)        | 0<br>(0 - 1)         | 0<br>(0 - 0)         | 0<br>(0 - 0)         |
| Sudden infant death syndrome                    | 1<br>(0 - 4)       | 1<br>(0 - 4)       | --                  | --                   | --                   | --                   |
| Injuries                                        | 539<br>(385 - 720) | 87<br>(46 - 139)   | 61<br>(42 - 85)     | 249<br>(173 - 343)   | 88<br>(48 - 145)     | 55<br>(27 - 84)      |
| Transport injuries                              | 263<br>(193 - 354) | 16<br>(8 - 30)     | 30<br>(18 - 46)     | 155<br>(103 - 221)   | 46<br>(27 - 75)      | 16<br>(10 - 25)      |
| Road injuries                                   | 253<br>(187 - 341) | 13<br>(7 - 26)     | 28<br>(17 - 44)     | 152<br>(102 - 217)   | 44<br>(26 - 72)      | 15<br>(9 - 24)       |
| Pedestrian road injuries                        | 73<br>(48 - 105)   | 4<br>(2 - 9)       | 10<br>(5 - 17)      | 36<br>(22 - 55)      | 16<br>(8 - 28)       | 7<br>(4 - 10)        |
| Cyclist road injuries                           | 11<br>(7 - 18)     | 1<br>(0 - 2)       | 2<br>(1 - 4)        | 4<br>(2 - 8)         | 3<br>(1 - 7)         | 1<br>(0 - 1)         |
| Motorcyclist road injuries                      | 27<br>(14 - 45)    | 1<br>(0 - 2)       | 1<br>(1 - 3)        | 21<br>(10 - 36)      | 3<br>(1 - 5)         | 1<br>(0 - 2)         |
| Motor vehicle road injuries                     | 138<br>(98 - 197)  | 7<br>(3 - 14)      | 14<br>(8 - 23)      | 89<br>(57 - 129)     | 21<br>(12 - 36)      | 7<br>(4 - 11)        |
| Other road injuries                             | 3<br>(2 - 7)       | 0<br>(0 - 1)       | 1<br>(0 - 1)        | 2<br>(1 - 4)         | 1<br>(0 - 2)         | 0<br>(0 - 1)         |
| Other transport injuries                        | 9<br>(3 - 14)      | 2<br>(1 - 4)       | 1<br>(0 - 3)        | 3<br>(1 - 4)         | 2<br>(0 - 4)         | 1<br>(0 - 2)         |
| Unintentional injuries                          | 205<br>(110 - 286) | 66<br>(31 - 107)   | 28<br>(17 - 40)     | 45<br>(26 - 66)      | 32<br>(14 - 56)      | 34<br>(14 - 56)      |
| Falls                                           | 40<br>(17 - 60)    | 6<br>(2 - 12)      | 3<br>(1 - 6)        | 7<br>(3 - 12)        | 7<br>(3 - 13)        | 16<br>(7 - 28)       |
| Drowning                                        | 37<br>(18 - 61)    | 16<br>(5 - 34)     | 9<br>(4 - 16)       | 7<br>(3 - 13)        | 3<br>(1 - 5)         | 1<br>(1 - 2)         |
| Fire, heat, and hot substances                  | 29<br>(10 - 46)    | 11<br>(3 - 23)     | 4<br>(1 - 6)        | 7<br>(3 - 12)        | 4<br>(1 - 8)         | 3<br>(1 - 6)         |
| Poisonings                                      | 8<br>(3 - 14)      | 3<br>(1 - 8)       | 1<br>(0 - 2)        | 2<br>(1 - 4)         | 1<br>(0 - 3)         | 0<br>(0 - 1)         |
| Exposure to mechanical forces                   | 21<br>(13 - 31)    | 7<br>(3 - 13)      | 3<br>(2 - 6)        | 6<br>(3 - 9)         | 4<br>(2 - 6)         | 2<br>(1 - 3)         |
| Unintentional firearm injuries                  | 7<br>(3 - 10)      | 1<br>(0 - 3)       | 1<br>(0 - 2)        | 3<br>(1 - 5)         | 1<br>(0 - 2)         | 0<br>(0 - 1)         |
| Unintentional suffocation                       | 2<br>(1 - 4)       | 1<br>(0 - 3)       | 0<br>(0 - 1)        | 0<br>(0 - 0)         | 0<br>(0 - 0)         | 0<br>(0 - 0)         |
| Other exposure to mechanical forces             | 13<br>(7 - 21)     | 5<br>(2 - 10)      | 2<br>(1 - 4)        | 3<br>(1 - 5)         | 2<br>(1 - 4)         | 1<br>(0 - 2)         |
| Adverse effects of medical treatment            | 21<br>(6 - 40)     | 4<br>(1 - 11)      | 1<br>(0 - 2)        | 5<br>(1 - 9)         | 5<br>(1 - 13)        | 5<br>(1 - 11)        |
| Animal contact                                  | 15<br>(4 - 24)     | 2<br>(1 - 6)       | 2<br>(1 - 5)        | 6<br>(2 - 10)        | 3<br>(0 - 6)         | 2<br>(0 - 3)         |
| Venomous animal contact                         | 10<br>(3 - 18)     | 2<br>(0 - 5)       | 2<br>(0 - 4)        | 4<br>(1 - 8)         | 2<br>(0 - 4)         | 1<br>(0 - 2)         |
| Non-venomous animal contact                     | 5<br>(1 - 8)       | 0<br>(0 - 1)       | 1<br>(0 - 1)        | 2<br>(0 - 3)         | 1<br>(0 - 3)         | 1<br>(0 - 2)         |
| Foreign body                                    | 24<br>(10 - 51)    | 14<br>(4 - 35)     | 2<br>(1 - 5)        | 2<br>(1 - 5)         | 2<br>(1 - 4)         | 4<br>(1 - 6)         |
| Pulmonary aspiration and foreign body in airway | 24<br>(10 - 51)    | 14<br>(4 - 35)     | 2<br>(1 - 5)        | 2<br>(1 - 5)         | 2<br>(1 - 4)         | 3<br>(1 - 6)         |
| Foreign body in other body part                 | 0<br>(0 - 1)       | 0<br>(0 - 0)       | 0<br>(0 - 0)        | 0<br>(0 - 0)         | 0<br>(0 - 0)         | 0<br>(0 - 0)         |
| Other unintentional injuries                    | 11<br>(4 - 17)     | 3<br>(1 - 5)       | 2<br>(1 - 4)        | 3<br>(1 - 5)         | 2<br>(1 - 4)         | 2<br>(0 - 3)         |
| Self-harm and interpersonal violence            | 72<br>(35 - 112)   | 5<br>(1 - 12)      | 4<br>(1 - 7)        | 49<br>(24 - 80)      | 10<br>(4 - 18)       | 4<br>(1 - 7)         |
| Self-harm                                       | 26<br>(14 - 42)    | --                 | 1<br>(0 - 1)        | 14<br>(8 - 26)       | 7<br>(3 - 14)        | 4<br>(1 - 7)         |
| Interpersonal violence                          | 46<br>(17 - 77)    | 5<br>(1 - 12)      | 3<br>(1 - 6)        | 35<br>(13 - 62)      | 2<br>(0 - 5)         | 0<br>(0 - 1)         |
| Assault by firearm                              | 14<br>(4 - 25)     | 1<br>(0 - 4)       | 1<br>(0 - 2)        | 10<br>(4 - 20)       | 1<br>(0 - 2)         | 0<br>(0 - 0)         |
| Assault by sharp object                         | 13<br>(4 - 27)     | 1<br>(0 - 3)       | 1<br>(0 - 1)        | 11<br>(3 - 24)       | 0<br>(0 - 1)         | 0<br>(0 - 0)         |
| Assault by other means                          | 19<br>(7 - 31)     | 3<br>(1 - 7)       | 2<br>(0 - 3)        | 13<br>(5 - 24)       | 1<br>(0 - 2)         | 0<br>(0 - 1)         |

Web Table 31- Guyana deaths with 95% UI by age, sex, and cause in 2013

| Cause                                                             | Both Sexes, All Ages     | Both Sexes, 0-4 Years | Both Sexes, 5-14 Years | Both Sexes, 15-49 Years  | Both Sexes, 50-69 Years  | Both Sexes, 70-80 Years  |
|-------------------------------------------------------------------|--------------------------|-----------------------|------------------------|--------------------------|--------------------------|--------------------------|
| All causes                                                        | 6,027<br>(5,114 - 7,043) | 592<br>(281 - 1,143)  | 137<br>(91 - 207)      | 1,891<br>(1,577 - 2,231) | 1,893<br>(1,504 - 2,260) | 1,515<br>(1,314 - 1,718) |
| Communicable, maternal, neonatal, and nutritional diseases        | 1,089<br>(836 - 1,423)   | 385<br>(190 - 698)    | 25<br>(16 - 39)        | 427<br>(336 - 496)       | 135<br>(104 - 171)       | 117<br>(96 - 141)        |
| HIV/AIDS and tuberculosis                                         | 382<br>(267 - 480)       | 2<br>(1 - 4)          | 1<br>(0 - 3)           | 307<br>(212 - 377)       | 65<br>(40 - 97)          | 7<br>(5 - 10)            |
| Tuberculosis                                                      | 37<br>(25 - 47)          | 1<br>(0 - 2)          | 0<br>(0 - 1)           | 20<br>(14 - 26)          | 12<br>(8 - 16)           | 4<br>(3 - 5)             |
| HIV/AIDS                                                          | 345<br>(230 - 443)       | 1<br>(0 - 3)          | 0<br>(0 - 2)           | 287<br>(194 - 357)       | 53<br>(28 - 86)          | 4<br>(2 - 6)             |
| HIV/AIDS resulting in mycobacterial infection                     | 21<br>(14 - 30)          | 0<br>(0 - 0)          | 0<br>(0 - 0)           | 17<br>(11 - 24)          | 3<br>(2 - 6)             | 0<br>(0 - 0)             |
| HIV/AIDS resulting in other diseases                              | 324<br>(216 - 415)       | 1<br>(0 - 3)          | 0<br>(0 - 2)           | 269<br>(182 - 336)       | 50<br>(26 - 79)          | 3<br>(2 - 6)             |
| Diarrhea, lower respiratory, and other common infectious diseases | 339<br>(251 - 484)       | 120<br>(49 - 256)     | 17<br>(11 - 28)        | 66<br>(52 - 84)          | 50<br>(37 - 64)          | 86<br>(69 - 108)         |
| Diarrheal diseases                                                | 64<br>(34 - 122)         | 47<br>(18 - 105)      | 2<br>(1 - 4)           | 6<br>(4 - 7)             | 4<br>(3 - 5)             | 5<br>(4 - 8)             |
| Intestinal infectious diseases                                    | 10<br>(4 - 21)           | 4<br>(1 - 9)          | 3<br>(1 - 7)           | 3<br>(1 - 5)             | 0<br>(0 - 1)             | 0<br>(0 - 0)             |
| Typhoid fever                                                     | 8<br>(3 - 16)            | 3<br>(1 - 7)          | 3<br>(1 - 5)           | 2<br>(1 - 4)             | 0<br>(0 - 0)             | 0<br>(0 - 0)             |
| Paratyphoid fever                                                 | 2<br>(1 - 4)             | 1<br>(0 - 2)          | 1<br>(0 - 1)           | 1<br>(0 - 1)             | 0<br>(0 - 0)             | 0<br>(0 - 0)             |
| Other intestinal infectious diseases                              | 0<br>(0 - 2)             | 0<br>(0 - 1)          | 0<br>(0 - 0)           | 0<br>(0 - 1)             | 0<br>(0 - 0)             | 0<br>(0 - 0)             |
| Lower respiratory infections                                      | 231<br>(179 - 299)       | 58<br>(23 - 125)      | 8<br>(5 - 12)          | 46<br>(35 - 60)          | 41<br>(30 - 53)          | 79<br>(61 - 99)          |
| Upper respiratory infections                                      | 0<br>(0 - 1)             | 0<br>(0 - 0)          | 0<br>(0 - 0)           | 0<br>(0 - 0)             | 0<br>(0 - 0)             | 0<br>(0 - 0)             |
| Otitis media                                                      | 1<br>(0 - 1)             | 0<br>(0 - 0)          | 0<br>(0 - 0)           | 0<br>(0 - 0)             | 0<br>(0 - 0)             | 0<br>(0 - 0)             |
| Meningitis                                                        | 18<br>(13 - 27)          | 7<br>(3 - 15)         | 2<br>(1 - 2)           | 6<br>(4 - 7)             | 3<br>(2 - 4)             | 1<br>(1 - 2)             |
| Pneumococcal meningitis                                           | 5<br>(3 - 7)             | 2<br>(1 - 4)          | 1<br>(0 - 1)           | 2<br>(1 - 3)             | 1<br>(1 - 1)             | 0<br>(0 - 1)             |
| H influenzae type B meningitis                                    | 4<br>(2 - 7)             | 2<br>(1 - 5)          | 0<br>(0 - 1)           | 1<br>(0 - 1)             | 0<br>(0 - 0)             | 0<br>(0 - 0)             |
| Meningococcal meningitis                                          | 2<br>(1 - 3)             | 1<br>(0 - 1)          | 0<br>(0 - 0)           | 1<br>(0 - 1)             | 0<br>(0 - 0)             | 0<br>(0 - 0)             |
| Other meningitis                                                  | 7<br>(5 - 10)            | 2<br>(1 - 5)          | 1<br>(0 - 1)           | 3<br>(2 - 4)             | 1<br>(1 - 2)             | 1<br>(0 - 1)             |
| Encephalitis                                                      | 14<br>(9 - 21)           | 4<br>(2 - 10)         | 2<br>(1 - 4)           | 5<br>(4 - 7)             | 2<br>(1 - 2)             | 1<br>(0 - 1)             |
| Diphtheria                                                        | 0<br>(0 - 1)             | 0<br>(0 - 1)          | 0<br>(0 - 0)           | 0<br>(0 - 0)             | 0<br>(0 - 0)             | --<br>(0 - 0)            |
| Whooping cough                                                    | 0<br>(0 - 1)             | 0<br>(0 - 1)          | 0<br>(0 - 0)           | 0<br>(0 - 0)             | 0<br>(0 - 0)             | --<br>(0 - 0)            |
| Tetanus                                                           | 1<br>(0 - 1)             | 0<br>(0 - 0)          | 0<br>(0 - 0)           | 0<br>(0 - 0)             | 0<br>(0 - 0)             | 0<br>(0 - 0)             |
| Measles                                                           | 0<br>(0 - 0)             | 0<br>(0 - 0)          | 0<br>(0 - 0)           | 0<br>(0 - 0)             | 0<br>(0 - 0)             | --<br>(0 - 0)            |
| Varicella and herpes zoster                                       | 0<br>(0 - 1)             | 0<br>(0 - 0)          | 0<br>(0 - 0)           | 0<br>(0 - 0)             | 0<br>(0 - 0)             | 0<br>(0 - 0)             |
| Neglected tropical diseases and malaria                           | 12<br>(8 - 18)           | 2<br>(1 - 7)          | 2<br>(1 - 4)           | 6<br>(4 - 8)             | 2<br>(1 - 3)             | 1<br>(0 - 1)             |
| Malaria                                                           | 4<br>(2 - 7)             | 0<br>(0 - 2)          | 0<br>(0 - 1)           | 3<br>(1 - 5)             | 1<br>(0 - 1)             | 0<br>(0 - 0)             |
| Chagas disease                                                    | 0<br>(0 - 0)             | 0<br>(0 - 0)          | 0<br>(0 - 0)           | 0<br>(0 - 0)             | 0<br>(0 - 0)             | 0<br>(0 - 0)             |
| Leishmaniasis                                                     | 1<br>(0 - 1)             | 0<br>(0 - 1)          | 0<br>(0 - 0)           | 0<br>(0 - 0)             | 0<br>(0 - 0)             | 0<br>(0 - 0)             |
| Visceral leishmaniasis                                            | 1<br>(0 - 1)             | 0<br>(0 - 1)          | 0<br>(0 - 0)           | 0<br>(0 - 0)             | 0<br>(0 - 0)             | 0<br>(0 - 0)             |
| Cysticercosis                                                     | 1<br>(0 - 1)             | 0<br>(0 - 0)          | 0<br>(0 - 0)           | 0<br>(0 - 0)             | 0<br>(0 - 0)             | 0<br>(0 - 0)             |
| Cystic echinococcosis                                             | 0<br>(0 - 0)             | 0<br>(0 - 0)          | 0<br>(0 - 0)           | 0<br>(0 - 0)             | 0<br>(0 - 0)             | 0<br>(0 - 0)             |
| Dengue                                                            | 3<br>(2 - 5)             | 1<br>(0 - 1)          | 1<br>(0 - 1)           | 2<br>(1 - 2)             | 0<br>(0 - 1)             | 0<br>(0 - 0)             |
| Yellow fever                                                      | 0<br>(0 - 0)             | 0<br>(0 - 0)          | 0<br>(0 - 0)           | 0<br>(0 - 0)             | 0<br>(0 - 0)             | 0<br>(0 - 0)             |
| Rabies                                                            | 0<br>(0 - 0)             | 0<br>(0 - 0)          | 0<br>(0 - 0)           | 0<br>(0 - 0)             | 0<br>(0 - 0)             | 0<br>(0 - 0)             |
| Intestinal nematode infections                                    | 1<br>(0 - 5)             | 0<br>(0 - 4)          | 0<br>(0 - 2)           | 0<br>(0 - 2)             | 0<br>(0 - 1)             | 0<br>(0 - 1)             |
| Ascariasis                                                        | 1<br>(0 - 5)             | 0<br>(0 - 4)          | 0<br>(0 - 2)           | 0<br>(0 - 2)             | 0<br>(0 - 1)             | 0<br>(0 - 1)             |
| Other neglected tropical diseases                                 | 3<br>(2 - 4)             | 1<br>(0 - 2)          | 0<br>(0 - 0)           | 1<br>(1 - 1)             | 0<br>(0 - 1)             | 0<br>(0 - 0)             |

Web Table 31- Guyana deaths with 95% UI by age, sex, and cause in 2013

| Cause                                                            | Both Sexes, All Ages     | Both Sexes, 0-4 Years | Both Sexes, 5-14 Years | Both Sexes, 15-49 Years | Both Sexes, 50-69 Years  | Both Sexes, 70-80 Years  |
|------------------------------------------------------------------|--------------------------|-----------------------|------------------------|-------------------------|--------------------------|--------------------------|
| Maternal disorders                                               | 20<br>(13 - 30)          | --                    | 0<br>(0 - 0)           | 19<br>(12 - 29)         | --                       | --                       |
| Maternal hemorrhage                                              | 3<br>(2 - 5)             | --                    | 0<br>(0 - 0)           | 3<br>(2 - 5)            | --                       | --                       |
| Maternal sepsis and other maternal infections                    | 2<br>(1 - 2)             | --                    | 0<br>(0 - 0)           | 2<br>(1 - 2)            | --                       | --                       |
| Maternal hypertensive disorders                                  | 3<br>(2 - 5)             | --                    | 0<br>(0 - 0)           | 3<br>(2 - 5)            | --                       | --                       |
| Maternal obstructed labor                                        | 2<br>(1 - 3)             | --                    | 0<br>(0 - 0)           | 2<br>(1 - 3)            | --                       | --                       |
| Maternal abortive outcome                                        | 4<br>(2 - 7)             | --                    | 0<br>(0 - 0)           | 4<br>(2 - 7)            | --                       | --                       |
| Indirect maternal deaths                                         | 2<br>(1 - 3)             | --                    | 0<br>(0 - 0)           | 2<br>(1 - 3)            | --                       | --                       |
| Late maternal deaths                                             | 1<br>(1 - 2)             | --                    | 0<br>(0 - 0)           | 1<br>(1 - 2)            | --                       | --                       |
| Maternal deaths aggravated by HIV/AIDS                           | 0<br>(0 - 0)             | --                    | --                     | 0<br>(0 - 0)            | --                       | --                       |
| Other maternal disorders                                         | 2<br>(1 - 4)             | --                    | 0<br>(0 - 0)           | 2<br>(1 - 4)            | --                       | --                       |
| Neonatal disorders                                               | 220<br>(122 - 348)       | 220<br>(122 - 348)    | --                     | --                      | --                       | --                       |
| Neonatal preterm birth complications                             | 98<br>(49 - 156)         | 98<br>(49 - 156)      | --                     | --                      | --                       | --                       |
| Neonatal encephalopathy due to birth asphyxia and trauma         | 52<br>(26 - 87)          | 52<br>(26 - 87)       | --                     | --                      | --                       | --                       |
| Neonatal sepsis and other neonatal infections                    | 37<br>(16 - 69)          | 37<br>(16 - 69)       | --                     | --                      | --                       | --                       |
| Hemolytic disease and other neonatal jaundice                    | 4<br>(2 - 9)             | 4<br>(2 - 9)          | --                     | --                      | --                       | --                       |
| Other neonatal disorders                                         | 30<br>(15 - 52)          | 30<br>(15 - 52)       | --                     | --                      | --                       | --                       |
| Nutritional deficiencies                                         | 93<br>(62 - 149)         | 37<br>(13 - 84)       | 4<br>(2 - 6)           | 19<br>(14 - 27)         | 13<br>(9 - 19)           | 20<br>(15 - 27)          |
| Protein-energy malnutrition                                      | 50<br>(27 - 96)          | 32<br>(11 - 72)       | 2<br>(1 - 4)           | 5<br>(3 - 9)            | 4<br>(2 - 7)             | 8<br>(5 - 12)            |
| Iodine deficiency                                                | 1<br>(0 - 2)             | 0<br>(0 - 1)          | 0<br>(0 - 0)           | 0<br>(0 - 1)            | 0<br>(0 - 0)             | 0<br>(0 - 1)             |
| Iron-deficiency anemia                                           | 37<br>(25 - 52)          | 4<br>(1 - 12)         | 1<br>(1 - 2)           | 12<br>(8 - 17)          | 8<br>(4 - 11)            | 11<br>(7 - 16)           |
| Other nutritional deficiencies                                   | 5<br>(3 - 9)             | 1<br>(0 - 4)          | 0<br>(0 - 1)           | 1<br>(1 - 2)            | 1<br>(1 - 2)             | 1<br>(1 - 2)             |
| Other communicable, maternal, neonatal, and nutritional diseases | 22<br>(15 - 30)          | 3<br>(1 - 8)          | 1<br>(1 - 2)           | 10<br>(7 - 14)          | 5<br>(3 - 7)             | 2<br>(1 - 3)             |
| Sexually transmitted diseases excluding HIV                      | 3<br>(1 - 6)             | 1<br>(0 - 4)          | 0<br>(0 - 0)           | 1<br>(0 - 1)            | 0<br>(0 - 1)             | 0<br>(0 - 0)             |
| Syphilis                                                         | 2<br>(1 - 5)             | 1<br>(0 - 4)          | 0<br>(0 - 0)           | 0<br>(0 - 0)            | 0<br>(0 - 0)             | 0<br>(0 - 0)             |
| Chlamydial infection                                             | 0<br>(0 - 0)             | --                    | 0<br>(0 - 0)           | 0<br>(0 - 0)            | 0<br>(0 - 0)             | 0<br>(0 - 0)             |
| Gonococcal infection                                             | 0<br>(0 - 0)             | --                    | 0<br>(0 - 0)           | 0<br>(0 - 0)            | 0<br>(0 - 0)             | 0<br>(0 - 0)             |
| Other sexually transmitted diseases                              | 0<br>(0 - 0)             | --                    | 0<br>(0 - 0)           | 0<br>(0 - 0)            | 0<br>(0 - 0)             | 0<br>(0 - 0)             |
| Hepatitis                                                        | 2<br>(2 - 3)             | 0<br>(0 - 0)          | 0<br>(0 - 0)           | 1<br>(1 - 2)            | 1<br>(0 - 1)             | 0<br>(0 - 0)             |
| Acute hepatitis A                                                | 1<br>(0 - 1)             | 0<br>(0 - 0)          | 0<br>(0 - 0)           | 0<br>(0 - 1)            | 0<br>(0 - 0)             | 0<br>(0 - 0)             |
| Acute hepatitis B                                                | 1<br>(1 - 2)             | 0<br>(0 - 0)          | 0<br>(0 - 0)           | 1<br>(0 - 1)            | 0<br>(0 - 1)             | 0<br>(0 - 0)             |
| Acute hepatitis C                                                | 0<br>(0 - 0)             | --                    | 0<br>(0 - 0)           | 0<br>(0 - 0)            | 0<br>(0 - 0)             | 0<br>(0 - 0)             |
| Other infectious diseases                                        | 17<br>(11 - 24)          | 2<br>(1 - 4)          | 1<br>(1 - 2)           | 8<br>(5 - 12)           | 4<br>(3 - 6)             | 2<br>(1 - 3)             |
| Non-communicable diseases                                        | 4,124<br>(3,436 - 4,881) | 152<br>(68 - 319)     | 59<br>(39 - 89)        | 920<br>(733 - 1,138)    | 1,637<br>(1,277 - 1,963) | 1,356<br>(1,171 - 1,545) |
| Neoplasms                                                        | 731<br>(591 - 885)       | 9<br>(3 - 19)         | 16<br>(10 - 24)        | 216<br>(166 - 277)      | 302<br>(232 - 373)       | 188<br>(157 - 219)       |
| Esophageal cancer                                                | 16<br>(12 - 21)          | --                    | --                     | 3<br>(2 - 4)            | 9<br>(6 - 12)            | 4<br>(3 - 5)             |
| Stomach cancer                                                   | 42<br>(34 - 52)          | --                    | --                     | 10<br>(7 - 12)          | 19<br>(14 - 24)          | 14<br>(11 - 16)          |
| Liver cancer                                                     | 30<br>(23 - 37)          | --                    | 0<br>(0 - 0)           | 8<br>(6 - 11)           | 14<br>(10 - 18)          | 7<br>(6 - 9)             |
| Liver cancer due to hepatitis B                                  | 8<br>(5 - 12)            | --                    | 0<br>(0 - 0)           | 3<br>(2 - 5)            | 4<br>(2 - 6)             | 1<br>(1 - 2)             |
| Liver cancer due to hepatitis C                                  | 13<br>(9 - 18)           | --                    | 0<br>(0 - 0)           | 3<br>(2 - 4)            | 7<br>(4 - 10)            | 4<br>(3 - 5)             |
| Liver cancer due to alcohol use                                  | 5<br>(3 - 8)             | --                    | --                     | 1<br>(1 - 1)            | 2<br>(1 - 4)             | 2<br>(1 - 3)             |

Web Table 31- Guyana deaths with 95% UI by age, sex, and cause in 2013

| Cause                                         | Both Sexes, All Ages     | Both Sexes, 0-4 Years | Both Sexes, 5-14 Years | Both Sexes, 15-49 Years | Both Sexes, 50-69 Years | Both Sexes, 70-80 Years |
|-----------------------------------------------|--------------------------|-----------------------|------------------------|-------------------------|-------------------------|-------------------------|
| Liver cancer due to other causes              | 4<br>(2 - 5)             | --                    | 0<br>(0 - 0)           | 1<br>(1 - 2)            | 1<br>(1 - 2)            | 1<br>(0 - 1)            |
| Larynx cancer                                 | 8<br>(6 - 11)            | --                    | --                     | 2<br>(1 - 3)            | 5<br>(3 - 6)            | 1<br>(1 - 2)            |
| Tracheal, bronchus and lung cancer            | 57<br>(45 - 69)          | --                    | --                     | 16<br>(12 - 20)         | 28<br>(21 - 36)         | 13<br>(10 - 15)         |
| Breast cancer                                 | 83<br>(58 - 111)         | --                    | --                     | 32<br>(22 - 46)         | 33<br>(22 - 45)         | 18<br>(13 - 23)         |
| Cervical cancer                               | 66<br>(45 - 95)          | --                    | --                     | 28<br>(18 - 43)         | 25<br>(16 - 36)         | 12<br>(9 - 17)          |
| Uterine cancer                                | 18<br>(10 - 25)          | --                    | --                     | 2<br>(1 - 3)            | 9<br>(5 - 13)           | 7<br>(4 - 10)           |
| Prostate cancer                               | 56<br>(33 - 79)          | --                    | --                     | 2<br>(1 - 3)            | 21<br>(12 - 32)         | 33<br>(20 - 47)         |
| Colon and rectum cancer                       | 76<br>(61 - 92)          | --                    | --                     | 17<br>(13 - 21)         | 33<br>(26 - 41)         | 26<br>(20 - 32)         |
| Lip and oral cavity cancer                    | 11<br>(8 - 15)           | --                    | --                     | 3<br>(2 - 4)            | 6<br>(4 - 8)            | 2<br>(2 - 3)            |
| Nasopharynx cancer                            | 5<br>(4 - 6)             | --                    | 0<br>(0 - 0)           | 2<br>(2 - 3)            | 2<br>(1 - 2)            | 0<br>(0 - 1)            |
| Other pharynx cancer                          | 6<br>(4 - 8)             | --                    | --                     | 2<br>(1 - 2)            | 3<br>(2 - 5)            | 1<br>(1 - 1)            |
| Gallbladder and biliary tract cancer          | 10<br>(7 - 16)           | --                    | --                     | 2<br>(1 - 3)            | 5<br>(3 - 7)            | 4<br>(2 - 5)            |
| Pancreatic cancer                             | 30<br>(24 - 37)          | --                    | --                     | 6<br>(4 - 8)            | 14<br>(11 - 18)         | 10<br>(8 - 13)          |
| Malignant skin melanoma                       | 4<br>(3 - 6)             | --                    | --                     | 2<br>(1 - 3)            | 1<br>(1 - 2)            | 1<br>(1 - 1)            |
| Non-melanoma skin cancer                      | 3<br>(2 - 3)             | --                    | --                     | 1<br>(0 - 1)            | 1<br>(1 - 1)            | 1<br>(1 - 1)            |
| Ovarian cancer                                | 25<br>(17 - 33)          | --                    | --                     | 8<br>(5 - 11)           | 11<br>(7 - 15)          | 6<br>(4 - 8)            |
| Testicular cancer                             | 1<br>(0 - 1)             | --                    | --                     | 1<br>(0 - 1)            | 0<br>(0 - 0)            | 0<br>(0 - 0)            |
| Kidney cancer                                 | 13<br>(10 - 16)          | 0<br>(0 - 0)          | 0<br>(0 - 0)           | 3<br>(3 - 4)            | 6<br>(5 - 8)            | 2<br>(2 - 3)            |
| Bladder cancer                                | 9<br>(7 - 12)            | --                    | --                     | 1<br>(1 - 2)            | 4<br>(3 - 5)            | 4<br>(3 - 5)            |
| Brain and nervous system cancer               | 16<br>(9 - 21)           | 1<br>(0 - 2)          | 2<br>(1 - 3)           | 7<br>(3 - 9)            | 5<br>(2 - 7)            | 2<br>(1 - 2)            |
| Thyroid cancer                                | 4<br>(3 - 5)             | --                    | 0<br>(0 - 0)           | 1<br>(1 - 1)            | 2<br>(1 - 2)            | 1<br>(1 - 2)            |
| Mesothelioma                                  | 2<br>(2 - 3)             | --                    | --                     | 1<br>(0 - 1)            | 1<br>(1 - 1)            | 1<br>(1 - 1)            |
| Hodgkin lymphoma                              | 4<br>(1 - 6)             | 0<br>(0 - 0)          | 0<br>(0 - 1)           | 2<br>(1 - 3)            | 1<br>(0 - 1)            | 0<br>(0 - 0)            |
| Non-Hodgkin lymphoma                          | 35<br>(26 - 45)          | 1<br>(0 - 2)          | 2<br>(1 - 3)           | 16<br>(12 - 21)         | 12<br>(8 - 16)          | 5<br>(3 - 6)            |
| Multiple myeloma                              | 13<br>(9 - 17)           | --                    | --                     | 3<br>(2 - 4)            | 7<br>(5 - 10)           | 3<br>(2 - 4)            |
| Leukemia                                      | 35<br>(28 - 44)          | 3<br>(1 - 6)          | 6<br>(4 - 9)           | 15<br>(12 - 19)         | 8<br>(6 - 10)           | 4<br>(3 - 5)            |
| Other neoplasms                               | 56<br>(44 - 71)          | 4<br>(2 - 10)         | 6<br>(3 - 9)           | 22<br>(17 - 29)         | 16<br>(12 - 22)         | 8<br>(6 - 10)           |
| Cardiovascular diseases                       | 1,925<br>(1,578 - 2,276) | 14<br>(6 - 30)        | 9<br>(6 - 14)          | 305<br>(240 - 387)      | 807<br>(630 - 977)      | 790<br>(659 - 914)      |
| Rheumatic heart disease                       | 14<br>(10 - 18)          | 0<br>(0 - 0)          | 1<br>(1 - 2)           | 8<br>(6 - 11)           | 3<br>(2 - 4)            | 2<br>(1 - 2)            |
| Ischemic heart disease                        | 870<br>(699 - 1,069)     | 2<br>(1 - 5)          | 2<br>(1 - 3)           | 138<br>(104 - 184)      | 389<br>(299 - 483)      | 340<br>(273 - 408)      |
| Cerebrovascular disease                       | 695<br>(561 - 840)       | 4<br>(2 - 9)          | 3<br>(2 - 5)           | 89<br>(67 - 118)        | 295<br>(222 - 373)      | 304<br>(247 - 362)      |
| Ischemic stroke                               | 396<br>(315 - 511)       | 1<br>(0 - 3)          | 1<br>(1 - 2)           | 24<br>(16 - 37)         | 155<br>(112 - 219)      | 215<br>(173 - 263)      |
| Hemorrhagic stroke                            | 299<br>(222 - 374)       | 3<br>(1 - 7)          | 2<br>(1 - 3)           | 65<br>(48 - 85)         | 140<br>(100 - 177)      | 88<br>(60 - 113)        |
| Hypertensive heart disease                    | 174<br>(124 - 226)       | 0<br>(0 - 0)          | 0<br>(0 - 0)           | 21<br>(14 - 28)         | 60<br>(42 - 82)         | 93<br>(65 - 124)        |
| Cardiomyopathy and myocarditis                | 57<br>(44 - 73)          | 4<br>(1 - 8)          | 2<br>(1 - 3)           | 21<br>(15 - 27)         | 19<br>(14 - 25)         | 12<br>(9 - 16)          |
| Atrial fibrillation and flutter               | 16<br>(11 - 22)          | --                    | --                     | 1<br>(1 - 2)            | 5<br>(3 - 6)            | 10<br>(7 - 14)          |
| Aortic aneurysm                               | 16<br>(11 - 20)          | --                    | --                     | 3<br>(2 - 4)            | 7<br>(5 - 9)            | 5<br>(4 - 7)            |
| Peripheral vascular disease                   | 6<br>(4 - 8)             | --                    | --                     | 0<br>(0 - 0)            | 1<br>(1 - 2)            | 4<br>(3 - 6)            |
| Endocarditis                                  | 7<br>(5 - 10)            | 1<br>(0 - 1)          | 0<br>(0 - 0)           | 3<br>(2 - 4)            | 2<br>(1 - 3)            | 2<br>(1 - 3)            |
| Other cardiovascular and circulatory diseases | 71<br>(53 - 89)          | 3<br>(1 - 6)          | 1<br>(1 - 2)           | 23<br>(16 - 30)         | 26<br>(17 - 35)         | 19<br>(13 - 25)         |

Web Table 31- Guyana deaths with 95% UI by age, sex, and cause in 2013

| Cause                                               | Both Sexes, All Ages | Both Sexes, 0-4 Years | Both Sexes, 5-14 Years | Both Sexes, 15-49 Years | Both Sexes, 50-69 Years | Both Sexes, 70-80 Years |
|-----------------------------------------------------|----------------------|-----------------------|------------------------|-------------------------|-------------------------|-------------------------|
| Chronic respiratory diseases                        | 130<br>(106 - 160)   | 8<br>(3 - 18)         | 3<br>(2 - 4)           | 32<br>(24 - 41)         | 43<br>(32 - 54)         | 45<br>(37 - 57)         |
| Chronic obstructive pulmonary disease               | 74<br>(59 - 92)      | 3<br>(1 - 8)          | 1<br>(0 - 1)           | 12<br>(9 - 16)          | 24<br>(18 - 32)         | 33<br>(27 - 42)         |
| Pneumoconiosis                                      | 4<br>(3 - 7)         | 0<br>(0 - 0)          | 0<br>(0 - 0)           | 1<br>(1 - 2)            | 2<br>(1 - 4)            | 1<br>(1 - 1)            |
| Silicosis                                           | 0<br>(0 - 0)         | 0<br>(0 - 0)          | 0<br>(0 - 0)           | 0<br>(0 - 0)            | 0<br>(0 - 0)            | 0<br>(0 - 0)            |
| Asbestosis                                          | 1<br>(1 - 1)         | 0<br>(0 - 0)          | 0<br>(0 - 0)           | 0<br>(0 - 0)            | 1<br>(0 - 1)            | 0<br>(0 - 0)            |
| Coal workers pneumoconiosis                         | 1<br>(1 - 2)         | 0<br>(0 - 0)          | 0<br>(0 - 0)           | 1<br>(0 - 1)            | 1<br>(0 - 1)            | 0<br>(0 - 0)            |
| Other pneumoconiosis                                | 2<br>(1 - 3)         | 0<br>(0 - 0)          | 0<br>(0 - 0)           | 0<br>(0 - 1)            | 1<br>(1 - 1)            | 1<br>(0 - 1)            |
| Asthma                                              | 33<br>(26 - 42)      | 2<br>(1 - 5)          | 2<br>(1 - 2)           | 13<br>(10 - 17)         | 10<br>(7 - 13)          | 7<br>(5 - 9)            |
| Interstitial lung disease and pulmonary sarcoidosis | 11<br>(8 - 15)       | 0<br>(0 - 0)          | 0<br>(0 - 0)           | 3<br>(2 - 4)            | 4<br>(3 - 6)            | 3<br>(2 - 5)            |
| Other chronic respiratory diseases                  | 7<br>(5 - 11)        | 3<br>(1 - 6)          | 0<br>(0 - 1)           | 2<br>(2 - 3)            | 1<br>(1 - 2)            | 1<br>(1 - 1)            |
| Cirrhosis                                           | 168<br>(130 - 211)   | 1<br>(0 - 2)          | 1<br>(1 - 2)           | 78<br>(59 - 102)        | 75<br>(55 - 95)         | 14<br>(11 - 17)         |
| Cirrhosis due to hepatitis B                        | 13<br>(7 - 21)       | 0<br>(0 - 0)          | 0<br>(0 - 0)           | 6<br>(3 - 10)           | 6<br>(3 - 10)           | 1<br>(1 - 2)            |
| Cirrhosis due to hepatitis C                        | 44<br>(22 - 71)      | 0<br>(0 - 0)          | 0<br>(0 - 0)           | 18<br>(9 - 32)          | 20<br>(10 - 32)         | 5<br>(2 - 8)            |
| Cirrhosis due to alcohol use                        | 77<br>(52 - 113)     | --                    | --                     | 34<br>(22 - 52)         | 37<br>(24 - 55)         | 6<br>(4 - 9)            |
| Cirrhosis due to other causes                       | 34<br>(23 - 48)      | 1<br>(0 - 1)          | 1<br>(1 - 2)           | 20<br>(13 - 28)         | 11<br>(7 - 17)          | 1<br>(1 - 2)            |
| Digestive diseases                                  | 117<br>(95 - 146)    | 3<br>(1 - 6)          | 3<br>(2 - 4)           | 43<br>(33 - 56)         | 40<br>(30 - 52)         | 29<br>(24 - 36)         |
| Peptic ulcer disease                                | 29<br>(22 - 41)      | 0<br>(0 - 0)          | 0<br>(0 - 0)           | 10<br>(7 - 16)          | 12<br>(8 - 17)          | 7<br>(5 - 9)            |
| Gastritis and duodenitis                            | 7<br>(4 - 10)        | 0<br>(0 - 0)          | 0<br>(0 - 0)           | 3<br>(2 - 4)            | 2<br>(1 - 4)            | 2<br>(1 - 3)            |
| Appendicitis                                        | 6<br>(4 - 9)         | 0<br>(0 - 0)          | 0<br>(0 - 1)           | 3<br>(2 - 4)            | 2<br>(1 - 2)            | 1<br>(1 - 1)            |
| Paralytic ileus and intestinal obstruction          | 15<br>(7 - 21)       | 1<br>(0 - 1)          | 1<br>(0 - 1)           | 4<br>(2 - 6)            | 5<br>(2 - 7)            | 5<br>(2 - 7)            |
| Inguinal, femoral, and abdominal hernia             | 6<br>(4 - 12)        | 0<br>(0 - 1)          | 0<br>(0 - 0)           | 2<br>(1 - 4)            | 2<br>(1 - 4)            | 2<br>(1 - 4)            |
| Inflammatory bowel disease                          | 12<br>(9 - 17)       | 1<br>(0 - 3)          | 0<br>(0 - 1)           | 4<br>(3 - 6)            | 3<br>(2 - 4)            | 3<br>(2 - 5)            |
| Vascular intestinal disorders                       | 4<br>(3 - 7)         | 0<br>(0 - 0)          | 0<br>(0 - 0)           | 1<br>(1 - 2)            | 2<br>(1 - 3)            | 1<br>(1 - 2)            |
| Gallbladder and biliary diseases                    | 9<br>(6 - 11)        | 0<br>(0 - 0)          | 0<br>(0 - 0)           | 3<br>(2 - 4)            | 3<br>(2 - 4)            | 2<br>(2 - 3)            |
| Pancreatitis                                        | 12<br>(8 - 17)       | 0<br>(0 - 0)          | 0<br>(0 - 0)           | 7<br>(5 - 10)           | 4<br>(3 - 6)            | 1<br>(1 - 2)            |
| Other digestive diseases                            | 18<br>(14 - 23)      | 0<br>(0 - 1)          | 1<br>(0 - 1)           | 6<br>(4 - 8)            | 6<br>(4 - 8)            | 5<br>(4 - 7)            |
| Neurological disorders                              | 126<br>(105 - 152)   | 3<br>(1 - 7)          | 4<br>(2 - 6)           | 27<br>(20 - 35)         | 21<br>(16 - 27)         | 71<br>(58 - 88)         |
| Alzheimer disease and other dementias               | 69<br>(56 - 87)      | --                    | --                     | 0<br>(0 - 0)            | 8<br>(5 - 11)           | 61<br>(49 - 78)         |
| Parkinson disease                                   | 10<br>(7 - 14)       | --                    | --                     | 0<br>(0 - 1)            | 3<br>(2 - 4)            | 6<br>(5 - 9)            |
| Epilepsy                                            | 31<br>(22 - 42)      | 2<br>(1 - 4)          | 3<br>(2 - 5)           | 20<br>(14 - 27)         | 5<br>(3 - 7)            | 2<br>(1 - 2)            |
| Multiple sclerosis                                  | 2<br>(1 - 3)         | --                    | --                     | 1<br>(1 - 2)            | 0<br>(0 - 1)            | 0<br>(0 - 0)            |
| Other neurological disorders                        | 15<br>(12 - 18)      | 1<br>(0 - 2)          | 1<br>(1 - 2)           | 6<br>(5 - 8)            | 5<br>(3 - 6)            | 2<br>(1 - 2)            |
| Mental and substance use disorders                  | 29<br>(20 - 38)      | 0<br>(0 - 1)          | 0<br>(0 - 0)           | 16<br>(11 - 22)         | 10<br>(6 - 14)          | 2<br>(2 - 3)            |
| Schizophrenia                                       | 2<br>(1 - 2)         | --                    | --                     | 1<br>(0 - 1)            | 1<br>(0 - 1)            | 0<br>(0 - 0)            |
| Alcohol use disorders                               | 17<br>(10 - 24)      | --                    | --                     | 8<br>(5 - 12)           | 7<br>(4 - 11)           | 1<br>(1 - 1)            |
| Drug use disorders                                  | 11<br>(7 - 14)       | 0<br>(0 - 1)          | --                     | 7<br>(5 - 10)           | 2<br>(1 - 3)            | 1<br>(1 - 1)            |
| Opioid use disorders                                | 3<br>(2 - 4)         | 0<br>(0 - 0)          | --                     | 2<br>(1 - 3)            | 1<br>(0 - 1)            | 0<br>(0 - 0)            |
| Cocaine use disorders                               | 1<br>(0 - 1)         | 0<br>(0 - 0)          | --                     | 0<br>(0 - 1)            | 0<br>(0 - 0)            | 0<br>(0 - 0)            |
| Amphetamine use disorders                           | 0<br>(0 - 0)         | 0<br>(0 - 0)          | --                     | 0<br>(0 - 0)            | 0<br>(0 - 0)            | 0<br>(0 - 0)            |
| Other drug use disorders                            | 7<br>(4 - 9)         | 0<br>(0 - 1)          | --                     | 5<br>(3 - 6)            | 2<br>(1 - 2)            | 1<br>(0 - 1)            |

Web Table 31- Guyana deaths with 95% UI by age, sex, and cause in 2013

| Cause                                               | Both Sexes, All Ages | Both Sexes, 0-4 Years | Both Sexes, 5-14 Years | Both Sexes, 15-49 Years | Both Sexes, 50-69 Years | Both Sexes, 70-80 Years |
|-----------------------------------------------------|----------------------|-----------------------|------------------------|-------------------------|-------------------------|-------------------------|
| Eating disorders                                    | 0<br>(0 - 0)         | --                    | 0<br>(0 - 0)           | 0<br>(0 - 0)            | --                      | --                      |
| Anorexia nervosa                                    | 0<br>(0 - 0)         | --                    | 0<br>(0 - 0)           | 0<br>(0 - 0)            | --                      | --                      |
| Diabetes, urogenital, blood, and endocrine diseases | 734<br>(593 - 885)   | 18<br>(7 - 42)        | 10<br>(7 - 16)         | 174<br>(137 - 222)      | 325<br>(246 - 397)      | 206<br>(167 - 245)      |
| Diabetes mellitus                                   | 475<br>(372 - 568)   | 1<br>(1 - 3)          | 1<br>(1 - 2)           | 81<br>(60 - 104)        | 242<br>(179 - 299)      | 150<br>(118 - 182)      |
| Acute glomerulonephritis                            | 0<br>(0 - 1)         | 0<br>(0 - 0)          | 0<br>(0 - 0)           | 0<br>(0 - 0)            | 0<br>(0 - 0)            | 0<br>(0 - 0)            |
| Chronic kidney disease                              | 151<br>(116 - 199)   | 5<br>(2 - 11)         | 3<br>(2 - 5)           | 51<br>(39 - 72)         | 55<br>(40 - 73)         | 37<br>(29 - 49)         |
| Chronic kidney disease due to diabetes mellitus     | 26<br>(15 - 38)      | 0<br>(0 - 1)          | 0<br>(0 - 0)           | 8<br>(4 - 12)           | 13<br>(7 - 19)          | 5<br>(3 - 8)            |
| Chronic kidney disease due to hypertension          | 75<br>(54 - 98)      | 1<br>(0 - 2)          | 1<br>(0 - 1)           | 24<br>(17 - 33)         | 28<br>(19 - 39)         | 21<br>(15 - 29)         |
| Chronic kidney disease due to glomerulonephritis    | 7<br>(5 - 10)        | 1<br>(0 - 2)          | 1<br>(0 - 1)           | 4<br>(2 - 5)            | 1<br>(1 - 2)            | 1<br>(1 - 1)            |
| Chronic kidney disease due to other causes          | 43<br>(29 - 69)      | 3<br>(1 - 6)          | 1<br>(1 - 3)           | 17<br>(11 - 29)         | 12<br>(7 - 21)          | 10<br>(6 - 17)          |
| Urinary diseases and male infertility               | 27<br>(20 - 32)      | 1<br>(0 - 3)          | 0<br>(0 - 1)           | 8<br>(5 - 10)           | 9<br>(6 - 12)           | 8<br>(6 - 10)           |
| Interstitial nephritis and urinary tract infections | 19<br>(13 - 24)      | 1<br>(0 - 2)          | 0<br>(0 - 0)           | 5<br>(3 - 7)            | 6<br>(4 - 8)            | 6<br>(4 - 8)            |
| Urolithiasis                                        | 1<br>(0 - 2)         | --                    | 0<br>(0 - 0)           | 0<br>(0 - 1)            | 1<br>(0 - 1)            | 0<br>(0 - 0)            |
| Other urinary diseases                              | 6<br>(4 - 9)         | 0<br>(0 - 1)          | 0<br>(0 - 0)           | 2<br>(1 - 3)            | 2<br>(2 - 4)            | 2<br>(1 - 3)            |
| Gynecological diseases                              | 1<br>(0 - 2)         | --                    | --                     | 1<br>(0 - 1)            | 0<br>(0 - 0)            | 0<br>(0 - 0)            |
| Uterine fibroids                                    | 0<br>(0 - 0)         | --                    | --                     | 0<br>(0 - 0)            | 0<br>(0 - 0)            | 0<br>(0 - 0)            |
| Polycystic ovarian syndrome                         | 0<br>(0 - 0)         | --                    | --                     | 0<br>(0 - 0)            | 0<br>(0 - 0)            | --                      |
| Endometriosis                                       | 0<br>(0 - 0)         | --                    | --                     | 0<br>(0 - 0)            | 0<br>(0 - 0)            | --                      |
| Genital prolapse                                    | 0<br>(0 - 0)         | --                    | --                     | 0<br>(0 - 0)            | 0<br>(0 - 0)            | 0<br>(0 - 0)            |
| Other gynecological diseases                        | 0<br>(0 - 1)         | --                    | --                     | 0<br>(0 - 1)            | 0<br>(0 - 0)            | 0<br>(0 - 0)            |
| Hemoglobinopathies and hemolytic anemias            | 24<br>(15 - 36)      | 5<br>(2 - 11)         | 4<br>(2 - 7)           | 11<br>(7 - 16)          | 3<br>(2 - 4)            | 1<br>(1 - 2)            |
| Thalassemias                                        | 1<br>(0 - 1)         | 0<br>(0 - 1)          | 0<br>(0 - 0)           | 0<br>(0 - 0)            | 0<br>(0 - 0)            | 0<br>(0 - 0)            |
| Sickle cell disorders                               | 20<br>(12 - 30)      | 4<br>(1 - 9)          | 4<br>(2 - 6)           | 10<br>(6 - 14)          | 2<br>(2 - 4)            | 0<br>(0 - 0)            |
| G6PD deficiency                                     | 1<br>(0 - 1)         | 0<br>(0 - 0)          | 0<br>(0 - 0)           | 0<br>(0 - 0)            | 0<br>(0 - 0)            | 0<br>(0 - 0)            |
| Other hemoglobinopathies and hemolytic anemias      | 3<br>(2 - 4)         | 1<br>(0 - 1)          | 0<br>(0 - 0)           | 1<br>(0 - 1)            | 1<br>(0 - 1)            | 1<br>(1 - 1)            |
| Endocrine, metabolic, blood, and immune disorders   | 57<br>(42 - 98)      | 7<br>(2 - 17)         | 2<br>(1 - 4)           | 23<br>(16 - 41)         | 16<br>(11 - 25)         | 10<br>(7 - 16)          |
| Musculoskeletal disorders                           | 15<br>(9 - 21)       | --                    | 1<br>(1 - 1)           | 9<br>(5 - 13)           | 3<br>(2 - 5)            | 2<br>(1 - 2)            |
| Rheumatoid arthritis                                | 2<br>(1 - 3)         | --                    | 0<br>(0 - 0)           | 1<br>(0 - 1)            | 1<br>(0 - 1)            | 1<br>(0 - 1)            |
| Other musculoskeletal disorders                     | 13<br>(8 - 19)       | --                    | 1<br>(0 - 1)           | 9<br>(5 - 13)           | 3<br>(2 - 4)            | 1<br>(1 - 2)            |
| Other non-communicable diseases                     | 148<br>(87 - 251)    | 97<br>(42 - 194)      | 12<br>(8 - 19)         | 19<br>(14 - 26)         | 10<br>(7 - 13)          | 10<br>(6 - 13)          |
| Congenital anomalies                                | 120<br>(65 - 215)    | 88<br>(39 - 178)      | 11<br>(7 - 18)         | 14<br>(10 - 21)         | 4<br>(3 - 6)            | 2<br>(1 - 2)            |
| Neural tube defects                                 | 5<br>(2 - 10)        | 5<br>(2 - 9)          | 0<br>(0 - 0)           | 0<br>(0 - 0)            | 0<br>(0 - 0)            | 0<br>(0 - 0)            |
| Congenital heart anomalies                          | 62<br>(32 - 113)     | 43<br>(18 - 91)       | 7<br>(4 - 12)          | 8<br>(6 - 13)           | 1<br>(1 - 2)            | 1<br>(1 - 1)            |
| Cleft lip and cleft palate                          | 0<br>(0 - 0)         | 0<br>(0 - 0)          | --                     | --                      | --                      | --                      |
| Down syndrome                                       | 8<br>(5 - 15)        | 5<br>(2 - 11)         | 1<br>(0 - 1)           | 2<br>(1 - 3)            | 1<br>(0 - 1)            | 0<br>(0 - 0)            |
| Chromosomal unbalanced rearrangements               | 2<br>(1 - 5)         | 2<br>(1 - 4)          | 0<br>(0 - 0)           | 0<br>(0 - 0)            | 0<br>(0 - 0)            | 0<br>(0 - 0)            |
| Other congenital anomalies                          | 43<br>(22 - 81)      | 34<br>(15 - 68)       | 3<br>(2 - 6)           | 3<br>(2 - 5)            | 2<br>(1 - 3)            | 1<br>(1 - 1)            |
| Skin and subcutaneous diseases                      | 21<br>(11 - 27)      | 2<br>(1 - 4)          | 1<br>(0 - 1)           | 5<br>(2 - 7)            | 6<br>(3 - 8)            | 8<br>(5 - 11)           |
| Cellulitis                                          | 2<br>(1 - 3)         | 0<br>(0 - 1)          | 0<br>(0 - 0)           | 0<br>(0 - 1)            | 1<br>(0 - 1)            | 1<br>(0 - 1)            |
| Pyoderma                                            | 7<br>(4 - 9)         | 1<br>(0 - 3)          | 0<br>(0 - 0)           | 2<br>(1 - 2)            | 2<br>(1 - 3)            | 2<br>(1 - 3)            |



Web Table 31- Guyana deaths with 95% UI by age, sex, and cause in 2013

| Cause                                           | Both Sexes, All Ages | Both Sexes, 0-4 Years | Both Sexes, 5-14 Years | Both Sexes, 15-49 Years | Both Sexes, 50-69 Years | Both Sexes, 70-80 Years |
|-------------------------------------------------|----------------------|-----------------------|------------------------|-------------------------|-------------------------|-------------------------|
| Decubitus ulcer                                 | 11<br>(6 - 14)       | 0<br>(0 - 0)          | 0<br>(0 - 0)           | 2<br>(1 - 3)            | 3<br>(2 - 5)            | 5<br>(3 - 7)            |
| Other skin and subcutaneous diseases            | 1<br>(0 - 1)         | 0<br>(0 - 0)          | 0<br>(0 - 0)           | 0<br>(0 - 1)            | 0<br>(0 - 0)            | 0<br>(0 - 0)            |
| Sudden infant death syndrome                    | 7<br>(2 - 17)        | 7<br>(2 - 17)         | --                     | --                      | --                      | --                      |
| Injuries                                        | 814<br>(631 - 1,020) | 55<br>(23 - 121)      | 53<br>(36 - 79)        | 543<br>(419 - 677)      | 121<br>(87 - 156)       | 42<br>(33 - 50)         |
| Transport injuries                              | 219<br>(159 - 280)   | 9<br>(4 - 20)         | 22<br>(14 - 33)        | 141<br>(97 - 183)       | 39<br>(26 - 51)         | 10<br>(7 - 12)          |
| Road injuries                                   | 203<br>(147 - 258)   | 8<br>(3 - 18)         | 20<br>(13 - 31)        | 130<br>(89 - 170)       | 36<br>(24 - 47)         | 9<br>(7 - 11)           |
| Pedestrian road injuries                        | 46<br>(31 - 62)      | 3<br>(1 - 6)          | 7<br>(5 - 12)          | 24<br>(15 - 33)         | 10<br>(6 - 14)          | 3<br>(2 - 4)            |
| Cyclist road injuries                           | 12<br>(8 - 15)       | 0<br>(0 - 1)          | 2<br>(1 - 3)           | 7<br>(4 - 9)            | 2<br>(1 - 3)            | 1<br>(0 - 1)            |
| Motorcyclist road injuries                      | 17<br>(11 - 24)      | 0<br>(0 - 1)          | 1<br>(1 - 1)           | 13<br>(8 - 19)          | 2<br>(1 - 3)            | 1<br>(0 - 1)            |
| Motor vehicle road injuries                     | 126<br>(87 - 163)    | 4<br>(2 - 10)         | 10<br>(6 - 16)         | 85<br>(57 - 112)        | 21<br>(14 - 29)         | 5<br>(4 - 6)            |
| Other road injuries                             | 2<br>(1 - 4)         | 0<br>(0 - 0)          | 0<br>(0 - 0)           | 1<br>(1 - 3)            | 0<br>(0 - 1)            | 0<br>(0 - 0)            |
| Other transport injuries                        | 17<br>(10 - 22)      | 1<br>(0 - 2)          | 1<br>(1 - 2)           | 10<br>(6 - 15)          | 3<br>(2 - 4)            | 1<br>(0 - 1)            |
| Unintentional injuries                          | 254<br>(192 - 336)   | 40<br>(17 - 91)       | 23<br>(15 - 34)        | 124<br>(94 - 159)       | 40<br>(28 - 51)         | 27<br>(20 - 33)         |
| Falls                                           | 36<br>(28 - 47)      | 2<br>(1 - 3)          | 2<br>(1 - 2)           | 15<br>(11 - 20)         | 8<br>(6 - 11)           | 10<br>(7 - 14)          |
| Drowning                                        | 73<br>(46 - 102)     | 7<br>(3 - 17)         | 10<br>(6 - 16)         | 46<br>(28 - 64)         | 9<br>(5 - 13)           | 1<br>(1 - 2)            |
| Fire, heat, and hot substances                  | 24<br>(15 - 34)      | 5<br>(2 - 11)         | 3<br>(2 - 4)           | 9<br>(6 - 12)           | 4<br>(2 - 5)            | 4<br>(2 - 5)            |
| Poisonings                                      | 6<br>(5 - 10)        | 1<br>(0 - 2)          | 1<br>(0 - 1)           | 4<br>(3 - 5)            | 1<br>(1 - 1)            | 0<br>(0 - 0)            |
| Exposure to mechanical forces                   | 36<br>(27 - 47)      | 2<br>(1 - 4)          | 3<br>(2 - 5)           | 25<br>(18 - 33)         | 5<br>(4 - 7)            | 1<br>(1 - 1)            |
| Unintentional firearm injuries                  | 16<br>(11 - 22)      | 0<br>(0 - 1)          | 1<br>(0 - 1)           | 12<br>(8 - 17)          | 2<br>(1 - 4)            | 0<br>(0 - 0)            |
| Unintentional suffocation                       | 4<br>(3 - 6)         | 1<br>(0 - 1)          | 0<br>(0 - 1)           | 2<br>(1 - 3)            | 1<br>(0 - 1)            | 0<br>(0 - 0)            |
| Other exposure to mechanical forces             | 16<br>(12 - 23)      | 1<br>(0 - 2)          | 2<br>(1 - 3)           | 10<br>(7 - 16)          | 2<br>(1 - 3)            | 0<br>(0 - 1)            |
| Adverse effects of medical treatment            | 26<br>(17 - 36)      | 5<br>(2 - 10)         | 1<br>(1 - 2)           | 9<br>(5 - 13)           | 6<br>(4 - 9)            | 5<br>(3 - 7)            |
| Animal contact                                  | 5<br>(2 - 7)         | 1<br>(0 - 2)          | 1<br>(0 - 1)           | 2<br>(1 - 3)            | 1<br>(0 - 2)            | 1<br>(0 - 1)            |
| Venomous animal contact                         | 4<br>(1 - 5)         | 0<br>(0 - 1)          | 0<br>(0 - 1)           | 2<br>(1 - 2)            | 1<br>(0 - 1)            | 0<br>(0 - 0)            |
| Non-venomous animal contact                     | 1<br>(0 - 2)         | 0<br>(0 - 1)          | 0<br>(0 - 0)           | 0<br>(0 - 1)            | 0<br>(0 - 0)            | 0<br>(0 - 1)            |
| Foreign body                                    | 39<br>(22 - 67)      | 18<br>(7 - 43)        | 2<br>(1 - 4)           | 10<br>(6 - 14)          | 5<br>(3 - 7)            | 4<br>(3 - 6)            |
| Pulmonary aspiration and foreign body in airway | 39<br>(22 - 66)      | 18<br>(7 - 43)        | 2<br>(1 - 4)           | 10<br>(6 - 14)          | 5<br>(3 - 7)            | 4<br>(3 - 6)            |
| Foreign body in other body part                 | 1<br>(0 - 1)         | 0<br>(0 - 1)          | 0<br>(0 - 0)           | 0<br>(0 - 0)            | 0<br>(0 - 0)            | 0<br>(0 - 0)            |
| Other unintentional injuries                    | 8<br>(6 - 11)        | 1<br>(0 - 2)          | 1<br>(0 - 1)           | 5<br>(3 - 8)            | 1<br>(1 - 2)            | 1<br>(0 - 1)            |
| Self-harm and interpersonal violence            | 341<br>(261 - 433)   | 6<br>(2 - 14)         | 9<br>(6 - 14)          | 279<br>(214 - 355)      | 42<br>(29 - 58)         | 5<br>(4 - 7)            |
| Self-harm                                       | 179<br>(137 - 226)   | --                    | 4<br>(2 - 6)           | 146<br>(112 - 187)      | 25<br>(17 - 35)         | 4<br>(3 - 5)            |
| Interpersonal violence                          | 163<br>(108 - 217)   | 6<br>(2 - 14)         | 5<br>(3 - 9)           | 133<br>(87 - 177)       | 17<br>(10 - 27)         | 2<br>(1 - 3)            |
| Assault by firearm                              | 80<br>(45 - 114)     | 1<br>(0 - 3)          | 2<br>(1 - 3)           | 71<br>(40 - 103)        | 6<br>(3 - 11)           | 0<br>(0 - 0)            |
| Assault by sharp object                         | 40<br>(22 - 59)      | 1<br>(0 - 2)          | 1<br>(1 - 2)           | 33<br>(18 - 51)         | 4<br>(2 - 7)            | 0<br>(0 - 1)            |
| Assault by other means                          | 43<br>(28 - 69)      | 4<br>(1 - 10)         | 2<br>(1 - 4)           | 28<br>(18 - 48)         | 7<br>(4 - 12)           | 1<br>(1 - 2)            |

Web Table 31- Guyana deaths with 95% UI by age, sex, and cause in 2013

| Cause                                                             | Males, All Ages          | Males, 0-4 Years   | Males, 5-14 Years | Males, 15-49 Years     | Males, 50-69 Years     | Males, 70-80 Years |
|-------------------------------------------------------------------|--------------------------|--------------------|-------------------|------------------------|------------------------|--------------------|
| All causes                                                        | 3,201<br>(2,568 - 3,978) | 334<br>(157 - 629) | 83<br>(56 - 120)  | 1,237<br>(988 - 1,543) | 1,084<br>(779 - 1,390) | 462<br>(375 - 522) |
| Communicable, maternal, neonatal, and nutritional diseases        | 656<br>(506 - 864)       | 221<br>(109 - 396) | 15<br>(9 - 22)    | 286<br>(221 - 340)     | 97<br>(71 - 124)       | 37<br>(30 - 46)    |
| HIV/AIDS and tuberculosis                                         | 282<br>(198 - 355)       | 1<br>(1 - 2)       | 1<br>(0 - 1)      | 222<br>(157 - 278)     | 53<br>(32 - 77)        | 5<br>(3 - 7)       |
| Tuberculosis                                                      | 29<br>(19 - 39)          | 0<br>(0 - 1)       | 0<br>(0 - 0)      | 16<br>(10 - 21)        | 10<br>(6 - 14)         | 2<br>(1 - 3)       |
| HIV/AIDS                                                          | 253<br>(171 - 326)       | 1<br>(0 - 2)       | 0<br>(0 - 1)      | 207<br>(140 - 263)     | 43<br>(24 - 67)        | 3<br>(1 - 4)       |
| HIV/AIDS resulting in mycobacterial infection                     | 17<br>(11 - 23)          | 0<br>(0 - 0)       | 0<br>(0 - 0)      | 14<br>(9 - 19)         | 3<br>(2 - 5)           | 0<br>(0 - 0)       |
| HIV/AIDS resulting in other diseases                              | 236<br>(160 - 304)       | 1<br>(0 - 1)       | 0<br>(0 - 1)      | 193<br>(131 - 245)     | 40<br>(22 - 62)        | 3<br>(1 - 4)       |
| Diarrhea, lower respiratory, and other common infectious diseases | 181<br>(125 - 264)       | 72<br>(30 - 153)   | 10<br>(6 - 16)    | 43<br>(30 - 60)        | 32<br>(21 - 45)        | 25<br>(19 - 32)    |
| Diarrheal diseases                                                | 38<br>(19 - 74)          | 30<br>(11 - 65)    | 1<br>(1 - 2)      | 3<br>(2 - 5)           | 2<br>(1 - 4)           | 2<br>(1 - 2)       |
| Intestinal infectious diseases                                    | 6<br>(2 - 11)            | 2<br>(1 - 5)       | 2<br>(1 - 4)      | 1<br>(1 - 3)           | 0<br>(0 - 0)           | 0<br>(0 - 0)       |
| Typhoid fever                                                     | 4<br>(2 - 9)             | 1<br>(0 - 4)       | 2<br>(1 - 3)      | 1<br>(0 - 2)           | 0<br>(0 - 0)           | 0<br>(0 - 0)       |
| Paratyphoid fever                                                 | 1<br>(0 - 2)             | 0<br>(0 - 1)       | 0<br>(0 - 1)      | 0<br>(0 - 1)           | 0<br>(0 - 0)           | 0<br>(0 - 0)       |
| Other intestinal infectious diseases                              | 0<br>(0 - 1)             | 0<br>(0 - 1)       | 0<br>(0 - 0)      | 0<br>(0 - 0)           | 0<br>(0 - 0)           | 0<br>(0 - 0)       |
| Lower respiratory infections                                      | 117<br>(85 - 165)        | 34<br>(13 - 73)    | 4<br>(2 - 7)      | 31<br>(21 - 44)        | 26<br>(17 - 38)        | 22<br>(16 - 30)    |
| Upper respiratory infections                                      | 0<br>(0 - 0)             | 0<br>(0 - 0)       | 0<br>(0 - 0)      | 0<br>(0 - 0)           | 0<br>(0 - 0)           | 0<br>(0 - 0)       |
| Otitis media                                                      | 0<br>(0 - 0)             | 0<br>(0 - 0)       | 0<br>(0 - 0)      | 0<br>(0 - 0)           | 0<br>(0 - 0)           | 0<br>(0 - 0)       |
| Meningitis                                                        | 10<br>(7 - 16)           | 4<br>(1 - 8)       | 1<br>(1 - 1)      | 4<br>(3 - 5)           | 2<br>(1 - 2)           | 0<br>(0 - 1)       |
| Pneumococcal meningitis                                           | 3<br>(2 - 4)             | 1<br>(0 - 2)       | 0<br>(0 - 1)      | 1<br>(1 - 2)           | 0<br>(0 - 1)           | 0<br>(0 - 0)       |
| H influenzae type B meningitis                                    | 2<br>(1 - 4)             | 1<br>(0 - 3)       | 0<br>(0 - 0)      | 0<br>(0 - 1)           | 0<br>(0 - 0)           | 0<br>(0 - 0)       |
| Meningococcal meningitis                                          | 1<br>(1 - 2)             | 0<br>(0 - 1)       | 0<br>(0 - 0)      | 0<br>(0 - 1)           | 0<br>(0 - 0)           | 0<br>(0 - 0)       |
| Other meningitis                                                  | 4<br>(3 - 7)             | 1<br>(0 - 3)       | 0<br>(0 - 1)      | 2<br>(1 - 3)           | 1<br>(0 - 1)           | 0<br>(0 - 0)       |
| Encephalitis                                                      | 8<br>(5 - 13)            | 3<br>(1 - 6)       | 1<br>(1 - 3)      | 3<br>(2 - 5)           | 1<br>(1 - 1)           | 0<br>(0 - 0)       |
| Diphtheria                                                        | 0<br>(0 - 1)             | 0<br>(0 - 0)       | 0<br>(0 - 0)      | 0<br>(0 - 0)           | 0<br>(0 - 0)           | --<br>(0 - 0)      |
| Whooping cough                                                    | 0<br>(0 - 0)             | 0<br>(0 - 0)       | 0<br>(0 - 0)      | 0<br>(0 - 0)           | 0<br>(0 - 0)           | --<br>(0 - 0)      |
| Tetanus                                                           | 0<br>(0 - 1)             | 0<br>(0 - 0)       | 0<br>(0 - 0)      | 0<br>(0 - 0)           | 0<br>(0 - 0)           | 0<br>(0 - 0)       |
| Measles                                                           | 0<br>(0 - 0)             | 0<br>(0 - 0)       | 0<br>(0 - 0)      | 0<br>(0 - 0)           | 0<br>(0 - 0)           | --<br>(0 - 0)      |
| Varicella and herpes zoster                                       | 0<br>(0 - 0)             | 0<br>(0 - 0)       | 0<br>(0 - 0)      | 0<br>(0 - 0)           | 0<br>(0 - 0)           | 0<br>(0 - 0)       |
| Neglected tropical diseases and malaria                           | 8<br>(5 - 13)            | 1<br>(0 - 4)       | 1<br>(1 - 2)      | 4<br>(2 - 7)           | 1<br>(1 - 2)           | 0<br>(0 - 0)       |
| Malaria                                                           | 3<br>(1 - 5)             | 0<br>(0 - 1)       | 0<br>(0 - 1)      | 2<br>(0 - 4)           | 0<br>(0 - 1)           | 0<br>(0 - 0)       |
| Chagas disease                                                    | 0<br>(0 - 0)             | 0<br>(0 - 0)       | 0<br>(0 - 0)      | 0<br>(0 - 0)           | 0<br>(0 - 0)           | 0<br>(0 - 0)       |
| Leishmaniasis                                                     | 1<br>(0 - 1)             | 0<br>(0 - 1)       | 0<br>(0 - 0)      | 0<br>(0 - 0)           | 0<br>(0 - 0)           | 0<br>(0 - 0)       |
| Visceral leishmaniasis                                            | 1<br>(0 - 1)             | 0<br>(0 - 1)       | 0<br>(0 - 0)      | 0<br>(0 - 0)           | 0<br>(0 - 0)           | 0<br>(0 - 0)       |
| Cysticercosis                                                     | 0<br>(0 - 0)             | 0<br>(0 - 0)       | 0<br>(0 - 0)      | 0<br>(0 - 0)           | 0<br>(0 - 0)           | 0<br>(0 - 0)       |
| Cystic echinococcosis                                             | 0<br>(0 - 0)             | 0<br>(0 - 0)       | 0<br>(0 - 0)      | 0<br>(0 - 0)           | 0<br>(0 - 0)           | 0<br>(0 - 0)       |
| Dengue                                                            | 2<br>(1 - 3)             | 0<br>(0 - 1)       | 0<br>(0 - 1)      | 1<br>(1 - 1)           | 0<br>(0 - 0)           | 0<br>(0 - 0)       |
| Yellow fever                                                      | 0<br>(0 - 0)             | 0<br>(0 - 0)       | 0<br>(0 - 0)      | 0<br>(0 - 0)           | 0<br>(0 - 0)           | 0<br>(0 - 0)       |
| Rabies                                                            | 0<br>(0 - 0)             | 0<br>(0 - 0)       | 0<br>(0 - 0)      | 0<br>(0 - 0)           | 0<br>(0 - 0)           | 0<br>(0 - 0)       |
| Intestinal nematode infections                                    | 1<br>(0 - 4)             | 0<br>(0 - 2)       | 0<br>(0 - 1)      | 0<br>(0 - 1)           | 0<br>(0 - 0)           | 0<br>(0 - 0)       |
| Ascariasis                                                        | 1<br>(0 - 4)             | 0<br>(0 - 2)       | 0<br>(0 - 1)      | 0<br>(0 - 1)           | 0<br>(0 - 0)           | 0<br>(0 - 0)       |
| Other neglected tropical diseases                                 | 1<br>(1 - 2)             | 0<br>(0 - 1)       | 0<br>(0 - 0)      | 1<br>(0 - 1)           | 0<br>(0 - 0)           | 0<br>(0 - 0)       |

Web Table 31- Guyana deaths with 95% UI by age, sex, and cause in 2013

| Cause                                                            | Males, All Ages          | Males, 0-4 Years  | Males, 5-14 Years | Males, 15-49 Years | Males, 50-69 Years   | Males, 70-80 Years |
|------------------------------------------------------------------|--------------------------|-------------------|-------------------|--------------------|----------------------|--------------------|
| Maternal disorders                                               | --                       | --                | --                | --                 | --                   | --                 |
| Maternal hemorrhage                                              | --                       | --                | --                | --                 | --                   | --                 |
| Maternal sepsis and other maternal infections                    | --                       | --                | --                | --                 | --                   | --                 |
| Maternal hypertensive disorders                                  | --                       | --                | --                | --                 | --                   | --                 |
| Maternal obstructed labor                                        | --                       | --                | --                | --                 | --                   | --                 |
| Maternal abortive outcome                                        | --                       | --                | --                | --                 | --                   | --                 |
| Indirect maternal deaths                                         | --                       | --                | --                | --                 | --                   | --                 |
| Late maternal deaths                                             | --                       | --                | --                | --                 | --                   | --                 |
| Maternal deaths aggravated by HIV/AIDS                           | --                       | --                | --                | --                 | --                   | --                 |
| Other maternal disorders                                         | --                       | --                | --                | --                 | --                   | --                 |
| Neonatal disorders                                               | 121<br>(65 - 192)        | 121<br>(65 - 192) | --                | --                 | --                   | --                 |
| Neonatal preterm birth complications                             | 52<br>(25 - 84)          | 52<br>(25 - 84)   | --                | --                 | --                   | --                 |
| Neonatal encephalopathy due to birth asphyxia and trauma         | 30<br>(15 - 51)          | 30<br>(15 - 51)   | --                | --                 | --                   | --                 |
| Neonatal sepsis and other neonatal infections                    | 20<br>(7 - 41)           | 20<br>(7 - 41)    | --                | --                 | --                   | --                 |
| Hemolytic disease and other neonatal jaundice                    | 3<br>(1 - 6)             | 3<br>(1 - 6)      | --                | --                 | --                   | --                 |
| Other neonatal disorders                                         | 17<br>(8 - 30)           | 17<br>(8 - 30)    | --                | --                 | --                   | --                 |
| Nutritional deficiencies                                         | 50<br>(30 - 91)          | 24<br>(8 - 54)    | 2<br>(1 - 4)      | 9<br>(6 - 16)      | 8<br>(5 - 13)        | 7<br>(4 - 11)      |
| Protein-energy malnutrition                                      | 30<br>(15 - 62)          | 20<br>(7 - 47)    | 1<br>(1 - 3)      | 3<br>(2 - 7)       | 3<br>(1 - 5)         | 3<br>(1 - 5)       |
| Iodine deficiency                                                | 0<br>(0 - 1)             | 0<br>(0 - 1)      | 0<br>(0 - 0)      | 0<br>(0 - 0)       | 0<br>(0 - 0)         | 0<br>(0 - 0)       |
| Iron-deficiency anemia                                           | 17<br>(8 - 28)           | 3<br>(1 - 8)      | 1<br>(0 - 1)      | 5<br>(2 - 9)       | 4<br>(2 - 7)         | 4<br>(2 - 6)       |
| Other nutritional deficiencies                                   | 3<br>(1 - 6)             | 1<br>(0 - 3)      | 0<br>(0 - 0)      | 1<br>(0 - 2)       | 1<br>(0 - 1)         | 0<br>(0 - 1)       |
| Other communicable, maternal, neonatal, and nutritional diseases | 14<br>(8 - 20)           | 2<br>(1 - 4)      | 1<br>(0 - 1)      | 7<br>(4 - 10)      | 3<br>(2 - 5)         | 1<br>(0 - 1)       |
| Sexually transmitted diseases excluding HIV                      | 1<br>(0 - 3)             | 1<br>(0 - 2)      | 0<br>(0 - 0)      | 0<br>(0 - 0)       | 0<br>(0 - 0)         | 0<br>(0 - 0)       |
| Syphilis                                                         | 1<br>(0 - 2)             | 1<br>(0 - 2)      | 0<br>(0 - 0)      | 0<br>(0 - 0)       | 0<br>(0 - 0)         | 0<br>(0 - 0)       |
| Chlamydial infection                                             | --                       | --                | --                | --                 | --                   | --                 |
| Gonococcal infection                                             | 0<br>(0 - 0)             | --                | 0<br>(0 - 0)      | 0<br>(0 - 0)       | 0<br>(0 - 0)         | 0<br>(0 - 0)       |
| Other sexually transmitted diseases                              | 0<br>(0 - 0)             | --                | 0<br>(0 - 0)      | 0<br>(0 - 0)       | 0<br>(0 - 0)         | 0<br>(0 - 0)       |
| Hepatitis                                                        | 1<br>(1 - 2)             | 0<br>(0 - 0)      | 0<br>(0 - 0)      | 1<br>(1 - 1)       | 0<br>(0 - 1)         | 0<br>(0 - 0)       |
| Acute hepatitis A                                                | 0<br>(0 - 1)             | 0<br>(0 - 0)      | 0<br>(0 - 0)      | 0<br>(0 - 1)       | 0<br>(0 - 0)         | 0<br>(0 - 0)       |
| Acute hepatitis B                                                | 1<br>(1 - 1)             | 0<br>(0 - 0)      | 0<br>(0 - 0)      | 0<br>(0 - 1)       | 0<br>(0 - 1)         | 0<br>(0 - 0)       |
| Acute hepatitis C                                                | 0<br>(0 - 0)             | --                | 0<br>(0 - 0)      | 0<br>(0 - 0)       | 0<br>(0 - 0)         | 0<br>(0 - 0)       |
| Other infectious diseases                                        | 11<br>(6 - 16)           | 1<br>(0 - 3)      | 1<br>(0 - 1)      | 6<br>(3 - 9)       | 3<br>(1 - 4)         | 1<br>(0 - 1)       |
| Non-communicable diseases                                        | 1,922<br>(1,467 - 2,407) | 81<br>(36 - 166)  | 33<br>(22 - 48)   | 506<br>(368 - 677) | 892<br>(627 - 1,158) | 410<br>(333 - 464) |
| Neoplasms                                                        | 315<br>(237 - 401)       | 5<br>(2 - 11)     | 9<br>(6 - 14)     | 88<br>(64 - 116)   | 141<br>(98 - 186)    | 72<br>(55 - 88)    |
| Esophageal cancer                                                | 11<br>(7 - 16)           | --                | --                | 2<br>(1 - 4)       | 6<br>(4 - 10)        | 2<br>(2 - 3)       |
| Stomach cancer                                                   | 22<br>(16 - 29)          | --                | --                | 6<br>(4 - 8)       | 12<br>(8 - 16)       | 5<br>(4 - 6)       |
| Liver cancer                                                     | 16<br>(12 - 21)          | --                | 0<br>(0 - 0)      | 5<br>(4 - 7)       | 8<br>(6 - 11)        | 2<br>(2 - 3)       |
| Liver cancer due to hepatitis B                                  | 5<br>(2 - 8)             | --                | 0<br>(0 - 0)      | 2<br>(1 - 3)       | 2<br>(1 - 4)         | 0<br>(0 - 1)       |
| Liver cancer due to hepatitis C                                  | 7<br>(4 - 11)            | --                | 0<br>(0 - 0)      | 2<br>(1 - 3)       | 4<br>(2 - 6)         | 1<br>(1 - 2)       |
| Liver cancer due to alcohol use                                  | 3<br>(2 - 5)             | --                | --                | 1<br>(0 - 1)       | 1<br>(1 - 3)         | 1<br>(0 - 1)       |

Web Table 31- Guyana deaths with 95% UI by age, sex, and cause in 2013

| Cause                                         | Males, All Ages      | Males, 0-4 Years | Males, 5-14 Years | Males, 15-49 Years | Males, 50-69 Years | Males, 70-80 Years |
|-----------------------------------------------|----------------------|------------------|-------------------|--------------------|--------------------|--------------------|
| Liver cancer due to other causes              | 1<br>(1 - 2)         | --               | 0<br>(0 - 0)      | 1<br>(0 - 1)       | 0<br>(0 - 1)       | 0<br>(0 - 0)       |
| Larynx cancer                                 | 7<br>(5 - 10)        | --               | --                | 2<br>(1 - 3)       | 4<br>(3 - 6)       | 1<br>(1 - 2)       |
| Tracheal, bronchus and lung cancer            | 35<br>(25 - 46)      | --               | --                | 10<br>(7 - 14)     | 18<br>(12 - 25)    | 6<br>(5 - 8)       |
| Breast cancer                                 | 2<br>(1 - 3)         | --               | --                | 1<br>(0 - 1)       | 1<br>(1 - 2)       | 0<br>(0 - 1)       |
| Cervical cancer                               | --                   | --               | --                | --                 | --                 | --                 |
| Uterine cancer                                | --                   | --               | --                | --                 | --                 | --                 |
| Prostate cancer                               | 56<br>(33 - 79)      | --               | --                | 2<br>(1 - 3)       | 21<br>(12 - 32)    | 33<br>(20 - 47)    |
| Colon and rectum cancer                       | 32<br>(23 - 41)      | --               | --                | 9<br>(6 - 12)      | 16<br>(11 - 21)    | 7<br>(5 - 9)       |
| Lip and oral cavity cancer                    | 8<br>(6 - 11)        | --               | --                | 2<br>(2 - 4)       | 4<br>(3 - 6)       | 1<br>(1 - 1)       |
| Nasopharynx cancer                            | 3<br>(2 - 4)         | --               | 0<br>(0 - 0)      | 2<br>(1 - 2)       | 1<br>(1 - 2)       | 0<br>(0 - 0)       |
| Other pharynx cancer                          | 5<br>(3 - 7)         | --               | --                | 1<br>(1 - 2)       | 3<br>(2 - 4)       | 0<br>(0 - 1)       |
| Gallbladder and biliary tract cancer          | 3<br>(2 - 7)         | --               | --                | 1<br>(0 - 2)       | 2<br>(1 - 4)       | 1<br>(0 - 1)       |
| Pancreatic cancer                             | 14<br>(10 - 18)      | --               | --                | 4<br>(3 - 5)       | 7<br>(5 - 10)      | 2<br>(2 - 3)       |
| Malignant skin melanoma                       | 2<br>(1 - 4)         | --               | --                | 1<br>(1 - 2)       | 1<br>(0 - 2)       | 0<br>(0 - 1)       |
| Non-melanoma skin cancer                      | 1<br>(1 - 2)         | --               | --                | 1<br>(0 - 1)       | 1<br>(0 - 1)       | 0<br>(0 - 0)       |
| Ovarian cancer                                | --                   | --               | --                | --                 | --                 | --                 |
| Testicular cancer                             | 1<br>(0 - 1)         | --               | --                | 1<br>(0 - 1)       | 0<br>(0 - 0)       | 0<br>(0 - 0)       |
| Kidney cancer                                 | 7<br>(5 - 9)         | 0<br>(0 - 0)     | 0<br>(0 - 0)      | 2<br>(1 - 3)       | 4<br>(3 - 5)       | 1<br>(1 - 1)       |
| Bladder cancer                                | 5<br>(4 - 7)         | --               | --                | 1<br>(0 - 1)       | 2<br>(2 - 3)       | 2<br>(1 - 2)       |
| Brain and nervous system cancer               | 8<br>(3 - 12)        | 0<br>(0 - 1)     | 1<br>(0 - 2)      | 4<br>(1 - 5)       | 3<br>(1 - 4)       | 1<br>(0 - 1)       |
| Thyroid cancer                                | 1<br>(1 - 2)         | --               | 0<br>(0 - 0)      | 0<br>(0 - 1)       | 1<br>(0 - 1)       | 0<br>(0 - 0)       |
| Mesothelioma                                  | 1<br>(1 - 2)         | --               | --                | 0<br>(0 - 0)       | 1<br>(0 - 1)       | 0<br>(0 - 0)       |
| Hodgkin lymphoma                              | 2<br>(1 - 4)         | 0<br>(0 - 0)     | 0<br>(0 - 0)      | 1<br>(0 - 2)       | 1<br>(0 - 1)       | 0<br>(0 - 0)       |
| Non-Hodgkin lymphoma                          | 18<br>(13 - 25)      | 0<br>(0 - 1)     | 1<br>(1 - 2)      | 9<br>(6 - 13)      | 6<br>(4 - 9)       | 2<br>(1 - 2)       |
| Multiple myeloma                              | 6<br>(4 - 9)         | --               | --                | 2<br>(1 - 2)       | 4<br>(2 - 5)       | 1<br>(1 - 1)       |
| Leukemia                                      | 19<br>(14 - 24)      | 1<br>(1 - 3)     | 4<br>(2 - 6)      | 8<br>(6 - 11)      | 4<br>(3 - 6)       | 1<br>(1 - 2)       |
| Other neoplasms                               | 27<br>(20 - 35)      | 2<br>(1 - 6)     | 3<br>(2 - 5)      | 11<br>(8 - 16)     | 8<br>(5 - 11)      | 2<br>(2 - 3)       |
| Cardiovascular diseases                       | 867<br>(652 - 1,090) | 7<br>(3 - 16)    | 5<br>(3 - 7)      | 179<br>(128 - 247) | 462<br>(325 - 599) | 213<br>(172 - 242) |
| Rheumatic heart disease                       | 6<br>(4 - 9)         | 0<br>(0 - 0)     | 1<br>(0 - 1)      | 3<br>(2 - 5)       | 1<br>(1 - 2)       | 0<br>(0 - 1)       |
| Ischemic heart disease                        | 425<br>(309 - 551)   | 1<br>(0 - 2)     | 1<br>(1 - 1)      | 89<br>(61 - 126)   | 238<br>(164 - 314) | 97<br>(76 - 115)   |
| Cerebrovascular disease                       | 301<br>(219 - 395)   | 2<br>(1 - 5)     | 2<br>(1 - 3)      | 50<br>(34 - 72)    | 164<br>(113 - 222) | 84<br>(64 - 103)   |
| Ischemic stroke                               | 165<br>(118 - 228)   | 1<br>(0 - 2)     | 0<br>(0 - 1)      | 14<br>(9 - 23)     | 89<br>(60 - 134)   | 60<br>(46 - 74)    |
| Hemorrhagic stroke                            | 137<br>(93 - 188)    | 2<br>(1 - 3)     | 1<br>(1 - 2)      | 36<br>(24 - 53)    | 75<br>(47 - 106)   | 23<br>(14 - 31)    |
| Hypertensive heart disease                    | 54<br>(33 - 78)      | 0<br>(0 - 0)     | 0<br>(0 - 0)      | 10<br>(5 - 16)     | 27<br>(15 - 41)    | 17<br>(10 - 25)    |
| Cardiomyopathy and myocarditis                | 31<br>(22 - 43)      | 2<br>(1 - 4)     | 1<br>(1 - 1)      | 12<br>(8 - 17)     | 12<br>(8 - 18)     | 4<br>(3 - 5)       |
| Atrial fibrillation and flutter               | 5<br>(4 - 7)         | --               | --                | 1<br>(0 - 1)       | 2<br>(1 - 3)       | 2<br>(1 - 3)       |
| Aortic aneurysm                               | 9<br>(6 - 12)        | --               | --                | 2<br>(1 - 3)       | 5<br>(3 - 7)       | 2<br>(2 - 3)       |
| Peripheral vascular disease                   | 2<br>(2 - 3)         | --               | --                | 0<br>(0 - 0)       | 1<br>(0 - 1)       | 1<br>(1 - 2)       |
| Endocarditis                                  | 3<br>(2 - 5)         | 0<br>(0 - 1)     | 0<br>(0 - 0)      | 1<br>(1 - 2)       | 1<br>(1 - 2)       | 0<br>(0 - 1)       |
| Other cardiovascular and circulatory diseases | 29<br>(20 - 39)      | 1<br>(1 - 3)     | 1<br>(0 - 1)      | 11<br>(7 - 16)     | 11<br>(7 - 16)     | 5<br>(4 - 7)       |

Web Table 31- Guyana deaths with 95% UI by age, sex, and cause in 2013

| Cause                                               | Males, All Ages   | Males, 0-4 Years | Males, 5-14 Years | Males, 15-49 Years | Males, 50-69 Years | Males, 70-80 Years |
|-----------------------------------------------------|-------------------|------------------|-------------------|--------------------|--------------------|--------------------|
| Chronic respiratory diseases                        | 79<br>(61 - 101)  | 5<br>(2 - 11)    | 2<br>(1 - 2)      | 18<br>(13 - 25)    | 30<br>(20 - 40)    | 25<br>(20 - 30)    |
| Chronic obstructive pulmonary disease               | 47<br>(36 - 61)   | 2<br>(1 - 5)     | 0<br>(0 - 1)      | 7<br>(5 - 10)      | 18<br>(12 - 25)    | 20<br>(15 - 24)    |
| Pneumoconiosis                                      | 4<br>(3 - 6)      | 0<br>(0 - 0)     | 0<br>(0 - 0)      | 1<br>(1 - 2)       | 2<br>(1 - 4)       | 1<br>(0 - 1)       |
| Silicosis                                           | 0<br>(0 - 0)      | 0<br>(0 - 0)     | 0<br>(0 - 0)      | 0<br>(0 - 0)       | 0<br>(0 - 0)       | 0<br>(0 - 0)       |
| Asbestosis                                          | 1<br>(1 - 1)      | 0<br>(0 - 0)     | 0<br>(0 - 0)      | 0<br>(0 - 0)       | 1<br>(0 - 1)       | 0<br>(0 - 0)       |
| Coal workers pneumoconiosis                         | 1<br>(1 - 2)      | 0<br>(0 - 0)     | 0<br>(0 - 0)      | 1<br>(0 - 1)       | 1<br>(0 - 1)       | 0<br>(0 - 0)       |
| Other pneumoconiosis                                | 2<br>(1 - 3)      | 0<br>(0 - 0)     | 0<br>(0 - 0)      | 0<br>(0 - 1)       | 1<br>(0 - 1)       | 0<br>(0 - 1)       |
| Asthma                                              | 17<br>(13 - 23)   | 1<br>(0 - 3)     | 1<br>(1 - 1)      | 7<br>(5 - 10)      | 6<br>(4 - 8)       | 3<br>(2 - 4)       |
| Interstitial lung disease and pulmonary sarcoidosis | 6<br>(4 - 9)      | 0<br>(0 - 0)     | 0<br>(0 - 0)      | 2<br>(1 - 2)       | 3<br>(2 - 4)       | 2<br>(1 - 2)       |
| Other chronic respiratory diseases                  | 4<br>(3 - 7)      | 2<br>(1 - 4)     | 0<br>(0 - 0)      | 1<br>(1 - 2)       | 1<br>(1 - 1)       | 0<br>(0 - 0)       |
| Cirrhosis                                           | 122<br>(86 - 163) | 0<br>(0 - 1)     | 1<br>(0 - 1)      | 59<br>(41 - 82)    | 57<br>(38 - 76)    | 6<br>(5 - 8)       |
| Cirrhosis due to hepatitis B                        | 9<br>(3 - 16)     | 0<br>(0 - 0)     | 0<br>(0 - 0)      | 4<br>(1 - 8)       | 4<br>(1 - 8)       | 0<br>(0 - 1)       |
| Cirrhosis due to hepatitis C                        | 23<br>(8 - 47)    | 0<br>(0 - 0)     | 0<br>(0 - 0)      | 10<br>(2 - 22)     | 12<br>(4 - 22)     | 2<br>(1 - 3)       |
| Cirrhosis due to alcohol use                        | 67<br>(43 - 102)  | --               | --                | 31<br>(19 - 48)    | 33<br>(21 - 50)    | 3<br>(2 - 5)       |
| Cirrhosis due to other causes                       | 23<br>(13 - 36)   | 0<br>(0 - 1)     | 0<br>(0 - 1)      | 14<br>(8 - 23)     | 8<br>(4 - 13)      | 0<br>(0 - 1)       |
| Digestive diseases                                  | 66<br>(49 - 90)   | 1<br>(1 - 3)     | 2<br>(1 - 2)      | 28<br>(20 - 41)    | 26<br>(18 - 36)    | 9<br>(7 - 12)      |
| Peptic ulcer disease                                | 19<br>(12 - 28)   | 0<br>(0 - 0)     | 0<br>(0 - 0)      | 8<br>(5 - 13)      | 8<br>(5 - 12)      | 3<br>(2 - 4)       |
| Gastritis and duodenitis                            | 5<br>(2 - 7)      | 0<br>(0 - 0)     | 0<br>(0 - 0)      | 2<br>(1 - 3)       | 2<br>(1 - 3)       | 1<br>(0 - 1)       |
| Appendicitis                                        | 4<br>(2 - 5)      | 0<br>(0 - 0)     | 0<br>(0 - 0)      | 2<br>(1 - 3)       | 1<br>(1 - 2)       | 0<br>(0 - 0)       |
| Paralytic ileus and intestinal obstruction          | 8<br>(3 - 11)     | 0<br>(0 - 1)     | 0<br>(0 - 1)      | 2<br>(1 - 4)       | 3<br>(1 - 5)       | 1<br>(1 - 2)       |
| Inguinal, femoral, and abdominal hernia             | 3<br>(2 - 7)      | 0<br>(0 - 0)     | 0<br>(0 - 0)      | 1<br>(1 - 3)       | 1<br>(1 - 3)       | 1<br>(0 - 1)       |
| Inflammatory bowel disease                          | 6<br>(4 - 9)      | 1<br>(0 - 1)     | 0<br>(0 - 0)      | 2<br>(1 - 4)       | 2<br>(1 - 3)       | 1<br>(1 - 2)       |
| Vascular intestinal disorders                       | 2<br>(1 - 5)      | 0<br>(0 - 0)     | 0<br>(0 - 0)      | 1<br>(0 - 1)       | 1<br>(0 - 2)       | 0<br>(0 - 1)       |
| Gallbladder and biliary diseases                    | 3<br>(2 - 5)      | 0<br>(0 - 0)     | 0<br>(0 - 0)      | 1<br>(1 - 2)       | 2<br>(1 - 2)       | 1<br>(0 - 1)       |
| Pancreatitis                                        | 8<br>(5 - 14)     | 0<br>(0 - 0)     | 0<br>(0 - 0)      | 5<br>(3 - 8)       | 3<br>(2 - 5)       | 0<br>(0 - 0)       |
| Other digestive diseases                            | 9<br>(5 - 12)     | 0<br>(0 - 0)     | 0<br>(0 - 1)      | 3<br>(2 - 5)       | 3<br>(2 - 5)       | 1<br>(1 - 2)       |
| Neurological disorders                              | 58<br>(45 - 72)   | 1<br>(1 - 4)     | 2<br>(1 - 4)      | 17<br>(11 - 23)    | 13<br>(9 - 17)     | 24<br>(19 - 31)    |
| Alzheimer disease and other dementias               | 25<br>(19 - 33)   | --               | --                | 0<br>(0 - 0)       | 4<br>(3 - 7)       | 21<br>(16 - 27)    |
| Parkinson disease                                   | 4<br>(3 - 6)      | --               | --                | 0<br>(0 - 0)       | 2<br>(1 - 3)       | 2<br>(2 - 3)       |
| Epilepsy                                            | 19<br>(13 - 27)   | 1<br>(0 - 2)     | 2<br>(1 - 3)      | 12<br>(8 - 18)     | 4<br>(2 - 5)       | 1<br>(0 - 1)       |
| Multiple sclerosis                                  | 0<br>(0 - 1)      | --               | --                | 0<br>(0 - 0)       | 0<br>(0 - 0)       | 0<br>(0 - 0)       |
| Other neurological disorders                        | 8<br>(6 - 11)     | 0<br>(0 - 1)     | 1<br>(0 - 1)      | 4<br>(3 - 5)       | 3<br>(2 - 4)       | 0<br>(0 - 1)       |
| Mental and substance use disorders                  | 24<br>(15 - 34)   | 0<br>(0 - 1)     | 0<br>(0 - 0)      | 14<br>(9 - 20)     | 9<br>(5 - 13)      | 1<br>(1 - 2)       |
| Schizophrenia                                       | 1<br>(1 - 2)      | --               | --                | 1<br>(0 - 1)       | 0<br>(0 - 1)       | 0<br>(0 - 0)       |
| Alcohol use disorders                               | 15<br>(8 - 21)    | --               | --                | 7<br>(4 - 11)      | 6<br>(3 - 10)      | 1<br>(0 - 1)       |
| Drug use disorders                                  | 9<br>(5 - 12)     | 0<br>(0 - 1)     | --                | 6<br>(3 - 9)       | 2<br>(1 - 3)       | 0<br>(0 - 1)       |
| Opioid use disorders                                | 2<br>(1 - 3)      | 0<br>(0 - 0)     | --                | 2<br>(1 - 3)       | 1<br>(0 - 1)       | 0<br>(0 - 0)       |
| Cocaine use disorders                               | 0<br>(0 - 1)      | 0<br>(0 - 0)     | --                | 0<br>(0 - 0)       | 0<br>(0 - 0)       | 0<br>(0 - 0)       |
| Amphetamine use disorders                           | 0<br>(0 - 0)      | 0<br>(0 - 0)     | --                | 0<br>(0 - 0)       | 0<br>(0 - 0)       | 0<br>(0 - 0)       |
| Other drug use disorders                            | 5<br>(3 - 8)      | 0<br>(0 - 0)     | --                | 4<br>(2 - 6)       | 1<br>(1 - 2)       | 0<br>(0 - 0)       |

Web Table 31- Guyana deaths with 95% UI by age, sex, and cause in 2013

| Cause                                               | Males, All Ages    | Males, 0-4 Years | Males, 5-14 Years | Males, 15-49 Years | Males, 50-69 Years | Males, 70-80 Years |
|-----------------------------------------------------|--------------------|------------------|-------------------|--------------------|--------------------|--------------------|
| Eating disorders                                    | 0<br>(0 - 0)       | --               | 0<br>(0 - 0)      | 0<br>(0 - 0)       | --                 | --                 |
| Anorexia nervosa                                    | 0<br>(0 - 0)       | --               | 0<br>(0 - 0)      | 0<br>(0 - 0)       | --                 | --                 |
| Diabetes, urogenital, blood, and endocrine diseases | 309<br>(231 - 400) | 10<br>(4 - 23)   | 5<br>(3 - 8)      | 89<br>(64 - 122)   | 149<br>(102 - 197) | 56<br>(44 - 67)    |
| Diabetes mellitus                                   | 182<br>(132 - 236) | 1<br>(0 - 2)     | 0<br>(0 - 1)      | 40<br>(28 - 57)    | 103<br>(71 - 138)  | 37<br>(29 - 46)    |
| Acute glomerulonephritis                            | 0<br>(0 - 0)       | 0<br>(0 - 0)     | 0<br>(0 - 0)      | 0<br>(0 - 0)       | 0<br>(0 - 0)       | 0<br>(0 - 0)       |
| Chronic kidney disease                              | 74<br>(53 - 100)   | 3<br>(1 - 6)     | 2<br>(1 - 2)      | 27<br>(19 - 39)    | 30<br>(19 - 42)    | 13<br>(10 - 17)    |
| Chronic kidney disease due to diabetes mellitus     | 12<br>(5 - 20)     | 0<br>(0 - 1)     | 0<br>(0 - 0)      | 4<br>(2 - 8)       | 6<br>(2 - 11)      | 2<br>(1 - 3)       |
| Chronic kidney disease due to hypertension          | 38<br>(24 - 53)    | 1<br>(0 - 1)     | 0<br>(0 - 1)      | 13<br>(8 - 19)     | 17<br>(10 - 25)    | 7<br>(5 - 10)      |
| Chronic kidney disease due to glomerulonephritis    | 4<br>(3 - 7)       | 0<br>(0 - 1)     | 0<br>(0 - 1)      | 2<br>(1 - 3)       | 1<br>(0 - 2)       | 0<br>(0 - 1)       |
| Chronic kidney disease due to other causes          | 20<br>(13 - 32)    | 1<br>(0 - 3)     | 1<br>(0 - 1)      | 8<br>(4 - 14)      | 6<br>(3 - 11)      | 4<br>(2 - 6)       |
| Urinary diseases and male infertility               | 14<br>(9 - 18)     | 1<br>(0 - 2)     | 0<br>(0 - 0)      | 4<br>(2 - 5)       | 6<br>(3 - 8)       | 3<br>(2 - 5)       |
| Interstitial nephritis and urinary tract infections | 8<br>(5 - 12)      | 1<br>(0 - 1)     | 0<br>(0 - 0)      | 2<br>(1 - 3)       | 3<br>(2 - 5)       | 2<br>(1 - 3)       |
| Urolithiasis                                        | 1<br>(0 - 1)       | --               | 0<br>(0 - 0)      | 0<br>(0 - 1)       | 0<br>(0 - 1)       | 0<br>(0 - 0)       |
| Other urinary diseases                              | 4<br>(3 - 7)       | 0<br>(0 - 1)     | 0<br>(0 - 0)      | 1<br>(1 - 2)       | 2<br>(1 - 3)       | 1<br>(1 - 2)       |
| Gynecological diseases                              | --                 | --               | --                | --                 | --                 | --                 |
| Uterine fibroids                                    | --                 | --               | --                | --                 | --                 | --                 |
| Polycystic ovarian syndrome                         | --                 | --               | --                | --                 | --                 | --                 |
| Endometriosis                                       | --                 | --               | --                | --                 | --                 | --                 |
| Genital prolapse                                    | --                 | --               | --                | --                 | --                 | --                 |
| Other gynecological diseases                        | --                 | --               | --                | --                 | --                 | --                 |
| Hemoglobinopathies and hemolytic anemias            | 13<br>(7 - 21)     | 3<br>(1 - 7)     | 2<br>(1 - 4)      | 6<br>(3 - 9)       | 2<br>(1 - 2)       | 0<br>(0 - 1)       |
| Thalassemias                                        | 0<br>(0 - 1)       | 0<br>(0 - 0)     | 0<br>(0 - 0)      | 0<br>(0 - 0)       | 0<br>(0 - 0)       | 0<br>(0 - 0)       |
| Sickle cell disorders                               | 11<br>(6 - 18)     | 2<br>(1 - 6)     | 2<br>(1 - 3)      | 5<br>(3 - 8)       | 1<br>(1 - 2)       | 0<br>(0 - 0)       |
| G6PD deficiency                                     | 0<br>(0 - 1)       | 0<br>(0 - 0)     | 0<br>(0 - 0)      | 0<br>(0 - 0)       | 0<br>(0 - 0)       | 0<br>(0 - 0)       |
| Other hemoglobinopathies and hemolytic anemias      | 1<br>(1 - 2)       | 0<br>(0 - 0)     | 0<br>(0 - 0)      | 0<br>(0 - 1)       | 0<br>(0 - 0)       | 0<br>(0 - 0)       |
| Endocrine, metabolic, blood, and immune disorders   | 26<br>(17 - 54)    | 3<br>(1 - 9)     | 1<br>(0 - 2)      | 11<br>(7 - 25)     | 8<br>(5 - 16)      | 2<br>(1 - 4)       |
| Musculoskeletal disorders                           | 7<br>(4 - 12)      | --               | 0<br>(0 - 1)      | 4<br>(2 - 7)       | 2<br>(1 - 3)       | 1<br>(0 - 1)       |
| Rheumatoid arthritis                                | 1<br>(0 - 1)       | --               | 0<br>(0 - 0)      | 0<br>(0 - 0)       | 0<br>(0 - 0)       | 0<br>(0 - 0)       |
| Other musculoskeletal disorders                     | 7<br>(4 - 11)      | --               | 0<br>(0 - 1)      | 4<br>(2 - 7)       | 2<br>(1 - 3)       | 1<br>(0 - 1)       |
| Other non-communicable diseases                     | 75<br>(43 - 127)   | 50<br>(22 - 99)  | 7<br>(4 - 10)     | 10<br>(7 - 14)     | 5<br>(3 - 8)       | 3<br>(2 - 4)       |
| Congenital anomalies                                | 61<br>(33 - 110)   | 45<br>(20 - 90)  | 6<br>(4 - 10)     | 7<br>(5 - 11)      | 2<br>(1 - 3)       | 0<br>(0 - 1)       |
| Neural tube defects                                 | 2<br>(1 - 4)       | 2<br>(1 - 4)     | 0<br>(0 - 0)      | 0<br>(0 - 0)       | 0<br>(0 - 0)       | 0<br>(0 - 0)       |
| Congenital heart anomalies                          | 30<br>(16 - 56)    | 21<br>(9 - 43)   | 4<br>(2 - 7)      | 4<br>(3 - 6)       | 1<br>(0 - 1)       | 0<br>(0 - 0)       |
| Cleft lip and cleft palate                          | 0<br>(0 - 0)       | 0<br>(0 - 0)     | --                | --                 | --                 | --                 |
| Down syndrome                                       | 5<br>(2 - 9)       | 2<br>(1 - 6)     | 0<br>(0 - 1)      | 2<br>(1 - 2)       | 0<br>(0 - 1)       | 0<br>(0 - 0)       |
| Chromosomal unbalanced rearrangements               | 1<br>(0 - 2)       | 1<br>(0 - 2)     | 0<br>(0 - 0)      | 0<br>(0 - 0)       | 0<br>(0 - 0)       | 0<br>(0 - 0)       |
| Other congenital anomalies                          | 23<br>(11 - 46)    | 19<br>(7 - 39)   | 2<br>(1 - 4)      | 2<br>(1 - 3)       | 1<br>(0 - 1)       | 0<br>(0 - 0)       |
| Skin and subcutaneous diseases                      | 10<br>(6 - 13)     | 1<br>(0 - 2)     | 0<br>(0 - 1)      | 3<br>(2 - 4)       | 3<br>(2 - 5)       | 2<br>(1 - 3)       |
| Cellulitis                                          | 1<br>(1 - 2)       | 0<br>(0 - 0)     | 0<br>(0 - 0)      | 0<br>(0 - 1)       | 0<br>(0 - 1)       | 0<br>(0 - 0)       |
| Pyoderma                                            | 3<br>(2 - 5)       | 1<br>(0 - 1)     | 0<br>(0 - 0)      | 1<br>(0 - 2)       | 1<br>(1 - 2)       | 1<br>(0 - 1)       |

Web Table 31- Guyana deaths with 95% UI by age, sex, and cause in 2013

| Cause                                           | Males, All Ages            | Males, 0-4 Years        | Males, 5-14 Years       | Males, 15-49 Years         | Males, 50-69 Years       | Males, 70-80 Years      |
|-------------------------------------------------|----------------------------|-------------------------|-------------------------|----------------------------|--------------------------|-------------------------|
| Decubitus ulcer                                 | 5<br>(3 - 6)               | 0<br>(0 - 0)            | 0<br>(0 - 0)            | 2<br>(1 - 2)               | 2<br>(1 - 2)             | 1<br>(1 - 2)            |
| Other skin and subcutaneous diseases            | 0<br>(0 - 1)               | 0<br>(0 - 0)            | 0<br>(0 - 0)            | 0<br>(0 - 0)               | 0<br>(0 - 0)             | 0<br>(0 - 0)            |
| Sudden infant death syndrome                    | 4<br>(1 - 10)              | 4<br>(1 - 10)           | --                      | --                         | --                       | --                      |
| <b>Injuries</b>                                 | <b>623<br/>(468 - 801)</b> | <b>32<br/>(13 - 71)</b> | <b>36<br/>(24 - 52)</b> | <b>445<br/>(329 - 576)</b> | <b>95<br/>(64 - 129)</b> | <b>15<br/>(11 - 18)</b> |
| Transport injuries                              | 169<br>(117 - 224)         | 5<br>(2 - 11)           | 15<br>(9 - 22)          | 115<br>(76 - 156)          | 30<br>(19 - 42)          | 4<br>(3 - 5)            |
| Road injuries                                   | 156<br>(108 - 208)         | 4<br>(2 - 9)            | 14<br>(9 - 21)          | 106<br>(71 - 145)          | 28<br>(18 - 39)          | 4<br>(3 - 5)            |
| Pedestrian road injuries                        | 33<br>(20 - 47)            | 1<br>(1 - 3)            | 5<br>(3 - 8)            | 17<br>(10 - 27)            | 7<br>(4 - 12)            | 1<br>(1 - 2)            |
| Cyclist road injuries                           | 10<br>(6 - 13)             | 0<br>(0 - 1)            | 1<br>(1 - 2)            | 6<br>(4 - 8)               | 2<br>(1 - 3)             | 0<br>(0 - 0)            |
| Motorcyclist road injuries                      | 15<br>(9 - 22)             | 0<br>(0 - 1)            | 1<br>(0 - 1)            | 12<br>(7 - 18)             | 2<br>(1 - 2)             | 0<br>(0 - 0)            |
| Motor vehicle road injuries                     | 98<br>(64 - 132)           | 2<br>(1 - 5)            | 6<br>(4 - 10)           | 70<br>(44 - 97)            | 17<br>(10 - 25)          | 2<br>(1 - 3)            |
| Other road injuries                             | 2<br>(1 - 3)               | 0<br>(0 - 0)            | 0<br>(0 - 0)            | 1<br>(1 - 2)               | 0<br>(0 - 1)             | 0<br>(0 - 0)            |
| Other transport injuries                        | 12<br>(7 - 18)             | 1<br>(0 - 1)            | 1<br>(1 - 2)            | 8<br>(4 - 13)              | 2<br>(1 - 3)             | 0<br>(0 - 1)            |
| Unintentional injuries                          | 178<br>(131 - 236)         | 24<br>(9 - 53)          | 16<br>(10 - 24)         | 101<br>(74 - 136)          | 30<br>(20 - 40)          | 8<br>(6 - 9)            |
| Falls                                           | 24<br>(17 - 32)            | 1<br>(0 - 2)            | 1<br>(1 - 2)            | 13<br>(9 - 18)             | 6<br>(4 - 9)             | 2<br>(1 - 3)            |
| Drowning                                        | 62<br>(37 - 87)            | 4<br>(1 - 11)           | 8<br>(4 - 13)           | 42<br>(24 - 59)            | 7<br>(4 - 11)            | 1<br>(0 - 1)            |
| Fire, heat, and hot substances                  | 12<br>(8 - 18)             | 3<br>(1 - 6)            | 1<br>(1 - 2)            | 5<br>(3 - 8)               | 2<br>(1 - 3)             | 1<br>(1 - 1)            |
| Poisonings                                      | 4<br>(3 - 7)               | 0<br>(0 - 1)            | 0<br>(0 - 1)            | 3<br>(2 - 4)               | 1<br>(0 - 1)             | 0<br>(0 - 0)            |
| Exposure to mechanical forces                   | 29<br>(21 - 40)            | 1<br>(0 - 2)            | 2<br>(1 - 3)            | 21<br>(15 - 29)            | 5<br>(3 - 7)             | 0<br>(0 - 0)            |
| Unintentional firearm injuries                  | 14<br>(9 - 20)             | 0<br>(0 - 1)            | 1<br>(0 - 1)            | 11<br>(7 - 16)             | 2<br>(1 - 3)             | 0<br>(0 - 0)            |
| Unintentional suffocation                       | 3<br>(2 - 6)               | 0<br>(0 - 1)            | 0<br>(0 - 1)            | 2<br>(1 - 3)               | 1<br>(0 - 1)             | 0<br>(0 - 0)            |
| Other exposure to mechanical forces             | 12<br>(9 - 19)             | 0<br>(0 - 1)            | 1<br>(1 - 2)            | 9<br>(6 - 14)              | 2<br>(1 - 3)             | 0<br>(0 - 0)            |
| Adverse effects of medical treatment            | 13<br>(8 - 18)             | 3<br>(1 - 6)            | 1<br>(0 - 1)            | 4<br>(3 - 7)               | 3<br>(2 - 5)             | 1<br>(1 - 2)            |
| Animal contact                                  | 3<br>(1 - 5)               | 0<br>(0 - 1)            | 0<br>(0 - 1)            | 1<br>(0 - 2)               | 1<br>(0 - 1)             | 0<br>(0 - 0)            |
| Venomous animal contact                         | 3<br>(1 - 4)               | 0<br>(0 - 1)            | 0<br>(0 - 1)            | 1<br>(0 - 2)               | 1<br>(0 - 1)             | 0<br>(0 - 0)            |
| Non-venomous animal contact                     | 1<br>(0 - 1)               | 0<br>(0 - 0)            | 0<br>(0 - 0)            | 0<br>(0 - 0)               | 0<br>(0 - 0)             | 0<br>(0 - 0)            |
| Foreign body                                    | 24<br>(11 - 42)            | 11<br>(4 - 25)          | 1<br>(1 - 2)            | 7<br>(4 - 11)              | 4<br>(2 - 6)             | 1<br>(1 - 2)            |
| Pulmonary aspiration and foreign body in airway | 24<br>(11 - 41)            | 11<br>(3 - 25)          | 1<br>(1 - 2)            | 7<br>(3 - 11)              | 3<br>(2 - 5)             | 1<br>(1 - 2)            |
| Foreign body in other body part                 | 0<br>(0 - 1)               | 0<br>(0 - 0)            | 0<br>(0 - 0)            | 0<br>(0 - 0)               | 0<br>(0 - 0)             | 0<br>(0 - 0)            |
| Other unintentional injuries                    | 7<br>(5 - 10)              | 0<br>(0 - 1)            | 1<br>(0 - 1)            | 4<br>(3 - 7)               | 1<br>(1 - 2)             | 0<br>(0 - 0)            |
| Self-harm and interpersonal violence            | 276<br>(203 - 368)         | 4<br>(1 - 10)           | 6<br>(3 - 9)            | 229<br>(166 - 306)         | 35<br>(22 - 50)          | 3<br>(2 - 4)            |
| Self-harm                                       | 144<br>(102 - 190)         | --                      | 2<br>(1 - 3)            | 119<br>(85 - 159)          | 21<br>(13 - 31)          | 2<br>(1 - 3)            |
| Interpersonal violence                          | 133<br>(82 - 183)          | 4<br>(1 - 10)           | 4<br>(2 - 6)            | 111<br>(68 - 154)          | 14<br>(7 - 23)           | 1<br>(0 - 2)            |
| Assault by firearm                              | 72<br>(38 - 107)           | 1<br>(0 - 2)            | 1<br>(0 - 3)            | 65<br>(34 - 97)            | 5<br>(2 - 10)            | 0<br>(0 - 0)            |
| Assault by sharp object                         | 31<br>(15 - 51)            | 1<br>(0 - 2)            | 1<br>(0 - 2)            | 26<br>(12 - 43)            | 3<br>(1 - 6)             | 0<br>(0 - 1)            |
| Assault by other means                          | 29<br>(17 - 54)            | 2<br>(1 - 7)            | 1<br>(1 - 3)            | 20<br>(11 - 38)            | 5<br>(3 - 10)            | 1<br>(0 - 1)            |

Web Table 31- Guyana deaths with 95% UI by age, sex, and cause in 2013

| Cause                                                             | Females, All Ages        | Females, 0-4 Years | Females, 5-14 Years | Females, 15-49 Years | Females, 50-69 Years | Females, 70-80 Years   |
|-------------------------------------------------------------------|--------------------------|--------------------|---------------------|----------------------|----------------------|------------------------|
| All causes                                                        | 2,826<br>(2,178 - 3,535) | 258<br>(122 - 494) | 54<br>(34 - 84)     | 653<br>(474 - 860)   | 809<br>(572 - 1,067) | 1,053<br>(862 - 1,261) |
| Communicable, maternal, neonatal, and nutritional diseases        | 433<br>(320 - 583)       | 164<br>(80 - 306)  | 10<br>(6 - 17)      | 141<br>(104 - 182)   | 38<br>(27 - 52)      | 80<br>(61 - 101)       |
| HIV/AIDS and tuberculosis                                         | 100<br>(56 - 152)        | 1<br>(0 - 2)       | 0<br>(0 - 1)        | 84<br>(48 - 126)     | 12<br>(5 - 23)       | 2<br>(1 - 4)           |
| Tuberculosis                                                      | 8<br>(6 - 12)            | 0<br>(0 - 1)       | 0<br>(0 - 0)        | 4<br>(3 - 7)         | 2<br>(1 - 3)         | 1<br>(1 - 2)           |
| HIV/AIDS                                                          | 92<br>(48 - 145)         | 1<br>(0 - 1)       | 0<br>(0 - 1)        | 80<br>(43 - 122)     | 10<br>(4 - 20)       | 1<br>(0 - 2)           |
| HIV/AIDS resulting in mycobacterial infection                     | 4<br>(2 - 7)             | 0<br>(0 - 0)       | 0<br>(0 - 0)        | 4<br>(2 - 6)         | 1<br>(0 - 1)         | 0<br>(0 - 0)           |
| HIV/AIDS resulting in other diseases                              | 87<br>(46 - 138)         | 1<br>(0 - 1)       | 0<br>(0 - 1)        | 76<br>(41 - 116)     | 10<br>(3 - 19)       | 1<br>(0 - 2)           |
| Diarrhea, lower respiratory, and other common infectious diseases | 158<br>(112 - 223)       | 48<br>(19 - 108)   | 7<br>(4 - 12)       | 23<br>(16 - 34)      | 18<br>(12 - 26)      | 62<br>(45 - 80)        |
| Diarrheal diseases                                                | 26<br>(14 - 52)          | 17<br>(6 - 42)     | 1<br>(0 - 2)        | 2<br>(1 - 3)         | 2<br>(1 - 3)         | 4<br>(2 - 6)           |
| Intestinal infectious diseases                                    | 5<br>(2 - 10)            | 2<br>(1 - 5)       | 1<br>(1 - 3)        | 1<br>(0 - 3)         | 0<br>(0 - 0)         | 0<br>(0 - 0)           |
| Typhoid fever                                                     | 4<br>(2 - 8)             | 1<br>(0 - 3)       | 1<br>(0 - 2)        | 1<br>(0 - 2)         | 0<br>(0 - 0)         | 0<br>(0 - 0)           |
| Paratyphoid fever                                                 | 1<br>(0 - 2)             | 0<br>(0 - 1)       | 0<br>(0 - 1)        | 0<br>(0 - 1)         | 0<br>(0 - 0)         | 0<br>(0 - 0)           |
| Other intestinal infectious diseases                              | 0<br>(0 - 1)             | 0<br>(0 - 0)       | 0<br>(0 - 0)        | 0<br>(0 - 0)         | 0<br>(0 - 0)         | 0<br>(0 - 0)           |
| Lower respiratory infections                                      | 113<br>(82 - 152)        | 24<br>(9 - 55)     | 3<br>(2 - 6)        | 15<br>(10 - 23)      | 15<br>(10 - 21)      | 56<br>(40 - 75)        |
| Upper respiratory infections                                      | 0<br>(0 - 0)             | 0<br>(0 - 0)       | 0<br>(0 - 0)        | 0<br>(0 - 0)         | 0<br>(0 - 0)         | 0<br>(0 - 0)           |
| Otitis media                                                      | 0<br>(0 - 0)             | 0<br>(0 - 0)       | 0<br>(0 - 0)        | 0<br>(0 - 0)         | 0<br>(0 - 0)         | 0<br>(0 - 0)           |
| Meningitis                                                        | 7<br>(5 - 12)            | 3<br>(1 - 7)       | 1<br>(0 - 1)        | 2<br>(1 - 3)         | 1<br>(1 - 2)         | 1<br>(1 - 1)           |
| Pneumococcal meningitis                                           | 2<br>(1 - 3)             | 1<br>(0 - 2)       | 0<br>(0 - 0)        | 1<br>(0 - 1)         | 0<br>(0 - 1)         | 0<br>(0 - 0)           |
| H influenzae type B meningitis                                    | 2<br>(1 - 3)             | 1<br>(0 - 3)       | 0<br>(0 - 0)        | 0<br>(0 - 0)         | 0<br>(0 - 0)         | 0<br>(0 - 0)           |
| Meningococcal meningitis                                          | 1<br>(1 - 1)             | 0<br>(0 - 1)       | 0<br>(0 - 0)        | 0<br>(0 - 0)         | 0<br>(0 - 0)         | 0<br>(0 - 0)           |
| Other meningitis                                                  | 3<br>(2 - 5)             | 1<br>(0 - 2)       | 0<br>(0 - 0)        | 1<br>(0 - 1)         | 0<br>(0 - 1)         | 0<br>(0 - 1)           |
| Encephalitis                                                      | 6<br>(3 - 9)             | 2<br>(1 - 4)       | 1<br>(0 - 2)        | 2<br>(1 - 3)         | 1<br>(0 - 1)         | 0<br>(0 - 1)           |
| Diphtheria                                                        | 0<br>(0 - 0)             | 0<br>(0 - 0)       | 0<br>(0 - 0)        | 0<br>(0 - 0)         | 0<br>(0 - 0)         | 0<br>(0 - 0)           |
| Whooping cough                                                    | 0<br>(0 - 1)             | 0<br>(0 - 1)       | 0<br>(0 - 0)        | 0<br>(0 - 0)         | 0<br>(0 - 0)         | 0<br>(0 - 0)           |
| Tetanus                                                           | 0<br>(0 - 1)             | 0<br>(0 - 0)       | 0<br>(0 - 0)        | 0<br>(0 - 0)         | 0<br>(0 - 0)         | 0<br>(0 - 0)           |
| Measles                                                           | 0<br>(0 - 0)             | 0<br>(0 - 0)       | 0<br>(0 - 0)        | 0<br>(0 - 0)         | 0<br>(0 - 0)         | 0<br>(0 - 0)           |
| Varicella and herpes zoster                                       | 0<br>(0 - 0)             | 0<br>(0 - 0)       | 0<br>(0 - 0)        | 0<br>(0 - 0)         | 0<br>(0 - 0)         | 0<br>(0 - 0)           |
| Neglected tropical diseases and malaria                           | 4<br>(3 - 8)             | 1<br>(0 - 4)       | 1<br>(0 - 1)        | 2<br>(1 - 3)         | 1<br>(0 - 1)         | 0<br>(0 - 1)           |
| Malaria                                                           | 1<br>(1 - 2)             | 0<br>(0 - 1)       | 0<br>(0 - 0)        | 1<br>(0 - 1)         | 0<br>(0 - 0)         | 0<br>(0 - 0)           |
| Chagas disease                                                    | 0<br>(0 - 0)             | 0<br>(0 - 0)       | 0<br>(0 - 0)        | 0<br>(0 - 0)         | 0<br>(0 - 0)         | 0<br>(0 - 0)           |
| Leishmaniasis                                                     | 0<br>(0 - 0)             | 0<br>(0 - 0)       | 0<br>(0 - 0)        | 0<br>(0 - 0)         | 0<br>(0 - 0)         | 0<br>(0 - 0)           |
| Visceral leishmaniasis                                            | 0<br>(0 - 0)             | 0<br>(0 - 0)       | 0<br>(0 - 0)        | 0<br>(0 - 0)         | 0<br>(0 - 0)         | 0<br>(0 - 0)           |
| Cysticercosis                                                     | 0<br>(0 - 0)             | 0<br>(0 - 0)       | 0<br>(0 - 0)        | 0<br>(0 - 0)         | 0<br>(0 - 0)         | 0<br>(0 - 0)           |
| Cystic echinococcosis                                             | 0<br>(0 - 0)             | 0<br>(0 - 0)       | 0<br>(0 - 0)        | 0<br>(0 - 0)         | 0<br>(0 - 0)         | 0<br>(0 - 0)           |
| Dengue                                                            | 1<br>(1 - 2)             | 0<br>(0 - 1)       | 0<br>(0 - 0)        | 1<br>(0 - 1)         | 0<br>(0 - 0)         | 0<br>(0 - 0)           |
| Yellow fever                                                      | 0<br>(0 - 0)             | 0<br>(0 - 0)       | 0<br>(0 - 0)        | 0<br>(0 - 0)         | 0<br>(0 - 0)         | 0<br>(0 - 0)           |
| Rabies                                                            | 0<br>(0 - 0)             | 0<br>(0 - 0)       | 0<br>(0 - 0)        | 0<br>(0 - 0)         | 0<br>(0 - 0)         | 0<br>(0 - 0)           |
| Intestinal nematode infections                                    | 0<br>(0 - 3)             | 0<br>(0 - 2)       | 0<br>(0 - 1)        | 0<br>(0 - 1)         | 0<br>(0 - 0)         | 0<br>(0 - 0)           |
| Ascariasis                                                        | 0<br>(0 - 3)             | 0<br>(0 - 2)       | 0<br>(0 - 1)        | 0<br>(0 - 1)         | 0<br>(0 - 0)         | 0<br>(0 - 0)           |
| Other neglected tropical diseases                                 | 1<br>(1 - 2)             | 0<br>(0 - 1)       | 0<br>(0 - 0)        | 0<br>(0 - 0)         | 0<br>(0 - 0)         | 0<br>(0 - 0)           |



Web Table 31- Guyana deaths with 95% UI by age, sex, and cause in 2013

| Cause                                                            | Females, All Ages        | Females, 0-4 Years | Females, 5-14 Years | Females, 15-49 Years | Females, 50-69 Years | Females, 70-80 Years |
|------------------------------------------------------------------|--------------------------|--------------------|---------------------|----------------------|----------------------|----------------------|
| Maternal disorders                                               | 20<br>(13 - 30)          | --                 | 0<br>(0 - 0)        | 19<br>(12 - 29)      | --                   | --                   |
| Maternal hemorrhage                                              | 3<br>(2 - 5)             | --                 | 0<br>(0 - 0)        | 3<br>(2 - 5)         | --                   | --                   |
| Maternal sepsis and other maternal infections                    | 2<br>(1 - 2)             | --                 | 0<br>(0 - 0)        | 2<br>(1 - 2)         | --                   | --                   |
| Maternal hypertensive disorders                                  | 3<br>(2 - 5)             | --                 | 0<br>(0 - 0)        | 3<br>(2 - 5)         | --                   | --                   |
| Maternal obstructed labor                                        | 2<br>(1 - 3)             | --                 | 0<br>(0 - 0)        | 2<br>(1 - 3)         | --                   | --                   |
| Maternal abortive outcome                                        | 4<br>(2 - 7)             | --                 | 0<br>(0 - 0)        | 4<br>(2 - 7)         | --                   | --                   |
| Indirect maternal deaths                                         | 2<br>(1 - 3)             | --                 | 0<br>(0 - 0)        | 2<br>(1 - 3)         | --                   | --                   |
| Late maternal deaths                                             | 1<br>(1 - 2)             | --                 | 0<br>(0 - 0)        | 1<br>(1 - 2)         | --                   | --                   |
| Maternal deaths aggravated by HIV/AIDS                           | 0<br>(0 - 0)             | --                 | --                  | 0<br>(0 - 0)         | --                   | --                   |
| Other maternal disorders                                         | 2<br>(1 - 4)             | --                 | 0<br>(0 - 0)        | 2<br>(1 - 4)         | --                   | --                   |
| Neonatal disorders                                               | 99<br>(53 - 159)         | 99<br>(53 - 159)   | --                  | --                   | --                   | --                   |
| Neonatal preterm birth complications                             | 46<br>(21 - 77)          | 46<br>(21 - 77)    | --                  | --                   | --                   | --                   |
| Neonatal encephalopathy due to birth asphyxia and trauma         | 23<br>(10 - 39)          | 23<br>(10 - 39)    | --                  | --                   | --                   | --                   |
| Neonatal sepsis and other neonatal infections                    | 17<br>(6 - 34)           | 17<br>(6 - 34)     | --                  | --                   | --                   | --                   |
| Hemolytic disease and other neonatal jaundice                    | 1<br>(0 - 4)             | 1<br>(0 - 4)       | --                  | --                   | --                   | --                   |
| Other neonatal disorders                                         | 13<br>(6 - 24)           | 13<br>(6 - 24)     | --                  | --                   | --                   | --                   |
| Nutritional deficiencies                                         | 43<br>(30 - 65)          | 14<br>(5 - 31)     | 1<br>(1 - 3)        | 9<br>(6 - 14)        | 5<br>(3 - 7)         | 14<br>(10 - 19)      |
| Protein-energy malnutrition                                      | 20<br>(11 - 38)          | 12<br>(4 - 27)     | 1<br>(0 - 1)        | 1<br>(1 - 3)         | 1<br>(1 - 3)         | 5<br>(2 - 9)         |
| Iodine deficiency                                                | 0<br>(0 - 1)             | 0<br>(0 - 1)       | 0<br>(0 - 0)        | 0<br>(0 - 0)         | 0<br>(0 - 0)         | 0<br>(0 - 1)         |
| Iron-deficiency anemia                                           | 20<br>(12 - 29)          | 2<br>(0 - 5)       | 1<br>(0 - 1)        | 7<br>(4 - 11)        | 3<br>(2 - 5)         | 8<br>(4 - 12)        |
| Other nutritional deficiencies                                   | 2<br>(1 - 5)             | 0<br>(0 - 1)       | 0<br>(0 - 0)        | 1<br>(0 - 1)         | 0<br>(0 - 1)         | 1<br>(0 - 2)         |
| Other communicable, maternal, neonatal, and nutritional diseases | 8<br>(6 - 12)            | 1<br>(0 - 3)       | 0<br>(0 - 1)        | 3<br>(2 - 5)         | 2<br>(1 - 3)         | 2<br>(1 - 2)         |
| Sexually transmitted diseases excluding HIV                      | 2<br>(1 - 3)             | 1<br>(0 - 2)       | 0<br>(0 - 0)        | 1<br>(0 - 1)         | 0<br>(0 - 0)         | 0<br>(0 - 0)         |
| Syphilis                                                         | 1<br>(0 - 3)             | 1<br>(0 - 2)       | 0<br>(0 - 0)        | 0<br>(0 - 0)         | 0<br>(0 - 0)         | 0<br>(0 - 0)         |
| Chlamydial infection                                             | 0<br>(0 - 0)             | --                 | 0<br>(0 - 0)        | 0<br>(0 - 0)         | 0<br>(0 - 0)         | 0<br>(0 - 0)         |
| Gonococcal infection                                             | 0<br>(0 - 0)             | --                 | 0<br>(0 - 0)        | 0<br>(0 - 0)         | 0<br>(0 - 0)         | 0<br>(0 - 0)         |
| Other sexually transmitted diseases                              | 0<br>(0 - 0)             | --                 | 0<br>(0 - 0)        | 0<br>(0 - 0)         | 0<br>(0 - 0)         | 0<br>(0 - 0)         |
| Hepatitis                                                        | 1<br>(0 - 1)             | 0<br>(0 - 0)       | 0<br>(0 - 0)        | 0<br>(0 - 1)         | 0<br>(0 - 0)         | 0<br>(0 - 0)         |
| Acute hepatitis A                                                | 0<br>(0 - 0)             | 0<br>(0 - 0)       | 0<br>(0 - 0)        | 0<br>(0 - 0)         | 0<br>(0 - 0)         | 0<br>(0 - 0)         |
| Acute hepatitis B                                                | 0<br>(0 - 1)             | 0<br>(0 - 0)       | 0<br>(0 - 0)        | 0<br>(0 - 0)         | 0<br>(0 - 0)         | 0<br>(0 - 0)         |
| Acute hepatitis C                                                | 0<br>(0 - 0)             | --                 | 0<br>(0 - 0)        | 0<br>(0 - 0)         | 0<br>(0 - 0)         | 0<br>(0 - 0)         |
| Other infectious diseases                                        | 6<br>(4 - 9)             | 1<br>(0 - 2)       | 0<br>(0 - 1)        | 2<br>(1 - 3)         | 2<br>(1 - 2)         | 1<br>(1 - 2)         |
| Non-communicable diseases                                        | 2,202<br>(1,673 - 2,817) | 71<br>(30 - 154)   | 26<br>(16 - 42)     | 414<br>(283 - 582)   | 745<br>(522 - 994)   | 946<br>(764 - 1,133) |
| Neoplasms                                                        | 417<br>(304 - 553)       | 4<br>(2 - 9)       | 6<br>(4 - 11)       | 129<br>(87 - 182)    | 161<br>(112 - 216)   | 116<br>(91 - 144)    |
| Esophageal cancer                                                | 5<br>(3 - 7)             | --                 | --                  | 1<br>(0 - 1)         | 2<br>(1 - 3)         | 2<br>(2 - 3)         |
| Stomach cancer                                                   | 20<br>(14 - 27)          | --                 | --                  | 4<br>(3 - 6)         | 7<br>(5 - 10)        | 9<br>(6 - 11)        |
| Liver cancer                                                     | 14<br>(10 - 19)          | --                 | 0<br>(0 - 0)        | 3<br>(2 - 5)         | 6<br>(4 - 8)         | 5<br>(3 - 7)         |
| Liver cancer due to hepatitis B                                  | 3<br>(1 - 5)             | --                 | 0<br>(0 - 0)        | 1<br>(1 - 2)         | 1<br>(0 - 2)         | 1<br>(0 - 1)         |
| Liver cancer due to hepatitis C                                  | 6<br>(3 - 10)            | --                 | 0<br>(0 - 0)        | 1<br>(0 - 2)         | 3<br>(1 - 4)         | 2<br>(1 - 4)         |
| Liver cancer due to alcohol use                                  | 2<br>(1 - 4)             | --                 | --                  | 0<br>(0 - 1)         | 1<br>(0 - 2)         | 1<br>(1 - 2)         |

Web Table 31- Guyana deaths with 95% UI by age, sex, and cause in 2013

| Cause                                         | Females, All Ages      | Females, 0-4 Years | Females, 5-14 Years | Females, 15-49 Years | Females, 50-69 Years | Females, 70-80 Years |
|-----------------------------------------------|------------------------|--------------------|---------------------|----------------------|----------------------|----------------------|
| Liver cancer due to other causes              | 2<br>(1 - 4)           | --                 | 0<br>(0 - 0)        | 1<br>(0 - 1)         | 1<br>(0 - 1)         | 1<br>(0 - 1)         |
| Larynx cancer                                 | 1<br>(0 - 2)           | --                 | --                  | 0<br>(0 - 0)         | 0<br>(0 - 1)         | 0<br>(0 - 1)         |
| Tracheal, bronchus and lung cancer            | 22<br>(16 - 30)        | --                 | --                  | 6<br>(4 - 8)         | 10<br>(7 - 14)       | 7<br>(5 - 9)         |
| Breast cancer                                 | 81<br>(56 - 110)       | --                 | --                  | 32<br>(21 - 46)      | 32<br>(21 - 44)      | 17<br>(13 - 22)      |
| Cervical cancer                               | 66<br>(45 - 95)        | --                 | --                  | 28<br>(18 - 43)      | 25<br>(16 - 36)      | 12<br>(9 - 17)       |
| Uterine cancer                                | 18<br>(10 - 25)        | --                 | --                  | 2<br>(1 - 3)         | 9<br>(5 - 13)        | 7<br>(4 - 10)        |
| Prostate cancer                               | --                     | --                 | --                  | --                   | --                   | --                   |
| Colon and rectum cancer                       | 44<br>(31 - 58)        | --                 | --                  | 8<br>(5 - 11)        | 17<br>(12 - 24)      | 18<br>(14 - 24)      |
| Lip and oral cavity cancer                    | 3<br>(2 - 5)           | --                 | --                  | 1<br>(0 - 1)         | 1<br>(1 - 2)         | 1<br>(1 - 2)         |
| Nasopharynx cancer                            | 2<br>(1 - 2)           | --                 | 0<br>(0 - 0)        | 1<br>(0 - 1)         | 1<br>(0 - 1)         | 0<br>(0 - 0)         |
| Other pharynx cancer                          | 1<br>(1 - 1)           | --                 | --                  | 0<br>(0 - 0)         | 0<br>(0 - 1)         | 0<br>(0 - 0)         |
| Gallbladder and biliary tract cancer          | 7<br>(4 - 10)          | --                 | --                  | 1<br>(1 - 1)         | 3<br>(2 - 5)         | 3<br>(2 - 4)         |
| Pancreatic cancer                             | 16<br>(12 - 22)        | --                 | --                  | 2<br>(1 - 3)         | 7<br>(5 - 10)        | 8<br>(6 - 10)        |
| Malignant skin melanoma                       | 2<br>(1 - 2)           | --                 | --                  | 1<br>(0 - 1)         | 1<br>(0 - 1)         | 0<br>(0 - 1)         |
| Non-melanoma skin cancer                      | 1<br>(1 - 2)           | --                 | --                  | 0<br>(0 - 0)         | 0<br>(0 - 1)         | 1<br>(0 - 1)         |
| Ovarian cancer                                | 25<br>(17 - 33)        | --                 | --                  | 8<br>(5 - 11)        | 6<br>(7 - 15)        | 11<br>(4 - 8)        |
| Testicular cancer                             | --                     | --                 | --                  | --                   | --                   | --                   |
| Kidney cancer                                 | 6<br>(4 - 8)           | 0<br>(0 - 0)       | 0<br>(0 - 0)        | 1<br>(1 - 2)         | 2<br>(2 - 3)         | 2<br>(1 - 2)         |
| Bladder cancer                                | 4<br>(2 - 6)           | --                 | --                  | 1<br>(0 - 1)         | 1<br>(1 - 2)         | 2<br>(1 - 3)         |
| Brain and nervous system cancer               | 8<br>(4 - 11)          | 0<br>(0 - 1)       | 1<br>(0 - 2)        | 3<br>(1 - 5)         | 2<br>(1 - 3)         | 1<br>(1 - 2)         |
| Thyroid cancer                                | 3<br>(2 - 4)           | --                 | 0<br>(0 - 0)        | 1<br>(0 - 1)         | 1<br>(1 - 2)         | 1<br>(1 - 1)         |
| Mesothelioma                                  | 1<br>(1 - 1)           | --                 | --                  | 0<br>(0 - 0)         | 0<br>(0 - 1)         | 0<br>(0 - 0)         |
| Hodgkin lymphoma                              | 2<br>(1 - 2)           | 0<br>(0 - 0)       | 0<br>(0 - 0)        | 1<br>(0 - 1)         | 0<br>(0 - 0)         | 0<br>(0 - 0)         |
| Non-Hodgkin lymphoma                          | 17<br>(10 - 24)        | 0<br>(0 - 1)       | 1<br>(0 - 1)        | 7<br>(4 - 11)        | 6<br>(3 - 8)         | 3<br>(2 - 5)         |
| Multiple myeloma                              | 7<br>(4 - 10)          | --                 | --                  | 1<br>(1 - 2)         | 3<br>(2 - 5)         | 2<br>(1 - 3)         |
| Leukemia                                      | 16<br>(12 - 22)        | 1<br>(0 - 3)       | 2<br>(1 - 3)        | 7<br>(5 - 10)        | 4<br>(3 - 5)         | 3<br>(2 - 3)         |
| Other neoplasms                               | 29<br>(19 - 41)        | 2<br>(1 - 4)       | 2<br>(1 - 4)        | 11<br>(7 - 17)       | 8<br>(5 - 13)        | 5<br>(4 - 8)         |
| Cardiovascular diseases                       | 1,058<br>(802 - 1,363) | 6<br>(2 - 14)      | 4<br>(2 - 7)        | 126<br>(83 - 188)    | 345<br>(237 - 466)   | 577<br>(457 - 697)   |
| Rheumatic heart disease                       | 8<br>(5 - 11)          | 0<br>(0 - 0)       | 1<br>(0 - 1)        | 4<br>(3 - 7)         | 2<br>(1 - 2)         | 1<br>(1 - 2)         |
| Ischemic heart disease                        | 445<br>(318 - 594)     | 1<br>(0 - 2)       | 1<br>(0 - 1)        | 49<br>(30 - 77)      | 151<br>(99 - 214)    | 243<br>(185 - 309)   |
| Cerebrovascular disease                       | 394<br>(290 - 506)     | 2<br>(1 - 4)       | 1<br>(1 - 3)        | 39<br>(25 - 58)      | 131<br>(88 - 184)    | 220<br>(167 - 276)   |
| Ischemic stroke                               | 232<br>(168 - 318)     | 0<br>(0 - 1)       | 0<br>(0 - 1)        | 10<br>(6 - 18)       | 65<br>(41 - 107)     | 155<br>(116 - 199)   |
| Hemorrhagic stroke                            | 162<br>(110 - 216)     | 1<br>(1 - 3)       | 1<br>(1 - 2)        | 29<br>(18 - 42)      | 66<br>(42 - 93)      | 65<br>(41 - 86)      |
| Hypertensive heart disease                    | 120<br>(78 - 169)      | 0<br>(0 - 0)       | 0<br>(0 - 0)        | 11<br>(6 - 17)       | 33<br>(20 - 48)      | 76<br>(50 - 106)     |
| Cardiomyopathy and myocarditis                | 25<br>(17 - 38)        | 2<br>(1 - 4)       | 1<br>(0 - 1)        | 8<br>(5 - 13)        | 7<br>(4 - 10)        | 8<br>(6 - 12)        |
| Atrial fibrillation and flutter               | 11<br>(6 - 16)         | --                 | --                  | 1<br>(0 - 1)         | 2<br>(1 - 4)         | 7<br>(4 - 11)        |
| Aortic aneurysm                               | 7<br>(4 - 10)          | --                 | --                  | 1<br>(0 - 2)         | 3<br>(1 - 4)         | 3<br>(2 - 5)         |
| Peripheral vascular disease                   | 4<br>(2 - 5)           | --                 | --                  | 0<br>(0 - 0)         | 1<br>(0 - 1)         | 3<br>(2 - 5)         |
| Endocarditis                                  | 4<br>(2 - 6)           | 0<br>(0 - 1)       | 0<br>(0 - 0)        | 1<br>(1 - 3)         | 1<br>(0 - 1)         | 1<br>(1 - 2)         |
| Other cardiovascular and circulatory diseases | 42<br>(27 - 58)        | 1<br>(1 - 3)       | 1<br>(0 - 1)        | 11<br>(7 - 18)       | 15<br>(9 - 22)       | 13<br>(9 - 19)       |

Web Table 31- Guyana deaths with 95% UI by age, sex, and cause in 2013

| Cause                                               | Females, All Ages | Females, 0-4 Years | Females, 5-14 Years | Females, 15-49 Years | Females, 50-69 Years | Females, 70-80 Years |
|-----------------------------------------------------|-------------------|--------------------|---------------------|----------------------|----------------------|----------------------|
| Chronic respiratory diseases                        | 50<br>(37 - 71)   | 3<br>(1 - 7)       | 1<br>(1 - 2)        | 13<br>(9 - 20)       | 13<br>(9 - 19)       | 20<br>(15 - 29)      |
| Chronic obstructive pulmonary disease               | 26<br>(19 - 38)   | 1<br>(0 - 3)       | 0<br>(0 - 0)        | 5<br>(3 - 7)         | 6<br>(4 - 10)        | 14<br>(10 - 20)      |
| Pneumoconiosis                                      | 0<br>(0 - 1)      | 0<br>(0 - 0)       | 0<br>(0 - 0)        | 0<br>(0 - 0)         | 0<br>(0 - 0)         | 0<br>(0 - 0)         |
| Silicosis                                           | 0<br>(0 - 0)      | 0<br>(0 - 0)       | 0<br>(0 - 0)        | 0<br>(0 - 0)         | 0<br>(0 - 0)         | 0<br>(0 - 0)         |
| Asbestosis                                          | 0<br>(0 - 0)      | 0<br>(0 - 0)       | 0<br>(0 - 0)        | 0<br>(0 - 0)         | 0<br>(0 - 0)         | 0<br>(0 - 0)         |
| Coal workers pneumoconiosis                         | 0<br>(0 - 0)      | 0<br>(0 - 0)       | 0<br>(0 - 0)        | 0<br>(0 - 0)         | 0<br>(0 - 0)         | 0<br>(0 - 0)         |
| Other pneumoconiosis                                | 0<br>(0 - 0)      | 0<br>(0 - 0)       | 0<br>(0 - 0)        | 0<br>(0 - 0)         | 0<br>(0 - 0)         | 0<br>(0 - 0)         |
| Asthma                                              | 16<br>(10 - 24)   | 1<br>(0 - 2)       | 1<br>(0 - 1)        | 6<br>(4 - 9)         | 4<br>(3 - 7)         | 4<br>(2 - 7)         |
| Interstitial lung disease and pulmonary sarcoidosis | 5<br>(3 - 8)      | 0<br>(0 - 0)       | 0<br>(0 - 0)        | 2<br>(1 - 3)         | 2<br>(1 - 3)         | 2<br>(1 - 3)         |
| Other chronic respiratory diseases                  | 3<br>(2 - 5)      | 1<br>(0 - 2)       | 0<br>(0 - 0)        | 1<br>(1 - 2)         | 0<br>(0 - 1)         | 1<br>(0 - 1)         |
| Cirrhosis                                           | 46<br>(32 - 63)   | 0<br>(0 - 1)       | 1<br>(0 - 1)        | 19<br>(12 - 28)      | 18<br>(12 - 26)      | 8<br>(6 - 10)        |
| Cirrhosis due to hepatitis B                        | 4<br>(2 - 8)      | 0<br>(0 - 0)       | 0<br>(0 - 0)        | 2<br>(0 - 4)         | 2<br>(1 - 4)         | 1<br>(0 - 2)         |
| Cirrhosis due to hepatitis C                        | 21<br>(9 - 34)    | 0<br>(0 - 0)       | 0<br>(0 - 0)        | 9<br>(4 - 14)        | 9<br>(2 - 14)        | 3<br>(1 - 6)         |
| Cirrhosis due to alcohol use                        | 10<br>(4 - 19)    | --                 | --                  | 3<br>(1 - 6)         | 4<br>(2 - 9)         | 2<br>(1 - 5)         |
| Cirrhosis due to other causes                       | 11<br>(6 - 18)    | 0<br>(0 - 1)       | 1<br>(0 - 1)        | 6<br>(3 - 9)         | 4<br>(2 - 7)         | 1<br>(0 - 2)         |
| Digestive diseases                                  | 51<br>(38 - 70)   | 1<br>(0 - 3)       | 1<br>(1 - 2)        | 14<br>(10 - 21)      | 15<br>(10 - 20)      | 20<br>(15 - 26)      |
| Peptic ulcer disease                                | 10<br>(7 - 15)    | 0<br>(0 - 0)       | 0<br>(0 - 0)        | 2<br>(1 - 4)         | 4<br>(2 - 5)         | 4<br>(3 - 6)         |
| Gastritis and duodenitis                            | 2<br>(1 - 4)      | 0<br>(0 - 0)       | 0<br>(0 - 0)        | 1<br>(0 - 1)         | 1<br>(0 - 1)         | 1<br>(0 - 2)         |
| Appendicitis                                        | 3<br>(2 - 4)      | 0<br>(0 - 0)       | 0<br>(0 - 0)        | 1<br>(1 - 2)         | 1<br>(0 - 1)         | 1<br>(0 - 1)         |
| Paralytic ileus and intestinal obstruction          | 7<br>(3 - 11)     | 0<br>(0 - 1)       | 0<br>(0 - 0)        | 2<br>(1 - 3)         | 2<br>(1 - 3)         | 3<br>(1 - 5)         |
| Inguinal, femoral, and abdominal hernia             | 3<br>(2 - 6)      | 0<br>(0 - 0)       | 0<br>(0 - 0)        | 1<br>(0 - 2)         | 1<br>(0 - 2)         | 1<br>(1 - 3)         |
| Inflammatory bowel disease                          | 6<br>(4 - 10)     | 1<br>(0 - 1)       | 0<br>(0 - 0)        | 2<br>(1 - 3)         | 1<br>(1 - 2)         | 2<br>(1 - 4)         |
| Vascular intestinal disorders                       | 2<br>(1 - 4)      | 0<br>(0 - 0)       | 0<br>(0 - 0)        | 1<br>(0 - 1)         | 1<br>(0 - 1)         | 1<br>(0 - 2)         |
| Gallbladder and biliary diseases                    | 5<br>(4 - 8)      | 0<br>(0 - 0)       | 0<br>(0 - 0)        | 2<br>(1 - 3)         | 2<br>(1 - 3)         | 2<br>(1 - 3)         |
| Pancreatitis                                        | 4<br>(2 - 6)      | 0<br>(0 - 0)       | 0<br>(0 - 0)        | 2<br>(1 - 3)         | 1<br>(1 - 2)         | 1<br>(1 - 1)         |
| Other digestive diseases                            | 9<br>(6 - 13)     | 0<br>(0 - 0)       | 0<br>(0 - 0)        | 3<br>(2 - 4)         | 3<br>(2 - 4)         | 4<br>(2 - 5)         |
| Neurological disorders                              | 68<br>(52 - 91)   | 1<br>(0 - 3)       | 1<br>(1 - 3)        | 10<br>(7 - 16)       | 8<br>(6 - 12)        | 46<br>(35 - 62)      |
| Alzheimer disease and other dementias               | 44<br>(32 - 59)   | --                 | --                  | 0<br>(0 - 0)         | 3<br>(2 - 5)         | 40<br>(29 - 54)      |
| Parkinson disease                                   | 6<br>(4 - 9)      | --                 | --                  | 0<br>(0 - 0)         | 1<br>(1 - 2)         | 4<br>(3 - 6)         |
| Epilepsy                                            | 11<br>(7 - 18)    | 1<br>(0 - 2)       | 1<br>(1 - 2)        | 7<br>(4 - 11)        | 1<br>(1 - 2)         | 1<br>(1 - 1)         |
| Multiple sclerosis                                  | 1<br>(1 - 2)      | --                 | --                  | 1<br>(0 - 1)         | 0<br>(0 - 0)         | 0<br>(0 - 0)         |
| Other neurological disorders                        | 6<br>(5 - 9)      | 1<br>(0 - 1)       | 0<br>(0 - 1)        | 3<br>(2 - 4)         | 2<br>(1 - 3)         | 1<br>(1 - 1)         |
| Mental and substance use disorders                  | 5<br>(3 - 7)      | 0<br>(0 - 0)       | 0<br>(0 - 0)        | 2<br>(2 - 4)         | 1<br>(1 - 2)         | 1<br>(1 - 1)         |
| Schizophrenia                                       | 0<br>(0 - 1)      | --                 | --                  | 0<br>(0 - 0)         | 0<br>(0 - 0)         | 0<br>(0 - 0)         |
| Alcohol use disorders                               | 2<br>(1 - 4)      | --                 | --                  | 1<br>(0 - 2)         | 1<br>(0 - 2)         | 0<br>(0 - 0)         |
| Drug use disorders                                  | 2<br>(2 - 3)      | 0<br>(0 - 0)       | --                  | 1<br>(1 - 2)         | 0<br>(0 - 1)         | 0<br>(0 - 1)         |
| Opioid use disorders                                | 1<br>(0 - 1)      | 0<br>(0 - 0)       | --                  | 0<br>(0 - 0)         | 0<br>(0 - 0)         | 0<br>(0 - 0)         |
| Cocaine use disorders                               | 0<br>(0 - 0)      | 0<br>(0 - 0)       | --                  | 0<br>(0 - 0)         | 0<br>(0 - 0)         | 0<br>(0 - 0)         |
| Amphetamine use disorders                           | 0<br>(0 - 0)      | 0<br>(0 - 0)       | --                  | 0<br>(0 - 0)         | 0<br>(0 - 0)         | 0<br>(0 - 0)         |
| Other drug use disorders                            | 1<br>(1 - 2)      | 0<br>(0 - 0)       | --                  | 1<br>(0 - 1)         | 0<br>(0 - 0)         | 0<br>(0 - 0)         |

Web Table 31- Guyana deaths with 95% UI by age, sex, and cause in 2013

| Cause                                               | Females, All Ages  | Females, 0-4 Years | Females, 5-14 Years | Females, 15-49 Years | Females, 50-69 Years | Females, 70-80 Years |
|-----------------------------------------------------|--------------------|--------------------|---------------------|----------------------|----------------------|----------------------|
| Eating disorders                                    | 0<br>(0 - 0)       | --                 | 0<br>(0 - 0)        | 0<br>(0 - 0)         | --                   | --                   |
| Anorexia nervosa                                    | 0<br>(0 - 0)       | --                 | 0<br>(0 - 0)        | 0<br>(0 - 0)         | --                   | --                   |
| Diabetes, urogenital, blood, and endocrine diseases | 426<br>(309 - 564) | 8<br>(3 - 19)      | 5<br>(3 - 8)        | 86<br>(57 - 126)     | 176<br>(119 - 242)   | 150<br>(114 - 187)   |
| Diabetes mellitus                                   | 293<br>(207 - 386) | 1<br>(0 - 1)       | 1<br>(0 - 1)        | 40<br>(26 - 59)      | 138<br>(93 - 191)    | 113<br>(81 - 143)    |
| Acute glomerulonephritis                            | 0<br>(0 - 0)       | 0<br>(0 - 0)       | 0<br>(0 - 0)        | 0<br>(0 - 0)         | 0<br>(0 - 0)         | 0<br>(0 - 0)         |
| Chronic kidney disease                              | 77<br>(52 - 118)   | 2<br>(1 - 5)       | 1<br>(1 - 2)        | 24<br>(15 - 40)      | 25<br>(15 - 39)      | 24<br>(16 - 36)      |
| Chronic kidney disease due to diabetes mellitus     | 14<br>(7 - 22)     | 0<br>(0 - 0)       | 0<br>(0 - 0)        | 3<br>(2 - 6)         | 6<br>(3 - 11)        | 4<br>(2 - 6)         |
| Chronic kidney disease due to hypertension          | 37<br>(23 - 57)    | 0<br>(0 - 1)       | 0<br>(0 - 0)        | 11<br>(6 - 18)       | 12<br>(7 - 18)       | 14<br>(9 - 22)       |
| Chronic kidney disease due to glomerulonephritis    | 3<br>(2 - 5)       | 0<br>(0 - 1)       | 0<br>(0 - 0)        | 2<br>(1 - 3)         | 1<br>(0 - 1)         | 0<br>(0 - 1)         |
| Chronic kidney disease due to other causes          | 23<br>(13 - 44)    | 1<br>(0 - 3)       | 1<br>(0 - 2)        | 8<br>(4 - 17)        | 6<br>(3 - 13)        | 6<br>(3 - 12)        |
| Urinary diseases and male infertility               | 13<br>(8 - 17)     | 0<br>(0 - 1)       | 0<br>(0 - 0)        | 4<br>(2 - 6)         | 4<br>(2 - 5)         | 5<br>(3 - 7)         |
| Interstitial nephritis and urinary tract infections | 10<br>(6 - 14)     | 0<br>(0 - 1)       | 0<br>(0 - 0)        | 3<br>(2 - 5)         | 3<br>(1 - 4)         | 4<br>(2 - 6)         |
| Urolithiasis                                        | 0<br>(0 - 1)       | --                 | 0<br>(0 - 0)        | 0<br>(0 - 0)         | 0<br>(0 - 0)         | 0<br>(0 - 0)         |
| Other urinary diseases                              | 2<br>(1 - 3)       | 0<br>(0 - 0)       | 0<br>(0 - 0)        | 1<br>(0 - 1)         | 1<br>(0 - 1)         | 1<br>(0 - 1)         |
| Gynecological diseases                              | 1<br>(0 - 2)       | --                 | --                  | 1<br>(0 - 1)         | 0<br>(0 - 0)         | 0<br>(0 - 0)         |
| Uterine fibroids                                    | 0<br>(0 - 0)       | --                 | --                  | 0<br>(0 - 0)         | 0<br>(0 - 0)         | 0<br>(0 - 0)         |
| Polycystic ovarian syndrome                         | 0<br>(0 - 0)       | --                 | --                  | 0<br>(0 - 0)         | 0<br>(0 - 0)         | --                   |
| Endometriosis                                       | 0<br>(0 - 0)       | --                 | --                  | 0<br>(0 - 0)         | 0<br>(0 - 0)         | --                   |
| Genital prolapse                                    | 0<br>(0 - 0)       | --                 | --                  | 0<br>(0 - 0)         | 0<br>(0 - 0)         | 0<br>(0 - 0)         |
| Other gynecological diseases                        | 0<br>(0 - 1)       | --                 | --                  | 0<br>(0 - 1)         | 0<br>(0 - 0)         | 0<br>(0 - 0)         |
| Hemoglobinopathies and hemolytic anemias            | 12<br>(6 - 19)     | 2<br>(1 - 5)       | 2<br>(1 - 3)        | 5<br>(3 - 9)         | 2<br>(1 - 3)         | 1<br>(0 - 1)         |
| Thalassemias                                        | 0<br>(0 - 0)       | 0<br>(0 - 0)       | 0<br>(0 - 0)        | 0<br>(0 - 0)         | 0<br>(0 - 0)         | 0<br>(0 - 0)         |
| Sickle cell disorders                               | 9<br>(5 - 15)      | 2<br>(1 - 4)       | 2<br>(1 - 3)        | 5<br>(3 - 8)         | 1<br>(1 - 2)         | 0<br>(0 - 0)         |
| G6PD deficiency                                     | 0<br>(0 - 0)       | 0<br>(0 - 0)       | 0<br>(0 - 0)        | 0<br>(0 - 0)         | 0<br>(0 - 0)         | 0<br>(0 - 0)         |
| Other hemoglobinopathies and hemolytic anemias      | 2<br>(1 - 3)       | 0<br>(0 - 1)       | 0<br>(0 - 0)        | 0<br>(0 - 1)         | 0<br>(0 - 0)         | 1<br>(0 - 1)         |
| Endocrine, metabolic, blood, and immune disorders   | 31<br>(21 - 49)    | 3<br>(1 - 8)       | 1<br>(0 - 2)        | 11<br>(7 - 19)       | 8<br>(5 - 12)        | 8<br>(5 - 12)        |
| Musculoskeletal disorders                           | 8<br>(4 - 13)      | --                 | 0<br>(0 - 1)        | 5<br>(3 - 9)         | 2<br>(1 - 3)         | 1<br>(1 - 2)         |
| Rheumatoid arthritis                                | 1<br>(0 - 2)       | --                 | 0<br>(0 - 0)        | 0<br>(0 - 1)         | 0<br>(0 - 1)         | 0<br>(0 - 1)         |
| Other musculoskeletal disorders                     | 7<br>(4 - 12)      | --                 | 0<br>(0 - 1)        | 5<br>(2 - 8)         | 1<br>(1 - 2)         | 1<br>(0 - 1)         |
| Other non-communicable diseases                     | 73<br>(41 - 132)   | 47<br>(20 - 101)   | 5<br>(3 - 10)       | 9<br>(6 - 14)        | 5<br>(3 - 7)         | 7<br>(4 - 10)        |
| Congenital anomalies                                | 59<br>(30 - 114)   | 43<br>(18 - 93)    | 5<br>(3 - 9)        | 7<br>(4 - 12)        | 2<br>(1 - 3)         | 1<br>(1 - 2)         |
| Neural tube defects                                 | 3<br>(1 - 6)       | 3<br>(1 - 6)       | 0<br>(0 - 0)        | 0<br>(0 - 0)         | 0<br>(0 - 0)         | 0<br>(0 - 0)         |
| Congenital heart anomalies                          | 31<br>(16 - 64)    | 22<br>(8 - 50)     | 3<br>(2 - 6)        | 5<br>(3 - 8)         | 1<br>(0 - 1)         | 1<br>(0 - 1)         |
| Cleft lip and cleft palate                          | 0<br>(0 - 0)       | 0<br>(0 - 0)       | --                  | --                   | --                   | --                   |
| Down syndrome                                       | 4<br>(2 - 8)       | 2<br>(1 - 6)       | 0<br>(0 - 1)        | 1<br>(0 - 1)         | 0<br>(0 - 1)         | 0<br>(0 - 0)         |
| Chromosomal unbalanced rearrangements               | 1<br>(0 - 3)       | 1<br>(0 - 2)       | 0<br>(0 - 0)        | 0<br>(0 - 0)         | 0<br>(0 - 0)         | 0<br>(0 - 0)         |
| Other congenital anomalies                          | 19<br>(9 - 40)     | 15<br>(6 - 33)     | 1<br>(1 - 3)        | 1<br>(1 - 3)         | 1<br>(0 - 1)         | 1<br>(0 - 1)         |
| Skin and subcutaneous diseases                      | 12<br>(6 - 16)     | 1<br>(0 - 2)       | 0<br>(0 - 0)        | 2<br>(1 - 3)         | 3<br>(1 - 4)         | 6<br>(3 - 8)         |
| Cellulitis                                          | 1<br>(0 - 2)       | 0<br>(0 - 0)       | 0<br>(0 - 0)        | 0<br>(0 - 0)         | 0<br>(0 - 1)         | 0<br>(0 - 1)         |
| Pyoderma                                            | 4<br>(2 - 5)       | 1<br>(0 - 1)       | 0<br>(0 - 0)        | 1<br>(0 - 1)         | 1<br>(0 - 1)         | 2<br>(1 - 3)         |

Web Table 31- Guyana deaths with 95% UI by age, sex, and cause in 2013

| Cause                                           | Females, All Ages  | Females, 0-4 Years | Females, 5-14 Years | Females, 15-49 Years | Females, 50-69 Years | Females, 70-80 Years |
|-------------------------------------------------|--------------------|--------------------|---------------------|----------------------|----------------------|----------------------|
| Decubitus ulcer                                 | 6<br>(3 - 9)       | 0<br>(0 - 0)       | 0<br>(0 - 0)        | 1<br>(0 - 1)         | 2<br>(1 - 3)         | 4<br>(2 - 5)         |
| Other skin and subcutaneous diseases            | 0<br>(0 - 1)       | 0<br>(0 - 0)       | 0<br>(0 - 0)        | 0<br>(0 - 0)         | 0<br>(0 - 0)         | 0<br>(0 - 0)         |
| Sudden infant death syndrome                    | 3<br>(1 - 8)       | 3<br>(1 - 8)       | --                  | --                   | --                   | --                   |
| Injuries                                        | 191<br>(133 - 259) | 23<br>(9 - 52)     | 17<br>(11 - 28)     | 98<br>(65 - 137)     | 26<br>(17 - 35)      | 27<br>(20 - 34)      |
| Transport injuries                              | 51<br>(33 - 70)    | 4<br>(1 - 9)       | 7<br>(4 - 12)       | 26<br>(16 - 37)      | 8<br>(5 - 12)        | 5<br>(4 - 7)         |
| Road injuries                                   | 46<br>(30 - 64)    | 4<br>(1 - 8)       | 7<br>(4 - 11)       | 24<br>(15 - 34)      | 7<br>(4 - 11)        | 5<br>(3 - 7)         |
| Pedestrian road injuries                        | 14<br>(9 - 20)     | 1<br>(0 - 3)       | 2<br>(1 - 4)        | 6<br>(4 - 10)        | 3<br>(1 - 4)         | 1<br>(1 - 2)         |
| Cyclist road injuries                           | 2<br>(1 - 3)       | 0<br>(0 - 0)       | 0<br>(0 - 1)        | 1<br>(0 - 1)         | 0<br>(0 - 0)         | 0<br>(0 - 0)         |
| Motorcyclist road injuries                      | 2<br>(1 - 3)       | 0<br>(0 - 0)       | 0<br>(0 - 0)        | 1<br>(1 - 2)         | 0<br>(0 - 0)         | 0<br>(0 - 1)         |
| Motor vehicle road injuries                     | 28<br>(18 - 39)    | 2<br>(1 - 5)       | 3<br>(2 - 6)        | 15<br>(9 - 22)       | 4<br>(2 - 6)         | 3<br>(2 - 4)         |
| Other road injuries                             | 0<br>(0 - 1)       | 0<br>(0 - 0)       | 0<br>(0 - 0)        | 0<br>(0 - 0)         | 0<br>(0 - 0)         | 0<br>(0 - 0)         |
| Other transport injuries                        | 4<br>(2 - 6)       | 0<br>(0 - 1)       | 0<br>(0 - 1)        | 2<br>(1 - 3)         | 1<br>(0 - 1)         | 1<br>(0 - 1)         |
| Unintentional injuries                          | 76<br>(52 - 109)   | 17<br>(7 - 39)     | 7<br>(4 - 12)       | 23<br>(14 - 33)      | 10<br>(6 - 15)       | 19<br>(13 - 25)      |
| Falls                                           | 13<br>(9 - 18)     | 1<br>(0 - 1)       | 0<br>(0 - 1)        | 2<br>(1 - 3)         | 2<br>(1 - 3)         | 8<br>(5 - 11)        |
| Drowning                                        | 12<br>(6 - 18)     | 3<br>(1 - 6)       | 2<br>(1 - 4)        | 5<br>(3 - 7)         | 1<br>(1 - 2)         | 1<br>(0 - 1)         |
| Fire, heat, and hot substances                  | 11<br>(6 - 17)     | 2<br>(1 - 5)       | 1<br>(1 - 2)        | 3<br>(2 - 5)         | 2<br>(1 - 3)         | 3<br>(1 - 4)         |
| Poisonings                                      | 2<br>(1 - 3)       | 1<br>(0 - 1)       | 0<br>(0 - 1)        | 1<br>(0 - 1)         | 0<br>(0 - 0)         | 0<br>(0 - 0)         |
| Exposure to mechanical forces                   | 6<br>(4 - 9)       | 1<br>(0 - 2)       | 1<br>(1 - 2)        | 3<br>(2 - 5)         | 1<br>(0 - 1)         | 1<br>(0 - 1)         |
| Unintentional firearm injuries                  | 2<br>(2 - 3)       | 0<br>(0 - 0)       | 0<br>(0 - 0)        | 2<br>(1 - 2)         | 0<br>(0 - 0)         | 0<br>(0 - 0)         |
| Unintentional suffocation                       | 1<br>(0 - 1)       | 0<br>(0 - 1)       | 0<br>(0 - 0)        | 0<br>(0 - 1)         | 0<br>(0 - 0)         | 0<br>(0 - 0)         |
| Other exposure to mechanical forces             | 3<br>(2 - 5)       | 1<br>(0 - 1)       | 1<br>(0 - 1)        | 1<br>(1 - 2)         | 0<br>(0 - 1)         | 0<br>(0 - 0)         |
| Adverse effects of medical treatment            | 14<br>(7 - 20)     | 2<br>(1 - 4)       | 0<br>(0 - 1)        | 5<br>(2 - 7)         | 3<br>(1 - 5)         | 4<br>(2 - 6)         |
| Animal contact                                  | 2<br>(0 - 3)       | 0<br>(0 - 1)       | 0<br>(0 - 0)        | 1<br>(0 - 1)         | 0<br>(0 - 1)         | 0<br>(0 - 1)         |
| Venomous animal contact                         | 1<br>(0 - 2)       | 0<br>(0 - 0)       | 0<br>(0 - 0)        | 0<br>(0 - 1)         | 0<br>(0 - 1)         | 0<br>(0 - 0)         |
| Non-venomous animal contact                     | 1<br>(0 - 1)       | 0<br>(0 - 0)       | 0<br>(0 - 0)        | 0<br>(0 - 0)         | 0<br>(0 - 0)         | 0<br>(0 - 0)         |
| Foreign body                                    | 15<br>(8 - 29)     | 8<br>(3 - 19)      | 1<br>(0 - 2)        | 3<br>(1 - 5)         | 1<br>(1 - 2)         | 3<br>(1 - 4)         |
| Pulmonary aspiration and foreign body in airway | 15<br>(8 - 29)     | 7<br>(3 - 19)      | 1<br>(0 - 2)        | 3<br>(1 - 5)         | 1<br>(1 - 2)         | 3<br>(1 - 4)         |
| Foreign body in other body part                 | 0<br>(0 - 0)       | 0<br>(0 - 0)       | 0<br>(0 - 0)        | 0<br>(0 - 0)         | 0<br>(0 - 0)         | 0<br>(0 - 0)         |
| Other unintentional injuries                    | 2<br>(1 - 2)       | 0<br>(0 - 1)       | 0<br>(0 - 0)        | 1<br>(0 - 1)         | 0<br>(0 - 0)         | 0<br>(0 - 0)         |
| Self-harm and interpersonal violence            | 65<br>(44 - 93)    | 2<br>(1 - 6)       | 3<br>(2 - 6)        | 50<br>(32 - 71)      | 7<br>(4 - 11)        | 3<br>(2 - 4)         |
| Self-harm                                       | 35<br>(24 - 50)    | --                 | 2<br>(1 - 3)        | 28<br>(18 - 40)      | 4<br>(2 - 6)         | 2<br>(1 - 2)         |
| Interpersonal violence                          | 30<br>(18 - 46)    | 2<br>(1 - 6)       | 2<br>(1 - 3)        | 22<br>(13 - 35)      | 3<br>(2 - 5)         | 1<br>(0 - 2)         |
| Assault by firearm                              | 8<br>(4 - 13)      | 0<br>(0 - 1)       | 0<br>(0 - 1)        | 6<br>(3 - 10)        | 1<br>(0 - 1)         | 0<br>(0 - 0)         |
| Assault by sharp object                         | 9<br>(4 - 14)      | 0<br>(0 - 1)       | 0<br>(0 - 1)        | 7<br>(4 - 12)        | 1<br>(0 - 1)         | 0<br>(0 - 0)         |
| Assault by other means                          | 13<br>(8 - 22)     | 2<br>(0 - 4)       | 1<br>(0 - 2)        | 9<br>(5 - 15)        | 1<br>(1 - 3)         | 1<br>(0 - 1)         |

Web Table 31- Haiti deaths with 95% UI by age, sex, and cause in 2013

| Cause                                                             | Both Sexes, All Ages        | Both Sexes, 0-4 Years       | Both Sexes, 5-14 Years   | Both Sexes, 15-49 Years     | Both Sexes, 50-69 Years     | Both Sexes, 70-80 Years     |
|-------------------------------------------------------------------|-----------------------------|-----------------------------|--------------------------|-----------------------------|-----------------------------|-----------------------------|
| All causes                                                        | 82,543<br>(75,770 - 89,922) | 17,477<br>(14,973 - 20,559) | 2,197<br>(1,906 - 2,582) | 19,044<br>(16,860 - 21,674) | 19,715<br>(17,234 - 22,287) | 24,110<br>(22,097 - 26,003) |
| Communicable, maternal, neonatal, and nutritional diseases        | 32,844<br>(29,930 - 36,253) | 14,229<br>(12,258 - 16,712) | 1,185<br>(1,020 - 1,389) | 9,578<br>(8,235 - 11,313)   | 4,058<br>(3,553 - 4,614)    | 3,794<br>(3,208 - 4,392)    |
| HIV/AIDS and tuberculosis                                         | 9,068<br>(7,448 - 11,418)   | 246<br>(180 - 322)          | 356<br>(294 - 418)       | 6,109<br>(4,590 - 8,216)    | 1,826<br>(1,530 - 2,296)    | 532<br>(435 - 667)          |
| Tuberculosis                                                      | 1,956<br>(1,598 - 2,639)    | 95<br>(61 - 140)            | 44<br>(31 - 62)          | 832<br>(610 - 1,188)        | 598<br>(475 - 830)          | 387<br>(307 - 504)          |
| HIV/AIDS                                                          | 7,113<br>(5,556 - 9,397)    | 151<br>(102 - 212)          | 312<br>(250 - 377)       | 5,277<br>(3,708 - 7,409)    | 1,228<br>(960 - 1,576)      | 145<br>(101 - 201)          |
| HIV/AIDS resulting in mycobacterial infection                     | 429<br>(312 - 596)          | 9<br>(6 - 14)               | 17<br>(13 - 22)          | 315<br>(213 - 459)          | 78<br>(56 - 105)            | 10<br>(6 - 14)              |
| HIV/AIDS resulting in other diseases                              | 6,684<br>(5,205 - 8,833)    | 142<br>(96 - 200)           | 295<br>(236 - 354)       | 4,962<br>(3,506 - 6,997)    | 1,150<br>(902 - 1,485)      | 135<br>(94 - 186)           |
| Diarrhea, lower respiratory, and other common infectious diseases | 11,389<br>(9,633 - 13,274)  | 5,378<br>(4,137 - 6,775)    | 488<br>(373 - 626)       | 1,659<br>(1,210 - 2,166)    | 1,484<br>(1,137 - 1,854)    | 2,380<br>(1,862 - 2,959)    |
| Diarrheal diseases                                                | 4,155<br>(2,888 - 5,534)    | 2,408<br>(1,427 - 3,576)    | 147<br>(76 - 245)        | 539<br>(337 - 820)          | 448<br>(253 - 694)          | 613<br>(367 - 965)          |
| Intestinal infectious diseases                                    | 186<br>(111 - 299)          | 81<br>(45 - 137)            | 46<br>(24 - 79)          | 48<br>(25 - 80)             | 7<br>(3 - 13)               | 3<br>(1 - 7)                |
| Typhoid fever                                                     | 114<br>(57 - 200)           | 45<br>(22 - 85)             | 33<br>(16 - 59)          | 31<br>(14 - 56)             | 3<br>(1 - 7)                | 1<br>(0 - 2)                |
| Paratyphoid fever                                                 | 31<br>(15 - 57)             | 13<br>(6 - 26)              | 9<br>(4 - 17)            | 8<br>(4 - 15)               | 1<br>(0 - 2)                | 0<br>(0 - 1)                |
| Other intestinal infectious diseases                              | 40<br>(22 - 62)             | 23<br>(10 - 40)             | 4<br>(1 - 10)            | 9<br>(3 - 19)               | 3<br>(0 - 8)                | 2<br>(0 - 6)                |
| Lower respiratory infections                                      | 5,500<br>(4,478 - 6,760)    | 2,096<br>(1,445 - 2,948)    | 141<br>(96 - 206)        | 771<br>(554 - 1,036)        | 855<br>(649 - 1,096)        | 1,637<br>(1,261 - 2,114)    |
| Upper respiratory infections                                      | 10<br>(5 - 17)              | 3<br>(1 - 9)                | 0<br>(0 - 1)             | 3<br>(1 - 6)                | 2<br>(0 - 5)                | 2<br>(0 - 5)                |
| Otitis media                                                      | 12<br>(10 - 14)             | 2<br>(2 - 4)                | 1<br>(0 - 1)             | 2<br>(2 - 3)                | 3<br>(2 - 4)                | 4<br>(3 - 5)                |
| Meningitis                                                        | 994<br>(768 - 1,272)        | 505<br>(334 - 768)          | 88<br>(56 - 130)         | 188<br>(133 - 256)          | 117<br>(85 - 158)           | 95<br>(69 - 131)            |
| Pneumococcal meningitis                                           | 284<br>(217 - 372)          | 127<br>(79 - 201)           | 29<br>(16 - 47)          | 59<br>(35 - 89)             | 36<br>(21 - 56)             | 33<br>(17 - 53)             |
| H influenzae type B meningitis                                    | 246<br>(167 - 357)          | 181<br>(105 - 287)          | 24<br>(13 - 40)          | 22<br>(12 - 34)             | 11<br>(6 - 18)              | 9<br>(5 - 14)               |
| Meningococcal meningitis                                          | 109<br>(81 - 144)           | 45<br>(26 - 73)             | 10<br>(5 - 16)           | 26<br>(17 - 42)             | 15<br>(8 - 25)              | 12<br>(6 - 20)              |
| Other meningitis                                                  | 356<br>(271 - 461)          | 153<br>(90 - 242)           | 26<br>(15 - 41)          | 81<br>(52 - 120)            | 55<br>(35 - 81)             | 41<br>(27 - 58)             |
| Encephalitis                                                      | 292<br>(177 - 430)          | 172<br>(100 - 267)          | 46<br>(18 - 86)          | 57<br>(20 - 117)            | 12<br>(7 - 19)              | 4<br>(3 - 7)                |
| Diphtheria                                                        | 6<br>(1 - 28)               | 4<br>(0 - 27)               | 1<br>(0 - 6)             | 1<br>(0 - 2)                | 0<br>(0 - 1)                | --                          |
| Whooping cough                                                    | 12<br>(6 - 20)              | 6<br>(2 - 15)               | 2<br>(1 - 3)             | 3<br>(2 - 5)                | 1<br>(0 - 1)                | --                          |
| Tetanus                                                           | 208<br>(119 - 300)          | 93<br>(43 - 161)            | 15<br>(7 - 26)           | 44<br>(23 - 70)             | 37<br>(20 - 59)             | 19<br>(9 - 31)              |
| Measles                                                           | 0<br>(0 - 0)                | 0<br>(0 - 0)                | 0<br>(0 - 0)             | 0<br>(0 - 0)                | 0<br>(0 - 0)                | --                          |
| Varicella and herpes zoster                                       | 15<br>(7 - 30)              | 5<br>(1 - 17)               | 1<br>(0 - 4)             | 3<br>(1 - 7)                | 1<br>(0 - 3)                | 4<br>(0 - 14)               |
| Neglected tropical diseases and malaria                           | 457<br>(290 - 684)          | 89<br>(28 - 321)            | 60<br>(32 - 97)          | 198<br>(112 - 321)          | 75<br>(41 - 118)            | 35<br>(21 - 52)             |
| Malaria                                                           | 338<br>(183 - 551)          | 50<br>(2 - 274)             | 44<br>(20 - 78)          | 160<br>(77 - 282)           | 60<br>(26 - 105)            | 24<br>(12 - 42)             |
| Leishmaniasis                                                     | 34<br>(17 - 52)             | 14<br>(4 - 26)              | 8<br>(2 - 15)            | 10<br>(4 - 17)              | 2<br>(1 - 3)                | 0<br>(0 - 1)                |
| Visceral leishmaniasis                                            | 34<br>(17 - 52)             | 14<br>(4 - 26)              | 8<br>(2 - 15)            | 10<br>(4 - 17)              | 2<br>(1 - 3)                | 0<br>(0 - 1)                |
| Cysticercosis                                                     | 17<br>(14 - 20)             | 1<br>(0 - 1)                | 1<br>(1 - 1)             | 10<br>(8 - 13)              | 4<br>(3 - 5)                | 1<br>(1 - 1)                |
| Cystic echinococcosis                                             | 3<br>(2 - 3)                | 0<br>(0 - 0)                | 0<br>(0 - 0)             | 1<br>(1 - 2)                | 0<br>(0 - 1)                | 0<br>(0 - 0)                |
| Dengue                                                            | 3<br>(2 - 5)                | 1<br>(0 - 1)                | 1<br>(0 - 2)             | 1<br>(1 - 1)                | 0<br>(0 - 1)                | 0<br>(0 - 0)                |
| Rabies                                                            | 4<br>(3 - 6)                | 0<br>(0 - 1)                | 1<br>(1 - 2)             | 1<br>(1 - 2)                | 1<br>(0 - 1)                | 0<br>(0 - 0)                |
| Intestinal nematode infections                                    | 7<br>(1 - 19)               | 5<br>(1 - 17)               | 1<br>(0 - 6)             | 1<br>(0 - 4)                | 0<br>(0 - 2)                | 0<br>(0 - 2)                |
| Ascariasis                                                        | 7<br>(1 - 19)               | 5<br>(1 - 17)               | 1<br>(0 - 6)             | 1<br>(0 - 4)                | 0<br>(0 - 2)                | 0<br>(0 - 2)                |
| Other neglected tropical diseases                                 | 52<br>(36 - 76)             | 18<br>(10 - 31)             | 4<br>(2 - 7)             | 13<br>(9 - 20)              | 8<br>(5 - 14)               | 8<br>(5 - 13)               |
| Maternal disorders                                                | 868<br>(571 - 1,251)        | --                          | 5<br>(2 - 11)            | 863<br>(568 - 1,247)        | --                          | --                          |
| Maternal hemorrhage                                               | 118<br>(62 - 197)           | --                          | 0<br>(0 - 1)             | 118<br>(62 - 197)           | --                          | --                          |

Web Table 31- Haiti deaths with 95% UI by age, sex, and cause in 2013

| Cause                                                            | Both Sexes, All Ages        | Both Sexes, 0-4 Years    | Both Sexes, 5-14 Years | Both Sexes, 15-49 Years  | Both Sexes, 50-69 Years     | Both Sexes, 70-80 Years     |
|------------------------------------------------------------------|-----------------------------|--------------------------|------------------------|--------------------------|-----------------------------|-----------------------------|
| Maternal sepsis and other maternal infections                    | 102<br>(63 - 159)           | --                       | 1<br>(0 - 2)           | 101<br>(62 - 158)        | --                          | --                          |
| Maternal hypertensive disorders                                  | 245<br>(158 - 374)          | --                       | 2<br>(1 - 4)           | 244<br>(158 - 372)       | --                          | --                          |
| Maternal obstructed labor                                        | 57<br>(27 - 95)             | --                       | 0<br>(0 - 1)           | 57<br>(27 - 95)          | --                          | --                          |
| Maternal abortive outcome                                        | 100<br>(50 - 165)           | --                       | 0<br>(0 - 1)           | 99<br>(50 - 165)         | --                          | --                          |
| Indirect maternal deaths                                         | 61<br>(25 - 110)            | --                       | 0<br>(0 - 1)           | 60<br>(25 - 109)         | --                          | --                          |
| Late maternal deaths                                             | 76<br>(35 - 130)            | --                       | 1<br>(0 - 2)           | 75<br>(34 - 129)         | --                          | --                          |
| Maternal deaths aggravated by HIV/AIDS                           | 7<br>(3 - 11)               | --                       | --                     | 7<br>(3 - 11)            | --                          | --                          |
| Other maternal disorders                                         | 101<br>(53 - 165)           | --                       | 0<br>(0 - 1)           | 100<br>(52 - 165)        | --                          | --                          |
| Neonatal disorders                                               | 5,261<br>(4,506 - 6,181)    | 5,261<br>(4,506 - 6,181) | --                     | --                       | --                          | --                          |
| Neonatal preterm birth complications                             | 1,482<br>(891 - 2,190)      | 1,482<br>(891 - 2,190)   | --                     | --                       | --                          | --                          |
| Neonatal encephalopathy due to birth asphyxia and trauma         | 1,190<br>(759 - 1,764)      | 1,190<br>(759 - 1,764)   | --                     | --                       | --                          | --                          |
| Neonatal sepsis and other neonatal infections                    | 1,998<br>(1,219 - 2,910)    | 1,998<br>(1,219 - 2,910) | --                     | --                       | --                          | --                          |
| Hemolytic disease and other neonatal jaundice                    | 33<br>(15 - 68)             | 33<br>(15 - 68)          | --                     | --                       | --                          | --                          |
| Other neonatal disorders                                         | 558<br>(324 - 888)          | 558<br>(324 - 888)       | --                     | --                       | --                          | --                          |
| Nutritional deficiencies                                         | 4,100<br>(3,117 - 5,120)    | 2,241<br>(1,510 - 3,055) | 184<br>(131 - 253)     | 494<br>(367 - 663)       | 480<br>(362 - 662)          | 701<br>(516 - 961)          |
| Protein-energy malnutrition                                      | 2,949<br>(2,137 - 3,967)    | 2,009<br>(1,325 - 2,852) | 144<br>(98 - 211)      | 188<br>(110 - 320)       | 254<br>(152 - 420)          | 354<br>(201 - 584)          |
| Iodine deficiency                                                | 11<br>(2 - 38)              | 4<br>(0 - 28)            | 1<br>(0 - 6)           | 2<br>(0 - 9)             | 2<br>(0 - 8)                | 2<br>(0 - 8)                |
| Iron-deficiency anemia                                           | 1,088<br>(571 - 1,572)      | 215<br>(54 - 476)        | 36<br>(15 - 66)        | 291<br>(165 - 416)       | 215<br>(102 - 334)          | 331<br>(166 - 506)          |
| Other nutritional deficiencies                                   | 52<br>(30 - 99)             | 13<br>(5 - 30)           | 2<br>(1 - 5)           | 12<br>(7 - 26)           | 9<br>(5 - 21)               | 15<br>(7 - 30)              |
| Other communicable, maternal, neonatal, and nutritional diseases | 1,699<br>(781 - 2,692)      | 1,014<br>(193 - 1,915)   | 91<br>(30 - 161)       | 255<br>(151 - 392)       | 193<br>(116 - 313)          | 146<br>(78 - 247)           |
| Sexually transmitted diseases excluding HIV                      | 1,011<br>(102 - 1,992)      | 880<br>(7 - 1,798)       | 65<br>(2 - 129)        | 29<br>(18 - 47)          | 24<br>(12 - 46)             | 13<br>(7 - 24)              |
| Syphilis                                                         | 983<br>(67 - 1,965)         | 880<br>(7 - 1,798)       | 64<br>(1 - 128)        | 13<br>(8 - 21)           | 15<br>(8 - 29)              | 10<br>(5 - 19)              |
| Chlamydial infection                                             | 6<br>(4 - 10)               | --                       | 0<br>(0 - 0)           | 4<br>(2 - 7)             | 1<br>(1 - 4)                | 0<br>(0 - 1)                |
| Gonococcal infection                                             | 12<br>(8 - 18)              | --                       | 0<br>(0 - 0)           | 6<br>(4 - 10)            | 4<br>(2 - 8)                | 2<br>(1 - 3)                |
| Other sexually transmitted diseases                              | 9<br>(6 - 14)               | --                       | 0<br>(0 - 0)           | 6<br>(4 - 9)             | 3<br>(1 - 6)                | 1<br>(0 - 1)                |
| Hepatitis                                                        | 86<br>(71 - 103)            | 4<br>(3 - 7)             | 3<br>(2 - 5)           | 31<br>(23 - 41)          | 29<br>(22 - 37)             | 19<br>(14 - 26)             |
| Acute hepatitis A                                                | 18<br>(8 - 31)              | 3<br>(2 - 6)             | 2<br>(1 - 4)           | 10<br>(4 - 18)           | 2<br>(0 - 4)                | 0<br>(0 - 1)                |
| Acute hepatitis B                                                | 60<br>(43 - 78)             | 1<br>(0 - 3)             | 1<br>(0 - 1)           | 17<br>(10 - 27)          | 24<br>(17 - 32)             | 17<br>(11 - 23)             |
| Acute hepatitis C                                                | 8<br>(2 - 19)               | --                       | 0<br>(0 - 1)           | 3<br>(1 - 8)             | 3<br>(0 - 7)                | 2<br>(0 - 6)                |
| Other infectious diseases                                        | 602<br>(326 - 919)          | 130<br>(55 - 307)        | 23<br>(11 - 47)        | 195<br>(99 - 328)        | 141<br>(66 - 258)           | 114<br>(47 - 211)           |
| Non-communicable diseases                                        | 42,125<br>(37,548 - 46,975) | 2,406<br>(1,835 - 3,143) | 587<br>(479 - 727)     | 6,202<br>(5,061 - 7,626) | 14,010<br>(11,909 - 16,083) | 18,920<br>(17,141 - 20,588) |
| Neoplasms                                                        | 6,994<br>(6,126 - 8,018)    | 179<br>(127 - 252)       | 104<br>(77 - 138)      | 1,191<br>(962 - 1,471)   | 2,577<br>(2,155 - 2,993)    | 2,943<br>(2,594 - 3,338)    |
| Esophageal cancer                                                | 130<br>(105 - 166)          | --                       | --                     | 11<br>(8 - 16)           | 68<br>(53 - 89)             | 50<br>(39 - 64)             |
| Stomach cancer                                                   | 596<br>(506 - 698)          | --                       | --                     | 70<br>(54 - 88)          | 267<br>(216 - 323)          | 258<br>(206 - 325)          |
| Liver cancer                                                     | 488<br>(398 - 587)          | --                       | 3<br>(2 - 4)           | 75<br>(54 - 104)         | 220<br>(169 - 282)          | 189<br>(142 - 246)          |
| Liver cancer due to hepatitis B                                  | 115<br>(70 - 161)           | --                       | 1<br>(0 - 1)           | 28<br>(17 - 41)          | 55<br>(31 - 83)             | 31<br>(17 - 47)             |
| Liver cancer due to hepatitis C                                  | 229<br>(164 - 297)          | --                       | 0<br>(0 - 1)           | 27<br>(16 - 43)          | 104<br>(70 - 142)           | 98<br>(67 - 134)            |
| Liver cancer due to alcohol use                                  | 93<br>(59 - 131)            | --                       | --                     | 9<br>(5 - 13)            | 38<br>(24 - 56)             | 46<br>(27 - 70)             |
| Liver cancer due to other causes                                 | 51<br>(33 - 73)             | --                       | 2<br>(1 - 3)           | 12<br>(7 - 17)           | 23<br>(13 - 35)             | 15<br>(9 - 24)              |
| Larynx cancer                                                    | 30<br>(23 - 44)             | --                       | --                     | 4<br>(3 - 5)             | 14<br>(10 - 21)             | 13<br>(9 - 19)              |

Web Table 31- Haiti deaths with 95% UI by age, sex, and cause in 2013

| Cause                                         | Both Sexes, All Ages        | Both Sexes, 0-4 Years | Both Sexes, 5-14 Years | Both Sexes, 15-49 Years  | Both Sexes, 50-69 Years  | Both Sexes, 70-80 Years    |
|-----------------------------------------------|-----------------------------|-----------------------|------------------------|--------------------------|--------------------------|----------------------------|
| Tracheal, bronchus and lung cancer            | 486<br>(416 - 564)          | --                    | --                     | 44<br>(33 - 57)          | 235<br>(193 - 286)       | 207<br>(174 - 245)         |
| Breast cancer                                 | 652<br>(500 - 823)          | --                    | --                     | 162<br>(116 - 217)       | 287<br>(202 - 381)       | 203<br>(154 - 261)         |
| Cervical cancer                               | 318<br>(235 - 417)          | --                    | --                     | 75<br>(51 - 107)         | 129<br>(85 - 181)        | 114<br>(79 - 157)          |
| Uterine cancer                                | 183<br>(98 - 264)           | --                    | --                     | 16<br>(7 - 26)           | 66<br>(33 - 104)         | 102<br>(53 - 157)          |
| Prostate cancer                               | 882<br>(595 - 1,277)        | --                    | --                     | 5<br>(2 - 9)             | 210<br>(132 - 321)       | 667<br>(448 - 978)         |
| Colon and rectum cancer                       | 741<br>(632 - 865)          | --                    | --                     | 113<br>(89 - 142)        | 278<br>(225 - 334)       | 350<br>(288 - 420)         |
| Lip and oral cavity cancer                    | 80<br>(60 - 100)            | --                    | --                     | 21<br>(15 - 30)          | 28<br>(19 - 38)          | 30<br>(22 - 39)            |
| Nasopharynx cancer                            | 23<br>(18 - 30)             | --                    | 0<br>(0 - 1)           | 10<br>(7 - 15)           | 8<br>(6 - 11)            | 5<br>(3 - 7)               |
| Other pharynx cancer                          | 24<br>(18 - 29)             | --                    | --                     | 6<br>(4 - 9)             | 12<br>(9 - 15)           | 6<br>(4 - 8)               |
| Gallbladder and biliary tract cancer          | 83<br>(58 - 150)            | --                    | --                     | 7<br>(5 - 11)            | 36<br>(24 - 67)          | 40<br>(25 - 73)            |
| Pancreatic cancer                             | 228<br>(192 - 266)          | --                    | --                     | 25<br>(19 - 33)          | 86<br>(69 - 105)         | 117<br>(94 - 141)          |
| Malignant skin melanoma                       | 40<br>(28 - 50)             | --                    | --                     | 16<br>(10 - 22)          | 14<br>(10 - 19)          | 11<br>(7 - 14)             |
| Non-melanoma skin cancer                      | 47<br>(34 - 63)             | --                    | --                     | 10<br>(7 - 15)           | 14<br>(9 - 20)           | 23<br>(16 - 32)            |
| Ovarian cancer                                | 152<br>(114 - 194)          | --                    | --                     | 48<br>(34 - 69)          | 58<br>(38 - 81)          | 46<br>(32 - 64)            |
| Testicular cancer                             | 11<br>(5 - 17)              | --                    | --                     | 8<br>(3 - 13)            | 1<br>(0 - 2)             | 2<br>(1 - 3)               |
| Kidney cancer                                 | 145<br>(119 - 172)          | 13<br>(7 - 24)        | 5<br>(2 - 8)           | 28<br>(21 - 37)          | 51<br>(38 - 64)          | 48<br>(35 - 64)            |
| Bladder cancer                                | 53<br>(42 - 67)             | --                    | --                     | 3<br>(2 - 4)             | 13<br>(10 - 18)          | 37<br>(28 - 49)            |
| Brain and nervous system cancer               | 29<br>(23 - 41)             | 1<br>(1 - 3)          | 1<br>(1 - 1)           | 10<br>(7 - 17)           | 9<br>(7 - 12)            | 8<br>(6 - 11)              |
| Thyroid cancer                                | 17<br>(12 - 27)             | --                    | 0<br>(0 - 0)           | 2<br>(2 - 4)             | 8<br>(5 - 13)            | 7<br>(5 - 11)              |
| Mesothelioma                                  | 24<br>(18 - 31)             | --                    | --                     | 2<br>(1 - 3)             | 9<br>(7 - 13)            | 13<br>(9 - 18)             |
| Hodgkin lymphoma                              | 61<br>(23 - 87)             | 7<br>(2 - 14)         | 3<br>(1 - 7)           | 25<br>(9 - 41)           | 14<br>(4 - 21)           | 11<br>(4 - 18)             |
| Non-Hodgkin lymphoma                          | 461<br>(279 - 587)          | 39<br>(24 - 60)       | 18<br>(8 - 30)         | 146<br>(81 - 207)        | 139<br>(80 - 187)        | 119<br>(69 - 163)          |
| Multiple myeloma                              | 61<br>(48 - 77)             | --                    | --                     | 9<br>(6 - 14)            | 31<br>(23 - 41)          | 21<br>(15 - 28)            |
| Leukemia                                      | 246<br>(210 - 285)          | 21<br>(11 - 35)       | 27<br>(19 - 38)        | 71<br>(55 - 92)          | 63<br>(51 - 78)          | 64<br>(52 - 77)            |
| Other neoplasms                               | 704<br>(549 - 850)          | 98<br>(60 - 148)      | 47<br>(29 - 68)        | 167<br>(115 - 221)       | 209<br>(160 - 265)       | 183<br>(142 - 235)         |
| Cardiovascular diseases                       | 20,277<br>(17,580 - 22,927) | 532<br>(374 - 745)    | 153<br>(113 - 207)     | 2,432<br>(1,873 - 3,066) | 7,074<br>(5,896 - 8,259) | 10,086<br>(8,912 - 11,255) |
| Rheumatic heart disease                       | 323<br>(220 - 408)          | 10<br>(5 - 19)        | 18<br>(10 - 28)        | 109<br>(66 - 148)        | 100<br>(70 - 136)        | 86<br>(59 - 112)           |
| Ischemic heart disease                        | 6,130<br>(4,939 - 7,251)    | 89<br>(47 - 156)      | 29<br>(19 - 46)        | 850<br>(614 - 1,166)     | 2,177<br>(1,719 - 2,606) | 2,985<br>(2,412 - 3,579)   |
| Cerebrovascular disease                       | 9,618<br>(8,061 - 11,153)   | 283<br>(203 - 404)    | 61<br>(43 - 85)        | 847<br>(639 - 1,081)     | 3,366<br>(2,704 - 4,043) | 5,060<br>(4,294 - 5,818)   |
| Ischemic stroke                               | 5,104<br>(4,136 - 6,299)    | 26<br>(14 - 44)       | 10<br>(6 - 19)         | 255<br>(175 - 373)       | 1,699<br>(1,313 - 2,176) | 3,115<br>(2,558 - 3,775)   |
| Hemorrhagic stroke                            | 4,513<br>(3,693 - 5,315)    | 257<br>(185 - 365)    | 51<br>(35 - 70)        | 593<br>(437 - 751)       | 1,667<br>(1,302 - 2,062) | 1,945<br>(1,543 - 2,350)   |
| Hypertensive heart disease                    | 2,350<br>(1,426 - 3,217)    | 5<br>(2 - 10)         | 5<br>(3 - 9)           | 244<br>(131 - 373)       | 850<br>(511 - 1,232)     | 1,245<br>(741 - 1,734)     |
| Cardiomyopathy and myocarditis                | 252<br>(189 - 363)          | 39<br>(22 - 65)       | 14<br>(8 - 24)         | 94<br>(62 - 152)         | 41<br>(31 - 56)          | 65<br>(41 - 110)           |
| Atrial fibrillation and flutter               | 5<br>(4 - 8)                | --                    | --                     | 3<br>(2 - 4)             | 1<br>(0 - 1)             | 2<br>(1 - 3)               |
| Aortic aneurysm                               | 58<br>(43 - 84)             | --                    | --                     | 9<br>(6 - 13)            | 24<br>(17 - 42)          | 25<br>(16 - 36)            |
| Peripheral vascular disease                   | 77<br>(63 - 95)             | --                    | --                     | 5<br>(3 - 7)             | 25<br>(20 - 33)          | 47<br>(36 - 61)            |
| Endocarditis                                  | 173<br>(123 - 249)          | 63<br>(35 - 109)      | 10<br>(6 - 15)         | 54<br>(37 - 79)          | 21<br>(14 - 30)          | 26<br>(17 - 37)            |
| Other cardiovascular and circulatory diseases | 1,292<br>(1,021 - 1,806)    | 43<br>(25 - 74)       | 16<br>(10 - 27)        | 217<br>(156 - 319)       | 468<br>(340 - 665)       | 546<br>(400 - 791)         |
| Chronic respiratory diseases                  | 1,320<br>(1,129 - 1,637)    | 35<br>(22 - 52)       | 13<br>(10 - 19)        | 169<br>(131 - 215)       | 418<br>(339 - 533)       | 684<br>(571 - 885)         |
| Chronic obstructive pulmonary disease         | 679<br>(559 - 905)          | 8<br>(4 - 13)         | 2<br>(1 - 4)           | 54<br>(39 - 75)          | 198<br>(152 - 279)       | 416<br>(339 - 556)         |



Web Table 31- Haiti deaths with 95% UI by age, sex, and cause in 2013

| Cause                                               | Both Sexes, All Ages     | Both Sexes, 0-4 Years | Both Sexes, 5-14 Years | Both Sexes, 15-49 Years | Both Sexes, 50-69 Years | Both Sexes, 70-80 Years |
|-----------------------------------------------------|--------------------------|-----------------------|------------------------|-------------------------|-------------------------|-------------------------|
| Pneumoconiosis                                      | 57<br>(40 - 82)          | 0<br>(0 - 0)          | 0<br>(0 - 0)           | 8<br>(5 - 13)           | 32<br>(22 - 48)         | 17<br>(11 - 24)         |
| Silicosis                                           | 3<br>(2 - 4)             | 0<br>(0 - 0)          | 0<br>(0 - 0)           | 0<br>(0 - 1)            | 2<br>(1 - 2)            | 1<br>(0 - 1)            |
| Asbestosis                                          | 11<br>(8 - 17)           | 0<br>(0 - 0)          | 0<br>(0 - 0)           | 0<br>(0 - 1)            | 11<br>(7 - 16)          | 0<br>(0 - 0)            |
| Coal workers pneumoconiosis                         | 15<br>(10 - 21)          | 0<br>(0 - 0)          | 0<br>(0 - 0)           | 4<br>(3 - 7)            | 8<br>(5 - 12)           | 3<br>(1 - 4)            |
| Other pneumoconiosis                                | 29<br>(21 - 41)          | 0<br>(0 - 0)          | 0<br>(0 - 0)           | 3<br>(2 - 5)            | 13<br>(8 - 19)          | 13<br>(9 - 20)          |
| Asthma                                              | 399<br>(319 - 498)       | 14<br>(7 - 25)        | 9<br>(6 - 12)          | 70<br>(52 - 93)         | 126<br>(93 - 165)       | 181<br>(135 - 242)      |
| Interstitial lung disease and pulmonary sarcoidosis | 98<br>(69 - 147)         | 1<br>(0 - 2)          | 0<br>(0 - 1)           | 12<br>(8 - 19)          | 37<br>(24 - 57)         | 48<br>(31 - 76)         |
| Other chronic respiratory diseases                  | 86<br>(66 - 114)         | 12<br>(7 - 19)        | 2<br>(2 - 4)           | 24<br>(17 - 35)         | 25<br>(17 - 37)         | 23<br>(15 - 34)         |
| Cirrhosis                                           | 1,296<br>(1,104 - 1,513) | 13<br>(7 - 23)        | 16<br>(12 - 21)        | 307<br>(234 - 394)      | 553<br>(447 - 663)      | 406<br>(330 - 495)      |
| Cirrhosis due to hepatitis B                        | 112<br>(57 - 171)        | 0<br>(0 - 0)          | 1<br>(0 - 1)           | 24<br>(13 - 39)         | 50<br>(25 - 78)         | 37<br>(17 - 60)         |
| Cirrhosis due to hepatitis C                        | 475<br>(330 - 619)       | 1<br>(0 - 2)          | 3<br>(2 - 5)           | 99<br>(65 - 144)        | 206<br>(131 - 282)      | 165<br>(109 - 227)      |
| Cirrhosis due to alcohol use                        | 481<br>(354 - 633)       | --                    | --                     | 98<br>(59 - 153)        | 218<br>(150 - 297)      | 165<br>(118 - 220)      |
| Cirrhosis due to other causes                       | 228<br>(162 - 302)       | 13<br>(7 - 22)        | 12<br>(9 - 17)         | 85<br>(58 - 121)        | 79<br>(48 - 115)        | 38<br>(22 - 59)         |
| Digestive diseases                                  | 2,104<br>(1,788 - 2,544) | 69<br>(42 - 112)      | 51<br>(37 - 67)        | 520<br>(397 - 680)      | 690<br>(550 - 877)      | 775<br>(622 - 1,020)    |
| Peptic ulcer disease                                | 521<br>(407 - 658)       | 4<br>(2 - 9)          | 5<br>(3 - 7)           | 116<br>(77 - 161)       | 204<br>(153 - 270)      | 193<br>(141 - 262)      |
| Gastritis and duodenitis                            | 49<br>(28 - 99)          | 0<br>(0 - 1)          | 1<br>(0 - 3)           | 16<br>(9 - 30)          | 12<br>(6 - 28)          | 19<br>(9 - 43)          |
| Appendicitis                                        | 169<br>(127 - 223)       | 5<br>(3 - 11)         | 8<br>(5 - 12)          | 46<br>(31 - 68)         | 51<br>(35 - 72)         | 58<br>(38 - 85)         |
| Paralytic ileus and intestinal obstruction          | 429<br>(228 - 594)       | 33<br>(16 - 59)       | 21<br>(12 - 31)        | 128<br>(61 - 193)       | 125<br>(59 - 185)       | 123<br>(60 - 187)       |
| Inguinal, femoral, and abdominal hernia             | 272<br>(194 - 448)       | 7<br>(2 - 15)         | 3<br>(2 - 6)           | 45<br>(28 - 76)         | 91<br>(60 - 151)        | 125<br>(82 - 210)       |
| Inflammatory bowel disease                          | 98<br>(75 - 138)         | 9<br>(4 - 16)         | 2<br>(1 - 3)           | 31<br>(22 - 47)         | 28<br>(19 - 42)         | 29<br>(20 - 43)         |
| Vascular intestinal disorders                       | 31<br>(11 - 64)          | 0<br>(0 - 0)          | 0<br>(0 - 0)           | 19<br>(6 - 39)          | 7<br>(2 - 21)           | 5<br>(2 - 14)           |
| Gallbladder and biliary diseases                    | 147<br>(102 - 267)       | 0<br>(0 - 1)          | 1<br>(0 - 1)           | 20<br>(13 - 33)         | 51<br>(32 - 92)         | 76<br>(46 - 153)        |
| Pancreatitis                                        | 87<br>(56 - 137)         | 0<br>(0 - 1)          | 1<br>(0 - 2)           | 32<br>(21 - 49)         | 31<br>(17 - 53)         | 23<br>(13 - 42)         |
| Other digestive diseases                            | 300<br>(235 - 405)       | 10<br>(5 - 19)        | 9<br>(5 - 13)          | 69<br>(49 - 98)         | 90<br>(65 - 126)        | 122<br>(84 - 185)       |
| Neurological disorders                              | 1,647<br>(1,361 - 1,897) | 41<br>(24 - 67)       | 28<br>(19 - 43)        | 160<br>(108 - 222)      | 215<br>(174 - 264)      | 1,203<br>(942 - 1,423)  |
| Alzheimer disease and other dementias               | 1,288<br>(1,021 - 1,520) | --                    | --                     | 1<br>(0 - 2)            | 133<br>(102 - 169)      | 1,154<br>(894 - 1,373)  |
| Parkinson disease                                   | 17<br>(11 - 36)          | --                    | --                     | 1<br>(0 - 1)            | 4<br>(3 - 8)            | 13<br>(8 - 27)          |
| Epilepsy                                            | 224<br>(159 - 306)       | 33<br>(17 - 58)       | 21<br>(13 - 35)        | 106<br>(68 - 156)       | 44<br>(32 - 62)         | 20<br>(14 - 30)         |
| Multiple sclerosis                                  | 50<br>(11 - 77)          | --                    | --                     | 31<br>(7 - 49)          | 13<br>(2 - 23)          | 6<br>(1 - 14)           |
| Other neurological disorders                        | 68<br>(58 - 82)          | 8<br>(6 - 11)         | 7<br>(5 - 13)          | 22<br>(17 - 29)         | 20<br>(16 - 25)         | 11<br>(9 - 13)          |
| Mental and substance use disorders                  | 609<br>(435 - 782)       | 39<br>(23 - 56)       | 0<br>(0 - 0)           | 297<br>(202 - 409)      | 196<br>(128 - 264)      | 77<br>(56 - 104)        |
| Schizophrenia                                       | 13<br>(10 - 22)          | --                    | --                     | 4<br>(3 - 6)            | 5<br>(3 - 9)            | 4<br>(3 - 7)            |
| Alcohol use disorders                               | 284<br>(169 - 382)       | --                    | --                     | 80<br>(47 - 123)        | 151<br>(88 - 217)       | 53<br>(30 - 77)         |
| Drug use disorders                                  | 311<br>(189 - 404)       | 39<br>(23 - 56)       | --                     | 213<br>(127 - 295)      | 39<br>(19 - 51)         | 20<br>(13 - 29)         |
| Opioid use disorders                                | 90<br>(55 - 120)         | 12<br>(7 - 18)        | --                     | 62<br>(37 - 89)         | 10<br>(5 - 14)          | 6<br>(4 - 9)            |
| Cocaine use disorders                               | 16<br>(10 - 21)          | 2<br>(1 - 4)          | --                     | 11<br>(7 - 16)          | 1<br>(1 - 2)            | 1<br>(1 - 1)            |
| Amphetamine use disorders                           | 11<br>(7 - 14)           | 2<br>(1 - 3)          | --                     | 7<br>(5 - 10)           | 1<br>(1 - 2)            | 1<br>(0 - 1)            |
| Other drug use disorders                            | 194<br>(117 - 252)       | 23<br>(13 - 33)       | --                     | 132<br>(79 - 184)       | 26<br>(12 - 34)         | 13<br>(8 - 18)          |
| Eating disorders                                    | 0<br>(0 - 0)             | --                    | 0<br>(0 - 0)           | 0<br>(0 - 0)            | --                      | --                      |
| Anorexia nervosa                                    | 0<br>(0 - 0)             | --                    | 0<br>(0 - 0)           | 0<br>(0 - 0)            | --                      | --                      |

Web Table 31- Haiti deaths with 95% UI by age, sex, and cause in 2013

| Cause                                               | Both Sexes, All Ages     | Both Sexes, 0-4 Years  | Both Sexes, 5-14 Years | Both Sexes, 15-49 Years | Both Sexes, 50-69 Years  | Both Sexes, 70-80 Years  |
|-----------------------------------------------------|--------------------------|------------------------|------------------------|-------------------------|--------------------------|--------------------------|
| Diabetes, urogenital, blood, and endocrine diseases | 5,946<br>(5,114 - 6,992) | 236<br>(165 - 338)     | 114<br>(83 - 176)      | 921<br>(726 - 1,169)    | 2,123<br>(1,720 - 2,565) | 2,553<br>(2,176 - 2,999) |
| Diabetes mellitus                                   | 3,635<br>(3,033 - 4,289) | 21<br>(14 - 32)        | 15<br>(10 - 22)        | 395<br>(310 - 497)      | 1,469<br>(1,145 - 1,811) | 1,734<br>(1,408 - 2,095) |
| Acute glomerulonephritis                            | 20<br>(15 - 28)          | 5<br>(3 - 8)           | 5<br>(3 - 8)           | 6<br>(4 - 8)            | 2<br>(2 - 3)             | 1<br>(1 - 2)             |
| Chronic kidney disease                              | 947<br>(761 - 1,383)     | 21<br>(14 - 32)        | 15<br>(10 - 25)        | 170<br>(124 - 247)      | 316<br>(238 - 469)       | 426<br>(327 - 630)       |
| Chronic kidney disease due to diabetes mellitus     | 69<br>(44 - 148)         | 2<br>(1 - 5)           | 1<br>(0 - 1)           | 10<br>(5 - 23)          | 14<br>(8 - 30)           | 43<br>(26 - 92)          |
| Chronic kidney disease due to hypertension          | 553<br>(445 - 759)       | 5<br>(3 - 9)           | 2<br>(1 - 3)           | 94<br>(67 - 132)        | 200<br>(149 - 285)       | 251<br>(193 - 342)       |
| Chronic kidney disease due to glomerulonephritis    | 50<br>(35 - 79)          | 5<br>(3 - 7)           | 7<br>(4 - 12)          | 14<br>(9 - 23)          | 12<br>(7 - 22)           | 12<br>(6 - 23)           |
| Chronic kidney disease due to other causes          | 275<br>(185 - 484)       | 8<br>(4 - 14)          | 5<br>(2 - 9)           | 52<br>(30 - 88)         | 90<br>(53 - 160)         | 120<br>(67 - 222)        |
| Urinary diseases and male infertility               | 445<br>(336 - 543)       | 51<br>(28 - 92)        | 8<br>(5 - 12)          | 77<br>(51 - 106)        | 118<br>(85 - 152)        | 191<br>(141 - 250)       |
| Interstitial nephritis and urinary tract infections | 329<br>(233 - 420)       | 46<br>(24 - 85)        | 7<br>(5 - 10)          | 56<br>(36 - 81)         | 80<br>(50 - 107)         | 140<br>(96 - 195)        |
| Urolithiasis                                        | 10<br>(6 - 17)           | --                     | 0<br>(0 - 1)           | 2<br>(1 - 4)            | 5<br>(2 - 9)             | 4<br>(2 - 7)             |
| Other urinary diseases                              | 106<br>(76 - 143)        | 5<br>(3 - 10)          | 1<br>(1 - 2)           | 18<br>(11 - 28)         | 34<br>(23 - 49)          | 47<br>(30 - 70)          |
| Gynecological diseases                              | 31<br>(21 - 52)          | --                     | --                     | 18<br>(11 - 31)         | 7<br>(4 - 12)            | 6<br>(3 - 10)            |
| Uterine fibroids                                    | 7<br>(4 - 11)            | --                     | --                     | 3<br>(2 - 5)            | 2<br>(1 - 4)             | 2<br>(1 - 3)             |
| Polycystic ovarian syndrome                         | 1<br>(1 - 2)             | --                     | --                     | 1<br>(1 - 2)            | 0<br>(0 - 0)             | --                       |
| Endometriosis                                       | 3<br>(2 - 5)             | --                     | --                     | 3<br>(2 - 5)            | 0<br>(0 - 0)             | --                       |
| Genital prolapse                                    | 5<br>(3 - 8)             | --                     | --                     | 2<br>(2 - 4)            | 1<br>(1 - 2)             | 1<br>(1 - 3)             |
| Other gynecological diseases                        | 15<br>(10 - 25)          | --                     | --                     | 9<br>(5 - 15)           | 3<br>(2 - 6)             | 3<br>(1 - 5)             |
| Hemoglobinopathies and hemolytic anemias            | 348<br>(229 - 508)       | 78<br>(46 - 133)       | 55<br>(34 - 93)        | 122<br>(75 - 192)       | 48<br>(30 - 68)          | 46<br>(29 - 63)          |
| Thalassemias                                        | 4<br>(3 - 6)             | 2<br>(1 - 3)           | 1<br>(1 - 1)           | 1<br>(1 - 2)            | 0<br>(0 - 0)             | 0<br>(0 - 0)             |
| Sickle cell disorders                               | 287<br>(189 - 431)       | 69<br>(40 - 118)       | 53<br>(33 - 89)        | 116<br>(72 - 183)       | 42<br>(26 - 59)          | 8<br>(5 - 12)            |
| G6PD deficiency                                     | 4<br>(3 - 6)             | 1<br>(1 - 2)           | 1<br>(0 - 1)           | 1<br>(1 - 2)            | 1<br>(0 - 1)             | 1<br>(1 - 1)             |
| Other hemoglobinopathies and hemolytic anemias      | 53<br>(35 - 71)          | 6<br>(4 - 10)          | 1<br>(1 - 2)           | 3<br>(2 - 5)            | 5<br>(4 - 8)             | 37<br>(24 - 51)          |
| Endocrine, metabolic, blood, and immune disorders   | 521<br>(392 - 910)       | 59<br>(36 - 110)       | 16<br>(9 - 34)         | 135<br>(91 - 240)       | 163<br>(111 - 295)       | 148<br>(102 - 267)       |
| Musculoskeletal disorders                           | 85<br>(66 - 117)         | --                     | 5<br>(3 - 9)           | 28<br>(20 - 42)         | 24<br>(18 - 34)          | 27<br>(20 - 38)          |
| Rheumatoid arthritis                                | 33<br>(23 - 51)          | --                     | 2<br>(1 - 5)           | 9<br>(5 - 15)           | 10<br>(6 - 16)           | 12<br>(8 - 19)           |
| Other musculoskeletal disorders                     | 51<br>(39 - 69)          | --                     | 3<br>(2 - 5)           | 19<br>(14 - 29)         | 14<br>(10 - 20)          | 15<br>(11 - 21)          |
| Other non-communicable diseases                     | 1,847<br>(1,393 - 2,369) | 1,262<br>(876 - 1,729) | 102<br>(66 - 147)      | 176<br>(111 - 239)      | 140<br>(98 - 173)        | 166<br>(117 - 208)       |
| Congenital anomalies                                | 1,512<br>(1,103 - 1,980) | 1,181<br>(816 - 1,617) | 93<br>(58 - 136)       | 112<br>(76 - 152)       | 66<br>(49 - 84)          | 61<br>(44 - 77)          |
| Neural tube defects                                 | 40<br>(17 - 81)          | 35<br>(12 - 75)        | 1<br>(0 - 1)           | 2<br>(1 - 3)            | 1<br>(1 - 2)             | 1<br>(1 - 1)             |
| Congenital heart anomalies                          | 531<br>(352 - 771)       | 404<br>(244 - 625)     | 48<br>(28 - 76)        | 43<br>(27 - 62)         | 13<br>(9 - 19)           | 22<br>(15 - 30)          |
| Cleft lip and cleft palate                          | 3<br>(0 - 6)             | 3<br>(0 - 6)           | --                     | --                      | --                       | --                       |
| Down syndrome                                       | 67<br>(33 - 127)         | 56<br>(24 - 116)       | 7<br>(3 - 14)          | 3<br>(2 - 5)            | 0<br>(0 - 1)             | 0<br>(0 - 0)             |
| Chromosomal unbalanced rearrangements               | 99<br>(14 - 257)         | 85<br>(8 - 236)        | 3<br>(0 - 7)           | 7<br>(3 - 11)           | 2<br>(1 - 3)             | 2<br>(1 - 3)             |
| Other congenital anomalies                          | 773<br>(495 - 1,080)     | 597<br>(349 - 883)     | 34<br>(18 - 54)        | 57<br>(37 - 81)         | 49<br>(35 - 63)          | 36<br>(26 - 46)          |
| Skin and subcutaneous diseases                      | 317<br>(180 - 406)       | 64<br>(31 - 120)       | 9<br>(5 - 14)          | 64<br>(32 - 92)         | 74<br>(45 - 96)          | 105<br>(66 - 144)        |
| Cellulitis                                          | 32<br>(18 - 56)          | 12<br>(4 - 28)         | 1<br>(0 - 1)           | 7<br>(4 - 13)           | 4<br>(2 - 6)             | 8<br>(4 - 14)            |
| Pyoderma                                            | 223<br>(121 - 283)       | 46<br>(22 - 82)        | 7<br>(4 - 11)          | 41<br>(19 - 59)         | 57<br>(33 - 75)          | 71<br>(41 - 99)          |
| Decubitus ulcer                                     | 46<br>(31 - 61)          | 1<br>(0 - 2)           | 1<br>(1 - 2)           | 11<br>(6 - 18)          | 10<br>(6 - 14)           | 23<br>(14 - 34)          |
| Other skin and subcutaneous diseases                | 17<br>(10 - 27)          | 6<br>(2 - 13)          | 0<br>(0 - 1)           | 4<br>(2 - 7)            | 3<br>(2 - 5)             | 3<br>(2 - 6)             |

Web Table 31- Haiti deaths with 95% UI by age, sex, and cause in 2013

| Cause                                           | Both Sexes, All Ages     | Both Sexes, 0-4 Years | Both Sexes, 5-14 Years | Both Sexes, 15-49 Years  | Both Sexes, 50-69 Years  | Both Sexes, 70-80 Years |
|-------------------------------------------------|--------------------------|-----------------------|------------------------|--------------------------|--------------------------|-------------------------|
| Sudden infant death syndrome                    | 18<br>(2 - 81)           | 18<br>(2 - 81)        | --                     | --                       | --                       | --                      |
| Injuries                                        | 7,574<br>(5,911 - 9,046) | 842<br>(587 - 1,207)  | 425<br>(328 - 534)     | 3,264<br>(2,460 - 4,241) | 1,646<br>(1,235 - 1,983) | 1,396<br>(947 - 1,734)  |
| Transport injuries                              | 2,269<br>(1,716 - 2,738) | 180<br>(107 - 271)    | 152<br>(106 - 212)     | 961<br>(691 - 1,278)     | 595<br>(435 - 742)       | 382<br>(262 - 480)      |
| Road injuries                                   | 1,989<br>(1,556 - 2,410) | 156<br>(95 - 238)     | 138<br>(98 - 194)      | 851<br>(622 - 1,132)     | 506<br>(386 - 630)       | 337<br>(240 - 423)      |
| Pedestrian road injuries                        | 487<br>(354 - 636)       | 43<br>(25 - 71)       | 47<br>(29 - 70)        | 163<br>(109 - 237)       | 139<br>(96 - 188)        | 94<br>(64 - 131)        |
| Cyclist road injuries                           | 103<br>(77 - 135)        | 6<br>(2 - 12)         | 10<br>(6 - 16)         | 44<br>(29 - 64)          | 26<br>(18 - 35)          | 18<br>(12 - 25)         |
| Motorcyclist road injuries                      | 137<br>(95 - 190)        | 9<br>(5 - 15)         | 5<br>(3 - 9)           | 83<br>(52 - 124)         | 19<br>(12 - 27)          | 22<br>(14 - 34)         |
| Motor vehicle road injuries                     | 1,229<br>(925 - 1,488)   | 96<br>(58 - 150)      | 74<br>(50 - 107)       | 543<br>(386 - 720)       | 317<br>(233 - 401)       | 198<br>(136 - 256)      |
| Other road injuries                             | 33<br>(21 - 60)          | 2<br>(1 - 4)          | 2<br>(1 - 3)           | 18<br>(10 - 37)          | 6<br>(3 - 11)            | 5<br>(3 - 10)           |
| Other transport injuries                        | 280<br>(146 - 368)       | 24<br>(9 - 39)        | 13<br>(6 - 22)         | 109<br>(59 - 158)        | 89<br>(44 - 128)         | 45<br>(20 - 65)         |
| Unintentional injuries                          | 3,643<br>(2,497 - 4,595) | 602<br>(383 - 919)    | 225<br>(161 - 303)     | 1,100<br>(706 - 1,490)   | 799<br>(517 - 1,024)     | 916<br>(559 - 1,212)    |
| Falls                                           | 725<br>(307 - 979)       | 53<br>(20 - 93)       | 25<br>(10 - 42)        | 172<br>(60 - 270)        | 176<br>(73 - 257)        | 299<br>(119 - 459)      |
| Drowning                                        | 342<br>(211 - 482)       | 71<br>(31 - 131)      | 55<br>(32 - 89)        | 107<br>(63 - 163)        | 69<br>(42 - 97)          | 41<br>(27 - 58)         |
| Fire, heat, and hot substances                  | 622<br>(342 - 927)       | 183<br>(80 - 358)     | 50<br>(25 - 85)        | 163<br>(86 - 256)        | 93<br>(51 - 142)         | 133<br>(69 - 206)       |
| Poisonings                                      | 96<br>(66 - 122)         | 9<br>(4 - 17)         | 5<br>(3 - 7)           | 43<br>(27 - 63)          | 24<br>(16 - 34)          | 15<br>(10 - 20)         |
| Exposure to mechanical forces                   | 614<br>(345 - 780)       | 63<br>(34 - 110)      | 38<br>(22 - 60)        | 291<br>(164 - 416)       | 152<br>(80 - 199)        | 70<br>(40 - 91)         |
| Unintentional firearm injuries                  | 266<br>(139 - 365)       | 11<br>(6 - 21)        | 9<br>(5 - 14)          | 162<br>(81 - 251)        | 60<br>(32 - 90)          | 24<br>(13 - 35)         |
| Unintentional suffocation                       | 55<br>(36 - 108)         | 14<br>(4 - 45)        | 4<br>(2 - 7)           | 20<br>(12 - 32)          | 13<br>(8 - 22)           | 5<br>(3 - 9)            |
| Other exposure to mechanical forces             | 293<br>(127 - 380)       | 37<br>(14 - 69)       | 26<br>(10 - 45)        | 109<br>(48 - 159)        | 79<br>(36 - 110)         | 41<br>(18 - 57)         |
| Adverse effects of medical treatment            | 742<br>(417 - 1,076)     | 114<br>(52 - 244)     | 23<br>(13 - 38)        | 173<br>(88 - 277)        | 187<br>(93 - 289)        | 244<br>(123 - 380)      |
| Animal contact                                  | 107<br>(61 - 142)        | 13<br>(6 - 21)        | 6<br>(3 - 10)          | 24<br>(14 - 35)          | 27<br>(13 - 38)          | 38<br>(19 - 59)         |
| Venomous animal contact                         | 30<br>(14 - 43)          | 4<br>(1 - 7)          | 2<br>(1 - 3)           | 8<br>(3 - 13)            | 10<br>(4 - 15)           | 7<br>(3 - 11)           |
| Non-venomous animal contact                     | 77<br>(45 - 106)         | 9<br>(4 - 14)         | 4<br>(2 - 7)           | 16<br>(10 - 24)          | 17<br>(9 - 25)           | 32<br>(15 - 50)         |
| Foreign body                                    | 168<br>(120 - 235)       | 64<br>(40 - 103)      | 9<br>(5 - 15)          | 25<br>(16 - 39)          | 26<br>(18 - 36)          | 44<br>(30 - 63)         |
| Pulmonary aspiration and foreign body in airway | 156<br>(105 - 221)       | 59<br>(35 - 95)       | 8<br>(5 - 15)          | 24<br>(14 - 37)          | 24<br>(16 - 34)          | 42<br>(28 - 60)         |
| Foreign body in other body part                 | 12<br>(8 - 19)           | 5<br>(3 - 11)         | 1<br>(0 - 1)           | 2<br>(1 - 2)             | 3<br>(2 - 4)             | 2<br>(1 - 3)            |
| Other unintentional injuries                    | 228<br>(184 - 280)       | 34<br>(23 - 50)       | 14<br>(10 - 21)        | 101<br>(73 - 138)        | 45<br>(33 - 59)          | 33<br>(24 - 43)         |
| Self-harm and interpersonal violence            | 1,661<br>(1,281 - 2,325) | 59<br>(32 - 114)      | 48<br>(32 - 75)        | 1,204<br>(870 - 1,714)   | 252<br>(189 - 378)       | 98<br>(70 - 139)        |
| Self-harm                                       | 592<br>(426 - 754)       | --                    | 15<br>(7 - 27)         | 336<br>(222 - 464)       | 162<br>(113 - 212)       | 80<br>(54 - 111)        |
| Interpersonal violence                          | 1,069<br>(771 - 1,692)   | 59<br>(32 - 114)      | 34<br>(21 - 57)        | 868<br>(601 - 1,333)     | 90<br>(54 - 190)         | 18<br>(9 - 44)          |
| Assault by firearm                              | 821<br>(561 - 1,311)     | 21<br>(10 - 46)       | 22<br>(13 - 39)        | 716<br>(476 - 1,128)     | 54<br>(31 - 117)         | 8<br>(3 - 20)           |
| Assault by sharp object                         | 135<br>(83 - 246)        | 13<br>(6 - 28)        | 4<br>(2 - 7)           | 96<br>(54 - 178)         | 20<br>(10 - 48)          | 3<br>(1 - 8)            |
| Assault by other means                          | 113<br>(76 - 182)        | 26<br>(14 - 46)       | 8<br>(4 - 14)          | 56<br>(32 - 91)          | 16<br>(9 - 34)           | 8<br>(4 - 20)           |
| Forces of nature, war, and legal intervention   | 0<br>(0 - 0)             | 0<br>(0 - 0)          | --                     | --                       | --                       | --                      |
| Exposure to forces of nature                    | 0<br>(0 - 0)             | 0<br>(0 - 0)          | --                     | --                       | --                       | --                      |

Web Table 31- Haiti deaths with 95% UI by age, sex, and cause in 2013

| Cause                                                             | Males, All Ages             | Males, 0-4 Years          | Males, 5-14 Years        | Males, 15-49 Years        | Males, 50-69 Years        | Males, 70-80 Years         |
|-------------------------------------------------------------------|-----------------------------|---------------------------|--------------------------|---------------------------|---------------------------|----------------------------|
| All causes                                                        | 41,131<br>(36,848 - 45,415) | 9,741<br>(8,274 - 11,383) | 1,241<br>(1,068 - 1,455) | 9,898<br>(8,303 - 12,101) | 9,742<br>(8,026 - 11,179) | 10,509<br>(9,631 - 11,006) |
| Communicable, maternal, neonatal, and nutritional diseases        | 16,896<br>(15,115 - 18,838) | 7,906<br>(6,731 - 9,287)  | 645<br>(541 - 763)       | 4,329<br>(3,549 - 5,282)  | 2,214<br>(1,892 - 2,590)  | 1,803<br>(1,506 - 2,153)   |
| HIV/AIDS and tuberculosis                                         | 4,669<br>(3,801 - 5,963)    | 138<br>(98 - 188)         | 189<br>(154 - 223)       | 2,966<br>(2,196 - 4,034)  | 1,058<br>(860 - 1,371)    | 318<br>(250 - 424)         |
| Tuberculosis                                                      | 1,211<br>(900 - 1,759)      | 59<br>(31 - 99)           | 25<br>(16 - 40)          | 506<br>(328 - 800)        | 388<br>(280 - 580)        | 232<br>(172 - 336)         |
| HIV/AIDS                                                          | 3,458<br>(2,648 - 4,714)    | 79<br>(53 - 112)          | 164<br>(131 - 197)       | 2,460<br>(1,705 - 3,578)  | 670<br>(488 - 887)        | 86<br>(55 - 132)           |
| HIV/AIDS resulting in mycobacterial infection                     | 237<br>(168 - 332)          | 5<br>(4 - 8)              | 10<br>(8 - 13)           | 168<br>(109 - 251)        | 48<br>(33 - 67)           | 6<br>(4 - 10)              |
| HIV/AIDS resulting in other diseases                              | 3,221<br>(2,470 - 4,372)    | 74<br>(50 - 104)          | 153<br>(123 - 184)       | 2,292<br>(1,590 - 3,337)  | 622<br>(453 - 827)        | 79<br>(51 - 122)           |
| Diarrhea, lower respiratory, and other common infectious diseases | 6,133<br>(4,948 - 7,420)    | 3,051<br>(2,156 - 4,035)  | 292<br>(210 - 386)       | 929<br>(642 - 1,326)      | 776<br>(568 - 1,004)      | 1,085<br>(828 - 1,408)     |
| Diarrheal diseases                                                | 2,367<br>(1,476 - 3,482)    | 1,455<br>(724 - 2,477)    | 88<br>(38 - 163)         | 294<br>(163 - 486)        | 239<br>(125 - 417)        | 291<br>(158 - 487)         |
| Intestinal infectious diseases                                    | 101<br>(55 - 169)           | 45<br>(21 - 78)           | 26<br>(12 - 46)          | 26<br>(11 - 49)           | 3<br>(1 - 8)              | 1<br>(0 - 4)               |
| Typhoid fever                                                     | 60<br>(28 - 112)            | 24<br>(10 - 48)           | 19<br>(8 - 34)           | 16<br>(6 - 33)            | 1<br>(1 - 3)              | 0<br>(0 - 1)               |
| Paratyphoid fever                                                 | 17<br>(7 - 31)              | 7<br>(3 - 15)             | 5<br>(2 - 11)            | 4<br>(2 - 9)              | 0<br>(0 - 1)              | 0<br>(0 - 0)               |
| Other intestinal infectious diseases                              | 24<br>(12 - 40)             | 14<br>(5 - 26)            | 2<br>(0 - 8)             | 5<br>(1 - 13)             | 2<br>(0 - 6)              | 1<br>(0 - 4)               |
| Lower respiratory infections                                      | 2,818<br>(2,163 - 3,605)    | 1,138<br>(686 - 1,764)    | 72<br>(41 - 117)         | 415<br>(268 - 635)        | 450<br>(311 - 615)        | 743<br>(530 - 1,024)       |
| Upper respiratory infections                                      | 5<br>(2 - 11)               | 2<br>(0 - 7)              | 0<br>(0 - 1)             | 1<br>(0 - 4)              | 1<br>(0 - 3)              | 1<br>(0 - 3)               |
| Otitis media                                                      | 7<br>(5 - 9)                | 2<br>(1 - 3)              | 0<br>(0 - 0)             | 2<br>(1 - 2)              | 2<br>(1 - 2)              | 2<br>(1 - 2)               |
| Meningitis                                                        | 495<br>(354 - 698)          | 255<br>(136 - 461)        | 49<br>(26 - 85)          | 107<br>(67 - 162)         | 50<br>(32 - 72)           | 34<br>(21 - 52)            |
| Pneumococcal meningitis                                           | 136<br>(91 - 205)           | 62<br>(29 - 118)          | 16<br>(7 - 31)           | 33<br>(16 - 57)           | 15<br>(6 - 26)            | 10<br>(5 - 18)             |
| H influenzae type B meningitis                                    | 122<br>(72 - 203)           | 89<br>(43 - 167)          | 13<br>(5 - 25)           | 13<br>(5 - 22)            | 5<br>(2 - 9)              | 3<br>(1 - 6)               |
| Meningococcal meningitis                                          | 54<br>(36 - 78)             | 23<br>(11 - 43)           | 6<br>(2 - 11)            | 15<br>(8 - 27)            | 6<br>(3 - 12)             | 5<br>(2 - 8)               |
| Other meningitis                                                  | 182<br>(125 - 274)          | 81<br>(34 - 162)          | 15<br>(6 - 28)           | 47<br>(25 - 79)           | 24<br>(13 - 39)           | 15<br>(9 - 25)             |
| Encephalitis                                                      | 185<br>(88 - 299)           | 83<br>(37 - 151)          | 42<br>(13 - 82)          | 49<br>(11 - 111)          | 8<br>(5 - 13)             | 3<br>(2 - 5)               |
| Diphtheria                                                        | 3<br>(0 - 17)               | 2<br>(0 - 16)             | 1<br>(0 - 5)             | 0<br>(0 - 1)              | 0<br>(0 - 1)              | --                         |
| Whooping cough                                                    | 7<br>(3 - 14)               | 4<br>(1 - 11)             | 1<br>(1 - 2)             | 2<br>(1 - 3)              | 0<br>(0 - 0)              | --                         |
| Tetanus                                                           | 138<br>(76 - 209)           | 64<br>(28 - 121)          | 12<br>(5 - 21)           | 30<br>(14 - 54)           | 22<br>(11 - 40)           | 9<br>(4 - 17)              |
| Measles                                                           | 0<br>(0 - 0)                | 0<br>(0 - 0)              | 0<br>(0 - 0)             | 0<br>(0 - 0)              | 0<br>(0 - 0)              | --                         |
| Varicella and herpes zoster                                       | 7<br>(2 - 18)               | 3<br>(0 - 11)             | 1<br>(0 - 3)             | 2<br>(0 - 4)              | 1<br>(0 - 2)              | 2<br>(0 - 8)               |
| Neglected tropical diseases and malaria                           | 212<br>(65 - 400)           | 33<br>(14 - 75)           | 32<br>(7 - 67)           | 95<br>(18 - 211)          | 37<br>(9 - 81)            | 14<br>(5 - 27)             |
| Malaria                                                           | 135<br>(6 - 317)            | 6<br>(0 - 50)             | 20<br>(0 - 53)           | 73<br>(2 - 187)           | 28<br>(1 - 72)            | 8<br>(0 - 21)              |
| Leishmaniasis                                                     | 34<br>(17 - 52)             | 14<br>(4 - 26)            | 8<br>(2 - 15)            | 10<br>(4 - 17)            | 2<br>(1 - 3)              | 0<br>(0 - 1)               |
| Visceral leishmaniasis                                            | 34<br>(17 - 52)             | 14<br>(4 - 26)            | 8<br>(2 - 15)            | 10<br>(4 - 17)            | 2<br>(1 - 3)              | 0<br>(0 - 1)               |
| Cysticercosis                                                     | 7<br>(6 - 9)                | 0<br>(0 - 0)              | 0<br>(0 - 1)             | 5<br>(3 - 6)              | 2<br>(1 - 2)              | 0<br>(0 - 0)               |
| Cystic echinococcosis                                             | 1<br>(1 - 1)                | 0<br>(0 - 0)              | 0<br>(0 - 0)             | 1<br>(0 - 1)              | 0<br>(0 - 0)              | 0<br>(0 - 0)               |
| Dengue                                                            | 1<br>(1 - 2)                | 0<br>(0 - 0)              | 0<br>(0 - 0)             | 0<br>(0 - 1)              | 0<br>(0 - 0)              | 0<br>(0 - 0)               |
| Rabies                                                            | 2<br>(1 - 3)                | 0<br>(0 - 0)              | 1<br>(0 - 1)             | 1<br>(0 - 1)              | 0<br>(0 - 1)              | 0<br>(0 - 0)               |
| Intestinal nematode infections                                    | 4<br>(0 - 12)               | 3<br>(0 - 11)             | 1<br>(0 - 3)             | 0<br>(0 - 3)              | 0<br>(0 - 1)              | 0<br>(0 - 1)               |
| Ascariasis                                                        | 4<br>(0 - 12)               | 3<br>(0 - 11)             | 1<br>(0 - 3)             | 0<br>(0 - 3)              | 0<br>(0 - 1)              | 0<br>(0 - 1)               |
| Other neglected tropical diseases                                 | 28<br>(17 - 45)             | 10<br>(4 - 20)            | 2<br>(1 - 5)             | 6<br>(3 - 10)             | 5<br>(3 - 10)             | 5<br>(2 - 9)               |
| Maternal disorders                                                | --                          | --                        | --                       | --                        | --                        | --                         |
| Maternal hemorrhage                                               | --                          | --                        | --                       | --                        | --                        | --                         |

Web Table 31- Haiti deaths with 95% UI by age, sex, and cause in 2013

| Cause                                                            | Males, All Ages             | Males, 0-4 Years         | Males, 5-14 Years  | Males, 15-49 Years       | Males, 50-69 Years       | Males, 70-81 Years       |
|------------------------------------------------------------------|-----------------------------|--------------------------|--------------------|--------------------------|--------------------------|--------------------------|
| Maternal sepsis and other maternal infections                    | --                          | --                       | --                 | --                       | --                       | --                       |
| Maternal hypertensive disorders                                  | --                          | --                       | --                 | --                       | --                       | --                       |
| Maternal obstructed labor                                        | --                          | --                       | --                 | --                       | --                       | --                       |
| Maternal abortive outcome                                        | --                          | --                       | --                 | --                       | --                       | --                       |
| Indirect maternal deaths                                         | --                          | --                       | --                 | --                       | --                       | --                       |
| Late maternal deaths                                             | --                          | --                       | --                 | --                       | --                       | --                       |
| Maternal deaths aggravated by HIV/AIDS                           | --                          | --                       | --                 | --                       | --                       | --                       |
| Other maternal disorders                                         | --                          | --                       | --                 | --                       | --                       | --                       |
| Neonatal disorders                                               | 2,936<br>(2,506 - 3,475)    | 2,936<br>(2,506 - 3,475) | --                 | --                       | --                       | --                       |
| Neonatal preterm birth complications                             | 865<br>(423 - 1,395)        | 865<br>(423 - 1,395)     | --                 | --                       | --                       | --                       |
| Neonatal encephalopathy due to birth asphyxia and trauma         | 620<br>(305 - 1,070)        | 620<br>(305 - 1,070)     | --                 | --                       | --                       | --                       |
| Neonatal sepsis and other neonatal infections                    | 1,129<br>(547 - 1,869)      | 1,129<br>(547 - 1,869)   | --                 | --                       | --                       | --                       |
| Hemolytic disease and other neonatal jaundice                    | 16<br>(5 - 40)              | 16<br>(5 - 40)           | --                 | --                       | --                       | --                       |
| Other neonatal disorders                                         | 306<br>(144 - 556)          | 306<br>(144 - 556)       | --                 | --                       | --                       | --                       |
| Nutritional deficiencies                                         | 2,058<br>(1,201 - 2,912)    | 1,224<br>(627 - 1,904)   | 88<br>(50 - 143)   | 194<br>(111 - 320)       | 236<br>(136 - 396)       | 315<br>(184 - 504)       |
| Protein-energy malnutrition                                      | 1,606<br>(932 - 2,477)      | 1,117<br>(568 - 1,786)   | 71<br>(37 - 122)   | 111<br>(47 - 231)        | 134<br>(55 - 267)        | 174<br>(66 - 359)        |
| Iodine deficiency                                                | 4<br>(0 - 21)               | 2<br>(0 - 16)            | 0<br>(0 - 3)       | 1<br>(0 - 5)             | 1<br>(0 - 4)             | 1<br>(0 - 4)             |
| Iron-deficiency anemia                                           | 424<br>(127 - 830)          | 100<br>(14 - 299)        | 16<br>(3 - 39)     | 77<br>(23 - 153)         | 96<br>(27 - 186)         | 136<br>(40 - 266)        |
| Other nutritional deficiencies                                   | 23<br>(10 - 58)             | 6<br>(1 - 16)            | 1<br>(0 - 4)       | 5<br>(2 - 14)            | 6<br>(2 - 18)            | 6<br>(2 - 18)            |
| Other communicable, maternal, neonatal, and nutritional diseases | 889<br>(411 - 1,422)        | 523<br>(109 - 999)       | 44<br>(16 - 78)    | 144<br>(77 - 246)        | 106<br>(53 - 183)        | 71<br>(28 - 135)         |
| Sexually transmitted diseases excluding HIV                      | 502<br>(44 - 1,007)         | 442<br>(0 - 922)         | 31<br>(1 - 62)     | 10<br>(5 - 17)           | 13<br>(6 - 27)           | 6<br>(3 - 14)            |
| Syphilis                                                         | 492<br>(33 - 1,000)         | 442<br>(0 - 922)         | 30<br>(0 - 62)     | 5<br>(3 - 9)             | 9<br>(4 - 20)            | 5<br>(2 - 11)            |
| Chlamydial infection                                             | --                          | --                       | --                 | --                       | --                       | --                       |
| Gonococcal infection                                             | 6<br>(3 - 9)                | --                       | 0<br>(0 - 0)       | 2<br>(1 - 4)             | 2<br>(1 - 5)             | 1<br>(0 - 2)             |
| Other sexually transmitted diseases                              | 4<br>(2 - 6)                | --                       | 0<br>(0 - 0)       | 2<br>(1 - 3)             | 1<br>(1 - 3)             | 0<br>(0 - 1)             |
| Hepatitis                                                        | 45<br>(34 - 59)             | 2<br>(1 - 5)             | 2<br>(1 - 3)       | 19<br>(13 - 29)          | 15<br>(10 - 21)          | 6<br>(4 - 8)             |
| Acute hepatitis A                                                | 10<br>(4 - 18)              | 2<br>(1 - 4)             | 1<br>(1 - 2)       | 6<br>(2 - 12)            | 1<br>(0 - 2)             | 0<br>(0 - 0)             |
| Acute hepatitis B                                                | 31<br>(21 - 44)             | 1<br>(0 - 2)             | 0<br>(0 - 1)       | 12<br>(6 - 20)           | 13<br>(9 - 19)           | 5<br>(3 - 7)             |
| Acute hepatitis C                                                | 3<br>(1 - 9)                | --                       | 0<br>(0 - 0)       | 2<br>(0 - 4)             | 1<br>(0 - 3)             | 1<br>(0 - 2)             |
| Other infectious diseases                                        | 342<br>(167 - 565)          | 79<br>(29 - 218)         | 12<br>(5 - 27)     | 115<br>(53 - 211)        | 78<br>(29 - 152)         | 58<br>(17 - 123)         |
| Non-communicable diseases                                        | 19,512<br>(16,660 - 22,224) | 1,356<br>(983 - 1,849)   | 334<br>(268 - 414) | 3,232<br>(2,406 - 4,370) | 6,540<br>(5,217 - 7,616) | 8,050<br>(7,302 - 8,599) |
| Neoplasms                                                        | 3,397<br>(2,830 - 3,950)    | 99<br>(61 - 151)         | 62<br>(45 - 85)    | 540<br>(381 - 738)       | 1,185<br>(934 - 1,397)   | 1,511<br>(1,259 - 1,817) |
| Esophageal cancer                                                | 67<br>(50 - 97)             | --                       | --                 | 8<br>(5 - 13)            | 37<br>(26 - 56)          | 21<br>(15 - 30)          |
| Stomach cancer                                                   | 328<br>(264 - 393)          | --                       | --                 | 38<br>(26 - 55)          | 163<br>(123 - 207)       | 127<br>(98 - 160)        |
| Liver cancer                                                     | 251<br>(198 - 311)          | --                       | 1<br>(0 - 2)       | 49<br>(32 - 72)          | 111<br>(80 - 148)        | 90<br>(65 - 125)         |
| Liver cancer due to hepatitis B                                  | 70<br>(32 - 114)            | --                       | 0<br>(0 - 1)       | 19<br>(9 - 33)           | 34<br>(15 - 59)          | 17<br>(6 - 30)           |
| Liver cancer due to hepatitis C                                  | 117<br>(77 - 168)           | --                       | 0<br>(0 - 0)       | 18<br>(9 - 32)           | 51<br>(29 - 80)          | 48<br>(31 - 70)          |
| Liver cancer due to alcohol use                                  | 47<br>(30 - 71)             | --                       | --                 | 6<br>(3 - 10)            | 20<br>(12 - 33)          | 21<br>(12 - 34)          |
| Liver cancer due to other causes                                 | 16<br>(10 - 25)             | --                       | 0<br>(0 - 1)       | 5<br>(3 - 10)            | 6<br>(3 - 10)            | 4<br>(2 - 7)             |
| Larynx cancer                                                    | 22<br>(17 - 31)             | --                       | --                 | 3<br>(2 - 4)             | 10<br>(7 - 15)           | 9<br>(7 - 13)            |

Web Table 31- Haiti deaths with 95% UI by age, sex, and cause in 2013

| Cause                                         | Males, All Ages          | Males, 0-4 Years   | Males, 5-14 Years | Males, 15-49 Years     | Males, 50-69 Years       | Males, 70-80 Years       |
|-----------------------------------------------|--------------------------|--------------------|-------------------|------------------------|--------------------------|--------------------------|
| Tracheal, bronchus and lung cancer            | 278<br>(227 - 324)       | --                 | --                | 27<br>(19 - 38)        | 134<br>(104 - 163)       | 117<br>(94 - 141)        |
| Breast cancer                                 | 14<br>(10 - 20)          | --                 | --                | 4<br>(2 - 6)           | 5<br>(3 - 9)             | 4<br>(2 - 8)             |
| Cervical cancer                               | --                       | --                 | --                | --                     | --                       | --                       |
| Uterine cancer                                | --                       | --                 | --                | --                     | --                       | --                       |
| Prostate cancer                               | 882<br>(595 - 1,277)     | --                 | --                | 5<br>(2 - 9)           | 210<br>(132 - 321)       | 667<br>(448 - 978)       |
| Colon and rectum cancer                       | 312<br>(256 - 367)       | --                 | --                | 59<br>(42 - 82)        | 121<br>(91 - 147)        | 133<br>(105 - 164)       |
| Lip and oral cavity cancer                    | 44<br>(28 - 59)          | --                 | --                | 13<br>(8 - 20)         | 16<br>(9 - 23)           | 15<br>(10 - 21)          |
| Nasopharynx cancer                            | 15<br>(11 - 21)          | --                 | 0<br>(0 - 1)      | 8<br>(5 - 12)          | 5<br>(3 - 8)             | 2<br>(1 - 3)             |
| Other pharynx cancer                          | 17<br>(12 - 22)          | --                 | --                | 5<br>(3 - 7)           | 9<br>(6 - 12)            | 4<br>(3 - 6)             |
| Gallbladder and biliary tract cancer          | 23<br>(16 - 42)          | --                 | --                | 2<br>(1 - 4)           | 10<br>(6 - 18)           | 11<br>(7 - 20)           |
| Pancreatic cancer                             | 101<br>(82 - 121)        | --                 | --                | 18<br>(12 - 26)        | 39<br>(29 - 50)          | 44<br>(34 - 55)          |
| Malignant skin melanoma                       | 20<br>(9 - 29)           | --                 | --                | 8<br>(3 - 13)          | 5<br>(2 - 8)             | 7<br>(3 - 11)            |
| Non-melanoma skin cancer                      | 21<br>(13 - 29)          | --                 | --                | 5<br>(3 - 8)           | 6<br>(3 - 9)             | 10<br>(6 - 15)           |
| Ovarian cancer                                | --                       | --                 | --                | --                     | --                       | --                       |
| Testicular cancer                             | 11<br>(5 - 17)           | --                 | --                | 8<br>(3 - 13)          | 1<br>(0 - 2)             | 2<br>(1 - 3)             |
| Kidney cancer                                 | 71<br>(57 - 89)          | 5<br>(2 - 12)      | 1<br>(1 - 2)      | 15<br>(10 - 22)        | 31<br>(22 - 41)          | 19<br>(13 - 25)          |
| Bladder cancer                                | 43<br>(34 - 55)          | --                 | --                | 2<br>(1 - 3)           | 12<br>(9 - 17)           | 29<br>(21 - 39)          |
| Brain and nervous system cancer               | 15<br>(11 - 25)          | 0<br>(0 - 1)       | 0<br>(0 - 1)      | 7<br>(4 - 13)          | 5<br>(3 - 8)             | 2<br>(1 - 3)             |
| Thyroid cancer                                | 5<br>(3 - 8)             | --                 | 0<br>(0 - 0)      | 1<br>(0 - 1)           | 2<br>(1 - 3)             | 2<br>(1 - 3)             |
| Mesothelioma                                  | 15<br>(11 - 21)          | --                 | --                | 1<br>(1 - 2)           | 5<br>(3 - 8)             | 9<br>(5 - 14)            |
| Hodgkin lymphoma                              | 34<br>(9 - 55)           | 3<br>(1 - 7)       | 2<br>(1 - 5)      | 15<br>(4 - 28)         | 8<br>(2 - 15)            | 6<br>(1 - 11)            |
| Non-Hodgkin lymphoma                          | 272<br>(145 - 366)       | 22<br>(11 - 40)    | 10<br>(5 - 19)    | 92<br>(45 - 145)       | 81<br>(41 - 118)         | 68<br>(35 - 100)         |
| Multiple myeloma                              | 27<br>(17 - 35)          | --                 | --                | 5<br>(3 - 9)           | 15<br>(10 - 21)          | 6<br>(4 - 9)             |
| Leukemia                                      | 159<br>(131 - 194)       | 15<br>(7 - 28)     | 20<br>(13 - 30)   | 48<br>(34 - 68)        | 44<br>(32 - 57)          | 32<br>(25 - 41)          |
| Other neoplasms                               | 351<br>(262 - 433)       | 54<br>(29 - 89)    | 27<br>(15 - 43)   | 95<br>(62 - 136)       | 99<br>(68 - 133)         | 76<br>(54 - 104)         |
| Cardiovascular diseases                       | 8,555<br>(7,323 - 9,679) | 276<br>(169 - 426) | 81<br>(55 - 116)  | 1,189<br>(866 - 1,635) | 3,135<br>(2,497 - 3,635) | 3,875<br>(3,487 - 4,241) |
| Rheumatic heart disease                       | 149<br>(93 - 204)        | 6<br>(2 - 13)      | 10<br>(5 - 17)    | 47<br>(27 - 74)        | 43<br>(25 - 62)          | 42<br>(25 - 59)          |
| Ischemic heart disease                        | 3,130<br>(2,391 - 3,773) | 49<br>(21 - 96)    | 16<br>(9 - 25)    | 470<br>(317 - 676)     | 1,279<br>(960 - 1,579)   | 1,316<br>(984 - 1,593)   |
| Cerebrovascular disease                       | 3,654<br>(3,006 - 4,390) | 142<br>(89 - 221)  | 33<br>(21 - 48)   | 395<br>(273 - 561)     | 1,240<br>(955 - 1,541)   | 1,845<br>(1,542 - 2,222) |
| Ischemic stroke                               | 2,033<br>(1,596 - 2,547) | 12<br>(5 - 25)     | 5<br>(3 - 9)      | 125<br>(79 - 189)      | 700<br>(517 - 915)       | 1,190<br>(943 - 1,498)   |
| Hemorrhagic stroke                            | 1,622<br>(1,242 - 2,043) | 130<br>(82 - 199)  | 27<br>(17 - 41)   | 270<br>(182 - 391)     | 540<br>(376 - 715)       | 655<br>(491 - 846)       |
| Hypertensive heart disease                    | 769<br>(447 - 1,114)     | 4<br>(1 - 9)       | 3<br>(1 - 5)      | 103<br>(50 - 173)      | 328<br>(185 - 498)       | 331<br>(180 - 507)       |
| Cardiomyopathy and myocarditis                | 99<br>(67 - 162)         | 18<br>(8 - 35)     | 7<br>(3 - 13)     | 22<br>(13 - 43)        | 21<br>(14 - 32)          | 32<br>(17 - 63)          |
| Atrial fibrillation and flutter               | 2<br>(1 - 3)             | --                 | --                | 0<br>(0 - 1)           | 0<br>(0 - 1)             | 1<br>(1 - 2)             |
| Aortic aneurysm                               | 46<br>(35 - 69)          | --                 | --                | 8<br>(5 - 11)          | 21<br>(15 - 38)          | 17<br>(12 - 25)          |
| Peripheral vascular disease                   | 36<br>(28 - 45)          | --                 | --                | 3<br>(2 - 5)           | 15<br>(10 - 20)          | 18<br>(13 - 24)          |
| Endocarditis                                  | 93<br>(58 - 149)         | 36<br>(16 - 73)    | 6<br>(3 - 11)     | 29<br>(17 - 49)        | 11<br>(6 - 17)           | 11<br>(7 - 18)           |
| Other cardiovascular and circulatory diseases | 577<br>(452 - 857)       | 21<br>(11 - 37)    | 8<br>(4 - 13)     | 111<br>(74 - 174)      | 177<br>(120 - 272)       | 261<br>(189 - 407)       |
| Chronic respiratory diseases                  | 777<br>(644 - 1,023)     | 21<br>(11 - 36)    | 8<br>(6 - 12)     | 80<br>(57 - 111)       | 270<br>(202 - 366)       | 398<br>(322 - 534)       |
| Chronic obstructive pulmonary disease         | 409<br>(326 - 565)       | 4<br>(2 - 8)       | 1<br>(1 - 2)      | 18<br>(12 - 27)        | 126<br>(90 - 178)        | 261<br>(207 - 362)       |

Web Table 31- Haiti deaths with 95% UI by age, sex, and cause in 2013

| Cause                                               | Males, All Ages        | Males, 0-4 Years | Males, 5-14 Years | Males, 15-49 Years | Males, 50-69 Years | Males, 70-80 Years |
|-----------------------------------------------------|------------------------|------------------|-------------------|--------------------|--------------------|--------------------|
| Pneumoconiosis                                      | 52<br>(36 - 77)        | 0<br>(0 - 0)     | 0<br>(0 - 0)      | 8<br>(5 - 12)      | 30<br>(19 - 47)    | 14<br>(9 - 22)     |
| Silicosis                                           | 2<br>(2 - 3)           | 0<br>(0 - 0)     | 0<br>(0 - 0)      | 0<br>(0 - 1)       | 1<br>(1 - 2)       | 0<br>(0 - 1)       |
| Asbestosis                                          | 11<br>(7 - 17)         | 0<br>(0 - 0)     | 0<br>(0 - 0)      | 0<br>(0 - 1)       | 10<br>(7 - 16)     | 0<br>(0 - 0)       |
| Coal workers pneumoconiosis                         | 14<br>(9 - 21)         | 0<br>(0 - 0)     | 0<br>(0 - 0)      | 4<br>(3 - 7)       | 7<br>(5 - 12)      | 3<br>(1 - 4)       |
| Other pneumoconiosis                                | 25<br>(17 - 36)        | 0<br>(0 - 0)     | 0<br>(0 - 0)      | 3<br>(2 - 4)       | 11<br>(7 - 17)     | 11<br>(7 - 17)     |
| Asthma                                              | 193<br>(143 - 253)     | 8<br>(3 - 17)    | 5<br>(3 - 7)      | 33<br>(22 - 48)    | 74<br>(51 - 100)   | 73<br>(49 - 102)   |
| Interstitial lung disease and pulmonary sarcoidosis | 70<br>(46 - 110)       | 0<br>(0 - 1)     | 0<br>(0 - 1)      | 9<br>(5 - 14)      | 25<br>(15 - 40)    | 36<br>(21 - 60)    |
| Other chronic respiratory diseases                  | 52<br>(38 - 75)        | 9<br>(4 - 16)    | 2<br>(1 - 3)      | 13<br>(8 - 20)     | 15<br>(9 - 24)     | 14<br>(8 - 23)     |
| Cirrhosis                                           | 722<br>(579 - 885)     | 6<br>(2 - 14)    | 9<br>(6 - 13)     | 202<br>(139 - 281) | 315<br>(232 - 400) | 189<br>(148 - 243) |
| Cirrhosis due to hepatitis B                        | 53<br>(22 - 97)        | 0<br>(0 - 0)     | 0<br>(0 - 1)      | 14<br>(5 - 29)     | 24<br>(10 - 46)    | 15<br>(6 - 26)     |
| Cirrhosis due to hepatitis C                        | 206<br>(110 - 307)     | 0<br>(0 - 1)     | 2<br>(1 - 3)      | 51<br>(22 - 87)    | 90<br>(40 - 147)   | 63<br>(34 - 91)    |
| Cirrhosis due to alcohol use                        | 344<br>(241 - 460)     | --               | --                | 84<br>(47 - 137)   | 161<br>(107 - 230) | 98<br>(71 - 133)   |
| Cirrhosis due to other causes                       | 119<br>(69 - 175)      | 6<br>(2 - 13)    | 7<br>(5 - 10)     | 52<br>(29 - 84)    | 39<br>(18 - 67)    | 14<br>(7 - 22)     |
| Digestive diseases                                  | 1,179<br>(960 - 1,438) | 40<br>(20 - 75)  | 31<br>(21 - 44)   | 338<br>(233 - 486) | 406<br>(308 - 524) | 363<br>(288 - 470) |
| Peptic ulcer disease                                | 282<br>(194 - 372)     | 2<br>(1 - 7)     | 3<br>(1 - 6)      | 75<br>(43 - 114)   | 113<br>(77 - 162)  | 88<br>(57 - 128)   |
| Gastritis and duodenitis                            | 31<br>(15 - 64)        | 0<br>(0 - 1)     | 1<br>(0 - 3)      | 10<br>(5 - 20)     | 9<br>(3 - 22)      | 11<br>(4 - 25)     |
| Appendicitis                                        | 87<br>(57 - 120)       | 4<br>(1 - 8)     | 5<br>(3 - 9)      | 30<br>(17 - 48)    | 26<br>(16 - 39)    | 22<br>(13 - 33)    |
| Paralytic ileus and intestinal obstruction          | 236<br>(102 - 341)     | 19<br>(7 - 38)   | 12<br>(5 - 19)    | 81<br>(34 - 134)   | 86<br>(35 - 134)   | 38<br>(12 - 67)    |
| Inguinal, femoral, and abdominal hernia             | 201<br>(139 - 334)     | 6<br>(2 - 14)    | 3<br>(1 - 5)      | 37<br>(21 - 64)    | 67<br>(41 - 116)   | 88<br>(57 - 147)   |
| Inflammatory bowel disease                          | 52<br>(38 - 79)        | 5<br>(2 - 10)    | 1<br>(0 - 1)      | 18<br>(11 - 30)    | 14<br>(9 - 22)     | 15<br>(10 - 25)    |
| Vascular intestinal disorders                       | 18<br>(6 - 39)         | 0<br>(0 - 0)     | 0<br>(0 - 0)      | 16<br>(5 - 36)     | 1<br>(0 - 2)       | 1<br>(0 - 2)       |
| Gallbladder and biliary diseases                    | 63<br>(40 - 125)       | 0<br>(0 - 0)     | 0<br>(0 - 1)      | 9<br>(5 - 19)      | 22<br>(12 - 46)    | 31<br>(17 - 67)    |
| Pancreatitis                                        | 50<br>(30 - 87)        | 0<br>(0 - 1)     | 1<br>(0 - 1)      | 17<br>(10 - 29)    | 14<br>(8 - 26)     | 18<br>(8 - 36)     |
| Other digestive diseases                            | 158<br>(110 - 224)     | 5<br>(2 - 12)    | 5<br>(3 - 9)      | 43<br>(26 - 69)    | 54<br>(34 - 82)    | 51<br>(32 - 80)    |
| Neurological disorders                              | 861<br>(690 - 1,034)   | 19<br>(9 - 39)   | 17<br>(11 - 28)   | 77<br>(50 - 116)   | 115<br>(86 - 148)  | 634<br>(482 - 797) |
| Alzheimer disease and other dementias               | 693<br>(531 - 860)     | --               | --                | 0<br>(0 - 1)       | 77<br>(54 - 105)   | 615<br>(465 - 779) |
| Parkinson disease                                   | 6<br>(4 - 13)          | --               | --                | 0<br>(0 - 0)       | 1<br>(1 - 3)       | 4<br>(2 - 10)      |
| Epilepsy                                            | 125<br>(87 - 177)      | 16<br>(7 - 35)   | 11<br>(6 - 21)    | 62<br>(37 - 98)    | 26<br>(17 - 39)    | 9<br>(6 - 14)      |
| Multiple sclerosis                                  | 5<br>(2 - 10)          | --               | --                | 3<br>(1 - 5)       | 2<br>(1 - 3)       | 1<br>(0 - 2)       |
| Other neurological disorders                        | 32<br>(25 - 44)        | 3<br>(2 - 5)     | 6<br>(4 - 12)     | 11<br>(8 - 16)     | 7<br>(5 - 10)      | 5<br>(3 - 6)       |
| Mental and substance use disorders                  | 488<br>(310 - 655)     | 23<br>(12 - 37)  | 0<br>(0 - 0)      | 235<br>(136 - 345) | 171<br>(102 - 240) | 60<br>(35 - 85)    |
| Schizophrenia                                       | 7<br>(4 - 11)          | --               | --                | 2<br>(1 - 4)       | 3<br>(2 - 5)       | 2<br>(1 - 3)       |
| Alcohol use disorders                               | 254<br>(145 - 348)     | --               | --                | 71<br>(38 - 114)   | 136<br>(75 - 202)  | 46<br>(26 - 71)    |
| Drug use disorders                                  | 228<br>(104 - 316)     | 23<br>(12 - 37)  | --                | 161<br>(76 - 240)  | 32<br>(9 - 43)     | 12<br>(1 - 17)     |
| Opioid use disorders                                | 67<br>(31 - 94)        | 7<br>(3 - 12)    | --                | 48<br>(22 - 72)    | 9<br>(3 - 12)      | 4<br>(0 - 5)       |
| Cocaine use disorders                               | 10<br>(5 - 15)         | 1<br>(1 - 2)     | --                | 8<br>(3 - 12)      | 1<br>(0 - 2)       | 0<br>(0 - 1)       |
| Amphetamine use disorders                           | 7<br>(3 - 10)          | 1<br>(0 - 2)     | --                | 5<br>(2 - 7)       | 1<br>(0 - 1)       | 0<br>(0 - 0)       |
| Other drug use disorders                            | 144<br>(65 - 200)      | 14<br>(7 - 22)   | --                | 101<br>(48 - 150)  | 21<br>(6 - 29)     | 8<br>(1 - 11)      |
| Eating disorders                                    | 0<br>(0 - 0)           | --               | 0<br>(0 - 0)      | 0<br>(0 - 0)       | --                 | --                 |
| Anorexia nervosa                                    | 0<br>(0 - 0)           | --               | 0<br>(0 - 0)      | 0<br>(0 - 0)       | --                 | --                 |

Web Table 31- Haiti deaths with 95% UI by age, sex, and cause in 2013

| Cause                                               | Males, All Ages          | Males, 0-4 Years     | Males, 5-14 Years | Males, 15-49 Years | Males, 50-69 Years   | Males, 70-80 Years   |
|-----------------------------------------------------|--------------------------|----------------------|-------------------|--------------------|----------------------|----------------------|
| Diabetes, urogenital, blood, and endocrine diseases | 2,397<br>(2,018 - 2,868) | 129<br>(85 - 201)    | 59<br>(42 - 92)   | 449<br>(320 - 628) | 845<br>(646 - 1,054) | 916<br>(770 - 1,082) |
| Diabetes mellitus                                   | 1,234<br>(1,012 - 1,484) | 11<br>(6 - 19)       | 6<br>(4 - 9)      | 176<br>(124 - 246) | 519<br>(391 - 660)   | 522<br>(414 - 651)   |
| Acute glomerulonephritis                            | 10<br>(7 - 16)           | 3<br>(1 - 6)         | 3<br>(2 - 5)      | 3<br>(2 - 5)       | 1<br>(1 - 1)         | 1<br>(0 - 1)         |
| Chronic kidney disease                              | 486<br>(374 - 695)       | 13<br>(7 - 21)       | 10<br>(6 - 16)    | 98<br>(63 - 146)   | 162<br>(114 - 238)   | 204<br>(151 - 298)   |
| Chronic kidney disease due to diabetes mellitus     | 44<br>(25 - 103)         | 2<br>(1 - 4)         | 1<br>(0 - 1)      | 6<br>(3 - 19)      | 10<br>(5 - 24)       | 25<br>(13 - 61)      |
| Chronic kidney disease due to hypertension          | 272<br>(190 - 363)       | 4<br>(2 - 7)         | 1<br>(0 - 2)      | 52<br>(31 - 78)    | 101<br>(68 - 145)    | 114<br>(74 - 162)    |
| Chronic kidney disease due to glomerulonephritis    | 31<br>(20 - 53)          | 3<br>(1 - 5)         | 5<br>(3 - 8)      | 10<br>(6 - 19)     | 7<br>(4 - 14)        | 6<br>(2 - 13)        |
| Chronic kidney disease due to other causes          | 139<br>(85 - 239)        | 4<br>(2 - 8)         | 3<br>(1 - 6)      | 30<br>(15 - 52)    | 43<br>(21 - 82)      | 59<br>(28 - 109)     |
| Urinary diseases and male infertility               | 245<br>(173 - 311)       | 29<br>(13 - 64)      | 4<br>(3 - 7)      | 41<br>(25 - 60)    | 66<br>(44 - 88)      | 104<br>(69 - 145)    |
| Interstitial nephritis and urinary tract infections | 164<br>(107 - 219)       | 26<br>(12 - 58)      | 4<br>(2 - 6)      | 26<br>(15 - 40)    | 42<br>(24 - 57)      | 67<br>(38 - 97)      |
| Urolithiasis                                        | 3<br>(2 - 6)             | --                   | 0<br>(0 - 0)      | 1<br>(0 - 1)       | 2<br>(1 - 4)         | 1<br>(0 - 2)         |
| Other urinary diseases                              | 77<br>(50 - 111)         | 3<br>(1 - 7)         | 1<br>(0 - 1)      | 14<br>(8 - 23)     | 23<br>(13 - 36)      | 37<br>(21 - 59)      |
| Gynecological diseases                              | --                       | --                   | --                | --                 | --                   | --                   |
| Uterine fibroids                                    | --                       | --                   | --                | --                 | --                   | --                   |
| Polycystic ovarian syndrome                         | --                       | --                   | --                | --                 | --                   | --                   |
| Endometriosis                                       | --                       | --                   | --                | --                 | --                   | --                   |
| Genital prolapse                                    | --                       | --                   | --                | --                 | --                   | --                   |
| Other gynecological diseases                        | --                       | --                   | --                | --                 | --                   | --                   |
| Hemoglobinopathies and hemolytic anemias            | 163<br>(96 - 250)        | 37<br>(20 - 69)      | 26<br>(15 - 47)   | 56<br>(29 - 92)    | 20<br>(12 - 30)      | 24<br>(14 - 37)      |
| Thalassemias                                        | 2<br>(1 - 3)             | 1<br>(1 - 2)         | 0<br>(0 - 1)      | 0<br>(0 - 1)       | 0<br>(0 - 0)         | 0<br>(0 - 0)         |
| Sickle cell disorders                               | 133<br>(76 - 208)        | 34<br>(18 - 63)      | 25<br>(14 - 45)   | 53<br>(28 - 88)    | 17<br>(10 - 26)      | 4<br>(3 - 7)         |
| G6PD deficiency                                     | 2<br>(1 - 4)             | 1<br>(0 - 1)         | 0<br>(0 - 0)      | 1<br>(0 - 1)       | 0<br>(0 - 1)         | 1<br>(0 - 1)         |
| Other hemoglobinopathies and hemolytic anemias      | 26<br>(15 - 39)          | 2<br>(1 - 3)         | 0<br>(0 - 1)      | 2<br>(1 - 3)       | 3<br>(2 - 4)         | 19<br>(12 - 29)      |
| Endocrine, metabolic, blood, and immune disorders   | 259<br>(189 - 486)       | 35<br>(19 - 75)      | 10<br>(5 - 23)    | 75<br>(47 - 149)   | 77<br>(51 - 142)     | 61<br>(38 - 112)     |
| Musculoskeletal disorders                           | 37<br>(26 - 52)          | --                   | 3<br>(1 - 5)      | 13<br>(9 - 21)     | 11<br>(7 - 16)       | 11<br>(7 - 15)       |
| Rheumatoid arthritis                                | 8<br>(5 - 14)            | --                   | 1<br>(1 - 3)      | 2<br>(1 - 4)       | 2<br>(1 - 4)         | 3<br>(1 - 5)         |
| Other musculoskeletal disorders                     | 29<br>(20 - 41)          | --                   | 1<br>(1 - 3)      | 11<br>(7 - 18)     | 8<br>(5 - 12)        | 8<br>(5 - 12)        |
| Other non-communicable diseases                     | 1,098<br>(787 - 1,467)   | 743<br>(488 - 1,073) | 63<br>(39 - 97)   | 110<br>(64 - 159)  | 89<br>(53 - 115)     | 94<br>(56 - 129)     |
| Congenital anomalies                                | 861<br>(598 - 1,195)     | 689<br>(448 - 1,003) | 56<br>(33 - 88)   | 60<br>(38 - 90)    | 32<br>(21 - 43)      | 23<br>(16 - 30)      |
| Neural tube defects                                 | 13<br>(5 - 33)           | 11<br>(3 - 31)       | 0<br>(0 - 1)      | 1<br>(1 - 2)       | 1<br>(0 - 1)         | 0<br>(0 - 1)         |
| Congenital heart anomalies                          | 247<br>(149 - 377)       | 191<br>(101 - 316)   | 23<br>(12 - 40)   | 20<br>(12 - 32)    | 7<br>(4 - 11)        | 5<br>(3 - 8)         |
| Cleft lip and cleft palate                          | 1<br>(0 - 4)             | 1<br>(0 - 4)         | --                | --                 | --                   | --                   |
| Down syndrome                                       | 55<br>(23 - 114)         | 45<br>(16 - 104)     | 6<br>(3 - 12)     | 3<br>(1 - 5)       | 0<br>(0 - 1)         | 0<br>(0 - 0)         |
| Chromosomal unbalanced rearrangements               | 34<br>(7 - 96)           | 29<br>(4 - 90)       | 1<br>(0 - 3)      | 2<br>(1 - 3)       | 1<br>(1 - 2)         | 1<br>(0 - 1)         |
| Other congenital anomalies                          | 511<br>(313 - 742)       | 411<br>(235 - 627)   | 26<br>(13 - 44)   | 34<br>(19 - 54)    | 23<br>(14 - 31)      | 16<br>(11 - 22)      |
| Skin and subcutaneous diseases                      | 235<br>(125 - 316)       | 51<br>(23 - 103)     | 7<br>(3 - 11)     | 50<br>(23 - 76)    | 57<br>(31 - 77)      | 71<br>(39 - 105)     |
| Cellulitis                                          | 25<br>(12 - 49)          | 10<br>(3 - 26)       | 0<br>(0 - 1)      | 6<br>(3 - 11)      | 2<br>(1 - 4)         | 6<br>(3 - 12)        |
| Pyoderma                                            | 168<br>(83 - 222)        | 36<br>(15 - 71)      | 5<br>(3 - 9)      | 32<br>(14 - 48)    | 45<br>(23 - 61)      | 50<br>(26 - 73)      |
| Decubitus ulcer                                     | 31<br>(19 - 44)          | 1<br>(0 - 2)         | 1<br>(0 - 2)      | 9<br>(4 - 15)      | 8<br>(4 - 12)        | 13<br>(6 - 23)       |
| Other skin and subcutaneous diseases                | 12<br>(6 - 21)           | 3<br>(1 - 10)        | 0<br>(0 - 0)      | 4<br>(1 - 6)       | 2<br>(1 - 4)         | 3<br>(1 - 5)         |



Web Table 31- Haiti deaths with 95% UI by age, sex, and cause in 2013

| Cause                                           | Males, All Ages          | Males, 0-4 Years   | Males, 5-14 Years  | Males, 15-49 Years       | Males, 50-69 Years   | Males, 70-80 Years |
|-------------------------------------------------|--------------------------|--------------------|--------------------|--------------------------|----------------------|--------------------|
| Sudden infant death syndrome                    | 3<br>(0 - 15)            | 3<br>(0 - 15)      | --                 | --                       | --                   | --                 |
| Injuries                                        | 4,723<br>(3,664 - 5,860) | 479<br>(300 - 730) | 262<br>(203 - 335) | 2,338<br>(1,686 - 3,208) | 989<br>(743 - 1,204) | 656<br>(462 - 815) |
| Transport injuries                              | 1,343<br>(997 - 1,726)   | 98<br>(53 - 168)   | 93<br>(61 - 135)   | 636<br>(442 - 919)       | 319<br>(232 - 407)   | 197<br>(129 - 259) |
| Road injuries                                   | 1,192<br>(892 - 1,532)   | 85<br>(45 - 150)   | 85<br>(55 - 124)   | 563<br>(389 - 810)       | 284<br>(205 - 362)   | 175<br>(117 - 231) |
| Pedestrian road injuries                        | 277<br>(178 - 396)       | 24<br>(11 - 47)    | 29<br>(17 - 47)    | 100<br>(57 - 167)        | 68<br>(41 - 100)     | 55<br>(32 - 81)    |
| Cyclist road injuries                           | 75<br>(53 - 105)         | 4<br>(1 - 10)      | 8<br>(4 - 13)      | 34<br>(21 - 52)          | 16<br>(10 - 24)      | 14<br>(8 - 21)     |
| Motorcyclist road injuries                      | 104<br>(65 - 154)        | 7<br>(3 - 13)      | 4<br>(2 - 7)       | 69<br>(40 - 108)         | 13<br>(7 - 20)       | 11<br>(6 - 19)     |
| Motor vehicle road injuries                     | 711<br>(514 - 919)       | 49<br>(26 - 87)    | 42<br>(26 - 65)    | 344<br>(232 - 483)       | 183<br>(130 - 241)   | 93<br>(58 - 128)   |
| Other road injuries                             | 25<br>(15 - 49)          | 1<br>(0 - 3)       | 1<br>(1 - 2)       | 16<br>(8 - 34)           | 4<br>(2 - 9)         | 2<br>(1 - 4)       |
| Other transport injuries                        | 151<br>(88 - 211)        | 12<br>(5 - 24)     | 9<br>(4 - 16)      | 73<br>(41 - 116)         | 35<br>(18 - 51)      | 22<br>(10 - 34)    |
| Unintentional injuries                          | 2,154<br>(1,468 - 2,767) | 345<br>(200 - 568) | 139<br>(100 - 191) | 788<br>(485 - 1,133)     | 482<br>(309 - 629)   | 398<br>(249 - 535) |
| Falls                                           | 414<br>(167 - 579)       | 27<br>(9 - 55)     | 18<br>(7 - 32)     | 145<br>(48 - 240)        | 126<br>(51 - 193)    | 98<br>(35 - 159)   |
| Drowning                                        | 232<br>(141 - 340)       | 43<br>(18 - 91)    | 41<br>(23 - 71)    | 81<br>(45 - 130)         | 43<br>(25 - 65)      | 25<br>(16 - 37)    |
| Fire, heat, and hot substances                  | 352<br>(178 - 580)       | 117<br>(46 - 263)  | 28<br>(13 - 54)    | 102<br>(49 - 176)        | 45<br>(24 - 72)      | 60<br>(28 - 97)    |
| Poisonings                                      | 52<br>(31 - 72)          | 5<br>(2 - 10)      | 3<br>(1 - 5)       | 29<br>(16 - 47)          | 10<br>(6 - 15)       | 5<br>(3 - 8)       |
| Exposure to mechanical forces                   | 454<br>(256 - 604)       | 36<br>(18 - 70)    | 22<br>(13 - 33)    | 235<br>(124 - 352)       | 116<br>(64 - 158)    | 46<br>(28 - 61)    |
| Unintentional firearm injuries                  | 216<br>(105 - 310)       | 6<br>(2 - 13)      | 5<br>(2 - 10)      | 139<br>(62 - 226)        | 50<br>(24 - 78)      | 16<br>(7 - 26)     |
| Unintentional suffocation                       | 42<br>(25 - 91)          | 12<br>(3 - 42)     | 3<br>(1 - 7)       | 16<br>(8 - 27)           | 8<br>(4 - 14)        | 3<br>(1 - 7)       |
| Other exposure to mechanical forces             | 196<br>(95 - 262)        | 18<br>(7 - 34)     | 13<br>(6 - 22)     | 80<br>(37 - 122)         | 58<br>(26 - 85)      | 27<br>(13 - 38)    |
| Adverse effects of medical treatment            | 359<br>(185 - 547)       | 62<br>(26 - 168)   | 12<br>(6 - 21)     | 90<br>(39 - 152)         | 80<br>(34 - 138)     | 115<br>(53 - 195)  |
| Animal contact                                  | 54<br>(25 - 73)          | 8<br>(3 - 14)      | 4<br>(2 - 7)       | 16<br>(8 - 27)           | 14<br>(6 - 22)       | 12<br>(5 - 18)     |
| Venomous animal contact                         | 18<br>(7 - 26)           | 2<br>(1 - 5)       | 1<br>(0 - 2)       | 5<br>(2 - 9)             | 5<br>(2 - 8)         | 4<br>(2 - 7)       |
| Non-venomous animal contact                     | 36<br>(16 - 50)          | 5<br>(2 - 10)      | 3<br>(1 - 5)       | 11<br>(6 - 18)           | 9<br>(4 - 14)        | 8<br>(3 - 12)      |
| Foreign body                                    | 87<br>(53 - 135)         | 30<br>(17 - 53)    | 4<br>(2 - 7)       | 20<br>(11 - 34)          | 17<br>(9 - 25)       | 17<br>(10 - 27)    |
| Pulmonary aspiration and foreign body in airway | 79<br>(44 - 125)         | 26<br>(12 - 47)    | 3<br>(2 - 6)       | 19<br>(10 - 33)          | 15<br>(8 - 23)       | 16<br>(9 - 26)     |
| Foreign body in other body part                 | 8<br>(5 - 15)            | 4<br>(2 - 10)      | 0<br>(0 - 1)       | 1<br>(0 - 1)             | 2<br>(1 - 3)         | 1<br>(0 - 1)       |
| Other unintentional injuries                    | 149<br>(116 - 193)       | 18<br>(12 - 29)    | 7<br>(5 - 11)      | 72<br>(48 - 108)         | 30<br>(21 - 41)      | 21<br>(15 - 28)    |
| Self-harm and interpersonal violence            | 1,226<br>(869 - 1,832)   | 36<br>(16 - 79)    | 29<br>(17 - 51)    | 914<br>(616 - 1,410)     | 187<br>(128 - 289)   | 60<br>(39 - 93)    |
| Self-harm                                       | 384<br>(248 - 527)       | --                 | 7<br>(3 - 15)      | 211<br>(118 - 321)       | 118<br>(75 - 165)    | 48<br>(28 - 75)    |
| Interpersonal violence                          | 842<br>(560 - 1,460)     | 36<br>(16 - 79)    | 22<br>(12 - 44)    | 703<br>(451 - 1,187)     | 69<br>(38 - 158)     | 12<br>(5 - 34)     |
| Assault by firearm                              | 688<br>(445 - 1,153)     | 14<br>(5 - 38)     | 16<br>(8 - 34)     | 607<br>(388 - 1,008)     | 45<br>(24 - 101)     | 6<br>(2 - 17)      |
| Assault by sharp object                         | 93<br>(45 - 200)         | 7<br>(3 - 20)      | 2<br>(1 - 5)       | 67<br>(28 - 141)         | 15<br>(6 - 40)       | 2<br>(1 - 6)       |
| Assault by other means                          | 61<br>(34 - 121)         | 14<br>(6 - 29)     | 4<br>(2 - 8)       | 30<br>(14 - 59)          | 9<br>(4 - 22)        | 4<br>(2 - 13)      |
| Forces of nature, war, and legal intervention   | 0<br>(0 - 0)             | 0<br>(0 - 0)       | --                 | --                       | --                   | --                 |
| Exposure to forces of nature                    | 0<br>(0 - 0)             | 0<br>(0 - 0)       | --                 | --                       | --                   | --                 |

Web Table 31- Haiti deaths with 95% UI by age, sex, and cause in 2013

| Cause                                                              | Females, All Ages           | Females, 0-4 Years       | Females, 5-14 Years  | Females, 15-49 Years      | Females, 50-69 Years      | Females, 70-80 Years        |
|--------------------------------------------------------------------|-----------------------------|--------------------------|----------------------|---------------------------|---------------------------|-----------------------------|
| All causes                                                         | 41,412<br>(36,202 - 46,969) | 7,736<br>(6,364 - 9,398) | 956<br>(803 - 1,166) | 9,146<br>(7,915 - 10,541) | 9,972<br>(7,730 - 12,173) | 13,601<br>(11,628 - 15,546) |
| Communicable, maternal, neonatal, and nutritional diseases         | 15,948<br>(14,265 - 18,129) | 6,323<br>(5,190 - 7,652) | 540<br>(446 - 659)   | 5,249<br>(4,439 - 6,232)  | 1,845<br>(1,459 - 2,256)  | 1,991<br>(1,530 - 2,542)    |
| HIV/AIDS and tuberculosis                                          | 4,399<br>(3,395 - 5,778)    | 107<br>(76 - 143)        | 167<br>(138 - 197)   | 3,142<br>(2,271 - 4,329)  | 769<br>(578 - 1,013)      | 214<br>(155 - 283)          |
| Tuberculosis                                                       | 745<br>(564 - 1,025)        | 36<br>(20 - 58)          | 19<br>(12 - 29)      | 325<br>(219 - 482)        | 211<br>(142 - 299)        | 155<br>(107 - 214)          |
| HIV/AIDS                                                           | 3,655<br>(2,678 - 5,042)    | 72<br>(48 - 101)         | 148<br>(119 - 179)   | 2,817<br>(1,926 - 4,046)  | 558<br>(386 - 772)        | 59<br>(29 - 94)             |
| HIV/AIDS resulting in mycobacterial infection                      | 192<br>(131 - 277)          | 4<br>(2 - 6)             | 7<br>(5 - 9)         | 147<br>(95 - 221)         | 30<br>(19 - 43)           | 3<br>(2 - 6)                |
| HIV/AIDS resulting in other diseases                               | 3,463<br>(2,527 - 4,766)    | 68<br>(46 - 96)          | 141<br>(113 - 170)   | 2,670<br>(1,824 - 3,845)  | 528<br>(365 - 734)        | 56<br>(28 - 88)             |
| Diarrrhea, lower respiratory, and other common infectious diseases | 5,256<br>(4,253 - 6,452)    | 2,327<br>(1,643 - 3,204) | 197<br>(138 - 274)   | 730<br>(497 - 1,044)      | 707<br>(465 - 994)        | 1,295<br>(895 - 1,807)      |
| Diarrrheal diseases                                                | 1,788<br>(1,118 - 2,599)    | 954<br>(430 - 1,709)     | 58<br>(25 - 115)     | 245<br>(136 - 433)        | 209<br>(102 - 386)        | 322<br>(157 - 588)          |
| Intestinal infectious diseases                                     | 85<br>(46 - 144)            | 37<br>(19 - 66)          | 20<br>(9 - 40)       | 22<br>(10 - 42)           | 4<br>(1 - 8)              | 2<br>(0 - 5)                |
| Typhoid fever                                                      | 53<br>(25 - 97)             | 21<br>(9 - 42)           | 15<br>(7 - 30)       | 15<br>(6 - 30)            | 2<br>(1 - 4)              | 1<br>(0 - 1)                |
| Paratyphoid fever                                                  | 15<br>(7 - 27)              | 6<br>(3 - 13)            | 4<br>(1 - 8)         | 4<br>(1 - 8)              | 0<br>(0 - 1)              | 0<br>(0 - 0)                |
| Other intestinal infectious diseases                               | 16<br>(8 - 29)              | 9<br>(3 - 19)            | 2<br>(0 - 5)         | 4<br>(1 - 10)             | 1<br>(0 - 5)              | 1<br>(0 - 4)                |
| Lower respiratory infections                                       | 2,682<br>(2,037 - 3,491)    | 958<br>(569 - 1,503)     | 70<br>(41 - 113)     | 355<br>(232 - 526)        | 405<br>(258 - 585)        | 894<br>(585 - 1,296)        |
| Upper respiratory infections                                       | 5<br>(2 - 9)                | 1<br>(0 - 5)             | 0<br>(0 - 1)         | 1<br>(0 - 3)              | 1<br>(0 - 3)              | 1<br>(0 - 4)                |
| Otitis media                                                       | 5<br>(4 - 7)                | 1<br>(0 - 1)             | 0<br>(0 - 0)         | 1<br>(1 - 1)              | 2<br>(1 - 2)              | 2<br>(1 - 3)                |
| Meningitis                                                         | 499<br>(365 - 686)          | 250<br>(145 - 411)       | 39<br>(22 - 63)      | 81<br>(52 - 122)          | 67<br>(42 - 106)          | 61<br>(39 - 93)             |
| Pneumococcal meningitis                                            | 147<br>(104 - 206)          | 64<br>(33 - 111)         | 13<br>(6 - 23)       | 26<br>(13 - 45)           | 21<br>(10 - 39)           | 22<br>(10 - 38)             |
| H influenzae type B meningitis                                     | 124<br>(70 - 203)           | 92<br>(40 - 167)         | 11<br>(5 - 20)       | 9<br>(5 - 17)             | 6<br>(3 - 12)             | 6<br>(3 - 11)               |
| Meningococcal meningitis                                           | 54<br>(36 - 77)             | 23<br>(11 - 42)          | 4<br>(1 - 8)         | 11<br>(6 - 19)            | 9<br>(4 - 17)             | 8<br>(3 - 14)               |
| Other meningitis                                                   | 173<br>(116 - 252)          | 71<br>(28 - 145)         | 11<br>(5 - 19)       | 34<br>(21 - 54)           | 31<br>(15 - 54)           | 25<br>(14 - 40)             |
| Encephalitis                                                       | 107<br>(64 - 180)           | 90<br>(45 - 160)         | 4<br>(1 - 9)         | 8<br>(4 - 17)             | 3<br>(2 - 7)              | 1<br>(1 - 3)                |
| Diphtheria                                                         | 3<br>(0 - 16)               | 2<br>(0 - 14)            | 0<br>(0 - 3)         | 0<br>(0 - 1)              | 0<br>(0 - 0)              | --                          |
| Whooping cough                                                     | 5<br>(2 - 10)               | 2<br>(0 - 6)             | 1<br>(0 - 1)         | 2<br>(1 - 3)              | 0<br>(0 - 0)              | --                          |
| Tetanus                                                            | 71<br>(32 - 115)            | 29<br>(9 - 61)           | 4<br>(2 - 7)         | 13<br>(6 - 23)            | 15<br>(6 - 29)            | 9<br>(4 - 19)               |
| Measles                                                            | 0<br>(0 - 0)                | 0<br>(0 - 0)             | 0<br>(0 - 0)         | 0<br>(0 - 0)              | 0<br>(0 - 0)              | --                          |
| Varicella and herpes zoster                                        | 7<br>(2 - 19)               | 2<br>(0 - 10)            | 1<br>(0 - 2)         | 1<br>(0 - 5)              | 1<br>(0 - 2)              | 2<br>(0 - 11)               |
| Neglected tropical diseases and malaria                            | 246<br>(91 - 522)           | 56<br>(9 - 282)          | 28<br>(8 - 56)       | 102<br>(36 - 206)         | 38<br>(14 - 77)           | 21<br>(8 - 39)              |
| Malaria                                                            | 203<br>(52 - 480)           | 44<br>(1 - 270)          | 24<br>(5 - 51)       | 87<br>(21 - 188)          | 32<br>(8 - 70)            | 16<br>(4 - 35)              |
| Leishmaniasis                                                      | 0<br>(0 - 0)                | 0<br>(0 - 0)             | 0<br>(0 - 0)         | 0<br>(0 - 0)              | 0<br>(0 - 0)              | 0<br>(0 - 0)                |
| Visceral leishmaniasis                                             | 0<br>(0 - 0)                | 0<br>(0 - 0)             | 0<br>(0 - 0)         | 0<br>(0 - 0)              | 0<br>(0 - 0)              | 0<br>(0 - 0)                |
| Cysticercosis                                                      | 10<br>(7 - 12)              | 0<br>(0 - 0)             | 0<br>(0 - 1)         | 6<br>(4 - 8)              | 2<br>(2 - 3)              | 1<br>(1 - 1)                |
| Cystic echinococcosis                                              | 1<br>(1 - 2)                | 0<br>(0 - 0)             | 0<br>(0 - 0)         | 1<br>(1 - 1)              | 0<br>(0 - 0)              | 0<br>(0 - 0)                |
| Dengue                                                             | 2<br>(1 - 4)                | 1<br>(0 - 1)             | 1<br>(0 - 1)         | 0<br>(0 - 1)              | 0<br>(0 - 0)              | 0<br>(0 - 0)                |
| Rabies                                                             | 2<br>(1 - 3)                | 0<br>(0 - 1)             | 1<br>(0 - 1)         | 1<br>(0 - 1)              | 0<br>(0 - 1)              | 0<br>(0 - 0)                |
| Intestinal nematode infections                                     | 4<br>(0 - 12)               | 3<br>(0 - 11)            | 0<br>(0 - 3)         | 0<br>(0 - 3)              | 0<br>(0 - 2)              | 0<br>(0 - 1)                |
| Ascariasis                                                         | 4<br>(0 - 12)               | 3<br>(0 - 11)            | 0<br>(0 - 3)         | 0<br>(0 - 3)              | 0<br>(0 - 2)              | 0<br>(0 - 1)                |
| Other neglected tropical diseases                                  | 24<br>(15 - 37)             | 8<br>(4 - 16)            | 2<br>(1 - 4)         | 8<br>(4 - 13)             | 3<br>(2 - 6)              | 3<br>(1 - 6)                |
| Maternal disorders                                                 | 868<br>(571 - 1,251)        | --                       | 5<br>(2 - 11)        | 863<br>(568 - 1,247)      | --                        | --                          |
| Maternal hemorrhage                                                | 118<br>(62 - 197)           | --                       | 0<br>(0 - 1)         | 118<br>(62 - 197)         | --                        | --                          |

Web Table 31- Haiti deaths with 95% UI by age, sex, and cause in 2013

| Cause                                                            | Females, All Ages           | Females, 0-4 Years       | Females, 5-14 Years | Females, 15-49 Years     | Females, 50-69 Years     | Females, 70-80 Years       |
|------------------------------------------------------------------|-----------------------------|--------------------------|---------------------|--------------------------|--------------------------|----------------------------|
| Maternal sepsis and other maternal infections                    | 102<br>(63 - 159)           | --                       | 1<br>(0 - 2)        | 101<br>(62 - 158)        | --                       | --                         |
| Maternal hypertensive disorders                                  | 245<br>(158 - 374)          | --                       | 2<br>(1 - 4)        | 244<br>(158 - 372)       | --                       | --                         |
| Maternal obstructed labor                                        | 57<br>(27 - 95)             | --                       | 0<br>(0 - 1)        | 57<br>(27 - 95)          | --                       | --                         |
| Maternal abortive outcome                                        | 100<br>(50 - 165)           | --                       | 0<br>(0 - 1)        | 99<br>(50 - 165)         | --                       | --                         |
| Indirect maternal deaths                                         | 61<br>(25 - 110)            | --                       | 0<br>(0 - 1)        | 60<br>(25 - 109)         | --                       | --                         |
| Late maternal deaths                                             | 76<br>(35 - 130)            | --                       | 1<br>(0 - 2)        | 75<br>(34 - 129)         | --                       | --                         |
| Maternal deaths aggravated by HIV/AIDS                           | 7<br>(3 - 11)               | --                       | --                  | 7<br>(3 - 11)            | --                       | --                         |
| Other maternal disorders                                         | 101<br>(53 - 165)           | --                       | 0<br>(0 - 1)        | 100<br>(52 - 165)        | --                       | --                         |
| Neonatal disorders                                               | 2,325<br>(1,886 - 2,899)    | 2,325<br>(1,886 - 2,899) | --                  | --                       | --                       | --                         |
| Neonatal preterm birth complications                             | 616<br>(302 - 1,031)        | 616<br>(302 - 1,031)     | --                  | --                       | --                       | --                         |
| Neonatal encephalopathy due to birth asphyxia and trauma         | 570<br>(297 - 944)          | 570<br>(297 - 944)       | --                  | --                       | --                       | --                         |
| Neonatal sepsis and other neonatal infections                    | 869<br>(469 - 1,389)        | 869<br>(469 - 1,389)     | --                  | --                       | --                       | --                         |
| Hemolytic disease and other neonatal jaundice                    | 18<br>(4 - 46)              | 18<br>(4 - 46)           | --                  | --                       | --                       | --                         |
| Other neonatal disorders                                         | 252<br>(126 - 454)          | 252<br>(126 - 454)       | --                  | --                       | --                       | --                         |
| Nutritional deficiencies                                         | 2,043<br>(1,542 - 2,637)    | 1,017<br>(620 - 1,502)   | 96<br>(63 - 142)    | 300<br>(207 - 418)       | 244<br>(161 - 345)       | 386<br>(267 - 552)         |
| Protein-energy malnutrition                                      | 1,343<br>(893 - 1,911)      | 892<br>(522 - 1,340)     | 74<br>(45 - 113)    | 77<br>(33 - 157)         | 120<br>(63 - 200)        | 180<br>(91 - 332)          |
| Iodine deficiency                                                | 7<br>(1 - 27)               | 3<br>(0 - 19)            | 1<br>(0 - 4)        | 1<br>(0 - 6)             | 1<br>(0 - 6)             | 1<br>(0 - 6)               |
| Iron-deficiency anemia                                           | 664<br>(314 - 1,012)        | 115<br>(23 - 314)        | 20<br>(6 - 41)      | 214<br>(117 - 314)       | 119<br>(50 - 193)        | 196<br>(85 - 322)          |
| Other nutritional deficiencies                                   | 29<br>(13 - 60)             | 7<br>(2 - 20)            | 1<br>(0 - 2)        | 8<br>(3 - 17)            | 4<br>(1 - 7)             | 9<br>(3 - 20)              |
| Other communicable, maternal, neonatal, and nutritional diseases | 811<br>(359 - 1,357)        | 491<br>(78 - 963)        | 47<br>(14 - 85)     | 111<br>(60 - 195)        | 87<br>(43 - 163)         | 75<br>(36 - 151)           |
| Sexually transmitted diseases excluding HIV                      | 509<br>(59 - 1,007)         | 438<br>(4 - 899)         | 35<br>(1 - 70)      | 19<br>(11 - 34)          | 11<br>(4 - 29)           | 7<br>(2 - 16)              |
| Syphilis                                                         | 491<br>(32 - 989)           | 438<br>(4 - 899)         | 34<br>(0 - 69)      | 8<br>(5 - 14)            | 6<br>(2 - 15)            | 5<br>(2 - 12)              |
| Chlamydial infection                                             | 6<br>(4 - 10)               | --                       | 0<br>(0 - 0)        | 4<br>(2 - 7)             | 1<br>(1 - 4)             | 0<br>(0 - 1)               |
| Gonococcal infection                                             | 7<br>(4 - 12)               | --                       | 0<br>(0 - 0)        | 4<br>(2 - 7)             | 2<br>(1 - 5)             | 1<br>(0 - 2)               |
| Other sexually transmitted diseases                              | 6<br>(3 - 10)               | --                       | 0<br>(0 - 0)        | 4<br>(2 - 6)             | 1<br>(1 - 4)             | 0<br>(0 - 1)               |
| Hepatitis                                                        | 42<br>(31 - 54)             | 2<br>(1 - 3)             | 1<br>(1 - 2)        | 12<br>(8 - 17)           | 14<br>(8 - 20)           | 13<br>(9 - 20)             |
| Acute hepatitis A                                                | 8<br>(4 - 14)               | 1<br>(1 - 3)             | 1<br>(1 - 2)        | 4<br>(2 - 8)             | 1<br>(0 - 2)             | 0<br>(0 - 1)               |
| Acute hepatitis B                                                | 28<br>(19 - 40)             | 0<br>(0 - 1)             | 0<br>(0 - 1)        | 5<br>(3 - 9)             | 11<br>(6 - 17)           | 11<br>(7 - 17)             |
| Acute hepatitis C                                                | 5<br>(1 - 12)               | --                       | 0<br>(0 - 0)        | 2<br>(0 - 4)             | 2<br>(0 - 4)             | 2<br>(0 - 5)               |
| Other infectious diseases                                        | 260<br>(122 - 450)          | 51<br>(18 - 144)         | 11<br>(4 - 26)      | 80<br>(35 - 159)         | 63<br>(21 - 137)         | 55<br>(17 - 129)           |
| Non-communicable diseases                                        | 22,613<br>(18,643 - 27,014) | 1,050<br>(741 - 1,414)   | 253<br>(192 - 335)  | 2,970<br>(2,265 - 3,899) | 7,470<br>(5,670 - 9,327) | 10,870<br>(9,151 - 12,457) |
| Neoplasms                                                        | 3,597<br>(2,882 - 4,389)    | 80<br>(51 - 119)         | 41<br>(28 - 60)     | 651<br>(496 - 843)       | 1,392<br>(1,023 - 1,778) | 1,432<br>(1,177 - 1,696)   |
| Esophageal cancer                                                | 63<br>(44 - 85)             | --                       | --                  | 3<br>(2 - 5)             | 31<br>(20 - 45)          | 29<br>(19 - 41)            |
| Stomach cancer                                                   | 268<br>(197 - 347)          | --                       | --                  | 31<br>(22 - 43)          | 104<br>(73 - 142)        | 132<br>(91 - 186)          |
| Liver cancer                                                     | 237<br>(169 - 320)          | --                       | 2<br>(1 - 3)        | 27<br>(16 - 40)          | 109<br>(71 - 158)        | 99<br>(63 - 145)           |
| Liver cancer due to hepatitis B                                  | 45<br>(19 - 79)             | --                       | 1<br>(0 - 1)        | 9<br>(5 - 15)            | 21<br>(6 - 44)           | 14<br>(5 - 26)             |
| Liver cancer due to hepatitis C                                  | 112<br>(66 - 164)           | --                       | 0<br>(0 - 0)        | 9<br>(3 - 16)            | 53<br>(24 - 83)          | 50<br>(27 - 79)            |
| Liver cancer due to alcohol use                                  | 45<br>(20 - 78)             | --                       | --                  | 2<br>(1 - 5)             | 18<br>(7 - 33)           | 24<br>(10 - 45)            |
| Liver cancer due to other causes                                 | 35<br>(19 - 56)             | --                       | 1<br>(1 - 2)        | 6<br>(3 - 11)            | 17<br>(8 - 29)           | 11<br>(5 - 19)             |
| Larynx cancer                                                    | 8<br>(4 - 18)               | --                       | --                  | 1<br>(0 - 2)             | 4<br>(2 - 9)             | 4<br>(2 - 8)               |

Web Table 31- Haiti deaths with 95% UI by age, sex, and cause in 2013

| Cause                                         | Females, All Ages          | Females, 0-4 Years | Females, 5-14 Years | Females, 15-49 Years   | Females, 50-69 Years     | Females, 70-80 Years     |
|-----------------------------------------------|----------------------------|--------------------|---------------------|------------------------|--------------------------|--------------------------|
| Tracheal, bronchus and lung cancer            | 208<br>(153 - 273)         | --                 | --                  | 17<br>(11 - 24)        | 101<br>(69 - 138)        | 90<br>(64 - 120)         |
| Breast cancer                                 | 638<br>(487 - 811)         | --                 | --                  | 158<br>(113 - 214)     | 281<br>(197 - 375)       | 198<br>(150 - 256)       |
| Cervical cancer                               | 318<br>(235 - 417)         | --                 | --                  | 75<br>(51 - 107)       | 129<br>(85 - 181)        | 114<br>(79 - 157)        |
| Uterine cancer                                | 183<br>(98 - 264)          | --                 | --                  | 16<br>(7 - 26)         | 66<br>(33 - 104)         | 102<br>(53 - 157)        |
| Prostate cancer                               | --                         | --                 | --                  | --                     | --                       | --                       |
| Colon and rectum cancer                       | 429<br>(333 - 540)         | --                 | --                  | 54<br>(40 - 73)        | 157<br>(112 - 211)       | 218<br>(163 - 283)       |
| Lip and oral cavity cancer                    | 36<br>(23 - 51)            | --                 | --                  | 9<br>(5 - 14)          | 12<br>(7 - 19)           | 15<br>(10 - 23)          |
| Nasopharynx cancer                            | 8<br>(5 - 13)              | --                 | 0<br>(0 - 0)        | 2<br>(1 - 4)           | 3<br>(1 - 5)             | 3<br>(2 - 5)             |
| Other pharynx cancer                          | 6<br>(4 - 9)               | --                 | --                  | 1<br>(1 - 2)           | 3<br>(2 - 5)             | 2<br>(1 - 3)             |
| Gallbladder and biliary tract cancer          | 60<br>(37 - 115)           | --                 | --                  | 4<br>(3 - 8)           | 27<br>(16 - 51)          | 29<br>(16 - 59)          |
| Pancreatic cancer                             | 127<br>(96 - 160)          | --                 | --                  | 7<br>(5 - 10)          | 47<br>(33 - 64)          | 73<br>(53 - 95)          |
| Malignant skin melanoma                       | 20<br>(14 - 26)            | --                 | --                  | 8<br>(5 - 11)          | 8<br>(5 - 12)            | 3<br>(2 - 5)             |
| Non-melanoma skin cancer                      | 27<br>(16 - 41)            | --                 | --                  | 5<br>(3 - 9)           | 8<br>(4 - 14)            | 13<br>(7 - 21)           |
| Ovarian cancer                                | 152<br>(114 - 194)         | --                 | --                  | 48<br>(34 - 69)        | 58<br>(38 - 81)          | 46<br>(32 - 64)          |
| Testicular cancer                             | --                         | --                 | --                  | --                     | --                       | --                       |
| Kidney cancer                                 | 74<br>(53 - 98)            | 8<br>(3 - 15)      | 4<br>(2 - 7)        | 13<br>(9 - 20)         | 20<br>(12 - 29)          | 30<br>(19 - 44)          |
| Bladder cancer                                | 10<br>(6 - 17)             | --                 | --                  | 1<br>(0 - 1)           | 1<br>(1 - 2)             | 8<br>(5 - 15)            |
| Brain and nervous system cancer               | 14<br>(10 - 18)            | 1<br>(0 - 2)       | 0<br>(0 - 1)        | 3<br>(2 - 5)           | 4<br>(2 - 5)             | 5<br>(4 - 8)             |
| Thyroid cancer                                | 13<br>(8 - 21)             | --                 | 0<br>(0 - 0)        | 2<br>(1 - 3)           | 6<br>(4 - 11)            | 5<br>(3 - 8)             |
| Mesothelioma                                  | 9<br>(6 - 13)              | --                 | --                  | 1<br>(0 - 1)           | 4<br>(2 - 6)             | 4<br>(3 - 7)             |
| Hodgkin lymphoma                              | 27<br>(11 - 40)            | 4<br>(1 - 9)       | 2<br>(1 - 4)        | 11<br>(4 - 18)         | 5<br>(2 - 9)             | 6<br>(2 - 10)            |
| Non-Hodgkin lymphoma                          | 189<br>(100 - 259)         | 17<br>(8 - 30)     | 8<br>(2 - 15)       | 55<br>(26 - 85)        | 58<br>(28 - 85)          | 52<br>(26 - 78)          |
| Multiple myeloma                              | 34<br>(24 - 48)            | --                 | --                  | 4<br>(3 - 6)           | 16<br>(10 - 24)          | 14<br>(9 - 21)           |
| Leukemia                                      | 86<br>(69 - 108)           | 6<br>(3 - 11)      | 7<br>(4 - 10)       | 23<br>(16 - 31)        | 20<br>(13 - 27)          | 31<br>(22 - 42)          |
| Other neoplasms                               | 353<br>(252 - 476)         | 44<br>(22 - 76)    | 19<br>(10 - 31)     | 72<br>(43 - 107)       | 111<br>(70 - 161)        | 107<br>(72 - 158)        |
| Cardiovascular diseases                       | 11,722<br>(9,219 - 14,367) | 256<br>(156 - 409) | 72<br>(47 - 114)    | 1,244<br>(849 - 1,786) | 3,939<br>(2,884 - 5,039) | 6,211<br>(5,055 - 7,343) |
| Rheumatic heart disease                       | 174<br>(100 - 247)         | 4<br>(2 - 9)       | 8<br>(3 - 14)       | 62<br>(27 - 96)        | 57<br>(34 - 89)          | 44<br>(26 - 65)          |
| Ischemic heart disease                        | 3,000<br>(2,212 - 3,908)   | 40<br>(15 - 94)    | 14<br>(7 - 27)      | 381<br>(234 - 634)     | 898<br>(588 - 1,220)     | 1,669<br>(1,243 - 2,181) |
| Cerebrovascular disease                       | 5,963<br>(4,574 - 7,387)   | 141<br>(86 - 226)  | 29<br>(17 - 44)     | 452<br>(294 - 643)     | 2,127<br>(1,523 - 2,747) | 3,215<br>(2,508 - 3,908) |
| Ischemic stroke                               | 3,072<br>(2,239 - 4,132)   | 13<br>(6 - 28)     | 5<br>(2 - 10)       | 130<br>(73 - 222)      | 999<br>(665 - 1,418)     | 1,924<br>(1,426 - 2,500) |
| Hemorrhagic stroke                            | 2,892<br>(2,110 - 3,640)   | 128<br>(79 - 201)  | 24<br>(14 - 36)     | 322<br>(209 - 459)     | 1,128<br>(791 - 1,493)   | 1,290<br>(909 - 1,647)   |
| Hypertensive heart disease                    | 1,581<br>(836 - 2,286)     | 1<br>(0 - 3)       | 3<br>(1 - 5)        | 141<br>(59 - 242)      | 523<br>(250 - 858)       | 914<br>(475 - 1,321)     |
| Cardiomyopathy and myocarditis                | 152<br>(108 - 235)         | 21<br>(9 - 42)     | 7<br>(4 - 13)       | 72<br>(45 - 123)       | 20<br>(13 - 30)          | 33<br>(19 - 60)          |
| Atrial fibrillation and flutter               | 4<br>(2 - 5)               | --                 | --                  | 2<br>(1 - 4)           | 0<br>(0 - 0)             | 1<br>(0 - 1)             |
| Aortic aneurysm                               | 12<br>(5 - 23)             | --                 | --                  | 2<br>(1 - 4)           | 3<br>(1 - 5)             | 8<br>(2 - 16)            |
| Peripheral vascular disease                   | 41<br>(29 - 57)            | --                 | --                  | 2<br>(1 - 3)           | 11<br>(7 - 15)           | 29<br>(20 - 42)          |
| Endocarditis                                  | 80<br>(48 - 139)           | 27<br>(11 - 59)    | 4<br>(2 - 7)        | 25<br>(14 - 43)        | 10<br>(5 - 17)           | 14<br>(8 - 24)           |
| Other cardiovascular and circulatory diseases | 714<br>(510 - 1,061)       | 23<br>(11 - 44)    | 8<br>(5 - 16)       | 107<br>(69 - 171)      | 291<br>(185 - 445)       | 286<br>(194 - 426)       |
| Chronic respiratory diseases                  | 543<br>(422 - 741)         | 14<br>(8 - 22)     | 5<br>(4 - 8)        | 89<br>(64 - 122)       | 148<br>(103 - 209)       | 286<br>(219 - 412)       |
| Chronic obstructive pulmonary disease         | 269<br>(186 - 392)         | 4<br>(2 - 8)       | 1<br>(0 - 2)        | 36<br>(23 - 55)        | 73<br>(46 - 111)         | 156<br>(103 - 231)       |

Web Table 31- Haiti deaths with 95% UI by age, sex, and cause in 2013

| Cause                                               | Females, All Ages    | Females, 0-4 Years | Females, 5-14 Years | Females, 15-49 Years | Females, 50-69 Years | Females, 70-80 Years |
|-----------------------------------------------------|----------------------|--------------------|---------------------|----------------------|----------------------|----------------------|
| Pneumoconiosis                                      | 5<br>(3 - 8)         | 0<br>(0 - 0)       | 0<br>(0 - 0)        | 1<br>(0 - 1)         | 2<br>(1 - 4)         | 2<br>(1 - 4)         |
| Silicosis                                           | 0<br>(0 - 1)         | 0<br>(0 - 0)       | 0<br>(0 - 0)        | 0<br>(0 - 0)         | 0<br>(0 - 0)         | 0<br>(0 - 0)         |
| Asbestosis                                          | 0<br>(0 - 1)         | 0<br>(0 - 0)       | 0<br>(0 - 0)        | 0<br>(0 - 0)         | 0<br>(0 - 0)         | 0<br>(0 - 0)         |
| Coal workers pneumoconiosis                         | 0<br>(0 - 0)         | 0<br>(0 - 0)       | 0<br>(0 - 0)        | 0<br>(0 - 0)         | 0<br>(0 - 0)         | 0<br>(0 - 0)         |
| Other pneumoconiosis                                | 4<br>(3 - 7)         | 0<br>(0 - 0)       | 0<br>(0 - 0)        | 1<br>(0 - 1)         | 2<br>(1 - 3)         | 2<br>(1 - 4)         |
| Asthma                                              | 206<br>(139 - 297)   | 6<br>(3 - 11)      | 4<br>(2 - 6)        | 37<br>(23 - 55)      | 52<br>(30 - 79)      | 108<br>(71 - 174)    |
| Interstitial lung disease and pulmonary sarcoidosis | 28<br>(16 - 51)      | 0<br>(0 - 1)       | 0<br>(0 - 0)        | 3<br>(2 - 6)         | 12<br>(6 - 24)       | 12<br>(6 - 22)       |
| Other chronic respiratory diseases                  | 34<br>(23 - 48)      | 3<br>(2 - 6)       | 0<br>(0 - 1)        | 11<br>(7 - 18)       | 10<br>(6 - 17)       | 9<br>(5 - 14)        |
| Cirrhosis                                           | 574<br>(437 - 718)   | 7<br>(3 - 14)      | 7<br>(5 - 10)       | 105<br>(76 - 141)    | 239<br>(167 - 317)   | 216<br>(156 - 293)   |
| Cirrhosis due to hepatitis B                        | 59<br>(29 - 98)      | 0<br>(0 - 0)       | 0<br>(0 - 1)        | 10<br>(5 - 17)       | 25<br>(12 - 43)      | 23<br>(9 - 42)       |
| Cirrhosis due to hepatitis C                        | 269<br>(166 - 390)   | 0<br>(0 - 1)       | 2<br>(1 - 3)        | 48<br>(26 - 73)      | 116<br>(63 - 183)    | 103<br>(59 - 153)    |
| Cirrhosis due to alcohol use                        | 137<br>(71 - 227)    | --                 | --                  | 14<br>(7 - 24)       | 57<br>(26 - 97)      | 67<br>(32 - 118)     |
| Cirrhosis due to other causes                       | 109<br>(65 - 163)    | 6<br>(3 - 13)      | 5<br>(3 - 8)        | 33<br>(19 - 52)      | 40<br>(18 - 67)      | 25<br>(12 - 43)      |
| Digestive diseases                                  | 926<br>(692 - 1,270) | 29<br>(16 - 48)    | 19<br>(13 - 28)     | 183<br>(134 - 254)   | 284<br>(190 - 408)   | 412<br>(298 - 596)   |
| Peptic ulcer disease                                | 239<br>(163 - 336)   | 2<br>(1 - 4)       | 2<br>(1 - 3)        | 40<br>(25 - 61)      | 90<br>(56 - 135)     | 105<br>(62 - 162)    |
| Gastritis and duodenitis                            | 18<br>(7 - 49)       | 0<br>(0 - 0)       | 0<br>(0 - 0)        | 5<br>(2 - 15)        | 4<br>(1 - 10)        | 9<br>(3 - 25)        |
| Appendicitis                                        | 83<br>(53 - 125)     | 2<br>(1 - 4)       | 3<br>(1 - 5)        | 16<br>(10 - 27)      | 25<br>(14 - 43)      | 37<br>(20 - 60)      |
| Paralytic ileus and intestinal obstruction          | 194<br>(84 - 299)    | 14<br>(6 - 27)     | 10<br>(5 - 15)      | 47<br>(17 - 82)      | 38<br>(13 - 71)      | 85<br>(36 - 139)     |
| Inguinal, femoral, and abdominal hernia             | 71<br>(37 - 155)     | 1<br>(0 - 3)       | 1<br>(0 - 1)        | 8<br>(4 - 17)        | 24<br>(12 - 52)      | 37<br>(17 - 84)      |
| Inflammatory bowel disease                          | 46<br>(30 - 73)      | 4<br>(1 - 9)       | 1<br>(1 - 2)        | 13<br>(8 - 22)       | 14<br>(7 - 26)       | 14<br>(7 - 23)       |
| Vascular intestinal disorders                       | 13<br>(3 - 40)       | 0<br>(0 - 0)       | 0<br>(0 - 0)        | 3<br>(0 - 9)         | 6<br>(2 - 20)        | 4<br>(1 - 13)        |
| Gallbladder and biliary diseases                    | 84<br>(51 - 161)     | 0<br>(0 - 0)       | 0<br>(0 - 0)        | 11<br>(7 - 18)       | 29<br>(16 - 53)      | 44<br>(23 - 98)      |
| Pancreatitis                                        | 37<br>(20 - 67)      | 0<br>(0 - 1)       | 0<br>(0 - 0)        | 14<br>(8 - 26)       | 17<br>(7 - 33)       | 6<br>(3 - 10)        |
| Other digestive diseases                            | 142<br>(96 - 212)    | 5<br>(2 - 11)      | 3<br>(2 - 6)        | 25<br>(16 - 38)      | 37<br>(21 - 59)      | 72<br>(42 - 122)     |
| Neurological disorders                              | 786<br>(609 - 998)   | 22<br>(11 - 42)    | 11<br>(6 - 21)      | 83<br>(48 - 124)     | 100<br>(69 - 137)    | 570<br>(417 - 753)   |
| Alzheimer disease and other dementias               | 595<br>(439 - 782)   | --                 | --                  | 0<br>(0 - 1)         | 56<br>(34 - 83)      | 538<br>(388 - 715)   |
| Parkinson disease                                   | 12<br>(7 - 24)       | --                 | --                  | 0<br>(0 - 1)         | 2<br>(1 - 5)         | 9<br>(5 - 18)        |
| Epilepsy                                            | 99<br>(61 - 148)     | 17<br>(7 - 36)     | 10<br>(5 - 19)      | 44<br>(23 - 72)      | 18<br>(10 - 30)      | 11<br>(6 - 19)       |
| Multiple sclerosis                                  | 44<br>(8 - 71)       | --                 | --                  | 28<br>(6 - 46)       | 11<br>(1 - 20)       | 6<br>(1 - 13)        |
| Other neurological disorders                        | 36<br>(29 - 44)      | 5<br>(3 - 7)       | 1<br>(1 - 2)        | 11<br>(8 - 14)       | 13<br>(9 - 17)       | 6<br>(4 - 8)         |
| Mental and substance use disorders                  | 120<br>(90 - 163)    | 15<br>(8 - 26)     | 0<br>(0 - 0)        | 63<br>(42 - 90)      | 25<br>(16 - 40)      | 18<br>(12 - 28)      |
| Schizophrenia                                       | 7<br>(4 - 13)        | --                 | --                  | 2<br>(1 - 4)         | 2<br>(1 - 6)         | 2<br>(1 - 5)         |
| Alcohol use disorders                               | 31<br>(13 - 53)      | --                 | --                  | 9<br>(3 - 16)        | 15<br>(6 - 27)       | 7<br>(3 - 12)        |
| Drug use disorders                                  | 83<br>(59 - 115)     | 15<br>(8 - 26)     | --                  | 51<br>(32 - 77)      | 8<br>(5 - 12)        | 9<br>(5 - 15)        |
| Opioid use disorders                                | 23<br>(16 - 32)      | 4<br>(2 - 8)       | --                  | 14<br>(9 - 21)       | 2<br>(1 - 3)         | 2<br>(1 - 4)         |
| Cocaine use disorders                               | 6<br>(4 - 8)         | 1<br>(0 - 2)       | --                  | 4<br>(2 - 6)         | 0<br>(0 - 1)         | 0<br>(0 - 1)         |
| Amphetamine use disorders                           | 4<br>(3 - 6)         | 1<br>(0 - 2)       | --                  | 2<br>(2 - 4)         | 0<br>(0 - 1)         | 0<br>(0 - 1)         |
| Other drug use disorders                            | 50<br>(35 - 70)      | 9<br>(4 - 15)      | --                  | 31<br>(19 - 47)      | 5<br>(3 - 8)         | 5<br>(3 - 9)         |
| Eating disorders                                    | 0<br>(0 - 0)         | --                 | 0<br>(0 - 0)        | 0<br>(0 - 0)         | --                   | --                   |
| Anorexia nervosa                                    | 0<br>(0 - 0)         | --                 | 0<br>(0 - 0)        | 0<br>(0 - 0)         | --                   | --                   |

Web Table 31- Haiti deaths with 95% UI by age, sex, and cause in 2013

| Cause                                               | Females, All Ages        | Females, 0-4 Years | Females, 5-14 Years | Females, 15-49 Years | Females, 50-69 Years   | Females, 70-80 Years     |
|-----------------------------------------------------|--------------------------|--------------------|---------------------|----------------------|------------------------|--------------------------|
| Diabetes, urogenital, blood, and endocrine diseases | 3,549<br>(2,793 - 4,484) | 107<br>(71 - 165)  | 55<br>(37 - 89)     | 472<br>(356 - 643)   | 1,278<br>(912 - 1,685) | 1,637<br>(1,289 - 2,041) |
| Diabetes mellitus                                   | 2,400<br>(1,814 - 3,026) | 10<br>(5 - 18)     | 9<br>(5 - 15)       | 219<br>(159 - 306)   | 950<br>(657 - 1,272)   | 1,212<br>(918 - 1,555)   |
| Acute glomerulonephritis                            | 9<br>(6 - 14)            | 2<br>(1 - 4)       | 2<br>(1 - 4)        | 3<br>(2 - 4)         | 1<br>(1 - 2)           | 1<br>(0 - 1)             |
| Chronic kidney disease                              | 461<br>(325 - 712)       | 8<br>(5 - 14)      | 5<br>(3 - 9)        | 71<br>(47 - 113)     | 154<br>(97 - 248)      | 223<br>(149 - 363)       |
| Chronic kidney disease due to diabetes mellitus     | 26<br>(12 - 51)          | 1<br>(0 - 1)       | 0<br>(0 - 0)        | 3<br>(2 - 6)         | 4<br>(1 - 9)           | 18<br>(8 - 36)           |
| Chronic kidney disease due to hypertension          | 281<br>(196 - 420)       | 2<br>(1 - 3)       | 1<br>(0 - 2)        | 42<br>(28 - 65)      | 98<br>(61 - 158)       | 138<br>(92 - 211)        |
| Chronic kidney disease due to glomerulonephritis    | 19<br>(12 - 33)          | 2<br>(1 - 3)       | 2<br>(1 - 4)        | 3<br>(2 - 5)         | 5<br>(2 - 10)          | 7<br>(3 - 14)            |
| Chronic kidney disease due to other causes          | 136<br>(71 - 258)        | 4<br>(2 - 9)       | 2<br>(1 - 4)        | 23<br>(10 - 47)      | 47<br>(19 - 98)        | 60<br>(26 - 130)         |
| Urinary diseases and male infertility               | 200<br>(137 - 264)       | 22<br>(10 - 45)    | 4<br>(2 - 7)        | 36<br>(21 - 57)      | 52<br>(32 - 78)        | 86<br>(54 - 132)         |
| Interstitial nephritis and urinary tract infections | 164<br>(106 - 225)       | 19<br>(8 - 42)     | 3<br>(2 - 5)        | 30<br>(17 - 49)      | 38<br>(21 - 59)        | 73<br>(44 - 116)         |
| Urolithiasis                                        | 7<br>(4 - 13)            | --                 | 0<br>(0 - 0)        | 1<br>(0 - 2)         | 3<br>(1 - 7)           | 3<br>(1 - 6)             |
| Other urinary diseases                              | 29<br>(18 - 46)          | 2<br>(1 - 5)       | 0<br>(0 - 1)        | 4<br>(2 - 9)         | 11<br>(6 - 20)         | 10<br>(5 - 18)           |
| Gynecological diseases                              | 31<br>(21 - 52)          | --                 | --                  | 18<br>(11 - 31)      | 7<br>(4 - 12)          | 6<br>(3 - 10)            |
| Uterine fibroids                                    | 7<br>(4 - 11)            | --                 | --                  | 3<br>(2 - 5)         | 2<br>(1 - 4)           | 2<br>(1 - 3)             |
| Polycystic ovarian syndrome                         | 1<br>(1 - 2)             | --                 | --                  | 1<br>(1 - 2)         | 0<br>(0 - 0)           | --                       |
| Endometriosis                                       | 3<br>(2 - 5)             | --                 | --                  | 3<br>(2 - 5)         | 0<br>(0 - 0)           | --                       |
| Genital prolapse                                    | 5<br>(3 - 8)             | --                 | --                  | 2<br>(2 - 4)         | 1<br>(1 - 2)           | 1<br>(1 - 3)             |
| Other gynecological diseases                        | 15<br>(10 - 25)          | --                 | --                  | 9<br>(5 - 15)        | 3<br>(2 - 6)           | 3<br>(1 - 5)             |
| Hemoglobinopathies and hemolytic anemias            | 185<br>(105 - 298)       | 41<br>(20 - 77)    | 29<br>(16 - 55)     | 66<br>(34 - 119)     | 28<br>(14 - 45)        | 22<br>(11 - 36)          |
| Thalassemias                                        | 2<br>(1 - 4)             | 1<br>(1 - 2)       | 0<br>(0 - 1)        | 1<br>(0 - 1)         | 0<br>(0 - 0)           | 0<br>(0 - 0)             |
| Sickle cell disorders                               | 154<br>(87 - 257)        | 35<br>(17 - 67)    | 28<br>(15 - 52)     | 63<br>(32 - 113)     | 25<br>(13 - 41)        | 4<br>(2 - 7)             |
| G6PD deficiency                                     | 2<br>(1 - 3)             | 0<br>(0 - 1)       | 0<br>(0 - 1)        | 1<br>(0 - 1)         | 0<br>(0 - 0)           | 0<br>(0 - 1)             |
| Other hemoglobinopathies and hemolytic anemias      | 27<br>(15 - 42)          | 4<br>(2 - 8)       | 1<br>(0 - 1)        | 2<br>(1 - 3)         | 3<br>(1 - 4)           | 18<br>(9 - 30)           |
| Endocrine, metabolic, blood, and immune disorders   | 263<br>(177 - 493)       | 24<br>(13 - 44)    | 7<br>(3 - 15)       | 60<br>(36 - 109)     | 86<br>(50 - 171)       | 87<br>(51 - 172)         |
| Musculoskeletal disorders                           | 48<br>(31 - 72)          | --                 | 2<br>(1 - 5)        | 15<br>(8 - 24)       | 14<br>(8 - 23)         | 17<br>(10 - 27)          |
| Rheumatoid arthritis                                | 25<br>(15 - 41)          | --                 | 1<br>(0 - 3)        | 7<br>(3 - 12)        | 8<br>(4 - 13)          | 9<br>(5 - 15)            |
| Other musculoskeletal disorders                     | 23<br>(15 - 38)          | --                 | 1<br>(1 - 3)        | 8<br>(5 - 14)        | 6<br>(3 - 11)          | 7<br>(4 - 13)            |
| Other non-communicable diseases                     | 749<br>(507 - 1,050)     | 520<br>(312 - 801) | 39<br>(21 - 67)     | 66<br>(41 - 100)     | 51<br>(34 - 71)        | 73<br>(51 - 97)          |
| Congenital anomalies                                | 652<br>(424 - 935)       | 492<br>(294 - 748) | 37<br>(19 - 63)     | 51<br>(30 - 80)      | 34<br>(22 - 50)        | 38<br>(26 - 52)          |
| Neural tube defects                                 | 27<br>(8 - 63)           | 24<br>(6 - 60)     | 0<br>(0 - 1)        | 1<br>(0 - 2)         | 1<br>(0 - 1)           | 0<br>(0 - 1)             |
| Congenital heart anomalies                          | 284<br>(161 - 467)       | 213<br>(104 - 373) | 26<br>(12 - 45)     | 22<br>(12 - 37)      | 6<br>(3 - 10)          | 17<br>(10 - 25)          |
| Cleft lip and cleft palate                          | 1<br>(0 - 3)             | 1<br>(0 - 3)       | --                  | --                   | --                     | --                       |
| Down syndrome                                       | 12<br>(5 - 27)           | 11<br>(4 - 24)     | 1<br>(0 - 3)        | 0<br>(0 - 1)         | 0<br>(0 - 0)           | 0<br>(0 - 0)             |
| Chromosomal unbalanced rearrangements               | 65<br>(5 - 181)          | 56<br>(2 - 170)    | 2<br>(0 - 5)        | 5<br>(2 - 9)         | 1<br>(0 - 2)           | 1<br>(0 - 2)             |
| Other congenital anomalies                          | 263<br>(147 - 408)       | 186<br>(83 - 324)  | 8<br>(3 - 15)       | 23<br>(13 - 37)      | 26<br>(16 - 39)        | 19<br>(12 - 28)          |
| Skin and subcutaneous diseases                      | 82<br>(53 - 112)         | 14<br>(6 - 26)     | 3<br>(1 - 4)        | 14<br>(8 - 23)       | 17<br>(11 - 26)        | 35<br>(21 - 51)          |
| Cellulitis                                          | 7<br>(4 - 12)            | 2<br>(1 - 5)       | 0<br>(0 - 1)        | 1<br>(1 - 2)         | 2<br>(1 - 3)           | 2<br>(1 - 3)             |
| Pyoderma                                            | 55<br>(35 - 76)          | 10<br>(4 - 18)     | 2<br>(1 - 3)        | 10<br>(5 - 16)       | 13<br>(7 - 19)         | 22<br>(13 - 34)          |
| Decubitus ulcer                                     | 15<br>(9 - 23)           | 0<br>(0 - 0)       | 1<br>(0 - 1)        | 3<br>(1 - 4)         | 2<br>(1 - 3)           | 10<br>(5 - 17)           |
| Other skin and subcutaneous diseases                | 5<br>(2 - 8)             | 2<br>(1 - 5)       | 0<br>(0 - 1)        | 1<br>(0 - 1)         | 1<br>(0 - 2)           | 1<br>(0 - 1)             |

Web Table 31- Haiti deaths with 95% UI by age, sex, and cause in 2013

| Cause                                           | Females, All Ages        | Females, 0-4 Years | Females, 5-14 Years | Females, 15-49 Years | Females, 50-69 Years | Females, 70-80 Years |
|-------------------------------------------------|--------------------------|--------------------|---------------------|----------------------|----------------------|----------------------|
| Sudden infant death syndrome                    | 14<br>(1 - 73)           | 14<br>(1 - 73)     | --                  | --                   | --                   | --                   |
| Injuries                                        | 2,851<br>(2,014 - 3,687) | 363<br>(226 - 537) | 164<br>(114 - 220)  | 926<br>(645 - 1,255) | 657<br>(426 - 897)   | 740<br>(445 - 999)   |
| Transport injuries                              | 926<br>(595 - 1,211)     | 82<br>(43 - 138)   | 58<br>(33 - 92)     | 325<br>(199 - 456)   | 276<br>(169 - 394)   | 185<br>(107 - 262)   |
| Road injuries                                   | 797<br>(543 - 1,026)     | 71<br>(39 - 120)   | 54<br>(31 - 85)     | 288<br>(184 - 401)   | 222<br>(142 - 314)   | 162<br>(99 - 231)    |
| Pedestrian road injuries                        | 210<br>(133 - 300)       | 19<br>(9 - 36)     | 17<br>(9 - 30)      | 63<br>(37 - 98)      | 71<br>(43 - 112)     | 39<br>(22 - 63)      |
| Cyclist road injuries                           | 28<br>(17 - 39)          | 1<br>(1 - 3)       | 2<br>(1 - 4)        | 10<br>(6 - 16)       | 10<br>(5 - 15)       | 4<br>(2 - 7)         |
| Motorcyclist road injuries                      | 33<br>(20 - 51)          | 2<br>(1 - 4)       | 1<br>(1 - 2)        | 14<br>(8 - 23)       | 6<br>(3 - 11)        | 10<br>(5 - 19)       |
| Motor vehicle road injuries                     | 518<br>(338 - 688)       | 47<br>(26 - 80)    | 32<br>(18 - 51)     | 199<br>(124 - 286)   | 134<br>(82 - 194)    | 105<br>(62 - 152)    |
| Other road injuries                             | 8<br>(5 - 15)            | 1<br>(0 - 2)       | 1<br>(0 - 2)        | 2<br>(1 - 4)         | 1<br>(1 - 3)         | 3<br>(1 - 7)         |
| Other transport injuries                        | 129<br>(47 - 193)        | 11<br>(3 - 22)     | 5<br>(1 - 9)        | 37<br>(13 - 61)      | 54<br>(19 - 88)      | 22<br>(7 - 40)       |
| Unintentional injuries                          | 1,489<br>(940 - 2,024)   | 257<br>(147 - 406) | 86<br>(57 - 125)    | 312<br>(200 - 453)   | 317<br>(185 - 459)   | 518<br>(279 - 730)   |
| Falls                                           | 310<br>(116 - 484)       | 25<br>(8 - 49)     | 7<br>(2 - 14)       | 27<br>(9 - 46)       | 50<br>(18 - 86)      | 201<br>(70 - 342)    |
| Drowning                                        | 110<br>(58 - 176)        | 28<br>(11 - 62)    | 14<br>(7 - 27)      | 27<br>(13 - 45)      | 25<br>(12 - 42)      | 16<br>(8 - 26)       |
| Fire, heat, and hot substances                  | 270<br>(137 - 411)       | 67<br>(26 - 143)   | 21<br>(9 - 44)      | 61<br>(29 - 106)     | 47<br>(22 - 85)      | 73<br>(33 - 127)     |
| Poisonings                                      | 44<br>(26 - 61)          | 4<br>(2 - 8)       | 2<br>(1 - 3)        | 15<br>(8 - 24)       | 14<br>(8 - 22)       | 9<br>(5 - 14)        |
| Exposure to mechanical forces                   | 160<br>(83 - 216)        | 27<br>(10 - 48)    | 17<br>(8 - 30)      | 57<br>(32 - 84)      | 36<br>(19 - 54)      | 24<br>(11 - 33)      |
| Unintentional firearm injuries                  | 50<br>(30 - 69)          | 5<br>(2 - 11)      | 3<br>(2 - 7)        | 23<br>(13 - 37)      | 10<br>(5 - 16)       | 7<br>(3 - 12)        |
| Unintentional suffocation                       | 13<br>(8 - 24)           | 2<br>(0 - 6)       | 0<br>(0 - 1)        | 4<br>(2 - 7)         | 5<br>(3 - 10)        | 2<br>(1 - 3)         |
| Other exposure to mechanical forces             | 97<br>(32 - 140)         | 19<br>(5 - 37)     | 13<br>(4 - 25)      | 29<br>(10 - 48)      | 21<br>(8 - 33)       | 14<br>(4 - 22)       |
| Adverse effects of medical treatment            | 382<br>(191 - 586)       | 52<br>(18 - 138)   | 11<br>(6 - 21)      | 84<br>(38 - 148)     | 107<br>(48 - 181)    | 129<br>(55 - 223)    |
| Animal contact                                  | 53<br>(18 - 85)          | 5<br>(1 - 10)      | 2<br>(1 - 4)        | 7<br>(3 - 13)        | 12<br>(4 - 21)       | 26<br>(10 - 46)      |
| Venomous animal contact                         | 11<br>(3 - 22)           | 1<br>(0 - 4)       | 1<br>(0 - 2)        | 2<br>(1 - 5)         | 5<br>(1 - 9)         | 2<br>(1 - 6)         |
| Non-venomous animal contact                     | 41<br>(14 - 70)          | 3<br>(1 - 7)       | 1<br>(0 - 3)        | 5<br>(2 - 9)         | 8<br>(2 - 14)        | 24<br>(9 - 42)       |
| Foreign body                                    | 81<br>(49 - 127)         | 34<br>(17 - 62)    | 5<br>(3 - 10)       | 5<br>(3 - 9)         | 10<br>(6 - 16)       | 27<br>(16 - 41)      |
| Pulmonary aspiration and foreign body in airway | 77<br>(46 - 123)         | 33<br>(16 - 61)    | 5<br>(2 - 10)       | 5<br>(2 - 8)         | 9<br>(5 - 15)        | 25<br>(14 - 40)      |
| Foreign body in other body part                 | 4<br>(2 - 6)             | 1<br>(0 - 2)       | 0<br>(0 - 0)        | 1<br>(0 - 1)         | 1<br>(0 - 1)         | 1<br>(1 - 2)         |
| Other unintentional injuries                    | 79<br>(40 - 115)         | 16<br>(8 - 28)     | 7<br>(3 - 13)       | 29<br>(14 - 47)      | 15<br>(6 - 25)       | 12<br>(5 - 19)       |
| Self-harm and interpersonal violence            | 435<br>(318 - 602)       | 24<br>(11 - 49)    | 20<br>(11 - 33)     | 290<br>(198 - 415)   | 65<br>(42 - 101)     | 38<br>(24 - 59)      |
| Self-harm                                       | 208<br>(132 - 296)       | --                 | 8<br>(3 - 18)       | 125<br>(73 - 194)    | 44<br>(25 - 67)      | 31<br>(19 - 49)      |
| Interpersonal violence                          | 228<br>(155 - 340)       | 24<br>(11 - 49)    | 12<br>(6 - 21)      | 165<br>(101 - 257)   | 21<br>(11 - 44)      | 6<br>(3 - 16)        |
| Assault by firearm                              | 133<br>(82 - 206)        | 7<br>(3 - 14)      | 6<br>(3 - 11)       | 109<br>(64 - 175)    | 10<br>(5 - 20)       | 2<br>(1 - 5)         |
| Assault by sharp object                         | 42<br>(24 - 76)          | 5<br>(2 - 14)      | 2<br>(1 - 3)        | 30<br>(15 - 56)      | 5<br>(2 - 11)        | 1<br>(0 - 3)         |
| Assault by other means                          | 52<br>(32 - 90)          | 12<br>(5 - 25)     | 4<br>(2 - 8)        | 26<br>(13 - 48)      | 7<br>(3 - 15)        | 4<br>(1 - 10)        |
| Forces of nature, war, and legal intervention   | 0<br>(0 - 0)             | 0<br>(0 - 0)       | --                  | --                   | --                   | --                   |
| Exposure to forces of nature                    | 0<br>(0 - 0)             | 0<br>(0 - 0)       | --                  | --                   | --                   | --                   |

Web Table 31- Honduras deaths with 95% UI by age, sex, and cause in 2013

| Cause                                                             | Both Sexes, All Ages        | Both Sexes, 0-4 Years    | Both Sexes, 5-14 Years | Both Sexes, 15-49 Years   | Both Sexes, 50-69 Years    | Both Sexes, 70-80 Years     |
|-------------------------------------------------------------------|-----------------------------|--------------------------|------------------------|---------------------------|----------------------------|-----------------------------|
| All causes                                                        | 43,229<br>(35,611 - 51,949) | 4,802<br>(4,412 - 5,248) | 808<br>(704 - 1,013)   | 8,523<br>(6,527 - 10,941) | 10,108<br>(7,664 - 12,956) | 18,988<br>(15,673 - 21,826) |
| Communicable, maternal, neonatal, and nutritional diseases        | 8,102<br>(6,404 - 11,888)   | 2,835<br>(2,473 - 3,250) | 244<br>(171 - 431)     | 1,514<br>(729 - 4,560)    | 1,110<br>(720 - 1,892)     | 2,399<br>(1,743 - 3,108)    |
| HIV/AIDS and tuberculosis                                         | 1,357<br>(315 - 5,947)      | 35<br>(2 - 205)          | 41<br>(2 - 268)        | 841<br>(120 - 4,073)      | 318<br>(86 - 1,191)        | 123<br>(80 - 218)           |
| Tuberculosis                                                      | 234<br>(170 - 317)          | 1<br>(1 - 2)             | 2<br>(1 - 3)           | 51<br>(29 - 89)           | 79<br>(52 - 118)           | 100<br>(74 - 134)           |
| HIV/AIDS                                                          | 1,123<br>(91 - 5,692)       | 33<br>(1 - 204)          | 39<br>(0 - 267)        | 789<br>(71 - 4,030)       | 239<br>(15 - 1,117)        | 23<br>(1 - 129)             |
| HIV/AIDS resulting in mycobacterial infection                     | 60<br>(5 - 316)             | 2<br>(0 - 10)            | 2<br>(0 - 13)          | 42<br>(3 - 215)           | 14<br>(1 - 66)             | 1<br>(0 - 8)                |
| HIV/AIDS resulting in other diseases                              | 1,063<br>(86 - 5,369)       | 31<br>(1 - 193)          | 37<br>(0 - 254)        | 748<br>(67 - 3,822)       | 225<br>(14 - 1,059)        | 22<br>(1 - 121)             |
| Diarrhea, lower respiratory, and other common infectious diseases | 3,591<br>(2,760 - 4,454)    | 964<br>(722 - 1,191)     | 143<br>(93 - 206)      | 353<br>(208 - 528)        | 518<br>(343 - 726)         | 1,613<br>(1,075 - 2,209)    |
| Diarrheal diseases                                                | 1,374<br>(970 - 1,891)      | 434<br>(249 - 662)       | 46<br>(24 - 79)        | 117<br>(60 - 190)         | 216<br>(123 - 351)         | 562<br>(335 - 926)          |
| Intestinal infectious diseases                                    | 143<br>(68 - 259)           | 48<br>(24 - 87)          | 45<br>(21 - 82)        | 43<br>(16 - 87)           | 5<br>(2 - 10)              | 2<br>(1 - 5)                |
| Typhoid fever                                                     | 107<br>(50 - 198)           | 34<br>(16 - 65)          | 35<br>(16 - 63)        | 32<br>(12 - 68)           | 3<br>(1 - 7)               | 2<br>(1 - 3)                |
| Paratyphoid fever                                                 | 29<br>(13 - 54)             | 10<br>(5 - 18)           | 9<br>(4 - 18)          | 9<br>(3 - 19)             | 1<br>(0 - 2)               | 0<br>(0 - 1)                |
| Other intestinal infectious diseases                              | 7<br>(2 - 15)               | 4<br>(1 - 10)            | 1<br>(0 - 4)           | 2<br>(0 - 6)              | 1<br>(0 - 3)               | 0<br>(0 - 3)                |
| Lower respiratory infections                                      | 1,777<br>(1,217 - 2,305)    | 359<br>(245 - 504)       | 29<br>(16 - 45)        | 139<br>(77 - 215)         | 256<br>(157 - 360)         | 994<br>(579 - 1,410)        |
| Upper respiratory infections                                      | 3<br>(1 - 5)                | 0<br>(0 - 1)             | 0<br>(0 - 0)           | 1<br>(0 - 2)              | 1<br>(0 - 2)               | 1<br>(0 - 3)                |
| Otitis media                                                      | 1<br>(1 - 1)                | 0<br>(0 - 0)             | 0<br>(0 - 0)           | 0<br>(0 - 1)              | 0<br>(0 - 0)               | 0<br>(0 - 0)                |
| Meningitis                                                        | 133<br>(94 - 173)           | 26<br>(15 - 41)          | 7<br>(4 - 12)          | 34<br>(18 - 56)           | 26<br>(15 - 39)            | 40<br>(26 - 59)             |
| Pneumococcal meningitis                                           | 46<br>(32 - 61)             | 7<br>(4 - 12)            | 3<br>(1 - 5)           | 12<br>(6 - 19)            | 9<br>(5 - 15)              | 15<br>(9 - 23)              |
| H influenzae type B meningitis                                    | 21<br>(15 - 28)             | 10<br>(5 - 15)           | 2<br>(1 - 3)           | 3<br>(2 - 6)              | 2<br>(1 - 4)               | 4<br>(2 - 6)                |
| Meningococcal meningitis                                          | 16<br>(11 - 22)             | 3<br>(1 - 4)             | 1<br>(0 - 2)           | 5<br>(2 - 8)              | 3<br>(1 - 5)               | 5<br>(3 - 9)                |
| Other meningitis                                                  | 50<br>(34 - 69)             | 6<br>(4 - 11)            | 2<br>(1 - 3)           | 14<br>(7 - 25)            | 11<br>(6 - 18)             | 16<br>(9 - 25)              |
| Encephalitis                                                      | 59<br>(28 - 123)            | 15<br>(5 - 35)           | 7<br>(2 - 20)          | 15<br>(6 - 38)            | 13<br>(6 - 27)             | 9<br>(5 - 19)               |
| Diphtheria                                                        | 1<br>(0 - 3)                | 0<br>(0 - 3)             | 0<br>(0 - 1)           | 0<br>(0 - 0)              | 0<br>(0 - 0)               | --                          |
| Whooping cough                                                    | 87<br>(28 - 228)            | 79<br>(18 - 221)         | 6<br>(3 - 11)          | 2<br>(1 - 3)              | 0<br>(0 - 1)               | --                          |
| Tetanus                                                           | 8<br>(2 - 24)               | 2<br>(0 - 3)             | 0<br>(0 - 1)           | 2<br>(0 - 6)              | 2<br>(0 - 7)               | 3<br>(1 - 8)                |
| Measles                                                           | 0<br>(0 - 0)                | 0<br>(0 - 0)             | 0<br>(0 - 0)           | 0<br>(0 - 0)              | 0<br>(0 - 0)               | --                          |
| Varicella and herpes zoster                                       | 5<br>(2 - 12)               | 1<br>(0 - 5)             | 0<br>(0 - 1)           | 1<br>(0 - 2)              | 0<br>(0 - 1)               | 2<br>(0 - 8)                |
| Neglected tropical diseases and malaria                           | 100<br>(70 - 159)           | 28<br>(14 - 57)          | 11<br>(7 - 19)         | 17<br>(10 - 28)           | 17<br>(11 - 31)            | 26<br>(19 - 41)             |
| Malaria                                                           | 12<br>(7 - 20)              | 2<br>(1 - 4)             | 1<br>(0 - 1)           | 3<br>(1 - 5)              | 3<br>(1 - 5)               | 5<br>(2 - 9)                |
| Chagas disease                                                    | 14<br>(4 - 47)              | 0<br>(0 - 1)             | 0<br>(0 - 1)           | 2<br>(1 - 7)              | 6<br>(2 - 20)              | 5<br>(1 - 20)               |
| Leishmaniasis                                                     | 3<br>(2 - 4)                | 1<br>(1 - 2)             | 0<br>(0 - 1)           | 1<br>(0 - 2)              | 0<br>(0 - 0)               | 0<br>(0 - 0)                |
| Visceral leishmaniasis                                            | 3<br>(2 - 4)                | 1<br>(1 - 2)             | 0<br>(0 - 1)           | 1<br>(0 - 2)              | 0<br>(0 - 0)               | 0<br>(0 - 0)                |
| Cysticercosis                                                     | 3<br>(2 - 5)                | 0<br>(0 - 0)             | 0<br>(0 - 0)           | 2<br>(1 - 3)              | 1<br>(1 - 1)               | 0<br>(0 - 0)                |
| Cystic echinococcosis                                             | 1<br>(1 - 1)                | 0<br>(0 - 0)             | 0<br>(0 - 0)           | 0<br>(0 - 1)              | 0<br>(0 - 0)               | 0<br>(0 - 0)                |
| Dengue                                                            | 24<br>(16 - 40)             | 4<br>(2 - 8)             | 3<br>(2 - 7)           | 4<br>(2 - 7)              | 3<br>(2 - 5)               | 10<br>(7 - 17)              |
| Rabies                                                            | 3<br>(2 - 6)                | 0<br>(0 - 1)             | 1<br>(1 - 2)           | 1<br>(0 - 2)              | 1<br>(0 - 1)               | 0<br>(0 - 1)                |
| Intestinal nematode infections                                    | 3<br>(0 - 10)               | 1<br>(0 - 7)             | 0<br>(0 - 4)           | 0<br>(0 - 3)              | 0<br>(0 - 2)               | 0<br>(0 - 2)                |
| Ascariasis                                                        | 3<br>(0 - 10)               | 1<br>(0 - 7)             | 0<br>(0 - 4)           | 0<br>(0 - 3)              | 0<br>(0 - 2)               | 0<br>(0 - 2)                |
| Other neglected tropical diseases                                 | 37<br>(22 - 69)             | 20<br>(8 - 46)           | 4<br>(2 - 9)           | 4<br>(2 - 9)              | 3<br>(2 - 7)               | 5<br>(3 - 11)               |
| Maternal disorders                                                | 153<br>(75 - 260)           | --                       | 1<br>(0 - 2)           | 152<br>(74 - 260)         | --                         | --                          |



Web Table 31- Honduras deaths with 95% UI by age, sex, and cause in 2013

| Cause                                                            | Both Sexes, All Ages        | Both Sexes, 0-4 Years    | Both Sexes, 5-14 Years | Both Sexes, 15-49 Years  | Both Sexes, 50-69 Years   | Both Sexes, 70-80 Years     |
|------------------------------------------------------------------|-----------------------------|--------------------------|------------------------|--------------------------|---------------------------|-----------------------------|
| Maternal hemorrhage                                              | 28<br>(12 - 47)             | --                       | 0<br>(0 - 0)           | 27<br>(12 - 47)          | --                        | --                          |
| Maternal sepsis and other maternal infections                    | 11<br>(5 - 21)              | --                       | 0<br>(0 - 0)           | 11<br>(5 - 21)           | --                        | --                          |
| Maternal hypertensive disorders                                  | 15<br>(5 - 32)              | --                       | 0<br>(0 - 0)           | 15<br>(5 - 32)           | --                        | --                          |
| Maternal obstructed labor                                        | 14<br>(6 - 26)              | --                       | 0<br>(0 - 0)           | 14<br>(6 - 25)           | --                        | --                          |
| Maternal abortive outcome                                        | 17<br>(7 - 32)              | --                       | 0<br>(0 - 0)           | 17<br>(7 - 32)           | --                        | --                          |
| Indirect maternal deaths                                         | 22<br>(9 - 41)              | --                       | 0<br>(0 - 0)           | 22<br>(9 - 41)           | --                        | --                          |
| Late maternal deaths                                             | 13<br>(5 - 23)              | --                       | 0<br>(0 - 0)           | 13<br>(5 - 23)           | --                        | --                          |
| Maternal deaths aggravated by HIV/AIDS                           | 0<br>(0 - 0)                | --                       | --                     | 0<br>(0 - 0)             | --                        | --                          |
| Other maternal disorders                                         | 32<br>(14 - 54)             | --                       | 0<br>(0 - 0)           | 31<br>(14 - 54)          | --                        | --                          |
| Neonatal disorders                                               | 1,587<br>(1,327 - 1,876)    | 1,587<br>(1,327 - 1,876) | --                     | --                       | --                        | --                          |
| Neonatal preterm birth complications                             | 857<br>(608 - 1,154)        | 857<br>(608 - 1,154)     | --                     | --                       | --                        | --                          |
| Neonatal encephalopathy due to birth asphyxia and trauma         | 333<br>(190 - 531)          | 333<br>(190 - 531)       | --                     | --                       | --                        | --                          |
| Neonatal sepsis and other neonatal infections                    | 231<br>(96 - 421)           | 231<br>(96 - 421)        | --                     | --                       | --                        | --                          |
| Hemolytic disease and other neonatal jaundice                    | 5<br>(2 - 14)               | 5<br>(2 - 14)            | --                     | --                       | --                        | --                          |
| Other neonatal disorders                                         | 161<br>(83 - 268)           | 161<br>(83 - 268)        | --                     | --                       | --                        | --                          |
| Nutritional deficiencies                                         | 981<br>(692 - 1,313)        | 104<br>(63 - 151)        | 27<br>(16 - 45)        | 109<br>(61 - 177)        | 212<br>(137 - 302)        | 528<br>(347 - 751)          |
| Protein-energy malnutrition                                      | 381<br>(240 - 580)          | 78<br>(46 - 121)         | 16<br>(8 - 29)         | 30<br>(14 - 61)          | 77<br>(40 - 134)          | 180<br>(94 - 301)           |
| Iodine deficiency                                                | 1<br>(0 - 4)                | 0<br>(0 - 1)             | 0<br>(0 - 0)           | 0<br>(0 - 1)             | 0<br>(0 - 2)              | 0<br>(0 - 2)                |
| Iron-deficiency anemia                                           | 414<br>(230 - 610)          | 15<br>(5 - 32)           | 8<br>(3 - 14)          | 58<br>(29 - 98)          | 95<br>(48 - 151)          | 238<br>(123 - 371)          |
| Other nutritional deficiencies                                   | 184<br>(97 - 302)           | 10<br>(4 - 21)           | 4<br>(2 - 8)           | 21<br>(9 - 42)           | 39<br>(19 - 68)           | 109<br>(53 - 188)           |
| Other communicable, maternal, neonatal, and nutritional diseases | 334<br>(199 - 542)          | 118<br>(44 - 203)        | 22<br>(11 - 36)        | 42<br>(22 - 72)          | 44<br>(20 - 85)           | 109<br>(39 - 270)           |
| Sexually transmitted diseases excluding HIV                      | 96<br>(21 - 188)            | 79<br>(9 - 163)          | 7<br>(1 - 15)          | 2<br>(1 - 6)             | 3<br>(1 - 8)              | 5<br>(2 - 14)               |
| Syphilis                                                         | 93<br>(17 - 183)            | 79<br>(9 - 163)          | 7<br>(1 - 15)          | 1<br>(0 - 2)             | 2<br>(1 - 5)              | 4<br>(1 - 11)               |
| Chlamydial infection                                             | 1<br>(0 - 2)                | --                       | 0<br>(0 - 0)           | 0<br>(0 - 1)             | 0<br>(0 - 1)              | 0<br>(0 - 1)                |
| Gonococcal infection                                             | 2<br>(1 - 4)                | --                       | 0<br>(0 - 0)           | 0<br>(0 - 1)             | 1<br>(0 - 1)              | 1<br>(0 - 2)                |
| Other sexually transmitted diseases                              | 1<br>(0 - 2)                | --                       | 0<br>(0 - 0)           | 0<br>(0 - 1)             | 0<br>(0 - 1)              | 0<br>(0 - 1)                |
| Hepatitis                                                        | 1<br>(1 - 2)                | 0<br>(0 - 0)             | 0<br>(0 - 0)           | 0<br>(0 - 1)             | 0<br>(0 - 0)              | 0<br>(0 - 0)                |
| Acute hepatitis A                                                | 1<br>(0 - 1)                | 0<br>(0 - 0)             | 0<br>(0 - 0)           | 0<br>(0 - 0)             | 0<br>(0 - 0)              | 0<br>(0 - 0)                |
| Acute hepatitis B                                                | 0<br>(0 - 1)                | 0<br>(0 - 0)             | 0<br>(0 - 0)           | 0<br>(0 - 0)             | 0<br>(0 - 0)              | 0<br>(0 - 0)                |
| Acute hepatitis C                                                | 0<br>(0 - 0)                | --                       | 0<br>(0 - 0)           | 0<br>(0 - 0)             | 0<br>(0 - 0)              | 0<br>(0 - 0)                |
| Other infectious diseases                                        | 236<br>(140 - 419)          | 39<br>(18 - 83)          | 15<br>(7 - 26)         | 39<br>(20 - 69)          | 41<br>(18 - 82)           | 104<br>(35 - 265)           |
| Non-communicable diseases                                        | 29,845<br>(23,790 - 36,262) | 1,733<br>(1,432 - 2,042) | 328<br>(225 - 440)     | 3,631<br>(2,151 - 5,624) | 8,108<br>(5,959 - 10,496) | 16,045<br>(13,101 - 18,728) |
| Neoplasms                                                        | 4,482<br>(3,303 - 5,838)    | 68<br>(33 - 103)         | 70<br>(43 - 97)        | 848<br>(467 - 1,336)     | 1,704<br>(1,224 - 2,247)  | 1,793<br>(1,385 - 2,237)    |
| Esophageal cancer                                                | 12<br>(7 - 21)              | --                       | --                     | 2<br>(1 - 4)             | 6<br>(3 - 12)             | 4<br>(3 - 7)                |
| Stomach cancer                                                   | 783<br>(549 - 1,078)        | --                       | --                     | 91<br>(50 - 145)         | 278<br>(187 - 384)        | 414<br>(293 - 584)          |
| Liver cancer                                                     | 152<br>(110 - 204)          | --                       | 2<br>(1 - 3)           | 24<br>(13 - 38)          | 63<br>(44 - 89)           | 63<br>(44 - 87)             |
| Liver cancer due to hepatitis B                                  | 46<br>(27 - 79)             | --                       | 1<br>(0 - 1)           | 10<br>(4 - 20)           | 22<br>(12 - 39)           | 15<br>(8 - 23)              |
| Liver cancer due to hepatitis C                                  | 68<br>(42 - 101)            | --                       | 0<br>(0 - 1)           | 9<br>(4 - 14)            | 28<br>(15 - 44)           | 31<br>(19 - 47)             |
| Liver cancer due to alcohol use                                  | 23<br>(11 - 40)             | --                       | --                     | 2<br>(1 - 4)             | 8<br>(4 - 16)             | 12<br>(6 - 22)              |
| Liver cancer due to other causes                                 | 14<br>(8 - 24)              | --                       | 1<br>(0 - 1)           | 4<br>(2 - 7)             | 5<br>(3 - 10)             | 5<br>(3 - 8)                |

Web Table 31- Honduras deaths with 95% UI by age, sex, and cause in 2013

| Cause                                         | Both Sexes, All Ages        | Both Sexes, 0-4 Years | Both Sexes, 5-14 Years | Both Sexes, 15-49 Years | Both Sexes, 50-69 Years  | Both Sexes, 70-80 Years  |
|-----------------------------------------------|-----------------------------|-----------------------|------------------------|-------------------------|--------------------------|--------------------------|
| Larynx cancer                                 | 23<br>(15 - 33)             | --                    | --                     | 4<br>(2 - 7)            | 10<br>(6 - 15)           | 9<br>(6 - 13)            |
| Tracheal, bronchus and lung cancer            | 462<br>(336 - 642)          | --                    | --                     | 55<br>(30 - 97)         | 236<br>(163 - 331)       | 172<br>(128 - 224)       |
| Breast cancer                                 | 336<br>(198 - 519)          | --                    | --                     | 114<br>(52 - 194)       | 147<br>(85 - 231)        | 75<br>(45 - 116)         |
| Cervical cancer                               | 137<br>(79 - 209)           | --                    | --                     | 43<br>(18 - 77)         | 55<br>(30 - 88)          | 40<br>(23 - 61)          |
| Uterine cancer                                | 51<br>(28 - 82)             | --                    | --                     | 6<br>(2 - 12)           | 21<br>(10 - 37)          | 24<br>(12 - 39)          |
| Prostate cancer                               | 93<br>(57 - 161)            | --                    | --                     | 2<br>(1 - 4)            | 20<br>(11 - 35)          | 71<br>(44 - 124)         |
| Colon and rectum cancer                       | 361<br>(264 - 480)          | --                    | --                     | 48<br>(26 - 77)         | 138<br>(99 - 189)        | 175<br>(128 - 230)       |
| Lip and oral cavity cancer                    | 49<br>(32 - 68)             | --                    | --                     | 8<br>(4 - 13)           | 19<br>(11 - 29)          | 21<br>(14 - 31)          |
| Nasopharynx cancer                            | 24<br>(16 - 36)             | --                    | 0<br>(0 - 1)           | 9<br>(5 - 16)           | 9<br>(6 - 14)            | 6<br>(4 - 9)             |
| Other pharynx cancer                          | 31<br>(21 - 43)             | --                    | --                     | 7<br>(4 - 12)           | 15<br>(9 - 22)           | 9<br>(6 - 12)            |
| Gallbladder and biliary tract cancer          | 166<br>(88 - 258)           | --                    | --                     | 9<br>(4 - 15)           | 61<br>(31 - 99)          | 97<br>(48 - 159)         |
| Pancreatic cancer                             | 195<br>(140 - 262)          | --                    | --                     | 19<br>(11 - 30)         | 74<br>(51 - 103)         | 102<br>(73 - 136)        |
| Malignant skin melanoma                       | 61<br>(37 - 95)             | --                    | --                     | 27<br>(12 - 48)         | 19<br>(12 - 29)          | 15<br>(10 - 21)          |
| Non-melanoma skin cancer                      | 95<br>(60 - 156)            | --                    | --                     | 10<br>(5 - 19)          | 26<br>(15 - 42)          | 59<br>(36 - 97)          |
| Ovarian cancer                                | 181<br>(98 - 279)           | --                    | --                     | 48<br>(21 - 85)         | 87<br>(44 - 143)         | 46<br>(24 - 72)          |
| Testicular cancer                             | 2<br>(1 - 4)                | --                    | --                     | 1<br>(1 - 3)            | 0<br>(0 - 0)             | 0<br>(0 - 1)             |
| Kidney cancer                                 | 139<br>(96 - 191)           | 5<br>(2 - 9)          | 2<br>(1 - 4)           | 18<br>(10 - 28)         | 68<br>(43 - 100)         | 46<br>(31 - 68)          |
| Bladder cancer                                | 63<br>(45 - 86)             | --                    | --                     | 3<br>(2 - 5)            | 23<br>(15 - 33)          | 37<br>(26 - 52)          |
| Brain and nervous system cancer               | 182<br>(111 - 250)          | 5<br>(2 - 9)          | 9<br>(4 - 14)          | 65<br>(33 - 97)         | 64<br>(35 - 91)          | 40<br>(24 - 57)          |
| Thyroid cancer                                | 59<br>(42 - 82)             | --                    | 0<br>(0 - 0)           | 7<br>(4 - 11)           | 24<br>(16 - 35)          | 28<br>(19 - 40)          |
| Mesothelioma                                  | 10<br>(7 - 14)              | --                    | --                     | 1<br>(1 - 2)            | 5<br>(3 - 8)             | 3<br>(2 - 5)             |
| Hodgkin lymphoma                              | 49<br>(31 - 72)             | 2<br>(1 - 4)          | 4<br>(2 - 8)           | 16<br>(9 - 27)          | 14<br>(8 - 22)           | 13<br>(7 - 19)           |
| Non-Hodgkin lymphoma                          | 87<br>(46 - 192)            | 8<br>(3 - 16)         | 8<br>(4 - 13)          | 30<br>(11 - 79)         | 17<br>(8 - 42)           | 23<br>(11 - 53)          |
| Multiple myeloma                              | 45<br>(27 - 62)             | --                    | --                     | 6<br>(3 - 9)            | 22<br>(13 - 33)          | 17<br>(10 - 24)          |
| Leukemia                                      | 290<br>(202 - 413)          | 18<br>(8 - 31)        | 33<br>(20 - 49)        | 105<br>(61 - 176)       | 72<br>(48 - 102)         | 62<br>(45 - 84)          |
| Other neoplasms                               | 343<br>(237 - 505)          | 29<br>(11 - 49)       | 12<br>(5 - 19)         | 70<br>(36 - 118)        | 109<br>(72 - 162)        | 123<br>(85 - 180)        |
| Cardiovascular diseases                       | 13,013<br>(10,335 - 15,877) | 154<br>(104 - 274)    | 75<br>(46 - 115)       | 1,430<br>(846 - 2,132)  | 3,608<br>(2,652 - 4,709) | 7,747<br>(6,206 - 9,180) |
| Rheumatic heart disease                       | 16<br>(9 - 35)              | 0<br>(0 - 0)          | 0<br>(0 - 1)           | 3<br>(1 - 8)            | 6<br>(3 - 13)            | 7<br>(4 - 14)            |
| Ischemic heart disease                        | 8,041<br>(6,021 - 9,968)    | 55<br>(25 - 125)      | 32<br>(15 - 57)        | 882<br>(526 - 1,325)    | 2,337<br>(1,667 - 3,092) | 4,736<br>(3,525 - 5,772) |
| Cerebrovascular disease                       | 3,603<br>(2,660 - 4,824)    | 40<br>(26 - 64)       | 25<br>(15 - 41)        | 339<br>(184 - 550)      | 895<br>(613 - 1,270)     | 2,304<br>(1,730 - 2,982) |
| Ischemic stroke                               | 2,529<br>(1,866 - 3,339)    | 10<br>(5 - 24)        | 9<br>(5 - 17)          | 135<br>(71 - 213)       | 544<br>(368 - 776)       | 1,831<br>(1,365 - 2,408) |
| Hemorrhagic stroke                            | 1,073<br>(743 - 1,608)      | 30<br>(20 - 45)       | 16<br>(10 - 29)        | 204<br>(111 - 358)      | 350<br>(233 - 538)       | 473<br>(320 - 698)       |
| Hypertensive heart disease                    | 421<br>(101 - 894)          | 10<br>(2 - 26)        | 4<br>(1 - 8)           | 46<br>(12 - 101)        | 112<br>(24 - 258)        | 249<br>(53 - 540)        |
| Cardiomyopathy and myocarditis                | 151<br>(105 - 233)          | 23<br>(14 - 45)       | 6<br>(3 - 10)          | 41<br>(22 - 77)         | 40<br>(26 - 65)          | 40<br>(26 - 61)          |
| Atrial fibrillation and flutter               | 25<br>(13 - 43)             | --                    | --                     | 1<br>(0 - 1)            | 4<br>(2 - 7)             | 20<br>(10 - 35)          |
| Aortic aneurysm                               | 50<br>(34 - 83)             | --                    | --                     | 5<br>(3 - 11)           | 14<br>(9 - 23)           | 31<br>(21 - 49)          |
| Peripheral vascular disease                   | 32<br>(20 - 46)             | --                    | --                     | 1<br>(0 - 1)            | 5<br>(3 - 8)             | 26<br>(16 - 38)          |
| Endocarditis                                  | 39<br>(25 - 63)             | 6<br>(3 - 12)         | 2<br>(1 - 3)           | 11<br>(5 - 22)          | 9<br>(5 - 15)            | 12<br>(7 - 19)           |
| Other cardiovascular and circulatory diseases | 635<br>(418 - 1,310)        | 20<br>(11 - 40)       | 7<br>(4 - 14)          | 100<br>(50 - 237)       | 187<br>(115 - 363)       | 321<br>(199 - 696)       |
| Chronic respiratory diseases                  | 3,800<br>(3,027 - 4,877)    | 354<br>(189 - 485)    | 30<br>(18 - 41)        | 205<br>(117 - 333)      | 788<br>(547 - 1,145)     | 2,422<br>(1,884 - 3,162) |

Web Table 31- Honduras deaths with 95% UI by age, sex, and cause in 2013

| Cause                                               | Both Sexes, All Ages     | Both Sexes, 0-4 Years | Both Sexes, 5-14 Years | Both Sexes, 15-49 Years | Both Sexes, 50-69 Years | Both Sexes, 70-80 Years  |
|-----------------------------------------------------|--------------------------|-----------------------|------------------------|-------------------------|-------------------------|--------------------------|
| Chronic obstructive pulmonary disease               | 3,068<br>(2,420 - 3,924) | 199<br>(101 - 297)    | 16<br>(9 - 23)         | 123<br>(71 - 202)       | 615<br>(423 - 887)      | 2,115<br>(1,656 - 2,743) |
| Pneumoconiosis                                      | 35<br>(22 - 56)          | 1<br>(0 - 1)          | 1<br>(0 - 1)           | 4<br>(2 - 8)            | 13<br>(7 - 23)          | 16<br>(10 - 26)          |
| Silicosis                                           | 5<br>(3 - 9)             | 0<br>(0 - 0)          | 0<br>(0 - 0)           | 1<br>(0 - 2)            | 2<br>(1 - 3)            | 2<br>(1 - 4)             |
| Asbestosis                                          | 6<br>(3 - 9)             | 0<br>(0 - 0)          | 0<br>(0 - 0)           | 1<br>(0 - 1)            | 3<br>(1 - 4)            | 2<br>(1 - 4)             |
| Coal workers pneumoconiosis                         | 5<br>(3 - 7)             | 0<br>(0 - 0)          | 0<br>(0 - 0)           | 1<br>(0 - 1)            | 2<br>(1 - 3)            | 2<br>(1 - 4)             |
| Other pneumoconiosis                                | 19<br>(12 - 31)          | 0<br>(0 - 0)          | 0<br>(0 - 0)           | 2<br>(1 - 4)            | 7<br>(4 - 12)           | 10<br>(6 - 16)           |
| Asthma                                              | 346<br>(234 - 536)       | 33<br>(15 - 59)       | 8<br>(5 - 12)          | 43<br>(22 - 77)         | 89<br>(53 - 155)        | 172<br>(108 - 280)       |
| Interstitial lung disease and pulmonary sarcoidosis | 163<br>(99 - 242)        | 5<br>(2 - 9)          | 2<br>(1 - 3)           | 20<br>(10 - 33)         | 55<br>(32 - 86)         | 81<br>(46 - 125)         |
| Other chronic respiratory diseases                  | 189<br>(134 - 233)       | 117<br>(59 - 155)     | 4<br>(2 - 6)           | 15<br>(8 - 27)          | 16<br>(9 - 27)          | 37<br>(22 - 61)          |
| Cirrhosis                                           | 1,086<br>(796 - 1,496)   | 0<br>(0 - 1)          | 1<br>(1 - 1)           | 203<br>(115 - 334)      | 483<br>(329 - 674)      | 398<br>(302 - 542)       |
| Cirrhosis due to hepatitis B                        | 41<br>(23 - 66)          | 0<br>(0 - 0)          | 0<br>(0 - 0)           | 8<br>(3 - 15)           | 18<br>(10 - 30)         | 15<br>(9 - 24)           |
| Cirrhosis due to hepatitis C                        | 439<br>(292 - 624)       | 0<br>(0 - 0)          | 0<br>(0 - 0)           | 65<br>(33 - 106)        | 190<br>(120 - 279)      | 184<br>(122 - 264)       |
| Cirrhosis due to alcohol use                        | 474<br>(321 - 659)       | --                    | --                     | 89<br>(47 - 151)        | 218<br>(138 - 326)      | 167<br>(114 - 234)       |
| Cirrhosis due to other causes                       | 132<br>(77 - 215)        | 0<br>(0 - 1)          | 1<br>(0 - 1)           | 42<br>(21 - 75)         | 57<br>(32 - 93)         | 32<br>(19 - 53)          |
| Digestive diseases                                  | 1,681<br>(1,266 - 2,179) | 18<br>(11 - 28)       | 18<br>(11 - 27)        | 234<br>(135 - 366)      | 438<br>(300 - 586)      | 972<br>(740 - 1,281)     |
| Peptic ulcer disease                                | 330<br>(155 - 555)       | 0<br>(0 - 1)          | 1<br>(0 - 2)           | 23<br>(10 - 41)         | 63<br>(10 - 139)        | 242<br>(131 - 401)       |
| Gastritis and duodenitis                            | 138<br>(84 - 244)        | 2<br>(1 - 4)          | 1<br>(1 - 2)           | 16<br>(8 - 31)          | 32<br>(18 - 58)         | 87<br>(49 - 156)         |
| Appendicitis                                        | 137<br>(81 - 211)        | 1<br>(1 - 2)          | 4<br>(2 - 7)           | 36<br>(18 - 61)         | 41<br>(24 - 69)         | 54<br>(30 - 93)          |
| Paralytic ileus and intestinal obstruction          | 85<br>(54 - 148)         | 6<br>(3 - 12)         | 4<br>(2 - 7)           | 19<br>(9 - 38)          | 19<br>(10 - 36)         | 36<br>(21 - 62)          |
| Inguinal, femoral, and abdominal hernia             | 139<br>(83 - 210)        | 1<br>(1 - 2)          | 1<br>(1 - 2)           | 11<br>(5 - 19)          | 36<br>(19 - 57)         | 90<br>(53 - 141)         |
| Inflammatory bowel disease                          | 57<br>(35 - 99)          | 3<br>(1 - 5)          | 1<br>(1 - 2)           | 11<br>(5 - 22)          | 15<br>(8 - 27)          | 26<br>(14 - 48)          |
| Vascular intestinal disorders                       | 191<br>(108 - 324)       | 1<br>(0 - 2)          | 1<br>(0 - 2)           | 12<br>(5 - 24)          | 45<br>(22 - 82)         | 131<br>(75 - 224)        |
| Gallbladder and biliary diseases                    | 213<br>(122 - 387)       | 0<br>(0 - 1)          | 1<br>(0 - 1)           | 21<br>(10 - 42)         | 64<br>(35 - 122)        | 127<br>(68 - 229)        |
| Pancreatitis                                        | 175<br>(112 - 262)       | 1<br>(0 - 2)          | 2<br>(1 - 3)           | 58<br>(33 - 98)         | 54<br>(32 - 85)         | 60<br>(37 - 96)          |
| Other digestive diseases                            | 217<br>(133 - 342)       | 2<br>(1 - 3)          | 2<br>(1 - 3)           | 27<br>(14 - 49)         | 67<br>(40 - 107)        | 119<br>(71 - 191)        |
| Neurological disorders                              | 1,744<br>(1,227 - 2,393) | 22<br>(13 - 39)       | 23<br>(13 - 41)        | 171<br>(97 - 295)       | 164<br>(109 - 238)      | 1,365<br>(902 - 1,882)   |
| Alzheimer disease and other dementias               | 1,313<br>(856 - 1,843)   | --                    | --                     | 0<br>(0 - 1)            | 76<br>(44 - 124)        | 1,237<br>(783 - 1,745)   |
| Parkinson disease                                   | 63<br>(38 - 101)         | --                    | --                     | 1<br>(0 - 1)            | 9<br>(5 - 15)           | 54<br>(31 - 88)          |
| Epilepsy                                            | 285<br>(183 - 467)       | 13<br>(5 - 30)        | 18<br>(9 - 36)         | 143<br>(79 - 257)       | 55<br>(32 - 87)         | 56<br>(32 - 87)          |
| Multiple sclerosis                                  | 11<br>(6 - 18)           | --                    | --                     | 4<br>(2 - 7)            | 4<br>(2 - 7)            | 3<br>(2 - 6)             |
| Other neurological disorders                        | 71<br>(51 - 95)          | 9<br>(6 - 12)         | 5<br>(3 - 7)           | 23<br>(14 - 36)         | 20<br>(13 - 27)         | 15<br>(11 - 20)          |
| Mental and substance use disorders                  | 292<br>(164 - 601)       | 2<br>(1 - 4)          | 0<br>(0 - 0)           | 144<br>(71 - 320)       | 111<br>(65 - 213)       | 35<br>(24 - 65)          |
| Schizophrenia                                       | 18<br>(11 - 27)          | --                    | --                     | 6<br>(3 - 10)           | 7<br>(3 - 12)           | 5<br>(3 - 8)             |
| Alcohol use disorders                               | 131<br>(72 - 342)        | --                    | --                     | 49<br>(22 - 152)        | 59<br>(31 - 145)        | 23<br>(14 - 51)          |
| Drug use disorders                                  | 143<br>(63 - 236)        | 2<br>(1 - 4)          | --                     | 89<br>(36 - 159)        | 45<br>(20 - 70)         | 8<br>(4 - 12)            |
| Opioid use disorders                                | 30<br>(14 - 50)          | 0<br>(0 - 1)          | --                     | 19<br>(8 - 35)          | 9<br>(4 - 15)           | 2<br>(1 - 3)             |
| Cocaine use disorders                               | 3<br>(1 - 6)             | 0<br>(0 - 0)          | --                     | 2<br>(1 - 4)            | 1<br>(0 - 1)            | 0<br>(0 - 0)             |
| Amphetamine use disorders                           | 3<br>(1 - 4)             | 0<br>(0 - 0)          | --                     | 2<br>(1 - 3)            | 1<br>(0 - 1)            | 0<br>(0 - 0)             |
| Other drug use disorders                            | 107<br>(48 - 178)        | 1<br>(1 - 3)          | --                     | 66<br>(27 - 118)        | 34<br>(15 - 53)         | 6<br>(3 - 9)             |
| Eating disorders                                    | 0<br>(0 - 1)             | --                    | 0<br>(0 - 0)           | 0<br>(0 - 1)            | --                      | --                       |

Web Table 31- Honduras deaths with 95% UI by age, sex, and cause in 2013

| Cause                                               | Both Sexes, All Ages     | Both Sexes, 0-4 Years | Both Sexes, 5-14 Years | Both Sexes, 15-49 Years | Both Sexes, 50-69 Years | Both Sexes, 70-80 Years |
|-----------------------------------------------------|--------------------------|-----------------------|------------------------|-------------------------|-------------------------|-------------------------|
| Anorexia nervosa                                    | 0<br>(0 - 1)             | --                    | 0<br>(0 - 0)           | 0<br>(0 - 1)            | --                      | --                      |
| Diabetes, urogenital, blood, and endocrine diseases | 2,555<br>(1,887 - 3,564) | 131<br>(70 - 205)     | 50<br>(29 - 92)        | 314<br>(175 - 543)      | 786<br>(555 - 1,098)    | 1,275<br>(957 - 1,735)  |
| Diabetes mellitus                                   | 1,134<br>(809 - 1,519)   | 1<br>(1 - 3)          | 2<br>(1 - 3)           | 91<br>(51 - 147)        | 427<br>(286 - 592)      | 613<br>(443 - 828)      |
| Acute glomerulonephritis                            | 4<br>(3 - 6)             | 0<br>(0 - 0)          | 0<br>(0 - 0)           | 1<br>(0 - 2)            | 1<br>(1 - 1)            | 2<br>(1 - 3)            |
| Chronic kidney disease                              | 314<br>(205 - 718)       | 3<br>(2 - 7)          | 3<br>(1 - 6)           | 50<br>(24 - 127)        | 99<br>(63 - 209)        | 158<br>(100 - 377)      |
| Chronic kidney disease due to diabetes mellitus     | 152<br>(95 - 309)        | 0<br>(0 - 1)          | 0<br>(0 - 0)           | 19<br>(8 - 43)          | 60<br>(37 - 109)        | 73<br>(43 - 157)        |
| Chronic kidney disease due to hypertension          | 108<br>(59 - 265)        | 1<br>(1 - 3)          | 1<br>(1 - 2)           | 19<br>(9 - 51)          | 27<br>(12 - 70)         | 59<br>(31 - 142)        |
| Chronic kidney disease due to glomerulonephritis    | 22<br>(12 - 58)          | 1<br>(0 - 2)          | 1<br>(0 - 2)           | 6<br>(3 - 18)           | 4<br>(2 - 11)           | 9<br>(5 - 26)           |
| Chronic kidney disease due to other causes          | 32<br>(13 - 144)         | 1<br>(0 - 3)          | 1<br>(0 - 2)           | 6<br>(2 - 26)           | 8<br>(3 - 35)           | 17<br>(6 - 80)          |
| Urinary diseases and male infertility               | 480<br>(355 - 635)       | 8<br>(4 - 15)         | 2<br>(1 - 3)           | 43<br>(25 - 62)         | 100<br>(65 - 141)       | 327<br>(228 - 451)      |
| Interstitial nephritis and urinary tract infections | 314<br>(198 - 438)       | 6<br>(3 - 12)         | 1<br>(1 - 2)           | 25<br>(13 - 38)         | 55<br>(30 - 84)         | 226<br>(137 - 328)      |
| Urolithiasis                                        | 91<br>(35 - 147)         | --                    | 0<br>(0 - 1)           | 12<br>(5 - 21)          | 30<br>(12 - 49)         | 49<br>(15 - 93)         |
| Other urinary diseases                              | 76<br>(39 - 148)         | 2<br>(1 - 4)          | 0<br>(0 - 1)           | 7<br>(3 - 15)           | 15<br>(8 - 34)          | 52<br>(24 - 105)        |
| Gynecological diseases                              | 29<br>(12 - 59)          | --                    | --                     | 15<br>(5 - 31)          | 7<br>(3 - 14)           | 8<br>(3 - 17)           |
| Uterine fibroids                                    | 7<br>(3 - 14)            | --                    | --                     | 3<br>(1 - 6)            | 2<br>(1 - 4)            | 2<br>(1 - 5)            |
| Polycystic ovarian syndrome                         | 1<br>(0 - 2)             | --                    | --                     | 1<br>(0 - 2)            | 0<br>(0 - 0)            | --                      |
| Endometriosis                                       | 2<br>(1 - 5)             | --                    | --                     | 2<br>(1 - 5)            | 0<br>(0 - 0)            | --                      |
| Genital prolapse                                    | 5<br>(2 - 10)            | --                    | --                     | 2<br>(1 - 4)            | 1<br>(0 - 3)            | 2<br>(1 - 4)            |
| Other gynecological diseases                        | 14<br>(6 - 28)           | --                    | --                     | 7<br>(2 - 15)           | 4<br>(1 - 7)            | 3<br>(1 - 7)            |
| Hemoglobinopathies and hemolytic anemias            | 238<br>(148 - 396)       | 51<br>(24 - 123)      | 31<br>(16 - 64)        | 51<br>(27 - 91)         | 61<br>(35 - 93)         | 45<br>(27 - 65)         |
| Thalassemias                                        | 4<br>(2 - 9)             | 2<br>(1 - 5)          | 1<br>(1 - 3)           | 1<br>(0 - 2)            | 0<br>(0 - 0)            | 0<br>(0 - 0)            |
| Sickle cell disorders                               | 89<br>(49 - 168)         | 25<br>(11 - 65)       | 20<br>(10 - 42)        | 28<br>(15 - 52)         | 14<br>(8 - 22)          | 1<br>(1 - 2)            |
| G6PD deficiency                                     | 12<br>(7 - 22)           | 4<br>(2 - 10)         | 2<br>(1 - 4)           | 3<br>(2 - 5)            | 3<br>(2 - 4)            | 1<br>(0 - 1)            |
| Other hemoglobinopathies and hemolytic anemias      | 133<br>(87 - 202)        | 20<br>(10 - 43)       | 8<br>(4 - 15)          | 19<br>(10 - 33)         | 44<br>(26 - 66)         | 43<br>(26 - 62)         |
| Endocrine, metabolic, blood, and immune disorders   | 355<br>(236 - 639)       | 67<br>(29 - 108)      | 12<br>(5 - 23)         | 63<br>(30 - 147)        | 91<br>(57 - 176)        | 122<br>(77 - 245)       |
| Musculoskeletal disorders                           | 11<br>(7 - 20)           | --                    | 1<br>(0 - 2)           | 3<br>(1 - 6)            | 3<br>(2 - 5)            | 5<br>(3 - 8)            |
| Rheumatoid arthritis                                | 8<br>(5 - 13)            | --                    | 0<br>(0 - 1)           | 1<br>(1 - 3)            | 2<br>(1 - 3)            | 4<br>(3 - 6)            |
| Other musculoskeletal disorders                     | 3<br>(2 - 8)             | --                    | 0<br>(0 - 1)           | 1<br>(1 - 3)            | 1<br>(0 - 2)            | 1<br>(0 - 2)            |
| Other non-communicable diseases                     | 1,180<br>(916 - 1,456)   | 985<br>(749 - 1,223)  | 59<br>(35 - 98)        | 79<br>(43 - 133)        | 24<br>(15 - 37)         | 33<br>(23 - 46)         |
| Congenital anomalies                                | 1,130<br>(869 - 1,414)   | 958<br>(724 - 1,201)  | 58<br>(33 - 97)        | 73<br>(39 - 125)        | 19<br>(11 - 31)         | 22<br>(14 - 34)         |
| Neural tube defects                                 | 152<br>(66 - 309)        | 134<br>(52 - 289)     | 7<br>(3 - 14)          | 7<br>(3 - 18)           | 1<br>(0 - 3)            | 3<br>(1 - 7)            |
| Congenital heart anomalies                          | 186<br>(121 - 286)       | 147<br>(90 - 236)     | 15<br>(8 - 27)         | 20<br>(11 - 37)         | 3<br>(2 - 5)            | 1<br>(1 - 3)            |
| Cleft lip and cleft palate                          | 1<br>(0 - 4)             | 1<br>(0 - 4)          | --                     | --                      | --                      | --                      |
| Down syndrome                                       | 60<br>(29 - 115)         | 40<br>(17 - 77)       | 6<br>(3 - 13)          | 12<br>(5 - 24)          | 2<br>(1 - 5)            | 0<br>(0 - 1)            |
| Chromosomal unbalanced rearrangements               | 14<br>(6 - 28)           | 12<br>(5 - 24)        | 1<br>(0 - 1)           | 1<br>(1 - 3)            | 0<br>(0 - 0)            | 0<br>(0 - 1)            |
| Other congenital anomalies                          | 716<br>(503 - 932)       | 625<br>(423 - 821)    | 29<br>(16 - 49)        | 33<br>(17 - 55)         | 12<br>(7 - 20)          | 17<br>(10 - 26)         |
| Skin and subcutaneous diseases                      | 28<br>(19 - 41)          | 4<br>(2 - 11)         | 1<br>(1 - 3)           | 6<br>(3 - 11)           | 5<br>(3 - 8)            | 11<br>(7 - 15)          |
| Cellulitis                                          | 4<br>(2 - 7)             | 1<br>(0 - 3)          | 0<br>(0 - 1)           | 1<br>(1 - 2)            | 1<br>(1 - 2)            | 1<br>(1 - 2)            |
| Pyoderma                                            | 10<br>(6 - 17)           | 3<br>(1 - 7)          | 1<br>(0 - 2)           | 2<br>(1 - 5)            | 2<br>(1 - 3)            | 2<br>(1 - 3)            |
| Decubitus ulcer                                     | 13<br>(9 - 18)           | 0<br>(0 - 0)          | 0<br>(0 - 0)           | 2<br>(1 - 4)            | 2<br>(2 - 4)            | 8<br>(5 - 12)           |

Web Table 31- Honduras deaths with 95% UI by age, sex, and cause in 2013

| Cause                                           | Both Sexes, All Ages     | Both Sexes, 0-4 Years | Both Sexes, 5-14 Years | Both Sexes, 15-49 Years  | Both Sexes, 50-69 Years | Both Sexes, 70-80 Years |
|-------------------------------------------------|--------------------------|-----------------------|------------------------|--------------------------|-------------------------|-------------------------|
| Other skin and subcutaneous diseases            | 1<br>(1 - 2)             | 0<br>(0 - 1)          | 0<br>(0 - 0)           | 0<br>(0 - 1)             | 0<br>(0 - 0)            | 0<br>(0 - 0)            |
| Sudden infant death syndrome                    | 22<br>(6 - 54)           | 22<br>(6 - 54)        | --                     | --                       | --                      | --                      |
| Injuries                                        | 5,282<br>(2,282 - 7,513) | 234<br>(127 - 345)    | 235<br>(108 - 336)     | 3,378<br>(1,451 - 4,950) | 890<br>(276 - 1,350)    | 545<br>(222 - 732)      |
| Transport injuries                              | 1,146<br>(315 - 1,666)   | 23<br>(4 - 38)        | 51<br>(11 - 82)        | 572<br>(180 - 927)       | 270<br>(62 - 405)       | 230<br>(51 - 335)       |
| Road injuries                                   | 1,092<br>(289 - 1,606)   | 21<br>(3 - 36)        | 49<br>(11 - 80)        | 544<br>(163 - 894)       | 255<br>(56 - 383)       | 222<br>(49 - 321)       |
| Pedestrian road injuries                        | 518<br>(130 - 756)       | 12<br>(2 - 21)        | 26<br>(6 - 43)         | 179<br>(52 - 304)        | 145<br>(31 - 224)       | 156<br>(35 - 233)       |
| Cyclist road injuries                           | 58<br>(14 - 94)          | 1<br>(0 - 2)          | 4<br>(1 - 7)           | 24<br>(7 - 44)           | 18<br>(3 - 31)          | 11<br>(2 - 19)          |
| Motorcyclist road injuries                      | 86<br>(23 - 141)         | 1<br>(0 - 2)          | 2<br>(0 - 4)           | 56<br>(16 - 102)         | 18<br>(3 - 31)          | 9<br>(2 - 16)           |
| Motor vehicle road injuries                     | 392<br>(110 - 610)       | 7<br>(1 - 12)         | 15<br>(3 - 26)         | 269<br>(80 - 450)        | 63<br>(14 - 96)         | 37<br>(8 - 59)          |
| Other road injuries                             | 37<br>(8 - 76)           | 1<br>(0 - 2)          | 2<br>(0 - 4)           | 17<br>(4 - 39)           | 11<br>(2 - 23)          | 7<br>(1 - 15)           |
| Other transport injuries                        | 54<br>(10 - 84)          | 2<br>(0 - 3)          | 1<br>(0 - 3)           | 28<br>(6 - 45)           | 15<br>(3 - 24)          | 8<br>(1 - 14)           |
| Unintentional injuries                          | 1,160<br>(786 - 1,699)   | 120<br>(73 - 220)     | 85<br>(50 - 153)       | 548<br>(310 - 914)       | 222<br>(110 - 324)      | 184<br>(126 - 240)      |
| Falls                                           | 45<br>(10 - 71)          | 0<br>(0 - 1)          | 0<br>(0 - 1)           | 9<br>(2 - 16)            | 14<br>(2 - 25)          | 21<br>(5 - 35)          |
| Drowning                                        | 373<br>(234 - 686)       | 34<br>(15 - 87)       | 45<br>(22 - 100)       | 191<br>(105 - 379)       | 60<br>(37 - 95)         | 44<br>(30 - 64)         |
| Fire, heat, and hot substances                  | 35<br>(12 - 61)          | 2<br>(0 - 8)          | 2<br>(1 - 4)           | 15<br>(5 - 27)           | 7<br>(2 - 14)           | 9<br>(2 - 17)           |
| Poisonings                                      | 38<br>(27 - 56)          | 0<br>(0 - 1)          | 1<br>(0 - 1)           | 13<br>(7 - 22)           | 10<br>(6 - 14)          | 15<br>(10 - 23)         |
| Exposure to mechanical forces                   | 397<br>(46 - 625)        | 10<br>(3 - 19)        | 22<br>(3 - 42)         | 252<br>(30 - 448)        | 85<br>(6 - 142)         | 28<br>(3 - 43)          |
| Unintentional firearm injuries                  | 26<br>(6 - 43)           | 0<br>(0 - 1)          | 1<br>(0 - 2)           | 14<br>(3 - 28)           | 6<br>(1 - 10)           | 5<br>(1 - 8)            |
| Unintentional suffocation                       | 17<br>(9 - 27)           | 3<br>(1 - 7)          | 2<br>(1 - 4)           | 9<br>(4 - 15)            | 2<br>(1 - 4)            | 1<br>(1 - 2)            |
| Other exposure to mechanical forces             | 353<br>(21 - 564)        | 6<br>(0 - 14)         | 19<br>(1 - 37)         | 230<br>(15 - 411)        | 77<br>(3 - 133)         | 22<br>(1 - 36)          |
| Adverse effects of medical treatment            | 63<br>(33 - 97)          | 4<br>(2 - 10)         | 1<br>(0 - 1)           | 10<br>(5 - 16)           | 15<br>(6 - 25)          | 34<br>(15 - 60)         |
| Animal contact                                  | 10<br>(5 - 21)           | 3<br>(1 - 9)          | 1<br>(0 - 2)           | 1<br>(1 - 4)             | 2<br>(1 - 4)            | 2<br>(1 - 5)            |
| Venomous animal contact                         | 7<br>(4 - 16)            | 3<br>(1 - 7)          | 1<br>(0 - 1)           | 1<br>(0 - 3)             | 1<br>(1 - 3)            | 2<br>(1 - 4)            |
| Non-venomous animal contact                     | 2<br>(1 - 6)             | 0<br>(0 - 1)          | 0<br>(0 - 1)           | 0<br>(0 - 1)             | 1<br>(0 - 1)            | 1<br>(0 - 2)            |
| Foreign body                                    | 198<br>(116 - 421)       | 66<br>(37 - 132)      | 14<br>(8 - 27)         | 56<br>(26 - 145)         | 29<br>(15 - 60)         | 32<br>(19 - 67)         |
| Pulmonary aspiration and foreign body in airway | 196<br>(115 - 419)       | 66<br>(36 - 132)      | 14<br>(8 - 27)         | 56<br>(26 - 144)         | 28<br>(15 - 59)         | 32<br>(19 - 67)         |
| Foreign body in other body part                 | 2<br>(1 - 2)             | 0<br>(0 - 1)          | 0<br>(0 - 0)           | 1<br>(0 - 1)             | 0<br>(0 - 0)            | 0<br>(0 - 0)            |
| Other unintentional injuries                    | 2<br>(1 - 4)             | 0<br>(0 - 0)          | 0<br>(0 - 0)           | 1<br>(1 - 2)             | 0<br>(0 - 0)            | 0<br>(0 - 0)            |
| Self-harm and interpersonal violence            | 2,976<br>(928 - 4,680)   | 91<br>(11 - 171)      | 100<br>(19 - 175)      | 2,258<br>(731 - 3,576)   | 397<br>(87 - 676)       | 130<br>(35 - 198)       |
| Self-harm                                       | 394<br>(77 - 655)        | --                    | 6<br>(1 - 14)          | 229<br>(43 - 439)        | 93<br>(16 - 147)        | 66<br>(13 - 104)        |
| Interpersonal violence                          | 2,583<br>(660 - 4,152)   | 91<br>(11 - 171)      | 94<br>(14 - 168)       | 2,029<br>(542 - 3,310)   | 304<br>(56 - 551)       | 65<br>(14 - 118)        |
| Assault by firearm                              | 1,542<br>(372 - 2,590)   | 22<br>(2 - 49)        | 44<br>(6 - 87)         | 1,285<br>(330 - 2,144)   | 169<br>(27 - 328)       | 21<br>(4 - 46)          |
| Assault by sharp object                         | 554<br>(112 - 1,031)     | 12<br>(1 - 27)        | 13<br>(1 - 28)         | 445<br>(92 - 846)        | 68<br>(10 - 139)        | 16<br>(3 - 32)          |
| Assault by other means                          | 487<br>(97 - 847)        | 56<br>(6 - 112)       | 37<br>(5 - 74)         | 299<br>(62 - 537)        | 67<br>(11 - 126)        | 28<br>(6 - 52)          |

Web Table 31- Honduras deaths with 95% UI by age, sex, and cause in 2013

| Cause                                                             | Males, All Ages             | Males, 0-4 Years         | Males, 5-14 Years  | Males, 15-49 Years       | Males, 50-69 Years       | Males, 70-80 Years        |
|-------------------------------------------------------------------|-----------------------------|--------------------------|--------------------|--------------------------|--------------------------|---------------------------|
| All causes                                                        | 23,179<br>(18,182 - 28,807) | 2,655<br>(2,376 - 2,973) | 462<br>(403 - 560) | 5,389<br>(3,852 - 7,274) | 5,779<br>(4,029 - 7,800) | 8,895<br>(7,221 - 10,802) |
| Communicable, maternal, neonatal, and nutritional diseases        | 4,134<br>(3,209 - 5,987)    | 1,627<br>(1,383 - 1,885) | 132<br>(88 - 228)  | 656<br>(280 - 1,937)     | 608<br>(365 - 1,038)     | 1,110<br>(754 - 1,557)    |
| HIV/AIDS and tuberculosis                                         | 700<br>(196 - 2,755)        | 18<br>(1 - 105)          | 21<br>(1 - 139)    | 389<br>(69 - 1,746)      | 190<br>(57 - 654)        | 81<br>(50 - 136)          |
| Tuberculosis                                                      | 163<br>(111 - 245)          | 1<br>(0 - 2)             | 1<br>(1 - 2)       | 35<br>(18 - 69)          | 58<br>(35 - 92)          | 68<br>(45 - 98)           |
| HIV/AIDS                                                          | 537<br>(49 - 2,613)         | 17<br>(0 - 104)          | 20<br>(0 - 138)    | 354<br>(37 - 1,725)      | 133<br>(10 - 599)        | 13<br>(1 - 63)            |
| HIV/AIDS resulting in mycobacterial infection                     | 33<br>(3 - 161)             | 1<br>(0 - 6)             | 1<br>(0 - 8)       | 21<br>(2 - 103)          | 9<br>(1 - 39)            | 1<br>(0 - 5)              |
| HIV/AIDS resulting in other diseases                              | 504<br>(46 - 2,474)         | 16<br>(0 - 98)           | 19<br>(0 - 131)    | 333<br>(35 - 1,631)      | 124<br>(9 - 562)         | 12<br>(1 - 58)            |
| Diarrhea, lower respiratory, and other common infectious diseases | 1,876<br>(1,394 - 2,413)    | 552<br>(379 - 746)       | 81<br>(48 - 118)   | 193<br>(102 - 311)       | 290<br>(169 - 444)       | 760<br>(480 - 1,124)      |
| Diarrheal diseases                                                | 755<br>(477 - 1,115)        | 261<br>(125 - 444)       | 27<br>(11 - 55)    | 66<br>(30 - 119)         | 130<br>(62 - 251)        | 271<br>(143 - 469)        |
| Intestinal infectious diseases                                    | 78<br>(36 - 146)            | 26<br>(11 - 49)          | 26<br>(11 - 49)    | 23<br>(8 - 54)           | 2<br>(1 - 5)             | 1<br>(0 - 3)              |
| Typhoid fever                                                     | 58<br>(25 - 113)            | 18<br>(8 - 37)           | 20<br>(9 - 39)     | 17<br>(6 - 40)           | 2<br>(1 - 3)             | 1<br>(0 - 1)              |
| Paratyphoid fever                                                 | 16<br>(7 - 31)              | 5<br>(2 - 11)            | 5<br>(2 - 11)      | 5<br>(1 - 12)            | 0<br>(0 - 1)             | 0<br>(0 - 0)              |
| Other intestinal infectious diseases                              | 4<br>(1 - 12)               | 2<br>(0 - 8)             | 0<br>(0 - 2)       | 1<br>(0 - 5)             | 0<br>(0 - 2)             | 0<br>(0 - 2)              |
| Lower respiratory infections                                      | 881<br>(599 - 1,218)        | 199<br>(113 - 306)       | 15<br>(7 - 25)     | 72<br>(38 - 119)         | 133<br>(73 - 205)        | 463<br>(243 - 728)        |
| Upper respiratory infections                                      | 2<br>(1 - 4)                | 0<br>(0 - 1)             | 0<br>(0 - 1)       | 0<br>(0 - 1)             | 0<br>(0 - 1)             | 0<br>(0 - 2)              |
| Otitis media                                                      | 0<br>(0 - 1)                | 0<br>(0 - 0)             | 0<br>(0 - 0)       | 0<br>(0 - 0)             | 0<br>(0 - 0)             | 0<br>(0 - 0)              |
| Meningitis                                                        | 72<br>(46 - 103)            | 14<br>(6 - 27)           | 5<br>(2 - 8)       | 21<br>(11 - 38)          | 15<br>(7 - 25)           | 18<br>(9 - 29)            |
| Pneumococcal meningitis                                           | 25<br>(15 - 37)             | 4<br>(2 - 7)             | 2<br>(1 - 3)       | 7<br>(3 - 13)            | 6<br>(3 - 10)            | 6<br>(3 - 11)             |
| H influenzae type B meningitis                                    | 11<br>(7 - 16)              | 5<br>(2 - 10)            | 1<br>(0 - 2)       | 2<br>(1 - 4)             | 1<br>(1 - 2)             | 2<br>(1 - 3)              |
| Meningococcal meningitis                                          | 8<br>(5 - 13)               | 1<br>(1 - 3)             | 1<br>(0 - 1)       | 3<br>(1 - 6)             | 2<br>(1 - 3)             | 2<br>(1 - 4)              |
| Other meningitis                                                  | 28<br>(16 - 42)             | 3<br>(1 - 8)             | 1<br>(0 - 3)       | 9<br>(4 - 17)            | 7<br>(3 - 12)            | 8<br>(4 - 14)             |
| Encephalitis                                                      | 34<br>(16 - 77)             | 9<br>(3 - 23)            | 5<br>(1 - 13)      | 8<br>(3 - 22)            | 7<br>(3 - 15)            | 5<br>(2 - 10)             |
| Diphtheria                                                        | 0<br>(0 - 2)                | 0<br>(0 - 2)             | 0<br>(0 - 1)       | 0<br>(0 - 0)             | 0<br>(0 - 0)             | --                        |
| Whooping cough                                                    | 46<br>(13 - 140)            | 41<br>(7 - 136)          | 3<br>(1 - 7)       | 1<br>(0 - 2)             | 0<br>(0 - 1)             | --                        |
| Tetanus                                                           | 5<br>(1 - 20)               | 1<br>(0 - 3)             | 0<br>(0 - 1)       | 1<br>(0 - 5)             | 1<br>(0 - 6)             | 1<br>(0 - 5)              |
| Measles                                                           | 0<br>(0 - 0)                | 0<br>(0 - 0)             | 0<br>(0 - 0)       | 0<br>(0 - 0)             | 0<br>(0 - 0)             | --                        |
| Varicella and herpes zoster                                       | 3<br>(1 - 7)                | 1<br>(0 - 3)             | 0<br>(0 - 1)       | 1<br>(0 - 2)             | 0<br>(0 - 1)             | 1<br>(0 - 4)              |
| Neglected tropical diseases and malaria                           | 53<br>(33 - 89)             | 16<br>(6 - 36)           | 6<br>(3 - 11)      | 10<br>(5 - 17)           | 10<br>(5 - 21)           | 12<br>(7 - 18)            |
| Malaria                                                           | 6<br>(3 - 11)               | 0<br>(0 - 1)             | 0<br>(0 - 1)       | 1<br>(1 - 3)             | 1<br>(0 - 3)             | 2<br>(1 - 5)              |
| Chagas disease                                                    | 7<br>(1 - 23)               | 0<br>(0 - 0)             | 0<br>(0 - 1)       | 1<br>(0 - 3)             | 4<br>(1 - 13)            | 2<br>(0 - 7)              |
| Leishmaniasis                                                     | 2<br>(1 - 3)                | 1<br>(0 - 1)             | 0<br>(0 - 0)       | 1<br>(0 - 2)             | 0<br>(0 - 0)             | 0<br>(0 - 0)              |
| Visceral leishmaniasis                                            | 2<br>(1 - 3)                | 1<br>(0 - 1)             | 0<br>(0 - 0)       | 1<br>(0 - 2)             | 0<br>(0 - 0)             | 0<br>(0 - 0)              |
| Cysticercosis                                                     | 2<br>(1 - 3)                | 0<br>(0 - 0)             | 0<br>(0 - 0)       | 1<br>(1 - 2)             | 0<br>(0 - 1)             | 0<br>(0 - 0)              |
| Cystic echinococcosis                                             | 0<br>(0 - 1)                | 0<br>(0 - 0)             | 0<br>(0 - 0)       | 0<br>(0 - 0)             | 0<br>(0 - 0)             | 0<br>(0 - 0)              |
| Dengue                                                            | 11<br>(7 - 17)              | 2<br>(1 - 5)             | 2<br>(1 - 3)       | 2<br>(1 - 4)             | 2<br>(1 - 3)             | 4<br>(3 - 7)              |
| Rabies                                                            | 1<br>(1 - 3)                | 0<br>(0 - 0)             | 0<br>(0 - 1)       | 1<br>(0 - 2)             | 0<br>(0 - 1)             | 0<br>(0 - 0)              |
| Intestinal nematode infections                                    | 1<br>(0 - 7)                | 1<br>(0 - 5)             | 0<br>(0 - 3)       | 0<br>(0 - 3)             | 0<br>(0 - 1)             | 0<br>(0 - 2)              |
| Ascariasis                                                        | 1<br>(0 - 7)                | 1<br>(0 - 5)             | 0<br>(0 - 3)       | 0<br>(0 - 3)             | 0<br>(0 - 1)             | 0<br>(0 - 2)              |
| Other neglected tropical diseases                                 | 22<br>(11 - 49)             | 12<br>(4 - 32)           | 3<br>(1 - 6)       | 3<br>(1 - 5)             | 2<br>(1 - 4)             | 3<br>(1 - 7)              |
| Maternal disorders                                                | --                          | --                       | --                 | --                       | --                       | --                        |

Web Table 31- Honduras deaths with 95% UI by age, sex, and cause in 2013

| Cause                                                            | Males, All Ages             | Males, 0-4 Years     | Males, 5-14 Years  | Males, 15-49 Years       | Males, 50-69 Years       | Males, 70-80 Years       |
|------------------------------------------------------------------|-----------------------------|----------------------|--------------------|--------------------------|--------------------------|--------------------------|
| Maternal hemorrhage                                              | --                          | --                   | --                 | --                       | --                       | --                       |
| Maternal sepsis and other maternal infections                    | --                          | --                   | --                 | --                       | --                       | --                       |
| Maternal hypertensive disorders                                  | --                          | --                   | --                 | --                       | --                       | --                       |
| Maternal obstructed labor                                        | --                          | --                   | --                 | --                       | --                       | --                       |
| Maternal abortive outcome                                        | --                          | --                   | --                 | --                       | --                       | --                       |
| Indirect maternal deaths                                         | --                          | --                   | --                 | --                       | --                       | --                       |
| Late maternal deaths                                             | --                          | --                   | --                 | --                       | --                       | --                       |
| Maternal deaths aggravated by HIV/AIDS                           | --                          | --                   | --                 | --                       | --                       | --                       |
| Other maternal disorders                                         | --                          | --                   | --                 | --                       | --                       | --                       |
| Neonatal disorders                                               | 930<br>(763 - 1,101)        | 930<br>(763 - 1,101) | --                 | --                       | --                       | --                       |
| Neonatal preterm birth complications                             | 507<br>(313 - 715)          | 507<br>(313 - 715)   | --                 | --                       | --                       | --                       |
| Neonatal encephalopathy due to birth asphyxia and trauma         | 186<br>(86 - 344)           | 186<br>(86 - 344)    | --                 | --                       | --                       | --                       |
| Neonatal sepsis and other neonatal infections                    | 138<br>(41 - 300)           | 138<br>(41 - 300)    | --                 | --                       | --                       | --                       |
| Hemolytic disease and other neonatal jaundice                    | 4<br>(1 - 12)               | 4<br>(1 - 12)        | --                 | --                       | --                       | --                       |
| Other neonatal disorders                                         | 95<br>(39 - 178)            | 95<br>(39 - 178)     | --                 | --                       | --                       | --                       |
| Nutritional deficiencies                                         | 420<br>(206 - 656)          | 52<br>(22 - 93)      | 13<br>(6 - 25)     | 43<br>(19 - 91)          | 96<br>(43 - 162)         | 218<br>(94 - 367)        |
| Protein-energy malnutrition                                      | 167<br>(72 - 309)           | 38<br>(15 - 70)      | 8<br>(3 - 17)      | 13<br>(4 - 37)           | 34<br>(12 - 75)          | 73<br>(22 - 154)         |
| Iodine deficiency                                                | 1<br>(0 - 2)                | 0<br>(0 - 1)         | 0<br>(0 - 0)       | 0<br>(0 - 1)             | 0<br>(0 - 1)             | 0<br>(0 - 1)             |
| Iron-deficiency anemia                                           | 172<br>(60 - 303)           | 8<br>(1 - 21)        | 3<br>(1 - 7)       | 21<br>(7 - 44)           | 43<br>(14 - 83)          | 98<br>(27 - 186)         |
| Other nutritional deficiencies                                   | 81<br>(29 - 167)            | 5<br>(1 - 14)        | 2<br>(1 - 4)       | 9<br>(3 - 22)            | 19<br>(6 - 40)           | 47<br>(14 - 97)          |
| Other communicable, maternal, neonatal, and nutritional diseases | 155<br>(90 - 269)           | 60<br>(20 - 109)     | 12<br>(5 - 22)     | 22<br>(10 - 46)          | 22<br>(8 - 51)           | 40<br>(12 - 120)         |
| Sexually transmitted diseases excluding HIV                      | 44<br>(7 - 89)              | 39<br>(5 - 80)       | 3<br>(0 - 7)       | 0<br>(0 - 1)             | 1<br>(0 - 2)             | 1<br>(0 - 2)             |
| Syphilis                                                         | 43<br>(6 - 88)              | 39<br>(5 - 80)       | 3<br>(0 - 7)       | 0<br>(0 - 0)             | 0<br>(0 - 1)             | 1<br>(0 - 2)             |
| Chlamydial infection                                             | --                          | --                   | --                 | --                       | --                       | --                       |
| Gonococcal infection                                             | 0<br>(0 - 1)                | --                   | 0<br>(0 - 0)       | 0<br>(0 - 0)             | 0<br>(0 - 0)             | 0<br>(0 - 0)             |
| Other sexually transmitted diseases                              | 0<br>(0 - 0)                | --                   | 0<br>(0 - 0)       | 0<br>(0 - 0)             | 0<br>(0 - 0)             | 0<br>(0 - 0)             |
| Hepatitis                                                        | 1<br>(0 - 1)                | 0<br>(0 - 0)         | 0<br>(0 - 0)       | 0<br>(0 - 1)             | 0<br>(0 - 0)             | 0<br>(0 - 0)             |
| Acute hepatitis A                                                | 0<br>(0 - 1)                | 0<br>(0 - 0)         | 0<br>(0 - 0)       | 0<br>(0 - 0)             | 0<br>(0 - 0)             | 0<br>(0 - 0)             |
| Acute hepatitis B                                                | 0<br>(0 - 0)                | 0<br>(0 - 0)         | 0<br>(0 - 0)       | 0<br>(0 - 0)             | 0<br>(0 - 0)             | 0<br>(0 - 0)             |
| Acute hepatitis C                                                | 0<br>(0 - 0)                | --                   | 0<br>(0 - 0)       | 0<br>(0 - 0)             | 0<br>(0 - 0)             | 0<br>(0 - 0)             |
| Other infectious diseases                                        | 111<br>(60 - 221)           | 21<br>(7 - 54)       | 8<br>(3 - 18)      | 21<br>(9 - 45)           | 22<br>(7 - 50)           | 39<br>(11 - 119)         |
| Non-communicable diseases                                        | 14,947<br>(11,346 - 19,593) | 909<br>(698 - 1,140) | 181<br>(126 - 246) | 1,953<br>(1,091 - 3,393) | 4,473<br>(3,053 - 6,198) | 7,431<br>(5,986 - 9,253) |
| Neoplasms                                                        | 2,026<br>(1,462 - 2,733)    | 35<br>(18 - 55)      | 44<br>(28 - 61)    | 327<br>(184 - 570)       | 780<br>(531 - 1,079)     | 839<br>(650 - 1,091)     |
| Esophageal cancer                                                | 10<br>(5 - 19)              | --                   | --                 | 2<br>(1 - 3)             | 6<br>(3 - 11)            | 3<br>(2 - 5)             |
| Stomach cancer                                                   | 428<br>(280 - 611)          | --                   | --                 | 48<br>(24 - 85)          | 168<br>(103 - 253)       | 213<br>(143 - 306)       |
| Liver cancer                                                     | 95<br>(67 - 134)            | --                   | 1<br>(1 - 2)       | 14<br>(8 - 26)           | 41<br>(26 - 62)          | 38<br>(26 - 55)          |
| Liver cancer due to hepatitis B                                  | 35<br>(16 - 63)             | --                   | 0<br>(0 - 1)       | 7<br>(2 - 16)            | 17<br>(8 - 31)           | 11<br>(5 - 19)           |
| Liver cancer due to hepatitis C                                  | 41<br>(21 - 66)             | --                   | 0<br>(0 - 1)       | 5<br>(2 - 9)             | 17<br>(6 - 32)           | 18<br>(9 - 30)           |
| Liver cancer due to alcohol use                                  | 13<br>(6 - 27)              | --                   | --                 | 1<br>(0 - 3)             | 5<br>(2 - 12)            | 7<br>(3 - 14)            |
| Liver cancer due to other causes                                 | 6<br>(3 - 10)               | --                   | 1<br>(0 - 1)       | 2<br>(1 - 3)             | 2<br>(1 - 4)             | 2<br>(1 - 3)             |

Web Table 31- Honduras deaths with 95% UI by age, sex, and cause in 2013

| Cause                                         | Males, All Ages          | Males, 0-4 Years  | Males, 5-14 Years | Males, 15-49 Years   | Males, 50-69 Years       | Males, 70-80 Years       |
|-----------------------------------------------|--------------------------|-------------------|-------------------|----------------------|--------------------------|--------------------------|
| Larynx cancer                                 | 22<br>(14 - 32)          | --                | --                | 3<br>(2 - 6)         | 10<br>(6 - 15)           | 9<br>(6 - 13)            |
| Tracheal, bronchus and lung cancer            | 303<br>(210 - 432)       | --                | --                | 33<br>(17 - 62)      | 166<br>(110 - 244)       | 104<br>(74 - 141)        |
| Breast cancer                                 | 1<br>(0 - 1)             | --                | --                | 0<br>(0 - 1)         | 0<br>(0 - 0)             | 0<br>(0 - 0)             |
| Cervical cancer                               | --                       | --                | --                | --                   | --                       | --                       |
| Uterine cancer                                | --                       | --                | --                | --                   | --                       | --                       |
| Prostate cancer                               | 93<br>(57 - 161)         | --                | --                | 2<br>(1 - 4)         | 20<br>(11 - 35)          | 71<br>(44 - 124)         |
| Colon and rectum cancer                       | 158<br>(113 - 217)       | --                | --                | 19<br>(10 - 34)      | 59<br>(39 - 87)          | 80<br>(58 - 109)         |
| Lip and oral cavity cancer                    | 39<br>(23 - 58)          | --                | --                | 6<br>(3 - 11)        | 17<br>(9 - 27)           | 16<br>(9 - 25)           |
| Nasopharynx cancer                            | 14<br>(9 - 22)           | --                | 0<br>(0 - 1)      | 6<br>(3 - 11)        | 6<br>(3 - 10)            | 2<br>(1 - 3)             |
| Other pharynx cancer                          | 24<br>(15 - 36)          | --                | --                | 6<br>(3 - 10)        | 13<br>(7 - 20)           | 5<br>(3 - 8)             |
| Gallbladder and biliary tract cancer          | 53<br>(25 - 85)          | --                | --                | 3<br>(1 - 7)         | 22<br>(10 - 39)          | 28<br>(12 - 45)          |
| Pancreatic cancer                             | 96<br>(66 - 132)         | --                | --                | 9<br>(5 - 16)        | 38<br>(24 - 57)          | 49<br>(34 - 69)          |
| Malignant skin melanoma                       | 13<br>(8 - 24)           | --                | --                | 6<br>(3 - 14)        | 3<br>(1 - 4)             | 4<br>(2 - 7)             |
| Non-melanoma skin cancer                      | 51<br>(30 - 88)          | --                | --                | 5<br>(2 - 11)        | 17<br>(9 - 30)           | 29<br>(16 - 50)          |
| Ovarian cancer                                | --                       | --                | --                | --                   | --                       | --                       |
| Testicular cancer                             | 2<br>(1 - 4)             | --                | --                | 1<br>(1 - 3)         | 0<br>(0 - 0)             | 0<br>(0 - 1)             |
| Kidney cancer                                 | 65<br>(42 - 93)          | 3<br>(1 - 6)      | 1<br>(1 - 2)      | 9<br>(5 - 16)        | 29<br>(17 - 44)          | 22<br>(13 - 34)          |
| Bladder cancer                                | 44<br>(30 - 63)          | --                | --                | 2<br>(1 - 4)         | 14<br>(9 - 22)           | 28<br>(18 - 40)          |
| Brain and nervous system cancer               | 67<br>(32 - 99)          | 2<br>(0 - 5)      | 5<br>(1 - 8)      | 24<br>(11 - 40)      | 24<br>(10 - 38)          | 13<br>(5 - 21)           |
| Thyroid cancer                                | 32<br>(21 - 47)          | --                | 0<br>(0 - 0)      | 4<br>(2 - 7)         | 14<br>(8 - 22)           | 14<br>(8 - 22)           |
| Mesothelioma                                  | 4<br>(2 - 6)             | --                | --                | 1<br>(0 - 2)         | 2<br>(1 - 3)             | 1<br>(1 - 2)             |
| Hodgkin lymphoma                              | 29<br>(16 - 48)          | 1<br>(0 - 3)      | 3<br>(1 - 7)      | 10<br>(5 - 18)       | 8<br>(4 - 16)            | 7<br>(3 - 12)            |
| Non-Hodgkin lymphoma                          | 44<br>(27 - 81)          | 6<br>(2 - 10)     | 7<br>(3 - 11)     | 17<br>(6 - 44)       | 7<br>(4 - 13)            | 8<br>(4 - 14)            |
| Multiple myeloma                              | 25<br>(10 - 40)          | --                | --                | 3<br>(1 - 6)         | 12<br>(5 - 22)           | 9<br>(3 - 15)            |
| Leukemia                                      | 173<br>(114 - 263)       | 10<br>(4 - 19)    | 21<br>(12 - 32)   | 68<br>(37 - 131)     | 38<br>(23 - 59)          | 37<br>(25 - 53)          |
| Other neoplasms                               | 140<br>(97 - 200)        | 13<br>(4 - 23)    | 6<br>(2 - 10)     | 25<br>(14 - 45)      | 46<br>(28 - 70)          | 50<br>(33 - 74)          |
| Cardiovascular diseases                       | 6,500<br>(4,820 - 8,561) | 83<br>(52 - 128)  | 43<br>(25 - 66)   | 803<br>(436 - 1,385) | 2,089<br>(1,412 - 2,899) | 3,482<br>(2,757 - 4,369) |
| Rheumatic heart disease                       | 5<br>(3 - 13)            | 0<br>(0 - 0)      | 0<br>(0 - 0)      | 1<br>(0 - 4)         | 2<br>(1 - 4)             | 2<br>(1 - 5)             |
| Ischemic heart disease                        | 4,255<br>(3,112 - 5,722) | 30<br>(13 - 55)   | 18<br>(9 - 29)    | 538<br>(307 - 892)   | 1,426<br>(951 - 2,006)   | 2,244<br>(1,674 - 2,903) |
| Cerebrovascular disease                       | 1,636<br>(1,111 - 2,579) | 23<br>(13 - 40)   | 15<br>(8 - 27)    | 159<br>(78 - 326)    | 478<br>(290 - 766)       | 962<br>(673 - 1,480)     |
| Ischemic stroke                               | 1,169<br>(784 - 1,812)   | 6<br>(2 - 14)     | 5<br>(2 - 10)     | 66<br>(33 - 132)     | 313<br>(186 - 513)       | 779<br>(531 - 1,172)     |
| Hemorrhagic stroke                            | 467<br>(288 - 863)       | 16<br>(9 - 29)    | 9<br>(5 - 19)     | 93<br>(44 - 220)     | 166<br>(93 - 288)        | 182<br>(107 - 336)       |
| Hypertensive heart disease                    | 173<br>(22 - 469)        | 5<br>(1 - 19)     | 2<br>(0 - 6)      | 20<br>(3 - 52)       | 54<br>(6 - 156)          | 91<br>(9 - 262)          |
| Cardiomyopathy and myocarditis                | 85<br>(53 - 150)         | 13<br>(6 - 23)    | 3<br>(2 - 6)      | 24<br>(11 - 56)      | 27<br>(15 - 49)          | 18<br>(10 - 33)          |
| Atrial fibrillation and flutter               | 9<br>(5 - 18)            | --                | --                | 0<br>(0 - 1)         | 2<br>(1 - 3)             | 7<br>(4 - 15)            |
| Aortic aneurysm                               | 34<br>(21 - 64)          | --                | --                | 3<br>(2 - 9)         | 10<br>(6 - 19)           | 21<br>(12 - 37)          |
| Peripheral vascular disease                   | 16<br>(7 - 26)           | --                | --                | 0<br>(0 - 1)         | 3<br>(1 - 5)             | 13<br>(6 - 21)           |
| Endocarditis                                  | 22<br>(12 - 41)          | 4<br>(1 - 8)      | 1<br>(0 - 2)      | 7<br>(3 - 16)        | 5<br>(3 - 10)            | 6<br>(3 - 10)            |
| Other cardiovascular and circulatory diseases | 262<br>(160 - 709)       | 8<br>(4 - 19)     | 3<br>(1 - 8)      | 50<br>(23 - 147)     | 83<br>(45 - 208)         | 119<br>(71 - 302)        |
| Chronic respiratory diseases                  | 1,804<br>(1,400 - 2,401) | 187<br>(91 - 281) | 16<br>(9 - 23)    | 98<br>(57 - 168)     | 393<br>(250 - 602)       | 1,109<br>(856 - 1,494)   |



Web Table 31- Honduras deaths with 95% UI by age, sex, and cause in 2013

| Cause                                               | Males, All Ages          | Males, 0-4 Years  | Males, 5-14 Years | Males, 15-49 Years | Males, 50-69 Years | Males, 70-80 Years   |
|-----------------------------------------------------|--------------------------|-------------------|-------------------|--------------------|--------------------|----------------------|
| Chronic obstructive pulmonary disease               | 1,458<br>(1,113 - 1,969) | 107<br>(49 - 177) | 8<br>(4 - 13)     | 62<br>(34 - 112)   | 311<br>(192 - 478) | 970<br>(738 - 1,302) |
| Pneumoconiosis                                      | 31<br>(19 - 51)          | 0<br>(0 - 1)      | 0<br>(0 - 1)      | 3<br>(2 - 7)       | 12<br>(7 - 22)     | 15<br>(8 - 25)       |
| Silicosis                                           | 5<br>(3 - 9)             | 0<br>(0 - 0)      | 0<br>(0 - 0)      | 1<br>(0 - 2)       | 2<br>(1 - 3)       | 2<br>(1 - 4)         |
| Asbestosis                                          | 5<br>(3 - 9)             | 0<br>(0 - 0)      | 0<br>(0 - 0)      | 0<br>(0 - 1)       | 3<br>(1 - 4)       | 2<br>(1 - 4)         |
| Coal workers pneumoconiosis                         | 4<br>(3 - 7)             | 0<br>(0 - 0)      | 0<br>(0 - 0)      | 0<br>(0 - 1)       | 1<br>(1 - 3)       | 2<br>(1 - 4)         |
| Other pneumoconiosis                                | 17<br>(10 - 28)          | 0<br>(0 - 0)      | 0<br>(0 - 0)      | 2<br>(1 - 3)       | 6<br>(3 - 11)      | 8<br>(5 - 14)        |
| Asthma                                              | 149<br>(91 - 234)        | 16<br>(6 - 35)    | 4<br>(2 - 7)      | 18<br>(9 - 32)     | 37<br>(20 - 64)    | 74<br>(41 - 124)     |
| Interstitial lung disease and pulmonary sarcoidosis | 75<br>(44 - 122)         | 2<br>(1 - 5)      | 1<br>(0 - 1)      | 9<br>(4 - 17)      | 26<br>(13 - 45)    | 38<br>(21 - 63)      |
| Other chronic respiratory diseases                  | 91<br>(58 - 119)         | 62<br>(29 - 89)   | 2<br>(1 - 3)      | 7<br>(4 - 14)      | 7<br>(4 - 13)      | 13<br>(8 - 23)       |
| Cirrhosis                                           | 732<br>(490 - 1,030)     | 0<br>(0 - 1)      | 0<br>(0 - 1)      | 164<br>(90 - 281)  | 345<br>(218 - 502) | 222<br>(153 - 312)   |
| Cirrhosis due to hepatitis B                        | 25<br>(11 - 43)          | 0<br>(0 - 0)      | 0<br>(0 - 0)      | 6<br>(2 - 12)      | 12<br>(5 - 21)     | 7<br>(3 - 13)        |
| Cirrhosis due to hepatitis C                        | 236<br>(135 - 371)       | 0<br>(0 - 0)      | 0<br>(0 - 0)      | 44<br>(18 - 79)    | 111<br>(59 - 182)  | 81<br>(44 - 128)     |
| Cirrhosis due to alcohol use                        | 390<br>(256 - 563)       | --                | --                | 83<br>(44 - 143)   | 187<br>(111 - 290) | 120<br>(79 - 177)    |
| Cirrhosis due to other causes                       | 81<br>(40 - 145)         | 0<br>(0 - 1)      | 0<br>(0 - 1)      | 32<br>(14 - 61)    | 35<br>(16 - 65)    | 14<br>(7 - 24)       |
| Digestive diseases                                  | 901<br>(622 - 1,242)     | 11<br>(6 - 18)    | 11<br>(7 - 17)    | 146<br>(83 - 254)  | 268<br>(165 - 400) | 465<br>(319 - 651)   |
| Peptic ulcer disease                                | 216<br>(81 - 409)        | 0<br>(0 - 1)      | 1<br>(0 - 2)      | 18<br>(7 - 34)     | 49<br>(6 - 121)    | 148<br>(63 - 275)    |
| Gastritis and duodenitis                            | 67<br>(31 - 126)         | 1<br>(0 - 2)      | 1<br>(0 - 1)      | 11<br>(5 - 24)     | 20<br>(8 - 39)     | 35<br>(14 - 67)      |
| Appendicitis                                        | 88<br>(46 - 156)         | 1<br>(0 - 1)      | 3<br>(1 - 5)      | 23<br>(11 - 44)    | 28<br>(13 - 52)    | 34<br>(15 - 69)      |
| Paralytic ileus and intestinal obstruction          | 52<br>(27 - 98)          | 4<br>(2 - 8)      | 2<br>(1 - 4)      | 12<br>(5 - 28)     | 12<br>(5 - 22)     | 21<br>(10 - 43)      |
| Inguinal, femoral, and abdominal hernia             | 79<br>(32 - 140)         | 1<br>(0 - 2)      | 1<br>(0 - 1)      | 7<br>(3 - 15)      | 23<br>(9 - 43)     | 48<br>(18 - 90)      |
| Inflammatory bowel disease                          | 29<br>(16 - 54)          | 2<br>(1 - 3)      | 1<br>(0 - 1)      | 6<br>(3 - 13)      | 9<br>(4 - 18)      | 11<br>(5 - 21)       |
| Vascular intestinal disorders                       | 97<br>(35 - 210)         | 1<br>(0 - 2)      | 1<br>(0 - 2)      | 8<br>(2 - 18)      | 29<br>(10 - 64)    | 59<br>(21 - 128)     |
| Gallbladder and biliary diseases                    | 79<br>(42 - 149)         | 0<br>(0 - 1)      | 1<br>(0 - 1)      | 9<br>(4 - 20)      | 29<br>(14 - 58)    | 40<br>(19 - 79)      |
| Pancreatitis                                        | 97<br>(52 - 159)         | 1<br>(0 - 1)      | 1<br>(0 - 2)      | 38<br>(18 - 71)    | 33<br>(15 - 61)    | 24<br>(12 - 42)      |
| Other digestive diseases                            | 98<br>(55 - 163)         | 1<br>(0 - 2)      | 1<br>(1 - 2)      | 15<br>(7 - 28)     | 37<br>(18 - 66)    | 45<br>(22 - 79)      |
| Neurological disorders                              | 861<br>(588 - 1,207)     | 12<br>(6 - 22)    | 13<br>(6 - 25)    | 92<br>(50 - 173)   | 93<br>(59 - 141)   | 651<br>(423 - 925)   |
| Alzheimer disease and other dementias               | 640<br>(408 - 909)       | --                | --                | 0<br>(0 - 1)       | 46<br>(24 - 77)    | 594<br>(369 - 856)   |
| Parkinson disease                                   | 20<br>(11 - 39)          | --                | --                | 0<br>(0 - 1)       | 3<br>(2 - 7)       | 17<br>(8 - 34)       |
| Epilepsy                                            | 156<br>(96 - 262)        | 7<br>(2 - 17)     | 10<br>(4 - 22)    | 76<br>(39 - 148)   | 32<br>(17 - 51)    | 31<br>(17 - 49)      |
| Multiple sclerosis                                  | 5<br>(2 - 8)             | --                | --                | 1<br>(1 - 2)       | 2<br>(1 - 3)       | 2<br>(1 - 4)         |
| Other neurological disorders                        | 40<br>(25 - 58)          | 4<br>(3 - 7)      | 3<br>(2 - 4)      | 14<br>(8 - 24)     | 11<br>(6 - 17)     | 7<br>(4 - 11)        |
| Mental and substance use disorders                  | 251<br>(133 - 545)       | 2<br>(1 - 4)      | 0<br>(0 - 0)      | 127<br>(58 - 298)  | 97<br>(53 - 200)   | 26<br>(16 - 55)      |
| Schizophrenia                                       | 6<br>(3 - 11)            | --                | --                | 2<br>(1 - 5)       | 2<br>(1 - 5)       | 2<br>(1 - 3)         |
| Alcohol use disorders                               | 108<br>(54 - 315)        | --                | --                | 40<br>(16 - 140)   | 51<br>(25 - 137)   | 17<br>(9 - 45)       |
| Drug use disorders                                  | 137<br>(59 - 230)        | 2<br>(1 - 4)      | --                | 85<br>(34 - 155)   | 43<br>(20 - 69)    | 7<br>(3 - 11)        |
| Opioid use disorders                                | 29<br>(12 - 48)          | 0<br>(0 - 1)      | --                | 18<br>(7 - 34)     | 9<br>(4 - 14)      | 2<br>(1 - 2)         |
| Cocaine use disorders                               | 3<br>(1 - 5)             | 0<br>(0 - 0)      | --                | 2<br>(1 - 4)       | 1<br>(0 - 1)       | 0<br>(0 - 0)         |
| Amphetamine use disorders                           | 2<br>(1 - 4)             | 0<br>(0 - 0)      | --                | 1<br>(1 - 3)       | 1<br>(0 - 1)       | 0<br>(0 - 0)         |
| Other drug use disorders                            | 102<br>(44 - 173)        | 1<br>(1 - 3)      | --                | 63<br>(25 - 115)   | 33<br>(15 - 52)    | 5<br>(2 - 8)         |
| Eating disorders                                    | 0<br>(0 - 0)             | --                | 0<br>(0 - 0)      | 0<br>(0 - 0)       | --                 | --                   |

Web Table 31- Honduras deaths with 95% UI by age, sex, and cause in 2013

| Cause                                               | Males, All Ages        | Males, 0-4 Years   | Males, 5-14 Years | Males, 15-49 Years | Males, 50-69 Years | Males, 70-80 Years |
|-----------------------------------------------------|------------------------|--------------------|-------------------|--------------------|--------------------|--------------------|
| Anorexia nervosa                                    | 0<br>(0 - 0)           | --                 | 0<br>(0 - 0)      | 0<br>(0 - 0)       | --                 | --                 |
| Diabetes, urogenital, blood, and endocrine diseases | 1,260<br>(927 - 1,809) | 70<br>(35 - 117)   | 24<br>(14 - 52)   | 154<br>(84 - 304)  | 392<br>(256 - 564) | 620<br>(461 - 823) |
| Diabetes mellitus                                   | 468<br>(326 - 646)     | 0<br>(0 - 1)       | 1<br>(0 - 1)      | 49<br>(27 - 82)    | 188<br>(120 - 274) | 229<br>(161 - 324) |
| Acute glomerulonephritis                            | 2<br>(1 - 3)           | 0<br>(0 - 0)       | 0<br>(0 - 0)      | 0<br>(0 - 1)       | 1<br>(0 - 1)       | 1<br>(0 - 1)       |
| Chronic kidney disease                              | 156<br>(101 - 347)     | 2<br>(1 - 5)       | 1<br>(1 - 3)      | 22<br>(11 - 59)    | 55<br>(33 - 109)   | 76<br>(48 - 170)   |
| Chronic kidney disease due to diabetes mellitus     | 73<br>(31 - 126)       | 0<br>(0 - 0)       | 0<br>(0 - 0)      | 8<br>(3 - 18)      | 32<br>(14 - 53)    | 33<br>(13 - 60)    |
| Chronic kidney disease due to hypertension          | 56<br>(23 - 170)       | 1<br>(0 - 2)       | 1<br>(0 - 1)      | 9<br>(3 - 32)      | 16<br>(5 - 51)     | 30<br>(11 - 83)    |
| Chronic kidney disease due to glomerulonephritis    | 11<br>(5 - 31)         | 0<br>(0 - 1)       | 0<br>(0 - 1)      | 3<br>(1 - 10)      | 2<br>(1 - 7)       | 5<br>(2 - 14)      |
| Chronic kidney disease due to other causes          | 16<br>(6 - 72)         | 0<br>(0 - 2)       | 0<br>(0 - 1)      | 2<br>(1 - 10)      | 5<br>(1 - 23)      | 9<br>(3 - 43)      |
| Urinary diseases and male infertility               | 334<br>(229 - 479)     | 6<br>(3 - 12)      | 1<br>(0 - 2)      | 27<br>(15 - 45)    | 68<br>(39 - 107)   | 232<br>(153 - 347) |
| Interstitial nephritis and urinary tract infections | 194<br>(105 - 295)     | 4<br>(2 - 9)       | 0<br>(0 - 1)      | 13<br>(6 - 25)     | 31<br>(13 - 54)    | 145<br>(73 - 233)  |
| Urolithiasis                                        | 78<br>(22 - 132)       | --                 | 0<br>(0 - 1)      | 9<br>(3 - 18)      | 25<br>(8 - 44)     | 43<br>(8 - 86)     |
| Other urinary diseases                              | 62<br>(27 - 131)       | 1<br>(0 - 3)       | 0<br>(0 - 0)      | 4<br>(2 - 13)      | 12<br>(5 - 29)     | 44<br>(18 - 97)    |
| Gynecological diseases                              | --                     | --                 | --                | --                 | --                 | --                 |
| Uterine fibroids                                    | --                     | --                 | --                | --                 | --                 | --                 |
| Polycystic ovarian syndrome                         | --                     | --                 | --                | --                 | --                 | --                 |
| Endometriosis                                       | --                     | --                 | --                | --                 | --                 | --                 |
| Genital prolapse                                    | --                     | --                 | --                | --                 | --                 | --                 |
| Other gynecological diseases                        | --                     | --                 | --                | --                 | --                 | --                 |
| Hemoglobinopathies and hemolytic anemias            | 107<br>(59 - 186)      | 22<br>(10 - 60)    | 14<br>(7 - 32)    | 22<br>(11 - 42)    | 27<br>(14 - 45)    | 23<br>(13 - 37)    |
| Thalassemias                                        | 2<br>(1 - 4)           | 1<br>(0 - 3)       | 1<br>(0 - 1)      | 0<br>(0 - 1)       | 0<br>(0 - 0)       | 0<br>(0 - 0)       |
| Sickle cell disorders                               | 38<br>(19 - 78)        | 11<br>(5 - 33)     | 9<br>(4 - 20)     | 11<br>(5 - 22)     | 6<br>(3 - 10)      | 1<br>(0 - 1)       |
| G6PD deficiency                                     | 7<br>(4 - 14)          | 2<br>(1 - 7)       | 1<br>(1 - 3)      | 2<br>(1 - 3)       | 2<br>(1 - 3)       | 0<br>(0 - 1)       |
| Other hemoglobinopathies and hemolytic anemias      | 60<br>(35 - 95)        | 7<br>(3 - 18)      | 3<br>(2 - 8)      | 9<br>(4 - 16)      | 19<br>(10 - 32)    | 22<br>(12 - 35)    |
| Endocrine, metabolic, blood, and immune disorders   | 193<br>(120 - 385)     | 40<br>(14 - 71)    | 7<br>(3 - 17)     | 35<br>(16 - 100)   | 53<br>(29 - 110)   | 58<br>(32 - 127)   |
| Musculoskeletal disorders                           | 4<br>(2 - 11)          | --                 | 0<br>(0 - 0)      | 1<br>(1 - 4)       | 1<br>(1 - 4)       | 2<br>(1 - 3)       |
| Rheumatoid arthritis                                | 2<br>(1 - 6)           | --                 | 0<br>(0 - 0)      | 0<br>(0 - 2)       | 1<br>(0 - 2)       | 1<br>(1 - 2)       |
| Other musculoskeletal disorders                     | 2<br>(1 - 5)           | --                 | 0<br>(0 - 0)      | 1<br>(0 - 2)       | 1<br>(0 - 2)       | 1<br>(0 - 1)       |
| Other non-communicable diseases                     | 608<br>(441 - 801)     | 510<br>(358 - 689) | 29<br>(17 - 49)   | 40<br>(21 - 76)    | 13<br>(8 - 22)     | 16<br>(11 - 24)    |
| Congenital anomalies                                | 578<br>(416 - 773)     | 495<br>(348 - 673) | 28<br>(16 - 48)   | 36<br>(18 - 68)    | 9<br>(5 - 16)      | 10<br>(6 - 17)     |
| Neural tube defects                                 | 42<br>(13 - 114)       | 37<br>(10 - 105)   | 2<br>(1 - 4)      | 2<br>(1 - 7)       | 0<br>(0 - 1)       | 1<br>(0 - 2)       |
| Congenital heart anomalies                          | 147<br>(88 - 245)      | 115<br>(61 - 201)  | 12<br>(6 - 23)    | 16<br>(8 - 31)     | 3<br>(1 - 5)       | 1<br>(1 - 3)       |
| Cleft lip and cleft palate                          | 1<br>(0 - 3)           | 1<br>(0 - 3)       | --                | --                 | --                 | --                 |
| Down syndrome                                       | 16<br>(7 - 35)         | 10<br>(3 - 25)     | 2<br>(1 - 3)      | 4<br>(2 - 8)       | 1<br>(0 - 2)       | 0<br>(0 - 0)       |
| Chromosomal unbalanced rearrangements               | 3<br>(2 - 7)           | 3<br>(1 - 6)       | 0<br>(0 - 0)      | 0<br>(0 - 1)       | 0<br>(0 - 0)       | 0<br>(0 - 0)       |
| Other congenital anomalies                          | 369<br>(239 - 517)     | 330<br>(208 - 467) | 13<br>(6 - 23)    | 13<br>(7 - 27)     | 5<br>(3 - 9)       | 7<br>(4 - 13)      |
| Skin and subcutaneous diseases                      | 18<br>(12 - 30)        | 3<br>(1 - 8)       | 1<br>(1 - 2)      | 4<br>(2 - 9)       | 4<br>(2 - 7)       | 6<br>(4 - 10)      |
| Cellulitis                                          | 2<br>(1 - 5)           | 1<br>(0 - 2)       | 0<br>(0 - 0)      | 1<br>(0 - 1)       | 1<br>(0 - 1)       | 1<br>(0 - 1)       |
| Pyoderma                                            | 8<br>(5 - 14)          | 2<br>(1 - 6)       | 1<br>(0 - 2)      | 2<br>(1 - 4)       | 2<br>(1 - 3)       | 1<br>(1 - 2)       |
| Decubitus ulcer                                     | 8<br>(5 - 12)          | 0<br>(0 - 0)       | 0<br>(0 - 0)      | 1<br>(1 - 3)       | 2<br>(1 - 3)       | 4<br>(2 - 7)       |

Web Table 31- Honduras deaths with 95% UI by age, sex, and cause in 2013

| Cause                                           | Males, All Ages          | Males, 0-4 Years  | Males, 5-14 Years | Males, 15-49 Years       | Males, 50-69 Years   | Males, 70-80 Years |
|-------------------------------------------------|--------------------------|-------------------|-------------------|--------------------------|----------------------|--------------------|
| Other skin and subcutaneous diseases            | 0<br>(0 - 1)             | 0<br>(0 - 0)      | 0<br>(0 - 0)      | 0<br>(0 - 0)             | 0<br>(0 - 0)         | 0<br>(0 - 0)       |
| Sudden infant death syndrome                    | 12<br>(2 - 35)           | 12<br>(2 - 35)    | --                | --                       | --                   | --                 |
| Injuries                                        | 4,098<br>(1,778 - 6,034) | 119<br>(58 - 185) | 148<br>(67 - 204) | 2,780<br>(1,244 - 4,156) | 698<br>(211 - 1,115) | 354<br>(130 - 502) |
| Transport injuries                              | 841<br>(221 - 1,357)     | 12<br>(2 - 22)    | 32<br>(7 - 54)    | 456<br>(143 - 813)       | 194<br>(40 - 311)    | 147<br>(27 - 229)  |
| Road injuries                                   | 802<br>(205 - 1,313)     | 11<br>(1 - 21)    | 32<br>(6 - 53)    | 435<br>(130 - 782)       | 184<br>(35 - 295)    | 141<br>(24 - 219)  |
| Pedestrian road injuries                        | 363<br>(80 - 578)        | 5<br>(1 - 11)     | 16<br>(3 - 27)    | 136<br>(37 - 257)        | 108<br>(19 - 178)    | 98<br>(16 - 155)   |
| Cyclist road injuries                           | 49<br>(11 - 85)          | 1<br>(0 - 2)      | 3<br>(1 - 6)      | 20<br>(6 - 40)           | 16<br>(3 - 28)       | 9<br>(1 - 16)      |
| Motorcyclist road injuries                      | 73<br>(18 - 130)         | 1<br>(0 - 1)      | 2<br>(0 - 3)      | 49<br>(14 - 95)          | 15<br>(3 - 28)       | 6<br>(1 - 12)      |
| Motor vehicle road injuries                     | 287<br>(80 - 509)        | 4<br>(0 - 8)      | 10<br>(2 - 18)    | 216<br>(66 - 393)        | 36<br>(7 - 65)       | 21<br>(4 - 37)     |
| Other road injuries                             | 31<br>(6 - 72)           | 0<br>(0 - 1)      | 1<br>(0 - 3)      | 14<br>(3 - 38)           | 10<br>(1 - 23)       | 5<br>(1 - 13)      |
| Other transport injuries                        | 39<br>(7 - 64)           | 1<br>(0 - 2)      | 1<br>(0 - 1)      | 21<br>(4 - 38)           | 10<br>(1 - 19)       | 6<br>(1 - 12)      |
| Unintentional injuries                          | 880<br>(555 - 1,331)     | 58<br>(32 - 116)  | 53<br>(30 - 95)   | 468<br>(255 - 799)       | 184<br>(86 - 278)    | 118<br>(76 - 164)  |
| Falls                                           | 39<br>(7 - 66)           | 0<br>(0 - 0)      | 0<br>(0 - 1)      | 9<br>(2 - 16)            | 13<br>(2 - 24)       | 17<br>(2 - 32)     |
| Drowning                                        | 283<br>(166 - 531)       | 16<br>(6 - 43)    | 28<br>(12 - 63)   | 160<br>(82 - 335)        | 49<br>(28 - 81)      | 29<br>(19 - 45)    |
| Fire, heat, and hot substances                  | 21<br>(7 - 37)           | 1<br>(0 - 4)      | 1<br>(0 - 2)      | 10<br>(4 - 19)           | 4<br>(1 - 9)         | 4<br>(1 - 9)       |
| Poisonings                                      | 23<br>(15 - 36)          | 0<br>(0 - 0)      | 0<br>(0 - 1)      | 9<br>(5 - 18)            | 6<br>(3 - 10)        | 7<br>(4 - 12)      |
| Exposure to mechanical forces                   | 347<br>(32 - 557)        | 5<br>(1 - 10)     | 15<br>(2 - 28)    | 228<br>(22 - 409)        | 77<br>(5 - 133)      | 22<br>(1 - 36)     |
| Unintentional firearm injuries                  | 19<br>(3 - 35)           | 0<br>(0 - 0)      | 1<br>(0 - 1)      | 11<br>(2 - 25)           | 5<br>(1 - 8)         | 2<br>(0 - 5)       |
| Unintentional suffocation                       | 13<br>(6 - 22)           | 2<br>(0 - 5)      | 1<br>(0 - 3)      | 7<br>(3 - 13)            | 2<br>(1 - 4)         | 1<br>(0 - 2)       |
| Other exposure to mechanical forces             | 315<br>(15 - 511)        | 3<br>(0 - 8)      | 13<br>(1 - 25)    | 210<br>(11 - 378)        | 71<br>(2 - 125)      | 19<br>(0 - 31)     |
| Adverse effects of medical treatment            | 26<br>(14 - 42)          | 2<br>(1 - 3)      | 0<br>(0 - 1)      | 3<br>(2 - 6)             | 8<br>(4 - 14)        | 13<br>(5 - 24)     |
| Animal contact                                  | 7<br>(4 - 16)            | 3<br>(1 - 7)      | 1<br>(0 - 2)      | 1<br>(0 - 2)             | 1<br>(1 - 3)         | 2<br>(1 - 3)       |
| Venomous animal contact                         | 5<br>(3 - 12)            | 2<br>(1 - 6)      | 0<br>(0 - 1)      | 0<br>(0 - 1)             | 1<br>(0 - 2)         | 1<br>(1 - 2)       |
| Non-venomous animal contact                     | 2<br>(1 - 4)             | 0<br>(0 - 1)      | 0<br>(0 - 1)      | 0<br>(0 - 1)             | 0<br>(0 - 1)         | 1<br>(0 - 1)       |
| Foreign body                                    | 134<br>(69 - 318)        | 31<br>(15 - 76)   | 8<br>(4 - 18)     | 47<br>(20 - 131)         | 25<br>(12 - 55)      | 23<br>(12 - 52)    |
| Pulmonary aspiration and foreign body in airway | 133<br>(68 - 317)        | 31<br>(14 - 75)   | 8<br>(3 - 18)     | 47<br>(19 - 130)         | 24<br>(12 - 55)      | 23<br>(12 - 52)    |
| Foreign body in other body part                 | 1<br>(0 - 2)             | 0<br>(0 - 0)      | 0<br>(0 - 0)      | 0<br>(0 - 1)             | 0<br>(0 - 0)         | 0<br>(0 - 0)       |
| Other unintentional injuries                    | 1<br>(1 - 2)             | 0<br>(0 - 0)      | 0<br>(0 - 0)      | 1<br>(0 - 2)             | 0<br>(0 - 0)         | 0<br>(0 - 0)       |
| Self-harm and interpersonal violence            | 2,377<br>(742 - 3,824)   | 49<br>(5 - 106)   | 63<br>(10 - 113)  | 1,856<br>(621 - 2,963)   | 319<br>(60 - 576)    | 89<br>(18 - 147)   |
| Self-harm                                       | 310<br>(45 - 538)        | --                | 4<br>(0 - 10)     | 187<br>(27 - 374)        | 73<br>(9 - 125)      | 46<br>(6 - 80)     |
| Interpersonal violence                          | 2,066<br>(545 - 3,365)   | 49<br>(5 - 106)   | 59<br>(8 - 109)   | 1,669<br>(464 - 2,740)   | 246<br>(43 - 466)    | 43<br>(7 - 87)     |
| Assault by firearm                              | 1,353<br>(329 - 2,314)   | 15<br>(1 - 38)    | 33<br>(4 - 68)    | 1,138<br>(296 - 1,943)   | 149<br>(24 - 295)    | 18<br>(3 - 40)     |
| Assault by sharp object                         | 428<br>(83 - 864)        | 7<br>(1 - 19)     | 8<br>(1 - 18)     | 349<br>(72 - 713)        | 53<br>(6 - 116)      | 11<br>(1 - 24)     |
| Assault by other means                          | 285<br>(54 - 520)        | 26<br>(2 - 61)    | 19<br>(2 - 40)    | 182<br>(38 - 360)        | 44<br>(6 - 93)       | 14<br>(2 - 31)     |

Web Table 31- Honduras deaths with 95% UI by age, sex, and cause in 2013

| Cause                                                             | Females, All Ages           | Females, 0-4 Years       | Females, 5-14 Years | Females, 15-49 Years     | Females, 50-69 Years     | Females, 70-80 Years       |
|-------------------------------------------------------------------|-----------------------------|--------------------------|---------------------|--------------------------|--------------------------|----------------------------|
| All causes                                                        | 20,051<br>(14,897 - 25,528) | 2,147<br>(1,898 - 2,410) | 346<br>(274 - 501)  | 3,134<br>(2,116 - 4,694) | 4,329<br>(2,686 - 6,144) | 10,094<br>(7,482 - 12,019) |
| Communicable, maternal, neonatal, and nutritional diseases        | 3,968<br>(2,848 - 6,162)    | 1,208<br>(986 - 1,451)   | 112<br>(72 - 201)   | 858<br>(404 - 2,569)     | 502<br>(273 - 888)       | 1,289<br>(851 - 1,828)     |
| HIV/AIDS and tuberculosis                                         | 658<br>(110 - 3,113)        | 17<br>(1 - 100)          | 20<br>(1 - 129)     | 452<br>(50 - 2,377)      | 127<br>(24 - 553)        | 42<br>(21 - 98)            |
| Tuberculosis                                                      | 71<br>(45 - 104)            | 1<br>(0 - 1)             | 1<br>(0 - 1)        | 17<br>(8 - 29)           | 21<br>(12 - 34)          | 32<br>(18 - 49)            |
| HIV/AIDS                                                          | 586<br>(38 - 3,056)         | 16<br>(0 - 100)          | 19<br>(0 - 128)     | 435<br>(32 - 2,367)      | 106<br>(5 - 538)         | 10<br>(0 - 64)             |
| HIV/AIDS resulting in mycobacterial infection                     | 27<br>(2 - 152)             | 1<br>(0 - 4)             | 1<br>(0 - 5)        | 20<br>(1 - 112)          | 5<br>(0 - 28)            | 1<br>(0 - 3)               |
| HIV/AIDS resulting in other diseases                              | 559<br>(37 - 2,893)         | 15<br>(0 - 95)           | 18<br>(0 - 123)     | 415<br>(31 - 2,241)      | 101<br>(5 - 510)         | 10<br>(0 - 60)             |
| Diarrhea, lower respiratory, and other common infectious diseases | 1,715<br>(1,195 - 2,348)    | 411<br>(282 - 556)       | 62<br>(36 - 95)     | 160<br>(74 - 267)        | 228<br>(125 - 364)       | 853<br>(506 - 1,301)       |
| Diarrheal diseases                                                | 619<br>(376 - 959)          | 172<br>(77 - 315)        | 20<br>(8 - 38)      | 51<br>(22 - 93)          | 86<br>(37 - 160)         | 290<br>(133 - 538)         |
| Intestinal infectious diseases                                    | 65<br>(29 - 122)            | 22<br>(11 - 41)          | 19<br>(9 - 36)      | 20<br>(6 - 43)           | 3<br>(1 - 6)             | 1<br>(0 - 3)               |
| Typhoid fever                                                     | 49<br>(22 - 93)             | 16<br>(8 - 30)           | 15<br>(7 - 29)      | 15<br>(4 - 33)           | 2<br>(1 - 4)             | 1<br>(0 - 2)               |
| Paratyphoid fever                                                 | 13<br>(6 - 26)              | 5<br>(2 - 10)            | 4<br>(1 - 8)        | 4<br>(1 - 10)            | 0<br>(0 - 1)             | 0<br>(0 - 1)               |
| Other intestinal infectious diseases                              | 3<br>(0 - 9)                | 2<br>(0 - 6)             | 0<br>(0 - 2)        | 1<br>(0 - 4)             | 0<br>(0 - 2)             | 0<br>(0 - 2)               |
| Lower respiratory infections                                      | 896<br>(550 - 1,314)        | 160<br>(96 - 242)        | 15<br>(7 - 25)      | 67<br>(27 - 119)         | 123<br>(62 - 206)        | 531<br>(284 - 871)         |
| Upper respiratory infections                                      | 1<br>(0 - 3)                | 0<br>(0 - 1)             | 0<br>(0 - 0)        | 0<br>(0 - 1)             | 0<br>(0 - 1)             | 1<br>(0 - 2)               |
| Otitis media                                                      | 0<br>(0 - 1)                | 0<br>(0 - 0)             | 0<br>(0 - 0)        | 0<br>(0 - 0)             | 0<br>(0 - 0)             | 0<br>(0 - 0)               |
| Meningitis                                                        | 60<br>(40 - 86)             | 12<br>(7 - 20)           | 3<br>(1 - 5)        | 13<br>(6 - 23)           | 11<br>(5 - 18)           | 22<br>(12 - 37)            |
| Pneumococcal meningitis                                           | 21<br>(13 - 32)             | 3<br>(2 - 6)             | 1<br>(0 - 2)        | 5<br>(2 - 9)             | 4<br>(2 - 7)             | 8<br>(4 - 16)              |
| H influenzae type B meningitis                                    | 10<br>(6 - 14)              | 5<br>(2 - 7)             | 1<br>(0 - 1)        | 1<br>(1 - 3)             | 1<br>(0 - 2)             | 2<br>(1 - 4)               |
| Meningococcal meningitis                                          | 8<br>(5 - 12)               | 1<br>(1 - 2)             | 0<br>(0 - 1)        | 2<br>(1 - 3)             | 1<br>(0 - 2)             | 3<br>(1 - 6)               |
| Other meningitis                                                  | 22<br>(12 - 34)             | 3<br>(1 - 5)             | 1<br>(0 - 1)        | 5<br>(2 - 10)            | 5<br>(2 - 9)             | 9<br>(3 - 16)              |
| Encephalitis                                                      | 25<br>(10 - 58)             | 6<br>(2 - 16)            | 3<br>(1 - 8)        | 7<br>(2 - 19)            | 5<br>(2 - 14)            | 4<br>(2 - 11)              |
| Diphtheria                                                        | 0<br>(0 - 2)                | 0<br>(0 - 2)             | 0<br>(0 - 1)        | 0<br>(0 - 0)             | 0<br>(0 - 0)             | --                         |
| Whooping cough                                                    | 41<br>(9 - 121)             | 37<br>(4 - 118)          | 3<br>(2 - 6)        | 1<br>(0 - 1)             | 0<br>(0 - 0)             | --                         |
| Tetanus                                                           | 3<br>(1 - 10)               | 1<br>(0 - 1)             | 0<br>(0 - 0)        | 1<br>(0 - 2)             | 1<br>(0 - 2)             | 1<br>(0 - 5)               |
| Measles                                                           | 0<br>(0 - 0)                | 0<br>(0 - 0)             | 0<br>(0 - 0)        | 0<br>(0 - 0)             | 0<br>(0 - 0)             | --                         |
| Varicella and herpes zoster                                       | 3<br>(1 - 8)                | 1<br>(0 - 3)             | 0<br>(0 - 1)        | 0<br>(0 - 1)             | 0<br>(0 - 1)             | 1<br>(0 - 6)               |
| Neglected tropical diseases and malaria                           | 47<br>(31 - 82)             | 12<br>(6 - 27)           | 5<br>(3 - 10)       | 8<br>(4 - 14)            | 8<br>(4 - 15)            | 15<br>(9 - 26)             |
| Malaria                                                           | 7<br>(4 - 12)               | 1<br>(0 - 3)             | 0<br>(0 - 1)        | 1<br>(1 - 3)             | 1<br>(1 - 3)             | 2<br>(1 - 5)               |
| Chagas disease                                                    | 6<br>(1 - 30)               | 0<br>(0 - 0)             | 0<br>(0 - 1)        | 1<br>(0 - 4)             | 2<br>(1 - 10)            | 3<br>(1 - 13)              |
| Leishmaniasis                                                     | 1<br>(0 - 1)                | 0<br>(0 - 1)             | 0<br>(0 - 0)        | 0<br>(0 - 0)             | 0<br>(0 - 0)             | 0<br>(0 - 0)               |
| Visceral leishmaniasis                                            | 1<br>(0 - 1)                | 0<br>(0 - 1)             | 0<br>(0 - 0)        | 0<br>(0 - 0)             | 0<br>(0 - 0)             | 0<br>(0 - 0)               |
| Cysticercosis                                                     | 1<br>(1 - 2)                | 0<br>(0 - 0)             | 0<br>(0 - 0)        | 1<br>(0 - 1)             | 0<br>(0 - 1)             | 0<br>(0 - 0)               |
| Cystic echinococcosis                                             | 0<br>(0 - 1)                | 0<br>(0 - 0)             | 0<br>(0 - 0)        | 0<br>(0 - 0)             | 0<br>(0 - 0)             | 0<br>(0 - 0)               |
| Dengue                                                            | 13<br>(7 - 25)              | 2<br>(1 - 5)             | 2<br>(1 - 4)        | 2<br>(1 - 4)             | 1<br>(1 - 3)             | 6<br>(3 - 12)              |
| Rabies                                                            | 2<br>(1 - 3)                | 0<br>(0 - 0)             | 1<br>(0 - 1)        | 0<br>(0 - 1)             | 1<br>(0 - 1)             | 0<br>(0 - 1)               |
| Intestinal nematode infections                                    | 1<br>(0 - 7)                | 1<br>(0 - 5)             | 0<br>(0 - 2)        | 0<br>(0 - 1)             | 0<br>(0 - 1)             | 0<br>(0 - 1)               |
| Ascariasis                                                        | 1<br>(0 - 7)                | 1<br>(0 - 5)             | 0<br>(0 - 2)        | 0<br>(0 - 1)             | 0<br>(0 - 1)             | 0<br>(0 - 1)               |
| Other neglected tropical diseases                                 | 15<br>(7 - 30)              | 8<br>(3 - 20)            | 2<br>(1 - 4)        | 2<br>(1 - 4)             | 1<br>(1 - 3)             | 3<br>(1 - 5)               |
| Maternal disorders                                                | 153<br>(75 - 260)           | --                       | 1<br>(0 - 2)        | 152<br>(74 - 260)        | --                       | --                         |

Web Table 31- Honduras deaths with 95% UI by age, sex, and cause in 2013

| Cause                                                            | Females, All Ages           | Females, 0-4 Years   | Females, 5-14 Years | Females, 15-49 Years   | Females, 50-69 Years     | Females, 70-80 Years      |
|------------------------------------------------------------------|-----------------------------|----------------------|---------------------|------------------------|--------------------------|---------------------------|
| Maternal hemorrhage                                              | 28<br>(12 - 47)             | --                   | 0<br>(0 - 0)        | 27<br>(12 - 47)        | --                       | --                        |
| Maternal sepsis and other maternal infections                    | 11<br>(5 - 21)              | --                   | 0<br>(0 - 0)        | 11<br>(5 - 21)         | --                       | --                        |
| Maternal hypertensive disorders                                  | 15<br>(5 - 32)              | --                   | 0<br>(0 - 0)        | 15<br>(5 - 32)         | --                       | --                        |
| Maternal obstructed labor                                        | 14<br>(6 - 26)              | --                   | 0<br>(0 - 0)        | 14<br>(6 - 25)         | --                       | --                        |
| Maternal abortive outcome                                        | 17<br>(7 - 32)              | --                   | 0<br>(0 - 0)        | 17<br>(7 - 32)         | --                       | --                        |
| Indirect maternal deaths                                         | 22<br>(9 - 41)              | --                   | 0<br>(0 - 0)        | 22<br>(9 - 41)         | --                       | --                        |
| Late maternal deaths                                             | 13<br>(5 - 23)              | --                   | 0<br>(0 - 0)        | 13<br>(5 - 23)         | --                       | --                        |
| Maternal deaths aggravated by HIV/AIDS                           | 0<br>(0 - 0)                | --                   | --                  | 0<br>(0 - 0)           | --                       | --                        |
| Other maternal disorders                                         | 32<br>(14 - 54)             | --                   | 0<br>(0 - 0)        | 31<br>(14 - 54)        | --                       | --                        |
| Neonatal disorders                                               | 658<br>(484 - 840)          | 658<br>(484 - 840)   | --                  | --                     | --                       | --                        |
| Neonatal preterm birth complications                             | 350<br>(206 - 521)          | 350<br>(206 - 521)   | --                  | --                     | --                       | --                        |
| Neonatal encephalopathy due to birth asphyxia and trauma         | 147<br>(62 - 268)           | 147<br>(62 - 268)    | --                  | --                     | --                       | --                        |
| Neonatal sepsis and other neonatal infections                    | 93<br>(27 - 188)            | 93<br>(27 - 188)     | --                  | --                     | --                       | --                        |
| Hemolytic disease and other neonatal jaundice                    | 1<br>(0 - 4)                | 1<br>(0 - 4)         | --                  | --                     | --                       | --                        |
| Other neonatal disorders                                         | 66<br>(29 - 129)            | 66<br>(29 - 129)     | --                  | --                     | --                       | --                        |
| Nutritional deficiencies                                         | 560<br>(358 - 792)          | 52<br>(30 - 83)      | 15<br>(8 - 25)      | 67<br>(31 - 117)       | 116<br>(65 - 182)        | 311<br>(176 - 468)        |
| Protein-energy malnutrition                                      | 214<br>(114 - 371)          | 40<br>(20 - 69)      | 8<br>(3 - 16)       | 17<br>(6 - 38)         | 43<br>(18 - 81)          | 107<br>(44 - 207)         |
| Iodine deficiency                                                | 1<br>(0 - 3)                | 0<br>(0 - 1)         | 0<br>(0 - 0)        | 0<br>(0 - 1)           | 0<br>(0 - 1)             | 0<br>(0 - 2)              |
| Iron-deficiency anemia                                           | 242<br>(110 - 406)          | 7<br>(1 - 19)        | 4<br>(1 - 9)        | 38<br>(15 - 67)        | 53<br>(22 - 96)          | 140<br>(59 - 255)         |
| Other nutritional deficiencies                                   | 103<br>(44 - 190)           | 5<br>(1 - 12)        | 2<br>(1 - 5)        | 12<br>(4 - 29)         | 20<br>(8 - 42)           | 63<br>(24 - 120)          |
| Other communicable, maternal, neonatal, and nutritional diseases | 179<br>(95 - 334)           | 58<br>(19 - 103)     | 10<br>(4 - 19)      | 20<br>(8 - 37)         | 22<br>(8 - 45)           | 69<br>(16 - 209)          |
| Sexually transmitted diseases excluding HIV                      | 53<br>(14 - 101)            | 40<br>(4 - 83)       | 4<br>(1 - 8)        | 2<br>(1 - 5)           | 2<br>(1 - 8)             | 5<br>(1 - 13)             |
| Syphilis                                                         | 49<br>(10 - 97)             | 40<br>(4 - 83)       | 4<br>(0 - 8)        | 1<br>(0 - 2)           | 1<br>(0 - 4)             | 4<br>(1 - 10)             |
| Chlamydial infection                                             | 1<br>(0 - 2)                | --                   | 0<br>(0 - 0)        | 0<br>(0 - 1)           | 0<br>(0 - 1)             | 0<br>(0 - 1)              |
| Gonococcal infection                                             | 1<br>(1 - 3)                | --                   | 0<br>(0 - 0)        | 0<br>(0 - 1)           | 0<br>(0 - 1)             | 1<br>(0 - 2)              |
| Other sexually transmitted diseases                              | 1<br>(0 - 2)                | --                   | 0<br>(0 - 0)        | 0<br>(0 - 1)           | 0<br>(0 - 1)             | 0<br>(0 - 1)              |
| Hepatitis                                                        | 0<br>(0 - 1)                | 0<br>(0 - 0)         | 0<br>(0 - 0)        | 0<br>(0 - 0)           | 0<br>(0 - 0)             | 0<br>(0 - 0)              |
| Acute hepatitis A                                                | 0<br>(0 - 0)                | 0<br>(0 - 0)         | 0<br>(0 - 0)        | 0<br>(0 - 0)           | 0<br>(0 - 0)             | 0<br>(0 - 0)              |
| Acute hepatitis B                                                | 0<br>(0 - 0)                | 0<br>(0 - 0)         | 0<br>(0 - 0)        | 0<br>(0 - 0)           | 0<br>(0 - 0)             | 0<br>(0 - 0)              |
| Acute hepatitis C                                                | 0<br>(0 - 0)                | --                   | 0<br>(0 - 0)        | 0<br>(0 - 0)           | 0<br>(0 - 0)             | 0<br>(0 - 0)              |
| Other infectious diseases                                        | 125<br>(58 - 281)           | 18<br>(6 - 44)       | 6<br>(2 - 13)       | 18<br>(7 - 34)         | 19<br>(7 - 43)           | 65<br>(13 - 204)          |
| Non-communicable diseases                                        | 14,898<br>(10,647 - 19,136) | 824<br>(640 - 1,013) | 147<br>(92 - 206)   | 1,678<br>(796 - 2,701) | 3,635<br>(2,207 - 5,206) | 8,614<br>(6,382 - 10,247) |
| Neoplasms                                                        | 2,457<br>(1,603 - 3,527)    | 32<br>(14 - 54)      | 26<br>(13 - 42)     | 520<br>(237 - 882)     | 923<br>(560 - 1,349)     | 954<br>(645 - 1,299)      |
| Esophageal cancer                                                | 2<br>(1 - 3)                | --                   | --                  | 1<br>(0 - 1)           | 0<br>(0 - 1)             | 1<br>(0 - 2)              |
| Stomach cancer                                                   | 356<br>(214 - 529)          | --                   | --                  | 44<br>(18 - 77)        | 110<br>(63 - 166)        | 202<br>(116 - 319)        |
| Liver cancer                                                     | 57<br>(33 - 88)             | --                   | 0<br>(0 - 1)        | 9<br>(4 - 17)          | 23<br>(12 - 37)          | 24<br>(13 - 39)           |
| Liver cancer due to hepatitis B                                  | 11<br>(4 - 22)              | --                   | 0<br>(0 - 0)        | 3<br>(1 - 6)           | 5<br>(1 - 11)            | 4<br>(1 - 7)              |
| Liver cancer due to hepatitis C                                  | 28<br>(11 - 47)             | --                   | 0<br>(0 - 0)        | 4<br>(1 - 7)           | 11<br>(3 - 21)           | 13<br>(6 - 22)            |
| Liver cancer due to alcohol use                                  | 9<br>(3 - 17)               | --                   | --                  | 1<br>(0 - 2)           | 3<br>(1 - 7)             | 5<br>(2 - 10)             |
| Liver cancer due to other causes                                 | 9<br>(4 - 17)               | --                   | 0<br>(0 - 0)        | 2<br>(1 - 4)           | 3<br>(1 - 7)             | 3<br>(1 - 6)              |

Web Table 31- Honduras deaths with 95% UI by age, sex, and cause in 2013

| Cause                                         | Females, All Ages        | Females, 0-4 Years | Females, 5-14 Years | Females, 15-49 Years | Females, 50-69 Years   | Females, 70-80 Years     |
|-----------------------------------------------|--------------------------|--------------------|---------------------|----------------------|------------------------|--------------------------|
| Larynx cancer                                 | 1<br>(0 - 2)             | --                 | --                  | 0<br>(0 - 1)         | 0<br>(0 - 1)           | 0<br>(0 - 1)             |
| Tracheal, bronchus and lung cancer            | 159<br>(98 - 237)        | --                 | --                  | 22<br>(9 - 42)       | 70<br>(40 - 106)       | 68<br>(42 - 98)          |
| Breast cancer                                 | 335<br>(198 - 518)       | --                 | --                  | 114<br>(51 - 194)    | 146<br>(85 - 231)      | 75<br>(45 - 116)         |
| Cervical cancer                               | 137<br>(79 - 209)        | --                 | --                  | 43<br>(18 - 77)      | 55<br>(30 - 88)        | 40<br>(23 - 61)          |
| Uterine cancer                                | 51<br>(28 - 82)          | --                 | --                  | 6<br>(2 - 12)        | 21<br>(10 - 37)        | 24<br>(12 - 39)          |
| Prostate cancer                               | --                       | --                 | --                  | --                   | --                     | --                       |
| Colon and rectum cancer                       | 204<br>(129 - 297)       | --                 | --                  | 29<br>(13 - 49)      | 80<br>(47 - 121)       | 95<br>(59 - 139)         |
| Lip and oral cavity cancer                    | 9<br>(6 - 15)            | --                 | --                  | 1<br>(1 - 3)         | 3<br>(1 - 4)           | 5<br>(3 - 9)             |
| Nasopharynx cancer                            | 10<br>(5 - 17)           | --                 | 0<br>(0 - 0)        | 3<br>(1 - 7)         | 3<br>(1 - 5)           | 4<br>(2 - 7)             |
| Other pharynx cancer                          | 7<br>(4 - 10)            | --                 | --                  | 1<br>(0 - 2)         | 2<br>(1 - 4)           | 3<br>(2 - 5)             |
| Gallbladder and biliary tract cancer          | 113<br>(50 - 192)        | --                 | --                  | 5<br>(2 - 11)        | 39<br>(17 - 73)        | 69<br>(28 - 126)         |
| Pancreatic cancer                             | 99<br>(62 - 145)         | --                 | --                  | 10<br>(4 - 18)       | 36<br>(21 - 55)        | 53<br>(31 - 81)          |
| Malignant skin melanoma                       | 48<br>(26 - 76)          | --                 | --                  | 21<br>(8 - 38)       | 17<br>(9 - 26)         | 10<br>(6 - 16)           |
| Non-melanoma skin cancer                      | 44<br>(21 - 87)          | --                 | --                  | 5<br>(2 - 10)        | 9<br>(4 - 17)          | 30<br>(12 - 63)          |
| Ovarian cancer                                | 181<br>(98 - 279)        | --                 | --                  | 48<br>(21 - 85)      | 87<br>(44 - 143)       | 46<br>(24 - 72)          |
| Testicular cancer                             | --                       | --                 | --                  | --                   | --                     | --                       |
| Kidney cancer                                 | 74<br>(42 - 119)         | 2<br>(1 - 3)       | 1<br>(0 - 2)        | 9<br>(4 - 16)        | 39<br>(19 - 66)        | 24<br>(12 - 43)          |
| Bladder cancer                                | 18<br>(10 - 31)          | --                 | --                  | 1<br>(0 - 2)         | 8<br>(4 - 16)          | 9<br>(5 - 15)            |
| Brain and nervous system cancer               | 115<br>(59 - 181)        | 3<br>(1 - 6)       | 4<br>(2 - 7)        | 41<br>(16 - 72)      | 40<br>(19 - 65)        | 27<br>(13 - 43)          |
| Thyroid cancer                                | 27<br>(15 - 45)          | --                 | 0<br>(0 - 0)        | 3<br>(1 - 5)         | 10<br>(5 - 18)         | 14<br>(8 - 24)           |
| Mesothelioma                                  | 6<br>(3 - 9)             | --                 | --                  | 1<br>(0 - 1)         | 3<br>(2 - 6)           | 2<br>(1 - 3)             |
| Hodgkin lymphoma                              | 21<br>(11 - 35)          | 1<br>(0 - 2)       | 1<br>(0 - 3)        | 7<br>(3 - 13)        | 6<br>(2 - 11)          | 6<br>(3 - 11)            |
| Non-Hodgkin lymphoma                          | 42<br>(15 - 126)         | 2<br>(0 - 8)       | 1<br>(0 - 4)        | 13<br>(4 - 44)       | 11<br>(3 - 33)         | 15<br>(5 - 45)           |
| Multiple myeloma                              | 20<br>(12 - 31)          | --                 | --                  | 2<br>(1 - 4)         | 10<br>(5 - 16)         | 8<br>(5 - 12)            |
| Leukemia                                      | 117<br>(71 - 171)        | 9<br>(3 - 17)      | 12<br>(5 - 21)      | 37<br>(17 - 63)      | 34<br>(18 - 54)        | 25<br>(15 - 40)          |
| Other neoplasms                               | 202<br>(117 - 331)       | 16<br>(5 - 30)     | 6<br>(2 - 11)       | 45<br>(18 - 85)      | 63<br>(34 - 106)       | 73<br>(41 - 126)         |
| Cardiovascular diseases                       | 6,513<br>(4,210 - 8,563) | 71<br>(39 - 178)   | 32<br>(17 - 63)     | 627<br>(292 - 1,001) | 1,519<br>(839 - 2,186) | 4,264<br>(2,749 - 5,323) |
| Rheumatic heart disease                       | 11<br>(6 - 24)           | 0<br>(0 - 0)       | 0<br>(0 - 0)        | 2<br>(1 - 6)         | 4<br>(2 - 9)           | 5<br>(3 - 10)            |
| Ischemic heart disease                        | 3,786<br>(2,189 - 5,140) | 25<br>(6 - 90)     | 13<br>(5 - 34)      | 344<br>(144 - 555)   | 911<br>(441 - 1,338)   | 2,493<br>(1,373 - 3,276) |
| Cerebrovascular disease                       | 1,967<br>(1,265 - 2,718) | 18<br>(9 - 37)     | 11<br>(5 - 19)      | 180<br>(79 - 301)    | 416<br>(235 - 628)     | 1,342<br>(844 - 1,824)   |
| Ischemic stroke                               | 1,360<br>(849 - 1,901)   | 4<br>(1 - 14)      | 4<br>(1 - 9)        | 68<br>(27 - 120)     | 232<br>(128 - 362)     | 1,052<br>(663 - 1,445)   |
| Hemorrhagic stroke                            | 607<br>(362 - 965)       | 14<br>(7 - 24)     | 7<br>(3 - 12)       | 112<br>(51 - 201)    | 185<br>(99 - 310)      | 290<br>(167 - 472)       |
| Hypertensive heart disease                    | 248<br>(64 - 498)        | 4<br>(1 - 14)      | 2<br>(0 - 4)        | 26<br>(6 - 58)       | 57<br>(13 - 128)       | 158<br>(38 - 330)        |
| Cardiomyopathy and myocarditis                | 66<br>(40 - 102)         | 11<br>(5 - 25)     | 3<br>(1 - 5)        | 17<br>(8 - 31)       | 13<br>(7 - 23)         | 22<br>(11 - 37)          |
| Atrial fibrillation and flutter               | 16<br>(6 - 32)           | --                 | --                  | 0<br>(0 - 1)         | 2<br>(1 - 5)           | 13<br>(5 - 27)           |
| Aortic aneurysm                               | 16<br>(8 - 28)           | --                 | --                  | 2<br>(1 - 4)         | 3<br>(2 - 7)           | 10<br>(5 - 18)           |
| Peripheral vascular disease                   | 16<br>(8 - 25)           | --                 | --                  | 0<br>(0 - 1)         | 2<br>(1 - 4)           | 14<br>(7 - 22)           |
| Endocarditis                                  | 17<br>(9 - 31)           | 2<br>(1 - 5)       | 1<br>(0 - 2)        | 4<br>(2 - 8)         | 4<br>(2 - 7)           | 6<br>(3 - 12)            |
| Other cardiovascular and circulatory diseases | 372<br>(218 - 715)       | 11<br>(5 - 25)     | 4<br>(2 - 7)        | 50<br>(22 - 105)     | 105<br>(56 - 185)      | 202<br>(112 - 420)       |
| Chronic respiratory diseases                  | 1,996<br>(1,392 - 2,807) | 167<br>(83 - 242)  | 14<br>(8 - 22)      | 107<br>(48 - 191)    | 395<br>(231 - 612)     | 1,312<br>(884 - 1,874)   |

Web Table 31- Honduras deaths with 95% UI by age, sex, and cause in 2013

| Cause                                               | Females, All Ages        | Females, 0-4 Years | Females, 5-14 Years | Females, 15-49 Years | Females, 50-69 Years | Females, 70-80 Years   |
|-----------------------------------------------------|--------------------------|--------------------|---------------------|----------------------|----------------------|------------------------|
| Chronic obstructive pulmonary disease               | 1,610<br>(1,112 - 2,273) | 92<br>(42 - 151)   | 7<br>(4 - 12)       | 61<br>(26 - 108)     | 304<br>(174 - 473)   | 1,145<br>(769 - 1,634) |
| Pneumoconiosis                                      | 4<br>(2 - 6)             | 0<br>(0 - 1)       | 0<br>(0 - 1)        | 1<br>(0 - 2)         | 1<br>(0 - 1)         | 2<br>(1 - 3)           |
| Silicosis                                           | 0<br>(0 - 1)             | 0<br>(0 - 0)       | 0<br>(0 - 0)        | 0<br>(0 - 0)         | 0<br>(0 - 0)         | 0<br>(0 - 0)           |
| Asbestosis                                          | 0<br>(0 - 1)             | 0<br>(0 - 0)       | 0<br>(0 - 0)        | 0<br>(0 - 0)         | 0<br>(0 - 0)         | 0<br>(0 - 0)           |
| Coal workers pneumoconiosis                         | 0<br>(0 - 1)             | 0<br>(0 - 0)       | 0<br>(0 - 0)        | 0<br>(0 - 0)         | 0<br>(0 - 0)         | 0<br>(0 - 0)           |
| Other pneumoconiosis                                | 3<br>(1 - 5)             | 0<br>(0 - 0)       | 0<br>(0 - 0)        | 1<br>(0 - 1)         | 1<br>(0 - 1)         | 1<br>(1 - 3)           |
| Asthma                                              | 197<br>(103 - 370)       | 17<br>(7 - 34)     | 4<br>(2 - 7)        | 25<br>(10 - 53)      | 52<br>(24 - 103)     | 98<br>(46 - 196)       |
| Interstitial lung disease and pulmonary sarcoidosis | 87<br>(37 - 154)         | 2<br>(1 - 5)       | 1<br>(0 - 2)        | 11<br>(4 - 22)       | 30<br>(12 - 56)      | 43<br>(17 - 84)        |
| Other chronic respiratory diseases                  | 98<br>(63 - 134)         | 55<br>(27 - 79)    | 2<br>(1 - 3)        | 8<br>(4 - 17)        | 9<br>(4 - 17)        | 24<br>(10 - 46)        |
| Cirrhosis                                           | 354<br>(220 - 520)       | 0<br>(0 - 0)       | 1<br>(0 - 1)        | 40<br>(17 - 68)      | 138<br>(78 - 215)    | 176<br>(107 - 266)     |
| Cirrhosis due to hepatitis B                        | 16<br>(7 - 32)           | 0<br>(0 - 0)       | 0<br>(0 - 0)        | 2<br>(1 - 4)         | 6<br>(2 - 14)        | 8<br>(3 - 16)          |
| Cirrhosis due to hepatitis C                        | 203<br>(117 - 307)       | 0<br>(0 - 0)       | 0<br>(0 - 0)        | 21<br>(8 - 38)       | 79<br>(40 - 128)     | 104<br>(58 - 158)      |
| Cirrhosis due to alcohol use                        | 84<br>(45 - 154)         | --                 | --                  | 6<br>(2 - 12)        | 31<br>(15 - 57)      | 47<br>(23 - 90)        |
| Cirrhosis due to other causes                       | 50<br>(24 - 89)          | 0<br>(0 - 0)       | 0<br>(0 - 1)        | 10<br>(4 - 19)       | 22<br>(9 - 40)       | 18<br>(8 - 35)         |
| Digestive diseases                                  | 780<br>(500 - 1,157)     | 7<br>(4 - 12)      | 7<br>(4 - 11)       | 88<br>(42 - 152)     | 169<br>(94 - 262)    | 508<br>(324 - 772)     |
| Peptic ulcer disease                                | 114<br>(46 - 236)        | 0<br>(0 - 0)       | 0<br>(0 - 1)        | 5<br>(2 - 12)        | 14<br>(3 - 40)       | 94<br>(40 - 194)       |
| Gastritis and duodenitis                            | 71<br>(32 - 145)         | 1<br>(0 - 2)       | 1<br>(0 - 1)        | 5<br>(2 - 12)        | 12<br>(5 - 25)       | 52<br>(22 - 109)       |
| Appendicitis                                        | 49<br>(25 - 89)          | 1<br>(0 - 1)       | 1<br>(1 - 2)        | 13<br>(5 - 24)       | 14<br>(6 - 25)       | 20<br>(9 - 42)         |
| Paralytic ileus and intestinal obstruction          | 34<br>(17 - 67)          | 2<br>(1 - 5)       | 2<br>(1 - 4)        | 7<br>(3 - 15)        | 8<br>(3 - 18)        | 14<br>(6 - 30)         |
| Inguinal, femoral, and abdominal hernia             | 60<br>(31 - 115)         | 0<br>(0 - 1)       | 0<br>(0 - 1)        | 4<br>(2 - 8)         | 13<br>(6 - 24)       | 42<br>(19 - 89)        |
| Inflammatory bowel disease                          | 28<br>(15 - 59)          | 1<br>(0 - 2)       | 1<br>(0 - 1)        | 5<br>(2 - 11)        | 6<br>(3 - 13)        | 15<br>(7 - 33)         |
| Vascular intestinal disorders                       | 94<br>(46 - 171)         | 0<br>(0 - 1)       | 0<br>(0 - 1)        | 5<br>(2 - 10)        | 16<br>(7 - 31)       | 73<br>(34 - 132)       |
| Gallbladder and biliary diseases                    | 134<br>(65 - 283)        | 0<br>(0 - 0)       | 0<br>(0 - 0)        | 12<br>(5 - 27)       | 35<br>(16 - 80)      | 87<br>(39 - 181)       |
| Pancreatitis                                        | 77<br>(40 - 134)         | 1<br>(0 - 1)       | 1<br>(0 - 2)        | 20<br>(9 - 35)       | 20<br>(10 - 36)      | 35<br>(17 - 65)        |
| Other digestive diseases                            | 118<br>(61 - 203)        | 1<br>(0 - 1)       | 1<br>(0 - 2)        | 12<br>(5 - 24)       | 30<br>(14 - 54)      | 74<br>(35 - 137)       |
| Neurological disorders                              | 884<br>(572 - 1,275)     | 10<br>(6 - 20)     | 10<br>(5 - 19)      | 79<br>(36 - 145)     | 71<br>(40 - 109)     | 714<br>(442 - 1,044)   |
| Alzheimer disease and other dementias               | 674<br>(407 - 996)       | --                 | --                  | 0<br>(0 - 1)         | 30<br>(15 - 51)      | 643<br>(380 - 957)     |
| Parkinson disease                                   | 43<br>(22 - 76)          | --                 | --                  | 0<br>(0 - 1)         | 5<br>(3 - 10)        | 37<br>(18 - 68)        |
| Epilepsy                                            | 129<br>(69 - 228)        | 6<br>(2 - 15)      | 8<br>(3 - 17)       | 67<br>(30 - 126)     | 24<br>(10 - 45)      | 25<br>(10 - 53)        |
| Multiple sclerosis                                  | 6<br>(3 - 12)            | --                 | --                  | 3<br>(1 - 6)         | 2<br>(1 - 5)         | 1<br>(0 - 2)           |
| Other neurological disorders                        | 31<br>(21 - 45)          | 4<br>(3 - 6)       | 2<br>(1 - 3)        | 8<br>(4 - 14)        | 9<br>(5 - 14)        | 8<br>(5 - 11)          |
| Mental and substance use disorders                  | 41<br>(22 - 76)          | 0<br>(0 - 0)       | 0<br>(0 - 0)        | 17<br>(7 - 35)       | 14<br>(7 - 26)       | 10<br>(5 - 17)         |
| Schizophrenia                                       | 12<br>(6 - 19)           | --                 | --                  | 4<br>(2 - 7)         | 4<br>(2 - 8)         | 3<br>(1 - 6)           |
| Alcohol use disorders                               | 23<br>(10 - 57)          | --                 | --                  | 9<br>(3 - 25)        | 9<br>(4 - 21)        | 6<br>(2 - 13)          |
| Drug use disorders                                  | 6<br>(3 - 10)            | 0<br>(0 - 0)       | --                  | 4<br>(1 - 7)         | 1<br>(1 - 2)         | 1<br>(1 - 2)           |
| Opioid use disorders                                | 1<br>(1 - 2)             | 0<br>(0 - 0)       | --                  | 1<br>(0 - 1)         | 0<br>(0 - 0)         | 0<br>(0 - 0)           |
| Cocaine use disorders                               | 0<br>(0 - 0)             | 0<br>(0 - 0)       | --                  | 0<br>(0 - 0)         | 0<br>(0 - 0)         | 0<br>(0 - 0)           |
| Amphetamine use disorders                           | 0<br>(0 - 0)             | 0<br>(0 - 0)       | --                  | 0<br>(0 - 0)         | 0<br>(0 - 0)         | 0<br>(0 - 0)           |
| Other drug use disorders                            | 4<br>(2 - 7)             | 0<br>(0 - 0)       | --                  | 3<br>(1 - 5)         | 1<br>(0 - 1)         | 1<br>(0 - 1)           |
| Eating disorders                                    | 0<br>(0 - 1)             | --                 | 0<br>(0 - 0)        | 0<br>(0 - 0)         | --                   | --                     |

Web Table 31- Honduras deaths with 95% UI by age, sex, and cause in 2013

| Cause                                               | Females, All Ages      | Females, 0-4 Years | Females, 5-14 Years | Females, 15-49 Years | Females, 50-69 Years | Females, 70-80 Years |
|-----------------------------------------------------|------------------------|--------------------|---------------------|----------------------|----------------------|----------------------|
| Anorexia nervosa                                    | 0<br>(0 - 1)           | --                 | 0<br>(0 - 0)        | 0<br>(0 - 0)         | --                   | --                   |
| Diabetes, urogenital, blood, and endocrine diseases | 1,295<br>(825 - 1,943) | 61<br>(31 - 103)   | 25<br>(13 - 48)     | 160<br>(73 - 279)    | 394<br>(231 - 601)   | 655<br>(416 - 969)   |
| Diabetes mellitus                                   | 666<br>(413 - 958)     | 1<br>(0 - 2)       | 1<br>(1 - 3)        | 42<br>(19 - 75)      | 238<br>(136 - 367)   | 383<br>(232 - 573)   |
| Acute glomerulonephritis                            | 2<br>(1 - 3)           | 0<br>(0 - 0)       | 0<br>(0 - 0)        | 0<br>(0 - 1)         | 0<br>(0 - 1)         | 1<br>(0 - 2)         |
| Chronic kidney disease                              | 158<br>(80 - 421)      | 1<br>(1 - 4)       | 1<br>(1 - 3)        | 28<br>(12 - 81)      | 44<br>(21 - 112)     | 82<br>(42 - 228)     |
| Chronic kidney disease due to diabetes mellitus     | 79<br>(35 - 214)       | 0<br>(0 - 1)       | 0<br>(0 - 0)        | 11<br>(3 - 32)       | 28<br>(13 - 71)      | 40<br>(16 - 118)     |
| Chronic kidney disease due to hypertension          | 52<br>(22 - 127)       | 1<br>(0 - 1)       | 1<br>(0 - 1)        | 10<br>(4 - 26)       | 11<br>(4 - 25)       | 29<br>(11 - 73)      |
| Chronic kidney disease due to glomerulonephritis    | 10<br>(5 - 27)         | 0<br>(0 - 1)       | 1<br>(0 - 1)        | 3<br>(1 - 9)         | 2<br>(1 - 4)         | 5<br>(2 - 13)        |
| Chronic kidney disease due to other causes          | 16<br>(5 - 79)         | 0<br>(0 - 1)       | 0<br>(0 - 1)        | 4<br>(1 - 18)        | 3<br>(1 - 15)        | 9<br>(2 - 48)        |
| Urinary diseases and male infertility               | 147<br>(80 - 222)      | 2<br>(1 - 6)       | 1<br>(0 - 2)        | 16<br>(7 - 29)       | 32<br>(15 - 54)      | 95<br>(47 - 149)     |
| Interstitial nephritis and urinary tract infections | 120<br>(62 - 183)      | 2<br>(1 - 5)       | 1<br>(0 - 1)        | 12<br>(5 - 21)       | 24<br>(10 - 43)      | 81<br>(39 - 132)     |
| Urolithiasis                                        | 13<br>(5 - 24)         | --                 | 0<br>(0 - 0)        | 2<br>(1 - 5)         | 4<br>(1 - 9)         | 6<br>(2 - 14)        |
| Other urinary diseases                              | 14<br>(7 - 29)         | 1<br>(0 - 1)       | 0<br>(0 - 1)        | 2<br>(1 - 5)         | 3<br>(1 - 7)         | 8<br>(3 - 19)        |
| Gynecological diseases                              | 29<br>(12 - 59)        | --                 | --                  | 15<br>(5 - 31)       | 7<br>(3 - 14)        | 8<br>(3 - 17)        |
| Uterine fibroids                                    | 7<br>(3 - 14)          | --                 | --                  | 3<br>(1 - 6)         | 2<br>(1 - 4)         | 2<br>(1 - 5)         |
| Polycystic ovarian syndrome                         | 1<br>(0 - 2)           | --                 | --                  | 1<br>(0 - 2)         | 0<br>(0 - 0)         | --                   |
| Endometriosis                                       | 2<br>(1 - 5)           | --                 | --                  | 2<br>(1 - 5)         | 0<br>(0 - 0)         | --                   |
| Genital prolapse                                    | 5<br>(2 - 10)          | --                 | --                  | 2<br>(1 - 4)         | 1<br>(0 - 3)         | 2<br>(1 - 4)         |
| Other gynecological diseases                        | 14<br>(6 - 28)         | --                 | --                  | 7<br>(2 - 15)        | 4<br>(1 - 7)         | 3<br>(1 - 7)         |
| Hemoglobinopathies and hemolytic anemias            | 131<br>(68 - 232)      | 29<br>(11 - 74)    | 17<br>(7 - 38)      | 29<br>(13 - 55)      | 35<br>(17 - 59)      | 22<br>(11 - 36)      |
| Thalassemias                                        | 3<br>(1 - 6)           | 1<br>(0 - 3)       | 1<br>(0 - 2)        | 1<br>(0 - 1)         | 0<br>(0 - 0)         | 0<br>(0 - 0)         |
| Sickle cell disorders                               | 51<br>(24 - 105)       | 14<br>(5 - 39)     | 11<br>(4 - 25)      | 17<br>(8 - 33)       | 8<br>(4 - 14)        | 1<br>(0 - 1)         |
| G6PD deficiency                                     | 5<br>(2 - 9)           | 1<br>(1 - 4)       | 1<br>(0 - 2)        | 1<br>(1 - 2)         | 1<br>(1 - 2)         | 0<br>(0 - 0)         |
| Other hemoglobinopathies and hemolytic anemias      | 73<br>(40 - 120)       | 12<br>(5 - 30)     | 4<br>(2 - 10)       | 10<br>(4 - 19)       | 25<br>(12 - 43)      | 21<br>(10 - 34)      |
| Endocrine, metabolic, blood, and immune disorders   | 162<br>(96 - 307)      | 27<br>(11 - 54)    | 5<br>(2 - 11)       | 28<br>(11 - 59)      | 38<br>(19 - 79)      | 64<br>(30 - 148)     |
| Musculoskeletal disorders                           | 7<br>(4 - 11)          | --                 | 1<br>(0 - 1)        | 1<br>(1 - 3)         | 2<br>(1 - 3)         | 3<br>(2 - 5)         |
| Rheumatoid arthritis                                | 6<br>(3 - 9)           | --                 | 0<br>(0 - 1)        | 1<br>(0 - 2)         | 1<br>(1 - 2)         | 3<br>(2 - 5)         |
| Other musculoskeletal disorders                     | 1<br>(1 - 3)           | --                 | 0<br>(0 - 1)        | 0<br>(0 - 1)         | 0<br>(0 - 0)         | 0<br>(0 - 1)         |
| Other non-communicable diseases                     | 571<br>(392 - 779)     | 475<br>(326 - 648) | 30<br>(14 - 56)     | 39<br>(16 - 77)      | 10<br>(5 - 19)       | 17<br>(9 - 27)       |
| Congenital anomalies                                | 552<br>(371 - 760)     | 463<br>(311 - 640) | 30<br>(13 - 56)     | 37<br>(15 - 75)      | 9<br>(4 - 18)        | 12<br>(6 - 22)       |
| Neural tube defects                                 | 109<br>(35 - 241)      | 96<br>(27 - 218)   | 5<br>(2 - 12)       | 5<br>(2 - 12)        | 1<br>(0 - 2)         | 2<br>(1 - 6)         |
| Congenital heart anomalies                          | 39<br>(20 - 75)        | 32<br>(14 - 62)    | 3<br>(1 - 7)        | 4<br>(1 - 9)         | 0<br>(0 - 1)         | 0<br>(0 - 0)         |
| Cleft lip and cleft palate                          | 1<br>(0 - 1)           | 1<br>(0 - 1)       | --                  | --                   | --                   | --                   |
| Down syndrome                                       | 45<br>(18 - 91)        | 30<br>(11 - 63)    | 5<br>(2 - 11)       | 8<br>(2 - 19)        | 1<br>(0 - 4)         | 0<br>(0 - 1)         |
| Chromosomal unbalanced rearrangements               | 11<br>(4 - 24)         | 9<br>(3 - 20)      | 0<br>(0 - 1)        | 1<br>(0 - 3)         | 0<br>(0 - 0)         | 0<br>(0 - 0)         |
| Other congenital anomalies                          | 347<br>(213 - 503)     | 295<br>(173 - 437) | 17<br>(8 - 29)      | 20<br>(8 - 39)       | 7<br>(3 - 13)        | 9<br>(4 - 17)        |
| Skin and subcutaneous diseases                      | 9<br>(6 - 14)          | 2<br>(1 - 4)       | 0<br>(0 - 1)        | 2<br>(1 - 3)         | 1<br>(1 - 2)         | 5<br>(3 - 8)         |
| Cellulitis                                          | 2<br>(1 - 3)           | 1<br>(0 - 1)       | 0<br>(0 - 0)        | 0<br>(0 - 1)         | 0<br>(0 - 1)         | 0<br>(0 - 1)         |
| Pyoderma                                            | 2<br>(1 - 3)           | 1<br>(0 - 2)       | 0<br>(0 - 0)        | 0<br>(0 - 1)         | 0<br>(0 - 0)         | 0<br>(0 - 1)         |
| Decubitus ulcer                                     | 5<br>(3 - 8)           | 0<br>(0 - 0)       | 0<br>(0 - 0)        | 1<br>(0 - 1)         | 1<br>(0 - 1)         | 4<br>(2 - 6)         |



Web Table 31- Honduras deaths with 95% UI by age, sex, and cause in 2013

| Cause                                           | Females, All Ages      | Females, 0-4 Years | Females, 5-14 Years | Females, 15-49 Years | Females, 50-69 Years | Females, 70-80 Years |
|-------------------------------------------------|------------------------|--------------------|---------------------|----------------------|----------------------|----------------------|
| Other skin and subcutaneous diseases            | 1<br>(0 - 1)           | 0<br>(0 - 0)       | 0<br>(0 - 0)        | 0<br>(0 - 0)         | 0<br>(0 - 0)         | 0<br>(0 - 0)         |
| Sudden infant death syndrome                    | 10<br>(1 - 37)         | 10<br>(1 - 37)     | --                  | --                   | --                   | --                   |
| Injuries                                        | 1,184<br>(470 - 1,883) | 115<br>(55 - 180)  | 87<br>(39 - 141)    | 598<br>(175 - 1,071) | 192<br>(60 - 317)    | 191<br>(80 - 276)    |
| Transport injuries                              | 304<br>(74 - 488)      | 11<br>(2 - 23)     | 18<br>(4 - 36)      | 116<br>(27 - 214)    | 76<br>(17 - 131)     | 83<br>(19 - 138)     |
| Road injuries                                   | 290<br>(71 - 464)      | 11<br>(2 - 21)     | 17<br>(4 - 34)      | 109<br>(25 - 201)    | 71<br>(16 - 123)     | 81<br>(18 - 135)     |
| Pedestrian road injuries                        | 155<br>(36 - 256)      | 6<br>(1 - 14)      | 10<br>(2 - 21)      | 43<br>(9 - 84)       | 38<br>(8 - 67)       | 58<br>(13 - 98)      |
| Cyclist road injuries                           | 9<br>(2 - 16)          | 0<br>(0 - 1)       | 1<br>(0 - 1)        | 4<br>(1 - 8)         | 2<br>(0 - 4)         | 2<br>(0 - 4)         |
| Motorcyclist road injuries                      | 14<br>(2 - 27)         | 0<br>(0 - 1)       | 1<br>(0 - 2)        | 7<br>(1 - 14)        | 3<br>(0 - 6)         | 3<br>(0 - 7)         |
| Motor vehicle road injuries                     | 105<br>(23 - 176)      | 4<br>(1 - 8)       | 5<br>(1 - 10)       | 53<br>(12 - 102)     | 28<br>(6 - 49)       | 16<br>(3 - 30)       |
| Other road injuries                             | 6<br>(1 - 13)          | 0<br>(0 - 1)       | 1<br>(0 - 1)        | 3<br>(0 - 6)         | 1<br>(0 - 3)         | 2<br>(0 - 4)         |
| Other transport injuries                        | 15<br>(2 - 26)         | 1<br>(0 - 2)       | 1<br>(0 - 2)        | 7<br>(1 - 14)        | 4<br>(1 - 8)         | 2<br>(0 - 4)         |
| Unintentional injuries                          | 280<br>(186 - 408)     | 62<br>(34 - 117)   | 32<br>(17 - 59)     | 80<br>(37 - 139)     | 39<br>(20 - 60)      | 66<br>(41 - 95)      |
| Falls                                           | 5<br>(3 - 9)           | 0<br>(0 - 0)       | 0<br>(0 - 0)        | 1<br>(0 - 1)         | 1<br>(0 - 2)         | 4<br>(2 - 6)         |
| Drowning                                        | 90<br>(49 - 167)       | 17<br>(6 - 50)     | 17<br>(7 - 39)      | 30<br>(13 - 59)      | 11<br>(6 - 19)       | 15<br>(8 - 27)       |
| Fire, heat, and hot substances                  | 15<br>(4 - 29)         | 1<br>(0 - 5)       | 1<br>(0 - 2)        | 5<br>(1 - 11)        | 3<br>(1 - 7)         | 4<br>(1 - 10)        |
| Poisonings                                      | 15<br>(9 - 25)         | 0<br>(0 - 0)       | 0<br>(0 - 0)        | 3<br>(1 - 6)         | 3<br>(2 - 6)         | 8<br>(4 - 14)        |
| Exposure to mechanical forces                   | 50<br>(14 - 83)        | 5<br>(1 - 10)      | 7<br>(1 - 15)       | 25<br>(6 - 45)       | 8<br>(2 - 13)        | 6<br>(2 - 9)         |
| Unintentional firearm injuries                  | 7<br>(3 - 11)          | 0<br>(0 - 1)       | 0<br>(0 - 1)        | 2<br>(1 - 4)         | 2<br>(1 - 3)         | 2<br>(1 - 5)         |
| Unintentional suffocation                       | 5<br>(2 - 8)           | 1<br>(0 - 4)       | 1<br>(0 - 1)        | 2<br>(1 - 4)         | 0<br>(0 - 1)         | 0<br>(0 - 1)         |
| Other exposure to mechanical forces             | 38<br>(5 - 68)         | 3<br>(0 - 8)       | 6<br>(1 - 13)       | 20<br>(3 - 39)       | 6<br>(1 - 10)        | 3<br>(0 - 4)         |
| Adverse effects of medical treatment            | 37<br>(15 - 66)        | 3<br>(1 - 7)       | 0<br>(0 - 1)        | 6<br>(2 - 12)        | 7<br>(2 - 14)        | 20<br>(6 - 43)       |
| Animal contact                                  | 3<br>(1 - 9)           | 1<br>(0 - 2)       | 0<br>(0 - 1)        | 1<br>(0 - 2)         | 0<br>(0 - 2)         | 1<br>(0 - 3)         |
| Venomous animal contact                         | 2<br>(1 - 7)           | 0<br>(0 - 2)       | 0<br>(0 - 0)        | 0<br>(0 - 2)         | 0<br>(0 - 1)         | 1<br>(0 - 2)         |
| Non-venomous animal contact                     | 1<br>(0 - 3)           | 0<br>(0 - 0)       | 0<br>(0 - 0)        | 0<br>(0 - 1)         | 0<br>(0 - 0)         | 0<br>(0 - 1)         |
| Foreign body                                    | 64<br>(33 - 120)       | 35<br>(16 - 73)    | 6<br>(3 - 12)       | 9<br>(4 - 19)        | 4<br>(2 - 8)         | 9<br>(4 - 18)        |
| Pulmonary aspiration and foreign body in airway | 63<br>(33 - 119)       | 35<br>(15 - 73)    | 6<br>(3 - 12)       | 9<br>(4 - 19)        | 4<br>(2 - 8)         | 9<br>(4 - 18)        |
| Foreign body in other body part                 | 1<br>(0 - 1)           | 0<br>(0 - 0)       | 0<br>(0 - 0)        | 0<br>(0 - 0)         | 0<br>(0 - 0)         | 0<br>(0 - 0)         |
| Other unintentional injuries                    | 1<br>(0 - 2)           | 0<br>(0 - 0)       | 0<br>(0 - 0)        | 0<br>(0 - 1)         | 0<br>(0 - 0)         | 0<br>(0 - 0)         |
| Self-harm and interpersonal violence            | 600<br>(129 - 1,092)   | 42<br>(4 - 90)     | 37<br>(6 - 72)      | 402<br>(79 - 760)    | 78<br>(16 - 146)     | 41<br>(11 - 70)      |
| Self-harm                                       | 84<br>(17 - 144)       | --                 | 2<br>(0 - 6)        | 42<br>(8 - 87)       | 20<br>(4 - 34)       | 19<br>(4 - 33)       |
| Interpersonal violence                          | 516<br>(83 - 987)      | 42<br>(4 - 90)     | 35<br>(5 - 71)      | 360<br>(55 - 713)    | 58<br>(8 - 119)      | 22<br>(4 - 46)       |
| Assault by firearm                              | 189<br>(24 - 399)      | 7<br>(0 - 17)      | 11<br>(1 - 26)      | 147<br>(19 - 321)    | 21<br>(2 - 48)       | 4<br>(1 - 9)         |
| Assault by sharp object                         | 126<br>(17 - 276)      | 5<br>(0 - 12)      | 5<br>(0 - 12)       | 96<br>(11 - 217)     | 15<br>(2 - 35)       | 5<br>(1 - 12)        |
| Assault by other means                          | 202<br>(31 - 434)      | 30<br>(3 - 69)     | 19<br>(2 - 44)      | 117<br>(17 - 271)    | 22<br>(3 - 51)       | 13<br>(3 - 30)       |

Web Table 31- Hungary deaths with 95% UI by age, sex, and cause in 2013

| Cause                                                              | Both Sexes, All Ages           | Both Sexes, 0-4 Years | Both Sexes, 5-14 Years | Both Sexes, 15-49 Years  | Both Sexes, 50-69 Years     | Both Sexes, 70-80 Years     |
|--------------------------------------------------------------------|--------------------------------|-----------------------|------------------------|--------------------------|-----------------------------|-----------------------------|
| All causes                                                         | 126,509<br>(123,824 - 129,237) | 503<br>(403 - 632)    | 107<br>(93 - 123)      | 7,303<br>(7,077 - 7,558) | 35,422<br>(34,478 - 36,442) | 83,175<br>(81,612 - 84,866) |
| Communicable, maternal, neonatal, and nutritional diseases         | 1,902<br>(1,724 - 2,161)       | 279<br>(219 - 348)    | 8<br>(6 - 10)          | 166<br>(150 - 183)       | 384<br>(346 - 462)          | 1,065<br>(917 - 1,283)      |
| HIV/AIDS and tuberculosis                                          | 185<br>(155 - 327)             | 0<br>(0 - 0)          | 0<br>(0 - 0)           | 38<br>(31 - 49)          | 73<br>(59 - 129)            | 73<br>(56 - 154)            |
| Tuberculosis                                                       | 134<br>(108 - 272)             | 0<br>(0 - 0)          | 0<br>(0 - 0)           | 11<br>(9 - 19)           | 53<br>(43 - 107)            | 70<br>(53 - 151)            |
| HIV/AIDS                                                           | 51<br>(39 - 66)                | 0<br>(0 - 0)          | 0<br>(0 - 0)           | 27<br>(21 - 36)          | 20<br>(13 - 29)             | 3<br>(2 - 5)                |
| HIV/AIDS resulting in mycobacterial infection                      | 3<br>(2 - 4)                   | 0<br>(0 - 0)          | 0<br>(0 - 0)           | 1<br>(1 - 2)             | 1<br>(1 - 2)                | 0<br>(0 - 0)                |
| HIV/AIDS resulting in other diseases                               | 48<br>(37 - 62)                | 0<br>(0 - 0)          | 0<br>(0 - 0)           | 26<br>(20 - 34)          | 19<br>(12 - 27)             | 3<br>(2 - 5)                |
| Diarrrhea, lower respiratory, and other common infectious diseases | 1,288<br>(1,135 - 1,514)       | 33<br>(24 - 45)       | 6<br>(5 - 8)           | 102<br>(88 - 117)        | 272<br>(240 - 315)          | 874<br>(737 - 1,076)        |
| Diarrrheal diseases                                                | 118<br>(96 - 150)              | 4<br>(2 - 6)          | 0<br>(0 - 0)           | 3<br>(3 - 4)             | 21<br>(17 - 25)             | 89<br>(68 - 121)            |
| Intestinal infectious diseases                                     | 18<br>(8 - 33)                 | 2<br>(1 - 4)          | 2<br>(1 - 4)           | 7<br>(3 - 13)            | 4<br>(1 - 10)               | 3<br>(1 - 6)                |
| Typhoid fever                                                      | 13<br>(6 - 24)                 | 1<br>(0 - 3)          | 1<br>(1 - 3)           | 5<br>(2 - 10)            | 3<br>(1 - 7)                | 2<br>(1 - 4)                |
| Paratyphoid fever                                                  | 4<br>(2 - 7)                   | 0<br>(0 - 1)          | 0<br>(0 - 1)           | 1<br>(1 - 3)             | 1<br>(0 - 2)                | 1<br>(0 - 1)                |
| Other intestinal infectious diseases                               | 1<br>(0 - 4)                   | 0<br>(0 - 1)          | 0<br>(0 - 0)           | 0<br>(0 - 2)             | 0<br>(0 - 2)                | 0<br>(0 - 2)                |
| Lower respiratory infections                                       | 1,054<br>(907 - 1,267)         | 21<br>(14 - 29)       | 2<br>(2 - 3)           | 73<br>(60 - 87)          | 213<br>(182 - 251)          | 744<br>(612 - 937)          |
| Upper respiratory infections                                       | 3<br>(1 - 8)                   | 0<br>(0 - 0)          | 0<br>(0 - 0)           | 0<br>(0 - 1)             | 1<br>(0 - 2)                | 2<br>(0 - 6)                |
| Otitis media                                                       | 1<br>(1 - 1)                   | 0<br>(0 - 0)          | 0<br>(0 - 0)           | 0<br>(0 - 0)             | 0<br>(0 - 0)                | 0<br>(0 - 0)                |
| Meningitis                                                         | 61<br>(54 - 72)                | 4<br>(3 - 7)          | 1<br>(1 - 1)           | 10<br>(8 - 11)           | 24<br>(20 - 28)             | 22<br>(18 - 29)             |
| Pneumococcal meningitis                                            | 17<br>(12 - 22)                | 1<br>(0 - 1)          | 0<br>(0 - 0)           | 3<br>(2 - 4)             | 7<br>(4 - 10)               | 6<br>(3 - 9)                |
| H influenzae type B meningitis                                     | 7<br>(5 - 9)                   | 1<br>(1 - 2)          | 0<br>(0 - 0)           | 1<br>(1 - 2)             | 2<br>(1 - 3)                | 2<br>(1 - 3)                |
| Meningococcal meningitis                                           | 13<br>(10 - 18)                | 1<br>(1 - 2)          | 0<br>(0 - 0)           | 2<br>(1 - 3)             | 5<br>(3 - 7)                | 5<br>(3 - 8)                |
| Other meningitis                                                   | 24<br>(19 - 29)                | 1<br>(1 - 2)          | 0<br>(0 - 0)           | 4<br>(2 - 5)             | 10<br>(7 - 13)              | 9<br>(6 - 12)               |
| Encephalitis                                                       | 22<br>(15 - 38)                | 1<br>(1 - 3)          | 1<br>(0 - 1)           | 7<br>(4 - 13)            | 7<br>(5 - 13)               | 5<br>(4 - 10)               |
| Diphtheria                                                         | 0<br>(0 - 1)                   | 0<br>(0 - 0)          | 0<br>(0 - 0)           | 0<br>(0 - 0)             | 0<br>(0 - 0)                | --<br>(0 - 0)               |
| Whooping cough                                                     | 1<br>(1 - 1)                   | 0<br>(0 - 0)          | 0<br>(0 - 0)           | 0<br>(0 - 1)             | 0<br>(0 - 0)                | --<br>(0 - 0)               |
| Tetanus                                                            | 3<br>(2 - 7)                   | 0<br>(0 - 0)          | 0<br>(0 - 0)           | 1<br>(0 - 1)             | 1<br>(0 - 3)                | 1<br>(1 - 4)                |
| Measles                                                            | 0<br>(0 - 0)                   | 0<br>(0 - 0)          | 0<br>(0 - 0)           | 0<br>(0 - 0)             | 0<br>(0 - 0)                | --<br>(0 - 0)               |
| Varicella and herpes zoster                                        | 8<br>(2 - 23)                  | 0<br>(0 - 1)          | 0<br>(0 - 0)           | 1<br>(0 - 2)             | 1<br>(0 - 2)                | 6<br>(0 - 22)               |
| Neglected tropical diseases and malaria                            | 5<br>(5 - 6)                   | 0<br>(0 - 0)          | 0<br>(0 - 0)           | 2<br>(1 - 2)             | 2<br>(1 - 2)                | 2<br>(1 - 2)                |
| Cysticercosis                                                      | 0<br>(0 - 0)                   | 0<br>(0 - 0)          | 0<br>(0 - 0)           | 0<br>(0 - 0)             | 0<br>(0 - 0)                | 0<br>(0 - 0)                |
| Cystic echinococcosis                                              | 1<br>(1 - 1)                   | 0<br>(0 - 0)          | 0<br>(0 - 0)           | 0<br>(0 - 0)             | 1<br>(1 - 1)                | 1<br>(0 - 1)                |
| Dengue                                                             | 1<br>(1 - 1)                   | 0<br>(0 - 0)          | 0<br>(0 - 0)           | 0<br>(0 - 0)             | 0<br>(0 - 0)                | 0<br>(0 - 0)                |
| Rabies                                                             | 1<br>(1 - 1)                   | 0<br>(0 - 0)          | 0<br>(0 - 0)           | 0<br>(0 - 1)             | 0<br>(0 - 0)                | 0<br>(0 - 0)                |
| Other neglected tropical diseases                                  | 2<br>(2 - 3)                   | 0<br>(0 - 0)          | 0<br>(0 - 0)           | 1<br>(0 - 1)             | 0<br>(0 - 1)                | 1<br>(1 - 1)                |
| Maternal disorders                                                 | 9<br>(6 - 11)                  | --                    | 0<br>(0 - 0)           | 9<br>(6 - 11)            | --                          | --                          |
| Maternal hemorrhage                                                | 1<br>(1 - 2)                   | --                    | 0<br>(0 - 0)           | 1<br>(1 - 2)             | --                          | --                          |
| Maternal sepsis and other maternal infections                      | 1<br>(0 - 1)                   | --                    | 0<br>(0 - 0)           | 1<br>(0 - 1)             | --                          | --                          |
| Maternal hypertensive disorders                                    | 1<br>(1 - 2)                   | --                    | 0<br>(0 - 0)           | 1<br>(1 - 2)             | --                          | --                          |
| Maternal obstructed labor                                          | 1<br>(0 - 1)                   | --                    | 0<br>(0 - 0)           | 1<br>(0 - 1)             | --                          | --                          |
| Maternal abortive outcome                                          | 2<br>(1 - 2)                   | --                    | 0<br>(0 - 0)           | 2<br>(1 - 2)             | --                          | --                          |
| Indirect maternal deaths                                           | 1<br>(0 - 1)                   | --                    | 0<br>(0 - 0)           | 1<br>(0 - 1)             | --                          | --                          |

Web Table 31- Hungary deaths with 95% UI by age, sex, and cause in 2013

| Cause                                                            | Both Sexes, All Ages           | Both Sexes, 0-4 Years | Both Sexes, 5-14 Years | Both Sexes, 15-49 Years  | Both Sexes, 50-69 Years     | Both Sexes, 70-80 Years     |
|------------------------------------------------------------------|--------------------------------|-----------------------|------------------------|--------------------------|-----------------------------|-----------------------------|
| Late maternal deaths                                             | 1<br>(1 - 2)                   | --                    | 0<br>(0 - 0)           | 1<br>(1 - 2)             | --                          | --                          |
| Maternal deaths aggravated by HIV/AIDS                           | 0<br>(0 - 0)                   | --                    | --                     | 0<br>(0 - 0)             | --                          | --                          |
| Other maternal disorders                                         | 1<br>(1 - 2)                   | --                    | 0<br>(0 - 0)           | 1<br>(1 - 2)             | --                          | --                          |
| Neonatal disorders                                               | 241<br>(188 - 303)             | 241<br>(188 - 303)    | --                     | --                       | --                          | --                          |
| Neonatal preterm birth complications                             | 129<br>(94 - 171)              | 129<br>(94 - 171)     | --                     | --                       | --                          | --                          |
| Neonatal encephalopathy due to birth asphyxia and trauma         | 32<br>(20 - 62)                | 32<br>(20 - 62)       | --                     | --                       | --                          | --                          |
| Neonatal sepsis and other neonatal infections                    | 10<br>(5 - 17)                 | 10<br>(5 - 17)        | --                     | --                       | --                          | --                          |
| Hemolytic disease and other neonatal jaundice                    | 0<br>(0 - 1)                   | 0<br>(0 - 1)          | --                     | --                       | --                          | --                          |
| Other neonatal disorders                                         | 69<br>(29 - 100)               | 69<br>(29 - 100)      | --                     | --                       | --                          | --                          |
| Nutritional deficiencies                                         | 109<br>(46 - 134)              | 1<br>(0 - 2)          | 0<br>(0 - 0)           | 7<br>(3 - 8)             | 15<br>(8 - 18)              | 87<br>(35 - 110)            |
| Protein-energy malnutrition                                      | 19<br>(4 - 37)                 | 1<br>(0 - 1)          | 0<br>(0 - 0)           | 1<br>(0 - 2)             | 3<br>(1 - 6)                | 14<br>(3 - 29)              |
| Iodine deficiency                                                | 1<br>(0 - 5)                   | 0<br>(0 - 0)          | 0<br>(0 - 0)           | 0<br>(0 - 0)             | 0<br>(0 - 1)                | 1<br>(0 - 5)                |
| Iron-deficiency anemia                                           | 62<br>(25 - 87)                | 0<br>(0 - 0)          | 0<br>(0 - 0)           | 4<br>(2 - 6)             | 8<br>(4 - 11)               | 50<br>(19 - 72)             |
| Other nutritional deficiencies                                   | 27<br>(12 - 47)                | 0<br>(0 - 1)          | 0<br>(0 - 0)           | 1<br>(1 - 2)             | 3<br>(2 - 5)                | 22<br>(10 - 40)             |
| Other communicable, maternal, neonatal, and nutritional diseases | 65<br>(53 - 80)                | 3<br>(2 - 6)          | 1<br>(1 - 1)           | 9<br>(7 - 11)            | 22<br>(17 - 26)             | 30<br>(23 - 41)             |
| Sexually transmitted diseases excluding HIV                      | 10<br>(6 - 15)                 | 1<br>(0 - 3)          | 0<br>(0 - 0)           | 1<br>(1 - 2)             | 3<br>(2 - 4)                | 5<br>(3 - 9)                |
| Syphilis                                                         | 7<br>(4 - 11)                  | 1<br>(0 - 3)          | 0<br>(0 - 0)           | 0<br>(0 - 1)             | 1<br>(1 - 2)                | 4<br>(2 - 7)                |
| Chlamydial infection                                             | 1<br>(0 - 1)                   | --                    | 0<br>(0 - 0)           | 0<br>(0 - 0)             | 0<br>(0 - 0)                | 0<br>(0 - 0)                |
| Gonococcal infection                                             | 1<br>(1 - 2)                   | --                    | 0<br>(0 - 0)           | 0<br>(0 - 0)             | 0<br>(0 - 1)                | 1<br>(0 - 1)                |
| Other sexually transmitted diseases                              | 1<br>(0 - 1)                   | --                    | 0<br>(0 - 0)           | 0<br>(0 - 0)             | 0<br>(0 - 0)                | 0<br>(0 - 0)                |
| Hepatitis                                                        | 5<br>(4 - 6)                   | 0<br>(0 - 0)          | 0<br>(0 - 0)           | 1<br>(1 - 1)             | 2<br>(2 - 3)                | 2<br>(2 - 3)                |
| Acute hepatitis A                                                | 1<br>(0 - 2)                   | 0<br>(0 - 0)          | 0<br>(0 - 0)           | 0<br>(0 - 1)             | 0<br>(0 - 1)                | 0<br>(0 - 0)                |
| Acute hepatitis B                                                | 4<br>(3 - 5)                   | 0<br>(0 - 0)          | 0<br>(0 - 0)           | 0<br>(0 - 1)             | 2<br>(1 - 2)                | 2<br>(1 - 2)                |
| Acute hepatitis C                                                | 0<br>(0 - 1)                   | --                    | 0<br>(0 - 0)           | 0<br>(0 - 0)             | 0<br>(0 - 0)                | 0<br>(0 - 1)                |
| Other infectious diseases                                        | 51<br>(41 - 66)                | 2<br>(2 - 3)          | 1<br>(0 - 1)           | 7<br>(5 - 9)             | 18<br>(13 - 22)             | 23<br>(17 - 36)             |
| Non-communicable diseases                                        | 117,719<br>(114,280 - 120,597) | 200<br>(157 - 253)    | 64<br>(55 - 75)        | 5,260<br>(4,956 - 5,476) | 33,001<br>(32,015 - 34,013) | 79,195<br>(76,700 - 80,999) |
| Neoplasms                                                        | 32,279<br>(30,458 - 33,621)    | 16<br>(11 - 22)       | 31<br>(26 - 38)        | 2,130<br>(1,998 - 2,246) | 14,567<br>(13,637 - 15,234) | 15,535<br>(14,649 - 16,427) |
| Esophageal cancer                                                | 683<br>(609 - 823)             | --                    | --                     | 53<br>(41 - 83)          | 427<br>(372 - 516)          | 202<br>(178 - 232)          |
| Stomach cancer                                                   | 1,950<br>(1,716 - 2,235)       | --                    | --                     | 84<br>(71 - 100)         | 706<br>(629 - 791)          | 1,161<br>(979 - 1,403)      |
| Liver cancer                                                     | 1,097<br>(868 - 1,327)         | --                    | 1<br>(0 - 1)           | 63<br>(47 - 80)          | 488<br>(378 - 590)          | 545<br>(435 - 687)          |
| Liver cancer due to hepatitis B                                  | 213<br>(96 - 334)              | --                    | 0<br>(0 - 0)           | 19<br>(10 - 28)          | 114<br>(40 - 187)           | 81<br>(43 - 122)            |
| Liver cancer due to hepatitis C                                  | 509<br>(368 - 672)             | --                    | 0<br>(0 - 0)           | 26<br>(17 - 37)          | 223<br>(150 - 313)          | 259<br>(191 - 342)          |
| Liver cancer due to alcohol use                                  | 273<br>(192 - 363)             | --                    | --                     | 9<br>(6 - 14)            | 107<br>(69 - 149)           | 156<br>(110 - 216)          |
| Liver cancer due to other causes                                 | 102<br>(64 - 143)              | --                    | 0<br>(0 - 0)           | 9<br>(6 - 13)            | 44<br>(27 - 62)             | 49<br>(28 - 75)             |
| Larynx cancer                                                    | 491<br>(356 - 580)             | --                    | --                     | 46<br>(35 - 58)          | 310<br>(216 - 366)          | 134<br>(97 - 166)           |
| Tracheal, bronchus and lung cancer                               | 8,439<br>(7,457 - 9,078)       | --                    | --                     | 443<br>(380 - 499)       | 4,843<br>(4,230 - 5,265)    | 3,153<br>(2,737 - 3,433)    |
| Breast cancer                                                    | 1,961<br>(1,516 - 2,349)       | --                    | --                     | 192<br>(138 - 227)       | 821<br>(645 - 973)          | 949<br>(718 - 1,176)        |
| Cervical cancer                                                  | 450<br>(363 - 529)             | --                    | --                     | 81<br>(59 - 99)          | 185<br>(138 - 222)          | 184<br>(146 - 238)          |
| Uterine cancer                                                   | 281<br>(238 - 334)             | --                    | --                     | 9<br>(7 - 13)            | 97<br>(78 - 121)            | 175<br>(141 - 220)          |
| Prostate cancer                                                  | 1,028<br>(811 - 1,489)         | --                    | --                     | 4<br>(3 - 7)             | 233<br>(169 - 321)          | 790<br>(611 - 1,217)        |

Web Table 31- Hungary deaths with 95% UI by age, sex, and cause in 2013

| Cause                                         | Both Sexes, All Ages        | Both Sexes, 0-4 Years | Both Sexes, 5-14 Years | Both Sexes, 15-49 Years  | Both Sexes, 50-69 Years     | Both Sexes, 70-80 Years     |
|-----------------------------------------------|-----------------------------|-----------------------|------------------------|--------------------------|-----------------------------|-----------------------------|
| Colon and rectum cancer                       | 4,684<br>(4,364 - 5,028)    | --                    | --                     | 176<br>(158 - 195)       | 1,735<br>(1,620 - 1,843)    | 2,773<br>(2,512 - 3,071)    |
| Lip and oral cavity cancer                    | 782<br>(654 - 864)          | --                    | --                     | 96<br>(80 - 115)         | 479<br>(367 - 551)          | 207<br>(179 - 235)          |
| Nasopharynx cancer                            | 107<br>(61 - 131)           | --                    | 0<br>(0 - 0)           | 20<br>(10 - 27)          | 67<br>(37 - 86)             | 20<br>(12 - 26)             |
| Other pharynx cancer                          | 525<br>(348 - 628)          | --                    | --                     | 80<br>(63 - 106)         | 373<br>(227 - 462)          | 72<br>(54 - 89)             |
| Gallbladder and biliary tract cancer          | 765<br>(612 - 1,000)        | --                    | --                     | 19<br>(13 - 24)          | 254<br>(202 - 321)          | 491<br>(386 - 666)          |
| Pancreatic cancer                             | 2,001<br>(1,873 - 2,131)    | --                    | --                     | 98<br>(85 - 110)         | 834<br>(768 - 901)          | 1,069<br>(974 - 1,168)      |
| Malignant skin melanoma                       | 422<br>(283 - 578)          | --                    | --                     | 64<br>(42 - 90)          | 171<br>(110 - 239)          | 188<br>(130 - 255)          |
| Non-melanoma skin cancer                      | 213<br>(168 - 296)          | --                    | --                     | 6<br>(5 - 9)             | 38<br>(27 - 51)             | 169<br>(130 - 240)          |
| Ovarian cancer                                | 617<br>(545 - 691)          | --                    | --                     | 51<br>(42 - 60)          | 273<br>(235 - 312)          | 293<br>(241 - 349)          |
| Testicular cancer                             | 43<br>(26 - 57)             | --                    | --                     | 27<br>(15 - 37)          | 9<br>(6 - 13)               | 7<br>(5 - 10)               |
| Kidney cancer                                 | 888<br>(781 - 1,015)        | 1<br>(0 - 1)          | 1<br>(1 - 2)           | 56<br>(45 - 67)          | 378<br>(327 - 435)          | 452<br>(370 - 549)          |
| Bladder cancer                                | 880<br>(705 - 1,006)        | --                    | --                     | 17<br>(13 - 22)          | 307<br>(229 - 362)          | 556<br>(447 - 648)          |
| Brain and nervous system cancer               | 722<br>(639 - 884)          | 4<br>(2 - 6)          | 11<br>(8 - 15)         | 137<br>(115 - 164)       | 359<br>(311 - 455)          | 212<br>(173 - 267)          |
| Thyroid cancer                                | 117<br>(99 - 142)           | --                    | 0<br>(0 - 0)           | 7<br>(6 - 9)             | 46<br>(38 - 55)             | 63<br>(52 - 83)             |
| Mesothelioma                                  | 72<br>(57 - 120)            | --                    | --                     | 8<br>(5 - 14)            | 37<br>(28 - 62)             | 26<br>(19 - 49)             |
| Hodgkin lymphoma                              | 56<br>(46 - 95)             | 0<br>(0 - 0)          | 0<br>(0 - 1)           | 17<br>(14 - 26)          | 21<br>(16 - 36)             | 18<br>(13 - 32)             |
| Non-Hodgkin lymphoma                          | 633<br>(433 - 805)          | 1<br>(1 - 2)          | 3<br>(1 - 4)           | 65<br>(41 - 82)          | 240<br>(165 - 305)          | 325<br>(209 - 427)          |
| Multiple myeloma                              | 341<br>(242 - 481)          | --                    | --                     | 14<br>(9 - 20)           | 144<br>(99 - 209)           | 183<br>(127 - 256)          |
| Leukemia                                      | 920<br>(828 - 999)          | 3<br>(2 - 5)          | 9<br>(7 - 12)          | 90<br>(77 - 101)         | 304<br>(267 - 335)          | 513<br>(452 - 574)          |
| Other neoplasms                               | 1,110<br>(967 - 1,369)      | 7<br>(5 - 10)         | 6<br>(5 - 8)           | 106<br>(87 - 132)        | 386<br>(333 - 481)          | 605<br>(499 - 781)          |
| Cardiovascular diseases                       | 60,263<br>(57,528 - 62,374) | 2<br>(1 - 3)          | 4<br>(3 - 4)           | 1,533<br>(1,403 - 1,647) | 11,713<br>(11,132 - 12,696) | 47,012<br>(44,273 - 48,749) |
| Rheumatic heart disease                       | 316<br>(254 - 503)          | 0<br>(0 - 0)          | 0<br>(0 - 0)           | 19<br>(14 - 32)          | 80<br>(57 - 154)            | 217<br>(168 - 323)          |
| Ischemic heart disease                        | 31,854<br>(25,758 - 34,390) | 0<br>(0 - 0)          | 0<br>(0 - 0)           | 779<br>(678 - 874)       | 6,259<br>(5,666 - 6,867)    | 24,815<br>(18,984 - 27,159) |
| Cerebrovascular disease                       | 17,953<br>(15,985 - 22,316) | 0<br>(0 - 1)          | 2<br>(1 - 2)           | 360<br>(300 - 435)       | 3,209<br>(2,785 - 3,905)    | 14,382<br>(12,709 - 18,206) |
| Ischemic stroke                               | 13,810<br>(11,819 - 16,752) | 0<br>(0 - 0)          | 0<br>(0 - 0)           | 98<br>(67 - 128)         | 1,845<br>(1,469 - 2,296)    | 11,867<br>(10,096 - 14,542) |
| Hemorrhagic stroke                            | 4,143<br>(3,129 - 6,252)    | 0<br>(0 - 0)          | 1<br>(1 - 2)           | 262<br>(219 - 321)       | 1,364<br>(1,101 - 1,788)    | 2,516<br>(1,716 - 4,248)    |
| Hypertensive heart disease                    | 4,573<br>(3,212 - 5,651)    | 0<br>(0 - 0)          | 0<br>(0 - 0)           | 68<br>(43 - 94)          | 667<br>(491 - 847)          | 3,837<br>(2,583 - 4,804)    |
| Cardiomyopathy and myocarditis                | 2,006<br>(1,675 - 3,238)    | 1<br>(1 - 2)          | 1<br>(1 - 1)           | 183<br>(138 - 226)       | 621<br>(484 - 782)          | 1,200<br>(908 - 2,275)      |
| Atrial fibrillation and flutter               | 487<br>(392 - 604)          | --                    | --                     | 2<br>(2 - 3)             | 39<br>(30 - 47)             | 447<br>(353 - 563)          |
| Aortic aneurysm                               | 451<br>(348 - 540)          | --                    | --                     | 22<br>(16 - 28)          | 146<br>(112 - 172)          | 282<br>(213 - 344)          |
| Peripheral vascular disease                   | 303<br>(262 - 354)          | --                    | --                     | 8<br>(6 - 10)            | 92<br>(77 - 111)            | 203<br>(170 - 248)          |
| Endocarditis                                  | 90<br>(66 - 137)            | 0<br>(0 - 0)          | 0<br>(0 - 0)           | 11<br>(8 - 16)           | 36<br>(25 - 57)             | 42<br>(31 - 66)             |
| Other cardiovascular and circulatory diseases | 2,231<br>(1,894 - 2,844)    | 0<br>(0 - 0)          | 0<br>(0 - 0)           | 80<br>(63 - 100)         | 565<br>(466 - 716)          | 1,586<br>(1,286 - 2,069)    |
| Chronic respiratory diseases                  | 5,873<br>(4,641 - 6,373)    | 2<br>(1 - 2)          | 1<br>(1 - 1)           | 158<br>(111 - 181)       | 1,510<br>(1,088 - 1,680)    | 4,203<br>(3,416 - 4,618)    |
| Chronic obstructive pulmonary disease         | 5,346<br>(4,224 - 5,801)    | 1<br>(1 - 2)          | 1<br>(0 - 1)           | 129<br>(88 - 150)        | 1,336<br>(944 - 1,487)      | 3,879<br>(3,153 - 4,265)    |
| Pneumoconiosis                                | 65<br>(41 - 87)             | 0<br>(0 - 0)          | 0<br>(0 - 0)           | 3<br>(2 - 4)             | 27<br>(17 - 37)             | 35<br>(21 - 51)             |
| Silicosis                                     | 28<br>(16 - 39)             | 0<br>(0 - 0)          | 0<br>(0 - 0)           | 1<br>(0 - 1)             | 8<br>(5 - 11)               | 19<br>(10 - 28)             |
| Asbestosis                                    | 4<br>(3 - 5)                | 0<br>(0 - 0)          | 0<br>(0 - 0)           | 0<br>(0 - 1)             | 2<br>(1 - 3)                | 1<br>(1 - 2)                |
| Coal workers pneumoconiosis                   | 16<br>(9 - 21)              | 0<br>(0 - 0)          | 0<br>(0 - 0)           | 1<br>(0 - 1)             | 8<br>(5 - 11)               | 7<br>(4 - 10)               |
| Other pneumoconiosis                          | 18<br>(11 - 25)             | 0<br>(0 - 0)          | 0<br>(0 - 0)           | 1<br>(1 - 2)             | 9<br>(5 - 13)               | 8<br>(5 - 12)               |

Web Table 31- Hungary deaths with 95% UI by age, sex, and cause in 2013

| Cause                                               | Both Sexes, All Ages     | Both Sexes, 0-4 Years | Both Sexes, 5-14 Years | Both Sexes, 15-49 Years | Both Sexes, 50-69 Years  | Both Sexes, 70-80 Years  |
|-----------------------------------------------------|--------------------------|-----------------------|------------------------|-------------------------|--------------------------|--------------------------|
| Asthma                                              | 162<br>(114 - 220)       | 0<br>(0 - 0)          | 0<br>(0 - 0)           | 11<br>(7 - 14)          | 58<br>(37 - 78)          | 94<br>(64 - 132)         |
| Interstitial lung disease and pulmonary sarcoidosis | 259<br>(134 - 375)       | 0<br>(0 - 0)          | 0<br>(0 - 0)           | 10<br>(5 - 14)          | 81<br>(43 - 113)         | 168<br>(82 - 250)        |
| Other chronic respiratory diseases                  | 42<br>(30 - 58)          | 0<br>(0 - 0)          | 0<br>(0 - 0)           | 5<br>(4 - 7)            | 9<br>(6 - 12)            | 27<br>(18 - 41)          |
| Cirrhosis                                           | 3,881<br>(3,641 - 4,120) | 0<br>(0 - 0)          | 0<br>(0 - 1)           | 710<br>(637 - 780)      | 2,428<br>(2,255 - 2,610) | 742<br>(676 - 807)       |
| Cirrhosis due to hepatitis B                        | 1,139<br>(857 - 1,497)   | 0<br>(0 - 0)          | 0<br>(0 - 0)           | 201<br>(141 - 281)      | 717<br>(534 - 968)       | 221<br>(161 - 285)       |
| Cirrhosis due to hepatitis C                        | 891<br>(532 - 1,408)     | 0<br>(0 - 0)          | 0<br>(0 - 0)           | 161<br>(97 - 244)       | 550<br>(299 - 899)       | 179<br>(103 - 304)       |
| Cirrhosis due to alcohol use                        | 1,152<br>(728 - 1,505)   | --                    | --                     | 156<br>(84 - 238)       | 741<br>(460 - 977)       | 255<br>(164 - 332)       |
| Cirrhosis due to other causes                       | 700<br>(458 - 1,046)     | 0<br>(0 - 0)          | 0<br>(0 - 0)           | 192<br>(123 - 275)      | 420<br>(256 - 662)       | 87<br>(57 - 127)         |
| Digestive diseases                                  | 2,783<br>(2,518 - 3,153) | 1<br>(1 - 1)          | 1<br>(1 - 2)           | 177<br>(153 - 200)      | 778<br>(673 - 851)       | 1,826<br>(1,632 - 2,135) |
| Peptic ulcer disease                                | 637<br>(472 - 762)       | 0<br>(0 - 0)          | 0<br>(0 - 0)           | 37<br>(25 - 47)         | 203<br>(142 - 254)       | 396<br>(296 - 495)       |
| Gastritis and duodenitis                            | 35<br>(18 - 47)          | 0<br>(0 - 0)          | 0<br>(0 - 0)           | 3<br>(1 - 4)            | 9<br>(4 - 13)            | 23<br>(11 - 34)          |
| Appendicitis                                        | 36<br>(27 - 48)          | 0<br>(0 - 0)          | 0<br>(0 - 0)           | 3<br>(2 - 4)            | 12<br>(9 - 16)           | 21<br>(14 - 29)          |
| Paralytic ileus and intestinal obstruction          | 266<br>(173 - 410)       | 0<br>(0 - 0)          | 0<br>(0 - 0)           | 12<br>(8 - 19)          | 59<br>(39 - 92)          | 194<br>(123 - 312)       |
| Inguinal, femoral, and abdominal hernia             | 93<br>(55 - 132)         | 0<br>(0 - 0)          | 0<br>(0 - 0)           | 2<br>(1 - 2)            | 17<br>(10 - 24)          | 74<br>(42 - 112)         |
| Inflammatory bowel disease                          | 106<br>(81 - 152)        | 0<br>(0 - 0)          | 0<br>(0 - 0)           | 9<br>(6 - 12)           | 33<br>(25 - 45)          | 63<br>(45 - 99)          |
| Vascular intestinal disorders                       | 552<br>(364 - 822)       | 0<br>(0 - 0)          | 0<br>(0 - 0)           | 16<br>(9 - 27)          | 136<br>(82 - 212)        | 400<br>(247 - 598)       |
| Gallbladder and biliary diseases                    | 367<br>(295 - 503)       | 0<br>(0 - 0)          | 0<br>(0 - 0)           | 7<br>(5 - 9)            | 71<br>(56 - 93)          | 290<br>(228 - 406)       |
| Pancreatitis                                        | 413<br>(325 - 535)       | 0<br>(0 - 0)          | 0<br>(0 - 0)           | 74<br>(59 - 95)         | 161<br>(123 - 211)       | 177<br>(131 - 252)       |
| Other digestive diseases                            | 279<br>(206 - 333)       | 0<br>(0 - 0)          | 0<br>(0 - 0)           | 14<br>(8 - 17)          | 77<br>(53 - 92)          | 188<br>(140 - 231)       |
| Neurological disorders                              | 7,138<br>(6,085 - 8,420) | 7<br>(5 - 9)          | 5<br>(4 - 7)           | 108<br>(93 - 139)       | 494<br>(423 - 568)       | 6,525<br>(5,466 - 7,774) |
| Alzheimer disease and other dementias               | 6,432<br>(5,370 - 7,699) | --                    | --                     | 1<br>(0 - 1)            | 278<br>(220 - 343)       | 6,152<br>(5,098 - 7,415) |
| Parkinson disease                                   | 327<br>(203 - 382)       | --                    | --                     | 2<br>(1 - 2)            | 49<br>(35 - 59)          | 276<br>(164 - 330)       |
| Epilepsy                                            | 114<br>(94 - 148)        | 1<br>(1 - 2)          | 3<br>(2 - 4)           | 52<br>(42 - 75)         | 39<br>(32 - 47)          | 19<br>(15 - 23)          |
| Multiple sclerosis                                  | 92<br>(67 - 142)         | --                    | --                     | 24<br>(16 - 39)         | 49<br>(34 - 80)          | 20<br>(13 - 29)          |
| Other neurological disorders                        | 173<br>(152 - 194)       | 5<br>(4 - 8)          | 3<br>(2 - 4)           | 30<br>(25 - 35)         | 79<br>(68 - 91)          | 57<br>(48 - 66)          |
| Mental and substance use disorders                  | 524<br>(422 - 794)       | 0<br>(0 - 0)          | 0<br>(0 - 0)           | 152<br>(123 - 242)      | 281<br>(222 - 455)       | 91<br>(62 - 113)         |
| Schizophrenia                                       | 57<br>(21 - 81)          | --                    | --                     | 8<br>(3 - 12)           | 26<br>(10 - 38)          | 23<br>(7 - 37)           |
| Alcohol use disorders                               | 401<br>(324 - 718)       | --                    | --                     | 112<br>(84 - 214)       | 237<br>(188 - 425)       | 53<br>(38 - 85)          |
| Drug use disorders                                  | 65<br>(40 - 74)          | 0<br>(0 - 0)          | --                     | 32<br>(16 - 39)         | 18<br>(12 - 22)          | 15<br>(11 - 18)          |
| Opioid use disorders                                | 25<br>(15 - 29)          | 0<br>(0 - 0)          | --                     | 12<br>(6 - 15)          | 6<br>(4 - 8)             | 6<br>(4 - 7)             |
| Cocaine use disorders                               | 3<br>(2 - 4)             | 0<br>(0 - 0)          | --                     | 2<br>(1 - 2)            | 1<br>(1 - 1)             | 1<br>(1 - 1)             |
| Amphetamine use disorders                           | 3<br>(2 - 4)             | 0<br>(0 - 0)          | --                     | 1<br>(1 - 2)            | 1<br>(1 - 1)             | 1<br>(1 - 1)             |
| Other drug use disorders                            | 34<br>(21 - 39)          | 0<br>(0 - 0)          | --                     | 16<br>(8 - 20)          | 10<br>(7 - 12)           | 8<br>(6 - 9)             |
| Eating disorders                                    | 1<br>(1 - 2)             | --                    | 0<br>(0 - 0)           | 1<br>(1 - 1)            | --                       | --                       |
| Anorexia nervosa                                    | 1<br>(1 - 2)             | --                    | 0<br>(0 - 0)           | 1<br>(1 - 1)            | --                       | --                       |
| Diabetes, urogenital, blood, and endocrine diseases | 4,349<br>(3,868 - 4,687) | 11<br>(7 - 16)        | 6<br>(4 - 8)           | 184<br>(156 - 201)      | 1,082<br>(1,000 - 1,168) | 3,065<br>(2,620 - 3,374) |
| Diabetes mellitus                                   | 2,266<br>(2,024 - 2,483) | 1<br>(0 - 1)          | 0<br>(0 - 0)           | 67<br>(57 - 77)         | 617<br>(556 - 684)       | 1,581<br>(1,374 - 1,779) |
| Acute glomerulonephritis                            | 8<br>(6 - 13)            | 0<br>(0 - 0)          | 0<br>(0 - 0)           | 1<br>(1 - 2)            | 3<br>(2 - 5)             | 4<br>(3 - 7)             |
| Chronic kidney disease                              | 1,305<br>(833 - 1,501)   | 0<br>(0 - 1)          | 1<br>(0 - 1)           | 51<br>(38 - 58)         | 245<br>(192 - 280)       | 1,008<br>(574 - 1,189)   |
| Chronic kidney disease due to diabetes mellitus     | 189<br>(79 - 252)        | 0<br>(0 - 0)          | 0<br>(0 - 0)           | 7<br>(3 - 10)           | 50<br>(22 - 65)          | 132<br>(50 - 183)        |

Web Table 31- Hungary deaths with 95% UI by age, sex, and cause in 2013

| Cause                                               | Both Sexes, All Ages     | Both Sexes, 0-4 Years | Both Sexes, 5-14 Years | Both Sexes, 15-49 Years  | Both Sexes, 50-69 Years  | Both Sexes, 70-80 Years  |
|-----------------------------------------------------|--------------------------|-----------------------|------------------------|--------------------------|--------------------------|--------------------------|
| Chronic kidney disease due to hypertension          | 501<br>(290 - 639)       | 0<br>(0 - 0)          | 0<br>(0 - 0)           | 17<br>(10 - 21)          | 86<br>(57 - 110)         | 398<br>(213 - 524)       |
| Chronic kidney disease due to glomerulonephritis    | 80<br>(58 - 122)         | 0<br>(0 - 0)          | 0<br>(0 - 0)           | 8<br>(5 - 11)            | 22<br>(16 - 32)          | 50<br>(33 - 81)          |
| Chronic kidney disease due to other causes          | 535<br>(268 - 726)       | 0<br>(0 - 0)          | 0<br>(0 - 1)           | 19<br>(11 - 26)          | 88<br>(59 - 118)         | 427<br>(185 - 604)       |
| Urinary diseases and male infertility               | 418<br>(329 - 695)       | 0<br>(0 - 0)          | 0<br>(0 - 0)           | 13<br>(11 - 19)          | 95<br>(76 - 153)         | 309<br>(234 - 545)       |
| Interstitial nephritis and urinary tract infections | 291<br>(209 - 524)       | 0<br>(0 - 0)          | 0<br>(0 - 0)           | 9<br>(6 - 14)            | 63<br>(45 - 113)         | 219<br>(151 - 414)       |
| Urolithiasis                                        | 62<br>(35 - 110)         | --                    | 0<br>(0 - 0)           | 2<br>(1 - 3)             | 15<br>(9 - 26)           | 45<br>(24 - 85)          |
| Other urinary diseases                              | 65<br>(35 - 90)          | 0<br>(0 - 0)          | 0<br>(0 - 0)           | 3<br>(1 - 4)             | 17<br>(9 - 23)           | 45<br>(22 - 66)          |
| Gynecological diseases                              | 3<br>(2 - 5)             | --                    | --                     | 0<br>(0 - 1)             | 1<br>(1 - 1)             | 2<br>(1 - 4)             |
| Uterine fibroids                                    | 1<br>(1 - 1)             | --                    | --                     | 0<br>(0 - 0)             | 0<br>(0 - 0)             | 1<br>(0 - 1)             |
| Polycystic ovarian syndrome                         | 0<br>(0 - 0)             | --                    | --                     | 0<br>(0 - 0)             | 0<br>(0 - 0)             | --                       |
| Endometriosis                                       | 0<br>(0 - 0)             | --                    | --                     | 0<br>(0 - 0)             | 0<br>(0 - 0)             | --                       |
| Genital prolapse                                    | 1<br>(1 - 1)             | --                    | --                     | 0<br>(0 - 0)             | 0<br>(0 - 0)             | 1<br>(0 - 1)             |
| Other gynecological diseases                        | 2<br>(1 - 2)             | --                    | --                     | 0<br>(0 - 0)             | 0<br>(0 - 1)             | 1<br>(1 - 2)             |
| Hemoglobinopathies and hemolytic anemias            | 49<br>(32 - 64)          | 1<br>(1 - 1)          | 1<br>(1 - 1)           | 10<br>(6 - 14)           | 11<br>(7 - 15)           | 26<br>(17 - 36)          |
| Thalassemias                                        | 4<br>(3 - 6)             | 1<br>(0 - 1)          | 1<br>(0 - 1)           | 3<br>(2 - 4)             | 0<br>(0 - 0)             | 0<br>(0 - 0)             |
| Sickle cell disorders                               | 3<br>(2 - 4)             | 0<br>(0 - 0)          | 0<br>(0 - 0)           | 1<br>(1 - 2)             | 1<br>(1 - 1)             | 0<br>(0 - 0)             |
| G6PD deficiency                                     | 1<br>(1 - 1)             | 0<br>(0 - 0)          | 0<br>(0 - 0)           | 0<br>(0 - 0)             | 0<br>(0 - 0)             | 0<br>(0 - 0)             |
| Other hemoglobinopathies and hemolytic anemias      | 41<br>(27 - 54)          | 0<br>(0 - 0)          | 0<br>(0 - 0)           | 5<br>(3 - 8)             | 9<br>(6 - 13)            | 26<br>(17 - 35)          |
| Endocrine, metabolic, blood, and immune disorders   | 300<br>(171 - 352)       | 9<br>(5 - 13)         | 4<br>(2 - 5)           | 41<br>(21 - 51)          | 110<br>(59 - 133)        | 136<br>(74 - 167)        |
| Musculoskeletal disorders                           | 203<br>(178 - 260)       | --                    | 0<br>(0 - 1)           | 22<br>(18 - 28)          | 80<br>(68 - 104)         | 100<br>(83 - 134)        |
| Rheumatoid arthritis                                | 58<br>(47 - 79)          | --                    | 0<br>(0 - 0)           | 2<br>(1 - 2)             | 21<br>(16 - 28)          | 35<br>(26 - 51)          |
| Other musculoskeletal disorders                     | 145<br>(124 - 180)       | --                    | 0<br>(0 - 1)           | 20<br>(17 - 26)          | 59<br>(48 - 74)          | 65<br>(52 - 86)          |
| Other non-communicable diseases                     | 425<br>(357 - 481)       | 162<br>(126 - 208)    | 14<br>(11 - 18)        | 86<br>(71 - 96)          | 67<br>(49 - 76)          | 96<br>(43 - 116)         |
| Congenital anomalies                                | 293<br>(248 - 339)       | 145<br>(112 - 186)    | 14<br>(11 - 18)        | 80<br>(66 - 89)          | 38<br>(32 - 44)          | 16<br>(12 - 20)          |
| Neural tube defects                                 | 3<br>(2 - 5)             | 2<br>(1 - 4)          | 0<br>(0 - 0)           | 1<br>(0 - 1)             | 0<br>(0 - 0)             | 0<br>(0 - 0)             |
| Congenital heart anomalies                          | 129<br>(103 - 152)       | 67<br>(50 - 87)       | 6<br>(4 - 8)           | 42<br>(32 - 49)          | 10<br>(7 - 12)           | 4<br>(3 - 6)             |
| Cleft lip and cleft palate                          | 2<br>(0 - 5)             | 2<br>(0 - 5)          | --                     | --                       | --                       | --                       |
| Down syndrome                                       | 28<br>(18 - 41)          | 10<br>(5 - 19)        | 2<br>(1 - 2)           | 10<br>(7 - 14)           | 6<br>(4 - 8)             | 0<br>(0 - 0)             |
| Chromosomal unbalanced rearrangements               | 7<br>(4 - 9)             | 5<br>(3 - 8)          | 0<br>(0 - 0)           | 1<br>(0 - 1)             | 0<br>(0 - 0)             | 0<br>(0 - 0)             |
| Other congenital anomalies                          | 125<br>(103 - 153)       | 60<br>(43 - 84)       | 6<br>(5 - 9)           | 26<br>(20 - 32)          | 22<br>(18 - 26)          | 11<br>(8 - 14)           |
| Skin and subcutaneous diseases                      | 116<br>(46 - 138)        | 1<br>(0 - 1)          | 0<br>(0 - 0)           | 6<br>(3 - 8)             | 29<br>(13 - 36)          | 80<br>(30 - 100)         |
| Cellulitis                                          | 5<br>(2 - 10)            | 0<br>(0 - 0)          | 0<br>(0 - 0)           | 1<br>(0 - 1)             | 2<br>(1 - 3)             | 2<br>(1 - 6)             |
| Pyoderma                                            | 73<br>(36 - 88)          | 0<br>(0 - 0)          | 0<br>(0 - 0)           | 4<br>(2 - 5)             | 22<br>(10 - 27)          | 47<br>(24 - 60)          |
| Decubitus ulcer                                     | 29<br>(1 - 39)           | 0<br>(0 - 0)          | 0<br>(0 - 0)           | 1<br>(0 - 1)             | 4<br>(0 - 5)             | 24<br>(0 - 35)           |
| Other skin and subcutaneous diseases                | 10<br>(4 - 15)           | 0<br>(0 - 0)          | 0<br>(0 - 0)           | 1<br>(0 - 1)             | 2<br>(1 - 3)             | 6<br>(2 - 11)            |
| Sudden infant death syndrome                        | 16<br>(9 - 32)           | 16<br>(9 - 32)        | --                     | --                       | --                       | --                       |
| Injuries                                            | 6,888<br>(6,039 - 9,641) | 25<br>(18 - 36)       | 35<br>(29 - 41)        | 1,877<br>(1,740 - 2,167) | 2,037<br>(1,844 - 2,621) | 2,915<br>(2,289 - 4,906) |
| Transport injuries                                  | 981<br>(904 - 1,077)     | 4<br>(2 - 6)          | 15<br>(12 - 19)        | 446<br>(385 - 491)       | 314<br>(285 - 352)       | 202<br>(176 - 264)       |
| Road injuries                                       | 898<br>(813 - 978)       | 4<br>(2 - 6)          | 14<br>(11 - 18)        | 410<br>(342 - 455)       | 284<br>(253 - 319)       | 186<br>(162 - 245)       |
| Pedestrian road injuries                            | 281<br>(215 - 405)       | 1<br>(1 - 2)          | 5<br>(3 - 7)           | 78<br>(51 - 128)         | 96<br>(69 - 138)         | 100<br>(76 - 150)        |

Web Table 31- Hungary deaths with 95% UI by age, sex, and cause in 2013

| Cause                                           | Both Sexes, All Ages     | Both Sexes, 0-4 Years | Both Sexes, 5-14 Years | Both Sexes, 15-49 Years | Both Sexes, 50-69 Years | Both Sexes, 70-80 Years  |
|-------------------------------------------------|--------------------------|-----------------------|------------------------|-------------------------|-------------------------|--------------------------|
| Cyclist road injuries                           | 137<br>(98 - 189)        | 0<br>(0 - 0)          | 2<br>(1 - 3)           | 38<br>(24 - 53)         | 61<br>(43 - 86)         | 36<br>(24 - 51)          |
| Motorcyclist road injuries                      | 83<br>(43 - 109)         | 0<br>(0 - 0)          | 1<br>(0 - 1)           | 54<br>(27 - 73)         | 20<br>(11 - 28)         | 8<br>(4 - 13)            |
| Motor vehicle road injuries                     | 387<br>(283 - 457)       | 2<br>(1 - 4)          | 6<br>(4 - 9)           | 237<br>(177 - 279)      | 102<br>(69 - 129)       | 39<br>(21 - 54)          |
| Other road injuries                             | 11<br>(6 - 25)           | 0<br>(0 - 0)          | 0<br>(0 - 0)           | 3<br>(1 - 6)            | 5<br>(3 - 12)           | 3<br>(1 - 6)             |
| Other transport injuries                        | 83<br>(67 - 114)         | 0<br>(0 - 0)          | 1<br>(1 - 1)           | 36<br>(28 - 49)         | 30<br>(23 - 44)         | 16<br>(11 - 24)          |
| Unintentional injuries                          | 3,276<br>(2,614 - 5,273) | 17<br>(12 - 27)       | 15<br>(12 - 20)        | 370<br>(326 - 493)      | 730<br>(631 - 1,013)    | 2,144<br>(1,569 - 3,885) |
| Falls                                           | 2,325<br>(1,703 - 4,198) | 1<br>(1 - 2)          | 1<br>(1 - 2)           | 114<br>(91 - 184)       | 394<br>(317 - 622)      | 1,815<br>(1,263 - 3,501) |
| Drowning                                        | 170<br>(128 - 259)       | 3<br>(2 - 5)          | 8<br>(6 - 13)          | 81<br>(56 - 136)        | 54<br>(40 - 78)         | 25<br>(19 - 33)          |
| Fire, heat, and hot substances                  | 187<br>(153 - 266)       | 2<br>(1 - 4)          | 1<br>(1 - 1)           | 30<br>(23 - 47)         | 62<br>(50 - 89)         | 91<br>(70 - 136)         |
| Poisonings                                      | 66<br>(54 - 95)          | 1<br>(0 - 1)          | 1<br>(0 - 1)           | 18<br>(15 - 26)         | 25<br>(20 - 38)         | 20<br>(15 - 34)          |
| Exposure to mechanical forces                   | 78<br>(68 - 91)          | 1<br>(1 - 2)          | 1<br>(1 - 2)           | 35<br>(28 - 42)         | 26<br>(21 - 32)         | 15<br>(12 - 20)          |
| Unintentional firearm injuries                  | 3<br>(2 - 3)             | 0<br>(0 - 0)          | 0<br>(0 - 0)           | 2<br>(1 - 2)            | 1<br>(0 - 1)            | 0<br>(0 - 0)             |
| Unintentional suffocation                       | 2<br>(1 - 3)             | 0<br>(0 - 1)          | 0<br>(0 - 0)           | 1<br>(1 - 1)            | 0<br>(0 - 1)            | 0<br>(0 - 1)             |
| Other exposure to mechanical forces             | 74<br>(63 - 85)          | 1<br>(0 - 1)          | 1<br>(1 - 2)           | 32<br>(25 - 39)         | 25<br>(20 - 31)         | 15<br>(11 - 19)          |
| Adverse effects of medical treatment            | 129<br>(97 - 178)        | 1<br>(0 - 2)          | 0<br>(0 - 0)           | 8<br>(6 - 14)           | 40<br>(31 - 58)         | 80<br>(54 - 113)         |
| Animal contact                                  | 19<br>(14 - 30)          | 0<br>(0 - 0)          | 0<br>(0 - 0)           | 4<br>(3 - 5)            | 8<br>(6 - 13)           | 7<br>(5 - 13)            |
| Venomous animal contact                         | 5<br>(3 - 8)             | 0<br>(0 - 0)          | 0<br>(0 - 0)           | 2<br>(1 - 3)            | 2<br>(2 - 4)            | 1<br>(0 - 2)             |
| Non-venomous animal contact                     | 14<br>(10 - 23)          | 0<br>(0 - 0)          | 0<br>(0 - 0)           | 2<br>(1 - 3)            | 6<br>(4 - 9)            | 6<br>(4 - 11)            |
| Foreign body                                    | 250<br>(171 - 357)       | 7<br>(4 - 12)         | 1<br>(1 - 2)           | 56<br>(36 - 86)         | 102<br>(67 - 159)       | 83<br>(54 - 114)         |
| Pulmonary aspiration and foreign body in airway | 248<br>(169 - 354)       | 7<br>(4 - 12)         | 1<br>(1 - 2)           | 56<br>(35 - 85)         | 101<br>(66 - 158)       | 83<br>(53 - 114)         |
| Foreign body in other body part                 | 2<br>(1 - 3)             | 0<br>(0 - 0)          | 0<br>(0 - 0)           | 1<br>(0 - 1)            | 1<br>(0 - 1)            | 0<br>(0 - 1)             |
| Other unintentional injuries                    | 52<br>(43 - 64)          | 1<br>(1 - 2)          | 1<br>(0 - 1)           | 24<br>(18 - 33)         | 19<br>(13 - 27)         | 8<br>(6 - 11)            |
| Self-harm and interpersonal violence            | 2,631<br>(2,364 - 3,445) | 4<br>(3 - 6)          | 5<br>(4 - 7)           | 1,060<br>(882 - 1,293)  | 993<br>(869 - 1,303)    | 569<br>(483 - 896)       |
| Self-harm                                       | 2,446<br>(2,190 - 3,227) | -                     | 3<br>(2 - 5)           | 979<br>(801 - 1,197)    | 931<br>(809 - 1,239)    | 533<br>(452 - 863)       |
| Interpersonal violence                          | 185<br>(145 - 249)       | 4<br>(3 - 6)          | 2<br>(1 - 2)           | 81<br>(61 - 110)        | 62<br>(48 - 89)         | 36<br>(27 - 50)          |
| Assault by firearm                              | 11<br>(5 - 17)           | 0<br>(0 - 0)          | 0<br>(0 - 0)           | 8<br>(3 - 12)           | 3<br>(1 - 4)            | 0<br>(0 - 1)             |
| Assault by sharp object                         | 66<br>(50 - 107)         | 0<br>(0 - 1)          | 0<br>(0 - 1)           | 36<br>(26 - 60)         | 21<br>(15 - 35)         | 8<br>(6 - 14)            |
| Assault by other means                          | 107<br>(79 - 140)        | 4<br>(2 - 5)          | 1<br>(1 - 2)           | 37<br>(24 - 49)         | 38<br>(28 - 54)         | 27<br>(20 - 37)          |

Web Table 31- Hungary deaths with 95% UI by age, sex, and cause in 2013

| Cause                                                             | Males, All Ages             | Males, 0-4 Years   | Males, 5-14 Years | Males, 15-49 Years       | Males, 50-69 Years          | Males, 70-80 Years          |
|-------------------------------------------------------------------|-----------------------------|--------------------|-------------------|--------------------------|-----------------------------|-----------------------------|
| All causes                                                        | 61,113<br>(59,420 - 62,963) | 281<br>(221 - 357) | 64<br>(54 - 74)   | 5,129<br>(4,928 - 5,348) | 22,979<br>(22,200 - 23,844) | 32,661<br>(31,943 - 33,466) |
| Communicable, maternal, neonatal, and nutritional diseases        | 948<br>(852 - 1,138)        | 157<br>(123 - 198) | 4<br>(3 - 6)      | 112<br>(97 - 128)        | 257<br>(225 - 324)          | 418<br>(345 - 544)          |
| HIV/AIDS and tuberculosis                                         | 131<br>(108 - 243)          | 0<br>(0 - 0)       | 0<br>(0 - 0)      | 31<br>(25 - 40)          | 60<br>(47 - 111)            | 39<br>(29 - 93)             |
| Tuberculosis                                                      | 87<br>(69 - 196)            | 0<br>(0 - 0)       | 0<br>(0 - 0)      | 9<br>(7 - 16)            | 42<br>(33 - 88)             | 36<br>(26 - 90)             |
| HIV/AIDS                                                          | 43<br>(33 - 56)             | 0<br>(0 - 0)       | 0<br>(0 - 0)      | 23<br>(17 - 30)          | 18<br>(12 - 26)             | 3<br>(2 - 4)                |
| HIV/AIDS resulting in mycobacterial infection                     | 3<br>(2 - 4)                | 0<br>(0 - 0)       | 0<br>(0 - 0)      | 1<br>(1 - 2)             | 1<br>(1 - 2)                | 0<br>(0 - 0)                |
| HIV/AIDS resulting in other diseases                              | 41<br>(31 - 53)             | 0<br>(0 - 0)       | 0<br>(0 - 0)      | 22<br>(16 - 29)          | 17<br>(11 - 24)             | 3<br>(2 - 4)                |
| Diarrhea, lower respiratory, and other common infectious diseases | 619<br>(538 - 753)          | 19<br>(13 - 27)    | 3<br>(2 - 5)      | 71<br>(58 - 85)          | 178<br>(152 - 216)          | 347<br>(281 - 452)          |
| Diarrheal diseases                                                | 43<br>(34 - 53)             | 2<br>(1 - 3)       | 0<br>(0 - 0)      | 2<br>(2 - 3)             | 11<br>(9 - 15)              | 27<br>(19 - 37)             |
| Intestinal infectious diseases                                    | 11<br>(5 - 22)              | 1<br>(0 - 3)       | 1<br>(0 - 3)      | 4<br>(2 - 9)             | 3<br>(1 - 7)                | 2<br>(0 - 4)                |
| Typhoid fever                                                     | 8<br>(3 - 16)               | 1<br>(0 - 2)       | 1<br>(0 - 2)      | 3<br>(1 - 7)             | 2<br>(1 - 5)                | 1<br>(0 - 3)                |
| Paratyphoid fever                                                 | 2<br>(1 - 5)                | 0<br>(0 - 1)       | 0<br>(0 - 1)      | 1<br>(0 - 2)             | 1<br>(0 - 2)                | 0<br>(0 - 1)                |
| Other intestinal infectious diseases                              | 1<br>(0 - 3)                | 0<br>(0 - 1)       | 0<br>(0 - 0)      | 0<br>(0 - 1)             | 0<br>(0 - 1)                | 0<br>(0 - 1)                |
| Lower respiratory infections                                      | 513<br>(434 - 649)          | 12<br>(8 - 18)     | 1<br>(1 - 2)      | 52<br>(41 - 65)          | 143<br>(117 - 179)          | 304<br>(239 - 408)          |
| Upper respiratory infections                                      | 2<br>(0 - 4)                | 0<br>(0 - 0)       | 0<br>(0 - 0)      | 0<br>(0 - 1)             | 1<br>(0 - 2)                | 1<br>(0 - 3)                |
| Otitis media                                                      | 1<br>(0 - 1)                | 0<br>(0 - 0)       | 0<br>(0 - 0)      | 0<br>(0 - 0)             | 0<br>(0 - 0)                | 0<br>(0 - 0)                |
| Meningitis                                                        | 35<br>(31 - 40)             | 3<br>(2 - 5)       | 0<br>(0 - 1)      | 7<br>(6 - 8)             | 16<br>(13 - 19)             | 10<br>(8 - 12)              |
| Pneumococcal meningitis                                           | 10<br>(6 - 15)              | 1<br>(0 - 1)       | 0<br>(0 - 0)      | 2<br>(1 - 3)             | 4<br>(2 - 7)                | 3<br>(1 - 4)                |
| H influenzae type B meningitis                                    | 4<br>(3 - 6)                | 1<br>(1 - 2)       | 0<br>(0 - 0)      | 1<br>(0 - 1)             | 1<br>(1 - 3)                | 1<br>(0 - 2)                |
| Meningococcal meningitis                                          | 7<br>(5 - 10)               | 1<br>(0 - 1)       | 0<br>(0 - 0)      | 1<br>(1 - 2)             | 3<br>(1 - 5)                | 2<br>(1 - 3)                |
| Other meningitis                                                  | 14<br>(9 - 18)              | 1<br>(0 - 1)       | 0<br>(0 - 0)      | 3<br>(2 - 4)             | 7<br>(4 - 10)               | 4<br>(2 - 6)                |
| Encephalitis                                                      | 11<br>(8 - 20)              | 1<br>(0 - 2)       | 0<br>(0 - 1)      | 4<br>(2 - 7)             | 4<br>(3 - 8)                | 2<br>(1 - 4)                |
| Diphtheria                                                        | 0<br>(0 - 1)                | 0<br>(0 - 0)       | 0<br>(0 - 0)      | 0<br>(0 - 0)             | 0<br>(0 - 0)                | --<br>(0 - 0)               |
| Whooping cough                                                    | 0<br>(0 - 0)                | 0<br>(0 - 0)       | 0<br>(0 - 0)      | 0<br>(0 - 0)             | 0<br>(0 - 0)                | --<br>(0 - 0)               |
| Tetanus                                                           | 1<br>(0 - 2)                | 0<br>(0 - 0)       | 0<br>(0 - 0)      | 0<br>(0 - 0)             | 0<br>(0 - 1)                | 0<br>(0 - 1)                |
| Measles                                                           | 0<br>(0 - 0)                | 0<br>(0 - 0)       | 0<br>(0 - 0)      | 0<br>(0 - 0)             | 0<br>(0 - 0)                | --<br>(0 - 0)               |
| Varicella and herpes zoster                                       | 3<br>(1 - 10)               | 0<br>(0 - 1)       | 0<br>(0 - 0)      | 0<br>(0 - 1)             | 0<br>(0 - 1)                | 2<br>(0 - 9)                |
| Neglected tropical diseases and malaria                           | 3<br>(2 - 3)                | 0<br>(0 - 0)       | 0<br>(0 - 0)      | 1<br>(1 - 1)             | 1<br>(1 - 1)                | 1<br>(1 - 1)                |
| Cysticercosis                                                     | 0<br>(0 - 0)                | 0<br>(0 - 0)       | 0<br>(0 - 0)      | 0<br>(0 - 0)             | 0<br>(0 - 0)                | 0<br>(0 - 0)                |
| Cystic echinococcosis                                             | 1<br>(1 - 1)                | 0<br>(0 - 0)       | 0<br>(0 - 0)      | 0<br>(0 - 0)             | 0<br>(0 - 0)                | 0<br>(0 - 0)                |
| Dengue                                                            | 0<br>(0 - 0)                | 0<br>(0 - 0)       | 0<br>(0 - 0)      | 0<br>(0 - 0)             | 0<br>(0 - 0)                | 0<br>(0 - 0)                |
| Rabies                                                            | 0<br>(0 - 1)                | 0<br>(0 - 0)       | 0<br>(0 - 0)      | 0<br>(0 - 0)             | 0<br>(0 - 0)                | 0<br>(0 - 0)                |
| Other neglected tropical diseases                                 | 1<br>(1 - 1)                | 0<br>(0 - 0)       | 0<br>(0 - 0)      | 0<br>(0 - 0)             | 0<br>(0 - 0)                | 0<br>(0 - 1)                |
| Maternal disorders                                                | --                          | --                 | --                | --                       | --                          | --                          |
| Maternal hemorrhage                                               | --                          | --                 | --                | --                       | --                          | --                          |
| Maternal sepsis and other maternal infections                     | --                          | --                 | --                | --                       | --                          | --                          |
| Maternal hypertensive disorders                                   | --                          | --                 | --                | --                       | --                          | --                          |
| Maternal obstructed labor                                         | --                          | --                 | --                | --                       | --                          | --                          |
| Maternal abortive outcome                                         | --                          | --                 | --                | --                       | --                          | --                          |
| Indirect maternal deaths                                          | --                          | --                 | --                | --                       | --                          | --                          |



Web Table 31- Hungary deaths with 95% UI by age, sex, and cause in 2013

| Cause                                                            | Males, All Ages             | Males, 0-4 Years   | Males, 5-14 Years | Males, 15-49 Years       | Males, 50-69 Years          | Males, 70-80 Years          |
|------------------------------------------------------------------|-----------------------------|--------------------|-------------------|--------------------------|-----------------------------|-----------------------------|
| Late maternal deaths                                             | --                          | --                 | --                | --                       | --                          | --                          |
| Maternal deaths aggravated by HIV/AIDS                           | --                          | --                 | --                | --                       | --                          | --                          |
| Other maternal disorders                                         | --                          | --                 | --                | --                       | --                          | --                          |
| Neonatal disorders                                               | 135<br>(105 - 171)          | 135<br>(105 - 171) | --                | --                       | --                          | --                          |
| Neonatal preterm birth complications                             | 71<br>(48 - 97)             | 71<br>(48 - 97)    | --                | --                       | --                          | --                          |
| Neonatal encephalopathy due to birth asphyxia and trauma         | 20<br>(12 - 42)             | 20<br>(12 - 42)    | --                | --                       | --                          | --                          |
| Neonatal sepsis and other neonatal infections                    | 5<br>(2 - 11)               | 5<br>(2 - 11)      | --                | --                       | --                          | --                          |
| Hemolytic disease and other neonatal jaundice                    | 0<br>(0 - 0)                | 0<br>(0 - 0)       | --                | --                       | --                          | --                          |
| Other neonatal disorders                                         | 39<br>(15 - 58)             | 39<br>(15 - 58)    | --                | --                       | --                          | --                          |
| Nutritional deficiencies                                         | 33<br>(11 - 44)             | 1<br>(0 - 1)       | 0<br>(0 - 0)      | 3<br>(1 - 4)             | 7<br>(3 - 10)               | 21<br>(6 - 31)              |
| Protein-energy malnutrition                                      | 6<br>(1 - 12)               | 0<br>(0 - 1)       | 0<br>(0 - 0)      | 1<br>(0 - 1)             | 2<br>(0 - 3)                | 3<br>(0 - 7)                |
| Iodine deficiency                                                | 0<br>(0 - 2)                | 0<br>(0 - 0)       | 0<br>(0 - 0)      | 0<br>(0 - 0)             | 0<br>(0 - 1)                | 0<br>(0 - 1)                |
| Iron-deficiency anemia                                           | 18<br>(5 - 28)              | 0<br>(0 - 0)       | 0<br>(0 - 0)      | 2<br>(1 - 3)             | 4<br>(1 - 6)                | 12<br>(3 - 21)              |
| Other nutritional deficiencies                                   | 8<br>(3 - 16)               | 0<br>(0 - 0)       | 0<br>(0 - 0)      | 1<br>(0 - 1)             | 1<br>(0 - 3)                | 6<br>(2 - 12)               |
| Other communicable, maternal, neonatal, and nutritional diseases | 28<br>(21 - 38)             | 2<br>(1 - 3)       | 0<br>(0 - 1)      | 5<br>(4 - 7)             | 12<br>(8 - 16)              | 9<br>(7 - 15)               |
| Sexually transmitted diseases excluding HIV                      | 1<br>(0 - 2)                | 0<br>(0 - 1)       | 0<br>(0 - 0)      | 0<br>(0 - 0)             | 0<br>(0 - 0)                | 0<br>(0 - 0)                |
| Syphilis                                                         | 1<br>(0 - 2)                | 0<br>(0 - 1)       | 0<br>(0 - 0)      | 0<br>(0 - 0)             | 0<br>(0 - 0)                | 0<br>(0 - 0)                |
| Chlamydial infection                                             | --                          | --                 | --                | --                       | --                          | --                          |
| Gonococcal infection                                             | 0<br>(0 - 0)                | --                 | 0<br>(0 - 0)      | 0<br>(0 - 0)             | 0<br>(0 - 0)                | 0<br>(0 - 0)                |
| Other sexually transmitted diseases                              | 0<br>(0 - 0)                | --                 | 0<br>(0 - 0)      | 0<br>(0 - 0)             | 0<br>(0 - 0)                | 0<br>(0 - 0)                |
| Hepatitis                                                        | 3<br>(2 - 4)                | 0<br>(0 - 0)       | 0<br>(0 - 0)      | 0<br>(0 - 1)             | 1<br>(1 - 2)                | 1<br>(1 - 1)                |
| Acute hepatitis A                                                | 0<br>(0 - 1)                | 0<br>(0 - 0)       | 0<br>(0 - 0)      | 0<br>(0 - 0)             | 0<br>(0 - 0)                | 0<br>(0 - 0)                |
| Acute hepatitis B                                                | 2<br>(2 - 3)                | 0<br>(0 - 0)       | 0<br>(0 - 0)      | 0<br>(0 - 0)             | 1<br>(1 - 2)                | 1<br>(0 - 1)                |
| Acute hepatitis C                                                | 0<br>(0 - 1)                | --                 | 0<br>(0 - 0)      | 0<br>(0 - 0)             | 0<br>(0 - 0)                | 0<br>(0 - 0)                |
| Other infectious diseases                                        | 25<br>(18 - 34)             | 1<br>(1 - 2)       | 0<br>(0 - 0)      | 5<br>(3 - 6)             | 10<br>(6 - 14)              | 8<br>(6 - 14)               |
| Non-communicable diseases                                        | 55,855<br>(54,045 - 57,606) | 111<br>(86 - 146)  | 36<br>(30 - 44)   | 3,468<br>(3,196 - 3,662) | 21,193<br>(20,386 - 22,023) | 31,047<br>(30,154 - 31,880) |
| Neoplasms                                                        | 17,700<br>(16,913 - 18,637) | 8<br>(5 - 13)      | 18<br>(15 - 23)   | 1,182<br>(1,098 - 1,279) | 8,966<br>(8,520 - 9,443)    | 7,525<br>(7,095 - 8,035)    |
| Esophageal cancer                                                | 530<br>(459 - 665)          | --                 | --                | 46<br>(34 - 75)          | 354<br>(300 - 440)          | 131<br>(107 - 159)          |
| Stomach cancer                                                   | 1,156<br>(1,054 - 1,275)    | --                 | --                | 55<br>(47 - 66)          | 506<br>(452 - 570)          | 595<br>(521 - 684)          |
| Liver cancer                                                     | 649<br>(439 - 859)          | --                 | 0<br>(0 - 1)      | 38<br>(26 - 53)          | 336<br>(229 - 438)          | 274<br>(179 - 393)          |
| Liver cancer due to hepatitis B                                  | 143<br>(34 - 250)           | --                 | 0<br>(0 - 0)      | 13<br>(5 - 22)           | 82<br>(13 - 152)            | 49<br>(15 - 90)             |
| Liver cancer due to hepatitis C                                  | 298<br>(180 - 442)          | --                 | 0<br>(0 - 0)      | 16<br>(8 - 25)           | 155<br>(87 - 241)           | 127<br>(73 - 188)           |
| Liver cancer due to alcohol use                                  | 176<br>(102 - 252)          | --                 | --                | 7<br>(3 - 11)            | 81<br>(45 - 121)            | 87<br>(51 - 131)            |
| Liver cancer due to other causes                                 | 32<br>(13 - 51)             | --                 | 0<br>(0 - 0)      | 3<br>(1 - 5)             | 17<br>(6 - 29)              | 11<br>(4 - 20)              |
| Larynx cancer                                                    | 430<br>(293 - 512)          | --                 | --                | 39<br>(28 - 51)          | 277<br>(185 - 332)          | 114<br>(77 - 144)           |
| Tracheal, bronchus and lung cancer                               | 5,577<br>(5,160 - 5,977)    | --                 | --                | 275<br>(236 - 319)       | 3,366<br>(3,086 - 3,647)    | 1,936<br>(1,766 - 2,109)    |
| Breast cancer                                                    | 43<br>(18 - 82)             | --                 | --                | 3<br>(1 - 6)             | 20<br>(7 - 38)              | 21<br>(8 - 40)              |
| Cervical cancer                                                  | --                          | --                 | --                | --                       | --                          | --                          |
| Uterine cancer                                                   | --                          | --                 | --                | --                       | --                          | --                          |
| Prostate cancer                                                  | 1,028<br>(811 - 1,489)      | --                 | --                | 4<br>(3 - 7)             | 233<br>(169 - 321)          | 790<br>(611 - 1,217)        |

Web Table 31- Hungary deaths with 95% UI by age, sex, and cause in 2013

| Cause                                         | Males, All Ages             | Males, 0-4 Years | Males, 5-14 Years | Males, 15-49 Years       | Males, 50-69 Years       | Males, 70-80 Years          |
|-----------------------------------------------|-----------------------------|------------------|-------------------|--------------------------|--------------------------|-----------------------------|
| Colon and rectum cancer                       | 2,541<br>(2,375 - 2,713)    | --               | --                | 102<br>(88 - 115)        | 1,088<br>(1,002 - 1,169) | 1,352<br>(1,223 - 1,497)    |
| Lip and oral cavity cancer                    | 615<br>(498 - 689)          | --               | --                | 79<br>(63 - 97)          | 410<br>(304 - 475)       | 126<br>(106 - 147)          |
| Nasopharynx cancer                            | 83<br>(46 - 104)            | --               | 0<br>(0 - 0)      | 17<br>(8 - 23)           | 55<br>(29 - 72)          | 11<br>(6 - 16)              |
| Other pharynx cancer                          | 443<br>(285 - 541)          | --               | --                | 68<br>(52 - 95)          | 322<br>(183 - 405)       | 53<br>(38 - 67)             |
| Gallbladder and biliary tract cancer          | 232<br>(150 - 298)          | --               | --                | 8<br>(4 - 11)            | 97<br>(58 - 126)         | 127<br>(83 - 173)           |
| Pancreatic cancer                             | 962<br>(887 - 1,036)        | --               | --                | 65<br>(54 - 76)          | 475<br>(430 - 524)       | 422<br>(378 - 470)          |
| Malignant skin melanoma                       | 225<br>(111 - 371)          | --               | --                | 37<br>(17 - 61)          | 100<br>(48 - 167)        | 88<br>(44 - 145)            |
| Non-melanoma skin cancer                      | 103<br>(65 - 159)           | --               | --                | 4<br>(3 - 7)             | 26<br>(15 - 39)          | 73<br>(46 - 117)            |
| Ovarian cancer                                | --                          | --               | --                | --                       | --                       | --                          |
| Testicular cancer                             | 43<br>(26 - 57)             | --               | --                | 27<br>(15 - 37)          | 9<br>(6 - 13)            | 7<br>(5 - 10)               |
| Kidney cancer                                 | 520<br>(451 - 588)          | 0<br>(0 - 1)     | 1<br>(0 - 1)      | 40<br>(31 - 50)          | 249<br>(210 - 289)       | 230<br>(187 - 275)          |
| Bladder cancer                                | 613<br>(458 - 702)          | --               | --                | 11<br>(8 - 14)           | 226<br>(162 - 266)       | 376<br>(282 - 441)          |
| Brain and nervous system cancer               | 349<br>(293 - 468)          | 2<br>(1 - 4)     | 6<br>(4 - 9)      | 83<br>(66 - 108)         | 172<br>(137 - 245)       | 86<br>(63 - 115)            |
| Thyroid cancer                                | 42<br>(34 - 50)             | --               | 0<br>(0 - 0)      | 4<br>(3 - 5)             | 20<br>(15 - 25)          | 18<br>(14 - 23)             |
| Mesothelioma                                  | 46<br>(34 - 82)             | --               | --                | 6<br>(4 - 11)            | 26<br>(18 - 45)          | 14<br>(9 - 30)              |
| Hodgkin lymphoma                              | 31<br>(23 - 56)             | 0<br>(0 - 0)     | 0<br>(0 - 0)      | 10<br>(7 - 16)           | 12<br>(9 - 24)           | 8<br>(5 - 15)               |
| Non-Hodgkin lymphoma                          | 316<br>(161 - 411)          | 1<br>(0 - 1)     | 2<br>(1 - 3)      | 40<br>(18 - 53)          | 135<br>(71 - 177)        | 138<br>(71 - 188)           |
| Multiple myeloma                              | 156<br>(89 - 241)           | --               | --                | 7<br>(4 - 12)            | 71<br>(41 - 115)         | 77<br>(40 - 115)            |
| Leukemia                                      | 478<br>(429 - 524)          | 2<br>(1 - 3)     | 6<br>(4 - 8)      | 53<br>(45 - 61)          | 173<br>(152 - 196)       | 244<br>(213 - 274)          |
| Other neoplasms                               | 488<br>(369 - 622)          | 3<br>(2 - 6)     | 3<br>(2 - 5)      | 60<br>(41 - 82)          | 207<br>(153 - 266)       | 214<br>(148 - 293)          |
| Cardiovascular diseases                       | 25,589<br>(24,527 - 26,566) | 1<br>(1 - 1)     | 2<br>(1 - 2)      | 1,139<br>(1,011 - 1,246) | 7,853<br>(7,425 - 8,285) | 16,595<br>(15,858 - 17,262) |
| Rheumatic heart disease                       | 99<br>(73 - 170)            | 0<br>(0 - 0)     | 0<br>(0 - 0)      | 11<br>(7 - 19)           | 37<br>(24 - 76)          | 51<br>(34 - 86)             |
| Ischemic heart disease                        | 13,512<br>(11,120 - 14,659) | 0<br>(0 - 0)     | 0<br>(0 - 0)      | 607<br>(512 - 687)       | 4,303<br>(3,785 - 4,727) | 8,602<br>(6,773 - 9,532)    |
| Cerebrovascular disease                       | 7,969<br>(6,850 - 9,402)    | 0<br>(0 - 0)     | 1<br>(1 - 1)      | 240<br>(177 - 301)       | 2,138<br>(1,781 - 2,545) | 5,591<br>(4,731 - 6,677)    |
| Ischemic stroke                               | 5,939<br>(4,830 - 7,120)    | 0<br>(0 - 0)     | 0<br>(0 - 0)      | 69<br>(42 - 95)          | 1,264<br>(942 - 1,555)   | 4,605<br>(3,705 - 5,509)    |
| Hemorrhagic stroke                            | 2,030<br>(1,522 - 2,925)    | 0<br>(0 - 0)     | 1<br>(0 - 1)      | 171<br>(128 - 214)       | 873<br>(663 - 1,189)     | 985<br>(651 - 1,590)        |
| Hypertensive heart disease                    | 1,350<br>(855 - 1,860)      | 0<br>(0 - 0)     | 0<br>(0 - 0)      | 49<br>(26 - 74)          | 384<br>(235 - 541)       | 917<br>(547 - 1,316)        |
| Cardiomyopathy and myocarditis                | 1,150<br>(953 - 1,652)      | 1<br>(0 - 1)     | 1<br>(0 - 1)      | 152<br>(104 - 191)       | 468<br>(340 - 587)       | 529<br>(371 - 910)          |
| Atrial fibrillation and flutter               | 163<br>(123 - 207)          | --               | --                | 2<br>(1 - 2)             | 23<br>(16 - 29)          | 138<br>(101 - 180)          |
| Aortic aneurysm                               | 276<br>(193 - 323)          | --               | --                | 16<br>(9 - 20)           | 105<br>(74 - 124)        | 155<br>(106 - 185)          |
| Peripheral vascular disease                   | 172<br>(144 - 205)          | --               | --                | 6<br>(4 - 8)             | 70<br>(55 - 87)          | 96<br>(75 - 122)            |
| Endocarditis                                  | 49<br>(34 - 80)             | 0<br>(0 - 0)     | 0<br>(0 - 0)      | 8<br>(5 - 13)            | 23<br>(15 - 39)          | 18<br>(12 - 29)             |
| Other cardiovascular and circulatory diseases | 849<br>(716 - 1,120)        | 0<br>(0 - 0)     | 0<br>(0 - 0)      | 48<br>(33 - 60)          | 302<br>(248 - 394)       | 498<br>(405 - 674)          |
| Chronic respiratory diseases                  | 3,362<br>(2,474 - 3,728)    | 1<br>(1 - 1)     | 1<br>(0 - 1)      | 103<br>(66 - 123)        | 997<br>(711 - 1,124)     | 2,261<br>(1,682 - 2,544)    |
| Chronic obstructive pulmonary disease         | 3,092<br>(2,282 - 3,427)    | 1<br>(0 - 1)     | 0<br>(0 - 0)      | 88<br>(55 - 106)         | 895<br>(623 - 1,006)     | 2,107<br>(1,566 - 2,374)    |
| Pneumoconiosis                                | 59<br>(35 - 81)             | 0<br>(0 - 0)     | 0<br>(0 - 0)      | 3<br>(2 - 4)             | 25<br>(15 - 35)          | 32<br>(18 - 47)             |
| Silicosis                                     | 27<br>(16 - 38)             | 0<br>(0 - 0)     | 0<br>(0 - 0)      | 1<br>(0 - 1)             | 8<br>(5 - 11)            | 19<br>(10 - 28)             |
| Asbestosis                                    | 4<br>(2 - 5)                | 0<br>(0 - 0)     | 0<br>(0 - 0)      | 0<br>(0 - 1)             | 2<br>(1 - 3)             | 1<br>(1 - 2)                |
| Coal workers pneumoconiosis                   | 14<br>(9 - 20)              | 0<br>(0 - 0)     | 0<br>(0 - 0)      | 1<br>(0 - 1)             | 7<br>(4 - 10)            | 7<br>(4 - 10)               |
| Other pneumoconiosis                          | 14<br>(8 - 20)              | 0<br>(0 - 0)     | 0<br>(0 - 0)      | 1<br>(1 - 2)             | 8<br>(4 - 12)            | 5<br>(3 - 8)                |

Web Table 31- Hungarian deaths with 95% UI by age, sex, and cause in 2013

| Cause                                               | Males, All Ages          | Males, 0-4 Years | Males, 5-14 Years | Males, 15-49 Years | Males, 50-69 Years       | Males, 70-80 Years       |
|-----------------------------------------------------|--------------------------|------------------|-------------------|--------------------|--------------------------|--------------------------|
| Asthma                                              | 60<br>(43 - 73)          | 0<br>(0 - 0)     | 0<br>(0 - 0)      | 4<br>(2 - 4)       | 21<br>(15 - 26)          | 35<br>(25 - 45)          |
| Interstitial lung disease and pulmonary sarcoidosis | 135<br>(69 - 183)        | 0<br>(0 - 0)     | 0<br>(0 - 0)      | 5<br>(3 - 7)       | 50<br>(25 - 72)          | 79<br>(37 - 114)         |
| Other chronic respiratory diseases                  | 17<br>(12 - 21)          | 0<br>(0 - 0)     | 0<br>(0 - 0)      | 3<br>(2 - 5)       | 6<br>(4 - 8)             | 8<br>(5 - 11)            |
| Cirrhosis                                           | 2,738<br>(2,538 - 2,932) | 0<br>(0 - 0)     | 0<br>(0 - 0)      | 553<br>(491 - 619) | 1,750<br>(1,597 - 1,911) | 435<br>(386 - 483)       |
| Cirrhosis due to hepatitis B                        | 709<br>(436 - 1,051)     | 0<br>(0 - 0)     | 0<br>(0 - 0)      | 142<br>(84 - 213)  | 464<br>(283 - 699)       | 103<br>(59 - 150)        |
| Cirrhosis due to hepatitis C                        | 549<br>(209 - 1,062)     | 0<br>(0 - 0)     | 0<br>(0 - 0)      | 119<br>(53 - 206)  | 339<br>(109 - 689)       | 90<br>(25 - 210)         |
| Cirrhosis due to alcohol use                        | 986<br>(559 - 1,343)     | --               | --                | 143<br>(67 - 226)  | 650<br>(363 - 889)       | 194<br>(100 - 266)       |
| Cirrhosis due to other causes                       | 494<br>(268 - 795)       | 0<br>(0 - 0)     | 0<br>(0 - 0)      | 149<br>(84 - 227)  | 297<br>(146 - 504)       | 47<br>(23 - 80)          |
| Digestive diseases                                  | 1,242<br>(1,105 - 1,404) | 1<br>(0 - 1)     | 1<br>(0 - 1)      | 130<br>(107 - 149) | 488<br>(404 - 551)       | 622<br>(542 - 756)       |
| Peptic ulcer disease                                | 319<br>(224 - 401)       | 0<br>(0 - 0)     | 0<br>(0 - 0)      | 28<br>(17 - 38)    | 142<br>(95 - 185)        | 148<br>(103 - 197)       |
| Gastritis and duodenitis                            | 17<br>(7 - 25)           | 0<br>(0 - 0)     | 0<br>(0 - 0)      | 2<br>(1 - 3)       | 7<br>(3 - 10)            | 8<br>(3 - 13)            |
| Appendicitis                                        | 19<br>(13 - 27)          | 0<br>(0 - 0)     | 0<br>(0 - 0)      | 2<br>(1 - 3)       | 8<br>(5 - 11)            | 9<br>(6 - 14)            |
| Paralytic ileus and intestinal obstruction          | 102<br>(60 - 175)        | 0<br>(0 - 0)     | 0<br>(0 - 0)      | 8<br>(4 - 13)      | 33<br>(18 - 55)          | 61<br>(35 - 107)         |
| Inguinal, femoral, and abdominal hernia             | 42<br>(21 - 64)          | 0<br>(0 - 0)     | 0<br>(0 - 0)      | 1<br>(1 - 2)       | 10<br>(4 - 15)           | 31<br>(15 - 51)          |
| Inflammatory bowel disease                          | 39<br>(29 - 60)          | 0<br>(0 - 0)     | 0<br>(0 - 0)      | 5<br>(3 - 7)       | 16<br>(11 - 24)          | 18<br>(12 - 30)          |
| Vascular intestinal disorders                       | 210<br>(93 - 383)        | 0<br>(0 - 0)     | 0<br>(0 - 0)      | 10<br>(4 - 20)     | 82<br>(35 - 152)         | 119<br>(51 - 215)        |
| Gallbladder and biliary diseases                    | 144<br>(109 - 201)       | 0<br>(0 - 0)     | 0<br>(0 - 0)      | 4<br>(2 - 5)       | 37<br>(27 - 51)          | 104<br>(75 - 147)        |
| Pancreatitis                                        | 242<br>(174 - 332)       | 0<br>(0 - 0)     | 0<br>(0 - 0)      | 61<br>(46 - 81)    | 111<br>(78 - 156)        | 70<br>(46 - 105)         |
| Other digestive diseases                            | 106<br>(63 - 134)        | 0<br>(0 - 0)     | 0<br>(0 - 0)      | 9<br>(4 - 12)      | 43<br>(23 - 56)          | 54<br>(32 - 73)          |
| Neurological disorders                              | 2,818<br>(2,345 - 3,333) | 4<br>(2 - 6)     | 3<br>(2 - 4)      | 68<br>(56 - 93)    | 262<br>(220 - 310)       | 2,482<br>(2,026 - 2,986) |
| Alzheimer disease and other dementias               | 2,440<br>(1,985 - 2,948) | --               | --                | 0<br>(0 - 1)       | 144<br>(106 - 186)       | 2,296<br>(1,847 - 2,795) |
| Parkinson disease                                   | 176<br>(91 - 210)        | --               | --                | 1<br>(1 - 1)       | 30<br>(19 - 37)          | 145<br>(77 - 178)        |
| Epilepsy                                            | 80<br>(64 - 110)         | 1<br>(0 - 1)     | 2<br>(1 - 2)      | 38<br>(29 - 59)    | 29<br>(22 - 37)          | 11<br>(8 - 14)           |
| Multiple sclerosis                                  | 33<br>(17 - 64)          | --               | --                | 9<br>(4 - 17)      | 18<br>(9 - 36)           | 6<br>(3 - 11)            |
| Other neurological disorders                        | 89<br>(70 - 111)         | 3<br>(2 - 5)     | 2<br>(1 - 2)      | 19<br>(15 - 25)    | 42<br>(33 - 53)          | 24<br>(18 - 30)          |
| Mental and substance use disorders                  | 397<br>(310 - 688)       | 0<br>(0 - 0)     | 0<br>(0 - 0)      | 123<br>(96 - 210)  | 219<br>(169 - 404)       | 55<br>(37 - 82)          |
| Schizophrenia                                       | 22<br>(8 - 34)           | --               | --                | 5<br>(2 - 8)       | 11<br>(4 - 19)           | 6<br>(2 - 10)            |
| Alcohol use disorders                               | 328<br>(260 - 629)       | --               | --                | 91<br>(67 - 184)   | 195<br>(150 - 384)       | 42<br>(27 - 70)          |
| Drug use disorders                                  | 47<br>(22 - 55)          | 0<br>(0 - 0)     | --                | 27<br>(12 - 34)    | 12<br>(6 - 15)           | 7<br>(4 - 10)            |
| Opioid use disorders                                | 18<br>(8 - 22)           | 0<br>(0 - 0)     | --                | 11<br>(5 - 14)     | 4<br>(2 - 6)             | 3<br>(2 - 4)             |
| Cocaine use disorders                               | 2<br>(1 - 3)             | 0<br>(0 - 0)     | --                | 2<br>(1 - 2)       | 0<br>(0 - 1)             | 0<br>(0 - 0)             |
| Amphetamine use disorders                           | 2<br>(1 - 2)             | 0<br>(0 - 0)     | --                | 1<br>(1 - 2)       | 1<br>(0 - 1)             | 0<br>(0 - 0)             |
| Other drug use disorders                            | 24<br>(11 - 29)          | 0<br>(0 - 0)     | --                | 14<br>(6 - 17)     | 7<br>(3 - 9)             | 4<br>(2 - 5)             |
| Eating disorders                                    | 0<br>(0 - 0)             | --               | 0<br>(0 - 0)      | 0<br>(0 - 0)       | --                       | --                       |
| Anorexia nervosa                                    | 0<br>(0 - 0)             | --               | 0<br>(0 - 0)      | 0<br>(0 - 0)       | --                       | --                       |
| Diabetes, urogenital, blood, and endocrine diseases | 1,741<br>(1,583 - 1,874) | 7<br>(4 - 10)    | 3<br>(2 - 5)      | 114<br>(94 - 129)  | 597<br>(542 - 660)       | 1,020<br>(903 - 1,130)   |
| Diabetes mellitus                                   | 940<br>(860 - 1,018)     | 0<br>(0 - 0)     | 0<br>(0 - 0)      | 47<br>(39 - 56)    | 362<br>(319 - 407)       | 530<br>(467 - 593)       |
| Acute glomerulonephritis                            | 4<br>(3 - 7)             | 0<br>(0 - 0)     | 0<br>(0 - 0)      | 1<br>(0 - 1)       | 1<br>(1 - 3)             | 2<br>(1 - 3)             |
| Chronic kidney disease                              | 498<br>(348 - 567)       | 0<br>(0 - 0)     | 0<br>(0 - 1)      | 32<br>(23 - 39)    | 129<br>(104 - 152)       | 336<br>(211 - 396)       |
| Chronic kidney disease due to diabetes mellitus     | 69<br>(15 - 97)          | 0<br>(0 - 0)     | 0<br>(0 - 0)      | 5<br>(1 - 7)       | 24<br>(6 - 34)           | 41<br>(7 - 60)           |

Web Table 31- Hungary deaths with 95% UI by age, sex, and cause in 2013

| Cause                                               | Males, All Ages          | Males, 0-4 Years | Males, 5-14 Years | Males, 15-49 Years       | Males, 50-69 Years       | Males, 70-80 Years       |
|-----------------------------------------------------|--------------------------|------------------|-------------------|--------------------------|--------------------------|--------------------------|
| Chronic kidney disease due to hypertension          | 211<br>(108 - 258)       | 0<br>(0 - 0)     | 0<br>(0 - 0)      | 11<br>(6 - 14)           | 49<br>(30 - 64)          | 151<br>(72 - 193)        |
| Chronic kidney disease due to glomerulonephritis    | 33<br>(23 - 57)          | 0<br>(0 - 0)     | 0<br>(0 - 0)      | 4<br>(3 - 6)             | 11<br>(8 - 18)           | 17<br>(11 - 33)          |
| Chronic kidney disease due to other causes          | 185<br>(113 - 284)       | 0<br>(0 - 0)     | 0<br>(0 - 0)      | 12<br>(7 - 19)           | 45<br>(28 - 72)          | 127<br>(69 - 205)        |
| Urinary diseases and male infertility               | 157<br>(125 - 291)       | 0<br>(0 - 0)     | 0<br>(0 - 0)      | 7<br>(5 - 10)            | 46<br>(36 - 80)          | 105<br>(78 - 206)        |
| Interstitial nephritis and urinary tract infections | 100<br>(70 - 208)        | 0<br>(0 - 0)     | 0<br>(0 - 0)      | 4<br>(3 - 7)             | 28<br>(20 - 55)          | 67<br>(44 - 151)         |
| Urolithiasis                                        | 21<br>(11 - 42)          | --               | 0<br>(0 - 0)      | 1<br>(0 - 1)             | 6<br>(3 - 12)            | 14<br>(7 - 29)           |
| Other urinary diseases                              | 37<br>(19 - 57)          | 0<br>(0 - 0)     | 0<br>(0 - 0)      | 2<br>(1 - 3)             | 11<br>(6 - 16)           | 24<br>(11 - 40)          |
| Gynecological diseases                              | --                       | --               | --                | --                       | --                       | --                       |
| Uterine fibroids                                    | --                       | --               | --                | --                       | --                       | --                       |
| Polycystic ovarian syndrome                         | --                       | --               | --                | --                       | --                       | --                       |
| Endometriosis                                       | --                       | --               | --                | --                       | --                       | --                       |
| Genital prolapse                                    | --                       | --               | --                | --                       | --                       | --                       |
| Other gynecological diseases                        | --                       | --               | --                | --                       | --                       | --                       |
| Hemoglobinopathies and hemolytic anemias            | 20<br>(12 - 29)          | 0<br>(0 - 1)     | 0<br>(0 - 1)      | 5<br>(3 - 7)             | 4<br>(3 - 7)             | 10<br>(6 - 15)           |
| Thalassemias                                        | 2<br>(1 - 3)             | 0<br>(0 - 1)     | 0<br>(0 - 0)      | 1<br>(1 - 2)             | 0<br>(0 - 0)             | 0<br>(0 - 0)             |
| Sickle cell disorders                               | 1<br>(1 - 2)             | 0<br>(0 - 0)     | 0<br>(0 - 0)      | 1<br>(0 - 1)             | 0<br>(0 - 1)             | 0<br>(0 - 0)             |
| G6PD deficiency                                     | 0<br>(0 - 1)             | 0<br>(0 - 0)     | 0<br>(0 - 0)      | 0<br>(0 - 0)             | 0<br>(0 - 0)             | 0<br>(0 - 0)             |
| Other hemoglobinopathies and hemolytic anemias      | 16<br>(10 - 24)          | 0<br>(0 - 0)     | 0<br>(0 - 0)      | 3<br>(1 - 4)             | 4<br>(2 - 6)             | 10<br>(6 - 15)           |
| Endocrine, metabolic, blood, and immune disorders   | 122<br>(58 - 148)        | 5<br>(3 - 9)     | 2<br>(1 - 3)      | 23<br>(10 - 30)          | 54<br>(22 - 68)          | 38<br>(19 - 50)          |
| Musculoskeletal disorders                           | 58<br>(39 - 78)          | --               | 0<br>(0 - 0)      | 8<br>(5 - 10)            | 26<br>(17 - 34)          | 24<br>(15 - 34)          |
| Rheumatoid arthritis                                | 10<br>(7 - 17)           | --               | 0<br>(0 - 0)      | 1<br>(0 - 1)             | 4<br>(2 - 8)             | 5<br>(3 - 10)            |
| Other musculoskeletal disorders                     | 48<br>(30 - 60)          | --               | 0<br>(0 - 0)      | 7<br>(4 - 9)             | 22<br>(14 - 28)          | 19<br>(11 - 26)          |
| Other non-communicable diseases                     | 210<br>(176 - 241)       | 90<br>(69 - 117) | 8<br>(6 - 11)     | 49<br>(38 - 57)          | 35<br>(24 - 41)          | 27<br>(13 - 34)          |
| Congenital anomalies                                | 161<br>(133 - 189)       | 81<br>(61 - 107) | 8<br>(6 - 10)     | 46<br>(36 - 54)          | 20<br>(16 - 24)          | 6<br>(4 - 7)             |
| Neural tube defects                                 | 2<br>(1 - 3)             | 1<br>(1 - 2)     | 0<br>(0 - 0)      | 0<br>(0 - 0)             | 0<br>(0 - 0)             | 0<br>(0 - 0)             |
| Congenital heart anomalies                          | 71<br>(54 - 87)          | 37<br>(27 - 50)  | 3<br>(2 - 5)      | 24<br>(17 - 30)          | 5<br>(3 - 7)             | 1<br>(0 - 1)             |
| Cleft lip and cleft palate                          | 1<br>(0 - 4)             | 1<br>(0 - 4)     | --                | --                       | --                       | --                       |
| Down syndrome                                       | 14<br>(6 - 22)           | 5<br>(2 - 10)    | 1<br>(0 - 1)      | 5<br>(2 - 8)             | 3<br>(1 - 5)             | 0<br>(0 - 0)             |
| Chromosomal unbalanced rearrangements               | 2<br>(1 - 3)             | 2<br>(1 - 3)     | 0<br>(0 - 0)      | 0<br>(0 - 0)             | 0<br>(0 - 0)             | 0<br>(0 - 0)             |
| Other congenital anomalies                          | 71<br>(57 - 90)          | 35<br>(24 - 51)  | 4<br>(2 - 6)      | 16<br>(12 - 21)          | 12<br>(9 - 15)           | 5<br>(4 - 6)             |
| Skin and subcutaneous diseases                      | 40<br>(15 - 48)          | 0<br>(0 - 0)     | 0<br>(0 - 0)      | 3<br>(1 - 4)             | 15<br>(6 - 20)           | 21<br>(8 - 28)           |
| Cellulitis                                          | 2<br>(1 - 5)             | 0<br>(0 - 0)     | 0<br>(0 - 0)      | 0<br>(0 - 1)             | 1<br>(0 - 2)             | 1<br>(0 - 3)             |
| Pyoderma                                            | 29<br>(13 - 35)          | 0<br>(0 - 0)     | 0<br>(0 - 0)      | 2<br>(1 - 3)             | 12<br>(5 - 16)           | 14<br>(7 - 19)           |
| Decubitus ulcer                                     | 6<br>(0 - 9)             | 0<br>(0 - 0)     | 0<br>(0 - 0)      | 0<br>(0 - 1)             | 1<br>(0 - 2)             | 4<br>(0 - 7)             |
| Other skin and subcutaneous diseases                | 3<br>(1 - 5)             | 0<br>(0 - 0)     | 0<br>(0 - 0)      | 0<br>(0 - 1)             | 1<br>(0 - 1)             | 2<br>(1 - 3)             |
| Sudden infant death syndrome                        | 9<br>(3 - 18)            | 9<br>(3 - 18)    | --                | --                       | --                       | --                       |
| Injuries                                            | 4,310<br>(3,902 - 5,549) | 14<br>(9 - 20)   | 23<br>(19 - 28)   | 1,550<br>(1,407 - 1,782) | 1,528<br>(1,368 - 1,926) | 1,196<br>(1,004 - 1,814) |
| Transport injuries                                  | 717<br>(650 - 772)       | 2<br>(1 - 3)     | 9<br>(7 - 12)     | 360<br>(305 - 399)       | 233<br>(208 - 258)       | 113<br>(98 - 131)        |
| Road injuries                                       | 654<br>(579 - 712)       | 2<br>(1 - 3)     | 8<br>(6 - 11)     | 329<br>(272 - 368)       | 210<br>(183 - 236)       | 105<br>(91 - 122)        |
| Pedestrian road injuries                            | 184<br>(120 - 288)       | 1<br>(0 - 1)     | 3<br>(2 - 5)      | 64<br>(37 - 113)         | 69<br>(42 - 106)         | 48<br>(30 - 69)          |

Web Table 31- Hungary deaths with 95% UI by age, sex, and cause in 2013

| Cause                                           | Males, All Ages          | Males, 0-4 Years | Males, 5-14 Years | Males, 15-49 Years   | Males, 50-69 Years | Males, 70-80 Years   |
|-------------------------------------------------|--------------------------|------------------|-------------------|----------------------|--------------------|----------------------|
| Cyclist road injuries                           | 110<br>(76 - 160)        | 0<br>(0 - 0)     | 1<br>(1 - 2)      | 31<br>(18 - 45)      | 49<br>(31 - 73)    | 28<br>(17 - 43)      |
| Motorcyclist road injuries                      | 77<br>(38 - 102)         | 0<br>(0 - 0)     | 0<br>(0 - 1)      | 51<br>(25 - 69)      | 18<br>(10 - 26)    | 7<br>(4 - 12)        |
| Motor vehicle road injuries                     | 275<br>(182 - 339)       | 1<br>(0 - 2)     | 3<br>(2 - 5)      | 181<br>(127 - 220)   | 69<br>(40 - 94)    | 20<br>(9 - 31)       |
| Other road injuries                             | 9<br>(5 - 22)            | 0<br>(0 - 0)     | 0<br>(0 - 0)      | 2<br>(1 - 5)         | 5<br>(2 - 11)      | 2<br>(1 - 6)         |
| Other transport injuries                        | 63<br>(49 - 88)          | 0<br>(0 - 0)     | 1<br>(0 - 1)      | 30<br>(22 - 42)      | 23<br>(16 - 37)    | 8<br>(5 - 13)        |
| Unintentional injuries                          | 1,598<br>(1,365 - 2,357) | 10<br>(6 - 15)   | 10<br>(8 - 14)    | 317<br>(274 - 422)   | 541<br>(464 - 749) | 721<br>(566 - 1,217) |
| Falls                                           | 996<br>(804 - 1,671)     | 1<br>(0 - 2)     | 1<br>(1 - 1)      | 102<br>(81 - 162)    | 303<br>(244 - 480) | 590<br>(446 - 1,077) |
| Drowning                                        | 137<br>(99 - 216)        | 2<br>(1 - 4)     | 6<br>(4 - 10)     | 72<br>(49 - 127)     | 44<br>(32 - 64)    | 14<br>(10 - 20)      |
| Fire, heat, and hot substances                  | 108<br>(86 - 161)        | 1<br>(1 - 2)     | 1<br>(0 - 1)      | 24<br>(17 - 37)      | 45<br>(33 - 66)    | 38<br>(28 - 56)      |
| Poisonings                                      | 42<br>(33 - 65)          | 0<br>(0 - 1)     | 0<br>(0 - 0)      | 14<br>(11 - 22)      | 18<br>(14 - 30)    | 9<br>(6 - 15)        |
| Exposure to mechanical forces                   | 62<br>(53 - 72)          | 1<br>(0 - 1)     | 1<br>(1 - 1)      | 31<br>(25 - 38)      | 22<br>(17 - 27)    | 7<br>(6 - 9)         |
| Unintentional firearm injuries                  | 2<br>(2 - 3)             | 0<br>(0 - 0)     | 0<br>(0 - 0)      | 1<br>(1 - 2)         | 0<br>(0 - 1)       | 0<br>(0 - 0)         |
| Unintentional suffocation                       | 1<br>(1 - 2)             | 0<br>(0 - 1)     | 0<br>(0 - 0)      | 0<br>(0 - 1)         | 0<br>(0 - 0)       | 0<br>(0 - 0)         |
| Other exposure to mechanical forces             | 59<br>(49 - 69)          | 0<br>(0 - 1)     | 1<br>(1 - 1)      | 30<br>(23 - 36)      | 21<br>(17 - 26)    | 7<br>(6 - 9)         |
| Adverse effects of medical treatment            | 38<br>(28 - 60)          | 0<br>(0 - 1)     | 0<br>(0 - 0)      | 4<br>(3 - 8)         | 15<br>(11 - 24)    | 18<br>(12 - 28)      |
| Animal contact                                  | 12<br>(10 - 20)          | 0<br>(0 - 0)     | 0<br>(0 - 0)      | 3<br>(2 - 4)         | 6<br>(4 - 10)      | 3<br>(2 - 6)         |
| Venomous animal contact                         | 4<br>(3 - 6)             | 0<br>(0 - 0)     | 0<br>(0 - 0)      | 1<br>(1 - 2)         | 2<br>(1 - 3)       | 0<br>(0 - 1)         |
| Non-venomous animal contact                     | 8<br>(6 - 14)            | 0<br>(0 - 0)     | 0<br>(0 - 0)      | 1<br>(1 - 2)         | 4<br>(3 - 7)       | 3<br>(2 - 5)         |
| Foreign body                                    | 159<br>(91 - 262)        | 3<br>(2 - 6)     | 1<br>(1 - 1)      | 44<br>(25 - 73)      | 73<br>(42 - 124)   | 38<br>(21 - 62)      |
| Pulmonary aspiration and foreign body in airway | 157<br>(90 - 261)        | 3<br>(2 - 6)     | 1<br>(0 - 1)      | 44<br>(24 - 73)      | 72<br>(41 - 124)   | 37<br>(21 - 62)      |
| Foreign body in other body part                 | 1<br>(1 - 2)             | 0<br>(0 - 0)     | 0<br>(0 - 0)      | 0<br>(0 - 1)         | 1<br>(0 - 1)       | 0<br>(0 - 1)         |
| Other unintentional injuries                    | 43<br>(33 - 55)          | 1<br>(0 - 1)     | 1<br>(0 - 1)      | 21<br>(15 - 30)      | 16<br>(10 - 23)    | 5<br>(3 - 7)         |
| Self-harm and interpersonal violence            | 1,995<br>(1,726 - 2,678) | 2<br>(1 - 3)     | 3<br>(2 - 5)      | 874<br>(680 - 1,066) | 754<br>(620 - 999) | 362<br>(294 - 573)   |
| Self-harm                                       | 1,884<br>(1,609 - 2,550) | -                | 3<br>(2 - 4)      | 822<br>(626 - 1,006) | 713<br>(580 - 958) | 347<br>(281 - 560)   |
| Interpersonal violence                          | 111<br>(75 - 176)        | 2<br>(1 - 3)     | 1<br>(0 - 1)      | 52<br>(34 - 81)      | 42<br>(29 - 68)    | 15<br>(10 - 25)      |
| Assault by firearm                              | 7<br>(3 - 13)            | 0<br>(0 - 0)     | 0<br>(0 - 0)      | 5<br>(2 - 9)         | 2<br>(1 - 3)       | 0<br>(0 - 0)         |
| Assault by sharp object                         | 44<br>(29 - 81)          | 0<br>(0 - 0)     | 0<br>(0 - 0)      | 26<br>(17 - 48)      | 15<br>(9 - 27)     | 3<br>(2 - 6)         |
| Assault by other means                          | 60<br>(37 - 89)          | 2<br>(1 - 3)     | 0<br>(0 - 1)      | 21<br>(10 - 30)      | 25<br>(16 - 41)    | 11<br>(7 - 19)       |

Web Table 31- Hungary deaths with 95% UI by age, sex, and cause in 2013

| Cause                                                             | Females, All Ages           | Females, 0-4 Years | Females, 5-14 Years | Females, 15-49 Years     | Females, 50-69 Years        | Females, 70-80 Years        |
|-------------------------------------------------------------------|-----------------------------|--------------------|---------------------|--------------------------|-----------------------------|-----------------------------|
| All causes                                                        | 65,396<br>(63,440 - 67,567) | 222<br>(175 - 276) | 43<br>(38 - 49)     | 2,174<br>(2,070 - 2,288) | 12,443<br>(11,967 - 12,975) | 50,514<br>(49,145 - 52,027) |
| Communicable, maternal, neonatal, and nutritional diseases        | 954<br>(824 - 1,117)        | 122<br>(93 - 155)  | 4<br>(3 - 5)        | 55<br>(48 - 61)          | 127<br>(110 - 145)          | 647<br>(531 - 798)          |
| HIV/AIDS and tuberculosis                                         | 54<br>(42 - 101)            | 0<br>(0 - 0)       | 0<br>(0 - 0)        | 7<br>(5 - 9)             | 14<br>(10 - 24)             | 34<br>(24 - 68)             |
| Tuberculosis                                                      | 46<br>(35 - 93)             | 0<br>(0 - 0)       | 0<br>(0 - 0)        | 2<br>(2 - 4)             | 11<br>(8 - 22)              | 33<br>(23 - 67)             |
| HIV/AIDS                                                          | 8<br>(5 - 11)               | 0<br>(0 - 0)       | 0<br>(0 - 0)        | 5<br>(3 - 7)             | 3<br>(1 - 4)                | 0<br>(0 - 1)                |
| HIV/AIDS resulting in mycobacterial infection                     | 0<br>(0 - 0)                | 0<br>(0 - 0)       | 0<br>(0 - 0)        | 0<br>(0 - 0)             | 0<br>(0 - 0)                | 0<br>(0 - 0)                |
| HIV/AIDS resulting in other diseases                              | 7<br>(5 - 10)               | 0<br>(0 - 0)       | 0<br>(0 - 0)        | 4<br>(3 - 6)             | 2<br>(1 - 4)                | 0<br>(0 - 1)                |
| Diarrhea, lower respiratory, and other common infectious diseases | 668<br>(552 - 825)          | 14<br>(9 - 19)     | 3<br>(2 - 4)        | 31<br>(26 - 37)          | 94<br>(79 - 111)            | 527<br>(418 - 674)          |
| Diarrheal diseases                                                | 75<br>(55 - 103)            | 2<br>(1 - 3)       | 0<br>(0 - 0)        | 1<br>(1 - 2)             | 9<br>(7 - 13)               | 63<br>(43 - 91)             |
| Intestinal infectious diseases                                    | 7<br>(3 - 14)               | 1<br>(0 - 2)       | 1<br>(0 - 2)        | 2<br>(1 - 5)             | 1<br>(0 - 3)                | 2<br>(0 - 3)                |
| Typhoid fever                                                     | 5<br>(2 - 10)               | 1<br>(0 - 1)       | 1<br>(0 - 1)        | 2<br>(0 - 4)             | 1<br>(0 - 2)                | 1<br>(0 - 2)                |
| Paratyphoid fever                                                 | 1<br>(1 - 3)                | 0<br>(0 - 0)       | 0<br>(0 - 0)        | 0<br>(0 - 1)             | 0<br>(0 - 1)                | 0<br>(0 - 1)                |
| Other intestinal infectious diseases                              | 0<br>(0 - 3)                | 0<br>(0 - 1)       | 0<br>(0 - 0)        | 0<br>(0 - 1)             | 0<br>(0 - 1)                | 0<br>(0 - 1)                |
| Lower respiratory infections                                      | 541<br>(430 - 689)          | 8<br>(5 - 13)      | 1<br>(1 - 2)        | 21<br>(17 - 26)          | 70<br>(56 - 86)             | 440<br>(336 - 584)          |
| Upper respiratory infections                                      | 2<br>(0 - 5)                | 0<br>(0 - 0)       | 0<br>(0 - 0)        | 0<br>(0 - 0)             | 0<br>(0 - 1)                | 1<br>(0 - 5)                |
| Otitis media                                                      | 1<br>(1 - 1)                | 0<br>(0 - 0)       | 0<br>(0 - 0)        | 0<br>(0 - 0)             | 0<br>(0 - 0)                | 0<br>(0 - 0)                |
| Meningitis                                                        | 26<br>(22 - 34)             | 2<br>(1 - 2)       | 0<br>(0 - 0)        | 3<br>(2 - 4)             | 8<br>(6 - 11)               | 13<br>(10 - 19)             |
| Pneumococcal meningitis                                           | 7<br>(4 - 9)                | 0<br>(0 - 0)       | 0<br>(0 - 0)        | 1<br>(0 - 1)             | 2<br>(1 - 3)                | 3<br>(2 - 6)                |
| H influenzae type B meningitis                                    | 3<br>(2 - 4)                | 0<br>(0 - 1)       | 0<br>(0 - 0)        | 0<br>(0 - 1)             | 1<br>(0 - 1)                | 1<br>(1 - 2)                |
| Meningococcal meningitis                                          | 6<br>(4 - 9)                | 0<br>(0 - 1)       | 0<br>(0 - 0)        | 1<br>(0 - 1)             | 2<br>(1 - 3)                | 3<br>(2 - 5)                |
| Other meningitis                                                  | 10<br>(7 - 15)              | 0<br>(0 - 1)       | 0<br>(0 - 0)        | 1<br>(1 - 2)             | 4<br>(2 - 5)                | 5<br>(3 - 8)                |
| Encephalitis                                                      | 11<br>(8 - 20)              | 1<br>(0 - 1)       | 0<br>(0 - 1)        | 3<br>(2 - 6)             | 4<br>(2 - 7)                | 3<br>(2 - 7)                |
| Diphtheria                                                        | 0<br>(0 - 0)                | 0<br>(0 - 0)       | 0<br>(0 - 0)        | 0<br>(0 - 0)             | 0<br>(0 - 0)                | --<br>(0 - 0)               |
| Whooping cough                                                    | 0<br>(0 - 0)                | 0<br>(0 - 0)       | 0<br>(0 - 0)        | 0<br>(0 - 0)             | 0<br>(0 - 0)                | --<br>(0 - 0)               |
| Tetanus                                                           | 2<br>(1 - 6)                | 0<br>(0 - 0)       | 0<br>(0 - 0)        | 0<br>(0 - 0)             | 1<br>(0 - 2)                | 1<br>(0 - 4)                |
| Measles                                                           | 0<br>(0 - 0)                | 0<br>(0 - 0)       | 0<br>(0 - 0)        | 0<br>(0 - 0)             | 0<br>(0 - 0)                | --<br>(0 - 0)               |
| Varicella and herpes zoster                                       | 5<br>(1 - 21)               | 0<br>(0 - 1)       | 0<br>(0 - 0)        | 0<br>(0 - 1)             | 0<br>(0 - 1)                | 4<br>(0 - 20)               |
| Neglected tropical diseases and malaria                           | 3<br>(2 - 3)                | 0<br>(0 - 0)       | 0<br>(0 - 0)        | 1<br>(1 - 1)             | 1<br>(1 - 1)                | 1<br>(1 - 1)                |
| Cysticercosis                                                     | 0<br>(0 - 0)                | 0<br>(0 - 0)       | 0<br>(0 - 0)        | 0<br>(0 - 0)             | 0<br>(0 - 0)                | 0<br>(0 - 0)                |
| Cystic echinococcosis                                             | 1<br>(1 - 1)                | 0<br>(0 - 0)       | 0<br>(0 - 0)        | 0<br>(0 - 0)             | 0<br>(0 - 0)                | 0<br>(0 - 0)                |
| Dengue                                                            | 0<br>(0 - 1)                | 0<br>(0 - 0)       | 0<br>(0 - 0)        | 0<br>(0 - 0)             | 0<br>(0 - 0)                | 0<br>(0 - 0)                |
| Rabies                                                            | 0<br>(0 - 1)                | 0<br>(0 - 0)       | 0<br>(0 - 0)        | 0<br>(0 - 0)             | 0<br>(0 - 0)                | 0<br>(0 - 0)                |
| Other neglected tropical diseases                                 | 1<br>(1 - 1)                | 0<br>(0 - 0)       | 0<br>(0 - 0)        | 0<br>(0 - 0)             | 0<br>(0 - 0)                | 0<br>(0 - 1)                |
| Maternal disorders                                                | 9<br>(6 - 11)               | --                 | 0<br>(0 - 0)        | 9<br>(6 - 11)            | --                          | --                          |
| Maternal hemorrhage                                               | 1<br>(1 - 2)                | --                 | 0<br>(0 - 0)        | 1<br>(1 - 2)             | --                          | --                          |
| Maternal sepsis and other maternal infections                     | 1<br>(0 - 1)                | --                 | 0<br>(0 - 0)        | 1<br>(0 - 1)             | --                          | --                          |
| Maternal hypertensive disorders                                   | 1<br>(1 - 2)                | --                 | 0<br>(0 - 0)        | 1<br>(1 - 2)             | --                          | --                          |
| Maternal obstructed labor                                         | 1<br>(0 - 1)                | --                 | 0<br>(0 - 0)        | 1<br>(0 - 1)             | --                          | --                          |
| Maternal abortive outcome                                         | 2<br>(1 - 2)                | --                 | 0<br>(0 - 0)        | 2<br>(1 - 2)             | --                          | --                          |
| Indirect maternal deaths                                          | 1<br>(0 - 1)                | --                 | 0<br>(0 - 0)        | 1<br>(0 - 1)             | --                          | --                          |

Web Table 31- Hungary deaths with 95% UI by age, sex, and cause in 2013

| Cause                                                            | Females, All Ages           | Females, 0-4 Years | Females, 5-14 Years | Females, 15-49 Years     | Females, 50-69 Years        | Females, 70-80 Years        |
|------------------------------------------------------------------|-----------------------------|--------------------|---------------------|--------------------------|-----------------------------|-----------------------------|
| Late maternal deaths                                             | 1<br>(1 - 2)                | --                 | 0<br>(0 - 0)        | 1<br>(1 - 2)             | --                          | --                          |
| Maternal deaths aggravated by HIV/AIDS                           | 0<br>(0 - 0)                | --                 | --                  | 0<br>(0 - 0)             | --                          | --                          |
| Other maternal disorders                                         | 1<br>(1 - 2)                | --                 | 0<br>(0 - 0)        | 1<br>(1 - 2)             | --                          | --                          |
| Neonatal disorders                                               | 106<br>(81 - 135)           | 106<br>(81 - 135)  | --                  | --                       | --                          | --                          |
| Neonatal preterm birth complications                             | 58<br>(40 - 80)             | 58<br>(40 - 80)    | --                  | --                       | --                          | --                          |
| Neonatal encephalopathy due to birth asphyxia and trauma         | 13<br>(8 - 24)              | 13<br>(8 - 24)     | --                  | --                       | --                          | --                          |
| Neonatal sepsis and other neonatal infections                    | 5<br>(2 - 9)                | 5<br>(2 - 9)       | --                  | --                       | --                          | --                          |
| Hemolytic disease and other neonatal jaundice                    | 0<br>(0 - 1)                | 0<br>(0 - 1)       | --                  | --                       | --                          | --                          |
| Other neonatal disorders                                         | 30<br>(9 - 45)              | 30<br>(9 - 45)     | --                  | --                       | --                          | --                          |
| Nutritional deficiencies                                         | 77<br>(29 - 97)             | 0<br>(0 - 1)       | 0<br>(0 - 0)        | 3<br>(1 - 4)             | 8<br>(4 - 10)               | 65<br>(24 - 85)             |
| Protein-energy malnutrition                                      | 13<br>(3 - 29)              | 0<br>(0 - 0)       | 0<br>(0 - 0)        | 1<br>(0 - 1)             | 2<br>(0 - 3)                | 11<br>(2 - 25)              |
| Iodine deficiency                                                | 1<br>(0 - 5)                | 0<br>(0 - 0)       | 0<br>(0 - 0)        | 0<br>(0 - 0)             | 0<br>(0 - 1)                | 1<br>(0 - 5)                |
| Iron-deficiency anemia                                           | 44<br>(16 - 64)             | 0<br>(0 - 0)       | 0<br>(0 - 0)        | 2<br>(1 - 3)             | 4<br>(2 - 6)                | 38<br>(13 - 56)             |
| Other nutritional deficiencies                                   | 19<br>(7 - 37)              | 0<br>(0 - 0)       | 0<br>(0 - 0)        | 1<br>(0 - 1)             | 2<br>(1 - 3)                | 17<br>(6 - 33)              |
| Other communicable, maternal, neonatal, and nutritional diseases | 37<br>(28 - 47)             | 2<br>(1 - 3)       | 0<br>(0 - 1)        | 4<br>(3 - 5)             | 11<br>(7 - 13)              | 20<br>(15 - 30)             |
| Sexually transmitted diseases excluding HIV                      | 9<br>(5 - 14)               | 1<br>(0 - 1)       | 0<br>(0 - 0)        | 1<br>(0 - 1)             | 2<br>(1 - 4)                | 5<br>(3 - 9)                |
| Syphilis                                                         | 6<br>(4 - 10)               | 1<br>(0 - 1)       | 0<br>(0 - 0)        | 0<br>(0 - 1)             | 1<br>(1 - 2)                | 4<br>(2 - 7)                |
| Chlamydial infection                                             | 1<br>(0 - 1)                | --                 | 0<br>(0 - 0)        | 0<br>(0 - 0)             | 0<br>(0 - 0)                | 0<br>(0 - 0)                |
| Gonococcal infection                                             | 1<br>(1 - 2)                | --                 | 0<br>(0 - 0)        | 0<br>(0 - 0)             | 0<br>(0 - 1)                | 1<br>(0 - 1)                |
| Other sexually transmitted diseases                              | 1<br>(0 - 1)                | --                 | 0<br>(0 - 0)        | 0<br>(0 - 0)             | 0<br>(0 - 0)                | 0<br>(0 - 0)                |
| Hepatitis                                                        | 2<br>(2 - 3)                | 0<br>(0 - 0)       | 0<br>(0 - 0)        | 0<br>(0 - 0)             | 1<br>(0 - 1)                | 1<br>(1 - 2)                |
| Acute hepatitis A                                                | 0<br>(0 - 1)                | 0<br>(0 - 0)       | 0<br>(0 - 0)        | 0<br>(0 - 0)             | 0<br>(0 - 0)                | 0<br>(0 - 0)                |
| Acute hepatitis B                                                | 2<br>(1 - 2)                | 0<br>(0 - 0)       | 0<br>(0 - 0)        | 0<br>(0 - 0)             | 1<br>(0 - 1)                | 1<br>(0 - 2)                |
| Acute hepatitis C                                                | 0<br>(0 - 1)                | --                 | 0<br>(0 - 0)        | 0<br>(0 - 0)             | 0<br>(0 - 0)                | 0<br>(0 - 0)                |
| Other infectious diseases                                        | 26<br>(19 - 38)             | 1<br>(1 - 2)       | 0<br>(0 - 0)        | 3<br>(2 - 3)             | 8<br>(5 - 10)               | 14<br>(10 - 25)             |
| Non-communicable diseases                                        | 61,864<br>(59,445 - 63,905) | 89<br>(68 - 113)   | 28<br>(24 - 32)     | 1,792<br>(1,692 - 1,891) | 11,807<br>(11,306 - 12,286) | 48,148<br>(46,244 - 49,702) |
| Neoplasms                                                        | 14,579<br>(12,858 - 15,544) | 7<br>(5 - 10)      | 13<br>(11 - 16)     | 949<br>(840 - 1,020)     | 5,601<br>(4,759 - 6,022)    | 8,010<br>(7,171 - 8,643)    |
| Esophageal cancer                                                | 153<br>(135 - 174)          | --                 | --                  | 8<br>(6 - 10)            | 74<br>(62 - 86)             | 72<br>(61 - 85)             |
| Stomach cancer                                                   | 794<br>(579 - 1,056)        | --                 | --                  | 28<br>(20 - 39)          | 200<br>(145 - 261)          | 566<br>(399 - 790)          |
| Liver cancer                                                     | 448<br>(365 - 549)          | --                 | 0<br>(0 - 0)        | 25<br>(15 - 32)          | 152<br>(118 - 186)          | 271<br>(209 - 351)          |
| Liver cancer due to hepatitis B                                  | 70<br>(26 - 114)            | --                 | 0<br>(0 - 0)        | 6<br>(2 - 10)            | 32<br>(11 - 53)             | 32<br>(12 - 57)             |
| Liver cancer due to hepatitis C                                  | 211<br>(137 - 293)          | --                 | 0<br>(0 - 0)        | 10<br>(5 - 16)           | 68<br>(43 - 96)             | 133<br>(82 - 196)           |
| Liver cancer due to alcohol use                                  | 97<br>(53 - 151)            | --                 | --                  | 3<br>(1 - 5)             | 26<br>(13 - 41)             | 69<br>(37 - 110)            |
| Liver cancer due to other causes                                 | 71<br>(37 - 106)            | --                 | 0<br>(0 - 0)        | 6<br>(3 - 9)             | 26<br>(13 - 41)             | 38<br>(19 - 63)             |
| Larynx cancer                                                    | 61<br>(41 - 88)             | --                 | --                  | 7<br>(4 - 11)            | 34<br>(22 - 51)             | 21<br>(13 - 31)             |
| Tracheal, bronchus and lung cancer                               | 2,862<br>(1,890 - 3,290)    | --                 | --                  | 168<br>(120 - 201)       | 1,477<br>(861 - 1,755)      | 1,217<br>(813 - 1,433)      |
| Breast cancer                                                    | 1,918<br>(1,462 - 2,291)    | --                 | --                  | 189<br>(134 - 225)       | 801<br>(624 - 960)          | 928<br>(693 - 1,150)        |
| Cervical cancer                                                  | 450<br>(363 - 529)          | --                 | --                  | 81<br>(59 - 99)          | 185<br>(138 - 222)          | 184<br>(146 - 238)          |
| Uterine cancer                                                   | 281<br>(238 - 334)          | --                 | --                  | 9<br>(7 - 13)            | 97<br>(78 - 121)            | 175<br>(141 - 220)          |
| Prostate cancer                                                  | --                          | --                 | --                  | --                       | --                          | --                          |

Web Table 31- Hungary deaths with 95% UI by age, sex, and cause in 2013

| Cause                                         | Females, All Ages           | Females, 0-4 Years | Females, 5-14 Years | Females, 15-49 Years | Females, 50-69 Years     | Females, 70-80 Years        |
|-----------------------------------------------|-----------------------------|--------------------|---------------------|----------------------|--------------------------|-----------------------------|
| Colon and rectum cancer                       | 2,143<br>(1,910 - 2,409)    | --                 | --                  | 75<br>(64 - 86)      | 648<br>(581 - 709)       | 1,421<br>(1,221 - 1,661)    |
| Lip and oral cavity cancer                    | 167<br>(139 - 197)          | --                 | --                  | 17<br>(12 - 22)      | 69<br>(54 - 89)          | 81<br>(64 - 101)            |
| Nasopharynx cancer                            | 24<br>(9 - 34)              | --                 | 0<br>(0 - 0)        | 3<br>(1 - 5)         | 12<br>(4 - 18)           | 9<br>(3 - 14)               |
| Other pharynx cancer                          | 82<br>(56 - 142)            | --                 | --                  | 11<br>(8 - 17)       | 51<br>(33 - 99)          | 19<br>(13 - 33)             |
| Gallbladder and biliary tract cancer          | 533<br>(408 - 743)          | --                 | --                  | 11<br>(7 - 15)       | 157<br>(117 - 221)       | 364<br>(271 - 529)          |
| Pancreatic cancer                             | 1,039<br>(932 - 1,147)      | --                 | --                  | 33<br>(27 - 39)      | 359<br>(319 - 400)       | 647<br>(566 - 741)          |
| Malignant skin melanoma                       | 197<br>(122 - 245)          | --                 | --                  | 27<br>(17 - 35)      | 70<br>(42 - 88)          | 99<br>(64 - 131)            |
| Non-melanoma skin cancer                      | 110<br>(79 - 156)           | --                 | --                  | 2<br>(2 - 3)         | 12<br>(9 - 15)           | 96<br>(66 - 140)            |
| Ovarian cancer                                | 617<br>(545 - 691)          | --                 | --                  | 51<br>(42 - 60)      | 273<br>(235 - 312)       | 293<br>(241 - 349)          |
| Testicular cancer                             | --                          | --                 | --                  | --                   | --                       | --                          |
| Kidney cancer                                 | 368<br>(280 - 467)          | 0<br>(0 - 1)       | 1<br>(0 - 1)        | 16<br>(12 - 21)      | 129<br>(99 - 164)        | 222<br>(156 - 303)          |
| Bladder cancer                                | 267<br>(165 - 350)          | --                 | --                  | 6<br>(3 - 9)         | 81<br>(46 - 113)         | 180<br>(115 - 243)          |
| Brain and nervous system cancer               | 373<br>(300 - 465)          | 1<br>(1 - 2)       | 4<br>(3 - 7)        | 54<br>(43 - 68)      | 187<br>(146 - 233)       | 126<br>(94 - 169)           |
| Thyroid cancer                                | 75<br>(59 - 97)             | --                 | 0<br>(0 - 0)        | 3<br>(2 - 5)         | 27<br>(19 - 34)          | 45<br>(35 - 62)             |
| Mesothelioma                                  | 26<br>(19 - 48)             | --                 | --                  | 2<br>(1 - 4)         | 11<br>(7 - 20)           | 12<br>(8 - 25)              |
| Hodgkin lymphoma                              | 25<br>(20 - 42)             | 0<br>(0 - 0)       | 0<br>(0 - 0)        | 7<br>(5 - 10)        | 8<br>(6 - 13)            | 10<br>(7 - 19)              |
| Non-Hodgkin lymphoma                          | 317<br>(144 - 452)          | 0<br>(0 - 1)       | 1<br>(0 - 1)        | 24<br>(10 - 34)      | 105<br>(47 - 150)        | 186<br>(85 - 276)           |
| Multiple myeloma                              | 186<br>(117 - 292)          | --                 | --                  | 6<br>(4 - 10)        | 73<br>(43 - 113)         | 106<br>(64 - 169)           |
| Leukemia                                      | 442<br>(372 - 505)          | 1<br>(1 - 2)       | 4<br>(3 - 5)        | 37<br>(29 - 44)      | 131<br>(108 - 152)       | 269<br>(217 - 316)          |
| Other neoplasms                               | 622<br>(506 - 818)          | 4<br>(2 - 5)       | 3<br>(2 - 4)        | 45<br>(37 - 56)      | 179<br>(146 - 232)       | 391<br>(297 - 550)          |
| Cardiovascular diseases                       | 34,674<br>(32,439 - 36,565) | 1<br>(1 - 1)       | 2<br>(1 - 2)        | 394<br>(343 - 501)   | 3,861<br>(3,483 - 4,781) | 30,416<br>(28,116 - 31,912) |
| Rheumatic heart disease                       | 217<br>(165 - 369)          | 0<br>(0 - 0)       | 0<br>(0 - 0)        | 8<br>(6 - 16)        | 42<br>(29 - 93)          | 167<br>(120 - 260)          |
| Ischemic heart disease                        | 18,342<br>(13,171 - 20,353) | 0<br>(0 - 0)       | 0<br>(0 - 0)        | 173<br>(135 - 222)   | 1,956<br>(1,630 - 2,392) | 16,213<br>(11,347 - 18,187) |
| Cerebrovascular disease                       | 9,984<br>(8,489 - 14,155)   | 0<br>(0 - 0)       | 1<br>(1 - 1)        | 120<br>(97 - 174)    | 1,071<br>(872 - 1,658)   | 8,792<br>(7,425 - 12,470)   |
| Ischemic stroke                               | 7,871<br>(6,314 - 10,728)   | 0<br>(0 - 0)       | 0<br>(0 - 0)        | 29<br>(18 - 41)      | 581<br>(417 - 902)       | 7,261<br>(5,870 - 9,839)    |
| Hemorrhagic stroke                            | 2,113<br>(1,452 - 3,953)    | 0<br>(0 - 0)       | 1<br>(0 - 1)        | 91<br>(73 - 138)     | 491<br>(371 - 866)       | 1,531<br>(972 - 3,062)      |
| Hypertensive heart disease                    | 3,223<br>(2,085 - 4,254)    | 0<br>(0 - 0)       | 0<br>(0 - 0)        | 19<br>(13 - 26)      | 284<br>(187 - 386)       | 2,920<br>(1,846 - 3,920)    |
| Cardiomyopathy and myocarditis                | 856<br>(656 - 1,800)        | 1<br>(0 - 1)       | 1<br>(0 - 1)        | 31<br>(24 - 53)      | 153<br>(123 - 233)       | 671<br>(483 - 1,497)        |
| Atrial fibrillation and flutter               | 325<br>(241 - 432)          | --                 | --                  | 1<br>(1 - 1)         | 16<br>(12 - 20)          | 308<br>(225 - 416)          |
| Aortic aneurysm                               | 174<br>(101 - 243)          | --                 | --                  | 6<br>(4 - 9)         | 42<br>(24 - 61)          | 127<br>(71 - 182)           |
| Peripheral vascular disease                   | 131<br>(105 - 166)          | --                 | --                  | 2<br>(1 - 3)         | 22<br>(17 - 29)          | 107<br>(82 - 140)           |
| Endocarditis                                  | 41<br>(28 - 71)             | 0<br>(0 - 0)       | 0<br>(0 - 0)        | 3<br>(2 - 5)         | 14<br>(9 - 24)           | 25<br>(16 - 44)             |
| Other cardiovascular and circulatory diseases | 1,381<br>(1,085 - 1,794)    | 0<br>(0 - 0)       | 0<br>(0 - 0)        | 32<br>(23 - 43)      | 262<br>(197 - 364)       | 1,087<br>(822 - 1,422)      |
| Chronic respiratory diseases                  | 2,511<br>(1,866 - 2,841)    | 1<br>(0 - 1)       | 1<br>(0 - 1)        | 55<br>(37 - 66)      | 513<br>(305 - 593)       | 1,942<br>(1,498 - 2,242)    |
| Chronic obstructive pulmonary disease         | 2,254<br>(1,687 - 2,580)    | 0<br>(0 - 1)       | 0<br>(0 - 0)        | 41<br>(26 - 50)      | 440<br>(257 - 521)       | 1,772<br>(1,375 - 2,071)    |
| Pneumoconiosis                                | 6<br>(3 - 9)                | 0<br>(0 - 0)       | 0<br>(0 - 0)        | 0<br>(0 - 1)         | 2<br>(1 - 3)             | 4<br>(2 - 6)                |
| Silicosis                                     | 0<br>(0 - 1)                | 0<br>(0 - 0)       | 0<br>(0 - 0)        | 0<br>(0 - 0)         | 0<br>(0 - 0)             | 0<br>(0 - 0)                |
| Asbestosis                                    | 0<br>(0 - 0)                | 0<br>(0 - 0)       | 0<br>(0 - 0)        | 0<br>(0 - 0)         | 0<br>(0 - 0)             | 0<br>(0 - 0)                |
| Coal workers pneumoconiosis                   | 1<br>(1 - 2)                | 0<br>(0 - 0)       | 0<br>(0 - 0)        | 0<br>(0 - 0)         | 1<br>(0 - 1)             | 0<br>(0 - 1)                |
| Other pneumoconiosis                          | 4<br>(2 - 7)                | 0<br>(0 - 0)       | 0<br>(0 - 0)        | 0<br>(0 - 0)         | 1<br>(0 - 2)             | 3<br>(1 - 5)                |



Web Table 31- Hungary deaths with 95% UI by age, sex, and cause in 2013

| Cause                                               | Females, All Ages        | Females, 0-4 Years | Females, 5-14 Years | Females, 15-49 Years | Females, 50-69 Years | Females, 70-80 Years     |
|-----------------------------------------------------|--------------------------|--------------------|---------------------|----------------------|----------------------|--------------------------|
| Asthma                                              | 102<br>(56 - 161)        | 0<br>(0 - 0)       | 0<br>(0 - 0)        | 7<br>(4 - 10)        | 36<br>(18 - 58)      | 59<br>(32 - 96)          |
| Interstitial lung disease and pulmonary sarcoidosis | 124<br>(44 - 216)        | 0<br>(0 - 0)       | 0<br>(0 - 0)        | 5<br>(2 - 8)         | 31<br>(11 - 57)      | 88<br>(29 - 161)         |
| Other chronic respiratory diseases                  | 25<br>(14 - 40)          | 0<br>(0 - 0)       | 0<br>(0 - 0)        | 2<br>(1 - 3)         | 3<br>(2 - 5)         | 20<br>(10 - 33)          |
| Cirrhosis                                           | 1,144<br>(1,025 - 1,242) | 0<br>(0 - 0)       | 0<br>(0 - 0)        | 158<br>(136 - 180)   | 678<br>(597 - 752)   | 307<br>(265 - 346)       |
| Cirrhosis due to hepatitis B                        | 429<br>(278 - 569)       | 0<br>(0 - 0)       | 0<br>(0 - 0)        | 58<br>(39 - 83)      | 253<br>(167 - 342)   | 118<br>(67 - 163)        |
| Cirrhosis due to hepatitis C                        | 342<br>(215 - 482)       | 0<br>(0 - 0)       | 0<br>(0 - 0)        | 43<br>(25 - 63)      | 211<br>(129 - 295)   | 89<br>(52 - 136)         |
| Cirrhosis due to alcohol use                        | 165<br>(102 - 236)       | --                 | --                  | 14<br>(7 - 22)       | 91<br>(57 - 133)     | 61<br>(36 - 91)          |
| Cirrhosis due to other causes                       | 206<br>(108 - 326)       | 0<br>(0 - 0)       | 0<br>(0 - 0)        | 43<br>(25 - 63)      | 123<br>(60 - 201)    | 40<br>(21 - 65)          |
| Digestive diseases                                  | 1,541<br>(1,321 - 1,813) | 0<br>(0 - 1)       | 1<br>(0 - 1)        | 48<br>(40 - 56)      | 290<br>(241 - 333)   | 1,203<br>(1,024 - 1,440) |
| Peptic ulcer disease                                | 318<br>(219 - 409)       | 0<br>(0 - 0)       | 0<br>(0 - 0)        | 9<br>(6 - 12)        | 61<br>(39 - 80)      | 248<br>(168 - 330)       |
| Gastritis and duodenitis                            | 18<br>(7 - 29)           | 0<br>(0 - 0)       | 0<br>(0 - 0)        | 1<br>(0 - 1)         | 2<br>(1 - 4)         | 15<br>(5 - 25)           |
| Appendicitis                                        | 17<br>(11 - 25)          | 0<br>(0 - 0)       | 0<br>(0 - 0)        | 1<br>(1 - 2)         | 5<br>(3 - 7)         | 11<br>(6 - 18)           |
| Paralytic ileus and intestinal obstruction          | 164<br>(85 - 282)        | 0<br>(0 - 0)       | 0<br>(0 - 0)        | 5<br>(3 - 8)         | 26<br>(13 - 44)      | 133<br>(68 - 233)        |
| Inguinal, femoral, and abdominal hernia             | 51<br>(25 - 91)          | 0<br>(0 - 0)       | 0<br>(0 - 0)        | 0<br>(0 - 1)         | 7<br>(4 - 12)        | 43<br>(20 - 81)          |
| Inflammatory bowel disease                          | 66<br>(42 - 103)         | 0<br>(0 - 0)       | 0<br>(0 - 0)        | 4<br>(3 - 6)         | 17<br>(10 - 24)      | 45<br>(27 - 76)          |
| Vascular intestinal disorders                       | 342<br>(177 - 560)       | 0<br>(0 - 0)       | 0<br>(0 - 0)        | 6<br>(3 - 11)        | 54<br>(27 - 92)      | 282<br>(145 - 461)       |
| Gallbladder and biliary diseases                    | 223<br>(163 - 340)       | 0<br>(0 - 0)       | 0<br>(0 - 0)        | 3<br>(2 - 5)         | 34<br>(24 - 49)      | 186<br>(133 - 286)       |
| Pancreatitis                                        | 171<br>(117 - 257)       | 0<br>(0 - 0)       | 0<br>(0 - 0)        | 13<br>(9 - 19)       | 51<br>(36 - 76)      | 107<br>(70 - 166)        |
| Other digestive diseases                            | 173<br>(126 - 215)       | 0<br>(0 - 0)       | 0<br>(0 - 0)        | 5<br>(3 - 6)         | 34<br>(24 - 43)      | 134<br>(95 - 173)        |
| Neurological disorders                              | 4,320<br>(3,398 - 5,442) | 3<br>(2 - 4)       | 2<br>(2 - 3)        | 40<br>(33 - 51)      | 232<br>(185 - 283)   | 4,043<br>(3,114 - 5,182) |
| Alzheimer disease and other dementias               | 3,991<br>(3,066 - 5,139) | --                 | --                  | 0<br>(0 - 1)         | 134<br>(96 - 180)    | 3,856<br>(2,918 - 5,014) |
| Parkinson disease                                   | 150<br>(74 - 191)        | --                 | --                  | 1<br>(0 - 1)         | 19<br>(10 - 25)      | 131<br>(62 - 169)        |
| Epilepsy                                            | 34<br>(25 - 43)          | 0<br>(0 - 1)       | 1<br>(1 - 2)        | 14<br>(10 - 18)      | 10<br>(7 - 13)       | 9<br>(6 - 12)            |
| Multiple sclerosis                                  | 59<br>(37 - 99)          | --                 | --                  | 15<br>(9 - 26)       | 31<br>(19 - 51)      | 14<br>(7 - 21)           |
| Other neurological disorders                        | 84<br>(74 - 94)          | 3<br>(2 - 4)       | 1<br>(1 - 1)        | 10<br>(8 - 12)       | 37<br>(31 - 43)      | 34<br>(28 - 40)          |
| Mental and substance use disorders                  | 127<br>(75 - 204)        | 0<br>(0 - 0)       | 0<br>(0 - 0)        | 29<br>(18 - 56)      | 62<br>(36 - 109)     | 36<br>(19 - 50)          |
| Schizophrenia                                       | 35<br>(11 - 53)          | --                 | --                  | 3<br>(1 - 6)         | 14<br>(5 - 23)       | 17<br>(4 - 30)           |
| Alcohol use disorders                               | 73<br>(39 - 163)         | --                 | --                  | 21<br>(11 - 48)      | 41<br>(21 - 93)      | 11<br>(5 - 25)           |
| Drug use disorders                                  | 18<br>(15 - 22)          | 0<br>(0 - 0)       | --                  | 4<br>(3 - 6)         | 6<br>(5 - 8)         | 8<br>(5 - 10)            |
| Opioid use disorders                                | 7<br>(5 - 8)             | 0<br>(0 - 0)       | --                  | 2<br>(1 - 2)         | 2<br>(2 - 3)         | 3<br>(2 - 4)             |
| Cocaine use disorders                               | 1<br>(1 - 1)             | 0<br>(0 - 0)       | --                  | 0<br>(0 - 0)         | 0<br>(0 - 0)         | 0<br>(0 - 1)             |
| Amphetamine use disorders                           | 1<br>(1 - 1)             | 0<br>(0 - 0)       | --                  | 0<br>(0 - 0)         | 0<br>(0 - 0)         | 0<br>(0 - 1)             |
| Other drug use disorders                            | 9<br>(8 - 11)            | 0<br>(0 - 0)       | --                  | 2<br>(2 - 3)         | 3<br>(3 - 4)         | 4<br>(3 - 5)             |
| Eating disorders                                    | 1<br>(0 - 1)             | --                 | 0<br>(0 - 0)        | 1<br>(0 - 1)         | --                   | --                       |
| Anorexia nervosa                                    | 1<br>(0 - 1)             | --                 | 0<br>(0 - 0)        | 1<br>(0 - 1)         | --                   | --                       |
| Diabetes, urogenital, blood, and endocrine diseases | 2,608<br>(2,147 - 2,940) | 5<br>(3 - 6)       | 3<br>(2 - 4)        | 70<br>(57 - 79)      | 485<br>(425 - 553)   | 2,045<br>(1,635 - 2,338) |
| Diabetes mellitus                                   | 1,326<br>(1,128 - 1,528) | 0<br>(0 - 0)       | 0<br>(0 - 0)        | 20<br>(16 - 24)      | 255<br>(216 - 305)   | 1,051<br>(862 - 1,246)   |
| Acute glomerulonephritis                            | 5<br>(3 - 7)             | 0<br>(0 - 0)       | 0<br>(0 - 0)        | 0<br>(0 - 1)         | 2<br>(1 - 3)         | 2<br>(1 - 4)             |
| Chronic kidney disease                              | 807<br>(404 - 970)       | 0<br>(0 - 0)       | 0<br>(0 - 1)        | 19<br>(13 - 23)      | 116<br>(73 - 141)    | 671<br>(311 - 831)       |
| Chronic kidney disease due to diabetes mellitus     | 120<br>(39 - 169)        | 0<br>(0 - 0)       | 0<br>(0 - 0)        | 2<br>(1 - 4)         | 26<br>(10 - 36)      | 91<br>(29 - 135)         |

Web Table 31- Hungary deaths with 95% UI by age, sex, and cause in 2013

| Cause                                               | Females, All Ages        | Females, 0-4 Years | Females, 5-14 Years | Females, 15-49 Years | Females, 50-69 Years | Females, 70-80 Years     |
|-----------------------------------------------------|--------------------------|--------------------|---------------------|----------------------|----------------------|--------------------------|
| Chronic kidney disease due to hypertension          | 290<br>(139 - 414)       | 0<br>(0 - 0)       | 0<br>(0 - 0)        | 6<br>(3 - 9)         | 37<br>(20 - 54)      | 247<br>(114 - 363)       |
| Chronic kidney disease due to glomerulonephritis    | 47<br>(30 - 78)          | 0<br>(0 - 0)       | 0<br>(0 - 0)        | 3<br>(2 - 5)         | 11<br>(7 - 18)       | 33<br>(19 - 58)          |
| Chronic kidney disease due to other causes          | 349<br>(119 - 523)       | 0<br>(0 - 0)       | 0<br>(0 - 0)        | 7<br>(3 - 11)        | 42<br>(20 - 63)      | 300<br>(91 - 459)        |
| Urinary diseases and male infertility               | 260<br>(192 - 479)       | 0<br>(0 - 0)       | 0<br>(0 - 0)        | 7<br>(5 - 11)        | 49<br>(36 - 85)      | 204<br>(145 - 398)       |
| Interstitial nephritis and urinary tract infections | 191<br>(131 - 361)       | 0<br>(0 - 0)       | 0<br>(0 - 0)        | 5<br>(3 - 8)         | 34<br>(23 - 66)      | 152<br>(100 - 308)       |
| Urolithiasis                                        | 41<br>(21 - 82)          | --                 | 0<br>(0 - 0)        | 1<br>(1 - 2)         | 9<br>(5 - 16)        | 31<br>(15 - 64)          |
| Other urinary diseases                              | 28<br>(11 - 44)          | 0<br>(0 - 0)       | 0<br>(0 - 0)        | 1<br>(0 - 1)         | 6<br>(2 - 9)         | 22<br>(7 - 36)           |
| Gynecological diseases                              | 3<br>(2 - 5)             | --                 | --                  | 0<br>(0 - 1)         | 1<br>(1 - 1)         | 2<br>(1 - 4)             |
| Uterine fibroids                                    | 1<br>(1 - 1)             | --                 | --                  | 0<br>(0 - 0)         | 0<br>(0 - 0)         | 1<br>(0 - 1)             |
| Polycystic ovarian syndrome                         | 0<br>(0 - 0)             | --                 | --                  | 0<br>(0 - 0)         | 0<br>(0 - 0)         | --                       |
| Endometriosis                                       | 0<br>(0 - 0)             | --                 | --                  | 0<br>(0 - 0)         | 0<br>(0 - 0)         | --                       |
| Genital prolapse                                    | 1<br>(1 - 1)             | --                 | --                  | 0<br>(0 - 0)         | 0<br>(0 - 0)         | 1<br>(0 - 1)             |
| Other gynecological diseases                        | 2<br>(1 - 2)             | --                 | --                  | 0<br>(0 - 0)         | 0<br>(0 - 1)         | 1<br>(1 - 2)             |
| Hemoglobinopathies and hemolytic anemias            | 29<br>(17 - 41)          | 0<br>(0 - 1)       | 0<br>(0 - 1)        | 5<br>(3 - 8)         | 6<br>(4 - 9)         | 16<br>(9 - 24)           |
| Thalassemias                                        | 2<br>(1 - 3)             | 0<br>(0 - 1)       | 0<br>(0 - 1)        | 2<br>(1 - 2)         | 0<br>(0 - 0)         | 0<br>(0 - 0)             |
| Sickle cell disorders                               | 1<br>(1 - 2)             | 0<br>(0 - 0)       | 0<br>(0 - 0)        | 1<br>(0 - 1)         | 1<br>(0 - 1)         | 0<br>(0 - 0)             |
| G6PD deficiency                                     | 0<br>(0 - 1)             | 0<br>(0 - 0)       | 0<br>(0 - 0)        | 0<br>(0 - 0)         | 0<br>(0 - 0)         | 0<br>(0 - 0)             |
| Other hemoglobinopathies and hemolytic anemias      | 25<br>(14 - 36)          | 0<br>(0 - 0)       | 0<br>(0 - 0)        | 3<br>(2 - 4)         | 6<br>(3 - 8)         | 16<br>(9 - 24)           |
| Endocrine, metabolic, blood, and immune disorders   | 178<br>(91 - 216)        | 4<br>(2 - 5)       | 2<br>(1 - 2)        | 18<br>(8 - 24)       | 57<br>(29 - 71)      | 98<br>(47 - 126)         |
| Musculoskeletal disorders                           | 145<br>(122 - 188)       | --                 | 0<br>(0 - 0)        | 14<br>(11 - 19)      | 54<br>(43 - 69)      | 76<br>(60 - 104)         |
| Rheumatoid arthritis                                | 48<br>(38 - 65)          | --                 | 0<br>(0 - 0)        | 1<br>(1 - 2)         | 17<br>(12 - 23)      | 30<br>(21 - 44)          |
| Other musculoskeletal disorders                     | 97<br>(81 - 125)         | --                 | 0<br>(0 - 0)        | 13<br>(10 - 17)      | 38<br>(30 - 49)      | 46<br>(35 - 64)          |
| Other non-communicable diseases                     | 215<br>(169 - 246)       | 72<br>(54 - 94)    | 6<br>(5 - 8)        | 36<br>(28 - 42)      | 32<br>(24 - 38)      | 69<br>(28 - 89)          |
| Congenital anomalies                                | 132<br>(108 - 156)       | 64<br>(48 - 84)    | 6<br>(5 - 8)        | 33<br>(25 - 39)      | 17<br>(14 - 22)      | 11<br>(7 - 14)           |
| Neural tube defects                                 | 1<br>(1 - 3)             | 1<br>(0 - 2)       | 0<br>(0 - 0)        | 0<br>(0 - 0)         | 0<br>(0 - 0)         | 0<br>(0 - 0)             |
| Congenital heart anomalies                          | 58<br>(45 - 70)          | 29<br>(21 - 40)    | 3<br>(2 - 4)        | 18<br>(13 - 22)      | 5<br>(3 - 6)         | 4<br>(2 - 5)             |
| Cleft lip and cleft palate                          | 1<br>(0 - 3)             | 1<br>(0 - 3)       | --                  | --                   | --                   | --                       |
| Down syndrome                                       | 14<br>(7 - 23)           | 5<br>(2 - 10)      | 1<br>(0 - 1)        | 5<br>(2 - 8)         | 3<br>(1 - 5)         | 0<br>(0 - 0)             |
| Chromosomal unbalanced rearrangements               | 4<br>(2 - 6)             | 3<br>(1 - 5)       | 0<br>(0 - 0)        | 0<br>(0 - 1)         | 0<br>(0 - 0)         | 0<br>(0 - 0)             |
| Other congenital anomalies                          | 53<br>(41 - 66)          | 25<br>(17 - 34)    | 3<br>(2 - 4)        | 10<br>(7 - 13)       | 9<br>(7 - 12)        | 7<br>(4 - 9)             |
| Skin and subcutaneous diseases                      | 76<br>(28 - 96)          | 0<br>(0 - 0)       | 0<br>(0 - 0)        | 3<br>(1 - 4)         | 14<br>(6 - 19)       | 58<br>(21 - 77)          |
| Cellulitis                                          | 2<br>(1 - 6)             | 0<br>(0 - 0)       | 0<br>(0 - 0)        | 0<br>(0 - 0)         | 1<br>(0 - 2)         | 1<br>(0 - 4)             |
| Pyoderma                                            | 44<br>(21 - 58)          | 0<br>(0 - 0)       | 0<br>(0 - 0)        | 2<br>(1 - 2)         | 10<br>(4 - 13)       | 33<br>(16 - 45)          |
| Decubitus ulcer                                     | 23<br>(1 - 33)           | 0<br>(0 - 0)       | 0<br>(0 - 0)        | 0<br>(0 - 1)         | 2<br>(0 - 3)         | 20<br>(0 - 29)           |
| Other skin and subcutaneous diseases                | 7<br>(2 - 11)            | 0<br>(0 - 0)       | 0<br>(0 - 0)        | 0<br>(0 - 1)         | 1<br>(0 - 2)         | 5<br>(1 - 9)             |
| Sudden infant death syndrome                        | 7<br>(2 - 17)            | 7<br>(2 - 17)      | --                  | --                   | --                   | --                       |
| Injuries                                            | 2,578<br>(2,027 - 4,273) | 11<br>(8 - 17)     | 12<br>(10 - 14)     | 327<br>(296 - 394)   | 509<br>(446 - 702)   | 1,719<br>(1,221 - 3,226) |
| Transport injuries                                  | 265<br>(227 - 373)       | 2<br>(1 - 3)       | 6<br>(4 - 8)        | 87<br>(65 - 101)     | 81<br>(67 - 116)     | 89<br>(70 - 147)         |
| Road injuries                                       | 244<br>(207 - 343)       | 2<br>(1 - 3)       | 6<br>(4 - 7)        | 81<br>(59 - 94)      | 75<br>(61 - 108)     | 81<br>(64 - 138)         |
| Pedestrian road injuries                            | 97<br>(76 - 172)         | 1<br>(0 - 1)       | 2<br>(1 - 3)        | 14<br>(10 - 24)      | 28<br>(20 - 47)      | 53<br>(38 - 106)         |

Web Table 31- Hungary deaths with 95% UI by age, sex, and cause in 2013

| Cause                                           | Females, All Ages        | Females, 0-4 Years | Females, 5-14 Years | Females, 15-49 Years | Females, 50-69 Years | Females, 70-80 Years   |
|-------------------------------------------------|--------------------------|--------------------|---------------------|----------------------|----------------------|------------------------|
| Cyclist road injuries                           | 27<br>(18 - 38)          | 0<br>(0 - 0)       | 1<br>(0 - 1)        | 7<br>(4 - 10)        | 12<br>(7 - 18)       | 7<br>(4 - 12)          |
| Motorcyclist road injuries                      | 6<br>(2 - 9)             | 0<br>(0 - 0)       | 0<br>(0 - 0)        | 3<br>(1 - 5)         | 2<br>(0 - 3)         | 1<br>(0 - 1)           |
| Motor vehicle road injuries                     | 112<br>(72 - 139)        | 1<br>(1 - 2)       | 3<br>(2 - 4)        | 56<br>(38 - 67)      | 33<br>(20 - 45)      | 19<br>(8 - 29)         |
| Other road injuries                             | 2<br>(1 - 3)             | 0<br>(0 - 0)       | 0<br>(0 - 0)        | 0<br>(0 - 1)         | 1<br>(0 - 1)         | 1<br>(0 - 2)           |
| Other transport injuries                        | 21<br>(13 - 33)          | 0<br>(0 - 0)       | 0<br>(0 - 1)        | 6<br>(4 - 9)         | 7<br>(4 - 11)        | 8<br>(5 - 13)          |
| Unintentional injuries                          | 1,678<br>(1,181 - 3,146) | 7<br>(5 - 13)      | 4<br>(3 - 6)        | 54<br>(45 - 76)      | 189<br>(154 - 287)   | 1,424<br>(955 - 2,819) |
| Falls                                           | 1,329<br>(849 - 2,786)   | 0<br>(0 - 1)       | 0<br>(0 - 1)        | 12<br>(8 - 21)       | 91<br>(65 - 171)     | 1,225<br>(771 - 2,598) |
| Drowning                                        | 32<br>(23 - 49)          | 1<br>(0 - 2)       | 2<br>(1 - 3)        | 9<br>(6 - 14)        | 10<br>(7 - 14)       | 11<br>(8 - 16)         |
| Fire, heat, and hot substances                  | 79<br>(58 - 127)         | 1<br>(1 - 2)       | 0<br>(0 - 1)        | 6<br>(5 - 11)        | 17<br>(13 - 27)      | 53<br>(37 - 91)        |
| Poisonings                                      | 24<br>(17 - 40)          | 0<br>(0 - 0)       | 0<br>(0 - 0)        | 4<br>(3 - 6)         | 7<br>(5 - 12)        | 12<br>(7 - 23)         |
| Exposure to mechanical forces                   | 17<br>(14 - 21)          | 1<br>(0 - 1)       | 0<br>(0 - 1)        | 3<br>(3 - 4)         | 4<br>(3 - 6)         | 8<br>(6 - 11)          |
| Unintentional firearm injuries                  | 1<br>(1 - 1)             | 0<br>(0 - 0)       | 0<br>(0 - 0)        | 0<br>(0 - 0)         | 0<br>(0 - 0)         | 0<br>(0 - 0)           |
| Unintentional suffocation                       | 1<br>(0 - 1)             | 0<br>(0 - 0)       | 0<br>(0 - 0)        | 0<br>(0 - 0)         | 0<br>(0 - 0)         | 0<br>(0 - 0)           |
| Other exposure to mechanical forces             | 15<br>(12 - 19)          | 0<br>(0 - 1)       | 0<br>(0 - 0)        | 3<br>(2 - 4)         | 4<br>(3 - 5)         | 8<br>(5 - 11)          |
| Adverse effects of medical treatment            | 91<br>(60 - 132)         | 0<br>(0 - 1)       | 0<br>(0 - 0)        | 4<br>(3 - 8)         | 24<br>(17 - 38)      | 62<br>(37 - 91)        |
| Animal contact                                  | 7<br>(3 - 16)            | 0<br>(0 - 0)       | 0<br>(0 - 0)        | 1<br>(0 - 1)         | 2<br>(1 - 5)         | 4<br>(2 - 9)           |
| Venomous animal contact                         | 1<br>(1 - 3)             | 0<br>(0 - 0)       | 0<br>(0 - 0)        | 0<br>(0 - 1)         | 1<br>(0 - 1)         | 0<br>(0 - 1)           |
| Non-venomous animal contact                     | 5<br>(3 - 13)            | 0<br>(0 - 0)       | 0<br>(0 - 0)        | 0<br>(0 - 1)         | 1<br>(1 - 3)         | 3<br>(2 - 8)           |
| Foreign body                                    | 91<br>(49 - 139)         | 3<br>(2 - 7)       | 0<br>(0 - 1)        | 12<br>(6 - 21)       | 29<br>(16 - 46)      | 46<br>(22 - 68)        |
| Pulmonary aspiration and foreign body in airway | 90<br>(48 - 138)         | 3<br>(2 - 7)       | 0<br>(0 - 1)        | 12<br>(6 - 20)       | 29<br>(16 - 46)      | 46<br>(22 - 68)        |
| Foreign body in other body part                 | 1<br>(1 - 1)             | 0<br>(0 - 0)       | 0<br>(0 - 0)        | 0<br>(0 - 0)         | 0<br>(0 - 0)         | 0<br>(0 - 0)           |
| Other unintentional injuries                    | 9<br>(7 - 14)            | 0<br>(0 - 1)       | 0<br>(0 - 0)        | 2<br>(1 - 4)         | 3<br>(2 - 5)         | 4<br>(2 - 6)           |
| Self-harm and interpersonal violence            | 636<br>(555 - 957)       | 2<br>(1 - 3)       | 2<br>(1 - 2)        | 186<br>(161 - 238)   | 239<br>(203 - 345)   | 207<br>(168 - 369)     |
| Self-harm                                       | 562<br>(485 - 889)       | -                  | 1<br>(0 - 1)        | 157<br>(133 - 211)   | 218<br>(183 - 320)   | 186<br>(149 - 351)     |
| Interpersonal violence                          | 74<br>(52 - 102)         | 2<br>(1 - 3)       | 1<br>(1 - 1)        | 29<br>(20 - 40)      | 21<br>(15 - 29)      | 21<br>(14 - 30)        |
| Assault by firearm                              | 4<br>(2 - 6)             | 0<br>(0 - 0)       | 0<br>(0 - 0)        | 2<br>(1 - 4)         | 1<br>(0 - 2)         | 0<br>(0 - 0)           |
| Assault by sharp object                         | 23<br>(15 - 37)          | 0<br>(0 - 0)       | 0<br>(0 - 0)        | 11<br>(7 - 18)       | 7<br>(4 - 12)        | 5<br>(3 - 8)           |
| Assault by other means                          | 47<br>(31 - 63)          | 2<br>(1 - 3)       | 1<br>(0 - 1)        | 16<br>(9 - 23)       | 13<br>(8 - 18)       | 16<br>(10 - 22)        |

Web Table 31- Iceland deaths with 95% UI by age, sex, and cause in 2013

| Cause                                                             | Both Sexes, All Ages     | Both Sexes, 0-4 Years | Both Sexes, 5-14 Years | Both Sexes, 15-49 Years | Both Sexes, 50-69 Years | Both Sexes, 70-80 Years  |
|-------------------------------------------------------------------|--------------------------|-----------------------|------------------------|-------------------------|-------------------------|--------------------------|
| All causes                                                        | 1,929<br>(1,751 - 2,116) | 12<br>(8 - 16)        | 3<br>(3 - 4)           | 90<br>(78 - 103)        | 375<br>(326 - 426)      | 1,449<br>(1,334 - 1,579) |
| Communicable, maternal, neonatal, and nutritional diseases        | 91<br>(67 - 142)         | 5<br>(3 - 7)          | 0<br>(0 - 1)           | 2<br>(1 - 3)            | 4<br>(3 - 6)            | 79<br>(56 - 130)         |
| HIV/AIDS and tuberculosis                                         | 2<br>(2 - 3)             | 0<br>(0 - 0)          | 0<br>(0 - 0)           | 0<br>(0 - 0)            | 0<br>(0 - 1)            | 2<br>(1 - 2)             |
| Tuberculosis                                                      | 2<br>(1 - 3)             | 0<br>(0 - 0)          | 0<br>(0 - 0)           | 0<br>(0 - 0)            | 0<br>(0 - 0)            | 2<br>(1 - 2)             |
| HIV/AIDS                                                          | 0<br>(0 - 0)             | 0<br>(0 - 0)          | 0<br>(0 - 0)           | 0<br>(0 - 0)            | 0<br>(0 - 0)            | 0<br>(0 - 0)             |
| HIV/AIDS resulting in mycobacterial infection                     | 0<br>(0 - 0)             | 0<br>(0 - 0)          | 0<br>(0 - 0)           | 0<br>(0 - 0)            | 0<br>(0 - 0)            | 0<br>(0 - 0)             |
| HIV/AIDS resulting in other diseases                              | 0<br>(0 - 0)             | 0<br>(0 - 0)          | 0<br>(0 - 0)           | 0<br>(0 - 0)            | 0<br>(0 - 0)            | 0<br>(0 - 0)             |
| Diarrhea, lower respiratory, and other common infectious diseases | 80<br>(57 - 132)         | 1<br>(0 - 1)          | 0<br>(0 - 1)           | 1<br>(1 - 2)            | 4<br>(3 - 5)            | 74<br>(52 - 126)         |
| Diarrheal diseases                                                | 1<br>(0 - 1)             | 0<br>(0 - 0)          | 0<br>(0 - 0)           | 0<br>(0 - 0)            | 0<br>(0 - 0)            | 1<br>(0 - 1)             |
| Intestinal infectious diseases                                    | 1<br>(0 - 3)             | 0<br>(0 - 1)          | 0<br>(0 - 1)           | 1<br>(0 - 1)            | 0<br>(0 - 0)            | 0<br>(0 - 0)             |
| Typhoid fever                                                     | 1<br>(0 - 2)             | 0<br>(0 - 0)          | 0<br>(0 - 0)           | 0<br>(0 - 1)            | 0<br>(0 - 0)            | 0<br>(0 - 0)             |
| Paratyphoid fever                                                 | 0<br>(0 - 1)             | 0<br>(0 - 0)          | 0<br>(0 - 0)           | 0<br>(0 - 0)            | 0<br>(0 - 0)            | 0<br>(0 - 0)             |
| Other intestinal infectious diseases                              | 0<br>(0 - 0)             | 0<br>(0 - 0)          | 0<br>(0 - 0)           | 0<br>(0 - 0)            | 0<br>(0 - 0)            | 0<br>(0 - 0)             |
| Lower respiratory infections                                      | 77<br>(54 - 129)         | 0<br>(0 - 0)          | 0<br>(0 - 0)           | 0<br>(0 - 1)            | 3<br>(2 - 5)            | 73<br>(50 - 124)         |
| Upper respiratory infections                                      | 0<br>(0 - 0)             | 0<br>(0 - 0)          | 0<br>(0 - 0)           | 0<br>(0 - 0)            | 0<br>(0 - 0)            | 0<br>(0 - 0)             |
| Otitis media                                                      | 0<br>(0 - 0)             | 0<br>(0 - 0)          | 0<br>(0 - 0)           | 0<br>(0 - 0)            | 0<br>(0 - 0)            | 0<br>(0 - 0)             |
| Meningitis                                                        | 0<br>(0 - 1)             | 0<br>(0 - 0)          | 0<br>(0 - 0)           | 0<br>(0 - 0)            | 0<br>(0 - 0)            | 0<br>(0 - 0)             |
| Pneumococcal meningitis                                           | 0<br>(0 - 0)             | 0<br>(0 - 0)          | 0<br>(0 - 0)           | 0<br>(0 - 0)            | 0<br>(0 - 0)            | 0<br>(0 - 0)             |
| H influenzae type B meningitis                                    | 0<br>(0 - 0)             | 0<br>(0 - 0)          | 0<br>(0 - 0)           | 0<br>(0 - 0)            | 0<br>(0 - 0)            | 0<br>(0 - 0)             |
| Meningococcal meningitis                                          | 0<br>(0 - 0)             | 0<br>(0 - 0)          | 0<br>(0 - 0)           | 0<br>(0 - 0)            | 0<br>(0 - 0)            | 0<br>(0 - 0)             |
| Other meningitis                                                  | 0<br>(0 - 0)             | 0<br>(0 - 0)          | 0<br>(0 - 0)           | 0<br>(0 - 0)            | 0<br>(0 - 0)            | 0<br>(0 - 0)             |
| Encephalitis                                                      | 0<br>(0 - 0)             | 0<br>(0 - 0)          | 0<br>(0 - 0)           | 0<br>(0 - 0)            | 0<br>(0 - 0)            | 0<br>(0 - 0)             |
| Diphtheria                                                        | 0<br>(0 - 0)             | 0<br>(0 - 0)          | 0<br>(0 - 0)           | 0<br>(0 - 0)            | 0<br>(0 - 0)            | --                       |
| Whooping cough                                                    | 0<br>(0 - 0)             | 0<br>(0 - 0)          | 0<br>(0 - 0)           | 0<br>(0 - 0)            | 0<br>(0 - 0)            | --                       |
| Tetanus                                                           | 0<br>(0 - 0)             | 0<br>(0 - 0)          | 0<br>(0 - 0)           | 0<br>(0 - 0)            | 0<br>(0 - 0)            | 0<br>(0 - 0)             |
| Measles                                                           | 0<br>(0 - 0)             | 0<br>(0 - 0)          | 0<br>(0 - 0)           | 0<br>(0 - 0)            | 0<br>(0 - 0)            | --                       |
| Varicella and herpes zoster                                       | 0<br>(0 - 1)             | 0<br>(0 - 0)          | 0<br>(0 - 0)           | 0<br>(0 - 0)            | 0<br>(0 - 0)            | 0<br>(0 - 1)             |
| Neglected tropical diseases and malaria                           | 0<br>(0 - 0)             | 0<br>(0 - 0)          | 0<br>(0 - 0)           | 0<br>(0 - 0)            | 0<br>(0 - 0)            | 0<br>(0 - 0)             |
| Cysticercosis                                                     | 0<br>(0 - 0)             | 0<br>(0 - 0)          | 0<br>(0 - 0)           | 0<br>(0 - 0)            | 0<br>(0 - 0)            | 0<br>(0 - 0)             |
| Cystic echinococcosis                                             | 0<br>(0 - 0)             | 0<br>(0 - 0)          | 0<br>(0 - 0)           | 0<br>(0 - 0)            | 0<br>(0 - 0)            | 0<br>(0 - 0)             |
| Dengue                                                            | 0<br>(0 - 0)             | 0<br>(0 - 0)          | 0<br>(0 - 0)           | 0<br>(0 - 0)            | 0<br>(0 - 0)            | 0<br>(0 - 0)             |
| Rabies                                                            | 0<br>(0 - 0)             | 0<br>(0 - 0)          | 0<br>(0 - 0)           | 0<br>(0 - 0)            | 0<br>(0 - 0)            | 0<br>(0 - 0)             |
| Other neglected tropical diseases                                 | 0<br>(0 - 0)             | 0<br>(0 - 0)          | 0<br>(0 - 0)           | 0<br>(0 - 0)            | 0<br>(0 - 0)            | 0<br>(0 - 0)             |
| Maternal disorders                                                | 0<br>(0 - 0)             | --                    | 0<br>(0 - 0)           | 0<br>(0 - 0)            | --                      | --                       |
| Maternal hemorrhage                                               | 0<br>(0 - 0)             | --                    | 0<br>(0 - 0)           | 0<br>(0 - 0)            | --                      | --                       |
| Maternal sepsis and other maternal infections                     | 0<br>(0 - 0)             | --                    | 0<br>(0 - 0)           | 0<br>(0 - 0)            | --                      | --                       |
| Maternal hypertensive disorders                                   | 0<br>(0 - 0)             | --                    | 0<br>(0 - 0)           | 0<br>(0 - 0)            | --                      | --                       |
| Maternal obstructed labor                                         | 0<br>(0 - 0)             | --                    | 0<br>(0 - 0)           | 0<br>(0 - 0)            | --                      | --                       |
| Maternal abortive outcome                                         | 0<br>(0 - 0)             | --                    | 0<br>(0 - 0)           | 0<br>(0 - 0)            | --                      | --                       |
| Indirect maternal deaths                                          | 0<br>(0 - 0)             | --                    | 0<br>(0 - 0)           | 0<br>(0 - 0)            | --                      | --                       |

Web Table 31- Iceland deaths with 95% UI by age, sex, and cause in 2013

| Cause                                                            | Both Sexes, All Ages     | Both Sexes, 0-4 Years | Both Sexes, 5-14 Years | Both Sexes, 15-49 Years | Both Sexes, 50-69 Years | Both Sexes, 70-80 Years  |
|------------------------------------------------------------------|--------------------------|-----------------------|------------------------|-------------------------|-------------------------|--------------------------|
| Late maternal deaths                                             | 0<br>(0 - 0)             | --                    | 0<br>(0 - 0)           | 0<br>(0 - 0)            | --                      | --                       |
| Maternal deaths aggravated by HIV/AIDS                           | 0<br>(0 - 0)             | --                    | --                     | 0<br>(0 - 0)            | --                      | --                       |
| Other maternal disorders                                         | 0<br>(0 - 0)             | --                    | 0<br>(0 - 0)           | 0<br>(0 - 0)            | --                      | --                       |
| Neonatal disorders                                               | 4<br>(3 - 7)             | 4<br>(3 - 7)          | --                     | --                      | --                      | --                       |
| Neonatal preterm birth complications                             | 3<br>(2 - 5)             | 3<br>(2 - 5)          | --                     | --                      | --                      | --                       |
| Neonatal encephalopathy due to birth asphyxia and trauma         | 1<br>(0 - 1)             | 1<br>(0 - 1)          | --                     | --                      | --                      | --                       |
| Neonatal sepsis and other neonatal infections                    | 0<br>(0 - 0)             | 0<br>(0 - 0)          | --                     | --                      | --                      | --                       |
| Hemolytic disease and other neonatal jaundice                    | 0<br>(0 - 0)             | 0<br>(0 - 0)          | --                     | --                      | --                      | --                       |
| Other neonatal disorders                                         | 1<br>(0 - 1)             | 1<br>(0 - 1)          | --                     | --                      | --                      | --                       |
| Nutritional deficiencies                                         | 3<br>(1 - 4)             | 0<br>(0 - 0)          | 0<br>(0 - 0)           | 0<br>(0 - 0)            | 0<br>(0 - 0)            | 2<br>(1 - 3)             |
| Protein-energy malnutrition                                      | 0<br>(0 - 1)             | 0<br>(0 - 0)          | 0<br>(0 - 0)           | 0<br>(0 - 0)            | 0<br>(0 - 0)            | 0<br>(0 - 1)             |
| Iodine deficiency                                                | 0<br>(0 - 0)             | 0<br>(0 - 0)          | 0<br>(0 - 0)           | 0<br>(0 - 0)            | 0<br>(0 - 0)            | 0<br>(0 - 0)             |
| Iron-deficiency anemia                                           | 2<br>(1 - 3)             | 0<br>(0 - 0)          | 0<br>(0 - 0)           | 0<br>(0 - 0)            | 0<br>(0 - 0)            | 2<br>(1 - 3)             |
| Other nutritional deficiencies                                   | 0<br>(0 - 0)             | 0<br>(0 - 0)          | 0<br>(0 - 0)           | 0<br>(0 - 0)            | 0<br>(0 - 0)            | 0<br>(0 - 0)             |
| Other communicable, maternal, neonatal, and nutritional diseases | 1<br>(1 - 2)             | 0<br>(0 - 0)          | 0<br>(0 - 0)           | 0<br>(0 - 0)            | 0<br>(0 - 0)            | 1<br>(1 - 1)             |
| Sexually transmitted diseases excluding HIV                      | 0<br>(0 - 0)             | 0<br>(0 - 0)          | 0<br>(0 - 0)           | 0<br>(0 - 0)            | 0<br>(0 - 0)            | 0<br>(0 - 0)             |
| Syphilis                                                         | 0<br>(0 - 0)             | 0<br>(0 - 0)          | 0<br>(0 - 0)           | 0<br>(0 - 0)            | 0<br>(0 - 0)            | 0<br>(0 - 0)             |
| Chlamydial infection                                             | 0<br>(0 - 0)             | --                    | 0<br>(0 - 0)           | 0<br>(0 - 0)            | 0<br>(0 - 0)            | 0<br>(0 - 0)             |
| Gonococcal infection                                             | 0<br>(0 - 0)             | --                    | 0<br>(0 - 0)           | 0<br>(0 - 0)            | 0<br>(0 - 0)            | 0<br>(0 - 0)             |
| Other sexually transmitted diseases                              | 0<br>(0 - 0)             | --                    | 0<br>(0 - 0)           | 0<br>(0 - 0)            | 0<br>(0 - 0)            | 0<br>(0 - 0)             |
| Hepatitis                                                        | 0<br>(0 - 0)             | 0<br>(0 - 0)          | 0<br>(0 - 0)           | 0<br>(0 - 0)            | 0<br>(0 - 0)            | 0<br>(0 - 0)             |
| Acute hepatitis A                                                | 0<br>(0 - 0)             | 0<br>(0 - 0)          | 0<br>(0 - 0)           | 0<br>(0 - 0)            | 0<br>(0 - 0)            | 0<br>(0 - 0)             |
| Acute hepatitis B                                                | 0<br>(0 - 0)             | 0<br>(0 - 0)          | 0<br>(0 - 0)           | 0<br>(0 - 0)            | 0<br>(0 - 0)            | 0<br>(0 - 0)             |
| Acute hepatitis C                                                | 0<br>(0 - 0)             | --                    | 0<br>(0 - 0)           | 0<br>(0 - 0)            | 0<br>(0 - 0)            | 0<br>(0 - 0)             |
| Other infectious diseases                                        | 1<br>(1 - 1)             | 0<br>(0 - 0)          | 0<br>(0 - 0)           | 0<br>(0 - 0)            | 0<br>(0 - 0)            | 1<br>(1 - 1)             |
| Non-communicable diseases                                        | 1,742<br>(1,581 - 1,928) | 6<br>(4 - 8)          | 2<br>(1 - 2)           | 53<br>(45 - 61)         | 345<br>(301 - 394)      | 1,336<br>(1,221 - 1,467) |
| Neoplasms                                                        | 547<br>(486 - 616)       | 0<br>(0 - 1)          | 1<br>(1 - 2)           | 31<br>(27 - 36)         | 194<br>(169 - 223)      | 320<br>(285 - 359)       |
| Esophageal cancer                                                | 14<br>(11 - 17)          | --                    | --                     | 0<br>(0 - 1)            | 5<br>(4 - 7)            | 8<br>(7 - 10)            |
| Stomach cancer                                                   | 30<br>(24 - 36)          | --                    | --                     | 1<br>(1 - 1)            | 9<br>(7 - 10)           | 20<br>(16 - 25)          |
| Liver cancer                                                     | 9<br>(6 - 12)            | --                    | 0<br>(0 - 0)           | 0<br>(0 - 1)            | 3<br>(2 - 4)            | 5<br>(4 - 7)             |
| Liver cancer due to hepatitis B                                  | 2<br>(1 - 3)             | --                    | 0<br>(0 - 0)           | 0<br>(0 - 0)            | 1<br>(0 - 1)            | 1<br>(0 - 2)             |
| Liver cancer due to hepatitis C                                  | 5<br>(4 - 8)             | --                    | 0<br>(0 - 0)           | 0<br>(0 - 0)            | 2<br>(1 - 3)            | 3<br>(2 - 5)             |
| Liver cancer due to alcohol use                                  | 1<br>(0 - 2)             | --                    | --                     | 0<br>(0 - 0)            | 0<br>(0 - 1)            | 1<br>(0 - 2)             |
| Liver cancer due to other causes                                 | 0<br>(0 - 1)             | --                    | 0<br>(0 - 0)           | 0<br>(0 - 0)            | 0<br>(0 - 0)            | 0<br>(0 - 0)             |
| Larynx cancer                                                    | 2<br>(1 - 2)             | --                    | --                     | 0<br>(0 - 0)            | 1<br>(0 - 1)            | 1<br>(1 - 1)             |
| Tracheal, bronchus and lung cancer                               | 119<br>(103 - 136)       | --                    | --                     | 5<br>(4 - 6)            | 51<br>(44 - 60)         | 63<br>(54 - 73)          |
| Breast cancer                                                    | 40<br>(29 - 50)          | --                    | --                     | 5<br>(4 - 6)            | 17<br>(12 - 23)         | 18<br>(13 - 23)          |
| Cervical cancer                                                  | 5<br>(4 - 6)             | --                    | --                     | 1<br>(1 - 2)            | 2<br>(1 - 2)            | 2<br>(1 - 2)             |
| Uterine cancer                                                   | 7<br>(5 - 9)             | --                    | --                     | 0<br>(0 - 0)            | 3<br>(2 - 4)            | 4<br>(3 - 6)             |
| Prostate cancer                                                  | 55<br>(40 - 79)          | --                    | --                     | 0<br>(0 - 0)            | 11<br>(7 - 16)          | 44<br>(31 - 65)          |

Web Table 31- Iceland deaths with 95% UI by age, sex, and cause in 2013

| Cause                                         | Both Sexes, All Ages | Both Sexes, 0-4 Years | Both Sexes, 5-14 Years | Both Sexes, 15-49 Years | Both Sexes, 50-69 Years | Both Sexes, 70-80 Years |
|-----------------------------------------------|----------------------|-----------------------|------------------------|-------------------------|-------------------------|-------------------------|
| Colon and rectum cancer                       | 66<br>(56 - 77)      | --                    | --                     | 2<br>(2 - 3)            | 19<br>(16 - 22)         | 45<br>(37 - 54)         |
| Lip and oral cavity cancer                    | 4<br>(3 - 5)         | --                    | --                     | 0<br>(0 - 0)            | 1<br>(1 - 2)            | 3<br>(2 - 3)            |
| Nasopharynx cancer                            | 0<br>(0 - 1)         | --                    | 0<br>(0 - 0)           | 0<br>(0 - 0)            | 0<br>(0 - 0)            | 0<br>(0 - 0)            |
| Other pharynx cancer                          | 1<br>(1 - 2)         | --                    | --                     | 0<br>(0 - 0)            | 1<br>(1 - 1)            | 1<br>(0 - 1)            |
| Gallbladder and biliary tract cancer          | 5<br>(4 - 7)         | --                    | --                     | 0<br>(0 - 0)            | 2<br>(1 - 2)            | 4<br>(3 - 5)            |
| Pancreatic cancer                             | 31<br>(27 - 36)      | --                    | --                     | 1<br>(1 - 1)            | 12<br>(10 - 14)         | 18<br>(15 - 21)         |
| Malignant skin melanoma                       | 10<br>(7 - 15)       | --                    | --                     | 1<br>(1 - 2)            | 4<br>(3 - 6)            | 5<br>(3 - 7)            |
| Non-melanoma skin cancer                      | 0<br>(0 - 1)         | --                    | --                     | 0<br>(0 - 0)            | 0<br>(0 - 0)            | 0<br>(0 - 1)            |
| Ovarian cancer                                | 12<br>(9 - 15)       | --                    | --                     | 1<br>(1 - 1)            | 6<br>(4 - 7)            | 6<br>(4 - 8)            |
| Testicular cancer                             | 0<br>(0 - 0)         | --                    | --                     | 0<br>(0 - 0)            | 0<br>(0 - 0)            | 0<br>(0 - 0)            |
| Kidney cancer                                 | 22<br>(18 - 27)      | 0<br>(0 - 0)          | 0<br>(0 - 0)           | 1<br>(1 - 1)            | 9<br>(7 - 11)           | 12<br>(9 - 15)          |
| Bladder cancer                                | 16<br>(13 - 20)      | --                    | --                     | 0<br>(0 - 0)            | 4<br>(3 - 5)            | 12<br>(9 - 16)          |
| Brain and nervous system cancer               | 20<br>(17 - 25)      | 0<br>(0 - 0)          | 1<br>(0 - 1)           | 4<br>(3 - 5)            | 9<br>(7 - 11)           | 6<br>(5 - 8)            |
| Thyroid cancer                                | 5<br>(3 - 7)         | --                    | 0<br>(0 - 0)           | 0<br>(0 - 0)            | 2<br>(1 - 2)            | 3<br>(2 - 4)            |
| Mesothelioma                                  | 3<br>(1 - 4)         | --                    | --                     | 0<br>(0 - 0)            | 1<br>(0 - 2)            | 1<br>(0 - 2)            |
| Hodgkin lymphoma                              | 1<br>(0 - 1)         | 0<br>(0 - 0)          | 0<br>(0 - 0)           | 0<br>(0 - 0)            | 0<br>(0 - 0)            | 0<br>(0 - 0)            |
| Non-Hodgkin lymphoma                          | 17<br>(11 - 22)      | 0<br>(0 - 0)          | 0<br>(0 - 0)           | 1<br>(1 - 2)            | 6<br>(4 - 9)            | 9<br>(6 - 12)           |
| Multiple myeloma                              | 13<br>(9 - 19)       | --                    | --                     | 1<br>(0 - 1)            | 5<br>(3 - 7)            | 8<br>(5 - 12)           |
| Leukemia                                      | 18<br>(15 - 21)      | 0<br>(0 - 0)          | 0<br>(0 - 0)           | 2<br>(2 - 3)            | 5<br>(4 - 6)            | 10<br>(8 - 12)          |
| Other neoplasms                               | 22<br>(15 - 27)      | 0<br>(0 - 0)          | 0<br>(0 - 0)           | 3<br>(2 - 3)            | 7<br>(5 - 9)            | 12<br>(7 - 16)          |
| Cardiovascular diseases                       | 713<br>(637 - 798)   | 0<br>(0 - 0)          | 0<br>(0 - 0)           | 11<br>(9 - 14)          | 102<br>(87 - 119)       | 600<br>(537 - 672)      |
| Rheumatic heart disease                       | 2<br>(1 - 2)         | 0<br>(0 - 0)          | 0<br>(0 - 0)           | 0<br>(0 - 0)            | 0<br>(0 - 0)            | 1<br>(1 - 2)            |
| Ischemic heart disease                        | 441<br>(388 - 507)   | 0<br>(0 - 0)          | 0<br>(0 - 0)           | 7<br>(5 - 8)            | 73<br>(61 - 87)         | 362<br>(318 - 419)      |
| Cerebrovascular disease                       | 176<br>(142 - 209)   | 0<br>(0 - 0)          | 0<br>(0 - 0)           | 3<br>(2 - 3)            | 16<br>(12 - 20)         | 157<br>(126 - 187)      |
| Ischemic stroke                               | 106<br>(82 - 127)    | 0<br>(0 - 0)          | 0<br>(0 - 0)           | 0<br>(0 - 0)            | 6<br>(4 - 8)            | 100<br>(78 - 120)       |
| Hemorrhagic stroke                            | 70<br>(53 - 88)      | 0<br>(0 - 0)          | 0<br>(0 - 0)           | 2<br>(2 - 3)            | 11<br>(8 - 13)          | 57<br>(42 - 73)         |
| Hypertensive heart disease                    | 11<br>(6 - 15)       | 0<br>(0 - 0)          | 0<br>(0 - 0)           | 0<br>(0 - 0)            | 2<br>(1 - 2)            | 9<br>(5 - 13)           |
| Cardiomyopathy and myocarditis                | 8<br>(6 - 10)        | 0<br>(0 - 0)          | 0<br>(0 - 0)           | 1<br>(1 - 1)            | 2<br>(2 - 3)            | 5<br>(4 - 7)            |
| Atrial fibrillation and flutter               | 27<br>(19 - 36)      | --                    | --                     | 0<br>(0 - 0)            | 1<br>(1 - 2)            | 26<br>(17 - 35)         |
| Aortic aneurysm                               | 14<br>(11 - 18)      | --                    | --                     | 0<br>(0 - 0)            | 3<br>(2 - 4)            | 11<br>(9 - 14)          |
| Peripheral vascular disease                   | 1<br>(1 - 2)         | --                    | --                     | 0<br>(0 - 0)            | 0<br>(0 - 0)            | 1<br>(1 - 2)            |
| Endocarditis                                  | 1<br>(1 - 2)         | 0<br>(0 - 0)          | 0<br>(0 - 0)           | 0<br>(0 - 0)            | 0<br>(0 - 0)            | 1<br>(1 - 1)            |
| Other cardiovascular and circulatory diseases | 32<br>(23 - 43)      | 0<br>(0 - 0)          | 0<br>(0 - 0)           | 1<br>(0 - 1)            | 4<br>(3 - 5)            | 28<br>(19 - 38)         |
| Chronic respiratory diseases                  | 98<br>(67 - 117)     | 0<br>(0 - 0)          | 0<br>(0 - 0)           | 1<br>(1 - 1)            | 13<br>(9 - 16)          | 84<br>(58 - 101)        |
| Chronic obstructive pulmonary disease         | 89<br>(60 - 106)     | 0<br>(0 - 0)          | 0<br>(0 - 0)           | 0<br>(0 - 1)            | 11<br>(7 - 14)          | 78<br>(53 - 93)         |
| Pneumoconiosis                                | 1<br>(0 - 1)         | 0<br>(0 - 0)          | 0<br>(0 - 0)           | 0<br>(0 - 0)            | 0<br>(0 - 0)            | 1<br>(0 - 1)            |
| Silicosis                                     | 0<br>(0 - 0)         | 0<br>(0 - 0)          | 0<br>(0 - 0)           | 0<br>(0 - 0)            | 0<br>(0 - 0)            | 0<br>(0 - 0)            |
| Asbestosis                                    | 0<br>(0 - 0)         | 0<br>(0 - 0)          | 0<br>(0 - 0)           | 0<br>(0 - 0)            | 0<br>(0 - 0)            | 0<br>(0 - 0)            |
| Coal workers pneumoconiosis                   | 0<br>(0 - 0)         | 0<br>(0 - 0)          | 0<br>(0 - 0)           | 0<br>(0 - 0)            | 0<br>(0 - 0)            | 0<br>(0 - 0)            |
| Other pneumoconiosis                          | 0<br>(0 - 1)         | 0<br>(0 - 0)          | 0<br>(0 - 0)           | 0<br>(0 - 0)            | 0<br>(0 - 0)            | 0<br>(0 - 1)            |

Web Table 31- Iceland deaths with 95% UI by age, sex, and cause in 2013

| Cause                                               | Both Sexes, All Ages | Both Sexes, 0-4 Years | Both Sexes, 5-14 Years | Both Sexes, 15-49 Years | Both Sexes, 50-69 Years | Both Sexes, 70-80 Years |
|-----------------------------------------------------|----------------------|-----------------------|------------------------|-------------------------|-------------------------|-------------------------|
| Asthma                                              | 2<br>(1-4)           | 0<br>(0-0)            | 0<br>(0-0)             | 0<br>(0-0)              | 0<br>(0-1)              | 2<br>(1-3)              |
| Interstitial lung disease and pulmonary sarcoidosis | 5<br>(3-8)           | 0<br>(0-0)            | 0<br>(0-0)             | 0<br>(0-0)              | 1<br>(1-2)              | 4<br>(2-6)              |
| Other chronic respiratory diseases                  | 0<br>(0-0)           | 0<br>(0-0)            | 0<br>(0-0)             | 0<br>(0-0)              | 0<br>(0-0)              | 0<br>(0-0)              |
| Cirrhosis                                           | 8<br>(6-9)           | 0<br>(0-0)            | 0<br>(0-0)             | 0<br>(0-1)              | 3<br>(3-4)              | 4<br>(3-4)              |
| Cirrhosis due to hepatitis B                        | 1<br>(1-1)           | 0<br>(0-0)            | 0<br>(0-0)             | 0<br>(0-0)              | 0<br>(0-1)              | 0<br>(0-1)              |
| Cirrhosis due to hepatitis C                        | 4<br>(3-5)           | 0<br>(0-0)            | 0<br>(0-0)             | 0<br>(0-0)              | 2<br>(1-2)              | 2<br>(1-3)              |
| Cirrhosis due to alcohol use                        | 2<br>(1-3)           | --                    | --                     | 0<br>(0-0)              | 1<br>(0-2)              | 1<br>(1-2)              |
| Cirrhosis due to other causes                       | 1<br>(0-1)           | 0<br>(0-0)            | 0<br>(0-0)             | 0<br>(0-0)              | 0<br>(0-1)              | 0<br>(0-0)              |
| Digestive diseases                                  | 41<br>(33-48)        | 0<br>(0-0)            | 0<br>(0-0)             | 1<br>(1-1)              | 5<br>(4-6)              | 35<br>(28-42)           |
| Peptic ulcer disease                                | 7<br>(5-9)           | 0<br>(0-0)            | 0<br>(0-0)             | 0<br>(0-0)              | 2<br>(1-2)              | 5<br>(3-7)              |
| Gastritis and duodenitis                            | 0<br>(0-0)           | 0<br>(0-0)            | 0<br>(0-0)             | 0<br>(0-0)              | 0<br>(0-0)              | 0<br>(0-0)              |
| Appendicitis                                        | 0<br>(0-0)           | 0<br>(0-0)            | 0<br>(0-0)             | 0<br>(0-0)              | 0<br>(0-0)              | 0<br>(0-0)              |
| Paralytic ileus and intestinal obstruction          | 6<br>(3-9)           | 0<br>(0-0)            | 0<br>(0-0)             | 0<br>(0-0)              | 1<br>(0-1)              | 5<br>(2-8)              |
| Inguinal, femoral, and abdominal hernia             | 0<br>(0-0)           | 0<br>(0-0)            | 0<br>(0-0)             | 0<br>(0-0)              | 0<br>(0-0)              | 0<br>(0-0)              |
| Inflammatory bowel disease                          | 2<br>(0-3)           | 0<br>(0-0)            | 0<br>(0-0)             | 0<br>(0-0)              | 0<br>(0-0)              | 1<br>(0-3)              |
| Vascular intestinal disorders                       | 8<br>(5-14)          | 0<br>(0-0)            | 0<br>(0-0)             | 0<br>(0-0)              | 1<br>(0-1)              | 8<br>(5-13)             |
| Gallbladder and biliary diseases                    | 5<br>(3-7)           | 0<br>(0-0)            | 0<br>(0-0)             | 0<br>(0-0)              | 0<br>(0-0)              | 4<br>(3-6)              |
| Pancreatitis                                        | 2<br>(1-2)           | 0<br>(0-0)            | 0<br>(0-0)             | 0<br>(0-0)              | 0<br>(0-1)              | 1<br>(0-1)              |
| Other digestive diseases                            | 12<br>(9-16)         | 0<br>(0-0)            | 0<br>(0-0)             | 0<br>(0-0)              | 1<br>(1-2)              | 11<br>(8-15)            |
| Neurological disorders                              | 250<br>(197-310)     | 0<br>(0-0)            | 0<br>(0-0)             | 2<br>(2-3)              | 15<br>(12-18)           | 233<br>(180-291)        |
| Alzheimer disease and other dementias               | 211<br>(156-272)     | --                    | --                     | 0<br>(0-0)              | 6<br>(4-8)              | 205<br>(151-263)        |
| Parkinson disease                                   | 24<br>(17-31)        | --                    | --                     | 0<br>(0-0)              | 2<br>(1-3)              | 22<br>(15-29)           |
| Epilepsy                                            | 1<br>(1-2)           | 0<br>(0-0)            | 0<br>(0-0)             | 1<br>(0-1)              | 0<br>(0-0)              | 0<br>(0-0)              |
| Multiple sclerosis                                  | 2<br>(1-3)           | --                    | --                     | 0<br>(0-1)              | 1<br>(1-2)              | 1<br>(0-1)              |
| Other neurological disorders                        | 12<br>(10-14)        | 0<br>(0-0)            | 0<br>(0-0)             | 1<br>(1-1)              | 5<br>(4-6)              | 5<br>(4-7)              |
| Mental and substance use disorders                  | 6<br>(5-8)           | 0<br>(0-0)            | 0<br>(0-0)             | 3<br>(2-3)              | 3<br>(2-5)              | 1<br>(0-1)              |
| Schizophrenia                                       | 0<br>(0-0)           | --                    | --                     | 0<br>(0-0)              | 0<br>(0-0)              | 0<br>(0-0)              |
| Alcohol use disorders                               | 4<br>(3-6)           | --                    | --                     | 1<br>(1-1)              | 2<br>(2-4)              | 0<br>(0-1)              |
| Drug use disorders                                  | 3<br>(2-3)           | 0<br>(0-0)            | --                     | 1<br>(1-2)              | 1<br>(1-1)              | 0<br>(0-0)              |
| Opioid use disorders                                | 1<br>(1-1)           | 0<br>(0-0)            | --                     | 1<br>(0-1)              | 0<br>(0-0)              | 0<br>(0-0)              |
| Cocaine use disorders                               | 0<br>(0-0)           | 0<br>(0-0)            | --                     | 0<br>(0-0)              | 0<br>(0-0)              | 0<br>(0-0)              |
| Amphetamine use disorders                           | 0<br>(0-0)           | 0<br>(0-0)            | --                     | 0<br>(0-0)              | 0<br>(0-0)              | 0<br>(0-0)              |
| Other drug use disorders                            | 1<br>(1-2)           | 0<br>(0-0)            | --                     | 1<br>(1-1)              | 1<br>(0-1)              | 0<br>(0-0)              |
| Eating disorders                                    | 0<br>(0-0)           | --                    | 0<br>(0-0)             | 0<br>(0-0)              | --                      | --                      |
| Anorexia nervosa                                    | 0<br>(0-0)           | --                    | 0<br>(0-0)             | 0<br>(0-0)              | --                      | --                      |
| Diabetes, urogenital, blood, and endocrine diseases | 64<br>(53-75)        | 0<br>(0-0)            | 0<br>(0-0)             | 2<br>(1-2)              | 8<br>(7-10)             | 53<br>(43-63)           |
| Diabetes mellitus                                   | 23<br>(19-27)        | 0<br>(0-0)            | 0<br>(0-0)             | 1<br>(0-1)              | 4<br>(3-5)              | 18<br>(14-22)           |
| Acute glomerulonephritis                            | 0<br>(0-0)           | 0<br>(0-0)            | 0<br>(0-0)             | 0<br>(0-0)              | 0<br>(0-0)              | 0<br>(0-0)              |
| Chronic kidney disease                              | 23<br>(18-29)        | 0<br>(0-0)            | 0<br>(0-0)             | 0<br>(0-1)              | 2<br>(1-3)              | 21<br>(16-27)           |
| Chronic kidney disease due to diabetes mellitus     | 0<br>(0-1)           | 0<br>(0-0)            | 0<br>(0-0)             | 0<br>(0-0)              | 0<br>(0-0)              | 0<br>(0-0)              |

Web Table 31- Iceland deaths with 95% UI by age, sex, and cause in 2013

| Cause                                               | Both Sexes, All Ages | Both Sexes, 0-4 Years | Both Sexes, 5-14 Years | Both Sexes, 15-49 Years | Both Sexes, 50-69 Years | Both Sexes, 70-80 Years |
|-----------------------------------------------------|----------------------|-----------------------|------------------------|-------------------------|-------------------------|-------------------------|
| Chronic kidney disease due to hypertension          | 10<br>(7 - 12)       | 0<br>(0 - 0)          | 0<br>(0 - 0)           | 0<br>(0 - 0)            | 1<br>(0 - 1)            | 9<br>(6 - 11)           |
| Chronic kidney disease due to glomerulonephritis    | 0                    | 0                     | 0                      | 0                       | 0                       | 0                       |
| Chronic kidney disease due to other causes          | 13<br>(9 - 18)       | 0<br>(0 - 0)          | 0<br>(0 - 0)           | 0<br>(0 - 0)            | 1<br>(1 - 2)            | 12<br>(8 - 16)          |
| Urinary diseases and male infertility               | 13<br>(9 - 17)       | 0<br>(0 - 0)          | 0<br>(0 - 0)           | 0<br>(0 - 0)            | 1<br>(1 - 1)            | 11<br>(7 - 16)          |
| Interstitial nephritis and urinary tract infections | 12<br>(8 - 17)       | 0<br>(0 - 0)          | 0<br>(0 - 0)           | 0<br>(0 - 0)            | 1<br>(1 - 1)            | 11<br>(7 - 16)          |
| Urolithiasis                                        | 0                    | --                    | 0                      | 0                       | 0                       | 0                       |
| Other urinary diseases                              | 0<br>(0 - 1)         | 0<br>(0 - 0)          | 0<br>(0 - 0)           | 0<br>(0 - 0)            | 0<br>(0 - 0)            | 0<br>(0 - 1)            |
| Gynecological diseases                              | 0                    | --                    | --                     | 0                       | 0                       | 0                       |
| Uterine fibroids                                    | 0<br>(0 - 0)         | --                    | --                     | 0<br>(0 - 0)            | 0<br>(0 - 0)            | 0<br>(0 - 0)            |
| Polycystic ovarian syndrome                         | 0                    | --                    | --                     | 0                       | 0                       | --                      |
| Endometriosis                                       | 0<br>(0 - 0)         | --                    | --                     | 0<br>(0 - 0)            | 0<br>(0 - 0)            | --                      |
| Genital prolapse                                    | 0                    | --                    | --                     | 0                       | 0                       | 0                       |
| Other gynecological diseases                        | 0<br>(0 - 0)         | --                    | --                     | 0<br>(0 - 0)            | 0<br>(0 - 0)            | 0<br>(0 - 0)            |
| Hemoglobinopathies and hemolytic anemias            | 0                    | 0                     | 0                      | 0                       | 0                       | 0                       |
| Thalassemias                                        | 0<br>(0 - 0)         | 0<br>(0 - 0)          | 0<br>(0 - 0)           | 0<br>(0 - 0)            | 0<br>(0 - 0)            | 0<br>(0 - 0)            |
| Sickle cell disorders                               | 0<br>(0 - 0)         | 0<br>(0 - 0)          | 0<br>(0 - 0)           | 0<br>(0 - 0)            | 0<br>(0 - 0)            | 0<br>(0 - 0)            |
| G6PD deficiency                                     | 0<br>(0 - 0)         | 0<br>(0 - 0)          | 0<br>(0 - 0)           | 0<br>(0 - 0)            | 0<br>(0 - 0)            | 0<br>(0 - 0)            |
| Other hemoglobinopathies and hemolytic anemias      | 0<br>(0 - 0)         | 0<br>(0 - 0)          | 0<br>(0 - 0)           | 0<br>(0 - 0)            | 0<br>(0 - 0)            | 0<br>(0 - 0)            |
| Endocrine, metabolic, blood, and immune disorders   | 5<br>(4 - 6)         | 0<br>(0 - 0)          | 0<br>(0 - 0)           | 1<br>(0 - 1)            | 1<br>(1 - 1)            | 3<br>(2 - 4)            |
| Musculoskeletal disorders                           | 5<br>(3 - 6)         | --                    | 0<br>(0 - 0)           | 0<br>(0 - 0)            | 1<br>(1 - 1)            | 4<br>(2 - 5)            |
| Rheumatoid arthritis                                | 1<br>(1 - 2)         | --                    | 0<br>(0 - 0)           | 0<br>(0 - 0)            | 0<br>(0 - 0)            | 1<br>(0 - 1)            |
| Other musculoskeletal disorders                     | 4<br>(2 - 5)         | --                    | 0<br>(0 - 0)           | 0<br>(0 - 0)            | 1<br>(1 - 1)            | 3<br>(2 - 4)            |
| Other non-communicable diseases                     | 9<br>(7 - 12)        | 5<br>(3 - 7)          | 0<br>(0 - 0)           | 1<br>(1 - 2)            | 1<br>(1 - 2)            | 2<br>(1 - 2)            |
| Congenital anomalies                                | 7<br>(5 - 10)        | 3<br>(2 - 4)          | 0<br>(0 - 0)           | 1<br>(1 - 2)            | 1<br>(1 - 2)            | 1<br>(1 - 2)            |
| Neural tube defects                                 | 0                    | 0                     | 0                      | 0                       | 0                       | 0                       |
| Congenital heart anomalies                          | 2<br>(2 - 3)         | 1<br>(1 - 1)          | 0<br>(0 - 0)           | 1<br>(0 - 1)            | 0<br>(0 - 1)            | 0<br>(0 - 0)            |
| Cleft lip and cleft palate                          | 0<br>(0 - 0)         | 0<br>(0 - 0)          | --                     | --                      | --                      | --                      |
| Down syndrome                                       | 0<br>(0 - 1)         | 0<br>(0 - 0)          | 0<br>(0 - 0)           | 0<br>(0 - 0)            | 0<br>(0 - 0)            | 0<br>(0 - 0)            |
| Chromosomal unbalanced rearrangements               | 0                    | 0                     | 0                      | 0                       | 0                       | 0                       |
| Other congenital anomalies                          | 4<br>(3 - 5)         | 2<br>(1 - 3)          | 0<br>(0 - 0)           | 0<br>(0 - 1)            | 1<br>(0 - 1)            | 1<br>(1 - 1)            |
| Skin and subcutaneous diseases                      | 1<br>(0 - 1)         | 0<br>(0 - 0)          | 0<br>(0 - 0)           | 0<br>(0 - 0)            | 0<br>(0 - 0)            | 1<br>(0 - 1)            |
| Cellulitis                                          | 0                    | 0                     | 0                      | 0                       | 0                       | 0                       |
| Pyoderma                                            | 0<br>(0 - 1)         | 0<br>(0 - 0)          | 0<br>(0 - 0)           | 0<br>(0 - 0)            | 0<br>(0 - 0)            | 0<br>(0 - 0)            |
| Decubitus ulcer                                     | 0                    | 0                     | 0                      | 0                       | 0                       | 0                       |
| Other skin and subcutaneous diseases                | 0<br>(0 - 0)         | 0<br>(0 - 0)          | 0<br>(0 - 0)           | 0<br>(0 - 0)            | 0<br>(0 - 0)            | 0<br>(0 - 0)            |
| Sudden infant death syndrome                        | 2<br>(1 - 3)         | 2<br>(1 - 3)          | --                     | --                      | --                      | --                      |
| Injuries                                            | 96<br>(81 - 112)     | 1<br>(0 - 1)          | 1<br>(1 - 1)           | 36<br>(30 - 42)         | 25<br>(21 - 30)         | 34<br>(25 - 43)         |
| Transport injuries                                  | 19                   | 0                     | 0                      | 10                      | 5                       | 4                       |
| Road injuries                                       | 16<br>(13 - 20)      | 0<br>(0 - 0)          | 0<br>(0 - 1)           | 8<br>(6 - 10)           | 4<br>(3 - 5)            | 4<br>(3 - 4)            |
| Pedestrian road injuries                            | 1<br>(1 - 2)         | 0<br>(0 - 0)          | 0<br>(0 - 0)           | 0<br>(0 - 1)            | 0<br>(0 - 1)            | 1<br>(0 - 1)            |



Web Table 31- Iceland deaths with 95% UI by age, sex, and cause in 2013

| Cause                                           | Both Sexes, All Ages | Both Sexes, 0-4 Years | Both Sexes, 5-14 Years | Both Sexes, 15-49 Years | Both Sexes, 50-69 Years | Both Sexes, 70-80 Years |
|-------------------------------------------------|----------------------|-----------------------|------------------------|-------------------------|-------------------------|-------------------------|
| Cyclist road injuries                           | 0<br>(0 - 0)         | 0<br>(0 - 0)          | 0<br>(0 - 0)           | 0<br>(0 - 0)            | 0<br>(0 - 0)            | 0<br>(0 - 0)            |
| Motorcyclist road injuries                      | 1<br>(0 - 1)         | 0<br>(0 - 0)          | 0<br>(0 - 0)           | 1<br>(0 - 1)            | 0<br>(0 - 0)            | 0<br>(0 - 0)            |
| Motor vehicle road injuries                     | 14<br>(11 - 17)      | 0<br>(0 - 0)          | 0<br>(0 - 1)           | 7<br>(5 - 9)            | 3<br>(3 - 4)            | 3<br>(2 - 4)            |
| Other road injuries                             | 0<br>(0 - 0)         | 0<br>(0 - 0)          | 0<br>(0 - 0)           | 0<br>(0 - 0)            | 0<br>(0 - 0)            | 0<br>(0 - 0)            |
| Other transport injuries                        | 2<br>(2 - 4)         | 0<br>(0 - 0)          | 0<br>(0 - 0)           | 2<br>(1 - 3)            | 1<br>(0 - 1)            | 0<br>(0 - 0)            |
| Unintentional injuries                          | 39<br>(30 - 49)      | 0<br>(0 - 1)          | 0<br>(0 - 1)           | 5<br>(4 - 7)            | 7<br>(6 - 9)            | 27<br>(18 - 35)         |
| Falls                                           | 28<br>(17 - 37)      | 0<br>(0 - 0)          | 0<br>(0 - 0)           | 1<br>(1 - 2)            | 3<br>(2 - 4)            | 23<br>(14 - 31)         |
| Drowning                                        | 4<br>(3 - 8)         | 0<br>(0 - 0)          | 0<br>(0 - 0)           | 2<br>(1 - 4)            | 1<br>(1 - 3)            | 0<br>(0 - 1)            |
| Fire, heat, and hot substances                  | 1<br>(1 - 2)         | 0<br>(0 - 0)          | 0<br>(0 - 0)           | 0<br>(0 - 1)            | 0<br>(0 - 1)            | 0<br>(0 - 1)            |
| Poisonings                                      | 1<br>(0 - 1)         | 0<br>(0 - 0)          | 0<br>(0 - 0)           | 0<br>(0 - 0)            | 0<br>(0 - 0)            | 0<br>(0 - 0)            |
| Exposure to mechanical forces                   | 2<br>(1 - 2)         | 0<br>(0 - 0)          | 0<br>(0 - 0)           | 1<br>(1 - 1)            | 1<br>(0 - 1)            | 0<br>(0 - 0)            |
| Unintentional firearm injuries                  | 0<br>(0 - 0)         | 0<br>(0 - 0)          | 0<br>(0 - 0)           | 0<br>(0 - 0)            | 0<br>(0 - 0)            | 0<br>(0 - 0)            |
| Unintentional suffocation                       | 0<br>(0 - 0)         | 0<br>(0 - 0)          | 0<br>(0 - 0)           | 0<br>(0 - 0)            | 0<br>(0 - 0)            | 0<br>(0 - 0)            |
| Other exposure to mechanical forces             | 1<br>(1 - 2)         | 0<br>(0 - 0)          | 0<br>(0 - 0)           | 1<br>(0 - 1)            | 1<br>(0 - 1)            | 0<br>(0 - 0)            |
| Adverse effects of medical treatment            | 3<br>(2 - 4)         | 0<br>(0 - 0)          | 0<br>(0 - 0)           | 0<br>(0 - 0)            | 1<br>(0 - 1)            | 2<br>(1 - 3)            |
| Animal contact                                  | 0<br>(0 - 0)         | 0<br>(0 - 0)          | 0<br>(0 - 0)           | 0<br>(0 - 0)            | 0<br>(0 - 0)            | 0<br>(0 - 0)            |
| Venomous animal contact                         | 0<br>(0 - 0)         | 0<br>(0 - 0)          | 0<br>(0 - 0)           | 0<br>(0 - 0)            | 0<br>(0 - 0)            | 0<br>(0 - 0)            |
| Non-venomous animal contact                     | 0<br>(0 - 0)         | 0<br>(0 - 0)          | 0<br>(0 - 0)           | 0<br>(0 - 0)            | 0<br>(0 - 0)            | 0<br>(0 - 0)            |
| Foreign body                                    | 1<br>(1 - 2)         | 0<br>(0 - 0)          | 0<br>(0 - 0)           | 0<br>(0 - 0)            | 1<br>(0 - 1)            | 1<br>(0 - 1)            |
| Pulmonary aspiration and foreign body in airway | 1<br>(1 - 2)         | 0<br>(0 - 0)          | 0<br>(0 - 0)           | 0<br>(0 - 0)            | 1<br>(0 - 1)            | 1<br>(0 - 1)            |
| Foreign body in other body part                 | 0<br>(0 - 0)         | 0<br>(0 - 0)          | 0<br>(0 - 0)           | 0<br>(0 - 0)            | 0<br>(0 - 0)            | 0<br>(0 - 0)            |
| Other unintentional injuries                    | 0<br>(0 - 0)         | 0<br>(0 - 0)          | 0<br>(0 - 0)           | 0<br>(0 - 0)            | 0<br>(0 - 0)            | 0<br>(0 - 0)            |
| Self-harm and interpersonal violence            | 38<br>(30 - 47)      | 0<br>(0 - 0)          | 0<br>(0 - 0)           | 21<br>(16 - 26)         | 13<br>(10 - 17)         | 4<br>(3 - 5)            |
| Self-harm                                       | 36<br>(28 - 44)      | --                    | 0<br>(0 - 0)           | 19<br>(15 - 25)         | 13<br>(10 - 16)         | 3<br>(3 - 4)            |
| Interpersonal violence                          | 2<br>(1 - 3)         | 0<br>(0 - 0)          | 0<br>(0 - 0)           | 1<br>(1 - 2)            | 1<br>(0 - 1)            | 0<br>(0 - 0)            |
| Assault by firearm                              | 0<br>(0 - 0)         | 0<br>(0 - 0)          | 0<br>(0 - 0)           | 0<br>(0 - 0)            | 0<br>(0 - 0)            | 0<br>(0 - 0)            |
| Assault by sharp object                         | 0<br>(0 - 1)         | 0<br>(0 - 0)          | 0<br>(0 - 0)           | 0<br>(0 - 1)            | 0<br>(0 - 0)            | 0<br>(0 - 0)            |
| Assault by other means                          | 2<br>(1 - 2)         | 0<br>(0 - 0)          | 0<br>(0 - 0)           | 1<br>(0 - 2)            | 1<br>(0 - 1)            | 0<br>(0 - 0)            |

Web Table 31- Iceland deaths with 95% UI by age, sex, and cause in 2013

| Cause                                                             | Males, All Ages        | Males, 0-4 Years | Males, 5-14 Years | Males, 15-49 Years | Males, 50-69 Years | Males, 70-80 Years |
|-------------------------------------------------------------------|------------------------|------------------|-------------------|--------------------|--------------------|--------------------|
| All causes                                                        | 1,003<br>(874 - 1,142) | 6<br>(4 - 9)     | 2<br>(1 - 2)      | 58<br>(48 - 69)    | 233<br>(196 - 277) | 704<br>(623 - 790) |
| Communicable, maternal, neonatal, and nutritional diseases        | 37<br>(25 - 62)        | 3<br>(2 - 4)     | 0<br>(0 - 0)      | 1<br>(1 - 1)       | 3<br>(2 - 4)       | 31<br>(19 - 54)    |
| HIV/AIDS and tuberculosis                                         | 1<br>(0 - 1)           | 0<br>(0 - 0)     | 0<br>(0 - 0)      | 0<br>(0 - 0)       | 0<br>(0 - 0)       | 0<br>(0 - 0)       |
| Tuberculosis                                                      | 0<br>(0 - 1)           | 0<br>(0 - 0)     | 0<br>(0 - 0)      | 0<br>(0 - 0)       | 0<br>(0 - 0)       | 0<br>(0 - 0)       |
| HIV/AIDS                                                          | 0<br>(0 - 0)           | 0<br>(0 - 0)     | 0<br>(0 - 0)      | 0<br>(0 - 0)       | 0<br>(0 - 0)       | 0<br>(0 - 0)       |
| HIV/AIDS resulting in mycobacterial infection                     | 0<br>(0 - 0)           | 0<br>(0 - 0)     | 0<br>(0 - 0)      | 0<br>(0 - 0)       | 0<br>(0 - 0)       | 0<br>(0 - 0)       |
| HIV/AIDS resulting in other diseases                              | 0<br>(0 - 0)           | 0<br>(0 - 0)     | 0<br>(0 - 0)      | 0<br>(0 - 0)       | 0<br>(0 - 0)       | 0<br>(0 - 0)       |
| Diarrhea, lower respiratory, and other common infectious diseases | 33<br>(21 - 58)        | 0<br>(0 - 1)     | 0<br>(0 - 0)      | 1<br>(0 - 1)       | 2<br>(2 - 3)       | 30<br>(18 - 54)    |
| Diarrheal diseases                                                | 0<br>(0 - 1)           | 0<br>(0 - 0)     | 0<br>(0 - 0)      | 0<br>(0 - 0)       | 0<br>(0 - 0)       | 0<br>(0 - 1)       |
| Intestinal infectious diseases                                    | 1<br>(0 - 2)           | 0<br>(0 - 0)     | 0<br>(0 - 0)      | 0<br>(0 - 1)       | 0<br>(0 - 0)       | 0<br>(0 - 0)       |
| Typhoid fever                                                     | 0<br>(0 - 1)           | 0<br>(0 - 0)     | 0<br>(0 - 0)      | 0<br>(0 - 1)       | 0<br>(0 - 0)       | 0<br>(0 - 0)       |
| Paratyphoid fever                                                 | 0<br>(0 - 0)           | 0<br>(0 - 0)     | 0<br>(0 - 0)      | 0<br>(0 - 0)       | 0<br>(0 - 0)       | 0<br>(0 - 0)       |
| Other intestinal infectious diseases                              | 0<br>(0 - 0)           | 0<br>(0 - 0)     | 0<br>(0 - 0)      | 0<br>(0 - 0)       | 0<br>(0 - 0)       | 0<br>(0 - 0)       |
| Lower respiratory infections                                      | 32<br>(20 - 57)        | 0<br>(0 - 0)     | 0<br>(0 - 0)      | 0<br>(0 - 0)       | 2<br>(1 - 3)       | 29<br>(18 - 53)    |
| Upper respiratory infections                                      | 0<br>(0 - 0)           | 0<br>(0 - 0)     | 0<br>(0 - 0)      | 0<br>(0 - 0)       | 0<br>(0 - 0)       | 0<br>(0 - 0)       |
| Otitis media                                                      | 0<br>(0 - 0)           | 0<br>(0 - 0)     | 0<br>(0 - 0)      | 0<br>(0 - 0)       | 0<br>(0 - 0)       | 0<br>(0 - 0)       |
| Meningitis                                                        | 0<br>(0 - 0)           | 0<br>(0 - 0)     | 0<br>(0 - 0)      | 0<br>(0 - 0)       | 0<br>(0 - 0)       | 0<br>(0 - 0)       |
| Pneumococcal meningitis                                           | 0<br>(0 - 0)           | 0<br>(0 - 0)     | 0<br>(0 - 0)      | 0<br>(0 - 0)       | 0<br>(0 - 0)       | 0<br>(0 - 0)       |
| H influenzae type B meningitis                                    | 0<br>(0 - 0)           | 0<br>(0 - 0)     | 0<br>(0 - 0)      | 0<br>(0 - 0)       | 0<br>(0 - 0)       | 0<br>(0 - 0)       |
| Meningococcal meningitis                                          | 0<br>(0 - 0)           | 0<br>(0 - 0)     | 0<br>(0 - 0)      | 0<br>(0 - 0)       | 0<br>(0 - 0)       | 0<br>(0 - 0)       |
| Other meningitis                                                  | 0<br>(0 - 0)           | 0<br>(0 - 0)     | 0<br>(0 - 0)      | 0<br>(0 - 0)       | 0<br>(0 - 0)       | 0<br>(0 - 0)       |
| Encephalitis                                                      | 0<br>(0 - 0)           | 0<br>(0 - 0)     | 0<br>(0 - 0)      | 0<br>(0 - 0)       | 0<br>(0 - 0)       | 0<br>(0 - 0)       |
| Diphtheria                                                        | 0<br>(0 - 0)           | 0<br>(0 - 0)     | 0<br>(0 - 0)      | 0<br>(0 - 0)       | 0<br>(0 - 0)       | --                 |
| Whooping cough                                                    | 0<br>(0 - 0)           | 0<br>(0 - 0)     | 0<br>(0 - 0)      | 0<br>(0 - 0)       | 0<br>(0 - 0)       | --                 |
| Tetanus                                                           | 0<br>(0 - 0)           | 0<br>(0 - 0)     | 0<br>(0 - 0)      | 0<br>(0 - 0)       | 0<br>(0 - 0)       | 0<br>(0 - 0)       |
| Measles                                                           | 0<br>(0 - 0)           | 0<br>(0 - 0)     | 0<br>(0 - 0)      | 0<br>(0 - 0)       | 0<br>(0 - 0)       | --                 |
| Varicella and herpes zoster                                       | 0<br>(0 - 0)           | 0<br>(0 - 0)     | 0<br>(0 - 0)      | 0<br>(0 - 0)       | 0<br>(0 - 0)       | 0<br>(0 - 0)       |
| Neglected tropical diseases and malaria                           | 0<br>(0 - 0)           | 0<br>(0 - 0)     | 0<br>(0 - 0)      | 0<br>(0 - 0)       | 0<br>(0 - 0)       | 0<br>(0 - 0)       |
| Cysticercosis                                                     | 0<br>(0 - 0)           | 0<br>(0 - 0)     | 0<br>(0 - 0)      | 0<br>(0 - 0)       | 0<br>(0 - 0)       | 0<br>(0 - 0)       |
| Cystic echinococcosis                                             | 0<br>(0 - 0)           | 0<br>(0 - 0)     | 0<br>(0 - 0)      | 0<br>(0 - 0)       | 0<br>(0 - 0)       | 0<br>(0 - 0)       |
| Dengue                                                            | 0<br>(0 - 0)           | 0<br>(0 - 0)     | 0<br>(0 - 0)      | 0<br>(0 - 0)       | 0<br>(0 - 0)       | 0<br>(0 - 0)       |
| Rabies                                                            | 0<br>(0 - 0)           | 0<br>(0 - 0)     | 0<br>(0 - 0)      | 0<br>(0 - 0)       | 0<br>(0 - 0)       | 0<br>(0 - 0)       |
| Other neglected tropical diseases                                 | 0<br>(0 - 0)           | 0<br>(0 - 0)     | 0<br>(0 - 0)      | 0<br>(0 - 0)       | 0<br>(0 - 0)       | 0<br>(0 - 0)       |
| Maternal disorders                                                | --                     | --               | --                | --                 | --                 | --                 |
| Maternal hemorrhage                                               | --                     | --               | --                | --                 | --                 | --                 |
| Maternal sepsis and other maternal infections                     | --                     | --               | --                | --                 | --                 | --                 |
| Maternal hypertensive disorders                                   | --                     | --               | --                | --                 | --                 | --                 |
| Maternal obstructed labor                                         | --                     | --               | --                | --                 | --                 | --                 |
| Maternal abortive outcome                                         | --                     | --               | --                | --                 | --                 | --                 |
| Indirect maternal deaths                                          | --                     | --               | --                | --                 | --                 | --                 |

Web Table 31- Iceland deaths with 95% UI by age, sex, and cause in 2013

| Cause                                                            | Males, All Ages      | Males, 0-4 Years | Males, 5-14 Years | Males, 15-49 Years | Males, 50-69 Years | Males, 70-80 Years |
|------------------------------------------------------------------|----------------------|------------------|-------------------|--------------------|--------------------|--------------------|
| Late maternal deaths                                             | --                   | --               | --                | --                 | --                 | --                 |
| Maternal deaths aggravated by HIV/AIDS                           | --                   | --               | --                | --                 | --                 | --                 |
| Other maternal disorders                                         | --                   | --               | --                | --                 | --                 | --                 |
| Neonatal disorders                                               | 2<br>(2 - 4)         | 2<br>(2 - 4)     | --                | --                 | --                 | --                 |
| Neonatal preterm birth complications                             | 2<br>(1 - 2)         | 2<br>(1 - 2)     | --                | --                 | --                 | --                 |
| Neonatal encephalopathy due to birth asphyxia and trauma         | 0<br>(0 - 0)         | 0<br>(0 - 0)     | --                | --                 | --                 | --                 |
| Neonatal sepsis and other neonatal infections                    | 0<br>(0 - 0)         | 0<br>(0 - 0)     | --                | --                 | --                 | --                 |
| Hemolytic disease and other neonatal jaundice                    | 0<br>(0 - 0)         | 0<br>(0 - 0)     | --                | --                 | --                 | --                 |
| Other neonatal disorders                                         | 1<br>(0 - 1)         | 1<br>(0 - 1)     | --                | --                 | --                 | --                 |
| Nutritional deficiencies                                         | 1<br>(0 - 1)         | 0<br>(0 - 0)     | 0<br>(0 - 0)      | 0<br>(0 - 0)       | 0<br>(0 - 0)       | 1<br>(0 - 1)       |
| Protein-energy malnutrition                                      | 0<br>(0 - 0)         | 0<br>(0 - 0)     | 0<br>(0 - 0)      | 0<br>(0 - 0)       | 0<br>(0 - 0)       | 0<br>(0 - 0)       |
| Iodine deficiency                                                | 0<br>(0 - 0)         | 0<br>(0 - 0)     | 0<br>(0 - 0)      | 0<br>(0 - 0)       | 0<br>(0 - 0)       | 0<br>(0 - 0)       |
| Iron-deficiency anemia                                           | 0<br>(0 - 1)         | 0<br>(0 - 0)     | 0<br>(0 - 0)      | 0<br>(0 - 0)       | 0<br>(0 - 0)       | 0<br>(0 - 1)       |
| Other nutritional deficiencies                                   | 0<br>(0 - 0)         | 0<br>(0 - 0)     | 0<br>(0 - 0)      | 0<br>(0 - 0)       | 0<br>(0 - 0)       | 0<br>(0 - 0)       |
| Other communicable, maternal, neonatal, and nutritional diseases | 0<br>(0 - 1)         | 0<br>(0 - 0)     | 0<br>(0 - 0)      | 0<br>(0 - 0)       | 0<br>(0 - 0)       | 0<br>(0 - 0)       |
| Sexually transmitted diseases excluding HIV                      | 0<br>(0 - 0)         | 0<br>(0 - 0)     | 0<br>(0 - 0)      | 0<br>(0 - 0)       | 0<br>(0 - 0)       | 0<br>(0 - 0)       |
| Syphilis                                                         | 0<br>(0 - 0)         | 0<br>(0 - 0)     | 0<br>(0 - 0)      | 0<br>(0 - 0)       | 0<br>(0 - 0)       | 0<br>(0 - 0)       |
| Chlamydial infection                                             | --                   | --               | --                | --                 | --                 | --                 |
| Gonococcal infection                                             | 0<br>(0 - 0)         | --               | 0<br>(0 - 0)      | 0<br>(0 - 0)       | 0<br>(0 - 0)       | 0<br>(0 - 0)       |
| Other sexually transmitted diseases                              | 0<br>(0 - 0)         | --               | 0<br>(0 - 0)      | 0<br>(0 - 0)       | 0<br>(0 - 0)       | 0<br>(0 - 0)       |
| Hepatitis                                                        | 0<br>(0 - 0)         | 0<br>(0 - 0)     | 0<br>(0 - 0)      | 0<br>(0 - 0)       | 0<br>(0 - 0)       | 0<br>(0 - 0)       |
| Acute hepatitis A                                                | 0<br>(0 - 0)         | 0<br>(0 - 0)     | 0<br>(0 - 0)      | 0<br>(0 - 0)       | 0<br>(0 - 0)       | 0<br>(0 - 0)       |
| Acute hepatitis B                                                | 0<br>(0 - 0)         | 0<br>(0 - 0)     | 0<br>(0 - 0)      | 0<br>(0 - 0)       | 0<br>(0 - 0)       | 0<br>(0 - 0)       |
| Acute hepatitis C                                                | 0<br>(0 - 0)         | --               | 0<br>(0 - 0)      | 0<br>(0 - 0)       | 0<br>(0 - 0)       | 0<br>(0 - 0)       |
| Other infectious diseases                                        | 0<br>(0 - 0)         | 0<br>(0 - 0)     | 0<br>(0 - 0)      | 0<br>(0 - 0)       | 0<br>(0 - 0)       | 0<br>(0 - 0)       |
| Non-communicable diseases                                        | 900<br>(785 - 1,025) | 3<br>(2 - 5)     | 1<br>(1 - 1)      | 28<br>(23 - 34)    | 212<br>(178 - 251) | 655<br>(578 - 738) |
| Neoplasms                                                        | 297<br>(252 - 348)   | 0<br>(0 - 0)     | 1<br>(0 - 1)      | 14<br>(11 - 17)    | 105<br>(87 - 126)  | 178<br>(152 - 207) |
| Esophageal cancer                                                | 10<br>(8 - 13)       | --               | --                | 0<br>(0 - 0)       | 4<br>(3 - 6)       | 6<br>(4 - 7)       |
| Stomach cancer                                                   | 18<br>(14 - 22)      | --               | --                | 1<br>(0 - 1)       | 6<br>(5 - 7)       | 11<br>(8 - 15)     |
| Liver cancer                                                     | 5<br>(4 - 8)         | --               | 0<br>(0 - 0)      | 0<br>(0 - 0)       | 2<br>(1 - 3)       | 3<br>(2 - 5)       |
| Liver cancer due to hepatitis B                                  | 1<br>(0 - 2)         | --               | 0<br>(0 - 0)      | 0<br>(0 - 0)       | 0<br>(0 - 1)       | 1<br>(0 - 1)       |
| Liver cancer due to hepatitis C                                  | 3<br>(2 - 5)         | --               | 0<br>(0 - 0)      | 0<br>(0 - 0)       | 1<br>(1 - 2)       | 2<br>(1 - 3)       |
| Liver cancer due to alcohol use                                  | 1<br>(0 - 2)         | --               | --                | 0<br>(0 - 0)       | 0<br>(0 - 0)       | 1<br>(0 - 1)       |
| Liver cancer due to other causes                                 | 0<br>(0 - 0)         | --               | 0<br>(0 - 0)      | 0<br>(0 - 0)       | 0<br>(0 - 0)       | 0<br>(0 - 0)       |
| Larynx cancer                                                    | 1<br>(1 - 2)         | --               | --                | 0<br>(0 - 0)       | 1<br>(0 - 1)       | 1<br>(0 - 1)       |
| Tracheal, bronchus and lung cancer                               | 63<br>(53 - 76)      | --               | --                | 2<br>(1 - 2)       | 27<br>(22 - 33)    | 34<br>(29 - 41)    |
| Breast cancer                                                    | 0<br>(0 - 1)         | --               | --                | 0<br>(0 - 0)       | 0<br>(0 - 0)       | 0<br>(0 - 0)       |
| Cervical cancer                                                  | --                   | --               | --                | --                 | --                 | --                 |
| Uterine cancer                                                   | --                   | --               | --                | --                 | --                 | --                 |
| Prostate cancer                                                  | 55<br>(40 - 79)      | --               | --                | 0<br>(0 - 0)       | 11<br>(7 - 16)     | 44<br>(31 - 65)    |

Web Table 31- Iceland deaths with 95% UI by age, sex, and cause in 2013

| Cause                                         | Males, All Ages    | Males, 0-4 Years | Males, 5-14 Years | Males, 15-49 Years | Males, 50-69 Years | Males, 70-80 Years |
|-----------------------------------------------|--------------------|------------------|-------------------|--------------------|--------------------|--------------------|
| Colon and rectum cancer                       | 36<br>(30 - 44)    | --               | --                | 1<br>(1 - 1)       | 12<br>(10 - 15)    | 23<br>(19 - 29)    |
| Lip and oral cavity cancer                    | 3<br>(2 - 3)       | --               | --                | 0<br>(0 - 0)       | 1<br>(1 - 1)       | 1<br>(1 - 2)       |
| Nasopharynx cancer                            | 0<br>(0 - 0)       | --               | 0<br>(0 - 0)      | 0<br>(0 - 0)       | 0<br>(0 - 0)       | 0<br>(0 - 0)       |
| Other pharynx cancer                          | 1<br>(1 - 2)       | --               | --                | 0<br>(0 - 0)       | 1<br>(0 - 1)       | 1<br>(0 - 1)       |
| Gallbladder and biliary tract cancer          | 2<br>(1 - 3)       | --               | --                | 0<br>(0 - 0)       | 1<br>(1 - 1)       | 1<br>(1 - 2)       |
| Pancreatic cancer                             | 16<br>(13 - 19)    | --               | --                | 1<br>(1 - 1)       | 7<br>(6 - 9)       | 8<br>(6 - 9)       |
| Malignant skin melanoma                       | 5<br>(3 - 9)       | --               | --                | 1<br>(0 - 1)       | 2<br>(1 - 4)       | 2<br>(1 - 4)       |
| Non-melanoma skin cancer                      | 0<br>(0 - 0)       | --               | --                | 0<br>(0 - 0)       | 0<br>(0 - 0)       | 0<br>(0 - 0)       |
| Ovarian cancer                                | --                 | --               | --                | --                 | --                 | --                 |
| Testicular cancer                             | 0<br>(0 - 0)       | --               | --                | 0<br>(0 - 0)       | 0<br>(0 - 0)       | 0<br>(0 - 0)       |
| Kidney cancer                                 | 14<br>(11 - 18)    | 0<br>(0 - 0)     | 0<br>(0 - 0)      | 1<br>(1 - 1)       | 6<br>(4 - 8)       | 7<br>(5 - 10)      |
| Bladder cancer                                | 12<br>(8 - 15)     | --               | --                | 0<br>(0 - 0)       | 3<br>(2 - 4)       | 9<br>(6 - 12)      |
| Brain and nervous system cancer               | 11<br>(9 - 15)     | 0<br>(0 - 0)     | 0<br>(0 - 0)      | 2<br>(2 - 3)       | 5<br>(4 - 7)       | 3<br>(2 - 5)       |
| Thyroid cancer                                | 2<br>(2 - 3)       | --               | 0<br>(0 - 0)      | 0<br>(0 - 0)       | 1<br>(1 - 1)       | 2<br>(1 - 2)       |
| Mesothelioma                                  | 2<br>(1 - 3)       | --               | --                | 0<br>(0 - 0)       | 1<br>(0 - 1)       | 1<br>(0 - 2)       |
| Hodgkin lymphoma                              | 0<br>(0 - 0)       | 0<br>(0 - 0)     | 0<br>(0 - 0)      | 0<br>(0 - 0)       | 0<br>(0 - 0)       | 0<br>(0 - 0)       |
| Non-Hodgkin lymphoma                          | 10<br>(5 - 15)     | 0<br>(0 - 0)     | 0<br>(0 - 0)      | 1<br>(1 - 2)       | 4<br>(2 - 6)       | 5<br>(3 - 8)       |
| Multiple myeloma                              | 6<br>(4 - 11)      | --               | --                | 0<br>(0 - 1)       | 3<br>(1 - 5)       | 4<br>(2 - 6)       |
| Leukemia                                      | 11<br>(9 - 13)     | 0<br>(0 - 0)     | 0<br>(0 - 0)      | 1<br>(1 - 2)       | 4<br>(3 - 5)       | 6<br>(4 - 7)       |
| Other neoplasms                               | 10<br>(6 - 14)     | 0<br>(0 - 0)     | 0<br>(0 - 0)      | 1<br>(1 - 2)       | 4<br>(2 - 5)       | 5<br>(3 - 7)       |
| Cardiovascular diseases                       | 372<br>(322 - 429) | 0<br>(0 - 0)     | 0<br>(0 - 0)      | 9<br>(7 - 11)      | 78<br>(65 - 94)    | 285<br>(246 - 327) |
| Rheumatic heart disease                       | 0<br>(0 - 1)       | 0<br>(0 - 0)     | 0<br>(0 - 0)      | 0<br>(0 - 0)       | 0<br>(0 - 0)       | 0<br>(0 - 0)       |
| Ischemic heart disease                        | 245<br>(210 - 292) | 0<br>(0 - 0)     | 0<br>(0 - 0)      | 6<br>(5 - 7)       | 59<br>(49 - 71)    | 180<br>(155 - 214) |
| Cerebrovascular disease                       | 80<br>(58 - 101)   | 0<br>(0 - 0)     | 0<br>(0 - 0)      | 1<br>(1 - 2)       | 10<br>(7 - 13)     | 68<br>(50 - 87)    |
| Ischemic stroke                               | 47<br>(33 - 62)    | 0<br>(0 - 0)     | 0<br>(0 - 0)      | 0<br>(0 - 0)       | 4<br>(2 - 6)       | 43<br>(30 - 57)    |
| Hemorrhagic stroke                            | 32<br>(22 - 43)    | 0<br>(0 - 0)     | 0<br>(0 - 0)      | 1<br>(1 - 2)       | 6<br>(4 - 8)       | 25<br>(16 - 35)    |
| Hypertensive heart disease                    | 5<br>(3 - 7)       | 0<br>(0 - 0)     | 0<br>(0 - 0)      | 0<br>(0 - 0)       | 1<br>(1 - 2)       | 3<br>(2 - 5)       |
| Cardiomyopathy and myocarditis                | 5<br>(3 - 7)       | 0<br>(0 - 0)     | 0<br>(0 - 0)      | 1<br>(1 - 1)       | 2<br>(1 - 2)       | 2<br>(1 - 3)       |
| Atrial fibrillation and flutter               | 13<br>(8 - 19)     | --               | --                | 0<br>(0 - 0)       | 1<br>(0 - 1)       | 12<br>(7 - 18)     |
| Aortic aneurysm                               | 9<br>(7 - 12)      | --               | --                | 0<br>(0 - 0)       | 3<br>(2 - 3)       | 6<br>(5 - 8)       |
| Peripheral vascular disease                   | 0<br>(0 - 1)       | --               | --                | 0<br>(0 - 0)       | 0<br>(0 - 0)       | 0<br>(0 - 0)       |
| Endocarditis                                  | 1<br>(0 - 1)       | 0<br>(0 - 0)     | 0<br>(0 - 0)      | 0<br>(0 - 0)       | 0<br>(0 - 0)       | 0<br>(0 - 1)       |
| Other cardiovascular and circulatory diseases | 14<br>(10 - 19)    | 0<br>(0 - 0)     | 0<br>(0 - 0)      | 0<br>(0 - 0)       | 3<br>(2 - 3)       | 11<br>(7 - 15)     |
| Chronic respiratory diseases                  | 49<br>(32 - 60)    | 0<br>(0 - 0)     | 0<br>(0 - 0)      | 0<br>(0 - 1)       | 7<br>(4 - 9)       | 41<br>(27 - 51)    |
| Chronic obstructive pulmonary disease         | 44<br>(29 - 54)    | 0<br>(0 - 0)     | 0<br>(0 - 0)      | 0<br>(0 - 0)       | 6<br>(4 - 8)       | 38<br>(25 - 47)    |
| Pneumoconiosis                                | 1<br>(0 - 1)       | 0<br>(0 - 0)     | 0<br>(0 - 0)      | 0<br>(0 - 0)       | 0<br>(0 - 0)       | 1<br>(0 - 1)       |
| Silicosis                                     | 0<br>(0 - 0)       | 0<br>(0 - 0)     | 0<br>(0 - 0)      | 0<br>(0 - 0)       | 0<br>(0 - 0)       | 0<br>(0 - 0)       |
| Asbestosis                                    | 0<br>(0 - 0)       | 0<br>(0 - 0)     | 0<br>(0 - 0)      | 0<br>(0 - 0)       | 0<br>(0 - 0)       | 0<br>(0 - 0)       |
| Coal workers pneumoconiosis                   | 0<br>(0 - 0)       | 0<br>(0 - 0)     | 0<br>(0 - 0)      | 0<br>(0 - 0)       | 0<br>(0 - 0)       | 0<br>(0 - 0)       |
| Other pneumoconiosis                          | 0<br>(0 - 1)       | 0<br>(0 - 0)     | 0<br>(0 - 0)      | 0<br>(0 - 0)       | 0<br>(0 - 0)       | 0<br>(0 - 1)       |

Web Table 31- Iceland deaths with 95% UI by age, sex, and cause in 2013

| Cause                                               | Males, All Ages | Males, 0-4 Years | Males, 5-14 Years | Males, 15-49 Years | Males, 50-69 Years | Males, 70-80 Years |
|-----------------------------------------------------|-----------------|------------------|-------------------|--------------------|--------------------|--------------------|
| Asthma                                              | 0<br>(0-0)      | 0<br>(0-0)       | 0<br>(0-0)        | 0<br>(0-0)         | 0<br>(0-0)         | 0<br>(0-0)         |
| Interstitial lung disease and pulmonary sarcoidosis | 3<br>(2-5)      | 0<br>(0-0)       | 0<br>(0-0)        | 0<br>(0-0)         | 1<br>(0-1)         | 3<br>(1-4)         |
| Other chronic respiratory diseases                  | 0<br>(0-0)      | 0<br>(0-0)       | 0<br>(0-0)        | 0<br>(0-0)         | 0<br>(0-0)         | 0<br>(0-0)         |
| Cirrhosis                                           | 4<br>(4-5)      | 0<br>(0-0)       | 0<br>(0-0)        | 0<br>(0-0)         | 2<br>(2-3)         | 2<br>(1-2)         |
| Cirrhosis due to hepatitis B                        | 0<br>(0-1)      | 0<br>(0-0)       | 0<br>(0-0)        | 0<br>(0-0)         | 0<br>(0-0)         | 0<br>(0-0)         |
| Cirrhosis due to hepatitis C                        | 2<br>(1-3)      | 0<br>(0-0)       | 0<br>(0-0)        | 0<br>(0-0)         | 1<br>(1-2)         | 1<br>(0-1)         |
| Cirrhosis due to alcohol use                        | 2<br>(1-2)      | --               | --                | 0<br>(0-0)         | 1<br>(0-1)         | 1<br>(0-1)         |
| Cirrhosis due to other causes                       | 0<br>(0-1)      | 0<br>(0-0)       | 0<br>(0-0)        | 0<br>(0-0)         | 0<br>(0-0)         | 0<br>(0-0)         |
| Digestive diseases                                  | 17<br>(13-21)   | 0<br>(0-0)       | 0<br>(0-0)        | 0<br>(0-1)         | 3<br>(2-4)         | 13<br>(10-17)      |
| Peptic ulcer disease                                | 4<br>(3-6)      | 0<br>(0-0)       | 0<br>(0-0)        | 0<br>(0-0)         | 1<br>(1-1)         | 3<br>(2-4)         |
| Gastritis and duodenitis                            | 0<br>(0-0)      | 0<br>(0-0)       | 0<br>(0-0)        | 0<br>(0-0)         | 0<br>(0-0)         | 0<br>(0-0)         |
| Appendicitis                                        | 0<br>(0-0)      | 0<br>(0-0)       | 0<br>(0-0)        | 0<br>(0-0)         | 0<br>(0-0)         | 0<br>(0-0)         |
| Paralytic ileus and intestinal obstruction          | 2<br>(1-3)      | 0<br>(0-0)       | 0<br>(0-0)        | 0<br>(0-0)         | 0<br>(0-1)         | 2<br>(1-3)         |
| Inguinal, femoral, and abdominal hernia             | 0<br>(0-0)      | 0<br>(0-0)       | 0<br>(0-0)        | 0<br>(0-0)         | 0<br>(0-0)         | 0<br>(0-0)         |
| Inflammatory bowel disease                          | 0<br>(0-0)      | 0<br>(0-0)       | 0<br>(0-0)        | 0<br>(0-0)         | 0<br>(0-0)         | 0<br>(0-0)         |
| Vascular intestinal disorders                       | 1<br>(0-2)      | 0<br>(0-0)       | 0<br>(0-0)        | 0<br>(0-0)         | 0<br>(0-0)         | 1<br>(0-2)         |
| Gallbladder and biliary diseases                    | 3<br>(2-4)      | 0<br>(0-0)       | 0<br>(0-0)        | 0<br>(0-0)         | 0<br>(0-0)         | 2<br>(1-4)         |
| Pancreatitis                                        | 1<br>(0-1)      | 0<br>(0-0)       | 0<br>(0-0)        | 0<br>(0-0)         | 0<br>(0-1)         | 0<br>(0-1)         |
| Other digestive diseases                            | 5<br>(3-8)      | 0<br>(0-0)       | 0<br>(0-0)        | 0<br>(0-0)         | 1<br>(0-1)         | 5<br>(3-7)         |
| Neurological disorders                              | 120<br>(87-157) | 0<br>(0-0)       | 0<br>(0-0)        | 1<br>(1-2)         | 9<br>(6-11)        | 110<br>(77-146)    |
| Alzheimer disease and other dementias               | 98<br>(65-134)  | --               | --                | 0<br>(0-0)         | 4<br>(2-6)         | 94<br>(62-129)     |
| Parkinson disease                                   | 14<br>(9-19)    | --               | --                | 0<br>(0-0)         | 1<br>(1-2)         | 13<br>(8-18)       |
| Epilepsy                                            | 1<br>(0-1)      | 0<br>(0-0)       | 0<br>(0-0)        | 0<br>(0-1)         | 0<br>(0-0)         | 0<br>(0-0)         |
| Multiple sclerosis                                  | 1<br>(0-1)      | --               | --                | 0<br>(0-0)         | 0<br>(0-1)         | 0<br>(0-0)         |
| Other neurological disorders                        | 6<br>(5-8)      | 0<br>(0-0)       | 0<br>(0-0)        | 1<br>(0-1)         | 3<br>(2-4)         | 3<br>(2-4)         |
| Mental and substance use disorders                  | 4<br>(3-6)      | 0<br>(0-0)       | 0<br>(0-0)        | 2<br>(1-2)         | 2<br>(2-4)         | 0<br>(0-1)         |
| Schizophrenia                                       | 0<br>(0-0)      | --               | --                | 0<br>(0-0)         | 0<br>(0-0)         | 0<br>(0-0)         |
| Alcohol use disorders                               | 3<br>(2-5)      | --               | --                | 1<br>(0-1)         | 2<br>(1-3)         | 0<br>(0-0)         |
| Drug use disorders                                  | 1<br>(1-2)      | 0<br>(0-0)       | --                | 1<br>(1-1)         | 0<br>(0-0)         | 0<br>(0-0)         |
| Opioid use disorders                                | 1<br>(0-1)      | 0<br>(0-0)       | --                | 0<br>(0-0)         | 0<br>(0-0)         | 0<br>(0-0)         |
| Cocaine use disorders                               | 0<br>(0-0)      | 0<br>(0-0)       | --                | 0<br>(0-0)         | 0<br>(0-0)         | 0<br>(0-0)         |
| Amphetamine use disorders                           | 0<br>(0-0)      | 0<br>(0-0)       | --                | 0<br>(0-0)         | 0<br>(0-0)         | 0<br>(0-0)         |
| Other drug use disorders                            | 1<br>(1-1)      | 0<br>(0-0)       | --                | 1<br>(0-1)         | 0<br>(0-0)         | 0<br>(0-0)         |
| Eating disorders                                    | 0<br>(0-0)      | --               | 0<br>(0-0)        | 0<br>(0-0)         | --                 | --                 |
| Anorexia nervosa                                    | 0<br>(0-0)      | --               | 0<br>(0-0)        | 0<br>(0-0)         | --                 | --                 |
| Diabetes, urogenital, blood, and endocrine diseases | 30<br>(24-37)   | 0<br>(0-0)       | 0<br>(0-0)        | 1<br>(1-1)         | 5<br>(4-6)         | 24<br>(19-30)      |
| Diabetes mellitus                                   | 12<br>(10-16)   | 0<br>(0-0)       | 0<br>(0-0)        | 0<br>(0-1)         | 3<br>(2-4)         | 9<br>(7-12)        |
| Acute glomerulonephritis                            | 0<br>(0-0)      | 0<br>(0-0)       | 0<br>(0-0)        | 0<br>(0-0)         | 0<br>(0-0)         | 0<br>(0-0)         |
| Chronic kidney disease                              | 12<br>(8-16)    | 0<br>(0-0)       | 0<br>(0-0)        | 0<br>(0-0)         | 1<br>(1-2)         | 11<br>(7-15)       |
| Chronic kidney disease due to diabetes mellitus     | 0<br>(0-0)      | 0<br>(0-0)       | 0<br>(0-0)        | 0<br>(0-0)         | 0<br>(0-0)         | 0<br>(0-0)         |

Web Table 31- Iceland deaths with 95% UI by age, sex, and cause in 2013

| Cause                                               | Males, All Ages | Males, 0-4 Years | Males, 5-14 Years | Males, 15-49 Years | Males, 50-69 Years | Males, 70-80 Years |
|-----------------------------------------------------|-----------------|------------------|-------------------|--------------------|--------------------|--------------------|
| Chronic kidney disease due to hypertension          | 4<br>(3 - 6)    | 0<br>(0 - 0)     | 0<br>(0 - 0)      | 0<br>(0 - 0)       | 0<br>(0 - 1)       | 4<br>(2 - 5)       |
| Chronic kidney disease due to glomerulonephritis    | 0<br>(0 - 0)    | 0<br>(0 - 0)     | 0<br>(0 - 0)      | 0<br>(0 - 0)       | 0<br>(0 - 0)       | 0<br>(0 - 0)       |
| Chronic kidney disease due to other causes          | 7<br>(4 - 11)   | 0<br>(0 - 0)     | 0<br>(0 - 0)      | 0<br>(0 - 0)       | 1<br>(0 - 1)       | 7<br>(4 - 10)      |
| Urinary diseases and male infertility               | 4<br>(2 - 5)    | 0<br>(0 - 0)     | 0<br>(0 - 0)      | 0<br>(0 - 0)       | 0<br>(0 - 0)       | 3<br>(2 - 5)       |
| Interstitial nephritis and urinary tract infections | 3<br>(2 - 5)    | 0<br>(0 - 0)     | 0<br>(0 - 0)      | 0<br>(0 - 0)       | 0<br>(0 - 0)       | 3<br>(2 - 5)       |
| Urolithiasis                                        | 0<br>(0 - 0)    | --               | 0<br>(0 - 0)      | 0<br>(0 - 0)       | 0<br>(0 - 0)       | 0<br>(0 - 0)       |
| Other urinary diseases                              | 0<br>(0 - 0)    | 0<br>(0 - 0)     | 0<br>(0 - 0)      | 0<br>(0 - 0)       | 0<br>(0 - 0)       | 0<br>(0 - 0)       |
| Gynecological diseases                              | --              | --               | --                | --                 | --                 | --                 |
| Uterine fibroids                                    | --              | --               | --                | --                 | --                 | --                 |
| Polycystic ovarian syndrome                         | --              | --               | --                | --                 | --                 | --                 |
| Endometriosis                                       | --              | --               | --                | --                 | --                 | --                 |
| Genital prolapse                                    | --              | --               | --                | --                 | --                 | --                 |
| Other gynecological diseases                        | --              | --               | --                | --                 | --                 | --                 |
| Hemoglobinopathies and hemolytic anemias            | 0<br>(0 - 0)    | 0<br>(0 - 0)     | 0<br>(0 - 0)      | 0<br>(0 - 0)       | 0<br>(0 - 0)       | 0<br>(0 - 0)       |
| Thalassemias                                        | 0<br>(0 - 0)    | 0<br>(0 - 0)     | 0<br>(0 - 0)      | 0<br>(0 - 0)       | 0<br>(0 - 0)       | 0<br>(0 - 0)       |
| Sickle cell disorders                               | 0<br>(0 - 0)    | 0<br>(0 - 0)     | 0<br>(0 - 0)      | 0<br>(0 - 0)       | 0<br>(0 - 0)       | 0<br>(0 - 0)       |
| G6PD deficiency                                     | 0<br>(0 - 0)    | 0<br>(0 - 0)     | 0<br>(0 - 0)      | 0<br>(0 - 0)       | 0<br>(0 - 0)       | 0<br>(0 - 0)       |
| Other hemoglobinopathies and hemolytic anemias      | 0<br>(0 - 0)    | 0<br>(0 - 0)     | 0<br>(0 - 0)      | 0<br>(0 - 0)       | 0<br>(0 - 0)       | 0<br>(0 - 0)       |
| Endocrine, metabolic, blood, and immune disorders   | 2<br>(1 - 3)    | 0<br>(0 - 0)     | 0<br>(0 - 0)      | 0<br>(0 - 1)       | 1<br>(0 - 1)       | 1<br>(1 - 2)       |
| Musculoskeletal disorders                           | 1<br>(1 - 2)    | --               | 0<br>(0 - 0)      | 0<br>(0 - 0)       | 0<br>(0 - 0)       | 1<br>(0 - 2)       |
| Rheumatoid arthritis                                | 0<br>(0 - 0)    | --               | 0<br>(0 - 0)      | 0<br>(0 - 0)       | 0<br>(0 - 0)       | 0<br>(0 - 0)       |
| Other musculoskeletal disorders                     | 1<br>(1 - 2)    | --               | 0<br>(0 - 0)      | 0<br>(0 - 0)       | 0<br>(0 - 0)       | 1<br>(0 - 1)       |
| Other non-communicable diseases                     | 5<br>(4 - 6)    | 3<br>(2 - 4)     | 0<br>(0 - 0)      | 1<br>(1 - 1)       | 1<br>(1 - 1)       | 1<br>(1 - 1)       |
| Congenital anomalies                                | 4<br>(3 - 5)    | 2<br>(1 - 3)     | 0<br>(0 - 0)      | 1<br>(1 - 1)       | 1<br>(1 - 1)       | 1<br>(0 - 1)       |
| Neural tube defects                                 | 0<br>(0 - 0)    | 0<br>(0 - 0)     | 0<br>(0 - 0)      | 0<br>(0 - 0)       | 0<br>(0 - 0)       | 0<br>(0 - 0)       |
| Congenital heart anomalies                          | 1<br>(1 - 2)    | 1<br>(0 - 1)     | 0<br>(0 - 0)      | 0<br>(0 - 1)       | 0<br>(0 - 0)       | 0<br>(0 - 0)       |
| Cleft lip and cleft palate                          | 0<br>(0 - 0)    | 0<br>(0 - 0)     | --                | --                 | --                 | --                 |
| Down syndrome                                       | 0<br>(0 - 0)    | 0<br>(0 - 0)     | 0<br>(0 - 0)      | 0<br>(0 - 0)       | 0<br>(0 - 0)       | 0<br>(0 - 0)       |
| Chromosomal unbalanced rearrangements               | 0<br>(0 - 0)    | 0<br>(0 - 0)     | 0<br>(0 - 0)      | 0<br>(0 - 0)       | 0<br>(0 - 0)       | 0<br>(0 - 0)       |
| Other congenital anomalies                          | 2<br>(1 - 3)    | 1<br>(1 - 2)     | 0<br>(0 - 0)      | 0<br>(0 - 0)       | 0<br>(0 - 0)       | 0<br>(0 - 1)       |
| Skin and subcutaneous diseases                      | 0<br>(0 - 0)    | 0<br>(0 - 0)     | 0<br>(0 - 0)      | 0<br>(0 - 0)       | 0<br>(0 - 0)       | 0<br>(0 - 0)       |
| Cellulitis                                          | 0<br>(0 - 0)    | 0<br>(0 - 0)     | 0<br>(0 - 0)      | 0<br>(0 - 0)       | 0<br>(0 - 0)       | 0<br>(0 - 0)       |
| Pyoderma                                            | 0<br>(0 - 0)    | 0<br>(0 - 0)     | 0<br>(0 - 0)      | 0<br>(0 - 0)       | 0<br>(0 - 0)       | 0<br>(0 - 0)       |
| Decubitus ulcer                                     | 0<br>(0 - 0)    | 0<br>(0 - 0)     | 0<br>(0 - 0)      | 0<br>(0 - 0)       | 0<br>(0 - 0)       | 0<br>(0 - 0)       |
| Other skin and subcutaneous diseases                | 0<br>(0 - 0)    | 0<br>(0 - 0)     | 0<br>(0 - 0)      | 0<br>(0 - 0)       | 0<br>(0 - 0)       | 0<br>(0 - 0)       |
| Sudden infant death syndrome                        | 1<br>(0 - 2)    | 1<br>(0 - 2)     | --                | --                 | --                 | --                 |
| Injuries                                            | 66<br>(54 - 79) | 0<br>(0 - 1)     | 1<br>(0 - 1)      | 29<br>(23 - 35)    | 18<br>(15 - 23)    | 18<br>(12 - 23)    |
| Transport injuries                                  | 14<br>(11 - 17) | 0<br>(0 - 0)     | 0<br>(0 - 0)      | 8<br>(6 - 10)      | 4<br>(3 - 4)       | 2<br>(2 - 3)       |
| Road injuries                                       | 12<br>(9 - 15)  | 0<br>(0 - 0)     | 0<br>(0 - 0)      | 6<br>(4 - 8)       | 3<br>(2 - 4)       | 2<br>(2 - 3)       |
| Pedestrian road injuries                            | 1<br>(0 - 2)    | 0<br>(0 - 0)     | 0<br>(0 - 0)      | 0<br>(0 - 0)       | 0<br>(0 - 0)       | 0<br>(0 - 1)       |

Web Table 31- Iceland deaths with 95% UI by age, sex, and cause in 2013

| Cause                                           | Males, All Ages | Males, 0-4 Years | Males, 5-14 Years | Males, 15-49 Years | Males, 50-69 Years | Males, 70-80 Years |
|-------------------------------------------------|-----------------|------------------|-------------------|--------------------|--------------------|--------------------|
| Cyclist road injuries                           | 0<br>(0 - 0)    | 0<br>(0 - 0)     | 0<br>(0 - 0)      | 0<br>(0 - 0)       | 0<br>(0 - 0)       | 0<br>(0 - 0)       |
| Motorcyclist road injuries                      | 1<br>(0 - 1)    | 0<br>(0 - 0)     | 0<br>(0 - 0)      | 1<br>(0 - 1)       | 0<br>(0 - 0)       | 0<br>(0 - 0)       |
| Motor vehicle road injuries                     | 10<br>(7 - 13)  | 0<br>(0 - 0)     | 0<br>(0 - 0)      | 5<br>(4 - 7)       | 3<br>(2 - 3)       | 2<br>(1 - 2)       |
| Other road injuries                             | 0<br>(0 - 0)    | 0<br>(0 - 0)     | 0<br>(0 - 0)      | 0<br>(0 - 0)       | 0<br>(0 - 0)       | 0<br>(0 - 0)       |
| Other transport injuries                        | 2<br>(1 - 4)    | 0<br>(0 - 0)     | 0<br>(0 - 0)      | 2<br>(1 - 3)       | 1<br>(0 - 1)       | 0<br>(0 - 0)       |
| Unintentional injuries                          | 23<br>(18 - 29) | 0<br>(0 - 0)     | 0<br>(0 - 0)      | 4<br>(3 - 6)       | 6<br>(5 - 7)       | 13<br>(8 - 17)     |
| Falls                                           | 15<br>(8 - 20)  | 0<br>(0 - 0)     | 0<br>(0 - 0)      | 1<br>(1 - 2)       | 3<br>(2 - 3)       | 11<br>(6 - 15)     |
| Drowning                                        | 4<br>(2 - 7)    | 0<br>(0 - 0)     | 0<br>(0 - 0)      | 2<br>(1 - 4)       | 1<br>(1 - 2)       | 0<br>(0 - 1)       |
| Fire, heat, and hot substances                  | 1<br>(0 - 1)    | 0<br>(0 - 0)     | 0<br>(0 - 0)      | 0<br>(0 - 1)       | 0<br>(0 - 1)       | 0<br>(0 - 0)       |
| Poisonings                                      | 0<br>(0 - 1)    | 0<br>(0 - 0)     | 0<br>(0 - 0)      | 0<br>(0 - 0)       | 0<br>(0 - 0)       | 0<br>(0 - 0)       |
| Exposure to mechanical forces                   | 2<br>(1 - 2)    | 0<br>(0 - 0)     | 0<br>(0 - 0)      | 1<br>(0 - 1)       | 1<br>(0 - 1)       | 0<br>(0 - 0)       |
| Unintentional firearm injuries                  | 0<br>(0 - 0)    | 0<br>(0 - 0)     | 0<br>(0 - 0)      | 0<br>(0 - 0)       | 0<br>(0 - 0)       | 0<br>(0 - 0)       |
| Unintentional suffocation                       | 0<br>(0 - 0)    | 0<br>(0 - 0)     | 0<br>(0 - 0)      | 0<br>(0 - 0)       | 0<br>(0 - 0)       | 0<br>(0 - 0)       |
| Other exposure to mechanical forces             | 1<br>(1 - 2)    | 0<br>(0 - 0)     | 0<br>(0 - 0)      | 1<br>(0 - 1)       | 1<br>(0 - 1)       | 0<br>(0 - 0)       |
| Adverse effects of medical treatment            | 1<br>(1 - 2)    | 0<br>(0 - 0)     | 0<br>(0 - 0)      | 0<br>(0 - 0)       | 0<br>(0 - 0)       | 1<br>(0 - 1)       |
| Animal contact                                  | 0<br>(0 - 0)    | 0<br>(0 - 0)     | 0<br>(0 - 0)      | 0<br>(0 - 0)       | 0<br>(0 - 0)       | 0<br>(0 - 0)       |
| Venomous animal contact                         | 0<br>(0 - 0)    | 0<br>(0 - 0)     | 0<br>(0 - 0)      | 0<br>(0 - 0)       | 0<br>(0 - 0)       | 0<br>(0 - 0)       |
| Non-venomous animal contact                     | 0<br>(0 - 0)    | 0<br>(0 - 0)     | 0<br>(0 - 0)      | 0<br>(0 - 0)       | 0<br>(0 - 0)       | 0<br>(0 - 0)       |
| Foreign body                                    | 1<br>(0 - 1)    | 0<br>(0 - 0)     | 0<br>(0 - 0)      | 0<br>(0 - 0)       | 0<br>(0 - 1)       | 0<br>(0 - 1)       |
| Pulmonary aspiration and foreign body in airway | 1<br>(0 - 1)    | 0<br>(0 - 0)     | 0<br>(0 - 0)      | 0<br>(0 - 0)       | 0<br>(0 - 1)       | 0<br>(0 - 1)       |
| Foreign body in other body part                 | 0<br>(0 - 0)    | 0<br>(0 - 0)     | 0<br>(0 - 0)      | 0<br>(0 - 0)       | 0<br>(0 - 0)       | 0<br>(0 - 0)       |
| Other unintentional injuries                    | 0<br>(0 - 0)    | 0<br>(0 - 0)     | 0<br>(0 - 0)      | 0<br>(0 - 0)       | 0<br>(0 - 0)       | 0<br>(0 - 0)       |
| Self-harm and interpersonal violence            | 28<br>(20 - 37) | 0<br>(0 - 0)     | 0<br>(0 - 0)      | 17<br>(12 - 22)    | 9<br>(6 - 12)      | 2<br>(2 - 3)       |
| Self-harm                                       | 27<br>(19 - 34) | --               | 0<br>(0 - 0)      | 15<br>(11 - 20)    | 9<br>(6 - 12)      | 2<br>(2 - 3)       |
| Interpersonal violence                          | 2<br>(1 - 3)    | 0<br>(0 - 0)     | 0<br>(0 - 0)      | 1<br>(1 - 2)       | 1<br>(0 - 1)       | 0<br>(0 - 0)       |
| Assault by firearm                              | 0<br>(0 - 0)    | 0<br>(0 - 0)     | 0<br>(0 - 0)      | 0<br>(0 - 0)       | 0<br>(0 - 0)       | 0<br>(0 - 0)       |
| Assault by sharp object                         | 0<br>(0 - 1)    | 0<br>(0 - 0)     | 0<br>(0 - 0)      | 0<br>(0 - 0)       | 0<br>(0 - 0)       | 0<br>(0 - 0)       |
| Assault by other means                          | 1<br>(1 - 2)    | 0<br>(0 - 0)     | 0<br>(0 - 0)      | 1<br>(0 - 1)       | 0<br>(0 - 1)       | 0<br>(0 - 0)       |

Web Table 31- Iceland deaths with 95% UI by age, sex, and cause in 2013

| Cause                                                             | Females, All Ages    | Females, 0-4 Years | Females, 5-14 Years | Females, 15-49 Years | Females, 50-69 Years | Females, 70-80 Years |
|-------------------------------------------------------------------|----------------------|--------------------|---------------------|----------------------|----------------------|----------------------|
| All causes                                                        | 926<br>(816 - 1,044) | 5<br>(4 - 7)       | 1<br>(1 - 2)        | 32<br>(26 - 39)      | 141<br>(116 - 170)   | 746<br>(667 - 830)   |
| Communicable, maternal, neonatal, and nutritional diseases        | 53<br>(36 - 89)      | 2<br>(1 - 3)       | 0<br>(0 - 0)        | 1<br>(1 - 1)         | 2<br>(1 - 2)         | 48<br>(31 - 84)      |
| HIV/AIDS and tuberculosis                                         | 2<br>(1 - 2)         | 0<br>(0 - 0)       | 0<br>(0 - 0)        | 0<br>(0 - 0)         | 0<br>(0 - 0)         | 1<br>(1 - 2)         |
| Tuberculosis                                                      | 2<br>(1 - 2)         | 0<br>(0 - 0)       | 0<br>(0 - 0)        | 0<br>(0 - 0)         | 0<br>(0 - 0)         | 1<br>(1 - 2)         |
| HIV/AIDS                                                          | 0<br>(0 - 0)         | 0<br>(0 - 0)       | 0<br>(0 - 0)        | 0<br>(0 - 0)         | 0<br>(0 - 0)         | 0<br>(0 - 0)         |
| HIV/AIDS resulting in mycobacterial infection                     | 0<br>(0 - 0)         | 0<br>(0 - 0)       | 0<br>(0 - 0)        | 0<br>(0 - 0)         | 0<br>(0 - 0)         | 0<br>(0 - 0)         |
| HIV/AIDS resulting in other diseases                              | 0<br>(0 - 0)         | 0<br>(0 - 0)       | 0<br>(0 - 0)        | 0<br>(0 - 0)         | 0<br>(0 - 0)         | 0<br>(0 - 0)         |
| Diarrhea, lower respiratory, and other common infectious diseases | 47<br>(30 - 84)      | 0<br>(0 - 0)       | 0<br>(0 - 0)        | 1<br>(0 - 1)         | 1<br>(1 - 2)         | 44<br>(28 - 81)      |
| Diarrheal diseases                                                | 0<br>(0 - 1)         | 0<br>(0 - 0)       | 0<br>(0 - 0)        | 0<br>(0 - 0)         | 0<br>(0 - 0)         | 0<br>(0 - 1)         |
| Intestinal infectious diseases                                    | 1<br>(0 - 1)         | 0<br>(0 - 0)       | 0<br>(0 - 0)        | 0<br>(0 - 1)         | 0<br>(0 - 0)         | 0<br>(0 - 0)         |
| Typhoid fever                                                     | 0<br>(0 - 1)         | 0<br>(0 - 0)       | 0<br>(0 - 0)        | 0<br>(0 - 0)         | 0<br>(0 - 0)         | 0<br>(0 - 0)         |
| Paratyphoid fever                                                 | 0<br>(0 - 0)         | 0<br>(0 - 0)       | 0<br>(0 - 0)        | 0<br>(0 - 0)         | 0<br>(0 - 0)         | 0<br>(0 - 0)         |
| Other intestinal infectious diseases                              | 0<br>(0 - 0)         | 0<br>(0 - 0)       | 0<br>(0 - 0)        | 0<br>(0 - 0)         | 0<br>(0 - 0)         | 0<br>(0 - 0)         |
| Lower respiratory infections                                      | 45<br>(29 - 82)      | 0<br>(0 - 0)       | 0<br>(0 - 0)        | 0<br>(0 - 0)         | 1<br>(1 - 2)         | 44<br>(27 - 81)      |
| Upper respiratory infections                                      | 0<br>(0 - 0)         | 0<br>(0 - 0)       | 0<br>(0 - 0)        | 0<br>(0 - 0)         | 0<br>(0 - 0)         | 0<br>(0 - 0)         |
| Otitis media                                                      | 0<br>(0 - 0)         | 0<br>(0 - 0)       | 0<br>(0 - 0)        | 0<br>(0 - 0)         | 0<br>(0 - 0)         | 0<br>(0 - 0)         |
| Meningitis                                                        | 0<br>(0 - 0)         | 0<br>(0 - 0)       | 0<br>(0 - 0)        | 0<br>(0 - 0)         | 0<br>(0 - 0)         | 0<br>(0 - 0)         |
| Pneumococcal meningitis                                           | 0<br>(0 - 0)         | 0<br>(0 - 0)       | 0<br>(0 - 0)        | 0<br>(0 - 0)         | 0<br>(0 - 0)         | 0<br>(0 - 0)         |
| H influenzae type B meningitis                                    | 0<br>(0 - 0)         | 0<br>(0 - 0)       | 0<br>(0 - 0)        | 0<br>(0 - 0)         | 0<br>(0 - 0)         | 0<br>(0 - 0)         |
| Meningococcal meningitis                                          | 0<br>(0 - 0)         | 0<br>(0 - 0)       | 0<br>(0 - 0)        | 0<br>(0 - 0)         | 0<br>(0 - 0)         | 0<br>(0 - 0)         |
| Other meningitis                                                  | 0<br>(0 - 0)         | 0<br>(0 - 0)       | 0<br>(0 - 0)        | 0<br>(0 - 0)         | 0<br>(0 - 0)         | 0<br>(0 - 0)         |
| Encephalitis                                                      | 0<br>(0 - 0)         | 0<br>(0 - 0)       | 0<br>(0 - 0)        | 0<br>(0 - 0)         | 0<br>(0 - 0)         | 0<br>(0 - 0)         |
| Diphtheria                                                        | 0<br>(0 - 0)         | 0<br>(0 - 0)       | 0<br>(0 - 0)        | 0<br>(0 - 0)         | 0<br>(0 - 0)         | --                   |
| Whooping cough                                                    | 0<br>(0 - 0)         | 0<br>(0 - 0)       | 0<br>(0 - 0)        | 0<br>(0 - 0)         | 0<br>(0 - 0)         | --                   |
| Tetanus                                                           | 0<br>(0 - 0)         | 0<br>(0 - 0)       | 0<br>(0 - 0)        | 0<br>(0 - 0)         | 0<br>(0 - 0)         | 0<br>(0 - 0)         |
| Measles                                                           | 0<br>(0 - 0)         | 0<br>(0 - 0)       | 0<br>(0 - 0)        | 0<br>(0 - 0)         | 0<br>(0 - 0)         | --                   |
| Varicella and herpes zoster                                       | 0<br>(0 - 1)         | 0<br>(0 - 0)       | 0<br>(0 - 0)        | 0<br>(0 - 0)         | 0<br>(0 - 0)         | 0<br>(0 - 1)         |
| Neglected tropical diseases and malaria                           | 0<br>(0 - 0)         | 0<br>(0 - 0)       | 0<br>(0 - 0)        | 0<br>(0 - 0)         | 0<br>(0 - 0)         | 0<br>(0 - 0)         |
| Cysticercosis                                                     | 0<br>(0 - 0)         | 0<br>(0 - 0)       | 0<br>(0 - 0)        | 0<br>(0 - 0)         | 0<br>(0 - 0)         | 0<br>(0 - 0)         |
| Cystic echinococcosis                                             | 0<br>(0 - 0)         | 0<br>(0 - 0)       | 0<br>(0 - 0)        | 0<br>(0 - 0)         | 0<br>(0 - 0)         | 0<br>(0 - 0)         |
| Dengue                                                            | 0<br>(0 - 0)         | 0<br>(0 - 0)       | 0<br>(0 - 0)        | 0<br>(0 - 0)         | 0<br>(0 - 0)         | 0<br>(0 - 0)         |
| Rabies                                                            | 0<br>(0 - 0)         | 0<br>(0 - 0)       | 0<br>(0 - 0)        | 0<br>(0 - 0)         | 0<br>(0 - 0)         | 0<br>(0 - 0)         |
| Other neglected tropical diseases                                 | 0<br>(0 - 0)         | 0<br>(0 - 0)       | 0<br>(0 - 0)        | 0<br>(0 - 0)         | 0<br>(0 - 0)         | 0<br>(0 - 0)         |
| Maternal disorders                                                | 0<br>(0 - 0)         | --                 | 0<br>(0 - 0)        | 0<br>(0 - 0)         | --                   | --                   |
| Maternal hemorrhage                                               | 0<br>(0 - 0)         | --                 | 0<br>(0 - 0)        | 0<br>(0 - 0)         | --                   | --                   |
| Maternal sepsis and other maternal infections                     | 0<br>(0 - 0)         | --                 | 0<br>(0 - 0)        | 0<br>(0 - 0)         | --                   | --                   |
| Maternal hypertensive disorders                                   | 0<br>(0 - 0)         | --                 | 0<br>(0 - 0)        | 0<br>(0 - 0)         | --                   | --                   |
| Maternal obstructed labor                                         | 0<br>(0 - 0)         | --                 | 0<br>(0 - 0)        | 0<br>(0 - 0)         | --                   | --                   |
| Maternal abortive outcome                                         | 0<br>(0 - 0)         | --                 | 0<br>(0 - 0)        | 0<br>(0 - 0)         | --                   | --                   |
| Indirect maternal deaths                                          | 0<br>(0 - 0)         | --                 | 0<br>(0 - 0)        | 0<br>(0 - 0)         | --                   | --                   |



Web Table 31- Iceland deaths with 95% UI by age, sex, and cause in 2013

| Cause                                                            | Females, All Ages | Females, 0-4 Years | Females, 5-14 Years | Females, 15-49 Years | Females, 50-69 Years | Females, 70-80 Years |
|------------------------------------------------------------------|-------------------|--------------------|---------------------|----------------------|----------------------|----------------------|
| Late maternal deaths                                             | 0<br>(0-0)        | --                 | 0<br>(0-0)          | 0<br>(0-0)           | --                   | --                   |
| Maternal deaths aggravated by HIV/AIDS                           | 0<br>(0-0)        | --                 | --                  | 0<br>(0-0)           | --                   | --                   |
| Other maternal disorders                                         | 0<br>(0-0)        | --                 | 0<br>(0-0)          | 0<br>(0-0)           | --                   | --                   |
| Neonatal disorders                                               | 2<br>(1-3)        | 2<br>(1-3)         | --                  | --                   | --                   | --                   |
| Neonatal preterm birth complications                             | 1<br>(1-2)        | 1<br>(1-2)         | --                  | --                   | --                   | --                   |
| Neonatal encephalopathy due to birth asphyxia and trauma         | 0<br>(0-1)        | 0<br>(0-1)         | --                  | --                   | --                   | --                   |
| Neonatal sepsis and other neonatal infections                    | 0<br>(0-0)        | 0<br>(0-0)         | --                  | --                   | --                   | --                   |
| Hemolytic disease and other neonatal jaundice                    | 0<br>(0-0)        | 0<br>(0-0)         | --                  | --                   | --                   | --                   |
| Other neonatal disorders                                         | 0<br>(0-0)        | 0<br>(0-0)         | --                  | --                   | --                   | --                   |
| Nutritional deficiencies                                         | 2<br>(1-3)        | 0<br>(0-0)         | 0<br>(0-0)          | 0<br>(0-0)           | 0<br>(0-0)           | 2<br>(1-3)           |
| Protein-energy malnutrition                                      | 0<br>(0-1)        | 0<br>(0-0)         | 0<br>(0-0)          | 0<br>(0-0)           | 0<br>(0-0)           | 0<br>(0-0)           |
| Iodine deficiency                                                | 0<br>(0-0)        | 0<br>(0-0)         | 0<br>(0-0)          | 0<br>(0-0)           | 0<br>(0-0)           | 0<br>(0-0)           |
| Iron-deficiency anemia                                           | 2<br>(1-3)        | 0<br>(0-0)         | 0<br>(0-0)          | 0<br>(0-0)           | 0<br>(0-0)           | 2<br>(1-2)           |
| Other nutritional deficiencies                                   | 0<br>(0-0)        | 0<br>(0-0)         | 0<br>(0-0)          | 0<br>(0-0)           | 0<br>(0-0)           | 0<br>(0-0)           |
| Other communicable, maternal, neonatal, and nutritional diseases | 1<br>(1-1)        | 0<br>(0-0)         | 0<br>(0-0)          | 0<br>(0-0)           | 0<br>(0-0)           | 1<br>(0-1)           |
| Sexually transmitted diseases excluding HIV                      | 0<br>(0-0)        | 0<br>(0-0)         | 0<br>(0-0)          | 0<br>(0-0)           | 0<br>(0-0)           | 0<br>(0-0)           |
| Syphilis                                                         | 0<br>(0-0)        | 0<br>(0-0)         | 0<br>(0-0)          | 0<br>(0-0)           | 0<br>(0-0)           | 0<br>(0-0)           |
| Chlamydial infection                                             | 0<br>(0-0)        | --                 | 0<br>(0-0)          | 0<br>(0-0)           | 0<br>(0-0)           | 0<br>(0-0)           |
| Gonococcal infection                                             | 0<br>(0-0)        | --                 | 0<br>(0-0)          | 0<br>(0-0)           | 0<br>(0-0)           | 0<br>(0-0)           |
| Other sexually transmitted diseases                              | 0<br>(0-0)        | --                 | 0<br>(0-0)          | 0<br>(0-0)           | 0<br>(0-0)           | 0<br>(0-0)           |
| Hepatitis                                                        | 0<br>(0-0)        | 0<br>(0-0)         | 0<br>(0-0)          | 0<br>(0-0)           | 0<br>(0-0)           | 0<br>(0-0)           |
| Acute hepatitis A                                                | 0<br>(0-0)        | 0<br>(0-0)         | 0<br>(0-0)          | 0<br>(0-0)           | 0<br>(0-0)           | 0<br>(0-0)           |
| Acute hepatitis B                                                | 0<br>(0-0)        | 0<br>(0-0)         | 0<br>(0-0)          | 0<br>(0-0)           | 0<br>(0-0)           | 0<br>(0-0)           |
| Acute hepatitis C                                                | 0<br>(0-0)        | --                 | 0<br>(0-0)          | 0<br>(0-0)           | 0<br>(0-0)           | 0<br>(0-0)           |
| Other infectious diseases                                        | 1<br>(0-1)        | 0<br>(0-0)         | 0<br>(0-0)          | 0<br>(0-0)           | 0<br>(0-0)           | 1<br>(0-1)           |
| Non-communicable diseases                                        | 842<br>(738-960)  | 3<br>(2-4)         | 1<br>(1-1)          | 25<br>(20-30)        | 133<br>(109-159)     | 681<br>(603-767)     |
| Neoplasms                                                        | 250<br>(208-292)  | 0<br>(0-0)         | 1<br>(0-1)          | 18<br>(14-22)        | 89<br>(73-108)       | 142<br>(116-166)     |
| Esophageal cancer                                                | 4<br>(3-5)        | --                 | --                  | 0<br>(0-0)           | 1<br>(1-1)           | 3<br>(2-4)           |
| Stomach cancer                                                   | 12<br>(8-17)      | --                 | --                  | 0<br>(0-1)           | 3<br>(2-4)           | 9<br>(6-13)          |
| Liver cancer                                                     | 3<br>(2-5)        | --                 | 0<br>(0-0)          | 0<br>(0-0)           | 1<br>(1-1)           | 2<br>(1-3)           |
| Liver cancer due to hepatitis B                                  | 1<br>(0-1)        | --                 | 0<br>(0-0)          | 0<br>(0-0)           | 0<br>(0-0)           | 0<br>(0-1)           |
| Liver cancer due to hepatitis C                                  | 2<br>(1-3)        | --                 | 0<br>(0-0)          | 0<br>(0-0)           | 1<br>(0-1)           | 1<br>(1-2)           |
| Liver cancer due to alcohol use                                  | 0<br>(0-1)        | --                 | --                  | 0<br>(0-0)           | 0<br>(0-0)           | 0<br>(0-1)           |
| Liver cancer due to other causes                                 | 0<br>(0-1)        | --                 | 0<br>(0-0)          | 0<br>(0-0)           | 0<br>(0-0)           | 0<br>(0-0)           |
| Larynx cancer                                                    | 0<br>(0-0)        | --                 | --                  | 0<br>(0-0)           | 0<br>(0-0)           | 0<br>(0-0)           |
| Tracheal, bronchus and lung cancer                               | 56<br>(44-68)     | --                 | --                  | 3<br>(2-4)           | 24<br>(19-31)        | 29<br>(21-36)        |
| Breast cancer                                                    | 40<br>(29-50)     | --                 | --                  | 5<br>(4-6)           | 17<br>(12-23)        | 18<br>(12-23)        |
| Cervical cancer                                                  | 5<br>(4-6)        | --                 | --                  | 1<br>(1-2)           | 2<br>(1-2)           | 2<br>(1-2)           |
| Uterine cancer                                                   | 7<br>(5-9)        | --                 | --                  | 0<br>(0-0)           | 3<br>(2-4)           | 4<br>(3-6)           |
| Prostate cancer                                                  | --                | --                 | --                  | --                   | --                   | --                   |

Web Table 31- Iceland deaths with 95% UI by age, sex, and cause in 2013

| Cause                                         | Females, All Ages  | Females, 0-4 Years | Females, 5-14 Years | Females, 15-49 Years | Females, 50-69 Years | Females, 70-80 Years |
|-----------------------------------------------|--------------------|--------------------|---------------------|----------------------|----------------------|----------------------|
| Colon and rectum cancer                       | 29<br>(23 - 37)    | --                 | --                  | 1<br>(1 - 1)         | 7<br>(5 - 9)         | 22<br>(16 - 29)      |
| Lip and oral cavity cancer                    | 2<br>(1 - 2)       | --                 | --                  | 0<br>(0 - 0)         | 0<br>(0 - 1)         | 1<br>(1 - 2)         |
| Nasopharynx cancer                            | 0<br>(0 - 0)       | --                 | 0<br>(0 - 0)        | 0<br>(0 - 0)         | 0<br>(0 - 0)         | 0<br>(0 - 0)         |
| Other pharynx cancer                          | 0<br>(0 - 0)       | --                 | --                  | 0<br>(0 - 0)         | 0<br>(0 - 0)         | 0<br>(0 - 0)         |
| Gallbladder and biliary tract cancer          | 3<br>(2 - 4)       | --                 | --                  | 0<br>(0 - 0)         | 1<br>(0 - 1)         | 2<br>(1 - 3)         |
| Pancreatic cancer                             | 16<br>(12 - 19)    | --                 | --                  | 0<br>(0 - 1)         | 5<br>(4 - 6)         | 10<br>(8 - 13)       |
| Malignant skin melanoma                       | 5<br>(3 - 7)       | --                 | --                  | 1<br>(0 - 1)         | 2<br>(1 - 3)         | 3<br>(1 - 4)         |
| Non-melanoma skin cancer                      | 0<br>(0 - 0)       | --                 | --                  | 0<br>(0 - 0)         | 0<br>(0 - 0)         | 0<br>(0 - 0)         |
| Ovarian cancer                                | 12<br>(9 - 15)     | --                 | --                  | 1<br>(1 - 1)         | 6<br>(4 - 7)         | 6<br>(4 - 8)         |
| Testicular cancer                             | --                 | --                 | --                  | --                   | --                   | --                   |
| Kidney cancer                                 | 8<br>(5 - 11)      | 0<br>(0 - 0)       | 0<br>(0 - 0)        | 0<br>(0 - 0)         | 3<br>(2 - 4)         | 5<br>(3 - 7)         |
| Bladder cancer                                | 5<br>(3 - 6)       | --                 | --                  | 0<br>(0 - 0)         | 1<br>(1 - 1)         | 3<br>(2 - 5)         |
| Brain and nervous system cancer               | 9<br>(7 - 12)      | 0<br>(0 - 0)       | 0<br>(0 - 0)        | 2<br>(1 - 2)         | 4<br>(3 - 5)         | 3<br>(2 - 4)         |
| Thyroid cancer                                | 2<br>(1 - 3)       | --                 | 0<br>(0 - 0)        | 0<br>(0 - 0)         | 1<br>(0 - 1)         | 2<br>(1 - 3)         |
| Mesothelioma                                  | 0<br>(0 - 1)       | --                 | --                  | 0<br>(0 - 0)         | 0<br>(0 - 0)         | 0<br>(0 - 0)         |
| Hodgkin lymphoma                              | 0<br>(0 - 0)       | 0<br>(0 - 0)       | 0<br>(0 - 0)        | 0<br>(0 - 0)         | 0<br>(0 - 0)         | 0<br>(0 - 0)         |
| Non-Hodgkin lymphoma                          | 7<br>(3 - 10)      | 0<br>(0 - 0)       | 0<br>(0 - 0)        | 0<br>(0 - 1)         | 2<br>(1 - 4)         | 4<br>(2 - 6)         |
| Multiple myeloma                              | 7<br>(4 - 11)      | --                 | --                  | 0<br>(0 - 0)         | 2<br>(1 - 4)         | 4<br>(3 - 7)         |
| Leukemia                                      | 7<br>(5 - 9)       | 0<br>(0 - 0)       | 0<br>(0 - 0)        | 1<br>(1 - 1)         | 2<br>(1 - 2)         | 4<br>(3 - 6)         |
| Other neoplasms                               | 12<br>(8 - 15)     | 0<br>(0 - 0)       | 0<br>(0 - 0)        | 1<br>(1 - 1)         | 4<br>(3 - 5)         | 7<br>(4 - 9)         |
| Cardiovascular diseases                       | 342<br>(291 - 408) | 0<br>(0 - 0)       | 0<br>(0 - 0)        | 3<br>(2 - 4)         | 23<br>(18 - 31)      | 315<br>(266 - 375)   |
| Rheumatic heart disease                       | 1<br>(1 - 2)       | 0<br>(0 - 0)       | 0<br>(0 - 0)        | 0<br>(0 - 0)         | 0<br>(0 - 0)         | 1<br>(0 - 2)         |
| Ischemic heart disease                        | 196<br>(160 - 250) | 0<br>(0 - 0)       | 0<br>(0 - 0)        | 1<br>(1 - 1)         | 14<br>(10 - 20)      | 181<br>(148 - 230)   |
| Cerebrovascular disease                       | 96<br>(73 - 122)   | 0<br>(0 - 0)       | 0<br>(0 - 0)        | 1<br>(1 - 2)         | 6<br>(4 - 8)         | 88<br>(67 - 113)     |
| Ischemic stroke                               | 58<br>(42 - 76)    | 0<br>(0 - 0)       | 0<br>(0 - 0)        | 0<br>(0 - 0)         | 2<br>(1 - 2)         | 56<br>(41 - 74)      |
| Hemorrhagic stroke                            | 38<br>(27 - 53)    | 0<br>(0 - 0)       | 0<br>(0 - 0)        | 1<br>(1 - 2)         | 4<br>(3 - 6)         | 32<br>(22 - 46)      |
| Hypertensive heart disease                    | 6<br>(3 - 10)      | 0<br>(0 - 0)       | 0<br>(0 - 0)        | 0<br>(0 - 0)         | 0<br>(0 - 0)         | 6<br>(2 - 10)        |
| Cardiomyopathy and myocarditis                | 3<br>(2 - 5)       | 0<br>(0 - 0)       | 0<br>(0 - 0)        | 0<br>(0 - 0)         | 1<br>(0 - 1)         | 3<br>(2 - 4)         |
| Atrial fibrillation and flutter               | 14<br>(8 - 21)     | --                 | --                  | 0<br>(0 - 0)         | 0<br>(0 - 1)         | 13<br>(8 - 21)       |
| Aortic aneurysm                               | 5<br>(3 - 8)       | --                 | --                  | 0<br>(0 - 0)         | 0<br>(0 - 1)         | 5<br>(3 - 7)         |
| Peripheral vascular disease                   | 1<br>(1 - 1)       | --                 | --                  | 0<br>(0 - 0)         | 0<br>(0 - 0)         | 1<br>(0 - 1)         |
| Endocarditis                                  | 1<br>(0 - 1)       | 0<br>(0 - 0)       | 0<br>(0 - 0)        | 0<br>(0 - 0)         | 0<br>(0 - 0)         | 0<br>(0 - 1)         |
| Other cardiovascular and circulatory diseases | 18<br>(12 - 27)    | 0<br>(0 - 0)       | 0<br>(0 - 0)        | 0<br>(0 - 0)         | 1<br>(1 - 2)         | 17<br>(10 - 25)      |
| Chronic respiratory diseases                  | 49<br>(31 - 62)    | 0<br>(0 - 0)       | 0<br>(0 - 0)        | 0<br>(0 - 0)         | 6<br>(4 - 8)         | 43<br>(26 - 55)      |
| Chronic obstructive pulmonary disease         | 45<br>(28 - 57)    | 0<br>(0 - 0)       | 0<br>(0 - 0)        | 0<br>(0 - 0)         | 5<br>(3 - 7)         | 40<br>(24 - 51)      |
| Pneumoconiosis                                | 0<br>(0 - 0)       | 0<br>(0 - 0)       | 0<br>(0 - 0)        | 0<br>(0 - 0)         | 0<br>(0 - 0)         | 0<br>(0 - 0)         |
| Silicosis                                     | 0<br>(0 - 0)       | 0<br>(0 - 0)       | 0<br>(0 - 0)        | 0<br>(0 - 0)         | 0<br>(0 - 0)         | 0<br>(0 - 0)         |
| Asbestosis                                    | 0<br>(0 - 0)       | 0<br>(0 - 0)       | 0<br>(0 - 0)        | 0<br>(0 - 0)         | 0<br>(0 - 0)         | 0<br>(0 - 0)         |
| Coal workers pneumoconiosis                   | 0<br>(0 - 0)       | 0<br>(0 - 0)       | 0<br>(0 - 0)        | 0<br>(0 - 0)         | 0<br>(0 - 0)         | 0<br>(0 - 0)         |
| Other pneumoconiosis                          | 0<br>(0 - 0)       | 0<br>(0 - 0)       | 0<br>(0 - 0)        | 0<br>(0 - 0)         | 0<br>(0 - 0)         | 0<br>(0 - 0)         |

Web Table 31- Iceland deaths with 95% UI by age, sex, and cause in 2013

| Cause                                               | Females, All Ages | Females, 0-4 Years | Females, 5-14 Years | Females, 15-49 Years | Females, 50-69 Years | Females, 70-80 Years |
|-----------------------------------------------------|-------------------|--------------------|---------------------|----------------------|----------------------|----------------------|
| Asthma                                              | 2<br>(1 - 4)      | 0<br>(0 - 0)       | 0<br>(0 - 0)        | 0<br>(0 - 0)         | 0<br>(0 - 1)         | 2<br>(1 - 3)         |
| Interstitial lung disease and pulmonary sarcoidosis | 2<br>(0 - 4)      | 0<br>(0 - 0)       | 0<br>(0 - 0)        | 0<br>(0 - 0)         | 0<br>(0 - 0)         | 1<br>(0 - 3)         |
| Other chronic respiratory diseases                  | 0<br>(0 - 0)      | 0<br>(0 - 0)       | 0<br>(0 - 0)        | 0<br>(0 - 0)         | 0<br>(0 - 0)         | 0<br>(0 - 0)         |
| Cirrhosis                                           | 3<br>(2 - 4)      | 0<br>(0 - 0)       | 0<br>(0 - 0)        | 0<br>(0 - 0)         | 1<br>(1 - 1)         | 2<br>(1 - 3)         |
| Cirrhosis due to hepatitis B                        | 0<br>(0 - 1)      | 0<br>(0 - 0)       | 0<br>(0 - 0)        | 0<br>(0 - 0)         | 0<br>(0 - 0)         | 0<br>(0 - 1)         |
| Cirrhosis due to hepatitis C                        | 2<br>(1 - 2)      | 0<br>(0 - 0)       | 0<br>(0 - 0)        | 0<br>(0 - 0)         | 0<br>(0 - 1)         | 1<br>(1 - 2)         |
| Cirrhosis due to alcohol use                        | 0<br>(0 - 1)      | --                 | --                  | 0<br>(0 - 0)         | 0<br>(0 - 1)         | 0<br>(0 - 1)         |
| Cirrhosis due to other causes                       | 0<br>(0 - 1)      | 0<br>(0 - 0)       | 0<br>(0 - 0)        | 0<br>(0 - 0)         | 0<br>(0 - 0)         | 0<br>(0 - 0)         |
| Digestive diseases                                  | 25<br>(18 - 31)   | 0<br>(0 - 0)       | 0<br>(0 - 0)        | 0<br>(0 - 0)         | 2<br>(2 - 3)         | 22<br>(16 - 28)      |
| Peptic ulcer disease                                | 3<br>(2 - 4)      | 0<br>(0 - 0)       | 0<br>(0 - 0)        | 0<br>(0 - 0)         | 1<br>(0 - 1)         | 2<br>(1 - 3)         |
| Gastritis and duodenitis                            | 0<br>(0 - 0)      | 0<br>(0 - 0)       | 0<br>(0 - 0)        | 0<br>(0 - 0)         | 0<br>(0 - 0)         | 0<br>(0 - 0)         |
| Appendicitis                                        | 0<br>(0 - 0)      | 0<br>(0 - 0)       | 0<br>(0 - 0)        | 0<br>(0 - 0)         | 0<br>(0 - 0)         | 0<br>(0 - 0)         |
| Paralytic ileus and intestinal obstruction          | 4<br>(2 - 6)      | 0<br>(0 - 0)       | 0<br>(0 - 0)        | 0<br>(0 - 0)         | 0<br>(0 - 0)         | 3<br>(1 - 6)         |
| Inguinal, femoral, and abdominal hernia             | 0<br>(0 - 0)      | 0<br>(0 - 0)       | 0<br>(0 - 0)        | 0<br>(0 - 0)         | 0<br>(0 - 0)         | 0<br>(0 - 0)         |
| Inflammatory bowel disease                          | 1<br>(0 - 3)      | 0<br>(0 - 0)       | 0<br>(0 - 0)        | 0<br>(0 - 0)         | 0<br>(0 - 0)         | 1<br>(0 - 3)         |
| Vascular intestinal disorders                       | 7<br>(4 - 12)     | 0<br>(0 - 0)       | 0<br>(0 - 0)        | 0<br>(0 - 0)         | 0<br>(0 - 1)         | 7<br>(4 - 11)        |
| Gallbladder and biliary diseases                    | 2<br>(1 - 3)      | 0<br>(0 - 0)       | 0<br>(0 - 0)        | 0<br>(0 - 0)         | 0<br>(0 - 0)         | 2<br>(1 - 3)         |
| Pancreatitis                                        | 1<br>(0 - 1)      | 0<br>(0 - 0)       | 0<br>(0 - 0)        | 0<br>(0 - 0)         | 0<br>(0 - 0)         | 1<br>(0 - 1)         |
| Other digestive diseases                            | 7<br>(4 - 10)     | 0<br>(0 - 0)       | 0<br>(0 - 0)        | 0<br>(0 - 0)         | 6<br>(0 - 1)         | 6<br>(4 - 9)         |
| Neurological disorders                              | 130<br>(92 - 173) | 0<br>(0 - 0)       | 0<br>(0 - 0)        | 1<br>(1 - 1)         | 6<br>(4 - 8)         | 123<br>(85 - 165)    |
| Alzheimer disease and other dementias               | 113<br>(74 - 156) | --                 | --                  | 0<br>(0 - 0)         | 2<br>(1 - 4)         | 111<br>(72 - 153)    |
| Parkinson disease                                   | 10<br>(5 - 15)    | --                 | --                  | 0<br>(0 - 0)         | 1<br>(0 - 1)         | 9<br>(5 - 14)        |
| Epilepsy                                            | 0<br>(0 - 1)      | 0<br>(0 - 0)       | 0<br>(0 - 0)        | 0<br>(0 - 0)         | 0<br>(0 - 0)         | 0<br>(0 - 0)         |
| Multiple sclerosis                                  | 2<br>(1 - 2)      | --                 | --                  | 0<br>(0 - 1)         | 1<br>(0 - 1)         | 1<br>(0 - 1)         |
| Other neurological disorders                        | 5<br>(4 - 7)      | 0<br>(0 - 0)       | 0<br>(0 - 0)        | 0<br>(0 - 1)         | 2<br>(2 - 3)         | 2<br>(2 - 3)         |
| Mental and substance use disorders                  | 2<br>(1 - 3)      | 0<br>(0 - 0)       | 0<br>(0 - 0)        | 1<br>(1 - 1)         | 1<br>(1 - 1)         | 0<br>(0 - 0)         |
| Schizophrenia                                       | 0<br>(0 - 0)      | --                 | --                  | 0<br>(0 - 0)         | 0<br>(0 - 0)         | 0<br>(0 - 0)         |
| Alcohol use disorders                               | 1<br>(0 - 1)      | --                 | --                  | 0<br>(0 - 0)         | 0<br>(0 - 1)         | 0<br>(0 - 0)         |
| Drug use disorders                                  | 1<br>(1 - 2)      | 0<br>(0 - 0)       | --                  | 1<br>(0 - 1)         | 0<br>(0 - 1)         | 0<br>(0 - 0)         |
| Opioid use disorders                                | 0<br>(0 - 1)      | 0<br>(0 - 0)       | --                  | 0<br>(0 - 0)         | 0<br>(0 - 0)         | 0<br>(0 - 0)         |
| Cocaine use disorders                               | 0<br>(0 - 0)      | 0<br>(0 - 0)       | --                  | 0<br>(0 - 0)         | 0<br>(0 - 0)         | 0<br>(0 - 0)         |
| Amphetamine use disorders                           | 0<br>(0 - 0)      | 0<br>(0 - 0)       | --                  | 0<br>(0 - 0)         | 0<br>(0 - 0)         | 0<br>(0 - 0)         |
| Other drug use disorders                            | 1<br>(0 - 1)      | 0<br>(0 - 0)       | --                  | 0<br>(0 - 0)         | 0<br>(0 - 0)         | 0<br>(0 - 0)         |
| Eating disorders                                    | 0<br>(0 - 0)      | --                 | 0<br>(0 - 0)        | 0<br>(0 - 0)         | --                   | --                   |
| Anorexia nervosa                                    | 0<br>(0 - 0)      | --                 | 0<br>(0 - 0)        | 0<br>(0 - 0)         | --                   | --                   |
| Diabetes, urogenital, blood, and endocrine diseases | 34<br>(25 - 42)   | 0<br>(0 - 0)       | 0<br>(0 - 0)        | 1<br>(1 - 1)         | 4<br>(3 - 4)         | 29<br>(21 - 37)      |
| Diabetes mellitus                                   | 11<br>(7 - 13)    | 0<br>(0 - 0)       | 0<br>(0 - 0)        | 0<br>(0 - 0)         | 1<br>(1 - 2)         | 9<br>(6 - 12)        |
| Acute glomerulonephritis                            | 0<br>(0 - 0)      | 0<br>(0 - 0)       | 0<br>(0 - 0)        | 0<br>(0 - 0)         | 0<br>(0 - 0)         | 0<br>(0 - 0)         |
| Chronic kidney disease                              | 12<br>(8 - 16)    | 0<br>(0 - 0)       | 0<br>(0 - 0)        | 0<br>(0 - 0)         | 1<br>(1 - 1)         | 10<br>(7 - 14)       |
| Chronic kidney disease due to diabetes mellitus     | 0<br>(0 - 0)      | 0<br>(0 - 0)       | 0<br>(0 - 0)        | 0<br>(0 - 0)         | 0<br>(0 - 0)         | 0<br>(0 - 0)         |

Web Table 31- Iceland deaths with 95% UI by age, sex, and cause in 2013

| Cause                                               | Females, All Ages | Females, 0-4 Years | Females, 5-14 Years | Females, 15-49 Years | Females, 50-69 Years | Females, 70-80 Years |
|-----------------------------------------------------|-------------------|--------------------|---------------------|----------------------|----------------------|----------------------|
| Chronic kidney disease due to hypertension          | 5<br>(3 - 8)      | 0<br>(0 - 0)       | 0<br>(0 - 0)        | 0<br>(0 - 0)         | 0<br>(0 - 0)         | 5<br>(3 - 7)         |
| Chronic kidney disease due to glomerulonephritis    | 0                 | 0                  | 0                   | 0                    | 0                    | 0                    |
| Chronic kidney disease due to other causes          | 6<br>(3 - 9)      | 0<br>(0 - 0)       | 0<br>(0 - 0)        | 0<br>(0 - 0)         | 1<br>(0 - 1)         | 5<br>(2 - 8)         |
| Urinary diseases and male infertility               | 9<br>(6 - 13)     | 0<br>(0 - 0)       | 0<br>(0 - 0)        | 0<br>(0 - 0)         | 1<br>(0 - 1)         | 8<br>(5 - 13)        |
| Interstitial nephritis and urinary tract infections | 9                 | 0                  | 0                   | 0                    | 1                    | 8                    |
| Urolithiasis                                        | 0<br>(0 - 0)      | --                 | 0<br>(0 - 0)        | 0<br>(0 - 0)         | 0<br>(0 - 0)         | 0<br>(0 - 0)         |
| Other urinary diseases                              | 0<br>(0 - 0)      | 0<br>(0 - 0)       | 0<br>(0 - 0)        | 0<br>(0 - 0)         | 0<br>(0 - 0)         | 0<br>(0 - 0)         |
| Gynecological diseases                              | 0<br>(0 - 0)      | --                 | --                  | 0<br>(0 - 0)         | 0<br>(0 - 0)         | 0<br>(0 - 0)         |
| Uterine fibroids                                    | 0<br>(0 - 0)      | --                 | --                  | 0<br>(0 - 0)         | 0<br>(0 - 0)         | 0<br>(0 - 0)         |
| Polycystic ovarian syndrome                         | 0<br>(0 - 0)      | --                 | --                  | 0<br>(0 - 0)         | 0<br>(0 - 0)         | --                   |
| Endometriosis                                       | 0<br>(0 - 0)      | --                 | --                  | 0<br>(0 - 0)         | 0<br>(0 - 0)         | --                   |
| Genital prolapse                                    | 0<br>(0 - 0)      | --                 | --                  | 0<br>(0 - 0)         | 0<br>(0 - 0)         | 0<br>(0 - 0)         |
| Other gynecological diseases                        | 0<br>(0 - 0)      | --                 | --                  | 0<br>(0 - 0)         | 0<br>(0 - 0)         | 0<br>(0 - 0)         |
| Hemoglobinopathies and hemolytic anemias            | 0<br>(0 - 0)      | 0<br>(0 - 0)       | 0<br>(0 - 0)        | 0<br>(0 - 0)         | 0<br>(0 - 0)         | 0<br>(0 - 0)         |
| Thalassemias                                        | 0<br>(0 - 0)      | 0<br>(0 - 0)       | 0<br>(0 - 0)        | 0<br>(0 - 0)         | 0<br>(0 - 0)         | 0<br>(0 - 0)         |
| Sickle cell disorders                               | 0<br>(0 - 0)      | 0<br>(0 - 0)       | 0<br>(0 - 0)        | 0<br>(0 - 0)         | 0<br>(0 - 0)         | 0<br>(0 - 0)         |
| G6PD deficiency                                     | 0<br>(0 - 0)      | 0<br>(0 - 0)       | 0<br>(0 - 0)        | 0<br>(0 - 0)         | 0<br>(0 - 0)         | 0<br>(0 - 0)         |
| Other hemoglobinopathies and hemolytic anemias      | 0<br>(0 - 0)      | 0<br>(0 - 0)       | 0<br>(0 - 0)        | 0<br>(0 - 0)         | 0<br>(0 - 0)         | 0<br>(0 - 0)         |
| Endocrine, metabolic, blood, and immune disorders   | 3<br>(2 - 4)      | 0<br>(0 - 0)       | 0<br>(0 - 0)        | 0<br>(0 - 0)         | 1<br>(0 - 1)         | 2<br>(1 - 2)         |
| Musculoskeletal disorders                           | 3<br>(2 - 5)      | --                 | 0<br>(0 - 0)        | 0<br>(0 - 0)         | 0<br>(0 - 1)         | 3<br>(2 - 4)         |
| Rheumatoid arthritis                                | 1<br>(0 - 1)      | --                 | 0<br>(0 - 0)        | 0<br>(0 - 0)         | 0<br>(0 - 0)         | 1<br>(0 - 1)         |
| Other musculoskeletal disorders                     | 2<br>(2 - 4)      | --                 | 0<br>(0 - 0)        | 0<br>(0 - 0)         | 0<br>(0 - 1)         | 2<br>(1 - 3)         |
| Other non-communicable diseases                     | 4<br>(3 - 6)      | 2<br>(1 - 3)       | 0<br>(0 - 0)        | 1<br>(0 - 1)         | 1<br>(0 - 1)         | 1<br>(1 - 1)         |
| Congenital anomalies                                | 3<br>(2 - 5)      | 1<br>(1 - 2)       | 0<br>(0 - 0)        | 1<br>(0 - 1)         | 1<br>(0 - 1)         | 1<br>(0 - 1)         |
| Neural tube defects                                 | 0                 | 0                  | 0                   | 0                    | 0                    | 0                    |
| Congenital heart anomalies                          | 1<br>(1 - 1)      | 0<br>(0 - 1)       | 0<br>(0 - 0)        | 0<br>(0 - 0)         | 0<br>(0 - 0)         | 0<br>(0 - 0)         |
| Cleft lip and cleft palate                          | 0<br>(0 - 0)      | 0<br>(0 - 0)       | --                  | --                   | --                   | --                   |
| Down syndrome                                       | 0<br>(0 - 0)      | 0<br>(0 - 0)       | 0<br>(0 - 0)        | 0<br>(0 - 0)         | 0<br>(0 - 0)         | 0<br>(0 - 0)         |
| Chromosomal unbalanced rearrangements               | 0<br>(0 - 0)      | 0<br>(0 - 0)       | 0<br>(0 - 0)        | 0<br>(0 - 0)         | 0<br>(0 - 0)         | 0<br>(0 - 0)         |
| Other congenital anomalies                          | 2<br>(1 - 3)      | 1<br>(1 - 1)       | 0<br>(0 - 0)        | 0<br>(0 - 0)         | 0<br>(0 - 1)         | 0<br>(0 - 1)         |
| Skin and subcutaneous diseases                      | 0<br>(0 - 1)      | 0<br>(0 - 0)       | 0<br>(0 - 0)        | 0<br>(0 - 0)         | 0<br>(0 - 0)         | 0<br>(0 - 1)         |
| Cellulitis                                          | 0<br>(0 - 0)      | 0<br>(0 - 0)       | 0<br>(0 - 0)        | 0<br>(0 - 0)         | 0<br>(0 - 0)         | 0<br>(0 - 0)         |
| Pyoderma                                            | 0<br>(0 - 0)      | 0<br>(0 - 0)       | 0<br>(0 - 0)        | 0<br>(0 - 0)         | 0<br>(0 - 0)         | 0<br>(0 - 0)         |
| Decubitus ulcer                                     | 0<br>(0 - 0)      | 0<br>(0 - 0)       | 0<br>(0 - 0)        | 0<br>(0 - 0)         | 0<br>(0 - 0)         | 0<br>(0 - 0)         |
| Other skin and subcutaneous diseases                | 0<br>(0 - 0)      | 0<br>(0 - 0)       | 0<br>(0 - 0)        | 0<br>(0 - 0)         | 0<br>(0 - 0)         | 0<br>(0 - 0)         |
| Sudden infant death syndrome                        | 1<br>(0 - 2)      | 1<br>(0 - 2)       | --                  | --                   | --                   | --                   |
| Injuries                                            | 31<br>(23 - 39)   | 0<br>(0 - 0)       | 0<br>(0 - 0)        | 7<br>(6 - 9)         | 7<br>(5 - 9)         | 16<br>(10 - 23)      |
| Transport injuries                                  | 5<br>(4 - 6)      | 0<br>(0 - 0)       | 0<br>(0 - 0)        | 2<br>(2 - 3)         | 1<br>(1 - 1)         | 1<br>(1 - 2)         |
| Road injuries                                       | 5<br>(4 - 6)      | 0<br>(0 - 0)       | 0<br>(0 - 0)        | 2<br>(1 - 3)         | 1<br>(1 - 1)         | 1<br>(1 - 2)         |
| Pedestrian road injuries                            | 0<br>(0 - 1)      | 0<br>(0 - 0)       | 0<br>(0 - 0)        | 0<br>(0 - 0)         | 0<br>(0 - 0)         | 0<br>(0 - 1)         |

Web Table 31- Iceland deaths with 95% UI by age, sex, and cause in 2013

| Cause                                           | Females, All Ages | Females, 0-4 Years | Females, 5-14 Years | Females, 15-49 Years | Females, 50-69 Years | Females, 70-80 Years |
|-------------------------------------------------|-------------------|--------------------|---------------------|----------------------|----------------------|----------------------|
| Cyclist road injuries                           | 0<br>(0 - 0)      | 0<br>(0 - 0)       | 0<br>(0 - 0)        | 0<br>(0 - 0)         | 0<br>(0 - 0)         | 0<br>(0 - 0)         |
| Motorcyclist road injuries                      | 0<br>(0 - 0)      | 0<br>(0 - 0)       | 0<br>(0 - 0)        | 0<br>(0 - 0)         | 0<br>(0 - 0)         | 0<br>(0 - 0)         |
| Motor vehicle road injuries                     | 4<br>(3 - 5)      | 0<br>(0 - 0)       | 0<br>(0 - 0)        | 2<br>(1 - 2)         | 1<br>(1 - 1)         | 1<br>(1 - 1)         |
| Other road injuries                             | 0<br>(0 - 0)      | 0<br>(0 - 0)       | 0<br>(0 - 0)        | 0<br>(0 - 0)         | 0<br>(0 - 0)         | 0<br>(0 - 0)         |
| Other transport injuries                        | 0<br>(0 - 0)      | 0<br>(0 - 0)       | 0<br>(0 - 0)        | 0<br>(0 - 0)         | 0<br>(0 - 0)         | 0<br>(0 - 0)         |
| Unintentional injuries                          | 16<br>(10 - 23)   | 0<br>(0 - 0)       | 0<br>(0 - 0)        | 1<br>(1 - 1)         | 1<br>(1 - 2)         | 14<br>(8 - 21)       |
| Falls                                           | 13<br>(7 - 20)    | 0<br>(0 - 0)       | 0<br>(0 - 0)        | 0<br>(0 - 0)         | 1<br>(0 - 1)         | 12<br>(6 - 19)       |
| Drowning                                        | 0<br>(0 - 0)      | 0<br>(0 - 0)       | 0<br>(0 - 0)        | 0<br>(0 - 0)         | 0<br>(0 - 0)         | 0<br>(0 - 0)         |
| Fire, heat, and hot substances                  | 0<br>(0 - 1)      | 0<br>(0 - 0)       | 0<br>(0 - 0)        | 0<br>(0 - 0)         | 0<br>(0 - 0)         | 0<br>(0 - 0)         |
| Poisonings                                      | 0<br>(0 - 0)      | 0<br>(0 - 0)       | 0<br>(0 - 0)        | 0<br>(0 - 0)         | 0<br>(0 - 0)         | 0<br>(0 - 0)         |
| Exposure to mechanical forces                   | 0<br>(0 - 0)      | 0<br>(0 - 0)       | 0<br>(0 - 0)        | 0<br>(0 - 0)         | 0<br>(0 - 0)         | 0<br>(0 - 0)         |
| Unintentional firearm injuries                  | 0<br>(0 - 0)      | 0<br>(0 - 0)       | 0<br>(0 - 0)        | 0<br>(0 - 0)         | 0<br>(0 - 0)         | 0<br>(0 - 0)         |
| Unintentional suffocation                       | 0<br>(0 - 0)      | 0<br>(0 - 0)       | 0<br>(0 - 0)        | 0<br>(0 - 0)         | 0<br>(0 - 0)         | 0<br>(0 - 0)         |
| Other exposure to mechanical forces             | 0<br>(0 - 0)      | 0<br>(0 - 0)       | 0<br>(0 - 0)        | 0<br>(0 - 0)         | 0<br>(0 - 0)         | 0<br>(0 - 0)         |
| Adverse effects of medical treatment            | 2<br>(1 - 2)      | 0<br>(0 - 0)       | 0<br>(0 - 0)        | 0<br>(0 - 0)         | 0<br>(0 - 0)         | 1<br>(1 - 2)         |
| Animal contact                                  | 0<br>(0 - 0)      | 0<br>(0 - 0)       | 0<br>(0 - 0)        | 0<br>(0 - 0)         | 0<br>(0 - 0)         | 0<br>(0 - 0)         |
| Venomous animal contact                         | 0<br>(0 - 0)      | 0<br>(0 - 0)       | 0<br>(0 - 0)        | 0<br>(0 - 0)         | 0<br>(0 - 0)         | 0<br>(0 - 0)         |
| Non-venomous animal contact                     | 0<br>(0 - 0)      | 0<br>(0 - 0)       | 0<br>(0 - 0)        | 0<br>(0 - 0)         | 0<br>(0 - 0)         | 0<br>(0 - 0)         |
| Foreign body                                    | 0<br>(0 - 1)      | 0<br>(0 - 0)       | 0<br>(0 - 0)        | 0<br>(0 - 0)         | 0<br>(0 - 0)         | 0<br>(0 - 0)         |
| Pulmonary aspiration and foreign body in airway | 0<br>(0 - 1)      | 0<br>(0 - 0)       | 0<br>(0 - 0)        | 0<br>(0 - 0)         | 0<br>(0 - 0)         | 0<br>(0 - 0)         |
| Foreign body in other body part                 | 0<br>(0 - 0)      | 0<br>(0 - 0)       | 0<br>(0 - 0)        | 0<br>(0 - 0)         | 0<br>(0 - 0)         | 0<br>(0 - 0)         |
| Other unintentional injuries                    | 0<br>(0 - 0)      | 0<br>(0 - 0)       | 0<br>(0 - 0)        | 0<br>(0 - 0)         | 0<br>(0 - 0)         | 0<br>(0 - 0)         |
| Self-harm and interpersonal violence            | 10<br>(7 - 13)    | 0<br>(0 - 0)       | 0<br>(0 - 0)        | 4<br>(3 - 6)         | 4<br>(3 - 6)         | 1<br>(1 - 1)         |
| Self-harm                                       | 9<br>(7 - 12)     | --                 | 0<br>(0 - 0)        | 4<br>(3 - 5)         | 4<br>(3 - 6)         | 1<br>(1 - 1)         |
| Interpersonal violence                          | 0<br>(0 - 1)      | 0<br>(0 - 0)       | 0<br>(0 - 0)        | 0<br>(0 - 0)         | 0<br>(0 - 0)         | 0<br>(0 - 0)         |
| Assault by firearm                              | 0<br>(0 - 0)      | 0<br>(0 - 0)       | 0<br>(0 - 0)        | 0<br>(0 - 0)         | 0<br>(0 - 0)         | 0<br>(0 - 0)         |
| Assault by sharp object                         | 0<br>(0 - 0)      | 0<br>(0 - 0)       | 0<br>(0 - 0)        | 0<br>(0 - 0)         | 0<br>(0 - 0)         | 0<br>(0 - 0)         |
| Assault by other means                          | 0<br>(0 - 0)      | 0<br>(0 - 0)       | 0<br>(0 - 0)        | 0<br>(0 - 0)         | 0<br>(0 - 0)         | 0<br>(0 - 0)         |

Web Table 31- India deaths with 95% UI by age, sex, and cause in 2013

| Cause                                                             | Both Sexes, All Ages                   | Both Sexes, 0-4 Years                | Both Sexes, 5-14 Years         | Both Sexes, 15-49 Years              | Both Sexes, 50-69 Years              | Both Sexes, 70-80 Years              |
|-------------------------------------------------------------------|----------------------------------------|--------------------------------------|--------------------------------|--------------------------------------|--------------------------------------|--------------------------------------|
| All causes                                                        | 10,248,877<br>(9,331,581 - 11,350,652) | 1,249,673<br>(1,103,816 - 1,443,687) | 212,653<br>(195,883 - 232,759) | 2,082,867<br>(1,834,471 - 2,417,042) | 3,221,862<br>(2,858,493 - 3,695,100) | 3,481,822<br>(3,193,254 - 3,789,399) |
| Communicable, maternal, neonatal, and nutritional diseases        | 2,853,922<br>(2,647,448 - 3,081,600)   | 1,050,380<br>(926,754 - 1,206,116)   | 120,565<br>(106,335 - 136,862) | 623,249<br>(558,131 - 697,466)       | 530,283<br>(467,572 - 608,104)       | 529,445<br>(470,894 - 597,290)       |
| HIV/AIDS and tuberculosis                                         | 624,178<br>(525,557 - 725,745)         | 17,644<br>(7,675 - 24,649)           | 9,686<br>(7,101 - 11,968)      | 261,376<br>(217,576 - 310,376)       | 217,699<br>(178,071 - 265,916)       | 117,773<br>(99,114 - 140,944)        |
| Tuberculosis                                                      | 545,516<br>(450,129 - 650,735)         | 16,455<br>(6,612 - 23,481)           | 6,980<br>(4,490 - 8,985)       | 204,548<br>(161,351 - 252,953)       | 201,183<br>(163,057 - 248,598)       | 116,530<br>(97,571 - 139,052)        |
| HIV/AIDS                                                          | 78,662<br>(66,197 - 96,173)            | 1,189<br>(775 - 1,637)               | 2,706<br>(1,523 - 3,910)       | 56,828<br>(48,401 - 67,338)          | 16,516<br>(10,913 - 27,035)          | 1,423<br>(913 - 2,361)               |
| HIV/AIDS resulting in mycobacterial infection                     | 5,061<br>(3,908 - 6,666)               | 70<br>(43 - 100)                     | 149<br>(84 - 215)              | 3,615<br>(2,838 - 4,560)             | 1,125<br>(697 - 1,946)               | 102<br>(61 - 172)                    |
| HIV/AIDS resulting in other diseases                              | 73,601<br>(61,699 - 89,927)            | 1,119<br>(724 - 1,537)               | 2,557<br>(1,432 - 3,691)       | 53,214<br>(45,276 - 63,259)          | 15,390<br>(10,199 - 25,156)          | 1,321<br>(848 - 2,182)               |
| Diarrhea, lower respiratory, and other common infectious diseases | 1,070,181<br>(938,931 - 1,213,377)     | 316,133<br>(259,465 - 394,684)       | 77,577<br>(63,687 - 92,710)    | 174,419<br>(137,320 - 221,926)       | 209,689<br>(169,247 - 258,968)       | 292,362<br>(240,982 - 355,435)       |
| Diarrheal diseases                                                | 413,226<br>(338,229 - 494,442)         | 80,225<br>(53,009 - 113,295)         | 22,182<br>(14,689 - 31,021)    | 50,039<br>(38,541 - 62,849)          | 100,380<br>(72,772 - 136,798)        | 160,399<br>(117,352 - 217,111)       |
| Intestinal infectious diseases                                    | 105,023<br>(56,644 - 176,604)          | 25,972<br>(12,505 - 47,582)          | 27,783<br>(15,277 - 43,971)    | 42,551<br>(21,099 - 78,527)          | 6,601<br>(3,007 - 12,784)            | 2,117<br>(967 - 3,951)               |
| Typhoid fever                                                     | 76,687<br>(40,503 - 131,616)           | 18,213<br>(8,605 - 32,617)           | 20,398<br>(10,699 - 33,661)    | 31,485<br>(15,325 - 58,556)          | 4,979<br>(2,195 - 9,516)             | 1,612<br>(705 - 3,053)               |
| Paratyphoid fever                                                 | 27,358<br>(13,976 - 47,955)            | 7,331<br>(3,125 - 13,851)            | 7,302<br>(3,523 - 13,043)      | 10,781<br>(4,924 - 21,173)           | 1,508<br>(610 - 3,208)               | 437<br>(157 - 934)                   |
| Other intestinal infectious diseases                              | 978<br>(810 - 1,186)                   | 428<br>(302 - 595)                   | 83<br>(59 - 110)               | 285<br>(222 - 358)                   | 114<br>(85 - 148)                    | 68<br>(48 - 90)                      |
| Lower respiratory infections                                      | 403,930<br>(346,988 - 462,932)         | 154,884<br>(117,836 - 197,886)       | 17,312<br>(12,717 - 23,323)    | 48,940<br>(38,206 - 63,227)          | 71,099<br>(55,602 - 88,882)          | 111,695<br>(90,524 - 135,517)        |
| Upper respiratory infections                                      | 1,151<br>(672 - 1,813)                 | 155<br>(41 - 385)                    | 35<br>(5 - 102)                | 314<br>(134 - 578)                   | 365<br>(107 - 806)                   | 282<br>(70 - 668)                    |
| Otitis media                                                      | 279<br>(197 - 362)                     | 43<br>(27 - 63)                      | 42<br>(28 - 58)                | 103<br>(71 - 137)                    | 64<br>(42 - 88)                      | 27<br>(18 - 36)                      |
| Meningitis                                                        | 56,391<br>(46,332 - 67,308)            | 8,659<br>(5,712 - 12,394)            | 2,783<br>(2,016 - 3,726)       | 18,419<br>(14,058 - 23,804)          | 17,064<br>(12,611 - 22,033)          | 9,466<br>(7,287 - 12,052)            |
| Pneumococcal meningitis                                           | 16,825<br>(12,819 - 21,523)            | 2,167<br>(1,367 - 3,217)             | 1,024<br>(658 - 1,552)         | 5,666<br>(3,840 - 8,078)             | 5,151<br>(3,292 - 7,488)             | 2,818<br>(1,812 - 4,125)             |
| H influenzae type B meningitis                                    | 9,094<br>(6,890 - 11,492)              | 3,436<br>(2,186 - 4,950)             | 734<br>(479 - 1,063)           | 2,126<br>(1,354 - 3,068)             | 1,805<br>(1,061 - 2,762)             | 992<br>(640 - 1,491)                 |
| Meningococcal meningitis                                          | 7,936<br>(5,969 - 10,138)              | 627<br>(395 - 929)                   | 295<br>(189 - 428)             | 2,841<br>(1,940 - 3,905)             | 2,563<br>(1,625 - 3,870)             | 1,610<br>(1,052 - 2,199)             |
| Other meningitis                                                  | 22,536<br>(17,912 - 28,087)            | 2,429<br>(1,470 - 3,644)             | 730<br>(419 - 1,063)           | 7,785<br>(5,427 - 10,689)            | 7,545<br>(5,461 - 10,347)            | 4,046<br>(2,659 - 5,736)             |
| Encephalitis                                                      | 37,170<br>(28,749 - 48,476)            | 12,116<br>(7,535 - 18,776)           | 5,116<br>(3,409 - 7,364)       | 11,109<br>(8,196 - 15,050)           | 6,838<br>(5,055 - 9,646)             | 1,991<br>(1,502 - 2,664)             |
| Diphtheria                                                        | 1,391<br>(262 - 4,500)                 | 749<br>(6 - 3,626)                   | 311<br>(5 - 1,455)             | 249<br>(38 - 730)                    | 82<br>(1 - 385)                      | --                                   |
| Whooping cough                                                    | 11,525<br>(289 - 50,785)               | 10,724<br>(270 - 47,538)             | 599<br>(15 - 2,820)            | 173<br>(4 - 758)                     | 29<br>(1 - 130)                      | --                                   |
| Tetanus                                                           | 29,540<br>(15,401 - 44,786)            | 14,711<br>(4,098 - 26,607)           | 335<br>(149 - 555)             | 1,849<br>(1,157 - 3,387)             | 6,911<br>(4,159 - 11,872)            | 5,735<br>(3,244 - 9,845)             |
| Measles                                                           | 8,604<br>(4,959 - 14,371)              | 7,426<br>(4,238 - 12,477)            | 974<br>(567 - 1,619)           | 196<br>(114 - 314)                   | 8<br>(5 - 13)                        | --                                   |
| Varicella and herpes zoster                                       | 1,950<br>(988 - 3,392)                 | 468<br>(104 - 1,317)                 | 107<br>(16 - 329)              | 477<br>(192 - 958)                   | 248<br>(69 - 564)                    | 650<br>(130 - 1,814)                 |
| Neglected tropical diseases and malaria                           | 166,813<br>(140,181 - 202,433)         | 22,894<br>(15,889 - 32,146)          | 19,376<br>(15,039 - 24,505)    | 55,278<br>(44,392 - 69,395)          | 42,600<br>(30,802 - 57,746)          | 26,666<br>(18,826 - 37,715)          |
| Malaria                                                           | 116,322<br>(90,658 - 149,612)          | 9,453<br>(5,062 - 16,345)            | 10,274<br>(6,739 - 15,388)     | 38,998<br>(28,380 - 53,010)          | 35,006<br>(23,556 - 50,399)          | 22,592<br>(14,725 - 33,278)          |
| Leishmaniasis                                                     | 28,054<br>(22,433 - 34,781)            | 9,609<br>(6,279 - 14,170)            | 6,065<br>(4,233 - 8,240)       | 9,338<br>(6,760 - 12,536)            | 2,396<br>(1,618 - 3,287)             | 646<br>(457 - 843)                   |
| Visceral leishmaniasis                                            | 28,054<br>(22,433 - 34,781)            | 9,609<br>(6,279 - 14,170)            | 6,065<br>(4,233 - 8,240)       | 9,338<br>(6,760 - 12,536)            | 2,396<br>(1,618 - 3,287)             | 646<br>(457 - 843)                   |
| Cysticercosis                                                     | 77<br>(59 - 99)                        | 1<br>(1 - 1)                         | 3<br>(2 - 4)                   | 43<br>(32 - 55)                      | 24<br>(18 - 31)                      | 7<br>(5 - 8)                         |
| Cystic echinococcosis                                             | 402<br>(343 - 468)                     | 15<br>(10 - 22)                      | 47<br>(39 - 56)                | 184<br>(152 - 222)                   | 108<br>(91 - 129)                    | 47<br>(41 - 54)                      |
| Dengue                                                            | 1,663<br>(1,318 - 2,298)               | 196<br>(115 - 409)                   | 87<br>(65 - 124)               | 842<br>(629 - 1,131)                 | 303<br>(238 - 434)                   | 235<br>(184 - 344)                   |
| Rabies                                                            | 12,349<br>(8,196 - 15,399)             | 928<br>(393 - 1,838)                 | 2,448<br>(1,345 - 3,734)       | 4,264<br>(2,724 - 5,575)             | 3,536<br>(2,486 - 4,583)             | 1,172<br>(780 - 1,556)               |
| Intestinal nematode infections                                    | 577<br>(465 - 721)                     | 286<br>(197 - 405)                   | 112<br>(78 - 154)              | 82<br>(54 - 118)                     | 53<br>(31 - 78)                      | 44<br>(25 - 65)                      |
| Ascariasis                                                        | 577<br>(465 - 721)                     | 286<br>(197 - 405)                   | 112<br>(78 - 154)              | 82<br>(54 - 118)                     | 53<br>(31 - 78)                      | 44<br>(25 - 65)                      |
| Other neglected tropical diseases                                 | 7,370<br>(5,362 - 10,665)              | 2,406<br>(1,295 - 4,579)             | 339<br>(211 - 540)             | 1,527<br>(1,058 - 2,237)             | 1,175<br>(764 - 1,687)               | 1,924<br>(1,401 - 2,647)             |
| Maternal disorders                                                | 71,792<br>(52,723 - 94,564)            | --                                   | 44<br>(20 - 82)                | 71,748<br>(52,681 - 94,528)          | --                                   | --                                   |
| Maternal hemorrhage                                               | 10,542<br>(6,614 - 15,648)             | --                                   | 3<br>(1 - 6)                   | 10,539<br>(6,611 - 15,645)           | --                                   | --                                   |

Web Table 31- India deaths with 95% UI by age, sex, and cause in 2013

| Cause                                                            | Both Sexes, All Ages                 | Both Sexes, 0-4 Years          | Both Sexes, 5-14 Years      | Both Sexes, 15-49 Years          | Both Sexes, 50-69 Years              | Both Sexes, 70-80 Years              |
|------------------------------------------------------------------|--------------------------------------|--------------------------------|-----------------------------|----------------------------------|--------------------------------------|--------------------------------------|
| Maternal sepsis and other maternal infections                    | 7,236<br>(4,761 - 10,523)            | --                             | 3<br>(1 - 7)                | 7,233<br>(4,757 - 10,520)        | --                                   | --                                   |
| Maternal hypertensive disorders                                  | 6,043<br>(3,541 - 9,063)             | --                             | 8<br>(4 - 17)               | 6,035<br>(3,530 - 9,054)         | --                                   | --                                   |
| Maternal obstructed labor                                        | 4,975<br>(3,313 - 7,116)             | --                             | 1<br>(1 - 3)                | 4,973<br>(3,311 - 7,115)         | --                                   | --                                   |
| Maternal abortive outcome                                        | 7,830<br>(5,009 - 11,428)            | --                             | 5<br>(2 - 10)               | 7,825<br>(5,005 - 11,421)        | --                                   | --                                   |
| Indirect maternal deaths                                         | 8,766<br>(5,838 - 12,632)            | --                             | 5<br>(2 - 10)               | 8,761<br>(5,834 - 12,627)        | --                                   | --                                   |
| Late maternal deaths                                             | 13,632<br>(8,284 - 20,913)           | --                             | 10<br>(4 - 21)              | 13,622<br>(8,272 - 20,904)       | --                                   | --                                   |
| Maternal deaths aggravated by HIV/AIDS                           | 23<br>(11 - 38)                      | --                             | --                          | 23<br>(11 - 38)                  | --                                   | --                                   |
| Other maternal disorders                                         | 12,607<br>(7,373 - 19,147)           | --                             | 7<br>(3 - 15)               | 12,600<br>(7,368 - 19,135)       | --                                   | --                                   |
| Neonatal disorders                                               | 615,644<br>(548,285 - 688,699)       | 615,644<br>(548,285 - 688,699) | --                          | --                               | --                                   | --                                   |
| Neonatal preterm birth complications                             | 211,108<br>(144,126 - 279,806)       | 211,108<br>(144,126 - 279,806) | --                          | --                               | --                                   | --                                   |
| Neonatal encephalopathy due to birth asphyxia and trauma         | 212,686<br>(155,253 - 278,303)       | 212,686<br>(155,253 - 278,303) | --                          | --                               | --                                   | --                                   |
| Neonatal sepsis and other neonatal infections                    | 94,299<br>(54,247 - 156,671)         | 94,299<br>(54,247 - 156,671)   | --                          | --                               | --                                   | --                                   |
| Hemolytic disease and other neonatal jaundice                    | 6,433<br>(3,070 - 14,086)            | 6,433<br>(3,070 - 14,086)      | --                          | --                               | --                                   | --                                   |
| Other neonatal disorders                                         | 91,118<br>(60,254 - 130,779)         | 91,118<br>(60,254 - 130,779)   | --                          | --                               | --                                   | --                                   |
| Nutritional deficiencies                                         | 164,562<br>(110,809 - 200,679)       | 26,310<br>(15,721 - 38,545)    | 4,432<br>(2,635 - 5,924)    | 26,668<br>(19,261 - 34,480)      | 34,774<br>(21,321 - 45,821)          | 72,379<br>(47,209 - 93,858)          |
| Protein-energy malnutrition                                      | 104,970<br>(59,240 - 136,233)        | 19,483<br>(10,333 - 29,791)    | 3,115<br>(1,537 - 4,432)    | 12,886<br>(7,463 - 17,917)       | 16,141<br>(8,373 - 23,836)           | 53,345<br>(27,560 - 72,116)          |
| Iodine deficiency                                                | 1,269<br>(373 - 3,050)               | 101<br>(1 - 560)               | 24<br>(0 - 102)             | 326<br>(40 - 1,059)              | 493<br>(32 - 1,864)                  | 324<br>(13 - 1,214)                  |
| Iron-deficiency anemia                                           | 46,971<br>(26,620 - 72,576)          | 5,951<br>(2,106 - 12,133)      | 1,243<br>(521 - 2,086)      | 11,877<br>(7,122 - 17,088)       | 14,439<br>(7,216 - 22,187)           | 13,460<br>(6,441 - 26,280)           |
| Other nutritional deficiencies                                   | 11,352<br>(6,928 - 17,916)           | 775<br>(247 - 2,229)           | 49<br>(26 - 92)             | 1,579<br>(827 - 2,675)           | 3,700<br>(2,120 - 6,419)             | 5,249<br>(2,633 - 8,720)             |
| Other communicable, maternal, neonatal, and nutritional diseases | 140,752<br>(104,933 - 182,248)       | 51,755<br>(27,382 - 83,221)    | 9,451<br>(6,837 - 12,998)   | 33,760<br>(26,837 - 43,096)      | 25,520<br>(17,120 - 38,888)          | 20,265<br>(11,992 - 32,627)          |
| Sexually transmitted diseases excluding HIV                      | 28,283<br>(10,404 - 50,121)          | 22,873<br>(6,351 - 42,990)     | 1,603<br>(481 - 3,060)      | 913<br>(632 - 1,281)             | 898<br>(523 - 1,483)                 | 1,996<br>(909 - 4,417)               |
| Syphilis                                                         | 26,901<br>(9,083 - 48,528)           | 22,873<br>(6,351 - 42,990)     | 1,573<br>(453 - 3,021)      | 431<br>(296 - 598)               | 544<br>(324 - 889)                   | 1,481<br>(700 - 3,203)               |
| Chlamydial infection                                             | 313<br>(192 - 539)                   | --                             | 8<br>(4 - 12)               | 99<br>(61 - 162)                 | 82<br>(37 - 167)                     | 124<br>(44 - 310)                    |
| Gonococcal infection                                             | 629<br>(430 - 993)                   | --                             | 11<br>(7 - 16)              | 205<br>(143 - 286)               | 159<br>(93 - 264)                    | 254<br>(111 - 576)                   |
| Other sexually transmitted diseases                              | 440<br>(306 - 664)                   | --                             | 11<br>(7 - 16)              | 178<br>(125 - 250)               | 113<br>(63 - 194)                    | 137<br>(53 - 330)                    |
| Hepatitis                                                        | 51,775<br>(42,568 - 69,123)          | 10,873<br>(6,175 - 21,147)     | 4,726<br>(3,494 - 6,651)    | 23,268<br>(18,662 - 29,398)      | 9,104<br>(7,096 - 11,477)            | 3,804<br>(2,953 - 4,833)             |
| Acute hepatitis A                                                | 7,692<br>(2,489 - 15,474)            | 4,952<br>(1,653 - 10,335)      | 738<br>(191 - 1,614)        | 1,630<br>(410 - 3,609)           | 311<br>(77 - 744)                    | 61<br>(13 - 152)                     |
| Acute hepatitis B                                                | 17,686<br>(11,324 - 26,278)          | 3,891<br>(1,449 - 8,823)       | 396<br>(168 - 781)          | 4,790<br>(2,012 - 8,229)         | 5,605<br>(3,542 - 7,913)             | 3,003<br>(2,156 - 3,970)             |
| Acute hepatitis C                                                | 857<br>(142 - 2,442)                 | --                             | 75<br>(12 - 219)            | 475<br>(78 - 1,454)              | 229<br>(34 - 692)                    | 78<br>(12 - 234)                     |
| Acute hepatitis E                                                | 25,540<br>(18,123 - 35,754)          | 2,030<br>(833 - 4,856)         | 3,517<br>(2,425 - 5,057)    | 16,373<br>(12,008 - 21,839)      | 2,958<br>(1,408 - 5,126)             | 662<br>(222 - 1,355)                 |
| Other infectious diseases                                        | 60,694<br>(30,021 - 94,388)          | 18,010<br>(4,482 - 44,962)     | 3,122<br>(1,378 - 6,205)    | 9,579<br>(4,121 - 15,426)        | 15,518<br>(7,994 - 27,678)           | 14,465<br>(6,251 - 26,932)           |
| Non-communicable diseases                                        | 6,186,135<br>(5,545,440 - 7,026,863) | 123,265<br>(92,063 - 158,217)  | 44,435<br>(37,820 - 51,586) | 870,628<br>(734,469 - 1,049,260) | 2,402,292<br>(2,113,208 - 2,801,112) | 2,745,516<br>(2,501,204 - 3,013,798) |
| Neoplasms                                                        | 677,242<br>(587,147 - 786,991)       | 14,575<br>(9,314 - 20,544)     | 7,404<br>(5,875 - 8,935)    | 137,757<br>(114,147 - 165,362)   | 336,902<br>(288,849 - 393,736)       | 180,603<br>(159,648 - 205,108)       |
| Esophageal cancer                                                | 63,596<br>(51,058 - 77,330)          | --                             | --                          | 10,034<br>(7,757 - 12,835)       | 32,736<br>(25,159 - 40,502)          | 20,826<br>(16,367 - 25,871)          |
| Stomach cancer                                                   | 68,863<br>(58,273 - 81,292)          | --                             | --                          | 11,635<br>(9,398 - 14,526)       | 35,788<br>(29,565 - 43,648)          | 21,440<br>(17,544 - 26,551)          |
| Liver cancer                                                     | 66,857<br>(55,392 - 80,466)          | --                             | 150<br>(100 - 212)          | 9,444<br>(7,211 - 12,141)        | 36,425<br>(28,922 - 45,493)          | 20,838<br>(16,605 - 26,021)          |
| Liver cancer due to hepatitis B                                  | 28,322<br>(20,590 - 36,434)          | --                             | 68<br>(43 - 100)            | 5,216<br>(3,757 - 6,878)         | 16,130<br>(11,293 - 21,549)          | 6,908<br>(4,812 - 9,324)             |
| Liver cancer due to hepatitis C                                  | 17,129<br>(11,868 - 23,952)          | --                             | 5<br>(2 - 12)               | 1,504<br>(853 - 2,268)           | 9,035<br>(5,896 - 12,972)            | 6,584<br>(4,467 - 9,303)             |
| Liver cancer due to alcohol use                                  | 10,446<br>(7,533 - 13,998)           | --                             | --                          | 797<br>(500 - 1,181)             | 5,227<br>(3,594 - 7,336)             | 4,422<br>(3,116 - 5,993)             |
| Liver cancer due to other causes                                 | 10,960<br>(7,512 - 14,959)           | --                             | 77<br>(49 - 114)            | 1,926<br>(1,302 - 2,730)         | 6,032<br>(3,969 - 8,723)             | 2,925<br>(1,813 - 4,212)             |

Web Table 31- India deaths with 95% UI by age, sex, and cause in 2013

| Cause                                         | Both Sexes, All Ages                 | Both Sexes, 0-4 Years      | Both Sexes, 5-14 Years    | Both Sexes, 15-49 Years        | Both Sexes, 50-69 Years            | Both Sexes, 70-80 Years              |
|-----------------------------------------------|--------------------------------------|----------------------------|---------------------------|--------------------------------|------------------------------------|--------------------------------------|
| Larynx cancer                                 | 15,749<br>(12,012 - 20,807)          | --                         | --                        | 2,393<br>(1,731 - 3,574)       | 8,446<br>(6,183 - 11,050)          | 4,910<br>(3,740 - 6,526)             |
| Tracheal, bronchus and lung cancer            | 61,735<br>(51,975 - 74,091)          | --                         | --                        | 8,748<br>(7,019 - 10,880)      | 36,349<br>(29,853 - 44,695)        | 16,638<br>(14,398 - 19,409)          |
| Breast cancer                                 | 48,513<br>(37,647 - 60,182)          | --                         | --                        | 11,594<br>(8,478 - 15,282)     | 24,907<br>(18,996 - 31,258)        | 12,012<br>(9,662 - 14,773)           |
| Cervical cancer                               | 40,985<br>(30,324 - 53,090)          | --                         | --                        | 9,156<br>(6,314 - 12,988)      | 22,461<br>(16,005 - 29,980)        | 9,368<br>(7,086 - 12,252)            |
| Uterine cancer                                | 2,503<br>(1,576 - 3,386)             | --                         | --                        | 286<br>(183 - 426)             | 1,329<br>(798 - 1,841)             | 888<br>(574 - 1,272)                 |
| Prostate cancer                               | 5,070<br>(3,461 - 8,203)             | --                         | --                        | 72<br>(48 - 112)               | 1,004<br>(655 - 1,580)             | 3,994<br>(2,688 - 6,526)             |
| Colon and rectum cancer                       | 40,350<br>(35,023 - 47,173)          | --                         | --                        | 8,167<br>(6,746 - 9,968)       | 20,278<br>(17,184 - 24,220)        | 11,904<br>(10,340 - 13,757)          |
| Lip and oral cavity cancer                    | 38,069<br>(30,274 - 48,745)          | --                         | --                        | 7,815<br>(5,694 - 10,201)      | 18,607<br>(14,328 - 24,168)        | 11,646<br>(9,032 - 16,146)           |
| Nasopharynx cancer                            | 7,806<br>(6,148 - 10,304)            | --                         | 72<br>(38 - 141)          | 2,560<br>(1,911 - 3,523)       | 4,274<br>(3,249 - 5,828)           | 901<br>(682 - 1,278)                 |
| Other pharynx cancer                          | 26,710<br>(18,818 - 32,643)          | --                         | --                        | 4,578<br>(3,213 - 5,913)       | 16,545<br>(11,409 - 20,946)        | 5,587<br>(3,768 - 7,039)             |
| Gallbladder and biliary tract cancer          | 10,320<br>(7,343 - 12,666)           | --                         | --                        | 2,389<br>(1,685 - 3,055)       | 5,605<br>(3,986 - 7,083)           | 2,326<br>(1,640 - 2,878)             |
| Pancreatic cancer                             | 11,375<br>(9,684 - 13,383)           | --                         | --                        | 2,124<br>(1,708 - 2,649)       | 6,052<br>(5,029 - 7,281)           | 3,198<br>(2,719 - 3,685)             |
| Malignant skin melanoma                       | 4,150<br>(2,691 - 8,017)             | --                         | --                        | 1,929<br>(1,239 - 3,256)       | 1,223<br>(742 - 2,407)             | 999<br>(534 - 2,415)                 |
| Non-melanoma skin cancer                      | 2,041<br>(1,478 - 3,309)             | --                         | --                        | 799<br>(424 - 1,712)           | 496<br>(345 - 672)                 | 746<br>(534 - 1,062)                 |
| Ovarian cancer                                | 18,293<br>(14,126 - 23,348)          | --                         | --                        | 4,139<br>(2,964 - 5,616)       | 10,692<br>(7,998 - 14,023)         | 3,462<br>(2,662 - 4,427)             |
| Testicular cancer                             | 1,353<br>(908 - 1,890)               | --                         | --                        | 788<br>(505 - 1,147)           | 415<br>(268 - 618)                 | 150<br>(89 - 221)                    |
| Kidney cancer                                 | 6,916<br>(5,752 - 8,287)             | 153<br>(83 - 281)          | 98<br>(69 - 136)          | 1,086<br>(855 - 1,381)         | 4,001<br>(3,174 - 4,933)           | 1,578<br>(1,312 - 1,896)             |
| Bladder cancer                                | 10,639<br>(8,471 - 12,869)           | --                         | --                        | 975<br>(743 - 1,274)           | 5,351<br>(4,114 - 6,778)           | 4,314<br>(3,370 - 5,305)             |
| Brain and nervous system cancer               | 18,129<br>(13,973 - 26,615)          | 253<br>(127 - 499)         | 778<br>(547 - 1,182)      | 6,423<br>(4,818 - 9,656)       | 8,284<br>(6,170 - 12,271)          | 2,390<br>(1,858 - 3,476)             |
| Thyroid cancer                                | 3,901<br>(3,138 - 5,100)             | --                         | 22<br>(13 - 38)           | 748<br>(540 - 1,123)           | 1,880<br>(1,493 - 2,485)           | 1,251<br>(1,000 - 1,607)             |
| Mesothelioma                                  | 565<br>(446 - 719)                   | --                         | --                        | 240<br>(176 - 339)             | 261<br>(196 - 348)                 | 65<br>(49 - 86)                      |
| Hodgkin lymphoma                              | 3,690<br>(2,650 - 5,680)             | 1,311<br>(637 - 2,579)     | 162<br>(85 - 315)         | 791<br>(580 - 1,231)           | 924<br>(656 - 1,515)               | 501<br>(345 - 910)                   |
| Non-Hodgkin lymphoma                          | 20,131<br>(15,780 - 29,050)          | 696<br>(195 - 2,280)       | 669<br>(467 - 1,020)      | 5,360<br>(4,031 - 7,627)       | 8,665<br>(6,619 - 12,190)          | 4,741<br>(3,791 - 6,684)             |
| Multiple myeloma                              | 5,039<br>(3,792 - 6,174)             | --                         | --                        | 793<br>(595 - 1,034)           | 2,754<br>(2,043 - 3,435)           | 1,492<br>(1,126 - 1,859)             |
| Leukemia                                      | 24,731<br>(21,488 - 28,869)          | 759<br>(469 - 1,162)       | 2,341<br>(1,821 - 2,922)  | 10,537<br>(8,754 - 12,788)     | 7,574<br>(6,376 - 9,031)           | 3,520<br>(2,998 - 4,093)             |
| Other neoplasms                               | 49,161<br>(38,530 - 59,714)          | 11,403<br>(6,778 - 16,545) | 3,112<br>(2,094 - 4,242)  | 12,155<br>(9,245 - 16,364)     | 13,574<br>(10,415 - 17,120)        | 8,916<br>(7,091 - 11,123)            |
| Cardiovascular diseases                       | 2,760,757<br>(2,394,181 - 3,189,535) | 9,260<br>(6,413 - 14,761)  | 9,064<br>(6,919 - 12,635) | 341,534<br>(279,269 - 416,538) | 1,089,525<br>(922,301 - 1,301,256) | 1,311,373<br>(1,156,260 - 1,460,035) |
| Rheumatic heart disease                       | 87,941<br>(62,357 - 130,094)         | 686<br>(334 - 1,392)       | 2,013<br>(1,260 - 3,043)  | 27,644<br>(18,584 - 40,356)    | 33,992<br>(23,214 - 51,222)        | 23,607<br>(16,357 - 35,742)          |
| Ischemic heart disease                        | 1,586,508<br>(1,331,531 - 1,852,608) | 2,695<br>(1,507 - 5,954)   | 2,699<br>(1,851 - 4,609)  | 203,566<br>(161,866 - 255,629) | 646,924<br>(534,189 - 775,325)     | 730,624<br>(610,922 - 830,896)       |
| Cerebrovascular disease                       | 714,216<br>(590,160 - 841,167)       | 2,104<br>(1,442 - 3,162)   | 2,879<br>(2,059 - 4,285)  | 63,898<br>(49,641 - 81,268)    | 262,907<br>(209,699 - 326,449)     | 382,427<br>(316,125 - 445,607)       |
| Ischemic stroke                               | 332,770<br>(249,102 - 409,620)       | 286<br>(160 - 479)         | 367<br>(212 - 591)        | 10,241<br>(6,441 - 14,377)     | 92,394<br>(65,445 - 122,702)       | 229,482<br>(170,149 - 276,793)       |
| Hemorrhagic stroke                            | 381,446<br>(294,382 - 487,330)       | 1,818<br>(1,243 - 2,806)   | 2,512<br>(1,764 - 3,741)  | 53,657<br>(41,057 - 69,021)    | 170,512<br>(129,992 - 221,687)     | 152,946<br>(112,507 - 208,738)       |
| Hypertensive heart disease                    | 261,694<br>(200,563 - 349,092)       | 661<br>(339 - 1,187)       | 347<br>(227 - 498)        | 24,411<br>(16,868 - 34,169)    | 104,275<br>(73,536 - 139,777)      | 132,000<br>(100,888 - 183,976)       |
| Cardiomyopathy and myocarditis                | 52,729<br>(35,263 - 69,046)          | 2,546<br>(1,525 - 3,842)   | 877<br>(493 - 1,323)      | 13,479<br>(8,751 - 18,467)     | 19,891<br>(12,689 - 27,429)        | 15,937<br>(10,610 - 22,653)          |
| Atrial fibrillation and flutter               | 1,368<br>(808 - 1,995)               | --                         | --                        | 72<br>(48 - 100)               | 358<br>(216 - 513)                 | 938<br>(516 - 1,456)                 |
| Aortic aneurysm                               | 19,230<br>(13,174 - 25,834)          | --                         | --                        | 2,102<br>(1,322 - 2,917)       | 7,786<br>(5,123 - 10,723)          | 9,341<br>(6,400 - 12,711)            |
| Peripheral vascular disease                   | 1,010<br>(579 - 1,446)               | --                         | --                        | 39<br>(21 - 59)                | 291<br>(161 - 414)                 | 681<br>(386 - 1,020)                 |
| Endocarditis                                  | 10,900<br>(7,309 - 15,195)           | 399<br>(192 - 829)         | 133<br>(68 - 256)         | 2,786<br>(1,784 - 4,164)       | 3,624<br>(2,350 - 5,311)           | 3,958<br>(2,590 - 5,670)             |
| Other cardiovascular and circulatory diseases | 25,159<br>(18,511 - 39,729)          | 169<br>(85 - 465)          | 117<br>(71 - 221)         | 3,537<br>(2,466 - 5,905)       | 9,476<br>(6,602 - 15,368)          | 11,860<br>(8,543 - 18,018)           |
| Chronic respiratory diseases                  | 1,395,761<br>(1,213,584 - 1,629,060) | 6,692<br>(4,577 - 9,537)   | 3,386<br>(2,690 - 4,238)  | 91,693<br>(72,523 - 115,801)   | 529,463<br>(444,397 - 636,425)     | 764,526<br>(670,343 - 884,689)       |



Web Table 31- India deaths with 95% UI by age, sex, and cause in 2013

| Cause                                               | Both Sexes, All Ages           | Both Sexes, 0-4 Years    | Both Sexes, 5-14 Years   | Both Sexes, 15-49 Years      | Both Sexes, 50-69 Years        | Both Sexes, 70-80 Years        |
|-----------------------------------------------------|--------------------------------|--------------------------|--------------------------|------------------------------|--------------------------------|--------------------------------|
| Chronic obstructive pulmonary disease               | 757,940<br>(616,806 - 899,959) | 1,954<br>(1,090 - 3,220) | 750<br>(472 - 1,038)     | 33,915<br>(24,029 - 45,248)  | 270,304<br>(211,931 - 333,900) | 451,018<br>(375,459 - 530,609) |
| Pneumoconiosis                                      | 191,964<br>(144,331 - 249,608) | 20<br>(6 - 50)           | 71<br>(34 - 122)         | 13,174<br>(9,512 - 17,828)   | 82,728<br>(60,499 - 111,578)   | 95,971<br>(67,180 - 131,844)   |
| Silicosis                                           | 25,655<br>(16,175 - 38,942)    | 5<br>(1 - 13)            | 16<br>(6 - 33)           | 2,021<br>(1,138 - 3,610)     | 11,651<br>(7,069 - 18,399)     | 11,962<br>(7,559 - 18,491)     |
| Asbestosis                                          | 15,092<br>(10,271 - 21,772)    | 4<br>(1 - 10)            | 14<br>(6 - 27)           | 1,532<br>(992 - 2,272)       | 8,320<br>(5,417 - 12,299)      | 5,222<br>(3,401 - 7,805)       |
| Coal workers pneumoconiosis                         | 14,859<br>(10,040 - 22,314)    | 3<br>(1 - 9)             | 13<br>(5 - 24)           | 1,503<br>(894 - 2,349)       | 7,464<br>(4,892 - 11,388)      | 5,877<br>(3,788 - 9,104)       |
| Other pneumoconiosis                                | 136,359<br>(96,826 - 181,807)  | 8<br>(3 - 20)            | 28<br>(14 - 46)          | 8,119<br>(5,484 - 11,232)    | 55,293<br>(38,338 - 75,951)    | 72,911<br>(48,376 - 103,998)   |
| Asthma                                              | 226,743<br>(156,313 - 391,662) | 1,639<br>(865 - 2,759)   | 1,779<br>(1,226 - 2,528) | 28,787<br>(19,489 - 45,163)  | 89,575<br>(59,548 - 149,957)   | 104,963<br>(68,688 - 191,690)  |
| Interstitial lung disease and pulmonary sarcoidosis | 191,479<br>(141,843 - 253,555) | 61<br>(6 - 271)          | 123<br>(33 - 368)        | 12,019<br>(7,565 - 16,650)   | 77,066<br>(51,455 - 102,323)   | 102,210<br>(69,687 - 145,011)  |
| Other chronic respiratory diseases                  | 27,635<br>(19,589 - 37,579)    | 3,018<br>(1,776 - 4,586) | 664<br>(421 - 925)       | 3,797<br>(2,446 - 5,472)     | 9,791<br>(6,405 - 14,643)      | 10,365<br>(6,977 - 15,036)     |
| Cirrhosis                                           | 262,180<br>(224,811 - 308,351) | 4,424<br>(2,581 - 7,102) | 4,203<br>(3,300 - 5,320) | 85,836<br>(69,409 - 107,454) | 114,157<br>(94,870 - 137,671)  | 53,560<br>(45,306 - 62,633)    |
| Cirrhosis due to hepatitis B                        | 69,932<br>(50,845 - 93,317)    | 161<br>(67 - 311)        | 613<br>(357 - 950)       | 21,771<br>(14,051 - 30,970)  | 31,693<br>(22,497 - 43,391)    | 15,694<br>(11,692 - 20,008)    |
| Cirrhosis due to hepatitis C                        | 42,020<br>(26,348 - 59,950)    | 232<br>(92 - 463)        | 400<br>(207 - 650)       | 11,987<br>(6,151 - 19,211)   | 19,239<br>(11,428 - 28,345)    | 10,163<br>(6,474 - 14,440)     |
| Cirrhosis due to alcohol use                        | 94,202<br>(68,772 - 121,163)   | --                       | --                       | 27,697<br>(17,479 - 38,740)  | 44,922<br>(32,205 - 59,051)    | 21,582<br>(16,261 - 27,283)    |
| Cirrhosis due to other causes                       | 56,026<br>(40,513 - 74,383)    | 4,031<br>(2,341 - 6,469) | 3,190<br>(2,443 - 4,083) | 24,381<br>(16,870 - 32,852)  | 18,303<br>(11,125 - 26,751)    | 6,121<br>(3,505 - 8,993)       |
| Digestive diseases                                  | 324,482<br>(253,351 - 402,199) | 2,108<br>(1,281 - 3,245) | 7,368<br>(5,381 - 9,595) | 90,206<br>(66,377 - 119,633) | 112,804<br>(85,017 - 144,222)  | 111,996<br>(88,464 - 140,635)  |
| Peptic ulcer disease                                | 101,278<br>(69,705 - 133,161)  | 166<br>(61 - 344)        | 957<br>(527 - 1,506)     | 22,828<br>(15,032 - 32,394)  | 39,243<br>(25,870 - 50,459)    | 38,085<br>(26,965 - 50,594)    |
| Gastritis and duodenitis                            | 18,938<br>(11,658 - 32,493)    | 163<br>(70 - 329)        | 582<br>(301 - 1,133)     | 4,882<br>(2,878 - 8,749)     | 6,425<br>(3,776 - 11,134)      | 6,886<br>(3,662 - 13,283)      |
| Appendicitis                                        | 36,938<br>(22,890 - 51,366)    | 170<br>(64 - 357)        | 798<br>(454 - 1,269)     | 16,746<br>(10,330 - 24,589)  | 9,485<br>(5,861 - 13,922)      | 9,738<br>(5,843 - 14,112)      |
| Paralytic ileus and intestinal obstruction          | 75,334<br>(54,026 - 114,071)   | 1,067<br>(550 - 1,885)   | 2,815<br>(1,832 - 4,033) | 18,188<br>(12,095 - 28,095)  | 26,269<br>(17,948 - 41,440)    | 26,995<br>(17,948 - 41,429)    |
| Inguinal, femoral, and abdominal hernia             | 8,905<br>(5,048 - 18,995)      | 40<br>(16 - 87)          | 355<br>(133 - 1,011)     | 1,295<br>(510 - 3,602)       | 1,914<br>(837 - 4,782)         | 5,300<br>(3,148 - 10,558)      |
| Inflammatory bowel disease                          | 11,615<br>(8,009 - 17,174)     | 290<br>(129 - 535)       | 584<br>(342 - 913)       | 4,095<br>(2,735 - 6,157)     | 3,305<br>(2,167 - 4,942)       | 3,341<br>(2,206 - 5,230)       |
| Vascular intestinal disorders                       | 7,931<br>(4,173 - 14,454)      | 26<br>(5 - 73)           | 124<br>(28 - 332)        | 1,498<br>(720 - 3,008)       | 2,617<br>(1,300 - 4,771)       | 3,665<br>(1,919 - 6,610)       |
| Gallbladder and biliary diseases                    | 11,354<br>(8,052 - 16,337)     | 32<br>(14 - 62)          | 229<br>(123 - 354)       | 2,189<br>(1,481 - 3,232)     | 4,475<br>(2,909 - 6,681)       | 4,429<br>(2,857 - 6,960)       |
| Pancreatitis                                        | 38,660<br>(19,608 - 57,585)    | 40<br>(17 - 81)          | 426<br>(199 - 719)       | 14,288<br>(7,250 - 22,735)   | 14,242<br>(7,060 - 22,333)     | 9,662<br>(4,707 - 15,626)      |
| Other digestive diseases                            | 13,530<br>(7,854 - 19,561)     | 113<br>(53 - 202)        | 496<br>(283 - 729)       | 4,197<br>(1,994 - 6,249)     | 4,829<br>(2,820 - 7,119)       | 3,895<br>(2,412 - 5,923)       |
| Neurological disorders                              | 140,282<br>(118,279 - 164,599) | 3,904<br>(2,102 - 8,144) | 2,087<br>(1,213 - 3,278) | 10,529<br>(6,766 - 14,394)   | 16,790<br>(13,535 - 20,597)    | 106,971<br>(88,055 - 127,812)  |
| Alzheimer disease and other dementias               | 110,337<br>(90,727 - 131,803)  | --                       | --                       | 77<br>(39 - 129)             | 10,477<br>(7,921 - 13,324)     | 99,784<br>(81,313 - 120,342)   |
| Parkinson disease                                   | 1,431<br>(950 - 2,492)         | --                       | --                       | 69<br>(54 - 86)              | 28<br>(21 - 36)                | 1,334<br>(859 - 2,388)         |
| Epilepsy                                            | 17,721<br>(13,212 - 23,104)    | 3,040<br>(1,299 - 7,300) | 1,704<br>(878 - 2,882)   | 7,012<br>(3,711 - 10,480)    | 2,472<br>(1,843 - 3,298)       | 3,493<br>(2,423 - 5,205)       |
| Multiple sclerosis                                  | 2,223<br>(1,258 - 3,760)       | --                       | --                       | 743<br>(434 - 1,351)         | 876<br>(486 - 1,464)           | 604<br>(274 - 932)             |
| Other neurological disorders                        | 8,570<br>(6,691 - 10,866)      | 864<br>(597 - 1,186)     | 383<br>(279 - 504)       | 2,628<br>(1,931 - 3,463)     | 2,938<br>(2,279 - 3,846)       | 1,757<br>(1,354 - 2,275)       |
| Mental and substance use disorders                  | 11,089<br>(8,538 - 15,001)     | 130<br>(63 - 233)        | 8<br>(4 - 14)            | 4,372<br>(3,214 - 6,045)     | 4,583<br>(3,436 - 6,264)       | 1,997<br>(1,487 - 2,747)       |
| Schizophrenia                                       | 973<br>(347 - 2,250)           | --                       | --                       | 323<br>(97 - 858)            | 404<br>(142 - 898)             | 246<br>(98 - 517)              |
| Alcohol use disorders                               | 5,821<br>(3,586 - 8,193)       | --                       | --                       | 2,409<br>(1,348 - 3,411)     | 2,104<br>(1,386 - 3,216)       | 1,308<br>(791 - 1,879)         |
| Drug use disorders                                  | 4,214<br>(3,083 - 5,876)       | 130<br>(63 - 233)        | --                       | 1,567<br>(1,122 - 2,368)     | 2,075<br>(1,391 - 2,978)       | 442<br>(283 - 637)             |
| Opioid use disorders                                | 2,244<br>(1,648 - 3,153)       | 75<br>(36 - 140)         | --                       | 859<br>(611 - 1,316)         | 1,068<br>(701 - 1,536)         | 242<br>(153 - 352)             |
| Cocaine use disorders                               | 48<br>(35 - 66)                | 2<br>(1 - 5)             | --                       | 21<br>(15 - 32)              | 20<br>(13 - 30)                | 5<br>(3 - 7)                   |
| Amphetamine use disorders                           | 49<br>(36 - 68)                | 3<br>(1 - 5)             | --                       | 17<br>(12 - 27)              | 24<br>(16 - 36)                | 5<br>(3 - 7)                   |
| Other drug use disorders                            | 1,872<br>(1,354 - 2,643)       | 49<br>(24 - 89)          | --                       | 669<br>(475 - 1,016)         | 962<br>(633 - 1,410)           | 191<br>(122 - 274)             |
| Eating disorders                                    | 81<br>(54 - 123)               | --                       | 8<br>(4 - 14)            | 73<br>(47 - 114)             | --                             | --                             |

Web Table 31- India deaths with 95% UI by age, sex, and cause in 2013

| Cause                                               | Both Sexes, All Ages           | Both Sexes, 0-4 Years       | Both Sexes, 5-14 Years   | Both Sexes, 15-49 Years     | Both Sexes, 50-69 Years        | Both Sexes, 70-80 Years        |
|-----------------------------------------------------|--------------------------------|-----------------------------|--------------------------|-----------------------------|--------------------------------|--------------------------------|
| Anorexia nervosa                                    | 81<br>(54 - 123)               | --                          | 8<br>(4 - 14)            | 73<br>(47 - 114)            | --                             | --                             |
| Diabetes, urogenital, blood, and endocrine diseases | 456,114<br>(380,799 - 529,800) | 10,115<br>(7,437 - 13,913)  | 4,127<br>(3,208 - 5,495) | 73,054<br>(58,879 - 89,603) | 173,563<br>(142,358 - 208,802) | 195,255<br>(162,677 - 225,667) |
| Diabetes mellitus                                   | 237,775<br>(205,782 - 274,642) | 1,194<br>(849 - 1,674)      | 427<br>(297 - 617)       | 27,177<br>(22,114 - 33,192) | 97,272<br>(81,199 - 115,452)   | 111,704<br>(96,005 - 130,704)  |
| Acute glomerulonephritis                            | 5,579<br>(2,812 - 9,345)       | 965<br>(283 - 2,053)        | 535<br>(232 - 926)       | 1,786<br>(949 - 2,930)      | 1,281<br>(689 - 2,194)         | 1,012<br>(552 - 1,767)         |
| Chronic kidney disease                              | 136,947<br>(68,525 - 177,003)  | 285<br>(164 - 463)          | 294<br>(174 - 399)       | 25,770<br>(14,464 - 34,513) | 53,145<br>(25,806 - 70,577)    | 57,454<br>(27,098 - 74,778)    |
| Chronic kidney disease due to diabetes mellitus     | 9,504<br>(1,704 - 14,453)      | 11<br>(2 - 21)              | 14<br>(3 - 27)           | 1,621<br>(289 - 2,552)      | 4,646<br>(793 - 7,558)         | 3,213<br>(617 - 5,126)         |
| Chronic kidney disease due to hypertension          | 38,413<br>(13,515 - 57,166)    | 37<br>(13 - 68)             | 32<br>(9 - 57)           | 5,472<br>(1,711 - 8,420)    | 14,523<br>(5,125 - 22,237)     | 18,349<br>(6,548 - 28,116)     |
| Chronic kidney disease due to glomerulonephritis    | 27,385<br>(16,569 - 39,559)    | 166<br>(101 - 285)          | 198<br>(126 - 278)       | 7,838<br>(5,010 - 11,220)   | 10,071<br>(5,887 - 15,625)     | 9,112<br>(4,888 - 13,672)      |
| Chronic kidney disease due to other causes          | 61,645<br>(27,525 - 85,004)    | 70<br>(28 - 153)            | 50<br>(24 - 82)          | 10,839<br>(5,319 - 16,225)  | 23,905<br>(10,619 - 34,958)    | 26,780<br>(10,510 - 38,770)    |
| Urinary diseases and male infertility               | 32,047<br>(26,788 - 39,131)    | 486<br>(310 - 766)          | 328<br>(240 - 444)       | 6,100<br>(4,820 - 8,171)    | 11,661<br>(9,361 - 14,984)     | 13,472<br>(10,673 - 16,787)    |
| Interstitial nephritis and urinary tract infections | 20,994<br>(16,298 - 28,194)    | 416<br>(268 - 665)          | 223<br>(157 - 309)       | 4,122<br>(3,123 - 5,780)    | 7,489<br>(5,549 - 10,461)      | 8,744<br>(6,355 - 12,068)      |
| Urolithiasis                                        | 2,495<br>(1,699 - 4,208)       | --                          | 33<br>(19 - 61)          | 517<br>(313 - 1,019)        | 1,019<br>(618 - 1,863)         | 926<br>(548 - 1,573)           |
| Other urinary diseases                              | 8,558<br>(4,810 - 11,706)      | 70<br>(35 - 130)            | 72<br>(44 - 104)         | 1,460<br>(846 - 2,108)      | 3,153<br>(1,740 - 4,491)       | 3,802<br>(2,000 - 5,629)       |
| Gynecological diseases                              | 882<br>(568 - 1,475)           | --                          | --                       | 314<br>(188 - 594)          | 39<br>(25 - 60)                | 529<br>(295 - 930)             |
| Uterine fibroids                                    | 258<br>(165 - 438)             | --                          | --                       | 80<br>(42 - 157)            | 11<br>(7 - 18)                 | 167<br>(93 - 294)              |
| Polycystic ovarian syndrome                         | 18<br>(11 - 31)                | --                          | --                       | 17<br>(10 - 31)             | 0<br>(0 - 1)                   | --                             |
| Endometriosis                                       | 45<br>(28 - 81)                | --                          | --                       | 43<br>(26 - 80)             | 1<br>(1 - 2)                   | --                             |
| Genital prolapse                                    | 175<br>(109 - 290)             | --                          | --                       | 36<br>(22 - 66)             | 7<br>(4 - 10)                  | 132<br>(74 - 232)              |
| Other gynecological diseases                        | 387<br>(250 - 642)             | --                          | --                       | 138<br>(82 - 260)           | 20<br>(13 - 30)                | 230<br>(128 - 404)             |
| Hemoglobinopathies and hemolytic anemias            | 18,199<br>(10,825 - 27,469)    | 3,976<br>(2,143 - 7,356)    | 1,841<br>(1,133 - 2,985) | 6,478<br>(3,796 - 9,602)    | 2,918<br>(1,808 - 4,135)       | 2,985<br>(1,539 - 4,682)       |
| Thalassemias                                        | 6,222<br>(3,662 - 10,260)      | 2,512<br>(1,331 - 4,727)    | 1,096<br>(675 - 1,794)   | 2,427<br>(1,360 - 3,918)    | 145<br>(89 - 207)              | 41<br>(21 - 65)                |
| Sickle cell disorders                               | 4,793<br>(2,921 - 6,835)       | 700<br>(367 - 1,317)        | 471<br>(290 - 757)       | 2,397<br>(1,419 - 3,418)    | 1,181<br>(725 - 1,683)         | 45<br>(20 - 89)                |
| G6PD deficiency                                     | 1,393<br>(841 - 2,018)         | 262<br>(138 - 493)          | 128<br>(79 - 203)        | 576<br>(341 - 838)          | 288<br>(179 - 413)             | 139<br>(73 - 217)              |
| Other hemoglobinopathies and hemolytic anemias      | 5,790<br>(3,345 - 8,298)       | 503<br>(303 - 814)          | 145<br>(90 - 225)        | 1,078<br>(642 - 1,540)      | 1,304<br>(801 - 1,873)         | 2,760<br>(1,422 - 4,337)       |
| Endocrine, metabolic, blood, and immune disorders   | 24,686<br>(17,805 - 30,904)    | 3,208<br>(1,913 - 5,043)    | 701<br>(444 - 999)       | 5,429<br>(3,988 - 7,159)    | 7,247<br>(5,326 - 9,396)       | 8,100<br>(5,593 - 10,906)      |
| Musculoskeletal disorders                           | 19,293<br>(14,960 - 26,825)    | --                          | 889<br>(623 - 1,413)     | 5,954<br>(4,417 - 8,355)    | 8,992<br>(6,609 - 12,705)      | 3,458<br>(2,523 - 4,882)       |
| Rheumatoid arthritis                                | 7,690<br>(4,968 - 11,647)      | --                          | 203<br>(68 - 503)        | 1,308<br>(679 - 2,417)      | 3,972<br>(2,528 - 6,046)       | 2,207<br>(1,482 - 3,171)       |
| Other musculoskeletal disorders                     | 11,604<br>(8,192 - 16,197)     | --                          | 686<br>(497 - 965)       | 4,647<br>(3,387 - 6,358)    | 5,020<br>(3,098 - 7,516)       | 1,251<br>(808 - 2,056)         |
| Other non-communicable diseases                     | 138,935<br>(105,622 - 172,030) | 72,057<br>(48,938 - 97,826) | 5,898<br>(3,885 - 8,037) | 29,692<br>(21,859 - 39,680) | 15,512<br>(8,393 - 20,249)     | 15,776<br>(9,197 - 19,508)     |
| Congenital anomalies                                | 122,492<br>(89,340 - 153,927)  | 69,283<br>(46,515 - 94,775) | 5,713<br>(3,713 - 7,814) | 27,252<br>(19,840 - 36,796) | 10,808<br>(3,568 - 14,900)     | 9,436<br>(2,973 - 12,457)      |
| Neural tube defects                                 | 5,593<br>(2,120 - 13,894)      | 3,976<br>(1,200 - 10,847)   | 179<br>(70 - 512)        | 1,065<br>(512 - 2,498)      | 242<br>(31 - 533)              | 131<br>(16 - 321)              |
| Congenital heart anomalies                          | 72,779<br>(42,713 - 98,892)    | 41,124<br>(20,016 - 61,682) | 3,678<br>(1,935 - 5,446) | 13,040<br>(7,823 - 19,028)  | 7,536<br>(2,544 - 10,719)      | 7,402<br>(2,252 - 10,102)      |
| Cleft lip and cleft palate                          | 892<br>(278 - 2,299)           | 892<br>(278 - 2,299)        | --                       | --                          | --                             | --                             |
| Down syndrome                                       | 7,914<br>(4,128 - 13,236)      | 2,482<br>(890 - 5,055)      | 479<br>(189 - 959)       | 4,150<br>(2,465 - 6,835)    | 729<br>(177 - 1,250)           | 74<br>(19 - 131)               |
| Chromosomal unbalanced rearrangements               | 3,648<br>(2,130 - 6,225)       | 2,145<br>(1,010 - 4,242)    | 132<br>(67 - 249)        | 1,159<br>(694 - 1,933)      | 147<br>(41 - 247)              | 66<br>(19 - 114)               |
| Other congenital anomalies                          | 31,666<br>(21,478 - 41,940)    | 18,663<br>(11,726 - 27,825) | 1,245<br>(763 - 1,886)   | 7,839<br>(4,848 - 11,210)   | 2,154<br>(731 - 3,169)         | 1,764<br>(606 - 2,637)         |
| Skin and subcutaneous diseases                      | 14,568<br>(11,939 - 17,737)    | 899<br>(527 - 1,588)        | 185<br>(138 - 251)       | 2,440<br>(1,880 - 3,255)    | 4,704<br>(3,705 - 5,940)       | 6,340<br>(4,902 - 8,110)       |
| Cellulitis                                          | 7,060<br>(3,571 - 11,856)      | 672<br>(317 - 1,276)        | 124<br>(71 - 191)        | 1,191<br>(555 - 2,127)      | 2,263<br>(1,085 - 3,912)       | 2,809<br>(1,302 - 5,054)       |
| Pyoderma                                            | 5,741<br>(2,346 - 9,541)       | 170<br>(25 - 424)           | 34<br>(8 - 69)           | 1,020<br>(346 - 1,727)      | 2,087<br>(799 - 3,414)         | 2,431<br>(955 - 4,329)         |
| Decubitus ulcer                                     | 1,627<br>(523 - 3,352)         | 39<br>(6 - 107)             | 20<br>(5 - 42)           | 183<br>(56 - 359)           | 318<br>(97 - 647)              | 1,067<br>(323 - 2,263)         |

Web Table 31- India deaths with 95% UI by age, sex, and cause in 2013

| Cause                                           | Both Sexes, All Ages                 | Both Sexes, 0-4 Years        | Both Sexes, 5-14 Years      | Both Sexes, 15-49 Years        | Both Sexes, 50-69 Years        | Both Sexes, 70-80 Years        |
|-------------------------------------------------|--------------------------------------|------------------------------|-----------------------------|--------------------------------|--------------------------------|--------------------------------|
| Other skin and subcutaneous diseases            | 140<br>(45 - 232)                    | 19<br>(3 - 42)               | 6<br>(1 - 12)               | 46<br>(15 - 77)                | 35<br>(11 - 61)                | 34<br>(12 - 58)                |
| Sudden infant death syndrome                    | 1,875<br>(626 - 4,989)               | 1,875<br>(626 - 4,989)       | --                          | --                             | --                             | --                             |
| Injuries                                        | 1,208,820<br>(1,037,362 - 1,401,908) | 76,029<br>(57,042 - 103,193) | 47,653<br>(39,517 - 57,418) | 588,991<br>(492,424 - 705,832) | 289,288<br>(243,729 - 343,779) | 206,861<br>(165,535 - 239,648) |
| Transport injuries                              | 288,440<br>(234,758 - 348,820)       | 6,780<br>(4,345 - 9,342)     | 9,032<br>(6,970 - 11,181)   | 155,974<br>(124,380 - 196,714) | 72,614<br>(57,225 - 89,858)    | 44,040<br>(31,316 - 53,162)    |
| Road injuries                                   | 264,348<br>(213,890 - 320,593)       | 5,756<br>(3,653 - 7,928)     | 7,837<br>(5,957 - 9,804)    | 142,079<br>(112,588 - 179,727) | 67,070<br>(52,256 - 83,322)    | 41,605<br>(29,131 - 50,493)    |
| Pedestrian road injuries                        | 112,156<br>(84,691 - 139,341)        | 3,417<br>(2,146 - 4,807)     | 5,094<br>(3,822 - 6,483)    | 38,656<br>(27,532 - 53,999)    | 35,870<br>(26,978 - 44,757)    | 29,118<br>(20,316 - 36,139)    |
| Cyclist road injuries                           | 18,144<br>(13,406 - 23,679)          | 242<br>(128 - 415)           | 694<br>(475 - 959)          | 9,994<br>(7,227 - 13,686)      | 3,775<br>(2,528 - 5,382)       | 3,438<br>(2,270 - 4,641)       |
| Motorcyclist road injuries                      | 51,373<br>(35,886 - 69,501)          | 339<br>(174 - 524)           | 340<br>(209 - 506)          | 43,193<br>(29,735 - 59,188)    | 5,798<br>(3,837 - 7,903)       | 1,702<br>(943 - 2,431)         |
| Motor vehicle road injuries                     | 78,527<br>(58,331 - 99,600)          | 1,471<br>(773 - 2,170)       | 1,488<br>(979 - 2,079)      | 49,102<br>(36,436 - 64,006)    | 19,457<br>(13,561 - 25,456)    | 7,009<br>(4,207 - 9,296)       |
| Other road injuries                             | 4,149<br>(2,859 - 6,224)             | 287<br>(146 - 494)           | 221<br>(126 - 388)          | 1,134<br>(735 - 1,781)         | 2,170<br>(1,273 - 3,670)       | 338<br>(189 - 505)             |
| Other transport injuries                        | 24,092<br>(19,094 - 31,982)          | 1,024<br>(620 - 1,530)       | 1,194<br>(859 - 1,604)      | 13,895<br>(10,485 - 19,247)    | 5,545<br>(4,152 - 7,693)       | 2,435<br>(1,863 - 3,346)       |
| Unintentional injuries                          | 583,069<br>(506,252 - 681,391)       | 67,314<br>(49,642 - 93,975)  | 33,630<br>(27,001 - 43,551) | 216,357<br>(178,392 - 265,940) | 134,702<br>(112,552 - 163,789) | 131,066<br>(108,243 - 152,828) |
| Falls                                           | 111,910<br>(84,594 - 137,747)        | 5,146<br>(2,815 - 9,664)     | 3,834<br>(2,606 - 5,721)    | 27,211<br>(20,225 - 36,400)    | 29,011<br>(21,508 - 38,981)    | 46,708<br>(30,657 - 61,741)    |
| Drowning                                        | 87,544<br>(67,674 - 135,394)         | 14,502<br>(5,479 - 29,166)   | 12,029<br>(8,231 - 20,020)  | 36,621<br>(27,447 - 55,463)    | 15,829<br>(11,313 - 25,185)    | 8,563<br>(6,183 - 13,049)      |
| Fire, heat, and hot substances                  | 125,316<br>(96,319 - 166,696)        | 6,376<br>(3,440 - 13,303)    | 4,713<br>(3,240 - 7,373)    | 74,179<br>(55,781 - 100,004)   | 23,108<br>(17,664 - 30,845)    | 16,940<br>(12,153 - 21,941)    |
| Poisonings                                      | 15,571<br>(9,521 - 20,284)           | 564<br>(200 - 924)           | 452<br>(235 - 661)          | 9,326<br>(5,648 - 12,716)      | 3,316<br>(1,848 - 4,502)       | 1,913<br>(1,164 - 2,561)       |
| Exposure to mechanical forces                   | 51,621<br>(42,639 - 63,437)          | 6,896<br>(4,188 - 10,982)    | 3,522<br>(2,474 - 4,895)    | 23,101<br>(17,593 - 30,269)    | 12,429<br>(9,608 - 16,023)     | 5,673<br>(4,507 - 7,394)       |
| Unintentional firearm injuries                  | 20,686<br>(15,270 - 27,207)          | 808<br>(468 - 1,333)         | 571<br>(340 - 865)          | 12,038<br>(8,169 - 16,947)     | 4,910<br>(3,326 - 7,007)       | 2,359<br>(1,580 - 3,383)       |
| Unintentional suffocation                       | 5,081<br>(3,291 - 9,173)             | 2,229<br>(939 - 4,786)       | 883<br>(507 - 1,553)        | 1,067<br>(749 - 1,731)         | 639<br>(436 - 1,104)           | 263<br>(174 - 442)             |
| Other exposure to mechanical forces             | 25,854<br>(20,930 - 32,012)          | 3,859<br>(2,171 - 6,485)     | 2,068<br>(1,285 - 3,065)    | 9,996<br>(7,370 - 13,367)      | 6,880<br>(4,932 - 9,383)       | 3,050<br>(2,202 - 4,294)       |
| Adverse effects of medical treatment            | 34,719<br>(25,118 - 48,932)          | 8,475<br>(4,655 - 14,595)    | 832<br>(521 - 1,371)        | 9,736<br>(6,778 - 14,333)      | 10,409<br>(7,009 - 16,132)     | 5,267<br>(3,508 - 7,629)       |
| Animal contact                                  | 50,946<br>(37,549 - 96,358)          | 5,083<br>(2,802 - 10,083)    | 5,986<br>(3,805 - 10,395)   | 19,879<br>(13,707 - 39,288)    | 13,714<br>(8,907 - 28,162)     | 6,284<br>(4,198 - 12,603)      |
| Venomous animal contact                         | 40,668<br>(29,649 - 78,189)          | 3,321<br>(1,614 - 6,547)     | 4,829<br>(3,107 - 8,267)    | 17,506<br>(11,936 - 34,847)    | 11,257<br>(7,258 - 22,864)     | 3,756<br>(2,408 - 7,838)       |
| Non-venomous animal contact                     | 10,277<br>(6,965 - 20,404)           | 1,762<br>(834 - 4,035)       | 1,157<br>(568 - 2,749)      | 2,373<br>(1,496 - 4,311)       | 2,457<br>(1,379 - 5,632)       | 2,528<br>(1,532 - 5,123)       |
| Foreign body                                    | 33,813<br>(23,998 - 48,394)          | 17,446<br>(11,361 - 26,839)  | 284<br>(184 - 510)          | 2,902<br>(1,982 - 4,780)       | 2,546<br>(1,743 - 4,325)       | 10,634<br>(7,324 - 14,649)     |
| Pulmonary aspiration and foreign body in airway | 32,450<br>(22,758 - 46,992)          | 17,350<br>(11,267 - 26,746)  | 241<br>(147 - 461)          | 2,625<br>(1,754 - 4,439)       | 2,044<br>(1,333 - 3,850)       | 10,189<br>(6,879 - 14,238)     |
| Foreign body in other body part                 | 1,363<br>(1,000 - 2,021)             | 96<br>(53 - 149)             | 43<br>(29 - 68)             | 277<br>(192 - 452)             | 502<br>(316 - 847)             | 445<br>(291 - 711)             |
| Other unintentional injuries                    | 71,629<br>(55,759 - 86,871)          | 2,826<br>(1,833 - 4,769)     | 1,978<br>(1,425 - 2,658)    | 13,401<br>(10,396 - 17,379)    | 24,339<br>(18,842 - 30,892)    | 29,085<br>(18,240 - 37,436)    |
| Self-harm and interpersonal violence            | 332,761<br>(242,312 - 409,258)       | 1,883<br>(897 - 3,455)       | 4,854<br>(3,123 - 7,229)    | 214,475<br>(156,774 - 266,395) | 80,240<br>(57,837 - 102,453)   | 31,310<br>(20,113 - 40,114)    |
| Self-harm                                       | 265,275<br>(186,073 - 328,136)       | --                           | 3,594<br>(2,020 - 5,977)    | 175,214<br>(122,112 - 223,483) | 63,341<br>(42,406 - 83,137)    | 23,127<br>(14,830 - 30,458)    |
| Interpersonal violence                          | 67,486<br>(42,849 - 89,741)          | 1,883<br>(897 - 3,455)       | 1,260<br>(741 - 1,944)      | 39,261<br>(25,054 - 55,479)    | 16,899<br>(11,101 - 25,509)    | 8,183<br>(3,799 - 13,202)      |
| Assault by firearm                              | 23,062<br>(12,276 - 35,572)          | 90<br>(43 - 188)             | 135<br>(56 - 295)           | 11,615<br>(5,791 - 19,520)     | 8,009<br>(4,392 - 13,499)      | 3,212<br>(1,388 - 5,499)       |
| Assault by sharp object                         | 29,452<br>(18,362 - 44,448)          | 361<br>(156 - 787)           | 334<br>(183 - 570)          | 20,997<br>(13,308 - 31,863)    | 6,279<br>(3,352 - 10,596)      | 1,482<br>(639 - 2,643)         |
| Assault by other means                          | 14,972<br>(8,644 - 20,369)           | 1,432<br>(645 - 2,588)       | 790<br>(425 - 1,281)        | 6,650<br>(3,780 - 9,713)       | 2,611<br>(1,731 - 3,989)       | 3,489<br>(1,519 - 5,941)       |
| Forces of nature, war, and legal intervention   | 4,550<br>(2,450 - 9,012)             | 52<br>(0 - 5)                | 138<br>(76 - 277)           | 2,184<br>(1,217 - 4,370)       | 1,731<br>(939 - 3,487)         | 445<br>(232 - 887)             |
| Exposure to forces of nature                    | 4,550<br>(2,450 - 9,012)             | 52<br>(0 - 5)                | 138<br>(76 - 277)           | 2,184<br>(1,217 - 4,370)       | 1,731<br>(939 - 3,487)         | 445<br>(232 - 887)             |

Web Table 31- India deaths with 95% UI by age, sex, and cause in 2013

| Cause                                                             | Males, All Ages                      | Males, 0-4 Years               | Males, 5-14 Years              | Males, 15-49 Years                   | Males, 50-69 Years                   | Males, 70-80 Years                   |
|-------------------------------------------------------------------|--------------------------------------|--------------------------------|--------------------------------|--------------------------------------|--------------------------------------|--------------------------------------|
| All causes                                                        | 5,749,004<br>(4,857,382 - 6,623,737) | 646,320<br>(551,860 - 761,369) | 111,223<br>(100,122 - 124,828) | 1,307,513<br>(1,042,775 - 1,575,660) | 1,962,341<br>(1,588,260 - 2,346,909) | 1,721,608<br>(1,513,441 - 1,921,529) |
| Communicable, maternal, neonatal, and nutritional diseases        | 1,518,469<br>(1,374,150 - 1,688,790) | 543,397<br>(467,310 - 638,693) | 59,885<br>(50,296 - 70,398)    | 336,501<br>(285,162 - 397,510)       | 320,924<br>(268,074 - 381,948)       | 257,673<br>(219,257 - 300,298)       |
| HIV/AIDS and tuberculosis                                         | 406,284<br>(322,920 - 505,714)       | 8,995<br>(3,918 - 13,988)      | 4,564<br>(3,306 - 5,887)       | 170,038<br>(131,475 - 210,327)       | 151,538<br>(116,130 - 197,168)       | 71,149<br>(53,778 - 93,202)          |
| Tuberculosis                                                      | 356,940<br>(271,034 - 454,519)       | 8,398<br>(3,319 - 13,460)      | 3,183<br>(2,118 - 4,498)       | 135,241<br>(98,343 - 176,060)        | 139,959<br>(105,007 - 184,420)       | 70,158<br>(52,884 - 92,422)          |
| HIV/AIDS                                                          | 49,345<br>(38,882 - 63,680)          | 597<br>(385 - 813)             | 1,382<br>(776 - 1,998)         | 34,797<br>(28,362 - 43,089)          | 11,579<br>(7,124 - 20,252)           | 991<br>(589 - 1,707)                 |
| HIV/AIDS resulting in mycobacterial infection                     | 3,502<br>(2,576 - 4,868)             | 40<br>(24 - 56)                | 84<br>(48 - 123)               | 2,449<br>(1,836 - 3,230)             | 853<br>(509 - 1,538)                 | 77<br>(42 - 140)                     |
| HIV/AIDS resulting in other diseases                              | 45,843<br>(36,171 - 59,372)          | 557<br>(358 - 761)             | 1,297<br>(726 - 1,874)         | 32,349<br>(26,395 - 40,082)          | 10,726<br>(6,532 - 18,779)           | 914<br>(545 - 1,578)                 |
| Diarrhea, lower respiratory, and other common infectious diseases | 526,757<br>(440,893 - 628,151)       | 145,074<br>(107,594 - 190,462) | 39,143<br>(29,727 - 48,807)    | 99,951<br>(73,886 - 136,230)         | 112,915<br>(83,465 - 148,608)        | 129,673<br>(102,785 - 162,378)       |
| Diarrheal diseases                                                | 180,401<br>(139,913 - 228,864)       | 34,627<br>(18,278 - 56,872)    | 10,416<br>(5,938 - 16,812)     | 25,954<br>(18,169 - 35,886)          | 47,434<br>(29,821 - 71,372)          | 61,971<br>(41,677 - 88,437)          |
| Intestinal infectious diseases                                    | 57,488<br>(27,745 - 102,979)         | 14,080<br>(6,080 - 27,516)     | 15,573<br>(7,545 - 25,829)     | 23,637<br>(9,043 - 47,014)           | 3,342<br>(1,055 - 7,568)             | 856<br>(246 - 1,947)                 |
| Typhoid fever                                                     | 41,712<br>(20,332 - 74,804)          | 9,765<br>(4,061 - 18,951)      | 11,312<br>(5,363 - 19,650)     | 17,511<br>(6,522 - 35,572)           | 2,492<br>(744 - 5,769)               | 631<br>(160 - 1,510)                 |
| Paratyphoid fever                                                 | 15,201<br>(6,716 - 27,042)           | 4,065<br>(1,419 - 8,408)       | 4,211<br>(1,643 - 7,926)       | 5,952<br>(1,986 - 12,545)            | 784<br>(195 - 2,091)                 | 188<br>(37 - 513)                    |
| Other intestinal infectious diseases                              | 575<br>(449 - 726)                   | 250<br>(155 - 381)             | 49<br>(33 - 72)                | 174<br>(126 - 234)                   | 66<br>(44 - 94)                      | 36<br>(22 - 54)                      |
| Lower respiratory infections                                      | 212,447<br>(171,722 - 258,504)       | 71,550<br>(48,111 - 99,393)    | 8,416<br>(5,299 - 12,437)      | 30,905<br>(21,475 - 43,591)          | 44,058<br>(31,617 - 60,223)          | 57,519<br>(42,431 - 76,327)          |
| Upper respiratory infections                                      | 644<br>(286 - 1,229)                 | 70<br>(9 - 214)                | 17<br>(1 - 66)                 | 198<br>(55 - 467)                    | 221<br>(40 - 601)                    | 138<br>(15 - 420)                    |
| Otitis media                                                      | 148<br>(95 - 223)                    | 18<br>(9 - 32)                 | 23<br>(14 - 38)                | 59<br>(38 - 92)                      | 35<br>(20 - 56)                      | 14<br>(8 - 22)                       |
| Meningitis                                                        | 30,511<br>(23,468 - 38,664)          | 3,662<br>(1,890 - 6,353)       | 1,266<br>(795 - 1,925)         | 11,620<br>(8,248 - 16,477)           | 9,701<br>(6,496 - 13,730)            | 4,262<br>(2,899 - 6,119)             |
| Pneumococcal meningitis                                           | 8,947<br>(6,224 - 12,239)            | 946<br>(468 - 1,688)           | 466<br>(227 - 806)             | 3,531<br>(2,029 - 5,431)             | 2,811<br>(1,433 - 4,505)             | 1,194<br>(485 - 2,065)               |
| H influenzae type B meningitis                                    | 4,612<br>(3,277 - 6,346)             | 1,432<br>(766 - 2,619)         | 356<br>(190 - 595)             | 1,326<br>(761 - 2,090)               | 1,040<br>(549 - 1,826)               | 458<br>(244 - 769)                   |
| Meningococcal meningitis                                          | 4,409<br>(2,784 - 6,450)             | 259<br>(122 - 483)             | 135<br>(66 - 251)              | 1,797<br>(1,087 - 2,838)             | 1,498<br>(688 - 2,764)               | 720<br>(351 - 1,270)                 |
| Other meningitis                                                  | 12,542<br>(9,069 - 17,334)           | 1,026<br>(414 - 1,920)         | 310<br>(145 - 552)             | 4,966<br>(3,116 - 7,605)             | 4,351<br>(2,569 - 6,764)             | 1,890<br>(966 - 3,011)               |
| Encephalitis                                                      | 16,623<br>(12,363 - 23,462)          | 4,214<br>(2,120 - 7,624)       | 2,308<br>(1,466 - 3,669)       | 5,619<br>(3,675 - 7,992)             | 3,305<br>(2,280 - 5,129)             | 1,177<br>(787 - 1,670)               |
| Diphtheria                                                        | 674<br>(67 - 2,824)                  | 319<br>(0 - 2,447)             | 153<br>(0 - 965)               | 153<br>(8 - 591)                     | 49<br>(0 - 301)                      | --                                   |
| Whooping cough                                                    | 5,212<br>(125 - 24,039)              | 4,844<br>(116 - 22,353)        | 265<br>(6 - 1,200)             | 88<br>(2 - 380)                      | 15<br>(0 - 67)                       | --                                   |
| Tetanus                                                           | 17,451<br>(8,452 - 28,420)           | 7,809<br>(2,266 - 14,958)      | 176<br>(69 - 361)              | 1,378<br>(762 - 2,785)               | 4,633<br>(2,106 - 9,377)             | 3,455<br>(1,527 - 7,231)             |
| Measles                                                           | 4,217<br>(2,242 - 7,311)             | 3,651<br>(1,903 - 6,448)       | 474<br>(273 - 790)             | 87<br>(50 - 143)                     | 5<br>(3 - 8)                         | --                                   |
| Varicella and herpes zoster                                       | 940<br>(397 - 1,925)                 | 229<br>(23 - 833)              | 55<br>(2 - 221)                | 254<br>(65 - 642)                    | 119<br>(16 - 358)                    | 283<br>(24 - 1,062)                  |
| Neglected tropical diseases and malaria                           | 84,117<br>(63,820 - 106,216)         | 10,802<br>(6,500 - 16,221)     | 9,521<br>(7,191 - 12,403)      | 30,676<br>(22,310 - 40,071)          | 21,177<br>(13,997 - 30,643)          | 11,940<br>(7,476 - 18,434)           |
| Malaria                                                           | 54,179<br>(35,494 - 74,975)          | 3,302<br>(1,716 - 5,923)       | 4,051<br>(2,273 - 6,676)       | 20,196<br>(12,267 - 29,741)          | 16,803<br>(9,632 - 26,361)           | 9,827<br>(5,333 - 16,458)            |
| Leishmaniasis                                                     | 17,025<br>(12,577 - 22,322)          | 5,324<br>(2,737 - 9,214)       | 3,453<br>(2,159 - 5,085)       | 6,280<br>(3,929 - 8,966)             | 1,571<br>(966 - 2,335)               | 397<br>(252 - 559)                   |
| Visceral leishmaniasis                                            | 17,025<br>(12,577 - 22,322)          | 5,324<br>(2,737 - 9,214)       | 3,453<br>(2,159 - 5,085)       | 6,280<br>(3,929 - 8,966)             | 1,571<br>(966 - 2,335)               | 397<br>(252 - 559)                   |
| Cysticercosis                                                     | 40<br>(29 - 53)                      | 0<br>(0 - 1)                   | 1<br>(1 - 2)                   | 23<br>(17 - 31)                      | 13<br>(9 - 17)                       | 3<br>(2 - 4)                         |
| Cystic echinococcosis                                             | 195<br>(159 - 241)                   | 5<br>(3 - 8)                   | 19<br>(15 - 23)                | 96<br>(74 - 122)                     | 56<br>(44 - 70)                      | 19<br>(16 - 23)                      |
| Dengue                                                            | 668<br>(499 - 910)                   | 119<br>(66 - 213)              | 40<br>(23 - 53)                | 225<br>(156 - 321)                   | 170<br>(121 - 256)                   | 113<br>(77 - 147)                    |
| Rabies                                                            | 7,562<br>(4,135 - 10,149)            | 498<br>(168 - 1,182)           | 1,650<br>(733 - 2,807)         | 2,754<br>(1,488 - 3,880)             | 2,021<br>(1,129 - 2,940)             | 639<br>(316 - 967)                   |
| Intestinal nematode infections                                    | 265<br>(197 - 358)                   | 115<br>(67 - 187)              | 52<br>(33 - 77)                | 48<br>(27 - 76)                      | 30<br>(15 - 52)                      | 20<br>(9 - 36)                       |
| Ascariasis                                                        | 265<br>(197 - 358)                   | 115<br>(67 - 187)              | 52<br>(33 - 77)                | 48<br>(27 - 76)                      | 30<br>(15 - 52)                      | 20<br>(9 - 36)                       |
| Other neglected tropical diseases                                 | 4,182<br>(2,816 - 6,555)             | 1,438<br>(623 - 3,062)         | 255<br>(148 - 441)             | 1,054<br>(660 - 1,685)               | 514<br>(270 - 812)                   | 920<br>(616 - 1,346)                 |
| Maternal disorders                                                | --                                   | --                             | --                             | --                                   | --                                   | --                                   |
| Maternal hemorrhage                                               | --                                   | --                             | --                             | --                                   | --                                   | --                                   |

Web Table 31- India deaths with 95% UI by age, sex, and cause in 2013

| Cause                                                            | Males, All Ages                      | Males, 0-4 Years               | Males, 5-14 Years           | Males, 15-49 Years             | Males, 50-69 Years                   | Males, 70-80 Years                   |
|------------------------------------------------------------------|--------------------------------------|--------------------------------|-----------------------------|--------------------------------|--------------------------------------|--------------------------------------|
| Maternal sepsis and other maternal infections                    | --                                   | --                             | --                          | --                             | --                                   | --                                   |
| Maternal hypertensive disorders                                  | --                                   | --                             | --                          | --                             | --                                   | --                                   |
| Maternal obstructed labor                                        | --                                   | --                             | --                          | --                             | --                                   | --                                   |
| Maternal abortive outcome                                        | --                                   | --                             | --                          | --                             | --                                   | --                                   |
| Indirect maternal deaths                                         | --                                   | --                             | --                          | --                             | --                                   | --                                   |
| Late maternal deaths                                             | --                                   | --                             | --                          | --                             | --                                   | --                                   |
| Maternal deaths aggravated by HIV/AIDS                           | --                                   | --                             | --                          | --                             | --                                   | --                                   |
| Other maternal disorders                                         | --                                   | --                             | --                          | --                             | --                                   | --                                   |
| Neonatal disorders                                               | 342,710<br>(304,983 - 387,998)       | 342,710<br>(304,983 - 387,998) | --                          | --                             | --                                   | --                                   |
| Neonatal preterm birth complications                             | 113,076<br>(62,830 - 168,237)        | 113,076<br>(62,830 - 168,237)  | --                          | --                             | --                                   | --                                   |
| Neonatal encephalopathy due to birth asphyxia and trauma         | 118,907<br>(73,100 - 170,032)        | 118,907<br>(73,100 - 170,032)  | --                          | --                             | --                                   | --                                   |
| Neonatal sepsis and other neonatal infections                    | 57,597<br>(25,275 - 112,245)         | 57,597<br>(25,275 - 112,245)   | --                          | --                             | --                                   | --                                   |
| Hemolytic disease and other neonatal jaundice                    | 4,151<br>(1,482 - 10,532)            | 4,151<br>(1,482 - 10,532)      | --                          | --                             | --                                   | --                                   |
| Other neonatal disorders                                         | 48,980<br>(26,171 - 81,766)          | 48,980<br>(26,171 - 81,766)    | --                          | --                             | --                                   | --                                   |
| Nutritional deficiencies                                         | 81,793<br>(38,730 - 110,473)         | 11,018<br>(4,606 - 19,387)     | 1,974<br>(860 - 2,990)      | 13,421<br>(8,028 - 19,786)     | 20,227<br>(8,602 - 29,561)           | 35,153<br>(14,767 - 52,190)          |
| Protein-energy malnutrition                                      | 53,016<br>(19,509 - 79,446)          | 8,500<br>(3,380 - 15,627)      | 1,357<br>(443 - 2,210)      | 6,622<br>(3,112 - 10,232)      | 10,867<br>(3,927 - 18,592)           | 25,670<br>(7,638 - 41,306)           |
| Iodine deficiency                                                | 649<br>(86 - 2,138)                  | 27<br>(0 - 165)                | 8<br>(0 - 50)               | 175<br>(7 - 824)               | 329<br>(3 - 1,565)                   | 109<br>(0 - 566)                     |
| Iron-deficiency anemia                                           | 21,574<br>(9,799 - 42,448)           | 2,198<br>(529 - 5,015)         | 583<br>(212 - 1,021)        | 5,532<br>(2,949 - 10,108)      | 7,700<br>(3,000 - 15,222)            | 5,560<br>(851 - 16,194)              |
| Other nutritional deficiencies                                   | 6,555<br>(2,135 - 11,359)            | 293<br>(77 - 1,021)            | 26<br>(8 - 49)              | 1,092<br>(435 - 1,994)         | 1,331<br>(325 - 2,464)               | 3,813<br>(1,149 - 7,105)             |
| Other communicable, maternal, neonatal, and nutritional diseases | 76,809<br>(54,853 - 102,249)         | 24,798<br>(12,425 - 44,009)    | 4,682<br>(3,167 - 6,717)    | 22,413<br>(16,512 - 30,278)    | 15,067<br>(8,844 - 26,538)           | 9,848<br>(4,483 - 18,598)            |
| Sexually transmitted diseases excluding HIV                      | 12,438<br>(4,200 - 22,952)           | 10,802<br>(3,015 - 20,661)     | 717<br>(206 - 1,378)        | 413<br>(234 - 623)             | 296<br>(158 - 524)                   | 210<br>(102 - 400)                   |
| Syphilis                                                         | 12,127<br>(3,876 - 22,552)           | 10,802<br>(3,015 - 20,661)     | 708<br>(197 - 1,369)        | 228<br>(127 - 349)             | 214<br>(114 - 375)                   | 176<br>(85 - 336)                    |
| Chlamydial infection                                             | --                                   | --                             | --                          | --                             | --                                   | --                                   |
| Gonococcal infection                                             | 183<br>(108 - 268)                   | --                             | 5<br>(3 - 7)                | 102<br>(58 - 152)              | 52<br>(27 - 92)                      | 25<br>(12 - 47)                      |
| Other sexually transmitted diseases                              | 128<br>(77 - 187)                    | --                             | 5<br>(3 - 7)                | 83<br>(48 - 124)               | 31<br>(16 - 57)                      | 10<br>(5 - 18)                       |
| Hepatitis                                                        | 32,241<br>(24,823 - 43,555)          | 5,504<br>(2,483 - 12,864)      | 2,448<br>(1,626 - 3,749)    | 15,946<br>(11,734 - 21,610)    | 6,170<br>(4,381 - 8,443)             | 2,173<br>(1,571 - 2,928)             |
| Acute hepatitis A                                                | 4,125<br>(1,203 - 9,120)             | 2,378<br>(642 - 6,205)         | 382<br>(97 - 869)           | 1,151<br>(291 - 2,653)         | 186<br>(45 - 471)                    | 28<br>(6 - 72)                       |
| Acute hepatitis B                                                | 11,789<br>(7,026 - 17,887)           | 2,237<br>(666 - 6,200)         | 257<br>(95 - 525)           | 3,732<br>(1,390 - 6,661)       | 3,830<br>(2,214 - 5,768)             | 1,733<br>(1,137 - 2,441)             |
| Acute hepatitis C                                                | 684<br>(112 - 2,046)                 | --                             | 57<br>(8 - 170)             | 409<br>(62 - 1,304)            | 171<br>(20 - 556)                    | 47<br>(5 - 154)                      |
| Acute hepatitis E                                                | 15,643<br>(10,362 - 22,769)          | 890<br>(278 - 2,413)           | 1,752<br>(1,055 - 2,687)    | 10,653<br>(7,049 - 15,545)     | 1,982<br>(884 - 3,715)               | 366<br>(118 - 825)                   |
| Other infectious diseases                                        | 32,129<br>(11,735 - 52,171)          | 8,492<br>(1,704 - 25,657)      | 1,517<br>(492 - 3,356)      | 6,055<br>(1,707 - 10,343)      | 8,601<br>(3,037 - 19,384)            | 7,464<br>(2,014 - 15,940)            |
| Non-communicable diseases                                        | 3,484,192<br>(2,897,102 - 4,117,608) | 65,454<br>(46,222 - 88,592)    | 24,176<br>(19,809 - 28,722) | 573,425<br>(444,275 - 723,998) | 1,456,416<br>(1,166,050 - 1,775,465) | 1,364,721<br>(1,199,747 - 1,541,396) |
| Neoplasms                                                        | 355,223<br>(291,474 - 430,028)       | 8,300<br>(4,779 - 12,180)      | 4,452<br>(3,395 - 5,710)    | 72,417<br>(56,568 - 92,798)    | 179,283<br>(142,403 - 221,000)       | 90,770<br>(77,529 - 104,912)         |
| Esophageal cancer                                                | 35,153<br>(24,632 - 45,203)          | --                             | --                          | 5,582<br>(3,851 - 7,807)       | 20,295<br>(14,046 - 27,197)          | 9,276<br>(6,202 - 12,458)            |
| Stomach cancer                                                   | 35,218<br>(27,893 - 43,215)          | --                             | --                          | 6,422<br>(4,746 - 8,558)       | 19,131<br>(14,736 - 24,283)          | 9,665<br>(7,630 - 11,917)            |
| Liver cancer                                                     | 40,625<br>(31,875 - 50,894)          | --                             | 75<br>(47 - 114)            | 5,656<br>(4,030 - 7,633)       | 22,024<br>(16,125 - 29,395)          | 12,869<br>(9,759 - 16,969)           |
| Liver cancer due to hepatitis B                                  | 18,208<br>(12,347 - 25,115)          | --                             | 41<br>(22 - 64)             | 3,338<br>(2,223 - 4,682)       | 10,370<br>(6,605 - 15,318)           | 4,459<br>(2,878 - 6,638)             |
| Liver cancer due to hepatitis C                                  | 11,145<br>(6,653 - 16,411)           | --                             | 3<br>(1 - 8)                | 1,060<br>(467 - 1,828)         | 5,944<br>(3,302 - 9,337)             | 4,138<br>(2,362 - 6,090)             |
| Liver cancer due to alcohol use                                  | 7,690<br>(5,154 - 11,039)            | --                             | --                          | 587<br>(338 - 927)             | 3,796<br>(2,391 - 5,877)             | 3,307<br>(2,161 - 4,798)             |
| Liver cancer due to other causes                                 | 3,582<br>(1,833 - 5,574)             | --                             | 31<br>(16 - 54)             | 672<br>(349 - 1,113)           | 1,914<br>(917 - 3,247)               | 965<br>(445 - 1,591)                 |

Web Table 31- India deaths with 95% UI by age, sex, and cause in 2013

| Cause                                         | Males, All Ages                      | Males, 0-4 Years          | Males, 5-14 Years        | Males, 15-49 Years             | Males, 50-69 Years             | Males, 70-80 Years             |
|-----------------------------------------------|--------------------------------------|---------------------------|--------------------------|--------------------------------|--------------------------------|--------------------------------|
| Larynx cancer                                 | 13,718<br>(10,153 - 18,918)          | --                        | --                       | 2,076<br>(1,456 - 3,246)       | 7,418<br>(5,276 - 9,960)       | 4,223<br>(3,117 - 5,761)       |
| Tracheal, bronchus and lung cancer            | 45,333<br>(36,863 - 56,291)          | --                        | --                       | 6,207<br>(4,676 - 8,165)       | 26,734<br>(21,100 - 34,289)    | 12,392<br>(10,206 - 14,771)    |
| Breast cancer                                 | 926<br>(596 - 1,254)                 | --                        | --                       | 229<br>(141 - 334)             | 467<br>(271 - 694)             | 230<br>(146 - 341)             |
| Cervical cancer                               | --                                   | --                        | --                       | --                             | --                             | --                             |
| Uterine cancer                                | --                                   | --                        | --                       | --                             | --                             | --                             |
| Prostate cancer                               | 5,070<br>(3,461 - 8,203)             | --                        | --                       | 72<br>(48 - 112)               | 1,004<br>(655 - 1,580)         | 3,994<br>(2,688 - 6,526)       |
| Colon and rectum cancer                       | 24,470<br>(19,870 - 30,167)          | --                        | --                       | 5,322<br>(4,008 - 6,999)       | 12,733<br>(10,058 - 16,205)    | 6,415<br>(5,281 - 7,746)       |
| Lip and oral cavity cancer                    | 22,350<br>(15,308 - 29,647)          | --                        | --                       | 5,019<br>(3,101 - 7,056)       | 10,561<br>(6,554 - 14,319)     | 6,770<br>(4,773 - 10,287)      |
| Nasopharynx cancer                            | 5,617<br>(4,237 - 7,489)             | --                        | 57<br>(26 - 125)         | 1,922<br>(1,322 - 2,743)       | 3,066<br>(2,176 - 4,376)       | 571<br>(403 - 803)             |
| Other pharynx cancer                          | 20,472<br>(12,941 - 26,328)          | --                        | --                       | 3,173<br>(1,995 - 4,337)       | 13,013<br>(8,131 - 17,198)     | 4,286<br>(2,535 - 5,717)       |
| Gallbladder and biliary tract cancer          | 4,032<br>(2,856 - 5,222)             | --                        | --                       | 830<br>(547 - 1,137)           | 2,272<br>(1,579 - 3,066)       | 930<br>(653 - 1,205)           |
| Pancreatic cancer                             | 7,231<br>(5,669 - 9,042)             | --                        | --                       | 1,502<br>(1,104 - 2,022)       | 4,000<br>(3,049 - 5,113)       | 1,730<br>(1,401 - 2,105)       |
| Malignant skin melanoma                       | 2,223<br>(1,129 - 5,841)             | --                        | --                       | 910<br>(485 - 2,094)           | 608<br>(275 - 1,783)           | 704<br>(294 - 2,106)           |
| Non-melanoma skin cancer                      | 1,303<br>(816 - 2,537)               | --                        | --                       | 695<br>(320 - 1,616)           | 284<br>(181 - 448)             | 324<br>(213 - 516)             |
| Ovarian cancer                                | --                                   | --                        | --                       | --                             | --                             | --                             |
| Testicular cancer                             | 1,353<br>(908 - 1,890)               | --                        | --                       | 788<br>(505 - 1,147)           | 415<br>(268 - 618)             | 150<br>(89 - 221)              |
| Kidney cancer                                 | 4,752<br>(3,741 - 5,947)             | 46<br>(21 - 88)           | 50<br>(32 - 74)          | 721<br>(520 - 974)             | 2,932<br>(2,187 - 3,863)       | 1,004<br>(772 - 1,271)         |
| Bladder cancer                                | 9,086<br>(6,935 - 11,303)            | --                        | --                       | 754<br>(542 - 1,059)           | 4,698<br>(3,505 - 6,128)       | 3,634<br>(2,746 - 4,573)       |
| Brain and nervous system cancer               | 12,450<br>(8,674 - 20,583)           | 165<br>(60 - 380)         | 571<br>(356 - 952)       | 4,531<br>(3,068 - 7,412)       | 5,661<br>(3,731 - 9,450)       | 1,523<br>(1,057 - 2,428)       |
| Thyroid cancer                                | 1,852<br>(1,355 - 2,426)             | --                        | 8<br>(5 - 11)            | 310<br>(210 - 424)             | 1,030<br>(731 - 1,411)         | 505<br>(366 - 671)             |
| Mesothelioma                                  | 432<br>(318 - 570)                   | --                        | --                       | 197<br>(135 - 292)             | 205<br>(141 - 291)             | 31<br>(20 - 45)                |
| Hodgkin lymphoma                              | 1,866<br>(1,273 - 3,280)             | 549<br>(203 - 1,434)      | 96<br>(40 - 219)         | 470<br>(327 - 754)             | 508<br>(334 - 830)             | 244<br>(155 - 436)             |
| Non-Hodgkin lymphoma                          | 13,867<br>(10,333 - 20,025)          | 226<br>(87 - 541)         | 474<br>(308 - 742)       | 4,116<br>(2,929 - 6,119)       | 6,130<br>(4,468 - 9,045)       | 2,920<br>(2,205 - 4,000)       |
| Multiple myeloma                              | 3,025<br>(1,987 - 3,994)             | --                        | --                       | 525<br>(335 - 751)             | 1,687<br>(1,034 - 2,297)       | 813<br>(522 - 1,092)           |
| Leukemia                                      | 13,931<br>(11,132 - 17,184)          | 341<br>(175 - 615)        | 1,430<br>(1,050 - 1,902) | 6,254<br>(4,707 - 7,989)       | 4,014<br>(3,091 - 5,231)       | 1,892<br>(1,522 - 2,319)       |
| Other neoplasms                               | 28,869<br>(22,387 - 36,403)          | 6,973<br>(3,957 - 10,691) | 1,692<br>(1,066 - 2,445) | 8,134<br>(5,767 - 11,490)      | 8,392<br>(6,082 - 11,190)      | 3,678<br>(2,834 - 4,691)       |
| Cardiovascular diseases                       | 1,579,977<br>(1,307,796 - 1,880,304) | 4,604<br>(3,038 - 6,863)  | 4,439<br>(3,247 - 5,915) | 236,999<br>(181,625 - 299,828) | 692,792<br>(554,686 - 857,770) | 641,142<br>(557,041 - 734,439) |
| Rheumatic heart disease                       | 42,125<br>(25,184 - 72,271)          | 308<br>(112 - 694)        | 925<br>(481 - 1,533)     | 14,314<br>(8,061 - 23,854)     | 16,312<br>(9,382 - 28,985)     | 10,267<br>(5,743 - 18,090)     |
| Ischemic heart disease                        | 962,686<br>(785,819 - 1,172,582)     | 1,325<br>(684 - 2,379)    | 1,393<br>(890 - 1,987)   | 151,137<br>(112,617 - 195,234) | 437,759<br>(345,439 - 544,748) | 371,072<br>(311,239 - 436,984) |
| Cerebrovascular disease                       | 365,297<br>(286,511 - 465,499)       | 1,149<br>(709 - 1,803)    | 1,489<br>(994 - 2,185)   | 40,899<br>(29,754 - 56,597)    | 148,654<br>(112,895 - 200,083) | 173,105<br>(137,551 - 218,740) |
| Ischemic stroke                               | 167,039<br>(113,527 - 225,569)       | 159<br>(70 - 304)         | 189<br>(95 - 344)        | 6,725<br>(3,688 - 10,337)      | 55,404<br>(35,520 - 79,428)    | 104,563<br>(71,791 - 137,433)  |
| Hemorrhagic stroke                            | 198,258<br>(141,893 - 289,500)       | 991<br>(621 - 1,569)      | 1,301<br>(867 - 1,938)   | 34,173<br>(24,269 - 48,762)    | 93,250<br>(66,152 - 136,780)   | 68,543<br>(45,001 - 107,015)   |
| Hypertensive heart disease                    | 144,073<br>(96,938 - 225,700)        | 339<br>(131 - 736)        | 173<br>(90 - 284)        | 16,596<br>(9,969 - 25,235)     | 62,742<br>(38,967 - 94,972)    | 64,223<br>(41,818 - 107,908)   |
| Cardiomyopathy and myocarditis                | 31,667<br>(19,640 - 45,772)          | 1,212<br>(588 - 2,079)    | 363<br>(159 - 594)       | 8,880<br>(5,237 - 13,408)      | 13,256<br>(7,710 - 20,145)     | 7,957<br>(4,768 - 12,647)      |
| Atrial fibrillation and flutter               | 737<br>(424 - 1,141)                 | --                        | --                       | 46<br>(26 - 70)                | 229<br>(126 - 373)             | 462<br>(247 - 764)             |
| Aortic aneurysm                               | 12,912<br>(8,294 - 18,325)           | --                        | --                       | 1,462<br>(885 - 2,197)         | 5,670<br>(3,516 - 8,361)       | 5,780<br>(3,619 - 8,517)       |
| Peripheral vascular disease                   | 496<br>(255 - 780)                   | --                        | --                       | 25<br>(11 - 43)                | 176<br>(84 - 287)              | 295<br>(152 - 465)             |
| Endocarditis                                  | 6,283<br>(3,678 - 9,829)             | 205<br>(95 - 402)         | 52<br>(29 - 90)          | 1,752<br>(1,036 - 2,768)       | 2,360<br>(1,364 - 3,805)       | 1,914<br>(1,101 - 3,125)       |
| Other cardiovascular and circulatory diseases | 13,700<br>(9,208 - 23,666)           | 66<br>(26 - 225)          | 44<br>(24 - 96)          | 1,887<br>(1,216 - 3,470)       | 5,635<br>(3,471 - 10,047)      | 6,067<br>(4,052 - 10,549)      |
| Chronic respiratory diseases                  | 743,155<br>(609,119 - 901,428)       | 3,107<br>(1,868 - 4,966)  | 1,700<br>(1,245 - 2,201) | 55,012<br>(40,466 - 74,803)    | 303,010<br>(233,651 - 379,943) | 380,326<br>(320,921 - 459,220) |

Web Table 31- India deaths with 95% UI by age, sex, and cause in 2013

| Cause                                               | Males, All Ages                | Males, 0-4 Years       | Males, 5-14 Years        | Males, 15-49 Years          | Males, 50-69 Years             | Males, 70-80 Years             |
|-----------------------------------------------------|--------------------------------|------------------------|--------------------------|-----------------------------|--------------------------------|--------------------------------|
| Chronic obstructive pulmonary disease               | 438,102<br>(337,952 - 541,651) | 587<br>(224 - 1,220)   | 407<br>(213 - 600)       | 22,923<br>(13,675 - 33,145) | 165,822<br>(118,678 - 218,246) | 248,362<br>(197,174 - 302,834) |
| Pneumoconiosis                                      | 88,819<br>(57,567 - 125,102)   | 15<br>(2 - 46)         | 51<br>(16 - 104)         | 7,988<br>(5,081 - 12,242)   | 42,750<br>(27,330 - 61,462)    | 38,014<br>(23,978 - 55,487)    |
| Silicosis                                           | 22,332<br>(13,663 - 34,984)    | 4<br>(1 - 13)          | 13<br>(3 - 30)           | 1,673<br>(859 - 3,221)      | 10,027<br>(5,851 - 16,438)     | 10,615<br>(6,413 - 16,449)     |
| Asbestosis                                          | 12,194<br>(7,746 - 18,321)     | 3<br>(1 - 10)          | 12<br>(4 - 25)           | 1,226<br>(697 - 1,938)      | 6,914<br>(4,114 - 10,766)      | 4,038<br>(2,435 - 6,222)       |
| Coal workers pneumoconiosis                         | 12,225<br>(7,515 - 19,505)     | 3<br>(0 - 8)           | 10<br>(2 - 22)           | 1,188<br>(609 - 2,069)      | 6,182<br>(3,715 - 9,817)       | 4,842<br>(2,807 - 7,817)       |
| Other pneumoconiosis                                | 42,068<br>(26,549 - 61,939)    | 5<br>(1 - 17)          | 16<br>(5 - 34)           | 3,901<br>(2,220 - 6,214)    | 19,627<br>(11,552 - 29,300)    | 18,519<br>(11,225 - 28,302)    |
| Asthma                                              | 108,402<br>(66,187 - 199,097)  | 742<br>(310 - 1,515)   | 817<br>(494 - 1,312)     | 14,891<br>(8,629 - 28,906)  | 46,588<br>(26,931 - 86,132)    | 45,364<br>(26,028 - 82,730)    |
| Interstitial lung disease and pulmonary sarcoidosis | 93,233<br>(64,537 - 133,344)   | 33<br>(2 - 166)        | 61<br>(15 - 186)         | 6,899<br>(3,821 - 10,554)   | 42,491<br>(26,797 - 60,965)    | 43,750<br>(26,948 - 68,988)    |
| Other chronic respiratory diseases                  | 14,600<br>(8,738 - 22,394)     | 1,731<br>(815 - 2,961) | 364<br>(184 - 605)       | 2,311<br>(1,227 - 4,026)    | 5,358<br>(2,887 - 9,231)       | 4,836<br>(2,602 - 8,090)       |
| Cirrhosis                                           | 187,743<br>(150,196 - 231,986) | 2,089<br>(942 - 4,018) | 2,408<br>(1,754 - 3,300) | 68,759<br>(51,996 - 88,573) | 82,374<br>(64,039 - 104,321)   | 32,113<br>(25,441 - 39,436)    |
| Cirrhosis due to hepatitis B                        | 46,091<br>(30,075 - 67,172)    | 91<br>(29 - 218)       | 389<br>(196 - 666)       | 16,839<br>(10,226 - 25,445) | 20,733<br>(13,201 - 30,913)    | 8,039<br>(5,350 - 11,324)      |
| Cirrhosis due to hepatitis C                        | 25,561<br>(12,714 - 41,487)    | 105<br>(30 - 260)      | 254<br>(108 - 478)       | 8,579<br>(3,194 - 15,929)   | 11,278<br>(4,730 - 19,756)     | 5,347<br>(2,904 - 8,665)       |
| Cirrhosis due to alcohol use                        | 79,809<br>(55,528 - 106,099)   | --                     | --                       | 25,923<br>(15,763 - 36,846) | 38,413<br>(26,167 - 52,490)    | 15,473<br>(11,253 - 20,060)    |
| Cirrhosis due to other causes                       | 36,282<br>(22,674 - 51,872)    | 1,894<br>(858 - 3,617) | 1,765<br>(1,252 - 2,448) | 17,418<br>(10,690 - 25,039) | 11,950<br>(5,574 - 18,866)     | 3,255<br>(1,529 - 5,283)       |
| Digestive diseases                                  | 189,333<br>(125,456 - 259,404) | 984<br>(477 - 1,790)   | 3,625<br>(2,269 - 5,359) | 61,092<br>(40,986 - 88,204) | 68,665<br>(43,701 - 97,009)    | 54,966<br>(36,336 - 73,803)    |
| Peptic ulcer disease                                | 65,016<br>(38,823 - 90,501)    | 78<br>(19 - 203)       | 426<br>(168 - 805)       | 17,314<br>(10,336 - 26,164) | 26,209<br>(14,980 - 38,567)    | 20,989<br>(13,160 - 30,280)    |
| Gastritis and duodenitis                            | 9,563<br>(4,901 - 19,955)      | 63<br>(18 - 173)       | 203<br>(91 - 443)        | 3,026<br>(1,542 - 6,355)    | 3,368<br>(1,546 - 7,180)       | 2,904<br>(1,409 - 5,915)       |
| Appendicitis                                        | 22,835<br>(12,543 - 34,365)    | 32<br>(9 - 79)         | 278<br>(122 - 503)       | 12,417<br>(6,960 - 19,288)  | 5,969<br>(3,024 - 9,780)       | 4,139<br>(2,139 - 6,871)       |
| Paralytic ileus and intestinal obstruction          | 38,282<br>(24,134 - 65,970)    | 562<br>(238 - 1,151)   | 1,983<br>(1,168 - 3,131) | 9,111<br>(5,294 - 16,419)   | 15,243<br>(8,891 - 27,541)     | 11,383<br>(6,537 - 19,608)     |
| Inguinal, femoral, and abdominal hernia             | 6,972<br>(3,812 - 15,409)      | 20<br>(6 - 54)         | 83<br>(36 - 224)         | 905<br>(276 - 2,855)        | 1,454<br>(625 - 3,843)         | 4,509<br>(2,547 - 9,199)       |
| Inflammatory bowel disease                          | 6,023<br>(3,418 - 10,153)      | 133<br>(40 - 303)      | 190<br>(79 - 347)        | 2,356<br>(1,368 - 4,203)    | 1,784<br>(917 - 3,071)         | 1,560<br>(798 - 2,717)         |
| Vascular intestinal disorders                       | 4,079<br>(1,363 - 9,726)       | 21<br>(3 - 67)         | 87<br>(16 - 245)         | 978<br>(311 - 2,405)        | 1,450<br>(478 - 3,468)         | 1,543<br>(495 - 3,635)         |
| Gallbladder and biliary diseases                    | 4,537<br>(2,907 - 8,001)       | 10<br>(4 - 22)         | 55<br>(27 - 99)          | 1,178<br>(714 - 2,047)      | 1,728<br>(1,008 - 2,942)       | 1,565<br>(858 - 3,287)         |
| Pancreatitis                                        | 24,606<br>(9,537 - 41,258)     | 21<br>(6 - 54)         | 156<br>(44 - 307)        | 10,948<br>(4,346 - 19,084)  | 8,755<br>(3,348 - 15,414)      | 4,726<br>(1,737 - 8,279)       |
| Other digestive diseases                            | 7,418<br>(1,862 - 12,744)      | 44<br>(9 - 104)        | 164<br>(35 - 302)        | 2,858<br>(658 - 4,917)      | 2,705<br>(654 - 4,834)         | 1,648<br>(481 - 3,005)         |
| Neurological disorders                              | 74,356<br>(60,803 - 90,077)    | 2,413<br>(947 - 6,159) | 1,416<br>(829 - 2,371)   | 7,331<br>(4,394 - 10,531)   | 9,602<br>(6,952 - 12,751)      | 53,594<br>(42,335 - 65,474)    |
| Alzheimer disease and other dementias               | 55,889<br>(43,768 - 68,256)    | --                     | --                       | 39<br>(14 - 78)             | 5,793<br>(3,726 - 8,050)       | 50,057<br>(38,722 - 61,886)    |
| Parkinson disease                                   | 239<br>(141 - 487)             | --                     | --                       | 38<br>(28 - 52)             | 13<br>(9 - 17)                 | 188<br>(90 - 435)              |
| Epilepsy                                            | 12,448<br>(9,052 - 16,648)     | 2,004<br>(600 - 5,663) | 1,196<br>(644 - 2,130)   | 5,096<br>(2,668 - 8,024)    | 1,869<br>(1,285 - 2,722)       | 2,284<br>(1,554 - 3,356)       |
| Multiple sclerosis                                  | 1,101<br>(401 - 1,930)         | --                     | --                       | 406<br>(157 - 758)          | 430<br>(161 - 777)             | 265<br>(80 - 446)              |
| Other neurological disorders                        | 4,680<br>(3,125 - 6,487)       | 409<br>(233 - 639)     | 220<br>(135 - 328)       | 1,752<br>(1,139 - 2,533)    | 1,498<br>(974 - 2,182)         | 800<br>(506 - 1,137)           |
| Mental and substance use disorders                  | 8,975<br>(6,449 - 12,320)      | 61<br>(24 - 152)       | 1<br>(0 - 2)             | 3,681<br>(2,493 - 5,214)    | 3,641<br>(2,569 - 5,172)       | 1,592<br>(1,065 - 2,176)       |
| Schizophrenia                                       | 541<br>(188 - 1,390)           | --                     | --                       | 203<br>(61 - 557)           | 230<br>(77 - 570)              | 109<br>(40 - 254)              |
| Alcohol use disorders                               | 4,974<br>(2,861 - 6,952)       | --                     | --                       | 2,101<br>(1,084 - 3,085)    | 1,721<br>(1,026 - 2,705)       | 1,153<br>(637 - 1,684)         |
| Drug use disorders                                  | 3,446<br>(2,385 - 5,235)       | 61<br>(24 - 152)       | --                       | 1,364<br>(935 - 2,153)      | 1,690<br>(1,012 - 2,587)       | 330<br>(150 - 530)             |
| Opioid use disorders                                | 1,840<br>(1,269 - 2,832)       | 36<br>(14 - 90)        | --                       | 750<br>(511 - 1,221)        | 873<br>(530 - 1,343)           | 181<br>(82 - 291)              |
| Cocaine use disorders                               | 36<br>(25 - 54)                | 1<br>(0 - 2)           | --                       | 17<br>(11 - 28)             | 15<br>(9 - 24)                 | 3<br>(1 - 5)                   |
| Amphetamine use disorders                           | 35<br>(24 - 55)                | 1<br>(0 - 3)           | --                       | 14<br>(9 - 23)              | 18<br>(10 - 28)                | 3<br>(1 - 5)                   |
| Other drug use disorders                            | 1,535<br>(1,071 - 2,325)       | 23<br>(9 - 58)         | --                       | 584<br>(399 - 935)          | 784<br>(453 - 1,214)           | 144<br>(66 - 231)              |
| Eating disorders                                    | 14<br>(8 - 22)                 | --                     | 1<br>(0 - 2)             | 13<br>(7 - 21)              | --                             | --                             |

Web Table 31- India deaths with 95% UI by age, sex, and cause in 2013

| Cause                                               | Males, All Ages                | Males, 0-4 Years            | Males, 5-14 Years        | Males, 15-49 Years          | Males, 50-69 Years            | Males, 70-80 Years            |
|-----------------------------------------------------|--------------------------------|-----------------------------|--------------------------|-----------------------------|-------------------------------|-------------------------------|
| Anorexia nervosa                                    | 14<br>(8 - 22)                 | --                          | 1<br>(0 - 2)             | 13<br>(7 - 21)              | --                            | --                            |
| Diabetes, urogenital, blood, and endocrine diseases | 255,921<br>(201,742 - 317,466) | 4,598<br>(3,046 - 6,940)    | 2,393<br>(1,750 - 3,196) | 47,343<br>(35,534 - 63,506) | 101,409<br>(78,089 - 132,019) | 100,178<br>(78,833 - 120,540) |
| Diabetes mellitus                                   | 126,213<br>(102,234 - 157,343) | 552<br>(381 - 790)          | 188<br>(133 - 256)       | 16,440<br>(12,257 - 21,753) | 53,771<br>(41,261 - 70,422)   | 55,262<br>(44,347 - 67,761)   |
| Acute glomerulonephritis                            | 3,120<br>(1,498 - 5,535)       | 551<br>(144 - 1,277)        | 285<br>(117 - 538)       | 1,024<br>(517 - 1,818)      | 727<br>(384 - 1,278)          | 533<br>(266 - 983)            |
| Chronic kidney disease                              | 85,070<br>(42,142 - 116,529)   | 159<br>(81 - 300)           | 173<br>(105 - 258)       | 18,833<br>(10,341 - 27,005) | 33,997<br>(16,592 - 48,462)   | 31,909<br>(14,586 - 44,259)   |
| Chronic kidney disease due to diabetes mellitus     | 5,866<br>(576 - 10,220)        | 6<br>(1 - 14)               | 9<br>(1 - 19)            | 1,169<br>(130 - 2,142)      | 2,905<br>(280 - 5,499)        | 1,778<br>(139 - 3,298)        |
| Chronic kidney disease due to hypertension          | 25,651<br>(8,256 - 38,851)     | 25<br>(7 - 44)              | 20<br>(6 - 35)           | 4,269<br>(1,138 - 6,876)    | 10,246<br>(3,227 - 16,671)    | 11,090<br>(3,718 - 17,338)    |
| Chronic kidney disease due to glomerulonephritis    | 15,246<br>(8,686 - 22,630)     | 85<br>(46 - 162)            | 111<br>(71 - 165)        | 4,984<br>(3,074 - 7,358)    | 5,560<br>(3,067 - 9,051)      | 4,505<br>(2,122 - 7,161)      |
| Chronic kidney disease due to other causes          | 38,307<br>(17,382 - 59,510)    | 42<br>(14 - 100)            | 32<br>(13 - 64)          | 8,411<br>(4,137 - 13,722)   | 15,285<br>(6,974 - 25,201)    | 14,536<br>(5,588 - 23,724)    |
| Urinary diseases and male infertility               | 19,103<br>(15,111 - 24,897)    | 168<br>(97 - 295)           | 160<br>(115 - 217)       | 3,708<br>(2,692 - 5,319)    | 7,273<br>(5,265 - 9,916)      | 7,793<br>(5,780 - 10,487)     |
| Interstitial nephritis and urinary tract infections | 11,649<br>(8,562 - 16,163)     | 137<br>(80 - 252)           | 94<br>(62 - 141)         | 2,384<br>(1,627 - 3,661)    | 4,353<br>(2,910 - 6,309)      | 4,681<br>(3,209 - 6,724)      |
| Urolithiasis                                        | 1,756<br>(1,043 - 3,267)       | --                          | 18<br>(9 - 39)           | 351<br>(179 - 771)          | 741<br>(363 - 1,517)          | 646<br>(341 - 1,243)          |
| Other urinary diseases                              | 5,698<br>(3,194 - 8,140)       | 31<br>(13 - 61)             | 48<br>(24 - 76)          | 973<br>(553 - 1,536)        | 2,180<br>(1,193 - 3,366)      | 2,466<br>(1,220 - 3,858)      |
| Gynecological diseases                              | --                             | --                          | --                       | --                          | --                            | --                            |
| Uterine fibroids                                    | --                             | --                          | --                       | --                          | --                            | --                            |
| Polycystic ovarian syndrome                         | --                             | --                          | --                       | --                          | --                            | --                            |
| Endometriosis                                       | --                             | --                          | --                       | --                          | --                            | --                            |
| Genital prolapse                                    | --                             | --                          | --                       | --                          | --                            | --                            |
| Other gynecological diseases                        | --                             | --                          | --                       | --                          | --                            | --                            |
| Hemoglobinopathies and hemolytic anemias            | 11,353<br>(6,638 - 17,017)     | 2,159<br>(1,144 - 4,024)    | 1,201<br>(696 - 1,859)   | 4,185<br>(2,360 - 6,371)    | 2,031<br>(1,202 - 3,178)      | 1,778<br>(935 - 2,825)        |
| Thalassemias                                        | 3,678<br>(2,084 - 5,902)       | 1,357<br>(702 - 2,597)      | 706<br>(411 - 1,095)     | 1,488<br>(805 - 2,429)      | 104<br>(62 - 162)             | 24<br>(13 - 39)               |
| Sickle cell disorders                               | 3,084<br>(1,825 - 4,656)       | 375<br>(193 - 720)          | 310<br>(179 - 477)       | 1,564<br>(890 - 2,429)      | 821<br>(489 - 1,287)          | 13<br>(7 - 23)                |
| G6PD deficiency                                     | 918<br>(544 - 1,399)           | 140<br>(72 - 270)           | 89<br>(52 - 138)         | 389<br>(221 - 594)          | 216<br>(128 - 337)            | 84<br>(45 - 133)              |
| Other hemoglobinopathies and hemolytic anemias      | 3,673<br>(2,120 - 5,589)       | 287<br>(169 - 449)          | 96<br>(54 - 147)         | 744<br>(427 - 1,148)        | 890<br>(518 - 1,415)          | 1,656<br>(870 - 2,647)        |
| Endocrine, metabolic, blood, and immune disorders   | 11,062<br>(7,059 - 14,444)     | 1,010<br>(587 - 1,644)      | 386<br>(238 - 591)       | 3,153<br>(2,126 - 4,451)    | 3,610<br>(2,282 - 5,193)      | 2,904<br>(1,594 - 4,300)      |
| Musculoskeletal disorders                           | 12,049<br>(8,412 - 18,110)     | --                          | 457<br>(284 - 831)       | 3,583<br>(2,383 - 5,234)    | 6,562<br>(4,374 - 10,176)     | 1,448<br>(977 - 2,250)        |
| Rheumatoid arthritis                                | 3,942<br>(2,265 - 7,335)       | --                          | 116<br>(28 - 321)        | 745<br>(330 - 1,536)        | 2,397<br>(1,288 - 4,562)      | 684<br>(403 - 1,142)          |
| Other musculoskeletal disorders                     | 8,108<br>(4,916 - 12,161)      | --                          | 342<br>(208 - 559)       | 2,838<br>(1,708 - 4,189)    | 4,165<br>(2,378 - 6,444)      | 763<br>(429 - 1,267)          |
| Other non-communicable diseases                     | 77,460<br>(57,380 - 96,921)    | 39,297<br>(24,497 - 54,809) | 3,283<br>(1,957 - 4,737) | 17,209<br>(12,260 - 23,472) | 9,079<br>(4,543 - 11,843)     | 8,592<br>(4,211 - 10,994)     |
| Congenital anomalies                                | 68,403<br>(48,588 - 87,127)    | 38,029<br>(23,453 - 53,556) | 3,187<br>(1,873 - 4,631) | 15,495<br>(10,819 - 21,421) | 6,270<br>(1,945 - 8,763)      | 5,423<br>(1,473 - 7,350)      |
| Neural tube defects                                 | 3,024<br>(767 - 10,250)        | 2,114<br>(416 - 8,040)      | 114<br>(26 - 398)        | 597<br>(185 - 1,678)        | 113<br>(13 - 334)             | 86<br>(8 - 261)               |
| Congenital heart anomalies                          | 39,574<br>(21,851 - 56,819)    | 21,433<br>(9,023 - 34,942)  | 2,008<br>(964 - 3,245)   | 7,443<br>(4,318 - 11,570)   | 4,429<br>(1,367 - 6,343)      | 4,261<br>(1,070 - 5,980)      |
| Cleft lip and cleft palate                          | 363<br>(98 - 1,091)            | 363<br>(98 - 1,091)         | --                       | --                          | --                            | --                            |
| Down syndrome                                       | 4,200<br>(2,003 - 7,521)       | 1,349<br>(436 - 3,342)      | 212<br>(79 - 459)        | 2,236<br>(1,151 - 3,961)    | 364<br>(85 - 674)             | 39<br>(9 - 73)                |
| Chromosomal unbalanced rearrangements               | 1,631<br>(809 - 3,206)         | 1,000<br>(393 - 2,252)      | 71<br>(31 - 164)         | 448<br>(245 - 760)          | 79<br>(24 - 153)              | 33<br>(10 - 63)               |
| Other congenital anomalies                          | 19,612<br>(11,378 - 29,455)    | 11,771<br>(6,181 - 19,346)  | 782<br>(409 - 1,293)     | 4,771<br>(2,491 - 7,232)    | 1,284<br>(408 - 2,187)        | 1,004<br>(342 - 1,769)        |
| Skin and subcutaneous diseases                      | 8,069<br>(6,051 - 10,427)      | 279<br>(140 - 579)          | 97<br>(68 - 142)         | 1,714<br>(1,226 - 2,374)    | 2,809<br>(1,996 - 3,804)      | 3,170<br>(2,211 - 4,350)      |
| Cellulitis                                          | 3,139<br>(916 - 7,171)         | 172<br>(51 - 440)           | 56<br>(20 - 106)         | 711<br>(197 - 1,601)        | 1,107<br>(296 - 2,617)        | 1,093<br>(272 - 2,756)        |
| Pyoderma                                            | 4,102<br>(832 - 6,855)         | 83<br>(8 - 213)             | 24<br>(2 - 53)           | 847<br>(150 - 1,496)        | 1,502<br>(297 - 2,590)        | 1,645<br>(397 - 2,872)        |
| Decubitus ulcer                                     | 749<br>(123 - 1,453)           | 16<br>(2 - 43)              | 13<br>(2 - 26)           | 126<br>(19 - 253)           | 179<br>(26 - 360)             | 416<br>(75 - 875)             |



Web Table 31- India deaths with 95% UI by age, sex, and cause in 2013

| Cause                                           | Males, All Ages                | Males, 0-4 Years            | Males, 5-14 Years           | Males, 15-49 Years             | Males, 50-69 Years             | Males, 70-80 Years           |
|-------------------------------------------------|--------------------------------|-----------------------------|-----------------------------|--------------------------------|--------------------------------|------------------------------|
| Other skin and subcutaneous diseases            | 79<br>(17 - 136)               | 8<br>(1 - 20)               | 4<br>(0 - 9)                | 30<br>(7 - 53)                 | 21<br>(4 - 39)                 | 16<br>(4 - 30)               |
| Sudden infant death syndrome                    | 988<br>(267 - 2,802)           | 988<br>(267 - 2,802)        | --                          | --                             | --                             | --                           |
| Injuries                                        | 746,343<br>(603,711 - 905,895) | 37,470<br>(25,853 - 55,327) | 27,162<br>(21,708 - 33,900) | 397,588<br>(307,860 - 497,573) | 185,000<br>(146,219 - 231,710) | 99,123<br>(77,753 - 117,742) |
| Transport injuries                              | 215,677<br>(168,853 - 270,951) | 3,489<br>(2,033 - 5,388)    | 5,576<br>(3,986 - 7,368)    | 130,338<br>(99,230 - 169,781)  | 50,080<br>(36,818 - 65,493)    | 26,194<br>(17,964 - 32,432)  |
| Road injuries                                   | 199,661<br>(155,393 - 250,258) | 3,116<br>(1,806 - 4,826)    | 5,039<br>(3,626 - 6,685)    | 120,191<br>(90,705 - 156,689)  | 46,374<br>(33,769 - 60,281)    | 24,941<br>(16,677 - 30,925)  |
| Pedestrian road injuries                        | 75,663<br>(54,500 - 101,527)   | 1,877<br>(1,073 - 3,068)    | 3,210<br>(2,139 - 4,454)    | 31,878<br>(21,241 - 46,726)    | 22,526<br>(15,640 - 30,884)    | 16,172<br>(10,920 - 20,865)  |
| Cyclist road injuries                           | 15,410<br>(10,951 - 21,014)    | 125<br>(55 - 258)           | 415<br>(251 - 645)          | 8,947<br>(6,327 - 12,658)      | 3,463<br>(2,284 - 5,066)       | 2,460<br>(1,514 - 3,463)     |
| Motorcyclist road injuries                      | 45,782<br>(30,544 - 63,520)    | 229<br>(104 - 386)          | 275<br>(146 - 445)          | 39,795<br>(26,597 - 55,788)    | 4,262<br>(2,636 - 6,364)       | 1,220<br>(655 - 1,880)       |
| Motor vehicle road injuries                     | 59,225<br>(41,854 - 78,123)    | 709<br>(336 - 1,189)        | 976<br>(577 - 1,475)        | 38,561<br>(27,467 - 52,181)    | 14,043<br>(9,105 - 20,024)     | 4,937<br>(2,781 - 6,898)     |
| Other road injuries                             | 3,580<br>(2,317 - 5,650)       | 176<br>(77 - 344)           | 163<br>(76 - 324)           | 1,009<br>(607 - 1,690)         | 2,081<br>(1,180 - 3,578)       | 151<br>(71 - 247)            |
| Other transport injuries                        | 16,016<br>(11,738 - 24,079)    | 373<br>(203 - 661)          | 537<br>(328 - 880)          | 10,147<br>(7,063 - 15,269)     | 3,706<br>(2,534 - 5,793)       | 1,253<br>(874 - 2,024)       |
| Unintentional injuries                          | 310,295<br>(255,644 - 377,816) | 33,395<br>(22,429 - 50,766) | 19,353<br>(14,909 - 25,750) | 126,859<br>(97,940 - 163,340)  | 77,314<br>(60,748 - 98,087)    | 53,373<br>(42,758 - 64,621)  |
| Falls                                           | 66,132<br>(47,541 - 84,620)    | 2,659<br>(1,247 - 5,302)    | 2,433<br>(1,469 - 3,939)    | 21,429<br>(15,007 - 29,686)    | 19,384<br>(13,452 - 27,332)    | 20,227<br>(12,555 - 28,293)  |
| Drowning                                        | 55,384<br>(38,424 - 81,699)    | 7,107<br>(2,423 - 17,471)   | 7,315<br>(4,525 - 12,935)   | 26,729<br>(18,204 - 38,772)    | 10,309<br>(6,827 - 16,227)     | 3,924<br>(2,693 - 5,792)     |
| Fire, heat, and hot substances                  | 39,328<br>(28,916 - 52,419)    | 2,654<br>(1,289 - 5,763)    | 1,453<br>(915 - 2,386)      | 22,798<br>(15,807 - 31,392)    | 7,918<br>(5,592 - 11,229)      | 4,506<br>(3,136 - 6,093)     |
| Poisonings                                      | 10,577<br>(5,284 - 14,692)     | 345<br>(92 - 665)           | 243<br>(100 - 381)          | 6,628<br>(3,464 - 9,826)       | 2,268<br>(1,059 - 3,356)       | 1,094<br>(476 - 1,605)       |
| Exposure to mechanical forces                   | 36,353<br>(28,298 - 46,505)    | 3,427<br>(1,902 - 6,171)    | 2,015<br>(1,337 - 2,964)    | 18,855<br>(13,427 - 25,784)    | 9,032<br>(6,438 - 12,213)      | 3,024<br>(2,184 - 3,992)     |
| Unintentional firearm injuries                  | 14,473<br>(9,340 - 20,511)     | 339<br>(159 - 668)          | 259<br>(125 - 449)          | 9,303<br>(5,630 - 14,030)      | 3,094<br>(1,791 - 4,756)       | 1,477<br>(832 - 2,370)       |
| Unintentional suffocation                       | 3,294<br>(1,977 - 7,115)       | 1,400<br>(487 - 3,683)      | 539<br>(260 - 1,076)        | 751<br>(475 - 1,307)           | 390<br>(235 - 697)             | 215<br>(129 - 385)           |
| Other exposure to mechanical forces             | 18,586<br>(14,224 - 23,932)    | 1,688<br>(900 - 3,014)      | 1,217<br>(695 - 1,922)      | 8,800<br>(6,164 - 11,987)      | 5,548<br>(3,741 - 7,857)       | 1,333<br>(930 - 1,844)       |
| Adverse effects of medical treatment            | 16,483<br>(11,060 - 25,315)    | 5,410<br>(2,606 - 10,681)   | 656<br>(385 - 1,144)        | 4,310<br>(2,765 - 6,879)       | 3,690<br>(2,305 - 5,769)       | 2,417<br>(1,402 - 4,232)     |
| Animal contact                                  | 30,959<br>(22,742 - 51,899)    | 2,524<br>(1,144 - 5,509)    | 3,721<br>(2,215 - 6,192)    | 13,467<br>(8,991 - 23,825)     | 8,077<br>(5,279 - 14,164)      | 3,171<br>(2,098 - 5,331)     |
| Venomous animal contact                         | 25,331<br>(18,354 - 43,107)    | 1,536<br>(621 - 3,468)      | 3,042<br>(1,775 - 5,042)    | 11,621<br>(7,687 - 21,179)     | 6,955<br>(4,475 - 12,278)      | 2,178<br>(1,386 - 3,840)     |
| Non-venomous animal contact                     | 5,628<br>(3,808 - 9,483)       | 988<br>(387 - 2,405)        | 679<br>(303 - 1,506)        | 1,847<br>(1,080 - 3,151)       | 1,122<br>(603 - 2,221)         | 992<br>(581 - 1,701)         |
| Foreign body                                    | 15,882<br>(9,547 - 27,018)     | 8,198<br>(4,212 - 13,555)   | 251<br>(153 - 485)          | 1,473<br>(865 - 3,025)         | 1,673<br>(1,028 - 3,281)       | 4,286<br>(2,485 - 7,372)     |
| Pulmonary aspiration and foreign body in airway | 15,073<br>(8,950 - 26,172)     | 8,159<br>(4,158 - 13,479)   | 223<br>(129 - 445)          | 1,255<br>(686 - 2,732)         | 1,200<br>(636 - 2,775)         | 4,237<br>(2,428 - 7,322)     |
| Foreign body in other body part                 | 808<br>(504 - 1,367)           | 39<br>(20 - 74)             | 28<br>(17 - 51)             | 218<br>(134 - 374)             | 473<br>(290 - 814)             | 50<br>(29 - 81)              |
| Other unintentional injuries                    | 39,198<br>(30,469 - 48,933)    | 1,072<br>(643 - 1,937)      | 1,266<br>(887 - 1,797)      | 11,172<br>(8,249 - 15,031)     | 14,963<br>(10,738 - 20,413)    | 10,725<br>(8,231 - 13,843)   |
| Self-harm and interpersonal violence            | 217,546<br>(136,950 - 281,807) | 559<br>(263 - 1,074)        | 2,151<br>(1,126 - 3,800)    | 138,953<br>(87,948 - 184,704)  | 56,530<br>(35,123 - 77,341)    | 19,353<br>(10,213 - 26,992)  |
| Self-harm                                       | 164,974<br>(96,371 - 217,572)  | --                          | 1,573<br>(649 - 3,192)      | 106,979<br>(62,603 - 144,870)  | 42,332<br>(22,632 - 60,364)    | 14,090<br>(7,298 - 20,627)   |
| Interpersonal violence                          | 52,573<br>(30,893 - 75,220)    | 559<br>(263 - 1,074)        | 579<br>(314 - 1,123)        | 31,974<br>(18,998 - 48,063)    | 14,198<br>(8,430 - 22,703)     | 5,263<br>(1,986 - 9,237)     |
| Assault by firearm                              | 21,143<br>(10,524 - 33,048)    | 50<br>(19 - 132)            | 129<br>(50 - 293)           | 11,103<br>(5,387 - 19,048)     | 7,663<br>(4,029 - 12,981)      | 2,198<br>(765 - 4,248)       |
| Assault by sharp object                         | 23,064<br>(12,833 - 36,317)    | 16<br>(5 - 46)              | 113<br>(39 - 243)           | 16,406<br>(9,157 - 26,579)     | 5,576<br>(2,654 - 9,723)       | 954<br>(317 - 1,821)         |
| Assault by other means                          | 8,366<br>(3,999 - 12,626)      | 493<br>(215 - 951)          | 337<br>(164 - 622)          | 4,466<br>(2,210 - 7,208)       | 959<br>(451 - 1,818)           | 2,110<br>(695 - 3,836)       |
| Forces of nature, war, and legal intervention   | 2,825<br>(1,406 - 6,830)       | 27<br>(0 - 3)               | 82<br>(42 - 203)            | 1,437<br>(719 - 3,277)         | 1,076<br>(534 - 2,672)         | 203<br>(91 - 550)            |
| Exposure to forces of nature                    | 2,825<br>(1,406 - 6,830)       | 27<br>(0 - 3)               | 82<br>(42 - 203)            | 1,437<br>(719 - 3,277)         | 1,076<br>(534 - 2,672)         | 203<br>(91 - 550)            |

Web Table 31- India deaths with 95% UI by age, sex, and cause in 2013

| Cause                                                             | Females, All Ages                    | Females, 0-4 Years             | Females, 5-14 Years           | Females, 15-49 Years           | Females, 50-69 Years                 | Females, 70-80 Years                 |
|-------------------------------------------------------------------|--------------------------------------|--------------------------------|-------------------------------|--------------------------------|--------------------------------------|--------------------------------------|
| All causes                                                        | 4,499,872<br>(3,898,573 - 5,070,507) | 603,353<br>(519,281 - 709,677) | 101,430<br>(90,584 - 114,113) | 775,354<br>(636,383 - 914,807) | 1,259,521<br>(1,034,080 - 1,475,998) | 1,760,214<br>(1,536,997 - 1,965,696) |
| Communicable, maternal, neonatal, and nutritional diseases        | 1,335,452<br>(1,198,618 - 1,494,105) | 506,984<br>(432,404 - 599,338) | 60,680<br>(51,783 - 70,780)   | 286,748<br>(246,534 - 333,626) | 209,358<br>(172,223 - 255,422)       | 271,681<br>(221,380 - 334,158)       |
| HIV/AIDS and tuberculosis                                         | 217,894<br>(171,336 - 268,494)       | 8,649<br>(3,274 - 13,190)      | 5,122<br>(3,414 - 6,810)      | 91,338<br>(68,672 - 118,904)   | 66,161<br>(49,808 - 85,617)          | 46,624<br>(35,173 - 59,970)          |
| Tuberculosis                                                      | 188,576<br>(141,824 - 238,149)       | 8,056<br>(2,692 - 12,561)      | 3,798<br>(2,063 - 5,445)      | 69,306<br>(47,225 - 95,697)    | 61,224<br>(45,104 - 80,602)          | 46,192<br>(34,644 - 59,443)          |
| HIV/AIDS                                                          | 29,318<br>(20,048 - 38,653)          | 593<br>(382 - 806)             | 1,324<br>(746 - 1,912)        | 22,031<br>(14,975 - 27,567)    | 4,937<br>(2,679 - 9,164)             | 433<br>(194 - 793)                   |
| HIV/AIDS resulting in mycobacterial infection                     | 1,559<br>(1,033 - 2,160)             | 31<br>(19 - 44)                | 64<br>(36 - 93)               | 1,166<br>(755 - 1,597)         | 272<br>(140 - 498)                   | 25<br>(11 - 48)                      |
| HIV/AIDS resulting in other diseases                              | 27,759<br>(18,958 - 36,646)          | 562<br>(361 - 767)             | 1,260<br>(706 - 1,816)        | 20,865<br>(14,244 - 26,186)    | 4,664<br>(2,513 - 8,614)             | 407<br>(183 - 743)                   |
| Diarrhea, lower respiratory, and other common infectious diseases | 543,424<br>(454,725 - 643,217)       | 171,059<br>(135,107 - 216,690) | 38,434<br>(30,260 - 46,797)   | 74,468<br>(53,650 - 100,018)   | 96,774<br>(71,058 - 130,228)         | 162,688<br>(120,664 - 217,205)       |
| Diarrheal diseases                                                | 232,825<br>(174,129 - 306,314)       | 45,598<br>(26,898 - 74,221)    | 11,766<br>(6,747 - 18,520)    | 24,085<br>(16,418 - 33,532)    | 52,947<br>(33,223 - 80,908)          | 98,429<br>(63,033 - 147,120)         |
| Intestinal infectious diseases                                    | 47,535<br>(24,822 - 79,897)          | 11,892<br>(5,811 - 21,270)     | 12,209<br>(6,174 - 19,890)    | 18,914<br>(8,529 - 35,575)     | 3,259<br>(1,319 - 6,628)             | 1,261<br>(492 - 2,482)               |
| Typhoid fever                                                     | 34,975<br>(17,849 - 59,952)          | 8,448<br>(3,887 - 15,293)      | 9,085<br>(4,428 - 15,391)     | 13,974<br>(6,159 - 27,139)     | 2,487<br>(1,011 - 5,277)             | 981<br>(378 - 1,946)                 |
| Paratyphoid fever                                                 | 12,158<br>(5,988 - 22,153)           | 3,266<br>(1,336 - 6,731)       | 3,091<br>(1,368 - 5,904)      | 4,829<br>(1,888 - 9,994)       | 723<br>(233 - 1,691)                 | 248<br>(72 - 610)                    |
| Other intestinal infectious diseases                              | 402<br>(315 - 499)                   | 178<br>(121 - 252)             | 33<br>(21 - 51)               | 111<br>(77 - 153)              | 48<br>(31 - 71)                      | 32<br>(19 - 47)                      |
| Lower respiratory infections                                      | 191,483<br>(158,276 - 230,731)       | 83,334<br>(59,161 - 111,677)   | 8,896<br>(5,800 - 13,123)     | 18,036<br>(12,594 - 24,385)    | 27,041<br>(19,595 - 35,976)          | 54,176<br>(39,795 - 71,158)          |
| Upper respiratory infections                                      | 507<br>(215 - 944)                   | 85<br>(11 - 272)               | 18<br>(1 - 66)                | 116<br>(33 - 271)              | 144<br>(24 - 421)                    | 144<br>(17 - 429)                    |
| Otitis media                                                      | 131<br>(90 - 171)                    | 26<br>(15 - 40)                | 19<br>(13 - 26)               | 44<br>(30 - 60)                | 29<br>(18 - 42)                      | 13<br>(8 - 19)                       |
| Meningitis                                                        | 25,880<br>(19,696 - 32,920)          | 4,996<br>(3,078 - 7,372)       | 1,517<br>(1,007 - 2,182)      | 6,799<br>(4,522 - 9,722)       | 7,363<br>(4,803 - 10,602)            | 5,205<br>(3,599 - 7,249)             |
| Pneumococcal meningitis                                           | 7,878<br>(5,651 - 11,028)            | 1,222<br>(722 - 1,942)         | 558<br>(320 - 896)            | 2,135<br>(1,296 - 3,438)       | 2,339<br>(1,222 - 4,071)             | 1,624<br>(930 - 2,625)               |
| H influenzae type B meningitis                                    | 4,482<br>(3,034 - 6,011)             | 2,004<br>(1,122 - 3,194)       | 379<br>(198 - 608)            | 800<br>(420 - 1,275)           | 765<br>(320 - 1,372)                 | 534<br>(302 - 880)                   |
| Meningococcal meningitis                                          | 3,527<br>(2,190 - 4,990)             | 367<br>(206 - 600)             | 160<br>(87 - 268)             | 1,044<br>(485 - 1,777)         | 1,065<br>(538 - 1,949)               | 890<br>(329 - 1,479)                 |
| Other meningitis                                                  | 9,993<br>(7,163 - 13,565)            | 1,403<br>(698 - 2,379)         | 420<br>(217 - 701)            | 2,819<br>(1,630 - 4,498)       | 3,194<br>(1,712 - 5,055)             | 2,156<br>(1,019 - 3,532)             |
| Encephalitis                                                      | 20,547<br>(14,431 - 28,702)          | 7,902<br>(4,292 - 12,856)      | 2,808<br>(1,648 - 4,345)      | 5,490<br>(3,482 - 8,524)       | 3,533<br>(2,328 - 5,461)             | 814<br>(548 - 1,226)                 |
| Diphtheria                                                        | 717<br>(53 - 3,131)                  | 430<br>(0 - 2,861)             | 158<br>(0 - 936)              | 96<br>(5 - 343)                | 33<br>(0 - 226)                      | --                                   |
| Whooping cough                                                    | 6,313<br>(171 - 27,891)              | 5,879<br>(161 - 25,948)        | 334<br>(8 - 1,596)            | 86<br>(2 - 362)                | 14<br>(0 - 63)                       | --                                   |
| Tetanus                                                           | 12,089<br>(4,812 - 21,051)           | 6,901<br>(1,044 - 15,369)      | 158<br>(61 - 267)             | 471<br>(271 - 754)             | 2,278<br>(1,278 - 3,993)             | 2,280<br>(1,260 - 3,894)             |
| Measles                                                           | 4,387<br>(2,513 - 7,176)             | 3,776<br>(2,098 - 6,284)       | 499<br>(288 - 805)            | 109<br>(61 - 182)              | 3<br>(2 - 6)                         | --                                   |
| Varicella and herpes zoster                                       | 1,010<br>(397 - 2,189)               | 240<br>(18 - 850)              | 52<br>(2 - 201)               | 222<br>(55 - 560)              | 129<br>(21 - 374)                    | 367<br>(29 - 1,317)                  |
| Neglected tropical diseases and malaria                           | 82,697<br>(64,865 - 106,310)         | 12,092<br>(7,940 - 18,757)     | 9,855<br>(7,117 - 13,602)     | 24,601<br>(17,726 - 33,158)    | 21,423<br>(14,517 - 31,641)          | 14,726<br>(9,777 - 21,604)           |
| Malaria                                                           | 62,143<br>(45,048 - 85,171)          | 6,151<br>(2,810 - 11,992)      | 6,223<br>(3,721 - 9,880)      | 18,802<br>(12,022 - 27,324)    | 18,203<br>(11,460 - 28,102)          | 12,765<br>(7,963 - 19,487)           |
| Leishmaniasis                                                     | 11,029<br>(8,264 - 14,392)           | 4,285<br>(2,609 - 6,414)       | 2,612<br>(1,659 - 3,812)      | 3,058<br>(1,935 - 4,306)       | 825<br>(431 - 1,279)                 | 248<br>(147 - 363)                   |
| Visceral leishmaniasis                                            | 11,029<br>(8,264 - 14,392)           | 4,285<br>(2,609 - 6,414)       | 2,612<br>(1,659 - 3,812)      | 3,058<br>(1,935 - 4,306)       | 825<br>(431 - 1,279)                 | 248<br>(147 - 363)                   |
| Cysticercosis                                                     | 37<br>(27 - 49)                      | 1<br>(0 - 1)                   | 2<br>(1 - 2)                  | 19<br>(14 - 27)                | 11<br>(8 - 15)                       | 4<br>(3 - 5)                         |
| Cystic echinococcosis                                             | 207<br>(167 - 251)                   | 10<br>(7 - 14)                 | 28<br>(23 - 34)               | 88<br>(67 - 111)               | 52<br>(42 - 65)                      | 28<br>(23 - 33)                      |
| Dengue                                                            | 995<br>(724 - 1,568)                 | 77<br>(36 - 240)               | 47<br>(31 - 84)               | 617<br>(421 - 886)             | 133<br>(92 - 215)                    | 121<br>(78 - 223)                    |
| Rabies                                                            | 4,787<br>(3,022 - 6,547)             | 429<br>(169 - 884)             | 799<br>(430 - 1,284)          | 1,510<br>(846 - 2,134)         | 1,516<br>(963 - 2,273)               | 533<br>(327 - 846)                   |
| Intestinal nematode infections                                    | 311<br>(238 - 401)                   | 171<br>(117 - 241)             | 60<br>(38 - 88)               | 34<br>(18 - 58)                | 22<br>(10 - 40)                      | 23<br>(11 - 41)                      |
| Ascariasis                                                        | 311<br>(238 - 401)                   | 171<br>(117 - 241)             | 60<br>(38 - 88)               | 34<br>(18 - 58)                | 22<br>(10 - 40)                      | 23<br>(11 - 41)                      |
| Other neglected tropical diseases                                 | 3,188<br>(2,135 - 5,077)             | 967<br>(469 - 2,028)           | 84<br>(31 - 146)              | 473<br>(280 - 799)             | 661<br>(373 - 1,115)                 | 1,003<br>(615 - 1,577)               |
| Maternal disorders                                                | 71,792<br>(52,723 - 94,564)          | --                             | 44<br>(20 - 82)               | 71,748<br>(52,681 - 94,528)    | --                                   | --                                   |
| Maternal hemorrhage                                               | 10,542<br>(6,614 - 15,648)           | --                             | 3<br>(1 - 6)                  | 10,539<br>(6,611 - 15,645)     | --                                   | --                                   |

Web Table 31- India deaths with 95% UI by age, sex, and cause in 2013

| Cause                                                            | Females, All Ages                    | Females, 0-4 Years             | Females, 5-14 Years         | Females, 15-49 Years           | Females, 50-69 Years             | Females, 70-80 Years                 |
|------------------------------------------------------------------|--------------------------------------|--------------------------------|-----------------------------|--------------------------------|----------------------------------|--------------------------------------|
| Maternal sepsis and other maternal infections                    | 7,236<br>(4,761 - 10,523)            | --                             | 3<br>(1 - 7)                | 7,233<br>(4,757 - 10,520)      | --                               | --                                   |
| Maternal hypertensive disorders                                  | 6,043<br>(3,541 - 9,063)             | --                             | 8<br>(4 - 17)               | 6,035<br>(3,530 - 9,054)       | --                               | --                                   |
| Maternal obstructed labor                                        | 4,975<br>(3,313 - 7,116)             | --                             | 1<br>(1 - 3)                | 4,973<br>(3,311 - 7,115)       | --                               | --                                   |
| Maternal abortive outcome                                        | 7,830<br>(5,009 - 11,428)            | --                             | 5<br>(2 - 10)               | 7,825<br>(5,005 - 11,421)      | --                               | --                                   |
| Indirect maternal deaths                                         | 8,766<br>(5,838 - 12,632)            | --                             | 5<br>(2 - 10)               | 8,761<br>(5,834 - 12,627)      | --                               | --                                   |
| Late maternal deaths                                             | 13,632<br>(8,284 - 20,913)           | --                             | 10<br>(4 - 21)              | 13,622<br>(8,272 - 20,904)     | --                               | --                                   |
| Maternal deaths aggravated by HIV/AIDS                           | 23<br>(11 - 38)                      | --                             | --                          | 23<br>(11 - 38)                | --                               | --                                   |
| Other maternal disorders                                         | 12,607<br>(7,373 - 19,147)           | --                             | 7<br>(3 - 15)               | 12,600<br>(7,368 - 19,135)     | --                               | --                                   |
| Neonatal disorders                                               | 272,934<br>(228,912 - 324,653)       | 272,934<br>(228,912 - 324,653) | --                          | --                             | --                               | --                                   |
| Neonatal preterm birth complications                             | 98,032<br>(59,501 - 143,276)         | 98,032<br>(59,501 - 143,276)   | --                          | --                             | --                               | --                                   |
| Neonatal encephalopathy due to birth asphyxia and trauma         | 93,779<br>(60,001 - 133,265)         | 93,779<br>(60,001 - 133,265)   | --                          | --                             | --                               | --                                   |
| Neonatal sepsis and other neonatal infections                    | 36,702<br>(18,627 - 67,830)          | 36,702<br>(18,627 - 67,830)    | --                          | --                             | --                               | --                                   |
| Hemolytic disease and other neonatal jaundice                    | 2,283<br>(842 - 5,508)               | 2,283<br>(842 - 5,508)         | --                          | --                             | --                               | --                                   |
| Other neonatal disorders                                         | 42,138<br>(24,697 - 67,766)          | 42,138<br>(24,697 - 67,766)    | --                          | --                             | --                               | --                                   |
| Nutritional deficiencies                                         | 82,769<br>(50,146 - 102,113)         | 15,292<br>(8,935 - 24,087)     | 2,458<br>(1,425 - 3,409)    | 13,246<br>(5,998 - 17,915)     | 14,547<br>(7,342 - 19,377)       | 37,226<br>(23,807 - 50,826)          |
| Protein-energy malnutrition                                      | 51,955<br>(25,904 - 72,612)          | 10,983<br>(4,928 - 19,165)     | 1,758<br>(776 - 2,709)      | 6,265<br>(2,314 - 10,361)      | 5,274<br>(1,803 - 9,289)         | 27,674<br>(13,462 - 40,496)          |
| Iodine deficiency                                                | 620<br>(90 - 1,745)                  | 74<br>(0 - 523)                | 16<br>(0 - 89)              | 151<br>(6 - 611)               | 164<br>(2 - 754)                 | 215<br>(1 - 1,067)                   |
| Iron-deficiency anemia                                           | 25,397<br>(9,124 - 45,022)           | 3,753<br>(901 - 9,143)         | 660<br>(160 - 1,393)        | 6,344<br>(2,328 - 10,482)      | 6,739<br>(2,315 - 11,721)        | 7,900<br>(1,906 - 17,350)            |
| Other nutritional deficiencies                                   | 4,797<br>(1,822 - 10,667)            | 482<br>(96 - 1,787)            | 24<br>(10 - 63)             | 486<br>(109 - 1,412)           | 2,369<br>(810 - 5,312)           | 1,436<br>(589 - 3,193)               |
| Other communicable, maternal, neonatal, and nutritional diseases | 63,943<br>(43,231 - 92,738)          | 26,957<br>(12,941 - 48,067)    | 4,768<br>(3,093 - 7,272)    | 11,347<br>(7,780 - 15,727)     | 10,453<br>(6,033 - 17,509)       | 10,417<br>(5,423 - 19,130)           |
| Sexually transmitted diseases excluding HIV                      | 15,844<br>(6,215 - 27,979)           | 12,071<br>(3,240 - 23,348)     | 886<br>(268 - 1,704)        | 500<br>(304 - 828)             | 602<br>(279 - 1,164)             | 1,786<br>(684 - 4,225)               |
| Syphilis                                                         | 14,774<br>(5,194 - 26,978)           | 12,071<br>(3,240 - 23,348)     | 865<br>(245 - 1,677)        | 203<br>(122 - 338)             | 330<br>(152 - 645)               | 1,305<br>(502 - 3,058)               |
| Chlamydial infection                                             | 313<br>(192 - 539)                   | --                             | 8<br>(4 - 12)               | 99<br>(61 - 162)               | 82<br>(37 - 167)                 | 124<br>(44 - 310)                    |
| Gonococcal infection                                             | 446<br>(260 - 814)                   | --                             | 7<br>(4 - 11)               | 103<br>(62 - 171)              | 108<br>(50 - 209)                | 229<br>(85 - 555)                    |
| Other sexually transmitted diseases                              | 311<br>(188 - 551)                   | --                             | 7<br>(4 - 11)               | 95<br>(58 - 156)               | 82<br>(37 - 165)                 | 127<br>(43 - 321)                    |
| Hepatitis                                                        | 19,534<br>(14,937 - 27,178)          | 5,369<br>(2,961 - 10,041)      | 2,278<br>(1,517 - 3,393)    | 7,323<br>(5,210 - 9,723)       | 2,934<br>(2,065 - 4,117)         | 1,631<br>(1,099 - 2,281)             |
| Acute hepatitis A                                                | 3,567<br>(1,170 - 6,981)             | 2,574<br>(892 - 5,289)         | 356<br>(90 - 839)           | 479<br>(117 - 1,102)           | 125<br>(28 - 298)                | 33<br>(7 - 90)                       |
| Acute hepatitis B                                                | 5,897<br>(3,557 - 9,155)             | 1,655<br>(533 - 3,849)         | 139<br>(50 - 285)           | 1,058<br>(447 - 1,996)         | 1,775<br>(986 - 2,778)           | 1,271<br>(774 - 1,899)               |
| Acute hepatitis C                                                | 173<br>(29 - 455)                    | --                             | 18<br>(3 - 55)              | 65<br>(10 - 202)               | 59<br>(9 - 161)                  | 31<br>(4 - 108)                      |
| Acute hepatitis E                                                | 9,897<br>(6,792 - 14,507)            | 1,140<br>(434 - 2,549)         | 1,765<br>(1,123 - 2,717)    | 5,720<br>(3,913 - 7,896)       | 976<br>(366 - 1,882)             | 296<br>(52 - 724)                    |
| Other infectious diseases                                        | 28,565<br>(12,300 - 55,211)          | 9,518<br>(2,093 - 28,954)      | 1,605<br>(571 - 3,952)      | 3,524<br>(1,402 - 6,661)       | 6,918<br>(2,945 - 14,028)        | 7,001<br>(2,298 - 16,244)            |
| Non-communicable diseases                                        | 2,701,942<br>(2,259,005 - 3,149,301) | 57,811<br>(41,278 - 78,661)    | 20,259<br>(16,234 - 24,857) | 297,203<br>(225,504 - 374,851) | 945,875<br>(760,384 - 1,134,384) | 1,380,794<br>(1,192,986 - 1,558,932) |
| Neoplasms                                                        | 322,019<br>(258,091 - 395,547)       | 6,275<br>(3,581 - 9,819)       | 2,952<br>(2,178 - 3,918)    | 65,340<br>(49,261 - 82,252)    | 157,619<br>(125,235 - 195,288)   | 89,833<br>(74,654 - 107,970)         |
| Esophageal cancer                                                | 28,443<br>(21,666 - 36,407)          | --                             | --                          | 4,451<br>(3,134 - 6,105)       | 12,441<br>(8,939 - 16,441)       | 11,551<br>(8,572 - 15,662)           |
| Stomach cancer                                                   | 33,645<br>(26,142 - 43,233)          | --                             | --                          | 5,213<br>(3,731 - 7,085)       | 16,657<br>(12,540 - 21,861)      | 11,776<br>(8,473 - 16,418)           |
| Liver cancer                                                     | 26,233<br>(19,066 - 35,129)          | --                             | 75<br>(42 - 124)            | 3,787<br>(2,428 - 5,547)       | 14,400<br>(9,865 - 20,508)       | 7,969<br>(5,487 - 11,197)            |
| Liver cancer due to hepatitis B                                  | 10,114<br>(5,911 - 15,182)           | --                             | 27<br>(12 - 48)             | 1,878<br>(1,100 - 2,868)       | 5,761<br>(3,136 - 9,123)         | 2,449<br>(1,293 - 3,966)             |
| Liver cancer due to hepatitis C                                  | 5,984<br>(3,085 - 10,263)            | --                             | 2<br>(1 - 5)                | 445<br>(127 - 955)             | 3,091<br>(1,376 - 5,636)         | 2,446<br>(1,256 - 4,210)             |
| Liver cancer due to alcohol use                                  | 2,756<br>(1,536 - 4,477)             | --                             | --                          | 210<br>(96 - 381)              | 1,431<br>(753 - 2,440)           | 1,114<br>(588 - 1,898)               |
| Liver cancer due to other causes                                 | 7,378<br>(4,502 - 10,798)            | --                             | 46<br>(26 - 81)             | 1,254<br>(728 - 1,933)         | 4,117<br>(2,313 - 6,337)         | 1,960<br>(1,088 - 3,160)             |

Web Table 31- India deaths with 95% UI by age, sex, and cause in 2013

| Cause                                         | Females, All Ages                  | Females, 0-4 Years       | Females, 5-14 Years      | Females, 15-49 Years          | Females, 50-69 Years           | Females, 70-80 Years           |
|-----------------------------------------------|------------------------------------|--------------------------|--------------------------|-------------------------------|--------------------------------|--------------------------------|
| Larynx cancer                                 | 2,031<br>(1,037 - 3,466)           | --                       | --                       | 316<br>(159 - 548)            | 1,028<br>(513 - 1,804)         | 686<br>(344 - 1,163)           |
| Tracheal, bronchus and lung cancer            | 16,402<br>(12,581 - 20,887)        | --                       | --                       | 2,540<br>(1,809 - 3,460)      | 9,615<br>(7,287 - 12,559)      | 4,246<br>(3,268 - 5,409)       |
| Breast cancer                                 | 47,587<br>(36,673 - 59,256)        | --                       | --                       | 11,364<br>(8,246 - 15,079)    | 24,440<br>(18,519 - 30,810)    | 11,782<br>(9,427 - 14,578)     |
| Cervical cancer                               | 40,985<br>(30,324 - 53,090)        | --                       | --                       | 9,156<br>(6,314 - 12,988)     | 22,461<br>(16,005 - 29,980)    | 9,368<br>(7,086 - 12,252)      |
| Uterine cancer                                | 2,503<br>(1,576 - 3,386)           | --                       | --                       | 286<br>(183 - 426)            | 1,329<br>(798 - 1,841)         | 888<br>(574 - 1,272)           |
| Prostate cancer                               | --                                 | --                       | --                       | --                            | --                             | --                             |
| Colon and rectum cancer                       | 15,880<br>(12,854 - 19,487)        | --                       | --                       | 2,845<br>(2,097 - 3,698)      | 7,545<br>(5,860 - 9,543)       | 5,489<br>(4,382 - 6,815)       |
| Lip and oral cavity cancer                    | 15,719<br>(10,705 - 22,984)        | --                       | --                       | 2,796<br>(1,728 - 4,109)      | 8,046<br>(5,280 - 11,964)      | 4,877<br>(3,418 - 7,289)       |
| Nasopharynx cancer                            | 2,190<br>(1,490 - 3,813)           | --                       | 15<br>(7 - 29)           | 637<br>(401 - 1,009)          | 1,208<br>(781 - 2,219)         | 330<br>(206 - 625)             |
| Other pharynx cancer                          | 6,238<br>(4,398 - 8,291)           | --                       | --                       | 1,405<br>(802 - 2,170)        | 3,532<br>(2,385 - 4,969)       | 1,301<br>(919 - 1,752)         |
| Gallbladder and biliary tract cancer          | 6,288<br>(3,720 - 8,419)           | --                       | --                       | 1,560<br>(925 - 2,196)        | 3,333<br>(1,933 - 4,569)       | 1,396<br>(821 - 1,891)         |
| Pancreatic cancer                             | 4,144<br>(3,275 - 5,136)           | --                       | --                       | 623<br>(457 - 832)            | 2,052<br>(1,566 - 2,640)       | 1,469<br>(1,157 - 1,820)       |
| Malignant skin melanoma                       | 1,928<br>(1,329 - 2,580)           | --                       | --                       | 1,018<br>(640 - 1,486)        | 615<br>(409 - 873)             | 295<br>(197 - 449)             |
| Non-melanoma skin cancer                      | 738<br>(432 - 1,086)               | --                       | --                       | 103<br>(57 - 156)             | 212<br>(111 - 325)             | 422<br>(248 - 673)             |
| Ovarian cancer                                | 18,293<br>(14,126 - 23,348)        | --                       | --                       | 4,139<br>(2,964 - 5,616)      | 10,692<br>(7,998 - 14,023)     | 3,462<br>(2,662 - 4,427)       |
| Testicular cancer                             | --                                 | --                       | --                       | --                            | --                             | --                             |
| Kidney cancer                                 | 2,163<br>(1,679 - 2,733)           | 107<br>(50 - 218)        | 49<br>(29 - 79)          | 365<br>(260 - 494)            | 1,069<br>(772 - 1,410)         | 574<br>(421 - 773)             |
| Bladder cancer                                | 1,553<br>(914 - 2,120)             | --                       | --                       | 221<br>(127 - 317)            | 653<br>(360 - 945)             | 680<br>(406 - 938)             |
| Brain and nervous system cancer               | 5,679<br>(4,328 - 7,426)           | 88<br>(47 - 172)         | 208<br>(144 - 297)       | 1,893<br>(1,350 - 2,603)      | 2,623<br>(1,945 - 3,566)       | 867<br>(655 - 1,167)           |
| Thyroid cancer                                | 2,049<br>(1,452 - 3,084)           | --                       | 14<br>(6 - 30)           | 439<br>(255 - 812)            | 850<br>(580 - 1,251)           | 746<br>(527 - 1,100)           |
| Mesothelioma                                  | 133<br>(100 - 180)                 | --                       | --                       | 43<br>(29 - 65)               | 56<br>(37 - 82)                | 34<br>(24 - 49)                |
| Hodgkin lymphoma                              | 1,824<br>(1,170 - 3,002)           | 762<br>(318 - 1,574)     | 66<br>(31 - 136)         | 322<br>(208 - 572)            | 417<br>(253 - 717)             | 258<br>(158 - 560)             |
| Non-Hodgkin lymphoma                          | 6,264<br>(4,351 - 10,382)          | 470<br>(85 - 1,930)      | 195<br>(115 - 345)       | 1,244<br>(812 - 1,972)        | 2,535<br>(1,771 - 3,829)       | 1,821<br>(1,285 - 2,996)       |
| Multiple myeloma                              | 2,014<br>(1,443 - 2,748)           | --                       | --                       | 268<br>(181 - 381)            | 1,066<br>(760 - 1,520)         | 680<br>(483 - 916)             |
| Leukemia                                      | 10,800<br>(8,584 - 13,348)         | 418<br>(230 - 696)       | 911<br>(660 - 1,251)     | 4,284<br>(3,173 - 5,580)      | 3,560<br>(2,757 - 4,565)       | 1,628<br>(1,283 - 2,052)       |
| Other neoplasms                               | 20,292<br>(13,806 - 27,280)        | 4,430<br>(2,263 - 7,436) | 1,421<br>(822 - 2,268)   | 4,021<br>(2,560 - 5,975)      | 5,182<br>(3,461 - 7,521)       | 5,238<br>(3,675 - 7,323)       |
| Cardiovascular diseases                       | 1,180,780<br>(904,744 - 1,429,648) | 4,656<br>(2,710 - 9,672) | 4,625<br>(3,100 - 8,111) | 104,535<br>(70,401 - 147,933) | 396,733<br>(291,301 - 501,765) | 670,231<br>(532,345 - 788,339) |
| Rheumatic heart disease                       | 45,816<br>(27,403 - 70,824)        | 378<br>(144 - 928)       | 1,088<br>(598 - 1,937)   | 13,330<br>(7,478 - 20,690)    | 17,681<br>(10,236 - 28,964)    | 13,340<br>(8,241 - 22,736)     |
| Ischemic heart disease                        | 623,823<br>(446,663 - 800,946)     | 1,370<br>(562 - 4,495)   | 1,306<br>(683 - 3,205)   | 52,429<br>(32,792 - 81,922)   | 209,166<br>(143,758 - 282,653) | 359,552<br>(267,888 - 436,641) |
| Cerebrovascular disease                       | 348,919<br>(249,980 - 433,870)     | 955<br>(547 - 1,791)     | 1,390<br>(830 - 2,451)   | 23,000<br>(14,468 - 31,783)   | 114,252<br>(76,422 - 147,917)  | 209,322<br>(154,436 - 257,294) |
| Ischemic stroke                               | 165,731<br>(104,964 - 221,960)     | 127<br>(57 - 270)        | 178<br>(76 - 388)        | 3,516<br>(1,745 - 5,869)      | 36,991<br>(20,939 - 55,425)    | 124,919<br>(80,706 - 163,695)  |
| Hemorrhagic stroke                            | 183,188<br>(119,427 - 253,801)     | 828<br>(474 - 1,585)     | 1,211<br>(710 - 2,295)   | 19,484<br>(12,089 - 27,056)   | 77,262<br>(49,030 - 106,941)   | 84,403<br>(51,885 - 126,162)   |
| Hypertensive heart disease                    | 117,621<br>(78,748 - 163,373)      | 322<br>(129 - 704)       | 174<br>(97 - 292)        | 7,815<br>(4,492 - 12,012)     | 41,533<br>(24,758 - 60,980)    | 67,777<br>(45,443 - 98,330)    |
| Cardiomyopathy and myocarditis                | 21,062<br>(10,526 - 32,069)        | 1,334<br>(549 - 2,388)   | 514<br>(185 - 933)       | 4,598<br>(2,125 - 7,225)      | 6,635<br>(3,128 - 10,812)      | 7,981<br>(4,155 - 13,800)      |
| Atrial fibrillation and flutter               | 631<br>(254 - 1,145)               | --                       | --                       | 26<br>(14 - 45)               | 130<br>(55 - 243)              | 476<br>(172 - 902)             |
| Aortic aneurysm                               | 6,318<br>(2,886 - 10,564)          | --                       | --                       | 640<br>(279 - 1,173)          | 2,117<br>(921 - 3,687)         | 3,562<br>(1,630 - 5,870)       |
| Peripheral vascular disease                   | 514<br>(247 - 963)                 | --                       | --                       | 14<br>(6 - 30)                | 115<br>(50 - 209)              | 386<br>(187 - 730)             |
| Endocarditis                                  | 4,617<br>(2,414 - 7,604)           | 195<br>(64 - 561)        | 81<br>(29 - 188)         | 1,034<br>(479 - 1,859)        | 1,263<br>(623 - 2,130)         | 2,044<br>(1,059 - 3,482)       |
| Other cardiovascular and circulatory diseases | 11,459<br>(7,822 - 19,345)         | 103<br>(47 - 289)        | 73<br>(39 - 151)         | 1,650<br>(998 - 2,765)        | 3,841<br>(2,409 - 7,220)       | 5,793<br>(3,779 - 9,394)       |
| Chronic respiratory diseases                  | 652,605<br>(526,094 - 801,502)     | 3,585<br>(2,273 - 5,515) | 1,686<br>(1,236 - 2,283) | 36,681<br>(25,826 - 49,731)   | 226,454<br>(173,059 - 291,728) | 384,200<br>(312,494 - 463,494) |

Web Table 31- India deaths with 95% UI by age, sex, and cause in 2013

| Cause                                               | Females, All Ages              | Females, 0-4 Years       | Females, 5-14 Years      | Females, 15-49 Years        | Females, 50-69 Years          | Females, 70-80 Years           |
|-----------------------------------------------------|--------------------------------|--------------------------|--------------------------|-----------------------------|-------------------------------|--------------------------------|
| Chronic obstructive pulmonary disease               | 319,838<br>(218,952 - 428,297) | 1,367<br>(644 - 2,386)   | 342<br>(160 - 587)       | 10,992<br>(6,193 - 17,341)  | 104,481<br>(67,480 - 146,994) | 202,656<br>(139,392 - 269,145) |
| Pneumoconiosis                                      | 103,145<br>(64,437 - 151,864)  | 5<br>(2 - 9)             | 20<br>(10 - 34)          | 5,186<br>(3,231 - 7,694)    | 39,978<br>(23,637 - 61,697)   | 57,957<br>(32,856 - 91,165)    |
| Silicosis                                           | 3,322<br>(1,549 - 6,448)       | 1<br>(0 - 2)             | 3<br>(1 - 7)             | 348<br>(163 - 740)          | 1,624<br>(683 - 3,375)        | 1,347<br>(562 - 3,836)         |
| Asbestosis                                          | 2,898<br>(1,506 - 5,301)       | 1<br>(0 - 1)             | 3<br>(1 - 6)             | 306<br>(147 - 570)          | 1,406<br>(643 - 2,686)        | 1,183<br>(532 - 2,293)         |
| Coal workers pneumoconiosis                         | 2,634<br>(1,319 - 4,809)       | 1<br>(0 - 1)             | 3<br>(1 - 6)             | 314<br>(160 - 598)          | 1,281<br>(582 - 2,552)        | 1,035<br>(397 - 2,277)         |
| Other pneumoconiosis                                | 94,290<br>(58,846 - 137,565)   | 3<br>(1 - 6)             | 11<br>(5 - 19)           | 4,218<br>(2,521 - 6,367)    | 35,666<br>(21,184 - 55,030)   | 54,392<br>(30,857 - 85,425)    |
| Asthma                                              | 118,341<br>(63,257 - 244,256)  | 898<br>(388 - 1,629)     | 962<br>(599 - 1,454)     | 13,897<br>(7,532 - 23,422)  | 42,987<br>(21,898 - 89,558)   | 59,598<br>(30,183 - 133,060)   |
| Interstitial lung disease and pulmonary sarcoidosis | 98,246<br>(57,479 - 146,203)   | 28<br>(2 - 145)          | 62<br>(15 - 220)         | 5,121<br>(2,686 - 7,890)    | 34,575<br>(17,292 - 54,489)   | 58,460<br>(34,104 - 93,135)    |
| Other chronic respiratory diseases                  | 13,035<br>(8,891 - 18,957)     | 1,287<br>(788 - 2,204)   | 300<br>(161 - 493)       | 1,486<br>(902 - 2,291)      | 4,432<br>(2,690 - 7,062)      | 5,530<br>(3,425 - 8,772)       |
| Cirrhosis                                           | 74,436<br>(59,325 - 90,534)    | 2,335<br>(1,214 - 4,330) | 1,795<br>(1,252 - 2,465) | 17,076<br>(12,512 - 22,216) | 31,783<br>(24,372 - 40,259)   | 21,447<br>(16,474 - 27,229)    |
| Cirrhosis due to hepatitis B                        | 23,841<br>(15,764 - 33,493)    | 70<br>(17 - 187)         | 224<br>(64 - 493)        | 4,931<br>(2,551 - 7,797)    | 10,960<br>(6,992 - 15,628)    | 7,655<br>(4,925 - 10,950)      |
| Cirrhosis due to hepatitis C                        | 16,459<br>(8,745 - 26,713)     | 127<br>(27 - 350)        | 146<br>(49 - 294)        | 3,408<br>(1,852 - 5,744)    | 7,961<br>(3,947 - 12,794)     | 4,816<br>(2,142 - 8,497)       |
| Cirrhosis due to alcohol use                        | 14,393<br>(7,999 - 21,642)     | --                       | --                       | 1,774<br>(618 - 3,024)      | 6,509<br>(3,358 - 10,520)     | 6,110<br>(3,335 - 9,376)       |
| Cirrhosis due to other causes                       | 19,744<br>(11,742 - 29,557)    | 2,137<br>(1,082 - 3,952) | 1,425<br>(957 - 2,021)   | 6,963<br>(4,403 - 10,673)   | 6,353<br>(2,360 - 11,298)     | 2,866<br>(1,099 - 5,120)       |
| Digestive diseases                                  | 135,149<br>(99,971 - 180,310)  | 1,124<br>(671 - 1,794)   | 3,742<br>(2,502 - 5,262) | 29,114<br>(20,221 - 41,298) | 44,139<br>(30,746 - 60,164)   | 57,030<br>(41,750 - 78,202)    |
| Peptic ulcer disease                                | 36,263<br>(22,479 - 51,476)    | 88<br>(29 - 215)         | 531<br>(284 - 906)       | 5,513<br>(2,967 - 8,721)    | 13,034<br>(7,574 - 19,344)    | 17,096<br>(10,473 - 25,676)    |
| Gastritis and duodenitis                            | 9,374<br>(4,152 - 20,949)      | 100<br>(35 - 235)        | 379<br>(159 - 898)       | 1,856<br>(884 - 4,338)      | 3,057<br>(1,223 - 7,118)      | 3,982<br>(1,504 - 9,719)       |
| Appendicitis                                        | 14,102<br>(7,646 - 21,648)     | 138<br>(47 - 317)        | 520<br>(262 - 951)       | 4,329<br>(2,224 - 7,170)    | 3,515<br>(1,863 - 5,898)      | 5,600<br>(2,838 - 9,302)       |
| Paralytic ileus and intestinal obstruction          | 37,052<br>(23,075 - 61,963)    | 505<br>(225 - 926)       | 832<br>(366 - 1,394)     | 9,076<br>(5,457 - 15,486)   | 11,026<br>(6,162 - 19,630)    | 15,612<br>(8,839 - 27,415)     |
| Inguinal, femoral, and abdominal hernia             | 1,932<br>(821 - 5,426)         | 20<br>(6 - 63)           | 272<br>(83 - 894)        | 389<br>(178 - 1,008)        | 460<br>(145 - 1,410)          | 791<br>(326 - 2,285)           |
| Inflammatory bowel disease                          | 5,592<br>(3,196 - 8,907)       | 157<br>(54 - 334)        | 394<br>(201 - 672)       | 1,739<br>(949 - 2,873)      | 1,521<br>(831 - 2,615)        | 1,781<br>(968 - 3,149)         |
| Vascular intestinal disorders                       | 3,852<br>(1,751 - 7,885)       | 5<br>(0 - 27)            | 37<br>(0 - 210)          | 521<br>(239 - 1,122)        | 1,167<br>(520 - 2,368)        | 2,122<br>(804 - 4,640)         |
| Gallbladder and biliary diseases                    | 6,817<br>(4,047 - 10,404)      | 22<br>(7 - 50)           | 174<br>(72 - 291)        | 1,010<br>(552 - 1,624)      | 2,747<br>(1,457 - 4,525)      | 2,863<br>(1,595 - 4,817)       |
| Pancreatitis                                        | 14,054<br>(6,463 - 24,567)     | 19<br>(7 - 46)           | 270<br>(117 - 506)       | 3,340<br>(1,601 - 5,808)    | 5,488<br>(2,463 - 10,033)     | 4,937<br>(2,129 - 9,028)       |
| Other digestive diseases                            | 6,112<br>(3,861 - 9,520)       | 69<br>(24 - 144)         | 332<br>(185 - 559)       | 1,339<br>(778 - 2,103)      | 2,124<br>(1,272 - 3,468)      | 2,247<br>(1,244 - 3,893)       |
| Neurological disorders                              | 65,926<br>(51,552 - 84,397)    | 1,491<br>(844 - 2,905)   | 671<br>(323 - 1,250)     | 3,199<br>(1,893 - 4,938)    | 7,189<br>(5,288 - 9,328)      | 53,377<br>(39,941 - 70,180)    |
| Alzheimer disease and other dementias               | 54,449<br>(41,111 - 71,121)    | --                       | --                       | 39<br>(10 - 72)             | 4,684<br>(3,216 - 6,178)      | 49,726<br>(36,699 - 66,028)    |
| Parkinson disease                                   | 1,191<br>(741 - 2,116)         | --                       | --                       | 31<br>(20 - 41)             | 15<br>(10 - 22)               | 1,145<br>(697 - 2,052)         |
| Epilepsy                                            | 5,273<br>(3,282 - 8,165)       | 1,036<br>(455 - 2,470)   | 508<br>(178 - 1,076)     | 1,916<br>(769 - 3,556)      | 604<br>(359 - 945)            | 1,209<br>(554 - 2,503)         |
| Multiple sclerosis                                  | 1,122<br>(505 - 1,872)         | --                       | --                       | 337<br>(159 - 672)          | 446<br>(200 - 815)            | 340<br>(123 - 611)             |
| Other neurological disorders                        | 3,890<br>(2,996 - 5,754)       | 455<br>(316 - 730)       | 163<br>(117 - 258)       | 876<br>(622 - 1,396)        | 1,440<br>(1,032 - 2,177)      | 957<br>(714 - 1,426)           |
| Mental and substance use disorders                  | 2,114<br>(1,346 - 3,511)       | 69<br>(24 - 159)         | 7<br>(3 - 13)            | 692<br>(429 - 1,143)        | 942<br>(575 - 1,584)          | 405<br>(239 - 714)             |
| Schizophrenia                                       | 432<br>(121 - 1,216)           | --                       | --                       | 120<br>(26 - 401)           | 174<br>(45 - 510)             | 137<br>(44 - 357)              |
| Alcohol use disorders                               | 847<br>(384 - 1,579)           | --                       | --                       | 308<br>(133 - 575)          | 383<br>(173 - 758)            | 156<br>(65 - 271)              |
| Drug use disorders                                  | 769<br>(422 - 1,184)           | 69<br>(24 - 159)         | --                       | 203<br>(105 - 327)          | 385<br>(205 - 608)            | 112<br>(50 - 208)              |
| Opioid use disorders                                | 405<br>(222 - 619)             | 40<br>(14 - 90)          | --                       | 109<br>(56 - 180)           | 195<br>(102 - 310)            | 61<br>(27 - 116)               |
| Cocaine use disorders                               | 13<br>(7 - 19)                 | 2<br>(0 - 4)             | --                       | 4<br>(2 - 7)                | 5<br>(3 - 9)                  | 2<br>(1 - 3)                   |
| Amphetamine use disorders                           | 14<br>(8 - 22)                 | 2<br>(1 - 5)             | --                       | 4<br>(2 - 6)                | 7<br>(4 - 11)                 | 2<br>(1 - 3)                   |
| Other drug use disorders                            | 337<br>(182 - 526)             | 26<br>(9 - 63)           | --                       | 86<br>(43 - 142)            | 178<br>(92 - 286)             | 48<br>(21 - 90)                |
| Eating disorders                                    | 67<br>(41 - 109)               | --                       | 7<br>(3 - 13)            | 60<br>(35 - 100)            | --                            | --                             |

Web Table 31- India deaths with 95% UI by age, sex, and cause in 2013

| Cause                                               | Females, All Ages              | Females, 0-4 Years          | Females, 5-14 Years      | Females, 15-49 Years        | Females, 50-69 Years        | Females, 70-80 Years         |
|-----------------------------------------------------|--------------------------------|-----------------------------|--------------------------|-----------------------------|-----------------------------|------------------------------|
| Anorexia nervosa                                    | 67<br>(41 - 109)               | --                          | 7<br>(3 - 13)            | 60<br>(35 - 100)            | --                          | --                           |
| Diabetes, urogenital, blood, and endocrine diseases | 200,193<br>(157,283 - 246,076) | 5,516<br>(3,749 - 7,838)    | 1,734<br>(1,243 - 2,577) | 25,712<br>(18,917 - 33,576) | 72,155<br>(54,801 - 92,537) | 95,077<br>(74,654 - 115,857) |
| Diabetes mellitus                                   | 111,562<br>(88,649 - 137,806)  | 642<br>(367 - 1,095)        | 240<br>(128 - 422)       | 10,737<br>(7,629 - 14,123)  | 43,501<br>(33,079 - 55,864) | 56,442<br>(45,346 - 71,242)  |
| Acute glomerulonephritis                            | 2,459<br>(1,041 - 4,454)       | 414<br>(112 - 881)          | 250<br>(94 - 472)        | 762<br>(339 - 1,343)        | 554<br>(229 - 1,016)        | 479<br>(212 - 903)           |
| Chronic kidney disease                              | 51,877<br>(20,307 - 76,389)    | 125<br>(64 - 275)           | 121<br>(54 - 204)        | 6,937<br>(3,208 - 10,554)   | 19,148<br>(7,208 - 29,373)  | 25,545<br>(9,566 - 37,298)   |
| Chronic kidney disease due to diabetes mellitus     | 3,638<br>(751 - 6,315)         | 4<br>(1 - 10)               | 5<br>(1 - 12)            | 452<br>(87 - 835)           | 1,741<br>(328 - 3,275)      | 1,435<br>(292 - 2,680)       |
| Chronic kidney disease due to hypertension          | 12,763<br>(3,191 - 24,129)     | 12<br>(3 - 34)              | 12<br>(2 - 31)           | 1,203<br>(276 - 2,548)      | 4,277<br>(1,044 - 8,475)    | 7,259<br>(1,899 - 14,010)    |
| Chronic kidney disease due to glomerulonephritis    | 12,139<br>(5,340 - 21,443)     | 81<br>(44 - 181)            | 87<br>(44 - 156)         | 2,854<br>(1,401 - 4,911)    | 4,511<br>(1,896 - 8,309)    | 4,607<br>(1,866 - 8,468)     |
| Chronic kidney disease due to other causes          | 23,338<br>(6,727 - 40,473)     | 28<br>(8 - 82)              | 17<br>(5 - 39)           | 2,428<br>(862 - 4,288)      | 8,620<br>(2,330 - 15,723)   | 12,244<br>(3,357 - 21,789)   |
| Urinary diseases and male infertility               | 12,944<br>(9,739 - 17,402)     | 318<br>(181 - 595)          | 168<br>(104 - 270)       | 2,392<br>(1,608 - 3,660)    | 4,388<br>(3,047 - 6,578)    | 5,679<br>(3,966 - 8,026)     |
| Interstitial nephritis and urinary tract infections | 9,345<br>(6,379 - 14,112)      | 279<br>(159 - 526)          | 129<br>(79 - 205)        | 1,738<br>(1,102 - 2,805)    | 3,136<br>(1,943 - 5,132)    | 4,063<br>(2,512 - 6,435)     |
| Urolithiasis                                        | 739<br>(421 - 1,317)           | --                          | 15<br>(7 - 30)           | 166<br>(82 - 320)           | 279<br>(142 - 585)          | 280<br>(127 - 546)           |
| Other urinary diseases                              | 2,860<br>(1,216 - 4,853)       | 40<br>(16 - 92)             | 24<br>(13 - 47)          | 488<br>(204 - 911)          | 973<br>(370 - 1,704)        | 1,336<br>(478 - 2,387)       |
| Gynecological diseases                              | 882<br>(568 - 1,475)           | --                          | --                       | 314<br>(188 - 594)          | 39<br>(25 - 60)             | 529<br>(295 - 930)           |
| Uterine fibroids                                    | 258<br>(165 - 438)             | --                          | --                       | 80<br>(42 - 157)            | 11<br>(7 - 18)              | 167<br>(93 - 294)            |
| Polycystic ovarian syndrome                         | 18<br>(11 - 31)                | --                          | --                       | 17<br>(10 - 31)             | 0<br>(0 - 1)                | --                           |
| Endometriosis                                       | 45<br>(28 - 81)                | --                          | --                       | 43<br>(26 - 80)             | 1<br>(1 - 2)                | --                           |
| Genital prolapse                                    | 175<br>(109 - 290)             | --                          | --                       | 36<br>(22 - 66)             | 7<br>(4 - 10)               | 132<br>(74 - 232)            |
| Other gynecological diseases                        | 387<br>(250 - 642)             | --                          | --                       | 138<br>(82 - 260)           | 20<br>(13 - 30)             | 230<br>(128 - 404)           |
| Hemoglobinopathies and hemolytic anemias            | 6,846<br>(2,677 - 13,393)      | 1,818<br>(723 - 3,847)      | 641<br>(274 - 1,421)     | 2,293<br>(831 - 4,514)      | 887<br>(322 - 1,930)        | 1,207<br>(386 - 2,601)       |
| Thalassemias                                        | 2,544<br>(1,063 - 5,062)       | 1,155<br>(451 - 2,468)      | 391<br>(167 - 879)       | 940<br>(345 - 1,871)        | 42<br>(15 - 90)             | 17<br>(5 - 37)               |
| Sickle cell disorders                               | 1,709<br>(663 - 3,420)         | 324<br>(125 - 700)          | 161<br>(69 - 356)        | 833<br>(297 - 1,628)        | 359<br>(128 - 777)          | 31<br>(9 - 74)               |
| G6PD deficiency                                     | 476<br>(186 - 924)             | 122<br>(49 - 257)           | 39<br>(17 - 88)          | 187<br>(68 - 368)           | 72<br>(26 - 156)            | 55<br>(18 - 118)             |
| Other hemoglobinopathies and hemolytic anemias      | 2,117<br>(747 - 4,262)         | 216<br>(91 - 446)           | 50<br>(21 - 103)         | 334<br>(117 - 658)          | 414<br>(153 - 917)          | 1,104<br>(354 - 2,367)       |
| Endocrine, metabolic, blood, and immune disorders   | 13,623<br>(9,244 - 18,704)     | 2,199<br>(1,105 - 3,884)    | 315<br>(149 - 571)       | 2,276<br>(1,429 - 3,468)    | 3,638<br>(2,398 - 5,530)    | 5,196<br>(3,261 - 7,901)     |
| Musculoskeletal disorders                           | 7,244<br>(4,937 - 10,284)      | --                          | 431<br>(267 - 676)       | 2,372<br>(1,505 - 3,693)    | 2,430<br>(1,550 - 3,533)    | 2,011<br>(1,195 - 3,005)     |
| Rheumatoid arthritis                                | 3,748<br>(2,319 - 5,513)       | --                          | 87<br>(34 - 245)         | 563<br>(268 - 1,175)        | 1,575<br>(914 - 2,337)      | 1,523<br>(862 - 2,392)       |
| Other musculoskeletal disorders                     | 3,496<br>(2,391 - 5,827)       | --                          | 344<br>(205 - 509)       | 1,809<br>(1,177 - 2,785)    | 855<br>(461 - 1,532)        | 488<br>(265 - 1,078)         |
| Other non-communicable diseases                     | 61,474<br>(42,519 - 82,944)    | 32,760<br>(20,226 - 48,825) | 2,614<br>(1,487 - 4,160) | 12,484<br>(7,259 - 19,314)  | 6,433<br>(3,106 - 9,448)    | 7,184<br>(4,009 - 9,594)     |
| Congenital anomalies                                | 54,089<br>(35,858 - 75,294)    | 31,253<br>(18,536 - 46,664) | 2,526<br>(1,409 - 4,047) | 11,758<br>(6,619 - 18,409)  | 4,538<br>(1,301 - 7,431)    | 4,013<br>(1,126 - 6,205)     |
| Neural tube defects                                 | 2,569<br>(842 - 6,707)         | 1,863<br>(423 - 5,501)      | 65<br>(21 - 174)         | 468<br>(182 - 1,041)        | 128<br>(10 - 328)           | 45<br>(4 - 103)              |
| Congenital heart anomalies                          | 33,205<br>(17,498 - 48,760)    | 19,692<br>(8,464 - 31,974)  | 1,670<br>(752 - 2,917)   | 5,597<br>(2,727 - 9,542)    | 3,106<br>(902 - 5,283)      | 3,141<br>(887 - 4,902)       |
| Cleft lip and cleft palate                          | 528<br>(117 - 1,776)           | 528<br>(117 - 1,776)        | --                       | --                          | --                          | --                           |
| Down syndrome                                       | 3,715<br>(1,587 - 7,652)       | 1,134<br>(283 - 2,741)      | 267<br>(77 - 698)        | 1,914<br>(862 - 3,884)      | 365<br>(67 - 780)           | 34<br>(6 - 82)               |
| Chromosomal unbalanced rearrangements               | 2,017<br>(877 - 4,503)         | 1,145<br>(363 - 3,009)      | 61<br>(22 - 145)         | 711<br>(329 - 1,450)        | 68<br>(13 - 136)            | 33<br>(6 - 74)               |
| Other congenital anomalies                          | 12,054<br>(6,960 - 20,364)     | 6,892<br>(3,382 - 12,910)   | 463<br>(220 - 879)       | 3,068<br>(1,407 - 5,870)    | 870<br>(257 - 1,668)        | 760<br>(221 - 1,406)         |
| Skin and subcutaneous diseases                      | 6,499<br>(5,050 - 8,377)       | 620<br>(334 - 1,191)        | 88<br>(61 - 125)         | 726<br>(509 - 1,037)        | 1,895<br>(1,356 - 2,621)    | 3,170<br>(2,246 - 4,368)     |
| Cellulitis                                          | 3,921<br>(1,564 - 6,627)       | 500<br>(234 - 1,075)        | 69<br>(33 - 111)         | 480<br>(201 - 853)          | 1,156<br>(444 - 2,085)      | 1,715<br>(518 - 3,072)       |
| Pyoderma                                            | 1,639<br>(193 - 3,289)         | 87<br>(5 - 284)             | 10<br>(1 - 25)           | 173<br>(17 - 375)           | 585<br>(71 - 1,206)         | 785<br>(94 - 1,710)          |
| Decubitus ulcer                                     | 877<br>(157 - 2,311)           | 22<br>(2 - 86)              | 7<br>(1 - 24)            | 57<br>(6 - 182)             | 139<br>(21 - 401)           | 651<br>(124 - 1,686)         |

Web Table 31- India deaths with 95% UI by age, sex, and cause in 2013

| Cause                                           | Females, All Ages              | Females, 0-4 Years          | Females, 5-14 Years         | Females, 15-49 Years           | Females, 50-69 Years          | Females, 70-80 Years          |
|-------------------------------------------------|--------------------------------|-----------------------------|-----------------------------|--------------------------------|-------------------------------|-------------------------------|
| Other skin and subcutaneous diseases            | 61<br>(7 - 125)                | 11<br>(1 - 29)              | 2<br>(0 - 5)                | 16<br>(2 - 35)                 | 15<br>(2 - 31)                | 18<br>(3 - 36)                |
| Sudden infant death syndrome                    | 887<br>(191 - 3,184)           | 887<br>(191 - 3,184)        | --                          | --                             | --                            | --                            |
| Injuries                                        | 462,478<br>(366,786 - 558,152) | 38,559<br>(27,434 - 53,291) | 20,490<br>(16,179 - 26,109) | 191,403<br>(142,149 - 243,073) | 104,287<br>(80,494 - 132,779) | 107,738<br>(82,410 - 129,142) |
| Transport injuries                              | 72,763<br>(51,034 - 90,969)    | 3,291<br>(1,945 - 4,904)    | 3,456<br>(2,432 - 4,732)    | 25,636<br>(18,137 - 33,778)    | 22,535<br>(15,914 - 29,532)   | 17,846<br>(11,097 - 23,639)   |
| Road injuries                                   | 64,687<br>(44,904 - 80,987)    | 2,640<br>(1,503 - 3,977)    | 2,798<br>(1,937 - 3,851)    | 21,888<br>(15,362 - 28,687)    | 20,696<br>(14,487 - 27,200)   | 16,664<br>(9,998 - 21,825)    |
| Pedestrian road injuries                        | 36,492<br>(24,762 - 46,053)    | 1,540<br>(930 - 2,344)      | 1,884<br>(1,276 - 2,652)    | 6,778<br>(4,411 - 9,598)       | 13,344<br>(9,055 - 17,854)    | 12,946<br>(7,790 - 17,251)    |
| Cyclist road injuries                           | 2,734<br>(1,685 - 3,821)       | 116<br>(51 - 226)           | 280<br>(166 - 437)          | 1,047<br>(623 - 1,585)         | 312<br>(165 - 471)            | 978<br>(524 - 1,476)          |
| Motorcyclist road injuries                      | 5,591<br>(2,858 - 8,011)       | 111<br>(39 - 206)           | 65<br>(28 - 116)            | 3,398<br>(1,900 - 5,040)       | 1,536<br>(727 - 2,305)        | 482<br>(185 - 793)            |
| Motor vehicle road injuries                     | 19,301<br>(12,643 - 25,393)    | 762<br>(332 - 1,251)        | 512<br>(287 - 810)          | 10,541<br>(7,083 - 14,289)     | 5,414<br>(3,403 - 7,673)      | 2,072<br>(1,033 - 3,104)      |
| Other road injuries                             | 569<br>(308 - 864)             | 112<br>(43 - 232)           | 58<br>(28 - 104)            | 124<br>(70 - 202)              | 89<br>(45 - 151)              | 186<br>(82 - 335)             |
| Other transport injuries                        | 8,076<br>(5,738 - 10,459)      | 651<br>(348 - 1,048)        | 657<br>(387 - 1,018)        | 3,747<br>(2,514 - 5,280)       | 1,839<br>(1,225 - 2,574)      | 1,182<br>(765 - 1,704)        |
| Unintentional injuries                          | 272,775<br>(217,726 - 339,601) | 33,919<br>(23,517 - 48,525) | 14,277<br>(10,608 - 19,764) | 89,498<br>(63,396 - 122,723)   | 57,388<br>(43,447 - 77,073)   | 77,693<br>(58,938 - 94,622)   |
| Falls                                           | 45,778<br>(29,403 - 63,288)    | 2,487<br>(1,120 - 5,319)    | 1,400<br>(881 - 2,318)      | 5,783<br>(3,842 - 8,303)       | 9,627<br>(5,770 - 14,097)     | 26,481<br>(15,563 - 39,242)   |
| Drowning                                        | 32,160<br>(22,604 - 60,962)    | 7,395<br>(2,609 - 16,382)   | 4,713<br>(2,693 - 8,826)    | 9,893<br>(5,850 - 19,116)      | 5,520<br>(3,330 - 10,524)     | 4,639<br>(2,900 - 8,368)      |
| Fire, heat, and hot substances                  | 85,988<br>(60,934 - 122,584)   | 3,722<br>(1,877 - 8,292)    | 3,260<br>(2,110 - 5,436)    | 51,381<br>(34,398 - 75,988)    | 15,191<br>(10,283 - 21,869)   | 12,434<br>(8,160 - 16,958)    |
| Poisonings                                      | 4,994<br>(2,353 - 7,267)       | 220<br>(76 - 396)           | 209<br>(85 - 341)           | 2,698<br>(1,244 - 4,266)       | 1,048<br>(451 - 1,580)        | 819<br>(423 - 1,219)          |
| Exposure to mechanical forces                   | 15,268<br>(11,854 - 20,355)    | 3,469<br>(2,033 - 5,701)    | 1,507<br>(1,003 - 2,200)    | 4,246<br>(2,898 - 6,189)       | 3,397<br>(2,298 - 5,149)      | 2,649<br>(1,888 - 3,932)      |
| Unintentional firearm injuries                  | 6,213<br>(4,423 - 8,671)       | 469<br>(229 - 901)          | 311<br>(162 - 548)          | 2,735<br>(1,701 - 4,230)       | 1,816<br>(1,037 - 3,077)      | 883<br>(511 - 1,468)          |
| Unintentional suffocation                       | 1,787<br>(1,000 - 3,536)       | 829<br>(299 - 2,033)        | 345<br>(179 - 691)          | 316<br>(189 - 633)             | 249<br>(148 - 508)            | 48<br>(28 - 103)              |
| Other exposure to mechanical forces             | 7,268<br>(5,372 - 10,442)      | 2,171<br>(1,119 - 3,923)    | 851<br>(516 - 1,377)        | 1,196<br>(769 - 1,952)         | 1,332<br>(899 - 2,026)        | 1,718<br>(1,129 - 3,014)      |
| Adverse effects of medical treatment            | 18,236<br>(11,592 - 29,116)    | 3,065<br>(1,387 - 6,085)    | 176<br>(92 - 316)           | 5,427<br>(3,152 - 9,239)       | 6,719<br>(3,743 - 11,546)     | 2,850<br>(1,641 - 4,563)      |
| Animal contact                                  | 19,987<br>(11,422 - 50,961)    | 2,559<br>(915 - 6,070)      | 2,265<br>(1,092 - 5,430)    | 6,412<br>(3,412 - 17,216)      | 5,637<br>(2,829 - 16,368)     | 3,113<br>(1,515 - 8,469)      |
| Venomous animal contact                         | 15,337<br>(8,499 - 38,954)     | 1,785<br>(498 - 4,589)      | 1,787<br>(837 - 4,098)      | 5,885<br>(3,091 - 15,693)      | 4,302<br>(2,070 - 12,392)     | 1,577<br>(666 - 4,583)        |
| Non-venomous animal contact                     | 4,650<br>(2,111 - 12,329)      | 774<br>(268 - 2,266)        | 478<br>(158 - 1,492)        | 527<br>(153 - 1,649)           | 1,335<br>(487 - 3,899)        | 1,536<br>(694 - 3,906)        |
| Foreign body                                    | 17,932<br>(10,616 - 27,726)    | 9,248<br>(5,149 - 15,766)   | 33<br>(19 - 51)             | 1,430<br>(822 - 2,425)         | 873<br>(519 - 1,479)          | 6,348<br>(3,573 - 9,716)      |
| Pulmonary aspiration and foreign body in airway | 17,377<br>(10,050 - 27,219)    | 9,191<br>(5,101 - 15,728)   | 18<br>(6 - 34)              | 1,370<br>(766 - 2,369)         | 844<br>(491 - 1,454)          | 5,953<br>(3,198 - 9,279)      |
| Foreign body in other body part                 | 555<br>(370 - 873)             | 57<br>(27 - 101)            | 15<br>(9 - 23)              | 59<br>(39 - 92)                | 29<br>(17 - 42)               | 395<br>(244 - 657)            |
| Other unintentional injuries                    | 32,431<br>(16,826 - 45,210)    | 1,754<br>(954 - 3,522)      | 712<br>(410 - 1,182)        | 2,229<br>(1,511 - 3,274)       | 9,376<br>(4,951 - 14,019)     | 18,360<br>(7,738 - 25,949)    |
| Self-harm and interpersonal violence            | 115,215<br>(81,061 - 153,579)  | 1,323<br>(522 - 2,737)      | 2,702<br>(1,528 - 4,608)    | 75,522<br>(51,194 - 103,652)   | 23,710<br>(16,249 - 35,739)   | 11,957<br>(8,031 - 16,074)    |
| Self-harm                                       | 100,301<br>(67,386 - 139,006)  | --                          | 2,021<br>(909 - 3,922)      | 68,235<br>(44,426 - 95,865)    | 21,009<br>(13,608 - 31,955)   | 9,036<br>(5,765 - 12,692)     |
| Interpersonal violence                          | 14,914<br>(9,077 - 21,639)     | 1,323<br>(522 - 2,737)      | 681<br>(321 - 1,240)        | 7,288<br>(4,205 - 11,155)      | 2,701<br>(1,655 - 4,703)      | 2,921<br>(1,300 - 5,310)      |
| Assault by firearm                              | 1,919<br>(896 - 3,327)         | 39<br>(11 - 107)            | 7<br>(2 - 14)               | 513<br>(211 - 995)             | 346<br>(169 - 722)            | 1,014<br>(401 - 2,010)        |
| Assault by sharp object                         | 6,388<br>(3,963 - 9,941)       | 345<br>(140 - 768)          | 221<br>(100 - 422)          | 4,591<br>(2,771 - 7,208)       | 703<br>(389 - 1,384)          | 527<br>(199 - 1,134)          |
| Assault by other means                          | 6,606<br>(3,594 - 9,787)       | 939<br>(332 - 1,942)        | 453<br>(197 - 847)          | 2,184<br>(983 - 3,565)         | 1,652<br>(966 - 2,873)        | 1,379<br>(533 - 2,649)        |
| Forces of nature, war, and legal intervention   | 1,725<br>(797 - 4,321)         | 25<br>(0 - 3)               | 56<br>(27 - 137)            | 747<br>(352 - 1,770)           | 655<br>(307 - 1,674)          | 242<br>(102 - 630)            |
| Exposure to forces of nature                    | 1,725<br>(797 - 4,321)         | 25<br>(0 - 3)               | 56<br>(27 - 137)            | 747<br>(352 - 1,770)           | 655<br>(307 - 1,674)          | 242<br>(102 - 630)            |

Web Table 31- Indonesia deaths with 95% UI by age, sex, and cause in 2013

| Cause                                                             | Both Sexes, All Ages                 | Both Sexes, 0-4 Years          | Both Sexes, 5-14 Years      | Both Sexes, 15-49 Years        | Both Sexes, 50-69 Years        | Both Sexes, 70-80 Years        |
|-------------------------------------------------------------------|--------------------------------------|--------------------------------|-----------------------------|--------------------------------|--------------------------------|--------------------------------|
| All causes                                                        | 1,589,640<br>(1,476,910 - 1,704,630) | 148,807<br>(132,243 - 168,224) | 25,183<br>(22,849 - 28,169) | 304,464<br>(279,879 - 341,725) | 495,450<br>(443,604 - 549,334) | 615,736<br>(577,445 - 648,279) |
| Communicable, maternal, neonatal, and nutritional diseases        | 383,225<br>(340,234 - 429,423)       | 121,289<br>(107,717 - 138,885) | 11,026<br>(8,937 - 14,966)  | 77,281<br>(62,967 - 108,810)   | 71,750<br>(59,724 - 84,663)    | 101,879<br>(85,521 - 116,518)  |
| HIV/AIDS and tuberculosis                                         | 123,170<br>(82,679 - 172,581)        | 645<br>(145 - 3,028)           | 710<br>(449 - 1,098)        | 42,626<br>(27,418 - 79,901)    | 42,208<br>(30,525 - 53,967)    | 36,981<br>(23,801 - 45,603)    |
| Tuberculosis                                                      | 108,723<br>(73,764 - 127,293)        | 173<br>(106 - 257)             | 655<br>(430 - 888)          | 31,511<br>(19,618 - 38,431)    | 39,728<br>(28,147 - 47,884)    | 36,657<br>(23,362 - 44,858)    |
| HIV/AIDS                                                          | 14,446<br>(912 - 72,555)             | 472<br>(7 - 2,834)             | 55<br>(0 - 390)             | 11,115<br>(801 - 55,412)       | 2,480<br>(104 - 13,117)        | 324<br>(12 - 1,831)            |
| HIV/AIDS resulting in mycobacterial infection                     | 926<br>(58 - 4,790)                  | 24<br>(0 - 148)                | 3<br>(0 - 20)               | 706<br>(49 - 3,655)            | 168<br>(7 - 901)               | 24<br>(1 - 145)                |
| HIV/AIDS resulting in other diseases                              | 13,521<br>(852 - 68,357)             | 447<br>(7 - 2,692)             | 52<br>(0 - 368)             | 10,409<br>(749 - 52,323)       | 2,312<br>(97 - 12,318)         | 300<br>(11 - 1,680)            |
| Diarrhea, lower respiratory, and other common infectious diseases | 148,520<br>(129,711 - 173,723)       | 55,026<br>(43,621 - 69,453)    | 8,103<br>(5,967 - 12,437)   | 18,188<br>(14,248 - 22,378)    | 22,841<br>(18,140 - 28,444)    | 44,362<br>(34,902 - 55,708)    |
| Diarrheal diseases                                                | 51,597<br>(41,632 - 62,648)          | 8,700<br>(4,659 - 13,724)      | 2,154<br>(1,261 - 3,293)    | 6,933<br>(5,004 - 9,103)       | 10,759<br>(7,586 - 14,581)     | 23,051<br>(16,429 - 31,927)    |
| Intestinal infectious diseases                                    | 5,703<br>(3,116 - 9,598)             | 1,683<br>(723 - 3,125)         | 1,794<br>(845 - 3,167)      | 1,758<br>(804 - 3,277)         | 357<br>(168 - 700)             | 110<br>(57 - 186)              |
| Typhoid fever                                                     | 4,002<br>(1,997 - 7,050)             | 1,084<br>(418 - 2,155)         | 1,340<br>(590 - 2,434)      | 1,261<br>(479 - 2,484)         | 253<br>(98 - 540)              | 64<br>(22 - 127)               |
| Paratyphoid fever                                                 | 1,164<br>(573 - 2,097)               | 393<br>(152 - 790)             | 395<br>(175 - 757)          | 317<br>(121 - 625)             | 48<br>(17 - 114)               | 11<br>(3 - 24)                 |
| Other intestinal infectious diseases                              | 537<br>(405 - 667)                   | 206<br>(114 - 303)             | 59<br>(36 - 87)             | 181<br>(129 - 228)             | 56<br>(38 - 76)                | 35<br>(23 - 50)                |
| Lower respiratory infections                                      | 65,634<br>(53,472 - 80,333)          | 28,186<br>(19,279 - 36,557)    | 1,272<br>(790 - 1,909)      | 6,184<br>(4,583 - 8,395)       | 10,054<br>(7,573 - 13,620)     | 19,938<br>(14,746 - 26,773)    |
| Upper respiratory infections                                      | 98<br>(53 - 161)                     | 11<br>(2 - 29)                 | 3<br>(0 - 8)                | 27<br>(9 - 55)                 | 30<br>(7 - 69)                 | 7<br>(4 - 73)                  |
| Otitis media                                                      | 79<br>(68 - 90)                      | 4<br>(2 - 6)                   | 6<br>(4 - 7)                | 28<br>(23 - 34)                | 15<br>(12 - 19)                | 26<br>(21 - 34)                |
| Meningitis                                                        | 8,094<br>(5,851 - 10,695)            | 4,968<br>(2,842 - 7,433)       | 666<br>(404 - 980)          | 1,550<br>(1,093 - 2,021)       | 476<br>(338 - 653)             | 434<br>(302 - 610)             |
| Pneumococcal meningitis                                           | 2,239<br>(1,516 - 2,972)             | 1,174<br>(599 - 1,855)         | 237<br>(130 - 387)          | 529<br>(345 - 768)             | 157<br>(97 - 252)              | 141<br>(89 - 213)              |
| H influenzae type B meningitis                                    | 2,351<br>(1,500 - 3,348)             | 1,843<br>(1,057 - 2,835)       | 177<br>(98 - 293)           | 221<br>(138 - 321)             | 56<br>(33 - 85)                | 56<br>(32 - 88)                |
| Meningococcal meningitis                                          | 793<br>(569 - 1,049)                 | 312<br>(150 - 517)             | 67<br>(33 - 113)            | 257<br>(159 - 383)             | 77<br>(45 - 117)               | 80<br>(47 - 126)               |
| Other meningitis                                                  | 2,711<br>(1,843 - 3,811)             | 1,640<br>(865 - 2,573)         | 186<br>(99 - 293)           | 542<br>(338 - 795)             | 186<br>(115 - 312)             | 157<br>(99 - 244)              |
| Encephalitis                                                      | 3,113<br>(2,355 - 3,897)             | 1,082<br>(533 - 1,775)         | 397<br>(258 - 581)          | 876<br>(625 - 1,190)           | 415<br>(304 - 556)             | 342<br>(236 - 455)             |
| Diphtheria                                                        | 97<br>(10 - 341)                     | 49<br>(0 - 278)                | 22<br>(0 - 121)             | 19<br>(2 - 68)                 | 6<br>(0 - 33)                  | --                             |
| Whooping cough                                                    | 3,693<br>(4 - 15,663)                | 3,333<br>(4 - 14,068)          | 279<br>(0 - 1,230)          | 71<br>(0 - 328)                | 10<br>(0 - 45)                 | --                             |
| Tetanus                                                           | 1,975<br>(1,025 - 2,659)             | 483<br>(181 - 812)             | 74<br>(46 - 116)            | 364<br>(219 - 537)             | 688<br>(293 - 1,062)           | 367<br>(151 - 619)             |
| Measles                                                           | 8,241<br>(254 - 37,242)              | 6,487<br>(208 - 29,136)        | 1,421<br>(40 - 6,654)       | 321<br>(7 - 1,464)             | 11<br>(0 - 55)                 | --                             |
| Varicella and herpes zoster                                       | 197<br>(95 - 387)                    | 40<br>(4 - 117)                | 15<br>(1 - 55)              | 55<br>(15 - 126)               | 21<br>(4 - 52)                 | 66<br>(7 - 233)                |
| Neglected tropical diseases and malaria                           | 7,549<br>(5,665 - 9,082)             | 1,539<br>(688 - 2,314)         | 1,463<br>(770 - 1,979)      | 2,537<br>(1,951 - 3,202)       | 1,327<br>(991 - 1,782)         | 683<br>(528 - 897)             |
| Malaria                                                           | 3,143<br>(2,418 - 4,019)             | 129<br>(71 - 223)              | 233<br>(132 - 372)          | 1,558<br>(1,049 - 2,190)       | 850<br>(543 - 1,273)           | 372<br>(228 - 579)             |
| Leishmaniasis                                                     | 1<br>(1 - 2)                         | 1<br>(0 - 2)                   | 0<br>(0 - 0)                | 0<br>(0 - 0)                   | 0<br>(0 - 0)                   | 0<br>(0 - 0)                   |
| Visceral leishmaniasis                                            | 1<br>(1 - 2)                         | 1<br>(0 - 2)                   | 0<br>(0 - 0)                | 0<br>(0 - 0)                   | 0<br>(0 - 0)                   | 0<br>(0 - 0)                   |
| Schistosomiasis                                                   | 553<br>(424 - 704)                   | 1<br>(1 - 3)                   | 10<br>(5 - 16)              | 185<br>(125 - 253)             | 228<br>(150 - 320)             | 129<br>(83 - 189)              |
| Cysticercosis                                                     | 3<br>(1 - 8)                         | 0<br>(0 - 0)                   | 0<br>(0 - 0)                | 2<br>(0 - 5)                   | 1<br>(0 - 2)                   | 0<br>(0 - 1)                   |
| Cystic echinococcosis                                             | 36<br>(31 - 40)                      | 1<br>(1 - 2)                   | 4<br>(3 - 5)                | 16<br>(14 - 19)                | 9<br>(8 - 11)                  | 5<br>(4 - 5)                   |
| Dengue                                                            | 3,096<br>(1,257 - 4,120)             | 1,207<br>(379 - 1,917)         | 1,113<br>(396 - 1,598)      | 545<br>(282 - 683)             | 139<br>(81 - 170)              | 93<br>(54 - 126)               |
| Rabies                                                            | 312<br>(230 - 488)                   | 16<br>(7 - 33)                 | 59<br>(32 - 107)            | 150<br>(103 - 252)             | 62<br>(42 - 88)                | 24<br>(14 - 35)                |
| Intestinal nematode infections                                    | 40<br>(20 - 63)                      | 18<br>(6 - 38)                 | 8<br>(2 - 20)               | 6<br>(1 - 15)                  | 4<br>(0 - 11)                  | 4<br>(0 - 11)                  |
| Ascariasis                                                        | 40<br>(20 - 63)                      | 18<br>(6 - 38)                 | 8<br>(2 - 20)               | 6<br>(1 - 15)                  | 4<br>(0 - 11)                  | 4<br>(0 - 11)                  |
| Other neglected tropical diseases                                 | 365<br>(260 - 517)                   | 165<br>(80 - 299)              | 35<br>(20 - 57)             | 75<br>(52 - 105)               | 34<br>(23 - 56)                | 56<br>(38 - 82)                |
| Maternal disorders                                                | 9,352<br>(7,010 - 12,079)            | --                             | 25<br>(9 - 53)              | 9,327<br>(6,972 - 12,059)      | --                             | --                             |



Web Table 31- Indonesia deaths with 95% UI by age, sex, and cause in 2013

| Cause                                                            | Both Sexes, All Ages               | Both Sexes, 0-4 Years       | Both Sexes, 5-14 Years   | Both Sexes, 15-49 Years        | Both Sexes, 50-69 Years        | Both Sexes, 70-80 Years        |
|------------------------------------------------------------------|------------------------------------|-----------------------------|--------------------------|--------------------------------|--------------------------------|--------------------------------|
| Maternal hemorrhage                                              | 1,370<br>(847 - 1,964)             | --                          | 3<br>(1 - 6)             | 1,367<br>(844 - 1,960)         | --                             | --                             |
| Maternal sepsis and other maternal infections                    | 602<br>(338 - 946)                 | --                          | 2<br>(1 - 4)             | 600<br>(337 - 945)             | --                             | --                             |
| Maternal hypertensive disorders                                  | 1,266<br>(741 - 1,897)             | --                          | 3<br>(1 - 7)             | 1,264<br>(739 - 1,895)         | --                             | --                             |
| Maternal obstructed labor                                        | 727<br>(412 - 1,190)               | --                          | 2<br>(1 - 5)             | 725<br>(411 - 1,186)           | --                             | --                             |
| Maternal abortive outcome                                        | 1,292<br>(827 - 1,861)             | --                          | 3<br>(1 - 7)             | 1,289<br>(825 - 1,859)         | --                             | --                             |
| Indirect maternal deaths                                         | 1,148<br>(746 - 1,620)             | --                          | 3<br>(1 - 7)             | 1,145<br>(742 - 1,618)         | --                             | --                             |
| Late maternal deaths                                             | 1,206<br>(764 - 1,752)             | --                          | 5<br>(2 - 13)            | 1,201<br>(759 - 1,746)         | --                             | --                             |
| Maternal deaths aggravated by HIV/AIDS                           | 5<br>(3 - 9)                       | --                          | --                       | 5<br>(3 - 9)                   | --                             | --                             |
| Other maternal disorders                                         | 1,714<br>(999 - 2,489)             | --                          | 5<br>(2 - 10)            | 1,709<br>(993 - 2,485)         | --                             | --                             |
| Neonatal disorders                                               | 60,181<br>(52,167 - 69,658)        | 60,181<br>(52,167 - 69,658) | --                       | --                             | --                             | --                             |
| Neonatal preterm birth complications                             | 19,396<br>(12,119 - 26,785)        | 19,396<br>(12,119 - 26,785) | --                       | --                             | --                             | --                             |
| Neonatal encephalopathy due to birth asphyxia and trauma         | 25,303<br>(16,633 - 34,641)        | 25,303<br>(16,633 - 34,641) | --                       | --                             | --                             | --                             |
| Neonatal sepsis and other neonatal infections                    | 7,381<br>(3,195 - 13,026)          | 7,381<br>(3,195 - 13,026)   | --                       | --                             | --                             | --                             |
| Hemolytic disease and other neonatal jaundice                    | 456<br>(186 - 923)                 | 456<br>(186 - 923)          | --                       | --                             | --                             | --                             |
| Other neonatal disorders                                         | 7,646<br>(4,448 - 12,917)          | 7,646<br>(4,448 - 12,917)   | --                       | --                             | --                             | --                             |
| Nutritional deficiencies                                         | 27,510<br>(19,048 - 34,859)        | 1,680<br>(906 - 2,715)      | 475<br>(297 - 674)       | 2,913<br>(1,891 - 3,689)       | 4,024<br>(2,706 - 5,254)       | 18,417<br>(11,918 - 24,951)    |
| Protein-energy malnutrition                                      | 17,513<br>(8,778 - 23,868)         | 1,424<br>(734 - 2,316)      | 251<br>(121 - 388)       | 1,701<br>(853 - 2,313)         | 2,537<br>(1,204 - 3,488)       | 11,599<br>(5,228 - 17,321)     |
| Iodine deficiency                                                | 50<br>(10 - 132)                   | 8<br>(0 - 51)               | 4<br>(0 - 26)            | 11<br>(1 - 38)                 | 11<br>(0 - 48)                 | 15<br>(0 - 73)                 |
| Iron-deficiency anemia                                           | 8,756<br>(5,011 - 14,084)          | 199<br>(55 - 433)           | 180<br>(93 - 311)        | 1,033<br>(633 - 1,589)         | 1,338<br>(773 - 2,256)         | 6,006<br>(3,044 - 10,140)      |
| Other nutritional deficiencies                                   | 1,191<br>(577 - 2,075)             | 49<br>(15 - 110)            | 40<br>(17 - 97)          | 168<br>(81 - 324)              | 137<br>(65 - 342)              | 797<br>(298 - 1,456)           |
| Other communicable, maternal, neonatal, and nutritional diseases | 6,943<br>(4,732 - 10,102)          | 2,218<br>(659 - 4,343)      | 249<br>(102 - 454)       | 1,691<br>(1,220 - 2,358)       | 1,349<br>(893 - 2,272)         | 1,436<br>(841 - 2,271)         |
| Sexually transmitted diseases excluding HIV                      | 2,048<br>(360 - 4,268)             | 1,606<br>(0 - 3,653)        | 158<br>(13 - 347)        | 108<br>(66 - 170)              | 64<br>(30 - 119)               | 111<br>(51 - 225)              |
| Syphilis                                                         | 1,938<br>(226 - 4,128)             | 1,606<br>(0 - 3,653)        | 152<br>(4 - 340)         | 51<br>(32 - 81)                | 41<br>(19 - 77)                | 88<br>(41 - 177)               |
| Chlamydial infection                                             | 21<br>(10 - 36)                    | --                          | 1<br>(0 - 2)             | 11<br>(4 - 21)                 | 5<br>(1 - 11)                  | 5<br>(2 - 11)                  |
| Gonococcal infection                                             | 51<br>(33 - 76)                    | --                          | 2<br>(1 - 4)             | 25<br>(15 - 39)                | 11<br>(5 - 21)                 | 13<br>(6 - 27)                 |
| Other sexually transmitted diseases                              | 37<br>(24 - 55)                    | --                          | 2<br>(1 - 4)             | 21<br>(13 - 33)                | 7<br>(3 - 15)                  | 6<br>(3 - 12)                  |
| Hepatitis                                                        | 1,815<br>(1,494 - 2,172)           | 91<br>(45 - 171)            | 39<br>(27 - 53)          | 902<br>(666 - 1,167)           | 468<br>(354 - 610)             | 315<br>(238 - 406)             |
| Acute hepatitis A                                                | 142<br>(44 - 298)                  | 44<br>(14 - 93)             | 8<br>(2 - 17)            | 71<br>(19 - 170)               | 15<br>(3 - 36)                 | 4<br>(1 - 10)                  |
| Acute hepatitis B                                                | 1,050<br>(730 - 1,401)             | 40<br>(14 - 96)             | 6<br>(2 - 11)            | 394<br>(216 - 629)             | 342<br>(236 - 481)             | 268<br>(186 - 359)             |
| Acute hepatitis C                                                | 8<br>(2 - 22)                      | --                          | 0<br>(0 - 0)             | 4<br>(1 - 11)                  | 3<br>(0 - 7)                   | 2<br>(0 - 6)                   |
| Acute hepatitis E                                                | 615<br>(345 - 952)                 | 7<br>(2 - 15)               | 25<br>(13 - 38)          | 434<br>(239 - 649)             | 108<br>(40 - 211)              | 42<br>(13 - 92)                |
| Other infectious diseases                                        | 3,081<br>(1,921 - 5,271)           | 521<br>(227 - 1,128)        | 53<br>(22 - 94)          | 680<br>(379 - 1,153)           | 818<br>(427 - 1,718)           | 1,009<br>(439 - 2,324)         |
| Non-communicable diseases                                        | 1,096,625<br>(998,729 - 1,189,804) | 19,092<br>(13,784 - 24,717) | 6,087<br>(4,534 - 7,432) | 168,339<br>(139,055 - 193,407) | 403,497<br>(354,727 - 451,316) | 499,610<br>(464,195 - 531,283) |
| Neoplasms                                                        | 147,879<br>(129,150 - 165,230)     | 682<br>(367 - 1,035)        | 1,579<br>(1,141 - 1,986) | 32,777<br>(26,580 - 37,735)    | 67,647<br>(57,771 - 77,448)    | 45,193<br>(40,212 - 50,311)    |
| Esophageal cancer                                                | 3,232<br>(2,434 - 4,004)           | --                          | --                       | 448<br>(320 - 605)             | 1,550<br>(1,122 - 2,030)       | 1,234<br>(910 - 1,590)         |
| Stomach cancer                                                   | 12,309<br>(10,604 - 14,233)        | --                          | --                       | 1,967<br>(1,528 - 2,473)       | 5,529<br>(4,564 - 6,626)       | 4,813<br>(3,870 - 5,998)       |
| Liver cancer                                                     | 10,464<br>(8,690 - 12,530)         | --                          | 34<br>(21 - 53)          | 2,226<br>(1,601 - 2,950)       | 5,282<br>(4,068 - 6,727)       | 2,922<br>(2,231 - 3,773)       |
| Liver cancer due to hepatitis B                                  | 2,410<br>(1,398 - 4,004)           | --                          | 8<br>(3 - 14)            | 674<br>(390 - 1,191)           | 1,267<br>(668 - 2,215)         | 462<br>(248 - 783)             |
| Liver cancer due to hepatitis C                                  | 6,026<br>(3,849 - 7,913)           | --                          | 8<br>(4 - 14)            | 1,087<br>(557 - 1,674)         | 3,058<br>(1,781 - 4,268)       | 1,873<br>(1,254 - 2,539)       |
| Liver cancer due to alcohol use                                  | 704<br>(442 - 1,076)               | --                          | --                       | 101<br>(55 - 179)              | 340<br>(200 - 560)             | 263<br>(156 - 417)             |

Web Table 31- Indonesia deaths with 95% UI by age, sex, and cause in 2013

| Cause                                         | Both Sexes, All Ages           | Both Sexes, 0-4 Years  | Both Sexes, 5-14 Years | Both Sexes, 15-49 Years     | Both Sexes, 50-69 Years        | Both Sexes, 70-80 Years        |
|-----------------------------------------------|--------------------------------|------------------------|------------------------|-----------------------------|--------------------------------|--------------------------------|
| Liver cancer due to other causes              | 1,323<br>(876 - 1,885)         | --                     | 19<br>(11 - 30)        | 365<br>(214 - 562)          | 617<br>(376 - 920)             | 323<br>(193 - 489)             |
| Larynx cancer                                 | 1,356<br>(934 - 1,755)         | --                     | --                     | 172<br>(116 - 242)          | 664<br>(452 - 896)             | 520<br>(332 - 714)             |
| Tracheal, bronchus and lung cancer            | 31,692<br>(25,752 - 37,410)    | --                     | --                     | 3,911<br>(3,020 - 4,896)    | 16,973<br>(13,097 - 20,980)    | 10,808<br>(8,687 - 13,000)     |
| Breast cancer                                 | 10,538<br>(8,077 - 14,666)     | --                     | --                     | 3,969<br>(2,873 - 5,596)    | 4,770<br>(3,410 - 7,040)       | 1,799<br>(1,315 - 2,594)       |
| Cervical cancer                               | 11,264<br>(7,545 - 14,228)     | --                     | --                     | 4,245<br>(2,787 - 5,795)    | 5,044<br>(3,352 - 6,854)       | 1,975<br>(1,294 - 2,733)       |
| Uterine cancer                                | 1,145<br>(787 - 1,714)         | --                     | --                     | 182<br>(109 - 275)          | 654<br>(420 - 1,016)           | 310<br>(196 - 497)             |
| Prostate cancer                               | 1,864<br>(1,255 - 2,851)       | --                     | --                     | 48<br>(26 - 76)             | 449<br>(271 - 689)             | 1,367<br>(883 - 2,178)         |
| Colon and rectum cancer                       | 13,742<br>(11,872 - 15,825)    | --                     | --                     | 2,383<br>(1,879 - 2,869)    | 5,824<br>(4,835 - 6,919)       | 5,535<br>(4,612 - 6,755)       |
| Lip and oral cavity cancer                    | 4,276<br>(3,247 - 5,440)       | --                     | --                     | 780<br>(554 - 1,089)        | 1,968<br>(1,456 - 2,590)       | 1,527<br>(1,048 - 2,134)       |
| Nasopharynx cancer                            | 2,969<br>(2,280 - 3,761)       | --                     | 50<br>(16 - 131)       | 1,024<br>(708 - 1,402)      | 1,214<br>(814 - 1,669)         | 681<br>(454 - 934)             |
| Other pharynx cancer                          | 2,033<br>(1,612 - 2,679)       | --                     | --                     | 384<br>(263 - 559)          | 1,120<br>(827 - 1,540)         | 529<br>(396 - 716)             |
| Gallbladder and biliary tract cancer          | 3,304<br>(2,029 - 4,256)       | --                     | --                     | 421<br>(233 - 584)          | 1,571<br>(913 - 2,145)         | 1,313<br>(835 - 1,775)         |
| Pancreatic cancer                             | 5,037<br>(4,283 - 5,921)       | --                     | --                     | 826<br>(634 - 1,049)        | 2,556<br>(2,075 - 3,094)       | 1,656<br>(1,350 - 2,023)       |
| Malignant skin melanoma                       | 614<br>(479 - 837)             | --                     | --                     | 236<br>(161 - 340)          | 268<br>(203 - 367)             | 109<br>(81 - 157)              |
| Non-melanoma skin cancer                      | 535<br>(386 - 796)             | --                     | --                     | 75<br>(44 - 141)            | 151<br>(101 - 235)             | 309<br>(211 - 448)             |
| Ovarian cancer                                | 3,859<br>(2,732 - 5,050)       | --                     | --                     | 1,073<br>(715 - 1,538)      | 2,130<br>(1,405 - 2,999)       | 656<br>(449 - 935)             |
| Testicular cancer                             | 81<br>(46 - 141)               | --                     | --                     | 70<br>(40 - 123)            | 6<br>(2 - 13)                  | 5<br>(2 - 11)                  |
| Kidney cancer                                 | 2,128<br>(1,743 - 2,555)       | 36<br>(15 - 68)        | 19<br>(11 - 29)        | 337<br>(250 - 441)          | 1,109<br>(848 - 1,412)         | 628<br>(475 - 828)             |
| Bladder cancer                                | 2,609<br>(2,025 - 3,155)       | --                     | --                     | 182<br>(127 - 252)          | 1,015<br>(758 - 1,306)         | 1,412<br>(1,048 - 1,807)       |
| Brain and nervous system cancer               | 4,588<br>(3,359 - 5,472)       | 81<br>(30 - 168)       | 313<br>(202 - 437)     | 2,025<br>(1,339 - 2,527)    | 1,622<br>(1,174 - 2,058)       | 547<br>(395 - 709)             |
| Thyroid cancer                                | 1,100<br>(842 - 1,376)         | --                     | 4<br>(2 - 6)           | 181<br>(128 - 243)          | 536<br>(389 - 697)             | 379<br>(274 - 519)             |
| Mesothelioma                                  | 436<br>(333 - 559)             | --                     | --                     | 92<br>(61 - 136)            | 243<br>(165 - 352)             | 101<br>(65 - 153)              |
| Hodgkin lymphoma                              | 366<br>(293 - 460)             | 44<br>(14 - 88)        | 29<br>(14 - 57)        | 133<br>(93 - 188)           | 59<br>(41 - 87)                | 101<br>(70 - 146)              |
| Non-Hodgkin lymphoma                          | 4,382<br>(3,472 - 5,479)       | 66<br>(29 - 121)       | 194<br>(122 - 291)     | 1,284<br>(942 - 1,632)      | 1,699<br>(1,276 - 2,212)       | 1,139<br>(851 - 1,551)         |
| Multiple myeloma                              | 564<br>(422 - 683)             | --                     | --                     | 121<br>(82 - 161)           | 274<br>(196 - 351)             | 169<br>(128 - 217)             |
| Leukemia                                      | 6,072<br>(5,090 - 7,002)       | 265<br>(121 - 486)     | 766<br>(512 - 1,043)   | 2,523<br>(1,933 - 3,064)    | 1,471<br>(1,188 - 1,820)       | 1,047<br>(858 - 1,294)         |
| Other neoplasms                               | 5,318<br>(4,376 - 6,760)       | 190<br>(94 - 314)      | 170<br>(105 - 249)     | 1,459<br>(1,107 - 1,941)    | 1,897<br>(1,468 - 2,466)       | 1,603<br>(1,219 - 2,169)       |
| Cardiovascular diseases                       | 552,225<br>(498,919 - 606,089) | 1,455<br>(968 - 2,176) | 543<br>(344 - 784)     | 69,474<br>(55,943 - 80,750) | 198,416<br>(172,919 - 224,107) | 282,336<br>(258,763 - 304,575) |
| Rheumatic heart disease                       | 3,945<br>(2,422 - 5,203)       | 23<br>(7 - 50)         | 118<br>(60 - 182)      | 1,518<br>(838 - 2,128)      | 1,042<br>(728 - 1,456)         | 1,245<br>(737 - 1,755)         |
| Ischemic heart disease                        | 209,360<br>(176,912 - 240,725) | 39<br>(16 - 76)        | 47<br>(23 - 90)        | 29,912<br>(22,887 - 35,877) | 81,628<br>(66,877 - 95,075)    | 97,734<br>(83,582 - 114,316)   |
| Cerebrovascular disease                       | 289,917<br>(256,355 - 321,575) | 344<br>(216 - 544)     | 92<br>(54 - 144)       | 29,454<br>(23,093 - 35,538) | 99,772<br>(85,395 - 115,069)   | 160,255<br>(141,447 - 177,175) |
| Ischemic stroke                               | 152,842<br>(123,947 - 174,086) | 28<br>(9 - 66)         | 11<br>(6 - 18)         | 4,672<br>(3,182 - 6,292)    | 37,444<br>(29,678 - 45,635)    | 110,688<br>(87,821 - 126,961)  |
| Hemorrhagic stroke                            | 137,075<br>(115,277 - 165,435) | 317<br>(199 - 501)     | 81<br>(47 - 128)       | 24,782<br>(19,347 - 29,782) | 62,328<br>(52,090 - 74,448)    | 49,567<br>(38,718 - 67,694)    |
| Hypertensive heart disease                    | 18,915<br>(13,856 - 24,033)    | 29<br>(11 - 66)        | 13<br>(7 - 22)         | 2,034<br>(1,265 - 2,780)    | 5,999<br>(4,021 - 8,072)       | 10,840<br>(7,810 - 14,816)     |
| Cardiomyopathy and myocarditis                | 6,412<br>(4,897 - 8,400)       | 436<br>(205 - 772)     | 115<br>(67 - 192)      | 1,801<br>(1,260 - 2,422)    | 1,755<br>(1,256 - 2,511)       | 2,306<br>(1,586 - 3,434)       |
| Atrial fibrillation and flutter               | 212<br>(159 - 288)             | --                     | --                     | 36<br>(25 - 51)             | 70<br>(50 - 102)               | 105<br>(72 - 155)              |
| Aortic aneurysm                               | 1,896<br>(1,472 - 2,415)       | --                     | --                     | 227<br>(158 - 297)          | 406<br>(300 - 542)             | 1,263<br>(957 - 1,642)         |
| Peripheral vascular disease                   | 197<br>(150 - 249)             | --                     | --                     | 16<br>(11 - 22)             | 53<br>(38 - 70)                | 128<br>(94 - 170)              |
| Endocarditis                                  | 2,362<br>(1,600 - 3,266)       | 113<br>(55 - 205)      | 38<br>(19 - 79)        | 779<br>(463 - 1,097)        | 731<br>(470 - 1,043)           | 701<br>(441 - 1,024)           |
| Other cardiovascular and circulatory diseases | 19,008<br>(13,301 - 30,837)    | 471<br>(244 - 857)     | 121<br>(64 - 219)      | 3,697<br>(2,386 - 5,343)    | 6,961<br>(4,652 - 11,349)      | 7,758<br>(5,124 - 12,891)      |

Web Table 31- Indonesia deaths with 95% UI by age, sex, and cause in 2013

| Cause                                               | Both Sexes, All Ages           | Both Sexes, 0-4 Years    | Both Sexes, 5-14 Years | Both Sexes, 15-49 Years     | Both Sexes, 50-69 Years     | Both Sexes, 70-80 Years     |
|-----------------------------------------------------|--------------------------------|--------------------------|------------------------|-----------------------------|-----------------------------|-----------------------------|
| Chronic respiratory diseases                        | 129,475<br>(112,294 - 144,772) | 2,197<br>(1,340 - 3,276) | 348<br>(243 - 463)     | 10,136<br>(7,994 - 12,130)  | 39,931<br>(33,208 - 47,023) | 76,863<br>(66,144 - 86,893) |
| Chronic obstructive pulmonary disease               | 53,137<br>(43,291 - 67,049)    | 983<br>(497 - 1,677)     | 15<br>(8 - 24)         | 1,692<br>(1,179 - 2,466)    | 15,391<br>(11,831 - 19,947) | 35,055<br>(27,943 - 45,155) |
| Pneumoconiosis                                      | 3,414<br>(2,214 - 4,861)       | 30<br>(11 - 61)          | 10<br>(6 - 14)         | 334<br>(207 - 503)          | 1,536<br>(918 - 2,345)      | 1,505<br>(938 - 2,273)      |
| Silicosis                                           | 1,798<br>(1,063 - 2,803)       | 6<br>(2 - 12)            | 2<br>(1 - 3)           | 20<br>(10 - 36)             | 504<br>(219 - 933)          | 1,266<br>(775 - 1,938)      |
| Asbestosis                                          | 290<br>(170 - 468)             | 6<br>(2 - 12)            | 2<br>(1 - 3)           | 48<br>(28 - 75)             | 231<br>(129 - 387)          | 3<br>(2 - 6)                |
| Coal workers pneumoconiosis                         | 766<br>(449 - 1,213)           | 6<br>(2 - 11)            | 2<br>(1 - 3)           | 173<br>(102 - 264)          | 551<br>(306 - 904)          | 36<br>(15 - 67)             |
| Other pneumoconiosis                                | 559<br>(321 - 877)             | 12<br>(4 - 26)           | 3<br>(2 - 5)           | 93<br>(57 - 145)            | 250<br>(136 - 415)          | 201<br>(92 - 369)           |
| Asthma                                              | 56,953<br>(42,587 - 67,737)    | 317<br>(111 - 650)       | 264<br>(186 - 349)     | 7,181<br>(5,499 - 8,700)    | 19,212<br>(13,768 - 23,797) | 29,979<br>(21,328 - 37,462) |
| Interstitial lung disease and pulmonary sarcoidosis | 10,035<br>(6,644 - 13,589)     | 43<br>(9 - 121)          | 11<br>(5 - 23)         | 230<br>(128 - 416)          | 2,949<br>(1,856 - 4,092)    | 6,803<br>(4,396 - 9,611)    |
| Other chronic respiratory diseases                  | 5,936<br>(4,484 - 7,944)       | 824<br>(539 - 1,199)     | 49<br>(27 - 80)        | 699<br>(475 - 946)          | 844<br>(599 - 1,167)        | 3,520<br>(2,330 - 5,195)    |
| Cirrhosis                                           | 39,365<br>(33,109 - 45,525)    | 100<br>(42 - 179)        | 167<br>(116 - 227)     | 12,995<br>(10,088 - 15,964) | 18,982<br>(15,169 - 22,976) | 7,120<br>(5,754 - 8,575)    |
| Cirrhosis due to hepatitis B                        | 12,790<br>(8,323 - 17,949)     | 5<br>(1 - 10)            | 27<br>(13 - 45)        | 4,459<br>(2,646 - 6,835)    | 6,068<br>(3,822 - 8,823)    | 2,233<br>(1,414 - 3,218)    |
| Cirrhosis due to hepatitis C                        | 9,718<br>(5,517 - 14,374)      | 3<br>(1 - 8)             | 18<br>(8 - 36)         | 2,886<br>(1,227 - 4,708)    | 4,818<br>(2,403 - 7,310)    | 1,993<br>(1,267 - 2,912)    |
| Cirrhosis due to alcohol use                        | 12,148<br>(7,448 - 17,078)     | --                       | --                     | 3,317<br>(1,409 - 5,332)    | 6,363<br>(3,769 - 9,257)    | 2,468<br>(1,564 - 3,693)    |
| Cirrhosis due to other causes                       | 4,709<br>(3,056 - 6,927)       | 93<br>(39 - 168)         | 122<br>(79 - 169)      | 2,334<br>(1,376 - 3,519)    | 1,734<br>(1,071 - 2,776)    | 426<br>(258 - 677)          |
| Digestive diseases                                  | 45,194<br>(37,945 - 52,099)    | 783<br>(356 - 1,262)     | 725<br>(505 - 975)     | 10,876<br>(8,250 - 13,121)  | 14,441<br>(11,754 - 17,243) | 18,368<br>(15,133 - 21,959) |
| Peptic ulcer disease                                | 11,403<br>(8,780 - 14,716)     | 23<br>(8 - 45)           | 52<br>(32 - 78)        | 2,017<br>(1,375 - 2,773)    | 4,100<br>(2,954 - 5,548)    | 5,212<br>(3,655 - 7,059)    |
| Gastritis and duodenitis                            | 1,162<br>(780 - 1,999)         | 20<br>(7 - 39)           | 29<br>(16 - 48)        | 253<br>(156 - 454)          | 346<br>(225 - 584)          | 515<br>(307 - 927)          |
| Appendicitis                                        | 6,342<br>(3,805 - 9,126)       | 107<br>(40 - 220)        | 195<br>(117 - 297)     | 2,187<br>(1,355 - 3,149)    | 1,955<br>(1,113 - 3,071)    | 1,899<br>(972 - 3,189)      |
| Paralytic ileus and intestinal obstruction          | 8,747<br>(5,988 - 12,136)      | 301<br>(97 - 616)        | 125<br>(72 - 211)      | 1,817<br>(1,075 - 2,757)    | 2,355<br>(1,542 - 3,475)    | 4,149<br>(2,572 - 5,921)    |
| Inguinal, femoral, and abdominal hernia             | 3,006<br>(1,429 - 4,304)       | 139<br>(30 - 344)        | 120<br>(65 - 195)      | 410<br>(209 - 660)          | 1,045<br>(467 - 1,671)      | 1,292<br>(571 - 2,026)      |
| Inflammatory bowel disease                          | 1,148<br>(846 - 1,748)         | 34<br>(13 - 70)          | 31<br>(18 - 48)        | 324<br>(220 - 474)          | 327<br>(219 - 510)          | 432<br>(285 - 680)          |
| Vascular intestinal disorders                       | 336<br>(203 - 559)             | 5<br>(1 - 13)            | 9<br>(2 - 21)          | 97<br>(54 - 163)            | 84<br>(46 - 148)            | 140<br>(80 - 244)           |
| Gallbladder and biliary diseases                    | 4,126<br>(2,824 - 5,471)       | 32<br>(11 - 62)          | 34<br>(18 - 51)        | 811<br>(482 - 1,156)        | 1,340<br>(878 - 1,896)      | 1,908<br>(1,173 - 2,835)    |
| Pancreatitis                                        | 4,057<br>(2,832 - 5,308)       | 17<br>(6 - 36)           | 35<br>(19 - 55)        | 1,813<br>(1,122 - 2,491)    | 1,283<br>(870 - 1,768)      | 908<br>(619 - 1,289)        |
| Other digestive diseases                            | 4,867<br>(3,766 - 6,327)       | 105<br>(38 - 212)        | 94<br>(58 - 141)       | 1,148<br>(773 - 1,547)      | 1,607<br>(1,159 - 2,189)    | 1,913<br>(1,306 - 2,734)    |
| Neurological disorders                              | 32,234<br>(27,100 - 38,206)    | 173<br>(94 - 304)        | 488<br>(286 - 759)     | 2,793<br>(2,084 - 3,543)    | 4,046<br>(3,261 - 4,899)    | 24,733<br>(19,931 - 30,305) |
| Alzheimer disease and other dementias               | 27,040<br>(22,221 - 32,740)    | --                       | --                     | 35<br>(17 - 58)             | 2,924<br>(2,252 - 3,685)    | 24,082<br>(19,370 - 29,652) |
| Parkinson disease                                   | 93<br>(62 - 188)               | --                       | --                     | 17<br>(12 - 31)             | 28<br>(13 - 83)             | 48<br>(28 - 82)             |
| Epilepsy                                            | 3,829<br>(2,961 - 4,856)       | 72<br>(28 - 168)         | 385<br>(192 - 637)     | 2,265<br>(1,641 - 2,969)    | 781<br>(573 - 1,042)        | 327<br>(228 - 486)          |
| Multiple sclerosis                                  | 74<br>(49 - 114)               | --                       | --                     | 36<br>(22 - 54)             | 25<br>(16 - 41)             | 14<br>(8 - 21)              |
| Other neurological disorders                        | 1,197<br>(991 - 1,450)         | 101<br>(57 - 192)        | 103<br>(71 - 146)      | 441<br>(334 - 558)          | 289<br>(236 - 372)          | 263<br>(216 - 323)          |
| Mental and substance use disorders                  | 3,572<br>(2,782 - 4,506)       | 24<br>(12 - 43)          | 2<br>(1 - 3)           | 2,698<br>(1,983 - 3,438)    | 721<br>(549 - 1,007)        | 126<br>(102 - 169)          |
| Schizophrenia                                       | 122<br>(91 - 173)              | --                       | --                     | 54<br>(37 - 81)             | 41<br>(28 - 61)             | 27<br>(19 - 38)             |
| Alcohol use disorders                               | 939<br>(563 - 1,501)           | --                       | --                     | 556<br>(305 - 882)          | 343<br>(215 - 573)          | 39<br>(27 - 66)             |
| Drug use disorders                                  | 2,496<br>(1,888 - 3,080)       | 24<br>(12 - 43)          | --                     | 2,075<br>(1,499 - 2,622)    | 337<br>(267 - 427)          | 60<br>(45 - 84)             |
| Opioid use disorders                                | 1,602<br>(1,208 - 1,982)       | 16<br>(8 - 29)           | --                     | 1,343<br>(956 - 1,709)      | 205<br>(160 - 258)          | 38<br>(29 - 55)             |
| Cocaine use disorders                               | 41<br>(30 - 52)                | 0<br>(0 - 1)             | --                     | 35<br>(25 - 46)             | 4<br>(3 - 6)                | 1<br>(1 - 1)                |
| Amphetamine use disorders                           | 42<br>(32 - 53)                | 1<br>(0 - 1)             | --                     | 34<br>(24 - 44)             | 6<br>(4 - 8)                | 1<br>(1 - 2)                |
| Other drug use disorders                            | 812<br>(617 - 1,030)           | 7<br>(3 - 13)            | --                     | 663<br>(488 - 847)          | 122<br>(97 - 155)           | 19<br>(14 - 27)             |

Web Table 31- Indonesia deaths with 95% UI by age, sex, and cause in 2013

| Cause                                               | Both Sexes, All Ages           | Both Sexes, 0-4 Years      | Both Sexes, 5-14 Years | Both Sexes, 15-49 Years     | Both Sexes, 50-69 Years     | Both Sexes, 70-80 Years     |
|-----------------------------------------------------|--------------------------------|----------------------------|------------------------|-----------------------------|-----------------------------|-----------------------------|
| Eating disorders                                    | 15<br>(10 - 22)                | --                         | 2<br>(1 - 3)           | 13<br>(8 - 20)              | --                          | --                          |
| Anorexia nervosa                                    | 15<br>(10 - 22)                | --                         | 2<br>(1 - 3)           | 13<br>(8 - 20)              | --                          | --                          |
| Diabetes, urogenital, blood, and endocrine diseases | 124,942<br>(109,342 - 140,736) | 1,261<br>(738 - 1,872)     | 883<br>(632 - 1,148)   | 23,244<br>(18,664 - 27,320) | 57,051<br>(47,957 - 66,309) | 42,502<br>(36,715 - 48,789) |
| Diabetes mellitus                                   | 78,966<br>(68,230 - 91,148)    | 55<br>(29 - 92)            | 62<br>(40 - 91)        | 11,716<br>(9,250 - 14,472)  | 39,186<br>(32,316 - 46,605) | 27,948<br>(23,345 - 33,130) |
| Acute glomerulonephritis                            | 328<br>(195 - 417)             | 26<br>(8 - 54)             | 59<br>(25 - 101)       | 152<br>(88 - 204)           | 54<br>(31 - 74)             | 37<br>(27 - 53)             |
| Chronic kidney disease                              | 28,999<br>(24,341 - 33,665)    | 119<br>(59 - 228)          | 282<br>(192 - 390)     | 7,296<br>(5,408 - 8,863)    | 12,029<br>(9,605 - 14,529)  | 9,274<br>(7,522 - 11,523)   |
| Chronic kidney disease due to diabetes mellitus     | 2,503<br>(1,599 - 3,882)       | 6<br>(3 - 13)              | 12<br>(6 - 21)         | 469<br>(256 - 805)          | 1,013<br>(620 - 1,680)      | 1,004<br>(605 - 1,577)      |
| Chronic kidney disease due to hypertension          | 9,319<br>(6,776 - 12,450)      | 20<br>(9 - 35)             | 30<br>(17 - 50)        | 1,857<br>(1,186 - 2,589)    | 4,089<br>(2,757 - 5,572)    | 3,324<br>(2,364 - 4,647)    |
| Chronic kidney disease due to glomerulonephritis    | 2,474<br>(1,830 - 3,288)       | 46<br>(24 - 73)            | 93<br>(64 - 126)       | 789<br>(545 - 1,060)        | 779<br>(525 - 1,123)        | 767<br>(538 - 1,103)        |
| Chronic kidney disease due to other causes          | 14,702<br>(10,714 - 18,353)    | 47<br>(18 - 132)           | 147<br>(85 - 232)      | 4,182<br>(2,763 - 5,455)    | 6,148<br>(4,025 - 8,242)    | 4,179<br>(2,716 - 5,965)    |
| Urinary diseases and male infertility               | 10,883<br>(7,946 - 13,171)     | 117<br>(54 - 212)          | 73<br>(47 - 103)       | 2,013<br>(1,405 - 2,651)    | 4,556<br>(3,087 - 5,828)    | 4,125<br>(2,970 - 5,429)    |
| Interstitial nephritis and urinary tract infections | 4,730<br>(3,085 - 6,306)       | 61<br>(28 - 113)           | 29<br>(17 - 44)        | 865<br>(526 - 1,227)        | 1,775<br>(1,037 - 2,485)    | 2,000<br>(1,168 - 2,952)    |
| Urolithiasis                                        | 692<br>(411 - 974)             | --                         | 10<br>(6 - 15)         | 151<br>(85 - 247)           | 303<br>(159 - 490)          | 228<br>(122 - 374)          |
| Other urinary diseases                              | 5,461<br>(3,999 - 7,083)       | 56<br>(24 - 113)           | 34<br>(20 - 51)        | 997<br>(655 - 1,394)        | 2,478<br>(1,646 - 3,388)    | 1,896<br>(1,288 - 2,780)    |
| Gynecological diseases                              | 336<br>(199 - 493)             | --                         | --                     | 92<br>(64 - 134)            | 53<br>(29 - 94)             | 192<br>(65 - 347)           |
| Uterine fibroids                                    | 87<br>(49 - 136)               | --                         | --                     | 14<br>(9 - 25)              | 14<br>(8 - 26)              | 58<br>(20 - 106)            |
| Polycystic ovarian syndrome                         | 7<br>(5 - 10)                  | --                         | --                     | 7<br>(5 - 10)               | 0<br>(0 - 0)                | --                          |
| Endometriosis                                       | 16<br>(11 - 23)                | --                         | --                     | 16<br>(11 - 22)             | 0<br>(0 - 1)                | --                          |
| Genital prolapse                                    | 73<br>(38 - 112)               | --                         | --                     | 14<br>(10 - 19)             | 10<br>(6 - 19)              | 49<br>(16 - 88)             |
| Other gynecological diseases                        | 153<br>(92 - 226)              | --                         | --                     | 41<br>(28 - 60)             | 28<br>(15 - 50)             | 84<br>(29 - 153)            |
| Hemoglobinopathies and hemolytic anemias            | 2,790<br>(1,997 - 4,059)       | 558<br>(253 - 902)         | 377<br>(237 - 559)     | 1,017<br>(700 - 1,489)      | 429<br>(305 - 631)          | 408<br>(275 - 615)          |
| Thalassemias                                        | 1,914<br>(1,327 - 2,779)       | 522<br>(233 - 845)         | 364<br>(228 - 540)     | 847<br>(587 - 1,242)        | 159<br>(113 - 234)          | 23<br>(15 - 34)             |
| Sickle cell disorders                               | 0<br>(0 - 0)                   | 0<br>(0 - 0)               | 0<br>(0 - 0)           | 0<br>(0 - 0)                | 0<br>(0 - 0)                | 0<br>(0 - 0)                |
| G6PD deficiency                                     | 60<br>(43 - 86)                | 7<br>(3 - 11)              | 3<br>(2 - 5)           | 23<br>(15 - 33)             | 21<br>(15 - 31)             | 6<br>(4 - 9)                |
| Other hemoglobinopathies and hemolytic anemias      | 815<br>(600 - 1,183)           | 30<br>(16 - 47)            | 9<br>(6 - 14)          | 148<br>(96 - 216)           | 250<br>(177 - 366)          | 379<br>(256 - 571)          |
| Endocrine, metabolic, blood, and immune disorders   | 2,639<br>(2,084 - 4,140)       | 386<br>(219 - 654)         | 32<br>(19 - 50)        | 958<br>(698 - 1,484)        | 745<br>(512 - 1,202)        | 519<br>(354 - 913)          |
| Musculoskeletal disorders                           | 3,512<br>(2,757 - 4,185)       | --                         | 188<br>(129 - 261)     | 997<br>(729 - 1,233)        | 1,195<br>(894 - 1,511)      | 1,131<br>(824 - 1,478)      |
| Rheumatoid arthritis                                | 556<br>(405 - 739)             | --                         | 21<br>(13 - 32)        | 69<br>(47 - 92)             | 189<br>(128 - 264)          | 278<br>(177 - 422)          |
| Other musculoskeletal disorders                     | 2,956<br>(2,333 - 3,561)       | --                         | 167<br>(114 - 234)     | 929<br>(678 - 1,155)        | 1,006<br>(745 - 1,289)      | 854<br>(612 - 1,132)        |
| Other non-communicable diseases                     | 18,228<br>(14,300 - 23,161)    | 12,415<br>(8,977 - 16,548) | 1,163<br>(736 - 1,655) | 2,348<br>(1,752 - 2,994)    | 1,065<br>(816 - 1,435)      | 1,238<br>(913 - 1,713)      |
| Congenital anomalies                                | 15,604<br>(11,772 - 20,349)    | 12,240<br>(8,869 - 16,381) | 1,145<br>(720 - 1,633) | 1,528<br>(1,042 - 2,095)    | 364<br>(249 - 599)          | 327<br>(239 - 474)          |
| Neural tube defects                                 | 1,421<br>(495 - 2,865)         | 1,310<br>(423 - 2,724)     | 34<br>(14 - 64)        | 63<br>(30 - 103)            | 11<br>(4 - 28)              | 4<br>(2 - 7)                |
| Congenital heart anomalies                          | 9,265<br>(6,580 - 12,519)      | 7,178<br>(4,699 - 10,117)  | 786<br>(478 - 1,163)   | 940<br>(597 - 1,310)        | 152<br>(91 - 251)           | 209<br>(144 - 319)          |
| Cleft lip and cleft palate                          | 34<br>(14 - 65)                | 34<br>(14 - 65)            | --                     | --                          | --                          | --                          |
| Down syndrome                                       | 360<br>(199 - 637)             | 230<br>(99 - 473)          | 51<br>(26 - 88)        | 61<br>(40 - 97)             | 16<br>(9 - 32)              | 2<br>(1 - 3)                |
| Chromosomal unbalanced rearrangements               | 373<br>(187 - 699)             | 279<br>(111 - 572)         | 16<br>(8 - 28)         | 62<br>(41 - 94)             | 12<br>(7 - 22)              | 5<br>(3 - 8)                |
| Other congenital anomalies                          | 4,150<br>(2,766 - 5,965)       | 3,208<br>(1,937 - 4,910)   | 258<br>(143 - 400)     | 402<br>(269 - 569)          | 174<br>(118 - 280)          | 108<br>(75 - 156)           |
| Skin and subcutaneous diseases                      | 2,471<br>(2,018 - 3,029)       | 22<br>(11 - 45)            | 17<br>(11 - 29)        | 820<br>(592 - 1,042)        | 701<br>(520 - 932)          | 910<br>(637 - 1,314)        |
| Cellulitis                                          | 919<br>(598 - 1,402)           | 11<br>(4 - 23)             | 7<br>(3 - 14)          | 329<br>(205 - 510)          | 310<br>(187 - 503)          | 263<br>(142 - 502)          |
| Pyoderma                                            | 860<br>(589 - 1,155)           | 11<br>(5 - 23)             | 6<br>(4 - 10)          | 312<br>(199 - 435)          | 269<br>(168 - 399)          | 263<br>(152 - 421)          |

Web Table 31- Indonesia deaths with 95% UI by age, sex, and cause in 2013

| Cause                                           | Both Sexes, All Ages          | Both Sexes, 0-4 Years     | Both Sexes, 5-14 Years    | Both Sexes, 15-49 Years     | Both Sexes, 50-69 Years     | Both Sexes, 70-80 Years     |
|-------------------------------------------------|-------------------------------|---------------------------|---------------------------|-----------------------------|-----------------------------|-----------------------------|
| Decubitus ulcer                                 | 607<br>(410 - 840)            | 0<br>(0 - 1)              | 2<br>(1 - 4)              | 129<br>(74 - 183)           | 105<br>(61 - 160)           | 371<br>(230 - 572)          |
| Other skin and subcutaneous diseases            | 85<br>(51 - 118)              | 1<br>(0 - 1)              | 2<br>(1 - 3)              | 50<br>(30 - 74)             | 18<br>(10 - 28)             | 14<br>(7 - 23)              |
| Sudden infant death syndrome                    | 153<br>(50 - 431)             | 153<br>(50 - 431)         | --                        | --                          | --                          | --                          |
| Injuries                                        | 109,790<br>(93,588 - 128,268) | 8,426<br>(5,227 - 11,934) | 8,070<br>(5,985 - 10,064) | 58,843<br>(47,728 - 71,018) | 20,204<br>(17,136 - 24,161) | 14,247<br>(12,085 - 17,251) |
| Transport injuries                              | 54,191<br>(45,087 - 69,242)   | 2,217<br>(1,276 - 3,517)  | 2,964<br>(2,188 - 3,838)  | 32,415<br>(25,928 - 41,595) | 10,839<br>(8,815 - 13,937)  | 5,756<br>(4,525 - 8,195)    |
| Road injuries                                   | 48,090<br>(39,880 - 62,092)   | 1,487<br>(793 - 2,461)    | 2,696<br>(1,978 - 3,474)  | 28,506<br>(22,650 - 37,298) | 9,990<br>(8,074 - 12,970)   | 5,412<br>(4,263 - 7,667)    |
| Pedestrian road injuries                        | 14,854<br>(11,364 - 19,427)   | 609<br>(319 - 1,001)      | 1,032<br>(682 - 1,418)    | 7,183<br>(5,101 - 10,104)   | 3,653<br>(2,711 - 4,946)    | 2,376<br>(1,731 - 3,293)    |
| Cyclist road injuries                           | 3,816<br>(2,952 - 5,355)      | 72<br>(30 - 134)          | 317<br>(212 - 465)        | 1,784<br>(1,299 - 2,502)    | 1,100<br>(789 - 1,597)      | 545<br>(391 - 805)          |
| Motorcyclist road injuries                      | 19,816<br>(14,982 - 26,758)   | 381<br>(172 - 734)        | 851<br>(566 - 1,187)      | 13,956<br>(10,317 - 18,961) | 3,183<br>(2,266 - 4,508)    | 1,445<br>(998 - 2,311)      |
| Motor vehicle road injuries                     | 8,004<br>(6,242 - 11,120)     | 362<br>(191 - 610)        | 415<br>(268 - 590)        | 4,624<br>(3,389 - 6,536)    | 1,753<br>(1,314 - 2,457)    | 851<br>(593 - 1,335)        |
| Other road injuries                             | 1,599<br>(1,105 - 2,366)      | 62<br>(27 - 131)          | 82<br>(44 - 136)          | 959<br>(580 - 1,491)        | 302<br>(185 - 490)          | 195<br>(125 - 336)          |
| Other transport injuries                        | 6,101<br>(4,421 - 7,717)      | 731<br>(425 - 1,227)      | 267<br>(146 - 419)        | 3,909<br>(2,577 - 5,232)    | 849<br>(618 - 1,171)        | 345<br>(228 - 564)          |
| Unintentional injuries                          | 46,623<br>(39,198 - 53,944)   | 6,178<br>(3,611 - 9,252)  | 5,005<br>(3,438 - 6,691)  | 20,176<br>(15,740 - 24,898) | 7,425<br>(6,046 - 8,840)    | 7,840<br>(6,417 - 9,684)    |
| Falls                                           | 12,511<br>(10,069 - 15,242)   | 372<br>(200 - 602)        | 231<br>(139 - 368)        | 3,496<br>(2,464 - 4,836)    | 3,349<br>(2,373 - 4,447)    | 5,062<br>(3,694 - 6,863)    |
| Drowning                                        | 20,522<br>(14,596 - 26,448)   | 3,280<br>(1,549 - 6,058)  | 4,026<br>(2,652 - 5,650)  | 10,815<br>(7,482 - 14,045)  | 1,563<br>(1,153 - 2,075)    | 839<br>(630 - 1,109)        |
| Fire, heat, and hot substances                  | 2,305<br>(1,753 - 3,083)      | 636<br>(311 - 1,109)      | 107<br>(63 - 166)         | 840<br>(606 - 1,141)        | 462<br>(326 - 647)          | 259<br>(190 - 349)          |
| Poisonings                                      | 411<br>(283 - 741)            | 4<br>(1 - 10)             | 7<br>(4 - 17)             | 271<br>(178 - 477)          | 111<br>(67 - 214)           | 18<br>(8 - 53)              |
| Exposure to mechanical forces                   | 2,048<br>(1,626 - 2,835)      | 149<br>(71 - 327)         | 163<br>(93 - 252)         | 1,164<br>(834 - 1,663)      | 346<br>(247 - 508)          | 225<br>(167 - 305)          |
| Unintentional firearm injuries                  | 368<br>(266 - 528)            | 7<br>(3 - 15)             | 14<br>(8 - 26)            | 227<br>(144 - 357)          | 75<br>(45 - 123)            | 45<br>(28 - 72)             |
| Unintentional suffocation                       | 77<br>(44 - 186)              | 37<br>(9 - 129)           | 7<br>(4 - 13)             | 23<br>(16 - 39)             | 8<br>(5 - 14)               | 1<br>(1 - 3)                |
| Other exposure to mechanical forces             | 1,603<br>(1,240 - 2,270)      | 105<br>(43 - 239)         | 142<br>(75 - 230)         | 914<br>(638 - 1,334)        | 264<br>(175 - 411)          | 179<br>(125 - 255)          |
| Adverse effects of medical treatment            | 1,992<br>(1,528 - 2,747)      | 151<br>(78 - 267)         | 43<br>(27 - 66)           | 526<br>(368 - 768)          | 505<br>(354 - 695)          | 766<br>(500 - 1,157)        |
| Animal contact                                  | 1,334<br>(825 - 1,838)        | 163<br>(78 - 279)         | 193<br>(100 - 327)        | 399<br>(231 - 577)          | 386<br>(218 - 547)          | 194<br>(112 - 286)          |
| Venomous animal contact                         | 386<br>(250 - 637)            | 67<br>(27 - 137)          | 54<br>(23 - 131)          | 125<br>(66 - 199)           | 96<br>(53 - 166)            | 44<br>(23 - 80)             |
| Non-venomous animal contact                     | 949<br>(547 - 1,266)          | 96<br>(47 - 173)          | 139<br>(61 - 244)         | 274<br>(155 - 404)          | 290<br>(161 - 424)          | 150<br>(80 - 217)           |
| Foreign body                                    | 2,074<br>(1,436 - 3,168)      | 1,350<br>(857 - 2,166)    | 27<br>(18 - 37)           | 240<br>(158 - 425)          | 151<br>(104 - 263)          | 306<br>(208 - 508)          |
| Pulmonary aspiration and foreign body in airway | 1,926<br>(1,301 - 3,044)      | 1,344<br>(852 - 2,159)    | 13<br>(6 - 20)            | 178<br>(103 - 360)          | 113<br>(71 - 218)           | 278<br>(180 - 481)          |
| Foreign body in other body part                 | 148<br>(96 - 224)             | 6<br>(3 - 11)             | 13<br>(8 - 26)            | 62<br>(37 - 96)             | 38<br>(22 - 60)             | 28<br>(16 - 43)             |
| Other unintentional injuries                    | 3,426<br>(2,737 - 4,174)      | 72<br>(37 - 118)          | 207<br>(135 - 293)        | 2,424<br>(1,815 - 3,090)    | 550<br>(403 - 733)          | 171<br>(132 - 220)          |
| Self-harm and interpersonal violence            | 8,974<br>(7,109 - 12,411)     | 29<br>(13 - 73)           | 102<br>(63 - 157)         | 6,253<br>(4,658 - 8,903)    | 1,940<br>(1,489 - 2,705)    | 650<br>(472 - 927)          |
| Self-harm                                       | 6,592<br>(5,141 - 9,834)      | --                        | 32<br>(16 - 58)           | 4,299<br>(3,156 - 6,641)    | 1,670<br>(1,246 - 2,492)    | 591<br>(413 - 891)          |
| Interpersonal violence                          | 2,382<br>(1,521 - 3,634)      | 29<br>(13 - 73)           | 69<br>(38 - 115)          | 1,954<br>(1,225 - 3,132)    | 270<br>(136 - 397)          | 59<br>(21 - 101)            |
| Assault by firearm                              | 613<br>(322 - 1,082)          | 4<br>(1 - 11)             | 14<br>(5 - 33)            | 522<br>(270 - 949)          | 68<br>(31 - 117)            | 6<br>(2 - 12)               |
| Assault by sharp object                         | 1,194<br>(654 - 1,807)        | 4<br>(1 - 10)             | 11<br>(5 - 20)            | 1,049<br>(580 - 1,625)      | 109<br>(48 - 177)           | 21<br>(6 - 40)              |
| Assault by other means                          | 575<br>(379 - 837)            | 21<br>(9 - 55)            | 44<br>(24 - 77)           | 383<br>(236 - 614)          | 93<br>(46 - 144)            | 33<br>(11 - 57)             |
| Forces of nature, war, and legal intervention   | 1<br>(0 - 1)                  | 1<br>(0 - 1)              | --                        | --                          | --                          | --                          |
| Exposure to forces of nature                    | 1<br>(0 - 1)                  | 1<br>(0 - 1)              | --                        | --                          | --                          | --                          |

Web Table 31- Indonesia deaths with 95% UI by age, sex, and cause in 2013

| Cause                                                             | Males, All Ages                | Males, 0-4 Years            | Males, 5-14 Years           | Males, 15-49 Years             | Males, 50-69 Years             | Males, 70-80 Years             |
|-------------------------------------------------------------------|--------------------------------|-----------------------------|-----------------------------|--------------------------------|--------------------------------|--------------------------------|
| All causes                                                        | 858,327<br>(768,009 - 929,656) | 84,549<br>(73,973 - 96,748) | 14,586<br>(13,118 - 16,312) | 193,257<br>(172,525 - 226,988) | 286,001<br>(241,956 - 313,458) | 279,933<br>(254,025 - 300,758) |
| Communicable, maternal, neonatal, and nutritional diseases        | 211,952<br>(187,626 - 242,130) | 68,432<br>(59,751 - 79,200) | 5,775<br>(4,470 - 7,969)    | 44,640<br>(35,196 - 66,225)    | 45,428<br>(36,826 - 55,556)    | 47,676<br>(39,965 - 55,840)    |
| HIV/AIDS and tuberculosis                                         | 80,997<br>(61,919 - 114,217)   | 359<br>(91 - 1,573)         | 503<br>(312 - 781)          | 28,871<br>(19,233 - 53,390)    | 28,982<br>(21,379 - 38,452)    | 22,282<br>(16,477 - 28,583)    |
| Tuberculosis                                                      | 71,151<br>(53,474 - 85,108)    | 121<br>(68 - 193)           | 475<br>(303 - 681)          | 21,296<br>(14,132 - 26,913)    | 27,229<br>(20,285 - 33,970)    | 22,030<br>(16,263 - 28,062)    |
| HIV/AIDS                                                          | 9,846<br>(666 - 48,942)        | 238<br>(4 - 1,428)          | 28<br>(0 - 195)             | 7,575<br>(561 - 37,241)        | 1,753<br>(83 - 9,336)          | 251<br>(10 - 1,411)            |
| HIV/AIDS resulting in mycobacterial infection                     | 687<br>(45 - 3,485)            | 14<br>(0 - 87)              | 2<br>(0 - 11)               | 523<br>(38 - 2,639)            | 129<br>(6 - 675)               | 20<br>(1 - 115)                |
| HIV/AIDS resulting in other diseases                              | 9,158<br>(614 - 45,762)        | 224<br>(3 - 1,345)          | 26<br>(0 - 183)             | 7,052<br>(523 - 34,754)        | 1,625<br>(76 - 8,636)          | 232<br>(9 - 1,306)             |
| Diarrhea, lower respiratory, and other common infectious diseases | 77,296<br>(64,839 - 92,073)    | 30,759<br>(23,245 - 39,723) | 4,286<br>(3,028 - 6,659)    | 11,525<br>(8,522 - 14,928)     | 13,088<br>(9,636 - 17,131)     | 17,639<br>(13,388 - 23,279)    |
| Diarrheal diseases                                                | 24,741<br>(19,098 - 31,198)    | 5,573<br>(2,478 - 9,785)    | 1,137<br>(570 - 2,015)      | 4,334<br>(2,820 - 6,170)       | 5,621<br>(3,366 - 8,498)       | 8,076<br>(4,988 - 12,292)      |
| Intestinal infectious diseases                                    | 2,949<br>(1,523 - 5,132)       | 833<br>(348 - 1,660)        | 941<br>(435 - 1,796)        | 908<br>(358 - 1,766)           | 209<br>(81 - 446)              | 57<br>(25 - 109)               |
| Typhoid fever                                                     | 2,047<br>(948 - 3,804)         | 521<br>(188 - 1,111)        | 701<br>(301 - 1,354)        | 640<br>(200 - 1,354)           | 150<br>(42 - 347)              | 35<br>(9 - 81)                 |
| Paratyphoid fever                                                 | 596<br>(256 - 1,117)           | 194<br>(63 - 403)           | 207<br>(81 - 411)           | 161<br>(45 - 353)              | 28<br>(6 - 76)                 | 6<br>(1 - 14)                  |
| Other intestinal infectious diseases                              | 306<br>(228 - 392)             | 118<br>(64 - 180)           | 33<br>(19 - 50)             | 107<br>(72 - 147)              | 32<br>(19 - 47)                | 17<br>(9 - 28)                 |
| Lower respiratory infections                                      | 36,024<br>(28,083 - 46,785)    | 16,373<br>(10,949 - 22,338) | 664<br>(348 - 1,083)        | 4,037<br>(2,749 - 5,850)       | 6,118<br>(4,190 - 9,248)       | 8,832<br>(5,854 - 13,483)      |
| Upper respiratory infections                                      | 53<br>(21 - 103)               | 6<br>(0 - 21)               | 2<br>(0 - 6)                | 17<br>(3 - 44)                 | 17<br>(2 - 51)                 | 12<br>(1 - 44)                 |
| Otitis media                                                      | 52<br>(42 - 62)                | 2<br>(1 - 3)                | 3<br>(2 - 4)                | 20<br>(16 - 26)                | 10<br>(7 - 13)                 | 17<br>(12 - 24)                |
| Meningitis                                                        | 4,381<br>(2,990 - 6,090)       | 2,421<br>(1,224 - 4,098)    | 439<br>(232 - 724)          | 1,104<br>(744 - 1,532)         | 239<br>(151 - 361)             | 178<br>(103 - 278)             |
| Pneumococcal meningitis                                           | 1,197<br>(776 - 1,681)         | 538<br>(245 - 973)          | 151<br>(69 - 285)           | 368<br>(189 - 593)             | 79<br>(37 - 141)               | 61<br>(29 - 108)               |
| H influenzae type B meningitis                                    | 1,243<br>(705 - 1,966)         | 919<br>(418 - 1,579)        | 119<br>(54 - 223)           | 154<br>(87 - 240)              | 29<br>(14 - 51)                | 22<br>(11 - 40)                |
| Meningococcal meningitis                                          | 450<br>(294 - 657)             | 152<br>(65 - 281)           | 45<br>(16 - 93)             | 187<br>(100 - 314)             | 36<br>(15 - 66)                | 30<br>(12 - 56)                |
| Other meningitis                                                  | 1,491<br>(963 - 2,131)         | 811<br>(367 - 1,483)        | 125<br>(57 - 228)           | 394<br>(218 - 631)             | 95<br>(50 - 164)               | 65<br>(34 - 117)               |
| Encephalitis                                                      | 1,916<br>(1,283 - 2,572)       | 657<br>(263 - 1,191)        | 262<br>(155 - 420)          | 600<br>(362 - 864)             | 246<br>(162 - 366)             | 151<br>(89 - 212)              |
| Diphtheria                                                        | 52<br>(2 - 219)                | 24<br>(0 - 174)             | 12<br>(0 - 90)              | 12<br>(0 - 53)                 | 3<br>(0 - 25)                  | --                             |
| Whooping cough                                                    | 1,626<br>(2 - 7,101)           | 1,473<br>(2 - 6,410)        | 114<br>(0 - 517)            | 34<br>(0 - 159)                | 5<br>(0 - 22)                  | --                             |
| Tetanus                                                           | 1,391<br>(612 - 1,943)         | 161<br>(85 - 286)           | 45<br>(25 - 80)             | 295<br>(149 - 468)             | 602<br>(183 - 974)             | 287<br>(81 - 511)              |
| Measles                                                           | 4,019<br>(120 - 19,037)        | 3,215<br>(100 - 14,968)     | 661<br>(18 - 3,223)         | 136<br>(3 - 642)               | 7<br>(0 - 32)                  | --                             |
| Varicella and herpes zoster                                       | 92<br>(32 - 208)               | 20<br>(1 - 89)              | 7<br>(0 - 34)               | 28<br>(4 - 78)                 | 10<br>(1 - 33)                 | 27<br>(1 - 129)                |
| Neglected tropical diseases and malaria                           | 4,107<br>(3,137 - 5,086)       | 891<br>(399 - 1,469)        | 616<br>(355 - 820)          | 1,496<br>(1,078 - 2,006)       | 834<br>(577 - 1,169)           | 269<br>(197 - 361)             |
| Malaria                                                           | 1,802<br>(1,320 - 2,434)       | 50<br>(28 - 95)             | 89<br>(47 - 158)            | 966<br>(621 - 1,422)           | 579<br>(346 - 902)             | 118<br>(62 - 202)              |
| Leishmaniasis                                                     | 0<br>(0 - 1)                   | 0<br>(0 - 1)                | 0<br>(0 - 0)                | 0<br>(0 - 0)                   | 0<br>(0 - 0)                   | 0<br>(0 - 0)                   |
| Visceral leishmaniasis                                            | 0<br>(0 - 1)                   | 0<br>(0 - 1)                | 0<br>(0 - 0)                | 0<br>(0 - 0)                   | 0<br>(0 - 0)                   | 0<br>(0 - 0)                   |
| Schistosomiasis                                                   | 321<br>(228 - 434)             | 1<br>(0 - 2)                | 6<br>(2 - 10)               | 120<br>(75 - 183)              | 62<br>(76 - 204)               | 62<br>(34 - 104)               |
| Cysticercosis                                                     | 1<br>(0 - 4)                   | 0<br>(0 - 0)                | 0<br>(0 - 0)                | 1<br>(0 - 3)                   | 0<br>(0 - 1)                   | 0<br>(0 - 0)                   |
| Cystic echinococcosis                                             | 17<br>(15 - 20)                | 0<br>(0 - 1)                | 2<br>(1 - 2)                | 9<br>(7 - 11)                  | 4<br>(4 - 5)                   | 2<br>(1 - 2)                   |
| Dengue                                                            | 1,525<br>(635 - 2,126)         | 704<br>(229 - 1,202)        | 455<br>(179 - 625)          | 256<br>(124 - 343)             | 67<br>(40 - 80)                | 42<br>(24 - 53)                |
| Rabies                                                            | 186<br>(120 - 335)             | 10<br>(3 - 22)              | 35<br>(17 - 72)             | 98<br>(59 - 184)               | 34<br>(20 - 54)                | 10<br>(5 - 16)                 |
| Intestinal nematode infections                                    | 20<br>(9 - 36)                 | 9<br>(2 - 23)               | 4<br>(0 - 12)               | 4<br>(0 - 11)                  | 2<br>(0 - 7)                   | 2<br>(0 - 7)                   |
| Ascariasis                                                        | 20<br>(9 - 36)                 | 9<br>(2 - 23)               | 4<br>(0 - 12)               | 4<br>(0 - 11)                  | 2<br>(0 - 7)                   | 2<br>(0 - 7)                   |
| Other neglected tropical diseases                                 | 234<br>(153 - 357)             | 117<br>(49 - 241)           | 25<br>(13 - 47)             | 43<br>(27 - 66)                | 14<br>(9 - 21)                 | 34<br>(21 - 54)                |
| Maternal disorders                                                | --                             | --                          | --                          | --                             | --                             | --                             |

Web Table 31- Indonesia deaths with 95% UI by age, sex, and cause in 2013

| Cause                                                            | Males, All Ages                | Males, 0-4 Years            | Males, 5-14 Years        | Males, 15-49 Years           | Males, 50-69 Years             | Males, 70-80 Years             |
|------------------------------------------------------------------|--------------------------------|-----------------------------|--------------------------|------------------------------|--------------------------------|--------------------------------|
| Maternal hemorrhage                                              | --                             | --                          | --                       | --                           | --                             | --                             |
| Maternal sepsis and other maternal infections                    | --                             | --                          | --                       | --                           | --                             | --                             |
| Maternal hypertensive disorders                                  | --                             | --                          | --                       | --                           | --                             | --                             |
| Maternal obstructed labor                                        | --                             | --                          | --                       | --                           | --                             | --                             |
| Maternal abortive outcome                                        | --                             | --                          | --                       | --                           | --                             | --                             |
| Indirect maternal deaths                                         | --                             | --                          | --                       | --                           | --                             | --                             |
| Late maternal deaths                                             | --                             | --                          | --                       | --                           | --                             | --                             |
| Maternal deaths aggravated by HIV/AIDS                           | --                             | --                          | --                       | --                           | --                             | --                             |
| Other maternal disorders                                         | --                             | --                          | --                       | --                           | --                             | --                             |
| Neonatal disorders                                               | 34,284<br>(30,120 - 40,403)    | 34,284<br>(30,120 - 40,403) | --                       | --                           | --                             | --                             |
| Neonatal preterm birth complications                             | 10,363<br>(5,378 - 16,531)     | 10,363<br>(5,378 - 16,531)  | --                       | --                           | --                             | --                             |
| Neonatal encephalopathy due to birth asphyxia and trauma         | 15,329<br>(8,701 - 21,917)     | 15,329<br>(8,701 - 21,917)  | --                       | --                           | --                             | --                             |
| Neonatal sepsis and other neonatal infections                    | 4,543<br>(1,406 - 9,287)       | 4,543<br>(1,406 - 9,287)    | --                       | --                           | --                             | --                             |
| Hemolytic disease and other neonatal jaundice                    | 266<br>(95 - 634)              | 266<br>(95 - 634)           | --                       | --                           | --                             | --                             |
| Other neonatal disorders                                         | 3,783<br>(1,746 - 7,606)       | 3,783<br>(1,746 - 7,606)    | --                       | --                           | --                             | --                             |
| Nutritional deficiencies                                         | 11,404<br>(5,270 - 15,872)     | 1,031<br>(441 - 1,852)      | 252<br>(135 - 394)       | 1,506<br>(748 - 2,512)       | 1,739<br>(789 - 2,531)         | 6,876<br>(2,934 - 10,612)      |
| Protein-energy malnutrition                                      | 7,406<br>(2,623 - 11,013)      | 949<br>(404 - 1,735)        | 188<br>(73 - 308)        | 1,000<br>(378 - 1,462)       | 1,106<br>(336 - 1,762)         | 4,164<br>(1,169 - 7,157)       |
| Iodine deficiency                                                | 19<br>(2 - 67)                 | 3<br>(0 - 29)               | 1<br>(0 - 10)            | 6<br>(0 - 26)                | 5<br>(0 - 28)                  | 4<br>(0 - 30)                  |
| Iron-deficiency anemia                                           | 3,001<br>(1,226 - 5,677)       | 60<br>(12 - 165)            | 38<br>(10 - 100)         | 371<br>(151 - 669)           | 525<br>(219 - 936)             | 2,007<br>(698 - 3,943)         |
| Other nutritional deficiencies                                   | 977<br>(361 - 1,773)           | 18<br>(4 - 55)              | 24<br>(7 - 78)           | 131<br>(50 - 263)            | 104<br>(43 - 267)              | 701<br>(206 - 1,327)           |
| Other communicable, maternal, neonatal, and nutritional diseases | 3,864<br>(2,699 - 5,598)       | 1,109<br>(325 - 2,167)      | 119<br>(54 - 203)        | 1,242<br>(856 - 1,762)       | 785<br>(466 - 1,468)           | 610<br>(328 - 1,276)           |
| Sexually transmitted diseases excluding HIV                      | 944<br>(134 - 2,005)           | 760<br>(0 - 1,736)          | 68<br>(6 - 144)          | 51<br>(30 - 87)              | 29<br>(12 - 64)                | 35<br>(13 - 93)                |
| Syphilis                                                         | 904<br>(96 - 1,966)            | 760<br>(0 - 1,736)          | 65<br>(3 - 142)          | 28<br>(16 - 48)              | 21<br>(9 - 47)                 | 29<br>(10 - 78)                |
| Chlamydial infection                                             | --                             | --                          | --                       | --                           | --                             | --                             |
| Gonococcal infection                                             | 23<br>(15 - 41)                | --                          | 2<br>(1 - 3)             | 13<br>(8 - 21)               | 5<br>(2 - 11)                  | 4<br>(1 - 11)                  |
| Other sexually transmitted diseases                              | 16<br>(10 - 27)                | --                          | 1<br>(1 - 3)             | 11<br>(6 - 17)               | 3<br>(1 - 6)                   | 2<br>(1 - 4)                   |
| Hepatitis                                                        | 1,303<br>(1,020 - 1,642)       | 58<br>(22 - 132)            | 24<br>(15 - 36)          | 728<br>(507 - 987)           | 312<br>(210 - 437)             | 182<br>(126 - 256)             |
| Acute hepatitis A                                                | 99<br>(29 - 220)               | 26<br>(7 - 68)              | 5<br>(1 - 11)            | 57<br>(15 - 139)             | 9<br>(2 - 22)                  | 2<br>(0 - 5)                   |
| Acute hepatitis B                                                | 764<br>(518 - 1,054)           | 28<br>(7 - 78)              | 4<br>(1 - 8)             | 335<br>(174 - 540)           | 237<br>(152 - 349)             | 159<br>(106 - 228)             |
| Acute hepatitis C                                                | 5<br>(1 - 15)                  | --                          | 0<br>(0 - 0)             | 3<br>(0 - 9)                 | 1<br>(0 - 4)                   | 1<br>(0 - 3)                   |
| Acute hepatitis E                                                | 436<br>(227 - 703)             | 4<br>(1 - 10)               | 15<br>(7 - 25)           | 333<br>(167 - 524)           | 64<br>(21 - 138)               | 20<br>(5 - 47)                 |
| Other infectious diseases                                        | 1,617<br>(925 - 2,983)         | 291<br>(83 - 744)           | 26<br>(10 - 54)          | 462<br>(230 - 841)           | 444<br>(179 - 1,113)           | 393<br>(130 - 1,045)           |
| Non-communicable diseases                                        | 567,102<br>(490,424 - 621,229) | 11,213<br>(8,051 - 14,889)  | 3,318<br>(2,540 - 4,110) | 99,859<br>(80,471 - 121,349) | 227,212<br>(186,947 - 253,178) | 225,501<br>(202,076 - 245,345) |
| Neoplasms                                                        | 74,079<br>(61,630 - 83,350)    | 439<br>(235 - 714)          | 840<br>(601 - 1,102)     | 14,382<br>(11,533 - 17,611)  | 34,977<br>(27,946 - 40,609)    | 23,442<br>(19,894 - 26,843)    |
| Esophageal cancer                                                | 2,185<br>(1,562 - 2,810)       | --                          | --                       | 327<br>(216 - 470)           | 1,118<br>(749 - 1,520)         | 740<br>(513 - 1,006)           |
| Stomach cancer                                                   | 6,958<br>(5,644 - 8,311)       | --                          | --                       | 1,085<br>(797 - 1,444)       | 3,297<br>(2,483 - 4,154)       | 2,576<br>(1,971 - 3,361)       |
| Liver cancer                                                     | 6,953<br>(5,449 - 8,557)       | --                          | 19<br>(10 - 33)          | 1,604<br>(1,045 - 2,311)     | 3,617<br>(2,644 - 4,817)       | 1,712<br>(1,213 - 2,341)       |
| Liver cancer due to hepatitis B                                  | 1,869<br>(985 - 3,389)         | --                          | 5<br>(2 - 10)            | 548<br>(288 - 1,060)         | 1,002<br>(462 - 1,922)         | 314<br>(138 - 631)             |
| Liver cancer due to hepatitis C                                  | 3,937<br>(2,052 - 5,618)       | --                          | 5<br>(2 - 10)            | 770<br>(263 - 1,340)         | 2,054<br>(931 - 3,094)         | 1,108<br>(639 - 1,602)         |
| Liver cancer due to alcohol use                                  | 528<br>(294 - 879)             | --                          | --                       | 83<br>(40 - 162)             | 266<br>(138 - 477)             | 179<br>(94 - 312)              |

Web Table 31- Indonesia deaths with 95% UI by age, sex, and cause in 2013

| Cause                                         | Males, All Ages                | Males, 0-4 Years       | Males, 5-14 Years  | Males, 15-49 Years          | Males, 50-69 Years            | Males, 70-80 Years             |
|-----------------------------------------------|--------------------------------|------------------------|--------------------|-----------------------------|-------------------------------|--------------------------------|
| Liver cancer due to other causes              | 619<br>(318 - 1,111)           | --                     | 10<br>(4 - 18)     | 203<br>(86 - 393)           | 295<br>(129 - 579)            | 111<br>(51 - 197)              |
| Larynx cancer                                 | 1,182<br>(782 - 1,557)         | --                     | --                 | 141<br>(87 - 209)           | 584<br>(381 - 815)            | 457<br>(282 - 633)             |
| Tracheal, bronchus and lung cancer            | 21,229<br>(16,706 - 25,791)    | --                     | --                 | 2,376<br>(1,713 - 3,194)    | 11,793<br>(8,948 - 14,869)    | 7,061<br>(5,437 - 8,994)       |
| Breast cancer                                 | 92<br>(55 - 142)               | --                     | --                 | 41<br>(21 - 74)             | 45<br>(21 - 82)               | 7<br>(3 - 15)                  |
| Cervical cancer                               | --                             | --                     | --                 | --                          | --                            | --                             |
| Uterine cancer                                | --                             | --                     | --                 | --                          | --                            | --                             |
| Prostate cancer                               | 1,864<br>(1,255 - 2,851)       | --                     | --                 | 48<br>(26 - 76)             | 449<br>(271 - 689)            | 1,367<br>(883 - 2,178)         |
| Colon and rectum cancer                       | 6,976<br>(5,654 - 8,237)       | --                     | --                 | 1,369<br>(1,029 - 1,772)    | 3,058<br>(2,384 - 3,751)      | 2,548<br>(1,974 - 3,272)       |
| Lip and oral cavity cancer                    | 2,650<br>(1,965 - 3,710)       | --                     | --                 | 551<br>(359 - 827)          | 1,278<br>(899 - 1,847)        | 820<br>(546 - 1,201)           |
| Nasopharynx cancer                            | 1,950<br>(1,429 - 2,569)       | --                     | 43<br>(11 - 121)   | 781<br>(510 - 1,128)        | 833<br>(521 - 1,218)          | 293<br>(187 - 432)             |
| Other pharynx cancer                          | 1,528<br>(1,154 - 2,195)       | --                     | --                 | 306<br>(200 - 473)          | 853<br>(585 - 1,284)          | 369<br>(253 - 545)             |
| Gallbladder and biliary tract cancer          | 1,338<br>(754 - 1,755)         | --                     | --                 | 180<br>(93 - 273)           | 665<br>(347 - 950)            | 493<br>(307 - 690)             |
| Pancreatic cancer                             | 3,027<br>(2,380 - 3,688)       | --                     | --                 | 569<br>(407 - 770)          | 1,595<br>(1,189 - 2,068)      | 863<br>(658 - 1,136)           |
| Malignant skin melanoma                       | 273<br>(152 - 464)             | --                     | --                 | 144<br>(74 - 235)           | 86<br>(49 - 156)              | 43<br>(26 - 85)                |
| Non-melanoma skin cancer                      | 374<br>(253 - 625)             | --                     | --                 | 55<br>(29 - 114)            | 102<br>(57 - 179)             | 218<br>(133 - 341)             |
| Ovarian cancer                                | --                             | --                     | --                 | --                          | --                            | --                             |
| Testicular cancer                             | 81<br>(46 - 141)               | --                     | --                 | 70<br>(40 - 123)            | 6<br>(2 - 13)                 | 5<br>(2 - 11)                  |
| Kidney cancer                                 | 1,305<br>(1,024 - 1,636)       | 17<br>(6 - 37)         | 8<br>(5 - 13)      | 215<br>(145 - 309)          | 725<br>(530 - 965)            | 340<br>(235 - 477)             |
| Bladder cancer                                | 1,949<br>(1,463 - 2,448)       | --                     | --                 | 118<br>(76 - 179)           | 780<br>(550 - 1,053)          | 1,052<br>(753 - 1,428)         |
| Brain and nervous system cancer               | 2,350<br>(1,290 - 3,001)       | 71<br>(24 - 157)       | 157<br>(78 - 243)  | 988<br>(499 - 1,376)        | 809<br>(458 - 1,093)          | 325<br>(186 - 472)             |
| Thyroid cancer                                | 345<br>(254 - 439)             | --                     | 2<br>(1 - 3)       | 61<br>(40 - 89)             | 177<br>(120 - 246)            | 105<br>(70 - 151)              |
| Mesothelioma                                  | 214<br>(152 - 286)             | --                     | --                 | 57<br>(32 - 97)             | 79<br>(49 - 118)              | 78<br>(46 - 128)               |
| Hodgkin lymphoma                              | 192<br>(140 - 260)             | 5<br>(2 - 11)          | 9<br>(3 - 21)      | 94<br>(61 - 138)            | 33<br>(21 - 50)               | 51<br>(29 - 82)                |
| Non-Hodgkin lymphoma                          | 2,660<br>(1,955 - 3,423)       | 35<br>(15 - 74)        | 108<br>(64 - 169)  | 841<br>(575 - 1,127)        | 1,050<br>(737 - 1,440)        | 626<br>(429 - 884)             |
| Multiple myeloma                              | 309<br>(212 - 399)             | --                     | --                 | 67<br>(40 - 99)             | 155<br>(102 - 212)            | 87<br>(60 - 125)               |
| Leukemia                                      | 3,241<br>(2,592 - 3,836)       | 138<br>(53 - 292)      | 390<br>(245 - 574) | 1,453<br>(1,055 - 1,858)    | 761<br>(563 - 975)            | 499<br>(382 - 648)             |
| Other neoplasms                               | 2,852<br>(2,259 - 3,589)       | 173<br>(85 - 292)      | 103<br>(61 - 155)  | 840<br>(624 - 1,153)        | 1,029<br>(747 - 1,429)        | 707<br>(498 - 972)             |
| Cardiovascular diseases                       | 272,982<br>(234,991 - 303,989) | 1,295<br>(831 - 1,978) | 136<br>(85 - 200)  | 42,504<br>(33,258 - 52,394) | 111,098<br>(91,105 - 125,842) | 117,948<br>(104,088 - 131,100) |
| Rheumatic heart disease                       | 1,388<br>(777 - 2,012)         | 19<br>(5 - 45)         | 28<br>(12 - 50)    | 527<br>(273 - 808)          | 412<br>(249 - 627)            | 402<br>(210 - 617)             |
| Ischemic heart disease                        | 115,669<br>(92,440 - 135,906)  | 23<br>(6 - 53)         | 6<br>(3 - 11)      | 20,485<br>(14,962 - 25,866) | 51,750<br>(40,207 - 62,216)   | 43,405<br>(35,235 - 52,325)    |
| Cerebrovascular disease                       | 134,060<br>(110,863 - 157,091) | 313<br>(189 - 508)     | 25<br>(14 - 41)    | 16,846<br>(12,223 - 22,073) | 51,595<br>(40,395 - 61,895)   | 65,281<br>(54,685 - 76,286)    |
| Ischemic stroke                               | 68,619<br>(53,251 - 83,285)    | 23<br>(7 - 62)         | 3<br>(1 - 6)       | 2,822<br>(1,602 - 4,463)    | 20,482<br>(14,503 - 27,757)   | 45,289<br>(35,058 - 54,134)    |
| Hemorrhagic stroke                            | 65,441<br>(50,480 - 83,627)    | 290<br>(176 - 464)     | 22<br>(12 - 36)    | 14,025<br>(9,888 - 18,506)  | 31,113<br>(23,166 - 39,455)   | 19,991<br>(14,513 - 29,041)    |
| Hypertensive heart disease                    | 7,778<br>(4,979 - 10,850)      | 26<br>(8 - 62)         | 4<br>(2 - 7)       | 1,105<br>(615 - 1,654)      | 2,898<br>(1,700 - 4,290)      | 3,745<br>(2,246 - 5,691)       |
| Cardiomyopathy and myocarditis                | 3,260<br>(2,360 - 4,690)       | 394<br>(166 - 731)     | 31<br>(17 - 52)    | 953<br>(606 - 1,437)        | 915<br>(589 - 1,484)          | 966<br>(585 - 1,553)           |
| Atrial fibrillation and flutter               | 82<br>(53 - 139)               | --                     | --                 | 15<br>(9 - 26)              | 30<br>(17 - 53)               | 38<br>(21 - 69)                |
| Aortic aneurysm                               | 1,174<br>(860 - 1,535)         | --                     | --                 | 135<br>(91 - 185)           | 220<br>(158 - 303)            | 819<br>(566 - 1,142)           |
| Peripheral vascular disease                   | 104<br>(72 - 139)              | --                     | --                 | 9<br>(6 - 15)               | 33<br>(22 - 46)               | 61<br>(41 - 87)                |
| Endocarditis                                  | 1,222<br>(694 - 1,895)         | 93<br>(40 - 186)       | 8<br>(4 - 15)      | 437<br>(225 - 706)          | 389<br>(211 - 630)            | 295<br>(158 - 461)             |
| Other cardiovascular and circulatory diseases | 8,244<br>(5,528 - 15,198)      | 427<br>(218 - 795)     | 34<br>(17 - 62)    | 1,991<br>(1,255 - 3,150)    | 2,856<br>(1,786 - 5,375)      | 2,937<br>(1,875 - 5,588)       |



Web Table 31- Indonesia deaths with 95% UI by age, sex, and cause in 2013

| Cause                                               | Males, All Ages             | Males, 0-4 Years       | Males, 5-14 Years  | Males, 15-49 Years         | Males, 50-69 Years          | Males, 70-80 Years          |
|-----------------------------------------------------|-----------------------------|------------------------|--------------------|----------------------------|-----------------------------|-----------------------------|
| Chronic respiratory diseases                        | 72,748<br>(58,701 - 84,165) | 1,272<br>(703 - 2,043) | 296<br>(200 - 407) | 6,317<br>(4,606 - 8,060)   | 24,711<br>(18,650 - 30,404) | 40,152<br>(32,207 - 47,690) |
| Chronic obstructive pulmonary disease               | 29,003<br>(23,092 - 35,157) | 662<br>(304 - 1,169)   | 14<br>(7 - 22)     | 1,180<br>(780 - 1,684)     | 9,074<br>(6,634 - 11,794)   | 18,073<br>(14,018 - 23,012) |
| Pneumoconiosis                                      | 3,325<br>(2,118 - 4,771)    | 9<br>(3 - 26)          | 7<br>(4 - 12)      | 314<br>(189 - 482)         | 1,517<br>(898 - 2,327)      | 1,478<br>(912 - 2,245)      |
| Silicosis                                           | 1,791<br>(1,056 - 2,796)    | 2<br>(1 - 6)           | 2<br>(1 - 3)       | 19<br>(8 - 35)             | 503<br>(218 - 932)          | 1,265<br>(775 - 1,938)      |
| Asbestosis                                          | 283<br>(162 - 460)          | 2<br>(0 - 5)           | 2<br>(1 - 3)       | 46<br>(26 - 73)            | 231<br>(128 - 387)          | 3<br>(1 - 5)                |
| Coal workers pneumoconiosis                         | 759<br>(442 - 1,207)        | 2<br>(0 - 5)           | 2<br>(1 - 3)       | 171<br>(101 - 263)         | 550<br>(306 - 904)          | 35<br>(14 - 67)             |
| Other pneumoconiosis                                | 492<br>(258 - 804)          | 4<br>(1 - 10)          | 2<br>(1 - 4)       | 77<br>(43 - 126)           | 233<br>(122 - 393)          | 176<br>(70 - 343)           |
| Asthma                                              | 33,023<br>(25,269 - 39,765) | 272<br>(94 - 590)      | 227<br>(152 - 305) | 4,278<br>(3,111 - 5,424)   | 11,848<br>(8,543 - 15,299)  | 16,398<br>(12,334 - 20,954) |
| Interstitial lung disease and pulmonary sarcoidosis | 5,015<br>(3,000 - 7,286)    | 12<br>(2 - 39)         | 8<br>(4 - 18)      | 116<br>(60 - 228)          | 1,799<br>(1,029 - 2,797)    | 3,081<br>(1,780 - 4,683)    |
| Other chronic respiratory diseases                  | 2,382<br>(1,418 - 3,258)    | 317<br>(183 - 520)     | 40<br>(21 - 72)    | 429<br>(219 - 670)         | 474<br>(249 - 747)          | 1,122<br>(593 - 1,782)      |
| Cirrhosis                                           | 30,588<br>(24,624 - 36,305) | 59<br>(21 - 121)       | 70<br>(46 - 100)   | 10,639<br>(7,929 - 13,674) | 15,315<br>(11,577 - 19,222) | 4,505<br>(3,480 - 5,869)    |
| Cirrhosis due to hepatitis B                        | 9,409<br>(5,463 - 14,432)   | 3<br>(1 - 9)           | 16<br>(6 - 28)     | 3,639<br>(1,977 - 5,944)   | 4,604<br>(2,527 - 7,238)    | 1,147<br>(620 - 1,815)      |
| Cirrhosis due to hepatitis C                        | 7,125<br>(3,199 - 11,563)   | 2<br>(0 - 7)           | 6<br>(1 - 18)      | 2,224<br>(779 - 4,029)     | 3,724<br>(1,452 - 6,370)    | 1,169<br>(525 - 2,052)      |
| Cirrhosis due to alcohol use                        | 10,756<br>(6,217 - 15,891)  | --                     | --                 | 3,026<br>(1,227 - 5,080)   | 5,755<br>(3,255 - 8,782)    | 1,976<br>(1,111 - 2,938)    |
| Cirrhosis due to other causes                       | 3,297<br>(1,937 - 5,249)    | 54<br>(18 - 113)       | 48<br>(28 - 74)    | 1,751<br>(972 - 2,867)     | 1,232<br>(656 - 2,120)      | 213<br>(113 - 370)          |
| Digestive diseases                                  | 24,626<br>(19,263 - 29,452) | 429<br>(188 - 760)     | 420<br>(279 - 607) | 7,272<br>(5,146 - 9,139)   | 8,236<br>(6,166 - 10,388)   | 8,269<br>(6,511 - 10,339)   |
| Peptic ulcer disease                                | 6,486<br>(4,570 - 9,048)    | 12<br>(3 - 29)         | 24<br>(12 - 42)    | 1,427<br>(864 - 2,143)     | 2,516<br>(1,621 - 3,692)    | 2,506<br>(1,524 - 3,734)    |
| Gastritis and duodenitis                            | 551<br>(319 - 1,046)        | 9<br>(3 - 23)          | 12<br>(6 - 25)     | 134<br>(68 - 287)          | 179<br>(93 - 362)           | 218<br>(111 - 412)          |
| Appendicitis                                        | 3,486<br>(2,010 - 5,207)    | 58<br>(20 - 131)       | 122<br>(68 - 205)  | 1,358<br>(791 - 2,022)     | 1,101<br>(553 - 1,887)      | 847<br>(402 - 1,484)        |
| Paralytic ileus and intestinal obstruction          | 4,481<br>(2,581 - 6,701)    | 101<br>(15 - 329)      | 71<br>(34 - 140)   | 1,426<br>(702 - 2,227)     | 1,196<br>(674 - 1,987)      | 1,685<br>(902 - 2,670)      |
| Inguinal, femoral, and abdominal hernia             | 2,406<br>(965 - 3,578)      | 130<br>(25 - 328)      | 93<br>(43 - 162)   | 378<br>(179 - 625)         | 885<br>(330 - 1,497)        | 920<br>(343 - 1,556)        |
| Inflammatory bowel disease                          | 518<br>(362 - 811)          | 20<br>(5 - 48)         | 15<br>(8 - 27)     | 154<br>(95 - 258)          | 146<br>(91 - 256)           | 183<br>(115 - 292)          |
| Vascular intestinal disorders                       | 146<br>(56 - 316)           | 4<br>(1 - 12)          | 6<br>(2 - 15)      | 43<br>(15 - 95)            | 42<br>(15 - 94)             | 51<br>(19 - 113)            |
| Gallbladder and biliary diseases                    | 1,546<br>(1,020 - 2,174)    | 13<br>(4 - 30)         | 15<br>(8 - 25)     | 377<br>(203 - 586)         | 539<br>(316 - 835)          | 601<br>(351 - 976)          |
| Pancreatitis                                        | 2,472<br>(1,440 - 3,450)    | 10<br>(3 - 23)         | 16<br>(8 - 28)     | 1,293<br>(697 - 1,963)     | 761<br>(436 - 1,150)        | 392<br>(228 - 614)          |
| Other digestive diseases                            | 2,534<br>(1,747 - 3,536)    | 71<br>(22 - 159)       | 45<br>(24 - 75)    | 684<br>(410 - 1,072)       | 870<br>(555 - 1,345)        | 865<br>(508 - 1,443)        |
| Neurological disorders                              | 15,316<br>(12,431 - 18,196) | 117<br>(57 - 239)      | 362<br>(185 - 591) | 1,757<br>(1,211 - 2,344)   | 2,169<br>(1,609 - 2,813)    | 10,912<br>(8,487 - 13,596)  |
| Alzheimer disease and other dementias               | 12,255<br>(9,561 - 15,123)  | --                     | --                 | 20<br>(6 - 39)             | 1,605<br>(1,085 - 2,176)    | 10,629<br>(8,189 - 13,321)  |
| Parkinson disease                                   | 10<br>(7 - 13)              | --                     | --                 | 7<br>(5 - 9)               | 2<br>(1 - 4)                | 1<br>(0 - 1)                |
| Epilepsy                                            | 2,318<br>(1,675 - 3,085)    | 52<br>(19 - 136)       | 294<br>(117 - 529) | 1,402<br>(936 - 1,977)     | 400<br>(264 - 601)          | 169<br>(107 - 256)          |
| Multiple sclerosis                                  | 29<br>(14 - 48)             | --                     | --                 | 13<br>(6 - 23)             | 10<br>(5 - 17)              | 6<br>(3 - 11)               |
| Other neurological disorders                        | 705<br>(526 - 945)          | 65<br>(33 - 148)       | 68<br>(39 - 108)   | 314<br>(218 - 428)         | 151<br>(114 - 218)          | 107<br>(79 - 141)           |
| Mental and substance use disorders                  | 2,844<br>(2,057 - 3,754)    | 15<br>(7 - 25)         | 0<br>(0 - 0)       | 2,210<br>(1,536 - 2,909)   | 558<br>(403 - 814)          | 60<br>(45 - 89)             |
| Schizophrenia                                       | 63<br>(41 - 95)             | --                     | --                 | 32<br>(20 - 50)            | 20<br>(12 - 33)             | 11<br>(6 - 17)              |
| Alcohol use disorders                               | 902<br>(531 - 1,433)        | --                     | --                 | 541<br>(294 - 843)         | 329<br>(201 - 547)          | 32<br>(21 - 53)             |
| Drug use disorders                                  | 1,876<br>(1,353 - 2,428)    | 15<br>(7 - 25)         | --                 | 1,635<br>(1,110 - 2,168)   | 210<br>(152 - 281)          | 17<br>(12 - 31)             |
| Opioid use disorders                                | 1,213<br>(858 - 1,567)      | 10<br>(5 - 17)         | --                 | 1,064<br>(725 - 1,418)     | 128<br>(92 - 173)           | 11<br>(8 - 20)              |
| Cocaine use disorders                               | 27<br>(19 - 37)             | 0<br>(0 - 0)           | --                 | 25<br>(16 - 35)            | 2<br>(1 - 3)                | 0<br>(0 - 0)                |
| Amphetamine use disorders                           | 27<br>(19 - 37)             | 0<br>(0 - 1)           | --                 | 23<br>(16 - 33)            | 3<br>(2 - 4)                | 0<br>(0 - 0)                |
| Other drug use disorders                            | 609<br>(436 - 805)          | 4<br>(2 - 8)           | --                 | 523<br>(357 - 696)         | 76<br>(55 - 105)            | 6<br>(4 - 11)               |

Web Table 31- Indonesia deaths with 95% UI by age, sex, and cause in 2013

| Cause                                               | Males, All Ages             | Males, 0-4 Years         | Males, 5-14 Years    | Males, 15-49 Years          | Males, 50-69 Years          | Males, 70-80 Years          |
|-----------------------------------------------------|-----------------------------|--------------------------|----------------------|-----------------------------|-----------------------------|-----------------------------|
| Eating disorders                                    | 3<br>(2 - 4)                | --                       | 0<br>(0 - 0)         | 2<br>(1 - 4)                | --                          | --                          |
| Anorexia nervosa                                    | 3<br>(2 - 4)                | --                       | 0<br>(0 - 0)         | 2<br>(1 - 4)                | --                          | --                          |
| Diabetes, urogenital, blood, and endocrine diseases | 62,348<br>(52,084 - 71,434) | 568<br>(307 - 913)       | 462<br>(325 - 648)   | 13,036<br>(10,129 - 16,124) | 28,935<br>(22,992 - 34,641) | 19,346<br>(15,990 - 23,035) |
| Diabetes mellitus                                   | 36,413<br>(29,789 - 43,319) | 6<br>(3 - 11)            | 45<br>(28 - 70)      | 5,894<br>(4,275 - 7,733)    | 18,237<br>(14,080 - 22,891) | 12,230<br>(9,658 - 15,328)  |
| Acute glomerulonephritis                            | 143<br>(82 - 187)           | 4<br>(2 - 11)            | 4<br>(2 - 9)         | 72<br>(35 - 104)            | 39<br>(17 - 60)             | 23<br>(15 - 35)             |
| Chronic kidney disease                              | 16,338<br>(12,872 - 19,615) | 81<br>(37 - 176)         | 170<br>(109 - 254)   | 4,718<br>(3,269 - 6,116)    | 6,930<br>(5,110 - 8,640)    | 4,438<br>(3,348 - 5,936)    |
| Chronic kidney disease due to diabetes mellitus     | 1,144<br>(318 - 2,261)      | 4<br>(1 - 10)            | 5<br>(2 - 13)        | 268<br>(72 - 569)           | 447<br>(127 - 931)          | 419<br>(122 - 896)          |
| Chronic kidney disease due to hypertension          | 5,071<br>(3,258 - 7,066)    | 11<br>(4 - 23)           | 13<br>(7 - 25)       | 1,190<br>(668 - 1,798)      | 2,359<br>(1,330 - 3,527)    | 1,498<br>(898 - 2,388)      |
| Chronic kidney disease due to glomerulonephritis    | 1,265<br>(849 - 1,789)      | 30<br>(14 - 50)          | 59<br>(36 - 87)      | 406<br>(239 - 592)          | 417<br>(251 - 668)          | 353<br>(209 - 564)          |
| Chronic kidney disease due to other causes          | 8,858<br>(6,031 - 11,508)   | 36<br>(12 - 115)         | 93<br>(47 - 159)     | 2,854<br>(1,770 - 4,048)    | 3,707<br>(2,295 - 5,212)    | 2,168<br>(1,174 - 3,407)    |
| Urinary diseases and male infertility               | 7,037<br>(4,361 - 8,874)    | 64<br>(26 - 134)         | 28<br>(17 - 41)      | 1,398<br>(841 - 1,949)      | 3,257<br>(1,807 - 4,464)    | 2,289<br>(1,446 - 3,258)    |
| Interstitial nephritis and urinary tract infections | 2,372<br>(1,215 - 3,376)    | 33<br>(12 - 69)          | 12<br>(6 - 19)       | 471<br>(211 - 743)          | 1,052<br>(476 - 1,665)      | 805<br>(361 - 1,369)        |
| Urolithiasis                                        | 459<br>(210 - 702)          | --                       | 3<br>(2 - 6)         | 104<br>(48 - 193)           | 218<br>(86 - 397)           | 134<br>(52 - 246)           |
| Other urinary diseases                              | 4,206<br>(2,618 - 5,647)    | 32<br>(11 - 76)          | 13<br>(8 - 22)       | 823<br>(482 - 1,217)        | 1,987<br>(1,100 - 2,804)    | 1,350<br>(805 - 2,010)      |
| Gynecological diseases                              | --                          | --                       | --                   | --                          | --                          | --                          |
| Uterine fibroids                                    | --                          | --                       | --                   | --                          | --                          | --                          |
| Polycystic ovarian syndrome                         | --                          | --                       | --                   | --                          | --                          | --                          |
| Endometriosis                                       | --                          | --                       | --                   | --                          | --                          | --                          |
| Genital prolapse                                    | --                          | --                       | --                   | --                          | --                          | --                          |
| Other gynecological diseases                        | --                          | --                       | --                   | --                          | --                          | --                          |
| Hemoglobinopathies and hemolytic anemias            | 1,625<br>(979 - 2,506)      | 323<br>(140 - 572)       | 205<br>(116 - 333)   | 617<br>(347 - 975)          | 261<br>(158 - 410)          | 219<br>(128 - 348)          |
| Thalassemias                                        | 1,110<br>(658 - 1,722)      | 304<br>(130 - 539)       | 198<br>(112 - 322)   | 500<br>(276 - 779)          | 96<br>(58 - 150)            | 12<br>(7 - 20)              |
| Sickle cell disorders                               | 0<br>(0 - 0)                | 0<br>(0 - 0)             | 0<br>(0 - 0)         | 0<br>(0 - 0)                | 0<br>(0 - 0)                | 0<br>(0 - 0)                |
| G6PD deficiency                                     | 39<br>(23 - 60)             | 5<br>(2 - 8)             | 2<br>(1 - 3)         | 15<br>(8 - 23)              | 14<br>(9 - 22)              | 4<br>(2 - 6)                |
| Other hemoglobinopathies and hemolytic anemias      | 475<br>(281 - 730)          | 14<br>(7 - 23)           | 5<br>(3 - 8)         | 102<br>(55 - 160)           | 151<br>(90 - 240)           | 203<br>(119 - 322)          |
| Endocrine, metabolic, blood, and immune disorders   | 793<br>(568 - 1,548)        | 89<br>(46 - 202)         | 10<br>(5 - 18)       | 337<br>(224 - 596)          | 211<br>(125 - 451)          | 146<br>(83 - 329)           |
| Musculoskeletal disorders                           | 1,471<br>(956 - 1,861)      | --                       | 70<br>(46 - 105)     | 452<br>(276 - 596)          | 522<br>(341 - 711)          | 428<br>(261 - 609)          |
| Rheumatoid arthritis                                | 209<br>(120 - 296)          | --                       | 11<br>(6 - 19)       | 39<br>(21 - 61)             | 86<br>(45 - 134)            | 73<br>(39 - 126)            |
| Other musculoskeletal disorders                     | 1,262<br>(829 - 1,597)      | --                       | 59<br>(38 - 90)      | 412<br>(252 - 546)          | 436<br>(276 - 599)          | 355<br>(218 - 510)          |
| Other non-communicable diseases                     | 10,100<br>(7,612 - 13,005)  | 7,019<br>(4,776 - 9,723) | 662<br>(377 - 1,019) | 1,291<br>(879 - 1,726)      | 691<br>(496 - 917)          | 437<br>(299 - 664)          |
| Congenital anomalies                                | 8,849<br>(6,442 - 11,708)   | 6,933<br>(4,700 - 9,652) | 651<br>(365 - 1,005) | 877<br>(514 - 1,265)        | 224<br>(129 - 322)          | 164<br>(100 - 235)          |
| Neural tube defects                                 | 928<br>(226 - 2,241)        | 871<br>(193 - 2,148)     | 19<br>(6 - 44)       | 32<br>(11 - 61)             | 5<br>(2 - 11)               | 2<br>(0 - 4)                |
| Congenital heart anomalies                          | 5,345<br>(3,498 - 7,652)    | 4,085<br>(2,396 - 6,217) | 470<br>(256 - 764)   | 583<br>(336 - 852)          | 107<br>(56 - 161)           | 100<br>(56 - 150)           |
| Cleft lip and cleft palate                          | 15<br>(5 - 36)              | 15<br>(5 - 36)           | --                   | --                          | --                          | --                          |
| Down syndrome                                       | 158<br>(71 - 372)           | 106<br>(31 - 305)        | 19<br>(8 - 37)       | 28<br>(15 - 49)             | 5<br>(2 - 9)                | 1<br>(0 - 1)                |
| Chromosomal unbalanced rearrangements               | 152<br>(65 - 368)           | 110<br>(32 - 312)        | 9<br>(4 - 20)        | 24<br>(13 - 39)             | 7<br>(3 - 12)               | 2<br>(1 - 4)                |
| Other congenital anomalies                          | 2,250<br>(1,262 - 3,539)    | 1,745<br>(813 - 2,944)   | 134<br>(60 - 233)    | 211<br>(114 - 341)          | 101<br>(55 - 155)           | 60<br>(32 - 95)             |
| Skin and subcutaneous diseases                      | 1,172<br>(923 - 1,489)      | 7<br>(3 - 14)            | 11<br>(7 - 20)       | 414<br>(289 - 553)          | 467<br>(328 - 650)          | 274<br>(165 - 472)          |
| Cellulitis                                          | 491<br>(301 - 814)          | 3<br>(1 - 8)             | 5<br>(2 - 10)        | 168<br>(98 - 282)           | 212<br>(115 - 362)          | 103<br>(47 - 229)           |
| Pyoderma                                            | 430<br>(265 - 617)          | 3<br>(1 - 6)             | 4<br>(2 - 7)         | 166<br>(96 - 245)           | 176<br>(90 - 287)           | 81<br>(37 - 156)            |

Web Table 31- Indonesia deaths with 95% UI by age, sex, and cause in 2013

| Cause                                           | Males, All Ages             | Males, 0-4 Years         | Males, 5-14 Years        | Males, 15-49 Years          | Males, 50-69 Years          | Males, 70-80 Years       |
|-------------------------------------------------|-----------------------------|--------------------------|--------------------------|-----------------------------|-----------------------------|--------------------------|
| Decubitus ulcer                                 | 215<br>(116 - 329)          | 0<br>(0 - 0)             | 1<br>(1 - 3)             | 59<br>(30 - 90)             | 68<br>(31 - 113)            | 86<br>(38 - 164)         |
| Other skin and subcutaneous diseases            | 37<br>(18 - 61)             | 0<br>(0 - 1)             | 1<br>(0 - 3)             | 22<br>(10 - 37)             | 10<br>(4 - 19)              | 4<br>(1 - 8)             |
| Sudden infant death syndrome                    | 79<br>(21 - 228)            | 79<br>(21 - 228)         | --                       | --                          | --                          | --                       |
| Injuries                                        | 79,273<br>(67,004 - 93,577) | 4,904<br>(2,952 - 7,490) | 5,493<br>(4,095 - 6,964) | 48,758<br>(39,299 - 59,738) | 13,361<br>(10,688 - 16,481) | 6,757<br>(5,390 - 8,352) |
| Transport injuries                              | 40,142<br>(32,565 - 51,929) | 1,389<br>(704 - 2,467)   | 1,998<br>(1,418 - 2,590) | 26,664<br>(21,014 - 34,725) | 7,155<br>(5,504 - 9,429)    | 2,935<br>(2,217 - 4,088) |
| Road injuries                                   | 35,211<br>(28,320 - 46,047) | 852<br>(374 - 1,650)     | 1,784<br>(1,261 - 2,350) | 23,175<br>(18,030 - 30,980) | 6,585<br>(4,983 - 8,618)    | 2,815<br>(2,122 - 3,943) |
| Pedestrian road injuries                        | 10,003<br>(6,881 - 13,870)  | 320<br>(125 - 620)       | 669<br>(399 - 973)       | 5,643<br>(3,677 - 8,149)    | 2,304<br>(1,499 - 3,325)    | 1,067<br>(677 - 1,538)   |
| Cyclist road injuries                           | 2,681<br>(1,952 - 3,807)    | 56<br>(20 - 114)         | 239<br>(147 - 371)       | 1,414<br>(955 - 2,074)      | 656<br>(429 - 990)          | 315<br>(208 - 485)       |
| Motorcyclist road injuries                      | 16,241<br>(11,831 - 22,176) | 252<br>(101 - 539)       | 602<br>(382 - 904)       | 11,943<br>(8,653 - 16,452)  | 2,443<br>(1,645 - 3,505)    | 1,002<br>(647 - 1,541)   |
| Motor vehicle road injuries                     | 5,028<br>(3,609 - 7,377)    | 193<br>(83 - 417)        | 214<br>(124 - 334)       | 3,321<br>(2,239 - 5,036)    | 970<br>(636 - 1,441)        | 330<br>(213 - 537)       |
| Other road injuries                             | 1,258<br>(763 - 1,943)      | 30<br>(11 - 77)          | 61<br>(27 - 112)         | 854<br>(481 - 1,363)        | 212<br>(109 - 388)          | 101<br>(51 - 180)        |
| Other transport injuries                        | 4,931<br>(3,283 - 6,418)    | 537<br>(289 - 942)       | 214<br>(106 - 347)       | 3,489<br>(2,137 - 4,819)    | 570<br>(369 - 856)          | 121<br>(74 - 188)        |
| Unintentional injuries                          | 32,717<br>(26,656 - 39,363) | 3,498<br>(2,005 - 5,714) | 3,426<br>(2,359 - 4,811) | 17,481<br>(13,342 - 22,060) | 4,888<br>(3,746 - 6,224)    | 3,423<br>(2,538 - 4,550) |
| Falls                                           | 7,852<br>(5,772 - 10,126)   | 144<br>(62 - 269)        | 186<br>(104 - 317)       | 3,102<br>(2,099 - 4,425)    | 2,301<br>(1,471 - 3,356)    | 2,120<br>(1,340 - 3,182) |
| Drowning                                        | 16,288<br>(11,185 - 21,620) | 2,213<br>(962 - 4,343)   | 2,819<br>(1,827 - 4,175) | 9,799<br>(6,568 - 13,167)   | 987<br>(643 - 1,389)        | 469<br>(323 - 654)       |
| Fire, heat, and hot substances                  | 1,113<br>(813 - 1,604)      | 119<br>(52 - 216)        | 44<br>(24 - 72)          | 581<br>(384 - 849)          | 233<br>(150 - 361)          | 134<br>(88 - 206)        |
| Poisonings                                      | 335<br>(234 - 599)          | 2<br>(0 - 6)             | 4<br>(2 - 9)             | 229<br>(146 - 393)          | 94<br>(56 - 181)            | 6<br>(3 - 24)            |
| Exposure to mechanical forces                   | 1,453<br>(1,112 - 2,165)    | 100<br>(47 - 225)        | 78<br>(45 - 125)         | 923<br>(654 - 1,334)        | 239<br>(162 - 379)          | 113<br>(79 - 159)        |
| Unintentional firearm injuries                  | 307<br>(213 - 454)          | 4<br>(2 - 11)            | 10<br>(5 - 21)           | 190<br>(112 - 306)          | 67<br>(38 - 112)            | 36<br>(20 - 62)          |
| Unintentional suffocation                       | 56<br>(27 - 164)            | 34<br>(8 - 124)          | 4<br>(1 - 7)             | 13<br>(8 - 23)              | 4<br>(2 - 8)                | 1<br>(0 - 1)             |
| Other exposure to mechanical forces             | 1,090<br>(814 - 1,581)      | 62<br>(26 - 147)         | 64<br>(34 - 109)         | 720<br>(493 - 1,062)        | 168<br>(105 - 287)          | 76<br>(52 - 113)         |
| Adverse effects of medical treatment            | 949<br>(675 - 1,393)        | 77<br>(33 - 148)         | 24<br>(14 - 40)          | 304<br>(187 - 491)          | 257<br>(151 - 414)          | 287<br>(158 - 540)       |
| Animal contact                                  | 938<br>(507 - 1,238)        | 96<br>(41 - 182)         | 144<br>(62 - 256)        | 347<br>(182 - 517)          | 243<br>(124 - 369)          | 108<br>(57 - 167)        |
| Venomous animal contact                         | 237<br>(125 - 341)          | 19<br>(7 - 39)           | 13<br>(5 - 26)           | 113<br>(55 - 183)           | 72<br>(32 - 127)            | 20<br>(10 - 38)          |
| Non-venomous animal contact                     | 701<br>(359 - 924)          | 77<br>(31 - 153)         | 131<br>(56 - 237)        | 234<br>(110 - 357)          | 171<br>(86 - 267)           | 87<br>(42 - 138)         |
| Foreign body                                    | 1,070<br>(682 - 1,799)      | 719<br>(394 - 1,203)     | 17<br>(11 - 28)          | 149<br>(92 - 301)           | 105<br>(68 - 200)           | 80<br>(53 - 142)         |
| Pulmonary aspiration and foreign body in airway | 947<br>(565 - 1,670)        | 715<br>(392 - 1,199)     | 7<br>(3 - 12)            | 96<br>(49 - 236)            | 69<br>(38 - 154)            | 59<br>(34 - 127)         |
| Foreign body in other body part                 | 123<br>(72 - 192)           | 3<br>(2 - 7)             | 10<br>(6 - 22)           | 53<br>(30 - 87)             | 36<br>(20 - 58)             | 21<br>(9 - 33)           |
| Other unintentional injuries                    | 2,719<br>(2,083 - 3,452)    | 27<br>(15 - 44)          | 110<br>(68 - 168)        | 2,047<br>(1,467 - 2,691)    | 428<br>(286 - 600)          | 107<br>(76 - 149)        |
| Self-harm and interpersonal violence            | 6,413<br>(4,745 - 9,282)    | 16<br>(6 - 40)           | 68<br>(35 - 111)         | 4,612<br>(3,328 - 6,810)    | 1,318<br>(928 - 1,931)      | 398<br>(251 - 645)       |
| Self-harm                                       | 4,446<br>(3,272 - 6,972)    | --                       | 19<br>(7 - 40)           | 2,944<br>(2,021 - 4,711)    | 1,119<br>(755 - 1,744)      | 365<br>(215 - 628)       |
| Interpersonal violence                          | 1,967<br>(1,089 - 3,086)    | 16<br>(6 - 40)           | 50<br>(20 - 87)          | 1,669<br>(917 - 2,658)      | 200<br>(93 - 319)           | 33<br>(10 - 64)          |
| Assault by firearm                              | 529<br>(251 - 983)          | 3<br>(1 - 9)             | 12<br>(4 - 31)           | 454<br>(205 - 867)          | 55<br>(21 - 104)            | 5<br>(1 - 11)            |
| Assault by sharp object                         | 1,079<br>(552 - 1,678)      | 3<br>(1 - 9)             | 6<br>(2 - 13)            | 965<br>(493 - 1,546)        | 89<br>(34 - 159)            | 15<br>(3 - 31)           |
| Assault by other means                          | 359<br>(189 - 608)          | 10<br>(3 - 25)           | 31<br>(13 - 57)          | 250<br>(123 - 451)          | 56<br>(25 - 99)             | 13<br>(4 - 28)           |
| Forces of nature, war, and legal intervention   | 1<br>(0 - 0)                | 1<br>(0 - 0)             | --                       | --                          | --                          | --                       |
| Exposure to forces of nature                    | 1<br>(0 - 0)                | 1<br>(0 - 0)             | --                       | --                          | --                          | --                       |

Web Table 31- Indonesia deaths with 95% UI by age, sex, and cause in 2013

| Cause                                                             | Females, All Ages              | Females, 0-4 Years          | Females, 5-14 Years        | Females, 15-49 Years          | Females, 50-69 Years           | Females, 70-80 Years           |
|-------------------------------------------------------------------|--------------------------------|-----------------------------|----------------------------|-------------------------------|--------------------------------|--------------------------------|
| All causes                                                        | 731,314<br>(652,568 - 797,197) | 64,258<br>(55,565 - 74,641) | 10,597<br>(9,006 - 12,324) | 111,206<br>(97,583 - 125,441) | 209,449<br>(176,010 - 244,024) | 335,803<br>(301,733 - 353,423) |
| Communicable, maternal, neonatal, and nutritional diseases        | 171,272<br>(145,820 - 193,928) | 52,857<br>(44,712 - 62,046) | 5,251<br>(4,052 - 7,115)   | 32,641<br>(26,008 - 42,447)   | 26,321<br>(19,697 - 32,920)    | 54,203<br>(41,785 - 65,202)    |
| HIV/AIDS and tuberculosis                                         | 42,173<br>(18,178 - 61,489)    | 286<br>(46 - 1,447)         | 208<br>(99 - 382)          | 13,754<br>(6,035 - 26,477)    | 13,226<br>(5,909 - 18,403)     | 14,700<br>(5,636 - 19,731)     |
| Tuberculosis                                                      | 37,572<br>(15,822 - 47,009)    | 52<br>(28 - 87)             | 180<br>(90 - 278)          | 10,214<br>(4,587 - 13,367)    | 12,499<br>(5,508 - 16,743)     | 14,626<br>(5,540 - 19,680)     |
| HIV/AIDS                                                          | 4,601<br>(227 - 24,839)        | 234<br>(4 - 1,406)          | 27<br>(0 - 194)            | 3,540<br>(203 - 18,688)       | 727<br>(20 - 4,201)            | 73<br>(1 - 513)                |
| HIV/AIDS resulting in mycobacterial infection                     | 238<br>(11 - 1,261)            | 10<br>(0 - 61)              | 1<br>(0 - 9)               | 183<br>(10 - 962)             | 40<br>(1 - 236)                | 4<br>(0 - 32)                  |
| HIV/AIDS resulting in other diseases                              | 4,362<br>(214 - 23,585)        | 223<br>(3 - 1,347)          | 26<br>(0 - 185)            | 3,357<br>(193 - 17,786)       | 687<br>(19 - 3,960)            | 69<br>(1 - 482)                |
| Diarrhea, lower respiratory, and other common infectious diseases | 71,223<br>(59,660 - 85,381)    | 24,267<br>(18,583 - 31,248) | 3,817<br>(2,606 - 5,915)   | 6,663<br>(4,987 - 8,709)      | 9,754<br>(6,806 - 13,360)      | 26,723<br>(19,541 - 35,587)    |
| Diarrheal diseases                                                | 26,856<br>(19,390 - 35,790)    | 3,127<br>(1,311 - 5,825)    | 1,017<br>(507 - 1,738)     | 2,600<br>(1,720 - 3,734)      | 5,137<br>(2,944 - 8,221)       | 14,975<br>(9,161 - 22,813)     |
| Intestinal infectious diseases                                    | 2,754<br>(1,345 - 4,826)       | 850<br>(311 - 1,808)        | 853<br>(334 - 1,630)       | 850<br>(366 - 1,564)          | 148<br>(66 - 304)              | 53<br>(25 - 102)               |
| Typhoid fever                                                     | 1,955<br>(869 - 3,535)         | 563<br>(176 - 1,278)        | 638<br>(241 - 1,260)       | 621<br>(236 - 1,209)          | 103<br>(37 - 238)              | 30<br>(9 - 68)                 |
| Paratyphoid fever                                                 | 568<br>(252 - 1,058)           | 199<br>(61 - 452)           | 188<br>(66 - 394)          | 155<br>(56 - 318)             | 21<br>(6 - 49)                 | 5<br>(1 - 14)                  |
| Other intestinal infectious diseases                              | 231<br>(164 - 294)             | 88<br>(44 - 137)            | 26<br>(12 - 45)            | 74<br>(48 - 104)              | 25<br>(14 - 39)                | 18<br>(9 - 28)                 |
| Lower respiratory infections                                      | 29,610<br>(22,689 - 37,233)    | 11,813<br>(7,222 - 16,648)  | 609<br>(333 - 970)         | 2,148<br>(1,432 - 2,980)      | 3,936<br>(2,729 - 5,473)       | 11,105<br>(7,142 - 16,078)     |
| Upper respiratory infections                                      | 44<br>(16 - 90)                | 5<br>(0 - 19)               | 1<br>(0 - 5)               | 10<br>(2 - 27)                | 13<br>(1 - 37)                 | 15<br>(1 - 53)                 |
| Otitis media                                                      | 27<br>(22 - 33)                | 2<br>(1 - 4)                | 3<br>(2 - 4)               | 8<br>(6 - 10)                 | 5<br>(4 - 7)                   | 10<br>(7 - 13)                 |
| Meningitis                                                        | 3,713<br>(2,353 - 5,324)       | 2,548<br>(1,294 - 4,101)    | 227<br>(120 - 369)         | 446<br>(294 - 639)            | 237<br>(151 - 373)             | 256<br>(152 - 397)             |
| Pneumococcal meningitis                                           | 1,042<br>(594 - 1,583)         | 636<br>(235 - 1,177)        | 86<br>(40 - 155)           | 161<br>(86 - 261)             | 78<br>(36 - 141)               | 80<br>(42 - 134)               |
| H influenzae type B meningitis                                    | 1,109<br>(610 - 1,787)         | 924<br>(447 - 1,592)        | 58<br>(26 - 101)           | 66<br>(34 - 120)              | 27<br>(13 - 47)                | 34<br>(16 - 59)                |
| Meningococcal meningitis                                          | 343<br>(221 - 499)             | 160<br>(56 - 306)           | 22<br>(8 - 48)             | 70<br>(35 - 114)              | 41<br>(21 - 70)                | 50<br>(22 - 90)                |
| Other meningitis                                                  | 1,220<br>(693 - 1,953)         | 829<br>(358 - 1,516)        | 61<br>(24 - 118)           | 148<br>(80 - 247)             | 91<br>(42 - 180)               | 92<br>(47 - 157)               |
| Encephalitis                                                      | 1,197<br>(860 - 1,662)         | 425<br>(197 - 742)          | 136<br>(77 - 214)          | 277<br>(183 - 436)            | 168<br>(112 - 254)             | 191<br>(118 - 280)             |
| Diphtheria                                                        | 44<br>(2 - 209)                | 25<br>(0 - 176)             | 10<br>(0 - 69)             | 7<br>(0 - 31)                 | 3<br>(0 - 21)                  | --                             |
| Whooping cough                                                    | 2,067<br>(2 - 8,870)           | 1,860<br>(2 - 7,803)        | 165<br>(0 - 733)           | 37<br>(0 - 168)               | 5<br>(0 - 23)                  | --                             |
| Tetanus                                                           | 584<br>(335 - 911)             | 321<br>(62 - 645)           | 29<br>(14 - 52)            | 69<br>(43 - 120)              | 85<br>(48 - 156)               | 79<br>(35 - 173)               |
| Measles                                                           | 4,222<br>(139 - 18,427)        | 3,272<br>(110 - 14,154)     | 760<br>(22 - 3,388)        | 185<br>(4 - 882)              | 5<br>(0 - 23)                  | --                             |
| Varicella and herpes zoster                                       | 105<br>(31 - 272)              | 20<br>(1 - 79)              | 8<br>(0 - 36)              | 28<br>(3 - 78)                | 11<br>(1 - 35)                 | 39<br>(1 - 192)                |
| Neglected tropical diseases and malaria                           | 3,442<br>(2,246 - 4,266)       | 648<br>(219 - 1,038)        | 847<br>(331 - 1,231)       | 1,041<br>(765 - 1,347)        | 493<br>(360 - 667)             | 414<br>(297 - 571)             |
| Malaria                                                           | 1,341<br>(1,002 - 1,749)       | 79<br>(33 - 158)            | 144<br>(78 - 245)          | 592<br>(389 - 841)            | 271<br>(157 - 429)             | 255<br>(151 - 406)             |
| Leishmaniasis                                                     | 1<br>(0 - 2)                   | 0<br>(0 - 2)                | 0<br>(0 - 0)               | 0<br>(0 - 0)                  | 0<br>(0 - 0)                   | 0<br>(0 - 0)                   |
| Visceral leishmaniasis                                            | 1<br>(0 - 2)                   | 1<br>(0 - 2)                | 0<br>(0 - 0)               | 0<br>(0 - 0)                  | 0<br>(0 - 0)                   | 0<br>(0 - 0)                   |
| Schistosomiasis                                                   | 232<br>(160 - 318)             | 1<br>(0 - 1)                | 4<br>(2 - 8)               | 65<br>(40 - 100)              | 95<br>(54 - 146)               | 67<br>(35 - 108)               |
| Cysticercosis                                                     | 1<br>(0 - 4)                   | 0<br>(0 - 0)                | 0<br>(0 - 0)               | 1<br>(0 - 2)                  | 0<br>(0 - 1)                   | 0<br>(0 - 0)                   |
| Cystic echinococcosis                                             | 18<br>(15 - 22)                | 1<br>(0 - 1)                | 2<br>(2 - 3)               | 7<br>(6 - 9)                  | 5<br>(4 - 6)                   | 3<br>(3 - 3)                   |
| Dengue                                                            | 1,571<br>(438 - 2,228)         | 503<br>(95 - 879)           | 658<br>(146 - 1,022)       | 289<br>(111 - 371)            | 71<br>(32 - 96)                | 51<br>(21 - 81)                |
| Rabies                                                            | 126<br>(85 - 220)              | 7<br>(2 - 16)               | 24<br>(12 - 51)            | 53<br>(34 - 97)               | 28<br>(16 - 45)                | 14<br>(6 - 23)                 |
| Intestinal nematode infections                                    | 20<br>(7 - 37)                 | 9<br>(2 - 22)               | 4<br>(0 - 13)              | 2<br>(0 - 8)                  | 2<br>(0 - 7)                   | 2<br>(0 - 8)                   |
| Ascariasis                                                        | 20<br>(7 - 37)                 | 9<br>(2 - 22)               | 4<br>(0 - 13)              | 2<br>(0 - 8)                  | 2<br>(0 - 7)                   | 2<br>(0 - 8)                   |
| Other neglected tropical diseases                                 | 131<br>(89 - 200)              | 48<br>(21 - 93)             | 10<br>(5 - 17)             | 32<br>(20 - 52)               | 20<br>(11 - 40)                | 22<br>(11 - 42)                |
| Maternal disorders                                                | 9,352<br>(7,010 - 12,079)      | --                          | 25<br>(9 - 53)             | 9,327<br>(6,972 - 12,059)     | --                             | --                             |

Web Table 31- Indonesia deaths with 95% UI by age, sex, and cause in 2013

| Cause                                                            | Females, All Ages              | Females, 0-4 Years          | Females, 5-14 Years      | Females, 15-49 Years        | Females, 50-69 Years           | Females, 70-80 Years           |
|------------------------------------------------------------------|--------------------------------|-----------------------------|--------------------------|-----------------------------|--------------------------------|--------------------------------|
| Maternal hemorrhage                                              | 1,370<br>(847 - 1,964)         | --                          | 3<br>(1 - 6)             | 1,367<br>(844 - 1,960)      | --                             | --                             |
| Maternal sepsis and other maternal infections                    | 602<br>(338 - 946)             | --                          | 2<br>(1 - 4)             | 600<br>(337 - 945)          | --                             | --                             |
| Maternal hypertensive disorders                                  | 1,266<br>(741 - 1,897)         | --                          | 3<br>(1 - 7)             | 1,264<br>(739 - 1,895)      | --                             | --                             |
| Maternal obstructed labor                                        | 727<br>(412 - 1,190)           | --                          | 2<br>(1 - 5)             | 725<br>(411 - 1,186)        | --                             | --                             |
| Maternal abortive outcome                                        | 1,292<br>(827 - 1,861)         | --                          | 3<br>(1 - 7)             | 1,289<br>(825 - 1,859)      | --                             | --                             |
| Indirect maternal deaths                                         | 1,148<br>(746 - 1,620)         | --                          | 3<br>(1 - 7)             | 1,145<br>(742 - 1,618)      | --                             | --                             |
| Late maternal deaths                                             | 1,206<br>(764 - 1,752)         | --                          | 5<br>(2 - 13)            | 1,201<br>(759 - 1,746)      | --                             | --                             |
| Maternal deaths aggravated by HIV/AIDS                           | 5<br>(3 - 9)                   | --                          | --                       | 5<br>(3 - 9)                | --                             | --                             |
| Other maternal disorders                                         | 1,714<br>(999 - 2,489)         | --                          | 5<br>(2 - 10)            | 1,709<br>(993 - 2,485)      | --                             | --                             |
| Neonatal disorders                                               | 25,898<br>(21,262 - 31,880)    | 25,898<br>(21,262 - 31,880) | --                       | --                          | --                             | --                             |
| Neonatal preterm birth complications                             | 9,033<br>(4,590 - 13,782)      | 9,033<br>(4,590 - 13,782)   | --                       | --                          | --                             | --                             |
| Neonatal encephalopathy due to birth asphyxia and trauma         | 9,974<br>(5,929 - 15,212)      | 9,974<br>(5,929 - 15,212)   | --                       | --                          | --                             | --                             |
| Neonatal sepsis and other neonatal infections                    | 2,837<br>(1,019 - 5,462)       | 2,837<br>(1,019 - 5,462)    | --                       | --                          | --                             | --                             |
| Hemolytic disease and other neonatal jaundice                    | 190<br>(52 - 613)              | 190<br>(52 - 613)           | --                       | --                          | --                             | --                             |
| Other neonatal disorders                                         | 3,863<br>(2,000 - 6,529)       | 3,863<br>(2,000 - 6,529)    | --                       | --                          | --                             | --                             |
| Nutritional deficiencies                                         | 16,106<br>(10,689 - 21,638)    | 650<br>(329 - 1,097)        | 223<br>(131 - 345)       | 1,407<br>(948 - 1,872)      | 2,285<br>(1,507 - 3,249)       | 11,541<br>(7,195 - 16,842)     |
| Protein-energy malnutrition                                      | 10,106<br>(4,643 - 15,118)     | 475<br>(215 - 888)          | 63<br>(22 - 111)         | 701<br>(337 - 1,063)        | 1,432<br>(687 - 2,221)         | 7,436<br>(3,070 - 12,097)      |
| Iodine deficiency                                                | 31<br>(3 - 106)                | 5<br>(0 - 36)               | 3<br>(0 - 24)            | 6<br>(0 - 26)               | 6<br>(0 - 37)                  | 11<br>(0 - 64)                 |
| Iron-deficiency anemia                                           | 5,755<br>(2,613 - 10,803)      | 138<br>(27 - 333)           | 142<br>(72 - 239)        | 662<br>(341 - 1,103)        | 813<br>(351 - 1,581)           | 3,999<br>(1,557 - 8,015)       |
| Other nutritional deficiencies                                   | 214<br>(112 - 516)             | 31<br>(7 - 78)              | 15<br>(5 - 32)           | 37<br>(18 - 91)             | 34<br>(14 - 102)               | 96<br>(39 - 275)               |
| Other communicable, maternal, neonatal, and nutritional diseases | 3,079<br>(1,858 - 4,970)       | 1,109<br>(292 - 2,250)      | 131<br>(43 - 254)        | 449<br>(289 - 701)          | 564<br>(314 - 1,199)           | 826<br>(386 - 1,852)           |
| Sexually transmitted diseases excluding HIV                      | 1,104<br>(219 - 2,294)         | 846<br>(0 - 1,925)          | 90<br>(6 - 206)          | 57<br>(22 - 109)            | 35<br>(9 - 82)                 | 76<br>(26 - 172)               |
| Syphilis                                                         | 1,033<br>(132 - 2,213)         | 846<br>(0 - 1,925)          | 87<br>(2 - 203)          | 23<br>(9 - 45)              | 19<br>(5 - 45)                 | 58<br>(20 - 130)               |
| Chlamydial infection                                             | 21<br>(10 - 36)                | --                          | 1<br>(0 - 2)             | 11<br>(4 - 21)              | 5<br>(1 - 11)                  | 5<br>(2 - 11)                  |
| Gonococcal infection                                             | 28<br>(14 - 49)                | --                          | 1<br>(0 - 1)             | 12<br>(5 - 23)              | 6<br>(2 - 15)                  | 9<br>(3 - 21)                  |
| Other sexually transmitted diseases                              | 21<br>(10 - 35)                | --                          | 1<br>(0 - 1)             | 11<br>(4 - 21)              | 5<br>(1 - 11)                  | 4<br>(1 - 10)                  |
| Hepatitis                                                        | 511<br>(404 - 627)             | 33<br>(16 - 60)             | 15<br>(8 - 22)           | 175<br>(123 - 233)          | 155<br>(104 - 221)             | 133<br>(91 - 186)              |
| Acute hepatitis A                                                | 43<br>(13 - 84)                | 18<br>(6 - 39)              | 3<br>(1 - 7)             | 13<br>(3 - 32)              | 6<br>(1 - 16)                  | 2<br>(0 - 6)                   |
| Acute hepatitis B                                                | 286<br>(185 - 396)             | 12<br>(4 - 29)              | 2<br>(1 - 4)             | 59<br>(26 - 103)            | 105<br>(61 - 159)              | 108<br>(63 - 160)              |
| Acute hepatitis C                                                | 3<br>(1 - 7)                   | --                          | 0<br>(0 - 0)             | 1<br>(0 - 2)                | 1<br>(0 - 3)                   | 1<br>(0 - 3)                   |
| Acute hepatitis E                                                | 179<br>(105 - 275)             | 2<br>(1 - 6)                | 10<br>(5 - 16)           | 101<br>(60 - 149)           | 43<br>(16 - 89)                | 22<br>(7 - 51)                 |
| Other infectious diseases                                        | 1,464<br>(774 - 2,962)         | 231<br>(93 - 500)           | 26<br>(7 - 58)           | 217<br>(95 - 430)           | 374<br>(153 - 989)             | 616<br>(201 - 1,646)           |
| Non-communicable diseases                                        | 529,523<br>(461,976 - 587,739) | 7,879<br>(5,226 - 11,090)   | 2,769<br>(1,882 - 3,573) | 68,481<br>(55,825 - 79,638) | 176,285<br>(146,136 - 207,517) | 274,109<br>(245,397 - 294,629) |
| Neoplasms                                                        | 73,800<br>(60,740 - 86,769)    | 243<br>(114 - 407)          | 739<br>(478 - 1,020)     | 18,395<br>(14,362 - 22,103) | 32,670<br>(26,087 - 40,217)    | 21,752<br>(18,407 - 25,117)    |
| Esophageal cancer                                                | 1,046<br>(721 - 1,478)         | --                          | --                       | 121<br>(77 - 180)           | 432<br>(268 - 669)             | 494<br>(315 - 723)             |
| Stomach cancer                                                   | 5,351<br>(4,224 - 6,695)       | --                          | --                       | 882<br>(626 - 1,196)        | 2,232<br>(1,605 - 2,917)       | 2,237<br>(1,605 - 3,081)       |
| Liver cancer                                                     | 3,511<br>(2,562 - 4,787)       | --                          | 15<br>(7 - 27)           | 622<br>(401 - 906)          | 1,665<br>(1,068 - 2,449)       | 1,209<br>(768 - 1,780)         |
| Liver cancer due to hepatitis B                                  | 541<br>(223 - 883)             | --                          | 3<br>(1 - 6)             | 126<br>(56 - 213)           | 265<br>(91 - 475)              | 148<br>(61 - 264)              |
| Liver cancer due to hepatitis C                                  | 2,089<br>(1,359 - 2,942)       | --                          | 3<br>(1 - 7)             | 317<br>(167 - 504)          | 1,004<br>(605 - 1,525)         | 765<br>(445 - 1,184)           |
| Liver cancer due to alcohol use                                  | 176<br>(99 - 284)              | --                          | --                       | 18<br>(9 - 33)              | 73<br>(39 - 120)               | 85<br>(39 - 164)               |

Web Table 31- Indonesia deaths with 95% UI by age, sex, and cause in 2013

| Cause                                         | Females, All Ages              | Females, 0-4 Years | Females, 5-14 Years | Females, 15-49 Years        | Females, 50-69 Years         | Females, 70-80 Years           |
|-----------------------------------------------|--------------------------------|--------------------|---------------------|-----------------------------|------------------------------|--------------------------------|
| Liver cancer due to other causes              | 704<br>(426 - 1,067)           | --                 | 9<br>(4 - 17)       | 161<br>(89 - 258)           | 323<br>(176 - 547)           | 212<br>(104 - 351)             |
| Larynx cancer                                 | 174<br>(76 - 284)              | --                 | --                  | 31<br>(14 - 54)             | 80<br>(35 - 140)             | 63<br>(25 - 117)               |
| Tracheal, bronchus and lung cancer            | 10,463<br>(7,364 - 13,225)     | --                 | --                  | 1,536<br>(1,022 - 2,077)    | 5,181<br>(3,346 - 7,050)     | 3,747<br>(2,603 - 5,011)       |
| Breast cancer                                 | 10,446<br>(7,984 - 14,573)     | --                 | --                  | 3,929<br>(2,830 - 5,556)    | 4,725<br>(3,362 - 6,994)     | 1,792<br>(1,309 - 2,590)       |
| Cervical cancer                               | 11,264<br>(7,545 - 14,228)     | --                 | --                  | 4,245<br>(2,787 - 5,795)    | 5,044<br>(3,352 - 6,854)     | 1,975<br>(1,294 - 2,733)       |
| Uterine cancer                                | 1,145<br>(787 - 1,714)         | --                 | --                  | 182<br>(109 - 275)          | 654<br>(420 - 1,016)         | 310<br>(196 - 497)             |
| Prostate cancer                               | --                             | --                 | --                  | --                          | --                           | --                             |
| Colon and rectum cancer                       | 6,767<br>(5,478 - 8,285)       | --                 | --                  | 1,014<br>(750 - 1,321)      | 2,766<br>(2,143 - 3,542)     | 2,987<br>(2,248 - 4,009)       |
| Lip and oral cavity cancer                    | 1,627<br>(990 - 2,420)         | --                 | --                  | 229<br>(142 - 350)          | 690<br>(406 - 1,072)         | 708<br>(381 - 1,198)           |
| Nasopharynx cancer                            | 1,019<br>(603 - 1,470)         | --                 | 7<br>(2 - 18)       | 243<br>(138 - 386)          | 381<br>(209 - 638)           | 387<br>(209 - 625)             |
| Other pharynx cancer                          | 504<br>(340 - 688)             | --                 | --                  | 78<br>(43 - 128)            | 267<br>(160 - 407)           | 159<br>(99 - 234)              |
| Gallbladder and biliary tract cancer          | 1,967<br>(1,032 - 2,726)       | --                 | --                  | 240<br>(101 - 363)          | 907<br>(440 - 1,336)         | 820<br>(459 - 1,222)           |
| Pancreatic cancer                             | 2,010<br>(1,591 - 2,498)       | --                 | --                  | 257<br>(182 - 347)          | 793<br>(707 - 1,288)         | 793<br>(588 - 1,043)           |
| Malignant skin melanoma                       | 340<br>(260 - 432)             | --                 | --                  | 92<br>(65 - 124)            | 182<br>(128 - 250)           | 66<br>(47 - 93)                |
| Non-melanoma skin cancer                      | 161<br>(102 - 255)             | --                 | --                  | 20<br>(12 - 35)             | 49<br>(29 - 82)              | 91<br>(50 - 158)               |
| Ovarian cancer                                | 3,859<br>(2,732 - 5,050)       | --                 | --                  | 1,073<br>(715 - 1,538)      | 2,130<br>(1,405 - 2,999)     | 656<br>(449 - 935)             |
| Testicular cancer                             | --                             | --                 | --                  | --                          | --                           | --                             |
| Kidney cancer                                 | 823<br>(560 - 1,114)           | 20<br>(7 - 43)     | 11<br>(5 - 19)      | 122<br>(81 - 178)           | 383<br>(232 - 559)           | 287<br>(172 - 432)             |
| Bladder cancer                                | 660<br>(424 - 924)             | --                 | --                  | 64<br>(39 - 96)             | 235<br>(144 - 352)           | 360<br>(221 - 530)             |
| Brain and nervous system cancer               | 2,238<br>(1,565 - 2,767)       | 10<br>(3 - 21)     | 156<br>(92 - 245)   | 1,037<br>(636 - 1,364)      | 813<br>(561 - 1,107)         | 223<br>(153 - 314)             |
| Thyroid cancer                                | 755<br>(526 - 1,020)           | --                 | 2<br>(1 - 4)        | 120<br>(70 - 175)           | 359<br>(230 - 521)           | 274<br>(180 - 416)             |
| Mesothelioma                                  | 222<br>(147 - 329)             | --                 | --                  | 35<br>(20 - 62)             | 164<br>(99 - 259)            | 23<br>(13 - 41)                |
| Hodgkin lymphoma                              | 173<br>(127 - 233)             | 38<br>(9 - 83)     | 20<br>(8 - 45)      | 40<br>(25 - 73)             | 26<br>(15 - 47)              | 50<br>(30 - 81)                |
| Non-Hodgkin lymphoma                          | 1,722<br>(1,163 - 2,572)       | 31<br>(11 - 66)    | 85<br>(42 - 158)    | 443<br>(289 - 688)          | 649<br>(401 - 1,032)         | 514<br>(323 - 821)             |
| Multiple myeloma                              | 255<br>(177 - 336)             | --                 | --                  | 53<br>(34 - 77)             | 119<br>(78 - 169)            | 82<br>(58 - 114)               |
| Leukemia                                      | 2,831<br>(2,275 - 3,525)       | 128<br>(47 - 265)  | 376<br>(220 - 571)  | 1,070<br>(783 - 1,374)      | 710<br>(523 - 981)           | 548<br>(412 - 733)             |
| Other neoplasms                               | 2,466<br>(1,848 - 3,652)       | 17<br>(6 - 31)     | 66<br>(31 - 120)    | 618<br>(417 - 942)          | 868<br>(591 - 1,324)         | 896<br>(616 - 1,358)           |
| Cardiovascular diseases                       | 279,243<br>(239,068 - 318,081) | 160<br>(86 - 258)  | 407<br>(235 - 632)  | 26,970<br>(19,819 - 32,660) | 87,318<br>(70,774 - 104,486) | 164,387<br>(143,733 - 182,960) |
| Rheumatic heart disease                       | 2,557<br>(1,372 - 3,676)       | 4<br>(1 - 8)       | 90<br>(42 - 149)    | 991<br>(445 - 1,514)        | 630<br>(362 - 1,024)         | 842<br>(413 - 1,317)           |
| Ischemic heart disease                        | 93,691<br>(75,490 - 116,115)   | 17<br>(5 - 37)     | 41<br>(18 - 83)     | 9,427<br>(6,606 - 12,365)   | 29,878<br>(22,720 - 38,026)  | 54,329<br>(42,874 - 67,962)    |
| Cerebrovascular disease                       | 155,857<br>(125,127 - 179,636) | 31<br>(14 - 61)    | 66<br>(34 - 115)    | 12,608<br>(8,793 - 15,830)  | 48,177<br>(37,792 - 58,896)  | 94,975<br>(76,160 - 108,642)   |
| Ischemic stroke                               | 84,223<br>(60,367 - 99,862)    | 5<br>(1 - 11)      | 8<br>(3 - 15)       | 1,850<br>(1,093 - 2,722)    | 16,962<br>(11,389 - 22,303)  | 65,399<br>(47,003 - 78,221)    |
| Hemorrhagic stroke                            | 71,634<br>(55,254 - 93,243)    | 26<br>(12 - 52)    | 59<br>(31 - 101)    | 10,758<br>(7,657 - 13,701)  | 31,215<br>(23,777 - 40,523)  | 29,576<br>(21,778 - 42,856)    |
| Hypertensive heart disease                    | 11,137<br>(7,308 - 15,523)     | 3<br>(1 - 9)       | 9<br>(4 - 17)       | 929<br>(509 - 1,397)        | 3,101<br>(1,875 - 4,695)     | 7,096<br>(4,553 - 10,431)      |
| Cardiomyopathy and myocarditis                | 3,152<br>(2,157 - 4,521)       | 41<br>(17 - 79)    | 84<br>(41 - 155)    | 848<br>(511 - 1,227)        | 840<br>(534 - 1,340)         | 1,340<br>(777 - 2,283)         |
| Atrial fibrillation and flutter               | 129<br>(83 - 198)              | --                 | --                  | 21<br>(13 - 34)             | 41<br>(24 - 68)              | 68<br>(39 - 109)               |
| Aortic aneurysm                               | 722<br>(460 - 1,133)           | --                 | --                  | 92<br>(51 - 143)            | 186<br>(112 - 317)           | 444<br>(280 - 686)             |
| Peripheral vascular disease                   | 93<br>(62 - 131)               | --                 | --                  | 7<br>(4 - 10)               | 20<br>(12 - 28)              | 67<br>(43 - 99)                |
| Endocarditis                                  | 1,140<br>(642 - 2,014)         | 20<br>(7 - 41)     | 30<br>(12 - 70)     | 342<br>(172 - 562)          | 342<br>(181 - 620)           | 406<br>(203 - 721)             |
| Other cardiovascular and circulatory diseases | 10,764<br>(6,876 - 16,574)     | 44<br>(19 - 87)    | 87<br>(40 - 170)    | 1,707<br>(915 - 2,632)      | 4,105<br>(2,478 - 6,349)     | 4,822<br>(2,994 - 7,848)       |

Web Table 31- Indonesia deaths with 95% UI by age, sex, and cause in 2013

| Cause                                               | Females, All Ages           | Females, 0-4 Years   | Females, 5-14 Years | Females, 15-49 Years     | Females, 50-69 Years        | Females, 70-80 Years        |
|-----------------------------------------------------|-----------------------------|----------------------|---------------------|--------------------------|-----------------------------|-----------------------------|
| Chronic respiratory diseases                        | 56,727<br>(46,682 - 68,100) | 925<br>(526 - 1,591) | 52<br>(32 - 73)     | 3,819<br>(2,815 - 4,950) | 15,220<br>(11,529 - 19,666) | 36,710<br>(29,769 - 44,399) |
| Chronic obstructive pulmonary disease               | 24,134<br>(16,907 - 36,408) | 322<br>(111 - 685)   | 2<br>(0 - 3)        | 511<br>(267 - 1,038)     | 6,317<br>(4,092 - 10,317)   | 16,982<br>(11,723 - 24,883) |
| Pneumoconiosis                                      | 89<br>(61 - 138)            | 21<br>(6 - 44)       | 3<br>(1 - 4)        | 20<br>(13 - 36)          | 19<br>(11 - 34)             | 27<br>(15 - 46)             |
| Silicosis                                           | 7<br>(4 - 13)               | 4<br>(1 - 9)         | 1<br>(0 - 1)        | 1<br>(1 - 3)             | 1<br>(0 - 1)                | 1<br>(0 - 1)                |
| Asbestosis                                          | 7<br>(4 - 12)               | 4<br>(1 - 9)         | 1<br>(0 - 1)        | 1<br>(1 - 3)             | 0<br>(0 - 1)                | 1<br>(0 - 1)                |
| Coal workers pneumoconiosis                         | 7<br>(4 - 12)               | 4<br>(1 - 9)         | 1<br>(0 - 1)        | 1<br>(1 - 3)             | 0<br>(0 - 1)                | 1<br>(0 - 2)                |
| Other pneumoconiosis                                | 68<br>(46 - 103)            | 9<br>(2 - 20)        | 1<br>(0 - 1)        | 16<br>(10 - 28)          | 17<br>(10 - 30)             | 25<br>(14 - 42)             |
| Asthma                                              | 23,930<br>(12,746 - 31,521) | 45<br>(4 - 104)      | 37<br>(22 - 62)     | 2,903<br>(2,068 - 3,795) | 7,364<br>(3,765 - 10,439)   | 13,581<br>(6,475 - 19,473)  |
| Interstitial lung disease and pulmonary sarcoidosis | 5,020<br>(2,780 - 7,809)    | 31<br>(5 - 100)      | 3<br>(1 - 8)        | 115<br>(49 - 250)        | 1,150<br>(603 - 1,912)      | 3,722<br>(2,014 - 6,119)    |
| Other chronic respiratory diseases                  | 3,554<br>(2,299 - 5,821)    | 507<br>(289 - 873)   | 8<br>(3 - 15)       | 270<br>(161 - 540)       | 370<br>(206 - 664)          | 2,398<br>(1,341 - 4,138)    |
| Cirrhosis                                           | 8,777<br>(7,076 - 10,608)   | 42<br>(14 - 83)      | 98<br>(58 - 150)    | 2,356<br>(1,647 - 3,073) | 3,667<br>(2,758 - 4,669)    | 2,615<br>(1,930 - 3,460)    |
| Cirrhosis due to hepatitis B                        | 3,382<br>(1,320 - 5,167)    | 1<br>(0 - 3)         | 11<br>(2 - 24)      | 820<br>(322 - 1,336)     | 1,464<br>(577 - 2,291)      | 1,086<br>(368 - 1,787)      |
| Cirrhosis due to hepatitis C                        | 2,593<br>(1,145 - 4,343)    | 1<br>(0 - 3)         | 12<br>(4 - 27)      | 662<br>(216 - 1,239)     | 1,094<br>(434 - 2,012)      | 824<br>(350 - 1,445)        |
| Cirrhosis due to alcohol use                        | 1,391<br>(534 - 2,687)      | --                   | --                  | 291<br>(95 - 592)        | 608<br>(230 - 1,216)        | 492<br>(170 - 993)          |
| Cirrhosis due to other causes                       | 1,412<br>(791 - 2,352)      | 39<br>(13 - 80)      | 74<br>(42 - 117)    | 583<br>(298 - 1,041)     | 502<br>(221 - 900)          | 214<br>(93 - 382)           |
| Digestive diseases                                  | 20,568<br>(16,471 - 24,589) | 354<br>(142 - 604)   | 305<br>(187 - 439)  | 3,604<br>(2,633 - 4,552) | 6,206<br>(4,672 - 8,023)    | 10,099<br>(7,876 - 12,880)  |
| Peptic ulcer disease                                | 4,917<br>(3,439 - 6,822)    | 11<br>(3 - 23)       | 27<br>(14 - 47)     | 590<br>(378 - 846)       | 1,584<br>(1,007 - 2,369)    | 2,706<br>(1,670 - 4,011)    |
| Gastritis and duodenitis                            | 611<br>(320 - 1,235)        | 10<br>(3 - 24)       | 17<br>(7 - 31)      | 119<br>(62 - 247)        | 167<br>(82 - 319)           | 297<br>(143 - 633)          |
| Appendicitis                                        | 2,855<br>(1,477 - 4,434)    | 49<br>(12 - 117)     | 73<br>(36 - 137)    | 829<br>(425 - 1,362)     | 854<br>(413 - 1,423)        | 1,051<br>(431 - 2,018)      |
| Paralytic ileus and intestinal obstruction          | 4,266<br>(2,521 - 6,566)    | 200<br>(72 - 372)    | 54<br>(27 - 97)     | 390<br>(211 - 764)       | 1,159<br>(611 - 1,931)      | 2,463<br>(1,270 - 3,958)    |
| Inguinal, femoral, and abdominal hernia             | 600<br>(270 - 963)          | 9<br>(2 - 21)        | 27<br>(12 - 51)     | 32<br>(18 - 55)          | 160<br>(83 - 271)           | 372<br>(136 - 667)          |
| Inflammatory bowel disease                          | 630<br>(416 - 1,044)        | 14<br>(4 - 33)       | 16<br>(7 - 28)      | 170<br>(103 - 275)       | 181<br>(104 - 318)          | 249<br>(132 - 460)          |
| Vascular intestinal disorders                       | 190<br>(98 - 374)           | 1<br>(0 - 6)         | 3<br>(0 - 13)       | 54<br>(24 - 101)         | 42<br>(21 - 84)             | 90<br>(43 - 183)            |
| Gallbladder and biliary diseases                    | 2,581<br>(1,507 - 3,702)    | 19<br>(5 - 41)       | 19<br>(8 - 31)      | 435<br>(245 - 647)       | 801<br>(467 - 1,233)        | 1,307<br>(685 - 2,084)      |
| Pancreatitis                                        | 1,585<br>(1,024 - 2,407)    | 8<br>(2 - 17)        | 19<br>(8 - 35)      | 520<br>(320 - 768)       | 521<br>(306 - 867)          | 516<br>(299 - 870)          |
| Other digestive diseases                            | 2,333<br>(1,643 - 3,231)    | 34<br>(10 - 74)      | 50<br>(26 - 82)     | 464<br>(309 - 657)       | 737<br>(464 - 1,081)        | 1,049<br>(618 - 1,645)      |
| Neurological disorders                              | 16,918<br>(12,846 - 21,764) | 56<br>(30 - 90)      | 127<br>(74 - 209)   | 1,037<br>(701 - 1,479)   | 1,877<br>(1,341 - 2,493)    | 13,821<br>(10,179 - 18,308) |
| Alzheimer disease and other dementias               | 14,786<br>(10,972 - 19,252) | --                   | --                  | 15<br>(5 - 33)           | 1,318<br>(886 - 1,835)      | 13,452<br>(9,794 - 17,887)  |
| Parkinson disease                                   | 83<br>(53 - 177)            | --                   | --                  | 10<br>(7 - 23)           | 26<br>(11 - 80)             | 47<br>(28 - 82)             |
| Epilepsy                                            | 1,511<br>(1,036 - 2,065)    | 20<br>(7 - 48)       | 91<br>(44 - 166)    | 862<br>(553 - 1,287)     | 380<br>(232 - 570)          | 158<br>(86 - 285)           |
| Multiple sclerosis                                  | 45<br>(28 - 80)             | --                   | --                  | 22<br>(13 - 39)          | 16<br>(8 - 30)              | 8<br>(4 - 14)               |
| Other neurological disorders                        | 492<br>(402 - 589)          | 36<br>(19 - 53)      | 36<br>(23 - 51)     | 127<br>(98 - 156)        | 137<br>(103 - 179)          | 156<br>(118 - 202)          |
| Mental and substance use disorders                  | 728<br>(577 - 904)          | 10<br>(4 - 23)       | 2<br>(0 - 3)        | 488<br>(374 - 628)       | 163<br>(119 - 214)          | 66<br>(49 - 89)             |
| Schizophrenia                                       | 59<br>(41 - 96)             | --                   | --                  | 22<br>(14 - 38)          | 21<br>(13 - 34)             | 16<br>(9 - 26)              |
| Alcohol use disorders                               | 37<br>(19 - 86)             | --                   | --                  | 15<br>(7 - 35)           | 15<br>(7 - 32)              | 7<br>(4 - 19)               |
| Drug use disorders                                  | 620<br>(490 - 763)          | 10<br>(4 - 23)       | --                  | 440<br>(335 - 558)       | 127<br>(92 - 166)           | 42<br>(30 - 58)             |
| Opioid use disorders                                | 389<br>(307 - 478)          | 6<br>(2 - 16)        | --                  | 279<br>(212 - 354)       | 77<br>(55 - 101)            | 27<br>(19 - 37)             |
| Cocaine use disorders                               | 14<br>(10 - 17)             | 0<br>(0 - 1)         | --                  | 10<br>(7 - 14)           | 2<br>(1 - 3)                | 1<br>(0 - 1)                |
| Amphetamine use disorders                           | 15<br>(12 - 19)             | 0<br>(0 - 1)         | --                  | 11<br>(8 - 14)           | 3<br>(2 - 4)                | 1<br>(1 - 1)                |
| Other drug use disorders                            | 203<br>(160 - 254)          | 3<br>(1 - 6)         | --                  | 141<br>(105 - 180)       | 46<br>(33 - 62)             | 14<br>(9 - 19)              |

Web Table 31- Indonesia deaths with 95% UI by age, sex, and cause in 2013

| Cause                                               | Females, All Ages           | Females, 0-4 Years       | Females, 5-14 Years | Females, 15-49 Years       | Females, 50-69 Years        | Females, 70-80 Years        |
|-----------------------------------------------------|-----------------------------|--------------------------|---------------------|----------------------------|-----------------------------|-----------------------------|
| Eating disorders                                    | 12<br>(7 - 19)              | --                       | 2<br>(0 - 3)        | 11<br>(6 - 17)             | --                          | --                          |
| Anorexia nervosa                                    | 12<br>(7 - 19)              | --                       | 2<br>(0 - 3)        | 11<br>(6 - 17)             | --                          | --                          |
| Diabetes, urogenital, blood, and endocrine diseases | 62,594<br>(51,679 - 74,317) | 694<br>(385 - 1,057)     | 421<br>(275 - 586)  | 10,208<br>(7,778 - 12,570) | 28,116<br>(21,833 - 34,995) | 23,155<br>(18,772 - 28,181) |
| Diabetes mellitus                                   | 42,554<br>(33,929 - 52,024) | 49<br>(24 - 86)          | 17<br>(8 - 28)      | 5,822<br>(4,099 - 7,648)   | 20,949<br>(15,806 - 26,820) | 15,717<br>(12,123 - 19,970) |
| Acute glomerulonephritis                            | 185<br>(95 - 255)           | 22<br>(3 - 49)           | 55<br>(19 - 96)     | 80<br>(44 - 111)           | 14<br>(9 - 25)              | 14<br>(9 - 22)              |
| Chronic kidney disease                              | 12,662<br>(10,147 - 16,263) | 38<br>(17 - 63)          | 112<br>(66 - 171)   | 2,578<br>(1,860 - 3,427)   | 5,098<br>(3,677 - 6,933)    | 4,836<br>(3,535 - 6,766)    |
| Chronic kidney disease due to diabetes mellitus     | 1,359<br>(722 - 2,155)      | 2<br>(1 - 5)             | 6<br>(3 - 12)       | 201<br>(104 - 341)         | 566<br>(283 - 983)          | 584<br>(294 - 957)          |
| Chronic kidney disease due to hypertension          | 4,248<br>(2,645 - 6,469)    | 8<br>(3 - 17)            | 17<br>(8 - 31)      | 667<br>(382 - 1,067)       | 1,730<br>(943 - 2,716)      | 1,826<br>(1,092 - 2,842)    |
| Chronic kidney disease due to glomerulonephritis    | 1,209<br>(789 - 1,905)      | 16<br>(7 - 29)           | 34<br>(19 - 53)     | 383<br>(240 - 605)         | 362<br>(202 - 610)          | 414<br>(240 - 681)          |
| Chronic kidney disease due to other causes          | 5,845<br>(3,873 - 8,538)    | 11<br>(3 - 23)           | 54<br>(26 - 98)     | 1,327<br>(792 - 2,001)     | 2,441<br>(1,317 - 4,017)    | 2,011<br>(1,037 - 3,378)    |
| Urinary diseases and male infertility               | 3,847<br>(2,821 - 5,111)    | 53<br>(21 - 104)         | 44<br>(23 - 70)     | 615<br>(409 - 894)         | 1,299<br>(863 - 1,830)      | 1,836<br>(1,142 - 2,767)    |
| Interstitial nephritis and urinary tract infections | 2,359<br>(1,437 - 3,333)    | 28<br>(10 - 60)          | 17<br>(9 - 31)      | 394<br>(230 - 606)         | 723<br>(410 - 1,075)        | 1,196<br>(634 - 1,925)      |
| Urolithiasis                                        | 233<br>(137 - 369)          | --                       | 6<br>(3 - 12)       | 47<br>(22 - 96)            | 86<br>(42 - 155)            | 94<br>(41 - 178)            |
| Other urinary diseases                              | 1,255<br>(818 - 2,084)      | 25<br>(9 - 54)           | 20<br>(10 - 36)     | 173<br>(94 - 307)          | 491<br>(295 - 823)          | 546<br>(281 - 1,022)        |
| Gynecological diseases                              | 336<br>(199 - 493)          | --                       | --                  | 92<br>(64 - 134)           | 53<br>(29 - 94)             | 192<br>(65 - 347)           |
| Uterine fibroids                                    | 87<br>(49 - 136)            | --                       | --                  | 14<br>(9 - 25)             | 14<br>(8 - 26)              | 58<br>(20 - 106)            |
| Polycystic ovarian syndrome                         | 7<br>(5 - 10)               | --                       | --                  | 7<br>(5 - 10)              | 0<br>(0 - 0)                | --                          |
| Endometriosis                                       | 16<br>(11 - 23)             | --                       | --                  | 16<br>(11 - 22)            | 0<br>(0 - 1)                | --                          |
| Genital prolapse                                    | 73<br>(38 - 112)            | --                       | --                  | 14<br>(10 - 19)            | 10<br>(6 - 19)              | 49<br>(16 - 88)             |
| Other gynecological diseases                        | 153<br>(92 - 226)           | --                       | --                  | 41<br>(28 - 60)            | 28<br>(15 - 50)             | 84<br>(29 - 153)            |
| Hemoglobinopathies and hemolytic anemias            | 1,165<br>(750 - 1,902)      | 236<br>(92 - 440)        | 172<br>(90 - 292)   | 400<br>(250 - 661)         | 168<br>(105 - 276)          | 189<br>(101 - 339)          |
| Thalassemias                                        | 804<br>(498 - 1,315)        | 218<br>(83 - 410)        | 166<br>(87 - 282)   | 347<br>(216 - 576)         | 63<br>(39 - 105)            | 11<br>(5 - 20)              |
| Sickle cell disorders                               | 0<br>(0 - 0)                | 0<br>(0 - 0)             | 0<br>(0 - 0)        | 0<br>(0 - 0)               | 0<br>(0 - 0)                | 0<br>(0 - 0)                |
| G6PD deficiency                                     | 20<br>(14 - 33)             | 2<br>(1 - 4)             | 1<br>(1 - 2)        | 8<br>(5 - 13)              | 7<br>(4 - 12)               | 2<br>(1 - 4)                |
| Other hemoglobinopathies and hemolytic anemias      | 340<br>(217 - 563)          | 16<br>(7 - 28)           | 5<br>(2 - 8)        | 46<br>(27 - 76)            | 99<br>(62 - 161)            | 176<br>(95 - 316)           |
| Endocrine, metabolic, blood, and immune disorders   | 1,846<br>(1,396 - 2,866)    | 297<br>(151 - 517)       | 22<br>(11 - 39)     | 621<br>(420 - 981)         | 534<br>(338 - 846)          | 372<br>(242 - 622)          |
| Musculoskeletal disorders                           | 2,041<br>(1,479 - 2,585)    | --                       | 118<br>(73 - 182)   | 546<br>(377 - 726)         | 674<br>(442 - 937)          | 703<br>(445 - 1,024)        |
| Rheumatoid arthritis                                | 347<br>(230 - 514)          | --                       | 10<br>(5 - 17)      | 29<br>(18 - 46)            | 103<br>(61 - 163)           | 205<br>(119 - 334)          |
| Other musculoskeletal disorders                     | 1,694<br>(1,230 - 2,128)    | --                       | 108<br>(67 - 167)   | 516<br>(355 - 688)         | 571<br>(373 - 801)          | 498<br>(310 - 747)          |
| Other non-communicable diseases                     | 8,128<br>(5,914 - 11,332)   | 5,396<br>(3,389 - 8,004) | 500<br>(276 - 814)  | 1,058<br>(765 - 1,565)     | 374<br>(269 - 615)          | 800<br>(559 - 1,171)        |
| Congenital anomalies                                | 6,755<br>(4,539 - 9,817)    | 5,307<br>(3,332 - 7,921) | 494<br>(271 - 804)  | 651<br>(436 - 1,123)       | 139<br>(90 - 316)           | 163<br>(116 - 266)          |
| Neural tube defects                                 | 494<br>(139 - 1,249)        | 439<br>(100 - 1,177)     | 15<br>(5 - 34)      | 31<br>(17 - 59)            | 5<br>(2 - 16)               | 2<br>(1 - 5)                |
| Congenital heart anomalies                          | 3,920<br>(2,421 - 5,886)    | 3,093<br>(1,782 - 4,922) | 316<br>(165 - 516)  | 357<br>(232 - 641)         | 45<br>(25 - 112)            | 109<br>(73 - 192)           |
| Cleft lip and cleft palate                          | 19<br>(4 - 44)              | 19<br>(4 - 44)           | --                  | --                         | --                          | --                          |
| Down syndrome                                       | 202<br>(99 - 380)           | 124<br>(46 - 269)        | 33<br>(13 - 67)     | 33<br>(19 - 64)            | 11<br>(6 - 27)              | 1<br>(0 - 2)                |
| Chromosomal unbalanced rearrangements               | 221<br>(100 - 488)          | 169<br>(62 - 415)        | 7<br>(3 - 14)       | 38<br>(20 - 67)            | 5<br>(2 - 12)               | 3<br>(1 - 5)                |
| Other congenital anomalies                          | 1,900<br>(1,134 - 3,076)    | 1,463<br>(738 - 2,595)   | 124<br>(56 - 217)   | 192<br>(114 - 328)         | 73<br>(47 - 157)            | 48<br>(30 - 78)             |
| Skin and subcutaneous diseases                      | 1,299<br>(982 - 1,692)      | 15<br>(6 - 36)           | 6<br>(4 - 10)       | 406<br>(265 - 569)         | 235<br>(159 - 339)          | 637<br>(415 - 968)          |
| Cellulitis                                          | 429<br>(257 - 749)          | 7<br>(2 - 18)            | 2<br>(1 - 5)        | 161<br>(89 - 278)          | 98<br>(54 - 181)            | 160<br>(75 - 343)           |
| Pyoderma                                            | 430<br>(279 - 604)          | 7<br>(3 - 18)            | 2<br>(1 - 3)        | 146<br>(84 - 215)          | 92<br>(50 - 149)            | 182<br>(95 - 315)           |



Web Table 31- Indonesia deaths with 95% UI by age, sex, and cause in 2013

| Cause                                           | Females, All Ages           | Females, 0-4 Years       | Females, 5-14 Years      | Females, 15-49 Years       | Females, 50-69 Years     | Females, 70-80 Years     |
|-------------------------------------------------|-----------------------------|--------------------------|--------------------------|----------------------------|--------------------------|--------------------------|
| Decubitus ulcer                                 | 392<br>(233 - 594)          | 0<br>(0 - 0)             | 1<br>(0 - 1)             | 70<br>(37 - 108)           | 37<br>(19 - 61)          | 285<br>(158 - 482)       |
| Other skin and subcutaneous diseases            | 48<br>(27 - 70)             | 0<br>(0 - 1)             | 1<br>(0 - 1)             | 29<br>(15 - 44)            | 8<br>(4 - 13)            | 10<br>(5 - 18)           |
| Sudden infant death syndrome                    | 74<br>(14 - 268)            | 74<br>(14 - 268)         | --                       | --                         | --                       | --                       |
| Injuries                                        | 30,518<br>(25,250 - 37,740) | 3,522<br>(1,995 - 5,127) | 2,577<br>(1,627 - 3,442) | 10,085<br>(7,789 - 13,308) | 6,843<br>(5,281 - 8,933) | 7,491<br>(5,868 - 9,771) |
| Transport injuries                              | 14,049<br>(11,040 - 19,902) | 828<br>(437 - 1,373)     | 966<br>(591 - 1,393)     | 5,750<br>(4,282 - 7,748)   | 3,684<br>(2,688 - 5,364) | 2,821<br>(1,963 - 4,676) |
| Road injuries                                   | 12,879<br>(10,154 - 18,129) | 635<br>(342 - 1,020)     | 912<br>(560 - 1,320)     | 5,330<br>(3,956 - 7,118)   | 3,405<br>(2,470 - 4,991) | 2,597<br>(1,816 - 4,283) |
| Pedestrian road injuries                        | 4,851<br>(3,589 - 6,747)    | 289<br>(156 - 475)       | 363<br>(199 - 573)       | 1,540<br>(1,036 - 2,156)   | 1,349<br>(895 - 1,999)   | 1,309<br>(869 - 2,111)   |
| Cyclist road injuries                           | 1,136<br>(813 - 1,762)      | 16<br>(5 - 35)           | 78<br>(42 - 132)         | 370<br>(247 - 567)         | 443<br>(282 - 740)       | 229<br>(138 - 413)       |
| Motorcyclist road injuries                      | 3,575<br>(2,508 - 5,775)    | 129<br>(55 - 267)        | 250<br>(134 - 416)       | 2,013<br>(1,330 - 3,043)   | 739<br>(441 - 1,363)     | 443<br>(237 - 940)       |
| Motor vehicle road injuries                     | 2,976<br>(2,217 - 4,234)    | 169<br>(88 - 277)        | 201<br>(113 - 317)       | 1,303<br>(871 - 1,828)     | 783<br>(529 - 1,146)     | 521<br>(327 - 931)       |
| Other road injuries                             | 342<br>(226 - 586)          | 31<br>(11 - 72)          | 21<br>(9 - 41)           | 104<br>(60 - 198)          | 90<br>(48 - 155)         | 94<br>(46 - 199)         |
| Other transport injuries                        | 1,170<br>(861 - 1,873)      | 193<br>(82 - 414)        | 54<br>(24 - 95)          | 420<br>(275 - 637)         | 279<br>(183 - 448)       | 224<br>(128 - 413)       |
| Unintentional injuries                          | 13,907<br>(11,303 - 16,642) | 2,680<br>(1,444 - 4,068) | 1,578<br>(930 - 2,324)   | 2,694<br>(2,099 - 3,378)   | 2,537<br>(1,917 - 3,241) | 4,417<br>(3,200 - 5,874) |
| Falls                                           | 4,659<br>(3,344 - 6,311)    | 228<br>(109 - 410)       | 45<br>(22 - 79)          | 395<br>(273 - 566)         | 1,049<br>(688 - 1,464)   | 2,942<br>(1,857 - 4,351) |
| Drowning                                        | 4,234<br>(2,794 - 5,788)    | 1,067<br>(433 - 2,140)   | 1,206<br>(671 - 1,907)   | 1,016<br>(672 - 1,413)     | 576<br>(344 - 855)       | 370<br>(240 - 539)       |
| Fire, heat, and hot substances                  | 1,192<br>(809 - 1,781)      | 517<br>(231 - 949)       | 63<br>(31 - 115)         | 259<br>(171 - 382)         | 229<br>(145 - 359)       | 129<br>(78 - 189)        |
| Poisonings                                      | 76<br>(40 - 186)            | 2<br>(0 - 6)             | 4<br>(1 - 9)             | 42<br>(21 - 102)           | 17<br>(7 - 50)           | 12<br>(5 - 35)           |
| Exposure to mechanical forces                   | 595<br>(462 - 841)          | 49<br>(21 - 107)         | 86<br>(45 - 139)         | 241<br>(169 - 374)         | 107<br>(72 - 152)        | 112<br>(77 - 161)        |
| Unintentional firearm injuries                  | 61<br>(42 - 93)             | 2<br>(1 - 5)             | 4<br>(2 - 8)             | 38<br>(23 - 63)            | 8<br>(5 - 15)            | 9<br>(5 - 16)            |
| Unintentional suffocation                       | 21<br>(13 - 41)             | 3<br>(1 - 9)             | 4<br>(2 - 8)             | 10<br>(6 - 19)             | 3<br>(2 - 8)             | 1<br>(0 - 1)             |
| Other exposure to mechanical forces             | 513<br>(394 - 703)          | 44<br>(17 - 100)         | 78<br>(40 - 130)         | 194<br>(131 - 303)         | 95<br>(62 - 138)         | 103<br>(69 - 149)        |
| Adverse effects of medical treatment            | 1,043<br>(724 - 1,549)      | 74<br>(32 - 159)         | 19<br>(10 - 31)          | 222<br>(142 - 362)         | 249<br>(149 - 402)       | 479<br>(272 - 801)       |
| Animal contact                                  | 396<br>(178 - 728)          | 66<br>(24 - 147)         | 49<br>(18 - 134)         | 52<br>(24 - 111)           | 142<br>(57 - 250)        | 87<br>(30 - 149)         |
| Venomous animal contact                         | 148<br>(74 - 334)           | 48<br>(16 - 115)         | 41<br>(14 - 117)         | 12<br>(5 - 32)             | 24<br>(9 - 62)           | 24<br>(8 - 57)           |
| Non-venomous animal contact                     | 248<br>(100 - 416)          | 19<br>(6 - 44)           | 8<br>(2 - 17)            | 40<br>(17 - 84)            | 119<br>(44 - 204)        | 63<br>(21 - 112)         |
| Foreign body                                    | 1,004<br>(607 - 1,843)      | 632<br>(321 - 1,236)     | 9<br>(5 - 14)            | 91<br>(55 - 170)           | 47<br>(28 - 91)          | 226<br>(139 - 400)       |
| Pulmonary aspiration and foreign body in airway | 980<br>(585 - 1,812)        | 629<br>(318 - 1,232)     | 6<br>(3 - 10)            | 82<br>(47 - 160)           | 45<br>(26 - 88)          | 218<br>(132 - 394)       |
| Foreign body in other body part                 | 24<br>(17 - 38)             | 3<br>(1 - 5)             | 3<br>(2 - 5)             | 9<br>(6 - 13)              | 2<br>(1 - 4)             | 8<br>(4 - 14)            |
| Other unintentional injuries                    | 707<br>(381 - 926)          | 46<br>(20 - 86)          | 97<br>(38 - 162)         | 377<br>(168 - 523)         | 122<br>(70 - 181)        | 65<br>(41 - 93)          |
| Self-harm and interpersonal violence            | 2,562<br>(1,904 - 3,896)    | 14<br>(5 - 43)           | 33<br>(17 - 62)          | 1,641<br>(1,159 - 2,554)   | 622<br>(417 - 961)       | 252<br>(167 - 377)       |
| Self-harm                                       | 2,147<br>(1,561 - 3,409)    | --                       | 14<br>(5 - 32)           | 1,356<br>(912 - 2,231)     | 551<br>(347 - 917)       | 226<br>(142 - 353)       |
| Interpersonal violence                          | 415<br>(271 - 629)          | 14<br>(5 - 43)           | 19<br>(8 - 43)           | 285<br>(174 - 461)         | 71<br>(31 - 115)         | 26<br>(8 - 52)           |
| Assault by firearm                              | 84<br>(45 - 151)            | 1<br>(0 - 3)             | 2<br>(1 - 5)             | 68<br>(36 - 123)           | 13<br>(5 - 24)           | 1<br>(0 - 2)             |
| Assault by sharp object                         | 115<br>(67 - 196)           | 1<br>(0 - 3)             | 5<br>(2 - 13)            | 83<br>(45 - 151)           | 20<br>(9 - 36)           | 6<br>(2 - 14)            |
| Assault by other means                          | 215<br>(131 - 313)          | 12<br>(4 - 37)           | 13<br>(6 - 29)           | 134<br>(78 - 225)          | 38<br>(14 - 64)          | 19<br>(5 - 39)           |
| Forces of nature, war, and legal intervention   | 0<br>(0 - 0)                | 0<br>(0 - 0)             | --                       | --                         | --                       | --                       |
| Exposure to forces of nature                    | 0<br>(0 - 0)                | 0<br>(0 - 0)             | --                       | --                         | --                       | --                       |

Web Table 31- Iran deaths with 95% UI by age, sex, and cause in 2013

| Cause                                                             | Both Sexes, All Ages           | Both Sexes, 0-4 Years       | Both Sexes, 5-14 Years   | Both Sexes, 15-49 Years     | Both Sexes, 50-69 Years     | Both Sexes, 70-80 Years        |
|-------------------------------------------------------------------|--------------------------------|-----------------------------|--------------------------|-----------------------------|-----------------------------|--------------------------------|
| All causes                                                        | 292,346<br>(261,433 - 325,673) | 27,378<br>(23,745 - 31,825) | 3,815<br>(3,410 - 4,229) | 44,715<br>(36,945 - 54,060) | 69,105<br>(59,045 - 79,543) | 147,333<br>(135,756 - 162,338) |
| Communicable, maternal, neonatal, and nutritional diseases        | 27,258<br>(23,506 - 30,731)    | 15,490<br>(12,732 - 18,357) | 663<br>(484 - 932)       | 2,660<br>(2,077 - 3,356)    | 2,445<br>(1,913 - 2,884)    | 6,001<br>(4,868 - 7,128)       |
| HIV/AIDS and tuberculosis                                         | 1,727<br>(925 - 2,061)         | 15<br>(7 - 20)              | 8<br>(4 - 11)            | 567<br>(361 - 719)          | 553<br>(243 - 691)          | 584<br>(293 - 709)             |
| Tuberculosis                                                      | 1,402<br>(601 - 1,689)         | 14<br>(7 - 20)              | 8<br>(4 - 11)            | 301<br>(110 - 397)          | 503<br>(194 - 638)          | 575<br>(284 - 699)             |
| HIV/AIDS                                                          | 325<br>(201 - 464)             | 0<br>(0 - 0)                | 0<br>(0 - 0)             | 266<br>(168 - 375)          | 50<br>(24 - 85)             | 9<br>(4 - 16)                  |
| HIV/AIDS resulting in mycobacterial infection                     | 19<br>(11 - 29)                | 0<br>(0 - 0)                | 0<br>(0 - 0)             | 16<br>(9 - 24)              | 3<br>(2 - 6)                | 1<br>(0 - 1)                   |
| HIV/AIDS resulting in other diseases                              | 305<br>(189 - 437)             | 0<br>(0 - 0)                | 0<br>(0 - 0)             | 251<br>(158 - 354)          | 46<br>(23 - 80)             | 8<br>(3 - 15)                  |
| Diarrhea, lower respiratory, and other common infectious diseases | 11,572<br>(9,335 - 13,843)     | 3,144<br>(2,253 - 4,262)    | 597<br>(421 - 869)       | 1,528<br>(1,066 - 2,177)    | 1,444<br>(1,060 - 1,790)    | 4,860<br>(3,728 - 5,978)       |
| Diarrheal diseases                                                | 1,179<br>(799 - 1,729)         | 647<br>(319 - 1,158)        | 27<br>(17 - 43)          | 57<br>(42 - 76)             | 91<br>(66 - 126)            | 357<br>(229 - 532)             |
| Intestinal infectious diseases                                    | 1,386<br>(686 - 2,516)         | 341<br>(168 - 620)          | 316<br>(158 - 557)       | 587<br>(271 - 1,149)        | 99<br>(44 - 186)            | 44<br>(20 - 84)                |
| Typhoid fever                                                     | 1,056<br>(513 - 1,947)         | 245<br>(115 - 446)          | 244<br>(115 - 438)       | 456<br>(203 - 885)          | 77<br>(32 - 147)            | 33<br>(14 - 66)                |
| Paratyphoid fever                                                 | 299<br>(140 - 553)             | 84<br>(37 - 162)            | 70<br>(32 - 129)         | 120<br>(52 - 242)           | 18<br>(7 - 38)              | 8<br>(3 - 17)                  |
| Other intestinal infectious diseases                              | 31<br>(19 - 45)                | 12<br>(5 - 22)              | 2<br>(0 - 7)             | 11<br>(5 - 20)              | 3<br>(1 - 8)                | 3<br>(0 - 7)                   |
| Lower respiratory infections                                      | 7,654<br>(5,785 - 9,114)       | 1,645<br>(1,167 - 2,211)    | 152<br>(103 - 204)       | 635<br>(361 - 855)          | 1,057<br>(708 - 1,357)      | 4,164<br>(3,060 - 5,202)       |
| Upper respiratory infections                                      | 10<br>(5 - 19)                 | 1<br>(0 - 3)                | 0<br>(0 - 1)             | 2<br>(1 - 5)                | 3<br>(1 - 7)                | 4<br>(1 - 12)                  |
| Otitis media                                                      | 26<br>(21 - 32)                | 1<br>(1 - 2)                | 1<br>(1 - 1)             | 6<br>(5 - 7)                | 5<br>(4 - 6)                | 13<br>(9 - 18)                 |
| Meningitis                                                        | 790<br>(596 - 936)             | 208<br>(122 - 301)          | 48<br>(31 - 62)          | 169<br>(109 - 215)          | 148<br>(111 - 180)          | 218<br>(179 - 267)             |
| Pneumococcal meningitis                                           | 185<br>(145 - 224)             | 38<br>(22 - 58)             | 13<br>(6 - 19)           | 44<br>(27 - 64)             | 36<br>(25 - 49)             | 54<br>(36 - 76)                |
| H influenzae type B meningitis                                    | 145<br>(97 - 192)              | 78<br>(40 - 117)            | 12<br>(7 - 18)           | 20<br>(11 - 30)             | 14<br>(9 - 21)              | 21<br>(12 - 34)                |
| Meningococcal meningitis                                          | 225<br>(162 - 280)             | 60<br>(34 - 90)             | 14<br>(9 - 21)           | 47<br>(29 - 64)             | 39<br>(23 - 58)             | 66<br>(45 - 92)                |
| Other meningitis                                                  | 234<br>(173 - 285)             | 32<br>(17 - 49)             | 8<br>(5 - 13)            | 58<br>(33 - 81)             | 58<br>(39 - 80)             | 77<br>(52 - 107)               |
| Encephalitis                                                      | 230<br>(134 - 451)             | 84<br>(39 - 184)            | 21<br>(10 - 53)          | 52<br>(29 - 109)            | 32<br>(19 - 69)             | 40<br>(25 - 79)                |
| Diphtheria                                                        | 3<br>(0 - 11)                  | 2<br>(0 - 9)                | 1<br>(0 - 4)             | 1<br>(0 - 2)                | 0<br>(0 - 1)                | --                             |
| Whooping cough                                                    | 17<br>(0 - 90)                 | 16<br>(0 - 83)              | 1<br>(0 - 5)             | 0<br>(0 - 2)                | 0<br>(0 - 0)                | --                             |
| Tetanus                                                           | 25<br>(11 - 36)                | 5<br>(3 - 8)                | 1<br>(0 - 1)             | 6<br>(2 - 8)                | 6<br>(2 - 9)                | 8<br>(2 - 15)                  |
| Measles                                                           | 224<br>(5 - 1,516)             | 189<br>(4 - 1,282)          | 28<br>(1 - 191)          | 7<br>(0 - 45)               | 0<br>(0 - 2)                | --                             |
| Varicella and herpes zoster                                       | 28<br>(12 - 60)                | 5<br>(1 - 16)               | 1<br>(0 - 5)             | 7<br>(2 - 17)               | 3<br>(1 - 7)                | 12<br>(1 - 41)                 |
| Neglected tropical diseases and malaria                           | 115<br>(91 - 139)              | 22<br>(14 - 35)             | 11<br>(8 - 17)           | 42<br>(30 - 55)             | 21<br>(16 - 27)             | 19<br>(13 - 28)                |
| Malaria                                                           | 10<br>(8 - 14)                 | 4<br>(2 - 7)                | 1<br>(0 - 2)             | 4<br>(2 - 6)                | 1<br>(1 - 2)                | 0<br>(0 - 1)                   |
| Leishmaniasis                                                     | 18<br>(14 - 22)                | 6<br>(4 - 8)                | 1<br>(1 - 2)             | 7<br>(5 - 9)                | 3<br>(2 - 4)                | 1<br>(1 - 2)                   |
| Visceral leishmaniasis                                            | 18<br>(14 - 22)                | 6<br>(4 - 8)                | 1<br>(1 - 2)             | 7<br>(5 - 9)                | 3<br>(2 - 4)                | 1<br>(1 - 2)                   |
| Cysticercosis                                                     | 0<br>(0 - 0)                   | 0<br>(0 - 0)                | 0<br>(0 - 0)             | 0<br>(0 - 0)                | 0<br>(0 - 0)                | 0<br>(0 - 0)                   |
| Cystic echinococcosis                                             | 7<br>(6 - 8)                   | 0<br>(0 - 0)                | 1<br>(1 - 1)             | 3<br>(2 - 3)                | 2<br>(1 - 2)                | 1<br>(1 - 1)                   |
| Dengue                                                            | 7<br>(6 - 9)                   | 1<br>(0 - 1)                | 1<br>(1 - 1)             | 4<br>(3 - 5)                | 1<br>(1 - 1)                | 0<br>(0 - 1)                   |
| Rabies                                                            | 26<br>(13 - 35)                | 1<br>(1 - 2)                | 3<br>(2 - 4)             | 11<br>(4 - 17)              | 8<br>(4 - 11)               | 3<br>(1 - 5)                   |
| Intestinal nematode infections                                    | 15<br>(6 - 26)                 | 7<br>(2 - 16)               | 3<br>(0 - 9)             | 2<br>(0 - 7)                | 1<br>(0 - 6)                | 2<br>(0 - 7)                   |
| Ascariasis                                                        | 15<br>(6 - 26)                 | 7<br>(2 - 16)               | 3<br>(0 - 9)             | 2<br>(0 - 7)                | 1<br>(0 - 6)                | 2<br>(0 - 7)                   |
| Other neglected tropical diseases                                 | 32<br>(23 - 47)                | 3<br>(2 - 6)                | 2<br>(1 - 3)             | 11<br>(7 - 18)              | 5<br>(3 - 8)                | 11<br>(6 - 17)                 |
| Maternal disorders                                                | 197<br>(137 - 266)             | --                          | 1<br>(0 - 1)             | 196<br>(136 - 266)          | --                          | --                             |
| Maternal hemorrhage                                               | 40<br>(27 - 57)                | --                          | 0<br>(0 - 0)             | 40<br>(27 - 57)             | --                          | --                             |

Web Table 31- Iran deaths with 95% UI by age, sex, and cause in 2013

| Cause                                                            | Both Sexes, All Ages           | Both Sexes, 0-4 Years      | Both Sexes, 5-14 Years   | Both Sexes, 15-49 Years     | Both Sexes, 50-69 Years     | Both Sexes, 70-80 Years        |
|------------------------------------------------------------------|--------------------------------|----------------------------|--------------------------|-----------------------------|-----------------------------|--------------------------------|
| Maternal sepsis and other maternal infections                    | 14<br>(9 - 21)                 | --                         | 0<br>(0 - 0)             | 14<br>(9 - 20)              | --                          | --                             |
| Maternal hypertensive disorders                                  | 20<br>(13 - 29)                | --                         | 0<br>(0 - 0)             | 20<br>(13 - 29)             | --                          | --                             |
| Maternal obstructed labor                                        | 15<br>(9 - 25)                 | --                         | 0<br>(0 - 0)             | 15<br>(9 - 25)              | --                          | --                             |
| Maternal abortive outcome                                        | 22<br>(15 - 32)                | --                         | 0<br>(0 - 0)             | 22<br>(15 - 32)             | --                          | --                             |
| Indirect maternal deaths                                         | 51<br>(34 - 72)                | --                         | 0<br>(0 - 0)             | 51<br>(34 - 72)             | --                          | --                             |
| Late maternal deaths                                             | 19<br>(10 - 33)                | --                         | 0<br>(0 - 0)             | 19<br>(10 - 33)             | --                          | --                             |
| Maternal deaths aggravated by HIV/AIDS                           | 0<br>(0 - 0)                   | --                         | --                       | 0<br>(0 - 0)                | --                          | --                             |
| Other maternal disorders                                         | 15<br>(9 - 22)                 | --                         | 0<br>(0 - 0)             | 15<br>(9 - 22)              | --                          | --                             |
| Neonatal disorders                                               | 12,044<br>(9,845 - 14,387)     | 12,044<br>(9,845 - 14,387) | --                       | --                          | --                          | --                             |
| Neonatal preterm birth complications                             | 8,148<br>(6,396 - 10,119)      | 8,148<br>(6,396 - 10,119)  | --                       | --                          | --                          | --                             |
| Neonatal encephalopathy due to birth asphyxia and trauma         | 1,357<br>(769 - 2,187)         | 1,357<br>(769 - 2,187)     | --                       | --                          | --                          | --                             |
| Neonatal sepsis and other neonatal infections                    | 327<br>(25 - 1,042)            | 327<br>(25 - 1,042)        | --                       | --                          | --                          | --                             |
| Hemolytic disease and other neonatal jaundice                    | 110<br>(53 - 197)              | 110<br>(53 - 197)          | --                       | --                          | --                          | --                             |
| Other neonatal disorders                                         | 2,101<br>(1,369 - 3,185)       | 2,101<br>(1,369 - 3,185)   | --                       | --                          | --                          | --                             |
| Nutritional deficiencies                                         | 539<br>(436 - 773)             | 115<br>(78 - 173)          | 14<br>(10 - 19)          | 72<br>(52 - 94)             | 84<br>(62 - 130)            | 254<br>(196 - 411)             |
| Protein-energy malnutrition                                      | 206<br>(140 - 314)             | 70<br>(39 - 115)           | 4<br>(2 - 7)             | 17<br>(9 - 28)              | 18<br>(10 - 34)             | 97<br>(60 - 162)               |
| Iodine deficiency                                                | 2<br>(0 - 8)                   | 0<br>(0 - 1)               | 0<br>(0 - 0)             | 0<br>(0 - 1)                | 1<br>(0 - 2)                | 1<br>(0 - 6)                   |
| Iron-deficiency anemia                                           | 301<br>(211 - 456)             | 42<br>(20 - 74)            | 9<br>(6 - 13)            | 49<br>(33 - 66)             | 61<br>(42 - 96)             | 140<br>(88 - 237)              |
| Other nutritional deficiencies                                   | 29<br>(17 - 62)                | 2<br>(1 - 5)               | 1<br>(1 - 2)             | 5<br>(3 - 10)               | 5<br>(2 - 10)               | 16<br>(8 - 38)                 |
| Other communicable, maternal, neonatal, and nutritional diseases | 1,065<br>(787 - 1,507)         | 151<br>(70 - 273)          | 31<br>(20 - 49)          | 255<br>(181 - 367)          | 344<br>(245 - 476)          | 284<br>(194 - 447)             |
| Sexually transmitted diseases excluding HIV                      | 62<br>(15 - 140)               | 40<br>(0 - 112)            | 4<br>(0 - 9)             | 5<br>(2 - 8)                | 4<br>(3 - 7)                | 9<br>(5 - 16)                  |
| Syphilis                                                         | 56<br>(10 - 135)               | 40<br>(0 - 112)            | 3<br>(0 - 9)             | 2<br>(1 - 4)                | 3<br>(2 - 5)                | 7<br>(4 - 13)                  |
| Chlamydial infection                                             | 1<br>(1 - 1)                   | --                         | 0<br>(0 - 0)             | 0<br>(0 - 1)                | 0<br>(0 - 0)                | 0<br>(0 - 0)                   |
| Gonococcal infection                                             | 3<br>(2 - 5)                   | --                         | 0<br>(0 - 0)             | 1<br>(1 - 2)                | 1<br>(0 - 1)                | 1<br>(1 - 2)                   |
| Other sexually transmitted diseases                              | 2<br>(1 - 3)                   | --                         | 0<br>(0 - 0)             | 1<br>(0 - 2)                | 0<br>(0 - 1)                | 0<br>(0 - 1)                   |
| Hepatitis                                                        | 713<br>(579 - 869)             | 48<br>(30 - 76)            | 16<br>(11 - 22)          | 193<br>(142 - 254)          | 275<br>(204 - 370)          | 181<br>(135 - 239)             |
| Acute hepatitis A                                                | 65<br>(20 - 129)               | 18<br>(6 - 36)             | 4<br>(1 - 8)             | 26<br>(7 - 53)              | 13<br>(3 - 31)              | 4<br>(1 - 10)                  |
| Acute hepatitis B                                                | 548<br>(417 - 703)             | 26<br>(13 - 48)            | 4<br>(2 - 6)             | 116<br>(74 - 174)           | 236<br>(167 - 324)          | 166<br>(121 - 224)             |
| Acute hepatitis C                                                | 14<br>(2 - 32)                 | --                         | 0<br>(0 - 0)             | 4<br>(1 - 11)               | 5<br>(1 - 14)               | 4<br>(1 - 11)                  |
| Acute hepatitis E                                                | 87<br>(47 - 147)               | 3<br>(1 - 7)               | 8<br>(5 - 13)            | 47<br>(25 - 78)             | 21<br>(9 - 44)              | 8<br>(2 - 18)                  |
| Other infectious diseases                                        | 290<br>(129 - 647)             | 62<br>(24 - 150)           | 12<br>(6 - 27)           | 57<br>(26 - 127)            | 65<br>(29 - 148)            | 94<br>(37 - 236)               |
| Non-communicable diseases                                        | 236,443<br>(211,699 - 263,808) | 9,522<br>(7,924 - 11,762)  | 1,410<br>(1,200 - 1,603) | 25,294<br>(20,786 - 30,765) | 62,196<br>(52,894 - 71,377) | 138,021<br>(127,115 - 151,579) |
| Neoplasms                                                        | 39,659<br>(34,139 - 45,501)    | 208<br>(140 - 293)         | 345<br>(282 - 412)       | 6,902<br>(5,581 - 8,412)    | 15,437<br>(13,029 - 17,944) | 16,766<br>(14,896 - 19,144)    |
| Esophageal cancer                                                | 5,731<br>(3,809 - 7,483)       | --                         | --                       | 561<br>(360 - 776)          | 2,702<br>(1,669 - 3,652)    | 2,468<br>(1,638 - 3,257)       |
| Stomach cancer                                                   | 7,713<br>(6,648 - 9,131)       | --                         | --                       | 790<br>(617 - 1,000)        | 2,902<br>(2,384 - 3,451)    | 4,021<br>(3,343 - 4,893)       |
| Liver cancer                                                     | 1,888<br>(1,563 - 2,286)       | --                         | 11<br>(7 - 16)           | 324<br>(248 - 417)          | 923<br>(723 - 1,148)        | 630<br>(495 - 788)             |
| Liver cancer due to hepatitis B                                  | 1,009<br>(735 - 1,321)         | --                         | 6<br>(4 - 10)            | 211<br>(157 - 280)          | 523<br>(361 - 718)          | 268<br>(183 - 366)             |
| Liver cancer due to hepatitis C                                  | 578<br>(380 - 805)             | --                         | 1<br>(0 - 2)             | 66<br>(30 - 108)            | 266<br>(151 - 407)          | 245<br>(166 - 331)             |
| Liver cancer due to alcohol use                                  | 165<br>(95 - 279)              | --                         | --                       | 16<br>(6 - 29)              | 77<br>(41 - 143)            | 72<br>(39 - 117)               |
| Liver cancer due to other causes                                 | 136<br>(94 - 192)              | --                         | 4<br>(2 - 7)             | 31<br>(20 - 46)             | 57<br>(36 - 84)             | 44<br>(27 - 70)                |

Web Table 31- Iran deaths with 95% UI by age, sex, and cause in 2013

| Cause                                         | Both Sexes, All Ages           | Both Sexes, 0-4 Years | Both Sexes, 5-14 Years | Both Sexes, 15-49 Years    | Both Sexes, 50-69 Years     | Both Sexes, 70-80 Years     |
|-----------------------------------------------|--------------------------------|-----------------------|------------------------|----------------------------|-----------------------------|-----------------------------|
| Larynx cancer                                 | 890<br>(630 - 1,137)           | --                    | --                     | 105<br>(68 - 146)          | 414<br>(269 - 544)          | 372<br>(269 - 491)          |
| Tracheal, bronchus and lung cancer            | 4,509<br>(3,825 - 5,518)       | --                    | --                     | 561<br>(437 - 724)         | 1,906<br>(1,544 - 2,365)    | 2,042<br>(1,726 - 2,515)    |
| Breast cancer                                 | 1,890<br>(1,432 - 2,455)       | --                    | --                     | 791<br>(579 - 1,062)       | 787<br>(579 - 1,044)        | 312<br>(249 - 394)          |
| Cervical cancer                               | 408<br>(238 - 534)             | --                    | --                     | 113<br>(55 - 161)          | 171<br>(100 - 238)          | 124<br>(79 - 165)           |
| Uterine cancer                                | 65<br>(45 - 111)               | --                    | --                     | 11<br>(7 - 18)             | 30<br>(19 - 52)             | 24<br>(15 - 43)             |
| Prostate cancer                               | 1,925<br>(1,192 - 2,768)       | --                    | --                     | 25<br>(13 - 40)            | 339<br>(196 - 479)          | 1,561<br>(970 - 2,317)      |
| Colon and rectum cancer                       | 2,125<br>(1,819 - 2,471)       | --                    | --                     | 428<br>(342 - 534)         | 815<br>(675 - 971)          | 883<br>(754 - 1,038)        |
| Lip and oral cavity cancer                    | 301<br>(225 - 405)             | --                    | --                     | 66<br>(45 - 97)            | 114<br>(83 - 160)           | 120<br>(88 - 163)           |
| Nasopharynx cancer                            | 240<br>(182 - 306)             | --                    | 6<br>(3 - 15)          | 89<br>(61 - 122)           | 94<br>(66 - 130)            | 51<br>(36 - 69)             |
| Other pharynx cancer                          | 85<br>(68 - 105)               | --                    | --                     | 19<br>(14 - 26)            | 38<br>(29 - 49)             | 28<br>(21 - 36)             |
| Gallbladder and biliary tract cancer          | 646<br>(489 - 810)             | --                    | --                     | 86<br>(62 - 112)           | 246<br>(183 - 316)          | 314<br>(224 - 410)          |
| Pancreatic cancer                             | 881<br>(745 - 1,041)           | --                    | --                     | 119<br>(93 - 153)          | 383<br>(313 - 461)          | 379<br>(318 - 445)          |
| Malignant skin melanoma                       | 184<br>(125 - 239)             | --                    | --                     | 36<br>(24 - 52)            | 62<br>(42 - 87)             | 86<br>(54 - 116)            |
| Non-melanoma skin cancer                      | 88<br>(63 - 121)               | --                    | --                     | 7<br>(5 - 9)               | 19<br>(13 - 26)             | 62<br>(43 - 88)             |
| Ovarian cancer                                | 436<br>(336 - 565)             | --                    | --                     | 147<br>(103 - 202)         | 189<br>(139 - 254)          | 101<br>(75 - 133)           |
| Testicular cancer                             | 70<br>(48 - 107)               | --                    | --                     | 40<br>(26 - 64)            | 12<br>(7 - 19)              | 18<br>(10 - 29)             |
| Kidney cancer                                 | 505<br>(419 - 603)             | 12<br>(7 - 20)        | 10<br>(6 - 14)         | 83<br>(63 - 109)           | 225<br>(177 - 278)          | 175<br>(140 - 220)          |
| Bladder cancer                                | 1,195<br>(959 - 1,671)         | --                    | --                     | 87<br>(63 - 121)           | 415<br>(309 - 666)          | 693<br>(550 - 924)          |
| Brain and nervous system cancer               | 2,096<br>(1,650 - 2,717)       | 47<br>(25 - 76)       | 90<br>(62 - 117)       | 762<br>(583 - 1,089)       | 779<br>(594 - 1,044)        | 419<br>(294 - 531)          |
| Thyroid cancer                                | 203<br>(160 - 263)             | --                    | 1<br>(1 - 2)           | 32<br>(23 - 43)            | 84<br>(64 - 114)            | 86<br>(66 - 113)            |
| Mesothelioma                                  | 33<br>(25 - 42)                | --                    | --                     | 6<br>(4 - 9)               | 12<br>(8 - 18)              | 14<br>(10 - 21)             |
| Hodgkin lymphoma                              | 157<br>(124 - 205)             | 4<br>(2 - 6)          | 7<br>(4 - 13)          | 72<br>(53 - 100)           | 44<br>(32 - 62)             | 30<br>(21 - 42)             |
| Non-Hodgkin lymphoma                          | 640<br>(494 - 921)             | 8<br>(5 - 12)         | 15<br>(10 - 20)        | 227<br>(161 - 350)         | 222<br>(166 - 323)          | 168<br>(129 - 241)          |
| Multiple myeloma                              | 240<br>(174 - 299)             | --                    | --                     | 50<br>(36 - 69)            | 99<br>(71 - 128)            | 90<br>(60 - 120)            |
| Leukemia                                      | 2,227<br>(1,873 - 2,621)       | 95<br>(55 - 147)      | 165<br>(124 - 209)     | 778<br>(622 - 972)         | 612<br>(497 - 737)          | 577<br>(476 - 688)          |
| Other neoplasms                               | 2,291<br>(1,555 - 3,951)       | 42<br>(21 - 93)       | 41<br>(26 - 74)        | 488<br>(316 - 846)         | 799<br>(524 - 1,442)        | 920<br>(640 - 1,574)        |
| Cardiovascular diseases                       | 134,060<br>(118,890 - 150,485) | 532<br>(394 - 791)    | 223<br>(181 - 303)     | 10,848<br>(8,830 - 13,322) | 34,754<br>(29,337 - 40,098) | 87,703<br>(79,968 - 96,404) |
| Rheumatic heart disease                       | 350<br>(226 - 760)             | 3<br>(1 - 5)          | 4<br>(3 - 8)           | 64<br>(43 - 117)           | 105<br>(65 - 220)           | 175<br>(99 - 418)           |
| Ischemic heart disease                        | 79,609<br>(68,664 - 90,752)    | 40<br>(18 - 134)      | 38<br>(25 - 85)        | 6,887<br>(5,458 - 8,631)   | 22,226<br>(18,173 - 25,845) | 50,417<br>(44,477 - 56,574) |
| Cerebrovascular disease                       | 28,451<br>(22,243 - 33,056)    | 55<br>(38 - 85)       | 55<br>(42 - 75)        | 1,537<br>(1,147 - 1,965)   | 5,942<br>(4,611 - 7,284)    | 20,862<br>(16,385 - 24,159) |
| Ischemic stroke                               | 16,394<br>(10,036 - 19,891)    | 5<br>(2 - 8)          | 7<br>(3 - 11)          | 329<br>(132 - 482)         | 2,570<br>(1,335 - 3,367)    | 13,483<br>(8,466 - 16,256)  |
| Hemorrhagic stroke                            | 12,057<br>(8,700 - 15,439)     | 50<br>(35 - 79)       | 49<br>(36 - 67)        | 1,208<br>(903 - 1,553)     | 3,372<br>(2,466 - 4,298)    | 7,378<br>(5,043 - 9,731)    |
| Hypertensive heart disease                    | 12,217<br>(8,985 - 15,415)     | 9<br>(5 - 15)         | 7<br>(5 - 10)          | 546<br>(372 - 747)         | 2,787<br>(2,024 - 3,608)    | 8,867<br>(6,475 - 11,495)   |
| Cardiomyopathy and myocarditis                | 2,250<br>(1,773 - 2,914)       | 50<br>(32 - 79)       | 15<br>(10 - 21)        | 420<br>(308 - 594)         | 598<br>(431 - 792)          | 1,167<br>(860 - 1,545)      |
| Atrial fibrillation and flutter               | 88<br>(56 - 139)               | --                    | --                     | 5<br>(3 - 8)               | 18<br>(10 - 30)             | 65<br>(40 - 103)            |
| Aortic aneurysm                               | 299<br>(229 - 379)             | --                    | --                     | 45<br>(32 - 62)            | 98<br>(73 - 129)            | 157<br>(117 - 204)          |
| Peripheral vascular disease                   | 66<br>(46 - 94)                | --                    | --                     | 5<br>(3 - 8)               | 13<br>(9 - 20)              | 48<br>(33 - 69)             |
| Endocarditis                                  | 347<br>(244 - 471)             | 17<br>(10 - 26)       | 7<br>(4 - 10)          | 79<br>(53 - 111)           | 82<br>(56 - 113)            | 162<br>(108 - 223)          |
| Other cardiovascular and circulatory diseases | 10,382<br>(8,340 - 17,452)     | 358<br>(270 - 508)    | 96<br>(73 - 125)       | 1,259<br>(951 - 2,081)     | 2,885<br>(2,177 - 5,060)    | 5,784<br>(4,352 - 9,950)    |
| Chronic respiratory diseases                  | 13,639<br>(11,442 - 15,753)    | 484<br>(251 - 676)    | 78<br>(47 - 96)        | 1,208<br>(923 - 1,508)     | 3,244<br>(2,596 - 3,874)    | 8,625<br>(7,319 - 9,864)    |

Web Table 31- Iran deaths with 95% UI by age, sex, and cause in 2013

| Cause                                               | Both Sexes, All Ages        | Both Sexes, 0-4 Years | Both Sexes, 5-14 Years | Both Sexes, 15-49 Years  | Both Sexes, 50-69 Years  | Both Sexes, 70-80 Years    |
|-----------------------------------------------------|-----------------------------|-----------------------|------------------------|--------------------------|--------------------------|----------------------------|
| Chronic obstructive pulmonary disease               | 8,897<br>(7,099 - 10,413)   | 330<br>(151 - 492)    | 36<br>(20 - 48)        | 676<br>(488 - 861)       | 2,097<br>(1,568 - 2,548) | 5,758<br>(4,692 - 6,776)   |
| Pneumoconiosis                                      | 55<br>(38 - 83)             | 1<br>(0 - 2)          | 2<br>(1 - 2)           | 19<br>(9 - 35)           | 11<br>(8 - 17)           | 22<br>(14 - 32)            |
| Silicosis                                           | 5<br>(3 - 8)                | 0<br>(0 - 0)          | 0<br>(0 - 0)           | 1<br>(1 - 2)             | 1<br>(0 - 1)             | 3<br>(1 - 4)               |
| Asbestosis                                          | 4<br>(3 - 7)                | 0<br>(0 - 0)          | 0<br>(0 - 1)           | 2<br>(1 - 4)             | 1<br>(0 - 1)             | 1<br>(1 - 2)               |
| Coal workers pneumoconiosis                         | 3<br>(2 - 5)                | 0<br>(0 - 0)          | 0<br>(0 - 1)           | 1<br>(1 - 2)             | 1<br>(0 - 1)             | 1<br>(0 - 1)               |
| Other pneumoconiosis                                | 42<br>(28 - 66)             | 0<br>(0 - 1)          | 1<br>(0 - 1)           | 14<br>(5 - 27)           | 9<br>(6 - 15)            | 18<br>(11 - 26)            |
| Asthma                                              | 4,096<br>(3,253 - 5,047)    | 47<br>(18 - 80)       | 28<br>(16 - 38)        | 419<br>(309 - 544)       | 1,048<br>(800 - 1,324)   | 2,554<br>(1,978 - 3,256)   |
| Interstitial lung disease and pulmonary sarcoidosis | 177<br>(32 - 574)           | 2<br>(1 - 4)          | 2<br>(1 - 3)           | 19<br>(11 - 50)          | 43<br>(7 - 173)          | 111<br>(9 - 380)           |
| Other chronic respiratory diseases                  | 414<br>(316 - 534)          | 104<br>(72 - 142)     | 9<br>(5 - 14)          | 76<br>(54 - 103)         | 45<br>(31 - 62)          | 180<br>(118 - 273)         |
| Cirrhosis                                           | 2,769<br>(2,361 - 3,239)    | 46<br>(31 - 66)       | 37<br>(31 - 45)        | 566<br>(441 - 709)       | 997<br>(824 - 1,184)     | 1,123<br>(971 - 1,309)     |
| Cirrhosis due to hepatitis B                        | 1,017<br>(639 - 1,529)      | 2<br>(1 - 6)          | 6<br>(2 - 12)          | 187<br>(81 - 323)        | 368<br>(213 - 588)       | 452<br>(264 - 650)         |
| Cirrhosis due to hepatitis C                        | 1,003<br>(532 - 1,510)      | 4<br>(2 - 8)          | 8<br>(3 - 14)          | 229<br>(110 - 368)       | 391<br>(163 - 617)       | 372<br>(188 - 584)         |
| Cirrhosis due to alcohol use                        | 430<br>(229 - 684)          | --                    | --                     | 51<br>(25 - 88)          | 149<br>(70 - 255)        | 230<br>(114 - 356)         |
| Cirrhosis due to other causes                       | 319<br>(221 - 437)          | 40<br>(25 - 57)       | 23<br>(17 - 31)        | 99<br>(60 - 153)         | 89<br>(49 - 137)         | 69<br>(41 - 113)           |
| Digestive diseases                                  | 3,620<br>(3,047 - 4,541)    | 59<br>(40 - 86)       | 44<br>(35 - 53)        | 518<br>(404 - 662)       | 966<br>(773 - 1,235)     | 2,032<br>(1,685 - 2,686)   |
| Peptic ulcer disease                                | 1,051<br>(570 - 1,493)      | 5<br>(2 - 9)          | 5<br>(2 - 8)           | 107<br>(47 - 179)        | 281<br>(140 - 436)       | 653<br>(355 - 924)         |
| Gastritis and duodenitis                            | 502<br>(268 - 1,043)        | 11<br>(4 - 36)        | 7<br>(4 - 14)          | 73<br>(40 - 139)         | 149<br>(76 - 320)        | 262<br>(129 - 569)         |
| Appendicitis                                        | 180<br>(108 - 253)          | 7<br>(2 - 15)         | 6<br>(3 - 11)          | 54<br>(28 - 83)          | 49<br>(28 - 73)          | 64<br>(38 - 95)            |
| Paralytic ileus and intestinal obstruction          | 696<br>(458 - 1,203)        | 13<br>(6 - 25)        | 8<br>(5 - 14)          | 106<br>(65 - 185)        | 179<br>(107 - 320)       | 391<br>(241 - 697)         |
| Inguinal, femoral, and abdominal hernia             | 57<br>(38 - 105)            | 2<br>(1 - 3)          | 2<br>(1 - 3)           | 10<br>(6 - 14)           | 11<br>(6 - 21)           | 33<br>(19 - 68)            |
| Inflammatory bowel disease                          | 165<br>(111 - 283)          | 7<br>(3 - 12)         | 5<br>(3 - 7)           | 37<br>(25 - 60)          | 38<br>(24 - 69)          | 79<br>(47 - 146)           |
| Vascular intestinal disorders                       | 83<br>(40 - 156)            | 1<br>(0 - 2)          | 2<br>(0 - 3)           | 19<br>(9 - 37)           | 24<br>(11 - 49)          | 37<br>(18 - 73)            |
| Gallbladder and biliary diseases                    | 322<br>(199 - 421)          | 3<br>(1 - 6)          | 2<br>(1 - 2)           | 25<br>(13 - 35)          | 75<br>(42 - 102)         | 217<br>(138 - 292)         |
| Pancreatitis                                        | 256<br>(187 - 362)          | 3<br>(1 - 5)          | 3<br>(2 - 4)           | 39<br>(24 - 57)          | 79<br>(55 - 113)         | 134<br>(92 - 212)          |
| Other digestive diseases                            | 306<br>(223 - 465)          | 8<br>(3 - 16)         | 5<br>(3 - 7)           | 49<br>(31 - 70)          | 82<br>(54 - 126)         | 162<br>(106 - 271)         |
| Neurological disorders                              | 13,558<br>(11,321 - 16,282) | 95<br>(40 - 155)      | 48<br>(18 - 77)        | 299<br>(156 - 429)       | 1,147<br>(891 - 1,419)   | 11,969<br>(9,952 - 14,466) |
| Alzheimer disease and other dementias               | 12,762<br>(10,594 - 15,321) | --                    | --                     | 6<br>(2 - 12)            | 1,003<br>(767 - 1,264)   | 11,753<br>(9,753 - 14,224) |
| Parkinson disease                                   | 116<br>(74 - 188)           | --                    | --                     | 5<br>(4 - 8)             | 20<br>(13 - 31)          | 90<br>(52 - 156)           |
| Epilepsy                                            | 462<br>(196 - 684)          | 86<br>(31 - 145)      | 46<br>(16 - 74)        | 215<br>(86 - 335)        | 59<br>(27 - 90)          | 57<br>(27 - 84)            |
| Multiple sclerosis                                  | 165<br>(112 - 281)          | --                    | --                     | 58<br>(36 - 102)         | 56<br>(37 - 98)          | 51<br>(32 - 88)            |
| Other neurological disorders                        | 54<br>(44 - 71)             | 9<br>(7 - 13)         | 3<br>(2 - 4)           | 15<br>(11 - 20)          | 10<br>(7 - 14)           | 17<br>(14 - 24)            |
| Mental and substance use disorders                  | 3,036<br>(2,310 - 3,995)    | 39<br>(28 - 59)       | 1<br>(0 - 1)           | 2,338<br>(1,742 - 3,153) | 471<br>(344 - 606)       | 187<br>(154 - 225)         |
| Schizophrenia                                       | 90<br>(62 - 116)            | --                    | --                     | 34<br>(23 - 48)          | 25<br>(17 - 35)          | 31<br>(21 - 42)            |
| Alcohol use disorders                               | 18<br>(11 - 26)             | --                    | --                     | 12<br>(8 - 19)           | 3<br>(2 - 5)             | 2<br>(1 - 3)               |
| Drug use disorders                                  | 2,923<br>(2,218 - 3,861)    | 39<br>(28 - 59)       | --                     | 2,287<br>(1,699 - 3,092) | 442<br>(318 - 572)       | 155<br>(123 - 191)         |
| Opioid use disorders                                | 1,612<br>(1,226 - 2,164)    | 23<br>(16 - 35)       | --                     | 1,276<br>(954 - 1,751)   | 228<br>(160 - 302)       | 85<br>(67 - 106)           |
| Cocaine use disorders                               | 36<br>(27 - 49)             | 1<br>(0 - 1)          | --                     | 30<br>(21 - 42)          | 4<br>(3 - 6)             | 2<br>(1 - 2)               |
| Amphetamine use disorders                           | 32<br>(24 - 43)             | 1<br>(0 - 1)          | --                     | 25<br>(18 - 35)          | 5<br>(3 - 7)             | 2<br>(1 - 2)               |
| Other drug use disorders                            | 1,242<br>(936 - 1,640)      | 15<br>(10 - 23)       | --                     | 956<br>(693 - 1,304)     | 205<br>(148 - 269)       | 66<br>(52 - 83)            |
| Eating disorders                                    | 5<br>(3 - 8)                | --                    | 1<br>(0 - 1)           | 5<br>(3 - 7)             | --                       | --                         |

Web Table 31- Iran deaths with 95% UI by age, sex, and cause in 2013

| Cause                                               | Both Sexes, All Ages        | Both Sexes, 0-4 Years    | Both Sexes, 5-14 Years | Both Sexes, 15-49 Years  | Both Sexes, 50-69 Years  | Both Sexes, 70-80 Years   |
|-----------------------------------------------------|-----------------------------|--------------------------|------------------------|--------------------------|--------------------------|---------------------------|
| Anorexia nervosa                                    | 5<br>(3 - 8)                | --                       | 1<br>(0 - 1)           | 5<br>(3 - 7)             | --                       | --                        |
| Diabetes, urogenital, blood, and endocrine diseases | 16,986<br>(14,582 - 19,588) | 497<br>(298 - 661)       | 190<br>(142 - 237)     | 2,107<br>(1,700 - 2,559) | 4,992<br>(4,138 - 5,958) | 9,200<br>(7,954 - 10,817) |
| Diabetes mellitus                                   | 6,966<br>(5,904 - 8,063)    | 33<br>(24 - 45)          | 16<br>(11 - 23)        | 580<br>(449 - 723)       | 2,523<br>(2,022 - 3,023) | 3,813<br>(3,274 - 4,438)  |
| Acute glomerulonephritis                            | 142<br>(103 - 228)          | 4<br>(2 - 9)             | 2<br>(2 - 3)           | 18<br>(13 - 27)          | 36<br>(23 - 57)          | 82<br>(53 - 142)          |
| Chronic kidney disease                              | 4,837<br>(2,722 - 5,753)    | 96<br>(40 - 141)         | 43<br>(22 - 56)        | 573<br>(287 - 725)       | 1,344<br>(714 - 1,671)   | 2,781<br>(1,606 - 3,317)  |
| Chronic kidney disease due to diabetes mellitus     | 148<br>(52 - 322)           | 3<br>(1 - 6)             | 3<br>(1 - 5)           | 27<br>(9 - 58)           | 48<br>(16 - 115)         | 67<br>(23 - 148)          |
| Chronic kidney disease due to hypertension          | 2,485<br>(1,511 - 3,248)    | 9<br>(5 - 16)            | 6<br>(3 - 10)          | 266<br>(156 - 362)       | 744<br>(409 - 987)       | 1,460<br>(925 - 1,944)    |
| Chronic kidney disease due to glomerulonephritis    | 201<br>(103 - 285)          | 9<br>(5 - 13)            | 5<br>(3 - 7)           | 38<br>(18 - 56)          | 47<br>(21 - 74)          | 101<br>(53 - 154)         |
| Chronic kidney disease due to other causes          | 2,003<br>(781 - 2,797)      | 75<br>(24 - 116)         | 29<br>(13 - 40)        | 241<br>(78 - 349)        | 505<br>(175 - 752)       | 1,153<br>(450 - 1,657)    |
| Urinary diseases and male infertility               | 3,716<br>(2,709 - 5,950)    | 74<br>(50 - 117)         | 39<br>(28 - 59)        | 520<br>(356 - 823)       | 907<br>(636 - 1,436)     | 2,177<br>(1,510 - 3,700)  |
| Interstitial nephritis and urinary tract infections | 2,750<br>(1,661 - 5,175)    | 60<br>(37 - 103)         | 30<br>(18 - 51)        | 420<br>(251 - 747)       | 690<br>(415 - 1,273)     | 1,550<br>(847 - 3,199)    |
| Urolithiasis                                        | 161<br>(33 - 274)           | --                       | 2<br>(1 - 5)           | 22<br>(6 - 47)           | 41<br>(9 - 77)           | 96<br>(16 - 176)          |
| Other urinary diseases                              | 805<br>(357 - 1,227)        | 14<br>(4 - 24)           | 7<br>(3 - 12)          | 78<br>(34 - 125)         | 175<br>(77 - 265)        | 531<br>(217 - 858)        |
| Gynecological diseases                              | 4<br>(2 - 6)                | --                       | --                     | 2<br>(1 - 3)             | 1<br>(0 - 1)             | 1<br>(0 - 2)              |
| Uterine fibroids                                    | 1<br>(0 - 1)                | --                       | --                     | 0<br>(0 - 1)             | 0<br>(0 - 0)             | 0<br>(0 - 1)              |
| Polycystic ovarian syndrome                         | 0<br>(0 - 0)                | --                       | --                     | 0<br>(0 - 0)             | 0<br>(0 - 0)             | --                        |
| Endometriosis                                       | 0<br>(0 - 1)                | --                       | --                     | 0<br>(0 - 1)             | 0<br>(0 - 0)             | --                        |
| Genital prolapse                                    | 1<br>(0 - 1)                | --                       | --                     | 0<br>(0 - 0)             | 0<br>(0 - 0)             | 0<br>(0 - 1)              |
| Other gynecological diseases                        | 2<br>(1 - 3)                | --                       | --                     | 1<br>(0 - 2)             | 0<br>(0 - 1)             | 0<br>(0 - 1)              |
| Hemoglobinopathies and hemolytic anemias            | 746<br>(539 - 1,059)        | 132<br>(86 - 189)        | 66<br>(45 - 94)        | 295<br>(199 - 430)       | 79<br>(47 - 126)         | 174<br>(118 - 257)        |
| Thalassemias                                        | 363<br>(249 - 498)          | 109<br>(71 - 156)        | 57<br>(39 - 80)        | 197<br>(129 - 287)       | 0<br>(0 - 0)             | 0<br>(0 - 0)              |
| Sickle cell disorders                               | 116<br>(83 - 175)           | 10<br>(7 - 15)           | 6<br>(4 - 9)           | 62<br>(42 - 94)          | 36<br>(21 - 59)          | 1<br>(1 - 2)              |
| G6PD deficiency                                     | 7<br>(5 - 10)               | 1<br>(1 - 1)             | 0<br>(0 - 1)           | 3<br>(2 - 4)             | 2<br>(1 - 3)             | 1<br>(1 - 2)              |
| Other hemoglobinopathies and hemolytic anemias      | 261<br>(186 - 380)          | 12<br>(8 - 17)           | 3<br>(2 - 4)           | 34<br>(23 - 52)          | 41<br>(25 - 66)          | 172<br>(116 - 254)        |
| Endocrine, metabolic, blood, and immune disorders   | 575<br>(88 - 789)           | 158<br>(20 - 243)        | 23<br>(3 - 35)         | 119<br>(19 - 171)        | 104<br>(16 - 149)        | 171<br>(25 - 247)         |
| Musculoskeletal disorders                           | 686<br>(496 - 1,021)        | --                       | 25<br>(17 - 36)        | 219<br>(151 - 359)       | 138<br>(92 - 245)        | 304<br>(206 - 449)        |
| Rheumatoid arthritis                                | 155<br>(105 - 251)          | --                       | 9<br>(6 - 13)          | 43<br>(28 - 71)          | 32<br>(19 - 67)          | 70<br>(40 - 114)          |
| Other musculoskeletal disorders                     | 531<br>(381 - 810)          | --                       | 16<br>(10 - 25)        | 176<br>(117 - 293)       | 105<br>(71 - 186)        | 234<br>(158 - 344)        |
| Other non-communicable diseases                     | 8,431<br>(6,932 - 10,553)   | 7,561<br>(6,100 - 9,645) | 419<br>(326 - 507)     | 289<br>(230 - 357)       | 50<br>(39 - 61)          | 112<br>(76 - 140)         |
| Congenital anomalies                                | 8,214<br>(6,690 - 10,350)   | 7,462<br>(5,981 - 9,559) | 416<br>(324 - 504)     | 269<br>(213 - 334)       | 31<br>(24 - 38)          | 36<br>(29 - 47)           |
| Neural tube defects                                 | 841<br>(495 - 1,378)        | 733<br>(394 - 1,248)     | 54<br>(37 - 77)        | 44<br>(32 - 62)          | 4<br>(3 - 5)             | 6<br>(3 - 8)              |
| Congenital heart anomalies                          | 2,311<br>(1,665 - 3,105)    | 2,096<br>(1,482 - 2,880) | 153<br>(108 - 202)     | 42<br>(30 - 57)          | 8<br>(6 - 10)            | 12<br>(9 - 17)            |
| Cleft lip and cleft palate                          | 18<br>(6 - 37)              | 18<br>(6 - 37)           | --                     | --                       | --                       | --                        |
| Down syndrome                                       | 262<br>(159 - 388)          | 214<br>(124 - 332)       | 24<br>(14 - 35)        | 22<br>(15 - 31)          | 1<br>(1 - 2)             | 1<br>(0 - 1)              |
| Chromosomal unbalanced rearrangements               | 474<br>(278 - 748)          | 432<br>(245 - 703)       | 12<br>(7 - 19)         | 21<br>(14 - 31)          | 4<br>(2 - 7)             | 4<br>(1 - 8)              |
| Other congenital anomalies                          | 4,308<br>(3,425 - 5,643)    | 3,969<br>(3,083 - 5,255) | 173<br>(129 - 225)     | 139<br>(108 - 179)       | 13<br>(10 - 17)          | 14<br>(11 - 20)           |
| Skin and subcutaneous diseases                      | 132<br>(66 - 168)           | 14<br>(6 - 23)           | 3<br>(1 - 4)           | 21<br>(12 - 28)          | 20<br>(10 - 26)          | 76<br>(34 - 102)          |
| Cellulitis                                          | 24<br>(10 - 37)             | 5<br>(2 - 10)            | 1<br>(0 - 1)           | 3<br>(2 - 5)             | 4<br>(2 - 6)             | 11<br>(4 - 20)            |
| Pyoderma                                            | 8<br>(5 - 11)               | 2<br>(1 - 4)             | 0<br>(0 - 0)           | 2<br>(1 - 3)             | 1<br>(1 - 2)             | 2<br>(1 - 4)              |
| Decubitus ulcer                                     | 88<br>(41 - 118)            | 1<br>(0 - 2)             | 1<br>(1 - 2)           | 12<br>(6 - 17)           | 13<br>(6 - 19)           | 60<br>(26 - 84)           |

Web Table 31- Iran deaths with 95% UI by age, sex, and cause in 2013

| Cause                                           | Both Sexes, All Ages        | Both Sexes, 0-4 Years    | Both Sexes, 5-14 Years   | Both Sexes, 15-49 Years     | Both Sexes, 50-69 Years  | Both Sexes, 70-80 Years  |
|-------------------------------------------------|-----------------------------|--------------------------|--------------------------|-----------------------------|--------------------------|--------------------------|
| Other skin and subcutaneous diseases            | 13<br>(7 - 25)              | 6<br>(2 - 12)            | 1<br>(0 - 1)             | 4<br>(2 - 6)                | 1<br>(1 - 3)             | 2<br>(1 - 4)             |
| Sudden infant death syndrome                    | 85<br>(27 - 192)            | 85<br>(27 - 192)         | --                       | --                          | --                       | --                       |
| Injuries                                        | 28,644<br>(24,140 - 34,558) | 2,366<br>(1,761 - 3,375) | 1,743<br>(1,498 - 2,014) | 16,760<br>(13,586 - 20,885) | 4,464<br>(3,574 - 6,072) | 3,311<br>(2,800 - 4,566) |
| Transport injuries                              | 12,876<br>(10,542 - 16,234) | 726<br>(491 - 993)       | 851<br>(716 - 1,000)     | 7,358<br>(5,803 - 9,222)    | 2,459<br>(1,912 - 3,770) | 1,482<br>(1,137 - 2,654) |
| Road injuries                                   | 12,219<br>(9,998 - 15,420)  | 694<br>(469 - 945)       | 812<br>(682 - 957)       | 6,982<br>(5,498 - 8,727)    | 2,329<br>(1,808 - 3,598) | 1,403<br>(1,072 - 2,538) |
| Pedestrian road injuries                        | 3,870<br>(2,922 - 5,332)    | 259<br>(161 - 382)       | 362<br>(279 - 454)       | 1,821<br>(1,306 - 2,514)    | 788<br>(569 - 1,279)     | 640<br>(441 - 1,213)     |
| Cyclist road injuries                           | 445<br>(318 - 622)          | 23<br>(11 - 41)          | 34<br>(23 - 50)          | 176<br>(120 - 248)          | 118<br>(82 - 179)        | 94<br>(60 - 162)         |
| Motorcyclist road injuries                      | 1,712<br>(1,181 - 2,367)    | 28<br>(16 - 47)          | 63<br>(41 - 89)          | 1,268<br>(864 - 1,755)      | 244<br>(156 - 403)       | 109<br>(66 - 215)        |
| Motor vehicle road injuries                     | 6,148<br>(4,882 - 7,918)    | 376<br>(246 - 523)       | 346<br>(270 - 437)       | 3,706<br>(2,839 - 4,777)    | 1,171<br>(856 - 1,791)   | 550<br>(385 - 1,015)     |
| Other road injuries                             | 45<br>(23 - 157)            | 8<br>(3 - 19)            | 7<br>(3 - 16)            | 11<br>(6 - 43)              | 8<br>(4 - 32)            | 11<br>(4 - 41)           |
| Other transport injuries                        | 657<br>(509 - 842)          | 32<br>(17 - 53)          | 40<br>(28 - 54)          | 376<br>(270 - 491)          | 130<br>(92 - 190)        | 79<br>(55 - 133)         |
| Unintentional injuries                          | 10,531<br>(8,810 - 13,303)  | 1,593<br>(1,135 - 2,644) | 775<br>(632 - 1,018)     | 5,308<br>(4,211 - 6,778)    | 1,354<br>(1,104 - 1,684) | 1,502<br>(1,309 - 1,762) |
| Falls                                           | 1,439<br>(856 - 1,819)      | 122<br>(62 - 183)        | 72<br>(40 - 98)          | 505<br>(235 - 716)          | 277<br>(168 - 365)       | 462<br>(302 - 578)       |
| Drowning                                        | 1,713<br>(1,196 - 3,661)    | 409<br>(223 - 1,082)     | 273<br>(178 - 539)       | 829<br>(560 - 1,604)        | 121<br>(80 - 247)        | 81<br>(52 - 148)         |
| Fire, heat, and hot substances                  | 2,886<br>(2,295 - 4,210)    | 347<br>(218 - 784)       | 160<br>(117 - 227)       | 1,477<br>(1,117 - 2,030)    | 384<br>(289 - 549)       | 517<br>(391 - 740)       |
| Poisonings                                      | 1,220<br>(788 - 1,545)      | 128<br>(64 - 190)        | 48<br>(25 - 66)          | 735<br>(441 - 991)          | 179<br>(125 - 243)       | 129<br>(99 - 180)        |
| Exposure to mechanical forces                   | 1,283<br>(973 - 1,801)      | 169<br>(94 - 361)        | 59<br>(42 - 78)          | 825<br>(582 - 1,185)        | 153<br>(111 - 210)       | 77<br>(58 - 105)         |
| Unintentional firearm injuries                  | 720<br>(507 - 1,082)        | 24<br>(14 - 43)          | 28<br>(17 - 43)          | 532<br>(351 - 817)          | 91<br>(60 - 146)         | 45<br>(30 - 71)          |
| Unintentional suffocation                       | 180<br>(103 - 388)          | 126<br>(57 - 319)        | 8<br>(4 - 14)            | 31<br>(21 - 54)             | 7<br>(4 - 10)            | 7<br>(5 - 12)            |
| Other exposure to mechanical forces             | 383<br>(195 - 556)          | 19<br>(10 - 34)          | 23<br>(13 - 34)          | 262<br>(123 - 406)          | 55<br>(30 - 80)          | 24<br>(14 - 33)          |
| Adverse effects of medical treatment            | 210<br>(23 - 409)           | 23<br>(1 - 57)           | 6<br>(2 - 11)            | 50<br>(10 - 98)             | 54<br>(5 - 108)          | 77<br>(3 - 155)          |
| Animal contact                                  | 203<br>(145 - 303)          | 60<br>(35 - 101)         | 40<br>(25 - 62)          | 50<br>(35 - 73)             | 23<br>(16 - 35)          | 29<br>(19 - 45)          |
| Venomous animal contact                         | 175<br>(122 - 262)          | 55<br>(31 - 91)          | 37<br>(23 - 58)          | 40<br>(27 - 57)             | 19<br>(13 - 29)          | 24<br>(15 - 38)          |
| Non-venomous animal contact                     | 27<br>(19 - 47)             | 6<br>(2 - 13)            | 3<br>(1 - 5)             | 10<br>(6 - 17)              | 5<br>(3 - 8)             | 5<br>(3 - 8)             |
| Foreign body                                    | 440<br>(287 - 618)          | 227<br>(141 - 347)       | 33<br>(20 - 47)          | 87<br>(55 - 129)            | 33<br>(21 - 49)          | 59<br>(37 - 81)          |
| Pulmonary aspiration and foreign body in airway | 427<br>(273 - 605)          | 226<br>(140 - 346)       | 32<br>(19 - 46)          | 82<br>(51 - 123)            | 30<br>(19 - 46)          | 56<br>(35 - 78)          |
| Foreign body in other body part                 | 13<br>(9 - 17)              | 1<br>(1 - 2)             | 1<br>(1 - 2)             | 5<br>(3 - 7)                | 3<br>(2 - 4)             | 3<br>(2 - 4)             |
| Other unintentional injuries                    | 1,138<br>(844 - 1,744)      | 106<br>(60 - 195)        | 85<br>(49 - 147)         | 749<br>(518 - 1,088)        | 128<br>(77 - 251)        | 70<br>(44 - 169)         |
| Self-harm and interpersonal violence            | 5,237<br>(3,766 - 6,964)    | 48<br>(27 - 91)          | 116<br>(67 - 156)        | 4,094<br>(2,899 - 5,458)    | 651<br>(475 - 930)       | 328<br>(256 - 447)       |
| Self-harm                                       | 3,431<br>(1,866 - 4,336)    | --                       | 78<br>(32 - 112)         | 2,707<br>(1,427 - 3,472)    | 418<br>(246 - 531)       | 228<br>(132 - 284)       |
| Interpersonal violence                          | 1,806<br>(1,264 - 3,149)    | 48<br>(27 - 91)          | 38<br>(23 - 59)          | 1,387<br>(940 - 2,428)      | 233<br>(142 - 469)       | 100<br>(55 - 218)        |
| Assault by firearm                              | 833<br>(508 - 1,601)        | 9<br>(4 - 20)            | 10<br>(5 - 19)           | 685<br>(401 - 1,309)        | 102<br>(56 - 235)        | 27<br>(13 - 67)          |
| Assault by sharp object                         | 515<br>(309 - 970)          | 6<br>(3 - 12)            | 7<br>(3 - 12)            | 413<br>(244 - 785)          | 71<br>(35 - 173)         | 18<br>(9 - 44)           |
| Assault by other means                          | 458<br>(309 - 830)          | 33<br>(19 - 61)          | 21<br>(12 - 33)          | 290<br>(178 - 552)          | 60<br>(36 - 122)         | 54<br>(30 - 111)         |
| Forces of nature, war, and legal intervention   | 0<br>(0 - 0)                | 0<br>(0 - 0)             | --                       | --                          | --                       | --                       |
| Exposure to forces of nature                    | 0<br>(0 - 0)                | 0<br>(0 - 0)             | --                       | --                          | --                       | --                       |

Web Table 31- Iran deaths with 95% UI by age, sex, and cause in 2013

| Cause                                                             | Males, All Ages                | Males, 0-4 Years            | Males, 5-14 Years        | Males, 15-49 Years          | Males, 50-69 Years          | Males, 70-80 Years          |
|-------------------------------------------------------------------|--------------------------------|-----------------------------|--------------------------|-----------------------------|-----------------------------|-----------------------------|
| All causes                                                        | 173,389<br>(149,075 - 206,313) | 15,393<br>(13,326 - 17,944) | 2,259<br>(1,996 - 2,514) | 30,968<br>(24,193 - 40,609) | 43,202<br>(34,607 - 52,997) | 81,567<br>(72,336 - 95,752) |
| Communicable, maternal, neonatal, and nutritional diseases        | 15,694<br>(13,572 - 17,872)    | 8,779<br>(7,240 - 10,490)   | 352<br>(246 - 498)       | 1,583<br>(1,206 - 2,040)    | 1,560<br>(1,201 - 1,945)    | 3,422<br>(2,641 - 4,359)    |
| HIV/AIDS and tuberculosis                                         | 1,137<br>(680 - 1,390)         | 7<br>(4 - 11)               | 4<br>(2 - 5)             | 430<br>(292 - 555)          | 339<br>(166 - 441)          | 356<br>(186 - 455)          |
| Tuberculosis                                                      | 829<br>(373 - 1,060)           | 7<br>(4 - 11)               | 4<br>(2 - 5)             | 179<br>(67 - 254)           | 291<br>(118 - 389)          | 348<br>(177 - 447)          |
| HIV/AIDS                                                          | 308<br>(191 - 441)             | 0<br>(0 - 0)                | 0<br>(0 - 0)             | 251<br>(157 - 355)          | 48<br>(23 - 83)             | 9<br>(4 - 16)               |
| HIV/AIDS resulting in mycobacterial infection                     | 19<br>(11 - 28)                | 0<br>(0 - 0)                | 0<br>(0 - 0)             | 15<br>(9 - 23)              | 3<br>(1 - 5)                | 1<br>(0 - 1)                |
| HIV/AIDS resulting in other diseases                              | 289<br>(180 - 414)             | 0<br>(0 - 0)                | 0<br>(0 - 0)             | 236<br>(148 - 333)          | 45<br>(22 - 78)             | 8<br>(3 - 15)               |
| Diarrhea, lower respiratory, and other common infectious diseases | 6,521<br>(5,134 - 8,137)       | 1,669<br>(1,125 - 2,432)    | 317<br>(211 - 467)       | 906<br>(592 - 1,318)        | 895<br>(632 - 1,192)        | 2,735<br>(1,937 - 3,658)    |
| Diarrheal diseases                                                | 606<br>(375 - 1,016)           | 348<br>(146 - 754)          | 11<br>(6 - 19)           | 28<br>(19 - 40)             | 50<br>(31 - 78)             | 168<br>(93 - 286)           |
| Intestinal infectious diseases                                    | 709<br>(340 - 1,281)           | 172<br>(80 - 310)           | 167<br>(74 - 301)        | 298<br>(121 - 611)          | 51<br>(20 - 101)            | 22<br>(9 - 46)              |
| Typhoid fever                                                     | 537<br>(248 - 977)             | 123<br>(53 - 226)           | 128<br>(54 - 237)        | 229<br>(88 - 463)           | 40<br>(16 - 80)             | 17<br>(6 - 36)              |
| Paratyphoid fever                                                 | 154<br>(69 - 288)              | 42<br>(17 - 86)             | 37<br>(15 - 75)          | 62<br>(23 - 131)            | 9<br>(3 - 21)               | 4<br>(1 - 10)               |
| Other intestinal infectious diseases                              | 19<br>(10 - 30)                | 7<br>(2 - 14)               | 1<br>(0 - 5)             | 6<br>(2 - 14)               | 2<br>(0 - 6)                | 2<br>(0 - 5)                |
| Lower respiratory infections                                      | 4,441<br>(3,126 - 5,644)       | 880<br>(564 - 1,278)        | 82<br>(50 - 122)         | 427<br>(214 - 614)          | 675<br>(425 - 945)          | 2,377<br>(1,582 - 3,275)    |
| Upper respiratory infections                                      | 6<br>(2 - 13)                  | 1<br>(0 - 2)                | 0<br>(0 - 1)             | 2<br>(0 - 4)                | 2<br>(0 - 5)                | 2<br>(0 - 8)                |
| Otitis media                                                      | 14<br>(11 - 19)                | 1<br>(0 - 1)                | 0<br>(0 - 1)             | 4<br>(3 - 5)                | 3<br>(2 - 4)                | 7<br>(5 - 10)               |
| Meningitis                                                        | 461<br>(344 - 581)             | 110<br>(50 - 184)           | 29<br>(18 - 39)          | 108<br>(69 - 147)           | 90<br>(63 - 116)            | 124<br>(93 - 159)           |
| Pneumococcal meningitis                                           | 109<br>(83 - 143)              | 19<br>(9 - 35)              | 8<br>(4 - 13)            | 29<br>(16 - 45)             | 22<br>(13 - 34)             | 31<br>(19 - 47)             |
| H influenzae type B meningitis                                    | 83<br>(52 - 123)               | 41<br>(17 - 72)             | 7<br>(4 - 12)            | 13<br>(6 - 22)              | 9<br>(4 - 15)               | 13<br>(6 - 25)              |
| Meningococcal meningitis                                          | 132<br>(83 - 174)              | 31<br>(14 - 55)             | 9<br>(4 - 14)            | 31<br>(16 - 47)             | 25<br>(10 - 41)             | 36<br>(21 - 56)             |
| Other meningitis                                                  | 137<br>(96 - 181)              | 18<br>(8 - 31)              | 5<br>(2 - 9)             | 35<br>(19 - 56)             | 34<br>(17 - 54)             | 45<br>(27 - 67)             |
| Encephalitis                                                      | 129<br>(74 - 273)              | 46<br>(19 - 114)            | 12<br>(6 - 35)           | 30<br>(16 - 68)             | 19<br>(11 - 44)             | 22<br>(13 - 44)             |
| Diphtheria                                                        | 2<br>(0 - 8)                   | 1<br>(0 - 6)                | 0<br>(0 - 3)             | 0<br>(0 - 2)                | 0<br>(0 - 1)                | --<br>(0 - 1)               |
| Whooping cough                                                    | 8<br>(0 - 41)                  | 7<br>(0 - 38)               | 0<br>(0 - 2)             | 0<br>(0 - 1)                | 0<br>(0 - 0)                | --<br>(0 - 0)               |
| Tetanus                                                           | 17<br>(7 - 26)                 | 3<br>(2 - 6)                | 1<br>(0 - 1)             | 3<br>(1 - 6)                | 4<br>(1 - 6)                | 6<br>(1 - 13)               |
| Measles                                                           | 114<br>(3 - 781)               | 98<br>(2 - 667)             | 14<br>(0 - 92)           | 3<br>(0 - 20)               | 0<br>(0 - 1)                | --<br>(0 - 1)               |
| Varicella and herpes zoster                                       | 14<br>(4 - 40)                 | 3<br>(0 - 12)               | 1<br>(0 - 3)             | 4<br>(0 - 11)               | 1<br>(0 - 5)                | 6<br>(0 - 30)               |
| Neglected tropical diseases and malaria                           | 64<br>(49 - 84)                | 12<br>(7 - 20)              | 6<br>(4 - 11)            | 23<br>(17 - 33)             | 12<br>(9 - 17)              | 10<br>(6 - 17)              |
| Malaria                                                           | 5<br>(3 - 7)                   | 1<br>(1 - 3)                | 1<br>(0 - 1)             | 2<br>(1 - 3)                | 1<br>(0 - 1)                | 0<br>(0 - 1)                |
| Leishmaniasis                                                     | 12<br>(9 - 16)                 | 4<br>(2 - 6)                | 1<br>(0 - 1)             | 5<br>(3 - 7)                | 2<br>(1 - 3)                | 1<br>(1 - 1)                |
| Visceral leishmaniasis                                            | 12<br>(9 - 16)                 | 4<br>(2 - 6)                | 1<br>(0 - 1)             | 5<br>(3 - 7)                | 2<br>(1 - 3)                | 1<br>(1 - 1)                |
| Cysticercosis                                                     | 0<br>(0 - 0)                   | 0<br>(0 - 0)                | 0<br>(0 - 0)             | 0<br>(0 - 0)                | 0<br>(0 - 0)                | 0<br>(0 - 0)                |
| Cystic echinococcosis                                             | 4<br>(3 - 5)                   | 0<br>(0 - 0)                | 0<br>(0 - 0)             | 2<br>(1 - 2)                | 1<br>(1 - 1)                | 1<br>(1 - 1)                |
| Dengue                                                            | 4<br>(3 - 5)                   | 0<br>(0 - 1)                | 1<br>(0 - 1)             | 2<br>(2 - 3)                | 0<br>(0 - 1)                | 0<br>(0 - 0)                |
| Rabies                                                            | 11<br>(6 - 16)                 | 0<br>(0 - 1)                | 1<br>(1 - 2)             | 3<br>(2 - 5)                | 5<br>(3 - 7)                | 1<br>(0 - 2)                |
| Intestinal nematode infections                                    | 8<br>(2 - 18)                  | 4<br>(0 - 10)               | 1<br>(0 - 6)             | 1<br>(0 - 6)                | 1<br>(0 - 4)                | 1<br>(0 - 5)                |
| Ascariasis                                                        | 8<br>(2 - 18)                  | 4<br>(0 - 10)               | 1<br>(0 - 6)             | 1<br>(0 - 6)                | 1<br>(0 - 4)                | 1<br>(0 - 5)                |
| Other neglected tropical diseases                                 | 20<br>(12 - 31)                | 2<br>(1 - 4)                | 1<br>(1 - 2)             | 8<br>(4 - 13)               | 3<br>(2 - 5)                | 6<br>(3 - 11)               |
| Maternal disorders                                                | --                             | --                          | --                       | --                          | --                          | --                          |
| Maternal hemorrhage                                               | --                             | --                          | --                       | --                          | --                          | --                          |



Web Table 31- Iran deaths with 95% UI by age, sex, and cause in 2013

| Cause                                                            | Males, All Ages                | Males, 0-4 Years         | Males, 5-14 Years  | Males, 15-49 Years          | Males, 50-69 Years          | Males, 70-80 Years          |
|------------------------------------------------------------------|--------------------------------|--------------------------|--------------------|-----------------------------|-----------------------------|-----------------------------|
| Maternal sepsis and other maternal infections                    | --                             | --                       | --                 | --                          | --                          | --                          |
| Maternal hypertensive disorders                                  | --                             | --                       | --                 | --                          | --                          | --                          |
| Maternal obstructed labor                                        | --                             | --                       | --                 | --                          | --                          | --                          |
| Maternal abortive outcome                                        | --                             | --                       | --                 | --                          | --                          | --                          |
| Indirect maternal deaths                                         | --                             | --                       | --                 | --                          | --                          | --                          |
| Late maternal deaths                                             | --                             | --                       | --                 | --                          | --                          | --                          |
| Maternal deaths aggravated by HIV/AIDS                           | --                             | --                       | --                 | --                          | --                          | --                          |
| Other maternal disorders                                         | --                             | --                       | --                 | --                          | --                          | --                          |
| Neonatal disorders                                               | 6,953<br>(5,609 - 8,403)       | 6,953<br>(5,609 - 8,403) | --                 | --                          | --                          | --                          |
| Neonatal preterm birth complications                             | 4,723<br>(3,488 - 5,997)       | 4,723<br>(3,488 - 5,997) | --                 | --                          | --                          | --                          |
| Neonatal encephalopathy due to birth asphyxia and trauma         | 788<br>(380 - 1,438)           | 788<br>(380 - 1,438)     | --                 | --                          | --                          | --                          |
| Neonatal sepsis and other neonatal infections                    | 201<br>(11 - 674)              | 201<br>(11 - 674)        | --                 | --                          | --                          | --                          |
| Hemolytic disease and other neonatal jaundice                    | 58<br>(23 - 122)               | 58<br>(23 - 122)         | --                 | --                          | --                          | --                          |
| Other neonatal disorders                                         | 1,183<br>(671 - 1,982)         | 1,183<br>(671 - 1,982)   | --                 | --                          | --                          | --                          |
| Nutritional deficiencies                                         | 297<br>(218 - 502)             | 57<br>(33 - 97)          | 8<br>(5 - 11)      | 41<br>(24 - 62)             | 53<br>(35 - 95)             | 138<br>(95 - 268)           |
| Protein-energy malnutrition                                      | 108<br>(58 - 200)              | 33<br>(14 - 62)          | 2<br>(1 - 4)       | 12<br>(4 - 22)              | 12<br>(5 - 26)              | 49<br>(24 - 106)            |
| Iodine deficiency                                                | 1<br>(0 - 5)                   | 0<br>(0 - 1)             | 0<br>(0 - 0)       | 0<br>(0 - 1)                | 0<br>(0 - 2)                | 1<br>(0 - 4)                |
| Iron-deficiency anemia                                           | 170<br>(96 - 310)              | 23<br>(8 - 46)           | 5<br>(2 - 8)       | 25<br>(13 - 40)             | 38<br>(23 - 68)             | 78<br>(41 - 161)            |
| Other nutritional deficiencies                                   | 18<br>(9 - 46)                 | 1<br>(0 - 3)             | 0<br>(0 - 1)       | 3<br>(2 - 8)                | 3<br>(1 - 7)                | 10<br>(4 - 28)              |
| Other communicable, maternal, neonatal, and nutritional diseases | 723<br>(515 - 1,083)           | 81<br>(35 - 163)         | 17<br>(10 - 30)    | 182<br>(120 - 277)          | 260<br>(177 - 374)          | 183<br>(117 - 306)          |
| Sexually transmitted diseases excluding HIV                      | 32<br>(7 - 71)                 | 20<br>(0 - 56)           | 2<br>(0 - 4)       | 3<br>(1 - 6)                | 2<br>(1 - 5)                | 5<br>(2 - 11)               |
| Syphilis                                                         | 29<br>(5 - 68)                 | 20<br>(0 - 56)           | 2<br>(0 - 4)       | 1<br>(1 - 3)                | 2<br>(1 - 4)                | 4<br>(2 - 10)               |
| Chlamydial infection                                             | --                             | --                       | --                 | --                          | --                          | --                          |
| Gonococcal infection                                             | 2<br>(1 - 3)                   | --                       | 0<br>(0 - 0)       | 1<br>(0 - 1)                | 0<br>(0 - 1)                | 1<br>(0 - 1)                |
| Other sexually transmitted diseases                              | 1<br>(0 - 2)                   | --                       | 0<br>(0 - 0)       | 1<br>(0 - 1)                | 0<br>(0 - 1)                | 0<br>(0 - 1)                |
| Hepatitis                                                        | 506<br>(390 - 654)             | 24<br>(13 - 44)          | 9<br>(5 - 14)      | 142<br>(97 - 203)           | 212<br>(146 - 299)          | 120<br>(83 - 172)           |
| Acute hepatitis A                                                | 40<br>(11 - 85)                | 8<br>(2 - 19)            | 2<br>(1 - 4)       | 18<br>(5 - 40)              | 9<br>(2 - 23)               | 2<br>(0 - 6)                |
| Acute hepatitis B                                                | 403<br>(296 - 530)             | 14<br>(7 - 28)           | 2<br>(1 - 5)       | 91<br>(55 - 141)            | 184<br>(125 - 266)          | 111<br>(76 - 161)           |
| Acute hepatitis C                                                | 10<br>(2 - 24)                 | --                       | 0<br>(0 - 0)       | 3<br>(0 - 9)                | 4<br>(1 - 11)               | 2<br>(0 - 8)                |
| Acute hepatitis E                                                | 54<br>(26 - 101)               | 2<br>(1 - 4)             | 4<br>(2 - 8)       | 29<br>(14 - 54)             | 15<br>(5 - 32)              | 4<br>(1 - 11)               |
| Other infectious diseases                                        | 185<br>(78 - 460)              | 36<br>(12 - 108)         | 7<br>(3 - 17)      | 38<br>(16 - 94)             | 46<br>(19 - 113)            | 58<br>(21 - 160)            |
| Non-communicable diseases                                        | 136,434<br>(116,283 - 163,237) | 5,239<br>(4,139 - 6,570) | 764<br>(632 - 889) | 16,117<br>(12,384 - 21,170) | 38,314<br>(30,502 - 47,042) | 76,000<br>(67,117 - 88,888) |
| Neoplasms                                                        | 24,093<br>(19,943 - 29,456)    | 114<br>(73 - 175)        | 207<br>(162 - 257) | 3,594<br>(2,720 - 4,739)    | 9,139<br>(7,231 - 11,287)   | 11,040<br>(9,414 - 13,383)  |
| Esophageal cancer                                                | 2,746<br>(1,430 - 4,192)       | --                       | --                 | 246<br>(128 - 395)          | 1,212<br>(586 - 1,939)      | 1,288<br>(682 - 1,993)      |
| Stomach cancer                                                   | 5,358<br>(4,345 - 6,584)       | --                       | --                 | 511<br>(367 - 693)          | 2,064<br>(1,566 - 2,567)    | 2,783<br>(2,201 - 3,522)    |
| Liver cancer                                                     | 1,160<br>(882 - 1,464)         | --                       | 8<br>(4 - 13)      | 204<br>(142 - 282)          | 622<br>(460 - 806)          | 326<br>(236 - 445)          |
| Liver cancer due to hepatitis B                                  | 643<br>(413 - 920)             | --                       | 5<br>(2 - 9)       | 135<br>(88 - 197)           | 355<br>(205 - 531)          | 148<br>(83 - 231)           |
| Liver cancer due to hepatitis C                                  | 334<br>(164 - 532)             | --                       | 1<br>(0 - 2)       | 43<br>(15 - 80)             | 176<br>(75 - 305)           | 114<br>(57 - 183)           |
| Liver cancer due to alcohol use                                  | 134<br>(68 - 248)              | --                       | --                 | 14<br>(5 - 27)              | 67<br>(32 - 132)            | 53<br>(25 - 95)             |
| Liver cancer due to other causes                                 | 49<br>(23 - 83)                | --                       | 2<br>(1 - 5)       | 12<br>(6 - 21)              | 24<br>(9 - 45)              | 11<br>(4 - 21)              |

Web Table 31- Iran deaths with 95% UI by age, sex, and cause in 2013

| Cause                                         | Males, All Ages             | Males, 0-4 Years   | Males, 5-14 Years | Males, 15-49 Years       | Males, 50-69 Years          | Males, 70-80 Years          |
|-----------------------------------------------|-----------------------------|--------------------|-------------------|--------------------------|-----------------------------|-----------------------------|
| Larynx cancer                                 | 710<br>(457 - 927)          | --                 | --                | 77<br>(45 - 110)         | 317<br>(192 - 423)          | 316<br>(208 - 421)          |
| Tracheal, bronchus and lung cancer            | 3,224<br>(2,603 - 4,032)    | --                 | --                | 366<br>(267 - 503)       | 1,384<br>(1,065 - 1,766)    | 1,474<br>(1,200 - 1,856)    |
| Breast cancer                                 | 27<br>(15 - 38)             | --                 | --                | 8<br>(5 - 12)            | 10<br>(5 - 16)              | 9<br>(4 - 16)               |
| Cervical cancer                               | --                          | --                 | --                | --                       | --                          | --                          |
| Uterine cancer                                | --                          | --                 | --                | --                       | --                          | --                          |
| Prostate cancer                               | 1,925<br>(1,192 - 2,768)    | --                 | --                | 25<br>(13 - 40)          | 339<br>(196 - 479)          | 1,561<br>(970 - 2,317)      |
| Colon and rectum cancer                       | 1,276<br>(1,013 - 1,583)    | --                 | --                | 242<br>(179 - 327)       | 488<br>(377 - 615)          | 546<br>(436 - 694)          |
| Lip and oral cavity cancer                    | 201<br>(130 - 283)          | --                 | --                | 48<br>(29 - 75)          | 77<br>(48 - 112)            | 75<br>(49 - 110)            |
| Nasopharynx cancer                            | 166<br>(119 - 221)          | --                 | 5<br>(1 - 13)     | 63<br>(41 - 93)          | 64<br>(41 - 94)             | 34<br>(22 - 50)             |
| Other pharynx cancer                          | 54<br>(39 - 71)             | --                 | --                | 13<br>(9 - 19)           | 25<br>(17 - 34)             | 16<br>(11 - 22)             |
| Gallbladder and biliary tract cancer          | 270<br>(180 - 358)          | --                 | --                | 29<br>(19 - 40)          | 90<br>(60 - 125)            | 151<br>(91 - 210)           |
| Pancreatic cancer                             | 562<br>(448 - 693)          | --                 | --                | 83<br>(59 - 113)         | 248<br>(186 - 318)          | 231<br>(182 - 291)          |
| Malignant skin melanoma                       | 114<br>(55 - 167)           | --                 | --                | 20<br>(11 - 35)          | 36<br>(18 - 57)             | 57<br>(25 - 84)             |
| Non-melanoma skin cancer                      | 58<br>(38 - 88)             | --                 | --                | 4<br>(3 - 6)             | 13<br>(8 - 20)              | 41<br>(26 - 65)             |
| Ovarian cancer                                | --                          | --                 | --                | --                       | --                          | --                          |
| Testicular cancer                             | 70<br>(48 - 107)            | --                 | --                | 40<br>(26 - 64)          | 12<br>(7 - 19)              | 18<br>(10 - 29)             |
| Kidney cancer                                 | 325<br>(252 - 413)          | 6<br>(3 - 11)      | 4<br>(2 - 7)      | 49<br>(33 - 69)          | 146<br>(107 - 192)          | 121<br>(88 - 161)           |
| Bladder cancer                                | 916<br>(705 - 1,347)        | --                 | --                | 64<br>(44 - 95)          | 325<br>(229 - 566)          | 527<br>(399 - 723)          |
| Brain and nervous system cancer               | 1,249<br>(842 - 1,818)      | 26<br>(10 - 51)    | 51<br>(29 - 74)   | 454<br>(298 - 759)       | 476<br>(317 - 731)          | 241<br>(132 - 341)          |
| Thyroid cancer                                | 85<br>(62 - 116)            | --                 | 0<br>(0 - 1)      | 15<br>(10 - 23)          | 36<br>(24 - 49)             | 34<br>(23 - 47)             |
| Mesothelioma                                  | 24<br>(16 - 33)             | --                 | --                | 4<br>(2 - 6)             | 10<br>(6 - 15)              | 10<br>(6 - 18)              |
| Hodgkin lymphoma                              | 103<br>(75 - 146)           | 2<br>(1 - 5)       | 4<br>(2 - 9)      | 44<br>(30 - 70)          | 33<br>(22 - 48)             | 20<br>(12 - 31)             |
| Non-Hodgkin lymphoma                          | 446<br>(317 - 698)          | 4<br>(2 - 7)       | 10<br>(6 - 14)    | 164<br>(105 - 284)       | 149<br>(103 - 232)          | 119<br>(85 - 183)           |
| Multiple myeloma                              | 152<br>(97 - 202)           | --                 | --                | 31<br>(20 - 47)          | 65<br>(40 - 90)             | 56<br>(32 - 81)             |
| Leukemia                                      | 1,443<br>(1,148 - 1,765)    | 51<br>(25 - 88)    | 101<br>(71 - 137) | 505<br>(371 - 660)       | 391<br>(294 - 494)          | 394<br>(303 - 498)          |
| Other neoplasms                               | 1,431<br>(925 - 2,557)      | 25<br>(12 - 58)    | 23<br>(13 - 45)   | 282<br>(173 - 511)       | 508<br>(305 - 975)          | 593<br>(387 - 1,088)        |
| Cardiovascular diseases                       | 75,857<br>(64,396 - 91,225) | 268<br>(200 - 356) | 116<br>(92 - 142) | 7,323<br>(5,570 - 9,531) | 21,958<br>(17,405 - 26,954) | 46,192<br>(40,671 - 54,117) |
| Rheumatic heart disease                       | 183<br>(104 - 440)          | 1<br>(0 - 3)       | 2<br>(1 - 4)      | 35<br>(19 - 75)          | 57<br>(29 - 138)            | 88<br>(43 - 232)            |
| Ischemic heart disease                        | 48,483<br>(39,963 - 58,505) | 15<br>(7 - 44)     | 19<br>(13 - 38)   | 5,001<br>(3,726 - 6,637) | 14,999<br>(11,686 - 18,445) | 28,449<br>(24,125 - 33,500) |
| Cerebrovascular disease                       | 13,225<br>(10,183 - 16,939) | 30<br>(18 - 43)    | 33<br>(21 - 45)   | 828<br>(573 - 1,188)     | 3,019<br>(2,207 - 3,954)    | 9,315<br>(7,155 - 11,751)   |
| Ischemic stroke                               | 7,479<br>(3,870 - 10,186)   | 2<br>(1 - 5)       | 4<br>(1 - 7)      | 193<br>(58 - 326)        | 1,305<br>(556 - 2,007)      | 5,976<br>(3,184 - 8,098)    |
| Hemorrhagic stroke                            | 5,745<br>(3,647 - 9,275)    | 27<br>(16 - 40)    | 29<br>(18 - 40)   | 635<br>(433 - 911)       | 1,715<br>(1,062 - 2,566)    | 3,339<br>(1,910 - 5,997)    |
| Hypertensive heart disease                    | 6,054<br>(3,724 - 8,522)    | 5<br>(2 - 9)       | 3<br>(2 - 5)      | 316<br>(176 - 485)       | 1,523<br>(885 - 2,164)      | 4,206<br>(2,476 - 6,047)    |
| Cardiomyopathy and myocarditis                | 1,397<br>(971 - 1,917)      | 27<br>(16 - 43)    | 7<br>(4 - 10)     | 255<br>(173 - 385)       | 421<br>(272 - 603)          | 686<br>(438 - 988)          |
| Atrial fibrillation and flutter               | 42<br>(23 - 86)             | --                 | --                | 3<br>(2 - 6)             | 10<br>(5 - 21)              | 30<br>(15 - 62)             |
| Aortic aneurysm                               | 205<br>(154 - 274)          | --                 | --                | 27<br>(19 - 39)          | 74<br>(52 - 100)            | 104<br>(75 - 142)           |
| Peripheral vascular disease                   | 40<br>(25 - 61)             | --                 | --                | 3<br>(2 - 6)             | 8<br>(5 - 13)               | 28<br>(17 - 45)             |
| Endocarditis                                  | 213<br>(130 - 314)          | 10<br>(4 - 16)     | 3<br>(2 - 5)      | 58<br>(35 - 91)          | 48<br>(27 - 73)             | 93<br>(55 - 147)            |
| Other cardiovascular and circulatory diseases | 6,015<br>(4,608 - 10,459)   | 181<br>(134 - 244) | 49<br>(35 - 62)   | 796<br>(553 - 1,309)     | 1,798<br>(1,301 - 3,401)    | 3,193<br>(2,373 - 5,671)    |
| Chronic respiratory diseases                  | 8,143<br>(6,143 - 9,807)    | 271<br>(132 - 409) | 41<br>(22 - 54)   | 763<br>(543 - 1,014)     | 2,094<br>(1,522 - 2,625)    | 4,974<br>(3,841 - 5,990)    |

Web Table 31- Iran deaths with 95% UI by age, sex, and cause in 2013

| Cause                                               | Males, All Ages          | Males, 0-4 Years  | Males, 5-14 Years | Males, 15-49 Years       | Males, 50-69 Years       | Males, 70-80 Years       |
|-----------------------------------------------------|--------------------------|-------------------|-------------------|--------------------------|--------------------------|--------------------------|
| Chronic obstructive pulmonary disease               | 5,496<br>(3,950 - 6,674) | 186<br>(78 - 299) | 21<br>(11 - 29)   | 487<br>(331 - 657)       | 1,423<br>(1,000 - 1,797) | 3,380<br>(2,552 - 4,144) |
| Pneumoconiosis                                      | 46<br>(30 - 75)          | 0<br>(0 - 1)      | 1<br>(0 - 1)      | 15<br>(6 - 31)           | 10<br>(6 - 15)           | 20<br>(12 - 30)          |
| Silicosis                                           | 3<br>(2 - 5)             | 0<br>(0 - 0)      | 0<br>(0 - 0)      | 0<br>(0 - 1)             | 0<br>(0 - 1)             | 2<br>(1 - 4)             |
| Asbestosis                                          | 3<br>(2 - 5)             | 0<br>(0 - 0)      | 0<br>(0 - 0)      | 2<br>(1 - 3)             | 0<br>(0 - 0)             | 1<br>(0 - 1)             |
| Coal workers pneumoconiosis                         | 2<br>(1 - 3)             | 0<br>(0 - 0)      | 0<br>(0 - 0)      | 1<br>(0 - 1)             | 0<br>(0 - 0)             | 1<br>(0 - 1)             |
| Other pneumoconiosis                                | 39<br>(24 - 62)          | 0<br>(0 - 1)      | 0<br>(0 - 1)      | 13<br>(4 - 26)           | 9<br>(5 - 14)            | 17<br>(10 - 25)          |
| Asthma                                              | 2,299<br>(1,715 - 2,945) | 26<br>(9 - 50)    | 13<br>(7 - 19)    | 225<br>(157 - 313)       | 619<br>(440 - 831)       | 1,416<br>(1,014 - 1,889) |
| Interstitial lung disease and pulmonary sarcoidosis | 112<br>(18 - 366)        | 1<br>(0 - 2)      | 1<br>(0 - 1)      | 8<br>(5 - 15)            | 15<br>(3 - 51)           | 88<br>(6 - 303)          |
| Other chronic respiratory diseases                  | 189<br>(140 - 255)       | 58<br>(38 - 85)   | 5<br>(3 - 8)      | 28<br>(19 - 41)          | 27<br>(17 - 42)          | 71<br>(42 - 112)         |
| Cirrhosis                                           | 1,839<br>(1,480 - 2,245) | 25<br>(16 - 39)   | 21<br>(16 - 26)   | 387<br>(284 - 515)       | 712<br>(552 - 878)       | 694<br>(571 - 849)       |
| Cirrhosis due to hepatitis B                        | 635<br>(310 - 1,033)     | 1<br>(0 - 4)      | 3<br>(0 - 7)      | 117<br>(36 - 225)        | 251<br>(106 - 438)       | 264<br>(129 - 402)       |
| Cirrhosis due to hepatitis C                        | 632<br>(251 - 1,090)     | 2<br>(0 - 5)      | 5<br>(1 - 10)     | 160<br>(64 - 284)        | 265<br>(75 - 489)        | 200<br>(55 - 352)        |
| Cirrhosis due to alcohol use                        | 367<br>(184 - 598)       | --                | --                | 45<br>(22 - 83)          | 133<br>(59 - 232)        | 189<br>(88 - 304)        |
| Cirrhosis due to other causes                       | 205<br>(127 - 293)       | 22<br>(13 - 33)   | 13<br>(8 - 18)    | 65<br>(35 - 105)         | 64<br>(30 - 108)         | 42<br>(21 - 69)          |
| Digestive diseases                                  | 2,133<br>(1,714 - 2,772) | 32<br>(19 - 51)   | 23<br>(18 - 30)   | 342<br>(247 - 467)       | 605<br>(444 - 832)       | 1,131<br>(883 - 1,512)   |
| Peptic ulcer disease                                | 632<br>(289 - 999)       | 2<br>(1 - 4)      | 3<br>(1 - 5)      | 77<br>(29 - 136)         | 188<br>(80 - 310)        | 363<br>(169 - 584)       |
| Gastritis and duodenitis                            | 314<br>(159 - 705)       | 5<br>(2 - 18)     | 3<br>(2 - 7)      | 47<br>(25 - 100)         | 93<br>(41 - 230)         | 166<br>(78 - 398)        |
| Appendicitis                                        | 111<br>(61 - 168)        | 3<br>(1 - 7)      | 3<br>(1 - 6)      | 35<br>(18 - 58)          | 30<br>(16 - 48)          | 39<br>(20 - 62)          |
| Paralytic ileus and intestinal obstruction          | 395<br>(231 - 774)       | 7<br>(3 - 16)     | 5<br>(3 - 9)      | 65<br>(33 - 132)         | 106<br>(56 - 225)        | 212<br>(113 - 431)       |
| Inguinal, femoral, and abdominal hernia             | 33<br>(20 - 68)          | 1<br>(0 - 2)      | 1<br>(0 - 2)      | 6<br>(3 - 11)            | 6<br>(3 - 13)            | 19<br>(9 - 45)           |
| Inflammatory bowel disease                          | 107<br>(66 - 201)        | 4<br>(2 - 10)     | 2<br>(1 - 4)      | 26<br>(15 - 48)          | 26<br>(14 - 52)          | 49<br>(26 - 98)          |
| Vascular intestinal disorders                       | 49<br>(16 - 112)         | 1<br>(0 - 2)      | 1<br>(0 - 3)      | 13<br>(4 - 30)           | 16<br>(5 - 38)           | 18<br>(5 - 43)           |
| Gallbladder and biliary diseases                    | 157<br>(79 - 236)        | 2<br>(1 - 3)      | 1<br>(0 - 1)      | 15<br>(7 - 23)           | 39<br>(18 - 59)          | 100<br>(50 - 154)        |
| Pancreatitis                                        | 139<br>(86 - 222)        | 1<br>(0 - 2)      | 2<br>(1 - 3)      | 24<br>(12 - 38)          | 45<br>(27 - 76)          | 68<br>(41 - 122)         |
| Other digestive diseases                            | 197<br>(122 - 337)       | 5<br>(2 - 10)     | 2<br>(1 - 3)      | 36<br>(21 - 56)          | 56<br>(32 - 98)          | 98<br>(53 - 175)         |
| Neurological disorders                              | 7,801<br>(6,264 - 9,637) | 53<br>(20 - 93)   | 28<br>(10 - 48)   | 176<br>(84 - 267)        | 610<br>(419 - 798)       | 6,935<br>(5,471 - 8,686) |
| Alzheimer disease and other dementias               | 7,316<br>(5,818 - 9,087) | --                | --                | 4<br>(0 - 10)            | 520<br>(332 - 701)       | 6,792<br>(5,334 - 8,548) |
| Parkinson disease                                   | 92<br>(53 - 164)         | --                | --                | 3<br>(2 - 4)             | 16<br>(9 - 26)           | 73<br>(36 - 140)         |
| Epilepsy                                            | 279<br>(110 - 423)       | 48<br>(16 - 88)   | 27<br>(9 - 47)    | 131<br>(48 - 215)        | 39<br>(17 - 63)          | 34<br>(15 - 54)          |
| Multiple sclerosis                                  | 82<br>(43 - 161)         | --                | --                | 29<br>(13 - 59)          | 29<br>(15 - 59)          | 25<br>(12 - 50)          |
| Other neurological disorders                        | 32<br>(23 - 50)          | 5<br>(3 - 7)      | 1<br>(1 - 3)      | 10<br>(7 - 15)           | 6<br>(4 - 10)            | 10<br>(8 - 17)           |
| Mental and substance use disorders                  | 2,778<br>(2,061 - 3,734) | 23<br>(14 - 40)   | 0<br>(0 - 0)      | 2,196<br>(1,590 - 3,006) | 427<br>(303 - 559)       | 132<br>(101 - 168)       |
| Schizophrenia                                       | 56<br>(34 - 79)          | --                | --                | 22<br>(12 - 36)          | 17<br>(10 - 26)          | 17<br>(9 - 26)           |
| Alcohol use disorders                               | 14<br>(9 - 22)           | --                | --                | 10<br>(6 - 16)           | 3<br>(2 - 4)             | 1<br>(1 - 2)             |
| Drug use disorders                                  | 2,706<br>(2,005 - 3,640) | 23<br>(14 - 40)   | --                | 2,162<br>(1,564 - 2,966) | 407<br>(286 - 536)       | 113<br>(85 - 149)        |
| Opioid use disorders                                | 1,495<br>(1,098 - 2,054) | 14<br>(8 - 23)    | --                | 1,208<br>(879 - 1,692)   | 211<br>(143 - 284)       | 63<br>(46 - 83)          |
| Cocaine use disorders                               | 33<br>(23 - 45)          | 0<br>(0 - 1)      | --                | 28<br>(19 - 39)          | 4<br>(2 - 5)             | 1<br>(1 - 1)             |
| Amphetamine use disorders                           | 28<br>(20 - 39)          | 0<br>(0 - 1)      | --                | 22<br>(15 - 32)          | 4<br>(3 - 6)             | 1<br>(1 - 1)             |
| Other drug use disorders                            | 1,151<br>(847 - 1,553)   | 9<br>(5 - 15)     | --                | 904<br>(635 - 1,255)     | 189<br>(132 - 253)       | 49<br>(35 - 64)          |
| Eating disorders                                    | 1<br>(1 - 2)             | --                | 0<br>(0 - 0)      | 1<br>(1 - 2)             | --                       | --                       |

Web Table 31- Iran deaths with 95% UI by age, sex, and cause in 2013

| Cause                                               | Males, All Ages           | Males, 0-4 Years         | Males, 5-14 Years  | Males, 15-49 Years     | Males, 50-69 Years       | Males, 70-80 Years       |
|-----------------------------------------------------|---------------------------|--------------------------|--------------------|------------------------|--------------------------|--------------------------|
| Anorexia nervosa                                    | 1<br>(1 - 2)              | --                       | 0<br>(0 - 0)       | 1<br>(1 - 2)           | --                       | --                       |
| Diabetes, urogenital, blood, and endocrine diseases | 8,835<br>(7,162 - 10,702) | 275<br>(152 - 381)       | 95<br>(70 - 124)   | 1,091<br>(815 - 1,470) | 2,676<br>(2,050 - 3,355) | 4,698<br>(3,903 - 5,776) |
| Diabetes mellitus                                   | 3,334<br>(2,693 - 4,050)  | 18<br>(14 - 24)          | 6<br>(5 - 8)       | 302<br>(220 - 403)     | 1,279<br>(962 - 1,607)   | 1,728<br>(1,402 - 2,123) |
| Acute glomerulonephritis                            | 84<br>(55 - 144)          | 2<br>(1 - 6)             | 1<br>(1 - 2)       | 12<br>(8 - 19)         | 23<br>(13 - 40)          | 46<br>(26 - 82)          |
| Chronic kidney disease                              | 2,739<br>(1,462 - 3,444)  | 53<br>(22 - 82)          | 22<br>(11 - 31)    | 323<br>(156 - 448)     | 779<br>(393 - 1,024)     | 1,562<br>(842 - 1,959)   |
| Chronic kidney disease due to diabetes mellitus     | 68<br>(10 - 159)          | 1<br>(0 - 3)             | 1<br>(0 - 3)       | 15<br>(2 - 34)         | 17<br>(2 - 44)           | 34<br>(5 - 84)           |
| Chronic kidney disease due to hypertension          | 1,493<br>(853 - 2,012)    | 6<br>(3 - 11)            | 4<br>(2 - 6)       | 159<br>(85 - 234)      | 470<br>(249 - 648)       | 854<br>(501 - 1,200)     |
| Chronic kidney disease due to glomerulonephritis    | 110<br>(58 - 167)         | 5<br>(3 - 8)             | 3<br>(2 - 4)       | 23<br>(9 - 35)         | 26<br>(11 - 44)          | 54<br>(27 - 89)          |
| Chronic kidney disease due to other causes          | 1,068<br>(361 - 1,648)    | 41<br>(13 - 67)          | 14<br>(6 - 22)     | 127<br>(35 - 208)      | 266<br>(90 - 472)        | 620<br>(192 - 1,005)     |
| Urinary diseases and male infertility               | 1,950<br>(1,403 - 3,430)  | 39<br>(24 - 76)          | 16<br>(11 - 27)    | 237<br>(156 - 429)     | 487<br>(332 - 835)       | 1,171<br>(786 - 2,167)   |
| Interstitial nephritis and urinary tract infections | 1,261<br>(723 - 2,684)    | 30<br>(18 - 68)          | 12<br>(8 - 23)     | 171<br>(97 - 366)      | 329<br>(188 - 688)       | 719<br>(354 - 1,625)     |
| Urolithiasis                                        | 90<br>(18 - 156)          | --                       | 1<br>(0 - 2)       | 10<br>(3 - 17)         | 24<br>(6 - 44)           | 56<br>(9 - 110)          |
| Other urinary diseases                              | 599<br>(252 - 957)        | 9<br>(3 - 17)            | 3<br>(1 - 6)       | 56<br>(22 - 92)        | 134<br>(55 - 210)        | 397<br>(151 - 681)       |
| Gynecological diseases                              | --                        | --                       | --                 | --                     | --                       | --                       |
| Uterine fibroids                                    | --                        | --                       | --                 | --                     | --                       | --                       |
| Polycystic ovarian syndrome                         | --                        | --                       | --                 | --                     | --                       | --                       |
| Endometriosis                                       | --                        | --                       | --                 | --                     | --                       | --                       |
| Genital prolapse                                    | --                        | --                       | --                 | --                     | --                       | --                       |
| Other gynecological diseases                        | --                        | --                       | --                 | --                     | --                       | --                       |
| Hemoglobinopathies and hemolytic anemias            | 399<br>(251 - 665)        | 73<br>(40 - 118)         | 35<br>(21 - 58)    | 151<br>(89 - 259)      | 45<br>(22 - 86)          | 95<br>(57 - 167)         |
| Thalassemias                                        | 193<br>(118 - 309)        | 61<br>(34 - 100)         | 30<br>(18 - 50)    | 102<br>(59 - 171)      | 0<br>(0 - 0)             | 0<br>(0 - 0)             |
| Sickle cell disorders                               | 59<br>(36 - 104)          | 6<br>(3 - 9)             | 3<br>(2 - 5)       | 29<br>(17 - 52)        | 20<br>(10 - 39)          | 1<br>(0 - 1)             |
| G6PD deficiency                                     | 5<br>(3 - 9)              | 1<br>(0 - 1)             | 0<br>(0 - 1)       | 2<br>(1 - 3)           | 1<br>(1 - 2)             | 1<br>(1 - 1)             |
| Other hemoglobinopathies and hemolytic anemias      | 143<br>(89 - 243)         | 6<br>(3 - 9)             | 1<br>(1 - 2)       | 19<br>(11 - 34)        | 24<br>(12 - 44)          | 94<br>(56 - 165)         |
| Endocrine, metabolic, blood, and immune disorders   | 329<br>(44 - 464)         | 89<br>(10 - 143)         | 14<br>(2 - 22)     | 67<br>(9 - 105)        | 64<br>(8 - 97)           | 95<br>(11 - 148)         |
| Musculoskeletal disorders                           | 315<br>(170 - 507)        | --                       | 11<br>(6 - 19)     | 91<br>(47 - 151)       | 67<br>(39 - 121)         | 145<br>(67 - 237)        |
| Rheumatoid arthritis                                | 73<br>(39 - 122)          | --                       | 4<br>(2 - 7)       | 26<br>(13 - 42)        | 16<br>(8 - 33)           | 28<br>(12 - 50)          |
| Other musculoskeletal disorders                     | 241<br>(130 - 393)        | --                       | 7<br>(4 - 14)      | 65<br>(35 - 115)       | 51<br>(29 - 93)          | 118<br>(55 - 191)        |
| Other non-communicable diseases                     | 4,640<br>(3,584 - 5,988)  | 4,177<br>(3,172 - 5,470) | 221<br>(161 - 286) | 154<br>(113 - 211)     | 27<br>(19 - 35)          | 61<br>(38 - 79)          |
| Congenital anomalies                                | 4,526<br>(3,465 - 5,893)  | 4,128<br>(3,124 - 5,441) | 220<br>(160 - 285) | 143<br>(104 - 200)     | 16<br>(12 - 21)          | 19<br>(14 - 25)          |
| Neural tube defects                                 | 448<br>(234 - 821)        | 386<br>(177 - 753)       | 30<br>(18 - 49)    | 26<br>(18 - 39)        | 2<br>(1 - 3)             | 3<br>(2 - 4)             |
| Congenital heart anomalies                          | 1,296<br>(883 - 1,865)    | 1,188<br>(788 - 1,741)   | 74<br>(46 - 107)   | 23<br>(15 - 33)        | 4<br>(3 - 6)             | 6<br>(4 - 9)             |
| Cleft lip and cleft palate                          | 9<br>(2 - 23)             | 9<br>(2 - 23)            | --                 | --                     | --                       | --                       |
| Down syndrome                                       | 144<br>(72 - 248)         | 117<br>(54 - 215)        | 14<br>(8 - 24)     | 12<br>(7 - 18)         | 1<br>(0 - 1)             | 0<br>(0 - 1)             |
| Chromosomal unbalanced rearrangements               | 266<br>(89 - 486)         | 243<br>(76 - 464)        | 8<br>(4 - 14)      | 12<br>(6 - 18)         | 2<br>(1 - 4)             | 2<br>(1 - 3)             |
| Other congenital anomalies                          | 2,363<br>(1,708 - 3,259)  | 2,186<br>(1,534 - 3,058) | 93<br>(62 - 132)   | 70<br>(49 - 98)        | 7<br>(5 - 9)             | 8<br>(5 - 11)            |
| Skin and subcutaneous diseases                      | 73<br>(31 - 98)           | 8<br>(3 - 15)            | 1<br>(0 - 2)       | 11<br>(6 - 16)         | 11<br>(5 - 16)           | 42<br>(17 - 59)          |
| Cellulitis                                          | 15<br>(4 - 26)            | 2<br>(0 - 6)             | 0<br>(0 - 0)       | 2<br>(1 - 3)           | 3<br>(1 - 4)             | 8<br>(2 - 16)            |
| Pyoderma                                            | 5<br>(2 - 8)              | 1<br>(0 - 2)             | 0<br>(0 - 0)       | 1<br>(1 - 2)           | 1<br>(0 - 2)             | 2<br>(1 - 4)             |
| Decubitus ulcer                                     | 44<br>(19 - 65)           | 0<br>(0 - 1)             | 1<br>(0 - 1)       | 7<br>(3 - 10)          | 7<br>(3 - 11)            | 30<br>(12 - 45)          |

Web Table 31- Iran deaths with 95% UI by age, sex, and cause in 2013

| Cause                                           | Males, All Ages             | Males, 0-4 Years       | Males, 5-14 Years      | Males, 15-49 Years          | Males, 50-69 Years       | Males, 70-80 Years       |
|-------------------------------------------------|-----------------------------|------------------------|------------------------|-----------------------------|--------------------------|--------------------------|
| Other skin and subcutaneous diseases            | 9<br>(4 - 19)               | 4<br>(1 - 10)          | 0<br>(0 - 1)           | 2<br>(1 - 4)                | 1<br>(0 - 2)             | 2<br>(1 - 4)             |
| Sudden infant death syndrome                    | 41<br>(9 - 122)             | 41<br>(9 - 122)        | --                     | --                          | --                       | --                       |
| Injuries                                        | 21,261<br>(17,076 - 26,760) | 1,375<br>(982 - 1,989) | 1,143<br>(978 - 1,323) | 13,269<br>(10,328 - 17,240) | 3,328<br>(2,529 - 4,569) | 2,146<br>(1,753 - 2,938) |
| Transport injuries                              | 10,197<br>(8,000 - 13,269)  | 432<br>(279 - 638)     | 560<br>(445 - 681)     | 6,247<br>(4,760 - 8,078)    | 1,879<br>(1,385 - 2,882) | 1,080<br>(815 - 1,945)   |
| Road injuries                                   | 9,645<br>(7,561 - 12,553)   | 407<br>(263 - 601)     | 530<br>(423 - 643)     | 5,918<br>(4,491 - 7,663)    | 1,770<br>(1,310 - 2,734) | 1,020<br>(768 - 1,853)   |
| Pedestrian road injuries                        | 2,967<br>(2,100 - 4,225)    | 154<br>(84 - 250)      | 241<br>(167 - 311)     | 1,539<br>(1,026 - 2,248)    | 576<br>(383 - 946)       | 457<br>(301 - 831)       |
| Cyclist road injuries                           | 345<br>(234 - 512)          | 17<br>(8 - 33)         | 28<br>(18 - 43)        | 145<br>(93 - 218)           | 82<br>(51 - 134)         | 73<br>(44 - 132)         |
| Motorcyclist road injuries                      | 1,614<br>(1,083 - 2,278)    | 19<br>(10 - 35)        | 56<br>(34 - 81)        | 1,214<br>(815 - 1,696)      | 222<br>(137 - 368)       | 102<br>(60 - 205)        |
| Motor vehicle road injuries                     | 4,690<br>(3,482 - 6,294)    | 211<br>(131 - 323)     | 200<br>(142 - 270)     | 3,013<br>(2,195 - 4,061)    | 885<br>(618 - 1,415)     | 381<br>(253 - 704)       |
| Other road injuries                             | 29<br>(13 - 67)             | 6<br>(2 - 14)          | 5<br>(2 - 13)          | 7<br>(3 - 18)               | 5<br>(2 - 13)            | 6<br>(2 - 15)            |
| Other transport injuries                        | 552<br>(403 - 730)          | 25<br>(13 - 43)        | 30<br>(20 - 43)        | 329<br>(225 - 442)          | 109<br>(72 - 164)        | 60<br>(38 - 104)         |
| Unintentional injuries                          | 7,228<br>(5,794 - 9,100)    | 916<br>(633 - 1,481)   | 514<br>(406 - 685)     | 3,995<br>(3,023 - 5,257)    | 954<br>(739 - 1,226)     | 850<br>(685 - 1,040)     |
| Falls                                           | 1,108<br>(580 - 1,466)      | 80<br>(35 - 130)       | 53<br>(27 - 76)        | 457<br>(198 - 662)          | 227<br>(125 - 308)       | 291<br>(170 - 386)       |
| Drowning                                        | 1,343<br>(879 - 2,824)      | 251<br>(119 - 633)     | 207<br>(122 - 421)     | 730<br>(470 - 1,417)        | 98<br>(62 - 201)         | 57<br>(37 - 106)         |
| Fire, heat, and hot substances                  | 1,430<br>(1,050 - 2,087)    | 195<br>(109 - 456)     | 79<br>(51 - 128)       | 709<br>(464 - 1,017)        | 202<br>(138 - 309)       | 244<br>(175 - 361)       |
| Poisonings                                      | 916<br>(533 - 1,213)        | 76<br>(35 - 123)       | 25<br>(11 - 37)        | 596<br>(327 - 837)          | 140<br>(84 - 197)        | 79<br>(54 - 112)         |
| Exposure to mechanical forces                   | 1,017<br>(733 - 1,413)      | 88<br>(47 - 179)       | 41<br>(28 - 57)        | 720<br>(484 - 1,051)        | 123<br>(84 - 180)        | 46<br>(32 - 69)          |
| Unintentional firearm injuries                  | 609<br>(404 - 943)          | 17<br>(9 - 29)         | 20<br>(10 - 34)        | 472<br>(290 - 742)          | 76<br>(45 - 127)         | 26<br>(15 - 46)          |
| Unintentional suffocation                       | 99<br>(57 - 199)            | 60<br>(23 - 146)       | 6<br>(3 - 11)          | 24<br>(14 - 42)             | 4<br>(2 - 7)             | 4<br>(3 - 8)             |
| Other exposure to mechanical forces             | 309<br>(141 - 468)          | 11<br>(5 - 21)         | 16<br>(7 - 24)         | 224<br>(98 - 356)           | 43<br>(20 - 64)          | 16<br>(7 - 22)           |
| Adverse effects of medical treatment            | 122<br>(12 - 250)           | 14<br>(1 - 37)         | 3<br>(1 - 6)           | 30<br>(5 - 63)              | 31<br>(3 - 68)           | 44<br>(2 - 95)           |
| Animal contact                                  | 115<br>(74 - 160)           | 31<br>(15 - 54)        | 22<br>(12 - 34)        | 30<br>(18 - 44)             | 15<br>(10 - 24)          | 18<br>(11 - 28)          |
| Venomous animal contact                         | 98<br>(63 - 139)            | 29<br>(14 - 52)        | 20<br>(11 - 31)        | 24<br>(14 - 35)             | 12<br>(7 - 19)           | 14<br>(8 - 23)           |
| Non-venomous animal contact                     | 17<br>(10 - 25)             | 2<br>(1 - 4)           | 2<br>(1 - 4)           | 6<br>(3 - 10)               | 3<br>(2 - 6)             | 3<br>(2 - 6)             |
| Foreign body                                    | 262<br>(138 - 400)          | 113<br>(54 - 183)      | 21<br>(10 - 32)        | 67<br>(36 - 105)            | 25<br>(15 - 42)          | 35<br>(17 - 52)          |
| Pulmonary aspiration and foreign body in airway | 255<br>(134 - 393)          | 113<br>(54 - 182)      | 20<br>(10 - 31)        | 64<br>(34 - 103)            | 23<br>(13 - 40)          | 34<br>(16 - 50)          |
| Foreign body in other body part                 | 7<br>(3 - 11)               | 1<br>(0 - 1)           | 1<br>(0 - 1)           | 3<br>(1 - 4)                | 2<br>(1 - 3)             | 1<br>(1 - 2)             |
| Other unintentional injuries                    | 916<br>(661 - 1,234)        | 68<br>(34 - 123)       | 62<br>(31 - 109)       | 656<br>(433 - 953)          | 93<br>(53 - 158)         | 37<br>(22 - 57)          |
| Self-harm and interpersonal violence            | 3,836<br>(2,555 - 5,572)    | 27<br>(13 - 60)        | 69<br>(32 - 105)       | 3,028<br>(1,967 - 4,422)    | 495<br>(325 - 763)       | 216<br>(151 - 315)       |
| Self-harm                                       | 2,331<br>(1,061 - 3,145)    | --                     | 45<br>(15 - 71)        | 1,836<br>(813 - 2,520)      | 301<br>(152 - 409)       | 149<br>(71 - 200)        |
| Interpersonal violence                          | 1,505<br>(981 - 2,755)      | 27<br>(13 - 60)        | 24<br>(13 - 43)        | 1,192<br>(761 - 2,179)      | 194<br>(109 - 419)       | 67<br>(32 - 158)         |
| Assault by firearm                              | 775<br>(447 - 1,554)        | 4<br>(1 - 13)          | 7<br>(3 - 15)          | 651<br>(368 - 1,262)        | 91<br>(47 - 218)         | 22<br>(9 - 56)           |
| Assault by sharp object                         | 421<br>(228 - 860)          | 3<br>(1 - 6)           | 5<br>(2 - 9)           | 335<br>(179 - 688)          | 65<br>(29 - 165)         | 13<br>(5 - 34)           |
| Assault by other means                          | 309<br>(166 - 642)          | 20<br>(9 - 44)         | 13<br>(6 - 23)         | 206<br>(102 - 443)          | 38<br>(18 - 88)          | 31<br>(13 - 73)          |
| Forces of nature, war, and legal intervention   | 0<br>(0 - 0)                | 0<br>(0 - 0)           | --                     | --                          | --                       | --                       |
| Exposure to forces of nature                    | 0<br>(0 - 0)                | 0<br>(0 - 0)           | --                     | --                          | --                       | --                       |

Web Table 31- Iran deaths with 95% UI by age, sex, and cause in 2013

| Cause                                                             | Females, All Ages              | Females, 0-4 Years          | Females, 5-14 Years      | Females, 15-49 Years        | Females, 50-69 Years        | Females, 70-80 Years        |
|-------------------------------------------------------------------|--------------------------------|-----------------------------|--------------------------|-----------------------------|-----------------------------|-----------------------------|
| All causes                                                        | 118,957<br>(103,210 - 135,384) | 11,985<br>(10,274 - 14,305) | 1,557<br>(1,357 - 1,757) | 13,746<br>(10,567 - 17,610) | 25,903<br>(20,666 - 31,868) | 65,766<br>(58,579 - 71,735) |
| Communicable, maternal, neonatal, and nutritional diseases        | 11,564<br>(9,532 - 13,403)     | 6,711<br>(5,323 - 8,315)    | 311<br>(214 - 447)       | 1,077<br>(789 - 1,444)      | 885<br>(624 - 1,112)        | 2,579<br>(1,950 - 3,247)    |
| HIV/AIDS and tuberculosis                                         | 590<br>(221 - 771)             | 7<br>(2 - 12)               | 4<br>(2 - 7)             | 137<br>(53 - 193)           | 214<br>(64 - 306)           | 227<br>(94 - 305)           |
| Tuberculosis                                                      | 573<br>(203 - 757)             | 7<br>(2 - 12)               | 4<br>(2 - 7)             | 122<br>(39 - 175)           | 212<br>(62 - 304)           | 227<br>(94 - 305)           |
| HIV/AIDS                                                          | 17<br>(9 - 28)                 | 0<br>(0 - 0)                | 0<br>(0 - 0)             | 15<br>(8 - 24)              | 1<br>(1 - 3)                | 0<br>(0 - 0)                |
| HIV/AIDS resulting in mycobacterial infection                     | 1<br>(0 - 1)                   | 0<br>(0 - 0)                | 0<br>(0 - 0)             | 1<br>(0 - 1)                | 0<br>(0 - 0)                | 0<br>(0 - 0)                |
| HIV/AIDS resulting in other diseases                              | 16<br>(9 - 27)                 | 0<br>(0 - 0)                | 0<br>(0 - 0)             | 14<br>(8 - 23)              | 1<br>(1 - 3)                | 0<br>(0 - 0)                |
| Diarrhea, lower respiratory, and other common infectious diseases | 5,051<br>(3,856 - 6,197)       | 1,475<br>(955 - 2,077)      | 280<br>(185 - 419)       | 622<br>(393 - 948)          | 549<br>(371 - 729)          | 2,125<br>(1,537 - 2,767)    |
| Diarrheal diseases                                                | 574<br>(339 - 977)             | 298<br>(115 - 654)          | 16<br>(8 - 29)           | 29<br>(19 - 43)             | 41<br>(25 - 65)             | 189<br>(101 - 346)          |
| Intestinal infectious diseases                                    | 677<br>(334 - 1,243)           | 169<br>(82 - 320)           | 149<br>(73 - 267)        | 289<br>(120 - 574)          | 48<br>(15 - 104)            | 22<br>(8 - 43)              |
| Typhoid fever                                                     | 519<br>(252 - 952)             | 121<br>(57 - 229)           | 116<br>(55 - 210)        | 227<br>(93 - 455)           | 38<br>(11 - 81)             | 17<br>(5 - 35)              |
| Paratyphoid fever                                                 | 146<br>(67 - 279)              | 42<br>(19 - 90)             | 32<br>(13 - 64)          | 58<br>(21 - 124)            | 9<br>(2 - 22)               | 4<br>(1 - 10)               |
| Other intestinal infectious diseases                              | 12<br>(6 - 22)                 | 5<br>(1 - 11)               | 1<br>(0 - 3)             | 4<br>(1 - 10)               | 1<br>(0 - 5)                | 1<br>(0 - 4)                |
| Lower respiratory infections                                      | 3,213<br>(2,355 - 4,010)       | 765<br>(467 - 1,122)        | 70<br>(44 - 98)          | 208<br>(116 - 287)          | 382<br>(234 - 522)          | 1,787<br>(1,212 - 2,420)    |
| Upper respiratory infections                                      | 4<br>(1 - 10)                  | 0<br>(0 - 2)                | 0<br>(0 - 0)             | 1<br>(0 - 2)                | 1<br>(0 - 3)                | 2<br>(0 - 7)                |
| Otitis media                                                      | 12<br>(8 - 16)                 | 0<br>(0 - 1)                | 0<br>(0 - 1)             | 2<br>(2 - 3)                | 2<br>(1 - 3)                | 6<br>(4 - 10)               |
| Meningitis                                                        | 330<br>(240 - 403)             | 98<br>(55 - 146)            | 19<br>(12 - 26)          | 61<br>(34 - 84)             | 58<br>(40 - 78)             | 94<br>(70 - 125)            |
| Pneumococcal meningitis                                           | 77<br>(48 - 105)               | 19<br>(8 - 31)              | 5<br>(2 - 9)             | 15<br>(8 - 25)              | 14<br>(5 - 23)              | 23<br>(11 - 39)             |
| H influenzae type B meningitis                                    | 62<br>(41 - 90)                | 36<br>(18 - 61)             | 5<br>(3 - 8)             | 7<br>(3 - 11)               | 6<br>(2 - 11)               | 8<br>(4 - 15)               |
| Meningococcal meningitis                                          | 94<br>(67 - 122)               | 29<br>(16 - 44)             | 6<br>(3 - 9)             | 16<br>(9 - 24)              | 14<br>(8 - 22)              | 30<br>(18 - 45)             |
| Other meningitis                                                  | 97<br>(67 - 132)               | 14<br>(6 - 25)              | 3<br>(2 - 6)             | 23<br>(9 - 37)              | 24<br>(14 - 35)             | 32<br>(17 - 52)             |
| Encephalitis                                                      | 101<br>(56 - 213)              | 38<br>(15 - 94)             | 9<br>(4 - 24)            | 22<br>(11 - 55)             | 13<br>(7 - 31)              | 18<br>(10 - 41)             |
| Diphtheria                                                        | 1<br>(0 - 6)                   | 1<br>(0 - 5)                | 0<br>(0 - 2)             | 0<br>(0 - 1)                | 0<br>(0 - 0)                | --<br>(0 - 0)               |
| Whooping cough                                                    | 9<br>(0 - 50)                  | 8<br>(0 - 46)               | 0<br>(0 - 3)             | 0<br>(0 - 1)                | 0<br>(0 - 0)                | --<br>(0 - 0)               |
| Tetanus                                                           | 8<br>(3 - 12)                  | 2<br>(1 - 3)                | 0<br>(0 - 1)             | 2<br>(1 - 4)                | 2<br>(1 - 3)                | 2<br>(1 - 4)                |
| Measles                                                           | 109<br>(3 - 737)               | 91<br>(2 - 620)             | 14<br>(0 - 100)          | 4<br>(0 - 25)               | 0<br>(0 - 1)                | --<br>(0 - 1)               |
| Varicella and herpes zoster                                       | 14<br>(5 - 36)                 | 2<br>(0 - 10)               | 1<br>(0 - 3)             | 3<br>(1 - 10)               | 1<br>(0 - 4)                | 6<br>(0 - 29)               |
| Neglected tropical diseases and malaria                           | 51<br>(34 - 66)                | 11<br>(6 - 19)              | 5<br>(3 - 9)             | 18<br>(10 - 26)             | 8<br>(6 - 12)               | 9<br>(5 - 14)               |
| Malaria                                                           | 6<br>(3 - 9)                   | 3<br>(1 - 5)                | 0<br>(0 - 1)             | 2<br>(1 - 3)                | 1<br>(0 - 1)                | 0<br>(0 - 0)                |
| Leishmaniasis                                                     | 6<br>(4 - 7)                   | 2<br>(1 - 3)                | 0<br>(0 - 1)             | 2<br>(1 - 3)                | 1<br>(1 - 1)                | 0<br>(0 - 0)                |
| Visceral leishmaniasis                                            | 6<br>(4 - 7)                   | 2<br>(1 - 3)                | 0<br>(0 - 1)             | 2<br>(1 - 3)                | 1<br>(1 - 1)                | 0<br>(0 - 0)                |
| Cysticercosis                                                     | 0<br>(0 - 0)                   | 0<br>(0 - 0)                | 0<br>(0 - 0)             | 0<br>(0 - 0)                | 0<br>(0 - 0)                | 0<br>(0 - 0)                |
| Cystic echinococcosis                                             | 3<br>(2 - 4)                   | 0<br>(0 - 0)                | 0<br>(0 - 0)             | 1<br>(1 - 1)                | 1<br>(1 - 1)                | 1<br>(1 - 1)                |
| Dengue                                                            | 4<br>(2 - 5)                   | 0<br>(0 - 1)                | 1<br>(0 - 1)             | 2<br>(1 - 3)                | 0<br>(0 - 0)                | 0<br>(0 - 0)                |
| Rabies                                                            | 15<br>(4 - 22)                 | 1<br>(0 - 2)                | 1<br>(1 - 2)             | 8<br>(1 - 13)               | 3<br>(1 - 5)                | 2<br>(1 - 3)                |
| Intestinal nematode infections                                    | 6<br>(2 - 14)                  | 3<br>(0 - 10)               | 1<br>(0 - 5)             | 1<br>(0 - 4)                | 1<br>(0 - 3)                | 1<br>(0 - 5)                |
| Ascariasis                                                        | 6<br>(2 - 14)                  | 3<br>(0 - 10)               | 1<br>(0 - 5)             | 1<br>(0 - 4)                | 1<br>(0 - 3)                | 1<br>(0 - 5)                |
| Other neglected tropical diseases                                 | 12<br>(7 - 20)                 | 1<br>(1 - 3)                | 1<br>(0 - 2)             | 3<br>(2 - 6)                | 2<br>(1 - 4)                | 5<br>(2 - 9)                |
| Maternal disorders                                                | 197<br>(137 - 266)             | --                          | 1<br>(0 - 1)             | 196<br>(136 - 266)          | --                          | --                          |
| Maternal hemorrhage                                               | 40<br>(27 - 57)                | --                          | 0<br>(0 - 0)             | 40<br>(27 - 57)             | --                          | --                          |

Web Table 31- Iran deaths with 95% UI by age, sex, and cause in 2013

| Cause                                                            | Females, All Ages             | Females, 0-4 Years       | Females, 5-14 Years | Females, 15-49 Years      | Females, 50-69 Years        | Females, 70-80 Years        |
|------------------------------------------------------------------|-------------------------------|--------------------------|---------------------|---------------------------|-----------------------------|-----------------------------|
| Maternal sepsis and other maternal infections                    | 14<br>(9 - 21)                | --                       | 0<br>(0 - 0)        | 14<br>(9 - 20)            | --                          | --                          |
| Maternal hypertensive disorders                                  | 20<br>(13 - 29)               | --                       | 0<br>(0 - 0)        | 20<br>(13 - 29)           | --                          | --                          |
| Maternal obstructed labor                                        | 15<br>(9 - 25)                | --                       | 0<br>(0 - 0)        | 15<br>(9 - 25)            | --                          | --                          |
| Maternal abortive outcome                                        | 22<br>(15 - 32)               | --                       | 0<br>(0 - 0)        | 22<br>(15 - 32)           | --                          | --                          |
| Indirect maternal deaths                                         | 51<br>(34 - 72)               | --                       | 0<br>(0 - 0)        | 51<br>(34 - 72)           | --                          | --                          |
| Late maternal deaths                                             | 19<br>(10 - 33)               | --                       | 0<br>(0 - 0)        | 19<br>(10 - 33)           | --                          | --                          |
| Maternal deaths aggravated by HIV/AIDS                           | 0<br>(0 - 0)                  | --                       | --                  | 0<br>(0 - 0)              | --                          | --                          |
| Other maternal disorders                                         | 15<br>(9 - 22)                | --                       | 0<br>(0 - 0)        | 15<br>(9 - 22)            | --                          | --                          |
| Neonatal disorders                                               | 5,090<br>(3,935 - 6,416)      | 5,090<br>(3,935 - 6,416) | --                  | --                        | --                          | --                          |
| Neonatal preterm birth complications                             | 3,425<br>(2,475 - 4,527)      | 3,425<br>(2,475 - 4,527) | --                  | --                        | --                          | --                          |
| Neonatal encephalopathy due to birth asphyxia and trauma         | 569<br>(275 - 1,006)          | 569<br>(275 - 1,006)     | --                  | --                        | --                          | --                          |
| Neonatal sepsis and other neonatal infections                    | 126<br>(7 - 481)              | 126<br>(7 - 481)         | --                  | --                        | --                          | --                          |
| Hemolytic disease and other neonatal jaundice                    | 52<br>(18 - 112)              | 52<br>(18 - 112)         | --                  | --                        | --                          | --                          |
| Other neonatal disorders                                         | 918<br>(510 - 1,603)          | 918<br>(510 - 1,603)     | --                  | --                        | --                          | --                          |
| Nutritional deficiencies                                         | 242<br>(192 - 317)            | 58<br>(36 - 88)          | 7<br>(4 - 9)        | 31<br>(21 - 43)           | 30<br>(22 - 44)             | 116<br>(88 - 175)           |
| Protein-energy malnutrition                                      | 98<br>(57 - 149)              | 38<br>(17 - 64)          | 2<br>(1 - 3)        | 5<br>(2 - 10)             | 6<br>(2 - 12)               | 48<br>(23 - 83)             |
| Iodine deficiency                                                | 1<br>(0 - 5)                  | 0<br>(0 - 1)             | 0<br>(0 - 0)        | 0<br>(0 - 1)              | 0<br>(0 - 1)                | 1<br>(0 - 4)                |
| Iron-deficiency anemia                                           | 131<br>(77 - 191)             | 19<br>(5 - 38)           | 4<br>(2 - 6)        | 24<br>(15 - 34)           | 22<br>(14 - 33)             | 62<br>(33 - 104)            |
| Other nutritional deficiencies                                   | 11<br>(5 - 24)                | 1<br>(0 - 3)             | 1<br>(0 - 1)        | 2<br>(1 - 4)              | 2<br>(1 - 4)                | 6<br>(3 - 14)               |
| Other communicable, maternal, neonatal, and nutritional diseases | 342<br>(237 - 505)            | 70<br>(32 - 127)         | 14<br>(9 - 22)      | 73<br>(49 - 107)          | 84<br>(53 - 126)            | 101<br>(59 - 173)           |
| Sexually transmitted diseases excluding HIV                      | 30<br>(7 - 69)                | 20<br>(0 - 57)           | 2<br>(0 - 5)        | 2<br>(1 - 4)              | 2<br>(1 - 3)                | 4<br>(2 - 7)                |
| Syphilis                                                         | 27<br>(4 - 66)                | 20<br>(0 - 57)           | 2<br>(0 - 5)        | 1<br>(0 - 2)              | 1<br>(1 - 1)                | 3<br>(2 - 5)                |
| Chlamydial infection                                             | 1<br>(1 - 1)                  | --                       | 0<br>(0 - 0)        | 0<br>(0 - 1)              | 0<br>(0 - 0)                | 0<br>(0 - 0)                |
| Gonococcal infection                                             | 1<br>(1 - 2)                  | --                       | 0<br>(0 - 0)        | 0<br>(0 - 1)              | 0<br>(0 - 0)                | 0<br>(0 - 1)                |
| Other sexually transmitted diseases                              | 1<br>(1 - 1)                  | --                       | 0<br>(0 - 0)        | 0<br>(0 - 1)              | 0<br>(0 - 0)                | 0<br>(0 - 0)                |
| Hepatitis                                                        | 207<br>(154 - 276)            | 24<br>(12 - 45)          | 7<br>(4 - 11)       | 51<br>(34 - 74)           | 63<br>(40 - 96)             | 62<br>(38 - 97)             |
| Acute hepatitis A                                                | 25<br>(7 - 49)                | 10<br>(3 - 22)           | 2<br>(1 - 4)        | 8<br>(2 - 17)             | 4<br>(1 - 9)                | 2<br>(0 - 4)                |
| Acute hepatitis B                                                | 145<br>(103 - 201)            | 12<br>(4 - 26)           | 1<br>(0 - 3)        | 25<br>(13 - 41)           | 52<br>(32 - 79)             | 55<br>(32 - 88)             |
| Acute hepatitis C                                                | 4<br>(1 - 10)                 | --                       | 0<br>(0 - 0)        | 1<br>(0 - 3)              | 1<br>(0 - 4)                | 1<br>(0 - 4)                |
| Acute hepatitis E                                                | 34<br>(18 - 57)               | 2<br>(1 - 4)             | 4<br>(2 - 6)        | 18<br>(9 - 30)            | 7<br>(2 - 15)               | 4<br>(1 - 10)               |
| Other infectious diseases                                        | 105<br>(45 - 240)             | 26<br>(10 - 61)          | 5<br>(2 - 12)       | 19<br>(8 - 43)            | 19<br>(8 - 45)              | 36<br>(13 - 95)             |
| Non-communicable diseases                                        | 100,010<br>(85,882 - 114,488) | 4,282<br>(3,408 - 5,506) | 646<br>(544 - 759)  | 9,178<br>(6,956 - 11,895) | 23,882<br>(19,062 - 29,520) | 62,021<br>(55,202 - 67,835) |
| Neoplasms                                                        | 15,566<br>(12,483 - 18,966)   | 94<br>(57 - 138)         | 138<br>(105 - 174)  | 3,308<br>(2,451 - 4,315)  | 6,299<br>(4,923 - 7,880)    | 5,727<br>(4,877 - 6,839)    |
| Esophageal cancer                                                | 2,985<br>(1,859 - 3,921)      | --                       | --                  | 315<br>(185 - 458)        | 1,490<br>(866 - 2,014)      | 1,180<br>(781 - 1,592)      |
| Stomach cancer                                                   | 2,355<br>(1,834 - 2,928)      | --                       | --                  | 279<br>(183 - 382)        | 837<br>(623 - 1,091)        | 1,238<br>(925 - 1,626)      |
| Liver cancer                                                     | 728<br>(554 - 944)            | --                       | 3<br>(2 - 5)        | 119<br>(79 - 173)         | 301<br>(212 - 416)          | 304<br>(217 - 416)          |
| Liver cancer due to hepatitis B                                  | 366<br>(257 - 506)            | --                       | 2<br>(1 - 3)        | 76<br>(49 - 112)          | 168<br>(109 - 250)          | 120<br>(77 - 179)           |
| Liver cancer due to hepatitis C                                  | 244<br>(145 - 364)            | --                       | 0<br>(0 - 0)        | 23<br>(10 - 41)           | 90<br>(46 - 144)            | 131<br>(75 - 203)           |
| Liver cancer due to alcohol use                                  | 31<br>(9 - 69)                | --                       | --                  | 2<br>(1 - 5)              | 10<br>(3 - 24)              | 19<br>(4 - 44)              |
| Liver cancer due to other causes                                 | 87<br>(51 - 136)              | --                       | 2<br>(1 - 3)        | 19<br>(10 - 31)           | 33<br>(17 - 56)             | 34<br>(16 - 59)             |

Web Table 31- Iran deaths with 95% UI by age, sex, and cause in 2013

| Cause                                         | Females, All Ages           | Females, 0-4 Years | Females, 5-14 Years | Females, 15-49 Years     | Females, 50-69 Years       | Females, 70-80 Years        |
|-----------------------------------------------|-----------------------------|--------------------|---------------------|--------------------------|----------------------------|-----------------------------|
| Larynx cancer                                 | 181<br>(89 - 310)           | --                 | --                  | 28<br>(12 - 49)          | 97<br>(44 - 162)           | 56<br>(30 - 107)            |
| Tracheal, bronchus and lung cancer            | 1,285<br>(1,010 - 1,660)    | --                 | --                  | 195<br>(139 - 273)       | 521<br>(392 - 708)         | 568<br>(440 - 736)          |
| Breast cancer                                 | 1,863<br>(1,405 - 2,426)    | --                 | --                  | 783<br>(548 - 1,056)     | 777<br>(569 - 1,037)       | 303<br>(240 - 387)          |
| Cervical cancer                               | 408<br>(238 - 534)          | --                 | --                  | 113<br>(55 - 161)        | 171<br>(100 - 238)         | 124<br>(79 - 165)           |
| Uterine cancer                                | 65<br>(45 - 111)            | --                 | --                  | 11<br>(7 - 18)           | 30<br>(19 - 52)            | 24<br>(15 - 43)             |
| Prostate cancer                               | --                          | --                 | --                  | --                       | --                         | --                          |
| Colon and rectum cancer                       | 849<br>(660 - 1,046)        | --                 | --                  | 185<br>(133 - 250)       | 327<br>(245 - 417)         | 337<br>(258 - 424)          |
| Lip and oral cavity cancer                    | 100<br>(67 - 152)           | --                 | --                  | 18<br>(10 - 30)          | 37<br>(23 - 60)            | 45<br>(31 - 66)             |
| Nasopharynx cancer                            | 74<br>(42 - 110)            | --                 | 2<br>(1 - 4)        | 26<br>(13 - 41)          | 30<br>(17 - 51)            | 16<br>(9 - 27)              |
| Other pharynx cancer                          | 32<br>(23 - 42)             | --                 | --                  | 7<br>(4 - 10)            | 13<br>(9 - 18)             | 12<br>(9 - 18)              |
| Gallbladder and biliary tract cancer          | 376<br>(250 - 518)          | --                 | --                  | 57<br>(37 - 83)          | 156<br>(106 - 225)         | 163<br>(99 - 238)           |
| Pancreatic cancer                             | 319<br>(249 - 399)          | --                 | --                  | 36<br>(25 - 50)          | 135<br>(98 - 176)          | 148<br>(114 - 185)          |
| Malignant skin melanoma                       | 70<br>(52 - 90)             | --                 | --                  | 15<br>(10 - 22)          | 25<br>(18 - 35)            | 29<br>(20 - 40)             |
| Non-melanoma skin cancer                      | 30<br>(18 - 44)             | --                 | --                  | 3<br>(2 - 5)             | 6<br>(4 - 10)              | 21<br>(12 - 33)             |
| Ovarian cancer                                | 436<br>(336 - 565)          | --                 | --                  | 147<br>(103 - 202)       | 189<br>(139 - 254)         | 101<br>(75 - 133)           |
| Testicular cancer                             | --                          | --                 | --                  | --                       | --                         | --                          |
| Kidney cancer                                 | 179<br>(135 - 237)          | 6<br>(3 - 11)      | 5<br>(3 - 9)        | 34<br>(23 - 50)          | 79<br>(54 - 114)           | 55<br>(38 - 78)             |
| Bladder cancer                                | 279<br>(195 - 427)          | --                 | --                  | 22<br>(14 - 34)          | 90<br>(60 - 148)           | 166<br>(111 - 255)          |
| Brain and nervous system cancer               | 848<br>(649 - 1,075)        | 21<br>(10 - 39)    | 38<br>(25 - 54)     | 307<br>(210 - 418)       | 303<br>(221 - 408)         | 178<br>(124 - 245)          |
| Thyroid cancer                                | 118<br>(82 - 167)           | --                 | 1<br>(0 - 1)        | 17<br>(10 - 25)          | 49<br>(31 - 74)            | 52<br>(36 - 76)             |
| Mesothelioma                                  | 9<br>(6 - 13)               | --                 | --                  | 2<br>(1 - 4)             | 2<br>(1 - 4)               | 4<br>(2 - 6)                |
| Hodgkin lymphoma                              | 54<br>(38 - 72)             | 1<br>(1 - 2)       | 3<br>(1 - 6)        | 27<br>(17 - 40)          | 12<br>(7 - 18)             | 11<br>(7 - 16)              |
| Non-Hodgkin lymphoma                          | 194<br>(135 - 284)          | 3<br>(2 - 6)       | 5<br>(3 - 8)        | 63<br>(40 - 93)          | 74<br>(49 - 118)           | 49<br>(34 - 72)             |
| Multiple myeloma                              | 88<br>(63 - 119)            | --                 | --                  | 19<br>(12 - 29)          | 35<br>(23 - 49)            | 34<br>(23 - 48)             |
| Leukemia                                      | 784<br>(593 - 977)          | 45<br>(21 - 77)    | 63<br>(42 - 86)     | 273<br>(186 - 370)       | 221<br>(160 - 289)         | 183<br>(139 - 230)          |
| Other neoplasms                               | 859<br>(555 - 1,555)        | 17<br>(8 - 40)     | 18<br>(11 - 32)     | 205<br>(122 - 386)       | 291<br>(177 - 571)         | 328<br>(215 - 610)          |
| Cardiovascular diseases                       | 58,203<br>(49,524 - 66,793) | 264<br>(173 - 523) | 107<br>(77 - 177)   | 3,525<br>(2,594 - 4,632) | 12,796<br>(9,985 - 16,019) | 41,511<br>(36,235 - 46,067) |
| Rheumatic heart disease                       | 167<br>(106 - 388)          | 1<br>(1 - 3)       | 2<br>(1 - 4)        | 29<br>(19 - 54)          | 48<br>(29 - 109)           | 87<br>(50 - 233)            |
| Ischemic heart disease                        | 31,127<br>(24,754 - 36,815) | 25<br>(9 - 106)    | 19<br>(10 - 51)     | 1,886<br>(1,337 - 2,542) | 7,228<br>(5,487 - 9,257)   | 21,968<br>(17,823 - 25,292) |
| Cerebrovascular disease                       | 15,227<br>(9,925 - 18,544)  | 25<br>(14 - 56)    | 23<br>(15 - 40)     | 709<br>(387 - 976)       | 2,923<br>(1,803 - 3,824)   | 11,547<br>(7,460 - 13,894)  |
| Ischemic stroke                               | 8,915<br>(5,299 - 11,123)   | 2<br>(1 - 6)       | 3<br>(2 - 6)        | 136<br>(55 - 209)        | 1,266<br>(606 - 1,759)     | 7,508<br>(4,550 - 9,375)    |
| Hemorrhagic stroke                            | 6,312<br>(3,344 - 8,180)    | 23<br>(13 - 51)    | 20<br>(13 - 36)     | 572<br>(313 - 794)       | 1,657<br>(943 - 2,272)     | 4,039<br>(2,011 - 5,362)    |
| Hypertensive heart disease                    | 6,163<br>(4,151 - 8,660)    | 5<br>(2 - 9)       | 4<br>(3 - 7)        | 229<br>(140 - 346)       | 1,264<br>(829 - 1,801)     | 4,661<br>(3,046 - 6,860)    |
| Cardiomyopathy and myocarditis                | 853<br>(605 - 1,176)        | 23<br>(12 - 47)    | 9<br>(5 - 14)       | 165<br>(111 - 252)       | 176<br>(120 - 258)         | 481<br>(310 - 716)          |
| Atrial fibrillation and flutter               | 45<br>(24 - 75)             | --                 | --                  | 2<br>(1 - 4)             | 8<br>(4 - 13)              | 35<br>(18 - 61)             |
| Aortic aneurysm                               | 94<br>(52 - 137)            | --                 | --                  | 18<br>(9 - 30)           | 24<br>(13 - 37)            | 52<br>(29 - 79)             |
| Peripheral vascular disease                   | 26<br>(17 - 42)             | --                 | --                  | 2<br>(1 - 3)             | 5<br>(3 - 9)               | 20<br>(12 - 32)             |
| Endocarditis                                  | 134<br>(79 - 191)           | 7<br>(4 - 14)      | 3<br>(2 - 6)        | 21<br>(11 - 32)          | 34<br>(20 - 56)            | 69<br>(38 - 107)            |
| Other cardiovascular and circulatory diseases | 4,366<br>(3,203 - 7,937)    | 177<br>(117 - 317) | 47<br>(33 - 72)     | 464<br>(309 - 758)       | 1,088<br>(746 - 1,940)     | 2,591<br>(1,819 - 4,872)    |
| Chronic respiratory diseases                  | 5,496<br>(4,405 - 6,533)    | 213<br>(105 - 316) | 37<br>(20 - 49)     | 445<br>(311 - 593)       | 1,150<br>(867 - 1,474)     | 3,651<br>(2,903 - 4,416)    |



Web Table 31- Iran deaths with 95% UI by age, sex, and cause in 2013

| Cause                                               | Females, All Ages        | Females, 0-4 Years | Females, 5-14 Years | Females, 15-49 Years | Females, 50-69 Years | Females, 70-80 Years     |
|-----------------------------------------------------|--------------------------|--------------------|---------------------|----------------------|----------------------|--------------------------|
| Chronic obstructive pulmonary disease               | 3,401<br>(2,524 - 4,284) | 144<br>(64 - 234)  | 15<br>(8 - 22)      | 189<br>(121 - 274)   | 674<br>(462 - 934)   | 2,378<br>(1,769 - 3,040) |
| Pneumoconiosis                                      | 9<br>(5 - 12)            | 1<br>(0 - 1)       | 1<br>(0 - 1)        | 3<br>(2 - 5)         | 2<br>(1 - 3)         | 2<br>(1 - 4)             |
| Silicosis                                           | 2<br>(1 - 3)             | 0<br>(0 - 0)       | 0<br>(0 - 0)        | 1<br>(1 - 1)         | 0<br>(0 - 1)         | 0<br>(0 - 1)             |
| Asbestosis                                          | 2<br>(1 - 2)             | 0<br>(0 - 0)       | 0<br>(0 - 0)        | 1<br>(0 - 1)         | 0<br>(0 - 1)         | 0<br>(0 - 0)             |
| Coal workers pneumoconiosis                         | 2<br>(1 - 2)             | 0<br>(0 - 0)       | 0<br>(0 - 0)        | 1<br>(0 - 1)         | 0<br>(0 - 1)         | 0<br>(0 - 0)             |
| Other pneumoconiosis                                | 4<br>(2 - 6)             | 0<br>(0 - 0)       | 0<br>(0 - 0)        | 1<br>(1 - 2)         | 1<br>(0 - 1)         | 1<br>(1 - 3)             |
| Asthma                                              | 1,798<br>(1,166 - 2,542) | 21<br>(6 - 37)     | 15<br>(7 - 21)      | 194<br>(117 - 285)   | 429<br>(259 - 626)   | 1,139<br>(716 - 1,680)   |
| Interstitial lung disease and pulmonary sarcoidosis | 64<br>(12 - 292)         | 1<br>(0 - 3)       | 1<br>(1 - 2)        | 11<br>(5 - 38)       | 28<br>(3 - 139)      | 23<br>(1 - 115)          |
| Other chronic respiratory diseases                  | 225<br>(144 - 338)       | 46<br>(29 - 72)    | 5<br>(2 - 8)        | 47<br>(28 - 73)      | 18<br>(10 - 29)      | 109<br>(57 - 189)        |
| Cirrhosis                                           | 930<br>(747 - 1,138)     | 21<br>(13 - 30)    | 17<br>(13 - 21)     | 179<br>(129 - 240)   | 285<br>(216 - 370)   | 429<br>(346 - 529)       |
| Cirrhosis due to hepatitis B                        | 381<br>(176 - 614)       | 1<br>(0 - 3)       | 3<br>(1 - 7)        | 71<br>(28 - 125)     | 118<br>(50 - 201)    | 189<br>(79 - 312)        |
| Cirrhosis due to hepatitis C                        | 371<br>(174 - 592)       | 2<br>(1 - 6)       | 3<br>(1 - 5)        | 68<br>(29 - 119)     | 126<br>(55 - 215)    | 172<br>(68 - 288)        |
| Cirrhosis due to alcohol use                        | 63<br>(31 - 117)         | --                 | --                  | 6<br>(3 - 12)        | 16<br>(8 - 34)       | 41<br>(17 - 79)          |
| Cirrhosis due to other causes                       | 114<br>(70 - 187)        | 18<br>(11 - 26)    | 11<br>(7 - 15)      | 35<br>(15 - 67)      | 25<br>(11 - 48)      | 27<br>(13 - 54)          |
| Digestive diseases                                  | 1,487<br>(1,188 - 1,998) | 28<br>(18 - 41)    | 21<br>(16 - 26)     | 176<br>(125 - 237)   | 361<br>(271 - 486)   | 901<br>(696 - 1,296)     |
| Peptic ulcer disease                                | 419<br>(228 - 631)       | 3<br>(1 - 6)       | 2<br>(1 - 4)        | 31<br>(13 - 55)      | 93<br>(44 - 156)     | 290<br>(163 - 438)       |
| Gastritis and duodenitis                            | 188<br>(83 - 477)        | 6<br>(2 - 20)      | 4<br>(2 - 9)        | 26<br>(12 - 62)      | 56<br>(25 - 135)     | 96<br>(36 - 267)         |
| Appendicitis                                        | 69<br>(33 - 115)         | 4<br>(1 - 9)       | 3<br>(1 - 6)        | 19<br>(7 - 34)       | 19<br>(9 - 34)       | 25<br>(11 - 47)          |
| Paralytic ileus and intestinal obstruction          | 301<br>(177 - 550)       | 5<br>(2 - 12)      | 3<br>(2 - 6)        | 41<br>(23 - 71)      | 73<br>(39 - 137)     | 179<br>(97 - 349)        |
| Inguinal, femoral, and abdominal hernia             | 24<br>(13 - 47)          | 1<br>(0 - 1)       | 1<br>(0 - 1)        | 4<br>(2 - 6)         | 5<br>(2 - 11)        | 14<br>(6 - 33)           |
| Inflammatory bowel disease                          | 58<br>(34 - 116)         | 2<br>(1 - 5)       | 2<br>(1 - 3)        | 11<br>(6 - 19)       | 12<br>(7 - 25)       | 30<br>(15 - 69)          |
| Vascular intestinal disorders                       | 35<br>(15 - 72)          | 0<br>(0 - 1)       | 0<br>(0 - 1)        | 6<br>(2 - 13)        | 9<br>(4 - 18)        | 19<br>(8 - 40)           |
| Gallbladder and biliary diseases                    | 165<br>(95 - 239)        | 2<br>(0 - 3)       | 1<br>(0 - 1)        | 10<br>(5 - 16)       | 36<br>(18 - 54)      | 117<br>(70 - 178)        |
| Pancreatitis                                        | 117<br>(72 - 185)        | 2<br>(1 - 3)       | 1<br>(1 - 2)        | 15<br>(9 - 25)       | 33<br>(19 - 52)      | 66<br>(38 - 112)         |
| Other digestive diseases                            | 109<br>(69 - 180)        | 3<br>(1 - 7)       | 3<br>(2 - 5)        | 13<br>(7 - 21)       | 25<br>(15 - 45)      | 64<br>(35 - 122)         |
| Neurological disorders                              | 5,756<br>(4,181 - 7,557) | 42<br>(17 - 74)    | 20<br>(7 - 35)      | 123<br>(61 - 189)    | 537<br>(334 - 757)   | 5,034<br>(3,503 - 6,695) |
| Alzheimer disease and other dementias               | 5,446<br>(3,855 - 7,210) | --                 | --                  | 2<br>(0 - 8)         | 483<br>(288 - 692)   | 4,961<br>(3,424 - 6,602) |
| Parkinson disease                                   | 24<br>(14 - 44)          | --                 | --                  | 2<br>(2 - 4)         | 4<br>(2 - 8)         | 17<br>(10 - 34)          |
| Epilepsy                                            | 182<br>(71 - 284)        | 38<br>(13 - 69)    | 18<br>(6 - 33)      | 84<br>(31 - 143)     | 20<br>(8 - 34)       | 22<br>(10 - 37)          |
| Multiple sclerosis                                  | 82<br>(48 - 139)         | --                 | --                  | 29<br>(16 - 49)      | 27<br>(15 - 48)      | 26<br>(14 - 49)          |
| Other neurological disorders                        | 21<br>(17 - 26)          | 5<br>(3 - 6)       | 1<br>(1 - 2)        | 5<br>(4 - 7)         | 4<br>(3 - 5)         | 7<br>(5 - 9)             |
| Mental and substance use disorders                  | 258<br>(202 - 321)       | 16<br>(10 - 26)    | 0<br>(0 - 1)        | 142<br>(103 - 189)   | 44<br>(33 - 58)      | 56<br>(44 - 72)          |
| Schizophrenia                                       | 34<br>(22 - 48)          | --                 | --                  | 12<br>(7 - 17)       | 8<br>(5 - 13)        | 14<br>(8 - 23)           |
| Alcohol use disorders                               | 3<br>(1 - 6)             | --                 | --                  | 2<br>(1 - 4)         | 1<br>(0 - 1)         | 1<br>(0 - 1)             |
| Drug use disorders                                  | 217<br>(168 - 274)       | 16<br>(10 - 26)    | --                  | 125<br>(90 - 166)    | 35<br>(26 - 46)      | 41<br>(31 - 54)          |
| Opioid use disorders                                | 118<br>(91 - 148)        | 9<br>(6 - 15)      | --                  | 68<br>(48 - 92)      | 17<br>(13 - 23)      | 23<br>(17 - 30)          |
| Cocaine use disorders                               | 4<br>(3 - 5)             | 0<br>(0 - 1)       | --                  | 3<br>(2 - 4)         | 0<br>(0 - 1)         | 1<br>(0 - 1)             |
| Amphetamine use disorders                           | 4<br>(3 - 5)             | 0<br>(0 - 1)       | --                  | 2<br>(2 - 3)         | 1<br>(0 - 1)         | 1<br>(0 - 1)             |
| Other drug use disorders                            | 91<br>(71 - 116)         | 6<br>(4 - 10)      | --                  | 52<br>(36 - 70)      | 16<br>(12 - 21)      | 17<br>(13 - 23)          |
| Eating disorders                                    | 4<br>(2 - 6)             | --                 | 0<br>(0 - 1)        | 4<br>(2 - 6)         | --                   | --                       |

Web Table 31- Iran deaths with 95% UI by age, sex, and cause in 2013

| Cause                                               | Females, All Ages        | Females, 0-4 Years       | Females, 5-14 Years | Females, 15-49 Years   | Females, 50-69 Years     | Females, 70-80 Years     |
|-----------------------------------------------------|--------------------------|--------------------------|---------------------|------------------------|--------------------------|--------------------------|
| Anorexia nervosa                                    | 4<br>(2 - 6)             | --                       | 0<br>(0 - 1)        | 4<br>(2 - 6)           | --                       | --                       |
| Diabetes, urogenital, blood, and endocrine diseases | 8,151<br>(6,554 - 9,931) | 222<br>(119 - 312)       | 95<br>(67 - 122)    | 1,016<br>(749 - 1,331) | 2,317<br>(1,703 - 2,990) | 4,502<br>(3,682 - 5,631) |
| Diabetes mellitus                                   | 3,632<br>(2,758 - 4,498) | 15<br>(8 - 24)           | 10<br>(5 - 16)      | 278<br>(182 - 385)     | 1,244<br>(867 - 1,622)   | 2,085<br>(1,615 - 2,604) |
| Acute glomerulonephritis                            | 58<br>(38 - 103)         | 2<br>(1 - 3)             | 1<br>(1 - 1)        | 7<br>(4 - 10)          | 13<br>(8 - 22)           | 36<br>(20 - 75)          |
| Chronic kidney disease                              | 2,098<br>(1,102 - 2,659) | 43<br>(15 - 69)          | 21<br>(9 - 30)      | 249<br>(118 - 351)     | 565<br>(266 - 774)       | 1,219<br>(655 - 1,567)   |
| Chronic kidney disease due to diabetes mellitus     | 80<br>(27 - 198)         | 1<br>(1 - 3)             | 1<br>(1 - 3)        | 13<br>(5 - 31)         | 31<br>(9 - 83)           | 33<br>(10 - 85)          |
| Chronic kidney disease due to hypertension          | 992<br>(498 - 1,449)     | 3<br>(1 - 7)             | 3<br>(1 - 5)        | 107<br>(49 - 176)      | 273<br>(130 - 432)       | 606<br>(313 - 897)       |
| Chronic kidney disease due to glomerulonephritis    | 91<br>(41 - 154)         | 4<br>(2 - 7)             | 2<br>(1 - 3)        | 16<br>(6 - 28)         | 21<br>(8 - 40)           | 47<br>(21 - 85)          |
| Chronic kidney disease due to other causes          | 934<br>(306 - 1,455)     | 34<br>(10 - 59)          | 15<br>(5 - 23)      | 114<br>(32 - 196)      | 239<br>(66 - 424)        | 533<br>(175 - 882)       |
| Urinary diseases and male infertility               | 1,767<br>(1,096 - 3,076) | 35<br>(19 - 77)          | 23<br>(14 - 40)     | 283<br>(163 - 501)     | 420<br>(247 - 736)       | 1,006<br>(592 - 2,002)   |
| Interstitial nephritis and urinary tract infections | 1,490<br>(826 - 2,855)   | 30<br>(15 - 71)          | 18<br>(9 - 35)      | 249<br>(130 - 461)     | 361<br>(191 - 685)       | 832<br>(417 - 1,860)     |
| Urolithiasis                                        | 71<br>(9 - 147)          | --                       | 1<br>(0 - 3)        | 12<br>(2 - 33)         | 17<br>(2 - 40)           | 40<br>(4 - 85)           |
| Other urinary diseases                              | 206<br>(60 - 407)        | 5<br>(1 - 12)            | 4<br>(1 - 8)        | 22<br>(7 - 59)         | 42<br>(12 - 99)          | 134<br>(32 - 263)        |
| Gynecological diseases                              | 4<br>(2 - 6)             | --                       | --                  | 2<br>(1 - 3)           | 1<br>(0 - 1)             | 1<br>(0 - 2)             |
| Uterine fibroids                                    | 1<br>(0 - 1)             | --                       | --                  | 0<br>(0 - 1)           | 0<br>(0 - 0)             | 0<br>(0 - 1)             |
| Polycystic ovarian syndrome                         | 0<br>(0 - 0)             | --                       | --                  | 0<br>(0 - 0)           | 0<br>(0 - 0)             | --                       |
| Endometriosis                                       | 0<br>(0 - 1)             | --                       | --                  | 0<br>(0 - 1)           | 0<br>(0 - 0)             | --                       |
| Genital prolapse                                    | 1<br>(0 - 1)             | --                       | --                  | 0<br>(0 - 0)           | 0<br>(0 - 0)             | 0<br>(0 - 1)             |
| Other gynecological diseases                        | 2<br>(1 - 3)             | --                       | --                  | 1<br>(0 - 2)           | 0<br>(0 - 1)             | 0<br>(0 - 1)             |
| Hemoglobinopathies and hemolytic anemias            | 347<br>(208 - 510)       | 60<br>(35 - 93)          | 31<br>(18 - 49)     | 144<br>(78 - 239)      | 34<br>(19 - 58)          | 79<br>(45 - 133)         |
| Thalassemias                                        | 170<br>(99 - 253)        | 48<br>(27 - 76)          | 27<br>(15 - 42)     | 95<br>(50 - 159)       | 0<br>(0 - 0)             | 0<br>(0 - 0)             |
| Sickle cell disorders                               | 57<br>(34 - 90)          | 5<br>(3 - 7)             | 3<br>(2 - 5)        | 33<br>(18 - 55)        | 16<br>(9 - 28)           | 1<br>(0 - 1)             |
| G6PD deficiency                                     | 2<br>(1 - 3)             | 0<br>(0 - 0)             | 0<br>(0 - 0)        | 1<br>(0 - 1)           | 0<br>(0 - 1)             | 0<br>(0 - 0)             |
| Other hemoglobinopathies and hemolytic anemias      | 118<br>(72 - 184)        | 6<br>(4 - 10)            | 1<br>(1 - 2)        | 15<br>(8 - 25)         | 18<br>(10 - 30)          | 78<br>(44 - 131)         |
| Endocrine, metabolic, blood, and immune disorders   | 246<br>(33 - 359)        | 68<br>(7 - 117)          | 9<br>(1 - 15)       | 52<br>(7 - 84)         | 40<br>(6 - 62)           | 76<br>(11 - 123)         |
| Musculoskeletal disorders                           | 372<br>(244 - 620)       | --                       | 14<br>(8 - 20)      | 128<br>(78 - 236)      | 71<br>(42 - 139)         | 159<br>(91 - 260)        |
| Rheumatoid arthritis                                | 82<br>(43 - 154)         | --                       | 5<br>(2 - 8)        | 18<br>(9 - 37)         | 17<br>(8 - 39)           | 43<br>(19 - 81)          |
| Other musculoskeletal disorders                     | 289<br>(193 - 492)       | --                       | 9<br>(5 - 14)       | 111<br>(68 - 200)      | 54<br>(32 - 102)         | 116<br>(66 - 195)        |
| Other non-communicable diseases                     | 3,791<br>(2,945 - 4,853) | 3,384<br>(2,559 - 4,419) | 198<br>(143 - 259)  | 136<br>(98 - 183)      | 23<br>(16 - 31)          | 51<br>(34 - 69)          |
| Congenital anomalies                                | 3,688<br>(2,809 - 4,760) | 3,334<br>(2,495 - 4,373) | 196<br>(142 - 258)  | 126<br>(90 - 173)      | 15<br>(10 - 20)          | 17<br>(12 - 25)          |
| Neural tube defects                                 | 393<br>(193 - 709)       | 347<br>(152 - 657)       | 24<br>(13 - 37)     | 18<br>(9 - 28)         | 2<br>(1 - 3)             | 3<br>(1 - 5)             |
| Congenital heart anomalies                          | 1,015<br>(683 - 1,428)   | 908<br>(589 - 1,305)     | 79<br>(51 - 115)    | 19<br>(12 - 29)        | 3<br>(2 - 5)             | 5<br>(4 - 9)             |
| Cleft lip and cleft palate                          | 9<br>(2 - 22)            | 9<br>(2 - 22)            | --                  | --                     | --                       | --                       |
| Down syndrome                                       | 118<br>(61 - 193)        | 97<br>(48 - 167)         | 10<br>(4 - 16)      | 10<br>(5 - 15)         | 1<br>(0 - 1)             | 0<br>(0 - 0)             |
| Chromosomal unbalanced rearrangements               | 208<br>(90 - 369)        | 190<br>(80 - 344)        | 4<br>(2 - 7)        | 10<br>(5 - 17)         | 2<br>(1 - 4)             | 2<br>(1 - 5)             |
| Other congenital anomalies                          | 1,945<br>(1,404 - 2,660) | 1,783<br>(1,246 - 2,489) | 80<br>(54 - 114)    | 69<br>(47 - 94)        | 7<br>(5 - 9)             | 7<br>(4 - 10)            |
| Skin and subcutaneous diseases                      | 59<br>(29 - 79)          | 6<br>(3 - 11)            | 2<br>(1 - 2)        | 10<br>(6 - 14)         | 8<br>(4 - 12)            | 34<br>(14 - 48)          |
| Cellulitis                                          | 9<br>(4 - 16)            | 3<br>(1 - 6)             | 0<br>(0 - 1)        | 2<br>(1 - 3)           | 1<br>(0 - 2)             | 3<br>(1 - 7)             |
| Pyoderma                                            | 3<br>(2 - 4)             | 1<br>(0 - 3)             | 0<br>(0 - 0)        | 1<br>(0 - 1)           | 0<br>(0 - 1)             | 0<br>(0 - 0)             |
| Decubitus ulcer                                     | 43<br>(18 - 60)          | 1<br>(0 - 1)             | 1<br>(0 - 1)        | 5<br>(3 - 8)           | 6<br>(3 - 9)             | 31<br>(12 - 44)          |

Web Table 31- Iran deaths with 95% UI by age, sex, and cause in 2013

| Cause                                           | Females, All Ages        | Females, 0-4 Years   | Females, 5-14 Years | Females, 15-49 Years     | Females, 50-69 Years   | Females, 70-80 Years   |
|-------------------------------------------------|--------------------------|----------------------|---------------------|--------------------------|------------------------|------------------------|
| Other skin and subcutaneous diseases            | 4<br>(2 - 8)             | 1<br>(0 - 4)         | 0<br>(0 - 1)        | 2<br>(1 - 3)             | 0<br>(0 - 1)           | 0<br>(0 - 1)           |
| Sudden infant death syndrome                    | 44<br>(10 - 127)         | 44<br>(10 - 127)     | --                  | --                       | --                     | --                     |
| Injuries                                        | 7,384<br>(5,935 - 9,719) | 991<br>(735 - 1,487) | 599<br>(495 - 722)  | 3,491<br>(2,663 - 4,568) | 1,136<br>(834 - 1,715) | 1,166<br>(914 - 1,773) |
| Transport injuries                              | 2,679<br>(2,060 - 3,804) | 294<br>(184 - 406)   | 291<br>(224 - 365)  | 1,112<br>(808 - 1,510)   | 580<br>(394 - 984)     | 402<br>(267 - 838)     |
| Road injuries                                   | 2,574<br>(1,980 - 3,673) | 286<br>(178 - 395)   | 281<br>(217 - 353)  | 1,065<br>(775 - 1,448)   | 559<br>(379 - 953)     | 383<br>(252 - 803)     |
| Pedestrian road injuries                        | 903<br>(670 - 1,484)     | 105<br>(61 - 162)    | 121<br>(84 - 167)   | 282<br>(195 - 429)       | 212<br>(137 - 407)     | 183<br>(111 - 411)     |
| Cyclist road injuries                           | 100<br>(56 - 169)        | 6<br>(2 - 11)        | 6<br>(3 - 10)       | 31<br>(14 - 49)          | 36<br>(20 - 67)        | 20<br>(11 - 48)        |
| Motorcyclist road injuries                      | 97<br>(62 - 165)         | 9<br>(4 - 15)        | 7<br>(4 - 12)       | 54<br>(31 - 84)          | 22<br>(12 - 44)        | 6<br>(3 - 15)          |
| Motor vehicle road injuries                     | 1,458<br>(1,094 - 2,015) | 165<br>(101 - 235)   | 145<br>(97 - 192)   | 693<br>(493 - 952)       | 286<br>(190 - 488)     | 169<br>(104 - 351)     |
| Other road injuries                             | 16<br>(6 - 89)           | 2<br>(1 - 7)         | 1<br>(1 - 6)        | 4<br>(1 - 23)            | 3<br>(1 - 19)          | 5<br>(1 - 22)          |
| Other transport injuries                        | 105<br>(79 - 149)        | 8<br>(4 - 13)        | 10<br>(6 - 14)      | 47<br>(31 - 68)          | 21<br>(14 - 35)        | 19<br>(11 - 38)        |
| Unintentional injuries                          | 3,303<br>(2,583 - 4,712) | 677<br>(468 - 1,220) | 261<br>(200 - 366)  | 1,313<br>(953 - 1,832)   | 400<br>(294 - 600)     | 652<br>(521 - 851)     |
| Falls                                           | 331<br>(214 - 423)       | 43<br>(21 - 69)      | 18<br>(11 - 27)     | 48<br>(28 - 69)          | 50<br>(32 - 70)        | 172<br>(110 - 229)     |
| Drowning                                        | 370<br>(234 - 969)       | 158<br>(82 - 455)    | 65<br>(42 - 134)    | 99<br>(60 - 229)         | 24<br>(14 - 53)        | 24<br>(13 - 50)        |
| Fire, heat, and hot substances                  | 1,456<br>(1,060 - 2,239) | 152<br>(91 - 356)    | 81<br>(56 - 122)    | 768<br>(528 - 1,123)     | 182<br>(124 - 296)     | 273<br>(182 - 455)     |
| Poisonings                                      | 304<br>(177 - 403)       | 52<br>(22 - 83)      | 23<br>(10 - 36)     | 139<br>(71 - 203)        | 40<br>(25 - 64)        | 50<br>(33 - 91)        |
| Exposure to mechanical forces                   | 266<br>(185 - 457)       | 82<br>(35 - 221)     | 17<br>(12 - 25)     | 106<br>(70 - 170)        | 30<br>(21 - 45)        | 31<br>(21 - 45)        |
| Unintentional firearm injuries                  | 111<br>(77 - 183)        | 8<br>(4 - 19)        | 8<br>(5 - 14)       | 60<br>(37 - 109)         | 15<br>(9 - 26)         | 20<br>(11 - 32)        |
| Unintentional suffocation                       | 81<br>(34 - 218)         | 66<br>(22 - 199)     | 2<br>(1 - 4)        | 7<br>(4 - 14)            | 2<br>(1 - 4)           | 3<br>(2 - 6)           |
| Other exposure to mechanical forces             | 74<br>(45 - 118)         | 8<br>(4 - 17)        | 7<br>(4 - 12)       | 38<br>(21 - 65)          | 13<br>(7 - 20)         | 8<br>(6 - 12)          |
| Adverse effects of medical treatment            | 88<br>(9 - 179)          | 9<br>(1 - 23)        | 3<br>(1 - 5)        | 21<br>(4 - 43)           | 23<br>(2 - 48)         | 33<br>(1 - 69)         |
| Animal contact                                  | 88<br>(38 - 167)         | 30<br>(11 - 63)      | 18<br>(7 - 35)      | 20<br>(8 - 38)           | 8<br>(3 - 17)          | 11<br>(4 - 22)         |
| Venomous animal contact                         | 77<br>(33 - 141)         | 26<br>(10 - 54)      | 17<br>(6 - 33)      | 17<br>(6 - 31)           | 7<br>(3 - 14)          | 10<br>(4 - 20)         |
| Non-venomous animal contact                     | 11<br>(4 - 26)           | 4<br>(1 - 10)        | 1<br>(0 - 2)        | 3<br>(1 - 10)            | 1<br>(0 - 3)           | 1<br>(0 - 3)           |
| Foreign body                                    | 178<br>(103 - 282)       | 114<br>(61 - 197)    | 12<br>(6 - 19)      | 20<br>(11 - 32)          | 8<br>(4 - 12)          | 24<br>(14 - 40)        |
| Pulmonary aspiration and foreign body in airway | 172<br>(97 - 277)        | 113<br>(60 - 196)    | 12<br>(6 - 19)      | 18<br>(10 - 29)          | 7<br>(4 - 11)          | 22<br>(13 - 38)        |
| Foreign body in other body part                 | 6<br>(3 - 9)             | 1<br>(0 - 1)         | 1<br>(0 - 1)        | 3<br>(1 - 4)             | 1<br>(0 - 1)           | 2<br>(1 - 3)           |
| Other unintentional injuries                    | 222<br>(133 - 707)       | 38<br>(16 - 107)     | 23<br>(10 - 70)     | 93<br>(50 - 279)         | 35<br>(16 - 132)       | 33<br>(15 - 132)       |
| Self-harm and interpersonal violence            | 1,401<br>(901 - 1,843)   | 20<br>(10 - 40)      | 47<br>(23 - 65)     | 1,066<br>(640 - 1,417)   | 156<br>(105 - 215)     | 112<br>(84 - 170)      |
| Self-harm                                       | 1,101<br>(539 - 1,458)   | --                   | 33<br>(12 - 49)     | 871<br>(422 - 1,175)     | 117<br>(63 - 160)      | 79<br>(44 - 103)       |
| Interpersonal violence                          | 301<br>(200 - 522)       | 20<br>(10 - 40)      | 13<br>(7 - 23)      | 195<br>(123 - 337)       | 39<br>(22 - 70)        | 33<br>(15 - 76)        |
| Assault by firearm                              | 58<br>(33 - 112)         | 4<br>(2 - 10)        | 3<br>(1 - 7)        | 34<br>(17 - 70)          | 11<br>(5 - 22)         | 5<br>(2 - 14)          |
| Assault by sharp object                         | 94<br>(55 - 175)         | 3<br>(1 - 8)         | 2<br>(1 - 5)        | 78<br>(44 - 144)         | 5<br>(3 - 13)          | 5<br>(2 - 13)          |
| Assault by other means                          | 149<br>(96 - 266)        | 12<br>(6 - 25)       | 8<br>(4 - 14)       | 84<br>(45 - 149)         | 22<br>(13 - 42)        | 23<br>(10 - 50)        |
| Forces of nature, war, and legal intervention   | 0<br>(0 - 0)             | 0<br>(0 - 0)         | --                  | --                       | --                     | --                     |
| Exposure to forces of nature                    | 0<br>(0 - 0)             | 0<br>(0 - 0)         | --                  | --                       | --                     | --                     |

Web Table 31- Iraq deaths with 95% UI by age, sex, and cause in 2013

| Cause                                                             | Both Sexes, All Ages           | Both Sexes, 0-4 Years       | Both Sexes, 5-14 Years   | Both Sexes, 15-49 Years     | Both Sexes, 50-69 Years     | Both Sexes, 70-80 Years     |
|-------------------------------------------------------------------|--------------------------------|-----------------------------|--------------------------|-----------------------------|-----------------------------|-----------------------------|
| All causes                                                        | 152,839<br>(129,642 - 177,827) | 29,942<br>(27,269 - 33,007) | 4,065<br>(3,677 - 4,451) | 31,202<br>(23,478 - 39,660) | 36,259<br>(27,195 - 45,564) | 51,371<br>(43,913 - 58,342) |
| Communicable, maternal, neonatal, and nutritional diseases        | 26,696<br>(23,866 - 30,029)    | 18,987<br>(16,595 - 21,883) | 1,006<br>(806 - 1,264)   | 3,305<br>(2,663 - 4,070)    | 1,460<br>(1,117 - 1,846)    | 1,939<br>(1,546 - 2,374)    |
| HIV/AIDS and tuberculosis                                         | 1,261<br>(996 - 1,581)         | 68<br>(48 - 93)             | 20<br>(15 - 27)          | 640<br>(489 - 820)          | 291<br>(209 - 388)          | 241<br>(178 - 313)          |
| Tuberculosis                                                      | 1,050<br>(791 - 1,352)         | 54<br>(36 - 77)             | 16<br>(11 - 21)          | 479<br>(340 - 653)          | 264<br>(182 - 360)          | 237<br>(175 - 310)          |
| HIV/AIDS                                                          | 211<br>(159 - 273)             | 14<br>(6 - 29)              | 5<br>(3 - 8)             | 161<br>(125 - 202)          | 27<br>(18 - 39)             | 4<br>(2 - 6)                |
| HIV/AIDS resulting in mycobacterial infection                     | 12<br>(9 - 17)                 | 1<br>(0 - 2)                | 0<br>(0 - 0)             | 9<br>(7 - 12)               | 2<br>(1 - 3)                | 0<br>(0 - 0)                |
| HIV/AIDS resulting in other diseases                              | 199<br>(149 - 258)             | 14<br>(6 - 28)              | 5<br>(3 - 8)             | 152<br>(118 - 190)          | 26<br>(17 - 36)             | 4<br>(2 - 5)                |
| Diarrhea, lower respiratory, and other common infectious diseases | 10,997<br>(8,969 - 13,565)     | 6,576<br>(4,893 - 8,744)    | 775<br>(582 - 1,034)     | 1,369<br>(969 - 1,850)      | 886<br>(621 - 1,171)        | 1,391<br>(1,051 - 1,785)    |
| Diarrheal diseases                                                | 2,120<br>(1,426 - 3,133)       | 1,599<br>(908 - 2,573)      | 65<br>(36 - 106)         | 164<br>(109 - 233)          | 102<br>(66 - 154)           | 190<br>(127 - 282)          |
| Intestinal infectious diseases                                    | 828<br>(384 - 1,498)           | 232<br>(95 - 452)           | 267<br>(133 - 462)       | 289<br>(121 - 535)          | 28<br>(11 - 56)             | 11<br>(4 - 21)              |
| Typhoid fever                                                     | 631<br>(294 - 1,138)           | 168<br>(67 - 337)           | 207<br>(104 - 364)       | 225<br>(92 - 418)           | 22<br>(8 - 44)              | 8<br>(3 - 17)               |
| Paratyphoid fever                                                 | 187<br>(81 - 347)              | 59<br>(22 - 119)            | 59<br>(27 - 110)         | 61<br>(24 - 120)            | 6<br>(2 - 12)               | 2<br>(1 - 4)                |
| Other intestinal infectious diseases                              | 10<br>(4 - 19)                 | 5<br>(1 - 12)               | 1<br>(0 - 4)             | 3<br>(0 - 9)                | 1<br>(0 - 3)                | 0<br>(0 - 3)                |
| Lower respiratory infections                                      | 5,392<br>(4,297 - 6,801)       | 2,900<br>(2,042 - 4,016)    | 199<br>(133 - 279)       | 607<br>(418 - 856)          | 629<br>(427 - 865)          | 1,057<br>(756 - 1,418)      |
| Upper respiratory infections                                      | 10<br>(5 - 17)                 | 2<br>(0 - 5)                | 0<br>(0 - 1)             | 3<br>(1 - 7)                | 2<br>(0 - 5)                | 2<br>(0 - 6)                |
| Otitis media                                                      | 13<br>(11 - 16)                | 4<br>(3 - 6)                | 1<br>(1 - 1)             | 3<br>(2 - 3)                | 2<br>(2 - 3)                | 3<br>(2 - 4)                |
| Meningitis                                                        | 1,044<br>(776 - 1,413)         | 673<br>(412 - 1,019)        | 85<br>(55 - 127)         | 165<br>(111 - 234)          | 67<br>(44 - 100)            | 55<br>(37 - 79)             |
| Pneumococcal meningitis                                           | 213<br>(160 - 286)             | 120<br>(69 - 190)           | 22<br>(13 - 36)          | 42<br>(25 - 68)             | 15<br>(9 - 25)              | 13<br>(8 - 19)              |
| H influenzae type B meningitis                                    | 297<br>(193 - 438)             | 245<br>(140 - 383)          | 20<br>(12 - 34)          | 20<br>(12 - 31)             | 7<br>(4 - 11)               | 5<br>(3 - 8)                |
| Meningococcal meningitis                                          | 311<br>(215 - 450)             | 203<br>(114 - 331)          | 27<br>(16 - 44)          | 48<br>(30 - 72)             | 18<br>(10 - 30)             | 16<br>(10 - 25)             |
| Other meningitis                                                  | 223<br>(161 - 298)             | 104<br>(61 - 161)           | 16<br>(8 - 27)           | 55<br>(33 - 85)             | 27<br>(16 - 42)             | 21<br>(13 - 32)             |
| Encephalitis                                                      | 560<br>(355 - 760)             | 268<br>(150 - 424)          | 70<br>(41 - 104)         | 106<br>(68 - 157)           | 51<br>(26 - 78)             | 64<br>(30 - 98)             |
| Diphtheria                                                        | 10<br>(1 - 38)                 | 6<br>(0 - 34)               | 2<br>(0 - 13)            | 2<br>(0 - 5)                | 0<br>(0 - 2)                | --                          |
| Whooping cough                                                    | 752<br>(2 - 3,586)             | 692<br>(1 - 3,272)          | 49<br>(0 - 269)          | 11<br>(0 - 58)              | 1<br>(0 - 4)                | --                          |
| Tetanus                                                           | 8<br>(5 - 19)                  | 2<br>(1 - 6)                | 1<br>(1 - 3)             | 4<br>(3 - 11)               | 0<br>(0 - 1)                | 0<br>(0 - 0)                |
| Measles                                                           | 224<br>(4 - 1,362)             | 187<br>(4 - 1,113)          | 32<br>(1 - 190)          | 5<br>(0 - 32)               | 0<br>(0 - 1)                | --                          |
| Varicella and herpes zoster                                       | 36<br>(16 - 69)                | 12<br>(2 - 37)              | 3<br>(0 - 10)            | 10<br>(3 - 22)              | 3<br>(0 - 7)                | 8<br>(1 - 29)               |
| Neglected tropical diseases and malaria                           | 988<br>(713 - 1,302)           | 393<br>(241 - 587)          | 132<br>(88 - 178)        | 344<br>(230 - 495)          | 89<br>(56 - 128)            | 30<br>(21 - 40)             |
| Leishmaniasis                                                     | 865<br>(611 - 1,158)           | 356<br>(207 - 545)          | 118<br>(76 - 164)        | 309<br>(203 - 454)          | 67<br>(39 - 101)            | 15<br>(9 - 22)              |
| Visceral leishmaniasis                                            | 865<br>(611 - 1,158)           | 356<br>(207 - 545)          | 118<br>(76 - 164)        | 309<br>(203 - 454)          | 67<br>(39 - 101)            | 15<br>(9 - 22)              |
| Schistosomiasis                                                   | 51<br>(37 - 67)                | 0<br>(0 - 0)                | 1<br>(1 - 2)             | 20<br>(13 - 30)             | 18<br>(11 - 26)             | 11<br>(7 - 16)              |
| Cysticercosis                                                     | 0<br>(0 - 1)                   | 0<br>(0 - 0)                | 0<br>(0 - 0)             | 0<br>(0 - 0)                | 0<br>(0 - 0)                | 0<br>(0 - 0)                |
| Cystic echinococcosis                                             | 4<br>(3 - 5)                   | 0<br>(0 - 0)                | 1<br>(0 - 1)             | 2<br>(1 - 3)                | 1<br>(1 - 1)                | 0<br>(0 - 0)                |
| Dengue                                                            | 6<br>(4 - 8)                   | 2<br>(1 - 3)                | 1<br>(1 - 1)             | 3<br>(2 - 4)                | 0<br>(0 - 0)                | 0<br>(0 - 0)                |
| Rabies                                                            | 16<br>(10 - 30)                | 3<br>(1 - 7)                | 5<br>(3 - 10)            | 5<br>(3 - 10)               | 1<br>(0 - 2)                | 2<br>(1 - 3)                |
| Intestinal nematode infections                                    | 18<br>(7 - 33)                 | 10<br>(3 - 20)              | 4<br>(0 - 11)            | 2<br>(0 - 10)               | 1<br>(0 - 6)                | 1<br>(0 - 6)                |
| Ascariasis                                                        | 18<br>(7 - 33)                 | 10<br>(3 - 20)              | 4<br>(0 - 11)            | 2<br>(0 - 10)               | 1<br>(0 - 6)                | 1<br>(0 - 6)                |
| Other neglected tropical diseases                                 | 29<br>(18 - 45)                | 22<br>(12 - 38)             | 2<br>(1 - 4)             | 3<br>(2 - 4)                | 1<br>(1 - 2)                | 1<br>(0 - 1)                |
| Maternal disorders                                                | 695<br>(427 - 1,170)           | --                          | 2<br>(1 - 5)             | 693<br>(424 - 1,168)        | --                          | --                          |
| Maternal hemorrhage                                               | 154<br>(89 - 269)              | --                          | 0<br>(0 - 1)             | 154<br>(89 - 268)           | --                          | --                          |

Web Table 31- Iraq deaths with 95% UI by age, sex, and cause in 2013

| Cause                                                            | Both Sexes, All Ages          | Both Sexes, 0-4 Years      | Both Sexes, 5-14 Years   | Both Sexes, 15-49 Years     | Both Sexes, 50-69 Years     | Both Sexes, 70-80 Years     |
|------------------------------------------------------------------|-------------------------------|----------------------------|--------------------------|-----------------------------|-----------------------------|-----------------------------|
| Maternal sepsis and other maternal infections                    | 100<br>(58 - 172)             | --                         | 0<br>(0 - 1)             | 99<br>(57 - 172)            | --                          | --                          |
| Maternal hypertensive disorders                                  | 69<br>(37 - 125)              | --                         | 0<br>(0 - 1)             | 68<br>(36 - 125)            | --                          | --                          |
| Maternal obstructed labor                                        | 64<br>(35 - 119)              | --                         | 0<br>(0 - 0)             | 64<br>(35 - 119)            | --                          | --                          |
| Maternal abortive outcome                                        | 72<br>(40 - 131)              | --                         | 0<br>(0 - 1)             | 72<br>(39 - 130)            | --                          | --                          |
| Indirect maternal deaths                                         | 53<br>(21 - 107)              | --                         | 0<br>(0 - 0)             | 53<br>(21 - 107)            | --                          | --                          |
| Late maternal deaths                                             | 72<br>(34 - 135)              | --                         | 0<br>(0 - 1)             | 72<br>(33 - 135)            | --                          | --                          |
| Maternal deaths aggravated by HIV/AIDS                           | 0<br>(0 - 0)                  | --                         | --                       | 0<br>(0 - 0)                | --                          | --                          |
| Other maternal disorders                                         | 110<br>(55 - 196)             | --                         | 0<br>(0 - 1)             | 110<br>(55 - 196)           | --                          | --                          |
| Neonatal disorders                                               | 11,543<br>(9,692 - 13,542)    | 11,543<br>(9,692 - 13,542) | --                       | --                          | --                          | --                          |
| Neonatal preterm birth complications                             | 7,416<br>(5,636 - 9,394)      | 7,416<br>(5,636 - 9,394)   | --                       | --                          | --                          | --                          |
| Neonatal encephalopathy due to birth asphyxia and trauma         | 1,063<br>(505 - 1,991)        | 1,063<br>(505 - 1,991)     | --                       | --                          | --                          | --                          |
| Neonatal sepsis and other neonatal infections                    | 1,727<br>(761 - 3,177)        | 1,727<br>(761 - 3,177)     | --                       | --                          | --                          | --                          |
| Hemolytic disease and other neonatal jaundice                    | 27<br>(12 - 60)               | 27<br>(12 - 60)            | --                       | --                          | --                          | --                          |
| Other neonatal disorders                                         | 1,310<br>(721 - 2,114)        | 1,310<br>(721 - 2,114)     | --                       | --                          | --                          | --                          |
| Nutritional deficiencies                                         | 631<br>(490 - 837)            | 184<br>(111 - 286)         | 33<br>(23 - 45)          | 138<br>(95 - 203)           | 97<br>(66 - 141)            | 179<br>(127 - 258)          |
| Protein-energy malnutrition                                      | 237<br>(149 - 342)            | 127<br>(69 - 206)          | 12<br>(7 - 20)           | 13<br>(7 - 25)              | 25<br>(12 - 40)             | 61<br>(31 - 98)             |
| Iodine deficiency                                                | 9<br>(2 - 26)                 | 2<br>(0 - 15)              | 1<br>(0 - 4)             | 2<br>(0 - 8)                | 2<br>(0 - 8)                | 2<br>(0 - 10)               |
| Iron-deficiency anemia                                           | 348<br>(256 - 504)            | 46<br>(20 - 97)            | 18<br>(11 - 27)          | 113<br>(76 - 167)           | 66<br>(44 - 100)            | 105<br>(68 - 159)           |
| Other nutritional deficiencies                                   | 36<br>(19 - 82)               | 9<br>(3 - 25)              | 1<br>(1 - 3)             | 10<br>(5 - 25)              | 4<br>(2 - 13)               | 11<br>(5 - 27)              |
| Other communicable, maternal, neonatal, and nutritional diseases | 581<br>(425 - 836)            | 222<br>(118 - 456)         | 43<br>(27 - 73)          | 120<br>(83 - 166)           | 98<br>(66 - 145)            | 98<br>(64 - 165)            |
| Sexually transmitted diseases excluding HIV                      | 30<br>(19 - 44)               | 12<br>(6 - 21)             | 1<br>(1 - 2)             | 9<br>(5 - 15)               | 4<br>(2 - 9)                | 4<br>(1 - 8)                |
| Syphilis                                                         | 22<br>(14 - 33)               | 12<br>(6 - 21)             | 1<br>(1 - 2)             | 4<br>(2 - 7)                | 2<br>(1 - 5)                | 3<br>(1 - 6)                |
| Chlamydial infection                                             | 2<br>(1 - 3)                  | --                         | 0<br>(0 - 0)             | 1<br>(1 - 3)                | 0<br>(0 - 1)                | 0<br>(0 - 0)                |
| Gonococcal infection                                             | 3<br>(2 - 5)                  | --                         | 0<br>(0 - 0)             | 2<br>(1 - 3)                | 1<br>(0 - 2)                | 0<br>(0 - 1)                |
| Other sexually transmitted diseases                              | 3<br>(1 - 4)                  | --                         | 0<br>(0 - 0)             | 2<br>(1 - 3)                | 0<br>(0 - 1)                | 0<br>(0 - 1)                |
| Hepatitis                                                        | 196<br>(154 - 249)            | 42<br>(24 - 70)            | 11<br>(7 - 15)           | 52<br>(38 - 72)             | 53<br>(37 - 76)             | 38<br>(28 - 50)             |
| Acute hepatitis A                                                | 30<br>(10 - 55)               | 18<br>(6 - 36)             | 4<br>(2 - 8)             | 5<br>(1 - 11)               | 2<br>(0 - 5)                | 1<br>(0 - 2)                |
| Acute hepatitis B                                                | 118<br>(80 - 163)             | 23<br>(10 - 46)            | 3<br>(2 - 6)             | 21<br>(11 - 33)             | 40<br>(25 - 60)             | 31<br>(21 - 42)             |
| Acute hepatitis C                                                | 12<br>(2 - 31)                | --                         | 1<br>(0 - 2)             | 3<br>(1 - 9)                | 4<br>(1 - 12)               | 4<br>(1 - 9)                |
| Acute hepatitis E                                                | 36<br>(19 - 60)               | 0<br>(0 - 1)               | 2<br>(1 - 4)             | 23<br>(13 - 38)             | 7<br>(3 - 16)               | 3<br>(1 - 6)                |
| Other infectious diseases                                        | 356<br>(220 - 603)            | 169<br>(70 - 392)          | 31<br>(15 - 61)          | 59<br>(36 - 91)             | 41<br>(21 - 78)             | 56<br>(26 - 123)            |
| Non-communicable diseases                                        | 110,981<br>(91,196 - 131,085) | 9,069<br>(7,346 - 11,027)  | 1,590<br>(1,359 - 1,842) | 18,417<br>(13,776 - 24,044) | 33,243<br>(24,822 - 41,827) | 48,661<br>(41,382 - 55,256) |
| Neoplasms                                                        | 14,493<br>(11,429 - 17,854)   | 455<br>(294 - 673)         | 442<br>(352 - 529)       | 4,211<br>(3,151 - 5,590)    | 5,445<br>(4,068 - 6,925)    | 3,940<br>(3,275 - 4,682)    |
| Esophageal cancer                                                | 252<br>(187 - 343)            | --                         | --                       | 57<br>(39 - 81)             | 110<br>(77 - 161)           | 84<br>(63 - 111)            |
| Stomach cancer                                                   | 1,029<br>(783 - 1,313)        | --                         | --                       | 273<br>(191 - 390)          | 398<br>(286 - 517)          | 358<br>(273 - 467)          |
| Liver cancer                                                     | 1,064<br>(814 - 1,363)        | --                         | 6<br>(4 - 10)            | 218<br>(152 - 309)          | 494<br>(347 - 681)          | 345<br>(256 - 454)          |
| Liver cancer due to hepatitis B                                  | 246<br>(136 - 415)            | --                         | 3<br>(1 - 5)             | 74<br>(39 - 123)            | 111<br>(50 - 211)           | 58<br>(32 - 105)            |
| Liver cancer due to hepatitis C                                  | 556<br>(361 - 793)            | --                         | 1<br>(0 - 2)             | 89<br>(50 - 148)            | 266<br>(154 - 399)          | 200<br>(130 - 296)          |
| Liver cancer due to alcohol use                                  | 106<br>(61 - 176)             | --                         | --                       | 11<br>(5 - 21)              | 45<br>(23 - 82)             | 50<br>(28 - 88)             |
| Liver cancer due to other causes                                 | 156<br>(82 - 289)             | --                         | 3<br>(1 - 5)             | 45<br>(23 - 82)             | 72<br>(34 - 149)            | 37<br>(17 - 71)             |

Web Table 31- Iraq deaths with 95% UI by age, sex, and cause in 2013

| Cause                                         | Both Sexes, All Ages        | Both Sexes, 0-4 Years  | Both Sexes, 5-14 Years | Both Sexes, 15-49 Years  | Both Sexes, 50-69 Years     | Both Sexes, 70-80 Years     |
|-----------------------------------------------|-----------------------------|------------------------|------------------------|--------------------------|-----------------------------|-----------------------------|
| Larynx cancer                                 | 170<br>(117 - 263)          | --                     | --                     | 35<br>(23 - 55)          | 79<br>(50 - 131)            | 56<br>(38 - 86)             |
| Tracheal, bronchus and lung cancer            | 1,971<br>(1,520 - 2,507)    | --                     | --                     | 366<br>(260 - 502)       | 906<br>(669 - 1,197)        | 700<br>(541 - 889)          |
| Breast cancer                                 | 2,101<br>(1,409 - 2,962)    | --                     | --                     | 930<br>(586 - 1,441)     | 849<br>(544 - 1,181)        | 322<br>(229 - 413)          |
| Cervical cancer                               | 289<br>(191 - 416)          | --                     | --                     | 112<br>(68 - 186)        | 124<br>(75 - 188)           | 54<br>(37 - 77)             |
| Uterine cancer                                | 166<br>(78 - 253)           | --                     | --                     | 46<br>(17 - 83)          | 81<br>(36 - 134)            | 39<br>(23 - 59)             |
| Prostate cancer                               | 301<br>(184 - 491)          | --                     | --                     | 7<br>(4 - 16)            | 82<br>(44 - 146)            | 211<br>(133 - 348)          |
| Colon and rectum cancer                       | 801<br>(619 - 999)          | --                     | --                     | 215<br>(155 - 296)       | 332<br>(242 - 432)          | 254<br>(199 - 319)          |
| Lip and oral cavity cancer                    | 148<br>(106 - 195)          | --                     | --                     | 37<br>(25 - 54)          | 62<br>(41 - 85)             | 49<br>(33 - 68)             |
| Nasopharynx cancer                            | 79<br>(55 - 123)            | --                     | 4<br>(2 - 8)           | 39<br>(25 - 60)          | 27<br>(17 - 43)             | 10<br>(6 - 16)              |
| Other pharynx cancer                          | 76<br>(51 - 103)            | --                     | --                     | 26<br>(16 - 37)          | 30<br>(19 - 45)             | 19<br>(13 - 27)             |
| Gallbladder and biliary tract cancer          | 167<br>(123 - 223)          | --                     | --                     | 34<br>(24 - 49)          | 79<br>(55 - 114)            | 53<br>(38 - 73)             |
| Pancreatic cancer                             | 612<br>(472 - 763)          | --                     | --                     | 113<br>(79 - 153)        | 273<br>(199 - 354)          | 226<br>(177 - 285)          |
| Malignant skin melanoma                       | 34<br>(23 - 55)             | --                     | --                     | 9<br>(5 - 16)            | 15<br>(9 - 24)              | 10<br>(7 - 15)              |
| Non-melanoma skin cancer                      | 44<br>(29 - 71)             | --                     | --                     | 10<br>(6 - 19)           | 17<br>(10 - 29)             | 17<br>(12 - 25)             |
| Ovarian cancer                                | 275<br>(183 - 389)          | --                     | --                     | 103<br>(64 - 163)        | 123<br>(76 - 182)           | 49<br>(33 - 70)             |
| Testicular cancer                             | 24<br>(14 - 39)             | --                     | --                     | 21<br>(11 - 34)          | 2<br>(1 - 3)                | 1<br>(1 - 3)                |
| Kidney cancer                                 | 257<br>(200 - 333)          | 17<br>(8 - 30)         | 15<br>(9 - 24)         | 58<br>(40 - 80)          | 111<br>(77 - 156)           | 57<br>(41 - 77)             |
| Bladder cancer                                | 561<br>(404 - 762)          | --                     | --                     | 56<br>(36 - 86)          | 231<br>(154 - 337)          | 274<br>(199 - 373)          |
| Brain and nervous system cancer               | 828<br>(516 - 1,132)        | 39<br>(17 - 76)        | 87<br>(57 - 120)       | 334<br>(202 - 496)       | 247<br>(152 - 360)          | 121<br>(73 - 171)           |
| Thyroid cancer                                | 107<br>(77 - 147)           | --                     | 1<br>(0 - 1)           | 23<br>(15 - 34)          | 45<br>(30 - 65)             | 38<br>(26 - 54)             |
| Mesothelioma                                  | 11<br>(8 - 15)              | --                     | --                     | 5<br>(3 - 8)             | 3<br>(2 - 5)                | 2<br>(1 - 4)                |
| Hodgkin lymphoma                              | 48<br>(30 - 81)             | 13<br>(5 - 30)         | 8<br>(4 - 15)          | 18<br>(9 - 41)           | 6<br>(3 - 17)               | 3<br>(2 - 8)                |
| Non-Hodgkin lymphoma                          | 406<br>(308 - 565)          | 8<br>(5 - 13)          | 19<br>(12 - 28)        | 166<br>(116 - 240)       | 120<br>(83 - 172)           | 94<br>(69 - 134)            |
| Multiple myeloma                              | 85<br>(61 - 122)            | --                     | --                     | 18<br>(12 - 28)          | 39<br>(26 - 59)             | 27<br>(19 - 38)             |
| Leukemia                                      | 1,167<br>(908 - 1,477)      | 87<br>(46 - 155)       | 173<br>(126 - 230)     | 455<br>(326 - 616)       | 247<br>(178 - 340)          | 205<br>(154 - 266)          |
| Other neoplasms                               | 1,420<br>(1,006 - 1,818)    | 291<br>(162 - 471)     | 130<br>(91 - 185)      | 426<br>(299 - 581)       | 313<br>(212 - 421)          | 260<br>(181 - 341)          |
| Cardiovascular diseases                       | 55,620<br>(45,284 - 66,797) | 1,028<br>(745 - 1,357) | 306<br>(234 - 395)     | 7,429<br>(5,442 - 9,882) | 18,445<br>(13,911 - 23,537) | 28,412<br>(23,851 - 32,339) |
| Rheumatic heart disease                       | 872<br>(624 - 1,172)        | 23<br>(11 - 46)        | 16<br>(10 - 25)        | 250<br>(172 - 369)       | 174<br>(113 - 245)          | 408<br>(272 - 550)          |
| Ischemic heart disease                        | 27,885<br>(22,111 - 34,689) | 15<br>(7 - 33)         | 57<br>(37 - 89)        | 4,031<br>(2,915 - 5,443) | 9,968<br>(7,329 - 13,021)   | 13,815<br>(11,456 - 16,455) |
| Cerebrovascular disease                       | 17,398<br>(13,940 - 21,086) | 217<br>(136 - 331)     | 121<br>(91 - 160)      | 1,752<br>(1,239 - 2,376) | 5,325<br>(3,905 - 6,895)    | 9,984<br>(8,165 - 11,848)   |
| Ischemic stroke                               | 9,987<br>(7,733 - 12,064)   | 7<br>(3 - 14)          | 16<br>(10 - 24)        | 388<br>(259 - 545)       | 2,551<br>(1,790 - 3,357)    | 7,025<br>(5,603 - 8,448)    |
| Hemorrhagic stroke                            | 7,411<br>(5,739 - 9,414)    | 210<br>(133 - 320)     | 105<br>(78 - 138)      | 1,363<br>(973 - 1,884)   | 2,774<br>(1,972 - 3,721)    | 2,959<br>(2,313 - 3,764)    |
| Hypertensive heart disease                    | 3,588<br>(2,425 - 4,665)    | 3<br>(2 - 6)           | 4<br>(2 - 7)           | 444<br>(280 - 638)       | 898<br>(577 - 1,274)        | 2,238<br>(1,476 - 2,943)    |
| Cardiomyopathy and myocarditis                | 1,451<br>(1,091 - 1,862)    | 374<br>(232 - 541)     | 62<br>(41 - 88)        | 413<br>(278 - 600)       | 338<br>(231 - 478)          | 264<br>(187 - 369)          |
| Atrial fibrillation and flutter               | 115<br>(80 - 152)           | --                     | --                     | 13<br>(9 - 19)           | 28<br>(18 - 42)             | 74<br>(49 - 103)            |
| Aortic aneurysm                               | 270<br>(198 - 374)          | --                     | --                     | 38<br>(26 - 58)          | 125<br>(85 - 189)           | 106<br>(76 - 142)           |
| Peripheral vascular disease                   | 7<br>(5 - 9)                | --                     | --                     | 1<br>(1 - 2)             | 2<br>(1 - 3)                | 4<br>(3 - 5)                |
| Endocarditis                                  | 396<br>(278 - 557)          | 197<br>(113 - 312)     | 13<br>(7 - 21)         | 69<br>(44 - 102)         | 50<br>(31 - 76)             | 67<br>(44 - 97)             |
| Other cardiovascular and circulatory diseases | 3,639<br>(2,673 - 4,618)    | 198<br>(121 - 311)     | 32<br>(21 - 47)        | 417<br>(278 - 624)       | 1,539<br>(1,003 - 2,099)    | 1,452<br>(1,027 - 1,930)    |
| Chronic respiratory diseases                  | 10,573<br>(8,443 - 12,972)  | 310<br>(218 - 433)     | 51<br>(40 - 63)        | 833<br>(601 - 1,114)     | 2,634<br>(1,883 - 3,543)    | 6,745<br>(5,508 - 8,107)    |

Web Table 31- Iraq deaths with 95% UI by age, sex, and cause in 2013

| Cause                                               | Both Sexes, All Ages     | Both Sexes, 0-4 Years | Both Sexes, 5-14 Years | Both Sexes, 15-49 Years | Both Sexes, 50-69 Years  | Both Sexes, 70-80 Years  |
|-----------------------------------------------------|--------------------------|-----------------------|------------------------|-------------------------|--------------------------|--------------------------|
| Chronic obstructive pulmonary disease               | 6,929<br>(5,428 - 8,748) | 44<br>(23 - 80)       | 8<br>(5 - 11)          | 279<br>(188 - 398)      | 1,694<br>(1,182 - 2,333) | 4,904<br>(3,882 - 6,040) |
| Pneumoconiosis                                      | 271<br>(166 - 413)       | 0<br>(0 - 1)          | 1<br>(1 - 1)           | 90<br>(54 - 140)        | 81<br>(43 - 136)         | 98<br>(60 - 151)         |
| Silicosis                                           | 69<br>(41 - 109)         | 0<br>(0 - 0)          | 0<br>(0 - 0)           | 2<br>(2 - 3)            | 11<br>(6 - 20)           | 56<br>(32 - 89)          |
| Asbestosis                                          | 16<br>(9 - 25)           | 0<br>(0 - 0)          | 0<br>(0 - 0)           | 12<br>(7 - 20)          | 3<br>(2 - 5)             | 0<br>(0 - 1)             |
| Coal workers pneumoconiosis                         | 5<br>(3 - 7)             | 0<br>(0 - 0)          | 0<br>(0 - 0)           | 4<br>(2 - 6)            | 0<br>(0 - 1)             | 0<br>(0 - 0)             |
| Other pneumoconiosis                                | 181<br>(108 - 278)       | 0<br>(0 - 0)          | 0<br>(0 - 0)           | 72<br>(43 - 113)        | 67<br>(35 - 112)         | 42<br>(25 - 68)          |
| Asthma                                              | 1,355<br>(993 - 1,800)   | 36<br>(17 - 65)       | 26<br>(20 - 34)        | 273<br>(189 - 380)      | 434<br>(292 - 616)       | 586<br>(404 - 831)       |
| Interstitial lung disease and pulmonary sarcoidosis | 1,282<br>(729 - 1,883)   | 1<br>(0 - 3)          | 2<br>(1 - 3)           | 32<br>(18 - 50)         | 341<br>(183 - 540)       | 906<br>(500 - 1,395)     |
| Other chronic respiratory diseases                  | 736<br>(572 - 932)       | 227<br>(155 - 315)    | 14<br>(10 - 20)        | 159<br>(111 - 229)      | 84<br>(54 - 126)         | 252<br>(171 - 369)       |
| Cirrhosis                                           | 1,222<br>(947 - 1,540)   | 59<br>(30 - 108)      | 45<br>(34 - 60)        | 380<br>(275 - 515)      | 472<br>(345 - 624)       | 265<br>(204 - 340)       |
| Cirrhosis due to hepatitis B                        | 387<br>(199 - 586)       | 3<br>(1 - 8)          | 8<br>(2 - 16)          | 117<br>(55 - 192)       | 158<br>(74 - 248)        | 101<br>(58 - 152)        |
| Cirrhosis due to hepatitis C                        | 550<br>(345 - 799)       | 6<br>(2 - 12)         | 11<br>(6 - 18)         | 182<br>(109 - 271)      | 237<br>(139 - 353)       | 115<br>(72 - 173)        |
| Cirrhosis due to alcohol use                        | 99<br>(58 - 184)         | --                    | --                     | 22<br>(11 - 44)         | 43<br>(23 - 87)          | 34<br>(19 - 58)          |
| Cirrhosis due to other causes                       | 186<br>(132 - 263)       | 50<br>(25 - 94)       | 27<br>(18 - 38)        | 60<br>(35 - 98)         | 35<br>(19 - 60)          | 14<br>(9 - 23)           |
| Digestive diseases                                  | 700<br>(536 - 1,001)     | 52<br>(27 - 95)       | 24<br>(18 - 32)        | 176<br>(121 - 263)      | 187<br>(132 - 263)       | 261<br>(201 - 363)       |
| Peptic ulcer disease                                | 217<br>(159 - 289)       | 1<br>(0 - 1)          | 2<br>(1 - 3)           | 47<br>(30 - 70)         | 60<br>(40 - 87)          | 108<br>(77 - 146)        |
| Gastritis and duodenitis                            | 9<br>(6 - 17)            | 1<br>(0 - 2)          | 2<br>(1 - 3)           | 3<br>(2 - 4)            | 2<br>(1 - 5)             | 2<br>(1 - 4)             |
| Appendicitis                                        | 44<br>(27 - 73)          | 9<br>(4 - 19)         | 2<br>(1 - 4)           | 17<br>(11 - 27)         | 8<br>(4 - 14)            | 7<br>(3 - 15)            |
| Paralytic ileus and intestinal obstruction          | 145<br>(98 - 231)        | 9<br>(4 - 19)         | 4<br>(2 - 6)           | 30<br>(16 - 59)         | 45<br>(27 - 68)          | 57<br>(36 - 86)          |
| Inguinal, femoral, and abdominal hernia             | 15<br>(8 - 35)           | 1<br>(0 - 1)          | 1<br>(1 - 2)           | 3<br>(2 - 6)            | 5<br>(2 - 12)            | 6<br>(2 - 16)            |
| Inflammatory bowel disease                          | 47<br>(30 - 86)          | 14<br>(6 - 29)        | 5<br>(3 - 7)           | 17<br>(10 - 31)         | 5<br>(2 - 11)            | 7<br>(3 - 15)            |
| Vascular intestinal disorders                       | 8<br>(3 - 16)            | 0<br>(0 - 1)          | 1<br>(0 - 1)           | 5<br>(2 - 10)           | 2<br>(1 - 4)             | 0<br>(0 - 0)             |
| Gallbladder and biliary diseases                    | 84<br>(56 - 141)         | 5<br>(2 - 10)         | 3<br>(2 - 4)           | 19<br>(12 - 30)         | 26<br>(16 - 47)          | 32<br>(19 - 59)          |
| Pancreatitis                                        | 24<br>(13 - 41)          | 1<br>(0 - 1)          | 1<br>(1 - 2)           | 7<br>(4 - 12)           | 10<br>(4 - 19)           | 6<br>(3 - 10)            |
| Other digestive diseases                            | 106<br>(76 - 146)        | 12<br>(5 - 21)        | 4<br>(3 - 6)           | 29<br>(19 - 43)         | 25<br>(16 - 38)          | 36<br>(23 - 53)          |
| Neurological disorders                              | 3,576<br>(2,834 - 4,317) | 64<br>(39 - 104)      | 55<br>(37 - 80)        | 296<br>(215 - 403)      | 405<br>(288 - 552)       | 2,756<br>(2,142 - 3,335) |
| Alzheimer disease and other dementias               | 2,998<br>(2,339 - 3,649) | --                    | --                     | 2<br>(1 - 5)            | 306<br>(211 - 431)       | 2,689<br>(2,084 - 3,263) |
| Parkinson disease                                   | 24<br>(17 - 37)          | --                    | --                     | 5<br>(4 - 8)            | 5<br>(3 - 10)            | 14<br>(9 - 22)           |
| Epilepsy                                            | 340<br>(255 - 463)       | 45<br>(24 - 82)       | 45<br>(28 - 69)        | 203<br>(142 - 291)      | 31<br>(20 - 46)          | 17<br>(8 - 31)           |
| Multiple sclerosis                                  | 42<br>(23 - 64)          | --                    | --                     | 16<br>(10 - 31)         | 15<br>(6 - 25)           | 10<br>(3 - 18)           |
| Other neurological disorders                        | 172<br>(135 - 214)       | 20<br>(14 - 27)       | 10<br>(8 - 15)         | 69<br>(49 - 92)         | 47<br>(34 - 63)          | 26<br>(20 - 32)          |
| Mental and substance use disorders                  | 1,395<br>(700 - 2,007)   | 24<br>(14 - 34)       | 0<br>(0 - 0)           | 1,187<br>(553 - 1,744)  | 160<br>(98 - 243)        | 24<br>(17 - 33)          |
| Schizophrenia                                       | 12<br>(8 - 19)           | --                    | --                     | 1<br>(1 - 2)            | 3<br>(1 - 5)             | 8<br>(4 - 14)            |
| Alcohol use disorders                               | 82<br>(50 - 125)         | --                    | --                     | 44<br>(27 - 66)         | 31<br>(20 - 54)          | 6<br>(4 - 9)             |
| Drug use disorders                                  | 1,299<br>(616 - 1,897)   | 24<br>(14 - 34)       | --                     | 1,140<br>(516 - 1,676)  | 126<br>(67 - 203)        | 9<br>(6 - 14)            |
| Opioid use disorders                                | 721<br>(333 - 1,039)     | 14<br>(8 - 21)        | --                     | 636<br>(285 - 933)      | 65<br>(34 - 104)         | 5<br>(3 - 8)             |
| Cocaine use disorders                               | 17<br>(8 - 26)           | 0<br>(0 - 1)          | --                     | 15<br>(7 - 23)          | 1<br>(1 - 2)             | 0<br>(0 - 0)             |
| Amphetamine use disorders                           | 15<br>(7 - 21)           | 0<br>(0 - 1)          | --                     | 13<br>(6 - 19)          | 1<br>(1 - 2)             | 0<br>(0 - 0)             |
| Other drug use disorders                            | 547<br>(263 - 795)       | 9<br>(5 - 13)         | --                     | 476<br>(219 - 693)      | 58<br>(31 - 94)          | 4<br>(3 - 6)             |
| Eating disorders                                    | 2<br>(1 - 3)             | --                    | 0<br>(0 - 0)           | 2<br>(1 - 3)            | --                       | --                       |

Web Table 31- Iraq deaths with 95% UI by age, sex, and cause in 2013

| Cause                                               | Both Sexes, All Ages        | Both Sexes, 0-4 Years    | Both Sexes, 5-14 Years | Both Sexes, 15-49 Years  | Both Sexes, 50-69 Years  | Both Sexes, 70-80 Years  |
|-----------------------------------------------------|-----------------------------|--------------------------|------------------------|--------------------------|--------------------------|--------------------------|
| Anorexia nervosa                                    | 2<br>(1 - 3)                | --                       | 0<br>(0 - 0)           | 2<br>(1 - 3)             | --                       | --                       |
| Diabetes, urogenital, blood, and endocrine diseases | 16,220<br>(12,862 - 19,708) | 956<br>(694 - 1,244)     | 300<br>(243 - 365)     | 3,485<br>(2,550 - 4,601) | 5,363<br>(3,979 - 6,822) | 6,117<br>(4,955 - 7,284) |
| Diabetes mellitus                                   | 7,071<br>(5,613 - 8,646)    | 113<br>(77 - 160)        | 46<br>(31 - 68)        | 1,095<br>(803 - 1,483)   | 2,679<br>(1,980 - 3,488) | 3,138<br>(2,447 - 3,854) |
| Acute glomerulonephritis                            | 16<br>(10 - 33)             | 2<br>(1 - 4)             | 1<br>(1 - 2)           | 4<br>(2 - 8)             | 4<br>(2 - 8)             | 5<br>(2 - 13)            |
| Chronic kidney disease                              | 7,139<br>(5,264 - 8,964)    | 208<br>(131 - 321)       | 110<br>(76 - 143)      | 1,790<br>(1,248 - 2,408) | 2,396<br>(1,599 - 3,179) | 2,635<br>(1,909 - 3,303) |
| Chronic kidney disease due to diabetes mellitus     | 34<br>(22 - 67)             | 15<br>(7 - 29)           | 5<br>(3 - 7)           | 10<br>(7 - 21)           | 2<br>(1 - 4)             | 2<br>(1 - 4)             |
| Chronic kidney disease due to hypertension          | 3,346<br>(2,261 - 4,415)    | 30<br>(15 - 52)          | 10<br>(6 - 15)         | 847<br>(559 - 1,205)     | 1,283<br>(852 - 1,769)   | 1,176<br>(823 - 1,564)   |
| Chronic kidney disease due to glomerulonephritis    | 306<br>(212 - 468)          | 46<br>(28 - 69)          | 19<br>(13 - 28)        | 58<br>(30 - 110)         | 38<br>(16 - 89)          | 145<br>(96 - 214)        |
| Chronic kidney disease due to other causes          | 3,453<br>(2,136 - 4,608)    | 118<br>(59 - 207)        | 76<br>(44 - 106)       | 874<br>(463 - 1,268)     | 1,072<br>(616 - 1,561)   | 1,313<br>(787 - 1,856)   |
| Urinary diseases and male infertility               | 808<br>(554 - 1,077)        | 193<br>(95 - 369)        | 26<br>(15 - 36)        | 208<br>(133 - 305)       | 169<br>(112 - 235)       | 212<br>(151 - 281)       |
| Interstitial nephritis and urinary tract infections | 631<br>(419 - 851)          | 141<br>(70 - 289)        | 11<br>(5 - 17)         | 157<br>(91 - 246)        | 141<br>(89 - 197)        | 182<br>(124 - 248)       |
| Urolithiasis                                        | 24<br>(15 - 40)             | --                       | 2<br>(1 - 4)           | 18<br>(10 - 28)          | 2<br>(1 - 9)             | 2<br>(1 - 6)             |
| Other urinary diseases                              | 152<br>(95 - 235)           | 52<br>(21 - 106)         | 12<br>(8 - 18)         | 34<br>(21 - 56)          | 26<br>(13 - 48)          | 28<br>(13 - 55)          |
| Gynecological diseases                              | 5<br>(3 - 12)               | --                       | --                     | 4<br>(2 - 7)             | 1<br>(0 - 3)             | 1<br>(0 - 2)             |
| Uterine fibroids                                    | 1<br>(1 - 3)                | --                       | --                     | 1<br>(0 - 1)             | 0<br>(0 - 1)             | 0<br>(0 - 1)             |
| Polycystic ovarian syndrome                         | 0<br>(0 - 1)                | --                       | --                     | 0<br>(0 - 1)             | 0<br>(0 - 0)             | --                       |
| Endometriosis                                       | 1<br>(0 - 1)                | --                       | --                     | 1<br>(0 - 1)             | 0<br>(0 - 0)             | --                       |
| Genital prolapse                                    | 1<br>(0 - 2)                | --                       | --                     | 1<br>(0 - 1)             | 0<br>(0 - 0)             | 0<br>(0 - 1)             |
| Other gynecological diseases                        | 2<br>(1 - 5)                | --                       | --                     | 2<br>(1 - 3)             | 0<br>(0 - 1)             | 0<br>(0 - 1)             |
| Hemoglobinopathies and hemolytic anemias            | 600<br>(425 - 838)          | 189<br>(126 - 278)       | 67<br>(46 - 96)        | 242<br>(155 - 359)       | 46<br>(27 - 79)          | 56<br>(34 - 83)          |
| Thalassemias                                        | 267<br>(190 - 374)          | 119<br>(79 - 176)        | 43<br>(30 - 62)        | 105<br>(67 - 159)        | 0<br>(0 - 0)             | 0<br>(0 - 0)             |
| Sickle cell disorders                               | 226<br>(155 - 325)          | 43<br>(28 - 64)          | 21<br>(14 - 30)        | 121<br>(77 - 182)        | 38<br>(22 - 63)          | 3<br>(1 - 5)             |
| G6PD deficiency                                     | 8<br>(6 - 11)               | 3<br>(2 - 4)             | 1<br>(1 - 1)           | 3<br>(2 - 5)             | 1<br>(0 - 1)             | 1<br>(0 - 1)             |
| Other hemoglobinopathies and hemolytic anemias      | 100<br>(68 - 143)           | 24<br>(16 - 37)          | 3<br>(2 - 4)           | 12<br>(8 - 18)           | 8<br>(5 - 14)            | 53<br>(32 - 79)          |
| Endocrine, metabolic, blood, and immune disorders   | 581<br>(418 - 767)          | 250<br>(143 - 369)       | 50<br>(32 - 74)        | 143<br>(98 - 198)        | 69<br>(46 - 103)         | 70<br>(49 - 106)         |
| Musculoskeletal disorders                           | 169<br>(128 - 231)          | --                       | 14<br>(10 - 20)        | 82<br>(58 - 118)         | 37<br>(26 - 53)          | 36<br>(26 - 51)          |
| Rheumatoid arthritis                                | 10<br>(6 - 20)              | --                       | 1<br>(1 - 3)           | 5<br>(3 - 9)             | 1<br>(0 - 3)             | 3<br>(1 - 5)             |
| Other musculoskeletal disorders                     | 158<br>(120 - 216)          | --                       | 13<br>(9 - 18)         | 77<br>(55 - 110)         | 36<br>(25 - 51)          | 33<br>(24 - 46)          |
| Other non-communicable diseases                     | 7,013<br>(5,606 - 8,773)    | 6,122<br>(4,787 - 7,794) | 353<br>(246 - 490)     | 337<br>(243 - 466)       | 96<br>(67 - 129)         | 105<br>(81 - 132)        |
| Congenital anomalies                                | 6,847<br>(5,445 - 8,582)    | 6,018<br>(4,684 - 7,702) | 348<br>(241 - 484)     | 318<br>(227 - 443)       | 80<br>(55 - 109)         | 83<br>(61 - 108)         |
| Neural tube defects                                 | 182<br>(75 - 398)           | 172<br>(67 - 387)        | 5<br>(3 - 9)           | 4<br>(3 - 6)             | 0<br>(0 - 0)             | 0<br>(0 - 0)             |
| Congenital heart anomalies                          | 3,204<br>(2,410 - 4,227)    | 2,796<br>(2,038 - 3,791) | 208<br>(141 - 294)     | 153<br>(105 - 222)       | 25<br>(16 - 36)          | 22<br>(14 - 31)          |
| Cleft lip and cleft palate                          | 17<br>(6 - 48)              | 17<br>(6 - 48)           | --                     | --                       | --                       | --                       |
| Down syndrome                                       | 181<br>(112 - 287)          | 140<br>(77 - 242)        | 22<br>(12 - 41)        | 16<br>(10 - 25)          | 3<br>(2 - 4)             | 0<br>(0 - 0)             |
| Chromosomal unbalanced rearrangements               | 71<br>(46 - 106)            | 49<br>(29 - 80)          | 8<br>(5 - 14)          | 12<br>(6 - 18)           | 1<br>(0 - 2)             | 1<br>(0 - 1)             |
| Other congenital anomalies                          | 3,193<br>(2,464 - 4,129)    | 2,844<br>(2,107 - 3,769) | 104<br>(67 - 153)      | 133<br>(93 - 190)        | 51<br>(34 - 71)          | 61<br>(44 - 79)          |
| Skin and subcutaneous diseases                      | 114<br>(84 - 158)           | 52<br>(29 - 90)          | 5<br>(3 - 8)           | 19<br>(14 - 28)          | 17<br>(11 - 24)          | 22<br>(15 - 34)          |
| Cellulitis                                          | 31<br>(21 - 46)             | 11<br>(5 - 23)           | 2<br>(1 - 2)           | 5<br>(3 - 8)             | 5<br>(3 - 8)             | 8<br>(5 - 13)            |
| Pyoderma                                            | 70<br>(49 - 103)            | 39<br>(20 - 70)          | 2<br>(1 - 3)           | 7<br>(5 - 10)            | 9<br>(6 - 13)            | 12<br>(8 - 20)           |
| Decubitus ulcer                                     | 7<br>(5 - 14)               | 0<br>(0 - 1)             | 1<br>(0 - 1)           | 4<br>(2 - 7)             | 1<br>(1 - 3)             | 1<br>(1 - 4)             |



Web Table 31- Iraq deaths with 95% UI by age, sex, and cause in 2013

| Cause                                           | Both Sexes, All Ages        | Both Sexes, 0-4 Years    | Both Sexes, 5-14 Years   | Both Sexes, 15-49 Years   | Both Sexes, 50-69 Years  | Both Sexes, 70-80 Years |
|-------------------------------------------------|-----------------------------|--------------------------|--------------------------|---------------------------|--------------------------|-------------------------|
| Other skin and subcutaneous diseases            | 6<br>(5 - 9)                | 1<br>(0 - 2)             | 1<br>(0 - 1)             | 3<br>(2 - 5)              | 1<br>(0 - 1)             | 1<br>(0 - 1)            |
| Sudden infant death syndrome                    | 52<br>(15 - 133)            | 52<br>(15 - 133)         | --                       | --                        | --                       | --                      |
| Injuries                                        | 15,161<br>(11,900 - 18,836) | 1,886<br>(1,365 - 2,482) | 1,469<br>(1,259 - 1,695) | 9,481<br>(6,852 - 12,380) | 1,555<br>(1,139 - 2,041) | 771<br>(628 - 944)      |
| Transport injuries                              | 3,942<br>(3,016 - 5,191)    | 533<br>(344 - 787)       | 424<br>(317 - 550)       | 2,251<br>(1,566 - 3,191)  | 511<br>(372 - 692)       | 222<br>(168 - 300)      |
| Road injuries                                   | 3,797<br>(2,903 - 5,012)    | 503<br>(320 - 750)       | 405<br>(304 - 524)       | 2,183<br>(1,520 - 3,106)  | 493<br>(359 - 667)       | 213<br>(160 - 285)      |
| Pedestrian road injuries                        | 1,346<br>(1,000 - 1,799)    | 242<br>(147 - 378)       | 203<br>(145 - 270)       | 578<br>(371 - 856)        | 197<br>(135 - 276)       | 127<br>(91 - 172)       |
| Cyclist road injuries                           | 193<br>(141 - 263)          | 18<br>(8 - 33)           | 23<br>(15 - 33)          | 95<br>(64 - 138)          | 40<br>(27 - 57)          | 17<br>(12 - 25)         |
| Motorcyclist road injuries                      | 552<br>(356 - 828)          | 19<br>(11 - 33)          | 17<br>(11 - 27)          | 437<br>(271 - 679)        | 64<br>(38 - 102)         | 13<br>(7 - 22)          |
| Motor vehicle road injuries                     | 1,682<br>(1,224 - 2,345)    | 211<br>(129 - 332)       | 155<br>(105 - 219)       | 1,070<br>(720 - 1,566)    | 192<br>(131 - 284)       | 54<br>(37 - 83)         |
| Other road injuries                             | 25<br>(15 - 43)             | 12<br>(6 - 23)           | 7<br>(3 - 14)            | 4<br>(2 - 9)              | 1<br>(0 - 2)             | 1<br>(0 - 2)            |
| Other transport injuries                        | 144<br>(107 - 206)          | 31<br>(18 - 48)          | 19<br>(12 - 29)          | 68<br>(44 - 112)          | 18<br>(12 - 27)          | 10<br>(6 - 17)          |
| Unintentional injuries                          | 6,429<br>(5,148 - 7,987)    | 1,097<br>(770 - 1,469)   | 801<br>(668 - 960)       | 3,542<br>(2,572 - 4,710)  | 593<br>(435 - 806)       | 395<br>(316 - 496)      |
| Falls                                           | 768<br>(584 - 1,017)        | 135<br>(76 - 235)        | 73<br>(49 - 111)         | 353<br>(243 - 518)        | 99<br>(65 - 149)         | 108<br>(74 - 157)       |
| Drowning                                        | 1,045<br>(795 - 1,363)      | 271<br>(159 - 443)       | 238<br>(166 - 319)       | 458<br>(308 - 676)        | 59<br>(39 - 88)          | 19<br>(14 - 27)         |
| Fire, heat, and hot substances                  | 921<br>(678 - 1,261)        | 236<br>(135 - 385)       | 96<br>(63 - 137)         | 461<br>(319 - 657)        | 87<br>(53 - 140)         | 41<br>(26 - 67)         |
| Poisonings                                      | 160<br>(117 - 237)          | 49<br>(28 - 82)          | 17<br>(11 - 27)          | 53<br>(34 - 94)           | 21<br>(12 - 34)          | 20<br>(13 - 29)         |
| Exposure to mechanical forces                   | 1,530<br>(1,042 - 2,117)    | 120<br>(68 - 202)        | 153<br>(98 - 231)        | 1,085<br>(673 - 1,588)    | 134<br>(79 - 212)        | 39<br>(26 - 55)         |
| Unintentional firearm injuries                  | 88<br>(52 - 158)            | 7<br>(4 - 15)            | 5<br>(3 - 9)             | 64<br>(34 - 122)          | 8<br>(4 - 16)            | 3<br>(2 - 6)            |
| Unintentional suffocation                       | 86<br>(54 - 138)            | 14<br>(5 - 40)           | 14<br>(7 - 26)           | 48<br>(28 - 77)           | 8<br>(5 - 14)            | 1<br>(1 - 3)            |
| Other exposure to mechanical forces             | 1,357<br>(851 - 1,903)      | 98<br>(52 - 175)         | 134<br>(80 - 209)        | 973<br>(570 - 1,462)      | 118<br>(66 - 190)        | 34<br>(22 - 51)         |
| Adverse effects of medical treatment            | 432<br>(309 - 594)          | 139<br>(78 - 257)        | 22<br>(13 - 35)          | 83<br>(57 - 124)          | 87<br>(54 - 129)         | 100<br>(62 - 151)       |
| Animal contact                                  | 124<br>(81 - 179)           | 20<br>(11 - 35)          | 15<br>(8 - 25)           | 73<br>(39 - 111)          | 9<br>(6 - 16)            | 7<br>(4 - 13)           |
| Venomous animal contact                         | 25<br>(16 - 46)             | 8<br>(4 - 15)            | 5<br>(2 - 10)            | 8<br>(5 - 17)             | 2<br>(1 - 3)             | 2<br>(1 - 3)            |
| Non-venomous animal contact                     | 100<br>(59 - 145)           | 12<br>(7 - 21)           | 10<br>(6 - 16)           | 65<br>(31 - 99)           | 8<br>(5 - 13)            | 6<br>(3 - 11)           |
| Foreign body                                    | 83<br>(60 - 130)            | 27<br>(16 - 48)          | 10<br>(7 - 16)           | 30<br>(20 - 50)           | 5<br>(3 - 9)             | 11<br>(7 - 17)          |
| Pulmonary aspiration and foreign body in airway | 75<br>(53 - 123)            | 24<br>(14 - 44)          | 9<br>(6 - 15)            | 27<br>(18 - 47)           | 4<br>(3 - 7)             | 10<br>(7 - 17)          |
| Foreign body in other body part                 | 8<br>(6 - 13)               | 3<br>(1 - 5)             | 1<br>(1 - 1)             | 3<br>(2 - 5)              | 1<br>(0 - 1)             | 0<br>(0 - 1)            |
| Other unintentional injuries                    | 1,366<br>(992 - 1,792)      | 101<br>(59 - 166)        | 179<br>(129 - 244)       | 946<br>(641 - 1,304)      | 91<br>(57 - 134)         | 49<br>(35 - 66)         |
| Self-harm and interpersonal violence            | 4,791<br>(2,680 - 6,539)    | 255<br>(51 - 526)        | 245<br>(89 - 390)        | 3,687<br>(2,173 - 5,120)  | 451<br>(240 - 690)       | 153<br>(96 - 215)       |
| Self-harm                                       | 1,238<br>(905 - 1,635)      | --                       | 34<br>(17 - 61)          | 916<br>(641 - 1,263)      | 188<br>(127 - 264)       | 100<br>(66 - 138)       |
| Interpersonal violence                          | 3,553<br>(1,603 - 5,098)    | 255<br>(51 - 526)        | 211<br>(59 - 347)        | 2,771<br>(1,351 - 4,062)  | 263<br>(81 - 450)        | 54<br>(16 - 99)         |
| Assault by firearm                              | 2,205<br>(897 - 3,279)      | 173<br>(30 - 348)        | 120<br>(30 - 208)        | 1,717<br>(750 - 2,632)    | 162<br>(48 - 289)        | 33<br>(8 - 64)          |
| Assault by sharp object                         | 253<br>(122 - 473)          | 10<br>(2 - 30)           | 7<br>(2 - 17)            | 214<br>(106 - 404)        | 21<br>(6 - 43)           | 2<br>(1 - 5)            |
| Assault by other means                          | 1,095<br>(434 - 1,902)      | 72<br>(17 - 183)         | 84<br>(22 - 171)         | 840<br>(348 - 1,447)      | 80<br>(22 - 156)         | 19<br>(6 - 37)          |

Web Table 31- Iraq deaths with 95% UI by age, sex, and cause in 2013

| Cause                                                              | Males, All Ages             | Males, 0-4 Years            | Males, 5-14 Years        | Males, 15-49 Years          | Males, 50-69 Years          | Males, 70-80 Years          |
|--------------------------------------------------------------------|-----------------------------|-----------------------------|--------------------------|-----------------------------|-----------------------------|-----------------------------|
| All causes                                                         | 75,494<br>(59,073 - 96,997) | 16,497<br>(14,582 - 18,499) | 2,289<br>(2,114 - 2,533) | 18,105<br>(11,937 - 25,580) | 17,692<br>(12,075 - 25,358) | 20,911<br>(16,729 - 26,454) |
| Communicable, maternal, neonatal, and nutritional diseases         | 13,394<br>(11,250 - 15,876) | 9,699<br>(7,984 - 11,571)   | 506<br>(393 - 662)       | 1,458<br>(1,026 - 2,010)    | 783<br>(534 - 1,122)        | 947<br>(683 - 1,317)        |
| HIV/AIDS and tuberculosis                                          | 670<br>(497 - 906)          | 43<br>(27 - 65)             | 9<br>(7 - 13)            | 346<br>(249 - 469)          | 161<br>(105 - 244)          | 111<br>(75 - 161)           |
| Tuberculosis                                                       | 531<br>(359 - 767)          | 35<br>(21 - 56)             | 7<br>(4 - 10)            | 239<br>(147 - 363)          | 142<br>(85 - 225)           | 109<br>(72 - 158)           |
| HIV/AIDS                                                           | 139<br>(101 - 181)          | 8<br>(3 - 16)               | 3<br>(2 - 4)             | 107<br>(80 - 136)           | 19<br>(12 - 28)             | 3<br>(2 - 4)                |
| HIV/AIDS resulting in mycobacterial infection                      | 9<br>(6 - 12)               | 0<br>(0 - 1)                | 0<br>(0 - 0)             | 7<br>(5 - 9)                | 1<br>(1 - 2)                | 0<br>(0 - 0)                |
| HIV/AIDS resulting in other diseases                               | 130<br>(95 - 169)           | 7<br>(3 - 15)               | 3<br>(1 - 4)             | 100<br>(75 - 128)           | 18<br>(11 - 26)             | 3<br>(2 - 4)                |
| Diarrrhea, lower respiratory, and other common infectious diseases | 6,516<br>(5,071 - 8,202)    | 4,207<br>(3,052 - 5,457)    | 387<br>(279 - 537)       | 772<br>(477 - 1,168)        | 468<br>(284 - 726)          | 683<br>(459 - 1,004)        |
| Diarrrheal diseases                                                | 1,371<br>(769 - 2,213)      | 1,102<br>(532 - 1,923)      | 31<br>(14 - 61)          | 105<br>(60 - 169)           | 56<br>(30 - 99)             | 77<br>(45 - 126)            |
| Intestinal infectious diseases                                     | 448<br>(204 - 860)          | 120<br>(46 - 249)           | 144<br>(68 - 265)        | 166<br>(64 - 333)           | 13<br>(4 - 29)              | 4<br>(1 - 10)               |
| Typhoid fever                                                      | 339<br>(150 - 646)          | 87<br>(31 - 189)            | 111<br>(52 - 204)        | 128<br>(48 - 262)           | 10<br>(3 - 23)              | 3<br>(1 - 8)                |
| Paratyphoid fever                                                  | 102<br>(42 - 199)           | 30<br>(10 - 64)             | 33<br>(14 - 64)          | 37<br>(12 - 75)             | 2<br>(1 - 7)                | 1<br>(0 - 2)                |
| Other intestinal infectious diseases                               | 6<br>(2 - 13)               | 3<br>(1 - 8)                | 1<br>(0 - 3)             | 2<br>(0 - 7)                | 0<br>(0 - 2)                | 0<br>(0 - 2)                |
| Lower respiratory infections                                       | 3,232<br>(2,413 - 4,297)    | 1,957<br>(1,295 - 2,720)    | 95<br>(53 - 153)         | 314<br>(183 - 519)          | 326<br>(186 - 535)          | 539<br>(339 - 830)          |
| Upper respiratory infections                                       | 5<br>(2 - 10)               | 1<br>(0 - 4)                | 0<br>(0 - 1)             | 2<br>(0 - 5)                | 1<br>(0 - 3)                | 1<br>(0 - 3)                |
| Otitis media                                                       | 7<br>(6 - 10)               | 3<br>(2 - 4)                | 1<br>(0 - 1)             | 1<br>(1 - 2)                | 1<br>(1 - 2)                | 1<br>(1 - 2)                |
| Meningitis                                                         | 647<br>(417 - 960)          | 425<br>(209 - 734)          | 42<br>(23 - 73)          | 110<br>(65 - 177)           | 44<br>(24 - 76)             | 26<br>(14 - 45)             |
| Pneumococcal meningitis                                            | 130<br>(86 - 188)           | 75<br>(34 - 133)            | 11<br>(5 - 21)           | 28<br>(15 - 49)             | 10<br>(5 - 19)              | 6<br>(3 - 11)               |
| H influenzae type B meningitis                                     | 189<br>(106 - 313)          | 158<br>(75 - 281)           | 11<br>(5 - 20)           | 13<br>(7 - 24)              | 4<br>(2 - 8)                | 3<br>(1 - 5)                |
| Meningococcal meningitis                                           | 193<br>(111 - 317)          | 129<br>(56 - 248)           | 13<br>(6 - 25)           | 33<br>(17 - 57)             | 12<br>(6 - 22)              | 7<br>(3 - 13)               |
| Other meningitis                                                   | 135<br>(80 - 198)           | 64<br>(28 - 116)            | 8<br>(3 - 16)            | 36<br>(17 - 65)             | 18<br>(9 - 33)              | 10<br>(5 - 19)              |
| Encephalitis                                                       | 300<br>(176 - 444)          | 156<br>(71 - 270)           | 32<br>(17 - 50)          | 56<br>(31 - 92)             | 25<br>(11 - 44)             | 31<br>(12 - 51)             |
| Diphtheria                                                         | 6<br>(0 - 28)               | 3<br>(0 - 22)               | 1<br>(0 - 10)            | 1<br>(0 - 4)                | 0<br>(0 - 2)                | --                          |
| Whooping cough                                                     | 363<br>(1 - 1,758)          | 335<br>(1 - 1,615)          | 22<br>(0 - 118)          | 6<br>(0 - 30)               | 0<br>(0 - 2)                | --                          |
| Tetanus                                                            | 4<br>(2 - 10)               | 1<br>(0 - 3)                | 1<br>(0 - 2)             | 2<br>(1 - 5)                | 0<br>(0 - 1)                | 0<br>(0 - 0)                |
| Measles                                                            | 114<br>(2 - 645)            | 96<br>(2 - 542)             | 16<br>(0 - 91)           | 3<br>(0 - 16)               | 0<br>(0 - 0)                | --                          |
| Varicella and herpes zoster                                        | 18<br>(6 - 43)              | 6<br>(0 - 25)               | 2<br>(0 - 8)             | 6<br>(1 - 17)               | 1<br>(0 - 4)                | 3<br>(0 - 14)               |
| Neglected tropical diseases and malaria                            | 665<br>(451 - 944)          | 257<br>(131 - 416)          | 81<br>(49 - 116)         | 253<br>(148 - 397)          | 58<br>(32 - 97)             | 16<br>(10 - 25)             |
| Leishmaniasis                                                      | 595<br>(386 - 863)          | 232<br>(111 - 386)          | 73<br>(42 - 107)         | 233<br>(132 - 367)          | 47<br>(24 - 80)             | 10<br>(6 - 17)              |
| Visceral leishmaniasis                                             | 595<br>(386 - 863)          | 232<br>(111 - 386)          | 73<br>(42 - 107)         | 233<br>(132 - 367)          | 47<br>(24 - 80)             | 10<br>(6 - 17)              |
| Schistosomiasis                                                    | 28<br>(18 - 43)             | 0<br>(0 - 0)                | 1<br>(0 - 2)             | 13<br>(7 - 22)              | 9<br>(5 - 17)               | 5<br>(2 - 9)                |
| Cysticercosis                                                      | 0<br>(0 - 0)                | 0<br>(0 - 0)                | 0<br>(0 - 0)             | 0<br>(0 - 0)                | 0<br>(0 - 0)                | 0<br>(0 - 0)                |
| Cystic echinococcosis                                              | 2<br>(1 - 3)                | 0<br>(0 - 0)                | 0<br>(0 - 0)             | 1<br>(1 - 2)                | 0<br>(0 - 0)                | 0<br>(0 - 0)                |
| Dengue                                                             | 2<br>(1 - 3)                | 0<br>(0 - 0)                | 0<br>(0 - 1)             | 1<br>(1 - 2)                | 0<br>(0 - 0)                | 0<br>(0 - 0)                |
| Rabies                                                             | 8<br>(4 - 17)               | 2<br>(1 - 5)                | 3<br>(2 - 7)             | 2<br>(1 - 3)                | 1<br>(0 - 2)                | 0<br>(0 - 0)                |
| Intestinal nematode infections                                     | 9<br>(2 - 20)               | 5<br>(1 - 12)               | 2<br>(0 - 7)             | 1<br>(0 - 8)                | 0<br>(0 - 3)                | 0<br>(0 - 3)                |
| Ascariasis                                                         | 9<br>(2 - 20)               | 5<br>(1 - 12)               | 2<br>(0 - 7)             | 1<br>(0 - 8)                | 0<br>(0 - 3)                | 0<br>(0 - 3)                |
| Other neglected tropical diseases                                  | 21<br>(12 - 37)             | 18<br>(9 - 34)              | 2<br>(0 - 1)             | 2<br>(1 - 3)                | 0<br>(0 - 1)                | 0<br>(0 - 0)                |
| Maternal disorders                                                 | --                          | --                          | --                       | --                          | --                          | --                          |
| Maternal hemorrhage                                                | --                          | --                          | --                       | --                          | --                          | --                          |

Web Table 31- Iraq deaths with 95% UI by age, sex, and cause in 2013

| Cause                                                            | Males, All Ages             | Males, 0-4 Years         | Males, 5-14 Years  | Males, 15-49 Years        | Males, 50-69 Years          | Males, 70-80 Years          |
|------------------------------------------------------------------|-----------------------------|--------------------------|--------------------|---------------------------|-----------------------------|-----------------------------|
| Maternal sepsis and other maternal infections                    | --                          | --                       | --                 | --                        | --                          | --                          |
| Maternal hypertensive disorders                                  | --                          | --                       | --                 | --                        | --                          | --                          |
| Maternal obstructed labor                                        | --                          | --                       | --                 | --                        | --                          | --                          |
| Maternal abortive outcome                                        | --                          | --                       | --                 | --                        | --                          | --                          |
| Indirect maternal deaths                                         | --                          | --                       | --                 | --                        | --                          | --                          |
| Late maternal deaths                                             | --                          | --                       | --                 | --                        | --                          | --                          |
| Maternal deaths aggravated by HIV/AIDS                           | --                          | --                       | --                 | --                        | --                          | --                          |
| Other maternal disorders                                         | --                          | --                       | --                 | --                        | --                          | --                          |
| Neonatal disorders                                               | 4,957<br>(3,738 - 6,275)    | 4,957<br>(3,738 - 6,275) | --                 | --                        | --                          | --                          |
| Neonatal preterm birth complications                             | 3,253<br>(1,975 - 4,709)    | 3,253<br>(1,975 - 4,709) | --                 | --                        | --                          | --                          |
| Neonatal encephalopathy due to birth asphyxia and trauma         | 236<br>(44 - 793)           | 236<br>(44 - 793)        | --                 | --                        | --                          | --                          |
| Neonatal sepsis and other neonatal infections                    | 1,050<br>(344 - 2,305)      | 1,050<br>(344 - 2,305)   | --                 | --                        | --                          | --                          |
| Hemolytic disease and other neonatal jaundice                    | 13<br>(4 - 41)              | 13<br>(4 - 41)           | --                 | --                        | --                          | --                          |
| Other neonatal disorders                                         | 406<br>(158 - 868)          | 406<br>(158 - 868)       | --                 | --                        | --                          | --                          |
| Nutritional deficiencies                                         | 285<br>(179 - 453)          | 96<br>(46 - 176)         | 13<br>(7 - 20)     | 36<br>(20 - 68)           | 46<br>(25 - 82)             | 95<br>(53 - 159)            |
| Protein-energy malnutrition                                      | 113<br>(54 - 193)           | 62<br>(23 - 122)         | 3<br>(1 - 7)       | 7<br>(3 - 15)             | 9<br>(2 - 18)               | 33<br>(11 - 63)             |
| Iodine deficiency                                                | 4<br>(0 - 11)               | 1<br>(0 - 5)             | 0<br>(0 - 2)       | 1<br>(0 - 4)              | 1<br>(0 - 3)                | 1<br>(0 - 5)                |
| Iron-deficiency anemia                                           | 145<br>(81 - 259)           | 27<br>(9 - 67)           | 8<br>(4 - 14)      | 20<br>(11 - 42)           | 35<br>(19 - 64)             | 54<br>(25 - 94)             |
| Other nutritional deficiencies                                   | 23<br>(11 - 58)             | 6<br>(2 - 18)            | 1<br>(0 - 2)       | 7<br>(3 - 19)             | 2<br>(1 - 6)                | 7<br>(3 - 20)               |
| Other communicable, maternal, neonatal, and nutritional diseases | 300<br>(193 - 506)          | 139<br>(60 - 320)        | 17<br>(9 - 32)     | 52<br>(31 - 84)           | 50<br>(29 - 85)             | 42<br>(24 - 80)             |
| Sexually transmitted diseases excluding HIV                      | 12<br>(7 - 20)              | 7<br>(3 - 12)            | 1<br>(0 - 1)       | 2<br>(1 - 5)              | 1<br>(0 - 3)                | 1<br>(0 - 3)                |
| Syphilis                                                         | 10<br>(6 - 17)              | 7<br>(3 - 12)            | 1<br>(0 - 1)       | 1<br>(1 - 3)              | 1<br>(0 - 2)                | 1<br>(0 - 2)                |
| Chlamydial infection                                             | --                          | --                       | --                 | --                        | --                          | --                          |
| Gonococcal infection                                             | 1<br>(1 - 2)                | --                       | 0<br>(0 - 0)       | 1<br>(0 - 1)              | 0<br>(0 - 1)                | 0<br>(0 - 0)                |
| Other sexually transmitted diseases                              | 1<br>(0 - 2)                | --                       | 0<br>(0 - 0)       | 1<br>(0 - 1)              | 0<br>(0 - 0)                | 0<br>(0 - 0)                |
| Hepatitis                                                        | 105<br>(73 - 149)           | 22<br>(10 - 45)          | 3<br>(2 - 5)       | 28<br>(17 - 44)           | 33<br>(19 - 54)             | 18<br>(12 - 27)             |
| Acute hepatitis A                                                | 14<br>(4 - 30)              | 8<br>(2 - 22)            | 1<br>(0 - 2)       | 3<br>(1 - 6)              | 1<br>(0 - 3)                | 0<br>(0 - 1)                |
| Acute hepatitis B                                                | 69<br>(44 - 103)            | 13<br>(4 - 29)           | 1<br>(1 - 2)       | 14<br>(7 - 25)            | 25<br>(14 - 42)             | 15<br>(9 - 24)              |
| Acute hepatitis C                                                | 7<br>(1 - 21)               | --                       | 0<br>(0 - 1)       | 2<br>(0 - 7)              | 3<br>(0 - 10)               | 2<br>(0 - 5)                |
| Acute hepatitis E                                                | 15<br>(6 - 29)              | 0<br>(0 - 1)             | 0<br>(0 - 1)       | 10<br>(4 - 18)            | 4<br>(1 - 9)                | 1<br>(0 - 3)                |
| Other infectious diseases                                        | 183<br>(95 - 370)           | 110<br>(38 - 285)        | 13<br>(5 - 28)     | 21<br>(9 - 41)            | 16<br>(6 - 38)              | 22<br>(7 - 57)              |
| Non-communicable diseases                                        | 51,409<br>(38,454 - 68,228) | 5,553<br>(4,227 - 6,941) | 838<br>(713 - 986) | 9,476<br>(6,013 - 13,616) | 15,975<br>(10,799 - 23,019) | 19,567<br>(15,644 - 24,822) |
| Neoplasms                                                        | 6,721<br>(4,868 - 9,067)    | 342<br>(201 - 543)       | 282<br>(218 - 353) | 1,704<br>(1,105 - 2,485)  | 2,409<br>(1,640 - 3,500)    | 1,984<br>(1,522 - 2,583)    |
| Esophageal cancer                                                | 140<br>(90 - 224)           | --                       | --                 | 30<br>(17 - 48)           | 61<br>(35 - 107)            | 49<br>(32 - 74)             |
| Stomach cancer                                                   | 416<br>(285 - 587)          | --                       | --                 | 109<br>(65 - 165)         | 164<br>(105 - 250)          | 144<br>(98 - 204)           |
| Liver cancer                                                     | 481<br>(320 - 703)          | --                       | 5<br>(3 - 8)       | 98<br>(59 - 154)          | 225<br>(136 - 363)          | 152<br>(101 - 229)          |
| Liver cancer due to hepatitis B                                  | 173<br>(73 - 307)           | --                       | 2<br>(1 - 4)       | 47<br>(22 - 79)           | 83<br>(25 - 157)            | 41<br>(19 - 74)             |
| Liver cancer due to hepatitis C                                  | 238<br>(136 - 388)          | --                       | 1<br>(0 - 1)       | 37<br>(19 - 66)           | 114<br>(56 - 204)           | 86<br>(51 - 138)            |
| Liver cancer due to alcohol use                                  | 38<br>(16 - 75)             | --                       | --                 | 4<br>(1 - 9)              | 16<br>(6 - 36)              | 18<br>(7 - 35)              |
| Liver cancer due to other causes                                 | 32<br>(14 - 61)             | --                       | 2<br>(1 - 4)       | 10<br>(4 - 19)            | 13<br>(4 - 27)              | 8<br>(2 - 14)               |

Web Table 31- Iraq deaths with 95% UI by age, sex, and cause in 2013

| Cause                                         | Males, All Ages             | Males, 0-4 Years     | Males, 5-14 Years  | Males, 15-49 Years       | Males, 50-69 Years        | Males, 70-80 Years        |
|-----------------------------------------------|-----------------------------|----------------------|--------------------|--------------------------|---------------------------|---------------------------|
| Larynx cancer                                 | 134<br>(88 - 213)           | --                   | --                 | 23<br>(14 - 39)          | 63<br>(37 - 108)          | 47<br>(30 - 73)           |
| Tracheal, bronchus and lung cancer            | 1,201<br>(846 - 1,707)      | --                   | --                 | 194<br>(119 - 288)       | 570<br>(375 - 843)        | 438<br>(312 - 611)        |
| Breast cancer                                 | 62<br>(24 - 102)            | --                   | --                 | 27<br>(10 - 48)          | 27<br>(9 - 52)            | 9<br>(4 - 17)             |
| Cervical cancer                               | --                          | --                   | --                 | --                       | --                        | --                        |
| Uterine cancer                                | --                          | --                   | --                 | --                       | --                        | --                        |
| Prostate cancer                               | 301<br>(184 - 491)          | --                   | --                 | 7<br>(4 - 16)            | 82<br>(44 - 146)          | 211<br>(133 - 348)        |
| Colon and rectum cancer                       | 312<br>(217 - 443)          | --                   | --                 | 80<br>(51 - 119)         | 138<br>(91 - 205)         | 95<br>(67 - 133)          |
| Lip and oral cavity cancer                    | 73<br>(47 - 111)            | --                   | --                 | 25<br>(15 - 41)          | 33<br>(19 - 52)           | 15<br>(9 - 23)            |
| Nasopharynx cancer                            | 44<br>(27 - 68)             | --                   | 2<br>(1 - 6)       | 21<br>(12 - 36)          | 15<br>(8 - 27)            | 6<br>(3 - 10)             |
| Other pharynx cancer                          | 58<br>(37 - 86)             | --                   | --                 | 19<br>(11 - 31)          | 24<br>(13 - 38)           | 15<br>(9 - 23)            |
| Gallbladder and biliary tract cancer          | 49<br>(33 - 76)             | --                   | --                 | 9<br>(6 - 15)            | 20<br>(11 - 34)           | 20<br>(12 - 31)           |
| Pancreatic cancer                             | 303<br>(211 - 426)          | --                   | --                 | 63<br>(38 - 94)          | 124<br>(80 - 190)         | 117<br>(81 - 165)         |
| Malignant skin melanoma                       | 22<br>(12 - 40)             | --                   | --                 | 7<br>(4 - 14)            | 10<br>(5 - 20)            | 4<br>(2 - 7)              |
| Non-melanoma skin cancer                      | 22<br>(13 - 42)             | --                   | --                 | 8<br>(4 - 16)            | 7<br>(4 - 14)             | 7<br>(4 - 12)             |
| Ovarian cancer                                | --                          | --                   | --                 | --                       | --                        | --                        |
| Testicular cancer                             | 24<br>(14 - 39)             | --                   | --                 | 21<br>(11 - 34)          | 2<br>(1 - 3)              | 1<br>(1 - 3)              |
| Kidney cancer                                 | 156<br>(109 - 222)          | 9<br>(4 - 19)        | 11<br>(6 - 20)     | 35<br>(21 - 53)          | 62<br>(39 - 99)           | 38<br>(24 - 57)           |
| Bladder cancer                                | 444<br>(304 - 639)          | --                   | --                 | 42<br>(23 - 70)          | 187<br>(114 - 291)        | 215<br>(144 - 305)        |
| Brain and nervous system cancer               | 590<br>(305 - 856)          | 29<br>(10 - 65)      | 60<br>(31 - 90)    | 244<br>(125 - 392)       | 174<br>(83 - 277)         | 82<br>(39 - 127)          |
| Thyroid cancer                                | 32<br>(21 - 50)             | --                   | 0<br>(0 - 0)       | 10<br>(6 - 17)           | 14<br>(8 - 24)            | 7<br>(4 - 11)             |
| Mesothelioma                                  | 5<br>(3 - 8)                | --                   | --                 | 2<br>(1 - 4)             | 1<br>(1 - 2)              | 2<br>(1 - 3)              |
| Hodgkin lymphoma                              | 32<br>(18 - 58)             | 10<br>(3 - 27)       | 5<br>(2 - 12)      | 12<br>(5 - 31)           | 3<br>(1 - 10)             | 2<br>(1 - 5)              |
| Non-Hodgkin lymphoma                          | 207<br>(136 - 324)          | 3<br>(2 - 6)         | 9<br>(5 - 17)      | 89<br>(54 - 144)         | 63<br>(39 - 106)          | 42<br>(27 - 68)           |
| Multiple myeloma                              | 51<br>(33 - 85)             | --                   | --                 | 12<br>(7 - 21)           | 23<br>(14 - 41)           | 16<br>(10 - 26)           |
| Leukemia                                      | 828<br>(601 - 1,110)        | 70<br>(33 - 134)     | 124<br>(83 - 178)  | 323<br>(203 - 481)       | 171<br>(109 - 263)        | 140<br>(97 - 197)         |
| Other neoplasms                               | 732<br>(486 - 1,009)        | 220<br>(112 - 389)   | 64<br>(41 - 100)   | 191<br>(120 - 286)       | 145<br>(88 - 227)         | 112<br>(74 - 168)         |
| Cardiovascular diseases                       | 23,711<br>(17,226 - 32,246) | 720<br>(504 - 1,028) | 161<br>(115 - 219) | 4,039<br>(2,522 - 5,877) | 8,949<br>(6,074 - 13,039) | 9,842<br>(7,782 - 12,527) |
| Rheumatic heart disease                       | 305<br>(184 - 461)          | 8<br>(3 - 20)        | 9<br>(4 - 16)      | 104<br>(58 - 180)        | 81<br>(43 - 137)          | 103<br>(52 - 157)         |
| Ischemic heart disease                        | 12,781<br>(9,010 - 18,051)  | 8<br>(2 - 22)        | 28<br>(17 - 49)    | 2,324<br>(1,434 - 3,471) | 5,433<br>(3,665 - 8,100)  | 4,988<br>(3,811 - 6,600)  |
| Cerebrovascular disease                       | 7,093<br>(5,057 - 9,869)    | 180<br>(111 - 278)   | 67<br>(45 - 96)    | 829<br>(491 - 1,266)     | 2,376<br>(1,549 - 3,524)  | 3,640<br>(2,664 - 4,892)  |
| Ischemic stroke                               | 4,099<br>(2,841 - 5,685)    | 2<br>(1 - 4)         | 7<br>(4 - 12)      | 222<br>(126 - 341)       | 1,231<br>(768 - 1,847)    | 2,636<br>(1,883 - 3,585)  |
| Hemorrhagic stroke                            | 2,994<br>(2,043 - 4,380)    | 178<br>(110 - 275)   | 59<br>(40 - 84)    | 607<br>(366 - 958)       | 1,145<br>(716 - 1,795)    | 1,004<br>(647 - 1,453)    |
| Hypertensive heart disease                    | 1,102<br>(662 - 1,688)      | 2<br>(1 - 4)         | 1<br>(0 - 2)       | 253<br>(134 - 405)       | 382<br>(211 - 651)        | 464<br>(279 - 714)        |
| Cardiomyopathy and myocarditis                | 825<br>(535 - 1,161)        | 261<br>(138 - 422)   | 34<br>(19 - 55)    | 235<br>(130 - 373)       | 181<br>(101 - 299)        | 113<br>(67 - 182)         |
| Atrial fibrillation and flutter               | 54<br>(33 - 82)             | --                   | --                 | 7<br>(4 - 12)            | 20<br>(11 - 34)           | 28<br>(15 - 42)           |
| Aortic aneurysm                               | 195<br>(131 - 289)          | --                   | --                 | 22<br>(13 - 37)          | 109<br>(68 - 168)         | 64<br>(43 - 96)           |
| Peripheral vascular disease                   | 4<br>(3 - 7)                | --                   | --                 | 1<br>(1 - 2)             | 2<br>(1 - 3)              | 2<br>(1 - 3)              |
| Endocarditis                                  | 236<br>(138 - 378)          | 136<br>(68 - 246)    | 8<br>(3 - 13)      | 35<br>(18 - 61)          | 31<br>(15 - 55)           | 27<br>(15 - 49)           |
| Other cardiovascular and circulatory diseases | 1,115<br>(761 - 1,612)      | 125<br>(71 - 215)    | 14<br>(8 - 22)     | 229<br>(137 - 369)       | 335<br>(195 - 535)        | 413<br>(268 - 618)        |
| Chronic respiratory diseases                  | 5,967<br>(4,283 - 8,068)    | 240<br>(151 - 355)   | 29<br>(22 - 39)    | 386<br>(239 - 593)       | 1,558<br>(988 - 2,374)    | 3,754<br>(2,801 - 4,978)  |

Web Table 31- Iraq deaths with 95% UI by age, sex, and cause in 2013

| Cause                                               | Males, All Ages          | Males, 0-4 Years   | Males, 5-14 Years | Males, 15-49 Years     | Males, 50-69 Years   | Males, 70-80 Years       |
|-----------------------------------------------------|--------------------------|--------------------|-------------------|------------------------|----------------------|--------------------------|
| Chronic obstructive pulmonary disease               | 4,007<br>(2,883 - 5,530) | 23<br>(9 - 54)     | 3<br>(2 - 5)      | 121<br>(71 - 192)      | 965<br>(602 - 1,511) | 2,894<br>(2,146 - 3,908) |
| Pneumoconiosis                                      | 255<br>(150 - 397)       | 0<br>(0 - 1)       | 1<br>(0 - 1)      | 84<br>(48 - 134)       | 79<br>(41 - 133)     | 91<br>(53 - 144)         |
| Silicosis                                           | 68<br>(40 - 108)         | 0<br>(0 - 0)       | 0<br>(0 - 0)      | 2<br>(1 - 3)           | 11<br>(6 - 19)       | 55<br>(31 - 89)          |
| Asbestosis                                          | 15<br>(8 - 24)           | 0<br>(0 - 0)       | 0<br>(0 - 0)      | 12<br>(6 - 19)         | 3<br>(1 - 5)         | 0<br>(0 - 0)             |
| Coal workers pneumoconiosis                         | 2<br>(1 - 3)             | 0<br>(0 - 0)       | 0<br>(0 - 0)      | 1<br>(1 - 2)           | 0<br>(0 - 0)         | 0<br>(0 - 0)             |
| Other pneumoconiosis                                | 170<br>(96 - 267)        | 0<br>(0 - 0)       | 0<br>(0 - 0)      | 69<br>(40 - 110)       | 65<br>(33 - 110)     | 36<br>(20 - 59)          |
| Asthma                                              | 593<br>(395 - 858)       | 21<br>(7 - 45)     | 15<br>(10 - 20)   | 119<br>(72 - 187)      | 210<br>(123 - 338)   | 228<br>(143 - 345)       |
| Interstitial lung disease and pulmonary sarcoidosis | 708<br>(362 - 1,122)     | 1<br>(0 - 2)       | 1<br>(0 - 1)      | 11<br>(6 - 20)         | 250<br>(123 - 432)   | 445<br>(217 - 745)       |
| Other chronic respiratory diseases                  | 405<br>(284 - 531)       | 194<br>(121 - 282) | 10<br>(6 - 15)    | 51<br>(29 - 81)        | 54<br>(30 - 91)      | 96<br>(58 - 152)         |
| Cirrhosis                                           | 674<br>(467 - 955)       | 28<br>(11 - 60)    | 19<br>(13 - 27)   | 226<br>(140 - 337)     | 261<br>(167 - 403)   | 140<br>(94 - 201)        |
| Cirrhosis due to hepatitis B                        | 211<br>(91 - 356)        | 2<br>(0 - 5)       | 4<br>(1 - 7)      | 71<br>(31 - 126)       | 87<br>(35 - 162)     | 47<br>(21 - 82)          |
| Cirrhosis due to hepatitis C                        | 288<br>(142 - 482)       | 3<br>(1 - 7)       | 5<br>(2 - 10)     | 104<br>(45 - 174)      | 119<br>(45 - 216)    | 57<br>(27 - 100)         |
| Cirrhosis due to alcohol use                        | 81<br>(40 - 164)         | --                 | --                | 19<br>(8 - 40)         | 35<br>(15 - 79)      | 27<br>(12 - 50)          |
| Cirrhosis due to other causes                       | 94<br>(57 - 154)         | 23<br>(9 - 50)     | 11<br>(6 - 17)    | 32<br>(16 - 59)        | 20<br>(8 - 45)       | 8<br>(3 - 16)            |
| Digestive diseases                                  | 340<br>(238 - 514)       | 25<br>(12 - 52)    | 11<br>(7 - 15)    | 104<br>(63 - 169)      | 93<br>(59 - 149)     | 107<br>(75 - 158)        |
| Peptic ulcer disease                                | 130<br>(85 - 188)        | 0<br>(0 - 1)       | 1<br>(0 - 1)      | 37<br>(22 - 59)        | 43<br>(25 - 70)      | 49<br>(31 - 73)          |
| Gastritis and duodenitis                            | 5<br>(3 - 10)            | 1<br>(0 - 2)       | 0<br>(0 - 1)      | 1<br>(1 - 3)           | 0<br>(0 - 0)         | 2<br>(1 - 4)             |
| Appendicitis                                        | 22<br>(12 - 38)          | 7<br>(2 - 16)      | 1<br>(1 - 2)      | 9<br>(5 - 15)          | 3<br>(1 - 5)         | 2<br>(1 - 5)             |
| Paralytic ileus and intestinal obstruction          | 58<br>(33 - 116)         | 3<br>(1 - 7)       | 2<br>(1 - 3)      | 17<br>(7 - 39)         | 16<br>(8 - 32)       | 21<br>(11 - 38)          |
| Inguinal, femoral, and abdominal hernia             | 7<br>(3 - 18)            | 0<br>(0 - 1)       | 0<br>(0 - 1)      | 2<br>(1 - 4)           | 2<br>(1 - 7)         | 3<br>(1 - 7)             |
| Inflammatory bowel disease                          | 20<br>(12 - 37)          | 8<br>(3 - 17)      | 3<br>(2 - 4)      | 7<br>(4 - 13)          | 1<br>(0 - 3)         | 1<br>(0 - 4)             |
| Vascular intestinal disorders                       | 5<br>(2 - 11)            | 0<br>(0 - 1)       | 1<br>(0 - 1)      | 3<br>(1 - 6)           | 2<br>(0 - 4)         | 0<br>(0 - 0)             |
| Gallbladder and biliary diseases                    | 38<br>(23 - 65)          | 1<br>(1 - 3)       | 1<br>(1 - 2)      | 9<br>(5 - 17)          | 11<br>(6 - 19)       | 15<br>(7 - 28)           |
| Pancreatitis                                        | 14<br>(8 - 29)           | 0<br>(0 - 1)       | 1<br>(0 - 2)      | 5<br>(3 - 10)          | 5<br>(2 - 11)        | 3<br>(2 - 6)             |
| Other digestive diseases                            | 42<br>(26 - 69)          | 5<br>(2 - 11)      | 1<br>(1 - 2)      | 14<br>(8 - 25)         | 11<br>(6 - 20)       | 11<br>(6 - 20)           |
| Neurological disorders                              | 1,670<br>(1,258 - 2,230) | 36<br>(19 - 67)    | 29<br>(18 - 45)   | 154<br>(96 - 236)      | 192<br>(116 - 300)   | 1,259<br>(940 - 1,686)   |
| Alzheimer disease and other dementias               | 1,393<br>(1,020 - 1,874) | --                 | --                | 1<br>(0 - 4)           | 159<br>(91 - 252)    | 1,233<br>(916 - 1,655)   |
| Parkinson disease                                   | 11<br>(7 - 20)           | --                 | --                | 3<br>(2 - 4)           | 1<br>(1 - 3)         | 8<br>(4 - 14)            |
| Epilepsy                                            | 168<br>(113 - 253)       | 24<br>(10 - 54)    | 22<br>(12 - 37)   | 102<br>(61 - 164)      | 13<br>(7 - 27)       | 6<br>(3 - 13)            |
| Multiple sclerosis                                  | 12<br>(6 - 24)           | --                 | --                | 6<br>(3 - 13)          | 4<br>(2 - 8)         | 3<br>(1 - 5)             |
| Other neurological disorders                        | 85<br>(59 - 121)         | 12<br>(7 - 18)     | 7<br>(5 - 11)     | 42<br>(26 - 63)        | 14<br>(9 - 22)       | 10<br>(6 - 14)           |
| Mental and substance use disorders                  | 1,267<br>(568 - 1,872)   | 22<br>(13 - 32)    | 0<br>(0 - 0)      | 1,102<br>(475 - 1,653) | 136<br>(77 - 217)    | 8<br>(5 - 12)            |
| Schizophrenia                                       | 4<br>(2 - 7)             | --                 | --                | 1<br>(0 - 2)           | 2<br>(1 - 3)         | 1<br>(1 - 2)             |
| Alcohol use disorders                               | 48<br>(28 - 77)          | --                 | --                | 27<br>(15 - 44)        | 17<br>(9 - 29)       | 4<br>(2 - 7)             |
| Drug use disorders                                  | 1,215<br>(534 - 1,805)   | 22<br>(13 - 32)    | --                | 1,074<br>(452 - 1,608) | 117<br>(58 - 194)    | 3<br>(2 - 4)             |
| Opioid use disorders                                | 675<br>(293 - 1,004)     | 13<br>(7 - 19)     | --                | 600<br>(253 - 899)     | 61<br>(30 - 101)     | 1<br>(1 - 2)             |
| Cocaine use disorders                               | 15<br>(7 - 24)           | 0<br>(0 - 1)       | --                | 14<br>(6 - 22)         | 1<br>(1 - 2)         | 0<br>(0 - 0)             |
| Amphetamine use disorders                           | 13<br>(6 - 20)           | 0<br>(0 - 1)       | --                | 12<br>(5 - 18)         | 1<br>(1 - 2)         | 0<br>(0 - 0)             |
| Other drug use disorders                            | 512<br>(222 - 764)       | 8<br>(5 - 12)      | --                | 448<br>(189 - 669)     | 54<br>(28 - 90)      | 1<br>(1 - 2)             |
| Eating disorders                                    | 0<br>(0 - 1)             | --                 | 0<br>(0 - 0)      | 0<br>(0 - 1)           | --                   | --                       |

Web Table 31- Iraq deaths with 95% UI by age, sex, and cause in 2013

| Cause                                               | Males, All Ages          | Males, 0-4 Years         | Males, 5-14 Years  | Males, 15-49 Years       | Males, 50-69 Years       | Males, 70-80 Years       |
|-----------------------------------------------------|--------------------------|--------------------------|--------------------|--------------------------|--------------------------|--------------------------|
| Anorexia nervosa                                    | 0<br>(0 - 1)             | --                       | 0<br>(0 - 0)       | 0<br>(0 - 1)             | --                       | --                       |
| Diabetes, urogenital, blood, and endocrine diseases | 7,155<br>(5,190 - 9,633) | 680<br>(451 - 937)       | 143<br>(108 - 182) | 1,591<br>(1,012 - 2,339) | 2,323<br>(1,532 - 3,458) | 2,418<br>(1,804 - 3,177) |
| Diabetes mellitus                                   | 2,759<br>(1,974 - 3,847) | 85<br>(54 - 127)         | 17<br>(11 - 25)    | 479<br>(301 - 705)       | 1,074<br>(685 - 1,633)   | 1,103<br>(795 - 1,533)   |
| Acute glomerulonephritis                            | 8<br>(4 - 16)            | 1<br>(0 - 1)             | 1<br>(0 - 1)       | 2<br>(1 - 4)             | 2<br>(1 - 4)             | 3<br>(1 - 6)             |
| Chronic kidney disease                              | 3,350<br>(2,271 - 4,634) | 133<br>(72 - 217)        | 55<br>(35 - 79)    | 871<br>(533 - 1,294)     | 1,121<br>(699 - 1,727)   | 1,170<br>(780 - 1,641)   |
| Chronic kidney disease due to diabetes mellitus     | 26<br>(14 - 55)          | 15<br>(7 - 28)           | 3<br>(1 - 5)       | 6<br>(3 - 16)            | 1<br>(0 - 2)             | 1<br>(0 - 3)             |
| Chronic kidney disease due to hypertension          | 1,450<br>(866 - 2,123)   | 29<br>(14 - 51)          | 5<br>(2 - 8)       | 365<br>(200 - 577)       | 578<br>(311 - 927)       | 473<br>(280 - 713)       |
| Chronic kidney disease due to glomerulonephritis    | 171<br>(103 - 309)       | 14<br>(7 - 24)           | 9<br>(5 - 16)      | 43<br>(20 - 87)          | 34<br>(12 - 85)          | 71<br>(40 - 123)         |
| Chronic kidney disease due to other causes          | 1,703<br>(956 - 2,534)   | 76<br>(29 - 151)         | 38<br>(18 - 59)    | 456<br>(236 - 717)       | 508<br>(247 - 886)       | 625<br>(310 - 974)       |
| Urinary diseases and male infertility               | 402<br>(249 - 601)       | 142<br>(56 - 300)        | 14<br>(8 - 21)     | 71<br>(41 - 109)         | 78<br>(46 - 129)         | 97<br>(62 - 145)         |
| Interstitial nephritis and urinary tract infections | 260<br>(149 - 410)       | 99<br>(38 - 232)         | 5<br>(2 - 8)       | 31<br>(17 - 51)          | 54<br>(28 - 90)          | 70<br>(40 - 110)         |
| Urolithiasis                                        | 17<br>(10 - 26)          | --                       | 2<br>(1 - 3)       | 12<br>(6 - 21)           | 1<br>(0 - 3)             | 2<br>(0 - 6)             |
| Other urinary diseases                              | 126<br>(72 - 201)        | 42<br>(15 - 92)          | 8<br>(4 - 11)      | 27<br>(15 - 44)          | 23<br>(11 - 45)          | 25<br>(12 - 48)          |
| Gynecological diseases                              | --                       | --                       | --                 | --                       | --                       | --                       |
| Uterine fibroids                                    | --                       | --                       | --                 | --                       | --                       | --                       |
| Polycystic ovarian syndrome                         | --                       | --                       | --                 | --                       | --                       | --                       |
| Endometriosis                                       | --                       | --                       | --                 | --                       | --                       | --                       |
| Genital prolapse                                    | --                       | --                       | --                 | --                       | --                       | --                       |
| Other gynecological diseases                        | --                       | --                       | --                 | --                       | --                       | --                       |
| Hemoglobinopathies and hemolytic anemias            | 320<br>(188 - 509)       | 123<br>(70 - 192)        | 28<br>(16 - 44)    | 123<br>(67 - 220)        | 21<br>(10 - 44)          | 24<br>(13 - 44)          |
| Thalassemias                                        | 146<br>(85 - 228)        | 74<br>(42 - 118)         | 17<br>(10 - 26)    | 55<br>(29 - 101)         | 0<br>(0 - 0)             | 0<br>(0 - 0)             |
| Sickle cell disorders                               | 117<br>(69 - 196)        | 30<br>(17 - 47)          | 10<br>(6 - 16)     | 60<br>(33 - 106)         | 17<br>(8 - 35)           | 1<br>(1 - 2)             |
| G6PD deficiency                                     | 4<br>(3 - 7)             | 2<br>(1 - 3)             | 0<br>(0 - 1)       | 2<br>(1 - 3)             | 0<br>(0 - 1)             | 0<br>(0 - 1)             |
| Other hemoglobinopathies and hemolytic anemias      | 52<br>(30 - 86)          | 17<br>(9 - 29)           | 1<br>(1 - 2)       | 7<br>(4 - 12)            | 4<br>(2 - 9)             | 23<br>(12 - 41)          |
| Endocrine, metabolic, blood, and immune disorders   | 317<br>(196 - 454)       | 196<br>(92 - 312)        | 28<br>(16 - 47)    | 45<br>(27 - 77)          | 26<br>(14 - 47)          | 22<br>(13 - 39)          |
| Musculoskeletal disorders                           | 59<br>(39 - 96)          | --                       | 5<br>(4 - 9)       | 26<br>(16 - 42)          | 13<br>(8 - 24)           | 14<br>(9 - 23)           |
| Rheumatoid arthritis                                | 5<br>(2 - 12)            | --                       | 1<br>(0 - 2)       | 2<br>(1 - 5)             | 1<br>(0 - 3)             | 1<br>(0 - 3)             |
| Other musculoskeletal disorders                     | 53<br>(36 - 85)          | --                       | 5<br>(3 - 8)       | 24<br>(14 - 38)          | 12<br>(7 - 22)           | 13<br>(8 - 20)           |
| Other non-communicable diseases                     | 3,845<br>(2,839 - 4,981) | 3,460<br>(2,461 - 4,605) | 158<br>(101 - 237) | 144<br>(91 - 224)        | 42<br>(26 - 66)          | 40<br>(29 - 58)          |
| Congenital anomalies                                | 3,758<br>(2,752 - 4,900) | 3,406<br>(2,401 - 4,534) | 156<br>(99 - 235)  | 132<br>(83 - 208)        | 34<br>(21 - 56)          | 29<br>(20 - 44)          |
| Neural tube defects                                 | 78<br>(23 - 251)         | 74<br>(20 - 247)         | 2<br>(1 - 4)       | 2<br>(1 - 4)             | 0<br>(0 - 0)             | 0<br>(0 - 0)             |
| Congenital heart anomalies                          | 1,589<br>(1,062 - 2,224) | 1,436<br>(916 - 2,069)   | 88<br>(49 - 141)   | 53<br>(33 - 85)          | 8<br>(4 - 13)            | 4<br>(2 - 7)             |
| Cleft lip and cleft palate                          | 4<br>(1 - 10)            | 4<br>(1 - 10)            | --                 | --                       | --                       | --                       |
| Down syndrome                                       | 86<br>(43 - 159)         | 65<br>(25 - 136)         | 6<br>(3 - 13)      | 14<br>(8 - 23)           | 1<br>(1 - 2)             | 0<br>(0 - 0)             |
| Chromosomal unbalanced rearrangements               | 47<br>(23 - 81)          | 35<br>(16 - 66)          | 5<br>(2 - 9)       | 6<br>(2 - 10)            | 1<br>(0 - 2)             | 1<br>(0 - 1)             |
| Other congenital anomalies                          | 1,953<br>(1,316 - 2,772) | 1,792<br>(1,159 - 2,593) | 55<br>(30 - 91)    | 58<br>(35 - 90)          | 24<br>(14 - 39)          | 25<br>(17 - 37)          |
| Skin and subcutaneous diseases                      | 60<br>(40 - 91)          | 27<br>(13 - 52)          | 2<br>(1 - 3)       | 12<br>(7 - 19)           | 8<br>(5 - 13)            | 11<br>(7 - 19)           |
| Cellulitis                                          | 11<br>(7 - 18)           | 2<br>(1 - 4)             | 1<br>(0 - 1)       | 2<br>(1 - 4)             | 3<br>(2 - 5)             | 4<br>(2 - 7)             |
| Pyoderma                                            | 39<br>(25 - 64)          | 24<br>(11 - 49)          | 1<br>(0 - 1)       | 4<br>(2 - 6)             | 4<br>(2 - 6)             | 7<br>(4 - 11)            |
| Decubitus ulcer                                     | 5<br>(3 - 10)            | 0<br>(0 - 0)             | 0<br>(0 - 1)       | 3<br>(2 - 5)             | 1<br>(0 - 2)             | 1<br>(0 - 1)             |

Web Table 31- Iraq deaths with 95% UI by age, sex, and cause in 2013

| Cause                                           | Males, All Ages            | Males, 0-4 Years       | Males, 5-14 Years    | Males, 15-49 Years       | Males, 50-69 Years   | Males, 70-80 Years |
|-------------------------------------------------|----------------------------|------------------------|----------------------|--------------------------|----------------------|--------------------|
| Other skin and subcutaneous diseases            | 4<br>(3 - 7)               | 1<br>(0 - 1)           | 0<br>(0 - 1)         | 2<br>(1 - 4)             | 1<br>(0 - 1)         | 0<br>(0 - 1)       |
| Sudden infant death syndrome                    | 27<br>(6 - 86)             | 27<br>(6 - 86)         | --                   | --                       | --                   | --                 |
| Injuries                                        | 10,691<br>(7,741 - 14,199) | 1,244<br>(829 - 1,728) | 945<br>(800 - 1,106) | 7,171<br>(4,764 - 9,876) | 934<br>(597 - 1,390) | 397<br>(296 - 539) |
| Transport injuries                              | 2,822<br>(2,045 - 4,002)   | 373<br>(218 - 592)     | 287<br>(203 - 396)   | 1,736<br>(1,116 - 2,663) | 298<br>(188 - 465)   | 128<br>(86 - 195)  |
| Road injuries                                   | 2,730<br>(1,979 - 3,883)   | 351<br>(205 - 562)     | 275<br>(194 - 379)   | 1,692<br>(1,091 - 2,594) | 291<br>(184 - 454)   | 122<br>(82 - 185)  |
| Pedestrian road injuries                        | 984<br>(669 - 1,383)       | 182<br>(101 - 301)     | 153<br>(101 - 216)   | 459<br>(264 - 730)       | 117<br>(68 - 195)    | 73<br>(48 - 110)   |
| Cyclist road injuries                           | 136<br>(91 - 200)          | 12<br>(4 - 25)         | 16<br>(9 - 27)       | 76<br>(46 - 118)         | 20<br>(12 - 35)      | 12<br>(7 - 19)     |
| Motorcyclist road injuries                      | 475<br>(284 - 749)         | 17<br>(8 - 30)         | 12<br>(6 - 21)       | 377<br>(218 - 616)       | 57<br>(31 - 95)      | 12<br>(6 - 21)     |
| Motor vehicle road injuries                     | 1,118<br>(744 - 1,725)     | 130<br>(67 - 226)      | 89<br>(50 - 141)     | 778<br>(473 - 1,262)     | 96<br>(52 - 166)     | 25<br>(13 - 47)    |
| Other road injuries                             | 18<br>(10 - 34)            | 10<br>(4 - 20)         | 5<br>(2 - 12)        | 2<br>(1 - 6)             | 0<br>(0 - 1)         | 0<br>(0 - 1)       |
| Other transport injuries                        | 92<br>(64 - 145)           | 22<br>(11 - 38)        | 12<br>(7 - 21)       | 44<br>(25 - 82)          | 8<br>(4 - 15)        | 6<br>(3 - 11)      |
| Unintentional injuries                          | 4,327<br>(3,201 - 5,758)   | 714<br>(488 - 1,003)   | 516<br>(420 - 636)   | 2,581<br>(1,734 - 3,699) | 333<br>(218 - 513)   | 182<br>(133 - 258) |
| Falls                                           | 489<br>(322 - 717)         | 95<br>(44 - 189)       | 48<br>(28 - 83)      | 251<br>(149 - 401)       | 61<br>(35 - 105)     | 34<br>(19 - 56)    |
| Drowning                                        | 776<br>(547 - 1,084)       | 182<br>(93 - 317)      | 170<br>(113 - 244)   | 377<br>(235 - 600)       | 36<br>(21 - 61)      | 11<br>(7 - 17)     |
| Fire, heat, and hot substances                  | 400<br>(264 - 580)         | 127<br>(65 - 240)      | 40<br>(25 - 63)      | 186<br>(111 - 296)       | 29<br>(15 - 53)      | 18<br>(9 - 36)     |
| Poisonings                                      | 79<br>(52 - 128)           | 35<br>(17 - 62)        | 9<br>(5 - 16)        | 26<br>(14 - 56)          | 3<br>(1 - 7)         | 7<br>(4 - 12)      |
| Exposure to mechanical forces                   | 1,282<br>(827 - 1,837)     | 82<br>(46 - 139)       | 111<br>(68 - 167)    | 947<br>(565 - 1,444)     | 112<br>(63 - 185)    | 31<br>(19 - 46)    |
| Unintentional firearm injuries                  | 85<br>(50 - 151)           | 7<br>(3 - 14)          | 4<br>(2 - 8)         | 63<br>(33 - 120)         | 8<br>(4 - 16)        | 3<br>(2 - 6)       |
| Unintentional suffocation                       | 54<br>(30 - 90)            | 8<br>(2 - 27)          | 11<br>(5 - 23)       | 30<br>(15 - 52)          | 4<br>(2 - 8)         | 1<br>(1 - 2)       |
| Other exposure to mechanical forces             | 1,143<br>(694 - 1,668)     | 66<br>(33 - 122)       | 95<br>(52 - 150)     | 855<br>(494 - 1,315)     | 100<br>(53 - 167)    | 27<br>(16 - 41)    |
| Adverse effects of medical treatment            | 222<br>(141 - 346)         | 92<br>(46 - 189)       | 9<br>(5 - 16)        | 39<br>(21 - 67)          | 33<br>(17 - 59)      | 50<br>(26 - 86)    |
| Animal contact                                  | 87<br>(44 - 131)           | 12<br>(6 - 22)         | 7<br>(3 - 14)        | 59<br>(27 - 94)          | 5<br>(3 - 9)         | 3<br>(2 - 5)       |
| Venomous animal contact                         | 12<br>(8 - 23)             | 5<br>(3 - 10)          | 1<br>(0 - 3)         | 4<br>(2 - 11)            | 0<br>(0 - 1)         | 1<br>(1 - 2)       |
| Non-venomous animal contact                     | 75<br>(33 - 114)           | 7<br>(3 - 13)          | 6<br>(3 - 12)        | 55<br>(21 - 88)          | 5<br>(2 - 9)         | 2<br>(1 - 4)       |
| Foreign body                                    | 48<br>(31 - 88)            | 21<br>(12 - 40)        | 7<br>(4 - 12)        | 14<br>(8 - 26)           | 3<br>(2 - 6)         | 3<br>(2 - 6)       |
| Pulmonary aspiration and foreign body in airway | 42<br>(25 - 79)            | 19<br>(10 - 37)        | 6<br>(4 - 11)        | 11<br>(6 - 22)           | 2<br>(1 - 5)         | 3<br>(2 - 6)       |
| Foreign body in other body part                 | 6<br>(4 - 11)              | 2<br>(1 - 5)           | 1<br>(0 - 1)         | 2<br>(1 - 4)             | 1<br>(0 - 1)         | 0<br>(0 - 0)       |
| Other unintentional injuries                    | 944<br>(663 - 1,312)       | 69<br>(37 - 119)       | 114<br>(77 - 164)    | 683<br>(438 - 1,003)     | 51<br>(30 - 85)      | 27<br>(18 - 40)    |
| Self-harm and interpersonal violence            | 3,543<br>(1,817 - 5,237)   | 158<br>(29 - 340)      | 142<br>(48 - 238)    | 2,854<br>(1,504 - 4,270) | 302<br>(133 - 518)   | 87<br>(48 - 142)   |
| Self-harm                                       | 700<br>(427 - 1,060)       | --                     | 19<br>(7 - 41)       | 525<br>(306 - 799)       | 104<br>(60 - 171)    | 53<br>(30 - 87)    |
| Interpersonal violence                          | 2,842<br>(1,221 - 4,325)   | 158<br>(29 - 340)      | 123<br>(32 - 214)    | 2,329<br>(1,058 - 3,580) | 198<br>(54 - 381)    | 34<br>(8 - 71)     |
| Assault by firearm                              | 1,849<br>(708 - 2,856)     | 105<br>(16 - 230)      | 69<br>(15 - 129)     | 1,530<br>(626 - 2,396)   | 125<br>(34 - 244)    | 21<br>(4 - 46)     |
| Assault by sharp object                         | 171<br>(73 - 356)          | 6<br>(1 - 23)          | 2<br>(1 - 5)         | 145<br>(64 - 297)        | 17<br>(4 - 37)       | 1<br>(0 - 3)       |
| Assault by other means                          | 822<br>(270 - 1,506)       | 47<br>(7 - 123)        | 53<br>(12 - 114)     | 654<br>(229 - 1,217)     | 57<br>(12 - 121)     | 12<br>(3 - 27)     |

Web Table 31- Iraq deaths with 95% UI by age, sex, and cause in 2013

| Cause                                                             | Females, All Ages           | Females, 0-4 Years          | Females, 5-14 Years      | Females, 15-49 Years       | Females, 50-69 Years        | Females, 70-80 Years        |
|-------------------------------------------------------------------|-----------------------------|-----------------------------|--------------------------|----------------------------|-----------------------------|-----------------------------|
| All causes                                                        | 77,344<br>(61,603 - 94,508) | 13,445<br>(11,772 - 15,582) | 1,776<br>(1,473 - 2,107) | 13,097<br>(9,527 - 18,804) | 18,566<br>(12,543 - 24,436) | 30,460<br>(23,885 - 35,180) |
| Communicable, maternal, neonatal, and nutritional diseases        | 13,302<br>(11,513 - 15,500) | 9,287<br>(7,763 - 11,134)   | 500<br>(379 - 658)       | 1,846<br>(1,416 - 2,446)   | 677<br>(466 - 915)          | 992<br>(731 - 1,290)        |
| HIV/AIDS and tuberculosis                                         | 591<br>(414 - 818)          | 25<br>(16 - 37)             | 11<br>(7 - 16)           | 294<br>(201 - 443)         | 130<br>(81 - 189)           | 130<br>(89 - 183)           |
| Tuberculosis                                                      | 518<br>(344 - 741)          | 19<br>(11 - 31)             | 9<br>(5 - 14)            | 240<br>(148 - 384)         | 122<br>(72 - 181)           | 129<br>(88 - 181)           |
| HIV/AIDS                                                          | 72<br>(52 - 98)             | 7<br>(3 - 13)               | 2<br>(1 - 4)             | 54<br>(41 - 72)            | 8<br>(5 - 12)               | 1<br>(0 - 2)                |
| HIV/AIDS resulting in mycobacterial infection                     | 3<br>(2 - 5)                | 0<br>(0 - 1)                | 0<br>(0 - 0)             | 3<br>(2 - 4)               | 0<br>(0 - 1)                | 0<br>(0 - 0)                |
| HIV/AIDS resulting in other diseases                              | 69<br>(50 - 94)             | 6<br>(3 - 13)               | 2<br>(1 - 3)             | 52<br>(39 - 68)            | 8<br>(5 - 12)               | 1<br>(0 - 2)                |
| Diarrhea, lower respiratory, and other common infectious diseases | 4,481<br>(3,339 - 5,917)    | 2,369<br>(1,506 - 3,583)    | 389<br>(274 - 547)       | 597<br>(390 - 918)         | 418<br>(259 - 609)          | 708<br>(479 - 985)          |
| Diarrheal diseases                                                | 749<br>(425 - 1,313)        | 496<br>(192 - 1,034)        | 34<br>(15 - 65)          | 59<br>(36 - 100)           | 46<br>(24 - 79)             | 113<br>(62 - 188)           |
| Intestinal infectious diseases                                    | 380<br>(172 - 670)          | 112<br>(46 - 223)           | 123<br>(59 - 228)        | 123<br>(47 - 242)          | 15<br>(4 - 31)              | 6<br>(2 - 13)               |
| Typhoid fever                                                     | 291<br>(131 - 519)          | 81<br>(33 - 159)            | 97<br>(45 - 181)         | 97<br>(38 - 192)           | 12<br>(3 - 24)              | 5<br>(2 - 10)               |
| Paratyphoid fever                                                 | 85<br>(37 - 155)            | 29<br>(11 - 65)             | 26<br>(11 - 52)          | 25<br>(8 - 52)             | 3<br>(1 - 8)                | 1<br>(0 - 3)                |
| Other intestinal infectious diseases                              | 4<br>(1 - 10)               | 2<br>(0 - 6)                | 0<br>(0 - 3)             | 1<br>(0 - 4)               | 0<br>(0 - 2)                | 0<br>(0 - 2)                |
| Lower respiratory infections                                      | 2,159<br>(1,568 - 2,904)    | 942<br>(522 - 1,545)        | 104<br>(61 - 159)        | 293<br>(178 - 470)         | 303<br>(172 - 458)          | 517<br>(319 - 760)          |
| Upper respiratory infections                                      | 5<br>(2 - 9)                | 1<br>(0 - 3)                | 0<br>(0 - 1)             | 1<br>(0 - 3)               | 1<br>(0 - 4)                | 1<br>(0 - 5)                |
| Otitis media                                                      | 6<br>(4 - 7)                | 1<br>(1 - 2)                | 0<br>(0 - 1)             | 1<br>(1 - 2)               | 1<br>(1 - 2)                | 2<br>(1 - 2)                |
| Meningitis                                                        | 397<br>(267 - 591)          | 247<br>(129 - 418)          | 43<br>(24 - 69)          | 54<br>(33 - 88)            | 23<br>(13 - 42)             | 29<br>(17 - 47)             |
| Pneumococcal meningitis                                           | 83<br>(53 - 125)            | 46<br>(22 - 81)             | 11<br>(4 - 21)           | 14<br>(7 - 27)             | 6<br>(1 - 11)               | 7<br>(4 - 11)               |
| H influenzae type B meningitis                                    | 108<br>(60 - 181)           | 87<br>(40 - 156)            | 10<br>(4 - 18)           | 6<br>(3 - 12)              | 2<br>(1 - 5)                | 3<br>(1 - 5)                |
| Meningococcal meningitis                                          | 118<br>(70 - 198)           | 74<br>(34 - 142)            | 14<br>(7 - 27)           | 15<br>(7 - 28)             | 6<br>(3 - 12)               | 9<br>(5 - 15)               |
| Other meningitis                                                  | 88<br>(56 - 129)            | 40<br>(18 - 76)             | 8<br>(3 - 15)            | 19<br>(10 - 35)            | 9<br>(3 - 18)               | 11<br>(5 - 18)              |
| Encephalitis                                                      | 260<br>(156 - 382)          | 112<br>(54 - 206)           | 38<br>(19 - 63)          | 50<br>(28 - 83)            | 26<br>(12 - 43)             | 34<br>(15 - 54)             |
| Diphtheria                                                        | 4<br>(0 - 21)               | 3<br>(0 - 18)               | 1<br>(0 - 8)             | 1<br>(0 - 3)               | 0<br>(0 - 1)                | --                          |
| Whooping cough                                                    | 389<br>(1 - 1,756)          | 356<br>(1 - 1,587)          | 27<br>(0 - 150)          | 5<br>(0 - 26)              | 0<br>(0 - 2)                | --                          |
| Tetanus                                                           | 5<br>(3 - 10)               | 1<br>(0 - 3)                | 1<br>(0 - 1)             | 3<br>(1 - 6)               | 0<br>(0 - 1)                | 0<br>(0 - 0)                |
| Measles                                                           | 110<br>(2 - 668)            | 91<br>(2 - 557)             | 16<br>(0 - 103)          | 3<br>(0 - 16)              | 0<br>(0 - 0)                | --                          |
| Varicella and herpes zoster                                       | 18<br>(6 - 43)              | 6<br>(0 - 24)               | 2<br>(0 - 7)             | 4<br>(1 - 11)              | 1<br>(0 - 5)                | 5<br>(0 - 23)               |
| Neglected tropical diseases and malaria                           | 323<br>(220 - 454)          | 136<br>(70 - 221)           | 51<br>(32 - 78)          | 91<br>(54 - 146)           | 30<br>(17 - 47)             | 14<br>(9 - 20)              |
| Leishmaniasis                                                     | 270<br>(174 - 400)          | 124<br>(61 - 206)           | 45<br>(26 - 70)          | 76<br>(43 - 124)           | 20<br>(10 - 33)             | 5<br>(2 - 7)                |
| Visceral leishmaniasis                                            | 270<br>(174 - 400)          | 124<br>(61 - 206)           | 45<br>(26 - 70)          | 76<br>(43 - 124)           | 20<br>(10 - 33)             | 5<br>(2 - 7)                |
| Schistosomiasis                                                   | 22<br>(14 - 32)             | 0<br>(0 - 0)                | 1<br>(0 - 1)             | 7<br>(4 - 12)              | 8<br>(4 - 14)               | 6<br>(3 - 10)               |
| Cysticercosis                                                     | 0<br>(0 - 0)                | 0<br>(0 - 0)                | 0<br>(0 - 0)             | 0<br>(0 - 0)               | 0<br>(0 - 0)                | 0<br>(0 - 0)                |
| Cystic echinococcosis                                             | 2<br>(2 - 3)                | 0<br>(0 - 0)                | 0<br>(0 - 0)             | 1<br>(1 - 1)               | 0<br>(0 - 1)                | 0<br>(0 - 0)                |
| Dengue                                                            | 4<br>(2 - 6)                | 2<br>(1 - 3)                | 1<br>(0 - 1)             | 1<br>(1 - 2)               | 0<br>(0 - 0)                | 0<br>(0 - 0)                |
| Rabies                                                            | 8<br>(5 - 16)               | 1<br>(0 - 3)                | 1<br>(1 - 3)             | 3<br>(2 - 8)               | 0<br>(0 - 0)                | 2<br>(1 - 3)                |
| Intestinal nematode infections                                    | 9<br>(3 - 20)               | 5<br>(1 - 12)               | 2<br>(0 - 7)             | 1<br>(0 - 5)               | 1<br>(0 - 4)                | 1<br>(0 - 4)                |
| Ascariasis                                                        | 9<br>(3 - 20)               | 5<br>(1 - 12)               | 2<br>(0 - 7)             | 1<br>(0 - 5)               | 1<br>(0 - 4)                | 1<br>(0 - 4)                |
| Other neglected tropical diseases                                 | 8<br>(4 - 13)               | 4<br>(2 - 8)                | 2<br>(1 - 3)             | 1<br>(1 - 2)               | 0<br>(0 - 1)                | 0<br>(0 - 1)                |
| Maternal disorders                                                | 695<br>(427 - 1,170)        | --                          | 2<br>(1 - 5)             | 693<br>(424 - 1,168)       | --                          | --                          |
| Maternal hemorrhage                                               | 154<br>(89 - 269)           | --                          | 0<br>(0 - 1)             | 154<br>(89 - 268)          | --                          | --                          |



Web Table 31- Iraq deaths with 95% UI by age, sex, and cause in 2013

| Cause                                                            | Females, All Ages           | Females, 0-4 Years       | Females, 5-14 Years | Females, 15-49 Years      | Females, 50-69 Years        | Females, 70-80 Years        |
|------------------------------------------------------------------|-----------------------------|--------------------------|---------------------|---------------------------|-----------------------------|-----------------------------|
| Maternal sepsis and other maternal infections                    | 100<br>(58 - 172)           | --                       | 0<br>(0 - 1)        | 99<br>(57 - 172)          | --                          | --                          |
| Maternal hypertensive disorders                                  | 69<br>(37 - 125)            | --                       | 0<br>(0 - 1)        | 68<br>(36 - 125)          | --                          | --                          |
| Maternal obstructed labor                                        | 64<br>(35 - 119)            | --                       | 0<br>(0 - 0)        | 64<br>(35 - 119)          | --                          | --                          |
| Maternal abortive outcome                                        | 72<br>(40 - 131)            | --                       | 0<br>(0 - 1)        | 72<br>(39 - 130)          | --                          | --                          |
| Indirect maternal deaths                                         | 53<br>(21 - 107)            | --                       | 0<br>(0 - 0)        | 53<br>(21 - 107)          | --                          | --                          |
| Late maternal deaths                                             | 72<br>(34 - 135)            | --                       | 0<br>(0 - 1)        | 72<br>(33 - 135)          | --                          | --                          |
| Maternal deaths aggravated by HIV/AIDS                           | 0<br>(0 - 0)                | --                       | --                  | 0<br>(0 - 0)              | --                          | --                          |
| Other maternal disorders                                         | 110<br>(55 - 196)           | --                       | 0<br>(0 - 1)        | 110<br>(55 - 196)         | --                          | --                          |
| Neonatal disorders                                               | 6,585<br>(5,112 - 8,459)    | 6,585<br>(5,112 - 8,459) | --                  | --                        | --                          | --                          |
| Neonatal preterm birth complications                             | 4,163<br>(3,007 - 5,450)    | 4,163<br>(3,007 - 5,450) | --                  | --                        | --                          | --                          |
| Neonatal encephalopathy due to birth asphyxia and trauma         | 827<br>(247 - 1,697)        | 827<br>(247 - 1,697)     | --                  | --                        | --                          | --                          |
| Neonatal sepsis and other neonatal infections                    | 677<br>(227 - 1,360)        | 677<br>(227 - 1,360)     | --                  | --                        | --                          | --                          |
| Hemolytic disease and other neonatal jaundice                    | 14<br>(5 - 35)              | 14<br>(5 - 35)           | --                  | --                        | --                          | --                          |
| Other neonatal disorders                                         | 904<br>(394 - 1,681)        | 904<br>(394 - 1,681)     | --                  | --                        | --                          | --                          |
| Nutritional deficiencies                                         | 345<br>(252 - 471)          | 88<br>(46 - 155)         | 20<br>(12 - 31)     | 103<br>(65 - 162)         | 51<br>(30 - 77)             | 84<br>(55 - 123)            |
| Protein-energy malnutrition                                      | 124<br>(67 - 193)           | 65<br>(29 - 116)         | 9<br>(4 - 16)       | 6<br>(2 - 14)             | 16<br>(6 - 30)              | 28<br>(10 - 52)             |
| Iodine deficiency                                                | 6<br>(1 - 19)               | 1<br>(0 - 13)            | 0<br>(0 - 3)        | 1<br>(0 - 6)              | 1<br>(0 - 6)                | 1<br>(0 - 8)                |
| Iron-deficiency anemia                                           | 204<br>(132 - 294)          | 19<br>(5 - 50)           | 10<br>(4 - 17)      | 93<br>(58 - 147)          | 31<br>(16 - 51)             | 51<br>(29 - 80)             |
| Other nutritional deficiencies                                   | 12<br>(5 - 37)              | 3<br>(1 - 10)            | 1<br>(0 - 1)        | 3<br>(1 - 9)              | 2<br>(1 - 9)                | 3<br>(1 - 11)               |
| Other communicable, maternal, neonatal, and nutritional diseases | 282<br>(192 - 419)          | 83<br>(40 - 202)         | 26<br>(14 - 54)     | 68<br>(42 - 111)          | 48<br>(26 - 83)             | 56<br>(31 - 111)            |
| Sexually transmitted diseases excluding HIV                      | 18<br>(10 - 29)             | 5<br>(2 - 9)             | 1<br>(0 - 1)        | 6<br>(3 - 13)             | 3<br>(1 - 8)                | 3<br>(1 - 7)                |
| Syphilis                                                         | 12<br>(7 - 18)              | 5<br>(2 - 9)             | 1<br>(0 - 1)        | 3<br>(1 - 6)              | 2<br>(0 - 5)                | 2<br>(0 - 5)                |
| Chlamydial infection                                             | 2<br>(1 - 3)                | --                       | 0<br>(0 - 0)        | 1<br>(1 - 3)              | 0<br>(0 - 1)                | 0<br>(0 - 0)                |
| Gonococcal infection                                             | 2<br>(1 - 4)                | --                       | 0<br>(0 - 0)        | 1<br>(1 - 3)              | 0<br>(0 - 1)                | 0<br>(0 - 1)                |
| Other sexually transmitted diseases                              | 2<br>(1 - 3)                | --                       | 0<br>(0 - 0)        | 1<br>(1 - 2)              | 0<br>(0 - 1)                | 0<br>(0 - 1)                |
| Hepatitis                                                        | 91<br>(67 - 123)            | 20<br>(10 - 35)          | 7<br>(5 - 11)       | 24<br>(15 - 38)           | 20<br>(12 - 30)             | 20<br>(13 - 28)             |
| Acute hepatitis A                                                | 16<br>(6 - 29)              | 10<br>(3 - 20)           | 3<br>(1 - 6)        | 2<br>(1 - 5)              | 1<br>(0 - 2)                | 0<br>(0 - 1)                |
| Acute hepatitis B                                                | 49<br>(32 - 71)             | 10<br>(4 - 22)           | 2<br>(1 - 4)        | 7<br>(3 - 13)             | 14<br>(8 - 23)              | 16<br>(10 - 23)             |
| Acute hepatitis C                                                | 5<br>(1 - 12)               | --                       | 1<br>(0 - 1)        | 1<br>(0 - 3)              | 1<br>(0 - 4)                | 2<br>(0 - 5)                |
| Acute hepatitis E                                                | 21<br>(11 - 37)             | 0<br>(0 - 1)             | 1<br>(1 - 3)        | 14<br>(7 - 25)            | 4<br>(1 - 9)                | 2<br>(0 - 5)                |
| Other infectious diseases                                        | 173<br>(97 - 307)           | 58<br>(19 - 180)         | 18<br>(7 - 46)      | 38<br>(19 - 70)           | 25<br>(10 - 54)             | 34<br>(11 - 89)             |
| Non-communicable diseases                                        | 59,572<br>(45,198 - 74,541) | 3,516<br>(2,470 - 4,852) | 752<br>(580 - 941)  | 8,941<br>(6,236 - 13,306) | 17,268<br>(11,656 - 22,839) | 29,094<br>(22,787 - 33,689) |
| Neoplasms                                                        | 7,772<br>(5,487 - 10,586)   | 113<br>(67 - 178)        | 160<br>(116 - 221)  | 2,508<br>(1,694 - 3,836)  | 3,036<br>(2,007 - 4,095)    | 1,955<br>(1,476 - 2,362)    |
| Esophageal cancer                                                | 112<br>(74 - 158)           | --                       | --                  | 27<br>(16 - 44)           | 50<br>(29 - 75)             | 35<br>(23 - 51)             |
| Stomach cancer                                                   | 613<br>(413 - 847)          | --                       | --                  | 164<br>(101 - 273)        | 234<br>(148 - 334)          | 214<br>(141 - 306)          |
| Liver cancer                                                     | 583<br>(377 - 811)          | --                       | 1<br>(1 - 2)        | 120<br>(69 - 201)         | 269<br>(159 - 404)          | 193<br>(124 - 278)          |
| Liver cancer due to hepatitis B                                  | 73<br>(19 - 227)            | --                       | 0<br>(0 - 1)        | 27<br>(7 - 71)            | 29<br>(2 - 119)             | 17<br>(2 - 48)              |
| Liver cancer due to hepatitis C                                  | 318<br>(169 - 509)          | --                       | 0<br>(0 - 0)        | 52<br>(17 - 103)          | 152<br>(72 - 265)           | 114<br>(58 - 186)           |
| Liver cancer due to alcohol use                                  | 67<br>(26 - 143)            | --                       | --                  | 6<br>(1 - 17)             | 29<br>(9 - 67)              | 32<br>(13 - 67)             |
| Liver cancer due to other causes                                 | 124<br>(55 - 260)           | --                       | 1<br>(0 - 1)        | 35<br>(16 - 72)           | 59<br>(23 - 139)            | 29<br>(11 - 63)             |

Web Table 31- Iraq deaths with 95% UI by age, sex, and cause in 2013

| Cause                                         | Females, All Ages           | Females, 0-4 Years | Females, 5-14 Years | Females, 15-49 Years     | Females, 50-69 Years      | Females, 70-80 Years        |
|-----------------------------------------------|-----------------------------|--------------------|---------------------|--------------------------|---------------------------|-----------------------------|
| Larynx cancer                                 | 36<br>(17 - 74)             | --                 | --                  | 11<br>(5 - 22)           | 16<br>(7 - 33)            | 9<br>(5 - 20)               |
| Tracheal, bronchus and lung cancer            | 770<br>(520 - 1,056)        | --                 | --                  | 172<br>(106 - 269)       | 336<br>(210 - 479)        | 262<br>(181 - 355)          |
| Breast cancer                                 | 2,039<br>(1,346 - 2,901)    | --                 | --                  | 904<br>(558 - 1,408)     | 822<br>(518 - 1,154)      | 313<br>(220 - 405)          |
| Cervical cancer                               | 289<br>(191 - 416)          | --                 | --                  | 112<br>(68 - 186)        | 124<br>(75 - 188)         | 54<br>(37 - 77)             |
| Uterine cancer                                | 166<br>(78 - 253)           | --                 | --                  | 46<br>(17 - 83)          | 81<br>(36 - 134)          | 39<br>(23 - 59)             |
| Prostate cancer                               | --                          | --                 | --                  | --                       | --                        | --                          |
| Colon and rectum cancer                       | 489<br>(339 - 660)          | --                 | --                  | 135<br>(87 - 210)        | 194<br>(124 - 272)        | 160<br>(115 - 212)          |
| Lip and oral cavity cancer                    | 76<br>(44 - 109)            | --                 | --                  | 12<br>(6 - 21)           | 30<br>(16 - 47)           | 34<br>(19 - 52)             |
| Nasopharynx cancer                            | 35<br>(20 - 64)             | --                 | 2<br>(1 - 3)        | 17<br>(9 - 32)           | 12<br>(6 - 24)            | 4<br>(2 - 8)                |
| Other pharynx cancer                          | 17<br>(10 - 26)             | --                 | --                  | 7<br>(3 - 12)            | 7<br>(3 - 11)             | 4<br>(2 - 6)                |
| Gallbladder and biliary tract cancer          | 117<br>(79 - 170)           | --                 | --                  | 25<br>(15 - 40)          | 59<br>(35 - 91)           | 33<br>(22 - 50)             |
| Pancreatic cancer                             | 308<br>(207 - 420)          | --                 | --                  | 50<br>(31 - 80)          | 149<br>(91 - 215)         | 109<br>(76 - 148)           |
| Malignant skin melanoma                       | 12<br>(8 - 17)              | --                 | --                  | 2<br>(1 - 2)             | 4<br>(3 - 6)              | 6<br>(4 - 10)               |
| Non-melanoma skin cancer                      | 22<br>(13 - 38)             | --                 | --                  | 2<br>(1 - 5)             | 10<br>(5 - 19)            | 10<br>(5 - 16)              |
| Ovarian cancer                                | 275<br>(183 - 389)          | --                 | --                  | 103<br>(64 - 163)        | 123<br>(76 - 182)         | 49<br>(33 - 70)             |
| Testicular cancer                             | --                          | --                 | --                  | --                       | --                        | --                          |
| Kidney cancer                                 | 101<br>(69 - 145)           | 8<br>(3 - 16)      | 3<br>(2 - 6)        | 23<br>(14 - 39)          | 48<br>(29 - 76)           | 19<br>(11 - 28)             |
| Bladder cancer                                | 117<br>(70 - 176)           | --                 | --                  | 14<br>(7 - 25)           | 44<br>(24 - 69)           | 59<br>(36 - 91)             |
| Brain and nervous system cancer               | 238<br>(159 - 346)          | 9<br>(4 - 18)      | 27<br>(17 - 42)     | 89<br>(56 - 147)         | 73<br>(43 - 109)          | 39<br>(24 - 59)             |
| Thyroid cancer                                | 75<br>(48 - 111)            | --                 | 0<br>(0 - 1)        | 13<br>(7 - 23)           | 31<br>(18 - 49)           | 31<br>(19 - 46)             |
| Mesothelioma                                  | 6<br>(4 - 9)                | --                 | --                  | 3<br>(2 - 5)             | 2<br>(1 - 3)              | 1<br>(0 - 1)                |
| Hodgkin lymphoma                              | 16<br>(9 - 35)              | 3<br>(1 - 5)       | 3<br>(1 - 6)        | 6<br>(3 - 15)            | 3<br>(1 - 10)             | 1<br>(1 - 4)                |
| Non-Hodgkin lymphoma                          | 199<br>(132 - 301)          | 5<br>(2 - 9)       | 10<br>(5 - 15)      | 76<br>(46 - 126)         | 57<br>(34 - 89)           | 52<br>(33 - 80)             |
| Multiple myeloma                              | 34<br>(21 - 51)             | --                 | --                  | 7<br>(4 - 11)            | 16<br>(9 - 26)            | 11<br>(7 - 16)              |
| Leukemia                                      | 339<br>(241 - 469)          | 18<br>(7 - 36)     | 48<br>(31 - 71)     | 132<br>(88 - 205)        | 76<br>(45 - 109)          | 65<br>(45 - 88)             |
| Other neoplasms                               | 688<br>(433 - 985)          | 71<br>(37 - 131)   | 66<br>(38 - 108)    | 235<br>(138 - 378)       | 168<br>(97 - 254)         | 148<br>(93 - 215)           |
| Cardiovascular diseases                       | 31,909<br>(23,820 - 40,394) | 308<br>(181 - 486) | 145<br>(98 - 208)   | 3,390<br>(2,247 - 5,320) | 9,496<br>(6,361 - 12,739) | 18,570<br>(14,490 - 21,904) |
| Rheumatic heart disease                       | 567<br>(374 - 833)          | 15<br>(6 - 32)     | 7<br>(4 - 13)       | 146<br>(85 - 246)        | 93<br>(52 - 148)          | 305<br>(196 - 444)          |
| Ischemic heart disease                        | 15,104<br>(10,827 - 19,783) | 7<br>(3 - 17)      | 29<br>(15 - 49)     | 1,706<br>(1,093 - 2,658) | 4,535<br>(2,900 - 6,225)  | 8,827<br>(6,619 - 10,814)   |
| Cerebrovascular disease                       | 10,306<br>(7,553 - 13,399)  | 37<br>(15 - 76)    | 55<br>(34 - 83)     | 922<br>(578 - 1,478)     | 2,949<br>(1,917 - 4,085)  | 6,344<br>(4,808 - 7,920)    |
| Ischemic stroke                               | 5,888<br>(4,207 - 7,493)    | 5<br>(2 - 12)      | 9<br>(5 - 15)       | 166<br>(96 - 271)        | 1,320<br>(825 - 1,839)    | 4,389<br>(3,189 - 5,459)    |
| Hemorrhagic stroke                            | 4,418<br>(3,122 - 6,191)    | 32<br>(13 - 66)    | 46<br>(28 - 71)     | 756<br>(477 - 1,232)     | 1,629<br>(1,033 - 2,343)  | 1,955<br>(1,414 - 2,662)    |
| Hypertensive heart disease                    | 2,486<br>(1,516 - 3,444)    | 1<br>(1 - 3)       | 3<br>(2 - 6)        | 192<br>(102 - 311)       | 516<br>(285 - 784)        | 1,774<br>(1,041 - 2,413)    |
| Cardiomyopathy and myocarditis                | 626<br>(438 - 906)          | 113<br>(59 - 211)  | 28<br>(15 - 47)     | 178<br>(106 - 300)       | 156<br>(94 - 244)         | 151<br>(89 - 250)           |
| Atrial fibrillation and flutter               | 60<br>(38 - 90)             | --                 | --                  | 6<br>(4 - 10)            | 8<br>(5 - 13)             | 46<br>(28 - 73)             |
| Aortic aneurysm                               | 75<br>(45 - 119)            | --                 | --                  | 16<br>(9 - 31)           | 17<br>(9 - 30)            | 42<br>(24 - 64)             |
| Peripheral vascular disease                   | 3<br>(2 - 4)                | --                 | --                  | 0<br>(0 - 0)             | 0<br>(0 - 1)              | 2<br>(1 - 3)                |
| Endocarditis                                  | 160<br>(95 - 241)           | 61<br>(26 - 117)   | 6<br>(2 - 10)       | 34<br>(17 - 58)          | 19<br>(10 - 31)           | 41<br>(22 - 67)             |
| Other cardiovascular and circulatory diseases | 2,523<br>(1,628 - 3,421)    | 73<br>(39 - 131)   | 18<br>(10 - 30)     | 189<br>(113 - 328)       | 1,204<br>(689 - 1,731)    | 1,040<br>(642 - 1,451)      |
| Chronic respiratory diseases                  | 4,606<br>(3,363 - 5,958)    | 70<br>(39 - 112)   | 22<br>(15 - 30)     | 447<br>(293 - 689)       | 1,076<br>(675 - 1,523)    | 2,991<br>(2,250 - 3,807)    |

Web Table 31- Iraq deaths with 95% UI by age, sex, and cause in 2013

| Cause                                               | Females, All Ages        | Females, 0-4 Years | Females, 5-14 Years | Females, 15-49 Years | Females, 50-69 Years | Females, 70-80 Years     |
|-----------------------------------------------------|--------------------------|--------------------|---------------------|----------------------|----------------------|--------------------------|
| Chronic obstructive pulmonary disease               | 2,922<br>(2,062 - 4,004) | 21<br>(9 - 43)     | 4<br>(2 - 7)        | 158<br>(89 - 263)    | 729<br>(445 - 1,094) | 2,010<br>(1,428 - 2,722) |
| Pneumoconiosis                                      | 16<br>(10 - 26)          | 0<br>(0 - 0)       | 0<br>(0 - 1)        | 7<br>(4 - 11)        | 2<br>(1 - 4)         | 7<br>(3 - 14)            |
| Silicosis                                           | 1<br>(1 - 2)             | 0<br>(0 - 0)       | 0<br>(0 - 0)        | 1<br>(0 - 1)         | 0<br>(0 - 0)         | 0<br>(0 - 1)             |
| Asbestosis                                          | 1<br>(1 - 2)             | 0<br>(0 - 0)       | 0<br>(0 - 0)        | 1<br>(0 - 1)         | 0<br>(0 - 0)         | 0<br>(0 - 0)             |
| Coal workers pneumoconiosis                         | 3<br>(2 - 5)             | 0<br>(0 - 0)       | 0<br>(0 - 0)        | 2<br>(1 - 4)         | 0<br>(0 - 1)         | 0<br>(0 - 0)             |
| Other pneumoconiosis                                | 11<br>(6 - 18)           | 0<br>(0 - 0)       | 0<br>(0 - 0)        | 3<br>(2 - 5)         | 2<br>(1 - 3)         | 6<br>(3 - 13)            |
| Asthma                                              | 762<br>(465 - 1,157)     | 15<br>(7 - 29)     | 11<br>(8 - 17)      | 154<br>(92 - 251)    | 224<br>(119 - 357)   | 358<br>(196 - 590)       |
| Interstitial lung disease and pulmonary sarcoidosis | 573<br>(254 - 972)       | 0<br>(0 - 1)       | 1<br>(1 - 2)        | 21<br>(9 - 37)       | 91<br>(34 - 163)     | 460<br>(200 - 799)       |
| Other chronic respiratory diseases                  | 332<br>(214 - 493)       | 33<br>(18 - 60)    | 4<br>(2 - 7)        | 108<br>(64 - 173)    | 30<br>(15 - 51)      | 156<br>(88 - 265)        |
| Cirrhosis                                           | 548<br>(390 - 739)       | 31<br>(13 - 65)    | 26<br>(17 - 38)     | 154<br>(101 - 243)   | 211<br>(132 - 300)   | 126<br>(87 - 173)        |
| Cirrhosis due to hepatitis B                        | 176<br>(78 - 329)        | 1<br>(0 - 4)       | 4<br>(0 - 10)       | 45<br>(15 - 101)     | 71<br>(30 - 134)     | 54<br>(26 - 95)          |
| Cirrhosis due to hepatitis C                        | 262<br>(131 - 410)       | 3<br>(1 - 8)       | 6<br>(2 - 11)       | 78<br>(36 - 136)     | 118<br>(54 - 187)    | 58<br>(27 - 94)          |
| Cirrhosis due to alcohol use                        | 18<br>(10 - 30)          | --                 | --                  | 3<br>(2 - 6)         | 7<br>(4 - 13)        | 8<br>(4 - 14)            |
| Cirrhosis due to other causes                       | 92<br>(61 - 135)         | 27<br>(11 - 57)    | 16<br>(9 - 26)      | 27<br>(14 - 50)      | 15<br>(7 - 26)       | 7<br>(3 - 12)            |
| Digestive diseases                                  | 360<br>(256 - 516)       | 27<br>(12 - 50)    | 14<br>(9 - 19)      | 72<br>(46 - 118)     | 93<br>(57 - 140)     | 154<br>(108 - 221)       |
| Peptic ulcer disease                                | 87<br>(57 - 129)         | 0<br>(0 - 1)       | 1<br>(1 - 2)        | 10<br>(5 - 17)       | 17<br>(9 - 27)       | 59<br>(37 - 91)          |
| Gastritis and duodenitis                            | 4<br>(2 - 10)            | 0<br>(0 - 1)       | 1<br>(1 - 3)        | 1<br>(1 - 2)         | 1<br>(0 - 5)         | 0<br>(0 - 0)             |
| Appendicitis                                        | 22<br>(12 - 41)          | 3<br>(1 - 6)       | 1<br>(1 - 3)        | 8<br>(4 - 15)        | 5<br>(2 - 10)        | 5<br>(1 - 12)            |
| Paralytic ileus and intestinal obstruction          | 87<br>(47 - 140)         | 7<br>(2 - 14)      | 2<br>(1 - 4)        | 13<br>(6 - 26)       | 29<br>(14 - 48)      | 37<br>(18 - 61)          |
| Inguinal, femoral, and abdominal hernia             | 8<br>(4 - 21)            | 0<br>(0 - 1)       | 1<br>(0 - 1)        | 1<br>(1 - 3)         | 3<br>(1 - 6)         | 4<br>(1 - 11)            |
| Inflammatory bowel disease                          | 27<br>(15 - 56)          | 6<br>(2 - 14)      | 2<br>(1 - 3)        | 10<br>(5 - 20)       | 4<br>(2 - 9)         | 6<br>(3 - 12)            |
| Vascular intestinal disorders                       | 3<br>(1 - 9)             | 0<br>(0 - 1)       | 0<br>(0 - 1)        | 2<br>(0 - 7)         | 0<br>(0 - 1)         | 0<br>(0 - 0)             |
| Gallbladder and biliary diseases                    | 47<br>(28 - 86)          | 4<br>(1 - 8)       | 1<br>(1 - 2)        | 9<br>(5 - 16)        | 15<br>(8 - 33)       | 17<br>(8 - 37)           |
| Pancreatitis                                        | 10<br>(5 - 19)           | 0<br>(0 - 0)       | 0<br>(0 - 1)        | 2<br>(1 - 3)         | 5<br>(2 - 11)        | 2<br>(1 - 5)             |
| Other digestive diseases                            | 64<br>(42 - 94)          | 7<br>(3 - 13)      | 3<br>(2 - 5)        | 15<br>(9 - 25)       | 14<br>(8 - 23)       | 25<br>(15 - 41)          |
| Neurological disorders                              | 1,906<br>(1,388 - 2,422) | 28<br>(14 - 51)    | 25<br>(14 - 43)     | 142<br>(87 - 228)    | 213<br>(133 - 301)   | 1,497<br>(1,072 - 1,911) |
| Alzheimer disease and other dementias               | 1,605<br>(1,146 - 2,049) | --                 | --                  | 1<br>(0 - 3)         | 147<br>(84 - 218)    | 1,456<br>(1,038 - 1,868) |
| Parkinson disease                                   | 13<br>(8 - 20)           | --                 | --                  | 3<br>(2 - 5)         | 4<br>(2 - 7)         | 6<br>(4 - 10)            |
| Epilepsy                                            | 172<br>(112 - 263)       | 20<br>(8 - 43)     | 23<br>(12 - 40)     | 101<br>(58 - 173)    | 18<br>(10 - 28)      | 11<br>(4 - 21)           |
| Multiple sclerosis                                  | 30<br>(12 - 48)          | --                 | --                  | 11<br>(5 - 23)       | 11<br>(3 - 21)       | 8<br>(2 - 15)            |
| Other neurological disorders                        | 86<br>(63 - 115)         | 8<br>(5 - 12)      | 3<br>(2 - 4)        | 26<br>(17 - 40)      | 33<br>(21 - 46)      | 16<br>(11 - 22)          |
| Mental and substance use disorders                  | 128<br>(77 - 210)        | 2<br>(1 - 4)       | 0<br>(0 - 0)        | 85<br>(49 - 152)     | 24<br>(13 - 40)      | 16<br>(10 - 24)          |
| Schizophrenia                                       | 9<br>(5 - 14)            | --                 | --                  | 1<br>(0 - 1)         | 1<br>(0 - 2)         | 7<br>(3 - 13)            |
| Alcohol use disorders                               | 34<br>(13 - 67)          | --                 | --                  | 17<br>(6 - 32)       | 15<br>(6 - 30)       | 2<br>(1 - 4)             |
| Drug use disorders                                  | 84<br>(50 - 152)         | 2<br>(1 - 4)       | --                  | 67<br>(38 - 125)     | 9<br>(4 - 16)        | 7<br>(4 - 11)            |
| Opioid use disorders                                | 46<br>(27 - 81)          | 1<br>(1 - 2)       | --                  | 36<br>(20 - 67)      | 4<br>(2 - 8)         | 4<br>(2 - 6)             |
| Cocaine use disorders                               | 2<br>(1 - 3)             | 0<br>(0 - 0)       | --                  | 1<br>(1 - 3)         | 0<br>(0 - 0)         | 0<br>(0 - 0)             |
| Amphetamine use disorders                           | 2<br>(1 - 3)             | 0<br>(0 - 0)       | --                  | 1<br>(1 - 2)         | 0<br>(0 - 0)         | 0<br>(0 - 0)             |
| Other drug use disorders                            | 35<br>(21 - 65)          | 1<br>(0 - 2)       | --                  | 28<br>(16 - 52)      | 4<br>(2 - 8)         | 3<br>(2 - 5)             |
| Eating disorders                                    | 1<br>(1 - 3)             | --                 | 0<br>(0 - 0)        | 1<br>(1 - 2)         | --                   | --                       |

Web Table 31- Iraq deaths with 95% UI by age, sex, and cause in 2013

| Cause                                               | Females, All Ages         | Females, 0-4 Years       | Females, 5-14 Years | Females, 15-49 Years     | Females, 50-69 Years     | Females, 70-80 Years     |
|-----------------------------------------------------|---------------------------|--------------------------|---------------------|--------------------------|--------------------------|--------------------------|
| Anorexia nervosa                                    | 1<br>(1 - 3)              | --                       | 0<br>(0 - 0)        | 1<br>(1 - 2)             | --                       | --                       |
| Diabetes, urogenital, blood, and endocrine diseases | 9,065<br>(6,484 - 11,793) | 276<br>(176 - 406)       | 157<br>(117 - 206)  | 1,894<br>(1,258 - 2,878) | 3,040<br>(1,956 - 4,161) | 3,699<br>(2,718 - 4,571) |
| Diabetes mellitus                                   | 4,312<br>(2,985 - 5,603)  | 27<br>(15 - 48)          | 29<br>(16 - 49)     | 616<br>(402 - 936)       | 1,605<br>(1,023 - 2,232) | 2,035<br>(1,460 - 2,632) |
| Acute glomerulonephritis                            | 9<br>(5 - 21)             | 2<br>(1 - 3)             | 1<br>(0 - 1)        | 2<br>(1 - 5)             | 2<br>(1 - 5)             | 3<br>(1 - 8)             |
| Chronic kidney disease                              | 3,789<br>(2,481 - 5,141)  | 75<br>(40 - 134)         | 54<br>(34 - 82)     | 919<br>(573 - 1,441)     | 1,275<br>(739 - 1,832)   | 1,465<br>(960 - 1,935)   |
| Chronic kidney disease due to diabetes mellitus     | 8<br>(5 - 13)             | 0<br>(0 - 1)             | 2<br>(1 - 3)        | 4<br>(2 - 7)             | 1<br>(1 - 2)             | 1<br>(0 - 1)             |
| Chronic kidney disease due to hypertension          | 1,895<br>(1,129 - 2,738)  | 1<br>(0 - 1)             | 5<br>(2 - 9)        | 482<br>(277 - 795)       | 705<br>(398 - 1,038)     | 703<br>(417 - 1,028)     |
| Chronic kidney disease due to glomerulonephritis    | 135<br>(86 - 201)         | 32<br>(17 - 54)          | 10<br>(7 - 14)      | 15<br>(6 - 32)           | 4<br>(2 - 8)             | 74<br>(39 - 122)         |
| Chronic kidney disease due to other causes          | 1,750<br>(892 - 2,672)    | 42<br>(17 - 87)          | 38<br>(19 - 62)     | 418<br>(175 - 729)       | 564<br>(267 - 963)       | 688<br>(291 - 1,123)     |
| Urinary diseases and male infertility               | 406<br>(254 - 580)        | 52<br>(23 - 122)         | 12<br>(6 - 20)      | 137<br>(74 - 232)        | 90<br>(51 - 137)         | 115<br>(70 - 171)        |
| Interstitial nephritis and urinary tract infections | 372<br>(219 - 540)        | 42<br>(18 - 106)         | 6<br>(2 - 12)       | 126<br>(64 - 213)        | 87<br>(47 - 133)         | 112<br>(67 - 169)        |
| Urolithiasis                                        | 8<br>(3 - 19)             | --                       | 1<br>(0 - 1)        | 5<br>(2 - 13)            | 2<br>(0 - 6)             | 0<br>(0 - 1)             |
| Other urinary diseases                              | 26<br>(14 - 55)           | 10<br>(4 - 23)           | 5<br>(2 - 9)        | 6<br>(2 - 19)            | 2<br>(1 - 8)             | 3<br>(1 - 12)            |
| Gynecological diseases                              | 5<br>(3 - 12)             | --                       | --                  | 4<br>(2 - 7)             | 1<br>(0 - 3)             | 1<br>(0 - 2)             |
| Uterine fibroids                                    | 1<br>(1 - 3)              | --                       | --                  | 1<br>(0 - 1)             | 0<br>(0 - 1)             | 0<br>(0 - 1)             |
| Polycystic ovarian syndrome                         | 0<br>(0 - 1)              | --                       | --                  | 0<br>(0 - 1)             | 0<br>(0 - 0)             | --                       |
| Endometriosis                                       | 1<br>(0 - 1)              | --                       | --                  | 1<br>(0 - 1)             | 0<br>(0 - 0)             | --                       |
| Genital prolapse                                    | 1<br>(0 - 2)              | --                       | --                  | 1<br>(0 - 1)             | 0<br>(0 - 0)             | 0<br>(0 - 1)             |
| Other gynecological diseases                        | 2<br>(1 - 5)              | --                       | --                  | 2<br>(1 - 3)             | 0<br>(0 - 1)             | 0<br>(0 - 1)             |
| Hemoglobinopathies and hemolytic anemias            | 281<br>(175 - 429)        | 66<br>(37 - 110)         | 39<br>(23 - 63)     | 119<br>(67 - 199)        | 25<br>(13 - 46)          | 32<br>(17 - 55)          |
| Thalassemias                                        | 121<br>(76 - 185)         | 45<br>(24 - 75)          | 26<br>(16 - 42)     | 50<br>(29 - 82)          | 0<br>(0 - 0)             | 0<br>(0 - 0)             |
| Sickle cell disorders                               | 109<br>(64 - 179)         | 14<br>(7 - 23)           | 11<br>(6 - 17)      | 62<br>(34 - 107)         | 21<br>(11 - 38)          | 2<br>(1 - 3)             |
| G6PD deficiency                                     | 4<br>(2 - 6)              | 1<br>(0 - 1)             | 1<br>(0 - 1)        | 2<br>(1 - 3)             | 0<br>(0 - 1)             | 0<br>(0 - 1)             |
| Other hemoglobinopathies and hemolytic anemias      | 48<br>(28 - 77)           | 7<br>(4 - 12)            | 2<br>(1 - 3)        | 6<br>(3 - 10)            | 4<br>(2 - 7)             | 30<br>(16 - 52)          |
| Endocrine, metabolic, blood, and immune disorders   | 264<br>(177 - 380)        | 54<br>(29 - 94)          | 22<br>(12 - 39)     | 98<br>(53 - 155)         | 42<br>(24 - 68)          | 48<br>(29 - 79)          |
| Musculoskeletal disorders                           | 110<br>(75 - 163)         | --                       | 9<br>(5 - 13)       | 56<br>(35 - 89)          | 24<br>(14 - 36)          | 22<br>(14 - 34)          |
| Rheumatoid arthritis                                | 5<br>(3 - 10)             | --                       | 1<br>(0 - 1)        | 2<br>(1 - 5)             | 0<br>(0 - 1)             | 1<br>(1 - 3)             |
| Other musculoskeletal disorders                     | 105<br>(72 - 154)         | --                       | 8<br>(5 - 12)       | 53<br>(34 - 85)          | 23<br>(14 - 35)          | 20<br>(13 - 32)          |
| Other non-communicable diseases                     | 3,169<br>(2,265 - 4,365)  | 2,662<br>(1,786 - 3,862) | 195<br>(119 - 295)  | 193<br>(123 - 312)       | 54<br>(33 - 78)          | 65<br>(45 - 88)          |
| Congenital anomalies                                | 3,089<br>(2,199 - 4,282)  | 2,612<br>(1,757 - 3,801) | 192<br>(116 - 292)  | 186<br>(117 - 300)       | 46<br>(28 - 67)          | 54<br>(35 - 76)          |
| Neural tube defects                                 | 104<br>(31 - 261)         | 98<br>(26 - 255)         | 4<br>(2 - 7)        | 2<br>(1 - 3)             | 0<br>(0 - 0)             | 0<br>(0 - 0)             |
| Congenital heart anomalies                          | 1,615<br>(1,075 - 2,384)  | 1,360<br>(841 - 2,095)   | 120<br>(71 - 184)   | 100<br>(62 - 165)        | 17<br>(10 - 27)          | 18<br>(11 - 28)          |
| Cleft lip and cleft palate                          | 13<br>(4 - 41)            | 13<br>(4 - 41)           | --                  | --                       | --                       | --                       |
| Down syndrome                                       | 95<br>(52 - 173)          | 75<br>(36 - 142)         | 16<br>(7 - 33)      | 2<br>(1 - 4)             | 2<br>(1 - 3)             | 0<br>(0 - 0)             |
| Chromosomal unbalanced rearrangements               | 24<br>(13 - 45)           | 14<br>(6 - 30)           | 4<br>(2 - 9)        | 6<br>(3 - 11)            | 0<br>(0 - 0)             | 0<br>(0 - 0)             |
| Other congenital anomalies                          | 1,240<br>(848 - 1,765)    | 1,052<br>(665 - 1,560)   | 49<br>(26 - 82)     | 76<br>(46 - 125)         | 27<br>(16 - 40)          | 36<br>(23 - 53)          |
| Skin and subcutaneous diseases                      | 55<br>(38 - 82)           | 25<br>(11 - 48)          | 3<br>(2 - 5)        | 8<br>(5 - 13)            | 9<br>(5 - 14)            | 11<br>(7 - 17)           |
| Cellulitis                                          | 20<br>(12 - 34)           | 10<br>(4 - 21)           | 1<br>(1 - 2)        | 3<br>(1 - 5)             | 3<br>(1 - 4)             | 4<br>(2 - 7)             |
| Pyoderma                                            | 30<br>(20 - 48)           | 14<br>(6 - 31)           | 1<br>(1 - 2)        | 3<br>(2 - 6)             | 6<br>(3 - 9)             | 6<br>(3 - 10)            |
| Decubitus ulcer                                     | 3<br>(2 - 5)              | 0<br>(0 - 0)             | 0<br>(0 - 1)        | 1<br>(1 - 2)             | 0<br>(0 - 1)             | 1<br>(0 - 2)             |

Web Table 31- Iraq deaths with 95% UI by age, sex, and cause in 2013

| Cause                                           | Females, All Ages        | Females, 0-4 Years | Females, 5-14 Years | Females, 15-49 Years     | Females, 50-69 Years | Females, 70-80 Years |
|-------------------------------------------------|--------------------------|--------------------|---------------------|--------------------------|----------------------|----------------------|
| Other skin and subcutaneous diseases            | 2<br>(1 - 4)             | 0<br>(0 - 1)       | 0<br>(0 - 1)        | 1<br>(0 - 2)             | 0<br>(0 - 1)         | 0<br>(0 - 1)         |
| Sudden infant death syndrome                    | 25<br>(4 - 93)           | 25<br>(4 - 93)     | --                  | --                       | --                   | --                   |
| Injuries                                        | 4,470<br>(3,327 - 5,937) | 642<br>(398 - 906) | 524<br>(402 - 663)  | 2,310<br>(1,558 - 3,473) | 621<br>(413 - 849)   | 374<br>(279 - 475)   |
| Transport injuries                              | 1,120<br>(808 - 1,571)   | 161<br>(83 - 263)  | 137<br>(89 - 197)   | 515<br>(326 - 810)       | 213<br>(130 - 313)   | 95<br>(65 - 133)     |
| Road injuries                                   | 1,067<br>(774 - 1,493)   | 152<br>(79 - 244)  | 130<br>(84 - 190)   | 491<br>(310 - 770)       | 203<br>(125 - 300)   | 91<br>(62 - 128)     |
| Pedestrian road injuries                        | 362<br>(246 - 507)       | 60<br>(29 - 104)   | 50<br>(29 - 77)     | 119<br>(70 - 197)        | 80<br>(47 - 124)     | 54<br>(35 - 78)      |
| Cyclist road injuries                           | 57<br>(37 - 84)          | 6<br>(2 - 13)      | 7<br>(4 - 11)       | 19<br>(11 - 32)          | 20<br>(11 - 31)      | 5<br>(3 - 9)         |
| Motorcyclist road injuries                      | 76<br>(43 - 133)         | 3<br>(1 - 6)       | 5<br>(2 - 10)       | 60<br>(32 - 108)         | 7<br>(3 - 13)        | 1<br>(1 - 3)         |
| Motor vehicle road injuries                     | 565<br>(397 - 824)       | 81<br>(40 - 143)   | 66<br>(40 - 101)    | 292<br>(184 - 472)       | 96<br>(56 - 151)     | 30<br>(18 - 45)      |
| Other road injuries                             | 7<br>(3 - 15)            | 2<br>(1 - 6)       | 2<br>(1 - 4)        | 2<br>(1 - 4)             | 0<br>(0 - 1)         | 1<br>(0 - 2)         |
| Other transport injuries                        | 53<br>(35 - 84)          | 9<br>(4 - 19)      | 6<br>(3 - 12)       | 24<br>(14 - 41)          | 10<br>(5 - 16)       | 4<br>(2 - 7)         |
| Unintentional injuries                          | 2,102<br>(1,577 - 2,763) | 384<br>(220 - 580) | 285<br>(214 - 370)  | 961<br>(618 - 1,441)     | 260<br>(168 - 368)   | 213<br>(157 - 283)   |
| Falls                                           | 278<br>(195 - 387)       | 39<br>(18 - 77)    | 24<br>(14 - 40)     | 102<br>(62 - 164)        | 38<br>(22 - 60)      | 75<br>(46 - 117)     |
| Drowning                                        | 269<br>(179 - 390)       | 89<br>(40 - 178)   | 67<br>(38 - 109)    | 81<br>(49 - 128)         | 23<br>(13 - 36)      | 9<br>(5 - 14)        |
| Fire, heat, and hot substances                  | 522<br>(344 - 788)       | 110<br>(46 - 215)  | 56<br>(31 - 92)     | 275<br>(167 - 436)       | 58<br>(31 - 102)     | 24<br>(14 - 41)      |
| Poisonings                                      | 81<br>(51 - 134)         | 14<br>(6 - 32)     | 8<br>(4 - 13)       | 28<br>(15 - 50)          | 18<br>(9 - 30)       | 13<br>(7 - 21)       |
| Exposure to mechanical forces                   | 248<br>(159 - 366)       | 38<br>(19 - 71)    | 43<br>(26 - 70)     | 137<br>(77 - 227)        | 22<br>(13 - 35)      | 8<br>(5 - 13)        |
| Unintentional firearm injuries                  | 2<br>(2 - 6)             | 0<br>(0 - 1)       | 0<br>(0 - 1)        | 1<br>(1 - 2)             | 0<br>(0 - 1)         | 0<br>(0 - 0)         |
| Unintentional suffocation                       | 31<br>(16 - 70)          | 6<br>(1 - 24)      | 3<br>(1 - 7)        | 18<br>(8 - 36)           | 4<br>(2 - 8)         | 0<br>(0 - 0)         |
| Other exposure to mechanical forces             | 215<br>(133 - 323)       | 32<br>(15 - 58)    | 39<br>(22 - 66)     | 118<br>(62 - 199)        | 18<br>(10 - 29)      | 8<br>(4 - 12)        |
| Adverse effects of medical treatment            | 209<br>(137 - 331)       | 48<br>(20 - 105)   | 12<br>(7 - 22)      | 45<br>(25 - 74)          | 54<br>(29 - 91)      | 50<br>(26 - 91)      |
| Animal contact                                  | 38<br>(16 - 74)          | 8<br>(3 - 20)      | 7<br>(3 - 15)       | 14<br>(5 - 29)           | 4<br>(2 - 9)         | 4<br>(2 - 10)        |
| Venomous animal contact                         | 12<br>(5 - 26)           | 3<br>(1 - 8)       | 4<br>(1 - 8)        | 4<br>(1 - 9)             | 1<br>(0 - 3)         | 1<br>(0 - 1)         |
| Non-venomous animal contact                     | 25<br>(11 - 51)          | 5<br>(2 - 12)      | 4<br>(1 - 7)        | 10<br>(4 - 22)           | 3<br>(1 - 6)         | 4<br>(1 - 9)         |
| Foreign body                                    | 35<br>(22 - 63)          | 5<br>(3 - 11)      | 3<br>(2 - 5)        | 17<br>(9 - 32)           | 2<br>(1 - 4)         | 8<br>(4 - 14)        |
| Pulmonary aspiration and foreign body in airway | 33<br>(21 - 60)          | 5<br>(2 - 11)      | 3<br>(1 - 4)        | 16<br>(9 - 31)           | 2<br>(1 - 4)         | 7<br>(4 - 13)        |
| Foreign body in other body part                 | 2<br>(1 - 3)             | 0<br>(0 - 1)       | 0<br>(0 - 1)        | 1<br>(1 - 2)             | 0<br>(0 - 0)         | 0<br>(0 - 0)         |
| Other unintentional injuries                    | 422<br>(119 - 644)       | 32<br>(14 - 64)    | 64<br>(18 - 106)    | 263<br>(53 - 437)        | 40<br>(13 - 67)      | 22<br>(11 - 34)      |
| Self-harm and interpersonal violence            | 1,248<br>(665 - 1,857)   | 97<br>(18 - 229)   | 103<br>(30 - 180)   | 834<br>(471 - 1,315)     | 149<br>(73 - 228)    | 66<br>(38 - 99)      |
| Self-harm                                       | 538<br>(357 - 840)       | --                 | 15<br>(5 - 34)      | 392<br>(247 - 640)       | 84<br>(49 - 130)     | 46<br>(27 - 73)      |
| Interpersonal violence                          | 711<br>(251 - 1,165)     | 97<br>(18 - 229)   | 87<br>(17 - 166)    | 442<br>(169 - 770)       | 65<br>(17 - 118)     | 20<br>(5 - 40)       |
| Assault by firearm                              | 356<br>(99 - 606)        | 68<br>(10 - 166)   | 51<br>(9 - 104)     | 187<br>(59 - 343)        | 38<br>(9 - 70)       | 12<br>(2 - 28)       |
| Assault by sharp object                         | 82<br>(29 - 159)         | 3<br>(1 - 11)      | 5<br>(1 - 13)       | 69<br>(25 - 135)         | 4<br>(1 - 10)        | 1<br>(0 - 2)         |
| Assault by other means                          | 273<br>(100 - 488)       | 26<br>(6 - 72)     | 31<br>(6 - 70)      | 187<br>(73 - 340)        | 23<br>(6 - 45)       | 6<br>(2 - 14)        |

Web Table 31- Ireland deaths with 95% UI by age, sex, and cause in 2013

| Cause                                                              | Both Sexes, All Ages        | Both Sexes, 0-4 Years | Both Sexes, 5-14 Years | Both Sexes, 15-49 Years  | Both Sexes, 50-69 Years  | Both Sexes, 70-80 Years     |
|--------------------------------------------------------------------|-----------------------------|-----------------------|------------------------|--------------------------|--------------------------|-----------------------------|
| All causes                                                         | 31,102<br>(28,622 - 33,820) | 325<br>(244 - 434)    | 66<br>(56 - 80)        | 1,913<br>(1,684 - 2,191) | 6,337<br>(5,671 - 7,143) | 22,460<br>(20,862 - 24,132) |
| Communicable, maternal, neonatal, and nutritional diseases         | 2,185<br>(1,805 - 2,768)    | 119<br>(88 - 162)     | 6<br>(4 - 8)           | 65<br>(55 - 74)          | 167<br>(138 - 201)       | 1,829<br>(1,455 - 2,405)    |
| HIV/AIDS and tuberculosis                                          | 55<br>(47 - 66)             | 0<br>(0 - 0)          | 0<br>(0 - 0)           | 16<br>(13 - 21)          | 15<br>(12 - 19)          | 24<br>(19 - 30)             |
| Tuberculosis                                                       | 38<br>(31 - 45)             | 0<br>(0 - 0)          | 0<br>(0 - 0)           | 4<br>(3 - 4)             | 11<br>(9 - 13)           | 24<br>(19 - 29)             |
| HIV/AIDS                                                           | 17<br>(12 - 25)             | 0<br>(0 - 0)          | 0<br>(0 - 0)           | 13<br>(9 - 18)           | 4<br>(2 - 7)             | 0<br>(0 - 1)                |
| HIV/AIDS resulting in mycobacterial infection                      | 1<br>(1 - 1)                | 0<br>(0 - 0)          | 0<br>(0 - 0)           | 1<br>(0 - 1)             | 0<br>(0 - 0)             | 0<br>(0 - 0)                |
| HIV/AIDS resulting in other diseases                               | 16<br>(11 - 23)             | 0<br>(0 - 0)          | 0<br>(0 - 0)           | 12<br>(9 - 17)           | 4<br>(2 - 7)             | 0<br>(0 - 1)                |
| Diarrrhea, lower respiratory, and other common infectious diseases | 1,938<br>(1,567 - 2,521)    | 20<br>(14 - 29)       | 5<br>(3 - 7)           | 36<br>(30 - 44)          | 138<br>(111 - 170)       | 1,739<br>(1,369 - 2,305)    |
| Diarrheal diseases                                                 | 30<br>(22 - 41)             | 2<br>(1 - 4)          | 0<br>(0 - 0)           | 1<br>(1 - 1)             | 2<br>(2 - 3)             | 24<br>(16 - 35)             |
| Intestinal infectious diseases                                     | 6<br>(2 - 13)               | 1<br>(0 - 3)          | 1<br>(0 - 3)           | 2<br>(1 - 5)             | 1<br>(0 - 2)             | 0<br>(0 - 1)                |
| Typhoid fever                                                      | 4<br>(1 - 10)               | 1<br>(0 - 2)          | 1<br>(0 - 2)           | 2<br>(0 - 4)             | 0<br>(0 - 1)             | 0<br>(0 - 1)                |
| Paratyphoid fever                                                  | 1<br>(0 - 3)                | 0<br>(0 - 1)          | 0<br>(0 - 1)           | 0<br>(0 - 1)             | 0<br>(0 - 0)             | 0<br>(0 - 0)                |
| Other intestinal infectious diseases                               | 0<br>(0 - 3)                | 0<br>(0 - 1)          | 0<br>(0 - 0)           | 0<br>(0 - 1)             | 0<br>(0 - 1)             | 0<br>(0 - 1)                |
| Lower respiratory infections                                       | 1,871<br>(1,498 - 2,454)    | 11<br>(7 - 16)        | 2<br>(1 - 3)           | 27<br>(22 - 34)          | 129<br>(103 - 160)       | 1,703<br>(1,369 - 2,270)    |
| Upper respiratory infections                                       | 1<br>(0 - 2)                | 0<br>(0 - 0)          | 0<br>(0 - 0)           | 0<br>(0 - 0)             | 0<br>(0 - 0)             | 0<br>(0 - 1)                |
| Otitis media                                                       | 1<br>(0 - 1)                | 0<br>(0 - 0)          | 0<br>(0 - 0)           | 0<br>(0 - 0)             | 0<br>(0 - 0)             | 0<br>(0 - 0)                |
| Meningitis                                                         | 19<br>(16 - 23)             | 4<br>(3 - 6)          | 1<br>(1 - 1)           | 3<br>(3 - 4)             | 4<br>(3 - 5)             | 7<br>(6 - 9)                |
| Pneumococcal meningitis                                            | 3<br>(2 - 4)                | 1<br>(0 - 1)          | 0<br>(0 - 0)           | 1<br>(0 - 1)             | 1<br>(0 - 1)             | 1<br>(1 - 2)                |
| H influenzae type B meningitis                                     | 3<br>(2 - 4)                | 1<br>(1 - 2)          | 0<br>(0 - 0)           | 0<br>(0 - 1)             | 0<br>(0 - 1)             | 1<br>(0 - 1)                |
| Meningococcal meningitis                                           | 6<br>(5 - 8)                | 1<br>(1 - 2)          | 0<br>(0 - 0)           | 1<br>(1 - 1)             | 1<br>(1 - 2)             | 3<br>(2 - 4)                |
| Other meningitis                                                   | 7<br>(5 - 8)                | 1<br>(1 - 2)          | 0<br>(0 - 0)           | 1<br>(1 - 2)             | 1<br>(1 - 2)             | 2<br>(1 - 3)                |
| Encephalitis                                                       | 7<br>(4 - 8)                | 1<br>(0 - 1)          | 0<br>(0 - 1)           | 2<br>(1 - 2)             | 2<br>(1 - 3)             | 2<br>(1 - 3)                |
| Diphtheria                                                         | 0<br>(0 - 0)                | 0<br>(0 - 0)          | 0<br>(0 - 0)           | 0<br>(0 - 0)             | 0<br>(0 - 0)             | --                          |
| Whooping cough                                                     | 0<br>(0 - 0)                | 0<br>(0 - 0)          | 0<br>(0 - 0)           | 0<br>(0 - 0)             | 0<br>(0 - 0)             | --                          |
| Tetanus                                                            | 0<br>(0 - 0)                | 0<br>(0 - 0)          | 0<br>(0 - 0)           | 0<br>(0 - 0)             | 0<br>(0 - 0)             | 0<br>(0 - 0)                |
| Measles                                                            | 0<br>(0 - 0)                | 0<br>(0 - 0)          | 0<br>(0 - 0)           | 0<br>(0 - 0)             | 0<br>(0 - 0)             | --                          |
| Varicella and herpes zoster                                        | 3<br>(1 - 9)                | 0<br>(0 - 1)          | 0<br>(0 - 0)           | 0<br>(0 - 1)             | 0<br>(0 - 1)             | 2<br>(0 - 8)                |
| Neglected tropical diseases and malaria                            | 2<br>(0 - 0)                | 0<br>(0 - 0)          | 0<br>(0 - 0)           | 1<br>(1 - 1)             | 0<br>(0 - 0)             | 0<br>(0 - 0)                |
| Cysticercosis                                                      | 0<br>(0 - 0)                | 0<br>(0 - 0)          | 0<br>(0 - 0)           | 0<br>(0 - 0)             | 0<br>(0 - 0)             | 0<br>(0 - 0)                |
| Cystic echinococcosis                                              | 0<br>(0 - 0)                | 0<br>(0 - 0)          | 0<br>(0 - 0)           | 0<br>(0 - 0)             | 0<br>(0 - 0)             | 0<br>(0 - 0)                |
| Dengue                                                             | 0<br>(0 - 1)                | 0<br>(0 - 0)          | 0<br>(0 - 0)           | 0<br>(0 - 0)             | 0<br>(0 - 0)             | 0<br>(0 - 0)                |
| Rabies                                                             | 0<br>(0 - 0)                | 0<br>(0 - 0)          | 0<br>(0 - 0)           | 0<br>(0 - 0)             | 0<br>(0 - 0)             | 0<br>(0 - 0)                |
| Other neglected tropical diseases                                  | 1<br>(0 - 1)                | 0<br>(0 - 0)          | 0<br>(0 - 0)           | 0<br>(0 - 0)             | 0<br>(0 - 0)             | 0<br>(0 - 0)                |
| Maternal disorders                                                 | 2<br>(2 - 3)                | --                    | 0<br>(0 - 0)           | 2<br>(2 - 3)             | --                       | --                          |
| Maternal hemorrhage                                                | 0<br>(0 - 0)                | --                    | 0<br>(0 - 0)           | 0<br>(0 - 0)             | --                       | --                          |
| Maternal sepsis and other maternal infections                      | 0<br>(0 - 0)                | --                    | 0<br>(0 - 0)           | 0<br>(0 - 0)             | --                       | --                          |
| Maternal hypertensive disorders                                    | 0<br>(0 - 0)                | --                    | 0<br>(0 - 0)           | 0<br>(0 - 0)             | --                       | --                          |
| Maternal obstructed labor                                          | 0<br>(0 - 0)                | --                    | 0<br>(0 - 0)           | 0<br>(0 - 0)             | --                       | --                          |
| Maternal abortive outcome                                          | 1<br>(0 - 1)                | --                    | 0<br>(0 - 0)           | 1<br>(0 - 1)             | --                       | --                          |
| Indirect maternal deaths                                           | 0<br>(0 - 0)                | --                    | 0<br>(0 - 0)           | 0<br>(0 - 0)             | --                       | --                          |

Web Table 31- Ireland deaths with 95% UI by age, sex, and cause in 2013

| Cause                                                            | Both Sexes, All Ages        | Both Sexes, 0-4 Years | Both Sexes, 5-14 Years | Both Sexes, 15-49 Years  | Both Sexes, 50-69 Years  | Both Sexes, 70-80 Years     |
|------------------------------------------------------------------|-----------------------------|-----------------------|------------------------|--------------------------|--------------------------|-----------------------------|
| Late maternal deaths                                             | 0<br>(0 - 0)                | --                    | 0<br>(0 - 0)           | 0<br>(0 - 0)             | --                       | --                          |
| Maternal deaths aggravated by HIV/AIDS                           | 0<br>(0 - 0)                | --                    | --                     | 0<br>(0 - 0)             | --                       | --                          |
| Other maternal disorders                                         | 0<br>(0 - 1)                | --                    | 0<br>(0 - 0)           | 0<br>(0 - 1)             | --                       | --                          |
| Neonatal disorders                                               | 96<br>(71 - 131)            | 96<br>(71 - 131)      | --                     | --                       | --                       | --                          |
| Neonatal preterm birth complications                             | 62<br>(44 - 87)             | 62<br>(44 - 87)       | --                     | --                       | --                       | --                          |
| Neonatal encephalopathy due to birth asphyxia and trauma         | 20<br>(14 - 30)             | 20<br>(14 - 30)       | --                     | --                       | --                       | --                          |
| Neonatal sepsis and other neonatal infections                    | 2<br>(1 - 4)                | 2<br>(1 - 4)          | --                     | --                       | --                       | --                          |
| Hemolytic disease and other neonatal jaundice                    | 0<br>(0 - 0)                | 0<br>(0 - 0)          | --                     | --                       | --                       | --                          |
| Other neonatal disorders                                         | 12<br>(6 - 18)              | 12<br>(6 - 18)        | --                     | --                       | --                       | --                          |
| Nutritional deficiencies                                         | 58<br>(45 - 75)             | 0<br>(0 - 0)          | 0<br>(0 - 0)           | 2<br>(1 - 2)             | 5<br>(4 - 7)             | 51<br>(38 - 68)             |
| Protein-energy malnutrition                                      | 9<br>(4 - 14)               | 0<br>(0 - 0)          | 0<br>(0 - 0)           | 0<br>(0 - 1)             | 1<br>(1 - 2)             | 7<br>(3 - 12)               |
| Iodine deficiency                                                | 0<br>(0 - 1)                | 0<br>(0 - 0)          | 0<br>(0 - 0)           | 0<br>(0 - 0)             | 0<br>(0 - 0)             | 0<br>(0 - 1)                |
| Iron-deficiency anemia                                           | 42<br>(30 - 57)             | 0<br>(0 - 0)          | 0<br>(0 - 0)           | 1<br>(1 - 1)             | 3<br>(2 - 4)             | 38<br>(27 - 52)             |
| Other nutritional deficiencies                                   | 6<br>(3 - 11)               | 0<br>(0 - 0)          | 0<br>(0 - 0)           | 0<br>(0 - 0)             | 1<br>(0 - 1)             | 5<br>(2 - 10)               |
| Other communicable, maternal, neonatal, and nutritional diseases | 34<br>(25 - 42)             | 2<br>(1 - 4)          | 1<br>(0 - 1)           | 7<br>(5 - 9)             | 10<br>(7 - 12)           | 14<br>(9 - 18)              |
| Sexually transmitted diseases excluding HIV                      | 2<br>(1 - 3)                | 1<br>(0 - 1)          | 0<br>(0 - 0)           | 0<br>(0 - 0)             | 0<br>(0 - 0)             | 1<br>(1 - 1)                |
| Syphilis                                                         | 2<br>(1 - 3)                | 1<br>(0 - 1)          | 0<br>(0 - 0)           | 0<br>(0 - 0)             | 0<br>(0 - 0)             | 1<br>(0 - 1)                |
| Chlamydial infection                                             | 0<br>(0 - 0)                | --                    | 0<br>(0 - 0)           | 0<br>(0 - 0)             | 0<br>(0 - 0)             | 0<br>(0 - 0)                |
| Gonococcal infection                                             | 0<br>(0 - 0)                | --                    | 0<br>(0 - 0)           | 0<br>(0 - 0)             | 0<br>(0 - 0)             | 0<br>(0 - 0)                |
| Other sexually transmitted diseases                              | 0<br>(0 - 0)                | --                    | 0<br>(0 - 0)           | 0<br>(0 - 0)             | 0<br>(0 - 0)             | 0<br>(0 - 0)                |
| Hepatitis                                                        | 6<br>(4 - 7)                | 0<br>(0 - 0)          | 0<br>(0 - 0)           | 2<br>(2 - 3)             | 2<br>(1 - 3)             | 1<br>(1 - 2)                |
| Acute hepatitis A                                                | 2<br>(1 - 3)                | 0<br>(0 - 0)          | 0<br>(0 - 0)           | 1<br>(0 - 1)             | 0<br>(0 - 1)             | 0<br>(0 - 0)                |
| Acute hepatitis B                                                | 4<br>(2 - 5)                | 0<br>(0 - 0)          | 0<br>(0 - 0)           | 1<br>(1 - 2)             | 1<br>(1 - 2)             | 1<br>(1 - 1)                |
| Acute hepatitis C                                                | 0<br>(0 - 1)                | --                    | 0<br>(0 - 0)           | 0<br>(0 - 1)             | 0<br>(0 - 1)             | 0<br>(0 - 0)                |
| Other infectious diseases                                        | 26<br>(18 - 34)             | 2<br>(1 - 2)          | 1<br>(0 - 1)           | 5<br>(3 - 6)             | 8<br>(5 - 10)            | 12<br>(7 - 16)              |
| Non-communicable diseases                                        | 27,483<br>(25,280 - 29,890) | 188<br>(139 - 249)    | 39<br>(32 - 47)        | 1,257<br>(1,099 - 1,442) | 5,867<br>(5,250 - 6,611) | 20,133<br>(18,649 - 21,731) |
| Neoplasms                                                        | 8,529<br>(7,617 - 9,462)    | 8<br>(5 - 12)         | 17<br>(14 - 21)        | 554<br>(480 - 638)       | 3,029<br>(2,680 - 3,405) | 4,921<br>(4,358 - 5,429)    |
| Esophageal cancer                                                | 359<br>(302 - 416)          | --                    | --                     | 17<br>(13 - 22)          | 140<br>(109 - 172)       | 202<br>(170 - 236)          |
| Stomach cancer                                                   | 419<br>(350 - 498)          | --                    | --                     | 20<br>(16 - 24)          | 116<br>(96 - 137)        | 284<br>(231 - 350)          |
| Liver cancer                                                     | 175<br>(124 - 215)          | --                    | 0<br>(0 - 0)           | 9<br>(6 - 12)            | 68<br>(47 - 87)          | 98<br>(68 - 122)            |
| Liver cancer due to hepatitis B                                  | 45<br>(26 - 78)             | --                    | 0<br>(0 - 0)           | 4<br>(2 - 7)             | 22<br>(11 - 39)          | 19<br>(11 - 33)             |
| Liver cancer due to hepatitis C                                  | 78<br>(44 - 113)            | --                    | 0<br>(0 - 0)           | 3<br>(1 - 5)             | 27<br>(11 - 43)          | 48<br>(29 - 70)             |
| Liver cancer due to alcohol use                                  | 44<br>(25 - 72)             | --                    | --                     | 1<br>(1 - 3)             | 16<br>(8 - 28)           | 27<br>(14 - 43)             |
| Liver cancer due to other causes                                 | 7<br>(2 - 13)               | --                    | 0<br>(0 - 0)           | 1<br>(0 - 1)             | 3<br>(1 - 6)             | 4<br>(1 - 7)                |
| Larynx cancer                                                    | 57<br>(40 - 72)             | --                    | --                     | 3<br>(2 - 4)             | 27<br>(18 - 35)          | 27<br>(19 - 35)             |
| Tracheal, bronchus and lung cancer                               | 1,918<br>(1,666 - 2,182)    | --                    | --                     | 67<br>(55 - 81)          | 761<br>(659 - 889)       | 1,091<br>(931 - 1,249)      |
| Breast cancer                                                    | 728<br>(523 - 903)          | --                    | --                     | 104<br>(80 - 136)        | 321<br>(226 - 400)       | 303<br>(204 - 389)          |
| Cervical cancer                                                  | 87<br>(58 - 111)            | --                    | --                     | 26<br>(17 - 35)          | 34<br>(21 - 45)          | 27<br>(19 - 36)             |
| Uterine cancer                                                   | 77<br>(53 - 99)             | --                    | --                     | 3<br>(2 - 4)             | 30<br>(20 - 40)          | 45<br>(31 - 60)             |
| Prostate cancer                                                  | 653<br>(509 - 930)          | --                    | --                     | 2<br>(1 - 3)             | 128<br>(86 - 175)        | 523<br>(398 - 775)          |

Web Table 31- Ireland deaths with 95% UI by age, sex, and cause in 2013

| Cause                                         | Both Sexes, All Ages       | Both Sexes, 0-4 Years | Both Sexes, 5-14 Years | Both Sexes, 15-49 Years | Both Sexes, 50-69 Years  | Both Sexes, 70-80 Years  |
|-----------------------------------------------|----------------------------|-----------------------|------------------------|-------------------------|--------------------------|--------------------------|
| Colon and rectum cancer                       | 1,129<br>(990 - 1,274)     | --                    | --                     | 50<br>(42 - 59)         | 361<br>(317 - 413)       | 719<br>(621 - 824)       |
| Lip and oral cavity cancer                    | 85<br>(72 - 101)           | --                    | --                     | 8<br>(6 - 10)           | 37<br>(28 - 46)          | 41<br>(34 - 50)          |
| Nasopharynx cancer                            | 10<br>(8 - 14)             | --                    | 0<br>(0 - 0)           | 2<br>(1 - 3)            | 5<br>(3 - 6)             | 3<br>(2 - 5)             |
| Other pharynx cancer                          | 38<br>(30 - 49)            | --                    | --                     | 3<br>(3 - 5)            | 21<br>(15 - 28)          | 14<br>(11 - 18)          |
| Gallbladder and biliary tract cancer          | 76<br>(53 - 98)            | --                    | --                     | 2<br>(1 - 3)            | 21<br>(16 - 27)          | 53<br>(36 - 71)          |
| Pancreatic cancer                             | 515<br>(451 - 578)         | --                    | --                     | 20<br>(16 - 24)         | 185<br>(159 - 214)       | 310<br>(267 - 352)       |
| Malignant skin melanoma                       | 112<br>(74 - 158)          | --                    | --                     | 20<br>(14 - 28)         | 39<br>(25 - 55)          | 53<br>(35 - 73)          |
| Non-melanoma skin cancer                      | 72<br>(50 - 96)            | --                    | --                     | 3<br>(2 - 4)            | 11<br>(8 - 16)           | 58<br>(40 - 78)          |
| Ovarian cancer                                | 280<br>(226 - 340)         | --                    | --                     | 23<br>(17 - 30)         | 124<br>(99 - 154)        | 133<br>(101 - 170)       |
| Testicular cancer                             | 6<br>(4 - 8)               | --                    | --                     | 4<br>(3 - 6)            | 1<br>(1 - 1)             | 1<br>(1 - 1)             |
| Kidney cancer                                 | 203<br>(172 - 239)         | 0<br>(0 - 1)          | 0<br>(0 - 1)           | 13<br>(10 - 17)         | 84<br>(67 - 105)         | 105<br>(85 - 131)        |
| Bladder cancer                                | 165<br>(132 - 195)         | --                    | --                     | 3<br>(3 - 4)            | 37<br>(29 - 45)          | 125<br>(98 - 151)        |
| Brain and nervous system cancer               | 261<br>(217 - 321)         | 2<br>(1 - 3)          | 5<br>(4 - 7)           | 47<br>(37 - 60)         | 123<br>(102 - 156)       | 83<br>(64 - 104)         |
| Thyroid cancer                                | 25<br>(20 - 32)            | --                    | 0<br>(0 - 0)           | 1<br>(1 - 2)            | 8<br>(6 - 10)            | 16<br>(12 - 21)          |
| Mesothelioma                                  | 32<br>(21 - 42)            | --                    | --                     | 2<br>(1 - 3)            | 16<br>(9 - 23)           | 14<br>(8 - 20)           |
| Hodgkin lymphoma                              | 23<br>(17 - 31)            | 0<br>(0 - 0)          | 0<br>(0 - 1)           | 9<br>(6 - 12)           | 8<br>(6 - 10)            | 6<br>(4 - 9)             |
| Non-Hodgkin lymphoma                          | 278<br>(162 - 351)         | 0<br>(0 - 0)          | 1<br>(1 - 2)           | 27<br>(16 - 35)         | 100<br>(60 - 129)        | 150<br>(81 - 196)        |
| Multiple myeloma                              | 194<br>(130 - 283)         | --                    | --                     | 7<br>(4 - 10)           | 67<br>(45 - 98)          | 121<br>(79 - 174)        |
| Leukemia                                      | 254<br>(218 - 289)         | 2<br>(1 - 4)          | 6<br>(4 - 7)           | 27<br>(22 - 33)         | 72<br>(59 - 85)          | 146<br>(124 - 171)       |
| Other neoplasms                               | 297<br>(215 - 362)         | 3<br>(2 - 4)          | 4<br>(3 - 5)           | 33<br>(26 - 40)         | 86<br>(66 - 105)         | 170<br>(109 - 221)       |
| Cardiovascular diseases                       | 10,833<br>(9,728 - 12,070) | 1<br>(1 - 2)          | 2<br>(1 - 2)           | 272<br>(229 - 325)      | 1,754<br>(1,528 - 2,036) | 8,804<br>(7,900 - 9,789) |
| Rheumatic heart disease                       | 53<br>(31 - 68)            | 0<br>(0 - 0)          | 0<br>(0 - 0)           | 4<br>(3 - 6)            | 13<br>(8 - 17)           | 36<br>(19 - 48)          |
| Ischemic heart disease                        | 6,447<br>(5,655 - 7,328)   | 0<br>(0 - 0)          | 0<br>(0 - 0)           | 156<br>(127 - 191)      | 1,208<br>(1,035 - 1,425) | 5,083<br>(4,424 - 5,788) |
| Cerebrovascular disease                       | 2,536<br>(2,100 - 3,047)   | 0<br>(0 - 0)          | 1<br>(0 - 1)           | 61<br>(48 - 74)         | 283<br>(227 - 343)       | 2,191<br>(1,809 - 2,639) |
| Ischemic stroke                               | 1,463<br>(1,191 - 1,890)   | 0<br>(0 - 0)          | 0<br>(0 - 0)           | 5<br>(4 - 7)            | 81<br>(58 - 111)         | 1,377<br>(1,116 - 1,775) |
| Hemorrhagic stroke                            | 1,073<br>(808 - 1,296)     | 0<br>(0 - 0)          | 1<br>(0 - 1)           | 55<br>(44 - 67)         | 203<br>(159 - 245)       | 813<br>(589 - 1,002)     |
| Hypertensive heart disease                    | 133<br>(90 - 175)          | 0<br>(0 - 0)          | 0<br>(0 - 0)           | 3<br>(2 - 4)            | 20<br>(13 - 27)          | 110<br>(71 - 149)        |
| Cardiomyopathy and myocarditis                | 309<br>(227 - 567)         | 1<br>(0 - 1)          | 0<br>(0 - 1)           | 19<br>(14 - 27)         | 51<br>(40 - 73)          | 238<br>(164 - 472)       |
| Atrial fibrillation and flutter               | 448<br>(338 - 597)         | --                    | --                     | 1<br>(1 - 1)            | 28<br>(21 - 37)          | 419<br>(311 - 566)       |
| Aortic aneurysm                               | 281<br>(206 - 351)         | --                    | --                     | 7<br>(5 - 9)            | 55<br>(42 - 69)          | 220<br>(157 - 279)       |
| Peripheral vascular disease                   | 136<br>(102 - 176)         | --                    | --                     | 0<br>(0 - 1)            | 12<br>(9 - 16)           | 124<br>(91 - 162)        |
| Endocarditis                                  | 48<br>(35 - 75)            | 0<br>(0 - 0)          | 0<br>(0 - 0)           | 4<br>(3 - 6)            | 13<br>(9 - 21)           | 32<br>(21 - 50)          |
| Other cardiovascular and circulatory diseases | 442<br>(248 - 563)         | 0<br>(0 - 0)          | 0<br>(0 - 0)           | 17<br>(10 - 22)         | 72<br>(46 - 92)          | 353<br>(188 - 464)       |
| Chronic respiratory diseases                  | 2,146<br>(1,855 - 2,435)   | 2<br>(1 - 2)          | 1<br>(1 - 1)           | 30<br>(25 - 36)         | 304<br>(257 - 364)       | 1,810<br>(1,543 - 2,063) |
| Chronic obstructive pulmonary disease         | 1,794<br>(1,537 - 2,107)   | 1<br>(0 - 1)          | 0<br>(0 - 0)           | 11<br>(9 - 15)          | 237<br>(201 - 289)       | 1,545<br>(1,315 - 1,811) |
| Pneumoconiosis                                | 17<br>(10 - 26)            | 0<br>(0 - 0)          | 0<br>(0 - 0)           | 0<br>(0 - 1)            | 3<br>(2 - 4)             | 14<br>(8 - 22)           |
| Silicosis                                     | 0<br>(0 - 1)               | 0<br>(0 - 0)          | 0<br>(0 - 0)           | 0<br>(0 - 0)            | 0<br>(0 - 0)             | 0<br>(0 - 0)             |
| Asbestosis                                    | 8<br>(5 - 12)              | 0<br>(0 - 0)          | 0<br>(0 - 0)           | 0<br>(0 - 0)            | 1<br>(1 - 2)             | 7<br>(4 - 10)            |
| Coal workers pneumoconiosis                   | 2<br>(1 - 2)               | 0<br>(0 - 0)          | 0<br>(0 - 0)           | 0<br>(0 - 0)            | 0<br>(0 - 0)             | 1<br>(1 - 2)             |
| Other pneumoconiosis                          | 7<br>(4 - 11)              | 0<br>(0 - 0)          | 0<br>(0 - 0)           | 0<br>(0 - 0)            | 1<br>(1 - 2)             | 6<br>(3 - 10)            |



Web Table 31- Ireland deaths with 95% UI by age, sex, and cause in 2013

| Cause                                               | Both Sexes, All Ages     | Both Sexes, 0-4 Years | Both Sexes, 5-14 Years | Both Sexes, 15-49 Years | Both Sexes, 50-69 Years | Both Sexes, 70-80 Years  |
|-----------------------------------------------------|--------------------------|-----------------------|------------------------|-------------------------|-------------------------|--------------------------|
| Asthma                                              | 67<br>(49 - 90)          | 0<br>(0 - 0)          | 1<br>(0 - 1)           | 10<br>(8 - 13)          | 15<br>(11 - 21)         | 41<br>(26 - 60)          |
| Interstitial lung disease and pulmonary sarcoidosis | 220<br>(108 - 322)       | 0<br>(0 - 0)          | 0<br>(0 - 0)           | 6<br>(4 - 9)            | 43<br>(21 - 65)         | 170<br>(81 - 255)        |
| Other chronic respiratory diseases                  | 48<br>(34 - 65)          | 1<br>(0 - 1)          | 0<br>(0 - 0)           | 1<br>(1 - 2)            | 5<br>(4 - 7)            | 40<br>(28 - 57)          |
| Cirrhosis                                           | 344<br>(299 - 391)       | 0<br>(0 - 0)          | 0<br>(0 - 0)           | 68<br>(56 - 81)         | 166<br>(142 - 194)      | 110<br>(94 - 126)        |
| Cirrhosis due to hepatitis B                        | 38<br>(18 - 59)          | 0<br>(0 - 0)          | 0<br>(0 - 0)           | 7<br>(3 - 12)           | 18<br>(8 - 29)          | 12<br>(6 - 20)           |
| Cirrhosis due to hepatitis C                        | 142<br>(92 - 198)        | 0<br>(0 - 0)          | 0<br>(0 - 0)           | 27<br>(12 - 41)         | 66<br>(38 - 99)         | 49<br>(35 - 65)          |
| Cirrhosis due to alcohol use                        | 126<br>(81 - 173)        | --<br>(0 - 0)         | --<br>(0 - 0)          | 22<br>(12 - 33)         | 63<br>(38 - 91)         | 41<br>(28 - 54)          |
| Cirrhosis due to other causes                       | 38<br>(19 - 65)          | 0<br>(0 - 0)          | 0<br>(0 - 0)           | 12<br>(6 - 21)          | 18<br>(7 - 32)          | 8<br>(4 - 13)            |
| Digestive diseases                                  | 739<br>(607 - 861)       | 1<br>(0 - 1)          | 1<br>(1 - 1)           | 27<br>(22 - 33)         | 119<br>(93 - 139)       | 592<br>(483 - 693)       |
| Peptic ulcer disease                                | 131<br>(103 - 167)       | 0<br>(0 - 0)          | 0<br>(0 - 0)           | 4<br>(3 - 5)            | 22<br>(16 - 29)         | 105<br>(81 - 138)        |
| Gastritis and duodenitis                            | 11<br>(6 - 16)           | 0<br>(0 - 0)          | 0<br>(0 - 0)           | 1<br>(0 - 1)            | 2<br>(1 - 3)            | 8<br>(4 - 12)            |
| Appendicitis                                        | 7<br>(5 - 10)            | 0<br>(0 - 0)          | 0<br>(0 - 0)           | 1<br>(1 - 1)            | 2<br>(1 - 3)            | 4<br>(3 - 6)             |
| Paralytic ileus and intestinal obstruction          | 109<br>(70 - 154)        | 0<br>(0 - 0)          | 0<br>(0 - 0)           | 3<br>(2 - 4)            | 15<br>(9 - 23)          | 91<br>(57 - 129)         |
| Inguinal, femoral, and abdominal hernia             | 20<br>(11 - 29)          | 0<br>(0 - 0)          | 0<br>(0 - 0)           | 1<br>(0 - 1)            | 3<br>(2 - 5)            | 17<br>(8 - 24)           |
| Inflammatory bowel disease                          | 77<br>(55 - 108)         | 0<br>(0 - 0)          | 0<br>(0 - 0)           | 3<br>(2 - 4)            | 11<br>(8 - 15)          | 63<br>(43 - 90)          |
| Vascular intestinal disorders                       | 99<br>(54 - 146)         | 0<br>(0 - 0)          | 0<br>(0 - 0)           | 2<br>(1 - 3)            | 18<br>(10 - 28)         | 79<br>(42 - 118)         |
| Gallbladder and biliary diseases                    | 70<br>(44 - 89)          | 0<br>(0 - 0)          | 0<br>(0 - 0)           | 2<br>(1 - 2)            | 9<br>(6 - 12)           | 59<br>(36 - 76)          |
| Pancreatitis                                        | 46<br>(30 - 60)          | 0<br>(0 - 0)          | 0<br>(0 - 0)           | 7<br>(5 - 9)            | 13<br>(9 - 19)          | 25<br>(16 - 35)          |
| Other digestive diseases                            | 169<br>(127 - 211)       | 0<br>(0 - 0)          | 0<br>(0 - 0)           | 4<br>(3 - 6)            | 23<br>(16 - 29)         | 141<br>(106 - 180)       |
| Neurological disorders                              | 2,780<br>(2,287 - 3,310) | 7<br>(5 - 10)         | 4<br>(3 - 5)           | 57<br>(46 - 70)         | 186<br>(155 - 219)      | 2,527<br>(2,041 - 3,030) |
| Alzheimer disease and other dementias               | 2,270<br>(1,795 - 2,770) | --<br>(0 - 0)         | --<br>(0 - 0)          | 0<br>(0 - 1)            | 71<br>(53 - 91)         | 2,199<br>(1,728 - 2,690) |
| Parkinson disease                                   | 237<br>(170 - 289)       | --<br>(0 - 0)         | --<br>(0 - 0)          | 1<br>(0 - 1)            | 18<br>(13 - 23)         | 219<br>(153 - 271)       |
| Epilepsy                                            | 55<br>(40 - 68)          | 1<br>(1 - 2)          | 1<br>(1 - 2)           | 26<br>(20 - 33)         | 12<br>(8 - 15)          | 15<br>(10 - 20)          |
| Multiple sclerosis                                  | 48<br>(33 - 73)          | --<br>(0 - 0)         | --<br>(0 - 0)          | 12<br>(8 - 20)          | 24<br>(15 - 36)         | 12<br>(7 - 18)           |
| Other neurological disorders                        | 170<br>(143 - 201)       | 6<br>(4 - 9)          | 2<br>(2 - 3)           | 17<br>(13 - 21)         | 62<br>(50 - 76)         | 83<br>(68 - 100)         |
| Mental and substance use disorders                  | 234<br>(148 - 283)       | 0<br>(0 - 0)          | 0<br>(0 - 0)           | 158<br>(94 - 195)       | 58<br>(35 - 71)         | 18<br>(10 - 24)          |
| Schizophrenia                                       | 5<br>(1 - 8)             | --<br>(0 - 0)         | --<br>(0 - 0)          | 0<br>(0 - 0)            | 1<br>(0 - 1)            | 4<br>(1 - 7)             |
| Alcohol use disorders                               | 76<br>(33 - 99)          | --<br>(0 - 0)         | --<br>(0 - 0)          | 32<br>(14 - 44)         | 36<br>(15 - 48)         | 8<br>(4 - 11)            |
| Drug use disorders                                  | 152<br>(93 - 187)        | 0<br>(0 - 0)          | --<br>(0 - 0)          | 125<br>(70 - 157)       | 21<br>(16 - 27)         | 6<br>(5 - 8)             |
| Opioid use disorders                                | 56<br>(34 - 70)          | 0<br>(0 - 0)          | --<br>(0 - 0)          | 47<br>(26 - 59)         | 7<br>(5 - 9)            | 2<br>(2 - 3)             |
| Cocaine use disorders                               | 5<br>(3 - 6)             | 0<br>(0 - 0)          | --<br>(0 - 0)          | 4<br>(2 - 5)            | 1<br>(0 - 1)            | 0<br>(0 - 0)             |
| Amphetamine use disorders                           | 4<br>(3 - 5)             | 0<br>(0 - 0)          | --<br>(0 - 0)          | 3<br>(2 - 5)            | 1<br>(1 - 1)            | 0<br>(0 - 0)             |
| Other drug use disorders                            | 87<br>(54 - 108)         | 0<br>(0 - 0)          | --<br>(0 - 0)          | 71<br>(40 - 90)         | 13<br>(10 - 16)         | 4<br>(3 - 5)             |
| Eating disorders                                    | 1<br>(0 - 1)             | --<br>(0 - 0)         | 0<br>(0 - 0)           | 1<br>(0 - 1)            | --<br>(0 - 0)           | --<br>(0 - 0)            |
| Anorexia nervosa                                    | 1<br>(0 - 1)             | --<br>(0 - 0)         | 0<br>(0 - 0)           | 1<br>(0 - 1)            | --<br>(0 - 0)           | --<br>(0 - 0)            |
| Diabetes, urogenital, blood, and endocrine diseases | 1,460<br>(1,279 - 1,639) | 9<br>(6 - 12)         | 6<br>(4 - 8)           | 56<br>(48 - 67)         | 197<br>(170 - 233)      | 1,193<br>(1,026 - 1,354) |
| Diabetes mellitus                                   | 499<br>(430 - 575)       | 0<br>(0 - 0)          | 0<br>(0 - 0)           | 15<br>(12 - 18)         | 81<br>(67 - 96)         | 403<br>(341 - 473)       |
| Acute glomerulonephritis                            | 1<br>(0 - 1)             | 0<br>(0 - 0)          | 0<br>(0 - 0)           | 0<br>(0 - 0)            | 0<br>(0 - 0)            | 0<br>(0 - 0)             |
| Chronic kidney disease                              | 558<br>(454 - 660)       | 0<br>(0 - 0)          | 0<br>(0 - 0)           | 13<br>(11 - 17)         | 58<br>(48 - 74)         | 486<br>(387 - 581)       |
| Chronic kidney disease due to diabetes mellitus     | 92<br>(60 - 145)         | 0<br>(0 - 0)          | 0<br>(0 - 0)           | 3<br>(2 - 5)            | 12<br>(8 - 19)          | 77<br>(49 - 123)         |

Web Table 31- Ireland deaths with 95% UI by age, sex, and cause in 2013

| Cause                                               | Both Sexes, All Ages     | Both Sexes, 0-4 Years | Both Sexes, 5-14 Years | Both Sexes, 15-49 Years | Both Sexes, 50-69 Years | Both Sexes, 70-80 Years |
|-----------------------------------------------------|--------------------------|-----------------------|------------------------|-------------------------|-------------------------|-------------------------|
| Chronic kidney disease due to hypertension          | 192<br>(139 - 256)       | 0<br>(0 - 0)          | 0<br>(0 - 0)           | 2<br>(1 - 3)            | 18<br>(13 - 28)         | 171<br>(123 - 230)      |
| Chronic kidney disease due to glomerulonephritis    | 13<br>(8 - 18)           | 0<br>(0 - 0)          | 0<br>(0 - 0)           | 1<br>(1 - 2)            | 3<br>(2 - 4)            | 9<br>(5 - 13)           |
| Chronic kidney disease due to other causes          | 261<br>(174 - 340)       | 0<br>(0 - 0)          | 0<br>(0 - 0)           | 7<br>(5 - 9)            | 25<br>(16 - 34)         | 229<br>(148 - 302)      |
| Urinary diseases and male infertility               | 216<br>(149 - 273)       | 0<br>(0 - 1)          | 0<br>(0 - 0)           | 4<br>(4 - 5)            | 17<br>(13 - 22)         | 194<br>(129 - 252)      |
| Interstitial nephritis and urinary tract infections | 190<br>(130 - 244)       | 0<br>(0 - 0)          | 0<br>(0 - 0)           | 3<br>(3 - 4)            | 14<br>(11 - 18)         | 173<br>(113 - 227)      |
| Urolithiasis                                        | 4<br>(2 - 6)             | --                    | 0<br>(0 - 0)           | 0<br>(0 - 0)            | 1<br>(0 - 1)            | 3<br>(1 - 5)            |
| Other urinary diseases                              | 21<br>(11 - 33)          | 0<br>(0 - 0)          | 0<br>(0 - 0)           | 1<br>(0 - 1)            | 2<br>(1 - 3)            | 18<br>(9 - 29)          |
| Gynecological diseases                              | 1<br>(1 - 2)             | --                    | --                     | 0<br>(0 - 0)            | 0<br>(0 - 0)            | 1<br>(0 - 1)            |
| Uterine fibroids                                    | 0<br>(0 - 0)             | --                    | --                     | 0<br>(0 - 0)            | 0<br>(0 - 0)            | 0<br>(0 - 0)            |
| Polycystic ovarian syndrome                         | 0<br>(0 - 0)             | --                    | --                     | 0<br>(0 - 0)            | 0<br>(0 - 0)            | --                      |
| Endometriosis                                       | 0<br>(0 - 0)             | --                    | --                     | 0<br>(0 - 0)            | 0<br>(0 - 0)            | --                      |
| Genital prolapse                                    | 0<br>(0 - 0)             | --                    | --                     | 0<br>(0 - 0)            | 0<br>(0 - 0)            | 0<br>(0 - 0)            |
| Other gynecological diseases                        | 1<br>(0 - 1)             | --                    | --                     | 0<br>(0 - 0)            | 0<br>(0 - 0)            | 0<br>(0 - 1)            |
| Hemoglobinopathies and hemolytic anemias            | 20<br>(15 - 30)          | 0<br>(0 - 1)          | 0<br>(0 - 1)           | 1<br>(1 - 2)            | 3<br>(2 - 5)            | 14<br>(10 - 22)         |
| Thalassemias                                        | 1<br>(0 - 1)             | 0<br>(0 - 0)          | 0<br>(0 - 0)           | 0<br>(0 - 0)            | 0<br>(0 - 0)            | 0<br>(0 - 0)            |
| Sickle cell disorders                               | 3<br>(2 - 4)             | 0<br>(0 - 0)          | 0<br>(0 - 0)           | 1<br>(0 - 1)            | 1<br>(1 - 2)            | 1<br>(0 - 1)            |
| G6PD deficiency                                     | 0<br>(0 - 0)             | 0<br>(0 - 0)          | 0<br>(0 - 0)           | 0<br>(0 - 0)            | 0<br>(0 - 0)            | 0<br>(0 - 0)            |
| Other hemoglobinopathies and hemolytic anemias      | 16<br>(12 - 25)          | 0<br>(0 - 0)          | 0<br>(0 - 0)           | 1<br>(0 - 1)            | 2<br>(1 - 3)            | 14<br>(10 - 21)         |
| Endocrine, metabolic, blood, and immune disorders   | 166<br>(117 - 204)       | 7<br>(5 - 11)         | 5<br>(3 - 7)           | 22<br>(16 - 28)         | 37<br>(27 - 52)         | 95<br>(59 - 123)        |
| Musculoskeletal disorders                           | 124<br>(100 - 155)       | --                    | 0<br>(0 - 0)           | 7<br>(6 - 10)           | 31<br>(25 - 43)         | 86<br>(65 - 110)        |
| Rheumatoid arthritis                                | 60<br>(46 - 77)          | --                    | 0<br>(0 - 0)           | 1<br>(1 - 2)            | 14<br>(11 - 20)         | 45<br>(32 - 60)         |
| Other musculoskeletal disorders                     | 64<br>(50 - 84)          | --                    | 0<br>(0 - 0)           | 6<br>(5 - 9)            | 17<br>(13 - 25)         | 41<br>(30 - 56)         |
| Other non-communicable diseases                     | 292<br>(241 - 356)       | 160<br>(117 - 210)    | 8<br>(6 - 11)          | 28<br>(23 - 34)         | 25<br>(21 - 30)         | 71<br>(54 - 94)         |
| Congenital anomalies                                | 189<br>(150 - 239)       | 125<br>(91 - 169)     | 8<br>(6 - 11)          | 27<br>(21 - 33)         | 17<br>(13 - 21)         | 12<br>(9 - 15)          |
| Neural tube defects                                 | 15<br>(10 - 23)          | 13<br>(8 - 21)        | 1<br>(0 - 1)           | 1<br>(1 - 2)            | 0<br>(0 - 0)            | 0<br>(0 - 0)            |
| Congenital heart anomalies                          | 57<br>(44 - 73)          | 35<br>(24 - 49)       | 4<br>(2 - 5)           | 12<br>(10 - 15)         | 4<br>(3 - 6)            | 2<br>(2 - 3)            |
| Cleft lip and cleft palate                          | 0<br>(0 - 0)             | 0<br>(0 - 0)          | --                     | --                      | --                      | --                      |
| Down syndrome                                       | 21<br>(14 - 27)          | 7<br>(4 - 11)         | 1<br>(0 - 1)           | 5<br>(4 - 7)            | 7<br>(5 - 10)           | 1<br>(0 - 1)            |
| Chromosomal unbalanced rearrangements               | 23<br>(14 - 34)          | 22<br>(14 - 33)       | 0<br>(0 - 0)           | 1<br>(0 - 1)            | 0<br>(0 - 0)            | 0<br>(0 - 0)            |
| Other congenital anomalies                          | 73<br>(56 - 97)          | 49<br>(34 - 70)       | 3<br>(2 - 4)           | 7<br>(5 - 9)            | 5<br>(4 - 7)            | 9<br>(7 - 12)           |
| Skin and subcutaneous diseases                      | 69<br>(50 - 92)          | 0<br>(0 - 0)          | 0<br>(0 - 0)           | 1<br>(1 - 2)            | 8<br>(6 - 10)           | 59<br>(41 - 81)         |
| Cellulitis                                          | 25<br>(11 - 40)          | 0<br>(0 - 0)          | 0<br>(0 - 0)           | 0<br>(0 - 1)            | 3<br>(2 - 5)            | 21<br>(9 - 35)          |
| Pyoderma                                            | 21<br>(13 - 32)          | 0<br>(0 - 0)          | 0<br>(0 - 0)           | 0<br>(0 - 1)            | 2<br>(1 - 4)            | 18<br>(10 - 28)         |
| Decubitus ulcer                                     | 20<br>(12 - 40)          | 0<br>(0 - 0)          | 0<br>(0 - 0)           | 0<br>(0 - 1)            | 2<br>(1 - 3)            | 18<br>(10 - 35)         |
| Other skin and subcutaneous diseases                | 2<br>(1 - 5)             | 0<br>(0 - 0)          | 0<br>(0 - 0)           | 0<br>(0 - 0)            | 0<br>(0 - 1)            | 2<br>(1 - 4)            |
| Sudden infant death syndrome                        | 35<br>(20 - 63)          | 35<br>(20 - 63)       | --                     | --                      | --                      | --                      |
| Injuries                                            | 1,434<br>(1,257 - 1,660) | 19<br>(13 - 26)       | 22<br>(18 - 27)        | 592<br>(507 - 695)      | 303<br>(256 - 357)      | 499<br>(417 - 620)      |
| Transport injuries                                  | 254<br>(217 - 305)       | 4<br>(3 - 7)          | 10<br>(7 - 12)         | 140<br>(116 - 172)      | 50<br>(41 - 61)         | 49<br>(40 - 60)         |
| Road injuries                                       | 243<br>(209 - 293)       | 4<br>(3 - 6)          | 9<br>(7 - 12)          | 134<br>(111 - 165)      | 47<br>(39 - 58)         | 48<br>(39 - 59)         |
| Pedestrian road injuries                            | 68<br>(50 - 95)          | 2<br>(1 - 4)          | 5<br>(3 - 6)           | 21<br>(13 - 33)         | 17<br>(11 - 24)         | 23<br>(16 - 32)         |

Web Table 31- Ireland deaths with 95% UI by age, sex, and cause in 2013

| Cause                                           | Both Sexes, All Ages | Both Sexes, 0-4 Years | Both Sexes, 5-14 Years | Both Sexes, 15-49 Years | Both Sexes, 50-69 Years | Both Sexes, 70-80 Years |
|-------------------------------------------------|----------------------|-----------------------|------------------------|-------------------------|-------------------------|-------------------------|
| Cyclist road injuries                           | 13<br>(9 - 19)       | 0<br>(0 - 0)          | 2<br>(1 - 3)           | 5<br>(3 - 8)            | 4<br>(2 - 5)            | 3<br>(2 - 4)            |
| Motorcyclist road injuries                      | 20<br>(12 - 32)      | 0<br>(0 - 0)          | 0<br>(0 - 0)           | 17<br>(10 - 28)         | 2<br>(1 - 3)            | 1<br>(0 - 1)            |
| Motor vehicle road injuries                     | 141<br>(111 - 176)   | 2<br>(1 - 3)          | 3<br>(2 - 4)           | 91<br>(72 - 114)        | 25<br>(18 - 33)         | 21<br>(15 - 28)         |
| Other road injuries                             | 2<br>(1 - 2)         | 0<br>(0 - 0)          | 0<br>(0 - 0)           | 0<br>(0 - 1)            | 0<br>(0 - 1)            | 0<br>(0 - 1)            |
| Other transport injuries                        | 11<br>(7 - 14)       | 0<br>(0 - 0)          | 0<br>(0 - 1)           | 6<br>(4 - 8)            | 3<br>(2 - 4)            | 1<br>(1 - 2)            |
| Unintentional injuries                          | 655<br>(558 - 810)   | 13<br>(9 - 18)        | 9<br>(7 - 12)          | 110<br>(91 - 145)       | 112<br>(92 - 133)       | 411<br>(332 - 533)      |
| Falls                                           | 371<br>(296 - 512)   | 1<br>(1 - 2)          | 1<br>(1 - 2)           | 32<br>(24 - 43)         | 48<br>(35 - 62)         | 289<br>(221 - 417)      |
| Drowning                                        | 52<br>(39 - 95)      | 2<br>(1 - 4)          | 3<br>(2 - 6)           | 27<br>(19 - 50)         | 13<br>(9 - 25)          | 7<br>(5 - 11)           |
| Fire, heat, and hot substances                  | 47<br>(38 - 62)      | 3<br>(2 - 4)          | 1<br>(1 - 2)           | 9<br>(7 - 12)           | 9<br>(7 - 13)           | 24<br>(18 - 34)         |
| Poisonings                                      | 15<br>(11 - 19)      | 0<br>(0 - 1)          | 0<br>(0 - 0)           | 7<br>(5 - 9)            | 4<br>(3 - 5)            | 3<br>(2 - 5)            |
| Exposure to mechanical forces                   | 24<br>(20 - 32)      | 2<br>(1 - 3)          | 2<br>(1 - 2)           | 12<br>(9 - 18)          | 5<br>(4 - 7)            | 3<br>(2 - 4)            |
| Unintentional firearm injuries                  | 1<br>(1 - 2)         | 0<br>(0 - 0)          | 0<br>(0 - 0)           | 1<br>(1 - 1)            | 0<br>(0 - 0)            | 0<br>(0 - 0)            |
| Unintentional suffocation                       | 3<br>(2 - 4)         | 1<br>(0 - 2)          | 0<br>(0 - 1)           | 1<br>(0 - 1)            | 0<br>(0 - 1)            | 1<br>(0 - 1)            |
| Other exposure to mechanical forces             | 20<br>(16 - 27)      | 1<br>(1 - 2)          | 1<br>(1 - 2)           | 10<br>(8 - 16)          | 5<br>(4 - 6)            | 2<br>(2 - 3)            |
| Adverse effects of medical treatment            | 51<br>(35 - 65)      | 1<br>(0 - 1)          | 0<br>(0 - 0)           | 4<br>(3 - 6)            | 10<br>(7 - 14)          | 35<br>(23 - 47)         |
| Animal contact                                  | 3<br>(3 - 6)         | 0<br>(0 - 0)          | 0<br>(0 - 0)           | 1<br>(0 - 1)            | 1<br>(1 - 2)            | 1<br>(1 - 3)            |
| Venomous animal contact                         | 0<br>(0 - 1)         | 0<br>(0 - 0)          | 0<br>(0 - 0)           | 0<br>(0 - 0)            | 0<br>(0 - 0)            | 0<br>(0 - 0)            |
| Non-venomous animal contact                     | 3<br>(2 - 6)         | 0<br>(0 - 0)          | 0<br>(0 - 0)           | 1<br>(0 - 1)            | 1<br>(1 - 2)            | 1<br>(1 - 2)            |
| Foreign body                                    | 87<br>(48 - 116)     | 3<br>(2 - 5)          | 1<br>(1 - 2)           | 16<br>(10 - 24)         | 19<br>(11 - 27)         | 47<br>(22 - 70)         |
| Pulmonary aspiration and foreign body in airway | 87<br>(48 - 115)     | 3<br>(2 - 5)          | 1<br>(1 - 2)           | 16<br>(9 - 23)          | 19<br>(11 - 27)         | 47<br>(22 - 70)         |
| Foreign body in other body part                 | 1<br>(0 - 1)         | 0<br>(0 - 0)          | 0<br>(0 - 0)           | 0<br>(0 - 0)            | 0<br>(0 - 0)            | 0<br>(0 - 0)            |
| Other unintentional injuries                    | 4<br>(3 - 5)         | 0<br>(0 - 1)          | 0<br>(0 - 0)           | 2<br>(1 - 3)            | 1<br>(1 - 1)            | 1<br>(1 - 1)            |
| Self-harm and interpersonal violence            | 525<br>(391 - 630)   | 1<br>(1 - 2)          | 3<br>(2 - 4)           | 342<br>(258 - 412)      | 141<br>(101 - 175)      | 38<br>(27 - 47)         |
| Self-harm                                       | 488<br>(355 - 589)   | --                    | 2<br>(1 - 3)           | 316<br>(234 - 384)      | 135<br>(96 - 170)       | 35<br>(24 - 44)         |
| Interpersonal violence                          | 36<br>(22 - 47)      | 1<br>(1 - 2)          | 1<br>(0 - 1)           | 26<br>(15 - 35)         | 6<br>(3 - 7)            | 3<br>(2 - 4)            |
| Assault by firearm                              | 11<br>(4 - 16)       | 0<br>(0 - 0)          | 0<br>(0 - 0)           | 9<br>(4 - 14)           | 1<br>(1 - 2)            | 0<br>(0 - 0)            |
| Assault by sharp object                         | 9<br>(5 - 14)        | 0<br>(0 - 0)          | 0<br>(0 - 0)           | 7<br>(4 - 12)           | 1<br>(1 - 2)            | 0<br>(0 - 1)            |
| Assault by other means                          | 16<br>(9 - 23)       | 1<br>(1 - 2)          | 0<br>(0 - 1)           | 9<br>(6 - 15)           | 3<br>(2 - 4)            | 2<br>(1 - 3)            |

Web Table 31- Ireland deaths with 95% UI by age, sex, and cause in 2013

| Cause                                                              | Males, All Ages             | Males, 0-4 Years   | Males, 5-14 Years | Males, 15-49 Years       | Males, 50-69 Years       | Males, 70-80 Years         |
|--------------------------------------------------------------------|-----------------------------|--------------------|-------------------|--------------------------|--------------------------|----------------------------|
| All causes                                                         | 16,048<br>(14,134 - 18,266) | 182<br>(133 - 244) | 40<br>(32 - 48)   | 1,240<br>(1,035 - 1,490) | 3,887<br>(3,291 - 4,580) | 10,700<br>(9,579 - 11,931) |
| Communicable, maternal, neonatal, and nutritional diseases         | 956<br>(756 - 1,218)        | 69<br>(49 - 95)    | 3<br>(2 - 5)      | 38<br>(31 - 46)          | 100<br>(77 - 129)        | 746<br>(564 - 992)         |
| HIV/AIDS and tuberculosis                                          | 34<br>(27 - 42)             | 0<br>(0 - 0)       | 0<br>(0 - 0)      | 11<br>(8 - 15)           | 9<br>(7 - 13)            | 13<br>(10 - 17)            |
| Tuberculosis                                                       | 22<br>(17 - 27)             | 0<br>(0 - 0)       | 0<br>(0 - 0)      | 2<br>(2 - 3)             | 6<br>(5 - 9)             | 13<br>(10 - 17)            |
| HIV/AIDS                                                           | 12<br>(8 - 18)              | 0<br>(0 - 0)       | 0<br>(0 - 0)      | 9<br>(6 - 13)            | 3<br>(1 - 5)             | 0<br>(0 - 1)               |
| HIV/AIDS resulting in mycobacterial infection                      | 1<br>(0 - 1)                | 0<br>(0 - 0)       | 0<br>(0 - 0)      | 0<br>(0 - 1)             | 0<br>(0 - 0)             | 0<br>(0 - 0)               |
| HIV/AIDS resulting in other diseases                               | 11<br>(7 - 17)              | 0<br>(0 - 0)       | 0<br>(0 - 0)      | 8<br>(5 - 12)            | 3<br>(1 - 5)             | 0<br>(0 - 1)               |
| Diarrrhea, lower respiratory, and other common infectious diseases | 826<br>(631 - 1,082)        | 11<br>(7 - 17)     | 3<br>(2 - 4)      | 21<br>(16 - 28)          | 82<br>(60 - 109)         | 709<br>(526 - 957)         |
| Diarrheal diseases                                                 | 10<br>(7 - 14)              | 1<br>(1 - 2)       | 0<br>(0 - 0)      | 0<br>(0 - 1)             | 1<br>(1 - 2)             | 7<br>(4 - 11)              |
| Intestinal infectious diseases                                     | 3<br>(1 - 7)                | 1<br>(0 - 2)       | 1<br>(0 - 2)      | 1<br>(0 - 3)             | 0<br>(0 - 1)             | 0<br>(0 - 1)               |
| Typhoid fever                                                      | 2<br>(1 - 5)                | 0<br>(0 - 1)       | 0<br>(0 - 1)      | 1<br>(0 - 2)             | 0<br>(0 - 1)             | 0<br>(0 - 0)               |
| Paratyphoid fever                                                  | 1<br>(0 - 2)                | 0<br>(0 - 0)       | 0<br>(0 - 0)      | 0<br>(0 - 1)             | 0<br>(0 - 0)             | 0<br>(0 - 0)               |
| Other intestinal infectious diseases                               | 0<br>(0 - 2)                | 0<br>(0 - 1)       | 0<br>(0 - 0)      | 0<br>(0 - 1)             | 0<br>(0 - 1)             | 0<br>(0 - 0)               |
| Lower respiratory infections                                       | 795<br>(601 - 1,053)        | 6<br>(4 - 9)       | 1<br>(1 - 1)      | 16<br>(12 - 22)          | 77<br>(56 - 103)         | 696<br>(512 - 943)         |
| Upper respiratory infections                                       | 0<br>(0 - 1)                | 0<br>(0 - 0)       | 0<br>(0 - 0)      | 0<br>(0 - 0)             | 0<br>(0 - 0)             | 0<br>(0 - 1)               |
| Otitis media                                                       | 0<br>(0 - 0)                | 0<br>(0 - 0)       | 0<br>(0 - 0)      | 0<br>(0 - 0)             | 0<br>(0 - 0)             | 0<br>(0 - 0)               |
| Meningitis                                                         | 11<br>(8 - 13)              | 3<br>(1 - 4)       | 1<br>(0 - 1)      | 2<br>(1 - 2)             | 2<br>(2 - 3)             | 4<br>(3 - 5)               |
| Pneumococcal meningitis                                            | 2<br>(1 - 3)                | 0<br>(0 - 1)       | 0<br>(0 - 0)      | 0<br>(0 - 1)             | 0<br>(0 - 1)             | 1<br>(0 - 1)               |
| H influenzae type B meningitis                                     | 2<br>(1 - 2)                | 1<br>(0 - 1)       | 0<br>(0 - 0)      | 0<br>(0 - 0)             | 0<br>(0 - 0)             | 0<br>(0 - 1)               |
| Meningococcal meningitis                                           | 4<br>(3 - 5)                | 1<br>(0 - 1)       | 0<br>(0 - 0)      | 1<br>(0 - 1)             | 1<br>(0 - 1)             | 1<br>(1 - 2)               |
| Other meningitis                                                   | 4<br>(3 - 5)                | 1<br>(0 - 1)       | 0<br>(0 - 0)      | 1<br>(0 - 1)             | 1<br>(0 - 1)             | 1<br>(1 - 2)               |
| Encephalitis                                                       | 4<br>(2 - 5)                | 0<br>(0 - 1)       | 0<br>(0 - 0)      | 1<br>(1 - 1)             | 1<br>(1 - 2)             | 1<br>(1 - 2)               |
| Diphtheria                                                         | 0<br>(0 - 0)                | 0<br>(0 - 0)       | 0<br>(0 - 0)      | 0<br>(0 - 0)             | 0<br>(0 - 0)             | --                         |
| Whooping cough                                                     | 0<br>(0 - 0)                | 0<br>(0 - 0)       | 0<br>(0 - 0)      | 0<br>(0 - 0)             | 0<br>(0 - 0)             | --                         |
| Tetanus                                                            | 0<br>(0 - 0)                | 0<br>(0 - 0)       | 0<br>(0 - 0)      | 0<br>(0 - 0)             | 0<br>(0 - 0)             | 0<br>(0 - 0)               |
| Measles                                                            | 0<br>(0 - 0)                | 0<br>(0 - 0)       | 0<br>(0 - 0)      | 0<br>(0 - 0)             | 0<br>(0 - 0)             | --                         |
| Varicella and herpes zoster                                        | 1<br>(0 - 4)                | 0<br>(0 - 1)       | 0<br>(0 - 0)      | 0<br>(0 - 1)             | 0<br>(0 - 1)             | 1<br>(0 - 4)               |
| Neglected tropical diseases and malaria                            | 1<br>(1 - 1)                | 0<br>(0 - 0)       | 0<br>(0 - 0)      | 0<br>(0 - 0)             | 0<br>(0 - 0)             | 0<br>(0 - 0)               |
| Cysticercosis                                                      | 0<br>(0 - 0)                | 0<br>(0 - 0)       | 0<br>(0 - 0)      | 0<br>(0 - 0)             | 0<br>(0 - 0)             | 0<br>(0 - 0)               |
| Cystic echinococcosis                                              | 0<br>(0 - 0)                | 0<br>(0 - 0)       | 0<br>(0 - 0)      | 0<br>(0 - 0)             | 0<br>(0 - 0)             | 0<br>(0 - 0)               |
| Dengue                                                             | 0<br>(0 - 0)                | 0<br>(0 - 0)       | 0<br>(0 - 0)      | 0<br>(0 - 0)             | 0<br>(0 - 0)             | 0<br>(0 - 0)               |
| Rabies                                                             | 0<br>(0 - 0)                | 0<br>(0 - 0)       | 0<br>(0 - 0)      | 0<br>(0 - 0)             | 0<br>(0 - 0)             | 0<br>(0 - 0)               |
| Other neglected tropical diseases                                  | 0<br>(0 - 0)                | 0<br>(0 - 0)       | 0<br>(0 - 0)      | 0<br>(0 - 0)             | 0<br>(0 - 0)             | 0<br>(0 - 0)               |
| Maternal disorders                                                 | --                          | --                 | --                | --                       | --                       | --                         |
| Maternal hemorrhage                                                | --                          | --                 | --                | --                       | --                       | --                         |
| Maternal sepsis and other maternal infections                      | --                          | --                 | --                | --                       | --                       | --                         |
| Maternal hypertensive disorders                                    | --                          | --                 | --                | --                       | --                       | --                         |
| Maternal obstructed labor                                          | --                          | --                 | --                | --                       | --                       | --                         |
| Maternal abortive outcome                                          | --                          | --                 | --                | --                       | --                       | --                         |
| Indirect maternal deaths                                           | --                          | --                 | --                | --                       | --                       | --                         |

Web Table 31- Ireland deaths with 95% UI by age, sex, and cause in 2013

| Cause                                                            | Males, All Ages             | Males, 0-4 Years  | Males, 5-14 Years | Males, 15-49 Years | Males, 50-69 Years       | Males, 70-80 Years        |
|------------------------------------------------------------------|-----------------------------|-------------------|-------------------|--------------------|--------------------------|---------------------------|
| Late maternal deaths                                             | --                          | --                | --                | --                 | --                       | --                        |
| Maternal deaths aggravated by HIV/AIDS                           | --                          | --                | --                | --                 | --                       | --                        |
| Other maternal disorders                                         | --                          | --                | --                | --                 | --                       | --                        |
| Neonatal disorders                                               | 56<br>(40 - 76)             | 56<br>(40 - 76)   | --                | --                 | --                       | --                        |
| Neonatal preterm birth complications                             | 36<br>(25 - 52)             | 36<br>(25 - 52)   | --                | --                 | --                       | --                        |
| Neonatal encephalopathy due to birth asphyxia and trauma         | 11<br>(6 - 18)              | 11<br>(6 - 18)    | --                | --                 | --                       | --                        |
| Neonatal sepsis and other neonatal infections                    | 1<br>(0 - 3)                | 1<br>(0 - 3)      | --                | --                 | --                       | --                        |
| Hemolytic disease and other neonatal jaundice                    | 0<br>(0 - 0)                | 0<br>(0 - 0)      | --                | --                 | --                       | --                        |
| Other neonatal disorders                                         | 7<br>(3 - 11)               | 7<br>(3 - 11)     | --                | --                 | --                       | --                        |
| Nutritional deficiencies                                         | 21<br>(13 - 35)             | 0<br>(0 - 0)      | 0<br>(0 - 0)      | 1<br>(0 - 1)       | 3<br>(2 - 4)             | 18<br>(11 - 30)           |
| Protein-energy malnutrition                                      | 5<br>(2 - 9)                | 0<br>(0 - 0)      | 0<br>(0 - 0)      | 0<br>(0 - 0)       | 1<br>(0 - 1)             | 4<br>(1 - 7)              |
| Iodine deficiency                                                | 0<br>(0 - 0)                | 0<br>(0 - 0)      | 0<br>(0 - 0)      | 0<br>(0 - 0)       | 0<br>(0 - 0)             | 0<br>(0 - 0)              |
| Iron-deficiency anemia                                           | 14<br>(8 - 25)              | 0<br>(0 - 0)      | 0<br>(0 - 0)      | 0<br>(0 - 1)       | 1<br>(1 - 3)             | 12<br>(6 - 22)            |
| Other nutritional deficiencies                                   | 3<br>(1 - 6)                | 0<br>(0 - 0)      | 0<br>(0 - 0)      | 0<br>(0 - 0)       | 0<br>(0 - 1)             | 2<br>(1 - 5)              |
| Other communicable, maternal, neonatal, and nutritional diseases | 19<br>(13 - 24)             | 1<br>(1 - 2)      | 0<br>(0 - 1)      | 5<br>(4 - 7)       | 6<br>(4 - 8)             | 6<br>(4 - 9)              |
| Sexually transmitted diseases excluding HIV                      | 1<br>(0 - 1)                | 0<br>(0 - 1)      | 0<br>(0 - 0)      | 0<br>(0 - 0)       | 0<br>(0 - 0)             | 0<br>(0 - 0)              |
| Syphilis                                                         | 0<br>(0 - 1)                | 0<br>(0 - 1)      | 0<br>(0 - 0)      | 0<br>(0 - 0)       | 0<br>(0 - 0)             | 0<br>(0 - 0)              |
| Chlamydial infection                                             | --                          | --                | --                | --                 | --                       | --                        |
| Gonococcal infection                                             | 0<br>(0 - 0)                | --                | 0<br>(0 - 0)      | 0<br>(0 - 0)       | 0<br>(0 - 0)             | 0<br>(0 - 0)              |
| Other sexually transmitted diseases                              | 0<br>(0 - 0)                | --                | 0<br>(0 - 0)      | 0<br>(0 - 0)       | 0<br>(0 - 0)             | 0<br>(0 - 0)              |
| Hepatitis                                                        | 4<br>(3 - 6)                | 0<br>(0 - 0)      | 0<br>(0 - 0)      | 2<br>(1 - 3)       | 2<br>(1 - 2)             | 1<br>(1 - 1)              |
| Acute hepatitis A                                                | 1<br>(0 - 2)                | 0<br>(0 - 0)      | 0<br>(0 - 0)      | 1<br>(0 - 1)       | 0<br>(0 - 1)             | 0<br>(0 - 0)              |
| Acute hepatitis B                                                | 3<br>(2 - 4)                | 0<br>(0 - 0)      | 0<br>(0 - 0)      | 1<br>(1 - 2)       | 1<br>(1 - 2)             | 1<br>(0 - 1)              |
| Acute hepatitis C                                                | 0<br>(0 - 1)                | --                | 0<br>(0 - 0)      | 0<br>(0 - 0)       | 0<br>(0 - 0)             | 0<br>(0 - 0)              |
| Other infectious diseases                                        | 14<br>(9 - 19)              | 1<br>(0 - 1)      | 0<br>(0 - 0)      | 3<br>(2 - 4)       | 4<br>(2 - 6)             | 5<br>(3 - 8)              |
| Non-communicable diseases                                        | 14,145<br>(12,416 - 16,114) | 102<br>(73 - 138) | 22<br>(17 - 27)   | 727<br>(599 - 883) | 3,568<br>(3,018 - 4,208) | 9,727<br>(8,677 - 10,903) |
| Neoplasms                                                        | 4,682<br>(4,035 - 5,411)    | 4<br>(3 - 7)      | 10<br>(7 - 13)    | 245<br>(200 - 299) | 1,678<br>(1,409 - 1,998) | 2,744<br>(2,383 - 3,149)  |
| Esophageal cancer                                                | 238<br>(184 - 288)          | --                | --                | 14<br>(10 - 19)    | 108<br>(79 - 136)        | 117<br>(88 - 145)         |
| Stomach cancer                                                   | 256<br>(211 - 304)          | --                | --                | 12<br>(9 - 16)     | 80<br>(65 - 99)          | 164<br>(131 - 201)        |
| Liver cancer                                                     | 108<br>(66 - 143)           | --                | 0<br>(0 - 0)      | 6<br>(4 - 9)       | 47<br>(27 - 65)          | 55<br>(33 - 76)           |
| Liver cancer due to hepatitis B                                  | 30<br>(12 - 59)             | --                | 0<br>(0 - 0)      | 3<br>(1 - 5)       | 15<br>(5 - 31)           | 12<br>(5 - 24)            |
| Liver cancer due to hepatitis C                                  | 43<br>(17 - 78)             | --                | 0<br>(0 - 0)      | 2<br>(0 - 4)       | 18<br>(5 - 35)           | 24<br>(10 - 43)           |
| Liver cancer due to alcohol use                                  | 32<br>(15 - 61)             | --                | --                | 1<br>(1 - 2)       | 13<br>(6 - 25)           | 18<br>(8 - 34)            |
| Liver cancer due to other causes                                 | 2<br>(0 - 6)                | --                | 0<br>(0 - 0)      | 0<br>(0 - 0)       | 1<br>(0 - 3)             | 1<br>(0 - 3)              |
| Larynx cancer                                                    | 47<br>(30 - 60)             | --                | --                | 3<br>(2 - 4)       | 22<br>(14 - 29)          | 22<br>(14 - 29)           |
| Tracheal, bronchus and lung cancer                               | 1,172<br>(988 - 1,385)      | --                | --                | 37<br>(28 - 49)    | 474<br>(387 - 580)       | 660<br>(559 - 782)        |
| Breast cancer                                                    | 6<br>(2 - 10)               | --                | --                | 0<br>(0 - 1)       | 2<br>(1 - 4)             | 3<br>(1 - 6)              |
| Cervical cancer                                                  | --                          | --                | --                | --                 | --                       | --                        |
| Uterine cancer                                                   | --                          | --                | --                | --                 | --                       | --                        |
| Prostate cancer                                                  | 653<br>(509 - 930)          | --                | --                | 2<br>(1 - 3)       | 128<br>(86 - 175)        | 523<br>(398 - 775)        |

Web Table 31- Ireland deaths with 95% UI by age, sex, and cause in 2013

| Cause                                         | Males, All Ages          | Males, 0-4 Years | Males, 5-14 Years | Males, 15-49 Years | Males, 50-69 Years       | Males, 70-80 Years       |
|-----------------------------------------------|--------------------------|------------------|-------------------|--------------------|--------------------------|--------------------------|
| Colon and rectum cancer                       | 674<br>(572 - 790)       | --               | --                | 29<br>(22 - 36)    | 237<br>(196 - 286)       | 408<br>(342 - 485)       |
| Lip and oral cavity cancer                    | 60<br>(48 - 74)          | --               | --                | 5<br>(4 - 7)       | 28<br>(21 - 38)          | 26<br>(20 - 34)          |
| Nasopharynx cancer                            | 8<br>(6 - 10)            | --               | 0<br>(0 - 0)      | 2<br>(1 - 2)       | 4<br>(3 - 6)             | 2<br>(2 - 3)             |
| Other pharynx cancer                          | 28<br>(20 - 38)          | --               | --                | 3<br>(2 - 4)       | 16<br>(11 - 23)          | 9<br>(7 - 13)            |
| Gallbladder and biliary tract cancer          | 28<br>(17 - 37)          | --               | --                | 1<br>(1 - 2)       | 8<br>(5 - 12)            | 18<br>(11 - 25)          |
| Pancreatic cancer                             | 270<br>(227 - 314)       | --               | --                | 13<br>(10 - 17)    | 111<br>(91 - 135)        | 145<br>(120 - 174)       |
| Malignant skin melanoma                       | 60<br>(29 - 96)          | --               | --                | 11<br>(5 - 19)     | 22<br>(10 - 36)          | 26<br>(12 - 42)          |
| Non-melanoma skin cancer                      | 46<br>(26 - 67)          | --               | --                | 2<br>(1 - 3)       | 8<br>(4 - 13)            | 36<br>(20 - 53)          |
| Ovarian cancer                                | --                       | --               | --                | --                 | --                       | --                       |
| Testicular cancer                             | 6<br>(4 - 8)             | --               | --                | 4<br>(3 - 6)       | 1<br>(1 - 1)             | 1<br>(1 - 1)             |
| Kidney cancer                                 | 135<br>(106 - 169)       | 0<br>(0 - 0)     | 0<br>(0 - 0)      | 8<br>(6 - 12)      | 59<br>(44 - 76)          | 67<br>(51 - 88)          |
| Bladder cancer                                | 114<br>(89 - 140)        | --               | --                | 2<br>(1 - 3)       | 26<br>(19 - 33)          | 86<br>(66 - 107)         |
| Brain and nervous system cancer               | 156<br>(118 - 207)       | 1<br>(1 - 2)     | 3<br>(2 - 4)      | 29<br>(22 - 40)    | 77<br>(58 - 109)         | 46<br>(31 - 63)          |
| Thyroid cancer                                | 10<br>(8 - 13)           | --               | 0<br>(0 - 0)      | 1<br>(0 - 1)       | 4<br>(3 - 5)             | 5<br>(4 - 7)             |
| Mesothelioma                                  | 26<br>(14 - 36)          | --               | --                | 1<br>(1 - 2)       | 14<br>(7 - 21)           | 11<br>(5 - 18)           |
| Hodgkin lymphoma                              | 13<br>(9 - 20)           | 0<br>(0 - 0)     | 0<br>(0 - 0)      | 5<br>(4 - 8)       | 5<br>(3 - 7)             | 3<br>(2 - 4)             |
| Non-Hodgkin lymphoma                          | 156<br>(70 - 205)        | 0<br>(0 - 0)     | 1<br>(0 - 1)      | 17<br>(8 - 23)     | 60<br>(25 - 81)          | 78<br>(30 - 110)         |
| Multiple myeloma                              | 114<br>(61 - 181)        | --               | --                | 4<br>(2 - 7)       | 42<br>(22 - 72)          | 68<br>(37 - 111)         |
| Leukemia                                      | 153<br>(126 - 182)       | 1<br>(1 - 2)     | 3<br>(2 - 5)      | 16<br>(12 - 20)    | 47<br>(36 - 58)          | 86<br>(69 - 106)         |
| Other neoplasms                               | 148<br>(85 - 192)        | 2<br>(1 - 3)     | 2<br>(1 - 3)      | 19<br>(13 - 24)    | 48<br>(30 - 65)          | 77<br>(39 - 109)         |
| Cardiovascular diseases                       | 5,410<br>(4,716 - 6,166) | 1<br>(0 - 1)     | 1<br>(1 - 1)      | 194<br>(156 - 241) | 1,244<br>(1,050 - 1,475) | 3,971<br>(3,490 - 4,497) |
| Rheumatic heart disease                       | 13<br>(7 - 18)           | 0<br>(0 - 0)     | 0<br>(0 - 0)      | 2<br>(1 - 3)       | 4<br>(2 - 6)             | 8<br>(4 - 12)            |
| Ischemic heart disease                        | 3,469<br>(2,948 - 4,022) | 0<br>(0 - 0)     | 0<br>(0 - 0)      | 126<br>(99 - 159)  | 910<br>(752 - 1,092)     | 2,433<br>(2,062 - 2,806) |
| Cerebrovascular disease                       | 1,062<br>(820 - 1,339)   | 0<br>(0 - 0)     | 0<br>(0 - 0)      | 32<br>(22 - 43)    | 161<br>(113 - 210)       | 868<br>(659 - 1,103)     |
| Ischemic stroke                               | 594<br>(438 - 786)       | 0<br>(0 - 0)     | 0<br>(0 - 0)      | 3<br>(2 - 4)       | 52<br>(34 - 73)          | 539<br>(396 - 728)       |
| Hemorrhagic stroke                            | 468<br>(316 - 603)       | 0<br>(0 - 0)     | 0<br>(0 - 0)      | 29<br>(20 - 39)    | 109<br>(75 - 144)        | 329<br>(209 - 441)       |
| Hypertensive heart disease                    | 52<br>(32 - 75)          | 0<br>(0 - 0)     | 0<br>(0 - 0)      | 2<br>(1 - 3)       | 13<br>(7 - 20)           | 37<br>(22 - 56)          |
| Cardiomyopathy and myocarditis                | 180<br>(123 - 321)       | 0<br>(0 - 0)     | 0<br>(0 - 0)      | 16<br>(11 - 22)    | 41<br>(29 - 59)          | 123<br>(73 - 243)        |
| Atrial fibrillation and flutter               | 173<br>(116 - 243)       | --               | --                | 1<br>(0 - 1)       | 17<br>(10 - 24)          | 156<br>(103 - 222)       |
| Aortic aneurysm                               | 181<br>(128 - 221)       | --               | --                | 5<br>(3 - 7)       | 42<br>(29 - 55)          | 133<br>(92 - 166)        |
| Peripheral vascular disease                   | 61<br>(44 - 84)          | --               | --                | 0<br>(0 - 0)       | 8<br>(5 - 11)            | 53<br>(37 - 75)          |
| Endocarditis                                  | 26<br>(16 - 45)          | 0<br>(0 - 0)     | 0<br>(0 - 0)      | 2<br>(1 - 4)       | 8<br>(5 - 14)            | 16<br>(10 - 28)          |
| Other cardiovascular and circulatory diseases | 192<br>(110 - 241)       | 0<br>(0 - 0)     | 0<br>(0 - 0)      | 9<br>(5 - 11)      | 40<br>(23 - 53)          | 143<br>(77 - 188)        |
| Chronic respiratory diseases                  | 1,192<br>(963 - 1,439)   | 1<br>(1 - 2)     | 1<br>(0 - 1)      | 16<br>(12 - 22)    | 184<br>(145 - 234)       | 990<br>(795 - 1,193)     |
| Chronic obstructive pulmonary disease         | 977<br>(804 - 1,208)     | 0<br>(0 - 1)     | 0<br>(0 - 0)      | 6<br>(4 - 9)       | 141<br>(111 - 182)       | 830<br>(678 - 1,027)     |
| Pneumoconiosis                                | 17<br>(10 - 26)          | 0<br>(0 - 0)     | 0<br>(0 - 0)      | 0<br>(0 - 1)       | 3<br>(1 - 4)             | 14<br>(8 - 22)           |
| Silicosis                                     | 0<br>(0 - 1)             | 0<br>(0 - 0)     | 0<br>(0 - 0)      | 0<br>(0 - 0)       | 0<br>(0 - 0)             | 0<br>(0 - 0)             |
| Asbestosis                                    | 8<br>(5 - 12)            | 0<br>(0 - 0)     | 0<br>(0 - 0)      | 0<br>(0 - 0)       | 1<br>(1 - 2)             | 7<br>(4 - 10)            |
| Coal workers pneumoconiosis                   | 2<br>(1 - 2)             | 0<br>(0 - 0)     | 0<br>(0 - 0)      | 0<br>(0 - 0)       | 0<br>(0 - 0)             | 1<br>(1 - 2)             |
| Other pneumoconiosis                          | 7<br>(4 - 11)            | 0<br>(0 - 0)     | 0<br>(0 - 0)      | 0<br>(0 - 0)       | 1<br>(1 - 2)             | 6<br>(3 - 10)            |

Web Table 31- Ireland deaths with 95% UI by age, sex, and cause in 2013

| Cause                                               | Males, All Ages        | Males, 0-4 Years | Males, 5-14 Years | Males, 15-49 Years | Males, 50-69 Years | Males, 70-80 Years     |
|-----------------------------------------------------|------------------------|------------------|-------------------|--------------------|--------------------|------------------------|
| Asthma                                              | 25<br>(18 - 33)        | 0<br>(0 - 0)     | 0<br>(0 - 0)      | 5<br>(4 - 7)       | 7<br>(5 - 10)      | 13<br>(8 - 18)         |
| Interstitial lung disease and pulmonary sarcoidosis | 142<br>(64 - 209)      | 0<br>(0 - 0)     | 0<br>(0 - 0)      | 4<br>(2 - 6)       | 29<br>(12 - 46)    | 109<br>(48 - 165)      |
| Other chronic respiratory diseases                  | 31<br>(21 - 43)        | 0<br>(0 - 1)     | 0<br>(0 - 0)      | 1<br>(1 - 1)       | 4<br>(3 - 6)       | 25<br>(16 - 37)        |
| Cirrhosis                                           | 212<br>(176 - 254)     | 0<br>(0 - 0)     | 0<br>(0 - 0)      | 44<br>(34 - 55)    | 111<br>(89 - 136)  | 57<br>(46 - 69)        |
| Cirrhosis due to hepatitis B                        | 21<br>(7 - 39)         | 0<br>(0 - 0)     | 0<br>(0 - 0)      | 5<br>(1 - 9)       | 11<br>(3 - 22)     | 5<br>(1 - 9)           |
| Cirrhosis due to hepatitis C                        | 70<br>(29 - 120)       | 0<br>(0 - 0)     | 0<br>(0 - 0)      | 14<br>(1 - 28)     | 35<br>(12 - 65)    | 21<br>(12 - 31)        |
| Cirrhosis due to alcohol use                        | 99<br>(61 - 147)       | --               | --                | 19<br>(10 - 30)    | 53<br>(30 - 82)    | 27<br>(17 - 37)        |
| Cirrhosis due to other causes                       | 22<br>(7 - 46)         | 0<br>(0 - 0)     | 0<br>(0 - 0)      | 7<br>(2 - 16)      | 11<br>(3 - 24)     | 3<br>(1 - 7)           |
| Digestive diseases                                  | 321<br>(250 - 388)     | 0<br>(0 - 1)     | 0<br>(0 - 1)      | 17<br>(13 - 22)    | 68<br>(50 - 84)    | 236<br>(184 - 287)     |
| Peptic ulcer disease                                | 64<br>(47 - 83)        | 0<br>(0 - 0)     | 0<br>(0 - 0)      | 3<br>(2 - 4)       | 15<br>(10 - 20)    | 47<br>(33 - 64)        |
| Gastritis and duodenitis                            | 5<br>(2 - 8)           | 0<br>(0 - 0)     | 0<br>(0 - 0)      | 1<br>(0 - 1)       | 2<br>(1 - 3)       | 3<br>(1 - 5)           |
| Appendicitis                                        | 3<br>(2 - 5)           | 0<br>(0 - 0)     | 0<br>(0 - 0)      | 0<br>(0 - 1)       | 1<br>(1 - 1)       | 2<br>(1 - 3)           |
| Paralytic ileus and intestinal obstruction          | 54<br>(30 - 82)        | 0<br>(0 - 0)     | 0<br>(0 - 0)      | 2<br>(1 - 3)       | 9<br>(5 - 14)      | 43<br>(23 - 66)        |
| Inguinal, femoral, and abdominal hernia             | 11<br>(4 - 17)         | 0<br>(0 - 0)     | 0<br>(0 - 0)      | 0<br>(0 - 1)       | 2<br>(1 - 3)       | 8<br>(3 - 13)          |
| Inflammatory bowel disease                          | 30<br>(19 - 45)        | 0<br>(0 - 0)     | 0<br>(0 - 0)      | 2<br>(1 - 2)       | 5<br>(3 - 8)       | 23<br>(14 - 36)        |
| Vascular intestinal disorders                       | 39<br>(16 - 77)        | 0<br>(0 - 0)     | 0<br>(0 - 0)      | 1<br>(0 - 2)       | 9<br>(3 - 18)      | 30<br>(12 - 59)        |
| Gallbladder and biliary diseases                    | 31<br>(17 - 43)        | 0<br>(0 - 0)     | 0<br>(0 - 0)      | 1<br>(1 - 1)       | 5<br>(3 - 7)       | 25<br>(13 - 36)        |
| Pancreatitis                                        | 26<br>(14 - 36)        | 0<br>(0 - 0)     | 0<br>(0 - 0)      | 5<br>(3 - 7)       | 9<br>(5 - 14)      | 11<br>(6 - 17)         |
| Other digestive diseases                            | 60<br>(39 - 82)        | 0<br>(0 - 0)     | 0<br>(0 - 0)      | 3<br>(2 - 4)       | 12<br>(7 - 16)     | 45<br>(29 - 64)        |
| Neurological disorders                              | 1,250<br>(924 - 1,590) | 4<br>(3 - 6)     | 2<br>(2 - 3)      | 34<br>(26 - 44)    | 104<br>(81 - 133)  | 1,105<br>(789 - 1,440) |
| Alzheimer disease and other dementias               | 958<br>(653 - 1,288)   | --               | --                | 0<br>(0 - 1)       | 39<br>(26 - 55)    | 919<br>(612 - 1,252)   |
| Parkinson disease                                   | 139<br>(96 - 183)      | --               | --                | 0<br>(0 - 0)       | 10<br>(7 - 14)     | 128<br>(86 - 170)      |
| Epilepsy                                            | 32<br>(22 - 42)        | 1<br>(0 - 1)     | 1<br>(0 - 1)      | 17<br>(12 - 23)    | 7<br>(4 - 10)      | 7<br>(4 - 9)           |
| Multiple sclerosis                                  | 19<br>(8 - 35)         | --               | --                | 5<br>(2 - 9)       | 9<br>(3 - 17)      | 5<br>(2 - 9)           |
| Other neurological disorders                        | 101<br>(79 - 134)      | 4<br>(2 - 6)     | 1<br>(1 - 2)      | 11<br>(8 - 15)     | 38<br>(28 - 51)    | 47<br>(36 - 63)        |
| Mental and substance use disorders                  | 173<br>(91 - 219)      | 0<br>(0 - 0)     | 0<br>(0 - 0)      | 126<br>(64 - 161)  | 36<br>(18 - 48)    | 11<br>(5 - 14)         |
| Schizophrenia                                       | 2<br>(1 - 4)           | --               | --                | 0<br>(0 - 0)       | 1<br>(0 - 1)       | 1<br>(0 - 3)           |
| Alcohol use disorders                               | 55<br>(21 - 73)        | --               | --                | 24<br>(9 - 34)     | 25<br>(10 - 34)    | 6<br>(3 - 9)           |
| Drug use disorders                                  | 115<br>(56 - 148)      | 0<br>(0 - 0)     | --                | 101<br>(47 - 132)  | 11<br>(6 - 15)     | 3<br>(2 - 4)           |
| Opioid use disorders                                | 43<br>(21 - 56)        | 0<br>(0 - 0)     | --                | 38<br>(18 - 51)    | 4<br>(2 - 5)       | 1<br>(1 - 2)           |
| Cocaine use disorders                               | 3<br>(1 - 4)           | 0<br>(0 - 0)     | --                | 3<br>(1 - 4)       | 0<br>(0 - 0)       | 0<br>(0 - 0)           |
| Amphetamine use disorders                           | 3<br>(1 - 4)           | 0<br>(0 - 0)     | --                | 3<br>(1 - 4)       | 0<br>(0 - 0)       | 0<br>(0 - 0)           |
| Other drug use disorders                            | 66<br>(33 - 85)        | 0<br>(0 - 0)     | --                | 58<br>(28 - 76)    | 7<br>(4 - 9)       | 2<br>(1 - 3)           |
| Eating disorders                                    | 0<br>(0 - 0)           | --               | 0<br>(0 - 0)      | 0<br>(0 - 0)       | --                 | --                     |
| Anorexia nervosa                                    | 0<br>(0 - 0)           | --               | 0<br>(0 - 0)      | 0<br>(0 - 0)       | --                 | --                     |
| Diabetes, urogenital, blood, and endocrine diseases | 721<br>(615 - 852)     | 5<br>(3 - 8)     | 3<br>(2 - 5)      | 33<br>(26 - 42)    | 119<br>(97 - 150)  | 562<br>(471 - 663)     |
| Diabetes mellitus                                   | 268<br>(223 - 327)     | 0<br>(0 - 0)     | 0<br>(0 - 0)      | 10<br>(8 - 13)     | 51<br>(40 - 64)    | 206<br>(166 - 256)     |
| Acute glomerulonephritis                            | 0<br>(0 - 0)           | 0<br>(0 - 0)     | 0<br>(0 - 0)      | 0<br>(0 - 0)       | 0<br>(0 - 0)       | 0<br>(0 - 0)           |
| Chronic kidney disease                              | 283<br>(224 - 352)     | 0<br>(0 - 0)     | 0<br>(0 - 0)      | 8<br>(6 - 11)      | 36<br>(27 - 49)    | 239<br>(186 - 301)     |
| Chronic kidney disease due to diabetes mellitus     | 61<br>(31 - 111)       | 0<br>(0 - 0)     | 0<br>(0 - 0)      | 1<br>(1 - 3)       | 9<br>(4 - 14)      | 51<br>(26 - 92)        |

Web Table 31- Ireland deaths with 95% UI by age, sex, and cause in 2013

| Cause                                               | Males, All Ages      | Males, 0-4 Years | Males, 5-14 Years | Males, 15-49 Years | Males, 50-69 Years | Males, 70-84 Years |
|-----------------------------------------------------|----------------------|------------------|-------------------|--------------------|--------------------|--------------------|
| Chronic kidney disease due to hypertension          | 86<br>(59 - 134)     | 0<br>(0 - 0)     | 0<br>(0 - 0)      | 2<br>(1 - 3)       | 10<br>(6 - 19)     | 74<br>(49 - 114)   |
| Chronic kidney disease due to glomerulonephritis    | 7<br>(4 - 10)        | 0<br>(0 - 0)     | 0<br>(0 - 0)      | 1<br>(1 - 1)       | 2<br>(1 - 3)       | 4<br>(2 - 7)       |
| Chronic kidney disease due to other causes          | 130<br>(78 - 178)    | 0<br>(0 - 0)     | 0<br>(0 - 0)      | 4<br>(2 - 6)       | 16<br>(9 - 24)     | 110<br>(61 - 157)  |
| Urinary diseases and male infertility               | 80<br>(56 - 107)     | 0<br>(0 - 0)     | 0<br>(0 - 0)      | 2<br>(1 - 3)       | 8<br>(6 - 10)      | 70<br>(47 - 96)    |
| Interstitial nephritis and urinary tract infections | 64<br>(42 - 87)      | 0<br>(0 - 0)     | 0<br>(0 - 0)      | 1<br>(1 - 2)       | 6<br>(4 - 8)       | 56<br>(36 - 79)    |
| Urolithiasis                                        | 2<br>(1 - 2)         | --               | 0<br>(0 - 0)      | 0<br>(0 - 0)       | 0<br>(0 - 1)       | 1<br>(0 - 2)       |
| Other urinary diseases                              | 15<br>(7 - 25)       | 0<br>(0 - 0)     | 0<br>(0 - 0)      | 0<br>(0 - 1)       | 2<br>(1 - 3)       | 13<br>(6 - 22)     |
| Gynecological diseases                              | --                   | --               | --                | --                 | --                 | --                 |
| Uterine fibroids                                    | --                   | --               | --                | --                 | --                 | --                 |
| Polycystic ovarian syndrome                         | --                   | --               | --                | --                 | --                 | --                 |
| Endometriosis                                       | --                   | --               | --                | --                 | --                 | --                 |
| Genital prolapse                                    | --                   | --               | --                | --                 | --                 | --                 |
| Other gynecological diseases                        | --                   | --               | --                | --                 | --                 | --                 |
| Hemoglobinopathies and hemolytic anemias            | 11<br>(7 - 17)       | 0<br>(0 - 0)     | 0<br>(0 - 0)      | 1<br>(1 - 1)       | 2<br>(1 - 3)       | 8<br>(5 - 12)      |
| Thalassemias                                        | 0<br>(0 - 1)         | 0<br>(0 - 0)     | 0<br>(0 - 0)      | 0<br>(0 - 0)       | 0<br>(0 - 0)       | 0<br>(0 - 0)       |
| Sickle cell disorders                               | 1<br>(1 - 2)         | 0<br>(0 - 0)     | 0<br>(0 - 0)      | 0<br>(0 - 1)       | 1<br>(0 - 1)       | 0<br>(0 - 1)       |
| G6PD deficiency                                     | 0<br>(0 - 0)         | 0<br>(0 - 0)     | 0<br>(0 - 0)      | 0<br>(0 - 0)       | 0<br>(0 - 0)       | 0<br>(0 - 0)       |
| Other hemoglobinopathies and hemolytic anemias      | 9<br>(5 - 14)        | 0<br>(0 - 0)     | 0<br>(0 - 0)      | 0<br>(0 - 1)       | 1<br>(1 - 1)       | 7<br>(5 - 12)      |
| Endocrine, metabolic, blood, and immune disorders   | 79<br>(53 - 112)     | 4<br>(2 - 7)     | 3<br>(2 - 4)      | 12<br>(8 - 17)     | 22<br>(14 - 36)    | 38<br>(22 - 56)    |
| Musculoskeletal disorders                           | 40<br>(27 - 55)      | --               | 0<br>(0 - 0)      | 3<br>(2 - 4)       | 12<br>(8 - 18)     | 25<br>(16 - 35)    |
| Rheumatoid arthritis                                | 17<br>(10 - 25)      | --               | 0<br>(0 - 0)      | 0<br>(0 - 1)       | 5<br>(3 - 9)       | 11<br>(6 - 16)     |
| Other musculoskeletal disorders                     | 23<br>(14 - 32)      | --               | 0<br>(0 - 0)      | 2<br>(2 - 4)       | 6<br>(4 - 10)      | 14<br>(7 - 20)     |
| Other non-communicable diseases                     | 145<br>(115 - 181)   | 86<br>(61 - 118) | 4<br>(3 - 6)      | 15<br>(11 - 19)    | 13<br>(10 - 16)    | 26<br>(19 - 35)    |
| Congenital anomalies                                | 100<br>(77 - 129)    | 67<br>(47 - 93)  | 4<br>(3 - 6)      | 14<br>(11 - 18)    | 9<br>(7 - 12)      | 6<br>(4 - 7)       |
| Neural tube defects                                 | 7<br>(4 - 11)        | 6<br>(3 - 10)    | 0<br>(0 - 0)      | 0<br>(0 - 1)       | 0<br>(0 - 0)       | 0<br>(0 - 0)       |
| Congenital heart anomalies                          | 31<br>(22 - 41)      | 19<br>(12 - 28)  | 2<br>(1 - 3)      | 7<br>(5 - 9)       | 2<br>(2 - 4)       | 1<br>(0 - 1)       |
| Cleft lip and cleft palate                          | 0<br>(0 - 0)         | 0<br>(0 - 0)     | --                | --                 | --                 | --                 |
| Down syndrome                                       | 11<br>(5 - 16)       | 4<br>(1 - 7)     | 0<br>(0 - 1)      | 2<br>(1 - 4)       | 4<br>(2 - 6)       | 0<br>(0 - 1)       |
| Chromosomal unbalanced rearrangements               | 11<br>(6 - 17)       | 10<br>(5 - 17)   | 0<br>(0 - 0)      | 0<br>(0 - 0)       | 0<br>(0 - 0)       | 0<br>(0 - 0)       |
| Other congenital anomalies                          | 41<br>(31 - 55)      | 28<br>(18 - 41)  | 2<br>(1 - 2)      | 4<br>(3 - 6)       | 3<br>(2 - 4)       | 4<br>(3 - 6)       |
| Skin and subcutaneous diseases                      | 25<br>(18 - 35)      | 0<br>(0 - 0)     | 0<br>(0 - 0)      | 1<br>(1 - 1)       | 4<br>(3 - 5)       | 20<br>(14 - 29)    |
| Cellulitis                                          | 9<br>(3 - 14)        | 0<br>(0 - 0)     | 0<br>(0 - 0)      | 0<br>(0 - 1)       | 1<br>(0 - 2)       | 7<br>(2 - 12)      |
| Pyoderma                                            | 8<br>(4 - 12)        | 0<br>(0 - 0)     | 0<br>(0 - 0)      | 0<br>(0 - 1)       | 1<br>(1 - 2)       | 6<br>(3 - 10)      |
| Decubitus ulcer                                     | 9<br>(5 - 16)        | 0<br>(0 - 0)     | 0<br>(0 - 0)      | 0<br>(0 - 0)       | 1<br>(1 - 2)       | 7<br>(4 - 14)      |
| Other skin and subcutaneous diseases                | 1<br>(0 - 1)         | 0<br>(0 - 0)     | 0<br>(0 - 0)      | 0<br>(0 - 0)       | 0<br>(0 - 0)       | 0<br>(0 - 1)       |
| Sudden infant death syndrome                        | 19<br>(10 - 38)      | 0<br>(10 - 38)   | --                | --                 | --                 | --                 |
| Injuries                                            | 947<br>(789 - 1,123) | 11<br>(7 - 16)   | 15<br>(12 - 19)   | 474<br>(387 - 571) | 219<br>(173 - 269) | 228<br>(185 - 280) |
| Transport injuries                                  | 181<br>(150 - 217)   | 2<br>(1 - 4)     | 6<br>(4 - 8)      | 110<br>(87 - 136)  | 34<br>(26 - 42)    | 29<br>(23 - 36)    |
| Road injuries                                       | 172<br>(142 - 207)   | 2<br>(1 - 4)     | 6<br>(4 - 8)      | 104<br>(82 - 130)  | 32<br>(25 - 40)    | 28<br>(22 - 35)    |
| Pedestrian road injuries                            | 44<br>(24 - 69)      | 1<br>(1 - 3)     | 3<br>(2 - 4)      | 16<br>(8 - 28)     | 11<br>(6 - 18)     | 12<br>(7 - 19)     |



Web Table 31- Ireland deaths with 95% UI by age, sex, and cause in 2013

| Cause                                           | Males, All Ages    | Males, 0-4 Years | Males, 5-14 Years | Males, 15-49 Years | Males, 50-69 Years | Males, 70-80 Years |
|-------------------------------------------------|--------------------|------------------|-------------------|--------------------|--------------------|--------------------|
| Cyclist road injuries                           | 10<br>(6 - 17)     | 0<br>(0 - 0)     | 1<br>(1 - 2)      | 4<br>(2 - 7)       | 3<br>(2 - 5)       | 2<br>(1 - 4)       |
| Motorcyclist road injuries                      | 19<br>(11 - 29)    | 0<br>(0 - 0)     | 0<br>(0 - 0)      | 16<br>(9 - 25)     | 2<br>(1 - 3)       | 1<br>(0 - 1)       |
| Motor vehicle road injuries                     | 98<br>(72 - 129)   | 1<br>(0 - 1)     | 1<br>(1 - 2)      | 68<br>(50 - 89)    | 15<br>(10 - 21)    | 12<br>(8 - 19)     |
| Other road injuries                             | 1<br>(0 - 2)       | 0<br>(0 - 0)     | 0<br>(0 - 0)      | 0<br>(0 - 1)       | 0<br>(0 - 1)       | 0<br>(0 - 1)       |
| Other transport injuries                        | 9<br>(6 - 12)      | 0<br>(0 - 0)     | 0<br>(0 - 1)      | 5<br>(3 - 7)       | 2<br>(1 - 4)       | 1<br>(1 - 2)       |
| Unintentional injuries                          | 354<br>(287 - 442) | 8<br>(5 - 12)    | 7<br>(5 - 9)      | 89<br>(71 - 121)   | 80<br>(62 - 99)    | 171<br>(133 - 220) |
| Falls                                           | 176<br>(135 - 231) | 1<br>(1 - 1)     | 1<br>(1 - 1)      | 27<br>(20 - 37)    | 37<br>(25 - 49)    | 111<br>(82 - 155)  |
| Drowning                                        | 43<br>(31 - 81)    | 2<br>(1 - 3)     | 2<br>(2 - 4)      | 24<br>(16 - 45)    | 11<br>(7 - 21)     | 5<br>(3 - 9)       |
| Fire, heat, and hot substances                  | 28<br>(21 - 39)    | 2<br>(1 - 3)     | 1<br>(0 - 1)      | 6<br>(5 - 9)       | 6<br>(4 - 9)       | 13<br>(9 - 19)     |
| Poisonings                                      | 10<br>(6 - 13)     | 0<br>(0 - 0)     | 0<br>(0 - 0)      | 6<br>(3 - 8)       | 2<br>(1 - 3)       | 1<br>(1 - 2)       |
| Exposure to mechanical forces                   | 19<br>(15 - 27)    | 1<br>(1 - 2)     | 1<br>(1 - 2)      | 11<br>(8 - 16)     | 5<br>(3 - 6)       | 2<br>(1 - 2)       |
| Unintentional firearm injuries                  | 1<br>(1 - 1)       | 0<br>(0 - 0)     | 0<br>(0 - 0)      | 1<br>(0 - 1)       | 0<br>(0 - 0)       | 0<br>(0 - 0)       |
| Unintentional suffocation                       | 2<br>(1 - 3)       | 1<br>(0 - 1)     | 0<br>(0 - 1)      | 1<br>(0 - 1)       | 0<br>(0 - 0)       | 0<br>(0 - 1)       |
| Other exposure to mechanical forces             | 16<br>(13 - 23)    | 1<br>(0 - 1)     | 1<br>(1 - 1)      | 9<br>(7 - 15)      | 4<br>(3 - 6)       | 1<br>(1 - 2)       |
| Adverse effects of medical treatment            | 22<br>(12 - 30)    | 0<br>(0 - 1)     | 0<br>(0 - 0)      | 2<br>(1 - 4)       | 6<br>(3 - 9)       | 13<br>(6 - 19)     |
| Animal contact                                  | 3<br>(2 - 5)       | 0<br>(0 - 0)     | 0<br>(0 - 0)      | 0<br>(0 - 1)       | 1<br>(1 - 2)       | 1<br>(1 - 2)       |
| Venomous animal contact                         | 0<br>(0 - 0)       | 0<br>(0 - 0)     | 0<br>(0 - 0)      | 0<br>(0 - 0)       | 0<br>(0 - 0)       | 0<br>(0 - 0)       |
| Non-venomous animal contact                     | 3<br>(2 - 5)       | 0<br>(0 - 0)     | 0<br>(0 - 0)      | 0<br>(0 - 1)       | 1<br>(1 - 2)       | 1<br>(1 - 2)       |
| Foreign body                                    | 51<br>(22 - 73)    | 2<br>(1 - 3)     | 1<br>(1 - 2)      | 11<br>(6 - 18)     | 12<br>(5 - 18)     | 25<br>(9 - 38)     |
| Pulmonary aspiration and foreign body in airway | 50<br>(22 - 72)    | 2<br>(1 - 3)     | 1<br>(1 - 2)      | 11<br>(5 - 18)     | 12<br>(5 - 18)     | 25<br>(9 - 38)     |
| Foreign body in other body part                 | 0<br>(0 - 0)       | 0<br>(0 - 0)     | 0<br>(0 - 0)      | 0<br>(0 - 0)       | 0<br>(0 - 0)       | 0<br>(0 - 0)       |
| Other unintentional injuries                    | 3<br>(2 - 4)       | 0<br>(0 - 0)     | 0<br>(0 - 0)      | 1<br>(1 - 2)       | 1<br>(0 - 1)       | 1<br>(0 - 1)       |
| Self-harm and interpersonal violence            | 412<br>(285 - 514) | 1<br>(0 - 1)     | 2<br>(1 - 3)      | 276<br>(194 - 344) | 106<br>(66 - 141)  | 28<br>(17 - 36)    |
| Self-harm                                       | 383<br>(262 - 482) | --               | 2<br>(1 - 2)      | 254<br>(178 - 318) | 102<br>(63 - 136)  | 26<br>(16 - 35)    |
| Interpersonal violence                          | 28<br>(14 - 39)    | 1<br>(0 - 1)     | 0<br>(0 - 1)      | 21<br>(11 - 30)    | 4<br>(2 - 6)       | 2<br>(1 - 2)       |
| Assault by firearm                              | 10<br>(3 - 15)     | 0<br>(0 - 0)     | 0<br>(0 - 0)      | 8<br>(3 - 13)      | 1<br>(0 - 2)       | 0<br>(0 - 0)       |
| Assault by sharp object                         | 8<br>(4 - 13)      | 0<br>(0 - 0)     | 0<br>(0 - 0)      | 6<br>(3 - 10)      | 1<br>(0 - 2)       | 0<br>(0 - 1)       |
| Assault by other means                          | 11<br>(5 - 17)     | 1<br>(0 - 1)     | 0<br>(0 - 0)      | 7<br>(3 - 12)      | 2<br>(1 - 3)       | 1<br>(1 - 2)       |

Web Table 31- Ireland deaths with 95% UI by age, sex, and cause in 2013

| Cause                                                             | Females, All Ages           | Females, 0-4 Years | Females, 5-14 Years | Females, 15-49 Years | Females, 50-69 Years     | Females, 70-80 Years        |
|-------------------------------------------------------------------|-----------------------------|--------------------|---------------------|----------------------|--------------------------|-----------------------------|
| All causes                                                        | 15,054<br>(13,502 - 16,996) | 144<br>(107 - 189) | 27<br>(23 - 32)     | 674<br>(564 - 819)   | 2,450<br>(2,119 - 2,874) | 11,760<br>(10,661 - 13,117) |
| Communicable, maternal, neonatal, and nutritional diseases        | 1,229<br>(916 - 1,655)      | 50<br>(36 - 69)    | 3<br>(2 - 4)        | 26<br>(22 - 32)      | 67<br>(52 - 86)          | 1,082<br>(782 - 1,504)      |
| HIV/AIDS and tuberculosis                                         | 22<br>(17 - 28)             | 0<br>(0 - 0)       | 0<br>(0 - 0)        | 6<br>(4 - 8)         | 5<br>(4 - 7)             | 11<br>(7 - 15)              |
| Tuberculosis                                                      | 16<br>(12 - 21)             | 0<br>(0 - 0)       | 0<br>(0 - 0)        | 1<br>(1 - 2)         | 4<br>(3 - 6)             | 11<br>(7 - 15)              |
| HIV/AIDS                                                          | 6<br>(4 - 9)                | 0<br>(0 - 0)       | 0<br>(0 - 0)        | 4<br>(3 - 7)         | 1<br>(1 - 2)             | 0<br>(0 - 0)                |
| HIV/AIDS resulting in mycobacterial infection                     | 0<br>(0 - 0)                | 0<br>(0 - 0)       | 0<br>(0 - 0)        | 0<br>(0 - 0)         | 0<br>(0 - 0)             | 0<br>(0 - 0)                |
| HIV/AIDS resulting in other diseases                              | 5<br>(3 - 8)                | 0<br>(0 - 0)       | 0<br>(0 - 0)        | 4<br>(3 - 6)         | 1<br>(1 - 2)             | 0<br>(0 - 0)                |
| Diarrhea, lower respiratory, and other common infectious diseases | 1,112<br>(803 - 1,536)      | 9<br>(6 - 13)      | 2<br>(2 - 3)        | 15<br>(11 - 19)      | 56<br>(42 - 73)          | 1,030<br>(726 - 1,449)      |
| Diarrheal diseases                                                | 20<br>(13 - 31)             | 1<br>(1 - 2)       | 0<br>(0 - 0)        | 0<br>(0 - 1)         | 1<br>(1 - 2)             | 17<br>(10 - 28)             |
| Intestinal infectious diseases                                    | 3<br>(1 - 6)                | 1<br>(0 - 2)       | 1<br>(0 - 1)        | 1<br>(0 - 3)         | 0<br>(0 - 1)             | 0<br>(0 - 1)                |
| Typhoid fever                                                     | 2<br>(1 - 5)                | 0<br>(0 - 1)       | 0<br>(0 - 1)        | 1<br>(0 - 2)         | 0<br>(0 - 1)             | 0<br>(0 - 0)                |
| Paratyphoid fever                                                 | 0<br>(0 - 1)                | 0<br>(0 - 0)       | 0<br>(0 - 0)        | 0<br>(0 - 0)         | 0<br>(0 - 0)             | 0<br>(0 - 0)                |
| Other intestinal infectious diseases                              | 0<br>(0 - 1)                | 0<br>(0 - 1)       | 0<br>(0 - 0)        | 0<br>(0 - 0)         | 0<br>(0 - 0)             | 0<br>(0 - 1)                |
| Lower respiratory infections                                      | 1,076<br>(770 - 1,500)      | 5<br>(3 - 8)       | 1<br>(1 - 1)        | 11<br>(8 - 14)       | 52<br>(38 - 69)          | 1,007<br>(704 - 1,422)      |
| Upper respiratory infections                                      | 0<br>(0 - 1)                | 0<br>(0 - 0)       | 0<br>(0 - 0)        | 0<br>(0 - 0)         | 0<br>(0 - 0)             | 0<br>(0 - 1)                |
| Otitis media                                                      | 0<br>(0 - 0)                | 0<br>(0 - 0)       | 0<br>(0 - 0)        | 0<br>(0 - 0)         | 0<br>(0 - 0)             | 0<br>(0 - 0)                |
| Meningitis                                                        | 8<br>(6 - 10)               | 2<br>(1 - 2)       | 0<br>(0 - 1)        | 1<br>(1 - 2)         | 2<br>(1 - 2)             | 3<br>(2 - 5)                |
| Pneumococcal meningitis                                           | 1<br>(1 - 2)                | 0<br>(0 - 0)       | 0<br>(0 - 0)        | 0<br>(0 - 0)         | 0<br>(0 - 0)             | 1<br>(0 - 1)                |
| H influenzae type B meningitis                                    | 1<br>(1 - 2)                | 0<br>(0 - 1)       | 0<br>(0 - 0)        | 0<br>(0 - 0)         | 0<br>(0 - 0)             | 0<br>(0 - 1)                |
| Meningococcal meningitis                                          | 3<br>(2 - 4)                | 1<br>(0 - 1)       | 0<br>(0 - 0)        | 0<br>(0 - 1)         | 1<br>(0 - 1)             | 1<br>(1 - 2)                |
| Other meningitis                                                  | 3<br>(2 - 4)                | 0<br>(0 - 1)       | 0<br>(0 - 0)        | 1<br>(0 - 1)         | 1<br>(0 - 1)             | 1<br>(1 - 2)                |
| Encephalitis                                                      | 3<br>(2 - 4)                | 0<br>(0 - 0)       | 0<br>(0 - 0)        | 1<br>(0 - 1)         | 1<br>(0 - 1)             | 1<br>(0 - 1)                |
| Diphtheria                                                        | 0<br>(0 - 0)                | 0<br>(0 - 0)       | 0<br>(0 - 0)        | 0<br>(0 - 0)         | 0<br>(0 - 0)             | --<br>(0 - 0)               |
| Whooping cough                                                    | 0<br>(0 - 0)                | 0<br>(0 - 0)       | 0<br>(0 - 0)        | 0<br>(0 - 0)         | 0<br>(0 - 0)             | --<br>(0 - 0)               |
| Tetanus                                                           | 0<br>(0 - 0)                | 0<br>(0 - 0)       | 0<br>(0 - 0)        | 0<br>(0 - 0)         | 0<br>(0 - 0)             | 0<br>(0 - 0)                |
| Measles                                                           | 0<br>(0 - 0)                | 0<br>(0 - 0)       | 0<br>(0 - 0)        | 0<br>(0 - 0)         | 0<br>(0 - 0)             | --<br>(0 - 0)               |
| Varicella and herpes zoster                                       | 2<br>(0 - 7)                | 0<br>(0 - 1)       | 0<br>(0 - 0)        | 0<br>(0 - 1)         | 0<br>(0 - 1)             | 1<br>(0 - 6)                |
| Neglected tropical diseases and malaria                           | 1<br>(1 - 1)                | 0<br>(0 - 0)       | 0<br>(0 - 0)        | 0<br>(0 - 0)         | 0<br>(0 - 0)             | 0<br>(0 - 0)                |
| Cysticercosis                                                     | 0<br>(0 - 0)                | 0<br>(0 - 0)       | 0<br>(0 - 0)        | 0<br>(0 - 0)         | 0<br>(0 - 0)             | 0<br>(0 - 0)                |
| Cystic echinococcosis                                             | 0<br>(0 - 0)                | 0<br>(0 - 0)       | 0<br>(0 - 0)        | 0<br>(0 - 0)         | 0<br>(0 - 0)             | 0<br>(0 - 0)                |
| Dengue                                                            | 0<br>(0 - 0)                | 0<br>(0 - 0)       | 0<br>(0 - 0)        | 0<br>(0 - 0)         | 0<br>(0 - 0)             | 0<br>(0 - 0)                |
| Rabies                                                            | 0<br>(0 - 0)                | 0<br>(0 - 0)       | 0<br>(0 - 0)        | 0<br>(0 - 0)         | 0<br>(0 - 0)             | 0<br>(0 - 0)                |
| Other neglected tropical diseases                                 | 0<br>(0 - 0)                | 0<br>(0 - 0)       | 0<br>(0 - 0)        | 0<br>(0 - 0)         | 0<br>(0 - 0)             | 0<br>(0 - 0)                |
| Maternal disorders                                                | 2<br>(2 - 3)                | --                 | 0<br>(0 - 0)        | 2<br>(2 - 3)         | --                       | --                          |
| Maternal hemorrhage                                               | 0<br>(0 - 0)                | --                 | 0<br>(0 - 0)        | 0<br>(0 - 0)         | --                       | --                          |
| Maternal sepsis and other maternal infections                     | 0<br>(0 - 0)                | --                 | 0<br>(0 - 0)        | 0<br>(0 - 0)         | --                       | --                          |
| Maternal hypertensive disorders                                   | 0<br>(0 - 0)                | --                 | 0<br>(0 - 0)        | 0<br>(0 - 0)         | --                       | --                          |
| Maternal obstructed labor                                         | 0<br>(0 - 0)                | --                 | 0<br>(0 - 0)        | 0<br>(0 - 0)         | --                       | --                          |
| Maternal abortive outcome                                         | 1<br>(0 - 1)                | --                 | 0<br>(0 - 0)        | 1<br>(0 - 1)         | --                       | --                          |
| Indirect maternal deaths                                          | 0<br>(0 - 0)                | --                 | 0<br>(0 - 0)        | 0<br>(0 - 0)         | --                       | --                          |

Web Table 31- Ireland deaths with 95% UI by age, sex, and cause in 2013

| Cause                                                            | Females, All Ages           | Females, 0-4 Years | Females, 5-14 Years | Females, 15-49 Years | Females, 50-69 Years     | Females, 70-80 Years       |
|------------------------------------------------------------------|-----------------------------|--------------------|---------------------|----------------------|--------------------------|----------------------------|
| Late maternal deaths                                             | 0<br>(0 - 0)                | --                 | 0<br>(0 - 0)        | 0<br>(0 - 0)         | --                       | --                         |
| Maternal deaths aggravated by HIV/AIDS                           | 0<br>(0 - 0)                | --                 | --                  | 0<br>(0 - 0)         | --                       | --                         |
| Other maternal disorders                                         | 0<br>(0 - 1)                | --                 | 0<br>(0 - 0)        | 0<br>(0 - 1)         | --                       | --                         |
| Neonatal disorders                                               | 40<br>(29 - 55)             | 40<br>(29 - 55)    | --                  | --                   | --                       | --                         |
| Neonatal preterm birth complications                             | 26<br>(17 - 37)             | 26<br>(17 - 37)    | --                  | --                   | --                       | --                         |
| Neonatal encephalopathy due to birth asphyxia and trauma         | 9<br>(5 - 15)               | 9<br>(5 - 15)      | --                  | --                   | --                       | --                         |
| Neonatal sepsis and other neonatal infections                    | 0<br>(0 - 1)                | 0<br>(0 - 1)       | --                  | --                   | --                       | --                         |
| Hemolytic disease and other neonatal jaundice                    | 0<br>(0 - 0)                | 0<br>(0 - 0)       | --                  | --                   | --                       | --                         |
| Other neonatal disorders                                         | 5<br>(2 - 9)                | 5<br>(2 - 9)       | --                  | --                   | --                       | --                         |
| Nutritional deficiencies                                         | 36<br>(26 - 50)             | 0<br>(0 - 0)       | 0<br>(0 - 0)        | 1<br>(1 - 1)         | 2<br>(2 - 3)             | 33<br>(24 - 47)            |
| Protein-energy malnutrition                                      | 4<br>(1 - 9)                | 0<br>(0 - 0)       | 0<br>(0 - 0)        | 0<br>(0 - 0)         | 0<br>(0 - 1)             | 4<br>(1 - 8)               |
| Iodine deficiency                                                | 0<br>(0 - 1)                | 0<br>(0 - 0)       | 0<br>(0 - 0)        | 0<br>(0 - 0)         | 0<br>(0 - 0)             | 0<br>(0 - 1)               |
| Iron-deficiency anemia                                           | 28<br>(19 - 40)             | 0<br>(0 - 0)       | 0<br>(0 - 0)        | 0<br>(0 - 1)         | 2<br>(1 - 2)             | 26<br>(17 - 38)            |
| Other nutritional deficiencies                                   | 4<br>(1 - 8)                | 0<br>(0 - 0)       | 0<br>(0 - 0)        | 0<br>(0 - 0)         | 0<br>(0 - 1)             | 3<br>(1 - 7)               |
| Other communicable, maternal, neonatal, and nutritional diseases | 15<br>(9 - 21)              | 1<br>(1 - 2)       | 0<br>(0 - 0)        | 2<br>(2 - 3)         | 4<br>(2 - 5)             | 8<br>(4 - 11)              |
| Sexually transmitted diseases excluding HIV                      | 1<br>(1 - 2)                | 0<br>(0 - 1)       | 0<br>(0 - 0)        | 0<br>(0 - 0)         | 0<br>(0 - 0)             | 1<br>(0 - 1)               |
| Syphilis                                                         | 1<br>(1 - 2)                | 0<br>(0 - 1)       | 0<br>(0 - 0)        | 0<br>(0 - 0)         | 0<br>(0 - 0)             | 1<br>(0 - 1)               |
| Chlamydial infection                                             | 0<br>(0 - 0)                | --                 | 0<br>(0 - 0)        | 0<br>(0 - 0)         | 0<br>(0 - 0)             | 0<br>(0 - 0)               |
| Gonococcal infection                                             | 0<br>(0 - 0)                | --                 | 0<br>(0 - 0)        | 0<br>(0 - 0)         | 0<br>(0 - 0)             | 0<br>(0 - 0)               |
| Other sexually transmitted diseases                              | 0<br>(0 - 0)                | --                 | 0<br>(0 - 0)        | 0<br>(0 - 0)         | 0<br>(0 - 0)             | 0<br>(0 - 0)               |
| Hepatitis                                                        | 1<br>(1 - 2)                | 0<br>(0 - 0)       | 0<br>(0 - 0)        | 0<br>(0 - 1)         | 0<br>(0 - 1)             | 0<br>(0 - 1)               |
| Acute hepatitis A                                                | 0<br>(0 - 1)                | 0<br>(0 - 0)       | 0<br>(0 - 0)        | 0<br>(0 - 0)         | 0<br>(0 - 0)             | 0<br>(0 - 0)               |
| Acute hepatitis B                                                | 1<br>(0 - 1)                | 0<br>(0 - 0)       | 0<br>(0 - 0)        | 0<br>(0 - 0)         | 0<br>(0 - 0)             | 0<br>(0 - 0)               |
| Acute hepatitis C                                                | 0<br>(0 - 0)                | --                 | 0<br>(0 - 0)        | 0<br>(0 - 0)         | 0<br>(0 - 0)             | 0<br>(0 - 0)               |
| Other infectious diseases                                        | 13<br>(7 - 18)              | 1<br>(0 - 1)       | 0<br>(0 - 0)        | 2<br>(1 - 2)         | 3<br>(2 - 5)             | 7<br>(3 - 10)              |
| Non-communicable diseases                                        | 13,338<br>(11,931 - 15,057) | 86<br>(63 - 115)   | 17<br>(14 - 21)     | 530<br>(440 - 645)   | 2,299<br>(1,990 - 2,691) | 10,406<br>(9,324 - 11,630) |
| Neoplasms                                                        | 3,848<br>(3,200 - 4,499)    | 4<br>(3 - 5)       | 7<br>(6 - 9)        | 309<br>(254 - 378)   | 1,351<br>(1,137 - 1,603) | 2,177<br>(1,754 - 2,534)   |
| Esophageal cancer                                                | 121<br>(98 - 148)           | --                 | --                  | 3<br>(2 - 5)         | 32<br>(25 - 42)          | 85<br>(67 - 107)           |
| Stomach cancer                                                   | 163<br>(115 - 229)          | --                 | --                  | 8<br>(5 - 11)        | 35<br>(25 - 49)          | 120<br>(82 - 174)          |
| Liver cancer                                                     | 67<br>(41 - 86)             | --                 | 0<br>(0 - 0)        | 3<br>(2 - 4)         | 21<br>(13 - 28)          | 43<br>(26 - 58)            |
| Liver cancer due to hepatitis B                                  | 16<br>(5 - 26)              | --                 | 0<br>(0 - 0)        | 1<br>(1 - 2)         | 7<br>(2 - 12)            | 7<br>(2 - 14)              |
| Liver cancer due to hepatitis C                                  | 35<br>(20 - 52)             | --                 | 0<br>(0 - 0)        | 1<br>(0 - 2)         | 9<br>(4 - 16)            | 24<br>(14 - 38)            |
| Liver cancer due to alcohol use                                  | 12<br>(6 - 20)              | --                 | --                  | 0<br>(0 - 1)         | 3<br>(1 - 6)             | 8<br>(4 - 15)              |
| Liver cancer due to other causes                                 | 5<br>(1 - 10)               | --                 | 0<br>(0 - 0)        | 0<br>(0 - 1)         | 2<br>(0 - 4)             | 3<br>(1 - 6)               |
| Larynx cancer                                                    | 11<br>(7 - 15)              | --                 | --                  | 0<br>(0 - 1)         | 5<br>(3 - 7)             | 5<br>(3 - 8)               |
| Tracheal, bronchus and lung cancer                               | 747<br>(546 - 908)          | --                 | --                  | 30<br>(22 - 39)      | 287<br>(221 - 355)       | 430<br>(280 - 541)         |
| Breast cancer                                                    | 723<br>(513 - 898)          | --                 | --                  | 103<br>(80 - 135)    | 319<br>(223 - 398)       | 300<br>(200 - 387)         |
| Cervical cancer                                                  | 87<br>(58 - 111)            | --                 | --                  | 26<br>(17 - 35)      | 34<br>(21 - 45)          | 27<br>(19 - 36)            |
| Uterine cancer                                                   | 77<br>(53 - 99)             | --                 | --                  | 3<br>(2 - 4)         | 30<br>(20 - 40)          | 45<br>(31 - 60)            |
| Prostate cancer                                                  | --                          | --                 | --                  | --                   | --                       | --                         |

Web Table 31- Ireland deaths with 95% UI by age, sex, and cause in 2013

| Cause                                         | Females, All Ages        | Females, 0-4 Years | Females, 5-14 Years | Females, 15-49 Years | Females, 50-69 Years | Females, 70-80 Years     |
|-----------------------------------------------|--------------------------|--------------------|---------------------|----------------------|----------------------|--------------------------|
| Colon and rectum cancer                       | 455<br>(375 - 554)       | --                 | --                  | 21<br>(17 - 27)      | 124<br>(100 - 148)   | 311<br>(245 - 391)       |
| Lip and oral cavity cancer                    | 26<br>(20 - 32)          | --                 | --                  | 2<br>(2 - 3)         | 8<br>(6 - 11)        | 15<br>(11 - 20)          |
| Nasopharynx cancer                            | 2<br>(1 - 5)             | --                 | 0<br>(0 - 0)        | 0<br>(0 - 1)         | 1<br>(0 - 1)         | 1<br>(1 - 3)             |
| Other pharynx cancer                          | 10<br>(8 - 13)           | --                 | --                  | 1<br>(1 - 1)         | 5<br>(3 - 6)         | 5<br>(3 - 7)             |
| Gallbladder and biliary tract cancer          | 48<br>(32 - 68)          | --                 | --                  | 1<br>(1 - 1)         | 13<br>(9 - 18)       | 34<br>(21 - 51)          |
| Pancreatic cancer                             | 245<br>(201 - 293)       | --                 | --                  | 7<br>(5 - 9)         | 74<br>(59 - 91)      | 164<br>(131 - 201)       |
| Malignant skin melanoma                       | 53<br>(34 - 71)          | --                 | --                  | 9<br>(6 - 13)        | 17<br>(11 - 23)      | 27<br>(17 - 38)          |
| Non-melanoma skin cancer                      | 26<br>(18 - 36)          | --                 | --                  | 1<br>(1 - 1)         | 3<br>(2 - 4)         | 22<br>(14 - 31)          |
| Ovarian cancer                                | 280<br>(226 - 340)       | --                 | --                  | 23<br>(17 - 30)      | 124<br>(99 - 154)    | 133<br>(101 - 170)       |
| Testicular cancer                             | --                       | --                 | --                  | --                   | --                   | --                       |
| Kidney cancer                                 | 68<br>(50 - 91)          | 0<br>(0 - 1)       | 0<br>(0 - 0)        | 4<br>(3 - 6)         | 25<br>(18 - 35)      | 38<br>(24 - 57)          |
| Bladder cancer                                | 51<br>(33 - 71)          | --                 | --                  | 2<br>(1 - 2)         | 11<br>(7 - 15)       | 39<br>(25 - 56)          |
| Brain and nervous system cancer               | 105<br>(81 - 138)        | 1<br>(0 - 2)       | 2<br>(1 - 3)        | 17<br>(13 - 24)      | 47<br>(35 - 61)      | 38<br>(26 - 51)          |
| Thyroid cancer                                | 15<br>(11 - 20)          | --                 | 0<br>(0 - 0)        | 1<br>(0 - 1)         | 4<br>(3 - 6)         | 10<br>(7 - 14)           |
| Mesothelioma                                  | 6<br>(4 - 10)            | --                 | --                  | 1<br>(0 - 1)         | 2<br>(2 - 4)         | 2<br>(1 - 5)             |
| Hodgkin lymphoma                              | 10<br>(6 - 14)           | 0<br>(0 - 0)       | 0<br>(0 - 0)        | 3<br>(2 - 5)         | 3<br>(2 - 5)         | 4<br>(2 - 5)             |
| Non-Hodgkin lymphoma                          | 122<br>(51 - 169)        | 0<br>(0 - 0)       | 0<br>(0 - 1)        | 10<br>(5 - 15)       | 40<br>(17 - 58)      | 72<br>(28 - 101)         |
| Multiple myeloma                              | 81<br>(51 - 128)         | --                 | --                  | 3<br>(1 - 4)         | 26<br>(16 - 43)      | 53<br>(31 - 85)          |
| Leukemia                                      | 101<br>(81 - 122)        | 1<br>(1 - 2)       | 2<br>(2 - 3)        | 11<br>(9 - 15)       | 25<br>(18 - 33)      | 60<br>(46 - 76)          |
| Other neoplasms                               | 149<br>(100 - 190)       | 1<br>(1 - 2)       | 2<br>(1 - 3)        | 15<br>(11 - 19)      | 38<br>(28 - 49)      | 93<br>(55 - 127)         |
| Cardiovascular diseases                       | 5,424<br>(4,619 - 6,544) | 1<br>(0 - 1)       | 1<br>(0 - 1)        | 78<br>(59 - 105)     | 511<br>(407 - 706)   | 4,834<br>(4,085 - 5,737) |
| Rheumatic heart disease                       | 39<br>(19 - 53)          | 0<br>(0 - 0)       | 0<br>(0 - 0)        | 3<br>(1 - 4)         | 9<br>(5 - 13)        | 28<br>(13 - 40)          |
| Ischemic heart disease                        | 2,979<br>(2,361 - 3,751) | 0<br>(0 - 0)       | 0<br>(0 - 0)        | 31<br>(21 - 43)      | 298<br>(231 - 451)   | 2,650<br>(2,078 - 3,292) |
| Cerebrovascular disease                       | 1,474<br>(1,149 - 1,915) | 0<br>(0 - 0)       | 0<br>(0 - 0)        | 28<br>(20 - 39)      | 122<br>(90 - 178)    | 1,323<br>(1,025 - 1,724) |
| Ischemic stroke                               | 870<br>(662 - 1,232)     | 0<br>(0 - 0)       | 0<br>(0 - 0)        | 2<br>(1 - 4)         | 28<br>(18 - 50)      | 839<br>(631 - 1,188)     |
| Hemorrhagic stroke                            | 605<br>(395 - 797)       | 0<br>(0 - 0)       | 0<br>(0 - 0)        | 26<br>(18 - 35)      | 94<br>(69 - 132)     | 484<br>(296 - 648)       |
| Hypertensive heart disease                    | 81<br>(45 - 118)         | 0<br>(0 - 0)       | 0<br>(0 - 0)        | 1<br>(1 - 1)         | 7<br>(4 - 10)        | 73<br>(39 - 109)         |
| Cardiomyopathy and myocarditis                | 129<br>(84 - 304)        | 0<br>(0 - 0)       | 0<br>(0 - 0)        | 4<br>(2 - 6)         | 10<br>(7 - 17)       | 115<br>(72 - 281)        |
| Atrial fibrillation and flutter               | 275<br>(179 - 413)       | --                 | --                  | 0<br>(0 - 0)         | 11<br>(7 - 16)       | 264<br>(168 - 397)       |
| Aortic aneurysm                               | 101<br>(54 - 152)        | --                 | --                  | 2<br>(1 - 3)         | 13<br>(7 - 20)       | 86<br>(47 - 132)         |
| Peripheral vascular disease                   | 74<br>(48 - 107)         | --                 | --                  | 0<br>(0 - 0)         | 4<br>(3 - 6)         | 70<br>(44 - 103)         |
| Endocarditis                                  | 22<br>(13 - 43)          | 0<br>(0 - 0)       | 0<br>(0 - 0)        | 1<br>(1 - 3)         | 5<br>(3 - 11)        | 16<br>(9 - 32)           |
| Other cardiovascular and circulatory diseases | 249<br>(117 - 345)       | 0<br>(0 - 0)       | 0<br>(0 - 0)        | 8<br>(4 - 12)        | 32<br>(19 - 45)      | 209<br>(94 - 296)        |
| Chronic respiratory diseases                  | 954<br>(745 - 1,169)     | 1<br>(0 - 1)       | 0<br>(0 - 1)        | 13<br>(10 - 17)      | 120<br>(94 - 149)    | 820<br>(625 - 1,019)     |
| Chronic obstructive pulmonary disease         | 817<br>(645 - 1,020)     | 0<br>(0 - 0)       | 0<br>(0 - 0)        | 5<br>(4 - 8)         | 96<br>(75 - 123)     | 715<br>(558 - 900)       |
| Pneumoconiosis                                | 1<br>(0 - 1)             | 0<br>(0 - 0)       | 0<br>(0 - 0)        | 0<br>(0 - 0)         | 0<br>(0 - 0)         | 0<br>(0 - 1)             |
| Silicosis                                     | 0<br>(0 - 0)             | 0<br>(0 - 0)       | 0<br>(0 - 0)        | 0<br>(0 - 0)         | 0<br>(0 - 0)         | 0<br>(0 - 0)             |
| Asbestosis                                    | 0<br>(0 - 0)             | 0<br>(0 - 0)       | 0<br>(0 - 0)        | 0<br>(0 - 0)         | 0<br>(0 - 0)         | 0<br>(0 - 0)             |
| Coal workers pneumoconiosis                   | 0<br>(0 - 0)             | 0<br>(0 - 0)       | 0<br>(0 - 0)        | 0<br>(0 - 0)         | 0<br>(0 - 0)         | 0<br>(0 - 0)             |
| Other pneumoconiosis                          | 0<br>(0 - 1)             | 0<br>(0 - 0)       | 0<br>(0 - 0)        | 0<br>(0 - 0)         | 0<br>(0 - 0)         | 0<br>(0 - 0)             |

Web Table 31- Ireland deaths with 95% UI by age, sex, and cause in 2013

| Cause                                               | Females, All Ages        | Females, 0-4 Years | Females, 5-14 Years | Females, 15-49 Years | Females, 50-69 Years | Females, 70-80 Years     |
|-----------------------------------------------------|--------------------------|--------------------|---------------------|----------------------|----------------------|--------------------------|
| Asthma                                              | 42<br>(25 - 65)          | 0<br>(0 - 0)       | 0<br>(0 - 0)        | 5<br>(4 - 7)         | 8<br>(5 - 14)        | 28<br>(15 - 47)          |
| Interstitial lung disease and pulmonary sarcoidosis | 78<br>(27 - 137)         | 0<br>(0 - 0)       | 0<br>(0 - 0)        | 2<br>(1 - 4)         | 14<br>(5 - 24)       | 61<br>(19 - 113)         |
| Other chronic respiratory diseases                  | 17<br>(9 - 29)           | 0<br>(0 - 0)       | 0<br>(0 - 0)        | 0<br>(0 - 1)         | 1<br>(1 - 2)         | 15<br>(7 - 27)           |
| Cirrhosis                                           | 132<br>(109 - 159)       | 0<br>(0 - 0)       | 0<br>(0 - 0)        | 24<br>(18 - 30)      | 55<br>(44 - 68)      | 53<br>(42 - 66)          |
| Cirrhosis due to hepatitis B                        | 17<br>(7 - 31)           | 0<br>(0 - 0)       | 0<br>(0 - 0)        | 3<br>(1 - 5)         | 7<br>(3 - 14)        | 7<br>(3 - 14)            |
| Cirrhosis due to hepatitis C                        | 71<br>(43 - 101)         | 0<br>(0 - 0)       | 0<br>(0 - 0)        | 13<br>(8 - 19)       | 31<br>(17 - 44)      | 28<br>(16 - 41)          |
| Cirrhosis due to alcohol use                        | 27<br>(13 - 40)          | --                 | --                  | 3<br>(1 - 5)         | 10<br>(4 - 16)       | 14<br>(6 - 23)           |
| Cirrhosis due to other causes                       | 16<br>(7 - 30)           | 0<br>(0 - 0)       | 0<br>(0 - 0)        | 5<br>(2 - 8)         | 7<br>(3 - 14)        | 4<br>(1 - 9)             |
| Digestive diseases                                  | 418<br>(309 - 512)       | 0<br>(0 - 0)       | 0<br>(0 - 0)        | 10<br>(8 - 14)       | 51<br>(38 - 64)      | 356<br>(259 - 438)       |
| Peptic ulcer disease                                | 67<br>(47 - 97)          | 0<br>(0 - 0)       | 0<br>(0 - 0)        | 1<br>(1 - 2)         | 8<br>(5 - 11)        | 58<br>(40 - 86)          |
| Gastritis and duodenitis                            | 5<br>(2 - 10)            | 0<br>(0 - 0)       | 0<br>(0 - 0)        | 0<br>(0 - 1)         | 0<br>(0 - 1)         | 5<br>(2 - 9)             |
| Appendicitis                                        | 4<br>(2 - 6)             | 0<br>(0 - 0)       | 0<br>(0 - 0)        | 0<br>(0 - 1)         | 1<br>(0 - 1)         | 3<br>(1 - 5)             |
| Paralytic ileus and intestinal obstruction          | 56<br>(28 - 97)          | 0<br>(0 - 0)       | 0<br>(0 - 0)        | 1<br>(1 - 2)         | 6<br>(3 - 11)        | 48<br>(24 - 83)          |
| Inguinal, femoral, and abdominal hernia             | 10<br>(4 - 17)           | 0<br>(0 - 0)       | 0<br>(0 - 0)        | 0<br>(0 - 0)         | 1<br>(1 - 2)         | 8<br>(3 - 15)            |
| Inflammatory bowel disease                          | 48<br>(28 - 73)          | 0<br>(0 - 0)       | 0<br>(0 - 0)        | 1<br>(1 - 2)         | 5<br>(3 - 8)         | 41<br>(22 - 64)          |
| Vascular intestinal disorders                       | 60<br>(24 - 92)          | 0<br>(0 - 0)       | 0<br>(0 - 0)        | 1<br>(0 - 2)         | 9<br>(4 - 15)        | 50<br>(19 - 78)          |
| Gallbladder and biliary diseases                    | 39<br>(24 - 56)          | 0<br>(0 - 0)       | 0<br>(0 - 0)        | 1<br>(1 - 1)         | 4<br>(3 - 6)         | 34<br>(20 - 49)          |
| Pancreatitis                                        | 20<br>(12 - 30)          | 0<br>(0 - 0)       | 0<br>(0 - 0)        | 2<br>(1 - 3)         | 4<br>(3 - 7)         | 14<br>(8 - 21)           |
| Other digestive diseases                            | 109<br>(76 - 145)        | 0<br>(0 - 0)       | 0<br>(0 - 0)        | 2<br>(1 - 2)         | 11<br>(7 - 15)       | 96<br>(65 - 131)         |
| Neurological disorders                              | 1,531<br>(1,142 - 1,980) | 3<br>(2 - 4)       | 1<br>(1 - 2)        | 23<br>(17 - 30)      | 81<br>(62 - 104)     | 1,423<br>(1,037 - 1,863) |
| Alzheimer disease and other dementias               | 1,312<br>(919 - 1,750)   | --                 | --                  | 0<br>(0 - 1)         | 32<br>(19 - 47)      | 1,280<br>(894 - 1,713)   |
| Parkinson disease                                   | 98<br>(52 - 139)         | --                 | --                  | 0<br>(0 - 0)         | 7<br>(5 - 11)        | 91<br>(46 - 130)         |
| Epilepsy                                            | 23<br>(14 - 31)          | 0<br>(0 - 1)       | 1<br>(0 - 1)        | 9<br>(6 - 12)        | 4<br>(2 - 6)         | 8<br>(5 - 13)            |
| Multiple sclerosis                                  | 29<br>(17 - 46)          | --                 | --                  | 7<br>(5 - 13)        | 15<br>(8 - 24)       | 7<br>(4 - 12)            |
| Other neurological disorders                        | 68<br>(55 - 83)          | 2<br>(1 - 4)       | 1<br>(1 - 1)        | 6<br>(4 - 7)         | 24<br>(18 - 30)      | 36<br>(28 - 46)          |
| Mental and substance use disorders                  | 61<br>(43 - 79)          | 0<br>(0 - 0)       | 0<br>(0 - 0)        | 32<br>(24 - 41)      | 21<br>(12 - 30)      | 8<br>(4 - 11)            |
| Schizophrenia                                       | 3<br>(1 - 5)             | --                 | --                  | 0<br>(0 - 0)         | 0<br>(0 - 1)         | 2<br>(0 - 5)             |
| Alcohol use disorders                               | 21<br>(6 - 33)           | --                 | --                  | 8<br>(2 - 13)        | 11<br>(3 - 18)       | 2<br>(1 - 3)             |
| Drug use disorders                                  | 37<br>(29 - 48)          | 0<br>(0 - 0)       | --                  | 24<br>(18 - 32)      | 10<br>(7 - 14)       | 3<br>(2 - 5)             |
| Opioid use disorders                                | 13<br>(10 - 17)          | 0<br>(0 - 0)       | --                  | 8<br>(6 - 11)        | 3<br>(2 - 5)         | 1<br>(1 - 2)             |
| Cocaine use disorders                               | 1<br>(1 - 2)             | 0<br>(0 - 0)       | --                  | 1<br>(1 - 1)         | 0<br>(0 - 0)         | 0<br>(0 - 0)             |
| Amphetamine use disorders                           | 2<br>(1 - 2)             | 0<br>(0 - 0)       | --                  | 1<br>(1 - 1)         | 0<br>(0 - 1)         | 0<br>(0 - 0)             |
| Other drug use disorders                            | 21<br>(16 - 27)          | 0<br>(0 - 0)       | --                  | 13<br>(10 - 18)      | 6<br>(5 - 8)         | 2<br>(1 - 3)             |
| Eating disorders                                    | 1<br>(0 - 1)             | --                 | 0<br>(0 - 0)        | 1<br>(0 - 1)         | --                   | --                       |
| Anorexia nervosa                                    | 1<br>(0 - 1)             | --                 | 0<br>(0 - 0)        | 1<br>(0 - 1)         | --                   | --                       |
| Diabetes, urogenital, blood, and endocrine diseases | 739<br>(582 - 880)       | 4<br>(2 - 5)       | 3<br>(2 - 4)        | 23<br>(18 - 29)      | 78<br>(63 - 96)      | 631<br>(488 - 761)       |
| Diabetes mellitus                                   | 230<br>(181 - 287)       | 0<br>(0 - 0)       | 0<br>(0 - 0)        | 5<br>(3 - 6)         | 29<br>(22 - 38)      | 197<br>(151 - 251)       |
| Acute glomerulonephritis                            | 0<br>(0 - 0)             | 0<br>(0 - 0)       | 0<br>(0 - 0)        | 0<br>(0 - 0)         | 0<br>(0 - 0)         | 0<br>(0 - 0)             |
| Chronic kidney disease                              | 275<br>(200 - 349)       | 0<br>(0 - 0)       | 0<br>(0 - 0)        | 5<br>(4 - 7)         | 22<br>(16 - 30)      | 247<br>(176 - 317)       |
| Chronic kidney disease due to diabetes mellitus     | 32<br>(21 - 47)          | 0<br>(0 - 0)       | 0<br>(0 - 0)        | 2<br>(1 - 3)         | 4<br>(2 - 6)         | 26<br>(16 - 41)          |

Web Table 31- Ireland deaths with 95% UI by age, sex, and cause in 2013

| Cause                                               | Females, All Ages  | Females, 0-4 Years | Females, 5-14 Years | Females, 15-49 Years | Females, 50-69 Years | Females, 70-80 Years |
|-----------------------------------------------------|--------------------|--------------------|---------------------|----------------------|----------------------|----------------------|
| Chronic kidney disease due to hypertension          | 106<br>(62 - 153)  | 0<br>(0 - 0)       | 0<br>(0 - 0)        | 0<br>(0 - 1)         | 8<br>(5 - 13)        | 98<br>(56 - 143)     |
| Chronic kidney disease due to glomerulonephritis    | 6<br>(4 - 10)      | 0<br>(0 - 0)       | 0<br>(0 - 0)        | 0<br>(0 - 1)         | 1<br>(1 - 2)         | 4<br>(2 - 8)         |
| Chronic kidney disease due to other causes          | 131<br>(75 - 195)  | 0<br>(0 - 0)       | 0<br>(0 - 0)        | 3<br>(2 - 4)         | 9<br>(5 - 14)        | 119<br>(65 - 180)    |
| Urinary diseases and male infertility               | 136<br>(75 - 194)  | 0<br>(0 - 0)       | 0<br>(0 - 0)        | 2<br>(2 - 3)         | 9<br>(6 - 13)        | 124<br>(63 - 181)    |
| Interstitial nephritis and urinary tract infections | 127<br>(70 - 181)  | 0<br>(0 - 0)       | 0<br>(0 - 0)        | 2<br>(1 - 3)         | 8<br>(6 - 12)        | 116<br>(60 - 171)    |
| Urolithiasis                                        | 3<br>(1 - 4)       | --                 | 0<br>(0 - 0)        | 0<br>(0 - 0)         | 0<br>(0 - 1)         | 2<br>(1 - 4)         |
| Other urinary diseases                              | 7<br>(3 - 12)      | 0<br>(0 - 0)       | 0<br>(0 - 0)        | 0<br>(0 - 0)         | 1<br>(0 - 1)         | 5<br>(2 - 11)        |
| Gynecological diseases                              | 1<br>(1 - 2)       | --                 | --                  | 0<br>(0 - 0)         | 0<br>(0 - 0)         | 1<br>(0 - 1)         |
| Uterine fibroids                                    | 0<br>(0 - 0)       | --                 | --                  | 0<br>(0 - 0)         | 0<br>(0 - 0)         | 0<br>(0 - 0)         |
| Polycystic ovarian syndrome                         | 0<br>(0 - 0)       | --                 | --                  | 0<br>(0 - 0)         | 0<br>(0 - 0)         | --                   |
| Endometriosis                                       | 0<br>(0 - 0)       | --                 | --                  | 0<br>(0 - 0)         | 0<br>(0 - 0)         | --                   |
| Genital prolapse                                    | 0<br>(0 - 0)       | --                 | --                  | 0<br>(0 - 0)         | 0<br>(0 - 0)         | 0<br>(0 - 0)         |
| Other gynecological diseases                        | 1<br>(0 - 1)       | --                 | --                  | 0<br>(0 - 0)         | 0<br>(0 - 0)         | 0<br>(0 - 1)         |
| Hemoglobinopathies and hemolytic anemias            | 9<br>(6 - 16)      | 0<br>(0 - 0)       | 0<br>(0 - 0)        | 1<br>(0 - 1)         | 2<br>(1 - 3)         | 7<br>(4 - 12)        |
| Thalassemias                                        | 0<br>(0 - 0)       | 0<br>(0 - 0)       | 0<br>(0 - 0)        | 0<br>(0 - 0)         | 0<br>(0 - 0)         | 0<br>(0 - 0)         |
| Sickle cell disorders                               | 1<br>(1 - 3)       | 0<br>(0 - 0)       | 0<br>(0 - 0)        | 0<br>(0 - 0)         | 1<br>(0 - 1)         | 0<br>(0 - 1)         |
| G6PD deficiency                                     | 0<br>(0 - 0)       | 0<br>(0 - 0)       | 0<br>(0 - 0)        | 0<br>(0 - 0)         | 0<br>(0 - 0)         | 0<br>(0 - 0)         |
| Other hemoglobinopathies and hemolytic anemias      | 8<br>(5 - 13)      | 0<br>(0 - 0)       | 0<br>(0 - 0)        | 0<br>(0 - 0)         | 1<br>(1 - 2)         | 6<br>(4 - 11)        |
| Endocrine, metabolic, blood, and immune disorders   | 87<br>(47 - 115)   | 3<br>(2 - 5)       | 2<br>(1 - 3)        | 10<br>(6 - 13)       | 15<br>(9 - 21)       | 57<br>(27 - 81)      |
| Musculoskeletal disorders                           | 85<br>(65 - 109)   | --                 | 0<br>(0 - 0)        | 5<br>(3 - 7)         | 19<br>(14 - 26)      | 61<br>(44 - 82)      |
| Rheumatoid arthritis                                | 44<br>(31 - 59)    | --                 | 0<br>(0 - 0)        | 1<br>(0 - 1)         | 9<br>(6 - 13)        | 34<br>(22 - 48)      |
| Other musculoskeletal disorders                     | 41<br>(30 - 57)    | --                 | 0<br>(0 - 0)        | 4<br>(3 - 6)         | 10<br>(7 - 15)       | 27<br>(18 - 40)      |
| Other non-communicable diseases                     | 147<br>(119 - 183) | 74<br>(53 - 100)   | 4<br>(3 - 5)        | 13<br>(10 - 17)      | 12<br>(9 - 15)       | 45<br>(31 - 65)      |
| Congenital anomalies                                | 89<br>(66 - 115)   | 58<br>(41 - 80)    | 4<br>(3 - 5)        | 13<br>(9 - 17)       | 8<br>(6 - 10)        | 6<br>(4 - 9)         |
| Neural tube defects                                 | 8<br>(5 - 13)      | 7<br>(4 - 12)      | 0<br>(0 - 1)        | 1<br>(0 - 1)         | 0<br>(0 - 0)         | 0<br>(0 - 0)         |
| Congenital heart anomalies                          | 27<br>(19 - 35)    | 16<br>(10 - 22)    | 2<br>(1 - 2)        | 6<br>(4 - 8)         | 2<br>(1 - 3)         | 2<br>(1 - 2)         |
| Cleft lip and cleft palate                          | 0<br>(0 - 0)       | 0<br>(0 - 0)       | --                  | --                   | --                   | --                   |
| Down syndrome                                       | 10<br>(5 - 14)     | 3<br>(1 - 5)       | 0<br>(0 - 1)        | 3<br>(2 - 5)         | 3<br>(2 - 5)         | 0<br>(0 - 0)         |
| Chromosomal unbalanced rearrangements               | 12<br>(7 - 19)     | 11<br>(7 - 18)     | 0<br>(0 - 0)        | 0<br>(0 - 0)         | 0<br>(0 - 0)         | 0<br>(0 - 0)         |
| Other congenital anomalies                          | 32<br>(22 - 43)    | 21<br>(13 - 31)    | 1<br>(1 - 2)        | 3<br>(2 - 4)         | 2<br>(1 - 3)         | 4<br>(3 - 7)         |
| Skin and subcutaneous diseases                      | 43<br>(30 - 64)    | 0<br>(0 - 0)       | 0<br>(0 - 0)        | 0<br>(0 - 1)         | 4<br>(3 - 6)         | 38<br>(25 - 59)      |
| Cellulitis                                          | 16<br>(5 - 28)     | 0<br>(0 - 0)       | 0<br>(0 - 0)        | 0<br>(0 - 0)         | 2<br>(1 - 3)         | 14<br>(4 - 26)       |
| Pyoderma                                            | 14<br>(7 - 24)     | 0<br>(0 - 0)       | 0<br>(0 - 0)        | 0<br>(0 - 0)         | 1<br>(1 - 2)         | 12<br>(6 - 22)       |
| Decubitus ulcer                                     | 12<br>(6 - 28)     | 0<br>(0 - 0)       | 0<br>(0 - 0)        | 0<br>(0 - 0)         | 1<br>(1 - 2)         | 11<br>(5 - 25)       |
| Other skin and subcutaneous diseases                | 2<br>(1 - 4)       | 0<br>(0 - 0)       | 0<br>(0 - 0)        | 0<br>(0 - 0)         | 0<br>(0 - 0)         | 1<br>(0 - 4)         |
| Sudden infant death syndrome                        | 15<br>(7 - 30)     | 15<br>(7 - 30)     | --                  | --                   | --                   | --                   |
| Injuries                                            | 487<br>(397 - 621) | 8<br>(5 - 10)      | 7<br>(6 - 9)        | 118<br>(95 - 146)    | 83<br>(68 - 103)     | 271<br>(203 - 373)   |
| Transport injuries                                  | 73<br>(58 - 102)   | 2<br>(1 - 3)       | 4<br>(3 - 5)        | 31<br>(24 - 44)      | 16<br>(12 - 23)      | 20<br>(14 - 28)      |
| Road injuries                                       | 71<br>(57 - 100)   | 2<br>(1 - 3)       | 4<br>(3 - 5)        | 30<br>(23 - 43)      | 16<br>(11 - 23)      | 20<br>(14 - 28)      |
| Pedestrian road injuries                            | 23<br>(17 - 38)    | 1<br>(0 - 2)       | 2<br>(1 - 3)        | 5<br>(3 - 9)         | 5<br>(3 - 9)         | 11<br>(7 - 17)       |

Web Table 31- Ireland deaths with 95% UI by age, sex, and cause in 2013

| Cause                                           | Females, All Ages  | Females, 0-4 Years | Females, 5-14 Years | Females, 15-49 Years | Females, 50-69 Years | Females, 70-80 Years |
|-------------------------------------------------|--------------------|--------------------|---------------------|----------------------|----------------------|----------------------|
| Cyclist road injuries                           | 3<br>(2 - 4)       | 0<br>(0 - 0)       | 0<br>(0 - 1)        | 1<br>(1 - 2)         | 1<br>(0 - 1)         | 0<br>(0 - 1)         |
| Motorcyclist road injuries                      | 1<br>(1 - 4)       | 0<br>(0 - 0)       | 0<br>(0 - 0)        | 1<br>(0 - 3)         | 0<br>(0 - 0)         | 0<br>(0 - 0)         |
| Motor vehicle road injuries                     | 43<br>(31 - 59)    | 1<br>(0 - 2)       | 1<br>(1 - 2)        | 23<br>(17 - 32)      | 9<br>(6 - 14)        | 8<br>(5 - 12)        |
| Other road injuries                             | 1<br>(0 - 1)       | 0<br>(0 - 0)       | 0<br>(0 - 0)        | 0<br>(0 - 0)         | 0<br>(0 - 0)         | 0<br>(0 - 0)         |
| Other transport injuries                        | 1<br>(1 - 2)       | 0<br>(0 - 0)       | 0<br>(0 - 0)        | 1<br>(0 - 1)         | 0<br>(0 - 1)         | 0<br>(0 - 0)         |
| Unintentional injuries                          | 301<br>(230 - 408) | 5<br>(3 - 7)       | 3<br>(2 - 4)        | 21<br>(17 - 27)      | 32<br>(25 - 41)      | 240<br>(175 - 335)   |
| Falls                                           | 195<br>(133 - 301) | 0<br>(0 - 1)       | 0<br>(0 - 0)        | 5<br>(3 - 7)         | 11<br>(8 - 15)       | 179<br>(117 - 280)   |
| Drowning                                        | 9<br>(7 - 14)      | 1<br>(0 - 1)       | 1<br>(0 - 1)        | 3<br>(2 - 5)         | 2<br>(2 - 4)         | 2<br>(1 - 3)         |
| Fire, heat, and hot substances                  | 19<br>(13 - 29)    | 1<br>(1 - 2)       | 0<br>(0 - 1)        | 3<br>(2 - 4)         | 3<br>(2 - 5)         | 11<br>(7 - 18)       |
| Poisonings                                      | 6<br>(3 - 7)       | 0<br>(0 - 0)       | 0<br>(0 - 0)        | 2<br>(1 - 3)         | 2<br>(1 - 2)         | 2<br>(1 - 3)         |
| Exposure to mechanical forces                   | 5<br>(4 - 7)       | 1<br>(1 - 1)       | 0<br>(0 - 1)        | 1<br>(1 - 2)         | 1<br>(1 - 1)         | 1<br>(1 - 2)         |
| Unintentional firearm injuries                  | 0<br>(0 - 0)       | 0<br>(0 - 0)       | 0<br>(0 - 0)        | 0<br>(0 - 0)         | 0<br>(0 - 0)         | 0<br>(0 - 0)         |
| Unintentional suffocation                       | 1<br>(1 - 2)       | 0<br>(0 - 1)       | 0<br>(0 - 0)        | 0<br>(0 - 0)         | 0<br>(0 - 0)         | 0<br>(0 - 1)         |
| Other exposure to mechanical forces             | 4<br>(3 - 5)       | 1<br>(0 - 1)       | 0<br>(0 - 1)        | 1<br>(1 - 2)         | 1<br>(0 - 1)         | 1<br>(1 - 2)         |
| Adverse effects of medical treatment            | 29<br>(20 - 45)    | 0<br>(0 - 0)       | 0<br>(0 - 0)        | 2<br>(1 - 3)         | 5<br>(3 - 7)         | 22<br>(14 - 36)      |
| Animal contact                                  | 1<br>(0 - 1)       | 0<br>(0 - 0)       | 0<br>(0 - 0)        | 0<br>(0 - 0)         | 0<br>(0 - 0)         | 0<br>(0 - 1)         |
| Venomous animal contact                         | 0<br>(0 - 0)       | 0<br>(0 - 0)       | 0<br>(0 - 0)        | 0<br>(0 - 0)         | 0<br>(0 - 0)         | 0<br>(0 - 0)         |
| Non-venomous animal contact                     | 1<br>(0 - 1)       | 0<br>(0 - 0)       | 0<br>(0 - 0)        | 0<br>(0 - 0)         | 0<br>(0 - 0)         | 0<br>(0 - 1)         |
| Foreign body                                    | 37<br>(17 - 55)    | 1<br>(1 - 3)       | 0<br>(0 - 1)        | 5<br>(3 - 8)         | 8<br>(4 - 12)        | 22<br>(9 - 38)       |
| Pulmonary aspiration and foreign body in airway | 36<br>(16 - 55)    | 1<br>(1 - 3)       | 0<br>(0 - 1)        | 5<br>(2 - 7)         | 8<br>(4 - 12)        | 22<br>(9 - 38)       |
| Foreign body in other body part                 | 0<br>(0 - 0)       | 0<br>(0 - 0)       | 0<br>(0 - 0)        | 0<br>(0 - 0)         | 0<br>(0 - 0)         | 0<br>(0 - 0)         |
| Other unintentional injuries                    | 1<br>(1 - 2)       | 0<br>(0 - 0)       | 0<br>(0 - 0)        | 0<br>(0 - 1)         | 0<br>(0 - 0)         | 0<br>(0 - 1)         |
| Self-harm and interpersonal violence            | 113<br>(87 - 141)  | 1<br>(0 - 1)       | 1<br>(1 - 1)        | 66<br>(49 - 84)      | 35<br>(25 - 45)      | 11<br>(7 - 14)       |
| Self-harm                                       | 105<br>(79 - 133)  | --                 | 0<br>(0 - 1)        | 61<br>(45 - 79)      | 34<br>(24 - 44)      | 10<br>(6 - 13)       |
| Interpersonal violence                          | 8<br>(5 - 10)      | 1<br>(0 - 1)       | 0<br>(0 - 0)        | 4<br>(3 - 6)         | 1<br>(1 - 2)         | 1<br>(1 - 2)         |
| Assault by firearm                              | 1<br>(1 - 2)       | 0<br>(0 - 0)       | 0<br>(0 - 0)        | 1<br>(0 - 1)         | 0<br>(0 - 0)         | 0<br>(0 - 0)         |
| Assault by sharp object                         | 2<br>(1 - 2)       | 0<br>(0 - 0)       | 0<br>(0 - 0)        | 1<br>(1 - 2)         | 0<br>(0 - 0)         | 0<br>(0 - 0)         |
| Assault by other means                          | 5<br>(3 - 7)       | 0<br>(0 - 1)       | 0<br>(0 - 0)        | 3<br>(2 - 4)         | 1<br>(1 - 1)         | 1<br>(1 - 1)         |

Web Table 31- Israel deaths with 95% UI by age, sex, and cause in 2013

| Cause                                                             | Both Sexes, All Ages        | Both Sexes, 0-4 Years | Both Sexes, 5-14 Years | Both Sexes, 15-49 Years  | Both Sexes, 50-69 Years  | Both Sexes, 70-80 Years     |
|-------------------------------------------------------------------|-----------------------------|-----------------------|------------------------|--------------------------|--------------------------|-----------------------------|
| All causes                                                        | 43,235<br>(42,305 - 44,207) | 677<br>(584 - 788)    | 147<br>(135 - 163)     | 2,303<br>(2,212 - 2,399) | 7,530<br>(7,252 - 7,810) | 32,578<br>(31,992 - 33,194) |
| Communicable, maternal, neonatal, and nutritional diseases        | 2,588<br>(1,971 - 2,996)    | 288<br>(243 - 340)    | 14<br>(12 - 17)        | 94<br>(81 - 106)         | 207<br>(153 - 242)       | 1,985<br>(1,442 - 2,372)    |
| HIV/AIDS and tuberculosis                                         | 66<br>(56 - 78)             | 0<br>(0 - 0)          | 0<br>(0 - 0)           | 23<br>(18 - 28)          | 13<br>(10 - 17)          | 30<br>(24 - 38)             |
| Tuberculosis                                                      | 39<br>(32 - 48)             | 0<br>(0 - 0)          | 0<br>(0 - 0)           | 3<br>(2 - 3)             | 7<br>(6 - 8)             | 29<br>(23 - 37)             |
| HIV/AIDS                                                          | 27<br>(20 - 36)             | 0<br>(0 - 0)          | 0<br>(0 - 0)           | 20<br>(15 - 26)          | 6<br>(3 - 10)            | 1<br>(0 - 2)                |
| HIV/AIDS resulting in mycobacterial infection                     | 1<br>(1 - 2)                | 0<br>(0 - 0)          | 0<br>(0 - 0)           | 1<br>(1 - 1)             | 0<br>(0 - 1)             | 0<br>(0 - 0)                |
| HIV/AIDS resulting in other diseases                              | 26<br>(19 - 34)             | 0<br>(0 - 0)          | 0<br>(0 - 0)           | 19<br>(15 - 24)          | 6<br>(3 - 10)            | 1<br>(0 - 1)                |
| Diarrhea, lower respiratory, and other common infectious diseases | 1,969<br>(1,427 - 2,354)    | 38<br>(29 - 48)       | 11<br>(9 - 13)         | 48<br>(39 - 55)          | 160<br>(113 - 191)       | 1,712<br>(1,220 - 2,097)    |
| Diarrheal diseases                                                | 195<br>(143 - 265)          | 6<br>(4 - 9)          | 1<br>(1 - 1)           | 3<br>(3 - 4)             | 12<br>(9 - 15)           | 173<br>(122 - 242)          |
| Intestinal infectious diseases                                    | 6<br>(2 - 13)               | 2<br>(0 - 4)          | 1<br>(0 - 3)           | 2<br>(1 - 5)             | 1<br>(0 - 2)             | 0<br>(0 - 2)                |
| Typhoid fever                                                     | 4<br>(1 - 9)                | 1<br>(0 - 2)          | 1<br>(0 - 2)           | 1<br>(0 - 3)             | 0<br>(0 - 1)             | 0<br>(0 - 1)                |
| Paratyphoid fever                                                 | 2<br>(0 - 3)                | 0<br>(0 - 1)          | 0<br>(0 - 1)           | 1<br>(0 - 1)             | 0<br>(0 - 0)             | 0<br>(0 - 0)                |
| Other intestinal infectious diseases                              | 1<br>(0 - 3)                | 0<br>(0 - 2)          | 0<br>(0 - 1)           | 0<br>(0 - 1)             | 0<br>(0 - 1)             | 0<br>(0 - 1)                |
| Lower respiratory infections                                      | 1,696<br>(1,163 - 2,072)    | 18<br>(13 - 24)       | 5<br>(3 - 6)           | 32<br>(24 - 39)          | 136<br>(90 - 166)        | 1,506<br>(1,017 - 1,874)    |
| Upper respiratory infections                                      | 1<br>(0 - 2)                | 0<br>(0 - 0)          | 0<br>(0 - 0)           | 0<br>(0 - 0)             | 0<br>(0 - 0)             | 1<br>(0 - 2)                |
| Otitis media                                                      | 4<br>(3 - 5)                | 1<br>(0 - 1)          | 0<br>(0 - 0)           | 0<br>(0 - 0)             | 0<br>(0 - 1)             | 0<br>(2 - 3)                |
| Meningitis                                                        | 39<br>(33 - 44)             | 7<br>(5 - 10)         | 1<br>(1 - 2)           | 5<br>(4 - 5)             | 7<br>(5 - 8)             | 19<br>(15 - 23)             |
| Pneumococcal meningitis                                           | 7<br>(5 - 9)                | 1<br>(1 - 1)          | 0<br>(0 - 0)           | 1<br>(1 - 1)             | 1<br>(1 - 2)             | 4<br>(2 - 5)                |
| H influenzae type B meningitis                                    | 5<br>(4 - 7)                | 2<br>(1 - 3)          | 0<br>(0 - 0)           | 1<br>(0 - 1)             | 1<br>(0 - 1)             | 2<br>(1 - 3)                |
| Meningococcal meningitis                                          | 13<br>(10 - 15)             | 2<br>(1 - 3)          | 1<br>(0 - 1)           | 2<br>(1 - 2)             | 2<br>(1 - 3)             | 6<br>(4 - 9)                |
| Other meningitis                                                  | 14<br>(10 - 17)             | 2<br>(1 - 3)          | 0<br>(0 - 1)           | 2<br>(1 - 2)             | 2<br>(2 - 3)             | 7<br>(5 - 9)                |
| Encephalitis                                                      | 21<br>(17 - 31)             | 3<br>(2 - 5)          | 2<br>(1 - 3)           | 4<br>(3 - 6)             | 4<br>(3 - 6)             | 9<br>(6 - 14)               |
| Diphtheria                                                        | 0<br>(0 - 0)                | 0<br>(0 - 0)          | 0<br>(0 - 0)           | 0<br>(0 - 0)             | 0<br>(0 - 0)             | --                          |
| Whooping cough                                                    | 1<br>(1 - 1)                | 0<br>(0 - 1)          | 0<br>(0 - 0)           | 0<br>(0 - 0)             | 0<br>(0 - 0)             | --                          |
| Tetanus                                                           | 1<br>(0 - 1)                | 0<br>(0 - 0)          | 0<br>(0 - 0)           | 0<br>(0 - 0)             | 0<br>(0 - 0)             | 0<br>(0 - 0)                |
| Measles                                                           | 0<br>(0 - 0)                | 0<br>(0 - 0)          | 0<br>(0 - 0)           | 0<br>(0 - 0)             | 0<br>(0 - 0)             | --                          |
| Varicella and herpes zoster                                       | 5<br>(2 - 13)               | 1<br>(0 - 2)          | 0<br>(0 - 1)           | 1<br>(0 - 1)             | 0<br>(0 - 1)             | 3<br>(0 - 12)               |
| Neglected tropical diseases and malaria                           | 11<br>(9 - 12)              | 0<br>(0 - 1)          | 1<br>(0 - 1)           | 2<br>(2 - 2)             | 3<br>(2 - 3)             | 5<br>(4 - 7)                |
| Leishmaniasis                                                     | 0<br>(0 - 0)                | 0<br>(0 - 0)          | 0<br>(0 - 0)           | 0<br>(0 - 0)             | 0<br>(0 - 0)             | 0<br>(0 - 0)                |
| Visceral leishmaniasis                                            | 0<br>(0 - 0)                | 0<br>(0 - 0)          | 0<br>(0 - 0)           | 0<br>(0 - 0)             | 0<br>(0 - 0)             | 0<br>(0 - 0)                |
| Cysticercosis                                                     | 0<br>(0 - 0)                | 0<br>(0 - 0)          | 0<br>(0 - 0)           | 0<br>(0 - 0)             | 0<br>(0 - 0)             | 0<br>(0 - 0)                |
| Cystic echinococcosis                                             | 3<br>(2 - 3)                | 0<br>(0 - 0)          | 0<br>(0 - 0)           | 1<br>(1 - 1)             | 1<br>(1 - 1)             | 1<br>(1 - 1)                |
| Dengue                                                            | 1<br>(1 - 1)                | 0<br>(0 - 0)          | 0<br>(0 - 0)           | 0<br>(0 - 0)             | 0<br>(0 - 0)             | 0<br>(0 - 0)                |
| Rabies                                                            | 1<br>(0 - 1)                | 0<br>(0 - 0)          | 0<br>(0 - 0)           | 0<br>(0 - 0)             | 0<br>(0 - 0)             | 0<br>(0 - 0)                |
| Other neglected tropical diseases                                 | 6<br>(5 - 8)                | 0<br>(0 - 0)          | 0<br>(0 - 0)           | 1<br>(1 - 1)             | 1<br>(1 - 2)             | 4<br>(3 - 5)                |
| Maternal disorders                                                | 7<br>(5 - 9)                | --                    | 0<br>(0 - 0)           | 7<br>(5 - 8)             | --                       | --                          |
| Maternal hemorrhage                                               | 1<br>(0 - 1)                | --                    | 0<br>(0 - 0)           | 1<br>(0 - 1)             | --                       | --                          |
| Maternal sepsis and other maternal infections                     | 1<br>(0 - 1)                | --                    | 0<br>(0 - 0)           | 1<br>(0 - 1)             | --                       | --                          |
| Maternal hypertensive disorders                                   | 1<br>(1 - 1)                | --                    | 0<br>(0 - 0)           | 1<br>(1 - 1)             | --                       | --                          |
| Maternal obstructed labor                                         | 1<br>(0 - 1)                | --                    | 0<br>(0 - 0)           | 1<br>(0 - 1)             | --                       | --                          |



Web Table 31- Israel deaths with 95% UI by age, sex, and cause in 2013

| Cause                                                            | Both Sexes, All Ages        | Both Sexes, 0-4 Years | Both Sexes, 5-14 Years | Both Sexes, 15-49 Years  | Both Sexes, 50-69 Years  | Both Sexes, 70-80 Years     |
|------------------------------------------------------------------|-----------------------------|-----------------------|------------------------|--------------------------|--------------------------|-----------------------------|
| Maternal abortive outcome                                        | 1<br>(1 - 2)                | --                    | 0<br>(0 - 0)           | 1<br>(1 - 2)             | --                       | --                          |
| Indirect maternal deaths                                         | 1<br>(0 - 1)                | --                    | 0<br>(0 - 0)           | 1<br>(0 - 1)             | --                       | --                          |
| Late maternal deaths                                             | 1<br>(0 - 1)                | --                    | 0<br>(0 - 0)           | 1<br>(0 - 1)             | --                       | --                          |
| Maternal deaths aggravated by HIV/AIDS                           | 0<br>(0 - 0)                | --                    | --                     | 0<br>(0 - 0)             | --                       | --                          |
| Other maternal disorders                                         | 1<br>(1 - 2)                | --                    | 0<br>(0 - 0)           | 1<br>(1 - 2)             | --                       | --                          |
| Neonatal disorders                                               | 242<br>(202 - 289)          | 242<br>(202 - 289)    | --                     | --                       | --                       | --                          |
| Neonatal preterm birth complications                             | 131<br>(103 - 169)          | 131<br>(103 - 169)    | --                     | --                       | --                       | --                          |
| Neonatal encephalopathy due to birth asphyxia and trauma         | 30<br>(20 - 40)             | 30<br>(20 - 40)       | --                     | --                       | --                       | --                          |
| Neonatal sepsis and other neonatal infections                    | 17<br>(11 - 30)             | 17<br>(11 - 30)       | --                     | --                       | --                       | --                          |
| Hemolytic disease and other neonatal jaundice                    | 0<br>(0 - 0)                | 0<br>(0 - 0)          | --                     | --                       | --                       | --                          |
| Other neonatal disorders                                         | 63<br>(39 - 83)             | 63<br>(39 - 83)       | --                     | --                       | --                       | --                          |
| Nutritional deficiencies                                         | 209<br>(131 - 261)          | 2<br>(1 - 3)          | 1<br>(1 - 1)           | 6<br>(4 - 7)             | 12<br>(8 - 14)           | 188<br>(117 - 240)          |
| Protein-energy malnutrition                                      | 37<br>(10 - 66)             | 1<br>(1 - 2)          | 0<br>(0 - 0)           | 1<br>(0 - 2)             | 2<br>(1 - 3)             | 32<br>(7 - 60)              |
| Iodine deficiency                                                | 0<br>(0 - 1)                | 0<br>(0 - 0)          | 0<br>(0 - 0)           | 0<br>(0 - 0)             | 0<br>(0 - 0)             | 0<br>(0 - 1)                |
| Iron-deficiency anemia                                           | 162<br>(102 - 207)          | 0<br>(0 - 1)          | 0<br>(0 - 0)           | 4<br>(3 - 5)             | 9<br>(6 - 11)            | 148<br>(93 - 193)           |
| Other nutritional deficiencies                                   | 9<br>(5 - 19)               | 0<br>(0 - 1)          | 0<br>(0 - 0)           | 1<br>(0 - 1)             | 1<br>(0 - 1)             | 7<br>(3 - 16)               |
| Other communicable, maternal, neonatal, and nutritional diseases | 85<br>(57 - 106)            | 5<br>(3 - 8)          | 1<br>(1 - 2)           | 9<br>(6 - 11)            | 21<br>(13 - 27)          | 49<br>(30 - 64)             |
| Sexually transmitted diseases excluding HIV                      | 5<br>(2 - 8)                | 2<br>(0 - 4)          | 0<br>(0 - 0)           | 0<br>(0 - 1)             | 1<br>(0 - 1)             | 2<br>(1 - 3)                |
| Syphilis                                                         | 4<br>(2 - 7)                | 2<br>(0 - 4)          | 0<br>(0 - 0)           | 0<br>(0 - 0)             | 0<br>(0 - 1)             | 1<br>(1 - 3)                |
| Chlamydial infection                                             | 0<br>(0 - 0)                | --                    | 0<br>(0 - 0)           | 0<br>(0 - 0)             | 0<br>(0 - 0)             | 0<br>(0 - 0)                |
| Gonococcal infection                                             | 0<br>(0 - 1)                | --                    | 0<br>(0 - 0)           | 0<br>(0 - 0)             | 0<br>(0 - 0)             | 0<br>(0 - 0)                |
| Other sexually transmitted diseases                              | 0<br>(0 - 0)                | --                    | 0<br>(0 - 0)           | 0<br>(0 - 0)             | 0<br>(0 - 0)             | 0<br>(0 - 0)                |
| Hepatitis                                                        | 13<br>(11 - 16)             | 0<br>(0 - 1)          | 0<br>(0 - 0)           | 2<br>(2 - 3)             | 4<br>(3 - 5)             | 6<br>(4 - 8)                |
| Acute hepatitis A                                                | 3<br>(1 - 6)                | 0<br>(0 - 1)          | 0<br>(0 - 0)           | 1<br>(0 - 2)             | 1<br>(0 - 2)             | 1<br>(0 - 2)                |
| Acute hepatitis B                                                | 9<br>(6 - 12)               | 0<br>(0 - 0)          | 0<br>(0 - 0)           | 1<br>(1 - 2)             | 3<br>(2 - 4)             | 4<br>(2 - 6)                |
| Acute hepatitis C                                                | 1<br>(0 - 3)                | --                    | 0<br>(0 - 0)           | 0<br>(0 - 1)             | 0<br>(0 - 1)             | 1<br>(0 - 2)                |
| Other infectious diseases                                        | 68<br>(39 - 88)             | 3<br>(2 - 5)          | 1<br>(0 - 1)           | 6<br>(3 - 8)             | 16<br>(9 - 22)           | 42<br>(22 - 56)             |
| Non-communicable diseases                                        | 38,062<br>(37,129 - 39,074) | 336<br>(285 - 393)    | 84<br>(75 - 93)        | 1,403<br>(1,337 - 1,472) | 6,877<br>(6,620 - 7,128) | 29,363<br>(28,692 - 30,105) |
| Neoplasms                                                        | 11,021<br>(10,460 - 11,585) | 20<br>(15 - 27)       | 41<br>(35 - 47)        | 760<br>(717 - 807)       | 3,569<br>(3,366 - 3,755) | 6,630<br>(6,233 - 7,078)    |
| Esophageal cancer                                                | 132<br>(115 - 152)          | --                    | --                     | 7<br>(5 - 9)             | 40<br>(33 - 48)          | 86<br>(73 - 101)            |
| Stomach cancer                                                   | 610<br>(529 - 716)          | --                    | --                     | 33<br>(27 - 38)          | 166<br>(146 - 190)       | 411<br>(339 - 501)          |
| Liver cancer                                                     | 285<br>(230 - 353)          | --                    | 1<br>(0 - 1)           | 14<br>(10 - 18)          | 102<br>(79 - 128)        | 169<br>(134 - 218)          |
| Liver cancer due to hepatitis B                                  | 65<br>(38 - 104)            | --                    | 0<br>(0 - 1)           | 6<br>(3 - 9)             | 30<br>(16 - 51)          | 29<br>(17 - 51)             |
| Liver cancer due to hepatitis C                                  | 152<br>(93 - 206)           | --                    | 0<br>(0 - 0)           | 5<br>(3 - 9)             | 50<br>(28 - 71)          | 97<br>(61 - 132)            |
| Liver cancer due to alcohol use                                  | 54<br>(34 - 84)             | --                    | --                     | 2<br>(1 - 3)             | 17<br>(9 - 28)           | 36<br>(22 - 56)             |
| Liver cancer due to other causes                                 | 13<br>(7 - 21)              | --                    | 0<br>(0 - 0)           | 1<br>(1 - 1)             | 4<br>(2 - 7)             | 8<br>(4 - 13)               |
| Larynx cancer                                                    | 64<br>(47 - 77)             | --                    | --                     | 4<br>(2 - 5)             | 23<br>(16 - 28)          | 37<br>(27 - 47)             |
| Tracheal, bronchus and lung cancer                               | 1,975<br>(1,825 - 2,148)    | --                    | --                     | 96<br>(83 - 110)         | 828<br>(754 - 904)       | 1,052<br>(945 - 1,181)      |
| Breast cancer                                                    | 1,024<br>(811 - 1,201)      | --                    | --                     | 130<br>(106 - 155)       | 401<br>(281 - 472)       | 493<br>(388 - 617)          |
| Cervical cancer                                                  | 109<br>(71 - 138)           | --                    | --                     | 23<br>(12 - 33)          | 38<br>(22 - 51)          | 48<br>(34 - 61)             |

Web Table 31- Israel deaths with 95% UI by age, sex, and cause in 2013

| Cause                                         | Both Sexes, All Ages        | Both Sexes, 0-4 Years | Both Sexes, 5-14 Years | Both Sexes, 15-49 Years | Both Sexes, 50-69 Years  | Both Sexes, 70-80 Years    |
|-----------------------------------------------|-----------------------------|-----------------------|------------------------|-------------------------|--------------------------|----------------------------|
| Uterine cancer                                | 119<br>(75 - 147)           | --                    | --                     | 2<br>(1 - 4)            | 39<br>(23 - 51)          | 78<br>(48 - 99)            |
| Prostate cancer                               | 553<br>(403 - 888)          | --                    | --                     | 1<br>(1 - 2)            | 85<br>(60 - 129)         | 466<br>(327 - 771)         |
| Colon and rectum cancer                       | 1,557<br>(1,399 - 1,722)    | --                    | --                     | 67<br>(59 - 75)         | 419<br>(378 - 459)       | 1,071<br>(940 - 1,221)     |
| Lip and oral cavity cancer                    | 85<br>(70 - 98)             | --                    | --                     | 9<br>(7 - 10)           | 28<br>(21 - 33)          | 49<br>(40 - 59)            |
| Nasopharynx cancer                            | 15<br>(12 - 23)             | --                    | 0<br>(0 - 0)           | 4<br>(3 - 6)            | 6<br>(4 - 9)             | 5<br>(4 - 9)               |
| Other pharynx cancer                          | 27<br>(22 - 36)             | --                    | --                     | 4<br>(3 - 5)            | 13<br>(10 - 18)          | 11<br>(8 - 15)             |
| Gallbladder and biliary tract cancer          | 99<br>(79 - 143)            | --                    | --                     | 2<br>(2 - 3)            | 24<br>(19 - 32)          | 73<br>(56 - 111)           |
| Pancreatic cancer                             | 881<br>(798 - 955)          | --                    | --                     | 33<br>(28 - 38)         | 297<br>(267 - 328)       | 551<br>(490 - 613)         |
| Malignant skin melanoma                       | 194<br>(135 - 289)          | --                    | --                     | 35<br>(25 - 55)         | 68<br>(47 - 105)         | 91<br>(61 - 131)           |
| Non-melanoma skin cancer                      | 78<br>(55 - 102)            | --                    | --                     | 2<br>(1 - 3)            | 9<br>(6 - 13)            | 67<br>(47 - 88)            |
| Ovarian cancer                                | 274<br>(232 - 329)          | --                    | --                     | 23<br>(18 - 29)         | 115<br>(95 - 139)        | 135<br>(105 - 171)         |
| Testicular cancer                             | 5<br>(4 - 7)                | --                    | --                     | 3<br>(2 - 4)            | 1<br>(1 - 2)             | 1<br>(1 - 2)               |
| Kidney cancer                                 | 259<br>(223 - 306)          | 0<br>(0 - 1)          | 1<br>(0 - 1)           | 14<br>(11 - 17)         | 91<br>(75 - 108)         | 154<br>(124 - 194)         |
| Bladder cancer                                | 353<br>(300 - 427)          | --                    | --                     | 5<br>(4 - 6)            | 72<br>(60 - 84)          | 276<br>(230 - 342)         |
| Brain and nervous system cancer               | 348<br>(282 - 395)          | 5<br>(3 - 7)          | 12<br>(9 - 16)         | 62<br>(51 - 73)         | 151<br>(122 - 177)       | 117<br>(86 - 144)          |
| Thyroid cancer                                | 59<br>(48 - 71)             | --                    | 0<br>(0 - 0)           | 3<br>(3 - 4)            | 18<br>(15 - 23)          | 37<br>(29 - 48)            |
| Mesothelioma                                  | 41<br>(25 - 51)             | --                    | --                     | 3<br>(2 - 4)            | 19<br>(11 - 26)          | 19<br>(11 - 26)            |
| Hodgkin lymphoma                              | 36<br>(27 - 47)             | 0<br>(0 - 0)          | 1<br>(0 - 1)           | 15<br>(11 - 20)         | 10<br>(7 - 13)           | 11<br>(8 - 15)             |
| Non-Hodgkin lymphoma                          | 603<br>(407 - 777)          | 2<br>(1 - 3)          | 4<br>(3 - 6)           | 50<br>(32 - 63)         | 179<br>(114 - 225)       | 368<br>(244 - 494)         |
| Multiple myeloma                              | 249<br>(176 - 347)          | --                    | --                     | 9<br>(6 - 13)           | 82<br>(56 - 113)         | 159<br>(109 - 221)         |
| Leukemia                                      | 457<br>(412 - 502)          | 4<br>(3 - 7)          | 11<br>(9 - 13)         | 54<br>(47 - 62)         | 115<br>(99 - 130)        | 273<br>(240 - 308)         |
| Other neoplasms                               | 529<br>(393 - 620)          | 9<br>(6 - 13)         | 12<br>(9 - 14)         | 55<br>(42 - 64)         | 131<br>(97 - 153)        | 323<br>(221 - 399)         |
| Cardiovascular diseases                       | 12,266<br>(11,289 - 14,139) | 5<br>(4 - 6)          | 4<br>(3 - 5)           | 239<br>(215 - 268)      | 1,577<br>(1,436 - 1,866) | 10,442<br>(9,530 - 12,064) |
| Rheumatic heart disease                       | 160<br>(77 - 204)           | 0<br>(0 - 0)          | 0<br>(0 - 1)           | 13<br>(9 - 17)          | 37<br>(20 - 46)          | 110<br>(45 - 149)          |
| Ischemic heart disease                        | 7,196<br>(6,281 - 9,540)    | 0<br>(0 - 0)          | 0<br>(0 - 1)           | 140<br>(122 - 174)      | 992<br>(863 - 1,315)     | 6,063<br>(5,236 - 8,140)   |
| Cerebrovascular disease                       | 2,680<br>(1,868 - 3,241)    | 0<br>(0 - 0)          | 0<br>(0 - 0)           | 31<br>(21 - 39)         | 291<br>(209 - 367)       | 2,358<br>(1,618 - 2,880)   |
| Ischemic stroke                               | 1,527<br>(969 - 1,893)      | 0<br>(0 - 0)          | 0<br>(0 - 0)           | 4<br>(2 - 6)            | 92<br>(54 - 129)         | 1,431<br>(908 - 1,767)     |
| Hemorrhagic stroke                            | 1,153<br>(703 - 1,457)      | 0<br>(0 - 0)          | 0<br>(0 - 0)           | 26<br>(18 - 33)         | 200<br>(136 - 251)       | 927<br>(527 - 1,193)       |
| Hypertensive heart disease                    | 218<br>(126 - 403)          | 0<br>(0 - 0)          | 0<br>(0 - 0)           | 3<br>(2 - 5)            | 21<br>(12 - 38)          | 194<br>(110 - 365)         |
| Cardiomyopathy and myocarditis                | 186<br>(155 - 248)          | 3<br>(2 - 4)          | 2<br>(1 - 2)           | 20<br>(16 - 26)         | 46<br>(37 - 66)          | 116<br>(91 - 161)          |
| Atrial fibrillation and flutter               | 547<br>(412 - 721)          | --                    | --                     | 2<br>(1 - 2)            | 30<br>(23 - 39)          | 515<br>(382 - 679)         |
| Aortic aneurysm                               | 173<br>(132 - 215)          | --                    | --                     | 5<br>(4 - 6)            | 34<br>(23 - 40)          | 135<br>(103 - 172)         |
| Peripheral vascular disease                   | 219<br>(168 - 276)          | --                    | --                     | 1<br>(1 - 2)            | 22<br>(16 - 28)          | 196<br>(148 - 251)         |
| Endocarditis                                  | 111<br>(65 - 144)           | 0<br>(0 - 0)          | 0<br>(0 - 0)           | 4<br>(3 - 5)            | 15<br>(9 - 21)           | 91<br>(52 - 120)           |
| Other cardiovascular and circulatory diseases | 776<br>(468 - 980)          | 1<br>(1 - 1)          | 1<br>(0 - 1)           | 20<br>(13 - 25)         | 88<br>(53 - 110)         | 666<br>(385 - 862)         |
| Chronic respiratory diseases                  | 1,894<br>(1,624 - 2,101)    | 5<br>(4 - 7)          | 2<br>(2 - 3)           | 35<br>(29 - 40)         | 266<br>(207 - 298)       | 1,585<br>(1,369 - 1,783)   |
| Chronic obstructive pulmonary disease         | 1,581<br>(1,333 - 1,777)    | 2<br>(1 - 3)          | 1<br>(1 - 1)           | 17<br>(13 - 21)         | 205<br>(152 - 233)       | 1,357<br>(1,155 - 1,544)   |
| Pneumoconiosis                                | 22<br>(15 - 32)             | 0<br>(0 - 0)          | 0<br>(0 - 0)           | 1<br>(1 - 2)            | 3<br>(2 - 5)             | 17<br>(10 - 26)            |
| Silicosis                                     | 1<br>(1 - 2)                | 0<br>(0 - 0)          | 0<br>(0 - 0)           | 1<br>(0 - 1)            | 0<br>(0 - 0)             | 0<br>(0 - 1)               |
| Asbestosis                                    | 6<br>(4 - 9)                | 0<br>(0 - 0)          | 0<br>(0 - 0)           | 0<br>(0 - 0)            | 1<br>(1 - 1)             | 5<br>(3 - 8)               |

Web Table 31- Israel deaths with 95% UI by age, sex, and cause in 2013

| Cause                                               | Both Sexes, All Ages     | Both Sexes, 0-4 Years | Both Sexes, 5-14 Years | Both Sexes, 15-49 Years | Both Sexes, 50-69 Years | Both Sexes, 70-80 Years  |
|-----------------------------------------------------|--------------------------|-----------------------|------------------------|-------------------------|-------------------------|--------------------------|
| Coal workers pneumoconiosis                         | 2<br>(1 - 3)             | 0<br>(0 - 0)          | 0<br>(0 - 0)           | 0<br>(0 - 0)            | 0<br>(0 - 0)            | 2<br>(1 - 3)             |
| Other pneumoconiosis                                | 13<br>(8 - 18)           | 0<br>(0 - 0)          | 0<br>(0 - 0)           | 0<br>(0 - 0)            | 2<br>(1 - 3)            | 10<br>(6 - 15)           |
| Asthma                                              | 121<br>(88 - 164)        | 1<br>(0 - 1)          | 0<br>(0 - 0)           | 9<br>(8 - 11)           | 25<br>(19 - 33)         | 85<br>(58 - 123)         |
| Interstitial lung disease and pulmonary sarcoidosis | 150<br>(108 - 206)       | 0<br>(0 - 1)          | 0<br>(0 - 0)           | 5<br>(4 - 7)            | 30<br>(22 - 41)         | 114<br>(79 - 163)        |
| Other chronic respiratory diseases                  | 19<br>(14 - 25)          | 2<br>(1 - 3)          | 1<br>(0 - 1)           | 2<br>(1 - 3)            | 3<br>(2 - 4)            | 12<br>(8 - 18)           |
| Cirrhosis                                           | 583<br>(529 - 634)       | 1<br>(1 - 1)          | 1<br>(1 - 1)           | 56<br>(49 - 63)         | 183<br>(163 - 203)      | 342<br>(300 - 384)       |
| Cirrhosis due to hepatitis B                        | 61<br>(38 - 83)          | 0<br>(0 - 0)          | 0<br>(0 - 0)           | 5<br>(3 - 9)            | 18<br>(11 - 26)         | 37<br>(22 - 52)          |
| Cirrhosis due to hepatitis C                        | 294<br>(207 - 367)       | 0<br>(0 - 0)          | 0<br>(0 - 0)           | 26<br>(15 - 37)         | 89<br>(58 - 119)        | 178<br>(128 - 225)       |
| Cirrhosis due to alcohol use                        | 174<br>(107 - 261)       | --                    | --                     | 14<br>(6 - 24)          | 55<br>(32 - 88)         | 105<br>(62 - 154)        |
| Cirrhosis due to other causes                       | 54<br>(33 - 82)          | 1<br>(1 - 1)          | 1<br>(1 - 1)           | 10<br>(6 - 16)          | 19<br>(11 - 30)         | 22<br>(11 - 38)          |
| Digestive diseases                                  | 953<br>(792 - 1,070)     | 2<br>(1 - 2)          | 1<br>(1 - 2)           | 24<br>(20 - 27)         | 113<br>(88 - 129)       | 812<br>(674 - 925)       |
| Peptic ulcer disease                                | 87<br>(65 - 113)         | 0<br>(0 - 0)          | 0<br>(0 - 0)           | 2<br>(2 - 3)            | 12<br>(8 - 15)          | 73<br>(54 - 99)          |
| Gastritis and duodenitis                            | 4<br>(3 - 8)             | 0<br>(0 - 0)          | 0<br>(0 - 0)           | 1<br>(0 - 1)            | 1<br>(1 - 2)            | 3<br>(2 - 5)             |
| Appendicitis                                        | 25<br>(12 - 40)          | 0<br>(0 - 0)          | 0<br>(0 - 0)           | 2<br>(1 - 3)            | 4<br>(2 - 6)            | 18<br>(8 - 32)           |
| Paralytic ileus and intestinal obstruction          | 173<br>(122 - 287)       | 0<br>(0 - 1)          | 0<br>(0 - 0)           | 3<br>(2 - 6)            | 18<br>(13 - 30)         | 151<br>(104 - 251)       |
| Inguinal, femoral, and abdominal hernia             | 33<br>(15 - 49)          | 0<br>(0 - 0)          | 0<br>(0 - 0)           | 1<br>(0 - 1)            | 3<br>(1 - 4)            | 30<br>(13 - 44)          |
| Inflammatory bowel disease                          | 39<br>(25 - 50)          | 0<br>(0 - 0)          | 0<br>(0 - 0)           | 3<br>(2 - 3)            | 6<br>(4 - 8)            | 30<br>(18 - 41)          |
| Vascular intestinal disorders                       | 194<br>(125 - 287)       | 0<br>(0 - 0)          | 0<br>(0 - 0)           | 2<br>(1 - 4)            | 24<br>(14 - 37)         | 167<br>(105 - 251)       |
| Gallbladder and biliary diseases                    | 180<br>(90 - 235)        | 0<br>(0 - 0)          | 0<br>(0 - 0)           | 2<br>(1 - 2)            | 14<br>(6 - 19)          | 164<br>(82 - 217)        |
| Pancreatitis                                        | 80<br>(55 - 105)         | 0<br>(0 - 0)          | 0<br>(0 - 0)           | 5<br>(3 - 7)            | 14<br>(8 - 18)          | 61<br>(42 - 82)          |
| Other digestive diseases                            | 137<br>(93 - 169)        | 0<br>(0 - 1)          | 0<br>(0 - 0)           | 4<br>(2 - 5)            | 18<br>(9 - 23)          | 115<br>(79 - 144)        |
| Neurological disorders                              | 4,851<br>(4,130 - 5,620) | 15<br>(12 - 20)       | 7<br>(6 - 9)           | 64<br>(51 - 74)         | 265<br>(225 - 304)      | 4,499<br>(3,785 - 5,267) |
| Alzheimer disease and other dementias               | 4,168<br>(3,436 - 4,937) | --                    | --                     | 1<br>(0 - 1)            | 130<br>(101 - 163)      | 4,038<br>(3,306 - 4,804) |
| Parkinson disease                                   | 387<br>(298 - 474)       | --                    | --                     | 1<br>(1 - 1)            | 34<br>(27 - 44)         | 351<br>(263 - 436)       |
| Epilepsy                                            | 72<br>(48 - 90)          | 2<br>(1 - 4)          | 3<br>(2 - 4)           | 22<br>(15 - 29)         | 15<br>(10 - 20)         | 29<br>(18 - 40)          |
| Multiple sclerosis                                  | 40<br>(19 - 52)          | --                    | --                     | 10<br>(5 - 15)          | 22<br>(10 - 31)         | 8<br>(4 - 11)            |
| Other neurological disorders                        | 184<br>(157 - 209)       | 13<br>(10 - 17)       | 4<br>(3 - 5)           | 29<br>(24 - 35)         | 64<br>(53 - 74)         | 74<br>(62 - 86)          |
| Mental and substance use disorders                  | 128<br>(104 - 164)       | 0<br>(0 - 0)          | 0<br>(0 - 0)           | 55<br>(46 - 71)         | 36<br>(27 - 48)         | 36<br>(26 - 46)          |
| Schizophrenia                                       | 24<br>(12 - 34)          | --                    | --                     | 3<br>(1 - 4)            | 8<br>(4 - 13)           | 12<br>(6 - 19)           |
| Alcohol use disorders                               | 47<br>(32 - 71)          | --                    | --                     | 14<br>(9 - 22)          | 20<br>(13 - 31)         | 13<br>(9 - 21)           |
| Drug use disorders                                  | 57<br>(47 - 70)          | 0<br>(0 - 0)          | --                     | 38<br>(30 - 49)         | 8<br>(6 - 11)           | 11<br>(8 - 14)           |
| Opioid use disorders                                | 21<br>(17 - 26)          | 0<br>(0 - 0)          | --                     | 14<br>(11 - 18)         | 3<br>(2 - 4)            | 4<br>(3 - 5)             |
| Cocaine use disorders                               | 1<br>(1 - 2)             | 0<br>(0 - 0)          | --                     | 1<br>(1 - 1)            | 0<br>(0 - 0)            | 0<br>(0 - 0)             |
| Amphetamine use disorders                           | 1<br>(1 - 2)             | 0<br>(0 - 0)          | --                     | 1<br>(1 - 1)            | 0<br>(0 - 0)            | 0<br>(0 - 0)             |
| Other drug use disorders                            | 33<br>(27 - 40)          | 0<br>(0 - 0)          | --                     | 22<br>(17 - 28)         | 5<br>(4 - 7)            | 6<br>(5 - 8)             |
| Eating disorders                                    | 1<br>(0 - 1)             | --                    | 0<br>(0 - 0)           | 1<br>(0 - 1)            | --                      | --                       |
| Anorexia nervosa                                    | 1<br>(0 - 1)             | --                    | 0<br>(0 - 0)           | 1<br>(0 - 1)            | --                      | --                       |
| Diabetes, urogenital, blood, and endocrine diseases | 5,334<br>(4,581 - 5,831) | 31<br>(23 - 40)       | 12<br>(8 - 14)         | 123<br>(107 - 137)      | 779<br>(691 - 845)      | 4,390<br>(3,717 - 4,866) |
| Diabetes mellitus                                   | 2,246<br>(1,866 - 2,485) | 1<br>(0 - 1)          | 1<br>(0 - 1)           | 38<br>(32 - 44)         | 398<br>(347 - 440)      | 1,810<br>(1,460 - 2,053) |
| Acute glomerulonephritis                            | 3<br>(2 - 4)             | 0<br>(0 - 0)          | 0<br>(0 - 0)           | 0<br>(0 - 1)            | 0<br>(0 - 1)            | 2<br>(1 - 3)             |

Web Table 31- Israel deaths with 95% UI by age, sex, and cause in 2013

| Cause                                               | Both Sexes, All Ages     | Both Sexes, 0-4 Years | Both Sexes, 5-14 Years | Both Sexes, 15-49 Years | Both Sexes, 50-69 Years | Both Sexes, 70-80 Years  |
|-----------------------------------------------------|--------------------------|-----------------------|------------------------|-------------------------|-------------------------|--------------------------|
| Chronic kidney disease                              | 2,081<br>(1,814 - 2,583) | 3<br>(2 - 4)          | 2<br>(1 - 2)           | 39<br>(33 - 49)         | 255<br>(220 - 318)      | 1,782<br>(1,520 - 2,259) |
| Chronic kidney disease due to diabetes mellitus     | 593<br>(440 - 800)       | 0<br>(0 - 0)          | 0<br>(0 - 0)           | 12<br>(9 - 20)          | 111<br>(87 - 156)       | 470<br>(343 - 638)       |
| Chronic kidney disease due to hypertension          | 533<br>(366 - 714)       | 0<br>(0 - 1)          | 0<br>(0 - 0)           | 7<br>(4 - 10)           | 42<br>(25 - 62)         | 484<br>(329 - 656)       |
| Chronic kidney disease due to glomerulonephritis    | 26<br>(16 - 36)          | 0<br>(0 - 0)          | 0<br>(0 - 0)           | 2<br>(1 - 2)            | 3<br>(2 - 4)            | 20<br>(12 - 30)          |
| Chronic kidney disease due to other causes          | 928<br>(680 - 1,333)     | 2<br>(1 - 3)          | 1<br>(1 - 2)           | 18<br>(13 - 25)         | 100<br>(68 - 137)       | 807<br>(582 - 1,182)     |
| Urinary diseases and male infertility               | 501<br>(170 - 700)       | 1<br>(0 - 1)          | 0<br>(0 - 1)           | 7<br>(3 - 10)           | 38<br>(14 - 50)         | 454<br>(151 - 644)       |
| Interstitial nephritis and urinary tract infections | 405<br>(121 - 602)       | 1<br>(0 - 1)          | 0<br>(0 - 0)           | 4<br>(1 - 6)            | 23<br>(7 - 33)          | 377<br>(111 - 567)       |
| Urolithiasis                                        | 19<br>(8 - 44)           | --                    | 0<br>(0 - 0)           | 1<br>(0 - 1)            | 2<br>(1 - 5)            | 15<br>(7 - 38)           |
| Other urinary diseases                              | 77<br>(30 - 150)         | 0<br>(0 - 1)          | 0<br>(0 - 0)           | 3<br>(1 - 4)            | 12<br>(5 - 20)          | 62<br>(23 - 129)         |
| Gynecological diseases                              | 2<br>(1 - 4)             | --                    | --                     | 0<br>(0 - 0)            | 0<br>(0 - 0)            | 2<br>(1 - 3)             |
| Uterine fibroids                                    | 1<br>(0 - 1)             | --                    | --                     | 0<br>(0 - 0)            | 0<br>(0 - 0)            | 1<br>(0 - 1)             |
| Polycystic ovarian syndrome                         | 0<br>(0 - 0)             | --                    | --                     | 0<br>(0 - 0)            | 0<br>(0 - 0)            | --                       |
| Endometriosis                                       | 0<br>(0 - 0)             | --                    | --                     | 0<br>(0 - 0)            | 0<br>(0 - 0)            | --                       |
| Genital prolapse                                    | 1<br>(0 - 1)             | --                    | --                     | 0<br>(0 - 0)            | 0<br>(0 - 0)            | 0<br>(0 - 1)             |
| Other gynecological diseases                        | 1<br>(1 - 2)             | --                    | --                     | 0<br>(0 - 0)            | 0<br>(0 - 0)            | 1<br>(0 - 1)             |
| Hemoglobinopathies and hemolytic anemias            | 32<br>(19 - 47)          | 2<br>(1 - 3)          | 2<br>(1 - 3)           | 5<br>(3 - 7)            | 5<br>(3 - 8)            | 19<br>(11 - 28)          |
| Thalassemias                                        | 2<br>(1 - 3)             | 0<br>(0 - 1)          | 0<br>(0 - 1)           | 1<br>(0 - 1)            | 0<br>(0 - 0)            | 0<br>(0 - 0)             |
| Sickle cell disorders                               | 10<br>(6 - 15)           | 1<br>(0 - 1)          | 1<br>(1 - 1)           | 3<br>(2 - 4)            | 4<br>(2 - 6)            | 2<br>(1 - 3)             |
| G6PD deficiency                                     | 1<br>(0 - 1)             | 0<br>(0 - 0)          | 0<br>(0 - 0)           | 0<br>(0 - 0)            | 0<br>(0 - 0)            | 0<br>(0 - 0)             |
| Other hemoglobinopathies and hemolytic anemias      | 20<br>(11 - 29)          | 1<br>(0 - 1)          | 0<br>(0 - 0)           | 1<br>(1 - 1)            | 1<br>(1 - 2)            | 17<br>(9 - 25)           |
| Endocrine, metabolic, blood, and immune disorders   | 469<br>(319 - 561)       | 24<br>(18 - 34)       | 7<br>(4 - 9)           | 34<br>(22 - 42)         | 82<br>(49 - 101)        | 321<br>(213 - 403)       |
| Musculoskeletal disorders                           | 231<br>(162 - 283)       | --                    | 1<br>(1 - 1)           | 15<br>(11 - 18)         | 39<br>(28 - 47)         | 176<br>(119 - 224)       |
| Rheumatoid arthritis                                | 22<br>(11 - 31)          | --                    | 0<br>(0 - 0)           | 1<br>(1 - 1)            | 5<br>(2 - 6)            | 16<br>(8 - 24)           |
| Other musculoskeletal disorders                     | 209<br>(146 - 254)       | --                    | 1<br>(1 - 1)           | 14<br>(10 - 17)         | 35<br>(24 - 41)         | 159<br>(107 - 202)       |
| Other non-communicable diseases                     | 802<br>(567 - 924)       | 256<br>(212 - 311)    | 14<br>(12 - 18)        | 32<br>(27 - 37)         | 49<br>(31 - 57)         | 450<br>(204 - 566)       |
| Congenital anomalies                                | 304<br>(261 - 354)       | 223<br>(184 - 270)    | 14<br>(11 - 17)        | 26<br>(22 - 30)         | 17<br>(14 - 19)         | 24<br>(19 - 31)          |
| Neural tube defects                                 | 10<br>(7 - 14)           | 9<br>(6 - 13)         | 0<br>(0 - 0)           | 1<br>(0 - 1)            | 0<br>(0 - 0)            | 0<br>(0 - 0)             |
| Congenital heart anomalies                          | 94<br>(76 - 117)         | 73<br>(58 - 95)       | 6<br>(4 - 8)           | 10<br>(8 - 12)          | 3<br>(2 - 4)            | 2<br>(1 - 3)             |
| Cleft lip and cleft palate                          | 0<br>(0 - 0)             | 0<br>(0 - 0)          | --                     | --                      | --                      | --                       |
| Down syndrome                                       | 23<br>(17 - 32)          | 10<br>(6 - 15)        | 1<br>(1 - 2)           | 6<br>(4 - 7)            | 6<br>(5 - 8)            | 0<br>(0 - 1)             |
| Chromosomal unbalanced rearrangements               | 19<br>(13 - 27)          | 18<br>(12 - 25)       | 1<br>(0 - 1)           | 1<br>(1 - 1)            | 0<br>(0 - 0)            | 0<br>(0 - 0)             |
| Other congenital anomalies                          | 157<br>(132 - 186)       | 114<br>(91 - 142)     | 6<br>(4 - 8)           | 9<br>(7 - 12)           | 7<br>(5 - 8)            | 21<br>(17 - 27)          |
| Skin and subcutaneous diseases                      | 466<br>(198 - 583)       | 2<br>(1 - 2)          | 0<br>(0 - 1)           | 6<br>(3 - 8)            | 32<br>(14 - 40)         | 426<br>(182 - 543)       |
| Cellulitis                                          | 53<br>(21 - 88)          | 0<br>(0 - 0)          | 0<br>(0 - 0)           | 1<br>(0 - 2)            | 5<br>(2 - 8)            | 46<br>(18 - 81)          |
| Pyoderma                                            | 35<br>(16 - 51)          | 1<br>(0 - 1)          | 0<br>(0 - 0)           | 1<br>(0 - 1)            | 3<br>(2 - 5)            | 31<br>(14 - 46)          |
| Decubitus ulcer                                     | 367<br>(156 - 466)       | 0<br>(0 - 0)          | 0<br>(0 - 0)           | 3<br>(1 - 5)            | 22<br>(9 - 29)          | 341<br>(145 - 439)       |
| Other skin and subcutaneous diseases                | 12<br>(5 - 21)           | 1<br>(0 - 1)          | 0<br>(0 - 0)           | 1<br>(0 - 1)            | 1<br>(0 - 2)            | 9<br>(3 - 19)            |
| Sudden infant death syndrome                        | 32<br>(18 - 60)          | 32<br>(18 - 60)       | --                     | --                      | --                      | --                       |
| Injuries                                            | 2,585<br>(2,365 - 2,809) | 53<br>(42 - 69)       | 50<br>(44 - 57)        | 805<br>(757 - 856)      | 446<br>(407 - 524)      | 1,230<br>(1,027 - 1,401) |
| Transport injuries                                  | 629<br>(565 - 693)       | 19<br>(13 - 25)       | 27<br>(22 - 32)        | 283<br>(253 - 311)      | 113<br>(97 - 127)       | 187<br>(154 - 226)       |

Web Table 31- Israel deaths with 95% UI by age, sex, and cause in 2013

| Cause                                           | Both Sexes, All Ages     | Both Sexes, 0-4 Years | Both Sexes, 5-14 Years | Both Sexes, 15-49 Years | Both Sexes, 50-69 Years | Both Sexes, 70-80 Years |
|-------------------------------------------------|--------------------------|-----------------------|------------------------|-------------------------|-------------------------|-------------------------|
| Road injuries                                   | 611<br>(550 - 675)       | 18<br>(12 - 25)       | 27<br>(22 - 32)        | 275<br>(247 - 302)      | 109<br>(94 - 123)       | 183<br>(150 - 221)      |
| Pedestrian road injuries                        | 209<br>(155 - 262)       | 9<br>(6 - 13)         | 11<br>(8 - 15)         | 39<br>(23 - 58)         | 38<br>(26 - 50)         | 111<br>(83 - 142)       |
| Cyclist road injuries                           | 22<br>(14 - 31)          | 1<br>(0 - 2)          | 2<br>(1 - 4)           | 6<br>(3 - 8)            | 6<br>(3 - 9)            | 8<br>(4 - 12)           |
| Motorcyclist road injuries                      | 45<br>(22 - 61)          | 0<br>(0 - 1)          | 0<br>(0 - 1)           | 35<br>(17 - 49)         | 6<br>(3 - 9)            | 3<br>(1 - 5)            |
| Motor vehicle road injuries                     | 333<br>(277 - 392)       | 8<br>(5 - 11)         | 12<br>(9 - 16)         | 195<br>(166 - 226)      | 58<br>(45 - 71)         | 60<br>(40 - 84)         |
| Other road injuries                             | 2<br>(1 - 3)             | 0<br>(0 - 0)          | 0<br>(0 - 0)           | 0<br>(0 - 1)            | 0<br>(0 - 1)            | 0<br>(0 - 1)            |
| Other transport injuries                        | 18<br>(12 - 23)          | 0<br>(0 - 1)          | 1<br>(0 - 1)           | 8<br>(5 - 11)           | 4<br>(3 - 6)            | 4<br>(3 - 7)            |
| Unintentional injuries                          | 1,242<br>(1,038 - 1,433) | 30<br>(23 - 43)       | 16<br>(13 - 21)        | 106<br>(93 - 133)       | 161<br>(134 - 226)      | 929<br>(736 - 1,086)    |
| Falls                                           | 274<br>(201 - 339)       | 2<br>(1 - 3)          | 1<br>(1 - 2)           | 15<br>(11 - 19)         | 21<br>(14 - 26)         | 235<br>(168 - 297)      |
| Drowning                                        | 52<br>(42 - 85)          | 4<br>(2 - 7)          | 6<br>(4 - 11)          | 25<br>(19 - 40)         | 9<br>(7 - 15)           | 9<br>(7 - 14)           |
| Fire, heat, and hot substances                  | 60<br>(42 - 76)          | 3<br>(2 - 5)          | 1<br>(1 - 2)           | 11<br>(7 - 15)          | 9<br>(6 - 12)           | 36<br>(25 - 47)         |
| Poisonings                                      | 5<br>(4 - 8)             | 0<br>(0 - 1)          | 0<br>(0 - 0)           | 2<br>(1 - 2)            | 1<br>(1 - 1)            | 2<br>(2 - 4)            |
| Exposure to mechanical forces                   | 32<br>(28 - 51)          | 2<br>(1 - 2)          | 2<br>(1 - 3)           | 14<br>(12 - 24)         | 5<br>(4 - 7)            | 10<br>(8 - 15)          |
| Unintentional firearm injuries                  | 7<br>(6 - 9)             | 0<br>(0 - 0)          | 0<br>(0 - 1)           | 4<br>(3 - 6)            | 1<br>(1 - 1)            | 1<br>(1 - 2)            |
| Unintentional suffocation                       | 8<br>(6 - 14)            | 1<br>(0 - 1)          | 0<br>(0 - 1)           | 2<br>(1 - 4)            | 1<br>(1 - 2)            | 4<br>(2 - 8)            |
| Other exposure to mechanical forces             | 17<br>(14 - 31)          | 1<br>(1 - 1)          | 1<br>(1 - 2)           | 8<br>(6 - 16)           | 3<br>(2 - 5)            | 5<br>(3 - 8)            |
| Adverse effects of medical treatment            | 527<br>(382 - 711)       | 10<br>(6 - 21)        | 3<br>(2 - 5)           | 21<br>(15 - 34)         | 92<br>(68 - 154)        | 402<br>(268 - 535)      |
| Animal contact                                  | 4<br>(2 - 5)             | 0<br>(0 - 1)          | 0<br>(0 - 0)           | 1<br>(0 - 1)            | 1<br>(0 - 1)            | 2<br>(1 - 3)            |
| Venomous animal contact                         | 1<br>(0 - 1)             | 0<br>(0 - 0)          | 0<br>(0 - 0)           | 0<br>(0 - 0)            | 0<br>(0 - 0)            | 0<br>(0 - 0)            |
| Non-venomous animal contact                     | 3<br>(2 - 4)             | 0<br>(0 - 0)          | 0<br>(0 - 0)           | 0<br>(0 - 0)            | 0<br>(0 - 1)            | 2<br>(1 - 3)            |
| Foreign body                                    | 273<br>(169 - 379)       | 8<br>(5 - 12)         | 2<br>(1 - 2)           | 11<br>(7 - 14)          | 22<br>(14 - 30)         | 230<br>(141 - 327)      |
| Pulmonary aspiration and foreign body in airway | 271<br>(167 - 377)       | 8<br>(5 - 11)         | 1<br>(1 - 2)           | 10<br>(6 - 14)          | 22<br>(13 - 30)         | 229<br>(140 - 326)      |
| Foreign body in other body part                 | 2<br>(1 - 3)             | 0<br>(0 - 0)          | 0<br>(0 - 0)           | 0<br>(0 - 1)            | 0<br>(0 - 0)            | 1<br>(1 - 2)            |
| Other unintentional injuries                    | 14<br>(11 - 17)          | 1<br>(0 - 1)          | 0<br>(0 - 1)           | 8<br>(5 - 11)           | 2<br>(1 - 3)            | 3<br>(2 - 4)            |
| Self-harm and interpersonal violence            | 715<br>(625 - 835)       | 5<br>(3 - 7)          | 7<br>(5 - 9)           | 416<br>(347 - 464)      | 172<br>(142 - 204)      | 114<br>(93 - 184)       |
| Self-harm                                       | 533<br>(459 - 654)       | --                    | 2<br>(1 - 3)           | 290<br>(243 - 336)      | 142<br>(117 - 173)      | 99<br>(78 - 170)        |
| Interpersonal violence                          | 182<br>(117 - 220)       | 5<br>(3 - 7)          | 5<br>(3 - 7)           | 126<br>(80 - 155)       | 31<br>(18 - 40)         | 15<br>(10 - 19)         |
| Assault by firearm                              | 87<br>(49 - 116)         | 1<br>(1 - 2)          | 1<br>(1 - 2)           | 70<br>(39 - 93)         | 11<br>(5 - 17)          | 4<br>(2 - 6)            |
| Assault by sharp object                         | 55<br>(33 - 86)          | 1<br>(0 - 1)          | 1<br>(1 - 2)           | 39<br>(22 - 63)         | 10<br>(6 - 16)          | 4<br>(2 - 6)            |
| Assault by other means                          | 39<br>(24 - 54)          | 3<br>(2 - 4)          | 2<br>(1 - 3)           | 17<br>(10 - 25)         | 9<br>(5 - 14)           | 7<br>(5 - 10)           |

Web Table 31- Israel deaths with 95% UI by age, sex, and cause in 2013

| Cause                                                             | Males, All Ages             | Males, 0-4 Years   | Males, 5-14 Years | Males, 15-49 Years       | Males, 50-69 Years       | Males, 70-80 Years          |
|-------------------------------------------------------------------|-----------------------------|--------------------|-------------------|--------------------------|--------------------------|-----------------------------|
| All causes                                                        | 21,245<br>(20,571 - 21,952) | 361<br>(310 - 428) | 86<br>(78 - 96)   | 1,567<br>(1,483 - 1,655) | 4,595<br>(4,374 - 4,836) | 14,636<br>(14,279 - 15,026) |
| Communicable, maternal, neonatal, and nutritional diseases        | 1,203<br>(922 - 1,436)      | 153<br>(127 - 184) | 7<br>(6 - 9)      | 54<br>(45 - 63)          | 129<br>(95 - 156)        | 859<br>(623 - 1,079)        |
| HIV/AIDS and tuberculosis                                         | 38<br>(31 - 48)             | 0<br>(0 - 0)       | 0<br>(0 - 0)      | 11<br>(9 - 16)           | 8<br>(6 - 11)            | 18<br>(14 - 24)             |
| Tuberculosis                                                      | 25<br>(20 - 31)             | 0<br>(0 - 0)       | 0<br>(0 - 0)      | 2<br>(2 - 2)             | 5<br>(4 - 6)             | 18<br>(14 - 24)             |
| HIV/AIDS                                                          | 13<br>(9 - 20)              | 0<br>(0 - 0)       | 0<br>(0 - 0)      | 9<br>(7 - 14)            | 3<br>(2 - 6)             | 0<br>(0 - 1)                |
| HIV/AIDS resulting in mycobacterial infection                     | 1<br>(0 - 1)                | 0<br>(0 - 0)       | 0<br>(0 - 0)      | 1<br>(0 - 1)             | 0<br>(0 - 0)             | 0<br>(0 - 0)                |
| HIV/AIDS resulting in other diseases                              | 12<br>(8 - 19)              | 0<br>(0 - 0)       | 0<br>(0 - 0)      | 9<br>(6 - 13)            | 3<br>(2 - 5)             | 0<br>(0 - 1)                |
| Diarrhea, lower respiratory, and other common infectious diseases | 911<br>(655 - 1,128)        | 20<br>(14 - 27)    | 6<br>(4 - 8)      | 33<br>(26 - 39)          | 101<br>(70 - 127)        | 751<br>(532 - 962)          |
| Diarrheal diseases                                                | 79<br>(54 - 112)            | 3<br>(2 - 5)       | 1<br>(0 - 1)      | 2<br>(1 - 3)             | 7<br>(5 - 9)             | 66<br>(42 - 100)            |
| Intestinal infectious diseases                                    | 4<br>(1 - 8)                | 1<br>(0 - 2)       | 1<br>(0 - 2)      | 1<br>(0 - 3)             | 0<br>(0 - 1)             | 0<br>(0 - 1)                |
| Typhoid fever                                                     | 2<br>(1 - 5)                | 1<br>(0 - 1)       | 1<br>(0 - 1)      | 1<br>(0 - 2)             | 0<br>(0 - 0)             | 0<br>(0 - 0)                |
| Paratyphoid fever                                                 | 1<br>(0 - 2)                | 0<br>(0 - 1)       | 0<br>(0 - 1)      | 0<br>(0 - 1)             | 0<br>(0 - 0)             | 0<br>(0 - 0)                |
| Other intestinal infectious diseases                              | 0<br>(0 - 2)                | 0<br>(0 - 1)       | 0<br>(0 - 0)      | 0<br>(0 - 1)             | 0<br>(0 - 1)             | 0<br>(0 - 1)                |
| Lower respiratory infections                                      | 793<br>(543 - 1,005)        | 10<br>(6 - 14)     | 2<br>(2 - 4)      | 23<br>(16 - 29)          | 88<br>(57 - 112)         | 670<br>(459 - 875)          |
| Upper respiratory infections                                      | 0<br>(0 - 1)                | 0<br>(0 - 0)       | 0<br>(0 - 0)      | 0<br>(0 - 0)             | 0<br>(0 - 0)             | 0<br>(0 - 1)                |
| Otitis media                                                      | 2<br>(1 - 2)                | 0<br>(0 - 1)       | 0<br>(0 - 0)      | 0<br>(0 - 0)             | 0<br>(0 - 0)             | 1<br>(1 - 2)                |
| Meningitis                                                        | 19<br>(16 - 23)             | 4<br>(2 - 6)       | 1<br>(1 - 1)      | 3<br>(3 - 4)             | 4<br>(3 - 5)             | 8<br>(6 - 11)               |
| Pneumococcal meningitis                                           | 3<br>(2 - 5)                | 0<br>(0 - 1)       | 0<br>(0 - 0)      | 1<br>(0 - 1)             | 1<br>(0 - 1)             | 2<br>(1 - 3)                |
| H influenzae type B meningitis                                    | 3<br>(2 - 4)                | 1<br>(1 - 2)       | 0<br>(0 - 0)      | 0<br>(0 - 1)             | 0<br>(0 - 1)             | 1<br>(0 - 1)                |
| Meningococcal meningitis                                          | 6<br>(5 - 8)                | 1<br>(0 - 2)       | 0<br>(0 - 0)      | 1<br>(1 - 1)             | 1<br>(1 - 2)             | 3<br>(2 - 4)                |
| Other meningitis                                                  | 7<br>(5 - 9)                | 1<br>(1 - 2)       | 0<br>(0 - 0)      | 1<br>(1 - 2)             | 1<br>(1 - 2)             | 3<br>(2 - 5)                |
| Encephalitis                                                      | 11<br>(8 - 18)              | 2<br>(1 - 3)       | 1<br>(1 - 2)      | 2<br>(2 - 4)             | 2<br>(1 - 4)             | 4<br>(2 - 7)                |
| Diphtheria                                                        | 0<br>(0 - 0)                | 0<br>(0 - 0)       | 0<br>(0 - 0)      | 0<br>(0 - 0)             | 0<br>(0 - 0)             | --                          |
| Whooping cough                                                    | 0<br>(0 - 1)                | 0<br>(0 - 0)       | 0<br>(0 - 0)      | 0<br>(0 - 0)             | 0<br>(0 - 0)             | --                          |
| Tetanus                                                           | 0<br>(0 - 0)                | 0<br>(0 - 0)       | 0<br>(0 - 0)      | 0<br>(0 - 0)             | 0<br>(0 - 0)             | 0<br>(0 - 0)                |
| Measles                                                           | 0<br>(0 - 0)                | 0<br>(0 - 0)       | 0<br>(0 - 0)      | 0<br>(0 - 0)             | 0<br>(0 - 0)             | --                          |
| Varicella and herpes zoster                                       | 2<br>(1 - 7)                | 0<br>(0 - 1)       | 0<br>(0 - 0)      | 0<br>(0 - 1)             | 0<br>(0 - 1)             | 1<br>(0 - 6)                |
| Neglected tropical diseases and malaria                           | 6<br>(5 - 8)                | 0<br>(0 - 0)       | 0<br>(0 - 0)      | 1<br>(1 - 1)             | 2<br>(1 - 2)             | 3<br>(2 - 4)                |
| Leishmaniasis                                                     | 0<br>(0 - 0)                | 0<br>(0 - 0)       | 0<br>(0 - 0)      | 0<br>(0 - 0)             | 0<br>(0 - 0)             | 0<br>(0 - 0)                |
| Visceral leishmaniasis                                            | 0<br>(0 - 0)                | 0<br>(0 - 0)       | 0<br>(0 - 0)      | 0<br>(0 - 0)             | 0<br>(0 - 0)             | 0<br>(0 - 0)                |
| Cysticercosis                                                     | 0<br>(0 - 0)                | 0<br>(0 - 0)       | 0<br>(0 - 0)      | 0<br>(0 - 0)             | 0<br>(0 - 0)             | 0<br>(0 - 0)                |
| Cystic echinococcosis                                             | 1<br>(1 - 1)                | 0<br>(0 - 0)       | 0<br>(0 - 0)      | 0<br>(0 - 0)             | 0<br>(0 - 0)             | 0<br>(0 - 0)                |
| Dengue                                                            | 0<br>(0 - 1)                | 0<br>(0 - 0)       | 0<br>(0 - 0)      | 0<br>(0 - 0)             | 0<br>(0 - 0)             | 0<br>(0 - 0)                |
| Rabies                                                            | 0<br>(0 - 0)                | 0<br>(0 - 0)       | 0<br>(0 - 0)      | 0<br>(0 - 0)             | 0<br>(0 - 0)             | 0<br>(0 - 0)                |
| Other neglected tropical diseases                                 | 4<br>(3 - 6)                | 0<br>(0 - 0)       | 0<br>(0 - 0)      | 0<br>(0 - 1)             | 1<br>(1 - 2)             | 2<br>(1 - 4)                |
| Maternal disorders                                                | --                          | --                 | --                | --                       | --                       | --                          |
| Maternal hemorrhage                                               | --                          | --                 | --                | --                       | --                       | --                          |
| Maternal sepsis and other maternal infections                     | --                          | --                 | --                | --                       | --                       | --                          |
| Maternal hypertensive disorders                                   | --                          | --                 | --                | --                       | --                       | --                          |
| Maternal obstructed labor                                         | --                          | --                 | --                | --                       | --                       | --                          |

Web Table 31- Israel deaths with 95% UI by age, sex, and cause in 2013

| Cause                                                            | Males, All Ages             | Males, 0-4 Years   | Males, 5-14 Years | Males, 15-49 Years | Males, 50-69 Years       | Males, 70-80 Years          |
|------------------------------------------------------------------|-----------------------------|--------------------|-------------------|--------------------|--------------------------|-----------------------------|
| Maternal abortive outcome                                        | --                          | --                 | --                | --                 | --                       | --                          |
| Indirect maternal deaths                                         | --                          | --                 | --                | --                 | --                       | --                          |
| Late maternal deaths                                             | --                          | --                 | --                | --                 | --                       | --                          |
| Maternal deaths aggravated by HIV/AIDS                           | --                          | --                 | --                | --                 | --                       | --                          |
| Other maternal disorders                                         | --                          | --                 | --                | --                 | --                       | --                          |
| Neonatal disorders                                               | 129<br>(107 - 156)          | 129<br>(107 - 156) | --                | --                 | --                       | --                          |
| Neonatal preterm birth complications                             | 70<br>(51 - 93)             | 70<br>(51 - 93)    | --                | --                 | --                       | --                          |
| Neonatal encephalopathy due to birth asphyxia and trauma         | 16<br>(9 - 23)              | 16<br>(9 - 23)     | --                | --                 | --                       | --                          |
| Neonatal sepsis and other neonatal infections                    | 10<br>(4 - 19)              | 10<br>(4 - 19)     | --                | --                 | --                       | --                          |
| Hemolytic disease and other neonatal jaundice                    | 0<br>(0 - 0)                | 0<br>(0 - 0)       | --                | --                 | --                       | --                          |
| Other neonatal disorders                                         | 34<br>(21 - 47)             | 34<br>(21 - 47)    | --                | --                 | --                       | --                          |
| Nutritional deficiencies                                         | 75<br>(33 - 103)            | 1<br>(0 - 2)       | 0<br>(0 - 1)      | 3<br>(2 - 4)       | 6<br>(3 - 9)             | 64<br>(26 - 90)             |
| Protein-energy malnutrition                                      | 14<br>(3 - 28)              | 1<br>(0 - 1)       | 0<br>(0 - 0)      | 1<br>(0 - 1)       | 1<br>(0 - 2)             | 12<br>(2 - 23)              |
| Iodine deficiency                                                | 0<br>(0 - 1)                | 0<br>(0 - 0)       | 0<br>(0 - 0)      | 0<br>(0 - 0)       | 0<br>(0 - 0)             | 0<br>(0 - 0)                |
| Iron-deficiency anemia                                           | 57<br>(24 - 81)             | 0<br>(0 - 1)       | 0<br>(0 - 0)      | 2<br>(1 - 3)       | 5<br>(2 - 7)             | 49<br>(20 - 73)             |
| Other nutritional deficiencies                                   | 4<br>(1 - 8)                | 0<br>(0 - 0)       | 0<br>(0 - 0)      | 0<br>(0 - 1)       | 0<br>(0 - 1)             | 3<br>(1 - 7)                |
| Other communicable, maternal, neonatal, and nutritional diseases | 44<br>(26 - 57)             | 3<br>(1 - 5)       | 1<br>(0 - 1)      | 6<br>(4 - 8)       | 12<br>(7 - 16)           | 23<br>(12 - 31)             |
| Sexually transmitted diseases excluding HIV                      | 2<br>(1 - 4)                | 1<br>(0 - 2)       | 0<br>(0 - 0)      | 0<br>(0 - 0)       | 0<br>(0 - 0)             | 1<br>(0 - 2)                |
| Syphilis                                                         | 2<br>(1 - 3)                | 1<br>(0 - 2)       | 0<br>(0 - 0)      | 0<br>(0 - 0)       | 0<br>(0 - 0)             | 1<br>(0 - 1)                |
| Chlamydial infection                                             | --                          | --                 | --                | --                 | --                       | --                          |
| Gonococcal infection                                             | 0<br>(0 - 0)                | --                 | 0<br>(0 - 0)      | 0<br>(0 - 0)       | 0<br>(0 - 0)             | 0<br>(0 - 0)                |
| Other sexually transmitted diseases                              | 0<br>(0 - 0)                | --                 | 0<br>(0 - 0)      | 0<br>(0 - 0)       | 0<br>(0 - 0)             | 0<br>(0 - 0)                |
| Hepatitis                                                        | 7<br>(5 - 9)                | 0<br>(0 - 1)       | 0<br>(0 - 0)      | 2<br>(1 - 2)       | 3<br>(2 - 4)             | 2<br>(1 - 3)                |
| Acute hepatitis A                                                | 2<br>(1 - 3)                | 0<br>(0 - 0)       | 0<br>(0 - 0)      | 1<br>(0 - 1)       | 0<br>(0 - 1)             | 0<br>(0 - 1)                |
| Acute hepatitis B                                                | 5<br>(3 - 7)                | 0<br>(0 - 0)       | 0<br>(0 - 0)      | 1<br>(0 - 2)       | 2<br>(1 - 3)             | 2<br>(1 - 3)                |
| Acute hepatitis C                                                | 1<br>(0 - 2)                | --                 | 0<br>(0 - 0)      | 0<br>(0 - 0)       | 0<br>(0 - 1)             | 0<br>(0 - 1)                |
| Other infectious diseases                                        | 35<br>(17 - 48)             | 2<br>(1 - 3)       | 1<br>(0 - 1)      | 4<br>(2 - 6)       | 9<br>(4 - 13)            | 20<br>(8 - 28)              |
| Non-communicable diseases                                        | 18,413<br>(17,774 - 19,028) | 180<br>(149 - 218) | 46<br>(40 - 53)   | 841<br>(786 - 898) | 4,142<br>(3,931 - 4,353) | 13,205<br>(12,817 - 13,593) |
| Neoplasms                                                        | 5,788<br>(5,406 - 6,216)    | 12<br>(8 - 17)     | 23<br>(19 - 28)   | 374<br>(343 - 410) | 1,967<br>(1,835 - 2,099) | 3,412<br>(3,153 - 3,743)    |
| Esophageal cancer                                                | 87<br>(73 - 107)            | --                 | --                | 6<br>(4 - 7)       | 30<br>(24 - 38)          | 51<br>(42 - 65)             |
| Stomach cancer                                                   | 351<br>(310 - 397)          | --                 | --                | 19<br>(16 - 24)    | 116<br>(101 - 133)       | 215<br>(178 - 256)          |
| Liver cancer                                                     | 171<br>(125 - 233)          | --                 | 0<br>(0 - 1)      | 9<br>(6 - 13)      | 73<br>(52 - 99)          | 89<br>(62 - 130)            |
| Liver cancer due to hepatitis B                                  | 45<br>(19 - 81)             | --                 | 0<br>(0 - 0)      | 4<br>(2 - 7)       | 24<br>(10 - 44)          | 16<br>(6 - 32)              |
| Liver cancer due to hepatitis C                                  | 85<br>(36 - 127)            | --                 | 0<br>(0 - 0)      | 3<br>(1 - 6)       | 34<br>(12 - 54)          | 48<br>(21 - 77)             |
| Liver cancer due to alcohol use                                  | 38<br>(19 - 64)             | --                 | --                | 1<br>(1 - 2)       | 14<br>(7 - 24)           | 23<br>(11 - 40)             |
| Liver cancer due to other causes                                 | 4<br>(1 - 7)                | --                 | 0<br>(0 - 0)      | 0<br>(0 - 1)       | 2<br>(0 - 4)             | 2<br>(0 - 3)                |
| Larynx cancer                                                    | 55<br>(38 - 68)             | --                 | --                | 3<br>(2 - 4)       | 20<br>(13 - 26)          | 31<br>(22 - 41)             |
| Tracheal, bronchus and lung cancer                               | 1,322<br>(1,198 - 1,443)    | --                 | --                | 66<br>(54 - 79)    | 587<br>(525 - 654)       | 669<br>(597 - 748)          |
| Breast cancer                                                    | 18<br>(9 - 44)              | --                 | --                | 2<br>(1 - 5)       | 6<br>(3 - 15)            | 10<br>(5 - 26)              |
| Cervical cancer                                                  | --                          | --                 | --                | --                 | --                       | --                          |

Web Table 31- Israel deaths with 95% UI by age, sex, and cause in 2013

| Cause                                         | Males, All Ages          | Males, 0-4 Years | Males, 5-14 Years | Males, 15-49 Years | Males, 50-69 Years       | Males, 70-80 Years       |
|-----------------------------------------------|--------------------------|------------------|-------------------|--------------------|--------------------------|--------------------------|
| Uterine cancer                                | --                       | --               | --                | --                 | --                       | --                       |
| Prostate cancer                               | 553<br>(403 - 888)       | --               | --                | 1<br>(1 - 2)       | 85<br>(60 - 129)         | 466<br>(327 - 771)       |
| Colon and rectum cancer                       | 836<br>(755 - 929)       | --               | --                | 38<br>(32 - 45)    | 256<br>(229 - 285)       | 542<br>(474 - 626)       |
| Lip and oral cavity cancer                    | 53<br>(42 - 63)          | --               | --                | 6<br>(5 - 8)       | 21<br>(15 - 26)          | 26<br>(20 - 34)          |
| Nasopharynx cancer                            | 11<br>(9 - 16)           | --               | 0<br>(0 - 0)      | 3<br>(2 - 5)       | 5<br>(3 - 7)             | 3<br>(2 - 5)             |
| Other pharynx cancer                          | 21<br>(17 - 29)          | --               | --                | 3<br>(2 - 4)       | 11<br>(8 - 15)           | 7<br>(5 - 11)            |
| Gallbladder and biliary tract cancer          | 31<br>(23 - 48)          | --               | --                | 1<br>(1 - 2)       | 9<br>(6 - 12)            | 21<br>(15 - 34)          |
| Pancreatic cancer                             | 455<br>(412 - 499)       | --               | --                | 22<br>(18 - 27)    | 174<br>(154 - 195)       | 258<br>(224 - 293)       |
| Malignant skin melanoma                       | 112<br>(57 - 202)        | --               | --                | 22<br>(12 - 41)    | 42<br>(22 - 77)          | 48<br>(23 - 82)          |
| Non-melanoma skin cancer                      | 43<br>(26 - 64)          | --               | --                | 2<br>(1 - 2)       | 7<br>(4 - 11)            | 35<br>(20 - 51)          |
| Ovarian cancer                                | --                       | --               | --                | --                 | --                       | --                       |
| Testicular cancer                             | 5<br>(4 - 7)             | --               | --                | 3<br>(2 - 4)       | 1<br>(1 - 2)             | 1<br>(1 - 2)             |
| Kidney cancer                                 | 160<br>(136 - 187)       | 0<br>(0 - 0)     | 0<br>(0 - 0)      | 10<br>(8 - 13)     | 63<br>(51 - 76)          | 86<br>(68 - 110)         |
| Bladder cancer                                | 269<br>(226 - 333)       | --               | --                | 4<br>(3 - 5)       | 58<br>(48 - 69)          | 207<br>(169 - 264)       |
| Brain and nervous system cancer               | 198<br>(148 - 236)       | 3<br>(1 - 5)     | 7<br>(5 - 9)      | 40<br>(31 - 50)    | 88<br>(68 - 112)         | 60<br>(40 - 79)          |
| Thyroid cancer                                | 22<br>(18 - 26)          | --               | 0<br>(0 - 0)      | 2<br>(1 - 2)       | 8<br>(6 - 10)            | 12<br>(9 - 15)           |
| Mesothelioma                                  | 31<br>(15 - 41)          | --               | --                | 2<br>(1 - 3)       | 15<br>(7 - 22)           | 14<br>(6 - 21)           |
| Hodgkin lymphoma                              | 20<br>(14 - 29)          | 0<br>(0 - 0)     | 0<br>(0 - 1)      | 8<br>(6 - 12)      | 6<br>(4 - 9)             | 5<br>(3 - 8)             |
| Non-Hodgkin lymphoma                          | 324<br>(157 - 424)       | 1<br>(0 - 2)     | 3<br>(1 - 4)      | 30<br>(14 - 39)    | 104<br>(44 - 137)        | 186<br>(95 - 260)        |
| Multiple myeloma                              | 132<br>(72 - 203)        | --               | --                | 5<br>(3 - 9)       | 46<br>(25 - 75)          | 80<br>(42 - 126)         |
| Leukemia                                      | 264<br>(236 - 295)       | 3<br>(1 - 4)     | 7<br>(5 - 9)      | 34<br>(28 - 39)    | 72<br>(62 - 84)          | 149<br>(127 - 174)       |
| Other neoplasms                               | 245<br>(154 - 301)       | 5<br>(3 - 8)     | 6<br>(4 - 8)      | 31<br>(22 - 39)    | 63<br>(36 - 79)          | 140<br>(80 - 183)        |
| Cardiovascular diseases                       | 5,612<br>(5,244 - 5,986) | 2<br>(2 - 3)     | 2<br>(2 - 2)      | 183<br>(162 - 205) | 1,090<br>(1,001 - 1,177) | 4,335<br>(4,016 - 4,677) |
| Rheumatic heart disease                       | 55<br>(21 - 79)          | 0<br>(0 - 0)     | 0<br>(0 - 0)      | 7<br>(4 - 10)      | 15<br>(6 - 22)           | 33<br>(11 - 52)          |
| Ischemic heart disease                        | 3,598<br>(3,248 - 4,277) | 0<br>(0 - 0)     | 0<br>(0 - 0)      | 120<br>(104 - 144) | 738<br>(658 - 869)       | 2,739<br>(2,442 - 3,294) |
| Cerebrovascular disease                       | 1,008<br>(671 - 1,282)   | 0<br>(0 - 0)     | 0<br>(0 - 0)      | 18<br>(11 - 25)    | 169<br>(102 - 217)       | 820<br>(558 - 1,049)     |
| Ischemic stroke                               | 527<br>(321 - 710)       | 0<br>(0 - 0)     | 0<br>(0 - 0)      | 3<br>(1 - 4)       | 54<br>(29 - 75)          | 469<br>(286 - 638)       |
| Hemorrhagic stroke                            | 482<br>(261 - 661)       | 0<br>(0 - 0)     | 0<br>(0 - 0)      | 16<br>(9 - 21)     | 115<br>(62 - 151)        | 351<br>(185 - 503)       |
| Hypertensive heart disease                    | 76<br>(38 - 150)         | 0<br>(0 - 0)     | 0<br>(0 - 0)      | 2<br>(1 - 4)       | 12<br>(6 - 24)           | 61<br>(29 - 125)         |
| Cardiomyopathy and myocarditis                | 103<br>(79 - 152)        | 1<br>(1 - 2)     | 1<br>(1 - 1)      | 14<br>(10 - 19)    | 32<br>(24 - 47)          | 54<br>(39 - 87)          |
| Atrial fibrillation and flutter               | 191<br>(123 - 257)       | --               | --                | 1<br>(1 - 2)       | 18<br>(11 - 25)          | 172<br>(108 - 237)       |
| Aortic aneurysm                               | 115<br>(81 - 137)        | --               | --                | 4<br>(3 - 5)       | 27<br>(17 - 33)          | 84<br>(60 - 104)         |
| Peripheral vascular disease                   | 106<br>(73 - 137)        | --               | --                | 1<br>(0 - 1)       | 17<br>(11 - 23)          | 88<br>(61 - 118)         |
| Endocarditis                                  | 54<br>(27 - 78)          | 0<br>(0 - 0)     | 0<br>(0 - 0)      | 3<br>(2 - 4)       | 10<br>(5 - 14)           | 41<br>(19 - 61)          |
| Other cardiovascular and circulatory diseases | 306<br>(142 - 384)       | 0<br>(0 - 1)     | 0<br>(0 - 1)      | 12<br>(7 - 15)     | 51<br>(24 - 64)          | 243<br>(107 - 316)       |
| Chronic respiratory diseases                  | 1,042<br>(834 - 1,183)   | 3<br>(2 - 4)     | 1<br>(1 - 2)      | 22<br>(17 - 26)    | 180<br>(135 - 207)       | 836<br>(686 - 971)       |
| Chronic obstructive pulmonary disease         | 883<br>(702 - 1,014)     | 1<br>(1 - 2)     | 0<br>(0 - 1)      | 11<br>(8 - 14)     | 148<br>(107 - 172)       | 723<br>(580 - 845)       |
| Pneumoconiosis                                | 19<br>(12 - 28)          | 0<br>(0 - 0)     | 0<br>(0 - 0)      | 1<br>(1 - 2)       | 3<br>(2 - 4)             | 15<br>(9 - 23)           |
| Silicosis                                     | 1<br>(1 - 2)             | 0<br>(0 - 0)     | 0<br>(0 - 0)      | 1<br>(0 - 1)       | 0<br>(0 - 0)             | 0<br>(0 - 0)             |
| Asbestosis                                    | 6<br>(4 - 9)             | 0<br>(0 - 0)     | 0<br>(0 - 0)      | 0<br>(0 - 0)       | 1<br>(1 - 1)             | 5<br>(3 - 8)             |



Web Table 31- Israel deaths with 95% UI by age, sex, and cause in 2013

| Cause                                               | Males, All Ages          | Males, 0-4 Years | Males, 5-14 Years | Males, 15-49 Years | Males, 50-69 Years | Males, 70-80 Years       |
|-----------------------------------------------------|--------------------------|------------------|-------------------|--------------------|--------------------|--------------------------|
| Coal workers pneumoconiosis                         | 2<br>(1 - 3)             | 0<br>(0 - 0)     | 0<br>(0 - 0)      | 0<br>(0 - 0)       | 0<br>(0 - 0)       | 2<br>(1 - 3)             |
| Other pneumoconiosis                                | 10<br>(6 - 15)           | 0<br>(0 - 0)     | 0<br>(0 - 0)      | 0<br>(0 - 0)       | 2<br>(1 - 3)       | 8<br>(5 - 13)            |
| Asthma                                              | 41<br>(32 - 52)          | 0<br>(0 - 0)     | 0<br>(0 - 0)      | 5<br>(4 - 6)       | 11<br>(8 - 15)     | 24<br>(17 - 34)          |
| Interstitial lung disease and pulmonary sarcoidosis | 88<br>(60 - 135)         | 0<br>(0 - 0)     | 0<br>(0 - 0)      | 4<br>(3 - 5)       | 17<br>(11 - 25)    | 68<br>(45 - 106)         |
| Other chronic respiratory diseases                  | 10<br>(7 - 14)           | 1<br>(1 - 2)     | 0<br>(0 - 0)      | 1<br>(1 - 2)       | 1<br>(1 - 2)       | 6<br>(4 - 10)            |
| Cirrhosis                                           | 337<br>(306 - 371)       | 0<br>(0 - 1)     | 1<br>(0 - 1)      | 44<br>(37 - 51)    | 128<br>(113 - 145) | 164<br>(142 - 190)       |
| Cirrhosis due to hepatitis B                        | 31<br>(17 - 50)          | 0<br>(0 - 0)     | 0<br>(0 - 0)      | 4<br>(2 - 7)       | 12<br>(6 - 19)     | 15<br>(8 - 24)           |
| Cirrhosis due to hepatitis C                        | 145<br>(63 - 209)        | 0<br>(0 - 0)     | 0<br>(0 - 0)      | 19<br>(6 - 30)     | 56<br>(21 - 87)    | 69<br>(27 - 100)         |
| Cirrhosis due to alcohol use                        | 131<br>(80 - 205)        | --               | --                | 13<br>(5 - 23)     | 47<br>(25 - 78)    | 71<br>(42 - 110)         |
| Cirrhosis due to other causes                       | 31<br>(13 - 50)          | 0<br>(0 - 1)     | 0<br>(0 - 1)      | 8<br>(4 - 13)      | 13<br>(5 - 21)     | 9<br>(4 - 17)            |
| Digestive diseases                                  | 408<br>(334 - 472)       | 1<br>(1 - 1)     | 1<br>(1 - 1)      | 17<br>(13 - 20)    | 69<br>(52 - 80)    | 321<br>(265 - 381)       |
| Peptic ulcer disease                                | 42<br>(30 - 57)          | 0<br>(0 - 0)     | 0<br>(0 - 0)      | 2<br>(1 - 2)       | 8<br>(5 - 11)      | 33<br>(22 - 47)          |
| Gastritis and duodenitis                            | 2<br>(1 - 4)             | 0<br>(0 - 0)     | 0<br>(0 - 0)      | 0<br>(0 - 1)       | 1<br>(0 - 1)       | 1<br>(1 - 3)             |
| Appendicitis                                        | 11<br>(5 - 19)           | 0<br>(0 - 0)     | 0<br>(0 - 0)      | 1<br>(1 - 2)       | 3<br>(1 - 4)       | 7<br>(3 - 13)            |
| Paralytic ileus and intestinal obstruction          | 73<br>(48 - 138)         | 0<br>(0 - 0)     | 0<br>(0 - 0)      | 2<br>(1 - 4)       | 10<br>(6 - 19)     | 61<br>(38 - 114)         |
| Inguinal, femoral, and abdominal hernia             | 15<br>(6 - 24)           | 0<br>(0 - 0)     | 0<br>(0 - 0)      | 0<br>(0 - 1)       | 1<br>(1 - 2)       | 13<br>(5 - 22)           |
| Inflammatory bowel disease                          | 18<br>(11 - 25)          | 0<br>(0 - 0)     | 0<br>(0 - 0)      | 2<br>(1 - 2)       | 4<br>(2 - 5)       | 12<br>(7 - 18)           |
| Vascular intestinal disorders                       | 76<br>(32 - 141)         | 0<br>(0 - 0)     | 0<br>(0 - 0)      | 2<br>(1 - 3)       | 14<br>(6 - 25)     | 60<br>(25 - 114)         |
| Gallbladder and biliary diseases                    | 73<br>(30 - 104)         | 0<br>(0 - 0)     | 0<br>(0 - 0)      | 1<br>(0 - 1)       | 8<br>(3 - 12)      | 64<br>(27 - 93)          |
| Pancreatitis                                        | 39<br>(24 - 55)          | 0<br>(0 - 0)     | 0<br>(0 - 0)      | 4<br>(3 - 6)       | 9<br>(5 - 13)      | 26<br>(16 - 39)          |
| Other digestive diseases                            | 58<br>(25 - 77)          | 0<br>(0 - 0)     | 0<br>(0 - 0)      | 3<br>(1 - 3)       | 12<br>(4 - 16)     | 44<br>(19 - 60)          |
| Neurological disorders                              | 2,093<br>(1,638 - 2,526) | 8<br>(5 - 11)    | 4<br>(3 - 5)      | 42<br>(33 - 50)    | 142<br>(114 - 172) | 1,897<br>(1,459 - 2,323) |
| Alzheimer disease and other dementias               | 1,714<br>(1,235 - 2,144) | --               | --                | 0<br>(0 - 1)       | 60<br>(35 - 83)    | 1,653<br>(1,190 - 2,079) |
| Parkinson disease                                   | 212<br>(160 - 271)       | --               | --                | 1<br>(1 - 1)       | 22<br>(17 - 28)    | 189<br>(139 - 248)       |
| Epilepsy                                            | 42<br>(27 - 53)          | 1<br>(1 - 2)     | 1<br>(1 - 2)      | 15<br>(9 - 20)     | 10<br>(7 - 14)     | 14<br>(8 - 20)           |
| Multiple sclerosis                                  | 18<br>(6 - 27)           | --               | --                | 6<br>(2 - 9)       | 10<br>(3 - 16)     | 3<br>(1 - 5)             |
| Other neurological disorders                        | 107<br>(84 - 136)        | 7<br>(4 - 10)    | 2<br>(2 - 3)      | 21<br>(16 - 27)    | 40<br>(30 - 50)    | 38<br>(29 - 48)          |
| Mental and substance use disorders                  | 106<br>(87 - 144)        | 0<br>(0 - 0)     | 0<br>(0 - 0)      | 50<br>(41 - 66)    | 32<br>(23 - 44)    | 24<br>(18 - 32)          |
| Schizophrenia                                       | 13<br>(5 - 19)           | --               | --                | 2<br>(1 - 4)       | 6<br>(2 - 10)      | 5<br>(2 - 7)             |
| Alcohol use disorders                               | 43<br>(29 - 66)          | --               | --                | 13<br>(8 - 21)     | 18<br>(12 - 30)    | 12<br>(7 - 18)           |
| Drug use disorders                                  | 50<br>(41 - 63)          | 0<br>(0 - 0)     | --                | 35<br>(27 - 45)    | 7<br>(5 - 11)      | 8<br>(6 - 11)            |
| Opioid use disorders                                | 19<br>(15 - 24)          | 0<br>(0 - 0)     | --                | 13<br>(10 - 17)    | 3<br>(2 - 4)       | 3<br>(2 - 4)             |
| Cocaine use disorders                               | 1<br>(1 - 2)             | 0<br>(0 - 0)     | --                | 1<br>(1 - 1)       | 0<br>(0 - 0)       | 0<br>(0 - 0)             |
| Amphetamine use disorders                           | 1<br>(1 - 2)             | 0<br>(0 - 0)     | --                | 1<br>(1 - 1)       | 0<br>(0 - 0)       | 0<br>(0 - 0)             |
| Other drug use disorders                            | 29<br>(24 - 37)          | 0<br>(0 - 0)     | --                | 20<br>(15 - 26)    | 5<br>(3 - 7)       | 5<br>(3 - 7)             |
| Eating disorders                                    | 0<br>(0 - 0)             | --               | 0<br>(0 - 0)      | 0<br>(0 - 0)       | --                 | --                       |
| Anorexia nervosa                                    | 0<br>(0 - 0)             | --               | 0<br>(0 - 0)      | 0<br>(0 - 0)       | --                 | --                       |
| Diabetes, urogenital, blood, and endocrine diseases | 2,568<br>(2,300 - 2,839) | 17<br>(11 - 24)  | 6<br>(4 - 8)      | 83<br>(71 - 95)    | 488<br>(430 - 543) | 1,975<br>(1,737 - 2,223) |
| Diabetes mellitus                                   | 1,042<br>(926 - 1,171)   | 0<br>(0 - 0)     | 0<br>(0 - 0)      | 26<br>(22 - 32)    | 256<br>(221 - 290) | 759<br>(656 - 884)       |
| Acute glomerulonephritis                            | 2<br>(1 - 3)             | 0<br>(0 - 0)     | 0<br>(0 - 0)      | 0<br>(0 - 0)       | 0<br>(0 - 0)       | 1<br>(1 - 2)             |

Web Table 31- Israel deaths with 95% UI by age, sex, and cause in 2013

| Cause                                               | Males, All Ages          | Males, 0-4 Years   | Males, 5-14 Years | Males, 15-49 Years | Males, 50-69 Years | Males, 70-80 Years   |
|-----------------------------------------------------|--------------------------|--------------------|-------------------|--------------------|--------------------|----------------------|
| Chronic kidney disease                              | 1,090<br>(919 - 1,377)   | 1<br>(1 - 2)       | 1<br>(1 - 1)      | 26<br>(21 - 34)    | 161<br>(133 - 206) | 901<br>(747 - 1,143) |
| Chronic kidney disease due to diabetes mellitus     | 320<br>(195 - 522)       | 0<br>(0 - 0)       | 0<br>(0 - 0)      | 8<br>(5 - 16)      | 71<br>(48 - 113)   | 241<br>(132 - 407)   |
| Chronic kidney disease due to hypertension          | 261<br>(154 - 381)       | 0<br>(0 - 0)       | 0<br>(0 - 0)      | 5<br>(2 - 7)       | 27<br>(13 - 43)    | 229<br>(138 - 336)   |
| Chronic kidney disease due to glomerulonephritis    | 11<br>(7 - 16)           | 0<br>(0 - 0)       | 0<br>(0 - 0)      | 1<br>(1 - 2)       | 2<br>(1 - 3)       | 8<br>(4 - 12)        |
| Chronic kidney disease due to other causes          | 499<br>(327 - 752)       | 1<br>(1 - 1)       | 1<br>(0 - 1)      | 12<br>(7 - 17)     | 62<br>(31 - 95)    | 423<br>(265 - 663)   |
| Urinary diseases and male infertility               | 226<br>(64 - 311)        | 1<br>(0 - 1)       | 0<br>(0 - 0)      | 4<br>(2 - 6)       | 22<br>(7 - 29)     | 199<br>(54 - 281)    |
| Interstitial nephritis and urinary tract infections | 153<br>(34 - 229)        | 0<br>(0 - 1)       | 0<br>(0 - 0)      | 2<br>(0 - 3)       | 10<br>(3 - 16)     | 140<br>(31 - 213)    |
| Urolithiasis                                        | 12<br>(4 - 29)           | --                 | 0<br>(0 - 0)      | 1<br>(0 - 1)       | 1<br>(0 - 3)       | 10<br>(3 - 26)       |
| Other urinary diseases                              | 61<br>(21 - 127)         | 0<br>(0 - 0)       | 0<br>(0 - 0)      | 2<br>(1 - 3)       | 10<br>(3 - 16)     | 49<br>(17 - 109)     |
| Gynecological diseases                              | --                       | --                 | --                | --                 | --                 | --                   |
| Uterine fibroids                                    | --                       | --                 | --                | --                 | --                 | --                   |
| Polycystic ovarian syndrome                         | --                       | --                 | --                | --                 | --                 | --                   |
| Endometriosis                                       | --                       | --                 | --                | --                 | --                 | --                   |
| Genital prolapse                                    | --                       | --                 | --                | --                 | --                 | --                   |
| Other gynecological diseases                        | --                       | --                 | --                | --                 | --                 | --                   |
| Hemoglobinopathies and hemolytic anemias            | 15<br>(8 - 22)           | 1<br>(0 - 1)       | 1<br>(0 - 1)      | 3<br>(1 - 4)       | 2<br>(1 - 3)       | 8<br>(4 - 13)        |
| Thalassemias                                        | 1<br>(0 - 1)             | 0<br>(0 - 0)       | 0<br>(0 - 0)      | 0<br>(0 - 1)       | 0<br>(0 - 0)       | 0<br>(0 - 0)         |
| Sickle cell disorders                               | 5<br>(3 - 7)             | 0<br>(0 - 1)       | 0<br>(0 - 1)      | 2<br>(1 - 3)       | 2<br>(1 - 3)       | 1<br>(0 - 1)         |
| G6PD deficiency                                     | 0<br>(0 - 1)             | 0<br>(0 - 0)       | 0<br>(0 - 0)      | 0<br>(0 - 0)       | 0<br>(0 - 0)       | 0<br>(0 - 0)         |
| Other hemoglobinopathies and hemolytic anemias      | 9<br>(5 - 14)            | 0<br>(0 - 0)       | 0<br>(0 - 0)      | 1<br>(0 - 1)       | 1<br>(0 - 1)       | 8<br>(4 - 12)        |
| Endocrine, metabolic, blood, and immune disorders   | 194<br>(126 - 258)       | 14<br>(9 - 21)     | 4<br>(2 - 5)      | 23<br>(15 - 30)    | 46<br>(26 - 61)    | 106<br>(68 - 161)    |
| Musculoskeletal disorders                           | 89<br>(45 - 116)         | --                 | 0<br>(0 - 1)      | 7<br>(4 - 9)       | 17<br>(9 - 22)     | 65<br>(32 - 89)      |
| Rheumatoid arthritis                                | 5<br>(2 - 9)             | --                 | 0<br>(0 - 0)      | 1<br>(0 - 1)       | 1<br>(1 - 2)       | 3<br>(1 - 6)         |
| Other musculoskeletal disorders                     | 84<br>(43 - 110)         | --                 | 0<br>(0 - 0)      | 6<br>(3 - 8)       | 16<br>(8 - 20)     | 62<br>(30 - 84)      |
| Other non-communicable diseases                     | 369<br>(278 - 428)       | 136<br>(111 - 167) | 8<br>(6 - 10)     | 21<br>(17 - 25)    | 29<br>(17 - 37)    | 175<br>(81 - 226)    |
| Congenital anomalies                                | 164<br>(138 - 197)       | 120<br>(98 - 150)  | 7<br>(5 - 10)     | 16<br>(13 - 20)    | 10<br>(8 - 12)     | 11<br>(8 - 14)       |
| Neural tube defects                                 | 5<br>(3 - 8)             | 4<br>(2 - 7)       | 0<br>(0 - 0)      | 0<br>(0 - 0)       | 0<br>(0 - 0)       | 0<br>(0 - 0)         |
| Congenital heart anomalies                          | 52<br>(40 - 69)          | 41<br>(30 - 57)    | 3<br>(2 - 4)      | 6<br>(4 - 8)       | 2<br>(1 - 3)       | 1<br>(0 - 1)         |
| Cleft lip and cleft palate                          | 0<br>(0 - 0)             | 0<br>(0 - 0)       | --                | --                 | --                 | --                   |
| Down syndrome                                       | 14<br>(9 - 20)           | 5<br>(2 - 9)       | 1<br>(0 - 2)      | 4<br>(2 - 5)       | 4<br>(2 - 5)       | 0<br>(0 - 1)         |
| Chromosomal unbalanced rearrangements               | 8<br>(5 - 12)            | 7<br>(4 - 11)      | 0<br>(0 - 1)      | 0<br>(0 - 1)       | 0<br>(0 - 0)       | 0<br>(0 - 0)         |
| Other congenital anomalies                          | 85<br>(68 - 106)         | 63<br>(46 - 82)    | 3<br>(2 - 5)      | 6<br>(4 - 8)       | 4<br>(3 - 6)       | 10<br>(7 - 13)       |
| Skin and subcutaneous diseases                      | 190<br>(81 - 243)        | 1<br>(0 - 1)       | 0<br>(0 - 0)      | 4<br>(2 - 6)       | 20<br>(8 - 27)     | 165<br>(71 - 216)    |
| Cellulitis                                          | 21<br>(8 - 37)           | 0<br>(0 - 0)       | 0<br>(0 - 0)      | 1<br>(0 - 1)       | 3<br>(1 - 5)       | 17<br>(6 - 32)       |
| Pyoderma                                            | 15<br>(7 - 23)           | 0<br>(0 - 0)       | 0<br>(0 - 0)      | 1<br>(0 - 1)       | 2<br>(1 - 3)       | 12<br>(6 - 20)       |
| Decubitus ulcer                                     | 150<br>(61 - 198)        | 0<br>(0 - 0)       | 0<br>(0 - 0)      | 3<br>(1 - 4)       | 14<br>(6 - 20)     | 133<br>(54 - 178)    |
| Other skin and subcutaneous diseases                | 4<br>(1 - 8)             | 0<br>(0 - 1)       | 0<br>(0 - 0)      | 0<br>(0 - 0)       | 0<br>(0 - 1)       | 3<br>(1 - 7)         |
| Sudden infant death syndrome                        | 16<br>(7 - 31)           | 16<br>(7 - 31)     | --                | --                 | --                 | --                   |
| Injuries                                            | 1,629<br>(1,494 - 1,793) | 28<br>(21 - 38)    | 33<br>(28 - 38)   | 671<br>(620 - 720) | 324<br>(290 - 381) | 572<br>(473 - 672)   |
| Transport injuries                                  | 451<br>(412 - 489)       | 10<br>(7 - 15)     | 19<br>(15 - 23)   | 235<br>(209 - 262) | 81<br>(70 - 93)    | 106<br>(88 - 127)    |

Web Table 31- Israel deaths with 95% UI by age, sex, and cause in 2013

| Cause                                           | Males, All Ages    | Males, 0-4 Years | Males, 5-14 Years | Males, 15-49 Years | Males, 50-69 Years | Males, 70-80 Years |
|-------------------------------------------------|--------------------|------------------|-------------------|--------------------|--------------------|--------------------|
| Road injuries                                   | 437<br>(397 - 473) | 10<br>(6 - 14)   | 18<br>(14 - 22)   | 227<br>(202 - 254) | 77<br>(67 - 89)    | 104<br>(86 - 124)  |
| Pedestrian road injuries                        | 125<br>(76 - 172)  | 5<br>(3 - 9)     | 8<br>(5 - 11)     | 28<br>(14 - 46)    | 24<br>(13 - 36)    | 59<br>(37 - 81)    |
| Cyclist road injuries                           | 19<br>(10 - 27)    | 1<br>(0 - 1)     | 2<br>(1 - 4)      | 5<br>(3 - 7)       | 5<br>(3 - 8)       | 6<br>(3 - 10)      |
| Motorcyclist road injuries                      | 41<br>(19 - 57)    | 0<br>(0 - 0)     | 0<br>(0 - 1)      | 33<br>(15 - 47)    | 6<br>(3 - 8)       | 2<br>(1 - 4)       |
| Motor vehicle road injuries                     | 250<br>(198 - 307) | 4<br>(2 - 6)     | 8<br>(5 - 11)     | 161<br>(133 - 192) | 42<br>(30 - 55)    | 36<br>(20 - 57)    |
| Other road injuries                             | 1<br>(0 - 1)       | 0<br>(0 - 0)     | 0<br>(0 - 0)      | 0<br>(0 - 0)       | 0<br>(0 - 0)       | 0<br>(0 - 0)       |
| Other transport injuries                        | 15<br>(9 - 19)     | 0<br>(0 - 0)     | 0<br>(0 - 1)      | 8<br>(5 - 11)      | 4<br>(2 - 6)       | 3<br>(2 - 4)       |
| Unintentional injuries                          | 603<br>(488 - 742) | 16<br>(11 - 24)  | 10<br>(8 - 14)    | 84<br>(72 - 107)   | 107<br>(86 - 153)  | 387<br>(290 - 479) |
| Falls                                           | 127<br>(83 - 156)  | 1<br>(1 - 2)     | 1<br>(1 - 1)      | 14<br>(9 - 18)     | 15<br>(9 - 20)     | 96<br>(61 - 121)   |
| Drowning                                        | 41<br>(31 - 68)    | 2<br>(1 - 4)     | 4<br>(3 - 8)      | 22<br>(16 - 35)    | 7<br>(5 - 11)      | 6<br>(4 - 9)       |
| Fire, heat, and hot substances                  | 31<br>(21 - 41)    | 2<br>(1 - 4)     | 1<br>(1 - 1)      | 8<br>(5 - 11)      | 6<br>(4 - 8)       | 15<br>(10 - 21)    |
| Poisonings                                      | 3<br>(2 - 5)       | 0<br>(0 - 0)     | 0<br>(0 - 0)      | 1<br>(1 - 2)       | 0<br>(0 - 1)       | 1<br>(0 - 2)       |
| Exposure to mechanical forces                   | 21<br>(18 - 36)    | 1<br>(0 - 1)     | 1<br>(1 - 2)      | 12<br>(9 - 21)     | 3<br>(3 - 6)       | 4<br>(3 - 7)       |
| Unintentional firearm injuries                  | 5<br>(4 - 7)       | 0<br>(0 - 0)     | 0<br>(0 - 0)      | 4<br>(2 - 5)       | 1<br>(0 - 1)       | 1<br>(0 - 1)       |
| Unintentional suffocation                       | 5<br>(4 - 10)      | 0<br>(0 - 1)     | 0<br>(0 - 1)      | 2<br>(1 - 3)       | 1<br>(1 - 2)       | 2<br>(1 - 4)       |
| Other exposure to mechanical forces             | 10<br>(8 - 21)     | 0<br>(0 - 0)     | 1<br>(0 - 1)      | 7<br>(5 - 14)      | 2<br>(1 - 4)       | 1<br>(1 - 2)       |
| Adverse effects of medical treatment            | 241<br>(159 - 362) | 5<br>(3 - 11)    | 1<br>(1 - 2)      | 13<br>(9 - 23)     | 59<br>(40 - 103)   | 163<br>(96 - 242)  |
| Animal contact                                  | 2<br>(1 - 2)       | 0<br>(0 - 0)     | 0<br>(0 - 0)      | 0<br>(0 - 1)       | 0<br>(0 - 0)       | 1<br>(0 - 1)       |
| Venomous animal contact                         | 1<br>(0 - 1)       | 0<br>(0 - 0)     | 0<br>(0 - 0)      | 0<br>(0 - 0)       | 0<br>(0 - 0)       | 0<br>(0 - 0)       |
| Non-venomous animal contact                     | 1<br>(1 - 2)       | 0<br>(0 - 0)     | 0<br>(0 - 0)      | 0<br>(0 - 0)       | 0<br>(0 - 0)       | 1<br>(0 - 1)       |
| Foreign body                                    | 128<br>(65 - 190)  | 4<br>(2 - 6)     | 1<br>(0 - 1)      | 8<br>(4 - 11)      | 15<br>(7 - 22)     | 100<br>(49 - 154)  |
| Pulmonary aspiration and foreign body in airway | 128<br>(65 - 189)  | 4<br>(2 - 6)     | 1<br>(0 - 1)      | 8<br>(4 - 11)      | 15<br>(7 - 22)     | 100<br>(49 - 154)  |
| Foreign body in other body part                 | 1<br>(0 - 1)       | 0<br>(0 - 0)     | 0<br>(0 - 0)      | 0<br>(0 - 0)       | 0<br>(0 - 0)       | 0<br>(0 - 0)       |
| Other unintentional injuries                    | 10<br>(8 - 13)     | 0<br>(0 - 1)     | 0<br>(0 - 1)      | 7<br>(5 - 10)      | 1<br>(1 - 2)       | 1<br>(1 - 2)       |
| Self-harm and interpersonal violence            | 574<br>(465 - 665) | 2<br>(1 - 4)     | 5<br>(3 - 6)      | 352<br>(279 - 401) | 136<br>(100 - 166) | 79<br>(62 - 118)   |
| Self-harm                                       | 434<br>(355 - 535) | --               | 2<br>(1 - 3)      | 249<br>(196 - 294) | 112<br>(84 - 142)  | 71<br>(54 - 111)   |
| Interpersonal violence                          | 140<br>(81 - 178)  | 2<br>(1 - 4)     | 3<br>(2 - 4)      | 103<br>(59 - 132)  | 24<br>(12 - 32)    | 8<br>(4 - 11)      |
| Assault by firearm                              | 75<br>(37 - 103)   | 1<br>(0 - 1)     | 1<br>(0 - 2)      | 62<br>(31 - 83)    | 9<br>(4 - 15)      | 2<br>(1 - 4)       |
| Assault by sharp object                         | 42<br>(20 - 71)    | 0<br>(0 - 1)     | 1<br>(0 - 2)      | 31<br>(14 - 54)    | 8<br>(4 - 13)      | 2<br>(1 - 3)       |
| Assault by other means                          | 24<br>(11 - 37)    | 1<br>(1 - 2)     | 1<br>(1 - 2)      | 11<br>(5 - 19)     | 6<br>(3 - 10)      | 4<br>(2 - 6)       |

Web Table 31- Israel deaths with 95% UI by age, sex, and cause in 2013

| Cause                                                             | Females, All Ages           | Females, 0-4 Years | Females, 5-14 Years | Females, 15-49 Years | Females, 50-69 Years     | Females, 70-80 Years        |
|-------------------------------------------------------------------|-----------------------------|--------------------|---------------------|----------------------|--------------------------|-----------------------------|
| All causes                                                        | 21,990<br>(21,313 - 22,717) | 315<br>(261 - 377) | 61<br>(55 - 68)     | 736<br>(690 - 787)   | 2,935<br>(2,775 - 3,106) | 17,942<br>(17,459 - 18,447) |
| Communicable, maternal, neonatal, and nutritional diseases        | 1,385<br>(987 - 1,716)      | 135<br>(107 - 165) | 6<br>(5 - 8)        | 40<br>(33 - 46)      | 78<br>(54 - 95)          | 1,126<br>(763 - 1,440)      |
| HIV/AIDS and tuberculosis                                         | 29<br>(22 - 36)             | 0<br>(0 - 0)       | 0<br>(0 - 0)        | 12<br>(8 - 16)       | 5<br>(3 - 7)             | 12<br>(8 - 17)              |
| Tuberculosis                                                      | 14<br>(10 - 20)             | 0<br>(0 - 0)       | 0<br>(0 - 0)        | 1<br>(1 - 1)         | 2<br>(1 - 3)             | 11<br>(8 - 16)              |
| HIV/AIDS                                                          | 14<br>(10 - 20)             | 0<br>(0 - 0)       | 0<br>(0 - 0)        | 11<br>(8 - 15)       | 3<br>(2 - 5)             | 0<br>(0 - 1)                |
| HIV/AIDS resulting in mycobacterial infection                     | 1<br>(0 - 1)                | 0<br>(0 - 0)       | 0<br>(0 - 0)        | 0<br>(0 - 1)         | 0<br>(0 - 0)             | 0<br>(0 - 0)                |
| HIV/AIDS resulting in other diseases                              | 14<br>(9 - 19)              | 0<br>(0 - 0)       | 0<br>(0 - 0)        | 10<br>(7 - 14)       | 3<br>(1 - 5)             | 0<br>(0 - 1)                |
| Diarrhea, lower respiratory, and other common infectious diseases | 1,058<br>(688 - 1,364)      | 18<br>(13 - 23)    | 5<br>(4 - 6)        | 15<br>(12 - 18)      | 58<br>(37 - 73)          | 961<br>(615 - 1,267)        |
| Diarrheal diseases                                                | 117<br>(73 - 177)           | 3<br>(2 - 5)       | 0<br>(0 - 1)        | 1<br>(1 - 2)         | 5<br>(3 - 7)             | 107<br>(63 - 166)           |
| Intestinal infectious diseases                                    | 2<br>(1 - 5)                | 1<br>(0 - 2)       | 1<br>(0 - 1)        | 1<br>(0 - 2)         | 0<br>(0 - 1)             | 0<br>(0 - 1)                |
| Typhoid fever                                                     | 2<br>(1 - 3)                | 0<br>(0 - 1)       | 0<br>(0 - 1)        | 1<br>(0 - 1)         | 0<br>(0 - 0)             | 0<br>(0 - 0)                |
| Paratyphoid fever                                                 | 1<br>(0 - 1)                | 0<br>(0 - 0)       | 0<br>(0 - 0)        | 0<br>(0 - 0)         | 0<br>(0 - 0)             | 0<br>(0 - 0)                |
| Other intestinal infectious diseases                              | 0<br>(0 - 2)                | 0<br>(0 - 1)       | 0<br>(0 - 0)        | 0<br>(0 - 1)         | 0<br>(0 - 1)             | 0<br>(0 - 1)                |
| Lower respiratory infections                                      | 903<br>(534 - 1,198)        | 9<br>(6 - 12)      | 2<br>(2 - 3)        | 9<br>(6 - 11)        | 47<br>(26 - 62)          | 836<br>(490 - 1,130)        |
| Upper respiratory infections                                      | 0<br>(0 - 2)                | 0<br>(0 - 0)       | 0<br>(0 - 0)        | 0<br>(0 - 0)         | 0<br>(0 - 0)             | 0<br>(0 - 2)                |
| Otitis media                                                      | 2<br>(1 - 3)                | 0<br>(0 - 1)       | 0<br>(0 - 0)        | 0<br>(0 - 0)         | 0<br>(0 - 0)             | 1<br>(1 - 2)                |
| Meningitis                                                        | 20<br>(15 - 24)             | 4<br>(2 - 5)       | 1<br>(1 - 1)        | 2<br>(1 - 2)         | 3<br>(2 - 4)             | 11<br>(8 - 14)              |
| Pneumococcal meningitis                                           | 4<br>(2 - 5)                | 0<br>(0 - 1)       | 0<br>(0 - 0)        | 0<br>(0 - 0)         | 1<br>(0 - 1)             | 2<br>(1 - 4)                |
| H influenzae type B meningitis                                    | 3<br>(2 - 3)                | 1<br>(1 - 1)       | 0<br>(0 - 0)        | 0<br>(0 - 0)         | 0<br>(0 - 0)             | 1<br>(0 - 2)                |
| Meningococcal meningitis                                          | 7<br>(5 - 9)                | 1<br>(1 - 2)       | 0<br>(0 - 0)        | 1<br>(0 - 1)         | 1<br>(0 - 2)             | 4<br>(2 - 6)                |
| Other meningitis                                                  | 7<br>(5 - 9)                | 1<br>(1 - 2)       | 0<br>(0 - 0)        | 1<br>(0 - 1)         | 1<br>(1 - 2)             | 4<br>(2 - 6)                |
| Encephalitis                                                      | 10<br>(8 - 17)              | 1<br>(1 - 2)       | 1<br>(0 - 2)        | 1<br>(1 - 2)         | 2<br>(1 - 3)             | 5<br>(3 - 9)                |
| Diphtheria                                                        | 0<br>(0 - 0)                | 0<br>(0 - 0)       | 0<br>(0 - 0)        | 0<br>(0 - 0)         | 0<br>(0 - 0)             | --                          |
| Whooping cough                                                    | 0<br>(0 - 1)                | 0<br>(0 - 0)       | 0<br>(0 - 0)        | 0<br>(0 - 0)         | 0<br>(0 - 0)             | --                          |
| Tetanus                                                           | 0<br>(0 - 0)                | 0<br>(0 - 0)       | 0<br>(0 - 0)        | 0<br>(0 - 0)         | 0<br>(0 - 0)             | 0<br>(0 - 0)                |
| Measles                                                           | 0<br>(0 - 0)                | 0<br>(0 - 0)       | 0<br>(0 - 0)        | 0<br>(0 - 0)         | 0<br>(0 - 0)             | --                          |
| Varicella and herpes zoster                                       | 3<br>(1 - 10)               | 0<br>(0 - 1)       | 0<br>(0 - 0)        | 0<br>(0 - 1)         | 0<br>(0 - 1)             | 2<br>(0 - 9)                |
| Neglected tropical diseases and malaria                           | 4<br>(4 - 6)                | 0<br>(0 - 0)       | 0<br>(0 - 0)        | 1<br>(1 - 1)         | 1<br>(1 - 1)             | 2<br>(2 - 3)                |
| Leishmaniasis                                                     | 0<br>(0 - 0)                | 0<br>(0 - 0)       | 0<br>(0 - 0)        | 0<br>(0 - 0)         | 0<br>(0 - 0)             | 0<br>(0 - 0)                |
| Visceral leishmaniasis                                            | 0<br>(0 - 0)                | 0<br>(0 - 0)       | 0<br>(0 - 0)        | 0<br>(0 - 0)         | 0<br>(0 - 0)             | 0<br>(0 - 0)                |
| Cysticercosis                                                     | 0<br>(0 - 0)                | 0<br>(0 - 0)       | 0<br>(0 - 0)        | 0<br>(0 - 0)         | 0<br>(0 - 0)             | 0<br>(0 - 0)                |
| Cystic echinococcosis                                             | 1<br>(1 - 1)                | 0<br>(0 - 0)       | 0<br>(0 - 0)        | 0<br>(0 - 0)         | 0<br>(0 - 0)             | 1<br>(1 - 1)                |
| Dengue                                                            | 0<br>(0 - 1)                | 0<br>(0 - 0)       | 0<br>(0 - 0)        | 0<br>(0 - 0)         | 0<br>(0 - 0)             | 0<br>(0 - 0)                |
| Rabies                                                            | 0<br>(0 - 0)                | 0<br>(0 - 0)       | 0<br>(0 - 0)        | 0<br>(0 - 0)         | 0<br>(0 - 0)             | 0<br>(0 - 0)                |
| Other neglected tropical diseases                                 | 2<br>(2 - 3)                | 0<br>(0 - 0)       | 0<br>(0 - 0)        | 0<br>(0 - 0)         | 1<br>(0 - 1)             | 1<br>(1 - 3)                |
| Maternal disorders                                                | 7<br>(5 - 9)                | --                 | 0<br>(0 - 0)        | 7<br>(5 - 8)         | --                       | --                          |
| Maternal hemorrhage                                               | 1<br>(0 - 1)                | --                 | 0<br>(0 - 0)        | 1<br>(0 - 1)         | --                       | --                          |
| Maternal sepsis and other maternal infections                     | 1<br>(0 - 1)                | --                 | 0<br>(0 - 0)        | 1<br>(0 - 1)         | --                       | --                          |
| Maternal hypertensive disorders                                   | 1<br>(1 - 1)                | --                 | 0<br>(0 - 0)        | 1<br>(1 - 1)         | --                       | --                          |
| Maternal obstructed labor                                         | 1<br>(0 - 1)                | --                 | 0<br>(0 - 0)        | 1<br>(0 - 1)         | --                       | --                          |

Web Table 31- Israel deaths with 95% UI by age, sex, and cause in 2013

| Cause                                                            | Females, All Ages           | Females, 0-4 Years | Females, 5-14 Years | Females, 15-49 Years | Females, 50-69 Years     | Females, 70-80 Years        |
|------------------------------------------------------------------|-----------------------------|--------------------|---------------------|----------------------|--------------------------|-----------------------------|
| Maternal abortive outcome                                        | 1<br>(1 - 2)                | --                 | 0<br>(0 - 0)        | 1<br>(1 - 2)         | --                       | --                          |
| Indirect maternal deaths                                         | 1<br>(0 - 1)                | --                 | 0<br>(0 - 0)        | 1<br>(0 - 1)         | --                       | --                          |
| Late maternal deaths                                             | 1<br>(0 - 1)                | --                 | 0<br>(0 - 0)        | 1<br>(0 - 1)         | --                       | --                          |
| Maternal deaths aggravated by HIV/AIDS                           | 0<br>(0 - 0)                | --                 | --                  | 0<br>(0 - 0)         | --                       | --                          |
| Other maternal disorders                                         | 1<br>(1 - 2)                | --                 | 0<br>(0 - 0)        | 1<br>(1 - 2)         | --                       | --                          |
| Neonatal disorders                                               | 113<br>(88 - 142)           | 113<br>(88 - 142)  | --                  | --                   | --                       | --                          |
| Neonatal preterm birth complications                             | 62<br>(44 - 82)             | 62<br>(44 - 82)    | --                  | --                   | --                       | --                          |
| Neonatal encephalopathy due to birth asphyxia and trauma         | 14<br>(9 - 21)              | 14<br>(9 - 21)     | --                  | --                   | --                       | --                          |
| Neonatal sepsis and other neonatal infections                    | 8<br>(4 - 15)               | 8<br>(4 - 15)      | --                  | --                   | --                       | --                          |
| Hemolytic disease and other neonatal jaundice                    | 0<br>(0 - 0)                | 0<br>(0 - 0)       | --                  | --                   | --                       | --                          |
| Other neonatal disorders                                         | 29<br>(15 - 43)             | 29<br>(15 - 43)    | --                  | --                   | --                       | --                          |
| Nutritional deficiencies                                         | 133<br>(82 - 175)           | 1<br>(1 - 2)       | 0<br>(0 - 1)        | 3<br>(2 - 3)         | 5<br>(4 - 7)             | 124<br>(76 - 165)           |
| Protein-energy malnutrition                                      | 23<br>(5 - 48)              | 1<br>(0 - 1)       | 0<br>(0 - 0)        | 1<br>(0 - 1)         | 1<br>(0 - 2)             | 20<br>(4 - 44)              |
| Iodine deficiency                                                | 0<br>(0 - 1)                | 0<br>(0 - 0)       | 0<br>(0 - 0)        | 0<br>(0 - 0)         | 0<br>(0 - 0)             | 0<br>(0 - 1)                |
| Iron-deficiency anemia                                           | 105<br>(64 - 142)           | 0<br>(0 - 0)       | 0<br>(0 - 0)        | 2<br>(1 - 2)         | 4<br>(3 - 5)             | 99<br>(59 - 136)            |
| Other nutritional deficiencies                                   | 5<br>(2 - 14)               | 0<br>(0 - 0)       | 0<br>(0 - 0)        | 0<br>(0 - 0)         | 0<br>(0 - 1)             | 4<br>(1 - 13)               |
| Other communicable, maternal, neonatal, and nutritional diseases | 41<br>(25 - 54)             | 2<br>(1 - 4)       | 1<br>(0 - 1)        | 3<br>(2 - 4)         | 9<br>(5 - 12)            | 27<br>(15 - 36)             |
| Sexually transmitted diseases excluding HIV                      | 3<br>(1 - 4)                | 1<br>(0 - 2)       | 0<br>(0 - 0)        | 0<br>(0 - 0)         | 0<br>(0 - 1)             | 1<br>(1 - 2)                |
| Syphilis                                                         | 2<br>(1 - 4)                | 1<br>(0 - 2)       | 0<br>(0 - 0)        | 0<br>(0 - 0)         | 0<br>(0 - 0)             | 1<br>(0 - 2)                |
| Chlamydial infection                                             | 0<br>(0 - 0)                | --                 | 0<br>(0 - 0)        | 0<br>(0 - 0)         | 0<br>(0 - 0)             | 0<br>(0 - 0)                |
| Gonococcal infection                                             | 0<br>(0 - 0)                | --                 | 0<br>(0 - 0)        | 0<br>(0 - 0)         | 0<br>(0 - 0)             | 0<br>(0 - 0)                |
| Other sexually transmitted diseases                              | 0<br>(0 - 0)                | --                 | 0<br>(0 - 0)        | 0<br>(0 - 0)         | 0<br>(0 - 0)             | 0<br>(0 - 0)                |
| Hepatitis                                                        | 6<br>(5 - 9)                | 0<br>(0 - 0)       | 0<br>(0 - 0)        | 1<br>(1 - 1)         | 1<br>(1 - 2)             | 3<br>(2 - 6)                |
| Acute hepatitis A                                                | 2<br>(1 - 3)                | 0<br>(0 - 0)       | 0<br>(0 - 0)        | 0<br>(0 - 1)         | 0<br>(0 - 1)             | 1<br>(0 - 1)                |
| Acute hepatitis B                                                | 4<br>(2 - 6)                | 0<br>(0 - 0)       | 0<br>(0 - 0)        | 0<br>(0 - 1)         | 1<br>(0 - 2)             | 2<br>(1 - 4)                |
| Acute hepatitis C                                                | 1<br>(0 - 2)                | --                 | 0<br>(0 - 0)        | 0<br>(0 - 0)         | 0<br>(0 - 0)             | 1<br>(0 - 2)                |
| Other infectious diseases                                        | 32<br>(17 - 44)             | 1<br>(1 - 2)       | 0<br>(0 - 1)        | 2<br>(1 - 3)         | 7<br>(4 - 10)            | 22<br>(10 - 31)             |
| Non-communicable diseases                                        | 19,649<br>(18,966 - 20,376) | 156<br>(128 - 189) | 38<br>(33 - 43)     | 562<br>(523 - 604)   | 2,735<br>(2,581 - 2,898) | 16,158<br>(15,622 - 16,750) |
| Neoplasms                                                        | 5,232<br>(4,603 - 5,638)    | 8<br>(6 - 11)      | 18<br>(15 - 21)     | 386<br>(355 - 419)   | 1,602<br>(1,396 - 1,740) | 3,218<br>(2,803 - 3,538)    |
| Esophageal cancer                                                | 45<br>(37 - 54)             | --                 | --                  | 1<br>(1 - 2)         | 9<br>(7 - 12)            | 34<br>(28 - 43)             |
| Stomach cancer                                                   | 259<br>(187 - 357)          | --                 | --                  | 13<br>(10 - 17)      | 50<br>(35 - 67)          | 196<br>(135 - 279)          |
| Liver cancer                                                     | 114<br>(81 - 143)           | --                 | 0<br>(0 - 0)        | 4<br>(3 - 6)         | 29<br>(21 - 36)          | 80<br>(56 - 107)            |
| Liver cancer due to hepatitis B                                  | 21<br>(9 - 45)              | --                 | 0<br>(0 - 0)        | 1<br>(1 - 3)         | 7<br>(2 - 15)            | 12<br>(5 - 27)              |
| Liver cancer due to hepatitis C                                  | 67<br>(42 - 93)             | --                 | 0<br>(0 - 0)        | 2<br>(1 - 3)         | 16<br>(10 - 22)          | 49<br>(29 - 71)             |
| Liver cancer due to alcohol use                                  | 16<br>(7 - 28)              | --                 | --                  | 0<br>(0 - 1)         | 3<br>(1 - 6)             | 13<br>(5 - 23)              |
| Liver cancer due to other causes                                 | 9<br>(4 - 17)               | --                 | 0<br>(0 - 0)        | 1<br>(0 - 1)         | 3<br>(1 - 5)             | 6<br>(2 - 11)               |
| Larynx cancer                                                    | 9<br>(6 - 13)               | --                 | --                  | 0<br>(0 - 1)         | 3<br>(2 - 4)             | 6<br>(4 - 9)                |
| Tracheal, bronchus and lung cancer                               | 653<br>(518 - 758)          | --                 | --                  | 30<br>(23 - 37)      | 241<br>(181 - 281)       | 382<br>(291 - 483)          |
| Breast cancer                                                    | 1,007<br>(779 - 1,182)      | --                 | --                  | 129<br>(104 - 153)   | 395<br>(274 - 467)       | 483<br>(375 - 608)          |
| Cervical cancer                                                  | 109<br>(71 - 138)           | --                 | --                  | 23<br>(12 - 33)      | 38<br>(22 - 51)          | 48<br>(34 - 61)             |

Web Table 31- Israel deaths with 95% UI by age, sex, and cause in 2013

| Cause                                         | Females, All Ages        | Females, 0-4 Years | Females, 5-14 Years | Females, 15-49 Years | Females, 50-69 Years | Females, 70-80 Years     |
|-----------------------------------------------|--------------------------|--------------------|---------------------|----------------------|----------------------|--------------------------|
| Uterine cancer                                | 119<br>(75 - 147)        | --                 | --                  | 2<br>(1 - 4)         | 39<br>(23 - 51)      | 78<br>(48 - 99)          |
| Prostate cancer                               | --                       | --                 | --                  | --                   | --                   | --                       |
| Colon and rectum cancer                       | 721<br>(602 - 852)       | --                 | --                  | 29<br>(24 - 33)      | 163<br>(134 - 184)   | 529<br>(423 - 652)       |
| Lip and oral cavity cancer                    | 32<br>(25 - 41)          | --                 | --                  | 2<br>(2 - 3)         | 7<br>(5 - 9)         | 23<br>(17 - 30)          |
| Nasopharynx cancer                            | 4<br>(2 - 10)            | --                 | 0<br>(0 - 0)        | 1<br>(0 - 2)         | 1<br>(1 - 3)         | 2<br>(1 - 5)             |
| Other pharynx cancer                          | 6<br>(4 - 8)             | --                 | --                  | 1<br>(0 - 1)         | 2<br>(1 - 3)         | 4<br>(2 - 5)             |
| Gallbladder and biliary tract cancer          | 68<br>(51 - 105)         | --                 | --                  | 1<br>(1 - 1)         | 15<br>(11 - 22)      | 52<br>(37 - 85)          |
| Pancreatic cancer                             | 426<br>(359 - 487)       | --                 | --                  | 11<br>(8 - 13)       | 122<br>(99 - 142)    | 293<br>(241 - 346)       |
| Malignant skin melanoma                       | 82<br>(57 - 113)         | --                 | --                  | 13<br>(9 - 20)       | 26<br>(18 - 38)      | 43<br>(27 - 58)          |
| Non-melanoma skin cancer                      | 35<br>(23 - 47)          | --                 | --                  | 0<br>(0 - 1)         | 2<br>(2 - 3)         | 32<br>(21 - 44)          |
| Ovarian cancer                                | 274<br>(232 - 329)       | --                 | --                  | 23<br>(18 - 29)      | 115<br>(95 - 139)    | 135<br>(105 - 171)       |
| Testicular cancer                             | --                       | --                 | --                  | --                   | --                   | --                       |
| Kidney cancer                                 | 100<br>(72 - 135)        | 0<br>(0 - 1)       | 0<br>(0 - 1)        | 3<br>(3 - 4)         | 28<br>(21 - 38)      | 67<br>(44 - 97)          |
| Bladder cancer                                | 84<br>(56 - 120)         | --                 | --                  | 1<br>(1 - 2)         | 13<br>(9 - 19)       | 70<br>(46 - 102)         |
| Brain and nervous system cancer               | 150<br>(105 - 178)       | 2<br>(1 - 3)       | 6<br>(4 - 7)        | 22<br>(17 - 27)      | 63<br>(45 - 77)      | 57<br>(35 - 75)          |
| Thyroid cancer                                | 37<br>(27 - 48)          | --                 | 0<br>(0 - 0)        | 1<br>(1 - 2)         | 10<br>(7 - 14)       | 26<br>(18 - 35)          |
| Mesothelioma                                  | 10<br>(7 - 14)           | --                 | --                  | 1<br>(1 - 1)         | 4<br>(3 - 6)         | 5<br>(3 - 7)             |
| Hodgkin lymphoma                              | 16<br>(11 - 21)          | 0<br>(0 - 0)       | 0<br>(0 - 1)        | 6<br>(4 - 9)         | 4<br>(2 - 5)         | 6<br>(4 - 9)             |
| Non-Hodgkin lymphoma                          | 279<br>(133 - 413)       | 1<br>(0 - 1)       | 1<br>(1 - 2)        | 20<br>(9 - 28)       | 75<br>(30 - 104)     | 182<br>(94 - 280)        |
| Multiple myeloma                              | 118<br>(74 - 187)        | --                 | --                  | 4<br>(2 - 6)         | 36<br>(22 - 57)      | 79<br>(46 - 128)         |
| Leukemia                                      | 193<br>(157 - 227)       | 2<br>(1 - 3)       | 4<br>(3 - 6)        | 20<br>(16 - 25)      | 43<br>(30 - 52)      | 125<br>(100 - 152)       |
| Other neoplasms                               | 284<br>(200 - 343)       | 4<br>(2 - 5)       | 6<br>(4 - 7)        | 23<br>(18 - 28)      | 68<br>(50 - 83)      | 183<br>(116 - 238)       |
| Cardiovascular diseases                       | 6,654<br>(5,823 - 8,528) | 2<br>(2 - 4)       | 2<br>(1 - 2)        | 56<br>(46 - 78)      | 487<br>(392 - 766)   | 6,107<br>(5,348 - 7,696) |
| Rheumatic heart disease                       | 105<br>(47 - 140)        | 0<br>(0 - 0)       | 0<br>(0 - 0)        | 6<br>(4 - 9)         | 21<br>(12 - 29)      | 77<br>(30 - 107)         |
| Ischemic heart disease                        | 3,598<br>(2,904 - 5,606) | 0<br>(0 - 0)       | 0<br>(0 - 0)        | 20<br>(14 - 36)      | 255<br>(181 - 497)   | 3,323<br>(2,686 - 5,107) |
| Cerebrovascular disease                       | 1,672<br>(1,023 - 2,229) | 0<br>(0 - 0)       | 0<br>(0 - 0)        | 12<br>(7 - 17)       | 122<br>(79 - 197)    | 1,537<br>(935 - 2,041)   |
| Ischemic stroke                               | 1,000<br>(558 - 1,360)   | 0<br>(0 - 0)       | 0<br>(0 - 0)        | 2<br>(1 - 3)         | 37<br>(20 - 67)      | 961<br>(530 - 1,300)     |
| Hemorrhagic stroke                            | 672<br>(336 - 957)       | 0<br>(0 - 0)       | 0<br>(0 - 0)        | 11<br>(6 - 14)       | 85<br>(53 - 136)     | 576<br>(264 - 821)       |
| Hypertensive heart disease                    | 143<br>(79 - 284)        | 0<br>(0 - 0)       | 0<br>(0 - 0)        | 1<br>(1 - 2)         | 9<br>(5 - 18)        | 133<br>(72 - 268)        |
| Cardiomyopathy and myocarditis                | 83<br>(62 - 116)         | 2<br>(1 - 2)       | 1<br>(1 - 1)        | 6<br>(4 - 9)         | 14<br>(10 - 23)      | 61<br>(42 - 88)          |
| Atrial fibrillation and flutter               | 356<br>(245 - 516)       | --                 | --                  | 1<br>(0 - 1)         | 12<br>(9 - 18)       | 343<br>(234 - 499)       |
| Aortic aneurysm                               | 58<br>(35 - 95)          | --                 | --                  | 1<br>(1 - 1)         | 7<br>(4 - 11)        | 51<br>(30 - 83)          |
| Peripheral vascular disease                   | 113<br>(77 - 163)        | --                 | --                  | 0<br>(0 - 1)         | 5<br>(3 - 7)         | 108<br>(73 - 155)        |
| Endocarditis                                  | 57<br>(29 - 82)          | 0<br>(0 - 0)       | 0<br>(0 - 0)        | 1<br>(1 - 2)         | 6<br>(3 - 9)         | 50<br>(25 - 72)          |
| Other cardiovascular and circulatory diseases | 470<br>(286 - 625)       | 1<br>(0 - 1)       | 0<br>(0 - 0)        | 8<br>(5 - 11)        | 37<br>(25 - 52)      | 424<br>(244 - 577)       |
| Chronic respiratory diseases                  | 852<br>(675 - 1,008)     | 2<br>(1 - 3)       | 1<br>(1 - 1)        | 13<br>(10 - 16)      | 86<br>(59 - 102)     | 750<br>(594 - 902)       |
| Chronic obstructive pulmonary disease         | 698<br>(554 - 853)       | 1<br>(0 - 1)       | 0<br>(0 - 1)        | 6<br>(4 - 8)         | 57<br>(36 - 72)      | 634<br>(503 - 785)       |
| Pneumoconiosis                                | 3<br>(2 - 5)             | 0<br>(0 - 0)       | 0<br>(0 - 0)        | 0<br>(0 - 0)         | 0<br>(0 - 1)         | 2<br>(1 - 4)             |
| Silicosis                                     | 0<br>(0 - 0)             | 0<br>(0 - 0)       | 0<br>(0 - 0)        | 0<br>(0 - 0)         | 0<br>(0 - 0)         | 0<br>(0 - 0)             |
| Asbestosis                                    | 0<br>(0 - 0)             | 0<br>(0 - 0)       | 0<br>(0 - 0)        | 0<br>(0 - 0)         | 0<br>(0 - 0)         | 0<br>(0 - 0)             |

Web Table 31- Israel deaths with 95% UI by age, sex, and cause in 2013

| Cause                                               | Females, All Ages        | Females, 0-4 Years | Females, 5-14 Years | Females, 15-49 Years | Females, 50-69 Years | Females, 70-80 Years     |
|-----------------------------------------------------|--------------------------|--------------------|---------------------|----------------------|----------------------|--------------------------|
| Coal workers pneumoconiosis                         | 0<br>(0 - 0)             | 0<br>(0 - 0)       | 0<br>(0 - 0)        | 0<br>(0 - 0)         | 0<br>(0 - 0)         | 0<br>(0 - 0)             |
| Other pneumoconiosis                                | 2<br>(1 - 4)             | 0<br>(0 - 0)       | 0<br>(0 - 0)        | 0<br>(0 - 0)         | 0<br>(0 - 1)         | 2<br>(1 - 4)             |
| Asthma                                              | 80<br>(47 - 123)         | 0<br>(0 - 1)       | 0<br>(0 - 0)        | 4<br>(3 - 6)         | 14<br>(9 - 21)       | 61<br>(35 - 98)          |
| Interstitial lung disease and pulmonary sarcoidosis | 62<br>(33 - 103)         | 0<br>(0 - 0)       | 0<br>(0 - 0)        | 2<br>(1 - 3)         | 13<br>(7 - 21)       | 47<br>(23 - 81)          |
| Other chronic respiratory diseases                  | 9<br>(5 - 14)            | 1<br>(0 - 1)       | 0<br>(0 - 0)        | 1<br>(0 - 1)         | 1<br>(1 - 2)         | 6<br>(3 - 10)            |
| Cirrhosis                                           | 245<br>(204 - 283)       | 1<br>(0 - 1)       | 1<br>(0 - 1)        | 12<br>(10 - 15)      | 54<br>(44 - 63)      | 178<br>(142 - 212)       |
| Cirrhosis due to hepatitis B                        | 30<br>(13 - 48)          | 0<br>(0 - 0)       | 0<br>(0 - 0)        | 1<br>(0 - 2)         | 6<br>(3 - 11)        | 22<br>(9 - 37)           |
| Cirrhosis due to hepatitis C                        | 149<br>(101 - 195)       | 0<br>(0 - 0)       | 0<br>(0 - 0)        | 7<br>(4 - 10)        | 33<br>(19 - 45)      | 109<br>(73 - 145)        |
| Cirrhosis due to alcohol use                        | 43<br>(18 - 70)          | --                 | --                  | 1<br>(0 - 2)         | 8<br>(3 - 13)        | 34<br>(14 - 57)          |
| Cirrhosis due to other causes                       | 23<br>(7 - 43)           | 1<br>(0 - 1)       | 0<br>(0 - 1)        | 3<br>(1 - 5)         | 7<br>(1 - 14)        | 13<br>(3 - 26)           |
| Digestive diseases                                  | 545<br>(415 - 641)       | 1<br>(1 - 1)       | 1<br>(1 - 1)        | 7<br>(6 - 9)         | 44<br>(31 - 53)      | 491<br>(372 - 584)       |
| Peptic ulcer disease                                | 44<br>(28 - 65)          | 0<br>(0 - 0)       | 0<br>(0 - 0)        | 0<br>(0 - 1)         | 4<br>(2 - 6)         | 40<br>(25 - 60)          |
| Gastritis and duodenitis                            | 2<br>(1 - 4)             | 0<br>(0 - 0)       | 0<br>(0 - 0)        | 0<br>(0 - 0)         | 0<br>(0 - 1)         | 1<br>(1 - 3)             |
| Appendicitis                                        | 14<br>(5 - 25)           | 0<br>(0 - 0)       | 0<br>(0 - 0)        | 1<br>(0 - 1)         | 2<br>(1 - 3)         | 11<br>(4 - 22)           |
| Paralytic ileus and intestinal obstruction          | 100<br>(57 - 187)        | 0<br>(0 - 0)       | 0<br>(0 - 0)        | 1<br>(1 - 2)         | 8<br>(5 - 17)        | 90<br>(51 - 171)         |
| Inguinal, femoral, and abdominal hernia             | 18<br>(6 - 30)           | 0<br>(0 - 0)       | 0<br>(0 - 0)        | 0<br>(0 - 0)         | 1<br>(0 - 2)         | 16<br>(5 - 27)           |
| Inflammatory bowel disease                          | 21<br>(9 - 32)           | 0<br>(0 - 0)       | 0<br>(0 - 0)        | 1<br>(0 - 1)         | 2<br>(1 - 3)         | 18<br>(8 - 28)           |
| Vascular intestinal disorders                       | 118<br>(63 - 196)        | 0<br>(0 - 0)       | 0<br>(0 - 0)        | 1<br>(0 - 2)         | 6<br>(5 - 16)        | 107<br>(56 - 183)        |
| Gallbladder and biliary diseases                    | 107<br>(48 - 150)        | 0<br>(0 - 0)       | 0<br>(0 - 0)        | 1<br>(0 - 1)         | 6<br>(2 - 8)         | 100<br>(45 - 142)        |
| Pancreatitis                                        | 41<br>(24 - 59)          | 0<br>(0 - 0)       | 0<br>(0 - 0)        | 1<br>(1 - 1)         | 4<br>(2 - 6)         | 35<br>(20 - 53)          |
| Other digestive diseases                            | 79<br>(50 - 105)         | 0<br>(0 - 0)       | 0<br>(0 - 0)        | 1<br>(1 - 2)         | 7<br>(4 - 9)         | 71<br>(43 - 96)          |
| Neurological disorders                              | 2,758<br>(2,181 - 3,408) | 8<br>(5 - 10)      | 3<br>(2 - 4)        | 22<br>(16 - 26)      | 124<br>(93 - 152)    | 2,602<br>(2,038 - 3,236) |
| Alzheimer disease and other dementias               | 2,454<br>(1,884 - 3,086) | --                 | --                  | 0<br>(0 - 1)         | 70<br>(46 - 95)      | 2,384<br>(1,819 - 3,011) |
| Parkinson disease                                   | 175<br>(106 - 240)       | --                 | --                  | 0<br>(0 - 1)         | 12<br>(8 - 18)       | 162<br>(96 - 225)        |
| Epilepsy                                            | 30<br>(17 - 41)          | 1<br>(1 - 2)       | 2<br>(1 - 2)        | 7<br>(4 - 10)        | 5<br>(3 - 7)         | 15<br>(8 - 23)           |
| Multiple sclerosis                                  | 22<br>(9 - 29)           | --                 | --                  | 5<br>(2 - 7)         | 12<br>(5 - 17)       | 5<br>(2 - 7)             |
| Other neurological disorders                        | 77<br>(65 - 88)          | 6<br>(4 - 9)       | 2<br>(1 - 2)        | 9<br>(7 - 10)        | 24<br>(19 - 29)      | 36<br>(28 - 44)          |
| Mental and substance use disorders                  | 22<br>(15 - 29)          | 0<br>(0 - 0)       | 0<br>(0 - 0)        | 5<br>(4 - 6)         | 5<br>(3 - 6)         | 12<br>(7 - 18)           |
| Schizophrenia                                       | 11<br>(5 - 17)           | --                 | --                  | 1<br>(0 - 1)         | 3<br>(1 - 4)         | 8<br>(3 - 13)            |
| Alcohol use disorders                               | 4<br>(2 - 8)             | --                 | --                  | 1<br>(0 - 2)         | 1<br>(0 - 2)         | 2<br>(1 - 4)             |
| Drug use disorders                                  | 7<br>(5 - 8)             | 0<br>(0 - 0)       | --                  | 3<br>(2 - 4)         | 1<br>(1 - 1)         | 3<br>(2 - 4)             |
| Opioid use disorders                                | 2<br>(2 - 3)             | 0<br>(0 - 0)       | --                  | 1<br>(1 - 1)         | 0<br>(0 - 0)         | 1<br>(1 - 1)             |
| Cocaine use disorders                               | 0<br>(0 - 0)             | 0<br>(0 - 0)       | --                  | 0<br>(0 - 0)         | 0<br>(0 - 0)         | 0<br>(0 - 0)             |
| Amphetamine use disorders                           | 0<br>(0 - 0)             | 0<br>(0 - 0)       | --                  | 0<br>(0 - 0)         | 0<br>(0 - 0)         | 0<br>(0 - 0)             |
| Other drug use disorders                            | 4<br>(3 - 5)             | 0<br>(0 - 0)       | --                  | 2<br>(1 - 2)         | 1<br>(0 - 1)         | 2<br>(1 - 2)             |
| Eating disorders                                    | 1<br>(0 - 1)             | --                 | 0<br>(0 - 0)        | 0<br>(0 - 1)         | --                   | --                       |
| Anorexia nervosa                                    | 1<br>(0 - 1)             | --                 | 0<br>(0 - 0)        | 0<br>(0 - 1)         | --                   | --                       |
| Diabetes, urogenital, blood, and endocrine diseases | 2,766<br>(2,180 - 3,134) | 14<br>(9 - 19)     | 6<br>(4 - 7)        | 41<br>(32 - 46)      | 291<br>(230 - 334)   | 2,415<br>(1,863 - 2,760) |
| Diabetes mellitus                                   | 1,204<br>(836 - 1,427)   | 0<br>(0 - 0)       | 0<br>(0 - 0)        | 11<br>(8 - 14)       | 142<br>(112 - 170)   | 1,051<br>(708 - 1,265)   |
| Acute glomerulonephritis                            | 1<br>(1 - 2)             | 0<br>(0 - 0)       | 0<br>(0 - 0)        | 0<br>(0 - 0)         | 0<br>(0 - 0)         | 1<br>(0 - 1)             |

Web Table 31- Israel deaths with 95% UI by age, sex, and cause in 2013

| Cause                                               | Females, All Ages    | Females, 0-4 Years | Females, 5-14 Years | Females, 15-49 Years | Females, 50-69 Years | Females, 70-80 Years |
|-----------------------------------------------------|----------------------|--------------------|---------------------|----------------------|----------------------|----------------------|
| Chronic kidney disease                              | 991<br>(796 - 1,281) | 1<br>(1 - 2)       | 1<br>(1 - 1)        | 13<br>(10 - 17)      | 94<br>(75 - 117)     | 882<br>(695 - 1,180) |
| Chronic kidney disease due to diabetes mellitus     | 274<br>(190 - 371)   | 0<br>(0 - 0)       | 0<br>(0 - 0)        | 4<br>(3 - 5)         | 40<br>(28 - 54)      | 230<br>(149 - 329)   |
| Chronic kidney disease due to hypertension          | 273<br>(144 - 423)   | 0<br>(0 - 0)       | 0<br>(0 - 0)        | 2<br>(1 - 4)         | 15<br>(8 - 26)       | 255<br>(134 - 402)   |
| Chronic kidney disease due to glomerulonephritis    | 15<br>(7 - 26)       | 0<br>(0 - 0)       | 0<br>(0 - 0)        | 1<br>(0 - 1)         | 1<br>(1 - 2)         | 13<br>(6 - 23)       |
| Chronic kidney disease due to other causes          | 429<br>(272 - 649)   | 1<br>(1 - 1)       | 1<br>(0 - 1)        | 6<br>(4 - 10)        | 37<br>(23 - 55)      | 384<br>(238 - 596)   |
| Urinary diseases and male infertility               | 275<br>(77 - 429)    | 0<br>(0 - 1)       | 0<br>(0 - 0)        | 3<br>(1 - 5)         | 16<br>(5 - 24)       | 255<br>(70 - 402)    |
| Interstitial nephritis and urinary tract infections | 253<br>(67 - 390)    | 0<br>(0 - 0)       | 0<br>(0 - 0)        | 2<br>(1 - 3)         | 13<br>(4 - 20)       | 237<br>(61 - 373)    |
| Urolithiasis                                        | 7<br>(3 - 20)        | --                 | 0<br>(0 - 0)        | 0<br>(0 - 0)         | 1<br>(0 - 2)         | 6<br>(2 - 18)        |
| Other urinary diseases                              | 15<br>(5 - 41)       | 0<br>(0 - 0)       | 0<br>(0 - 0)        | 1<br>(0 - 1)         | 2<br>(1 - 5)         | 12<br>(4 - 35)       |
| Gynecological diseases                              | 2<br>(1 - 4)         | --                 | --                  | 0<br>(0 - 0)         | 0<br>(0 - 0)         | 2<br>(1 - 3)         |
| Uterine fibroids                                    | 1<br>(0 - 1)         | --                 | --                  | 0<br>(0 - 0)         | 0<br>(0 - 0)         | 1<br>(0 - 1)         |
| Polycystic ovarian syndrome                         | 0<br>(0 - 0)         | --                 | --                  | 0<br>(0 - 0)         | 0<br>(0 - 0)         | --                   |
| Endometriosis                                       | 0<br>(0 - 0)         | --                 | --                  | 0<br>(0 - 0)         | 0<br>(0 - 0)         | --                   |
| Genital prolapse                                    | 1<br>(0 - 1)         | --                 | --                  | 0<br>(0 - 0)         | 0<br>(0 - 0)         | 0<br>(0 - 1)         |
| Other gynecological diseases                        | 1<br>(1 - 2)         | --                 | --                  | 0<br>(0 - 0)         | 0<br>(0 - 0)         | 1<br>(0 - 1)         |
| Hemoglobinopathies and hemolytic anemias            | 17<br>(8 - 26)       | 1<br>(1 - 2)       | 1<br>(0 - 1)        | 2<br>(1 - 3)         | 3<br>(2 - 4)         | 10<br>(5 - 17)       |
| Thalassemias                                        | 1<br>(0 - 1)         | 0<br>(0 - 1)       | 0<br>(0 - 0)        | 0<br>(0 - 1)         | 0<br>(0 - 0)         | 0<br>(0 - 0)         |
| Sickle cell disorders                               | 5<br>(3 - 8)         | 0<br>(0 - 1)       | 0<br>(0 - 1)        | 1<br>(1 - 2)         | 2<br>(1 - 3)         | 1<br>(1 - 2)         |
| G6PD deficiency                                     | 0<br>(0 - 0)         | 0<br>(0 - 0)       | 0<br>(0 - 0)        | 0<br>(0 - 0)         | 0<br>(0 - 0)         | 0<br>(0 - 0)         |
| Other hemoglobinopathies and hemolytic anemias      | 11<br>(5 - 18)       | 0<br>(0 - 1)       | 0<br>(0 - 0)        | 0<br>(0 - 1)         | 1<br>(0 - 1)         | 9<br>(4 - 15)        |
| Endocrine, metabolic, blood, and immune disorders   | 276<br>(145 - 361)   | 11<br>(6 - 16)     | 3<br>(2 - 5)        | 11<br>(6 - 14)       | 36<br>(18 - 47)      | 215<br>(110 - 295)   |
| Musculoskeletal disorders                           | 141<br>(98 - 183)    | --                 | 1<br>(0 - 1)        | 8<br>(6 - 10)        | 22<br>(16 - 28)      | 110<br>(73 - 149)    |
| Rheumatoid arthritis                                | 17<br>(7 - 25)       | --                 | 0<br>(0 - 0)        | 0<br>(0 - 1)         | 3<br>(1 - 5)         | 13<br>(5 - 21)       |
| Other musculoskeletal disorders                     | 125<br>(89 - 161)    | --                 | 0<br>(0 - 1)        | 8<br>(6 - 10)        | 19<br>(14 - 24)      | 97<br>(64 - 133)     |
| Other non-communicable diseases                     | 433<br>(280 - 539)   | 120<br>(94 - 150)  | 7<br>(5 - 9)        | 11<br>(9 - 14)       | 19<br>(12 - 24)      | 275<br>(115 - 378)   |
| Congenital anomalies                                | 140<br>(114 - 169)   | 103<br>(81 - 131)  | 7<br>(5 - 9)        | 10<br>(7 - 12)       | 7<br>(5 - 9)         | 14<br>(10 - 18)      |
| Neural tube defects                                 | 5<br>(3 - 8)         | 5<br>(3 - 8)       | 0<br>(0 - 0)        | 0<br>(0 - 0)         | 0<br>(0 - 0)         | 0<br>(0 - 0)         |
| Congenital heart anomalies                          | 42<br>(32 - 54)      | 32<br>(24 - 44)    | 3<br>(2 - 4)        | 4<br>(3 - 5)         | 1<br>(1 - 2)         | 2<br>(1 - 2)         |
| Cleft lip and cleft palate                          | 0<br>(0 - 0)         | 0<br>(0 - 0)       | --                  | --                   | --                   | --                   |
| Down syndrome                                       | 10<br>(6 - 15)       | 4<br>(2 - 8)       | 1<br>(0 - 1)        | 2<br>(1 - 3)         | 3<br>(2 - 4)         | 0<br>(0 - 0)         |
| Chromosomal unbalanced rearrangements               | 11<br>(6 - 17)       | 10<br>(6 - 16)     | 0<br>(0 - 0)        | 0<br>(0 - 1)         | 0<br>(0 - 0)         | 0<br>(0 - 0)         |
| Other congenital anomalies                          | 71<br>(56 - 89)      | 51<br>(37 - 69)    | 3<br>(2 - 4)        | 3<br>(2 - 4)         | 3<br>(2 - 3)         | 12<br>(8 - 16)       |
| Skin and subcutaneous diseases                      | 276<br>(108 - 380)   | 1<br>(0 - 1)       | 0<br>(0 - 0)        | 2<br>(1 - 2)         | 12<br>(6 - 17)       | 261<br>(103 - 363)   |
| Cellulitis                                          | 32<br>(9 - 64)       | 0<br>(0 - 0)       | 0<br>(0 - 0)        | 0<br>(0 - 0)         | 2<br>(1 - 4)         | 29<br>(8 - 61)       |
| Pyoderma                                            | 21<br>(8 - 35)       | 0<br>(0 - 0)       | 0<br>(0 - 0)        | 0<br>(0 - 0)         | 1<br>(1 - 2)         | 19<br>(7 - 33)       |
| Decubitus ulcer                                     | 216<br>(84 - 304)    | 0<br>(0 - 0)       | 0<br>(0 - 0)        | 1<br>(0 - 1)         | 8<br>(3 - 11)        | 207<br>(81 - 295)    |
| Other skin and subcutaneous diseases                | 8<br>(3 - 17)        | 0<br>(0 - 1)       | 0<br>(0 - 0)        | 0<br>(0 - 0)         | 1<br>(0 - 1)         | 6<br>(2 - 16)        |
| Sudden infant death syndrome                        | 16<br>(6 - 39)       | 16<br>(6 - 39)     | --                  | --                   | --                   | --                   |
| Injuries                                            | 956<br>(787 - 1,120) | 25<br>(20 - 33)    | 17<br>(14 - 21)     | 134<br>(121 - 154)   | 122<br>(105 - 158)   | 658<br>(500 - 798)   |
| Transport injuries                                  | 177<br>(138 - 218)   | 8<br>(5 - 12)      | 9<br>(6 - 11)       | 48<br>(37 - 58)      | 32<br>(22 - 40)      | 81<br>(57 - 109)     |



Web Table 31- Israel deaths with 95% UI by age, sex, and cause in 2013

| Cause                                           | Females, All Ages  | Females, 0-4 Years | Females, 5-14 Years | Females, 15-49 Years | Females, 50-69 Years | Females, 70-80 Years |
|-------------------------------------------------|--------------------|--------------------|---------------------|----------------------|----------------------|----------------------|
| Road injuries                                   | 174<br>(136 - 213) | 8<br>(5 - 11)      | 8<br>(6 - 11)       | 47<br>(37 - 57)      | 32<br>(22 - 40)      | 79<br>(56 - 107)     |
| Pedestrian road injuries                        | 84<br>(54 - 114)   | 4<br>(2 - 6)       | 4<br>(2 - 5)        | 10<br>(6 - 15)       | 14<br>(8 - 20)       | 52<br>(32 - 75)      |
| Cyclist road injuries                           | 3<br>(2 - 5)       | 0<br>(0 - 0)       | 0<br>(0 - 0)        | 1<br>(0 - 1)         | 1<br>(0 - 1)         | 1<br>(1 - 3)         |
| Motorcyclist road injuries                      | 3<br>(1 - 6)       | 0<br>(0 - 0)       | 0<br>(0 - 0)        | 2<br>(1 - 4)         | 1<br>(0 - 1)         | 1<br>(0 - 1)         |
| Motor vehicle road injuries                     | 83<br>(59 - 107)   | 4<br>(2 - 6)       | 5<br>(3 - 7)        | 34<br>(26 - 42)      | 16<br>(10 - 22)      | 24<br>(14 - 38)      |
| Other road injuries                             | 1<br>(0 - 1)       | 0<br>(0 - 0)       | 0<br>(0 - 0)        | 0<br>(0 - 0)         | 0<br>(0 - 1)         | 0<br>(0 - 1)         |
| Other transport injuries                        | 3<br>(2 - 5)       | 0<br>(0 - 0)       | 0<br>(0 - 0)        | 1<br>(0 - 1)         | 1<br>(0 - 1)         | 2<br>(1 - 3)         |
| Unintentional injuries                          | 638<br>(481 - 787) | 14<br>(10 - 21)    | 6<br>(5 - 8)        | 22<br>(19 - 30)      | 54<br>(41 - 83)      | 543<br>(393 - 677)   |
| Falls                                           | 148<br>(98 - 205)  | 1<br>(0 - 1)       | 0<br>(0 - 0)        | 2<br>(1 - 2)         | 6<br>(4 - 7)         | 140<br>(92 - 196)    |
| Drowning                                        | 11<br>(9 - 20)     | 1<br>(1 - 3)       | 2<br>(1 - 3)        | 3<br>(2 - 6)         | 2<br>(1 - 3)         | 3<br>(2 - 5)         |
| Fire, heat, and hot substances                  | 29<br>(18 - 40)    | 1<br>(1 - 2)       | 1<br>(0 - 1)        | 3<br>(2 - 4)         | 3<br>(2 - 5)         | 21<br>(13 - 30)      |
| Poisonings                                      | 3<br>(2 - 4)       | 0<br>(0 - 0)       | 0<br>(0 - 0)        | 0<br>(0 - 1)         | 0<br>(0 - 0)         | 2<br>(1 - 3)         |
| Exposure to mechanical forces                   | 11<br>(9 - 16)     | 1<br>(1 - 1)       | 1<br>(1 - 1)        | 2<br>(2 - 3)         | 1<br>(1 - 2)         | 6<br>(4 - 9)         |
| Unintentional firearm injuries                  | 2<br>(1 - 2)       | 0<br>(0 - 0)       | 0<br>(0 - 0)        | 1<br>(0 - 1)         | 0<br>(0 - 0)         | 0<br>(0 - 1)         |
| Unintentional suffocation                       | 3<br>(2 - 6)       | 0<br>(0 - 0)       | 0<br>(0 - 0)        | 0<br>(0 - 1)         | 0<br>(0 - 0)         | 2<br>(1 - 5)         |
| Other exposure to mechanical forces             | 7<br>(5 - 9)       | 1<br>(0 - 1)       | 1<br>(0 - 1)        | 1<br>(1 - 2)         | 1<br>(1 - 1)         | 3<br>(2 - 5)         |
| Adverse effects of medical treatment            | 286<br>(172 - 418) | 5<br>(3 - 10)      | 1<br>(1 - 3)        | 8<br>(6 - 14)        | 33<br>(22 - 63)      | 238<br>(131 - 357)   |
| Animal contact                                  | 2<br>(1 - 3)       | 0<br>(0 - 0)       | 0<br>(0 - 0)        | 0<br>(0 - 0)         | 0<br>(0 - 0)         | 1<br>(0 - 2)         |
| Venomous animal contact                         | 0<br>(0 - 1)       | 0<br>(0 - 0)       | 0<br>(0 - 0)        | 0<br>(0 - 0)         | 0<br>(0 - 0)         | 0<br>(0 - 0)         |
| Non-venomous animal contact                     | 2<br>(0 - 3)       | 0<br>(0 - 0)       | 0<br>(0 - 0)        | 0<br>(0 - 0)         | 0<br>(0 - 0)         | 1<br>(0 - 2)         |
| Foreign body                                    | 145<br>(76 - 222)  | 4<br>(2 - 7)       | 1<br>(0 - 1)        | 3<br>(2 - 4)         | 7<br>(4 - 11)        | 130<br>(66 - 202)    |
| Pulmonary aspiration and foreign body in airway | 143<br>(74 - 220)  | 4<br>(2 - 7)       | 1<br>(0 - 1)        | 2<br>(2 - 4)         | 7<br>(4 - 11)        | 129<br>(65 - 202)    |
| Foreign body in other body part                 | 1<br>(1 - 3)       | 0<br>(0 - 0)       | 0<br>(0 - 0)        | 0<br>(0 - 0)         | 0<br>(0 - 0)         | 1<br>(0 - 2)         |
| Other unintentional injuries                    | 4<br>(1 - 5)       | 0<br>(0 - 1)       | 0<br>(0 - 0)        | 1<br>(0 - 1)         | 1<br>(0 - 1)         | 2<br>(0 - 3)         |
| Self-harm and interpersonal violence            | 141<br>(120 - 198) | 2<br>(1 - 3)       | 3<br>(2 - 3)        | 64<br>(55 - 78)      | 36<br>(30 - 46)      | 35<br>(27 - 70)      |
| Self-harm                                       | 99<br>(84 - 153)   | --                 | 1<br>(0 - 1)        | 41<br>(34 - 52)      | 29<br>(24 - 40)      | 28<br>(20 - 63)      |
| Interpersonal violence                          | 41<br>(27 - 53)    | 2<br>(1 - 3)       | 2<br>(1 - 3)        | 23<br>(15 - 30)      | 7<br>(4 - 10)        | 7<br>(4 - 10)        |
| Assault by firearm                              | 13<br>(7 - 20)     | 0<br>(0 - 1)       | 1<br>(0 - 1)        | 9<br>(5 - 13)        | 2<br>(1 - 3)         | 1<br>(1 - 2)         |
| Assault by sharp object                         | 14<br>(8 - 20)     | 0<br>(0 - 1)       | 0<br>(0 - 1)        | 8<br>(5 - 13)        | 3<br>(2 - 4)         | 2<br>(1 - 3)         |
| Assault by other means                          | 15<br>(9 - 21)     | 1<br>(1 - 2)       | 1<br>(1 - 2)        | 6<br>(3 - 9)         | 3<br>(1 - 4)         | 4<br>(2 - 5)         |

Web Table 31- Italy deaths with 95% UI by age, sex, and cause in 2013

| Cause                                                             | Both Sexes, All Ages           | Both Sexes, 0-4 Years    | Both Sexes, 5-14 Years | Both Sexes, 15-49 Years     | Both Sexes, 50-69 Years     | Both Sexes, 70-80 Years        |
|-------------------------------------------------------------------|--------------------------------|--------------------------|------------------------|-----------------------------|-----------------------------|--------------------------------|
| All causes                                                        | 638,278<br>(606,814 - 672,374) | 2,060<br>(1,577 - 2,694) | 524<br>(444 - 623)     | 22,024<br>(20,326 - 23,964) | 86,271<br>(80,329 - 93,107) | 527,400<br>(502,393 - 553,382) |
| Communicable, maternal, neonatal, and nutritional diseases        | 19,043<br>(15,941 - 22,165)    | 1,127<br>(848 - 1,478)   | 46<br>(34 - 65)        | 1,119<br>(914 - 1,401)      | 1,568<br>(1,291 - 1,876)    | 15,182<br>(12,318 - 18,115)    |
| HIV/AIDS and tuberculosis                                         | 1,515<br>(1,129 - 2,045)       | 1<br>(1 - 2)             | 1<br>(0 - 1)           | 663<br>(471 - 950)          | 406<br>(238 - 629)          | 445<br>(355 - 556)             |
| Tuberculosis                                                      | 498<br>(415 - 600)             | 0<br>(0 - 1)             | 1<br>(0 - 1)           | 33<br>(27 - 40)             | 83<br>(67 - 114)            | 381<br>(305 - 470)             |
| HIV/AIDS                                                          | 1,017<br>(651 - 1,549)         | 1<br>(0 - 2)             | 0<br>(0 - 1)           | 630<br>(439 - 917)          | 323<br>(159 - 545)          | 64<br>(18 - 128)               |
| HIV/AIDS resulting in mycobacterial infection                     | 53<br>(32 - 86)                | 0<br>(0 - 0)             | 0<br>(0 - 0)           | 32<br>(21 - 49)             | 17<br>(8 - 31)              | 4<br>(1 - 8)                   |
| HIV/AIDS resulting in other diseases                              | 964<br>(617 - 1,474)           | 1<br>(0 - 2)             | 0<br>(0 - 1)           | 598<br>(417 - 870)          | 305<br>(149 - 514)          | 60<br>(17 - 120)               |
| Diarrhea, lower respiratory, and other common infectious diseases | 13,819<br>(11,118 - 16,811)    | 87<br>(61 - 122)         | 36<br>(25 - 54)        | 307<br>(258 - 363)          | 872<br>(683 - 1,047)        | 12,517<br>(9,877 - 15,496)     |
| Diarrheal diseases                                                | 455<br>(313 - 640)             | 8<br>(5 - 11)            | 1<br>(1 - 1)           | 9<br>(7 - 11)               | 25<br>(19 - 32)             | 413<br>(274 - 597)             |
| Intestinal infectious diseases                                    | 79<br>(33 - 165)               | 14<br>(5 - 31)           | 13<br>(5 - 31)         | 28<br>(10 - 59)             | 10<br>(4 - 21)              | 14<br>(6 - 27)                 |
| Typhoid fever                                                     | 55<br>(19 - 123)               | 9<br>(3 - 22)            | 10<br>(3 - 23)         | 20<br>(7 - 45)              | 7<br>(2 - 16)               | 9<br>(3 - 19)                  |
| Paratyphoid fever                                                 | 14<br>(5 - 33)                 | 3<br>(1 - 8)             | 3<br>(1 - 7)           | 5<br>(2 - 12)               | 1<br>(0 - 3)                | 2<br>(1 - 4)                   |
| Other intestinal infectious diseases                              | 10<br>(4 - 18)                 | 2<br>(0 - 6)             | 0<br>(0 - 2)           | 2<br>(0 - 7)                | 2<br>(0 - 6)                | 4<br>(1 - 9)                   |
| Lower respiratory infections                                      | 12,668<br>(10,014 - 15,698)    | 37<br>(24 - 54)          | 9<br>(7 - 13)          | 184<br>(148 - 223)          | 706<br>(524 - 873)          | 11,733<br>(9,129 - 14,744)     |
| Upper respiratory infections                                      | 13<br>(3 - 40)                 | 0<br>(0 - 0)             | 0<br>(0 - 0)           | 1<br>(0 - 2)                | 2<br>(0 - 5)                | 10<br>(1 - 37)                 |
| Otitis media                                                      | 17<br>(14 - 21)                | 1<br>(0 - 1)             | 0<br>(0 - 1)           | 3<br>(2 - 3)                | 3<br>(3 - 4)                | 9<br>(6 - 13)                  |
| Meningitis                                                        | 211<br>(164 - 240)             | 14<br>(9 - 20)           | 4<br>(3 - 5)           | 28<br>(23 - 33)             | 46<br>(36 - 55)             | 118<br>(85 - 142)              |
| Pneumococcal meningitis                                           | 43<br>(30 - 58)                | 2<br>(1 - 3)             | 1<br>(0 - 1)           | 6<br>(4 - 8)                | 9<br>(6 - 14)               | 26<br>(16 - 36)                |
| H influenzae type B meningitis                                    | 31<br>(23 - 40)                | 5<br>(3 - 8)             | 1<br>(1 - 1)           | 4<br>(3 - 6)                | 6<br>(4 - 8)                | 15<br>(9 - 23)                 |
| Meningococcal meningitis                                          | 66<br>(47 - 84)                | 3<br>(2 - 6)             | 1<br>(1 - 2)           | 9<br>(6 - 13)               | 14<br>(8 - 20)              | 38<br>(25 - 52)                |
| Other meningitis                                                  | 70<br>(51 - 87)                | 3<br>(2 - 5)             | 1<br>(1 - 2)           | 9<br>(6 - 13)               | 17<br>(11 - 23)             | 39<br>(25 - 54)                |
| Encephalitis                                                      | 276<br>(155 - 346)             | 10<br>(6 - 15)           | 6<br>(4 - 10)          | 45<br>(27 - 64)             | 69<br>(41 - 97)             | 146<br>(66 - 199)              |
| Diphtheria                                                        | 1<br>(0 - 2)                   | 0<br>(0 - 1)             | 0<br>(0 - 0)           | 0<br>(0 - 1)                | 0<br>(0 - 1)                | --                             |
| Whooping cough                                                    | 5<br>(3 - 8)                   | 1<br>(0 - 3)             | 0<br>(0 - 1)           | 2<br>(2 - 3)                | 1<br>(0 - 1)                | --                             |
| Tetanus                                                           | 22<br>(13 - 33)                | 0<br>(0 - 0)             | 0<br>(0 - 1)           | 3<br>(1 - 4)                | 4<br>(3 - 6)                | 14<br>(8 - 24)                 |
| Measles                                                           | 0<br>(0 - 0)                   | 0<br>(0 - 0)             | 0<br>(0 - 0)           | 0<br>(0 - 0)                | 0<br>(0 - 0)                | --                             |
| Varicella and herpes zoster                                       | 73<br>(16 - 255)               | 2<br>(0 - 7)             | 1<br>(0 - 2)           | 5<br>(1 - 11)               | 5<br>(1 - 14)               | 60<br>(4 - 236)                |
| Neglected tropical diseases and malaria                           | 65<br>(56 - 73)                | 1<br>(1 - 2)             | 2<br>(1 - 2)           | 14<br>(11 - 17)             | 17<br>(14 - 19)             | 31<br>(27 - 35)                |
| Leishmaniasis                                                     | 6<br>(4 - 8)                   | 0<br>(0 - 1)             | 0<br>(0 - 0)           | 1<br>(1 - 2)                | 2<br>(1 - 3)                | 2<br>(1 - 3)                   |
| Visceral leishmaniasis                                            | 6<br>(4 - 8)                   | 0<br>(0 - 1)             | 0<br>(0 - 0)           | 1<br>(1 - 2)                | 2<br>(1 - 3)                | 2<br>(1 - 3)                   |
| Cysticercosis                                                     | 1<br>(1 - 1)                   | 0<br>(0 - 0)             | 0<br>(0 - 0)           | 0<br>(0 - 0)                | 0<br>(0 - 0)                | 0<br>(0 - 0)                   |
| Cystic echinococcosis                                             | 32<br>(29 - 35)                | 0<br>(0 - 0)             | 0<br>(0 - 0)           | 5<br>(4 - 6)                | 8<br>(7 - 9)                | 18<br>(16 - 20)                |
| Dengue                                                            | 6<br>(4 - 6)                   | 0<br>(0 - 0)             | 0<br>(0 - 1)           | 3<br>(2 - 3)                | 1<br>(1 - 2)                | 1<br>(1 - 1)                   |
| Rabies                                                            | 5<br>(2 - 6)                   | 0<br>(0 - 0)             | 0<br>(0 - 1)           | 2<br>(1 - 3)                | 1<br>(1 - 2)                | 1<br>(0 - 1)                   |
| Other neglected tropical diseases                                 | 16<br>(12 - 20)                | 0<br>(0 - 0)             | 0<br>(0 - 1)           | 3<br>(2 - 4)                | 4<br>(3 - 6)                | 8<br>(6 - 12)                  |
| Maternal disorders                                                | 24<br>(18 - 32)                | --                       | 0<br>(0 - 0)           | 24<br>(18 - 32)             | --                          | --                             |
| Maternal hemorrhage                                               | 4<br>(2 - 5)                   | --                       | 0<br>(0 - 0)           | 4<br>(2 - 5)                | --                          | --                             |
| Maternal sepsis and other maternal infections                     | 1<br>(1 - 2)                   | --                       | 0<br>(0 - 0)           | 1<br>(1 - 2)                | --                          | --                             |
| Maternal hypertensive disorders                                   | 3<br>(2 - 4)                   | --                       | 0<br>(0 - 0)           | 3<br>(2 - 4)                | --                          | --                             |
| Maternal obstructed labor                                         | 2<br>(1 - 3)                   | --                       | 0<br>(0 - 0)           | 2<br>(1 - 3)                | --                          | --                             |

Web Table 31- Italy deaths with 95% UI by age, sex, and cause in 2013

| Cause                                                            | Both Sexes, All Ages           | Both Sexes, 0-4 Years  | Both Sexes, 5-14 Years | Both Sexes, 15-49 Years     | Both Sexes, 50-69 Years     | Both Sexes, 70-80 Years        |
|------------------------------------------------------------------|--------------------------------|------------------------|------------------------|-----------------------------|-----------------------------|--------------------------------|
| Maternal abortive outcome                                        | 6<br>(4 - 9)                   | --                     | 0<br>(0 - 0)           | 6<br>(4 - 9)                | --                          | --                             |
| Indirect maternal deaths                                         | 2<br>(1 - 4)                   | --                     | 0<br>(0 - 0)           | 2<br>(1 - 4)                | --                          | --                             |
| Late maternal deaths                                             | 2<br>(1 - 3)                   | --                     | 0<br>(0 - 0)           | 2<br>(1 - 3)                | --                          | --                             |
| Maternal deaths aggravated by HIV/AIDS                           | 0<br>(0 - 0)                   | --                     | --                     | 0<br>(0 - 0)                | --                          | --                             |
| Other maternal disorders                                         | 4<br>(3 - 6)                   | --                     | 0<br>(0 - 0)           | 4<br>(3 - 6)                | --                          | --                             |
| Neonatal disorders                                               | 1,003<br>(748 - 1,317)         | 1,003<br>(748 - 1,317) | --                     | --                          | --                          | --                             |
| Neonatal preterm birth complications                             | 537<br>(377 - 767)             | 537<br>(377 - 767)     | --                     | --                          | --                          | --                             |
| Neonatal encephalopathy due to birth asphyxia and trauma         | 183<br>(128 - 250)             | 183<br>(128 - 250)     | --                     | --                          | --                          | --                             |
| Neonatal sepsis and other neonatal infections                    | 70<br>(37 - 126)               | 70<br>(37 - 126)       | --                     | --                          | --                          | --                             |
| Hemolytic disease and other neonatal jaundice                    | 4<br>(2 - 8)                   | 4<br>(2 - 8)           | --                     | --                          | --                          | --                             |
| Other neonatal disorders                                         | 209<br>(94 - 309)              | 209<br>(94 - 309)      | --                     | --                          | --                          | --                             |
| Nutritional deficiencies                                         | 1,855<br>(1,054 - 2,383)       | 4<br>(2 - 5)           | 2<br>(1 - 2)           | 40<br>(24 - 49)             | 90<br>(56 - 112)            | 1,720<br>(964 - 2,234)         |
| Protein-energy malnutrition                                      | 400<br>(45 - 778)              | 1<br>(0 - 2)           | 0<br>(0 - 1)           | 5<br>(1 - 9)                | 16<br>(3 - 28)              | 377<br>(40 - 742)              |
| Iodine deficiency                                                | 5<br>(0 - 28)                  | 0<br>(0 - 0)           | 0<br>(0 - 0)           | 0<br>(0 - 1)                | 1<br>(0 - 3)                | 4<br>(0 - 26)                  |
| Iron-deficiency anemia                                           | 1,267<br>(758 - 1,719)         | 2<br>(1 - 3)           | 1<br>(0 - 1)           | 30<br>(18 - 37)             | 62<br>(41 - 80)             | 1,173<br>(693 - 1,615)         |
| Other nutritional deficiencies                                   | 183<br>(62 - 330)              | 1<br>(0 - 2)           | 0<br>(0 - 1)           | 5<br>(2 - 8)                | 11<br>(4 - 17)              | 166<br>(55 - 308)              |
| Other communicable, maternal, neonatal, and nutritional diseases | 761<br>(551 - 938)             | 31<br>(11 - 68)        | 6<br>(4 - 9)           | 70<br>(53 - 86)             | 184<br>(134 - 229)          | 470<br>(317 - 603)             |
| Sexually transmitted diseases excluding HIV                      | 53<br>(29 - 94)                | 24<br>(4 - 59)         | 2<br>(0 - 4)           | 3<br>(2 - 4)                | 6<br>(4 - 8)                | 19<br>(12 - 28)                |
| Syphilis                                                         | 45<br>(23 - 84)                | 24<br>(4 - 59)         | 2<br>(0 - 4)           | 2<br>(1 - 2)                | 3<br>(2 - 5)                | 15<br>(10 - 23)                |
| Chlamydial infection                                             | 2<br>(1 - 2)                   | --                     | 0<br>(0 - 0)           | 0<br>(0 - 1)                | 0<br>(0 - 1)                | 1<br>(0 - 1)                   |
| Gonococcal infection                                             | 4<br>(3 - 5)                   | --                     | 0<br>(0 - 0)           | 1<br>(0 - 1)                | 1<br>(1 - 1)                | 2<br>(1 - 3)                   |
| Other sexually transmitted diseases                              | 2<br>(2 - 3)                   | --                     | 0<br>(0 - 0)           | 1<br>(0 - 1)                | 1<br>(0 - 1)                | 1<br>(1 - 1)                   |
| Hepatitis                                                        | 301<br>(247 - 370)             | 2<br>(1 - 3)           | 2<br>(1 - 2)           | 34<br>(26 - 44)             | 84<br>(63 - 109)            | 180<br>(133 - 241)             |
| Acute hepatitis A                                                | 48<br>(15 - 98)                | 1<br>(1 - 3)           | 1<br>(1 - 2)           | 11<br>(4 - 20)              | 14<br>(4 - 29)              | 21<br>(5 - 50)                 |
| Acute hepatitis B                                                | 200<br>(129 - 276)             | 1<br>(0 - 1)           | 0<br>(0 - 1)           | 16<br>(8 - 26)              | 56<br>(35 - 80)             | 126<br>(76 - 185)              |
| Acute hepatitis C                                                | 53<br>(12 - 113)               | --                     | 0<br>(0 - 1)           | 7<br>(2 - 16)               | 13<br>(3 - 30)              | 32<br>(6 - 73)                 |
| Other infectious diseases                                        | 407<br>(225 - 540)             | 6<br>(3 - 9)           | 3<br>(1 - 4)           | 33<br>(19 - 45)             | 95<br>(52 - 130)            | 271<br>(138 - 372)             |
| Non-communicable diseases                                        | 592,227<br>(562,738 - 625,087) | 835<br>(632 - 1,100)   | 333<br>(278 - 396)     | 15,086<br>(13,853 - 16,499) | 80,836<br>(75,185 - 87,221) | 495,137<br>(471,764 - 520,547) |
| Neoplasms                                                        | 178,959<br>(164,337 - 192,833) | 81<br>(56 - 115)       | 184<br>(151 - 222)     | 8,096<br>(7,356 - 8,962)    | 46,757<br>(43,113 - 50,668) | 123,841<br>(111,685 - 134,998) |
| Esophageal cancer                                                | 2,107<br>(1,780 - 2,934)       | --                     | --                     | 98<br>(73 - 153)            | 771<br>(622 - 1,133)        | 1,238<br>(1,034 - 1,664)       |
| Stomach cancer                                                   | 13,263<br>(11,043 - 15,836)    | --                     | --                     | 412<br>(341 - 493)          | 2,550<br>(2,172 - 2,946)    | 10,300<br>(8,311 - 12,592)     |
| Liver cancer                                                     | 11,585<br>(8,773 - 16,092)     | --                     | 2<br>(1 - 4)           | 342<br>(227 - 521)          | 3,342<br>(2,314 - 5,041)    | 7,899<br>(5,989 - 10,958)      |
| Liver cancer due to hepatitis B                                  | 1,426<br>(904 - 2,263)         | --                     | 1<br>(0 - 2)           | 85<br>(51 - 142)            | 570<br>(335 - 949)          | 771<br>(490 - 1,224)           |
| Liver cancer due to hepatitis C                                  | 7,736<br>(5,783 - 10,869)      | --                     | 1<br>(0 - 2)           | 198<br>(129 - 309)          | 2,141<br>(1,478 - 3,312)    | 5,396<br>(3,965 - 7,452)       |
| Liver cancer due to alcohol use                                  | 2,123<br>(1,404 - 3,128)       | --                     | --                     | 46<br>(25 - 78)             | 551<br>(326 - 882)          | 1,526<br>(1,020 - 2,288)       |
| Liver cancer due to other causes                                 | 300<br>(186 - 462)             | --                     | 1<br>(0 - 1)           | 13<br>(8 - 20)              | 81<br>(47 - 132)            | 205<br>(113 - 330)             |
| Larynx cancer                                                    | 1,662<br>(1,236 - 2,116)       | --                     | --                     | 74<br>(55 - 115)            | 589<br>(458 - 802)          | 999<br>(681 - 1,286)           |
| Tracheal, bronchus and lung cancer                               | 35,216<br>(30,830 - 39,137)    | --                     | --                     | 1,060<br>(889 - 1,251)      | 11,244<br>(9,796 - 12,681)  | 22,912<br>(19,785 - 25,746)    |
| Breast cancer                                                    | 12,390<br>(8,812 - 14,740)     | --                     | --                     | 1,228<br>(1,006 - 1,531)    | 3,927<br>(2,996 - 4,700)    | 7,236<br>(4,631 - 8,878)       |
| Cervical cancer                                                  | 1,335<br>(777 - 1,823)         | --                     | --                     | 172<br>(93 - 248)           | 376<br>(209 - 517)          | 788<br>(456 - 1,159)           |

Web Table 31- Italy deaths with 95% UI by age, sex, and cause in 2013

| Cause                                         | Both Sexes, All Ages           | Both Sexes, 0-4 Years | Both Sexes, 5-14 Years | Both Sexes, 15-49 Years  | Both Sexes, 50-69 Years     | Both Sexes, 70-80 Years        |
|-----------------------------------------------|--------------------------------|-----------------------|------------------------|--------------------------|-----------------------------|--------------------------------|
| Uterine cancer                                | 1,505<br>(820 - 1,924)         | --                    | --                     | 38<br>(26 - 53)          | 400<br>(238 - 518)          | 1,067<br>(541 - 1,431)         |
| Prostate cancer                               | 10,214<br>(7,527 - 14,653)     | --                    | --                     | 15<br>(9 - 23)           | 1,018<br>(697 - 1,480)      | 9,181<br>(6,710 - 13,373)      |
| Colon and rectum cancer                       | 22,928<br>(19,954 - 25,916)    | --                    | --                     | 668<br>(575 - 768)       | 5,075<br>(4,468 - 5,652)    | 17,184<br>(14,702 - 19,785)    |
| Lip and oral cavity cancer                    | 1,895<br>(1,636 - 2,176)       | --                    | --                     | 151<br>(124 - 187)       | 664<br>(558 - 788)          | 1,080<br>(902 - 1,296)         |
| Nasopharynx cancer                            | 261<br>(202 - 359)             | --                    | 1<br>(0 - 1)           | 49<br>(34 - 72)          | 114<br>(84 - 162)           | 97<br>(70 - 142)               |
| Other pharynx cancer                          | 1,004<br>(823 - 1,461)         | --                    | --                     | 89<br>(67 - 130)         | 490<br>(387 - 726)          | 425<br>(329 - 631)             |
| Gallbladder and biliary tract cancer          | 3,745<br>(2,497 - 4,726)       | --                    | --                     | 65<br>(49 - 85)          | 778<br>(552 - 955)          | 2,902<br>(1,840 - 3,762)       |
| Pancreatic cancer                             | 11,631<br>(10,275 - 12,900)    | --                    | --                     | 371<br>(314 - 433)       | 3,179<br>(2,794 - 3,590)    | 8,082<br>(6,993 - 9,127)       |
| Malignant skin melanoma                       | 1,944<br>(1,280 - 2,713)       | --                    | --                     | 330<br>(220 - 495)       | 634<br>(404 - 943)          | 980<br>(630 - 1,305)           |
| Non-melanoma skin cancer                      | 841<br>(631 - 1,202)           | --                    | --                     | 21<br>(15 - 30)          | 88<br>(64 - 130)            | 733<br>(545 - 1,060)           |
| Ovarian cancer                                | 3,801<br>(2,951 - 4,529)       | --                    | --                     | 276<br>(216 - 346)       | 1,319<br>(1,056 - 1,573)    | 2,206<br>(1,539 - 2,829)       |
| Testicular cancer                             | 89<br>(58 - 124)               | --                    | --                     | 43<br>(26 - 63)          | 16<br>(10 - 24)             | 30<br>(20 - 45)                |
| Kidney cancer                                 | 4,136<br>(3,331 - 5,055)       | 3<br>(2 - 5)          | 4<br>(3 - 6)           | 168<br>(133 - 209)       | 1,195<br>(980 - 1,438)      | 2,766<br>(2,104 - 3,560)       |
| Bladder cancer                                | 6,681<br>(5,169 - 7,969)       | --                    | --                     | 66<br>(50 - 89)          | 1,083<br>(904 - 1,292)      | 5,532<br>(4,075 - 6,804)       |
| Brain and nervous system cancer               | 3,845<br>(3,193 - 4,528)       | 16<br>(9 - 26)        | 43<br>(32 - 58)        | 532<br>(444 - 656)       | 1,543<br>(1,282 - 1,861)    | 1,711<br>(1,305 - 2,093)       |
| Thyroid cancer                                | 667<br>(529 - 834)             | --                    | 0<br>(0 - 0)           | 33<br>(24 - 45)          | 173<br>(139 - 230)          | 461<br>(350 - 589)             |
| Mesothelioma                                  | 1,843<br>(1,393 - 3,013)       | --                    | --                     | 72<br>(42 - 151)         | 619<br>(436 - 1,062)        | 1,152<br>(800 - 1,973)         |
| Hodgkin lymphoma                              | 421<br>(309 - 518)             | 0<br>(0 - 0)          | 2<br>(1 - 3)           | 101<br>(76 - 137)        | 104<br>(79 - 143)           | 213<br>(136 - 276)             |
| Non-Hodgkin lymphoma                          | 5,952<br>(3,336 - 7,480)       | 5<br>(2 - 8)          | 16<br>(8 - 27)         | 423<br>(244 - 608)       | 1,485<br>(822 - 1,917)      | 4,024<br>(2,096 - 5,407)       |
| Multiple myeloma                              | 3,410<br>(2,429 - 4,850)       | --                    | --                     | 87<br>(60 - 138)         | 848<br>(601 - 1,233)        | 2,476<br>(1,717 - 3,494)       |
| Leukemia                                      | 6,089<br>(5,270 - 6,868)       | 21<br>(13 - 33)       | 56<br>(43 - 72)        | 453<br>(389 - 517)       | 1,218<br>(1,043 - 1,378)    | 4,341<br>(3,637 - 5,048)       |
| Other neoplasms                               | 8,498<br>(6,235 - 10,246)      | 36<br>(23 - 52)       | 60<br>(42 - 78)        | 660<br>(547 - 771)       | 1,914<br>(1,603 - 2,255)    | 5,828<br>(3,756 - 7,452)       |
| Cardiovascular diseases                       | 230,791<br>(213,588 - 251,964) | 15<br>(11 - 21)       | 23<br>(19 - 30)        | 3,201<br>(2,844 - 3,601) | 19,199<br>(17,512 - 21,436) | 208,353<br>(192,871 - 227,503) |
| Rheumatic heart disease                       | 2,021<br>(1,069 - 2,605)       | 0<br>(0 - 1)          | 2<br>(1 - 3)           | 70<br>(52 - 96)          | 302<br>(218 - 411)          | 1,647<br>(767 - 2,234)         |
| Ischemic heart disease                        | 102,042<br>(90,219 - 118,480)  | 1<br>(1 - 2)          | 4<br>(3 - 5)           | 1,794<br>(1,552 - 2,046) | 10,844<br>(9,628 - 12,330)  | 89,399<br>(78,560 - 104,906)   |
| Cerebrovascular disease                       | 70,557<br>(60,359 - 82,030)    | 3<br>(2 - 5)          | 9<br>(7 - 12)          | 731<br>(587 - 892)       | 4,205<br>(3,458 - 5,046)    | 65,608<br>(56,117 - 76,601)    |
| Ischemic stroke                               | 42,249<br>(35,128 - 54,099)    | 0<br>(0 - 1)          | 1<br>(1 - 2)           | 73<br>(50 - 110)         | 1,166<br>(842 - 1,686)      | 41,008<br>(34,062 - 52,539)    |
| Hemorrhagic stroke                            | 28,308<br>(20,402 - 34,724)    | 3<br>(2 - 4)          | 8<br>(6 - 11)          | 658<br>(519 - 797)       | 3,039<br>(2,401 - 3,637)    | 24,600<br>(16,902 - 30,564)    |
| Hypertensive heart disease                    | 18,963<br>(13,756 - 25,997)    | 1<br>(0 - 1)          | 1<br>(0 - 1)           | 68<br>(49 - 93)          | 902<br>(668 - 1,278)        | 17,991<br>(12,903 - 24,855)    |
| Cardiomyopathy and myocarditis                | 15,392<br>(11,497 - 24,768)    | 7<br>(5 - 10)         | 5<br>(3 - 7)           | 199<br>(156 - 283)       | 961<br>(773 - 1,385)        | 14,220<br>(10,394 - 23,173)    |
| Atrial fibrillation and flutter               | 6,776<br>(5,025 - 8,912)       | --                    | --                     | 18<br>(13 - 23)          | 202<br>(154 - 257)          | 6,557<br>(4,809 - 8,703)       |
| Aortic aneurysm                               | 3,798<br>(2,916 - 4,518)       | --                    | --                     | 97<br>(76 - 121)         | 690<br>(516 - 821)          | 3,011<br>(2,302 - 3,640)       |
| Peripheral vascular disease                   | 1,718<br>(1,311 - 2,231)       | --                    | --                     | 8<br>(6 - 10)            | 103<br>(79 - 126)           | 1,608<br>(1,208 - 2,096)       |
| Endocarditis                                  | 576<br>(411 - 777)             | 1<br>(1 - 2)          | 1<br>(1 - 2)           | 39<br>(28 - 55)          | 111<br>(82 - 163)           | 423<br>(285 - 577)             |
| Other cardiovascular and circulatory diseases | 8,948<br>(6,363 - 11,408)      | 1<br>(1 - 2)          | 2<br>(1 - 2)           | 177<br>(133 - 222)       | 880<br>(680 - 1,101)        | 7,889<br>(5,321 - 10,295)      |
| Chronic respiratory diseases                  | 29,532<br>(24,512 - 33,659)    | 6<br>(4 - 8)          | 5<br>(4 - 6)           | 234<br>(181 - 273)       | 2,171<br>(1,816 - 2,536)    | 27,117<br>(22,342 - 30,946)    |
| Chronic obstructive pulmonary disease         | 25,913<br>(21,786 - 29,718)    | 4<br>(2 - 5)          | 2<br>(2 - 3)           | 144<br>(112 - 176)       | 1,719<br>(1,432 - 2,079)    | 24,044<br>(20,012 - 27,582)    |
| Pneumoconiosis                                | 954<br>(648 - 1,515)           | 0<br>(0 - 0)          | 0<br>(0 - 1)           | 13<br>(9 - 20)           | 103<br>(59 - 181)           | 837<br>(559 - 1,338)           |
| Silicosis                                     | 500<br>(324 - 807)             | 0<br>(0 - 0)          | 0<br>(0 - 0)           | 4<br>(3 - 7)             | 36<br>(16 - 65)             | 460<br>(291 - 743)             |
| Asbestosis                                    | 189<br>(125 - 298)             | 0<br>(0 - 0)          | 0<br>(0 - 0)           | 3<br>(2 - 5)             | 28<br>(13 - 51)             | 157<br>(104 - 251)             |

Web Table 31- Italy deaths with 95% UI by age, sex, and cause in 2013

| Cause                                               | Both Sexes, All Ages        | Both Sexes, 0-4 Years | Both Sexes, 5-14 Years | Both Sexes, 15-49 Years | Both Sexes, 50-69 Years  | Both Sexes, 70-80 Years     |
|-----------------------------------------------------|-----------------------------|-----------------------|------------------------|-------------------------|--------------------------|-----------------------------|
| Coal workers pneumoconiosis                         | 41<br>(27 - 64)             | 0<br>(0 - 0)          | 0<br>(0 - 0)           | 2<br>(1 - 3)            | 6<br>(3 - 10)            | 33<br>(22 - 54)             |
| Other pneumoconiosis                                | 224<br>(146 - 347)          | 0<br>(0 - 0)          | 0<br>(0 - 0)           | 4<br>(2 - 6)            | 34<br>(17 - 60)          | 187<br>(119 - 290)          |
| Asthma                                              | 668<br>(465 - 1,030)        | 0<br>(0 - 0)          | 1<br>(1 - 1)           | 25<br>(18 - 34)         | 83<br>(59 - 118)         | 558<br>(375 - 904)          |
| Interstitial lung disease and pulmonary sarcoidosis | 1,808<br>(589 - 3,069)      | 1<br>(0 - 2)          | 1<br>(0 - 2)           | 44<br>(18 - 71)         | 242<br>(58 - 433)        | 1,520<br>(503 - 2,597)      |
| Other chronic respiratory diseases                  | 190<br>(139 - 255)          | 1<br>(1 - 2)          | 0<br>(0 - 1)           | 7<br>(5 - 9)            | 23<br>(16 - 32)          | 158<br>(113 - 221)          |
| Cirrhosis                                           | 12,718<br>(11,187 - 14,106) | 2<br>(1 - 3)          | 3<br>(2 - 3)           | 1,044<br>(892 - 1,222)  | 3,526<br>(3,060 - 3,981) | 8,144<br>(7,025 - 9,218)    |
| Cirrhosis due to hepatitis B                        | 2,039<br>(1,350 - 2,819)    | 0<br>(0 - 0)          | 0<br>(0 - 1)           | 144<br>(79 - 247)       | 513<br>(324 - 765)       | 1,382<br>(899 - 1,969)      |
| Cirrhosis due to hepatitis C                        | 6,537<br>(4,874 - 8,166)    | 0<br>(0 - 1)          | 1<br>(0 - 2)           | 532<br>(226 - 750)      | 1,801<br>(1,102 - 2,392) | 4,203<br>(3,161 - 5,339)    |
| Cirrhosis due to alcohol use                        | 3,583<br>(2,416 - 4,918)    | --                    | --                     | 284<br>(173 - 478)      | 1,031<br>(653 - 1,564)   | 2,268<br>(1,501 - 3,073)    |
| Cirrhosis due to other causes                       | 558<br>(347 - 825)          | 1<br>(1 - 2)          | 1<br>(1 - 2)           | 85<br>(53 - 131)        | 180<br>(109 - 270)       | 291<br>(159 - 471)          |
| Digestive diseases                                  | 12,966<br>(11,099 - 14,782) | 4<br>(3 - 6)          | 5<br>(4 - 6)           | 249<br>(211 - 288)      | 1,186<br>(1,021 - 1,393) | 11,523<br>(9,731 - 13,269)  |
| Peptic ulcer disease                                | 1,386<br>(1,041 - 1,859)    | 0<br>(0 - 0)          | 0<br>(0 - 0)           | 30<br>(22 - 39)         | 145<br>(110 - 191)       | 1,211<br>(884 - 1,667)      |
| Gastritis and duodenitis                            | 204<br>(128 - 393)          | 0<br>(0 - 0)          | 0<br>(0 - 0)           | 7<br>(5 - 11)           | 22<br>(14 - 38)          | 175<br>(106 - 343)          |
| Appendicitis                                        | 139<br>(97 - 205)           | 0<br>(0 - 0)          | 1<br>(0 - 1)           | 10<br>(7 - 13)          | 21<br>(15 - 29)          | 108<br>(71 - 167)           |
| Paralytic ileus and intestinal obstruction          | 3,149<br>(2,254 - 4,637)    | 1<br>(1 - 2)          | 1<br>(1 - 2)           | 35<br>(25 - 54)         | 208<br>(148 - 313)       | 2,904<br>(2,043 - 4,299)    |
| Inguinal, femoral, and abdominal hernia             | 425<br>(249 - 644)          | 0<br>(0 - 0)          | 0<br>(0 - 0)           | 4<br>(2 - 6)            | 36<br>(23 - 53)          | 385<br>(213 - 595)          |
| Inflammatory bowel disease                          | 963<br>(407 - 1,399)        | 1<br>(0 - 2)          | 1<br>(0 - 1)           | 28<br>(15 - 38)         | 101<br>(50 - 138)        | 832<br>(327 - 1,241)        |
| Vascular intestinal disorders                       | 2,289<br>(1,381 - 3,528)    | 0<br>(0 - 1)          | 0<br>(0 - 1)           | 21<br>(11 - 37)         | 210<br>(120 - 339)       | 2,057<br>(1,217 - 3,178)    |
| Gallbladder and biliary diseases                    | 1,733<br>(1,216 - 2,206)    | 0<br>(0 - 0)          | 0<br>(0 - 1)           | 22<br>(17 - 28)         | 127<br>(93 - 164)        | 1,582<br>(1,091 - 2,042)    |
| Pancreatitis                                        | 1,038<br>(740 - 1,378)      | 0<br>(0 - 0)          | 0<br>(0 - 1)           | 64<br>(47 - 85)         | 174<br>(126 - 237)       | 799<br>(542 - 1,083)        |
| Other digestive diseases                            | 1,640<br>(1,160 - 2,083)    | 1<br>(0 - 1)          | 1<br>(0 - 1)           | 27<br>(20 - 34)         | 141<br>(101 - 176)       | 1,470<br>(1,033 - 1,904)    |
| Neurological disorders                              | 81,563<br>(69,637 - 95,243) | 45<br>(31 - 65)       | 24<br>(19 - 32)        | 485<br>(394 - 571)      | 2,728<br>(2,254 - 3,168) | 78,281<br>(66,740 - 91,764) |
| Alzheimer disease and other dementias               | 73,005<br>(61,470 - 86,386) | --                    | --                     | 12<br>(4 - 21)          | 1,359<br>(1,023 - 1,684) | 71,633<br>(60,228 - 84,763) |
| Parkinson disease                                   | 4,886<br>(3,599 - 6,178)    | --                    | --                     | 6<br>(5 - 8)            | 247<br>(198 - 317)       | 4,632<br>(3,400 - 5,891)    |
| Epilepsy                                            | 585<br>(337 - 784)          | 5<br>(3 - 7)          | 6<br>(4 - 9)           | 121<br>(82 - 156)       | 122<br>(74 - 162)        | 330<br>(166 - 492)          |
| Multiple sclerosis                                  | 458<br>(263 - 595)          | --                    | --                     | 105<br>(65 - 158)       | 214<br>(119 - 290)       | 139<br>(69 - 193)           |
| Other neurological disorders                        | 2,630<br>(2,174 - 3,004)    | 41<br>(28 - 59)       | 18<br>(14 - 25)        | 240<br>(198 - 284)      | 785<br>(644 - 917)       | 1,545<br>(1,243 - 1,804)    |
| Mental and substance use disorders                  | 1,303<br>(1,044 - 1,554)    | 0<br>(0 - 0)          | 0<br>(0 - 0)           | 647<br>(536 - 881)      | 307<br>(225 - 366)       | 349<br>(220 - 451)          |
| Schizophrenia                                       | 246<br>(103 - 357)          | --                    | --                     | 24<br>(12 - 34)         | 70<br>(32 - 99)          | 152<br>(51 - 248)           |
| Alcohol use disorders                               | 291<br>(182 - 379)          | --                    | --                     | 81<br>(54 - 114)        | 119<br>(68 - 169)        | 91<br>(52 - 122)            |
| Drug use disorders                                  | 761<br>(648 - 1,002)        | 0<br>(0 - 0)          | --                     | 537<br>(436 - 799)      | 118<br>(93 - 144)        | 106<br>(83 - 132)           |
| Opioid use disorders                                | 277<br>(233 - 360)          | 0<br>(0 - 0)          | --                     | 200<br>(159 - 292)      | 38<br>(30 - 47)          | 39<br>(29 - 49)             |
| Cocaine use disorders                               | 21<br>(18 - 28)             | 0<br>(0 - 0)          | --                     | 16<br>(12 - 24)         | 3<br>(2 - 4)             | 2<br>(2 - 3)                |
| Amphetamine use disorders                           | 21<br>(18 - 28)             | 0<br>(0 - 0)          | --                     | 14<br>(11 - 22)         | 4<br>(3 - 5)             | 3<br>(2 - 4)                |
| Other drug use disorders                            | 441<br>(374 - 586)          | 0<br>(0 - 0)          | --                     | 307<br>(246 - 456)      | 73<br>(57 - 88)          | 62<br>(48 - 78)             |
| Eating disorders                                    | 6<br>(4 - 8)                | --                    | 0<br>(0 - 0)           | 5<br>(3 - 8)            | --                       | --                          |
| Anorexia nervosa                                    | 6<br>(4 - 8)                | --                    | 0<br>(0 - 0)           | 5<br>(3 - 8)            | --                       | --                          |
| Diabetes, urogenital, blood, and endocrine diseases | 40,279<br>(35,462 - 46,132) | 63<br>(41 - 86)       | 38<br>(29 - 48)        | 779<br>(627 - 909)      | 4,376<br>(3,803 - 5,083) | 35,024<br>(30,633 - 40,453) |
| Diabetes mellitus                                   | 20,940<br>(18,047 - 24,320) | 3<br>(2 - 4)          | 2<br>(2 - 3)           | 221<br>(185 - 261)      | 2,463<br>(2,122 - 2,833) | 18,251<br>(15,454 - 21,532) |
| Acute glomerulonephritis                            | 12<br>(8 - 23)              | 0<br>(0 - 0)          | 0<br>(0 - 1)           | 3<br>(2 - 3)            | 2<br>(1 - 4)             | 7<br>(3 - 16)               |

Web Table 31- Italy deaths with 95% UI by age, sex, and cause in 2013

| Cause                                               | Both Sexes, All Ages        | Both Sexes, 0-4 Years | Both Sexes, 5-14 Years | Both Sexes, 15-49 Years  | Both Sexes, 50-69 Years  | Both Sexes, 70-80 Years     |
|-----------------------------------------------------|-----------------------------|-----------------------|------------------------|--------------------------|--------------------------|-----------------------------|
| Chronic kidney disease                              | 13,715<br>(11,109 - 19,115) | 3<br>(2 - 4)          | 3<br>(2 - 5)           | 155<br>(119 - 279)       | 1,021<br>(811 - 1,695)   | 12,533<br>(10,071 - 17,040) |
| Chronic kidney disease due to diabetes mellitus     | 713<br>(458 - 1,370)        | 0<br>(0 - 1)          | 0<br>(0 - 1)           | 17<br>(10 - 32)          | 116<br>(69 - 177)        | 578<br>(361 - 1,131)        |
| Chronic kidney disease due to hypertension          | 5,843<br>(4,215 - 7,877)    | 1<br>(0 - 1)          | 1<br>(0 - 1)           | 53<br>(39 - 96)          | 382<br>(269 - 625)       | 5,407<br>(3,878 - 7,310)    |
| Chronic kidney disease due to glomerulonephritis    | 235<br>(144 - 400)          | 0<br>(0 - 1)          | 0<br>(0 - 0)           | 9<br>(6 - 14)            | 32<br>(21 - 52)          | 193<br>(112 - 339)          |
| Chronic kidney disease due to other causes          | 6,924<br>(4,675 - 10,950)   | 2<br>(1 - 3)          | 2<br>(1 - 3)           | 76<br>(50 - 159)         | 490<br>(325 - 918)       | 6,355<br>(4,236 - 9,749)    |
| Urinary diseases and male infertility               | 1,716<br>(1,283 - 2,167)    | 1<br>(1 - 1)          | 1<br>(0 - 1)           | 29<br>(22 - 35)          | 135<br>(100 - 160)       | 1,551<br>(1,134 - 1,986)    |
| Interstitial nephritis and urinary tract infections | 1,292<br>(912 - 1,666)      | 0<br>(0 - 1)          | 0<br>(0 - 0)           | 17<br>(13 - 21)          | 82<br>(59 - 102)         | 1,192<br>(818 - 1,566)      |
| Urolithiasis                                        | 126<br>(88 - 228)           | --                    | 0<br>(0 - 0)           | 5<br>(3 - 7)             | 18<br>(13 - 27)          | 103<br>(68 - 194)           |
| Other urinary diseases                              | 298<br>(181 - 436)          | 0<br>(0 - 1)          | 0<br>(0 - 0)           | 7<br>(4 - 9)             | 35<br>(20 - 47)          | 256<br>(153 - 392)          |
| Gynecological diseases                              | 13<br>(8 - 19)              | --                    | --                     | 2<br>(1 - 2)             | 2<br>(1 - 2)             | 10<br>(5 - 15)              |
| Uterine fibroids                                    | 4<br>(2 - 5)                | --                    | --                     | 0<br>(0 - 1)             | 0<br>(0 - 1)             | 3<br>(2 - 5)                |
| Polycystic ovarian syndrome                         | 0<br>(0 - 0)                | --                    | --                     | 0<br>(0 - 0)             | 0<br>(0 - 0)             | --                          |
| Endometriosis                                       | 0<br>(0 - 0)                | --                    | --                     | 0<br>(0 - 0)             | 0<br>(0 - 0)             | --                          |
| Genital prolapse                                    | 3<br>(2 - 5)                | --                    | --                     | 0<br>(0 - 0)             | 0<br>(0 - 0)             | 3<br>(1 - 4)                |
| Other gynecological diseases                        | 6<br>(3 - 9)                | --                    | --                     | 1<br>(0 - 1)             | 1<br>(1 - 1)             | 4<br>(2 - 7)                |
| Hemoglobinopathies and hemolytic anemias            | 729<br>(488 - 998)          | 6<br>(3 - 10)         | 9<br>(6 - 13)          | 51<br>(35 - 72)          | 73<br>(48 - 102)         | 591<br>(393 - 811)          |
| Thalassemias                                        | 39<br>(27 - 57)             | 4<br>(3 - 7)          | 7<br>(4 - 10)          | 28<br>(19 - 41)          | 0<br>(0 - 0)             | 0<br>(0 - 0)                |
| Sickle cell disorders                               | 65<br>(44 - 90)             | 0<br>(0 - 1)          | 1<br>(1 - 1)           | 10<br>(7 - 14)           | 30<br>(20 - 41)          | 24<br>(16 - 34)             |
| G6PD deficiency                                     | 0<br>(0 - 0)                | 0<br>(0 - 0)          | 0<br>(0 - 0)           | 0<br>(0 - 0)             | 0<br>(0 - 0)             | 0<br>(0 - 0)                |
| Other hemoglobinopathies and hemolytic anemias      | 625<br>(418 - 861)          | 1<br>(1 - 2)          | 1<br>(1 - 2)           | 13<br>(9 - 18)           | 43<br>(29 - 61)          | 567<br>(375 - 781)          |
| Endocrine, metabolic, blood, and immune disorders   | 3,154<br>(1,722 - 3,906)    | 50<br>(30 - 70)       | 23<br>(14 - 31)        | 319<br>(176 - 393)       | 680<br>(385 - 838)       | 2,081<br>(1,081 - 2,736)    |
| Musculoskeletal disorders                           | 1,623<br>(1,248 - 1,993)    | --                    | 2<br>(2 - 3)           | 86<br>(70 - 113)         | 290<br>(233 - 364)       | 1,244<br>(910 - 1,595)      |
| Rheumatoid arthritis                                | 596<br>(414 - 817)          | --                    | 0<br>(0 - 1)           | 8<br>(6 - 12)            | 82<br>(61 - 108)         | 505<br>(332 - 713)          |
| Other musculoskeletal disorders                     | 1,027<br>(767 - 1,298)      | --                    | 2<br>(1 - 2)           | 78<br>(64 - 105)         | 208<br>(162 - 265)       | 739<br>(505 - 981)          |
| Other non-communicable diseases                     | 2,493<br>(2,070 - 2,966)    | 619<br>(462 - 823)    | 48<br>(37 - 62)        | 267<br>(202 - 311)       | 296<br>(189 - 348)       | 1,263<br>(940 - 1,667)      |
| Congenital anomalies                                | 1,474<br>(1,208 - 1,741)    | 591<br>(442 - 793)    | 48<br>(36 - 62)        | 252<br>(188 - 295)       | 236<br>(144 - 282)       | 348<br>(218 - 434)          |
| Neural tube defects                                 | 20<br>(14 - 29)             | 14<br>(9 - 23)        | 1<br>(0 - 1)           | 3<br>(1 - 4)             | 2<br>(1 - 2)             | 1<br>(1 - 2)                |
| Congenital heart anomalies                          | 490<br>(370 - 595)          | 237<br>(173 - 319)    | 20<br>(14 - 28)        | 101<br>(70 - 127)        | 58<br>(34 - 77)          | 75<br>(43 - 104)            |
| Cleft lip and cleft palate                          | 1<br>(0 - 2)                | 1<br>(0 - 2)          | --                     | --                       | --                       | --                          |
| Down syndrome                                       | 179<br>(117 - 268)          | 36<br>(13 - 91)       | 4<br>(2 - 7)           | 49<br>(32 - 76)          | 82<br>(42 - 112)         | 7<br>(4 - 13)               |
| Chromosomal unbalanced rearrangements               | 49<br>(32 - 70)             | 41<br>(26 - 60)       | 1<br>(1 - 2)           | 4<br>(2 - 5)             | 2<br>(1 - 3)             | 1<br>(1 - 2)                |
| Other congenital anomalies                          | 734<br>(569 - 890)          | 262<br>(182 - 378)    | 22<br>(15 - 30)        | 95<br>(68 - 123)         | 92<br>(58 - 122)         | 263<br>(170 - 334)          |
| Skin and subcutaneous diseases                      | 993<br>(709 - 1,392)        | 1<br>(1 - 2)          | 1<br>(0 - 1)           | 15<br>(12 - 19)          | 61<br>(44 - 75)          | 915<br>(631 - 1,308)        |
| Cellulitis                                          | 96<br>(46 - 209)            | 0<br>(0 - 1)          | 0<br>(0 - 0)           | 4<br>(2 - 6)             | 13<br>(7 - 23)           | 79<br>(34 - 184)            |
| Pyoderma                                            | 266<br>(173 - 387)          | 1<br>(0 - 1)          | 0<br>(0 - 0)           | 6<br>(4 - 8)             | 26<br>(16 - 34)          | 233<br>(143 - 353)          |
| Decubitus ulcer                                     | 521<br>(334 - 774)          | 0<br>(0 - 0)          | 0<br>(0 - 0)           | 2<br>(2 - 3)             | 13<br>(8 - 18)           | 505<br>(319 - 755)          |
| Other skin and subcutaneous diseases                | 110<br>(51 - 238)           | 0<br>(0 - 0)          | 0<br>(0 - 0)           | 3<br>(2 - 4)             | 10<br>(6 - 14)           | 97<br>(41 - 219)            |
| Sudden infant death syndrome                        | 27<br>(14 - 58)             | 27<br>(14 - 58)       | --                     | --                       | --                       | --                          |
| Injuries                                            | 27,009<br>(23,832 - 30,855) | 98<br>(72 - 137)      | 145<br>(121 - 175)     | 5,819<br>(5,205 - 6,448) | 3,866<br>(3,453 - 4,306) | 17,081<br>(14,378 - 20,807) |
| Transport injuries                                  | 6,310<br>(5,536 - 7,023)    | 28<br>(19 - 41)       | 83<br>(65 - 104)       | 2,842<br>(2,471 - 3,193) | 1,297<br>(1,105 - 1,506) | 2,060<br>(1,715 - 2,421)    |

Web Table 31- Italy deaths with 95% UI by age, sex, and cause in 2013

| Cause                                           | Both Sexes, All Ages        | Both Sexes, 0-4 Years | Both Sexes, 5-14 Years | Both Sexes, 15-49 Years  | Both Sexes, 50-69 Years  | Both Sexes, 70-80 Years     |
|-------------------------------------------------|-----------------------------|-----------------------|------------------------|--------------------------|--------------------------|-----------------------------|
| Road injuries                                   | 6,042<br>(5,370 - 6,708)    | 27<br>(18 - 39)       | 79<br>(63 - 100)       | 2,725<br>(2,393 - 3,054) | 1,214<br>(1,045 - 1,403) | 1,996<br>(1,667 - 2,343)    |
| Pedestrian road injuries                        | 1,675<br>(1,081 - 2,172)    | 9<br>(5 - 15)         | 24<br>(15 - 34)        | 270<br>(149 - 433)       | 357<br>(213 - 495)       | 1,015<br>(664 - 1,298)      |
| Cyclist road injuries                           | 465<br>(282 - 632)          | 1<br>(1 - 3)          | 14<br>(8 - 21)         | 98<br>(52 - 128)         | 122<br>(67 - 165)        | 230<br>(142 - 341)          |
| Motorcyclist road injuries                      | 937<br>(633 - 1,289)        | 1<br>(0 - 1)          | 8<br>(5 - 16)          | 676<br>(424 - 888)       | 136<br>(84 - 206)        | 117<br>(66 - 258)           |
| Motor vehicle road injuries                     | 2,951<br>(2,384 - 3,658)    | 16<br>(10 - 23)       | 32<br>(23 - 44)        | 1,677<br>(1,375 - 2,050) | 597<br>(465 - 792)       | 629<br>(443 - 861)          |
| Other road injuries                             | 13<br>(8 - 19)              | 0<br>(0 - 1)          | 1<br>(0 - 1)           | 4<br>(2 - 5)             | 3<br>(2 - 5)             | 5<br>(2 - 9)                |
| Other transport injuries                        | 268<br>(129 - 396)          | 1<br>(0 - 2)          | 3<br>(2 - 6)           | 117<br>(57 - 174)        | 83<br>(37 - 134)         | 64<br>(26 - 108)            |
| Unintentional injuries                          | 15,554<br>(12,925 - 19,164) | 66<br>(46 - 93)       | 50<br>(41 - 63)        | 914<br>(791 - 1,049)     | 1,117<br>(968 - 1,264)   | 13,407<br>(10,858 - 17,088) |
| Falls                                           | 12,309<br>(9,686 - 16,067)  | 8<br>(5 - 12)         | 9<br>(6 - 13)          | 307<br>(237 - 376)       | 508<br>(383 - 614)       | 11,477<br>(8,890 - 15,240)  |
| Drowning                                        | 391<br>(270 - 520)          | 8<br>(4 - 14)         | 16<br>(11 - 25)        | 160<br>(111 - 219)       | 90<br>(60 - 120)         | 118<br>(73 - 152)           |
| Fire, heat, and hot substances                  | 401<br>(272 - 497)          | 4<br>(2 - 7)          | 3<br>(2 - 5)           | 46<br>(35 - 60)          | 74<br>(54 - 94)          | 273<br>(171 - 359)          |
| Poisonings                                      | 191<br>(154 - 274)          | 2<br>(1 - 3)          | 2<br>(1 - 3)           | 52<br>(41 - 85)          | 37<br>(28 - 58)          | 98<br>(72 - 131)            |
| Exposure to mechanical forces                   | 498<br>(332 - 574)          | 9<br>(6 - 13)         | 11<br>(8 - 14)         | 184<br>(133 - 219)       | 139<br>(96 - 169)        | 156<br>(83 - 194)           |
| Unintentional firearm injuries                  | 50<br>(34 - 61)             | 0<br>(0 - 1)          | 2<br>(1 - 3)           | 23<br>(17 - 30)          | 14<br>(9 - 19)           | 11<br>(6 - 15)              |
| Unintentional suffocation                       | 50<br>(16 - 64)             | 3<br>(2 - 5)          | 2<br>(1 - 3)           | 17<br>(5 - 23)           | 12<br>(3 - 18)           | 15<br>(4 - 23)              |
| Other exposure to mechanical forces             | 399<br>(275 - 464)          | 5<br>(3 - 8)          | 7<br>(5 - 10)          | 144<br>(105 - 175)       | 112<br>(81 - 140)        | 130<br>(70 - 164)           |
| Adverse effects of medical treatment            | 997<br>(770 - 1,318)        | 4<br>(3 - 8)          | 2<br>(1 - 2)           | 44<br>(34 - 61)          | 155<br>(118 - 220)       | 792<br>(584 - 1,071)        |
| Animal contact                                  | 43<br>(30 - 73)             | 0<br>(0 - 1)          | 1<br>(0 - 1)           | 7<br>(5 - 12)            | 16<br>(11 - 28)          | 19<br>(11 - 34)             |
| Venomous animal contact                         | 17<br>(12 - 29)             | 0<br>(0 - 0)          | 0<br>(0 - 0)           | 4<br>(3 - 6)             | 9<br>(6 - 19)            | 4<br>(2 - 6)                |
| Non-venomous animal contact                     | 25<br>(17 - 44)             | 0<br>(0 - 0)          | 0<br>(0 - 0)           | 4<br>(2 - 6)             | 6<br>(4 - 10)            | 15<br>(9 - 29)              |
| Foreign body                                    | 582<br>(275 - 858)          | 29<br>(18 - 48)       | 5<br>(3 - 7)           | 61<br>(36 - 85)          | 74<br>(42 - 96)          | 414<br>(168 - 673)          |
| Pulmonary aspiration and foreign body in airway | 568<br>(265 - 840)          | 28<br>(17 - 47)       | 5<br>(3 - 7)           | 58<br>(33 - 81)          | 72<br>(40 - 94)          | 407<br>(163 - 660)          |
| Foreign body in other body part                 | 14<br>(7 - 22)              | 1<br>(1 - 2)          | 1<br>(0 - 1)           | 3<br>(2 - 4)             | 2<br>(1 - 3)             | 7<br>(3 - 15)               |
| Other unintentional injuries                    | 142<br>(111 - 178)          | 3<br>(1 - 5)          | 2<br>(1 - 4)           | 52<br>(37 - 72)          | 25<br>(16 - 37)          | 60<br>(36 - 89)             |
| Self-harm and interpersonal violence            | 5,145<br>(4,375 - 6,045)    | 5<br>(3 - 7)          | 12<br>(9 - 17)         | 2,062<br>(1,671 - 2,398) | 1,452<br>(1,196 - 1,708) | 1,614<br>(1,349 - 2,104)    |
| Self-harm                                       | 4,555<br>(3,845 - 5,260)    | -                     | 6<br>(4 - 9)           | 1,705<br>(1,224 - 1,992) | 1,329<br>(1,078 - 1,572) | 1,514<br>(1,245 - 2,015)    |
| Interpersonal violence                          | 590<br>(445 - 864)          | 5<br>(3 - 7)          | 6<br>(4 - 8)           | 357<br>(269 - 559)       | 123<br>(87 - 181)        | 100<br>(64 - 125)           |
| Assault by firearm                              | 334<br>(235 - 591)          | 1<br>(0 - 1)          | 2<br>(1 - 4)           | 238<br>(161 - 433)       | 69<br>(47 - 129)         | 24<br>(15 - 44)             |
| Assault by sharp object                         | 127<br>(72 - 180)           | 1<br>(0 - 1)          | 1<br>(1 - 2)           | 72<br>(36 - 108)         | 27<br>(16 - 41)          | 26<br>(15 - 36)             |
| Assault by other means                          | 129<br>(68 - 171)           | 3<br>(2 - 5)          | 2<br>(1 - 3)           | 48<br>(23 - 68)          | 26<br>(12 - 38)          | 50<br>(25 - 68)             |

Web Table 31- Italy deaths with 95% UI by age, sex, and cause in 2013

| Cause                                                             | Males, All Ages                | Males, 0-4 Years       | Males, 5-14 Years  | Males, 15-49 Years          | Males, 50-69 Years          | Males, 70-80 Years             |
|-------------------------------------------------------------------|--------------------------------|------------------------|--------------------|-----------------------------|-----------------------------|--------------------------------|
| All causes                                                        | 313,096<br>(292,531 - 337,006) | 1,135<br>(854 - 1,495) | 311<br>(257 - 374) | 14,616<br>(13,254 - 16,257) | 55,494<br>(50,709 - 61,157) | 241,541<br>(227,073 - 258,167) |
| Communicable, maternal, neonatal, and nutritional diseases        | 8,950<br>(7,348 - 10,803)      | 622<br>(468 - 824)     | 25<br>(18 - 36)    | 758<br>(595 - 1,030)        | 1,025<br>(792 - 1,280)      | 6,519<br>(5,055 - 8,170)       |
| HIV/AIDS and tuberculosis                                         | 1,070<br>(762 - 1,588)         | 0<br>(0 - 1)           | 0<br>(0 - 1)       | 493<br>(339 - 769)          | 309<br>(172 - 512)          | 267<br>(204 - 354)             |
| Tuberculosis                                                      | 295<br>(238 - 389)             | 0<br>(0 - 0)           | 0<br>(0 - 0)       | 21<br>(16 - 28)             | 56<br>(44 - 86)             | 217<br>(168 - 287)             |
| HIV/AIDS                                                          | 775<br>(492 - 1,290)           | 0<br>(0 - 1)           | 0<br>(0 - 0)       | 472<br>(319 - 742)          | 253<br>(120 - 456)          | 50<br>(13 - 112)               |
| HIV/AIDS resulting in mycobacterial infection                     | 43<br>(25 - 75)                | 0<br>(0 - 0)           | 0<br>(0 - 0)       | 26<br>(16 - 42)             | 14<br>(7 - 27)              | 3<br>(1 - 7)                   |
| HIV/AIDS resulting in other diseases                              | 732<br>(463 - 1,214)           | 0<br>(0 - 1)           | 0<br>(0 - 0)       | 447<br>(302 - 703)          | 238<br>(113 - 429)          | 47<br>(12 - 105)               |
| Diarrhea, lower respiratory, and other common infectious diseases | 6,269<br>(4,789 - 8,035)       | 47<br>(31 - 68)        | 20<br>(13 - 30)    | 190<br>(153 - 233)          | 546<br>(400 - 692)          | 5,466<br>(4,085 - 7,166)       |
| Diarrheal diseases                                                | 176<br>(115 - 272)             | 4<br>(2 - 7)           | 0<br>(0 - 1)       | 5<br>(4 - 7)                | 14<br>(10 - 20)             | 152<br>(90 - 248)              |
| Intestinal infectious diseases                                    | 45<br>(18 - 92)                | 8<br>(3 - 17)          | 8<br>(3 - 18)      | 16<br>(6 - 35)              | 6<br>(2 - 12)               | 7<br>(3 - 14)                  |
| Typhoid fever                                                     | 31<br>(10 - 69)                | 5<br>(2 - 12)          | 6<br>(2 - 14)      | 11<br>(4 - 26)              | 4<br>(1 - 9)                | 4<br>(1 - 10)                  |
| Paratyphoid fever                                                 | 8<br>(3 - 20)                  | 2<br>(0 - 4)           | 2<br>(1 - 4)       | 3<br>(1 - 7)                | 1<br>(0 - 2)                | 1<br>(0 - 3)                   |
| Other intestinal infectious diseases                              | 5<br>(2 - 12)                  | 1<br>(0 - 4)           | 0<br>(0 - 1)       | 1<br>(0 - 5)                | 1<br>(0 - 4)                | 2<br>(0 - 5)                   |
| Lower respiratory infections                                      | 5,752<br>(4,309 - 7,484)       | 20<br>(12 - 31)        | 5<br>(3 - 7)       | 120<br>(88 - 155)           | 456<br>(319 - 599)          | 5,151<br>(3,781 - 6,837)       |
| Upper respiratory infections                                      | 6<br>(1 - 20)                  | 0<br>(0 - 0)           | 0<br>(0 - 0)       | 0<br>(0 - 1)                | 1<br>(0 - 4)                | 4<br>(0 - 17)                  |
| Otitis media                                                      | 8<br>(6 - 10)                  | 0<br>(0 - 1)           | 0<br>(0 - 0)       | 1<br>(1 - 2)                | 2<br>(1 - 2)                | 4<br>(2 - 6)                   |
| Meningitis                                                        | 105<br>(84 - 123)              | 7<br>(4 - 12)          | 2<br>(1 - 3)       | 17<br>(13 - 21)             | 25<br>(19 - 31)             | 54<br>(40 - 69)                |
| Pneumococcal meningitis                                           | 21<br>(14 - 28)                | 1<br>(0 - 2)           | 0<br>(0 - 1)       | 4<br>(2 - 6)                | 5<br>(3 - 8)                | 11<br>(6 - 17)                 |
| H influenzae type B meningitis                                    | 16<br>(11 - 22)                | 3<br>(1 - 5)           | 0<br>(0 - 1)       | 3<br>(1 - 4)                | 3<br>(2 - 6)                | 7<br>(3 - 12)                  |
| Meningococcal meningitis                                          | 32<br>(22 - 43)                | 2<br>(1 - 3)           | 1<br>(0 - 1)       | 6<br>(3 - 9)                | 8<br>(4 - 12)               | 16<br>(9 - 25)                 |
| Other meningitis                                                  | 36<br>(22 - 47)                | 2<br>(1 - 3)           | 1<br>(0 - 1)       | 5<br>(3 - 8)                | 9<br>(4 - 14)               | 20<br>(9 - 29)                 |
| Encephalitis                                                      | 140<br>(72 - 186)              | 5<br>(3 - 9)           | 3<br>(2 - 6)       | 25<br>(15 - 39)             | 38<br>(19 - 60)             | 68<br>(28 - 95)                |
| Diphtheria                                                        | 0<br>(0 - 2)                   | 0<br>(0 - 0)           | 0<br>(0 - 0)       | 0<br>(0 - 1)                | 0<br>(0 - 1)                | --                             |
| Whooping cough                                                    | 2<br>(1 - 4)                   | 0<br>(0 - 2)           | 0<br>(0 - 0)       | 1<br>(1 - 2)                | 0<br>(0 - 0)                | --                             |
| Tetanus                                                           | 7<br>(3 - 11)                  | 0<br>(0 - 0)           | 0<br>(0 - 0)       | 1<br>(0 - 2)                | 1<br>(1 - 2)                | 4<br>(2 - 8)                   |
| Measles                                                           | 0<br>(0 - 0)                   | 0<br>(0 - 0)           | 0<br>(0 - 0)       | 0<br>(0 - 0)                | 0<br>(0 - 0)                | --                             |
| Varicella and herpes zoster                                       | 29<br>(5 - 117)                | 1<br>(0 - 5)           | 0<br>(0 - 2)       | 3<br>(0 - 8)                | 2<br>(0 - 8)                | 22<br>(0 - 109)                |
| Neglected tropical diseases and malaria                           | 34<br>(29 - 40)                | 1<br>(0 - 1)           | 1<br>(1 - 1)       | 8<br>(7 - 10)               | 10<br>(8 - 12)              | 14<br>(12 - 17)                |
| Leishmaniasis                                                     | 4<br>(2 - 5)                   | 0<br>(0 - 0)           | 0<br>(0 - 0)       | 1<br>(1 - 2)                | 1<br>(1 - 2)                | 1<br>(1 - 2)                   |
| Visceral leishmaniasis                                            | 4<br>(2 - 5)                   | 0<br>(0 - 0)           | 0<br>(0 - 0)       | 1<br>(1 - 2)                | 1<br>(1 - 2)                | 1<br>(1 - 2)                   |
| Cysticercosis                                                     | 0<br>(0 - 0)                   | 0<br>(0 - 0)           | 0<br>(0 - 0)       | 0<br>(0 - 0)                | 0<br>(0 - 0)                | 0<br>(0 - 0)                   |
| Cystic echinococcosis                                             | 15<br>(13 - 16)                | 0<br>(0 - 0)           | 0<br>(0 - 0)       | 3<br>(3 - 3)                | 5<br>(4 - 5)                | 7<br>(6 - 8)                   |
| Dengue                                                            | 3<br>(2 - 3)                   | 0<br>(0 - 0)           | 0<br>(0 - 0)       | 1<br>(1 - 2)                | 1<br>(0 - 1)                | 0<br>(0 - 1)                   |
| Rabies                                                            | 2<br>(1 - 3)                   | 0<br>(0 - 0)           | 0<br>(0 - 0)       | 1<br>(0 - 1)                | 1<br>(0 - 1)                | 0<br>(0 - 0)                   |
| Other neglected tropical diseases                                 | 10<br>(8 - 14)                 | 0<br>(0 - 0)           | 0<br>(0 - 0)       | 2<br>(1 - 2)                | 3<br>(2 - 5)                | 5<br>(3 - 8)                   |
| Maternal disorders                                                | --                             | --                     | --                 | --                          | --                          | --                             |
| Maternal hemorrhage                                               | --                             | --                     | --                 | --                          | --                          | --                             |
| Maternal sepsis and other maternal infections                     | --                             | --                     | --                 | --                          | --                          | --                             |
| Maternal hypertensive disorders                                   | --                             | --                     | --                 | --                          | --                          | --                             |
| Maternal obstructed labor                                         | --                             | --                     | --                 | --                          | --                          | --                             |



Web Table 31- Italy deaths with 95% UI by age, sex, and cause in 2013

| Cause                                                            | Males, All Ages                | Males, 0-4 Years   | Males, 5-14 Years  | Males, 15-49 Years        | Males, 50-69 Years          | Males, 70-80 Years             |
|------------------------------------------------------------------|--------------------------------|--------------------|--------------------|---------------------------|-----------------------------|--------------------------------|
| Maternal abortive outcome                                        | --                             | --                 | --                 | --                        | --                          | --                             |
| Indirect maternal deaths                                         | --                             | --                 | --                 | --                        | --                          | --                             |
| Late maternal deaths                                             | --                             | --                 | --                 | --                        | --                          | --                             |
| Maternal deaths aggravated by HIV/AIDS                           | --                             | --                 | --                 | --                        | --                          | --                             |
| Other maternal disorders                                         | --                             | --                 | --                 | --                        | --                          | --                             |
| Neonatal disorders                                               | 556<br>(414 - 738)             | 556<br>(414 - 738) | --                 | --                        | --                          | --                             |
| Neonatal preterm birth complications                             | 294<br>(203 - 417)             | 294<br>(203 - 417) | --                 | --                        | --                          | --                             |
| Neonatal encephalopathy due to birth asphyxia and trauma         | 103<br>(68 - 153)              | 103<br>(68 - 153)  | --                 | --                        | --                          | --                             |
| Neonatal sepsis and other neonatal infections                    | 41<br>(16 - 86)                | 41<br>(16 - 86)    | --                 | --                        | --                          | --                             |
| Hemolytic disease and other neonatal jaundice                    | 3<br>(1 - 6)                   | 3<br>(1 - 6)       | --                 | --                        | --                          | --                             |
| Other neonatal disorders                                         | 114<br>(50 - 171)              | 114<br>(50 - 171)  | --                 | --                        | --                          | --                             |
| Nutritional deficiencies                                         | 614<br>(267 - 874)             | 2<br>(1 - 3)       | 1<br>(0 - 1)       | 20<br>(8 - 27)            | 47<br>(23 - 63)             | 544<br>(233 - 793)             |
| Protein-energy malnutrition                                      | 144<br>(13 - 305)              | 1<br>(0 - 1)       | 0<br>(0 - 0)       | 3<br>(1 - 7)              | 10<br>(1 - 18)              | 130<br>(10 - 283)              |
| Iodine deficiency                                                | 2<br>(0 - 9)                   | 0<br>(0 - 0)       | 0<br>(0 - 0)       | 0<br>(0 - 1)              | 0<br>(0 - 2)                | 1<br>(0 - 8)                   |
| Iron-deficiency anemia                                           | 404<br>(178 - 608)             | 1<br>(0 - 2)       | 0<br>(0 - 1)       | 14<br>(6 - 20)            | 31<br>(14 - 44)             | 358<br>(157 - 550)             |
| Other nutritional deficiencies                                   | 64<br>(19 - 134)               | 0<br>(0 - 1)       | 0<br>(0 - 0)       | 2<br>(1 - 4)              | 6<br>(2 - 11)               | 56<br>(15 - 122)               |
| Other communicable, maternal, neonatal, and nutritional diseases | 406<br>(288 - 503)             | 16<br>(6 - 35)     | 3<br>(2 - 5)       | 47<br>(34 - 60)           | 114<br>(80 - 147)           | 226<br>(143 - 297)             |
| Sexually transmitted diseases excluding HIV                      | 21<br>(9 - 41)                 | 12<br>(2 - 30)     | 1<br>(0 - 2)       | 1<br>(1 - 2)              | 2<br>(1 - 4)                | 5<br>(2 - 9)                   |
| Syphilis                                                         | 19<br>(7 - 39)                 | 12<br>(2 - 30)     | 1<br>(0 - 2)       | 1<br>(0 - 1)              | 2<br>(1 - 3)                | 4<br>(2 - 8)                   |
| Chlamydial infection                                             | --                             | --                 | --                 | --                        | --                          | --                             |
| Gonococcal infection                                             | 1<br>(1 - 2)                   | --                 | 0<br>(0 - 0)       | 0<br>(0 - 1)              | 0<br>(0 - 1)                | 1<br>(0 - 1)                   |
| Other sexually transmitted diseases                              | 1<br>(0 - 1)                   | --                 | 0<br>(0 - 0)       | 0<br>(0 - 0)              | 0<br>(0 - 0)                | 0<br>(0 - 0)                   |
| Hepatitis                                                        | 174<br>(139 - 217)             | 1<br>(1 - 2)       | 1<br>(1 - 2)       | 25<br>(18 - 35)           | 57<br>(41 - 76)             | 90<br>(64 - 127)               |
| Acute hepatitis A                                                | 26<br>(8 - 55)                 | 1<br>(0 - 1)       | 1<br>(0 - 1)       | 7<br>(2 - 14)             | 9<br>(2 - 19)               | 9<br>(2 - 23)                  |
| Acute hepatitis B                                                | 119<br>(77 - 167)              | 0<br>(0 - 1)       | 0<br>(0 - 0)       | 13<br>(6 - 21)            | 39<br>(25 - 58)             | 66<br>(36 - 99)                |
| Acute hepatitis C                                                | 29<br>(6 - 67)                 | --                 | 0<br>(0 - 0)       | 5<br>(1 - 12)             | 9<br>(2 - 21)               | 15<br>(2 - 39)                 |
| Other infectious diseases                                        | 211<br>(108 - 287)             | 3<br>(1 - 5)       | 1<br>(1 - 2)       | 21<br>(11 - 29)           | 55<br>(27 - 77)             | 132<br>(61 - 188)              |
| Non-communicable diseases                                        | 288,935<br>(269,994 - 311,008) | 457<br>(335 - 619) | 187<br>(151 - 230) | 9,041<br>(8,104 - 10,188) | 51,554<br>(47,129 - 56,784) | 227,696<br>(214,110 - 243,612) |
| Neoplasms                                                        | 103,614<br>(95,036 - 113,050)  | 44<br>(28 - 66)    | 106<br>(83 - 134)  | 4,047<br>(3,537 - 4,688)  | 28,787<br>(25,743 - 32,055) | 70,629<br>(64,144 - 77,385)    |
| Esophageal cancer                                                | 1,636<br>(1,334 - 2,444)       | --                 | --                 | 85<br>(60 - 141)          | 667<br>(522 - 1,028)        | 885<br>(704 - 1,293)           |
| Stomach cancer                                                   | 7,544<br>(6,404 - 9,040)       | --                 | --                 | 242<br>(198 - 299)        | 1,757<br>(1,468 - 2,061)    | 5,544<br>(4,506 - 6,876)       |
| Liver cancer                                                     | 7,873<br>(5,531 - 12,033)      | --                 | 2<br>(1 - 3)       | 272<br>(165 - 449)        | 2,684<br>(1,749 - 4,315)    | 4,915<br>(3,404 - 7,555)       |
| Liver cancer due to hepatitis B                                  | 1,081<br>(594 - 1,890)         | --                 | 1<br>(0 - 2)       | 70<br>(38 - 126)          | 473<br>(248 - 843)          | 537<br>(288 - 960)             |
| Liver cancer due to hepatitis C                                  | 5,174<br>(3,578 - 8,007)       | --                 | 1<br>(0 - 1)       | 157<br>(92 - 259)         | 1,707<br>(1,083 - 2,765)    | 3,308<br>(2,208 - 5,199)       |
| Liver cancer due to alcohol use                                  | 1,528<br>(870 - 2,448)         | --                 | --                 | 40<br>(21 - 72)           | 469<br>(257 - 806)          | 1,019<br>(575 - 1,718)         |
| Liver cancer due to other causes                                 | 91<br>(39 - 162)               | --                 | 0<br>(0 - 1)       | 5<br>(3 - 10)             | 35<br>(15 - 64)             | 50<br>(20 - 90)                |
| Larynx cancer                                                    | 1,493<br>(1,057 - 1,938)       | --                 | --                 | 66<br>(46 - 106)          | 537<br>(407 - 755)          | 890<br>(582 - 1,164)           |
| Tracheal, bronchus and lung cancer                               | 27,005<br>(24,240 - 30,208)    | --                 | --                 | 660<br>(534 - 811)        | 8,729<br>(7,711 - 9,927)    | 17,617<br>(15,539 - 19,883)    |
| Breast cancer                                                    | 118<br>(28 - 174)              | --                 | --                 | 7<br>(2 - 12)             | 36<br>(8 - 59)              | 75<br>(17 - 121)               |
| Cervical cancer                                                  | --                             | --                 | --                 | --                        | --                          | --                             |

Web Table 31- Italy deaths with 95% UI by age, sex, and cause in 2013

| Cause                                         | Males, All Ages              | Males, 0-4 Years | Males, 5-14 Years | Males, 15-49 Years       | Males, 50-69 Years          | Males, 70-80 Years          |
|-----------------------------------------------|------------------------------|------------------|-------------------|--------------------------|-----------------------------|-----------------------------|
| Uterine cancer                                | --                           | --               | --                | --                       | --                          | --                          |
| Prostate cancer                               | 10,214<br>(7,527 - 14,653)   | --               | --                | 15<br>(9 - 23)           | 1,018<br>(697 - 1,480)      | 9,181<br>(6,710 - 13,373)   |
| Colon and rectum cancer                       | 12,232<br>(10,594 - 13,982)  | --               | --                | 364<br>(304 - 435)       | 3,109<br>(2,672 - 3,581)    | 8,760<br>(7,426 - 10,275)   |
| Lip and oral cavity cancer                    | 1,281<br>(1,077 - 1,524)     | --               | --                | 110<br>(84 - 144)        | 515<br>(417 - 633)          | 656<br>(519 - 837)          |
| Nasopharynx cancer                            | 190<br>(148 - 261)           | --               | 0<br>(0 - 1)      | 37<br>(24 - 57)          | 90<br>(62 - 131)            | 63<br>(45 - 93)             |
| Other pharynx cancer                          | 822<br>(649 - 1,284)         | --               | --                | 72<br>(50 - 113)         | 420<br>(317 - 668)          | 330<br>(241 - 533)          |
| Gallbladder and biliary tract cancer          | 1,400<br>(794 - 1,816)       | --               | --                | 31<br>(18 - 44)          | 341<br>(178 - 457)          | 1,028<br>(581 - 1,365)      |
| Pancreatic cancer                             | 5,614<br>(4,903 - 6,325)     | --               | --                | 235<br>(190 - 286)       | 1,902<br>(1,602 - 2,239)    | 3,478<br>(2,944 - 4,074)    |
| Malignant skin melanoma                       | 1,117<br>(508 - 1,873)       | --               | --                | 197<br>(95 - 363)        | 398<br>(184 - 699)          | 522<br>(226 - 835)          |
| Non-melanoma skin cancer                      | 454<br>(284 - 739)           | --               | --                | 13<br>(8 - 22)           | 63<br>(39 - 102)            | 378<br>(232 - 631)          |
| Ovarian cancer                                | --                           | --               | --                | --                       | --                          | --                          |
| Testicular cancer                             | 89<br>(58 - 124)             | --               | --                | 43<br>(26 - 63)          | 16<br>(10 - 24)             | 30<br>(20 - 45)             |
| Kidney cancer                                 | 2,878<br>(2,327 - 3,498)     | 2<br>(1 - 3)     | 2<br>(1 - 4)      | 123<br>(91 - 161)        | 893<br>(704 - 1,098)        | 1,859<br>(1,370 - 2,391)    |
| Bladder cancer                                | 5,223<br>(3,731 - 6,414)     | --               | --                | 49<br>(35 - 68)          | 906<br>(729 - 1,110)        | 4,268<br>(2,910 - 5,458)    |
| Brain and nervous system cancer               | 2,141<br>(1,661 - 2,680)     | 9<br>(4 - 16)    | 24<br>(17 - 35)   | 335<br>(257 - 436)       | 927<br>(715 - 1,189)        | 846<br>(575 - 1,129)        |
| Thyroid cancer                                | 251<br>(201 - 301)           | --               | 0<br>(0 - 0)      | 18<br>(13 - 24)          | 81<br>(62 - 102)            | 151<br>(114 - 196)          |
| Mesothelioma                                  | 1,315<br>(900 - 2,313)       | --               | --                | 50<br>(26 - 117)         | 470<br>(307 - 851)          | 795<br>(465 - 1,481)        |
| Hodgkin lymphoma                              | 233<br>(139 - 319)           | 0<br>(0 - 0)     | 1<br>(0 - 2)      | 58<br>(36 - 88)          | 63<br>(40 - 94)             | 111<br>(60 - 155)           |
| Non-Hodgkin lymphoma                          | 3,245<br>(1,133 - 4,241)     | 3<br>(1 - 6)     | 11<br>(5 - 21)    | 267<br>(110 - 397)       | 891<br>(325 - 1,189)        | 2,072<br>(706 - 2,962)      |
| Multiple myeloma                              | 1,713<br>(930 - 2,714)       | --               | --                | 49<br>(28 - 89)          | 455<br>(247 - 762)          | 1,210<br>(646 - 1,911)      |
| Leukemia                                      | 3,420<br>(2,952 - 3,969)     | 11<br>(6 - 20)   | 33<br>(24 - 45)   | 269<br>(224 - 320)       | 748<br>(620 - 891)          | 2,359<br>(1,968 - 2,859)    |
| Other neoplasms                               | 4,111<br>(2,893 - 4,995)     | 19<br>(9 - 30)   | 32<br>(17 - 46)   | 380<br>(292 - 468)       | 1,072<br>(830 - 1,373)      | 2,608<br>(1,492 - 3,410)    |
| Cardiovascular diseases                       | 98,069<br>(89,600 - 107,408) | 7<br>(5 - 10)    | 12<br>(9 - 15)    | 2,348<br>(2,034 - 2,717) | 13,368<br>(11,730 - 15,087) | 82,334<br>(75,030 - 90,201) |
| Rheumatic heart disease                       | 574<br>(268 - 821)           | 0<br>(0 - 0)     | 1<br>(0 - 1)      | 35<br>(21 - 50)          | 117<br>(63 - 168)           | 421<br>(171 - 639)          |
| Ischemic heart disease                        | 47,112<br>(40,243 - 54,590)  | 1<br>(0 - 1)     | 2<br>(1 - 3)      | 1,477<br>(1,246 - 1,720) | 8,131<br>(6,912 - 9,379)    | 37,501<br>(31,617 - 43,916) |
| Cerebrovascular disease                       | 27,869<br>(22,098 - 33,813)  | 2<br>(1 - 3)     | 5<br>(3 - 6)      | 414<br>(303 - 539)       | 2,546<br>(1,850 - 3,238)    | 24,903<br>(19,627 - 30,340) |
| Ischemic stroke                               | 15,970<br>(11,862 - 20,108)  | 0<br>(0 - 0)     | 0<br>(0 - 1)      | 43<br>(25 - 66)          | 762<br>(505 - 1,038)        | 15,165<br>(11,313 - 19,159) |
| Hemorrhagic stroke                            | 11,899<br>(7,687 - 15,528)   | 1<br>(1 - 2)     | 4<br>(3 - 6)      | 372<br>(268 - 483)       | 1,784<br>(1,223 - 2,306)    | 9,738<br>(6,065 - 12,901)   |
| Hypertensive heart disease                    | 5,908<br>(3,606 - 8,584)     | 0<br>(0 - 0)     | 0<br>(0 - 0)      | 44<br>(27 - 66)          | 527<br>(335 - 804)          | 5,336<br>(3,146 - 7,781)    |
| Cardiomyopathy and myocarditis                | 6,735<br>(4,526 - 12,457)    | 3<br>(2 - 5)     | 2<br>(2 - 4)      | 153<br>(112 - 234)       | 691<br>(513 - 1,084)        | 5,885<br>(3,750 - 11,357)   |
| Atrial fibrillation and flutter               | 2,587<br>(1,721 - 3,695)     | --               | --                | 12<br>(8 - 17)           | 129<br>(86 - 175)           | 2,446<br>(1,600 - 3,516)    |
| Aortic aneurysm                               | 2,705<br>(1,934 - 3,199)     | --               | --                | 77<br>(55 - 97)          | 568<br>(391 - 685)          | 2,060<br>(1,487 - 2,477)    |
| Peripheral vascular disease                   | 749<br>(533 - 1,026)         | --               | --                | 5<br>(3 - 7)             | 74<br>(52 - 96)             | 671<br>(455 - 938)          |
| Endocarditis                                  | 283<br>(162 - 428)           | 1<br>(0 - 1)     | 1<br>(0 - 1)      | 28<br>(16 - 43)          | 68<br>(40 - 113)            | 186<br>(97 - 283)           |
| Other cardiovascular and circulatory diseases | 3,547<br>(2,148 - 4,427)     | 1<br>(0 - 1)     | 1<br>(0 - 1)      | 104<br>(64 - 134)        | 517<br>(325 - 657)          | 2,925<br>(1,743 - 3,762)    |
| Chronic respiratory diseases                  | 18,418<br>(14,815 - 21,645)  | 3<br>(2 - 5)     | 3<br>(2 - 3)      | 148<br>(111 - 181)       | 1,539<br>(1,262 - 1,895)    | 16,725<br>(13,416 - 19,684) |
| Chronic obstructive pulmonary disease         | 16,061<br>(13,033 - 19,097)  | 2<br>(1 - 3)     | 1<br>(1 - 2)      | 95<br>(70 - 121)         | 1,252<br>(1,021 - 1,605)    | 14,711<br>(11,830 - 17,516) |
| Pneumoconiosis                                | 900<br>(589 - 1,450)         | 0<br>(0 - 0)     | 0<br>(0 - 0)      | 12<br>(7 - 19)           | 99<br>(46 - 176)            | 789<br>(511 - 1,270)        |
| Silicosis                                     | 493<br>(317 - 800)           | 0<br>(0 - 0)     | 0<br>(0 - 0)      | 4<br>(3 - 7)             | 35<br>(16 - 65)             | 454<br>(286 - 737)          |
| Asbestosis                                    | 179<br>(116 - 287)           | 0<br>(0 - 0)     | 0<br>(0 - 0)      | 3<br>(2 - 4)             | 28<br>(13 - 51)             | 148<br>(95 - 242)           |

Web Table 31- Italy deaths with 95% UI by age, sex, and cause in 2013

| Cause                                               | Males, All Ages             | Males, 0-4 Years | Males, 5-14 Years | Males, 15-49 Years | Males, 50-69 Years       | Males, 70-80 Years          |
|-----------------------------------------------------|-----------------------------|------------------|-------------------|--------------------|--------------------------|-----------------------------|
| Coal workers pneumoconiosis                         | 39<br>(26 - 63)             | 0<br>(0 - 0)     | 0<br>(0 - 0)      | 2<br>(1 - 2)       | 5<br>(2 - 10)            | 33<br>(21 - 53)             |
| Other pneumoconiosis                                | 189<br>(113 - 313)          | 0<br>(0 - 0)     | 0<br>(0 - 0)      | 3<br>(2 - 5)       | 31<br>(14 - 57)          | 155<br>(91 - 259)           |
| Asthma                                              | 229<br>(164 - 304)          | 0<br>(0 - 0)     | 0<br>(0 - 1)      | 9<br>(7 - 13)      | 32<br>(23 - 42)          | 187<br>(127 - 260)          |
| Interstitial lung disease and pulmonary sarcoidosis | 1,115<br>(394 - 1,839)      | 0<br>(0 - 1)     | 1<br>(0 - 1)      | 28<br>(11 - 46)    | 141<br>(28 - 273)        | 945<br>(348 - 1,549)        |
| Other chronic respiratory diseases                  | 113<br>(79 - 157)           | 1<br>(0 - 1)     | 0<br>(0 - 0)      | 4<br>(3 - 6)       | 15<br>(10 - 22)          | 93<br>(61 - 133)            |
| Cirrhosis                                           | 7,166<br>(6,307 - 8,088)    | 1<br>(0 - 1)     | 1<br>(1 - 2)      | 824<br>(693 - 990) | 2,495<br>(2,111 - 2,900) | 3,845<br>(3,279 - 4,464)    |
| Cirrhosis due to hepatitis B                        | 820<br>(471 - 1,271)        | 0<br>(0 - 0)     | 0<br>(0 - 0)      | 96<br>(48 - 183)   | 287<br>(155 - 476)       | 437<br>(260 - 655)          |
| Cirrhosis due to hepatitis C                        | 3,436<br>(2,187 - 4,686)    | 0<br>(0 - 0)     | 1<br>(0 - 1)      | 412<br>(148 - 615) | 1,220<br>(672 - 1,736)   | 1,803<br>(1,137 - 2,430)    |
| Cirrhosis due to alcohol use                        | 2,638<br>(1,674 - 3,783)    | --               | --                | 260<br>(153 - 446) | 882<br>(534 - 1,372)     | 1,496<br>(965 - 2,156)      |
| Cirrhosis due to other causes                       | 273<br>(132 - 452)          | 1<br>(0 - 1)     | 1<br>(0 - 1)      | 57<br>(29 - 97)    | 107<br>(47 - 181)        | 109<br>(39 - 195)           |
| Digestive diseases                                  | 5,441<br>(4,527 - 6,512)    | 2<br>(1 - 3)     | 3<br>(2 - 3)      | 167<br>(136 - 204) | 722<br>(600 - 878)       | 4,548<br>(3,726 - 5,460)    |
| Peptic ulcer disease                                | 661<br>(434 - 990)          | 0<br>(0 - 0)     | 0<br>(0 - 0)      | 22<br>(16 - 31)    | 98<br>(70 - 141)         | 541<br>(340 - 846)          |
| Gastritis and duodenitis                            | 93<br>(52 - 201)            | 0<br>(0 - 0)     | 0<br>(0 - 0)      | 5<br>(3 - 9)       | 15<br>(8 - 27)           | 73<br>(37 - 164)            |
| Appendicitis                                        | 67<br>(41 - 105)            | 0<br>(0 - 0)     | 0<br>(0 - 1)      | 6<br>(4 - 9)       | 12<br>(7 - 18)           | 48<br>(28 - 78)             |
| Paralytic ileus and intestinal obstruction          | 1,221<br>(744 - 2,004)      | 1<br>(0 - 1)     | 1<br>(0 - 1)      | 21<br>(12 - 37)    | 119<br>(74 - 205)        | 1,080<br>(640 - 1,788)      |
| Inguinal, femoral, and abdominal hernia             | 189<br>(99 - 310)           | 0<br>(0 - 0)     | 0<br>(0 - 0)      | 3<br>(1 - 4)       | 19<br>(10 - 34)          | 167<br>(83 - 280)           |
| Inflammatory bowel disease                          | 379<br>(156 - 566)          | 1<br>(0 - 1)     | 0<br>(0 - 0)      | 17<br>(9 - 24)     | 57<br>(25 - 85)          | 304<br>(116 - 476)          |
| Vascular intestinal disorders                       | 1,020<br>(434 - 1,929)      | 0<br>(0 - 0)     | 0<br>(0 - 0)      | 14<br>(5 - 29)     | 136<br>(58 - 259)        | 870<br>(357 - 1,663)        |
| Gallbladder and biliary diseases                    | 700<br>(420 - 969)          | 0<br>(0 - 0)     | 0<br>(0 - 0)      | 13<br>(8 - 17)     | 73<br>(46 - 102)         | 614<br>(357 - 863)          |
| Pancreatitis                                        | 520<br>(328 - 760)          | 0<br>(0 - 0)     | 0<br>(0 - 0)      | 49<br>(33 - 69)    | 116<br>(73 - 172)        | 355<br>(207 - 532)          |
| Other digestive diseases                            | 592<br>(374 - 820)          | 0<br>(0 - 1)     | 0<br>(0 - 0)      | 17<br>(11 - 23)    | 77<br>(48 - 104)         | 497<br>(314 - 714)          |
| Neurological disorders                              | 35,862<br>(29,316 - 42,679) | 25<br>(16 - 40)  | 15<br>(11 - 22)   | 300<br>(225 - 370) | 1,544<br>(1,221 - 1,865) | 33,978<br>(27,447 - 40,831) |
| Alzheimer disease and other dementias               | 31,475<br>(25,001 - 38,508) | --               | --                | 7<br>(1 - 14)      | 779<br>(565 - 1,029)     | 30,689<br>(24,200 - 37,686) |
| Parkinson disease                                   | 2,525<br>(1,847 - 3,284)    | --               | --                | 4<br>(3 - 6)       | 158<br>(118 - 204)       | 2,363<br>(1,688 - 3,115)    |
| Epilepsy                                            | 304<br>(173 - 404)          | 2<br>(1 - 5)     | 3<br>(2 - 5)      | 79<br>(49 - 107)   | 74<br>(41 - 101)         | 146<br>(74 - 213)           |
| Multiple sclerosis                                  | 178<br>(68 - 261)           | --               | --                | 48<br>(19 - 82)    | 85<br>(30 - 138)         | 45<br>(17 - 72)             |
| Other neurological disorders                        | 1,380<br>(994 - 1,673)      | 23<br>(14 - 38)  | 12<br>(8 - 19)    | 163<br>(122 - 207) | 448<br>(326 - 566)       | 735<br>(503 - 909)          |
| Mental and substance use disorders                  | 893<br>(723 - 1,133)        | 0<br>(0 - 0)     | 0<br>(0 - 0)      | 534<br>(424 - 777) | 178<br>(115 - 226)       | 182<br>(116 - 233)          |
| Schizophrenia                                       | 113<br>(48 - 166)           | --               | --                | 16<br>(7 - 26)     | 42<br>(17 - 65)          | 55<br>(20 - 90)             |
| Alcohol use disorders                               | 230<br>(127 - 305)          | --               | --                | 60<br>(35 - 86)    | 99<br>(52 - 142)         | 71<br>(37 - 95)             |
| Drug use disorders                                  | 549<br>(438 - 809)          | 0<br>(0 - 0)     | --                | 456<br>(355 - 727) | 37<br>(25 - 48)          | 56<br>(40 - 75)             |
| Opioid use disorders                                | 204<br>(161 - 297)          | 0<br>(0 - 0)     | --                | 171<br>(130 - 269) | 13<br>(9 - 17)           | 20<br>(15 - 29)             |
| Cocaine use disorders                               | 14<br>(11 - 22)             | 0<br>(0 - 0)     | --                | 12<br>(9 - 20)     | 1<br>(0 - 1)             | 1<br>(1 - 2)                |
| Amphetamine use disorders                           | 13<br>(10 - 20)             | 0<br>(0 - 0)     | --                | 11<br>(8 - 19)     | 1<br>(1 - 1)             | 1<br>(1 - 2)                |
| Other drug use disorders                            | 317<br>(252 - 472)          | 0<br>(0 - 0)     | --                | 261<br>(201 - 414) | 23<br>(16 - 30)          | 33<br>(24 - 46)             |
| Eating disorders                                    | 1<br>(1 - 2)                | --               | 0<br>(0 - 0)      | 1<br>(1 - 2)       | --                       | --                          |
| Anorexia nervosa                                    | 1<br>(1 - 2)                | --               | 0<br>(0 - 0)      | 1<br>(1 - 2)       | --                       | --                          |
| Diabetes, urogenital, blood, and endocrine diseases | 17,979<br>(15,446 - 22,695) | 36<br>(22 - 56)  | 20<br>(14 - 28)   | 499<br>(377 - 617) | 2,684<br>(2,221 - 3,211) | 14,739<br>(12,522 - 18,857) |
| Diabetes mellitus                                   | 8,770<br>(7,456 - 10,302)   | 1<br>(1 - 2)     | 1<br>(1 - 2)      | 148<br>(118 - 185) | 1,543<br>(1,270 - 1,835) | 7,076<br>(5,879 - 8,477)    |
| Acute glomerulonephritis                            | 6<br>(4 - 13)               | 0<br>(0 - 0)     | 0<br>(0 - 0)      | 1<br>(1 - 2)       | 1<br>(1 - 2)             | 3<br>(1 - 9)                |

Web Table 31- Italy deaths with 95% UI by age, sex, and cause in 2013

| Cause                                               | Males, All Ages             | Males, 0-4 Years   | Males, 5-14 Years | Males, 15-49 Years       | Males, 50-69 Years       | Males, 70-80 Years       |
|-----------------------------------------------------|-----------------------------|--------------------|-------------------|--------------------------|--------------------------|--------------------------|
| Chronic kidney disease                              | 6,661<br>(4,908 - 11,453)   | 2<br>(1 - 3)       | 2<br>(1 - 3)      | 99<br>(69 - 205)         | 641<br>(458 - 1,182)     | 5,918<br>(4,308 - 9,998) |
| Chronic kidney disease due to diabetes mellitus     | 401<br>(204 - 1,044)        | 0<br>(0 - 0)       | 0<br>(0 - 1)      | 12<br>(5 - 26)           | 81<br>(32 - 144)         | 307<br>(144 - 880)       |
| Chronic kidney disease due to hypertension          | 2,763<br>(1,782 - 4,627)    | 0<br>(0 - 1)       | 0<br>(0 - 1)      | 32<br>(20 - 68)          | 230<br>(132 - 458)       | 2,499<br>(1,603 - 4,174) |
| Chronic kidney disease due to glomerulonephritis    | 118<br>(70 - 234)           | 0<br>(0 - 0)       | 0<br>(0 - 0)      | 5<br>(3 - 9)             | 20<br>(12 - 35)          | 92<br>(51 - 196)         |
| Chronic kidney disease due to other causes          | 3,380<br>(2,011 - 6,822)    | 1<br>(1 - 2)       | 1<br>(0 - 2)      | 50<br>(27 - 118)         | 309<br>(178 - 678)       | 3,019<br>(1,774 - 5,901) |
| Urinary diseases and male infertility               | 806<br>(595 - 1,078)        | 0<br>(0 - 1)       | 0<br>(0 - 0)      | 15<br>(10 - 19)          | 76<br>(48 - 96)          | 715<br>(519 - 980)       |
| Interstitial nephritis and urinary tract infections | 554<br>(371 - 771)          | 0<br>(0 - 0)       | 0<br>(0 - 0)      | 8<br>(5 - 11)            | 41<br>(27 - 56)          | 505<br>(329 - 716)       |
| Urolithiasis                                        | 61<br>(37 - 108)            | --                 | 0<br>(0 - 0)      | 3<br>(2 - 4)             | 10<br>(6 - 17)           | 48<br>(27 - 92)          |
| Other urinary diseases                              | 191<br>(94 - 290)           | 0<br>(0 - 0)       | 0<br>(0 - 0)      | 4<br>(2 - 6)             | 25<br>(11 - 36)          | 162<br>(78 - 261)        |
| Gynecological diseases                              | --                          | --                 | --                | --                       | --                       | --                       |
| Uterine fibroids                                    | --                          | --                 | --                | --                       | --                       | --                       |
| Polycystic ovarian syndrome                         | --                          | --                 | --                | --                       | --                       | --                       |
| Endometriosis                                       | --                          | --                 | --                | --                       | --                       | --                       |
| Genital prolapse                                    | --                          | --                 | --                | --                       | --                       | --                       |
| Other gynecological diseases                        | --                          | --                 | --                | --                       | --                       | --                       |
| Hemoglobinopathies and hemolytic anemias            | 334<br>(202 - 512)          | 3<br>(1 - 5)       | 5<br>(2 - 8)      | 30<br>(17 - 47)          | 36<br>(20 - 55)          | 261<br>(157 - 404)       |
| Thalassemias                                        | 21<br>(13 - 33)             | 2<br>(1 - 4)       | 3<br>(2 - 6)      | 16<br>(9 - 25)           | 0<br>(0 - 0)             | 0<br>(0 - 0)             |
| Sickle cell disorders                               | 32<br>(19 - 48)             | 0<br>(0 - 1)       | 1<br>(0 - 1)      | 6<br>(3 - 9)             | 15<br>(8 - 22)           | 10<br>(6 - 17)           |
| G6PD deficiency                                     | 0<br>(0 - 0)                | 0<br>(0 - 0)       | 0<br>(0 - 0)      | 0<br>(0 - 0)             | 0<br>(0 - 0)             | 0<br>(0 - 0)             |
| Other hemoglobinopathies and hemolytic anemias      | 281<br>(169 - 431)          | 0<br>(0 - 1)       | 1<br>(0 - 1)      | 8<br>(4 - 12)            | 21<br>(12 - 33)          | 250<br>(151 - 389)       |
| Endocrine, metabolic, blood, and immune disorders   | 1,403<br>(757 - 1,776)      | 30<br>(17 - 47)    | 12<br>(7 - 18)    | 206<br>(99 - 272)        | 388<br>(177 - 513)       | 767<br>(405 - 1,065)     |
| Musculoskeletal disorders                           | 395<br>(195 - 513)          | --                 | 1<br>(0 - 1)      | 23<br>(13 - 30)          | 81<br>(42 - 106)         | 290<br>(139 - 394)       |
| Rheumatoid arthritis                                | 109<br>(52 - 171)           | --                 | 0<br>(0 - 0)      | 2<br>(1 - 4)             | 20<br>(10 - 34)          | 87<br>(38 - 141)         |
| Other musculoskeletal disorders                     | 285<br>(132 - 383)          | --                 | 0<br>(0 - 1)      | 20<br>(11 - 27)          | 61<br>(30 - 81)          | 203<br>(83 - 290)        |
| Other non-communicable diseases                     | 1,097<br>(924 - 1,277)      | 339<br>(246 - 459) | 26<br>(19 - 35)   | 151<br>(114 - 182)       | 155<br>(103 - 188)       | 426<br>(314 - 547)       |
| Congenital anomalies                                | 771<br>(642 - 927)          | 323<br>(233 - 439) | 26<br>(19 - 35)   | 142<br>(107 - 173)       | 124<br>(78 - 154)        | 156<br>(112 - 202)       |
| Neural tube defects                                 | 11<br>(7 - 15)              | 7<br>(4 - 12)      | 0<br>(0 - 1)      | 2<br>(1 - 2)             | 1<br>(0 - 1)             | 1<br>(0 - 1)             |
| Congenital heart anomalies                          | 257<br>(192 - 325)          | 131<br>(91 - 183)  | 11<br>(7 - 17)    | 59<br>(41 - 79)          | 30<br>(18 - 44)          | 25<br>(14 - 39)          |
| Cleft lip and cleft palate                          | 0<br>(0 - 1)                | 0<br>(0 - 1)       | --                | --                       | --                       | --                       |
| Down syndrome                                       | 86<br>(36 - 150)            | 17<br>(6 - 51)     | 2<br>(1 - 4)      | 23<br>(10 - 43)          | 40<br>(13 - 60)          | 4<br>(1 - 8)             |
| Chromosomal unbalanced rearrangements               | 21<br>(11 - 31)             | 18<br>(9 - 27)     | 1<br>(0 - 1)      | 2<br>(1 - 2)             | 1<br>(0 - 1)             | 0<br>(0 - 1)             |
| Other congenital anomalies                          | 396<br>(309 - 489)          | 149<br>(97 - 227)  | 12<br>(7 - 18)    | 57<br>(38 - 76)          | 52<br>(32 - 77)          | 126<br>(86 - 164)        |
| Skin and subcutaneous diseases                      | 311<br>(214 - 420)          | 1<br>(0 - 1)       | 0<br>(0 - 0)      | 9<br>(6 - 11)            | 31<br>(20 - 40)          | 270<br>(181 - 380)       |
| Cellulitis                                          | 41<br>(18 - 87)             | 0<br>(0 - 0)       | 0<br>(0 - 0)      | 2<br>(1 - 4)             | 7<br>(3 - 14)            | 32<br>(12 - 75)          |
| Pyoderma                                            | 99<br>(60 - 142)            | 0<br>(0 - 1)       | 0<br>(0 - 0)      | 4<br>(2 - 6)             | 14<br>(7 - 20)           | 80<br>(45 - 124)         |
| Decubitus ulcer                                     | 138<br>(83 - 206)           | 0<br>(0 - 0)       | 0<br>(0 - 0)      | 1<br>(1 - 2)             | 6<br>(3 - 10)            | 131<br>(76 - 197)        |
| Other skin and subcutaneous diseases                | 33<br>(15 - 62)             | 0<br>(0 - 0)       | 0<br>(0 - 0)      | 1<br>(1 - 2)             | 4<br>(2 - 6)             | 28<br>(11 - 57)          |
| Sudden infant death syndrome                        | 15<br>(5 - 35)              | 15<br>(5 - 35)     | --                | --                       | --                       | --                       |
| Injuries                                            | 15,212<br>(13,387 - 17,207) | 56<br>(39 - 81)    | 99<br>(80 - 122)  | 4,816<br>(4,209 - 5,399) | 2,914<br>(2,512 - 3,349) | 7,326<br>(6,117 - 8,769) |
| Transport injuries                                  | 4,976<br>(4,314 - 5,628)    | 16<br>(10 - 25)    | 55<br>(42 - 73)   | 2,405<br>(2,065 - 2,727) | 1,025<br>(850 - 1,226)   | 1,475<br>(1,207 - 1,789) |

Web Table 31- Italy deaths with 95% UI by age, sex, and cause in 2013

| Cause                                           | Males, All Ages          | Males, 0-4 Years | Males, 5-14 Years | Males, 15-49 Years       | Males, 50-69 Years     | Males, 70-80 Years       |
|-------------------------------------------------|--------------------------|------------------|-------------------|--------------------------|------------------------|--------------------------|
| Road injuries                                   | 4,741<br>(4,153 - 5,340) | 16<br>(10 - 23)  | 53<br>(40 - 70)   | 2,300<br>(1,982 - 2,611) | 950<br>(797 - 1,121)   | 1,422<br>(1,165 - 1,734) |
| Pedestrian road injuries                        | 1,207<br>(685 - 1,744)   | 5<br>(2 - 10)    | 15<br>(8 - 24)    | 217<br>(104 - 397)       | 270<br>(132 - 412)     | 699<br>(419 - 974)       |
| Cyclist road injuries                           | 361<br>(207 - 518)       | 1<br>(0 - 2)     | 11<br>(5 - 17)    | 75<br>(35 - 107)         | 92<br>(45 - 131)       | 182<br>(100 - 289)       |
| Motorcyclist road injuries                      | 882<br>(577 - 1,228)     | 0<br>(0 - 1)     | 7<br>(4 - 15)     | 639<br>(397 - 855)       | 125<br>(74 - 195)      | 111<br>(60 - 252)        |
| Motor vehicle road injuries                     | 2,284<br>(1,737 - 2,945) | 9<br>(5 - 14)    | 19<br>(11 - 28)   | 1,367<br>(1,081 - 1,721) | 461<br>(329 - 638)     | 428<br>(258 - 648)       |
| Other road injuries                             | 7<br>(3 - 13)            | 0<br>(0 - 0)     | 0<br>(0 - 1)      | 2<br>(1 - 3)             | 2<br>(1 - 3)           | 3<br>(1 - 7)             |
| Other transport injuries                        | 235<br>(98 - 361)        | 1<br>(0 - 2)     | 3<br>(1 - 5)      | 104<br>(46 - 161)        | 74<br>(29 - 126)       | 53<br>(18 - 97)          |
| Unintentional injuries                          | 6,339<br>(5,096 - 7,646) | 38<br>(25 - 57)  | 36<br>(27 - 46)   | 763<br>(642 - 887)       | 796<br>(642 - 929)     | 4,706<br>(3,597 - 5,959) |
| Falls                                           | 4,459<br>(3,317 - 5,775) | 5<br>(3 - 8)     | 7<br>(5 - 10)     | 263<br>(193 - 327)       | 384<br>(266 - 476)     | 3,800<br>(2,740 - 5,054) |
| Drowning                                        | 312<br>(208 - 419)       | 5<br>(3 - 10)    | 13<br>(8 - 20)    | 143<br>(96 - 197)        | 71<br>(45 - 98)        | 80<br>(47 - 111)         |
| Fire, heat, and hot substances                  | 193<br>(124 - 251)       | 2<br>(1 - 4)     | 2<br>(1 - 3)      | 32<br>(23 - 45)          | 33<br>(22 - 46)        | 124<br>(74 - 174)        |
| Poisonings                                      | 101<br>(78 - 156)        | 1<br>(0 - 2)     | 1<br>(1 - 2)      | 37<br>(26 - 63)          | 22<br>(16 - 35)        | 41<br>(27 - 62)          |
| Exposure to mechanical forces                   | 415<br>(280 - 483)       | 5<br>(3 - 8)     | 8<br>(5 - 10)     | 166<br>(118 - 200)       | 123<br>(84 - 150)      | 113<br>(62 - 139)        |
| Unintentional firearm injuries                  | 44<br>(31 - 55)          | 0<br>(0 - 0)     | 1<br>(1 - 2)      | 20<br>(14 - 27)          | 13<br>(8 - 18)         | 9<br>(5 - 14)            |
| Unintentional suffocation                       | 38<br>(8 - 50)           | 2<br>(1 - 3)     | 1<br>(0 - 3)      | 15<br>(3 - 20)           | 11<br>(2 - 16)         | 10<br>(1 - 16)           |
| Other exposure to mechanical forces             | 333<br>(227 - 392)       | 3<br>(2 - 5)     | 5<br>(3 - 7)      | 131<br>(93 - 162)        | 100<br>(72 - 125)      | 93<br>(51 - 117)         |
| Adverse effects of medical treatment            | 440<br>(314 - 619)       | 2<br>(1 - 5)     | 1<br>(1 - 2)      | 27<br>(19 - 39)          | 90<br>(58 - 141)       | 320<br>(217 - 467)       |
| Animal contact                                  | 24<br>(18 - 37)          | 0<br>(0 - 0)     | 0<br>(0 - 0)      | 6<br>(4 - 9)             | 9<br>(6 - 13)          | 9<br>(6 - 14)            |
| Venomous animal contact                         | 10<br>(7 - 15)           | 0<br>(0 - 0)     | 0<br>(0 - 0)      | 3<br>(2 - 5)             | 4<br>(2 - 6)           | 2<br>(1 - 5)             |
| Non-venomous animal contact                     | 14<br>(10 - 22)          | 0<br>(0 - 0)     | 0<br>(0 - 0)      | 3<br>(2 - 5)             | 5<br>(3 - 8)           | 6<br>(4 - 10)            |
| Foreign body                                    | 308<br>(127 - 441)       | 16<br>(9 - 30)   | 3<br>(2 - 5)      | 44<br>(23 - 69)          | 45<br>(21 - 62)        | 201<br>(67 - 322)        |
| Pulmonary aspiration and foreign body in airway | 304<br>(122 - 436)       | 16<br>(8 - 29)   | 3<br>(1 - 5)      | 42<br>(21 - 67)          | 44<br>(20 - 62)        | 199<br>(66 - 321)        |
| Foreign body in other body part                 | 5<br>(3 - 7)             | 0<br>(0 - 1)     | 0<br>(0 - 0)      | 2<br>(1 - 2)             | 1<br>(1 - 2)           | 2<br>(1 - 3)             |
| Other unintentional injuries                    | 87<br>(66 - 112)         | 1<br>(1 - 3)     | 2<br>(1 - 3)      | 45<br>(30 - 63)          | 19<br>(11 - 31)        | 20<br>(12 - 31)          |
| Self-harm and interpersonal violence            | 3,897<br>(3,197 - 4,719) | 2<br>(1 - 4)     | 8<br>(5 - 12)     | 1,649<br>(1,239 - 1,989) | 1,093<br>(817 - 1,354) | 1,145<br>(893 - 1,636)   |
| Self-harm                                       | 3,458<br>(2,779 - 4,192) | --               | 5<br>(3 - 8)      | 1,358<br>(938 - 1,639)   | 1,002<br>(724 - 1,255) | 1,092<br>(850 - 1,585)   |
| Interpersonal violence                          | 440<br>(329 - 743)       | 2<br>(1 - 4)     | 3<br>(2 - 5)      | 291<br>(212 - 505)       | 91<br>(62 - 158)       | 53<br>(35 - 82)          |
| Assault by firearm                              | 288<br>(193 - 563)       | 0<br>(0 - 1)     | 1<br>(1 - 3)      | 211<br>(139 - 412)       | 58<br>(37 - 120)       | 16<br>(9 - 37)           |
| Assault by sharp object                         | 80<br>(32 - 133)         | 0<br>(0 - 1)     | 1<br>(0 - 1)      | 50<br>(17 - 84)          | 17<br>(6 - 29)         | 13<br>(6 - 22)           |
| Assault by other means                          | 72<br>(33 - 108)         | 1<br>(1 - 2)     | 1<br>(1 - 2)      | 29<br>(12 - 47)          | 16<br>(6 - 26)         | 23<br>(11 - 35)          |

Web Table 31- Italy deaths with 95% UI by age, sex, and cause in 2013

| Cause                                                             | Females, All Ages              | Females, 0-4 Years   | Females, 5-14 Years | Females, 15-49 Years     | Females, 50-69 Years        | Females, 70-80 Years           |
|-------------------------------------------------------------------|--------------------------------|----------------------|---------------------|--------------------------|-----------------------------|--------------------------------|
| All causes                                                        | 325,182<br>(302,484 - 352,035) | 925<br>(695 - 1,200) | 213<br>(182 - 252)  | 7,408<br>(6,593 - 8,426) | 30,777<br>(27,855 - 34,320) | 285,859<br>(267,009 - 307,991) |
| Communicable, maternal, neonatal, and nutritional diseases        | 10,093<br>(7,702 - 12,742)     | 504<br>(371 - 668)   | 22<br>(16 - 29)     | 360<br>(288 - 469)       | 543<br>(427 - 657)          | 8,664<br>(6,423 - 11,274)      |
| HIV/AIDS and tuberculosis                                         | 445<br>(331 - 622)             | 1<br>(0 - 1)         | 0<br>(0 - 1)        | 169<br>(111 - 281)       | 97<br>(58 - 157)            | 178<br>(120 - 242)             |
| Tuberculosis                                                      | 203<br>(144 - 271)             | 0<br>(0 - 0)         | 0<br>(0 - 0)        | 12<br>(8 - 16)           | 27<br>(20 - 36)             | 164<br>(108 - 228)             |
| HIV/AIDS                                                          | 242<br>(144 - 407)             | 0<br>(0 - 1)         | 0<br>(0 - 0)        | 158<br>(98 - 270)        | 70<br>(32 - 129)            | 14<br>(3 - 33)                 |
| HIV/AIDS resulting in mycobacterial infection                     | 10<br>(6 - 18)                 | 0<br>(0 - 0)         | 0<br>(0 - 0)        | 6<br>(4 - 11)            | 3<br>(1 - 6)                | 1<br>(0 - 2)                   |
| HIV/AIDS resulting in other diseases                              | 232<br>(138 - 388)             | 0<br>(0 - 1)         | 0<br>(0 - 0)        | 151<br>(94 - 257)        | 67<br>(31 - 124)            | 13<br>(3 - 31)                 |
| Diarrhea, lower respiratory, and other common infectious diseases | 7,550<br>(5,468 - 10,230)      | 40<br>(28 - 55)      | 17<br>(11 - 24)     | 117<br>(93 - 142)        | 326<br>(248 - 405)          | 7,051<br>(4,996 - 9,744)       |
| Diarrheal diseases                                                | 279<br>(163 - 457)             | 3<br>(2 - 6)         | 0<br>(0 - 1)        | 4<br>(3 - 5)             | 11<br>(7 - 16)              | 260<br>(145 - 438)             |
| Intestinal infectious diseases                                    | 35<br>(14 - 72)                | 6<br>(2 - 15)        | 6<br>(2 - 12)       | 12<br>(4 - 25)           | 4<br>(1 - 9)                | 7<br>(3 - 15)                  |
| Typhoid fever                                                     | 25<br>(8 - 54)                 | 4<br>(1 - 10)        | 4<br>(1 - 9)        | 9<br>(3 - 20)            | 3<br>(1 - 7)                | 4<br>(1 - 9)                   |
| Paratyphoid fever                                                 | 6<br>(2 - 13)                  | 1<br>(0 - 3)         | 1<br>(0 - 3)        | 2<br>(0 - 5)             | 0<br>(0 - 1)                | 1<br>(0 - 2)                   |
| Other intestinal infectious diseases                              | 5<br>(1 - 10)                  | 1<br>(0 - 3)         | 0<br>(0 - 1)        | 1<br>(0 - 4)             | 1<br>(0 - 4)                | 2<br>(0 - 6)                   |
| Lower respiratory infections                                      | 6,917<br>(4,871 - 9,569)       | 17<br>(10 - 25)      | 5<br>(3 - 7)        | 64<br>(50 - 80)          | 249<br>(173 - 322)          | 6,582<br>(4,542 - 9,758)       |
| Upper respiratory infections                                      | 7<br>(1 - 33)                  | 0<br>(0 - 0)         | 0<br>(0 - 0)        | 0<br>(0 - 1)             | 1<br>(0 - 3)                | 6<br>(0 - 31)                  |
| Otitis media                                                      | 9<br>(7 - 12)                  | 0<br>(0 - 1)         | 0<br>(0 - 0)        | 1<br>(1 - 2)             | 2<br>(1 - 2)                | 5<br>(3 - 9)                   |
| Meningitis                                                        | 105<br>(72 - 129)              | 7<br>(4 - 10)        | 2<br>(1 - 3)        | 11<br>(8 - 14)           | 21<br>(15 - 27)             | 64<br>(42 - 84)                |
| Pneumococcal meningitis                                           | 22<br>(13 - 34)                | 1<br>(1 - 2)         | 0<br>(0 - 1)        | 2<br>(1 - 3)             | 4<br>(2 - 7)                | 15<br>(6 - 25)                 |
| H influenzae type B meningitis                                    | 15<br>(9 - 21)                 | 3<br>(1 - 4)         | 0<br>(0 - 1)        | 1<br>(1 - 2)             | 2<br>(1 - 4)                | 8<br>(4 - 13)                  |
| Meningococcal meningitis                                          | 34<br>(21 - 46)                | 2<br>(1 - 3)         | 1<br>(0 - 1)        | 3<br>(2 - 5)             | 7<br>(3 - 10)               | 22<br>(12 - 33)                |
| Other meningitis                                                  | 34<br>(24 - 47)                | 1<br>(1 - 3)         | 0<br>(0 - 1)        | 4<br>(3 - 6)             | 8<br>(5 - 12)               | 20<br>(11 - 30)                |
| Encephalitis                                                      | 136<br>(70 - 184)              | 4<br>(2 - 8)         | 3<br>(2 - 5)        | 19<br>(10 - 29)          | 31<br>(18 - 48)             | 78<br>(30 - 116)               |
| Diphtheria                                                        | 0<br>(0 - 1)                   | 0<br>(0 - 0)         | 0<br>(0 - 0)        | 0<br>(0 - 1)             | 0<br>(0 - 1)                | --                             |
| Whooping cough                                                    | 2<br>(1 - 4)                   | 0<br>(0 - 2)         | 0<br>(0 - 0)        | 1<br>(1 - 2)             | 0<br>(0 - 0)                | --                             |
| Tetanus                                                           | 15<br>(8 - 25)                 | 0<br>(0 - 0)         | 0<br>(0 - 0)        | 2<br>(1 - 2)             | 3<br>(1 - 4)                | 10<br>(5 - 19)                 |
| Measles                                                           | 0<br>(0 - 0)                   | 0<br>(0 - 0)         | 0<br>(0 - 0)        | 0<br>(0 - 0)             | 0<br>(0 - 0)                | --                             |
| Varicella and herpes zoster                                       | 44<br>(5 - 194)                | 1<br>(0 - 5)         | 0<br>(0 - 1)        | 2<br>(0 - 7)             | 3<br>(0 - 9)                | 38<br>(0 - 189)                |
| Neglected tropical diseases and malaria                           | 31<br>(25 - 36)                | 1<br>(0 - 1)         | 1<br>(1 - 1)        | 6<br>(5 - 7)             | 7<br>(5 - 8)                | 17<br>(14 - 20)                |
| Leishmaniasis                                                     | 2<br>(1 - 3)                   | 0<br>(0 - 0)         | 0<br>(0 - 0)        | 0<br>(0 - 1)             | 0<br>(0 - 1)                | 1<br>(0 - 1)                   |
| Visceral leishmaniasis                                            | 2<br>(1 - 3)                   | 0<br>(0 - 0)         | 0<br>(0 - 0)        | 0<br>(0 - 1)             | 0<br>(0 - 1)                | 1<br>(0 - 1)                   |
| Cysticercosis                                                     | 0<br>(0 - 0)                   | 0<br>(0 - 0)         | 0<br>(0 - 0)        | 0<br>(0 - 0)             | 0<br>(0 - 0)                | 0<br>(0 - 0)                   |
| Cystic echinococcosis                                             | 17<br>(15 - 19)                | 0<br>(0 - 0)         | 0<br>(0 - 0)        | 2<br>(2 - 2)             | 4<br>(3 - 4)                | 11<br>(10 - 12)                |
| Dengue                                                            | 3<br>(2 - 4)                   | 0<br>(0 - 0)         | 0<br>(0 - 0)        | 1<br>(1 - 2)             | 1<br>(0 - 1)                | 1<br>(0 - 1)                   |
| Rabies                                                            | 3<br>(1 - 3)                   | 0<br>(0 - 0)         | 0<br>(0 - 0)        | 1<br>(0 - 1)             | 1<br>(0 - 1)                | 0<br>(0 - 1)                   |
| Other neglected tropical diseases                                 | 6<br>(4 - 9)                   | 0<br>(0 - 0)         | 0<br>(0 - 0)        | 1<br>(1 - 2)             | 1<br>(1 - 1)                | 3<br>(2 - 6)                   |
| Maternal disorders                                                | 24<br>(18 - 32)                | --                   | 0<br>(0 - 0)        | 24<br>(18 - 32)          | --                          | --                             |
| Maternal hemorrhage                                               | 4<br>(2 - 5)                   | --                   | 0<br>(0 - 0)        | 4<br>(2 - 5)             | --                          | --                             |
| Maternal sepsis and other maternal infections                     | 1<br>(1 - 2)                   | --                   | 0<br>(0 - 0)        | 1<br>(1 - 2)             | --                          | --                             |
| Maternal hypertensive disorders                                   | 3<br>(2 - 4)                   | --                   | 0<br>(0 - 0)        | 3<br>(2 - 4)             | --                          | --                             |
| Maternal obstructed labor                                         | 2<br>(1 - 3)                   | --                   | 0<br>(0 - 0)        | 2<br>(1 - 3)             | --                          | --                             |

Web Table 31- Italy deaths with 95% UI by age, sex, and cause in 2013

| Cause                                                            | Females, All Ages              | Females, 0-4 Years | Females, 5-14 Years | Females, 15-49 Years     | Females, 50-69 Years        | Females, 70-80 Years           |
|------------------------------------------------------------------|--------------------------------|--------------------|---------------------|--------------------------|-----------------------------|--------------------------------|
| Maternal abortive outcome                                        | 6<br>(4 - 9)                   | --                 | 0<br>(0 - 0)        | 6<br>(4 - 9)             | --                          | --                             |
| Indirect maternal deaths                                         | 2<br>(1 - 4)                   | --                 | 0<br>(0 - 0)        | 2<br>(1 - 4)             | --                          | --                             |
| Late maternal deaths                                             | 2<br>(1 - 3)                   | --                 | 0<br>(0 - 0)        | 2<br>(1 - 3)             | --                          | --                             |
| Maternal deaths aggravated by HIV/AIDS                           | 0<br>(0 - 0)                   | --                 | --                  | 0<br>(0 - 0)             | --                          | --                             |
| Other maternal disorders                                         | 4<br>(3 - 6)                   | --                 | 0<br>(0 - 0)        | 4<br>(3 - 6)             | --                          | --                             |
| Neonatal disorders                                               | 447<br>(326 - 596)             | 447<br>(326 - 596) | --                  | --                       | --                          | --                             |
| Neonatal preterm birth complications                             | 243<br>(163 - 358)             | 243<br>(163 - 358) | --                  | --                       | --                          | --                             |
| Neonatal encephalopathy due to birth asphyxia and trauma         | 80<br>(51 - 115)               | 80<br>(51 - 115)   | --                  | --                       | --                          | --                             |
| Neonatal sepsis and other neonatal infections                    | 28<br>(13 - 55)                | 28<br>(13 - 55)    | --                  | --                       | --                          | --                             |
| Hemolytic disease and other neonatal jaundice                    | 1<br>(0 - 4)                   | 1<br>(0 - 4)       | --                  | --                       | --                          | --                             |
| Other neonatal disorders                                         | 94<br>(32 - 147)               | 94<br>(32 - 147)   | --                  | --                       | --                          | --                             |
| Nutritional deficiencies                                         | 1,241<br>(637 - 1,686)         | 2<br>(1 - 3)       | 1<br>(0 - 1)        | 20<br>(11 - 25)          | 43<br>(23 - 55)             | 1,175<br>(596 - 1,614)         |
| Protein-energy malnutrition                                      | 256<br>(20 - 591)              | 0<br>(0 - 1)       | 0<br>(0 - 0)        | 2<br>(1 - 4)             | 6<br>(1 - 13)               | 247<br>(19 - 572)              |
| Iodine deficiency                                                | 3<br>(0 - 26)                  | 0<br>(0 - 0)       | 0<br>(0 - 0)        | 0<br>(0 - 0)             | 0<br>(0 - 2)                | 3<br>(0 - 25)                  |
| Iron-deficiency anemia                                           | 863<br>(453 - 1,290)           | 1<br>(0 - 2)       | 0<br>(0 - 1)        | 15<br>(9 - 20)           | 32<br>(19 - 43)             | 815<br>(422 - 1,236)           |
| Other nutritional deficiencies                                   | 118<br>(24 - 239)              | 0<br>(0 - 1)       | 0<br>(0 - 0)        | 2<br>(1 - 5)             | 5<br>(1 - 9)                | 110<br>(22 - 225)              |
| Other communicable, maternal, neonatal, and nutritional diseases | 355<br>(227 - 468)             | 15<br>(5 - 33)     | 3<br>(2 - 4)        | 23<br>(16 - 30)          | 71<br>(45 - 96)             | 243<br>(145 - 342)             |
| Sexually transmitted diseases excluding HIV                      | 32<br>(19 - 53)                | 12<br>(2 - 29)     | 1<br>(0 - 2)        | 2<br>(1 - 3)             | 3<br>(2 - 5)                | 14<br>(9 - 23)                 |
| Syphilis                                                         | 27<br>(14 - 47)                | 12<br>(2 - 29)     | 1<br>(0 - 2)        | 1<br>(1 - 1)             | 2<br>(1 - 3)                | 11<br>(7 - 18)                 |
| Chlamydial infection                                             | 2<br>(1 - 2)                   | --                 | 0<br>(0 - 0)        | 0<br>(0 - 1)             | 0<br>(0 - 1)                | 1<br>(0 - 1)                   |
| Gonococcal infection                                             | 3<br>(2 - 4)                   | --                 | 0<br>(0 - 0)        | 0<br>(0 - 1)             | 1<br>(0 - 1)                | 2<br>(1 - 3)                   |
| Other sexually transmitted diseases                              | 2<br>(1 - 2)                   | --                 | 0<br>(0 - 0)        | 0<br>(0 - 1)             | 0<br>(0 - 1)                | 1<br>(0 - 1)                   |
| Hepatitis                                                        | 127<br>(85 - 183)              | 1<br>(0 - 1)       | 1<br>(0 - 1)        | 9<br>(6 - 13)            | 27<br>(16 - 40)             | 90<br>(51 - 144)               |
| Acute hepatitis A                                                | 22<br>(7 - 48)                 | 1<br>(0 - 1)       | 1<br>(0 - 1)        | 4<br>(1 - 6)             | 5<br>(1 - 11)               | 12<br>(3 - 32)                 |
| Acute hepatitis B                                                | 81<br>(43 - 130)               | 0<br>(0 - 0)       | 0<br>(0 - 0)        | 4<br>(2 - 6)             | 17<br>(8 - 28)              | 60<br>(29 - 104)               |
| Acute hepatitis C                                                | 24<br>(5 - 55)                 | --                 | 0<br>(0 - 0)        | 2<br>(0 - 4)             | 5<br>(1 - 12)               | 17<br>(3 - 44)                 |
| Other infectious diseases                                        | 196<br>(94 - 280)              | 3<br>(1 - 4)       | 1<br>(1 - 2)        | 12<br>(6 - 18)           | 41<br>(19 - 60)             | 139<br>(62 - 207)              |
| Non-communicable diseases                                        | 303,292<br>(281,803 - 328,333) | 378<br>(286 - 491) | 146<br>(123 - 171)  | 6,045<br>(5,358 - 6,889) | 29,282<br>(26,502 - 32,641) | 267,441<br>(248,870 - 287,945) |
| Neoplasms                                                        | 75,345<br>(63,737 - 85,228)    | 37<br>(26 - 52)    | 78<br>(64 - 95)     | 4,049<br>(3,557 - 4,640) | 17,969<br>(15,654 - 20,222) | 53,212<br>(43,715 - 60,858)    |
| Esophageal cancer                                                | 471<br>(387 - 564)             | --                 | --                  | 13<br>(10 - 18)          | 104<br>(82 - 129)           | 353<br>(285 - 430)             |
| Stomach cancer                                                   | 5,719<br>(4,105 - 7,873)       | --                 | --                  | 170<br>(117 - 230)       | 793<br>(566 - 1,043)        | 4,756<br>(3,341 - 6,715)       |
| Liver cancer                                                     | 3,712<br>(2,822 - 5,205)       | --                 | 1<br>(0 - 1)        | 69<br>(49 - 109)         | 658<br>(488 - 1,074)        | 2,983<br>(2,157 - 4,153)       |
| Liver cancer due to hepatitis B                                  | 346<br>(199 - 553)             | --                 | 0<br>(0 - 0)        | 15<br>(9 - 23)           | 97<br>(53 - 161)            | 234<br>(128 - 390)             |
| Liver cancer due to hepatitis C                                  | 2,562<br>(1,867 - 3,607)       | --                 | 0<br>(0 - 0)        | 41<br>(26 - 68)          | 433<br>(305 - 723)          | 2,088<br>(1,454 - 2,956)       |
| Liver cancer due to alcohol use                                  | 595<br>(338 - 955)             | --                 | --                  | 6<br>(3 - 12)            | 82<br>(43 - 147)            | 507<br>(280 - 831)             |
| Liver cancer due to other causes                                 | 209<br>(103 - 351)             | --                 | 0<br>(0 - 1)        | 8<br>(5 - 13)            | 46<br>(24 - 84)             | 155<br>(68 - 269)              |
| Larynx cancer                                                    | 169<br>(108 - 251)             | --                 | --                  | 9<br>(5 - 14)            | 51<br>(32 - 75)             | 109<br>(67 - 162)              |
| Tracheal, bronchus and lung cancer                               | 8,211<br>(5,186 - 10,236)      | --                 | --                  | 400<br>(273 - 510)       | 2,515<br>(1,612 - 3,074)    | 5,296<br>(3,159 - 6,867)       |
| Breast cancer                                                    | 12,272<br>(8,698 - 14,622)     | --                 | --                  | 1,221<br>(1,000 - 1,521) | 3,891<br>(2,979 - 4,659)    | 7,161<br>(4,539 - 8,799)       |
| Cervical cancer                                                  | 1,335<br>(777 - 1,823)         | --                 | --                  | 172<br>(93 - 248)        | 376<br>(209 - 517)          | 788<br>(456 - 1,159)           |

Web Table 31- Italy deaths with 95% UI by age, sex, and cause in 2013

| Cause                                         | Females, All Ages              | Females, 0-4 Years | Females, 5-14 Years | Females, 15-49 Years | Females, 50-69 Years     | Females, 70-80 Years           |
|-----------------------------------------------|--------------------------------|--------------------|---------------------|----------------------|--------------------------|--------------------------------|
| Uterine cancer                                | 1,505<br>(820 - 1,924)         | --                 | --                  | 38<br>(26 - 53)      | 400<br>(238 - 518)       | 1,067<br>(541 - 1,431)         |
| Prostate cancer                               | --                             | --                 | --                  | --                   | --                       | --                             |
| Colon and rectum cancer                       | 10,696<br>(8,807 - 13,045)     | --                 | --                  | 304<br>(246 - 368)   | 1,966<br>(1,666 - 2,263) | 8,425<br>(6,644 - 10,640)      |
| Lip and oral cavity cancer                    | 614<br>(479 - 769)             | --                 | --                  | 41<br>(28 - 53)      | 149<br>(114 - 186)       | 424<br>(317 - 557)             |
| Nasopharynx cancer                            | 70<br>(37 - 148)               | --                 | 0<br>(0 - 1)        | 12<br>(6 - 26)       | 25<br>(13 - 55)          | 33<br>(16 - 71)                |
| Other pharynx cancer                          | 181<br>(138 - 238)             | --                 | --                  | 17<br>(11 - 26)      | 70<br>(51 - 91)          | 94<br>(65 - 131)               |
| Gallbladder and biliary tract cancer          | 2,345<br>(1,448 - 3,223)       | --                 | --                  | 33<br>(23 - 50)      | 437<br>(299 - 566)       | 1,875<br>(1,086 - 2,644)       |
| Pancreatic cancer                             | 6,017<br>(5,055 - 7,087)       | --                 | --                  | 135<br>(106 - 170)   | 1,277<br>(1,065 - 1,499) | 4,604<br>(3,763 - 5,571)       |
| Malignant skin melanoma                       | 827<br>(517 - 1,072)           | --                 | --                  | 133<br>(80 - 175)    | 236<br>(142 - 303)       | 458<br>(277 - 626)             |
| Non-melanoma skin cancer                      | 387<br>(265 - 557)             | --                 | --                  | 7<br>(5 - 10)        | 25<br>(18 - 34)          | 354<br>(237 - 520)             |
| Ovarian cancer                                | 3,801<br>(2,951 - 4,529)       | --                 | --                  | 276<br>(216 - 346)   | 1,319<br>(1,056 - 1,573) | 2,206<br>(1,539 - 2,829)       |
| Testicular cancer                             | --                             | --                 | --                  | --                   | --                       | --                             |
| Kidney cancer                                 | 1,258<br>(809 - 1,937)         | 1<br>(1 - 3)       | 2<br>(1 - 4)        | 45<br>(33 - 60)      | 302<br>(227 - 397)       | 907<br>(518 - 1,553)           |
| Bladder cancer                                | 1,458<br>(904 - 2,089)         | --                 | --                  | 17<br>(11 - 27)      | 177<br>(118 - 277)       | 1,264<br>(759 - 1,841)         |
| Brain and nervous system cancer               | 1,704<br>(1,299 - 2,119)       | 7<br>(4 - 12)      | 19<br>(13 - 29)     | 197<br>(154 - 262)   | 616<br>(484 - 796)       | 865<br>(577 - 1,148)           |
| Thyroid cancer                                | 417<br>(301 - 580)             | --                 | 0<br>(0 - 0)        | 15<br>(10 - 23)      | 92<br>(66 - 141)         | 310<br>(217 - 440)             |
| Mesothelioma                                  | 528<br>(367 - 991)             | --                 | --                  | 21<br>(13 - 45)      | 149<br>(95 - 274)        | 357<br>(224 - 691)             |
| Hodgkin lymphoma                              | 188<br>(133 - 252)             | 0<br>(0 - 0)       | 1<br>(0 - 2)        | 43<br>(30 - 63)      | 41<br>(28 - 64)          | 103<br>(62 - 148)              |
| Non-Hodgkin lymphoma                          | 2,708<br>(1,116 - 3,744)       | 2<br>(1 - 3)       | 4<br>(2 - 8)        | 156<br>(83 - 257)    | 594<br>(281 - 858)       | 1,952<br>(732 - 2,785)         |
| Multiple myeloma                              | 1,697<br>(1,050 - 2,713)       | --                 | --                  | 38<br>(23 - 65)      | 393<br>(243 - 653)       | 1,266<br>(736 - 2,009)         |
| Leukemia                                      | 2,669<br>(2,022 - 3,258)       | 10<br>(5 - 17)     | 23<br>(16 - 31)     | 184<br>(145 - 227)   | 469<br>(352 - 575)       | 1,982<br>(1,414 - 2,487)       |
| Other neoplasms                               | 4,387<br>(2,870 - 5,689)       | 17<br>(11 - 24)    | 28<br>(20 - 37)     | 281<br>(217 - 352)   | 842<br>(639 - 1,035)     | 3,219<br>(1,883 - 4,405)       |
| Cardiovascular diseases                       | 132,722<br>(116,980 - 152,708) | 8<br>(5 - 13)      | 11<br>(9 - 17)      | 853<br>(685 - 1,115) | 5,832<br>(4,810 - 7,955) | 126,019<br>(111,333 - 143,901) |
| Rheumatic heart disease                       | 1,447<br>(691 - 1,968)         | 0<br>(0 - 0)       | 1<br>(1 - 2)        | 35<br>(25 - 56)      | 184<br>(130 - 292)       | 1,226<br>(522 - 1,722)         |
| Ischemic heart disease                        | 54,931<br>(45,635 - 72,686)    | 1<br>(0 - 1)       | 2<br>(1 - 3)        | 317<br>(231 - 472)   | 2,713<br>(2,117 - 4,039) | 51,898<br>(42,921 - 68,396)    |
| Cerebrovascular disease                       | 42,688<br>(34,492 - 55,687)    | 2<br>(1 - 3)       | 5<br>(3 - 7)        | 317<br>(238 - 420)   | 1,659<br>(1,320 - 2,476) | 40,705<br>(32,737 - 52,922)    |
| Ischemic stroke                               | 26,279<br>(20,339 - 37,198)    | 0<br>(0 - 1)       | 1<br>(0 - 1)        | 30<br>(18 - 56)      | 404<br>(250 - 785)       | 25,843<br>(19,983 - 36,351)    |
| Hemorrhagic stroke                            | 16,409<br>(10,882 - 22,178)    | 2<br>(1 - 3)       | 4<br>(3 - 6)        | 286<br>(214 - 378)   | 1,255<br>(981 - 1,832)   | 14,862<br>(9,728 - 20,433)     |
| Hypertensive heart disease                    | 13,055<br>(8,699 - 18,975)     | 0<br>(0 - 1)       | 0<br>(0 - 1)        | 25<br>(17 - 38)      | 375<br>(252 - 604)       | 12,654<br>(8,280 - 18,528)     |
| Cardiomyopathy and myocarditis                | 8,656<br>(6,004 - 15,049)      | 4<br>(2 - 6)       | 2<br>(1 - 4)        | 46<br>(33 - 72)      | 270<br>(198 - 442)       | 8,335<br>(5,724 - 14,527)      |
| Atrial fibrillation and flutter               | 4,189<br>(2,787 - 5,889)       | --                 | --                  | 5<br>(4 - 8)         | 73<br>(51 - 99)          | 4,110<br>(2,715 - 5,827)       |
| Aortic aneurysm                               | 1,093<br>(591 - 1,600)         | --                 | --                  | 20<br>(12 - 33)      | 123<br>(69 - 188)        | 951<br>(506 - 1,401)           |
| Peripheral vascular disease                   | 969<br>(654 - 1,422)           | --                 | --                  | 3<br>(2 - 5)         | 29<br>(21 - 41)          | 937<br>(623 - 1,385)           |
| Endocarditis                                  | 293<br>(178 - 472)             | 0<br>(0 - 1)       | 0<br>(0 - 1)        | 12<br>(7 - 21)       | 43<br>(27 - 81)          | 238<br>(139 - 380)             |
| Other cardiovascular and circulatory diseases | 5,401<br>(3,595 - 7,449)       | 1<br>(0 - 1)       | 1<br>(0 - 1)        | 73<br>(52 - 105)     | 362<br>(257 - 536)       | 4,964<br>(3,108 - 6,903)       |
| Chronic respiratory diseases                  | 11,114<br>(7,958 - 13,658)     | 3<br>(2 - 4)       | 2<br>(2 - 3)        | 86<br>(62 - 106)     | 631<br>(412 - 777)       | 10,392<br>(7,385 - 12,842)     |
| Chronic obstructive pulmonary disease         | 9,852<br>(7,197 - 12,222)      | 2<br>(1 - 3)       | 1<br>(1 - 2)        | 50<br>(34 - 66)      | 467<br>(318 - 592)       | 9,333<br>(6,815 - 11,643)      |
| Pneumoconiosis                                | 54<br>(26 - 97)                | 0<br>(0 - 0)       | 0<br>(0 - 0)        | 2<br>(1 - 3)         | 4<br>(2 - 7)             | 48<br>(22 - 89)                |
| Silicosis                                     | 7<br>(3 - 15)                  | 0<br>(0 - 0)       | 0<br>(0 - 0)        | 0<br>(0 - 1)         | 0<br>(0 - 1)             | 6<br>(3 - 14)                  |
| Asbestosis                                    | 10<br>(4 - 19)                 | 0<br>(0 - 0)       | 0<br>(0 - 0)        | 0<br>(0 - 1)         | 0<br>(0 - 1)             | 9<br>(3 - 18)                  |



Web Table 31- Italy deaths with 95% UI by age, sex, and cause in 2013

| Cause                                               | Females, All Ages           | Females, 0-4 Years | Females, 5-14 Years | Females, 15-49 Years | Females, 50-69 Years     | Females, 70-80 Years        |
|-----------------------------------------------------|-----------------------------|--------------------|---------------------|----------------------|--------------------------|-----------------------------|
| Coal workers pneumoconiosis                         | 1<br>(1 - 2)                | 0<br>(0 - 0)       | 0<br>(0 - 0)        | 0<br>(0 - 1)         | 0<br>(0 - 0)             | 0<br>(0 - 1)                |
| Other pneumoconiosis                                | 35<br>(17 - 66)             | 0<br>(0 - 0)       | 0<br>(0 - 0)        | 1<br>(0 - 1)         | 3<br>(1 - 5)             | 32<br>(14 - 61)             |
| Asthma                                              | 439<br>(247 - 823)          | 0<br>(0 - 0)       | 0<br>(0 - 1)        | 16<br>(10 - 24)      | 51<br>(30 - 86)          | 371<br>(195 - 721)          |
| Interstitial lung disease and pulmonary sarcoidosis | 693<br>(101 - 1,496)        | 0<br>(0 - 1)       | 0<br>(0 - 1)        | 16<br>(4 - 30)       | 101<br>(22 - 197)        | 574<br>(72 - 1,301)         |
| Other chronic respiratory diseases                  | 76<br>(41 - 127)            | 0<br>(0 - 1)       | 0<br>(0 - 0)        | 2<br>(1 - 4)         | 8<br>(4 - 13)            | 65<br>(33 - 113)            |
| Cirrhosis                                           | 5,552<br>(4,570 - 6,545)    | 1<br>(1 - 1)       | 1<br>(1 - 2)        | 219<br>(174 - 268)   | 1,031<br>(849 - 1,215)   | 4,299<br>(3,419 - 5,221)    |
| Cirrhosis due to hepatitis B                        | 1,220<br>(711 - 1,934)      | 0<br>(0 - 0)       | 0<br>(0 - 0)        | 47<br>(21 - 86)      | 227<br>(125 - 362)       | 945<br>(539 - 1,534)        |
| Cirrhosis due to hepatitis C                        | 3,101<br>(2,104 - 4,193)    | 0<br>(0 - 0)       | 0<br>(0 - 1)        | 120<br>(58 - 175)    | 581<br>(371 - 810)       | 2,400<br>(1,537 - 3,359)    |
| Cirrhosis due to alcohol use                        | 945<br>(439 - 1,598)        | --                 | --                  | 24<br>(10 - 42)      | 150<br>(75 - 244)        | 771<br>(333 - 1,347)        |
| Cirrhosis due to other causes                       | 286<br>(114 - 501)          | 1<br>(1 - 1)       | 1<br>(0 - 1)        | 28<br>(14 - 50)      | 74<br>(26 - 134)         | 182<br>(67 - 351)           |
| Digestive diseases                                  | 7,524<br>(5,905 - 9,080)    | 2<br>(1 - 3)       | 2<br>(2 - 3)        | 82<br>(65 - 102)     | 463<br>(372 - 573)       | 6,975<br>(5,424 - 8,450)    |
| Peptic ulcer disease                                | 725<br>(467 - 1,096)        | 0<br>(0 - 0)       | 0<br>(0 - 0)        | 8<br>(5 - 11)        | 47<br>(30 - 67)          | 670<br>(421 - 1,025)        |
| Gastritis and duodenitis                            | 111<br>(49 - 249)           | 0<br>(0 - 0)       | 0<br>(0 - 0)        | 2<br>(1 - 4)         | 7<br>(4 - 15)            | 102<br>(43 - 229)           |
| Appendicitis                                        | 72<br>(40 - 133)            | 0<br>(0 - 0)       | 0<br>(0 - 1)        | 3<br>(2 - 5)         | 8<br>(5 - 14)            | 60<br>(30 - 116)            |
| Paralytic ileus and intestinal obstruction          | 1,928<br>(1,089 - 3,149)    | 1<br>(0 - 1)       | 0<br>(0 - 1)        | 14<br>(8 - 24)       | 89<br>(52 - 150)         | 1,824<br>(1,030 - 3,003)    |
| Inguinal, femoral, and abdominal hernia             | 236<br>(97 - 392)           | 0<br>(0 - 0)       | 0<br>(0 - 0)        | 2<br>(1 - 2)         | 16<br>(8 - 29)           | 218<br>(85 - 371)           |
| Inflammatory bowel disease                          | 584<br>(186 - 944)          | 0<br>(0 - 1)       | 0<br>(0 - 1)        | 11<br>(5 - 16)       | 44<br>(19 - 65)          | 528<br>(158 - 875)          |
| Vascular intestinal disorders                       | 1,269<br>(592 - 2,282)      | 0<br>(0 - 0)       | 0<br>(0 - 0)        | 7<br>(4 - 14)        | 74<br>(35 - 133)         | 1,187<br>(548 - 2,155)      |
| Gallbladder and biliary diseases                    | 1,033<br>(633 - 1,486)      | 0<br>(0 - 0)       | 0<br>(0 - 0)        | 10<br>(7 - 14)       | 55<br>(37 - 78)          | 968<br>(579 - 1,406)        |
| Pancreatitis                                        | 518<br>(314 - 780)          | 0<br>(0 - 0)       | 0<br>(0 - 0)        | 15<br>(10 - 22)      | 59<br>(40 - 92)          | 444<br>(257 - 682)          |
| Other digestive diseases                            | 1,048<br>(677 - 1,418)      | 0<br>(0 - 1)       | 0<br>(0 - 0)        | 10<br>(7 - 14)       | 64<br>(43 - 87)          | 973<br>(615 - 1,346)        |
| Neurological disorders                              | 45,700<br>(35,009 - 57,178) | 20<br>(14 - 29)    | 9<br>(7 - 12)       | 185<br>(146 - 231)   | 1,184<br>(938 - 1,468)   | 44,302<br>(33,771 - 55,803) |
| Alzheimer disease and other dementias               | 41,530<br>(31,349 - 52,777) | --                 | --                  | 5<br>(1 - 10)        | 580<br>(384 - 792)       | 40,945<br>(30,828 - 52,254) |
| Parkinson disease                                   | 2,361<br>(1,296 - 3,348)    | --                 | --                  | 2<br>(2 - 3)         | 89<br>(61 - 147)         | 2,269<br>(1,211 - 3,239)    |
| Epilepsy                                            | 280<br>(137 - 421)          | 2<br>(1 - 4)       | 3<br>(2 - 4)        | 43<br>(26 - 59)      | 48<br>(27 - 69)          | 184<br>(79 - 309)           |
| Multiple sclerosis                                  | 280<br>(130 - 375)          | --                 | --                  | 57<br>(34 - 94)      | 128<br>(60 - 187)        | 95<br>(36 - 139)            |
| Other neurological disorders                        | 1,249<br>(1,044 - 1,475)    | 18<br>(12 - 27)    | 7<br>(5 - 9)        | 77<br>(62 - 95)      | 337<br>(275 - 403)       | 810<br>(643 - 1,001)        |
| Mental and substance use disorders                  | 410<br>(290 - 516)          | 0<br>(0 - 0)       | 0<br>(0 - 0)        | 114<br>(90 - 142)    | 129<br>(99 - 162)        | 167<br>(86 - 248)           |
| Schizophrenia                                       | 133<br>(44 - 220)           | --                 | --                  | 7<br>(3 - 11)        | 28<br>(12 - 43)          | 97<br>(27 - 176)            |
| Alcohol use disorders                               | 60<br>(26 - 114)            | --                 | --                  | 20<br>(9 - 41)       | 20<br>(8 - 38)           | 20<br>(8 - 37)              |
| Drug use disorders                                  | 212<br>(170 - 254)          | 0<br>(0 - 0)       | --                  | 81<br>(64 - 102)     | 81<br>(62 - 104)         | 50<br>(36 - 67)             |
| Opioid use disorders                                | 73<br>(58 - 88)             | 0<br>(0 - 0)       | --                  | 29<br>(22 - 37)      | 26<br>(19 - 34)          | 18<br>(12 - 25)             |
| Cocaine use disorders                               | 7<br>(6 - 9)                | 0<br>(0 - 0)       | --                  | 3<br>(3 - 5)         | 2<br>(2 - 3)             | 1<br>(1 - 2)                |
| Amphetamine use disorders                           | 8<br>(7 - 10)               | 0<br>(0 - 0)       | --                  | 3<br>(2 - 4)         | 3<br>(2 - 4)             | 2<br>(1 - 3)                |
| Other drug use disorders                            | 124<br>(100 - 149)          | 0<br>(0 - 0)       | --                  | 46<br>(36 - 58)      | 50<br>(37 - 64)          | 29<br>(21 - 39)             |
| Eating disorders                                    | 4<br>(3 - 7)                | --                 | 0<br>(0 - 0)        | 4<br>(2 - 7)         | --                       | --                          |
| Anorexia nervosa                                    | 4<br>(3 - 7)                | --                 | 0<br>(0 - 0)        | 4<br>(2 - 7)         | --                       | --                          |
| Diabetes, urogenital, blood, and endocrine diseases | 22,300<br>(18,731 - 26,535) | 26<br>(17 - 37)    | 18<br>(13 - 24)     | 280<br>(224 - 340)   | 1,692<br>(1,422 - 2,062) | 20,284<br>(16,814 - 24,327) |
| Diabetes mellitus                                   | 12,171<br>(9,653 - 15,271)  | 1<br>(1 - 2)       | 1<br>(1 - 2)        | 72<br>(56 - 95)      | 921<br>(744 - 1,187)     | 11,175<br>(8,743 - 14,105)  |
| Acute glomerulonephritis                            | 6<br>(4 - 12)               | 0<br>(0 - 0)       | 0<br>(0 - 0)        | 1<br>(1 - 2)         | 1<br>(1 - 2)             | 4<br>(2 - 9)                |

Web Table 31- Italy deaths with 95% UI by age, sex, and cause in 2013

| Cause                                               | Females, All Ages          | Females, 0-4 Years | Females, 5-14 Years | Females, 15-49 Years   | Females, 50-69 Years | Females, 70-80 Years      |
|-----------------------------------------------------|----------------------------|--------------------|---------------------|------------------------|----------------------|---------------------------|
| Chronic kidney disease                              | 7,054<br>(5,272 - 9,057)   | 1<br>(1 - 2)       | 2<br>(1 - 2)        | 56<br>(43 - 84)        | 380<br>(296 - 567)   | 6,615<br>(4,839 - 8,581)  |
| Chronic kidney disease due to diabetes mellitus     | 312<br>(184 - 469)         | 0<br>(0 - 0)       | 0<br>(0 - 0)        | 6<br>(3 - 8)           | 35<br>(20 - 53)      | 271<br>(155 - 423)        |
| Chronic kidney disease due to hypertension          | 3,081<br>(1,949 - 4,304)   | 0<br>(0 - 0)       | 0<br>(0 - 1)        | 20<br>(13 - 34)        | 151<br>(99 - 242)    | 2,908<br>(1,817 - 4,061)  |
| Chronic kidney disease due to glomerulonephritis    | 117<br>(62 - 228)          | 0<br>(0 - 0)       | 0<br>(0 - 0)        | 4<br>(2 - 6)           | 12<br>(7 - 23)       | 101<br>(50 - 204)         |
| Chronic kidney disease due to other causes          | 3,544<br>(2,067 - 5,535)   | 1<br>(0 - 1)       | 1<br>(1 - 1)        | 26<br>(16 - 46)        | 181<br>(108 - 315)   | 3,335<br>(1,915 - 5,187)  |
| Urinary diseases and male infertility               | 910<br>(546 - 1,239)       | 0<br>(0 - 1)       | 0<br>(0 - 0)        | 14<br>(10 - 19)        | 59<br>(40 - 78)      | 836<br>(484 - 1,163)      |
| Interstitial nephritis and urinary tract infections | 738<br>(415 - 1,038)       | 0<br>(0 - 0)       | 0<br>(0 - 0)        | 9<br>(6 - 13)          | 41<br>(26 - 55)      | 687<br>(370 - 986)        |
| Urolithiasis                                        | 65<br>(37 - 133)           | --                 | 0<br>(0 - 0)        | 2<br>(1 - 4)           | 8<br>(5 - 15)        | 55<br>(28 - 121)          |
| Other urinary diseases                              | 107<br>(54 - 211)          | 0<br>(0 - 0)       | 0<br>(0 - 0)        | 2<br>(1 - 4)           | 10<br>(6 - 17)       | 94<br>(43 - 194)          |
| Gynecological diseases                              | 13<br>(8 - 19)             | --                 | --                  | 2<br>(1 - 2)           | 2<br>(1 - 2)         | 10<br>(5 - 15)            |
| Uterine fibroids                                    | 4<br>(2 - 5)               | --                 | --                  | 0<br>(0 - 1)           | 0<br>(0 - 1)         | 3<br>(2 - 5)              |
| Polycystic ovarian syndrome                         | 0<br>(0 - 0)               | --                 | --                  | 0<br>(0 - 0)           | 0<br>(0 - 0)         | --                        |
| Endometriosis                                       | 0<br>(0 - 0)               | --                 | --                  | 0<br>(0 - 0)           | 0<br>(0 - 0)         | --                        |
| Genital prolapse                                    | 3<br>(2 - 5)               | --                 | --                  | 0<br>(0 - 0)           | 0<br>(0 - 0)         | 3<br>(1 - 4)              |
| Other gynecological diseases                        | 6<br>(3 - 9)               | --                 | --                  | 1<br>(0 - 1)           | 1<br>(1 - 1)         | 4<br>(2 - 7)              |
| Hemoglobinopathies and hemolytic anemias            | 395<br>(220 - 613)         | 3<br>(2 - 6)       | 4<br>(2 - 7)        | 21<br>(13 - 34)        | 37<br>(21 - 57)      | 330<br>(180 - 518)        |
| Thalassemias                                        | 18<br>(11 - 29)            | 2<br>(1 - 4)       | 3<br>(2 - 5)        | 12<br>(7 - 20)         | 0<br>(0 - 0)         | 0<br>(0 - 0)              |
| Sickle cell disorders                               | 33<br>(20 - 50)            | 0<br>(0 - 0)       | 0<br>(0 - 1)        | 4<br>(2 - 6)           | 15<br>(9 - 23)       | 14<br>(8 - 21)            |
| G6PD deficiency                                     | 0<br>(0 - 0)               | 0<br>(0 - 0)       | 0<br>(0 - 0)        | 0<br>(0 - 0)           | 0<br>(0 - 0)         | 0<br>(0 - 0)              |
| Other hemoglobinopathies and hemolytic anemias      | 344<br>(190 - 536)         | 1<br>(0 - 1)       | 1<br>(0 - 1)        | 5<br>(3 - 8)           | 22<br>(12 - 33)      | 316<br>(171 - 502)        |
| Endocrine, metabolic, blood, and immune disorders   | 1,751<br>(800 - 2,379)     | 20<br>(10 - 30)    | 10<br>(5 - 15)      | 113<br>(58 - 151)      | 292<br>(153 - 380)   | 1,315<br>(552 - 1,894)    |
| Musculoskeletal disorders                           | 1,228<br>(913 - 1,594)     | --                 | 1<br>(1 - 2)        | 63<br>(48 - 85)        | 209<br>(158 - 270)   | 954<br>(659 - 1,291)      |
| Rheumatoid arthritis                                | 487<br>(301 - 716)         | --                 | 0<br>(0 - 0)        | 6<br>(4 - 9)           | 62<br>(43 - 87)      | 418<br>(239 - 633)        |
| Other musculoskeletal disorders                     | 741<br>(530 - 1,017)       | --                 | 1<br>(1 - 2)        | 57<br>(44 - 78)        | 147<br>(111 - 194)   | 536<br>(346 - 768)        |
| Other non-communicable diseases                     | 1,396<br>(1,084 - 1,748)   | 281<br>(205 - 376) | 22<br>(15 - 29)     | 116<br>(77 - 142)      | 141<br>(86 - 174)    | 837<br>(586 - 1,158)      |
| Congenital anomalies                                | 703<br>(495 - 851)         | 268<br>(194 - 361) | 21<br>(15 - 29)     | 109<br>(72 - 135)      | 111<br>(57 - 142)    | 192<br>(100 - 264)        |
| Neural tube defects                                 | 10<br>(6 - 15)             | 7<br>(4 - 11)      | 0<br>(0 - 1)        | 1<br>(0 - 2)           | 1<br>(0 - 1)         | 1<br>(0 - 1)              |
| Congenital heart anomalies                          | 234<br>(158 - 297)         | 106<br>(75 - 145)  | 9<br>(6 - 13)       | 42<br>(23 - 55)        | 28<br>(14 - 41)      | 50<br>(23 - 76)           |
| Cleft lip and cleft palate                          | 0<br>(0 - 1)               | 0<br>(0 - 1)       | --                  | --                     | --                   | --                        |
| Down syndrome                                       | 93<br>(43 - 144)           | 19<br>(6 - 50)     | 2<br>(1 - 4)        | 26<br>(12 - 43)        | 42<br>(16 - 61)      | 4<br>(1 - 7)              |
| Chromosomal unbalanced rearrangements               | 28<br>(15 - 43)            | 24<br>(13 - 38)    | 1<br>(0 - 1)        | 2<br>(1 - 3)           | 1<br>(1 - 2)         | 1<br>(0 - 1)              |
| Other congenital anomalies                          | 338<br>(231 - 435)         | 113<br>(77 - 160)  | 10<br>(6 - 14)      | 39<br>(24 - 53)        | 40<br>(22 - 58)      | 138<br>(72 - 195)         |
| Skin and subcutaneous diseases                      | 682<br>(457 - 1,019)       | 1<br>(0 - 1)       | 0<br>(0 - 0)        | 7<br>(5 - 9)           | 30<br>(21 - 39)      | 644<br>(421 - 976)        |
| Cellulitis                                          | 55<br>(21 - 143)           | 0<br>(0 - 0)       | 0<br>(0 - 0)        | 2<br>(1 - 3)           | 6<br>(3 - 12)        | 47<br>(16 - 132)          |
| Pyoderma                                            | 167<br>(91 - 280)          | 0<br>(0 - 1)       | 0<br>(0 - 0)        | 2<br>(1 - 3)           | 11<br>(7 - 16)       | 153<br>(80 - 264)         |
| Decubitus ulcer                                     | 382<br>(218 - 598)         | 0<br>(0 - 0)       | 0<br>(0 - 0)        | 1<br>(1 - 2)           | 7<br>(4 - 10)        | 374<br>(211 - 589)        |
| Other skin and subcutaneous diseases                | 78<br>(24 - 195)           | 0<br>(0 - 0)       | 0<br>(0 - 0)        | 2<br>(1 - 3)           | 6<br>(3 - 10)        | 70<br>(19 - 186)          |
| Sudden infant death syndrome                        | 12<br>(4 - 34)             | 12<br>(4 - 34)     | --                  | --                     | --                   | --                        |
| Injuries                                            | 11,797<br>(9,315 - 15,294) | 42<br>(31 - 58)    | 46<br>(37 - 57)     | 1,002<br>(857 - 1,159) | 952<br>(807 - 1,133) | 9,754<br>(7,386 - 13,133) |
| Transport injuries                                  | 1,334<br>(941 - 1,632)     | 12<br>(8 - 18)     | 27<br>(20 - 37)     | 437<br>(328 - 529)     | 273<br>(202 - 349)   | 585<br>(368 - 756)        |

Web Table 31- Italy deaths with 95% UI by age, sex, and cause in 2013

| Cause                                           | Females, All Ages         | Females, 0-4 Years | Females, 5-14 Years | Females, 15-49 Years | Females, 50-69 Years | Females, 70-80 Years      |
|-------------------------------------------------|---------------------------|--------------------|---------------------|----------------------|----------------------|---------------------------|
| Road injuries                                   | 1,301<br>(908 - 1,587)    | 12<br>(7 - 18)     | 27<br>(19 - 36)     | 425<br>(318 - 515)   | 264<br>(196 - 339)   | 574<br>(359 - 738)        |
| Pedestrian road injuries                        | 469<br>(236 - 632)        | 4<br>(2 - 6)       | 9<br>(4 - 13)       | 53<br>(23 - 75)      | 87<br>(41 - 122)     | 316<br>(157 - 450)        |
| Cyclist road injuries                           | 104<br>(55 - 138)         | 0<br>(0 - 1)       | 3<br>(2 - 5)        | 22<br>(11 - 32)      | 30<br>(16 - 44)      | 49<br>(25 - 74)           |
| Motorcyclist road injuries                      | 55<br>(22 - 96)           | 0<br>(0 - 0)       | 1<br>(1 - 3)        | 37<br>(15 - 62)      | 11<br>(3 - 19)       | 6<br>(2 - 12)             |
| Motor vehicle road injuries                     | 667<br>(507 - 917)        | 7<br>(4 - 11)      | 13<br>(9 - 19)      | 310<br>(238 - 387)   | 136<br>(98 - 214)    | 201<br>(132 - 324)        |
| Other road injuries                             | 6<br>(3 - 9)              | 0<br>(0 - 1)       | 0<br>(0 - 1)        | 2<br>(1 - 3)         | 1<br>(1 - 2)         | 2<br>(1 - 4)              |
| Other transport injuries                        | 33<br>(19 - 53)           | 0<br>(0 - 1)       | 1<br>(0 - 1)        | 12<br>(7 - 20)       | 9<br>(5 - 15)        | 11<br>(5 - 20)            |
| Unintentional injuries                          | 9,216<br>(6,871 - 12,585) | 28<br>(19 - 42)    | 15<br>(12 - 18)     | 152<br>(128 - 182)   | 321<br>(265 - 381)   | 8,701<br>(6,345 - 12,071) |
| Falls                                           | 7,850<br>(5,508 - 11,163) | 3<br>(2 - 4)       | 2<br>(2 - 3)        | 44<br>(33 - 57)      | 124<br>(92 - 159)    | 7,678<br>(5,360 - 10,989) |
| Drowning                                        | 79<br>(54 - 109)          | 3<br>(1 - 5)       | 3<br>(2 - 5)        | 17<br>(12 - 25)      | 19<br>(13 - 27)      | 37<br>(23 - 52)           |
| Fire, heat, and hot substances                  | 208<br>(123 - 281)        | 2<br>(1 - 4)       | 2<br>(1 - 2)        | 14<br>(9 - 19)       | 41<br>(27 - 54)      | 149<br>(80 - 216)         |
| Poisonings                                      | 90<br>(60 - 136)          | 1<br>(0 - 2)       | 1<br>(1 - 2)        | 16<br>(11 - 29)      | 15<br>(10 - 28)      | 57<br>(33 - 86)           |
| Exposure to mechanical forces                   | 83<br>(50 - 103)          | 4<br>(2 - 6)       | 3<br>(2 - 4)        | 18<br>(13 - 22)      | 16<br>(12 - 20)      | 43<br>(20 - 59)           |
| Unintentional firearm injuries                  | 6<br>(4 - 8)              | 0<br>(0 - 0)       | 0<br>(0 - 1)        | 3<br>(2 - 3)         | 2<br>(1 - 2)         | 1<br>(1 - 2)              |
| Unintentional suffocation                       | 11<br>(3 - 17)            | 1<br>(1 - 3)       | 0<br>(0 - 1)        | 2<br>(1 - 4)         | 2<br>(1 - 3)         | 5<br>(1 - 10)             |
| Other exposure to mechanical forces             | 66<br>(38 - 83)           | 2<br>(1 - 4)       | 2<br>(1 - 3)        | 13<br>(9 - 16)       | 12<br>(9 - 16)       | 36<br>(16 - 51)           |
| Adverse effects of medical treatment            | 557<br>(357 - 828)        | 2<br>(1 - 4)       | 1<br>(0 - 1)        | 17<br>(12 - 27)      | 65<br>(42 - 99)      | 472<br>(292 - 718)        |
| Animal contact                                  | 19<br>(9 - 45)            | 0<br>(0 - 0)       | 0<br>(0 - 1)        | 2<br>(1 - 3)         | 7<br>(3 - 18)        | 10<br>(4 - 24)            |
| Venomous animal contact                         | 8<br>(3 - 19)             | 0<br>(0 - 0)       | 0<br>(0 - 0)        | 1<br>(0 - 1)         | 6<br>(3 - 15)        | 1<br>(0 - 2)              |
| Non-venomous animal contact                     | 11<br>(5 - 27)            | 0<br>(0 - 0)       | 0<br>(0 - 0)        | 1<br>(0 - 2)         | 1<br>(0 - 3)         | 9<br>(3 - 22)             |
| Foreign body                                    | 274<br>(109 - 475)        | 13<br>(7 - 24)     | 2<br>(1 - 3)        | 17<br>(9 - 25)       | 29<br>(14 - 42)      | 213<br>(75 - 408)         |
| Pulmonary aspiration and foreign body in airway | 265<br>(100 - 461)        | 12<br>(6 - 23)     | 2<br>(1 - 3)        | 16<br>(8 - 24)       | 28<br>(14 - 41)      | 208<br>(70 - 397)         |
| Foreign body in other body part                 | 9<br>(4 - 17)             | 1<br>(0 - 1)       | 0<br>(0 - 0)        | 1<br>(1 - 2)         | 1<br>(0 - 1)         | 6<br>(2 - 14)             |
| Other unintentional injuries                    | 55<br>(32 - 84)           | 1<br>(1 - 2)       | 1<br>(0 - 1)        | 7<br>(5 - 11)        | 6<br>(3 - 10)        | 40<br>(17 - 70)           |
| Self-harm and interpersonal violence            | 1,247<br>(1,026 - 1,479)  | 2<br>(1 - 4)       | 4<br>(3 - 6)        | 413<br>(335 - 496)   | 359<br>(288 - 461)   | 469<br>(355 - 588)        |
| Self-harm                                       | 1,097<br>(896 - 1,329)    | --                 | 1<br>(1 - 2)        | 347<br>(277 - 426)   | 327<br>(259 - 428)   | 422<br>(323 - 539)        |
| Interpersonal violence                          | 150<br>(80 - 196)         | 2<br>(1 - 4)       | 3<br>(1 - 4)        | 67<br>(37 - 90)      | 32<br>(18 - 42)      | 47<br>(21 - 65)           |
| Assault by firearm                              | 46<br>(23 - 78)           | 0<br>(0 - 1)       | 1<br>(0 - 2)        | 26<br>(13 - 46)      | 11<br>(5 - 18)       | 8<br>(3 - 15)             |
| Assault by sharp object                         | 47<br>(24 - 68)           | 0<br>(0 - 1)       | 0<br>(0 - 1)        | 22<br>(11 - 33)      | 11<br>(6 - 17)       | 13<br>(6 - 21)            |
| Assault by other means                          | 58<br>(24 - 81)           | 2<br>(1 - 3)       | 1<br>(0 - 2)        | 18<br>(7 - 28)       | 10<br>(4 - 15)       | 27<br>(11 - 40)           |

Web Table 31- Jamaica deaths with 95% UI by age, sex, and cause in 2013

| Cause                                                             | Both Sexes, All Ages        | Both Sexes, 0-4 Years | Both Sexes, 5-14 Years | Both Sexes, 15-49 Years  | Both Sexes, 50-69 Years  | Both Sexes, 70-80 Years    |
|-------------------------------------------------------------------|-----------------------------|-----------------------|------------------------|--------------------------|--------------------------|----------------------------|
| All causes                                                        | 18,510<br>(16,096 - 21,136) | 920<br>(402 - 1,891)  | 162<br>(98 - 258)      | 2,179<br>(1,785 - 2,697) | 4,062<br>(3,290 - 4,901) | 11,187<br>(9,726 - 12,505) |
| Communicable, maternal, neonatal, and nutritional diseases        | 1,883<br>(1,514 - 2,477)    | 594<br>(246 - 1,186)  | 29<br>(16 - 48)        | 314<br>(267 - 367)       | 212<br>(171 - 260)       | 734<br>(583 - 922)         |
| HIV/AIDS and tuberculosis                                         | 264<br>(215 - 331)          | 1<br>(1 - 2)          | 1<br>(0 - 1)           | 175<br>(143 - 216)       | 68<br>(44 - 101)         | 18<br>(14 - 25)            |
| Tuberculosis                                                      | 35<br>(27 - 43)             | 1<br>(0 - 2)          | 0<br>(0 - 1)           | 11<br>(8 - 14)           | 12<br>(8 - 15)           | 11<br>(8 - 15)             |
| HIV/AIDS                                                          | 229<br>(179 - 296)          | 1<br>(0 - 1)          | 0<br>(0 - 1)           | 164<br>(133 - 206)       | 57<br>(33 - 88)          | 7<br>(4 - 12)              |
| HIV/AIDS resulting in mycobacterial infection                     | 13<br>(9 - 18)              | 0<br>(0 - 0)          | 0<br>(0 - 0)           | 9<br>(7 - 12)            | 3<br>(2 - 5)             | 0<br>(0 - 1)               |
| HIV/AIDS resulting in other diseases                              | 216<br>(169 - 280)          | 1<br>(0 - 1)          | 0<br>(0 - 1)           | 155<br>(125 - 195)       | 53<br>(31 - 83)          | 7<br>(4 - 12)              |
| Diarrhea, lower respiratory, and other common infectious diseases | 866<br>(703 - 1,068)        | 118<br>(53 - 254)     | 21<br>(12 - 35)        | 78<br>(59 - 103)         | 102<br>(78 - 130)        | 547<br>(410 - 717)         |
| Diarrheal diseases                                                | 79<br>(57 - 119)            | 29<br>(12 - 66)       | 2<br>(1 - 4)           | 6<br>(5 - 9)             | 8<br>(6 - 11)            | 33<br>(21 - 51)            |
| Intestinal infectious diseases                                    | 21<br>(9 - 42)              | 8<br>(2 - 19)         | 5<br>(2 - 11)          | 6<br>(3 - 13)            | 1<br>(0 - 3)             | 1<br>(0 - 1)               |
| Typhoid fever                                                     | 16<br>(6 - 33)              | 6<br>(2 - 14)         | 4<br>(2 - 8)           | 5<br>(2 - 10)            | 1<br>(0 - 2)             | 0<br>(0 - 1)               |
| Paratyphoid fever                                                 | 4<br>(2 - 9)                | 2<br>(0 - 4)          | 1<br>(0 - 2)           | 1<br>(1 - 3)             | 0<br>(0 - 0)             | 0<br>(0 - 0)               |
| Other intestinal infectious diseases                              | 1<br>(0 - 4)                | 0<br>(0 - 2)          | 0<br>(0 - 1)           | 0<br>(0 - 2)             | 0<br>(0 - 1)             | 0<br>(0 - 1)               |
| Lower respiratory infections                                      | 699<br>(549 - 885)          | 63<br>(27 - 140)      | 8<br>(4 - 14)          | 50<br>(37 - 66)          | 81<br>(60 - 107)         | 497<br>(366 - 671)         |
| Upper respiratory infections                                      | 1<br>(0 - 2)                | 0<br>(0 - 0)          | 0<br>(0 - 0)           | 0<br>(0 - 0)             | 0<br>(0 - 0)             | 0<br>(0 - 1)               |
| Otitis media                                                      | 1<br>(1 - 2)                | 0<br>(0 - 0)          | 0<br>(0 - 0)           | 0<br>(0 - 0)             | 0<br>(0 - 0)             | 1<br>(0 - 1)               |
| Meningitis                                                        | 36<br>(29 - 50)             | 10<br>(4 - 22)        | 2<br>(1 - 3)           | 8<br>(6 - 10)            | 6<br>(5 - 8)             | 10<br>(8 - 13)             |
| Pneumococcal meningitis                                           | 11<br>(8 - 14)              | 3<br>(1 - 6)          | 1<br>(0 - 1)           | 2<br>(1 - 3)             | 2<br>(1 - 3)             | 3<br>(2 - 5)               |
| H influenzae type B meningitis                                    | 6<br>(4 - 11)               | 4<br>(1 - 8)          | 0<br>(0 - 1)           | 1<br>(1 - 1)             | 1<br>(0 - 1)             | 1<br>(1 - 2)               |
| Meningococcal meningitis                                          | 4<br>(3 - 6)                | 1<br>(0 - 2)          | 0<br>(0 - 0)           | 1<br>(1 - 2)             | 1<br>(0 - 1)             | 1<br>(1 - 2)               |
| Other meningitis                                                  | 15<br>(12 - 20)             | 3<br>(1 - 7)          | 1<br>(0 - 1)           | 4<br>(3 - 5)             | 3<br>(2 - 4)             | 5<br>(3 - 7)               |
| Encephalitis                                                      | 24<br>(16 - 39)             | 7<br>(3 - 16)         | 3<br>(1 - 6)           | 7<br>(5 - 11)            | 4<br>(2 - 5)             | 4<br>(3 - 6)               |
| Diphtheria                                                        | 0<br>(0 - 1)                | 0<br>(0 - 1)          | 0<br>(0 - 0)           | 0<br>(0 - 0)             | 0<br>(0 - 0)             | --                         |
| Whooping cough                                                    | 1<br>(0 - 2)                | 0<br>(0 - 1)          | 0<br>(0 - 0)           | 0<br>(0 - 0)             | 0<br>(0 - 0)             | --                         |
| Tetanus                                                           | 2<br>(1 - 3)                | 0<br>(0 - 0)          | 0<br>(0 - 0)           | 0<br>(0 - 1)             | 0<br>(0 - 1)             | 1<br>(0 - 1)               |
| Measles                                                           | 0<br>(0 - 0)                | 0<br>(0 - 0)          | 0<br>(0 - 0)           | 0<br>(0 - 0)             | 0<br>(0 - 0)             | --                         |
| Varicella and herpes zoster                                       | 2<br>(1 - 4)                | 0<br>(0 - 1)          | 0<br>(0 - 0)           | 0<br>(0 - 1)             | 0<br>(0 - 0)             | 1<br>(0 - 3)               |
| Neglected tropical diseases and malaria                           | 13<br>(10 - 20)             | 3<br>(1 - 8)          | 1<br>(1 - 3)           | 4<br>(3 - 5)             | 2<br>(2 - 4)             | 3<br>(2 - 6)               |
| Leishmaniasis                                                     | 1<br>(0 - 1)                | 0<br>(0 - 1)          | 0<br>(0 - 0)           | 0<br>(0 - 1)             | 0<br>(0 - 0)             | 0<br>(0 - 0)               |
| Visceral leishmaniasis                                            | 1<br>(0 - 1)                | 0<br>(0 - 1)          | 0<br>(0 - 0)           | 0<br>(0 - 1)             | 0<br>(0 - 0)             | 0<br>(0 - 0)               |
| Cysticercosis                                                     | 1<br>(1 - 1)                | 0<br>(0 - 0)          | 0<br>(0 - 0)           | 0<br>(0 - 0)             | 0<br>(0 - 0)             | 0<br>(0 - 0)               |
| Cystic echinococcosis                                             | 0<br>(0 - 0)                | 0<br>(0 - 0)          | 0<br>(0 - 0)           | 0<br>(0 - 0)             | 0<br>(0 - 0)             | 0<br>(0 - 0)               |
| Dengue                                                            | 4<br>(3 - 6)                | 1<br>(0 - 2)          | 1<br>(0 - 1)           | 1<br>(1 - 2)             | 1<br>(1 - 1)             | 1<br>(0 - 1)               |
| Rabies                                                            | 0<br>(0 - 0)                | 0<br>(0 - 0)          | 0<br>(0 - 0)           | 0<br>(0 - 0)             | 0<br>(0 - 0)             | 0<br>(0 - 0)               |
| Intestinal nematode infections                                    | 1<br>(0 - 6)                | 1<br>(0 - 5)          | 0<br>(0 - 2)           | 0<br>(0 - 1)             | 0<br>(0 - 1)             | 0<br>(0 - 2)               |
| Ascariasis                                                        | 1<br>(0 - 6)                | 1<br>(0 - 5)          | 0<br>(0 - 2)           | 0<br>(0 - 1)             | 0<br>(0 - 1)             | 0<br>(0 - 2)               |
| Other neglected tropical diseases                                 | 6<br>(4 - 8)                | 1<br>(0 - 3)          | 0<br>(0 - 1)           | 1<br>(1 - 2)             | 1<br>(1 - 1)             | 2<br>(1 - 3)               |
| Maternal disorders                                                | 23<br>(15 - 34)             | --                    | 0<br>(0 - 0)           | 23<br>(15 - 33)          | --                       | --                         |
| Maternal hemorrhage                                               | 4<br>(3 - 7)                | --                    | 0<br>(0 - 0)           | 4<br>(3 - 7)             | --                       | --                         |
| Maternal sepsis and other maternal infections                     | 2<br>(1 - 3)                | --                    | 0<br>(0 - 0)           | 2<br>(1 - 3)             | --                       | --                         |

Web Table 31- Jamaica deaths with 95% UI by age, sex, and cause in 2013

| Cause                                                            | Both Sexes, All Ages        | Both Sexes, 0-4 Years | Both Sexes, 5-14 Years | Both Sexes, 15-49 Years | Both Sexes, 50-69 Years  | Both Sexes, 70-80 Years    |
|------------------------------------------------------------------|-----------------------------|-----------------------|------------------------|-------------------------|--------------------------|----------------------------|
| Maternal hypertensive disorders                                  | 4<br>(3 - 7)                | --                    | 0<br>(0 - 0)           | 4<br>(3 - 7)            | --                       | --                         |
| Maternal obstructed labor                                        | 2<br>(1 - 3)                | --                    | 0<br>(0 - 0)           | 2<br>(1 - 3)            | --                       | --                         |
| Maternal abortive outcome                                        | 3<br>(2 - 5)                | --                    | 0<br>(0 - 0)           | 3<br>(2 - 5)            | --                       | --                         |
| Indirect maternal deaths                                         | 2<br>(1 - 4)                | --                    | 0<br>(0 - 0)           | 2<br>(1 - 4)            | --                       | --                         |
| Late maternal deaths                                             | 2<br>(1 - 3)                | --                    | 0<br>(0 - 0)           | 2<br>(1 - 3)            | --                       | --                         |
| Maternal deaths aggravated by HIV/AIDS                           | 0<br>(0 - 0)                | --                    | --                     | 0<br>(0 - 0)            | --                       | --                         |
| Other maternal disorders                                         | 2<br>(1 - 4)                | --                    | 0<br>(0 - 0)           | 2<br>(1 - 4)            | --                       | --                         |
| Neonatal disorders                                               | 425<br>(170 - 811)          | 425<br>(170 - 811)    | --                     | --                      | --                       | --                         |
| Neonatal preterm birth complications                             | 245<br>(97 - 480)           | 245<br>(97 - 480)     | --                     | --                      | --                       | --                         |
| Neonatal encephalopathy due to birth asphyxia and trauma         | 84<br>(32 - 177)            | 84<br>(32 - 177)      | --                     | --                      | --                       | --                         |
| Neonatal sepsis and other neonatal infections                    | 55<br>(20 - 123)            | 55<br>(20 - 123)      | --                     | --                      | --                       | --                         |
| Hemolytic disease and other neonatal jaundice                    | 6<br>(2 - 14)               | 6<br>(2 - 14)         | --                     | --                      | --                       | --                         |
| Other neonatal disorders                                         | 35<br>(14 - 75)             | 35<br>(14 - 75)       | --                     | --                      | --                       | --                         |
| Nutritional deficiencies                                         | 233<br>(179 - 318)          | 30<br>(11 - 75)       | 4<br>(2 - 7)           | 22<br>(16 - 32)         | 28<br>(20 - 39)          | 150<br>(107 - 201)         |
| Protein-energy malnutrition                                      | 117<br>(81 - 197)           | 26<br>(10 - 64)       | 2<br>(1 - 5)           | 6<br>(4 - 14)           | 11<br>(6 - 19)           | 72<br>(46 - 111)           |
| Iodine deficiency                                                | 0<br>(0 - 1)                | 0<br>(0 - 0)          | 0<br>(0 - 0)           | 0<br>(0 - 0)            | 0<br>(0 - 0)             | 0<br>(0 - 0)               |
| Iron-deficiency anemia                                           | 106<br>(61 - 144)           | 3<br>(1 - 9)          | 1<br>(1 - 2)           | 14<br>(9 - 20)          | 16<br>(9 - 23)           | 72<br>(37 - 105)           |
| Other nutritional deficiencies                                   | 10<br>(5 - 16)              | 1<br>(0 - 3)          | 0<br>(0 - 0)           | 1<br>(1 - 2)            | 2<br>(1 - 3)             | 6<br>(3 - 10)              |
| Other communicable, maternal, neonatal, and nutritional diseases | 59<br>(35 - 92)             | 16<br>(2 - 44)        | 2<br>(1 - 5)           | 14<br>(8 - 19)          | 17<br>(7 - 16)           | 16<br>(10 - 21)            |
| Sexually transmitted diseases excluding HIV                      | 18<br>(4 - 46)              | 13<br>(0 - 39)        | 1<br>(0 - 3)           | 1<br>(1 - 2)            | 1<br>(1 - 2)             | 2<br>(1 - 3)               |
| Syphilis                                                         | 17<br>(3 - 45)              | 13<br>(0 - 39)        | 1<br>(0 - 3)           | 0<br>(0 - 1)            | 1<br>(0 - 1)             | 2<br>(1 - 3)               |
| Chlamydial infection                                             | 0<br>(0 - 1)                | --                    | 0<br>(0 - 0)           | 0<br>(0 - 0)            | 0<br>(0 - 0)             | 0<br>(0 - 0)               |
| Gonococcal infection                                             | 1<br>(0 - 1)                | --                    | 0<br>(0 - 0)           | 0<br>(0 - 0)            | 0<br>(0 - 0)             | 0<br>(0 - 0)               |
| Other sexually transmitted diseases                              | 0<br>(0 - 1)                | --                    | 0<br>(0 - 0)           | 0<br>(0 - 0)            | 0<br>(0 - 0)             | 0<br>(0 - 0)               |
| Hepatitis                                                        | 5<br>(4 - 6)                | 0<br>(0 - 1)          | 0<br>(0 - 0)           | 2<br>(1 - 3)            | 1<br>(1 - 2)             | 1<br>(1 - 2)               |
| Acute hepatitis A                                                | 1<br>(0 - 2)                | 0<br>(0 - 0)          | 0<br>(0 - 0)           | 1<br>(0 - 1)            | 0<br>(0 - 0)             | 0<br>(0 - 0)               |
| Acute hepatitis B                                                | 3<br>(2 - 4)                | 0<br>(0 - 0)          | 0<br>(0 - 0)           | 1<br>(0 - 2)            | 1<br>(1 - 2)             | 1<br>(1 - 1)               |
| Acute hepatitis C                                                | 0<br>(0 - 0)                | --                    | 0<br>(0 - 0)           | 0<br>(0 - 0)            | 0<br>(0 - 0)             | 0<br>(0 - 0)               |
| Other infectious diseases                                        | 36<br>(21 - 49)             | 3<br>(1 - 6)          | 1<br>(1 - 2)           | 11<br>(6 - 16)          | 9<br>(5 - 13)            | 13<br>(7 - 18)             |
| Non-communicable diseases                                        | 15,301<br>(13,110 - 17,429) | 251<br>(116 - 539)    | 76<br>(44 - 123)       | 1,166<br>(912 - 1,486)  | 3,621<br>(2,934 - 4,378) | 10,187<br>(8,872 - 11,419) |
| Neoplasms                                                        | 3,282<br>(2,701 - 3,869)    | 18<br>(7 - 38)        | 23<br>(13 - 38)        | 395<br>(310 - 500)      | 1,076<br>(857 - 1,317)   | 1,770<br>(1,444 - 2,111)   |
| Esophageal cancer                                                | 82<br>(62 - 113)            | --                    | --                     | 5<br>(3 - 7)            | 30<br>(21 - 45)          | 46<br>(34 - 64)            |
| Stomach cancer                                                   | 221<br>(175 - 276)          | --                    | --                     | 14<br>(10 - 19)         | 66<br>(51 - 85)          | 141<br>(108 - 184)         |
| Liver cancer                                                     | 97<br>(75 - 123)            | --                    | 0<br>(0 - 1)           | 12<br>(8 - 16)          | 34<br>(26 - 45)          | 51<br>(36 - 70)            |
| Liver cancer due to hepatitis B                                  | 22<br>(14 - 31)             | --                    | 0<br>(0 - 0)           | 4<br>(3 - 7)            | 9<br>(5 - 14)            | 8<br>(5 - 13)              |
| Liver cancer due to hepatitis C                                  | 46<br>(34 - 62)             | --                    | 0<br>(0 - 0)           | 4<br>(3 - 6)            | 16<br>(11 - 23)          | 26<br>(18 - 38)            |
| Liver cancer due to alcohol use                                  | 20<br>(14 - 29)             | --                    | --                     | 1<br>(1 - 2)            | 6<br>(4 - 9)             | 13<br>(8 - 20)             |
| Liver cancer due to other causes                                 | 9<br>(6 - 13)               | --                    | 0<br>(0 - 0)           | 2<br>(1 - 3)            | 3<br>(2 - 5)             | 4<br>(2 - 6)               |
| Larynx cancer                                                    | 30<br>(20 - 40)             | --                    | --                     | 3<br>(2 - 4)            | 12<br>(8 - 18)           | 15<br>(10 - 21)            |
| Tracheal, bronchus and lung cancer                               | 410<br>(330 - 502)          | --                    | --                     | 34<br>(24 - 47)         | 189<br>(145 - 240)       | 188<br>(149 - 232)         |

Web Table 31- Jamaica deaths with 95% UI by age, sex, and cause in 2013

| Cause                                         | Both Sexes, All Ages     | Both Sexes, 0-4 Years | Both Sexes, 5-14 Years | Both Sexes, 15-49 Years | Both Sexes, 50-69 Years | Both Sexes, 70-80 Years  |
|-----------------------------------------------|--------------------------|-----------------------|------------------------|-------------------------|-------------------------|--------------------------|
| Breast cancer                                 | 349<br>(258 - 447)       | --                    | --                     | 79<br>(53 - 110)        | 131<br>(91 - 178)       | 139<br>(98 - 189)        |
| Cervical cancer                               | 193<br>(135 - 278)       | --                    | --                     | 48<br>(31 - 77)         | 72<br>(48 - 105)        | 72<br>(47 - 107)         |
| Uterine cancer                                | 71<br>(34 - 105)         | --                    | --                     | 3<br>(1 - 5)            | 25<br>(12 - 39)         | 44<br>(20 - 68)          |
| Prostate cancer                               | 536<br>(306 - 758)       | --                    | --                     | 2<br>(1 - 5)            | 95<br>(52 - 145)        | 439<br>(252 - 620)       |
| Colon and rectum cancer                       | 348<br>(279 - 424)       | --                    | --                     | 27<br>(20 - 34)         | 106<br>(84 - 131)       | 215<br>(167 - 275)       |
| Lip and oral cavity cancer                    | 36<br>(27 - 48)          | --                    | --                     | 4<br>(3 - 7)            | 14<br>(10 - 20)         | 17<br>(12 - 23)          |
| Nasopharynx cancer                            | 13<br>(10 - 18)          | --                    | 0<br>(0 - 0)           | 4<br>(3 - 6)            | 5<br>(4 - 8)            | 4<br>(3 - 5)             |
| Other pharynx cancer                          | 17<br>(13 - 23)          | --                    | --                     | 3<br>(2 - 4)            | 8<br>(6 - 11)           | 6<br>(4 - 9)             |
| Gallbladder and biliary tract cancer          | 38<br>(22 - 71)          | --                    | --                     | 3<br>(1 - 5)            | 13<br>(7 - 24)          | 22<br>(13 - 42)          |
| Pancreatic cancer                             | 126<br>(99 - 157)        | --                    | --                     | 9<br>(7 - 12)           | 43<br>(33 - 54)         | 73<br>(55 - 97)          |
| Malignant skin melanoma                       | 12<br>(8 - 18)           | --                    | --                     | 2<br>(2 - 4)            | 4<br>(2 - 6)            | 6<br>(4 - 9)             |
| Non-melanoma skin cancer                      | 13<br>(9 - 20)           | --                    | --                     | 1<br>(1 - 2)            | 3<br>(2 - 4)            | 9<br>(6 - 14)            |
| Ovarian cancer                                | 81<br>(58 - 108)         | --                    | --                     | 12<br>(8 - 18)          | 32<br>(22 - 44)         | 37<br>(25 - 53)          |
| Testicular cancer                             | 2<br>(1 - 3)             | --                    | --                     | 1<br>(0 - 2)            | 0<br>(0 - 1)            | 1<br>(0 - 1)             |
| Kidney cancer                                 | 35<br>(28 - 45)          | 0<br>(0 - 1)          | 0<br>(0 - 0)           | 4<br>(3 - 6)            | 14<br>(11 - 19)         | 16<br>(12 - 22)          |
| Bladder cancer                                | 55<br>(41 - 77)          | --                    | --                     | 2<br>(1 - 3)            | 13<br>(9 - 19)          | 40<br>(29 - 57)          |
| Brain and nervous system cancer               | 36<br>(18 - 48)          | 2<br>(1 - 4)          | 3<br>(1 - 5)           | 10<br>(5 - 15)          | 12<br>(6 - 16)          | 10<br>(4 - 14)           |
| Thyroid cancer                                | 12<br>(9 - 16)           | --                    | 0<br>(0 - 0)           | 1<br>(1 - 2)            | 4<br>(3 - 5)            | 6<br>(5 - 9)             |
| Mesothelioma                                  | 9<br>(7 - 13)            | --                    | --                     | 1<br>(1 - 1)            | 3<br>(2 - 4)            | 6<br>(4 - 8)             |
| Hodgkin lymphoma                              | 7<br>(2 - 10)            | 0<br>(0 - 1)          | 0<br>(0 - 1)           | 3<br>(1 - 5)            | 2<br>(1 - 3)            | 1<br>(0 - 2)             |
| Non-Hodgkin lymphoma                          | 134<br>(95 - 169)        | 1<br>(1 - 3)          | 3<br>(2 - 5)           | 34<br>(25 - 46)         | 48<br>(33 - 63)         | 48<br>(29 - 67)          |
| Multiple myeloma                              | 49<br>(35 - 63)          | --                    | --                     | 4<br>(3 - 6)            | 22<br>(15 - 30)         | 22<br>(15 - 30)          |
| Leukemia                                      | 97<br>(79 - 119)         | 5<br>(2 - 12)         | 8<br>(5 - 15)          | 28<br>(22 - 37)         | 24<br>(18 - 31)         | 31<br>(24 - 38)          |
| Other neoplasms                               | 175<br>(138 - 219)       | 9<br>(3 - 20)         | 8<br>(4 - 14)          | 40<br>(28 - 53)         | 53<br>(40 - 69)         | 65<br>(46 - 85)          |
| Cardiovascular diseases                       | 5,956<br>(5,032 - 7,065) | 17<br>(8 - 38)        | 11<br>(6 - 18)         | 292<br>(221 - 396)      | 1,182<br>(941 - 1,464)  | 4,454<br>(3,798 - 5,255) |
| Rheumatic heart disease                       | 28<br>(21 - 39)          | 0<br>(0 - 0)          | 2<br>(1 - 3)           | 10<br>(7 - 16)          | 6<br>(4 - 9)            | 10<br>(6 - 13)           |
| Ischemic heart disease                        | 1,865<br>(1,492 - 2,443) | 2<br>(1 - 5)          | 2<br>(1 - 3)           | 92<br>(67 - 138)        | 400<br>(309 - 535)      | 1,369<br>(1,088 - 1,801) |
| Cerebrovascular disease                       | 2,775<br>(2,261 - 3,291) | 6<br>(2 - 12)         | 4<br>(2 - 6)           | 103<br>(78 - 137)       | 522<br>(410 - 649)      | 2,140<br>(1,722 - 2,541) |
| Ischemic stroke                               | 1,840<br>(1,460 - 2,209) | 1<br>(1 - 3)          | 1<br>(1 - 2)           | 26<br>(17 - 37)         | 275<br>(203 - 357)      | 1,538<br>(1,221 - 1,841) |
| Hemorrhagic stroke                            | 934<br>(721 - 1,161)     | 4<br>(2 - 9)          | 3<br>(1 - 4)           | 77<br>(58 - 104)        | 247<br>(189 - 317)      | 603<br>(428 - 766)       |
| Hypertensive heart disease                    | 646<br>(435 - 988)       | 0<br>(0 - 1)          | 0<br>(0 - 0)           | 26<br>(17 - 39)         | 114<br>(78 - 174)       | 506<br>(328 - 782)       |
| Cardiomyopathy and myocarditis                | 160<br>(118 - 213)       | 5<br>(2 - 11)         | 2<br>(1 - 3)           | 24<br>(17 - 35)         | 43<br>(30 - 58)         | 87<br>(56 - 128)         |
| Atrial fibrillation and flutter               | 103<br>(66 - 154)        | --                    | --                     | 2<br>(1 - 3)            | 13<br>(9 - 19)          | 88<br>(54 - 136)         |
| Aortic aneurysm                               | 62<br>(45 - 83)          | --                    | --                     | 4<br>(3 - 6)            | 18<br>(13 - 24)         | 40<br>(29 - 56)          |
| Peripheral vascular disease                   | 79<br>(57 - 108)         | --                    | --                     | 0<br>(0 - 1)            | 5<br>(3 - 6)            | 74<br>(52 - 103)         |
| Endocarditis                                  | 25<br>(17 - 34)          | 1<br>(0 - 2)          | 0<br>(0 - 1)           | 4<br>(3 - 6)            | 4<br>(3 - 7)            | 15<br>(9 - 22)           |
| Other cardiovascular and circulatory diseases | 213<br>(156 - 277)       | 4<br>(2 - 8)          | 2<br>(1 - 3)           | 27<br>(19 - 39)         | 56<br>(39 - 76)         | 125<br>(83 - 173)        |
| Chronic respiratory diseases                  | 722<br>(595 - 857)       | 12<br>(5 - 25)        | 3<br>(2 - 5)           | 46<br>(35 - 63)         | 151<br>(117 - 194)      | 510<br>(405 - 615)       |
| Chronic obstructive pulmonary disease         | 549<br>(440 - 664)       | 4<br>(2 - 10)         | 1<br>(0 - 1)           | 19<br>(14 - 26)         | 106<br>(80 - 138)       | 419<br>(329 - 510)       |
| Pneumoconiosis                                | 15<br>(11 - 22)          | 0<br>(0 - 0)          | 0<br>(0 - 0)           | 0<br>(1 - 2)            | 5<br>(3 - 8)            | 9<br>(6 - 13)            |

Web Table 31- Jamaica deaths with 95% UI by age, sex, and cause in 2013

| Cause                                               | Both Sexes, All Ages     | Both Sexes, 0-4 Years | Both Sexes, 5-14 Years | Both Sexes, 15-49 Years | Both Sexes, 50-69 Years | Both Sexes, 70-80 Years  |
|-----------------------------------------------------|--------------------------|-----------------------|------------------------|-------------------------|-------------------------|--------------------------|
| Silicosis                                           | 1<br>(1 - 1)             | 0<br>(0 - 0)          | 0<br>(0 - 0)           | 0<br>(0 - 0)            | 0<br>(0 - 0)            | 0<br>(0 - 1)             |
| Asbestosis                                          | 2<br>(2 - 4)             | 0<br>(0 - 0)          | 0<br>(0 - 0)           | 0<br>(0 - 0)            | 2<br>(1 - 3)            | 0<br>(0 - 1)             |
| Coal workers pneumoconiosis                         | 3<br>(2 - 5)             | 0<br>(0 - 0)          | 0<br>(0 - 0)           | 1<br>(0 - 1)            | 1<br>(1 - 2)            | 1<br>(1 - 2)             |
| Other pneumoconiosis                                | 9<br>(6 - 13)            | 0<br>(0 - 0)          | 0<br>(0 - 0)           | 1<br>(0 - 1)            | 2<br>(1 - 3)            | 7<br>(4 - 10)            |
| Asthma                                              | 108<br>(79 - 139)        | 4<br>(1 - 8)          | 2<br>(1 - 3)           | 19<br>(14 - 26)         | 27<br>(19 - 37)         | 56<br>(37 - 78)          |
| Interstitial lung disease and pulmonary sarcoidosis | 34<br>(23 - 49)          | 0<br>(0 - 1)          | 0<br>(0 - 0)           | 4<br>(3 - 6)            | 9<br>(6 - 13)           | 20<br>(13 - 31)          |
| Other chronic respiratory diseases                  | 15<br>(11 - 21)          | 3<br>(1 - 7)          | 0<br>(0 - 1)           | 3<br>(2 - 4)            | 3<br>(2 - 4)            | 6<br>(4 - 9)             |
| Cirrhosis                                           | 204<br>(168 - 244)       | 1<br>(1 - 3)          | 1<br>(1 - 2)           | 41<br>(32 - 53)         | 85<br>(67 - 107)        | 75<br>(60 - 91)          |
| Cirrhosis due to hepatitis B                        | 18<br>(9 - 27)           | 0<br>(0 - 0)          | 0<br>(0 - 0)           | 4<br>(2 - 6)            | 7<br>(4 - 12)           | 6<br>(3 - 10)            |
| Cirrhosis due to hepatitis C                        | 74<br>(49 - 99)          | 0<br>(0 - 0)          | 0<br>(0 - 1)           | 13<br>(7 - 20)          | 30<br>(18 - 41)         | 31<br>(21 - 42)          |
| Cirrhosis due to alcohol use                        | 82<br>(57 - 109)         | --                    | --                     | 14<br>(9 - 20)          | 37<br>(25 - 51)         | 32<br>(22 - 42)          |
| Cirrhosis due to other causes                       | 31<br>(20 - 43)          | 1<br>(0 - 3)          | 1<br>(1 - 2)           | 11<br>(7 - 15)          | 12<br>(7 - 18)          | 6<br>(4 - 9)             |
| Digestive diseases                                  | 325<br>(264 - 413)       | 5<br>(2 - 10)         | 3<br>(2 - 5)           | 43<br>(31 - 69)         | 82<br>(63 - 114)        | 192<br>(155 - 232)       |
| Peptic ulcer disease                                | 97<br>(72 - 146)         | 0<br>(0 - 0)          | 0<br>(0 - 0)           | 11<br>(7 - 21)          | 27<br>(18 - 45)         | 59<br>(44 - 83)          |
| Gastritis and duodenitis                            | 24<br>(15 - 39)          | 0<br>(0 - 1)          | 0<br>(0 - 0)           | 3<br>(2 - 6)            | 6<br>(3 - 9)            | 15<br>(9 - 24)           |
| Appendicitis                                        | 12<br>(8 - 18)           | 0<br>(0 - 1)          | 1<br>(0 - 1)           | 3<br>(2 - 5)            | 3<br>(2 - 5)            | 5<br>(3 - 8)             |
| Paralytic ileus and intestinal obstruction          | 43<br>(15 - 67)          | 1<br>(0 - 2)          | 1<br>(0 - 1)           | 4<br>(1 - 7)            | 9<br>(3 - 14)           | 28<br>(9 - 46)           |
| Inguinal, femoral, and abdominal hernia             | 18<br>(8 - 41)           | 0<br>(0 - 1)          | 0<br>(0 - 0)           | 2<br>(1 - 5)            | 4<br>(2 - 9)            | 11<br>(5 - 27)           |
| Inflammatory bowel disease                          | 23<br>(17 - 31)          | 2<br>(1 - 5)          | 0<br>(0 - 1)           | 4<br>(3 - 6)            | 5<br>(4 - 8)            | 11<br>(7 - 16)           |
| Vascular intestinal disorders                       | 17<br>(10 - 29)          | 0<br>(0 - 0)          | 0<br>(0 - 0)           | 2<br>(1 - 3)            | 5<br>(2 - 9)            | 11<br>(6 - 18)           |
| Gallbladder and biliary diseases                    | 21<br>(16 - 27)          | 0<br>(0 - 0)          | 0<br>(0 - 0)           | 3<br>(2 - 4)            | 6<br>(4 - 8)            | 12<br>(9 - 17)           |
| Pancreatitis                                        | 19<br>(13 - 29)          | 0<br>(0 - 0)          | 0<br>(0 - 0)           | 6<br>(4 - 11)           | 6<br>(4 - 10)           | 6<br>(4 - 9)             |
| Other digestive diseases                            | 52<br>(39 - 67)          | 0<br>(0 - 1)          | 1<br>(0 - 1)           | 6<br>(4 - 9)            | 11<br>(8 - 16)          | 33<br>(24 - 45)          |
| Neurological disorders                              | 1,107<br>(904 - 1,306)   | 5<br>(2 - 11)         | 5<br>(3 - 8)           | 37<br>(27 - 54)         | 90<br>(72 - 113)        | 970<br>(769 - 1,161)     |
| Alzheimer disease and other dementias               | 959<br>(762 - 1,152)     | --                    | --                     | 0<br>(0 - 1)            | 59<br>(45 - 76)         | 900<br>(714 - 1,085)     |
| Parkinson disease                                   | 57<br>(43 - 80)          | --                    | --                     | 1<br>(0 - 1)            | 9<br>(6 - 12)           | 48<br>(35 - 68)          |
| Epilepsy                                            | 54<br>(40 - 80)          | 3<br>(1 - 8)          | 3<br>(2 - 6)           | 26<br>(17 - 40)         | 11<br>(8 - 15)          | 12<br>(8 - 17)           |
| Multiple sclerosis                                  | 4<br>(2 - 6)             | --                    | --                     | 2<br>(1 - 3)            | 1<br>(1 - 2)            | 1<br>(1 - 2)             |
| Other neurological disorders                        | 33<br>(27 - 40)          | 2<br>(1 - 3)          | 1<br>(1 - 2)           | 9<br>(7 - 13)           | 11<br>(9 - 14)          | 9<br>(7 - 12)            |
| Mental and substance use disorders                  | 48<br>(33 - 62)          | 0<br>(0 - 1)          | 0<br>(0 - 0)           | 18<br>(12 - 25)         | 16<br>(10 - 22)         | 14<br>(9 - 18)           |
| Schizophrenia                                       | 4<br>(2 - 7)             | --                    | --                     | 1<br>(0 - 1)            | 1<br>(0 - 2)            | 2<br>(1 - 4)             |
| Alcohol use disorders                               | 23<br>(15 - 32)          | --                    | --                     | 7<br>(5 - 12)           | 10<br>(6 - 15)          | 6<br>(3 - 8)             |
| Drug use disorders                                  | 21<br>(13 - 27)          | 0<br>(0 - 1)          | --                     | 9<br>(5 - 13)           | 5<br>(3 - 7)            | 6<br>(4 - 9)             |
| Opioid use disorders                                | 6<br>(4 - 8)             | 0<br>(0 - 0)          | --                     | 3<br>(2 - 4)            | 1<br>(1 - 2)            | 2<br>(1 - 3)             |
| Cocaine use disorders                               | 1<br>(1 - 1)             | 0<br>(0 - 0)          | --                     | 0<br>(0 - 1)            | 0<br>(0 - 0)            | 0<br>(0 - 0)             |
| Amphetamine use disorders                           | 1<br>(0 - 1)             | 0<br>(0 - 0)          | --                     | 0<br>(0 - 0)            | 0<br>(0 - 0)            | 0<br>(0 - 0)             |
| Other drug use disorders                            | 13<br>(8 - 17)           | 0<br>(0 - 1)          | --                     | 6<br>(3 - 8)            | 3<br>(2 - 4)            | 4<br>(3 - 5)             |
| Eating disorders                                    | 0<br>(0 - 0)             | --                    | 0<br>(0 - 0)           | 0<br>(0 - 0)            | --                      | --                       |
| Anorexia nervosa                                    | 0<br>(0 - 0)             | --                    | 0<br>(0 - 0)           | 0<br>(0 - 0)            | --                      | --                       |
| Diabetes, urogenital, blood, and endocrine diseases | 3,337<br>(2,733 - 3,938) | 24<br>(10 - 54)       | 12<br>(7 - 20)         | 244<br>(186 - 321)      | 907<br>(714 - 1,107)    | 2,149<br>(1,756 - 2,541) |

Web Table 31- Jamaica deaths with 95% UI by age, sex, and cause in 2013

| Cause                                               | Both Sexes, All Ages     | Both Sexes, 0-4 Years | Both Sexes, 5-14 Years | Both Sexes, 15-49 Years | Both Sexes, 50-69 Years | Both Sexes, 70-80 Years  |
|-----------------------------------------------------|--------------------------|-----------------------|------------------------|-------------------------|-------------------------|--------------------------|
| Diabetes mellitus                                   | 2,323<br>(1,852 - 2,768) | 2<br>(1 - 4)          | 1<br>(1 - 2)           | 104<br>(77 - 136)       | 654<br>(512 - 795)      | 1,562<br>(1,226 - 1,890) |
| Acute glomerulonephritis                            | 1<br>(1 - 2)             | 0<br>(0 - 0)          | 0<br>(0 - 0)           | 0<br>(0 - 0)            | 0<br>(0 - 0)            | 1<br>(0 - 1)             |
| Chronic kidney disease                              | 722<br>(549 - 998)       | 6<br>(3 - 14)         | 4<br>(2 - 6)           | 88<br>(64 - 125)        | 194<br>(145 - 264)      | 430<br>(316 - 627)       |
| Chronic kidney disease due to diabetes mellitus     | 60<br>(32 - 93)          | 1<br>(0 - 1)          | 0<br>(0 - 0)           | 10<br>(5 - 17)          | 26<br>(14 - 41)         | 23<br>(11 - 38)          |
| Chronic kidney disease due to hypertension          | 463<br>(351 - 625)       | 1<br>(0 - 3)          | 1<br>(0 - 2)           | 47<br>(33 - 68)         | 118<br>(85 - 164)       | 296<br>(224 - 412)       |
| Chronic kidney disease due to glomerulonephritis    | 15<br>(10 - 21)          | 1<br>(0 - 2)          | 1<br>(0 - 1)           | 4<br>(3 - 6)            | 3<br>(2 - 5)            | 6<br>(4 - 9)             |
| Chronic kidney disease due to other causes          | 184<br>(114 - 332)       | 4<br>(1 - 9)          | 2<br>(1 - 3)           | 27<br>(17 - 48)         | 46<br>(26 - 85)         | 106<br>(54 - 211)        |
| Urinary diseases and male infertility               | 128<br>(88 - 164)        | 1<br>(1 - 3)          | 0<br>(0 - 1)           | 10<br>(7 - 13)          | 22<br>(15 - 29)         | 94<br>(62 - 125)         |
| Interstitial nephritis and urinary tract infections | 101<br>(67 - 132)        | 1<br>(0 - 2)          | 0<br>(0 - 0)           | 7<br>(5 - 9)            | 15<br>(10 - 21)         | 77<br>(49 - 105)         |
| Urolithiasis                                        | 5<br>(1 - 7)             | --                    | 0<br>(0 - 0)           | 1<br>(0 - 1)            | 2<br>(0 - 3)            | 2<br>(0 - 4)             |
| Other urinary diseases                              | 23<br>(16 - 34)          | 0<br>(0 - 1)          | 0<br>(0 - 0)           | 2<br>(2 - 3)            | 5<br>(4 - 8)            | 15<br>(9 - 24)           |
| Gynecological diseases                              | 1<br>(1 - 3)             | --                    | --                     | 1<br>(0 - 1)            | 0<br>(0 - 0)            | 0<br>(0 - 1)             |
| Uterine fibroids                                    | 0<br>(0 - 1)             | --                    | --                     | 0<br>(0 - 0)            | 0<br>(0 - 0)            | 0<br>(0 - 0)             |
| Polycystic ovarian syndrome                         | 0<br>(0 - 0)             | --                    | --                     | 0<br>(0 - 0)            | 0<br>(0 - 0)            | --                       |
| Endometriosis                                       | 0<br>(0 - 0)             | --                    | --                     | 0<br>(0 - 0)            | 0<br>(0 - 0)            | --                       |
| Genital prolapse                                    | 0<br>(0 - 1)             | --                    | --                     | 0<br>(0 - 0)            | 0<br>(0 - 0)            | 0<br>(0 - 0)             |
| Other gynecological diseases                        | 1<br>(0 - 1)             | --                    | --                     | 0<br>(0 - 1)            | 0<br>(0 - 0)            | 0<br>(0 - 0)             |
| Hemoglobinopathies and hemolytic anemias            | 40<br>(26 - 58)          | 7<br>(3 - 15)         | 5<br>(2 - 8)           | 16<br>(10 - 22)         | 7<br>(4 - 10)           | 6<br>(4 - 9)             |
| Thalassemias                                        | 0<br>(0 - 0)             | 0<br>(0 - 0)          | 0<br>(0 - 0)           | 0<br>(0 - 0)            | 0<br>(0 - 0)            | 0<br>(0 - 0)             |
| Sickle cell disorders                               | 33<br>(21 - 49)          | 6<br>(3 - 14)         | 4<br>(2 - 8)           | 15<br>(9 - 21)          | 6<br>(4 - 9)            | 1<br>(1 - 2)             |
| G6PD deficiency                                     | 1<br>(0 - 1)             | 0<br>(0 - 0)          | 0<br>(0 - 0)           | 0<br>(0 - 0)            | 0<br>(0 - 0)            | 0<br>(0 - 0)             |
| Other hemoglobinopathies and hemolytic anemias      | 6<br>(4 - 9)             | 0<br>(0 - 1)          | 0<br>(0 - 0)           | 0<br>(0 - 0)            | 1<br>(0 - 1)            | 5<br>(3 - 7)             |
| Endocrine, metabolic, blood, and immune disorders   | 120<br>(91 - 188)        | 8<br>(3 - 18)         | 2<br>(1 - 4)           | 26<br>(18 - 43)         | 30<br>(22 - 44)         | 55<br>(38 - 87)          |
| Musculoskeletal disorders                           | 75<br>(32 - 96)          | --                    | 2<br>(1 - 3)           | 29<br>(11 - 41)         | 18<br>(7 - 24)          | 26<br>(12 - 36)          |
| Rheumatoid arthritis                                | 9<br>(2 - 13)            | --                    | 0<br>(0 - 0)           | 1<br>(0 - 2)            | 2<br>(0 - 3)            | 5<br>(1 - 9)             |
| Other musculoskeletal disorders                     | 66<br>(30 - 85)          | --                    | 2<br>(1 - 3)           | 28<br>(11 - 39)         | 15<br>(7 - 21)          | 21<br>(11 - 29)          |
| Other non-communicable diseases                     | 246<br>(145 - 446)       | 169<br>(76 - 362)     | 16<br>(9 - 27)         | 22<br>(16 - 29)         | 13<br>(10 - 17)         | 27<br>(20 - 34)          |
| Congenital anomalies                                | 217<br>(119 - 407)       | 160<br>(71 - 339)     | 15<br>(8 - 26)         | 20<br>(15 - 27)         | 9<br>(7 - 12)           | 12<br>(9 - 18)           |
| Neural tube defects                                 | 9<br>(3 - 22)            | 8<br>(3 - 21)         | 0<br>(0 - 0)           | 0<br>(0 - 1)            | 0<br>(0 - 0)            | 0<br>(0 - 0)             |
| Congenital heart anomalies                          | 108<br>(59 - 205)        | 77<br>(34 - 168)      | 9<br>(5 - 16)          | 12<br>(9 - 17)          | 3<br>(2 - 5)            | 6<br>(4 - 10)            |
| Cleft lip and cleft palate                          | 1<br>(0 - 2)             | 1<br>(0 - 2)          | --                     | --                      | --                      | --                       |
| Down syndrome                                       | 10<br>(5 - 18)           | 5<br>(2 - 13)         | 1<br>(0 - 1)           | 2<br>(1 - 3)            | 1<br>(1 - 2)            | 0<br>(0 - 0)             |
| Chromosomal unbalanced rearrangements               | 5<br>(2 - 11)            | 5<br>(2 - 10)         | 0<br>(0 - 0)           | 0<br>(0 - 0)            | 0<br>(0 - 0)            | 0<br>(0 - 0)             |
| Other congenital anomalies                          | 84<br>(43 - 166)         | 64<br>(26 - 141)      | 5<br>(2 - 9)           | 5<br>(3 - 8)            | 4<br>(3 - 6)            | 6<br>(4 - 9)             |
| Skin and subcutaneous diseases                      | 23<br>(17 - 29)          | 2<br>(1 - 6)          | 1<br>(0 - 1)           | 1<br>(1 - 2)            | 4<br>(2 - 6)            | 14<br>(10 - 20)          |
| Cellulitis                                          | 2<br>(1 - 2)             | 0<br>(0 - 1)          | 0<br>(0 - 0)           | 0<br>(0 - 0)            | 0<br>(0 - 1)            | 1<br>(0 - 1)             |
| Pyoderma                                            | 5<br>(3 - 8)             | 1<br>(0 - 4)          | 0<br>(0 - 0)           | 0<br>(0 - 1)            | 1<br>(1 - 2)            | 2<br>(1 - 3)             |
| Decubitus ulcer                                     | 15<br>(11 - 20)          | 0<br>(0 - 1)          | 0<br>(0 - 1)           | 1<br>(0 - 1)            | 2<br>(1 - 3)            | 11<br>(7 - 16)           |
| Other skin and subcutaneous diseases                | 1<br>(1 - 1)             | 0<br>(0 - 0)          | 0<br>(0 - 0)           | 0<br>(0 - 0)            | 0<br>(0 - 0)            | 0<br>(0 - 0)             |
| Sudden infant death syndrome                        | 6<br>(2 - 16)            | 6<br>(2 - 16)         | --                     | --                      | --                      | --                       |



Web Table 31- Jamaica deaths with 95% UI by age, sex, and cause in 2013

| Cause                                           | Both Sexes, All Ages   | Both Sexes, 0-4 Years | Both Sexes, 5-14 Years | Both Sexes, 15-49 Years | Both Sexes, 50-69 Years | Both Sexes, 70-80 Years |
|-------------------------------------------------|------------------------|-----------------------|------------------------|-------------------------|-------------------------|-------------------------|
| Injuries                                        | 1,325<br>(899 - 1,748) | 76<br>(34 - 165)      | 56<br>(33 - 91)        | 699<br>(470 - 945)      | 228<br>(141 - 306)      | 266<br>(169 - 340)      |
| Transport injuries                              | 224<br>(129 - 291)     | 11<br>(4 - 23)        | 16<br>(8 - 27)         | 100<br>(64 - 138)       | 47<br>(23 - 64)         | 51<br>(23 - 68)         |
| Road injuries                                   | 199<br>(118 - 258)     | 9<br>(4 - 20)         | 14<br>(7 - 24)         | 90<br>(60 - 124)        | 41<br>(21 - 57)         | 44<br>(20 - 59)         |
| Pedestrian road injuries                        | 60<br>(32 - 82)        | 4<br>(1 - 8)          | 6<br>(3 - 10)          | 22<br>(13 - 32)         | 14<br>(7 - 20)          | 14<br>(6 - 21)          |
| Cyclist road injuries                           | 17<br>(8 - 23)         | 1<br>(0 - 1)          | 1<br>(1 - 3)           | 7<br>(4 - 10)           | 4<br>(1 - 5)            | 4<br>(2 - 6)            |
| Motorcyclist road injuries                      | 16<br>(9 - 24)         | 0<br>(0 - 1)          | 1<br>(0 - 1)           | 10<br>(6 - 16)          | 2<br>(1 - 3)            | 3<br>(1 - 5)            |
| Motor vehicle road injuries                     | 104<br>(65 - 139)      | 5<br>(2 - 11)         | 6<br>(3 - 12)          | 49<br>(34 - 69)         | 21<br>(11 - 30)         | 22<br>(11 - 30)         |
| Other road injuries                             | 2<br>(1 - 4)           | 0<br>(0 - 0)          | 0<br>(0 - 0)           | 1<br>(1 - 2)            | 0<br>(0 - 1)            | 1<br>(0 - 1)            |
| Other transport injuries                        | 25<br>(10 - 37)        | 1<br>(0 - 3)          | 1<br>(0 - 3)           | 11<br>(5 - 16)          | 6<br>(2 - 9)            | 7<br>(2 - 11)           |
| Unintentional injuries                          | 468<br>(359 - 584)     | 45<br>(20 - 98)       | 22<br>(12 - 36)        | 152<br>(113 - 205)      | 75<br>(54 - 95)         | 174<br>(111 - 227)      |
| Falls                                           | 100<br>(62 - 134)      | 2<br>(1 - 5)          | 2<br>(1 - 3)           | 15<br>(11 - 22)         | 14<br>(9 - 18)          | 67<br>(34 - 99)         |
| Drowning                                        | 64<br>(44 - 93)        | 7<br>(2 - 16)         | 8<br>(4 - 15)          | 29<br>(20 - 47)         | 11<br>(7 - 15)          | 9<br>(5 - 12)           |
| Fire, heat, and hot substances                  | 54<br>(35 - 74)        | 7<br>(3 - 15)         | 3<br>(1 - 5)           | 10<br>(7 - 14)          | 8<br>(5 - 11)           | 26<br>(15 - 39)         |
| Poisonings                                      | 9<br>(6 - 14)          | 2<br>(1 - 3)          | 1<br>(0 - 1)           | 4<br>(2 - 7)            | 1<br>(1 - 2)            | 2<br>(1 - 3)            |
| Exposure to mechanical forces                   | 95<br>(65 - 133)       | 3<br>(1 - 7)          | 4<br>(2 - 7)           | 65<br>(42 - 97)         | 16<br>(10 - 23)         | 7<br>(5 - 9)            |
| Unintentional firearm injuries                  | 73<br>(39 - 107)       | 1<br>(0 - 3)          | 2<br>(1 - 3)           | 54<br>(28 - 85)         | 12<br>(5 - 18)          | 4<br>(2 - 6)            |
| Unintentional suffocation                       | 5<br>(4 - 8)           | 1<br>(0 - 2)          | 0<br>(0 - 1)           | 2<br>(1 - 3)            | 1<br>(1 - 2)            | 1<br>(1 - 2)            |
| Other exposure to mechanical forces             | 17<br>(12 - 31)        | 1<br>(0 - 3)          | 2<br>(1 - 3)           | 9<br>(6 - 20)           | 3<br>(2 - 5)            | 2<br>(1 - 3)            |
| Adverse effects of medical treatment            | 59<br>(35 - 83)        | 5<br>(2 - 11)         | 1<br>(1 - 2)           | 10<br>(6 - 15)          | 12<br>(7 - 17)          | 31<br>(15 - 48)         |
| Animal contact                                  | 8<br>(2 - 11)          | 1<br>(0 - 2)          | 1<br>(0 - 1)           | 2<br>(1 - 3)            | 2<br>(0 - 3)            | 3<br>(0 - 4)            |
| Venomous animal contact                         | 5<br>(1 - 7)           | 1<br>(0 - 1)          | 0<br>(0 - 1)           | 1<br>(0 - 2)            | 1<br>(0 - 2)            | 1<br>(0 - 2)            |
| Non-venomous animal contact                     | 3<br>(1 - 5)           | 0<br>(0 - 1)          | 0<br>(0 - 0)           | 1<br>(0 - 1)            | 0<br>(0 - 1)            | 2<br>(0 - 3)            |
| Foreign body                                    | 64<br>(43 - 93)        | 17<br>(8 - 40)        | 2<br>(1 - 4)           | 10<br>(7 - 16)          | 9<br>(6 - 14)           | 25<br>(17 - 36)         |
| Pulmonary aspiration and foreign body in airway | 62<br>(42 - 91)        | 17<br>(7 - 39)        | 2<br>(1 - 4)           | 10<br>(6 - 16)          | 9<br>(6 - 13)           | 24<br>(16 - 35)         |
| Foreign body in other body part                 | 2<br>(1 - 3)           | 0<br>(0 - 1)          | 0<br>(0 - 0)           | 0<br>(0 - 0)            | 0<br>(0 - 0)            | 1<br>(0 - 1)            |
| Other unintentional injuries                    | 15<br>(10 - 20)        | 1<br>(0 - 3)          | 1<br>(0 - 2)           | 6<br>(4 - 9)            | 3<br>(2 - 5)            | 4<br>(2 - 7)            |
| Self-harm and interpersonal violence            | 633<br>(350 - 883)     | 20<br>(6 - 47)        | 19<br>(9 - 32)         | 446<br>(245 - 631)      | 107<br>(53 - 158)       | 41<br>(23 - 60)         |
| Self-harm                                       | 79<br>(60 - 104)       | --                    | 2<br>(1 - 4)           | 44<br>(32 - 62)         | 20<br>(14 - 26)         | 12<br>(9 - 16)          |
| Interpersonal violence                          | 554<br>(270 - 799)     | 20<br>(6 - 47)        | 16<br>(7 - 29)         | 402<br>(199 - 581)      | 87<br>(35 - 136)        | 29<br>(12 - 47)         |
| Assault by firearm                              | 200<br>(75 - 321)      | 4<br>(1 - 11)         | 6<br>(2 - 11)          | 152<br>(54 - 253)       | 33<br>(11 - 59)         | 5<br>(2 - 10)           |
| Assault by sharp object                         | 223<br>(113 - 345)     | 3<br>(1 - 8)          | 4<br>(2 - 9)           | 179<br>(92 - 284)       | 27<br>(10 - 46)         | 9<br>(3 - 15)           |
| Assault by other means                          | 131<br>(62 - 199)      | 12<br>(4 - 29)        | 6<br>(2 - 11)          | 71<br>(33 - 119)        | 27<br>(10 - 44)         | 15<br>(6 - 26)          |

Web Table 31- Jamaica deaths with 95% UI by age, sex, and cause in 2013

| Cause                                                             | Males, All Ages           | Males, 0-4 Years     | Males, 5-14 Years | Males, 15-49 Years     | Males, 50-69 Years       | Males, 70-80 Years       |
|-------------------------------------------------------------------|---------------------------|----------------------|-------------------|------------------------|--------------------------|--------------------------|
| All causes                                                        | 8,832<br>(7,236 - 10,443) | 521<br>(228 - 1,059) | 92<br>(51 - 152)  | 1,292<br>(982 - 1,665) | 2,192<br>(1,673 - 2,817) | 4,735<br>(4,043 - 5,659) |
| Communicable, maternal, neonatal, and nutritional diseases        | 985<br>(764 - 1,331)      | 339<br>(143 - 667)   | 16<br>(8 - 28)    | 193<br>(160 - 235)     | 139<br>(106 - 177)       | 298<br>(223 - 388)       |
| HIV/AIDS and tuberculosis                                         | 195<br>(155 - 248)        | 1<br>(0 - 2)         | 0<br>(0 - 1)      | 126<br>(101 - 158)     | 55<br>(34 - 81)          | 14<br>(10 - 19)          |
| Tuberculosis                                                      | 24<br>(17 - 32)           | 1<br>(0 - 1)         | 0<br>(0 - 0)      | 7<br>(5 - 10)          | 8<br>(6 - 12)            | 8<br>(5 - 10)            |
| HIV/AIDS                                                          | 171<br>(133 - 226)        | 0<br>(0 - 1)         | 0<br>(0 - 0)      | 118<br>(94 - 152)      | 46<br>(26 - 72)          | 6<br>(3 - 11)            |
| HIV/AIDS resulting in mycobacterial infection                     | 10<br>(7 - 15)            | 0<br>(0 - 0)         | 0<br>(0 - 0)      | 7<br>(5 - 10)          | 3<br>(2 - 5)             | 0<br>(0 - 1)             |
| HIV/AIDS resulting in other diseases                              | 161<br>(124 - 212)        | 0<br>(0 - 1)         | 0<br>(0 - 0)      | 111<br>(89 - 142)      | 43<br>(25 - 67)          | 6<br>(3 - 10)            |
| Diarrhea, lower respiratory, and other common infectious diseases | 391<br>(300 - 503)        | 65<br>(28 - 144)     | 11<br>(6 - 20)    | 47<br>(32 - 66)        | 59<br>(41 - 83)          | 209<br>(148 - 287)       |
| Diarrheal diseases                                                | 40<br>(27 - 63)           | 16<br>(6 - 38)       | 1<br>(1 - 3)      | 4<br>(2 - 5)           | 5<br>(3 - 7)             | 14<br>(8 - 24)           |
| Intestinal infectious diseases                                    | 11<br>(4 - 23)            | 4<br>(1 - 10)        | 3<br>(1 - 7)      | 3<br>(1 - 7)           | 1<br>(0 - 1)             | 0<br>(0 - 1)             |
| Typhoid fever                                                     | 8<br>(3 - 17)             | 3<br>(1 - 8)         | 2<br>(1 - 5)      | 2<br>(1 - 5)           | 0<br>(0 - 1)             | 0<br>(0 - 0)             |
| Paratyphoid fever                                                 | 2<br>(1 - 5)              | 1<br>(0 - 2)         | 1<br>(0 - 1)      | 1<br>(0 - 1)           | 0<br>(0 - 0)             | 0<br>(0 - 0)             |
| Other intestinal infectious diseases                              | 0<br>(0 - 3)              | 0<br>(0 - 2)         | 0<br>(0 - 0)      | 0<br>(0 - 1)           | 0<br>(0 - 1)             | 0<br>(0 - 0)             |
| Lower respiratory infections                                      | 304<br>(226 - 393)        | 34<br>(14 - 79)      | 4<br>(2 - 8)      | 31<br>(20 - 44)        | 48<br>(32 - 69)          | 187<br>(128 - 259)       |
| Upper respiratory infections                                      | 0<br>(0 - 1)              | 0<br>(0 - 0)         | 0<br>(0 - 0)      | 0<br>(0 - 0)           | 0<br>(0 - 0)             | 0<br>(0 - 1)             |
| Otitis media                                                      | 1<br>(0 - 1)              | 0<br>(0 - 0)         | 0<br>(0 - 0)      | 0<br>(0 - 0)           | 0<br>(0 - 0)             | 0<br>(0 - 0)             |
| Meningitis                                                        | 21<br>(15 - 29)           | 6<br>(2 - 14)        | 1<br>(1 - 2)      | 5<br>(3 - 7)           | 4<br>(3 - 5)             | 5<br>(3 - 6)             |
| Pneumococcal meningitis                                           | 6<br>(4 - 8)              | 2<br>(1 - 4)         | 0<br>(0 - 1)      | 1<br>(1 - 2)           | 1<br>(1 - 2)             | 1<br>(1 - 2)             |
| H influenzae type B meningitis                                    | 4<br>(2 - 7)              | 2<br>(1 - 5)         | 0<br>(0 - 1)      | 1<br>(0 - 1)           | 0<br>(0 - 1)             | 0<br>(0 - 1)             |
| Meningococcal meningitis                                          | 2<br>(1 - 4)              | 1<br>(0 - 1)         | 0<br>(0 - 0)      | 1<br>(0 - 1)           | 0<br>(0 - 1)             | 1<br>(0 - 1)             |
| Other meningitis                                                  | 9<br>(6 - 12)             | 2<br>(1 - 4)         | 0<br>(0 - 1)      | 2<br>(2 - 4)           | 2<br>(1 - 3)             | 2<br>(1 - 3)             |
| Encephalitis                                                      | 13<br>(8 - 23)            | 4<br>(1 - 10)        | 2<br>(1 - 4)      | 4<br>(2 - 7)           | 2<br>(1 - 3)             | 2<br>(1 - 3)             |
| Diphtheria                                                        | 0<br>(0 - 1)              | 0<br>(0 - 0)         | 0<br>(0 - 0)      | 0<br>(0 - 0)           | 0<br>(0 - 0)             | --                       |
| Whooping cough                                                    | 0<br>(0 - 1)              | 0<br>(0 - 1)         | 0<br>(0 - 0)      | 0<br>(0 - 0)           | 0<br>(0 - 0)             | --                       |
| Tetanus                                                           | 1<br>(1 - 2)              | 0<br>(0 - 0)         | 0<br>(0 - 0)      | 0<br>(0 - 1)           | 0<br>(0 - 1)             | 0<br>(0 - 1)             |
| Measles                                                           | 0<br>(0 - 0)              | 0<br>(0 - 0)         | 0<br>(0 - 0)      | 0<br>(0 - 0)           | 0<br>(0 - 0)             | --                       |
| Varicella and herpes zoster                                       | 1<br>(0 - 2)              | 0<br>(0 - 1)         | 0<br>(0 - 0)      | 0<br>(0 - 0)           | 0<br>(0 - 0)             | 0<br>(0 - 2)             |
| Neglected tropical diseases and malaria                           | 8<br>(5 - 12)             | 2<br>(1 - 5)         | 1<br>(0 - 2)      | 2<br>(2 - 4)           | 1<br>(1 - 2)             | 2<br>(1 - 3)             |
| Leishmaniasis                                                     | 1<br>(0 - 1)              | 0<br>(0 - 1)         | 0<br>(0 - 0)      | 0<br>(0 - 1)           | 0<br>(0 - 0)             | 0<br>(0 - 0)             |
| Visceral leishmaniasis                                            | 1<br>(0 - 1)              | 0<br>(0 - 1)         | 0<br>(0 - 0)      | 0<br>(0 - 1)           | 0<br>(0 - 0)             | 0<br>(0 - 0)             |
| Cysticercosis                                                     | 0<br>(0 - 1)              | 0<br>(0 - 0)         | 0<br>(0 - 0)      | 0<br>(0 - 0)           | 0<br>(0 - 0)             | 0<br>(0 - 0)             |
| Cystic echinococcosis                                             | 0<br>(0 - 0)              | 0<br>(0 - 0)         | 0<br>(0 - 0)      | 0<br>(0 - 0)           | 0<br>(0 - 0)             | 0<br>(0 - 0)             |
| Dengue                                                            | 2<br>(2 - 4)              | 0<br>(0 - 1)         | 0<br>(0 - 1)      | 1<br>(1 - 1)           | 0<br>(0 - 1)             | 0<br>(0 - 1)             |
| Rabies                                                            | 0<br>(0 - 0)              | 0<br>(0 - 0)         | 0<br>(0 - 0)      | 0<br>(0 - 0)           | 0<br>(0 - 0)             | 0<br>(0 - 0)             |
| Intestinal nematode infections                                    | 1<br>(0 - 4)              | 0<br>(0 - 3)         | 0<br>(0 - 1)      | 0<br>(0 - 1)           | 0<br>(0 - 1)             | 0<br>(0 - 1)             |
| Ascariasis                                                        | 1<br>(0 - 4)              | 0<br>(0 - 3)         | 0<br>(0 - 1)      | 0<br>(0 - 1)           | 0<br>(0 - 1)             | 0<br>(0 - 1)             |
| Other neglected tropical diseases                                 | 3<br>(2 - 5)              | 1<br>(0 - 2)         | 0<br>(0 - 0)      | 1<br>(1 - 1)           | 1<br>(0 - 1)             | 1<br>(1 - 2)             |
| Maternal disorders                                                | --                        | --                   | --                | --                     | --                       | --                       |
| Maternal hemorrhage                                               | --                        | --                   | --                | --                     | --                       | --                       |
| Maternal sepsis and other maternal infections                     | --                        | --                   | --                | --                     | --                       | --                       |

Web Table 31- Jamaica deaths with 95% UI by age, sex, and cause in 2013

| Cause                                                            | Males, All Ages          | Males, 0-4 Years   | Males, 5-14 Years | Males, 15-49 Years | Males, 50-69 Years       | Males, 70-80 Years       |
|------------------------------------------------------------------|--------------------------|--------------------|-------------------|--------------------|--------------------------|--------------------------|
| Maternal hypertensive disorders                                  | --                       | --                 | --                | --                 | --                       | --                       |
| Maternal obstructed labor                                        | --                       | --                 | --                | --                 | --                       | --                       |
| Maternal abortive outcome                                        | --                       | --                 | --                | --                 | --                       | --                       |
| Indirect maternal deaths                                         | --                       | --                 | --                | --                 | --                       | --                       |
| Late maternal deaths                                             | --                       | --                 | --                | --                 | --                       | --                       |
| Maternal deaths aggravated by HIV/AIDS                           | --                       | --                 | --                | --                 | --                       | --                       |
| Other maternal disorders                                         | --                       | --                 | --                | --                 | --                       | --                       |
| Neonatal disorders                                               | 245<br>(100 - 465)       | 245<br>(100 - 465) | --                | --                 | --                       | --                       |
| Neonatal preterm birth complications                             | 136<br>(50 - 269)        | 136<br>(50 - 269)  | --                | --                 | --                       | --                       |
| Neonatal encephalopathy due to birth asphyxia and trauma         | 51<br>(17 - 114)         | 51<br>(17 - 114)   | --                | --                 | --                       | --                       |
| Neonatal sepsis and other neonatal infections                    | 33<br>(9 - 79)           | 33<br>(9 - 79)     | --                | --                 | --                       | --                       |
| Hemolytic disease and other neonatal jaundice                    | 4<br>(1 - 11)            | 4<br>(1 - 11)      | --                | --                 | --                       | --                       |
| Other neonatal disorders                                         | 21<br>(7 - 49)           | 21<br>(7 - 49)     | --                | --                 | --                       | --                       |
| Nutritional deficiencies                                         | 114<br>(77 - 193)        | 18<br>(6 - 51)     | 2<br>(1 - 5)      | 10<br>(6 - 19)     | 17<br>(10 - 28)          | 67<br>(41 - 104)         |
| Protein-energy malnutrition                                      | 61<br>(36 - 123)         | 16<br>(5 - 44)     | 1<br>(1 - 3)      | 4<br>(2 - 10)      | 7<br>(3 - 15)            | 33<br>(17 - 61)          |
| Iodine deficiency                                                | 0<br>(0 - 0)             | 0<br>(0 - 0)       | 0<br>(0 - 0)      | 0<br>(0 - 0)       | 0<br>(0 - 0)             | 0<br>(0 - 0)             |
| Iron-deficiency anemia                                           | 48<br>(22 - 79)          | 2<br>(0 - 6)       | 1<br>(0 - 1)      | 5<br>(2 - 10)      | 9<br>(4 - 15)            | 32<br>(12 - 54)          |
| Other nutritional deficiencies                                   | 5<br>(2 - 10)            | 1<br>(0 - 2)       | 0<br>(0 - 0)      | 1<br>(0 - 1)       | 1<br>(0 - 2)             | 2<br>(1 - 5)             |
| Other communicable, maternal, neonatal, and nutritional diseases | 32<br>(17 - 50)          | 8<br>(1 - 23)      | 1<br>(1 - 3)      | 9<br>(5 - 14)      | 7<br>(3 - 10)            | 7<br>(3 - 10)            |
| Sexually transmitted diseases excluding HIV                      | 8<br>(1 - 23)            | 6<br>(0 - 20)      | 0<br>(0 - 1)      | 0<br>(0 - 0)       | 0<br>(0 - 1)             | 1<br>(0 - 1)             |
| Syphilis                                                         | 8<br>(1 - 22)            | 6<br>(0 - 20)      | 0<br>(0 - 1)      | 0<br>(0 - 0)       | 0<br>(0 - 1)             | 0<br>(0 - 1)             |
| Chlamydial infection                                             | --                       | --                 | --                | --                 | --                       | --                       |
| Gonococcal infection                                             | 0<br>(0 - 0)             | --                 | 0<br>(0 - 0)      | 0<br>(0 - 0)       | 0<br>(0 - 0)             | 0<br>(0 - 0)             |
| Other sexually transmitted diseases                              | 0<br>(0 - 0)             | --                 | 0<br>(0 - 0)      | 0<br>(0 - 0)       | 0<br>(0 - 0)             | 0<br>(0 - 0)             |
| Hepatitis                                                        | 2<br>(2 - 3)             | 0<br>(0 - 0)       | 0<br>(0 - 0)      | 1<br>(1 - 1)       | 1<br>(0 - 1)             | 0<br>(0 - 1)             |
| Acute hepatitis A                                                | 1<br>(0 - 1)             | 0<br>(0 - 0)       | 0<br>(0 - 0)      | 0<br>(0 - 1)       | 0<br>(0 - 0)             | 0<br>(0 - 0)             |
| Acute hepatitis B                                                | 2<br>(1 - 2)             | 0<br>(0 - 0)       | 0<br>(0 - 0)      | 1<br>(0 - 1)       | 1<br>(0 - 1)             | 0<br>(0 - 1)             |
| Acute hepatitis C                                                | 0<br>(0 - 0)             | --                 | 0<br>(0 - 0)      | 0<br>(0 - 0)       | 0<br>(0 - 0)             | 0<br>(0 - 0)             |
| Other infectious diseases                                        | 21<br>(10 - 31)          | 2<br>(1 - 4)       | 1<br>(0 - 1)      | 8<br>(3 - 12)      | 6<br>(2 - 9)             | 6<br>(3 - 9)             |
| Non-communicable diseases                                        | 6,929<br>(5,691 - 8,246) | 138<br>(60 - 299)  | 40<br>(22 - 68)   | 547<br>(394 - 760) | 1,886<br>(1,427 - 2,426) | 4,318<br>(3,661 - 5,175) |
| Neoplasms                                                        | 1,707<br>(1,322 - 2,131) | 10<br>(4 - 23)     | 14<br>(7 - 23)    | 151<br>(109 - 207) | 560<br>(419 - 730)       | 972<br>(749 - 1,244)     |
| Esophageal cancer                                                | 55<br>(38 - 86)          | --                 | --                | 4<br>(2 - 6)       | 22<br>(14 - 36)          | 30<br>(20 - 46)          |
| Stomach cancer                                                   | 125<br>(96 - 164)        | --                 | --                | 8<br>(5 - 12)      | 45<br>(32 - 61)          | 72<br>(53 - 98)          |
| Liver cancer                                                     | 52<br>(38 - 69)          | --                 | 0<br>(0 - 0)      | 7<br>(4 - 10)      | 21<br>(14 - 30)          | 24<br>(16 - 34)          |
| Liver cancer due to hepatitis B                                  | 12<br>(6 - 20)           | --                 | 0<br>(0 - 0)      | 3<br>(1 - 5)       | 6<br>(3 - 10)            | 4<br>(2 - 7)             |
| Liver cancer due to hepatitis C                                  | 26<br>(17 - 38)          | --                 | 0<br>(0 - 0)      | 3<br>(1 - 5)       | 10<br>(6 - 16)           | 13<br>(8 - 20)           |
| Liver cancer due to alcohol use                                  | 10<br>(6 - 16)           | --                 | --                | 1<br>(0 - 2)       | 4<br>(2 - 6)             | 6<br>(3 - 10)            |
| Liver cancer due to other causes                                 | 3<br>(2 - 5)             | --                 | 0<br>(0 - 0)      | 1<br>(0 - 1)       | 1<br>(1 - 2)             | 1<br>(0 - 2)             |
| Larynx cancer                                                    | 27<br>(17 - 37)          | --                 | --                | 2<br>(1 - 4)       | 11<br>(7 - 17)           | 13<br>(8 - 19)           |
| Tracheal, bronchus and lung cancer                               | 316<br>(237 - 402)       | --                 | --                | 25<br>(17 - 38)    | 156<br>(112 - 207)       | 135<br>(101 - 174)       |

Web Table 31- Jamaica deaths with 95% UI by age, sex, and cause in 2013

| Cause                                         | Males, All Ages          | Males, 0-4 Years | Males, 5-14 Years | Males, 15-49 Years | Males, 50-69 Years | Males, 70-80 Years       |
|-----------------------------------------------|--------------------------|------------------|-------------------|--------------------|--------------------|--------------------------|
| Breast cancer                                 | 6<br>(4 - 10)            | --               | --                | 1<br>(0 - 2)       | 2<br>(1 - 4)       | 3<br>(1 - 6)             |
| Cervical cancer                               | --                       | --               | --                | --                 | --                 | --                       |
| Uterine cancer                                | --                       | --               | --                | --                 | --                 | --                       |
| Prostate cancer                               | 536<br>(306 - 758)       | --               | --                | 2<br>(1 - 5)       | 95<br>(52 - 145)   | 439<br>(252 - 620)       |
| Colon and rectum cancer                       | 151<br>(114 - 193)       | --               | --                | 14<br>(9 - 19)     | 54<br>(38 - 72)    | 83<br>(61 - 110)         |
| Lip and oral cavity cancer                    | 23<br>(16 - 35)          | --               | --                | 3<br>(2 - 5)       | 10<br>(7 - 16)     | 10<br>(6 - 16)           |
| Nasopharynx cancer                            | 9<br>(6 - 12)            | --               | 0<br>(0 - 0)      | 3<br>(2 - 4)       | 4<br>(2 - 6)       | 2<br>(1 - 3)             |
| Other pharynx cancer                          | 13<br>(9 - 18)           | --               | --                | 2<br>(1 - 3)       | 7<br>(4 - 10)      | 4<br>(3 - 7)             |
| Gallbladder and biliary tract cancer          | 12<br>(7 - 30)           | --               | --                | 1<br>(0 - 2)       | 4<br>(2 - 11)      | 7<br>(4 - 17)            |
| Pancreatic cancer                             | 53<br>(40 - 69)          | --               | --                | 6<br>(4 - 9)       | 22<br>(16 - 30)    | 25<br>(19 - 34)          |
| Malignant skin melanoma                       | 7<br>(4 - 14)            | --               | --                | 2<br>(1 - 3)       | 2<br>(1 - 4)       | 3<br>(2 - 7)             |
| Non-melanoma skin cancer                      | 6<br>(4 - 9)             | --               | --                | 1<br>(0 - 1)       | 2<br>(1 - 3)       | 4<br>(2 - 6)             |
| Ovarian cancer                                | --                       | --               | --                | --                 | --                 | --                       |
| Testicular cancer                             | 2<br>(1 - 3)             | --               | --                | 1<br>(0 - 2)       | 0<br>(0 - 1)       | 1<br>(0 - 1)             |
| Kidney cancer                                 | 19<br>(14 - 25)          | 0<br>(0 - 0)     | 0<br>(0 - 0)      | 2<br>(2 - 4)       | 9<br>(6 - 13)      | 8<br>(5 - 11)            |
| Bladder cancer                                | 33<br>(23 - 50)          | --               | --                | 1<br>(1 - 2)       | 8<br>(5 - 13)      | 23<br>(16 - 38)          |
| Brain and nervous system cancer               | 16<br>(6 - 24)           | 1<br>(0 - 3)     | 1<br>(0 - 2)      | 5<br>(2 - 8)       | 6<br>(2 - 9)       | 4<br>(1 - 6)             |
| Thyroid cancer                                | 4<br>(3 - 5)             | --               | 0<br>(0 - 0)      | 1<br>(0 - 1)       | 2<br>(1 - 2)       | 2<br>(1 - 2)             |
| Mesothelioma                                  | 7<br>(4 - 10)            | --               | --                | 1<br>(0 - 1)       | 2<br>(1 - 3)       | 4<br>(2 - 7)             |
| Hodgkin lymphoma                              | 4<br>(1 - 7)             | 0<br>(0 - 0)     | 0<br>(0 - 1)      | 2<br>(1 - 3)       | 1<br>(0 - 2)       | 1<br>(0 - 1)             |
| Non-Hodgkin lymphoma                          | 75<br>(50 - 101)         | 1<br>(0 - 2)     | 2<br>(1 - 3)      | 20<br>(14 - 30)    | 27<br>(17 - 40)    | 25<br>(14 - 38)          |
| Multiple myeloma                              | 24<br>(15 - 33)          | --               | --                | 2<br>(1 - 4)       | 11<br>(7 - 17)     | 10<br>(7 - 15)           |
| Leukemia                                      | 52<br>(40 - 67)          | 3<br>(1 - 7)     | 5<br>(3 - 10)     | 16<br>(11 - 23)    | 12<br>(8 - 17)     | 15<br>(11 - 20)          |
| Other neoplasms                               | 81<br>(60 - 102)         | 5<br>(2 - 12)    | 4<br>(2 - 8)      | 20<br>(14 - 28)    | 25<br>(17 - 35)    | 27<br>(17 - 37)          |
| Cardiovascular diseases                       | 2,394<br>(1,940 - 2,939) | 9<br>(4 - 20)    | 5<br>(3 - 9)      | 153<br>(108 - 213) | 625<br>(467 - 814) | 1,602<br>(1,326 - 1,962) |
| Rheumatic heart disease                       | 11<br>(7 - 17)           | 0<br>(0 - 0)     | 1<br>(0 - 1)      | 4<br>(2 - 7)       | 3<br>(1 - 4)       | 4<br>(2 - 6)             |
| Ischemic heart disease                        | 813<br>(617 - 1,061)     | 1<br>(0 - 3)     | 1<br>(0 - 2)      | 52<br>(35 - 79)    | 229<br>(163 - 315) | 530<br>(405 - 703)       |
| Cerebrovascular disease                       | 1,093<br>(834 - 1,379)   | 3<br>(1 - 6)     | 2<br>(1 - 3)      | 55<br>(37 - 79)    | 272<br>(192 - 362) | 762<br>(583 - 966)       |
| Ischemic stroke                               | 724<br>(543 - 933)       | 1<br>(0 - 2)     | 1<br>(0 - 1)      | 15<br>(9 - 23)     | 151<br>(101 - 208) | 557<br>(420 - 713)       |
| Hemorrhagic stroke                            | 369<br>(239 - 492)       | 2<br>(1 - 5)     | 1<br>(1 - 2)      | 40<br>(27 - 59)    | 120<br>(78 - 170)  | 205<br>(124 - 282)       |
| Hypertensive heart disease                    | 210<br>(124 - 362)       | 0<br>(0 - 0)     | 0<br>(0 - 0)      | 11<br>(7 - 20)     | 52<br>(30 - 87)    | 147<br>(81 - 266)        |
| Cardiomyopathy and myocarditis                | 79<br>(53 - 114)         | 2<br>(1 - 5)     | 1<br>(1 - 2)      | 13<br>(8 - 19)     | 27<br>(17 - 40)    | 36<br>(21 - 59)          |
| Atrial fibrillation and flutter               | 33<br>(20 - 51)          | --               | --                | 1<br>(1 - 1)       | 6<br>(4 - 10)      | 26<br>(15 - 43)          |
| Aortic aneurysm                               | 29<br>(20 - 40)          | --               | --                | 2<br>(1 - 3)       | 11<br>(7 - 15)     | 16<br>(10 - 23)          |
| Peripheral vascular disease                   | 33<br>(22 - 49)          | --               | --                | 0<br>(0 - 1)       | 3<br>(2 - 4)       | 30<br>(19 - 45)          |
| Endocarditis                                  | 10<br>(6 - 17)           | 1<br>(0 - 1)     | 0<br>(0 - 0)      | 2<br>(1 - 3)       | 3<br>(1 - 4)       | 5<br>(3 - 8)             |
| Other cardiovascular and circulatory diseases | 82<br>(57 - 111)         | 2<br>(1 - 4)     | 1<br>(0 - 1)      | 12<br>(8 - 17)     | 21<br>(14 - 31)    | 46<br>(30 - 67)          |
| Chronic respiratory diseases                  | 506<br>(376 - 628)       | 7<br>(3 - 17)    | 2<br>(1 - 3)      | 28<br>(20 - 40)    | 114<br>(80 - 153)  | 356<br>(262 - 451)       |
| Chronic obstructive pulmonary disease         | 408<br>(302 - 509)       | 2<br>(1 - 6)     | 0<br>(0 - 1)      | 12<br>(8 - 18)     | 86<br>(60 - 117)   | 307<br>(223 - 388)       |
| Pneumoconiosis                                | 13<br>(8 - 19)           | 0<br>(0 - 0)     | 0<br>(0 - 0)      | 1<br>(1 - 2)       | 5<br>(3 - 8)       | 6<br>(4 - 10)            |

Web Table 31- Jamaica deaths with 95% UI by age, sex, and cause in 2013

| Cause                                               | Males, All Ages        | Males, 0-4 Years | Males, 5-14 Years | Males, 15-49 Years | Males, 50-69 Years | Males, 70-80 Years |
|-----------------------------------------------------|------------------------|------------------|-------------------|--------------------|--------------------|--------------------|
| Silicosis                                           | 1<br>(0 - 1)           | 0<br>(0 - 0)     | 0<br>(0 - 0)      | 0<br>(0 - 0)       | 0<br>(0 - 0)       | 0<br>(0 - 1)       |
| Asbestosis                                          | 2<br>(1 - 3)           | 0<br>(0 - 0)     | 0<br>(0 - 0)      | 0<br>(0 - 0)       | 2<br>(1 - 3)       | 0<br>(0 - 0)       |
| Coal workers pneumoconiosis                         | 3<br>(2 - 5)           | 0<br>(0 - 0)     | 0<br>(0 - 0)      | 1<br>(0 - 1)       | 1<br>(1 - 2)       | 1<br>(1 - 2)       |
| Other pneumoconiosis                                | 7<br>(4 - 10)          | 0<br>(0 - 0)     | 0<br>(0 - 0)      | 0<br>(0 - 1)       | 2<br>(1 - 3)       | 5<br>(3 - 8)       |
| Asthma                                              | 57<br>(39 - 77)        | 2<br>(1 - 5)     | 1<br>(1 - 2)      | 10<br>(7 - 15)     | 15<br>(9 - 23)     | 27<br>(16 - 41)    |
| Interstitial lung disease and pulmonary sarcoidosis | 21<br>(12 - 31)        | 0<br>(0 - 0)     | 0<br>(0 - 0)      | 2<br>(1 - 4)       | 6<br>(3 - 8)       | 13<br>(7 - 21)     |
| Other chronic respiratory diseases                  | 9<br>(7 - 13)          | 2<br>(1 - 5)     | 0<br>(0 - 0)      | 2<br>(1 - 3)       | 2<br>(1 - 3)       | 3<br>(2 - 5)       |
| Cirrhosis                                           | 126<br>(95 - 162)      | 1<br>(0 - 1)     | 1<br>(0 - 1)      | 25<br>(17 - 35)    | 58<br>(42 - 79)    | 42<br>(32 - 55)    |
| Cirrhosis due to hepatitis B                        | 10<br>(4 - 19)         | 0<br>(0 - 0)     | 0<br>(0 - 0)      | 2<br>(1 - 4)       | 5<br>(2 - 9)       | 3<br>(1 - 6)       |
| Cirrhosis due to hepatitis C                        | 37<br>(20 - 53)        | 0<br>(0 - 0)     | 0<br>(0 - 0)      | 6<br>(1 - 11)      | 16<br>(8 - 26)     | 14<br>(8 - 20)     |
| Cirrhosis due to alcohol use                        | 64<br>(43 - 89)        | --               | --                | 11<br>(7 - 18)     | 31<br>(20 - 44)    | 22<br>(15 - 31)    |
| Cirrhosis due to other causes                       | 16<br>(8 - 25)         | 1<br>(0 - 1)     | 0<br>(0 - 1)      | 6<br>(3 - 9)       | 7<br>(3 - 12)      | 3<br>(1 - 5)       |
| Digestive diseases                                  | 165<br>(124 - 236)     | 3<br>(1 - 6)     | 2<br>(1 - 3)      | 27<br>(17 - 51)    | 52<br>(36 - 81)    | 82<br>(63 - 111)   |
| Peptic ulcer disease                                | 56<br>(38 - 97)        | 0<br>(0 - 0)     | 0<br>(0 - 0)      | 8<br>(4 - 17)      | 19<br>(12 - 35)    | 29<br>(20 - 45)    |
| Gastritis and duodenitis                            | 13<br>(7 - 23)         | 0<br>(0 - 0)     | 0<br>(0 - 0)      | 2<br>(1 - 5)       | 4<br>(2 - 7)       | 7<br>(3 - 12)      |
| Appendicitis                                        | 6<br>(4 - 10)          | 0<br>(0 - 0)     | 0<br>(0 - 1)      | 2<br>(1 - 3)       | 2<br>(1 - 3)       | 2<br>(1 - 4)       |
| Paralytic ileus and intestinal obstruction          | 20<br>(6 - 31)         | 1<br>(0 - 1)     | 0<br>(0 - 1)      | 3<br>(1 - 4)       | 5<br>(1 - 9)       | 11<br>(3 - 18)     |
| Inguinal, femoral, and abdominal hernia             | 10<br>(4 - 24)         | 0<br>(0 - 1)     | 0<br>(0 - 0)      | 1<br>(0 - 3)       | 3<br>(1 - 7)       | 6<br>(2 - 15)      |
| Inflammatory bowel disease                          | 11<br>(8 - 17)         | 1<br>(0 - 3)     | 0<br>(0 - 0)      | 2<br>(1 - 4)       | 3<br>(2 - 5)       | 5<br>(3 - 8)       |
| Vascular intestinal disorders                       | 9<br>(3 - 19)          | 0<br>(0 - 0)     | 0<br>(0 - 0)      | 1<br>(0 - 2)       | 3<br>(1 - 7)       | 5<br>(2 - 10)      |
| Gallbladder and biliary diseases                    | 8<br>(5 - 12)          | 0<br>(0 - 0)     | 0<br>(0 - 0)      | 1<br>(1 - 2)       | 3<br>(2 - 5)       | 4<br>(3 - 6)       |
| Pancreatitis                                        | 11<br>(6 - 20)         | 0<br>(0 - 0)     | 0<br>(0 - 0)      | 4<br>(2 - 9)       | 4<br>(2 - 8)       | 2<br>(1 - 3)       |
| Other digestive diseases                            | 22<br>(12 - 31)        | 0<br>(0 - 1)     | 0<br>(0 - 1)      | 3<br>(2 - 6)       | 6<br>(3 - 9)       | 12<br>(6 - 17)     |
| Neurological disorders                              | 572<br>(442 - 721)     | 2<br>(1 - 6)     | 3<br>(1 - 5)      | 22<br>(14 - 36)    | 57<br>(40 - 78)    | 489<br>(373 - 630) |
| Alzheimer disease and other dementias               | 493<br>(370 - 638)     | --               | --                | 0<br>(0 - 1)       | 38<br>(26 - 54)    | 455<br>(341 - 592) |
| Parkinson disease                                   | 29<br>(20 - 40)        | --               | --                | 0<br>(0 - 1)       | 5<br>(4 - 8)       | 23<br>(16 - 33)    |
| Epilepsy                                            | 33<br>(23 - 52)        | 2<br>(1 - 4)     | 2<br>(1 - 4)      | 16<br>(10 - 27)    | 7<br>(5 - 10)      | 6<br>(4 - 10)      |
| Multiple sclerosis                                  | 1<br>(1 - 3)           | --               | --                | 0<br>(0 - 1)       | 0<br>(0 - 1)       | 0<br>(0 - 1)       |
| Other neurological disorders                        | 17<br>(12 - 23)        | 1<br>(0 - 1)     | 1<br>(0 - 1)      | 5<br>(4 - 8)       | 6<br>(4 - 9)       | 4<br>(3 - 5)       |
| Mental and substance use disorders                  | 36<br>(22 - 49)        | 0<br>(0 - 1)     | 0<br>(0 - 0)      | 14<br>(9 - 21)     | 13<br>(7 - 18)     | 9<br>(5 - 13)      |
| Schizophrenia                                       | 3<br>(1 - 4)           | --               | --                | 1<br>(0 - 1)       | 1<br>(0 - 2)       | 1<br>(0 - 2)       |
| Alcohol use disorders                               | 18<br>(10 - 27)        | --               | --                | 6<br>(3 - 10)      | 8<br>(4 - 12)      | 4<br>(2 - 6)       |
| Drug use disorders                                  | 15<br>(7 - 21)         | 0<br>(0 - 1)     | --                | 8<br>(4 - 11)      | 4<br>(2 - 6)       | 4<br>(2 - 5)       |
| Opioid use disorders                                | 4<br>(2 - 6)           | 0<br>(0 - 0)     | --                | 2<br>(1 - 3)       | 1<br>(0 - 2)       | 1<br>(0 - 2)       |
| Cocaine use disorders                               | 1<br>(0 - 1)           | 0<br>(0 - 0)     | --                | 0<br>(0 - 1)       | 0<br>(0 - 0)       | 0<br>(0 - 0)       |
| Amphetamine use disorders                           | 0<br>(0 - 1)           | 0<br>(0 - 0)     | --                | 0<br>(0 - 0)       | 0<br>(0 - 0)       | 0<br>(0 - 0)       |
| Other drug use disorders                            | 10<br>(5 - 13)         | 0<br>(0 - 0)     | --                | 5<br>(2 - 7)       | 3<br>(1 - 4)       | 2<br>(1 - 3)       |
| Eating disorders                                    | 0<br>(0 - 0)           | --               | 0<br>(0 - 0)      | 0<br>(0 - 0)       | --                 | --                 |
| Anorexia nervosa                                    | 0<br>(0 - 0)           | --               | 0<br>(0 - 0)      | 0<br>(0 - 0)       | --                 | --                 |
| Diabetes, urogenital, blood, and endocrine diseases | 1,273<br>(997 - 1,611) | 14<br>(5 - 31)   | 6<br>(3 - 11)     | 112<br>(77 - 165)  | 396<br>(293 - 532) | 746<br>(592 - 941) |

Web Table 31- Jamaica deaths with 95% UI by age, sex, and cause in 2013

| Cause                                               | Males, All Ages    | Males, 0-4 Years | Males, 5-14 Years | Males, 15-49 Years | Males, 50-69 Years | Males, 70-80 Years |
|-----------------------------------------------------|--------------------|------------------|-------------------|--------------------|--------------------|--------------------|
| Diabetes mellitus                                   | 783<br>(609 - 996) | 1<br>(0 - 3)     | 1<br>(0 - 1)      | 44<br>(29 - 65)    | 260<br>(188 - 349) | 477<br>(368 - 611) |
| Acute glomerulonephritis                            | 1<br>(0 - 1)       | 0<br>(0 - 0)     | 0<br>(0 - 0)      | 0<br>(0 - 0)       | 0<br>(0 - 0)       | 0<br>(0 - 1)       |
| Chronic kidney disease                              | 346<br>(256 - 500) | 4<br>(1 - 8)     | 2<br>(1 - 3)      | 43<br>(28 - 66)    | 105<br>(72 - 151)  | 193<br>(138 - 303) |
| Chronic kidney disease due to diabetes mellitus     | 26<br>(12 - 53)    | 0<br>(0 - 1)     | 0<br>(0 - 0)      | 5<br>(2 - 11)      | 12<br>(5 - 24)     | 9<br>(4 - 20)      |
| Chronic kidney disease due to hypertension          | 216<br>(154 - 303) | 1<br>(0 - 2)     | 0<br>(0 - 1)      | 22<br>(14 - 37)    | 65<br>(41 - 99)    | 127<br>(88 - 183)  |
| Chronic kidney disease due to glomerulonephritis    | 9<br>(6 - 14)      | 1<br>(0 - 2)     | 0<br>(0 - 1)      | 2<br>(1 - 4)       | 2<br>(1 - 3)       | 4<br>(2 - 7)       |
| Chronic kidney disease due to other causes          | 95<br>(51 - 186)   | 2<br>(1 - 4)     | 1<br>(0 - 2)      | 13<br>(7 - 27)     | 26<br>(11 - 49)    | 53<br>(23 - 123)   |
| Urinary diseases and male infertility               | 73<br>(46 - 100)   | 1<br>(0 - 2)     | 0<br>(0 - 0)      | 4<br>(3 - 6)       | 13<br>(8 - 19)     | 54<br>(31 - 78)    |
| Interstitial nephritis and urinary tract infections | 54<br>(29 - 76)    | 1<br>(0 - 2)     | 0<br>(0 - 0)      | 3<br>(1 - 4)       | 8<br>(4 - 13)      | 42<br>(22 - 63)    |
| Urolithiasis                                        | 3<br>(1 - 5)       | --               | 0<br>(0 - 0)      | 0<br>(0 - 1)       | 1<br>(0 - 2)       | 2<br>(0 - 3)       |
| Other urinary diseases                              | 16<br>(10 - 27)    | 0<br>(0 - 1)     | 0<br>(0 - 0)      | 1<br>(1 - 2)       | 4<br>(2 - 6)       | 11<br>(6 - 19)     |
| Gynecological diseases                              | --                 | --               | --                | --                 | --                 | --                 |
| Uterine fibroids                                    | --                 | --               | --                | --                 | --                 | --                 |
| Polycystic ovarian syndrome                         | --                 | --               | --                | --                 | --                 | --                 |
| Endometriosis                                       | --                 | --               | --                | --                 | --                 | --                 |
| Genital prolapse                                    | --                 | --               | --                | --                 | --                 | --                 |
| Other gynecological diseases                        | --                 | --               | --                | --                 | --                 | --                 |
| Hemoglobinopathies and hemolytic anemias            | 20<br>(11 - 33)    | 4<br>(1 - 9)     | 2<br>(1 - 5)      | 8<br>(4 - 13)      | 3<br>(2 - 5)       | 3<br>(2 - 4)       |
| Thalassemias                                        | 0<br>(0 - 0)       | 0<br>(0 - 0)     | 0<br>(0 - 0)      | 0<br>(0 - 0)       | 0<br>(0 - 0)       | 0<br>(0 - 0)       |
| Sickle cell disorders                               | 16<br>(9 - 28)     | 4<br>(1 - 9)     | 2<br>(1 - 5)      | 7<br>(4 - 12)      | 3<br>(1 - 4)       | 1<br>(0 - 1)       |
| G6PD deficiency                                     | 0<br>(0 - 1)       | 0<br>(0 - 0)     | 0<br>(0 - 0)      | 0<br>(0 - 0)       | 0<br>(0 - 0)       | 0<br>(0 - 0)       |
| Other hemoglobinopathies and hemolytic anemias      | 3<br>(2 - 4)       | 0<br>(0 - 0)     | 0<br>(0 - 0)      | 0<br>(0 - 0)       | 0<br>(0 - 1)       | 2<br>(1 - 3)       |
| Endocrine, metabolic, blood, and immune disorders   | 50<br>(34 - 102)   | 4<br>(1 - 11)    | 1<br>(0 - 2)      | 13<br>(8 - 27)     | 14<br>(9 - 27)     | 18<br>(11 - 39)    |
| Musculoskeletal disorders                           | 19<br>(9 - 27)     | --               | 1<br>(0 - 1)      | 5<br>(2 - 8)       | 5<br>(2 - 7)       | 9<br>(4 - 13)      |
| Rheumatoid arthritis                                | 2<br>(1 - 4)       | --               | 0<br>(0 - 0)      | 0<br>(0 - 1)       | 0<br>(0 - 1)       | 1<br>(0 - 3)       |
| Other musculoskeletal disorders                     | 17<br>(8 - 24)     | --               | 1<br>(0 - 1)      | 5<br>(2 - 7)       | 4<br>(2 - 7)       | 7<br>(3 - 11)      |
| Other non-communicable diseases                     | 130<br>(73 - 243)  | 92<br>(39 - 199) | 8<br>(4 - 15)     | 11<br>(7 - 16)     | 8<br>(5 - 11)      | 11<br>(8 - 16)     |
| Congenital anomalies                                | 115<br>(60 - 221)  | 87<br>(37 - 188) | 8<br>(4 - 15)     | 10<br>(7 - 15)     | 5<br>(3 - 7)       | 5<br>(3 - 8)       |
| Neural tube defects                                 | 4<br>(1 - 11)      | 4<br>(1 - 10)    | 0<br>(0 - 0)      | 0<br>(0 - 0)       | 0<br>(0 - 0)       | 0<br>(0 - 0)       |
| Congenital heart anomalies                          | 54<br>(28 - 105)   | 39<br>(16 - 87)  | 5<br>(2 - 9)      | 6<br>(4 - 9)       | 2<br>(1 - 3)       | 2<br>(1 - 3)       |
| Cleft lip and cleft palate                          | 0<br>(0 - 1)       | 0<br>(0 - 1)     | --                | --                 | --                 | --                 |
| Down syndrome                                       | 4<br>(2 - 10)      | 2<br>(1 - 7)     | 0<br>(0 - 1)      | 1<br>(1 - 2)       | 0<br>(0 - 1)       | 0<br>(0 - 0)       |
| Chromosomal unbalanced rearrangements               | 3<br>(1 - 7)       | 3<br>(1 - 6)     | 0<br>(0 - 0)      | 0<br>(0 - 0)       | 0<br>(0 - 0)       | 0<br>(0 - 0)       |
| Other congenital anomalies                          | 50<br>(23 - 102)   | 39<br>(14 - 88)  | 3<br>(1 - 6)      | 3<br>(2 - 5)       | 2<br>(1 - 4)       | 3<br>(2 - 5)       |
| Skin and subcutaneous diseases                      | 12<br>(8 - 16)     | 1<br>(0 - 3)     | 0<br>(0 - 1)      | 1<br>(1 - 1)       | 3<br>(1 - 5)       | 6<br>(4 - 9)       |
| Cellulitis                                          | 1<br>(0 - 1)       | 0<br>(0 - 0)     | 0<br>(0 - 0)      | 0<br>(0 - 0)       | 0<br>(0 - 0)       | 0<br>(0 - 1)       |
| Pyoderma                                            | 3<br>(2 - 5)       | 1<br>(0 - 2)     | 0<br>(0 - 0)      | 0<br>(0 - 0)       | 1<br>(0 - 1)       | 1<br>(1 - 2)       |
| Decubitus ulcer                                     | 7<br>(5 - 10)      | 0<br>(0 - 0)     | 0<br>(0 - 0)      | 0<br>(0 - 1)       | 2<br>(1 - 3)       | 5<br>(3 - 7)       |
| Other skin and subcutaneous diseases                | 0<br>(0 - 1)       | 0<br>(0 - 0)     | 0<br>(0 - 0)      | 0<br>(0 - 0)       | 0<br>(0 - 0)       | 0<br>(0 - 0)       |
| Sudden infant death syndrome                        | 3<br>(1 - 9)       | 3<br>(1 - 9)     | --                | --                 | --                 | --                 |

Web Table 31- Jamaica deaths with 95% UI by age, sex, and cause in 2013

| Cause                                           | Males, All Ages      | Males, 0-4 Years | Males, 5-14 Years | Males, 15-49 Years | Males, 50-69 Years | Males, 70-80 Years |
|-------------------------------------------------|----------------------|------------------|-------------------|--------------------|--------------------|--------------------|
| Injuries                                        | 919<br>(608 - 1,232) | 44<br>(18 - 99)  | 36<br>(20 - 59)   | 552<br>(360 - 768) | 167<br>(96 - 235)  | 120<br>(75 - 158)  |
| Transport injuries                              | 155<br>(82 - 210)    | 6<br>(2 - 13)    | 10<br>(5 - 18)    | 77<br>(45 - 111)   | 33<br>(14 - 48)    | 29<br>(12 - 41)    |
| Road injuries                                   | 137<br>(76 - 187)    | 5<br>(2 - 12)    | 9<br>(4 - 16)     | 68<br>(42 - 100)   | 30<br>(13 - 43)    | 25<br>(10 - 36)    |
| Pedestrian road injuries                        | 41<br>(20 - 60)      | 2<br>(1 - 5)     | 4<br>(2 - 7)      | 16<br>(8 - 25)     | 10<br>(4 - 15)     | 9<br>(3 - 14)      |
| Cyclist road injuries                           | 14<br>(7 - 21)       | 0<br>(0 - 1)     | 1<br>(0 - 2)      | 6<br>(3 - 10)      | 3<br>(1 - 5)       | 3<br>(1 - 5)       |
| Motorcyclist road injuries                      | 13<br>(7 - 21)       | 0<br>(0 - 1)     | 0<br>(0 - 1)      | 9<br>(5 - 15)      | 2<br>(1 - 3)       | 2<br>(1 - 3)       |
| Motor vehicle road injuries                     | 67<br>(40 - 99)      | 2<br>(1 - 6)     | 4<br>(2 - 7)      | 36<br>(23 - 56)    | 15<br>(6 - 23)     | 10<br>(4 - 17)     |
| Other road injuries                             | 2<br>(1 - 3)         | 0<br>(0 - 0)     | 0<br>(0 - 0)      | 1<br>(0 - 2)       | 0<br>(0 - 1)       | 0<br>(0 - 1)       |
| Other transport injuries                        | 18<br>(6 - 27)       | 1<br>(0 - 2)     | 1<br>(0 - 2)      | 8<br>(3 - 14)      | 4<br>(1 - 6)       | 4<br>(1 - 7)       |
| Unintentional injuries                          | 282<br>(207 - 366)   | 26<br>(11 - 58)  | 14<br>(8 - 25)    | 123<br>(85 - 173)  | 53<br>(36 - 71)    | 66<br>(45 - 86)    |
| Falls                                           | 44<br>(29 - 58)      | 1<br>(0 - 3)     | 1<br>(1 - 2)      | 13<br>(9 - 20)     | 10<br>(6 - 14)     | 18<br>(10 - 26)    |
| Drowning                                        | 48<br>(32 - 74)      | 4<br>(1 - 11)    | 6<br>(3 - 11)     | 24<br>(16 - 40)    | 8<br>(5 - 13)      | 6<br>(3 - 9)       |
| Fire, heat, and hot substances                  | 25<br>(16 - 35)      | 4<br>(1 - 9)     | 1<br>(1 - 3)      | 6<br>(4 - 9)       | 4<br>(2 - 6)       | 10<br>(5 - 15)     |
| Poisonings                                      | 5<br>(4 - 10)        | 1<br>(0 - 2)     | 0<br>(0 - 1)      | 3<br>(2 - 6)       | 1<br>(1 - 2)       | 1<br>(0 - 1)       |
| Exposure to mechanical forces                   | 80<br>(52 - 115)     | 2<br>(1 - 4)     | 3<br>(1 - 5)      | 59<br>(37 - 90)    | 13<br>(8 - 21)     | 4<br>(2 - 5)       |
| Unintentional firearm injuries                  | 65<br>(32 - 99)      | 1<br>(0 - 2)     | 1<br>(0 - 2)      | 50<br>(26 - 80)    | 10<br>(4 - 17)     | 2<br>(1 - 4)       |
| Unintentional suffocation                       | 4<br>(2 - 6)         | 0<br>(0 - 1)     | 0<br>(0 - 1)      | 2<br>(1 - 3)       | 1<br>(1 - 2)       | 1<br>(0 - 1)       |
| Other exposure to mechanical forces             | 12<br>(8 - 26)       | 1<br>(0 - 1)     | 1<br>(0 - 2)      | 7<br>(4 - 18)      | 2<br>(1 - 4)       | 1<br>(0 - 1)       |
| Adverse effects of medical treatment            | 25<br>(15 - 34)      | 3<br>(1 - 6)     | 1<br>(0 - 1)      | 4<br>(3 - 6)       | 6<br>(3 - 8)       | 11<br>(6 - 16)     |
| Animal contact                                  | 5<br>(1 - 7)         | 1<br>(0 - 1)     | 0<br>(0 - 1)      | 1<br>(0 - 2)       | 1<br>(0 - 2)       | 1<br>(0 - 2)       |
| Venomous animal contact                         | 4<br>(1 - 5)         | 0<br>(0 - 1)     | 0<br>(0 - 1)      | 1<br>(0 - 2)       | 1<br>(0 - 1)       | 1<br>(0 - 1)       |
| Non-venomous animal contact                     | 1<br>(0 - 2)         | 0<br>(0 - 0)     | 0<br>(0 - 0)      | 0<br>(0 - 1)       | 0<br>(0 - 1)       | 0<br>(0 - 1)       |
| Foreign body                                    | 37<br>(21 - 59)      | 10<br>(4 - 23)   | 1<br>(1 - 3)      | 7<br>(4 - 12)      | 7<br>(4 - 11)      | 12<br>(7 - 22)     |
| Pulmonary aspiration and foreign body in airway | 36<br>(20 - 58)      | 10<br>(3 - 23)   | 1<br>(1 - 2)      | 7<br>(4 - 12)      | 6<br>(3 - 11)      | 12<br>(7 - 22)     |
| Foreign body in other body part                 | 1<br>(1 - 2)         | 0<br>(0 - 1)     | 0<br>(0 - 0)      | 0<br>(0 - 0)       | 0<br>(0 - 0)       | 0<br>(0 - 1)       |
| Other unintentional injuries                    | 11<br>(8 - 16)       | 1<br>(0 - 2)     | 1<br>(0 - 1)      | 5<br>(3 - 9)       | 2<br>(1 - 4)       | 3<br>(1 - 5)       |
| Self-harm and interpersonal violence            | 482<br>(253 - 698)   | 12<br>(3 - 30)   | 12<br>(5 - 21)    | 352<br>(186 - 519) | 81<br>(35 - 127)   | 25<br>(12 - 40)    |
| Self-harm                                       | 51<br>(33 - 72)      | --               | 1<br>(1 - 2)      | 29<br>(18 - 45)    | 13<br>(8 - 19)     | 7<br>(5 - 9)       |
| Interpersonal violence                          | 432<br>(204 - 636)   | 12<br>(3 - 30)   | 11<br>(4 - 19)    | 323<br>(160 - 483) | 68<br>(24 - 112)   | 18<br>(6 - 33)     |
| Assault by firearm                              | 165<br>(55 - 276)    | 3<br>(1 - 8)     | 5<br>(1 - 9)      | 126<br>(39 - 222)  | 28<br>(8 - 51)     | 4<br>(1 - 8)       |
| Assault by sharp object                         | 181<br>(83 - 291)    | 2<br>(1 - 6)     | 3<br>(1 - 7)      | 150<br>(71 - 244)  | 21<br>(7 - 39)     | 6<br>(2 - 11)      |
| Assault by other means                          | 85<br>(36 - 141)     | 7<br>(2 - 18)    | 3<br>(1 - 6)      | 48<br>(21 - 86)    | 19<br>(6 - 34)     | 8<br>(3 - 16)      |

Web Table 31- Jamaica deaths with 95% UI by age, sex, and cause in 2013

| Cause                                                             | Females, All Ages         | Females, 0-4 Years | Females, 5-14 Years | Females, 15-49 Years | Females, 50-69 Years     | Females, 70-80 Years     |
|-------------------------------------------------------------------|---------------------------|--------------------|---------------------|----------------------|--------------------------|--------------------------|
| All causes                                                        | 9,678<br>(7,863 - 11,456) | 400<br>(170 - 811) | 69<br>(43 - 109)    | 887<br>(656 - 1,158) | 1,870<br>(1,359 - 2,353) | 6,452<br>(5,332 - 7,377) |
| Communicable, maternal, neonatal, and nutritional diseases        | 899<br>(694 - 1,179)      | 255<br>(107 - 512) | 13<br>(8 - 21)      | 121<br>(99 - 147)    | 73<br>(54 - 97)          | 436<br>(307 - 595)       |
| HIV/AIDS and tuberculosis                                         | 69<br>(52 - 89)           | 1<br>(0 - 1)       | 0<br>(0 - 1)        | 49<br>(38 - 65)      | 14<br>(9 - 21)           | 5<br>(3 - 7)             |
| Tuberculosis                                                      | 11<br>(7 - 15)            | 0<br>(0 - 1)       | 0<br>(0 - 0)        | 4<br>(2 - 5)         | 3<br>(2 - 5)             | 4<br>(2 - 6)             |
| HIV/AIDS                                                          | 57<br>(41 - 79)           | 0<br>(0 - 1)       | 0<br>(0 - 0)        | 46<br>(34 - 62)      | 10<br>(6 - 17)           | 1<br>(0 - 2)             |
| HIV/AIDS resulting in mycobacterial infection                     | 3<br>(2 - 4)              | 0<br>(0 - 0)       | 0<br>(0 - 0)        | 2<br>(1 - 3)         | 0<br>(0 - 1)             | 0<br>(0 - 0)             |
| HIV/AIDS resulting in other diseases                              | 55<br>(39 - 75)           | 0<br>(0 - 1)       | 0<br>(0 - 0)        | 44<br>(32 - 59)      | 10<br>(5 - 17)           | 1<br>(0 - 2)             |
| Diarrhea, lower respiratory, and other common infectious diseases | 475<br>(346 - 639)        | 53<br>(23 - 117)   | 10<br>(5 - 16)      | 32<br>(22 - 44)      | 42<br>(28 - 59)          | 338<br>(223 - 489)       |
| Diarrheal diseases                                                | 39<br>(26 - 61)           | 13<br>(5 - 31)     | 1<br>(1 - 2)        | 3<br>(2 - 4)         | 4<br>(2 - 6)             | 19<br>(10 - 35)          |
| Intestinal infectious diseases                                    | 10<br>(4 - 21)            | 4<br>(1 - 9)       | 2<br>(1 - 5)        | 3<br>(1 - 7)         | 1<br>(0 - 1)             | 0<br>(0 - 1)             |
| Typhoid fever                                                     | 8<br>(3 - 16)             | 3<br>(1 - 7)       | 2<br>(1 - 4)        | 2<br>(1 - 6)         | 0<br>(0 - 1)             | 0<br>(0 - 1)             |
| Paratyphoid fever                                                 | 2<br>(1 - 4)              | 1<br>(0 - 2)       | 1<br>(0 - 1)        | 1<br>(0 - 1)         | 0<br>(0 - 0)             | 0<br>(0 - 0)             |
| Other intestinal infectious diseases                              | 0<br>(0 - 2)              | 0<br>(0 - 1)       | 0<br>(0 - 0)        | 0<br>(0 - 1)         | 0<br>(0 - 0)             | 0<br>(0 - 1)             |
| Lower respiratory infections                                      | 395<br>(276 - 550)        | 29<br>(12 - 65)    | 4<br>(2 - 6)        | 19<br>(13 - 27)      | 33<br>(21 - 48)          | 310<br>(200 - 457)       |
| Upper respiratory infections                                      | 0<br>(0 - 1)              | 0<br>(0 - 0)       | 0<br>(0 - 0)        | 0<br>(0 - 0)         | 0<br>(0 - 0)             | 0<br>(0 - 1)             |
| Otitis media                                                      | 1<br>(0 - 1)              | 0<br>(0 - 0)       | 0<br>(0 - 0)        | 0<br>(0 - 0)         | 0<br>(0 - 0)             | 0<br>(0 - 1)             |
| Meningitis                                                        | 16<br>(12 - 23)           | 4<br>(2 - 9)       | 1<br>(0 - 1)        | 3<br>(2 - 4)         | 3<br>(2 - 4)             | 6<br>(4 - 8)             |
| Pneumococcal meningitis                                           | 5<br>(3 - 7)              | 1<br>(0 - 2)       | 0<br>(0 - 0)        | 1<br>(0 - 1)         | 1<br>(0 - 1)             | 2<br>(1 - 3)             |
| H influenzae type B meningitis                                    | 3<br>(2 - 5)              | 1<br>(1 - 4)       | 0<br>(0 - 0)        | 0<br>(0 - 1)         | 0<br>(0 - 0)             | 1<br>(0 - 1)             |
| Meningococcal meningitis                                          | 2<br>(1 - 3)              | 0<br>(0 - 1)       | 0<br>(0 - 0)        | 0<br>(0 - 1)         | 0<br>(0 - 1)             | 1<br>(0 - 1)             |
| Other meningitis                                                  | 6<br>(4 - 9)              | 1<br>(1 - 3)       | 0<br>(0 - 1)        | 1<br>(1 - 2)         | 1<br>(1 - 2)             | 2<br>(1 - 4)             |
| Encephalitis                                                      | 11<br>(7 - 19)            | 3<br>(1 - 7)       | 1<br>(1 - 3)        | 3<br>(2 - 5)         | 2<br>(1 - 3)             | 2<br>(1 - 4)             |
| Diphtheria                                                        | 0<br>(0 - 1)              | 0<br>(0 - 0)       | 0<br>(0 - 0)        | 0<br>(0 - 0)         | 0<br>(0 - 0)             | --                       |
| Whooping cough                                                    | 0<br>(0 - 1)              | 0<br>(0 - 1)       | 0<br>(0 - 0)        | 0<br>(0 - 0)         | 0<br>(0 - 0)             | --                       |
| Tetanus                                                           | 1<br>(1 - 2)              | 0<br>(0 - 0)       | 0<br>(0 - 0)        | 0<br>(0 - 0)         | 0<br>(0 - 0)             | 0<br>(0 - 1)             |
| Measles                                                           | 0<br>(0 - 0)              | 0<br>(0 - 0)       | 0<br>(0 - 0)        | 0<br>(0 - 0)         | 0<br>(0 - 0)             | --                       |
| Varicella and herpes zoster                                       | 1<br>(0 - 3)              | 0<br>(0 - 1)       | 0<br>(0 - 0)        | 0<br>(0 - 0)         | 0<br>(0 - 0)             | 1<br>(0 - 3)             |
| Neglected tropical diseases and malaria                           | 6<br>(4 - 11)             | 1<br>(0 - 4)       | 0<br>(0 - 1)        | 1<br>(1 - 2)         | 1<br>(1 - 1)             | 2<br>(1 - 4)             |
| Leishmaniasis                                                     | 0<br>(0 - 0)              | 0<br>(0 - 0)       | 0<br>(0 - 0)        | 0<br>(0 - 0)         | 0<br>(0 - 0)             | 0<br>(0 - 0)             |
| Visceral leishmaniasis                                            | 0<br>(0 - 0)              | 0<br>(0 - 0)       | 0<br>(0 - 0)        | 0<br>(0 - 0)         | 0<br>(0 - 0)             | 0<br>(0 - 0)             |
| Cysticercosis                                                     | 0<br>(0 - 1)              | 0<br>(0 - 0)       | 0<br>(0 - 0)        | 0<br>(0 - 0)         | 0<br>(0 - 0)             | 0<br>(0 - 0)             |
| Cystic echinococcosis                                             | 0<br>(0 - 0)              | 0<br>(0 - 0)       | 0<br>(0 - 0)        | 0<br>(0 - 0)         | 0<br>(0 - 0)             | 0<br>(0 - 0)             |
| Dengue                                                            | 2<br>(1 - 3)              | 0<br>(0 - 1)       | 0<br>(0 - 1)        | 1<br>(0 - 1)         | 0<br>(0 - 0)             | 0<br>(0 - 1)             |
| Rabies                                                            | 0<br>(0 - 0)              | 0<br>(0 - 0)       | 0<br>(0 - 0)        | 0<br>(0 - 0)         | 0<br>(0 - 0)             | 0<br>(0 - 0)             |
| Intestinal nematode infections                                    | 1<br>(0 - 5)              | 0<br>(0 - 3)       | 0<br>(0 - 0)        | 0<br>(0 - 0)         | 0<br>(0 - 0)             | 0<br>(0 - 2)             |
| Ascariasis                                                        | 1<br>(0 - 5)              | 0<br>(0 - 3)       | 0<br>(0 - 0)        | 0<br>(0 - 0)         | 0<br>(0 - 0)             | 0<br>(0 - 2)             |
| Other neglected tropical diseases                                 | 3<br>(2 - 4)              | 1<br>(0 - 2)       | 0<br>(0 - 0)        | 0<br>(0 - 1)         | 0<br>(0 - 1)             | 1<br>(1 - 2)             |
| Maternal disorders                                                | 23<br>(15 - 34)           | --                 | 0<br>(0 - 0)        | 23<br>(15 - 33)      | --                       | --                       |
| Maternal hemorrhage                                               | 4<br>(3 - 7)              | --                 | 0<br>(0 - 0)        | 4<br>(3 - 7)         | --                       | --                       |
| Maternal sepsis and other maternal infections                     | 2<br>(1 - 3)              | --                 | 0<br>(0 - 0)        | 2<br>(1 - 3)         | --                       | --                       |



Web Table 31- Jamaica deaths with 95% UI by age, sex, and cause in 2013

| Cause                                                            | Females, All Ages        | Females, 0-4 Years | Females, 5-14 Years | Females, 15-49 Years | Females, 50-69 Years     | Females, 70-80 Years     |
|------------------------------------------------------------------|--------------------------|--------------------|---------------------|----------------------|--------------------------|--------------------------|
| Maternal hypertensive disorders                                  | 4<br>(3 - 7)             | --                 | 0<br>(0 - 0)        | 4<br>(3 - 7)         | --                       | --                       |
| Maternal obstructed labor                                        | 2<br>(1 - 3)             | --                 | 0<br>(0 - 0)        | 2<br>(1 - 3)         | --                       | --                       |
| Maternal abortive outcome                                        | 3<br>(2 - 5)             | --                 | 0<br>(0 - 0)        | 3<br>(2 - 5)         | --                       | --                       |
| Indirect maternal deaths                                         | 2<br>(1 - 4)             | --                 | 0<br>(0 - 0)        | 2<br>(1 - 4)         | --                       | --                       |
| Late maternal deaths                                             | 2<br>(1 - 3)             | --                 | 0<br>(0 - 0)        | 2<br>(1 - 3)         | --                       | --                       |
| Maternal deaths aggravated by HIV/AIDS                           | 0<br>(0 - 0)             | --                 | --                  | 0<br>(0 - 0)         | --                       | --                       |
| Other maternal disorders                                         | 2<br>(1 - 4)             | --                 | 0<br>(0 - 0)        | 2<br>(1 - 4)         | --                       | --                       |
| Neonatal disorders                                               | 180<br>(73 - 344)        | 180<br>(73 - 344)  | --                  | --                   | --                       | --                       |
| Neonatal preterm birth complications                             | 109<br>(43 - 221)        | 109<br>(43 - 221)  | --                  | --                   | --                       | --                       |
| Neonatal encephalopathy due to birth asphyxia and trauma         | 33<br>(11 - 73)          | 33<br>(11 - 73)    | --                  | --                   | --                       | --                       |
| Neonatal sepsis and other neonatal infections                    | 23<br>(7 - 54)           | 23<br>(7 - 54)     | --                  | --                   | --                       | --                       |
| Hemolytic disease and other neonatal jaundice                    | 2<br>(0 - 4)             | 2<br>(0 - 4)       | --                  | --                   | --                       | --                       |
| Other neonatal disorders                                         | 14<br>(5 - 32)           | 14<br>(5 - 32)     | --                  | --                   | --                       | --                       |
| Nutritional deficiencies                                         | 119<br>(86 - 163)        | 12<br>(5 - 27)     | 2<br>(1 - 3)        | 12<br>(8 - 17)       | 11<br>(8 - 16)           | 82<br>(54 - 121)         |
| Protein-energy malnutrition                                      | 57<br>(34 - 90)          | 10<br>(4 - 24)     | 1<br>(0 - 2)        | 2<br>(1 - 5)         | 4<br>(2 - 7)             | 39<br>(20 - 67)          |
| Iodine deficiency                                                | 0<br>(0 - 0)             | 0<br>(0 - 0)       | 0<br>(0 - 0)        | 0<br>(0 - 0)         | 0<br>(0 - 0)             | 0<br>(0 - 0)             |
| Iron-deficiency anemia                                           | 58<br>(28 - 88)          | 1<br>(0 - 4)       | 1<br>(0 - 1)        | 9<br>(6 - 13)        | 7<br>(3 - 10)            | 40<br>(17 - 69)          |
| Other nutritional deficiencies                                   | 5<br>(2 - 9)             | 0<br>(0 - 1)       | 0<br>(0 - 0)        | 1<br>(0 - 1)         | 1<br>(0 - 1)             | 3<br>(1 - 7)             |
| Other communicable, maternal, neonatal, and nutritional diseases | 27<br>(16 - 44)          | 7<br>(1 - 22)      | 1<br>(0 - 2)        | 5<br>(3 - 7)         | 5<br>(3 - 7)             | 9<br>(5 - 13)            |
| Sexually transmitted diseases excluding HIV                      | 10<br>(3 - 25)           | 6<br>(0 - 20)      | 1<br>(0 - 1)        | 1<br>(1 - 1)         | 1<br>(0 - 1)             | 2<br>(1 - 3)             |
| Syphilis                                                         | 9<br>(2 - 23)            | 6<br>(0 - 20)      | 0<br>(0 - 1)        | 0<br>(0 - 1)         | 0<br>(0 - 1)             | 1<br>(1 - 2)             |
| Chlamydial infection                                             | 0<br>(0 - 1)             | --                 | 0<br>(0 - 0)        | 0<br>(0 - 0)         | 0<br>(0 - 0)             | 0<br>(0 - 0)             |
| Gonococcal infection                                             | 1<br>(0 - 1)             | --                 | 0<br>(0 - 0)        | 0<br>(0 - 0)         | 0<br>(0 - 0)             | 0<br>(0 - 0)             |
| Other sexually transmitted diseases                              | 0<br>(0 - 1)             | --                 | 0<br>(0 - 0)        | 0<br>(0 - 0)         | 0<br>(0 - 0)             | 0<br>(0 - 0)             |
| Hepatitis                                                        | 2<br>(1 - 3)             | 0<br>(0 - 0)       | 0<br>(0 - 0)        | 1<br>(0 - 1)         | 1<br>(0 - 1)             | 1<br>(0 - 1)             |
| Acute hepatitis A                                                | 1<br>(0 - 1)             | 0<br>(0 - 0)       | 0<br>(0 - 0)        | 0<br>(0 - 1)         | 0<br>(0 - 0)             | 0<br>(0 - 0)             |
| Acute hepatitis B                                                | 1<br>(1 - 2)             | 0<br>(0 - 0)       | 0<br>(0 - 0)        | 0<br>(0 - 1)         | 0<br>(0 - 1)             | 1<br>(0 - 1)             |
| Acute hepatitis C                                                | 0<br>(0 - 0)             | --                 | 0<br>(0 - 0)        | 0<br>(0 - 0)         | 0<br>(0 - 0)             | 0<br>(0 - 0)             |
| Other infectious diseases                                        | 15<br>(9 - 22)           | 1<br>(0 - 2)       | 0<br>(0 - 1)        | 3<br>(2 - 5)         | 4<br>(2 - 6)             | 7<br>(3 - 10)            |
| Non-communicable diseases                                        | 8,373<br>(6,724 - 9,849) | 113<br>(51 - 239)  | 36<br>(22 - 57)     | 619<br>(431 - 839)   | 1,735<br>(1,253 - 2,189) | 5,869<br>(4,843 - 6,759) |
| Neoplasms                                                        | 1,575<br>(1,195 - 1,975) | 8<br>(3 - 16)      | 10<br>(6 - 16)      | 244<br>(173 - 332)   | 516<br>(370 - 678)       | 798<br>(614 - 986)       |
| Esophageal cancer                                                | 26<br>(18 - 36)          | --                 | --                  | 1<br>(1 - 2)         | 8<br>(5 - 12)            | 17<br>(11 - 24)          |
| Stomach cancer                                                   | 96<br>(66 - 135)         | --                 | --                  | 6<br>(4 - 8)         | 21<br>(14 - 29)          | 69<br>(43 - 104)         |
| Liver cancer                                                     | 46<br>(30 - 65)          | --                 | 0<br>(0 - 0)        | 5<br>(3 - 8)         | 14<br>(9 - 20)           | 27<br>(16 - 44)          |
| Liver cancer due to hepatitis B                                  | 9<br>(5 - 16)            | --                 | 0<br>(0 - 0)        | 2<br>(1 - 3)         | 3<br>(1 - 6)             | 4<br>(2 - 9)             |
| Liver cancer due to hepatitis C                                  | 21<br>(13 - 32)          | --                 | 0<br>(0 - 0)        | 2<br>(1 - 3)         | 6<br>(3 - 10)            | 13<br>(7 - 22)           |
| Liver cancer due to alcohol use                                  | 10<br>(5 - 17)           | --                 | --                  | 0<br>(0 - 1)         | 2<br>(1 - 4)             | 7<br>(3 - 14)            |
| Liver cancer due to other causes                                 | 6<br>(3 - 10)            | --                 | 0<br>(0 - 0)        | 1<br>(1 - 2)         | 2<br>(1 - 3)             | 3<br>(1 - 6)             |
| Larynx cancer                                                    | 3<br>(1 - 6)             | --                 | --                  | 0<br>(0 - 1)         | 1<br>(0 - 2)             | 2<br>(1 - 4)             |
| Tracheal, bronchus and lung cancer                               | 94<br>(67 - 126)         | --                 | --                  | 8<br>(5 - 13)        | 33<br>(22 - 46)          | 53<br>(36 - 75)          |

Web Table 31- Jamaica deaths with 95% UI by age, sex, and cause in 2013

| Cause                                         | Females, All Ages        | Females, 0-4 Years | Females, 5-14 Years | Females, 15-49 Years | Females, 50-69 Years | Females, 70-80 Years     |
|-----------------------------------------------|--------------------------|--------------------|---------------------|----------------------|----------------------|--------------------------|
| Breast cancer                                 | 343<br>(253 - 441)       | --                 | --                  | 78<br>(53 - 109)     | 129<br>(89 - 175)    | 136<br>(95 - 185)        |
| Cervical cancer                               | 193<br>(135 - 278)       | --                 | --                  | 48<br>(31 - 77)      | 72<br>(48 - 105)     | 72<br>(47 - 107)         |
| Uterine cancer                                | 71<br>(34 - 105)         | --                 | --                  | 3<br>(1 - 5)         | 25<br>(12 - 39)      | 44<br>(20 - 68)          |
| Prostate cancer                               | --                       | --                 | --                  | --                   | --                   | --                       |
| Colon and rectum cancer                       | 197<br>(142 - 259)       | --                 | --                  | 13<br>(9 - 19)       | 52<br>(37 - 70)      | 132<br>(90 - 182)        |
| Lip and oral cavity cancer                    | 12<br>(8 - 18)           | --                 | --                  | 1<br>(1 - 2)         | 4<br>(2 - 6)         | 7<br>(5 - 11)            |
| Nasopharynx cancer                            | 5<br>(3 - 8)             | --                 | 0<br>(0 - 0)        | 1<br>(1 - 2)         | 2<br>(1 - 3)         | 2<br>(1 - 3)             |
| Other pharynx cancer                          | 4<br>(2 - 6)             | --                 | --                  | 1<br>(0 - 1)         | 1<br>(1 - 2)         | 2<br>(1 - 3)             |
| Gallbladder and biliary tract cancer          | 25<br>(14 - 42)          | --                 | --                  | 1<br>(1 - 3)         | 8<br>(5 - 14)        | 15<br>(8 - 27)           |
| Pancreatic cancer                             | 73<br>(50 - 98)          | --                 | --                  | 3<br>(2 - 5)         | 21<br>(13 - 29)      | 48<br>(33 - 70)          |
| Malignant skin melanoma                       | 4<br>(3 - 6)             | --                 | --                  | 1<br>(1 - 1)         | 1<br>(1 - 2)         | 2<br>(1 - 3)             |
| Non-melanoma skin cancer                      | 7<br>(4 - 12)            | --                 | --                  | 0<br>(0 - 1)         | 1<br>(1 - 2)         | 5<br>(3 - 10)            |
| Ovarian cancer                                | 81<br>(58 - 108)         | --                 | --                  | 12<br>(8 - 18)       | 32<br>(22 - 44)      | 37<br>(25 - 53)          |
| Testicular cancer                             | --                       | --                 | --                  | --                   | --                   | --                       |
| Kidney cancer                                 | 16<br>(11 - 23)          | 0<br>(0 - 0)       | 0<br>(0 - 0)        | 2<br>(1 - 3)         | 6<br>(3 - 8)         | 8<br>(5 - 13)            |
| Bladder cancer                                | 22<br>(14 - 36)          | --                 | --                  | 1<br>(1 - 2)         | 5<br>(3 - 8)         | 16<br>(10 - 27)          |
| Brain and nervous system cancer               | 20<br>(8 - 27)           | 1<br>(0 - 2)       | 1<br>(1 - 2)        | 6<br>(2 - 9)         | 6<br>(2 - 9)         | 6<br>(2 - 9)             |
| Thyroid cancer                                | 8<br>(5 - 12)            | --                 | 0<br>(0 - 0)        | 1<br>(1 - 1)         | 2<br>(1 - 4)         | 5<br>(3 - 7)             |
| Mesothelioma                                  | 3<br>(2 - 4)             | --                 | --                  | 0<br>(0 - 1)         | 1<br>(1 - 2)         | 1<br>(1 - 2)             |
| Hodgkin lymphoma                              | 3<br>(1 - 5)             | 0<br>(0 - 0)       | 0<br>(0 - 0)        | 1<br>(0 - 2)         | 1<br>(0 - 1)         | 1<br>(0 - 1)             |
| Non-Hodgkin lymphoma                          | 60<br>(34 - 83)          | 0<br>(0 - 1)       | 1<br>(1 - 2)        | 14<br>(8 - 21)       | 21<br>(12 - 30)      | 23<br>(11 - 35)          |
| Multiple myeloma                              | 25<br>(16 - 35)          | --                 | --                  | 2<br>(1 - 3)         | 11<br>(7 - 16)       | 12<br>(7 - 18)           |
| Leukemia                                      | 45<br>(34 - 59)          | 2<br>(1 - 6)       | 3<br>(2 - 5)        | 12<br>(8 - 18)       | 12<br>(8 - 16)       | 16<br>(11 - 22)          |
| Other neoplasms                               | 93<br>(64 - 134)         | 4<br>(1 - 9)       | 4<br>(2 - 7)        | 20<br>(12 - 30)      | 28<br>(18 - 43)      | 38<br>(25 - 55)          |
| Cardiovascular diseases                       | 3,562<br>(2,793 - 4,538) | 8<br>(4 - 19)      | 6<br>(3 - 10)       | 140<br>(92 - 223)    | 557<br>(385 - 777)   | 2,852<br>(2,275 - 3,532) |
| Rheumatic heart disease                       | 16<br>(11 - 25)          | 0<br>(0 - 0)       | 1<br>(0 - 2)        | 6<br>(4 - 10)        | 4<br>(2 - 6)         | 6<br>(3 - 8)             |
| Ischemic heart disease                        | 1,052<br>(768 - 1,540)   | 1<br>(0 - 2)       | 1<br>(0 - 2)        | 40<br>(25 - 71)      | 171<br>(113 - 264)   | 839<br>(608 - 1,213)     |
| Cerebrovascular disease                       | 1,682<br>(1,251 - 2,120) | 3<br>(1 - 6)       | 2<br>(1 - 3)        | 48<br>(31 - 76)      | 251<br>(171 - 355)   | 1,378<br>(1,029 - 1,715) |
| Ischemic stroke                               | 1,116<br>(813 - 1,450)   | 1<br>(0 - 1)       | 1<br>(0 - 1)        | 11<br>(6 - 19)       | 123<br>(82 - 185)    | 981<br>(716 - 1,258)     |
| Hemorrhagic stroke                            | 565<br>(401 - 769)       | 2<br>(1 - 5)       | 1<br>(1 - 2)        | 37<br>(24 - 59)      | 127<br>(85 - 186)    | 398<br>(261 - 547)       |
| Hypertensive heart disease                    | 437<br>(281 - 713)       | 0<br>(0 - 0)       | 0<br>(0 - 0)        | 14<br>(9 - 24)       | 63<br>(37 - 102)     | 360<br>(226 - 593)       |
| Cardiomyopathy and myocarditis                | 81<br>(51 - 125)         | 2<br>(1 - 6)       | 1<br>(0 - 2)        | 11<br>(7 - 19)       | 16<br>(10 - 25)      | 51<br>(27 - 90)          |
| Atrial fibrillation and flutter               | 71<br>(38 - 119)         | --                 | --                  | 1<br>(1 - 2)         | 7<br>(4 - 12)        | 62<br>(32 - 108)         |
| Aortic aneurysm                               | 33<br>(19 - 52)          | --                 | --                  | 2<br>(1 - 3)         | 7<br>(4 - 12)        | 24<br>(14 - 39)          |
| Peripheral vascular disease                   | 46<br>(28 - 71)          | --                 | --                  | 0<br>(0 - 0)         | 2<br>(1 - 3)         | 44<br>(27 - 69)          |
| Endocarditis                                  | 14<br>(8 - 22)           | 0<br>(0 - 1)       | 0<br>(0 - 0)        | 2<br>(1 - 4)         | 2<br>(1 - 3)         | 10<br>(5 - 16)           |
| Other cardiovascular and circulatory diseases | 132<br>(85 - 185)        | 2<br>(1 - 4)       | 1<br>(0 - 2)        | 15<br>(9 - 25)       | 35<br>(20 - 52)      | 78<br>(47 - 118)         |
| Chronic respiratory diseases                  | 216<br>(160 - 287)       | 4<br>(2 - 10)      | 1<br>(1 - 2)        | 18<br>(12 - 28)      | 38<br>(26 - 51)      | 154<br>(110 - 206)       |
| Chronic obstructive pulmonary disease         | 142<br>(99 - 196)        | 2<br>(1 - 4)       | 0<br>(0 - 1)        | 7<br>(4 - 11)        | 21<br>(13 - 30)      | 112<br>(79 - 157)        |
| Pneumoconiosis                                | 3<br>(2 - 5)             | 0<br>(0 - 0)       | 0<br>(0 - 0)        | 0<br>(0 - 0)         | 0<br>(0 - 1)         | 2<br>(1 - 4)             |

Web Table 31- Jamaica deaths with 95% UI by age, sex, and cause in 2013

| Cause                                               | Females, All Ages        | Females, 0-4 Years | Females, 5-14 Years | Females, 15-49 Years | Females, 50-69 Years | Females, 70-80 Years     |
|-----------------------------------------------------|--------------------------|--------------------|---------------------|----------------------|----------------------|--------------------------|
| Silicosis                                           | 0<br>(0 - 0)             | 0<br>(0 - 0)       | 0<br>(0 - 0)        | 0<br>(0 - 0)         | 0<br>(0 - 0)         | 0<br>(0 - 0)             |
| Asbestosis                                          | 0<br>(0 - 1)             | 0<br>(0 - 0)       | 0<br>(0 - 0)        | 0<br>(0 - 0)         | 0<br>(0 - 0)         | 0<br>(0 - 0)             |
| Coal workers pneumoconiosis                         | 0<br>(0 - 0)             | 0<br>(0 - 0)       | 0<br>(0 - 0)        | 0<br>(0 - 0)         | 0<br>(0 - 0)         | 0<br>(0 - 0)             |
| Other pneumoconiosis                                | 2<br>(1 - 4)             | 0<br>(0 - 0)       | 0<br>(0 - 0)        | 0<br>(0 - 0)         | 0<br>(0 - 0)         | 2<br>(1 - 3)             |
| Asthma                                              | 52<br>(32 - 77)          | 1<br>(0 - 3)       | 1<br>(0 - 1)        | 8<br>(5 - 13)        | 12<br>(7 - 18)       | 29<br>(15 - 48)          |
| Interstitial lung disease and pulmonary sarcoidosis | 14<br>(7 - 23)           | 0<br>(0 - 1)       | 0<br>(0 - 0)        | 2<br>(1 - 4)         | 4<br>(2 - 7)         | 8<br>(4 - 14)            |
| Other chronic respiratory diseases                  | 6<br>(4 - 9)             | 1<br>(0 - 3)       | 0<br>(0 - 0)        | 1<br>(1 - 2)         | 1<br>(0 - 1)         | 3<br>(2 - 5)             |
| Cirrhosis                                           | 78<br>(58 - 100)         | 1<br>(0 - 1)       | 1<br>(0 - 1)        | 16<br>(11 - 23)      | 27<br>(19 - 36)      | 33<br>(24 - 45)          |
| Cirrhosis due to hepatitis B                        | 8<br>(3 - 15)            | 0<br>(0 - 0)       | 0<br>(0 - 0)        | 2<br>(1 - 4)         | 3<br>(1 - 6)         | 3<br>(1 - 7)             |
| Cirrhosis due to hepatitis C                        | 38<br>(19 - 56)          | 0<br>(0 - 0)       | 0<br>(0 - 0)        | 7<br>(3 - 12)        | 13<br>(5 - 21)       | 17<br>(10 - 25)          |
| Cirrhosis due to alcohol use                        | 18<br>(8 - 31)           | --                 | --                  | 2<br>(1 - 4)         | 6<br>(2 - 12)        | 10<br>(4 - 16)           |
| Cirrhosis due to other causes                       | 14<br>(8 - 24)           | 1<br>(0 - 1)       | 1<br>(0 - 1)        | 5<br>(3 - 9)         | 5<br>(2 - 9)         | 4<br>(2 - 6)             |
| Digestive diseases                                  | 160<br>(118 - 203)       | 2<br>(1 - 5)       | 1<br>(1 - 2)        | 16<br>(11 - 23)      | 31<br>(21 - 43)      | 109<br>(81 - 141)        |
| Peptic ulcer disease                                | 41<br>(27 - 61)          | 0<br>(0 - 0)       | 0<br>(0 - 0)        | 3<br>(2 - 4)         | 8<br>(5 - 13)        | 30<br>(19 - 46)          |
| Gastritis and duodenitis                            | 11<br>(5 - 21)           | 0<br>(0 - 0)       | 0<br>(0 - 0)        | 1<br>(0 - 2)         | 2<br>(1 - 3)         | 8<br>(3 - 16)            |
| Appendicitis                                        | 6<br>(3 - 9)             | 0<br>(0 - 0)       | 0<br>(0 - 0)        | 1<br>(1 - 2)         | 1<br>(1 - 2)         | 3<br>(1 - 5)             |
| Paralytic ileus and intestinal obstruction          | 23<br>(6 - 41)           | 0<br>(0 - 1)       | 0<br>(0 - 0)        | 2<br>(1 - 3)         | 4<br>(1 - 7)         | 17<br>(4 - 32)           |
| Inguinal, femoral, and abdominal hernia             | 8<br>(3 - 21)            | 0<br>(0 - 1)       | 0<br>(0 - 0)        | 1<br>(0 - 2)         | 1<br>(1 - 4)         | 5<br>(2 - 16)            |
| Inflammatory bowel disease                          | 11<br>(7 - 17)           | 1<br>(0 - 2)       | 0<br>(0 - 0)        | 2<br>(1 - 3)         | 2<br>(1 - 4)         | 6<br>(3 - 10)            |
| Vascular intestinal disorders                       | 8<br>(4 - 17)            | 0<br>(0 - 0)       | 0<br>(0 - 0)        | 1<br>(0 - 2)         | 1<br>(1 - 3)         | 6<br>(3 - 12)            |
| Gallbladder and biliary diseases                    | 13<br>(9 - 19)           | 0<br>(0 - 0)       | 0<br>(0 - 0)        | 2<br>(1 - 3)         | 3<br>(2 - 5)         | 8<br>(5 - 12)            |
| Pancreatitis                                        | 8<br>(5 - 13)            | 0<br>(0 - 0)       | 0<br>(0 - 0)        | 2<br>(1 - 3)         | 2<br>(1 - 3)         | 4<br>(2 - 7)             |
| Other digestive diseases                            | 30<br>(20 - 43)          | 0<br>(0 - 1)       | 0<br>(0 - 1)        | 3<br>(2 - 4)         | 5<br>(3 - 8)         | 22<br>(14 - 32)          |
| Neurological disorders                              | 534<br>(392 - 689)       | 2<br>(1 - 5)       | 2<br>(1 - 3)        | 15<br>(10 - 23)      | 34<br>(24 - 45)      | 481<br>(344 - 628)       |
| Alzheimer disease and other dementias               | 466<br>(329 - 617)       | --                 | --                  | 0<br>(0 - 0)         | 21<br>(14 - 30)      | 445<br>(313 - 591)       |
| Parkinson disease                                   | 28<br>(18 - 43)          | --                 | --                  | 0<br>(0 - 1)         | 3<br>(2 - 6)         | 25<br>(15 - 38)          |
| Epilepsy                                            | 21<br>(14 - 34)          | 1<br>(0 - 4)       | 1<br>(1 - 3)        | 10<br>(6 - 16)       | 4<br>(2 - 5)         | 5<br>(3 - 8)             |
| Multiple sclerosis                                  | 3<br>(2 - 5)             | --                 | --                  | 1<br>(1 - 2)         | 1<br>(0 - 1)         | 1<br>(0 - 1)             |
| Other neurological disorders                        | 16<br>(12 - 21)          | 1<br>(0 - 2)       | 1<br>(0 - 1)        | 4<br>(3 - 6)         | 5<br>(4 - 7)         | 6<br>(4 - 8)             |
| Mental and substance use disorders                  | 12<br>(8 - 17)           | 0<br>(0 - 0)       | 0<br>(0 - 0)        | 4<br>(2 - 6)         | 3<br>(2 - 5)         | 5<br>(3 - 7)             |
| Schizophrenia                                       | 2<br>(0 - 3)             | --                 | --                  | 0<br>(0 - 1)         | 1<br>(0 - 1)         | 1<br>(0 - 2)             |
| Alcohol use disorders                               | 5<br>(2 - 9)             | --                 | --                  | 2<br>(1 - 3)         | 2<br>(1 - 4)         | 1<br>(1 - 2)             |
| Drug use disorders                                  | 5<br>(4 - 8)             | 0<br>(0 - 0)       | --                  | 2<br>(1 - 2)         | 1<br>(1 - 1)         | 3<br>(2 - 4)             |
| Opioid use disorders                                | 2<br>(1 - 2)             | 0<br>(0 - 0)       | --                  | 0<br>(0 - 1)         | 0<br>(0 - 0)         | 1<br>(0 - 1)             |
| Cocaine use disorders                               | 0<br>(0 - 0)             | 0<br>(0 - 0)       | --                  | 0<br>(0 - 0)         | 0<br>(0 - 0)         | 0<br>(0 - 0)             |
| Amphetamine use disorders                           | 0<br>(0 - 0)             | 0<br>(0 - 0)       | --                  | 0<br>(0 - 0)         | 0<br>(0 - 0)         | 0<br>(0 - 0)             |
| Other drug use disorders                            | 3<br>(2 - 5)             | 0<br>(0 - 0)       | --                  | 1<br>(1 - 2)         | 1<br>(0 - 1)         | 2<br>(1 - 2)             |
| Eating disorders                                    | 0<br>(0 - 0)             | --                 | 0<br>(0 - 0)        | 0<br>(0 - 0)         | --                   | --                       |
| Anorexia nervosa                                    | 0<br>(0 - 0)             | --                 | 0<br>(0 - 0)        | 0<br>(0 - 0)         | --                   | --                       |
| Diabetes, urogenital, blood, and endocrine diseases | 2,064<br>(1,551 - 2,557) | 11<br>(5 - 23)     | 6<br>(4 - 10)       | 132<br>(90 - 184)    | 512<br>(354 - 661)   | 1,403<br>(1,053 - 1,739) |

Web Table 31- Jamaica deaths with 95% UI by age, sex, and cause in 2013

| Cause                                               | Females, All Ages        | Females, 0-4 Years | Females, 5-14 Years | Females, 15-49 Years | Females, 50-69 Years | Females, 70-80 Years   |
|-----------------------------------------------------|--------------------------|--------------------|---------------------|----------------------|----------------------|------------------------|
| Diabetes mellitus                                   | 1,540<br>(1,120 - 1,945) | 1<br>(0 - 2)       | 1<br>(0 - 1)        | 59<br>(40 - 86)      | 394<br>(272 - 516)   | 1,086<br>(780 - 1,386) |
| Acute glomerulonephritis                            | 1<br>(0 - 1)             | 0<br>(0 - 0)       | 0<br>(0 - 0)        | 0<br>(0 - 0)         | 0<br>(0 - 0)         | 0<br>(0 - 1)           |
| Chronic kidney disease                              | 376<br>(245 - 571)       | 3<br>(1 - 7)       | 2<br>(1 - 3)        | 45<br>(28 - 73)      | 89<br>(53 - 139)     | 237<br>(154 - 374)     |
| Chronic kidney disease due to diabetes mellitus     | 34<br>(13 - 62)          | 0<br>(0 - 1)       | 0<br>(0 - 0)        | 5<br>(2 - 10)        | 15<br>(6 - 28)       | 14<br>(5 - 27)         |
| Chronic kidney disease due to hypertension          | 247<br>(160 - 372)       | 0<br>(0 - 1)       | 0<br>(0 - 1)        | 24<br>(14 - 40)      | 53<br>(30 - 84)      | 168<br>(105 - 258)     |
| Chronic kidney disease due to glomerulonephritis    | 6<br>(3 - 10)            | 0<br>(0 - 1)       | 0<br>(0 - 1)        | 2<br>(1 - 3)         | 1<br>(1 - 2)         | 2<br>(1 - 4)           |
| Chronic kidney disease due to other causes          | 90<br>(43 - 192)         | 2<br>(1 - 5)       | 1<br>(0 - 2)        | 14<br>(6 - 30)       | 20<br>(8 - 47)       | 53<br>(19 - 114)       |
| Urinary diseases and male infertility               | 55<br>(35 - 79)          | 1<br>(0 - 1)       | 0<br>(0 - 0)        | 5<br>(3 - 8)         | 9<br>(5 - 13)        | 40<br>(23 - 60)        |
| Interstitial nephritis and urinary tract infections | 47<br>(29 - 68)          | 0<br>(0 - 1)       | 0<br>(0 - 0)        | 4<br>(3 - 6)         | 7<br>(4 - 10)        | 35<br>(21 - 54)        |
| Urolithiasis                                        | 2<br>(0 - 3)             | --                 | 0<br>(0 - 0)        | 0<br>(0 - 1)         | 0<br>(0 - 1)         | 1<br>(0 - 2)           |
| Other urinary diseases                              | 6<br>(4 - 10)            | 0<br>(0 - 0)       | 0<br>(0 - 0)        | 1<br>(0 - 1)         | 1<br>(1 - 3)         | 4<br>(2 - 7)           |
| Gynecological diseases                              | 1<br>(1 - 3)             | --                 | --                  | 1<br>(0 - 1)         | 0<br>(0 - 0)         | 0<br>(0 - 1)           |
| Uterine fibroids                                    | 0<br>(0 - 1)             | --                 | --                  | 0<br>(0 - 0)         | 0<br>(0 - 0)         | 0<br>(0 - 0)           |
| Polycystic ovarian syndrome                         | 0<br>(0 - 0)             | --                 | --                  | 0<br>(0 - 0)         | 0<br>(0 - 0)         | --                     |
| Endometriosis                                       | 0<br>(0 - 0)             | --                 | --                  | 0<br>(0 - 0)         | 0<br>(0 - 0)         | --                     |
| Genital prolapse                                    | 0<br>(0 - 1)             | --                 | --                  | 0<br>(0 - 0)         | 0<br>(0 - 0)         | 0<br>(0 - 0)           |
| Other gynecological diseases                        | 1<br>(0 - 1)             | --                 | --                  | 0<br>(0 - 1)         | 0<br>(0 - 0)         | 0<br>(0 - 0)           |
| Hemoglobinopathies and hemolytic anemias            | 20<br>(11 - 31)          | 3<br>(1 - 6)       | 2<br>(1 - 4)        | 8<br>(4 - 12)        | 4<br>(2 - 6)         | 4<br>(2 - 6)           |
| Thalassemias                                        | 0<br>(0 - 0)             | 0<br>(0 - 0)       | 0<br>(0 - 0)        | 0<br>(0 - 0)         | 0<br>(0 - 0)         | 0<br>(0 - 0)           |
| Sickle cell disorders                               | 16<br>(9 - 25)           | 2<br>(1 - 5)       | 2<br>(1 - 4)        | 8<br>(4 - 12)        | 4<br>(2 - 6)         | 1<br>(0 - 1)           |
| G6PD deficiency                                     | 0<br>(0 - 0)             | 0<br>(0 - 0)       | 0<br>(0 - 0)        | 0<br>(0 - 0)         | 0<br>(0 - 0)         | 0<br>(0 - 0)           |
| Other hemoglobinopathies and hemolytic anemias      | 4<br>(2 - 6)             | 0<br>(0 - 0)       | 0<br>(0 - 0)        | 0<br>(0 - 0)         | 0<br>(0 - 0)         | 3<br>(1 - 5)           |
| Endocrine, metabolic, blood, and immune disorders   | 70<br>(48 - 105)         | 4<br>(2 - 9)       | 1<br>(0 - 2)        | 13<br>(8 - 21)       | 15<br>(10 - 23)      | 37<br>(22 - 59)        |
| Musculoskeletal disorders                           | 56<br>(20 - 75)          | --                 | 1<br>(0 - 2)        | 24<br>(7 - 36)       | 13<br>(4 - 18)       | 17<br>(7 - 26)         |
| Rheumatoid arthritis                                | 7<br>(1 - 11)            | --                 | 0<br>(0 - 0)        | 1<br>(0 - 1)         | 2<br>(0 - 3)         | 4<br>(0 - 7)           |
| Other musculoskeletal disorders                     | 49<br>(19 - 67)          | --                 | 1<br>(0 - 2)        | 23<br>(7 - 34)       | 11<br>(4 - 16)       | 13<br>(7 - 21)         |
| Other non-communicable diseases                     | 116<br>(67 - 218)        | 77<br>(33 - 167)   | 8<br>(4 - 13)       | 11<br>(7 - 16)       | 5<br>(3 - 8)         | 15<br>(10 - 22)        |
| Congenital anomalies                                | 102<br>(55 - 199)        | 73<br>(31 - 160)   | 7<br>(4 - 12)       | 10<br>(6 - 15)       | 4<br>(3 - 6)         | 8<br>(5 - 11)          |
| Neural tube defects                                 | 5<br>(1 - 14)            | 5<br>(1 - 13)      | 0<br>(0 - 0)        | 0<br>(0 - 0)         | 0<br>(0 - 0)         | 0<br>(0 - 0)           |
| Congenital heart anomalies                          | 55<br>(29 - 111)         | 38<br>(16 - 88)    | 5<br>(3 - 8)        | 6<br>(4 - 10)        | 1<br>(1 - 2)         | 4<br>(2 - 7)           |
| Cleft lip and cleft palate                          | 0<br>(0 - 1)             | 0<br>(0 - 1)       | --                  | --                   | --                   | --                     |
| Down syndrome                                       | 5<br>(3 - 10)            | 3<br>(1 - 7)       | 0<br>(0 - 1)        | 1<br>(1 - 2)         | 1<br>(0 - 1)         | 0<br>(0 - 0)           |
| Chromosomal unbalanced rearrangements               | 2<br>(1 - 5)             | 2<br>(1 - 5)       | 0<br>(0 - 0)        | 0<br>(0 - 0)         | 0<br>(0 - 0)         | 0<br>(0 - 0)           |
| Other congenital anomalies                          | 34<br>(15 - 73)          | 25<br>(9 - 61)     | 2<br>(1 - 4)        | 2<br>(1 - 4)         | 2<br>(1 - 4)         | 3<br>(2 - 5)           |
| Skin and subcutaneous diseases                      | 11<br>(7 - 16)           | 1<br>(0 - 3)       | 0<br>(0 - 1)        | 1<br>(0 - 1)         | 1<br>(1 - 1)         | 8<br>(5 - 13)          |
| Cellulitis                                          | 1<br>(0 - 1)             | 0<br>(0 - 1)       | 0<br>(0 - 0)        | 0<br>(0 - 0)         | 0<br>(0 - 0)         | 0<br>(0 - 1)           |
| Pyoderma                                            | 2<br>(1 - 4)             | 1<br>(0 - 2)       | 0<br>(0 - 0)        | 0<br>(0 - 0)         | 0<br>(0 - 0)         | 1<br>(0 - 2)           |
| Decubitus ulcer                                     | 8<br>(5 - 12)            | 0<br>(0 - 1)       | 0<br>(0 - 0)        | 0<br>(0 - 0)         | 1<br>(0 - 1)         | 7<br>(4 - 10)          |
| Other skin and subcutaneous diseases                | 0<br>(0 - 1)             | 0<br>(0 - 0)       | 0<br>(0 - 0)        | 0<br>(0 - 0)         | 0<br>(0 - 0)         | 0<br>(0 - 0)           |
| Sudden infant death syndrome                        | 3<br>(1 - 10)            | 3<br>(1 - 10)      | --                  | --                   | --                   | --                     |

Web Table 31- Jamaica deaths with 95% UI by age, sex, and cause in 2013

| Cause                                           | Females, All Ages  | Females, 0-4 Years | Females, 5-14 Years | Females, 15-49 Years | Females, 50-69 Years | Females, 70-80 Years |
|-------------------------------------------------|--------------------|--------------------|---------------------|----------------------|----------------------|----------------------|
| Injuries                                        | 406<br>(251 - 555) | 32<br>(14 - 70)    | 20<br>(12 - 33)     | 147<br>(86 - 211)    | 61<br>(36 - 88)      | 146<br>(81 - 204)    |
| Transport injuries                              | 70<br>(37 - 96)    | 5<br>(2 - 11)      | 6<br>(3 - 10)       | 24<br>(14 - 34)      | 14<br>(7 - 19)       | 22<br>(9 - 33)       |
| Road injuries                                   | 62<br>(34 - 85)    | 4<br>(1 - 9)       | 5<br>(3 - 9)        | 21<br>(13 - 31)      | 12<br>(7 - 17)       | 19<br>(9 - 28)       |
| Pedestrian road injuries                        | 20<br>(10 - 29)    | 1<br>(0 - 4)       | 2<br>(1 - 4)        | 7<br>(4 - 10)        | 4<br>(2 - 7)         | 5<br>(2 - 8)         |
| Cyclist road injuries                           | 2<br>(1 - 3)       | 0<br>(0 - 0)       | 0<br>(0 - 1)        | 1<br>(0 - 1)         | 0<br>(0 - 1)         | 1<br>(0 - 1)         |
| Motorcyclist road injuries                      | 3<br>(1 - 5)       | 0<br>(0 - 0)       | 0<br>(0 - 0)        | 1<br>(0 - 2)         | 0<br>(0 - 0)         | 1<br>(0 - 3)         |
| Motor vehicle road injuries                     | 36<br>(20 - 52)    | 2<br>(1 - 6)       | 3<br>(1 - 5)        | 13<br>(8 - 19)       | 7<br>(4 - 10)        | 12<br>(5 - 18)       |
| Other road injuries                             | 1<br>(0 - 1)       | 0<br>(0 - 0)       | 0<br>(0 - 0)        | 0<br>(0 - 0)         | 0<br>(0 - 0)         | 0<br>(0 - 1)         |
| Other transport injuries                        | 8<br>(3 - 12)      | 1<br>(0 - 2)       | 0<br>(0 - 1)        | 2<br>(1 - 4)         | 2<br>(1 - 3)         | 3<br>(1 - 5)         |
| Unintentional injuries                          | 186<br>(122 - 253) | 19<br>(9 - 42)     | 8<br>(4 - 12)       | 29<br>(20 - 42)      | 22<br>(14 - 31)      | 108<br>(59 - 155)    |
| Falls                                           | 56<br>(27 - 87)    | 1<br>(0 - 2)       | 1<br>(0 - 1)        | 2<br>(1 - 3)         | 4<br>(2 - 5)         | 49<br>(22 - 79)      |
| Drowning                                        | 15<br>(9 - 23)     | 3<br>(1 - 7)       | 2<br>(1 - 4)        | 5<br>(3 - 8)         | 2<br>(1 - 4)         | 3<br>(2 - 4)         |
| Fire, heat, and hot substances                  | 29<br>(16 - 43)    | 3<br>(1 - 7)       | 1<br>(1 - 2)        | 4<br>(2 - 7)         | 4<br>(2 - 6)         | 17<br>(8 - 28)       |
| Poisonings                                      | 4<br>(2 - 6)       | 1<br>(0 - 2)       | 0<br>(0 - 0)        | 1<br>(1 - 2)         | 0<br>(0 - 1)         | 1<br>(1 - 2)         |
| Exposure to mechanical forces                   | 15<br>(10 - 20)    | 2<br>(1 - 3)       | 1<br>(1 - 2)        | 6<br>(4 - 9)         | 2<br>(1 - 3)         | 3<br>(2 - 5)         |
| Unintentional firearm injuries                  | 8<br>(5 - 11)      | 1<br>(0 - 1)       | 1<br>(0 - 1)        | 4<br>(2 - 6)         | 1<br>(1 - 2)         | 2<br>(1 - 3)         |
| Unintentional suffocation                       | 1<br>(1 - 3)       | 0<br>(0 - 1)       | 0<br>(0 - 0)        | 0<br>(0 - 1)         | 0<br>(0 - 0)         | 0<br>(0 - 1)         |
| Other exposure to mechanical forces             | 5<br>(4 - 7)       | 1<br>(0 - 2)       | 1<br>(0 - 1)        | 2<br>(1 - 2)         | 1<br>(0 - 1)         | 1<br>(1 - 2)         |
| Adverse effects of medical treatment            | 35<br>(15 - 55)    | 2<br>(1 - 5)       | 1<br>(0 - 1)        | 6<br>(3 - 10)        | 6<br>(2 - 10)        | 20<br>(7 - 34)       |
| Animal contact                                  | 3<br>(0 - 5)       | 0<br>(0 - 1)       | 0<br>(0 - 0)        | 1<br>(0 - 1)         | 1<br>(0 - 1)         | 1<br>(0 - 3)         |
| Venomous animal contact                         | 1<br>(0 - 2)       | 0<br>(0 - 0)       | 0<br>(0 - 0)        | 0<br>(0 - 1)         | 1<br>(0 - 1)         | 0<br>(0 - 0)         |
| Non-venomous animal contact                     | 2<br>(0 - 3)       | 0<br>(0 - 0)       | 0<br>(0 - 0)        | 0<br>(0 - 0)         | 0<br>(0 - 0)         | 1<br>(0 - 2)         |
| Foreign body                                    | 26<br>(16 - 43)    | 7<br>(3 - 18)      | 1<br>(0 - 2)        | 3<br>(2 - 6)         | 2<br>(1 - 4)         | 12<br>(7 - 20)       |
| Pulmonary aspiration and foreign body in airway | 26<br>(16 - 42)    | 7<br>(3 - 18)      | 1<br>(0 - 2)        | 3<br>(2 - 6)         | 2<br>(1 - 4)         | 12<br>(7 - 19)       |
| Foreign body in other body part                 | 1<br>(0 - 1)       | 0<br>(0 - 0)       | 0<br>(0 - 0)        | 0<br>(0 - 0)         | 0<br>(0 - 0)         | 0<br>(0 - 1)         |
| Other unintentional injuries                    | 3<br>(1 - 5)       | 0<br>(0 - 1)       | 0<br>(0 - 0)        | 1<br>(0 - 1)         | 1<br>(0 - 1)         | 1<br>(0 - 3)         |
| Self-harm and interpersonal violence            | 151<br>(78 - 221)  | 8<br>(2 - 20)      | 7<br>(3 - 12)       | 94<br>(45 - 143)     | 26<br>(12 - 41)      | 16<br>(9 - 28)       |
| Self-harm                                       | 28<br>(20 - 41)    | --                 | 1<br>(1 - 2)        | 15<br>(10 - 23)      | 6<br>(4 - 10)        | 6<br>(4 - 8)         |
| Interpersonal violence                          | 123<br>(49 - 187)  | 8<br>(2 - 20)      | 6<br>(2 - 11)       | 79<br>(29 - 124)     | 19<br>(7 - 33)       | 11<br>(4 - 22)       |
| Assault by firearm                              | 35<br>(11 - 62)    | 2<br>(0 - 4)       | 1<br>(0 - 3)        | 26<br>(8 - 46)       | 5<br>(1 - 10)        | 1<br>(0 - 3)         |
| Assault by sharp object                         | 41<br>(16 - 67)    | 1<br>(0 - 3)       | 1<br>(0 - 3)        | 30<br>(11 - 51)      | 6<br>(2 - 12)        | 3<br>(1 - 6)         |
| Assault by other means                          | 46<br>(18 - 73)    | 5<br>(2 - 14)      | 3<br>(1 - 6)        | 23<br>(8 - 41)       | 8<br>(3 - 14)        | 7<br>(2 - 14)        |

Web Table 31- Japan deaths with 95% UI by age, sex, and cause in 2013

| Cause                                                             | Both Sexes, All Ages                 | Both Sexes, 0-4 Years    | Both Sexes, 5-14 Years | Both Sexes, 15-49 Years     | Both Sexes, 50-69 Years        | Both Sexes, 70-80 Years              |
|-------------------------------------------------------------------|--------------------------------------|--------------------------|------------------------|-----------------------------|--------------------------------|--------------------------------------|
| All causes                                                        | 1,338,047<br>(1,270,478 - 1,401,369) | 3,158<br>(2,473 - 4,042) | 982<br>(848 - 1,143)   | 42,185<br>(38,742 - 45,406) | 211,324<br>(196,805 - 225,737) | 1,080,398<br>(1,032,652 - 1,126,897) |
| Communicable, maternal, neonatal, and nutritional diseases        | 160,034<br>(131,193 - 187,077)       | 1,046<br>(792 - 1,380)   | 113<br>(86 - 145)      | 1,411<br>(1,225 - 1,598)    | 9,619<br>(7,775 - 11,546)      | 147,846<br>(120,979 - 174,675)       |
| HIV/AIDS and tuberculosis                                         | 4,882<br>(4,046 - 5,946)             | 1<br>(1 - 2)             | 1<br>(0 - 1)           | 105<br>(90 - 143)           | 480<br>(379 - 845)             | 4,295<br>(3,457 - 5,265)             |
| Tuberculosis                                                      | 4,821<br>(3,987 - 5,888)             | 1<br>(1 - 2)             | 1<br>(0 - 1)           | 65<br>(53 - 102)            | 464<br>(364 - 832)             | 4,290<br>(3,454 - 5,261)             |
| HIV/AIDS                                                          | 61<br>(43 - 90)                      | 0<br>(0 - 0)             | 0<br>(0 - 0)           | 41<br>(31 - 50)             | 16<br>(9 - 33)                 | 4<br>(2 - 9)                         |
| HIV/AIDS resulting in mycobacterial infection                     | 3<br>(2 - 5)                         | 0<br>(0 - 0)             | 0<br>(0 - 0)           | 2<br>(1 - 3)                | 1<br>(0 - 2)                   | 0<br>(0 - 1)                         |
| HIV/AIDS resulting in other diseases                              | 58<br>(41 - 85)                      | 0<br>(0 - 0)             | 0<br>(0 - 0)           | 38<br>(29 - 47)             | 15<br>(8 - 31)                 | 4<br>(2 - 9)                         |
| Diarrhea, lower respiratory, and other common infectious diseases | 147,439<br>(119,807 - 174,272)       | 264<br>(179 - 353)       | 92<br>(68 - 120)       | 992<br>(837 - 1,159)        | 8,169<br>(6,497 - 9,938)       | 137,922<br>(111,531 - 164,549)       |
| Diarrheal diseases                                                | 3,285<br>(2,409 - 4,563)             | 27<br>(17 - 39)          | 3<br>(2 - 5)           | 42<br>(34 - 52)             | 231<br>(179 - 292)             | 2,982<br>(2,107 - 4,229)             |
| Intestinal infectious diseases                                    | 107<br>(42 - 228)                    | 16<br>(5 - 34)           | 16<br>(5 - 36)         | 35<br>(12 - 78)             | 18<br>(6 - 40)                 | 22<br>(8 - 47)                       |
| Typhoid fever                                                     | 65<br>(20 - 146)                     | 9<br>(3 - 21)            | 10<br>(3 - 24)         | 23<br>(7 - 55)              | 11<br>(3 - 28)                 | 12<br>(3 - 28)                       |
| Paratyphoid fever                                                 | 27<br>(8 - 63)                       | 5<br>(1 - 11)            | 5<br>(1 - 12)          | 9<br>(3 - 23)               | 4<br>(1 - 11)                  | 5<br>(1 - 12)                        |
| Other intestinal infectious diseases                              | 14<br>(7 - 24)                       | 2<br>(0 - 7)             | 1<br>(0 - 3)           | 3<br>(0 - 7)                | 3<br>(0 - 7)                   | 6<br>(2 - 12)                        |
| Lower respiratory infections                                      | 142,649<br>(115,652 - 169,659)       | 168<br>(110 - 228)       | 54<br>(38 - 72)        | 769<br>(628 - 918)          | 7,639<br>(5,949 - 9,431)       | 134,018<br>(108,009 - 164,591)       |
| Upper respiratory infections                                      | 27<br>(7 - 83)                       | 0<br>(0 - 0)             | 0<br>(0 - 0)           | 1<br>(0 - 3)                | 4<br>(1 - 11)                  | 21<br>(2 - 78)                       |
| Otitis media                                                      | 37<br>(30 - 46)                      | 1<br>(0 - 1)             | 1<br>(1 - 1)           | 5<br>(5 - 6)                | 5<br>(4 - 6)                   | 25<br>(18 - 35)                      |
| Meningitis                                                        | 661<br>(546 - 758)                   | 29<br>(19 - 40)          | 6<br>(4 - 8)           | 54<br>(46 - 64)             | 135<br>(114 - 160)             | 438<br>(344 - 527)                   |
| Pneumococcal meningitis                                           | 139<br>(102 - 181)                   | 4<br>(2 - 7)             | 1<br>(1 - 2)           | 11<br>(7 - 16)              | 27<br>(18 - 41)                | 95<br>(62 - 135)                     |
| H influenzae type B meningitis                                    | 105<br>(77 - 138)                    | 13<br>(8 - 19)           | 2<br>(1 - 3)           | 9<br>(6 - 11)               | 18<br>(12 - 25)                | 64<br>(41 - 94)                      |
| Meningococcal meningitis                                          | 137<br>(83 - 193)                    | 1<br>(0 - 1)             | 0<br>(0 - 1)           | 10<br>(6 - 15)              | 25<br>(12 - 39)                | 101<br>(58 - 148)                    |
| Other meningitis                                                  | 280<br>(214 - 342)                   | 11<br>(6 - 17)           | 2<br>(1 - 3)           | 24<br>(17 - 31)             | 65<br>(49 - 83)                | 178<br>(117 - 235)                   |
| Encephalitis                                                      | 494<br>(376 - 686)                   | 16<br>(10 - 26)          | 8<br>(5 - 13)          | 66<br>(53 - 100)            | 121<br>(90 - 185)              | 282<br>(184 - 401)                   |
| Diphtheria                                                        | 1<br>(0 - 4)                         | 0<br>(0 - 2)             | 0<br>(0 - 1)           | 1<br>(0 - 2)                | 0<br>(0 - 2)                   | --                                   |
| Whooping cough                                                    | 9<br>(7 - 13)                        | 2<br>(1 - 5)             | 1<br>(1 - 1)           | 5<br>(4 - 6)                | 1<br>(1 - 2)                   | --                                   |
| Tetanus                                                           | 18<br>(13 - 25)                      | 1<br>(0 - 1)             | 1<br>(0 - 1)           | 5<br>(2 - 6)                | 3<br>(2 - 5)                   | 8<br>(5 - 16)                        |
| Measles                                                           | 1<br>(0 - 2)                         | 1<br>(0 - 2)             | 0<br>(0 - 0)           | 0<br>(0 - 0)                | 0<br>(0 - 0)                   | --                                   |
| Varicella and herpes zoster                                       | 149<br>(30 - 542)                    | 4<br>(0 - 13)            | 1<br>(0 - 4)           | 8<br>(2 - 19)               | 11<br>(2 - 27)                 | 125<br>(9 - 525)                     |
| Neglected tropical diseases and malaria                           | 217<br>(118 - 266)                   | 2<br>(1 - 3)             | 3<br>(2 - 4)           | 19<br>(16 - 22)             | 53<br>(27 - 68)                | 140<br>(69 - 184)                    |
| Cysticercosis                                                     | 2<br>(1 - 2)                         | 0<br>(0 - 0)             | 0<br>(0 - 0)           | 0<br>(0 - 0)                | 1<br>(0 - 1)                   | 1<br>(1 - 1)                         |
| Cystic echinococcosis                                             | 9<br>(8 - 10)                        | 0<br>(0 - 0)             | 0<br>(0 - 0)           | 1<br>(1 - 1)                | 3<br>(2 - 3)                   | 5<br>(5 - 6)                         |
| Dengue                                                            | 12<br>(9 - 14)                       | 1<br>(0 - 1)             | 1<br>(1 - 1)           | 5<br>(4 - 6)                | 3<br>(2 - 4)                   | 2<br>(2 - 3)                         |
| Rabies                                                            | 12<br>(8 - 14)                       | 1<br>(0 - 1)             | 1<br>(1 - 1)           | 5<br>(3 - 6)                | 3<br>(2 - 4)                   | 2<br>(1 - 3)                         |
| Other neglected tropical diseases                                 | 183<br>(87 - 231)                    | 1<br>(0 - 2)             | 1<br>(1 - 2)           | 7<br>(5 - 9)                | 43<br>(19 - 58)                | 130<br>(59 - 174)                    |
| Maternal disorders                                                | 66<br>(51 - 86)                      | --                       | 0<br>(0 - 0)           | 66<br>(51 - 86)             | --                             | --                                   |
| Maternal hemorrhage                                               | 12<br>(9 - 16)                       | --                       | 0<br>(0 - 0)           | 12<br>(9 - 16)              | --                             | --                                   |
| Maternal sepsis and other maternal infections                     | 4<br>(3 - 7)                         | --                       | 0<br>(0 - 0)           | 4<br>(3 - 7)                | --                             | --                                   |
| Maternal hypertensive disorders                                   | 5<br>(3 - 8)                         | --                       | 0<br>(0 - 0)           | 5<br>(3 - 8)                | --                             | --                                   |
| Maternal obstructed labor                                         | 6<br>(4 - 8)                         | --                       | 0<br>(0 - 0)           | 6<br>(4 - 8)                | --                             | --                                   |
| Maternal abortive outcome                                         | 11<br>(8 - 15)                       | --                       | 0<br>(0 - 0)           | 11<br>(8 - 15)              | --                             | --                                   |
| Indirect maternal deaths                                          | 12<br>(8 - 16)                       | --                       | 0<br>(0 - 0)           | 12<br>(8 - 16)              | --                             | --                                   |

Web Table 31- Japan deaths with 95% UI by age, sex, and cause in 2013

| Cause                                                            | Both Sexes, All Ages                 | Both Sexes, 0-4 Years    | Both Sexes, 5-14 Years | Both Sexes, 15-49 Years     | Both Sexes, 50-69 Years        | Both Sexes, 70-80 Years        |
|------------------------------------------------------------------|--------------------------------------|--------------------------|------------------------|-----------------------------|--------------------------------|--------------------------------|
| Late maternal deaths                                             | 4<br>(2 - 6)                         | --                       | 0<br>(0 - 0)           | 4<br>(2 - 6)                | --                             | --                             |
| Maternal deaths aggravated by HIV/AIDS                           | 0<br>(0 - 0)                         | --                       | --                     | 0<br>(0 - 0)                | --                             | --                             |
| Other maternal disorders                                         | 12<br>(9 - 17)                       | --                       | 0<br>(0 - 0)           | 12<br>(9 - 17)              | --                             | --                             |
| Neonatal disorders                                               | 717<br>(538 - 944)                   | 717<br>(538 - 944)       | --                     | --                          | --                             | --                             |
| Neonatal preterm birth complications                             | 292<br>(203 - 425)                   | 292<br>(203 - 425)       | --                     | --                          | --                             | --                             |
| Neonatal encephalopathy due to birth asphyxia and trauma         | 131<br>(89 - 187)                    | 131<br>(89 - 187)        | --                     | --                          | --                             | --                             |
| Neonatal sepsis and other neonatal infections                    | 91<br>(55 - 151)                     | 91<br>(55 - 151)         | --                     | --                          | --                             | --                             |
| Hemolytic disease and other neonatal jaundice                    | 3<br>(1 - 6)                         | 3<br>(1 - 6)             | --                     | --                          | --                             | --                             |
| Other neonatal disorders                                         | 200<br>(131 - 287)                   | 200<br>(131 - 287)       | --                     | --                          | --                             | --                             |
| Nutritional deficiencies                                         | 3,680<br>(2,622 - 4,580)             | 6<br>(4 - 9)             | 2<br>(1 - 3)           | 127<br>(92 - 153)           | 369<br>(215 - 465)             | 3,176<br>(2,289 - 4,050)       |
| Protein-energy malnutrition                                      | 1,922<br>(772 - 2,678)               | 3<br>(1 - 5)             | 1<br>(0 - 1)           | 63<br>(26 - 83)             | 239<br>(93 - 316)              | 1,617<br>(619 - 2,322)         |
| Iodine deficiency                                                | 9<br>(1 - 45)                        | 0<br>(0 - 0)             | 0<br>(0 - 0)           | 0<br>(0 - 1)                | 1<br>(0 - 6)                   | 8<br>(0 - 44)                  |
| Iron-deficiency anemia                                           | 1,262<br>(778 - 2,202)               | 1<br>(0 - 1)             | 1<br>(0 - 1)           | 49<br>(35 - 78)             | 72<br>(42 - 136)               | 1,139<br>(682 - 2,020)         |
| Other nutritional deficiencies                                   | 486<br>(275 - 882)                   | 2<br>(1 - 4)             | 1<br>(0 - 1)           | 14<br>(7 - 25)              | 57<br>(26 - 95)                | 412<br>(224 - 769)             |
| Other communicable, maternal, neonatal, and nutritional diseases | 3,032<br>(1,600 - 4,087)             | 55<br>(12 - 206)         | 14<br>(7 - 29)         | 102<br>(78 - 121)           | 547<br>(320 - 709)             | 2,313<br>(1,120 - 3,237)       |
| Sexually transmitted diseases excluding HIV                      | 158<br>(76 - 331)                    | 33<br>(0 - 187)          | 3<br>(0 - 17)          | 6<br>(4 - 8)                | 16<br>(11 - 23)                | 100<br>(54 - 173)              |
| Syphilis                                                         | 129<br>(58 - 300)                    | 33<br>(0 - 187)          | 3<br>(0 - 16)          | 3<br>(2 - 4)                | 10<br>(7 - 15)                 | 80<br>(43 - 139)               |
| Chlamydial infection                                             | 7<br>(4 - 11)                        | --                       | 0<br>(0 - 0)           | 1<br>(0 - 1)                | 1<br>(1 - 2)                   | 5<br>(3 - 9)                   |
| Gonococcal infection                                             | 15<br>(9 - 23)                       | --                       | 0<br>(0 - 0)           | 1<br>(1 - 2)                | 3<br>(2 - 4)                   | 11<br>(6 - 19)                 |
| Other sexually transmitted diseases                              | 8<br>(5 - 11)                        | --                       | 0<br>(0 - 0)           | 1<br>(1 - 2)                | 2<br>(1 - 3)                   | 5<br>(3 - 8)                   |
| Hepatitis                                                        | 213<br>(176 - 262)                   | 1<br>(1 - 1)             | 1<br>(1 - 2)           | 23<br>(18 - 30)             | 76<br>(58 - 97)                | 112<br>(83 - 149)              |
| Acute hepatitis A                                                | 19<br>(5 - 40)                       | 0<br>(0 - 1)             | 1<br>(0 - 1)           | 4<br>(1 - 9)                | 7<br>(2 - 15)                  | 7<br>(2 - 18)                  |
| Acute hepatitis B                                                | 189<br>(147 - 236)                   | 0<br>(0 - 1)             | 1<br>(0 - 1)           | 18<br>(12 - 25)             | 66<br>(48 - 88)                | 104<br>(75 - 142)              |
| Acute hepatitis C                                                | 6<br>(1 - 15)                        | --                       | 0<br>(0 - 0)           | 2<br>(0 - 4)                | 3<br>(1 - 7)                   | 2<br>(0 - 5)                   |
| Other infectious diseases                                        | 2,660<br>(1,249 - 3,691)             | 21<br>(11 - 33)          | 10<br>(6 - 14)         | 73<br>(50 - 89)             | 455<br>(228 - 612)             | 2,101<br>(911 - 2,997)         |
| Non-communicable diseases                                        | 1,095,180<br>(1,035,729 - 1,162,933) | 1,680<br>(1,309 - 2,130) | 528<br>(448 - 620)     | 24,919<br>(22,707 - 27,634) | 182,826<br>(170,030 - 196,014) | 885,228<br>(841,248 - 938,218) |
| Neoplasms                                                        | 418,080<br>(387,226 - 450,321)       | 152<br>(106 - 208)       | 281<br>(231 - 341)     | 12,460<br>(11,179 - 13,935) | 108,842<br>(99,946 - 119,257)  | 296,344<br>(269,446 - 319,318) |
| Esophageal cancer                                                | 14,167<br>(12,268 - 17,938)          | --                       | --                     | 232<br>(176 - 384)          | 5,371<br>(4,532 - 7,186)       | 8,564<br>(7,268 - 10,850)      |
| Stomach cancer                                                   | 65,476<br>(56,255 - 76,603)          | --                       | --                     | 1,983<br>(1,402 - 2,462)    | 15,858<br>(13,538 - 18,355)    | 47,636<br>(40,102 - 57,252)    |
| Liver cancer                                                     | 45,793<br>(35,506 - 64,177)          | --                       | 6<br>(3 - 8)           | 993<br>(551 - 1,809)        | 15,221<br>(9,766 - 24,614)     | 29,573<br>(23,382 - 38,897)    |
| Liver cancer due to hepatitis B                                  | 5,795<br>(3,772 - 9,485)             | --                       | 3<br>(2 - 5)           | 334<br>(160 - 641)          | 2,754<br>(1,517 - 5,005)       | 2,704<br>(1,927 - 3,993)       |
| Liver cancer due to hepatitis C                                  | 33,679<br>(26,182 - 46,190)          | --                       | 1<br>(1 - 2)           | 531<br>(281 - 1,006)        | 10,368<br>(6,533 - 16,791)     | 22,779<br>(17,646 - 29,935)    |
| Liver cancer due to alcohol use                                  | 4,880<br>(3,309 - 7,185)             | --                       | --                     | 84<br>(34 - 169)            | 1,578<br>(830 - 2,764)         | 3,219<br>(2,278 - 4,629)       |
| Liver cancer due to other causes                                 | 1,439<br>(930 - 2,217)               | --                       | 1<br>(0 - 2)           | 45<br>(21 - 87)             | 521<br>(285 - 912)             | 872<br>(570 - 1,289)           |
| Larynx cancer                                                    | 1,264<br>(1,020 - 1,740)             | --                       | --                     | 20<br>(15 - 29)             | 336<br>(260 - 502)             | 908<br>(706 - 1,228)           |
| Tracheal, bronchus and lung cancer                               | 79,070<br>(71,056 - 87,460)          | --                       | --                     | 1,204<br>(1,020 - 1,423)    | 19,175<br>(17,106 - 21,389)    | 58,692<br>(51,616 - 66,319)    |
| Breast cancer                                                    | 12,312<br>(6,094 - 14,543)           | --                       | --                     | 1,481<br>(1,073 - 1,792)    | 5,292<br>(2,525 - 6,371)       | 5,540<br>(2,449 - 6,884)       |
| Cervical cancer                                                  | 4,423<br>(3,608 - 5,494)             | --                       | --                     | 541<br>(347 - 695)          | 1,309<br>(992 - 1,613)         | 2,573<br>(1,919 - 3,370)       |
| Uterine cancer                                                   | 2,187<br>(1,201 - 2,720)             | --                       | --                     | 100<br>(55 - 132)           | 842<br>(436 - 1,099)           | 1,245<br>(684 - 1,658)         |
| Prostate cancer                                                  | 12,420<br>(8,381 - 15,992)           | --                       | --                     | 14<br>(8 - 21)              | 1,225<br>(733 - 1,603)         | 11,181<br>(7,420 - 14,739)     |

Web Table 31- Japan deaths with 95% UI by age, sex, and cause in 2013

| Cause                                         | Both Sexes, All Ages           | Both Sexes, 0-4 Years | Both Sexes, 5-14 Years | Both Sexes, 15-49 Years  | Both Sexes, 50-69 Years     | Both Sexes, 70-80 Years        |
|-----------------------------------------------|--------------------------------|-----------------------|------------------------|--------------------------|-----------------------------|--------------------------------|
| Colon and rectum cancer                       | 54,933<br>(49,210 - 61,489)    | --                    | --                     | 1,332<br>(1,167 - 1,526) | 13,210<br>(11,742 - 14,734) | 40,391<br>(35,191 - 46,154)    |
| Lip and oral cavity cancer                    | 3,867<br>(3,013 - 4,674)       | --                    | --                     | 191<br>(155 - 232)       | 1,142<br>(865 - 1,377)      | 2,534<br>(1,925 - 3,241)       |
| Nasopharynx cancer                            | 800<br>(545 - 983)             | --                    | 1<br>(1 - 2)           | 65<br>(48 - 98)          | 332<br>(236 - 442)          | 402<br>(239 - 517)             |
| Other pharynx cancer                          | 2,269<br>(1,287 - 2,808)       | --                    | --                     | 72<br>(53 - 91)          | 951<br>(525 - 1,221)        | 1,246<br>(667 - 1,619)         |
| Gallbladder and biliary tract cancer          | 20,459<br>(14,564 - 25,481)    | --                    | --                     | 209<br>(164 - 309)       | 3,521<br>(2,817 - 4,815)    | 16,729<br>(11,306 - 21,484)    |
| Pancreatic cancer                             | 31,519<br>(28,172 - 34,585)    | --                    | --                     | 576<br>(490 - 665)       | 8,674<br>(7,576 - 9,698)    | 22,269<br>(19,699 - 25,050)    |
| Malignant skin melanoma                       | 765<br>(502 - 1,094)           | --                    | --                     | 55<br>(37 - 81)          | 221<br>(144 - 322)          | 489<br>(316 - 708)             |
| Non-melanoma skin cancer                      | 1,133<br>(857 - 1,536)         | --                    | --                     | 24<br>(17 - 33)          | 137<br>(97 - 194)           | 972<br>(728 - 1,338)           |
| Ovarian cancer                                | 5,331<br>(4,032 - 6,355)       | --                    | --                     | 485<br>(388 - 588)       | 1,972<br>(1,443 - 2,329)    | 2,874<br>(2,079 - 3,724)       |
| Testicular cancer                             | 117<br>(87 - 164)              | --                    | --                     | 65<br>(46 - 91)          | 23<br>(16 - 34)             | 29<br>(20 - 46)                |
| Kidney cancer                                 | 6,070<br>(4,908 - 7,382)       | 4<br>(3 - 7)          | 3<br>(2 - 4)           | 150<br>(122 - 181)       | 1,635<br>(1,359 - 1,941)    | 4,278<br>(3,222 - 5,461)       |
| Bladder cancer                                | 7,739<br>(6,027 - 9,333)       | --                    | --                     | 59<br>(47 - 72)          | 1,080<br>(855 - 1,267)      | 6,600<br>(5,034 - 8,080)       |
| Brain and nervous system cancer               | 2,451<br>(2,070 - 2,976)       | 21<br>(12 - 33)       | 55<br>(42 - 72)        | 358<br>(290 - 426)       | 844<br>(703 - 1,070)        | 1,174<br>(919 - 1,498)         |
| Thyroid cancer                                | 1,982<br>(1,480 - 2,431)       | --                    | 1<br>(0 - 1)           | 31<br>(25 - 38)          | 391<br>(308 - 474)          | 1,560<br>(1,129 - 1,993)       |
| Mesothelioma                                  | 1,355<br>(730 - 2,024)         | --                    | --                     | 37<br>(23 - 55)          | 404<br>(174 - 585)          | 913<br>(498 - 1,483)           |
| Hodgkin lymphoma                              | 198<br>(155 - 278)             | 1<br>(0 - 1)          | 1<br>(1 - 2)           | 28<br>(22 - 41)          | 52<br>(39 - 86)             | 116<br>(86 - 155)              |
| Non-Hodgkin lymphoma                          | 11,128<br>(7,191 - 13,584)     | 10<br>(5 - 19)        | 23<br>(13 - 39)        | 442<br>(318 - 638)       | 2,575<br>(1,731 - 3,425)    | 8,078<br>(4,665 - 10,301)      |
| Multiple myeloma                              | 4,713<br>(3,125 - 6,453)       | --                    | --                     | 70<br>(46 - 105)         | 1,140<br>(772 - 1,637)      | 3,503<br>(2,278 - 4,841)       |
| Leukemia                                      | 8,702<br>(7,554 - 9,604)       | 40<br>(25 - 64)       | 78<br>(61 - 97)        | 698<br>(620 - 801)       | 2,314<br>(1,989 - 2,633)    | 5,571<br>(4,563 - 6,332)       |
| Other neoplasms                               | 15,438<br>(11,756 - 18,201)    | 76<br>(50 - 105)      | 115<br>(90 - 146)      | 947<br>(792 - 1,161)     | 3,596<br>(2,977 - 5,179)    | 10,705<br>(7,136 - 13,237)     |
| Cardiovascular diseases                       | 388,110<br>(356,547 - 446,421) | 58<br>(44 - 77)       | 46<br>(37 - 55)        | 7,160<br>(6,282 - 8,073) | 44,303<br>(39,505 - 49,217) | 336,543<br>(306,779 - 391,536) |
| Rheumatic heart disease                       | 3,763<br>(2,155 - 4,863)       | 0<br>(0 - 1)          | 2<br>(1 - 2)           | 42<br>(33 - 61)          | 271<br>(201 - 402)          | 3,447<br>(1,867 - 4,546)       |
| Ischemic heart disease                        | 126,320<br>(106,011 - 156,993) | 2<br>(1 - 3)          | 6<br>(3 - 8)           | 2,840<br>(2,263 - 3,353) | 17,425<br>(14,514 - 20,252) | 106,047<br>(87,273 - 135,956)  |
| Cerebrovascular disease                       | 185,577<br>(163,109 - 228,573) | 12<br>(8 - 16)        | 13<br>(10 - 17)        | 2,926<br>(2,452 - 3,485) | 19,435<br>(16,534 - 22,528) | 163,192<br>(142,022 - 204,546) |
| Ischemic stroke                               | 117,571<br>(98,197 - 156,199)  | 1<br>(0 - 1)          | 1<br>(1 - 1)           | 222<br>(163 - 304)       | 5,482<br>(4,128 - 7,370)    | 111,865<br>(93,207 - 149,003)  |
| Hemorrhagic stroke                            | 68,007<br>(54,476 - 80,497)    | 11<br>(7 - 15)        | 12<br>(9 - 15)         | 2,704<br>(2,265 - 3,213) | 13,953<br>(11,621 - 16,282) | 51,327<br>(39,467 - 63,655)    |
| Hypertensive heart disease                    | 22,950<br>(14,945 - 38,630)    | 0<br>(0 - 1)          | 1<br>(1 - 1)           | 236<br>(149 - 433)       | 1,164<br>(759 - 1,962)      | 21,549<br>(13,989 - 36,809)    |
| Cardiomyopathy and myocarditis                | 5,655<br>(4,634 - 7,604)       | 35<br>(25 - 47)       | 19<br>(14 - 23)        | 462<br>(370 - 644)       | 1,139<br>(872 - 1,464)      | 4,000<br>(3,115 - 5,502)       |
| Atrial fibrillation and flutter               | 10,224<br>(7,657 - 13,473)     | --                    | --                     | 36<br>(28 - 47)          | 605<br>(474 - 763)          | 9,582<br>(7,120 - 12,777)      |
| Aortic aneurysm                               | 12,740<br>(7,368 - 17,386)     | --                    | --                     | 232<br>(116 - 299)       | 1,947<br>(1,094 - 2,487)    | 10,561<br>(6,021 - 14,869)     |
| Peripheral vascular disease                   | 1,080<br>(848 - 1,385)         | --                    | --                     | 3<br>(2 - 4)             | 61<br>(48 - 77)             | 1,016<br>(786 - 1,331)         |
| Endocarditis                                  | 2,193<br>(1,605 - 3,311)       | 2<br>(1 - 3)          | 1<br>(1 - 2)           | 79<br>(56 - 119)         | 361<br>(256 - 583)          | 1,750<br>(1,258 - 2,716)       |
| Other cardiovascular and circulatory diseases | 17,609<br>(10,885 - 22,824)    | 7<br>(4 - 10)         | 5<br>(3 - 7)           | 304<br>(227 - 378)       | 1,896<br>(1,456 - 2,468)    | 15,398<br>(8,726 - 20,458)     |
| Chronic respiratory diseases                  | 93,861<br>(83,260 - 110,152)   | 37<br>(24 - 52)       | 19<br>(15 - 25)        | 599<br>(502 - 856)       | 86,886<br>(5,407 - 7,982)   | 86,886<br>(76,244 - 101,787)   |
| Chronic obstructive pulmonary disease         | 57,753<br>(46,223 - 68,920)    | 13<br>(8 - 20)        | 5<br>(4 - 7)           | 303<br>(242 - 460)       | 2,982<br>(2,182 - 3,721)    | 54,449<br>(43,460 - 65,050)    |
| Pneumoconiosis                                | 1,769<br>(1,125 - 2,533)       | 1<br>(0 - 1)          | 1<br>(1 - 2)           | 25<br>(17 - 39)          | 254<br>(157 - 423)          | 1,489<br>(930 - 2,125)         |
| Silicosis                                     | 672<br>(411 - 997)             | 0<br>(0 - 0)          | 0<br>(0 - 0)           | 4<br>(3 - 7)             | 68<br>(39 - 120)            | 599<br>(359 - 893)             |
| Asbestosis                                    | 576<br>(363 - 850)             | 0<br>(0 - 0)          | 0<br>(0 - 0)           | 4<br>(2 - 6)             | 102<br>(60 - 172)           | 470<br>(283 - 701)             |
| Coal workers pneumoconiosis                   | 59<br>(37 - 88)                | 0<br>(0 - 0)          | 0<br>(0 - 0)           | 3<br>(2 - 5)             | 18<br>(11 - 32)             | 37<br>(22 - 56)                |
| Other pneumoconiosis                          | 463<br>(300 - 663)             | 0<br>(0 - 0)          | 0<br>(0 - 0)           | 14<br>(10 - 22)          | 66<br>(40 - 108)            | 382<br>(241 - 554)             |



Web Table 31- Japan deaths with 95% UI by age, sex, and cause in 2013

| Cause                                               | Both Sexes, All Ages        | Both Sexes, 0-4 Years | Both Sexes, 5-14 Years | Both Sexes, 15-49 Years  | Both Sexes, 50-69 Years  | Both Sexes, 70-80 Years     |
|-----------------------------------------------------|-----------------------------|-----------------------|------------------------|--------------------------|--------------------------|-----------------------------|
| Asthma                                              | 3,086<br>(2,182 - 4,617)    | 6<br>(4 - 10)         | 7<br>(5 - 9)           | 109<br>(88 - 156)        | 287<br>(206 - 418)       | 2,677<br>(1,829 - 4,138)    |
| Interstitial lung disease and pulmonary sarcoidosis | 29,766<br>(22,735 - 41,605) | 8<br>(5 - 13)         | 4<br>(2 - 6)           | 106<br>(80 - 161)        | 2,721<br>(2,113 - 3,846) | 26,927<br>(20,201 - 38,189) |
| Other chronic respiratory diseases                  | 1,487<br>(1,039 - 2,122)    | 9<br>(5 - 13)         | 3<br>(2 - 4)           | 55<br>(43 - 72)          | 76<br>(52 - 102)         | 1,344<br>(913 - 1,977)      |
| Cirrhosis                                           | 26,042<br>(23,346 - 28,889) | 5<br>(3 - 7)          | 4<br>(3 - 5)           | 1,615<br>(1,384 - 1,860) | 8,065<br>(7,002 - 9,218) | 16,353<br>(14,303 - 18,473) |
| Cirrhosis due to hepatitis B                        | 4,352<br>(3,072 - 6,244)    | 0<br>(0 - 0)          | 0<br>(0 - 0)           | 231<br>(158 - 329)       | 1,228<br>(848 - 1,695)   | 2,894<br>(1,881 - 4,452)    |
| Cirrhosis due to hepatitis C                        | 12,995<br>(8,265 - 16,620)  | 1<br>(0 - 1)          | 1<br>(0 - 2)           | 728<br>(464 - 1,008)     | 3,895<br>(2,612 - 5,147) | 8,371<br>(4,609 - 11,003)   |
| Cirrhosis due to alcohol use                        | 5,164<br>(3,528 - 7,241)    | --                    | --                     | 259<br>(165 - 381)       | 1,639<br>(1,112 - 2,347) | 3,266<br>(2,136 - 4,912)    |
| Cirrhosis due to other causes                       | 3,531<br>(2,156 - 5,054)    | 4<br>(3 - 6)          | 3<br>(2 - 3)           | 398<br>(240 - 561)       | 1,304<br>(720 - 1,919)   | 1,822<br>(1,109 - 2,994)    |
| Digestive diseases                                  | 28,889<br>(25,415 - 33,257) | 7<br>(4 - 11)         | 9<br>(7 - 11)          | 464<br>(402 - 560)       | 2,876<br>(2,486 - 3,322) | 25,532<br>(22,271 - 29,846) |
| Peptic ulcer disease                                | 5,279<br>(4,157 - 7,040)    | 0<br>(0 - 1)          | 1<br>(0 - 1)           | 85<br>(63 - 115)         | 633<br>(447 - 807)       | 4,560<br>(3,451 - 6,267)    |
| Gastritis and duodenitis                            | 389<br>(127 - 1,179)        | 0<br>(0 - 1)          | 1<br>(0 - 1)           | 5<br>(3 - 8)             | 11<br>(5 - 27)           | 372<br>(114 - 1,154)        |
| Appendicitis                                        | 288<br>(189 - 425)          | 0<br>(0 - 0)          | 1<br>(1 - 1)           | 12<br>(8 - 17)           | 37<br>(26 - 51)          | 237<br>(150 - 368)          |
| Paralytic ileus and intestinal obstruction          | 8,171<br>(5,502 - 11,365)   | 4<br>(2 - 6)          | 3<br>(2 - 4)           | 105<br>(69 - 145)        | 734<br>(513 - 1,057)     | 7,325<br>(4,878 - 10,289)   |
| Inguinal, femoral, and abdominal hernia             | 570<br>(269 - 844)          | 0<br>(0 - 1)          | 1<br>(0 - 1)           | 5<br>(2 - 6)             | 36<br>(22 - 53)          | 528<br>(236 - 799)          |
| Inflammatory bowel disease                          | 549<br>(333 - 1,158)        | 0<br>(0 - 1)          | 1<br>(0 - 1)           | 16<br>(11 - 28)          | 77<br>(51 - 138)         | 454<br>(261 - 1,006)        |
| Vascular intestinal disorders                       | 2,655<br>(1,419 - 4,141)    | 0<br>(0 - 1)          | 0<br>(0 - 1)           | 25<br>(13 - 44)          | 305<br>(163 - 534)       | 2,324<br>(1,204 - 3,661)    |
| Gallbladder and biliary diseases                    | 5,973<br>(4,071 - 7,561)    | 0<br>(0 - 0)          | 1<br>(0 - 1)           | 34<br>(26 - 43)          | 332<br>(241 - 419)       | 5,606<br>(3,759 - 7,167)    |
| Pancreatitis                                        | 1,760<br>(1,337 - 2,496)    | 0<br>(0 - 0)          | 1<br>(0 - 0)           | 118<br>(89 - 165)        | 336<br>(246 - 480)       | 1,305<br>(944 - 1,931)      |
| Other digestive diseases                            | 3,255<br>(2,386 - 4,089)    | 1<br>(1 - 2)          | 1<br>(1 - 2)           | 59<br>(41 - 74)          | 374<br>(258 - 466)       | 2,820<br>(2,066 - 3,609)    |
| Neurological disorders                              | 65,422<br>(56,813 - 74,455) | 41<br>(28 - 58)       | 37<br>(29 - 46)        | 557<br>(478 - 646)       | 3,433<br>(2,988 - 3,893) | 61,355<br>(52,908 - 70,140) |
| Alzheimer disease and other dementias               | 52,598<br>(44,623 - 61,116) | --                    | --                     | 1<br>(1 - 3)             | 1,179<br>(974 - 1,456)   | 51,418<br>(43,389 - 59,865) |
| Parkinson disease                                   | 7,447<br>(4,986 - 9,025)    | --                    | --                     | 35<br>(22 - 43)          | 664<br>(518 - 812)       | 6,748<br>(4,370 - 8,277)    |
| Epilepsy                                            | 905<br>(538 - 1,216)        | 10<br>(6 - 15)        | 14<br>(9 - 19)         | 193<br>(150 - 233)       | 136<br>(87 - 176)        | 552<br>(276 - 818)          |
| Multiple sclerosis                                  | 145<br>(85 - 184)           | --                    | --                     | 33<br>(19 - 44)          | 65<br>(35 - 84)          | 47<br>(29 - 67)             |
| Other neurological disorders                        | 4,326<br>(3,566 - 4,886)    | 31<br>(21 - 45)       | 22<br>(17 - 30)        | 294<br>(250 - 362)       | 1,389<br>(1,180 - 1,655) | 2,591<br>(2,008 - 2,984)    |
| Mental and substance use disorders                  | 1,423<br>(1,101 - 1,644)    | 2<br>(1 - 3)          | 0<br>(0 - 1)           | 453<br>(385 - 575)       | 466<br>(332 - 576)       | 502<br>(339 - 633)          |
| Schizophrenia                                       | 393<br>(197 - 530)          | --                    | --                     | 60<br>(36 - 81)          | 146<br>(72 - 204)        | 188<br>(76 - 288)           |
| Alcohol use disorders                               | 463<br>(303 - 675)          | --                    | --                     | 106<br>(76 - 193)        | 234<br>(147 - 341)       | 122<br>(68 - 160)           |
| Drug use disorders                                  | 553<br>(477 - 643)          | 2<br>(1 - 3)          | --                     | 273<br>(230 - 326)       | 86<br>(70 - 102)         | 192<br>(146 - 250)          |
| Opioid use disorders                                | 153<br>(128 - 179)          | 1<br>(0 - 1)          | --                     | 75<br>(63 - 91)          | 21<br>(17 - 25)          | 56<br>(41 - 74)             |
| Cocaine use disorders                               | 47<br>(39 - 57)             | 0<br>(0 - 0)          | --                     | 27<br>(22 - 33)          | 6<br>(5 - 8)             | 14<br>(10 - 21)             |
| Amphetamine use disorders                           | 44<br>(36 - 53)             | 0<br>(0 - 0)          | --                     | 21<br>(17 - 26)          | 7<br>(6 - 9)             | 15<br>(10 - 21)             |
| Other drug use disorders                            | 310<br>(265 - 362)          | 1<br>(1 - 1)          | --                     | 150<br>(125 - 181)       | 52<br>(41 - 62)          | 107<br>(81 - 140)           |
| Eating disorders                                    | 14<br>(9 - 20)              | --                    | 0<br>(0 - 1)           | 13<br>(8 - 20)           | --                       | --                          |
| Anorexia nervosa                                    | 14<br>(9 - 20)              | --                    | 0<br>(0 - 1)           | 13<br>(8 - 20)           | --                       | --                          |
| Diabetes, urogenital, blood, and endocrine diseases | 63,383<br>(54,267 - 74,356) | 99<br>(71 - 134)      | 47<br>(37 - 61)        | 1,148<br>(997 - 1,562)   | 7,123<br>(6,214 - 8,799) | 54,967<br>(46,334 - 63,907) |
| Diabetes mellitus                                   | 9,587<br>(8,311 - 11,401)   | 1<br>(1 - 2)          | 2<br>(1 - 2)           | 276<br>(237 - 324)       | 1,620<br>(1,386 - 1,901) | 7,687<br>(6,474 - 9,302)    |
| Acute glomerulonephritis                            | 149<br>(103 - 226)          | 0<br>(0 - 1)          | 1<br>(1 - 1)           | 7<br>(5 - 9)             | 17<br>(12 - 24)          | 124<br>(80 - 198)           |
| Chronic kidney disease                              | 38,337<br>(32,237 - 49,090) | 7<br>(5 - 10)         | 6<br>(5 - 9)           | 363<br>(289 - 666)       | 4,088<br>(3,397 - 5,749) | 33,873<br>(28,013 - 42,574) |
| Chronic kidney disease due to diabetes mellitus     | 15,006<br>(11,899 - 22,313) | 1<br>(0 - 1)          | 1<br>(1 - 2)           | 193<br>(142 - 354)       | 2,360<br>(1,826 - 3,286) | 12,452<br>(9,617 - 18,791)  |

Web Table 31- Japan deaths with 95% UI by age, sex, and cause in 2013

| Cause                                               | Both Sexes, All Ages        | Both Sexes, 0-4 Years  | Both Sexes, 5-14 Years | Both Sexes, 15-49 Years     | Both Sexes, 50-69 Years     | Both Sexes, 70-80 Years     |
|-----------------------------------------------------|-----------------------------|------------------------|------------------------|-----------------------------|-----------------------------|-----------------------------|
| Chronic kidney disease due to hypertension          | 5,328<br>(3,458 - 8,600)    | 2<br>(1 - 3)           | 1<br>(1 - 1)           | 37<br>(23 - 85)             | 243<br>(156 - 480)          | 5,045<br>(3,205 - 8,207)    |
| Chronic kidney disease due to glomerulonephritis    | 1,866<br>(1,235 - 3,022)    | 2<br>(1 - 2)           | 2<br>(1 - 2)           | 33<br>(23 - 54)             | 190<br>(131 - 305)          | 1,640<br>(1,042 - 2,694)    |
| Chronic kidney disease due to other causes          | 16,137<br>(9,783 - 22,542)  | 4<br>(2 - 6)           | 3<br>(2 - 4)           | 101<br>(58 - 229)           | 1,294<br>(711 - 2,246)      | 14,736<br>(8,758 - 20,395)  |
| Urinary diseases and male infertility               | 9,238<br>(5,333 - 12,113)   | 6<br>(3 - 8)           | 2<br>(1 - 2)           | 69<br>(44 - 84)             | 561<br>(320 - 690)          | 8,601<br>(4,907 - 11,416)   |
| Interstitial nephritis and urinary tract infections | 8,095<br>(4,586 - 10,716)   | 3<br>(2 - 5)           | 1<br>(0 - 1)           | 50<br>(32 - 62)             | 461<br>(261 - 573)          | 7,581<br>(4,199 - 10,121)   |
| Urolithiasis                                        | 463<br>(182 - 824)          | --                     | 1<br>(0 - 1)           | 9<br>(5 - 14)               | 42<br>(20 - 70)             | 412<br>(150 - 750)          |
| Other urinary diseases                              | 680<br>(320 - 1,052)        | 2<br>(1 - 3)           | 0<br>(0 - 1)           | 11<br>(6 - 14)              | 58<br>(28 - 88)             | 608<br>(275 - 968)          |
| Gynecological diseases                              | 23<br>(12 - 35)             | --                     | --                     | 3<br>(2 - 3)                | 2<br>(1 - 2)                | 19<br>(9 - 30)              |
| Uterine fibroids                                    | 6<br>(3 - 10)               | --                     | --                     | 0<br>(0 - 1)                | 0<br>(0 - 1)                | 5<br>(3 - 9)                |
| Polycystic ovarian syndrome                         | 0<br>(0 - 0)                | --                     | --                     | 0<br>(0 - 0)                | 0<br>(0 - 0)                | --                          |
| Endometriosis                                       | 0<br>(0 - 1)                | --                     | --                     | 0<br>(0 - 1)                | 0<br>(0 - 0)                | --                          |
| Genital prolapse                                    | 5<br>(3 - 9)                | --                     | --                     | 0<br>(0 - 0)                | 0<br>(0 - 0)                | 5<br>(2 - 8)                |
| Other gynecological diseases                        | 10<br>(6 - 16)              | --                     | --                     | 1<br>(1 - 2)                | 1<br>(1 - 1)                | 8<br>(4 - 13)               |
| Hemoglobinopathies and hemolytic anemias            | 1,676<br>(1,226 - 2,412)    | 25<br>(16 - 41)        | 16<br>(11 - 25)        | 203<br>(139 - 321)          | 217<br>(161 - 332)          | 1,215<br>(841 - 1,774)      |
| Thalassemias                                        | 140<br>(102 - 215)          | 17<br>(11 - 29)        | 12<br>(8 - 19)         | 92<br>(63 - 145)            | 13<br>(10 - 19)             | 6<br>(4 - 9)                |
| Sickle cell disorders                               | 4<br>(3 - 7)                | 1<br>(0 - 1)           | 0<br>(0 - 1)           | 2<br>(1 - 3)                | 1<br>(1 - 2)                | 0<br>(0 - 1)                |
| G6PD deficiency                                     | 4<br>(3 - 5)                | 0<br>(0 - 0)           | 0<br>(0 - 0)           | 1<br>(1 - 2)                | 1<br>(1 - 2)                | 1<br>(1 - 1)                |
| Other hemoglobinopathies and hemolytic anemias      | 1,528<br>(1,099 - 2,202)    | 7<br>(5 - 12)          | 4<br>(2 - 6)           | 107<br>(73 - 174)           | 202<br>(149 - 310)          | 1,207<br>(835 - 1,764)      |
| Endocrine, metabolic, blood, and immune disorders   | 4,374<br>(2,985 - 5,465)    | 59<br>(38 - 83)        | 20<br>(14 - 28)        | 228<br>(183 - 302)          | 618<br>(457 - 803)          | 3,448<br>(2,173 - 4,487)    |
| Musculoskeletal disorders                           | 5,226<br>(4,228 - 6,574)    | --                     | 5<br>(4 - 7)           | 164<br>(135 - 293)          | 961<br>(796 - 1,634)        | 4,095<br>(3,188 - 5,087)    |
| Rheumatoid arthritis                                | 2,169<br>(1,605 - 3,032)    | --                     | 1<br>(1 - 1)           | 17<br>(13 - 27)             | 331<br>(242 - 530)          | 1,821<br>(1,300 - 2,533)    |
| Other musculoskeletal disorders                     | 3,056<br>(2,379 - 3,896)    | --                     | 4<br>(3 - 6)           | 147<br>(120 - 271)          | 631<br>(498 - 1,011)        | 2,275<br>(1,623 - 2,893)    |
| Other non-communicable diseases                     | 4,744<br>(4,091 - 5,558)    | 1,279<br>(989 - 1,637) | 79<br>(62 - 101)       | 299<br>(257 - 363)          | 437<br>(381 - 505)          | 2,650<br>(2,133 - 3,308)    |
| Congenital anomalies                                | 2,703<br>(2,255 - 3,179)    | 1,137<br>(868 - 1,484) | 77<br>(61 - 99)        | 274<br>(234 - 336)          | 288<br>(244 - 346)          | 927<br>(655 - 1,183)        |
| Neural tube defects                                 | 27<br>(19 - 35)             | 15<br>(10 - 22)        | 1<br>(1 - 2)           | 5<br>(3 - 7)                | 3<br>(2 - 5)                | 2<br>(1 - 3)                |
| Congenital heart anomalies                          | 1,189<br>(967 - 1,432)      | 497<br>(375 - 658)     | 41<br>(31 - 56)        | 156<br>(127 - 193)          | 133<br>(104 - 165)          | 363<br>(250 - 485)          |
| Cleft lip and cleft palate                          | 4<br>(1 - 12)               | 4<br>(1 - 12)          | --                     | --                          | --                          | --                          |
| Down syndrome                                       | 86<br>(47 - 166)            | 41<br>(17 - 92)        | 6<br>(3 - 13)          | 24<br>(14 - 46)             | 11<br>(6 - 20)              | 4<br>(2 - 7)                |
| Chromosomal unbalanced rearrangements               | 213<br>(140 - 298)          | 195<br>(126 - 278)     | 4<br>(2 - 6)           | 8<br>(5 - 11)               | 4<br>(3 - 5)                | 3<br>(2 - 4)                |
| Other congenital anomalies                          | 1,185<br>(957 - 1,425)      | 386<br>(282 - 522)     | 25<br>(17 - 36)        | 80<br>(62 - 104)            | 138<br>(110 - 173)          | 556<br>(396 - 730)          |
| Skin and subcutaneous diseases                      | 1,902<br>(1,444 - 2,484)    | 4<br>(3 - 5)           | 2<br>(1 - 2)           | 25<br>(20 - 31)             | 149<br>(121 - 179)          | 1,724<br>(1,273 - 2,311)    |
| Cellulitis                                          | 492<br>(249 - 757)          | 1<br>(1 - 2)           | 0<br>(0 - 1)           | 10<br>(7 - 14)              | 67<br>(46 - 89)             | 413<br>(185 - 669)          |
| Pyoderma                                            | 478<br>(325 - 690)          | 1<br>(1 - 2)           | 0<br>(0 - 1)           | 7<br>(5 - 9)                | 54<br>(39 - 72)             | 416<br>(264 - 625)          |
| Decubitus ulcer                                     | 655<br>(408 - 1,032)        | 0<br>(0 - 1)           | 0<br>(0 - 1)           | 3<br>(2 - 4)                | 9<br>(6 - 13)               | 642<br>(399 - 1,020)        |
| Other skin and subcutaneous diseases                | 277<br>(139 - 540)          | 1<br>(1 - 2)           | 0<br>(0 - 1)           | 5<br>(3 - 6)                | 19<br>(12 - 27)             | 253<br>(115 - 512)          |
| Sudden infant death syndrome                        | 139<br>(78 - 274)           | 139<br>(78 - 274)      | --                     | --                          | --                          | --                          |
| Injuries                                            | 82,832<br>(69,378 - 93,622) | 432<br>(317 - 592)     | 342<br>(287 - 406)     | 15,855<br>(13,651 - 17,514) | 18,880<br>(16,138 - 21,349) | 47,324<br>(36,809 - 55,656) |
| Transport injuries                                  | 10,561<br>(9,357 - 12,091)  | 69<br>(46 - 99)        | 110<br>(86 - 139)      | 2,091<br>(1,812 - 2,549)    | 2,665<br>(2,306 - 3,109)    | 5,626<br>(4,789 - 6,568)    |
| Road injuries                                       | 9,876<br>(8,750 - 11,366)   | 62<br>(42 - 89)        | 103<br>(79 - 130)      | 1,959<br>(1,689 - 2,403)    | 2,470<br>(2,125 - 2,891)    | 5,282<br>(4,512 - 6,168)    |
| Pedestrian road injuries                            | 3,889<br>(2,923 - 5,189)    | 39<br>(25 - 60)        | 50<br>(35 - 67)        | 365<br>(219 - 554)          | 887<br>(625 - 1,217)        | 2,549<br>(1,919 - 3,484)    |

Web Table 31- Japan deaths with 95% UI by age, sex, and cause in 2013

| Cause                                           | Both Sexes, All Ages        | Both Sexes, 0-4 Years | Both Sexes, 5-14 Years | Both Sexes, 15-49 Years    | Both Sexes, 50-69 Years    | Both Sexes, 70-80 Years     |
|-------------------------------------------------|-----------------------------|-----------------------|------------------------|----------------------------|----------------------------|-----------------------------|
| Cyclist road injuries                           | 2,156<br>(1,576 - 2,822)    | 3<br>(1 - 7)          | 30<br>(20 - 43)        | 143<br>(90 - 195)          | 481<br>(334 - 674)         | 1,499<br>(1,052 - 2,038)    |
| Motorcyclist road injuries                      | 1,356<br>(934 - 1,843)      | 1<br>(0 - 1)          | 4<br>(2 - 7)           | 532<br>(329 - 704)         | 383<br>(239 - 552)         | 438<br>(278 - 704)          |
| Motor vehicle road injuries                     | 2,456<br>(1,789 - 3,178)    | 19<br>(11 - 29)       | 18<br>(11 - 27)        | 913<br>(696 - 1,307)       | 715<br>(493 - 948)         | 790<br>(430 - 1,104)        |
| Other road injuries                             | 19<br>(9 - 27)              | 0<br>(0 - 1)          | 1<br>(0 - 2)           | 6<br>(3 - 10)              | 4<br>(2 - 7)               | 7<br>(3 - 13)               |
| Other transport injuries                        | 685<br>(506 - 884)          | 6<br>(3 - 11)         | 8<br>(5 - 12)          | 132<br>(96 - 178)          | 195<br>(128 - 260)         | 344<br>(221 - 494)          |
| Unintentional injuries                          | 41,002<br>(29,757 - 49,963) | 314<br>(224 - 439)    | 155<br>(123 - 203)     | 2,077<br>(1,751 - 2,470)   | 5,496<br>(4,271 - 6,469)   | 32,960<br>(22,873 - 41,049) |
| Falls                                           | 11,633<br>(8,610 - 14,071)  | 29<br>(20 - 42)       | 17<br>(12 - 23)        | 507<br>(425 - 659)         | 1,431<br>(1,158 - 1,717)   | 9,648<br>(6,851 - 12,060)   |
| Drowning                                        | 6,633<br>(4,356 - 8,376)    | 81<br>(43 - 168)      | 79<br>(57 - 125)       | 565<br>(435 - 836)         | 1,254<br>(806 - 1,627)     | 4,655<br>(2,853 - 6,103)    |
| Fire, heat, and hot substances                  | 2,491<br>(1,848 - 3,020)    | 26<br>(17 - 40)       | 20<br>(14 - 28)        | 200<br>(149 - 246)         | 435<br>(291 - 569)         | 1,811<br>(1,343 - 2,276)    |
| Poisonings                                      | 771<br>(540 - 932)          | 4<br>(2 - 6)          | 4<br>(3 - 5)           | 169<br>(107 - 209)         | 160<br>(104 - 200)         | 434<br>(279 - 566)          |
| Exposure to mechanical forces                   | 1,170<br>(995 - 1,394)      | 53<br>(33 - 88)       | 10<br>(7 - 13)         | 205<br>(165 - 353)         | 352<br>(285 - 505)         | 551<br>(356 - 688)          |
| Unintentional firearm injuries                  | 45<br>(34 - 59)             | 1<br>(0 - 1)          | 1<br>(1 - 1)           | 9<br>(7 - 11)              | 9<br>(6 - 12)              | 25<br>(16 - 38)             |
| Unintentional suffocation                       | 300<br>(140 - 408)          | 45<br>(27 - 80)       | 3<br>(2 - 5)           | 12<br>(9 - 17)             | 26<br>(16 - 37)            | 213<br>(58 - 323)           |
| Other exposure to mechanical forces             | 826<br>(705 - 1,143)        | 7<br>(4 - 10)         | 6<br>(4 - 9)           | 184<br>(145 - 331)         | 317<br>(253 - 475)         | 312<br>(248 - 386)          |
| Adverse effects of medical treatment            | 2,051<br>(1,117 - 2,761)    | 15<br>(7 - 23)        | 6<br>(3 - 9)           | 87<br>(51 - 116)           | 324<br>(173 - 438)         | 1,620<br>(845 - 2,227)      |
| Animal contact                                  | 84<br>(60 - 165)            | 1<br>(0 - 1)          | 1<br>(1 - 2)           | 8<br>(6 - 14)              | 21<br>(15 - 47)            | 53<br>(35 - 103)            |
| Venomous animal contact                         | 47<br>(32 - 100)            | 0<br>(0 - 1)          | 1<br>(0 - 1)           | 4<br>(3 - 7)               | 13<br>(8 - 31)             | 29<br>(18 - 62)             |
| Non-venomous animal contact                     | 38<br>(24 - 66)             | 0<br>(0 - 1)          | 1<br>(0 - 1)           | 4<br>(3 - 7)               | 9<br>(5 - 15)              | 24<br>(14 - 44)             |
| Foreign body                                    | 15,888<br>(8,018 - 22,181)  | 102<br>(65 - 150)     | 16<br>(10 - 23)        | 293<br>(167 - 376)         | 1,443<br>(778 - 1,878)     | 14,034<br>(6,914 - 20,131)  |
| Pulmonary aspiration and foreign body in airway | 15,860<br>(7,995 - 22,145)  | 101<br>(64 - 150)     | 15<br>(9 - 21)         | 288<br>(162 - 370)         | 1,438<br>(775 - 1,873)     | 14,017<br>(6,900 - 20,113)  |
| Foreign body in other body part                 | 28<br>(17 - 41)             | 1<br>(0 - 1)          | 1<br>(1 - 1)           | 5<br>(4 - 7)               | 5<br>(3 - 6)               | 16<br>(8 - 29)              |
| Other unintentional injuries                    | 279<br>(220 - 352)          | 4<br>(3 - 6)          | 2<br>(1 - 3)           | 43<br>(31 - 61)            | 76<br>(51 - 110)           | 155<br>(108 - 212)          |
| Self-harm and interpersonal violence            | 31,269<br>(26,062 - 34,746) | 49<br>(35 - 81)       | 77<br>(59 - 99)        | 11,686<br>(8,773 - 13,229) | 10,719<br>(8,150 - 12,281) | 8,737<br>(7,359 - 11,404)   |
| Self-harm                                       | 30,314<br>(24,978 - 33,751) | --                    | 50<br>(32 - 66)        | 11,395<br>(8,438 - 12,938) | 10,493<br>(7,936 - 12,063) | 8,375<br>(7,036 - 11,032)   |
| Interpersonal violence                          | 955<br>(768 - 1,285)        | 49<br>(35 - 81)       | 27<br>(20 - 43)        | 291<br>(233 - 456)         | 225<br>(175 - 317)         | 362<br>(254 - 460)          |
| Assault by firearm                              | 79<br>(37 - 129)            | 1<br>(0 - 2)          | 1<br>(0 - 2)           | 23<br>(11 - 48)            | 21<br>(9 - 35)             | 34<br>(14 - 55)             |
| Assault by sharp object                         | 266<br>(200 - 422)          | 4<br>(2 - 9)          | 4<br>(2 - 7)           | 101<br>(72 - 177)          | 76<br>(54 - 120)           | 81<br>(52 - 118)            |
| Assault by other means                          | 610<br>(476 - 814)          | 44<br>(31 - 72)       | 23<br>(16 - 35)        | 167<br>(126 - 246)         | 129<br>(94 - 187)          | 248<br>(168 - 328)          |
| Forces of nature, war, and legal intervention   | 0<br>(0 - 0)                | 0<br>(0 - 0)          | --                     | --                         | --                         | 0<br>(0 - 0)                |
| Exposure to forces of nature                    | 0<br>(0 - 0)                | 0<br>(0 - 0)          | --                     | --                         | --                         | 0<br>(0 - 0)                |

Web Table 31- Japan deaths with 95% UI by age, sex, and cause in 2013

| Cause                                                             | Males, All Ages                | Males, 0-4 Years         | Males, 5-14 Years  | Males, 15-49 Years          | Males, 50-69 Years             | Males, 70-80 Years             |
|-------------------------------------------------------------------|--------------------------------|--------------------------|--------------------|-----------------------------|--------------------------------|--------------------------------|
| All causes                                                        | 687,988<br>(642,977 - 734,701) | 1,739<br>(1,337 - 2,252) | 580<br>(489 - 683) | 27,815<br>(25,123 - 30,721) | 144,747<br>(132,453 - 157,728) | 513,107<br>(483,030 - 543,699) |
| Communicable, maternal, neonatal, and nutritional diseases        | 81,533<br>(65,181 - 98,358)    | 581<br>(435 - 757)       | 60<br>(42 - 81)    | 868<br>(710 - 1,037)        | 6,972<br>(5,355 - 8,787)       | 73,054<br>(57,902 - 89,919)    |
| HIV/AIDS and tuberculosis                                         | 2,951<br>(2,370 - 4,008)       | 0<br>(0 - 1)             | 0<br>(0 - 1)       | 79<br>(65 - 107)            | 361<br>(275 - 675)             | 2,510<br>(1,969 - 3,299)       |
| Tuberculosis                                                      | 2,906<br>(2,327 - 3,961)       | 0<br>(0 - 1)             | 0<br>(0 - 1)       | 50<br>(38 - 80)             | 349<br>(262 - 658)             | 2,507<br>(1,967 - 3,296)       |
| HIV/AIDS                                                          | 45<br>(30 - 67)                | 0<br>(0 - 0)             | 0<br>(0 - 0)       | 29<br>(22 - 38)             | 12<br>(6 - 25)                 | 3<br>(1 - 7)                   |
| HIV/AIDS resulting in mycobacterial infection                     | 3<br>(2 - 4)                   | 0<br>(0 - 0)             | 0<br>(0 - 0)       | 2<br>(1 - 2)                | 1<br>(0 - 2)                   | 0<br>(0 - 0)                   |
| HIV/AIDS resulting in other diseases                              | 42<br>(28 - 63)                | 0<br>(0 - 0)             | 0<br>(0 - 0)       | 27<br>(20 - 36)             | 11<br>(6 - 24)                 | 3<br>(1 - 7)                   |
| Diarrhea, lower respiratory, and other common infectious diseases | 75,138<br>(59,282 - 92,371)    | 148<br>(93 - 205)        | 49<br>(34 - 70)    | 648<br>(509 - 806)          | 5,978<br>(4,492 - 7,718)       | 68,315<br>(53,321 - 85,399)    |
| Diarrheal diseases                                                | 1,284<br>(899 - 1,838)         | 16<br>(9 - 26)           | 2<br>(1 - 3)       | 28<br>(21 - 36)             | 153<br>(107 - 204)             | 1,085<br>(716 - 1,618)         |
| Intestinal infectious diseases                                    | 64<br>(24 - 140)               | 10<br>(3 - 22)           | 22<br>(3 - 23)     | 22<br>(7 - 50)              | 10<br>(3 - 26)                 | 13<br>(4 - 29)                 |
| Typhoid fever                                                     | 39<br>(12 - 90)                | 5<br>(2 - 13)            | 6<br>(2 - 15)      | 14<br>(4 - 33)              | 6<br>(1 - 18)                  | 7<br>(1 - 18)                  |
| Paratyphoid fever                                                 | 18<br>(5 - 45)                 | 3<br>(1 - 7)             | 3<br>(1 - 8)       | 6<br>(2 - 16)               | 3<br>(0 - 7)                   | 3<br>(1 - 9)                   |
| Other intestinal infectious diseases                              | 8<br>(3 - 15)                  | 1<br>(0 - 5)             | 0<br>(0 - 2)       | 2<br>(0 - 5)                | 2<br>(0 - 5)                   | 3<br>(0 - 7)                   |
| Lower respiratory infections                                      | 73,070<br>(57,096 - 90,442)    | 93<br>(56 - 136)         | 28<br>(18 - 41)    | 510<br>(377 - 655)          | 5,632<br>(4,171 - 7,364)       | 66,807<br>(51,776 - 84,032)    |
| Upper respiratory infections                                      | 13<br>(3 - 41)                 | 0<br>(0 - 0)             | 0<br>(0 - 0)       | 1<br>(0 - 2)                | 3<br>(0 - 9)                   | 9<br>(0 - 37)                  |
| Otitis media                                                      | 19<br>(15 - 25)                | 0<br>(0 - 1)             | 1<br>(0 - 1)       | 3<br>(2 - 3)                | 3<br>(2 - 4)                   | 12<br>(8 - 18)                 |
| Meningitis                                                        | 352<br>(291 - 414)             | 16<br>(9 - 25)           | 3<br>(2 - 4)       | 36<br>(29 - 44)             | 92<br>(72 - 112)               | 206<br>(159 - 256)             |
| Pneumococcal meningitis                                           | 72<br>(50 - 102)               | 2<br>(1 - 4)             | 1<br>(0 - 1)       | 7<br>(4 - 11)               | 19<br>(10 - 31)                | 43<br>(22 - 65)                |
| H influenzae type B meningitis                                    | 55<br>(36 - 74)                | 7<br>(4 - 12)            | 1<br>(1 - 2)       | 6<br>(4 - 8)                | 12<br>(6 - 19)                 | 29<br>(17 - 44)                |
| Meningococcal meningitis                                          | 71<br>(41 - 107)               | 0<br>(0 - 1)             | 0<br>(0 - 0)       | 6<br>(3 - 11)               | 16<br>(4 - 28)                 | 48<br>(25 - 76)                |
| Other meningitis                                                  | 154<br>(119 - 195)             | 6<br>(3 - 11)            | 1<br>(1 - 2)       | 16<br>(11 - 22)             | 45<br>(31 - 62)                | 86<br>(56 - 119)               |
| Encephalitis                                                      | 262<br>(178 - 392)             | 9<br>(4 - 16)            | 4<br>(2 - 7)       | 40<br>(28 - 66)             | 77<br>(50 - 122)               | 132<br>(78 - 198)              |
| Diphtheria                                                        | 1<br>(0 - 3)                   | 0<br>(0 - 1)             | 0<br>(0 - 1)       | 0<br>(0 - 2)                | 0<br>(0 - 2)                   | --                             |
| Whooping cough                                                    | 5<br>(3 - 7)                   | 1<br>(0 - 3)             | 1<br>(0 - 1)       | 2<br>(2 - 3)                | 1<br>(0 - 1)                   | --                             |
| Tetanus                                                           | 9<br>(5 - 15)                  | 0<br>(0 - 0)             | 1<br>(0 - 1)       | 2<br>(1 - 3)                | 2<br>(1 - 3)                   | 4<br>(2 - 9)                   |
| Measles                                                           | 1<br>(0 - 1)                   | 0<br>(0 - 1)             | 0<br>(0 - 0)       | 0<br>(0 - 0)                | 0<br>(0 - 0)                   | --                             |
| Varicella and herpes zoster                                       | 58<br>(8 - 237)                | 2<br>(0 - 8)             | 1<br>(0 - 3)       | 4<br>(1 - 12)               | 5<br>(0 - 17)                  | 46<br>(1 - 227)                |
| Neglected tropical diseases and malaria                           | 108<br>(52 - 139)              | 1<br>(1 - 2)             | 2<br>(1 - 2)       | 10<br>(8 - 11)              | 28<br>(14 - 39)                | 67<br>(28 - 97)                |
| Cysticercosis                                                     | 1<br>(1 - 1)                   | 0<br>(0 - 0)             | 0<br>(0 - 0)       | 0<br>(0 - 0)                | 0<br>(0 - 0)                   | 0<br>(0 - 0)                   |
| Cystic echinococcosis                                             | 4<br>(4 - 5)                   | 0<br>(0 - 0)             | 0<br>(0 - 0)       | 1<br>(1 - 1)                | 2<br>(1 - 2)                   | 2<br>(2 - 2)                   |
| Dengue                                                            | 6<br>(4 - 7)                   | 0<br>(0 - 0)             | 1<br>(0 - 1)       | 3<br>(2 - 3)                | 2<br>(1 - 2)                   | 1<br>(1 - 1)                   |
| Rabies                                                            | 6<br>(3 - 7)                   | 0<br>(0 - 0)             | 1<br>(0 - 1)       | 2<br>(1 - 3)                | 2<br>(1 - 2)                   | 1<br>(0 - 1)                   |
| Other neglected tropical diseases                                 | 91<br>(35 - 123)               | 0<br>(0 - 1)             | 1<br>(0 - 1)       | 3<br>(3 - 4)                | 23<br>(10 - 34)                | 63<br>(23 - 93)                |
| Maternal disorders                                                | --                             | --                       | --                 | --                          | --                             | --                             |
| Maternal hemorrhage                                               | --                             | --                       | --                 | --                          | --                             | --                             |
| Maternal sepsis and other maternal infections                     | --                             | --                       | --                 | --                          | --                             | --                             |
| Maternal hypertensive disorders                                   | --                             | --                       | --                 | --                          | --                             | --                             |
| Maternal obstructed labor                                         | --                             | --                       | --                 | --                          | --                             | --                             |
| Maternal abortive outcome                                         | --                             | --                       | --                 | --                          | --                             | --                             |
| Indirect maternal deaths                                          | --                             | --                       | --                 | --                          | --                             | --                             |

Web Table 31- Japan deaths with 95% UI by age, sex, and cause in 2013

| Cause                                                            | Males, All Ages                | Males, 0-4 Years     | Males, 5-14 Years  | Males, 15-49 Years          | Males, 50-69 Years             | Males, 70-80 Years             |
|------------------------------------------------------------------|--------------------------------|----------------------|--------------------|-----------------------------|--------------------------------|--------------------------------|
| Late maternal deaths                                             | --                             | --                   | --                 | --                          | --                             | --                             |
| Maternal deaths aggravated by HIV/AIDS                           | --                             | --                   | --                 | --                          | --                             | --                             |
| Other maternal disorders                                         | --                             | --                   | --                 | --                          | --                             | --                             |
| Neonatal disorders                                               | 399<br>(298 - 522)             | 399<br>(298 - 522)   | --                 | --                          | --                             | --                             |
| Neonatal preterm birth complications                             | 163<br>(105 - 245)             | 163<br>(105 - 245)   | --                 | --                          | --                             | --                             |
| Neonatal encephalopathy due to birth asphyxia and trauma         | 73<br>(44 - 109)               | 73<br>(44 - 109)     | --                 | --                          | --                             | --                             |
| Neonatal sepsis and other neonatal infections                    | 50<br>(24 - 93)                | 50<br>(24 - 93)      | --                 | --                          | --                             | --                             |
| Hemolytic disease and other neonatal jaundice                    | 2<br>(1 - 4)                   | 2<br>(1 - 4)         | --                 | --                          | --                             | --                             |
| Other neonatal disorders                                         | 111<br>(67 - 167)              | 111<br>(67 - 167)    | --                 | --                          | --                             | --                             |
| Nutritional deficiencies                                         | 1,477<br>(788 - 2,016)         | 3<br>(2 - 5)         | 1<br>(0 - 1)       | 69<br>(37 - 98)             | 272<br>(130 - 364)             | 1,132<br>(610 - 1,649)         |
| Protein-energy malnutrition                                      | 863<br>(296 - 1,245)           | 2<br>(1 - 3)         | 0<br>(0 - 1)       | 42<br>(16 - 59)             | 179<br>(59 - 249)              | 641<br>(206 - 960)             |
| Iodine deficiency                                                | 4<br>(0 - 22)                  | 0<br>(0 - 0)         | 0<br>(0 - 0)       | 0<br>(0 - 1)                | 1<br>(0 - 4)                   | 3<br>(0 - 21)                  |
| Iron-deficiency anemia                                           | 402<br>(173 - 845)             | 0<br>(0 - 1)         | 0<br>(0 - 0)       | 17<br>(8 - 34)              | 49<br>(21 - 101)               | 335<br>(137 - 722)             |
| Other nutritional deficiencies                                   | 209<br>(94 - 440)              | 1<br>(0 - 2)         | 0<br>(0 - 1)       | 10<br>(4 - 20)              | 43<br>(15 - 77)                | 154<br>(67 - 345)              |
| Other communicable, maternal, neonatal, and nutritional diseases | 1,461<br>(712 - 1,974)         | 29<br>(6 - 105)      | 7<br>(4 - 14)      | 63<br>(44 - 79)             | 333<br>(175 - 445)             | 1,029<br>(452 - 1,459)         |
| Sexually transmitted diseases excluding HIV                      | 32<br>(10 - 119)               | 16<br>(0 - 93)       | 1<br>(0 - 8)       | 2<br>(1 - 3)                | 5<br>(3 - 11)                  | 7<br>(3 - 18)                  |
| Syphilis                                                         | 29<br>(7 - 116)                | 16<br>(0 - 93)       | 1<br>(0 - 8)       | 1<br>(1 - 2)                | 4<br>(2 - 8)                   | 6<br>(2 - 15)                  |
| Chlamydial infection                                             | --                             | --                   | --                 | --                          | --                             | --                             |
| Gonococcal infection                                             | 2<br>(2 - 4)                   | --                   | 0<br>(0 - 0)       | 1<br>(0 - 1)                | 1<br>(0 - 2)                   | 1<br>(0 - 2)                   |
| Other sexually transmitted diseases                              | 1<br>(1 - 2)                   | --                   | 0<br>(0 - 0)       | 0<br>(0 - 1)                | 0<br>(0 - 1)                   | 0<br>(0 - 1)                   |
| Hepatitis                                                        | 125<br>(98 - 158)              | 1<br>(0 - 1)         | 1<br>(0 - 1)       | 17<br>(12 - 25)             | 49<br>(34 - 67)                | 58<br>(39 - 81)                |
| Acute hepatitis A                                                | 10<br>(3 - 23)                 | 0<br>(0 - 1)         | 0<br>(0 - 1)       | 3<br>(1 - 6)                | 4<br>(1 - 10)                  | 3<br>(1 - 9)                   |
| Acute hepatitis B                                                | 111<br>(84 - 143)              | 0<br>(0 - 1)         | 0<br>(0 - 1)       | 14<br>(9 - 20)              | 43<br>(29 - 61)                | 54<br>(37 - 77)                |
| Acute hepatitis C                                                | 4<br>(1 - 10)                  | --                   | 0<br>(0 - 0)       | 1<br>(0 - 3)                | 2<br>(0 - 5)                   | 1<br>(0 - 3)                   |
| Other infectious diseases                                        | 1,304<br>(562 - 1,799)         | 12<br>(5 - 19)       | 5<br>(3 - 8)       | 43<br>(26 - 57)             | 279<br>(122 - 387)             | 965<br>(382 - 1,392)           |
| Non-communicable diseases                                        | 555,555<br>(515,092 - 598,455) | 905<br>(690 - 1,176) | 295<br>(244 - 358) | 15,044<br>(13,317 - 17,262) | 123,926<br>(112,986 - 135,446) | 415,386<br>(386,923 - 446,080) |
| Neoplasms                                                        | 245,448<br>(223,912 - 269,539) | 82<br>(52 - 120)     | 158<br>(125 - 203) | 6,073<br>(5,172 - 7,277)    | 71,817<br>(63,616 - 81,088)    | 167,318<br>(152,950 - 183,555) |
| Esophageal cancer                                                | 11,639<br>(9,807 - 15,550)     | --                   | --                 | 193<br>(138 - 347)          | 4,809<br>(3,981 - 6,606)       | 6,637<br>(5,447 - 8,925)       |
| Stomach cancer                                                   | 39,039<br>(33,873 - 45,455)    | --                   | --                 | 798<br>(644 - 956)          | 10,696<br>(8,998 - 12,453)     | 27,545<br>(22,961 - 33,611)    |
| Liver cancer                                                     | 31,346<br>(22,427 - 48,653)    | --                   | 4<br>(2 - 6)       | 873<br>(434 - 1,660)        | 12,796<br>(7,576 - 21,767)     | 17,673<br>(12,611 - 26,537)    |
| Liver cancer due to hepatitis B                                  | 4,549<br>(2,580 - 8,029)       | --                   | 2<br>(1 - 4)       | 300<br>(130 - 604)          | 2,404<br>(1,212 - 4,587)       | 1,843<br>(1,149 - 3,175)       |
| Liver cancer due to hepatitis C                                  | 22,223<br>(15,807 - 34,379)    | --                   | 1<br>(0 - 1)       | 460<br>(219 - 923)          | 8,586<br>(4,981 - 14,912)      | 13,176<br>(9,359 - 19,835)     |
| Liver cancer due to alcohol use                                  | 3,751<br>(2,248 - 6,063)       | --                   | --                 | 79<br>(29 - 161)            | 1,423<br>(681 - 2,578)         | 2,249<br>(1,359 - 3,580)       |
| Liver cancer due to other causes                                 | 823<br>(433 - 1,462)           | --                   | 1<br>(0 - 1)       | 35<br>(13 - 77)             | 382<br>(163 - 750)             | 406<br>(203 - 687)             |
| Larynx cancer                                                    | 1,096<br>(850 - 1,566)         | --                   | --                 | 17<br>(12 - 25)             | 302<br>(222 - 465)             | 778<br>(587 - 1,103)           |
| Tracheal, bronchus and lung cancer                               | 55,274<br>(49,554 - 61,917)    | --                   | --                 | 776<br>(640 - 928)          | 14,441<br>(12,621 - 16,420)    | 40,056<br>(35,262 - 45,434)    |
| Breast cancer                                                    | 89<br>(21 - 135)               | --                   | --                 | 5<br>(2 - 8)                | 22<br>(5 - 36)                 | 63<br>(14 - 103)               |
| Cervical cancer                                                  | --                             | --                   | --                 | --                          | --                             | --                             |
| Uterine cancer                                                   | --                             | --                   | --                 | --                          | --                             | --                             |
| Prostate cancer                                                  | 12,420<br>(8,381 - 15,992)     | --                   | --                 | 14<br>(8 - 21)              | 1,225<br>(733 - 1,603)         | 11,181<br>(7,420 - 14,739)     |

Web Table 31- Japan deaths with 95% UI by age, sex, and cause in 2013

| Cause                                         | Males, All Ages                | Males, 0-4 Years | Males, 5-14 Years | Males, 15-49 Years       | Males, 50-69 Years          | Males, 70-80 Years             |
|-----------------------------------------------|--------------------------------|------------------|-------------------|--------------------------|-----------------------------|--------------------------------|
| Colon and rectum cancer                       | 28,880<br>(25,456 - 32,792)    | --               | --                | 790<br>(662 - 941)       | 8,661<br>(7,393 - 9,955)    | 19,429<br>(16,749 - 22,727)    |
| Lip and oral cavity cancer                    | 2,442<br>(1,709 - 2,934)       | --               | --                | 134<br>(103 - 168)       | 864<br>(609 - 1,083)        | 1,444<br>(939 - 1,832)         |
| Nasopharynx cancer                            | 644<br>(402 - 804)             | --               | 1<br>(0 - 2)      | 50<br>(34 - 79)          | 283<br>(184 - 385)          | 311<br>(160 - 420)             |
| Other pharynx cancer                          | 1,970<br>(1,000 - 2,490)       | --               | --                | 56<br>(37 - 75)          | 864<br>(444 - 1,127)        | 1,050<br>(500 - 1,414)         |
| Gallbladder and biliary tract cancer          | 9,296<br>(5,676 - 12,077)      | --               | --                | 114<br>(79 - 168)        | 1,989<br>(1,314 - 2,820)    | 7,193<br>(4,217 - 9,520)       |
| Pancreatic cancer                             | 15,786<br>(13,828 - 17,780)    | --               | --                | 382<br>(311 - 464)       | 5,405<br>(4,551 - 6,280)    | 9,999<br>(8,571 - 11,592)      |
| Malignant skin melanoma                       | 407<br>(211 - 716)             | --               | --                | 31<br>(16 - 56)          | 134<br>(67 - 231)           | 242<br>(126 - 443)             |
| Non-melanoma skin cancer                      | 530<br>(334 - 891)             | --               | --                | 14<br>(9 - 24)           | 92<br>(54 - 151)            | 424<br>(266 - 721)             |
| Ovarian cancer                                | --                             | --               | --                | --                       | --                          | --                             |
| Testicular cancer                             | 117<br>(87 - 164)              | --               | --                | 65<br>(46 - 91)          | 23<br>(16 - 34)             | 29<br>(20 - 46)                |
| Kidney cancer                                 | 4,158<br>(3,393 - 5,073)       | 2<br>(1 - 4)     | 1<br>(1 - 2)      | 113<br>(88 - 144)        | 1,250<br>(1,009 - 1,537)    | 2,791<br>(2,100 - 3,621)       |
| Bladder cancer                                | 5,221<br>(3,756 - 6,360)       | --               | --                | 43<br>(33 - 54)          | 858<br>(638 - 1,038)        | 4,321<br>(3,050 - 5,387)       |
| Brain and nervous system cancer               | 1,383<br>(1,084 - 1,830)       | 12<br>(6 - 21)   | 29<br>(20 - 43)   | 226<br>(170 - 286)       | 522<br>(400 - 710)          | 595<br>(427 - 863)             |
| Thyroid cancer                                | 619<br>(500 - 752)             | --               | 0<br>(0 - 0)      | 15<br>(11 - 19)          | 168<br>(127 - 214)          | 436<br>(344 - 546)             |
| Mesothelioma                                  | 1,096<br>(501 - 1,801)         | --               | --                | 27<br>(14 - 47)          | 348<br>(125 - 521)          | 721<br>(342 - 1,317)           |
| Hodgkin lymphoma                              | 128<br>(92 - 201)              | 0<br>(0 - 1)     | 1<br>(0 - 2)      | 19<br>(13 - 29)          | 37<br>(26 - 66)             | 70<br>(47 - 109)               |
| Non-Hodgkin lymphoma                          | 6,254<br>(2,940 - 7,908)       | 6<br>(2 - 12)    | 16<br>(8 - 29)    | 288<br>(175 - 439)       | 1,670<br>(846 - 2,311)      | 4,273<br>(1,839 - 5,648)       |
| Multiple myeloma                              | 2,423<br>(1,257 - 3,681)       | --               | --                | 44<br>(25 - 72)          | 644<br>(330 - 1,037)        | 1,735<br>(875 - 2,674)         |
| Leukemia                                      | 5,104<br>(4,471 - 5,828)       | 23<br>(13 - 40)  | 46<br>(33 - 61)   | 426<br>(360 - 504)       | 1,489<br>(1,248 - 1,773)    | 3,120<br>(2,615 - 3,688)       |
| Other neoplasms                               | 8,085<br>(6,056 - 10,222)      | 38<br>(21 - 59)  | 60<br>(37 - 85)   | 559<br>(435 - 734)       | 2,224<br>(1,701 - 3,729)    | 5,204<br>(3,090 - 6,727)       |
| Cardiovascular diseases                       | 166,109<br>(151,180 - 183,621) | 31<br>(21 - 43)  | 25<br>(19 - 31)   | 5,320<br>(4,546 - 6,101) | 31,024<br>(26,775 - 35,556) | 129,709<br>(117,528 - 142,862) |
| Rheumatic heart disease                       | 1,016<br>(521 - 1,497)         | 0<br>(0 - 0)     | 1<br>(0 - 1)      | 18<br>(11 - 26)          | 136<br>(87 - 211)           | 861<br>(398 - 1,300)           |
| Ischemic heart disease                        | 53,795<br>(44,576 - 65,792)    | 1<br>(1 - 2)     | 4<br>(2 - 5)      | 2,284<br>(1,772 - 2,772) | 13,110<br>(10,522 - 15,754) | 38,397<br>(31,028 - 49,208)    |
| Cerebrovascular disease                       | 85,537<br>(71,303 - 99,514)    | 8<br>(4 - 11)    | 7<br>(5 - 9)      | 2,017<br>(1,596 - 2,510) | 13,332<br>(10,541 - 16,130) | 70,173<br>(58,720 - 81,902)    |
| Ischemic stroke                               | 52,867<br>(42,940 - 63,346)    | 1<br>(0 - 1)     | 0<br>(0 - 1)      | 140<br>(91 - 198)        | 4,109<br>(2,955 - 5,462)    | 48,618<br>(39,556 - 58,214)    |
| Hemorrhagic stroke                            | 32,670<br>(22,637 - 40,486)    | 7<br>(4 - 10)    | 7<br>(4 - 9)      | 1,877<br>(1,486 - 2,325) | 9,224<br>(6,903 - 11,241)   | 21,556<br>(13,777 - 27,977)    |
| Hypertensive heart disease                    | 5,291<br>(2,862 - 10,169)      | 0<br>(0 - 0)     | 0<br>(0 - 1)      | 185<br>(110 - 364)       | 720<br>(450 - 1,382)        | 4,386<br>(2,233 - 8,980)       |
| Cardiomyopathy and myocarditis                | 2,934<br>(2,254 - 4,312)       | 18<br>(12 - 25)  | 10<br>(7 - 14)    | 352<br>(273 - 525)       | 796<br>(565 - 1,081)        | 1,758<br>(1,268 - 2,818)       |
| Atrial fibrillation and flutter               | 3,720<br>(2,719 - 5,069)       | --               | --                | 30<br>(22 - 41)          | 430<br>(322 - 586)          | 3,259<br>(2,314 - 4,548)       |
| Aortic aneurysm                               | 7,151<br>(3,567 - 8,761)       | --               | --                | 199<br>(84 - 257)        | 1,452<br>(729 - 1,841)      | 5,500<br>(2,705 - 6,911)       |
| Peripheral vascular disease                   | 414<br>(306 - 554)             | --               | --                | 2<br>(1 - 3)             | 47<br>(35 - 62)             | 365<br>(257 - 500)             |
| Endocarditis                                  | 994<br>(650 - 1,677)           | 1<br>(1 - 2)     | 1<br>(0 - 1)      | 58<br>(38 - 97)          | 232<br>(147 - 404)          | 702<br>(438 - 1,229)           |
| Other cardiovascular and circulatory diseases | 5,255<br>(3,366 - 6,643)       | 3<br>(2 - 5)     | 2<br>(1 - 3)      | 174<br>(131 - 228)       | 768<br>(530 - 993)          | 4,307<br>(2,657 - 5,607)       |
| Chronic respiratory diseases                  | 53,693<br>(46,373 - 66,509)    | 20<br>(13 - 31)  | 12<br>(8 - 16)    | 417<br>(333 - 632)       | 4,883<br>(4,013 - 6,405)    | 48,361<br>(41,346 - 60,200)    |
| Chronic obstructive pulmonary disease         | 34,407<br>(27,207 - 43,288)    | 8<br>(4 - 13)    | 3<br>(2 - 4)      | 225<br>(171 - 369)       | 2,162<br>(1,389 - 2,895)    | 32,009<br>(25,291 - 40,169)    |
| Pneumoconiosis                                | 1,618<br>(992 - 2,378)         | 0<br>(0 - 1)     | 1<br>(0 - 1)      | 23<br>(15 - 37)          | 245<br>(147 - 415)          | 1,350<br>(804 - 2,020)         |
| Silicosis                                     | 659<br>(396 - 986)             | 0<br>(0 - 0)     | 0<br>(0 - 0)      | 4<br>(2 - 6)             | 67<br>(38 - 118)            | 588<br>(349 - 880)             |
| Asbestosis                                    | 541<br>(329 - 813)             | 0<br>(0 - 0)     | 0<br>(0 - 0)      | 3<br>(2 - 5)             | 99<br>(57 - 170)            | 439<br>(259 - 672)             |
| Coal workers pneumoconiosis                   | 57<br>(35 - 86)                | 0<br>(0 - 0)     | 0<br>(0 - 0)      | 3<br>(2 - 5)             | 18<br>(10 - 31)             | 36<br>(21 - 55)                |
| Other pneumoconiosis                          | 361<br>(214 - 557)             | 0<br>(0 - 0)     | 0<br>(0 - 0)      | 13<br>(8 - 21)           | 62<br>(36 - 104)            | 287<br>(157 - 454)             |

Web Table 31- Japan deaths with 95% UI by age, sex, and cause in 2013

| Cause                                               | Males, All Ages             | Males, 0-4 Years | Males, 5-14 Years | Males, 15-49 Years       | Males, 50-69 Years       | Males, 70-80 Years          |
|-----------------------------------------------------|-----------------------------|------------------|-------------------|--------------------------|--------------------------|-----------------------------|
| Asthma                                              | 1,245<br>(888 - 1,646)      | 3<br>(1 - 5)     | 4<br>(3 - 6)      | 62<br>(48 - 87)          | 167<br>(105 - 226)       | 1,010<br>(693 - 1,386)      |
| Interstitial lung disease and pulmonary sarcoidosis | 15,819<br>(11,502 - 24,320) | 4<br>(2 - 7)     | 2<br>(1 - 4)      | 70<br>(48 - 113)         | 2,264<br>(1,666 - 3,281) | 13,479<br>(9,516 - 20,925)  |
| Other chronic respiratory diseases                  | 604<br>(420 - 844)          | 6<br>(3 - 9)     | 2<br>(1 - 3)      | 37<br>(27 - 53)          | 46<br>(27 - 67)          | 512<br>(346 - 743)          |
| Cirrhosis                                           | 14,713<br>(13,041 - 16,585) | 2<br>(1 - 3)     | 2<br>(1 - 2)      | 1,305<br>(1,088 - 1,545) | 6,263<br>(5,301 - 7,318) | 7,141<br>(6,141 - 8,241)    |
| Cirrhosis due to hepatitis B                        | 2,203<br>(1,401 - 3,265)    | 0<br>(0 - 0)     | 0<br>(0 - 0)      | 185<br>(117 - 276)       | 907<br>(587 - 1,313)     | 1,111<br>(666 - 1,822)      |
| Cirrhosis due to hepatitis C                        | 6,336<br>(3,383 - 8,868)    | 0<br>(0 - 0)     | 0<br>(0 - 1)      | 550<br>(296 - 802)       | 2,834<br>(1,583 - 3,940) | 2,952<br>(1,176 - 4,436)    |
| Cirrhosis due to alcohol use                        | 3,974<br>(2,687 - 5,558)    | --               | --                | 245<br>(152 - 368)       | 1,497<br>(991 - 2,202)   | 2,233<br>(1,402 - 3,272)    |
| Cirrhosis due to other causes                       | 2,199<br>(1,050 - 3,435)    | 2<br>(1 - 3)     | 1<br>(1 - 2)      | 325<br>(161 - 483)       | 1,025<br>(448 - 1,657)   | 846<br>(371 - 1,556)        |
| Digestive diseases                                  | 12,417<br>(10,585 - 14,751) | 4<br>(2 - 6)     | 5<br>(4 - 7)      | 333<br>(275 - 419)       | 2,026<br>(1,663 - 2,422) | 10,048<br>(8,512 - 12,095)  |
| Peptic ulcer disease                                | 2,467<br>(1,803 - 3,372)    | 0<br>(0 - 0)     | 0<br>(0 - 0)      | 69<br>(48 - 95)          | 499<br>(329 - 664)       | 1,899<br>(1,358 - 2,722)    |
| Gastritis and duodenitis                            | 116<br>(41 - 363)           | 0<br>(0 - 0)     | 0<br>(0 - 0)      | 3<br>(2 - 5)             | 6<br>(3 - 18)            | 106<br>(34 - 345)           |
| Appendicitis                                        | 135<br>(82 - 206)           | 0<br>(0 - 0)     | 0<br>(0 - 1)      | 8<br>(5 - 12)            | 25<br>(15 - 37)          | 102<br>(59 - 164)           |
| Paralytic ileus and intestinal obstruction          | 3,547<br>(2,074 - 5,086)    | 2<br>(1 - 4)     | 2<br>(1 - 3)      | 66<br>(35 - 100)         | 478<br>(290 - 733)       | 2,998<br>(1,725 - 4,335)    |
| Inguinal, femoral, and abdominal hernia             | 180<br>(89 - 288)           | 0<br>(0 - 0)     | 0<br>(0 - 0)      | 3<br>(1 - 4)             | 24<br>(12 - 38)          | 152<br>(71 - 247)           |
| Inflammatory bowel disease                          | 248<br>(155 - 512)          | 0<br>(0 - 0)     | 0<br>(0 - 0)      | 11<br>(7 - 19)           | 51<br>(32 - 96)          | 186<br>(109 - 410)          |
| Vascular intestinal disorders                       | 1,172<br>(452 - 2,311)      | 0<br>(0 - 1)     | 0<br>(0 - 1)      | 17<br>(6 - 35)           | 211<br>(86 - 438)        | 943<br>(357 - 1,887)        |
| Gallbladder and biliary diseases                    | 2,356<br>(1,600 - 3,080)    | 0<br>(0 - 0)     | 0<br>(0 - 1)      | 21<br>(14 - 29)          | 226<br>(154 - 301)       | 2,109<br>(1,404 - 2,810)    |
| Pancreatitis                                        | 934<br>(617 - 1,438)        | 0<br>(0 - 0)     | 0<br>(0 - 1)      | 96<br>(67 - 143)         | 264<br>(175 - 392)       | 574<br>(361 - 928)          |
| Other digestive diseases                            | 1,262<br>(777 - 1,648)      | 1<br>(0 - 1)     | 1<br>(0 - 1)      | 40<br>(24 - 54)          | 242<br>(141 - 323)       | 978<br>(588 - 1,327)        |
| Neurological disorders                              | 29,797<br>(24,951 - 35,149) | 24<br>(16 - 39)  | 22<br>(17 - 30)   | 357<br>(293 - 442)       | 2,083<br>(1,735 - 2,453) | 27,311<br>(22,696 - 32,575) |
| Alzheimer disease and other dementias               | 23,114<br>(18,483 - 28,299) | --               | --                | 1<br>(0 - 2)             | 749<br>(571 - 975)       | 22,364<br>(17,800 - 27,517) |
| Parkinson disease                                   | 3,746<br>(2,650 - 4,698)    | --               | --                | 23<br>(14 - 30)          | 421<br>(302 - 526)       | 3,302<br>(2,253 - 4,206)    |
| Epilepsy                                            | 503<br>(294 - 670)          | 6<br>(3 - 10)    | 8<br>(5 - 12)     | 117<br>(84 - 150)        | 90<br>(52 - 123)         | 283<br>(135 - 420)          |
| Multiple sclerosis                                  | 52<br>(22 - 80)             | --               | --                | 12<br>(5 - 19)           | 23<br>(8 - 35)           | 16<br>(7 - 30)              |
| Other neurological disorders                        | 2,382<br>(1,709 - 2,860)    | 19<br>(12 - 32)  | 14<br>(10 - 22)   | 203<br>(163 - 274)       | 801<br>(636 - 1,067)     | 1,345<br>(831 - 1,641)      |
| Mental and substance use disorders                  | 882<br>(662 - 1,069)        | 1<br>(0 - 1)     | 0<br>(0 - 0)      | 290<br>(233 - 393)       | 348<br>(237 - 452)       | 243<br>(161 - 302)          |
| Schizophrenia                                       | 191<br>(84 - 265)           | --               | --                | 38<br>(19 - 56)          | 87<br>(33 - 131)         | 66<br>(25 - 104)            |
| Alcohol use disorders                               | 413<br>(265 - 609)          | --               | --                | 87<br>(61 - 167)         | 215<br>(132 - 324)       | 110<br>(58 - 143)           |
| Drug use disorders                                  | 275<br>(225 - 328)          | 1<br>(0 - 1)     | --                | 162<br>(126 - 203)       | 46<br>(32 - 59)          | 67<br>(47 - 89)             |
| Opioid use disorders                                | 78<br>(64 - 95)             | 0<br>(0 - 0)     | --                | 46<br>(36 - 60)          | 12<br>(8 - 16)           | 20<br>(14 - 28)             |
| Cocaine use disorders                               | 20<br>(15 - 25)             | 0<br>(0 - 0)     | --                | 13<br>(9 - 18)           | 3<br>(2 - 4)             | 4<br>(2 - 5)                |
| Amphetamine use disorders                           | 17<br>(14 - 21)             | 0<br>(0 - 0)     | --                | 10<br>(8 - 14)           | 3<br>(2 - 4)             | 4<br>(3 - 6)                |
| Other drug use disorders                            | 160<br>(131 - 192)          | 0<br>(0 - 1)     | --                | 92<br>(72 - 117)         | 28<br>(20 - 37)          | 39<br>(28 - 52)             |
| Eating disorders                                    | 3<br>(2 - 4)                | --               | 0<br>(0 - 0)      | 3<br>(2 - 4)             | --                       | --                          |
| Anorexia nervosa                                    | 3<br>(2 - 4)                | --               | 0<br>(0 - 0)      | 3<br>(2 - 4)             | --                       | --                          |
| Diabetes, urogenital, blood, and endocrine diseases | 28,794<br>(24,557 - 38,511) | 59<br>(39 - 84)  | 27<br>(20 - 39)   | 723<br>(604 - 1,009)     | 4,880<br>(4,063 - 6,262) | 23,106<br>(19,324 - 31,270) |
| Diabetes mellitus                                   | 4,378<br>(3,848 - 5,011)    | 1<br>(0 - 1)     | 1<br>(1 - 1)      | 210<br>(175 - 252)       | 1,198<br>(986 - 1,430)   | 2,968<br>(2,495 - 3,507)    |
| Acute glomerulonephritis                            | 66<br>(40 - 101)            | 0<br>(0 - 0)     | 1<br>(0 - 1)      | 3<br>(2 - 5)             | 10<br>(6 - 15)           | 52<br>(30 - 85)             |
| Chronic kidney disease                              | 18,535<br>(15,105 - 28,090) | 4<br>(3 - 6)     | 3<br>(2 - 6)      | 258<br>(196 - 502)       | 2,858<br>(2,259 - 4,223) | 15,411<br>(12,234 - 23,095) |
| Chronic kidney disease due to diabetes mellitus     | 8,004<br>(5,710 - 15,213)   | 0<br>(0 - 1)     | 1<br>(0 - 1)      | 143<br>(95 - 284)        | 1,696<br>(1,197 - 2,603) | 6,164<br>(4,198 - 12,509)   |

Web Table 31- Japan deaths with 95% UI by age, sex, and cause in 2013

| Cause                                               | Males, All Ages             | Males, 0-4 Years   | Males, 5-14 Years  | Males, 15-49 Years         | Males, 50-69 Years          | Males, 70-80 Years          |
|-----------------------------------------------------|-----------------------------|--------------------|--------------------|----------------------------|-----------------------------|-----------------------------|
| Chronic kidney disease due to hypertension          | 2,009<br>(1,008 - 4,062)    | 1<br>(0 - 2)       | 1<br>(0 - 1)       | 26<br>(13 - 68)            | 149<br>(78 - 349)           | 1,833<br>(909 - 3,672)      |
| Chronic kidney disease due to glomerulonephritis    | 788<br>(418 - 1,496)        | 1<br>(0 - 1)       | 1<br>(1 - 1)       | 19<br>(10 - 37)            | 115<br>(59 - 210)           | 652<br>(327 - 1,288)        |
| Chronic kidney disease due to other causes          | 7,734<br>(3,393 - 12,562)   | 2<br>(1 - 4)       | 1<br>(1 - 3)       | 69<br>(26 - 165)           | 899<br>(332 - 1,636)        | 6,762<br>(2,917 - 10,885)   |
| Urinary diseases and male infertility               | 3,136<br>(1,642 - 4,085)    | 3<br>(2 - 5)       | 1<br>(0 - 1)       | 35<br>(20 - 44)            | 312<br>(156 - 402)          | 2,785<br>(1,443 - 3,711)    |
| Interstitial nephritis and urinary tract infections | 2,621<br>(1,358 - 3,477)    | 2<br>(1 - 3)       | 0<br>(0 - 0)       | 23<br>(12 - 30)            | 245<br>(120 - 324)          | 2,351<br>(1,200 - 3,160)    |
| Urolithiasis                                        | 145<br>(68 - 274)           | --                 | 0<br>(0 - 0)       | 5<br>(3 - 8)               | 22<br>(10 - 41)             | 118<br>(51 - 236)           |
| Other urinary diseases                              | 369<br>(162 - 653)          | 1<br>(1 - 2)       | 0<br>(0 - 0)       | 7<br>(3 - 10)              | 45<br>(21 - 73)             | 316<br>(135 - 586)          |
| Gynecological diseases                              | --                          | --                 | --                 | --                         | --                          | --                          |
| Uterine fibroids                                    | --                          | --                 | --                 | --                         | --                          | --                          |
| Polycystic ovarian syndrome                         | --                          | --                 | --                 | --                         | --                          | --                          |
| Endometriosis                                       | --                          | --                 | --                 | --                         | --                          | --                          |
| Genital prolapse                                    | --                          | --                 | --                 | --                         | --                          | --                          |
| Other gynecological diseases                        | --                          | --                 | --                 | --                         | --                          | --                          |
| Hemoglobinopathies and hemolytic anemias            | 700<br>(461 - 1,161)        | 12<br>(7 - 22)     | 8<br>(5 - 15)      | 84<br>(53 - 146)           | 117<br>(73 - 198)           | 479<br>(306 - 791)          |
| Thalassemias                                        | 59<br>(39 - 99)             | 9<br>(5 - 16)      | 6<br>(4 - 11)      | 34<br>(22 - 60)            | 7<br>(4 - 11)               | 3<br>(2 - 4)                |
| Sickle cell disorders                               | 2<br>(2 - 4)                | 0<br>(0 - 1)       | 0<br>(0 - 0)       | 1<br>(1 - 2)               | 1<br>(0 - 1)                | 0<br>(0 - 0)                |
| G6PD deficiency                                     | 2<br>(1 - 3)                | 0<br>(0 - 0)       | 0<br>(0 - 0)       | 1<br>(0 - 1)               | 1<br>(0 - 1)                | 1<br>(0 - 1)                |
| Other hemoglobinopathies and hemolytic anemias      | 637<br>(414 - 1,056)        | 3<br>(2 - 6)       | 2<br>(1 - 3)       | 48<br>(30 - 84)            | 108<br>(67 - 185)           | 475<br>(304 - 785)          |
| Endocrine, metabolic, blood, and immune disorders   | 1,979<br>(1,412 - 2,838)    | 38<br>(23 - 58)    | 13<br>(8 - 20)     | 133<br>(95 - 196)          | 385<br>(263 - 579)          | 1,410<br>(908 - 2,069)      |
| Musculoskeletal disorders                           | 1,631<br>(1,085 - 2,131)    | --                 | 2<br>(2 - 4)       | 55<br>(42 - 81)            | 355<br>(259 - 506)          | 1,220<br>(741 - 1,599)      |
| Rheumatoid arthritis                                | 543<br>(353 - 861)          | --                 | 0<br>(0 - 1)       | 6<br>(3 - 10)              | 123<br>(75 - 207)           | 413<br>(247 - 671)          |
| Other musculoskeletal disorders                     | 1,089<br>(649 - 1,401)      | --                 | 2<br>(1 - 3)       | 49<br>(36 - 71)            | 232<br>(149 - 312)          | 806<br>(453 - 1,079)        |
| Other non-communicable diseases                     | 2,071<br>(1,781 - 2,410)    | 682<br>(519 - 900) | 41<br>(30 - 57)    | 173<br>(144 - 215)         | 247<br>(203 - 295)          | 929<br>(736 - 1,164)        |
| Congenital anomalies                                | 1,324<br>(1,117 - 1,575)    | 601<br>(448 - 790) | 40<br>(29 - 56)    | 158<br>(130 - 197)         | 153<br>(126 - 188)          | 372<br>(291 - 472)          |
| Neural tube defects                                 | 13<br>(8 - 18)              | 7<br>(4 - 12)      | 1<br>(0 - 1)       | 3<br>(1 - 3)               | 2<br>(1 - 2)                | 1<br>(0 - 1)                |
| Congenital heart anomalies                          | 579<br>(469 - 708)          | 272<br>(196 - 364) | 22<br>(15 - 34)    | 91<br>(70 - 119)           | 70<br>(52 - 95)             | 123<br>(80 - 175)           |
| Cleft lip and cleft palate                          | 2<br>(0 - 8)                | 2<br>(0 - 8)       | --                 | --                         | --                          | --                          |
| Down syndrome                                       | 44<br>(22 - 99)             | 20<br>(8 - 53)     | 2<br>(1 - 6)       | 16<br>(8 - 34)             | 4<br>(2 - 9)                | 2<br>(1 - 5)                |
| Chromosomal unbalanced rearrangements               | 93<br>(50 - 140)            | 86<br>(44 - 132)   | 2<br>(1 - 3)       | 3<br>(2 - 4)               | 2<br>(1 - 3)                | 1<br>(1 - 2)                |
| Other congenital anomalies                          | 593<br>(478 - 726)          | 214<br>(150 - 301) | 14<br>(8 - 22)     | 45<br>(32 - 62)            | 75<br>(55 - 101)            | 244<br>(174 - 325)          |
| Skin and subcutaneous diseases                      | 669<br>(501 - 880)          | 2<br>(1 - 3)       | 1<br>(0 - 1)       | 15<br>(12 - 20)            | 94<br>(67 - 120)            | 557<br>(397 - 760)          |
| Cellulitis                                          | 206<br>(109 - 316)          | 1<br>(0 - 1)       | 0<br>(0 - 0)       | 7<br>(4 - 10)              | 42<br>(24 - 60)             | 156<br>(71 - 262)           |
| Pyoderma                                            | 209<br>(135 - 302)          | 1<br>(0 - 1)       | 0<br>(0 - 0)       | 5<br>(3 - 7)               | 36<br>(22 - 52)             | 167<br>(100 - 254)          |
| Decubitus ulcer                                     | 164<br>(96 - 279)           | 0<br>(0 - 0)       | 0<br>(0 - 0)       | 2<br>(1 - 2)               | 5<br>(3 - 9)                | 157<br>(90 - 271)           |
| Other skin and subcutaneous diseases                | 91<br>(43 - 167)            | 1<br>(0 - 1)       | 0<br>(0 - 0)       | 2<br>(1 - 4)               | 11<br>(6 - 18)              | 77<br>(33 - 149)            |
| Sudden infant death syndrome                        | 78<br>(37 - 167)            | 78<br>(37 - 167)   | --                 | --                         | --                          | --                          |
| Injuries                                            | 50,899<br>(41,887 - 57,831) | 254<br>(179 - 358) | 226<br>(183 - 273) | 11,903<br>(9,778 - 13,438) | 13,849<br>(11,067 - 16,114) | 24,667<br>(18,856 - 28,968) |
| Transport injuries                                  | 7,087<br>(6,197 - 8,093)    | 39<br>(23 - 61)    | 72<br>(52 - 93)    | 1,688<br>(1,430 - 1,981)   | 1,866<br>(1,551 - 2,247)    | 3,422<br>(2,860 - 4,117)    |
| Road injuries                                       | 6,585<br>(5,748 - 7,529)    | 35<br>(21 - 54)    | 66<br>(47 - 86)    | 1,576<br>(1,330 - 1,857)   | 1,698<br>(1,419 - 2,027)    | 3,210<br>(2,678 - 3,864)    |
| Pedestrian road injuries                            | 1,955<br>(1,157 - 2,925)    | 23<br>(13 - 37)    | 32<br>(19 - 46)    | 284<br>(140 - 475)         | 545<br>(309 - 820)          | 1,070<br>(598 - 1,747)      |



Web Table 31- Japan deaths with 95% UI by age, sex, and cause in 2013

| Cause                                           | Males, All Ages             | Males, 0-4 Years   | Males, 5-14 Years | Males, 15-49 Years        | Males, 50-69 Years       | Males, 70-80 Years          |
|-------------------------------------------------|-----------------------------|--------------------|-------------------|---------------------------|--------------------------|-----------------------------|
| Cyclist road injuries                           | 1,659<br>(1,088 - 2,338)    | 2<br>(0 - 5)       | 22<br>(12 - 33)   | 96<br>(51 - 140)          | 300<br>(172 - 453)       | 1,239<br>(781 - 1,791)      |
| Motorcyclist road injuries                      | 1,191<br>(782 - 1,662)      | 0<br>(0 - 1)       | 3<br>(1 - 5)      | 476<br>(277 - 652)        | 316<br>(190 - 467)       | 395<br>(240 - 672)          |
| Motor vehicle road injuries                     | 1,767<br>(1,173 - 2,437)    | 10<br>(4 - 17)     | 9<br>(5 - 15)     | 715<br>(524 - 1,027)      | 533<br>(317 - 747)       | 501<br>(239 - 756)          |
| Other road injuries                             | 13<br>(4 - 20)              | 0<br>(0 - 1)       | 1<br>(0 - 1)      | 4<br>(1 - 7)              | 3<br>(1 - 5)             | 5<br>(1 - 10)               |
| Other transport injuries                        | 502<br>(334 - 647)          | 4<br>(2 - 8)       | 5<br>(3 - 9)      | 112<br>(77 - 158)         | 168<br>(101 - 232)       | 213<br>(115 - 320)          |
| Unintentional injuries                          | 22,402<br>(15,748 - 26,880) | 189<br>(127 - 275) | 107<br>(81 - 148) | 1,610<br>(1,357 - 2,042)  | 4,076<br>(3,090 - 4,875) | 16,420<br>(10,703 - 20,458) |
| Falls                                           | 6,089<br>(4,289 - 7,359)    | 19<br>(12 - 29)    | 12<br>(8 - 17)    | 419<br>(341 - 583)        | 1,171<br>(898 - 1,464)   | 4,468<br>(2,876 - 5,756)    |
| Drowning                                        | 3,520<br>(2,254 - 4,584)    | 52<br>(26 - 115)   | 60<br>(41 - 101)  | 445<br>(339 - 675)        | 876<br>(535 - 1,184)     | 2,087<br>(1,208 - 2,888)    |
| Fire, heat, and hot substances                  | 1,509<br>(1,021 - 1,951)    | 14<br>(8 - 25)     | 11<br>(7 - 16)    | 135<br>(95 - 179)         | 318<br>(193 - 441)       | 1,030<br>(703 - 1,415)      |
| Poisonings                                      | 455<br>(254 - 558)          | 2<br>(1 - 4)       | 2<br>(1 - 3)      | 136<br>(74 - 176)         | 118<br>(65 - 156)        | 198<br>(104 - 268)          |
| Exposure to mechanical forces                   | 888<br>(756 - 1,107)        | 31<br>(17 - 54)    | 6<br>(5 - 9)      | 185<br>(147 - 330)        | 312<br>(248 - 453)       | 353<br>(238 - 441)          |
| Unintentional firearm injuries                  | 21<br>(16 - 27)             | 0<br>(0 - 1)       | 1<br>(0 - 1)      | 6<br>(4 - 8)              | 7<br>(5 - 10)            | 7<br>(4 - 11)               |
| Unintentional suffocation                       | 166<br>(73 - 243)           | 27<br>(13 - 50)    | 2<br>(1 - 4)      | 8<br>(5 - 12)             | 19<br>(10 - 28)          | 111<br>(25 - 181)           |
| Other exposure to mechanical forces             | 700<br>(590 - 968)          | 4<br>(2 - 6)       | 4<br>(3 - 6)      | 171<br>(134 - 312)        | 286<br>(227 - 434)       | 235<br>(184 - 291)          |
| Adverse effects of medical treatment            | 989<br>(484 - 1,368)        | 8<br>(4 - 12)      | 3<br>(1 - 5)      | 56<br>(28 - 79)           | 205<br>(90 - 298)        | 717<br>(339 - 1,015)        |
| Animal contact                                  | 51<br>(38 - 102)            | 0<br>(0 - 1)       | 1<br>(0 - 1)      | 5<br>(4 - 10)             | 16<br>(11 - 37)          | 29<br>(20 - 53)             |
| Venomous animal contact                         | 29<br>(20 - 70)             | 0<br>(0 - 0)       | 0<br>(0 - 0)      | 3<br>(2 - 6)              | 10<br>(6 - 26)           | 16<br>(10 - 36)             |
| Non-venomous animal contact                     | 23<br>(14 - 38)             | 0<br>(0 - 0)       | 0<br>(0 - 1)      | 3<br>(2 - 5)              | 6<br>(3 - 11)            | 13<br>(7 - 23)              |
| Foreign body                                    | 8,715<br>(3,795 - 12,170)   | 60<br>(30 - 96)    | 10<br>(5 - 14)    | 192<br>(93 - 264)         | 994<br>(457 - 1,387)     | 7,459<br>(3,117 - 10,713)   |
| Pulmonary aspiration and foreign body in airway | 8,703<br>(3,782 - 12,157)   | 60<br>(29 - 95)    | 9<br>(4 - 14)     | 190<br>(91 - 261)         | 991<br>(454 - 1,385)     | 7,454<br>(3,111 - 10,709)   |
| Foreign body in other body part                 | 12<br>(6 - 17)              | 0<br>(0 - 1)       | 1<br>(0 - 1)      | 3<br>(2 - 4)              | 3<br>(1 - 4)             | 5<br>(3 - 9)                |
| Other unintentional injuries                    | 185<br>(142 - 236)          | 2<br>(1 - 4)       | 1<br>(1 - 2)      | 38<br>(25 - 56)           | 65<br>(41 - 98)          | 79<br>(53 - 114)            |
| Self-harm and interpersonal violence            | 21,410<br>(15,983 - 24,869) | 26<br>(16 - 44)    | 47<br>(32 - 65)   | 8,605<br>(6,054 - 10,012) | 7,907<br>(5,529 - 9,428) | 4,825<br>(3,763 - 6,309)    |
| Self-harm                                       | 20,867<br>(15,323 - 24,273) | --                 | 34<br>(19 - 48)   | 8,421<br>(5,842 - 9,826)  | 7,765<br>(5,386 - 9,277) | 4,647<br>(3,589 - 6,160)    |
| Interpersonal violence                          | 543<br>(373 - 835)          | 26<br>(16 - 44)    | 14<br>(9 - 23)    | 184<br>(133 - 326)        | 142<br>(96 - 235)        | 178<br>(94 - 247)           |
| Assault by firearm                              | 67<br>(27 - 115)            | 0<br>(0 - 1)       | 0<br>(0 - 1)      | 20<br>(9 - 44)            | 19<br>(7 - 33)           | 27<br>(8 - 47)              |
| Assault by sharp object                         | 166<br>(107 - 299)          | 2<br>(1 - 6)       | 2<br>(1 - 5)      | 67<br>(42 - 135)          | 50<br>(31 - 91)          | 44<br>(23 - 69)             |
| Assault by other means                          | 310<br>(199 - 479)          | 23<br>(14 - 39)    | 11<br>(7 - 18)    | 96<br>(62 - 167)          | 73<br>(43 - 124)         | 107<br>(58 - 162)           |
| Forces of nature, war, and legal intervention   | 0<br>(0 - 0)                | 0<br>(0 - 0)       | --                | --                        | --                       | 0<br>(0 - 0)                |
| Exposure to forces of nature                    | 0<br>(0 - 0)                | 0<br>(0 - 0)       | --                | --                        | --                       | 0<br>(0 - 0)                |

Web Table 31- Japan deaths with 95% UI by age, sex, and cause in 2013

| Cause                                                             | Females, All Ages              | Females, 0-4 Years       | Females, 5-14 Years | Females, 15-49 Years        | Females, 50-69 Years        | Females, 70-80 Years           |
|-------------------------------------------------------------------|--------------------------------|--------------------------|---------------------|-----------------------------|-----------------------------|--------------------------------|
| All causes                                                        | 650,059<br>(605,167 - 694,426) | 1,418<br>(1,107 - 1,833) | 403<br>(347 - 465)  | 14,370<br>(12,692 - 16,017) | 66,577<br>(60,122 - 72,979) | 567,291<br>(530,949 - 603,867) |
| Communicable, maternal, neonatal, and nutritional diseases        | 78,501<br>(59,687 - 98,862)    | 465<br>(341 - 633)       | 53<br>(39 - 68)     | 543<br>(468 - 626)          | 2,647<br>(2,055 - 3,199)    | 74,792<br>(56,348 - 94,954)    |
| HIV/AIDS and tuberculosis                                         | 1,932<br>(1,320 - 2,636)       | 1<br>(0 - 1)             | 0<br>(0 - 1)        | 27<br>(21 - 36)             | 120<br>(88 - 204)           | 1,784<br>(1,137 - 2,473)       |
| Tuberculosis                                                      | 1,915<br>(1,301 - 2,618)       | 1<br>(0 - 1)             | 0<br>(0 - 1)        | 15<br>(11 - 26)             | 116<br>(83 - 201)           | 1,783<br>(1,135 - 2,472)       |
| HIV/AIDS                                                          | 17<br>(11 - 24)                | 0<br>(0 - 0)             | 0<br>(0 - 0)        | 11<br>(8 - 16)              | 4<br>(2 - 8)                | 1<br>(0 - 2)                   |
| HIV/AIDS resulting in mycobacterial infection                     | 1<br>(0 - 1)                   | 0<br>(0 - 0)             | 0<br>(0 - 0)        | 0<br>(0 - 1)                | 0<br>(0 - 0)                | 0<br>(0 - 0)                   |
| HIV/AIDS resulting in other diseases                              | 16<br>(10 - 23)                | 0<br>(0 - 0)             | 0<br>(0 - 0)        | 11<br>(8 - 15)              | 4<br>(2 - 7)                | 1<br>(0 - 2)                   |
| Diarrhea, lower respiratory, and other common infectious diseases | 72,301<br>(53,622 - 92,466)    | 116<br>(80 - 159)        | 43<br>(32 - 56)     | 344<br>(282 - 413)          | 2,191<br>(1,660 - 2,702)    | 69,607<br>(51,174 - 89,885)    |
| Diarrheal diseases                                                | 2,001<br>(1,212 - 3,296)       | 10<br>(6 - 17)           | 1<br>(1 - 2)        | 15<br>(11 - 19)             | 78<br>(54 - 107)            | 1,897<br>(1,112 - 3,190)       |
| Intestinal infectious diseases                                    | 43<br>(16 - 93)                | 6<br>(2 - 14)            | 6<br>(2 - 14)       | 13<br>(4 - 33)              | 8<br>(2 - 19)               | 9<br>(3 - 20)                  |
| Typhoid fever                                                     | 27<br>(8 - 64)                 | 3<br>(1 - 8)             | 4<br>(1 - 10)       | 9<br>(3 - 24)               | 5<br>(1 - 14)               | 5<br>(1 - 13)                  |
| Paratyphoid fever                                                 | 10<br>(3 - 22)                 | 2<br>(0 - 5)             | 2<br>(1 - 4)        | 3<br>(1 - 8)                | 1<br>(0 - 4)                | 1<br>(0 - 4)                   |
| Other intestinal infectious diseases                              | 7<br>(2 - 13)                  | 1<br>(0 - 4)             | 0<br>(0 - 2)        | 1<br>(0 - 4)                | 1<br>(0 - 5)                | 3<br>(1 - 8)                   |
| Lower respiratory infections                                      | 69,579<br>(50,794 - 89,703)    | 75<br>(49 - 108)         | 27<br>(18 - 36)     | 259<br>(205 - 317)          | 2,006<br>(1,487 - 2,501)    | 67,212<br>(48,443 - 87,568)    |
| Upper respiratory infections                                      | 13<br>(2 - 65)                 | 0<br>(0 - 0)             | 0<br>(0 - 0)        | 0<br>(0 - 1)                | 1<br>(0 - 4)                | 11<br>(0 - 62)                 |
| Otitis media                                                      | 18<br>(13 - 26)                | 0<br>(0 - 1)             | 1<br>(0 - 1)        | 3<br>(2 - 3)                | 2<br>(1 - 3)                | 13<br>(8 - 20)                 |
| Meningitis                                                        | 309<br>(234 - 382)             | 13<br>(8 - 18)           | 3<br>(2 - 4)        | 18<br>(14 - 24)             | 44<br>(34 - 56)             | 232<br>(164 - 302)             |
| Pneumococcal meningitis                                           | 67<br>(38 - 109)               | 2<br>(1 - 3)             | 1<br>(0 - 1)        | 4<br>(2 - 6)                | 8<br>(4 - 15)               | 52<br>(24 - 92)                |
| H influenzae type B meningitis                                    | 51<br>(31 - 76)                | 6<br>(3 - 9)             | 1<br>(1 - 1)        | 3<br>(2 - 4)                | 6<br>(3 - 10)               | 35<br>(19 - 60)                |
| Meningococcal meningitis                                          | 67<br>(26 - 102)               | 0<br>(0 - 1)             | 0<br>(0 - 0)        | 4<br>(2 - 6)                | 9<br>(4 - 16)               | 53<br>(17 - 86)                |
| Other meningitis                                                  | 125<br>(74 - 175)              | 5<br>(2 - 8)             | 1<br>(1 - 2)        | 8<br>(4 - 11)               | 20<br>(13 - 29)             | 92<br>(46 - 139)               |
| Encephalitis                                                      | 232<br>(159 - 370)             | 7<br>(4 - 12)            | 4<br>(3 - 7)        | 27<br>(19 - 44)             | 44<br>(30 - 79)             | 150<br>(86 - 248)              |
| Diphtheria                                                        | 0<br>(0 - 2)                   | 0<br>(0 - 1)             | 0<br>(0 - 0)        | 0<br>(0 - 1)                | 0<br>(0 - 1)                | --                             |
| Whooping cough                                                    | 5<br>(3 - 8)                   | 1<br>(0 - 4)             | 0<br>(0 - 1)        | 2<br>(2 - 3)                | 1<br>(0 - 1)                | --                             |
| Tetanus                                                           | 9<br>(5 - 13)                  | 0<br>(0 - 0)             | 0<br>(0 - 1)        | 2<br>(1 - 3)                | 2<br>(1 - 2)                | 4<br>(2 - 9)                   |
| Measles                                                           | 1<br>(0 - 1)                   | 0<br>(0 - 1)             | 0<br>(0 - 0)        | 0<br>(0 - 0)                | 0<br>(0 - 0)                | --                             |
| Varicella and herpes zoster                                       | 91<br>(9 - 451)                | 2<br>(0 - 8)             | 1<br>(0 - 2)        | 4<br>(1 - 12)               | 6<br>(0 - 20)               | 79<br>(1 - 440)                |
| Neglected tropical diseases and malaria                           | 110<br>(32 - 149)              | 1<br>(1 - 2)             | 2<br>(1 - 2)        | 10<br>(7 - 11)              | 25<br>(8 - 34)              | 73<br>(14 - 108)               |
| Cysticercosis                                                     | 1<br>(1 - 1)                   | 0<br>(0 - 0)             | 0<br>(0 - 0)        | 0<br>(0 - 0)                | 0<br>(0 - 0)                | 0<br>(0 - 0)                   |
| Cystic echinococcosis                                             | 5<br>(4 - 5)                   | 0<br>(0 - 0)             | 0<br>(0 - 0)        | 1<br>(0 - 1)                | 1<br>(1 - 1)                | 3<br>(3 - 3)                   |
| Dengue                                                            | 6<br>(4 - 8)                   | 0<br>(0 - 0)             | 1<br>(0 - 1)        | 2<br>(2 - 3)                | 2<br>(1 - 2)                | 1<br>(1 - 2)                   |
| Rabies                                                            | 6<br>(4 - 8)                   | 0<br>(0 - 0)             | 0<br>(0 - 1)        | 2<br>(1 - 3)                | 2<br>(1 - 2)                | 1<br>(1 - 2)                   |
| Other neglected tropical diseases                                 | 92<br>(14 - 130)               | 1<br>(0 - 1)             | 1<br>(0 - 1)        | 4<br>(2 - 5)                | 20<br>(3 - 30)              | 67<br>(8 - 102)                |
| Maternal disorders                                                | 66<br>(51 - 86)                | --                       | 0<br>(0 - 0)        | 66<br>(51 - 86)             | --                          | --                             |
| Maternal hemorrhage                                               | 12<br>(9 - 16)                 | --                       | 0<br>(0 - 0)        | 12<br>(9 - 16)              | --                          | --                             |
| Maternal sepsis and other maternal infections                     | 4<br>(3 - 7)                   | --                       | 0<br>(0 - 0)        | 4<br>(3 - 7)                | --                          | --                             |
| Maternal hypertensive disorders                                   | 5<br>(3 - 8)                   | --                       | 0<br>(0 - 0)        | 5<br>(3 - 8)                | --                          | --                             |
| Maternal obstructed labor                                         | 6<br>(4 - 8)                   | --                       | 0<br>(0 - 0)        | 6<br>(4 - 8)                | --                          | --                             |
| Maternal abortive outcome                                         | 11<br>(8 - 15)                 | --                       | 0<br>(0 - 0)        | 11<br>(8 - 15)              | --                          | --                             |
| Indirect maternal deaths                                          | 12<br>(8 - 16)                 | --                       | 0<br>(0 - 0)        | 12<br>(8 - 16)              | --                          | --                             |

Web Table 31- Japan deaths with 95% UI by age, sex, and cause in 2013

| Cause                                                            | Females, All Ages              | Females, 0-4 Years | Females, 5-14 Years | Females, 15-49 Years      | Females, 50-69 Years        | Females, 70-80 Years           |
|------------------------------------------------------------------|--------------------------------|--------------------|---------------------|---------------------------|-----------------------------|--------------------------------|
| Late maternal deaths                                             | 4<br>(2 - 6)                   | --                 | 0<br>(0 - 0)        | 4<br>(2 - 6)              | --                          | --                             |
| Maternal deaths aggravated by HIV/AIDS                           | 0<br>(0 - 0)                   | --                 | --                  | 0<br>(0 - 0)              | --                          | --                             |
| Other maternal disorders                                         | 12<br>(9 - 17)                 | --                 | 0<br>(0 - 0)        | 12<br>(9 - 17)            | --                          | --                             |
| Neonatal disorders                                               | 318<br>(227 - 437)             | 318<br>(227 - 437) | --                  | --                        | --                          | --                             |
| Neonatal preterm birth complications                             | 130<br>(80 - 199)              | 130<br>(80 - 199)  | --                  | --                        | --                          | --                             |
| Neonatal encephalopathy due to birth asphyxia and trauma         | 58<br>(36 - 89)                | 58<br>(36 - 89)    | --                  | --                        | --                          | --                             |
| Neonatal sepsis and other neonatal infections                    | 41<br>(21 - 75)                | 41<br>(21 - 75)    | --                  | --                        | --                          | --                             |
| Hemolytic disease and other neonatal jaundice                    | 1<br>(0 - 2)                   | 1<br>(0 - 2)       | --                  | --                        | --                          | --                             |
| Other neonatal disorders                                         | 89<br>(50 - 136)               | 89<br>(50 - 136)   | --                  | --                        | --                          | --                             |
| Nutritional deficiencies                                         | 2,203<br>(1,565 - 2,906)       | 3<br>(1 - 4)       | 1<br>(1 - 2)        | 57<br>(45 - 70)           | 98<br>(64 - 120)            | 2,044<br>(1,415 - 2,749)       |
| Protein-energy malnutrition                                      | 1,059<br>(307 - 1,648)         | 1<br>(0 - 2)       | 0<br>(0 - 1)        | 21<br>(6 - 31)            | 60<br>(23 - 82)             | 976<br>(279 - 1,552)           |
| Iodine deficiency                                                | 6<br>(0 - 38)                  | 0<br>(0 - 0)       | 0<br>(0 - 0)        | 0<br>(0 - 1)              | 1<br>(0 - 4)                | 5<br>(0 - 37)                  |
| Iron-deficiency anemia                                           | 860<br>(429 - 1,610)           | 0<br>(0 - 1)       | 0<br>(0 - 1)        | 32<br>(21 - 49)           | 23<br>(11 - 47)             | 805<br>(391 - 1,515)           |
| Other nutritional deficiencies                                   | 278<br>(109 - 575)             | 1<br>(1 - 2)       | 0<br>(0 - 1)        | 4<br>(2 - 8)              | 14<br>(7 - 28)              | 258<br>(96 - 545)              |
| Other communicable, maternal, neonatal, and nutritional diseases | 1,571<br>(722 - 2,283)         | 26<br>(5 - 101)    | 7<br>(3 - 14)       | 40<br>(29 - 49)           | 214<br>(118 - 291)          | 1,284<br>(526 - 1,945)         |
| Sexually transmitted diseases excluding HIV                      | 126<br>(63 - 233)              | 17<br>(0 - 92)     | 2<br>(0 - 9)        | 3<br>(2 - 5)              | 11<br>(7 - 16)              | 94<br>(48 - 169)               |
| Syphilis                                                         | 100<br>(46 - 196)              | 17<br>(0 - 92)     | 2<br>(0 - 9)        | 1<br>(1 - 2)              | 6<br>(4 - 9)                | 74<br>(38 - 135)               |
| Chlamydial infection                                             | 7<br>(4 - 11)                  | --                 | 0<br>(0 - 0)        | 1<br>(0 - 1)              | 1<br>(1 - 2)                | 5<br>(3 - 9)                   |
| Gonococcal infection                                             | 13<br>(7 - 21)                 | --                 | 0<br>(0 - 0)        | 1<br>(0 - 1)              | 2<br>(1 - 3)                | 10<br>(5 - 18)                 |
| Other sexually transmitted diseases                              | 6<br>(4 - 10)                  | --                 | 0<br>(0 - 0)        | 1<br>(0 - 1)              | 1<br>(1 - 2)                | 4<br>(2 - 8)                   |
| Hepatitis                                                        | 88<br>(65 - 122)               | 0<br>(0 - 1)       | 1<br>(0 - 1)        | 6<br>(4 - 8)              | 27<br>(18 - 40)             | 54<br>(34 - 85)                |
| Acute hepatitis A                                                | 9<br>(2 - 19)                  | 0<br>(0 - 0)       | 0<br>(0 - 1)        | 1<br>(0 - 3)              | 3<br>(1 - 6)                | 4<br>(1 - 11)                  |
| Acute hepatitis B                                                | 77<br>(54 - 109)               | 0<br>(0 - 0)       | 0<br>(0 - 0)        | 4<br>(2 - 6)              | 23<br>(15 - 35)             | 50<br>(30 - 78)                |
| Acute hepatitis C                                                | 2<br>(0 - 6)                   | --                 | 0<br>(0 - 0)        | 0<br>(0 - 1)              | 1<br>(0 - 3)                | 1<br>(0 - 2)                   |
| Other infectious diseases                                        | 1,356<br>(546 - 2,030)         | 9<br>(4 - 15)      | 4<br>(2 - 7)        | 31<br>(21 - 39)           | 176<br>(85 - 251)           | 1,136<br>(408 - 1,759)         |
| Non-communicable diseases                                        | 539,625<br>(498,814 - 583,721) | 776<br>(602 - 997) | 233<br>(199 - 273)  | 9,875<br>(8,665 - 11,176) | 58,900<br>(53,276 - 65,056) | 469,842<br>(434,252 - 509,434) |
| Neoplasms                                                        | 172,632<br>(148,688 - 192,713) | 70<br>(49 - 97)    | 123<br>(101 - 150)  | 6,387<br>(5,554 - 7,245)  | 37,026<br>(32,712 - 41,105) | 129,026<br>(108,180 - 145,441) |
| Esophageal cancer                                                | 2,528<br>(2,101 - 3,043)       | --                 | --                  | 39<br>(30 - 50)           | 562<br>(453 - 687)          | 1,927<br>(1,556 - 2,401)       |
| Stomach cancer                                                   | 26,438<br>(19,352 - 36,247)    | --                 | --                  | 1,185<br>(624 - 1,622)    | 5,161<br>(3,676 - 6,891)    | 20,092<br>(14,160 - 28,555)    |
| Liver cancer                                                     | 14,447<br>(10,979 - 18,966)    | --                 | 2<br>(1 - 3)        | 120<br>(86 - 234)         | 2,425<br>(1,791 - 4,402)    | 11,900<br>(8,426 - 15,937)     |
| Liver cancer due to hepatitis B                                  | 1,245<br>(838 - 1,897)         | --                 | 1<br>(0 - 2)        | 34<br>(20 - 66)           | 350<br>(221 - 678)          | 861<br>(544 - 1,275)           |
| Liver cancer due to hepatitis C                                  | 11,457<br>(8,605 - 15,272)     | --                 | 0<br>(0 - 1)        | 71<br>(45 - 143)          | 1,781<br>(1,274 - 3,262)    | 9,604<br>(6,732 - 12,986)      |
| Liver cancer due to alcohol use                                  | 1,129<br>(700 - 1,712)         | --                 | --                  | 5<br>(2 - 11)             | 154<br>(90 - 285)           | 970<br>(574 - 1,494)           |
| Liver cancer due to other causes                                 | 616<br>(363 - 942)             | --                 | 1<br>(0 - 1)        | 10<br>(5 - 20)            | 139<br>(71 - 257)           | 466<br>(261 - 748)             |
| Larynx cancer                                                    | 168<br>(100 - 254)             | --                 | --                  | 3<br>(2 - 5)              | 35<br>(21 - 52)             | 130<br>(76 - 208)              |
| Tracheal, bronchus and lung cancer                               | 23,797<br>(17,784 - 28,740)    | --                 | --                  | 427<br>(333 - 616)        | 4,734<br>(3,903 - 5,681)    | 18,636<br>(12,771 - 23,412)    |
| Breast cancer                                                    | 12,223<br>(6,050 - 14,445)     | --                 | --                  | 1,476<br>(1,067 - 1,787)  | 5,270<br>(2,502 - 6,354)    | 5,477<br>(2,402 - 6,830)       |
| Cervical cancer                                                  | 4,423<br>(3,608 - 5,494)       | --                 | --                  | 541<br>(347 - 695)        | 1,309<br>(992 - 1,613)      | 2,573<br>(1,919 - 3,370)       |
| Uterine cancer                                                   | 2,187<br>(1,201 - 2,720)       | --                 | --                  | 100<br>(55 - 132)         | 842<br>(436 - 1,099)        | 1,245<br>(684 - 1,658)         |
| Prostate cancer                                                  | --                             | --                 | --                  | --                        | --                          | --                             |

Web Table 31- Japan deaths with 95% UI by age, sex, and cause in 2013

| Cause                                         | Females, All Ages              | Females, 0-4 Years | Females, 5-14 Years | Females, 15-49 Years     | Females, 50-69 Years        | Females, 70-80 Years           |
|-----------------------------------------------|--------------------------------|--------------------|---------------------|--------------------------|-----------------------------|--------------------------------|
| Colon and rectum cancer                       | 26,053<br>(21,181 - 31,797)    | --                 | --                  | 541<br>(448 - 646)       | 4,550<br>(3,888 - 5,185)    | 20,962<br>(16,344 - 26,664)    |
| Lip and oral cavity cancer                    | 1,425<br>(1,075 - 2,030)       | --                 | --                  | 57<br>(44 - 74)          | 278<br>(219 - 341)          | 1,090<br>(784 - 1,678)         |
| Nasopharynx cancer                            | 156<br>(70 - 277)              | --                 | 1<br>(0 - 1)        | 15<br>(8 - 31)           | 49<br>(25 - 98)             | 91<br>(35 - 152)               |
| Other pharynx cancer                          | 299<br>(222 - 392)             | --                 | --                  | 16<br>(11 - 22)          | 87<br>(62 - 113)            | 196<br>(137 - 278)             |
| Gallbladder and biliary tract cancer          | 11,163<br>(6,936 - 15,273)     | --                 | --                  | 95<br>(68 - 161)         | 1,532<br>(1,153 - 2,375)    | 9,536<br>(5,424 - 13,474)      |
| Pancreatic cancer                             | 15,732<br>(13,255 - 18,481)    | --                 | --                  | 194<br>(157 - 236)       | 3,269<br>(2,750 - 3,793)    | 12,270<br>(10,065 - 14,770)    |
| Malignant skin melanoma                       | 357<br>(192 - 460)             | --                 | --                  | 24<br>(14 - 31)          | 86<br>(50 - 112)            | 247<br>(127 - 339)             |
| Non-melanoma skin cancer                      | 604<br>(420 - 825)             | --                 | --                  | 10<br>(7 - 13)           | 45<br>(33 - 58)             | 549<br>(374 - 764)             |
| Ovarian cancer                                | 5,331<br>(4,032 - 6,355)       | --                 | --                  | 485<br>(388 - 588)       | 1,972<br>(1,443 - 2,329)    | 2,874<br>(2,079 - 3,724)       |
| Testicular cancer                             | --                             | --                 | --                  | --                       | --                          | --                             |
| Kidney cancer                                 | 1,912<br>(1,149 - 2,919)       | 2<br>(1 - 4)       | 1<br>(1 - 3)        | 36<br>(25 - 50)          | 385<br>(278 - 500)          | 1,487<br>(796 - 2,448)         |
| Bladder cancer                                | 2,518<br>(1,543 - 3,556)       | --                 | --                  | 16<br>(10 - 23)          | 222<br>(146 - 319)          | 2,280<br>(1,371 - 3,295)       |
| Brain and nervous system cancer               | 1,068<br>(819 - 1,347)         | 9<br>(5 - 15)      | 25<br>(18 - 34)     | 132<br>(101 - 166)       | 323<br>(253 - 442)          | 579<br>(398 - 808)             |
| Thyroid cancer                                | 1,363<br>(902 - 1,814)         | --                 | 0<br>(0 - 1)        | 16<br>(11 - 22)          | 223<br>(159 - 305)          | 1,124<br>(712 - 1,558)         |
| Mesothelioma                                  | 258<br>(104 - 366)             | --                 | --                  | 10<br>(5 - 14)           | 57<br>(21 - 83)             | 192<br>(77 - 291)              |
| Hodgkin lymphoma                              | 70<br>(51 - 98)                | 0<br>(0 - 1)       | 1<br>(0 - 1)        | 9<br>(7 - 13)            | 15<br>(10 - 25)             | 45<br>(29 - 65)                |
| Non-Hodgkin lymphoma                          | 4,874<br>(2,093 - 6,662)       | 4<br>(2 - 9)       | 7<br>(4 - 14)       | 153<br>(94 - 274)        | 904<br>(475 - 1,416)        | 3,805<br>(1,570 - 5,446)       |
| Multiple myeloma                              | 2,289<br>(1,334 - 3,546)       | --                 | --                  | 26<br>(15 - 43)          | 495<br>(298 - 791)          | 1,768<br>(1,004 - 2,793)       |
| Leukemia                                      | 3,598<br>(2,554 - 4,261)       | 17<br>(10 - 29)    | 32<br>(23 - 43)     | 272<br>(226 - 341)       | 825<br>(656 - 988)          | 2,451<br>(1,503 - 3,029)       |
| Other neoplasms                               | 7,353<br>(4,757 - 9,348)       | 37<br>(25 - 52)    | 54<br>(40 - 72)     | 388<br>(312 - 480)       | 1,372<br>(1,034 - 1,689)    | 5,501<br>(3,206 - 7,421)       |
| Cardiovascular diseases                       | 222,002<br>(194,762 - 280,152) | 27<br>(19 - 39)    | 21<br>(15 - 27)     | 1,840<br>(1,516 - 2,396) | 13,279<br>(11,293 - 17,822) | 206,834<br>(180,900 - 260,186) |
| Rheumatic heart disease                       | 2,746<br>(1,357 - 3,753)       | 0<br>(0 - 0)       | 1<br>(0 - 1)        | 24<br>(17 - 41)          | 135<br>(96 - 229)           | 2,586<br>(1,213 - 3,583)       |
| Ischemic heart disease                        | 72,524<br>(55,592 - 96,752)    | 1<br>(1 - 2)       | 2<br>(1 - 3)        | 556<br>(383 - 738)       | 4,315<br>(3,148 - 5,782)    | 67,650<br>(51,634 - 91,006)    |
| Cerebrovascular disease                       | 100,040<br>(81,367 - 141,584)  | 4<br>(2 - 8)       | 6<br>(4 - 9)        | 908<br>(724 - 1,264)     | 6,103<br>(4,951 - 8,934)    | 93,018<br>(75,069 - 131,846)   |
| Ischemic stroke                               | 64,704<br>(49,177 - 99,027)    | 0<br>(0 - 0)       | 1<br>(0 - 1)        | 82<br>(56 - 140)         | 1,373<br>(888 - 2,610)      | 63,247<br>(47,753 - 96,853)    |
| Hemorrhagic stroke                            | 35,336<br>(27,376 - 47,837)    | 4<br>(2 - 7)       | 6<br>(4 - 8)        | 826<br>(664 - 1,134)     | 4,730<br>(3,857 - 6,565)    | 29,771<br>(21,951 - 41,003)    |
| Hypertensive heart disease                    | 17,659<br>(11,191 - 31,247)    | 0<br>(0 - 0)       | 0<br>(0 - 1)        | 51<br>(33 - 92)          | 443<br>(270 - 830)          | 17,164<br>(10,830 - 30,584)    |
| Cardiomyopathy and myocarditis                | 2,721<br>(1,971 - 4,004)       | 17<br>(11 - 24)    | 8<br>(6 - 11)       | 110<br>(83 - 171)        | 343<br>(258 - 481)          | 2,243<br>(1,567 - 3,432)       |
| Atrial fibrillation and flutter               | 6,504<br>(4,376 - 9,528)       | --                 | --                  | 6<br>(5 - 9)             | 174<br>(125 - 239)          | 6,323<br>(4,203 - 9,310)       |
| Aortic aneurysm                               | 5,589<br>(2,524 - 9,519)       | --                 | --                  | 33<br>(16 - 52)          | 495<br>(231 - 783)          | 5,061<br>(2,280 - 8,770)       |
| Peripheral vascular disease                   | 666<br>(457 - 929)             | --                 | --                  | 1<br>(1 - 1)             | 14<br>(10 - 20)             | 651<br>(444 - 911)             |
| Endocarditis                                  | 1,198<br>(778 - 2,112)         | 1<br>(0 - 1)       | 1<br>(0 - 1)        | 21<br>(12 - 40)          | 129<br>(80 - 275)           | 1,048<br>(674 - 1,852)         |
| Other cardiovascular and circulatory diseases | 12,355<br>(6,700 - 16,700)     | 4<br>(2 - 6)       | 2<br>(1 - 4)        | 129<br>(75 - 178)        | 1,128<br>(794 - 1,684)      | 11,090<br>(5,377 - 15,357)     |
| Chronic respiratory diseases                  | 40,168<br>(32,174 - 49,550)    | 16<br>(10 - 24)    | 8<br>(6 - 10)       | 182<br>(147 - 259)       | 1,437<br>(1,183 - 1,880)    | 38,525<br>(30,655 - 47,887)    |
| Chronic obstructive pulmonary disease         | 23,346<br>(14,981 - 31,074)    | 6<br>(3 - 9)       | 2<br>(1 - 3)        | 78<br>(54 - 108)         | 821<br>(555 - 1,112)        | 22,439<br>(14,191 - 30,100)    |
| Pneumoconiosis                                | 151<br>(78 - 263)              | 0<br>(0 - 1)       | 1<br>(0 - 1)        | 3<br>(2 - 4)             | 9<br>(5 - 16)               | 139<br>(67 - 250)              |
| Silicosis                                     | 13<br>(6 - 26)                 | 0<br>(0 - 0)       | 0<br>(0 - 0)        | 0<br>(0 - 1)             | 1<br>(1 - 3)                | 11<br>(4 - 25)                 |
| Asbestosis                                    | 35<br>(16 - 67)                | 0<br>(0 - 0)       | 0<br>(0 - 0)        | 0<br>(0 - 1)             | 3<br>(1 - 5)                | 31<br>(14 - 63)                |
| Coal workers pneumoconiosis                   | 2<br>(1 - 3)                   | 0<br>(0 - 0)       | 0<br>(0 - 0)        | 0<br>(0 - 1)             | 1<br>(0 - 1)                | 1<br>(0 - 1)                   |
| Other pneumoconiosis                          | 102<br>(52 - 180)              | 0<br>(0 - 0)       | 0<br>(0 - 0)        | 1<br>(1 - 2)             | 4<br>(2 - 8)                | 96<br>(47 - 175)               |

Web Table 31- Japan deaths with 95% UI by age, sex, and cause in 2013

| Cause                                               | Females, All Ages           | Females, 0-4 Years | Females, 5-14 Years | Females, 15-49 Years | Females, 50-69 Years     | Females, 70-80 Years        |
|-----------------------------------------------------|-----------------------------|--------------------|---------------------|----------------------|--------------------------|-----------------------------|
| Asthma                                              | 1,841<br>(1,027 - 3,443)    | 4<br>(2 - 6)       | 3<br>(2 - 5)        | 48<br>(33 - 85)      | 121<br>(72 - 256)        | 1,667<br>(893 - 3,174)      |
| Interstitial lung disease and pulmonary sarcoidosis | 13,947<br>(8,313 - 22,159)  | 4<br>(2 - 7)       | 2<br>(1 - 2)        | 36<br>(24 - 61)      | 457<br>(274 - 724)       | 13,448<br>(7,988 - 21,536)  |
| Other chronic respiratory diseases                  | 883<br>(476 - 1,510)        | 3<br>(2 - 5)       | 1<br>(0 - 1)        | 18<br>(12 - 26)      | 30<br>(18 - 46)          | 832<br>(437 - 1,442)        |
| Cirrhosis                                           | 11,330<br>(9,442 - 13,356)  | 3<br>(2 - 4)       | 2<br>(2 - 3)        | 311<br>(257 - 372)   | 1,802<br>(1,491 - 2,108) | 9,212<br>(7,470 - 11,100)   |
| Cirrhosis due to hepatitis B                        | 2,149<br>(1,293 - 3,542)    | 0<br>(0 - 0)       | 0<br>(0 - 0)        | 46<br>(25 - 75)      | 320<br>(193 - 552)       | 1,783<br>(1,026 - 3,051)    |
| Cirrhosis due to hepatitis C                        | 6,659<br>(3,505 - 8,830)    | 1<br>(0 - 1)       | 1<br>(0 - 1)        | 177<br>(113 - 236)   | 1,061<br>(536 - 1,421)   | 5,419<br>(2,834 - 7,323)    |
| Cirrhosis due to alcohol use                        | 1,190<br>(620 - 2,392)      | --                 | --                  | 15<br>(7 - 26)       | 142<br>(77 - 278)        | 1,033<br>(518 - 2,092)      |
| Cirrhosis due to other causes                       | 1,332<br>(742 - 2,315)      | 2<br>(1 - 3)       | 1<br>(1 - 2)        | 73<br>(37 - 119)     | 279<br>(138 - 534)       | 977<br>(507 - 1,765)        |
| Digestive diseases                                  | 16,472<br>(13,532 - 20,173) | 3<br>(2 - 5)       | 4<br>(3 - 5)        | 131<br>(110 - 160)   | 849<br>(706 - 1,044)     | 15,484<br>(12,627 - 19,036) |
| Peptic ulcer disease                                | 2,812<br>(1,884 - 4,294)    | 0<br>(0 - 0)       | 0<br>(0 - 0)        | 17<br>(12 - 23)      | 134<br>(87 - 188)        | 2,661<br>(1,756 - 4,123)    |
| Gastritis and duodenitis                            | 274<br>(75 - 916)           | 0<br>(0 - 0)       | 0<br>(0 - 0)        | 2<br>(1 - 4)         | 4<br>(2 - 12)            | 266<br>(70 - 903)           |
| Appendicitis                                        | 153<br>(81 - 270)           | 0<br>(0 - 0)       | 0<br>(0 - 1)        | 5<br>(3 - 7)         | 12<br>(7 - 20)           | 136<br>(67 - 246)           |
| Paralytic ileus and intestinal obstruction          | 4,624<br>(2,618 - 7,269)    | 1<br>(1 - 2)       | 1<br>(1 - 2)        | 39<br>(23 - 60)      | 255<br>(162 - 407)       | 4,327<br>(2,400 - 6,783)    |
| Inguinal, femoral, and abdominal hernia             | 390<br>(143 - 662)          | 0<br>(0 - 0)       | 0<br>(0 - 0)        | 2<br>(1 - 3)         | 12<br>(6 - 21)           | 375<br>(130 - 639)          |
| Inflammatory bowel disease                          | 300<br>(155 - 786)          | 0<br>(0 - 0)       | 0<br>(0 - 0)        | 5<br>(3 - 11)        | 27<br>(14 - 59)          | 268<br>(131 - 711)          |
| Vascular intestinal disorders                       | 1,483<br>(538 - 2,358)      | 0<br>(0 - 0)       | 0<br>(0 - 1)        | 8<br>(3 - 14)        | 94<br>(40 - 159)         | 1,381<br>(487 - 2,223)      |
| Gallbladder and biliary diseases                    | 3,616<br>(1,731 - 5,055)    | 0<br>(0 - 0)       | 0<br>(0 - 0)        | 13<br>(8 - 18)       | 106<br>(60 - 145)        | 3,497<br>(1,649 - 4,933)    |
| Pancreatitis                                        | 826<br>(512 - 1,338)        | 0<br>(0 - 0)       | 0<br>(0 - 1)        | 21<br>(14 - 32)      | 73<br>(47 - 118)         | 731<br>(439 - 1,211)        |
| Other digestive diseases                            | 1,994<br>(1,381 - 2,678)    | 1<br>(0 - 1)       | 1<br>(0 - 1)        | 19<br>(13 - 24)      | 132<br>(85 - 174)        | 1,842<br>(1,267 - 2,521)    |
| Neurological disorders                              | 35,624<br>(28,414 - 43,533) | 16<br>(11 - 23)    | 14<br>(11 - 18)     | 200<br>(160 - 236)   | 1,349<br>(1,126 - 1,565) | 34,044<br>(26,971 - 41,834) |
| Alzheimer disease and other dementias               | 29,483<br>(22,777 - 36,701) | --                 | --                  | 1<br>(0 - 1)         | 429<br>(319 - 560)       | 29,053<br>(22,350 - 36,270) |
| Parkinson disease                                   | 3,701<br>(1,682 - 4,941)    | --                 | --                  | 12<br>(5 - 17)       | 244<br>(163 - 352)       | 3,445<br>(1,455 - 4,678)    |
| Epilepsy                                            | 402<br>(200 - 609)          | 4<br>(2 - 7)       | 6<br>(4 - 9)        | 76<br>(51 - 98)      | 46<br>(27 - 63)          | 269<br>(112 - 457)          |
| Multiple sclerosis                                  | 94<br>(44 - 125)            | --                 | --                  | 21<br>(10 - 30)      | 42<br>(18 - 58)          | 31<br>(14 - 46)             |
| Other neurological disorders                        | 1,945<br>(1,634 - 2,256)    | 12<br>(8 - 18)     | 8<br>(6 - 11)       | 90<br>(74 - 106)     | 588<br>(488 - 699)       | 1,246<br>(1,003 - 1,509)    |
| Mental and substance use disorders                  | 542<br>(390 - 660)          | 1<br>(1 - 2)       | 0<br>(0 - 1)        | 163<br>(134 - 199)   | 118<br>(78 - 149)        | 259<br>(155 - 364)          |
| Schizophrenia                                       | 202<br>(83 - 298)           | --                 | --                  | 22<br>(12 - 31)      | 59<br>(28 - 86)          | 122<br>(42 - 208)           |
| Alcohol use disorders                               | 50<br>(22 - 86)             | --                 | --                  | 19<br>(8 - 34)       | 19<br>(8 - 34)           | 12<br>(5 - 20)              |
| Drug use disorders                                  | 278<br>(225 - 342)          | 1<br>(1 - 2)       | --                  | 112<br>(91 - 137)    | 40<br>(31 - 50)          | 125<br>(85 - 178)           |
| Opioid use disorders                                | 75<br>(58 - 93)             | 0<br>(0 - 0)       | --                  | 29<br>(23 - 37)      | 9<br>(7 - 12)            | 36<br>(23 - 52)             |
| Cocaine use disorders                               | 27<br>(21 - 35)             | 0<br>(0 - 0)       | --                  | 13<br>(10 - 18)      | 3<br>(3 - 5)             | 10<br>(6 - 17)              |
| Amphetamine use disorders                           | 26<br>(21 - 34)             | 0<br>(0 - 0)       | --                  | 11<br>(9 - 14)       | 4<br>(3 - 5)             | 11<br>(7 - 17)              |
| Other drug use disorders                            | 150<br>(121 - 184)          | 1<br>(0 - 1)       | --                  | 58<br>(46 - 72)      | 23<br>(18 - 29)          | 68<br>(46 - 98)             |
| Eating disorders                                    | 11<br>(7 - 18)              | --                 | 0<br>(0 - 1)        | 11<br>(6 - 18)       | --                       | --                          |
| Anorexia nervosa                                    | 11<br>(7 - 18)              | --                 | 0<br>(0 - 1)        | 11<br>(6 - 18)       | --                       | --                          |
| Diabetes, urogenital, blood, and endocrine diseases | 34,589<br>(26,943 - 41,145) | 40<br>(29 - 57)    | 20<br>(15 - 27)     | 425<br>(350 - 564)   | 2,243<br>(1,872 - 2,748) | 31,861<br>(24,305 - 38,221) |
| Diabetes mellitus                                   | 5,209<br>(4,139 - 6,999)    | 1<br>(0 - 1)       | 1<br>(0 - 1)        | 66<br>(53 - 89)      | 422<br>(334 - 616)       | 4,720<br>(3,706 - 6,281)    |
| Acute glomerulonephritis                            | 83<br>(48 - 146)            | 0<br>(0 - 0)       | 0<br>(0 - 1)        | 3<br>(2 - 4)         | 7<br>(4 - 12)            | 72<br>(39 - 131)            |
| Chronic kidney disease                              | 19,802<br>(14,760 - 24,936) | 3<br>(2 - 4)       | 3<br>(2 - 4)        | 105<br>(83 - 176)    | 1,229<br>(985 - 1,630)   | 18,462<br>(13,483 - 23,430) |
| Chronic kidney disease due to diabetes mellitus     | 7,002<br>(5,013 - 9,521)    | 0<br>(0 - 0)       | 1<br>(0 - 1)        | 49<br>(37 - 81)      | 664<br>(493 - 854)       | 6,288<br>(4,354 - 8,740)    |

Web Table 31- Japan deaths with 95% UI by age, sex, and cause in 2013

| Cause                                               | Females, All Ages           | Females, 0-4 Years | Females, 5-14 Years | Females, 15-49 Years     | Females, 50-69 Years     | Females, 70-80 Years        |
|-----------------------------------------------------|-----------------------------|--------------------|---------------------|--------------------------|--------------------------|-----------------------------|
| Chronic kidney disease due to hypertension          | 3,319<br>(1,746 - 6,057)    | 1<br>(0 - 1)       | 0<br>(0 - 1)        | 11<br>(6 - 22)           | 94<br>(44 - 204)         | 3,212<br>(1,658 - 5,809)    |
| Chronic kidney disease due to glomerulonephritis    | 1,078<br>(613 - 2,043)      | 1<br>(0 - 1)       | 1<br>(0 - 1)        | 13<br>(8 - 23)           | 75<br>(45 - 131)         | 988<br>(539 - 1,944)        |
| Chronic kidney disease due to other causes          | 8,403<br>(4,094 - 12,819)   | 1<br>(1 - 2)       | 1<br>(1 - 2)        | 31<br>(18 - 65)          | 395<br>(208 - 694)       | 7,974<br>(3,680 - 12,428)   |
| Urinary diseases and male infertility               | 6,102<br>(2,834 - 8,810)    | 3<br>(1 - 4)       | 1<br>(0 - 1)        | 35<br>(20 - 45)          | 249<br>(129 - 331)       | 5,816<br>(2,644 - 8,496)    |
| Interstitial nephritis and urinary tract infections | 5,474<br>(2,533 - 7,889)    | 1<br>(1 - 2)       | 0<br>(0 - 0)        | 27<br>(15 - 36)          | 215<br>(114 - 289)       | 5,230<br>(2,385 - 7,620)    |
| Urolithiasis                                        | 318<br>(75 - 658)           | --                 | 0<br>(0 - 0)        | 4<br>(2 - 7)             | 20<br>(6 - 35)           | 294<br>(66 - 620)           |
| Other urinary diseases                              | 311<br>(85 - 596)           | 1<br>(1 - 2)       | 0<br>(0 - 0)        | 4<br>(2 - 5)             | 14<br>(5 - 23)           | 292<br>(72 - 579)           |
| Gynecological diseases                              | 23<br>(12 - 35)             | --                 | --                  | 3<br>(2 - 3)             | 2<br>(1 - 2)             | 19<br>(9 - 30)              |
| Uterine fibroids                                    | 6<br>(3 - 10)               | --                 | --                  | 0<br>(0 - 1)             | 0<br>(0 - 1)             | 5<br>(3 - 9)                |
| Polycystic ovarian syndrome                         | 0<br>(0 - 0)                | --                 | --                  | 0<br>(0 - 0)             | 0<br>(0 - 0)             | --                          |
| Endometriosis                                       | 0<br>(0 - 1)                | --                 | --                  | 0<br>(0 - 1)             | 0<br>(0 - 0)             | --                          |
| Genital prolapse                                    | 5<br>(3 - 9)                | --                 | --                  | 0<br>(0 - 0)             | 0<br>(0 - 0)             | 5<br>(2 - 8)                |
| Other gynecological diseases                        | 10<br>(6 - 16)              | --                 | --                  | 1<br>(1 - 2)             | 1<br>(1 - 1)             | 8<br>(4 - 13)               |
| Hemoglobinopathies and hemolytic anemias            | 976<br>(605 - 1,521)        | 13<br>(8 - 22)     | 8<br>(5 - 14)       | 119<br>(77 - 202)        | 101<br>(67 - 167)        | 736<br>(430 - 1,152)        |
| Thalassemias                                        | 81<br>(56 - 136)            | 8<br>(5 - 15)      | 6<br>(4 - 10)       | 58<br>(38 - 100)         | 6<br>(4 - 10)            | 3<br>(2 - 5)                |
| Sickle cell disorders                               | 2<br>(1 - 3)                | 0<br>(0 - 0)       | 0<br>(0 - 0)        | 1<br>(1 - 2)             | 0<br>(0 - 1)             | 0<br>(0 - 0)                |
| G6PD deficiency                                     | 2<br>(1 - 3)                | 0<br>(0 - 0)       | 0<br>(0 - 0)        | 1<br>(0 - 1)             | 0<br>(0 - 1)             | 0<br>(0 - 1)                |
| Other hemoglobinopathies and hemolytic anemias      | 891<br>(541 - 1,389)        | 4<br>(2 - 7)       | 2<br>(1 - 3)        | 59<br>(38 - 103)         | 94<br>(62 - 157)         | 732<br>(428 - 1,146)        |
| Endocrine, metabolic, blood, and immune disorders   | 2,395<br>(1,220 - 3,252)    | 21<br>(11 - 31)    | 7<br>(4 - 10)       | 96<br>(67 - 132)         | 233<br>(135 - 302)       | 2,038<br>(966 - 2,899)      |
| Musculoskeletal disorders                           | 3,594<br>(2,790 - 4,787)    | --                 | 3<br>(2 - 4)        | 109<br>(85 - 229)        | 606<br>(469 - 1,163)     | 2,876<br>(2,087 - 3,860)    |
| Rheumatoid arthritis                                | 1,627<br>(1,134 - 2,360)    | --                 | 0<br>(0 - 1)        | 11<br>(8 - 19)           | 207<br>(144 - 374)       | 1,408<br>(943 - 2,044)      |
| Other musculoskeletal disorders                     | 1,968<br>(1,472 - 2,579)    | --                 | 2<br>(2 - 3)        | 98<br>(77 - 206)         | 399<br>(303 - 759)       | 1,468<br>(929 - 2,014)      |
| Other non-communicable diseases                     | 2,673<br>(2,147 - 3,361)    | 598<br>(446 - 789) | 38<br>(28 - 50)     | 126<br>(100 - 160)       | 190<br>(155 - 236)       | 1,722<br>(1,232 - 2,315)    |
| Congenital anomalies                                | 1,379<br>(1,055 - 1,710)    | 536<br>(394 - 709) | 37<br>(28 - 49)     | 116<br>(91 - 149)        | 135<br>(106 - 170)       | 555<br>(332 - 781)          |
| Neural tube defects                                 | 14<br>(9 - 20)              | 8<br>(4 - 13)      | 1<br>(0 - 1)        | 3<br>(2 - 4)             | 2<br>(1 - 3)             | 1<br>(1 - 2)                |
| Congenital heart anomalies                          | 610<br>(459 - 769)          | 224<br>(155 - 315) | 19<br>(13 - 26)     | 64<br>(49 - 84)          | 62<br>(46 - 81)          | 239<br>(141 - 354)          |
| Cleft lip and cleft palate                          | 2<br>(0 - 7)                | 2<br>(0 - 7)       | --                  | --                       | --                       | --                          |
| Down syndrome                                       | 42<br>(21 - 87)             | 21<br>(8 - 51)     | 4<br>(2 - 9)        | 9<br>(4 - 16)            | 7<br>(3 - 15)            | 2<br>(1 - 4)                |
| Chromosomal unbalanced rearrangements               | 120<br>(69 - 174)           | 109<br>(61 - 162)  | 2<br>(1 - 4)        | 5<br>(3 - 8)             | 2<br>(1 - 3)             | 2<br>(1 - 2)                |
| Other congenital anomalies                          | 592<br>(424 - 769)          | 171<br>(117 - 242) | 11<br>(8 - 17)      | 35<br>(25 - 48)          | 62<br>(45 - 83)          | 311<br>(175 - 452)          |
| Skin and subcutaneous diseases                      | 1,233<br>(837 - 1,763)      | 2<br>(1 - 3)       | 1<br>(1 - 1)        | 10<br>(7 - 12)           | 55<br>(42 - 70)          | 1,166<br>(779 - 1,693)      |
| Cellulitis                                          | 286<br>(102 - 525)          | 1<br>(0 - 1)       | 0<br>(0 - 0)        | 3<br>(2 - 5)             | 25<br>(14 - 37)          | 258<br>(78 - 493)           |
| Pyoderma                                            | 270<br>(145 - 436)          | 1<br>(0 - 1)       | 0<br>(0 - 0)        | 2<br>(1 - 3)             | 19<br>(12 - 28)          | 248<br>(128 - 412)          |
| Decubitus ulcer                                     | 491<br>(261 - 857)          | 0<br>(0 - 0)       | 0<br>(0 - 0)        | 2<br>(1 - 2)             | 4<br>(2 - 6)             | 485<br>(256 - 850)          |
| Other skin and subcutaneous diseases                | 186<br>(58 - 441)           | 1<br>(0 - 1)       | 0<br>(0 - 0)        | 2<br>(1 - 4)             | 8<br>(4 - 14)            | 175<br>(47 - 431)           |
| Sudden infant death syndrome                        | 60<br>(22 - 149)            | 60<br>(22 - 149)   | --                  | --                       | --                       | --                          |
| Injuries                                            | 31,933<br>(24,516 - 38,183) | 177<br>(128 - 253) | 117<br>(96 - 143)   | 3,952<br>(3,279 - 4,525) | 5,031<br>(4,158 - 5,900) | 22,657<br>(16,149 - 28,387) |
| Transport injuries                                  | 3,474<br>(2,781 - 4,654)    | 29<br>(19 - 46)    | 39<br>(28 - 56)     | 403<br>(320 - 712)       | 799<br>(618 - 1,178)     | 2,204<br>(1,593 - 2,892)    |
| Road injuries                                       | 3,291<br>(2,628 - 4,451)    | 27<br>(17 - 42)    | 36<br>(26 - 53)     | 384<br>(302 - 687)       | 772<br>(599 - 1,144)     | 2,072<br>(1,514 - 2,749)    |
| Pedestrian road injuries                            | 1,934<br>(1,459 - 2,726)    | 16<br>(9 - 26)     | 18<br>(11 - 29)     | 80<br>(46 - 138)         | 342<br>(241 - 551)       | 1,479<br>(1,074 - 2,083)    |

Web Table 31- Japan deaths with 95% UI by age, sex, and cause in 2013

| Cause                                           | Females, All Ages           | Females, 0-4 Years | Females, 5-14 Years | Females, 15-49 Years     | Females, 50-69 Years     | Females, 70-80 Years        |
|-------------------------------------------------|-----------------------------|--------------------|---------------------|--------------------------|--------------------------|-----------------------------|
| Cyclist road injuries                           | 497<br>(320 - 684)          | 1<br>(0 - 3)       | 8<br>(4 - 14)       | 47<br>(26 - 83)          | 180<br>(112 - 285)       | 260<br>(132 - 405)          |
| Motorcyclist road injuries                      | 165<br>(69 - 289)           | 0<br>(0 - 1)       | 1<br>(0 - 2)        | 55<br>(25 - 109)         | 66<br>(27 - 125)         | 42<br>(11 - 82)             |
| Motor vehicle road injuries                     | 689<br>(436 - 980)          | 9<br>(5 - 15)      | 9<br>(5 - 14)       | 199<br>(140 - 399)       | 182<br>(108 - 276)       | 290<br>(115 - 456)          |
| Other road injuries                             | 6<br>(3 - 9)                | 0<br>(0 - 0)       | 0<br>(0 - 1)        | 2<br>(1 - 4)             | 2<br>(1 - 3)             | 2<br>(1 - 4)                |
| Other transport injuries                        | 183<br>(106 - 317)          | 2<br>(1 - 4)       | 2<br>(1 - 4)        | 20<br>(12 - 32)          | 27<br>(15 - 46)          | 131<br>(67 - 251)           |
| Unintentional injuries                          | 18,600<br>(12,251 - 24,436) | 125<br>(87 - 189)  | 48<br>(38 - 60)     | 467<br>(339 - 569)       | 1,420<br>(991 - 1,756)   | 16,540<br>(10,631 - 22,146) |
| Falls                                           | 5,543<br>(3,502 - 7,608)    | 10<br>(6 - 15)     | 5<br>(3 - 7)        | 89<br>(55 - 111)         | 259<br>(173 - 325)       | 5,181<br>(3,226 - 7,200)    |
| Drowning                                        | 3,114<br>(1,771 - 4,184)    | 29<br>(15 - 59)    | 19<br>(13 - 29)     | 120<br>(73 - 161)        | 378<br>(215 - 517)       | 2,568<br>(1,404 - 3,514)    |
| Fire, heat, and hot substances                  | 982<br>(638 - 1,276)        | 11<br>(7 - 18)     | 9<br>(6 - 13)       | 64<br>(44 - 81)          | 116<br>(74 - 150)        | 781<br>(490 - 1,049)        |
| Poisonings                                      | 316<br>(171 - 449)          | 2<br>(1 - 3)       | 2<br>(1 - 2)        | 34<br>(21 - 48)          | 43<br>(25 - 61)          | 236<br>(116 - 356)          |
| Exposure to mechanical forces                   | 283<br>(177 - 380)          | 22<br>(12 - 44)    | 3<br>(2 - 5)        | 20<br>(16 - 29)          | 40<br>(32 - 60)          | 198<br>(100 - 287)          |
| Unintentional firearm injuries                  | 24<br>(15 - 37)             | 0<br>(0 - 1)       | 1<br>(0 - 1)        | 3<br>(2 - 3)             | 2<br>(1 - 3)             | 18<br>(10 - 31)             |
| Unintentional suffocation                       | 133<br>(42 - 216)           | 19<br>(9 - 41)     | 1<br>(0 - 1)        | 4<br>(2 - 6)             | 8<br>(3 - 13)            | 102<br>(18 - 183)           |
| Other exposure to mechanical forces             | 126<br>(100 - 164)          | 3<br>(2 - 5)       | 2<br>(1 - 3)        | 13<br>(10 - 22)          | 31<br>(24 - 51)          | 77<br>(54 - 105)            |
| Adverse effects of medical treatment            | 1,062<br>(504 - 1,518)      | 7<br>(3 - 11)      | 3<br>(1 - 4)        | 31<br>(17 - 43)          | 119<br>(63 - 160)        | 902<br>(401 - 1,332)        |
| Animal contact                                  | 33<br>(17 - 80)             | 0<br>(0 - 1)       | 1<br>(0 - 1)        | 3<br>(1 - 6)             | 5<br>(2 - 14)            | 24<br>(11 - 63)             |
| Venomous animal contact                         | 18<br>(9 - 49)              | 0<br>(0 - 0)       | 0<br>(0 - 1)        | 1<br>(1 - 3)             | 3<br>(1 - 8)             | 13<br>(6 - 39)              |
| Non-venomous animal contact                     | 15<br>(6 - 33)              | 0<br>(0 - 0)       | 0<br>(0 - 1)        | 2<br>(1 - 4)             | 2<br>(1 - 6)             | 11<br>(3 - 24)              |
| Foreign body                                    | 7,173<br>(2,825 - 11,891)   | 42<br>(23 - 72)    | 7<br>(4 - 10)       | 101<br>(48 - 147)        | 449<br>(212 - 649)       | 6,574<br>(2,491 - 11,160)   |
| Pulmonary aspiration and foreign body in airway | 7,157<br>(2,802 - 11,876)   | 42<br>(23 - 71)    | 6<br>(3 - 10)       | 98<br>(46 - 144)         | 447<br>(210 - 647)       | 6,563<br>(2,482 - 11,150)   |
| Foreign body in other body part                 | 16<br>(8 - 29)              | 0<br>(0 - 0)       | 1<br>(0 - 1)        | 3<br>(2 - 4)             | 2<br>(1 - 3)             | 11<br>(4 - 23)              |
| Other unintentional injuries                    | 95<br>(51 - 143)            | 2<br>(1 - 3)       | 1<br>(0 - 1)        | 5<br>(3 - 8)             | 11<br>(6 - 17)           | 76<br>(37 - 124)            |
| Self-harm and interpersonal violence            | 9,859<br>(8,488 - 11,861)   | 24<br>(16 - 39)    | 30<br>(22 - 39)     | 3,081<br>(2,338 - 3,568) | 2,811<br>(2,311 - 3,434) | 3,913<br>(3,043 - 5,878)    |
| Self-harm                                       | 9,447<br>(8,021 - 11,408)   | --                 | 16<br>(10 - 22)     | 2,974<br>(2,220 - 3,459) | 2,728<br>(2,217 - 3,338) | 3,729<br>(2,866 - 5,706)    |
| Interpersonal violence                          | 413<br>(305 - 589)          | 24<br>(16 - 39)    | 14<br>(9 - 22)      | 108<br>(80 - 163)        | 83<br>(60 - 120)         | 184<br>(123 - 259)          |
| Assault by firearm                              | 13<br>(5 - 21)              | 0<br>(0 - 1)       | 0<br>(0 - 1)        | 3<br>(1 - 5)             | 2<br>(1 - 4)             | 7<br>(3 - 12)               |
| Assault by sharp object                         | 100<br>(66 - 166)           | 2<br>(1 - 4)       | 2<br>(1 - 4)        | 34<br>(23 - 59)          | 25<br>(16 - 42)          | 37<br>(20 - 65)             |
| Assault by other means                          | 300<br>(216 - 428)          | 21<br>(14 - 36)    | 11<br>(8 - 19)      | 71<br>(51 - 110)         | 55<br>(37 - 82)          | 141<br>(92 - 201)           |
| Forces of nature, war, and legal intervention   | 0<br>(0 - 0)                | 0<br>(0 - 0)       | --                  | --                       | --                       | 0<br>(0 - 0)                |
| Exposure to forces of nature                    | 0<br>(0 - 0)                | 0<br>(0 - 0)       | --                  | --                       | --                       | 0<br>(0 - 0)                |

Web Table 31- Jordan deaths with 95% UI by age, sex, and cause in 2013

| Cause                                                             | Both Sexes, All Ages        | Both Sexes, 0-4 Years    | Both Sexes, 5-14 Years | Both Sexes, 15-49 Years  | Both Sexes, 50-69 Years  | Both Sexes, 70-80 Years  |
|-------------------------------------------------------------------|-----------------------------|--------------------------|------------------------|--------------------------|--------------------------|--------------------------|
| All causes                                                        | 19,639<br>(17,496 - 21,931) | 3,513<br>(3,207 - 3,875) | 501<br>(462 - 543)     | 3,765<br>(3,094 - 4,498) | 4,808<br>(4,054 - 5,690) | 7,051<br>(6,429 - 7,837) |
| Communicable, maternal, neonatal, and nutritional diseases        | 2,632<br>(2,353 - 3,016)    | 1,845<br>(1,618 - 2,164) | 88<br>(62 - 138)       | 269<br>(215 - 338)       | 126<br>(100 - 157)       | 303<br>(249 - 365)       |
| HIV/AIDS and tuberculosis                                         | 32<br>(27 - 37)             | 1<br>(0 - 1)             | 1<br>(0 - 1)           | 13<br>(11 - 16)          | 8<br>(7 - 11)            | 9<br>(7 - 11)            |
| Tuberculosis                                                      | 23<br>(19 - 27)             | 1<br>(0 - 1)             | 0<br>(0 - 1)           | 6<br>(5 - 8)             | 7<br>(5 - 9)             | 9<br>(7 - 11)            |
| HIV/AIDS                                                          | 9<br>(7 - 11)               | 0<br>(0 - 0)             | 0<br>(0 - 0)           | 7<br>(6 - 9)             | 1<br>(1 - 2)             | 0<br>(0 - 0)             |
| HIV/AIDS resulting in mycobacterial infection                     | 0<br>(0 - 1)                | 0<br>(0 - 0)             | 0<br>(0 - 0)           | 0<br>(0 - 0)             | 0<br>(0 - 0)             | 0<br>(0 - 0)             |
| HIV/AIDS resulting in other diseases                              | 9<br>(7 - 11)               | 0<br>(0 - 0)             | 0<br>(0 - 0)           | 7<br>(6 - 9)             | 1<br>(1 - 2)             | 0<br>(0 - 0)             |
| Diarrhea, lower respiratory, and other common infectious diseases | 1,162<br>(956 - 1,518)      | 543<br>(406 - 822)       | 79<br>(52 - 131)       | 169<br>(124 - 232)       | 101<br>(76 - 130)        | 270<br>(215 - 330)       |
| Diarrheal diseases                                                | 53<br>(38 - 77)             | 35<br>(20 - 58)          | 2<br>(1 - 3)           | 3<br>(3 - 5)             | 2<br>(1 - 2)             | 11<br>(8 - 16)           |
| Intestinal infectious diseases                                    | 144<br>(70 - 256)           | 45<br>(19 - 84)          | 38<br>(19 - 68)        | 52<br>(23 - 99)          | 7<br>(3 - 13)            | 2<br>(1 - 4)             |
| Typhoid fever                                                     | 111<br>(53 - 202)           | 33<br>(15 - 62)          | 30<br>(15 - 53)        | 41<br>(18 - 78)          | 5<br>(2 - 10)            | 2<br>(1 - 3)             |
| Paratyphoid fever                                                 | 32<br>(15 - 59)             | 11<br>(5 - 22)           | 9<br>(4 - 17)          | 11<br>(4 - 21)           | 1<br>(0 - 3)             | 0<br>(0 - 1)             |
| Other intestinal infectious diseases                              | 1<br>(0 - 4)                | 0<br>(0 - 2)             | 0<br>(0 - 1)           | 0<br>(0 - 2)             | 0<br>(0 - 1)             | 0<br>(0 - 0)             |
| Lower respiratory infections                                      | 778<br>(643 - 912)          | 333<br>(246 - 421)       | 17<br>(12 - 23)        | 90<br>(66 - 116)         | 87<br>(63 - 114)         | 251<br>(198 - 310)       |
| Upper respiratory infections                                      | 1<br>(1 - 2)                | 0<br>(0 - 1)             | 0<br>(0 - 0)           | 0<br>(0 - 1)             | 0<br>(0 - 1)             | 0<br>(0 - 1)             |
| Otitis media                                                      | 1<br>(1 - 1)                | 0<br>(0 - 0)             | 0<br>(0 - 0)           | 0<br>(0 - 0)             | 0<br>(0 - 0)             | 0<br>(0 - 1)             |
| Meningitis                                                        | 46<br>(35 - 60)             | 29<br>(19 - 42)          | 4<br>(3 - 6)           | 8<br>(6 - 11)            | 2<br>(1 - 3)             | 3<br>(2 - 4)             |
| Pneumococcal meningitis                                           | 10<br>(7 - 13)              | 5<br>(3 - 8)             | 1<br>(1 - 2)           | 2<br>(1 - 3)             | 1<br>(0 - 1)             | 1<br>(0 - 1)             |
| H influenzae type B meningitis                                    | 13<br>(8 - 18)              | 10<br>(6 - 15)           | 1<br>(1 - 2)           | 1<br>(1 - 1)             | 0<br>(0 - 0)             | 0<br>(0 - 0)             |
| Meningococcal meningitis                                          | 13<br>(9 - 19)              | 9<br>(5 - 14)            | 1<br>(1 - 2)           | 2<br>(1 - 3)             | 1<br>(0 - 1)             | 1<br>(0 - 1)             |
| Other meningitis                                                  | 10<br>(7 - 14)              | 5<br>(3 - 8)             | 1<br>(0 - 1)           | 3<br>(2 - 4)             | 1<br>(0 - 1)             | 1<br>(1 - 2)             |
| Encephalitis                                                      | 34<br>(26 - 45)             | 13<br>(8 - 18)           | 5<br>(4 - 8)           | 12<br>(9 - 18)           | 3<br>(2 - 4)             | 1<br>(1 - 2)             |
| Diphtheria                                                        | 0<br>(0 - 2)                | 0<br>(0 - 2)             | 0<br>(0 - 0)           | 0<br>(0 - 0)             | 0<br>(0 - 0)             | --                       |
| Whooping cough                                                    | 3<br>(0 - 16)               | 3<br>(0 - 15)            | 0<br>(0 - 1)           | 0<br>(0 - 0)             | 0<br>(0 - 0)             | --                       |
| Tetanus                                                           | 1<br>(0 - 1)                | 0<br>(0 - 0)             | 0<br>(0 - 0)           | 0<br>(0 - 1)             | 0<br>(0 - 0)             | 0<br>(0 - 0)             |
| Measles                                                           | 98<br>(3 - 523)             | 84<br>(2 - 444)          | 12<br>(0 - 66)         | 2<br>(0 - 14)            | 0<br>(0 - 0)             | --                       |
| Varicella and herpes zoster                                       | 2<br>(1 - 4)                | 1<br>(0 - 2)             | 0<br>(0 - 1)           | 1<br>(0 - 1)             | 0<br>(0 - 0)             | 1<br>(0 - 2)             |
| Neglected tropical diseases and malaria                           | 50<br>(35 - 71)             | 16<br>(7 - 30)           | 5<br>(3 - 9)           | 19<br>(10 - 29)          | 7<br>(4 - 11)            | 3<br>(2 - 4)             |
| Leishmaniasis                                                     | 41<br>(25 - 61)             | 15<br>(6 - 29)           | 5<br>(2 - 9)           | 16<br>(7 - 25)           | 4<br>(2 - 8)             | 1<br>(0 - 2)             |
| Visceral leishmaniasis                                            | 41<br>(25 - 61)             | 15<br>(6 - 29)           | 5<br>(2 - 9)           | 16<br>(7 - 25)           | 4<br>(2 - 8)             | 1<br>(0 - 2)             |
| Schistosomiasis                                                   | 6<br>(5 - 8)                | 0<br>(0 - 0)             | 0<br>(0 - 0)           | 2<br>(1 - 3)             | 2<br>(2 - 3)             | 2<br>(1 - 2)             |
| Cysticercosis                                                     | 0<br>(0 - 0)                | 0<br>(0 - 0)             | 0<br>(0 - 0)           | 0<br>(0 - 0)             | 0<br>(0 - 0)             | 0<br>(0 - 0)             |
| Cystic echinococcosis                                             | 0<br>(0 - 0)                | 0<br>(0 - 0)             | 0<br>(0 - 0)           | 0<br>(0 - 0)             | 0<br>(0 - 0)             | 0<br>(0 - 0)             |
| Dengue                                                            | 1<br>(1 - 1)                | 0<br>(0 - 0)             | 0<br>(0 - 0)           | 0<br>(0 - 0)             | 0<br>(0 - 0)             | 0<br>(0 - 0)             |
| Rabies                                                            | 1<br>(0 - 1)                | 0<br>(0 - 0)             | 0<br>(0 - 0)           | 0<br>(0 - 0)             | 0<br>(0 - 0)             | 0<br>(0 - 0)             |
| Intestinal nematode infections                                    | 1<br>(0 - 3)                | 0<br>(0 - 3)             | 0<br>(0 - 1)           | 0<br>(0 - 1)             | 0<br>(0 - 0)             | 0<br>(0 - 0)             |
| Ascariasis                                                        | 1<br>(0 - 3)                | 0<br>(0 - 3)             | 0<br>(0 - 1)           | 0<br>(0 - 1)             | 0<br>(0 - 0)             | 0<br>(0 - 0)             |
| Other neglected tropical diseases                                 | 1<br>(1 - 1)                | 0<br>(0 - 0)             | 0<br>(0 - 0)           | 1<br>(0 - 1)             | 0<br>(0 - 0)             | 0<br>(0 - 0)             |
| Maternal disorders                                                | 57<br>(39 - 79)             | --                       | 0<br>(0 - 1)           | 57<br>(39 - 79)          | --                       | --                       |
| Maternal hemorrhage                                               | 8<br>(5 - 12)               | --                       | 0<br>(0 - 0)           | 8<br>(5 - 12)            | --                       | --                       |



Web Table 31- Jordan deaths with 95% UI by age, sex, and cause in 2013

| Cause                                                            | Both Sexes, All Ages        | Both Sexes, 0-4 Years    | Both Sexes, 5-14 Years | Both Sexes, 15-49 Years  | Both Sexes, 50-69 Years  | Both Sexes, 70-80 Years  |
|------------------------------------------------------------------|-----------------------------|--------------------------|------------------------|--------------------------|--------------------------|--------------------------|
| Maternal sepsis and other maternal infections                    | 5<br>(3 - 8)                | --                       | 0<br>(0 - 0)           | 5<br>(3 - 8)             | --                       | --                       |
| Maternal hypertensive disorders                                  | 9<br>(6 - 13)               | --                       | 0<br>(0 - 0)           | 9<br>(6 - 13)            | --                       | --                       |
| Maternal obstructed labor                                        | 7<br>(4 - 10)               | --                       | 0<br>(0 - 0)           | 7<br>(4 - 10)            | --                       | --                       |
| Maternal abortive outcome                                        | 7<br>(4 - 10)               | --                       | 0<br>(0 - 0)           | 7<br>(4 - 10)            | --                       | --                       |
| Indirect maternal deaths                                         | 5<br>(3 - 9)                | --                       | 0<br>(0 - 0)           | 5<br>(3 - 9)             | --                       | --                       |
| Late maternal deaths                                             | 5<br>(2 - 9)                | --                       | 0<br>(0 - 0)           | 5<br>(2 - 9)             | --                       | --                       |
| Maternal deaths aggravated by HIV/AIDS                           | 0<br>(0 - 0)                | --                       | --                     | 0<br>(0 - 0)             | --                       | --                       |
| Other maternal disorders                                         | 12<br>(8 - 18)              | --                       | 0<br>(0 - 0)           | 12<br>(8 - 18)           | --                       | --                       |
| Neonatal disorders                                               | 1,267<br>(1,094 - 1,473)    | 1,267<br>(1,094 - 1,473) | --                     | --                       | --                       | --                       |
| Neonatal preterm birth complications                             | 737<br>(577 - 919)          | 737<br>(577 - 919)       | --                     | --                       | --                       | --                       |
| Neonatal encephalopathy due to birth asphyxia and trauma         | 200<br>(128 - 295)          | 200<br>(128 - 295)       | --                     | --                       | --                       | --                       |
| Neonatal sepsis and other neonatal infections                    | 200<br>(113 - 301)          | 200<br>(113 - 301)       | --                     | --                       | --                       | --                       |
| Hemolytic disease and other neonatal jaundice                    | 13<br>(6 - 28)              | 13<br>(6 - 28)           | --                     | --                       | --                       | --                       |
| Other neonatal disorders                                         | 118<br>(74 - 188)           | 118<br>(74 - 188)        | --                     | --                       | --                       | --                       |
| Nutritional deficiencies                                         | 33<br>(26 - 44)             | 7<br>(4 - 10)            | 1<br>(1 - 1)           | 5<br>(4 - 8)             | 4<br>(3 - 6)             | 15<br>(11 - 22)          |
| Protein-energy malnutrition                                      | 10<br>(6 - 14)              | 4<br>(2 - 6)             | 0<br>(0 - 1)           | 1<br>(0 - 1)             | 1<br>(0 - 1)             | 4<br>(2 - 7)             |
| Iodine deficiency                                                | 0<br>(0 - 1)                | 0<br>(0 - 0)             | 0<br>(0 - 0)           | 0<br>(0 - 0)             | 0<br>(0 - 0)             | 0<br>(0 - 0)             |
| Iron-deficiency anemia                                           | 21<br>(15 - 29)             | 2<br>(1 - 4)             | 0<br>(0 - 1)           | 4<br>(3 - 6)             | 3<br>(2 - 5)             | 11<br>(7 - 16)           |
| Other nutritional deficiencies                                   | 2<br>(1 - 4)                | 1<br>(0 - 1)             | 0<br>(0 - 0)           | 1<br>(0 - 1)             | 0<br>(0 - 0)             | 1<br>(0 - 1)             |
| Other communicable, maternal, neonatal, and nutritional diseases | 31<br>(23 - 41)             | 12<br>(7 - 19)           | 2<br>(1 - 2)           | 5<br>(4 - 7)             | 6<br>(4 - 9)             | 7<br>(4 - 11)            |
| Sexually transmitted diseases excluding HIV                      | 5<br>(1 - 11)               | 4<br>(0 - 9)             | 0<br>(0 - 1)           | 1<br>(0 - 1)             | 0<br>(0 - 0)             | 0<br>(0 - 0)             |
| Syphilis                                                         | 4<br>(0 - 10)               | 4<br>(0 - 9)             | 0<br>(0 - 1)           | 0<br>(0 - 0)             | 0<br>(0 - 0)             | 0<br>(0 - 0)             |
| Chlamydial infection                                             | 0<br>(0 - 0)                | --                       | 0<br>(0 - 0)           | 0<br>(0 - 0)             | 0<br>(0 - 0)             | 0<br>(0 - 0)             |
| Gonococcal infection                                             | 0<br>(0 - 0)                | --                       | 0<br>(0 - 0)           | 0<br>(0 - 0)             | 0<br>(0 - 0)             | 0<br>(0 - 0)             |
| Other sexually transmitted diseases                              | 0<br>(0 - 0)                | --                       | 0<br>(0 - 0)           | 0<br>(0 - 0)             | 0<br>(0 - 0)             | 0<br>(0 - 0)             |
| Hepatitis                                                        | 10<br>(8 - 12)              | 2<br>(1 - 3)             | 0<br>(0 - 1)           | 2<br>(2 - 3)             | 3<br>(2 - 4)             | 2<br>(2 - 3)             |
| Acute hepatitis A                                                | 1<br>(0 - 3)                | 1<br>(0 - 2)             | 0<br>(0 - 0)           | 0<br>(0 - 0)             | 0<br>(0 - 0)             | 0<br>(0 - 0)             |
| Acute hepatitis B                                                | 7<br>(5 - 9)                | 1<br>(0 - 2)             | 0<br>(0 - 0)           | 1<br>(1 - 2)             | 2<br>(1 - 3)             | 2<br>(2 - 3)             |
| Acute hepatitis C                                                | 0<br>(0 - 0)                | --                       | 0<br>(0 - 0)           | 0<br>(0 - 0)             | 0<br>(0 - 0)             | 0<br>(0 - 0)             |
| Acute hepatitis E                                                | 2<br>(1 - 4)                | 0<br>(0 - 0)             | 0<br>(0 - 0)           | 1<br>(1 - 2)             | 1<br>(0 - 1)             | 0<br>(0 - 1)             |
| Other infectious diseases                                        | 16<br>(11 - 25)             | 6<br>(4 - 12)            | 1<br>(0 - 1)           | 2<br>(1 - 4)             | 3<br>(1 - 6)             | 4<br>(2 - 9)             |
| Non-communicable diseases                                        | 14,839<br>(13,060 - 16,771) | 1,303<br>(1,083 - 1,509) | 188<br>(156 - 213)     | 2,318<br>(1,888 - 2,790) | 4,472<br>(3,779 - 5,302) | 6,558<br>(5,982 - 7,289) |
| Neoplasms                                                        | 2,860<br>(2,408 - 3,341)    | 47<br>(31 - 63)          | 65<br>(53 - 77)        | 799<br>(637 - 969)       | 1,153<br>(953 - 1,381)   | 796<br>(694 - 919)       |
| Esophageal cancer                                                | 35<br>(27 - 43)             | --                       | --                     | 8<br>(6 - 11)            | 15<br>(12 - 20)          | 11<br>(9 - 14)           |
| Stomach cancer                                                   | 161<br>(131 - 195)          | --                       | --                     | 41<br>(32 - 53)          | 67<br>(53 - 85)          | 52<br>(42 - 65)          |
| Liver cancer                                                     | 85<br>(68 - 104)            | --                       | 1<br>(0 - 1)           | 16<br>(12 - 22)          | 40<br>(31 - 52)          | 27<br>(21 - 35)          |
| Liver cancer due to hepatitis B                                  | 24<br>(11 - 42)             | --                       | 0<br>(0 - 0)           | 7<br>(4 - 11)            | 11<br>(4 - 22)           | 6<br>(3 - 10)            |
| Liver cancer due to hepatitis C                                  | 40<br>(27 - 55)             | --                       | 0<br>(0 - 0)           | 6<br>(3 - 9)             | 20<br>(12 - 29)          | 14<br>(10 - 20)          |
| Liver cancer due to alcohol use                                  | 9<br>(5 - 16)               | --                       | --                     | 1<br>(0 - 2)             | 4<br>(2 - 8)             | 4<br>(2 - 7)             |
| Liver cancer due to other causes                                 | 12<br>(6 - 19)              | --                       | 0<br>(0 - 1)           | 3<br>(2 - 5)             | 5<br>(3 - 9)             | 3<br>(2 - 6)             |

Web Table 31- Jordan deaths with 95% UI by age, sex, and cause in 2013

| Cause                                         | Both Sexes, All Ages     | Both Sexes, 0-4 Years | Both Sexes, 5-14 Years | Both Sexes, 15-49 Years | Both Sexes, 50-69 Years  | Both Sexes, 70-80 Years  |
|-----------------------------------------------|--------------------------|-----------------------|------------------------|-------------------------|--------------------------|--------------------------|
| Larynx cancer                                 | 26<br>(18 - 35)          | --                    | --                     | 5<br>(3 - 7)            | 13<br>(9 - 18)           | 8<br>(6 - 11)            |
| Tracheal, bronchus and lung cancer            | 391<br>(313 - 483)       | --                    | --                     | 64<br>(47 - 84)         | 206<br>(162 - 255)       | 121<br>(100 - 148)       |
| Breast cancer                                 | 356<br>(239 - 466)       | --                    | --                     | 146<br>(93 - 196)       | 153<br>(103 - 207)       | 57<br>(42 - 70)          |
| Cervical cancer                               | 43<br>(29 - 56)          | --                    | --                     | 13<br>(8 - 19)          | 19<br>(12 - 26)          | 11<br>(8 - 15)           |
| Uterine cancer                                | 13<br>(8 - 21)           | --                    | --                     | 2<br>(1 - 3)            | 7<br>(4 - 12)            | 4<br>(3 - 7)             |
| Prostate cancer                               | 105<br>(65 - 152)        | --                    | --                     | 1<br>(1 - 2)            | 26<br>(16 - 39)          | 78<br>(48 - 112)         |
| Colon and rectum cancer                       | 354<br>(294 - 419)       | --                    | --                     | 80<br>(63 - 100)        | 155<br>(124 - 188)       | 119<br>(100 - 141)       |
| Lip and oral cavity cancer                    | 27<br>(20 - 35)          | --                    | --                     | 8<br>(6 - 11)           | 10<br>(7 - 13)           | 9<br>(6 - 11)            |
| Nasopharynx cancer                            | 20<br>(15 - 26)          | --                    | 1<br>(0 - 1)           | 9<br>(7 - 13)           | 7<br>(5 - 10)            | 3<br>(2 - 4)             |
| Other pharynx cancer                          | 11<br>(8 - 15)           | --                    | --                     | 3<br>(2 - 4)            | 6<br>(4 - 8)             | 3<br>(2 - 4)             |
| Gallbladder and biliary tract cancer          | 55<br>(40 - 71)          | --                    | --                     | 10<br>(7 - 14)          | 25<br>(18 - 34)          | 19<br>(14 - 26)          |
| Pancreatic cancer                             | 109<br>(90 - 132)        | --                    | --                     | 19<br>(14 - 24)         | 55<br>(44 - 68)          | 35<br>(29 - 43)          |
| Malignant skin melanoma                       | 5<br>(4 - 8)             | --                    | --                     | 2<br>(2 - 3)            | 2<br>(2 - 3)             | 1<br>(1 - 2)             |
| Non-melanoma skin cancer                      | 14<br>(10 - 20)          | --                    | --                     | 4<br>(3 - 6)            | 4<br>(3 - 6)             | 6<br>(4 - 9)             |
| Ovarian cancer                                | 59<br>(41 - 82)          | --                    | --                     | 20<br>(12 - 29)         | 27<br>(18 - 39)          | 12<br>(8 - 17)           |
| Testicular cancer                             | 9<br>(5 - 13)            | --                    | --                     | 7<br>(5 - 11)           | 1<br>(1 - 2)             | 0<br>(0 - 0)             |
| Kidney cancer                                 | 42<br>(33 - 52)          | 1<br>(1 - 2)          | 1<br>(1 - 1)           | 8<br>(6 - 11)           | 21<br>(15 - 27)          | 11<br>(8 - 14)           |
| Bladder cancer                                | 117<br>(92 - 147)        | --                    | --                     | 12<br>(9 - 18)          | 54<br>(40 - 71)          | 50<br>(38 - 64)          |
| Brain and nervous system cancer               | 112<br>(83 - 138)        | 5<br>(3 - 9)          | 10<br>(7 - 14)         | 47<br>(34 - 61)         | 37<br>(27 - 48)          | 13<br>(8 - 17)           |
| Thyroid cancer                                | 25<br>(17 - 34)          | --                    | 0<br>(0 - 0)           | 5<br>(3 - 7)            | 11<br>(7 - 15)           | 9<br>(6 - 13)            |
| Mesothelioma                                  | 1<br>(1 - 2)             | --                    | --                     | 0<br>(0 - 1)            | 0<br>(0 - 1)             | 1<br>(0 - 1)             |
| Hodgkin lymphoma                              | 4<br>(3 - 6)             | 0<br>(0 - 0)          | 1<br>(0 - 1)           | 2<br>(2 - 3)            | 1<br>(0 - 1)             | 0<br>(0 - 1)             |
| Non-Hodgkin lymphoma                          | 175<br>(134 - 220)       | 2<br>(1 - 3)          | 6<br>(4 - 9)           | 76<br>(57 - 98)         | 57<br>(41 - 75)          | 33<br>(23 - 42)          |
| Multiple myeloma                              | 26<br>(21 - 33)          | --                    | --                     | 5<br>(3 - 6)            | 13<br>(10 - 17)          | 8<br>(6 - 11)            |
| Leukemia                                      | 265<br>(219 - 311)       | 13<br>(8 - 21)        | 22<br>(16 - 27)        | 105<br>(82 - 129)       | 70<br>(55 - 87)          | 55<br>(45 - 65)          |
| Other neoplasms                               | 215<br>(166 - 259)       | 25<br>(15 - 36)       | 24<br>(17 - 32)        | 79<br>(56 - 102)        | 49<br>(36 - 62)          | 38<br>(28 - 49)          |
| Cardiovascular diseases                       | 6,181<br>(5,439 - 7,112) | 24<br>(17 - 33)       | 11<br>(8 - 14)         | 708<br>(564 - 889)      | 2,041<br>(1,715 - 2,428) | 3,397<br>(3,078 - 3,776) |
| Rheumatic heart disease                       | 29<br>(22 - 36)          | 1<br>(0 - 1)          | 1<br>(1 - 2)           | 8<br>(5 - 11)           | 6<br>(5 - 9)             | 13<br>(9 - 17)           |
| Ischemic heart disease                        | 3,006<br>(2,573 - 3,574) | 6<br>(3 - 9)          | 3<br>(2 - 4)           | 454<br>(352 - 582)      | 1,126<br>(918 - 1,383)   | 1,418<br>(1,234 - 1,661) |
| Cerebrovascular disease                       | 1,972<br>(1,689 - 2,270) | 6<br>(4 - 8)          | 3<br>(2 - 4)           | 104<br>(77 - 136)       | 547<br>(439 - 658)       | 1,313<br>(1,137 - 1,503) |
| Ischemic stroke                               | 1,436<br>(1,212 - 1,651) | 1<br>(1 - 2)          | 0<br>(0 - 1)           | 38<br>(26 - 52)         | 332<br>(261 - 406)       | 1,064<br>(902 - 1,218)   |
| Hemorrhagic stroke                            | 536<br>(436 - 658)       | 5<br>(3 - 7)          | 2<br>(2 - 3)           | 66<br>(49 - 88)         | 215<br>(166 - 275)       | 248<br>(201 - 312)       |
| Hypertensive heart disease                    | 848<br>(607 - 1,056)     | 0<br>(0 - 1)          | 0<br>(0 - 0)           | 55<br>(37 - 75)         | 253<br>(175 - 332)       | 541<br>(369 - 683)       |
| Cardiomyopathy and myocarditis                | 33<br>(25 - 48)          | 3<br>(2 - 4)          | 1<br>(1 - 2)           | 15<br>(11 - 24)         | 7<br>(5 - 11)            | 5<br>(4 - 8)             |
| Atrial fibrillation and flutter               | 3<br>(2 - 5)             | --                    | --                     | 1<br>(0 - 1)            | 1<br>(1 - 1)             | 2<br>(1 - 3)             |
| Aortic aneurysm                               | 45<br>(36 - 57)          | --                    | --                     | 8<br>(6 - 11)           | 19<br>(14 - 25)          | 18<br>(13 - 23)          |
| Peripheral vascular disease                   | 1<br>(1 - 1)             | --                    | --                     | 0<br>(0 - 0)            | 0<br>(0 - 0)             | 0<br>(0 - 1)             |
| Endocarditis                                  | 23<br>(17 - 32)          | 3<br>(2 - 4)          | 0<br>(0 - 1)           | 4<br>(3 - 6)            | 5<br>(3 - 7)             | 11<br>(8 - 16)           |
| Other cardiovascular and circulatory diseases | 221<br>(177 - 277)       | 6<br>(4 - 9)          | 2<br>(2 - 4)           | 59<br>(44 - 76)         | 78<br>(58 - 105)         | 76<br>(59 - 99)          |
| Chronic respiratory diseases                  | 737<br>(622 - 874)       | 8<br>(5 - 15)         | 3<br>(2 - 4)           | 70<br>(55 - 86)         | 202<br>(157 - 248)       | 454<br>(384 - 536)       |

Web Table 31- Jordan deaths with 95% UI by age, sex, and cause in 2013

| Cause                                               | Both Sexes, All Ages | Both Sexes, 0-4 Years | Both Sexes, 5-14 Years | Both Sexes, 15-49 Years | Both Sexes, 50-69 Years | Both Sexes, 70-80 Years |
|-----------------------------------------------------|----------------------|-----------------------|------------------------|-------------------------|-------------------------|-------------------------|
| Chronic obstructive pulmonary disease               | 504<br>(413 - 609)   | 4<br>(3 - 8)          | 0<br>(0 - 1)           | 27<br>(19 - 35)         | 135<br>(103 - 170)      | 338<br>(277 - 409)      |
| Pneumoconiosis                                      | 12<br>(8 - 17)       | 0<br>(0 - 0)          | 0<br>(0 - 0)           | 5<br>(3 - 7)            | 3<br>(2 - 5)            | 4<br>(3 - 6)            |
| Silicosis                                           | 3<br>(2 - 5)         | 0<br>(0 - 0)          | 0<br>(0 - 0)           | 0<br>(0 - 0)            | 1<br>(0 - 1)            | 3<br>(2 - 4)            |
| Asbestosis                                          | 1<br>(1 - 1)         | 0<br>(0 - 0)          | 0<br>(0 - 0)           | 1<br>(0 - 1)            | 0<br>(0 - 0)            | 0<br>(0 - 0)            |
| Coal workers pneumoconiosis                         | 0<br>(0 - 0)         | 0<br>(0 - 0)          | 0<br>(0 - 0)           | 0<br>(0 - 0)            | 0<br>(0 - 0)            | 0<br>(0 - 0)            |
| Other pneumoconiosis                                | 7<br>(5 - 11)        | 0<br>(0 - 0)          | 0<br>(0 - 0)           | 3<br>(2 - 5)            | 2<br>(1 - 4)            | 1<br>(1 - 2)            |
| Asthma                                              | 88<br>(66 - 110)     | 2<br>(1 - 5)          | 2<br>(1 - 2)           | 23<br>(16 - 30)         | 26<br>(18 - 35)         | 34<br>(24 - 46)         |
| Interstitial lung disease and pulmonary sarcoidosis | 122<br>(90 - 165)    | 1<br>(0 - 2)          | 0<br>(0 - 1)           | 13<br>(9 - 19)          | 36<br>(25 - 50)         | 72<br>(51 - 101)        |
| Other chronic respiratory diseases                  | 11<br>(9 - 15)       | 1<br>(0 - 1)          | 0<br>(0 - 0)           | 3<br>(2 - 4)            | 1<br>(1 - 2)            | 6<br>(4 - 9)            |
| Cirrhosis                                           | 297<br>(248 - 350)   | 10<br>(5 - 16)        | 5<br>(4 - 7)           | 78<br>(61 - 99)         | 111<br>(88 - 138)       | 94<br>(77 - 112)        |
| Cirrhosis due to hepatitis B                        | 94<br>(45 - 137)     | 0<br>(0 - 1)          | 1<br>(0 - 2)           | 23<br>(9 - 36)          | 36<br>(16 - 56)         | 33<br>(17 - 51)         |
| Cirrhosis due to hepatitis C                        | 125<br>(82 - 178)    | 1<br>(0 - 2)          | 1<br>(0 - 2)           | 34<br>(22 - 50)         | 50<br>(28 - 76)         | 39<br>(23 - 57)         |
| Cirrhosis due to alcohol use                        | 36<br>(17 - 63)      | --                    | --                     | 6<br>(3 - 12)           | 14<br>(6 - 28)          | 16<br>(8 - 27)          |
| Cirrhosis due to other causes                       | 43<br>(29 - 64)      | 9<br>(5 - 14)         | 3<br>(2 - 5)           | 15<br>(9 - 25)          | 10<br>(5 - 18)          | 6<br>(3 - 10)           |
| Digestive diseases                                  | 241<br>(201 - 283)   | 6<br>(4 - 9)          | 3<br>(3 - 4)           | 44<br>(35 - 56)         | 60<br>(47 - 75)         | 127<br>(106 - 150)      |
| Peptic ulcer disease                                | 43<br>(33 - 55)      | 0<br>(0 - 0)          | 0<br>(0 - 0)           | 7<br>(5 - 9)            | 10<br>(7 - 14)          | 26<br>(19 - 34)         |
| Gastritis and duodenitis                            | 1<br>(1 - 2)         | 0<br>(0 - 1)          | 0<br>(0 - 0)           | 1<br>(0 - 1)            | 0<br>(0 - 0)            | 0<br>(0 - 0)            |
| Appendicitis                                        | 6<br>(4 - 8)         | 1<br>(0 - 1)          | 0<br>(0 - 0)           | 2<br>(1 - 3)            | 1<br>(1 - 2)            | 2<br>(1 - 3)            |
| Paralytic ileus and intestinal obstruction          | 62<br>(44 - 84)      | 2<br>(1 - 4)          | 1<br>(0 - 1)           | 9<br>(5 - 12)           | 13<br>(8 - 19)          | 38<br>(26 - 52)         |
| Inguinal, femoral, and abdominal hernia             | 2<br>(1 - 3)         | 0<br>(0 - 0)          | 0<br>(0 - 0)           | 1<br>(0 - 1)            | 1<br>(0 - 1)            | 1<br>(0 - 1)            |
| Inflammatory bowel disease                          | 11<br>(8 - 14)       | 0<br>(0 - 1)          | 0<br>(0 - 1)           | 4<br>(3 - 5)            | 3<br>(2 - 4)            | 3<br>(2 - 5)            |
| Vascular intestinal disorders                       | 28<br>(16 - 43)      | 0<br>(0 - 0)          | 0<br>(0 - 0)           | 6<br>(3 - 10)           | 8<br>(4 - 13)           | 13<br>(8 - 22)          |
| Gallbladder and biliary diseases                    | 35<br>(24 - 45)      | 1<br>(0 - 1)          | 0<br>(0 - 0)           | 3<br>(2 - 5)            | 9<br>(6 - 13)           | 21<br>(14 - 29)         |
| Pancreatitis                                        | 23<br>(17 - 33)      | 0<br>(0 - 0)          | 0<br>(0 - 1)           | 7<br>(5 - 11)           | 9<br>(6 - 12)           | 7<br>(5 - 10)           |
| Other digestive diseases                            | 29<br>(21 - 37)      | 1<br>(1 - 2)          | 1<br>(0 - 1)           | 5<br>(4 - 7)            | 6<br>(4 - 9)            | 15<br>(10 - 21)         |
| Neurological disorders                              | 698<br>(587 - 816)   | 29<br>(21 - 38)       | 7<br>(5 - 9)           | 52<br>(40 - 68)         | 88<br>(67 - 114)        | 523<br>(429 - 614)      |
| Alzheimer disease and other dementias               | 582<br>(472 - 690)   | --                    | --                     | 1<br>(0 - 1)            | 74<br>(55 - 98)         | 507<br>(414 - 598)      |
| Parkinson disease                                   | 16<br>(11 - 23)      | --                    | --                     | 1<br>(1 - 2)            | 3<br>(2 - 5)            | 12<br>(8 - 18)          |
| Epilepsy                                            | 50<br>(38 - 65)      | 6<br>(3 - 10)         | 4<br>(3 - 6)           | 33<br>(24 - 44)         | 6<br>(4 - 8)            | 2<br>(1 - 2)            |
| Multiple sclerosis                                  | 11<br>(7 - 19)       | --                    | --                     | 6<br>(4 - 12)           | 3<br>(2 - 5)            | 1<br>(1 - 2)            |
| Other neurological disorders                        | 40<br>(32 - 50)      | 23<br>(17 - 31)       | 2<br>(2 - 3)           | 11<br>(9 - 15)          | 2<br>(2 - 3)            | 1<br>(0 - 1)            |
| Mental and substance use disorders                  | 177<br>(136 - 223)   | 3<br>(2 - 4)          | 0<br>(0 - 0)           | 154<br>(117 - 198)      | 17<br>(13 - 23)         | 3<br>(2 - 3)            |
| Schizophrenia                                       | 1<br>(0 - 1)         | --                    | --                     | 0<br>(0 - 1)            | 0<br>(0 - 0)            | 0<br>(0 - 0)            |
| Alcohol use disorders                               | 7<br>(5 - 11)        | --                    | --                     | 4<br>(3 - 6)            | 2<br>(1 - 3)            | 1<br>(1 - 1)            |
| Drug use disorders                                  | 169<br>(129 - 215)   | 3<br>(2 - 4)          | --                     | 149<br>(113 - 192)      | 15<br>(11 - 20)         | 2<br>(1 - 2)            |
| Opioid use disorders                                | 93<br>(71 - 121)     | 2<br>(1 - 2)          | --                     | 83<br>(62 - 108)        | 8<br>(6 - 10)           | 1<br>(1 - 1)            |
| Cocaine use disorders                               | 2<br>(2 - 3)         | 0<br>(0 - 0)          | --                     | 2<br>(2 - 3)            | 0<br>(0 - 0)            | 0<br>(0 - 0)            |
| Amphetamine use disorders                           | 2<br>(2 - 3)         | 0<br>(0 - 0)          | --                     | 2<br>(1 - 2)            | 0<br>(0 - 0)            | 0<br>(0 - 0)            |
| Other drug use disorders                            | 71<br>(54 - 92)      | 1<br>(1 - 2)          | --                     | 62<br>(47 - 81)         | 7<br>(5 - 10)           | 1<br>(1 - 1)            |
| Eating disorders                                    | 0<br>(0 - 0)         | --                    | 0<br>(0 - 0)           | 0<br>(0 - 0)            | --                      | --                      |

Web Table 31- Jordan deaths with 95% UI by age, sex, and cause in 2013

| Cause                                               | Both Sexes, All Ages     | Both Sexes, 0-4 Years  | Both Sexes, 5-14 Years | Both Sexes, 15-49 Years | Both Sexes, 50-69 Years | Both Sexes, 70-80 Years |
|-----------------------------------------------------|--------------------------|------------------------|------------------------|-------------------------|-------------------------|-------------------------|
| Anorexia nervosa                                    | 0<br>(0 - 0)             | --                     | 0<br>(0 - 0)           | 0<br>(0 - 0)            | --                      | --                      |
| Diabetes, urogenital, blood, and endocrine diseases | 2,326<br>(1,998 - 2,650) | 94<br>(67 - 121)       | 31<br>(24 - 38)        | 301<br>(242 - 371)      | 780<br>(638 - 930)      | 1,119<br>(968 - 1,268)  |
| Diabetes mellitus                                   | 1,135<br>(959 - 1,312)   | 4<br>(3 - 6)           | 1<br>(1 - 2)           | 86<br>(67 - 109)        | 451<br>(368 - 540)      | 593<br>(496 - 682)      |
| Acute glomerulonephritis                            | 2<br>(2 - 3)             | 0<br>(0 - 0)           | 0<br>(0 - 0)           | 1<br>(1 - 1)            | 0<br>(0 - 1)            | 1<br>(1 - 1)            |
| Chronic kidney disease                              | 903<br>(748 - 1,071)     | 12<br>(8 - 16)         | 10<br>(7 - 13)         | 135<br>(105 - 173)      | 289<br>(224 - 358)      | 458<br>(375 - 546)      |
| Chronic kidney disease due to diabetes mellitus     | 117<br>(43 - 156)        | 1<br>(0 - 1)           | 1<br>(0 - 1)           | 12<br>(6 - 17)          | 47<br>(16 - 66)         | 56<br>(18 - 78)         |
| Chronic kidney disease due to hypertension          | 442<br>(342 - 560)       | 3<br>(2 - 4)           | 3<br>(2 - 4)           | 61<br>(45 - 84)         | 141<br>(104 - 182)      | 235<br>(179 - 301)      |
| Chronic kidney disease due to glomerulonephritis    | 7<br>(5 - 10)            | 1<br>(1 - 2)           | 0<br>(0 - 0)           | 3<br>(2 - 4)            | 1<br>(1 - 2)            | 1<br>(1 - 2)            |
| Chronic kidney disease due to other causes          | 338<br>(253 - 465)       | 7<br>(4 - 11)          | 6<br>(4 - 9)           | 59<br>(40 - 84)         | 100<br>(68 - 151)       | 165<br>(112 - 236)      |
| Urinary diseases and male infertility               | 61<br>(48 - 74)          | 5<br>(3 - 8)           | 2<br>(1 - 2)           | 9<br>(7 - 13)           | 13<br>(9 - 17)          | 32<br>(24 - 42)         |
| Interstitial nephritis and urinary tract infections | 33<br>(23 - 43)          | 4<br>(2 - 6)           | 1<br>(1 - 1)           | 6<br>(4 - 8)            | 6<br>(4 - 9)            | 17<br>(11 - 25)         |
| Urolithiasis                                        | 4<br>(2 - 5)             | --                     | 0<br>(0 - 0)           | 1<br>(1 - 2)            | 1<br>(1 - 2)            | 1<br>(1 - 2)            |
| Other urinary diseases                              | 24<br>(18 - 33)          | 1<br>(1 - 2)           | 0<br>(0 - 1)           | 3<br>(2 - 4)            | 5<br>(4 - 8)            | 14<br>(10 - 20)         |
| Gynecological diseases                              | 0<br>(0 - 0)             | --                     | --                     | 0<br>(0 - 0)            | 0<br>(0 - 0)            | 0<br>(0 - 0)            |
| Uterine fibroids                                    | 0<br>(0 - 0)             | --                     | --                     | 0<br>(0 - 0)            | 0<br>(0 - 0)            | 0<br>(0 - 0)            |
| Polycystic ovarian syndrome                         | 0<br>(0 - 0)             | --                     | --                     | 0<br>(0 - 0)            | 0<br>(0 - 0)            | --                      |
| Endometriosis                                       | 0<br>(0 - 0)             | --                     | --                     | 0<br>(0 - 0)            | 0<br>(0 - 0)            | --                      |
| Genital prolapse                                    | 0<br>(0 - 0)             | --                     | --                     | 0<br>(0 - 0)            | 0<br>(0 - 0)            | 0<br>(0 - 0)            |
| Other gynecological diseases                        | 0<br>(0 - 0)             | --                     | --                     | 0<br>(0 - 0)            | 0<br>(0 - 0)            | 0<br>(0 - 0)            |
| Hemoglobinopathies and hemolytic anemias            | 69<br>(49 - 92)          | 13<br>(9 - 18)         | 7<br>(4 - 9)           | 33<br>(23 - 46)         | 6<br>(4 - 9)            | 10<br>(6 - 14)          |
| Thalassemias                                        | 39<br>(28 - 53)          | 10<br>(7 - 15)         | 6<br>(4 - 8)           | 23<br>(16 - 33)         | 0<br>(0 - 0)            | 0<br>(0 - 0)            |
| Sickle cell disorders                               | 9<br>(6 - 13)            | 1<br>(1 - 2)           | 1<br>(1 - 1)           | 5<br>(3 - 7)            | 2<br>(1 - 3)            | 0<br>(0 - 0)            |
| G6PD deficiency                                     | 1<br>(1 - 2)             | 0<br>(0 - 0)           | 0<br>(0 - 0)           | 1<br>(1 - 1)            | 0<br>(0 - 0)            | 0<br>(0 - 0)            |
| Other hemoglobinopathies and hemolytic anemias      | 19<br>(13 - 26)          | 1<br>(1 - 2)           | 0<br>(0 - 0)           | 4<br>(3 - 6)            | 4<br>(3 - 5)            | 10<br>(6 - 13)          |
| Endocrine, metabolic, blood, and immune disorders   | 156<br>(114 - 192)       | 60<br>(38 - 83)        | 12<br>(8 - 17)         | 37<br>(26 - 49)         | 21<br>(14 - 30)         | 25<br>(18 - 33)         |
| Musculoskeletal disorders                           | 63<br>(49 - 85)          | --                     | 4<br>(3 - 6)           | 42<br>(30 - 60)         | 8<br>(6 - 11)           | 8<br>(6 - 11)           |
| Rheumatoid arthritis                                | 2<br>(2 - 4)             | --                     | 0<br>(0 - 1)           | 1<br>(1 - 2)            | 0<br>(0 - 1)            | 0<br>(0 - 1)            |
| Other musculoskeletal disorders                     | 61<br>(47 - 82)          | --                     | 4<br>(3 - 6)           | 41<br>(30 - 58)         | 8<br>(6 - 11)           | 8<br>(6 - 10)           |
| Other non-communicable diseases                     | 1,259<br>(1,060 - 1,457) | 1,082<br>(893 - 1,269) | 58<br>(43 - 73)        | 70<br>(53 - 90)         | 12<br>(9 - 15)          | 38<br>(30 - 49)         |
| Congenital anomalies                                | 1,207<br>(1,013 - 1,403) | 1,071<br>(885 - 1,261) | 57<br>(42 - 72)        | 66<br>(50 - 85)         | 6<br>(5 - 8)            | 7<br>(5 - 9)            |
| Neural tube defects                                 | 11<br>(6 - 19)           | 9<br>(5 - 17)          | 1<br>(0 - 1)           | 1<br>(0 - 1)            | 0<br>(0 - 0)            | 0<br>(0 - 0)            |
| Congenital heart anomalies                          | 545<br>(434 - 663)       | 490<br>(386 - 605)     | 24<br>(16 - 34)        | 29<br>(21 - 38)         | 2<br>(1 - 2)            | 0<br>(0 - 1)            |
| Cleft lip and cleft palate                          | 3<br>(1 - 6)             | 3<br>(1 - 6)           | --                     | --                      | --                      | --                      |
| Down syndrome                                       | 72<br>(48 - 103)         | 56<br>(35 - 86)        | 3<br>(2 - 5)           | 12<br>(9 - 17)          | 0<br>(0 - 0)            | 0<br>(0 - 0)            |
| Chromosomal unbalanced rearrangements               | 9<br>(6 - 13)            | 8<br>(5 - 12)          | 0<br>(0 - 0)           | 1<br>(0 - 1)            | 0<br>(0 - 0)            | 0<br>(0 - 0)            |
| Other congenital anomalies                          | 568<br>(456 - 692)       | 504<br>(398 - 622)     | 29<br>(20 - 39)        | 24<br>(17 - 32)         | 4<br>(3 - 6)            | 6<br>(5 - 8)            |
| Skin and subcutaneous diseases                      | 43<br>(34 - 55)          | 2<br>(1 - 3)           | 1<br>(1 - 1)           | 4<br>(3 - 5)            | 5<br>(4 - 7)            | 31<br>(23 - 42)         |
| Cellulitis                                          | 3<br>(2 - 5)             | 0<br>(0 - 1)           | 0<br>(0 - 0)           | 1<br>(0 - 1)            | 1<br>(1 - 1)            | 1<br>(1 - 2)            |
| Pyoderma                                            | 6<br>(4 - 7)             | 1<br>(1 - 2)           | 0<br>(0 - 0)           | 1<br>(1 - 1)            | 1<br>(1 - 2)            | 2<br>(1 - 3)            |
| Decubitus ulcer                                     | 33<br>(25 - 43)          | 0<br>(0 - 0)           | 0<br>(0 - 1)           | 2<br>(1 - 2)            | 3<br>(2 - 4)            | 28<br>(20 - 37)         |

Web Table 31- Jordan deaths with 95% UI by age, sex, and cause in 2013

| Cause                                           | Both Sexes, All Ages     | Both Sexes, 0-4 Years | Both Sexes, 5-14 Years | Both Sexes, 15-49 Years | Both Sexes, 50-69 Years | Both Sexes, 70-80 Years |
|-------------------------------------------------|--------------------------|-----------------------|------------------------|-------------------------|-------------------------|-------------------------|
| Other skin and subcutaneous diseases            | 1<br>(1 - 2)             | 0<br>(0 - 0)          | 0<br>(0 - 0)           | 1<br>(0 - 1)            | 0<br>(0 - 0)            | 0<br>(0 - 0)            |
| Sudden infant death syndrome                    | 9<br>(4 - 21)            | 9<br>(4 - 21)         | --                     | --                      | --                      | --                      |
| Injuries                                        | 2,167<br>(1,842 - 2,524) | 364<br>(247 - 460)    | 225<br>(190 - 257)     | 1,178<br>(936 - 1,440)  | 210<br>(170 - 256)      | 190<br>(164 - 229)      |
| Transport injuries                              | 753<br>(620 - 892)       | 119<br>(76 - 166)     | 87<br>(70 - 105)       | 383<br>(293 - 479)      | 104<br>(82 - 130)       | 60<br>(49 - 75)         |
| Road injuries                                   | 582<br>(483 - 686)       | 114<br>(72 - 159)     | 83<br>(66 - 100)       | 239<br>(184 - 303)      | 89<br>(71 - 111)        | 58<br>(46 - 72)         |
| Pedestrian road injuries                        | 280<br>(225 - 341)       | 72<br>(44 - 103)      | 54<br>(42 - 67)        | 73<br>(52 - 96)         | 48<br>(36 - 62)         | 33<br>(25 - 42)         |
| Cyclist road injuries                           | 24<br>(18 - 31)          | 4<br>(2 - 7)          | 4<br>(2 - 5)           | 5<br>(4 - 8)            | 7<br>(5 - 10)           | 3<br>(2 - 4)            |
| Motorcyclist road injuries                      | 74<br>(50 - 103)         | 2<br>(1 - 4)          | 2<br>(1 - 3)           | 58<br>(38 - 83)         | 4<br>(2 - 6)            | 8<br>(5 - 13)           |
| Motor vehicle road injuries                     | 203<br>(159 - 246)       | 34<br>(21 - 52)       | 22<br>(16 - 30)        | 102<br>(75 - 132)       | 30<br>(23 - 41)         | 13<br>(10 - 18)         |
| Other road injuries                             | 2<br>(1 - 3)             | 1<br>(0 - 2)          | 0<br>(0 - 1)           | 0<br>(0 - 1)            | 0<br>(0 - 0)            | 0<br>(0 - 0)            |
| Other transport injuries                        | 170<br>(125 - 224)       | 5<br>(3 - 8)          | 4<br>(3 - 7)           | 144<br>(102 - 192)      | 15<br>(10 - 21)         | 3<br>(2 - 4)            |
| Unintentional injuries                          | 1,034<br>(857 - 1,221)   | 233<br>(157 - 301)    | 123<br>(101 - 146)     | 500<br>(391 - 630)      | 71<br>(56 - 89)         | 106<br>(87 - 140)       |
| Falls                                           | 136<br>(107 - 173)       | 28<br>(16 - 45)       | 13<br>(9 - 18)         | 53<br>(36 - 74)         | 13<br>(9 - 18)          | 29<br>(21 - 40)         |
| Drowning                                        | 455<br>(332 - 590)       | 92<br>(53 - 143)      | 69<br>(51 - 90)        | 268<br>(186 - 363)      | 17<br>(12 - 24)         | 8<br>(6 - 11)           |
| Fire, heat, and hot substances                  | 124<br>(92 - 157)        | 28<br>(17 - 43)       | 9<br>(6 - 13)          | 62<br>(42 - 84)         | 10<br>(7 - 14)          | 15<br>(11 - 20)         |
| Poisonings                                      | 58<br>(42 - 75)          | 16<br>(8 - 26)        | 6<br>(4 - 9)           | 29<br>(20 - 39)         | 3<br>(2 - 5)            | 4<br>(2 - 5)            |
| Exposure to mechanical forces                   | 64<br>(51 - 83)          | 17<br>(10 - 27)       | 11<br>(7 - 16)         | 27<br>(19 - 36)         | 5<br>(4 - 7)            | 4<br>(3 - 6)            |
| Unintentional firearm injuries                  | 12<br>(8 - 17)           | 1<br>(1 - 2)          | 1<br>(1 - 1)           | 9<br>(5 - 13)           | 1<br>(1 - 2)            | 1<br>(0 - 1)            |
| Unintentional suffocation                       | 7<br>(4 - 11)            | 3<br>(1 - 6)          | 1<br>(1 - 2)           | 2<br>(1 - 3)            | 0<br>(0 - 1)            | 0<br>(0 - 0)            |
| Other exposure to mechanical forces             | 45<br>(35 - 60)          | 13<br>(7 - 24)        | 9<br>(5 - 13)          | 16<br>(11 - 22)         | 4<br>(2 - 5)            | 4<br>(3 - 5)            |
| Adverse effects of medical treatment            | 67<br>(47 - 109)         | 6<br>(3 - 10)         | 2<br>(1 - 3)           | 9<br>(6 - 16)           | 15<br>(10 - 25)         | 35<br>(22 - 63)         |
| Animal contact                                  | 5<br>(3 - 8)             | 2<br>(1 - 4)          | 1<br>(1 - 2)           | 1<br>(0 - 1)            | 0<br>(0 - 0)            | 1<br>(1 - 1)            |
| Venomous animal contact                         | 3<br>(2 - 5)             | 1<br>(1 - 3)          | 1<br>(0 - 1)           | 0<br>(0 - 1)            | 0<br>(0 - 0)            | 0<br>(0 - 1)            |
| Non-venomous animal contact                     | 2<br>(1 - 3)             | 1<br>(0 - 1)          | 0<br>(0 - 1)           | 0<br>(0 - 1)            | 0<br>(0 - 0)            | 0<br>(0 - 1)            |
| Foreign body                                    | 52<br>(37 - 78)          | 31<br>(20 - 47)       | 3<br>(2 - 4)           | 9<br>(6 - 15)           | 2<br>(2 - 5)            | 7<br>(5 - 11)           |
| Pulmonary aspiration and foreign body in airway | 51<br>(36 - 76)          | 30<br>(20 - 47)       | 3<br>(2 - 4)           | 8<br>(6 - 14)           | 2<br>(1 - 4)            | 7<br>(5 - 11)           |
| Foreign body in other body part                 | 1<br>(1 - 2)             | 0<br>(0 - 1)          | 0<br>(0 - 0)           | 0<br>(0 - 1)            | 0<br>(0 - 0)            | 0<br>(0 - 0)            |
| Other unintentional injuries                    | 72<br>(57 - 88)          | 13<br>(8 - 19)        | 9<br>(7 - 12)          | 42<br>(31 - 56)         | 5<br>(3 - 6)            | 3<br>(2 - 3)            |
| Self-harm and interpersonal violence            | 381<br>(260 - 491)       | 13<br>(5 - 23)        | 15<br>(8 - 23)         | 295<br>(198 - 389)      | 35<br>(25 - 47)         | 23<br>(16 - 30)         |
| Self-harm                                       | 136<br>(106 - 173)       | --                    | 3<br>(2 - 5)           | 98<br>(73 - 129)        | 18<br>(13 - 25)         | 17<br>(12 - 23)         |
| Interpersonal violence                          | 245<br>(132 - 332)       | 13<br>(5 - 23)        | 13<br>(5 - 20)         | 197<br>(107 - 274)      | 17<br>(9 - 26)          | 6<br>(2 - 10)           |
| Assault by firearm                              | 129<br>(60 - 191)        | 4<br>(1 - 8)          | 4<br>(1 - 8)           | 111<br>(52 - 165)       | 8<br>(4 - 13)           | 2<br>(1 - 5)            |
| Assault by sharp object                         | 58<br>(29 - 87)          | 3<br>(1 - 5)          | 3<br>(1 - 5)           | 48<br>(23 - 75)         | 4<br>(2 - 7)            | 1<br>(0 - 2)            |
| Assault by other means                          | 57<br>(29 - 87)          | 6<br>(2 - 12)         | 6<br>(2 - 9)           | 38<br>(19 - 60)         | 5<br>(3 - 8)            | 3<br>(1 - 5)            |

Web Table 31- Jordan deaths with 95% UI by age, sex, and cause in 2013

| Cause                                                             | Males, All Ages            | Males, 0-4 Years         | Males, 5-14 Years  | Males, 15-49 Years       | Males, 50-69 Years       | Males, 70-80 Years       |
|-------------------------------------------------------------------|----------------------------|--------------------------|--------------------|--------------------------|--------------------------|--------------------------|
| All causes                                                        | 11,017<br>(9,268 - 13,139) | 1,831<br>(1,627 - 2,076) | 276<br>(245 - 307) | 2,465<br>(1,849 - 3,139) | 2,881<br>(2,280 - 3,552) | 3,564<br>(3,089 - 4,273) |
| Communicable, maternal, neonatal, and nutritional diseases        | 1,355<br>(1,174 - 1,603)   | 954<br>(807 - 1,141)     | 41<br>(26 - 70)    | 119<br>(86 - 163)        | 78<br>(59 - 104)         | 163<br>(123 - 211)       |
| HIV/AIDS and tuberculosis                                         | 18<br>(15 - 23)            | 0<br>(0 - 1)             | 0<br>(0 - 0)       | 7<br>(6 - 9)             | 5<br>(4 - 7)             | 5<br>(4 - 7)             |
| Tuberculosis                                                      | 14<br>(10 - 19)            | 0<br>(0 - 1)             | 0<br>(0 - 0)       | 3<br>(2 - 5)             | 5<br>(3 - 7)             | 5<br>(4 - 7)             |
| HIV/AIDS                                                          | 5<br>(3 - 6)               | 0<br>(0 - 0)             | 0<br>(0 - 0)       | 4<br>(3 - 5)             | 1<br>(0 - 1)             | 0<br>(0 - 0)             |
| HIV/AIDS resulting in mycobacterial infection                     | 0<br>(0 - 0)               | 0<br>(0 - 0)             | 0<br>(0 - 0)       | 0<br>(0 - 0)             | 0<br>(0 - 0)             | 0<br>(0 - 0)             |
| HIV/AIDS resulting in other diseases                              | 4<br>(3 - 5)               | 0<br>(0 - 0)             | 0<br>(0 - 0)       | 3<br>(3 - 4)             | 1<br>(0 - 1)             | 0<br>(0 - 0)             |
| Diarrhea, lower respiratory, and other common infectious diseases | 612<br>(479 - 811)         | 273<br>(194 - 429)       | 36<br>(22 - 64)    | 95<br>(64 - 136)         | 63<br>(45 - 85)          | 145<br>(107 - 192)       |
| Diarrheal diseases                                                | 23<br>(14 - 38)            | 16<br>(7 - 31)           | 1<br>(0 - 1)       | 2<br>(1 - 2)             | 1<br>(0 - 1)             | 4<br>(3 - 7)             |
| Intestinal infectious diseases                                    | 73<br>(34 - 137)           | 23<br>(9 - 44)           | 20<br>(9 - 36)     | 26<br>(10 - 54)          | 3<br>(1 - 7)             | 1<br>(0 - 2)             |
| Typhoid fever                                                     | 56<br>(26 - 108)           | 17<br>(7 - 32)           | 15<br>(7 - 28)     | 21<br>(8 - 43)           | 3<br>(1 - 5)             | 1<br>(0 - 2)             |
| Paratyphoid fever                                                 | 16<br>(7 - 31)             | 6<br>(2 - 12)            | 5<br>(2 - 10)      | 5<br>(2 - 12)            | 1<br>(0 - 1)             | 0<br>(0 - 0)             |
| Other intestinal infectious diseases                              | 1<br>(0 - 3)               | 0<br>(0 - 2)             | 0<br>(0 - 1)       | 0<br>(0 - 1)             | 0<br>(0 - 0)             | 0<br>(0 - 0)             |
| Lower respiratory infections                                      | 421<br>(331 - 520)         | 168<br>(115 - 233)       | 6<br>(4 - 9)       | 54<br>(36 - 75)          | 56<br>(39 - 77)          | 137<br>(99 - 183)        |
| Upper respiratory infections                                      | 1<br>(0 - 1)               | 0<br>(0 - 0)             | 0<br>(0 - 0)       | 0<br>(0 - 0)             | 0<br>(0 - 0)             | 0<br>(0 - 0)             |
| Otitis media                                                      | 1<br>(1 - 1)               | 0<br>(0 - 0)             | 0<br>(0 - 0)       | 0<br>(0 - 0)             | 0<br>(0 - 0)             | 0<br>(0 - 0)             |
| Meningitis                                                        | 25<br>(17 - 36)            | 15<br>(8 - 26)           | 2<br>(1 - 4)       | 5<br>(3 - 8)             | 1<br>(1 - 1)             | 1<br>(1 - 2)             |
| Pneumococcal meningitis                                           | 5<br>(4 - 8)               | 3<br>(1 - 5)             | 1<br>(0 - 1)       | 1<br>(1 - 2)             | 0<br>(0 - 0)             | 0<br>(0 - 1)             |
| H influenzae type B meningitis                                    | 7<br>(4 - 11)              | 5<br>(3 - 9)             | 1<br>(0 - 1)       | 1<br>(0 - 1)             | 0<br>(0 - 0)             | 0<br>(0 - 0)             |
| Meningococcal meningitis                                          | 7<br>(4 - 11)              | 4<br>(2 - 8)             | 1<br>(0 - 1)       | 1<br>(1 - 2)             | 0<br>(0 - 0)             | 0<br>(0 - 1)             |
| Other meningitis                                                  | 6<br>(4 - 8)               | 3<br>(1 - 5)             | 0<br>(0 - 1)       | 2<br>(1 - 3)             | 0<br>(0 - 1)             | 0<br>(0 - 1)             |
| Encephalitis                                                      | 16<br>(11 - 22)            | 6<br>(3 - 10)            | 2<br>(1 - 3)       | 6<br>(4 - 9)             | 2<br>(1 - 3)             | 1<br>(0 - 1)             |
| Diphtheria                                                        | 0<br>(0 - 1)               | 0<br>(0 - 1)             | 0<br>(0 - 0)       | 0<br>(0 - 0)             | 0<br>(0 - 0)             | --<br>(0 - 0)            |
| Whooping cough                                                    | 1<br>(0 - 7)               | 1<br>(0 - 7)             | 0<br>(0 - 0)       | 0<br>(0 - 0)             | 0<br>(0 - 0)             | --<br>(0 - 0)            |
| Tetanus                                                           | 0<br>(0 - 0)               | 0<br>(0 - 0)             | 0<br>(0 - 0)       | 0<br>(0 - 0)             | 0<br>(0 - 0)             | 0<br>(0 - 0)             |
| Measles                                                           | 50<br>(1 - 265)            | 43<br>(1 - 229)          | 6<br>(0 - 31)      | 1<br>(0 - 6)             | 0<br>(0 - 0)             | --<br>(0 - 0)            |
| Varicella and herpes zoster                                       | 1<br>(0 - 3)               | 0<br>(0 - 2)             | 0<br>(0 - 0)       | 0<br>(0 - 1)             | 0<br>(0 - 0)             | 0<br>(0 - 1)             |
| Neglected tropical diseases and malaria                           | 32<br>(20 - 50)            | 10<br>(4 - 23)           | 3<br>(1 - 6)       | 13<br>(6 - 22)           | 5<br>(2 - 8)             | 2<br>(1 - 3)             |
| Leishmaniasis                                                     | 27<br>(15 - 45)            | 9<br>(4 - 22)            | 3<br>(1 - 6)       | 10<br>(3 - 19)           | 3<br>(1 - 6)             | 1<br>(0 - 2)             |
| Visceral leishmaniasis                                            | 27<br>(15 - 45)            | 9<br>(4 - 22)            | 3<br>(1 - 6)       | 10<br>(3 - 19)           | 3<br>(1 - 6)             | 1<br>(0 - 2)             |
| Schistosomiasis                                                   | 4<br>(3 - 5)               | 0<br>(0 - 0)             | 0<br>(0 - 0)       | 1<br>(1 - 2)             | 1<br>(1 - 2)             | 1<br>(0 - 1)             |
| Cysticercosis                                                     | 0<br>(0 - 0)               | 0<br>(0 - 0)             | 0<br>(0 - 0)       | 0<br>(0 - 0)             | 0<br>(0 - 0)             | 0<br>(0 - 0)             |
| Cystic echinococcosis                                             | 0<br>(0 - 0)               | 0<br>(0 - 0)             | 0<br>(0 - 0)       | 0<br>(0 - 0)             | 0<br>(0 - 0)             | 0<br>(0 - 0)             |
| Dengue                                                            | 0<br>(0 - 0)               | 0<br>(0 - 0)             | 0<br>(0 - 0)       | 0<br>(0 - 0)             | 0<br>(0 - 0)             | 0<br>(0 - 0)             |
| Rabies                                                            | 0<br>(0 - 0)               | 0<br>(0 - 0)             | 0<br>(0 - 0)       | 0<br>(0 - 0)             | 0<br>(0 - 0)             | 0<br>(0 - 0)             |
| Intestinal nematode infections                                    | 0<br>(0 - 2)               | 0<br>(0 - 2)             | 0<br>(0 - 1)       | 0<br>(0 - 0)             | 0<br>(0 - 0)             | 0<br>(0 - 0)             |
| Ascariasis                                                        | 0<br>(0 - 2)               | 0<br>(0 - 2)             | 0<br>(0 - 1)       | 0<br>(0 - 0)             | 0<br>(0 - 0)             | 0<br>(0 - 0)             |
| Other neglected tropical diseases                                 | 1<br>(0 - 1)               | 0<br>(0 - 0)             | 0<br>(0 - 0)       | 0<br>(0 - 1)             | 0<br>(0 - 0)             | 0<br>(0 - 0)             |
| Maternal disorders                                                | --                         | --                       | --                 | --                       | --                       | --                       |
| Maternal hemorrhage                                               | --                         | --                       | --                 | --                       | --                       | --                       |

Web Table 31- Jordan deaths with 95% UI by age, sex, and cause in 2013

| Cause                                                            | Males, All Ages          | Males, 0-4 Years   | Males, 5-14 Years | Males, 15-49 Years       | Males, 50-69 Years       | Males, 70-80 Years       |
|------------------------------------------------------------------|--------------------------|--------------------|-------------------|--------------------------|--------------------------|--------------------------|
| Maternal sepsis and other maternal infections                    | --                       | --                 | --                | --                       | --                       | --                       |
| Maternal hypertensive disorders                                  | --                       | --                 | --                | --                       | --                       | --                       |
| Maternal obstructed labor                                        | --                       | --                 | --                | --                       | --                       | --                       |
| Maternal abortive outcome                                        | --                       | --                 | --                | --                       | --                       | --                       |
| Indirect maternal deaths                                         | --                       | --                 | --                | --                       | --                       | --                       |
| Late maternal deaths                                             | --                       | --                 | --                | --                       | --                       | --                       |
| Maternal deaths aggravated by HIV/AIDS                           | --                       | --                 | --                | --                       | --                       | --                       |
| Other maternal disorders                                         | --                       | --                 | --                | --                       | --                       | --                       |
| Neonatal disorders                                               | 664<br>(561 - 797)       | 664<br>(561 - 797) | --                | --                       | --                       | --                       |
| Neonatal preterm birth complications                             | 385<br>(272 - 502)       | 385<br>(272 - 502) | --                | --                       | --                       | --                       |
| Neonatal encephalopathy due to birth asphyxia and trauma         | 111<br>(57 - 192)        | 111<br>(57 - 192)  | --                | --                       | --                       | --                       |
| Neonatal sepsis and other neonatal infections                    | 107<br>(42 - 192)        | 107<br>(42 - 192)  | --                | --                       | --                       | --                       |
| Hemolytic disease and other neonatal jaundice                    | 6<br>(2 - 13)            | 6<br>(2 - 13)      | --                | --                       | --                       | --                       |
| Other neonatal disorders                                         | 55<br>(28 - 107)         | 55<br>(28 - 107)   | --                | --                       | --                       | --                       |
| Nutritional deficiencies                                         | 14<br>(9 - 24)           | 2<br>(1 - 4)       | 0<br>(0 - 0)      | 2<br>(1 - 4)             | 2<br>(1 - 4)             | 7<br>(4 - 13)            |
| Protein-energy malnutrition                                      | 4<br>(2 - 7)             | 1<br>(0 - 2)       | 0<br>(0 - 0)      | 0<br>(0 - 1)             | 0<br>(0 - 1)             | 2<br>(1 - 4)             |
| Iodine deficiency                                                | 0<br>(0 - 0)             | 0<br>(0 - 0)       | 0<br>(0 - 0)      | 0<br>(0 - 0)             | 0<br>(0 - 0)             | 0<br>(0 - 0)             |
| Iron-deficiency anemia                                           | 9<br>(5 - 15)            | 1<br>(0 - 2)       | 0<br>(0 - 0)      | 1<br>(1 - 2)             | 2<br>(1 - 3)             | 5<br>(3 - 9)             |
| Other nutritional deficiencies                                   | 1<br>(1 - 3)             | 0<br>(0 - 1)       | 0<br>(0 - 0)      | 0<br>(0 - 1)             | 0<br>(0 - 0)             | 1<br>(0 - 1)             |
| Other communicable, maternal, neonatal, and nutritional diseases | 15<br>(11 - 22)          | 5<br>(2 - 9)       | 1<br>(0 - 1)      | 3<br>(2 - 4)             | 4<br>(2 - 7)             | 3<br>(2 - 7)             |
| Sexually transmitted diseases excluding HIV                      | 2<br>(0 - 5)             | 2<br>(0 - 5)       | 0<br>(0 - 0)      | 0<br>(0 - 0)             | 0<br>(0 - 0)             | 0<br>(0 - 0)             |
| Syphilis                                                         | 2<br>(0 - 5)             | 2<br>(0 - 5)       | 0<br>(0 - 0)      | 0<br>(0 - 0)             | 0<br>(0 - 0)             | 0<br>(0 - 0)             |
| Chlamydial infection                                             | --                       | --                 | --                | --                       | --                       | --                       |
| Gonococcal infection                                             | 0<br>(0 - 0)             | --                 | 0<br>(0 - 0)      | 0<br>(0 - 0)             | 0<br>(0 - 0)             | 0<br>(0 - 0)             |
| Other sexually transmitted diseases                              | 0<br>(0 - 0)             | --                 | 0<br>(0 - 0)      | 0<br>(0 - 0)             | 0<br>(0 - 0)             | 0<br>(0 - 0)             |
| Hepatitis                                                        | 5<br>(4 - 7)             | 1<br>(0 - 1)       | 0<br>(0 - 0)      | 1<br>(1 - 2)             | 2<br>(1 - 3)             | 1<br>(1 - 2)             |
| Acute hepatitis A                                                | 1<br>(0 - 1)             | 0<br>(0 - 1)       | 0<br>(0 - 0)      | 0<br>(0 - 0)             | 0<br>(0 - 0)             | 0<br>(0 - 0)             |
| Acute hepatitis B                                                | 4<br>(2 - 5)             | 0<br>(0 - 1)       | 0<br>(0 - 0)      | 1<br>(0 - 1)             | 1<br>(1 - 2)             | 1<br>(1 - 1)             |
| Acute hepatitis C                                                | 0<br>(0 - 0)             | --                 | 0<br>(0 - 0)      | 0<br>(0 - 0)             | 0<br>(0 - 0)             | 0<br>(0 - 0)             |
| Acute hepatitis E                                                | 1<br>(1 - 2)             | 0<br>(0 - 0)       | 0<br>(0 - 0)      | 1<br>(0 - 1)             | 0<br>(0 - 1)             | 0<br>(0 - 0)             |
| Other infectious diseases                                        | 8<br>(5 - 14)            | 2<br>(1 - 5)       | 0<br>(0 - 1)      | 1<br>(1 - 2)             | 2<br>(1 - 4)             | 2<br>(1 - 5)             |
| Non-communicable diseases                                        | 8,076<br>(6,643 - 9,791) | 666<br>(535 - 812) | 87<br>(71 - 104)  | 1,382<br>(1,020 - 1,783) | 2,658<br>(2,071 - 3,271) | 3,282<br>(2,836 - 3,938) |
| Neoplasms                                                        | 1,549<br>(1,239 - 1,928) | 25<br>(15 - 37)    | 32<br>(25 - 40)   | 366<br>(267 - 471)       | 649<br>(503 - 818)       | 477<br>(397 - 595)       |
| Esophageal cancer                                                | 18<br>(13 - 25)          | --                 | --                | 4<br>(3 - 6)             | 9<br>(6 - 12)            | 5<br>(4 - 7)             |
| Stomach cancer                                                   | 110<br>(83 - 143)        | --                 | --                | 26<br>(18 - 35)          | 50<br>(37 - 65)          | 34<br>(25 - 46)          |
| Liver cancer                                                     | 52<br>(40 - 68)          | --                 | 1<br>(0 - 1)      | 9<br>(6 - 14)            | 27<br>(19 - 36)          | 15<br>(11 - 21)          |
| Liver cancer due to hepatitis B                                  | 14<br>(4 - 30)           | --                 | 0<br>(0 - 0)      | 3<br>(1 - 7)             | 7<br>(1 - 17)            | 3<br>(1 - 7)             |
| Liver cancer due to hepatitis C                                  | 27<br>(14 - 41)          | --                 | 0<br>(0 - 0)      | 4<br>(2 - 7)             | 14<br>(7 - 23)           | 9<br>(5 - 13)            |
| Liver cancer due to alcohol use                                  | 6<br>(3 - 13)            | --                 | --                | 1<br>(0 - 2)             | 3<br>(1 - 7)             | 2<br>(1 - 4)             |
| Liver cancer due to other causes                                 | 5<br>(2 - 10)            | --                 | 0<br>(0 - 0)      | 1<br>(0 - 3)             | 3<br>(1 - 6)             | 1<br>(0 - 2)             |

Web Table 31- Jordan deaths with 95% UI by age, sex, and cause in 2013

| Cause                                         | Males, All Ages          | Males, 0-4 Years | Males, 5-14 Years | Males, 15-49 Years | Males, 50-69 Years     | Males, 70-80 Years       |
|-----------------------------------------------|--------------------------|------------------|-------------------|--------------------|------------------------|--------------------------|
| Larynx cancer                                 | 23<br>(16 - 32)          | --               | --                | 4<br>(3 - 6)       | 12<br>(8 - 17)         | 7<br>(5 - 10)            |
| Tracheal, bronchus and lung cancer            | 318<br>(248 - 404)       | --               | --                | 47<br>(33 - 64)    | 173<br>(130 - 223)     | 98<br>(78 - 124)         |
| Breast cancer                                 | 4<br>(3 - 6)             | --               | --                | 0<br>(0 - 1)       | 2<br>(1 - 4)           | 2<br>(1 - 3)             |
| Cervical cancer                               | --                       | --               | --                | --                 | --                     | --                       |
| Uterine cancer                                | --                       | --               | --                | --                 | --                     | --                       |
| Prostate cancer                               | 105<br>(65 - 152)        | --               | --                | 1<br>(1 - 2)       | 26<br>(16 - 39)        | 78<br>(48 - 112)         |
| Colon and rectum cancer                       | 190<br>(146 - 242)       | --               | --                | 40<br>(29 - 53)    | 87<br>(65 - 114)       | 62<br>(49 - 79)          |
| Lip and oral cavity cancer                    | 18<br>(12 - 25)          | --               | --                | 5<br>(3 - 8)       | 7<br>(4 - 11)          | 6<br>(4 - 8)             |
| Nasopharynx cancer                            | 15<br>(11 - 20)          | --               | 0<br>(0 - 1)      | 7<br>(5 - 10)      | 5<br>(3 - 8)           | 2<br>(1 - 3)             |
| Other pharynx cancer                          | 9<br>(7 - 13)            | --               | --                | 2<br>(1 - 3)       | 5<br>(3 - 7)           | 3<br>(2 - 4)             |
| Gallbladder and biliary tract cancer          | 19<br>(13 - 27)          | --               | --                | 3<br>(2 - 4)       | 9<br>(5 - 13)          | 7<br>(5 - 11)            |
| Pancreatic cancer                             | 63<br>(49 - 82)          | --               | --                | 12<br>(8 - 17)     | 33<br>(25 - 44)        | 18<br>(13 - 25)          |
| Malignant skin melanoma                       | 3<br>(2 - 6)             | --               | --                | 1<br>(1 - 2)       | 1<br>(1 - 2)           | 1<br>(0 - 1)             |
| Non-melanoma skin cancer                      | 8<br>(5 - 13)            | --               | --                | 2<br>(1 - 4)       | 2<br>(1 - 4)           | 4<br>(2 - 6)             |
| Ovarian cancer                                | --                       | --               | --                | --                 | --                     | --                       |
| Testicular cancer                             | 9<br>(5 - 13)            | --               | --                | 7<br>(5 - 11)      | 1<br>(1 - 2)           | 0<br>(0 - 0)             |
| Kidney cancer                                 | 31<br>(23 - 40)          | 0<br>(0 - 1)     | 0<br>(0 - 1)      | 6<br>(4 - 9)       | 16<br>(11 - 22)        | 8<br>(6 - 11)            |
| Bladder cancer                                | 104<br>(81 - 134)        | --               | --                | 11<br>(7 - 17)     | 49<br>(36 - 67)        | 44<br>(33 - 58)          |
| Brain and nervous system cancer               | 62<br>(37 - 85)          | 4<br>(1 - 7)     | 5<br>(3 - 8)      | 25<br>(15 - 35)    | 22<br>(14 - 31)        | 6<br>(3 - 9)             |
| Thyroid cancer                                | 8<br>(6 - 11)            | --               | 0<br>(0 - 0)      | 2<br>(1 - 2)       | 4<br>(2 - 5)           | 3<br>(2 - 4)             |
| Mesothelioma                                  | 1<br>(1 - 1)             | --               | --                | 0<br>(0 - 0)       | 0<br>(0 - 1)           | 0<br>(0 - 1)             |
| Hodgkin lymphoma                              | 2<br>(1 - 3)             | 0<br>(0 - 0)     | 0<br>(0 - 0)      | 1<br>(1 - 2)       | 0<br>(0 - 0)           | 0<br>(0 - 0)             |
| Non-Hodgkin lymphoma                          | 104<br>(76 - 137)        | 1<br>(1 - 2)     | 4<br>(2 - 6)      | 46<br>(33 - 64)    | 35<br>(24 - 48)        | 17<br>(12 - 25)          |
| Multiple myeloma                              | 14<br>(10 - 20)          | --               | --                | 2<br>(1 - 3)       | 8<br>(5 - 11)          | 4<br>(3 - 6)             |
| Leukemia                                      | 148<br>(117 - 185)       | 8<br>(4 - 14)    | 11<br>(7 - 15)    | 61<br>(43 - 80)    | 39<br>(29 - 52)        | 30<br>(23 - 38)          |
| Other neoplasms                               | 109<br>(83 - 139)        | 12<br>(7 - 20)   | 11<br>(7 - 16)    | 39<br>(27 - 52)    | 26<br>(18 - 36)        | 21<br>(15 - 29)          |
| Cardiovascular diseases                       | 3,414<br>(2,771 - 4,188) | 12<br>(7 - 18)   | 4<br>(3 - 6)      | 533<br>(389 - 706) | 1,277<br>(992 - 1,586) | 1,588<br>(1,363 - 1,911) |
| Rheumatic heart disease                       | 12<br>(8 - 18)           | 0<br>(0 - 1)     | 0<br>(0 - 1)      | 4<br>(3 - 6)       | 4<br>(2 - 6)           | 4<br>(2 - 5)             |
| Ischemic heart disease                        | 1,892<br>(1,504 - 2,386) | 3<br>(1 - 5)     | 1<br>(1 - 2)      | 380<br>(280 - 506) | 792<br>(609 - 1,000)   | 716<br>(591 - 879)       |
| Cerebrovascular disease                       | 973<br>(768 - 1,233)     | 3<br>(2 - 4)     | 1<br>(1 - 2)      | 58<br>(39 - 85)    | 302<br>(222 - 399)     | 609<br>(486 - 760)       |
| Ischemic stroke                               | 696<br>(543 - 878)       | 1<br>(0 - 2)     | 0<br>(0 - 0)      | 21<br>(13 - 32)    | 186<br>(135 - 251)     | 488<br>(385 - 610)       |
| Hemorrhagic stroke                            | 277<br>(198 - 381)       | 2<br>(1 - 3)     | 1<br>(1 - 2)      | 37<br>(25 - 54)    | 116<br>(80 - 163)      | 121<br>(85 - 168)        |
| Hypertensive heart disease                    | 374<br>(236 - 523)       | 0<br>(0 - 0)     | 0<br>(0 - 0)      | 39<br>(22 - 58)    | 131<br>(79 - 186)      | 204<br>(121 - 294)       |
| Cardiomyopathy and myocarditis                | 22<br>(16 - 33)          | 2<br>(1 - 2)     | 1<br>(0 - 1)      | 12<br>(8 - 19)     | 5<br>(3 - 8)           | 3<br>(2 - 4)             |
| Atrial fibrillation and flutter               | 3<br>(2 - 4)             | --               | --                | 1<br>(0 - 1)       | 1<br>(1 - 1)           | 1<br>(1 - 2)             |
| Aortic aneurysm                               | 35<br>(26 - 46)          | --               | --                | 6<br>(4 - 9)       | 16<br>(11 - 22)        | 12<br>(9 - 17)           |
| Peripheral vascular disease                   | 0<br>(0 - 0)             | --               | --                | 0<br>(0 - 0)       | 0<br>(0 - 0)           | 0<br>(0 - 0)             |
| Endocarditis                                  | 11<br>(7 - 17)           | 1<br>(1 - 2)     | 0<br>(0 - 0)      | 2<br>(1 - 4)       | 3<br>(2 - 5)           | 4<br>(2 - 7)             |
| Other cardiovascular and circulatory diseases | 90<br>(67 - 118)         | 3<br>(2 - 5)     | 0<br>(0 - 1)      | 30<br>(20 - 41)    | 23<br>(16 - 32)        | 34<br>(24 - 47)          |
| Chronic respiratory diseases                  | 484<br>(380 - 602)       | 3<br>(1 - 6)     | 1<br>(1 - 2)      | 42<br>(30 - 56)    | 140<br>(102 - 182)     | 297<br>(236 - 368)       |



Web Table 31- Jordan deaths with 95% UI by age, sex, and cause in 2013

| Cause                                               | Males, All Ages    | Males, 0-4 Years | Males, 5-14 Years | Males, 15-49 Years | Males, 50-69 Years | Males, 70-80 Years |
|-----------------------------------------------------|--------------------|------------------|-------------------|--------------------|--------------------|--------------------|
| Chronic obstructive pulmonary disease               | 353<br>(277 - 442) | 1<br>(0 - 2)     | 0<br>(0 - 0)      | 19<br>(13 - 26)    | 99<br>(72 - 130)   | 233<br>(184 - 290) |
| Pneumoconiosis                                      | 12<br>(8 - 17)     | 0<br>(0 - 0)     | 0<br>(0 - 0)      | 4<br>(3 - 7)       | 3<br>(2 - 5)       | 4<br>(2 - 6)       |
| Silicosis                                           | 3<br>(2 - 5)       | 0<br>(0 - 0)     | 0<br>(0 - 0)      | 0<br>(0 - 0)       | 0<br>(0 - 1)       | 3<br>(2 - 4)       |
| Asbestosis                                          | 1<br>(0 - 1)       | 0<br>(0 - 0)     | 0<br>(0 - 0)      | 1<br>(0 - 1)       | 0<br>(0 - 0)       | 0<br>(0 - 0)       |
| Coal workers pneumoconiosis                         | 0<br>(0 - 0)       | 0<br>(0 - 0)     | 0<br>(0 - 0)      | 0<br>(0 - 0)       | 0<br>(0 - 0)       | 0<br>(0 - 0)       |
| Other pneumoconiosis                                | 7<br>(5 - 11)      | 0<br>(0 - 0)     | 0<br>(0 - 0)      | 3<br>(2 - 5)       | 2<br>(1 - 4)       | 1<br>(1 - 2)       |
| Asthma                                              | 45<br>(33 - 58)    | 1<br>(1 - 3)     | 1<br>(0 - 1)      | 11<br>(8 - 15)     | 16<br>(10 - 22)    | 16<br>(11 - 23)    |
| Interstitial lung disease and pulmonary sarcoidosis | 69<br>(46 - 99)    | 0<br>(0 - 1)     | 0<br>(0 - 1)      | 6<br>(4 - 9)       | 21<br>(13 - 33)    | 41<br>(26 - 62)    |
| Other chronic respiratory diseases                  | 5<br>(4 - 7)       | 0<br>(0 - 1)     | 0<br>(0 - 0)      | 1<br>(1 - 2)       | 1<br>(1 - 2)       | 2<br>(2 - 4)       |
| Cirrhosis                                           | 179<br>(139 - 227) | 5<br>(2 - 9)     | 2<br>(1 - 3)      | 52<br>(37 - 69)    | 71<br>(51 - 93)    | 50<br>(38 - 64)    |
| Cirrhosis due to hepatitis B                        | 52<br>(12 - 90)    | 0<br>(0 - 1)     | 0<br>(0 - 1)      | 14<br>(3 - 27)     | 21<br>(5 - 38)     | 16<br>(3 - 31)     |
| Cirrhosis due to hepatitis C                        | 72<br>(38 - 116)   | 0<br>(0 - 1)     | 0<br>(0 - 1)      | 22<br>(13 - 35)    | 30<br>(11 - 53)    | 18<br>(7 - 31)     |
| Cirrhosis due to alcohol use                        | 30<br>(12 - 57)    | --               | --                | 5<br>(2 - 11)      | 12<br>(5 - 26)     | 12<br>(5 - 24)     |
| Cirrhosis due to other causes                       | 25<br>(15 - 45)    | 4<br>(2 - 7)     | 1<br>(1 - 2)      | 9<br>(5 - 19)      | 7<br>(3 - 15)      | 3<br>(1 - 7)       |
| Digestive diseases                                  | 127<br>(100 - 163) | 3<br>(2 - 5)     | 1<br>(1 - 2)      | 26<br>(19 - 36)    | 35<br>(25 - 47)    | 62<br>(48 - 81)    |
| Peptic ulcer disease                                | 25<br>(17 - 35)    | 0<br>(0 - 0)     | 0<br>(0 - 0)      | 5<br>(3 - 7)       | 7<br>(4 - 10)      | 13<br>(8 - 20)     |
| Gastritis and duodenitis                            | 0<br>(0 - 1)       | 0<br>(0 - 0)     | 0<br>(0 - 0)      | 0<br>(0 - 0)       | 0<br>(0 - 0)       | 0<br>(0 - 0)       |
| Appendicitis                                        | 4<br>(2 - 5)       | 0<br>(0 - 0)     | 0<br>(0 - 0)      | 1<br>(1 - 2)       | 1<br>(1 - 1)       | 1<br>(1 - 2)       |
| Paralytic ileus and intestinal obstruction          | 31<br>(19 - 47)    | 1<br>(0 - 2)     | 0<br>(0 - 0)      | 4<br>(2 - 7)       | 7<br>(4 - 11)      | 19<br>(11 - 28)    |
| Inguinal, femoral, and abdominal hernia             | 1<br>(1 - 2)       | 0<br>(0 - 0)     | 0<br>(0 - 0)      | 0<br>(0 - 1)       | 0<br>(0 - 1)       | 0<br>(0 - 1)       |
| Inflammatory bowel disease                          | 6<br>(4 - 8)       | 0<br>(0 - 1)     | 0<br>(0 - 0)      | 2<br>(1 - 3)       | 2<br>(1 - 2)       | 2<br>(1 - 3)       |
| Vascular intestinal disorders                       | 16<br>(7 - 31)     | 0<br>(0 - 0)     | 0<br>(0 - 0)      | 4<br>(2 - 7)       | 5<br>(2 - 10)      | 7<br>(3 - 14)      |
| Gallbladder and biliary diseases                    | 16<br>(9 - 23)     | 1<br>(0 - 1)     | 0<br>(0 - 0)      | 2<br>(1 - 3)       | 4<br>(2 - 7)       | 9<br>(5 - 14)      |
| Pancreatitis                                        | 12<br>(8 - 19)     | 0<br>(0 - 0)     | 0<br>(0 - 0)      | 5<br>(3 - 8)       | 4<br>(2 - 7)       | 3<br>(2 - 5)       |
| Other digestive diseases                            | 16<br>(11 - 23)    | 1<br>(0 - 1)     | 0<br>(0 - 0)      | 2<br>(1 - 4)       | 5<br>(3 - 7)       | 8<br>(5 - 13)      |
| Neurological disorders                              | 380<br>(305 - 462) | 17<br>(12 - 24)  | 4<br>(2 - 5)      | 29<br>(20 - 39)    | 47<br>(34 - 64)    | 284<br>(225 - 350) |
| Alzheimer disease and other dementias               | 314<br>(247 - 384) | --               | --                | 0<br>(0 - 1)       | 39<br>(28 - 55)    | 274<br>(216 - 338) |
| Parkinson disease                                   | 10<br>(6 - 16)     | --               | --                | 0<br>(0 - 0)       | 2<br>(1 - 3)       | 8<br>(5 - 14)      |
| Epilepsy                                            | 28<br>(20 - 38)    | 3<br>(2 - 7)     | 2<br>(1 - 4)      | 19<br>(12 - 27)    | 3<br>(2 - 4)       | 1<br>(1 - 2)       |
| Multiple sclerosis                                  | 4<br>(2 - 8)       | --               | --                | 2<br>(1 - 5)       | 1<br>(1 - 3)       | 1<br>(0 - 1)       |
| Other neurological disorders                        | 25<br>(18 - 33)    | 14<br>(9 - 20)   | 1<br>(1 - 2)      | 7<br>(5 - 10)      | 2<br>(1 - 3)       | 0<br>(0 - 1)       |
| Mental and substance use disorders                  | 139<br>(100 - 183) | 2<br>(2 - 3)     | 0<br>(0 - 0)      | 121<br>(86 - 162)  | 14<br>(10 - 19)    | 1<br>(1 - 2)       |
| Schizophrenia                                       | 0<br>(0 - 0)       | --               | --                | 0<br>(0 - 0)       | 0<br>(0 - 0)       | 0<br>(0 - 0)       |
| Alcohol use disorders                               | 5<br>(3 - 8)       | --               | --                | 3<br>(2 - 5)       | 1<br>(1 - 2)       | 1<br>(0 - 1)       |
| Drug use disorders                                  | 133<br>(96 - 177)  | 2<br>(2 - 3)     | --                | 118<br>(83 - 158)  | 13<br>(9 - 17)     | 1<br>(1 - 1)       |
| Opioid use disorders                                | 74<br>(52 - 99)    | 1<br>(1 - 2)     | --                | 66<br>(46 - 90)    | 6<br>(5 - 9)       | 0<br>(0 - 1)       |
| Cocaine use disorders                               | 2<br>(1 - 2)       | 0<br>(0 - 0)     | --                | 2<br>(1 - 2)       | 0<br>(0 - 0)       | 0<br>(0 - 0)       |
| Amphetamine use disorders                           | 1<br>(1 - 2)       | 0<br>(0 - 0)     | --                | 1<br>(1 - 2)       | 0<br>(0 - 0)       | 0<br>(0 - 0)       |
| Other drug use disorders                            | 56<br>(41 - 76)    | 1<br>(1 - 1)     | --                | 49<br>(35 - 67)    | 6<br>(4 - 8)       | 0<br>(0 - 0)       |
| Eating disorders                                    | 0<br>(0 - 0)       | --               | 0<br>(0 - 0)      | 0<br>(0 - 0)       | --                 | --                 |

Web Table 31- Jordan deaths with 95% UI by age, sex, and cause in 2013

| Cause                                               | Males, All Ages        | Males, 0-4 Years   | Males, 5-14 Years | Males, 15-49 Years | Males, 50-69 Years | Males, 70-80 Years |
|-----------------------------------------------------|------------------------|--------------------|-------------------|--------------------|--------------------|--------------------|
| Anorexia nervosa                                    | 0<br>(0 - 0)           | --                 | 0<br>(0 - 0)      | 0<br>(0 - 0)       | --                 | --                 |
| Diabetes, urogenital, blood, and endocrine diseases | 1,158<br>(936 - 1,449) | 52<br>(36 - 71)    | 16<br>(12 - 21)   | 169<br>(125 - 225) | 417<br>(318 - 534) | 505<br>(421 - 626) |
| Diabetes mellitus                                   | 561<br>(446 - 707)     | 3<br>(2 - 4)       | 0<br>(0 - 1)      | 52<br>(37 - 70)    | 248<br>(187 - 322) | 258<br>(207 - 327) |
| Acute glomerulonephritis                            | 1<br>(1 - 2)           | 0<br>(0 - 0)       | 0<br>(0 - 0)      | 0<br>(0 - 1)       | 0<br>(0 - 0)       | 0<br>(0 - 0)       |
| Chronic kidney disease                              | 457<br>(355 - 598)     | 8<br>(5 - 12)      | 4<br>(3 - 6)      | 80<br>(57 - 112)   | 150<br>(109 - 201) | 215<br>(163 - 276) |
| Chronic kidney disease due to diabetes mellitus     | 62<br>(10 - 93)        | 0<br>(0 - 1)       | 0<br>(0 - 1)      | 7<br>(2 - 12)      | 24<br>(3 - 38)     | 30<br>(5 - 49)     |
| Chronic kidney disease due to hypertension          | 216<br>(149 - 303)     | 2<br>(1 - 3)       | 1<br>(1 - 2)      | 39<br>(25 - 58)    | 72<br>(46 - 105)   | 103<br>(69 - 148)  |
| Chronic kidney disease due to glomerulonephritis    | 3<br>(2 - 5)           | 1<br>(1 - 2)       | 0<br>(0 - 0)      | 1<br>(1 - 2)       | 0<br>(0 - 1)       | 1<br>(0 - 2)       |
| Chronic kidney disease due to other causes          | 175<br>(116 - 266)     | 5<br>(2 - 8)       | 3<br>(2 - 5)      | 34<br>(20 - 55)    | 53<br>(30 - 91)    | 80<br>(45 - 130)   |
| Urinary diseases and male infertility               | 31<br>(24 - 41)        | 3<br>(2 - 5)       | 1<br>(0 - 1)      | 4<br>(2 - 5)       | 7<br>(5 - 10)      | 17<br>(12 - 24)    |
| Interstitial nephritis and urinary tract infections | 12<br>(7 - 17)         | 2<br>(1 - 4)       | 1<br>(0 - 1)      | 1<br>(1 - 2)       | 3<br>(1 - 4)       | 6<br>(2 - 9)       |
| Urolithiasis                                        | 2<br>(1 - 2)           | --                 | 0<br>(0 - 0)      | 0<br>(0 - 1)       | 1<br>(0 - 1)       | 1<br>(0 - 1)       |
| Other urinary diseases                              | 18<br>(13 - 26)        | 1<br>(0 - 2)       | 0<br>(0 - 0)      | 2<br>(1 - 3)       | 4<br>(3 - 6)       | 11<br>(7 - 17)     |
| Gynecological diseases                              | --                     | --                 | --                | --                 | --                 | --                 |
| Uterine fibroids                                    | --                     | --                 | --                | --                 | --                 | --                 |
| Polycystic ovarian syndrome                         | --                     | --                 | --                | --                 | --                 | --                 |
| Endometriosis                                       | --                     | --                 | --                | --                 | --                 | --                 |
| Genital prolapse                                    | --                     | --                 | --                | --                 | --                 | --                 |
| Other gynecological diseases                        | --                     | --                 | --                | --                 | --                 | --                 |
| Hemoglobinopathies and hemolytic anemias            | 33<br>(20 - 52)        | 6<br>(4 - 11)      | 3<br>(2 - 5)      | 16<br>(9 - 25)     | 3<br>(2 - 6)       | 5<br>(3 - 7)       |
| Thalassemias                                        | 19<br>(11 - 29)        | 5<br>(3 - 8)       | 3<br>(1 - 4)      | 11<br>(7 - 18)     | 0<br>(0 - 0)       | 0<br>(0 - 0)       |
| Sickle cell disorders                               | 5<br>(3 - 8)           | 1<br>(0 - 1)       | 0<br>(0 - 1)      | 3<br>(1 - 4)       | 1<br>(1 - 2)       | 0<br>(0 - 0)       |
| G6PD deficiency                                     | 1<br>(0 - 1)           | 0<br>(0 - 0)       | 0<br>(0 - 0)      | 0<br>(0 - 0)       | 0<br>(0 - 0)       | 0<br>(0 - 0)       |
| Other hemoglobinopathies and hemolytic anemias      | 9<br>(6 - 14)          | 1<br>(0 - 1)       | 0<br>(0 - 0)      | 2<br>(1 - 3)       | 2<br>(1 - 4)       | 4<br>(3 - 7)       |
| Endocrine, metabolic, blood, and immune disorders   | 75<br>(47 - 98)        | 33<br>(19 - 49)    | 7<br>(4 - 11)     | 17<br>(11 - 25)    | 8<br>(5 - 12)      | 10<br>(7 - 16)     |
| Musculoskeletal disorders                           | 18<br>(13 - 25)        | --                 | 1<br>(1 - 2)      | 10<br>(7 - 15)     | 3<br>(2 - 4)       | 4<br>(3 - 5)       |
| Rheumatoid arthritis                                | 1<br>(1 - 2)           | --                 | 0<br>(0 - 0)      | 1<br>(0 - 1)       | 0<br>(0 - 0)       | 0<br>(0 - 0)       |
| Other musculoskeletal disorders                     | 17<br>(12 - 24)        | --                 | 1<br>(1 - 1)      | 10<br>(7 - 14)     | 3<br>(2 - 4)       | 4<br>(2 - 5)       |
| Other non-communicable diseases                     | 628<br>(507 - 762)     | 547<br>(436 - 681) | 26<br>(17 - 35)   | 35<br>(25 - 50)    | 6<br>(4 - 8)       | 14<br>(10 - 20)    |
| Congenital anomalies                                | 608<br>(488 - 744)     | 543<br>(433 - 676) | 25<br>(17 - 35)   | 33<br>(23 - 47)    | 3<br>(2 - 5)       | 3<br>(2 - 4)       |
| Neural tube defects                                 | 7<br>(3 - 14)          | 6<br>(2 - 13)      | 1<br>(0 - 1)      | 1<br>(0 - 1)       | 0<br>(0 - 0)       | 0<br>(0 - 0)       |
| Congenital heart anomalies                          | 267<br>(198 - 347)     | 239<br>(173 - 316) | 10<br>(6 - 15)    | 16<br>(11 - 23)    | 1<br>(1 - 2)       | 0<br>(0 - 1)       |
| Cleft lip and cleft palate                          | 1<br>(0 - 2)           | 1<br>(0 - 2)       | --                | --                 | --                 | --                 |
| Down syndrome                                       | 34<br>(18 - 55)        | 26<br>(12 - 47)    | 2<br>(1 - 3)      | 5<br>(3 - 8)       | 0<br>(0 - 0)       | 0<br>(0 - 0)       |
| Chromosomal unbalanced rearrangements               | 4<br>(2 - 6)           | 3<br>(2 - 6)       | 0<br>(0 - 0)      | 0<br>(0 - 0)       | 0<br>(0 - 0)       | 0<br>(0 - 0)       |
| Other congenital anomalies                          | 296<br>(225 - 396)     | 268<br>(199 - 364) | 13<br>(8 - 19)    | 11<br>(7 - 16)     | 2<br>(2 - 3)       | 3<br>(2 - 4)       |
| Skin and subcutaneous diseases                      | 17<br>(12 - 23)        | 1<br>(0 - 1)       | 0<br>(0 - 1)      | 2<br>(2 - 3)       | 3<br>(2 - 4)       | 11<br>(7 - 17)     |
| Cellulitis                                          | 1<br>(1 - 2)           | 0<br>(0 - 0)       | 0<br>(0 - 0)      | 0<br>(0 - 0)       | 1<br>(0 - 1)       | 0<br>(0 - 1)       |
| Pyoderma                                            | 3<br>(2 - 4)           | 0<br>(0 - 1)       | 0<br>(0 - 0)      | 1<br>(0 - 1)       | 1<br>(0 - 1)       | 1<br>(0 - 2)       |
| Decubitus ulcer                                     | 12<br>(8 - 18)         | 0<br>(0 - 0)       | 0<br>(0 - 0)      | 1<br>(1 - 1)       | 1<br>(1 - 2)       | 9<br>(6 - 15)      |

Web Table 31- Jordan deaths with 95% UI by age, sex, and cause in 2013

| Cause                                           | Males, All Ages    | Males, 0-4 Years  | Males, 5-14 Years | Males, 15-49 Years | Males, 50-69 Years | Males, 70-80 Years |
|-------------------------------------------------|--------------------|-------------------|-------------------|--------------------|--------------------|--------------------|
| Other skin and subcutaneous diseases            | 1<br>(1 - 1)       | 0<br>(0 - 0)      | 0<br>(0 - 0)      | 0<br>(0 - 1)       | 0<br>(0 - 0)       | 0<br>(0 - 0)       |
| Sudden infant death syndrome                    | 3<br>1,586         | 3<br>211          | --<br>147         | --<br>963          | --<br>145          | --<br>119          |
| Injuries                                        | (1,296 - 1,940)    | (141 - 281)       | (122 - 172)       | (732 - 1,217)      | (110 - 189)        | (96 - 150)         |
| Transport injuries                              | 535<br>(420 - 664) | 67<br>(39 - 103)  | 55<br>(43 - 69)   | 300<br>(220 - 391) | 74<br>(55 - 99)    | 39<br>(29 - 52)    |
| Road injuries                                   | 370<br>(292 - 467) | 64<br>(37 - 97)   | 51<br>(40 - 64)   | 158<br>(112 - 213) | 60<br>(44 - 80)    | 37<br>(27 - 49)    |
| Pedestrian road injuries                        | 174<br>(128 - 226) | 45<br>(24 - 71)   | 37<br>(28 - 48)   | 41<br>(25 - 61)    | 32<br>(22 - 46)    | 19<br>(13 - 27)    |
| Cyclist road injuries                           | 18<br>(12 - 25)    | 4<br>(2 - 7)      | 3<br>(2 - 5)      | 4<br>(3 - 7)       | 4<br>(3 - 7)       | 2<br>(1 - 3)       |
| Motorcyclist road injuries                      | 71<br>(48 - 101)   | 2<br>(1 - 4)      | 2<br>(1 - 3)      | 56<br>(37 - 81)    | 3<br>(2 - 6)       | 8<br>(5 - 13)      |
| Motor vehicle road injuries                     | 106<br>(76 - 143)  | 13<br>(6 - 23)    | 9<br>(6 - 14)     | 57<br>(37 - 80)    | 20<br>(13 - 29)    | 7<br>(5 - 11)      |
| Other road injuries                             | 1<br>(1 - 2)       | 1<br>(0 - 1)      | 0<br>(0 - 1)      | 0<br>(0 - 0)       | 0<br>(0 - 0)       | 0<br>(0 - 0)       |
| Other transport injuries                        | 165<br>(121 - 219) | 4<br>(2 - 7)      | 4<br>(2 - 6)      | 142<br>(101 - 190) | 14<br>(9 - 20)     | 2<br>(1 - 3)       |
| Unintentional injuries                          | 755<br>(607 - 945) | 136<br>(87 - 189) | 82<br>(65 - 103)  | 428<br>(318 - 557) | 44<br>(33 - 59)    | 63<br>(48 - 87)    |
| Falls                                           | 102<br>(75 - 139)  | 18<br>(8 - 33)    | 9<br>(6 - 14)     | 46<br>(30 - 67)    | 9<br>(6 - 14)      | 20<br>(13 - 30)    |
| Drowning                                        | 376<br>(263 - 503) | 56<br>(28 - 95)   | 50<br>(35 - 68)   | 254<br>(173 - 349) | 10<br>(6 - 16)     | 6<br>(4 - 9)       |
| Fire, heat, and hot substances                  | 68<br>(45 - 92)    | 14<br>(7 - 25)    | 4<br>(3 - 7)      | 37<br>(22 - 53)    | 6<br>(3 - 8)       | 7<br>(5 - 11)      |
| Poisonings                                      | 32<br>(20 - 46)    | 8<br>(3 - 15)     | 2<br>(1 - 3)      | 19<br>(11 - 27)    | 2<br>(1 - 3)       | 2<br>(1 - 3)       |
| Exposure to mechanical forces                   | 51<br>(40 - 66)    | 11<br>(6 - 19)    | 8<br>(5 - 12)     | 25<br>(17 - 34)    | 4<br>(3 - 6)       | 3<br>(2 - 4)       |
| Unintentional firearm injuries                  | 12<br>(8 - 17)     | 1<br>(0 - 2)      | 1<br>(0 - 1)      | 9<br>(5 - 13)      | 1<br>(1 - 2)       | 1<br>(0 - 1)       |
| Unintentional suffocation                       | 4<br>(2 - 7)       | 1<br>(0 - 3)      | 1<br>(0 - 2)      | 1<br>(1 - 2)       | 0<br>(0 - 0)       | 0<br>(0 - 0)       |
| Other exposure to mechanical forces             | 36<br>(27 - 48)    | 9<br>(4 - 16)     | 7<br>(4 - 11)     | 15<br>(10 - 21)    | 3<br>(2 - 5)       | 3<br>(2 - 4)       |
| Adverse effects of medical treatment            | 36<br>(23 - 64)    | 3<br>(2 - 6)      | 1<br>(0 - 1)      | 5<br>(3 - 9)       | 8<br>(5 - 15)      | 19<br>(10 - 38)    |
| Animal contact                                  | 3<br>(2 - 4)       | 1<br>(1 - 2)      | 1<br>(0 - 1)      | 0<br>(0 - 0)       | 0<br>(0 - 0)       | 1<br>(0 - 1)       |
| Venomous animal contact                         | 2<br>(1 - 3)       | 1<br>(0 - 2)      | 0<br>(0 - 1)      | 0<br>(0 - 0)       | 0<br>(0 - 0)       | 0<br>(0 - 1)       |
| Non-venomous animal contact                     | 1<br>(1 - 1)       | 0<br>(0 - 1)      | 0<br>(0 - 0)      | 0<br>(0 - 0)       | 0<br>(0 - 0)       | 0<br>(0 - 0)       |
| Foreign body                                    | 31<br>(19 - 53)    | 17<br>(9 - 29)    | 2<br>(1 - 3)      | 6<br>(4 - 11)      | 2<br>(1 - 4)       | 4<br>(2 - 7)       |
| Pulmonary aspiration and foreign body in airway | 31<br>(18 - 52)    | 16<br>(9 - 28)    | 2<br>(1 - 3)      | 6<br>(4 - 11)      | 2<br>(1 - 4)       | 4<br>(2 - 7)       |
| Foreign body in other body part                 | 1<br>(0 - 1)       | 0<br>(0 - 0)      | 0<br>(0 - 0)      | 0<br>(0 - 0)       | 0<br>(0 - 0)       | 0<br>(0 - 0)       |
| Other unintentional injuries                    | 54<br>(42 - 68)    | 9<br>(5 - 14)     | 5<br>(4 - 8)      | 36<br>(25 - 48)    | 3<br>(2 - 4)       | 2<br>(1 - 2)       |
| Self-harm and interpersonal violence            | 296<br>(187 - 398) | 8<br>(2 - 17)     | 10<br>(4 - 17)    | 235<br>(148 - 325) | 27<br>(17 - 37)    | 17<br>(11 - 24)    |
| Self-harm                                       | 97<br>(69 - 129)   | --<br>(1 - 3)     | 1<br>(1 - 3)      | 70<br>(46 - 96)    | 13<br>(9 - 19)     | 12<br>(8 - 18)     |
| Interpersonal violence                          | 199<br>(102 - 280) | 8<br>(2 - 17)     | 9<br>(3 - 15)     | 165<br>(86 - 239)  | 14<br>(6 - 22)     | 5<br>(1 - 9)       |
| Assault by firearm                              | 115<br>(50 - 171)  | 2<br>(1 - 6)      | 3<br>(1 - 6)      | 101<br>(44 - 152)  | 7<br>(3 - 12)      | 2<br>(0 - 4)       |
| Assault by sharp object                         | 43<br>(18 - 72)    | 1<br>(0 - 3)      | 2<br>(1 - 4)      | 36<br>(15 - 63)    | 3<br>(1 - 6)       | 1<br>(0 - 1)       |
| Assault by other means                          | 41<br>(19 - 66)    | 4<br>(1 - 10)     | 4<br>(1 - 7)      | 28<br>(13 - 49)    | 3<br>(1 - 5)       | 2<br>(0 - 4)       |

Web Table 31- Jordan deaths with 95% UI by age, sex, and cause in 2013

| Cause                                                             | Females, All Ages        | Females, 0-4 Years       | Females, 5-14 Years | Females, 15-49 Years   | Females, 50-69 Years     | Females, 70-80 Years     |
|-------------------------------------------------------------------|--------------------------|--------------------------|---------------------|------------------------|--------------------------|--------------------------|
| All causes                                                        | 8,622<br>(7,395 - 9,665) | 1,682<br>(1,489 - 1,900) | 226<br>(204 - 249)  | 1,301<br>(975 - 1,612) | 1,926<br>(1,495 - 2,384) | 3,487<br>(3,068 - 3,770) |
| Communicable, maternal, neonatal, and nutritional diseases        | 1,278<br>(1,099 - 1,492) | 891<br>(734 - 1,073)     | 48<br>(33 - 73)     | 150<br>(117 - 192)     | 48<br>(34 - 64)          | 141<br>(104 - 183)       |
| HIV/AIDS and tuberculosis                                         | 14<br>(11 - 17)          | 0<br>(0 - 0)             | 0<br>(0 - 1)        | 6<br>(5 - 8)           | 3<br>(2 - 4)             | 4<br>(3 - 5)             |
| Tuberculosis                                                      | 9<br>(7 - 12)            | 0<br>(0 - 0)             | 0<br>(0 - 1)        | 2<br>(2 - 4)           | 3<br>(2 - 4)             | 4<br>(3 - 5)             |
| HIV/AIDS                                                          | 5<br>(4 - 6)             | 0<br>(0 - 0)             | 0<br>(0 - 0)        | 4<br>(3 - 5)           | 1<br>(0 - 1)             | 0<br>(0 - 0)             |
| HIV/AIDS resulting in mycobacterial infection                     | 0<br>(0 - 0)             | 0<br>(0 - 0)             | 0<br>(0 - 0)        | 0<br>(0 - 0)           | 0<br>(0 - 0)             | 0<br>(0 - 0)             |
| HIV/AIDS resulting in other diseases                              | 5<br>(4 - 6)             | 0<br>(0 - 0)             | 0<br>(0 - 0)        | 4<br>(3 - 5)           | 1<br>(0 - 1)             | 0<br>(0 - 0)             |
| Diarrhea, lower respiratory, and other common infectious diseases | 550<br>(438 - 732)       | 270<br>(189 - 412)       | 43<br>(29 - 68)     | 75<br>(50 - 109)       | 38<br>(26 - 53)          | 124<br>(89 - 167)        |
| Diarrheal diseases                                                | 30<br>(19 - 51)          | 19<br>(8 - 39)           | 2<br>(1 - 3)        | 2<br>(1 - 3)           | 1<br>(1 - 2)             | 7<br>(4 - 11)            |
| Intestinal infectious diseases                                    | 71<br>(33 - 131)         | 22<br>(10 - 43)          | 18<br>(8 - 34)      | 26<br>(10 - 54)        | 3<br>(1 - 7)             | 1<br>(0 - 3)             |
| Typhoid fever                                                     | 55<br>(25 - 102)         | 16<br>(7 - 32)           | 14<br>(6 - 26)      | 20<br>(8 - 43)         | 3<br>(1 - 6)             | 1<br>(0 - 2)             |
| Paratyphoid fever                                                 | 16<br>(7 - 30)           | 6<br>(2 - 11)            | 4<br>(2 - 8)        | 5<br>(2 - 11)          | 1<br>(0 - 2)             | 0<br>(0 - 1)             |
| Other intestinal infectious diseases                              | 0<br>(0 - 2)             | 0<br>(0 - 1)             | 0<br>(0 - 0)        | 0<br>(0 - 1)           | 0<br>(0 - 0)             | 0<br>(0 - 0)             |
| Lower respiratory infections                                      | 357<br>(281 - 437)       | 165<br>(110 - 227)       | 11<br>(7 - 17)      | 36<br>(23 - 50)        | 32<br>(20 - 45)          | 114<br>(80 - 156)        |
| Upper respiratory infections                                      | 0<br>(0 - 1)             | 0<br>(0 - 0)             | 0<br>(0 - 0)        | 0<br>(0 - 0)           | 0<br>(0 - 0)             | 0<br>(0 - 0)             |
| Otitis media                                                      | 1<br>(0 - 1)             | 0<br>(0 - 0)             | 0<br>(0 - 0)        | 0<br>(0 - 0)           | 0<br>(0 - 0)             | 0<br>(0 - 0)             |
| Meningitis                                                        | 21<br>(15 - 30)          | 14<br>(8 - 22)           | 2<br>(1 - 3)        | 3<br>(2 - 4)           | 1<br>(1 - 2)             | 1<br>(1 - 2)             |
| Pneumococcal meningitis                                           | 5<br>(3 - 7)             | 3<br>(1 - 4)             | 1<br>(0 - 1)        | 1<br>(0 - 1)           | 0<br>(0 - 1)             | 0<br>(0 - 1)             |
| H influenzae type B meningitis                                    | 6<br>(3 - 9)             | 5<br>(3 - 8)             | 0<br>(0 - 1)        | 0<br>(0 - 1)           | 0<br>(0 - 0)             | 0<br>(0 - 0)             |
| Meningococcal meningitis                                          | 6<br>(4 - 10)            | 4<br>(2 - 7)             | 1<br>(0 - 1)        | 1<br>(0 - 1)           | 0<br>(0 - 1)             | 0<br>(0 - 1)             |
| Other meningitis                                                  | 4<br>(3 - 7)             | 2<br>(1 - 4)             | 0<br>(0 - 1)        | 1<br>(1 - 2)           | 0<br>(0 - 1)             | 1<br>(0 - 1)             |
| Encephalitis                                                      | 18<br>(13 - 26)          | 7<br>(4 - 12)            | 4<br>(2 - 5)        | 6<br>(4 - 10)          | 1<br>(1 - 2)             | 1<br>(1 - 1)             |
| Diphtheria                                                        | 0<br>(0 - 1)             | 0<br>(0 - 1)             | 0<br>(0 - 0)        | 0<br>(0 - 0)           | 0<br>(0 - 0)             | --<br>(0 - 0)            |
| Whooping cough                                                    | 2<br>(0 - 8)             | 2<br>(0 - 8)             | 0<br>(0 - 0)        | 0<br>(0 - 0)           | 0<br>(0 - 0)             | --<br>(0 - 0)            |
| Tetanus                                                           | 0<br>(0 - 1)             | 0<br>(0 - 0)             | 0<br>(0 - 0)        | 0<br>(0 - 0)           | 0<br>(0 - 0)             | 0<br>(0 - 0)             |
| Measles                                                           | 48<br>(1 - 252)          | 41<br>(1 - 213)          | 6<br>(0 - 34)       | 1<br>(0 - 8)           | 0<br>(0 - 0)             | --<br>(0 - 0)            |
| Varicella and herpes zoster                                       | 1<br>(0 - 3)             | 0<br>(0 - 2)             | 0<br>(0 - 0)        | 0<br>(0 - 1)           | 0<br>(0 - 0)             | 0<br>(0 - 1)             |
| Neglected tropical diseases and malaria                           | 18<br>(9 - 28)           | 6<br>(1 - 14)            | 2<br>(1 - 4)        | 7<br>(3 - 11)          | 2<br>(1 - 4)             | 1<br>(1 - 2)             |
| Leishmaniasis                                                     | 14<br>(6 - 24)           | 6<br>(0 - 14)            | 2<br>(0 - 4)        | 5<br>(2 - 10)          | 1<br>(0 - 2)             | 0<br>(0 - 1)             |
| Visceral leishmaniasis                                            | 14<br>(6 - 24)           | 6<br>(0 - 14)            | 2<br>(0 - 4)        | 5<br>(2 - 10)          | 1<br>(0 - 2)             | 0<br>(0 - 1)             |
| Schistosomiasis                                                   | 2<br>(2 - 3)             | 0<br>(0 - 0)             | 0<br>(0 - 0)        | 1<br>(0 - 1)           | 1<br>(0 - 1)             | 1<br>(0 - 1)             |
| Cysticercosis                                                     | 0<br>(0 - 0)             | 0<br>(0 - 0)             | 0<br>(0 - 0)        | 0<br>(0 - 0)           | 0<br>(0 - 0)             | 0<br>(0 - 0)             |
| Cystic echinococcosis                                             | 0<br>(0 - 0)             | 0<br>(0 - 0)             | 0<br>(0 - 0)        | 0<br>(0 - 0)           | 0<br>(0 - 0)             | 0<br>(0 - 0)             |
| Dengue                                                            | 0<br>(0 - 0)             | 0<br>(0 - 0)             | 0<br>(0 - 0)        | 0<br>(0 - 0)           | 0<br>(0 - 0)             | 0<br>(0 - 0)             |
| Rabies                                                            | 0<br>(0 - 0)             | 0<br>(0 - 0)             | 0<br>(0 - 0)        | 0<br>(0 - 0)           | 0<br>(0 - 0)             | 0<br>(0 - 0)             |
| Intestinal nematode infections                                    | 0<br>(0 - 2)             | 0<br>(0 - 2)             | 0<br>(0 - 1)        | 0<br>(0 - 0)           | 0<br>(0 - 0)             | 0<br>(0 - 0)             |
| Ascariasis                                                        | 0<br>(0 - 2)             | 0<br>(0 - 2)             | 0<br>(0 - 1)        | 0<br>(0 - 0)           | 0<br>(0 - 0)             | 0<br>(0 - 0)             |
| Other neglected tropical diseases                                 | 0<br>(0 - 1)             | 0<br>(0 - 0)             | 0<br>(0 - 0)        | 0<br>(0 - 0)           | 0<br>(0 - 0)             | 0<br>(0 - 0)             |
| Maternal disorders                                                | 57<br>(39 - 79)          | --                       | 0<br>(0 - 1)        | 57<br>(39 - 79)        | --                       | --                       |
| Maternal hemorrhage                                               | 8<br>(5 - 12)            | --                       | 0<br>(0 - 0)        | 8<br>(5 - 12)          | --                       | --                       |

Web Table 31- Jordan deaths with 95% UI by age, sex, and cause in 2013

| Cause                                                            | Females, All Ages        | Females, 0-4 Years | Females, 5-14 Years | Females, 15-49 Years | Females, 50-69 Years     | Females, 70-80 Years     |
|------------------------------------------------------------------|--------------------------|--------------------|---------------------|----------------------|--------------------------|--------------------------|
| Maternal sepsis and other maternal infections                    | 5<br>(3 - 8)             | --                 | 0<br>(0 - 0)        | 5<br>(3 - 8)         | --                       | --                       |
| Maternal hypertensive disorders                                  | 9<br>(6 - 13)            | --                 | 0<br>(0 - 0)        | 9<br>(6 - 13)        | --                       | --                       |
| Maternal obstructed labor                                        | 7<br>(4 - 10)            | --                 | 0<br>(0 - 0)        | 7<br>(4 - 10)        | --                       | --                       |
| Maternal abortive outcome                                        | 7<br>(4 - 10)            | --                 | 0<br>(0 - 0)        | 7<br>(4 - 10)        | --                       | --                       |
| Indirect maternal deaths                                         | 5<br>(3 - 9)             | --                 | 0<br>(0 - 0)        | 5<br>(3 - 9)         | --                       | --                       |
| Late maternal deaths                                             | 5<br>(2 - 9)             | --                 | 0<br>(0 - 0)        | 5<br>(2 - 9)         | --                       | --                       |
| Maternal deaths aggravated by HIV/AIDS                           | 0<br>(0 - 0)             | --                 | --                  | 0<br>(0 - 0)         | --                       | --                       |
| Other maternal disorders                                         | 12<br>(8 - 18)           | --                 | 0<br>(0 - 0)        | 12<br>(8 - 18)       | --                       | --                       |
| Neonatal disorders                                               | 604<br>(482 - 737)       | 604<br>(482 - 737) | --                  | --                   | --                       | --                       |
| Neonatal preterm birth complications                             | 352<br>(242 - 469)       | 352<br>(242 - 469) | --                  | --                   | --                       | --                       |
| Neonatal encephalopathy due to birth asphyxia and trauma         | 89<br>(45 - 154)         | 89<br>(45 - 154)   | --                  | --                   | --                       | --                       |
| Neonatal sepsis and other neonatal infections                    | 93<br>(45 - 169)         | 93<br>(45 - 169)   | --                  | --                   | --                       | --                       |
| Hemolytic disease and other neonatal jaundice                    | 7<br>(2 - 20)            | 7<br>(2 - 20)      | --                  | --                   | --                       | --                       |
| Other neonatal disorders                                         | 62<br>(34 - 106)         | 62<br>(34 - 106)   | --                  | --                   | --                       | --                       |
| Nutritional deficiencies                                         | 19<br>(15 - 25)          | 5<br>(3 - 8)       | 1<br>(1 - 1)        | 3<br>(2 - 5)         | 2<br>(1 - 3)             | 8<br>(5 - 12)            |
| Protein-energy malnutrition                                      | 6<br>(3 - 10)            | 3<br>(1 - 5)       | 0<br>(0 - 1)        | 0<br>(0 - 0)         | 0<br>(0 - 1)             | 2<br>(1 - 5)             |
| Iodine deficiency                                                | 0<br>(0 - 1)             | 0<br>(0 - 0)       | 0<br>(0 - 0)        | 0<br>(0 - 0)         | 0<br>(0 - 0)             | 0<br>(0 - 0)             |
| Iron-deficiency anemia                                           | 12<br>(8 - 16)           | 2<br>(1 - 3)       | 0<br>(0 - 1)        | 3<br>(2 - 4)         | 1<br>(1 - 2)             | 6<br>(3 - 9)             |
| Other nutritional deficiencies                                   | 1<br>(0 - 2)             | 1<br>(0 - 1)       | 0<br>(0 - 0)        | 0<br>(0 - 0)         | 0<br>(0 - 0)             | 0<br>(0 - 0)             |
| Other communicable, maternal, neonatal, and nutritional diseases | 16<br>(11 - 23)          | 7<br>(4 - 12)      | 1<br>(1 - 1)        | 2<br>(2 - 3)         | 2<br>(1 - 3)             | 3<br>(2 - 6)             |
| Sexually transmitted diseases excluding HIV                      | 2<br>(0 - 6)             | 2<br>(0 - 5)       | 0<br>(0 - 0)        | 0<br>(0 - 1)         | 0<br>(0 - 0)             | 0<br>(0 - 0)             |
| Syphilis                                                         | 2<br>(0 - 5)             | 2<br>(0 - 5)       | 0<br>(0 - 0)        | 0<br>(0 - 0)         | 0<br>(0 - 0)             | 0<br>(0 - 0)             |
| Chlamydial infection                                             | 0<br>(0 - 0)             | --                 | 0<br>(0 - 0)        | 0<br>(0 - 0)         | 0<br>(0 - 0)             | 0<br>(0 - 0)             |
| Gonococcal infection                                             | 0<br>(0 - 0)             | --                 | 0<br>(0 - 0)        | 0<br>(0 - 0)         | 0<br>(0 - 0)             | 0<br>(0 - 0)             |
| Other sexually transmitted diseases                              | 0<br>(0 - 0)             | --                 | 0<br>(0 - 0)        | 0<br>(0 - 0)         | 0<br>(0 - 0)             | 0<br>(0 - 0)             |
| Hepatitis                                                        | 5<br>(4 - 6)             | 1<br>(1 - 2)       | 0<br>(0 - 0)        | 1<br>(1 - 1)         | 1<br>(1 - 1)             | 1<br>(1 - 2)             |
| Acute hepatitis A                                                | 1<br>(0 - 2)             | 1<br>(0 - 1)       | 0<br>(0 - 0)        | 0<br>(0 - 0)         | 0<br>(0 - 0)             | 0<br>(0 - 0)             |
| Acute hepatitis B                                                | 3<br>(2 - 4)             | 1<br>(0 - 1)       | 0<br>(0 - 0)        | 0<br>(0 - 1)         | 1<br>(0 - 1)             | 1<br>(1 - 2)             |
| Acute hepatitis C                                                | 0<br>(0 - 0)             | --                 | 0<br>(0 - 0)        | 0<br>(0 - 0)         | 0<br>(0 - 0)             | 0<br>(0 - 0)             |
| Acute hepatitis E                                                | 1<br>(0 - 2)             | 0<br>(0 - 0)       | 0<br>(0 - 0)        | 0<br>(0 - 1)         | 0<br>(0 - 0)             | 0<br>(0 - 0)             |
| Other infectious diseases                                        | 9<br>(5 - 14)            | 4<br>(2 - 9)       | 1<br>(0 - 1)        | 1<br>(1 - 2)         | 1<br>(0 - 2)             | 2<br>(1 - 5)             |
| Non-communicable diseases                                        | 6,763<br>(5,671 - 7,703) | 637<br>(501 - 773) | 100<br>(81 - 117)   | 936<br>(689 - 1,189) | 1,814<br>(1,403 - 2,247) | 3,276<br>(2,872 - 3,537) |
| Neoplasms                                                        | 1,311<br>(1,000 - 1,621) | 22<br>(14 - 32)    | 32<br>(25 - 41)     | 433<br>(306 - 561)   | 504<br>(375 - 655)       | 319<br>(260 - 368)       |
| Esophageal cancer                                                | 17<br>(12 - 22)          | --                 | --                  | 4<br>(3 - 6)         | 7<br>(5 - 10)            | 6<br>(4 - 8)             |
| Stomach cancer                                                   | 51<br>(37 - 66)          | --                 | --                  | 16<br>(10 - 22)      | 17<br>(12 - 24)          | 19<br>(13 - 25)          |
| Liver cancer                                                     | 32<br>(22 - 45)          | --                 | 0<br>(0 - 0)        | 7<br>(4 - 11)        | 13<br>(8 - 21)           | 12<br>(8 - 17)           |
| Liver cancer due to hepatitis B                                  | 10<br>(5 - 19)           | --                 | 0<br>(0 - 0)        | 3<br>(1 - 6)         | 4<br>(2 - 10)            | 3<br>(1 - 5)             |
| Liver cancer due to hepatitis C                                  | 13<br>(6 - 21)           | --                 | 0<br>(0 - 0)        | 2<br>(0 - 4)         | 5<br>(2 - 10)            | 6<br>(3 - 9)             |
| Liver cancer due to alcohol use                                  | 3<br>(1 - 5)             | --                 | --                  | 0<br>(0 - 0)         | 1<br>(0 - 2)             | 1<br>(0 - 3)             |
| Liver cancer due to other causes                                 | 7<br>(2 - 14)            | --                 | 0<br>(0 - 0)        | 2<br>(1 - 4)         | 3<br>(1 - 6)             | 2<br>(1 - 4)             |

Web Table 31- Jordan deaths with 95% UI by age, sex, and cause in 2013

| Cause                                         | Females, All Ages        | Females, 0-4 Years | Females, 5-14 Years | Females, 15-49 Years | Females, 50-69 Years | Females, 70-80 Years     |
|-----------------------------------------------|--------------------------|--------------------|---------------------|----------------------|----------------------|--------------------------|
| Larynx cancer                                 | 2<br>(1 - 5)             | --                 | --                  | 1<br>(0 - 1)         | 1<br>(0 - 2)         | 1<br>(0 - 2)             |
| Tracheal, bronchus and lung cancer            | 73<br>(53 - 106)         | --                 | --                  | 17<br>(11 - 27)      | 33<br>(23 - 49)      | 23<br>(17 - 31)          |
| Breast cancer                                 | 352<br>(236 - 460)       | --                 | --                  | 145<br>(93 - 196)    | 151<br>(100 - 205)   | 55<br>(40 - 69)          |
| Cervical cancer                               | 43<br>(29 - 56)          | --                 | --                  | 13<br>(8 - 19)       | 19<br>(12 - 26)      | 11<br>(8 - 15)           |
| Uterine cancer                                | 13<br>(8 - 21)           | --                 | --                  | 2<br>(1 - 3)         | 7<br>(4 - 12)        | 4<br>(3 - 7)             |
| Prostate cancer                               | --                       | --                 | --                  | --                   | --                   | --                       |
| Colon and rectum cancer                       | 164<br>(126 - 206)       | --                 | --                  | 40<br>(27 - 54)      | 68<br>(49 - 90)      | 56<br>(43 - 70)          |
| Lip and oral cavity cancer                    | 8<br>(5 - 13)            | --                 | --                  | 3<br>(1 - 5)         | 3<br>(1 - 4)         | 3<br>(2 - 4)             |
| Nasopharynx cancer                            | 5<br>(3 - 8)             | --                 | 0<br>(0 - 0)        | 2<br>(1 - 4)         | 2<br>(1 - 3)         | 1<br>(0 - 1)             |
| Other pharynx cancer                          | 2<br>(1 - 3)             | --                 | --                  | 1<br>(0 - 1)         | 1<br>(0 - 1)         | 0<br>(0 - 1)             |
| Gallbladder and biliary tract cancer          | 36<br>(23 - 50)          | --                 | --                  | 7<br>(4 - 11)        | 17<br>(10 - 24)      | 12<br>(7 - 18)           |
| Pancreatic cancer                             | 46<br>(35 - 59)          | --                 | --                  | 7<br>(5 - 10)        | 22<br>(15 - 30)      | 17<br>(13 - 22)          |
| Malignant skin melanoma                       | 2<br>(2 - 3)             | --                 | --                  | 1<br>(1 - 2)         | 1<br>(1 - 2)         | 0<br>(0 - 1)             |
| Non-melanoma skin cancer                      | 6<br>(3 - 9)             | --                 | --                  | 2<br>(1 - 3)         | 2<br>(1 - 3)         | 2<br>(1 - 4)             |
| Ovarian cancer                                | 59<br>(41 - 82)          | --                 | --                  | 20<br>(12 - 29)      | 27<br>(18 - 39)      | 12<br>(8 - 17)           |
| Testicular cancer                             | --                       | --                 | --                  | --                   | --                   | --                       |
| Kidney cancer                                 | 11<br>(8 - 15)           | 1<br>(0 - 1)       | 1<br>(0 - 1)        | 2<br>(1 - 3)         | 5<br>(3 - 8)         | 3<br>(2 - 4)             |
| Bladder cancer                                | 12<br>(8 - 18)           | --                 | --                  | 1<br>(1 - 2)         | 5<br>(3 - 8)         | 6<br>(4 - 9)             |
| Brain and nervous system cancer               | 50<br>(35 - 64)          | 2<br>(1 - 3)       | 5<br>(3 - 7)        | 23<br>(15 - 31)      | 15<br>(9 - 21)       | 6<br>(4 - 8)             |
| Thyroid cancer                                | 17<br>(10 - 25)          | --                 | 0<br>(0 - 0)        | 3<br>(2 - 5)         | 7<br>(4 - 12)        | 7<br>(4 - 10)            |
| Mesothelioma                                  | 0<br>(0 - 1)             | --                 | --                  | 0<br>(0 - 0)         | 0<br>(0 - 0)         | 0<br>(0 - 0)             |
| Hodgkin lymphoma                              | 2<br>(1 - 3)             | 0<br>(0 - 0)       | 0<br>(0 - 1)        | 1<br>(1 - 2)         | 0<br>(0 - 1)         | 0<br>(0 - 1)             |
| Non-Hodgkin lymphoma                          | 71<br>(42 - 101)         | 1<br>(1 - 2)       | 3<br>(2 - 4)        | 30<br>(17 - 45)      | 22<br>(12 - 34)      | 16<br>(8 - 23)           |
| Multiple myeloma                              | 12<br>(8 - 17)           | --                 | --                  | 2<br>(2 - 4)         | 6<br>(4 - 8)         | 4<br>(3 - 5)             |
| Leukemia                                      | 117<br>(85 - 146)        | 6<br>(3 - 10)      | 11<br>(8 - 15)      | 44<br>(29 - 59)      | 31<br>(21 - 43)      | 25<br>(18 - 32)          |
| Other neoplasms                               | 106<br>(70 - 140)        | 13<br>(7 - 21)     | 13<br>(8 - 20)      | 41<br>(24 - 59)      | 22<br>(13 - 33)      | 17<br>(11 - 24)          |
| Cardiovascular diseases                       | 2,767<br>(2,260 - 3,233) | 13<br>(8 - 20)     | 7<br>(5 - 10)       | 175<br>(109 - 243)   | 764<br>(571 - 975)   | 1,809<br>(1,555 - 2,025) |
| Rheumatic heart disease                       | 16<br>(10 - 22)          | 0<br>(0 - 1)       | 1<br>(0 - 1)        | 4<br>(2 - 5)         | 3<br>(2 - 4)         | 9<br>(6 - 13)            |
| Ischemic heart disease                        | 1,114<br>(875 - 1,441)   | 3<br>(1 - 5)       | 1<br>(1 - 2)        | 74<br>(43 - 110)     | 334<br>(241 - 462)   | 702<br>(566 - 895)       |
| Cerebrovascular disease                       | 999<br>(800 - 1,197)     | 3<br>(2 - 5)       | 2<br>(1 - 3)        | 46<br>(27 - 66)      | 245<br>(176 - 323)   | 704<br>(575 - 833)       |
| Ischemic stroke                               | 740<br>(589 - 898)       | 0<br>(0 - 1)       | 0<br>(0 - 0)        | 17<br>(9 - 27)       | 146<br>(102 - 193)   | 576<br>(469 - 689)       |
| Hemorrhagic stroke                            | 259<br>(189 - 350)       | 3<br>(2 - 4)       | 1<br>(1 - 2)        | 29<br>(17 - 41)      | 99<br>(68 - 144)     | 127<br>(92 - 175)        |
| Hypertensive heart disease                    | 474<br>(291 - 616)       | 0<br>(0 - 1)       | 0<br>(0 - 0)        | 15<br>(8 - 24)       | 122<br>(70 - 175)    | 336<br>(204 - 437)       |
| Cardiomyopathy and myocarditis                | 10<br>(7 - 16)           | 1<br>(1 - 3)       | 1<br>(0 - 2)        | 3<br>(2 - 5)         | 2<br>(1 - 3)         | 3<br>(2 - 5)             |
| Atrial fibrillation and flutter               | 1<br>(0 - 1)             | --                 | --                  | 0<br>(0 - 0)         | 0<br>(0 - 0)         | 0<br>(0 - 0)             |
| Aortic aneurysm                               | 10<br>(6 - 16)           | --                 | --                  | 2<br>(1 - 3)         | 3<br>(2 - 5)         | 6<br>(3 - 8)             |
| Peripheral vascular disease                   | 0<br>(0 - 1)             | --                 | --                  | 0<br>(0 - 0)         | 0<br>(0 - 0)         | 0<br>(0 - 0)             |
| Endocarditis                                  | 12<br>(8 - 19)           | 1<br>(1 - 3)       | 0<br>(0 - 0)        | 2<br>(1 - 3)         | 2<br>(1 - 3)         | 7<br>(4 - 12)            |
| Other cardiovascular and circulatory diseases | 131<br>(95 - 182)        | 3<br>(2 - 5)       | 2<br>(1 - 3)        | 29<br>(17 - 41)      | 54<br>(37 - 79)      | 42<br>(31 - 58)          |
| Chronic respiratory diseases                  | 253<br>(201 - 312)       | 5<br>(3 - 10)      | 2<br>(1 - 2)        | 28<br>(20 - 39)      | 61<br>(42 - 81)      | 157<br>(127 - 193)       |

Web Table 31- Jordan deaths with 95% UI by age, sex, and cause in 2013

| Cause                                               | Females, All Ages  | Females, 0-4 Years | Females, 5-14 Years | Females, 15-49 Years | Females, 50-69 Years | Females, 70-80 Years |
|-----------------------------------------------------|--------------------|--------------------|---------------------|----------------------|----------------------|----------------------|
| Chronic obstructive pulmonary disease               | 151<br>(112 - 195) | 3<br>(2 - 7)       | 0<br>(0 - 0)        | 7<br>(4 - 11)        | 36<br>(22 - 50)      | 104<br>(77 - 134)    |
| Pneumoconiosis                                      | 0<br>(0 - 1)       | 0<br>(0 - 0)       | 0<br>(0 - 0)        | 0<br>(0 - 0)         | 0<br>(0 - 0)         | 0<br>(0 - 0)         |
| Silicosis                                           | 0<br>(0 - 0)       | 0<br>(0 - 0)       | 0<br>(0 - 0)        | 0<br>(0 - 0)         | 0<br>(0 - 0)         | 0<br>(0 - 0)         |
| Asbestosis                                          | 0<br>(0 - 0)       | 0<br>(0 - 0)       | 0<br>(0 - 0)        | 0<br>(0 - 0)         | 0<br>(0 - 0)         | 0<br>(0 - 0)         |
| Coal workers pneumoconiosis                         | 0<br>(0 - 0)       | 0<br>(0 - 0)       | 0<br>(0 - 0)        | 0<br>(0 - 0)         | 0<br>(0 - 0)         | 0<br>(0 - 0)         |
| Other pneumoconiosis                                | 0<br>(0 - 0)       | 0<br>(0 - 0)       | 0<br>(0 - 0)        | 0<br>(0 - 0)         | 0<br>(0 - 0)         | 0<br>(0 - 0)         |
| Asthma                                              | 43<br>(25 - 60)    | 1<br>(0 - 2)       | 1<br>(1 - 2)        | 12<br>(7 - 18)       | 10<br>(5 - 16)       | 18<br>(10 - 27)      |
| Interstitial lung disease and pulmonary sarcoidosis | 53<br>(32 - 85)    | 0<br>(0 - 1)       | 0<br>(0 - 0)        | 7<br>(4 - 12)        | 15<br>(8 - 24)       | 31<br>(17 - 53)      |
| Other chronic respiratory diseases                  | 6<br>(4 - 9)       | 0<br>(0 - 1)       | 0<br>(0 - 0)        | 2<br>(1 - 2)         | 0<br>(0 - 0)         | 3<br>(2 - 6)         |
| Cirrhosis                                           | 118<br>(90 - 147)  | 5<br>(2 - 9)       | 3<br>(2 - 4)        | 26<br>(18 - 35)      | 40<br>(29 - 54)      | 44<br>(33 - 57)      |
| Cirrhosis due to hepatitis B                        | 42<br>(23 - 73)    | 0<br>(0 - 1)       | 1<br>(0 - 1)        | 9<br>(4 - 17)        | 15<br>(8 - 28)       | 17<br>(9 - 28)       |
| Cirrhosis due to hepatitis C                        | 53<br>(27 - 82)    | 0<br>(0 - 1)       | 0<br>(0 - 1)        | 11<br>(4 - 19)       | 20<br>(9 - 33)       | 21<br>(11 - 32)      |
| Cirrhosis due to alcohol use                        | 6<br>(3 - 13)      | --                 | --                  | 1<br>(0 - 2)         | 2<br>(1 - 5)         | 3<br>(1 - 7)         |
| Cirrhosis due to other causes                       | 18<br>(10 - 31)    | 5<br>(2 - 8)       | 2<br>(1 - 3)        | 5<br>(2 - 10)        | 3<br>(1 - 8)         | 3<br>(1 - 6)         |
| Digestive diseases                                  | 113<br>(89 - 138)  | 3<br>(2 - 5)       | 2<br>(1 - 3)        | 18<br>(13 - 25)      | 25<br>(17 - 34)      | 65<br>(52 - 81)      |
| Peptic ulcer disease                                | 18<br>(12 - 25)    | 0<br>(0 - 0)       | 0<br>(0 - 0)        | 2<br>(1 - 3)         | 3<br>(2 - 5)         | 13<br>(8 - 18)       |
| Gastritis and duodenitis                            | 1<br>(0 - 2)       | 0<br>(0 - 1)       | 0<br>(0 - 0)        | 0<br>(0 - 1)         | 0<br>(0 - 0)         | 0<br>(0 - 0)         |
| Appendicitis                                        | 3<br>(2 - 4)       | 1<br>(0 - 1)       | 0<br>(0 - 0)        | 0<br>(0 - 1)         | 0<br>(0 - 1)         | 1<br>(1 - 2)         |
| Paralytic ileus and intestinal obstruction          | 32<br>(17 - 45)    | 1<br>(0 - 2)       | 0<br>(0 - 1)        | 5<br>(2 - 7)         | 7<br>(3 - 10)        | 19<br>(10 - 29)      |
| Inguinal, femoral, and abdominal hernia             | 1<br>(0 - 2)       | 0<br>(0 - 0)       | 0<br>(0 - 0)        | 0<br>(0 - 0)         | 0<br>(0 - 1)         | 0<br>(0 - 1)         |
| Inflammatory bowel disease                          | 5<br>(3 - 7)       | 0<br>(0 - 0)       | 0<br>(0 - 0)        | 2<br>(1 - 3)         | 1<br>(1 - 2)         | 2<br>(1 - 3)         |
| Vascular intestinal disorders                       | 11<br>(6 - 21)     | 0<br>(0 - 0)       | 0<br>(0 - 0)        | 2<br>(1 - 5)         | 3<br>(1 - 5)         | 6<br>(3 - 11)        |
| Gallbladder and biliary diseases                    | 19<br>(11 - 26)    | 0<br>(0 - 0)       | 0<br>(0 - 0)        | 1<br>(1 - 2)         | 5<br>(3 - 7)         | 13<br>(7 - 18)       |
| Pancreatitis                                        | 11<br>(7 - 18)     | 0<br>(0 - 0)       | 0<br>(0 - 1)        | 3<br>(1 - 4)         | 4<br>(2 - 7)         | 4<br>(2 - 6)         |
| Other digestive diseases                            | 12<br>(8 - 17)     | 1<br>(0 - 1)       | 1<br>(0 - 1)        | 3<br>(2 - 4)         | 2<br>(1 - 3)         | 7<br>(4 - 11)        |
| Neurological disorders                              | 318<br>(236 - 399) | 12<br>(8 - 17)     | 3<br>(2 - 5)        | 23<br>(15 - 35)      | 41<br>(28 - 61)      | 238<br>(170 - 307)   |
| Alzheimer disease and other dementias               | 268<br>(193 - 344) | --                 | --                  | 0<br>(0 - 1)         | 34<br>(22 - 54)      | 233<br>(165 - 302)   |
| Parkinson disease                                   | 6<br>(4 - 10)      | --                 | --                  | 1<br>(0 - 2)         | 1<br>(1 - 2)         | 4<br>(2 - 6)         |
| Epilepsy                                            | 22<br>(15 - 32)    | 3<br>(1 - 5)       | 2<br>(1 - 4)        | 14<br>(9 - 22)       | 3<br>(1 - 5)         | 0<br>(0 - 1)         |
| Multiple sclerosis                                  | 7<br>(3 - 12)      | --                 | --                  | 4<br>(2 - 8)         | 2<br>(1 - 3)         | 1<br>(0 - 2)         |
| Other neurological disorders                        | 16<br>(12 - 20)    | 10<br>(7 - 13)     | 1<br>(1 - 2)        | 4<br>(3 - 5)         | 1<br>(1 - 1)         | 0<br>(0 - 0)         |
| Mental and substance use disorders                  | 38<br>(26 - 52)    | 1<br>(0 - 1)       | 0<br>(0 - 0)        | 33<br>(22 - 46)      | 3<br>(2 - 5)         | 1<br>(1 - 2)         |
| Schizophrenia                                       | 0<br>(0 - 1)       | --                 | --                  | 0<br>(0 - 0)         | 0<br>(0 - 0)         | 0<br>(0 - 0)         |
| Alcohol use disorders                               | 2<br>(1 - 4)       | --                 | --                  | 1<br>(0 - 2)         | 1<br>(0 - 2)         | 0<br>(0 - 0)         |
| Drug use disorders                                  | 35<br>(24 - 50)    | 1<br>(0 - 1)       | --                  | 31<br>(21 - 45)      | 2<br>(1 - 4)         | 1<br>(1 - 1)         |
| Opioid use disorders                                | 19<br>(13 - 27)    | 0<br>(0 - 1)       | --                  | 17<br>(11 - 25)      | 1<br>(1 - 2)         | 1<br>(0 - 1)         |
| Cocaine use disorders                               | 1<br>(0 - 1)       | 0<br>(0 - 0)       | --                  | 1<br>(0 - 1)         | 0<br>(0 - 0)         | 0<br>(0 - 0)         |
| Amphetamine use disorders                           | 1<br>(0 - 1)       | 0<br>(0 - 0)       | --                  | 1<br>(0 - 1)         | 0<br>(0 - 0)         | 0<br>(0 - 0)         |
| Other drug use disorders                            | 15<br>(10 - 21)    | 0<br>(0 - 0)       | --                  | 13<br>(9 - 18)       | 1<br>(1 - 2)         | 0<br>(0 - 1)         |
| Eating disorders                                    | 0<br>(0 - 0)       | --                 | 0<br>(0 - 0)        | 0<br>(0 - 0)         | --                   | --                   |

Web Table 31- Jordan deaths with 95% UI by age, sex, and cause in 2013

| Cause                                               | Females, All Ages      | Females, 0-4 Years | Females, 5-14 Years | Females, 15-49 Years | Females, 50-69 Years | Females, 70-80 Years |
|-----------------------------------------------------|------------------------|--------------------|---------------------|----------------------|----------------------|----------------------|
| Anorexia nervosa                                    | 0<br>(0 - 0)           | --                 | 0<br>(0 - 0)        | 0<br>(0 - 0)         | --                   | --                   |
| Diabetes, urogenital, blood, and endocrine diseases | 1,168<br>(940 - 1,391) | 42<br>(28 - 58)    | 16<br>(11 - 20)     | 132<br>(95 - 174)    | 364<br>(275 - 470)   | 614<br>(498 - 717)   |
| Diabetes mellitus                                   | 574<br>(445 - 697)     | 1<br>(1 - 2)       | 1<br>(0 - 1)        | 34<br>(24 - 46)      | 203<br>(146 - 266)   | 335<br>(261 - 412)   |
| Acute glomerulonephritis                            | 1<br>(1 - 2)           | 0<br>(0 - 0)       | 0<br>(0 - 0)        | 0<br>(0 - 0)         | 0<br>(0 - 0)         | 0<br>(0 - 1)         |
| Chronic kidney disease                              | 447<br>(343 - 571)     | 4<br>(2 - 6)       | 5<br>(4 - 8)        | 55<br>(37 - 78)      | 139<br>(98 - 188)    | 243<br>(180 - 312)   |
| Chronic kidney disease due to diabetes mellitus     | 54<br>(19 - 81)        | 0<br>(0 - 0)       | 0<br>(0 - 0)        | 6<br>(3 - 9)         | 23<br>(7 - 36)       | 25<br>(9 - 41)       |
| Chronic kidney disease due to hypertension          | 226<br>(150 - 307)     | 1<br>(0 - 2)       | 2<br>(1 - 3)        | 23<br>(13 - 35)      | 69<br>(42 - 102)     | 132<br>(87 - 179)    |
| Chronic kidney disease due to glomerulonephritis    | 3<br>(2 - 5)           | 1<br>(0 - 1)       | 0<br>(0 - 0)        | 2<br>(1 - 3)         | 1<br>(0 - 1)         | 0<br>(0 - 1)         |
| Chronic kidney disease due to other causes          | 163<br>(91 - 253)      | 2<br>(1 - 4)       | 3<br>(2 - 5)        | 25<br>(14 - 40)      | 47<br>(22 - 81)      | 85<br>(44 - 140)     |
| Urinary diseases and male infertility               | 29<br>(20 - 40)        | 2<br>(1 - 4)       | 1<br>(0 - 1)        | 6<br>(4 - 9)         | 5<br>(3 - 8)         | 15<br>(10 - 23)      |
| Interstitial nephritis and urinary tract infections | 22<br>(14 - 30)        | 2<br>(1 - 3)       | 0<br>(0 - 1)        | 4<br>(3 - 7)         | 3<br>(2 - 6)         | 11<br>(7 - 18)       |
| Urolithiasis                                        | 2<br>(1 - 3)           | --                 | 0<br>(0 - 0)        | 1<br>(0 - 1)         | 1<br>(0 - 1)         | 1<br>(0 - 1)         |
| Other urinary diseases                              | 6<br>(4 - 9)           | 0<br>(0 - 1)       | 0<br>(0 - 1)        | 1<br>(0 - 1)         | 1<br>(1 - 2)         | 3<br>(2 - 6)         |
| Gynecological diseases                              | 0<br>(0 - 0)           | --                 | --                  | 0<br>(0 - 0)         | 0<br>(0 - 0)         | 0<br>(0 - 0)         |
| Uterine fibroids                                    | 0<br>(0 - 0)           | --                 | --                  | 0<br>(0 - 0)         | 0<br>(0 - 0)         | 0<br>(0 - 0)         |
| Polycystic ovarian syndrome                         | 0<br>(0 - 0)           | --                 | --                  | 0<br>(0 - 0)         | 0<br>(0 - 0)         | --                   |
| Endometriosis                                       | 0<br>(0 - 0)           | --                 | --                  | 0<br>(0 - 0)         | 0<br>(0 - 0)         | --                   |
| Genital prolapse                                    | 0<br>(0 - 0)           | --                 | --                  | 0<br>(0 - 0)         | 0<br>(0 - 0)         | 0<br>(0 - 0)         |
| Other gynecological diseases                        | 0<br>(0 - 0)           | --                 | --                  | 0<br>(0 - 0)         | 0<br>(0 - 0)         | 0<br>(0 - 0)         |
| Hemoglobinopathies and hemolytic anemias            | 35<br>(22 - 52)        | 7<br>(4 - 11)      | 4<br>(2 - 6)        | 17<br>(10 - 27)      | 3<br>(2 - 4)         | 5<br>(3 - 9)         |
| Thalassemias                                        | 20<br>(13 - 30)        | 5<br>(3 - 9)       | 3<br>(2 - 5)        | 12<br>(7 - 20)       | 0<br>(0 - 0)         | 0<br>(0 - 0)         |
| Sickle cell disorders                               | 4<br>(3 - 7)           | 1<br>(0 - 1)       | 0<br>(0 - 1)        | 3<br>(2 - 4)         | 1<br>(0 - 1)         | 0<br>(0 - 0)         |
| G6PD deficiency                                     | 1<br>(1 - 1)           | 0<br>(0 - 0)       | 0<br>(0 - 0)        | 1<br>(0 - 1)         | 0<br>(0 - 0)         | 0<br>(0 - 0)         |
| Other hemoglobinopathies and hemolytic anemias      | 10<br>(6 - 14)         | 1<br>(1 - 1)       | 0<br>(0 - 0)        | 2<br>(1 - 3)         | 2<br>(1 - 3)         | 5<br>(3 - 8)         |
| Endocrine, metabolic, blood, and immune disorders   | 81<br>(50 - 107)       | 28<br>(16 - 41)    | 5<br>(3 - 8)        | 20<br>(11 - 30)      | 13<br>(7 - 21)       | 15<br>(9 - 22)       |
| Musculoskeletal disorders                           | 45<br>(31 - 65)        | --                 | 3<br>(2 - 5)        | 32<br>(21 - 48)      | 5<br>(3 - 8)         | 5<br>(3 - 7)         |
| Rheumatoid arthritis                                | 1<br>(1 - 2)           | --                 | 0<br>(0 - 0)        | 1<br>(0 - 1)         | 0<br>(0 - 1)         | 0<br>(0 - 1)         |
| Other musculoskeletal disorders                     | 43<br>(30 - 62)        | --                 | 3<br>(2 - 4)        | 31<br>(21 - 47)      | 5<br>(3 - 7)         | 4<br>(3 - 6)         |
| Other non-communicable diseases                     | 632<br>(502 - 768)     | 535<br>(411 - 662) | 32<br>(21 - 44)     | 35<br>(23 - 49)      | 6<br>(4 - 8)         | 24<br>(17 - 33)      |
| Congenital anomalies                                | 599<br>(470 - 734)     | 528<br>(404 - 654) | 32<br>(21 - 43)     | 33<br>(21 - 47)      | 3<br>(2 - 5)         | 4<br>(2 - 5)         |
| Neural tube defects                                 | 4<br>(2 - 8)           | 3<br>(1 - 8)       | 0<br>(0 - 0)        | 0<br>(0 - 0)         | 0<br>(0 - 0)         | 0<br>(0 - 0)         |
| Congenital heart anomalies                          | 279<br>(201 - 366)     | 251<br>(177 - 335) | 14<br>(8 - 22)      | 13<br>(8 - 19)       | 1<br>(0 - 1)         | 0<br>(0 - 0)         |
| Cleft lip and cleft palate                          | 2<br>(0 - 4)           | 2<br>(0 - 4)       | --                  | --                   | --                   | --                   |
| Down syndrome                                       | 38<br>(22 - 58)        | 30<br>(17 - 48)    | 1<br>(0 - 3)        | 7<br>(4 - 11)        | 0<br>(0 - 0)         | 0<br>(0 - 0)         |
| Chromosomal unbalanced rearrangements               | 5<br>(3 - 9)           | 5<br>(3 - 8)       | 0<br>(0 - 0)        | 1<br>(0 - 1)         | 0<br>(0 - 0)         | 0<br>(0 - 0)         |
| Other congenital anomalies                          | 271<br>(203 - 347)     | 237<br>(172 - 310) | 16<br>(10 - 23)     | 13<br>(8 - 20)       | 2<br>(1 - 3)         | 4<br>(2 - 5)         |
| Skin and subcutaneous diseases                      | 26<br>(19 - 37)        | 1<br>(1 - 2)       | 1<br>(0 - 1)        | 2<br>(1 - 3)         | 2<br>(1 - 4)         | 20<br>(13 - 29)      |
| Cellulitis                                          | 2<br>(1 - 3)           | 0<br>(0 - 1)       | 0<br>(0 - 0)        | 0<br>(0 - 1)         | 0<br>(0 - 1)         | 1<br>(0 - 2)         |
| Pyoderma                                            | 3<br>(2 - 4)           | 1<br>(0 - 1)       | 0<br>(0 - 0)        | 0<br>(0 - 1)         | 1<br>(0 - 1)         | 1<br>(1 - 2)         |
| Decubitus ulcer                                     | 21<br>(14 - 30)        | 0<br>(0 - 0)       | 0<br>(0 - 1)        | 1<br>(0 - 1)         | 1<br>(1 - 2)         | 18<br>(12 - 27)      |



Web Table 31- Jordan deaths with 95% UI by age, sex, and cause in 2013

| Cause                                           | Females, All Ages  | Females, 0-4 Years | Females, 5-14 Years | Females, 15-49 Years | Females, 50-69 Years | Females, 70-80 Years |
|-------------------------------------------------|--------------------|--------------------|---------------------|----------------------|----------------------|----------------------|
| Other skin and subcutaneous diseases            | 1<br>(0 - 1)       | 0<br>(0 - 0)       | 0<br>(0 - 0)        | 0<br>(0 - 0)         | 0<br>(0 - 0)         | 0<br>(0 - 0)         |
| Sudden infant death syndrome                    | 6<br>(1 - 18)      | 6<br>(1 - 18)      | --                  | --                   | --                   | --                   |
| Injuries                                        | 581<br>(475 - 691) | 153<br>(104 - 196) | 78<br>(63 - 93)     | 215<br>(153 - 276)   | 65<br>(48 - 88)      | 71<br>(56 - 92)      |
| Transport injuries                              | 217<br>(160 - 269) | 51<br>(30 - 75)    | 32<br>(22 - 41)     | 83<br>(53 - 111)     | 30<br>(20 - 41)      | 22<br>(15 - 29)      |
| Road injuries                                   | 212<br>(156 - 263) | 50<br>(29 - 74)    | 31<br>(22 - 40)     | 81<br>(52 - 109)     | 29<br>(20 - 40)      | 21<br>(14 - 28)      |
| Pedestrian road injuries                        | 106<br>(78 - 135)  | 27<br>(15 - 44)    | 18<br>(11 - 24)     | 32<br>(19 - 46)      | 16<br>(10 - 23)      | 13<br>(9 - 18)       |
| Cyclist road injuries                           | 6<br>(4 - 8)       | 1<br>(0 - 1)       | 0<br>(0 - 1)        | 1<br>(1 - 2)         | 3<br>(2 - 4)         | 1<br>(1 - 2)         |
| Motorcyclist road injuries                      | 3<br>(2 - 4)       | 0<br>(0 - 0)       | 0<br>(0 - 0)        | 2<br>(1 - 3)         | 0<br>(0 - 0)         | 0<br>(0 - 0)         |
| Motor vehicle road injuries                     | 97<br>(67 - 123)   | 22<br>(11 - 34)    | 13<br>(8 - 19)      | 46<br>(28 - 63)      | 10<br>(7 - 15)       | 6<br>(4 - 9)         |
| Other road injuries                             | 1<br>(0 - 1)       | 0<br>(0 - 0)       | 0<br>(0 - 0)        | 0<br>(0 - 0)         | 0<br>(0 - 0)         | 0<br>(0 - 0)         |
| Other transport injuries                        | 5<br>(3 - 6)       | 1<br>(1 - 2)       | 1<br>(0 - 1)        | 2<br>(1 - 2)         | 1<br>(0 - 1)         | 1<br>(1 - 1)         |
| Unintentional injuries                          | 279<br>(227 - 343) | 97<br>(66 - 131)   | 41<br>(31 - 52)     | 72<br>(51 - 97)      | 26<br>(19 - 39)      | 43<br>(32 - 64)      |
| Falls                                           | 34<br>(24 - 45)    | 10<br>(5 - 17)     | 4<br>(2 - 6)        | 7<br>(4 - 11)        | 3<br>(2 - 5)         | 10<br>(6 - 15)       |
| Drowning                                        | 78<br>(52 - 111)   | 36<br>(19 - 61)    | 19<br>(12 - 28)     | 14<br>(8 - 21)       | 7<br>(4 - 12)        | 2<br>(1 - 3)         |
| Fire, heat, and hot substances                  | 57<br>(38 - 80)    | 15<br>(7 - 25)     | 5<br>(3 - 8)        | 25<br>(15 - 39)      | 4<br>(3 - 7)         | 8<br>(5 - 13)        |
| Poisonings                                      | 26<br>(15 - 37)    | 8<br>(4 - 15)      | 4<br>(2 - 7)        | 10<br>(6 - 16)       | 1<br>(1 - 2)         | 2<br>(1 - 3)         |
| Exposure to mechanical forces                   | 13<br>(9 - 19)     | 6<br>(3 - 10)      | 3<br>(2 - 4)        | 2<br>(1 - 3)         | 1<br>(1 - 1)         | 1<br>(1 - 2)         |
| Unintentional firearm injuries                  | 1<br>(1 - 1)       | 0<br>(0 - 0)       | 0<br>(0 - 0)        | 0<br>(0 - 0)         | 0<br>(0 - 0)         | 0<br>(0 - 0)         |
| Unintentional suffocation                       | 3<br>(1 - 6)       | 2<br>(1 - 4)       | 0<br>(0 - 1)        | 1<br>(0 - 1)         | 0<br>(0 - 0)         | 0<br>(0 - 0)         |
| Other exposure to mechanical forces             | 9<br>(6 - 14)      | 4<br>(2 - 8)       | 2<br>(1 - 3)        | 1<br>(1 - 2)         | 1<br>(0 - 1)         | 1<br>(1 - 2)         |
| Adverse effects of medical treatment            | 31<br>(19 - 58)    | 3<br>(1 - 5)       | 1<br>(1 - 2)        | 4<br>(2 - 8)         | 7<br>(4 - 14)        | 16<br>(8 - 35)       |
| Animal contact                                  | 2<br>(1 - 5)       | 1<br>(0 - 2)       | 0<br>(0 - 1)        | 0<br>(0 - 1)         | 0<br>(0 - 0)         | 0<br>(0 - 1)         |
| Venomous animal contact                         | 1<br>(1 - 3)       | 1<br>(0 - 2)       | 0<br>(0 - 0)        | 0<br>(0 - 0)         | 0<br>(0 - 0)         | 0<br>(0 - 0)         |
| Non-venomous animal contact                     | 1<br>(0 - 2)       | 0<br>(0 - 0)       | 0<br>(0 - 0)        | 0<br>(0 - 1)         | 0<br>(0 - 0)         | 0<br>(0 - 1)         |
| Foreign body                                    | 21<br>(13 - 36)    | 14<br>(8 - 26)     | 1<br>(0 - 1)        | 2<br>(1 - 4)         | 1<br>(0 - 1)         | 3<br>(2 - 5)         |
| Pulmonary aspiration and foreign body in airway | 20<br>(12 - 35)    | 14<br>(8 - 25)     | 1<br>(0 - 1)        | 2<br>(1 - 4)         | 0<br>(0 - 1)         | 3<br>(2 - 5)         |
| Foreign body in other body part                 | 1<br>(0 - 1)       | 0<br>(0 - 0)       | 0<br>(0 - 0)        | 0<br>(0 - 0)         | 0<br>(0 - 0)         | 0<br>(0 - 0)         |
| Other unintentional injuries                    | 17<br>(12 - 24)    | 4<br>(2 - 7)       | 3<br>(2 - 5)        | 7<br>(4 - 10)        | 2<br>(1 - 3)         | 1<br>(1 - 2)         |
| Self-harm and interpersonal violence            | 85<br>(57 - 115)   | 5<br>(2 - 10)      | 5<br>(3 - 9)        | 60<br>(40 - 84)      | 9<br>(6 - 13)        | 6<br>(4 - 9)         |
| Self-harm                                       | 40<br>(28 - 56)    | --                 | 1<br>(1 - 2)        | 28<br>(19 - 42)      | 5<br>(3 - 8)         | 5<br>(3 - 7)         |
| Interpersonal violence                          | 46<br>(21 - 67)    | 5<br>(2 - 10)      | 4<br>(2 - 8)        | 32<br>(14 - 49)      | 4<br>(1 - 6)         | 1<br>(0 - 2)         |
| Assault by firearm                              | 14<br>(5 - 23)     | 1<br>(0 - 3)       | 1<br>(0 - 2)        | 10<br>(4 - 18)       | 1<br>(0 - 2)         | 0<br>(0 - 1)         |
| Assault by sharp object                         | 15<br>(7 - 23)     | 2<br>(1 - 4)       | 1<br>(0 - 2)        | 11<br>(5 - 19)       | 0<br>(0 - 1)         | 0<br>(0 - 1)         |
| Assault by other means                          | 17<br>(7 - 27)     | 2<br>(1 - 4)       | 2<br>(1 - 4)        | 10<br>(4 - 18)       | 2<br>(1 - 4)         | 1<br>(0 - 1)         |

Web Table 31- Kazakhstan deaths with 95% UI by age, sex, and cause in 2013

| Cause                                                             | Both Sexes, All Ages           | Both Sexes, 0-4 Years    | Both Sexes, 5-14 Years   | Both Sexes, 15-49 Years     | Both Sexes, 50-69 Years     | Both Sexes, 70-80 Years     |
|-------------------------------------------------------------------|--------------------------------|--------------------------|--------------------------|-----------------------------|-----------------------------|-----------------------------|
| All causes                                                        | 154,545<br>(142,439 - 168,137) | 7,710<br>(6,974 - 8,562) | 1,322<br>(1,233 - 1,418) | 31,266<br>(27,554 - 35,823) | 52,441<br>(46,816 - 58,869) | 61,806<br>(58,796 - 65,367) |
| Communicable, maternal, neonatal, and nutritional diseases        | 11,569<br>(10,183 - 12,926)    | 4,903<br>(4,317 - 5,516) | 183<br>(155 - 220)       | 3,763<br>(2,988 - 4,533)    | 2,040<br>(1,677 - 2,431)    | 680<br>(574 - 799)          |
| HIV/AIDS and tuberculosis                                         | 3,554<br>(2,621 - 4,648)       | 21<br>(12 - 57)          | 11<br>(7 - 18)           | 2,459<br>(1,770 - 3,241)    | 953<br>(709 - 1,260)        | 110<br>(79 - 155)           |
| Tuberculosis                                                      | 2,482<br>(1,979 - 3,028)       | 13<br>(9 - 17)           | 7<br>(5 - 9)             | 1,650<br>(1,248 - 2,051)    | 730<br>(571 - 949)          | 82<br>(67 - 116)            |
| HIV/AIDS                                                          | 1,072<br>(240 - 2,118)         | 8<br>(1 - 44)            | 4<br>(0 - 10)            | 808<br>(193 - 1,604)        | 223<br>(44 - 499)           | 28<br>(5 - 64)              |
| HIV/AIDS resulting in mycobacterial infection                     | 71<br>(17 - 142)               | 0<br>(0 - 2)             | 0<br>(0 - 1)             | 54<br>(13 - 105)            | 15<br>(3 - 33)              | 2<br>(0 - 4)                |
| HIV/AIDS resulting in other diseases                              | 1,000<br>(222 - 1,983)         | 8<br>(1 - 42)            | 4<br>(0 - 10)            | 754<br>(179 - 1,496)        | 208<br>(40 - 468)           | 26<br>(4 - 60)              |
| Diarrhea, lower respiratory, and other common infectious diseases | 4,114<br>(3,431 - 4,679)       | 1,484<br>(1,237 - 1,797) | 142<br>(116 - 176)       | 1,003<br>(740 - 1,262)      | 971<br>(691 - 1,203)        | 515<br>(408 - 630)          |
| Diarrheal diseases                                                | 198<br>(149 - 260)             | 158<br>(111 - 218)       | 4<br>(3 - 6)             | 18<br>(14 - 23)             | 11<br>(8 - 15)              | 7<br>(5 - 10)               |
| Intestinal infectious diseases                                    | 16<br>(8 - 27)                 | 6<br>(2 - 11)            | 3<br>(1 - 6)             | 5<br>(2 - 9)                | 1<br>(0 - 4)                | 1<br>(0 - 2)                |
| Typhoid fever                                                     | 9<br>(4 - 18)                  | 3<br>(1 - 6)             | 2<br>(1 - 4)             | 3<br>(1 - 6)                | 1<br>(0 - 2)                | 0<br>(0 - 1)                |
| Paratyphoid fever                                                 | 3<br>(1 - 6)                   | 1<br>(0 - 2)             | 0<br>(0 - 1)             | 1<br>(0 - 2)                | 0<br>(0 - 0)                | 0<br>(0 - 0)                |
| Other intestinal infectious diseases                              | 3<br>(0 - 8)                   | 1<br>(0 - 5)             | 0<br>(0 - 2)             | 1<br>(0 - 3)                | 0<br>(0 - 3)                | 0<br>(0 - 2)                |
| Lower respiratory infections                                      | 3,468<br>(2,805 - 3,996)       | 1,143<br>(902 - 1,425)   | 91<br>(70 - 117)         | 852<br>(587 - 1,096)        | 895<br>(621 - 1,121)        | 488<br>(377 - 602)          |
| Upper respiratory infections                                      | 6<br>(3 - 11)                  | 0<br>(0 - 1)             | 0<br>(0 - 0)             | 2<br>(0 - 4)                | 2<br>(0 - 5)                | 2<br>(0 - 5)                |
| Otitis media                                                      | 7<br>(6 - 9)                   | 1<br>(1 - 1)             | 0<br>(0 - 1)             | 3<br>(3 - 4)                | 2<br>(2 - 3)                | 1<br>(0 - 1)                |
| Meningitis                                                        | 232<br>(200 - 278)             | 92<br>(66 - 130)         | 14<br>(11 - 18)          | 76<br>(62 - 95)             | 41<br>(33 - 51)             | 10<br>(7 - 12)              |
| Pneumococcal meningitis                                           | 58<br>(46 - 73)                | 17<br>(12 - 25)          | 4<br>(3 - 5)             | 22<br>(15 - 31)             | 12<br>(8 - 17)              | 3<br>(2 - 4)                |
| H influenzae type B meningitis                                    | 70<br>(56 - 91)                | 45<br>(32 - 66)          | 5<br>(3 - 6)             | 13<br>(9 - 17)              | 6<br>(4 - 9)                | 1<br>(1 - 2)                |
| Meningococcal meningitis                                          | 50<br>(40 - 62)                | 19<br>(13 - 29)          | 4<br>(2 - 5)             | 16<br>(12 - 22)             | 8<br>(6 - 12)               | 2<br>(2 - 3)                |
| Other meningitis                                                  | 55<br>(36 - 70)                | 10<br>(6 - 15)           | 2<br>(1 - 3)             | 25<br>(14 - 35)             | 15<br>(8 - 20)              | 3<br>(2 - 5)                |
| Encephalitis                                                      | 169<br>(134 - 233)             | 80<br>(53 - 118)         | 27<br>(17 - 46)          | 44<br>(32 - 62)             | 16<br>(11 - 25)             | 3<br>(2 - 4)                |
| Diphtheria                                                        | 2<br>(0 - 6)                   | 1<br>(0 - 5)             | 0<br>(0 - 1)             | 0<br>(0 - 2)                | 0<br>(0 - 1)                | --                          |
| Whooping cough                                                    | 5<br>(2 - 13)                  | 2<br>(0 - 10)            | 0<br>(0 - 1)             | 2<br>(1 - 2)                | 0<br>(0 - 1)                | --                          |
| Tetanus                                                           | 2<br>(1 - 3)                   | 0<br>(0 - 0)             | 0<br>(0 - 0)             | 1<br>(1 - 1)                | 1<br>(0 - 1)                | 0<br>(0 - 0)                |
| Measles                                                           | 0<br>(0 - 0)                   | 0<br>(0 - 0)             | 0<br>(0 - 0)             | 0<br>(0 - 0)                | 0<br>(0 - 0)                | --                          |
| Varicella and herpes zoster                                       | 9<br>(4 - 20)                  | 2<br>(0 - 6)             | 0<br>(0 - 1)             | 2<br>(1 - 4)                | 1<br>(0 - 3)                | 4<br>(0 - 14)               |
| Neglected tropical diseases and malaria                           | 33<br>(25 - 44)                | 9<br>(5 - 17)            | 4<br>(3 - 8)             | 10<br>(8 - 15)              | 7<br>(5 - 12)               | 3<br>(2 - 7)                |
| Leishmaniasis                                                     | 0<br>(0 - 0)                   | 0<br>(0 - 0)             | 0<br>(0 - 0)             | 0<br>(0 - 0)                | 0<br>(0 - 0)                | 0<br>(0 - 0)                |
| Visceral leishmaniasis                                            | 0<br>(0 - 0)                   | 0<br>(0 - 0)             | 0<br>(0 - 0)             | 0<br>(0 - 0)                | 0<br>(0 - 0)                | 0<br>(0 - 0)                |
| Cysticercosis                                                     | 0<br>(0 - 0)                   | 0<br>(0 - 0)             | 0<br>(0 - 0)             | 0<br>(0 - 0)                | 0<br>(0 - 0)                | 0<br>(0 - 0)                |
| Cystic echinococcosis                                             | 6<br>(5 - 7)                   | 0<br>(0 - 0)             | 0<br>(0 - 0)             | 3<br>(2 - 3)                | 2<br>(2 - 2)                | 1<br>(1 - 1)                |
| Dengue                                                            | 5<br>(4 - 7)                   | 2<br>(1 - 3)             | 1<br>(1 - 1)             | 1<br>(1 - 2)                | 0<br>(0 - 1)                | 0<br>(0 - 0)                |
| Rabies                                                            | 6<br>(3 - 7)                   | 0<br>(0 - 1)             | 1<br>(1 - 2)             | 2<br>(1 - 3)                | 1<br>(1 - 1)                | 0<br>(0 - 0)                |
| Intestinal nematode infections                                    | 8<br>(2 - 18)                  | 3<br>(0 - 10)            | 1<br>(0 - 5)             | 1<br>(0 - 6)                | 1<br>(0 - 6)                | 1<br>(0 - 5)                |
| Ascariasis                                                        | 8<br>(2 - 18)                  | 3<br>(0 - 10)            | 1<br>(0 - 5)             | 1<br>(0 - 6)                | 1<br>(0 - 6)                | 1<br>(0 - 5)                |
| Other neglected tropical diseases                                 | 9<br>(7 - 14)                  | 3<br>(2 - 7)             | 0<br>(0 - 1)             | 3<br>(2 - 3)                | 2<br>(1 - 3)                | 1<br>(1 - 2)                |
| Maternal disorders                                                | 90<br>(65 - 118)               | --                       | 0<br>(0 - 0)             | 90<br>(65 - 118)            | --                          | --                          |
| Maternal hemorrhage                                               | 11<br>(7 - 16)                 | --                       | 0<br>(0 - 0)             | 11<br>(7 - 16)              | --                          | --                          |
| Maternal sepsis and other maternal infections                     | 7<br>(3 - 12)                  | --                       | 0<br>(0 - 0)             | 7<br>(3 - 12)               | --                          | --                          |

Web Table 31- Kazakhstan deaths with 95% UI by age, sex, and cause in 2013

| Cause                                                            | Both Sexes, All Ages           | Both Sexes, 0-4 Years    | Both Sexes, 5-14 Years | Both Sexes, 15-49 Years     | Both Sexes, 50-69 Years     | Both Sexes, 70-80 Years     |
|------------------------------------------------------------------|--------------------------------|--------------------------|------------------------|-----------------------------|-----------------------------|-----------------------------|
| Maternal hypertensive disorders                                  | 8<br>(4 - 13)                  | --                       | 0<br>(0 - 0)           | 8<br>(4 - 13)               | --                          | --                          |
| Maternal obstructed labor                                        | 9<br>(5 - 14)                  | --                       | 0<br>(0 - 0)           | 9<br>(5 - 14)               | --                          | --                          |
| Maternal abortive outcome                                        | 12<br>(8 - 17)                 | --                       | 0<br>(0 - 0)           | 12<br>(8 - 17)              | --                          | --                          |
| Indirect maternal deaths                                         | 15<br>(10 - 21)                | --                       | 0<br>(0 - 0)           | 15<br>(10 - 21)             | --                          | --                          |
| Late maternal deaths                                             | 12<br>(7 - 19)                 | --                       | 0<br>(0 - 0)           | 12<br>(7 - 19)              | --                          | --                          |
| Maternal deaths aggravated by HIV/AIDS                           | 0<br>(0 - 0)                   | --                       | --                     | 0<br>(0 - 0)                | --                          | --                          |
| Other maternal disorders                                         | 16<br>(10 - 23)                | --                       | 0<br>(0 - 0)           | 16<br>(10 - 23)             | --                          | --                          |
| Neonatal disorders                                               | 3,220<br>(2,677 - 3,659)       | 3,220<br>(2,677 - 3,659) | --                     | --                          | --                          | --                          |
| Neonatal preterm birth complications                             | 942<br>(458 - 1,473)           | 942<br>(458 - 1,473)     | --                     | --                          | --                          | --                          |
| Neonatal encephalopathy due to birth asphyxia and trauma         | 1,603<br>(1,067 - 2,171)       | 1,603<br>(1,067 - 2,171) | --                     | --                          | --                          | --                          |
| Neonatal sepsis and other neonatal infections                    | 178<br>(81 - 358)              | 178<br>(81 - 358)        | --                     | --                          | --                          | --                          |
| Hemolytic disease and other neonatal jaundice                    | 12<br>(5 - 25)                 | 12<br>(5 - 25)           | --                     | --                          | --                          | --                          |
| Other neonatal disorders                                         | 486<br>(269 - 781)             | 486<br>(269 - 781)       | --                     | --                          | --                          | --                          |
| Nutritional deficiencies                                         | 279<br>(205 - 335)             | 24<br>(17 - 35)          | 6<br>(5 - 8)           | 142<br>(95 - 176)           | 70<br>(49 - 89)             | 37<br>(28 - 47)             |
| Protein-energy malnutrition                                      | 108<br>(70 - 154)              | 17<br>(11 - 27)          | 2<br>(2 - 4)           | 54<br>(32 - 81)             | 30<br>(17 - 42)             | 5<br>(2 - 8)                |
| Iodine deficiency                                                | 3<br>(1 - 7)                   | 0<br>(0 - 1)             | 0<br>(0 - 1)           | 1<br>(0 - 4)                | 1<br>(0 - 4)                | 1<br>(0 - 3)                |
| Iron-deficiency anemia                                           | 151<br>(98 - 198)              | 6<br>(2 - 11)            | 3<br>(1 - 4)           | 77<br>(44 - 105)            | 35<br>(21 - 50)             | 30<br>(22 - 40)             |
| Other nutritional deficiencies                                   | 17<br>(7 - 26)                 | 1<br>(1 - 3)             | 1<br>(0 - 2)           | 10<br>(3 - 15)              | 4<br>(2 - 6)                | 1<br>(0 - 2)                |
| Other communicable, maternal, neonatal, and nutritional diseases | 278<br>(183 - 444)             | 144<br>(56 - 299)        | 19<br>(12 - 31)        | 60<br>(48 - 73)             | 40<br>(32 - 49)             | 16<br>(12 - 19)             |
| Sexually transmitted diseases excluding HIV                      | 118<br>(26 - 284)              | 104<br>(17 - 258)        | 8<br>(1 - 19)          | 3<br>(2 - 5)                | 2<br>(1 - 4)                | 1<br>(0 - 2)                |
| Syphilis                                                         | 115<br>(22 - 282)              | 104<br>(17 - 258)        | 8<br>(1 - 19)          | 1<br>(1 - 3)                | 1<br>(1 - 3)                | 1<br>(0 - 2)                |
| Chlamydial infection                                             | 1<br>(0 - 1)                   | --                       | 0<br>(0 - 0)           | 0<br>(0 - 1)                | 0<br>(0 - 0)                | 0<br>(0 - 0)                |
| Gonococcal infection                                             | 1<br>(1 - 2)                   | --                       | 0<br>(0 - 0)           | 1<br>(0 - 1)                | 0<br>(0 - 1)                | 0<br>(0 - 0)                |
| Other sexually transmitted diseases                              | 1<br>(1 - 2)                   | --                       | 0<br>(0 - 0)           | 1<br>(0 - 1)                | 0<br>(0 - 1)                | 0<br>(0 - 0)                |
| Hepatitis                                                        | 81<br>(68 - 99)                | 17<br>(11 - 26)          | 6<br>(4 - 9)           | 37<br>(28 - 48)             | 14<br>(11 - 20)             | 6<br>(4 - 9)                |
| Acute hepatitis A                                                | 10<br>(3 - 19)                 | 4<br>(1 - 10)            | 2<br>(1 - 3)           | 3<br>(1 - 7)                | 0<br>(0 - 1)                | 0<br>(0 - 0)                |
| Acute hepatitis B                                                | 52<br>(39 - 68)                | 12<br>(7 - 20)           | 3<br>(2 - 5)           | 19<br>(12 - 29)             | 12<br>(8 - 16)              | 5<br>(4 - 8)                |
| Acute hepatitis C                                                | 5<br>(1 - 12)                  | --                       | 1<br>(0 - 2)           | 3<br>(1 - 7)                | 1<br>(0 - 3)                | 1<br>(0 - 1)                |
| Acute hepatitis E                                                | 14<br>(8 - 23)                 | 0<br>(0 - 0)             | 1<br>(0 - 1)           | 12<br>(7 - 19)              | 1<br>(1 - 3)                | 0<br>(0 - 1)                |
| Other infectious diseases                                        | 79<br>(53 - 98)                | 23<br>(13 - 34)          | 5<br>(3 - 6)           | 20<br>(12 - 25)             | 23<br>(16 - 30)             | 8<br>(5 - 11)               |
| Non-communicable diseases                                        | 125,215<br>(115,158 - 136,331) | 2,087<br>(1,718 - 2,520) | 393<br>(348 - 440)     | 15,929<br>(13,730 - 18,493) | 46,605<br>(41,498 - 52,286) | 60,202<br>(57,224 - 63,687) |
| Neoplasms                                                        | 22,344<br>(19,546 - 25,825)    | 101<br>(73 - 137)        | 132<br>(112 - 150)     | 3,395<br>(2,863 - 4,053)    | 11,874<br>(10,241 - 13,772) | 6,842<br>(6,165 - 8,002)    |
| Esophageal cancer                                                | 1,646<br>(1,248 - 2,371)       | --                       | --                     | 119<br>(80 - 189)           | 856<br>(641 - 1,251)        | 671<br>(504 - 959)          |
| Stomach cancer                                                   | 2,780<br>(2,428 - 3,190)       | --                       | --                     | 369<br>(305 - 448)          | 1,441<br>(1,219 - 1,698)    | 969<br>(827 - 1,154)        |
| Liver cancer                                                     | 1,250<br>(1,072 - 1,482)       | --                       | 3<br>(2 - 4)           | 134<br>(107 - 171)          | 689<br>(565 - 849)          | 425<br>(348 - 526)          |
| Liver cancer due to hepatitis B                                  | 451<br>(353 - 550)             | --                       | 1<br>(0 - 1)           | 58<br>(44 - 77)             | 271<br>(204 - 343)          | 121<br>(90 - 154)           |
| Liver cancer due to hepatitis C                                  | 441<br>(354 - 545)             | --                       | 0<br>(0 - 1)           | 42<br>(31 - 56)             | 238<br>(185 - 302)          | 160<br>(125 - 204)          |
| Liver cancer due to alcohol use                                  | 244<br>(191 - 314)             | --                       | --                     | 17<br>(10 - 25)             | 122<br>(89 - 164)           | 106<br>(80 - 139)           |
| Liver cancer due to other causes                                 | 115<br>(78 - 165)              | --                       | 2<br>(1 - 2)           | 18<br>(12 - 24)             | 58<br>(37 - 85)             | 38<br>(24 - 60)             |
| Larynx cancer                                                    | 353<br>(277 - 552)             | --                       | --                     | 47<br>(34 - 84)             | 232<br>(178 - 366)          | 74<br>(59 - 104)            |

Web Table 31- Kazakhstan deaths with 95% UI by age, sex, and cause in 2013

| Cause                                         | Both Sexes, All Ages        | Both Sexes, 0-4 Years | Both Sexes, 5-14 Years | Both Sexes, 15-49 Years  | Both Sexes, 50-69 Years     | Both Sexes, 70-80 Years     |
|-----------------------------------------------|-----------------------------|-----------------------|------------------------|--------------------------|-----------------------------|-----------------------------|
| Tracheal, bronchus and lung cancer            | 4,220<br>(3,670 - 4,938)    | --                    | --                     | 423<br>(340 - 531)       | 2,692<br>(2,269 - 3,226)    | 1,106<br>(962 - 1,291)      |
| Breast cancer                                 | 1,956<br>(1,548 - 2,421)    | --                    | --                     | 450<br>(335 - 587)       | 1,027<br>(788 - 1,286)      | 479<br>(391 - 585)          |
| Cervical cancer                               | 877<br>(685 - 1,162)        | --                    | --                     | 268<br>(187 - 351)       | 407<br>(312 - 563)          | 203<br>(161 - 314)          |
| Uterine cancer                                | 169<br>(120 - 342)          | --                    | --                     | 12<br>(8 - 23)           | 91<br>(62 - 187)            | 66<br>(48 - 132)            |
| Prostate cancer                               | 490<br>(306 - 764)          | --                    | --                     | 12<br>(7 - 18)           | 192<br>(119 - 308)          | 287<br>(175 - 447)          |
| Colon and rectum cancer                       | 2,252<br>(2,018 - 2,583)    | --                    | --                     | 246<br>(208 - 292)       | 1,066<br>(926 - 1,230)      | 941<br>(833 - 1,097)        |
| Lip and oral cavity cancer                    | 402<br>(281 - 487)          | --                    | --                     | 62<br>(44 - 79)          | 230<br>(154 - 285)          | 110<br>(82 - 133)           |
| Nasopharynx cancer                            | 64<br>(52 - 86)             | --                    | 0<br>(0 - 1)           | 22<br>(18 - 29)          | 31<br>(25 - 42)             | 10<br>(8 - 14)              |
| Other pharynx cancer                          | 177<br>(140 - 216)          | --                    | --                     | 30<br>(22 - 39)          | 118<br>(90 - 146)           | 30<br>(24 - 35)             |
| Gallbladder and biliary tract cancer          | 335<br>(252 - 413)          | --                    | --                     | 27<br>(20 - 36)          | 170<br>(126 - 215)          | 138<br>(95 - 183)           |
| Pancreatic cancer                             | 968<br>(858 - 1,103)        | --                    | --                     | 115<br>(96 - 139)        | 548<br>(473 - 637)          | 305<br>(264 - 371)          |
| Malignant skin melanoma                       | 237<br>(185 - 356)          | --                    | --                     | 64<br>(47 - 96)          | 105<br>(80 - 163)           | 68<br>(54 - 103)            |
| Non-melanoma skin cancer                      | 37<br>(24 - 52)             | --                    | --                     | 8<br>(4 - 12)            | 14<br>(8 - 22)              | 15<br>(10 - 22)             |
| Ovarian cancer                                | 546<br>(415 - 749)          | --                    | --                     | 111<br>(78 - 159)        | 311<br>(230 - 434)          | 124<br>(95 - 179)           |
| Testicular cancer                             | 28<br>(21 - 45)             | --                    | --                     | 14<br>(10 - 22)          | 9<br>(6 - 17)               | 5<br>(3 - 10)               |
| Kidney cancer                                 | 648<br>(561 - 744)          | 8<br>(6 - 12)         | 5<br>(4 - 6)           | 91<br>(75 - 110)         | 365<br>(310 - 430)          | 180<br>(157 - 210)          |
| Bladder cancer                                | 474<br>(406 - 586)          | --                    | --                     | 43<br>(34 - 59)          | 229<br>(190 - 292)          | 202<br>(173 - 250)          |
| Brain and nervous system cancer               | 382<br>(169 - 484)          | 13<br>(6 - 20)        | 23<br>(11 - 30)        | 144<br>(74 - 186)        | 171<br>(66 - 224)           | 31<br>(14 - 38)             |
| Thyroid cancer                                | 88<br>(58 - 107)            | --                    | 0<br>(0 - 0)           | 17<br>(13 - 22)          | 43<br>(28 - 54)             | 27<br>(16 - 34)             |
| Mesothelioma                                  | 59<br>(45 - 71)             | --                    | --                     | 12<br>(8 - 16)           | 36<br>(27 - 46)             | 11<br>(8 - 14)              |
| Hodgkin lymphoma                              | 71<br>(44 - 97)             | 1<br>(1 - 3)          | 3<br>(1 - 7)           | 34<br>(20 - 49)          | 26<br>(14 - 39)             | 7<br>(4 - 10)               |
| Non-Hodgkin lymphoma                          | 414<br>(328 - 523)          | 10<br>(6 - 15)        | 15<br>(11 - 20)        | 120<br>(88 - 169)        | 181<br>(135 - 232)          | 89<br>(59 - 112)            |
| Multiple myeloma                              | 101<br>(74 - 144)           | --                    | --                     | 19<br>(13 - 28)          | 57<br>(41 - 82)             | 24<br>(18 - 36)             |
| Leukemia                                      | 634<br>(558 - 723)          | 44<br>(31 - 60)       | 59<br>(48 - 71)        | 204<br>(173 - 241)       | 226<br>(190 - 265)          | 102<br>(88 - 117)           |
| Other neoplasms                               | 686<br>(439 - 1,210)        | 26<br>(15 - 47)       | 24<br>(16 - 39)        | 180<br>(116 - 310)       | 310<br>(184 - 583)          | 146<br>(92 - 282)           |
| Cardiovascular diseases                       | 78,502<br>(71,684 - 85,611) | 43<br>(35 - 54)       | 34<br>(27 - 39)        | 7,535<br>(6,391 - 8,903) | 26,358<br>(23,199 - 29,874) | 44,533<br>(40,565 - 47,270) |
| Rheumatic heart disease                       | 698<br>(548 - 1,046)        | 1<br>(1 - 2)          | 5<br>(4 - 7)           | 294<br>(217 - 490)       | 342<br>(260 - 486)          | 56<br>(41 - 76)             |
| Ischemic heart disease                        | 46,668<br>(41,975 - 51,397) | 8<br>(6 - 12)         | 7<br>(5 - 9)           | 4,538<br>(3,722 - 5,420) | 15,515<br>(13,262 - 17,790) | 26,600<br>(23,979 - 29,544) |
| Cerebrovascular disease                       | 27,085<br>(22,740 - 30,506) | 10<br>(8 - 13)        | 10<br>(7 - 12)         | 1,976<br>(1,583 - 2,474) | 8,800<br>(7,457 - 10,165)   | 16,290<br>(13,259 - 18,158) |
| Ischemic stroke                               | 16,335<br>(12,758 - 18,793) | 2<br>(1 - 4)          | 3<br>(2 - 4)           | 562<br>(416 - 757)       | 4,205<br>(3,288 - 5,077)    | 11,563<br>(8,888 - 13,316)  |
| Hemorrhagic stroke                            | 10,750<br>(8,455 - 12,954)  | 8<br>(6 - 10)         | 7<br>(5 - 8)           | 1,414<br>(1,101 - 1,786) | 4,595<br>(3,693 - 5,539)    | 4,727<br>(3,541 - 6,258)    |
| Hypertensive heart disease                    | 2,320<br>(1,589 - 2,963)    | 1<br>(0 - 1)          | 0<br>(0 - 0)           | 249<br>(161 - 335)       | 999<br>(669 - 1,301)        | 1,071<br>(687 - 1,428)      |
| Cardiomyopathy and myocarditis                | 495<br>(287 - 659)          | 8<br>(5 - 13)         | 5<br>(3 - 7)           | 137<br>(68 - 196)        | 214<br>(107 - 303)          | 132<br>(84 - 192)           |
| Atrial fibrillation and flutter               | 2<br>(1 - 3)                | --                    | --                     | 1<br>(1 - 1)             | 1<br>(0 - 1)                | 0<br>(0 - 0)                |
| Aortic aneurysm                               | 121<br>(83 - 166)           | --                    | --                     | 22<br>(12 - 33)          | 44<br>(28 - 62)             | 55<br>(36 - 83)             |
| Peripheral vascular disease                   | 38<br>(22 - 52)             | --                    | --                     | 5<br>(2 - 8)             | 18<br>(10 - 26)             | 15<br>(8 - 21)              |
| Endocarditis                                  | 54<br>(35 - 73)             | 5<br>(3 - 7)          | 1<br>(0 - 1)           | 11<br>(6 - 17)           | 19<br>(10 - 29)             | 20<br>(12 - 28)             |
| Other cardiovascular and circulatory diseases | 1,020<br>(637 - 1,294)      | 10<br>(6 - 14)        | 6<br>(4 - 9)           | 302<br>(158 - 408)       | 407<br>(240 - 546)          | 295<br>(189 - 404)          |
| Chronic respiratory diseases                  | 6,313<br>(5,513 - 8,306)    | 9<br>(7 - 13)         | 7<br>(6 - 8)           | 669<br>(545 - 837)       | 2,385<br>(2,029 - 2,992)    | 3,242<br>(2,828 - 4,437)    |
| Chronic obstructive pulmonary disease         | 5,356<br>(4,575 - 6,987)    | 4<br>(3 - 6)          | 3<br>(3 - 4)           | 513<br>(408 - 634)       | 2,036<br>(1,693 - 2,586)    | 2,799<br>(2,381 - 3,911)    |

Web Table 31- Kazakhstan deaths with 95% UI by age, sex, and cause in 2013

| Cause                                               | Both Sexes, All Ages     | Both Sexes, 0-4 Years | Both Sexes, 5-14 Years | Both Sexes, 15-49 Years  | Both Sexes, 50-69 Years  | Both Sexes, 70-80 Years  |
|-----------------------------------------------------|--------------------------|-----------------------|------------------------|--------------------------|--------------------------|--------------------------|
| Pneumoconiosis                                      | 218<br>(79 - 546)        | 0<br>(0 - 1)          | 1<br>(0 - 1)           | 26<br>(10 - 63)          | 107<br>(37 - 275)        | 83<br>(28 - 220)         |
| Silicosis                                           | 38<br>(12 - 81)          | 0<br>(0 - 0)          | 0<br>(0 - 0)           | 8<br>(3 - 17)            | 26<br>(8 - 58)           | 3<br>(1 - 7)             |
| Asbestosis                                          | 68<br>(23 - 177)         | 0<br>(0 - 0)          | 0<br>(0 - 0)           | 6<br>(2 - 17)            | 23<br>(7 - 63)           | 39<br>(13 - 98)          |
| Coal workers pneumoconiosis                         | 47<br>(13 - 156)         | 0<br>(0 - 0)          | 0<br>(0 - 0)           | 3<br>(1 - 10)            | 22<br>(5 - 73)           | 22<br>(6 - 69)           |
| Other pneumoconiosis                                | 65<br>(24 - 173)         | 0<br>(0 - 0)          | 0<br>(0 - 0)           | 10<br>(4 - 25)           | 36<br>(12 - 98)          | 19<br>(7 - 55)           |
| Asthma                                              | 395<br>(278 - 572)       | 1<br>(1 - 2)          | 2<br>(1 - 3)           | 78<br>(53 - 111)         | 145<br>(95 - 213)        | 169<br>(112 - 268)       |
| Interstitial lung disease and pulmonary sarcoidosis | 251<br>(168 - 411)       | 0<br>(0 - 1)          | 0<br>(0 - 1)           | 11<br>(6 - 20)           | 69<br>(43 - 112)         | 170<br>(105 - 299)       |
| Other chronic respiratory diseases                  | 93<br>(65 - 153)         | 3<br>(2 - 5)          | 1<br>(0 - 1)           | 42<br>(28 - 70)          | 27<br>(16 - 49)          | 21<br>(13 - 35)          |
| Cirrhosis                                           | 6,181<br>(5,410 - 7,189) | 6<br>(4 - 8)          | 13<br>(11 - 15)        | 2,087<br>(1,753 - 2,508) | 3,025<br>(2,607 - 3,505) | 1,049<br>(930 - 1,230)   |
| Cirrhosis due to hepatitis B                        | 2,656<br>(2,015 - 3,338) | 1<br>(0 - 1)          | 4<br>(3 - 5)           | 903<br>(646 - 1,196)     | 1,295<br>(971 - 1,640)   | 454<br>(341 - 591)       |
| Cirrhosis due to hepatitis C                        | 1,587<br>(1,118 - 2,254) | 0<br>(0 - 1)          | 2<br>(1 - 3)           | 502<br>(326 - 727)       | 793<br>(514 - 1,167)     | 289<br>(196 - 420)       |
| Cirrhosis due to alcohol use                        | 1,326<br>(924 - 1,809)   | --                    | --                     | 381<br>(218 - 558)       | 700<br>(490 - 965)       | 246<br>(173 - 331)       |
| Cirrhosis due to other causes                       | 612<br>(431 - 867)       | 5<br>(4 - 7)          | 7<br>(6 - 9)           | 302<br>(210 - 427)       | 237<br>(144 - 359)       | 61<br>(35 - 95)          |
| Digestive diseases                                  | 2,029<br>(1,775 - 2,347) | 21<br>(15 - 30)       | 17<br>(14 - 22)        | 622<br>(519 - 750)       | 821<br>(692 - 969)       | 548<br>(477 - 629)       |
| Peptic ulcer disease                                | 730<br>(532 - 934)       | 0<br>(0 - 1)          | 1<br>(0 - 1)           | 244<br>(170 - 330)       | 325<br>(236 - 421)       | 160<br>(107 - 213)       |
| Gastritis and duodenitis                            | 19<br>(8 - 29)           | 1<br>(0 - 1)          | 0<br>(0 - 1)           | 8<br>(2 - 13)            | 5<br>(2 - 9)             | 5<br>(2 - 8)             |
| Appendicitis                                        | 74<br>(51 - 97)          | 3<br>(2 - 6)          | 5<br>(4 - 7)           | 33<br>(23 - 46)          | 20<br>(13 - 29)          | 11<br>(7 - 16)           |
| Paralytic ileus and intestinal obstruction          | 328<br>(240 - 551)       | 11<br>(6 - 18)        | 7<br>(5 - 11)          | 112<br>(76 - 193)        | 116<br>(78 - 210)        | 83<br>(57 - 141)         |
| Inguinal, femoral, and abdominal hernia             | 82<br>(48 - 131)         | 1<br>(1 - 3)          | 1<br>(0 - 1)           | 11<br>(7 - 16)           | 34<br>(19 - 53)          | 35<br>(16 - 62)          |
| Inflammatory bowel disease                          | 53<br>(30 - 81)          | 3<br>(1 - 5)          | 1<br>(0 - 2)           | 19<br>(9 - 31)           | 17<br>(9 - 29)           | 13<br>(8 - 24)           |
| Vascular intestinal disorders                       | 47<br>(23 - 84)          | 1<br>(0 - 1)          | 0<br>(0 - 1)           | 10<br>(4 - 21)           | 22<br>(11 - 41)          | 13<br>(6 - 23)           |
| Gallbladder and biliary diseases                    | 425<br>(348 - 546)       | 0<br>(0 - 0)          | 1<br>(0 - 1)           | 72<br>(52 - 92)          | 172<br>(134 - 222)       | 181<br>(142 - 256)       |
| Pancreatitis                                        | 187<br>(85 - 327)        | 1<br>(0 - 1)          | 1<br>(0 - 1)           | 84<br>(34 - 147)         | 70<br>(31 - 125)         | 31<br>(16 - 58)          |
| Other digestive diseases                            | 84<br>(63 - 106)         | 0<br>(0 - 1)          | 0<br>(0 - 1)           | 30<br>(21 - 40)          | 39<br>(28 - 51)          | 15<br>(11 - 20)          |
| Neurological disorders                              | 3,714<br>(3,184 - 4,691) | 14<br>(9 - 20)        | 29<br>(21 - 36)        | 299<br>(231 - 381)       | 369<br>(298 - 450)       | 3,002<br>(2,506 - 3,923) |
| Alzheimer disease and other dementias               | 3,158<br>(2,643 - 4,095) | --                    | --                     | 1<br>(1 - 3)             | 249<br>(190 - 316)       | 2,908<br>(2,413 - 3,785) |
| Parkinson disease                                   | 115<br>(92 - 151)        | --                    | --                     | 4<br>(3 - 6)             | 41<br>(31 - 52)          | 70<br>(54 - 100)         |
| Epilepsy                                            | 353<br>(259 - 445)       | 10<br>(6 - 16)        | 26<br>(18 - 33)        | 256<br>(184 - 333)       | 53<br>(34 - 72)          | 8<br>(5 - 11)            |
| Multiple sclerosis                                  | 51<br>(34 - 110)         | --                    | --                     | 24<br>(15 - 47)          | 15<br>(9 - 30)           | 12<br>(6 - 30)           |
| Other neurological disorders                        | 36<br>(31 - 45)          | 4<br>(3 - 5)          | 3<br>(2 - 4)           | 14<br>(11 - 19)          | 11<br>(9 - 15)           | 4<br>(3 - 5)             |
| Mental and substance use disorders                  | 523<br>(395 - 816)       | 1<br>(0 - 2)          | 0<br>(0 - 0)           | 277<br>(206 - 462)       | 225<br>(158 - 343)       | 20<br>(16 - 29)          |
| Schizophrenia                                       | 51<br>(34 - 80)          | --                    | --                     | 33<br>(21 - 53)          | 15<br>(9 - 26)           | 3<br>(2 - 5)             |
| Alcohol use disorders                               | 411<br>(288 - 677)       | --                    | --                     | 201<br>(140 - 345)       | 197<br>(129 - 307)       | 13<br>(9 - 21)           |
| Drug use disorders                                  | 58<br>(44 - 120)         | 1<br>(0 - 2)          | --                     | 41<br>(29 - 90)          | 12<br>(8 - 21)           | 4<br>(3 - 6)             |
| Opioid use disorders                                | 12<br>(9 - 25)           | 0<br>(0 - 0)          | --                     | 9<br>(6 - 19)            | 2<br>(2 - 4)             | 1<br>(1 - 1)             |
| Cocaine use disorders                               | 1<br>(1 - 3)             | 0<br>(0 - 0)          | --                     | 1<br>(1 - 2)             | 0<br>(0 - 0)             | 0<br>(0 - 0)             |
| Amphetamine use disorders                           | 1<br>(1 - 3)             | 0<br>(0 - 0)          | --                     | 1<br>(1 - 2)             | 0<br>(0 - 1)             | 0<br>(0 - 0)             |
| Other drug use disorders                            | 43<br>(32 - 88)          | 0<br>(0 - 1)          | --                     | 30<br>(21 - 67)          | 9<br>(6 - 16)            | 3<br>(2 - 5)             |
| Eating disorders                                    | 3<br>(2 - 5)             | --                    | 0<br>(0 - 0)           | 3<br>(2 - 4)             | --                       | --                       |
| Anorexia nervosa                                    | 3<br>(2 - 5)             | --                    | 0<br>(0 - 0)           | 3<br>(2 - 4)             | --                       | --                       |

Web Table 31- Kazakhstan deaths with 95% UI by age, sex, and cause in 2013

| Cause                                               | Both Sexes, All Ages     | Both Sexes, 0-4 Years    | Both Sexes, 5-14 Years | Both Sexes, 15-49 Years | Both Sexes, 50-69 Years  | Both Sexes, 70-80 Years |
|-----------------------------------------------------|--------------------------|--------------------------|------------------------|-------------------------|--------------------------|-------------------------|
| Diabetes, urogenital, blood, and endocrine diseases | 3,392<br>(2,948 - 4,471) | 70<br>(54 - 90)          | 46<br>(38 - 55)        | 869<br>(722 - 1,185)    | 1,469<br>(1,249 - 1,924) | 937<br>(822 - 1,267)    |
| Diabetes mellitus                                   | 1,444<br>(1,251 - 1,835) | 2<br>(1 - 3)             | 10<br>(7 - 14)         | 204<br>(170 - 245)      | 706<br>(590 - 924)       | 522<br>(439 - 665)      |
| Acute glomerulonephritis                            | 12<br>(10 - 15)          | 1<br>(0 - 1)             | 0<br>(0 - 1)           | 6<br>(5 - 8)            | 3<br>(3 - 5)             | 1<br>(1 - 2)            |
| Chronic kidney disease                              | 826<br>(665 - 1,552)     | 8<br>(5 - 13)            | 11<br>(9 - 17)         | 308<br>(235 - 600)      | 331<br>(260 - 611)       | 168<br>(135 - 322)      |
| Chronic kidney disease due to diabetes mellitus     | 65<br>(31 - 96)          | 0<br>(0 - 1)             | 1<br>(1 - 2)           | 20<br>(9 - 32)          | 34<br>(14 - 52)          | 10<br>(4 - 16)          |
| Chronic kidney disease due to hypertension          | 183<br>(121 - 285)       | 2<br>(1 - 4)             | 1<br>(1 - 2)           | 44<br>(24 - 71)         | 72<br>(44 - 113)         | 63<br>(36 - 114)        |
| Chronic kidney disease due to glomerulonephritis    | 289<br>(207 - 442)       | 2<br>(1 - 4)             | 4<br>(3 - 6)           | 133<br>(91 - 212)       | 107<br>(76 - 156)        | 42<br>(28 - 67)         |
| Chronic kidney disease due to other causes          | 290<br>(185 - 829)       | 3<br>(1 - 7)             | 5<br>(3 - 10)          | 111<br>(61 - 327)       | 117<br>(70 - 353)        | 54<br>(32 - 147)        |
| Urinary diseases and male infertility               | 691<br>(589 - 872)       | 4<br>(3 - 5)             | 4<br>(3 - 6)           | 191<br>(154 - 244)      | 296<br>(241 - 396)       | 196<br>(159 - 265)      |
| Interstitial nephritis and urinary tract infections | 595<br>(504 - 745)       | 3<br>(2 - 5)             | 3<br>(3 - 5)           | 166<br>(134 - 211)      | 253<br>(205 - 333)       | 169<br>(136 - 226)      |
| Urolithiasis                                        | 42<br>(31 - 68)          | --                       | 0<br>(0 - 0)           | 10<br>(7 - 17)          | 20<br>(14 - 34)          | 12<br>(7 - 20)          |
| Other urinary diseases                              | 54<br>(39 - 90)          | 1<br>(0 - 1)             | 1<br>(0 - 1)           | 15<br>(10 - 23)         | 22<br>(15 - 38)          | 16<br>(9 - 33)          |
| Gynecological diseases                              | 5<br>(3 - 16)            | --                       | --                     | 3<br>(2 - 10)           | 1<br>(1 - 4)             | 0<br>(0 - 2)            |
| Uterine fibroids                                    | 1<br>(1 - 4)             | --                       | --                     | 1<br>(0 - 2)            | 0<br>(0 - 1)             | 0<br>(0 - 1)            |
| Polycystic ovarian syndrome                         | 0<br>(0 - 1)             | --                       | --                     | 0<br>(0 - 1)            | 0<br>(0 - 0)             | --                      |
| Endometriosis                                       | 1<br>(0 - 2)             | --                       | --                     | 0<br>(0 - 1)            | 0<br>(0 - 0)             | --                      |
| Genital prolapse                                    | 1<br>(0 - 2)             | --                       | --                     | 0<br>(0 - 1)            | 0<br>(0 - 1)             | 0<br>(0 - 0)            |
| Other gynecological diseases                        | 2<br>(1 - 8)             | --                       | --                     | 1<br>(1 - 5)            | 1<br>(0 - 2)             | 0<br>(0 - 1)            |
| Hemoglobinopathies and hemolytic anemias            | 95<br>(64 - 129)         | 18<br>(12 - 28)          | 9<br>(6 - 12)          | 44<br>(28 - 62)         | 20<br>(14 - 28)          | 4<br>(3 - 5)            |
| Thalassemias                                        | 38<br>(25 - 53)          | 15<br>(9 - 23)           | 7<br>(5 - 10)          | 16<br>(10 - 22)         | 0<br>(0 - 0)             | 0<br>(0 - 0)            |
| Sickle cell disorders                               | 2<br>(1 - 3)             | 0<br>(0 - 0)             | 0<br>(0 - 0)           | 1<br>(1 - 2)            | 1<br>(0 - 1)             | 0<br>(0 - 0)            |
| G6PD deficiency                                     | 2<br>(1 - 2)             | 0<br>(0 - 0)             | 0<br>(0 - 0)           | 1<br>(1 - 1)            | 0<br>(0 - 1)             | 0<br>(0 - 0)            |
| Other hemoglobinopathies and hemolytic anemias      | 52<br>(34 - 70)          | 3<br>(2 - 4)             | 1<br>(1 - 1)           | 26<br>(15 - 38)         | 19<br>(13 - 26)          | 4<br>(3 - 5)            |
| Endocrine, metabolic, blood, and immune disorders   | 320<br>(165 - 391)       | 38<br>(23 - 52)          | 12<br>(6 - 16)         | 114<br>(55 - 146)       | 111<br>(50 - 143)        | 45<br>(19 - 58)         |
| Musculoskeletal disorders                           | 65<br>(46 - 128)         | --                       | 7<br>(5 - 14)          | 25<br>(18 - 52)         | 23<br>(16 - 44)          | 10<br>(6 - 20)          |
| Rheumatoid arthritis                                | 17<br>(11 - 24)          | --                       | 1<br>(0 - 1)           | 6<br>(3 - 8)            | 6<br>(4 - 10)            | 4<br>(2 - 8)            |
| Other musculoskeletal disorders                     | 48<br>(31 - 107)         | --                       | 6<br>(4 - 13)          | 19<br>(12 - 45)         | 17<br>(10 - 36)          | 7<br>(4 - 13)           |
| Other non-communicable diseases                     | 2,151<br>(1,796 - 2,575) | 1,822<br>(1,492 - 2,226) | 108<br>(86 - 134)      | 150<br>(122 - 188)      | 55<br>(41 - 68)          | 17<br>(13 - 21)         |
| Congenital anomalies                                | 2,104<br>(1,747 - 2,529) | 1,784<br>(1,448 - 2,199) | 107<br>(86 - 133)      | 146<br>(118 - 183)      | 51<br>(38 - 65)          | 15<br>(12 - 20)         |
| Neural tube defects                                 | 162<br>(77 - 301)        | 144<br>(63 - 281)        | 7<br>(3 - 11)          | 7<br>(4 - 9)            | 3<br>(1 - 4)             | 2<br>(0 - 2)            |
| Congenital heart anomalies                          | 1,466<br>(1,169 - 1,802) | 1,207<br>(929 - 1,523)   | 92<br>(73 - 116)       | 126<br>(101 - 160)      | 35<br>(25 - 44)          | 6<br>(4 - 8)            |
| Cleft lip and cleft palate                          | 9<br>(4 - 17)            | 9<br>(4 - 17)            | --                     | --                      | --                       | --                      |
| Down syndrome                                       | 38<br>(22 - 61)          | 31<br>(16 - 53)          | 2<br>(1 - 3)           | 4<br>(2 - 6)            | 2<br>(1 - 3)             | 0<br>(0 - 1)            |
| Chromosomal unbalanced rearrangements               | 7<br>(5 - 12)            | 3<br>(1 - 6)             | 1<br>(0 - 1)           | 3<br>(1 - 5)            | 1<br>(1 - 2)             | 0<br>(0 - 1)            |
| Other congenital anomalies                          | 422<br>(296 - 596)       | 391<br>(266 - 561)       | 6<br>(3 - 11)          | 8<br>(5 - 11)           | 11<br>(8 - 17)           | 7<br>(5 - 9)            |
| Skin and subcutaneous diseases                      | 12<br>(10 - 15)          | 3<br>(2 - 5)             | 0<br>(0 - 1)           | 4<br>(3 - 4)            | 4<br>(3 - 5)             | 2<br>(1 - 2)            |
| Cellulitis                                          | 3<br>(2 - 4)             | 0<br>(0 - 1)             | 0<br>(0 - 0)           | 1<br>(1 - 2)            | 1<br>(1 - 2)             | 1<br>(0 - 1)            |
| Pyoderma                                            | 7<br>(5 - 10)            | 2<br>(1 - 4)             | 0<br>(0 - 0)           | 2<br>(1 - 2)            | 2<br>(1 - 3)             | 1<br>(1 - 1)            |
| Decubitus ulcer                                     | 1<br>(1 - 2)             | 0<br>(0 - 0)             | 0<br>(0 - 0)           | 1<br>(0 - 1)            | 0<br>(0 - 0)             | 0<br>(0 - 0)            |
| Other skin and subcutaneous diseases                | 1<br>(1 - 2)             | 0<br>(0 - 0)             | 0<br>(0 - 0)           | 1<br>(0 - 1)            | 0<br>(0 - 0)             | 0<br>(0 - 0)            |

Web Table 31- Kazakhstan deaths with 95% UI by age, sex, and cause in 2013

| Cause                                           | Both Sexes, All Ages        | Both Sexes, 0-4 Years | Both Sexes, 5-14 Years | Both Sexes, 15-49 Years    | Both Sexes, 50-69 Years  | Both Sexes, 70-80 Years |
|-------------------------------------------------|-----------------------------|-----------------------|------------------------|----------------------------|--------------------------|-------------------------|
| Sudden infant death syndrome                    | 35<br>(9 - 113)             | 35<br>(9 - 113)       | --                     | --                         | --                       | --                      |
| Injuries                                        | 17,761<br>(15,392 - 20,612) | 720<br>(554 - 929)    | 746<br>(672 - 817)     | 11,574<br>(9,840 - 13,751) | 3,796<br>(3,234 - 4,473) | 924<br>(818 - 1,075)    |
| Transport injuries                              | 4,919<br>(3,918 - 5,840)    | 160<br>(94 - 223)     | 300<br>(221 - 356)     | 3,256<br>(2,585 - 3,973)   | 980<br>(716 - 1,186)     | 224<br>(183 - 263)      |
| Road injuries                                   | 4,505<br>(3,594 - 5,351)    | 142<br>(83 - 197)     | 279<br>(204 - 333)     | 2,972<br>(2,380 - 3,638)   | 905<br>(653 - 1,099)     | 208<br>(168 - 243)      |
| Pedestrian road injuries                        | 847<br>(566 - 1,131)        | 50<br>(25 - 77)       | 102<br>(66 - 139)      | 396<br>(248 - 563)         | 210<br>(132 - 296)       | 90<br>(65 - 115)        |
| Cyclist road injuries                           | 183<br>(109 - 269)          | 12<br>(4 - 24)        | 23<br>(11 - 41)        | 77<br>(48 - 115)           | 59<br>(34 - 86)          | 11<br>(7 - 17)          |
| Motorcyclist road injuries                      | 574<br>(394 - 839)          | 4<br>(2 - 7)          | 7<br>(4 - 11)          | 498<br>(335 - 736)         | 60<br>(35 - 94)          | 5<br>(3 - 7)            |
| Motor vehicle road injuries                     | 2,860<br>(2,215 - 3,494)    | 73<br>(45 - 105)      | 141<br>(105 - 177)     | 1,981<br>(1,500 - 2,480)   | 566<br>(408 - 708)       | 99<br>(75 - 125)        |
| Other road injuries                             | 41<br>(12 - 66)             | 3<br>(1 - 6)          | 6<br>(2 - 11)          | 20<br>(5 - 35)             | 10<br>(2 - 18)           | 3<br>(1 - 5)            |
| Other transport injuries                        | 414<br>(304 - 525)          | 18<br>(10 - 28)       | 21<br>(14 - 29)        | 284<br>(195 - 376)         | 76<br>(52 - 104)         | 16<br>(11 - 23)         |
| Unintentional injuries                          | 4,494<br>(3,752 - 5,826)    | 532<br>(389 - 756)    | 331<br>(275 - 442)     | 2,403<br>(1,905 - 3,270)   | 958<br>(793 - 1,220)     | 269<br>(232 - 328)      |
| Falls                                           | 715<br>(522 - 868)          | 59<br>(39 - 85)       | 29<br>(20 - 37)        | 392<br>(270 - 492)         | 171<br>(115 - 213)       | 64<br>(46 - 79)         |
| Drowning                                        | 1,585<br>(1,235 - 2,483)    | 203<br>(129 - 356)    | 205<br>(156 - 321)     | 932<br>(685 - 1,413)       | 214<br>(140 - 343)       | 31<br>(21 - 49)         |
| Fire, heat, and hot substances                  | 599<br>(480 - 751)          | 89<br>(60 - 135)      | 26<br>(19 - 36)        | 263<br>(203 - 350)         | 163<br>(119 - 212)       | 59<br>(42 - 74)         |
| Poisonings                                      | 716<br>(495 - 1,626)        | 60<br>(34 - 123)      | 26<br>(17 - 44)        | 348<br>(214 - 929)         | 229<br>(159 - 465)       | 54<br>(40 - 91)         |
| Exposure to mechanical forces                   | 280<br>(222 - 376)          | 16<br>(7 - 36)        | 20<br>(15 - 30)        | 209<br>(157 - 281)         | 32<br>(23 - 44)          | 3<br>(2 - 6)            |
| Unintentional firearm injuries                  | 65<br>(46 - 95)             | 1<br>(1 - 1)          | 2<br>(2 - 4)           | 53<br>(35 - 80)            | 7<br>(4 - 12)            | 2<br>(1 - 3)            |
| Unintentional suffocation                       | 59<br>(24 - 101)            | 11<br>(4 - 31)        | 4<br>(2 - 8)           | 39<br>(8 - 72)             | 5<br>(2 - 9)             | 1<br>(0 - 3)            |
| Other exposure to mechanical forces             | 155<br>(120 - 245)          | 4<br>(2 - 8)          | 14<br>(9 - 22)         | 117<br>(87 - 184)          | 20<br>(14 - 29)          | 1<br>(0 - 1)            |
| Adverse effects of medical treatment            | 133<br>(102 - 163)          | 12<br>(8 - 20)        | 2<br>(2 - 3)           | 41<br>(31 - 55)            | 48<br>(32 - 63)          | 28<br>(22 - 39)         |
| Animal contact                                  | 37<br>(12 - 47)             | 5<br>(2 - 8)          | 3<br>(1 - 4)           | 13<br>(5 - 17)             | 14<br>(3 - 20)           | 2<br>(1 - 3)            |
| Venomous animal contact                         | 24<br>(7 - 32)              | 4<br>(1 - 7)          | 2<br>(1 - 3)           | 8<br>(3 - 12)              | 8<br>(2 - 12)            | 1<br>(0 - 1)            |
| Non-venomous animal contact                     | 13<br>(4 - 19)              | 1<br>(0 - 3)          | 1<br>(0 - 1)           | 4<br>(2 - 7)               | 5<br>(1 - 9)             | 1<br>(0 - 2)            |
| Foreign body                                    | 230<br>(96 - 376)           | 77<br>(33 - 128)      | 11<br>(3 - 21)         | 78<br>(25 - 146)           | 40<br>(14 - 71)          | 24<br>(11 - 45)         |
| Pulmonary aspiration and foreign body in airway | 227<br>(93 - 373)           | 77<br>(33 - 127)      | 10<br>(3 - 21)         | 77<br>(24 - 145)           | 39<br>(14 - 70)          | 23<br>(11 - 45)         |
| Foreign body in other body part                 | 3<br>(2 - 6)                | 1<br>(0 - 1)          | 0<br>(0 - 1)           | 1<br>(1 - 3)               | 1<br>(0 - 1)             | 0<br>(0 - 1)            |
| Other unintentional injuries                    | 199<br>(147 - 263)          | 11<br>(6 - 20)        | 10<br>(5 - 18)         | 127<br>(87 - 179)          | 48<br>(28 - 79)          | 3<br>(2 - 5)            |
| Self-harm and interpersonal violence            | 8,348<br>(6,863 - 10,081)   | 28<br>(16 - 46)       | 115<br>(82 - 146)      | 5,915<br>(4,776 - 7,229)   | 1,858<br>(1,493 - 2,301) | 432<br>(360 - 551)      |
| Self-harm                                       | 5,710<br>(4,484 - 6,898)    | --                    | 87<br>(55 - 118)       | 3,979<br>(2,956 - 4,888)   | 1,315<br>(1,042 - 1,649) | 329<br>(271 - 423)      |
| Interpersonal violence                          | 2,637<br>(1,959 - 3,754)    | 28<br>(16 - 46)       | 28<br>(18 - 42)        | 1,936<br>(1,404 - 2,906)   | 543<br>(356 - 801)       | 102<br>(59 - 155)       |
| Assault by firearm                              | 673<br>(269 - 1,214)        | 3<br>(1 - 7)          | 4<br>(2 - 7)           | 511<br>(190 - 944)         | 139<br>(59 - 253)        | 15<br>(7 - 29)          |
| Assault by sharp object                         | 743<br>(433 - 1,122)        | 7<br>(3 - 14)         | 6<br>(3 - 10)          | 571<br>(325 - 896)         | 135<br>(67 - 223)        | 24<br>(12 - 42)         |
| Assault by other means                          | 1,222<br>(819 - 2,063)      | 18<br>(10 - 31)       | 19<br>(12 - 28)        | 854<br>(532 - 1,525)       | 269<br>(168 - 442)       | 63<br>(35 - 96)         |

Web Table 31- Kazakhstan deaths with 95% UI by age, sex, and cause in 2013

| Cause                                                             | Males, All Ages             | Males, 0-4 Years         | Males, 5-14 Years  | Males, 15-49 Years          | Males, 50-69 Years          | Males, 70-80 Years          |
|-------------------------------------------------------------------|-----------------------------|--------------------------|--------------------|-----------------------------|-----------------------------|-----------------------------|
| All causes                                                        | 86,209<br>(77,140 - 98,118) | 4,397<br>(3,873 - 4,977) | 835<br>(765 - 905) | 23,547<br>(20,026 - 28,193) | 33,580<br>(29,098 - 39,326) | 23,849<br>(22,556 - 25,374) |
| Communicable, maternal, neonatal, and nutritional diseases        | 7,765<br>(6,703 - 8,860)    | 2,814<br>(2,444 - 3,200) | 101<br>(79 - 127)  | 2,907<br>(2,277 - 3,579)    | 1,592<br>(1,256 - 1,942)    | 352<br>(281 - 426)          |
| HIV/AIDS and tuberculosis                                         | 2,907<br>(2,111 - 3,799)    | 11<br>(6 - 30)           | 6<br>(3 - 9)       | 2,025<br>(1,433 - 2,644)    | 792<br>(575 - 1,068)        | 73<br>(49 - 114)            |
| Tuberculosis                                                      | 2,009<br>(1,542 - 2,570)    | 7<br>(5 - 10)            | 3<br>(2 - 4)       | 1,349<br>(986 - 1,744)      | 601<br>(445 - 841)          | 49<br>(37 - 80)             |
| HIV/AIDS                                                          | 899<br>(212 - 1,708)        | 4<br>(0 - 23)            | 2<br>(0 - 5)       | 677<br>(167 - 1,271)        | 191<br>(39 - 408)           | 24<br>(4 - 56)              |
| HIV/AIDS resulting in mycobacterial infection                     | 63<br>(15 - 121)            | 0<br>(0 - 1)             | 0<br>(0 - 0)       | 47<br>(12 - 89)             | 13<br>(3 - 29)              | 2<br>(0 - 4)                |
| HIV/AIDS resulting in other diseases                              | 836<br>(196 - 1,577)        | 4<br>(0 - 22)            | 2<br>(0 - 5)       | 630<br>(155 - 1,184)        | 178<br>(37 - 381)           | 23<br>(4 - 52)              |
| Diarrhea, lower respiratory, and other common infectious diseases | 2,658<br>(2,078 - 3,115)    | 827<br>(646 - 1,067)     | 80<br>(60 - 105)   | 753<br>(511 - 1,001)        | 738<br>(490 - 967)          | 260<br>(188 - 333)          |
| Diarrheal diseases                                                | 112<br>(76 - 159)           | 88<br>(53 - 136)         | 2<br>(1 - 4)       | 12<br>(8 - 16)              | 7<br>(5 - 10)               | 3<br>(2 - 4)                |
| Intestinal infectious diseases                                    | 8<br>(4 - 15)               | 3<br>(1 - 7)             | 2<br>(1 - 3)       | 3<br>(1 - 6)                | 1<br>(0 - 2)                | 0<br>(0 - 1)                |
| Typhoid fever                                                     | 5<br>(2 - 9)                | 2<br>(1 - 3)             | 1<br>(0 - 2)       | 2<br>(1 - 4)                | 0<br>(0 - 1)                | 0<br>(0 - 0)                |
| Paratyphoid fever                                                 | 2<br>(1 - 3)                | 1<br>(0 - 1)             | 0<br>(0 - 1)       | 1<br>(0 - 1)                | 0<br>(0 - 0)                | 0<br>(0 - 0)                |
| Other intestinal infectious diseases                              | 2<br>(0 - 6)                | 1<br>(0 - 4)             | 0<br>(0 - 1)       | 0<br>(0 - 3)                | 0<br>(0 - 2)                | 0<br>(0 - 1)                |
| Lower respiratory infections                                      | 2,273<br>(1,678 - 2,717)    | 632<br>(460 - 845)       | 52<br>(34 - 74)    | 651<br>(418 - 878)          | 689<br>(445 - 913)          | 249<br>(178 - 321)          |
| Upper respiratory infections                                      | 3<br>(1 - 7)                | 0<br>(0 - 1)             | 0<br>(0 - 0)       | 1<br>(0 - 3)                | 1<br>(0 - 4)                | 1<br>(0 - 2)                |
| Otitis media                                                      | 5<br>(4 - 6)                | 1<br>(0 - 1)             | 0<br>(0 - 0)       | 2<br>(2 - 3)                | 1<br>(1 - 2)                | 0<br>(0 - 0)                |
| Meningitis                                                        | 150<br>(120 - 188)          | 56<br>(34 - 86)          | 9<br>(6 - 12)      | 53<br>(41 - 68)             | 28<br>(20 - 37)             | 4<br>(3 - 6)                |
| Pneumococcal meningitis                                           | 38<br>(28 - 52)             | 10<br>(6 - 17)           | 2<br>(1 - 4)       | 15<br>(9 - 24)              | 8<br>(4 - 13)               | 1<br>(1 - 2)                |
| H influenzae type B meningitis                                    | 45<br>(32 - 62)             | 28<br>(17 - 43)          | 3<br>(2 - 4)       | 9<br>(6 - 13)               | 4<br>(2 - 7)                | 1<br>(0 - 1)                |
| Meningococcal meningitis                                          | 33<br>(24 - 43)             | 12<br>(7 - 20)           | 2<br>(1 - 3)       | 12<br>(7 - 18)              | 6<br>(3 - 9)                | 1<br>(1 - 2)                |
| Other meningitis                                                  | 35<br>(19 - 49)             | 6<br>(2 - 11)            | 1<br>(0 - 2)       | 17<br>(6 - 26)              | 10<br>(4 - 15)              | 2<br>(1 - 2)                |
| Encephalitis                                                      | 100<br>(74 - 146)           | 45<br>(25 - 77)          | 15<br>(9 - 29)     | 29<br>(19 - 46)             | 10<br>(6 - 16)              | 1<br>(1 - 2)                |
| Diphtheria                                                        | 1<br>(0 - 5)                | 0<br>(0 - 4)             | 0<br>(0 - 1)       | 0<br>(0 - 1)                | 0<br>(0 - 1)                | --<br>(0 - 1)               |
| Whooping cough                                                    | 2<br>(1 - 3)                | 0<br>(0 - 1)             | 0<br>(0 - 0)       | 1<br>(1 - 1)                | 0<br>(0 - 0)                | --<br>(0 - 0)               |
| Tetanus                                                           | 1<br>(0 - 1)                | 0<br>(0 - 0)             | 0<br>(0 - 0)       | 1<br>(0 - 1)                | 0<br>(0 - 0)                | 0<br>(0 - 0)                |
| Measles                                                           | 0<br>(0 - 0)                | 0<br>(0 - 0)             | 0<br>(0 - 0)       | 0<br>(0 - 0)                | 0<br>(0 - 0)                | --<br>(0 - 0)               |
| Varicella and herpes zoster                                       | 3<br>(1 - 8)                | 1<br>(0 - 4)             | 0<br>(0 - 1)       | 1<br>(0 - 2)                | 0<br>(0 - 1)                | 1<br>(0 - 4)                |
| Neglected tropical diseases and malaria                           | 20<br>(15 - 28)             | 5<br>(2 - 11)            | 2<br>(1 - 6)       | 7<br>(5 - 11)               | 4<br>(3 - 8)                | 2<br>(1 - 4)                |
| Leishmaniasis                                                     | 0<br>(0 - 0)                | 0<br>(0 - 0)             | 0<br>(0 - 0)       | 0<br>(0 - 0)                | 0<br>(0 - 0)                | 0<br>(0 - 0)                |
| Visceral leishmaniasis                                            | 0<br>(0 - 0)                | 0<br>(0 - 0)             | 0<br>(0 - 0)       | 0<br>(0 - 0)                | 0<br>(0 - 0)                | 0<br>(0 - 0)                |
| Cysticercosis                                                     | 0<br>(0 - 0)                | 0<br>(0 - 0)             | 0<br>(0 - 0)       | 0<br>(0 - 0)                | 0<br>(0 - 0)                | 0<br>(0 - 0)                |
| Cystic echinococcosis                                             | 3<br>(3 - 4)                | 0<br>(0 - 0)             | 0<br>(0 - 0)       | 2<br>(1 - 2)                | 1<br>(1 - 1)                | 0<br>(0 - 0)                |
| Dengue                                                            | 2<br>(2 - 3)                | 1<br>(0 - 1)             | 0<br>(0 - 1)       | 1<br>(0 - 1)                | 0<br>(0 - 0)                | 0<br>(0 - 0)                |
| Rabies                                                            | 4<br>(2 - 5)                | 0<br>(0 - 0)             | 1<br>(0 - 1)       | 2<br>(1 - 2)                | 1<br>(0 - 1)                | 0<br>(0 - 0)                |
| Intestinal nematode infections                                    | 4<br>(1 - 12)               | 2<br>(0 - 7)             | 1<br>(0 - 4)       | 1<br>(0 - 5)                | 1<br>(0 - 4)                | 0<br>(0 - 2)                |
| Ascariasis                                                        | 4<br>(1 - 12)               | 2<br>(0 - 7)             | 1<br>(0 - 4)       | 1<br>(0 - 5)                | 1<br>(0 - 4)                | 0<br>(0 - 2)                |
| Other neglected tropical diseases                                 | 6<br>(4 - 9)                | 2<br>(1 - 5)             | 0<br>(0 - 0)       | 2<br>(1 - 3)                | 1<br>(1 - 2)                | 1<br>(0 - 1)                |
| Maternal disorders                                                | --                          | --                       | --                 | --                          | --                          | --                          |
| Maternal hemorrhage                                               | --                          | --                       | --                 | --                          | --                          | --                          |
| Maternal sepsis and other maternal infections                     | --                          | --                       | --                 | --                          | --                          | --                          |



Web Table 31- Kazakhstan deaths with 95% UI by age, sex, and cause in 2013

| Cause                                                            | Males, All Ages             | Males, 0-4 Years         | Males, 5-14 Years  | Males, 15-49 Years         | Males, 50-69 Years          | Males, 70-80 Years          |
|------------------------------------------------------------------|-----------------------------|--------------------------|--------------------|----------------------------|-----------------------------|-----------------------------|
| Maternal hypertensive disorders                                  | --                          | --                       | --                 | --                         | --                          | --                          |
| Maternal obstructed labor                                        | --                          | --                       | --                 | --                         | --                          | --                          |
| Maternal abortive outcome                                        | --                          | --                       | --                 | --                         | --                          | --                          |
| Indirect maternal deaths                                         | --                          | --                       | --                 | --                         | --                          | --                          |
| Late maternal deaths                                             | --                          | --                       | --                 | --                         | --                          | --                          |
| Maternal deaths aggravated by HIV/AIDS                           | --                          | --                       | --                 | --                         | --                          | --                          |
| Other maternal disorders                                         | --                          | --                       | --                 | --                         | --                          | --                          |
| Neonatal disorders                                               | 1,883<br>(1,573 - 2,138)    | 1,883<br>(1,573 - 2,138) | --                 | --                         | --                          | --                          |
| Neonatal preterm birth complications                             | 551<br>(229 - 941)          | 551<br>(229 - 941)       | --                 | --                         | --                          | --                          |
| Neonatal encephalopathy due to birth asphyxia and trauma         | 957<br>(536 - 1,352)        | 957<br>(536 - 1,352)     | --                 | --                         | --                          | --                          |
| Neonatal sepsis and other neonatal infections                    | 91<br>(30 - 251)            | 91<br>(30 - 251)         | --                 | --                         | --                          | --                          |
| Hemolytic disease and other neonatal jaundice                    | 7<br>(1 - 18)               | 7<br>(1 - 18)            | --                 | --                         | --                          | --                          |
| Other neonatal disorders                                         | 278<br>(130 - 533)          | 278<br>(130 - 533)       | --                 | --                         | --                          | --                          |
| Nutritional deficiencies                                         | 152<br>(78 - 198)           | 14<br>(8 - 24)           | 3<br>(2 - 5)       | 85<br>(41 - 114)           | 39<br>(19 - 54)             | 11<br>(6 - 16)              |
| Protein-energy malnutrition                                      | 72<br>(34 - 110)            | 10<br>(5 - 18)           | 1<br>(1 - 3)       | 40<br>(16 - 66)            | 19<br>(8 - 31)              | 2<br>(0 - 3)                |
| Iodine deficiency                                                | 1<br>(0 - 4)                | 0<br>(0 - 1)             | 0<br>(0 - 0)       | 1<br>(0 - 3)               | 0<br>(0 - 2)                | 0<br>(0 - 1)                |
| Iron-deficiency anemia                                           | 67<br>(26 - 105)            | 3<br>(1 - 7)             | 1<br>(0 - 3)       | 38<br>(12 - 61)            | 17<br>(6 - 28)              | 9<br>(4 - 13)               |
| Other nutritional deficiencies                                   | 11<br>(3 - 18)              | 1<br>(0 - 2)             | 1<br>(0 - 1)       | 6<br>(1 - 11)              | 3<br>(1 - 5)                | 1<br>(0 - 1)                |
| Other communicable, maternal, neonatal, and nutritional diseases | 145<br>(94 - 232)           | 74<br>(30 - 156)         | 10<br>(6 - 16)     | 36<br>(27 - 47)            | 19<br>(14 - 25)             | 6<br>(4 - 8)                |
| Sexually transmitted diseases excluding HIV                      | 58<br>(12 - 142)            | 52<br>(9 - 130)          | 4<br>(1 - 9)       | 1<br>(1 - 3)               | 1<br>(0 - 3)                | 0<br>(0 - 1)                |
| Syphilis                                                         | 57<br>(11 - 141)            | 52<br>(9 - 130)          | 4<br>(1 - 9)       | 1<br>(0 - 2)               | 1<br>(0 - 2)                | 0<br>(0 - 1)                |
| Chlamydial infection                                             | --                          | --                       | --                 | --                         | --                          | --                          |
| Gonococcal infection                                             | 1<br>(0 - 1)                | --                       | 0<br>(0 - 0)       | 0<br>(0 - 1)               | 0<br>(0 - 0)                | 0<br>(0 - 0)                |
| Other sexually transmitted diseases                              | 0<br>(0 - 1)                | --                       | 0<br>(0 - 0)       | 0<br>(0 - 1)               | 0<br>(0 - 0)                | 0<br>(0 - 0)                |
| Hepatitis                                                        | 48<br>(38 - 61)             | 10<br>(5 - 17)           | 4<br>(2 - 6)       | 23<br>(16 - 31)            | 9<br>(6 - 14)               | 3<br>(2 - 4)                |
| Acute hepatitis A                                                | 5<br>(1 - 10)               | 2<br>(0 - 5)             | 1<br>(0 - 2)       | 2<br>(0 - 4)               | 0<br>(0 - 1)                | 0<br>(0 - 0)                |
| Acute hepatitis B                                                | 33<br>(24 - 45)             | 8<br>(4 - 13)            | 2<br>(1 - 3)       | 13<br>(8 - 20)             | 8<br>(5 - 12)               | 2<br>(2 - 4)                |
| Acute hepatitis C                                                | 3<br>(1 - 7)                | --                       | 0<br>(0 - 1)       | 2<br>(0 - 5)               | 1<br>(0 - 2)                | 0<br>(0 - 0)                |
| Acute hepatitis E                                                | 7<br>(4 - 12)               | 0<br>(0 - 0)             | 0<br>(0 - 1)       | 6<br>(3 - 10)              | 1<br>(0 - 2)                | 0<br>(0 - 0)                |
| Other infectious diseases                                        | 39<br>(22 - 52)             | 13<br>(6 - 20)           | 2<br>(1 - 4)       | 12<br>(7 - 17)             | 9<br>(5 - 13)               | 3<br>(2 - 4)                |
| Non-communicable diseases                                        | 64,416<br>(57,083 - 73,377) | 1,150<br>(901 - 1,451)   | 218<br>(184 - 253) | 10,923<br>(9,041 - 13,322) | 29,107<br>(24,989 - 34,151) | 23,018<br>(21,749 - 24,484) |
| Neoplasms                                                        | 12,202<br>(10,507 - 14,227) | 58<br>(39 - 85)          | 77<br>(63 - 93)    | 1,679<br>(1,349 - 2,094)   | 7,084<br>(5,987 - 8,421)    | 3,304<br>(2,983 - 3,680)    |
| Esophageal cancer                                                | 1,058<br>(753 - 1,683)      | --                       | --                 | 88<br>(53 - 152)           | 609<br>(421 - 977)          | 360<br>(258 - 561)          |
| Stomach cancer                                                   | 1,720<br>(1,452 - 2,041)    | --                       | --                 | 246<br>(192 - 311)         | 998<br>(819 - 1,229)        | 476<br>(402 - 561)          |
| Liver cancer                                                     | 744<br>(607 - 907)          | --                       | 1<br>(1 - 2)       | 87<br>(63 - 121)           | 449<br>(351 - 573)          | 207<br>(163 - 259)          |
| Liver cancer due to hepatitis B                                  | 304<br>(230 - 389)          | --                       | 0<br>(0 - 1)       | 43<br>(30 - 60)            | 191<br>(138 - 254)          | 70<br>(49 - 95)             |
| Liver cancer due to hepatitis C                                  | 257<br>(191 - 337)          | --                       | 0<br>(0 - 0)       | 27<br>(17 - 39)            | 154<br>(110 - 209)          | 76<br>(55 - 101)            |
| Liver cancer due to alcohol use                                  | 151<br>(105 - 206)          | --                       | --                 | 12<br>(7 - 19)             | 85<br>(56 - 120)            | 54<br>(36 - 76)             |
| Liver cancer due to other causes                                 | 32<br>(19 - 48)             | --                       | 0<br>(0 - 1)       | 6<br>(3 - 9)               | 19<br>(11 - 29)             | 7<br>(4 - 11)               |
| Larynx cancer                                                    | 318<br>(247 - 515)          | --                       | --                 | 41<br>(29 - 78)            | 214<br>(162 - 345)          | 63<br>(48 - 89)             |

Web Table 31- Kazakhstan deaths with 95% UI by age, sex, and cause in 2013

| Cause                                         | Males, All Ages             | Males, 0-4 Years | Males, 5-14 Years | Males, 15-49 Years       | Males, 50-69 Years          | Males, 70-80 Years          |
|-----------------------------------------------|-----------------------------|------------------|-------------------|--------------------------|-----------------------------|-----------------------------|
| Tracheal, bronchus and lung cancer            | 3,411<br>(2,902 - 4,042)    | --               | --                | 324<br>(250 - 413)       | 2,282<br>(1,876 - 2,770)    | 805<br>(684 - 935)          |
| Breast cancer                                 | 3<br>(2 - 4)                | --               | --                | 1<br>(1 - 2)             | 1<br>(1 - 2)                | 0<br>(0 - 1)                |
| Cervical cancer                               | --                          | --               | --                | --                       | --                          | --                          |
| Uterine cancer                                | --                          | --               | --                | --                       | --                          | --                          |
| Prostate cancer                               | 490<br>(306 - 764)          | --               | --                | 12<br>(7 - 18)           | 192<br>(119 - 308)          | 287<br>(175 - 447)          |
| Colon and rectum cancer                       | 1,046<br>(913 - 1,205)      | --               | --                | 128<br>(102 - 160)       | 529<br>(438 - 631)          | 389<br>(330 - 450)          |
| Lip and oral cavity cancer                    | 297<br>(188 - 375)          | --               | --                | 46<br>(30 - 62)          | 185<br>(112 - 240)          | 66<br>(43 - 81)             |
| Nasopharynx cancer                            | 44<br>(36 - 54)             | --               | 0<br>(0 - 0)      | 16<br>(12 - 20)          | 23<br>(18 - 29)             | 5<br>(4 - 6)                |
| Other pharynx cancer                          | 156<br>(119 - 193)          | --               | --                | 27<br>(19 - 36)          | 106<br>(79 - 135)           | 23<br>(18 - 29)             |
| Gallbladder and biliary tract cancer          | 107<br>(73 - 137)           | --               | --                | 11<br>(7 - 16)           | 61<br>(41 - 84)             | 34<br>(22 - 46)             |
| Pancreatic cancer                             | 545<br>(465 - 647)          | --               | --                | 83<br>(65 - 104)         | 346<br>(284 - 421)          | 117<br>(98 - 140)           |
| Malignant skin melanoma                       | 125<br>(75 - 236)           | --               | --                | 37<br>(22 - 68)          | 58<br>(34 - 111)            | 30<br>(19 - 61)             |
| Non-melanoma skin cancer                      | 25<br>(13 - 37)             | --               | --                | 6<br>(3 - 10)            | 11<br>(6 - 18)              | 8<br>(4 - 13)               |
| Ovarian cancer                                | --                          | --               | --                | --                       | --                          | --                          |
| Testicular cancer                             | 28<br>(21 - 45)             | --               | --                | 14<br>(10 - 22)          | 9<br>(6 - 17)               | 5<br>(3 - 10)               |
| Kidney cancer                                 | 402<br>(335 - 475)          | 5<br>(3 - 7)     | 2<br>(2 - 3)      | 62<br>(48 - 78)          | 248<br>(201 - 302)          | 86<br>(71 - 101)            |
| Bladder cancer                                | 371<br>(312 - 454)          | --               | --                | 31<br>(24 - 43)          | 185<br>(150 - 232)          | 156<br>(130 - 189)          |
| Brain and nervous system cancer               | 207<br>(63 - 292)           | 7<br>(2 - 14)    | 14<br>(4 - 21)    | 84<br>(28 - 122)         | 91<br>(21 - 137)            | 11<br>(3 - 15)              |
| Thyroid cancer                                | 35<br>(24 - 45)             | --               | 0<br>(0 - 0)      | 9<br>(7 - 12)            | 19<br>(12 - 25)             | 7<br>(4 - 9)                |
| Mesothelioma                                  | 37<br>(25 - 48)             | --               | --                | 8<br>(5 - 12)            | 23<br>(15 - 32)             | 5<br>(4 - 7)                |
| Hodgkin lymphoma                              | 47<br>(27 - 70)             | 1<br>(0 - 2)     | 3<br>(1 - 7)      | 21<br>(11 - 35)          | 19<br>(9 - 32)              | 4<br>(2 - 6)                |
| Non-Hodgkin lymphoma                          | 252<br>(189 - 347)          | 6<br>(3 - 10)    | 10<br>(7 - 14)    | 77<br>(55 - 119)         | 112<br>(78 - 158)           | 47<br>(28 - 63)             |
| Multiple myeloma                              | 53<br>(35 - 83)             | --               | --                | 11<br>(7 - 19)           | 31<br>(20 - 50)             | 11<br>(7 - 18)              |
| Leukemia                                      | 344<br>(295 - 404)          | 26<br>(17 - 39)  | 34<br>(25 - 44)   | 114<br>(92 - 142)        | 122<br>(98 - 149)           | 49<br>(40 - 58)             |
| Other neoplasms                               | 337<br>(204 - 618)          | 14<br>(7 - 27)   | 13<br>(8 - 22)    | 96<br>(57 - 176)         | 160<br>(88 - 323)           | 55<br>(33 - 109)            |
| Cardiovascular diseases                       | 38,516<br>(34,205 - 43,570) | 24<br>(18 - 31)  | 19<br>(15 - 23)   | 5,764<br>(4,749 - 7,055) | 16,839<br>(14,384 - 19,726) | 15,872<br>(14,979 - 16,947) |
| Rheumatic heart disease                       | 327<br>(234 - 590)          | 1<br>(0 - 1)     | 2<br>(1 - 4)      | 163<br>(107 - 319)       | 145<br>(96 - 254)           | 16<br>(10 - 28)             |
| Ischemic heart disease                        | 24,644<br>(21,396 - 28,129) | 4<br>(3 - 6)     | 4<br>(3 - 5)      | 3,798<br>(3,056 - 4,658) | 10,822<br>(9,012 - 12,810)  | 10,016<br>(9,084 - 10,960)  |
| Cerebrovascular disease                       | 11,473<br>(9,489 - 13,817)  | 5<br>(4 - 7)     | 5<br>(4 - 7)      | 1,300<br>(965 - 1,773)   | 4,885<br>(3,891 - 6,039)    | 5,277<br>(4,372 - 6,223)    |
| Ischemic stroke                               | 6,575<br>(5,235 - 8,083)    | 1<br>(1 - 2)     | 1<br>(1 - 2)      | 381<br>(251 - 560)       | 2,464<br>(1,879 - 3,194)    | 3,727<br>(3,007 - 4,535)    |
| Hemorrhagic stroke                            | 4,898<br>(3,582 - 6,271)    | 4<br>(3 - 6)     | 4<br>(3 - 5)      | 918<br>(645 - 1,256)     | 2,421<br>(1,752 - 3,198)    | 1,550<br>(1,024 - 2,096)    |
| Hypertensive heart disease                    | 1,033<br>(565 - 1,472)      | 0<br>(0 - 1)     | 0<br>(0 - 0)      | 157<br>(87 - 231)        | 524<br>(275 - 775)          | 351<br>(173 - 530)          |
| Cardiomyopathy and myocarditis                | 292<br>(150 - 420)          | 5<br>(3 - 8)     | 3<br>(2 - 5)      | 95<br>(44 - 149)         | 136<br>(60 - 208)           | 52<br>(30 - 79)             |
| Atrial fibrillation and flutter               | 1<br>(1 - 2)                | --               | --                | 1<br>(0 - 1)             | 0<br>(0 - 1)                | 0<br>(0 - 0)                |
| Aortic aneurysm                               | 77<br>(48 - 114)            | --               | --                | 17<br>(8 - 27)           | 36<br>(21 - 53)             | 24<br>(14 - 43)             |
| Peripheral vascular disease                   | 24<br>(14 - 35)             | --               | --                | 3<br>(1 - 6)             | 13<br>(7 - 20)              | 7<br>(5 - 11)               |
| Endocarditis                                  | 32<br>(18 - 48)             | 3<br>(2 - 5)     | 0<br>(0 - 1)      | 4<br>(2 - 7)             | 16<br>(8 - 26)              | 8<br>(5 - 13)               |
| Other cardiovascular and circulatory diseases | 613<br>(313 - 812)          | 6<br>(3 - 8)     | 4<br>(2 - 5)      | 225<br>(99 - 316)        | 260<br>(132 - 358)          | 119<br>(69 - 162)           |
| Chronic respiratory diseases                  | 4,034<br>(3,459 - 5,027)    | 6<br>(4 - 9)     | 4<br>(3 - 5)      | 469<br>(365 - 599)       | 1,760<br>(1,452 - 2,257)    | 1,795<br>(1,552 - 2,274)    |
| Chronic obstructive pulmonary disease         | 3,455<br>(2,883 - 4,348)    | 3<br>(1 - 4)     | 2<br>(1 - 3)      | 386<br>(287 - 492)       | 1,505<br>(1,192 - 1,932)    | 1,559<br>(1,318 - 2,000)    |

Web Table 31- Kazakhstan deaths with 95% UI by age, sex, and cause in 2013

| Cause                                               | Males, All Ages          | Males, 0-4 Years | Males, 5-14 Years | Males, 15-49 Years       | Males, 50-69 Years       | Males, 70-80 Years     |
|-----------------------------------------------------|--------------------------|------------------|-------------------|--------------------------|--------------------------|------------------------|
| Pneumoconiosis                                      | 212<br>(71 - 543)        | 0<br>(0 - 1)     | 0<br>(0 - 1)      | 23<br>(7 - 60)           | 106<br>(36 - 274)        | 83<br>(28 - 220)       |
| Silicosis                                           | 37<br>(11 - 80)          | 0<br>(0 - 0)     | 0<br>(0 - 0)      | 8<br>(2 - 17)            | 26<br>(8 - 58)           | 3<br>(1 - 7)           |
| Asbestosis                                          | 68<br>(22 - 177)         | 0<br>(0 - 0)     | 0<br>(0 - 0)      | 6<br>(1 - 17)            | 23<br>(7 - 63)           | 39<br>(13 - 98)        |
| Coal workers pneumoconiosis                         | 46<br>(13 - 155)         | 0<br>(0 - 0)     | 0<br>(0 - 0)      | 2<br>(0 - 9)             | 22<br>(5 - 73)           | 22<br>(6 - 69)         |
| Other pneumoconiosis                                | 61<br>(20 - 171)         | 0<br>(0 - 0)     | 0<br>(0 - 0)      | 8<br>(2 - 23)            | 35<br>(11 - 97)          | 19<br>(6 - 55)         |
| Asthma                                              | 178<br>(111 - 338)       | 1<br>(0 - 1)     | 1<br>(1 - 2)      | 32<br>(18 - 66)          | 75<br>(44 - 148)         | 69<br>(40 - 129)       |
| Interstitial lung disease and pulmonary sarcoidosis | 135<br>(82 - 224)        | 0<br>(0 - 1)     | 0<br>(0 - 0)      | 6<br>(3 - 13)            | 52<br>(29 - 92)          | 76<br>(44 - 129)       |
| Other chronic respiratory diseases                  | 54<br>(31 - 98)          | 2<br>(1 - 3)     | 0<br>(0 - 1)      | 22<br>(11 - 42)          | 23<br>(12 - 43)          | 7<br>(4 - 13)          |
| Cirrhosis                                           | 3,809<br>(3,170 - 4,584) | 3<br>(2 - 5)     | 7<br>(5 - 8)      | 1,512<br>(1,204 - 1,900) | 1,838<br>(1,506 - 2,236) | 449<br>(386 - 522)     |
| Cirrhosis due to hepatitis B                        | 1,607<br>(1,007 - 2,187) | 0<br>(0 - 1)     | 2<br>(1 - 3)      | 648<br>(379 - 926)       | 779<br>(486 - 1,082)     | 177<br>(113 - 238)     |
| Cirrhosis due to hepatitis C                        | 727<br>(421 - 1,168)     | 0<br>(0 - 0)     | 1<br>(0 - 2)      | 304<br>(161 - 503)       | 335<br>(172 - 557)       | 87<br>(46 - 135)       |
| Cirrhosis due to alcohol use                        | 1,093<br>(721 - 1,537)   | --               | --                | 345<br>(186 - 522)       | 586<br>(390 - 839)       | 161<br>(111 - 218)     |
| Cirrhosis due to other causes                       | 382<br>(239 - 555)       | 3<br>(2 - 4)     | 4<br>(2 - 5)      | 214<br>(128 - 324)       | 138<br>(76 - 218)        | 23<br>(13 - 36)        |
| Digestive diseases                                  | 1,232<br>(998 - 1,500)   | 12<br>(8 - 19)   | 10<br>(7 - 13)    | 471<br>(369 - 593)       | 521<br>(405 - 653)       | 218<br>(181 - 255)     |
| Peptic ulcer disease                                | 538<br>(376 - 725)       | 0<br>(0 - 0)     | 0<br>(0 - 1)      | 207<br>(137 - 288)       | 250<br>(168 - 343)       | 81<br>(52 - 108)       |
| Gastritis and duodenitis                            | 12<br>(3 - 20)           | 0<br>(0 - 1)     | 0<br>(0 - 0)      | 6<br>(1 - 11)            | 3<br>(1 - 6)             | 2<br>(1 - 3)           |
| Appendicitis                                        | 43<br>(26 - 62)          | 2<br>(1 - 4)     | 3<br>(1 - 4)      | 22<br>(13 - 33)          | 12<br>(6 - 19)           | 5<br>(3 - 8)           |
| Paralytic ileus and intestinal obstruction          | 183<br>(122 - 348)       | 6<br>(3 - 12)    | 4<br>(3 - 7)      | 77<br>(49 - 146)         | 68<br>(41 - 139)         | 29<br>(18 - 54)        |
| Inguinal, femoral, and abdominal hernia             | 23<br>(12 - 40)          | 1<br>(0 - 2)     | 0<br>(0 - 1)      | 6<br>(3 - 10)            | 8<br>(4 - 14)            | 8<br>(4 - 15)          |
| Inflammatory bowel disease                          | 31<br>(12 - 57)          | 1<br>(0 - 3)     | 1<br>(0 - 1)      | 12<br>(4 - 24)           | 11<br>(4 - 21)           | 6<br>(3 - 11)          |
| Vascular intestinal disorders                       | 27<br>(9 - 61)           | 0<br>(0 - 1)     | 0<br>(0 - 1)      | 8<br>(2 - 18)            | 14<br>(5 - 31)           | 5<br>(2 - 11)          |
| Gallbladder and biliary diseases                    | 179<br>(123 - 228)       | 0<br>(0 - 0)     | 0<br>(0 - 0)      | 38<br>(23 - 52)          | 77<br>(49 - 104)         | 63<br>(45 - 85)        |
| Pancreatitis                                        | 140<br>(55 - 267)        | 1<br>(0 - 1)     | 0<br>(0 - 1)      | 73<br>(27 - 136)         | 54<br>(20 - 105)         | 12<br>(5 - 30)         |
| Other digestive diseases                            | 56<br>(37 - 76)          | 0<br>(0 - 0)     | 0<br>(0 - 0)      | 23<br>(14 - 33)          | 26<br>(15 - 38)          | 7<br>(5 - 11)          |
| Neurological disorders                              | 1,445<br>(1,180 - 1,783) | 8<br>(5 - 14)    | 17<br>(11 - 23)   | 186<br>(129 - 250)       | 196<br>(150 - 252)       | 1,038<br>(822 - 1,308) |
| Alzheimer disease and other dementias               | 1,120<br>(885 - 1,426)   | --               | --                | 1<br>(0 - 2)             | 122<br>(83 - 169)        | 998<br>(781 - 1,268)   |
| Parkinson disease                                   | 57<br>(43 - 71)          | --               | --                | 3<br>(2 - 4)             | 25<br>(17 - 34)          | 30<br>(21 - 39)        |
| Epilepsy                                            | 223<br>(147 - 298)       | 6<br>(3 - 12)    | 15<br>(10 - 21)   | 162<br>(104 - 223)       | 36<br>(21 - 50)          | 4<br>(3 - 6)           |
| Multiple sclerosis                                  | 23<br>(14 - 54)          | --               | --                | 12<br>(6 - 27)           | 7<br>(4 - 15)            | 4<br>(2 - 12)          |
| Other neurological disorders                        | 21<br>(17 - 30)          | 2<br>(1 - 3)     | 2<br>(1 - 2)      | 9<br>(7 - 14)            | 7<br>(5 - 10)            | 2<br>(1 - 2)           |
| Mental and substance use disorders                  | 383<br>(279 - 634)       | 0<br>(0 - 0)     | 0<br>(0 - 0)      | 213<br>(150 - 387)       | 160<br>(106 - 255)       | 9<br>(6 - 15)          |
| Schizophrenia                                       | 26<br>(14 - 46)          | --               | --                | 18<br>(9 - 33)           | 8<br>(4 - 15)            | 1<br>(0 - 2)           |
| Alcohol use disorders                               | 315<br>(216 - 539)       | --               | --                | 162<br>(107 - 295)       | 146<br>(89 - 238)        | 7<br>(4 - 12)          |
| Drug use disorders                                  | 41<br>(27 - 103)         | 0<br>(0 - 0)     | --                | 33<br>(22 - 81)          | 7<br>(4 - 16)            | 1<br>(1 - 2)           |
| Opioid use disorders                                | 9<br>(6 - 22)            | 0<br>(0 - 0)     | --                | 7<br>(5 - 17)            | 1<br>(1 - 3)             | 0<br>(0 - 1)           |
| Cocaine use disorders                               | 1<br>(1 - 2)             | 0<br>(0 - 0)     | --                | 1<br>(0 - 2)             | 0<br>(0 - 0)             | 0<br>(0 - 0)           |
| Amphetamine use disorders                           | 1<br>(1 - 2)             | 0<br>(0 - 0)     | --                | 1<br>(0 - 2)             | 0<br>(0 - 0)             | 0<br>(0 - 0)           |
| Other drug use disorders                            | 30<br>(20 - 76)          | 0<br>(0 - 0)     | --                | 24<br>(16 - 60)          | 5<br>(3 - 12)            | 1<br>(0 - 2)           |
| Eating disorders                                    | 1<br>(0 - 1)             | --               | 0<br>(0 - 1)      | 1<br>(0 - 1)             | --                       | --                     |
| Anorexia nervosa                                    | 1<br>(0 - 1)             | --               | 0<br>(0 - 0)      | 1<br>(0 - 1)             | --                       | --                     |

Web Table 31- Kazakhstan deaths with 95% UI by age, sex, and cause in 2013

| Cause                                               | Males, All Ages          | Males, 0-4 Years     | Males, 5-14 Years | Males, 15-49 Years | Males, 50-69 Years | Males, 70-80 Years |
|-----------------------------------------------------|--------------------------|----------------------|-------------------|--------------------|--------------------|--------------------|
| Diabetes, urogenital, blood, and endocrine diseases | 1,574<br>(1,318 - 1,987) | 40<br>(28 - 56)      | 24<br>(18 - 29)   | 525<br>(415 - 708) | 663<br>(544 - 829) | 322<br>(278 - 421) |
| Diabetes mellitus                                   | 533<br>(456 - 630)       | 1<br>(0 - 1)         | 3<br>(2 - 4)      | 116<br>(92 - 146)  | 280<br>(227 - 340) | 133<br>(112 - 157) |
| Acute glomerulonephritis                            | 7<br>(5 - 11)            | 0<br>(0 - 0)         | 0<br>(0 - 0)      | 4<br>(3 - 7)       | 2<br>(1 - 3)       | 1<br>(0 - 1)       |
| Chronic kidney disease                              | 462<br>(352 - 906)       | 5<br>(3 - 9)         | 6<br>(4 - 10)     | 194<br>(142 - 394) | 179<br>(132 - 362) | 79<br>(60 - 163)   |
| Chronic kidney disease due to diabetes mellitus     | 33<br>(7 - 57)           | 0<br>(0 - 1)         | 1<br>(0 - 1)      | 12<br>(4 - 23)     | 16<br>(3 - 28)     | 4<br>(1 - 7)       |
| Chronic kidney disease due to hypertension          | 89<br>(49 - 154)         | 2<br>(0 - 3)         | 1<br>(0 - 2)      | 29<br>(13 - 55)    | 34<br>(16 - 61)    | 23<br>(11 - 47)    |
| Chronic kidney disease due to glomerulonephritis    | 188<br>(126 - 323)       | 1<br>(0 - 3)         | 2<br>(1 - 3)      | 90<br>(56 - 162)   | 70<br>(46 - 106)   | 26<br>(16 - 44)    |
| Chronic kidney disease due to other causes          | 152<br>(91 - 472)        | 2<br>(1 - 5)         | 3<br>(1 - 5)      | 63<br>(33 - 188)   | 59<br>(31 - 195)   | 26<br>(12 - 76)    |
| Urinary diseases and male infertility               | 327<br>(271 - 428)       | 2<br>(1 - 3)         | 2<br>(2 - 3)      | 101<br>(78 - 136)  | 132<br>(104 - 177) | 90<br>(70 - 132)   |
| Interstitial nephritis and urinary tract infections | 266<br>(217 - 337)       | 2<br>(1 - 3)         | 1<br>(1 - 2)      | 85<br>(66 - 112)   | 106<br>(81 - 141)  | 72<br>(55 - 99)    |
| Urolithiasis                                        | 22<br>(14 - 39)          | --                   | 0<br>(0 - 0)      | 5<br>(3 - 9)       | 11<br>(6 - 19)     | 7<br>(3 - 13)      |
| Other urinary diseases                              | 39<br>(25 - 73)          | 0<br>(0 - 1)         | 0<br>(0 - 1)      | 11<br>(7 - 19)     | 15<br>(9 - 30)     | 12<br>(7 - 27)     |
| Gynecological diseases                              | --                       | --                   | --                | --                 | --                 | --                 |
| Uterine fibroids                                    | --                       | --                   | --                | --                 | --                 | --                 |
| Polycystic ovarian syndrome                         | --                       | --                   | --                | --                 | --                 | --                 |
| Endometriosis                                       | --                       | --                   | --                | --                 | --                 | --                 |
| Genital prolapse                                    | --                       | --                   | --                | --                 | --                 | --                 |
| Other gynecological diseases                        | --                       | --                   | --                | --                 | --                 | --                 |
| Hemoglobinopathies and hemolytic anemias            | 59<br>(34 - 86)          | 10<br>(5 - 16)       | 5<br>(3 - 7)      | 34<br>(19 - 52)    | 8<br>(4 - 12)      | 2<br>(1 - 3)       |
| Thalassemias                                        | 24<br>(14 - 35)          | 8<br>(4 - 14)        | 4<br>(2 - 6)      | 11<br>(6 - 17)     | 0<br>(0 - 0)       | 0<br>(0 - 0)       |
| Sickle cell disorders                               | 2<br>(1 - 2)             | 0<br>(0 - 0)         | 0<br>(0 - 0)      | 1<br>(1 - 2)       | 0<br>(0 - 0)       | 0<br>(0 - 0)       |
| G6PD deficiency                                     | 1<br>(1 - 2)             | 0<br>(0 - 0)         | 0<br>(0 - 0)      | 1<br>(0 - 1)       | 0<br>(0 - 0)       | 0<br>(0 - 0)       |
| Other hemoglobinopathies and hemolytic anemias      | 33<br>(19 - 49)          | 1<br>(1 - 2)         | 1<br>(0 - 1)      | 21<br>(12 - 33)    | 8<br>(4 - 12)      | 2<br>(1 - 3)       |
| Endocrine, metabolic, blood, and immune disorders   | 185<br>(76 - 239)        | 23<br>(13 - 34)      | 7<br>(4 - 11)     | 76<br>(30 - 102)   | 62<br>(21 - 86)    | 17<br>(6 - 24)     |
| Musculoskeletal disorders                           | 40<br>(27 - 101)         | --                   | 5<br>(3 - 11)     | 17<br>(11 - 44)    | 14<br>(9 - 34)     | 4<br>(3 - 11)      |
| Rheumatoid arthritis                                | 6<br>(3 - 12)            | --                   | 0<br>(0 - 1)      | 2<br>(1 - 4)       | 3<br>(1 - 5)       | 1<br>(1 - 3)       |
| Other musculoskeletal disorders                     | 33<br>(21 - 90)          | --                   | 4<br>(3 - 10)     | 15<br>(9 - 40)     | 11<br>(6 - 29)     | 3<br>(2 - 8)       |
| Other non-communicable diseases                     | 1,180<br>(938 - 1,455)   | 999<br>(764 - 1,264) | 57<br>(42 - 77)   | 87<br>(66 - 113)   | 31<br>(21 - 41)    | 7<br>(5 - 9)       |
| Congenital anomalies                                | 1,156<br>(909 - 1,440)   | 979<br>(748 - 1,247) | 57<br>(42 - 76)   | 85<br>(65 - 111)   | 29<br>(20 - 39)    | 6<br>(4 - 8)       |
| Neural tube defects                                 | 85<br>(32 - 188)         | 76<br>(25 - 181)     | 4<br>(2 - 7)      | 3<br>(2 - 5)       | 1<br>(0 - 2)       | 1<br>(0 - 2)       |
| Congenital heart anomalies                          | 811<br>(600 - 1,034)     | 665<br>(470 - 894)   | 48<br>(35 - 64)   | 74<br>(56 - 97)    | 21<br>(14 - 29)    | 2<br>(1 - 4)       |
| Cleft lip and cleft palate                          | 5<br>(2 - 12)            | 5<br>(2 - 12)        | --                | --                 | --                 | --                 |
| Down syndrome                                       | 18<br>(8 - 34)           | 15<br>(6 - 31)       | 1<br>(0 - 1)      | 2<br>(1 - 3)       | 0<br>(0 - 1)       | 0<br>(0 - 0)       |
| Chromosomal unbalanced rearrangements               | 3<br>(2 - 5)             | 1<br>(0 - 3)         | 0<br>(0 - 0)      | 1<br>(0 - 2)       | 1<br>(0 - 1)       | 0<br>(0 - 0)       |
| Other congenital anomalies                          | 234<br>(144 - 369)       | 217<br>(129 - 352)   | 4<br>(1 - 9)      | 5<br>(3 - 8)       | 6<br>(4 - 10)      | 2<br>(2 - 4)       |
| Skin and subcutaneous diseases                      | 6<br>(5 - 8)             | 1<br>(1 - 2)         | 0<br>(0 - 0)      | 2<br>(1 - 3)       | 2<br>(1 - 2)       | 1<br>(0 - 1)       |
| Cellulitis                                          | 2<br>(1 - 2)             | 0<br>(0 - 0)         | 0<br>(0 - 0)      | 1<br>(0 - 1)       | 1<br>(0 - 1)       | 0<br>(0 - 0)       |
| Pyoderma                                            | 3<br>(2 - 5)             | 1<br>(1 - 2)         | 0<br>(0 - 0)      | 1<br>(1 - 1)       | 1<br>(1 - 1)       | 0<br>(0 - 0)       |
| Decubitus ulcer                                     | 1<br>(0 - 1)             | 0<br>(0 - 0)         | 0<br>(0 - 0)      | 0<br>(0 - 0)       | 0<br>(0 - 0)       | 0<br>(0 - 0)       |
| Other skin and subcutaneous diseases                | 0<br>(0 - 1)             | 0<br>(0 - 0)         | 0<br>(0 - 0)      | 0<br>(0 - 0)       | 0<br>(0 - 0)       | 0<br>(0 - 0)       |

Web Table 31- Kazakhstan deaths with 95% UI by age, sex, and cause in 2013

| Cause                                           | Males, All Ages             | Males, 0-4 Years   | Males, 5-14 Years  | Males, 15-49 Years        | Males, 50-69 Years       | Males, 70-80 Years |
|-------------------------------------------------|-----------------------------|--------------------|--------------------|---------------------------|--------------------------|--------------------|
| Sudden infant death syndrome                    | 19<br>(4 - 65)              | 19<br>(4 - 65)     | --                 | --                        | --                       | --                 |
| Injuries                                        | 14,028<br>(11,765 - 16,760) | 433<br>(306 - 591) | 516<br>(457 - 576) | 9,718<br>(8,042 - 11,858) | 2,882<br>(2,342 - 3,513) | 479<br>(408 - 551) |
| Transport injuries                              | 3,700<br>(2,899 - 4,543)    | 89<br>(49 - 132)   | 194<br>(139 - 241) | 2,644<br>(2,067 - 3,326)  | 671<br>(472 - 849)       | 101<br>(81 - 123)  |
| Road injuries                                   | 3,402<br>(2,653 - 4,191)    | 78<br>(44 - 117)   | 182<br>(129 - 229) | 2,425<br>(1,911 - 3,047)  | 622<br>(436 - 789)       | 95<br>(76 - 114)   |
| Pedestrian road injuries                        | 581<br>(359 - 822)          | 29<br>(14 - 50)    | 72<br>(44 - 105)   | 292<br>(161 - 448)        | 146<br>(80 - 223)        | 40<br>(27 - 56)    |
| Cyclist road injuries                           | 132<br>(78 - 219)           | 8<br>(3 - 19)      | 16<br>(8 - 34)     | 60<br>(34 - 99)           | 40<br>(23 - 66)          | 7<br>(4 - 13)      |
| Motorcyclist road injuries                      | 547<br>(363 - 811)          | 3<br>(2 - 6)       | 7<br>(4 - 11)      | 477<br>(314 - 714)        | 56<br>(31 - 91)          | 4<br>(2 - 6)       |
| Motor vehicle road injuries                     | 2,108<br>(1,522 - 2,663)    | 35<br>(18 - 58)    | 82<br>(53 - 112)   | 1,579<br>(1,131 - 2,042)  | 371<br>(244 - 484)       | 41<br>(28 - 57)    |
| Other road injuries                             | 35<br>(8 - 57)              | 2<br>(0 - 5)       | 5<br>(1 - 11)      | 17<br>(4 - 31)            | 8<br>(2 - 16)            | 2<br>(1 - 5)       |
| Other transport injuries                        | 297<br>(190 - 404)          | 10<br>(5 - 19)     | 12<br>(7 - 20)     | 219<br>(131 - 306)        | 49<br>(28 - 75)          | 6<br>(4 - 10)      |
| Unintentional injuries                          | 3,467<br>(2,820 - 4,602)    | 329<br>(224 - 471) | 238<br>(194 - 323) | 2,038<br>(1,588 - 2,812)  | 731<br>(584 - 946)       | 131<br>(109 - 159) |
| Falls                                           | 558<br>(373 - 695)          | 36<br>(21 - 58)    | 22<br>(15 - 30)    | 338<br>(221 - 437)        | 133<br>(84 - 172)        | 29<br>(18 - 37)    |
| Drowning                                        | 1,289<br>(977 - 2,015)      | 129<br>(72 - 230)  | 148<br>(108 - 239) | 817<br>(584 - 1,279)      | 177<br>(110 - 289)       | 18<br>(12 - 29)    |
| Fire, heat, and hot substances                  | 424<br>(322 - 565)          | 51<br>(29 - 84)    | 16<br>(10 - 25)    | 211<br>(155 - 299)        | 118<br>(78 - 164)        | 28<br>(18 - 37)    |
| Poisonings                                      | 488<br>(324 - 1,230)        | 31<br>(16 - 71)    | 14<br>(9 - 28)     | 260<br>(151 - 767)        | 159<br>(106 - 353)       | 24<br>(17 - 44)    |
| Exposure to mechanical forces                   | 245<br>(189 - 339)          | 9<br>(4 - 22)      | 16<br>(12 - 24)    | 189<br>(141 - 261)        | 29<br>(20 - 40)          | 2<br>(2 - 4)       |
| Unintentional firearm injuries                  | 59<br>(40 - 88)             | 0<br>(0 - 1)       | 2<br>(1 - 3)       | 49<br>(32 - 76)           | 7<br>(3 - 11)            | 2<br>(1 - 3)       |
| Unintentional suffocation                       | 40<br>(12 - 73)             | 6<br>(1 - 19)      | 3<br>(1 - 7)       | 27<br>(4 - 55)            | 4<br>(1 - 8)             | 0<br>(0 - 1)       |
| Other exposure to mechanical forces             | 146<br>(112 - 227)          | 2<br>(1 - 4)       | 11<br>(8 - 18)     | 113<br>(83 - 179)         | 19<br>(13 - 28)          | 1<br>(0 - 1)       |
| Adverse effects of medical treatment            | 78<br>(55 - 103)            | 7<br>(4 - 13)      | 1<br>(1 - 2)       | 26<br>(17 - 36)           | 31<br>(19 - 43)          | 13<br>(9 - 18)     |
| Animal contact                                  | 29<br>(8 - 39)              | 3<br>(1 - 6)       | 2<br>(1 - 3)       | 11<br>(3 - 15)            | 11<br>(2 - 17)           | 2<br>(0 - 2)       |
| Venomous animal contact                         | 20<br>(5 - 28)              | 3<br>(1 - 5)       | 2<br>(0 - 3)       | 7<br>(2 - 11)             | 7<br>(1 - 11)            | 1<br>(0 - 1)       |
| Non-venomous animal contact                     | 9<br>(2 - 14)               | 0<br>(0 - 1)       | 0<br>(0 - 1)       | 3<br>(1 - 6)              | 4<br>(1 - 7)             | 1<br>(0 - 2)       |
| Foreign body                                    | 174<br>(53 - 315)           | 55<br>(16 - 102)   | 9<br>(2 - 19)      | 68<br>(18 - 134)          | 29<br>(7 - 59)           | 14<br>(5 - 30)     |
| Pulmonary aspiration and foreign body in airway | 172<br>(50 - 314)           | 54<br>(15 - 102)   | 9<br>(2 - 19)      | 67<br>(18 - 133)          | 29<br>(7 - 58)           | 13<br>(5 - 30)     |
| Foreign body in other body part                 | 2<br>(1 - 4)                | 0<br>(0 - 1)       | 0<br>(0 - 0)       | 1<br>(0 - 2)              | 0<br>(0 - 1)             | 0<br>(0 - 0)       |
| Other unintentional injuries                    | 182<br>(131 - 246)          | 8<br>(4 - 17)      | 9<br>(4 - 16)      | 119<br>(80 - 171)         | 43<br>(24 - 74)          | 2<br>(1 - 4)       |
| Self-harm and interpersonal violence            | 6,861<br>(5,356 - 8,525)    | 15<br>(7 - 29)     | 84<br>(55 - 113)   | 5,036<br>(3,935 - 6,344)  | 1,479<br>(1,105 - 1,909) | 247<br>(187 - 307) |
| Self-harm                                       | 4,732<br>(3,405 - 5,921)    | --                 | 68<br>(41 - 97)    | 3,397<br>(2,391 - 4,313)  | 1,066<br>(769 - 1,372)   | 201<br>(148 - 250) |
| Interpersonal violence                          | 2,129<br>(1,446 - 3,218)    | 15<br>(7 - 29)     | 16<br>(8 - 28)     | 1,638<br>(1,124 - 2,564)  | 414<br>(230 - 659)       | 46<br>(21 - 80)    |
| Assault by firearm                              | 602<br>(191 - 1,143)        | 2<br>(0 - 5)       | 2<br>(1 - 5)       | 481<br>(156 - 917)        | 111<br>(31 - 228)        | 7<br>(2 - 16)      |
| Assault by sharp object                         | 547<br>(229 - 944)          | 4<br>(1 - 9)       | 4<br>(1 - 8)       | 431<br>(180 - 741)        | 98<br>(35 - 189)         | 11<br>(3 - 22)     |
| Assault by other means                          | 979<br>(586 - 1,809)        | 10<br>(4 - 20)     | 10<br>(5 - 18)     | 727<br>(412 - 1,386)      | 205<br>(112 - 381)       | 28<br>(13 - 53)    |

Web Table 31- Kazakhstan deaths with 95% UI by age, sex, and cause in 2013

| Cause                                                             | Females, All Ages           | Females, 0-4 Years       | Females, 5-14 Years | Females, 15-49 Years     | Females, 50-69 Years        | Females, 70-80 Years        |
|-------------------------------------------------------------------|-----------------------------|--------------------------|---------------------|--------------------------|-----------------------------|-----------------------------|
| All causes                                                        | 68,337<br>(61,499 - 76,855) | 3,313<br>(2,921 - 3,782) | 487<br>(451 - 530)  | 7,719<br>(6,362 - 9,562) | 18,861<br>(15,923 - 22,176) | 37,957<br>(35,367 - 41,259) |
| Communicable, maternal, neonatal, and nutritional diseases        | 3,804<br>(3,271 - 4,304)    | 2,089<br>(1,756 - 2,451) | 82<br>(68 - 101)    | 857<br>(677 - 1,051)     | 448<br>(349 - 549)          | 329<br>(262 - 420)          |
| HIV/AIDS and tuberculosis                                         | 647<br>(443 - 911)          | 10<br>(5 - 27)           | 6<br>(3 - 9)        | 433<br>(282 - 618)       | 161<br>(109 - 232)          | 37<br>(26 - 51)             |
| Tuberculosis                                                      | 474<br>(317 - 612)          | 6<br>(4 - 9)             | 4<br>(2 - 5)        | 302<br>(181 - 399)       | 129<br>(88 - 177)           | 33<br>(23 - 45)             |
| HIV/AIDS                                                          | 173<br>(30 - 429)           | 4<br>(0 - 22)            | 2<br>(0 - 5)        | 131<br>(26 - 311)        | 32<br>(4 - 94)              | 4<br>(0 - 13)               |
| HIV/AIDS resulting in mycobacterial infection                     | 9<br>(2 - 22)               | 0<br>(0 - 1)             | 0<br>(0 - 0)        | 7<br>(1 - 15)            | 2<br>(0 - 5)                | 0<br>(0 - 1)                |
| HIV/AIDS resulting in other diseases                              | 164<br>(29 - 407)           | 4<br>(0 - 21)            | 2<br>(0 - 5)        | 125<br>(24 - 294)        | 30<br>(4 - 89)              | 4<br>(0 - 12)               |
| Diarrhea, lower respiratory, and other common infectious diseases | 1,457<br>(1,238 - 1,701)    | 658<br>(523 - 823)       | 62<br>(49 - 80)     | 250<br>(191 - 318)       | 233<br>(168 - 309)          | 255<br>(192 - 340)          |
| Diarrheal diseases                                                | 87<br>(58 - 127)            | 70<br>(43 - 108)         | 2<br>(1 - 3)        | 6<br>(4 - 9)             | 4<br>(3 - 6)                | 4<br>(3 - 7)                |
| Intestinal infectious diseases                                    | 7<br>(3 - 14)               | 3<br>(1 - 6)             | 2<br>(1 - 3)        | 2<br>(1 - 5)             | 1<br>(0 - 2)                | 0<br>(0 - 2)                |
| Typhoid fever                                                     | 5<br>(2 - 9)                | 2<br>(1 - 3)             | 1<br>(0 - 2)        | 1<br>(0 - 3)             | 0<br>(0 - 1)                | 0<br>(0 - 0)                |
| Paratyphoid fever                                                 | 2<br>(1 - 3)                | 1<br>(0 - 1)             | 0<br>(0 - 1)        | 0<br>(0 - 1)             | 0<br>(0 - 0)                | 0<br>(0 - 0)                |
| Other intestinal infectious diseases                              | 1<br>(0 - 5)                | 1<br>(0 - 3)             | 0<br>(0 - 1)        | 0<br>(0 - 2)             | 0<br>(0 - 2)                | 0<br>(0 - 1)                |
| Lower respiratory infections                                      | 1,196<br>(990 - 1,419)      | 511<br>(385 - 670)       | 40<br>(29 - 53)     | 201<br>(147 - 261)       | 206<br>(141 - 275)          | 239<br>(177 - 320)          |
| Upper respiratory infections                                      | 2<br>(1 - 6)                | 0<br>(0 - 1)             | 0<br>(0 - 0)        | 0<br>(0 - 1)             | 1<br>(0 - 2)                | 1<br>(0 - 4)                |
| Otitis media                                                      | 2<br>(2 - 3)                | 0<br>(0 - 0)             | 0<br>(0 - 0)        | 1<br>(1 - 1)             | 1<br>(1 - 1)                | 0<br>(0 - 1)                |
| Meningitis                                                        | 82<br>(67 - 104)            | 36<br>(25 - 51)          | 6<br>(4 - 8)        | 23<br>(17 - 30)          | 13<br>(10 - 17)             | 5<br>(4 - 7)                |
| Pneumococcal meningitis                                           | 20<br>(16 - 26)             | 7<br>(4 - 10)            | 1<br>(1 - 2)        | 6<br>(4 - 10)            | 4<br>(2 - 6)                | 2<br>(1 - 2)                |
| H influenzae type B meningitis                                    | 26<br>(20 - 35)             | 18<br>(12 - 25)          | 2<br>(1 - 3)        | 4<br>(2 - 6)             | 2<br>(1 - 3)                | 1<br>(0 - 1)                |
| Meningococcal meningitis                                          | 17<br>(13 - 22)             | 8<br>(5 - 11)            | 1<br>(1 - 2)        | 5<br>(3 - 7)             | 3<br>(1 - 4)                | 1<br>(1 - 2)                |
| Other meningitis                                                  | 19<br>(14 - 25)             | 4<br>(2 - 6)             | 1<br>(0 - 1)        | 8<br>(5 - 12)            | 5<br>(2 - 7)                | 2<br>(1 - 3)                |
| Encephalitis                                                      | 70<br>(52 - 99)             | 35<br>(22 - 55)          | 12<br>(7 - 22)      | 15<br>(9 - 23)           | 6<br>(4 - 11)               | 2<br>(1 - 3)                |
| Diphtheria                                                        | 1<br>(0 - 3)                | 0<br>(0 - 3)             | 0<br>(0 - 1)        | 0<br>(0 - 1)             | 0<br>(0 - 0)                | --                          |
| Whooping cough                                                    | 3<br>(1 - 12)               | 2<br>(0 - 10)            | 0<br>(0 - 0)        | 1<br>(0 - 1)             | 0<br>(0 - 0)                | --                          |
| Tetanus                                                           | 1<br>(1 - 1)                | 0<br>(0 - 0)             | 0<br>(0 - 0)        | 0<br>(0 - 1)             | 0<br>(0 - 0)                | 0<br>(0 - 0)                |
| Measles                                                           | 0<br>(0 - 0)                | 0<br>(0 - 0)             | 0<br>(0 - 0)        | 0<br>(0 - 0)             | 0<br>(0 - 0)                | --                          |
| Varicella and herpes zoster                                       | 5<br>(2 - 17)               | 1<br>(0 - 4)             | 0<br>(0 - 1)        | 1<br>(0 - 2)             | 1<br>(0 - 2)                | 3<br>(0 - 14)               |
| Neglected tropical diseases and malaria                           | 14<br>(9 - 21)              | 4<br>(2 - 10)            | 2<br>(1 - 4)        | 3<br>(2 - 6)             | 3<br>(2 - 6)                | 2<br>(1 - 5)                |
| Leishmaniasis                                                     | 0<br>(0 - 0)                | 0<br>(0 - 0)             | 0<br>(0 - 0)        | 0<br>(0 - 0)             | 0<br>(0 - 0)                | 0<br>(0 - 0)                |
| Visceral leishmaniasis                                            | 0<br>(0 - 0)                | 0<br>(0 - 0)             | 0<br>(0 - 0)        | 0<br>(0 - 0)             | 0<br>(0 - 0)                | 0<br>(0 - 0)                |
| Cysticercosis                                                     | 0<br>(0 - 0)                | 0<br>(0 - 0)             | 0<br>(0 - 0)        | 0<br>(0 - 0)             | 0<br>(0 - 0)                | 0<br>(0 - 0)                |
| Cystic echinococcosis                                             | 3<br>(2 - 3)                | 0<br>(0 - 0)             | 0<br>(0 - 0)        | 1<br>(1 - 1)             | 1<br>(1 - 1)                | 1<br>(1 - 1)                |
| Dengue                                                            | 2<br>(2 - 4)                | 1<br>(1 - 2)             | 0<br>(0 - 1)        | 1<br>(0 - 1)             | 0<br>(0 - 0)                | 0<br>(0 - 0)                |
| Rabies                                                            | 2<br>(1 - 2)                | 0<br>(0 - 0)             | 1<br>(0 - 1)        | 1<br>(0 - 1)             | 1<br>(0 - 1)                | 0<br>(0 - 0)                |
| Intestinal nematode infections                                    | 3<br>(0 - 11)               | 1<br>(0 - 7)             | 0<br>(0 - 3)        | 0<br>(0 - 3)             | 0<br>(0 - 4)                | 1<br>(0 - 4)                |
| Ascariasis                                                        | 3<br>(0 - 11)               | 1<br>(0 - 7)             | 0<br>(0 - 3)        | 0<br>(0 - 3)             | 0<br>(0 - 4)                | 1<br>(0 - 4)                |
| Other neglected tropical diseases                                 | 3<br>(2 - 6)                | 1<br>(1 - 4)             | 0<br>(0 - 0)        | 1<br>(0 - 1)             | 1<br>(0 - 1)                | 0<br>(0 - 1)                |
| Maternal disorders                                                | 90<br>(65 - 118)            | --                       | 0<br>(0 - 0)        | 90<br>(65 - 118)         | --                          | --                          |
| Maternal hemorrhage                                               | 11<br>(7 - 16)              | --                       | 0<br>(0 - 0)        | 11<br>(7 - 16)           | --                          | --                          |
| Maternal sepsis and other maternal infections                     | 7<br>(3 - 12)               | --                       | 0<br>(0 - 0)        | 7<br>(3 - 12)            | --                          | --                          |

Web Table 31- Kazakhstan deaths with 95% UI by age, sex, and cause in 2013

| Cause                                                            | Females, All Ages           | Females, 0-4 Years       | Females, 5-14 Years | Females, 15-49 Years     | Females, 50-69 Years        | Females, 70-80 Years        |
|------------------------------------------------------------------|-----------------------------|--------------------------|---------------------|--------------------------|-----------------------------|-----------------------------|
| Maternal hypertensive disorders                                  | 8<br>(4 - 13)               | --                       | 0<br>(0 - 0)        | 8<br>(4 - 13)            | --                          | --                          |
| Maternal obstructed labor                                        | 9<br>(5 - 14)               | --                       | 0<br>(0 - 0)        | 9<br>(5 - 14)            | --                          | --                          |
| Maternal abortive outcome                                        | 12<br>(8 - 17)              | --                       | 0<br>(0 - 0)        | 12<br>(8 - 17)           | --                          | --                          |
| Indirect maternal deaths                                         | 15<br>(10 - 21)             | --                       | 0<br>(0 - 0)        | 15<br>(10 - 21)          | --                          | --                          |
| Late maternal deaths                                             | 12<br>(7 - 19)              | --                       | 0<br>(0 - 0)        | 12<br>(7 - 19)           | --                          | --                          |
| Maternal deaths aggravated by HIV/AIDS                           | 0<br>(0 - 0)                | --                       | --                  | 0<br>(0 - 0)             | --                          | --                          |
| Other maternal disorders                                         | 16<br>(10 - 23)             | --                       | 0<br>(0 - 0)        | 16<br>(10 - 23)          | --                          | --                          |
| Neonatal disorders                                               | 1,337<br>(1,064 - 1,603)    | 1,337<br>(1,064 - 1,603) | --                  | --                       | --                          | --                          |
| Neonatal preterm birth complications                             | 391<br>(147 - 689)          | 391<br>(147 - 689)       | --                  | --                       | --                          | --                          |
| Neonatal encephalopathy due to birth asphyxia and trauma         | 646<br>(374 - 938)          | 646<br>(374 - 938)       | --                  | --                       | --                          | --                          |
| Neonatal sepsis and other neonatal infections                    | 87<br>(34 - 199)            | 87<br>(34 - 199)         | --                  | --                       | --                          | --                          |
| Hemolytic disease and other neonatal jaundice                    | 5<br>(1 - 12)               | 5<br>(1 - 12)            | --                  | --                       | --                          | --                          |
| Other neonatal disorders                                         | 208<br>(97 - 373)           | 208<br>(97 - 373)        | --                  | --                       | --                          | --                          |
| Nutritional deficiencies                                         | 127<br>(100 - 161)          | 10<br>(7 - 15)           | 3<br>(2 - 4)        | 57<br>(41 - 74)          | 31<br>(23 - 41)             | 26<br>(18 - 35)             |
| Protein-energy malnutrition                                      | 35<br>(22 - 63)             | 7<br>(4 - 11)            | 1<br>(1 - 2)        | 14<br>(7 - 28)           | 11<br>(6 - 18)              | 3<br>(1 - 6)                |
| Iodine deficiency                                                | 1<br>(0 - 5)                | 0<br>(0 - 1)             | 0<br>(0 - 0)        | 0<br>(0 - 1)             | 1<br>(0 - 3)                | 0<br>(0 - 2)                |
| Iron-deficiency anemia                                           | 84<br>(53 - 112)            | 3<br>(1 - 6)             | 2<br>(1 - 2)        | 39<br>(22 - 56)          | 18<br>(11 - 27)             | 21<br>(14 - 30)             |
| Other nutritional deficiencies                                   | 7<br>(2 - 12)               | 1<br>(0 - 1)             | 0<br>(0 - 1)        | 4<br>(1 - 7)             | 1<br>(1 - 3)                | 1<br>(0 - 1)                |
| Other communicable, maternal, neonatal, and nutritional diseases | 133<br>(85 - 220)           | 70<br>(26 - 148)         | 9<br>(5 - 16)       | 24<br>(17 - 32)          | 21<br>(15 - 28)             | 10<br>(7 - 13)              |
| Sexually transmitted diseases excluding HIV                      | 60<br>(14 - 146)            | 52<br>(9 - 132)          | 4<br>(1 - 10)       | 2<br>(1 - 3)             | 1<br>(1 - 3)                | 1<br>(0 - 1)                |
| Syphilis                                                         | 58<br>(12 - 144)            | 52<br>(9 - 132)          | 4<br>(1 - 10)       | 1<br>(0 - 1)             | 1<br>(0 - 1)                | 0<br>(0 - 1)                |
| Chlamydial infection                                             | 1<br>(0 - 1)                | --                       | 0<br>(0 - 0)        | 0<br>(0 - 1)             | 0<br>(0 - 0)                | 0<br>(0 - 0)                |
| Gonococcal infection                                             | 1<br>(0 - 1)                | --                       | 0<br>(0 - 0)        | 0<br>(0 - 1)             | 0<br>(0 - 0)                | 0<br>(0 - 0)                |
| Other sexually transmitted diseases                              | 1<br>(0 - 1)                | --                       | 0<br>(0 - 0)        | 0<br>(0 - 1)             | 0<br>(0 - 0)                | 0<br>(0 - 0)                |
| Hepatitis                                                        | 33<br>(26 - 44)             | 7<br>(4 - 12)            | 3<br>(2 - 5)        | 15<br>(10 - 21)          | 5<br>(3 - 8)                | 4<br>(2 - 6)                |
| Acute hepatitis A                                                | 5<br>(1 - 9)                | 2<br>(1 - 5)             | 1<br>(0 - 2)        | 1<br>(0 - 3)             | 0<br>(0 - 0)                | 0<br>(0 - 0)                |
| Acute hepatitis B                                                | 19<br>(13 - 27)             | 5<br>(2 - 9)             | 1<br>(1 - 2)        | 6<br>(3 - 10)            | 4<br>(2 - 6)                | 3<br>(2 - 5)                |
| Acute hepatitis C                                                | 2<br>(0 - 5)                | --                       | 0<br>(0 - 1)        | 1<br>(0 - 3)             | 1<br>(0 - 1)                | 0<br>(0 - 1)                |
| Acute hepatitis E                                                | 7<br>(4 - 12)               | 0<br>(0 - 0)             | 0<br>(0 - 1)        | 6<br>(3 - 10)            | 1<br>(0 - 1)                | 0<br>(0 - 1)                |
| Other infectious diseases                                        | 39<br>(26 - 51)             | 10<br>(6 - 16)           | 2<br>(1 - 3)        | 7<br>(4 - 10)            | 14<br>(9 - 20)              | 5<br>(3 - 8)                |
| Non-communicable diseases                                        | 60,800<br>(54,601 - 68,426) | 936<br>(749 - 1,158)     | 175<br>(152 - 200)  | 5,006<br>(4,037 - 6,271) | 17,498<br>(14,734 - 20,569) | 37,184<br>(34,639 - 40,416) |
| Neoplasms                                                        | 10,141<br>(8,488 - 12,895)  | 43<br>(31 - 60)          | 55<br>(45 - 66)     | 1,716<br>(1,352 - 2,193) | 4,790<br>(3,904 - 6,078)    | 3,538<br>(3,072 - 4,499)    |
| Esophageal cancer                                                | 588<br>(442 - 869)          | --                       | --                  | 31<br>(22 - 46)          | 246<br>(183 - 356)          | 311<br>(220 - 463)          |
| Stomach cancer                                                   | 1,060<br>(862 - 1,362)      | --                       | --                  | 124<br>(95 - 166)        | 443<br>(349 - 578)          | 494<br>(385 - 662)          |
| Liver cancer                                                     | 506<br>(405 - 649)          | --                       | 2<br>(1 - 3)        | 47<br>(34 - 65)          | 240<br>(177 - 320)          | 218<br>(159 - 303)          |
| Liver cancer due to hepatitis B                                  | 147<br>(102 - 199)          | --                       | 0<br>(0 - 0)        | 16<br>(10 - 24)          | 80<br>(53 - 111)            | 51<br>(33 - 74)             |
| Liver cancer due to hepatitis C                                  | 184<br>(133 - 255)          | --                       | 0<br>(0 - 1)        | 15<br>(10 - 22)          | 84<br>(57 - 118)            | 85<br>(57 - 126)            |
| Liver cancer due to alcohol use                                  | 93<br>(62 - 136)            | --                       | --                  | 5<br>(2 - 8)             | 37<br>(23 - 57)             | 51<br>(32 - 80)             |
| Liver cancer due to other causes                                 | 83<br>(52 - 128)            | --                       | 1<br>(1 - 2)        | 12<br>(7 - 18)           | 39<br>(22 - 62)             | 31<br>(17 - 52)             |
| Larynx cancer                                                    | 35<br>(19 - 70)             | --                       | --                  | 6<br>(3 - 12)            | 18<br>(10 - 37)             | 10<br>(6 - 21)              |

Web Table 31- Kazakhstan deaths with 95% UI by age, sex, and cause in 2013

| Cause                                         | Females, All Ages           | Females, 0-4 Years | Females, 5-14 Years | Females, 15-49 Years     | Females, 50-69 Years      | Females, 70-80 Years        |
|-----------------------------------------------|-----------------------------|--------------------|---------------------|--------------------------|---------------------------|-----------------------------|
| Tracheal, bronchus and lung cancer            | 809<br>(660 - 1,109)        | --                 | --                  | 99<br>(74 - 143)         | 410<br>(320 - 568)        | 301<br>(242 - 408)          |
| Breast cancer                                 | 1,953<br>(1,546 - 2,419)    | --                 | --                  | 449<br>(334 - 585)       | 1,026<br>(787 - 1,285)    | 478<br>(390 - 584)          |
| Cervical cancer                               | 877<br>(685 - 1,162)        | --                 | --                  | 268<br>(187 - 351)       | 407<br>(312 - 563)        | 203<br>(161 - 314)          |
| Uterine cancer                                | 169<br>(120 - 342)          | --                 | --                  | 12<br>(8 - 23)           | 91<br>(62 - 187)          | 66<br>(48 - 132)            |
| Prostate cancer                               | --                          | --                 | --                  | --                       | --                        | --                          |
| Colon and rectum cancer                       | 1,206<br>(1,016 - 1,488)    | --                 | --                  | 118<br>(92 - 152)        | 537<br>(432 - 677)        | 551<br>(458 - 722)          |
| Lip and oral cavity cancer                    | 105<br>(68 - 141)           | --                 | --                  | 16<br>(10 - 23)          | 45<br>(28 - 62)           | 44<br>(30 - 61)             |
| Nasopharynx cancer                            | 19<br>(14 - 36)             | --                 | 0<br>(0 - 0)        | 6<br>(4 - 12)            | 8<br>(6 - 16)             | 4<br>(3 - 8)                |
| Other pharynx cancer                          | 21<br>(17 - 27)             | --                 | --                  | 3<br>(2 - 4)             | 12<br>(9 - 15)            | 7<br>(5 - 9)                |
| Gallbladder and biliary tract cancer          | 229<br>(156 - 302)          | --                 | --                  | 16<br>(10 - 24)          | 109<br>(73 - 147)         | 104<br>(62 - 148)           |
| Pancreatic cancer                             | 423<br>(352 - 530)          | --                 | --                  | 32<br>(25 - 43)          | 202<br>(160 - 255)        | 188<br>(154 - 245)          |
| Malignant skin melanoma                       | 112<br>(90 - 142)           | --                 | --                  | 27<br>(20 - 36)          | 47<br>(35 - 61)           | 38<br>(30 - 50)             |
| Non-melanoma skin cancer                      | 12<br>(8 - 20)              | --                 | --                  | 2<br>(1 - 3)             | 3<br>(2 - 5)              | 7<br>(4 - 13)               |
| Ovarian cancer                                | 546<br>(415 - 749)          | --                 | --                  | 111<br>(78 - 159)        | 311<br>(230 - 434)        | 124<br>(95 - 179)           |
| Testicular cancer                             | --                          | --                 | --                  | --                       | --                        | --                          |
| Kidney cancer                                 | 247<br>(196 - 313)          | 3<br>(2 - 5)       | 3<br>(2 - 3)        | 29<br>(21 - 39)          | 117<br>(88 - 154)         | 94<br>(75 - 118)            |
| Bladder cancer                                | 103<br>(74 - 168)           | --                 | --                  | 12<br>(8 - 20)           | 45<br>(31 - 76)           | 47<br>(33 - 78)             |
| Brain and nervous system cancer               | 174<br>(67 - 215)           | 5<br>(2 - 8)       | 9<br>(4 - 11)       | 60<br>(25 - 78)          | 81<br>(28 - 104)          | 21<br>(9 - 26)              |
| Thyroid cancer                                | 52<br>(29 - 70)             | --                 | 0<br>(0 - 0)        | 8<br>(5 - 11)            | 24<br>(13 - 33)           | 20<br>(10 - 27)             |
| Mesothelioma                                  | 22<br>(16 - 31)             | --                 | --                  | 3<br>(2 - 5)             | 13<br>(9 - 19)            | 6<br>(4 - 8)                |
| Hodgkin lymphoma                              | 24<br>(13 - 34)             | 0<br>(0 - 1)       | 1<br>(0 - 2)        | 12<br>(6 - 19)           | 7<br>(4 - 12)             | 3<br>(1 - 6)                |
| Non-Hodgkin lymphoma                          | 162<br>(105 - 222)          | 4<br>(2 - 7)       | 5<br>(3 - 7)        | 42<br>(27 - 66)          | 69<br>(41 - 97)           | 41<br>(22 - 58)             |
| Multiple myeloma                              | 48<br>(34 - 72)             | --                 | --                  | 8<br>(5 - 12)            | 27<br>(19 - 40)           | 13<br>(9 - 21)              |
| Leukemia                                      | 290<br>(237 - 352)          | 18<br>(12 - 26)    | 25<br>(19 - 32)     | 90<br>(70 - 116)         | 104<br>(80 - 135)         | 53<br>(43 - 66)             |
| Other neoplasms                               | 349<br>(213 - 666)          | 12<br>(7 - 23)     | 12<br>(7 - 19)      | 84<br>(52 - 152)         | 150<br>(84 - 307)         | 91<br>(54 - 200)            |
| Cardiovascular diseases                       | 39,986<br>(34,442 - 44,341) | 19<br>(13 - 27)    | 15<br>(9 - 19)      | 1,771<br>(1,301 - 2,279) | 9,520<br>(7,540 - 11,105) | 28,661<br>(25,082 - 31,002) |
| Rheumatic heart disease                       | 370<br>(270 - 545)          | 0<br>(0 - 1)       | 3<br>(2 - 4)        | 131<br>(91 - 207)        | 197<br>(136 - 288)        | 39<br>(25 - 54)             |
| Ischemic heart disease                        | 22,024<br>(18,759 - 25,814) | 4<br>(2 - 7)       | 3<br>(2 - 4)        | 741<br>(518 - 992)       | 4,693<br>(3,679 - 5,735)  | 16,584<br>(14,225 - 19,302) |
| Cerebrovascular disease                       | 15,612<br>(11,790 - 18,007) | 5<br>(3 - 8)       | 5<br>(3 - 6)        | 676<br>(459 - 893)       | 3,914<br>(2,808 - 4,720)  | 11,012<br>(8,359 - 12,541)  |
| Ischemic stroke                               | 9,760<br>(6,686 - 11,794)   | 1<br>(1 - 2)       | 1<br>(1 - 2)        | 181<br>(101 - 260)       | 1,741<br>(1,078 - 2,314)  | 7,836<br>(5,389 - 9,407)    |
| Hemorrhagic stroke                            | 5,852<br>(4,160 - 7,655)    | 4<br>(3 - 6)       | 3<br>(2 - 4)        | 495<br>(342 - 653)       | 2,174<br>(1,582 - 2,753)  | 3,176<br>(2,117 - 4,501)    |
| Hypertensive heart disease                    | 1,287<br>(833 - 1,710)      | 0<br>(0 - 1)       | 0<br>(0 - 0)        | 92<br>(59 - 132)         | 475<br>(304 - 646)        | 719<br>(423 - 1,021)        |
| Cardiomyopathy and myocarditis                | 204<br>(115 - 295)          | 3<br>(2 - 6)       | 2<br>(1 - 3)        | 41<br>(17 - 63)          | 77<br>(37 - 117)          | 80<br>(43 - 138)            |
| Atrial fibrillation and flutter               | 1<br>(0 - 1)                | --                 | --                  | 0<br>(0 - 1)             | 0<br>(0 - 1)              | 0<br>(0 - 0)                |
| Aortic aneurysm                               | 44<br>(27 - 74)             | --                 | --                  | 5<br>(2 - 8)             | 9<br>(4 - 14)             | 31<br>(17 - 55)             |
| Peripheral vascular disease                   | 14<br>(5 - 20)              | --                 | --                  | 1<br>(0 - 2)             | 5<br>(2 - 7)              | 8<br>(3 - 11)               |
| Endocarditis                                  | 22<br>(10 - 35)             | 2<br>(1 - 3)       | 0<br>(0 - 0)        | 6<br>(2 - 12)            | 2<br>(1 - 4)              | 12<br>(5 - 21)              |
| Other cardiovascular and circulatory diseases | 407<br>(235 - 555)          | 4<br>(2 - 7)       | 3<br>(1 - 4)        | 77<br>(43 - 114)         | 147<br>(79 - 213)         | 176<br>(98 - 263)           |
| Chronic respiratory diseases                  | 2,279<br>(1,856 - 3,653)    | 4<br>(3 - 6)       | 3<br>(2 - 4)        | 200<br>(151 - 283)       | 625<br>(486 - 917)        | 1,447<br>(1,154 - 2,409)    |
| Chronic obstructive pulmonary disease         | 1,901<br>(1,519 - 3,107)    | 2<br>(1 - 3)       | 1<br>(1 - 2)        | 127<br>(88 - 195)        | 531<br>(406 - 818)        | 1,240<br>(964 - 2,171)      |



Web Table 31- Kazakhstan deaths with 95% UI by age, sex, and cause in 2013

| Cause                                               | Females, All Ages        | Females, 0-4 Years | Females, 5-14 Years | Females, 15-49 Years | Females, 50-69 Years   | Females, 70-80 Years     |
|-----------------------------------------------------|--------------------------|--------------------|---------------------|----------------------|------------------------|--------------------------|
| Pneumoconiosis                                      | 5<br>(2 - 19)            | 0<br>(0 - 1)       | 0<br>(0 - 1)        | 3<br>(1 - 11)        | 1<br>(0 - 5)           | 0<br>(0 - 1)             |
| Silicosis                                           | 1<br>(0 - 2)             | 0<br>(0 - 0)       | 0<br>(0 - 0)        | 0<br>(0 - 1)         | 0<br>(0 - 0)           | 0<br>(0 - 0)             |
| Asbestosis                                          | 1<br>(0 - 2)             | 0<br>(0 - 0)       | 0<br>(0 - 0)        | 0<br>(0 - 1)         | 0<br>(0 - 0)           | 0<br>(0 - 0)             |
| Coal workers pneumoconiosis                         | 1<br>(0 - 2)             | 0<br>(0 - 0)       | 0<br>(0 - 0)        | 0<br>(0 - 1)         | 0<br>(0 - 0)           | 0<br>(0 - 0)             |
| Other pneumoconiosis                                | 4<br>(1 - 13)            | 0<br>(0 - 0)       | 0<br>(0 - 0)        | 2<br>(0 - 8)         | 1<br>(0 - 4)           | 0<br>(0 - 1)             |
| Asthma                                              | 217<br>(72 - 366)        | 1<br>(0 - 1)       | 1<br>(0 - 1)        | 45<br>(17 - 70)      | 71<br>(21 - 122)       | 100<br>(32 - 192)        |
| Interstitial lung disease and pulmonary sarcoidosis | 116<br>(57 - 243)        | 0<br>(0 - 0)       | 0<br>(0 - 0)        | 5<br>(2 - 11)        | 17<br>(7 - 37)         | 94<br>(43 - 200)         |
| Other chronic respiratory diseases                  | 39<br>(24 - 68)          | 1<br>(1 - 2)       | 0<br>(0 - 1)        | 20<br>(12 - 35)      | 4<br>(2 - 8)           | 14<br>(7 - 26)           |
| Cirrhosis                                           | 2,372<br>(1,948 - 2,963) | 3<br>(2 - 4)       | 6<br>(5 - 8)        | 576<br>(446 - 749)   | 1,187<br>(943 - 1,479) | 600<br>(505 - 765)       |
| Cirrhosis due to hepatitis B                        | 1,049<br>(711 - 1,445)   | 0<br>(0 - 1)       | 2<br>(1 - 3)        | 255<br>(152 - 372)   | 515<br>(333 - 741)     | 276<br>(191 - 392)       |
| Cirrhosis due to hepatitis C                        | 859<br>(504 - 1,306)     | 0<br>(0 - 0)       | 1<br>(0 - 2)        | 197<br>(104 - 306)   | 459<br>(248 - 703)     | 202<br>(118 - 326)       |
| Cirrhosis due to alcohol use                        | 234<br>(136 - 357)       | --                 | --                  | 35<br>(17 - 63)      | 114<br>(61 - 182)      | 84<br>(48 - 135)         |
| Cirrhosis due to other causes                       | 230<br>(108 - 390)       | 2<br>(2 - 3)       | 4<br>(2 - 5)        | 88<br>(46 - 141)     | 99<br>(31 - 186)       | 37<br>(14 - 69)          |
| Digestive diseases                                  | 798<br>(659 - 1,006)     | 9<br>(6 - 13)      | 8<br>(6 - 10)       | 152<br>(118 - 198)   | 300<br>(232 - 388)     | 330<br>(266 - 412)       |
| Peptic ulcer disease                                | 192<br>(119 - 265)       | 0<br>(0 - 0)       | 0<br>(0 - 1)        | 38<br>(23 - 55)      | 75<br>(46 - 108)       | 79<br>(45 - 116)         |
| Gastritis and duodenitis                            | 7<br>(3 - 13)            | 0<br>(0 - 0)       | 0<br>(0 - 1)        | 2<br>(1 - 3)         | 2<br>(1 - 3)           | 3<br>(1 - 7)             |
| Appendicitis                                        | 31<br>(19 - 45)          | 2<br>(1 - 3)       | 3<br>(2 - 4)        | 12<br>(7 - 18)       | 8<br>(4 - 14)          | 6<br>(3 - 11)            |
| Paralytic ileus and intestinal obstruction          | 145<br>(96 - 268)        | 5<br>(2 - 8)       | 3<br>(1 - 5)        | 35<br>(21 - 64)      | 48<br>(31 - 93)        | 55<br>(32 - 102)         |
| Inguinal, femoral, and abdominal hernia             | 59<br>(28 - 102)         | 0<br>(0 - 1)       | 0<br>(0 - 0)        | 5<br>(2 - 8)         | 26<br>(12 - 44)        | 27<br>(11 - 51)          |
| Inflammatory bowel disease                          | 22<br>(10 - 45)          | 1<br>(0 - 3)       | 1<br>(0 - 1)        | 7<br>(2 - 12)        | 7<br>(3 - 14)          | 7<br>(3 - 18)            |
| Vascular intestinal disorders                       | 20<br>(9 - 36)           | 0<br>(0 - 0)       | 0<br>(0 - 0)        | 2<br>(1 - 5)         | 9<br>(4 - 18)          | 8<br>(3 - 16)            |
| Gallbladder and biliary diseases                    | 247<br>(183 - 370)       | 0<br>(0 - 0)       | 0<br>(0 - 0)        | 34<br>(23 - 50)      | 95<br>(69 - 143)       | 117<br>(83 - 183)        |
| Pancreatitis                                        | 47<br>(22 - 87)          | 0<br>(0 - 0)       | 0<br>(0 - 0)        | 11<br>(5 - 20)       | 17<br>(8 - 31)         | 19<br>(8 - 36)           |
| Other digestive diseases                            | 28<br>(21 - 37)          | 0<br>(0 - 0)       | 0<br>(0 - 0)        | 7<br>(5 - 10)        | 13<br>(9 - 18)         | 8<br>(5 - 11)            |
| Neurological disorders                              | 2,269<br>(1,770 - 3,211) | 6<br>(4 - 9)       | 12<br>(8 - 17)      | 113<br>(78 - 153)    | 173<br>(128 - 229)     | 1,965<br>(1,471 - 2,892) |
| Alzheimer disease and other dementias               | 2,038<br>(1,548 - 2,945) | --                 | --                  | 1<br>(0 - 2)         | 127<br>(88 - 176)      | 1,910<br>(1,419 - 2,804) |
| Parkinson disease                                   | 58<br>(41 - 90)          | --                 | --                  | 1<br>(1 - 2)         | 16<br>(10 - 24)        | 41<br>(27 - 67)          |
| Epilepsy                                            | 130<br>(87 - 176)        | 4<br>(2 - 6)       | 11<br>(7 - 15)      | 94<br>(61 - 132)     | 17<br>(10 - 25)        | 4<br>(2 - 6)             |
| Multiple sclerosis                                  | 27<br>(16 - 69)          | --                 | --                  | 12<br>(7 - 27)       | 8<br>(4 - 19)          | 7<br>(3 - 22)            |
| Other neurological disorders                        | 15<br>(13 - 18)          | 2<br>(1 - 3)       | 1<br>(1 - 2)        | 4<br>(3 - 6)         | 4<br>(3 - 6)           | 2<br>(2 - 3)             |
| Mental and substance use disorders                  | 140<br>(89 - 244)        | 0<br>(0 - 1)       | 0<br>(0 - 0)        | 64<br>(41 - 111)     | 65<br>(36 - 119)       | 11<br>(7 - 17)           |
| Schizophrenia                                       | 25<br>(16 - 41)          | --                 | --                  | 15<br>(9 - 24)       | 8<br>(4 - 14)          | 2<br>(1 - 4)             |
| Alcohol use disorders                               | 96<br>(44 - 194)         | --                 | --                  | 39<br>(18 - 82)      | 52<br>(23 - 104)       | 5<br>(2 - 11)            |
| Drug use disorders                                  | 17<br>(12 - 22)          | 0<br>(0 - 1)       | --                  | 8<br>(6 - 11)        | 5<br>(3 - 8)           | 3<br>(2 - 5)             |
| Opioid use disorders                                | 3<br>(2 - 5)             | 0<br>(0 - 0)       | --                  | 2<br>(1 - 2)         | 1<br>(1 - 1)           | 1<br>(0 - 1)             |
| Cocaine use disorders                               | 1<br>(0 - 1)             | 0<br>(0 - 0)       | --                  | 0<br>(0 - 0)         | 0<br>(0 - 0)           | 0<br>(0 - 0)             |
| Amphetamine use disorders                           | 1<br>(0 - 1)             | 0<br>(0 - 0)       | --                  | 0<br>(0 - 0)         | 0<br>(0 - 0)           | 0<br>(0 - 0)             |
| Other drug use disorders                            | 13<br>(9 - 16)           | 0<br>(0 - 1)       | --                  | 6<br>(4 - 8)         | 4<br>(2 - 6)           | 2<br>(1 - 4)             |
| Eating disorders                                    | 2<br>(1 - 4)             | --                 | 0<br>(0 - 0)        | 2<br>(1 - 3)         | --                     | --                       |
| Anorexia nervosa                                    | 2<br>(1 - 4)             | --                 | 0<br>(0 - 0)        | 2<br>(1 - 3)         | --                     | --                       |

Web Table 31- Kazakhstan deaths with 95% UI by age, sex, and cause in 2013

| Cause                                               | Females, All Ages        | Females, 0-4 Years   | Females, 5-14 Years | Females, 15-49 Years | Females, 50-69 Years | Females, 70-80 Years |
|-----------------------------------------------------|--------------------------|----------------------|---------------------|----------------------|----------------------|----------------------|
| Diabetes, urogenital, blood, and endocrine diseases | 1,818<br>(1,498 - 2,605) | 30<br>(22 - 40)      | 23<br>(18 - 28)     | 344<br>(266 - 500)   | 806<br>(636 - 1,180) | 615<br>(514 - 877)   |
| Diabetes mellitus                                   | 911<br>(736 - 1,296)     | 1<br>(1 - 2)         | 6<br>(4 - 10)       | 88<br>(67 - 118)     | 426<br>(325 - 652)   | 389<br>(308 - 536)   |
| Acute glomerulonephritis                            | 4<br>(3 - 6)             | 0<br>(0 - 1)         | 0<br>(0 - 0)        | 2<br>(1 - 3)         | 1<br>(1 - 2)         | 1<br>(0 - 1)         |
| Chronic kidney disease                              | 364<br>(278 - 685)       | 3<br>(2 - 5)         | 5<br>(4 - 8)        | 114<br>(81 - 230)    | 153<br>(111 - 291)   | 90<br>(68 - 173)     |
| Chronic kidney disease due to diabetes mellitus     | 32<br>(12 - 53)          | 0<br>(0 - 0)         | 0<br>(0 - 1)        | 8<br>(3 - 14)        | 18<br>(6 - 31)       | 6<br>(2 - 11)        |
| Chronic kidney disease due to hypertension          | 94<br>(45 - 165)         | 1<br>(0 - 1)         | 0<br>(0 - 1)        | 15<br>(7 - 28)       | 38<br>(16 - 71)      | 40<br>(17 - 74)      |
| Chronic kidney disease due to glomerulonephritis    | 100<br>(57 - 151)        | 1<br>(1 - 2)         | 2<br>(1 - 3)        | 43<br>(25 - 64)      | 38<br>(20 - 59)      | 16<br>(7 - 29)       |
| Chronic kidney disease due to other causes          | 138<br>(81 - 383)        | 1<br>(0 - 3)         | 2<br>(1 - 5)        | 48<br>(22 - 150)     | 58<br>(28 - 172)     | 28<br>(12 - 78)      |
| Urinary diseases and male infertility               | 364<br>(286 - 504)       | 2<br>(1 - 3)         | 2<br>(2 - 3)        | 89<br>(66 - 127)     | 164<br>(121 - 241)   | 106<br>(78 - 156)    |
| Interstitial nephritis and urinary tract infections | 329<br>(258 - 442)       | 2<br>(1 - 3)         | 2<br>(1 - 3)        | 80<br>(59 - 114)     | 147<br>(108 - 216)   | 97<br>(70 - 141)     |
| Urolithiasis                                        | 20<br>(13 - 37)          | --                   | 0<br>(0 - 0)        | 5<br>(3 - 10)        | 9<br>(5 - 20)        | 5<br>(3 - 10)        |
| Other urinary diseases                              | 15<br>(10 - 25)          | 0<br>(0 - 1)         | 0<br>(0 - 0)        | 4<br>(2 - 6)         | 7<br>(4 - 12)        | 4<br>(2 - 9)         |
| Gynecological diseases                              | 5<br>(3 - 16)            | --                   | --                  | 3<br>(2 - 10)        | 1<br>(1 - 4)         | 0<br>(0 - 2)         |
| Uterine fibroids                                    | 1<br>(1 - 4)             | --                   | --                  | 1<br>(0 - 2)         | 0<br>(0 - 1)         | 0<br>(0 - 1)         |
| Polycystic ovarian syndrome                         | 0<br>(0 - 1)             | --                   | --                  | 0<br>(0 - 1)         | 0<br>(0 - 0)         | --                   |
| Endometriosis                                       | 1<br>(0 - 2)             | --                   | --                  | 0<br>(0 - 1)         | 0<br>(0 - 0)         | --                   |
| Genital prolapse                                    | 1<br>(0 - 2)             | --                   | --                  | 0<br>(0 - 1)         | 0<br>(0 - 1)         | 0<br>(0 - 0)         |
| Other gynecological diseases                        | 2<br>(1 - 8)             | --                   | --                  | 1<br>(1 - 5)         | 1<br>(0 - 2)         | 0<br>(0 - 1)         |
| Hemoglobinopathies and hemolytic anemias            | 36<br>(22 - 54)          | 9<br>(5 - 14)        | 4<br>(2 - 6)        | 10<br>(5 - 14)       | 12<br>(7 - 18)       | 2<br>(1 - 2)         |
| Thalassemias                                        | 15<br>(9 - 22)           | 7<br>(4 - 11)        | 3<br>(2 - 5)        | 5<br>(3 - 7)         | 0<br>(0 - 0)         | 0<br>(0 - 0)         |
| Sickle cell disorders                               | 1<br>(0 - 1)             | 0<br>(0 - 0)         | 0<br>(0 - 0)        | 0<br>(0 - 0)         | 0<br>(0 - 1)         | 0<br>(0 - 0)         |
| G6PD deficiency                                     | 1<br>(0 - 1)             | 0<br>(0 - 0)         | 0<br>(0 - 0)        | 0<br>(0 - 0)         | 0<br>(0 - 0)         | 0<br>(0 - 0)         |
| Other hemoglobinopathies and hemolytic anemias      | 19<br>(12 - 29)          | 2<br>(1 - 3)         | 0<br>(0 - 1)        | 4<br>(2 - 7)         | 11<br>(7 - 17)       | 2<br>(1 - 2)         |
| Endocrine, metabolic, blood, and immune disorders   | 135<br>(65 - 173)        | 15<br>(8 - 23)       | 5<br>(2 - 7)        | 38<br>(19 - 53)      | 49<br>(22 - 68)      | 28<br>(11 - 39)      |
| Musculoskeletal disorders                           | 26<br>(16 - 50)          | --                   | 3<br>(2 - 4)        | 8<br>(5 - 12)        | 9<br>(5 - 19)        | 6<br>(3 - 13)        |
| Rheumatoid arthritis                                | 10<br>(6 - 15)           | --                   | 1<br>(0 - 1)        | 4<br>(2 - 5)         | 4<br>(2 - 6)         | 3<br>(1 - 5)         |
| Other musculoskeletal disorders                     | 15<br>(9 - 32)           | --                   | 2<br>(1 - 4)        | 4<br>(3 - 8)         | 5<br>(3 - 12)        | 3<br>(2 - 6)         |
| Other non-communicable diseases                     | 971<br>(775 - 1,184)     | 823<br>(641 - 1,026) | 51<br>(38 - 68)     | 63<br>(46 - 85)      | 24<br>(17 - 31)      | 11<br>(8 - 14)       |
| Congenital anomalies                                | 948<br>(743 - 1,166)     | 805<br>(621 - 1,016) | 51<br>(37 - 68)     | 62<br>(44 - 84)      | 22<br>(15 - 29)      | 9<br>(6 - 13)        |
| Neural tube defects                                 | 77<br>(27 - 179)         | 68<br>(21 - 170)     | 3<br>(1 - 5)        | 3<br>(2 - 5)         | 1<br>(0 - 3)         | 1<br>(0 - 1)         |
| Congenital heart anomalies                          | 655<br>(491 - 847)       | 542<br>(386 - 714)   | 44<br>(32 - 59)     | 52<br>(38 - 69)      | 13<br>(9 - 18)       | 4<br>(2 - 5)         |
| Cleft lip and cleft palate                          | 4<br>(1 - 9)             | 4<br>(1 - 9)         | --                  | --                   | --                   | --                   |
| Down syndrome                                       | 20<br>(10 - 35)          | 16<br>(7 - 30)       | 1<br>(1 - 2)        | 2<br>(1 - 3)         | 1<br>(1 - 2)         | 0<br>(0 - 0)         |
| Chromosomal unbalanced rearrangements               | 5<br>(3 - 8)             | 1<br>(1 - 3)         | 0<br>(0 - 1)        | 2<br>(1 - 3)         | 1<br>(0 - 1)         | 0<br>(0 - 0)         |
| Other congenital anomalies                          | 188<br>(118 - 283)       | 174<br>(105 - 267)   | 2<br>(1 - 4)        | 3<br>(2 - 5)         | 5<br>(3 - 8)         | 4<br>(3 - 6)         |
| Skin and subcutaneous diseases                      | 7<br>(5 - 9)             | 1<br>(1 - 3)         | 0<br>(0 - 0)        | 2<br>(1 - 2)         | 2<br>(1 - 3)         | 1<br>(1 - 2)         |
| Cellulitis                                          | 1<br>(1 - 2)             | 0<br>(0 - 1)         | 0<br>(0 - 0)        | 0<br>(0 - 1)         | 1<br>(0 - 1)         | 0<br>(0 - 1)         |
| Pyoderma                                            | 4<br>(3 - 5)             | 1<br>(1 - 2)         | 0<br>(0 - 0)        | 1<br>(0 - 1)         | 1<br>(1 - 2)         | 1<br>(1 - 1)         |
| Decubitus ulcer                                     | 1<br>(0 - 1)             | 0<br>(0 - 0)         | 0<br>(0 - 0)        | 0<br>(0 - 0)         | 0<br>(0 - 0)         | 0<br>(0 - 0)         |
| Other skin and subcutaneous diseases                | 1<br>(0 - 1)             | 0<br>(0 - 0)         | 0<br>(0 - 0)        | 0<br>(0 - 0)         | 0<br>(0 - 0)         | 0<br>(0 - 0)         |

Web Table 31- Kazakhstan deaths with 95% UI by age, sex, and cause in 2013

| Cause                                           | Females, All Ages        | Females, 0-4 Years | Females, 5-14 Years | Females, 15-49 Years     | Females, 50-69 Years | Females, 70-80 Years |
|-------------------------------------------------|--------------------------|--------------------|---------------------|--------------------------|----------------------|----------------------|
| Sudden infant death syndrome                    | 16<br>(2 - 71)           | 16<br>(2 - 71)     | --                  | --                       | --                   | --                   |
| Injuries                                        | 3,733<br>(3,130 - 4,564) | 287<br>(227 - 374) | 230<br>(198 - 262)  | 1,856<br>(1,499 - 2,294) | 915<br>(733 - 1,196) | 445<br>(369 - 572)   |
| Transport injuries                              | 1,220<br>(832 - 1,486)   | 71<br>(39 - 101)   | 105<br>(70 - 132)   | 612<br>(406 - 779)       | 309<br>(208 - 393)   | 122<br>(90 - 157)    |
| Road injuries                                   | 1,103<br>(728 - 1,358)   | 64<br>(33 - 92)    | 97<br>(63 - 122)    | 547<br>(354 - 704)       | 282<br>(183 - 362)   | 113<br>(83 - 144)    |
| Pedestrian road injuries                        | 267<br>(147 - 373)       | 20<br>(8 - 37)     | 30<br>(14 - 47)     | 104<br>(49 - 164)        | 64<br>(33 - 99)      | 50<br>(31 - 73)      |
| Cyclist road injuries                           | 51<br>(19 - 90)          | 4<br>(1 - 9)       | 7<br>(2 - 12)       | 17<br>(7 - 32)           | 19<br>(7 - 35)       | 4<br>(2 - 7)         |
| Motorcyclist road injuries                      | 27<br>(14 - 42)          | 1<br>(0 - 2)       | 1<br>(0 - 1)        | 20<br>(10 - 33)          | 4<br>(2 - 7)         | 1<br>(1 - 2)         |
| Motor vehicle road injuries                     | 751<br>(528 - 944)       | 37<br>(21 - 56)    | 60<br>(41 - 79)     | 402<br>(272 - 525)       | 195<br>(128 - 255)   | 57<br>(39 - 78)      |
| Other road injuries                             | 7<br>(2 - 11)            | 1<br>(0 - 2)       | 1<br>(0 - 2)        | 3<br>(1 - 6)             | 1<br>(0 - 3)         | 1<br>(0 - 1)         |
| Other transport injuries                        | 117<br>(81 - 154)        | 7<br>(4 - 14)      | 8<br>(5 - 13)       | 65<br>(41 - 92)          | 27<br>(16 - 43)      | 9<br>(6 - 16)        |
| Unintentional injuries                          | 1,026<br>(828 - 1,444)   | 203<br>(151 - 298) | 93<br>(73 - 131)    | 365<br>(271 - 553)       | 227<br>(173 - 335)   | 138<br>(110 - 191)   |
| Falls                                           | 156<br>(109 - 202)       | 23<br>(14 - 35)    | 6<br>(4 - 9)        | 55<br>(37 - 74)          | 37<br>(24 - 51)      | 35<br>(23 - 48)      |
| Drowning                                        | 296<br>(219 - 542)       | 74<br>(45 - 143)   | 57<br>(41 - 91)     | 115<br>(78 - 202)        | 36<br>(24 - 68)      | 13<br>(8 - 23)       |
| Fire, heat, and hot substances                  | 175<br>(126 - 250)       | 38<br>(25 - 59)    | 10<br>(7 - 15)      | 52<br>(36 - 74)          | 45<br>(30 - 65)      | 31<br>(21 - 46)      |
| Poisonings                                      | 228<br>(149 - 495)       | 29<br>(15 - 66)    | 11<br>(7 - 21)      | 88<br>(48 - 211)         | 70<br>(42 - 153)     | 30<br>(19 - 60)      |
| Exposure to mechanical forces                   | 35<br>(21 - 54)          | 7<br>(3 - 21)      | 4<br>(3 - 7)        | 20<br>(9 - 31)           | 3<br>(2 - 6)         | 1<br>(1 - 3)         |
| Unintentional firearm injuries                  | 6<br>(4 - 8)             | 0<br>(0 - 1)       | 1<br>(0 - 1)        | 4<br>(3 - 5)             | 1<br>(0 - 1)         | 0<br>(0 - 1)         |
| Unintentional suffocation                       | 20<br>(6 - 37)           | 5<br>(1 - 19)      | 1<br>(0 - 2)        | 12<br>(2 - 23)           | 1<br>(1 - 3)         | 0<br>(0 - 2)         |
| Other exposure to mechanical forces             | 9<br>(7 - 20)            | 2<br>(1 - 4)       | 2<br>(1 - 5)        | 4<br>(3 - 9)             | 1<br>(1 - 3)         | 0<br>(0 - 0)         |
| Adverse effects of medical treatment            | 55<br>(37 - 77)          | 5<br>(3 - 9)       | 1<br>(1 - 2)        | 16<br>(10 - 23)          | 17<br>(10 - 24)      | 16<br>(10 - 26)      |
| Animal contact                                  | 8<br>(2 - 11)            | 2<br>(0 - 3)       | 1<br>(0 - 1)        | 2<br>(1 - 3)             | 3<br>(0 - 4)         | 1<br>(0 - 1)         |
| Venomous animal contact                         | 4<br>(1 - 6)             | 1<br>(0 - 2)       | 0<br>(0 - 1)        | 1<br>(0 - 2)             | 1<br>(0 - 2)         | 0<br>(0 - 1)         |
| Non-venomous animal contact                     | 4<br>(1 - 7)             | 1<br>(0 - 2)       | 0<br>(0 - 0)        | 1<br>(0 - 2)             | 1<br>(0 - 3)         | 0<br>(0 - 1)         |
| Foreign body                                    | 56<br>(24 - 97)          | 23<br>(7 - 42)     | 1<br>(1 - 3)        | 11<br>(4 - 21)           | 11<br>(4 - 21)       | 10<br>(3 - 28)       |
| Pulmonary aspiration and foreign body in airway | 54<br>(22 - 96)          | 22<br>(7 - 42)     | 1<br>(1 - 3)        | 10<br>(3 - 20)           | 10<br>(4 - 20)       | 10<br>(3 - 28)       |
| Foreign body in other body part                 | 1<br>(1 - 3)             | 0<br>(0 - 1)       | 0<br>(0 - 0)        | 1<br>(0 - 1)             | 0<br>(0 - 0)         | 0<br>(0 - 1)         |
| Other unintentional injuries                    | 18<br>(5 - 25)           | 3<br>(0 - 6)       | 1<br>(0 - 2)        | 8<br>(2 - 12)            | 5<br>(1 - 8)         | 1<br>(0 - 2)         |
| Self-harm and interpersonal violence            | 1,487<br>(1,200 - 1,911) | 13<br>(6 - 24)     | 31<br>(21 - 42)     | 879<br>(688 - 1,121)     | 379<br>(282 - 546)   | 185<br>(141 - 283)   |
| Self-harm                                       | 978<br>(777 - 1,326)     | --                 | 19<br>(11 - 27)     | 582<br>(440 - 751)       | 249<br>(188 - 404)   | 128<br>(96 - 238)    |
| Interpersonal violence                          | 509<br>(357 - 738)       | 13<br>(6 - 24)     | 12<br>(6 - 20)      | 298<br>(199 - 455)       | 130<br>(73 - 205)    | 57<br>(27 - 101)     |
| Assault by firearm                              | 71<br>(30 - 127)         | 2<br>(1 - 3)       | 2<br>(1 - 4)        | 30<br>(12 - 59)          | 28<br>(11 - 54)      | 9<br>(3 - 20)        |
| Assault by sharp object                         | 196<br>(109 - 346)       | 3<br>(1 - 7)       | 2<br>(1 - 4)        | 141<br>(75 - 252)        | 37<br>(16 - 72)      | 13<br>(5 - 28)       |
| Assault by other means                          | 242<br>(124 - 375)       | 8<br>(3 - 16)      | 8<br>(4 - 15)       | 127<br>(64 - 203)        | 64<br>(29 - 108)     | 35<br>(14 - 63)      |

Web Table 31- Kenya deaths with 95% UI by age, sex, and cause in 2013

| Cause                                                             | Both Sexes, All Ages           | Both Sexes, 0-4 Years        | Both Sexes, 5-14 Years     | Both Sexes, 15-49 Years      | Both Sexes, 50-69 Years     | Both Sexes, 70-80 Years     |
|-------------------------------------------------------------------|--------------------------------|------------------------------|----------------------------|------------------------------|-----------------------------|-----------------------------|
| All causes                                                        | 295,012<br>(270,742 - 324,577) | 89,504<br>(71,437 - 112,772) | 10,296<br>(8,706 - 12,477) | 92,149<br>(83,314 - 101,185) | 49,098<br>(43,578 - 56,768) | 53,964<br>(50,404 - 59,706) |
| Communicable, maternal, neonatal, and nutritional diseases        | 195,778<br>(177,535 - 218,424) | 77,178<br>(61,582 - 97,546)  | 7,815<br>(6,599 - 9,355)   | 67,126<br>(61,732 - 72,513)  | 22,918<br>(20,033 - 25,965) | 20,741<br>(18,333 - 23,331) |
| HIV/AIDS and tuberculosis                                         | 74,661<br>(68,061 - 81,112)    | 3,362<br>(2,327 - 4,549)     | 4,095<br>(3,232 - 4,969)   | 48,740<br>(44,141 - 53,139)  | 14,065<br>(11,275 - 17,093) | 4,399<br>(3,625 - 5,260)    |
| Tuberculosis                                                      | 17,898<br>(14,693 - 20,861)    | 871<br>(533 - 1,316)         | 168<br>(113 - 246)         | 8,811<br>(6,858 - 10,893)    | 4,475<br>(3,423 - 5,577)    | 3,572<br>(2,874 - 4,341)    |
| HIV/AIDS                                                          | 56,763<br>(49,968 - 63,388)    | 2,492<br>(1,549 - 3,634)     | 3,927<br>(3,044 - 4,781)   | 39,929<br>(35,446 - 44,433)  | 9,589<br>(6,652 - 12,600)   | 827<br>(543 - 1,237)        |
| HIV/AIDS resulting in mycobacterial infection                     | 3,585<br>(2,841 - 4,481)       | 145<br>(87 - 218)            | 213<br>(154 - 279)         | 2,522<br>(2,006 - 3,153)     | 646<br>(433 - 916)          | 59<br>(36 - 91)             |
| HIV/AIDS resulting in other diseases                              | 53,178<br>(46,673 - 59,167)    | 2,347<br>(1,455 - 3,421)     | 3,714<br>(2,884 - 4,556)   | 37,407<br>(33,133 - 41,515)  | 8,944<br>(6,199 - 11,714)   | 768<br>(504 - 1,145)        |
| Diarrhea, lower respiratory, and other common infectious diseases | 70,325<br>(58,931 - 84,500)    | 36,487<br>(26,910 - 48,721)  | 2,593<br>(1,869 - 3,680)   | 10,540<br>(8,225 - 13,364)   | 7,148<br>(5,642 - 9,294)    | 13,557<br>(11,381 - 15,904) |
| Diarrheal diseases                                                | 27,757<br>(21,545 - 35,365)    | 11,925<br>(7,073 - 18,464)   | 841<br>(491 - 1,380)       | 5,103<br>(3,747 - 6,939)     | 3,525<br>(2,482 - 4,932)    | 6,363<br>(4,510 - 8,405)    |
| Intestinal infectious diseases                                    | 2,041<br>(1,060 - 3,574)       | 902<br>(445 - 1,665)         | 449<br>(226 - 820)         | 605<br>(297 - 1,095)         | 59<br>(30 - 108)            | 26<br>(13 - 43)             |
| Typhoid fever                                                     | 1,482<br>(707 - 2,715)         | 612<br>(264 - 1,212)         | 350<br>(169 - 655)         | 462<br>(213 - 862)           | 42<br>(19 - 83)             | 16<br>(7 - 30)              |
| Paratyphoid fever                                                 | 364<br>(172 - 668)             | 163<br>(68 - 330)            | 84<br>(38 - 164)           | 106<br>(43 - 207)            | 9<br>(4 - 19)               | 3<br>(1 - 7)                |
| Other intestinal infectious diseases                              | 194<br>(130 - 279)             | 127<br>(75 - 201)            | 15<br>(7 - 27)             | 38<br>(22 - 57)              | 8<br>(3 - 16)               | 6<br>(2 - 14)               |
| Lower respiratory infections                                      | 30,452<br>(24,067 - 38,111)    | 17,324<br>(11,921 - 24,082)  | 605<br>(395 - 950)         | 2,771<br>(2,011 - 3,647)     | 2,952<br>(2,226 - 3,907)    | 6,800<br>(5,337 - 8,442)    |
| Upper respiratory infections                                      | 37<br>(18 - 66)                | 14<br>(2 - 38)               | 1<br>(0 - 4)               | 12<br>(4 - 26)               | 5<br>(1 - 12)               | 5<br>(1 - 12)               |
| Otitis media                                                      | 19<br>(15 - 25)                | 8<br>(5 - 13)                | 1<br>(1 - 1)               | 3<br>(2 - 4)                 | 2<br>(2 - 3)                | 5<br>(4 - 7)                |
| Meningitis                                                        | 6,176<br>(4,613 - 8,030)       | 3,160<br>(1,929 - 4,811)     | 452<br>(286 - 727)         | 1,724<br>(1,214 - 2,335)     | 521<br>(356 - 740)          | 319<br>(226 - 437)          |
| Pneumococcal meningitis                                           | 1,860<br>(1,378 - 2,456)       | 789<br>(447 - 1,226)         | 172<br>(99 - 285)          | 624<br>(420 - 918)           | 172<br>(101 - 262)          | 103<br>(67 - 150)           |
| H influenzae type B meningitis                                    | 811<br>(517 - 1,228)           | 524<br>(262 - 877)           | 68<br>(35 - 115)           | 161<br>(92 - 259)            | 36<br>(20 - 60)             | 23<br>(13 - 36)             |
| Meningococcal meningitis                                          | 631<br>(441 - 869)             | 205<br>(103 - 355)           | 34<br>(17 - 61)            | 240<br>(141 - 392)           | 87<br>(50 - 136)            | 65<br>(37 - 99)             |
| Other meningitis                                                  | 2,874<br>(2,064 - 3,926)       | 1,643<br>(979 - 2,586)       | 178<br>(99 - 308)          | 699<br>(421 - 999)           | 226<br>(144 - 334)          | 128<br>(87 - 183)           |
| Encephalitis                                                      | 190<br>(137 - 265)             | 94<br>(56 - 152)             | 13<br>(6 - 25)             | 48<br>(32 - 69)              | 19<br>(10 - 31)             | 15<br>(7 - 23)              |
| Diphtheria                                                        | 26<br>(2 - 122)                | 20<br>(0 - 118)              | 3<br>(0 - 21)              | 2<br>(0 - 7)                 | 0<br>(0 - 2)                | -<br>(-)                    |
| Whooping cough                                                    | 715<br>(1 - 3,410)             | 685<br>(1 - 3,275)           | 24<br>(0 - 117)            | 5<br>(0 - 23)                | 0<br>(0 - 2)                | -<br>(-)                    |
| Tetanus                                                           | 549<br>(240 - 850)             | 219<br>(83 - 389)            | 21<br>(10 - 39)            | 230<br>(76 - 429)            | 62<br>(20 - 111)            | 16<br>(7 - 30)              |
| Measles                                                           | 2,325<br>(919 - 4,697)         | 2,118<br>(836 - 4,304)       | 179<br>(72 - 366)          | 27<br>(11 - 55)              | 1<br>(0 - 1)                | -<br>(-)                    |
| Varicella and herpes zoster                                       | 39<br>(16 - 80)                | 18<br>(2 - 60)               | 3<br>(0 - 10)              | 8<br>(2 - 17)                | 2<br>(0 - 6)                | 8<br>(1 - 28)               |
| Neglected tropical diseases and malaria                           | 9,029<br>(5,534 - 15,120)      | 5,926<br>(2,732 - 11,397)    | 654<br>(338 - 1,234)       | 1,585<br>(1,073 - 2,373)     | 441<br>(282 - 659)          | 423<br>(230 - 721)          |
| Malaria                                                           | 8,360<br>(4,891 - 14,436)      | 5,743<br>(2,586 - 11,244)    | 569<br>(261 - 1,134)       | 1,299<br>(788 - 2,075)       | 370<br>(218 - 583)          | 379<br>(188 - 674)          |
| Leishmaniasis                                                     | 172<br>(114 - 243)             | 62<br>(29 - 106)             | 30<br>(17 - 49)            | 7<br>(43 - 105)              | 7<br>(4 - 11)               | 3<br>(2 - 5)                |
| Visceral leishmaniasis                                            | 172<br>(114 - 243)             | 62<br>(29 - 106)             | 30<br>(17 - 49)            | 7<br>(43 - 105)              | 7<br>(4 - 11)               | 3<br>(2 - 5)                |
| African trypanosomiasis                                           | 4<br>(2 - 7)                   | 0<br>(0 - 1)                 | 0<br>(0 - 1)               | 3<br>(1 - 5)                 | 0<br>(0 - 1)                | 0<br>(0 - 0)                |
| Schistosomiasis                                                   | 127<br>(93 - 168)              | 2<br>(1 - 4)                 | 3<br>(2 - 5)               | 70<br>(45 - 99)              | 33<br>(22 - 48)             | 19<br>(12 - 29)             |
| Cysticercosis                                                     | 16<br>(13 - 20)                | 1<br>(0 - 1)                 | 1<br>(0 - 1)               | 12<br>(10 - 15)              | 2<br>(2 - 3)                | 1<br>(1 - 1)                |
| Cystic echinococcosis                                             | 102<br>(85 - 122)              | 13<br>(8 - 19)               | 12<br>(9 - 16)             | 62<br>(48 - 77)              | 11<br>(9 - 14)              | 6<br>(5 - 7)                |
| Dengue                                                            | 4<br>(3 - 8)                   | 1<br>(0 - 2)                 | 1<br>(0 - 2)               | 2<br>(1 - 4)                 | 0<br>(0 - 1)                | 0<br>(0 - 0)                |
| Yellow fever                                                      | 1<br>(1 - 2)                   | 0<br>(0 - 0)                 | 0<br>(0 - 1)               | 1<br>(0 - 1)                 | 0<br>(0 - 0)                | 0<br>(0 - 0)                |
| Rabies                                                            | 126<br>(72 - 184)              | 30<br>(13 - 59)              | 31<br>(14 - 56)            | 54<br>(32 - 74)              | 9<br>(4 - 14)               | 2<br>(1 - 5)                |
| Intestinal nematode infections                                    | 57<br>(30 - 95)                | 45<br>(20 - 80)              | 6<br>(1 - 14)              | 5<br>(1 - 13)                | 1<br>(0 - 5)                | 1<br>(0 - 5)                |
| Ascariasis                                                        | 57<br>(30 - 95)                | 45<br>(20 - 80)              | 6<br>(1 - 14)              | 5<br>(1 - 13)                | 1<br>(0 - 5)                | 1<br>(0 - 5)                |

Web Table 31- Kenya deaths with 95% UI by age, sex, and cause in 2013

| Cause                                                            | Both Sexes, All Ages        | Both Sexes, 0-4 Years       | Both Sexes, 5-14 Years | Both Sexes, 15-49 Years     | Both Sexes, 50-69 Years     | Both Sexes, 70-80 Years     |
|------------------------------------------------------------------|-----------------------------|-----------------------------|------------------------|-----------------------------|-----------------------------|-----------------------------|
| Other neglected tropical diseases                                | 61<br>(40 - 103)            | 31<br>(16 - 61)             | 2<br>(1 - 3)           | 9<br>(6 - 17)               | 7<br>(4 - 13)               | 11<br>(6 - 20)              |
| Maternal disorders                                               | 4,361<br>(2,759 - 6,514)    | --                          | 8<br>(3 - 19)          | 4,354<br>(2,750 - 6,507)    | --                          | --                          |
| Maternal hemorrhage                                              | 500<br>(284 - 811)          | --                          | 1<br>(0 - 1)           | 500<br>(284 - 811)          | --                          | --                          |
| Maternal sepsis and other maternal infections                    | 416<br>(240 - 676)          | --                          | 1<br>(0 - 2)           | 415<br>(240 - 675)          | --                          | --                          |
| Maternal hypertensive disorders                                  | 456<br>(258 - 772)          | --                          | 1<br>(0 - 2)           | 455<br>(257 - 770)          | --                          | --                          |
| Maternal obstructed labor                                        | 229<br>(136 - 371)          | --                          | 0<br>(0 - 1)           | 229<br>(135 - 371)          | --                          | --                          |
| Maternal abortive outcome                                        | 826<br>(488 - 1,324)        | --                          | 1<br>(0 - 3)           | 825<br>(487 - 1,322)        | --                          | --                          |
| Indirect maternal deaths                                         | 357<br>(188 - 615)          | --                          | 0<br>(0 - 1)           | 357<br>(188 - 614)          | --                          | --                          |
| Late maternal deaths                                             | 376<br>(185 - 655)          | --                          | 1<br>(0 - 3)           | 375<br>(185 - 654)          | --                          | --                          |
| Maternal deaths aggravated by HIV/AIDS                           | 105<br>(56 - 175)           | --                          | --                     | 105<br>(56 - 175)           | --                          | --                          |
| Other maternal disorders                                         | 1,087<br>(673 - 1,681)      | --                          | 2<br>(1 - 4)           | 1,085<br>(672 - 1,679)      | --                          | --                          |
| Neonatal disorders                                               | 24,044<br>(19,873 - 29,068) | 24,044<br>(19,873 - 29,068) | --                     | --                          | --                          | --                          |
| Neonatal preterm birth complications                             | 8,380<br>(5,246 - 12,228)   | 8,380<br>(5,246 - 12,228)   | --                     | --                          | --                          | --                          |
| Neonatal encephalopathy due to birth asphyxia and trauma         | 7,065<br>(4,202 - 10,469)   | 7,065<br>(4,202 - 10,469)   | --                     | --                          | --                          | --                          |
| Neonatal sepsis and other neonatal infections                    | 6,363<br>(3,482 - 10,562)   | 6,363<br>(3,482 - 10,562)   | --                     | --                          | --                          | --                          |
| Hemolytic disease and other neonatal jaundice                    | 127<br>(52 - 291)           | 127<br>(52 - 291)           | --                     | --                          | --                          | --                          |
| Other neonatal disorders                                         | 2,110<br>(1,195 - 3,444)    | 2,110<br>(1,195 - 3,444)    | --                     | --                          | --                          | --                          |
| Nutritional deficiencies                                         | 10,365<br>(7,551 - 14,072)  | 5,400<br>(3,224 - 8,214)    | 330<br>(212 - 513)     | 1,464<br>(1,044 - 2,010)    | 1,030<br>(735 - 1,474)      | 2,140<br>(1,591 - 2,938)    |
| Protein-energy malnutrition                                      | 8,541<br>(5,972 - 11,948)   | 5,062<br>(2,991 - 7,770)    | 290<br>(179 - 453)     | 726<br>(428 - 1,151)        | 769<br>(495 - 1,153)        | 1,694<br>(1,157 - 2,387)    |
| Iodine deficiency                                                | 9<br>(1 - 34)               | 4<br>(0 - 24)               | 0<br>(0 - 2)           | 3<br>(0 - 13)               | 1<br>(0 - 4)                | 1<br>(0 - 5)                |
| Iron-deficiency anemia                                           | 1,767<br>(1,002 - 2,927)    | 327<br>(103 - 792)          | 39<br>(16 - 81)        | 724<br>(410 - 1,102)        | 253<br>(123 - 459)          | 423<br>(202 - 796)          |
| Other nutritional deficiencies                                   | 48<br>(25 - 81)             | 7<br>(2 - 18)               | 1<br>(0 - 2)           | 11<br>(5 - 23)              | 7<br>(4 - 13)               | 22<br>(8 - 48)              |
| Other communicable, maternal, neonatal, and nutritional diseases | 2,993<br>(1,358 - 5,011)    | 1,959<br>(408 - 3,840)      | 135<br>(43 - 262)      | 442<br>(319 - 598)          | 234<br>(151 - 377)          | 223<br>(122 - 408)          |
| Sexually transmitted diseases excluding HIV                      | 1,891<br>(228 - 3,830)      | 1,609<br>(0 - 3,471)        | 97<br>(3 - 218)        | 108<br>(63 - 189)           | 40<br>(18 - 85)             | 37<br>(15 - 85)             |
| Syphilis                                                         | 1,807<br>(130 - 3,740)      | 1,609<br>(0 - 3,471)        | 96<br>(1 - 216)        | 47<br>(27 - 79)             | 26<br>(12 - 52)             | 29<br>(12 - 66)             |
| Chlamydial infection                                             | 20<br>(11 - 40)             | --                          | 0<br>(0 - 0)           | 16<br>(8 - 32)              | 3<br>(1 - 7)                | 1<br>(0 - 4)                |
| Gonococcal infection                                             | 35<br>(21 - 59)             | --                          | 1<br>(0 - 1)           | 23<br>(14 - 40)             | 7<br>(3 - 15)               | 4<br>(2 - 10)               |
| Other sexually transmitted diseases                              | 29<br>(17 - 50)             | --                          | 1<br>(0 - 1)           | 21<br>(12 - 37)             | 5<br>(2 - 11)               | 2<br>(1 - 5)                |
| Hepatitis                                                        | 315<br>(241 - 461)          | 60<br>(33 - 114)            | 14<br>(9 - 22)         | 163<br>(111 - 254)          | 54<br>(38 - 75)             | 24<br>(17 - 33)             |
| Acute hepatitis A                                                | 39<br>(11 - 81)             | 22<br>(6 - 51)              | 5<br>(2 - 10)          | 11<br>(3 - 26)              | 1<br>(0 - 2)                | 0<br>(0 - 0)                |
| Acute hepatitis B                                                | 178<br>(121 - 262)          | 38<br>(17 - 78)             | 7<br>(3 - 12)          | 68<br>(36 - 120)            | 44<br>(30 - 62)             | 21<br>(15 - 29)             |
| Acute hepatitis C                                                | 3<br>(0 - 7)                | --                          | 0<br>(0 - 1)           | 2<br>(0 - 5)                | 1<br>(0 - 2)                | 0<br>(0 - 1)                |
| Acute hepatitis E                                                | 95<br>(54 - 172)            | 0<br>(0 - 1)                | 2<br>(1 - 4)           | 82<br>(47 - 155)            | 8<br>(3 - 17)               | 2<br>(1 - 5)                |
| Other infectious diseases                                        | 787<br>(535 - 1,157)        | 289<br>(155 - 491)          | 24<br>(11 - 47)        | 172<br>(93 - 273)           | 140<br>(70 - 270)           | 162<br>(72 - 350)           |
| Non-communicable diseases                                        | 80,784<br>(71,857 - 92,602) | 9,311<br>(6,526 - 13,477)   | 1,337<br>(995 - 1,849) | 15,215<br>(12,462 - 18,324) | 24,035<br>(20,236 - 30,042) | 30,886<br>(28,139 - 34,894) |
| Neoplasms                                                        | 17,235<br>(14,840 - 20,913) | 508<br>(322 - 736)          | 362<br>(239 - 519)     | 2,980<br>(2,320 - 3,605)    | 8,863<br>(7,430 - 11,467)   | 4,521<br>(3,942 - 5,332)    |
| Esophageal cancer                                                | 2,735<br>(2,055 - 3,472)    | --                          | --                     | 201<br>(150 - 262)          | 1,453<br>(1,063 - 1,888)    | 1,081<br>(775 - 1,432)      |
| Stomach cancer                                                   | 1,346<br>(1,120 - 1,639)    | --                          | --                     | 150<br>(112 - 199)          | 632<br>(494 - 832)          | 564<br>(454 - 701)          |
| Liver cancer                                                     | 1,101<br>(842 - 1,390)      | --                          | 11<br>(5 - 20)         | 289<br>(163 - 415)          | 571<br>(425 - 761)          | 229<br>(170 - 311)          |
| Liver cancer due to hepatitis B                                  | 216<br>(104 - 356)          | --                          | 3<br>(0 - 8)           | 89<br>(19 - 161)            | 87<br>(40 - 163)            | 37<br>(19 - 59)             |

Web Table 31- Kenya deaths with 95% UI by age, sex, and cause in 2013

| Cause                                | Both Sexes, All Ages        | Both Sexes, 0-4 Years | Both Sexes, 5-14 Years | Both Sexes, 15-49 Years  | Both Sexes, 50-69 Years   | Both Sexes, 70-80 Years     |
|--------------------------------------|-----------------------------|-----------------------|------------------------|--------------------------|---------------------------|-----------------------------|
| Liver cancer due to hepatitis C      | 428<br>(283 - 612)          | --                    | 1<br>(0 - 2)           | 85<br>(46 - 137)         | 247<br>(155 - 364)        | 95<br>(59 - 143)            |
| Liver cancer due to alcohol use      | 214<br>(137 - 318)          | --                    | --                     | 35<br>(19 - 57)          | 123<br>(72 - 194)         | 57<br>(36 - 87)             |
| Liver cancer due to other causes     | 243<br>(160 - 347)          | --                    | 7<br>(3 - 13)          | 81<br>(51 - 118)         | 115<br>(65 - 183)         | 41<br>(23 - 64)             |
| Larynx cancer                        | 223<br>(159 - 324)          | --                    | --                     | 15<br>(10 - 24)          | 158<br>(107 - 232)        | 49<br>(34 - 78)             |
| Tracheal, bronchus and lung cancer   | 705<br>(571 - 871)          | --                    | --                     | 52<br>(38 - 83)          | 479<br>(373 - 609)        | 174<br>(143 - 212)          |
| Breast cancer                        | 1,642<br>(1,201 - 2,231)    | --                    | --                     | 407<br>(231 - 559)       | 1,015<br>(743 - 1,454)    | 220<br>(168 - 293)          |
| Cervical cancer                      | 2,007<br>(1,475 - 2,897)    | --                    | --                     | 294<br>(202 - 418)       | 1,337<br>(923 - 1,992)    | 376<br>(243 - 595)          |
| Uterine cancer                       | 73<br>(49 - 115)            | --                    | --                     | 5<br>(2 - 9)             | 44<br>(26 - 71)           | 25<br>(16 - 42)             |
| Prostate cancer                      | 439<br>(292 - 714)          | --                    | --                     | 7<br>(4 - 12)            | 157<br>(94 - 265)         | 275<br>(180 - 454)          |
| Colon and rectum cancer              | 947<br>(798 - 1,157)        | --                    | --                     | 219<br>(175 - 272)       | 492<br>(392 - 628)        | 236<br>(191 - 295)          |
| Lip and oral cavity cancer           | 375<br>(287 - 515)          | --                    | --                     | 79<br>(53 - 121)         | 219<br>(161 - 313)        | 77<br>(54 - 121)            |
| Nasopharynx cancer                   | 169<br>(117 - 227)          | --                    | 6<br>(2 - 14)          | 96<br>(67 - 133)         | 44<br>(24 - 67)           | 24<br>(16 - 34)             |
| Other pharynx cancer                 | 79<br>(59 - 107)            | --                    | --                     | 20<br>(12 - 31)          | 48<br>(33 - 67)           | 12<br>(8 - 18)              |
| Gallbladder and biliary tract cancer | 170<br>(127 - 246)          | --                    | --                     | 29<br>(18 - 44)          | 101<br>(66 - 159)         | 40<br>(28 - 58)             |
| Pancreatic cancer                    | 553<br>(452 - 684)          | --                    | --                     | 36<br>(28 - 46)          | 389<br>(305 - 500)        | 127<br>(101 - 161)          |
| Malignant skin melanoma              | 75<br>(53 - 102)            | --                    | --                     | 16<br>(9 - 25)           | 32<br>(23 - 47)           | 27<br>(16 - 37)             |
| Non-melanoma skin cancer             | 78<br>(51 - 121)            | --                    | --                     | 13<br>(8 - 22)           | 25<br>(15 - 40)           | 40<br>(23 - 75)             |
| Ovarian cancer                       | 496<br>(356 - 713)          | --                    | --                     | 74<br>(41 - 123)         | 336<br>(232 - 501)        | 86<br>(58 - 129)            |
| Testicular cancer                    | 26<br>(17 - 41)             | --                    | --                     | 16<br>(9 - 28)           | 7<br>(4 - 10)             | 4<br>(2 - 7)                |
| Kidney cancer                        | 181<br>(139 - 242)          | 39<br>(18 - 79)       | 11<br>(6 - 21)         | 25<br>(16 - 42)          | 82<br>(61 - 112)          | 25<br>(18 - 33)             |
| Bladder cancer                       | 360<br>(276 - 470)          | --                    | --                     | 26<br>(19 - 37)          | 229<br>(171 - 311)        | 105<br>(71 - 144)           |
| Brain and nervous system cancer      | 290<br>(216 - 362)          | 16<br>(7 - 32)        | 29<br>(18 - 45)        | 128<br>(88 - 168)        | 78<br>(55 - 112)          | 38<br>(25 - 56)             |
| Thyroid cancer                       | 78<br>(56 - 106)            | --                    | 1<br>(0 - 2)           | 16<br>(10 - 24)          | 42<br>(27 - 65)           | 19<br>(13 - 28)             |
| Mesothelioma                         | 25<br>(18 - 41)             | --                    | --                     | 10<br>(6 - 18)           | 10<br>(6 - 16)            | 6<br>(4 - 11)               |
| Hodgkin lymphoma                     | 111<br>(74 - 154)           | 4<br>(2 - 9)          | 4<br>(1 - 10)          | 24<br>(14 - 44)          | 37<br>(21 - 60)           | 42<br>(13 - 73)             |
| Non-Hodgkin lymphoma                 | 769<br>(560 - 1,000)        | 93<br>(44 - 162)      | 126<br>(67 - 203)      | 192<br>(122 - 271)       | 271<br>(197 - 375)        | 86<br>(63 - 115)            |
| Multiple myeloma                     | 220<br>(160 - 306)          | --                    | --                     | 38<br>(26 - 50)          | 127<br>(92 - 177)         | 55<br>(27 - 97)             |
| Leukemia                             | 356<br>(278 - 434)          | 35<br>(18 - 62)       | 59<br>(35 - 88)        | 141<br>(101 - 177)       | 67<br>(52 - 91)           | 54<br>(43 - 69)             |
| Other neoplasms                      | 1,603<br>(1,183 - 1,994)    | 321<br>(195 - 474)    | 114<br>(71 - 173)      | 363<br>(238 - 512)       | 382<br>(267 - 513)        | 422<br>(307 - 545)          |
| Cardiovascular diseases              | 27,866<br>(24,279 - 32,210) | 491<br>(321 - 716)    | 136<br>(93 - 198)      | 3,705<br>(2,902 - 4,793) | 8,107<br>(6,614 - 10,113) | 15,427<br>(13,554 - 17,740) |
| Rheumatic heart disease              | 1,034<br>(771 - 1,505)      | 17<br>(7 - 37)        | 29<br>(18 - 48)        | 456<br>(313 - 720)       | 255<br>(173 - 390)        | 276<br>(196 - 421)          |
| Ischemic heart disease               | 6,990<br>(5,583 - 8,489)    | 3<br>(1 - 6)          | 5<br>(3 - 11)          | 816<br>(589 - 1,077)     | 2,327<br>(1,747 - 2,964)  | 3,838<br>(3,058 - 4,712)    |
| Cerebrovascular disease              | 11,544<br>(9,320 - 13,733)  | 55<br>(32 - 88)       | 15<br>(9 - 24)         | 863<br>(662 - 1,130)     | 3,347<br>(2,613 - 4,278)  | 7,263<br>(5,885 - 8,653)    |
| Ischemic stroke                      | 5,283<br>(2,994 - 7,250)    | 4<br>(1 - 8)          | 2<br>(1 - 3)           | 118<br>(57 - 180)        | 1,056<br>(514 - 1,595)    | 4,104<br>(2,385 - 5,558)    |
| Hemorrhagic stroke                   | 6,261<br>(4,760 - 8,475)    | 51<br>(30 - 82)       | 14<br>(8 - 22)         | 746<br>(567 - 1,013)     | 2,291<br>(1,721 - 3,082)  | 3,159<br>(2,062 - 4,576)    |
| Hypertensive heart disease           | 2,951<br>(1,958 - 4,704)    | 10<br>(4 - 21)        | 4<br>(2 - 7)           | 261<br>(173 - 405)       | 738<br>(470 - 1,187)      | 1,938<br>(1,229 - 3,340)    |
| Cardiomyopathy and myocarditis       | 1,218<br>(796 - 1,631)      | 186<br>(88 - 301)     | 33<br>(17 - 55)        | 365<br>(203 - 547)       | 288<br>(176 - 420)        | 347<br>(186 - 547)          |
| Atrial fibrillation and flutter      | 10<br>(4 - 18)              | --                    | --                     | 1<br>(1 - 1)             | 2<br>(1 - 3)              | 7<br>(3 - 14)               |
| Aortic aneurysm                      | 284<br>(185 - 412)          | --                    | --                     | 46<br>(26 - 73)          | 86<br>(54 - 132)          | 153<br>(98 - 230)           |
| Peripheral vascular disease          | 14<br>(7 - 26)              | --                    | --                     | 0<br>(0 - 1)             | 3<br>(2 - 6)              | 10<br>(5 - 20)              |

Web Table 31- Kenya deaths with 95% UI by age, sex, and cause in 2013

| Cause                                               | Both Sexes, All Ages     | Both Sexes, 0-4 Years | Both Sexes, 5-14 Years | Both Sexes, 15-49 Years  | Both Sexes, 50-69 Years  | Both Sexes, 70-80 Years  |
|-----------------------------------------------------|--------------------------|-----------------------|------------------------|--------------------------|--------------------------|--------------------------|
| Endocarditis                                        | 500<br>(318 - 808)       | 46<br>(20 - 90)       | 10<br>(5 - 18)         | 121<br>(67 - 198)        | 126<br>(74 - 209)        | 198<br>(106 - 365)       |
| Other cardiovascular and circulatory diseases       | 3,320<br>(2,494 - 4,674) | 175<br>(91 - 314)     | 38<br>(23 - 60)        | 776<br>(502 - 1,204)     | 934<br>(641 - 1,391)     | 1,397<br>(943 - 2,200)   |
| Chronic respiratory diseases                        | 4,608<br>(3,838 - 5,371) | 208<br>(120 - 334)    | 40<br>(28 - 57)        | 599<br>(460 - 752)       | 1,234<br>(952 - 1,544)   | 2,527<br>(2,099 - 2,994) |
| Chronic obstructive pulmonary disease               | 2,569<br>(2,086 - 3,079) | 42<br>(20 - 77)       | 14<br>(9 - 21)         | 215<br>(157 - 278)       | 713<br>(536 - 911)       | 1,584<br>(1,268 - 1,921) |
| Pneumoconiosis                                      | 252<br>(171 - 362)       | 4<br>(2 - 8)          | 2<br>(1 - 3)           | 61<br>(39 - 92)          | 85<br>(51 - 131)         | 102<br>(63 - 152)        |
| Silicosis                                           | 64<br>(38 - 101)         | 1<br>(0 - 2)          | 0<br>(0 - 1)           | 13<br>(6 - 22)           | 21<br>(11 - 35)          | 29<br>(15 - 48)          |
| Asbestosis                                          | 30<br>(18 - 47)          | 1<br>(0 - 2)          | 0<br>(0 - 1)           | 8<br>(4 - 13)            | 12<br>(7 - 20)           | 9<br>(5 - 15)            |
| Coal workers pneumoconiosis                         | 36<br>(21 - 57)          | 0<br>(0 - 1)          | 0<br>(0 - 1)           | 7<br>(4 - 11)            | 14<br>(7 - 25)           | 14<br>(7 - 24)           |
| Other pneumoconiosis                                | 122<br>(80 - 177)        | 2<br>(1 - 4)          | 1<br>(0 - 1)           | 33<br>(21 - 50)          | 38<br>(22 - 59)          | 50<br>(28 - 78)          |
| Asthma                                              | 774<br>(550 - 991)       | 36<br>(15 - 69)       | 10<br>(6 - 15)         | 124<br>(89 - 166)        | 218<br>(146 - 302)       | 386<br>(264 - 524)       |
| Interstitial lung disease and pulmonary sarcoidosis | 612<br>(282 - 941)       | 9<br>(2 - 22)         | 3<br>(1 - 5)           | 72<br>(33 - 126)         | 172<br>(77 - 275)        | 356<br>(143 - 598)       |
| Other chronic respiratory diseases                  | 402<br>(302 - 523)       | 118<br>(67 - 189)     | 12<br>(7 - 18)         | 127<br>(86 - 175)        | 46<br>(31 - 66)          | 99<br>(64 - 145)         |
| Cirrhosis                                           | 4,053<br>(3,399 - 4,868) | 61<br>(31 - 111)      | 41<br>(28 - 59)        | 1,343<br>(1,039 - 1,678) | 1,597<br>(1,236 - 2,054) | 1,011<br>(818 - 1,228)   |
| Cirrhosis due to hepatitis B                        | 931<br>(592 - 1,278)     | 2<br>(1 - 5)          | 6<br>(3 - 10)          | 307<br>(189 - 442)       | 381<br>(231 - 556)       | 235<br>(141 - 348)       |
| Cirrhosis due to hepatitis C                        | 895<br>(530 - 1,257)     | 4<br>(1 - 11)         | 5<br>(2 - 9)           | 233<br>(127 - 358)       | 364<br>(180 - 548)       | 290<br>(139 - 418)       |
| Cirrhosis due to alcohol use                        | 1,634<br>(1,208 - 2,221) | --                    | --                     | 504<br>(353 - 709)       | 706<br>(482 - 1,022)     | 424<br>(310 - 598)       |
| Cirrhosis due to other causes                       | 593<br>(412 - 790)       | 55<br>(27 - 99)       | 30<br>(21 - 45)        | 299<br>(195 - 422)       | 147<br>(80 - 231)        | 62<br>(36 - 93)          |
| Digestive diseases                                  | 4,997<br>(4,205 - 5,923) | 158<br>(86 - 270)     | 120<br>(83 - 173)      | 1,628<br>(1,237 - 2,049) | 1,244<br>(973 - 1,593)   | 1,847<br>(1,528 - 2,200) |
| Peptic ulcer disease                                | 1,218<br>(864 - 1,616)   | 11<br>(5 - 22)        | 10<br>(5 - 18)         | 323<br>(210 - 471)       | 326<br>(211 - 462)       | 547<br>(377 - 738)       |
| Gastritis and duodenitis                            | 224<br>(102 - 504)       | 11<br>(4 - 21)        | 9<br>(4 - 17)          | 67<br>(35 - 124)         | 47<br>(18 - 124)         | 91<br>(30 - 261)         |
| Appendicitis                                        | 293<br>(180 - 434)       | 9<br>(4 - 16)         | 13<br>(7 - 21)         | 112<br>(70 - 168)        | 58<br>(32 - 99)          | 102<br>(50 - 182)        |
| Paralytic ileus and intestinal obstruction          | 1,739<br>(1,241 - 2,289) | 41<br>(20 - 76)       | 52<br>(34 - 78)        | 598<br>(395 - 837)       | 479<br>(314 - 657)       | 569<br>(387 - 792)       |
| Inguinal, femoral, and abdominal hernia             | 68<br>(44 - 99)          | 4<br>(1 - 8)          | 1<br>(1 - 3)           | 27<br>(15 - 42)          | 10<br>(5 - 19)           | 25<br>(16 - 41)          |
| Inflammatory bowel disease                          | 303<br>(194 - 412)       | 40<br>(18 - 75)       | 11<br>(6 - 19)         | 117<br>(74 - 172)        | 51<br>(27 - 82)          | 84<br>(44 - 144)         |
| Vascular intestinal disorders                       | 44<br>(20 - 92)          | 1<br>(0 - 2)          | 1<br>(0 - 2)           | 8<br>(4 - 15)            | 11<br>(5 - 24)           | 23<br>(10 - 54)          |
| Gallbladder and biliary diseases                    | 306<br>(212 - 415)       | 4<br>(2 - 8)          | 3<br>(2 - 6)           | 71<br>(48 - 100)         | 73<br>(47 - 106)         | 154<br>(96 - 230)        |
| Pancreatitis                                        | 278<br>(150 - 414)       | 3<br>(1 - 6)          | 3<br>(1 - 5)           | 142<br>(73 - 222)        | 67<br>(32 - 116)         | 63<br>(31 - 113)         |
| Other digestive diseases                            | 525<br>(395 - 696)       | 35<br>(15 - 67)       | 17<br>(10 - 27)        | 162<br>(110 - 228)       | 123<br>(80 - 186)        | 188<br>(124 - 276)       |
| Neurological disorders                              | 3,408<br>(2,871 - 4,040) | 292<br>(167 - 523)    | 148<br>(90 - 232)      | 774<br>(540 - 1,152)     | 265<br>(209 - 336)       | 1,929<br>(1,582 - 2,325) |
| Alzheimer disease and other dementias               | 1,840<br>(1,491 - 2,257) | --                    | --                     | 1<br>(0 - 2)             | 138<br>(104 - 181)       | 1,702<br>(1,361 - 2,096) |
| Parkinson disease                                   | 22<br>(13 - 37)          | --                    | --                     | 2<br>(1 - 3)             | 3<br>(1 - 6)             | 17<br>(8 - 32)           |
| Epilepsy                                            | 1,289<br>(967 - 1,803)   | 225<br>(113 - 435)    | 131<br>(77 - 216)      | 691<br>(468 - 1,061)     | 70<br>(47 - 103)         | 172<br>(116 - 251)       |
| Multiple sclerosis                                  | 8<br>(4 - 12)            | --                    | --                     | 5<br>(2 - 9)             | 2<br>(1 - 4)             | 1<br>(0 - 2)             |
| Other neurological disorders                        | 248<br>(196 - 312)       | 68<br>(43 - 116)      | 16<br>(11 - 24)        | 76<br>(56 - 101)         | 51<br>(38 - 69)          | 36<br>(27 - 46)          |
| Mental and substance use disorders                  | 1,742<br>(1,215 - 2,492) | 85<br>(30 - 166)      | 0<br>(0 - 0)           | 1,312<br>(909 - 1,915)   | 275<br>(174 - 432)       | 69<br>(41 - 116)         |
| Schizophrenia                                       | 40<br>(22 - 71)          | --                    | --                     | 26<br>(13 - 50)          | 8<br>(5 - 16)            | 5<br>(3 - 9)             |
| Alcohol use disorders                               | 929<br>(552 - 1,437)     | --                    | --                     | 676<br>(373 - 1,088)     | 210<br>(123 - 335)       | 42<br>(24 - 72)          |
| Drug use disorders                                  | 771<br>(499 - 1,107)     | 85<br>(30 - 166)      | --                     | 608<br>(397 - 872)       | 57<br>(20 - 100)         | 22<br>(6 - 42)           |
| Opioid use disorders                                | 82<br>(53 - 117)         | 9<br>(3 - 19)         | --                     | 65<br>(42 - 95)          | 5<br>(2 - 9)             | 2<br>(1 - 5)             |
| Cocaine use disorders                               | 4<br>(2 - 5)             | 0<br>(0 - 1)          | --                     | 3<br>(2 - 4)             | 0<br>(0 - 0)             | 0<br>(0 - 0)             |

Web Table 31- Kenya deaths with 95% UI by age, sex, and cause in 2013

| Cause                                               | Both Sexes, All Ages      | Both Sexes, 0-4 Years     | Both Sexes, 5-14 Years | Both Sexes, 15-49 Years  | Both Sexes, 50-69 Years  | Both Sexes, 70-80 Years  |
|-----------------------------------------------------|---------------------------|---------------------------|------------------------|--------------------------|--------------------------|--------------------------|
| Amphetamine use disorders                           | 2<br>(2 - 4)              | 0<br>(0 - 1)              | --                     | 2<br>(1 - 3)             | 0<br>(0 - 0)             | 0<br>(0 - 0)             |
| Other drug use disorders                            | 683<br>(441 - 981)        | 75<br>(26 - 145)          | --                     | 538<br>(353 - 769)       | 51<br>(18 - 91)          | 19<br>(6 - 38)           |
| Eating disorders                                    | 2<br>(1 - 3)              | --                        | 0<br>(0 - 0)           | 2<br>(1 - 3)             | --                       | --                       |
| Anorexia nervosa                                    | 2<br>(1 - 3)              | --                        | 0<br>(0 - 0)           | 2<br>(1 - 3)             | --                       | --                       |
| Diabetes, urogenital, blood, and endocrine diseases | 8,761<br>(7,588 - 10,213) | 1,064<br>(688 - 1,560)    | 244<br>(160 - 379)     | 2,177<br>(1,715 - 2,738) | 2,188<br>(1,797 - 2,744) | 3,089<br>(2,665 - 3,588) |
| Diabetes mellitus                                   | 3,637<br>(3,118 - 4,251)  | 34<br>(22 - 51)           | 12<br>(8 - 18)         | 501<br>(391 - 631)       | 1,300<br>(1,029 - 1,677) | 1,791<br>(1,486 - 2,136) |
| Acute glomerulonephritis                            | 94<br>(44 - 127)          | 13<br>(6 - 24)            | 4<br>(2 - 7)           | 29<br>(15 - 46)          | 26<br>(8 - 43)           | 22<br>(8 - 36)           |
| Chronic kidney disease                              | 1,557<br>(1,306 - 1,870)  | 121<br>(72 - 189)         | 42<br>(29 - 61)        | 545<br>(408 - 724)       | 301<br>(234 - 391)       | 549<br>(435 - 685)       |
| Chronic kidney disease due to diabetes mellitus     | 11<br>(7 - 23)            | 1<br>(0 - 1)              | 1<br>(0 - 1)           | 3<br>(2 - 6)             | 3<br>(1 - 8)             | 3<br>(1 - 8)             |
| Chronic kidney disease due to hypertension          | 595<br>(423 - 790)        | 17<br>(7 - 31)            | 5<br>(3 - 9)           | 140<br>(87 - 207)        | 152<br>(100 - 217)       | 282<br>(192 - 400)       |
| Chronic kidney disease due to glomerulonephritis    | 458<br>(330 - 620)        | 63<br>(37 - 100)          | 21<br>(14 - 30)        | 203<br>(136 - 292)       | 71<br>(42 - 106)         | 100<br>(58 - 151)        |
| Chronic kidney disease due to other causes          | 493<br>(327 - 710)        | 41<br>(20 - 74)           | 16<br>(9 - 26)         | 198<br>(121 - 309)       | 75<br>(38 - 124)         | 164<br>(87 - 252)        |
| Urinary diseases and male infertility               | 1,096<br>(881 - 1,384)    | 90<br>(48 - 161)          | 19<br>(12 - 31)        | 342<br>(254 - 459)       | 289<br>(214 - 387)       | 356<br>(258 - 509)       |
| Interstitial nephritis and urinary tract infections | 800<br>(623 - 1,013)      | 65<br>(33 - 124)          | 12<br>(7 - 19)         | 226<br>(158 - 312)       | 216<br>(157 - 295)       | 280<br>(196 - 406)       |
| Urolithiasis                                        | 37<br>(22 - 63)           | --                        | 2<br>(1 - 3)           | 16<br>(9 - 29)           | 11<br>(5 - 22)           | 8<br>(3 - 20)            |
| Other urinary diseases                              | 259<br>(178 - 389)        | 25<br>(12 - 50)           | 6<br>(3 - 10)          | 99<br>(66 - 151)         | 61<br>(33 - 105)         | 67<br>(31 - 124)         |
| Gynecological diseases                              | 14<br>(7 - 28)            | --                        | --                     | 7<br>(3 - 21)            | 3<br>(2 - 6)             | 3<br>(2 - 6)             |
| Uterine fibroids                                    | 3<br>(2 - 5)              | --                        | --                     | 1<br>(0 - 3)             | 1<br>(0 - 2)             | 1<br>(1 - 2)             |
| Polycystic ovarian syndrome                         | 1<br>(0 - 2)              | --                        | --                     | 0<br>(0 - 2)             | 0<br>(0 - 0)             | --                       |
| Endometriosis                                       | 1<br>(1 - 4)              | --                        | --                     | 1<br>(1 - 3)             | 0<br>(0 - 0)             | --                       |
| Genital prolapse                                    | 2<br>(1 - 4)              | --                        | --                     | 1<br>(0 - 3)             | 1<br>(0 - 1)             | 1<br>(0 - 2)             |
| Other gynecological diseases                        | 7<br>(4 - 14)             | --                        | --                     | 3<br>(2 - 10)            | 2<br>(1 - 3)             | 2<br>(1 - 3)             |
| Hemoglobinopathies and hemolytic anemias            | 1,260<br>(724 - 1,972)    | 545<br>(277 - 899)        | 137<br>(67 - 248)      | 429<br>(222 - 678)       | 83<br>(37 - 198)         | 66<br>(33 - 156)         |
| Thalassemias                                        | 16<br>(9 - 25)            | 12<br>(6 - 19)            | 1<br>(1 - 3)           | 3<br>(2 - 5)             | 0<br>(0 - 0)             | 0<br>(0 - 0)             |
| Sickle cell disorders                               | 1,108<br>(637 - 1,727)    | 493<br>(247 - 820)        | 132<br>(64 - 239)      | 408<br>(212 - 643)       | 70<br>(31 - 169)         | 5<br>(2 - 11)            |
| G6PD deficiency                                     | 21<br>(13 - 34)           | 12<br>(6 - 19)            | 2<br>(1 - 3)           | 5<br>(3 - 9)             | 1<br>(1 - 3)             | 2<br>(1 - 4)             |
| Other hemoglobinopathies and hemolytic anemias      | 114<br>(63 - 222)         | 29<br>(17 - 47)           | 2<br>(1 - 4)           | 12<br>(6 - 20)           | 11<br>(5 - 26)           | 60<br>(30 - 143)         |
| Endocrine, metabolic, blood, and immune disorders   | 1,103<br>(857 - 1,504)    | 261<br>(162 - 411)        | 30<br>(16 - 52)        | 325<br>(230 - 503)       | 186<br>(130 - 273)       | 301<br>(214 - 426)       |
| Musculoskeletal disorders                           | 387<br>(290 - 517)        | --                        | 27<br>(17 - 40)        | 212<br>(128 - 313)       | 78<br>(53 - 123)         | 70<br>(47 - 120)         |
| Rheumatoid arthritis                                | 72<br>(49 - 123)          | --                        | 4<br>(2 - 7)           | 20<br>(11 - 31)          | 22<br>(12 - 43)          | 27<br>(14 - 60)          |
| Other musculoskeletal disorders                     | 315<br>(220 - 430)        | --                        | 23<br>(14 - 35)        | 192<br>(115 - 286)       | 56<br>(37 - 86)          | 44<br>(29 - 71)          |
| Other non-communicable diseases                     | 7,727<br>(5,511 - 11,754) | 6,443<br>(4,265 - 10,377) | 221<br>(143 - 348)     | 484<br>(355 - 668)       | 184<br>(138 - 244)       | 396<br>(293 - 532)       |
| Congenital anomalies                                | 6,703<br>(4,482 - 10,691) | 6,146<br>(3,982 - 9,968)  | 208<br>(133 - 333)     | 270<br>(183 - 416)       | 34<br>(26 - 45)          | 45<br>(35 - 58)          |
| Neural tube defects                                 | 1,487<br>(458 - 3,106)    | 1,419<br>(433 - 2,996)    | 25<br>(7 - 56)         | 38<br>(11 - 86)          | 2<br>(1 - 5)             | 2<br>(1 - 5)             |
| Congenital heart anomalies                          | 3,047<br>(1,791 - 5,275)  | 2,754<br>(1,545 - 4,941)  | 118<br>(71 - 192)      | 141<br>(86 - 229)        | 14<br>(10 - 21)          | 20<br>(12 - 29)          |
| Cleft lip and cleft palate                          | 27<br>(6 - 61)            | 27<br>(6 - 61)            | --                     | --                       | --                       | --                       |
| Down syndrome                                       | 424<br>(173 - 834)        | 364<br>(129 - 759)        | 20<br>(9 - 37)         | 35<br>(17 - 58)          | 5<br>(3 - 7)             | 1<br>(1 - 2)             |
| Chromosomal unbalanced rearrangements               | 255<br>(113 - 519)        | 239<br>(101 - 498)        | 5<br>(3 - 10)          | 10<br>(5 - 18)           | 1<br>(1 - 2)             | 1<br>(1 - 2)             |
| Other congenital anomalies                          | 1,462<br>(741 - 3,173)    | 1,342<br>(638 - 2,959)    | 40<br>(20 - 80)        | 46<br>(27 - 82)          | 12<br>(8 - 19)           | 22<br>(15 - 32)          |
| Skin and subcutaneous diseases                      | 958<br>(721 - 1,292)      | 230<br>(123 - 419)        | 12<br>(8 - 19)         | 214<br>(139 - 330)       | 149<br>(109 - 205)       | 351<br>(250 - 486)       |



Web Table 31- Kenya deaths with 95% UI by age, sex, and cause in 2013

| Cause                                           | Both Sexes, All Ages        | Both Sexes, 0-4 Years    | Both Sexes, 5-14 Years | Both Sexes, 15-49 Years   | Both Sexes, 50-69 Years  | Both Sexes, 70-80 Years  |
|-------------------------------------------------|-----------------------------|--------------------------|------------------------|---------------------------|--------------------------|--------------------------|
| Cellulitis                                      | 395<br>(175 - 703)          | 98<br>(28 - 237)         | 6<br>(2 - 11)          | 98<br>(37 - 199)          | 67<br>(31 - 119)         | 126<br>(60 - 221)        |
| Pyoderma                                        | 413<br>(255 - 596)          | 121<br>(62 - 221)        | 5<br>(2 - 7)           | 90<br>(51 - 138)          | 62<br>(33 - 100)         | 136<br>(70 - 236)        |
| Decubitus ulcer                                 | 113<br>(64 - 170)           | 3<br>(1 - 7)             | 1<br>(1 - 2)           | 14<br>(7 - 23)            | 14<br>(7 - 23)           | 80<br>(42 - 128)         |
| Other skin and subcutaneous diseases            | 36<br>(19 - 54)             | 8<br>(2 - 18)            | 1<br>(0 - 2)           | 13<br>(5 - 20)            | 6<br>(3 - 10)            | 9<br>(4 - 17)            |
| Sudden infant death syndrome                    | 67<br>(24 - 161)            | 67<br>(24 - 161)         | --                     | --                        | --                       | --                       |
| Injuries                                        | 18,450<br>(15,480 - 22,285) | 3,015<br>(2,012 - 4,377) | 1,144<br>(846 - 1,594) | 9,808<br>(7,474 - 12,714) | 2,146<br>(1,700 - 2,715) | 2,337<br>(1,997 - 2,746) |
| Transport injuries                              | 5,233<br>(4,302 - 6,306)    | 714<br>(440 - 1,108)     | 399<br>(274 - 604)     | 3,005<br>(2,253 - 3,907)  | 638<br>(494 - 842)       | 477<br>(383 - 598)       |
| Road injuries                                   | 4,936<br>(4,036 - 5,965)    | 635<br>(389 - 990)       | 365<br>(249 - 551)     | 2,898<br>(2,177 - 3,756)  | 602<br>(468 - 794)       | 436<br>(348 - 559)       |
| Pedestrian road injuries                        | 2,406<br>(1,780 - 3,099)    | 368<br>(221 - 587)       | 206<br>(132 - 320)     | 1,222<br>(798 - 1,728)    | 331<br>(238 - 445)       | 279<br>(212 - 363)       |
| Cyclist road injuries                           | 242<br>(166 - 337)          | 23<br>(10 - 48)          | 24<br>(13 - 41)        | 129<br>(81 - 202)         | 41<br>(26 - 61)          | 25<br>(17 - 36)          |
| Motorcyclist road injuries                      | 302<br>(187 - 483)          | 22<br>(12 - 37)          | 10<br>(5 - 18)         | 221<br>(121 - 376)        | 28<br>(16 - 47)          | 21<br>(13 - 32)          |
| Motor vehicle road injuries                     | 1,940<br>(1,423 - 2,714)    | 199<br>(116 - 324)       | 120<br>(70 - 195)      | 1,318<br>(885 - 1,895)    | 196<br>(131 - 305)       | 107<br>(72 - 166)        |
| Other road injuries                             | 47<br>(24 - 81)             | 23<br>(9 - 47)           | 5<br>(2 - 11)          | 9<br>(5 - 18)             | 6<br>(3 - 12)            | 4<br>(2 - 9)             |
| Other transport injuries                        | 298<br>(223 - 381)          | 79<br>(44 - 129)         | 34<br>(20 - 58)        | 107<br>(70 - 182)         | 36<br>(23 - 52)          | 41<br>(21 - 61)          |
| Unintentional injuries                          | 7,861<br>(6,521 - 9,538)    | 2,123<br>(1,405 - 3,128) | 656<br>(461 - 951)     | 2,643<br>(2,027 - 3,522)  | 956<br>(759 - 1,226)     | 1,483<br>(1,203 - 1,834) |
| Falls                                           | 1,694<br>(1,340 - 2,098)    | 154<br>(90 - 244)        | 94<br>(58 - 153)       | 481<br>(328 - 676)        | 296<br>(206 - 422)       | 670<br>(480 - 922)       |
| Drowning                                        | 1,749<br>(1,217 - 2,531)    | 541<br>(291 - 970)       | 260<br>(157 - 416)     | 752<br>(498 - 1,134)      | 116<br>(79 - 166)        | 80<br>(58 - 110)         |
| Fire, heat, and hot substances                  | 1,109<br>(780 - 1,527)      | 426<br>(226 - 755)       | 88<br>(55 - 140)       | 286<br>(193 - 420)        | 139<br>(96 - 197)        | 169<br>(116 - 227)       |
| Poisonings                                      | 303<br>(204 - 408)          | 70<br>(34 - 127)         | 12<br>(7 - 19)         | 166<br>(105 - 239)        | 38<br>(22 - 55)          | 17<br>(11 - 24)          |
| Exposure to mechanical forces                   | 894<br>(641 - 1,595)        | 292<br>(159 - 517)       | 74<br>(37 - 209)       | 357<br>(234 - 779)        | 105<br>(67 - 170)        | 65<br>(41 - 107)         |
| Unintentional firearm injuries                  | 171<br>(122 - 253)          | 21<br>(12 - 37)          | 6<br>(3 - 11)          | 123<br>(77 - 199)         | 12<br>(8 - 18)           | 10<br>(6 - 14)           |
| Unintentional suffocation                       | 207<br>(86 - 801)           | 118<br>(47 - 273)        | 20<br>(5 - 137)        | 45<br>(11 - 442)          | 17<br>(8 - 73)           | 7<br>(2 - 50)            |
| Other exposure to mechanical forces             | 515<br>(363 - 726)          | 153<br>(76 - 301)        | 48<br>(24 - 89)        | 190<br>(122 - 297)        | 76<br>(40 - 116)         | 49<br>(27 - 73)          |
| Adverse effects of medical treatment            | 1,004<br>(736 - 1,373)      | 297<br>(165 - 544)       | 27<br>(15 - 45)        | 217<br>(144 - 327)        | 156<br>(102 - 240)       | 307<br>(176 - 476)       |
| Animal contact                                  | 376<br>(270 - 663)          | 74<br>(35 - 158)         | 43<br>(23 - 83)        | 145<br>(93 - 276)         | 57<br>(35 - 99)          | 57<br>(36 - 88)          |
| Venomous animal contact                         | 203<br>(123 - 355)          | 51<br>(22 - 117)         | 17<br>(7 - 39)         | 78<br>(42 - 156)          | 26<br>(13 - 45)          | 31<br>(11 - 53)          |
| Non-venomous animal contact                     | 173<br>(114 - 349)          | 23<br>(11 - 51)          | 26<br>(13 - 55)        | 67<br>(39 - 146)          | 30<br>(17 - 59)          | 26<br>(14 - 58)          |
| Foreign body                                    | 348<br>(240 - 514)          | 198<br>(119 - 324)       | 16<br>(10 - 26)        | 35<br>(23 - 60)           | 15<br>(11 - 24)          | 84<br>(55 - 124)         |
| Pulmonary aspiration and foreign body in airway | 322<br>(214 - 481)          | 190<br>(113 - 312)       | 12<br>(8 - 20)         | 30<br>(19 - 47)           | 10<br>(7 - 16)           | 79<br>(50 - 119)         |
| Foreign body in other body part                 | 26<br>(15 - 64)             | 8<br>(4 - 13)            | 3<br>(1 - 10)          | 5<br>(2 - 23)             | 5<br>(3 - 12)            | 5<br>(2 - 12)            |
| Other unintentional injuries                    | 385<br>(301 - 494)          | 71<br>(43 - 114)         | 43<br>(28 - 65)        | 204<br>(145 - 281)        | 34<br>(25 - 47)          | 33<br>(24 - 43)          |
| Self-harm and interpersonal violence            | 5,274<br>(3,941 - 7,169)    | 144<br>(80 - 254)        | 86<br>(54 - 136)       | 4,128<br>(2,912 - 5,851)  | 541<br>(402 - 742)       | 375<br>(278 - 525)       |
| Self-harm                                       | 2,823<br>(2,043 - 3,868)    | --                       | 37<br>(17 - 73)        | 2,009<br>(1,315 - 2,960)  | 428<br>(309 - 601)       | 349<br>(255 - 494)       |
| Interpersonal violence                          | 2,451<br>(1,676 - 3,652)    | 144<br>(80 - 254)        | 49<br>(30 - 82)        | 2,119<br>(1,408 - 3,202)  | 112<br>(71 - 193)        | 26<br>(16 - 43)          |
| Assault by firearm                              | 950<br>(580 - 1,580)        | 40<br>(20 - 76)          | 14<br>(7 - 27)         | 853<br>(503 - 1,432)      | 39<br>(22 - 75)          | 4<br>(2 - 8)             |
| Assault by sharp object                         | 552<br>(341 - 970)          | 35<br>(17 - 71)          | 10<br>(5 - 19)         | 459<br>(272 - 844)        | 37<br>(21 - 69)          | 10<br>(6 - 18)           |
| Assault by other means                          | 949<br>(621 - 1,474)        | 69<br>(38 - 123)         | 26<br>(15 - 42)        | 807<br>(504 - 1,284)      | 36<br>(22 - 61)          | 12<br>(7 - 19)           |
| Forces of nature, war, and legal intervention   | 82<br>(28 - 105)            | 33<br>(0 - 1)            | 2<br>(1 - 4)           | 32<br>(19 - 54)           | 11<br>(6 - 20)           | 3<br>(2 - 6)             |
| Exposure to forces of nature                    | 82<br>(28 - 105)            | 33<br>(0 - 1)            | 2<br>(1 - 4)           | 32<br>(19 - 54)           | 11<br>(6 - 20)           | 3<br>(2 - 6)             |

Web Table 31- Kenya deaths with 95% UI by age, sex, and cause in 2013

| Cause                                                             | Males, All Ages                | Males, 0-4 Years            | Males, 5-14 Years        | Males, 15-49 Years          | Males, 50-69 Years          | Males, 70-80 Years          |
|-------------------------------------------------------------------|--------------------------------|-----------------------------|--------------------------|-----------------------------|-----------------------------|-----------------------------|
| All causes                                                        | 160,325<br>(144,315 - 176,475) | 49,126<br>(39,252 - 61,509) | 5,852<br>(4,916 - 7,201) | 49,704<br>(43,777 - 56,586) | 28,583<br>(24,400 - 33,020) | 27,060<br>(24,265 - 28,898) |
| Communicable, maternal, neonatal, and nutritional diseases        | 105,594<br>(94,717 - 118,073)  | 42,773<br>(34,361 - 53,633) | 4,330<br>(3,598 - 5,313) | 33,653<br>(29,992 - 37,449) | 14,083<br>(11,922 - 16,407) | 10,755<br>(9,230 - 12,277)  |
| HIV/AIDS and tuberculosis                                         | 41,454<br>(36,700 - 46,070)    | 1,802<br>(1,245 - 2,467)    | 2,117<br>(1,673 - 2,568) | 26,025<br>(22,749 - 29,264) | 8,825<br>(6,908 - 11,145)   | 2,686<br>(2,023 - 3,276)    |
| Tuberculosis                                                      | 11,395<br>(8,667 - 14,118)     | 518<br>(288 - 871)          | 101<br>(61 - 167)        | 5,518<br>(3,883 - 7,307)    | 3,091<br>(2,154 - 4,079)    | 2,167<br>(1,578 - 2,741)    |
| HIV/AIDS                                                          | 30,059<br>(25,652 - 34,355)    | 1,283<br>(797 - 1,867)      | 2,016<br>(1,560 - 2,457) | 20,507<br>(17,160 - 23,914) | 5,734<br>(3,919 - 8,178)    | 519<br>(332 - 813)          |
| HIV/AIDS resulting in mycobacterial infection                     | 2,138<br>(1,655 - 2,728)       | 84<br>(50 - 126)            | 123<br>(89 - 162)        | 1,463<br>(1,135 - 1,881)    | 428<br>(274 - 638)          | 41<br>(24 - 66)             |
| HIV/AIDS resulting in other diseases                              | 27,921<br>(23,782 - 32,038)    | 1,199<br>(746 - 1,747)      | 1,893<br>(1,471 - 2,326) | 19,044<br>(15,940 - 22,278) | 5,306<br>(3,615 - 7,572)    | 478<br>(307 - 746)          |
| Diarrhea, lower respiratory, and other common infectious diseases | 37,721<br>(30,301 - 46,408)    | 19,716<br>(14,323 - 26,962) | 1,521<br>(1,071 - 2,246) | 5,691<br>(4,118 - 7,797)    | 4,175<br>(3,011 - 5,636)    | 6,620<br>(5,258 - 8,126)    |
| Diarrheal diseases                                                | 14,444<br>(10,050 - 19,832)    | 6,538<br>(3,267 - 11,284)   | 505<br>(240 - 955)       | 2,591<br>(1,649 - 3,928)    | 1,950<br>(1,189 - 3,008)    | 2,859<br>(1,823 - 4,281)    |
| Intestinal infectious diseases                                    | 1,052<br>(543 - 1,944)         | 436<br>(197 - 846)          | 232<br>(107 - 464)       | 342<br>(150 - 674)          | 30<br>(14 - 58)             | 12<br>(5 - 22)              |
| Typhoid fever                                                     | 736<br>(341 - 1,401)           | 277<br>(109 - 584)          | 176<br>(77 - 345)        | 255<br>(105 - 524)          | 21<br>(8 - 43)              | 7<br>(3 - 14)               |
| Paratyphoid fever                                                 | 198<br>(89 - 396)              | 82<br>(30 - 175)            | 46<br>(18 - 108)         | 64<br>(23 - 139)            | 5<br>(2 - 11)               | 2<br>(1 - 4)                |
| Other intestinal infectious diseases                              | 117<br>(75 - 175)              | 77<br>(41 - 127)            | 9<br>(4 - 18)            | 23<br>(12 - 38)             | 5<br>(1 - 12)               | 3<br>(0 - 9)                |
| Lower respiratory infections                                      | 16,658<br>(12,519 - 21,575)    | 9,371<br>(5,900 - 13,675)   | 366<br>(218 - 605)       | 1,543<br>(1,018 - 2,253)    | 1,811<br>(1,237 - 2,492)    | 3,567<br>(2,578 - 4,741)    |
| Upper respiratory infections                                      | 21<br>(8 - 45)                 | 8<br>(0 - 30)               | 1<br>(0 - 3)             | 7<br>(1 - 18)               | 3<br>(0 - 9)                | 2<br>(0 - 8)                |
| Otitis media                                                      | 8<br>(6 - 11)                  | 3<br>(2 - 5)                | 0<br>(0 - 1)             | 2<br>(1 - 3)                | 1<br>(1 - 1)                | 2<br>(1 - 2)                |
| Meningitis                                                        | 3,449<br>(2,366 - 4,935)       | 1,724<br>(813 - 3,060)      | 287<br>(157 - 527)       | 962<br>(619 - 1,428)        | 319<br>(200 - 491)          | 158<br>(96 - 241)           |
| Pneumococcal meningitis                                           | 1,031<br>(695 - 1,470)         | 423<br>(180 - 734)          | 108<br>(54 - 207)        | 341<br>(198 - 554)          | 108<br>(51 - 186)           | 51<br>(28 - 89)             |
| H influenzae type B meningitis                                    | 442<br>(238 - 745)             | 279<br>(105 - 556)          | 44<br>(16 - 86)          | 87<br>(33 - 173)            | 21<br>(8 - 41)              | 12<br>(4 - 22)              |
| Meningococcal meningitis                                          | 326<br>(196 - 488)             | 103<br>(39 - 210)           | 21<br>(9 - 43)           | 124<br>(60 - 230)           | 50<br>(23 - 88)             | 29<br>(13 - 50)             |
| Other meningitis                                                  | 1,649<br>(1,065 - 2,477)       | 918<br>(428 - 1,633)        | 115<br>(57 - 228)        | 409<br>(236 - 656)          | 141<br>(76 - 242)           | 66<br>(38 - 105)            |
| Encephalitis                                                      | 112<br>(74 - 169)              | 60<br>(31 - 107)            | 8<br>(3 - 16)            | 29<br>(17 - 46)             | 9<br>(5 - 15)               | 6<br>(3 - 10)               |
| Diphtheria                                                        | 14<br>(0 - 78)                 | 11<br>(0 - 76)              | 2<br>(0 - 14)            | 1<br>(0 - 5)                | 0<br>(0 - 1)                | -                           |
| Whooping cough                                                    | 333<br>(1 - 1,551)             | 319<br>(1 - 1,491)          | 11<br>(0 - 56)           | 2<br>(0 - 11)               | 0<br>(0 - 1)                | -                           |
| Tetanus                                                           | 421<br>(187 - 714)             | 149<br>(54 - 299)           | 17<br>(6 - 33)           | 196<br>(58 - 394)           | 49<br>(14 - 95)             | 10<br>(4 - 20)              |
| Measles                                                           | 1,190<br>(453 - 2,463)         | 1,087<br>(410 - 2,255)      | 91<br>(35 - 189)         | 12<br>(5 - 23)              | 0<br>(0 - 1)                | -                           |
| Varicella and herpes zoster                                       | 20<br>(6 - 53)                 | 10<br>(0 - 41)              | 1<br>(0 - 6)             | 4<br>(1 - 12)               | 1<br>(0 - 4)                | 3<br>(0 - 15)               |
| Neglected tropical diseases and malaria                           | 4,842<br>(2,967 - 7,881)       | 3,014<br>(1,339 - 5,845)    | 418<br>(224 - 757)       | 928<br>(604 - 1,453)        | 264<br>(160 - 415)          | 219<br>(116 - 415)          |
| Malaria                                                           | 4,464<br>(2,618 - 7,478)       | 2,905<br>(1,227 - 5,735)    | 366<br>(178 - 711)       | 775<br>(463 - 1,285)        | 221<br>(120 - 376)          | 197<br>(93 - 394)           |
| Leishmaniasis                                                     | 114<br>(69 - 172)              | 43<br>(17 - 83)             | 20<br>(10 - 37)          | 43<br>(21 - 71)             | 5<br>(2 - 7)                | 2<br>(1 - 4)                |
| Visceral leishmaniasis                                            | 114<br>(69 - 172)              | 43<br>(17 - 83)             | 20<br>(10 - 37)          | 43<br>(21 - 71)             | 5<br>(2 - 7)                | 2<br>(1 - 4)                |
| African trypanosomiasis                                           | 2<br>(1 - 4)                   | 0<br>(0 - 0)                | 0<br>(0 - 0)             | 1<br>(1 - 3)                | 0<br>(0 - 0)                | 0<br>(0 - 0)                |
| Schistosomiasis                                                   | 76<br>(52 - 109)               | 1<br>(0 - 2)                | 2<br>(1 - 4)             | 42<br>(24 - 66)             | 21<br>(12 - 35)             | 10<br>(6 - 17)              |
| Cysticercosis                                                     | 8<br>(6 - 10)                  | 0<br>(0 - 1)                | 0<br>(0 - 0)             | 6<br>(4 - 8)                | 1<br>(1 - 1)                | 0<br>(0 - 0)                |
| Cystic echinococcosis                                             | 47<br>(38 - 59)                | 6<br>(3 - 9)                | 6<br>(4 - 8)             | 28<br>(21 - 37)             | 6<br>(4 - 7)                | 2<br>(2 - 3)                |
| Dengue                                                            | 2<br>(1 - 6)                   | 0<br>(0 - 1)                | 1<br>(0 - 2)             | 1<br>(1 - 3)                | 0<br>(0 - 0)                | 0<br>(0 - 0)                |
| Yellow fever                                                      | 1<br>(1 - 2)                   | 0<br>(0 - 0)                | 0<br>(0 - 0)             | 1<br>(0 - 1)                | 0<br>(0 - 0)                | 0<br>(0 - 0)                |
| Rabies                                                            | 62<br>(28 - 104)               | 16<br>(6 - 42)              | 18<br>(6 - 36)           | 22<br>(10 - 37)             | 5<br>(1 - 8)                | 1<br>(0 - 2)                |
| Intestinal nematode infections                                    | 30<br>(13 - 55)                | 23<br>(8 - 48)              | 3<br>(0 - 10)            | 2<br>(0 - 9)                | 0<br>(0 - 3)                | 0<br>(0 - 3)                |
| Ascariasis                                                        | 30<br>(13 - 55)                | 23<br>(8 - 48)              | 3<br>(0 - 10)            | 2<br>(0 - 9)                | 0<br>(0 - 3)                | 0<br>(0 - 3)                |

Web Table 31- Kenya deaths with 95% UI by age, sex, and cause in 2013

| Cause                                                            | Males, All Ages             | Males, 0-4 Years            | Males, 5-14 Years    | Males, 15-49 Years        | Males, 50-69 Years          | Males, 70-80 Years          |
|------------------------------------------------------------------|-----------------------------|-----------------------------|----------------------|---------------------------|-----------------------------|-----------------------------|
| Other neglected tropical diseases                                | 36<br>(21 - 69)             | 19<br>(8 - 43)              | 1<br>(0 - 2)         | 6<br>(3 - 13)             | 5<br>(2 - 9)                | 5<br>(3 - 10)               |
| Maternal disorders                                               | --                          | --                          | --                   | --                        | --                          | --                          |
| Maternal hemorrhage                                              | --                          | --                          | --                   | --                        | --                          | --                          |
| Maternal sepsis and other maternal infections                    | --                          | --                          | --                   | --                        | --                          | --                          |
| Maternal hypertensive disorders                                  | --                          | --                          | --                   | --                        | --                          | --                          |
| Maternal obstructed labor                                        | --                          | --                          | --                   | --                        | --                          | --                          |
| Maternal abortive outcome                                        | --                          | --                          | --                   | --                        | --                          | --                          |
| Indirect maternal deaths                                         | --                          | --                          | --                   | --                        | --                          | --                          |
| Late maternal deaths                                             | --                          | --                          | --                   | --                        | --                          | --                          |
| Maternal deaths aggravated by HIV/AIDS                           | --                          | --                          | --                   | --                        | --                          | --                          |
| Other maternal disorders                                         | --                          | --                          | --                   | --                        | --                          | --                          |
| Neonatal disorders                                               | 14,232<br>(11,783 - 17,196) | 14,232<br>(11,783 - 17,196) | --                   | --                        | --                          | --                          |
| Neonatal preterm birth complications                             | 5,276<br>(2,686 - 8,430)    | 5,276<br>(2,686 - 8,430)    | --                   | --                        | --                          | --                          |
| Neonatal encephalopathy due to birth asphyxia and trauma         | 3,867<br>(1,777 - 6,587)    | 3,867<br>(1,777 - 6,587)    | --                   | --                        | --                          | --                          |
| Neonatal sepsis and other neonatal infections                    | 4,026<br>(1,715 - 7,647)    | 4,026<br>(1,715 - 7,647)    | --                   | --                        | --                          | --                          |
| Hemolytic disease and other neonatal jaundice                    | 101<br>(30 - 273)           | 101<br>(30 - 273)           | --                   | --                        | --                          | --                          |
| Other neonatal disorders                                         | 962<br>(450 - 1,905)        | 962<br>(450 - 1,905)        | --                   | --                        | --                          | --                          |
| Nutritional deficiencies                                         | 5,783<br>(3,751 - 9,053)    | 3,036<br>(1,622 - 5,196)    | 207<br>(115 - 361)   | 783<br>(491 - 1,272)      | 655<br>(387 - 1,121)        | 1,102<br>(695 - 1,859)      |
| Protein-energy malnutrition                                      | 4,870<br>(3,028 - 7,773)    | 2,836<br>(1,480 - 4,850)    | 181<br>(101 - 317)   | 483<br>(243 - 865)        | 505<br>(264 - 894)          | 865<br>(466 - 1,560)        |
| Iodine deficiency                                                | 4<br>(0 - 17)               | 2<br>(0 - 13)               | 0<br>(0 - 1)         | 1<br>(0 - 6)              | 0<br>(0 - 3)                | 0<br>(0 - 2)                |
| Iron-deficiency anemia                                           | 894<br>(330 - 1,810)        | 197<br>(41 - 575)           | 26<br>(7 - 66)       | 292<br>(107 - 561)        | 146<br>(44 - 334)           | 233<br>(71 - 539)           |
| Other nutritional deficiencies                                   | 16<br>(7 - 42)              | 1<br>(0 - 4)                | 1<br>(0 - 2)         | 7<br>(3 - 19)             | 3<br>(1 - 8)                | 5<br>(2 - 12)               |
| Other communicable, maternal, neonatal, and nutritional diseases | 1,561<br>(746 - 2,566)      | 973<br>(199 - 1,909)        | 67<br>(22 - 131)     | 227<br>(152 - 347)        | 165<br>(92 - 284)           | 128<br>(60 - 268)           |
| Sexually transmitted diseases excluding HIV                      | 910<br>(82 - 1,896)         | 801<br>(0 - 1,732)          | 48<br>(2 - 110)      | 27<br>(14 - 45)           | 21<br>(8 - 48)              | 13<br>(5 - 31)              |
| Syphilis                                                         | 888<br>(56 - 1,875)         | 801<br>(0 - 1,732)          | 47<br>(1 - 108)      | 14<br>(8 - 24)            | 15<br>(6 - 34)              | 11<br>(4 - 26)              |
| Chlamydial infection                                             | --                          | --                          | --                   | --                        | --                          | --                          |
| Gonococcal infection                                             | 12<br>(6 - 21)              | --                          | 0<br>(0 - 1)         | 7<br>(4 - 11)             | 4<br>(1 - 8)                | 2<br>(1 - 4)                |
| Other sexually transmitted diseases                              | 9<br>(4 - 15)               | --                          | 0<br>(0 - 1)         | 6<br>(3 - 9)              | 2<br>(1 - 5)                | 1<br>(0 - 1)                |
| Hepatitis                                                        | 208<br>(150 - 326)          | 35<br>(15 - 79)             | 10<br>(6 - 16)       | 102<br>(64 - 182)         | 43<br>(29 - 62)             | 18<br>(11 - 26)             |
| Acute hepatitis A                                                | 21<br>(6 - 51)              | 12<br>(3 - 32)              | 3<br>(1 - 7)         | 6<br>(1 - 15)             | 0<br>(0 - 1)                | 0<br>(0 - 0)                |
| Acute hepatitis B                                                | 129<br>(83 - 198)           | 24<br>(9 - 56)              | 5<br>(2 - 9)         | 50<br>(22 - 90)           | 35<br>(22 - 53)             | 16<br>(10 - 24)             |
| Acute hepatitis C                                                | 2<br>(0 - 6)                | --                          | 0<br>(0 - 0)         | 1<br>(0 - 3)              | 0<br>(0 - 1)                | 0<br>(0 - 1)                |
| Acute hepatitis E                                                | 55<br>(27 - 114)            | 0<br>(0 - 1)                | 1<br>(0 - 3)         | 45<br>(21 - 96)           | 7<br>(2 - 15)               | 2<br>(0 - 4)                |
| Other infectious diseases                                        | 443<br>(276 - 722)          | 137<br>(63 - 268)           | 10<br>(4 - 20)       | 98<br>(54 - 172)          | 101<br>(41 - 216)           | 97<br>(35 - 241)            |
| Non-communicable diseases                                        | 42,613<br>(36,326 - 50,106) | 4,714<br>(3,082 - 7,423)    | 785<br>(568 - 1,103) | 8,883<br>(6,804 - 11,569) | 13,048<br>(10,254 - 16,332) | 15,183<br>(13,231 - 16,842) |
| Neoplasms                                                        | 7,250<br>(5,884 - 8,746)    | 253<br>(147 - 394)          | 209<br>(134 - 314)   | 1,225<br>(903 - 1,617)    | 3,396<br>(2,617 - 4,275)    | 2,166<br>(1,764 - 2,556)    |
| Esophageal cancer                                                | 1,423<br>(937 - 1,914)      | --                          | --                   | 95<br>(64 - 136)          | 716<br>(468 - 1,013)        | 612<br>(351 - 904)          |
| Stomach cancer                                                   | 838<br>(656 - 1,068)        | --                          | --                   | 116<br>(81 - 165)         | 386<br>(276 - 532)          | 336<br>(250 - 443)          |
| Liver cancer                                                     | 613<br>(441 - 805)          | --                          | 8<br>(4 - 15)        | 197<br>(104 - 300)        | 317<br>(220 - 434)          | 91<br>(64 - 127)            |
| Liver cancer due to hepatitis B                                  | 106<br>(30 - 210)           | --                          | 3<br>(0 - 7)         | 61<br>(5 - 127)           | 30<br>(6 - 87)              | 12<br>(2 - 24)              |

Web Table 31- Kenya deaths with 95% UI by age, sex, and cause in 2013

| Cause                                | Males, All Ages             | Males, 0-4 Years   | Males, 5-14 Years | Males, 15-49 Years       | Males, 50-69 Years       | Males, 70-80 Years       |
|--------------------------------------|-----------------------------|--------------------|-------------------|--------------------------|--------------------------|--------------------------|
| Liver cancer due to hepatitis C      | 230<br>(121 - 355)          | --                 | 1<br>(0 - 1)      | 57<br>(29 - 101)         | 139<br>(70 - 221)        | 33<br>(14 - 58)          |
| Liver cancer due to alcohol use      | 159<br>(91 - 250)           | --                 | --                | 30<br>(15 - 53)          | 95<br>(48 - 160)         | 34<br>(19 - 55)          |
| Liver cancer due to other causes     | 117<br>(70 - 185)           | --                 | 5<br>(2 - 10)     | 48<br>(27 - 79)          | 53<br>(25 - 93)          | 12<br>(6 - 21)           |
| Larynx cancer                        | 213<br>(151 - 311)          | --                 | --                | 14<br>(9 - 22)           | 151<br>(101 - 222)       | 48<br>(33 - 77)          |
| Tracheal, bronchus and lung cancer   | 468<br>(365 - 578)          | --                 | --                | 34<br>(23 - 52)          | 312<br>(234 - 398)       | 122<br>(96 - 152)        |
| Breast cancer                        | 50<br>(32 - 73)             | --                 | --                | 10<br>(5 - 19)           | 22<br>(11 - 37)          | 17<br>(9 - 32)           |
| Cervical cancer                      | --                          | --                 | --                | --                       | --                       | --                       |
| Uterine cancer                       | --                          | --                 | --                | --                       | --                       | --                       |
| Prostate cancer                      | 439<br>(292 - 714)          | --                 | --                | 7<br>(4 - 12)            | 157<br>(94 - 265)        | 275<br>(180 - 454)       |
| Colon and rectum cancer              | 421<br>(326 - 541)          | --                 | --                | 93<br>(67 - 127)         | 259<br>(190 - 346)       | 68<br>(52 - 88)          |
| Lip and oral cavity cancer           | 199<br>(133 - 279)          | --                 | --                | 46<br>(26 - 81)          | 99<br>(60 - 143)         | 54<br>(33 - 99)          |
| Nasopharynx cancer                   | 105<br>(75 - 145)           | --                 | 4<br>(1 - 11)     | 60<br>(39 - 88)          | 25<br>(14 - 40)          | 16<br>(10 - 26)          |
| Other pharynx cancer                 | 56<br>(39 - 79)             | --                 | --                | 10<br>(5 - 17)           | 39<br>(24 - 57)          | 7<br>(5 - 13)            |
| Gallbladder and biliary tract cancer | 30<br>(20 - 50)             | --                 | --                | 5<br>(3 - 7)             | 15<br>(9 - 26)           | 11<br>(7 - 20)           |
| Pancreatic cancer                    | 270<br>(207 - 344)          | --                 | --                | 22<br>(15 - 30)          | 187<br>(135 - 248)       | 61<br>(44 - 82)          |
| Malignant skin melanoma              | 45<br>(23 - 70)             | --                 | --                | 10<br>(6 - 20)           | 17<br>(9 - 29)           | 18<br>(7 - 27)           |
| Non-melanoma skin cancer             | 39<br>(25 - 57)             | --                 | --                | 4<br>(2 - 6)             | 17<br>(9 - 29)           | 19<br>(10 - 28)          |
| Ovarian cancer                       | --                          | --                 | --                | --                       | --                       | --                       |
| Testicular cancer                    | 26<br>(17 - 41)             | --                 | --                | 16<br>(9 - 28)           | 7<br>(4 - 10)            | 4<br>(2 - 7)             |
| Kidney cancer                        | 102<br>(73 - 141)           | 22<br>(8 - 54)     | 6<br>(3 - 12)     | 4<br>(2 - 6)             | 53<br>(36 - 76)          | 17<br>(11 - 24)          |
| Bladder cancer                       | 204<br>(154 - 276)          | --                 | --                | 13<br>(9 - 20)           | 120<br>(85 - 167)        | 71<br>(48 - 107)         |
| Brain and nervous system cancer      | 165<br>(108 - 226)          | 1<br>(0 - 2)       | 21<br>(10 - 35)   | 60<br>(30 - 92)          | 55<br>(36 - 85)          | 29<br>(17 - 45)          |
| Thyroid cancer                       | 43<br>(26 - 60)             | --                 | 1<br>(0 - 2)      | 11<br>(4 - 19)           | 16<br>(8 - 24)           | 15<br>(10 - 24)          |
| Mesothelioma                         | 9<br>(6 - 13)               | --                 | --                | 1<br>(1 - 2)             | 5<br>(3 - 8)             | 2<br>(1 - 4)             |
| Hodgkin lymphoma                     | 38<br>(25 - 62)             | 3<br>(1 - 8)       | 4<br>(1 - 9)      | 18<br>(10 - 32)          | 10<br>(6 - 17)           | 3<br>(2 - 8)             |
| Non-Hodgkin lymphoma                 | 433<br>(301 - 606)          | 57<br>(22 - 117)   | 97<br>(50 - 166)  | 125<br>(75 - 184)        | 115<br>(77 - 181)        | 39<br>(27 - 59)          |
| Multiple myeloma                     | 96<br>(65 - 144)            | --                 | --                | 17<br>(8 - 27)           | 62<br>(39 - 97)          | 18<br>(11 - 27)          |
| Leukemia                             | 165<br>(130 - 207)          | 13<br>(6 - 24)     | 16<br>(9 - 26)    | 70<br>(50 - 97)          | 30<br>(21 - 42)          | 36<br>(26 - 48)          |
| Other neoplasms                      | 758<br>(548 - 983)          | 158<br>(88 - 253)  | 53<br>(30 - 85)   | 168<br>(113 - 247)       | 204<br>(128 - 293)       | 176<br>(118 - 247)       |
| Cardiovascular diseases              | 14,554<br>(12,190 - 16,922) | 241<br>(147 - 392) | 83<br>(52 - 128)  | 2,180<br>(1,608 - 2,905) | 5,003<br>(3,844 - 6,308) | 7,048<br>(6,028 - 7,985) |
| Rheumatic heart disease              | 479<br>(321 - 793)          | 11<br>(3 - 27)     | 19<br>(10 - 34)   | 204<br>(122 - 339)       | 129<br>(77 - 226)        | 117<br>(74 - 199)        |
| Ischemic heart disease               | 4,762<br>(3,204 - 5,908)    | 2<br>(1 - 5)       | 4<br>(2 - 8)      | 650<br>(407 - 907)       | 1,820<br>(1,216 - 2,413) | 2,285<br>(1,506 - 2,853) |
| Cerebrovascular disease              | 5,428<br>(4,276 - 6,672)    | 25<br>(13 - 42)    | 11<br>(6 - 18)    | 493<br>(342 - 698)       | 1,885<br>(1,384 - 2,520) | 3,014<br>(2,370 - 3,631) |
| Ischemic stroke                      | 2,347<br>(1,125 - 3,317)    | 2<br>(0 - 4)       | 1<br>(0 - 2)      | 68<br>(27 - 118)         | 616<br>(238 - 1,000)     | 1,660<br>(820 - 2,316)   |
| Hemorrhagic stroke                   | 3,080<br>(2,189 - 4,614)    | 23<br>(12 - 39)    | 10<br>(5 - 16)    | 425<br>(290 - 607)       | 1,269<br>(870 - 1,835)   | 1,354<br>(871 - 2,244)   |
| Hypertensive heart disease           | 1,164<br>(652 - 2,080)      | 4<br>(1 - 9)       | 2<br>(1 - 4)      | 128<br>(72 - 207)        | 379<br>(195 - 725)       | 651<br>(333 - 1,258)     |
| Cardiomyopathy and myocarditis       | 662<br>(413 - 962)          | 91<br>(37 - 163)   | 19<br>(8 - 35)    | 209<br>(115 - 331)       | 185<br>(97 - 308)        | 158<br>(84 - 291)        |
| Atrial fibrillation and flutter      | 3<br>(1 - 7)                | --                 | --                | 0<br>(0 - 1)             | 1<br>(0 - 2)             | 2<br>(1 - 5)             |
| Aortic aneurysm                      | 154<br>(92 - 251)           | --                 | --                | 23<br>(13 - 40)          | 54<br>(30 - 91)          | 77<br>(44 - 126)         |
| Peripheral vascular disease          | 6<br>(3 - 15)               | --                 | --                | 0<br>(0 - 1)             | 2<br>(1 - 4)             | 4<br>(2 - 10)            |

Web Table 31- Kenya deaths with 95% UI by age, sex, and cause in 2013

| Cause                                               | Males, All Ages          | Males, 0-4 Years  | Males, 5-14 Years | Males, 15-49 Years     | Males, 50-69 Years     | Males, 70-80 Years       |
|-----------------------------------------------------|--------------------------|-------------------|-------------------|------------------------|------------------------|--------------------------|
| Endocarditis                                        | 260<br>(136 - 435)       | 19<br>(7 - 42)    | 5<br>(2 - 10)     | 67<br>(33 - 116)       | 80<br>(37 - 145)       | 88<br>(46 - 152)         |
| Other cardiovascular and circulatory diseases       | 1,636<br>(1,114 - 2,633) | 89<br>(42 - 170)  | 23<br>(12 - 38)   | 404<br>(259 - 668)     | 469<br>(289 - 793)     | 652<br>(413 - 1,079)     |
| Chronic respiratory diseases                        | 2,709<br>(2,096 - 3,266) | 80<br>(43 - 141)  | 19<br>(12 - 28)   | 325<br>(224 - 441)     | 794<br>(573 - 1,045)   | 1,491<br>(1,142 - 1,824) |
| Chronic obstructive pulmonary disease               | 1,605<br>(1,218 - 1,969) | 19<br>(7 - 39)    | 8<br>(5 - 13)     | 132<br>(90 - 184)      | 468<br>(330 - 626)     | 978<br>(739 - 1,231)     |
| Pneumoconiosis                                      | 240<br>(158 - 348)       | 2<br>(1 - 6)      | 1<br>(1 - 2)      | 54<br>(33 - 84)        | 83<br>(50 - 129)       | 99<br>(61 - 150)         |
| Silicosis                                           | 63<br>(37 - 100)         | 1<br>(0 - 2)      | 0<br>(0 - 1)      | 12<br>(6 - 21)         | 21<br>(11 - 35)        | 29<br>(15 - 48)          |
| Asbestosis                                          | 29<br>(17 - 46)          | 0<br>(0 - 1)      | 0<br>(0 - 0)      | 7<br>(4 - 13)          | 12<br>(6 - 20)         | 9<br>(5 - 15)            |
| Coal workers pneumoconiosis                         | 35<br>(20 - 56)          | 0<br>(0 - 1)      | 0<br>(0 - 0)      | 7<br>(4 - 11)          | 14<br>(7 - 25)         | 14<br>(6 - 24)           |
| Other pneumoconiosis                                | 113<br>(70 - 169)        | 1<br>(0 - 3)      | 0<br>(0 - 1)      | 28<br>(16 - 44)        | 36<br>(21 - 58)        | 47<br>(26 - 75)          |
| Asthma                                              | 373<br>(250 - 496)       | 3<br>(1 - 8)      | 2<br>(1 - 4)      | 58<br>(37 - 84)        | 114<br>(68 - 171)      | 197<br>(126 - 278)       |
| Interstitial lung disease and pulmonary sarcoidosis | 310<br>(147 - 485)       | 3<br>(0 - 9)      | 1<br>(0 - 2)      | 28<br>(13 - 54)        | 103<br>(46 - 174)      | 175<br>(72 - 304)        |
| Other chronic respiratory diseases                  | 181<br>(116 - 254)       | 53<br>(27 - 94)   | 6<br>(3 - 10)     | 53<br>(31 - 84)        | 27<br>(15 - 44)        | 42<br>(24 - 68)          |
| Cirrhosis                                           | 2,656<br>(2,075 - 3,343) | 35<br>(13 - 72)   | 23<br>(15 - 35)   | 947<br>(679 - 1,289)   | 1,110<br>(810 - 1,494) | 541<br>(414 - 696)       |
| Cirrhosis due to hepatitis B                        | 613<br>(302 - 954)       | 1<br>(0 - 3)      | 3<br>(1 - 7)      | 213<br>(109 - 340)     | 267<br>(123 - 447)     | 129<br>(52 - 220)        |
| Cirrhosis due to hepatitis C                        | 390<br>(131 - 697)       | 3<br>(1 - 8)      | 2<br>(1 - 5)      | 102<br>(34 - 202)      | 172<br>(53 - 333)      | 111<br>(35 - 202)        |
| Cirrhosis due to alcohol use                        | 1,283<br>(891 - 1,833)   | --                | --                | 436<br>(288 - 649)     | 576<br>(365 - 869)     | 271<br>(176 - 413)       |
| Cirrhosis due to other causes                       | 369<br>(219 - 562)       | 31<br>(12 - 64)   | 17<br>(10 - 28)   | 195<br>(106 - 316)     | 96<br>(41 - 175)       | 30<br>(14 - 52)          |
| Digestive diseases                                  | 3,049<br>(2,354 - 3,755) | 84<br>(41 - 159)  | 79<br>(51 - 122)  | 1,105<br>(775 - 1,476) | 836<br>(607 - 1,109)   | 945<br>(732 - 1,194)     |
| Peptic ulcer disease                                | 791<br>(511 - 1,137)     | 6<br>(2 - 16)     | 7<br>(3 - 14)     | 235<br>(134 - 372)     | 234<br>(139 - 356)     | 308<br>(187 - 460)       |
| Gastritis and duodenitis                            | 119<br>(44 - 333)        | 6<br>(1 - 14)     | 5<br>(2 - 12)     | 40<br>(17 - 92)        | 28<br>(10 - 93)        | 40<br>(12 - 139)         |
| Appendicitis                                        | 116<br>(65 - 175)        | 3<br>(1 - 7)      | 7<br>(4 - 14)     | 52<br>(27 - 87)        | 26<br>(12 - 46)        | 28<br>(15 - 50)          |
| Paralytic ileus and intestinal obstruction          | 1,153<br>(747 - 1,617)   | 20<br>(7 - 46)    | 35<br>(20 - 58)   | 458<br>(265 - 676)     | 336<br>(196 - 489)     | 305<br>(175 - 471)       |
| Inguinal, femoral, and abdominal hernia             | 32<br>(14 - 60)          | 0<br>(0 - 0)      | 1<br>(0 - 2)      | 10<br>(4 - 19)         | 9<br>(3 - 16)          | 12<br>(6 - 23)           |
| Inflammatory bowel disease                          | 156<br>(71 - 247)        | 22<br>(7 - 47)    | 7<br>(3 - 13)     | 58<br>(26 - 95)        | 29<br>(12 - 60)        | 40<br>(15 - 95)          |
| Vascular intestinal disorders                       | 24<br>(8 - 55)           | 1<br>(0 - 2)      | 1<br>(0 - 2)      | 5<br>(2 - 12)          | 7<br>(2 - 16)          | 11<br>(3 - 26)           |
| Gallbladder and biliary diseases                    | 141<br>(89 - 209)        | 2<br>(1 - 5)      | 2<br>(1 - 4)      | 31<br>(18 - 49)        | 37<br>(21 - 62)        | 68<br>(35 - 120)         |
| Pancreatitis                                        | 190<br>(78 - 316)        | 2<br>(0 - 4)      | 2<br>(1 - 4)      | 108<br>(46 - 184)      | 46<br>(17 - 91)        | 32<br>(11 - 69)          |
| Other digestive diseases                            | 328<br>(204 - 480)       | 23<br>(8 - 50)    | 12<br>(6 - 20)    | 109<br>(63 - 173)      | 84<br>(46 - 145)       | 101<br>(53 - 167)        |
| Neurological disorders                              | 1,824<br>(1,474 - 2,248) | 123<br>(60 - 233) | 99<br>(56 - 172)  | 489<br>(306 - 741)     | 142<br>(103 - 189)     | 971<br>(753 - 1,240)     |
| Alzheimer disease and other dementias               | 901<br>(690 - 1,163)     | --                | --                | 0<br>(0 - 1)           | 77<br>(51 - 106)       | 824<br>(624 - 1,076)     |
| Parkinson disease                                   | 15<br>(7 - 30)           | --                | --                | 1<br>(1 - 2)           | 0<br>(0 - 0)           | 14<br>(6 - 29)           |
| Epilepsy                                            | 762<br>(529 - 1,100)     | 87<br>(35 - 184)  | 89<br>(47 - 161)  | 433<br>(260 - 680)     | 37<br>(22 - 61)        | 115<br>(70 - 180)        |
| Multiple sclerosis                                  | 3<br>(1 - 4)             | --                | --                | 2<br>(1 - 3)           | 1<br>(0 - 1)           | 0<br>(0 - 1)             |
| Other neurological disorders                        | 143<br>(97 - 196)        | 36<br>(18 - 79)   | 9<br>(6 - 15)     | 53<br>(34 - 78)        | 28<br>(16 - 41)        | 17<br>(9 - 24)           |
| Mental and substance use disorders                  | 1,267<br>(836 - 1,856)   | 66<br>(11 - 143)  | 0<br>(0 - 0)      | 944<br>(601 - 1,416)   | 212<br>(128 - 331)     | 45<br>(28 - 70)          |
| Schizophrenia                                       | 18<br>(7 - 39)           | --                | --                | 11<br>(4 - 27)         | 4<br>(2 - 10)          | 2<br>(1 - 5)             |
| Alcohol use disorders                               | 750<br>(422 - 1,241)     | --                | --                | 544<br>(293 - 905)     | 173<br>(94 - 285)      | 33<br>(17 - 56)          |
| Drug use disorders                                  | 500<br>(314 - 756)       | 66<br>(11 - 143)  | --                | 389<br>(240 - 616)     | 35<br>(14 - 57)        | 11<br>(4 - 16)           |
| Opioid use disorders                                | 54<br>(33 - 82)          | 7<br>(1 - 17)     | --                | 42<br>(26 - 68)        | 3<br>(1 - 5)           | 1<br>(0 - 2)             |
| Cocaine use disorders                               | 2<br>(1 - 3)             | 0<br>(0 - 1)      | --                | 1<br>(1 - 2)           | 0<br>(0 - 0)           | 0<br>(0 - 0)             |

Web Table 31- Kenya deaths with 95% UI by age, sex, and cause in 2013

| Cause                                               | Males, All Ages          | Males, 0-4 Years         | Males, 5-14 Years | Males, 15-49 Years     | Males, 50-69 Years       | Males, 70-80 Years       |
|-----------------------------------------------------|--------------------------|--------------------------|-------------------|------------------------|--------------------------|--------------------------|
| Amphetamine use disorders                           | 1<br>(1 - 2)             | 0<br>(0 - 1)             | --                | 1<br>(1 - 2)           | 0<br>(0 - 0)             | 0<br>(0 - 0)             |
| Other drug use disorders                            | 442<br>(280 - 670)       | 58<br>(10 - 125)         | --                | 344<br>(212 - 543)     | 31<br>(13 - 51)          | 10<br>(3 - 14)           |
| Eating disorders                                    | 0<br>(0 - 0)             | --                       | 0<br>(0 - 0)      | 0<br>(0 - 0)           | --                       | --                       |
| Anorexia nervosa                                    | 0<br>(0 - 0)             | --                       | 0<br>(0 - 0)      | 0<br>(0 - 0)           | --                       | --                       |
| Diabetes, urogenital, blood, and endocrine diseases | 5,240<br>(4,298 - 6,419) | 583<br>(359 - 945)       | 142<br>(84 - 262) | 1,333<br>(977 - 1,809) | 1,409<br>(1,077 - 1,840) | 1,774<br>(1,469 - 2,135) |
| Diabetes mellitus                                   | 2,279<br>(1,853 - 2,800) | 30<br>(18 - 47)          | 8<br>(5 - 13)     | 341<br>(249 - 462)     | 869<br>(651 - 1,169)     | 1,031<br>(795 - 1,285)   |
| Acute glomerulonephritis                            | 43<br>(14 - 65)          | 8<br>(3 - 17)            | 2<br>(1 - 4)      | 3<br>(2 - 8)           | 17<br>(3 - 32)           | 13<br>(3 - 23)           |
| Chronic kidney disease                              | 911<br>(718 - 1,153)     | 72<br>(39 - 118)         | 21<br>(14 - 32)   | 368<br>(257 - 515)     | 174<br>(124 - 240)       | 276<br>(207 - 367)       |
| Chronic kidney disease due to diabetes mellitus     | 6<br>(2 - 15)            | 0<br>(0 - 1)             | 0<br>(0 - 1)      | 2<br>(1 - 4)           | 2<br>(0 - 5)             | 1<br>(0 - 5)             |
| Chronic kidney disease due to hypertension          | 335<br>(152 - 509)       | 10<br>(3 - 20)           | 2<br>(1 - 5)      | 84<br>(35 - 137)       | 92<br>(42 - 147)         | 147<br>(66 - 244)        |
| Chronic kidney disease due to glomerulonephritis    | 260<br>(161 - 379)       | 38<br>(21 - 65)          | 12<br>(7 - 18)    | 121<br>(73 - 188)      | 39<br>(17 - 66)          | 51<br>(22 - 88)          |
| Chronic kidney disease due to other causes          | 310<br>(189 - 493)       | 24<br>(9 - 50)           | 7<br>(3 - 12)     | 161<br>(91 - 259)      | 41<br>(15 - 84)          | 77<br>(27 - 153)         |
| Urinary diseases and male infertility               | 737<br>(569 - 994)       | 56<br>(22 - 119)         | 12<br>(7 - 19)    | 225<br>(156 - 318)     | 194<br>(131 - 286)       | 250<br>(165 - 396)       |
| Interstitial nephritis and urinary tract infections | 517<br>(377 - 705)       | 42<br>(16 - 91)          | 7<br>(4 - 12)     | 146<br>(92 - 211)      | 136<br>(86 - 209)        | 186<br>(110 - 306)       |
| Urolithiasis                                        | 17<br>(8 - 37)           | --                       | 1<br>(0 - 1)      | 6<br>(3 - 13)          | 5<br>(2 - 14)            | 4<br>(1 - 13)            |
| Other urinary diseases                              | 203<br>(124 - 330)       | 14<br>(5 - 37)           | 4<br>(2 - 7)      | 73<br>(44 - 118)       | 52<br>(25 - 93)          | 60<br>(24 - 117)         |
| Gynecological diseases                              | --                       | --                       | --                | --                     | --                       | --                       |
| Uterine fibroids                                    | --                       | --                       | --                | --                     | --                       | --                       |
| Polycystic ovarian syndrome                         | --                       | --                       | --                | --                     | --                       | --                       |
| Endometriosis                                       | --                       | --                       | --                | --                     | --                       | --                       |
| Genital prolapse                                    | --                       | --                       | --                | --                     | --                       | --                       |
| Other gynecological diseases                        | --                       | --                       | --                | --                     | --                       | --                       |
| Hemoglobinopathies and hemolytic anemias            | 663<br>(293 - 1,482)     | 297<br>(123 - 586)       | 80<br>(31 - 193)  | 203<br>(76 - 496)      | 45<br>(15 - 151)         | 37<br>(15 - 114)         |
| Thalassemias                                        | 9<br>(4 - 17)            | 6<br>(3 - 12)            | 1<br>(0 - 2)      | 2<br>(1 - 4)           | 0<br>(0 - 0)             | 0<br>(0 - 0)             |
| Sickle cell disorders                               | 583<br>(255 - 1,264)     | 272<br>(112 - 533)       | 77<br>(30 - 186)  | 192<br>(72 - 470)      | 38<br>(13 - 128)         | 3<br>(1 - 8)             |
| G6PD deficiency                                     | 12<br>(5 - 25)           | 6<br>(3 - 13)            | 1<br>(0 - 2)      | 2<br>(1 - 6)           | 1<br>(0 - 3)             | 1<br>(0 - 3)             |
| Other hemoglobinopathies and hemolytic anemias      | 60<br>(25 - 163)         | 12<br>(6 - 24)           | 1<br>(1 - 3)      | 7<br>(3 - 16)          | 6<br>(2 - 20)            | 33<br>(13 - 103)         |
| Endocrine, metabolic, blood, and immune disorders   | 607<br>(414 - 823)       | 119<br>(66 - 202)        | 18<br>(9 - 32)    | 192<br>(121 - 289)     | 110<br>(69 - 168)        | 168<br>(101 - 262)       |
| Musculoskeletal disorders                           | 220<br>(132 - 323)       | --                       | 19<br>(10 - 32)   | 104<br>(57 - 158)      | 52<br>(29 - 91)          | 44<br>(24 - 78)          |
| Rheumatoid arthritis                                | 36<br>(18 - 62)          | --                       | 3<br>(1 - 5)      | 10<br>(5 - 18)         | 11<br>(5 - 23)           | 13<br>(5 - 27)           |
| Other musculoskeletal disorders                     | 184<br>(109 - 271)       | --                       | 17<br>(9 - 28)    | 95<br>(52 - 142)       | 41<br>(22 - 71)          | 32<br>(17 - 56)          |
| Other non-communicable diseases                     | 3,844<br>(2,493 - 6,380) | 3,249<br>(1,955 - 5,764) | 113<br>(65 - 196) | 231<br>(158 - 328)     | 94<br>(65 - 132)         | 157<br>(104 - 230)       |
| Congenital anomalies                                | 3,383<br>(2,097 - 5,950) | 3,110<br>(1,847 - 5,636) | 107<br>(59 - 187) | 130<br>(83 - 197)      | 18<br>(13 - 26)          | 18<br>(13 - 25)          |
| Neural tube defects                                 | 757<br>(149 - 1,770)     | 723<br>(134 - 1,728)     | 14<br>(3 - 37)    | 18<br>(4 - 42)         | 1<br>(0 - 4)             | 1<br>(0 - 3)             |
| Congenital heart anomalies                          | 1,563<br>(782 - 3,126)   | 1,417<br>(650 - 2,940)   | 62<br>(31 - 114)  | 70<br>(41 - 109)       | 8<br>(5 - 13)            | 7<br>(4 - 11)            |
| Cleft lip and cleft palate                          | 15<br>(3 - 45)           | 15<br>(3 - 45)           | --                | --                     | --                       | --                       |
| Down syndrome                                       | 211<br>(65 - 533)        | 184<br>(44 - 493)        | 8<br>(3 - 18)     | 16<br>(8 - 28)         | 2<br>(1 - 3)             | 0<br>(0 - 1)             |
| Chromosomal unbalanced rearrangements               | 76<br>(27 - 218)         | 71<br>(23 - 210)         | 2<br>(1 - 5)      | 2<br>(1 - 5)           | 0<br>(0 - 1)             | 0<br>(0 - 1)             |
| Other congenital anomalies                          | 760<br>(286 - 2,011)     | 700<br>(243 - 1,901)     | 21<br>(8 - 51)    | 24<br>(13 - 42)        | 6<br>(4 - 10)            | 9<br>(6 - 15)            |
| Skin and subcutaneous diseases                      | 413<br>(299 - 595)       | 91<br>(43 - 186)         | 7<br>(4 - 11)     | 101<br>(64 - 173)      | 76<br>(50 - 110)         | 138<br>(86 - 212)        |

Web Table 31- Kenya deaths with 95% UI by age, sex, and cause in 2013

| Cause                                           | Males, All Ages            | Males, 0-4 Years         | Males, 5-14 Years    | Males, 15-49 Years       | Males, 50-69 Years       | Males, 70-80 Years     |
|-------------------------------------------------|----------------------------|--------------------------|----------------------|--------------------------|--------------------------|------------------------|
| Cellulitis                                      | 184<br>(69 - 366)          | 41<br>(9 - 112)          | 3<br>(1 - 7)         | 47<br>(16 - 106)         | 36<br>(14 - 69)          | 57<br>(20 - 116)       |
| Pyoderma                                        | 176<br>(84 - 284)          | 45<br>(15 - 93)          | 2<br>(1 - 5)         | 41<br>(17 - 71)          | 32<br>(13 - 59)          | 55<br>(23 - 108)       |
| Decubitus ulcer                                 | 42<br>(17 - 76)            | 2<br>(0 - 5)             | 1<br>(0 - 1)         | 9<br>(3 - 16)            | 7<br>(2 - 13)            | 24<br>(9 - 50)         |
| Other skin and subcutaneous diseases            | 11<br>(3 - 27)             | 3<br>(0 - 10)            | 0<br>(0 - 1)         | 4<br>(1 - 10)            | 2<br>(1 - 3)             | 2<br>(1 - 4)           |
| Sudden infant death syndrome                    | 48<br>(13 - 127)           | 48<br>(13 - 127)         | --                   | --                       | --                       | --                     |
| Injuries                                        | 12,118<br>(9,776 - 15,173) | 1,639<br>(1,026 - 2,552) | 736<br>(541 - 1,057) | 7,168<br>(5,244 - 9,755) | 1,452<br>(1,089 - 1,917) | 1,123<br>(912 - 1,358) |
| Transport injuries                              | 3,478<br>(2,707 - 4,470)   | 403<br>(221 - 680)       | 262<br>(167 - 405)   | 2,168<br>(1,521 - 3,013) | 407<br>(286 - 567)       | 238<br>(179 - 317)     |
| Road injuries                                   | 3,312<br>(2,570 - 4,284)   | 362<br>(197 - 621)       | 241<br>(154 - 368)   | 2,106<br>(1,480 - 2,927) | 384<br>(270 - 533)       | 218<br>(164 - 295)     |
| Pedestrian road injuries                        | 1,605<br>(1,019 - 2,182)   | 200<br>(102 - 356)       | 137<br>(78 - 228)    | 957<br>(534 - 1,451)     | 194<br>(123 - 283)       | 117<br>(80 - 165)      |
| Cyclist road injuries                           | 208<br>(136 - 305)         | 19<br>(7 - 43)           | 20<br>(10 - 38)      | 121<br>(73 - 193)        | 30<br>(18 - 48)          | 17<br>(11 - 27)        |
| Motorcyclist road injuries                      | 265<br>(152 - 441)         | 17<br>(8 - 31)           | 9<br>(4 - 17)        | 203<br>(106 - 359)       | 23<br>(12 - 40)          | 14<br>(8 - 24)         |
| Motor vehicle road injuries                     | 1,198<br>(761 - 1,875)     | 108<br>(54 - 196)        | 71<br>(35 - 135)     | 818<br>(477 - 1,368)     | 134<br>(78 - 218)        | 67<br>(40 - 111)       |
| Other road injuries                             | 35<br>(15 - 67)            | 18<br>(6 - 40)           | 4<br>(1 - 10)        | 7<br>(3 - 16)            | 3<br>(1 - 8)             | 3<br>(1 - 6)           |
| Other transport injuries                        | 167<br>(107 - 229)         | 41<br>(19 - 77)          | 21<br>(9 - 41)       | 62<br>(39 - 99)          | 23<br>(11 - 37)          | 20<br>(7 - 33)         |
| Unintentional injuries                          | 4,596<br>(3,672 - 5,708)   | 1,138<br>(702 - 1,800)   | 411<br>(283 - 597)   | 1,784<br>(1,326 - 2,399) | 623<br>(458 - 823)       | 639<br>(484 - 819)     |
| Falls                                           | 969<br>(723 - 1,250)       | 70<br>(34 - 133)         | 61<br>(34 - 103)     | 353<br>(222 - 525)       | 210<br>(131 - 322)       | 274<br>(180 - 419)     |
| Drowning                                        | 1,168<br>(764 - 1,732)     | 302<br>(137 - 618)       | 174<br>(102 - 286)   | 569<br>(358 - 878)       | 74<br>(44 - 117)         | 48<br>(31 - 73)        |
| Fire, heat, and hot substances                  | 591<br>(378 - 862)         | 220<br>(104 - 439)       | 49<br>(28 - 84)      | 151<br>(93 - 229)        | 87<br>(54 - 134)         | 84<br>(49 - 123)       |
| Poisonings                                      | 228<br>(130 - 326)         | 45<br>(17 - 97)          | 8<br>(4 - 15)        | 137<br>(75 - 209)        | 27<br>(15 - 42)          | 11<br>(6 - 17)         |
| Exposure to mechanical forces                   | 524<br>(379 - 741)         | 157<br>(82 - 295)        | 44<br>(25 - 75)      | 224<br>(148 - 341)       | 74<br>(43 - 111)         | 24<br>(12 - 33)        |
| Unintentional firearm injuries                  | 94<br>(55 - 155)           | 10<br>(4 - 22)           | 3<br>(1 - 7)         | 70<br>(37 - 127)         | 6<br>(3 - 10)            | 4<br>(2 - 6)           |
| Unintentional suffocation                       | 108<br>(54 - 236)          | 73<br>(24 - 182)         | 7<br>(3 - 15)        | 14<br>(8 - 27)           | 11<br>(6 - 22)           | 2<br>(1 - 4)           |
| Other exposure to mechanical forces             | 322<br>(216 - 452)         | 74<br>(35 - 147)         | 34<br>(16 - 61)      | 139<br>(85 - 231)        | 57<br>(24 - 92)          | 18<br>(6 - 26)         |
| Adverse effects of medical treatment            | 511<br>(343 - 776)         | 185<br>(89 - 397)        | 16<br>(7 - 28)       | 109<br>(64 - 194)        | 81<br>(42 - 147)         | 119<br>(57 - 199)      |
| Animal contact                                  | 192<br>(122 - 273)         | 26<br>(12 - 58)          | 22<br>(11 - 42)      | 69<br>(40 - 112)         | 35<br>(19 - 57)          | 40<br>(19 - 64)        |
| Venomous animal contact                         | 80<br>(37 - 114)           | 7<br>(3 - 16)            | 4<br>(1 - 10)        | 29<br>(14 - 51)          | 16<br>(5 - 29)           | 23<br>(4 - 40)         |
| Non-venomous animal contact                     | 113<br>(72 - 177)          | 19<br>(8 - 45)           | 18<br>(9 - 32)       | 40<br>(23 - 73)          | 19<br>(10 - 35)          | 17<br>(9 - 32)         |
| Foreign body                                    | 155<br>(89 - 255)          | 96<br>(47 - 171)         | 9<br>(5 - 15)        | 20<br>(12 - 34)          | 10<br>(6 - 16)           | 21<br>(12 - 33)        |
| Pulmonary aspiration and foreign body in airway | 140<br>(71 - 227)          | 91<br>(42 - 163)         | 6<br>(3 - 11)        | 17<br>(9 - 28)           | 6<br>(3 - 10)            | 19<br>(11 - 32)        |
| Foreign body in other body part                 | 15<br>(8 - 37)             | 5<br>(2 - 9)             | 2<br>(1 - 7)         | 3<br>(1 - 11)            | 4<br>(2 - 9)             | 2<br>(1 - 4)           |
| Other unintentional injuries                    | 257<br>(197 - 346)         | 36<br>(21 - 61)          | 28<br>(17 - 45)      | 151<br>(102 - 220)       | 24<br>(16 - 36)          | 18<br>(13 - 25)        |
| Self-harm and interpersonal violence            | 3,997<br>(2,789 - 5,702)   | 80<br>(37 - 162)         | 61<br>(35 - 106)     | 3,197<br>(2,128 - 4,749) | 414<br>(284 - 595)       | 244<br>(156 - 367)     |
| Self-harm                                       | 2,184<br>(1,429 - 3,173)   | --                       | 32<br>(13 - 69)      | 1,595<br>(938 - 2,511)   | 327<br>(215 - 487)       | 230<br>(141 - 353)     |
| Interpersonal violence                          | 1,813<br>(1,143 - 2,928)   | 80<br>(37 - 162)         | 30<br>(15 - 55)      | 1,601<br>(971 - 2,596)   | 88<br>(51 - 163)         | 14<br>(8 - 25)         |
| Assault by firearm                              | 784<br>(421 - 1,374)       | 19<br>(7 - 49)           | 10<br>(4 - 21)       | 722<br>(379 - 1,281)     | 30<br>(15 - 66)          | 3<br>(1 - 7)           |
| Assault by sharp object                         | 373<br>(189 - 736)         | 18<br>(7 - 41)           | 6<br>(3 - 14)        | 312<br>(145 - 628)       | 32<br>(16 - 63)          | 5<br>(2 - 10)          |
| Assault by other means                          | 655<br>(345 - 1,100)       | 42<br>(19 - 88)          | 14<br>(6 - 26)       | 568<br>(282 - 961)       | 25<br>(13 - 47)          | 7<br>(3 - 12)          |
| Forces of nature, war, and legal intervention   | 47<br>(15 - 72)            | 18<br>(0 - 1)            | 1<br>(1 - 3)         | 20<br>(10 - 41)          | 7<br>(4 - 15)            | 2<br>(1 - 3)           |
| Exposure to forces of nature                    | 47<br>(15 - 72)            | 18<br>(0 - 1)            | 1<br>(1 - 3)         | 20<br>(10 - 41)          | 7<br>(4 - 15)            | 2<br>(1 - 3)           |

Web Table 31- Kenya deaths with 95% UI by age, sex, and cause in 2013

| Cause                                                             | Females, All Ages              | Females, 0-4 Years          | Females, 5-14 Years      | Females, 15-49 Years        | Females, 50-69 Years        | Females, 70-80 Years        |
|-------------------------------------------------------------------|--------------------------------|-----------------------------|--------------------------|-----------------------------|-----------------------------|-----------------------------|
| All causes                                                        | 134,687<br>(121,918 - 151,253) | 40,378<br>(31,401 - 52,834) | 4,444<br>(3,754 - 5,460) | 42,445<br>(37,085 - 47,861) | 20,516<br>(17,534 - 26,457) | 26,904<br>(24,655 - 32,086) |
| Communicable, maternal, neonatal, and nutritional diseases        | 90,184<br>(80,804 - 102,454)   | 34,405<br>(26,813 - 44,897) | 3,485<br>(2,934 - 4,153) | 33,473<br>(29,289 - 37,690) | 8,835<br>(7,284 - 10,636)   | 9,987<br>(8,260 - 11,902)   |
| HIV/AIDS and tuberculosis                                         | 33,207<br>(27,965 - 38,326)    | 1,560<br>(1,069 - 2,158)    | 1,978<br>(1,560 - 2,390) | 22,715<br>(18,843 - 26,492) | 5,240<br>(3,893 - 6,875)    | 1,713<br>(1,273 - 2,249)    |
| Tuberculosis                                                      | 6,502<br>(4,931 - 8,374)       | 352<br>(198 - 580)          | 67<br>(40 - 104)         | 3,293<br>(2,116 - 4,585)    | 1,384<br>(989 - 1,975)      | 1,405<br>(982 - 1,935)      |
| HIV/AIDS                                                          | 26,704<br>(21,777 - 31,960)    | 1,208<br>(752 - 1,772)      | 1,911<br>(1,486 - 2,325) | 19,422<br>(15,449 - 23,122) | 3,855<br>(2,489 - 5,525)    | 308<br>(147 - 520)          |
| HIV/AIDS resulting in mycobacterial infection                     | 1,447<br>(1,071 - 1,915)       | 61<br>(37 - 92)             | 90<br>(65 - 119)         | 1,060<br>(788 - 1,400)      | 218<br>(133 - 330)          | 18<br>(8 - 32)              |
| HIV/AIDS resulting in other diseases                              | 25,257<br>(20,541 - 30,283)    | 1,147<br>(711 - 1,670)      | 1,821<br>(1,415 - 2,230) | 18,362<br>(14,567 - 21,950) | 3,638<br>(2,353 - 5,244)    | 289<br>(139 - 490)          |
| Diarrhea, lower respiratory, and other common infectious diseases | 32,604<br>(26,638 - 40,476)    | 16,771<br>(11,843 - 23,286) | 1,072<br>(727 - 1,572)   | 4,849<br>(3,387 - 6,699)    | 2,974<br>(2,167 - 4,285)    | 6,937<br>(5,272 - 8,805)    |
| Diarrheal diseases                                                | 13,314<br>(9,252 - 18,147)     | 5,387<br>(2,598 - 9,104)    | 336<br>(162 - 607)       | 2,512<br>(1,552 - 3,788)    | 1,575<br>(954 - 2,531)      | 3,504<br>(2,163 - 5,173)    |
| Intestinal infectious diseases                                    | 989<br>(492 - 1,748)           | 466<br>(209 - 892)          | 217<br>(102 - 403)       | 264<br>(112 - 505)          | 29<br>(13 - 58)             | 14<br>(6 - 26)              |
| Typhoid fever                                                     | 746<br>(342 - 1,365)           | 335<br>(136 - 666)          | 174<br>(79 - 328)        | 207<br>(85 - 406)           | 21<br>(8 - 48)              | 9<br>(3 - 18)               |
| Paratyphoid fever                                                 | 166<br>(74 - 316)              | 81<br>(31 - 169)            | 38<br>(14 - 80)          | 42<br>(14 - 90)             | 4<br>(1 - 9)                | 2<br>(1 - 4)                |
| Other intestinal infectious diseases                              | 77<br>(48 - 119)               | 51<br>(26 - 87)             | 6<br>(2 - 13)            | 14<br>(6 - 26)              | 3<br>(1 - 8)                | 3<br>(0 - 9)                |
| Lower respiratory infections                                      | 13,794<br>(10,323 - 18,358)    | 7,953<br>(4,738 - 12,195)   | 239<br>(136 - 406)       | 1,229<br>(806 - 1,794)      | 1,140<br>(776 - 1,674)      | 3,233<br>(2,187 - 4,430)    |
| Upper respiratory infections                                      | 16<br>(6 - 34)                 | 6<br>(0 - 20)               | 0<br>(0 - 2)             | 5<br>(1 - 15)               | 2<br>(0 - 5)                | 2<br>(0 - 8)                |
| Otitis media                                                      | 11<br>(8 - 16)                 | 5<br>(3 - 9)                | 0<br>(0 - 1)             | 1<br>(1 - 2)                | 1<br>(1 - 2)                | 3<br>(2 - 5)                |
| Meningitis                                                        | 2,727<br>(1,900 - 3,762)       | 1,436<br>(812 - 2,285)      | 165<br>(89 - 280)        | 763<br>(470 - 1,171)        | 202<br>(127 - 314)          | 161<br>(101 - 245)          |
| Pneumococcal meningitis                                           | 828<br>(552 - 1,198)           | 366<br>(192 - 629)          | 64<br>(31 - 117)         | 283<br>(148 - 484)          | 64<br>(32 - 110)            | 52<br>(27 - 85)             |
| H influenzae type B meningitis                                    | 369<br>(228 - 596)             | 244<br>(121 - 431)          | 24<br>(11 - 47)          | 74<br>(34 - 138)            | 15<br>(6 - 30)              | 11<br>(6 - 21)              |
| Meningococcal meningitis                                          | 305<br>(173 - 486)             | 102<br>(32 - 208)           | 13<br>(5 - 29)           | 116<br>(50 - 230)           | 38<br>(16 - 68)             | 36<br>(16 - 66)             |
| Other meningitis                                                  | 1,225<br>(805 - 1,798)         | 725<br>(407 - 1,222)        | 64<br>(28 - 117)         | 290<br>(126 - 498)          | 85<br>(46 - 139)            | 62<br>(34 - 102)            |
| Encephalitis                                                      | 78<br>(53 - 113)               | 34<br>(18 - 62)             | 6<br>(2 - 11)            | 19<br>(11 - 33)             | 10<br>(4 - 19)              | 9<br>(3 - 14)               |
| Diphtheria                                                        | 12<br>(0 - 80)                 | 10<br>(0 - 77)              | 1<br>(0 - 10)            | 1<br>(0 - 4)                | 0<br>(0 - 1)                | -                           |
| Whooping cough                                                    | 382<br>(1 - 1,839)             | 366<br>(1 - 1,766)          | 13<br>(0 - 63)           | 2<br>(0 - 11)               | 0<br>(0 - 1)                | -                           |
| Tetanus                                                           | 128<br>(44 - 255)              | 69<br>(18 - 157)            | 5<br>(2 - 11)            | 35<br>(10 - 77)             | 13<br>(3 - 30)              | 6<br>(2 - 16)               |
| Measles                                                           | 1,135<br>(451 - 2,295)         | 1,031<br>(407 - 2,075)      | 89<br>(35 - 179)         | 15<br>(6 - 33)              | 0<br>(0 - 0)                | -                           |
| Varicella and herpes zoster                                       | 19<br>(6 - 50)                 | 9<br>(0 - 33)               | 1<br>(0 - 6)             | 4<br>(0 - 10)               | 1<br>(0 - 4)                | 5<br>(0 - 21)               |
| Neglected tropical diseases and malaria                           | 4,187<br>(2,102 - 8,419)       | 2,912<br>(1,099 - 6,933)    | 236<br>(86 - 533)        | 658<br>(313 - 1,277)        | 177<br>(78 - 341)           | 204<br>(70 - 450)           |
| Malaria                                                           | 3,896<br>(1,826 - 8,102)       | 2,838<br>(1,032 - 6,877)    | 203<br>(57 - 503)        | 523<br>(191 - 1,118)        | 149<br>(52 - 310)           | 182<br>(50 - 430)           |
| Leishmaniasis                                                     | 58<br>(36 - 88)                | 18<br>(7 - 34)              | 9<br>(4 - 17)            | 27<br>(14 - 45)             | 3<br>(1 - 5)                | 1<br>(0 - 1)                |
| Visceral leishmaniasis                                            | 58<br>(36 - 88)                | 18<br>(7 - 34)              | 9<br>(4 - 17)            | 27<br>(14 - 45)             | 3<br>(1 - 5)                | 1<br>(0 - 1)                |
| African trypanosomiasis                                           | 2<br>(1 - 3)                   | 0<br>(0 - 0)                | 0<br>(0 - 0)             | 1<br>(1 - 2)                | 0<br>(0 - 0)                | 0<br>(0 - 0)                |
| Schistosomiasis                                                   | 51<br>(34 - 71)                | 1<br>(0 - 2)                | 1<br>(0 - 2)             | 28<br>(16 - 44)             | 12<br>(6 - 20)              | 9<br>(5 - 15)               |
| Cysticercosis                                                     | 9<br>(6 - 11)                  | 0<br>(0 - 1)                | 0<br>(0 - 0)             | 7<br>(5 - 9)                | 1<br>(1 - 1)                | 0<br>(0 - 0)                |
| Cystic echinococcosis                                             | 55<br>(43 - 70)                | 7<br>(4 - 11)               | 6<br>(4 - 8)             | 34<br>(24 - 46)             | 5<br>(4 - 7)                | 3<br>(3 - 4)                |
| Dengue                                                            | 1<br>(1 - 3)                   | 0<br>(0 - 1)                | 0<br>(0 - 1)             | 1<br>(0 - 1)                | 0<br>(0 - 0)                | 0<br>(0 - 0)                |
| Yellow fever                                                      | 0<br>(0 - 1)                   | 0<br>(0 - 0)                | 0<br>(0 - 0)             | 0<br>(0 - 0)                | 0<br>(0 - 0)                | 0<br>(0 - 0)                |
| Rabies                                                            | 64<br>(35 - 101)               | 13<br>(5 - 30)              | 13<br>(5 - 28)           | 32<br>(17 - 47)             | 5<br>(2 - 9)                | 2<br>(0 - 4)                |
| Intestinal nematode infections                                    | 27<br>(12 - 50)                | 22<br>(8 - 45)              | 3<br>(0 - 9)             | 2<br>(0 - 8)                | 0<br>(0 - 3)                | 0<br>(0 - 4)                |
| Ascariasis                                                        | 27<br>(12 - 50)                | 22<br>(8 - 45)              | 3<br>(0 - 9)             | 2<br>(0 - 8)                | 0<br>(0 - 3)                | 0<br>(0 - 4)                |



Web Table 31- Kenya deaths with 95% UI by age, sex, and cause in 2013

| Cause                                                            | Females, All Ages           | Females, 0-4 Years        | Females, 5-14 Years | Females, 15-49 Years     | Females, 50-69 Years       | Females, 70-80 Years        |
|------------------------------------------------------------------|-----------------------------|---------------------------|---------------------|--------------------------|----------------------------|-----------------------------|
| Other neglected tropical diseases                                | 24<br>(15 - 43)             | 12<br>(5 - 26)            | 1<br>(0 - 1)        | 3<br>(2 - 6)             | 2<br>(1 - 5)               | 6<br>(2 - 12)               |
| Maternal disorders                                               | 4,361<br>(2,759 - 6,514)    | --                        | 8<br>(3 - 19)       | 4,354<br>(2,750 - 6,507) | --                         | --                          |
| Maternal hemorrhage                                              | 500<br>(284 - 811)          | --                        | 1<br>(0 - 1)        | 500<br>(284 - 811)       | --                         | --                          |
| Maternal sepsis and other maternal infections                    | 416<br>(240 - 676)          | --                        | 1<br>(0 - 2)        | 415<br>(240 - 675)       | --                         | --                          |
| Maternal hypertensive disorders                                  | 456<br>(258 - 772)          | --                        | 1<br>(0 - 2)        | 455<br>(257 - 770)       | --                         | --                          |
| Maternal obstructed labor                                        | 229<br>(136 - 371)          | --                        | 0<br>(0 - 1)        | 229<br>(135 - 371)       | --                         | --                          |
| Maternal abortive outcome                                        | 826<br>(488 - 1,324)        | --                        | 1<br>(0 - 3)        | 825<br>(487 - 1,322)     | --                         | --                          |
| Indirect maternal deaths                                         | 357<br>(188 - 615)          | --                        | 0<br>(0 - 1)        | 357<br>(188 - 614)       | --                         | --                          |
| Late maternal deaths                                             | 376<br>(185 - 655)          | --                        | 1<br>(0 - 3)        | 375<br>(185 - 654)       | --                         | --                          |
| Maternal deaths aggravated by HIV/AIDS                           | 105<br>(56 - 175)           | --                        | --                  | 105<br>(56 - 175)        | --                         | --                          |
| Other maternal disorders                                         | 1,087<br>(673 - 1,681)      | --                        | 2<br>(1 - 4)        | 1,085<br>(672 - 1,679)   | --                         | --                          |
| Neonatal disorders                                               | 9,812<br>(7,625 - 12,515)   | 9,812<br>(7,625 - 12,515) | --                  | --                       | --                         | --                          |
| Neonatal preterm birth complications                             | 3,104<br>(1,575 - 5,077)    | 3,104<br>(1,575 - 5,077)  | --                  | --                       | --                         | --                          |
| Neonatal encephalopathy due to birth asphyxia and trauma         | 3,197<br>(1,645 - 5,122)    | 3,197<br>(1,645 - 5,122)  | --                  | --                       | --                         | --                          |
| Neonatal sepsis and other neonatal infections                    | 2,337<br>(1,092 - 4,327)    | 2,337<br>(1,092 - 4,327)  | --                  | --                       | --                         | --                          |
| Hemolytic disease and other neonatal jaundice                    | 26<br>(9 - 59)              | 26<br>(9 - 59)            | --                  | --                       | --                         | --                          |
| Other neonatal disorders                                         | 1,148<br>(556 - 2,064)      | 1,148<br>(556 - 2,064)    | --                  | --                       | --                         | --                          |
| Nutritional deficiencies                                         | 4,581<br>(3,306 - 6,407)    | 2,363<br>(1,280 - 3,906)  | 123<br>(73 - 202)   | 681<br>(451 - 989)       | 376<br>(259 - 550)         | 1,038<br>(679 - 1,514)      |
| Protein-energy malnutrition                                      | 3,671<br>(2,374 - 5,323)    | 2,226<br>(1,214 - 3,676)  | 109<br>(62 - 180)   | 243<br>(112 - 444)       | 264<br>(157 - 404)         | 829<br>(491 - 1,254)        |
| Iodine deficiency                                                | 5<br>(0 - 21)               | 2<br>(0 - 16)             | 0<br>(0 - 1)        | 2<br>(0 - 11)            | 0<br>(0 - 3)               | 1<br>(0 - 4)                |
| Iron-deficiency anemia                                           | 873<br>(423 - 1,497)        | 130<br>(26 - 398)         | 14<br>(4 - 33)      | 432<br>(229 - 690)       | 107<br>(39 - 206)          | 191<br>(70 - 463)           |
| Other nutritional deficiencies                                   | 32<br>(11 - 64)             | 6<br>(1 - 17)             | 0<br>(0 - 1)        | 4<br>(1 - 8)             | 4<br>(1 - 9)               | 17<br>(3 - 44)              |
| Other communicable, maternal, neonatal, and nutritional diseases | 1,432<br>(609 - 2,500)      | 986<br>(202 - 2,004)      | 68<br>(18 - 135)    | 215<br>(123 - 339)       | 69<br>(34 - 134)           | 95<br>(34 - 207)            |
| Sexually transmitted diseases excluding HIV                      | 982<br>(163 - 2,038)        | 808<br>(0 - 1,822)        | 50<br>(1 - 112)     | 81<br>(41 - 163)         | 19<br>(6 - 53)             | 23<br>(7 - 66)              |
| Syphilis                                                         | 918<br>(89 - 1,978)         | 808<br>(0 - 1,822)        | 49<br>(0 - 112)     | 32<br>(17 - 66)          | 10<br>(3 - 29)             | 18<br>(5 - 49)              |
| Chlamydial infection                                             | 20<br>(11 - 40)             | --                        | 0<br>(0 - 0)        | 16<br>(8 - 32)           | 3<br>(1 - 7)               | 1<br>(0 - 4)                |
| Gonococcal infection                                             | 23<br>(12 - 44)             | --                        | 0<br>(0 - 0)        | 17<br>(8 - 33)           | 3<br>(1 - 9)               | 3<br>(1 - 8)                |
| Other sexually transmitted diseases                              | 20<br>(10 - 39)             | --                        | 0<br>(0 - 0)        | 16<br>(8 - 32)           | 3<br>(1 - 7)               | 1<br>(0 - 4)                |
| Hepatitis                                                        | 107<br>(74 - 166)           | 25<br>(13 - 46)           | 4<br>(2 - 8)        | 61<br>(36 - 104)         | 10<br>(7 - 16)             | 6<br>(4 - 9)                |
| Acute hepatitis A                                                | 18<br>(5 - 36)              | 11<br>(3 - 23)            | 2<br>(1 - 4)        | 5<br>(1 - 13)            | 0<br>(0 - 1)               | 0<br>(0 - 0)                |
| Acute hepatitis B                                                | 49<br>(30 - 78)             | 14<br>(5 - 29)            | 2<br>(1 - 4)        | 19<br>(8 - 38)           | 9<br>(5 - 14)              | 5<br>(4 - 8)                |
| Acute hepatitis C                                                | 1<br>(0 - 2)                | --                        | 0<br>(0 - 0)        | 1<br>(0 - 1)             | 0<br>(0 - 0)               | 0<br>(0 - 0)                |
| Acute hepatitis E                                                | 39<br>(20 - 70)             | 0<br>(0 - 1)              | 0<br>(0 - 1)        | 37<br>(18 - 64)          | 2<br>(0 - 4)               | 0<br>(0 - 1)                |
| Other infectious diseases                                        | 344<br>(181 - 576)          | 152<br>(64 - 323)         | 14<br>(4 - 36)      | 73<br>(23 - 143)         | 39<br>(13 - 99)            | 65<br>(15 - 183)            |
| Non-communicable diseases                                        | 38,171<br>(32,597 - 46,750) | 4,597<br>(3,006 - 6,792)  | 552<br>(398 - 787)  | 6,332<br>(4,806 - 8,222) | 10,987<br>(8,811 - 15,401) | 15,703<br>(13,635 - 19,247) |
| Neoplasms                                                        | 9,985<br>(8,036 - 13,157)   | 255<br>(153 - 389)        | 153<br>(95 - 230)   | 1,755<br>(1,275 - 2,250) | 5,468<br>(4,265 - 7,757)   | 2,355<br>(1,956 - 3,002)    |
| Esophageal cancer                                                | 1,312<br>(937 - 1,814)      | --                        | --                  | 106<br>(63 - 156)        | 737<br>(494 - 1,080)       | 469<br>(320 - 663)          |
| Stomach cancer                                                   | 508<br>(387 - 702)          | --                        | --                  | 34<br>(24 - 48)          | 246<br>(177 - 362)         | 228<br>(156 - 322)          |
| Liver cancer                                                     | 488<br>(335 - 692)          | --                        | 3<br>(1 - 7)        | 92<br>(48 - 150)         | 254<br>(167 - 391)         | 138<br>(90 - 209)           |
| Liver cancer due to hepatitis B                                  | 110<br>(49 - 189)           | --                        | 1<br>(0 - 2)        | 28<br>(12 - 50)          | 56<br>(20 - 106)           | 25<br>(9 - 45)              |

Web Table 31- Kenya deaths with 95% UI by age, sex, and cause in 2013

| Cause                                | Females, All Ages           | Females, 0-4 Years | Females, 5-14 Years | Females, 15-49 Years     | Females, 50-69 Years     | Females, 70-80 Years      |
|--------------------------------------|-----------------------------|--------------------|---------------------|--------------------------|--------------------------|---------------------------|
| Liver cancer due to hepatitis C      | 197<br>(115 - 311)          | --                 | 0<br>(0 - 1)        | 27<br>(8 - 55)           | 108<br>(57 - 188)        | 62<br>(35 - 99)           |
| Liver cancer due to alcohol use      | 55<br>(30 - 100)            | --                 | --                  | 4<br>(2 - 9)             | 28<br>(14 - 53)          | 23<br>(11 - 42)           |
| Liver cancer due to other causes     | 126<br>(67 - 203)           | --                 | 2<br>(1 - 5)        | 33<br>(16 - 58)          | 62<br>(28 - 113)         | 29<br>(14 - 52)           |
| Larynx cancer                        | 10<br>(5 - 18)              | --                 | --                  | 1<br>(1 - 3)             | 7<br>(3 - 13)            | 1<br>(1 - 2)              |
| Tracheal, bronchus and lung cancer   | 237<br>(173 - 351)          | --                 | --                  | 18<br>(11 - 37)          | 167<br>(116 - 251)       | 53<br>(37 - 78)           |
| Breast cancer                        | 1,592<br>(1,161 - 2,170)    | --                 | --                  | 397<br>(220 - 547)       | 993<br>(726 - 1,431)     | 203<br>(153 - 272)        |
| Cervical cancer                      | 2,007<br>(1,475 - 2,897)    | --                 | --                  | 294<br>(202 - 418)       | 1,337<br>(923 - 1,992)   | 376<br>(243 - 595)        |
| Uterine cancer                       | 73<br>(49 - 115)            | --                 | --                  | 5<br>(2 - 9)             | 44<br>(26 - 71)          | 25<br>(16 - 42)           |
| Prostate cancer                      | --                          | --                 | --                  | --                       | --                       | --                        |
| Colon and rectum cancer              | 527<br>(422 - 684)          | --                 | --                  | 126<br>(90 - 165)        | 233<br>(175 - 326)       | 168<br>(125 - 223)        |
| Lip and oral cavity cancer           | 175<br>(111 - 280)          | --                 | --                  | 33<br>(16 - 59)          | 119<br>(71 - 202)        | 23<br>(14 - 34)           |
| Nasopharynx cancer                   | 64<br>(27 - 103)            | --                 | 2<br>(0 - 6)        | 36<br>(17 - 65)          | 19<br>(5 - 37)           | 7<br>(3 - 12)             |
| Other pharynx cancer                 | 23<br>(15 - 34)             | --                 | --                  | 10<br>(5 - 19)           | 9<br>(6 - 14)            | 4<br>(3 - 6)              |
| Gallbladder and biliary tract cancer | 140<br>(99 - 207)           | --                 | --                  | 24<br>(13 - 39)          | 86<br>(55 - 141)         | 30<br>(19 - 46)           |
| Pancreatic cancer                    | 283<br>(215 - 390)          | --                 | --                  | 15<br>(10 - 21)          | 202<br>(145 - 288)       | 66<br>(48 - 91)           |
| Malignant skin melanoma              | 30<br>(22 - 42)             | --                 | --                  | 5<br>(3 - 8)             | 16<br>(10 - 24)          | 9<br>(7 - 13)             |
| Non-melanoma skin cancer             | 38<br>(19 - 79)             | --                 | --                  | 9<br>(4 - 18)            | 8<br>(3 - 18)            | 21<br>(8 - 56)            |
| Ovarian cancer                       | 496<br>(356 - 713)          | --                 | --                  | 74<br>(41 - 123)         | 336<br>(232 - 501)       | 86<br>(58 - 129)          |
| Testicular cancer                    | --                          | --                 | --                  | --                       | --                       | --                        |
| Kidney cancer                        | 80<br>(56 - 123)            | 17<br>(7 - 38)     | 5<br>(2 - 12)       | 21<br>(13 - 37)          | 28<br>(18 - 45)          | 8<br>(5 - 12)             |
| Bladder cancer                       | 156<br>(90 - 239)           | --                 | --                  | 13<br>(7 - 21)           | 109<br>(67 - 174)        | 34<br>(14 - 61)           |
| Brain and nervous system cancer      | 125<br>(85 - 164)           | 15<br>(6 - 31)     | 9<br>(5 - 14)       | 68<br>(40 - 92)          | 23<br>(15 - 36)          | 10<br>(6 - 16)            |
| Thyroid cancer                       | 35<br>(18 - 57)             | --                 | 0<br>(0 - 1)        | 5<br>(2 - 8)             | 27<br>(12 - 45)          | 3<br>(2 - 7)              |
| Mesothelioma                         | 17<br>(10 - 33)             | --                 | --                  | 8<br>(5 - 16)            | 4<br>(2 - 10)            | 4<br>(2 - 8)              |
| Hodgkin lymphoma                     | 73<br>(31 - 111)            | 1<br>(0 - 2)       | 1<br>(0 - 2)        | 6<br>(3 - 18)            | 27<br>(11 - 50)          | 39<br>(8 - 70)            |
| Non-Hodgkin lymphoma                 | 336<br>(201 - 498)          | 36<br>(13 - 78)    | 29<br>(12 - 55)     | 67<br>(33 - 117)         | 156<br>(96 - 244)        | 47<br>(26 - 70)           |
| Multiple myeloma                     | 123<br>(80 - 192)           | --                 | --                  | 21<br>(13 - 30)          | 65<br>(43 - 101)         | 38<br>(12 - 79)           |
| Leukemia                             | 191<br>(124 - 253)          | 22<br>(9 - 45)     | 43<br>(22 - 68)     | 71<br>(40 - 97)          | 37<br>(26 - 56)          | 19<br>(14 - 26)           |
| Other neoplasms                      | 844<br>(565 - 1,134)        | 163<br>(88 - 267)  | 61<br>(32 - 105)    | 196<br>(97 - 311)        | 178<br>(114 - 268)       | 246<br>(165 - 358)        |
| Cardiovascular diseases              | 13,311<br>(10,851 - 16,722) | 250<br>(143 - 405) | 52<br>(32 - 88)     | 1,525<br>(1,060 - 2,461) | 3,104<br>(2,390 - 4,367) | 8,379<br>(6,938 - 10,424) |
| Rheumatic heart disease              | 555<br>(365 - 902)          | 7<br>(2 - 18)      | 10<br>(5 - 19)      | 252<br>(141 - 473)       | 127<br>(75 - 225)        | 159<br>(96 - 256)         |
| Ischemic heart disease               | 2,229<br>(1,547 - 3,590)    | 1<br>(0 - 3)       | 1<br>(0 - 4)        | 166<br>(99 - 354)        | 508<br>(328 - 857)       | 1,553<br>(1,025 - 2,444)  |
| Cerebrovascular disease              | 6,116<br>(4,294 - 7,913)    | 31<br>(14 - 58)    | 4<br>(2 - 8)        | 370<br>(239 - 580)       | 1,462<br>(990 - 2,133)   | 4,249<br>(2,979 - 5,467)  |
| Ischemic stroke                      | 2,936<br>(1,444 - 4,209)    | 2<br>(1 - 6)       | 1<br>(0 - 1)        | 49<br>(20 - 83)          | 441<br>(175 - 760)       | 2,443<br>(1,225 - 3,498)  |
| Hemorrhagic stroke                   | 3,180<br>(2,057 - 4,512)    | 28<br>(13 - 53)    | 4<br>(2 - 7)        | 321<br>(202 - 521)       | 1,021<br>(661 - 1,498)   | 1,806<br>(1,020 - 2,766)  |
| Hypertensive heart disease           | 1,786<br>(1,049 - 3,623)    | 6<br>(1 - 14)      | 2<br>(1 - 4)        | 132<br>(70 - 276)        | 359<br>(188 - 752)       | 1,287<br>(720 - 2,760)    |
| Cardiomyopathy and myocarditis       | 557<br>(194 - 862)          | 95<br>(36 - 180)   | 15<br>(5 - 28)      | 155<br>(51 - 276)        | 103<br>(29 - 186)        | 189<br>(45 - 398)         |
| Atrial fibrillation and flutter      | 7<br>(3 - 15)               | --                 | --                  | 0<br>(0 - 1)             | 1<br>(0 - 2)             | 5<br>(2 - 13)             |
| Aortic aneurysm                      | 130<br>(65 - 222)           | --                 | --                  | 22<br>(9 - 45)           | 31<br>(15 - 56)          | 76<br>(38 - 142)          |
| Peripheral vascular disease          | 8<br>(3 - 17)               | --                 | --                  | 0<br>(0 - 0)             | 1<br>(1 - 3)             | 6<br>(2 - 14)             |

Web Table 31- Kenya deaths with 95% UI by age, sex, and cause in 2013

| Cause                                               | Females, All Ages        | Females, 0-4 Years | Females, 5-14 Years | Females, 15-49 Years | Females, 50-69 Years | Females, 70-80 Years   |
|-----------------------------------------------------|--------------------------|--------------------|---------------------|----------------------|----------------------|------------------------|
| Endocarditis                                        | 240<br>(107 - 580)       | 26<br>(8 - 67)     | 5<br>(2 - 12)       | 54<br>(23 - 128)     | 46<br>(14 - 115)     | 109<br>(29 - 288)      |
| Other cardiovascular and circulatory diseases       | 1,684<br>(1,153 - 2,575) | 86<br>(39 - 166)   | 15<br>(8 - 28)      | 372<br>(179 - 675)   | 466<br>(291 - 777)   | 745<br>(439 - 1,386)   |
| Chronic respiratory diseases                        | 1,899<br>(1,500 - 2,421) | 128<br>(64 - 221)  | 22<br>(14 - 33)     | 274<br>(194 - 375)   | 439<br>(314 - 623)   | 1,036<br>(781 - 1,367) |
| Chronic obstructive pulmonary disease               | 964<br>(666 - 1,313)     | 23<br>(8 - 54)     | 6<br>(3 - 10)       | 83<br>(52 - 124)     | 245<br>(160 - 368)   | 606<br>(394 - 842)     |
| Pneumoconiosis                                      | 12<br>(8 - 18)           | 1<br>(1 - 4)       | 0<br>(0 - 1)        | 6<br>(4 - 10)        | 2<br>(1 - 3)         | 2<br>(1 - 4)           |
| Silicosis                                           | 1<br>(1 - 2)             | 0<br>(0 - 1)       | 0<br>(0 - 0)        | 0<br>(0 - 1)         | 0<br>(0 - 0)         | 0<br>(0 - 0)           |
| Asbestosis                                          | 1<br>(1 - 1)             | 0<br>(0 - 0)       | 0<br>(0 - 0)        | 0<br>(0 - 1)         | 0<br>(0 - 0)         | 0<br>(0 - 0)           |
| Coal workers pneumoconiosis                         | 1<br>(1 - 1)             | 0<br>(0 - 0)       | 0<br>(0 - 0)        | 0<br>(0 - 1)         | 0<br>(0 - 0)         | 0<br>(0 - 0)           |
| Other pneumoconiosis                                | 10<br>(6 - 14)           | 1<br>(0 - 2)       | 0<br>(0 - 0)        | 5<br>(3 - 8)         | 1<br>(1 - 2)         | 2<br>(1 - 4)           |
| Asthma                                              | 400<br>(242 - 575)       | 32<br>(13 - 64)    | 8<br>(4 - 13)       | 67<br>(40 - 97)      | 104<br>(59 - 169)    | 190<br>(100 - 306)     |
| Interstitial lung disease and pulmonary sarcoidosis | 302<br>(100 - 564)       | 6<br>(1 - 16)      | 2<br>(1 - 4)        | 44<br>(16 - 82)      | 69<br>(21 - 142)     | 181<br>(48 - 376)      |
| Other chronic respiratory diseases                  | 220<br>(140 - 315)       | 65<br>(31 - 122)   | 6<br>(3 - 11)       | 74<br>(42 - 114)     | 19<br>(10 - 34)      | 57<br>(29 - 101)       |
| Cirrhosis                                           | 1,397<br>(1,113 - 1,797) | 26<br>(11 - 53)    | 18<br>(11 - 28)     | 396<br>(285 - 535)   | 487<br>(358 - 696)   | 469<br>(339 - 637)     |
| Cirrhosis due to hepatitis B                        | 317<br>(179 - 511)       | 1<br>(0 - 2)       | 2<br>(1 - 5)        | 94<br>(45 - 158)     | 114<br>(62 - 191)    | 106<br>(52 - 194)      |
| Cirrhosis due to hepatitis C                        | 505<br>(217 - 752)       | 2<br>(0 - 5)       | 3<br>(0 - 6)        | 130<br>(55 - 211)    | 192<br>(58 - 308)    | 179<br>(49 - 289)      |
| Cirrhosis due to alcohol use                        | 350<br>(202 - 543)       | --                 | --                  | 68<br>(32 - 119)     | 130<br>(65 - 217)    | 153<br>(87 - 250)      |
| Cirrhosis due to other causes                       | 224<br>(143 - 336)       | 24<br>(9 - 48)     | 13<br>(7 - 21)      | 104<br>(59 - 169)    | 51<br>(24 - 87)      | 32<br>(15 - 54)        |
| Digestive diseases                                  | 1,948<br>(1,571 - 2,453) | 74<br>(37 - 130)   | 41<br>(26 - 61)     | 523<br>(365 - 730)   | 409<br>(297 - 593)   | 901<br>(699 - 1,168)   |
| Peptic ulcer disease                                | 427<br>(270 - 623)       | 5<br>(2 - 11)      | 3<br>(2 - 6)        | 88<br>(51 - 145)     | 92<br>(53 - 156)     | 239<br>(143 - 373)     |
| Gastritis and duodenitis                            | 105<br>(33 - 334)        | 5<br>(2 - 13)      | 4<br>(1 - 10)       | 27<br>(11 - 62)      | 18<br>(5 - 64)       | 51<br>(12 - 191)       |
| Appendicitis                                        | 177<br>(88 - 289)        | 6<br>(2 - 12)      | 5<br>(3 - 10)       | 60<br>(31 - 100)     | 33<br>(14 - 62)      | 73<br>(29 - 147)       |
| Paralytic ileus and intestinal obstruction          | 586<br>(360 - 874)       | 21<br>(8 - 45)     | 17<br>(9 - 29)      | 141<br>(80 - 226)    | 143<br>(79 - 234)    | 264<br>(148 - 430)     |
| Inguinal, femoral, and abdominal hernia             | 36<br>(18 - 60)          | 3<br>(1 - 8)       | 0<br>(0 - 1)        | 17<br>(8 - 31)       | 2<br>(1 - 3)         | 13<br>(6 - 25)         |
| Inflammatory bowel disease                          | 147<br>(79 - 234)        | 18<br>(7 - 37)     | 4<br>(2 - 8)        | 60<br>(31 - 98)      | 21<br>(10 - 38)      | 44<br>(19 - 82)        |
| Vascular intestinal disorders                       | 20<br>(8 - 53)           | 0<br>(0 - 1)       | 0<br>(0 - 1)        | 3<br>(1 - 6)         | 4<br>(1 - 12)        | 13<br>(4 - 38)         |
| Gallbladder and biliary diseases                    | 166<br>(106 - 250)       | 2<br>(1 - 4)       | 1<br>(1 - 2)        | 40<br>(23 - 64)      | 36<br>(20 - 59)      | 86<br>(47 - 147)       |
| Pancreatitis                                        | 88<br>(46 - 140)         | 1<br>(0 - 3)       | 1<br>(0 - 2)        | 34<br>(14 - 58)      | 21<br>(9 - 40)       | 31<br>(13 - 67)        |
| Other digestive diseases                            | 197<br>(129 - 314)       | 12<br>(5 - 25)     | 5<br>(3 - 9)        | 54<br>(31 - 84)      | 39<br>(22 - 72)      | 88<br>(47 - 177)       |
| Neurological disorders                              | 1,584<br>(1,213 - 2,059) | 170<br>(81 - 354)  | 49<br>(26 - 93)     | 285<br>(163 - 506)   | 122<br>(90 - 173)    | 958<br>(694 - 1,232)   |
| Alzheimer disease and other dementias               | 940<br>(682 - 1,215)     | --                 | --                  | 0<br>(0 - 1)         | 61<br>(42 - 87)      | 878<br>(625 - 1,149)   |
| Parkinson disease                                   | 7<br>(3 - 11)            | --                 | --                  | 1<br>(0 - 1)         | 3<br>(1 - 6)         | 3<br>(1 - 6)           |
| Epilepsy                                            | 527<br>(324 - 891)       | 137<br>(54 - 321)  | 42<br>(20 - 85)     | 258<br>(136 - 477)   | 33<br>(19 - 56)      | 57<br>(31 - 100)       |
| Multiple sclerosis                                  | 5<br>(2 - 9)             | --                 | --                  | 3<br>(1 - 7)         | 1<br>(1 - 3)         | 1<br>(0 - 1)           |
| Other neurological disorders                        | 105<br>(81 - 134)        | 32<br>(19 - 50)    | 7<br>(4 - 10)       | 23<br>(17 - 31)      | 24<br>(17 - 35)      | 19<br>(14 - 25)        |
| Mental and substance use disorders                  | 474<br>(270 - 836)       | 19<br>(6 - 35)     | 0<br>(0 - 0)        | 368<br>(208 - 650)   | 63<br>(26 - 148)     | 24<br>(9 - 59)         |
| Schizophrenia                                       | 22<br>(10 - 40)          | --                 | --                  | 15<br>(4 - 29)       | 4<br>(2 - 8)         | 3<br>(1 - 6)           |
| Alcohol use disorders                               | 179<br>(54 - 428)        | --                 | --                  | 132<br>(38 - 324)    | 37<br>(10 - 96)      | 10<br>(3 - 27)         |
| Drug use disorders                                  | 271<br>(147 - 452)       | 19<br>(6 - 35)     | --                  | 219<br>(117 - 367)   | 22<br>(6 - 56)       | 11<br>(2 - 31)         |
| Opioid use disorders                                | 28<br>(15 - 47)          | 2<br>(1 - 4)       | --                  | 23<br>(12 - 39)      | 2<br>(0 - 5)         | 1<br>(0 - 3)           |
| Cocaine use disorders                               | 2<br>(1 - 3)             | 0<br>(0 - 0)       | --                  | 1<br>(1 - 2)         | 0<br>(0 - 0)         | 0<br>(0 - 0)           |

Web Table 31- Kenya deaths with 95% UI by age, sex, and cause in 2013

| Cause                                               | Females, All Ages        | Females, 0-4 Years       | Females, 5-14 Years | Females, 15-49 Years | Females, 50-69 Years | Females, 70-80 Years     |
|-----------------------------------------------------|--------------------------|--------------------------|---------------------|----------------------|----------------------|--------------------------|
| Amphetamine use disorders                           | 1<br>(1 - 2)             | 0<br>(0 - 0)             | --                  | 1<br>(0 - 2)         | 0<br>(0 - 0)         | 0<br>(0 - 0)             |
| Other drug use disorders                            | 241<br>(130 - 403)       | 17<br>(5 - 31)           | --                  | 194<br>(104 - 328)   | 20<br>(5 - 51)       | 10<br>(2 - 28)           |
| Eating disorders                                    | 2<br>(1 - 3)             | --                       | 0<br>(0 - 0)        | 2<br>(1 - 3)         | --                   | --                       |
| Anorexia nervosa                                    | 2<br>(1 - 3)             | --                       | 0<br>(0 - 0)        | 2<br>(1 - 3)         | --                   | --                       |
| Diabetes, urogenital, blood, and endocrine diseases | 3,521<br>(2,914 - 4,311) | 481<br>(278 - 798)       | 102<br>(65 - 156)   | 844<br>(610 - 1,146) | 779<br>(591 - 1,082) | 1,315<br>(1,052 - 1,671) |
| Diabetes mellitus                                   | 1,358<br>(1,081 - 1,759) | 4<br>(2 - 7)             | 4<br>(2 - 6)        | 160<br>(115 - 213)   | 430<br>(307 - 602)   | 760<br>(573 - 1,013)     |
| Acute glomerulonephritis                            | 51<br>(26 - 74)          | 4<br>(2 - 8)             | 2<br>(1 - 5)        | 25<br>(11 - 42)      | 9<br>(4 - 16)        | 10<br>(4 - 16)           |
| Chronic kidney disease                              | 647<br>(496 - 854)       | 49<br>(26 - 85)          | 21<br>(13 - 35)     | 176<br>(115 - 284)   | 128<br>(87 - 196)    | 273<br>(191 - 378)       |
| Chronic kidney disease due to diabetes mellitus     | 5<br>(2 - 10)            | 0<br>(0 - 1)             | 0<br>(0 - 1)        | 1<br>(1 - 2)         | 2<br>(0 - 4)         | 2<br>(0 - 5)             |
| Chronic kidney disease due to hypertension          | 260<br>(111 - 417)       | 7<br>(2 - 17)            | 3<br>(1 - 5)        | 56<br>(21 - 112)     | 59<br>(23 - 106)     | 135<br>(55 - 239)        |
| Chronic kidney disease due to glomerulonephritis    | 198<br>(102 - 305)       | 25<br>(12 - 44)          | 9<br>(5 - 15)       | 82<br>(40 - 130)     | 32<br>(13 - 59)      | 49<br>(18 - 91)          |
| Chronic kidney disease due to other causes          | 184<br>(98 - 295)        | 17<br>(6 - 39)           | 9<br>(4 - 18)       | 37<br>(17 - 80)      | 34<br>(14 - 64)      | 87<br>(33 - 161)         |
| Urinary diseases and male infertility               | 358<br>(266 - 483)       | 34<br>(17 - 69)          | 8<br>(3 - 15)       | 117<br>(73 - 193)    | 95<br>(61 - 147)     | 105<br>(66 - 158)        |
| Interstitial nephritis and urinary tract infections | 282<br>(201 - 387)       | 23<br>(10 - 50)          | 5<br>(2 - 10)       | 80<br>(48 - 142)     | 80<br>(50 - 125)     | 94<br>(59 - 142)         |
| Urolithiasis                                        | 20<br>(11 - 36)          | --                       | 1<br>(0 - 2)        | 10<br>(4 - 20)       | 6<br>(2 - 12)        | 4<br>(1 - 9)             |
| Other urinary diseases                              | 56<br>(35 - 96)          | 11<br>(4 - 24)           | 2<br>(1 - 4)        | 26<br>(14 - 50)      | 9<br>(5 - 19)        | 8<br>(3 - 16)            |
| Gynecological diseases                              | 14<br>(7 - 28)           | --                       | --                  | 7<br>(3 - 21)        | 3<br>(2 - 6)         | 3<br>(2 - 6)             |
| Uterine fibroids                                    | 3<br>(2 - 5)             | --                       | --                  | 1<br>(0 - 3)         | 1<br>(0 - 2)         | 1<br>(1 - 2)             |
| Polycystic ovarian syndrome                         | 1<br>(0 - 2)             | --                       | --                  | 0<br>(0 - 2)         | 0<br>(0 - 0)         | --                       |
| Endometriosis                                       | 1<br>(1 - 4)             | --                       | --                  | 1<br>(1 - 3)         | 0<br>(0 - 0)         | --                       |
| Genital prolapse                                    | 2<br>(1 - 4)             | --                       | --                  | 1<br>(0 - 3)         | 1<br>(0 - 1)         | 1<br>(0 - 2)             |
| Other gynecological diseases                        | 7<br>(4 - 14)            | --                       | --                  | 3<br>(2 - 10)        | 2<br>(1 - 3)         | 2<br>(1 - 3)             |
| Hemoglobinopathies and hemolytic anemias            | 597<br>(322 - 1,016)     | 248<br>(107 - 481)       | 57<br>(28 - 97)     | 226<br>(109 - 408)   | 37<br>(17 - 70)      | 29<br>(14 - 62)          |
| Thalassemias                                        | 8<br>(4 - 14)            | 5<br>(2 - 10)            | 1<br>(0 - 1)        | 2<br>(1 - 3)         | 0<br>(0 - 0)         | 0<br>(0 - 0)             |
| Sickle cell disorders                               | 525<br>(273 - 909)       | 220<br>(93 - 431)        | 54<br>(27 - 93)     | 216<br>(104 - 390)   | 32<br>(15 - 61)      | 2<br>(1 - 4)             |
| G6PD deficiency                                     | 10<br>(5 - 17)           | 5<br>(2 - 10)            | 1<br>(0 - 1)        | 3<br>(1 - 5)         | 1<br>(0 - 1)         | 1<br>(0 - 1)             |
| Other hemoglobinopathies and hemolytic anemias      | 55<br>(31 - 90)          | 17<br>(8 - 33)           | 1<br>(1 - 2)        | 5<br>(3 - 9)         | 5<br>(2 - 9)         | 27<br>(13 - 57)          |
| Endocrine, metabolic, blood, and immune disorders   | 496<br>(347 - 850)       | 142<br>(73 - 252)        | 12<br>(4 - 28)      | 133<br>(78 - 288)    | 76<br>(43 - 135)     | 134<br>(81 - 214)        |
| Musculoskeletal disorders                           | 168<br>(104 - 266)       | --                       | 7<br>(4 - 12)       | 108<br>(55 - 192)    | 26<br>(12 - 56)      | 26<br>(12 - 64)          |
| Rheumatoid arthritis                                | 37<br>(21 - 77)          | --                       | 1<br>(1 - 2)        | 10<br>(5 - 19)       | 11<br>(5 - 28)       | 14<br>(6 - 38)           |
| Other musculoskeletal disorders                     | 131<br>(78 - 221)        | --                       | 6<br>(3 - 11)       | 98<br>(49 - 182)     | 15<br>(7 - 36)       | 12<br>(5 - 33)           |
| Other non-communicable diseases                     | 3,884<br>(2,595 - 5,985) | 3,194<br>(1,915 - 5,258) | 107<br>(60 - 190)   | 253<br>(162 - 405)   | 90<br>(61 - 137)     | 240<br>(154 - 349)       |
| Congenital anomalies                                | 3,321<br>(2,022 - 5,419) | 3,035<br>(1,789 - 5,104) | 102<br>(56 - 184)   | 140<br>(71 - 264)    | 17<br>(11 - 24)      | 27<br>(18 - 38)          |
| Neural tube defects                                 | 729<br>(193 - 1,792)     | 697<br>(177 - 1,703)     | 11<br>(3 - 27)      | 20<br>(6 - 52)       | 1<br>(0 - 2)         | 1<br>(0 - 2)             |
| Congenital heart anomalies                          | 1,484<br>(763 - 2,634)   | 1,337<br>(653 - 2,458)   | 56<br>(27 - 107)    | 72<br>(31 - 148)     | 6<br>(3 - 11)        | 13<br>(7 - 20)           |
| Cleft lip and cleft palate                          | 12<br>(1 - 35)           | 12<br>(1 - 35)           | --                  | --                   | --                   | --                       |
| Down syndrome                                       | 213<br>(71 - 456)        | 180<br>(53 - 410)        | 11<br>(4 - 24)      | 19<br>(7 - 38)       | 2<br>(1 - 4)         | 1<br>(0 - 1)             |
| Chromosomal unbalanced rearrangements               | 179<br>(63 - 397)        | 168<br>(56 - 375)        | 3<br>(1 - 7)        | 7<br>(3 - 15)        | 1<br>(0 - 1)         | 1<br>(0 - 1)             |
| Other congenital anomalies                          | 703<br>(324 - 1,513)     | 642<br>(275 - 1,415)     | 20<br>(8 - 41)      | 23<br>(10 - 52)      | 6<br>(3 - 10)        | 12<br>(7 - 20)           |
| Skin and subcutaneous diseases                      | 544<br>(366 - 774)       | 140<br>(60 - 294)        | 6<br>(3 - 10)       | 113<br>(58 - 201)    | 73<br>(47 - 117)     | 213<br>(132 - 319)       |

Web Table 31- Kenya deaths with 95% UI by age, sex, and cause in 2013

| Cause                                           | Females, All Ages        | Females, 0-4 Years     | Females, 5-14 Years | Females, 15-49 Years     | Females, 50-69 Years | Females, 70-80 Years   |
|-------------------------------------------------|--------------------------|------------------------|---------------------|--------------------------|----------------------|------------------------|
| Cellulitis                                      | 211<br>(89 - 414)        | 57<br>(14 - 158)       | 2<br>(1 - 5)        | 51<br>(16 - 119)         | 31<br>(14 - 60)      | 69<br>(29 - 138)       |
| Pyoderma                                        | 237<br>(141 - 361)       | 76<br>(33 - 173)       | 2<br>(1 - 4)        | 48<br>(25 - 98)          | 30<br>(14 - 54)      | 80<br>(37 - 149)       |
| Decubitus ulcer                                 | 71<br>(37 - 118)         | 1<br>(0 - 3)           | 0<br>(0 - 1)        | 6<br>(3 - 12)            | 8<br>(3 - 14)        | 56<br>(25 - 95)        |
| Other skin and subcutaneous diseases            | 25<br>(14 - 42)          | 5<br>(2 - 12)          | 1<br>(0 - 1)        | 8<br>(4 - 16)            | 4<br>(2 - 8)         | 7<br>(3 - 14)          |
| Sudden infant death syndrome                    | 19<br>(4 - 62)           | 19<br>(4 - 62)         | --                  | --                       | --                   | --                     |
| Injuries                                        | 6,332<br>(5,118 - 8,064) | 1,375<br>(865 - 2,134) | 408<br>(270 - 607)  | 2,640<br>(1,793 - 3,860) | 694<br>(524 - 992)   | 1,215<br>(945 - 1,564) |
| Transport injuries                              | 1,755<br>(1,346 - 2,311) | 311<br>(176 - 505)     | 137<br>(80 - 216)   | 838<br>(558 - 1,245)     | 231<br>(164 - 343)   | 239<br>(170 - 340)     |
| Road injuries                                   | 1,624<br>(1,247 - 2,141) | 273<br>(152 - 454)     | 124<br>(72 - 200)   | 792<br>(530 - 1,169)     | 217<br>(154 - 322)   | 218<br>(155 - 317)     |
| Pedestrian road injuries                        | 800<br>(579 - 1,057)     | 168<br>(90 - 290)      | 69<br>(36 - 121)    | 264<br>(164 - 416)       | 137<br>(93 - 201)    | 162<br>(109 - 236)     |
| Cyclist road injuries                           | 34<br>(23 - 52)          | 5<br>(2 - 10)          | 3<br>(2 - 6)        | 9<br>(4 - 20)            | 10<br>(6 - 17)       | 7<br>(4 - 13)          |
| Motorcyclist road injuries                      | 37<br>(22 - 75)          | 5<br>(2 - 10)          | 1<br>(0 - 3)        | 18<br>(8 - 43)           | 5<br>(2 - 12)        | 7<br>(3 - 14)          |
| Motor vehicle road injuries                     | 742<br>(523 - 1,052)     | 90<br>(44 - 160)       | 49<br>(26 - 86)     | 500<br>(321 - 765)       | 62<br>(38 - 108)     | 40<br>(23 - 69)        |
| Other road injuries                             | 11<br>(6 - 29)           | 5<br>(2 - 13)          | 1<br>(0 - 3)        | 2<br>(1 - 4)             | 2<br>(1 - 6)         | 2<br>(1 - 5)           |
| Other transport injuries                        | 131<br>(93 - 207)        | 38<br>(19 - 71)        | 13<br>(6 - 25)      | 45<br>(24 - 101)         | 14<br>(8 - 23)       | 21<br>(10 - 33)        |
| Unintentional injuries                          | 3,265<br>(2,548 - 4,460) | 985<br>(620 - 1,512)   | 245<br>(150 - 416)  | 859<br>(559 - 1,372)     | 333<br>(240 - 477)   | 844<br>(624 - 1,144)   |
| Falls                                           | 725<br>(511 - 1,006)     | 83<br>(46 - 142)       | 33<br>(17 - 59)     | 128<br>(76 - 207)        | 86<br>(55 - 134)     | 396<br>(242 - 609)     |
| Drowning                                        | 581<br>(375 - 1,000)     | 239<br>(124 - 454)     | 86<br>(45 - 165)    | 182<br>(96 - 352)        | 42<br>(25 - 70)      | 32<br>(20 - 50)        |
| Fire, heat, and hot substances                  | 517<br>(332 - 771)       | 206<br>(95 - 418)      | 39<br>(20 - 71)     | 135<br>(79 - 229)        | 52<br>(32 - 82)      | 85<br>(52 - 130)       |
| Poisonings                                      | 74<br>(42 - 114)         | 25<br>(10 - 51)        | 3<br>(2 - 6)        | 29<br>(15 - 55)          | 11<br>(4 - 19)       | 6<br>(3 - 11)          |
| Exposure to mechanical forces                   | 370<br>(221 - 993)       | 134<br>(65 - 278)      | 30<br>(11 - 160)    | 133<br>(65 - 557)        | 31<br>(18 - 83)      | 42<br>(24 - 82)        |
| Unintentional firearm injuries                  | 78<br>(49 - 128)         | 11<br>(5 - 23)         | 3<br>(1 - 5)        | 52<br>(25 - 99)          | 6<br>(3 - 11)        | 6<br>(3 - 10)          |
| Unintentional suffocation                       | 99<br>(22 - 706)         | 45<br>(13 - 152)       | 13<br>(2 - 131)     | 30<br>(2 - 428)          | 6<br>(1 - 54)        | 5<br>(1 - 47)          |
| Other exposure to mechanical forces             | 193<br>(121 - 313)       | 78<br>(32 - 181)       | 14<br>(6 - 32)      | 50<br>(28 - 88)          | 19<br>(10 - 31)      | 31<br>(18 - 49)        |
| Adverse effects of medical treatment            | 493<br>(323 - 763)       | 112<br>(51 - 238)      | 11<br>(6 - 21)      | 108<br>(63 - 185)        | 74<br>(41 - 125)     | 188<br>(93 - 338)      |
| Animal contact                                  | 184<br>(98 - 437)        | 48<br>(19 - 121)       | 21<br>(8 - 58)      | 76<br>(35 - 207)         | 22<br>(8 - 51)       | 17<br>(7 - 40)         |
| Venomous animal contact                         | 123<br>(52 - 273)        | 44<br>(17 - 111)       | 13<br>(4 - 33)      | 49<br>(16 - 125)         | 10<br>(3 - 27)       | 8<br>(2 - 19)          |
| Non-venomous animal contact                     | 60<br>(24 - 188)         | 4<br>(1 - 13)          | 9<br>(2 - 30)       | 27<br>(9 - 92)           | 12<br>(4 - 32)       | 9<br>(3 - 26)          |
| Foreign body                                    | 193<br>(118 - 322)       | 102<br>(55 - 186)      | 7<br>(3 - 13)       | 15<br>(8 - 32)           | 6<br>(4 - 10)        | 63<br>(37 - 102)       |
| Pulmonary aspiration and foreign body in airway | 182<br>(107 - 305)       | 99<br>(52 - 183)       | 6<br>(3 - 11)       | 13<br>(6 - 25)           | 5<br>(3 - 8)         | 60<br>(33 - 99)        |
| Foreign body in other body part                 | 10<br>(5 - 40)           | 3<br>(1 - 6)           | 1<br>(0 - 5)        | 2<br>(1 - 17)            | 1<br>(0 - 5)         | 3<br>(1 - 10)          |
| Other unintentional injuries                    | 127<br>(82 - 190)        | 35<br>(18 - 65)        | 15<br>(8 - 28)      | 53<br>(30 - 89)          | 10<br>(6 - 15)       | 15<br>(9 - 23)         |
| Self-harm and interpersonal violence            | 1,277<br>(865 - 1,941)   | 64<br>(29 - 126)       | 25<br>(14 - 43)     | 931<br>(570 - 1,508)     | 126<br>(84 - 190)    | 131<br>(81 - 202)      |
| Self-harm                                       | 639<br>(436 - 944)       | --                     | 5<br>(2 - 11)       | 414<br>(248 - 702)       | 101<br>(64 - 159)    | 119<br>(71 - 188)      |
| Interpersonal violence                          | 638<br>(382 - 1,058)     | 64<br>(29 - 126)       | 20<br>(10 - 37)     | 517<br>(275 - 909)       | 25<br>(15 - 41)      | 12<br>(6 - 22)         |
| Assault by firearm                              | 165<br>(84 - 311)        | 21<br>(9 - 44)         | 5<br>(2 - 10)       | 131<br>(58 - 260)        | 8<br>(4 - 15)        | 1<br>(0 - 2)           |
| Assault by sharp object                         | 179<br>(97 - 347)        | 17<br>(6 - 39)         | 4<br>(2 - 7)        | 147<br>(72 - 292)        | 5<br>(3 - 9)         | 6<br>(3 - 11)          |
| Assault by other means                          | 294<br>(164 - 509)       | 26<br>(11 - 52)        | 12<br>(6 - 22)      | 239<br>(120 - 446)       | 11<br>(6 - 20)       | 5<br>(2 - 10)          |
| Forces of nature, war, and legal intervention   | 35<br>(9 - 48)           | 16<br>(0 - 1)          | 1<br>(0 - 2)        | 13<br>(6 - 29)           | 4<br>(2 - 10)        | 2<br>(1 - 4)           |
| Exposure to forces of nature                    | 35<br>(9 - 48)           | 16<br>(0 - 1)          | 1<br>(0 - 2)        | 13<br>(6 - 29)           | 4<br>(2 - 10)        | 2<br>(1 - 4)           |

Web Table 31- Kiribati deaths with 95% UI by age, sex, and cause in 2013

| Cause                                                             | Both Sexes, All Ages | Both Sexes, 0-4 Years | Both Sexes, 5-14 Years | Both Sexes, 15-49 Years | Both Sexes, 50-69 Years | Both Sexes, 70-80 Years |
|-------------------------------------------------------------------|----------------------|-----------------------|------------------------|-------------------------|-------------------------|-------------------------|
| All causes                                                        | 945<br>(752 - 1,170) | 123<br>(84 - 178)     | 19<br>(14 - 25)        | 244<br>(175 - 335)      | 319<br>(231 - 415)      | 240<br>(202 - 277)      |
| Communicable, maternal, neonatal, and nutritional diseases        | 214<br>(175 - 262)   | 92<br>(63 - 131)      | 7<br>(5 - 10)          | 38<br>(28 - 50)         | 35<br>(26 - 44)         | 42<br>(34 - 52)         |
| HIV/AIDS and tuberculosis                                         | 18<br>(13 - 25)      | 0<br>(0 - 1)          | 0<br>(0 - 0)           | 6<br>(4 - 8)            | 7<br>(5 - 10)           | 5<br>(3 - 6)            |
| Tuberculosis                                                      | 18<br>(13 - 25)      | 0<br>(0 - 1)          | 0<br>(0 - 0)           | 6<br>(4 - 8)            | 7<br>(5 - 10)           | 5<br>(3 - 6)            |
| HIV/AIDS                                                          | 0<br>(0 - 0)         | 0<br>(0 - 0)          | 0<br>(0 - 0)           | 0<br>(0 - 0)            | 0<br>(0 - 0)            | 0<br>(0 - 0)            |
| HIV/AIDS resulting in mycobacterial infection                     | 0<br>(0 - 0)         | 0<br>(0 - 0)          | 0<br>(0 - 0)           | 0<br>(0 - 0)            | 0<br>(0 - 0)            | 0<br>(0 - 0)            |
| HIV/AIDS resulting in other diseases                              | 0<br>(0 - 0)         | 0<br>(0 - 0)          | 0<br>(0 - 0)           | 0<br>(0 - 0)            | 0<br>(0 - 0)            | 0<br>(0 - 0)            |
| Diarrhea, lower respiratory, and other common infectious diseases | 98<br>(77 - 127)     | 32<br>(19 - 51)       | 5<br>(3 - 7)           | 16<br>(11 - 23)         | 18<br>(13 - 25)         | 27<br>(21 - 35)         |
| Diarrheal diseases                                                | 25<br>(19 - 34)      | 7<br>(3 - 11)         | 1<br>(1 - 1)           | 3<br>(2 - 4)            | 4<br>(3 - 7)            | 11<br>(7 - 16)          |
| Intestinal infectious diseases                                    | 3<br>(1 - 5)         | 1<br>(0 - 3)          | 1<br>(0 - 1)           | 1<br>(0 - 1)            | 0<br>(0 - 0)            | 0<br>(0 - 0)            |
| Typhoid fever                                                     | 2<br>(1 - 4)         | 1<br>(0 - 2)          | 1<br>(0 - 1)           | 1<br>(0 - 1)            | 0<br>(0 - 0)            | 0<br>(0 - 0)            |
| Paratyphoid fever                                                 | 1<br>(0 - 1)         | 0<br>(0 - 1)          | 0<br>(0 - 0)           | 0<br>(0 - 0)            | 0<br>(0 - 0)            | 0<br>(0 - 0)            |
| Other intestinal infectious diseases                              | 0<br>(0 - 1)         | 0<br>(0 - 1)          | 0<br>(0 - 0)           | 0<br>(0 - 0)            | 0<br>(0 - 0)            | 0<br>(0 - 0)            |
| Lower respiratory infections                                      | 56<br>(43 - 70)      | 17<br>(9 - 26)        | 1<br>(1 - 2)           | 9<br>(6 - 13)           | 12<br>(8 - 17)          | 16<br>(11 - 21)         |
| Upper respiratory infections                                      | 0<br>(0 - 0)         | 0<br>(0 - 0)          | 0<br>(0 - 0)           | 0<br>(0 - 0)            | 0<br>(0 - 0)            | 0<br>(0 - 0)            |
| Otitis media                                                      | 0<br>(0 - 0)         | 0<br>(0 - 0)          | 0<br>(0 - 0)           | 0<br>(0 - 0)            | 0<br>(0 - 0)            | 0<br>(0 - 0)            |
| Meningitis                                                        | 9<br>(7 - 13)        | 4<br>(2 - 7)          | 1<br>(1 - 1)           | 3<br>(2 - 4)            | 1<br>(1 - 2)            | 1<br>(0 - 1)            |
| Pneumococcal meningitis                                           | 3<br>(2 - 5)         | 1<br>(1 - 2)          | 0<br>(0 - 1)           | 1<br>(1 - 1)            | 0<br>(0 - 1)            | 0<br>(0 - 0)            |
| H influenzae type B meningitis                                    | 1<br>(1 - 2)         | 1<br>(0 - 1)          | 0<br>(0 - 0)           | 0<br>(0 - 0)            | 0<br>(0 - 0)            | 0<br>(0 - 0)            |
| Meningococcal meningitis                                          | 2<br>(1 - 2)         | 1<br>(0 - 1)          | 0<br>(0 - 0)           | 1<br>(0 - 1)            | 0<br>(0 - 0)            | 0<br>(0 - 0)            |
| Other meningitis                                                  | 3<br>(2 - 4)         | 1<br>(1 - 2)          | 0<br>(0 - 0)           | 1<br>(1 - 1)            | 0<br>(0 - 1)            | 0<br>(0 - 0)            |
| Encephalitis                                                      | 1<br>(0 - 1)         | 0<br>(0 - 0)          | 0<br>(0 - 0)           | 0<br>(0 - 1)            | 0<br>(0 - 0)            | 0<br>(0 - 0)            |
| Diphtheria                                                        | 0<br>(0 - 0)         | 0<br>(0 - 0)          | 0<br>(0 - 0)           | 0<br>(0 - 0)            | 0<br>(0 - 0)            | --                      |
| Whooping cough                                                    | 0<br>(0 - 1)         | 0<br>(0 - 1)          | 0<br>(0 - 0)           | 0<br>(0 - 0)            | 0<br>(0 - 0)            | --                      |
| Tetanus                                                           | 0<br>(0 - 0)         | 0<br>(0 - 0)          | 0<br>(0 - 0)           | 0<br>(0 - 0)            | 0<br>(0 - 0)            | 0<br>(0 - 0)            |
| Measles                                                           | 4<br>(0 - 22)        | 3<br>(0 - 18)         | 0<br>(0 - 3)           | 0<br>(0 - 1)            | 0<br>(0 - 0)            | --                      |
| Varicella and herpes zoster                                       | 0<br>(0 - 0)         | 0<br>(0 - 0)          | 0<br>(0 - 0)           | 0<br>(0 - 0)            | 0<br>(0 - 0)            | 0<br>(0 - 0)            |
| Neglected tropical diseases and malaria                           | 8<br>(4 - 10)        | 1<br>(1 - 2)          | 1<br>(0 - 1)           | 2<br>(1 - 2)            | 2<br>(1 - 2)            | 2<br>(1 - 3)            |
| Leishmaniasis                                                     | 0<br>(0 - 0)         | 0<br>(0 - 0)          | 0<br>(0 - 0)           | 0<br>(0 - 0)            | 0<br>(0 - 0)            | 0<br>(0 - 0)            |
| Visceral leishmaniasis                                            | 0<br>(0 - 0)         | 0<br>(0 - 0)          | 0<br>(0 - 0)           | 0<br>(0 - 0)            | 0<br>(0 - 0)            | 0<br>(0 - 0)            |
| Cysticercosis                                                     | 0<br>(0 - 0)         | 0<br>(0 - 0)          | 0<br>(0 - 0)           | 0<br>(0 - 0)            | 0<br>(0 - 0)            | 0<br>(0 - 0)            |
| Cystic echinococcosis                                             | 0<br>(0 - 0)         | 0<br>(0 - 0)          | 0<br>(0 - 0)           | 0<br>(0 - 0)            | 0<br>(0 - 0)            | 0<br>(0 - 0)            |
| Dengue                                                            | 7<br>(3 - 9)         | 1<br>(1 - 2)          | 1<br>(0 - 1)           | 2<br>(1 - 2)            | 1<br>(1 - 2)            | 2<br>(1 - 3)            |
| Rabies                                                            | 0<br>(0 - 0)         | 0<br>(0 - 0)          | 0<br>(0 - 0)           | 0<br>(0 - 0)            | 0<br>(0 - 0)            | 0<br>(0 - 0)            |
| Intestinal nematode infections                                    | 0<br>(0 - 1)         | 0<br>(0 - 0)          | 0<br>(0 - 0)           | 0<br>(0 - 0)            | 0<br>(0 - 0)            | 0<br>(0 - 0)            |
| Ascariasis                                                        | 0<br>(0 - 1)         | 0<br>(0 - 0)          | 0<br>(0 - 0)           | 0<br>(0 - 0)            | 0<br>(0 - 0)            | 0<br>(0 - 0)            |
| Other neglected tropical diseases                                 | 0<br>(0 - 1)         | 0<br>(0 - 0)          | 0<br>(0 - 0)           | 0<br>(0 - 0)            | 0<br>(0 - 0)            | 0<br>(0 - 0)            |
| Maternal disorders                                                | 2<br>(1 - 4)         | --                    | 0<br>(0 - 0)           | 2<br>(1 - 4)            | --                      | --                      |
| Maternal hemorrhage                                               | 0<br>(0 - 1)         | --                    | 0<br>(0 - 0)           | 0<br>(0 - 1)            | --                      | --                      |
| Maternal sepsis and other maternal infections                     | 0<br>(0 - 0)         | --                    | 0<br>(0 - 0)           | 0<br>(0 - 0)            | --                      | --                      |

Web Table 31- Kiribati deaths with 95% UI by age, sex, and cause in 2013

| Cause                                                            | Both Sexes, All Ages | Both Sexes, 0-4 Years | Both Sexes, 5-14 Years | Both Sexes, 15-49 Years | Both Sexes, 50-69 Years | Both Sexes, 70-80 Years |
|------------------------------------------------------------------|----------------------|-----------------------|------------------------|-------------------------|-------------------------|-------------------------|
| Maternal hypertensive disorders                                  | 0<br>(0 - 0)         | --                    | 0<br>(0 - 0)           | 0<br>(0 - 0)            | --                      | --                      |
| Maternal obstructed labor                                        | 0<br>(0 - 0)         | --                    | 0<br>(0 - 0)           | 0<br>(0 - 0)            | --                      | --                      |
| Maternal abortive outcome                                        | 0<br>(0 - 1)         | --                    | 0<br>(0 - 0)           | 0<br>(0 - 1)            | --                      | --                      |
| Indirect maternal deaths                                         | 0<br>(0 - 0)         | --                    | 0<br>(0 - 0)           | 0<br>(0 - 0)            | --                      | --                      |
| Late maternal deaths                                             | 0<br>(0 - 1)         | --                    | 0<br>(0 - 0)           | 0<br>(0 - 1)            | --                      | --                      |
| Maternal deaths aggravated by HIV/AIDS                           | 0<br>(0 - 0)         | --                    | --                     | 0<br>(0 - 0)            | --                      | --                      |
| Other maternal disorders                                         | 0<br>(0 - 1)         | --                    | 0<br>(0 - 0)           | 0<br>(0 - 1)            | --                      | --                      |
| Neonatal disorders                                               | 48<br>(36 - 65)      | 48<br>(36 - 65)       | --                     | --                      | --                      | --                      |
| Neonatal preterm birth complications                             | 10<br>(5 - 17)       | 10<br>(5 - 17)        | --                     | --                      | --                      | --                      |
| Neonatal encephalopathy due to birth asphyxia and trauma         | 7<br>(4 - 12)        | 7<br>(4 - 12)         | --                     | --                      | --                      | --                      |
| Neonatal sepsis and other neonatal infections                    | 4<br>(2 - 8)         | 4<br>(2 - 8)          | --                     | --                      | --                      | --                      |
| Hemolytic disease and other neonatal jaundice                    | 1<br>(1 - 3)         | 1<br>(1 - 3)          | --                     | --                      | --                      | --                      |
| Other neonatal disorders                                         | 26<br>(17 - 36)      | 26<br>(17 - 36)       | --                     | --                      | --                      | --                      |
| Nutritional deficiencies                                         | 22<br>(16 - 31)      | 7<br>(3 - 12)         | 1<br>(1 - 1)           | 5<br>(3 - 8)            | 4<br>(2 - 5)            | 6<br>(4 - 8)            |
| Protein-energy malnutrition                                      | 14<br>(10 - 21)      | 6<br>(3 - 11)         | 1<br>(0 - 1)           | 2<br>(1 - 3)            | 2<br>(1 - 3)            | 3<br>(2 - 5)            |
| Iodine deficiency                                                | 0<br>(0 - 0)         | 0<br>(0 - 0)          | 0<br>(0 - 0)           | 0<br>(0 - 0)            | 0<br>(0 - 0)            | 0<br>(0 - 0)            |
| Iron-deficiency anemia                                           | 7<br>(4 - 11)        | 0<br>(0 - 1)          | 0<br>(0 - 0)           | 3<br>(2 - 5)            | 1<br>(1 - 2)            | 2<br>(1 - 4)            |
| Other nutritional deficiencies                                   | 1<br>(1 - 2)         | 0<br>(0 - 0)          | 0<br>(0 - 0)           | 1<br>(0 - 1)            | 0<br>(0 - 0)            | 0<br>(0 - 1)            |
| Other communicable, maternal, neonatal, and nutritional diseases | 18<br>(11 - 24)      | 3<br>(2 - 6)          | 1<br>(1 - 1)           | 7<br>(4 - 10)           | 4<br>(3 - 6)            | 2<br>(1 - 3)            |
| Sexually transmitted diseases excluding HIV                      | 2<br>(1 - 3)         | 1<br>(0 - 2)          | 0<br>(0 - 0)           | 0<br>(0 - 1)            | 0<br>(0 - 0)            | 0<br>(0 - 0)            |
| Syphilis                                                         | 1<br>(1 - 3)         | 1<br>(0 - 2)          | 0<br>(0 - 0)           | 0<br>(0 - 0)            | 0<br>(0 - 0)            | 0<br>(0 - 0)            |
| Chlamydial infection                                             | 0<br>(0 - 0)         | --                    | 0<br>(0 - 0)           | 0<br>(0 - 0)            | 0<br>(0 - 0)            | 0<br>(0 - 0)            |
| Gonococcal infection                                             | 0<br>(0 - 0)         | --                    | 0<br>(0 - 0)           | 0<br>(0 - 0)            | 0<br>(0 - 0)            | 0<br>(0 - 0)            |
| Other sexually transmitted diseases                              | 0<br>(0 - 0)         | --                    | 0<br>(0 - 0)           | 0<br>(0 - 0)            | 0<br>(0 - 0)            | 0<br>(0 - 0)            |
| Hepatitis                                                        | 7<br>(5 - 9)         | 1<br>(0 - 1)          | 0<br>(0 - 1)           | 3<br>(2 - 4)            | 2<br>(2 - 3)            | 1<br>(1 - 1)            |
| Acute hepatitis A                                                | 0<br>(0 - 1)         | 0<br>(0 - 0)          | 0<br>(0 - 0)           | 0<br>(0 - 0)            | 0<br>(0 - 0)            | 0<br>(0 - 0)            |
| Acute hepatitis B                                                | 5<br>(3 - 7)         | 0<br>(0 - 1)          | 0<br>(0 - 0)           | 2<br>(1 - 3)            | 2<br>(1 - 3)            | 1<br>(1 - 1)            |
| Acute hepatitis C                                                | 0<br>(0 - 0)         | --                    | 0<br>(0 - 0)           | 0<br>(0 - 0)            | 0<br>(0 - 0)            | 0<br>(0 - 0)            |
| Acute hepatitis E                                                | 1<br>(1 - 3)         | 0<br>(0 - 0)          | 0<br>(0 - 0)           | 1<br>(1 - 2)            | 0<br>(0 - 1)            | 0<br>(0 - 0)            |
| Other infectious diseases                                        | 9<br>(4 - 14)        | 2<br>(1 - 4)          | 0<br>(0 - 1)           | 4<br>(1 - 6)            | 2<br>(1 - 3)            | 1<br>(1 - 2)            |
| Non-communicable diseases                                        | 661<br>(511 - 845)   | 25<br>(16 - 39)       | 8<br>(6 - 10)          | 164<br>(115 - 230)      | 274<br>(199 - 359)      | 190<br>(158 - 223)      |
| Neoplasms                                                        | 43<br>(31 - 56)      | 1<br>(0 - 1)          | 0<br>(0 - 1)           | 15<br>(10 - 21)         | 17<br>(12 - 23)         | 10<br>(7 - 12)          |
| Esophageal cancer                                                | 0<br>(0 - 0)         | --                    | --                     | 0<br>(0 - 0)            | 0<br>(0 - 0)            | 0<br>(0 - 0)            |
| Stomach cancer                                                   | 3<br>(2 - 4)         | --                    | --                     | 1<br>(1 - 1)            | 1<br>(1 - 2)            | 1<br>(1 - 1)            |
| Liver cancer                                                     | 1<br>(1 - 2)         | --                    | 0<br>(0 - 0)           | 0<br>(0 - 0)            | 0<br>(0 - 1)            | 0<br>(0 - 0)            |
| Liver cancer due to hepatitis B                                  | 0<br>(0 - 1)         | --                    | 0<br>(0 - 0)           | 0<br>(0 - 0)            | 0<br>(0 - 0)            | 0<br>(0 - 0)            |
| Liver cancer due to hepatitis C                                  | 0<br>(0 - 1)         | --                    | 0<br>(0 - 0)           | 0<br>(0 - 0)            | 0<br>(0 - 0)            | 0<br>(0 - 0)            |
| Liver cancer due to alcohol use                                  | 0<br>(0 - 0)         | --                    | --                     | 0<br>(0 - 0)            | 0<br>(0 - 0)            | 0<br>(0 - 0)            |
| Liver cancer due to other causes                                 | 0<br>(0 - 0)         | --                    | 0<br>(0 - 0)           | 0<br>(0 - 0)            | 0<br>(0 - 0)            | 0<br>(0 - 0)            |
| Larynx cancer                                                    | 0<br>(0 - 0)         | --                    | --                     | 0<br>(0 - 0)            | 0<br>(0 - 0)            | 0<br>(0 - 0)            |

Web Table 31- Kiribati deaths with 95% UI by age, sex, and cause in 2013

| Cause                                         | Both Sexes, All Ages | Both Sexes, 0-4 Years | Both Sexes, 5-14 Years | Both Sexes, 15-49 Years | Both Sexes, 50-69 Years | Both Sexes, 70-80 Years |
|-----------------------------------------------|----------------------|-----------------------|------------------------|-------------------------|-------------------------|-------------------------|
| Tracheal, bronchus and lung cancer            | 8<br>(6 - 10)        | --                    | --                     | 2<br>(1 - 3)            | 4<br>(2 - 5)            | 2<br>(1 - 2)            |
| Breast cancer                                 | 12<br>(7 - 18)       | --                    | --                     | 5<br>(3 - 8)            | 5<br>(3 - 8)            | 2<br>(1 - 3)            |
| Cervical cancer                               | 6<br>(4 - 9)         | --                    | --                     | 2<br>(1 - 3)            | 2<br>(1 - 3)            | 2<br>(1 - 3)            |
| Uterine cancer                                | 0<br>(0 - 1)         | --                    | --                     | 0<br>(0 - 0)            | 0<br>(0 - 1)            | 0<br>(0 - 0)            |
| Prostate cancer                               | 0<br>(0 - 1)         | --                    | --                     | 0<br>(0 - 0)            | 0<br>(0 - 0)            | 0<br>(0 - 0)            |
| Colon and rectum cancer                       | 2<br>(2 - 3)         | --                    | --                     | 1<br>(0 - 1)            | 1<br>(1 - 1)            | 1<br>(0 - 1)            |
| Lip and oral cavity cancer                    | 1<br>(0 - 1)         | --                    | --                     | 0<br>(0 - 0)            | 0<br>(0 - 0)            | 0<br>(0 - 0)            |
| Nasopharynx cancer                            | 1<br>(0 - 1)         | --                    | 0<br>(0 - 0)           | 0<br>(0 - 0)            | 0<br>(0 - 0)            | 0<br>(0 - 0)            |
| Other pharynx cancer                          | 0<br>(0 - 1)         | --                    | --                     | 0<br>(0 - 0)            | 0<br>(0 - 0)            | 0<br>(0 - 0)            |
| Gallbladder and biliary tract cancer          | 0<br>(0 - 0)         | --                    | --                     | 0<br>(0 - 0)            | 0<br>(0 - 0)            | 0<br>(0 - 0)            |
| Pancreatic cancer                             | 0<br>(0 - 1)         | --                    | --                     | 0<br>(0 - 0)            | 0<br>(0 - 0)            | 0<br>(0 - 0)            |
| Malignant skin melanoma                       | 0<br>(0 - 1)         | --                    | --                     | 0<br>(0 - 0)            | 0<br>(0 - 0)            | 0<br>(0 - 0)            |
| Non-melanoma skin cancer                      | 1<br>(0 - 1)         | --                    | --                     | 0<br>(0 - 0)            | 0<br>(0 - 0)            | 0<br>(0 - 0)            |
| Ovarian cancer                                | 0<br>(0 - 0)         | --                    | --                     | 0<br>(0 - 0)            | 0<br>(0 - 0)            | 0<br>(0 - 0)            |
| Testicular cancer                             | 0<br>(0 - 0)         | --                    | --                     | 0<br>(0 - 0)            | 0<br>(0 - 0)            | 0<br>(0 - 0)            |
| Kidney cancer                                 | 0<br>(0 - 1)         | 0<br>(0 - 0)          | 0<br>(0 - 0)           | 0<br>(0 - 0)            | 0<br>(0 - 0)            | 0<br>(0 - 0)            |
| Bladder cancer                                | 0<br>(0 - 0)         | --                    | --                     | 0<br>(0 - 0)            | 0<br>(0 - 0)            | 0<br>(0 - 0)            |
| Brain and nervous system cancer               | 0<br>(0 - 0)         | 0<br>(0 - 0)          | 0<br>(0 - 0)           | 0<br>(0 - 0)            | 0<br>(0 - 0)            | 0<br>(0 - 0)            |
| Thyroid cancer                                | 0<br>(0 - 0)         | --                    | 0<br>(0 - 0)           | 0<br>(0 - 0)            | 0<br>(0 - 0)            | 0<br>(0 - 0)            |
| Mesothelioma                                  | 0<br>(0 - 0)         | --                    | --                     | 0<br>(0 - 0)            | 0<br>(0 - 0)            | 0<br>(0 - 0)            |
| Hodgkin lymphoma                              | 0<br>(0 - 0)         | 0<br>(0 - 0)          | 0<br>(0 - 0)           | 0<br>(0 - 0)            | 0<br>(0 - 0)            | 0<br>(0 - 0)            |
| Non-Hodgkin lymphoma                          | 1<br>(0 - 1)         | 0<br>(0 - 0)          | 0<br>(0 - 0)           | 0<br>(0 - 0)            | 0<br>(0 - 0)            | 0<br>(0 - 0)            |
| Multiple myeloma                              | 0<br>(0 - 0)         | --                    | --                     | 0<br>(0 - 0)            | 0<br>(0 - 0)            | 0<br>(0 - 0)            |
| Leukemia                                      | 2<br>(1 - 2)         | 0<br>(0 - 0)          | 0<br>(0 - 0)           | 1<br>(1 - 1)            | 0<br>(0 - 0)            | 0<br>(0 - 0)            |
| Other neoplasms                               | 3<br>(1 - 4)         | 0<br>(0 - 1)          | 0<br>(0 - 0)           | 1<br>(1 - 2)            | 1<br>(0 - 1)            | 0<br>(0 - 0)            |
| Cardiovascular diseases                       | 267<br>(198 - 344)   | 3<br>(2 - 5)          | 2<br>(1 - 3)           | 70<br>(48 - 99)         | 118<br>(84 - 155)       | 73<br>(59 - 88)         |
| Rheumatic heart disease                       | 5<br>(3 - 7)         | 0<br>(0 - 0)          | 0<br>(0 - 1)           | 3<br>(1 - 4)            | 1<br>(1 - 2)            | 1<br>(0 - 1)            |
| Ischemic heart disease                        | 106<br>(78 - 143)    | 0<br>(0 - 1)          | 0<br>(0 - 0)           | 28<br>(18 - 41)         | 51<br>(36 - 70)         | 27<br>(21 - 35)         |
| Cerebrovascular disease                       | 114<br>(83 - 148)    | 1<br>(1 - 2)          | 1<br>(1 - 1)           | 25<br>(17 - 36)         | 50<br>(34 - 67)         | 37<br>(28 - 45)         |
| Ischemic stroke                               | 35<br>(25 - 46)      | 0<br>(0 - 0)          | 0<br>(0 - 0)           | 4<br>(3 - 6)            | 13<br>(9 - 18)          | 17<br>(13 - 22)         |
| Hemorrhagic stroke                            | 79<br>(56 - 106)     | 1<br>(1 - 2)          | 1<br>(0 - 1)           | 21<br>(14 - 30)         | 37<br>(25 - 50)         | 19<br>(14 - 24)         |
| Hypertensive heart disease                    | 4<br>(3 - 6)         | 0<br>(0 - 0)          | 0<br>(0 - 0)           | 1<br>(1 - 1)            | 2<br>(1 - 3)            | 1<br>(1 - 2)            |
| Cardiomyopathy and myocarditis                | 15<br>(9 - 21)       | 1<br>(0 - 1)          | 0<br>(0 - 1)           | 7<br>(4 - 11)           | 5<br>(3 - 7)            | 1<br>(1 - 2)            |
| Atrial fibrillation and flutter               | 1<br>(0 - 2)         | --                    | --                     | 0<br>(0 - 0)            | 0<br>(0 - 1)            | 1<br>(0 - 1)            |
| Aortic aneurysm                               | 1<br>(1 - 1)         | --                    | --                     | 0<br>(0 - 0)            | 0<br>(0 - 1)            | 0<br>(0 - 0)            |
| Peripheral vascular disease                   | 3<br>(2 - 5)         | --                    | --                     | 0<br>(0 - 0)            | 1<br>(1 - 1)            | 2<br>(1 - 3)            |
| Endocarditis                                  | 2<br>(2 - 3)         | 0<br>(0 - 0)          | 0<br>(0 - 0)           | 1<br>(1 - 2)            | 0<br>(0 - 1)            | 0<br>(0 - 1)            |
| Other cardiovascular and circulatory diseases | 15<br>(11 - 21)      | 0<br>(0 - 1)          | 0<br>(0 - 0)           | 5<br>(3 - 7)            | 7<br>(4 - 9)            | 3<br>(2 - 5)            |
| Chronic respiratory diseases                  | 74<br>(56 - 92)      | 2<br>(1 - 3)          | 1<br>(0 - 1)           | 10<br>(7 - 15)          | 29<br>(19 - 38)         | 32<br>(27 - 38)         |
| Chronic obstructive pulmonary disease         | 14<br>(11 - 19)      | 1<br>(0 - 1)          | 0<br>(0 - 0)           | 1<br>(1 - 2)            | 5<br>(3 - 6)            | 8<br>(6 - 10)           |



Web Table 31- Kiribati deaths with 95% UI by age, sex, and cause in 2013

| Cause                                               | Both Sexes, All Ages | Both Sexes, 0-4 Years | Both Sexes, 5-14 Years | Both Sexes, 15-49 Years | Both Sexes, 50-69 Years | Both Sexes, 70-80 Years |
|-----------------------------------------------------|----------------------|-----------------------|------------------------|-------------------------|-------------------------|-------------------------|
| Pneumoconiosis                                      | 6<br>(4 - 9)         | 0<br>(0 - 0)          | 0<br>(0 - 0)           | 1<br>(1 - 2)            | 3<br>(2 - 5)            | 2<br>(2 - 3)            |
| Silicosis                                           | 2<br>(1 - 3)         | 0<br>(0 - 0)          | 0<br>(0 - 0)           | 0<br>(0 - 1)            | 1<br>(0 - 2)            | 1<br>(0 - 1)            |
| Asbestosis                                          | 1<br>(0 - 1)         | 0<br>(0 - 0)          | 0<br>(0 - 0)           | 0<br>(0 - 0)            | 0<br>(0 - 1)            | 0<br>(0 - 0)            |
| Coal workers pneumoconiosis                         | 1<br>(0 - 1)         | 0<br>(0 - 0)          | 0<br>(0 - 0)           | 0<br>(0 - 0)            | 0<br>(0 - 1)            | 0<br>(0 - 0)            |
| Other pneumoconiosis                                | 3<br>(2 - 5)         | 0<br>(0 - 0)          | 0<br>(0 - 0)           | 1<br>(0 - 1)            | 1<br>(1 - 3)            | 1<br>(1 - 2)            |
| Asthma                                              | 39<br>(28 - 49)      | 0<br>(0 - 1)          | 0<br>(0 - 0)           | 6<br>(4 - 8)            | 17<br>(11 - 23)         | 15<br>(11 - 19)         |
| Interstitial lung disease and pulmonary sarcoidosis | 3<br>(2 - 5)         | 0<br>(0 - 0)          | 0<br>(0 - 0)           | 1<br>(0 - 1)            | 1<br>(1 - 2)            | 1<br>(1 - 2)            |
| Other chronic respiratory diseases                  | 11<br>(8 - 15)       | 0<br>(0 - 1)          | 0<br>(0 - 0)           | 2<br>(1 - 3)            | 3<br>(2 - 5)            | 6<br>(4 - 8)            |
| Cirrhosis                                           | 17<br>(12 - 24)      | 0<br>(0 - 0)          | 0<br>(0 - 1)           | 8<br>(5 - 12)           | 6<br>(4 - 9)            | 2<br>(2 - 3)            |
| Cirrhosis due to hepatitis B                        | 10<br>(7 - 14)       | 0<br>(0 - 0)          | 0<br>(0 - 0)           | 5<br>(3 - 7)            | 3<br>(2 - 5)            | 1<br>(1 - 2)            |
| Cirrhosis due to hepatitis C                        | 3<br>(2 - 5)         | 0<br>(0 - 0)          | 0<br>(0 - 0)           | 1<br>(1 - 2)            | 1<br>(1 - 2)            | 0<br>(0 - 1)            |
| Cirrhosis due to alcohol use                        | 3<br>(1 - 5)         | --                    | --                     | 1<br>(0 - 2)            | 1<br>(1 - 2)            | 0<br>(0 - 1)            |
| Cirrhosis due to other causes                       | 2<br>(1 - 3)         | 0<br>(0 - 0)          | 0<br>(0 - 0)           | 1<br>(1 - 1)            | 0<br>(0 - 1)            | 0<br>(0 - 0)            |
| Digestive diseases                                  | 60<br>(45 - 79)      | 1<br>(0 - 2)          | 1<br>(1 - 2)           | 20<br>(13 - 28)         | 22<br>(15 - 30)         | 16<br>(12 - 20)         |
| Peptic ulcer disease                                | 9<br>(6 - 14)        | 0<br>(0 - 0)          | 0<br>(0 - 0)           | 3<br>(2 - 5)            | 4<br>(2 - 6)            | 2<br>(2 - 3)            |
| Gastritis and duodenitis                            | 2<br>(1 - 3)         | 0<br>(0 - 0)          | 0<br>(0 - 0)           | 0<br>(0 - 1)            | 1<br>(0 - 1)            | 0<br>(0 - 1)            |
| Appendicitis                                        | 5<br>(3 - 7)         | 0<br>(0 - 0)          | 0<br>(0 - 0)           | 2<br>(1 - 4)            | 1<br>(1 - 2)            | 1<br>(1 - 1)            |
| Paralytic ileus and intestinal obstruction          | 14<br>(9 - 19)       | 0<br>(0 - 1)          | 0<br>(0 - 0)           | 4<br>(3 - 6)            | 5<br>(3 - 7)            | 4<br>(3 - 6)            |
| Inguinal, femoral, and abdominal hernia             | 1<br>(0 - 1)         | 0<br>(0 - 0)          | 0<br>(0 - 0)           | 0<br>(0 - 0)            | 0<br>(0 - 0)            | 0<br>(0 - 0)            |
| Inflammatory bowel disease                          | 3<br>(2 - 5)         | 0<br>(0 - 0)          | 0<br>(0 - 0)           | 1<br>(0 - 1)            | 1<br>(0 - 1)            | 2<br>(1 - 3)            |
| Vascular intestinal disorders                       | 0<br>(0 - 0)         | 0<br>(0 - 0)          | 0<br>(0 - 0)           | 0<br>(0 - 0)            | 0<br>(0 - 0)            | 0<br>(0 - 0)            |
| Gallbladder and biliary diseases                    | 7<br>(5 - 10)        | 0<br>(0 - 0)          | 0<br>(0 - 0)           | 2<br>(1 - 3)            | 2<br>(2 - 4)            | 2<br>(2 - 3)            |
| Pancreatitis                                        | 3<br>(2 - 5)         | 0<br>(0 - 0)          | 0<br>(0 - 0)           | 1<br>(1 - 3)            | 1<br>(0 - 1)            | 1<br>(0 - 1)            |
| Other digestive diseases                            | 17<br>(11 - 23)      | 0<br>(0 - 0)          | 1<br>(0 - 1)           | 5<br>(4 - 8)            | 7<br>(4 - 10)           | 4<br>(2 - 5)            |
| Neurological disorders                              | 15<br>(12 - 18)      | 0<br>(0 - 1)          | 0<br>(0 - 0)           | 2<br>(1 - 3)            | 2<br>(1 - 3)            | 10<br>(8 - 12)          |
| Alzheimer disease and other dementias               | 10<br>(8 - 13)       | --                    | --                     | 0<br>(0 - 0)            | 1<br>(1 - 2)            | 9<br>(7 - 11)           |
| Parkinson disease                                   | 0<br>(0 - 0)         | --                    | --                     | 0<br>(0 - 0)            | 0<br>(0 - 0)            | 0<br>(0 - 0)            |
| Epilepsy                                            | 2<br>(1 - 3)         | 0<br>(0 - 0)          | 0<br>(0 - 0)           | 1<br>(1 - 2)            | 0<br>(0 - 0)            | 0<br>(0 - 0)            |
| Multiple sclerosis                                  | 0<br>(0 - 0)         | --                    | --                     | 0<br>(0 - 0)            | 0<br>(0 - 0)            | 0<br>(0 - 0)            |
| Other neurological disorders                        | 2<br>(2 - 3)         | 0<br>(0 - 0)          | 0<br>(0 - 0)           | 1<br>(0 - 1)            | 1<br>(0 - 1)            | 1<br>(0 - 1)            |
| Mental and substance use disorders                  | 2<br>(1 - 3)         | 0<br>(0 - 0)          | 0<br>(0 - 0)           | 1<br>(1 - 2)            | 0<br>(0 - 1)            | 0<br>(0 - 0)            |
| Schizophrenia                                       | 0<br>(0 - 0)         | --                    | --                     | 0<br>(0 - 0)            | 0<br>(0 - 0)            | 0<br>(0 - 0)            |
| Alcohol use disorders                               | 2<br>(1 - 2)         | --                    | --                     | 1<br>(0 - 2)            | 0<br>(0 - 1)            | 0<br>(0 - 0)            |
| Drug use disorders                                  | 0<br>(0 - 1)         | 0<br>(0 - 0)          | --                     | 0<br>(0 - 0)            | 0<br>(0 - 0)            | 0<br>(0 - 0)            |
| Opioid use disorders                                | 0<br>(0 - 0)         | 0<br>(0 - 0)          | --                     | 0<br>(0 - 0)            | 0<br>(0 - 0)            | 0<br>(0 - 0)            |
| Cocaine use disorders                               | 0<br>(0 - 0)         | 0<br>(0 - 0)          | --                     | 0<br>(0 - 0)            | 0<br>(0 - 0)            | 0<br>(0 - 0)            |
| Amphetamine use disorders                           | 0<br>(0 - 0)         | 0<br>(0 - 0)          | --                     | 0<br>(0 - 0)            | 0<br>(0 - 0)            | 0<br>(0 - 0)            |
| Other drug use disorders                            | 0<br>(0 - 0)         | 0<br>(0 - 0)          | --                     | 0<br>(0 - 0)            | 0<br>(0 - 0)            | 0<br>(0 - 0)            |
| Eating disorders                                    | 0<br>(0 - 0)         | --                    | 0<br>(0 - 0)           | 0<br>(0 - 0)            | --                      | --                      |
| Anorexia nervosa                                    | 0<br>(0 - 0)         | --                    | 0<br>(0 - 0)           | 0<br>(0 - 0)            | --                      | --                      |

Web Table 31- Kiribati deaths with 95% UI by age, sex, and cause in 2013

| Cause                                               | Both Sexes, All Ages | Both Sexes, 0-4 Years | Both Sexes, 5-14 Years | Both Sexes, 15-49 Years | Both Sexes, 50-69 Years | Both Sexes, 70-80 Years |
|-----------------------------------------------------|----------------------|-----------------------|------------------------|-------------------------|-------------------------|-------------------------|
| Diabetes, urogenital, blood, and endocrine diseases | 161<br>(115 - 224)   | 3<br>(1 - 5)          | 1<br>(1 - 2)           | 33<br>(21 - 53)         | 78<br>(56 - 109)        | 45<br>(34 - 61)         |
| Diabetes mellitus                                   | 122<br>(89 - 162)    | 1<br>(0 - 1)          | 0<br>(0 - 0)           | 21<br>(13 - 32)         | 65<br>(45 - 86)         | 36<br>(27 - 46)         |
| Acute glomerulonephritis                            | 0<br>(0 - 0)         | 0<br>(0 - 0)          | 0<br>(0 - 0)           | 0<br>(0 - 0)            | 0<br>(0 - 0)            | 0<br>(0 - 0)            |
| Chronic kidney disease                              | 28<br>(13 - 63)      | 1<br>(0 - 1)          | 0<br>(0 - 1)           | 9<br>(4 - 21)           | 11<br>(5 - 25)          | 7<br>(3 - 16)           |
| Chronic kidney disease due to diabetes mellitus     | 6<br>(2 - 10)        | 0<br>(0 - 0)          | 0<br>(0 - 0)           | 2<br>(0 - 3)            | 3<br>(1 - 5)            | 1<br>(0 - 2)            |
| Chronic kidney disease due to hypertension          | 4<br>(2 - 7)         | 0<br>(0 - 0)          | 0<br>(0 - 0)           | 1<br>(1 - 3)            | 2<br>(1 - 3)            | 1<br>(1 - 2)            |
| Chronic kidney disease due to glomerulonephritis    | 1<br>(1 - 2)         | 0<br>(0 - 0)          | 0<br>(0 - 0)           | 0<br>(0 - 1)            | 0<br>(0 - 0)            | 0<br>(0 - 1)            |
| Chronic kidney disease due to other causes          | 17<br>(6 - 50)       | 0<br>(0 - 1)          | 0<br>(0 - 1)           | 6<br>(2 - 15)           | 7<br>(2 - 20)           | 4<br>(1 - 13)           |
| Urinary diseases and male infertility               | 2<br>(1 - 3)         | 0<br>(0 - 0)          | 0<br>(0 - 0)           | 1<br>(0 - 1)            | 1<br>(0 - 1)            | 1<br>(0 - 1)            |
| Interstitial nephritis and urinary tract infections | 1<br>(1 - 1)         | 0<br>(0 - 0)          | 0<br>(0 - 0)           | 0<br>(0 - 0)            | 0<br>(0 - 0)            | 0<br>(0 - 0)            |
| Urolithiasis                                        | 0<br>(0 - 0)         | --                    | 0<br>(0 - 0)           | 0<br>(0 - 0)            | 0<br>(0 - 0)            | 0<br>(0 - 0)            |
| Other urinary diseases                              | 1<br>(1 - 2)         | 0<br>(0 - 0)          | 0<br>(0 - 0)           | 0<br>(0 - 1)            | 0<br>(0 - 1)            | 0<br>(0 - 0)            |
| Gynecological diseases                              | 0<br>(0 - 1)         | --                    | --                     | 0<br>(0 - 0)            | 0<br>(0 - 0)            | 0<br>(0 - 0)            |
| Uterine fibroids                                    | 0<br>(0 - 0)         | --                    | --                     | 0<br>(0 - 0)            | 0<br>(0 - 0)            | 0<br>(0 - 0)            |
| Polycystic ovarian syndrome                         | 0<br>(0 - 0)         | --                    | --                     | 0<br>(0 - 0)            | 0<br>(0 - 0)            | --                      |
| Endometriosis                                       | 0<br>(0 - 0)         | --                    | --                     | 0<br>(0 - 0)            | 0<br>(0 - 0)            | --                      |
| Genital prolapse                                    | 0<br>(0 - 0)         | --                    | --                     | 0<br>(0 - 0)            | 0<br>(0 - 0)            | 0<br>(0 - 0)            |
| Other gynecological diseases                        | 0<br>(0 - 0)         | --                    | --                     | 0<br>(0 - 0)            | 0<br>(0 - 0)            | 0<br>(0 - 0)            |
| Hemoglobinopathies and hemolytic anemias            | 2<br>(1 - 3)         | 1<br>(0 - 1)          | 0<br>(0 - 1)           | 1<br>(1 - 1)            | 0<br>(0 - 0)            | 0<br>(0 - 0)            |
| Thalassemias                                        | 1<br>(1 - 2)         | 1<br>(0 - 1)          | 0<br>(0 - 1)           | 1<br>(0 - 1)            | 0<br>(0 - 0)            | 0<br>(0 - 0)            |
| Sickle cell disorders                               | 0<br>(0 - 0)         | 0<br>(0 - 0)          | 0<br>(0 - 0)           | 0<br>(0 - 0)            | 0<br>(0 - 0)            | 0<br>(0 - 0)            |
| G6PD deficiency                                     | 0<br>(0 - 0)         | 0<br>(0 - 0)          | 0<br>(0 - 0)           | 0<br>(0 - 0)            | 0<br>(0 - 0)            | 0<br>(0 - 0)            |
| Other hemoglobinopathies and hemolytic anemias      | 1<br>(0 - 1)         | 0<br>(0 - 0)          | 0<br>(0 - 0)           | 0<br>(0 - 0)            | 0<br>(0 - 0)            | 0<br>(0 - 0)            |
| Endocrine, metabolic, blood, and immune disorders   | 5<br>(4 - 7)         | 1<br>(0 - 1)          | 0<br>(0 - 0)           | 1<br>(1 - 2)            | 2<br>(1 - 3)            | 1<br>(1 - 2)            |
| Musculoskeletal disorders                           | 1<br>(1 - 2)         | --                    | 0<br>(0 - 0)           | 1<br>(0 - 1)            | 0<br>(0 - 0)            | 0<br>(0 - 0)            |
| Rheumatoid arthritis                                | 0<br>(0 - 0)         | --                    | 0<br>(0 - 0)           | 0<br>(0 - 0)            | 0<br>(0 - 0)            | 0<br>(0 - 0)            |
| Other musculoskeletal disorders                     | 1<br>(1 - 2)         | --                    | 0<br>(0 - 0)           | 1<br>(0 - 1)            | 0<br>(0 - 0)            | 0<br>(0 - 0)            |
| Other non-communicable diseases                     | 23<br>(15 - 33)      | 15<br>(9 - 24)        | 2<br>(1 - 3)           | 3<br>(2 - 5)            | 1<br>(1 - 2)            | 1<br>(1 - 2)            |
| Congenital anomalies                                | 20<br>(13 - 30)      | 15<br>(9 - 24)        | 2<br>(1 - 2)           | 2<br>(2 - 4)            | 1<br>(0 - 1)            | 0<br>(0 - 1)            |
| Neural tube defects                                 | 0<br>(0 - 1)         | 0<br>(0 - 0)          | 0<br>(0 - 0)           | 0<br>(0 - 0)            | 0<br>(0 - 0)            | 0<br>(0 - 0)            |
| Congenital heart anomalies                          | 3<br>(1 - 6)         | 2<br>(1 - 5)          | 0<br>(0 - 1)           | 0<br>(0 - 1)            | 0<br>(0 - 0)            | 0<br>(0 - 0)            |
| Cleft lip and cleft palate                          | 0<br>(0 - 0)         | 0<br>(0 - 0)          | --                     | --                      | --                      | --                      |
| Down syndrome                                       | 2<br>(1 - 4)         | 1<br>(0 - 3)          | 0<br>(0 - 0)           | 0<br>(0 - 0)            | 0<br>(0 - 0)            | 0<br>(0 - 0)            |
| Chromosomal unbalanced rearrangements               | 1<br>(0 - 1)         | 1<br>(0 - 1)          | 0<br>(0 - 0)           | 0<br>(0 - 0)            | 0<br>(0 - 0)            | 0<br>(0 - 0)            |
| Other congenital anomalies                          | 15<br>(10 - 23)      | 11<br>(7 - 18)        | 1<br>(1 - 2)           | 2<br>(1 - 3)            | 0<br>(0 - 1)            | 0<br>(0 - 0)            |
| Skin and subcutaneous diseases                      | 2<br>(2 - 3)         | 0<br>(0 - 0)          | 0<br>(0 - 0)           | 1<br>(0 - 1)            | 1<br>(0 - 1)            | 1<br>(0 - 1)            |
| Cellulitis                                          | 0<br>(0 - 0)         | 0<br>(0 - 0)          | 0<br>(0 - 0)           | 0<br>(0 - 0)            | 0<br>(0 - 0)            | 0<br>(0 - 0)            |
| Pyoderma                                            | 1<br>(1 - 2)         | 0<br>(0 - 0)          | 0<br>(0 - 0)           | 0<br>(0 - 1)            | 0<br>(0 - 1)            | 0<br>(0 - 1)            |
| Decubitus ulcer                                     | 1<br>(0 - 1)         | 0<br>(0 - 0)          | 0<br>(0 - 0)           | 0<br>(0 - 0)            | 0<br>(0 - 0)            | 0<br>(0 - 1)            |
| Other skin and subcutaneous diseases                | 0<br>(0 - 0)         | 0<br>(0 - 0)          | 0<br>(0 - 0)           | 0<br>(0 - 0)            | 0<br>(0 - 0)            | 0<br>(0 - 0)            |

Web Table 31- Kiribati deaths with 95% UI by age, sex, and cause in 2013

| Cause                                           | Both Sexes, All Ages | Both Sexes, 0-4 Years | Both Sexes, 5-14 Years | Both Sexes, 15-49 Years | Both Sexes, 50-69 Years | Both Sexes, 70-80 Years |
|-------------------------------------------------|----------------------|-----------------------|------------------------|-------------------------|-------------------------|-------------------------|
| Sudden infant death syndrome                    | 0<br>(0 - 0)         | 0<br>(0 - 0)          | --                     | --                      | --                      | --                      |
| Injuries                                        | 69<br>(51 - 91)      | 6<br>(3 - 10)         | 4<br>(3 - 5)           | 42<br>(30 - 59)         | 10<br>(7 - 14)          | 7<br>(5 - 9)            |
| Transport injuries                              | 22<br>(15 - 30)      | 2<br>(1 - 3)          | 2<br>(1 - 3)           | 14<br>(9 - 19)          | 3<br>(2 - 4)            | 2<br>(1 - 2)            |
| Road injuries                                   | 19<br>(13 - 26)      | 1<br>(1 - 2)          | 2<br>(1 - 2)           | 12<br>(8 - 17)          | 3<br>(2 - 4)            | 1<br>(1 - 2)            |
| Pedestrian road injuries                        | 3<br>(2 - 5)         | 0<br>(0 - 1)          | 0<br>(0 - 1)           | 2<br>(1 - 3)            | 1<br>(0 - 1)            | 0<br>(0 - 0)            |
| Cyclist road injuries                           | 2<br>(1 - 2)         | 0<br>(0 - 0)          | 0<br>(0 - 0)           | 1<br>(1 - 2)            | 0<br>(0 - 0)            | 0<br>(0 - 0)            |
| Motorcyclist road injuries                      | 3<br>(2 - 5)         | 0<br>(0 - 0)          | 0<br>(0 - 0)           | 2<br>(1 - 4)            | 0<br>(0 - 1)            | 0<br>(0 - 0)            |
| Motor vehicle road injuries                     | 10<br>(7 - 14)       | 1<br>(0 - 1)          | 1<br>(0 - 1)           | 6<br>(4 - 9)            | 1<br>(1 - 2)            | 1<br>(0 - 1)            |
| Other road injuries                             | 1<br>(0 - 1)         | 0<br>(0 - 0)          | 0<br>(0 - 0)           | 0<br>(0 - 1)            | 0<br>(0 - 0)            | 0<br>(0 - 0)            |
| Other transport injuries                        | 3<br>(2 - 4)         | 0<br>(0 - 1)          | 0<br>(0 - 0)           | 2<br>(1 - 2)            | 1<br>(0 - 1)            | 0<br>(0 - 0)            |
| Unintentional injuries                          | 27<br>(19 - 35)      | 4<br>(2 - 7)          | 1<br>(1 - 2)           | 13<br>(9 - 18)          | 4<br>(3 - 6)            | 4<br>(3 - 5)            |
| Falls                                           | 2<br>(1 - 3)         | 0<br>(0 - 0)          | 0<br>(0 - 0)           | 1<br>(0 - 1)            | 0<br>(0 - 0)            | 1<br>(0 - 1)            |
| Drowning                                        | 4<br>(3 - 7)         | 1<br>(0 - 2)          | 0<br>(0 - 1)           | 2<br>(1 - 3)            | 0<br>(0 - 1)            | 0<br>(0 - 0)            |
| Fire, heat, and hot substances                  | 1<br>(0 - 2)         | 0<br>(0 - 0)          | 0<br>(0 - 0)           | 1<br>(0 - 1)            | 0<br>(0 - 0)            | 0<br>(0 - 0)            |
| Poisonings                                      | 1<br>(1 - 2)         | 0<br>(0 - 0)          | 0<br>(0 - 0)           | 1<br>(0 - 1)            | 0<br>(0 - 0)            | 0<br>(0 - 1)            |
| Exposure to mechanical forces                   | 2<br>(2 - 3)         | 0<br>(0 - 1)          | 0<br>(0 - 0)           | 1<br>(1 - 2)            | 0<br>(0 - 1)            | 0<br>(0 - 0)            |
| Unintentional firearm injuries                  | 0<br>(0 - 0)         | 0<br>(0 - 0)          | 0<br>(0 - 0)           | 0<br>(0 - 0)            | 0<br>(0 - 0)            | 0<br>(0 - 0)            |
| Unintentional suffocation                       | 1<br>(0 - 1)         | 0<br>(0 - 0)          | 0<br>(0 - 0)           | 0<br>(0 - 1)            | 0<br>(0 - 0)            | 0<br>(0 - 0)            |
| Other exposure to mechanical forces             | 2<br>(1 - 2)         | 0<br>(0 - 0)          | 0<br>(0 - 0)           | 1<br>(0 - 1)            | 0<br>(0 - 0)            | 0<br>(0 - 0)            |
| Adverse effects of medical treatment            | 8<br>(5 - 11)        | 1<br>(1 - 2)          | 0<br>(0 - 0)           | 4<br>(2 - 5)            | 1<br>(1 - 2)            | 2<br>(1 - 3)            |
| Animal contact                                  | 1<br>(1 - 2)         | 0<br>(0 - 0)          | 0<br>(0 - 0)           | 1<br>(0 - 1)            | 0<br>(0 - 0)            | 0<br>(0 - 0)            |
| Venomous animal contact                         | 0<br>(0 - 1)         | 0<br>(0 - 0)          | 0<br>(0 - 0)           | 0<br>(0 - 0)            | 0<br>(0 - 0)            | 0<br>(0 - 0)            |
| Non-venomous animal contact                     | 1<br>(0 - 1)         | 0<br>(0 - 0)          | 0<br>(0 - 0)           | 0<br>(0 - 1)            | 0<br>(0 - 0)            | 0<br>(0 - 0)            |
| Foreign body                                    | 1<br>(1 - 2)         | 0<br>(0 - 1)          | 0<br>(0 - 0)           | 0<br>(0 - 0)            | 0<br>(0 - 0)            | 0<br>(0 - 0)            |
| Pulmonary aspiration and foreign body in airway | 1<br>(1 - 1)         | 0<br>(0 - 1)          | 0<br>(0 - 0)           | 0<br>(0 - 0)            | 0<br>(0 - 0)            | 0<br>(0 - 0)            |
| Foreign body in other body part                 | 0<br>(0 - 0)         | 0<br>(0 - 0)          | 0<br>(0 - 0)           | 0<br>(0 - 0)            | 0<br>(0 - 0)            | 0<br>(0 - 0)            |
| Other unintentional injuries                    | 5<br>(3 - 7)         | 0<br>(0 - 0)          | 0<br>(0 - 0)           | 3<br>(2 - 5)            | 1<br>(0 - 1)            | 0<br>(0 - 0)            |
| Self-harm and interpersonal violence            | 21<br>(14 - 31)      | 0<br>(0 - 0)          | 1<br>(0 - 1)           | 16<br>(11 - 24)         | 3<br>(2 - 4)            | 1<br>(1 - 2)            |
| Self-harm                                       | 18<br>(12 - 29)      | --                    | 1<br>(0 - 1)           | 14<br>(9 - 23)          | 2<br>(2 - 4)            | 1<br>(1 - 2)            |
| Interpersonal violence                          | 3<br>(1 - 4)         | 0<br>(0 - 0)          | 0<br>(0 - 0)           | 2<br>(1 - 3)            | 0<br>(0 - 1)            | 0<br>(0 - 0)            |
| Assault by firearm                              | 1<br>(0 - 2)         | 0<br>(0 - 0)          | 0<br>(0 - 0)           | 1<br>(0 - 1)            | 0<br>(0 - 0)            | 0<br>(0 - 0)            |
| Assault by sharp object                         | 1<br>(0 - 2)         | 0<br>(0 - 0)          | 0<br>(0 - 0)           | 1<br>(0 - 1)            | 0<br>(0 - 0)            | 0<br>(0 - 0)            |
| Assault by other means                          | 1<br>(0 - 1)         | 0<br>(0 - 0)          | 0<br>(0 - 0)           | 0<br>(0 - 0)            | 0<br>(0 - 0)            | 0<br>(0 - 0)            |

Web Table 31- Kiribati deaths with 95% UI by age, sex, and cause in 2013

| Cause                                                             | Males, All Ages    | Males, 0-4 Years | Males, 5-14 Years | Males, 15-49 Years | Males, 50-69 Years | Males, 70-80 Years |
|-------------------------------------------------------------------|--------------------|------------------|-------------------|--------------------|--------------------|--------------------|
| All causes                                                        | 553<br>(404 - 719) | 68<br>(46 - 95)  | 11<br>(9 - 14)    | 168<br>(112 - 243) | 200<br>(132 - 269) | 106<br>(85 - 118)  |
| Communicable, maternal, neonatal, and nutritional diseases        | 111<br>(87 - 139)  | 51<br>(35 - 71)  | 4<br>(3 - 5)      | 22<br>(15 - 31)    | 20<br>(14 - 26)    | 15<br>(12 - 18)    |
| HIV/AIDS and tuberculosis                                         | 10<br>(7 - 15)     | 0<br>(0 - 0)     | 0<br>(0 - 0)      | 3<br>(2 - 5)       | 4<br>(2 - 7)       | 2<br>(1 - 3)       |
| Tuberculosis                                                      | 10<br>(7 - 15)     | 0<br>(0 - 0)     | 0<br>(0 - 0)      | 3<br>(2 - 5)       | 4<br>(2 - 7)       | 2<br>(1 - 3)       |
| HIV/AIDS                                                          | 0<br>(0 - 0)       | 0<br>(0 - 0)     | 0<br>(0 - 0)      | 0<br>(0 - 0)       | 0<br>(0 - 0)       | 0<br>(0 - 0)       |
| HIV/AIDS resulting in mycobacterial infection                     | 0<br>(0 - 0)       | 0<br>(0 - 0)     | 0<br>(0 - 0)      | 0<br>(0 - 0)       | 0<br>(0 - 0)       | 0<br>(0 - 0)       |
| HIV/AIDS resulting in other diseases                              | 0<br>(0 - 0)       | 0<br>(0 - 0)     | 0<br>(0 - 0)      | 0<br>(0 - 0)       | 0<br>(0 - 0)       | 0<br>(0 - 0)       |
| Diarrhea, lower respiratory, and other common infectious diseases | 50<br>(37 - 66)    | 17<br>(10 - 28)  | 2<br>(2 - 4)      | 10<br>(6 - 15)     | 10<br>(7 - 15)     | 10<br>(7 - 12)     |
| Diarrheal diseases                                                | 11<br>(8 - 16)     | 4<br>(2 - 7)     | 1<br>(0 - 1)      | 2<br>(1 - 3)       | 2<br>(1 - 3)       | 3<br>(2 - 5)       |
| Intestinal infectious diseases                                    | 1<br>(1 - 3)       | 1<br>(0 - 2)     | 0<br>(0 - 1)      | 0<br>(0 - 1)       | 0<br>(0 - 0)       | 0<br>(0 - 0)       |
| Typhoid fever                                                     | 1<br>(0 - 2)       | 0<br>(0 - 1)     | 0<br>(0 - 1)      | 0<br>(0 - 1)       | 0<br>(0 - 0)       | 0<br>(0 - 0)       |
| Paratyphoid fever                                                 | 0<br>(0 - 1)       | 0<br>(0 - 0)     | 0<br>(0 - 0)      | 0<br>(0 - 0)       | 0<br>(0 - 0)       | 0<br>(0 - 0)       |
| Other intestinal infectious diseases                              | 0<br>(0 - 1)       | 0<br>(0 - 0)     | 0<br>(0 - 0)      | 0<br>(0 - 0)       | 0<br>(0 - 0)       | 0<br>(0 - 0)       |
| Lower respiratory infections                                      | 30<br>(21 - 40)    | 9<br>(5 - 16)    | 1<br>(0 - 1)      | 6<br>(4 - 10)      | 8<br>(5 - 11)      | 6<br>(4 - 8)       |
| Upper respiratory infections                                      | 0<br>(0 - 0)       | 0<br>(0 - 0)     | 0<br>(0 - 0)      | 0<br>(0 - 0)       | 0<br>(0 - 0)       | 0<br>(0 - 0)       |
| Otitis media                                                      | 0<br>(0 - 0)       | 0<br>(0 - 0)     | 0<br>(0 - 0)      | 0<br>(0 - 0)       | 0<br>(0 - 0)       | 0<br>(0 - 0)       |
| Meningitis                                                        | 5<br>(3 - 7)       | 2<br>(1 - 4)     | 0<br>(0 - 1)      | 2<br>(1 - 3)       | 1<br>(0 - 1)       | 0<br>(0 - 1)       |
| Pneumococcal meningitis                                           | 2<br>(1 - 2)       | 1<br>(0 - 1)     | 0<br>(0 - 0)      | 1<br>(0 - 1)       | 0<br>(0 - 0)       | 0<br>(0 - 0)       |
| H influenzae type B meningitis                                    | 1<br>(0 - 1)       | 0<br>(0 - 1)     | 0<br>(0 - 0)      | 0<br>(0 - 0)       | 0<br>(0 - 0)       | 0<br>(0 - 0)       |
| Meningococcal meningitis                                          | 1<br>(1 - 1)       | 0<br>(0 - 1)     | 0<br>(0 - 0)      | 0<br>(0 - 1)       | 0<br>(0 - 0)       | 0<br>(0 - 0)       |
| Other meningitis                                                  | 2<br>(1 - 2)       | 1<br>(0 - 1)     | 0<br>(0 - 0)      | 1<br>(0 - 1)       | 0<br>(0 - 0)       | 0<br>(0 - 0)       |
| Encephalitis                                                      | 0<br>(0 - 0)       | 0<br>(0 - 0)     | 0<br>(0 - 0)      | 0<br>(0 - 0)       | 0<br>(0 - 0)       | 0<br>(0 - 0)       |
| Diphtheria                                                        | 0<br>(0 - 0)       | 0<br>(0 - 0)     | 0<br>(0 - 0)      | 0<br>(0 - 0)       | 0<br>(0 - 0)       | --                 |
| Whooping cough                                                    | 0<br>(0 - 0)       | 0<br>(0 - 0)     | 0<br>(0 - 0)      | 0<br>(0 - 0)       | 0<br>(0 - 0)       | --                 |
| Tetanus                                                           | 0<br>(0 - 0)       | 0<br>(0 - 0)     | 0<br>(0 - 0)      | 0<br>(0 - 0)       | 0<br>(0 - 0)       | 0<br>(0 - 0)       |
| Measles                                                           | 2<br>(0 - 12)      | 2<br>(0 - 10)    | 0<br>(0 - 2)      | 0<br>(0 - 0)       | 0<br>(0 - 0)       | --                 |
| Varicella and herpes zoster                                       | 0<br>(0 - 0)       | 0<br>(0 - 0)     | 0<br>(0 - 0)      | 0<br>(0 - 0)       | 0<br>(0 - 0)       | 0<br>(0 - 0)       |
| Neglected tropical diseases and malaria                           | 4<br>(2 - 5)       | 1<br>(0 - 1)     | 0<br>(0 - 1)      | 1<br>(1 - 2)       | 1<br>(0 - 1)       | 1<br>(0 - 1)       |
| Leishmaniasis                                                     | 0<br>(0 - 0)       | 0<br>(0 - 0)     | 0<br>(0 - 0)      | 0<br>(0 - 0)       | 0<br>(0 - 0)       | 0<br>(0 - 0)       |
| Visceral leishmaniasis                                            | 0<br>(0 - 0)       | 0<br>(0 - 0)     | 0<br>(0 - 0)      | 0<br>(0 - 0)       | 0<br>(0 - 0)       | 0<br>(0 - 0)       |
| Cysticercosis                                                     | 0<br>(0 - 0)       | 0<br>(0 - 0)     | 0<br>(0 - 0)      | 0<br>(0 - 0)       | 0<br>(0 - 0)       | 0<br>(0 - 0)       |
| Cystic echinococcosis                                             | 0<br>(0 - 0)       | 0<br>(0 - 0)     | 0<br>(0 - 0)      | 0<br>(0 - 0)       | 0<br>(0 - 0)       | 0<br>(0 - 0)       |
| Dengue                                                            | 4<br>(2 - 5)       | 1<br>(0 - 1)     | 0<br>(0 - 0)      | 1<br>(1 - 2)       | 1<br>(0 - 1)       | 1<br>(0 - 1)       |
| Rabies                                                            | 0<br>(0 - 0)       | 0<br>(0 - 0)     | 0<br>(0 - 0)      | 0<br>(0 - 0)       | 0<br>(0 - 0)       | 0<br>(0 - 0)       |
| Intestinal nematode infections                                    | 0<br>(0 - 0)       | 0<br>(0 - 0)     | 0<br>(0 - 0)      | 0<br>(0 - 0)       | 0<br>(0 - 0)       | 0<br>(0 - 0)       |
| Ascariasis                                                        | 0<br>(0 - 0)       | 0<br>(0 - 0)     | 0<br>(0 - 0)      | 0<br>(0 - 0)       | 0<br>(0 - 0)       | 0<br>(0 - 0)       |
| Other neglected tropical diseases                                 | 0<br>(0 - 0)       | 0<br>(0 - 0)     | 0<br>(0 - 0)      | 0<br>(0 - 0)       | 0<br>(0 - 0)       | 0<br>(0 - 0)       |
| Maternal disorders                                                | --                 | --               | --                | --                 | --                 | --                 |
| Maternal hemorrhage                                               | --                 | --               | --                | --                 | --                 | --                 |
| Maternal sepsis and other maternal infections                     | --                 | --               | --                | --                 | --                 | --                 |

Web Table 31- Kiribati deaths with 95% UI by age, sex, and cause in 2013

| Cause                                                            | Males, All Ages    | Males, 0-4 Years | Males, 5-14 Years | Males, 15-49 Years | Males, 50-69 Years | Males, 70-80 Years |
|------------------------------------------------------------------|--------------------|------------------|-------------------|--------------------|--------------------|--------------------|
| Maternal hypertensive disorders                                  | --                 | --               | --                | --                 | --                 | --                 |
| Maternal obstructed labor                                        | --                 | --               | --                | --                 | --                 | --                 |
| Maternal abortive outcome                                        | --                 | --               | --                | --                 | --                 | --                 |
| Indirect maternal deaths                                         | --                 | --               | --                | --                 | --                 | --                 |
| Late maternal deaths                                             | --                 | --               | --                | --                 | --                 | --                 |
| Maternal deaths aggravated by HIV/AIDS                           | --                 | --               | --                | --                 | --                 | --                 |
| Other maternal disorders                                         | --                 | --               | --                | --                 | --                 | --                 |
| Neonatal disorders                                               | 28<br>(21 - 37)    | 28<br>(21 - 37)  | --                | --                 | --                 | --                 |
| Neonatal preterm birth complications                             | 5<br>(2 - 9)       | 5<br>(2 - 9)     | --                | --                 | --                 | --                 |
| Neonatal encephalopathy due to birth asphyxia and trauma         | 5<br>(2 - 8)       | 5<br>(2 - 8)     | --                | --                 | --                 | --                 |
| Neonatal sepsis and other neonatal infections                    | 3<br>(1 - 6)       | 3<br>(1 - 6)     | --                | --                 | --                 | --                 |
| Hemolytic disease and other neonatal jaundice                    | 1<br>(0 - 2)       | 1<br>(0 - 2)     | --                | --                 | --                 | --                 |
| Other neonatal disorders                                         | 15<br>(9 - 23)     | 15<br>(9 - 23)   | --                | --                 | --                 | --                 |
| Nutritional deficiencies                                         | 10<br>(6 - 15)     | 3<br>(1 - 6)     | 0<br>(0 - 1)      | 2<br>(1 - 4)       | 2<br>(1 - 4)       | 1<br>(1 - 2)       |
| Protein-energy malnutrition                                      | 7<br>(4 - 11)      | 3<br>(1 - 6)     | 0<br>(0 - 1)      | 1<br>(1 - 2)       | 1<br>(1 - 3)       | 1<br>(0 - 1)       |
| Iodine deficiency                                                | 0<br>(0 - 0)       | 0<br>(0 - 0)     | 0<br>(0 - 0)      | 0<br>(0 - 0)       | 0<br>(0 - 0)       | 0<br>(0 - 0)       |
| Iron-deficiency anemia                                           | 2<br>(1 - 3)       | 0<br>(0 - 0)     | 0<br>(0 - 0)      | 1<br>(0 - 1)       | 0<br>(0 - 1)       | 0<br>(0 - 1)       |
| Other nutritional deficiencies                                   | 1<br>(0 - 2)       | 0<br>(0 - 0)     | 0<br>(0 - 0)      | 0<br>(0 - 1)       | 0<br>(0 - 0)       | 0<br>(0 - 0)       |
| Other communicable, maternal, neonatal, and nutritional diseases | 10<br>(6 - 15)     | 2<br>(1 - 3)     | 1<br>(0 - 1)      | 5<br>(3 - 8)       | 2<br>(1 - 3)       | 1<br>(0 - 1)       |
| Sexually transmitted diseases excluding HIV                      | 1<br>(0 - 1)       | 1<br>(0 - 1)     | 0<br>(0 - 0)      | 0<br>(0 - 0)       | 0<br>(0 - 0)       | 0<br>(0 - 0)       |
| Syphilis                                                         | 1<br>(0 - 1)       | 1<br>(0 - 1)     | 0<br>(0 - 0)      | 0<br>(0 - 0)       | 0<br>(0 - 0)       | 0<br>(0 - 0)       |
| Chlamydial infection                                             | --                 | --               | --                | --                 | --                 | --                 |
| Gonococcal infection                                             | 0<br>(0 - 0)       | --               | 0<br>(0 - 0)      | 0<br>(0 - 0)       | 0<br>(0 - 0)       | 0<br>(0 - 0)       |
| Other sexually transmitted diseases                              | 0<br>(0 - 0)       | --               | 0<br>(0 - 0)      | 0<br>(0 - 0)       | 0<br>(0 - 0)       | 0<br>(0 - 0)       |
| Hepatitis                                                        | 4<br>(3 - 7)       | 0<br>(0 - 0)     | 0<br>(0 - 1)      | 2<br>(1 - 4)       | 1<br>(1 - 2)       | 0<br>(0 - 1)       |
| Acute hepatitis A                                                | 0<br>(0 - 1)       | 0<br>(0 - 0)     | 0<br>(0 - 0)      | 0<br>(0 - 0)       | 0<br>(0 - 0)       | 0<br>(0 - 0)       |
| Acute hepatitis B                                                | 3<br>(2 - 5)       | 0<br>(0 - 0)     | 0<br>(0 - 0)      | 1<br>(1 - 3)       | 1<br>(1 - 2)       | 0<br>(0 - 1)       |
| Acute hepatitis C                                                | 0<br>(0 - 0)       | --               | 0<br>(0 - 0)      | 0<br>(0 - 0)       | 0<br>(0 - 0)       | 0<br>(0 - 0)       |
| Acute hepatitis E                                                | 1<br>(0 - 2)       | 0<br>(0 - 0)     | 0<br>(0 - 0)      | 1<br>(0 - 1)       | 0<br>(0 - 0)       | 0<br>(0 - 0)       |
| Other infectious diseases                                        | 5<br>(2 - 8)       | 1<br>(0 - 2)     | 0<br>(0 - 0)      | 3<br>(1 - 5)       | 1<br>(0 - 1)       | 0<br>(0 - 1)       |
| Non-communicable diseases                                        | 392<br>(276 - 521) | 14<br>(8 - 22)   | 5<br>(3 - 6)      | 112<br>(72 - 165)  | 174<br>(115 - 236) | 88<br>(70 - 99)    |
| Neoplasms                                                        | 16<br>(11 - 22)    | 0<br>(0 - 1)     | 0<br>(0 - 0)      | 6<br>(4 - 9)       | 7<br>(4 - 9)       | 3<br>(2 - 3)       |
| Esophageal cancer                                                | 0<br>(0 - 0)       | --               | --                | 0<br>(0 - 0)       | 0<br>(0 - 0)       | 0<br>(0 - 0)       |
| Stomach cancer                                                   | 2<br>(1 - 3)       | --               | --                | 1<br>(0 - 1)       | 1<br>(1 - 1)       | 1<br>(0 - 1)       |
| Liver cancer                                                     | 0<br>(0 - 0)       | --               | 0<br>(0 - 0)      | 0<br>(0 - 0)       | 0<br>(0 - 0)       | 0<br>(0 - 0)       |
| Liver cancer due to hepatitis B                                  | 0<br>(0 - 0)       | --               | 0<br>(0 - 0)      | 0<br>(0 - 0)       | 0<br>(0 - 0)       | 0<br>(0 - 0)       |
| Liver cancer due to hepatitis C                                  | 0<br>(0 - 0)       | --               | 0<br>(0 - 0)      | 0<br>(0 - 0)       | 0<br>(0 - 0)       | 0<br>(0 - 0)       |
| Liver cancer due to alcohol use                                  | 0<br>(0 - 0)       | --               | --                | 0<br>(0 - 0)       | 0<br>(0 - 0)       | 0<br>(0 - 0)       |
| Liver cancer due to other causes                                 | 0<br>(0 - 0)       | --               | 0<br>(0 - 0)      | 0<br>(0 - 0)       | 0<br>(0 - 0)       | 0<br>(0 - 0)       |
| Larynx cancer                                                    | 0<br>(0 - 0)       | --               | --                | 0<br>(0 - 0)       | 0<br>(0 - 0)       | 0<br>(0 - 0)       |

Web Table 31- Kiribati deaths with 95% UI by age, sex, and cause in 2013

| Cause                                         | Males, All Ages    | Males, 0-4 Years | Males, 5-14 Years | Males, 15-49 Years | Males, 50-69 Years | Males, 70-80 Years |
|-----------------------------------------------|--------------------|------------------|-------------------|--------------------|--------------------|--------------------|
| Tracheal, bronchus and lung cancer            | 6<br>(4 - 8)       | --               | --                | 2<br>(1 - 3)       | 3<br>(2 - 4)       | 1<br>(1 - 1)       |
| Breast cancer                                 | 0<br>(0 - 0)       | --               | --                | 0<br>(0 - 0)       | 0<br>(0 - 0)       | 0<br>(0 - 0)       |
| Cervical cancer                               | --                 | --               | --                | --                 | --                 | --                 |
| Uterine cancer                                | --                 | --               | --                | --                 | --                 | --                 |
| Prostate cancer                               | 0<br>(0 - 1)       | --               | --                | 0<br>(0 - 0)       | 0<br>(0 - 0)       | 0<br>(0 - 0)       |
| Colon and rectum cancer                       | 1<br>(1 - 2)       | --               | --                | 0<br>(0 - 1)       | 1<br>(0 - 1)       | 0<br>(0 - 0)       |
| Lip and oral cavity cancer                    | 1<br>(0 - 1)       | --               | --                | 0<br>(0 - 0)       | 0<br>(0 - 0)       | 0<br>(0 - 0)       |
| Nasopharynx cancer                            | 0<br>(0 - 1)       | --               | 0<br>(0 - 0)      | 0<br>(0 - 0)       | 0<br>(0 - 0)       | 0<br>(0 - 0)       |
| Other pharynx cancer                          | 0<br>(0 - 1)       | --               | --                | 0<br>(0 - 0)       | 0<br>(0 - 0)       | 0<br>(0 - 0)       |
| Gallbladder and biliary tract cancer          | 0<br>(0 - 0)       | --               | --                | 0<br>(0 - 0)       | 0<br>(0 - 0)       | 0<br>(0 - 0)       |
| Pancreatic cancer                             | 0<br>(0 - 0)       | --               | --                | 0<br>(0 - 0)       | 0<br>(0 - 0)       | 0<br>(0 - 0)       |
| Malignant skin melanoma                       | 0<br>(0 - 0)       | --               | --                | 0<br>(0 - 0)       | 0<br>(0 - 0)       | 0<br>(0 - 0)       |
| Non-melanoma skin cancer                      | 0<br>(0 - 0)       | --               | --                | 0<br>(0 - 0)       | 0<br>(0 - 0)       | 0<br>(0 - 0)       |
| Ovarian cancer                                | --                 | --               | --                | --                 | --                 | --                 |
| Testicular cancer                             | 0<br>(0 - 0)       | --               | --                | 0<br>(0 - 0)       | 0<br>(0 - 0)       | 0<br>(0 - 0)       |
| Kidney cancer                                 | 0<br>(0 - 1)       | 0<br>(0 - 0)     | 0<br>(0 - 0)      | 0<br>(0 - 0)       | 0<br>(0 - 0)       | 0<br>(0 - 0)       |
| Bladder cancer                                | 0<br>(0 - 0)       | --               | --                | 0<br>(0 - 0)       | 0<br>(0 - 0)       | 0<br>(0 - 0)       |
| Brain and nervous system cancer               | 0<br>(0 - 0)       | 0<br>(0 - 0)     | 0<br>(0 - 0)      | 0<br>(0 - 0)       | 0<br>(0 - 0)       | 0<br>(0 - 0)       |
| Thyroid cancer                                | 0<br>(0 - 0)       | --               | 0<br>(0 - 0)      | 0<br>(0 - 0)       | 0<br>(0 - 0)       | 0<br>(0 - 0)       |
| Mesothelioma                                  | 0<br>(0 - 0)       | --               | --                | 0<br>(0 - 0)       | 0<br>(0 - 0)       | 0<br>(0 - 0)       |
| Hodgkin lymphoma                              | 0<br>(0 - 0)       | 0<br>(0 - 0)     | 0<br>(0 - 0)      | 0<br>(0 - 0)       | 0<br>(0 - 0)       | 0<br>(0 - 0)       |
| Non-Hodgkin lymphoma                          | 0<br>(0 - 0)       | 0<br>(0 - 0)     | 0<br>(0 - 0)      | 0<br>(0 - 0)       | 0<br>(0 - 0)       | 0<br>(0 - 0)       |
| Multiple myeloma                              | 0<br>(0 - 0)       | --               | --                | 0<br>(0 - 0)       | 0<br>(0 - 0)       | 0<br>(0 - 0)       |
| Leukemia                                      | 1<br>(0 - 1)       | 0<br>(0 - 0)     | 0<br>(0 - 0)      | 0<br>(0 - 1)       | 0<br>(0 - 0)       | 0<br>(0 - 0)       |
| Other neoplasms                               | 2<br>(1 - 3)       | 0<br>(0 - 1)     | 0<br>(0 - 0)      | 1<br>(0 - 2)       | 1<br>(0 - 1)       | 0<br>(0 - 0)       |
| Cardiovascular diseases                       | 176<br>(119 - 236) | 2<br>(1 - 4)     | 1<br>(1 - 1)      | 54<br>(34 - 79)    | 84<br>(54 - 115)   | 34<br>(27 - 39)    |
| Rheumatic heart disease                       | 3<br>(1 - 4)       | 0<br>(0 - 0)     | 0<br>(0 - 0)      | 1<br>(1 - 2)       | 1<br>(0 - 1)       | 0<br>(0 - 1)       |
| Ischemic heart disease                        | 71<br>(48 - 104)   | 0<br>(0 - 1)     | 0<br>(0 - 0)      | 23<br>(14 - 36)    | 37<br>(24 - 54)    | 11<br>(8 - 14)     |
| Cerebrovascular disease                       | 77<br>(52 - 105)   | 1<br>(1 - 2)     | 0<br>(0 - 1)      | 20<br>(12 - 30)    | 36<br>(22 - 51)    | 19<br>(14 - 23)    |
| Ischemic stroke                               | 22<br>(15 - 31)    | 0<br>(0 - 0)     | 0<br>(0 - 0)      | 3<br>(2 - 5)       | 10<br>(6 - 14)     | 9<br>(7 - 12)      |
| Hemorrhagic stroke                            | 54<br>(35 - 76)    | 1<br>(1 - 2)     | 0<br>(0 - 1)      | 17<br>(10 - 26)    | 27<br>(16 - 38)    | 9<br>(7 - 12)      |
| Hypertensive heart disease                    | 2<br>(1 - 3)       | 0<br>(0 - 0)     | 0<br>(0 - 0)      | 1<br>(0 - 1)       | 1<br>(1 - 2)       | 0<br>(0 - 1)       |
| Cardiomyopathy and myocarditis                | 10<br>(5 - 15)     | 0<br>(0 - 1)     | 0<br>(0 - 0)      | 5<br>(3 - 9)       | 3<br>(2 - 5)       | 1<br>(0 - 1)       |
| Atrial fibrillation and flutter               | 1<br>(0 - 1)       | --               | --                | 0<br>(0 - 0)       | 0<br>(0 - 1)       | 0<br>(0 - 1)       |
| Aortic aneurysm                               | 1<br>(0 - 1)       | --               | --                | 0<br>(0 - 0)       | 0<br>(0 - 0)       | 0<br>(0 - 0)       |
| Peripheral vascular disease                   | 1<br>(1 - 2)       | --               | --                | 0<br>(0 - 0)       | 1<br>(0 - 1)       | 1<br>(0 - 1)       |
| Endocarditis                                  | 1<br>(1 - 2)       | 0<br>(0 - 0)     | 0<br>(0 - 0)      | 1<br>(0 - 1)       | 0<br>(0 - 1)       | 0<br>(0 - 0)       |
| Other cardiovascular and circulatory diseases | 9<br>(6 - 13)      | 0<br>(0 - 0)     | 0<br>(0 - 0)      | 3<br>(2 - 5)       | 3<br>(2 - 5)       | 2<br>(1 - 2)       |
| Chronic respiratory diseases                  | 52<br>(37 - 67)    | 1<br>(0 - 2)     | 0<br>(0 - 1)      | 7<br>(4 - 11)      | 23<br>(14 - 31)    | 21<br>(16 - 25)    |
| Chronic obstructive pulmonary disease         | 10<br>(7 - 13)     | 0<br>(0 - 1)     | 0<br>(0 - 0)      | 1<br>(1 - 2)       | 3<br>(2 - 5)       | 5<br>(3 - 7)       |

Web Table 31- Kiribati deaths with 95% UI by age, sex, and cause in 2013

| Cause                                               | Males, All Ages | Males, 0-4 Years | Males, 5-14 Years | Males, 15-49 Years | Males, 50-69 Years | Males, 70-80 Years |
|-----------------------------------------------------|-----------------|------------------|-------------------|--------------------|--------------------|--------------------|
| Pneumoconiosis                                      | 6<br>(3 - 9)    | 0<br>(0 - 0)     | 0<br>(0 - 0)      | 1<br>(1 - 2)       | 3<br>(2 - 5)       | 2<br>(1 - 3)       |
| Silicosis                                           | 2<br>(1 - 3)    | 0<br>(0 - 0)     | 0<br>(0 - 0)      | 0<br>(0 - 1)       | 1<br>(0 - 2)       | 1<br>(0 - 1)       |
| Asbestosis                                          | 1<br>(0 - 1)    | 0<br>(0 - 0)     | 0<br>(0 - 0)      | 0<br>(0 - 0)       | 0<br>(0 - 1)       | 0<br>(0 - 0)       |
| Coal workers pneumoconiosis                         | 1<br>(0 - 1)    | 0<br>(0 - 0)     | 0<br>(0 - 0)      | 0<br>(0 - 0)       | 0<br>(0 - 1)       | 0<br>(0 - 0)       |
| Other pneumoconiosis                                | 3<br>(1 - 5)    | 0<br>(0 - 0)     | 0<br>(0 - 0)      | 0<br>(0 - 1)       | 1<br>(1 - 3)       | 1<br>(0 - 1)       |
| Asthma                                              | 27<br>(17 - 36) | 0<br>(0 - 1)     | 0<br>(0 - 0)      | 3<br>(2 - 5)       | 13<br>(8 - 18)     | 10<br>(7 - 13)     |
| Interstitial lung disease and pulmonary sarcoidosis | 2<br>(1 - 3)    | 0<br>(0 - 0)     | 0<br>(0 - 0)      | 0<br>(0 - 1)       | 1<br>(0 - 1)       | 0<br>(0 - 1)       |
| Other chronic respiratory diseases                  | 8<br>(6 - 12)   | 0<br>(0 - 1)     | 0<br>(0 - 0)      | 1<br>(1 - 2)       | 3<br>(2 - 4)       | 4<br>(2 - 6)       |
| Cirrhosis                                           | 12<br>(7 - 18)  | 0<br>(0 - 0)     | 0<br>(0 - 0)      | 6<br>(4 - 10)      | 4<br>(2 - 6)       | 1<br>(1 - 1)       |
| Cirrhosis due to hepatitis B                        | 6<br>(4 - 10)   | 0<br>(0 - 0)     | 0<br>(0 - 0)      | 4<br>(2 - 6)       | 2<br>(1 - 3)       | 0<br>(0 - 1)       |
| Cirrhosis due to hepatitis C                        | 2<br>(1 - 3)    | 0<br>(0 - 0)     | 0<br>(0 - 0)      | 1<br>(0 - 2)       | 1<br>(0 - 1)       | 0<br>(0 - 0)       |
| Cirrhosis due to alcohol use                        | 2<br>(1 - 4)    | --               | --                | 1<br>(0 - 2)       | 1<br>(0 - 2)       | 0<br>(0 - 0)       |
| Cirrhosis due to other causes                       | 1<br>(1 - 2)    | 0<br>(0 - 0)     | 0<br>(0 - 0)      | 1<br>(0 - 1)       | 0<br>(0 - 0)       | 0<br>(0 - 0)       |
| Digestive diseases                                  | 33<br>(23 - 47) | 1<br>(0 - 1)     | 1<br>(1 - 1)      | 13<br>(8 - 20)     | 12<br>(7 - 18)     | 7<br>(5 - 9)       |
| Peptic ulcer disease                                | 7<br>(4 - 11)   | 0<br>(0 - 0)     | 0<br>(0 - 0)      | 2<br>(1 - 4)       | 3<br>(1 - 4)       | 1<br>(1 - 2)       |
| Gastritis and duodenitis                            | 1<br>(1 - 2)    | 0<br>(0 - 0)     | 0<br>(0 - 0)      | 0<br>(0 - 0)       | 1<br>(0 - 1)       | 0<br>(0 - 0)       |
| Appendicitis                                        | 2<br>(1 - 4)    | 0<br>(0 - 0)     | 0<br>(0 - 0)      | 1<br>(1 - 2)       | 1<br>(0 - 1)       | 0<br>(0 - 1)       |
| Paralytic ileus and intestinal obstruction          | 7<br>(4 - 10)   | 0<br>(0 - 1)     | 0<br>(0 - 0)      | 3<br>(1 - 5)       | 2<br>(1 - 3)       | 2<br>(1 - 3)       |
| Inguinal, femoral, and abdominal hernia             | 1<br>(0 - 1)    | 0<br>(0 - 0)     | 0<br>(0 - 0)      | 0<br>(0 - 0)       | 0<br>(0 - 0)       | 0<br>(0 - 0)       |
| Inflammatory bowel disease                          | 1<br>(1 - 2)    | 0<br>(0 - 0)     | 0<br>(0 - 0)      | 0<br>(0 - 1)       | 0<br>(0 - 1)       | 0<br>(0 - 1)       |
| Vascular intestinal disorders                       | 0<br>(0 - 0)    | 0<br>(0 - 0)     | 0<br>(0 - 0)      | 0<br>(0 - 0)       | 0<br>(0 - 0)       | 0<br>(0 - 0)       |
| Gallbladder and biliary diseases                    | 4<br>(2 - 6)    | 0<br>(0 - 0)     | 0<br>(0 - 0)      | 1<br>(1 - 2)       | 1<br>(1 - 2)       | 1<br>(1 - 1)       |
| Pancreatitis                                        | 2<br>(1 - 3)    | 0<br>(0 - 0)     | 0<br>(0 - 0)      | 1<br>(1 - 2)       | 0<br>(0 - 1)       | 0<br>(0 - 0)       |
| Other digestive diseases                            | 9<br>(6 - 14)   | 0<br>(0 - 0)     | 0<br>(0 - 0)      | 3<br>(2 - 5)       | 4<br>(2 - 6)       | 1<br>(1 - 2)       |
| Neurological disorders                              | 7<br>(5 - 8)    | 0<br>(0 - 0)     | 0<br>(0 - 0)      | 2<br>(1 - 3)       | 1<br>(1 - 1)       | 4<br>(3 - 4)       |
| Alzheimer disease and other dementias               | 4<br>(3 - 5)    | --               | --                | 0<br>(0 - 0)       | 1<br>(0 - 1)       | 3<br>(3 - 4)       |
| Parkinson disease                                   | 0<br>(0 - 0)    | --               | --                | 0<br>(0 - 0)       | 0<br>(0 - 0)       | 0<br>(0 - 0)       |
| Epilepsy                                            | 1<br>(1 - 2)    | 0<br>(0 - 0)     | 0<br>(0 - 0)      | 1<br>(1 - 2)       | 0<br>(0 - 0)       | 0<br>(0 - 0)       |
| Multiple sclerosis                                  | 0<br>(0 - 0)    | --               | --                | 0<br>(0 - 0)       | 0<br>(0 - 0)       | 0<br>(0 - 0)       |
| Other neurological disorders                        | 1<br>(1 - 2)    | 0<br>(0 - 0)     | 0<br>(0 - 0)      | 1<br>(0 - 1)       | 0<br>(0 - 0)       | 0<br>(0 - 0)       |
| Mental and substance use disorders                  | 1<br>(1 - 2)    | 0<br>(0 - 0)     | 0<br>(0 - 0)      | 1<br>(0 - 2)       | 0<br>(0 - 0)       | 0<br>(0 - 0)       |
| Schizophrenia                                       | 0<br>(0 - 0)    | --               | --                | 0<br>(0 - 0)       | 0<br>(0 - 0)       | 0<br>(0 - 0)       |
| Alcohol use disorders                               | 1<br>(0 - 2)    | --               | --                | 1<br>(0 - 2)       | 0<br>(0 - 0)       | 0<br>(0 - 0)       |
| Drug use disorders                                  | 0<br>(0 - 0)    | 0<br>(0 - 0)     | --                | 0<br>(0 - 0)       | 0<br>(0 - 0)       | 0<br>(0 - 0)       |
| Opioid use disorders                                | 0<br>(0 - 0)    | 0<br>(0 - 0)     | --                | 0<br>(0 - 0)       | 0<br>(0 - 0)       | 0<br>(0 - 0)       |
| Cocaine use disorders                               | 0<br>(0 - 0)    | 0<br>(0 - 0)     | --                | 0<br>(0 - 0)       | 0<br>(0 - 0)       | 0<br>(0 - 0)       |
| Amphetamine use disorders                           | 0<br>(0 - 0)    | 0<br>(0 - 0)     | --                | 0<br>(0 - 0)       | 0<br>(0 - 0)       | 0<br>(0 - 0)       |
| Other drug use disorders                            | 0<br>(0 - 0)    | 0<br>(0 - 0)     | --                | 0<br>(0 - 0)       | 0<br>(0 - 0)       | 0<br>(0 - 0)       |
| Eating disorders                                    | 0<br>(0 - 0)    | --               | 0<br>(0 - 0)      | 0<br>(0 - 0)       | --                 | --                 |
| Anorexia nervosa                                    | 0<br>(0 - 0)    | --               | 0<br>(0 - 0)      | 0<br>(0 - 0)       | --                 | --                 |

Web Table 31- Kiribati deaths with 95% UI by age, sex, and cause in 2013

| Cause                                               | Males, All Ages  | Males, 0-4 Years | Males, 5-14 Years | Males, 15-49 Years | Males, 50-69 Years | Males, 70-80 Years |
|-----------------------------------------------------|------------------|------------------|-------------------|--------------------|--------------------|--------------------|
| Diabetes, urogenital, blood, and endocrine diseases | 82<br>(53 - 125) | 1<br>(1 - 2)     | 0<br>(0 - 1)      | 20<br>(11 - 36)    | 42<br>(26 - 65)    | 18<br>(13 - 25)    |
| Diabetes mellitus                                   | 64<br>(41 - 96)  | 0<br>(0 - 0)     | 0<br>(0 - 0)      | 14<br>(7 - 23)     | 36<br>(22 - 54)    | 15<br>(10 - 21)    |
| Acute glomerulonephritis                            | 0<br>(0 - 0)     | 0<br>(0 - 0)     | 0<br>(0 - 0)      | 0<br>(0 - 0)       | 0<br>(0 - 0)       | 0<br>(0 - 0)       |
| Chronic kidney disease                              | 12<br>(5 - 24)   | 0<br>(0 - 1)     | 0<br>(0 - 0)      | 5<br>(2 - 10)      | 5<br>(2 - 10)      | 2<br>(1 - 4)       |
| Chronic kidney disease due to diabetes mellitus     | 3<br>(1 - 6)     | 0<br>(0 - 0)     | 0<br>(0 - 0)      | 1<br>(0 - 3)       | 1<br>(0 - 3)       | 0<br>(0 - 1)       |
| Chronic kidney disease due to hypertension          | 2<br>(1 - 4)     | 0<br>(0 - 0)     | 0<br>(0 - 0)      | 1<br>(0 - 2)       | 1<br>(0 - 2)       | 0<br>(0 - 1)       |
| Chronic kidney disease due to glomerulonephritis    | 0<br>(0 - 1)     | 0<br>(0 - 0)     | 0<br>(0 - 0)      | 0<br>(0 - 0)       | 0<br>(0 - 0)       | 0<br>(0 - 0)       |
| Chronic kidney disease due to other causes          | 7<br>(2 - 17)    | 0<br>(0 - 0)     | 0<br>(0 - 0)      | 3<br>(1 - 7)       | 3<br>(1 - 7)       | 1<br>(0 - 3)       |
| Urinary diseases and male infertility               | 1<br>(1 - 2)     | 0<br>(0 - 0)     | 0<br>(0 - 0)      | 0<br>(0 - 1)       | 0<br>(0 - 1)       | 0<br>(0 - 0)       |
| Interstitial nephritis and urinary tract infections | 0<br>(0 - 1)     | 0<br>(0 - 0)     | 0<br>(0 - 0)      | 0<br>(0 - 0)       | 0<br>(0 - 0)       | 0<br>(0 - 0)       |
| Urolithiasis                                        | 0<br>(0 - 0)     | --               | 0<br>(0 - 0)      | 0<br>(0 - 0)       | 0<br>(0 - 0)       | 0<br>(0 - 0)       |
| Other urinary diseases                              | 1<br>(1 - 1)     | 0<br>(0 - 0)     | 0<br>(0 - 0)      | 0<br>(0 - 0)       | 0<br>(0 - 0)       | 0<br>(0 - 0)       |
| Gynecological diseases                              | --               | --               | --                | --                 | --                 | --                 |
| Uterine fibroids                                    | --               | --               | --                | --                 | --                 | --                 |
| Polycystic ovarian syndrome                         | --               | --               | --                | --                 | --                 | --                 |
| Endometriosis                                       | --               | --               | --                | --                 | --                 | --                 |
| Genital prolapse                                    | --               | --               | --                | --                 | --                 | --                 |
| Other gynecological diseases                        | --               | --               | --                | --                 | --                 | --                 |
| Hemoglobinopathies and hemolytic anemias            | 1<br>(1 - 2)     | 0<br>(0 - 1)     | 0<br>(0 - 0)      | 0<br>(0 - 1)       | 0<br>(0 - 0)       | 0<br>(0 - 0)       |
| Thalassemias                                        | 1<br>(0 - 1)     | 0<br>(0 - 1)     | 0<br>(0 - 0)      | 0<br>(0 - 0)       | 0<br>(0 - 0)       | 0<br>(0 - 0)       |
| Sickle cell disorders                               | 0<br>(0 - 0)     | 0<br>(0 - 0)     | 0<br>(0 - 0)      | 0<br>(0 - 0)       | 0<br>(0 - 0)       | 0<br>(0 - 0)       |
| G6PD deficiency                                     | 0<br>(0 - 0)     | 0<br>(0 - 0)     | 0<br>(0 - 0)      | 0<br>(0 - 0)       | 0<br>(0 - 0)       | 0<br>(0 - 0)       |
| Other hemoglobinopathies and hemolytic anemias      | 0<br>(0 - 1)     | 0<br>(0 - 0)     | 0<br>(0 - 0)      | 0<br>(0 - 0)       | 0<br>(0 - 0)       | 0<br>(0 - 0)       |
| Endocrine, metabolic, blood, and immune disorders   | 3<br>(2 - 5)     | 1<br>(0 - 1)     | 0<br>(0 - 0)      | 1<br>(0 - 1)       | 1<br>(1 - 2)       | 1<br>(0 - 1)       |
| Musculoskeletal disorders                           | 1<br>(0 - 1)     | --               | 0<br>(0 - 0)      | 0<br>(0 - 0)       | 0<br>(0 - 0)       | 0<br>(0 - 0)       |
| Rheumatoid arthritis                                | 0<br>(0 - 0)     | --               | 0<br>(0 - 0)      | 0<br>(0 - 0)       | 0<br>(0 - 0)       | 0<br>(0 - 0)       |
| Other musculoskeletal disorders                     | 1<br>(0 - 1)     | --               | 0<br>(0 - 0)      | 0<br>(0 - 0)       | 0<br>(0 - 0)       | 0<br>(0 - 0)       |
| Other non-communicable diseases                     | 12<br>(8 - 19)   | 8<br>(5 - 14)    | 1<br>(1 - 2)      | 2<br>(1 - 3)       | 1<br>(0 - 1)       | 0<br>(0 - 1)       |
| Congenital anomalies                                | 11<br>(7 - 18)   | 8<br>(5 - 14)    | 1<br>(1 - 2)      | 2<br>(1 - 3)       | 0<br>(0 - 1)       | 0<br>(0 - 0)       |
| Neural tube defects                                 | 0<br>(0 - 0)     | 0<br>(0 - 0)     | 0<br>(0 - 0)      | 0<br>(0 - 0)       | 0<br>(0 - 0)       | 0<br>(0 - 0)       |
| Congenital heart anomalies                          | 1<br>(1 - 4)     | 1<br>(0 - 3)     | 0<br>(0 - 0)      | 0<br>(0 - 0)       | 0<br>(0 - 0)       | 0<br>(0 - 0)       |
| Cleft lip and cleft palate                          | 0<br>(0 - 0)     | 0<br>(0 - 0)     | --                | --                 | --                 | --                 |
| Down syndrome                                       | 1<br>(0 - 1)     | 0<br>(0 - 1)     | 0<br>(0 - 0)      | 0<br>(0 - 0)       | 0<br>(0 - 0)       | 0<br>(0 - 0)       |
| Chromosomal unbalanced rearrangements               | 0<br>(0 - 1)     | 0<br>(0 - 1)     | 0<br>(0 - 0)      | 0<br>(0 - 0)       | 0<br>(0 - 0)       | 0<br>(0 - 0)       |
| Other congenital anomalies                          | 9<br>(5 - 14)    | 6<br>(3 - 11)    | 1<br>(0 - 1)      | 1<br>(1 - 2)       | 0<br>(0 - 0)       | 0<br>(0 - 0)       |
| Skin and subcutaneous diseases                      | 1<br>(1 - 2)     | 0<br>(0 - 0)     | 0<br>(0 - 0)      | 0<br>(0 - 1)       | 0<br>(0 - 1)       | 0<br>(0 - 0)       |
| Cellulitis                                          | 0<br>(0 - 0)     | 0<br>(0 - 0)     | 0<br>(0 - 0)      | 0<br>(0 - 0)       | 0<br>(0 - 0)       | 0<br>(0 - 0)       |
| Pyoderma                                            | 1<br>(0 - 1)     | 0<br>(0 - 0)     | 0<br>(0 - 0)      | 0<br>(0 - 0)       | 0<br>(0 - 0)       | 0<br>(0 - 0)       |
| Decubitus ulcer                                     | 0<br>(0 - 0)     | 0<br>(0 - 0)     | 0<br>(0 - 0)      | 0<br>(0 - 0)       | 0<br>(0 - 0)       | 0<br>(0 - 0)       |
| Other skin and subcutaneous diseases                | 0<br>(0 - 0)     | 0<br>(0 - 0)     | 0<br>(0 - 0)      | 0<br>(0 - 0)       | 0<br>(0 - 0)       | 0<br>(0 - 0)       |



Web Table 31- Kiribati deaths with 95% UI by age, sex, and cause in 2013

| Cause                                           | Males, All Ages | Males, 0-4 Years | Males, 5-14 Years | Males, 15-49 Years | Males, 50-69 Years | Males, 70-80 Years |
|-------------------------------------------------|-----------------|------------------|-------------------|--------------------|--------------------|--------------------|
| Sudden infant death syndrome                    | 0<br>(0 - 0)    | 0<br>(0 - 0)     | --                | --                 | --                 | --                 |
| Injuries                                        | 50<br>(35 - 70) | 3<br>(2 - 5)     | 3<br>(2 - 4)      | 35<br>(23 - 50)    | 7<br>(4 - 10)      | 3<br>(2 - 4)       |
| Transport injuries                              | 17<br>(11 - 24) | 1<br>(0 - 2)     | 1<br>(1 - 2)      | 11<br>(7 - 17)     | 2<br>(1 - 3)       | 1<br>(1 - 1)       |
| Road injuries                                   | 15<br>(10 - 21) | 1<br>(0 - 2)     | 1<br>(1 - 2)      | 10<br>(6 - 15)     | 2<br>(1 - 3)       | 1<br>(0 - 1)       |
| Pedestrian road injuries                        | 2<br>(1 - 4)    | 0<br>(0 - 0)     | 0<br>(0 - 0)      | 2<br>(1 - 3)       | 0<br>(0 - 1)       | 0<br>(0 - 0)       |
| Cyclist road injuries                           | 1<br>(1 - 2)    | 0<br>(0 - 0)     | 0<br>(0 - 0)      | 1<br>(1 - 1)       | 0<br>(0 - 0)       | 0<br>(0 - 0)       |
| Motorcyclist road injuries                      | 3<br>(1 - 4)    | 0<br>(0 - 0)     | 0<br>(0 - 0)      | 2<br>(1 - 3)       | 0<br>(0 - 0)       | 0<br>(0 - 0)       |
| Motor vehicle road injuries                     | 8<br>(5 - 11)   | 0<br>(0 - 1)     | 1<br>(0 - 1)      | 5<br>(3 - 8)       | 1<br>(1 - 2)       | 0<br>(0 - 1)       |
| Other road injuries                             | 1<br>(0 - 1)    | 0<br>(0 - 0)     | 0<br>(0 - 0)      | 0<br>(0 - 1)       | 0<br>(0 - 0)       | 0<br>(0 - 0)       |
| Other transport injuries                        | 2<br>(1 - 3)    | 0<br>(0 - 0)     | 0<br>(0 - 0)      | 1<br>(1 - 2)       | 0<br>(0 - 1)       | 0<br>(0 - 0)       |
| Unintentional injuries                          | 17<br>(11 - 24) | 2<br>(1 - 3)     | 1<br>(1 - 1)      | 10<br>(6 - 14)     | 2<br>(1 - 4)       | 2<br>(1 - 2)       |
| Falls                                           | 1<br>(0 - 2)    | 0<br>(0 - 0)     | 0<br>(0 - 0)      | 1<br>(0 - 1)       | 0<br>(0 - 0)       | 0<br>(0 - 0)       |
| Drowning                                        | 2<br>(1 - 4)    | 0<br>(0 - 1)     | 0<br>(0 - 0)      | 1<br>(1 - 2)       | 0<br>(0 - 0)       | 0<br>(0 - 0)       |
| Fire, heat, and hot substances                  | 0<br>(0 - 1)    | 0<br>(0 - 0)     | 0<br>(0 - 0)      | 0<br>(0 - 1)       | 0<br>(0 - 0)       | 0<br>(0 - 0)       |
| Poisonings                                      | 1<br>(0 - 1)    | 0<br>(0 - 0)     | 0<br>(0 - 0)      | 0<br>(0 - 1)       | 0<br>(0 - 0)       | 0<br>(0 - 0)       |
| Exposure to mechanical forces                   | 2<br>(1 - 2)    | 0<br>(0 - 0)     | 0<br>(0 - 0)      | 1<br>(1 - 1)       | 0<br>(0 - 0)       | 0<br>(0 - 0)       |
| Unintentional firearm injuries                  | 0<br>(0 - 0)    | 0<br>(0 - 0)     | 0<br>(0 - 0)      | 0<br>(0 - 0)       | 0<br>(0 - 0)       | 0<br>(0 - 0)       |
| Unintentional suffocation                       | 0<br>(0 - 1)    | 0<br>(0 - 0)     | 0<br>(0 - 0)      | 0<br>(0 - 1)       | 0<br>(0 - 0)       | 0<br>(0 - 0)       |
| Other exposure to mechanical forces             | 1<br>(1 - 1)    | 0<br>(0 - 0)     | 0<br>(0 - 0)      | 1<br>(0 - 1)       | 0<br>(0 - 0)       | 0<br>(0 - 0)       |
| Adverse effects of medical treatment            | 5<br>(3 - 7)    | 1<br>(0 - 1)     | 0<br>(0 - 0)      | 3<br>(1 - 4)       | 1<br>(0 - 1)       | 1<br>(0 - 1)       |
| Animal contact                                  | 1<br>(1 - 2)    | 0<br>(0 - 0)     | 0<br>(0 - 0)      | 0<br>(0 - 1)       | 0<br>(0 - 0)       | 0<br>(0 - 0)       |
| Venomous animal contact                         | 0<br>(0 - 1)    | 0<br>(0 - 0)     | 0<br>(0 - 0)      | 0<br>(0 - 0)       | 0<br>(0 - 0)       | 0<br>(0 - 0)       |
| Non-venomous animal contact                     | 1<br>(0 - 1)    | 0<br>(0 - 0)     | 0<br>(0 - 0)      | 0<br>(0 - 1)       | 0<br>(0 - 0)       | 0<br>(0 - 0)       |
| Foreign body                                    | 1<br>(0 - 1)    | 0<br>(0 - 0)     | 0<br>(0 - 0)      | 0<br>(0 - 0)       | 0<br>(0 - 0)       | 0<br>(0 - 0)       |
| Pulmonary aspiration and foreign body in airway | 1<br>(0 - 1)    | 0<br>(0 - 0)     | 0<br>(0 - 0)      | 0<br>(0 - 0)       | 0<br>(0 - 0)       | 0<br>(0 - 0)       |
| Foreign body in other body part                 | 0<br>(0 - 0)    | 0<br>(0 - 0)     | 0<br>(0 - 0)      | 0<br>(0 - 0)       | 0<br>(0 - 0)       | 0<br>(0 - 0)       |
| Other unintentional injuries                    | 4<br>(3 - 6)    | 0<br>(0 - 0)     | 0<br>(0 - 0)      | 3<br>(2 - 4)       | 0<br>(0 - 1)       | 0<br>(0 - 0)       |
| Self-harm and interpersonal violence            | 17<br>(11 - 26) | 0<br>(0 - 0)     | 0<br>(0 - 1)      | 14<br>(9 - 22)     | 2<br>(1 - 3)       | 1<br>(1 - 1)       |
| Self-harm                                       | 15<br>(9 - 25)  | --               | 0<br>(0 - 1)      | 12<br>(8 - 20)     | 2<br>(1 - 3)       | 1<br>(0 - 1)       |
| Interpersonal violence                          | 2<br>(1 - 4)    | 0<br>(0 - 0)     | 0<br>(0 - 0)      | 2<br>(0 - 3)       | 0<br>(0 - 1)       | 0<br>(0 - 0)       |
| Assault by firearm                              | 1<br>(0 - 2)    | 0<br>(0 - 0)     | 0<br>(0 - 0)      | 1<br>(0 - 1)       | 0<br>(0 - 0)       | 0<br>(0 - 0)       |
| Assault by sharp object                         | 1<br>(0 - 2)    | 0<br>(0 - 0)     | 0<br>(0 - 0)      | 1<br>(0 - 1)       | 0<br>(0 - 0)       | 0<br>(0 - 0)       |
| Assault by other means                          | 0<br>(0 - 1)    | 0<br>(0 - 0)     | 0<br>(0 - 0)      | 0<br>(0 - 0)       | 0<br>(0 - 0)       | 0<br>(0 - 0)       |

Web Table 31- Kiribati deaths with 95% UI by age, sex, and cause in 2013

| Cause                                                             | Females, All Ages  | Females, 0-4 Years | Females, 5-14 Years | Females, 15-49 Years | Females, 50-69 Years | Females, 70-80 Years |
|-------------------------------------------------------------------|--------------------|--------------------|---------------------|----------------------|----------------------|----------------------|
| All causes                                                        | 392<br>(282 - 521) | 55<br>(37 - 84)    | 8<br>(5 - 11)       | 76<br>(49 - 116)     | 118<br>(70 - 171)    | 134<br>(99 - 170)    |
| Communicable, maternal, neonatal, and nutritional diseases        | 103<br>(80 - 132)  | 41<br>(28 - 61)    | 3<br>(2 - 5)        | 16<br>(11 - 23)      | 15<br>(10 - 22)      | 28<br>(20 - 36)      |
| HIV/AIDS and tuberculosis                                         | 8<br>(5 - 13)      | 0<br>(0 - 0)       | 0<br>(0 - 0)        | 2<br>(1 - 4)         | 3<br>(1 - 5)         | 2<br>(1 - 4)         |
| Tuberculosis                                                      | 8<br>(5 - 13)      | 0<br>(0 - 0)       | 0<br>(0 - 0)        | 2<br>(1 - 4)         | 3<br>(1 - 5)         | 2<br>(1 - 4)         |
| HIV/AIDS                                                          | 0<br>(0 - 0)       | 0<br>(0 - 0)       | 0<br>(0 - 0)        | 0<br>(0 - 0)         | 0<br>(0 - 0)         | 0<br>(0 - 0)         |
| HIV/AIDS resulting in mycobacterial infection                     | 0<br>(0 - 0)       | 0<br>(0 - 0)       | 0<br>(0 - 0)        | 0<br>(0 - 0)         | 0<br>(0 - 0)         | 0<br>(0 - 0)         |
| HIV/AIDS resulting in other diseases                              | 0<br>(0 - 0)       | 0<br>(0 - 0)       | 0<br>(0 - 0)        | 0<br>(0 - 0)         | 0<br>(0 - 0)         | 0<br>(0 - 0)         |
| Diarrhea, lower respiratory, and other common infectious diseases | 49<br>(36 - 66)    | 15<br>(9 - 25)     | 2<br>(1 - 3)        | 6<br>(4 - 10)        | 8<br>(4 - 12)        | 18<br>(12 - 25)      |
| Diarrheal diseases                                                | 14<br>(9 - 21)     | 3<br>(1 - 6)       | 0<br>(0 - 1)        | 1<br>(1 - 2)         | 2<br>(1 - 4)         | 7<br>(4 - 12)        |
| Intestinal infectious diseases                                    | 1<br>(1 - 3)       | 1<br>(0 - 1)       | 0<br>(0 - 1)        | 0<br>(0 - 1)         | 0<br>(0 - 0)         | 0<br>(0 - 0)         |
| Typhoid fever                                                     | 1<br>(0 - 2)       | 0<br>(0 - 1)       | 0<br>(0 - 1)        | 0<br>(0 - 1)         | 0<br>(0 - 0)         | 0<br>(0 - 0)         |
| Paratyphoid fever                                                 | 0<br>(0 - 1)       | 0<br>(0 - 0)       | 0<br>(0 - 0)        | 0<br>(0 - 0)         | 0<br>(0 - 0)         | 0<br>(0 - 0)         |
| Other intestinal infectious diseases                              | 0<br>(0 - 0)       | 0<br>(0 - 0)       | 0<br>(0 - 0)        | 0<br>(0 - 0)         | 0<br>(0 - 0)         | 0<br>(0 - 0)         |
| Lower respiratory infections                                      | 26<br>(19 - 36)    | 8<br>(4 - 13)      | 1<br>(0 - 1)        | 3<br>(2 - 5)         | 5<br>(3 - 8)         | 10<br>(6 - 14)       |
| Upper respiratory infections                                      | 0<br>(0 - 0)       | 0<br>(0 - 0)       | 0<br>(0 - 0)        | 0<br>(0 - 0)         | 0<br>(0 - 0)         | 0<br>(0 - 0)         |
| Otitis media                                                      | 0<br>(0 - 0)       | 0<br>(0 - 0)       | 0<br>(0 - 0)        | 0<br>(0 - 0)         | 0<br>(0 - 0)         | 0<br>(0 - 0)         |
| Meningitis                                                        | 5<br>(3 - 7)       | 2<br>(1 - 4)       | 1<br>(0 - 1)        | 1<br>(1 - 2)         | 0<br>(0 - 1)         | 0<br>(0 - 1)         |
| Pneumococcal meningitis                                           | 2<br>(1 - 2)       | 1<br>(0 - 1)       | 0<br>(0 - 0)        | 0<br>(0 - 1)         | 0<br>(0 - 0)         | 0<br>(0 - 0)         |
| H influenzae type B meningitis                                    | 1<br>(0 - 1)       | 0<br>(0 - 1)       | 0<br>(0 - 0)        | 0<br>(0 - 0)         | 0<br>(0 - 0)         | 0<br>(0 - 0)         |
| Meningococcal meningitis                                          | 1<br>(1 - 1)       | 0<br>(0 - 1)       | 0<br>(0 - 0)        | 0<br>(0 - 0)         | 0<br>(0 - 0)         | 0<br>(0 - 0)         |
| Other meningitis                                                  | 1<br>(1 - 2)       | 1<br>(0 - 1)       | 0<br>(0 - 0)        | 0<br>(0 - 1)         | 0<br>(0 - 0)         | 0<br>(0 - 0)         |
| Encephalitis                                                      | 0<br>(0 - 1)       | 0<br>(0 - 0)       | 0<br>(0 - 0)        | 0<br>(0 - 0)         | 0<br>(0 - 0)         | 0<br>(0 - 0)         |
| Diphtheria                                                        | 0<br>(0 - 0)       | 0<br>(0 - 0)       | 0<br>(0 - 0)        | 0<br>(0 - 0)         | 0<br>(0 - 0)         | --                   |
| Whooping cough                                                    | 0<br>(0 - 1)       | 0<br>(0 - 1)       | 0<br>(0 - 0)        | 0<br>(0 - 0)         | 0<br>(0 - 0)         | --                   |
| Tetanus                                                           | 0<br>(0 - 0)       | 0<br>(0 - 0)       | 0<br>(0 - 0)        | 0<br>(0 - 0)         | 0<br>(0 - 0)         | 0<br>(0 - 0)         |
| Measles                                                           | 2<br>(0 - 10)      | 2<br>(0 - 8)       | 0<br>(0 - 1)        | 0<br>(0 - 0)         | 0<br>(0 - 0)         | --                   |
| Varicella and herpes zoster                                       | 0<br>(0 - 0)       | 0<br>(0 - 0)       | 0<br>(0 - 0)        | 0<br>(0 - 0)         | 0<br>(0 - 0)         | 0<br>(0 - 0)         |
| Neglected tropical diseases and malaria                           | 4<br>(2 - 6)       | 1<br>(0 - 1)       | 0<br>(0 - 1)        | 1<br>(0 - 1)         | 1<br>(0 - 1)         | 2<br>(1 - 2)         |
| Leishmaniasis                                                     | 0<br>(0 - 0)       | 0<br>(0 - 0)       | 0<br>(0 - 0)        | 0<br>(0 - 0)         | 0<br>(0 - 0)         | 0<br>(0 - 0)         |
| Visceral leishmaniasis                                            | 0<br>(0 - 0)       | 0<br>(0 - 0)       | 0<br>(0 - 0)        | 0<br>(0 - 0)         | 0<br>(0 - 0)         | 0<br>(0 - 0)         |
| Cysticercosis                                                     | 0<br>(0 - 0)       | 0<br>(0 - 0)       | 0<br>(0 - 0)        | 0<br>(0 - 0)         | 0<br>(0 - 0)         | 0<br>(0 - 0)         |
| Cystic echinococcosis                                             | 0<br>(0 - 0)       | 0<br>(0 - 0)       | 0<br>(0 - 0)        | 0<br>(0 - 0)         | 0<br>(0 - 0)         | 0<br>(0 - 0)         |
| Dengue                                                            | 3<br>(1 - 5)       | 1<br>(0 - 1)       | 0<br>(0 - 0)        | 1<br>(0 - 1)         | 1<br>(0 - 1)         | 1<br>(0 - 2)         |
| Rabies                                                            | 0<br>(0 - 0)       | 0<br>(0 - 0)       | 0<br>(0 - 0)        | 0<br>(0 - 0)         | 0<br>(0 - 0)         | 0<br>(0 - 0)         |
| Intestinal nematode infections                                    | 0<br>(0 - 0)       | 0<br>(0 - 0)       | 0<br>(0 - 0)        | 0<br>(0 - 0)         | 0<br>(0 - 0)         | 0<br>(0 - 0)         |
| Ascariasis                                                        | 0<br>(0 - 0)       | 0<br>(0 - 0)       | 0<br>(0 - 0)        | 0<br>(0 - 0)         | 0<br>(0 - 0)         | 0<br>(0 - 0)         |
| Other neglected tropical diseases                                 | 0<br>(0 - 0)       | 0<br>(0 - 0)       | 0<br>(0 - 0)        | 0<br>(0 - 0)         | 0<br>(0 - 0)         | 0<br>(0 - 0)         |
| Maternal disorders                                                | 2<br>(1 - 4)       | --                 | 0<br>(0 - 0)        | 2<br>(1 - 4)         | --                   | --                   |
| Maternal hemorrhage                                               | 0<br>(0 - 1)       | --                 | 0<br>(0 - 0)        | 0<br>(0 - 1)         | --                   | --                   |
| Maternal sepsis and other maternal infections                     | 0<br>(0 - 0)       | --                 | 0<br>(0 - 0)        | 0<br>(0 - 0)         | --                   | --                   |

Web Table 31- Kiribati deaths with 95% UI by age, sex, and cause in 2013

| Cause                                                            | Females, All Ages  | Females, 0-4 Years | Females, 5-14 Years | Females, 15-49 Years | Females, 50-69 Years | Females, 70-80 Years |
|------------------------------------------------------------------|--------------------|--------------------|---------------------|----------------------|----------------------|----------------------|
| Maternal hypertensive disorders                                  | 0<br>(0 - 0)       | --                 | 0<br>(0 - 0)        | 0<br>(0 - 0)         | --                   | --                   |
| Maternal obstructed labor                                        | 0<br>(0 - 0)       | --                 | 0<br>(0 - 0)        | 0<br>(0 - 0)         | --                   | --                   |
| Maternal abortive outcome                                        | 0<br>(0 - 1)       | --                 | 0<br>(0 - 0)        | 0<br>(0 - 1)         | --                   | --                   |
| Indirect maternal deaths                                         | 0<br>(0 - 0)       | --                 | 0<br>(0 - 0)        | 0<br>(0 - 0)         | --                   | --                   |
| Late maternal deaths                                             | 0<br>(0 - 1)       | --                 | 0<br>(0 - 0)        | 0<br>(0 - 1)         | --                   | --                   |
| Maternal deaths aggravated by HIV/AIDS                           | 0<br>(0 - 0)       | --                 | --                  | 0<br>(0 - 0)         | --                   | --                   |
| Other maternal disorders                                         | 0<br>(0 - 1)       | --                 | 0<br>(0 - 0)        | 0<br>(0 - 1)         | --                   | --                   |
| Neonatal disorders                                               | 20<br>(15 - 29)    | 20<br>(15 - 29)    | --                  | --                   | --                   | --                   |
| Neonatal preterm birth complications                             | 6<br>(3 - 10)      | 6<br>(3 - 10)      | --                  | --                   | --                   | --                   |
| Neonatal encephalopathy due to birth asphyxia and trauma         | 2<br>(1 - 5)       | 2<br>(1 - 5)       | --                  | --                   | --                   | --                   |
| Neonatal sepsis and other neonatal infections                    | 1<br>(0 - 3)       | 1<br>(0 - 3)       | --                  | --                   | --                   | --                   |
| Hemolytic disease and other neonatal jaundice                    | 1<br>(0 - 1)       | 1<br>(0 - 1)       | --                  | --                   | --                   | --                   |
| Other neonatal disorders                                         | 11<br>(6 - 17)     | 11<br>(6 - 17)     | --                  | --                   | --                   | --                   |
| Nutritional deficiencies                                         | 13<br>(8 - 18)     | 3<br>(2 - 6)       | 1<br>(0 - 1)        | 3<br>(2 - 4)         | 1<br>(1 - 2)         | 5<br>(3 - 7)         |
| Protein-energy malnutrition                                      | 7<br>(4 - 11)      | 3<br>(1 - 6)       | 0<br>(0 - 1)        | 0<br>(0 - 1)         | 0<br>(0 - 1)         | 3<br>(1 - 4)         |
| Iodine deficiency                                                | 0<br>(0 - 0)       | 0<br>(0 - 0)       | 0<br>(0 - 0)        | 0<br>(0 - 0)         | 0<br>(0 - 0)         | 0<br>(0 - 0)         |
| Iron-deficiency anemia                                           | 5<br>(3 - 8)       | 0<br>(0 - 1)       | 0<br>(0 - 0)        | 2<br>(1 - 4)         | 1<br>(0 - 2)         | 2<br>(1 - 3)         |
| Other nutritional deficiencies                                   | 0<br>(0 - 1)       | 0<br>(0 - 0)       | 0<br>(0 - 0)        | 0<br>(0 - 0)         | 0<br>(0 - 0)         | 0<br>(0 - 0)         |
| Other communicable, maternal, neonatal, and nutritional diseases | 7<br>(4 - 11)      | 2<br>(1 - 3)       | 0<br>(0 - 0)        | 2<br>(1 - 3)         | 2<br>(1 - 4)         | 1<br>(1 - 2)         |
| Sexually transmitted diseases excluding HIV                      | 1<br>(1 - 2)       | 1<br>(0 - 1)       | 0<br>(0 - 0)        | 0<br>(0 - 1)         | 0<br>(0 - 0)         | 0<br>(0 - 0)         |
| Syphilis                                                         | 1<br>(0 - 2)       | 1<br>(0 - 1)       | 0<br>(0 - 0)        | 0<br>(0 - 0)         | 0<br>(0 - 0)         | 0<br>(0 - 0)         |
| Chlamydial infection                                             | 0<br>(0 - 0)       | --                 | 0<br>(0 - 0)        | 0<br>(0 - 0)         | 0<br>(0 - 0)         | 0<br>(0 - 0)         |
| Gonococcal infection                                             | 0<br>(0 - 0)       | --                 | 0<br>(0 - 0)        | 0<br>(0 - 0)         | 0<br>(0 - 0)         | 0<br>(0 - 0)         |
| Other sexually transmitted diseases                              | 0<br>(0 - 0)       | --                 | 0<br>(0 - 0)        | 0<br>(0 - 0)         | 0<br>(0 - 0)         | 0<br>(0 - 0)         |
| Hepatitis                                                        | 2<br>(1 - 3)       | 0<br>(0 - 1)       | 0<br>(0 - 0)        | 0<br>(0 - 1)         | 1<br>(1 - 2)         | 0<br>(0 - 1)         |
| Acute hepatitis A                                                | 0<br>(0 - 0)       | 0<br>(0 - 0)       | 0<br>(0 - 0)        | 0<br>(0 - 0)         | 0<br>(0 - 0)         | 0<br>(0 - 0)         |
| Acute hepatitis B                                                | 2<br>(1 - 3)       | 0<br>(0 - 0)       | 0<br>(0 - 0)        | 0<br>(0 - 0)         | 1<br>(0 - 2)         | 0<br>(0 - 1)         |
| Acute hepatitis C                                                | 0<br>(0 - 0)       | --                 | 0<br>(0 - 0)        | 0<br>(0 - 0)         | 0<br>(0 - 0)         | 0<br>(0 - 0)         |
| Acute hepatitis E                                                | 0<br>(0 - 1)       | 0<br>(0 - 0)       | 0<br>(0 - 0)        | 0<br>(0 - 0)         | 0<br>(0 - 0)         | 0<br>(0 - 0)         |
| Other infectious diseases                                        | 4<br>(2 - 6)       | 1<br>(0 - 2)       | 0<br>(0 - 0)        | 1<br>(0 - 2)         | 1<br>(0 - 2)         | 1<br>(0 - 1)         |
| Non-communicable diseases                                        | 270<br>(179 - 373) | 11<br>(7 - 18)     | 3<br>(2 - 5)        | 52<br>(31 - 82)      | 100<br>(57 - 145)    | 103<br>(74 - 131)    |
| Neoplasms                                                        | 27<br>(17 - 39)    | 0<br>(0 - 0)       | 0<br>(0 - 0)        | 9<br>(5 - 15)        | 10<br>(6 - 15)       | 7<br>(5 - 9)         |
| Esophageal cancer                                                | 0<br>(0 - 0)       | --                 | --                  | 0<br>(0 - 0)         | 0<br>(0 - 0)         | 0<br>(0 - 0)         |
| Stomach cancer                                                   | 1<br>(0 - 1)       | --                 | --                  | 0<br>(0 - 0)         | 0<br>(0 - 1)         | 0<br>(0 - 0)         |
| Liver cancer                                                     | 1<br>(0 - 1)       | --                 | 0<br>(0 - 0)        | 0<br>(0 - 0)         | 0<br>(0 - 1)         | 0<br>(0 - 0)         |
| Liver cancer due to hepatitis B                                  | 0<br>(0 - 1)       | --                 | 0<br>(0 - 0)        | 0<br>(0 - 0)         | 0<br>(0 - 0)         | 0<br>(0 - 0)         |
| Liver cancer due to hepatitis C                                  | 0<br>(0 - 0)       | --                 | 0<br>(0 - 0)        | 0<br>(0 - 0)         | 0<br>(0 - 0)         | 0<br>(0 - 0)         |
| Liver cancer due to alcohol use                                  | 0<br>(0 - 0)       | --                 | --                  | 0<br>(0 - 0)         | 0<br>(0 - 0)         | 0<br>(0 - 0)         |
| Liver cancer due to other causes                                 | 0<br>(0 - 0)       | --                 | 0<br>(0 - 0)        | 0<br>(0 - 0)         | 0<br>(0 - 0)         | 0<br>(0 - 0)         |
| Larynx cancer                                                    | 0<br>(0 - 0)       | --                 | --                  | 0<br>(0 - 0)         | 0<br>(0 - 0)         | 0<br>(0 - 0)         |

Web Table 31- Kiribati deaths with 95% UI by age, sex, and cause in 2013

| Cause                                         | Females, All Ages | Females, 0-4 Years | Females, 5-14 Years | Females, 15-49 Years | Females, 50-69 Years | Females, 70-80 Years |
|-----------------------------------------------|-------------------|--------------------|---------------------|----------------------|----------------------|----------------------|
| Tracheal, bronchus and lung cancer            | 2<br>(1 - 3)      | --                 | --                  | 0<br>(0 - 1)         | 1<br>(0 - 1)         | 1<br>(1 - 2)         |
| Breast cancer                                 | 12<br>(7 - 18)    | --                 | --                  | 5<br>(3 - 8)         | 5<br>(3 - 8)         | 2<br>(1 - 3)         |
| Cervical cancer                               | 6<br>(4 - 9)      | --                 | --                  | 2<br>(1 - 3)         | 2<br>(1 - 3)         | 2<br>(1 - 3)         |
| Uterine cancer                                | 0<br>(0 - 1)      | --                 | --                  | 0<br>(0 - 0)         | 0<br>(0 - 1)         | 0<br>(0 - 0)         |
| Prostate cancer                               | --                | --                 | --                  | --                   | --                   | --                   |
| Colon and rectum cancer                       | 1<br>(0 - 1)      | --                 | --                  | 0<br>(0 - 0)         | 0<br>(0 - 0)         | 0<br>(0 - 0)         |
| Lip and oral cavity cancer                    | 0<br>(0 - 0)      | --                 | --                  | 0<br>(0 - 0)         | 0<br>(0 - 0)         | 0<br>(0 - 0)         |
| Nasopharynx cancer                            | 0<br>(0 - 0)      | --                 | 0<br>(0 - 0)        | 0<br>(0 - 0)         | 0<br>(0 - 0)         | 0<br>(0 - 0)         |
| Other pharynx cancer                          | 0<br>(0 - 0)      | --                 | --                  | 0<br>(0 - 0)         | 0<br>(0 - 0)         | 0<br>(0 - 0)         |
| Gallbladder and biliary tract cancer          | 0<br>(0 - 0)      | --                 | --                  | 0<br>(0 - 0)         | 0<br>(0 - 0)         | 0<br>(0 - 0)         |
| Pancreatic cancer                             | 0<br>(0 - 0)      | --                 | --                  | 0<br>(0 - 0)         | 0<br>(0 - 0)         | 0<br>(0 - 0)         |
| Malignant skin melanoma                       | 0<br>(0 - 0)      | --                 | --                  | 0<br>(0 - 0)         | 0<br>(0 - 0)         | 0<br>(0 - 0)         |
| Non-melanoma skin cancer                      | 0<br>(0 - 0)      | --                 | --                  | 0<br>(0 - 0)         | 0<br>(0 - 0)         | 0<br>(0 - 0)         |
| Ovarian cancer                                | 0<br>(0 - 0)      | --                 | --                  | 0<br>(0 - 0)         | 0<br>(0 - 0)         | 0<br>(0 - 0)         |
| Testicular cancer                             | --                | --                 | --                  | --                   | --                   | --                   |
| Kidney cancer                                 | 0<br>(0 - 0)      | 0<br>(0 - 0)       | 0<br>(0 - 0)        | 0<br>(0 - 0)         | 0<br>(0 - 0)         | 0<br>(0 - 0)         |
| Bladder cancer                                | 0<br>(0 - 0)      | --                 | --                  | 0<br>(0 - 0)         | 0<br>(0 - 0)         | 0<br>(0 - 0)         |
| Brain and nervous system cancer               | 0<br>(0 - 0)      | 0<br>(0 - 0)       | 0<br>(0 - 0)        | 0<br>(0 - 0)         | 0<br>(0 - 0)         | 0<br>(0 - 0)         |
| Thyroid cancer                                | 0<br>(0 - 0)      | --                 | 0<br>(0 - 0)        | 0<br>(0 - 0)         | 0<br>(0 - 0)         | 0<br>(0 - 0)         |
| Mesothelioma                                  | 0<br>(0 - 0)      | --                 | --                  | 0<br>(0 - 0)         | 0<br>(0 - 0)         | 0<br>(0 - 0)         |
| Hodgkin lymphoma                              | 0<br>(0 - 0)      | 0<br>(0 - 0)       | 0<br>(0 - 0)        | 0<br>(0 - 0)         | 0<br>(0 - 0)         | 0<br>(0 - 0)         |
| Non-Hodgkin lymphoma                          | 0<br>(0 - 1)      | 0<br>(0 - 0)       | 0<br>(0 - 0)        | 0<br>(0 - 0)         | 0<br>(0 - 0)         | 0<br>(0 - 0)         |
| Multiple myeloma                              | 0<br>(0 - 0)      | --                 | --                  | 0<br>(0 - 0)         | 0<br>(0 - 0)         | 0<br>(0 - 0)         |
| Leukemia                                      | 1<br>(1 - 2)      | 0<br>(0 - 0)       | 0<br>(0 - 0)        | 1<br>(0 - 1)         | 0<br>(0 - 0)         | 0<br>(0 - 0)         |
| Other neoplasms                               | 1<br>(0 - 1)      | 0<br>(0 - 0)       | 0<br>(0 - 0)        | 0<br>(0 - 1)         | 0<br>(0 - 0)         | 0<br>(0 - 0)         |
| Cardiovascular diseases                       | 91<br>(59 - 131)  | 1<br>(1 - 2)       | 1<br>(1 - 1)        | 16<br>(9 - 26)       | 34<br>(19 - 52)      | 39<br>(27 - 52)      |
| Rheumatic heart disease                       | 2<br>(1 - 3)      | 0<br>(0 - 0)       | 0<br>(0 - 0)        | 1<br>(1 - 2)         | 0<br>(0 - 1)         | 0<br>(0 - 0)         |
| Ischemic heart disease                        | 35<br>(21 - 53)   | 0<br>(0 - 0)       | 0<br>(0 - 0)        | 5<br>(3 - 9)         | 14<br>(7 - 22)       | 16<br>(11 - 23)      |
| Cerebrovascular disease                       | 38<br>(22 - 56)   | 0<br>(0 - 1)       | 0<br>(0 - 0)        | 5<br>(3 - 9)         | 14<br>(7 - 22)       | 18<br>(11 - 25)      |
| Ischemic stroke                               | 13<br>(7 - 20)    | 0<br>(0 - 0)       | 0<br>(0 - 0)        | 1<br>(1 - 2)         | 4<br>(2 - 6)         | 8<br>(4 - 12)        |
| Hemorrhagic stroke                            | 25<br>(14 - 37)   | 0<br>(0 - 1)       | 0<br>(0 - 0)        | 4<br>(2 - 7)         | 10<br>(5 - 17)       | 10<br>(5 - 14)       |
| Hypertensive heart disease                    | 2<br>(1 - 3)      | 0<br>(0 - 0)       | 0<br>(0 - 0)        | 0<br>(0 - 1)         | 1<br>(0 - 1)         | 1<br>(1 - 2)         |
| Cardiomyopathy and myocarditis                | 5<br>(3 - 8)      | 0<br>(0 - 1)       | 0<br>(0 - 0)        | 2<br>(1 - 3)         | 2<br>(1 - 3)         | 1<br>(0 - 1)         |
| Atrial fibrillation and flutter               | 0<br>(0 - 1)      | --                 | --                  | 0<br>(0 - 0)         | 0<br>(0 - 0)         | 0<br>(0 - 0)         |
| Aortic aneurysm                               | 0<br>(0 - 1)      | --                 | --                  | 0<br>(0 - 0)         | 0<br>(0 - 0)         | 0<br>(0 - 0)         |
| Peripheral vascular disease                   | 2<br>(1 - 3)      | --                 | --                  | 0<br>(0 - 0)         | 0<br>(0 - 1)         | 1<br>(1 - 2)         |
| Endocarditis                                  | 1<br>(0 - 2)      | 0<br>(0 - 0)       | 0<br>(0 - 0)        | 0<br>(0 - 1)         | 0<br>(0 - 0)         | 0<br>(0 - 1)         |
| Other cardiovascular and circulatory diseases | 6<br>(4 - 10)     | 0<br>(0 - 0)       | 0<br>(0 - 0)        | 1<br>(1 - 3)         | 3<br>(2 - 5)         | 2<br>(1 - 3)         |
| Chronic respiratory diseases                  | 22<br>(15 - 31)   | 1<br>(0 - 1)       | 0<br>(0 - 0)        | 3<br>(2 - 5)         | 6<br>(4 - 9)         | 12<br>(8 - 16)       |
| Chronic obstructive pulmonary disease         | 5<br>(3 - 8)      | 0<br>(0 - 1)       | 0<br>(0 - 0)        | 0<br>(0 - 1)         | 1<br>(1 - 2)         | 3<br>(2 - 5)         |

Web Table 31- Kiribati deaths with 95% UI by age, sex, and cause in 2013

| Cause                                               | Females, All Ages | Females, 0-4 Years | Females, 5-14 Years | Females, 15-49 Years | Females, 50-69 Years | Females, 70-80 Years |
|-----------------------------------------------------|-------------------|--------------------|---------------------|----------------------|----------------------|----------------------|
| Pneumoconiosis                                      | 1<br>(0 - 1)      | 0<br>(0 - 0)       | 0<br>(0 - 0)        | 0<br>(0 - 0)         | 0<br>(0 - 0)         | 0<br>(0 - 1)         |
| Silicosis                                           | 0<br>(0 - 0)      | 0<br>(0 - 0)       | 0<br>(0 - 0)        | 0<br>(0 - 0)         | 0<br>(0 - 0)         | 0<br>(0 - 0)         |
| Asbestosis                                          | 0<br>(0 - 0)      | 0<br>(0 - 0)       | 0<br>(0 - 0)        | 0<br>(0 - 0)         | 0<br>(0 - 0)         | 0<br>(0 - 0)         |
| Coal workers pneumoconiosis                         | 0<br>(0 - 0)      | 0<br>(0 - 0)       | 0<br>(0 - 0)        | 0<br>(0 - 0)         | 0<br>(0 - 0)         | 0<br>(0 - 0)         |
| Other pneumoconiosis                                | 1<br>(0 - 1)      | 0<br>(0 - 0)       | 0<br>(0 - 0)        | 0<br>(0 - 0)         | 0<br>(0 - 0)         | 0<br>(0 - 1)         |
| Asthma                                              | 12<br>(8 - 18)    | 0<br>(0 - 0)       | 0<br>(0 - 0)        | 2<br>(1 - 3)         | 4<br>(2 - 6)         | 6<br>(3 - 8)         |
| Interstitial lung disease and pulmonary sarcoidosis | 1<br>(1 - 2)      | 0<br>(0 - 0)       | 0<br>(0 - 0)        | 0<br>(0 - 0)         | 0<br>(0 - 0)         | 1<br>(1 - 2)         |
| Other chronic respiratory diseases                  | 3<br>(2 - 5)      | 0<br>(0 - 0)       | 0<br>(0 - 0)        | 1<br>(0 - 1)         | 0<br>(0 - 1)         | 2<br>(1 - 3)         |
| Cirrhosis                                           | 5<br>(3 - 8)      | 0<br>(0 - 0)       | 0<br>(0 - 0)        | 2<br>(1 - 3)         | 2<br>(1 - 3)         | 1<br>(1 - 2)         |
| Cirrhosis due to hepatitis B                        | 3<br>(2 - 5)      | 0<br>(0 - 0)       | 0<br>(0 - 0)        | 1<br>(1 - 2)         | 1<br>(1 - 2)         | 1<br>(0 - 1)         |
| Cirrhosis due to hepatitis C                        | 1<br>(0 - 2)      | 0<br>(0 - 0)       | 0<br>(0 - 0)        | 0<br>(0 - 1)         | 0<br>(0 - 1)         | 0<br>(0 - 0)         |
| Cirrhosis due to alcohol use                        | 1<br>(0 - 1)      | --                 | --                  | 0<br>(0 - 0)         | 0<br>(0 - 0)         | 0<br>(0 - 0)         |
| Cirrhosis due to other causes                       | 1<br>(0 - 1)      | 0<br>(0 - 0)       | 0<br>(0 - 0)        | 0<br>(0 - 1)         | 0<br>(0 - 0)         | 0<br>(0 - 0)         |
| Digestive diseases                                  | 27<br>(17 - 39)   | 0<br>(0 - 1)       | 1<br>(0 - 1)        | 7<br>(4 - 11)        | 10<br>(5 - 15)       | 9<br>(6 - 13)        |
| Peptic ulcer disease                                | 3<br>(1 - 5)      | 0<br>(0 - 0)       | 0<br>(0 - 0)        | 1<br>(0 - 1)         | 1<br>(0 - 2)         | 1<br>(0 - 2)         |
| Gastritis and duodenitis                            | 1<br>(0 - 1)      | 0<br>(0 - 0)       | 0<br>(0 - 0)        | 0<br>(0 - 0)         | 0<br>(0 - 1)         | 0<br>(0 - 0)         |
| Appendicitis                                        | 2<br>(1 - 4)      | 0<br>(0 - 0)       | 0<br>(0 - 0)        | 1<br>(0 - 2)         | 1<br>(0 - 2)         | 0<br>(0 - 1)         |
| Paralytic ileus and intestinal obstruction          | 7<br>(4 - 12)     | 0<br>(0 - 0)       | 0<br>(0 - 0)        | 1<br>(1 - 3)         | 3<br>(2 - 6)         | 2<br>(1 - 4)         |
| Inguinal, femoral, and abdominal hernia             | 0<br>(0 - 0)      | 0<br>(0 - 0)       | 0<br>(0 - 0)        | 0<br>(0 - 0)         | 0<br>(0 - 0)         | 0<br>(0 - 0)         |
| Inflammatory bowel disease                          | 2<br>(1 - 3)      | 0<br>(0 - 0)       | 0<br>(0 - 0)        | 0<br>(0 - 0)         | 0<br>(0 - 0)         | 1<br>(1 - 2)         |
| Vascular intestinal disorders                       | 0<br>(0 - 0)      | 0<br>(0 - 0)       | 0<br>(0 - 0)        | 0<br>(0 - 0)         | 0<br>(0 - 0)         | 0<br>(0 - 0)         |
| Gallbladder and biliary diseases                    | 3<br>(2 - 5)      | 0<br>(0 - 0)       | 0<br>(0 - 0)        | 1<br>(0 - 1)         | 1<br>(1 - 2)         | 1<br>(1 - 2)         |
| Pancreatitis                                        | 1<br>(1 - 2)      | 0<br>(0 - 0)       | 0<br>(0 - 0)        | 0<br>(0 - 1)         | 0<br>(0 - 1)         | 0<br>(0 - 1)         |
| Other digestive diseases                            | 8<br>(4 - 12)     | 0<br>(0 - 0)       | 0<br>(0 - 0)        | 2<br>(1 - 4)         | 3<br>(1 - 5)         | 2<br>(1 - 4)         |
| Neurological disorders                              | 8<br>(6 - 10)     | 0<br>(0 - 0)       | 0<br>(0 - 0)        | 0<br>(0 - 1)         | 1<br>(1 - 2)         | 6<br>(5 - 8)         |
| Alzheimer disease and other dementias               | 7<br>(5 - 9)      | --                 | --                  | 0<br>(0 - 0)         | 1<br>(0 - 1)         | 6<br>(4 - 8)         |
| Parkinson disease                                   | 0<br>(0 - 0)      | --                 | --                  | 0<br>(0 - 0)         | 0<br>(0 - 0)         | 0<br>(0 - 0)         |
| Epilepsy                                            | 0<br>(0 - 1)      | 0<br>(0 - 0)       | 0<br>(0 - 0)        | 0<br>(0 - 1)         | 0<br>(0 - 0)         | 0<br>(0 - 0)         |
| Multiple sclerosis                                  | 0<br>(0 - 0)      | --                 | --                  | 0<br>(0 - 0)         | 0<br>(0 - 0)         | 0<br>(0 - 0)         |
| Other neurological disorders                        | 1<br>(1 - 1)      | 0<br>(0 - 0)       | 0<br>(0 - 0)        | 0<br>(0 - 0)         | 0<br>(0 - 1)         | 0<br>(0 - 0)         |
| Mental and substance use disorders                  | 1<br>(0 - 1)      | 0<br>(0 - 0)       | 0<br>(0 - 0)        | 0<br>(0 - 0)         | 0<br>(0 - 0)         | 0<br>(0 - 0)         |
| Schizophrenia                                       | 0<br>(0 - 0)      | --                 | --                  | 0<br>(0 - 0)         | 0<br>(0 - 0)         | 0<br>(0 - 0)         |
| Alcohol use disorders                               | 0<br>(0 - 1)      | --                 | --                  | 0<br>(0 - 0)         | 0<br>(0 - 0)         | 0<br>(0 - 0)         |
| Drug use disorders                                  | 0<br>(0 - 0)      | 0<br>(0 - 0)       | --                  | 0<br>(0 - 0)         | 0<br>(0 - 0)         | 0<br>(0 - 0)         |
| Opioid use disorders                                | 0<br>(0 - 0)      | 0<br>(0 - 0)       | --                  | 0<br>(0 - 0)         | 0<br>(0 - 0)         | 0<br>(0 - 0)         |
| Cocaine use disorders                               | 0<br>(0 - 0)      | 0<br>(0 - 0)       | --                  | 0<br>(0 - 0)         | 0<br>(0 - 0)         | 0<br>(0 - 0)         |
| Amphetamine use disorders                           | 0<br>(0 - 0)      | 0<br>(0 - 0)       | --                  | 0<br>(0 - 0)         | 0<br>(0 - 0)         | 0<br>(0 - 0)         |
| Other drug use disorders                            | 0<br>(0 - 0)      | 0<br>(0 - 0)       | --                  | 0<br>(0 - 0)         | 0<br>(0 - 0)         | 0<br>(0 - 0)         |
| Eating disorders                                    | 0<br>(0 - 0)      | --                 | 0<br>(0 - 0)        | 0<br>(0 - 0)         | --                   | --                   |
| Anorexia nervosa                                    | 0<br>(0 - 0)      | --                 | 0<br>(0 - 0)        | 0<br>(0 - 0)         | --                   | --                   |

Web Table 31- Kiribati deaths with 95% UI by age, sex, and cause in 2013

| Cause                                               | Females, All Ages | Females, 0-4 Years | Females, 5-14 Years | Females, 15-49 Years | Females, 50-69 Years | Females, 70-80 Years |
|-----------------------------------------------------|-------------------|--------------------|---------------------|----------------------|----------------------|----------------------|
| Diabetes, urogenital, blood, and endocrine diseases | 78<br>(47 - 122)  | 1<br>(1 - 2)       | 0<br>(0 - 1)        | 13<br>(7 - 23)       | 36<br>(20 - 55)      | 27<br>(18 - 41)      |
| Diabetes mellitus                                   | 58<br>(34 - 86)   | 0<br>(0 - 1)       | 0<br>(0 - 0)        | 7<br>(4 - 12)        | 29<br>(16 - 45)      | 21<br>(13 - 32)      |
| Acute glomerulonephritis                            | 0<br>(0 - 0)      | 0<br>(0 - 0)       | 0<br>(0 - 0)        | 0<br>(0 - 0)         | 0<br>(0 - 0)         | 0<br>(0 - 0)         |
| Chronic kidney disease                              | 16<br>(7 - 42)    | 0<br>(0 - 1)       | 0<br>(0 - 1)        | 4<br>(2 - 12)        | 6<br>(2 - 18)        | 5<br>(2 - 13)        |
| Chronic kidney disease due to diabetes mellitus     | 3<br>(1 - 6)      | 0<br>(0 - 0)       | 0<br>(0 - 0)        | 1<br>(0 - 2)         | 1<br>(0 - 3)         | 1<br>(0 - 2)         |
| Chronic kidney disease due to hypertension          | 2<br>(1 - 5)      | 0<br>(0 - 0)       | 0<br>(0 - 0)        | 1<br>(0 - 1)         | 1<br>(0 - 2)         | 1<br>(0 - 1)         |
| Chronic kidney disease due to glomerulonephritis    | 1<br>(0 - 1)      | 0<br>(0 - 0)       | 0<br>(0 - 0)        | 0<br>(0 - 0)         | 0<br>(0 - 0)         | 0<br>(0 - 1)         |
| Chronic kidney disease due to other causes          | 10<br>(3 - 36)    | 0<br>(0 - 1)       | 0<br>(0 - 0)        | 3<br>(1 - 10)        | 4<br>(1 - 15)        | 3<br>(1 - 11)        |
| Urinary diseases and male infertility               | 1<br>(1 - 1)      | 0<br>(0 - 0)       | 0<br>(0 - 0)        | 0<br>(0 - 0)         | 0<br>(0 - 0)         | 0<br>(0 - 0)         |
| Interstitial nephritis and urinary tract infections | 1<br>(0 - 1)      | 0<br>(0 - 0)       | 0<br>(0 - 0)        | 0<br>(0 - 0)         | 0<br>(0 - 0)         | 0<br>(0 - 0)         |
| Urolithiasis                                        | 0<br>(0 - 0)      | --                 | 0<br>(0 - 0)        | 0<br>(0 - 0)         | 0<br>(0 - 0)         | 0<br>(0 - 0)         |
| Other urinary diseases                              | 0<br>(0 - 0)      | 0<br>(0 - 0)       | 0<br>(0 - 0)        | 0<br>(0 - 0)         | 0<br>(0 - 0)         | 0<br>(0 - 0)         |
| Gynecological diseases                              | 0<br>(0 - 1)      | --                 | --                  | 0<br>(0 - 0)         | 0<br>(0 - 0)         | 0<br>(0 - 0)         |
| Uterine fibroids                                    | 0<br>(0 - 0)      | --                 | --                  | 0<br>(0 - 0)         | 0<br>(0 - 0)         | 0<br>(0 - 0)         |
| Polycystic ovarian syndrome                         | 0<br>(0 - 0)      | --                 | --                  | 0<br>(0 - 0)         | 0<br>(0 - 0)         | --                   |
| Endometriosis                                       | 0<br>(0 - 0)      | --                 | --                  | 0<br>(0 - 0)         | 0<br>(0 - 0)         | --                   |
| Genital prolapse                                    | 0<br>(0 - 0)      | --                 | --                  | 0<br>(0 - 0)         | 0<br>(0 - 0)         | 0<br>(0 - 0)         |
| Other gynecological diseases                        | 0<br>(0 - 0)      | --                 | --                  | 0<br>(0 - 0)         | 0<br>(0 - 0)         | 0<br>(0 - 0)         |
| Hemoglobinopathies and hemolytic anemias            | 1<br>(1 - 2)      | 0<br>(0 - 1)       | 0<br>(0 - 0)        | 0<br>(0 - 1)         | 0<br>(0 - 0)         | 0<br>(0 - 0)         |
| Thalassemias                                        | 1<br>(0 - 1)      | 0<br>(0 - 1)       | 0<br>(0 - 0)        | 0<br>(0 - 1)         | 0<br>(0 - 0)         | 0<br>(0 - 0)         |
| Sickle cell disorders                               | 0<br>(0 - 0)      | 0<br>(0 - 0)       | 0<br>(0 - 0)        | 0<br>(0 - 0)         | 0<br>(0 - 0)         | 0<br>(0 - 0)         |
| G6PD deficiency                                     | 0<br>(0 - 0)      | 0<br>(0 - 0)       | 0<br>(0 - 0)        | 0<br>(0 - 0)         | 0<br>(0 - 0)         | 0<br>(0 - 0)         |
| Other hemoglobinopathies and hemolytic anemias      | 0<br>(0 - 1)      | 0<br>(0 - 0)       | 0<br>(0 - 0)        | 0<br>(0 - 0)         | 0<br>(0 - 0)         | 0<br>(0 - 0)         |
| Endocrine, metabolic, blood, and immune disorders   | 2<br>(1 - 3)      | 0<br>(0 - 0)       | 0<br>(0 - 0)        | 0<br>(0 - 1)         | 1<br>(0 - 1)         | 1<br>(0 - 1)         |
| Musculoskeletal disorders                           | 1<br>(0 - 1)      | --                 | 0<br>(0 - 0)        | 0<br>(0 - 0)         | 0<br>(0 - 0)         | 0<br>(0 - 0)         |
| Rheumatoid arthritis                                | 0<br>(0 - 0)      | --                 | 0<br>(0 - 0)        | 0<br>(0 - 0)         | 0<br>(0 - 0)         | 0<br>(0 - 0)         |
| Other musculoskeletal disorders                     | 1<br>(0 - 1)      | --                 | 0<br>(0 - 0)        | 0<br>(0 - 0)         | 0<br>(0 - 0)         | 0<br>(0 - 0)         |
| Other non-communicable diseases                     | 10<br>(7 - 16)    | 7<br>(4 - 12)      | 1<br>(0 - 1)        | 1<br>(1 - 2)         | 1<br>(0 - 1)         | 1<br>(0 - 1)         |
| Congenital anomalies                                | 9<br>(5 - 15)     | 7<br>(4 - 12)      | 1<br>(0 - 1)        | 1<br>(0 - 2)         | 0<br>(0 - 0)         | 0<br>(0 - 0)         |
| Neural tube defects                                 | 0<br>(0 - 0)      | 0<br>(0 - 0)       | 0<br>(0 - 0)        | 0<br>(0 - 0)         | 0<br>(0 - 0)         | 0<br>(0 - 0)         |
| Congenital heart anomalies                          | 1<br>(0 - 3)      | 1<br>(0 - 3)       | 0<br>(0 - 0)        | 0<br>(0 - 0)         | 0<br>(0 - 0)         | 0<br>(0 - 0)         |
| Cleft lip and cleft palate                          | 0<br>(0 - 0)      | 0<br>(0 - 0)       | --                  | --                   | --                   | --                   |
| Down syndrome                                       | 1<br>(0 - 3)      | 1<br>(0 - 3)       | 0<br>(0 - 0)        | 0<br>(0 - 0)         | 0<br>(0 - 0)         | 0<br>(0 - 0)         |
| Chromosomal unbalanced rearrangements               | 0<br>(0 - 1)      | 0<br>(0 - 1)       | 0<br>(0 - 0)        | 0<br>(0 - 0)         | 0<br>(0 - 0)         | 0<br>(0 - 0)         |
| Other congenital anomalies                          | 6<br>(3 - 11)     | 5<br>(2 - 9)       | 0<br>(0 - 1)        | 1<br>(0 - 1)         | 0<br>(0 - 0)         | 0<br>(0 - 0)         |
| Skin and subcutaneous diseases                      | 1<br>(1 - 2)      | 0<br>(0 - 0)       | 0<br>(0 - 0)        | 0<br>(0 - 1)         | 0<br>(0 - 0)         | 1<br>(0 - 1)         |
| Cellulitis                                          | 0<br>(0 - 0)      | 0<br>(0 - 0)       | 0<br>(0 - 0)        | 0<br>(0 - 0)         | 0<br>(0 - 0)         | 0<br>(0 - 0)         |
| Pyoderma                                            | 1<br>(0 - 1)      | 0<br>(0 - 0)       | 0<br>(0 - 0)        | 0<br>(0 - 0)         | 0<br>(0 - 0)         | 0<br>(0 - 0)         |
| Decubitus ulcer                                     | 0<br>(0 - 1)      | 0<br>(0 - 0)       | 0<br>(0 - 0)        | 0<br>(0 - 0)         | 0<br>(0 - 0)         | 0<br>(0 - 0)         |
| Other skin and subcutaneous diseases                | 0<br>(0 - 0)      | 0<br>(0 - 0)       | 0<br>(0 - 0)        | 0<br>(0 - 0)         | 0<br>(0 - 0)         | 0<br>(0 - 0)         |

Web Table 31- Kiribati deaths with 95% UI by age, sex, and cause in 2013

| Cause                                           | Females, All Ages | Females, 0-4 Years | Females, 5-14 Years | Females, 15-49 Years | Females, 50-69 Years | Females, 70-80 Years |
|-------------------------------------------------|-------------------|--------------------|---------------------|----------------------|----------------------|----------------------|
| Sudden infant death syndrome                    | 0<br>(0 - 0)      | 0<br>(0 - 0)       | --                  | --                   | --                   | --                   |
| Injuries                                        | 19<br>(13 - 26)   | 3<br>(1 - 5)       | 1<br>(1 - 2)        | 8<br>(5 - 12)        | 3<br>(2 - 5)         | 4<br>(3 - 5)         |
| Transport injuries                              | 5<br>(3 - 8)      | 1<br>(0 - 1)       | 0<br>(0 - 1)        | 2<br>(1 - 4)         | 1<br>(0 - 2)         | 1<br>(0 - 1)         |
| Road injuries                                   | 4<br>(2 - 6)      | 1<br>(0 - 1)       | 0<br>(0 - 1)        | 2<br>(1 - 3)         | 1<br>(0 - 1)         | 1<br>(0 - 1)         |
| Pedestrian road injuries                        | 1<br>(0 - 1)      | 0<br>(0 - 0)       | 0<br>(0 - 0)        | 0<br>(0 - 1)         | 0<br>(0 - 0)         | 0<br>(0 - 0)         |
| Cyclist road injuries                           | 0<br>(0 - 1)      | 0<br>(0 - 0)       | 0<br>(0 - 0)        | 0<br>(0 - 0)         | 0<br>(0 - 0)         | 0<br>(0 - 0)         |
| Motorcyclist road injuries                      | 0<br>(0 - 1)      | 0<br>(0 - 0)       | 0<br>(0 - 0)        | 0<br>(0 - 0)         | 0<br>(0 - 0)         | 0<br>(0 - 0)         |
| Motor vehicle road injuries                     | 2<br>(1 - 4)      | 0<br>(0 - 1)       | 0<br>(0 - 0)        | 1<br>(1 - 2)         | 0<br>(0 - 1)         | 0<br>(0 - 1)         |
| Other road injuries                             | 0<br>(0 - 0)      | 0<br>(0 - 0)       | 0<br>(0 - 0)        | 0<br>(0 - 0)         | 0<br>(0 - 0)         | 0<br>(0 - 0)         |
| Other transport injuries                        | 1<br>(0 - 2)      | 0<br>(0 - 0)       | 0<br>(0 - 0)        | 0<br>(0 - 1)         | 0<br>(0 - 0)         | 0<br>(0 - 0)         |
| Unintentional injuries                          | 10<br>(7 - 14)    | 2<br>(1 - 3)       | 0<br>(0 - 1)        | 3<br>(2 - 5)         | 2<br>(1 - 3)         | 3<br>(2 - 4)         |
| Falls                                           | 1<br>(0 - 1)      | 0<br>(0 - 0)       | 0<br>(0 - 0)        | 0<br>(0 - 0)         | 0<br>(0 - 0)         | 0<br>(0 - 1)         |
| Drowning                                        | 2<br>(1 - 3)      | 1<br>(0 - 2)       | 0<br>(0 - 0)        | 0<br>(0 - 1)         | 0<br>(0 - 0)         | 0<br>(0 - 0)         |
| Fire, heat, and hot substances                  | 1<br>(0 - 1)      | 0<br>(0 - 0)       | 0<br>(0 - 0)        | 0<br>(0 - 1)         | 0<br>(0 - 0)         | 0<br>(0 - 0)         |
| Poisonings                                      | 1<br>(0 - 1)      | 0<br>(0 - 0)       | 0<br>(0 - 0)        | 0<br>(0 - 0)         | 0<br>(0 - 0)         | 0<br>(0 - 0)         |
| Exposure to mechanical forces                   | 1<br>(1 - 1)      | 0<br>(0 - 0)       | 0<br>(0 - 0)        | 0<br>(0 - 1)         | 0<br>(0 - 0)         | 0<br>(0 - 0)         |
| Unintentional firearm injuries                  | 0<br>(0 - 0)      | 0<br>(0 - 0)       | 0<br>(0 - 0)        | 0<br>(0 - 0)         | 0<br>(0 - 0)         | 0<br>(0 - 0)         |
| Unintentional suffocation                       | 0<br>(0 - 1)      | 0<br>(0 - 0)       | 0<br>(0 - 0)        | 0<br>(0 - 0)         | 0<br>(0 - 0)         | 0<br>(0 - 0)         |
| Other exposure to mechanical forces             | 0<br>(0 - 1)      | 0<br>(0 - 0)       | 0<br>(0 - 0)        | 0<br>(0 - 0)         | 0<br>(0 - 0)         | 0<br>(0 - 0)         |
| Adverse effects of medical treatment            | 3<br>(2 - 5)      | 0<br>(0 - 1)       | 0<br>(0 - 0)        | 1<br>(1 - 2)         | 1<br>(0 - 1)         | 1<br>(1 - 2)         |
| Animal contact                                  | 0<br>(0 - 0)      | 0<br>(0 - 0)       | 0<br>(0 - 0)        | 0<br>(0 - 0)         | 0<br>(0 - 0)         | 0<br>(0 - 0)         |
| Venomous animal contact                         | 0<br>(0 - 0)      | 0<br>(0 - 0)       | 0<br>(0 - 0)        | 0<br>(0 - 0)         | 0<br>(0 - 0)         | 0<br>(0 - 0)         |
| Non-venomous animal contact                     | 0<br>(0 - 0)      | 0<br>(0 - 0)       | 0<br>(0 - 0)        | 0<br>(0 - 0)         | 0<br>(0 - 0)         | 0<br>(0 - 0)         |
| Foreign body                                    | 1<br>(0 - 1)      | 0<br>(0 - 0)       | 0<br>(0 - 0)        | 0<br>(0 - 0)         | 0<br>(0 - 0)         | 0<br>(0 - 0)         |
| Pulmonary aspiration and foreign body in airway | 0<br>(0 - 1)      | 0<br>(0 - 0)       | 0<br>(0 - 0)        | 0<br>(0 - 0)         | 0<br>(0 - 0)         | 0<br>(0 - 0)         |
| Foreign body in other body part                 | 0<br>(0 - 0)      | 0<br>(0 - 0)       | 0<br>(0 - 0)        | 0<br>(0 - 0)         | 0<br>(0 - 0)         | 0<br>(0 - 0)         |
| Other unintentional injuries                    | 1<br>(0 - 1)      | 0<br>(0 - 0)       | 0<br>(0 - 0)        | 0<br>(0 - 1)         | 0<br>(0 - 0)         | 0<br>(0 - 0)         |
| Self-harm and interpersonal violence            | 4<br>(2 - 6)      | 0<br>(0 - 0)       | 0<br>(0 - 0)        | 2<br>(1 - 4)         | 1<br>(0 - 1)         | 1<br>(0 - 1)         |
| Self-harm                                       | 3<br>(2 - 5)      | --                 | 0<br>(0 - 0)        | 2<br>(1 - 3)         | 1<br>(0 - 1)         | 0<br>(0 - 1)         |
| Interpersonal violence                          | 0<br>(0 - 1)      | 0<br>(0 - 0)       | 0<br>(0 - 0)        | 0<br>(0 - 0)         | 0<br>(0 - 0)         | 0<br>(0 - 0)         |
| Assault by firearm                              | 0<br>(0 - 0)      | 0<br>(0 - 0)       | 0<br>(0 - 0)        | 0<br>(0 - 0)         | 0<br>(0 - 0)         | 0<br>(0 - 0)         |
| Assault by sharp object                         | 0<br>(0 - 0)      | 0<br>(0 - 0)       | 0<br>(0 - 0)        | 0<br>(0 - 0)         | 0<br>(0 - 0)         | 0<br>(0 - 0)         |
| Assault by other means                          | 0<br>(0 - 0)      | 0<br>(0 - 0)       | 0<br>(0 - 0)        | 0<br>(0 - 0)         | 0<br>(0 - 0)         | 0<br>(0 - 0)         |

Web Table 31- Kuwait deaths with 95% UI by age, sex, and cause in 2013

| Cause                                                              | Both Sexes, All Ages     | Both Sexes, 0-4 Years | Both Sexes, 5-14 Years | Both Sexes, 15-49 Years  | Both Sexes, 50-69 Years  | Both Sexes, 70-80 Years  |
|--------------------------------------------------------------------|--------------------------|-----------------------|------------------------|--------------------------|--------------------------|--------------------------|
| All causes                                                         | 6,195<br>(5,884 - 6,486) | 599<br>(555 - 647)    | 97<br>(89 - 104)       | 1,716<br>(1,598 - 1,829) | 1,586<br>(1,487 - 1,684) | 2,198<br>(2,125 - 2,267) |
| Communicable, maternal, neonatal, and nutritional diseases         | 633<br>(544 - 713)       | 239<br>(208 - 272)    | 20<br>(12 - 31)        | 117<br>(97 - 145)        | 58<br>(46 - 68)          | 199<br>(152 - 237)       |
| HIV/AIDS and tuberculosis                                          | 61<br>(52 - 75)          | 2<br>(1 - 3)          | 1<br>(0 - 1)           | 37<br>(30 - 44)          | 10<br>(9 - 13)           | 12<br>(9 - 21)           |
| Tuberculosis                                                       | 28<br>(24 - 32)          | 0<br>(0 - 0)          | 0<br>(0 - 0)           | 10<br>(8 - 12)           | 7<br>(5 - 8)             | 11<br>(9 - 14)           |
| HIV/AIDS                                                           | 33<br>(25 - 46)          | 1<br>(1 - 2)          | 0<br>(0 - 1)           | 27<br>(21 - 33)          | 4<br>(2 - 5)             | 1<br>(0 - 10)            |
| HIV/AIDS resulting in mycobacterial infection                      | 2<br>(1 - 3)             | 0<br>(0 - 0)          | 0<br>(0 - 0)           | 1<br>(1 - 2)             | 0<br>(0 - 0)             | 0<br>(0 - 1)             |
| HIV/AIDS resulting in other diseases                               | 31<br>(24 - 43)          | 1<br>(1 - 2)          | 0<br>(0 - 1)           | 25<br>(20 - 31)          | 3<br>(2 - 5)             | 1<br>(0 - 9)             |
| Diarrrhea, lower respiratory, and other common infectious diseases | 363<br>(289 - 434)       | 55<br>(42 - 72)       | 18<br>(11 - 29)        | 65<br>(48 - 91)          | 44<br>(32 - 54)          | 182<br>(136 - 221)       |
| Diarrrheal diseases                                                | 7<br>(6 - 9)             | 4<br>(3 - 5)          | 0<br>(0 - 0)           | 1<br>(1 - 1)             | 1<br>(0 - 1)             | 2<br>(1 - 2)             |
| Intestinal infectious diseases                                     | 51<br>(17 - 107)         | 14<br>(5 - 29)        | 12<br>(4 - 23)         | 22<br>(7 - 50)           | 2<br>(1 - 6)             | 1<br>(0 - 1)             |
| Typhoid fever                                                      | 39<br>(13 - 83)          | 10<br>(3 - 22)        | 9<br>(3 - 18)          | 17<br>(6 - 39)           | 2<br>(1 - 5)             | 1<br>(0 - 1)             |
| Paratyphoid fever                                                  | 11<br>(4 - 25)           | 3<br>(1 - 8)          | 3<br>(1 - 5)           | 5<br>(1 - 12)            | 0<br>(0 - 1)             | 0<br>(0 - 0)             |
| Other intestinal infectious diseases                               | 0<br>(0 - 3)             | 0<br>(0 - 2)          | 0<br>(0 - 0)           | 0<br>(0 - 2)             | 0<br>(0 - 0)             | 0<br>(0 - 0)             |
| Lower respiratory infections                                       | 285<br>(221 - 330)       | 30<br>(22 - 38)       | 5<br>(3 - 6)           | 35<br>(28 - 41)          | 39<br>(28 - 48)          | 177<br>(131 - 215)       |
| Upper respiratory infections                                       | 0<br>(0 - 0)             | 0<br>(0 - 0)          | 0<br>(0 - 0)           | 0<br>(0 - 0)             | 0<br>(0 - 0)             | 0<br>(0 - 0)             |
| Otitis media                                                       | 1<br>(0 - 1)             | 0<br>(0 - 0)          | 0<br>(0 - 0)           | 0<br>(0 - 0)             | 0<br>(0 - 0)             | 0<br>(0 - 0)             |
| Meningitis                                                         | 10<br>(8 - 12)           | 4<br>(2 - 5)          | 1<br>(0 - 1)           | 3<br>(3 - 4)             | 1<br>(1 - 1)             | 2<br>(1 - 2)             |
| Pneumococcal meningitis                                            | 2<br>(2 - 3)             | 1<br>(0 - 1)          | 0<br>(0 - 0)           | 1<br>(1 - 1)             | 0<br>(0 - 0)             | 0<br>(0 - 1)             |
| H influenzae type B meningitis                                     | 2<br>(2 - 3)             | 1<br>(1 - 2)          | 0<br>(0 - 0)           | 0<br>(0 - 1)             | 0<br>(0 - 0)             | 0<br>(0 - 0)             |
| Meningococcal meningitis                                           | 3<br>(2 - 3)             | 1<br>(1 - 2)          | 0<br>(0 - 0)           | 1<br>(0 - 1)             | 0<br>(0 - 0)             | 0<br>(0 - 1)             |
| Other meningitis                                                   | 3<br>(2 - 3)             | 1<br>(0 - 1)          | 0<br>(0 - 0)           | 1<br>(1 - 1)             | 0<br>(0 - 1)             | 1<br>(0 - 1)             |
| Encephalitis                                                       | 6<br>(5 - 9)             | 2<br>(1 - 2)          | 1<br>(0 - 1)           | 3<br>(2 - 4)             | 1<br>(0 - 1)             | 1<br>(0 - 1)             |
| Diphtheria                                                         | 0<br>(0 - 0)             | 0<br>(0 - 0)          | 0<br>(0 - 0)           | 0<br>(0 - 0)             | 0<br>(0 - 0)             | --<br>(0 - 0)            |
| Whooping cough                                                     | 1<br>(0 - 4)             | 1<br>(0 - 4)          | 0<br>(0 - 0)           | 0<br>(0 - 0)             | 0<br>(0 - 0)             | --<br>(0 - 0)            |
| Tetanus                                                            | 0<br>(0 - 0)             | 0<br>(0 - 0)          | 0<br>(0 - 0)           | 0<br>(0 - 0)             | 0<br>(0 - 0)             | 0<br>(0 - 0)             |
| Measles                                                            | 1<br>(0 - 6)             | 1<br>(0 - 5)          | 0<br>(0 - 1)           | 0<br>(0 - 0)             | 0<br>(0 - 0)             | --<br>(0 - 0)            |
| Varicella and herpes zoster                                        | 1<br>(0 - 2)             | 0<br>(0 - 1)          | 0<br>(0 - 0)           | 0<br>(0 - 1)             | 0<br>(0 - 0)             | 0<br>(0 - 1)             |
| Neglected tropical diseases and malaria                            | 2<br>(1 - 2)             | 0<br>(0 - 0)          | 0<br>(0 - 0)           | 1<br>(1 - 1)             | 0<br>(0 - 0)             | 0<br>(0 - 0)             |
| Leishmaniasis                                                      | 0<br>(0 - 1)             | 0<br>(0 - 0)          | 0<br>(0 - 0)           | 0<br>(0 - 0)             | 0<br>(0 - 0)             | 0<br>(0 - 0)             |
| Visceral leishmaniasis                                             | 0<br>(0 - 1)             | 0<br>(0 - 0)          | 0<br>(0 - 0)           | 0<br>(0 - 0)             | 0<br>(0 - 0)             | 0<br>(0 - 0)             |
| Cysticercosis                                                      | 0<br>(0 - 0)             | 0<br>(0 - 0)          | 0<br>(0 - 0)           | 0<br>(0 - 0)             | 0<br>(0 - 0)             | 0<br>(0 - 0)             |
| Cystic echinococcosis                                              | 0<br>(0 - 0)             | 0<br>(0 - 0)          | 0<br>(0 - 0)           | 0<br>(0 - 0)             | 0<br>(0 - 0)             | 0<br>(0 - 0)             |
| Dengue                                                             | 0<br>(0 - 1)             | 0<br>(0 - 0)          | 0<br>(0 - 0)           | 0<br>(0 - 0)             | 0<br>(0 - 0)             | 0<br>(0 - 0)             |
| Rabies                                                             | 0<br>(0 - 0)             | 0<br>(0 - 0)          | 0<br>(0 - 0)           | 0<br>(0 - 0)             | 0<br>(0 - 0)             | 0<br>(0 - 0)             |
| Other neglected tropical diseases                                  | 0<br>(0 - 1)             | 0<br>(0 - 0)          | 0<br>(0 - 0)           | 0<br>(0 - 0)             | 0<br>(0 - 0)             | 0<br>(0 - 0)             |
| Maternal disorders                                                 | 7<br>(5 - 8)             | --                    | 0<br>(0 - 0)           | 7<br>(5 - 8)             | --                       | --                       |
| Maternal hemorrhage                                                | 1<br>(1 - 2)             | --                    | 0<br>(0 - 0)           | 1<br>(1 - 2)             | --                       | --                       |
| Maternal sepsis and other maternal infections                      | 0<br>(0 - 1)             | --                    | 0<br>(0 - 0)           | 0<br>(0 - 1)             | --                       | --                       |
| Maternal hypertensive disorders                                    | 1<br>(1 - 1)             | --                    | 0<br>(0 - 0)           | 1<br>(1 - 1)             | --                       | --                       |
| Maternal obstructed labor                                          | 1<br>(0 - 1)             | --                    | 0<br>(0 - 0)           | 1<br>(0 - 1)             | --                       | --                       |



Web Table 31- Kuwait deaths with 95% UI by age, sex, and cause in 2013

| Cause                                                            | Both Sexes, All Ages     | Both Sexes, 0-4 Years | Both Sexes, 5-14 Years | Both Sexes, 15-49 Years | Both Sexes, 50-69 Years  | Both Sexes, 70-80 Years  |
|------------------------------------------------------------------|--------------------------|-----------------------|------------------------|-------------------------|--------------------------|--------------------------|
| Maternal abortive outcome                                        | 1<br>(1 - 1)             | --                    | 0<br>(0 - 0)           | 1<br>(1 - 1)            | --                       | --                       |
| Indirect maternal deaths                                         | 1<br>(0 - 1)             | --                    | 0<br>(0 - 0)           | 1<br>(0 - 1)            | --                       | --                       |
| Late maternal deaths                                             | 1<br>(0 - 1)             | --                    | 0<br>(0 - 0)           | 1<br>(0 - 1)            | --                       | --                       |
| Maternal deaths aggravated by HIV/AIDS                           | 0<br>(0 - 0)             | --                    | --                     | 0<br>(0 - 0)            | --                       | --                       |
| Other maternal disorders                                         | 1<br>(1 - 2)             | --                    | 0<br>(0 - 0)           | 1<br>(1 - 2)            | --                       | --                       |
| Neonatal disorders                                               | 180<br>(153 - 206)       | 180<br>(153 - 206)    | --                     | --                      | --                       | --                       |
| Neonatal preterm birth complications                             | 138<br>(104 - 165)       | 138<br>(104 - 165)    | --                     | --                      | --                       | --                       |
| Neonatal encephalopathy due to birth asphyxia and trauma         | 24<br>(17 - 37)          | 24<br>(17 - 37)       | --                     | --                      | --                       | --                       |
| Neonatal sepsis and other neonatal infections                    | 12<br>(7 - 23)           | 12<br>(7 - 23)        | --                     | --                      | --                       | --                       |
| Hemolytic disease and other neonatal jaundice                    | 0<br>(0 - 0)             | 0<br>(0 - 0)          | --                     | --                      | --                       | --                       |
| Other neonatal disorders                                         | 5<br>(3 - 9)             | 5<br>(3 - 9)          | --                     | --                      | --                       | --                       |
| Nutritional deficiencies                                         | 7<br>(6 - 10)            | 1<br>(1 - 2)          | 0<br>(0 - 0)           | 3<br>(2 - 4)            | 1<br>(1 - 1)             | 2<br>(2 - 4)             |
| Protein-energy malnutrition                                      | 1<br>(0 - 1)             | 0<br>(0 - 1)          | 0<br>(0 - 0)           | 0<br>(0 - 1)            | 0<br>(0 - 0)             | 0<br>(0 - 0)             |
| Iodine deficiency                                                | 0<br>(0 - 0)             | 0<br>(0 - 0)          | 0<br>(0 - 0)           | 0<br>(0 - 0)            | 0<br>(0 - 0)             | 0<br>(0 - 0)             |
| Iron-deficiency anemia                                           | 6<br>(5 - 9)             | 1<br>(0 - 1)          | 0<br>(0 - 0)           | 2<br>(2 - 3)            | 1<br>(1 - 1)             | 2<br>(2 - 4)             |
| Other nutritional deficiencies                                   | 0<br>(0 - 1)             | 0<br>(0 - 0)          | 0<br>(0 - 0)           | 0<br>(0 - 1)            | 0<br>(0 - 0)             | 0<br>(0 - 0)             |
| Other communicable, maternal, neonatal, and nutritional diseases | 13<br>(10 - 16)          | 2<br>(1 - 4)          | 1<br>(0 - 1)           | 5<br>(4 - 6)            | 3<br>(2 - 4)             | 2<br>(2 - 3)             |
| Sexually transmitted diseases excluding HIV                      | 2<br>(1 - 3)             | 1<br>(0 - 2)          | 0<br>(0 - 0)           | 0<br>(0 - 0)            | 0<br>(0 - 0)             | 0<br>(0 - 0)             |
| Syphilis                                                         | 1<br>(0 - 2)             | 1<br>(0 - 2)          | 0<br>(0 - 0)           | 0<br>(0 - 0)            | 0<br>(0 - 0)             | 0<br>(0 - 0)             |
| Chlamydial infection                                             | 0<br>(0 - 0)             | --                    | 0<br>(0 - 0)           | 0<br>(0 - 0)            | 0<br>(0 - 0)             | 0<br>(0 - 0)             |
| Gonococcal infection                                             | 0<br>(0 - 0)             | --                    | 0<br>(0 - 0)           | 0<br>(0 - 0)            | 0<br>(0 - 0)             | 0<br>(0 - 0)             |
| Other sexually transmitted diseases                              | 0<br>(0 - 0)             | --                    | 0<br>(0 - 0)           | 0<br>(0 - 0)            | 0<br>(0 - 0)             | 0<br>(0 - 0)             |
| Hepatitis                                                        | 6<br>(4 - 7)             | 0<br>(0 - 1)          | 0<br>(0 - 0)           | 3<br>(2 - 4)            | 2<br>(1 - 2)             | 0<br>(0 - 0)             |
| Acute hepatitis A                                                | 1<br>(0 - 1)             | 0<br>(0 - 0)          | 0<br>(0 - 0)           | 0<br>(0 - 1)            | 0<br>(0 - 0)             | 0<br>(0 - 0)             |
| Acute hepatitis B                                                | 3<br>(2 - 4)             | 0<br>(0 - 1)          | 0<br>(0 - 0)           | 1<br>(1 - 2)            | 1<br>(1 - 2)             | 0<br>(0 - 0)             |
| Acute hepatitis C                                                | 0<br>(0 - 1)             | --                    | 0<br>(0 - 0)           | 0<br>(0 - 1)            | 0<br>(0 - 0)             | 0<br>(0 - 0)             |
| Acute hepatitis E                                                | 2<br>(1 - 3)             | 0<br>(0 - 0)          | 0<br>(0 - 0)           | 1<br>(1 - 2)            | 0<br>(0 - 1)             | 0<br>(0 - 0)             |
| Other infectious diseases                                        | 6<br>(4 - 8)             | 1<br>(1 - 2)          | 0<br>(0 - 0)           | 1<br>(1 - 2)            | 1<br>(1 - 2)             | 2<br>(1 - 3)             |
| Non-communicable diseases                                        | 4,720<br>(4,482 - 4,968) | 318<br>(284 - 354)    | 43<br>(36 - 49)        | 1,004<br>(927 - 1,085)  | 1,417<br>(1,328 - 1,502) | 1,939<br>(1,869 - 2,017) |
| Neoplasms                                                        | 837<br>(773 - 917)       | 9<br>(6 - 13)         | 13<br>(10 - 16)        | 227<br>(202 - 259)      | 315<br>(289 - 345)       | 273<br>(252 - 301)       |
| Esophageal cancer                                                | 16<br>(13 - 20)          | --                    | --                     | 3<br>(2 - 4)            | 6<br>(5 - 8)             | 7<br>(5 - 9)             |
| Stomach cancer                                                   | 38<br>(33 - 43)          | --                    | --                     | 8<br>(7 - 9)            | 13<br>(11 - 16)          | 17<br>(14 - 20)          |
| Liver cancer                                                     | 62<br>(53 - 73)          | --                    | 0<br>(0 - 0)           | 9<br>(7 - 12)           | 28<br>(22 - 34)          | 25<br>(19 - 32)          |
| Liver cancer due to hepatitis B                                  | 18<br>(9 - 26)           | --                    | 0<br>(0 - 0)           | 4<br>(2 - 5)            | 9<br>(4 - 14)            | 6<br>(3 - 9)             |
| Liver cancer due to hepatitis C                                  | 31<br>(22 - 42)          | --                    | 0<br>(0 - 0)           | 4<br>(2 - 5)            | 14<br>(10 - 20)          | 13<br>(8 - 19)           |
| Liver cancer due to alcohol use                                  | 7<br>(3 - 11)            | --                    | --                     | 0<br>(0 - 1)            | 2<br>(1 - 4)             | 4<br>(2 - 7)             |
| Liver cancer due to other causes                                 | 6<br>(4 - 9)             | --                    | 0<br>(0 - 0)           | 1<br>(1 - 2)            | 3<br>(1 - 4)             | 2<br>(1 - 3)             |
| Larynx cancer                                                    | 6<br>(5 - 10)            | --                    | --                     | 1<br>(1 - 2)            | 3<br>(2 - 4)             | 3<br>(2 - 4)             |
| Tracheal, bronchus and lung cancer                               | 96<br>(85 - 116)         | --                    | --                     | 14<br>(12 - 18)         | 43<br>(38 - 53)          | 39<br>(33 - 47)          |
| Breast cancer                                                    | 102<br>(83 - 118)        | --                    | --                     | 46<br>(37 - 55)         | 43<br>(34 - 51)          | 13<br>(11 - 16)          |

Web Table 31- Kuwait deaths with 95% UI by age, sex, and cause in 2013

| Cause                                         | Both Sexes, All Ages     | Both Sexes, 0-4 Years | Both Sexes, 5-14 Years | Both Sexes, 15-49 Years | Both Sexes, 50-69 Years | Both Sexes, 70-80 Years |
|-----------------------------------------------|--------------------------|-----------------------|------------------------|-------------------------|-------------------------|-------------------------|
| Cervical cancer                               | 15<br>(11 - 18)          | --                    | --                     | 6<br>(4 - 8)            | 6<br>(4 - 8)            | 3<br>(2 - 4)            |
| Uterine cancer                                | 6<br>(2 - 8)             | --                    | --                     | 1<br>(0 - 1)            | 3<br>(1 - 5)            | 2<br>(1 - 2)            |
| Prostate cancer                               | 41<br>(26 - 57)          | --                    | --                     | 1<br>(0 - 1)            | 9<br>(5 - 13)           | 32<br>(20 - 45)         |
| Colon and rectum cancer                       | 91<br>(81 - 100)         | --                    | --                     | 22<br>(19 - 25)         | 36<br>(32 - 41)         | 32<br>(27 - 38)         |
| Lip and oral cavity cancer                    | 8<br>(6 - 11)            | --                    | --                     | 2<br>(2 - 3)            | 3<br>(2 - 4)            | 3<br>(2 - 4)            |
| Nasopharynx cancer                            | 4<br>(3 - 5)             | --                    | 0<br>(0 - 0)           | 2<br>(1 - 3)            | 2<br>(1 - 2)            | 0<br>(0 - 1)            |
| Other pharynx cancer                          | 2<br>(2 - 4)             | --                    | --                     | 1<br>(1 - 1)            | 1<br>(1 - 2)            | 1<br>(0 - 1)            |
| Gallbladder and biliary tract cancer          | 12<br>(9 - 15)           | --                    | --                     | 2<br>(1 - 2)            | 5<br>(4 - 7)            | 5<br>(4 - 7)            |
| Pancreatic cancer                             | 49<br>(44 - 55)          | --                    | --                     | 8<br>(7 - 10)           | 21<br>(18 - 25)         | 20<br>(17 - 24)         |
| Malignant skin melanoma                       | 2<br>(1 - 3)             | --                    | --                     | 1<br>(0 - 1)            | 1<br>(0 - 1)            | 0<br>(0 - 1)            |
| Non-melanoma skin cancer                      | 2<br>(1 - 2)             | --                    | --                     | 0<br>(0 - 0)            | 0<br>(0 - 1)            | 1<br>(1 - 1)            |
| Ovarian cancer                                | 18<br>(15 - 23)          | --                    | --                     | 7<br>(5 - 9)            | 8<br>(6 - 10)           | 4<br>(3 - 5)            |
| Testicular cancer                             | 2<br>(2 - 4)             | --                    | --                     | 2<br>(1 - 3)            | 0<br>(0 - 1)            | 0<br>(0 - 0)            |
| Kidney cancer                                 | 15<br>(13 - 17)          | 0<br>(0 - 0)          | 0<br>(0 - 0)           | 3<br>(2 - 4)            | 7<br>(6 - 9)            | 4<br>(3 - 6)            |
| Bladder cancer                                | 31<br>(26 - 38)          | --                    | --                     | 3<br>(2 - 4)            | 10<br>(8 - 13)          | 18<br>(14 - 23)         |
| Brain and nervous system cancer               | 37<br>(29 - 51)          | 1<br>(1 - 2)          | 2<br>(2 - 3)           | 15<br>(12 - 23)         | 13<br>(10 - 18)         | 5<br>(4 - 7)            |
| Thyroid cancer                                | 6<br>(5 - 8)             | --                    | 0<br>(0 - 0)           | 1<br>(1 - 1)            | 2<br>(2 - 3)            | 3<br>(2 - 4)            |
| Mesothelioma                                  | 1<br>(1 - 1)             | --                    | --                     | 0<br>(0 - 1)            | 0<br>(0 - 1)            | 0<br>(0 - 0)            |
| Hodgkin lymphoma                              | 3<br>(3 - 5)             | 0<br>(0 - 0)          | 0<br>(0 - 0)           | 2<br>(1 - 3)            | 1<br>(1 - 1)            | 1<br>(0 - 1)            |
| Non-Hodgkin lymphoma                          | 41<br>(34 - 51)          | 1<br>(0 - 1)          | 1<br>(1 - 1)           | 14<br>(11 - 18)         | 15<br>(11 - 19)         | 10<br>(8 - 13)          |
| Multiple myeloma                              | 10<br>(7 - 13)           | --                    | --                     | 2<br>(1 - 3)            | 4<br>(3 - 6)            | 3<br>(2 - 4)            |
| Leukemia                                      | 68<br>(60 - 75)          | 3<br>(2 - 4)          | 5<br>(4 - 7)           | 31<br>(26 - 35)         | 16<br>(14 - 19)         | 13<br>(11 - 16)         |
| Other neoplasms                               | 53<br>(40 - 77)          | 4<br>(3 - 7)          | 3<br>(2 - 5)           | 20<br>(14 - 29)         | 15<br>(11 - 22)         | 11<br>(9 - 16)          |
| Cardiovascular diseases                       | 2,371<br>(2,219 - 2,527) | 10<br>(8 - 13)        | 6<br>(4 - 7)           | 560<br>(506 - 615)      | 785<br>(726 - 848)      | 1,010<br>(952 - 1,069)  |
| Rheumatic heart disease                       | 14<br>(11 - 18)          | 0<br>(0 - 0)          | 0<br>(0 - 1)           | 6<br>(5 - 8)            | 3<br>(2 - 4)            | 4<br>(3 - 6)            |
| Ischemic heart disease                        | 1,451<br>(1,311 - 1,578) | 2<br>(2 - 3)          | 2<br>(1 - 2)           | 392<br>(342 - 436)      | 540<br>(484 - 593)      | 514<br>(463 - 575)      |
| Cerebrovascular disease                       | 543<br>(460 - 618)       | 4<br>(3 - 5)          | 2<br>(1 - 2)           | 85<br>(70 - 101)        | 132<br>(112 - 155)      | 320<br>(266 - 365)      |
| Ischemic stroke                               | 383<br>(288 - 447)       | 1<br>(0 - 1)          | 1<br>(0 - 1)           | 32<br>(21 - 41)         | 85<br>(61 - 104)        | 264<br>(203 - 309)      |
| Hemorrhagic stroke                            | 160<br>(135 - 212)       | 3<br>(2 - 4)          | 1<br>(1 - 2)           | 53<br>(42 - 65)         | 48<br>(38 - 64)         | 56<br>(42 - 84)         |
| Hypertensive heart disease                    | 223<br>(177 - 307)       | 0<br>(0 - 0)          | 0<br>(0 - 0)           | 35<br>(26 - 53)         | 69<br>(52 - 100)        | 119<br>(91 - 164)       |
| Cardiomyopathy and myocarditis                | 32<br>(26 - 41)          | 2<br>(1 - 2)          | 1<br>(1 - 1)           | 15<br>(12 - 21)         | 7<br>(5 - 9)            | 7<br>(5 - 9)            |
| Atrial fibrillation and flutter               | 5<br>(4 - 7)             | --                    | --                     | 0<br>(0 - 1)            | 1<br>(1 - 1)            | 4<br>(3 - 5)            |
| Aortic aneurysm                               | 15<br>(12 - 23)          | --                    | --                     | 3<br>(2 - 4)            | 5<br>(4 - 8)            | 7<br>(5 - 10)           |
| Peripheral vascular disease                   | 1<br>(0 - 1)             | --                    | --                     | 0<br>(0 - 0)            | 0<br>(0 - 0)            | 0<br>(0 - 1)            |
| Endocarditis                                  | 10<br>(7 - 14)           | 1<br>(0 - 1)          | 0<br>(0 - 0)           | 3<br>(2 - 4)            | 2<br>(1 - 3)            | 4<br>(3 - 7)            |
| Other cardiovascular and circulatory diseases | 77<br>(63 - 96)          | 2<br>(1 - 2)          | 1<br>(0 - 1)           | 20<br>(15 - 26)         | 25<br>(20 - 32)         | 30<br>(23 - 39)         |
| Chronic respiratory diseases                  | 236<br>(177 - 262)       | 3<br>(2 - 3)          | 1<br>(1 - 1)           | 33<br>(25 - 39)         | 62<br>(45 - 71)         | 137<br>(102 - 156)      |
| Chronic obstructive pulmonary disease         | 137<br>(95 - 157)        | 1<br>(1 - 2)          | 0<br>(0 - 0)           | 12<br>(8 - 14)          | 34<br>(23 - 42)         | 89<br>(62 - 104)        |
| Pneumoconiosis                                | 9<br>(6 - 12)            | 0<br>(0 - 0)          | 0<br>(0 - 0)           | 5<br>(3 - 7)            | 2<br>(1 - 3)            | 2<br>(1 - 3)            |
| Silicosis                                     | 2<br>(1 - 3)             | 0<br>(0 - 0)          | 0<br>(0 - 0)           | 0<br>(0 - 0)            | 0<br>(0 - 0)            | 1<br>(1 - 2)            |

Web Table 31- Kuwait deaths with 95% UI by age, sex, and cause in 2013

| Cause                                               | Both Sexes, All Ages | Both Sexes, 0-4 Years | Both Sexes, 5-14 Years | Both Sexes, 15-49 Years | Both Sexes, 50-69 Years | Both Sexes, 70-80 Years |
|-----------------------------------------------------|----------------------|-----------------------|------------------------|-------------------------|-------------------------|-------------------------|
| Asbestosis                                          | 1<br>(1 - 1)         | 0<br>(0 - 0)          | 0<br>(0 - 0)           | 1<br>(0 - 1)            | 0<br>(0 - 0)            | 0<br>(0 - 0)            |
| Coal workers pneumoconiosis                         | 0<br>(0 - 0)         | 0<br>(0 - 0)          | 0<br>(0 - 0)           | 0<br>(0 - 0)            | 0<br>(0 - 0)            | 0<br>(0 - 0)            |
| Other pneumoconiosis                                | 7<br>(4 - 9)         | 0<br>(0 - 0)          | 0<br>(0 - 0)           | 4<br>(3 - 6)            | 2<br>(1 - 3)            | 1<br>(0 - 1)            |
| Asthma                                              | 37<br>(27 - 44)      | 1<br>(1 - 1)          | 1<br>(0 - 1)           | 11<br>(8 - 13)          | 9<br>(6 - 11)           | 16<br>(12 - 20)         |
| Interstitial lung disease and pulmonary sarcoidosis | 47<br>(33 - 59)      | 0<br>(0 - 0)          | 0<br>(0 - 0)           | 4<br>(2 - 5)            | 15<br>(11 - 20)         | 28<br>(18 - 36)         |
| Other chronic respiratory diseases                  | 6<br>(5 - 7)         | 1<br>(0 - 1)          | 0<br>(0 - 0)           | 2<br>(2 - 3)            | 1<br>(1 - 1)            | 2<br>(2 - 3)            |
| Cirrhosis                                           | 117<br>(107 - 128)   | 1<br>(0 - 1)          | 0<br>(0 - 1)           | 36<br>(32 - 42)         | 51<br>(45 - 57)         | 29<br>(25 - 33)         |
| Cirrhosis due to hepatitis B                        | 41<br>(23 - 61)      | 0<br>(0 - 0)          | 0<br>(0 - 0)           | 13<br>(7 - 20)          | 18<br>(10 - 28)         | 10<br>(6 - 16)          |
| Cirrhosis due to hepatitis C                        | 43<br>(22 - 72)      | 0<br>(0 - 0)          | 0<br>(0 - 0)           | 13<br>(5 - 24)          | 19<br>(10 - 34)         | 11<br>(7 - 16)          |
| Cirrhosis due to alcohol use                        | 18<br>(10 - 27)      | --                    | --                     | 4<br>(2 - 7)            | 8<br>(4 - 12)           | 6<br>(3 - 10)           |
| Cirrhosis due to other causes                       | 14<br>(8 - 25)       | 0<br>(0 - 1)          | 0<br>(0 - 0)           | 7<br>(3 - 12)           | 5<br>(2 - 10)           | 2<br>(1 - 4)            |
| Digestive diseases                                  | 57<br>(51 - 68)      | 1<br>(1 - 1)          | 1<br>(1 - 1)           | 13<br>(12 - 16)         | 15<br>(13 - 18)         | 28<br>(24 - 34)         |
| Peptic ulcer disease                                | 12<br>(10 - 16)      | 0<br>(0 - 0)          | 0<br>(0 - 0)           | 2<br>(1 - 2)            | 3<br>(3 - 4)            | 7<br>(5 - 10)           |
| Gastritis and duodenitis                            | 0<br>(0 - 0)         | 0<br>(0 - 0)          | 0<br>(0 - 0)           | 0<br>(0 - 0)            | 0<br>(0 - 0)            | 0<br>(0 - 0)            |
| Appendicitis                                        | 2<br>(1 - 3)         | 0<br>(0 - 0)          | 0<br>(0 - 0)           | 1<br>(0 - 1)            | 1<br>(0 - 1)            | 1<br>(1 - 1)            |
| Paralytic ileus and intestinal obstruction          | 11<br>(8 - 17)       | 0<br>(0 - 0)          | 0<br>(0 - 0)           | 2<br>(2 - 3)            | 3<br>(2 - 4)            | 6<br>(4 - 10)           |
| Inguinal, femoral, and abdominal hernia             | 1<br>(0 - 1)         | 0<br>(0 - 0)          | 0<br>(0 - 0)           | 0<br>(0 - 0)            | 0<br>(0 - 0)            | 0<br>(0 - 1)            |
| Inflammatory bowel disease                          | 2<br>(1 - 2)         | 0<br>(0 - 0)          | 0<br>(0 - 0)           | 1<br>(0 - 1)            | 0<br>(0 - 1)            | 1<br>(0 - 1)            |
| Vascular intestinal disorders                       | 8<br>(5 - 13)        | 0<br>(0 - 0)          | 0<br>(0 - 0)           | 1<br>(1 - 2)            | 2<br>(1 - 4)            | 5<br>(3 - 7)            |
| Gallbladder and biliary diseases                    | 6<br>(4 - 8)         | 0<br>(0 - 0)          | 0<br>(0 - 0)           | 1<br>(1 - 1)            | 2<br>(1 - 2)            | 4<br>(2 - 5)            |
| Pancreatitis                                        | 9<br>(7 - 12)        | 0<br>(0 - 0)          | 0<br>(0 - 0)           | 4<br>(3 - 5)            | 3<br>(2 - 4)            | 2<br>(2 - 4)            |
| Other digestive diseases                            | 5<br>(4 - 6)         | 0<br>(0 - 0)          | 0<br>(0 - 0)           | 1<br>(1 - 2)            | 1<br>(1 - 2)            | 2<br>(2 - 3)            |
| Neurological disorders                              | 259<br>(216 - 305)   | 6<br>(5 - 8)          | 3<br>(2 - 4)           | 19<br>(15 - 23)         | 31<br>(25 - 37)         | 200<br>(161 - 243)      |
| Alzheimer disease and other dementias               | 217<br>(176 - 262)   | --                    | --                     | 0<br>(0 - 1)            | 26<br>(20 - 33)         | 191<br>(153 - 234)      |
| Parkinson disease                                   | 7<br>(5 - 13)        | --                    | --                     | 0<br>(0 - 0)            | 1<br>(1 - 2)            | 6<br>(4 - 10)           |
| Epilepsy                                            | 22<br>(17 - 27)      | 2<br>(1 - 2)          | 2<br>(1 - 3)           | 15<br>(11 - 18)         | 2<br>(2 - 3)            | 1<br>(1 - 2)            |
| Multiple sclerosis                                  | 1<br>(1 - 2)         | --                    | --                     | 1<br>(1 - 1)            | 0<br>(0 - 0)            | 0<br>(0 - 0)            |
| Other neurological disorders                        | 11<br>(10 - 14)      | 5<br>(4 - 6)          | 1<br>(1 - 1)           | 3<br>(2 - 4)            | 1<br>(1 - 2)            | 1<br>(1 - 2)            |
| Mental and substance use disorders                  | 11<br>(9 - 18)       | 0<br>(0 - 1)          | 0<br>(0 - 0)           | 8<br>(7 - 13)           | 2<br>(1 - 3)            | 1<br>(1 - 2)            |
| Schizophrenia                                       | 0<br>(0 - 0)         | --                    | --                     | 0<br>(0 - 0)            | 0<br>(0 - 0)            | 0<br>(0 - 0)            |
| Alcohol use disorders                               | 1<br>(1 - 3)         | --                    | --                     | 1<br>(0 - 2)            | 0<br>(0 - 1)            | 0<br>(0 - 0)            |
| Drug use disorders                                  | 9<br>(8 - 15)        | 0<br>(0 - 1)          | --                     | 6<br>(5 - 10)           | 2<br>(1 - 2)            | 1<br>(1 - 2)            |
| Opioid use disorders                                | 5<br>(4 - 8)         | 0<br>(0 - 0)          | --                     | 4<br>(3 - 6)            | 1<br>(1 - 1)            | 1<br>(0 - 1)            |
| Cocaine use disorders                               | 0<br>(0 - 0)         | 0<br>(0 - 0)          | --                     | 0<br>(0 - 0)            | 0<br>(0 - 0)            | 0<br>(0 - 0)            |
| Amphetamine use disorders                           | 0<br>(0 - 0)         | 0<br>(0 - 0)          | --                     | 0<br>(0 - 0)            | 0<br>(0 - 0)            | 0<br>(0 - 0)            |
| Other drug use disorders                            | 4<br>(3 - 6)         | 0<br>(0 - 0)          | --                     | 3<br>(2 - 4)            | 1<br>(1 - 1)            | 0<br>(0 - 1)            |
| Eating disorders                                    | 1<br>(1 - 1)         | --                    | 0<br>(0 - 0)           | 1<br>(1 - 1)            | --                      | --                      |
| Anorexia nervosa                                    | 1<br>(1 - 1)         | --                    | 0<br>(0 - 0)           | 1<br>(1 - 1)            | --                      | --                      |
| Diabetes, urogenital, blood, and endocrine diseases | 497<br>(453 - 614)   | 15<br>(12 - 22)       | 6<br>(4 - 7)           | 79<br>(69 - 107)        | 148<br>(132 - 180)      | 249<br>(223 - 305)      |
| Diabetes mellitus                                   | 222<br>(201 - 246)   | 1<br>(1 - 2)          | 0<br>(0 - 1)           | 24<br>(21 - 28)         | 74<br>(65 - 84)         | 122<br>(107 - 141)      |

Web Table 31- Kuwait deaths with 95% UI by age, sex, and cause in 2013

| Cause                                               | Both Sexes, All Ages | Both Sexes, 0-4 Years | Both Sexes, 5-14 Years | Both Sexes, 15-49 Years | Both Sexes, 50-69 Years | Both Sexes, 70-80 Years |
|-----------------------------------------------------|----------------------|-----------------------|------------------------|-------------------------|-------------------------|-------------------------|
| Acute glomerulonephritis                            | 1<br>(0 - 1)         | 0<br>(0 - 0)          | 0<br>(0 - 0)           | 0<br>(0 - 0)            | 0<br>(0 - 0)            | 0<br>(0 - 1)            |
| Chronic kidney disease                              | 212<br>(181 - 314)   | 2<br>(2 - 3)          | 2<br>(1 - 2)           | 35<br>(29 - 56)         | 65<br>(54 - 93)         | 109<br>(90 - 162)       |
| Chronic kidney disease due to diabetes mellitus     | 33<br>(22 - 54)      | 0<br>(0 - 1)          | 0<br>(0 - 0)           | 5<br>(3 - 8)            | 10<br>(7 - 16)          | 18<br>(11 - 29)         |
| Chronic kidney disease due to hypertension          | 101<br>(80 - 148)    | 1<br>(0 - 1)          | 0<br>(0 - 1)           | 16<br>(13 - 25)         | 32<br>(25 - 45)         | 51<br>(39 - 76)         |
| Chronic kidney disease due to glomerulonephritis    | 1<br>(0 - 1)         | 0<br>(0 - 0)          | 0<br>(0 - 0)           | 0<br>(0 - 1)            | 0<br>(0 - 0)            | 0<br>(0 - 0)            |
| Chronic kidney disease due to other causes          | 78<br>(57 - 143)     | 1<br>(1 - 2)          | 1<br>(1 - 1)           | 13<br>(9 - 27)          | 22<br>(15 - 41)         | 40<br>(27 - 72)         |
| Urinary diseases and male infertility               | 19<br>(10 - 24)      | 1<br>(0 - 1)          | 0<br>(0 - 0)           | 3<br>(2 - 4)            | 4<br>(2 - 5)            | 11<br>(5 - 15)          |
| Interstitial nephritis and urinary tract infections | 11<br>(5 - 15)       | 1<br>(0 - 1)          | 0<br>(0 - 0)           | 2<br>(1 - 2)            | 2<br>(1 - 3)            | 7<br>(3 - 10)           |
| Urolithiasis                                        | 1<br>(1 - 2)         | --                    | 0<br>(0 - 0)           | 0<br>(0 - 1)            | 0<br>(0 - 1)            | 0<br>(0 - 1)            |
| Other urinary diseases                              | 6<br>(3 - 9)         | 0<br>(0 - 0)          | 0<br>(0 - 0)           | 1<br>(0 - 1)            | 1<br>(1 - 2)            | 4<br>(2 - 6)            |
| Gynecological diseases                              | 0<br>(0 - 0)         | --                    | --                     | 0<br>(0 - 0)            | 0<br>(0 - 0)            | 0<br>(0 - 0)            |
| Uterine fibroids                                    | 0<br>(0 - 0)         | --                    | --                     | 0<br>(0 - 0)            | 0<br>(0 - 0)            | 0<br>(0 - 0)            |
| Polycystic ovarian syndrome                         | 0<br>(0 - 0)         | --                    | --                     | 0<br>(0 - 0)            | 0<br>(0 - 0)            | --                      |
| Endometriosis                                       | 0<br>(0 - 0)         | --                    | --                     | 0<br>(0 - 0)            | 0<br>(0 - 0)            | --                      |
| Genital prolapse                                    | 0<br>(0 - 0)         | --                    | --                     | 0<br>(0 - 0)            | 0<br>(0 - 0)            | 0<br>(0 - 0)            |
| Other gynecological diseases                        | 0<br>(0 - 0)         | --                    | --                     | 0<br>(0 - 0)            | 0<br>(0 - 0)            | 0<br>(0 - 0)            |
| Hemoglobinopathies and hemolytic anemias            | 14<br>(11 - 20)      | 3<br>(2 - 4)          | 1<br>(1 - 2)           | 7<br>(5 - 9)            | 1<br>(1 - 2)            | 2<br>(1 - 3)            |
| Thalassemias                                        | 3<br>(2 - 4)         | 1<br>(1 - 2)          | 0<br>(0 - 1)           | 2<br>(1 - 2)            | 0<br>(0 - 0)            | 0<br>(0 - 0)            |
| Sickle cell disorders                               | 8<br>(6 - 11)        | 1<br>(1 - 2)          | 1<br>(0 - 1)           | 5<br>(3 - 6)            | 1<br>(1 - 2)            | 0<br>(0 - 0)            |
| G6PD deficiency                                     | 0<br>(0 - 0)         | 0<br>(0 - 0)          | 0<br>(0 - 0)           | 0<br>(0 - 0)            | 0<br>(0 - 0)            | 0<br>(0 - 0)            |
| Other hemoglobinopathies and hemolytic anemias      | 3<br>(2 - 4)         | 0<br>(0 - 1)          | 0<br>(0 - 0)           | 1<br>(0 - 1)            | 0<br>(0 - 1)            | 2<br>(1 - 2)            |
| Endocrine, metabolic, blood, and immune disorders   | 30<br>(24 - 46)      | 9<br>(6 - 14)         | 2<br>(1 - 3)           | 10<br>(8 - 15)          | 5<br>(4 - 7)            | 5<br>(3 - 8)            |
| Musculoskeletal disorders                           | 15<br>(13 - 18)      | --                    | 1<br>(1 - 1)           | 7<br>(6 - 9)            | 3<br>(2 - 3)            | 4<br>(3 - 6)            |
| Rheumatoid arthritis                                | 1<br>(1 - 2)         | --                    | 0<br>(0 - 0)           | 0<br>(0 - 0)            | 0<br>(0 - 0)            | 0<br>(0 - 1)            |
| Other musculoskeletal disorders                     | 14<br>(12 - 16)      | --                    | 1<br>(0 - 1)           | 7<br>(5 - 8)            | 2<br>(2 - 3)            | 4<br>(3 - 5)            |
| Other non-communicable diseases                     | 320<br>(285 - 355)   | 272<br>(241 - 307)    | 13<br>(10 - 16)        | 20<br>(16 - 23)         | 6<br>(5 - 7)            | 8<br>(7 - 10)           |
| Congenital anomalies                                | 300<br>(267 - 337)   | 258<br>(228 - 291)    | 13<br>(10 - 16)        | 19<br>(15 - 22)         | 5<br>(4 - 6)            | 5<br>(4 - 7)            |
| Neural tube defects                                 | 7<br>(3 - 10)        | 6<br>(3 - 10)         | 0<br>(0 - 0)           | 0<br>(0 - 0)            | 0<br>(0 - 0)            | 0<br>(0 - 0)            |
| Congenital heart anomalies                          | 126<br>(108 - 147)   | 111<br>(93 - 132)     | 6<br>(4 - 8)           | 8<br>(6 - 9)            | 1<br>(1 - 2)            | 1<br>(0 - 1)            |
| Cleft lip and cleft palate                          | 0<br>(0 - 0)         | 0<br>(0 - 0)          | --                     | --                      | --                      | --                      |
| Down syndrome                                       | 7<br>(5 - 10)        | 5<br>(3 - 7)          | 1<br>(0 - 1)           | 2<br>(1 - 2)            | 0<br>(0 - 0)            | 0<br>(0 - 0)            |
| Chromosomal unbalanced rearrangements               | 11<br>(7 - 16)       | 9<br>(6 - 14)         | 0<br>(0 - 0)           | 1<br>(1 - 1)            | 0<br>(0 - 0)            | 0<br>(0 - 0)            |
| Other congenital anomalies                          | 149<br>(126 - 171)   | 127<br>(106 - 148)    | 6<br>(4 - 8)           | 9<br>(7 - 11)           | 3<br>(3 - 4)            | 4<br>(3 - 5)            |
| Skin and subcutaneous diseases                      | 6<br>(5 - 7)         | 1<br>(0 - 1)          | 0<br>(0 - 0)           | 1<br>(1 - 1)            | 1<br>(1 - 1)            | 3<br>(2 - 4)            |
| Cellulitis                                          | 1<br>(1 - 2)         | 0<br>(0 - 0)          | 0<br>(0 - 0)           | 0<br>(0 - 0)            | 0<br>(0 - 0)            | 1<br>(0 - 1)            |
| Pyoderma                                            | 3<br>(2 - 4)         | 0<br>(0 - 1)          | 0<br>(0 - 0)           | 0<br>(0 - 0)            | 0<br>(0 - 1)            | 2<br>(1 - 2)            |
| Decubitus ulcer                                     | 2<br>(1 - 2)         | 0<br>(0 - 0)          | 0<br>(0 - 0)           | 0<br>(0 - 0)            | 0<br>(0 - 0)            | 1<br>(1 - 1)            |
| Other skin and subcutaneous diseases                | 0<br>(0 - 0)         | 0<br>(0 - 0)          | 0<br>(0 - 0)           | 0<br>(0 - 0)            | 0<br>(0 - 0)            | 0<br>(0 - 0)            |
| Sudden infant death syndrome                        | 13<br>(6 - 24)       | 13<br>(6 - 24)        | --                     | --                      | --                      | --                      |
| Injuries                                            | 841<br>(770 - 916)   | 41<br>(33 - 51)       | 34<br>(28 - 39)        | 595<br>(541 - 649)      | 110<br>(97 - 125)       | 61<br>(54 - 69)         |

Web Table 31- Kuwait deaths with 95% UI by age, sex, and cause in 2013

| Cause                                           | Both Sexes, All Ages | Both Sexes, 0-4 Years | Both Sexes, 5-14 Years | Both Sexes, 15-49 Years | Both Sexes, 50-69 Years | Both Sexes, 70-80 Years |
|-------------------------------------------------|----------------------|-----------------------|------------------------|-------------------------|-------------------------|-------------------------|
| Transport injuries                              | 505<br>(457 - 558)   | 18<br>(14 - 24)       | 22<br>(18 - 26)        | 358<br>(317 - 397)      | 72<br>(62 - 85)         | 35<br>(28 - 42)         |
| Road injuries                                   | 486<br>(438 - 542)   | 17<br>(13 - 23)       | 21<br>(17 - 25)        | 346<br>(309 - 387)      | 69<br>(59 - 83)         | 33<br>(26 - 41)         |
| Pedestrian road injuries                        | 118<br>(90 - 152)    | 7<br>(5 - 10)         | 9<br>(7 - 11)          | 66<br>(48 - 87)         | 22<br>(16 - 30)         | 14<br>(10 - 19)         |
| Cyclist road injuries                           | 36<br>(28 - 44)      | 2<br>(1 - 2)          | 3<br>(2 - 3)           | 19<br>(14 - 24)         | 9<br>(6 - 11)           | 4<br>(3 - 6)            |
| Motorcyclist road injuries                      | 53<br>(37 - 69)      | 1<br>(0 - 1)          | 1<br>(0 - 1)           | 45<br>(31 - 60)         | 4<br>(3 - 6)            | 2<br>(1 - 3)            |
| Motor vehicle road injuries                     | 278<br>(239 - 332)   | 8<br>(5 - 10)         | 9<br>(7 - 11)          | 216<br>(185 - 254)      | 34<br>(27 - 46)         | 12<br>(9 - 18)          |
| Other road injuries                             | 1<br>(1 - 1)         | 0<br>(0 - 0)          | 0<br>(0 - 0)           | 0<br>(0 - 0)            | 0<br>(0 - 0)            | 0<br>(0 - 0)            |
| Other transport injuries                        | 20<br>(7 - 27)       | 1<br>(0 - 2)          | 1<br>(0 - 2)           | 12<br>(4 - 17)          | 3<br>(1 - 5)            | 2<br>(1 - 4)            |
| Unintentional injuries                          | 235<br>(208 - 265)   | 22<br>(17 - 28)       | 10<br>(8 - 12)         | 151<br>(132 - 173)      | 29<br>(25 - 34)         | 23<br>(19 - 27)         |
| Falls                                           | 73<br>(50 - 91)      | 4<br>(2 - 5)          | 2<br>(1 - 2)           | 50<br>(34 - 65)         | 10<br>(7 - 13)          | 7<br>(5 - 9)            |
| Drowning                                        | 27<br>(21 - 49)      | 3<br>(2 - 6)          | 2<br>(2 - 4)           | 18<br>(13 - 32)         | 2<br>(2 - 4)            | 1<br>(1 - 2)            |
| Fire, heat, and hot substances                  | 35<br>(23 - 47)      | 3<br>(2 - 5)          | 2<br>(1 - 3)           | 22<br>(15 - 31)         | 4<br>(3 - 6)            | 3<br>(2 - 5)            |
| Poisonings                                      | 18<br>(11 - 23)      | 2<br>(1 - 2)          | 1<br>(0 - 1)           | 14<br>(8 - 18)          | 1<br>(1 - 2)            | 1<br>(0 - 1)            |
| Exposure to mechanical forces                   | 28<br>(22 - 36)      | 1<br>(1 - 1)          | 1<br>(1 - 1)           | 23<br>(17 - 30)         | 3<br>(2 - 3)            | 1<br>(0 - 1)            |
| Unintentional firearm injuries                  | 0<br>(0 - 1)         | 0<br>(0 - 0)          | 0<br>(0 - 0)           | 0<br>(0 - 0)            | 0<br>(0 - 0)            | 0<br>(0 - 0)            |
| Unintentional suffocation                       | 1<br>(1 - 1)         | 0<br>(0 - 0)          | 0<br>(0 - 0)           | 0<br>(0 - 0)            | 0<br>(0 - 0)            | 0<br>(0 - 0)            |
| Other exposure to mechanical forces             | 27<br>(20 - 34)      | 1<br>(0 - 1)          | 1<br>(1 - 1)           | 23<br>(17 - 29)         | 2<br>(2 - 3)            | 1<br>(0 - 1)            |
| Adverse effects of medical treatment            | 23<br>(18 - 32)      | 2<br>(2 - 4)          | 1<br>(0 - 1)           | 8<br>(7 - 12)           | 6<br>(4 - 8)            | 6<br>(4 - 8)            |
| Animal contact                                  | 1<br>(1 - 1)         | 0<br>(0 - 0)          | 0<br>(0 - 0)           | 0<br>(0 - 1)            | 0<br>(0 - 0)            | 0<br>(0 - 0)            |
| Venomous animal contact                         | 0<br>(0 - 0)         | 0<br>(0 - 0)          | 0<br>(0 - 0)           | 0<br>(0 - 0)            | 0<br>(0 - 0)            | 0<br>(0 - 0)            |
| Non-venomous animal contact                     | 1<br>(0 - 1)         | 0<br>(0 - 0)          | 0<br>(0 - 0)           | 0<br>(0 - 0)            | 0<br>(0 - 0)            | 0<br>(0 - 0)            |
| Foreign body                                    | 19<br>(13 - 26)      | 7<br>(4 - 9)          | 1<br>(1 - 2)           | 6<br>(4 - 8)            | 2<br>(1 - 2)            | 4<br>(2 - 5)            |
| Pulmonary aspiration and foreign body in airway | 19<br>(12 - 25)      | 7<br>(4 - 9)          | 1<br>(1 - 2)           | 5<br>(3 - 8)            | 1<br>(1 - 2)            | 4<br>(2 - 5)            |
| Foreign body in other body part                 | 0<br>(0 - 1)         | 0<br>(0 - 0)          | 0<br>(0 - 0)           | 0<br>(0 - 0)            | 0<br>(0 - 0)            | 0<br>(0 - 0)            |
| Other unintentional injuries                    | 11<br>(8 - 15)       | 0<br>(0 - 1)          | 0<br>(0 - 1)           | 8<br>(6 - 12)           | 1<br>(1 - 2)            | 1<br>(0 - 1)            |
| Self-harm and interpersonal violence            | 101<br>(82 - 127)    | 1<br>(1 - 2)          | 1<br>(1 - 2)           | 86<br>(70 - 110)        | 9<br>(7 - 12)           | 3<br>(2 - 4)            |
| Self-harm                                       | 61<br>(43 - 74)      | --                    | 0<br>(0 - 1)           | 53<br>(38 - 64)         | 6<br>(3 - 7)            | 2<br>(2 - 3)            |
| Interpersonal violence                          | 39<br>(29 - 62)      | 1<br>(1 - 2)          | 1<br>(0 - 1)           | 33<br>(24 - 54)         | 4<br>(2 - 6)            | 1<br>(0 - 1)            |
| Assault by firearm                              | 19<br>(12 - 33)      | 0<br>(0 - 0)          | 0<br>(0 - 0)           | 17<br>(10 - 29)         | 2<br>(1 - 4)            | 0<br>(0 - 0)            |
| Assault by sharp object                         | 16<br>(9 - 27)       | 0<br>(0 - 0)          | 0<br>(0 - 1)           | 14<br>(8 - 25)          | 1<br>(0 - 2)            | 0<br>(0 - 0)            |
| Assault by other means                          | 4<br>(3 - 7)         | 1<br>(0 - 1)          | 0<br>(0 - 0)           | 2<br>(2 - 4)            | 1<br>(0 - 1)            | 0<br>(0 - 1)            |

Web Table 31- Kuwait deaths with 95% UI by age, sex, and cause in 2013

| Cause                                                              | Males, All Ages          | Males, 0-4 Years   | Males, 5-14 Years | Males, 15-49 Years       | Males, 50-69 Years       | Males, 70-80 Years       |
|--------------------------------------------------------------------|--------------------------|--------------------|-------------------|--------------------------|--------------------------|--------------------------|
| All causes                                                         | 4,216<br>(3,951 - 4,486) | 321<br>(286 - 358) | 51<br>(46 - 56)   | 1,251<br>(1,142 - 1,372) | 1,098<br>(1,007 - 1,188) | 1,494<br>(1,426 - 1,560) |
| Communicable, maternal, neonatal, and nutritional diseases         | 380<br>(322 - 434)       | 130<br>(110 - 150) | 10<br>(6 - 16)    | 68<br>(55 - 86)          | 36<br>(28 - 43)          | 138<br>(103 - 174)       |
| HIV/AIDS and tuberculosis                                          | 40<br>(33 - 52)          | 1<br>(0 - 1)       | 0<br>(0 - 0)      | 24<br>(19 - 29)          | 7<br>(5 - 8)             | 8<br>(6 - 17)            |
| Tuberculosis                                                       | 16<br>(14 - 20)          | 0<br>(0 - 0)       | 0<br>(0 - 0)      | 5<br>(4 - 6)             | 4<br>(3 - 5)             | 8<br>(6 - 11)            |
| HIV/AIDS                                                           | 24<br>(18 - 35)          | 1<br>(0 - 1)       | 0<br>(0 - 0)      | 19<br>(15 - 24)          | 3<br>(2 - 4)             | 1<br>(0 - 10)            |
| HIV/AIDS resulting in mycobacterial infection                      | 1<br>(1 - 2)             | 0<br>(0 - 0)       | 0<br>(0 - 0)      | 1<br>(1 - 1)             | 0<br>(0 - 0)             | 0<br>(0 - 1)             |
| HIV/AIDS resulting in other diseases                               | 22<br>(17 - 33)          | 1<br>(0 - 1)       | 0<br>(0 - 0)      | 18<br>(14 - 22)          | 3<br>(2 - 4)             | 1<br>(0 - 9)             |
| Diarrrhea, lower respiratory, and other common infectious diseases | 228<br>(174 - 278)       | 27<br>(19 - 37)    | 9<br>(5 - 15)     | 39<br>(28 - 56)          | 27<br>(19 - 34)          | 126<br>(91 - 161)        |
| Diarrheal diseases                                                 | 4<br>(3 - 5)             | 2<br>(1 - 3)       | 0<br>(0 - 0)      | 1<br>(1 - 1)             | 0<br>(0 - 0)             | 1<br>(1 - 2)             |
| Intestinal infectious diseases                                     | 28<br>(9 - 60)           | 7<br>(2 - 15)      | 6<br>(2 - 13)     | 13<br>(4 - 31)           | 2<br>(0 - 4)             | 0<br>(0 - 1)             |
| Typhoid fever                                                      | 22<br>(7 - 46)           | 5<br>(2 - 12)      | 5<br>(2 - 10)     | 10<br>(3 - 23)           | 1<br>(0 - 3)             | 0<br>(0 - 1)             |
| Paratyphoid fever                                                  | 6<br>(2 - 14)            | 2<br>(1 - 4)       | 1<br>(0 - 3)      | 3<br>(1 - 8)             | 0<br>(0 - 1)             | 0<br>(0 - 0)             |
| Other intestinal infectious diseases                               | 0<br>(0 - 2)             | 0<br>(0 - 1)       | 0<br>(0 - 0)      | 0<br>(0 - 1)             | 0<br>(0 - 0)             | 0<br>(0 - 0)             |
| Lower respiratory infections                                       | 184<br>(140 - 221)       | 14<br>(10 - 20)    | 2<br>(1 - 3)      | 21<br>(16 - 26)          | 23<br>(16 - 30)          | 123<br>(88 - 158)        |
| Upper respiratory infections                                       | 0<br>(0 - 0)             | 0<br>(0 - 0)       | 0<br>(0 - 0)      | 0<br>(0 - 0)             | 0<br>(0 - 0)             | 0<br>(0 - 0)             |
| Otitis media                                                       | 0<br>(0 - 0)             | 0<br>(0 - 0)       | 0<br>(0 - 0)      | 0<br>(0 - 0)             | 0<br>(0 - 0)             | 0<br>(0 - 0)             |
| Meningitis                                                         | 6<br>(5 - 7)             | 2<br>(1 - 3)       | 0<br>(0 - 0)      | 2<br>(2 - 3)             | 1<br>(0 - 1)             | 1<br>(1 - 1)             |
| Pneumococcal meningitis                                            | 1<br>(1 - 2)             | 0<br>(0 - 1)       | 0<br>(0 - 0)      | 1<br>(0 - 1)             | 0<br>(0 - 0)             | 0<br>(0 - 0)             |
| H influenzae type B meningitis                                     | 1<br>(1 - 2)             | 1<br>(0 - 1)       | 0<br>(0 - 0)      | 0<br>(0 - 0)             | 0<br>(0 - 0)             | 0<br>(0 - 0)             |
| Meningococcal meningitis                                           | 2<br>(1 - 2)             | 1<br>(0 - 1)       | 0<br>(0 - 0)      | 1<br>(0 - 1)             | 0<br>(0 - 0)             | 0<br>(0 - 0)             |
| Other meningitis                                                   | 2<br>(1 - 2)             | 0<br>(0 - 1)       | 0<br>(0 - 0)      | 1<br>(0 - 1)             | 0<br>(0 - 0)             | 0<br>(0 - 1)             |
| Encephalitis                                                       | 3<br>(2 - 5)             | 1<br>(0 - 1)       | 0<br>(0 - 0)      | 2<br>(1 - 3)             | 0<br>(0 - 1)             | 0<br>(0 - 1)             |
| Diphtheria                                                         | 0<br>(0 - 0)             | 0<br>(0 - 0)       | 0<br>(0 - 0)      | 0<br>(0 - 0)             | 0<br>(0 - 0)             | --<br>(0 - 0)            |
| Whooping cough                                                     | 0<br>(0 - 2)             | 0<br>(0 - 2)       | 0<br>(0 - 0)      | 0<br>(0 - 0)             | 0<br>(0 - 0)             | 0<br>(0 - 0)             |
| Tetanus                                                            | 0<br>(0 - 0)             | 0<br>(0 - 0)       | 0<br>(0 - 0)      | 0<br>(0 - 0)             | 0<br>(0 - 0)             | 0<br>(0 - 0)             |
| Measles                                                            | 1<br>(0 - 3)             | 0<br>(0 - 2)       | 0<br>(0 - 0)      | 0<br>(0 - 0)             | 0<br>(0 - 0)             | --<br>(0 - 0)            |
| Varicella and herpes zoster                                        | 1<br>(0 - 1)             | 0<br>(0 - 1)       | 0<br>(0 - 0)      | 0<br>(0 - 1)             | 0<br>(0 - 0)             | 0<br>(0 - 1)             |
| Neglected tropical diseases and malaria                            | 1<br>(1 - 1)             | 0<br>(0 - 0)       | 0<br>(0 - 0)      | 1<br>(0 - 1)             | 0<br>(0 - 0)             | 0<br>(0 - 0)             |
| Leishmaniasis                                                      | 0<br>(0 - 1)             | 0<br>(0 - 0)       | 0<br>(0 - 0)      | 0<br>(0 - 0)             | 0<br>(0 - 0)             | 0<br>(0 - 0)             |
| Visceral leishmaniasis                                             | 0<br>(0 - 1)             | 0<br>(0 - 0)       | 0<br>(0 - 0)      | 0<br>(0 - 0)             | 0<br>(0 - 0)             | 0<br>(0 - 0)             |
| Cysticercosis                                                      | 0<br>(0 - 0)             | 0<br>(0 - 0)       | 0<br>(0 - 0)      | 0<br>(0 - 0)             | 0<br>(0 - 0)             | 0<br>(0 - 0)             |
| Cystic echinococcosis                                              | 0<br>(0 - 0)             | 0<br>(0 - 0)       | 0<br>(0 - 0)      | 0<br>(0 - 0)             | 0<br>(0 - 0)             | 0<br>(0 - 0)             |
| Dengue                                                             | 0<br>(0 - 0)             | 0<br>(0 - 0)       | 0<br>(0 - 0)      | 0<br>(0 - 0)             | 0<br>(0 - 0)             | 0<br>(0 - 0)             |
| Rabies                                                             | 0<br>(0 - 0)             | 0<br>(0 - 0)       | 0<br>(0 - 0)      | 0<br>(0 - 0)             | 0<br>(0 - 0)             | 0<br>(0 - 0)             |
| Other neglected tropical diseases                                  | 0<br>(0 - 0)             | 0<br>(0 - 0)       | 0<br>(0 - 0)      | 0<br>(0 - 0)             | 0<br>(0 - 0)             | 0<br>(0 - 0)             |
| Maternal disorders                                                 | --                       | --                 | --                | --                       | --                       | --                       |
| Maternal hemorrhage                                                | --                       | --                 | --                | --                       | --                       | --                       |
| Maternal sepsis and other maternal infections                      | --                       | --                 | --                | --                       | --                       | --                       |
| Maternal hypertensive disorders                                    | --                       | --                 | --                | --                       | --                       | --                       |
| Maternal obstructed labor                                          | --                       | --                 | --                | --                       | --                       | --                       |

Web Table 31- Kuwait deaths with 95% UI by age, sex, and cause in 2013

| Cause                                                            | Males, All Ages          | Males, 0-4 Years   | Males, 5-14 Years | Males, 15-49 Years | Males, 50-69 Years   | Males, 70-80 Years       |
|------------------------------------------------------------------|--------------------------|--------------------|-------------------|--------------------|----------------------|--------------------------|
| Maternal abortive outcome                                        | --                       | --                 | --                | --                 | --                   | --                       |
| Indirect maternal deaths                                         | --                       | --                 | --                | --                 | --                   | --                       |
| Late maternal deaths                                             | --                       | --                 | --                | --                 | --                   | --                       |
| Maternal deaths aggravated by HIV/AIDS                           | --                       | --                 | --                | --                 | --                   | --                       |
| Other maternal disorders                                         | --                       | --                 | --                | --                 | --                   | --                       |
| Neonatal disorders                                               | 101<br>(84 - 116)        | 101<br>(84 - 116)  | --                | --                 | --                   | --                       |
| Neonatal preterm birth complications                             | 78<br>(56 - 95)          | 78<br>(56 - 95)    | --                | --                 | --                   | --                       |
| Neonatal encephalopathy due to birth asphyxia and trauma         | 14<br>(9 - 24)           | 14<br>(9 - 24)     | --                | --                 | --                   | --                       |
| Neonatal sepsis and other neonatal infections                    | 7<br>(3 - 15)            | 7<br>(3 - 15)      | --                | --                 | --                   | --                       |
| Hemolytic disease and other neonatal jaundice                    | 0<br>(0 - 0)             | 0<br>(0 - 0)       | --                | --                 | --                   | --                       |
| Other neonatal disorders                                         | 2<br>(1 - 5)             | 2<br>(1 - 5)       | --                | --                 | --                   | --                       |
| Nutritional deficiencies                                         | 3<br>(2 - 6)             | 0<br>(0 - 1)       | 0<br>(0 - 0)      | 1<br>(1 - 2)       | 0<br>(0 - 1)         | 1<br>(1 - 3)             |
| Protein-energy malnutrition                                      | 0<br>(0 - 1)             | 0<br>(0 - 0)       | 0<br>(0 - 0)      | 0<br>(0 - 0)       | 0<br>(0 - 0)         | 0<br>(0 - 0)             |
| Iodine deficiency                                                | 0<br>(0 - 0)             | 0<br>(0 - 0)       | 0<br>(0 - 0)      | 0<br>(0 - 0)       | 0<br>(0 - 0)         | 0<br>(0 - 0)             |
| Iron-deficiency anemia                                           | 2<br>(2 - 5)             | 0<br>(0 - 0)       | 0<br>(0 - 0)      | 1<br>(0 - 1)       | 0<br>(0 - 1)         | 1<br>(1 - 3)             |
| Other nutritional deficiencies                                   | 0<br>(0 - 1)             | 0<br>(0 - 0)       | 0<br>(0 - 0)      | 0<br>(0 - 0)       | 0<br>(0 - 0)         | 0<br>(0 - 0)             |
| Other communicable, maternal, neonatal, and nutritional diseases | 8<br>(6 - 10)            | 1<br>(1 - 2)       | 0<br>(0 - 0)      | 3<br>(2 - 4)       | 2<br>(2 - 3)         | 2<br>(1 - 2)             |
| Sexually transmitted diseases excluding HIV                      | 1<br>(0 - 1)             | 0<br>(0 - 1)       | 0<br>(0 - 0)      | 0<br>(0 - 0)       | 0<br>(0 - 0)         | 0<br>(0 - 0)             |
| Syphilis                                                         | 1<br>(0 - 1)             | 0<br>(0 - 1)       | 0<br>(0 - 0)      | 0<br>(0 - 0)       | 0<br>(0 - 0)         | 0<br>(0 - 0)             |
| Chlamydial infection                                             | --                       | --                 | --                | --                 | --                   | --                       |
| Gonococcal infection                                             | 0<br>(0 - 0)             | --                 | 0<br>(0 - 0)      | 0<br>(0 - 0)       | 0<br>(0 - 0)         | 0<br>(0 - 0)             |
| Other sexually transmitted diseases                              | 0<br>(0 - 0)             | --                 | 0<br>(0 - 0)      | 0<br>(0 - 0)       | 0<br>(0 - 0)         | 0<br>(0 - 0)             |
| Hepatitis                                                        | 4<br>(3 - 6)             | 0<br>(0 - 1)       | 0<br>(0 - 0)      | 2<br>(2 - 3)       | 1<br>(1 - 2)         | 0<br>(0 - 0)             |
| Acute hepatitis A                                                | 0<br>(0 - 1)             | 0<br>(0 - 0)       | 0<br>(0 - 0)      | 0<br>(0 - 1)       | 0<br>(0 - 0)         | 0<br>(0 - 0)             |
| Acute hepatitis B                                                | 2<br>(1 - 4)             | 0<br>(0 - 0)       | 0<br>(0 - 0)      | 1<br>(0 - 2)       | 1<br>(1 - 1)         | 0<br>(0 - 0)             |
| Acute hepatitis C                                                | 0<br>(0 - 1)             | --                 | 0<br>(0 - 0)      | 0<br>(0 - 0)       | 0<br>(0 - 0)         | 0<br>(0 - 0)             |
| Acute hepatitis E                                                | 1<br>(1 - 2)             | 0<br>(0 - 0)       | 0<br>(0 - 0)      | 1<br>(0 - 2)       | 0<br>(0 - 0)         | 0<br>(0 - 0)             |
| Other infectious diseases                                        | 4<br>(2 - 5)             | 0<br>(0 - 1)       | 0<br>(0 - 0)      | 1<br>(0 - 1)       | 1<br>(0 - 1)         | 1<br>(1 - 2)             |
| Non-communicable diseases                                        | 3,151<br>(2,950 - 3,383) | 167<br>(144 - 191) | 20<br>(16 - 24)   | 684<br>(617 - 761) | 971<br>(891 - 1,056) | 1,308<br>(1,242 - 1,380) |
| Neoplasms                                                        | 491<br>(442 - 557)       | 5<br>(3 - 8)       | 7<br>(5 - 9)      | 106<br>(91 - 128)  | 178<br>(159 - 203)   | 194<br>(175 - 219)       |
| Esophageal cancer                                                | 10<br>(8 - 15)           | --                 | --                | 2<br>(1 - 3)       | 4<br>(3 - 5)         | 5<br>(3 - 8)             |
| Stomach cancer                                                   | 27<br>(23 - 31)          | --                 | --                | 4<br>(3 - 6)       | 10<br>(8 - 12)       | 13<br>(10 - 16)          |
| Liver cancer                                                     | 47<br>(38 - 57)          | --                 | 0<br>(0 - 0)      | 7<br>(5 - 9)       | 22<br>(16 - 28)      | 18<br>(14 - 25)          |
| Liver cancer due to hepatitis B                                  | 13<br>(5 - 21)           | --                 | 0<br>(0 - 0)      | 3<br>(1 - 4)       | 7<br>(2 - 11)        | 4<br>(1 - 7)             |
| Liver cancer due to hepatitis C                                  | 25<br>(15 - 36)          | --                 | 0<br>(0 - 0)      | 3<br>(2 - 5)       | 12<br>(7 - 17)       | 10<br>(5 - 16)           |
| Liver cancer due to alcohol use                                  | 5<br>(2 - 10)            | --                 | --                | 0<br>(0 - 1)       | 2<br>(1 - 4)         | 3<br>(1 - 7)             |
| Liver cancer due to other causes                                 | 3<br>(2 - 6)             | --                 | 0<br>(0 - 0)      | 1<br>(0 - 1)       | 1<br>(1 - 3)         | 1<br>(0 - 2)             |
| Larynx cancer                                                    | 6<br>(4 - 9)             | --                 | --                | 1<br>(1 - 1)       | 2<br>(2 - 3)         | 2<br>(2 - 4)             |
| Tracheal, bronchus and lung cancer                               | 74<br>(65 - 90)          | --                 | --                | 9<br>(7 - 12)      | 33<br>(28 - 41)      | 32<br>(27 - 39)          |
| Breast cancer                                                    | 1<br>(1 - 1)             | --                 | --                | 0<br>(0 - 0)       | 0<br>(0 - 0)         | 0<br>(0 - 0)             |

Web Table 31- Kuwait deaths with 95% UI by age, sex, and cause in 2013

| Cause                                         | Males, All Ages          | Males, 0-4 Years | Males, 5-14 Years | Males, 15-49 Years | Males, 50-69 Years | Males, 70-80 Years |
|-----------------------------------------------|--------------------------|------------------|-------------------|--------------------|--------------------|--------------------|
| Cervical cancer                               | --                       | --               | --                | --                 | --                 | --                 |
| Uterine cancer                                | --                       | --               | --                | --                 | --                 | --                 |
| Prostate cancer                               | 41<br>(26 - 57)          | --               | --                | 1<br>(0 - 1)       | 9<br>(5 - 13)      | 32<br>(20 - 45)    |
| Colon and rectum cancer                       | 56<br>(49 - 64)          | --               | --                | 12<br>(10 - 14)    | 22<br>(19 - 26)    | 22<br>(18 - 27)    |
| Lip and oral cavity cancer                    | 5<br>(4 - 7)             | --               | --                | 1<br>(1 - 2)       | 2<br>(1 - 3)       | 2<br>(1 - 3)       |
| Nasopharynx cancer                            | 3<br>(3 - 4)             | --               | 0<br>(0 - 0)      | 1<br>(1 - 2)       | 1<br>(1 - 2)       | 0<br>(0 - 1)       |
| Other pharynx cancer                          | 2<br>(1 - 3)             | --               | --                | 1<br>(0 - 1)       | 1<br>(1 - 1)       | 0<br>(0 - 1)       |
| Gallbladder and biliary tract cancer          | 5<br>(4 - 7)             | --               | --                | 1<br>(0 - 1)       | 2<br>(2 - 3)       | 2<br>(2 - 4)       |
| Pancreatic cancer                             | 32<br>(28 - 38)          | --               | --                | 5<br>(4 - 7)       | 13<br>(11 - 16)    | 14<br>(11 - 17)    |
| Malignant skin melanoma                       | 1<br>(1 - 3)             | --               | --                | 0<br>(0 - 1)       | 0<br>(0 - 1)       | 0<br>(0 - 1)       |
| Non-melanoma skin cancer                      | 1<br>(1 - 2)             | --               | --                | 0<br>(0 - 0)       | 0<br>(0 - 0)       | 1<br>(0 - 1)       |
| Ovarian cancer                                | --                       | --               | --                | --                 | --                 | --                 |
| Testicular cancer                             | 2<br>(2 - 4)             | --               | --                | 2<br>(1 - 3)       | 0<br>(0 - 1)       | 0<br>(0 - 0)       |
| Kidney cancer                                 | 11<br>(9 - 13)           | 0<br>(0 - 0)     | 0<br>(0 - 0)      | 2<br>(1 - 3)       | 5<br>(4 - 7)       | 3<br>(2 - 5)       |
| Bladder cancer                                | 24<br>(20 - 31)          | --               | --                | 2<br>(1 - 3)       | 8<br>(6 - 10)      | 15<br>(11 - 19)    |
| Brain and nervous system cancer               | 24<br>(17 - 38)          | 1<br>(0 - 2)     | 1<br>(1 - 2)      | 11<br>(7 - 18)     | 8<br>(6 - 13)      | 3<br>(2 - 5)       |
| Thyroid cancer                                | 2<br>(2 - 3)             | --               | 0<br>(0 - 0)      | 0<br>(0 - 1)       | 1<br>(1 - 1)       | 1<br>(1 - 1)       |
| Mesothelioma                                  | 1<br>(1 - 1)             | --               | --                | 0<br>(0 - 1)       | 0<br>(0 - 1)       | 0<br>(0 - 0)       |
| Hodgkin lymphoma                              | 2<br>(2 - 3)             | 0<br>(0 - 0)     | 0<br>(0 - 0)      | 1<br>(1 - 2)       | 1<br>(0 - 1)       | 0<br>(0 - 1)       |
| Non-Hodgkin lymphoma                          | 28<br>(21 - 37)          | 0<br>(0 - 1)     | 1<br>(0 - 1)      | 10<br>(7 - 13)     | 10<br>(7 - 13)     | 7<br>(5 - 10)      |
| Multiple myeloma                              | 6<br>(4 - 9)             | --               | --                | 1<br>(1 - 2)       | 3<br>(2 - 4)       | 2<br>(1 - 3)       |
| Leukemia                                      | 45<br>(39 - 51)          | 1<br>(1 - 2)     | 3<br>(2 - 4)      | 20<br>(16 - 24)    | 11<br>(9 - 13)     | 10<br>(8 - 13)     |
| Other neoplasms                               | 32<br>(23 - 48)          | 2<br>(1 - 4)     | 2<br>(1 - 3)      | 12<br>(8 - 18)     | 9<br>(6 - 14)      | 7<br>(5 - 11)      |
| Cardiovascular diseases                       | 1,715<br>(1,573 - 1,853) | 5<br>(4 - 6)     | 3<br>(2 - 3)      | 449<br>(400 - 501) | 592<br>(536 - 652) | 667<br>(618 - 715) |
| Rheumatic heart disease                       | 8<br>(5 - 11)            | 0<br>(0 - 0)     | 0<br>(0 - 0)      | 3<br>(2 - 5)       | 2<br>(1 - 3)       | 2<br>(1 - 4)       |
| Ischemic heart disease                        | 1,144<br>(1,008 - 1,265) | 1<br>(1 - 2)     | 1<br>(1 - 1)      | 339<br>(287 - 382) | 442<br>(387 - 492) | 361<br>(315 - 410) |
| Cerebrovascular disease                       | 344<br>(277 - 413)       | 2<br>(1 - 2)     | 1<br>(1 - 1)      | 54<br>(42 - 70)    | 83<br>(66 - 104)   | 204<br>(161 - 245) |
| Ischemic stroke                               | 242<br>(180 - 294)       | 0<br>(0 - 0)     | 0<br>(0 - 0)      | 20<br>(13 - 28)    | 52<br>(37 - 67)    | 169<br>(125 - 205) |
| Hemorrhagic stroke                            | 101<br>(76 - 140)        | 1<br>(1 - 2)     | 1<br>(0 - 1)      | 33<br>(24 - 45)    | 31<br>(22 - 44)    | 35<br>(24 - 57)    |
| Hypertensive heart disease                    | 135<br>(97 - 205)        | 0<br>(0 - 0)     | 0<br>(0 - 0)      | 26<br>(17 - 41)    | 44<br>(30 - 70)    | 66<br>(44 - 103)   |
| Cardiomyopathy and myocarditis                | 23<br>(17 - 31)          | 1<br>(0 - 1)     | 0<br>(0 - 1)      | 12<br>(9 - 18)     | 5<br>(4 - 7)       | 5<br>(3 - 7)       |
| Atrial fibrillation and flutter               | 4<br>(3 - 6)             | --               | --                | 0<br>(0 - 0)       | 1<br>(0 - 1)       | 3<br>(2 - 5)       |
| Aortic aneurysm                               | 13<br>(10 - 20)          | --               | --                | 2<br>(1 - 3)       | 5<br>(4 - 8)       | 6<br>(5 - 9)       |
| Peripheral vascular disease                   | 0<br>(0 - 0)             | --               | --                | 0<br>(0 - 0)       | 0<br>(0 - 0)       | 0<br>(0 - 0)       |
| Endocarditis                                  | 7<br>(4 - 10)            | 0<br>(0 - 0)     | 0<br>(0 - 0)      | 2<br>(1 - 3)       | 3<br>(1 - 2)       | 3<br>(2 - 5)       |
| Other cardiovascular and circulatory diseases | 38<br>(30 - 53)          | 1<br>(0 - 1)     | 0<br>(0 - 0)      | 11<br>(8 - 16)     | 9<br>(7 - 14)      | 16<br>(12 - 23)    |
| Chronic respiratory diseases                  | 171<br>(118 - 195)       | 1<br>(1 - 2)     | 0<br>(0 - 1)      | 21<br>(15 - 26)    | 45<br>(30 - 53)    | 103<br>(71 - 121)  |
| Chronic obstructive pulmonary disease         | 107<br>(71 - 125)        | 0<br>(0 - 1)     | 0<br>(0 - 0)      | 8<br>(5 - 10)      | 26<br>(16 - 32)    | 72<br>(48 - 86)    |
| Pneumoconiosis                                | 9<br>(5 - 12)            | 0<br>(0 - 0)     | 0<br>(0 - 0)      | 5<br>(3 - 7)       | 2<br>(1 - 3)       | 2<br>(1 - 3)       |
| Silicosis                                     | 2<br>(1 - 2)             | 0<br>(0 - 0)     | 0<br>(0 - 0)      | 0<br>(0 - 0)       | 0<br>(0 - 0)       | 1<br>(1 - 2)       |



Web Table 31- Kuwait deaths with 95% UI by age, sex, and cause in 2013

| Cause                                               | Males, All Ages    | Males, 0-4 Years | Males, 5-14 Years | Males, 15-49 Years | Males, 50-69 Years | Males, 70-80 Years |
|-----------------------------------------------------|--------------------|------------------|-------------------|--------------------|--------------------|--------------------|
| Asbestosis                                          | 1<br>(0 - 1)       | 0<br>(0 - 0)     | 0<br>(0 - 0)      | 1<br>(0 - 1)       | 0<br>(0 - 0)       | 0<br>(0 - 0)       |
| Coal workers pneumoconiosis                         | 0<br>(0 - 0)       | 0<br>(0 - 0)     | 0<br>(0 - 0)      | 0<br>(0 - 0)       | 0<br>(0 - 0)       | 0<br>(0 - 0)       |
| Other pneumoconiosis                                | 7<br>(4 - 9)       | 0<br>(0 - 0)     | 0<br>(0 - 0)      | 4<br>(3 - 6)       | 2<br>(1 - 3)       | 1<br>(0 - 1)       |
| Asthma                                              | 20<br>(14 - 25)    | 1<br>(0 - 1)     | 0<br>(0 - 0)      | 6<br>(4 - 7)       | 5<br>(3 - 6)       | 9<br>(6 - 12)      |
| Interstitial lung disease and pulmonary sarcoidosis | 31<br>(19 - 41)    | 0<br>(0 - 0)     | 0<br>(0 - 0)      | 2<br>(1 - 2)       | 11<br>(7 - 15)     | 18<br>(10 - 26)    |
| Other chronic respiratory diseases                  | 4<br>(2 - 5)       | 0<br>(0 - 1)     | 0<br>(0 - 0)      | 1<br>(1 - 1)       | 1<br>(0 - 1)       | 2<br>(1 - 2)       |
| Cirrhosis                                           | 86<br>(77 - 97)    | 0<br>(0 - 0)     | 0<br>(0 - 0)      | 28<br>(24 - 33)    | 38<br>(33 - 44)    | 20<br>(16 - 23)    |
| Cirrhosis due to hepatitis B                        | 31<br>(13 - 50)    | 0<br>(0 - 0)     | 0<br>(0 - 0)      | 10<br>(4 - 17)     | 14<br>(5 - 23)     | 7<br>(3 - 12)      |
| Cirrhosis due to hepatitis C                        | 28<br>(10 - 54)    | 0<br>(0 - 0)     | 0<br>(0 - 0)      | 9<br>(2 - 20)      | 13<br>(4 - 26)     | 6<br>(3 - 11)      |
| Cirrhosis due to alcohol use                        | 17<br>(9 - 26)     | --               | --                | 4<br>(1 - 7)       | 7<br>(4 - 12)      | 5<br>(2 - 9)       |
| Cirrhosis due to other causes                       | 11<br>(6 - 22)     | 0<br>(0 - 0)     | 0<br>(0 - 0)      | 5<br>(2 - 10)      | 4<br>(2 - 9)       | 1<br>(1 - 3)       |
| Digestive diseases                                  | 34<br>(29 - 42)    | 0<br>(0 - 1)     | 0<br>(0 - 0)      | 8<br>(7 - 11)      | 9<br>(7 - 11)      | 16<br>(13 - 21)    |
| Peptic ulcer disease                                | 8<br>(6 - 11)      | 0<br>(0 - 0)     | 0<br>(0 - 0)      | 1<br>(1 - 2)       | 2<br>(2 - 3)       | 5<br>(3 - 7)       |
| Gastritis and duodenitis                            | 0<br>(0 - 0)       | 0<br>(0 - 0)     | 0<br>(0 - 0)      | 0<br>(0 - 0)       | 0<br>(0 - 0)       | 0<br>(0 - 0)       |
| Appendicitis                                        | 1<br>(1 - 2)       | 0<br>(0 - 0)     | 0<br>(0 - 0)      | 0<br>(0 - 1)       | 0<br>(0 - 1)       | 0<br>(0 - 1)       |
| Paralytic ileus and intestinal obstruction          | 6<br>(4 - 11)      | 0<br>(0 - 0)     | 0<br>(0 - 0)      | 1<br>(1 - 2)       | 1<br>(1 - 3)       | 3<br>(2 - 6)       |
| Inguinal, femoral, and abdominal hernia             | 0<br>(0 - 1)       | 0<br>(0 - 0)     | 0<br>(0 - 0)      | 0<br>(0 - 0)       | 0<br>(0 - 0)       | 0<br>(0 - 0)       |
| Inflammatory bowel disease                          | 1<br>(1 - 1)       | 0<br>(0 - 0)     | 0<br>(0 - 0)      | 0<br>(0 - 0)       | 0<br>(0 - 0)       | 0<br>(0 - 1)       |
| Vascular intestinal disorders                       | 4<br>(2 - 7)       | 0<br>(0 - 0)     | 0<br>(0 - 0)      | 1<br>(0 - 1)       | 1<br>(0 - 2)       | 2<br>(1 - 4)       |
| Gallbladder and biliary diseases                    | 3<br>(2 - 5)       | 0<br>(0 - 0)     | 0<br>(0 - 0)      | 1<br>(0 - 1)       | 1<br>(0 - 1)       | 2<br>(1 - 3)       |
| Pancreatitis                                        | 7<br>(5 - 10)      | 0<br>(0 - 0)     | 0<br>(0 - 0)      | 3<br>(2 - 4)       | 2<br>(1 - 3)       | 2<br>(1 - 3)       |
| Other digestive diseases                            | 3<br>(2 - 5)       | 0<br>(0 - 0)     | 0<br>(0 - 0)      | 1<br>(1 - 1)       | 1<br>(1 - 1)       | 2<br>(1 - 2)       |
| Neurological disorders                              | 180<br>(140 - 224) | 3<br>(2 - 5)     | 1<br>(1 - 2)      | 11<br>(9 - 15)     | 19<br>(14 - 25)    | 145<br>(108 - 187) |
| Alzheimer disease and other dementias               | 155<br>(117 - 198) | --               | --                | 0<br>(0 - 1)       | 16<br>(11 - 22)    | 138<br>(102 - 181) |
| Parkinson disease                                   | 5<br>(4 - 11)      | --               | --                | 0<br>(0 - 0)       | 1<br>(1 - 2)       | 4<br>(3 - 9)       |
| Epilepsy                                            | 13<br>(9 - 17)     | 1<br>(1 - 1)     | 1<br>(1 - 1)      | 9<br>(6 - 12)      | 1<br>(1 - 2)       | 1<br>(1 - 1)       |
| Multiple sclerosis                                  | 0<br>(0 - 1)       | --               | --                | 0<br>(0 - 1)       | 0<br>(0 - 0)       | 0<br>(0 - 0)       |
| Other neurological disorders                        | 6<br>(5 - 10)      | 2<br>(1 - 4)     | 0<br>(0 - 0)      | 2<br>(2 - 3)       | 1<br>(1 - 1)       | 1<br>(1 - 2)       |
| Mental and substance use disorders                  | 8<br>(6 - 15)      | 0<br>(0 - 0)     | 0<br>(0 - 0)      | 5<br>(4 - 10)      | 2<br>(1 - 3)       | 1<br>(1 - 2)       |
| Schizophrenia                                       | 0<br>(0 - 0)       | --               | --                | 0<br>(0 - 0)       | 0<br>(0 - 0)       | 0<br>(0 - 0)       |
| Alcohol use disorders                               | 1<br>(1 - 3)       | --               | --                | 1<br>(0 - 2)       | 0<br>(0 - 1)       | 0<br>(0 - 0)       |
| Drug use disorders                                  | 7<br>(5 - 12)      | 0<br>(0 - 0)     | --                | 4<br>(3 - 8)       | 1<br>(1 - 2)       | 1<br>(1 - 1)       |
| Opioid use disorders                                | 4<br>(3 - 7)       | 0<br>(0 - 0)     | --                | 2<br>(2 - 5)       | 1<br>(0 - 1)       | 0<br>(0 - 1)       |
| Cocaine use disorders                               | 0<br>(0 - 0)       | 0<br>(0 - 0)     | --                | 0<br>(0 - 0)       | 0<br>(0 - 0)       | 0<br>(0 - 0)       |
| Amphetamine use disorders                           | 0<br>(0 - 0)       | 0<br>(0 - 0)     | --                | 0<br>(0 - 0)       | 0<br>(0 - 0)       | 0<br>(0 - 0)       |
| Other drug use disorders                            | 3<br>(2 - 5)       | 0<br>(0 - 0)     | --                | 2<br>(1 - 3)       | 1<br>(0 - 1)       | 0<br>(0 - 1)       |
| Eating disorders                                    | 0<br>(0 - 0)       | --               | 0<br>(0 - 0)      | 0<br>(0 - 0)       | --                 | --                 |
| Anorexia nervosa                                    | 0<br>(0 - 0)       | --               | 0<br>(0 - 0)      | 0<br>(0 - 0)       | --                 | --                 |
| Diabetes, urogenital, blood, and endocrine diseases | 290<br>(255 - 379) | 7<br>(5 - 12)    | 2<br>(2 - 3)      | 42<br>(35 - 62)    | 83<br>(71 - 108)   | 155<br>(133 - 200) |
| Diabetes mellitus                                   | 128<br>(112 - 147) | 0<br>(0 - 1)     | 0<br>(0 - 0)      | 13<br>(11 - 16)    | 41<br>(35 - 49)    | 73<br>(61 - 88)    |

Web Table 31- Kuwait deaths with 95% UI by age, sex, and cause in 2013

| Cause                                               | Males, All Ages    | Males, 0-4 Years   | Males, 5-14 Years | Males, 15-49 Years | Males, 50-69 Years | Males, 70-80 Years |
|-----------------------------------------------------|--------------------|--------------------|-------------------|--------------------|--------------------|--------------------|
| Acute glomerulonephritis                            | 0<br>(0 - 1)       | 0<br>(0 - 0)       | 0<br>(0 - 0)      | 0<br>(0 - 0)       | 0<br>(0 - 0)       | 0<br>(0 - 0)       |
| Chronic kidney disease                              | 128<br>(102 - 212) | 1<br>(1 - 2)       | 1<br>(0 - 1)      | 19<br>(15 - 36)    | 37<br>(28 - 61)    | 70<br>(54 - 112)   |
| Chronic kidney disease due to diabetes mellitus     | 21<br>(12 - 43)    | 0<br>(0 - 0)       | 0<br>(0 - 0)      | 3<br>(2 - 6)       | 6<br>(3 - 11)      | 12<br>(6 - 24)     |
| Chronic kidney disease due to hypertension          | 58<br>(40 - 98)    | 0<br>(0 - 1)       | 0<br>(0 - 0)      | 8<br>(6 - 15)      | 18<br>(12 - 29)    | 32<br>(21 - 54)    |
| Chronic kidney disease due to glomerulonephritis    | 1<br>(0 - 1)       | 0<br>(0 - 0)       | 0<br>(0 - 0)      | 0<br>(0 - 0)       | 0<br>(0 - 0)       | 0<br>(0 - 0)       |
| Chronic kidney disease due to other causes          | 47<br>(30 - 100)   | 1<br>(0 - 1)       | 0<br>(0 - 0)      | 8<br>(4 - 18)      | 13<br>(7 - 30)     | 26<br>(15 - 50)    |
| Urinary diseases and male infertility               | 11<br>(6 - 15)     | 0<br>(0 - 0)       | 0<br>(0 - 0)      | 1<br>(1 - 2)       | 2<br>(1 - 3)       | 8<br>(4 - 11)      |
| Interstitial nephritis and urinary tract infections | 6<br>(2 - 8)       | 0<br>(0 - 0)       | 0<br>(0 - 0)      | 1<br>(0 - 1)       | 1<br>(0 - 1)       | 4<br>(2 - 6)       |
| Urolithiasis                                        | 1<br>(0 - 1)       | --                 | 0<br>(0 - 0)      | 0<br>(0 - 0)       | 0<br>(0 - 0)       | 0<br>(0 - 0)       |
| Other urinary diseases                              | 5<br>(2 - 8)       | 0<br>(0 - 0)       | 0<br>(0 - 0)      | 1<br>(0 - 1)       | 1<br>(1 - 2)       | 3<br>(2 - 5)       |
| Gynecological diseases                              | --                 | --                 | --                | --                 | --                 | --                 |
| Uterine fibroids                                    | --                 | --                 | --                | --                 | --                 | --                 |
| Polycystic ovarian syndrome                         | --                 | --                 | --                | --                 | --                 | --                 |
| Endometriosis                                       | --                 | --                 | --                | --                 | --                 | --                 |
| Genital prolapse                                    | --                 | --                 | --                | --                 | --                 | --                 |
| Other gynecological diseases                        | --                 | --                 | --                | --                 | --                 | --                 |
| Hemoglobinopathies and hemolytic anemias            | 6<br>(4 - 10)      | 1<br>(1 - 2)       | 1<br>(0 - 1)      | 3<br>(2 - 5)       | 1<br>(0 - 1)       | 1<br>(1 - 2)       |
| Thalassemias                                        | 1<br>(1 - 2)       | 0<br>(0 - 1)       | 0<br>(0 - 0)      | 1<br>(0 - 1)       | 0<br>(0 - 0)       | 0<br>(0 - 0)       |
| Sickle cell disorders                               | 3<br>(2 - 5)       | 0<br>(0 - 1)       | 0<br>(0 - 0)      | 2<br>(1 - 3)       | 1<br>(0 - 1)       | 0<br>(0 - 0)       |
| G6PD deficiency                                     | 0<br>(0 - 0)       | 0<br>(0 - 0)       | 0<br>(0 - 0)      | 0<br>(0 - 0)       | 0<br>(0 - 0)       | 0<br>(0 - 0)       |
| Other hemoglobinopathies and hemolytic anemias      | 2<br>(1 - 3)       | 0<br>(0 - 0)       | 0<br>(0 - 0)      | 0<br>(0 - 0)       | 0<br>(0 - 0)       | 1<br>(1 - 2)       |
| Endocrine, metabolic, blood, and immune disorders   | 16<br>(12 - 28)    | 5<br>(3 - 8)       | 1<br>(1 - 2)      | 5<br>(3 - 9)       | 3<br>(2 - 5)       | 3<br>(2 - 6)       |
| Musculoskeletal disorders                           | 5<br>(4 - 7)       | --                 | 0<br>(0 - 0)      | 2<br>(1 - 2)       | 1<br>(1 - 1)       | 2<br>(2 - 4)       |
| Rheumatoid arthritis                                | 1<br>(0 - 1)       | --                 | 0<br>(0 - 0)      | 0<br>(0 - 0)       | 0<br>(0 - 0)       | 0<br>(0 - 0)       |
| Other musculoskeletal disorders                     | 5<br>(3 - 6)       | --                 | 0<br>(0 - 0)      | 2<br>(1 - 2)       | 1<br>(1 - 1)       | 2<br>(1 - 3)       |
| Other non-communicable diseases                     | 171<br>(148 - 195) | 145<br>(124 - 167) | 6<br>(5 - 8)      | 12<br>(9 - 14)     | 4<br>(3 - 4)       | 5<br>(4 - 6)       |
| Congenital anomalies                                | 162<br>(139 - 186) | 138<br>(117 - 160) | 6<br>(5 - 8)      | 11<br>(9 - 14)     | 3<br>(2 - 4)       | 3<br>(2 - 4)       |
| Neural tube defects                                 | 3<br>(1 - 4)       | 2<br>(1 - 4)       | 0<br>(0 - 0)      | 0<br>(0 - 0)       | 0<br>(0 - 0)       | 0<br>(0 - 0)       |
| Congenital heart anomalies                          | 65<br>(51 - 80)    | 56<br>(43 - 71)    | 3<br>(2 - 4)      | 5<br>(3 - 6)       | 1<br>(0 - 1)       | 1<br>(0 - 1)       |
| Cleft lip and cleft palate                          | 0<br>(0 - 0)       | 0<br>(0 - 0)       | --                | --                 | --                 | --                 |
| Down syndrome                                       | 4<br>(3 - 7)       | 3<br>(1 - 5)       | 0<br>(0 - 1)      | 1<br>(1 - 2)       | 0<br>(0 - 0)       | 0<br>(0 - 0)       |
| Chromosomal unbalanced rearrangements               | 5<br>(3 - 7)       | 4<br>(3 - 6)       | 0<br>(0 - 0)      | 0<br>(0 - 0)       | 0<br>(0 - 0)       | 0<br>(0 - 0)       |
| Other congenital anomalies                          | 85<br>(68 - 103)   | 72<br>(57 - 89)    | 3<br>(2 - 5)      | 5<br>(3 - 6)       | 2<br>(2 - 3)       | 3<br>(2 - 4)       |
| Skin and subcutaneous diseases                      | 3<br>(2 - 4)       | 0<br>(0 - 0)       | 0<br>(0 - 0)      | 0<br>(0 - 1)       | 0<br>(0 - 1)       | 2<br>(1 - 2)       |
| Cellulitis                                          | 1<br>(0 - 1)       | 0<br>(0 - 0)       | 0<br>(0 - 0)      | 0<br>(0 - 0)       | 0<br>(0 - 0)       | 0<br>(0 - 1)       |
| Pyoderma                                            | 2<br>(1 - 2)       | 0<br>(0 - 0)       | 0<br>(0 - 0)      | 0<br>(0 - 0)       | 0<br>(0 - 0)       | 1<br>(1 - 2)       |
| Decubitus ulcer                                     | 0<br>(0 - 1)       | 0<br>(0 - 0)       | 0<br>(0 - 0)      | 0<br>(0 - 0)       | 0<br>(0 - 0)       | 0<br>(0 - 0)       |
| Other skin and subcutaneous diseases                | 0<br>(0 - 0)       | 0<br>(0 - 0)       | 0<br>(0 - 0)      | 0<br>(0 - 0)       | 0<br>(0 - 0)       | 0<br>(0 - 0)       |
| Sudden infant death syndrome                        | 7<br>(3 - 14)      | 7<br>(3 - 14)      | --                | --                 | --                 | --                 |
| Injuries                                            | 684<br>(615 - 752) | 25<br>(18 - 32)    | 21<br>(17 - 25)   | 499<br>(446 - 553) | 91<br>(79 - 106)   | 48<br>(40 - 55)    |

Web Table 31- Kuwait deaths with 95% UI by age, sex, and cause in 2013

| Cause                                           | Males, All Ages    | Males, 0-4 Years | Males, 5-14 Years | Males, 15-49 Years | Males, 50-69 Years | Males, 70-80 Years |
|-------------------------------------------------|--------------------|------------------|-------------------|--------------------|--------------------|--------------------|
| Transport injuries                              | 428<br>(379 - 479) | 11<br>(8 - 16)   | 15<br>(12 - 18)   | 310<br>(271 - 348) | 62<br>(52 - 75)    | 30<br>(23 - 37)    |
| Road injuries                                   | 412<br>(366 - 465) | 11<br>(7 - 15)   | 15<br>(12 - 18)   | 300<br>(263 - 339) | 59<br>(49 - 72)    | 28<br>(22 - 36)    |
| Pedestrian road injuries                        | 97<br>(70 - 131)   | 5<br>(3 - 7)     | 6<br>(5 - 8)      | 56<br>(39 - 77)    | 19<br>(13 - 26)    | 12<br>(8 - 17)     |
| Cyclist road injuries                           | 31<br>(23 - 39)    | 1<br>(1 - 2)     | 2<br>(1 - 3)      | 16<br>(12 - 21)    | 8<br>(5 - 10)      | 4<br>(3 - 6)       |
| Motorcyclist road injuries                      | 49<br>(33 - 65)    | 1<br>(0 - 1)     | 1<br>(0 - 1)      | 42<br>(28 - 57)    | 4<br>(2 - 6)       | 2<br>(1 - 3)       |
| Motor vehicle road injuries                     | 234<br>(198 - 289) | 4<br>(2 - 6)     | 5<br>(4 - 7)      | 186<br>(157 - 222) | 29<br>(22 - 41)    | 10<br>(7 - 16)     |
| Other road injuries                             | 1<br>(0 - 1)       | 0<br>(0 - 0)     | 0<br>(0 - 0)      | 0<br>(0 - 0)       | 0<br>(0 - 0)       | 0<br>(0 - 0)       |
| Other transport injuries                        | 16<br>(5 - 23)     | 1<br>(0 - 1)     | 1<br>(0 - 1)      | 11<br>(3 - 15)     | 2<br>(1 - 4)       | 2<br>(0 - 3)       |
| Unintentional injuries                          | 180<br>(156 - 205) | 13<br>(9 - 17)   | 5<br>(4 - 7)      | 124<br>(105 - 144) | 22<br>(18 - 26)    | 16<br>(13 - 19)    |
| Falls                                           | 60<br>(41 - 77)    | 2<br>(1 - 4)     | 1<br>(1 - 2)      | 44<br>(28 - 58)    | 9<br>(6 - 12)      | 4<br>(3 - 6)       |
| Drowning                                        | 23<br>(17 - 43)    | 2<br>(1 - 4)     | 2<br>(1 - 3)      | 17<br>(12 - 29)    | 2<br>(2 - 4)       | 1<br>(1 - 2)       |
| Fire, heat, and hot substances                  | 18<br>(11 - 26)    | 2<br>(1 - 3)     | 1<br>(0 - 1)      | 12<br>(7 - 17)     | 2<br>(1 - 3)       | 2<br>(1 - 3)       |
| Poisonings                                      | 14<br>(8 - 18)     | 1<br>(0 - 2)     | 0<br>(0 - 0)      | 12<br>(6 - 15)     | 1<br>(0 - 1)       | 0<br>(0 - 1)       |
| Exposure to mechanical forces                   | 25<br>(19 - 33)    | 0<br>(0 - 1)     | 1<br>(0 - 1)      | 22<br>(16 - 28)    | 2<br>(2 - 3)       | 0<br>(0 - 1)       |
| Unintentional firearm injuries                  | 0<br>(0 - 0)       | 0<br>(0 - 0)     | 0<br>(0 - 0)      | 0<br>(0 - 0)       | 0<br>(0 - 0)       | 0<br>(0 - 0)       |
| Unintentional suffocation                       | 0<br>(0 - 0)       | 0<br>(0 - 0)     | 0<br>(0 - 0)      | 0<br>(0 - 0)       | 0<br>(0 - 0)       | 0<br>(0 - 0)       |
| Other exposure to mechanical forces             | 25<br>(18 - 32)    | 0<br>(0 - 1)     | 1<br>(0 - 1)      | 21<br>(16 - 28)    | 2<br>(1 - 3)       | 0<br>(0 - 1)       |
| Adverse effects of medical treatment            | 14<br>(11 - 21)    | 1<br>(1 - 2)     | 0<br>(0 - 0)      | 5<br>(4 - 8)       | 3<br>(2 - 5)       | 4<br>(3 - 6)       |
| Animal contact                                  | 0<br>(0 - 1)       | 0<br>(0 - 0)     | 0<br>(0 - 0)      | 0<br>(0 - 0)       | 0<br>(0 - 0)       | 0<br>(0 - 0)       |
| Venomous animal contact                         | 0<br>(0 - 0)       | 0<br>(0 - 0)     | 0<br>(0 - 0)      | 0<br>(0 - 0)       | 0<br>(0 - 0)       | 0<br>(0 - 0)       |
| Non-venomous animal contact                     | 0<br>(0 - 0)       | 0<br>(0 - 0)     | 0<br>(0 - 0)      | 0<br>(0 - 0)       | 0<br>(0 - 0)       | 0<br>(0 - 0)       |
| Foreign body                                    | 13<br>(7 - 19)     | 4<br>(2 - 6)     | 1<br>(0 - 1)      | 5<br>(3 - 8)       | 1<br>(0 - 1)       | 3<br>(1 - 4)       |
| Pulmonary aspiration and foreign body in airway | 13<br>(7 - 19)     | 4<br>(2 - 6)     | 1<br>(0 - 1)      | 5<br>(3 - 7)       | 1<br>(0 - 1)       | 2<br>(1 - 4)       |
| Foreign body in other body part                 | 0<br>(0 - 0)       | 0<br>(0 - 0)     | 0<br>(0 - 0)      | 0<br>(0 - 0)       | 0<br>(0 - 0)       | 0<br>(0 - 0)       |
| Other unintentional injuries                    | 10<br>(8 - 14)     | 0<br>(0 - 1)     | 0<br>(0 - 0)      | 8<br>(5 - 12)      | 1<br>(1 - 2)       | 1<br>(0 - 1)       |
| Self-harm and interpersonal violence            | 76<br>(58 - 101)   | 1<br>(0 - 1)     | 1<br>(0 - 1)      | 65<br>(50 - 87)    | 8<br>(5 - 10)      | 2<br>(1 - 3)       |
| Self-harm                                       | 42<br>(25 - 54)    | --               | 0<br>(0 - 0)      | 36<br>(22 - 47)    | 4<br>(2 - 6)       | 2<br>(1 - 2)       |
| Interpersonal violence                          | 34<br>(23 - 55)    | 1<br>(0 - 1)     | 0<br>(0 - 1)      | 29<br>(19 - 49)    | 3<br>(2 - 6)       | 1<br>(0 - 1)       |
| Assault by firearm                              | 18<br>(11 - 32)    | 0<br>(0 - 0)     | 0<br>(0 - 0)      | 16<br>(9 - 28)     | 2<br>(1 - 4)       | 0<br>(0 - 0)       |
| Assault by sharp object                         | 13<br>(7 - 24)     | 0<br>(0 - 0)     | 0<br>(0 - 1)      | 12<br>(6 - 22)     | 1<br>(0 - 1)       | 0<br>(0 - 0)       |
| Assault by other means                          | 2<br>(1 - 5)       | 0<br>(0 - 1)     | 0<br>(0 - 0)      | 1<br>(1 - 3)       | 0<br>(0 - 1)       | 0<br>(0 - 1)       |

Web Table 31- Kuwait deaths with 95% UI by age, sex, and cause in 2013

| Cause                                                             | Females, All Ages        | Females, 0-4 Years | Females, 5-14 Years | Females, 15-49 Years | Females, 50-69 Years | Females, 70-80 Years |
|-------------------------------------------------------------------|--------------------------|--------------------|---------------------|----------------------|----------------------|----------------------|
| All causes                                                        | 1,979<br>(1,849 - 2,116) | 277<br>(249 - 310) | 46<br>(40 - 51)     | 464<br>(413 - 513)   | 488<br>(449 - 536)   | 704<br>(673 - 736)   |
| Communicable, maternal, neonatal, and nutritional diseases        | 252<br>(215 - 288)       | 110<br>(90 - 131)  | 10<br>(7 - 16)      | 49<br>(40 - 61)      | 23<br>(16 - 28)      | 61<br>(45 - 74)      |
| HIV/AIDS and tuberculosis                                         | 21<br>(17 - 26)          | 1<br>(0 - 1)       | 0<br>(0 - 1)        | 13<br>(10 - 16)      | 4<br>(3 - 5)         | 4<br>(2 - 5)         |
| Tuberculosis                                                      | 12<br>(8 - 15)           | 0<br>(0 - 0)       | 0<br>(0 - 0)        | 5<br>(3 - 7)         | 3<br>(2 - 4)         | 3<br>(2 - 5)         |
| HIV/AIDS                                                          | 9<br>(7 - 13)            | 1<br>(0 - 1)       | 0<br>(0 - 0)        | 8<br>(6 - 10)        | 1<br>(1 - 1)         | 0<br>(0 - 0)         |
| HIV/AIDS resulting in mycobacterial infection                     | 0<br>(0 - 1)             | 0<br>(0 - 0)       | 0<br>(0 - 0)        | 0<br>(0 - 0)         | 0<br>(0 - 0)         | 0<br>(0 - 0)         |
| HIV/AIDS resulting in other diseases                              | 9<br>(7 - 12)            | 1<br>(0 - 1)       | 0<br>(0 - 0)        | 7<br>(6 - 10)        | 1<br>(1 - 1)         | 0<br>(0 - 0)         |
| Diarrhea, lower respiratory, and other common infectious diseases | 136<br>(108 - 165)       | 28<br>(20 - 37)    | 9<br>(6 - 15)       | 26<br>(18 - 38)      | 17<br>(11 - 22)      | 55<br>(40 - 69)      |
| Diarrheal diseases                                                | 3<br>(2 - 4)             | 2<br>(1 - 3)       | 0<br>(0 - 0)        | 0<br>(0 - 0)         | 0<br>(0 - 0)         | 1<br>(0 - 1)         |
| Intestinal infectious diseases                                    | 23<br>(8 - 48)           | 7<br>(2 - 15)      | 5<br>(2 - 12)       | 9<br>(3 - 21)        | 1<br>(0 - 2)         | 0<br>(0 - 1)         |
| Typhoid fever                                                     | 17<br>(6 - 37)           | 5<br>(2 - 11)      | 4<br>(1 - 9)        | 7<br>(2 - 16)        | 1<br>(0 - 2)         | 0<br>(0 - 1)         |
| Paratyphoid fever                                                 | 5<br>(2 - 12)            | 2<br>(1 - 4)       | 1<br>(0 - 3)        | 2<br>(0 - 5)         | 0<br>(0 - 1)         | 0<br>(0 - 0)         |
| Other intestinal infectious diseases                              | 0<br>(0 - 1)             | 0<br>(0 - 1)       | 0<br>(0 - 0)        | 0<br>(0 - 0)         | 0<br>(0 - 0)         | 0<br>(0 - 0)         |
| Lower respiratory infections                                      | 102<br>(78 - 119)        | 15<br>(10 - 21)    | 3<br>(2 - 4)        | 14<br>(11 - 17)      | 16<br>(10 - 20)      | 54<br>(39 - 67)      |
| Upper respiratory infections                                      | 0<br>(0 - 0)             | 0<br>(0 - 0)       | 0<br>(0 - 0)        | 0<br>(0 - 0)         | 0<br>(0 - 0)         | 0<br>(0 - 0)         |
| Otitis media                                                      | 0<br>(0 - 0)             | 0<br>(0 - 0)       | 0<br>(0 - 0)        | 0<br>(0 - 0)         | 0<br>(0 - 0)         | 0<br>(0 - 0)         |
| Meningitis                                                        | 4<br>(3 - 5)             | 2<br>(1 - 3)       | 0<br>(0 - 0)        | 1<br>(1 - 1)         | 0<br>(0 - 1)         | 0<br>(0 - 1)         |
| Pneumococcal meningitis                                           | 1<br>(1 - 1)             | 0<br>(0 - 1)       | 0<br>(0 - 0)        | 0<br>(0 - 0)         | 0<br>(0 - 0)         | 0<br>(0 - 0)         |
| H influenzae type B meningitis                                    | 1<br>(1 - 1)             | 1<br>(0 - 1)       | 0<br>(0 - 0)        | 0<br>(0 - 0)         | 0<br>(0 - 0)         | 0<br>(0 - 0)         |
| Meningococcal meningitis                                          | 1<br>(1 - 1)             | 1<br>(0 - 1)       | 0<br>(0 - 0)        | 0<br>(0 - 0)         | 0<br>(0 - 0)         | 0<br>(0 - 0)         |
| Other meningitis                                                  | 1<br>(1 - 1)             | 0<br>(0 - 0)       | 0<br>(0 - 0)        | 0<br>(0 - 1)         | 0<br>(0 - 0)         | 0<br>(0 - 0)         |
| Encephalitis                                                      | 3<br>(2 - 4)             | 1<br>(1 - 2)       | 0<br>(0 - 0)        | 1<br>(1 - 2)         | 0<br>(0 - 0)         | 0<br>(0 - 0)         |
| Diphtheria                                                        | 0<br>(0 - 0)             | 0<br>(0 - 0)       | 0<br>(0 - 0)        | 0<br>(0 - 0)         | 0<br>(0 - 0)         | --                   |
| Whooping cough                                                    | 0<br>(0 - 2)             | 0<br>(0 - 2)       | 0<br>(0 - 0)        | 0<br>(0 - 0)         | 0<br>(0 - 0)         | --                   |
| Tetanus                                                           | 0<br>(0 - 0)             | 0<br>(0 - 0)       | 0<br>(0 - 0)        | 0<br>(0 - 0)         | 0<br>(0 - 0)         | 0<br>(0 - 0)         |
| Measles                                                           | 1<br>(0 - 3)             | 0<br>(0 - 3)       | 0<br>(0 - 0)        | 0<br>(0 - 0)         | 0<br>(0 - 0)         | --                   |
| Varicella and herpes zoster                                       | 0<br>(0 - 1)             | 0<br>(0 - 1)       | 0<br>(0 - 0)        | 0<br>(0 - 0)         | 0<br>(0 - 0)         | 0<br>(0 - 0)         |
| Neglected tropical diseases and malaria                           | 1<br>(0 - 1)             | 0<br>(0 - 0)       | 0<br>(0 - 0)        | 0<br>(0 - 0)         | 0<br>(0 - 0)         | 0<br>(0 - 0)         |
| Leishmaniasis                                                     | 0<br>(0 - 0)             | 0<br>(0 - 0)       | 0<br>(0 - 0)        | 0<br>(0 - 0)         | 0<br>(0 - 0)         | 0<br>(0 - 0)         |
| Visceral leishmaniasis                                            | 0<br>(0 - 0)             | 0<br>(0 - 0)       | 0<br>(0 - 0)        | 0<br>(0 - 0)         | 0<br>(0 - 0)         | 0<br>(0 - 0)         |
| Cysticercosis                                                     | 0<br>(0 - 0)             | 0<br>(0 - 0)       | 0<br>(0 - 0)        | 0<br>(0 - 0)         | 0<br>(0 - 0)         | 0<br>(0 - 0)         |
| Cystic echinococcosis                                             | 0<br>(0 - 0)             | 0<br>(0 - 0)       | 0<br>(0 - 0)        | 0<br>(0 - 0)         | 0<br>(0 - 0)         | 0<br>(0 - 0)         |
| Dengue                                                            | 0<br>(0 - 0)             | 0<br>(0 - 0)       | 0<br>(0 - 0)        | 0<br>(0 - 0)         | 0<br>(0 - 0)         | 0<br>(0 - 0)         |
| Rabies                                                            | 0<br>(0 - 0)             | 0<br>(0 - 0)       | 0<br>(0 - 0)        | 0<br>(0 - 0)         | 0<br>(0 - 0)         | 0<br>(0 - 0)         |
| Other neglected tropical diseases                                 | 0<br>(0 - 0)             | 0<br>(0 - 0)       | 0<br>(0 - 0)        | 0<br>(0 - 0)         | 0<br>(0 - 0)         | 0<br>(0 - 0)         |
| Maternal disorders                                                | 7<br>(5 - 8)             | --                 | 0<br>(0 - 0)        | 7<br>(5 - 8)         | --                   | --                   |
| Maternal hemorrhage                                               | 1<br>(1 - 2)             | --                 | 0<br>(0 - 0)        | 1<br>(1 - 2)         | --                   | --                   |
| Maternal sepsis and other maternal infections                     | 0<br>(0 - 1)             | --                 | 0<br>(0 - 0)        | 0<br>(0 - 1)         | --                   | --                   |
| Maternal hypertensive disorders                                   | 1<br>(1 - 1)             | --                 | 0<br>(0 - 0)        | 1<br>(1 - 1)         | --                   | --                   |
| Maternal obstructed labor                                         | 1<br>(0 - 1)             | --                 | 0<br>(0 - 0)        | 1<br>(0 - 1)         | --                   | --                   |

Web Table 31- Kuwait deaths with 95% UI by age, sex, and cause in 2013

| Cause                                                            | Females, All Ages        | Females, 0-4 Years | Females, 5-14 Years | Females, 15-49 Years | Females, 50-69 Years | Females, 70-80 Years |
|------------------------------------------------------------------|--------------------------|--------------------|---------------------|----------------------|----------------------|----------------------|
| Maternal abortive outcome                                        | 1<br>(1 - 1)             | --                 | 0<br>(0 - 0)        | 1<br>(1 - 1)         | --                   | --                   |
| Indirect maternal deaths                                         | 1<br>(0 - 1)             | --                 | 0<br>(0 - 0)        | 1<br>(0 - 1)         | --                   | --                   |
| Late maternal deaths                                             | 1<br>(0 - 1)             | --                 | 0<br>(0 - 0)        | 1<br>(0 - 1)         | --                   | --                   |
| Maternal deaths aggravated by HIV/AIDS                           | 0<br>(0 - 0)             | --                 | --                  | 0<br>(0 - 0)         | --                   | --                   |
| Other maternal disorders                                         | 1<br>(1 - 2)             | --                 | 0<br>(0 - 0)        | 1<br>(1 - 2)         | --                   | --                   |
| Neonatal disorders                                               | 79<br>(62 - 98)          | 79<br>(62 - 98)    | --                  | --                   | --                   | --                   |
| Neonatal preterm birth complications                             | 60<br>(40 - 76)          | 60<br>(40 - 76)    | --                  | --                   | --                   | --                   |
| Neonatal encephalopathy due to birth asphyxia and trauma         | 10<br>(7 - 17)           | 10<br>(7 - 17)     | --                  | --                   | --                   | --                   |
| Neonatal sepsis and other neonatal infections                    | 6<br>(3 - 12)            | 6<br>(3 - 12)      | --                  | --                   | --                   | --                   |
| Hemolytic disease and other neonatal jaundice                    | 0<br>(0 - 0)             | 0<br>(0 - 0)       | --                  | --                   | --                   | --                   |
| Other neonatal disorders                                         | 3<br>(2 - 6)             | 3<br>(2 - 6)       | --                  | --                   | --                   | --                   |
| Nutritional deficiencies                                         | 4<br>(3 - 5)             | 1<br>(0 - 1)       | 0<br>(0 - 0)        | 2<br>(1 - 2)         | 0<br>(0 - 0)         | 1<br>(1 - 1)         |
| Protein-energy malnutrition                                      | 0<br>(0 - 1)             | 0<br>(0 - 1)       | 0<br>(0 - 0)        | 0<br>(0 - 0)         | 0<br>(0 - 0)         | 0<br>(0 - 0)         |
| Iodine deficiency                                                | 0<br>(0 - 0)             | 0<br>(0 - 0)       | 0<br>(0 - 0)        | 0<br>(0 - 0)         | 0<br>(0 - 0)         | 0<br>(0 - 0)         |
| Iron-deficiency anemia                                           | 3<br>(3 - 4)             | 0<br>(0 - 1)       | 0<br>(0 - 0)        | 2<br>(1 - 2)         | 0<br>(0 - 0)         | 1<br>(1 - 1)         |
| Other nutritional deficiencies                                   | 0<br>(0 - 0)             | 0<br>(0 - 0)       | 0<br>(0 - 0)        | 0<br>(0 - 0)         | 0<br>(0 - 0)         | 0<br>(0 - 0)         |
| Other communicable, maternal, neonatal, and nutritional diseases | 5<br>(4 - 6)             | 1<br>(1 - 2)       | 0<br>(0 - 0)        | 2<br>(1 - 2)         | 1<br>(1 - 1)         | 1<br>(1 - 1)         |
| Sexually transmitted diseases excluding HIV                      | 1<br>(0 - 1)             | 0<br>(0 - 1)       | 0<br>(0 - 0)        | 0<br>(0 - 0)         | 0<br>(0 - 0)         | 0<br>(0 - 0)         |
| Syphilis                                                         | 1<br>(0 - 1)             | 0<br>(0 - 1)       | 0<br>(0 - 0)        | 0<br>(0 - 0)         | 0<br>(0 - 0)         | 0<br>(0 - 0)         |
| Chlamydial infection                                             | 0<br>(0 - 0)             | --                 | 0<br>(0 - 0)        | 0<br>(0 - 0)         | 0<br>(0 - 0)         | 0<br>(0 - 0)         |
| Gonococcal infection                                             | 0<br>(0 - 0)             | --                 | 0<br>(0 - 0)        | 0<br>(0 - 0)         | 0<br>(0 - 0)         | 0<br>(0 - 0)         |
| Other sexually transmitted diseases                              | 0<br>(0 - 0)             | --                 | 0<br>(0 - 0)        | 0<br>(0 - 0)         | 0<br>(0 - 0)         | 0<br>(0 - 0)         |
| Hepatitis                                                        | 1<br>(1 - 2)             | 0<br>(0 - 0)       | 0<br>(0 - 0)        | 1<br>(0 - 1)         | 0<br>(0 - 0)         | 0<br>(0 - 0)         |
| Acute hepatitis A                                                | 0<br>(0 - 0)             | 0<br>(0 - 0)       | 0<br>(0 - 0)        | 0<br>(0 - 0)         | 0<br>(0 - 0)         | 0<br>(0 - 0)         |
| Acute hepatitis B                                                | 1<br>(0 - 1)             | 0<br>(0 - 0)       | 0<br>(0 - 0)        | 0<br>(0 - 0)         | 0<br>(0 - 0)         | 0<br>(0 - 0)         |
| Acute hepatitis C                                                | 0<br>(0 - 0)             | --                 | 0<br>(0 - 0)        | 0<br>(0 - 0)         | 0<br>(0 - 0)         | 0<br>(0 - 0)         |
| Acute hepatitis E                                                | 1<br>(0 - 1)             | 0<br>(0 - 0)       | 0<br>(0 - 0)        | 0<br>(0 - 1)         | 0<br>(0 - 0)         | 0<br>(0 - 0)         |
| Other infectious diseases                                        | 3<br>(2 - 4)             | 1<br>(0 - 1)       | 0<br>(0 - 0)        | 1<br>(0 - 1)         | 1<br>(0 - 1)         | 1<br>(0 - 1)         |
| Non-communicable diseases                                        | 1,569<br>(1,458 - 1,683) | 150<br>(130 - 174) | 23<br>(19 - 27)     | 320<br>(282 - 357)   | 446<br>(411 - 492)   | 630<br>(596 - 663)   |
| Neoplasms                                                        | 347<br>(306 - 387)       | 4<br>(3 - 6)       | 6<br>(4 - 8)        | 121<br>(104 - 139)   | 136<br>(119 - 155)   | 79<br>(70 - 87)      |
| Esophageal cancer                                                | 5<br>(4 - 7)             | --                 | --                  | 1<br>(1 - 2)         | 2<br>(2 - 3)         | 2<br>(1 - 2)         |
| Stomach cancer                                                   | 11<br>(9 - 13)           | --                 | --                  | 3<br>(3 - 4)         | 4<br>(3 - 5)         | 4<br>(3 - 5)         |
| Liver cancer                                                     | 15<br>(12 - 19)          | --                 | 0<br>(0 - 0)        | 3<br>(2 - 4)         | 6<br>(5 - 8)         | 6<br>(4 - 9)         |
| Liver cancer due to hepatitis B                                  | 5<br>(3 - 8)             | --                 | 0<br>(0 - 0)        | 1<br>(1 - 2)         | 2<br>(1 - 4)         | 2<br>(1 - 3)         |
| Liver cancer due to hepatitis C                                  | 6<br>(3 - 10)            | --                 | 0<br>(0 - 0)        | 1<br>(0 - 1)         | 3<br>(1 - 4)         | 3<br>(1 - 5)         |
| Liver cancer due to alcohol use                                  | 1<br>(0 - 3)             | --                 | --                  | 0<br>(0 - 0)         | 0<br>(0 - 1)         | 1<br>(0 - 2)         |
| Liver cancer due to other causes                                 | 3<br>(2 - 5)             | --                 | 0<br>(0 - 0)        | 1<br>(0 - 1)         | 1<br>(1 - 2)         | 1<br>(0 - 2)         |
| Larynx cancer                                                    | 1<br>(0 - 1)             | --                 | --                  | 0<br>(0 - 1)         | 0<br>(0 - 0)         | 0<br>(0 - 0)         |
| Tracheal, bronchus and lung cancer                               | 22<br>(18 - 28)          | --                 | --                  | 5<br>(4 - 7)         | 10<br>(8 - 13)       | 7<br>(6 - 9)         |
| Breast cancer                                                    | 101<br>(82 - 118)        | --                 | --                  | 46<br>(37 - 55)      | 42<br>(34 - 51)      | 13<br>(10 - 16)      |

Web Table 31- Kuwait deaths with 95% UI by age, sex, and cause in 2013

| Cause                                         | Females, All Ages  | Females, 0-4 Years | Females, 5-14 Years | Females, 15-49 Years | Females, 50-69 Years | Females, 70-80 Years |
|-----------------------------------------------|--------------------|--------------------|---------------------|----------------------|----------------------|----------------------|
| Cervical cancer                               | 15<br>(11 - 18)    | --                 | --                  | 6<br>(4 - 8)         | 6<br>(4 - 8)         | 3<br>(2 - 4)         |
| Uterine cancer                                | 6<br>(2 - 8)       | --                 | --                  | 1<br>(0 - 1)         | 3<br>(1 - 5)         | 2<br>(1 - 2)         |
| Prostate cancer                               | --                 | --                 | --                  | --                   | --                   | --                   |
| Colon and rectum cancer                       | 35<br>(29 - 40)    | --                 | --                  | 10<br>(8 - 13)       | 14<br>(11 - 17)      | 10<br>(8 - 13)       |
| Lip and oral cavity cancer                    | 3<br>(2 - 4)       | --                 | --                  | 1<br>(1 - 1)         | 1<br>(1 - 1)         | 1<br>(1 - 1)         |
| Nasopharynx cancer                            | 1<br>(1 - 2)       | --                 | 0<br>(0 - 0)        | 1<br>(0 - 1)         | 0<br>(0 - 1)         | 0<br>(0 - 0)         |
| Other pharynx cancer                          | 0<br>(0 - 1)       | --                 | --                  | 0<br>(0 - 0)         | 0<br>(0 - 0)         | 0<br>(0 - 0)         |
| Gallbladder and biliary tract cancer          | 7<br>(4 - 9)       | --                 | --                  | 1<br>(1 - 1)         | 3<br>(2 - 4)         | 2<br>(2 - 4)         |
| Pancreatic cancer                             | 17<br>(14 - 20)    | --                 | --                  | 3<br>(2 - 4)         | 8<br>(6 - 10)        | 6<br>(5 - 8)         |
| Malignant skin melanoma                       | 1<br>(0 - 1)       | --                 | --                  | 0<br>(0 - 0)         | 0<br>(0 - 0)         | 0<br>(0 - 0)         |
| Non-melanoma skin cancer                      | 1<br>(0 - 1)       | --                 | --                  | 0<br>(0 - 0)         | 0<br>(0 - 0)         | 0<br>(0 - 1)         |
| Ovarian cancer                                | 18<br>(15 - 23)    | --                 | --                  | 7<br>(5 - 9)         | 8<br>(6 - 10)        | 4<br>(3 - 5)         |
| Testicular cancer                             | --                 | --                 | --                  | --                   | --                   | --                   |
| Kidney cancer                                 | 4<br>(3 - 5)       | 0<br>(0 - 0)       | 0<br>(0 - 0)        | 1<br>(1 - 2)         | 2<br>(1 - 2)         | 1<br>(1 - 2)         |
| Bladder cancer                                | 6<br>(5 - 10)      | --                 | --                  | 1<br>(1 - 1)         | 2<br>(2 - 4)         | 3<br>(2 - 5)         |
| Brain and nervous system cancer               | 12<br>(10 - 15)    | 0<br>(0 - 1)       | 1<br>(1 - 2)        | 5<br>(4 - 6)         | 4<br>(3 - 5)         | 2<br>(1 - 2)         |
| Thyroid cancer                                | 4<br>(2 - 5)       | --                 | 0<br>(0 - 0)        | 1<br>(0 - 1)         | 1<br>(1 - 2)         | 2<br>(1 - 2)         |
| Mesothelioma                                  | 0<br>(0 - 0)       | --                 | --                  | 0<br>(0 - 0)         | 0<br>(0 - 0)         | 0<br>(0 - 0)         |
| Hodgkin lymphoma                              | 1<br>(1 - 2)       | 0<br>(0 - 0)       | 0<br>(0 - 0)        | 1<br>(0 - 1)         | 0<br>(0 - 0)         | 0<br>(0 - 0)         |
| Non-Hodgkin lymphoma                          | 13<br>(9 - 17)     | 0<br>(0 - 1)       | 0<br>(0 - 1)        | 5<br>(3 - 6)         | 5<br>(3 - 7)         | 3<br>(2 - 4)         |
| Multiple myeloma                              | 3<br>(2 - 5)       | --                 | --                  | 1<br>(1 - 1)         | 2<br>(1 - 2)         | 1<br>(1 - 1)         |
| Leukemia                                      | 23<br>(19 - 27)    | 1<br>(1 - 2)       | 2<br>(2 - 3)        | 11<br>(9 - 14)       | 5<br>(4 - 6)         | 3<br>(2 - 4)         |
| Other neoplasms                               | 21<br>(15 - 33)    | 2<br>(1 - 3)       | 2<br>(1 - 3)        | 8<br>(5 - 12)        | 6<br>(4 - 10)        | 4<br>(3 - 7)         |
| Cardiovascular diseases                       | 656<br>(584 - 723) | 6<br>(4 - 7)       | 3<br>(2 - 4)        | 111<br>(89 - 131)    | 193<br>(169 - 221)   | 343<br>(313 - 375)   |
| Rheumatic heart disease                       | 7<br>(5 - 9)       | 0<br>(0 - 0)       | 0<br>(0 - 0)        | 3<br>(2 - 4)         | 1<br>(1 - 2)         | 2<br>(1 - 3)         |
| Ischemic heart disease                        | 307<br>(261 - 371) | 1<br>(1 - 2)       | 1<br>(1 - 1)        | 54<br>(39 - 67)      | 98<br>(81 - 121)     | 153<br>(130 - 186)   |
| Cerebrovascular disease                       | 200<br>(150 - 225) | 2<br>(1 - 3)       | 1<br>(1 - 2)        | 31<br>(22 - 38)      | 50<br>(37 - 59)      | 116<br>(87 - 131)    |
| Ischemic stroke                               | 140<br>(94 - 165)  | 0<br>(0 - 1)       | 0<br>(0 - 0)        | 12<br>(6 - 16)       | 33<br>(21 - 41)      | 95<br>(65 - 111)     |
| Hemorrhagic stroke                            | 59<br>(47 - 86)    | 2<br>(1 - 2)       | 1<br>(1 - 1)        | 19<br>(15 - 25)      | 17<br>(13 - 26)      | 21<br>(15 - 34)      |
| Hypertensive heart disease                    | 88<br>(70 - 125)   | 0<br>(0 - 0)       | 0<br>(0 - 0)        | 10<br>(7 - 15)       | 25<br>(19 - 37)      | 53<br>(41 - 77)      |
| Cardiomyopathy and myocarditis                | 9<br>(7 - 12)      | 1<br>(1 - 2)       | 0<br>(0 - 0)        | 3<br>(3 - 5)         | 2<br>(1 - 3)         | 3<br>(2 - 3)         |
| Atrial fibrillation and flutter               | 1<br>(1 - 1)       | --                 | --                  | 0<br>(0 - 0)         | 0<br>(0 - 0)         | 0<br>(0 - 1)         |
| Aortic aneurysm                               | 2<br>(2 - 4)       | --                 | --                  | 1<br>(1 - 2)         | 1<br>(0 - 1)         | 1<br>(0 - 1)         |
| Peripheral vascular disease                   | 0<br>(0 - 0)       | --                 | --                  | 0<br>(0 - 0)         | 0<br>(0 - 0)         | 0<br>(0 - 0)         |
| Endocarditis                                  | 3<br>(2 - 4)       | 0<br>(0 - 0)       | 0<br>(0 - 0)        | 1<br>(0 - 1)         | 0<br>(0 - 1)         | 2<br>(1 - 2)         |
| Other cardiovascular and circulatory diseases | 39<br>(28 - 50)    | 1<br>(1 - 2)       | 0<br>(0 - 1)        | 9<br>(6 - 12)        | 16<br>(11 - 21)      | 14<br>(9 - 18)       |
| Chronic respiratory diseases                  | 65<br>(50 - 74)    | 1<br>(1 - 2)       | 1<br>(0 - 1)        | 12<br>(9 - 15)       | 17<br>(12 - 21)      | 34<br>(27 - 40)      |
| Chronic obstructive pulmonary disease         | 30<br>(20 - 38)    | 1<br>(0 - 1)       | 0<br>(0 - 0)        | 4<br>(3 - 5)         | 8<br>(5 - 11)        | 17<br>(11 - 22)      |
| Pneumoconiosis                                | 0<br>(0 - 0)       | 0<br>(0 - 0)       | 0<br>(0 - 0)        | 0<br>(0 - 0)         | 0<br>(0 - 0)         | 0<br>(0 - 0)         |
| Silicosis                                     | 0<br>(0 - 0)       | 0<br>(0 - 0)       | 0<br>(0 - 0)        | 0<br>(0 - 0)         | 0<br>(0 - 0)         | 0<br>(0 - 0)         |

Web Table 31- Kuwait deaths with 95% UI by age, sex, and cause in 2013

| Cause                                               | Females, All Ages  | Females, 0-4 Years | Females, 5-14 Years | Females, 15-49 Years | Females, 50-69 Years | Females, 70-80 Years |
|-----------------------------------------------------|--------------------|--------------------|---------------------|----------------------|----------------------|----------------------|
| Asbestosis                                          | 0<br>(0 - 0)       | 0<br>(0 - 0)       | 0<br>(0 - 0)        | 0<br>(0 - 0)         | 0<br>(0 - 0)         | 0<br>(0 - 0)         |
| Coal workers pneumoconiosis                         | 0<br>(0 - 0)       | 0<br>(0 - 0)       | 0<br>(0 - 0)        | 0<br>(0 - 0)         | 0<br>(0 - 0)         | 0<br>(0 - 0)         |
| Other pneumoconiosis                                | 0<br>(0 - 0)       | 0<br>(0 - 0)       | 0<br>(0 - 0)        | 0<br>(0 - 0)         | 0<br>(0 - 0)         | 0<br>(0 - 0)         |
| Asthma                                              | 17<br>(12 - 22)    | 0<br>(0 - 1)       | 0<br>(0 - 0)        | 5<br>(3 - 6)         | 4<br>(2 - 6)         | 7<br>(5 - 10)        |
| Interstitial lung disease and pulmonary sarcoidosis | 16<br>(9 - 22)     | 0<br>(0 - 0)       | 0<br>(0 - 0)        | 2<br>(1 - 3)         | 5<br>(2 - 7)         | 9<br>(5 - 14)        |
| Other chronic respiratory diseases                  | 3<br>(2 - 3)       | 0<br>(0 - 0)       | 0<br>(0 - 0)        | 1<br>(1 - 2)         | 0<br>(0 - 0)         | 1<br>(1 - 1)         |
| Cirrhosis                                           | 30<br>(26 - 35)    | 0<br>(0 - 0)       | 0<br>(0 - 0)        | 8<br>(7 - 10)        | 13<br>(10 - 15)      | 9<br>(7 - 11)        |
| Cirrhosis due to hepatitis B                        | 11<br>(4 - 17)     | 0<br>(0 - 0)       | 0<br>(0 - 0)        | 3<br>(1 - 5)         | 4<br>(2 - 7)         | 3<br>(1 - 6)         |
| Cirrhosis due to hepatitis C                        | 15<br>(9 - 22)     | 0<br>(0 - 0)       | 0<br>(0 - 0)        | 4<br>(2 - 6)         | 7<br>(4 - 10)        | 5<br>(2 - 7)         |
| Cirrhosis due to alcohol use                        | 1<br>(1 - 2)       | --                 | --                  | 0<br>(0 - 0)         | 0<br>(0 - 1)         | 1<br>(0 - 1)         |
| Cirrhosis due to other causes                       | 3<br>(2 - 5)       | 0<br>(0 - 0)       | 0<br>(0 - 0)        | 1<br>(1 - 2)         | 1<br>(0 - 2)         | 1<br>(0 - 1)         |
| Digestive diseases                                  | 23<br>(20 - 27)    | 0<br>(0 - 1)       | 0<br>(0 - 1)        | 5<br>(4 - 6)         | 6<br>(5 - 7)         | 12<br>(10 - 14)      |
| Peptic ulcer disease                                | 4<br>(3 - 5)       | 0<br>(0 - 0)       | 0<br>(0 - 0)        | 1<br>(1 - 1)         | 1<br>(1 - 2)         | 2<br>(1 - 3)         |
| Gastritis and duodenitis                            | 0<br>(0 - 0)       | 0<br>(0 - 0)       | 0<br>(0 - 0)        | 0<br>(0 - 0)         | 0<br>(0 - 0)         | 0<br>(0 - 0)         |
| Appendicitis                                        | 1<br>(1 - 1)       | 0<br>(0 - 0)       | 0<br>(0 - 0)        | 0<br>(0 - 0)         | 0<br>(0 - 0)         | 0<br>(0 - 1)         |
| Paralytic ileus and intestinal obstruction          | 5<br>(3 - 8)       | 0<br>(0 - 0)       | 0<br>(0 - 0)        | 1<br>(1 - 2)         | 1<br>(1 - 2)         | 3<br>(2 - 5)         |
| Inguinal, femoral, and abdominal hernia             | 0<br>(0 - 1)       | 0<br>(0 - 0)       | 0<br>(0 - 0)        | 0<br>(0 - 0)         | 0<br>(0 - 0)         | 0<br>(0 - 0)         |
| Inflammatory bowel disease                          | 1<br>(1 - 1)       | 0<br>(0 - 0)       | 0<br>(0 - 0)        | 0<br>(0 - 1)         | 0<br>(0 - 0)         | 0<br>(0 - 0)         |
| Vascular intestinal disorders                       | 5<br>(3 - 8)       | 0<br>(0 - 0)       | 0<br>(0 - 0)        | 0<br>(0 - 1)         | 1<br>(1 - 2)         | 3<br>(2 - 5)         |
| Gallbladder and biliary diseases                    | 3<br>(2 - 4)       | 0<br>(0 - 0)       | 0<br>(0 - 0)        | 1<br>(0 - 1)         | 1<br>(0 - 1)         | 2<br>(1 - 2)         |
| Pancreatitis                                        | 2<br>(2 - 3)       | 0<br>(0 - 0)       | 0<br>(0 - 0)        | 1<br>(1 - 1)         | 1<br>(0 - 1)         | 1<br>(0 - 1)         |
| Other digestive diseases                            | 2<br>(1 - 2)       | 0<br>(0 - 0)       | 0<br>(0 - 0)        | 1<br>(0 - 1)         | 0<br>(0 - 1)         | 1<br>(0 - 1)         |
| Neurological disorders                              | 79<br>(63 - 96)    | 3<br>(3 - 4)       | 2<br>(1 - 2)        | 7<br>(5 - 9)         | 12<br>(8 - 16)       | 55<br>(41 - 69)      |
| Alzheimer disease and other dementias               | 63<br>(47 - 79)    | --                 | --                  | 0<br>(0 - 0)         | 10<br>(7 - 14)       | 53<br>(39 - 67)      |
| Parkinson disease                                   | 2<br>(1 - 2)       | --                 | --                  | 0<br>(0 - 0)         | 0<br>(0 - 0)         | 1<br>(1 - 2)         |
| Epilepsy                                            | 9<br>(6 - 11)      | 1<br>(0 - 1)       | 1<br>(1 - 2)        | 6<br>(4 - 8)         | 1<br>(1 - 1)         | 0<br>(0 - 0)         |
| Multiple sclerosis                                  | 1<br>(0 - 1)       | --                 | --                  | 1<br>(0 - 1)         | 0<br>(0 - 0)         | 0<br>(0 - 0)         |
| Other neurological disorders                        | 5<br>(4 - 6)       | 3<br>(2 - 4)       | 1<br>(0 - 1)        | 1<br>(1 - 1)         | 0<br>(0 - 0)         | 0<br>(0 - 0)         |
| Mental and substance use disorders                  | 4<br>(3 - 4)       | 0<br>(0 - 0)       | 0<br>(0 - 0)        | 3<br>(2 - 4)         | 0<br>(0 - 0)         | 0<br>(0 - 0)         |
| Schizophrenia                                       | 0<br>(0 - 0)       | --                 | --                  | 0<br>(0 - 0)         | 0<br>(0 - 0)         | 0<br>(0 - 0)         |
| Alcohol use disorders                               | 0<br>(0 - 0)       | --                 | --                  | 0<br>(0 - 0)         | 0<br>(0 - 0)         | 0<br>(0 - 0)         |
| Drug use disorders                                  | 3<br>(2 - 3)       | 0<br>(0 - 0)       | --                  | 2<br>(2 - 3)         | 0<br>(0 - 0)         | 0<br>(0 - 0)         |
| Opioid use disorders                                | 1<br>(1 - 2)       | 0<br>(0 - 0)       | --                  | 1<br>(1 - 2)         | 0<br>(0 - 0)         | 0<br>(0 - 0)         |
| Cocaine use disorders                               | 0<br>(0 - 0)       | 0<br>(0 - 0)       | --                  | 0<br>(0 - 0)         | 0<br>(0 - 0)         | 0<br>(0 - 0)         |
| Amphetamine use disorders                           | 0<br>(0 - 0)       | 0<br>(0 - 0)       | --                  | 0<br>(0 - 0)         | 0<br>(0 - 0)         | 0<br>(0 - 0)         |
| Other drug use disorders                            | 1<br>(1 - 1)       | 0<br>(0 - 0)       | --                  | 1<br>(1 - 1)         | 0<br>(0 - 0)         | 0<br>(0 - 0)         |
| Eating disorders                                    | 1<br>(0 - 1)       | --                 | 0<br>(0 - 0)        | 1<br>(0 - 1)         | --                   | --                   |
| Anorexia nervosa                                    | 1<br>(0 - 1)       | --                 | 0<br>(0 - 0)        | 1<br>(0 - 1)         | --                   | --                   |
| Diabetes, urogenital, blood, and endocrine diseases | 208<br>(183 - 244) | 8<br>(6 - 11)      | 3<br>(3 - 4)        | 37<br>(31 - 46)      | 65<br>(55 - 78)      | 94<br>(81 - 111)     |
| Diabetes mellitus                                   | 94<br>(80 - 111)   | 1<br>(0 - 1)       | 0<br>(0 - 0)        | 11<br>(9 - 14)       | 33<br>(27 - 40)      | 49<br>(41 - 58)      |

Web Table 31- Kuwait deaths with 95% UI by age, sex, and cause in 2013

| Cause                                               | Females, All Ages  | Females, 0-4 Years | Females, 5-14 Years | Females, 15-49 Years | Females, 50-69 Years | Females, 70-80 Years |
|-----------------------------------------------------|--------------------|--------------------|---------------------|----------------------|----------------------|----------------------|
| Acute glomerulonephritis                            | 0<br>(0 - 0)       | 0<br>(0 - 0)       | 0<br>(0 - 0)        | 0<br>(0 - 0)         | 0<br>(0 - 0)         | 0<br>(0 - 0)         |
| Chronic kidney disease                              | 85<br>(71 - 111)   | 1<br>(1 - 2)       | 1<br>(1 - 2)        | 16<br>(12 - 22)      | 28<br>(22 - 37)      | 39<br>(31 - 52)      |
| Chronic kidney disease due to diabetes mellitus     | 12<br>(7 - 16)     | 0<br>(0 - 0)       | 0<br>(0 - 0)        | 2<br>(1 - 3)         | 4<br>(2 - 6)         | 5<br>(3 - 8)         |
| Chronic kidney disease due to hypertension          | 43<br>(31 - 60)    | 0<br>(0 - 1)       | 0<br>(0 - 1)        | 8<br>(6 - 11)        | 14<br>(10 - 21)      | 20<br>(13 - 28)      |
| Chronic kidney disease due to glomerulonephritis    | 0<br>(0 - 0)       | 0<br>(0 - 0)       | 0<br>(0 - 0)        | 0<br>(0 - 0)         | 0<br>(0 - 0)         | 0<br>(0 - 0)         |
| Chronic kidney disease due to other causes          | 30<br>(18 - 48)    | 1<br>(0 - 1)       | 1<br>(0 - 1)        | 6<br>(3 - 11)        | 9<br>(4 - 15)        | 14<br>(7 - 24)       |
| Urinary diseases and male infertility               | 7<br>(3 - 10)      | 0<br>(0 - 1)       | 0<br>(0 - 0)        | 2<br>(1 - 2)         | 2<br>(1 - 2)         | 4<br>(1 - 6)         |
| Interstitial nephritis and urinary tract infections | 6<br>(2 - 8)       | 0<br>(0 - 0)       | 0<br>(0 - 0)        | 1<br>(0 - 2)         | 1<br>(0 - 2)         | 3<br>(1 - 5)         |
| Urolithiasis                                        | 0<br>(0 - 1)       | --                 | 0<br>(0 - 0)        | 0<br>(0 - 0)         | 0<br>(0 - 0)         | 0<br>(0 - 0)         |
| Other urinary diseases                              | 1<br>(1 - 2)       | 0<br>(0 - 0)       | 0<br>(0 - 0)        | 0<br>(0 - 1)         | 0<br>(0 - 1)         | 1<br>(0 - 1)         |
| Gynecological diseases                              | 0<br>(0 - 0)       | --                 | --                  | 0<br>(0 - 0)         | 0<br>(0 - 0)         | 0<br>(0 - 0)         |
| Uterine fibroids                                    | 0<br>(0 - 0)       | --                 | --                  | 0<br>(0 - 0)         | 0<br>(0 - 0)         | 0<br>(0 - 0)         |
| Polycystic ovarian syndrome                         | 0<br>(0 - 0)       | --                 | --                  | 0<br>(0 - 0)         | 0<br>(0 - 0)         | --                   |
| Endometriosis                                       | 0<br>(0 - 0)       | --                 | --                  | 0<br>(0 - 0)         | 0<br>(0 - 0)         | --                   |
| Genital prolapse                                    | 0<br>(0 - 0)       | --                 | --                  | 0<br>(0 - 0)         | 0<br>(0 - 0)         | 0<br>(0 - 0)         |
| Other gynecological diseases                        | 0<br>(0 - 0)       | --                 | --                  | 0<br>(0 - 0)         | 0<br>(0 - 0)         | 0<br>(0 - 0)         |
| Hemoglobinopathies and hemolytic anemias            | 8<br>(5 - 12)      | 2<br>(1 - 3)       | 1<br>(0 - 1)        | 4<br>(3 - 6)         | 1<br>(0 - 1)         | 1<br>(0 - 1)         |
| Thalassemias                                        | 2<br>(1 - 3)       | 1<br>(0 - 1)       | 0<br>(0 - 0)        | 1<br>(1 - 1)         | 0<br>(0 - 0)         | 0<br>(0 - 0)         |
| Sickle cell disorders                               | 4<br>(3 - 6)       | 1<br>(0 - 1)       | 0<br>(0 - 1)        | 3<br>(2 - 4)         | 1<br>(0 - 1)         | 0<br>(0 - 0)         |
| G6PD deficiency                                     | 0<br>(0 - 0)       | 0<br>(0 - 0)       | 0<br>(0 - 0)        | 0<br>(0 - 0)         | 0<br>(0 - 0)         | 0<br>(0 - 0)         |
| Other hemoglobinopathies and hemolytic anemias      | 1<br>(1 - 2)       | 0<br>(0 - 0)       | 0<br>(0 - 0)        | 0<br>(0 - 0)         | 0<br>(0 - 0)         | 1<br>(0 - 1)         |
| Endocrine, metabolic, blood, and immune disorders   | 14<br>(10 - 21)    | 4<br>(3 - 6)       | 1<br>(1 - 2)        | 5<br>(3 - 8)         | 2<br>(1 - 3)         | 2<br>(1 - 3)         |
| Musculoskeletal disorders                           | 10<br>(8 - 12)     | --                 | 1<br>(0 - 1)        | 5<br>(4 - 7)         | 2<br>(1 - 2)         | 2<br>(1 - 3)         |
| Rheumatoid arthritis                                | 0<br>(0 - 1)       | --                 | 0<br>(0 - 0)        | 0<br>(0 - 0)         | 0<br>(0 - 0)         | 0<br>(0 - 0)         |
| Other musculoskeletal disorders                     | 9<br>(7 - 11)      | --                 | 1<br>(0 - 1)        | 5<br>(4 - 6)         | 2<br>(1 - 2)         | 2<br>(1 - 2)         |
| Other non-communicable diseases                     | 148<br>(126 - 173) | 127<br>(107 - 150) | 7<br>(5 - 9)        | 8<br>(6 - 10)        | 2<br>(2 - 3)         | 3<br>(3 - 4)         |
| Congenital anomalies                                | 138<br>(116 - 162) | 120<br>(100 - 144) | 7<br>(5 - 9)        | 8<br>(6 - 10)        | 2<br>(1 - 2)         | 2<br>(1 - 3)         |
| Neural tube defects                                 | 4<br>(2 - 7)       | 4<br>(2 - 7)       | 0<br>(0 - 0)        | 0<br>(0 - 0)         | 0<br>(0 - 0)         | 0<br>(0 - 0)         |
| Congenital heart anomalies                          | 61<br>(49 - 75)    | 54<br>(42 - 68)    | 3<br>(2 - 5)        | 3<br>(2 - 4)         | 0<br>(0 - 0)         | 0<br>(0 - 0)         |
| Cleft lip and cleft palate                          | 0<br>(0 - 0)       | 0<br>(0 - 0)       | --                  | --                   | --                   | --                   |
| Down syndrome                                       | 3<br>(2 - 5)       | 2<br>(1 - 3)       | 0<br>(0 - 1)        | 0<br>(0 - 0)         | 0<br>(0 - 0)         | 0<br>(0 - 0)         |
| Chromosomal unbalanced rearrangements               | 6<br>(3 - 10)      | 5<br>(3 - 9)       | 0<br>(0 - 0)        | 0<br>(0 - 1)         | 0<br>(0 - 0)         | 0<br>(0 - 0)         |
| Other congenital anomalies                          | 65<br>(51 - 80)    | 55<br>(42 - 69)    | 3<br>(2 - 4)        | 4<br>(3 - 5)         | 1<br>(1 - 2)         | 2<br>(1 - 2)         |
| Skin and subcutaneous diseases                      | 3<br>(2 - 4)       | 0<br>(0 - 1)       | 0<br>(0 - 0)        | 0<br>(0 - 1)         | 1<br>(0 - 1)         | 1<br>(1 - 2)         |
| Cellulitis                                          | 1<br>(0 - 1)       | 0<br>(0 - 0)       | 0<br>(0 - 0)        | 0<br>(0 - 0)         | 0<br>(0 - 0)         | 0<br>(0 - 0)         |
| Pyoderma                                            | 1<br>(1 - 2)       | 0<br>(0 - 0)       | 0<br>(0 - 0)        | 0<br>(0 - 0)         | 0<br>(0 - 0)         | 1<br>(0 - 1)         |
| Decubitus ulcer                                     | 1<br>(1 - 2)       | 0<br>(0 - 0)       | 0<br>(0 - 0)        | 0<br>(0 - 0)         | 0<br>(0 - 0)         | 1<br>(0 - 1)         |
| Other skin and subcutaneous diseases                | 0<br>(0 - 0)       | 0<br>(0 - 0)       | 0<br>(0 - 0)        | 0<br>(0 - 0)         | 0<br>(0 - 0)         | 0<br>(0 - 0)         |
| Sudden infant death syndrome                        | 7<br>(2 - 14)      | 7<br>(2 - 14)      | --                  | --                   | --                   | --                   |
| Injuries                                            | 157<br>(137 - 178) | 17<br>(14 - 21)    | 12<br>(10 - 15)     | 96<br>(82 - 111)     | 19<br>(16 - 22)      | 13<br>(11 - 16)      |



Web Table 31- Kuwait deaths with 95% UI by age, sex, and cause in 2013

| Cause                                           | Females, All Ages | Females, 0-4 Years | Females, 5-14 Years | Females, 15-49 Years | Females, 50-69 Years | Females, 70-80 Years |
|-------------------------------------------------|-------------------|--------------------|---------------------|----------------------|----------------------|----------------------|
| Transport injuries                              | 77<br>(65 - 92)   | 7<br>(5 - 10)      | 7<br>(5 - 9)        | 48<br>(39 - 57)      | 10<br>(8 - 13)       | 5<br>(4 - 6)         |
| Road injuries                                   | 74<br>(62 - 90)   | 7<br>(5 - 9)       | 6<br>(5 - 9)        | 46<br>(37 - 56)      | 10<br>(8 - 13)       | 4<br>(4 - 6)         |
| Pedestrian road injuries                        | 21<br>(16 - 29)   | 3<br>(2 - 4)       | 3<br>(2 - 4)        | 10<br>(7 - 14)       | 4<br>(3 - 5)         | 2<br>(1 - 3)         |
| Cyclist road injuries                           | 5<br>(3 - 6)      | 0<br>(0 - 1)       | 0<br>(0 - 1)        | 3<br>(2 - 4)         | 1<br>(1 - 1)         | 0<br>(0 - 0)         |
| Motorcyclist road injuries                      | 4<br>(2 - 5)      | 0<br>(0 - 0)       | 0<br>(0 - 0)        | 3<br>(1 - 4)         | 0<br>(0 - 0)         | 0<br>(0 - 0)         |
| Motor vehicle road injuries                     | 44<br>(35 - 55)   | 4<br>(2 - 5)       | 3<br>(2 - 4)        | 30<br>(24 - 38)      | 5<br>(4 - 7)         | 2<br>(1 - 3)         |
| Other road injuries                             | 0<br>(0 - 0)      | 0<br>(0 - 0)       | 0<br>(0 - 0)        | 0<br>(0 - 0)         | 0<br>(0 - 0)         | 0<br>(0 - 0)         |
| Other transport injuries                        | 3<br>(1 - 5)      | 0<br>(0 - 1)       | 0<br>(0 - 1)        | 2<br>(1 - 3)         | 1<br>(0 - 1)         | 0<br>(0 - 1)         |
| Unintentional injuries                          | 56<br>(45 - 65)   | 9<br>(7 - 12)      | 5<br>(4 - 6)        | 27<br>(21 - 33)      | 7<br>(5 - 9)         | 8<br>(6 - 9)         |
| Falls                                           | 12<br>(8 - 16)    | 1<br>(1 - 2)       | 1<br>(0 - 1)        | 6<br>(4 - 9)         | 1<br>(1 - 2)         | 3<br>(2 - 4)         |
| Drowning                                        | 4<br>(3 - 7)      | 1<br>(1 - 3)       | 1<br>(1 - 1)        | 1<br>(1 - 2)         | 0<br>(0 - 0)         | 0<br>(0 - 0)         |
| Fire, heat, and hot substances                  | 16<br>(11 - 22)   | 1<br>(1 - 2)       | 1<br>(1 - 2)        | 10<br>(7 - 14)       | 2<br>(1 - 3)         | 1<br>(1 - 2)         |
| Poisonings                                      | 4<br>(2 - 5)      | 1<br>(0 - 1)       | 0<br>(0 - 1)        | 3<br>(1 - 4)         | 0<br>(0 - 0)         | 0<br>(0 - 0)         |
| Exposure to mechanical forces                   | 3<br>(2 - 3)      | 0<br>(0 - 1)       | 0<br>(0 - 0)        | 1<br>(1 - 2)         | 0<br>(0 - 1)         | 0<br>(0 - 0)         |
| Unintentional firearm injuries                  | 0<br>(0 - 0)      | 0<br>(0 - 0)       | 0<br>(0 - 0)        | 0<br>(0 - 0)         | 0<br>(0 - 0)         | 0<br>(0 - 0)         |
| Unintentional suffocation                       | 0<br>(0 - 1)      | 0<br>(0 - 0)       | 0<br>(0 - 0)        | 0<br>(0 - 0)         | 0<br>(0 - 0)         | 0<br>(0 - 0)         |
| Other exposure to mechanical forces             | 2<br>(2 - 3)      | 0<br>(0 - 1)       | 0<br>(0 - 0)        | 1<br>(1 - 2)         | 0<br>(0 - 0)         | 0<br>(0 - 0)         |
| Adverse effects of medical treatment            | 9<br>(6 - 12)     | 1<br>(1 - 2)       | 0<br>(0 - 1)        | 3<br>(2 - 5)         | 3<br>(2 - 4)         | 2<br>(1 - 2)         |
| Animal contact                                  | 0<br>(0 - 1)      | 0<br>(0 - 0)       | 0<br>(0 - 0)        | 0<br>(0 - 0)         | 0<br>(0 - 0)         | 0<br>(0 - 0)         |
| Venomous animal contact                         | 0<br>(0 - 0)      | 0<br>(0 - 0)       | 0<br>(0 - 0)        | 0<br>(0 - 0)         | 0<br>(0 - 0)         | 0<br>(0 - 0)         |
| Non-venomous animal contact                     | 0<br>(0 - 0)      | 0<br>(0 - 0)       | 0<br>(0 - 0)        | 0<br>(0 - 0)         | 0<br>(0 - 0)         | 0<br>(0 - 0)         |
| Foreign body                                    | 6<br>(4 - 9)      | 3<br>(1 - 4)       | 1<br>(1 - 1)        | 1<br>(1 - 1)         | 1<br>(0 - 1)         | 1<br>(1 - 2)         |
| Pulmonary aspiration and foreign body in airway | 6<br>(4 - 9)      | 3<br>(1 - 4)       | 1<br>(0 - 1)        | 1<br>(0 - 1)         | 1<br>(0 - 1)         | 1<br>(1 - 2)         |
| Foreign body in other body part                 | 0<br>(0 - 0)      | 0<br>(0 - 0)       | 0<br>(0 - 0)        | 0<br>(0 - 0)         | 0<br>(0 - 0)         | 0<br>(0 - 0)         |
| Other unintentional injuries                    | 1<br>(0 - 1)      | 0<br>(0 - 0)       | 0<br>(0 - 0)        | 0<br>(0 - 0)         | 0<br>(0 - 0)         | 0<br>(0 - 0)         |
| Self-harm and interpersonal violence            | 25<br>(20 - 31)   | 0<br>(0 - 1)       | 1<br>(0 - 1)        | 21<br>(17 - 27)      | 2<br>(1 - 2)         | 1<br>(1 - 1)         |
| Self-harm                                       | 19<br>(15 - 24)   | --                 | 0<br>(0 - 0)        | 17<br>(13 - 21)      | 1<br>(1 - 2)         | 1<br>(0 - 1)         |
| Interpersonal violence                          | 6<br>(4 - 9)      | 0<br>(0 - 1)       | 0<br>(0 - 1)        | 4<br>(3 - 8)         | 0<br>(0 - 1)         | 0<br>(0 - 0)         |
| Assault by firearm                              | 1<br>(1 - 2)      | 0<br>(0 - 0)       | 0<br>(0 - 0)        | 1<br>(1 - 2)         | 0<br>(0 - 0)         | 0<br>(0 - 0)         |
| Assault by sharp object                         | 3<br>(2 - 4)      | 0<br>(0 - 0)       | 0<br>(0 - 0)        | 2<br>(1 - 4)         | 0<br>(0 - 0)         | 0<br>(0 - 0)         |
| Assault by other means                          | 2<br>(1 - 3)      | 0<br>(0 - 0)       | 0<br>(0 - 0)        | 1<br>(1 - 2)         | 0<br>(0 - 0)         | 0<br>(0 - 0)         |

Web Table 31- Kyrgyzstan deaths with 95% UI by age, sex, and cause in 2013

| Cause                                                             | Both Sexes, All Ages        | Both Sexes, 0-4 Years    | Both Sexes, 5-14 Years | Both Sexes, 15-49 Years  | Both Sexes, 50-69 Years     | Both Sexes, 70-80 Years     |
|-------------------------------------------------------------------|-----------------------------|--------------------------|------------------------|--------------------------|-----------------------------|-----------------------------|
| All causes                                                        | 38,193<br>(35,299 - 41,150) | 4,407<br>(4,026 - 4,800) | 393<br>(367 - 418)     | 7,754<br>(6,930 - 8,628) | 11,324<br>(10,211 - 12,483) | 14,316<br>(13,479 - 15,167) |
| Communicable, maternal, neonatal, and nutritional diseases        | 5,117<br>(4,605 - 5,561)    | 3,441<br>(3,118 - 3,793) | 88<br>(74 - 103)       | 959<br>(743 - 1,141)     | 423<br>(339 - 497)          | 206<br>(176 - 240)          |
| HIV/AIDS and tuberculosis                                         | 894<br>(576 - 1,135)        | 4<br>(2 - 13)            | 2<br>(1 - 4)           | 605<br>(371 - 790)       | 245<br>(173 - 308)          | 37<br>(27 - 47)             |
| Tuberculosis                                                      | 637<br>(391 - 760)          | 2<br>(1 - 3)             | 2<br>(1 - 3)           | 402<br>(227 - 490)       | 198<br>(132 - 246)          | 32<br>(22 - 38)             |
| HIV/AIDS                                                          | 257<br>(68 - 469)           | 2<br>(0 - 11)            | 0<br>(0 - 2)           | 203<br>(55 - 364)        | 47<br>(11 - 93)             | 6<br>(1 - 12)               |
| HIV/AIDS resulting in mycobacterial infection                     | 17<br>(5 - 32)              | 0<br>(0 - 1)             | 0<br>(0 - 0)           | 13<br>(4 - 25)           | 3<br>(1 - 6)                | 0<br>(0 - 1)                |
| HIV/AIDS resulting in other diseases                              | 240<br>(63 - 439)           | 2<br>(0 - 10)            | 0<br>(0 - 2)           | 189<br>(51 - 341)        | 43<br>(10 - 87)             | 5<br>(1 - 11)               |
| Diarrhea, lower respiratory, and other common infectious diseases | 1,954<br>(1,756 - 2,177)    | 1,330<br>(1,147 - 1,530) | 75<br>(62 - 88)        | 235<br>(198 - 276)       | 155<br>(126 - 189)          | 160<br>(130 - 194)          |
| Diarrheal diseases                                                | 219<br>(160 - 292)          | 195<br>(138 - 268)       | 4<br>(2 - 5)           | 11<br>(9 - 14)           | 5<br>(4 - 7)                | 4<br>(3 - 5)                |
| Intestinal infectious diseases                                    | 13<br>(7 - 21)              | 6<br>(2 - 12)            | 2<br>(1 - 5)           | 4<br>(2 - 8)             | 1<br>(0 - 3)                | 0<br>(0 - 3)                |
| Typhoid fever                                                     | 5<br>(2 - 8)                | 2<br>(1 - 3)             | 1<br>(1 - 2)           | 2<br>(1 - 3)             | 0<br>(0 - 1)                | 0<br>(0 - 0)                |
| Paratyphoid fever                                                 | 2<br>(1 - 3)                | 1<br>(0 - 1)             | 0<br>(0 - 1)           | 0<br>(0 - 1)             | 0<br>(0 - 0)                | 0<br>(0 - 0)                |
| Other intestinal infectious diseases                              | 7<br>(2 - 14)               | 4<br>(1 - 10)            | 1<br>(0 - 3)           | 2<br>(0 - 5)             | 1<br>(0 - 3)                | 0<br>(0 - 2)                |
| Lower respiratory infections                                      | 1,541<br>(1,356 - 1,752)    | 1,045<br>(876 - 1,233)   | 52<br>(41 - 65)        | 168<br>(138 - 202)       | 128<br>(100 - 160)          | 148<br>(119 - 182)          |
| Upper respiratory infections                                      | 3<br>(1 - 5)                | 0<br>(0 - 1)             | 0<br>(0 - 0)           | 1<br>(0 - 2)             | 1<br>(0 - 2)                | 1<br>(0 - 2)                |
| Otitis media                                                      | 1<br>(0 - 1)                | 0<br>(0 - 0)             | 0<br>(0 - 0)           | 0<br>(0 - 0)             | 0<br>(0 - 0)                | 0<br>(0 - 0)                |
| Meningitis                                                        | 88<br>(73 - 109)            | 45<br>(32 - 64)          | 6<br>(5 - 8)           | 24<br>(21 - 30)          | 10<br>(8 - 12)              | 2<br>(2 - 3)                |
| Pneumococcal meningitis                                           | 21<br>(17 - 25)             | 8<br>(6 - 12)            | 2<br>(1 - 2)           | 7<br>(5 - 10)            | 3<br>(2 - 4)                | 1<br>(1 - 1)                |
| H influenzae type B meningitis                                    | 31<br>(24 - 41)             | 22<br>(16 - 33)          | 2<br>(1 - 3)           | 4<br>(3 - 6)             | 2<br>(1 - 2)                | 0<br>(0 - 0)                |
| Meningococcal meningitis                                          | 19<br>(15 - 24)             | 9<br>(6 - 13)            | 2<br>(1 - 2)           | 6<br>(4 - 8)             | 2<br>(1 - 3)                | 1<br>(0 - 1)                |
| Other meningitis                                                  | 17<br>(13 - 22)             | 5<br>(3 - 8)             | 1<br>(1 - 1)           | 7<br>(4 - 9)             | 4<br>(2 - 5)                | 1<br>(1 - 1)                |
| Encephalitis                                                      | 83<br>(64 - 114)            | 36<br>(22 - 60)          | 10<br>(7 - 15)         | 25<br>(19 - 34)          | 9<br>(6 - 12)               | 3<br>(2 - 5)                |
| Diphtheria                                                        | 1<br>(0 - 4)                | 1<br>(0 - 3)             | 0<br>(0 - 1)           | 0<br>(0 - 1)             | 0<br>(0 - 0)                | --<br>(0 - 0)               |
| Whooping cough                                                    | 2<br>(1 - 5)                | 1<br>(0 - 5)             | 0<br>(0 - 0)           | 0<br>(0 - 0)             | 0<br>(0 - 0)                | --<br>(0 - 0)               |
| Tetanus                                                           | 1<br>(0 - 1)                | 0<br>(0 - 0)             | 0<br>(0 - 0)           | 0<br>(0 - 0)             | 0<br>(0 - 0)                | 0<br>(0 - 0)                |
| Measles                                                           | 0<br>(0 - 0)                | 0<br>(0 - 0)             | 0<br>(0 - 0)           | 0<br>(0 - 0)             | 0<br>(0 - 0)                | --<br>(0 - 0)               |
| Varicella and herpes zoster                                       | 3<br>(1 - 5)                | 1<br>(0 - 2)             | 0<br>(0 - 0)           | 1<br>(0 - 1)             | 0<br>(0 - 1)                | 1<br>(0 - 3)                |
| Neglected tropical diseases and malaria                           | 37<br>(27 - 49)             | 11<br>(5 - 19)           | 5<br>(2 - 8)           | 14<br>(9 - 20)           | 6<br>(4 - 8)                | 2<br>(2 - 4)                |
| Leishmaniasis                                                     | 20<br>(11 - 31)             | 7<br>(1 - 13)            | 3<br>(1 - 5)           | 8<br>(4 - 13)            | 2<br>(1 - 4)                | 1<br>(0 - 1)                |
| Visceral leishmaniasis                                            | 20<br>(11 - 31)             | 7<br>(1 - 13)            | 3<br>(1 - 5)           | 8<br>(4 - 13)            | 2<br>(1 - 4)                | 1<br>(0 - 1)                |
| Cysticercosis                                                     | 0<br>(0 - 0)                | 0<br>(0 - 0)             | 0<br>(0 - 0)           | 0<br>(0 - 0)             | 0<br>(0 - 0)                | 0<br>(0 - 0)                |
| Cystic echinococcosis                                             | 8<br>(7 - 9)                | 0<br>(0 - 0)             | 1<br>(0 - 1)           | 4<br>(3 - 4)             | 2<br>(2 - 3)                | 1<br>(1 - 1)                |
| Dengue                                                            | 1<br>(0 - 1)                | 0<br>(0 - 0)             | 0<br>(0 - 0)           | 0<br>(0 - 0)             | 0<br>(0 - 0)                | 0<br>(0 - 0)                |
| Rabies                                                            | 2<br>(2 - 4)                | 0<br>(0 - 1)             | 1<br>(0 - 1)           | 1<br>(1 - 1)             | 0<br>(0 - 1)                | 0<br>(0 - 0)                |
| Intestinal nematode infections                                    | 3<br>(0 - 9)                | 1<br>(0 - 7)             | 0<br>(0 - 3)           | 0<br>(0 - 3)             | 0<br>(0 - 3)                | 0<br>(0 - 3)                |
| Ascariasis                                                        | 3<br>(0 - 9)                | 1<br>(0 - 7)             | 0<br>(0 - 3)           | 0<br>(0 - 3)             | 0<br>(0 - 3)                | 0<br>(0 - 3)                |
| Other neglected tropical diseases                                 | 3<br>(2 - 4)                | 2<br>(1 - 3)             | 0<br>(0 - 0)           | 0<br>(0 - 1)             | 0<br>(0 - 0)                | 0<br>(0 - 0)                |
| Maternal disorders                                                | 69<br>(53 - 88)             | --                       | 0<br>(0 - 0)           | 69<br>(53 - 88)          | --                          | --                          |
| Maternal hemorrhage                                               | 10<br>(7 - 14)              | --                       | 0<br>(0 - 0)           | 10<br>(7 - 14)           | --                          | --                          |
| Maternal sepsis and other maternal infections                     | 7<br>(5 - 10)               | --                       | 0<br>(0 - 0)           | 7<br>(5 - 10)            | --                          | --                          |

Web Table 31- Kyrgyzstan deaths with 95% UI by age, sex, and cause in 2013

| Cause                                                            | Both Sexes, All Ages        | Both Sexes, 0-4 Years    | Both Sexes, 5-14 Years | Both Sexes, 15-49 Years  | Both Sexes, 50-69 Years    | Both Sexes, 70-80 Years     |
|------------------------------------------------------------------|-----------------------------|--------------------------|------------------------|--------------------------|----------------------------|-----------------------------|
| Maternal hypertensive disorders                                  | 10<br>(7 - 13)              | --                       | 0<br>(0 - 0)           | 10<br>(7 - 13)           | --                         | --                          |
| Maternal obstructed labor                                        | 5<br>(3 - 8)                | --                       | 0<br>(0 - 0)           | 5<br>(3 - 8)             | --                         | --                          |
| Maternal abortive outcome                                        | 6<br>(4 - 9)                | --                       | 0<br>(0 - 0)           | 6<br>(4 - 9)             | --                         | --                          |
| Indirect maternal deaths                                         | 13<br>(9 - 17)              | --                       | 0<br>(0 - 0)           | 13<br>(9 - 17)           | --                         | --                          |
| Late maternal deaths                                             | 8<br>(5 - 13)               | --                       | 0<br>(0 - 0)           | 8<br>(5 - 13)            | --                         | --                          |
| Maternal deaths aggravated by HIV/AIDS                           | 0<br>(0 - 0)                | --                       | --                     | 0<br>(0 - 0)             | --                         | --                          |
| Other maternal disorders                                         | 9<br>(6 - 12)               | --                       | 0<br>(0 - 0)           | 9<br>(6 - 12)            | --                         | --                          |
| Neonatal disorders                                               | 1,973<br>(1,752 - 2,182)    | 1,973<br>(1,752 - 2,182) | --                     | --                       | --                         | --                          |
| Neonatal preterm birth complications                             | 810<br>(577 - 985)          | 810<br>(577 - 985)       | --                     | --                       | --                         | --                          |
| Neonatal encephalopathy due to birth asphyxia and trauma         | 874<br>(695 - 1,072)        | 874<br>(695 - 1,072)     | --                     | --                       | --                         | --                          |
| Neonatal sepsis and other neonatal infections                    | 68<br>(40 - 117)            | 68<br>(40 - 117)         | --                     | --                       | --                         | --                          |
| Hemolytic disease and other neonatal jaundice                    | 19<br>(9 - 38)              | 19<br>(9 - 38)           | --                     | --                       | --                         | --                          |
| Other neonatal disorders                                         | 202<br>(142 - 274)          | 202<br>(142 - 274)       | --                     | --                       | --                         | --                          |
| Nutritional deficiencies                                         | 46<br>(35 - 57)             | 9<br>(6 - 12)            | 2<br>(2 - 3)           | 18<br>(13 - 23)          | 12<br>(9 - 17)             | 5<br>(4 - 6)                |
| Protein-energy malnutrition                                      | 13<br>(8 - 20)              | 2<br>(1 - 3)             | 0<br>(0 - 0)           | 5<br>(3 - 8)             | 6<br>(3 - 9)               | 1<br>(0 - 1)                |
| Iodine deficiency                                                | 1<br>(0 - 1)                | 0<br>(0 - 1)             | 0<br>(0 - 0)           | 0<br>(0 - 1)             | 0<br>(0 - 1)               | 0<br>(0 - 1)                |
| Iron-deficiency anemia                                           | 25<br>(18 - 34)             | 6<br>(4 - 8)             | 2<br>(1 - 2)           | 10<br>(7 - 14)           | 5<br>(3 - 8)               | 3<br>(2 - 4)                |
| Other nutritional deficiencies                                   | 7<br>(4 - 10)               | 1<br>(0 - 2)             | 1<br>(0 - 1)           | 3<br>(2 - 5)             | 1<br>(1 - 2)               | 1<br>(1 - 2)                |
| Other communicable, maternal, neonatal, and nutritional diseases | 144<br>(118 - 187)          | 115<br>(91 - 157)        | 4<br>(3 - 5)           | 17<br>(14 - 22)          | 5<br>(4 - 7)               | 2<br>(2 - 3)                |
| Sexually transmitted diseases excluding HIV                      | 6<br>(3 - 11)               | 3<br>(0 - 7)             | 0<br>(0 - 1)           | 2<br>(1 - 3)             | 1<br>(1 - 2)               | 0<br>(0 - 1)                |
| Syphilis                                                         | 5<br>(2 - 9)                | 3<br>(0 - 7)             | 0<br>(0 - 1)           | 1<br>(1 - 1)             | 1<br>(0 - 1)               | 0<br>(0 - 1)                |
| Chlamydial infection                                             | 0<br>(0 - 1)                | --                       | 0<br>(0 - 0)           | 0<br>(0 - 0)             | 0<br>(0 - 0)               | 0<br>(0 - 0)                |
| Gonococcal infection                                             | 1<br>(0 - 1)                | --                       | 0<br>(0 - 0)           | 0<br>(0 - 1)             | 0<br>(0 - 0)               | 0<br>(0 - 0)                |
| Other sexually transmitted diseases                              | 1<br>(0 - 1)                | --                       | 0<br>(0 - 0)           | 0<br>(0 - 1)             | 0<br>(0 - 0)               | 0<br>(0 - 0)                |
| Hepatitis                                                        | 29<br>(24 - 36)             | 8<br>(5 - 12)            | 3<br>(2 - 4)           | 14<br>(11 - 18)          | 3<br>(2 - 4)               | 1<br>(1 - 2)                |
| Acute hepatitis A                                                | 5<br>(1 - 9)                | 3<br>(1 - 5)             | 1<br>(0 - 2)           | 1<br>(0 - 2)             | 0<br>(0 - 0)               | 0<br>(0 - 0)                |
| Acute hepatitis B                                                | 16<br>(12 - 22)             | 5<br>(3 - 9)             | 1<br>(1 - 2)           | 6<br>(4 - 9)             | 3<br>(2 - 4)               | 1<br>(1 - 2)                |
| Acute hepatitis C                                                | 2<br>(0 - 4)                | --                       | 0<br>(0 - 1)           | 1<br>(0 - 2)             | 0<br>(0 - 1)               | 0<br>(0 - 0)                |
| Acute hepatitis E                                                | 7<br>(4 - 10)               | 0<br>(0 - 0)             | 0<br>(0 - 1)           | 6<br>(4 - 9)             | 0<br>(0 - 1)               | 0<br>(0 - 0)                |
| Other infectious diseases                                        | 108<br>(85 - 149)           | 105<br>(82 - 145)        | 0<br>(0 - 1)           | 1<br>(1 - 2)             | 1<br>(1 - 1)               | 1<br>(1 - 1)                |
| Non-communicable diseases                                        | 29,768<br>(27,374 - 32,160) | 694<br>(581 - 828)       | 135<br>(115 - 149)     | 4,698<br>(4,117 - 5,299) | 10,283<br>(9,263 - 11,330) | 13,960<br>(13,114 - 14,781) |
| Neoplasms                                                        | 3,643<br>(3,263 - 4,074)    | 23<br>(17 - 32)          | 38<br>(30 - 45)        | 788<br>(688 - 897)       | 1,865<br>(1,646 - 2,108)   | 928<br>(839 - 1,046)        |
| Esophageal cancer                                                | 185<br>(146 - 260)          | --                       | --                     | 17<br>(13 - 24)          | 95<br>(69 - 142)           | 74<br>(57 - 102)            |
| Stomach cancer                                                   | 644<br>(556 - 727)          | --                       | --                     | 117<br>(97 - 139)        | 342<br>(286 - 400)         | 185<br>(157 - 217)          |
| Liver cancer                                                     | 279<br>(239 - 324)          | --                       | 1<br>(1 - 1)           | 45<br>(36 - 57)          | 155<br>(127 - 184)         | 78<br>(64 - 97)             |
| Liver cancer due to hepatitis B                                  | 103<br>(84 - 124)           | --                       | 0<br>(0 - 0)           | 19<br>(14 - 25)          | 61<br>(49 - 77)            | 23<br>(17 - 29)             |
| Liver cancer due to hepatitis C                                  | 96<br>(77 - 118)            | --                       | 0<br>(0 - 0)           | 14<br>(11 - 19)          | 53<br>(40 - 68)            | 29<br>(22 - 38)             |
| Liver cancer due to alcohol use                                  | 52<br>(39 - 69)             | --                       | --                     | 6<br>(4 - 8)             | 27<br>(20 - 37)            | 19<br>(13 - 27)             |
| Liver cancer due to other causes                                 | 28<br>(20 - 38)             | --                       | 0<br>(0 - 1)           | 7<br>(5 - 9)             | 13<br>(9 - 19)             | 7<br>(5 - 10)               |
| Larynx cancer                                                    | 42<br>(32 - 69)             | --                       | --                     | 6<br>(4 - 10)            | 27<br>(20 - 46)            | 9<br>(6 - 14)               |

Web Table 31- Kyrgyzstan deaths with 95% UI by age, sex, and cause in 2013

| Cause                                         | Both Sexes, All Ages        | Both Sexes, 0-4 Years | Both Sexes, 5-14 Years | Both Sexes, 15-49 Years  | Both Sexes, 50-69 Years  | Both Sexes, 70-80 Years    |
|-----------------------------------------------|-----------------------------|-----------------------|------------------------|--------------------------|--------------------------|----------------------------|
| Tracheal, bronchus and lung cancer            | 489<br>(426 - 561)          | --                    | --                     | 63<br>(52 - 78)          | 305<br>(257 - 356)       | 121<br>(105 - 140)         |
| Breast cancer                                 | 280<br>(230 - 345)          | --                    | --                     | 85<br>(66 - 108)         | 140<br>(111 - 177)       | 55<br>(44 - 69)            |
| Cervical cancer                               | 212<br>(160 - 262)          | --                    | --                     | 79<br>(49 - 104)         | 94<br>(70 - 122)         | 39<br>(28 - 57)            |
| Uterine cancer                                | 54<br>(33 - 73)             | --                    | --                     | 8<br>(5 - 13)            | 29<br>(17 - 42)          | 17<br>(10 - 24)            |
| Prostate cancer                               | 67<br>(46 - 109)            | --                    | --                     | 2<br>(1 - 4)             | 28<br>(18 - 46)          | 37<br>(25 - 61)            |
| Colon and rectum cancer                       | 249<br>(220 - 283)          | --                    | --                     | 48<br>(40 - 56)          | 122<br>(105 - 142)       | 80<br>(69 - 94)            |
| Lip and oral cavity cancer                    | 59<br>(47 - 78)             | --                    | --                     | 10<br>(7 - 14)           | 34<br>(26 - 47)          | 14<br>(11 - 19)            |
| Nasopharynx cancer                            | 13<br>(11 - 17)             | --                    | 0<br>(0 - 1)           | 5<br>(4 - 7)             | 6<br>(4 - 8)             | 2<br>(1 - 2)               |
| Other pharynx cancer                          | 31<br>(24 - 39)             | --                    | --                     | 5<br>(4 - 7)             | 20<br>(15 - 26)          | 6<br>(5 - 8)               |
| Gallbladder and biliary tract cancer          | 35<br>(26 - 43)             | --                    | --                     | 4<br>(3 - 5)             | 17<br>(12 - 22)          | 14<br>(9 - 18)             |
| Pancreatic cancer                             | 150<br>(130 - 172)          | --                    | --                     | 21<br>(18 - 26)          | 85<br>(71 - 100)         | 44<br>(36 - 53)            |
| Malignant skin melanoma                       | 28<br>(20 - 39)             | --                    | --                     | 7<br>(5 - 10)            | 13<br>(9 - 19)           | 8<br>(6 - 10)              |
| Non-melanoma skin cancer                      | 32<br>(26 - 46)             | --                    | --                     | 5<br>(4 - 7)             | 12<br>(9 - 18)           | 16<br>(12 - 23)            |
| Ovarian cancer                                | 95<br>(74 - 122)            | --                    | --                     | 25<br>(19 - 34)          | 52<br>(39 - 69)          | 18<br>(13 - 25)            |
| Testicular cancer                             | 9<br>(5 - 12)               | --                    | --                     | 6<br>(4 - 9)             | 2<br>(1 - 3)             | 1<br>(0 - 1)               |
| Kidney cancer                                 | 71<br>(60 - 83)             | 2<br>(1 - 4)          | 1<br>(1 - 1)           | 13<br>(11 - 17)          | 39<br>(32 - 49)          | 15<br>(12 - 20)            |
| Bladder cancer                                | 53<br>(43 - 63)             | --                    | --                     | 4<br>(3 - 6)             | 26<br>(20 - 33)          | 22<br>(18 - 27)            |
| Brain and nervous system cancer               | 110<br>(79 - 132)           | 2<br>(1 - 4)          | 6<br>(3 - 7)           | 48<br>(33 - 60)          | 47<br>(34 - 58)          | 7<br>(5 - 9)               |
| Thyroid cancer                                | 16<br>(12 - 20)             | --                    | 0<br>(0 - 0)           | 3<br>(2 - 3)             | 7<br>(5 - 10)            | 5<br>(4 - 7)               |
| Mesothelioma                                  | 3<br>(2 - 3)                | --                    | --                     | 1<br>(1 - 1)             | 2<br>(1 - 2)             | 0<br>(0 - 0)               |
| Hodgkin lymphoma                              | 15<br>(12 - 21)             | 0<br>(0 - 1)          | 1<br>(0 - 2)           | 7<br>(5 - 10)            | 5<br>(4 - 8)             | 2<br>(2 - 3)               |
| Non-Hodgkin lymphoma                          | 47<br>(39 - 58)             | 1<br>(1 - 2)          | 2<br>(2 - 3)           | 16<br>(13 - 21)          | 19<br>(15 - 24)          | 9<br>(7 - 11)              |
| Multiple myeloma                              | 5<br>(4 - 6)                | --                    | --                     | 1<br>(1 - 2)             | 3<br>(2 - 4)             | 1<br>(1 - 1)               |
| Leukemia                                      | 124<br>(107 - 140)          | 8<br>(5 - 13)         | 16<br>(12 - 21)        | 56<br>(47 - 66)          | 34<br>(28 - 40)          | 10<br>(8 - 12)             |
| Other neoplasms                               | 246<br>(209 - 290)          | 9<br>(6 - 13)         | 10<br>(8 - 13)         | 78<br>(64 - 94)          | 105<br>(86 - 127)        | 43<br>(35 - 55)            |
| Cardiovascular diseases                       | 17,678<br>(15,990 - 19,036) | 11<br>(8 - 14)        | 12<br>(9 - 15)         | 1,714<br>(1,487 - 1,955) | 5,739<br>(5,056 - 6,322) | 10,202<br>(9,322 - 10,828) |
| Rheumatic heart disease                       | 266<br>(215 - 376)          | 0<br>(0 - 1)          | 3<br>(2 - 5)           | 141<br>(108 - 205)       | 107<br>(81 - 146)        | 14<br>(11 - 21)            |
| Ischemic heart disease                        | 10,391<br>(8,774 - 11,379)  | 4<br>(3 - 6)          | 3<br>(2 - 4)           | 775<br>(647 - 922)       | 2,945<br>(2,446 - 3,335) | 6,663<br>(5,576 - 7,225)   |
| Cerebrovascular disease                       | 6,053<br>(5,362 - 6,942)    | 2<br>(1 - 3)          | 2<br>(2 - 3)           | 547<br>(449 - 656)       | 2,260<br>(1,957 - 2,576) | 3,242<br>(2,872 - 3,841)   |
| Ischemic stroke                               | 3,507<br>(3,062 - 4,059)    | 1<br>(1 - 2)          | 1<br>(0 - 1)           | 111<br>(80 - 145)        | 946<br>(761 - 1,118)     | 2,449<br>(2,160 - 2,878)   |
| Hemorrhagic stroke                            | 2,545<br>(2,167 - 3,024)    | 1<br>(1 - 1)          | 2<br>(1 - 2)           | 435<br>(354 - 522)       | 1,314<br>(1,107 - 1,551) | 793<br>(650 - 1,038)       |
| Hypertensive heart disease                    | 367<br>(299 - 490)          | 1<br>(1 - 2)          | 0<br>(0 - 0)           | 34<br>(25 - 44)          | 147<br>(114 - 197)       | 185<br>(144 - 260)         |
| Cardiomyopathy and myocarditis                | 386<br>(308 - 476)          | 2<br>(1 - 2)          | 2<br>(1 - 3)           | 155<br>(119 - 192)       | 179<br>(137 - 227)       | 49<br>(39 - 70)            |
| Atrial fibrillation and flutter               | 0<br>(0 - 0)                | --                    | --                     | 0<br>(0 - 0)             | 0<br>(0 - 0)             | 0<br>(0 - 0)               |
| Aortic aneurysm                               | 23<br>(19 - 29)             | --                    | --                     | 6<br>(4 - 7)             | 10<br>(8 - 14)           | 7<br>(5 - 9)               |
| Peripheral vascular disease                   | 13<br>(11 - 17)             | --                    | --                     | 1<br>(1 - 2)             | 7<br>(5 - 9)             | 5<br>(4 - 7)               |
| Endocarditis                                  | 11<br>(8 - 15)              | 1<br>(1 - 1)          | 0<br>(0 - 0)           | 5<br>(4 - 7)             | 3<br>(2 - 5)             | 2<br>(1 - 2)               |
| Other cardiovascular and circulatory diseases | 169<br>(119 - 202)          | 1<br>(1 - 1)          | 1<br>(0 - 1)           | 51<br>(33 - 64)          | 81<br>(55 - 102)         | 35<br>(27 - 46)            |
| Chronic respiratory diseases                  | 2,256<br>(1,967 - 3,077)    | 3<br>(2 - 4)          | 2<br>(1 - 2)           | 198<br>(163 - 267)       | 674<br>(569 - 960)       | 1,379<br>(1,201 - 1,888)   |
| Chronic obstructive pulmonary disease         | 2,127<br>(1,857 - 2,918)    | 1<br>(1 - 2)          | 1<br>(1 - 1)           | 177<br>(145 - 239)       | 624<br>(526 - 889)       | 1,323<br>(1,155 - 1,813)   |

Web Table 31- Kyrgyzstan deaths with 95% UI by age, sex, and cause in 2013

| Cause                                               | Both Sexes, All Ages     | Both Sexes, 0-4 Years | Both Sexes, 5-14 Years | Both Sexes, 15-49 Years | Both Sexes, 50-69 Years | Both Sexes, 70-80 Years |
|-----------------------------------------------------|--------------------------|-----------------------|------------------------|-------------------------|-------------------------|-------------------------|
| Pneumoconiosis                                      | 8<br>(6 - 12)            | 0<br>(0 - 0)          | 0<br>(0 - 0)           | 1<br>(1 - 1)            | 4<br>(2 - 6)            | 4<br>(2 - 6)            |
| Silicosis                                           | 1<br>(1 - 2)             | 0<br>(0 - 0)          | 0<br>(0 - 0)           | 0<br>(0 - 0)            | 1<br>(0 - 1)            | 0<br>(0 - 0)            |
| Asbestosis                                          | 2<br>(2 - 3)             | 0<br>(0 - 0)          | 0<br>(0 - 0)           | 0<br>(0 - 0)            | 1<br>(0 - 1)            | 1<br>(1 - 2)            |
| Coal workers pneumoconiosis                         | 3<br>(2 - 5)             | 0<br>(0 - 0)          | 0<br>(0 - 0)           | 0<br>(0 - 0)            | 1<br>(1 - 2)            | 2<br>(1 - 2)            |
| Other pneumoconiosis                                | 2<br>(1 - 3)             | 0<br>(0 - 0)          | 0<br>(0 - 0)           | 0<br>(0 - 0)            | 1<br>(1 - 1)            | 1<br>(0 - 1)            |
| Asthma                                              | 98<br>(75 - 144)         | 0<br>(0 - 0)          | 0<br>(0 - 1)           | 17<br>(13 - 25)         | 40<br>(29 - 59)         | 41<br>(29 - 60)         |
| Interstitial lung disease and pulmonary sarcoidosis | 16<br>(11 - 29)          | 0<br>(0 - 0)          | 0<br>(0 - 0)           | 1<br>(1 - 2)            | 5<br>(3 - 8)            | 10<br>(7 - 19)          |
| Other chronic respiratory diseases                  | 6<br>(5 - 8)             | 1<br>(1 - 2)          | 0<br>(0 - 0)           | 2<br>(2 - 3)            | 1<br>(1 - 2)            | 1<br>(1 - 2)            |
| Cirrhosis                                           | 2,262<br>(2,006 - 2,543) | 3<br>(2 - 4)          | 9<br>(7 - 11)          | 861<br>(739 - 997)      | 1,047<br>(908 - 1,196)  | 342<br>(300 - 397)      |
| Cirrhosis due to hepatitis B                        | 946<br>(678 - 1,204)     | 0<br>(0 - 0)          | 3<br>(2 - 4)           | 364<br>(232 - 476)      | 434<br>(307 - 566)      | 145<br>(108 - 189)      |
| Cirrhosis due to hepatitis C                        | 576<br>(340 - 821)       | 0<br>(0 - 0)          | 1<br>(1 - 2)           | 211<br>(117 - 315)      | 273<br>(160 - 400)      | 90<br>(56 - 128)        |
| Cirrhosis due to alcohol use                        | 498<br>(344 - 701)       | --                    | --                     | 158<br>(92 - 248)       | 254<br>(178 - 353)      | 86<br>(62 - 115)        |
| Cirrhosis due to other causes                       | 242<br>(166 - 339)       | 2<br>(2 - 3)          | 5<br>(4 - 6)           | 129<br>(88 - 183)       | 85<br>(51 - 128)        | 21<br>(13 - 30)         |
| Digestive diseases                                  | 363<br>(314 - 447)       | 3<br>(2 - 4)          | 4<br>(4 - 5)           | 133<br>(111 - 166)      | 144<br>(122 - 177)      | 79<br>(67 - 104)        |
| Peptic ulcer disease                                | 116<br>(92 - 146)        | 0<br>(0 - 0)          | 0<br>(0 - 0)           | 40<br>(29 - 53)         | 52<br>(40 - 67)         | 24<br>(19 - 32)         |
| Gastritis and duodenitis                            | 7<br>(5 - 10)            | 0<br>(0 - 0)          | 0<br>(0 - 0)           | 2<br>(1 - 3)            | 2<br>(1 - 4)            | 2<br>(1 - 3)            |
| Appendicitis                                        | 9<br>(7 - 13)            | 0<br>(0 - 0)          | 1<br>(1 - 1)           | 4<br>(3 - 6)            | 3<br>(2 - 4)            | 1<br>(1 - 2)            |
| Paralytic ileus and intestinal obstruction          | 49<br>(35 - 73)          | 1<br>(0 - 1)          | 1<br>(1 - 2)           | 18<br>(13 - 27)         | 18<br>(13 - 29)         | 10<br>(7 - 16)          |
| Inguinal, femoral, and abdominal hernia             | 8<br>(5 - 12)            | 0<br>(0 - 0)          | 0<br>(0 - 0)           | 1<br>(1 - 2)            | 3<br>(2 - 5)            | 3<br>(2 - 5)            |
| Inflammatory bowel disease                          | 13<br>(10 - 17)          | 1<br>(1 - 2)          | 1<br>(0 - 1)           | 5<br>(4 - 7)            | 4<br>(3 - 6)            | 2<br>(2 - 3)            |
| Vascular intestinal disorders                       | 17<br>(10 - 29)          | 0<br>(0 - 0)          | 0<br>(0 - 0)           | 3<br>(1 - 6)            | 7<br>(4 - 13)           | 6<br>(4 - 11)           |
| Gallbladder and biliary diseases                    | 43<br>(34 - 63)          | 0<br>(0 - 0)          | 0<br>(0 - 0)           | 9<br>(7 - 12)           | 17<br>(13 - 24)         | 17<br>(13 - 28)         |
| Pancreatitis                                        | 66<br>(52 - 87)          | 0<br>(0 - 0)          | 0<br>(0 - 0)           | 35<br>(26 - 49)         | 23<br>(17 - 32)         | 8<br>(6 - 11)           |
| Other digestive diseases                            | 34<br>(27 - 43)          | 1<br>(0 - 1)          | 1<br>(0 - 1)           | 15<br>(11 - 19)         | 14<br>(10 - 19)         | 4<br>(3 - 6)            |
| Neurological disorders                              | 1,013<br>(842 - 1,192)   | 8<br>(5 - 13)         | 18<br>(13 - 24)        | 154<br>(123 - 185)      | 90<br>(75 - 107)        | 744<br>(593 - 918)      |
| Alzheimer disease and other dementias               | 787<br>(634 - 961)       | --                    | --                     | 0<br>(0 - 1)            | 50<br>(39 - 64)         | 737<br>(586 - 910)      |
| Parkinson disease                                   | 6<br>(5 - 7)             | --                    | --                     | 1<br>(1 - 1)            | 3<br>(2 - 4)            | 2<br>(1 - 2)            |
| Epilepsy                                            | 198<br>(156 - 239)       | 6<br>(3 - 11)         | 16<br>(11 - 22)        | 143<br>(112 - 173)      | 29<br>(22 - 37)         | 4<br>(3 - 5)            |
| Multiple sclerosis                                  | 4<br>(3 - 7)             | --                    | --                     | 2<br>(1 - 4)            | 2<br>(1 - 3)            | 0<br>(0 - 0)            |
| Other neurological disorders                        | 18<br>(15 - 21)          | 2<br>(1 - 2)          | 2<br>(1 - 2)           | 8<br>(6 - 9)            | 6<br>(5 - 7)            | 1<br>(1 - 2)            |
| Mental and substance use disorders                  | 570<br>(410 - 713)       | 1<br>(1 - 1)          | 0<br>(0 - 0)           | 326<br>(231 - 400)      | 218<br>(154 - 291)      | 26<br>(20 - 32)         |
| Schizophrenia                                       | 28<br>(22 - 37)          | --                    | --                     | 19<br>(14 - 25)         | 8<br>(5 - 11)           | 2<br>(1 - 2)            |
| Alcohol use disorders                               | 395<br>(249 - 542)       | --                    | --                     | 207<br>(127 - 276)      | 178<br>(115 - 252)      | 10<br>(6 - 14)          |
| Drug use disorders                                  | 147<br>(112 - 178)       | 1<br>(1 - 1)          | --                     | 100<br>(73 - 127)       | 33<br>(24 - 42)         | 14<br>(11 - 18)         |
| Opioid use disorders                                | 32<br>(24 - 39)          | 0<br>(0 - 0)          | --                     | 22<br>(16 - 29)         | 6<br>(5 - 8)            | 3<br>(2 - 4)            |
| Cocaine use disorders                               | 4<br>(3 - 4)             | 0<br>(0 - 0)          | --                     | 3<br>(2 - 3)            | 1<br>(0 - 1)            | 0<br>(0 - 0)            |
| Amphetamine use disorders                           | 4<br>(3 - 4)             | 0<br>(0 - 0)          | --                     | 2<br>(2 - 3)            | 1<br>(1 - 1)            | 0<br>(0 - 1)            |
| Other drug use disorders                            | 108<br>(81 - 132)        | 1<br>(0 - 1)          | --                     | 73<br>(53 - 92)         | 25<br>(18 - 32)         | 10<br>(8 - 13)          |
| Eating disorders                                    | 0<br>(0 - 0)             | --                    | 0<br>(0 - 0)           | 0<br>(0 - 0)            | --                      | --                      |
| Anorexia nervosa                                    | 0<br>(0 - 0)             | --                    | 0<br>(0 - 0)           | 0<br>(0 - 0)            | --                      | --                      |

Web Table 31- Kyrgyzstan deaths with 95% UI by age, sex, and cause in 2013

| Cause                                               | Both Sexes, All Ages   | Both Sexes, 0-4 Years | Both Sexes, 5-14 Years | Both Sexes, 15-49 Years | Both Sexes, 50-69 Years | Both Sexes, 70-80 Years |
|-----------------------------------------------------|------------------------|-----------------------|------------------------|-------------------------|-------------------------|-------------------------|
| Diabetes, urogenital, blood, and endocrine diseases | 1,205<br>(964 - 1,356) | 27<br>(21 - 34)       | 21<br>(16 - 25)        | 448<br>(332 - 517)      | 472<br>(376 - 540)      | 238<br>(194 - 267)      |
| Diabetes mellitus                                   | 286<br>(249 - 333)     | 1<br>(1 - 1)          | 2<br>(1 - 3)           | 52<br>(43 - 61)         | 158<br>(134 - 189)      | 73<br>(62 - 91)         |
| Acute glomerulonephritis                            | 9<br>(7 - 13)          | 1<br>(0 - 2)          | 1<br>(0 - 1)           | 4<br>(3 - 7)            | 2<br>(2 - 4)            | 1<br>(0 - 1)            |
| Chronic kidney disease                              | 524<br>(393 - 595)     | 7<br>(4 - 9)          | 9<br>(5 - 11)          | 245<br>(180 - 287)      | 185<br>(134 - 219)      | 79<br>(65 - 92)         |
| Chronic kidney disease due to diabetes mellitus     | 83<br>(59 - 115)       | 0<br>(0 - 0)          | 0<br>(0 - 1)           | 17<br>(12 - 28)         | 51<br>(35 - 71)         | 14<br>(10 - 20)         |
| Chronic kidney disease due to hypertension          | 39<br>(26 - 54)        | 2<br>(2 - 3)          | 1<br>(0 - 1)           | 11<br>(7 - 16)          | 13<br>(8 - 20)          | 12<br>(8 - 17)          |
| Chronic kidney disease due to glomerulonephritis    | 248<br>(179 - 292)     | 2<br>(1 - 3)          | 4<br>(3 - 5)           | 146<br>(107 - 173)      | 68<br>(47 - 85)         | 27<br>(19 - 34)         |
| Chronic kidney disease due to other causes          | 155<br>(95 - 191)      | 2<br>(1 - 4)          | 3<br>(1 - 5)           | 71<br>(43 - 92)         | 52<br>(28 - 72)         | 27<br>(18 - 35)         |
| Urinary diseases and male infertility               | 324<br>(199 - 389)     | 3<br>(2 - 4)          | 3<br>(2 - 4)           | 121<br>(71 - 149)       | 115<br>(71 - 144)       | 83<br>(50 - 103)        |
| Interstitial nephritis and urinary tract infections | 303<br>(182 - 364)     | 3<br>(2 - 4)          | 3<br>(2 - 4)           | 113<br>(65 - 140)       | 106<br>(62 - 133)       | 78<br>(47 - 97)         |
| Urolithiasis                                        | 10<br>(7 - 17)         | --                    | 0<br>(0 - 0)           | 4<br>(2 - 7)            | 4<br>(2 - 7)            | 2<br>(1 - 3)            |
| Other urinary diseases                              | 12<br>(8 - 21)         | 0<br>(0 - 0)          | 0<br>(0 - 0)           | 4<br>(3 - 7)            | 5<br>(3 - 8)            | 2<br>(1 - 5)            |
| Gynecological diseases                              | 0<br>(0 - 0)           | --                    | --                     | 0<br>(0 - 0)            | 0<br>(0 - 0)            | 0<br>(0 - 0)            |
| Uterine fibroids                                    | 0<br>(0 - 0)           | --                    | --                     | 0<br>(0 - 0)            | 0<br>(0 - 0)            | 0<br>(0 - 0)            |
| Polycystic ovarian syndrome                         | 0<br>(0 - 0)           | --                    | --                     | 0<br>(0 - 0)            | 0<br>(0 - 0)            | --                      |
| Endometriosis                                       | 0<br>(0 - 0)           | --                    | --                     | 0<br>(0 - 0)            | 0<br>(0 - 0)            | --                      |
| Genital prolapse                                    | 0<br>(0 - 0)           | --                    | --                     | 0<br>(0 - 0)            | 0<br>(0 - 0)            | 0<br>(0 - 0)            |
| Other gynecological diseases                        | 0<br>(0 - 0)           | --                    | --                     | 0<br>(0 - 0)            | 0<br>(0 - 0)            | 0<br>(0 - 0)            |
| Hemoglobinopathies and hemolytic anemias            | 20<br>(15 - 29)        | 7<br>(5 - 10)         | 2<br>(1 - 3)           | 8<br>(6 - 12)           | 2<br>(2 - 4)            | 1<br>(0 - 1)            |
| Thalassemias                                        | 11<br>(8 - 16)         | 5<br>(3 - 7)          | 2<br>(1 - 3)           | 5<br>(3 - 7)            | 0<br>(0 - 0)            | 0<br>(0 - 0)            |
| Sickle cell disorders                               | 0<br>(0 - 1)           | 0<br>(0 - 0)          | 0<br>(0 - 0)           | 0<br>(0 - 0)            | 0<br>(0 - 0)            | 0<br>(0 - 0)            |
| G6PD deficiency                                     | 0<br>(0 - 1)           | 0<br>(0 - 0)          | 0<br>(0 - 0)           | 0<br>(0 - 0)            | 0<br>(0 - 0)            | 0<br>(0 - 0)            |
| Other hemoglobinopathies and hemolytic anemias      | 8<br>(6 - 12)          | 2<br>(1 - 3)          | 0<br>(0 - 0)           | 3<br>(2 - 5)            | 2<br>(2 - 4)            | 1<br>(0 - 1)            |
| Endocrine, metabolic, blood, and immune disorders   | 41<br>(27 - 49)        | 9<br>(5 - 13)         | 4<br>(3 - 6)           | 17<br>(10 - 21)         | 9<br>(6 - 12)           | 2<br>(1 - 2)            |
| Musculoskeletal disorders                           | 71<br>(59 - 97)        | --                    | 5<br>(4 - 6)           | 29<br>(23 - 37)         | 20<br>(16 - 27)         | 17<br>(13 - 28)         |
| Rheumatoid arthritis                                | 32<br>(26 - 44)        | --                    | 0<br>(0 - 1)           | 7<br>(5 - 10)           | 12<br>(9 - 15)          | 13<br>(10 - 20)         |
| Other musculoskeletal disorders                     | 39<br>(32 - 54)        | --                    | 5<br>(4 - 6)           | 22<br>(17 - 28)         | 8<br>(6 - 12)           | 4<br>(3 - 9)            |
| Other non-communicable diseases                     | 706<br>(591 - 837)     | 615<br>(508 - 744)    | 26<br>(20 - 32)        | 47<br>(38 - 58)         | 14<br>(11 - 18)         | 4<br>(3 - 5)            |
| Congenital anomalies                                | 662<br>(553 - 786)     | 582<br>(477 - 703)    | 25<br>(19 - 31)        | 41<br>(33 - 52)         | 10<br>(8 - 14)          | 3<br>(2 - 4)            |
| Neural tube defects                                 | 41<br>(26 - 60)        | 39<br>(25 - 59)       | 1<br>(0 - 1)           | 1<br>(0 - 1)            | 0<br>(0 - 0)            | 0<br>(0 - 0)            |
| Congenital heart anomalies                          | 297<br>(235 - 363)     | 240<br>(183 - 305)    | 19<br>(14 - 23)        | 30<br>(24 - 38)         | 6<br>(5 - 9)            | 2<br>(1 - 2)            |
| Cleft lip and cleft palate                          | 5<br>(2 - 14)          | 5<br>(2 - 14)         | --                     | --                      | --                      | --                      |
| Down syndrome                                       | 9<br>(6 - 16)          | 7<br>(4 - 14)         | 0<br>(0 - 0)           | 1<br>(1 - 2)            | 0<br>(0 - 0)            | 0<br>(0 - 0)            |
| Chromosomal unbalanced rearrangements               | 1<br>(1 - 1)           | 0<br>(0 - 0)          | 0<br>(0 - 0)           | 0<br>(0 - 0)            | 0<br>(0 - 0)            | 0<br>(0 - 0)            |
| Other congenital anomalies                          | 309<br>(246 - 386)     | 290<br>(227 - 364)    | 5<br>(4 - 8)           | 9<br>(7 - 12)           | 4<br>(3 - 5)            | 1<br>(1 - 1)            |
| Skin and subcutaneous diseases                      | 13<br>(3 - 16)         | 2<br>(0 - 3)          | 1<br>(0 - 1)           | 6<br>(1 - 7)            | 4<br>(1 - 5)            | 1<br>(0 - 2)            |
| Cellulitis                                          | 6<br>(2 - 7)           | 1<br>(0 - 1)          | 0<br>(0 - 0)           | 3<br>(1 - 4)            | 2<br>(0 - 2)            | 1<br>(0 - 1)            |
| Pyoderma                                            | 5<br>(1 - 7)           | 1<br>(0 - 1)          | 0<br>(0 - 0)           | 2<br>(1 - 3)            | 1<br>(0 - 2)            | 1<br>(0 - 1)            |
| Decubitus ulcer                                     | 1<br>(0 - 1)           | 0<br>(0 - 0)          | 0<br>(0 - 0)           | 0<br>(0 - 0)            | 0<br>(0 - 0)            | 0<br>(0 - 0)            |
| Other skin and subcutaneous diseases                | 1<br>(0 - 2)           | 0<br>(0 - 0)          | 0<br>(0 - 0)           | 1<br>(0 - 1)            | 0<br>(0 - 0)            | 0<br>(0 - 0)            |

Web Table 31- Kyrgyzstan deaths with 95% UI by age, sex, and cause in 2013

| Cause                                           | Both Sexes, All Ages     | Both Sexes, 0-4 Years | Both Sexes, 5-14 Years | Both Sexes, 15-49 Years  | Both Sexes, 50-69 Years | Both Sexes, 70-80 Years |
|-------------------------------------------------|--------------------------|-----------------------|------------------------|--------------------------|-------------------------|-------------------------|
| Sudden infant death syndrome                    | 31<br>(15 - 65)          | 31<br>(15 - 65)       | -                      | -                        | -                       | -                       |
| Injuries                                        | 3,308<br>(2,867 - 3,975) | 272<br>(205 - 398)    | 170<br>(150 - 202)     | 2,098<br>(1,793 - 2,505) | 618<br>(523 - 781)      | 150<br>(130 - 196)      |
| Transport injuries                              | 1,062<br>(868 - 1,226)   | 20<br>(13 - 28)       | 56<br>(37 - 69)        | 751<br>(602 - 890)       | 192<br>(152 - 230)      | 43<br>(36 - 52)         |
| Road injuries                                   | 1,018<br>(830 - 1,175)   | 19<br>(11 - 26)       | 54<br>(36 - 67)        | 719<br>(577 - 852)       | 184<br>(146 - 221)      | 41<br>(35 - 50)         |
| Pedestrian road injuries                        | 233<br>(173 - 290)       | 9<br>(5 - 13)         | 26<br>(17 - 33)        | 130<br>(91 - 169)        | 49<br>(35 - 66)         | 19<br>(15 - 24)         |
| Cyclist road injuries                           | 48<br>(37 - 59)          | 2<br>(1 - 3)          | 6<br>(3 - 8)           | 22<br>(17 - 27)          | 15<br>(11 - 20)         | 4<br>(3 - 5)            |
| Motorcyclist road injuries                      | 105<br>(72 - 143)        | 0<br>(0 - 0)          | 1<br>(0 - 1)           | 93<br>(64 - 128)         | 10<br>(6 - 14)          | 1<br>(1 - 2)            |
| Motor vehicle road injuries                     | 608<br>(471 - 720)       | 7<br>(4 - 10)         | 19<br>(11 - 26)        | 461<br>(353 - 552)       | 104<br>(79 - 129)       | 17<br>(13 - 21)         |
| Other road injuries                             | 25<br>(15 - 33)          | 1<br>(0 - 2)          | 3<br>(2 - 5)           | 14<br>(8 - 19)           | 6<br>(3 - 9)            | 1<br>(1 - 2)            |
| Other transport injuries                        | 44<br>(33 - 55)          | 2<br>(1 - 3)          | 2<br>(1 - 3)           | 31<br>(23 - 40)          | 8<br>(5 - 11)           | 1<br>(1 - 2)            |
| Unintentional injuries                          | 1,173<br>(974 - 1,617)   | 245<br>(180 - 373)    | 95<br>(75 - 140)       | 549<br>(430 - 777)       | 222<br>(183 - 282)      | 63<br>(54 - 82)         |
| Falls                                           | 194<br>(157 - 277)       | 21<br>(14 - 42)       | 11<br>(8 - 19)         | 87<br>(68 - 130)         | 57<br>(45 - 77)         | 17<br>(13 - 27)         |
| Drowning                                        | 412<br>(312 - 693)       | 83<br>(49 - 171)      | 54<br>(38 - 101)       | 211<br>(152 - 340)       | 52<br>(38 - 83)         | 11<br>(8 - 17)          |
| Fire, heat, and hot substances                  | 140<br>(111 - 203)       | 34<br>(22 - 66)       | 6<br>(4 - 11)          | 53<br>(39 - 76)          | 34<br>(24 - 49)         | 14<br>(10 - 19)         |
| Poisonings                                      | 110<br>(87 - 184)        | 8<br>(5 - 11)         | 3<br>(2 - 5)           | 57<br>(43 - 102)         | 32<br>(24 - 54)         | 10<br>(7 - 15)          |
| Exposure to mechanical forces                   | 101<br>(82 - 132)        | 13<br>(8 - 21)        | 7<br>(5 - 10)          | 68<br>(53 - 91)          | 12<br>(9 - 16)          | 1<br>(1 - 2)            |
| Unintentional firearm injuries                  | 10<br>(8 - 14)           | 0<br>(0 - 0)          | 0<br>(0 - 0)           | 8<br>(6 - 12)            | 1<br>(1 - 2)            | 0<br>(0 - 0)            |
| Unintentional suffocation                       | 57<br>(42 - 88)          | 10<br>(5 - 17)        | 4<br>(2 - 7)           | 41<br>(28 - 63)          | 3<br>(2 - 5)            | 0<br>(0 - 0)            |
| Other exposure to mechanical forces             | 33<br>(27 - 40)          | 3<br>(2 - 5)          | 3<br>(2 - 4)           | 19<br>(14 - 24)          | 7<br>(5 - 10)           | 1<br>(1 - 1)            |
| Adverse effects of medical treatment            | 23<br>(18 - 32)          | 4<br>(3 - 9)          | 1<br>(0 - 1)           | 7<br>(5 - 9)             | 6<br>(5 - 9)            | 5<br>(3 - 7)            |
| Animal contact                                  | 11<br>(8 - 16)           | 3<br>(2 - 6)          | 3<br>(2 - 4)           | 3<br>(2 - 5)             | 2<br>(1 - 3)            | 0<br>(0 - 1)            |
| Venomous animal contact                         | 9<br>(7 - 14)            | 3<br>(2 - 5)          | 2<br>(1 - 4)           | 2<br>(2 - 4)             | 1<br>(1 - 2)            | 0<br>(0 - 0)            |
| Non-venomous animal contact                     | 2<br>(1 - 3)             | 0<br>(0 - 1)          | 0<br>(0 - 1)           | 1<br>(0 - 1)             | 0<br>(0 - 0)            | 0<br>(0 - 0)            |
| Foreign body                                    | 123<br>(82 - 172)        | 74<br>(47 - 109)      | 4<br>(2 - 5)           | 25<br>(16 - 38)          | 17<br>(11 - 26)         | 4<br>(2 - 5)            |
| Pulmonary aspiration and foreign body in airway | 122<br>(82 - 172)        | 74<br>(47 - 109)      | 4<br>(2 - 5)           | 24<br>(16 - 37)          | 17<br>(11 - 26)         | 4<br>(2 - 5)            |
| Foreign body in other body part                 | 1<br>(0 - 1)             | 0<br>(0 - 0)          | 0<br>(0 - 0)           | 0<br>(0 - 0)             | 0<br>(0 - 0)            | 0<br>(0 - 0)            |
| Other unintentional injuries                    | 60<br>(46 - 78)          | 4<br>(2 - 8)          | 6<br>(3 - 10)          | 39<br>(27 - 55)          | 10<br>(6 - 17)          | 2<br>(1 - 2)            |
| Self-harm and interpersonal violence            | 1,073<br>(878 - 1,522)   | 7<br>(4 - 12)         | 19<br>(13 - 26)        | 798<br>(646 - 1,084)     | 205<br>(159 - 332)      | 44<br>(35 - 72)         |
| Self-harm                                       | 663<br>(546 - 1,008)     | -                     | 14<br>(9 - 20)         | 479<br>(391 - 685)       | 137<br>(105 - 249)      | 33<br>(25 - 59)         |
| Interpersonal violence                          | 411<br>(307 - 640)       | 7<br>(4 - 12)         | 5<br>(3 - 8)           | 319<br>(232 - 504)       | 68<br>(46 - 121)        | 11<br>(7 - 20)          |
| Assault by firearm                              | 63<br>(34 - 121)         | 1<br>(1 - 2)          | 0<br>(0 - 1)           | 52<br>(27 - 105)         | 8<br>(4 - 17)           | 1<br>(0 - 2)            |
| Assault by sharp object                         | 199<br>(140 - 323)       | 2<br>(1 - 4)          | 2<br>(1 - 3)           | 158<br>(107 - 262)       | 34<br>(21 - 61)         | 4<br>(2 - 7)            |
| Assault by other means                          | 149<br>(106 - 242)       | 4<br>(2 - 6)          | 3<br>(2 - 5)           | 109<br>(74 - 174)        | 26<br>(16 - 50)         | 7<br>(4 - 12)           |

Web Table 31- Kyrgyzstan deaths with 95% UI by age, sex, and cause in 2013

| Cause                                                             | Males, All Ages             | Males, 0-4 Years         | Males, 5-14 Years  | Males, 15-49 Years       | Males, 50-69 Years       | Males, 70-80 Years       |
|-------------------------------------------------------------------|-----------------------------|--------------------------|--------------------|--------------------------|--------------------------|--------------------------|
| All causes                                                        | 21,803<br>(19,580 - 24,059) | 2,508<br>(2,250 - 2,790) | 239<br>(220 - 259) | 5,619<br>(4,837 - 6,424) | 7,243<br>(6,262 - 8,234) | 6,194<br>(5,703 - 6,669) |
| Communicable, maternal, neonatal, and nutritional diseases        | 3,313<br>(2,768 - 3,441)    | 1,981<br>(1,771 - 2,196) | 49<br>(38 - 60)    | 667<br>(493 - 814)       | 328<br>(256 - 394)       | 106<br>(86 - 128)        |
| HIV/AIDS and tuberculosis                                         | 709<br>(455 - 901)          | 2<br>(1 - 7)             | 1<br>(0 - 2)       | 481<br>(298 - 628)       | 201<br>(138 - 258)       | 25<br>(18 - 32)          |
| Tuberculosis                                                      | 495<br>(292 - 612)          | 1<br>(1 - 2)             | 1<br>(0 - 1)       | 313<br>(173 - 391)       | 161<br>(106 - 208)       | 20<br>(14 - 25)          |
| HIV/AIDS                                                          | 214<br>(60 - 379)           | 1<br>(0 - 5)             | 0<br>(0 - 1)       | 168<br>(49 - 296)        | 40<br>(10 - 78)          | 5<br>(1 - 11)            |
| HIV/AIDS resulting in mycobacterial infection                     | 15<br>(4 - 27)              | 0<br>(0 - 0)             | 0<br>(0 - 0)       | 12<br>(4 - 21)           | 3<br>(1 - 6)             | 0<br>(0 - 1)             |
| HIV/AIDS resulting in other diseases                              | 200<br>(55 - 353)           | 1<br>(0 - 5)             | 0<br>(0 - 1)       | 157<br>(46 - 275)        | 37<br>(10 - 73)          | 5<br>(1 - 10)            |
| Diarrhea, lower respiratory, and other common infectious diseases | 1,145<br>(999 - 1,315)      | 756<br>(627 - 905)       | 41<br>(32 - 51)    | 158<br>(126 - 196)       | 113<br>(86 - 144)        | 77<br>(60 - 97)          |
| Diarrheal diseases                                                | 117<br>(76 - 176)           | 103<br>(63 - 162)        | 2<br>(1 - 3)       | 7<br>(5 - 9)             | 3<br>(2 - 5)             | 2<br>(1 - 2)             |
| Intestinal infectious diseases                                    | 7<br>(3 - 13)               | 3<br>(1 - 8)             | 1<br>(0 - 3)       | 2<br>(1 - 5)             | 0<br>(0 - 2)             | 0<br>(0 - 2)             |
| Typhoid fever                                                     | 2<br>(1 - 5)                | 1<br>(0 - 2)             | 1<br>(0 - 1)       | 1<br>(0 - 2)             | 0<br>(0 - 0)             | 0<br>(0 - 0)             |
| Paratyphoid fever                                                 | 1<br>(0 - 1)                | 0<br>(0 - 1)             | 0<br>(0 - 0)       | 0<br>(0 - 1)             | 0<br>(0 - 0)             | 0<br>(0 - 0)             |
| Other intestinal infectious diseases                              | 4<br>(1 - 9)                | 2<br>(0 - 7)             | 0<br>(0 - 2)       | 1<br>(0 - 4)             | 0<br>(0 - 2)             | 0<br>(0 - 2)             |
| Lower respiratory infections                                      | 919<br>(772 - 1,072)        | 605<br>(481 - 748)       | 28<br>(20 - 39)    | 118<br>(90 - 150)        | 96<br>(71 - 126)         | 72<br>(55 - 92)          |
| Upper respiratory infections                                      | 2<br>(1 - 3)                | 0<br>(0 - 1)             | 0<br>(0 - 0)       | 1<br>(0 - 1)             | 1<br>(0 - 2)             | 0<br>(0 - 1)             |
| Otitis media                                                      | 0<br>(0 - 0)                | 0<br>(0 - 0)             | 0<br>(0 - 0)       | 0<br>(0 - 0)             | 0<br>(0 - 0)             | 0<br>(0 - 0)             |
| Meningitis                                                        | 53<br>(41 - 70)             | 26<br>(16 - 44)          | 3<br>(2 - 5)       | 15<br>(12 - 19)          | 7<br>(5 - 9)             | 1<br>(1 - 2)             |
| Pneumococcal meningitis                                           | 13<br>(9 - 17)              | 5<br>(3 - 8)             | 1<br>(0 - 2)       | 5<br>(3 - 7)             | 2<br>(1 - 3)             | 0<br>(0 - 1)             |
| H influenzae type B meningitis                                    | 18<br>(13 - 27)             | 13<br>(8 - 23)           | 1<br>(1 - 2)       | 3<br>(2 - 4)             | 1<br>(1 - 2)             | 0<br>(0 - 0)             |
| Meningococcal meningitis                                          | 11<br>(8 - 16)              | 5<br>(3 - 9)             | 1<br>(0 - 1)       | 3<br>(2 - 5)             | 1<br>(1 - 2)             | 0<br>(0 - 0)             |
| Other meningitis                                                  | 11<br>(7 - 15)              | 3<br>(1 - 6)             | 0<br>(0 - 1)       | 4<br>(1 - 7)             | 3<br>(1 - 4)             | 0<br>(0 - 1)             |
| Encephalitis                                                      | 44<br>(33 - 66)             | 18<br>(9 - 34)           | 6<br>(3 - 9)       | 15<br>(10 - 22)          | 5<br>(3 - 8)             | 1<br>(1 - 2)             |
| Diphtheria                                                        | 1<br>(0 - 3)                | 0<br>(0 - 3)             | 0<br>(0 - 1)       | 0<br>(0 - 1)             | 0<br>(0 - 0)             | 0<br>--                  |
| Whooping cough                                                    | 1<br>(0 - 1)                | 0<br>(0 - 1)             | 0<br>(0 - 0)       | 0<br>(0 - 0)             | 0<br>(0 - 0)             | 0<br>--                  |
| Tetanus                                                           | 0<br>(0 - 0)                | 0<br>(0 - 0)             | 0<br>(0 - 0)       | 0<br>(0 - 0)             | 0<br>(0 - 0)             | 0<br>(0 - 0)             |
| Measles                                                           | 0<br>(0 - 0)                | 0<br>(0 - 0)             | 0<br>(0 - 0)       | 0<br>(0 - 0)             | 0<br>(0 - 0)             | 0<br>--                  |
| Varicella and herpes zoster                                       | 1<br>(0 - 3)                | 0<br>(0 - 2)             | 0<br>(0 - 0)       | 0<br>(0 - 1)             | 0<br>(0 - 0)             | 0<br>(0 - 2)             |
| Neglected tropical diseases and malaria                           | 24<br>(15 - 34)             | 7<br>(3 - 14)            | 3<br>(1 - 6)       | 9<br>(6 - 14)            | 3<br>(2 - 6)             | 1<br>(1 - 2)             |
| Leishmaniasis                                                     | 14<br>(6 - 23)              | 5<br>(1 - 10)            | 2<br>(0 - 4)       | 5<br>(2 - 10)            | 1<br>(0 - 3)             | 0<br>(0 - 0)             |
| Visceral leishmaniasis                                            | 14<br>(6 - 23)              | 5<br>(1 - 10)            | 2<br>(0 - 4)       | 5<br>(2 - 10)            | 1<br>(0 - 3)             | 0<br>(0 - 0)             |
| Cysticercosis                                                     | 0<br>(0 - 0)                | 0<br>(0 - 0)             | 0<br>(0 - 0)       | 0<br>(0 - 0)             | 0<br>(0 - 0)             | 0<br>(0 - 0)             |
| Cystic echinococcosis                                             | 5<br>(4 - 5)                | 0<br>(0 - 0)             | 0<br>(0 - 0)       | 2<br>(2 - 3)             | 1<br>(1 - 2)             | 0<br>(0 - 0)             |
| Dengue                                                            | 0<br>(0 - 0)                | 0<br>(0 - 0)             | 0<br>(0 - 0)       | 0<br>(0 - 0)             | 0<br>(0 - 0)             | 0<br>(0 - 0)             |
| Rabies                                                            | 2<br>(1 - 3)                | 0<br>(0 - 1)             | 1<br>(0 - 1)       | 1<br>(1 - 1)             | 0<br>(0 - 1)             | 0<br>(0 - 0)             |
| Intestinal nematode infections                                    | 1<br>(0 - 4)                | 1<br>(0 - 4)             | 0<br>(0 - 2)       | 0<br>(0 - 2)             | 0<br>(0 - 2)             | 0<br>(0 - 1)             |
| Ascariasis                                                        | 1<br>(0 - 6)                | 1<br>(0 - 4)             | 0<br>(0 - 2)       | 0<br>(0 - 2)             | 0<br>(0 - 2)             | 0<br>(0 - 1)             |
| Other neglected tropical diseases                                 | 2<br>(1 - 3)                | 1<br>(1 - 2)             | 0<br>(0 - 0)       | 0<br>(0 - 0)             | 0<br>(0 - 0)             | 0<br>(0 - 0)             |
| Maternal disorders                                                | --                          | --                       | --                 | --                       | --                       | --                       |
| Maternal hemorrhage                                               | --                          | --                       | --                 | --                       | --                       | --                       |
| Maternal sepsis and other maternal infections                     | --                          | --                       | --                 | --                       | --                       | --                       |



Web Table 31- Kyrgyzstan deaths with 95% UI by age, sex, and cause in 2013

| Cause                                                            | Males, All Ages             | Males, 0-4 Years         | Males, 5-14 Years | Males, 15-49 Years       | Males, 50-69 Years       | Males, 70-80 Years       |
|------------------------------------------------------------------|-----------------------------|--------------------------|-------------------|--------------------------|--------------------------|--------------------------|
| Maternal hypertensive disorders                                  | --                          | --                       | --                | --                       | --                       | --                       |
| Maternal obstructed labor                                        | --                          | --                       | --                | --                       | --                       | --                       |
| Maternal abortive outcome                                        | --                          | --                       | --                | --                       | --                       | --                       |
| Indirect maternal deaths                                         | --                          | --                       | --                | --                       | --                       | --                       |
| Late maternal deaths                                             | --                          | --                       | --                | --                       | --                       | --                       |
| Maternal deaths aggravated by HIV/AIDS                           | --                          | --                       | --                | --                       | --                       | --                       |
| Other maternal disorders                                         | --                          | --                       | --                | --                       | --                       | --                       |
| Neonatal disorders                                               | 1,145<br>(1,022 - 1,260)    | 1,145<br>(1,022 - 1,260) | --                | --                       | --                       | --                       |
| Neonatal preterm birth complications                             | 453<br>(283 - 592)          | 453<br>(283 - 592)       | --                | --                       | --                       | --                       |
| Neonatal encephalopathy due to birth asphyxia and trauma         | 530<br>(394 - 685)          | 530<br>(394 - 685)       | --                | --                       | --                       | --                       |
| Neonatal sepsis and other neonatal infections                    | 36<br>(16 - 73)             | 36<br>(16 - 73)          | --                | --                       | --                       | --                       |
| Hemolytic disease and other neonatal jaundice                    | 11<br>(4 - 23)              | 11<br>(4 - 23)           | --                | --                       | --                       | --                       |
| Other neonatal disorders                                         | 115<br>(75 - 170)           | 115<br>(75 - 170)        | --                | --                       | --                       | --                       |
| Nutritional deficiencies                                         | 26<br>(16 - 36)             | 5<br>(3 - 8)             | 1<br>(1 - 2)      | 10<br>(5 - 14)           | 7<br>(5 - 12)            | 2<br>(1 - 3)             |
| Protein-energy malnutrition                                      | 9<br>(5 - 16)               | 1<br>(0 - 3)             | 0<br>(0 - 0)      | 4<br>(2 - 6)             | 4<br>(2 - 7)             | 0<br>(0 - 0)             |
| Iodine deficiency                                                | 0<br>(0 - 1)                | 0<br>(0 - 0)             | 0<br>(0 - 0)      | 0<br>(0 - 0)             | 0<br>(0 - 0)             | 0<br>(0 - 0)             |
| Iron-deficiency anemia                                           | 13<br>(6 - 20)              | 4<br>(2 - 6)             | 1<br>(1 - 2)      | 4<br>(2 - 7)             | 2<br>(1 - 5)             | 1<br>(1 - 2)             |
| Other nutritional deficiencies                                   | 4<br>(1 - 6)                | 0<br>(0 - 1)             | 0<br>(0 - 1)      | 2<br>(1 - 3)             | 1<br>(0 - 1)             | 1<br>(0 - 1)             |
| Other communicable, maternal, neonatal, and nutritional diseases | 82<br>(62 - 114)            | 65<br>(46 - 97)          | 2<br>(2 - 3)      | 10<br>(7 - 13)           | 4<br>(3 - 5)             | 1<br>(1 - 2)             |
| Sexually transmitted diseases excluding HIV                      | 3<br>(1 - 6)                | 1<br>(0 - 3)             | 0<br>(0 - 0)      | 1<br>(0 - 2)             | 1<br>(0 - 1)             | 0<br>(0 - 0)             |
| Syphilis                                                         | 2<br>(1 - 5)                | 1<br>(0 - 3)             | 0<br>(0 - 0)      | 0<br>(0 - 1)             | 0<br>(0 - 1)             | 0<br>(0 - 0)             |
| Chlamydial infection                                             | --                          | --                       | --                | --                       | --                       | --                       |
| Gonococcal infection                                             | 0<br>(0 - 1)                | --                       | 0<br>(0 - 0)      | 0<br>(0 - 0)             | 0<br>(0 - 0)             | 0<br>(0 - 0)             |
| Other sexually transmitted diseases                              | 0<br>(0 - 0)                | --                       | 0<br>(0 - 0)      | 0<br>(0 - 0)             | 0<br>(0 - 0)             | 0<br>(0 - 0)             |
| Hepatitis                                                        | 18<br>(14 - 24)             | 5<br>(3 - 9)             | 2<br>(1 - 3)      | 8<br>(6 - 11)            | 2<br>(2 - 4)             | 1<br>(1 - 1)             |
| Acute hepatitis A                                                | 3<br>(1 - 6)                | 2<br>(0 - 4)             | 1<br>(0 - 1)      | 1<br>(0 - 1)             | 0<br>(0 - 0)             | 0<br>(0 - 0)             |
| Acute hepatitis B                                                | 11<br>(8 - 16)              | 4<br>(2 - 7)             | 1<br>(0 - 2)      | 4<br>(2 - 6)             | 2<br>(1 - 3)             | 1<br>(0 - 1)             |
| Acute hepatitis C                                                | 1<br>(0 - 2)                | --                       | 0<br>(0 - 0)      | 1<br>(0 - 1)             | 0<br>(0 - 0)             | 0<br>(0 - 0)             |
| Acute hepatitis E                                                | 3<br>(2 - 5)                | 0<br>(0 - 0)             | 0<br>(0 - 1)      | 3<br>(1 - 4)             | 0<br>(0 - 1)             | 0<br>(0 - 0)             |
| Other infectious diseases                                        | 61<br>(42 - 93)             | 59<br>(40 - 90)          | 0<br>(0 - 0)      | 1<br>(1 - 2)             | 1<br>(0 - 1)             | 0<br>(0 - 0)             |
| Non-communicable diseases                                        | 16,075<br>(14,223 - 17,963) | 372<br>(295 - 464)       | 73<br>(60 - 85)   | 3,189<br>(2,688 - 3,709) | 6,434<br>(5,523 - 7,332) | 6,008<br>(5,523 - 6,473) |
| Neoplasms                                                        | 1,958<br>(1,694 - 2,244)    | 13<br>(9 - 20)           | 21<br>(16 - 26)   | 378<br>(317 - 445)       | 1,082<br>(916 - 1,264)   | 463<br>(407 - 525)       |
| Esophageal cancer                                                | 126<br>(90 - 198)           | --                       | --                | 11<br>(7 - 18)           | 72<br>(48 - 119)         | 42<br>(28 - 68)          |
| Stomach cancer                                                   | 446<br>(374 - 524)          | --                       | --                | 80<br>(63 - 101)         | 254<br>(204 - 309)       | 112<br>(90 - 137)        |
| Liver cancer                                                     | 168<br>(139 - 201)          | --                       | 1<br>(0 - 1)      | 27<br>(20 - 36)          | 101<br>(78 - 127)        | 39<br>(30 - 50)          |
| Liver cancer due to hepatitis B                                  | 70<br>(53 - 91)             | --                       | 0<br>(0 - 0)      | 13<br>(9 - 19)           | 44<br>(32 - 58)          | 13<br>(9 - 18)           |
| Liver cancer due to hepatitis C                                  | 56<br>(42 - 73)             | --                       | 0<br>(0 - 0)      | 8<br>(5 - 12)            | 34<br>(24 - 46)          | 14<br>(10 - 19)          |
| Liver cancer due to alcohol use                                  | 34<br>(23 - 45)             | --                       | --                | 4<br>(2 - 6)             | 19<br>(13 - 27)          | 10<br>(7 - 15)           |
| Liver cancer due to other causes                                 | 8<br>(5 - 12)               | --                       | 0<br>(0 - 0)      | 2<br>(1 - 3)             | 4<br>(2 - 7)             | 1<br>(1 - 2)             |
| Larynx cancer                                                    | 37<br>(28 - 64)             | --                       | --                | 5<br>(3 - 9)             | 25<br>(18 - 43)          | 7<br>(5 - 12)            |

Web Table 31- Kyrgyzstan deaths with 95% UI by age, sex, and cause in 2013

| Cause                                         | Males, All Ages           | Males, 0-4 Years | Males, 5-14 Years | Males, 15-49 Years       | Males, 50-69 Years       | Males, 70-80 Years       |
|-----------------------------------------------|---------------------------|------------------|-------------------|--------------------------|--------------------------|--------------------------|
| Tracheal, bronchus and lung cancer            | 378<br>(319 - 441)        | --               | --                | 46<br>(36 - 60)          | 249<br>(203 - 296)       | 83<br>(69 - 97)          |
| Breast cancer                                 | 3<br>(0 - 5)              | --               | --                | 1<br>(0 - 1)             | 1<br>(0 - 2)             | 1<br>(0 - 2)             |
| Cervical cancer                               | --                        | --               | --                | --                       | --                       | --                       |
| Uterine cancer                                | --                        | --               | --                | --                       | --                       | --                       |
| Prostate cancer                               | 67<br>(46 - 109)          | --               | --                | 2<br>(1 - 4)             | 28<br>(18 - 46)          | 37<br>(25 - 61)          |
| Colon and rectum cancer                       | 117<br>(99 - 137)         | --               | --                | 26<br>(21 - 32)          | 57<br>(46 - 69)          | 34<br>(29 - 41)          |
| Lip and oral cavity cancer                    | 42<br>(31 - 59)           | --               | --                | 7<br>(5 - 11)            | 26<br>(19 - 37)          | 8<br>(6 - 13)            |
| Nasopharynx cancer                            | 10<br>(8 - 14)            | --               | 0<br>(0 - 1)      | 4<br>(3 - 6)             | 5<br>(3 - 7)             | 1<br>(1 - 2)             |
| Other pharynx cancer                          | 25<br>(18 - 32)           | --               | --                | 4<br>(3 - 5)             | 17<br>(12 - 22)          | 5<br>(3 - 7)             |
| Gallbladder and biliary tract cancer          | 13<br>(9 - 17)            | --               | --                | 1<br>(1 - 2)             | 7<br>(5 - 10)            | 5<br>(3 - 7)             |
| Pancreatic cancer                             | 79<br>(65 - 94)           | --               | --                | 13<br>(10 - 18)          | 48<br>(38 - 60)          | 17<br>(14 - 22)          |
| Malignant skin melanoma                       | 17<br>(9 - 27)            | --               | --                | 5<br>(2 - 8)             | 8<br>(4 - 14)            | 4<br>(2 - 6)             |
| Non-melanoma skin cancer                      | 17<br>(12 - 26)           | --               | --                | 2<br>(2 - 4)             | 8<br>(5 - 12)            | 7<br>(5 - 10)            |
| Ovarian cancer                                | --                        | --               | --                | --                       | --                       | --                       |
| Testicular cancer                             | 9<br>(5 - 12)             | --               | --                | 6<br>(4 - 9)             | 2<br>(1 - 3)             | 1<br>(0 - 1)             |
| Kidney cancer                                 | 45<br>(36 - 55)           | 1<br>(1 - 3)     | 0<br>(0 - 1)      | 8<br>(6 - 11)            | 26<br>(20 - 35)          | 8<br>(6 - 11)            |
| Bladder cancer                                | 44<br>(35 - 54)           | --               | --                | 3<br>(2 - 4)             | 23<br>(17 - 30)          | 18<br>(14 - 23)          |
| Brain and nervous system cancer               | 65<br>(37 - 85)           | 1<br>(0 - 2)     | 3<br>(2 - 5)      | 30<br>(16 - 40)          | 28<br>(16 - 37)          | 3<br>(2 - 5)             |
| Thyroid cancer                                | 3<br>(3 - 4)              | --               | 0<br>(0 - 0)      | 1<br>(1 - 1)             | 2<br>(1 - 2)             | 1<br>(1 - 1)             |
| Mesothelioma                                  | 2<br>(2 - 2)              | --               | --                | 1<br>(0 - 1)             | 1<br>(1 - 2)             | 0<br>(0 - 0)             |
| Hodgkin lymphoma                              | 10<br>(7 - 14)            | 0<br>(0 - 0)     | 1<br>(0 - 1)      | 4<br>(3 - 7)             | 4<br>(2 - 6)             | 1<br>(1 - 1)             |
| Non-Hodgkin lymphoma                          | 31<br>(24 - 40)           | 1<br>(0 - 2)     | 2<br>(1 - 3)      | 12<br>(8 - 16)           | 12<br>(9 - 16)           | 5<br>(3 - 7)             |
| Multiple myeloma                              | 3<br>(2 - 4)              | --               | --                | 1<br>(0 - 1)             | 1<br>(1 - 2)             | 0<br>(0 - 1)             |
| Leukemia                                      | 71<br>(60 - 84)           | 5<br>(3 - 9)     | 9<br>(6 - 13)     | 32<br>(26 - 40)          | 19<br>(15 - 24)          | 5<br>(4 - 6)             |
| Other neoplasms                               | 132<br>(108 - 158)        | 5<br>(3 - 8)     | 5<br>(3 - 7)      | 45<br>(36 - 56)          | 59<br>(46 - 75)          | 18<br>(14 - 23)          |
| Cardiovascular diseases                       | 9,055<br>(8,042 - 10,131) | 6<br>(5 - 9)     | 6<br>(5 - 8)      | 1,245<br>(1,030 - 1,468) | 3,613<br>(3,123 - 4,142) | 4,184<br>(3,834 - 4,523) |
| Rheumatic heart disease                       | 132<br>(97 - 203)         | 0<br>(0 - 0)     | 2<br>(1 - 2)      | 75<br>(51 - 119)         | 51<br>(33 - 79)          | 5<br>(3 - 8)             |
| Ischemic heart disease                        | 5,362<br>(4,565 - 6,065)  | 2<br>(1 - 3)     | 2<br>(1 - 2)      | 631<br>(509 - 769)       | 1,975<br>(1,614 - 2,305) | 2,753<br>(2,384 - 3,051) |
| Cerebrovascular disease                       | 2,976<br>(2,451 - 3,598)  | 1<br>(1 - 2)     | 1<br>(1 - 2)      | 359<br>(274 - 457)       | 1,304<br>(1,067 - 1,593) | 1,310<br>(1,078 - 1,587) |
| Ischemic stroke                               | 1,683<br>(1,371 - 2,043)  | 1<br>(0 - 1)     | 0<br>(0 - 1)      | 80<br>(52 - 112)         | 621<br>(472 - 782)       | 980<br>(805 - 1,189)     |
| Hemorrhagic stroke                            | 1,293<br>(1,027 - 1,622)  | 0<br>(0 - 1)     | 1<br>(0 - 1)      | 279<br>(211 - 357)       | 683<br>(534 - 867)       | 330<br>(245 - 442)       |
| Hypertensive heart disease                    | 175<br>(125 - 251)        | 1<br>(0 - 1)     | 0<br>(0 - 0)      | 21<br>(14 - 31)          | 82<br>(55 - 120)         | 70<br>(46 - 107)         |
| Cardiomyopathy and myocarditis                | 285<br>(205 - 365)        | 1<br>(1 - 2)     | 1<br>(1 - 2)      | 120<br>(84 - 156)        | 139<br>(97 - 186)        | 23<br>(16 - 33)          |
| Atrial fibrillation and flutter               | 0<br>(0 - 0)              | --               | --                | 0<br>(0 - 0)             | 0<br>(0 - 0)             | 0<br>(0 - 0)             |
| Aortic aneurysm                               | 15<br>(12 - 19)           | --               | --                | 4<br>(3 - 5)             | 7<br>(5 - 10)            | 4<br>(3 - 5)             |
| Peripheral vascular disease                   | 10<br>(7 - 13)            | --               | --                | 1<br>(1 - 2)             | 6<br>(4 - 8)             | 3<br>(2 - 4)             |
| Endocarditis                                  | 8<br>(5 - 12)             | 1<br>(0 - 1)     | 0<br>(0 - 0)      | 3<br>(2 - 6)             | 3<br>(2 - 4)             | 1<br>(1 - 1)             |
| Other cardiovascular and circulatory diseases | 93<br>(56 - 116)          | 0<br>(0 - 1)     | 0<br>(0 - 1)      | 31<br>(16 - 40)          | 46<br>(27 - 59)          | 15<br>(10 - 21)          |
| Chronic respiratory diseases                  | 1,330<br>(1,125 - 1,833)  | 2<br>(1 - 2)     | 1<br>(1 - 1)      | 138<br>(108 - 197)       | 471<br>(379 - 694)       | 719<br>(617 - 959)       |
| Chronic obstructive pulmonary disease         | 1,255<br>(1,063 - 1,733)  | 1<br>(0 - 1)     | 1<br>(0 - 1)      | 127<br>(99 - 180)        | 438<br>(353 - 645)       | 689<br>(592 - 920)       |

Web Table 31- Kyrgyzstan deaths with 95% UI by age, sex, and cause in 2013

| Cause                                               | Males, All Ages          | Males, 0-4 Years | Males, 5-14 Years | Males, 15-49 Years | Males, 50-69 Years | Males, 70-80 Years |
|-----------------------------------------------------|--------------------------|------------------|-------------------|--------------------|--------------------|--------------------|
| Pneumoconiosis                                      | 8<br>(5 - 12)            | 0<br>(0 - 0)     | 0<br>(0 - 0)      | 1<br>(0 - 1)       | 3<br>(2 - 5)       | 4<br>(2 - 6)       |
| Silicosis                                           | 1<br>(1 - 2)             | 0<br>(0 - 0)     | 0<br>(0 - 0)      | 0<br>(0 - 0)       | 1<br>(0 - 1)       | 0<br>(0 - 0)       |
| Asbestosis                                          | 2<br>(2 - 3)             | 0<br>(0 - 0)     | 0<br>(0 - 0)      | 0<br>(0 - 0)       | 1<br>(0 - 1)       | 1<br>(1 - 2)       |
| Coal workers pneumoconiosis                         | 3<br>(2 - 4)             | 0<br>(0 - 0)     | 0<br>(0 - 0)      | 0<br>(0 - 0)       | 1<br>(1 - 2)       | 2<br>(1 - 2)       |
| Other pneumoconiosis                                | 2<br>(1 - 3)             | 0<br>(0 - 0)     | 0<br>(0 - 0)      | 0<br>(0 - 0)       | 1<br>(1 - 1)       | 1<br>(0 - 1)       |
| Asthma                                              | 53<br>(42 - 73)          | 0<br>(0 - 0)     | 0<br>(0 - 0)      | 8<br>(6 - 12)      | 24<br>(18 - 36)    | 20<br>(15 - 29)    |
| Interstitial lung disease and pulmonary sarcoidosis | 10<br>(7 - 17)           | 0<br>(0 - 0)     | 0<br>(0 - 0)      | 1<br>(0 - 1)       | 4<br>(2 - 6)       | 6<br>(4 - 10)      |
| Other chronic respiratory diseases                  | 4<br>(3 - 6)             | 1<br>(1 - 1)     | 0<br>(0 - 0)      | 2<br>(1 - 2)       | 1<br>(1 - 2)       | 0<br>(0 - 1)       |
| Cirrhosis                                           | 1,508<br>(1,280 - 1,740) | 2<br>(1 - 3)     | 5<br>(4 - 7)      | 651<br>(535 - 776) | 693<br>(580 - 818) | 157<br>(133 - 183) |
| Cirrhosis due to hepatitis B                        | 615<br>(383 - 823)       | 0<br>(0 - 0)     | 2<br>(1 - 2)      | 271<br>(153 - 376) | 282<br>(177 - 386) | 60<br>(38 - 82)    |
| Cirrhosis due to hepatitis C                        | 307<br>(146 - 532)       | 0<br>(0 - 0)     | 1<br>(0 - 2)      | 140<br>(69 - 238)  | 136<br>(57 - 249)  | 30<br>(13 - 55)    |
| Cirrhosis due to alcohol use                        | 429<br>(280 - 636)       | --               | --                | 146<br>(79 - 240)  | 223<br>(148 - 325) | 60<br>(42 - 83)    |
| Cirrhosis due to other causes                       | 158<br>(88 - 239)        | 1<br>(1 - 2)     | 3<br>(2 - 4)      | 93<br>(52 - 141)   | 53<br>(24 - 92)    | 8<br>(4 - 13)      |
| Digestive diseases                                  | 236<br>(197 - 294)       | 2<br>(1 - 3)     | 3<br>(2 - 3)      | 101<br>(81 - 129)  | 97<br>(78 - 123)   | 34<br>(28 - 43)    |
| Peptic ulcer disease                                | 88<br>(66 - 114)         | 0<br>(0 - 0)     | 0<br>(0 - 0)      | 34<br>(24 - 46)    | 41<br>(30 - 55)    | 13<br>(9 - 17)     |
| Gastritis and duodenitis                            | 4<br>(2 - 7)             | 0<br>(0 - 0)     | 0<br>(0 - 0)      | 1<br>(1 - 3)       | 1<br>(1 - 3)       | 1<br>(1 - 2)       |
| Appendicitis                                        | 5<br>(4 - 8)             | 0<br>(0 - 0)     | 0<br>(0 - 1)      | 3<br>(2 - 4)       | 2<br>(1 - 2)       | 1<br>(0 - 1)       |
| Paralytic ileus and intestinal obstruction          | 29<br>(18 - 47)          | 1<br>(0 - 1)     | 1<br>(1 - 1)      | 12<br>(7 - 20)     | 11<br>(7 - 20)     | 4<br>(2 - 7)       |
| Inguinal, femoral, and abdominal hernia             | 4<br>(3 - 7)             | 0<br>(0 - 0)     | 0<br>(0 - 0)      | 1<br>(1 - 2)       | 2<br>(1 - 3)       | 1<br>(1 - 2)       |
| Inflammatory bowel disease                          | 8<br>(6 - 11)            | 0<br>(0 - 1)     | 0<br>(0 - 0)      | 3<br>(2 - 4)       | 3<br>(2 - 4)       | 1<br>(1 - 2)       |
| Vascular intestinal disorders                       | 11<br>(4 - 22)           | 0<br>(0 - 0)     | 0<br>(0 - 0)      | 3<br>(1 - 6)       | 5<br>(2 - 11)      | 3<br>(1 - 6)       |
| Gallbladder and biliary diseases                    | 17<br>(13 - 25)          | 0<br>(0 - 0)     | 0<br>(0 - 0)      | 4<br>(3 - 6)       | 7<br>(5 - 10)      | 6<br>(4 - 9)       |
| Pancreatitis                                        | 47<br>(34 - 66)          | 0<br>(0 - 0)     | 0<br>(0 - 0)      | 28<br>(19 - 40)    | 16<br>(11 - 24)    | 2<br>(2 - 4)       |
| Other digestive diseases                            | 24<br>(18 - 32)          | 0<br>(0 - 1)     | 0<br>(0 - 0)      | 12<br>(8 - 16)     | 9<br>(6 - 13)      | 2<br>(2 - 3)       |
| Neurological disorders                              | 483<br>(405 - 570)       | 5<br>(3 - 9)     | 10<br>(7 - 15)    | 97<br>(73 - 122)   | 51<br>(40 - 64)    | 320<br>(256 - 392) |
| Alzheimer disease and other dementias               | 343<br>(276 - 418)       | --               | --                | 0<br>(0 - 1)       | 26<br>(18 - 35)    | 317<br>(252 - 389) |
| Parkinson disease                                   | 3<br>(2 - 3)             | --               | --                | 0<br>(0 - 0)       | 1<br>(1 - 2)       | 1<br>(1 - 1)       |
| Epilepsy                                            | 125<br>(93 - 157)        | 4<br>(2 - 8)     | 9<br>(6 - 14)     | 90<br>(67 - 115)   | 20<br>(13 - 26)    | 2<br>(2 - 3)       |
| Multiple sclerosis                                  | 3<br>(1 - 5)             | --               | --                | 1<br>(1 - 2)       | 1<br>(1 - 2)       | 0<br>(0 - 0)       |
| Other neurological disorders                        | 10<br>(8 - 13)           | 1<br>(1 - 1)     | 1<br>(1 - 2)      | 4<br>(3 - 6)       | 3<br>(2 - 4)       | 1<br>(0 - 1)       |
| Mental and substance use disorders                  | 447<br>(297 - 566)       | 0<br>(0 - 1)     | 0<br>(0 - 0)      | 267<br>(179 - 340) | 166<br>(102 - 227) | 14<br>(9 - 18)     |
| Schizophrenia                                       | 17<br>(11 - 25)          | --               | --                | 12<br>(7 - 17)     | 5<br>(3 - 9)       | 1<br>(0 - 1)       |
| Alcohol use disorders                               | 320<br>(187 - 433)       | --               | --                | 174<br>(96 - 246)  | 139<br>(77 - 205)  | 8<br>(4 - 11)      |
| Drug use disorders                                  | 110<br>(75 - 139)        | 0<br>(0 - 1)     | --                | 82<br>(54 - 108)   | 22<br>(14 - 30)    | 5<br>(3 - 8)       |
| Opioid use disorders                                | 24<br>(16 - 31)          | 0<br>(0 - 0)     | --                | 18<br>(12 - 25)    | 4<br>(3 - 6)       | 1<br>(1 - 2)       |
| Cocaine use disorders                               | 2<br>(2 - 3)             | 0<br>(0 - 0)     | --                | 2<br>(1 - 3)       | 0<br>(0 - 1)       | 0<br>(0 - 0)       |
| Amphetamine use disorders                           | 2<br>(2 - 3)             | 0<br>(0 - 0)     | --                | 2<br>(1 - 2)       | 0<br>(0 - 1)       | 0<br>(0 - 0)       |
| Other drug use disorders                            | 81<br>(57 - 103)         | 0<br>(0 - 0)     | --                | 60<br>(40 - 79)    | 17<br>(11 - 23)    | 4<br>(2 - 6)       |
| Eating disorders                                    | 0<br>(0 - 0)             | --               | 0<br>(0 - 0)      | 0<br>(0 - 0)       | --                 | --                 |
| Anorexia nervosa                                    | 0<br>(0 - 0)             | --               | 0<br>(0 - 0)      | 0<br>(0 - 0)       | --                 | --                 |

Web Table 31- Kyrgyzstan deaths with 95% UI by age, sex, and cause in 2013

| Cause                                               | Males, All Ages    | Males, 0-4 Years   | Males, 5-14 Years | Males, 15-49 Years | Males, 50-69 Years | Males, 70-80 Years |
|-----------------------------------------------------|--------------------|--------------------|-------------------|--------------------|--------------------|--------------------|
| Diabetes, urogenital, blood, and endocrine diseases | 658<br>(494 - 776) | 15<br>(10 - 20)    | 11<br>(8 - 13)    | 278<br>(195 - 339) | 247<br>(189 - 297) | 107<br>(82 - 127)  |
| Diabetes mellitus                                   | 130<br>(110 - 154) | 0<br>(0 - 1)       | 1<br>(0 - 1)      | 33<br>(26 - 40)    | 72<br>(59 - 89)    | 24<br>(19 - 30)    |
| Acute glomerulonephritis                            | 6<br>(5 - 9)       | 0<br>(0 - 1)       | 0<br>(0 - 1)      | 3<br>(2 - 5)       | 2<br>(1 - 3)       | 0<br>(0 - 1)       |
| Chronic kidney disease                              | 303<br>(222 - 360) | 4<br>(2 - 6)       | 5<br>(3 - 6)      | 153<br>(106 - 188) | 102<br>(73 - 127)  | 39<br>(30 - 47)    |
| Chronic kidney disease due to diabetes mellitus     | 38<br>(21 - 71)    | 0<br>(0 - 0)       | 0<br>(0 - 1)      | 10<br>(5 - 19)     | 23<br>(12 - 41)    | 5<br>(3 - 10)      |
| Chronic kidney disease due to hypertension          | 21<br>(12 - 32)    | 2<br>(1 - 2)       | 0<br>(0 - 1)      | 7<br>(3 - 11)      | 7<br>(4 - 12)      | 5<br>(3 - 9)       |
| Chronic kidney disease due to glomerulonephritis    | 156<br>(107 - 192) | 1<br>(1 - 2)       | 2<br>(1 - 3)      | 94<br>(65 - 119)   | 44<br>(27 - 58)    | 15<br>(9 - 20)     |
| Chronic kidney disease due to other causes          | 87<br>(48 - 117)   | 1<br>(0 - 3)       | 2<br>(1 - 3)      | 42<br>(22 - 61)    | 28<br>(13 - 44)    | 13<br>(8 - 19)     |
| Urinary diseases and male infertility               | 190<br>(104 - 235) | 2<br>(1 - 3)       | 2<br>(1 - 3)      | 78<br>(39 - 100)   | 65<br>(35 - 84)    | 43<br>(23 - 56)    |
| Interstitial nephritis and urinary tract infections | 175<br>(91 - 218)  | 2<br>(1 - 3)       | 2<br>(1 - 2)      | 72<br>(35 - 94)    | 60<br>(30 - 78)    | 40<br>(20 - 52)    |
| Urolithiasis                                        | 7<br>(4 - 12)      | --                 | 0<br>(0 - 0)      | 3<br>(1 - 6)       | 3<br>(1 - 5)       | 1<br>(1 - 2)       |
| Other urinary diseases                              | 8<br>(5 - 15)      | 0<br>(0 - 0)       | 0<br>(0 - 0)      | 3<br>(1 - 6)       | 3<br>(2 - 5)       | 2<br>(1 - 4)       |
| Gynecological diseases                              | --                 | --                 | --                | --                 | --                 | --                 |
| Uterine fibroids                                    | --                 | --                 | --                | --                 | --                 | --                 |
| Polycystic ovarian syndrome                         | --                 | --                 | --                | --                 | --                 | --                 |
| Endometriosis                                       | --                 | --                 | --                | --                 | --                 | --                 |
| Genital prolapse                                    | --                 | --                 | --                | --                 | --                 | --                 |
| Other gynecological diseases                        | --                 | --                 | --                | --                 | --                 | --                 |
| Hemoglobinopathies and hemolytic anemias            | 10<br>(6 - 15)     | 3<br>(2 - 4)       | 1<br>(1 - 2)      | 4<br>(2 - 6)       | 1<br>(1 - 2)       | 0<br>(0 - 0)       |
| Thalassemias                                        | 6<br>(4 - 9)       | 2<br>(1 - 4)       | 1<br>(1 - 2)      | 2<br>(1 - 4)       | 0<br>(0 - 0)       | 0<br>(0 - 0)       |
| Sickle cell disorders                               | 0<br>(0 - 0)       | 0<br>(0 - 0)       | 0<br>(0 - 0)      | 0<br>(0 - 0)       | 0<br>(0 - 0)       | 0<br>(0 - 0)       |
| G6PD deficiency                                     | 0<br>(0 - 0)       | 0<br>(0 - 0)       | 0<br>(0 - 0)      | 0<br>(0 - 0)       | 0<br>(0 - 0)       | 0<br>(0 - 0)       |
| Other hemoglobinopathies and hemolytic anemias      | 4<br>(2 - 6)       | 0<br>(0 - 1)       | 0<br>(0 - 0)      | 2<br>(1 - 2)       | 1<br>(1 - 2)       | 0<br>(0 - 0)       |
| Endocrine, metabolic, blood, and immune disorders   | 20<br>(12 - 25)    | 6<br>(3 - 9)       | 2<br>(1 - 3)      | 7<br>(4 - 9)       | 4<br>(2 - 5)       | 1<br>(0 - 1)       |
| Musculoskeletal disorders                           | 23<br>(18 - 40)    | --                 | 2<br>(2 - 4)      | 7<br>(5 - 11)      | 7<br>(5 - 11)      | 4<br>(4 - 15)      |
| Rheumatoid arthritis                                | 9<br>(6 - 16)      | --                 | 0<br>(0 - 0)      | 2<br>(1 - 2)       | 3<br>(2 - 5)       | 4<br>(2 - 8)       |
| Other musculoskeletal disorders                     | 15<br>(11 - 25)    | --                 | 2<br>(2 - 3)      | 6<br>(4 - 9)       | 4<br>(2 - 7)       | 3<br>(2 - 7)       |
| Other non-communicable diseases                     | 375<br>(301 - 463) | 327<br>(255 - 414) | 13<br>(9 - 17)    | 27<br>(21 - 34)    | 7<br>(5 - 9)       | 2<br>(1 - 2)       |
| Congenital anomalies                                | 353<br>(280 - 437) | 311<br>(243 - 396) | 13<br>(9 - 17)    | 23<br>(18 - 29)    | 5<br>(4 - 6)       | 1<br>(1 - 1)       |
| Neural tube defects                                 | 17<br>(10 - 27)    | 16<br>(9 - 26)     | 0<br>(0 - 1)      | 0<br>(0 - 1)       | 0<br>(0 - 0)       | 0<br>(0 - 0)       |
| Congenital heart anomalies                          | 164<br>(123 - 214) | 136<br>(96 - 184)  | 9<br>(6 - 13)     | 16<br>(12 - 21)    | 2<br>(1 - 3)       | 1<br>(0 - 1)       |
| Cleft lip and cleft palate                          | 2<br>(1 - 5)       | 2<br>(1 - 5)       | --                | --                 | --                 | --                 |
| Down syndrome                                       | 4<br>(2 - 8)       | 3<br>(1 - 7)       | 0<br>(0 - 0)      | 0<br>(0 - 1)       | 0<br>(0 - 0)       | 0<br>(0 - 0)       |
| Chromosomal unbalanced rearrangements               | 0<br>(0 - 0)       | 0<br>(0 - 0)       | 0<br>(0 - 0)      | 0<br>(0 - 0)       | 0<br>(0 - 0)       | 0<br>(0 - 0)       |
| Other congenital anomalies                          | 165<br>(120 - 220) | 154<br>(110 - 209) | 3<br>(1 - 5)      | 6<br>(4 - 8)       | 2<br>(1 - 3)       | 0<br>(0 - 1)       |
| Skin and subcutaneous diseases                      | 8<br>(2 - 10)      | 1<br>(0 - 1)       | 0<br>(0 - 0)      | 4<br>(1 - 5)       | 2<br>(0 - 3)       | 1<br>(0 - 1)       |
| Cellulitis                                          | 4<br>(1 - 5)       | 0<br>(0 - 0)       | 0<br>(0 - 0)      | 2<br>(0 - 3)       | 1<br>(0 - 2)       | 0<br>(0 - 0)       |
| Pyoderma                                            | 3<br>(1 - 4)       | 0<br>(0 - 1)       | 0<br>(0 - 0)      | 2<br>(0 - 2)       | 1<br>(0 - 1)       | 0<br>(0 - 0)       |
| Decubitus ulcer                                     | 0<br>(0 - 1)       | 0<br>(0 - 0)       | 0<br>(0 - 0)      | 0<br>(0 - 0)       | 0<br>(0 - 0)       | 0<br>(0 - 0)       |
| Other skin and subcutaneous diseases                | 0<br>(0 - 1)       | 0<br>(0 - 0)       | 0<br>(0 - 0)      | 0<br>(0 - 1)       | 0<br>(0 - 0)       | 0<br>(0 - 0)       |

Web Table 31- Kyrgyzstan deaths with 95% UI by age, sex, and cause in 2013

| Cause                                           | Males, All Ages          | Males, 0-4 Years   | Males, 5-14 Years  | Males, 15-49 Years       | Males, 50-69 Years | Males, 70-80 Years |
|-------------------------------------------------|--------------------------|--------------------|--------------------|--------------------------|--------------------|--------------------|
| Sudden infant death syndrome                    | 15<br>(6 - 39)           | 15<br>(6 - 39)     | -                  | -                        | -                  | -                  |
| Injuries                                        | 2,597<br>(2,204 - 3,174) | 156<br>(109 - 230) | 116<br>(101 - 140) | 1,763<br>(1,469 - 2,159) | 481<br>(393 - 619) | 81<br>(69 - 103)   |
| Transport injuries                              | 837<br>(670 - 993)       | 12<br>(6 - 18)     | 37<br>(23 - 47)    | 626<br>(495 - 756)       | 140<br>(108 - 177) | 23<br>(18 - 28)    |
| Road injuries                                   | 800<br>(638 - 951)       | 10<br>(6 - 16)     | 35<br>(22 - 45)    | 598<br>(473 - 722)       | 134<br>(102 - 168) | 22<br>(18 - 28)    |
| Pedestrian road injuries                        | 172<br>(117 - 229)       | 5<br>(3 - 9)       | 16<br>(10 - 22)    | 105<br>(68 - 145)        | 36<br>(23 - 52)    | 9<br>(6 - 12)      |
| Cyclist road injuries                           | 35<br>(25 - 45)          | 1<br>(0 - 2)       | 4<br>(2 - 6)       | 16<br>(11 - 22)          | 11<br>(8 - 15)     | 2<br>(2 - 3)       |
| Motorcyclist road injuries                      | 99<br>(68 - 138)         | 0<br>(0 - 0)       | 1<br>(0 - 1)       | 89<br>(61 - 125)         | 9<br>(5 - 13)      | 1<br>(0 - 1)       |
| Motor vehicle road injuries                     | 473<br>(352 - 578)       | 3<br>(2 - 5)       | 11<br>(6 - 16)     | 377<br>(286 - 462)       | 73<br>(52 - 95)    | 9<br>(6 - 12)      |
| Other road injuries                             | 21<br>(12 - 29)          | 1<br>(0 - 1)       | 3<br>(1 - 5)       | 11<br>(6 - 17)           | 5<br>(2 - 8)       | 1<br>(0 - 2)       |
| Other transport injuries                        | 38<br>(27 - 48)          | 1<br>(1 - 2)       | 2<br>(1 - 2)       | 28<br>(19 - 37)          | 7<br>(4 - 10)      | 1<br>(0 - 1)       |
| Unintentional injuries                          | 875<br>(709 - 1,216)     | 140<br>(96 - 215)  | 66<br>(51 - 96)    | 461<br>(353 - 660)       | 176<br>(141 - 226) | 32<br>(27 - 41)    |
| Falls                                           | 157<br>(125 - 226)       | 13<br>(8 - 25)     | 9<br>(6 - 15)      | 76<br>(58 - 117)         | 49<br>(38 - 66)    | 9<br>(7 - 15)      |
| Drowning                                        | 310<br>(229 - 521)       | 48<br>(26 - 106)   | 37<br>(25 - 68)    | 177<br>(121 - 294)       | 42<br>(28 - 68)    | 7<br>(4 - 10)      |
| Fire, heat, and hot substances                  | 94<br>(70 - 139)         | 18<br>(11 - 36)    | 3<br>(2 - 6)       | 42<br>(29 - 64)          | 25<br>(16 - 39)    | 6<br>(4 - 9)       |
| Poisonings                                      | 77<br>(57 - 144)         | 4<br>(2 - 7)       | 2<br>(1 - 3)       | 45<br>(31 - 89)          | 23<br>(16 - 44)    | 4<br>(3 - 7)       |
| Exposure to mechanical forces                   | 80<br>(64 - 109)         | 6<br>(3 - 12)      | 5<br>(3 - 8)       | 58<br>(44 - 83)          | 10<br>(8 - 14)     | 1<br>(0 - 1)       |
| Unintentional firearm injuries                  | 10<br>(7 - 13)           | 0<br>(0 - 0)       | 0<br>(0 - 0)       | 8<br>(5 - 11)            | 1<br>(1 - 2)       | 0<br>(0 - 0)       |
| Unintentional suffocation                       | 44<br>(30 - 74)          | 5<br>(2 - 10)      | 3<br>(1 - 6)       | 33<br>(21 - 56)          | 3<br>(1 - 5)       | 0<br>(0 - 0)       |
| Other exposure to mechanical forces             | 27<br>(21 - 33)          | 1<br>(1 - 2)       | 2<br>(1 - 3)       | 17<br>(13 - 22)          | 6<br>(5 - 9)       | 0<br>(0 - 1)       |
| Adverse effects of medical treatment            | 12<br>(9 - 18)           | 2<br>(1 - 5)       | 0<br>(0 - 1)       | 4<br>(3 - 6)             | 3<br>(2 - 5)       | 2<br>(1 - 3)       |
| Animal contact                                  | 9<br>(6 - 13)            | 3<br>(1 - 5)       | 2<br>(1 - 4)       | 2<br>(2 - 4)             | 1<br>(1 - 2)       | 0<br>(0 - 0)       |
| Venomous animal contact                         | 8<br>(5 - 12)            | 3<br>(1 - 5)       | 2<br>(1 - 3)       | 2<br>(1 - 3)             | 1<br>(1 - 2)       | 0<br>(0 - 0)       |
| Non-venomous animal contact                     | 1<br>(1 - 2)             | 0<br>(0 - 0)       | 0<br>(0 - 0)       | 1<br>(0 - 1)             | 0<br>(0 - 0)       | 0<br>(0 - 0)       |
| Foreign body                                    | 83<br>(47 - 127)         | 44<br>(22 - 73)    | 3<br>(1 - 4)       | 21<br>(12 - 34)          | 14<br>(8 - 23)     | 3<br>(1 - 4)       |
| Pulmonary aspiration and foreign body in airway | 83<br>(47 - 127)         | 44<br>(22 - 73)    | 3<br>(1 - 4)       | 21<br>(12 - 33)          | 14<br>(8 - 23)     | 3<br>(1 - 4)       |
| Foreign body in other body part                 | 0<br>(0 - 1)             | 0<br>(0 - 0)       | 0<br>(0 - 0)       | 0<br>(0 - 0)             | 0<br>(0 - 0)       | 0<br>(0 - 0)       |
| Other unintentional injuries                    | 53<br>(39 - 71)          | 3<br>(1 - 5)       | 4<br>(2 - 8)       | 36<br>(25 - 51)          | 9<br>(5 - 16)      | 1<br>(1 - 2)       |
| Self-harm and interpersonal violence            | 885<br>(699 - 1,259)     | 4<br>(2 - 7)       | 14<br>(9 - 20)     | 676<br>(533 - 955)       | 165<br>(123 - 278) | 26<br>(20 - 43)    |
| Self-harm                                       | 541<br>(432 - 847)       | -                  | 11<br>(7 - 16)     | 401<br>(316 - 587)       | 110<br>(81 - 206)  | 19<br>(15 - 35)    |
| Interpersonal violence                          | 344<br>(245 - 569)       | 4<br>(2 - 7)       | 3<br>(2 - 6)       | 275<br>(190 - 455)       | 55<br>(33 - 104)   | 7<br>(3 - 13)      |
| Assault by firearm                              | 57<br>(28 - 115)         | 1<br>(0 - 2)       | 0<br>(0 - 0)       | 49<br>(24 - 102)         | 6<br>(3 - 15)      | 0<br>(0 - 1)       |
| Assault by sharp object                         | 170<br>(111 - 293)       | 1<br>(0 - 2)       | 1<br>(0 - 2)       | 138<br>(87 - 239)        | 28<br>(16 - 53)    | 3<br>(1 - 6)       |
| Assault by other means                          | 117<br>(76 - 206)        | 2<br>(1 - 4)       | 2<br>(1 - 3)       | 88<br>(55 - 154)         | 21<br>(11 - 44)    | 4<br>(2 - 7)       |

Web Table 31- Kyrgyzstan deaths with 95% UI by age, sex, and cause in 2013

| Cause                                                             | Females, All Ages           | Females, 0-4 Years       | Females, 5-14 Years | Females, 15-49 Years     | Females, 50-69 Years     | Females, 70-80 Years     |
|-------------------------------------------------------------------|-----------------------------|--------------------------|---------------------|--------------------------|--------------------------|--------------------------|
| All causes                                                        | 16,390<br>(14,813 - 18,117) | 1,898<br>(1,659 - 2,121) | 154<br>(140 - 169)  | 2,135<br>(1,816 - 2,492) | 4,081<br>(3,524 - 4,673) | 8,121<br>(7,423 - 8,847) |
| Communicable, maternal, neonatal, and nutritional diseases        | 1,986<br>(1,758 - 2,224)    | 1,460<br>(1,259 - 1,677) | 39<br>(33 - 46)     | 291<br>(236 - 343)       | 95<br>(76 - 114)         | 100<br>(78 - 131)        |
| HIV/AIDS and tuberculosis                                         | 185<br>(104 - 249)          | 2<br>(1 - 6)             | 1<br>(1 - 2)        | 125<br>(68 - 173)        | 44<br>(28 - 60)          | 12<br>(8 - 17)           |
| Tuberculosis                                                      | 142<br>(71 - 180)           | 1<br>(0 - 2)             | 1<br>(0 - 2)        | 90<br>(39 - 118)         | 38<br>(23 - 51)          | 12<br>(7 - 17)           |
| HIV/AIDS                                                          | 43<br>(6 - 93)              | 1<br>(0 - 5)             | 0<br>(0 - 1)        | 35<br>(6 - 72)           | 6<br>(1 - 17)            | 1<br>(0 - 2)             |
| HIV/AIDS resulting in mycobacterial infection                     | 2<br>(0 - 5)                | 0<br>(0 - 0)             | 0<br>(0 - 0)        | 2<br>(0 - 4)             | 0<br>(0 - 1)             | 0<br>(0 - 0)             |
| HIV/AIDS resulting in other diseases                              | 41<br>(6 - 88)              | 1<br>(0 - 5)             | 0<br>(0 - 1)        | 33<br>(5 - 69)           | 6<br>(1 - 16)            | 1<br>(0 - 2)             |
| Diarrhea, lower respiratory, and other common infectious diseases | 809<br>(700 - 933)          | 573<br>(473 - 683)       | 34<br>(28 - 41)     | 77<br>(61 - 96)          | 42<br>(33 - 54)          | 82<br>(61 - 113)         |
| Diarrheal diseases                                                | 102<br>(66 - 151)           | 92<br>(56 - 140)         | 2<br>(1 - 3)        | 4<br>(3 - 6)             | 2<br>(1 - 3)             | 2<br>(1 - 3)             |
| Intestinal infectious diseases                                    | 6<br>(2 - 11)               | 3<br>(1 - 7)             | 1<br>(0 - 3)        | 2<br>(0 - 4)             | 0<br>(0 - 2)             | 0<br>(0 - 2)             |
| Typhoid fever                                                     | 2<br>(1 - 4)                | 1<br>(0 - 2)             | 1<br>(0 - 1)        | 1<br>(0 - 1)             | 0<br>(0 - 0)             | 0<br>(0 - 0)             |
| Paratyphoid fever                                                 | 1<br>(0 - 1)                | 0<br>(0 - 1)             | 0<br>(0 - 0)        | 0<br>(0 - 0)             | 0<br>(0 - 0)             | 0<br>(0 - 0)             |
| Other intestinal infectious diseases                              | 3<br>(0 - 8)                | 1<br>(0 - 5)             | 0<br>(0 - 2)        | 1<br>(0 - 3)             | 0<br>(0 - 2)             | 0<br>(0 - 2)             |
| Lower respiratory infections                                      | 622<br>(521 - 733)          | 440<br>(352 - 540)       | 24<br>(18 - 30)     | 50<br>(39 - 64)          | 32<br>(24 - 42)          | 76<br>(56 - 105)         |
| Upper respiratory infections                                      | 1<br>(0 - 3)                | 0<br>(0 - 1)             | 0<br>(0 - 0)        | 0<br>(0 - 1)             | 0<br>(0 - 1)             | 0<br>(0 - 2)             |
| Otitis media                                                      | 0<br>(0 - 0)                | 0<br>(0 - 0)             | 0<br>(0 - 0)        | 0<br>(0 - 0)             | 0<br>(0 - 0)             | 0<br>(0 - 0)             |
| Meningitis                                                        | 35<br>(29 - 47)             | 18<br>(13 - 28)          | 3<br>(2 - 4)        | 10<br>(7 - 13)           | 3<br>(2 - 4)             | 1<br>(1 - 1)             |
| Pneumococcal meningitis                                           | 8<br>(7 - 11)               | 3<br>(2 - 5)             | 1<br>(0 - 1)        | 3<br>(2 - 4)             | 1<br>(1 - 1)             | 0<br>(0 - 1)             |
| H influenzae type B meningitis                                    | 12<br>(9 - 18)              | 9<br>(6 - 14)            | 1<br>(1 - 1)        | 2<br>(1 - 3)             | 1<br>(0 - 1)             | 0<br>(0 - 0)             |
| Meningococcal meningitis                                          | 8<br>(6 - 11)               | 4<br>(3 - 6)             | 1<br>(0 - 1)        | 2<br>(1 - 4)             | 1<br>(0 - 1)             | 0<br>(0 - 0)             |
| Other meningitis                                                  | 7<br>(5 - 9)                | 2<br>(1 - 4)             | 0<br>(0 - 1)        | 3<br>(2 - 4)             | 1<br>(1 - 2)             | 0<br>(0 - 1)             |
| Encephalitis                                                      | 38<br>(28 - 56)             | 18<br>(10 - 33)          | 4<br>(3 - 7)        | 11<br>(7 - 15)           | 4<br>(2 - 6)             | 2<br>(1 - 3)             |
| Diphtheria                                                        | 0<br>(0 - 2)                | 0<br>(0 - 2)             | 0<br>(0 - 0)        | 0<br>(0 - 0)             | 0<br>(0 - 0)             | --<br>(0 - 0)            |
| Whooping cough                                                    | 1<br>(0 - 5)                | 1<br>(0 - 5)             | 0<br>(0 - 0)        | 0<br>(0 - 0)             | 0<br>(0 - 0)             | --<br>(0 - 0)            |
| Tetanus                                                           | 0<br>(0 - 0)                | 0<br>(0 - 0)             | 0<br>(0 - 0)        | 0<br>(0 - 0)             | 0<br>(0 - 0)             | 0<br>(0 - 0)             |
| Measles                                                           | 0<br>(0 - 0)                | 0<br>(0 - 0)             | 0<br>(0 - 0)        | 0<br>(0 - 0)             | 0<br>(0 - 0)             | --<br>(0 - 0)            |
| Varicella and herpes zoster                                       | 1<br>(0 - 4)                | 0<br>(0 - 2)             | 0<br>(0 - 0)        | 0<br>(0 - 1)             | 0<br>(0 - 0)             | 1<br>(0 - 3)             |
| Neglected tropical diseases and malaria                           | 13<br>(9 - 20)              | 4<br>(1 - 8)             | 1<br>(1 - 3)        | 5<br>(3 - 8)             | 2<br>(1 - 4)             | 1<br>(1 - 3)             |
| Leishmaniasis                                                     | 6<br>(3 - 11)               | 2<br>(0 - 5)             | 1<br>(0 - 2)        | 3<br>(1 - 6)             | 1<br>(0 - 2)             | 0<br>(0 - 1)             |
| Visceral leishmaniasis                                            | 6<br>(3 - 11)               | 2<br>(0 - 5)             | 1<br>(0 - 2)        | 3<br>(1 - 6)             | 1<br>(0 - 2)             | 0<br>(0 - 1)             |
| Cysticercosis                                                     | 0<br>(0 - 0)                | 0<br>(0 - 0)             | 0<br>(0 - 0)        | 0<br>(0 - 0)             | 0<br>(0 - 0)             | 0<br>(0 - 0)             |
| Cystic echinococcosis                                             | 4<br>(3 - 4)                | 0<br>(0 - 0)             | 0<br>(0 - 0)        | 1<br>(1 - 2)             | 1<br>(1 - 1)             | 1<br>(1 - 1)             |
| Dengue                                                            | 0<br>(0 - 0)                | 0<br>(0 - 0)             | 0<br>(0 - 0)        | 0<br>(0 - 0)             | 0<br>(0 - 0)             | 0<br>(0 - 0)             |
| Rabies                                                            | 1<br>(0 - 1)                | 0<br>(0 - 0)             | 0<br>(0 - 0)        | 0<br>(0 - 0)             | 0<br>(0 - 0)             | 0<br>(0 - 0)             |
| Intestinal nematode infections                                    | 1<br>(0 - 7)                | 1<br>(0 - 5)             | 0<br>(0 - 2)        | 0<br>(0 - 1)             | 0<br>(0 - 1)             | 0<br>(0 - 1)             |
| Ascariasis                                                        | 1<br>(0 - 7)                | 1<br>(0 - 5)             | 0<br>(0 - 2)        | 0<br>(0 - 1)             | 0<br>(0 - 1)             | 0<br>(0 - 1)             |
| Other neglected tropical diseases                                 | 1<br>(1 - 2)                | 1<br>(0 - 2)             | 0<br>(0 - 0)        | 0<br>(0 - 0)             | 0<br>(0 - 0)             | 0<br>(0 - 0)             |
| Maternal disorders                                                | 69<br>(53 - 88)             | --                       | 0<br>(0 - 0)        | 69<br>(53 - 88)          | --                       | --                       |
| Maternal hemorrhage                                               | 10<br>(7 - 14)              | --                       | 0<br>(0 - 0)        | 10<br>(7 - 14)           | --                       | --                       |
| Maternal sepsis and other maternal infections                     | 7<br>(5 - 10)               | --                       | 0<br>(0 - 0)        | 7<br>(5 - 10)            | --                       | --                       |

Web Table 31- Kyrgyzstan deaths with 95% UI by age, sex, and cause in 2013

| Cause                                                            | Females, All Ages           | Females, 0-4 Years | Females, 5-14 Years | Females, 15-49 Years     | Females, 50-69 Years     | Females, 70-80 Years     |
|------------------------------------------------------------------|-----------------------------|--------------------|---------------------|--------------------------|--------------------------|--------------------------|
| Maternal hypertensive disorders                                  | 10<br>(7 - 13)              | --                 | 0<br>(0 - 0)        | 10<br>(7 - 13)           | --                       | --                       |
| Maternal obstructed labor                                        | 5<br>(3 - 8)                | --                 | 0<br>(0 - 0)        | 5<br>(3 - 8)             | --                       | --                       |
| Maternal abortive outcome                                        | 6<br>(4 - 9)                | --                 | 0<br>(0 - 0)        | 6<br>(4 - 9)             | --                       | --                       |
| Indirect maternal deaths                                         | 13<br>(9 - 17)              | --                 | 0<br>(0 - 0)        | 13<br>(9 - 17)           | --                       | --                       |
| Late maternal deaths                                             | 8<br>(5 - 13)               | --                 | 0<br>(0 - 0)        | 8<br>(5 - 13)            | --                       | --                       |
| Maternal deaths aggravated by HIV/AIDS                           | 0<br>(0 - 0)                | --                 | --                  | 0<br>(0 - 0)             | --                       | --                       |
| Other maternal disorders                                         | 9<br>(6 - 12)               | --                 | 0<br>(0 - 0)        | 9<br>(6 - 12)            | --                       | --                       |
| Neonatal disorders                                               | 828<br>(700 - 955)          | 828<br>(700 - 955) | --                  | --                       | --                       | --                       |
| Neonatal preterm birth complications                             | 357<br>(242 - 465)          | 357<br>(242 - 465) | --                  | --                       | --                       | --                       |
| Neonatal encephalopathy due to birth asphyxia and trauma         | 344<br>(257 - 446)          | 344<br>(257 - 446) | --                  | --                       | --                       | --                       |
| Neonatal sepsis and other neonatal infections                    | 32<br>(16 - 60)             | 32<br>(16 - 60)    | --                  | --                       | --                       | --                       |
| Hemolytic disease and other neonatal jaundice                    | 8<br>(3 - 23)               | 8<br>(3 - 23)      | --                  | --                       | --                       | --                       |
| Other neonatal disorders                                         | 87<br>(54 - 128)            | 87<br>(54 - 128)   | --                  | --                       | --                       | --                       |
| Nutritional deficiencies                                         | 20<br>(17 - 25)             | 3<br>(2 - 5)       | 1<br>(1 - 1)        | 9<br>(7 - 11)            | 5<br>(4 - 6)             | 3<br>(2 - 4)             |
| Protein-energy malnutrition                                      | 4<br>(2 - 7)                | 1<br>(0 - 1)       | 0<br>(0 - 0)        | 1<br>(1 - 2)             | 1<br>(1 - 2)             | 0<br>(0 - 1)             |
| Iodine deficiency                                                | 0<br>(0 - 1)                | 0<br>(0 - 0)       | 0<br>(0 - 0)        | 0<br>(0 - 0)             | 0<br>(0 - 0)             | 0<br>(0 - 0)             |
| Iron-deficiency anemia                                           | 13<br>(8 - 17)              | 2<br>(1 - 3)       | 1<br>(0 - 1)        | 6<br>(4 - 8)             | 3<br>(2 - 4)             | 1<br>(1 - 2)             |
| Other nutritional deficiencies                                   | 4<br>(2 - 6)                | 1<br>(0 - 1)       | 0<br>(0 - 0)        | 2<br>(1 - 3)             | 1<br>(0 - 1)             | 1<br>(0 - 1)             |
| Other communicable, maternal, neonatal, and nutritional diseases | 62<br>(47 - 86)             | 50<br>(36 - 72)    | 1<br>(1 - 2)        | 8<br>(5 - 11)            | 2<br>(1 - 2)             | 1<br>(1 - 2)             |
| Sexually transmitted diseases excluding HIV                      | 3<br>(2 - 6)                | 1<br>(0 - 3)       | 0<br>(0 - 0)        | 1<br>(1 - 2)             | 1<br>(0 - 1)             | 0<br>(0 - 0)             |
| Syphilis                                                         | 2<br>(1 - 5)                | 1<br>(0 - 3)       | 0<br>(0 - 0)        | 0<br>(0 - 1)             | 0<br>(0 - 1)             | 0<br>(0 - 0)             |
| Chlamydial infection                                             | 0<br>(0 - 1)                | --                 | 0<br>(0 - 0)        | 0<br>(0 - 0)             | 0<br>(0 - 0)             | 0<br>(0 - 0)             |
| Gonococcal infection                                             | 0<br>(0 - 1)                | --                 | 0<br>(0 - 0)        | 0<br>(0 - 0)             | 0<br>(0 - 0)             | 0<br>(0 - 0)             |
| Other sexually transmitted diseases                              | 0<br>(0 - 0)                | --                 | 0<br>(0 - 0)        | 0<br>(0 - 0)             | 0<br>(0 - 0)             | 0<br>(0 - 0)             |
| Hepatitis                                                        | 11<br>(8 - 15)              | 3<br>(1 - 5)       | 1<br>(1 - 2)        | 6<br>(4 - 9)             | 1<br>(1 - 1)             | 1<br>(0 - 1)             |
| Acute hepatitis A                                                | 2<br>(1 - 4)                | 1<br>(0 - 2)       | 0<br>(0 - 1)        | 0<br>(0 - 1)             | 0<br>(0 - 0)             | 0<br>(0 - 0)             |
| Acute hepatitis B                                                | 5<br>(3 - 8)                | 2<br>(1 - 3)       | 0<br>(0 - 1)        | 2<br>(1 - 4)             | 1<br>(0 - 1)             | 0<br>(0 - 1)             |
| Acute hepatitis C                                                | 1<br>(0 - 1)                | --                 | 0<br>(0 - 0)        | 0<br>(0 - 1)             | 0<br>(0 - 0)             | 0<br>(0 - 0)             |
| Acute hepatitis E                                                | 4<br>(2 - 6)                | 0<br>(0 - 0)       | 0<br>(0 - 0)        | 3<br>(2 - 5)             | 0<br>(0 - 0)             | 0<br>(0 - 0)             |
| Other infectious diseases                                        | 47<br>(33 - 69)             | 46<br>(32 - 68)    | 0<br>(0 - 0)        | 0<br>(0 - 1)             | 0<br>(0 - 0)             | 0<br>(0 - 1)             |
| Non-communicable diseases                                        | 13,693<br>(12,217 - 15,281) | 322<br>(247 - 409) | 61<br>(52 - 70)     | 1,509<br>(1,256 - 1,781) | 3,849<br>(3,319 - 4,411) | 7,952<br>(7,256 - 8,640) |
| Neoplasms                                                        | 1,685<br>(1,436 - 2,016)    | 10<br>(7 - 14)     | 17<br>(13 - 20)     | 410<br>(333 - 491)       | 783<br>(655 - 958)       | 465<br>(400 - 568)       |
| Esophageal cancer                                                | 60<br>(47 - 79)             | --                 | --                  | 6<br>(4 - 8)             | 22<br>(16 - 31)          | 31<br>(23 - 43)          |
| Stomach cancer                                                   | 197<br>(163 - 245)          | --                 | --                  | 37<br>(28 - 47)          | 88<br>(69 - 114)         | 72<br>(54 - 99)          |
| Liver cancer                                                     | 111<br>(88 - 140)           | --                 | 0<br>(0 - 0)        | 18<br>(13 - 24)          | 53<br>(40 - 70)          | 39<br>(28 - 54)          |
| Liver cancer due to hepatitis B                                  | 32<br>(24 - 43)             | --                 | 0<br>(0 - 0)        | 6<br>(4 - 8)             | 18<br>(12 - 24)          | 9<br>(6 - 13)            |
| Liver cancer due to hepatitis C                                  | 40<br>(29 - 54)             | --                 | 0<br>(0 - 0)        | 6<br>(4 - 8)             | 19<br>(13 - 26)          | 15<br>(10 - 22)          |
| Liver cancer due to alcohol use                                  | 19<br>(10 - 30)             | --                 | --                  | 2<br>(1 - 3)             | 8<br>(4 - 13)            | 9<br>(4 - 15)            |
| Liver cancer due to other causes                                 | 20<br>(13 - 29)             | --                 | 0<br>(0 - 0)        | 5<br>(3 - 7)             | 9<br>(5 - 14)            | 6<br>(3 - 9)             |
| Larynx cancer                                                    | 4<br>(2 - 9)                | --                 | --                  | 1<br>(1 - 2)             | 2<br>(1 - 4)             | 1<br>(1 - 2)             |

Web Table 31- Kyrgyzstan deaths with 95% UI by age, sex, and cause in 2013

| Cause                                         | Females, All Ages        | Females, 0-4 Years | Females, 5-14 Years | Females, 15-49 Years | Females, 50-69 Years     | Females, 70-80 Years     |
|-----------------------------------------------|--------------------------|--------------------|---------------------|----------------------|--------------------------|--------------------------|
| Tracheal, bronchus and lung cancer            | 112<br>(91 - 143)        | --                 | --                  | 17<br>(13 - 23)      | 57<br>(44 - 75)          | 38<br>(30 - 50)          |
| Breast cancer                                 | 277<br>(228 - 343)       | --                 | --                  | 85<br>(65 - 107)     | 139<br>(110 - 176)       | 54<br>(43 - 68)          |
| Cervical cancer                               | 212<br>(160 - 262)       | --                 | --                  | 79<br>(49 - 104)     | 94<br>(70 - 122)         | 39<br>(28 - 57)          |
| Uterine cancer                                | 54<br>(33 - 73)          | --                 | --                  | 8<br>(5 - 13)        | 29<br>(17 - 42)          | 17<br>(10 - 24)          |
| Prostate cancer                               | --                       | --                 | --                  | --                   | --                       | --                       |
| Colon and rectum cancer                       | 132<br>(110 - 160)       | --                 | --                  | 22<br>(17 - 28)      | 65<br>(52 - 81)          | 45<br>(36 - 58)          |
| Lip and oral cavity cancer                    | 17<br>(12 - 24)          | --                 | --                  | 3<br>(2 - 4)         | 8<br>(6 - 12)            | 6<br>(4 - 8)             |
| Nasopharynx cancer                            | 3<br>(2 - 5)             | --                 | 0<br>(0 - 0)        | 1<br>(1 - 2)         | 1<br>(1 - 2)             | 1<br>(0 - 1)             |
| Other pharynx cancer                          | 6<br>(5 - 8)             | --                 | --                  | 1<br>(1 - 2)         | 4<br>(2 - 5)             | 1<br>(1 - 2)             |
| Gallbladder and biliary tract cancer          | 22<br>(14 - 29)          | --                 | --                  | 2<br>(2 - 3)         | 10<br>(7 - 14)           | 9<br>(6 - 13)            |
| Pancreatic cancer                             | 71<br>(58 - 89)          | --                 | --                  | 8<br>(6 - 11)        | 37<br>(28 - 47)          | 26<br>(20 - 34)          |
| Malignant skin melanoma                       | 11<br>(9 - 14)           | --                 | --                  | 2<br>(2 - 3)         | 5<br>(4 - 7)             | 4<br>(3 - 5)             |
| Non-melanoma skin cancer                      | 16<br>(11 - 25)          | --                 | --                  | 2<br>(2 - 4)         | 4<br>(3 - 7)             | 9<br>(6 - 15)            |
| Ovarian cancer                                | 95<br>(74 - 122)         | --                 | --                  | 25<br>(19 - 34)      | 52<br>(39 - 69)          | 18<br>(13 - 25)          |
| Testicular cancer                             | --                       | --                 | --                  | --                   | --                       | --                       |
| Kidney cancer                                 | 26<br>(21 - 34)          | 1<br>(0 - 2)       | 0<br>(0 - 0)        | 5<br>(4 - 7)         | 13<br>(9 - 19)           | 7<br>(5 - 10)            |
| Bladder cancer                                | 8<br>(6 - 13)            | --                 | --                  | 1<br>(1 - 2)         | 3<br>(2 - 5)             | 4<br>(3 - 6)             |
| Brain and nervous system cancer               | 45<br>(35 - 56)          | 1<br>(1 - 3)       | 2<br>(1 - 3)        | 19<br>(13 - 24)      | 19<br>(14 - 25)          | 4<br>(3 - 5)             |
| Thyroid cancer                                | 12<br>(9 - 17)           | --                 | 0<br>(0 - 0)        | 2<br>(1 - 3)         | 6<br>(4 - 8)             | 5<br>(3 - 7)             |
| Mesothelioma                                  | 1<br>(1 - 1)             | --                 | --                  | 0<br>(0 - 0)         | 1<br>(0 - 1)             | 0<br>(0 - 0)             |
| Hodgkin lymphoma                              | 6<br>(4 - 8)             | 0<br>(0 - 0)       | 0<br>(0 - 1)        | 3<br>(2 - 4)         | 1<br>(1 - 2)             | 1<br>(1 - 2)             |
| Non-Hodgkin lymphoma                          | 16<br>(12 - 23)          | 0<br>(0 - 1)       | 1<br>(0 - 1)        | 5<br>(3 - 7)         | 7<br>(5 - 10)            | 4<br>(2 - 5)             |
| Multiple myeloma                              | 2<br>(2 - 3)             | --                 | --                  | 0<br>(0 - 1)         | 1<br>(1 - 2)             | 0<br>(0 - 0)             |
| Leukemia                                      | 54<br>(44 - 64)          | 3<br>(2 - 6)       | 7<br>(5 - 9)        | 24<br>(19 - 30)      | 15<br>(11 - 19)          | 5<br>(4 - 6)             |
| Other neoplasms                               | 115<br>(85 - 153)        | 4<br>(2 - 6)       | 5<br>(4 - 8)        | 33<br>(23 - 45)      | 46<br>(32 - 65)          | 26<br>(18 - 37)          |
| Cardiovascular diseases                       | 8,623<br>(7,504 - 9,572) | 4<br>(3 - 7)       | 6<br>(4 - 8)        | 468<br>(370 - 599)   | 2,126<br>(1,756 - 2,454) | 6,018<br>(5,326 - 6,577) |
| Rheumatic heart disease                       | 134<br>(99 - 196)        | 2<br>(0 - 0)       | 2<br>(1 - 3)        | 67<br>(48 - 100)     | 57<br>(39 - 82)          | 9<br>(6 - 14)            |
| Ischemic heart disease                        | 5,029<br>(3,915 - 5,669) | 2<br>(1 - 3)       | 1<br>(1 - 2)        | 144<br>(106 - 195)   | 971<br>(708 - 1,149)     | 3,911<br>(3,055 - 4,386) |
| Cerebrovascular disease                       | 3,076<br>(2,599 - 3,746) | 1<br>(0 - 1)       | 1<br>(1 - 2)        | 187<br>(144 - 242)   | 955<br>(763 - 1,144)     | 1,932<br>(1,649 - 2,441) |
| Ischemic stroke                               | 1,824<br>(1,512 - 2,252) | 0<br>(0 - 1)       | 0<br>(0 - 0)        | 31<br>(21 - 42)      | 324<br>(220 - 414)       | 1,469<br>(1,229 - 1,848) |
| Hemorrhagic stroke                            | 1,252<br>(1,011 - 1,621) | 0<br>(0 - 1)       | 1<br>(1 - 1)        | 157<br>(119 - 203)   | 631<br>(497 - 781)       | 463<br>(352 - 675)       |
| Hypertensive heart disease                    | 192<br>(142 - 281)       | 0<br>(0 - 1)       | 0<br>(0 - 0)        | 13<br>(9 - 19)       | 65<br>(46 - 95)          | 114<br>(81 - 174)        |
| Cardiomyopathy and myocarditis                | 100<br>(80 - 143)        | 0<br>(0 - 1)       | 1<br>(0 - 1)        | 34<br>(25 - 48)      | 39<br>(30 - 56)          | 26<br>(19 - 44)          |
| Atrial fibrillation and flutter               | 0<br>(0 - 0)             | --                 | --                  | 0<br>(0 - 0)         | 0<br>(0 - 0)             | 0<br>(0 - 0)             |
| Aortic aneurysm                               | 8<br>(5 - 12)            | --                 | --                  | 2<br>(1 - 3)         | 3<br>(2 - 5)             | 3<br>(2 - 4)             |
| Peripheral vascular disease                   | 4<br>(3 - 5)             | --                 | --                  | 0<br>(0 - 0)         | 1<br>(1 - 1)             | 2<br>(2 - 4)             |
| Endocarditis                                  | 3<br>(2 - 5)             | 0<br>(0 - 1)       | 0<br>(0 - 0)        | 1<br>(1 - 2)         | 1<br>(0 - 1)             | 1<br>(1 - 1)             |
| Other cardiovascular and circulatory diseases | 76<br>(55 - 99)          | 0<br>(0 - 1)       | 0<br>(0 - 1)        | 20<br>(13 - 27)      | 35<br>(22 - 48)          | 20<br>(14 - 28)          |
| Chronic respiratory diseases                  | 926<br>(771 - 1,402)     | 1<br>(1 - 2)       | 1<br>(1 - 1)        | 60<br>(47 - 82)      | 204<br>(164 - 302)       | 661<br>(539 - 1,009)     |
| Chronic obstructive pulmonary disease         | 872<br>(728 - 1,317)     | 1<br>(0 - 1)       | 0<br>(0 - 0)        | 50<br>(39 - 69)      | 187<br>(150 - 276)       | 635<br>(518 - 974)       |



Web Table 31- Kyrgyzstan deaths with 95% UI by age, sex, and cause in 2013

| Cause                                               | Females, All Ages  | Females, 0-4 Years | Females, 5-14 Years | Females, 15-49 Years | Females, 50-69 Years | Females, 70-80 Years |
|-----------------------------------------------------|--------------------|--------------------|---------------------|----------------------|----------------------|----------------------|
| Pneumoconiosis                                      | 0<br>(0 - 0)       | 0<br>(0 - 0)       | 0<br>(0 - 0)        | 0<br>(0 - 0)         | 0<br>(0 - 0)         | 0<br>(0 - 0)         |
| Silicosis                                           | 0<br>(0 - 0)       | 0<br>(0 - 0)       | 0<br>(0 - 0)        | 0<br>(0 - 0)         | 0<br>(0 - 0)         | 0<br>(0 - 0)         |
| Asbestosis                                          | 0<br>(0 - 0)       | 0<br>(0 - 0)       | 0<br>(0 - 0)        | 0<br>(0 - 0)         | 0<br>(0 - 0)         | 0<br>(0 - 0)         |
| Coal workers pneumoconiosis                         | 0<br>(0 - 0)       | 0<br>(0 - 0)       | 0<br>(0 - 0)        | 0<br>(0 - 0)         | 0<br>(0 - 0)         | 0<br>(0 - 0)         |
| Other pneumoconiosis                                | 0<br>(0 - 0)       | 0<br>(0 - 0)       | 0<br>(0 - 0)        | 0<br>(0 - 0)         | 0<br>(0 - 0)         | 0<br>(0 - 0)         |
| Asthma                                              | 45<br>(26 - 81)    | 0<br>(0 - 0)       | 0<br>(0 - 0)        | 9<br>(5 - 15)        | 16<br>(9 - 28)       | 21<br>(11 - 38)      |
| Interstitial lung disease and pulmonary sarcoidosis | 6<br>(3 - 15)      | 0<br>(0 - 0)       | 0<br>(0 - 0)        | 0<br>(0 - 1)         | 1<br>(0 - 3)         | 5<br>(2 - 11)        |
| Other chronic respiratory diseases                  | 2<br>(1 - 3)       | 1<br>(0 - 1)       | 0<br>(0 - 0)        | 1<br>(0 - 1)         | 0<br>(0 - 0)         | 1<br>(0 - 1)         |
| Cirrhosis                                           | 754<br>(632 - 896) | 1<br>(1 - 2)       | 4<br>(3 - 5)        | 211<br>(169 - 256)   | 353<br>(287 - 433)   | 185<br>(153 - 236)   |
| Cirrhosis due to hepatitis B                        | 331<br>(238 - 458) | 0<br>(0 - 0)       | 1<br>(1 - 2)        | 93<br>(64 - 129)     | 152<br>(103 - 223)   | 86<br>(59 - 121)     |
| Cirrhosis due to hepatitis C                        | 269<br>(152 - 402) | 0<br>(0 - 0)       | 0<br>(0 - 1)        | 70<br>(33 - 106)     | 138<br>(70 - 208)    | 61<br>(34 - 96)      |
| Cirrhosis due to alcohol use                        | 69<br>(33 - 117)   | --                 | --                  | 12<br>(5 - 21)       | 32<br>(14 - 55)      | 26<br>(13 - 44)      |
| Cirrhosis due to other causes                       | 84<br>(53 - 132)   | 1<br>(1 - 1)       | 2<br>(1 - 3)        | 36<br>(23 - 54)      | 32<br>(17 - 55)      | 13<br>(7 - 20)       |
| Digestive diseases                                  | 127<br>(104 - 172) | 1<br>(1 - 2)       | 2<br>(1 - 2)        | 32<br>(25 - 43)      | 47<br>(38 - 64)      | 45<br>(36 - 65)      |
| Peptic ulcer disease                                | 28<br>(21 - 41)    | 0<br>(0 - 0)       | 0<br>(0 - 0)        | 6<br>(4 - 8)         | 11<br>(8 - 16)       | 12<br>(8 - 18)       |
| Gastritis and duodenitis                            | 3<br>(1 - 5)       | 0<br>(0 - 0)       | 0<br>(0 - 0)        | 1<br>(0 - 1)         | 1<br>(0 - 2)         | 1<br>(0 - 2)         |
| Appendicitis                                        | 4<br>(3 - 6)       | 0<br>(0 - 0)       | 0<br>(0 - 1)        | 2<br>(1 - 2)         | 1<br>(1 - 2)         | 1<br>(0 - 1)         |
| Paralytic ileus and intestinal obstruction          | 20<br>(12 - 33)    | 0<br>(0 - 1)       | 0<br>(0 - 1)        | 6<br>(4 - 10)        | 7<br>(4 - 12)        | 6<br>(3 - 11)        |
| Inguinal, femoral, and abdominal hernia             | 4<br>(2 - 6)       | 0<br>(0 - 0)       | 0<br>(0 - 0)        | 0<br>(0 - 1)         | 1<br>(1 - 2)         | 2<br>(1 - 4)         |
| Inflammatory bowel disease                          | 5<br>(4 - 8)       | 0<br>(0 - 1)       | 0<br>(0 - 0)        | 2<br>(1 - 3)         | 2<br>(1 - 3)         | 1<br>(0 - 2)         |
| Vascular intestinal disorders                       | 6<br>(4 - 14)      | 0<br>(0 - 0)       | 0<br>(0 - 0)        | 1<br>(0 - 2)         | 2<br>(1 - 5)         | 4<br>(2 - 8)         |
| Gallbladder and biliary diseases                    | 26<br>(19 - 42)    | 0<br>(0 - 0)       | 0<br>(0 - 0)        | 4<br>(3 - 7)         | 10<br>(7 - 16)       | 11<br>(8 - 21)       |
| Pancreatitis                                        | 20<br>(14 - 29)    | 0<br>(0 - 0)       | 0<br>(0 - 0)        | 7<br>(5 - 11)        | 7<br>(5 - 11)        | 5<br>(3 - 8)         |
| Other digestive diseases                            | 10<br>(8 - 14)     | 0<br>(0 - 0)       | 0<br>(0 - 0)        | 3<br>(2 - 4)         | 4<br>(3 - 6)         | 2<br>(1 - 3)         |
| Neurological disorders                              | 530<br>(397 - 707) | 3<br>(2 - 5)       | 7<br>(5 - 11)       | 57<br>(40 - 75)      | 39<br>(30 - 51)      | 424<br>(292 - 590)   |
| Alzheimer disease and other dementias               | 445<br>(311 - 611) | --                 | --                  | 0<br>(0 - 0)         | 24<br>(16 - 34)      | 420<br>(288 - 585)   |
| Parkinson disease                                   | 3<br>(2 - 4)       | --                 | --                  | 0<br>(0 - 0)         | 2<br>(1 - 2)         | 1<br>(1 - 1)         |
| Epilepsy                                            | 73<br>(50 - 94)    | 2<br>(1 - 4)       | 7<br>(4 - 10)       | 52<br>(35 - 70)      | 10<br>(6 - 14)       | 2<br>(1 - 3)         |
| Multiple sclerosis                                  | 2<br>(1 - 4)       | --                 | --                  | 1<br>(1 - 2)         | 1<br>(0 - 2)         | 0<br>(0 - 0)         |
| Other neurological disorders                        | 8<br>(7 - 9)       | 1<br>(1 - 1)       | 1<br>(0 - 1)        | 3<br>(2 - 4)         | 3<br>(2 - 3)         | 1<br>(1 - 1)         |
| Mental and substance use disorders                  | 123<br>(80 - 187)  | 1<br>(0 - 1)       | 0<br>(0 - 0)        | 59<br>(38 - 88)      | 52<br>(30 - 87)      | 12<br>(9 - 17)       |
| Schizophrenia                                       | 11<br>(7 - 15)     | --                 | --                  | 8<br>(5 - 10)        | 3<br>(2 - 4)         | 1<br>(0 - 1)         |
| Alcohol use disorders                               | 75<br>(33 - 140)   | --                 | --                  | 33<br>(14 - 62)      | 39<br>(17 - 74)      | 3<br>(1 - 5)         |
| Drug use disorders                                  | 37<br>(29 - 47)    | 1<br>(0 - 1)       | --                  | 18<br>(13 - 24)      | 11<br>(7 - 15)       | 8<br>(6 - 12)        |
| Opioid use disorders                                | 8<br>(6 - 10)      | 0<br>(0 - 0)       | --                  | 4<br>(3 - 5)         | 2<br>(1 - 3)         | 2<br>(1 - 3)         |
| Cocaine use disorders                               | 1<br>(1 - 2)       | 0<br>(0 - 0)       | --                  | 1<br>(0 - 1)         | 0<br>(0 - 0)         | 0<br>(0 - 0)         |
| Amphetamine use disorders                           | 1<br>(1 - 2)       | 0<br>(0 - 0)       | --                  | 1<br>(0 - 1)         | 0<br>(0 - 1)         | 0<br>(0 - 0)         |
| Other drug use disorders                            | 27<br>(21 - 35)    | 0<br>(0 - 1)       | --                  | 13<br>(10 - 17)      | 8<br>(6 - 11)        | 6<br>(4 - 9)         |
| Eating disorders                                    | 0<br>(0 - 0)       | --                 | 0<br>(0 - 0)        | 0<br>(0 - 0)         | --                   | --                   |
| Anorexia nervosa                                    | 0<br>(0 - 0)       | --                 | 0<br>(0 - 0)        | 0<br>(0 - 0)         | --                   | --                   |

Web Table 31- Kyrgyzstan deaths with 95% UI by age, sex, and cause in 2013

| Cause                                               | Females, All Ages  | Females, 0-4 Years | Females, 5-14 Years | Females, 15-49 Years | Females, 50-69 Years | Females, 70-80 Years |
|-----------------------------------------------------|--------------------|--------------------|---------------------|----------------------|----------------------|----------------------|
| Diabetes, urogenital, blood, and endocrine diseases | 547<br>(431 - 644) | 12<br>(9 - 16)     | 10<br>(7 - 12)      | 170<br>(125 - 206)   | 225<br>(172 - 273)   | 130<br>(105 - 156)   |
| Diabetes mellitus                                   | 155<br>(127 - 194) | 0<br>(0 - 0)       | 1<br>(1 - 2)        | 20<br>(14 - 25)      | 86<br>(66 - 111)     | 49<br>(39 - 65)      |
| Acute glomerulonephritis                            | 3<br>(2 - 5)       | 0<br>(0 - 1)       | 0<br>(0 - 0)        | 1<br>(1 - 2)         | 1<br>(0 - 1)         | 0<br>(0 - 1)         |
| Chronic kidney disease                              | 222<br>(160 - 268) | 3<br>(2 - 4)       | 4<br>(2 - 6)        | 92<br>(66 - 115)     | 83<br>(54 - 105)     | 40<br>(30 - 51)      |
| Chronic kidney disease due to diabetes mellitus     | 45<br>(30 - 59)    | 0<br>(0 - 0)       | 0<br>(0 - 0)        | 8<br>(5 - 11)        | 28<br>(18 - 39)      | 9<br>(5 - 12)        |
| Chronic kidney disease due to hypertension          | 17<br>(9 - 29)     | 1<br>(0 - 1)       | 0<br>(0 - 0)        | 4<br>(2 - 7)         | 6<br>(3 - 10)        | 6<br>(3 - 11)        |
| Chronic kidney disease due to glomerulonephritis    | 91<br>(65 - 114)   | 1<br>(1 - 2)       | 2<br>(1 - 3)        | 52<br>(36 - 66)      | 25<br>(15 - 35)      | 12<br>(8 - 17)       |
| Chronic kidney disease due to other causes          | 68<br>(38 - 93)    | 1<br>(0 - 2)       | 2<br>(1 - 3)        | 28<br>(16 - 41)      | 24<br>(10 - 37)      | 14<br>(8 - 21)       |
| Urinary diseases and male infertility               | 135<br>(82 - 173)  | 1<br>(1 - 2)       | 2<br>(1 - 2)        | 43<br>(25 - 57)      | 50<br>(28 - 67)      | 39<br>(22 - 52)      |
| Interstitial nephritis and urinary tract infections | 128<br>(78 - 164)  | 1<br>(1 - 2)       | 1<br>(1 - 2)        | 40<br>(23 - 54)      | 46<br>(26 - 63)      | 38<br>(21 - 51)      |
| Urolithiasis                                        | 3<br>(2 - 6)       | --                 | 0<br>(0 - 0)        | 1<br>(1 - 2)         | 1<br>(1 - 2)         | 1<br>(0 - 2)         |
| Other urinary diseases                              | 4<br>(2 - 8)       | 0<br>(0 - 0)       | 0<br>(0 - 0)        | 1<br>(1 - 2)         | 2<br>(1 - 4)         | 0<br>(0 - 1)         |
| Gynecological diseases                              | 0<br>(0 - 0)       | --                 | --                  | 0<br>(0 - 0)         | 0<br>(0 - 0)         | 0<br>(0 - 0)         |
| Uterine fibroids                                    | 0<br>(0 - 0)       | --                 | --                  | 0<br>(0 - 0)         | 0<br>(0 - 0)         | 0<br>(0 - 0)         |
| Polycystic ovarian syndrome                         | 0<br>(0 - 0)       | --                 | --                  | 0<br>(0 - 0)         | 0<br>(0 - 0)         | --                   |
| Endometriosis                                       | 0<br>(0 - 0)       | --                 | --                  | 0<br>(0 - 0)         | 0<br>(0 - 0)         | --                   |
| Genital prolapse                                    | 0<br>(0 - 0)       | --                 | --                  | 0<br>(0 - 0)         | 0<br>(0 - 0)         | 0<br>(0 - 0)         |
| Other gynecological diseases                        | 0<br>(0 - 0)       | --                 | --                  | 0<br>(0 - 0)         | 0<br>(0 - 0)         | 0<br>(0 - 0)         |
| Hemoglobinopathies and hemolytic anemias            | 11<br>(7 - 17)     | 4<br>(2 - 7)       | 1<br>(0 - 1)        | 4<br>(3 - 7)         | 1<br>(1 - 2)         | 0<br>(0 - 1)         |
| Thalassemias                                        | 6<br>(4 - 9)       | 3<br>(2 - 5)       | 1<br>(0 - 1)        | 2<br>(2 - 4)         | 0<br>(0 - 0)         | 0<br>(0 - 0)         |
| Sickle cell disorders                               | 0<br>(0 - 0)       | 0<br>(0 - 0)       | 0<br>(0 - 0)        | 0<br>(0 - 0)         | 0<br>(0 - 0)         | 0<br>(0 - 0)         |
| G6PD deficiency                                     | 0<br>(0 - 0)       | 0<br>(0 - 0)       | 0<br>(0 - 0)        | 0<br>(0 - 0)         | 0<br>(0 - 0)         | 0<br>(0 - 0)         |
| Other hemoglobinopathies and hemolytic anemias      | 4<br>(3 - 7)       | 1<br>(1 - 2)       | 0<br>(0 - 0)        | 2<br>(1 - 3)         | 1<br>(1 - 2)         | 0<br>(0 - 1)         |
| Endocrine, metabolic, blood, and immune disorders   | 22<br>(11 - 28)    | 4<br>(2 - 6)       | 2<br>(1 - 3)        | 10<br>(5 - 13)       | 5<br>(3 - 7)         | 1<br>(1 - 2)         |
| Musculoskeletal disorders                           | 48<br>(37 - 61)    | --                 | 3<br>(2 - 3)        | 22<br>(16 - 28)      | 13<br>(9 - 17)       | 11<br>(7 - 15)       |
| Rheumatoid arthritis                                | 24<br>(17 - 31)    | --                 | 0<br>(0 - 0)        | 6<br>(4 - 8)         | 8<br>(6 - 11)        | 9<br>(6 - 13)        |
| Other musculoskeletal disorders                     | 24<br>(19 - 32)    | --                 | 2<br>(2 - 3)        | 16<br>(12 - 21)      | 5<br>(3 - 7)         | 1<br>(1 - 3)         |
| Other non-communicable diseases                     | 331<br>(252 - 422) | 288<br>(213 - 373) | 13<br>(9 - 17)      | 20<br>(15 - 27)      | 7<br>(5 - 10)        | 2<br>(2 - 3)         |
| Congenital anomalies                                | 309<br>(233 - 394) | 271<br>(199 - 350) | 13<br>(9 - 17)      | 19<br>(13 - 25)      | 6<br>(4 - 8)         | 2<br>(1 - 2)         |
| Neural tube defects                                 | 24<br>(13 - 40)    | 24<br>(13 - 39)    | 0<br>(0 - 1)        | 0<br>(0 - 0)         | 0<br>(0 - 0)         | 0<br>(0 - 0)         |
| Congenital heart anomalies                          | 133<br>(96 - 175)  | 104<br>(69 - 143)  | 9<br>(6 - 13)       | 14<br>(10 - 19)      | 4<br>(3 - 6)         | 1<br>(1 - 2)         |
| Cleft lip and cleft palate                          | 3<br>(0 - 11)      | 3<br>(0 - 11)      | --                  | --                   | --                   | --                   |
| Down syndrome                                       | 5<br>(3 - 10)      | 4<br>(2 - 8)       | 0<br>(0 - 0)        | 1<br>(0 - 1)         | 0<br>(0 - 0)         | 0<br>(0 - 0)         |
| Chromosomal unbalanced rearrangements               | 0<br>(0 - 1)       | 0<br>(0 - 0)       | 0<br>(0 - 0)        | 0<br>(0 - 0)         | 0<br>(0 - 0)         | 0<br>(0 - 0)         |
| Other congenital anomalies                          | 144<br>(103 - 191) | 136<br>(95 - 182)  | 3<br>(2 - 4)        | 4<br>(2 - 5)         | 1<br>(1 - 2)         | 0<br>(0 - 1)         |
| Skin and subcutaneous diseases                      | 5<br>(2 - 7)       | 1<br>(0 - 2)       | 0<br>(0 - 0)        | 2<br>(0 - 2)         | 2<br>(0 - 2)         | 1<br>(0 - 1)         |
| Cellulitis                                          | 2<br>(1 - 3)       | 0<br>(0 - 1)       | 0<br>(0 - 0)        | 1<br>(0 - 1)         | 0<br>(0 - 1)         | 0<br>(0 - 0)         |
| Pyoderma                                            | 3<br>(1 - 4)       | 0<br>(0 - 1)       | 0<br>(0 - 0)        | 1<br>(0 - 1)         | 1<br>(0 - 1)         | 0<br>(0 - 1)         |
| Decubitus ulcer                                     | 0<br>(0 - 0)       | 0<br>(0 - 0)       | 0<br>(0 - 0)        | 0<br>(0 - 0)         | 0<br>(0 - 0)         | 0<br>(0 - 0)         |
| Other skin and subcutaneous diseases                | 1<br>(0 - 1)       | 0<br>(0 - 0)       | 0<br>(0 - 0)        | 0<br>(0 - 1)         | 0<br>(0 - 0)         | 0<br>(0 - 0)         |

Web Table 31- Kyrgyzstan deaths with 95% UI by age, sex, and cause in 2013

| Cause                                           | Females, All Ages  | Females, 0-4 Years | Females, 5-14 Years | Females, 15-49 Years | Females, 50-69 Years | Females, 70-80 Years |
|-------------------------------------------------|--------------------|--------------------|---------------------|----------------------|----------------------|----------------------|
| Sudden infant death syndrome                    | 16<br>(5 - 42)     | 16<br>(5 - 42)     | -                   | -                    | -                    | -                    |
| Injuries                                        | 711<br>(604 - 898) | 116<br>(86 - 178)  | 53<br>(45 - 66)     | 335<br>(272 - 409)   | 137<br>(112 - 184)   | 69<br>(56 - 96)      |
| Transport injuries                              | 224<br>(161 - 270) | 9<br>(5 - 13)      | 20<br>(13 - 25)     | 125<br>(85 - 157)    | 52<br>(39 - 66)      | 20<br>(15 - 27)      |
| Road injuries                                   | 218<br>(157 - 262) | 8<br>(5 - 12)      | 19<br>(12 - 25)     | 121<br>(82 - 152)    | 51<br>(38 - 64)      | 19<br>(15 - 27)      |
| Pedestrian road injuries                        | 61<br>(43 - 77)    | 4<br>(2 - 6)       | 9<br>(6 - 13)       | 25<br>(15 - 34)      | 13<br>(9 - 19)       | 10<br>(7 - 14)       |
| Cyclist road injuries                           | 13<br>(9 - 17)     | 0<br>(0 - 1)       | 1<br>(1 - 2)        | 6<br>(4 - 8)         | 4<br>(3 - 6)         | 1<br>(1 - 2)         |
| Motorcyclist road injuries                      | 5<br>(3 - 8)       | 0<br>(0 - 0)       | 0<br>(0 - 0)        | 4<br>(2 - 6)         | 1<br>(0 - 1)         | 0<br>(0 - 1)         |
| Motor vehicle road injuries                     | 135<br>(93 - 167)  | 4<br>(2 - 5)       | 8<br>(4 - 11)       | 84<br>(55 - 107)     | 31<br>(23 - 41)      | 8<br>(6 - 11)        |
| Other road injuries                             | 4<br>(2 - 6)       | 0<br>(0 - 1)       | 0<br>(0 - 1)        | 2<br>(1 - 3)         | 1<br>(0 - 1)         | 0<br>(0 - 0)         |
| Other transport injuries                        | 6<br>(4 - 8)       | 0<br>(0 - 1)       | 1<br>(0 - 1)        | 4<br>(2 - 5)         | 1<br>(1 - 1)         | 1<br>(0 - 1)         |
| Unintentional injuries                          | 298<br>(242 - 425) | 105<br>(76 - 169)  | 29<br>(22 - 44)     | 87<br>(68 - 122)     | 45<br>(35 - 63)      | 31<br>(25 - 44)      |
| Falls                                           | 37<br>(28 - 61)    | 8<br>(5 - 17)      | 2<br>(2 - 4)        | 10<br>(8 - 16)       | 8<br>(6 - 13)        | 8<br>(5 - 15)        |
| Drowning                                        | 102<br>(75 - 182)  | 36<br>(20 - 72)    | 17<br>(11 - 32)     | 34<br>(25 - 54)      | 11<br>(8 - 17)       | 5<br>(3 - 7)         |
| Fire, heat, and hot substances                  | 46<br>(35 - 73)    | 15<br>(10 - 34)    | 3<br>(2 - 5)        | 11<br>(8 - 16)       | 9<br>(7 - 14)        | 8<br>(5 - 12)        |
| Poisonings                                      | 33<br>(23 - 52)    | 4<br>(2 - 6)       | 2<br>(1 - 3)        | 12<br>(9 - 20)       | 9<br>(5 - 15)        | 6<br>(3 - 10)        |
| Exposure to mechanical forces                   | 21<br>(14 - 34)    | 6<br>(4 - 11)      | 2<br>(2 - 4)        | 10<br>(7 - 17)       | 1<br>(1 - 2)         | 1<br>(0 - 1)         |
| Unintentional firearm injuries                  | 1<br>(1 - 1)       | 0<br>(0 - 0)       | 0<br>(0 - 0)        | 1<br>(0 - 1)         | 0<br>(0 - 0)         | 0<br>(0 - 0)         |
| Unintentional suffocation                       | 13<br>(8 - 27)     | 5<br>(2 - 9)       | 1<br>(0 - 2)        | 7<br>(4 - 14)        | 0<br>(0 - 1)         | 0<br>(0 - 0)         |
| Other exposure to mechanical forces             | 6<br>(5 - 8)       | 2<br>(1 - 3)       | 1<br>(1 - 2)        | 2<br>(1 - 3)         | 1<br>(1 - 1)         | 0<br>(0 - 1)         |
| Adverse effects of medical treatment            | 11<br>(8 - 17)     | 2<br>(1 - 6)       | 0<br>(0 - 1)        | 2<br>(2 - 3)         | 3<br>(2 - 5)         | 3<br>(2 - 4)         |
| Animal contact                                  | 2<br>(1 - 4)       | 1<br>(0 - 1)       | 0<br>(0 - 1)        | 1<br>(0 - 1)         | 0<br>(0 - 1)         | 0<br>(0 - 0)         |
| Venomous animal contact                         | 1<br>(1 - 3)       | 0<br>(0 - 1)       | 0<br>(0 - 0)        | 0<br>(0 - 1)         | 0<br>(0 - 1)         | 0<br>(0 - 0)         |
| Non-venomous animal contact                     | 1<br>(0 - 2)       | 0<br>(0 - 0)       | 0<br>(0 - 0)        | 0<br>(0 - 0)         | 0<br>(0 - 0)         | 0<br>(0 - 0)         |
| Foreign body                                    | 40<br>(22 - 65)    | 31<br>(16 - 54)    | 1<br>(0 - 1)        | 4<br>(2 - 6)         | 3<br>(2 - 5)         | 1<br>(1 - 2)         |
| Pulmonary aspiration and foreign body in airway | 39<br>(22 - 64)    | 31<br>(16 - 54)    | 1<br>(0 - 1)        | 4<br>(2 - 6)         | 3<br>(2 - 5)         | 1<br>(1 - 2)         |
| Foreign body in other body part                 | 0<br>(0 - 0)       | 0<br>(0 - 0)       | 0<br>(0 - 0)        | 0<br>(0 - 0)         | 0<br>(0 - 0)         | 0<br>(0 - 0)         |
| Other unintentional injuries                    | 7<br>(5 - 11)      | 1<br>(1 - 3)       | 1<br>(1 - 2)        | 3<br>(2 - 5)         | 1<br>(1 - 2)         | 0<br>(0 - 1)         |
| Self-harm and interpersonal violence            | 189<br>(149 - 273) | 3<br>(2 - 6)       | 5<br>(3 - 7)        | 123<br>(95 - 167)    | 40<br>(30 - 68)      | 18<br>(13 - 35)      |
| Self-harm                                       | 122<br>(96 - 193)  | -                  | 3<br>(2 - 4)        | 78<br>(61 - 106)     | 27<br>(20 - 53)      | 13<br>(10 - 29)      |
| Interpersonal violence                          | 67<br>(47 - 106)   | 3<br>(2 - 6)       | 2<br>(1 - 3)        | 44<br>(29 - 71)      | 13<br>(8 - 22)       | 5<br>(3 - 9)         |
| Assault by firearm                              | 6<br>(3 - 12)      | 0<br>(0 - 1)       | 0<br>(0 - 0)        | 3<br>(2 - 6)         | 2<br>(1 - 4)         | 0<br>(0 - 1)         |
| Assault by sharp object                         | 29<br>(19 - 49)    | 1<br>(0 - 2)       | 1<br>(0 - 1)        | 20<br>(13 - 34)      | 6<br>(3 - 11)        | 1<br>(1 - 3)         |
| Assault by other means                          | 32<br>(22 - 51)    | 2<br>(1 - 3)       | 1<br>(1 - 2)        | 21<br>(13 - 34)      | 5<br>(3 - 9)         | 3<br>(2 - 6)         |

Web Table 31- Laos deaths with 95% UI by age, sex, and cause in 2013

| Cause                                                             | Both Sexes, All Ages        | Both Sexes, 0-4 Years      | Both Sexes, 5-14 Years   | Both Sexes, 15-49 Years   | Both Sexes, 50-69 Years    | Both Sexes, 70-80 Years    |
|-------------------------------------------------------------------|-----------------------------|----------------------------|--------------------------|---------------------------|----------------------------|----------------------------|
| All causes                                                        | 46,490<br>(34,643 - 64,165) | 11,071<br>(9,540 - 12,558) | 1,334<br>(1,108 - 1,566) | 9,903<br>(5,595 - 15,970) | 11,347<br>(6,820 - 18,630) | 12,834<br>(9,951 - 17,300) |
| Communicable, maternal, neonatal, and nutritional diseases        | 15,246<br>(12,178 - 19,232) | 8,698<br>(7,115 - 10,267)  | 506<br>(393 - 645)       | 2,466<br>(1,363 - 4,239)  | 1,636<br>(951 - 2,815)     | 1,941<br>(1,429 - 2,706)   |
| HIV/AIDS and tuberculosis                                         | 2,011<br>(1,127 - 3,709)    | 41<br>(20 - 100)           | 28<br>(15 - 60)          | 764<br>(349 - 1,872)      | 703<br>(375 - 1,257)       | 475<br>(299 - 711)         |
| Tuberculosis                                                      | 1,691<br>(987 - 2,779)      | 33<br>(18 - 53)            | 24<br>(14 - 36)          | 513<br>(255 - 953)        | 652<br>(361 - 1,149)       | 469<br>(294 - 682)         |
| HIV/AIDS                                                          | 320<br>(32 - 1,862)         | 8<br>(0 - 62)              | 4<br>(0 - 35)            | 251<br>(27 - 1,439)       | 51<br>(4 - 313)            | 6<br>(0 - 42)              |
| HIV/AIDS resulting in mycobacterial infection                     | 20<br>(2 - 114)             | 0<br>(0 - 3)               | 0<br>(0 - 2)             | 15<br>(2 - 86)            | 3<br>(0 - 21)              | 0<br>(0 - 3)               |
| HIV/AIDS resulting in other diseases                              | 300<br>(30 - 1,749)         | 8<br>(0 - 59)              | 4<br>(0 - 33)            | 235<br>(26 - 1,352)       | 47<br>(4 - 292)            | 6<br>(0 - 39)              |
| Diarrhea, lower respiratory, and other common infectious diseases | 7,694<br>(5,928 - 9,835)    | 4,349<br>(3,132 - 5,608)   | 392<br>(297 - 526)       | 900<br>(493 - 1,455)      | 782<br>(444 - 1,349)       | 1,270<br>(880 - 1,791)     |
| Diarrheal diseases                                                | 1,563<br>(985 - 2,266)      | 995<br>(494 - 1,644)       | 60<br>(33 - 98)          | 143<br>(74 - 231)         | 141<br>(72 - 257)          | 224<br>(137 - 349)         |
| Intestinal infectious diseases                                    | 213<br>(105 - 383)          | 80<br>(34 - 153)           | 63<br>(29 - 117)         | 59<br>(24 - 117)          | 8<br>(3 - 18)              | 2<br>(1 - 6)               |
| Typhoid fever                                                     | 151<br>(71 - 279)           | 52<br>(21 - 106)           | 47<br>(21 - 90)          | 44<br>(17 - 88)           | 6<br>(2 - 14)              | 2<br>(1 - 3)               |
| Paratyphoid fever                                                 | 46<br>(21 - 87)             | 19<br>(7 - 41)             | 14<br>(6 - 27)           | 11<br>(4 - 24)            | 1<br>(0 - 3)               | 0<br>(0 - 1)               |
| Other intestinal infectious diseases                              | 15<br>(6 - 28)              | 8<br>(2 - 18)              | 2<br>(0 - 7)             | 4<br>(0 - 11)             | 1<br>(0 - 5)               | 1<br>(0 - 3)               |
| Lower respiratory infections                                      | 4,395<br>(3,116 - 5,993)    | 2,193<br>(1,370 - 3,129)   | 140<br>(89 - 204)        | 503<br>(266 - 857)        | 562<br>(314 - 992)         | 997<br>(668 - 1,463)       |
| Upper respiratory infections                                      | 5<br>(2 - 8)                | 1<br>(0 - 4)               | 0<br>(0 - 1)             | 1<br>(0 - 3)              | 1<br>(0 - 3)               | 1<br>(0 - 2)               |
| Otitis media                                                      | 7<br>(5 - 11)               | 2<br>(1 - 3)               | 1<br>(1 - 1)             | 2<br>(1 - 3)              | 1<br>(1 - 2)               | 1<br>(1 - 2)               |
| Meningitis                                                        | 531<br>(332 - 789)          | 327<br>(175 - 546)         | 44<br>(25 - 68)          | 102<br>(53 - 166)         | 36<br>(20 - 65)            | 22<br>(14 - 36)            |
| Pneumococcal meningitis                                           | 149<br>(87 - 225)           | 77<br>(37 - 133)           | 15<br>(7 - 25)           | 36<br>(18 - 63)           | 12<br>(6 - 23)             | 8<br>(5 - 15)              |
| H influenzae type B meningitis                                    | 157<br>(92 - 251)           | 124<br>(64 - 213)          | 12<br>(7 - 20)           | 14<br>(7 - 23)            | 4<br>(2 - 8)               | 3<br>(1 - 5)               |
| Meningococcal meningitis                                          | 51<br>(31 - 78)             | 21<br>(10 - 38)            | 4<br>(2 - 8)             | 16<br>(8 - 29)            | 6<br>(3 - 12)              | 4<br>(2 - 7)               |
| Other meningitis                                                  | 175<br>(110 - 261)          | 104<br>(54 - 178)          | 13<br>(6 - 22)           | 36<br>(18 - 60)           | 14<br>(7 - 25)             | 8<br>(4 - 12)              |
| Encephalitis                                                      | 95<br>(61 - 143)            | 41<br>(20 - 72)            | 14<br>(8 - 24)           | 28<br>(13 - 46)           | 8<br>(4 - 15)              | 5<br>(3 - 8)               |
| Diphtheria                                                        | 9<br>(1 - 36)               | 6<br>(0 - 33)              | 2<br>(0 - 11)            | 1<br>(0 - 3)              | 0<br>(0 - 1)               | --                         |
| Whooping cough                                                    | 567<br>(2 - 2,448)          | 525<br>(2 - 2,243)         | 34<br>(0 - 165)          | 8<br>(0 - 39)             | 1<br>(0 - 4)               | --                         |
| Tetanus                                                           | 180<br>(108 - 357)          | 82<br>(32 - 192)           | 19<br>(8 - 34)           | 47<br>(19 - 92)           | 21<br>(8 - 43)             | 12<br>(6 - 23)             |
| Measles                                                           | 109<br>(14 - 437)           | 92<br>(12 - 378)           | 14<br>(2 - 58)           | 2<br>(0 - 10)             | 0<br>(0 - 0)               | --                         |
| Varicella and herpes zoster                                       | 19<br>(8 - 37)              | 7<br>(1 - 20)              | 2<br>(0 - 6)             | 5<br>(1 - 11)             | 2<br>(0 - 4)               | 4<br>(0 - 14)              |
| Neglected tropical diseases and malaria                           | 272<br>(181 - 456)          | 84<br>(40 - 206)           | 50<br>(33 - 81)          | 94<br>(49 - 177)          | 30<br>(16 - 56)            | 14<br>(9 - 23)             |
| Malaria                                                           | 105<br>(47 - 227)           | 29<br>(4 - 139)            | 16<br>(6 - 31)           | 47<br>(20 - 100)          | 11<br>(4 - 24)             | 4<br>(1 - 7)               |
| Leishmaniasis                                                     | 0<br>(0 - 0)                | 0<br>(0 - 0)               | 0<br>(0 - 0)             | 0<br>(0 - 0)              | 0<br>(0 - 0)               | 0<br>(0 - 0)               |
| Visceral leishmaniasis                                            | 0<br>(0 - 0)                | 0<br>(0 - 0)               | 0<br>(0 - 0)             | 0<br>(0 - 0)              | 0<br>(0 - 0)               | 0<br>(0 - 0)               |
| Schistosomiasis                                                   | 20<br>(12 - 32)             | 0<br>(0 - 0)               | 1<br>(0 - 1)             | 8<br>(4 - 13)             | 7<br>(4 - 13)              | 4<br>(2 - 6)               |
| Cysticercosis                                                     | 0<br>(0 - 1)                | 0<br>(0 - 0)               | 0<br>(0 - 0)             | 0<br>(0 - 1)              | 0<br>(0 - 0)               | 0<br>(0 - 0)               |
| Cystic echinococcosis                                             | 2<br>(1 - 2)                | 0<br>(0 - 0)               | 0<br>(0 - 0)             | 1<br>(0 - 1)              | 0<br>(0 - 0)               | 0<br>(0 - 0)               |
| Dengue                                                            | 35<br>(18 - 56)             | 17<br>(7 - 30)             | 12<br>(5 - 18)           | 5<br>(3 - 9)              | 1<br>(0 - 2)               | 1<br>(0 - 1)               |
| Rabies                                                            | 49<br>(18 - 169)            | 6<br>(1 - 23)              | 13<br>(4 - 43)           | 23<br>(7 - 84)            | 6<br>(2 - 19)              | 2<br>(1 - 5)               |
| Intestinal nematode infections                                    | 17<br>(6 - 38)              | 12<br>(3 - 29)             | 3<br>(0 - 11)            | 1<br>(0 - 8)              | 1<br>(0 - 4)               | 0<br>(0 - 3)               |
| Ascariasis                                                        | 17<br>(6 - 38)              | 12<br>(3 - 29)             | 3<br>(0 - 11)            | 1<br>(0 - 8)              | 1<br>(0 - 4)               | 0<br>(0 - 3)               |
| Other neglected tropical diseases                                 | 43<br>(19 - 71)             | 20<br>(8 - 40)             | 6<br>(3 - 11)            | 9<br>(4 - 17)             | 4<br>(1 - 8)               | 4<br>(1 - 7)               |
| Maternal disorders                                                | 543<br>(277 - 932)          | --                         | 3<br>(1 - 6)             | 541<br>(275 - 930)        | --                         | --                         |

Web Table 31- Laos deaths with 95% UI by age, sex, and cause in 2013

| Cause                                                            | Both Sexes, All Ages        | Both Sexes, 0-4 Years    | Both Sexes, 5-14 Years | Both Sexes, 15-49 Years  | Both Sexes, 50-69 Years   | Both Sexes, 70-80 Years    |
|------------------------------------------------------------------|-----------------------------|--------------------------|------------------------|--------------------------|---------------------------|----------------------------|
| Maternal hemorrhage                                              | 82<br>(40 - 146)            | --                       | 0<br>(0 - 1)           | 81<br>(39 - 145)         | --                        | --                         |
| Maternal sepsis and other maternal infections                    | 50<br>(26 - 90)             | --                       | 0<br>(0 - 1)           | 50<br>(25 - 90)          | --                        | --                         |
| Maternal hypertensive disorders                                  | 57<br>(21 - 107)            | --                       | 0<br>(0 - 1)           | 56<br>(21 - 107)         | --                        | --                         |
| Maternal obstructed labor                                        | 42<br>(18 - 75)             | --                       | 0<br>(0 - 0)           | 42<br>(18 - 75)          | --                        | --                         |
| Maternal abortive outcome                                        | 95<br>(43 - 179)            | --                       | 0<br>(0 - 1)           | 95<br>(43 - 179)         | --                        | --                         |
| Indirect maternal deaths                                         | 52<br>(22 - 101)            | --                       | 0<br>(0 - 1)           | 52<br>(22 - 100)         | --                        | --                         |
| Late maternal deaths                                             | 70<br>(33 - 128)            | --                       | 1<br>(0 - 1)           | 70<br>(32 - 128)         | --                        | --                         |
| Maternal deaths aggravated by HIV/AIDS                           | 0<br>(0 - 0)                | --                       | --                     | 0<br>(0 - 0)             | --                        | --                         |
| Other maternal disorders                                         | 94<br>(44 - 164)            | --                       | 0<br>(0 - 1)           | 93<br>(44 - 163)         | --                        | --                         |
| Neonatal disorders                                               | 3,975<br>(3,411 - 4,609)    | 3,975<br>(3,411 - 4,609) | --                     | --                       | --                        | --                         |
| Neonatal preterm birth complications                             | 2,087<br>(1,454 - 2,696)    | 2,087<br>(1,454 - 2,696) | --                     | --                       | --                        | --                         |
| Neonatal encephalopathy due to birth asphyxia and trauma         | 962<br>(590 - 1,456)        | 962<br>(590 - 1,456)     | --                     | --                       | --                        | --                         |
| Neonatal sepsis and other neonatal infections                    | 174<br>(66 - 407)           | 174<br>(66 - 407)        | --                     | --                       | --                        | --                         |
| Hemolytic disease and other neonatal jaundice                    | 23<br>(10 - 45)             | 23<br>(10 - 45)          | --                     | --                       | --                        | --                         |
| Other neonatal disorders                                         | 729<br>(361 - 1,392)        | 729<br>(361 - 1,392)     | --                     | --                       | --                        | --                         |
| Nutritional deficiencies                                         | 447<br>(293 - 647)          | 161<br>(89 - 267)        | 18<br>(11 - 27)        | 79<br>(39 - 133)         | 58<br>(31 - 99)           | 132<br>(86 - 196)          |
| Protein-energy malnutrition                                      | 130<br>(71 - 232)           | 64<br>(26 - 128)         | 5<br>(2 - 9)           | 14<br>(6 - 30)           | 14<br>(6 - 29)            | 32<br>(14 - 61)            |
| Iodine deficiency                                                | 2<br>(0 - 6)                | 1<br>(0 - 5)             | 0<br>(0 - 1)           | 0<br>(0 - 1)             | 0<br>(0 - 1)              | 0<br>(0 - 1)               |
| Iron-deficiency anemia                                           | 282<br>(170 - 421)          | 79<br>(36 - 143)         | 11<br>(6 - 17)         | 58<br>(29 - 98)          | 40<br>(20 - 70)           | 93<br>(56 - 145)           |
| Other nutritional deficiencies                                   | 34<br>(15 - 68)             | 16<br>(6 - 39)           | 2<br>(1 - 5)           | 5<br>(2 - 12)            | 3<br>(1 - 7)              | 7<br>(3 - 15)              |
| Other communicable, maternal, neonatal, and nutritional diseases | 303<br>(193 - 489)          | 87<br>(47 - 143)         | 16<br>(9 - 26)         | 89<br>(45 - 177)         | 63<br>(30 - 130)          | 49<br>(23 - 102)           |
| Sexually transmitted diseases excluding HIV                      | 44<br>(26 - 69)             | 27<br>(13 - 50)          | 3<br>(2 - 5)           | 7<br>(4 - 14)            | 3<br>(1 - 7)              | 3<br>(1 - 6)               |
| Syphilis                                                         | 37<br>(21 - 61)             | 27<br>(13 - 50)          | 3<br>(1 - 4)           | 3<br>(2 - 6)             | 2<br>(1 - 4)              | 2<br>(1 - 5)               |
| Chlamydial infection                                             | 2<br>(1 - 3)                | --                       | 0<br>(0 - 0)           | 1<br>(0 - 2)             | 0<br>(0 - 1)              | 0<br>(0 - 0)               |
| Gonococcal infection                                             | 3<br>(1 - 5)                | --                       | 0<br>(0 - 0)           | 2<br>(1 - 3)             | 1<br>(0 - 1)              | 0<br>(0 - 1)               |
| Other sexually transmitted diseases                              | 2<br>(1 - 4)                | --                       | 0<br>(0 - 0)           | 1<br>(1 - 3)             | 0<br>(0 - 1)              | 0<br>(0 - 0)               |
| Hepatitis                                                        | 44<br>(27 - 70)             | 6<br>(2 - 12)            | 1<br>(1 - 2)           | 16<br>(8 - 28)           | 13<br>(7 - 23)            | 7<br>(5 - 12)              |
| Acute hepatitis A                                                | 5<br>(2 - 11)               | 3<br>(1 - 7)             | 1<br>(0 - 1)           | 1<br>(0 - 3)             | 0<br>(0 - 1)              | 0<br>(0 - 0)               |
| Acute hepatitis B                                                | 24<br>(13 - 41)             | 3<br>(1 - 7)             | 0<br>(0 - 1)           | 6<br>(3 - 12)            | 9<br>(4 - 17)             | 6<br>(4 - 17)              |
| Acute hepatitis C                                                | 1<br>(0 - 3)                | --                       | 0<br>(0 - 0)           | 0<br>(0 - 1)             | 0<br>(0 - 1)              | 0<br>(0 - 1)               |
| Acute hepatitis E                                                | 13<br>(6 - 24)              | 0<br>(0 - 0)             | 0<br>(0 - 1)           | 9<br>(4 - 15)            | 3<br>(1 - 7)              | 1<br>(0 - 3)               |
| Other infectious diseases                                        | 216<br>(125 - 373)          | 54<br>(20 - 108)         | 11<br>(5 - 20)         | 65<br>(30 - 145)         | 47<br>(19 - 105)          | 39<br>(14 - 86)            |
| Non-communicable diseases                                        | 26,678<br>(18,143 - 39,336) | 1,762<br>(1,091 - 2,859) | 396<br>(301 - 500)     | 4,853<br>(2,553 - 8,041) | 9,092<br>(5,448 - 14,863) | 10,576<br>(8,183 - 14,148) |
| Neoplasms                                                        | 3,893<br>(2,456 - 6,062)    | 54<br>(29 - 116)         | 71<br>(52 - 103)       | 920<br>(500 - 1,519)     | 1,746<br>(1,024 - 2,909)  | 1,102<br>(806 - 1,537)     |
| Esophageal cancer                                                | 82<br>(50 - 131)            | --                       | --                     | 13<br>(7 - 23)           | 40<br>(23 - 67)           | 29<br>(20 - 43)            |
| Stomach cancer                                                   | 388<br>(244 - 612)          | --                       | --                     | 76<br>(40 - 131)         | 177<br>(104 - 297)        | 135<br>(94 - 197)          |
| Liver cancer                                                     | 270<br>(163 - 437)          | --                       | 2<br>(1 - 3)           | 61<br>(32 - 107)         | 135<br>(75 - 228)         | 72<br>(49 - 110)           |
| Liver cancer due to hepatitis B                                  | 108<br>(53 - 188)           | --                       | 1<br>(0 - 1)           | 30<br>(13 - 55)          | 54<br>(25 - 96)           | 24<br>(13 - 39)            |
| Liver cancer due to hepatitis C                                  | 115<br>(61 - 214)           | --                       | 0<br>(0 - 0)           | 20<br>(8 - 40)           | 59<br>(28 - 115)          | 35<br>(20 - 60)            |
| Liver cancer due to alcohol use                                  | 15<br>(7 - 30)              | --                       | --                     | 2<br>(1 - 5)             | 7<br>(3 - 17)             | 6<br>(3 - 10)              |

Web Table 31- Laos deaths with 95% UI by age, sex, and cause in 2013

| Cause                                         | Both Sexes, All Ages       | Both Sexes, 0-4 Years | Both Sexes, 5-14 Years | Both Sexes, 15-49 Years  | Both Sexes, 50-69 Years  | Both Sexes, 70-80 Years  |
|-----------------------------------------------|----------------------------|-----------------------|------------------------|--------------------------|--------------------------|--------------------------|
| Liver cancer due to other causes              | 32<br>(14 - 66)            | --                    | 1<br>(0 - 1)           | 9<br>(4 - 20)            | 15<br>(5 - 35)           | 7<br>(3 - 13)            |
| Larynx cancer                                 | 42<br>(25 - 69)            | --                    | --                     | 7<br>(3 - 13)            | 21<br>(11 - 36)          | 15<br>(9 - 22)           |
| Tracheal, bronchus and lung cancer            | 806<br>(472 - 1,287)       | --                    | --                     | 121<br>(59 - 213)        | 434<br>(241 - 731)       | 250<br>(172 - 360)       |
| Breast cancer                                 | 222<br>(122 - 401)         | --                    | --                     | 87<br>(44 - 166)         | 100<br>(52 - 189)        | 35<br>(23 - 55)          |
| Cervical cancer                               | 290<br>(159 - 496)         | --                    | --                     | 97<br>(48 - 173)         | 145<br>(73 - 250)        | 48<br>(28 - 75)          |
| Uterine cancer                                | 36<br>(18 - 65)            | --                    | --                     | 6<br>(2 - 11)            | 21<br>(9 - 40)           | 9<br>(5 - 17)            |
| Prostate cancer                               | 52<br>(27 - 78)            | --                    | --                     | 1<br>(0 - 1)             | 10<br>(5 - 18)           | 41<br>(21 - 60)          |
| Colon and rectum cancer                       | 325<br>(209 - 506)         | --                    | --                     | 59<br>(32 - 99)          | 138<br>(80 - 232)        | 128<br>(92 - 179)        |
| Lip and oral cavity cancer                    | 110<br>(61 - 183)          | --                    | --                     | 23<br>(11 - 41)          | 51<br>(26 - 90)          | 36<br>(21 - 56)          |
| Nasopharynx cancer                            | 54<br>(28 - 90)            | --                    | 1<br>(0 - 2)           | 21<br>(10 - 36)          | 24<br>(11 - 43)          | 9<br>(5 - 14)            |
| Other pharynx cancer                          | 51<br>(30 - 86)            | --                    | --                     | 11<br>(5 - 20)           | 28<br>(15 - 50)          | 13<br>(8 - 19)           |
| Gallbladder and biliary tract cancer          | 89<br>(49 - 147)           | --                    | --                     | 12<br>(5 - 21)           | 42<br>(21 - 76)          | 34<br>(21 - 53)          |
| Pancreatic cancer                             | 109<br>(69 - 171)          | --                    | --                     | 18<br>(9 - 31)           | 56<br>(33 - 94)          | 35<br>(25 - 50)          |
| Malignant skin melanoma                       | 15<br>(8 - 25)             | --                    | --                     | 5<br>(3 - 9)             | 6<br>(3 - 11)            | 4<br>(2 - 5)             |
| Non-melanoma skin cancer                      | 15<br>(9 - 24)             | --                    | --                     | 3<br>(2 - 5)             | 5<br>(2 - 8)             | 7<br>(4 - 11)            |
| Ovarian cancer                                | 95<br>(49 - 163)           | --                    | --                     | 30<br>(14 - 55)          | 52<br>(25 - 92)          | 14<br>(8 - 22)           |
| Testicular cancer                             | 4<br>(2 - 6)               | --                    | --                     | 3<br>(1 - 5)             | 1<br>(0 - 1)             | 0<br>(0 - 1)             |
| Kidney cancer                                 | 54<br>(32 - 84)            | 3<br>(1 - 8)          | 1<br>(0 - 2)           | 9<br>(5 - 16)            | 26<br>(14 - 43)          | 14<br>(9 - 21)           |
| Bladder cancer                                | 66<br>(43 - 99)            | --                    | --                     | 6<br>(3 - 10)            | 27<br>(15 - 44)          | 34<br>(23 - 47)          |
| Brain and nervous system cancer               | 84<br>(43 - 135)           | 3<br>(1 - 9)          | 7<br>(4 - 12)          | 35<br>(16 - 58)          | 27<br>(12 - 47)          | 11<br>(6 - 17)           |
| Thyroid cancer                                | 24<br>(14 - 41)            | --                    | 0<br>(0 - 0)           | 4<br>(2 - 7)             | 10<br>(5 - 19)           | 10<br>(6 - 15)           |
| Mesothelioma                                  | 8<br>(5 - 13)              | --                    | --                     | 2<br>(1 - 4)             | 4<br>(2 - 8)             | 2<br>(1 - 3)             |
| Hodgkin lymphoma                              | 18<br>(11 - 29)            | 2<br>(1 - 4)          | 2<br>(1 - 4)           | 8<br>(4 - 15)            | 4<br>(2 - 7)             | 2<br>(1 - 3)             |
| Non-Hodgkin lymphoma                          | 116<br>(72 - 183)          | 5<br>(2 - 11)         | 8<br>(5 - 14)          | 38<br>(20 - 61)          | 39<br>(22 - 69)          | 25<br>(17 - 38)          |
| Multiple myeloma                              | 14<br>(8 - 23)             | --                    | --                     | 3<br>(2 - 6)             | 7<br>(4 - 11)            | 4<br>(3 - 6)             |
| Leukemia                                      | 196<br>(125 - 287)         | 17<br>(8 - 37)        | 33<br>(23 - 47)        | 84<br>(46 - 133)         | 37<br>(22 - 62)          | 26<br>(19 - 36)          |
| Other neoplasms                               | 257<br>(142 - 422)         | 23<br>(10 - 62)       | 17<br>(10 - 33)        | 76<br>(37 - 132)         | 80<br>(39 - 140)         | 60<br>(35 - 93)          |
| Cardiovascular diseases                       | 12,682<br>(8,479 - 18,954) | 220<br>(136 - 339)    | 94<br>(58 - 130)       | 2,058<br>(1,043 - 3,461) | 4,432<br>(2,577 - 7,234) | 5,877<br>(4,443 - 7,914) |
| Rheumatic heart disease                       | 262<br>(144 - 430)         | 10<br>(4 - 20)        | 23<br>(11 - 37)        | 121<br>(56 - 211)        | 55<br>(28 - 106)         | 53<br>(33 - 85)          |
| Ischemic heart disease                        | 5,943<br>(3,745 - 9,077)   | 30<br>(11 - 59)       | 13<br>(6 - 20)         | 941<br>(458 - 1,643)     | 2,249<br>(1,270 - 3,770) | 2,709<br>(1,957 - 3,718) |
| Cerebrovascular disease                       | 5,018<br>(3,330 - 7,364)   | 64<br>(36 - 102)      | 26<br>(15 - 37)        | 669<br>(332 - 1,112)     | 1,683<br>(976 - 2,695)   | 2,577<br>(1,904 - 3,497) |
| Ischemic stroke                               | 2,574<br>(1,738 - 3,631)   | 11<br>(2 - 24)        | 4<br>(1 - 6)           | 111<br>(55 - 204)        | 651<br>(366 - 1,070)     | 1,798<br>(1,257 - 2,437) |
| Hemorrhagic stroke                            | 2,444<br>(1,447 - 3,790)   | 53<br>(30 - 87)       | 22<br>(13 - 32)        | 558<br>(285 - 931)       | 1,032<br>(557 - 1,692)   | 779<br>(519 - 1,160)     |
| Hypertensive heart disease                    | 452<br>(276 - 729)         | 3<br>(1 - 7)          | 1<br>(1 - 2)           | 62<br>(26 - 114)         | 150<br>(78 - 269)        | 235<br>(148 - 362)       |
| Cardiomyopathy and myocarditis                | 229<br>(144 - 343)         | 48<br>(14 - 84)       | 13<br>(6 - 20)         | 67<br>(32 - 115)         | 47<br>(26 - 81)          | 54<br>(33 - 89)          |
| Atrial fibrillation and flutter               | 3<br>(1 - 5)               | --                    | --                     | 1<br>(0 - 1)             | 1<br>(0 - 2)             | 1<br>(1 - 2)             |
| Aortic aneurysm                               | 43<br>(26 - 68)            | --                    | --                     | 7<br>(3 - 13)            | 10<br>(5 - 18)           | 26<br>(16 - 39)          |
| Peripheral vascular disease                   | 3<br>(2 - 5)               | --                    | --                     | 0<br>(0 - 1)             | 1<br>(0 - 2)             | 2<br>(1 - 3)             |
| Endocarditis                                  | 72<br>(40 - 124)           | 10<br>(4 - 23)        | 3<br>(2 - 6)           | 25<br>(11 - 45)          | 18<br>(9 - 33)           | 16<br>(10 - 26)          |
| Other cardiovascular and circulatory diseases | 658<br>(341 - 1,343)       | 55<br>(23 - 109)      | 15<br>(8 - 26)         | 165<br>(75 - 343)        | 219<br>(101 - 468)       | 203<br>(107 - 436)       |

Web Table 31- Laos deaths with 95% UI by age, sex, and cause in 2013

| Cause                                               | Both Sexes, All Ages     | Both Sexes, 0-4 Years | Both Sexes, 5-14 Years | Both Sexes, 15-49 Years | Both Sexes, 50-69 Years | Both Sexes, 70-80 Years  |
|-----------------------------------------------------|--------------------------|-----------------------|------------------------|-------------------------|-------------------------|--------------------------|
| Chronic respiratory diseases                        | 3,066<br>(2,059 - 4,740) | 238<br>(139 - 379)    | 47<br>(32 - 67)        | 377<br>(202 - 646)      | 899<br>(495 - 1,571)    | 1,505<br>(1,068 - 2,218) |
| Chronic obstructive pulmonary disease               | 1,443<br>(966 - 2,238)   | 81<br>(44 - 139)      | 7<br>(3 - 11)          | 93<br>(45 - 165)        | 407<br>(231 - 710)      | 855<br>(590 - 1,260)     |
| Pneumoconiosis                                      | 131<br>(66 - 228)        | 2<br>(1 - 4)          | 1<br>(1 - 2)           | 20<br>(9 - 38)          | 57<br>(26 - 110)        | 51<br>(25 - 86)          |
| Silicosis                                           | 70<br>(35 - 123)         | 0<br>(0 - 1)          | 0<br>(0 - 1)           | 2<br>(1 - 3)            | 23<br>(9 - 49)          | 44<br>(22 - 76)          |
| Asbestosis                                          | 10<br>(4 - 21)           | 0<br>(0 - 1)          | 0<br>(0 - 0)           | 3<br>(1 - 5)            | 7<br>(3 - 15)           | 0<br>(0 - 0)             |
| Coal workers pneumoconiosis                         | 30<br>(11 - 59)          | 0<br>(0 - 1)          | 0<br>(0 - 0)           | 9<br>(4 - 18)           | 19<br>(7 - 38)          | 1<br>(0 - 2)             |
| Other pneumoconiosis                                | 21<br>(10 - 39)          | 1<br>(0 - 2)          | 0<br>(0 - 1)           | 6<br>(3 - 13)           | 9<br>(4 - 18)           | 5<br>(2 - 11)            |
| Asthma                                              | 1,269<br>(651 - 2,340)   | 120<br>(56 - 219)     | 34<br>(20 - 52)        | 232<br>(109 - 430)      | 390<br>(169 - 775)      | 493<br>(230 - 959)       |
| Interstitial lung disease and pulmonary sarcoidosis | 78<br>(5 - 200)          | 0<br>(0 - 2)          | 0<br>(0 - 1)           | 3<br>(0 - 8)            | 25<br>(1 - 70)          | 50<br>(3 - 125)          |
| Other chronic respiratory diseases                  | 145<br>(86 - 234)        | 36<br>(18 - 64)       | 4<br>(2 - 7)           | 30<br>(13 - 55)         | 19<br>(9 - 37)          | 56<br>(32 - 94)          |
| Cirrhosis                                           | 910<br>(551 - 1,494)     | 12<br>(6 - 21)        | 9<br>(7 - 13)          | 347<br>(180 - 593)      | 388<br>(232 - 666)      | 153<br>(108 - 218)       |
| Cirrhosis due to hepatitis B                        | 303<br>(155 - 522)       | 1<br>(0 - 1)          | 2<br>(1 - 3)           | 114<br>(46 - 221)       | 131<br>(65 - 228)       | 55<br>(28 - 86)          |
| Cirrhosis due to hepatitis C                        | 266<br>(110 - 483)       | 1<br>(0 - 1)          | 1<br>(0 - 2)           | 101<br>(43 - 195)       | 118<br>(41 - 221)       | 45<br>(17 - 80)          |
| Cirrhosis due to alcohol use                        | 234<br>(113 - 428)       | --                    | --                     | 78<br>(24 - 158)        | 111<br>(52 - 204)       | 46<br>(27 - 69)          |
| Cirrhosis due to other causes                       | 107<br>(62 - 177)        | 10<br>(5 - 19)        | 6<br>(4 - 10)          | 53<br>(26 - 97)         | 29<br>(14 - 55)         | 8<br>(4 - 13)            |
| Digestive diseases                                  | 1,030<br>(675 - 1,572)   | 58<br>(31 - 101)      | 27<br>(18 - 38)        | 291<br>(160 - 482)      | 308<br>(178 - 524)      | 345<br>(249 - 496)       |
| Peptic ulcer disease                                | 393<br>(245 - 641)       | 6<br>(2 - 12)         | 4<br>(2 - 7)           | 92<br>(48 - 164)        | 139<br>(77 - 246)       | 152<br>(103 - 233)       |
| Gastritis and duodenitis                            | 32<br>(17 - 69)          | 3<br>(1 - 7)          | 1<br>(1 - 3)           | 8<br>(4 - 18)           | 8<br>(4 - 18)           | 11<br>(6 - 24)           |
| Appendicitis                                        | 82<br>(48 - 129)         | 9<br>(3 - 20)         | 7<br>(4 - 10)          | 31<br>(15 - 52)         | 20<br>(10 - 35)         | 16<br>(9 - 26)           |
| Paralytic ileus and intestinal obstruction          | 104<br>(59 - 170)        | 9<br>(4 - 19)         | 3<br>(2 - 5)           | 21<br>(10 - 39)         | 27<br>(13 - 51)         | 45<br>(25 - 71)          |
| Inguinal, femoral, and abdominal hernia             | 30<br>(17 - 50)          | 3<br>(1 - 8)          | 1<br>(1 - 3)           | 7<br>(4 - 13)           | 7<br>(4 - 14)           | 10<br>(6 - 18)           |
| Inflammatory bowel disease                          | 33<br>(21 - 53)          | 5<br>(2 - 13)         | 2<br>(1 - 3)           | 10<br>(5 - 18)          | 7<br>(4 - 13)           | 9<br>(5 - 15)            |
| Vascular intestinal disorders                       | 8<br>(4 - 18)            | 1<br>(0 - 2)          | 0<br>(0 - 1)           | 3<br>(1 - 6)            | 2<br>(1 - 4)            | 3<br>(1 - 5)             |
| Gallbladder and biliary diseases                    | 105<br>(65 - 165)        | 5<br>(3 - 9)          | 2<br>(1 - 3)           | 26<br>(13 - 44)         | 32<br>(16 - 56)         | 40<br>(24 - 62)          |
| Pancreatitis                                        | 105<br>(52 - 179)        | 2<br>(1 - 5)          | 2<br>(1 - 3)           | 55<br>(22 - 102)        | 27<br>(13 - 48)         | 18<br>(10 - 30)          |
| Other digestive diseases                            | 139<br>(85 - 222)        | 16<br>(8 - 30)        | 5<br>(3 - 8)           | 39<br>(20 - 71)         | 38<br>(20 - 70)         | 40<br>(24 - 63)          |
| Neurological disorders                              | 786<br>(577 - 1,065)     | 26<br>(9 - 59)        | 24<br>(14 - 37)        | 98<br>(51 - 156)        | 101<br>(60 - 167)       | 537<br>(403 - 716)       |
| Alzheimer disease and other dementias               | 588<br>(438 - 799)       | --                    | --                     | 1<br>(0 - 1)            | 72<br>(43 - 120)        | 516<br>(387 - 689)       |
| Parkinson disease                                   | 9<br>(6 - 14)            | --                    | --                     | 1<br>(0 - 1)            | 3<br>(1 - 5)            | 6<br>(3 - 9)             |
| Epilepsy                                            | 149<br>(83 - 225)        | 20<br>(5 - 51)        | 20<br>(11 - 33)        | 81<br>(41 - 131)        | 19<br>(10 - 33)         | 9<br>(6 - 15)            |
| Multiple sclerosis                                  | 3<br>(1 - 5)             | --                    | --                     | 1<br>(0 - 3)            | 1<br>(0 - 2)            | 0<br>(0 - 1)             |
| Other neurological disorders                        | 37<br>(23 - 64)          | 6<br>(3 - 17)         | 4<br>(3 - 8)           | 14<br>(7 - 25)          | 7<br>(4 - 13)           | 6<br>(4 - 9)             |
| Mental and substance use disorders                  | 177<br>(90 - 303)        | 5<br>(1 - 15)         | 0<br>(0 - 0)           | 108<br>(50 - 189)       | 55<br>(27 - 97)         | 9<br>(5 - 14)            |
| Schizophrenia                                       | 2<br>(1 - 4)             | --                    | --                     | 1<br>(0 - 2)            | 1<br>(0 - 1)            | 0<br>(0 - 1)             |
| Alcohol use disorders                               | 127<br>(58 - 219)        | --                    | --                     | 70<br>(29 - 127)        | 50<br>(22 - 88)         | 8<br>(4 - 13)            |
| Drug use disorders                                  | 48<br>(22 - 107)         | 5<br>(1 - 15)         | --                     | 37<br>(15 - 83)         | 5<br>(2 - 12)           | 1<br>(0 - 2)             |
| Opioid use disorders                                | 31<br>(14 - 69)          | 3<br>(1 - 10)         | --                     | 24<br>(10 - 54)         | 3<br>(1 - 7)            | 1<br>(0 - 1)             |
| Cocaine use disorders                               | 1<br>(0 - 2)             | 0<br>(0 - 0)          | --                     | 1<br>(0 - 2)            | 0<br>(0 - 0)            | 0<br>(0 - 0)             |
| Amphetamine use disorders                           | 1<br>(0 - 2)             | 0<br>(0 - 0)          | --                     | 1<br>(0 - 2)            | 0<br>(0 - 0)            | 0<br>(0 - 0)             |
| Other drug use disorders                            | 15<br>(7 - 35)           | 2<br>(0 - 4)          | --                     | 12<br>(5 - 27)          | 2<br>(1 - 4)            | 0<br>(0 - 1)             |

Web Table 31- Laos deaths with 95% UI by age, sex, and cause in 2013

| Cause                                               | Both Sexes, All Ages     | Both Sexes, 0-4 Years  | Both Sexes, 5-14 Years | Both Sexes, 15-49 Years | Both Sexes, 50-69 Years | Both Sexes, 70-80 Years |
|-----------------------------------------------------|--------------------------|------------------------|------------------------|-------------------------|-------------------------|-------------------------|
| Eating disorders                                    | 0<br>(0 - 1)             | --                     | 0<br>(0 - 0)           | 0<br>(0 - 1)            | --                      | --                      |
| Anorexia nervosa                                    | 0<br>(0 - 1)             | --                     | 0<br>(0 - 0)           | 0<br>(0 - 1)            | --                      | --                      |
| Diabetes, urogenital, blood, and endocrine diseases | 2,808<br>(1,837 - 4,212) | 125<br>(67 - 193)      | 52<br>(36 - 71)        | 535<br>(285 - 872)      | 1,108<br>(653 - 1,816)  | 989<br>(717 - 1,359)    |
| Diabetes mellitus                                   | 1,376<br>(874 - 2,149)   | 5<br>(3 - 7)           | 4<br>(2 - 6)           | 167<br>(88 - 284)       | 627<br>(368 - 1,057)    | 575<br>(392 - 822)      |
| Acute glomerulonephritis                            | 9<br>(6 - 14)            | 2<br>(1 - 3)           | 1<br>(1 - 2)           | 4<br>(2 - 6)            | 1<br>(1 - 3)            | 1<br>(1 - 2)            |
| Chronic kidney disease                              | 944<br>(558 - 1,482)     | 27<br>(11 - 43)        | 16<br>(10 - 23)        | 236<br>(122 - 393)      | 365<br>(195 - 622)      | 299<br>(190 - 440)      |
| Chronic kidney disease due to diabetes mellitus     | 56<br>(25 - 98)          | 1<br>(0 - 1)           | 0<br>(0 - 1)           | 10<br>(4 - 21)          | 22<br>(9 - 43)          | 22<br>(10 - 38)         |
| Chronic kidney disease due to hypertension          | 239<br>(124 - 405)       | 2<br>(1 - 5)           | 1<br>(0 - 2)           | 48<br>(20 - 86)         | 104<br>(48 - 184)       | 84<br>(48 - 136)        |
| Chronic kidney disease due to glomerulonephritis    | 160<br>(95 - 247)        | 12<br>(6 - 19)         | 8<br>(6 - 11)          | 54<br>(28 - 89)         | 45<br>(21 - 78)         | 41<br>(23 - 65)         |
| Chronic kidney disease due to other causes          | 489<br>(237 - 850)       | 11<br>(2 - 23)         | 7<br>(3 - 11)          | 124<br>(55 - 231)       | 194<br>(85 - 368)       | 153<br>(71 - 258)       |
| Urinary diseases and male infertility               | 205<br>(125 - 315)       | 14<br>(7 - 27)         | 3<br>(2 - 5)           | 47<br>(23 - 78)         | 67<br>(37 - 118)        | 74<br>(46 - 110)        |
| Interstitial nephritis and urinary tract infections | 113<br>(62 - 176)        | 7<br>(3 - 15)          | 1<br>(1 - 2)           | 25<br>(12 - 45)         | 35<br>(17 - 63)         | 44<br>(25 - 68)         |
| Urolithiasis                                        | 13<br>(7 - 23)           | --                     | 0<br>(0 - 1)           | 4<br>(2 - 7)            | 5<br>(2 - 9)            | 4<br>(2 - 9)            |
| Other urinary diseases                              | 79<br>(48 - 126)         | 7<br>(3 - 14)          | 1<br>(1 - 2)           | 18<br>(9 - 31)          | 27<br>(15 - 49)         | 25<br>(14 - 43)         |
| Gynecological diseases                              | 5<br>(2 - 11)            | --                     | --                     | 4<br>(1 - 8)            | 1<br>(0 - 3)            | 1<br>(0 - 2)            |
| Uterine fibroids                                    | 1<br>(0 - 2)             | --                     | --                     | 1<br>(0 - 1)            | 0<br>(0 - 1)            | 0<br>(0 - 0)            |
| Polycystic ovarian syndrome                         | 0<br>(0 - 1)             | --                     | --                     | 0<br>(0 - 1)            | 0<br>(0 - 0)            | --                      |
| Endometriosis                                       | 1<br>(0 - 1)             | --                     | --                     | 1<br>(0 - 1)            | 0<br>(0 - 0)            | --                      |
| Genital prolapse                                    | 1<br>(0 - 2)             | --                     | --                     | 0<br>(0 - 1)            | 0<br>(0 - 0)            | 0<br>(0 - 0)            |
| Other gynecological diseases                        | 3<br>(1 - 5)             | --                     | --                     | 2<br>(1 - 4)            | 1<br>(0 - 1)            | 0<br>(0 - 1)            |
| Hemoglobinopathies and hemolytic anemias            | 142<br>(71 - 225)        | 56<br>(17 - 101)       | 21<br>(11 - 33)        | 42<br>(19 - 75)         | 13<br>(6 - 23)          | 10<br>(6 - 16)          |
| Thalassemias                                        | 118<br>(57 - 190)        | 53<br>(16 - 96)        | 21<br>(11 - 32)        | 38<br>(17 - 67)         | 6<br>(3 - 11)           | 1<br>(1 - 2)            |
| Sickle cell disorders                               | 0<br>(0 - 0)             | 0<br>(0 - 0)           | 0<br>(0 - 0)           | 0<br>(0 - 0)            | 0<br>(0 - 0)            | 0<br>(0 - 0)            |
| G6PD deficiency                                     | 2<br>(1 - 3)             | 0<br>(0 - 1)           | 0<br>(0 - 0)           | 1<br>(0 - 1)            | 0<br>(0 - 1)            | 0<br>(0 - 0)            |
| Other hemoglobinopathies and hemolytic anemias      | 22<br>(12 - 34)          | 2<br>(1 - 4)           | 0<br>(0 - 1)           | 4<br>(2 - 7)            | 6<br>(3 - 11)           | 9<br>(5 - 14)           |
| Endocrine, metabolic, blood, and immune disorders   | 127<br>(74 - 209)        | 22<br>(8 - 62)         | 6<br>(3 - 12)          | 35<br>(17 - 64)         | 34<br>(18 - 59)         | 30<br>(18 - 44)         |
| Musculoskeletal disorders                           | 53<br>(28 - 94)          | --                     | 5<br>(3 - 8)           | 25<br>(12 - 47)         | 15<br>(8 - 27)          | 9<br>(5 - 16)           |
| Rheumatoid arthritis                                | 9<br>(5 - 18)            | --                     | 1<br>(0 - 2)           | 2<br>(1 - 5)            | 3<br>(1 - 7)            | 3<br>(1 - 6)            |
| Other musculoskeletal disorders                     | 44<br>(23 - 76)          | --                     | 4<br>(2 - 6)           | 23<br>(11 - 42)         | 11<br>(6 - 21)          | 6<br>(3 - 10)           |
| Other non-communicable diseases                     | 1,272<br>(712 - 2,354)   | 1,023<br>(502 - 2,029) | 67<br>(38 - 117)       | 94<br>(49 - 158)        | 40<br>(22 - 67)         | 49<br>(34 - 73)         |
| Congenital anomalies                                | 1,145<br>(595 - 2,181)   | 997<br>(487 - 1,989)   | 63<br>(35 - 114)       | 67<br>(34 - 114)        | 10<br>(5 - 19)          | 8<br>(6 - 12)           |
| Neural tube defects                                 | 241<br>(77 - 523)        | 225<br>(69 - 499)      | 6<br>(2 - 15)          | 9<br>(2 - 19)           | 1<br>(0 - 3)            | 0<br>(0 - 1)            |
| Congenital heart anomalies                          | 604<br>(243 - 1,362)     | 516<br>(181 - 1,231)   | 40<br>(20 - 75)        | 37<br>(18 - 65)         | 4<br>(2 - 7)            | 5<br>(4 - 8)            |
| Cleft lip and cleft palate                          | 5<br>(1 - 14)            | 5<br>(1 - 14)          | --                     | --                      | --                      | --                      |
| Down syndrome                                       | 28<br>(8 - 63)           | 22<br>(5 - 55)         | 3<br>(1 - 6)           | 3<br>(1 - 5)            | 0<br>(0 - 1)            | 0<br>(0 - 0)            |
| Chromosomal unbalanced rearrangements               | 23<br>(6 - 62)           | 19<br>(4 - 57)         | 1<br>(0 - 2)           | 2<br>(1 - 5)            | 0<br>(0 - 1)            | 0<br>(0 - 0)            |
| Other congenital anomalies                          | 244<br>(90 - 663)        | 209<br>(65 - 598)      | 13<br>(6 - 28)         | 16<br>(7 - 30)          | 5<br>(2 - 9)            | 3<br>(2 - 4)            |
| Skin and subcutaneous diseases                      | 115<br>(70 - 176)        | 15<br>(4 - 27)         | 4<br>(2 - 6)           | 27<br>(13 - 45)         | 29<br>(16 - 51)         | 41<br>(27 - 63)         |
| Cellulitis                                          | 63<br>(35 - 101)         | 9<br>(3 - 18)          | 2<br>(1 - 3)           | 15<br>(7 - 26)          | 18<br>(9 - 32)          | 18<br>(11 - 30)         |
| Pyoderma                                            | 28<br>(15 - 44)          | 5<br>(1 - 10)          | 1<br>(0 - 2)           | 7<br>(3 - 12)           | 7<br>(3 - 13)           | 8<br>(4 - 14)           |



Web Table 31- Laos deaths with 95% UI by age, sex, and cause in 2013

| Cause                                           | Both Sexes, All Ages     | Both Sexes, 0-4 Years | Both Sexes, 5-14 Years | Both Sexes, 15-49 Years  | Both Sexes, 50-69 Years | Both Sexes, 70-80 Years |
|-------------------------------------------------|--------------------------|-----------------------|------------------------|--------------------------|-------------------------|-------------------------|
| Decubitus ulcer                                 | 23<br>(12 - 35)          | 0<br>(0 - 1)          | 0<br>(0 - 1)           | 4<br>(2 - 6)             | 4<br>(2 - 7)            | 14<br>(8 - 24)          |
| Other skin and subcutaneous diseases            | 2<br>(1 - 4)             | 0<br>(0 - 1)          | 0<br>(0 - 1)           | 1<br>(0 - 2)             | 0<br>(0 - 1)            | 0<br>(0 - 1)            |
| Sudden infant death syndrome                    | 11<br>(3 - 43)           | 11<br>(3 - 43)        | --                     | --                       | --                      | --                      |
| Injuries                                        | 4,566<br>(3,046 - 6,540) | 612<br>(347 - 941)    | 432<br>(330 - 549)     | 2,585<br>(1,514 - 3,936) | 620<br>(375 - 1,058)    | 317<br>(233 - 453)      |
| Transport injuries                              | 1,826<br>(1,147 - 2,726) | 162<br>(92 - 264)     | 182<br>(129 - 243)     | 1,116<br>(621 - 1,742)   | 258<br>(147 - 454)      | 108<br>(71 - 156)       |
| Road injuries                                   | 1,727<br>(1,075 - 2,582) | 147<br>(82 - 243)     | 174<br>(122 - 231)     | 1,063<br>(593 - 1,661)   | 243<br>(137 - 425)      | 100<br>(66 - 145)       |
| Pedestrian road injuries                        | 441<br>(277 - 681)       | 60<br>(30 - 107)      | 70<br>(46 - 104)       | 199<br>(103 - 341)       | 73<br>(40 - 134)        | 37<br>(23 - 57)         |
| Cyclist road injuries                           | 121<br>(74 - 181)        | 10<br>(4 - 19)        | 19<br>(11 - 28)        | 60<br>(32 - 100)         | 23<br>(12 - 39)         | 9<br>(6 - 14)           |
| Motorcyclist road injuries                      | 507<br>(281 - 809)       | 25<br>(12 - 47)       | 30<br>(18 - 46)        | 382<br>(200 - 623)       | 53<br>(28 - 93)         | 17<br>(10 - 27)         |
| Motor vehicle road injuries                     | 568<br>(314 - 860)       | 42<br>(21 - 73)       | 43<br>(26 - 63)        | 375<br>(187 - 589)       | 81<br>(38 - 142)        | 28<br>(15 - 44)         |
| Other road injuries                             | 91<br>(39 - 152)         | 10<br>(4 - 22)        | 12<br>(5 - 21)         | 47<br>(16 - 90)          | 13<br>(5 - 27)          | 9<br>(3 - 16)           |
| Other transport injuries                        | 99<br>(63 - 156)         | 15<br>(8 - 26)        | 8<br>(5 - 13)          | 52<br>(27 - 94)          | 15<br>(8 - 28)          | 8<br>(5 - 13)           |
| Unintentional injuries                          | 1,818<br>(1,232 - 2,646) | 447<br>(227 - 722)    | 235<br>(157 - 318)     | 752<br>(413 - 1,258)     | 229<br>(129 - 404)      | 155<br>(111 - 235)      |
| Falls                                           | 228<br>(141 - 364)       | 21<br>(7 - 41)        | 14<br>(7 - 23)         | 87<br>(43 - 152)         | 56<br>(29 - 102)        | 51<br>(33 - 90)         |
| Drowning                                        | 705<br>(345 - 1,032)     | 196<br>(55 - 396)     | 147<br>(68 - 216)      | 288<br>(140 - 468)       | 54<br>(25 - 99)         | 21<br>(11 - 33)         |
| Fire, heat, and hot substances                  | 213<br>(135 - 349)       | 66<br>(24 - 128)      | 20<br>(12 - 33)        | 76<br>(40 - 140)         | 27<br>(14 - 56)         | 23<br>(13 - 47)         |
| Poisonings                                      | 130<br>(68 - 244)        | 21<br>(8 - 46)        | 10<br>(5 - 18)         | 71<br>(33 - 138)         | 19<br>(9 - 40)          | 9<br>(5 - 16)           |
| Exposure to mechanical forces                   | 213<br>(119 - 626)       | 23<br>(9 - 70)        | 21<br>(11 - 64)        | 130<br>(63 - 379)        | 28<br>(13 - 71)         | 11<br>(7 - 21)          |
| Unintentional firearm injuries                  | 97<br>(44 - 207)         | 7<br>(2 - 17)         | 5<br>(2 - 11)          | 66<br>(26 - 146)         | 13<br>(6 - 30)          | 6<br>(3 - 12)           |
| Unintentional suffocation                       | 5<br>(0 - 14)            | 2<br>(0 - 9)          | 1<br>(0 - 1)           | 2<br>(0 - 4)             | 1<br>(0 - 1)            | 0<br>(0 - 1)            |
| Other exposure to mechanical forces             | 110<br>(61 - 327)        | 15<br>(5 - 50)        | 15<br>(8 - 42)         | 62<br>(28 - 176)         | 14<br>(6 - 33)          | 5<br>(3 - 10)           |
| Adverse effects of medical treatment            | 83<br>(50 - 135)         | 17<br>(7 - 32)        | 4<br>(2 - 5)           | 24<br>(11 - 44)          | 19<br>(9 - 38)          | 20<br>(10 - 38)         |
| Animal contact                                  | 32<br>(17 - 56)          | 9<br>(3 - 18)         | 6<br>(3 - 11)          | 10<br>(4 - 19)           | 5<br>(2 - 10)           | 2<br>(1 - 5)            |
| Venomous animal contact                         | 22<br>(11 - 44)          | 7<br>(2 - 14)         | 5<br>(2 - 9)           | 7<br>(3 - 13)            | 3<br>(1 - 7)            | 1<br>(1 - 3)            |
| Non-venomous animal contact                     | 9<br>(3 - 18)            | 2<br>(0 - 5)          | 1<br>(0 - 3)           | 3<br>(1 - 7)             | 2<br>(1 - 4)            | 1<br>(0 - 2)            |
| Foreign body                                    | 127<br>(46 - 220)        | 82<br>(22 - 152)      | 6<br>(2 - 12)          | 16<br>(6 - 31)           | 10<br>(4 - 18)          | 12<br>(6 - 20)          |
| Pulmonary aspiration and foreign body in airway | 125<br>(45 - 217)        | 82<br>(21 - 151)      | 6<br>(2 - 11)          | 15<br>(6 - 30)           | 9<br>(3 - 18)           | 12<br>(6 - 20)          |
| Foreign body in other body part                 | 2<br>(1 - 4)             | 0<br>(0 - 1)          | 0<br>(0 - 1)           | 1<br>(0 - 1)             | 0<br>(0 - 1)            | 0<br>(0 - 0)            |
| Other unintentional injuries                    | 87<br>(46 - 141)         | 12<br>(5 - 21)        | 8<br>(4 - 13)          | 50<br>(23 - 89)          | 11<br>(6 - 22)          | 5<br>(3 - 8)            |
| Self-harm and interpersonal violence            | 909<br>(385 - 1,475)     | 3<br>(1 - 8)          | 15<br>(7 - 25)         | 710<br>(287 - 1,162)     | 128<br>(50 - 228)       | 53<br>(19 - 87)         |
| Self-harm                                       | 840<br>(284 - 1,394)     | --                    | 12<br>(4 - 23)         | 651<br>(220 - 1,090)     | 125<br>(43 - 224)       | 52<br>(19 - 87)         |
| Interpersonal violence                          | 68<br>(32 - 174)         | 3<br>(1 - 8)          | 2<br>(1 - 6)           | 59<br>(26 - 152)         | 4<br>(1 - 10)           | 1<br>(0 - 1)            |
| Assault by firearm                              | 19<br>(7 - 51)           | 0<br>(0 - 1)          | 0<br>(0 - 1)           | 17<br>(6 - 47)           | 1<br>(0 - 3)            | 0<br>(0 - 0)            |
| Assault by sharp object                         | 24<br>(9 - 68)           | 0<br>(0 - 1)          | 0<br>(0 - 1)           | 22<br>(8 - 64)           | 1<br>(0 - 4)            | 0<br>(0 - 0)            |
| Assault by other means                          | 25<br>(11 - 62)          | 2<br>(1 - 6)          | 2<br>(1 - 5)           | 19<br>(8 - 49)           | 2<br>(1 - 5)            | 0<br>(0 - 1)            |
| Forces of nature, war, and legal intervention   | 14<br>(7 - 29)           | 0<br>(0 - 0)          | 1<br>(0 - 1)           | 7<br>(4 - 15)            | 4<br>(2 - 9)            | 1<br>(0 - 3)            |
| Exposure to forces of nature                    | 14<br>(7 - 29)           | 0<br>(0 - 0)          | 1<br>(0 - 1)           | 7<br>(4 - 15)            | 4<br>(2 - 9)            | 1<br>(0 - 3)            |

Web Table 31- Laos deaths with 95% UI by age, sex, and cause in 2013

| Cause                                                             | Males, All Ages             | Males, 0-4 Years         | Males, 5-14 Years  | Males, 15-49 Years       | Males, 50-69 Years       | Males, 70-80 Years       |
|-------------------------------------------------------------------|-----------------------------|--------------------------|--------------------|--------------------------|--------------------------|--------------------------|
| All causes                                                        | 24,647<br>(18,385 - 33,850) | 6,080<br>(5,166 - 7,049) | 754<br>(650 - 880) | 5,927<br>(3,419 - 9,275) | 6,084<br>(3,715 - 9,986) | 5,802<br>(4,498 - 7,744) |
| Communicable, maternal, neonatal, and nutritional diseases        | 7,880<br>(6,326 - 9,988)    | 4,783<br>(3,865 - 5,706) | 265<br>(203 - 343) | 1,112<br>(591 - 2,014)   | 859<br>(511 - 1,499)     | 861<br>(604 - 1,229)     |
| HIV/AIDS and tuberculosis                                         | 1,099<br>(581 - 2,259)      | 19<br>(7 - 50)           | 13<br>(6 - 30)     | 437<br>(179 - 1,218)     | 382<br>(194 - 741)       | 247<br>(149 - 392)       |
| Tuberculosis                                                      | 859<br>(489 - 1,466)        | 14<br>(7 - 27)           | 11<br>(6 - 19)     | 250<br>(121 - 465)       | 341<br>(177 - 618)       | 242<br>(145 - 381)       |
| HIV/AIDS                                                          | 239<br>(25 - 1,388)         | 4<br>(0 - 32)            | 2<br>(0 - 18)      | 187<br>(21 - 1,034)      | 40<br>(4 - 236)          | 5<br>(0 - 36)            |
| HIV/AIDS resulting in mycobacterial infection                     | 16<br>(2 - 89)              | 0<br>(0 - 2)             | 0<br>(0 - 1)       | 12<br>(1 - 68)           | 3<br>(0 - 17)            | 0<br>(0 - 3)             |
| HIV/AIDS resulting in other diseases                              | 223<br>(24 - 1,297)         | 4<br>(0 - 30)            | 2<br>(0 - 17)      | 175<br>(20 - 970)        | 37<br>(3 - 219)          | 5<br>(0 - 33)            |
| Diarrhea, lower respiratory, and other common infectious diseases | 4,035<br>(3,032 - 5,199)    | 2,350<br>(1,643 - 3,115) | 209<br>(151 - 283) | 530<br>(276 - 853)       | 407<br>(228 - 733)       | 538<br>(354 - 772)       |
| Diarrheal diseases                                                | 840<br>(480 - 1,380)        | 568<br>(223 - 1,084)     | 37<br>(16 - 73)    | 84<br>(41 - 146)         | 66<br>(34 - 131)         | 85<br>(48 - 141)         |
| Intestinal infectious diseases                                    | 110<br>(51 - 219)           | 39<br>(14 - 83)          | 32<br>(13 - 68)    | 34<br>(12 - 72)          | 4<br>(1 - 10)            | 1<br>(0 - 3)             |
| Typhoid fever                                                     | 77<br>(33 - 158)            | 25<br>(8 - 57)           | 24<br>(9 - 51)     | 25<br>(8 - 55)           | 3<br>(1 - 7)             | 1<br>(0 - 2)             |
| Paratyphoid fever                                                 | 24<br>(10 - 48)             | 9<br>(3 - 21)            | 7<br>(3 - 15)      | 6<br>(2 - 15)            | 0<br>(0 - 2)             | 0<br>(0 - 0)             |
| Other intestinal infectious diseases                              | 9<br>(2 - 20)               | 5<br>(1 - 13)            | 1<br>(0 - 5)       | 2<br>(0 - 8)             | 1<br>(0 - 3)             | 0<br>(0 - 2)             |
| Lower respiratory infections                                      | 2,297<br>(1,558 - 3,198)    | 1,192<br>(676 - 1,793)   | 74<br>(42 - 120)   | 299<br>(142 - 521)       | 300<br>(155 - 549)       | 431<br>(260 - 654)       |
| Upper respiratory infections                                      | 3<br>(1 - 5)                | 1<br>(0 - 3)             | 0<br>(0 - 0)       | 1<br>(0 - 2)             | 1<br>(0 - 2)             | 0<br>(0 - 1)             |
| Otitis media                                                      | 4<br>(3 - 6)                | 1<br>(0 - 2)             | 0<br>(0 - 1)       | 1<br>(1 - 2)             | 1<br>(0 - 1)             | 1<br>(0 - 1)             |
| Meningitis                                                        | 300<br>(176 - 480)          | 190<br>(89 - 362)        | 23<br>(11 - 41)    | 58<br>(29 - 97)          | 20<br>(10 - 37)          | 9<br>(5 - 16)            |
| Pneumococcal meningitis                                           | 84<br>(47 - 145)            | 46<br>(19 - 94)          | 8<br>(3 - 16)      | 20<br>(9 - 37)           | 7<br>(3 - 13)            | 3<br>(2 - 6)             |
| H influenzae type B meningitis                                    | 92<br>(48 - 165)            | 75<br>(35 - 145)         | 6<br>(3 - 12)      | 8<br>(3 - 14)            | 2<br>(1 - 5)             | 1<br>(1 - 2)             |
| Meningococcal meningitis                                          | 29<br>(16 - 48)             | 13<br>(5 - 27)           | 2<br>(1 - 5)       | 9<br>(4 - 17)            | 3<br>(1 - 7)             | 2<br>(1 - 3)             |
| Other meningitis                                                  | 95<br>(54 - 153)            | 56<br>(25 - 112)         | 7<br>(3 - 14)      | 21<br>(10 - 36)          | 7<br>(3 - 14)            | 3<br>(1 - 6)             |
| Encephalitis                                                      | 56<br>(35 - 86)             | 24<br>(9 - 49)           | 8<br>(4 - 13)      | 17<br>(7 - 29)           | 5<br>(2 - 8)             | 2<br>(1 - 4)             |
| Diphtheria                                                        | 5<br>(0 - 23)               | 3<br>(0 - 21)            | 1<br>(0 - 9)       | 1<br>(0 - 2)             | 0<br>(0 - 1)             | --                       |
| Whooping cough                                                    | 261<br>(1 - 1,163)          | 242<br>(1 - 1,070)       | 15<br>(0 - 74)     | 4<br>(0 - 19)            | 0<br>(0 - 2)             | --                       |
| Tetanus                                                           | 97<br>(44 - 196)            | 42<br>(15 - 90)          | 11<br>(4 - 24)     | 28<br>(8 - 56)           | 11<br>(3 - 27)           | 6<br>(1 - 11)            |
| Measles                                                           | 53<br>(7 - 224)             | 46<br>(6 - 192)          | 6<br>(1 - 28)      | 1<br>(0 - 5)             | 0<br>(0 - 0)             | --                       |
| Varicella and herpes zoster                                       | 9<br>(3 - 24)               | 3<br>(0 - 15)            | 1<br>(0 - 4)       | 3<br>(0 - 8)             | 1<br>(0 - 2)             | 2<br>(0 - 8)             |
| Neglected tropical diseases and malaria                           | 140<br>(81 - 247)           | 33<br>(14 - 75)          | 27<br>(14 - 52)    | 57<br>(25 - 122)         | 16<br>(8 - 32)           | 7<br>(4 - 12)            |
| Malaria                                                           | 50<br>(16 - 104)            | 8<br>(1 - 52)            | 7<br>(2 - 18)      | 27<br>(8 - 65)           | 6<br>(2 - 14)            | 2<br>(1 - 5)             |
| Leishmaniasis                                                     | 0<br>(0 - 0)                | 0<br>(0 - 0)             | 0<br>(0 - 0)       | 0<br>(0 - 0)             | 0<br>(0 - 0)             | 0<br>(0 - 0)             |
| Visceral leishmaniasis                                            | 0<br>(0 - 0)                | 0<br>(0 - 0)             | 0<br>(0 - 0)       | 0<br>(0 - 0)             | 0<br>(0 - 0)             | 0<br>(0 - 0)             |
| Schistosomiasis                                                   | 11<br>(7 - 18)              | 0<br>(0 - 0)             | 0<br>(0 - 1)       | 5<br>(3 - 8)             | 4<br>(2 - 7)             | 2<br>(1 - 3)             |
| Cysticercosis                                                     | 0<br>(0 - 0)                | 0<br>(0 - 0)             | 0<br>(0 - 0)       | 0<br>(0 - 0)             | 0<br>(0 - 0)             | 0<br>(0 - 0)             |
| Cystic echinococcosis                                             | 1<br>(0 - 1)                | 0<br>(0 - 0)             | 0<br>(0 - 0)       | 0<br>(0 - 1)             | 0<br>(0 - 0)             | 0<br>(0 - 0)             |
| Dengue                                                            | 17<br>(8 - 29)              | 8<br>(3 - 16)            | 5<br>(2 - 9)       | 3<br>(1 - 5)             | 0<br>(0 - 1)             | 0<br>(0 - 0)             |
| Rabies                                                            | 35<br>(11 - 136)            | 4<br>(1 - 20)            | 9<br>(2 - 37)      | 17<br>(5 - 72)           | 4<br>(1 - 14)            | 1<br>(0 - 3)             |
| Intestinal nematode infections                                    | 9<br>(1 - 22)               | 6<br>(1 - 18)            | 1<br>(0 - 7)       | 1<br>(0 - 5)             | 0<br>(0 - 3)             | 0<br>(0 - 2)             |
| Ascariasis                                                        | 9<br>(1 - 22)               | 6<br>(1 - 18)            | 1<br>(0 - 7)       | 1<br>(0 - 5)             | 0<br>(0 - 3)             | 0<br>(0 - 2)             |
| Other neglected tropical diseases                                 | 17<br>(6 - 30)              | 7<br>(2 - 18)            | 3<br>(1 - 6)       | 4<br>(1 - 9)             | 2<br>(1 - 4)             | 2<br>(1 - 3)             |
| Maternal disorders                                                | --                          | --                       | --                 | --                       | --                       | --                       |

Web Table 31- Laos deaths with 95% UI by age, sex, and cause in 2013

| Cause                                                            | Males, All Ages            | Males, 0-4 Years         | Males, 5-14 Years  | Males, 15-49 Years       | Males, 50-69 Years       | Males, 70-80 Years       |
|------------------------------------------------------------------|----------------------------|--------------------------|--------------------|--------------------------|--------------------------|--------------------------|
| Maternal hemorrhage                                              | --                         | --                       | --                 | --                       | --                       | --                       |
| Maternal sepsis and other maternal infections                    | --                         | --                       | --                 | --                       | --                       | --                       |
| Maternal hypertensive disorders                                  | --                         | --                       | --                 | --                       | --                       | --                       |
| Maternal obstructed labor                                        | --                         | --                       | --                 | --                       | --                       | --                       |
| Maternal abortive outcome                                        | --                         | --                       | --                 | --                       | --                       | --                       |
| Indirect maternal deaths                                         | --                         | --                       | --                 | --                       | --                       | --                       |
| Late maternal deaths                                             | --                         | --                       | --                 | --                       | --                       | --                       |
| Maternal deaths aggravated by HIV/AIDS                           | --                         | --                       | --                 | --                       | --                       | --                       |
| Other maternal disorders                                         | --                         | --                       | --                 | --                       | --                       | --                       |
| Neonatal disorders                                               | 2,265<br>(1,930 - 2,633)   | 2,265<br>(1,930 - 2,633) | --                 | --                       | --                       | --                       |
| Neonatal preterm birth complications                             | 1,205<br>(731 - 1,682)     | 1,205<br>(731 - 1,682)   | --                 | --                       | --                       | --                       |
| Neonatal encephalopathy due to birth asphyxia and trauma         | 555<br>(257 - 969)         | 555<br>(257 - 969)       | --                 | --                       | --                       | --                       |
| Neonatal sepsis and other neonatal infections                    | 104<br>(26 - 268)          | 104<br>(26 - 268)        | --                 | --                       | --                       | --                       |
| Hemolytic disease and other neonatal jaundice                    | 13<br>(4 - 32)             | 13<br>(4 - 32)           | --                 | --                       | --                       | --                       |
| Other neonatal disorders                                         | 388<br>(176 - 767)         | 388<br>(176 - 767)       | --                 | --                       | --                       | --                       |
| Nutritional deficiencies                                         | 188<br>(103 - 293)         | 74<br>(33 - 143)         | 8<br>(4 - 13)      | 33<br>(13 - 57)          | 24<br>(11 - 44)          | 49<br>(26 - 79)          |
| Protein-energy malnutrition                                      | 73<br>(32 - 143)           | 37<br>(11 - 89)          | 3<br>(1 - 5)       | 9<br>(3 - 20)            | 8<br>(2 - 16)            | 16<br>(5 - 32)           |
| Iodine deficiency                                                | 1<br>(0 - 4)               | 0<br>(0 - 3)             | 0<br>(0 - 1)       | 0<br>(0 - 1)             | 0<br>(0 - 1)             | 0<br>(0 - 1)             |
| Iron-deficiency anemia                                           | 97<br>(42 - 162)           | 28<br>(8 - 62)           | 4<br>(1 - 7)       | 20<br>(6 - 38)           | 15<br>(6 - 28)           | 30<br>(12 - 56)          |
| Other nutritional deficiencies                                   | 17<br>(7 - 38)             | 8<br>(2 - 22)            | 1<br>(0 - 3)       | 3<br>(1 - 8)             | 2<br>(1 - 4)             | 3<br>(1 - 8)             |
| Other communicable, maternal, neonatal, and nutritional diseases | 153<br>(90 - 272)          | 42<br>(21 - 81)          | 8<br>(4 - 15)      | 54<br>(24 - 118)         | 29<br>(12 - 69)          | 20<br>(9 - 46)           |
| Sexually transmitted diseases excluding HIV                      | 19<br>(11 - 31)            | 13<br>(6 - 24)           | 1<br>(1 - 2)       | 2<br>(1 - 4)             | 1<br>(0 - 2)             | 1<br>(0 - 2)             |
| Syphilis                                                         | 17<br>(9 - 29)             | 13<br>(6 - 24)           | 1<br>(1 - 2)       | 1<br>(1 - 2)             | 1<br>(0 - 2)             | 1<br>(0 - 2)             |
| Chlamydial infection                                             | --                         | --                       | --                 | --                       | --                       | --                       |
| Gonococcal infection                                             | 1<br>(0 - 2)               | --                       | 0<br>(0 - 0)       | 1<br>(0 - 1)             | 0<br>(0 - 0)             | 0<br>(0 - 0)             |
| Other sexually transmitted diseases                              | 1<br>(0 - 1)               | --                       | 0<br>(0 - 0)       | 0<br>(0 - 1)             | 0<br>(0 - 0)             | 0<br>(0 - 0)             |
| Hepatitis                                                        | 24<br>(14 - 39)            | 3<br>(1 - 8)             | 1<br>(0 - 1)       | 11<br>(5 - 19)           | 7<br>(3 - 12)            | 3<br>(2 - 5)             |
| Acute hepatitis A                                                | 3<br>(1 - 6)               | 1<br>(0 - 4)             | 0<br>(0 - 1)       | 1<br>(0 - 2)             | 0<br>(0 - 0)             | 0<br>(0 - 0)             |
| Acute hepatitis B                                                | 14<br>(7 - 23)             | 2<br>(0 - 5)             | 0<br>(0 - 0)       | 4<br>(2 - 9)             | 5<br>(2 - 9)             | 3<br>(2 - 4)             |
| Acute hepatitis C                                                | 1<br>(0 - 2)               | --                       | 0<br>(0 - 0)       | 0<br>(0 - 1)             | 0<br>(0 - 1)             | 0<br>(0 - 0)             |
| Acute hepatitis E                                                | 8<br>(3 - 14)              | 0<br>(0 - 0)             | 0<br>(0 - 0)       | 5<br>(2 - 10)            | 2<br>(0 - 4)             | 0<br>(0 - 1)             |
| Other infectious diseases                                        | 110<br>(57 - 222)          | 26<br>(7 - 64)           | 6<br>(2 - 13)      | 41<br>(16 - 98)          | 22<br>(7 - 60)           | 15<br>(5 - 42)           |
| Non-communicable diseases                                        | 13,525<br>(9,166 - 19,924) | 925<br>(555 - 1,626)     | 205<br>(157 - 260) | 2,813<br>(1,509 - 4,582) | 4,815<br>(2,910 - 7,867) | 4,766<br>(3,726 - 6,325) |
| Neoplasms                                                        | 1,914<br>(1,216 - 2,959)   | 29<br>(14 - 68)          | 37<br>(26 - 54)    | 411<br>(219 - 672)       | 862<br>(509 - 1,443)     | 574<br>(421 - 783)       |
| Esophageal cancer                                                | 57<br>(34 - 95)            | --                       | --                 | 10<br>(5 - 18)           | 29<br>(16 - 51)          | 18<br>(12 - 26)          |
| Stomach cancer                                                   | 211<br>(131 - 337)         | --                       | --                 | 40<br>(20 - 68)          | 98<br>(57 - 166)         | 73<br>(50 - 106)         |
| Liver cancer                                                     | 176<br>(105 - 290)         | --                       | 1<br>(0 - 2)       | 43<br>(22 - 77)          | 89<br>(49 - 159)         | 43<br>(27 - 66)          |
| Liver cancer due to hepatitis B                                  | 77<br>(33 - 141)           | --                       | 0<br>(0 - 1)       | 22<br>(9 - 45)           | 38<br>(13 - 77)          | 16<br>(7 - 28)           |
| Liver cancer due to hepatitis C                                  | 75<br>(33 - 142)           | --                       | 0<br>(0 - 0)       | 14<br>(4 - 31)           | 39<br>(16 - 80)          | 21<br>(9 - 37)           |
| Liver cancer due to alcohol use                                  | 11<br>(5 - 24)             | --                       | --                 | 2<br>(1 - 5)             | 5<br>(2 - 14)            | 4<br>(2 - 7)             |

Web Table 31- Laos deaths with 95% UI by age, sex, and cause in 2013

| Cause                                         | Males, All Ages          | Males, 0-4 Years  | Males, 5-14 Years | Males, 15-49 Years     | Males, 50-69 Years       | Males, 70-80 Years       |
|-----------------------------------------------|--------------------------|-------------------|-------------------|------------------------|--------------------------|--------------------------|
| Liver cancer due to other causes              | 14<br>(5 - 33)           | --                | 0<br>(0 - 1)      | 5<br>(2 - 11)          | 6<br>(2 - 17)            | 2<br>(1 - 5)             |
| Larynx cancer                                 | 33<br>(19 - 55)          | --                | --                | 5<br>(2 - 9)           | 16<br>(9 - 29)           | 12<br>(7 - 19)           |
| Tracheal, bronchus and lung cancer            | 511<br>(313 - 800)       | --                | --                | 67<br>(34 - 115)       | 282<br>(162 - 458)       | 163<br>(114 - 233)       |
| Breast cancer                                 | 2<br>(1 - 3)             | --                | --                | 1<br>(0 - 1)           | 1<br>(0 - 1)             | 0<br>(0 - 1)             |
| Cervical cancer                               | --                       | --                | --                | --                     | --                       | --                       |
| Uterine cancer                                | --                       | --                | --                | --                     | --                       | --                       |
| Prostate cancer                               | 52<br>(27 - 78)          | --                | --                | 1<br>(0 - 1)           | 10<br>(5 - 18)           | 41<br>(21 - 60)          |
| Colon and rectum cancer                       | 158<br>(99 - 240)        | --                | --                | 33<br>(17 - 54)        | 68<br>(39 - 112)         | 58<br>(41 - 81)          |
| Lip and oral cavity cancer                    | 69<br>(39 - 116)         | --                | --                | 16<br>(8 - 30)         | 33<br>(17 - 59)          | 20<br>(12 - 30)          |
| Nasopharynx cancer                            | 33<br>(17 - 55)          | --                | 0<br>(0 - 1)      | 13<br>(6 - 24)         | 14<br>(7 - 26)           | 5<br>(3 - 8)             |
| Other pharynx cancer                          | 37<br>(21 - 64)          | --                | --                | 8<br>(4 - 15)          | 20<br>(11 - 38)          | 9<br>(5 - 14)            |
| Gallbladder and biliary tract cancer          | 34<br>(18 - 57)          | --                | --                | 5<br>(2 - 8)           | 16<br>(8 - 30)           | 13<br>(7 - 21)           |
| Pancreatic cancer                             | 65<br>(40 - 104)         | --                | --                | 12<br>(6 - 20)         | 34<br>(20 - 58)          | 19<br>(13 - 28)          |
| Malignant skin melanoma                       | 6<br>(2 - 11)            | --                | --                | 2<br>(1 - 5)           | 2<br>(1 - 4)             | 1<br>(1 - 3)             |
| Non-melanoma skin cancer                      | 8<br>(4 - 13)            | --                | --                | 2<br>(1 - 3)           | 3<br>(1 - 5)             | 3<br>(2 - 6)             |
| Ovarian cancer                                | --                       | --                | --                | --                     | --                       | --                       |
| Testicular cancer                             | 4<br>(2 - 6)             | --                | --                | 3<br>(1 - 5)           | 1<br>(0 - 1)             | 0<br>(0 - 1)             |
| Kidney cancer                                 | 31<br>(19 - 49)          | 1<br>(0 - 4)      | 0<br>(0 - 1)      | 5<br>(3 - 9)           | 16<br>(9 - 28)           | 7<br>(5 - 11)            |
| Bladder cancer                                | 48<br>(30 - 74)          | --                | --                | 4<br>(2 - 6)           | 20<br>(11 - 34)          | 25<br>(16 - 37)          |
| Brain and nervous system cancer               | 50<br>(19 - 87)          | 2<br>(1 - 7)      | 4<br>(2 - 8)      | 22<br>(7 - 37)         | 17<br>(5 - 30)           | 6<br>(1 - 10)            |
| Thyroid cancer                                | 8<br>(5 - 14)            | --                | 0<br>(0 - 0)      | 2<br>(1 - 3)           | 4<br>(2 - 7)             | 2<br>(1 - 4)             |
| Mesothelioma                                  | 3<br>(2 - 5)             | --                | --                | 1<br>(0 - 1)           | 1<br>(1 - 3)             | 1<br>(0 - 1)             |
| Hodgkin lymphoma                              | 9<br>(5 - 16)            | 1<br>(0 - 2)      | 1<br>(0 - 2)      | 5<br>(2 - 9)           | 2<br>(1 - 4)             | 1<br>(0 - 2)             |
| Non-Hodgkin lymphoma                          | 68<br>(40 - 108)         | 2<br>(1 - 7)      | 4<br>(2 - 8)      | 24<br>(13 - 41)        | 23<br>(13 - 41)          | 14<br>(9 - 21)           |
| Multiple myeloma                              | 8<br>(4 - 13)            | --                | --                | 2<br>(1 - 3)           | 4<br>(2 - 7)             | 2<br>(1 - 3)             |
| Leukemia                                      | 103<br>(66 - 147)        | 8<br>(3 - 19)     | 17<br>(11 - 26)   | 47<br>(25 - 73)        | 18<br>(10 - 30)          | 12<br>(8 - 18)           |
| Other neoplasms                               | 130<br>(74 - 207)        | 14<br>(6 - 41)    | 9<br>(5 - 17)     | 41<br>(20 - 71)        | 40<br>(18 - 73)          | 26<br>(12 - 42)          |
| Cardiovascular diseases                       | 6,234<br>(4,209 - 9,460) | 148<br>(87 - 237) | 42<br>(27 - 60)   | 1,239<br>(661 - 2,051) | 2,366<br>(1,442 - 3,907) | 2,439<br>(1,873 - 3,293) |
| Rheumatic heart disease                       | 105<br>(59 - 171)        | 6<br>(2 - 15)     | 10<br>(4 - 17)    | 47<br>(22 - 85)        | 22<br>(11 - 42)          | 19<br>(11 - 31)          |
| Ischemic heart disease                        | 3,166<br>(1,977 - 4,913) | 21<br>(6 - 46)    | 6<br>(3 - 10)     | 644<br>(323 - 1,097)   | 1,314<br>(775 - 2,200)   | 1,182<br>(832 - 1,620)   |
| Cerebrovascular disease                       | 2,284<br>(1,512 - 3,461) | 44<br>(23 - 77)   | 11<br>(7 - 18)    | 366<br>(189 - 625)     | 834<br>(493 - 1,394)     | 1,030<br>(757 - 1,411)   |
| Ischemic stroke                               | 1,131<br>(766 - 1,700)   | 7<br>(2 - 19)     | 2<br>(1 - 3)      | 63<br>(30 - 120)       | 339<br>(194 - 583)       | 720<br>(511 - 1,026)     |
| Hemorrhagic stroke                            | 1,153<br>(655 - 1,865)   | 37<br>(18 - 68)   | 10<br>(6 - 15)    | 303<br>(147 - 520)     | 495<br>(259 - 848)       | 309<br>(179 - 504)       |
| Hypertensive heart disease                    | 176<br>(92 - 305)        | 2<br>(0 - 5)      | 1<br>(0 - 1)      | 31<br>(12 - 60)        | 65<br>(30 - 124)         | 77<br>(41 - 129)         |
| Cardiomyopathy and myocarditis                | 122<br>(64 - 198)        | 32<br>(6 - 61)    | 6<br>(2 - 11)     | 37<br>(17 - 69)        | 24<br>(13 - 45)          | 23<br>(13 - 40)          |
| Atrial fibrillation and flutter               | 1<br>(1 - 2)             | --                | --                | 0<br>(0 - 0)           | 0<br>(0 - 1)             | 0<br>(0 - 1)             |
| Aortic aneurysm                               | 25<br>(15 - 41)          | --                | --                | 4<br>(2 - 8)           | 5<br>(3 - 9)             | 16<br>(9 - 26)           |
| Peripheral vascular disease                   | 2<br>(1 - 3)             | --                | --                | 0<br>(0 - 0)           | 1<br>(0 - 1)             | 1<br>(1 - 1)             |
| Endocarditis                                  | 36<br>(19 - 63)          | 5<br>(2 - 10)     | 1<br>(1 - 2)      | 14<br>(5 - 26)         | 9<br>(4 - 17)            | 7<br>(4 - 12)            |
| Other cardiovascular and circulatory diseases | 316<br>(154 - 776)       | 38<br>(13 - 87)   | 7<br>(3 - 15)     | 95<br>(40 - 208)       | 92<br>(41 - 247)         | 83<br>(40 - 223)         |

Web Table 31- Laos deaths with 95% UI by age, sex, and cause in 2013

| Cause                                               | Males, All Ages          | Males, 0-4 Years  | Males, 5-14 Years | Males, 15-49 Years | Males, 50-69 Years | Males, 70-80 Years   |
|-----------------------------------------------------|--------------------------|-------------------|-------------------|--------------------|--------------------|----------------------|
| Chronic respiratory diseases                        | 1,708<br>(1,132 - 2,666) | 129<br>(62 - 228) | 26<br>(17 - 39)   | 206<br>(106 - 361) | 518<br>(286 - 905) | 830<br>(587 - 1,206) |
| Chronic obstructive pulmonary disease               | 788<br>(508 - 1,237)     | 49<br>(23 - 95)   | 5<br>(2 - 8)      | 56<br>(25 - 102)   | 215<br>(113 - 394) | 463<br>(311 - 697)   |
| Pneumoconiosis                                      | 128<br>(64 - 224)        | 1<br>(0 - 3)      | 1<br>(0 - 2)      | 19<br>(8 - 37)     | 57<br>(26 - 109)   | 50<br>(25 - 85)      |
| Silicosis                                           | 69<br>(35 - 123)         | 0<br>(0 - 1)      | 0<br>(0 - 1)      | 2<br>(1 - 3)       | 23<br>(9 - 49)     | 44<br>(22 - 76)      |
| Asbestosis                                          | 10<br>(4 - 20)           | 0<br>(0 - 1)      | 0<br>(0 - 0)      | 3<br>(1 - 5)       | 7<br>(3 - 15)      | 0<br>(0 - 0)         |
| Coal workers pneumoconiosis                         | 30<br>(11 - 59)          | 0<br>(0 - 0)      | 0<br>(0 - 0)      | 9<br>(4 - 18)      | 19<br>(7 - 38)     | 1<br>(0 - 2)         |
| Other pneumoconiosis                                | 19<br>(8 - 36)           | 1<br>(0 - 1)      | 0<br>(0 - 1)      | 5<br>(2 - 11)      | 8<br>(3 - 17)      | 5<br>(2 - 11)        |
| Asthma                                              | 668<br>(335 - 1,140)     | 54<br>(17 - 120)  | 17<br>(9 - 29)    | 111<br>(51 - 216)  | 218<br>(96 - 422)  | 268<br>(122 - 452)   |
| Interstitial lung disease and pulmonary sarcoidosis | 39<br>(2 - 98)           | 0<br>(0 - 1)      | 0<br>(0 - 0)      | 1<br>(0 - 4)       | 15<br>(1 - 41)     | 23<br>(1 - 58)       |
| Other chronic respiratory diseases                  | 86<br>(43 - 171)         | 24<br>(9 - 50)    | 3<br>(1 - 6)      | 19<br>(7 - 40)     | 13<br>(5 - 28)     | 27<br>(12 - 58)      |
| Cirrhosis                                           | 626<br>(355 - 1,048)     | 6<br>(2 - 13)     | 3<br>(2 - 5)      | 259<br>(129 - 449) | 272<br>(156 - 464) | 86<br>(59 - 121)     |
| Cirrhosis due to hepatitis B                        | 186<br>(76 - 341)        | 0<br>(0 - 1)      | 1<br>(0 - 1)      | 79<br>(25 - 162)   | 82<br>(35 - 154)   | 25<br>(13 - 43)      |
| Cirrhosis due to hepatitis C                        | 169<br>(71 - 322)        | 0<br>(0 - 1)      | 1<br>(0 - 1)      | 72<br>(27 - 142)   | 75<br>(26 - 145)   | 22<br>(9 - 43)       |
| Cirrhosis due to alcohol use                        | 203<br>(88 - 381)        | --                | --                | 71<br>(17 - 151)   | 97<br>(42 - 179)   | 36<br>(20 - 56)      |
| Cirrhosis due to other causes                       | 66<br>(34 - 124)         | 5<br>(2 - 12)     | 2<br>(1 - 3)      | 37<br>(17 - 73)    | 19<br>(8 - 39)     | 4<br>(2 - 7)         |
| Digestive diseases                                  | 599<br>(381 - 937)       | 34<br>(15 - 64)   | 16<br>(10 - 24)   | 203<br>(108 - 342) | 182<br>(104 - 325) | 165<br>(112 - 243)   |
| Peptic ulcer disease                                | 242<br>(144 - 404)       | 3<br>(1 - 8)      | 2<br>(1 - 4)      | 69<br>(34 - 128)   | 89<br>(48 - 161)   | 79<br>(47 - 123)     |
| Gastritis and duodenitis                            | 16<br>(8 - 33)           | 1<br>(0 - 4)      | 1<br>(0 - 2)      | 5<br>(2 - 12)      | 4<br>(2 - 9)       | 5<br>(2 - 10)        |
| Appendicitis                                        | 37<br>(18 - 60)          | 4<br>(1 - 10)     | 3<br>(2 - 6)      | 17<br>(7 - 31)     | 8<br>(3 - 16)      | 5<br>(2 - 10)        |
| Paralytic ileus and intestinal obstruction          | 60<br>(27 - 104)         | 5<br>(2 - 12)     | 2<br>(1 - 4)      | 15<br>(6 - 29)     | 16<br>(6 - 32)     | 22<br>(9 - 37)       |
| Inguinal, femoral, and abdominal hernia             | 20<br>(10 - 36)          | 2<br>(1 - 7)      | 1<br>(1 - 2)      | 5<br>(2 - 10)      | 5<br>(2 - 9)       | 6<br>(3 - 12)        |
| Inflammatory bowel disease                          | 17<br>(9 - 28)           | 3<br>(1 - 9)      | 1<br>(0 - 2)      | 6<br>(3 - 10)      | 3<br>(2 - 6)       | 4<br>(2 - 7)         |
| Vascular intestinal disorders                       | 5<br>(2 - 12)            | 1<br>(0 - 2)      | 0<br>(0 - 1)      | 2<br>(0 - 4)       | 1<br>(0 - 3)       | 1<br>(0 - 3)         |
| Gallbladder and biliary diseases                    | 44<br>(25 - 73)          | 2<br>(1 - 5)      | 1<br>(0 - 2)      | 14<br>(6 - 26)     | 14<br>(7 - 25)     | 14<br>(7 - 23)       |
| Pancreatitis                                        | 70<br>(28 - 128)         | 1<br>(0 - 3)      | 1<br>(0 - 2)      | 43<br>(15 - 83)    | 17<br>(7 - 32)     | 8<br>(3 - 14)        |
| Other digestive diseases                            | 88<br>(49 - 148)         | 12<br>(4 - 25)    | 3<br>(2 - 6)      | 28<br>(13 - 53)    | 24<br>(11 - 47)    | 21<br>(10 - 39)      |
| Neurological disorders                              | 395<br>(291 - 534)       | 17<br>(6 - 47)    | 16<br>(8 - 27)    | 63<br>(33 - 103)   | 53<br>(32 - 89)    | 245<br>(183 - 323)   |
| Alzheimer disease and other dementias               | 273<br>(203 - 369)       | --                | --                | 0<br>(0 - 1)       | 38<br>(22 - 63)    | 235<br>(174 - 312)   |
| Parkinson disease                                   | 5<br>(3 - 8)             | --                | --                | 0<br>(0 - 1)       | 1<br>(1 - 3)       | 3<br>(1 - 6)         |
| Epilepsy                                            | 93<br>(50 - 145)         | 13<br>(3 - 39)    | 13<br>(6 - 23)    | 51<br>(26 - 86)    | 10<br>(5 - 19)     | 5<br>(3 - 8)         |
| Multiple sclerosis                                  | 1<br>(0 - 2)             | --                | --                | 1<br>(0 - 1)       | 0<br>(0 - 1)       | 0<br>(0 - 0)         |
| Other neurological disorders                        | 23<br>(13 - 49)          | 4<br>(2 - 16)     | 3<br>(2 - 6)      | 10<br>(5 - 20)     | 3<br>(2 - 7)       | 2<br>(2 - 4)         |
| Mental and substance use disorders                  | 141<br>(65 - 245)        | 2<br>(0 - 4)      | 0<br>(0 - 0)      | 87<br>(36 - 154)   | 45<br>(20 - 82)    | 7<br>(3 - 12)        |
| Schizophrenia                                       | 1<br>(0 - 2)             | --                | --                | 1<br>(0 - 1)       | 0<br>(0 - 1)       | 0<br>(0 - 0)         |
| Alcohol use disorders                               | 111<br>(48 - 199)        | --                | --                | 62<br>(23 - 115)   | 42<br>(18 - 77)    | 7<br>(3 - 11)        |
| Drug use disorders                                  | 29<br>(13 - 73)          | 2<br>(0 - 4)      | --                | 24<br>(10 - 64)    | 3<br>(1 - 7)       | 0<br>(0 - 1)         |
| Opioid use disorders                                | 19<br>(8 - 48)           | 1<br>(0 - 3)      | --                | 16<br>(6 - 42)     | 2<br>(1 - 5)       | 0<br>(0 - 0)         |
| Cocaine use disorders                               | 0<br>(0 - 1)             | 0<br>(0 - 0)      | --                | 0<br>(0 - 1)       | 0<br>(0 - 0)       | 0<br>(0 - 0)         |
| Amphetamine use disorders                           | 0<br>(0 - 1)             | 0<br>(0 - 0)      | --                | 0<br>(0 - 1)       | 0<br>(0 - 0)       | 0<br>(0 - 0)         |
| Other drug use disorders                            | 9<br>(4 - 24)            | 1<br>(0 - 1)      | --                | 8<br>(3 - 21)      | 1<br>(0 - 3)       | 0<br>(0 - 0)         |

Web Table 31- Laos deaths with 95% UI by age, sex, and cause in 2013

| Cause                                               | Males, All Ages        | Males, 0-4 Years     | Males, 5-14 Years | Males, 15-49 Years | Males, 50-69 Years | Males, 70-80 Years |
|-----------------------------------------------------|------------------------|----------------------|-------------------|--------------------|--------------------|--------------------|
| Eating disorders                                    | 0<br>(0 - 0)           | --                   | 0<br>(0 - 0)      | 0<br>(0 - 0)       | --                 | --                 |
| Anorexia nervosa                                    | 0<br>(0 - 0)           | --                   | 0<br>(0 - 0)      | 0<br>(0 - 0)       | --                 | --                 |
| Diabetes, urogenital, blood, and endocrine diseases | 1,264<br>(815 - 1,926) | 71<br>(36 - 120)     | 29<br>(19 - 41)   | 282<br>(149 - 459) | 487<br>(286 - 817) | 395<br>(287 - 541) |
| Diabetes mellitus                                   | 556<br>(344 - 864)     | 3<br>(2 - 5)         | 2<br>(1 - 4)      | 89<br>(45 - 155)   | 259<br>(146 - 446) | 202<br>(136 - 287) |
| Acute glomerulonephritis                            | 4<br>(3 - 7)           | 1<br>(0 - 2)         | 1<br>(0 - 1)      | 2<br>(1 - 3)       | 1<br>(0 - 1)       | 1<br>(0 - 1)       |
| Chronic kidney disease                              | 470<br>(274 - 769)     | 16<br>(4 - 31)       | 10<br>(5 - 16)    | 128<br>(63 - 227)  | 175<br>(89 - 307)  | 141<br>(84 - 223)  |
| Chronic kidney disease due to diabetes mellitus     | 24<br>(7 - 52)         | 0<br>(0 - 1)         | 0<br>(0 - 0)      | 6<br>(1 - 13)      | 9<br>(3 - 19)      | 9<br>(2 - 20)      |
| Chronic kidney disease due to hypertension          | 118<br>(61 - 205)      | 1<br>(0 - 3)         | 0<br>(0 - 1)      | 27<br>(11 - 51)    | 52<br>(24 - 94)    | 37<br>(20 - 65)    |
| Chronic kidney disease due to glomerulonephritis    | 74<br>(45 - 116)       | 7<br>(3 - 13)        | 5<br>(3 - 8)      | 24<br>(12 - 41)    | 20<br>(9 - 36)     | 18<br>(10 - 29)    |
| Chronic kidney disease due to other causes          | 253<br>(115 - 462)     | 7<br>(1 - 17)        | 4<br>(1 - 9)      | 71<br>(29 - 143)   | 94<br>(40 - 189)   | 76<br>(33 - 141)   |
| Urinary diseases and male infertility               | 99<br>(60 - 150)       | 10<br>(4 - 22)       | 2<br>(1 - 3)      | 22<br>(10 - 38)    | 31<br>(17 - 54)    | 34<br>(21 - 53)    |
| Interstitial nephritis and urinary tract infections | 39<br>(21 - 64)        | 5<br>(1 - 11)        | 1<br>(0 - 1)      | 8<br>(3 - 15)      | 11<br>(5 - 23)     | 14<br>(6 - 25)     |
| Urolithiasis                                        | 6<br>(3 - 11)          | --                   | 0<br>(0 - 0)      | 2<br>(1 - 3)       | 2<br>(1 - 5)       | 2<br>(1 - 4)       |
| Other urinary diseases                              | 54<br>(31 - 86)        | 5<br>(2 - 11)        | 1<br>(0 - 1)      | 13<br>(6 - 22)     | 18<br>(9 - 32)     | 18<br>(9 - 30)     |
| Gynecological diseases                              | --                     | --                   | --                | --                 | --                 | --                 |
| Uterine fibroids                                    | --                     | --                   | --                | --                 | --                 | --                 |
| Polycystic ovarian syndrome                         | --                     | --                   | --                | --                 | --                 | --                 |
| Endometriosis                                       | --                     | --                   | --                | --                 | --                 | --                 |
| Genital prolapse                                    | --                     | --                   | --                | --                 | --                 | --                 |
| Other gynecological diseases                        | --                     | --                   | --                | --                 | --                 | --                 |
| Hemoglobinopathies and hemolytic anemias            | 72<br>(36 - 117)       | 30<br>(9 - 55)       | 11<br>(5 - 17)    | 22<br>(9 - 40)     | 6<br>(3 - 11)      | 5<br>(2 - 9)       |
| Thalassemias                                        | 61<br>(29 - 100)       | 28<br>(8 - 52)       | 10<br>(5 - 17)    | 19<br>(8 - 35)     | 3<br>(1 - 6)       | 0<br>(0 - 1)       |
| Sickle cell disorders                               | 0<br>(0 - 0)           | 0<br>(0 - 0)         | 0<br>(0 - 0)      | 0<br>(0 - 0)       | 0<br>(0 - 0)       | 0<br>(0 - 0)       |
| G6PD deficiency                                     | 1<br>(1 - 2)           | 0<br>(0 - 1)         | 0<br>(0 - 0)      | 0<br>(0 - 1)       | 0<br>(0 - 1)       | 0<br>(0 - 0)       |
| Other hemoglobinopathies and hemolytic anemias      | 10<br>(5 - 17)         | 1<br>(0 - 2)         | 0<br>(0 - 0)      | 2<br>(1 - 4)       | 3<br>(1 - 5)       | 4<br>(2 - 8)       |
| Endocrine, metabolic, blood, and immune disorders   | 61<br>(33 - 119)       | 11<br>(4 - 43)       | 4<br>(2 - 8)      | 19<br>(9 - 37)     | 15<br>(7 - 27)     | 12<br>(7 - 20)     |
| Musculoskeletal disorders                           | 28<br>(13 - 47)        | --                   | 3<br>(1 - 5)      | 14<br>(6 - 23)     | 8<br>(3 - 13)      | 4<br>(2 - 7)       |
| Rheumatoid arthritis                                | 4<br>(1 - 6)           | --                   | 0<br>(0 - 1)      | 1<br>(0 - 2)       | 1<br>(0 - 2)       | 1<br>(0 - 1)       |
| Other musculoskeletal disorders                     | 25<br>(12 - 41)        | --                   | 2<br>(1 - 4)      | 12<br>(5 - 21)     | 6<br>(3 - 11)      | 4<br>(2 - 6)       |
| Other non-communicable diseases                     | 617<br>(348 - 1,338)   | 490<br>(240 - 1,160) | 34<br>(18 - 70)   | 51<br>(26 - 85)    | 22<br>(12 - 37)    | 20<br>(13 - 31)    |
| Congenital anomalies                                | 550<br>(292 - 1,261)   | 474<br>(230 - 1,136) | 32<br>(17 - 67)   | 35<br>(18 - 63)    | 6<br>(3 - 9)       | 4<br>(3 - 6)       |
| Neural tube defects                                 | 125<br>(24 - 265)      | 118<br>(22 - 247)    | 3<br>(0 - 8)      | 4<br>(1 - 10)      | 0<br>(0 - 1)       | 0<br>(0 - 0)       |
| Congenital heart anomalies                          | 287<br>(111 - 791)     | 240<br>(74 - 716)    | 21<br>(11 - 47)   | 21<br>(10 - 39)    | 3<br>(1 - 5)       | 2<br>(1 - 4)       |
| Cleft lip and cleft palate                          | 2<br>(0 - 5)           | 2<br>(0 - 5)         | --                | --                 | --                 | --                 |
| Down syndrome                                       | 10<br>(2 - 28)         | 8<br>(1 - 24)        | 1<br>(0 - 3)      | 1<br>(0 - 2)       | 0<br>(0 - 0)       | 0<br>(0 - 0)       |
| Chromosomal unbalanced rearrangements               | 7<br>(2 - 27)          | 6<br>(1 - 25)        | 0<br>(0 - 1)      | 1<br>(0 - 2)       | 0<br>(0 - 0)       | 0<br>(0 - 0)       |
| Other congenital anomalies                          | 119<br>(34 - 384)      | 101<br>(21 - 359)    | 6<br>(2 - 17)     | 8<br>(3 - 16)      | 2<br>(1 - 4)       | 1<br>(1 - 2)       |
| Skin and subcutaneous diseases                      | 60<br>(30 - 92)        | 9<br>(1 - 18)        | 2<br>(1 - 3)      | 16<br>(7 - 26)     | 17<br>(8 - 29)     | 16<br>(9 - 26)     |
| Cellulitis                                          | 33<br>(15 - 54)        | 6<br>(1 - 11)        | 1<br>(0 - 2)      | 9<br>(3 - 15)      | 10<br>(4 - 18)     | 8<br>(4 - 14)      |
| Pyoderma                                            | 16<br>(7 - 26)         | 3<br>(0 - 7)         | 1<br>(0 - 1)      | 5<br>(2 - 8)       | 4<br>(2 - 8)       | 3<br>(1 - 6)       |

Web Table 31- Laos deaths with 95% UI by age, sex, and cause in 2013

| Cause                                           | Males, All Ages          | Males, 0-4 Years   | Males, 5-14 Years  | Males, 15-49 Years       | Males, 50-69 Years | Males, 70-80 Years |
|-------------------------------------------------|--------------------------|--------------------|--------------------|--------------------------|--------------------|--------------------|
| Decubitus ulcer                                 | 10<br>(4 - 16)           | 0<br>(0 - 0)       | 0<br>(0 - 0)       | 2<br>(1 - 4)             | 2<br>(1 - 4)       | 5<br>(2 - 8)       |
| Other skin and subcutaneous diseases            | 1<br>(0 - 2)             | 0<br>(0 - 0)       | 0<br>(0 - 0)       | 0<br>(0 - 1)             | 0<br>(0 - 0)       | 0<br>(0 - 0)       |
| Sudden infant death syndrome                    | 6<br>(1 - 23)            | 6<br>(1 - 23)      | --                 | --                       | --                 | --                 |
| Injuries                                        | 3,242<br>(2,137 - 4,641) | 372<br>(206 - 603) | 284<br>(214 - 359) | 2,002<br>(1,179 - 3,049) | 410<br>(248 - 702) | 175<br>(123 - 243) |
| Transport injuries                              | 1,346<br>(836 - 2,000)   | 99<br>(49 - 184)   | 119<br>(81 - 168)  | 898<br>(497 - 1,381)     | 168<br>(94 - 296)  | 61<br>(40 - 89)    |
| Road injuries                                   | 1,277<br>(778 - 1,892)   | 90<br>(43 - 169)   | 114<br>(77 - 159)  | 856<br>(471 - 1,313)     | 159<br>(90 - 278)  | 58<br>(37 - 84)    |
| Pedestrian road injuries                        | 341<br>(203 - 548)       | 41<br>(18 - 84)    | 53<br>(32 - 82)    | 169<br>(82 - 298)        | 53<br>(27 - 100)   | 24<br>(14 - 38)    |
| Cyclist road injuries                           | 82<br>(48 - 128)         | 6<br>(2 - 14)      | 13<br>(7 - 21)     | 43<br>(22 - 74)          | 14<br>(7 - 25)     | 6<br>(3 - 9)       |
| Motorcyclist road injuries                      | 366<br>(193 - 609)       | 12<br>(5 - 26)     | 15<br>(8 - 24)     | 299<br>(146 - 508)       | 31<br>(16 - 56)    | 9<br>(5 - 15)      |
| Motor vehicle road injuries                     | 429<br>(238 - 654)       | 25<br>(11 - 49)    | 27<br>(15 - 41)    | 309<br>(157 - 499)       | 52<br>(25 - 90)    | 15<br>(8 - 24)     |
| Other road injuries                             | 60<br>(11 - 109)         | 5<br>(1 - 14)      | 7<br>(1 - 15)      | 35<br>(6 - 73)           | 9<br>(1 - 19)      | 4<br>(1 - 9)       |
| Other transport injuries                        | 69<br>(41 - 116)         | 9<br>(4 - 17)      | 5<br>(3 - 9)       | 42<br>(21 - 81)          | 9<br>(4 - 17)      | 3<br>(2 - 5)       |
| Unintentional injuries                          | 1,253<br>(845 - 1,819)   | 272<br>(131 - 471) | 157<br>(98 - 217)  | 594<br>(324 - 995)       | 153<br>(87 - 276)  | 78<br>(54 - 120)   |
| Falls                                           | 169<br>(99 - 278)        | 12<br>(3 - 27)     | 11<br>(5 - 20)     | 77<br>(37 - 136)         | 43<br>(22 - 81)    | 26<br>(14 - 47)    |
| Drowning                                        | 527<br>(250 - 792)       | 130<br>(26 - 286)  | 103<br>(43 - 158)  | 243<br>(116 - 399)       | 38<br>(18 - 73)    | 13<br>(7 - 23)     |
| Fire, heat, and hot substances                  | 102<br>(63 - 161)        | 28<br>(10 - 56)    | 8<br>(5 - 14)      | 43<br>(21 - 80)          | 13<br>(6 - 26)     | 10<br>(5 - 19)     |
| Poisonings                                      | 65<br>(33 - 131)         | 9<br>(3 - 21)      | 4<br>(2 - 8)       | 39<br>(17 - 83)          | 10<br>(5 - 22)     | 3<br>(2 - 6)       |
| Exposure to mechanical forces                   | 175<br>(93 - 498)        | 15<br>(6 - 43)     | 15<br>(7 - 47)     | 116<br>(55 - 340)        | 21<br>(10 - 60)    | 7<br>(4 - 14)      |
| Unintentional firearm injuries                  | 84<br>(34 - 190)         | 5<br>(1 - 14)      | 4<br>(1 - 10)      | 60<br>(22 - 135)         | 10<br>(4 - 26)     | 5<br>(2 - 10)      |
| Unintentional suffocation                       | 4<br>(0 - 12)            | 2<br>(0 - 7)       | 0<br>(0 - 1)       | 1<br>(0 - 3)             | 0<br>(0 - 1)       | 0<br>(0 - 0)       |
| Other exposure to mechanical forces             | 87<br>(45 - 247)         | 9<br>(3 - 26)      | 10<br>(5 - 29)     | 55<br>(24 - 156)         | 10<br>(5 - 27)     | 2<br>(1 - 6)       |
| Adverse effects of medical treatment            | 47<br>(25 - 85)          | 10<br>(3 - 21)     | 2<br>(1 - 3)       | 15<br>(6 - 30)           | 11<br>(4 - 25)     | 9<br>(4 - 21)      |
| Animal contact                                  | 19<br>(10 - 34)          | 4<br>(1 - 11)      | 4<br>(1 - 8)       | 7<br>(3 - 13)            | 3<br>(1 - 6)       | 1<br>(1 - 2)       |
| Venomous animal contact                         | 12<br>(6 - 24)           | 3<br>(1 - 8)       | 3<br>(1 - 6)       | 4<br>(2 - 9)             | 2<br>(1 - 4)       | 1<br>(0 - 1)       |
| Non-venomous animal contact                     | 7<br>(2 - 14)            | 1<br>(0 - 4)       | 1<br>(0 - 3)       | 3<br>(1 - 6)             | 1<br>(0 - 3)       | 1<br>(0 - 1)       |
| Foreign body                                    | 84<br>(25 - 157)         | 56<br>(13 - 117)   | 4<br>(1 - 8)       | 11<br>(4 - 23)           | 7<br>(2 - 13)      | 6<br>(2 - 10)      |
| Pulmonary aspiration and foreign body in airway | 82<br>(24 - 156)         | 56<br>(12 - 116)   | 4<br>(1 - 8)       | 11<br>(3 - 22)           | 6<br>(2 - 13)      | 6<br>(2 - 10)      |
| Foreign body in other body part                 | 1<br>(0 - 2)             | 0<br>(0 - 1)       | 0<br>(0 - 0)       | 0<br>(0 - 1)             | 0<br>(0 - 0)       | 0<br>(0 - 0)       |
| Other unintentional injuries                    | 66<br>(33 - 114)         | 8<br>(2 - 14)      | 6<br>(2 - 10)      | 43<br>(20 - 79)          | 8<br>(4 - 16)      | 3<br>(1 - 4)       |
| Self-harm and interpersonal violence            | 636<br>(234 - 1,042)     | 2<br>(1 - 5)       | 7<br>(3 - 15)      | 505<br>(189 - 846)       | 87<br>(26 - 155)   | 35<br>(8 - 61)     |
| Self-harm                                       | 580<br>(154 - 972)       | --                 | 6<br>(1 - 14)      | 455<br>(121 - 788)       | 84<br>(22 - 151)   | 35<br>(7 - 61)     |
| Interpersonal violence                          | 56<br>(25 - 147)         | 2<br>(1 - 5)       | 1<br>(1 - 4)       | 50<br>(21 - 131)         | 3<br>(1 - 9)       | 0<br>(0 - 1)       |
| Assault by firearm                              | 16<br>(5 - 45)           | 0<br>(0 - 1)       | 0<br>(0 - 1)       | 15<br>(5 - 41)           | 1<br>(0 - 3)       | 0<br>(0 - 0)       |
| Assault by sharp object                         | 21<br>(8 - 63)           | 0<br>(0 - 0)       | 0<br>(0 - 0)       | 20<br>(7 - 60)           | 1<br>(0 - 3)       | 0<br>(0 - 0)       |
| Assault by other means                          | 19<br>(8 - 49)           | 1<br>(0 - 4)       | 1<br>(0 - 3)       | 15<br>(6 - 40)           | 1<br>(0 - 3)       | 0<br>(0 - 1)       |
| Forces of nature, war, and legal intervention   | 8<br>(3 - 22)            | 0<br>(0 - 0)       | 0<br>(0 - 1)       | 5<br>(2 - 12)            | 3<br>(1 - 7)       | 1<br>(0 - 2)       |
| Exposure to forces of nature                    | 8<br>(3 - 22)            | 0<br>(0 - 0)       | 0<br>(0 - 1)       | 5<br>(2 - 12)            | 3<br>(1 - 7)       | 1<br>(0 - 2)       |

Web Table 31- Laos deaths with 95% UI by age, sex, and cause in 2013

| Cause                                                             | Females, All Ages           | Females, 0-4 Years       | Females, 5-14 Years | Females, 15-49 Years     | Females, 50-69 Years     | Females, 70-80 Years     |
|-------------------------------------------------------------------|-----------------------------|--------------------------|---------------------|--------------------------|--------------------------|--------------------------|
| All causes                                                        | 21,843<br>(15,988 - 30,269) | 4,991<br>(4,171 - 5,832) | 580<br>(452 - 723)  | 3,976<br>(2,189 - 6,637) | 5,263<br>(3,115 - 8,584) | 7,032<br>(5,445 - 9,556) |
| Communicable, maternal, neonatal, and nutritional diseases        | 7,366<br>(5,704 - 9,437)    | 3,914<br>(3,084 - 4,832) | 241<br>(171 - 327)  | 1,354<br>(751 - 2,358)   | 777<br>(421 - 1,294)     | 1,080<br>(737 - 1,560)   |
| HIV/AIDS and tuberculosis                                         | 913<br>(436 - 1,787)        | 23<br>(9 - 53)           | 15<br>(6 - 30)      | 326<br>(140 - 733)       | 321<br>(139 - 627)       | 228<br>(105 - 395)       |
| Tuberculosis                                                      | 832<br>(393 - 1,448)        | 19<br>(8 - 33)           | 13<br>(6 - 23)      | 263<br>(116 - 497)       | 311<br>(132 - 590)       | 227<br>(105 - 395)       |
| HIV/AIDS                                                          | 80<br>(7 - 501)             | 4<br>(0 - 30)            | 2<br>(0 - 17)       | 63<br>(6 - 383)          | 10<br>(1 - 77)           | 1<br>(0 - 9)             |
| HIV/AIDS resulting in mycobacterial infection                     | 4<br>(0 - 27)               | 0<br>(0 - 1)             | 0<br>(0 - 1)        | 3<br>(0 - 20)            | 1<br>(0 - 4)             | 0<br>(0 - 1)             |
| HIV/AIDS resulting in other diseases                              | 76<br>(7 - 474)             | 4<br>(0 - 29)            | 2<br>(0 - 16)       | 60<br>(6 - 364)          | 10<br>(1 - 73)           | 1<br>(0 - 9)             |
| Diarrhea, lower respiratory, and other common infectious diseases | 3,659<br>(2,666 - 4,854)    | 2,000<br>(1,340 - 2,688) | 183<br>(123 - 264)  | 370<br>(206 - 626)       | 375<br>(198 - 654)       | 732<br>(457 - 1,117)     |
| Diarrheal diseases                                                | 723<br>(403 - 1,192)        | 427<br>(162 - 844)       | 23<br>(9 - 44)      | 59<br>(28 - 103)         | 76<br>(33 - 147)         | 139<br>(69 - 250)        |
| Intestinal infectious diseases                                    | 103<br>(49 - 189)           | 41<br>(16 - 85)          | 31<br>(12 - 61)     | 26<br>(8 - 55)           | 4<br>(1 - 11)            | 1<br>(0 - 3)             |
| Typhoid fever                                                     | 74<br>(34 - 140)            | 27<br>(10 - 60)          | 23<br>(9 - 46)      | 19<br>(5 - 43)           | 3<br>(1 - 8)             | 1<br>(0 - 2)             |
| Paratyphoid fever                                                 | 23<br>(10 - 43)             | 10<br>(3 - 23)           | 7<br>(2 - 14)       | 5<br>(1 - 11)            | 1<br>(0 - 2)             | 0<br>(0 - 0)             |
| Other intestinal infectious diseases                              | 6<br>(2 - 15)               | 3<br>(0 - 10)            | 1<br>(0 - 5)        | 2<br>(0 - 6)             | 1<br>(0 - 4)             | 0<br>(0 - 2)             |
| Lower respiratory infections                                      | 2,098<br>(1,417 - 2,946)    | 1,001<br>(526 - 1,573)   | 66<br>(36 - 106)    | 203<br>(105 - 357)       | 262<br>(132 - 469)       | 566<br>(337 - 891)       |
| Upper respiratory infections                                      | 2<br>(1 - 5)                | 1<br>(0 - 3)             | 0<br>(0 - 0)        | 1<br>(0 - 1)             | 0<br>(0 - 2)             | 0<br>(0 - 2)             |
| Otitis media                                                      | 4<br>(2 - 5)                | 1<br>(0 - 2)             | 0<br>(0 - 1)        | 1<br>(1 - 2)             | 1<br>(0 - 1)             | 1<br>(0 - 1)             |
| Meningitis                                                        | 231<br>(136 - 379)          | 137<br>(61 - 259)        | 21<br>(10 - 36)     | 44<br>(22 - 75)          | 17<br>(8 - 32)           | 13<br>(7 - 23)           |
| Pneumococcal meningitis                                           | 64<br>(35 - 104)            | 31<br>(13 - 62)          | 7<br>(3 - 13)       | 16<br>(7 - 29)           | 6<br>(2 - 11)            | 5<br>(2 - 10)            |
| H influenzae type B meningitis                                    | 65<br>(34 - 117)            | 50<br>(20 - 100)         | 6<br>(2 - 10)       | 6<br>(3 - 12)            | 2<br>(1 - 4)             | 2<br>(1 - 3)             |
| Meningococcal meningitis                                          | 22<br>(12 - 38)             | 9<br>(3 - 19)            | 2<br>(1 - 4)        | 7<br>(3 - 14)            | 3<br>(1 - 6)             | 2<br>(1 - 4)             |
| Other meningitis                                                  | 80<br>(45 - 132)            | 48<br>(21 - 92)          | 6<br>(2 - 11)       | 15<br>(7 - 26)           | 7<br>(3 - 13)            | 5<br>(2 - 9)             |
| Encephalitis                                                      | 39<br>(23 - 64)             | 17<br>(8 - 33)           | 6<br>(3 - 11)       | 10<br>(5 - 19)           | 4<br>(2 - 7)             | 2<br>(1 - 4)             |
| Diphtheria                                                        | 4<br>(0 - 25)               | 3<br>(0 - 24)            | 1<br>(0 - 6)        | 0<br>(0 - 1)             | 0<br>(0 - 1)             | --                       |
| Whooping cough                                                    | 306<br>(1 - 1,339)          | 282<br>(1 - 1,226)       | 19<br>(0 - 92)      | 4<br>(0 - 19)            | 0<br>(0 - 2)             | --                       |
| Tetanus                                                           | 83<br>(41 - 202)            | 40<br>(12 - 132)         | 7<br>(3 - 15)       | 19<br>(6 - 41)           | 9<br>(3 - 22)            | 7<br>(2 - 15)            |
| Measles                                                           | 55<br>(7 - 212)             | 47<br>(6 - 181)          | 7<br>(1 - 29)       | 1<br>(0 - 6)             | 0<br>(0 - 0)             | --                       |
| Varicella and herpes zoster                                       | 10<br>(3 - 22)              | 3<br>(0 - 13)            | 1<br>(0 - 4)        | 2<br>(0 - 7)             | 1<br>(0 - 3)             | 3<br>(0 - 12)            |
| Neglected tropical diseases and malaria                           | 132<br>(80 - 232)           | 51<br>(19 - 148)         | 23<br>(15 - 38)     | 37<br>(19 - 71)          | 14<br>(7 - 27)           | 7<br>(4 - 13)            |
| Malaria                                                           | 55<br>(17 - 148)            | 21<br>(2 - 117)          | 8<br>(2 - 18)       | 20<br>(7 - 42)           | 5<br>(2 - 12)            | 2<br>(1 - 4)             |
| Leishmaniasis                                                     | 0                           | 0                        | 0                   | 0                        | 0                        | 0                        |
| Visceral leishmaniasis                                            | 0                           | 0                        | 0                   | 0                        | 0                        | 0                        |
| Schistosomiasis                                                   | 8                           | 0                        | 0                   | 3                        | 3                        | 2                        |
| Cysticercosis                                                     | 0                           | 0                        | 0                   | 0                        | 0                        | 0                        |
| Cystic echinococcosis                                             | 1                           | 0                        | 0                   | 0                        | 0                        | 0                        |
| Dengue                                                            | 18<br>(7 - 30)              | 9<br>(3 - 17)            | 6<br>(2 - 11)       | 2<br>(1 - 4)             | 0<br>(0 - 1)             | 0<br>(0 - 1)             |
| Rabies                                                            | 14<br>(6 - 54)              | 2<br>(0 - 7)             | 4<br>(1 - 14)       | 6<br>(2 - 23)            | 2<br>(1 - 8)             | 1<br>(0 - 3)             |
| Intestinal nematode infections                                    | 9                           | 6                        | 1                   | 1                        | 0                        | 0                        |
| Ascariasis                                                        | 9                           | 6                        | 1                   | 1                        | 0                        | 0                        |
| Other neglected tropical diseases                                 | 27<br>(10 - 46)             | 13<br>(4 - 29)           | 3<br>(1 - 6)        | 5<br>(2 - 10)            | 2<br>(1 - 5)             | 2<br>(1 - 5)             |
| Maternal disorders                                                | 543<br>(277 - 932)          | --                       | 3<br>(1 - 6)        | 541<br>(275 - 930)       | --                       | --                       |



Web Table 31- Laos deaths with 95% UI by age, sex, and cause in 2013

| Cause                                                            | Females, All Ages          | Females, 0-4 Years       | Females, 5-14 Years | Females, 15-49 Years     | Females, 50-69 Years     | Females, 70-80 Years     |
|------------------------------------------------------------------|----------------------------|--------------------------|---------------------|--------------------------|--------------------------|--------------------------|
| Maternal hemorrhage                                              | 82<br>(40 - 146)           | --                       | 0<br>(0 - 1)        | 81<br>(39 - 145)         | --                       | --                       |
| Maternal sepsis and other maternal infections                    | 50<br>(26 - 90)            | --                       | 0<br>(0 - 1)        | 50<br>(25 - 90)          | --                       | --                       |
| Maternal hypertensive disorders                                  | 57<br>(21 - 107)           | --                       | 0<br>(0 - 1)        | 56<br>(21 - 107)         | --                       | --                       |
| Maternal obstructed labor                                        | 42<br>(18 - 75)            | --                       | 0<br>(0 - 0)        | 42<br>(18 - 75)          | --                       | --                       |
| Maternal abortive outcome                                        | 95<br>(43 - 179)           | --                       | 0<br>(0 - 1)        | 95<br>(43 - 179)         | --                       | --                       |
| Indirect maternal deaths                                         | 52<br>(22 - 101)           | --                       | 0<br>(0 - 1)        | 52<br>(22 - 100)         | --                       | --                       |
| Late maternal deaths                                             | 70<br>(33 - 128)           | --                       | 1<br>(0 - 1)        | 70<br>(32 - 128)         | --                       | --                       |
| Maternal deaths aggravated by HIV/AIDS                           | 0<br>(0 - 0)               | --                       | --                  | 0<br>(0 - 0)             | --                       | --                       |
| Other maternal disorders                                         | 94<br>(44 - 164)           | --                       | 0<br>(0 - 1)        | 93<br>(44 - 163)         | --                       | --                       |
| Neonatal disorders                                               | 1,709<br>(1,396 - 2,093)   | 1,709<br>(1,396 - 2,093) | --                  | --                       | --                       | --                       |
| Neonatal preterm birth complications                             | 882<br>(492 - 1,267)       | 882<br>(492 - 1,267)     | --                  | --                       | --                       | --                       |
| Neonatal encephalopathy due to birth asphyxia and trauma         | 407<br>(196 - 705)         | 407<br>(196 - 705)       | --                  | --                       | --                       | --                       |
| Neonatal sepsis and other neonatal infections                    | 71<br>(22 - 182)           | 71<br>(22 - 182)         | --                  | --                       | --                       | --                       |
| Hemolytic disease and other neonatal jaundice                    | 9<br>(3 - 22)              | 9<br>(3 - 22)            | --                  | --                       | --                       | --                       |
| Other neonatal disorders                                         | 340<br>(136 - 722)         | 340<br>(136 - 722)       | --                  | --                       | --                       | --                       |
| Nutritional deficiencies                                         | 260<br>(155 - 401)         | 87<br>(39 - 164)         | 10<br>(5 - 17)      | 46<br>(22 - 79)          | 34<br>(16 - 59)          | 83<br>(47 - 134)         |
| Protein-energy malnutrition                                      | 57<br>(23 - 128)           | 27<br>(6 - 72)           | 2<br>(1 - 5)        | 5<br>(2 - 13)            | 6<br>(2 - 16)            | 17<br>(6 - 40)           |
| Iodine deficiency                                                | 1<br>(0 - 4)               | 0<br>(0 - 4)             | 0<br>(0 - 1)        | 0<br>(0 - 1)             | 0<br>(0 - 1)             | 0<br>(0 - 1)             |
| Iron-deficiency anemia                                           | 185<br>(99 - 288)          | 51<br>(19 - 101)         | 7<br>(3 - 12)       | 39<br>(19 - 67)          | 26<br>(12 - 46)          | 63<br>(34 - 106)         |
| Other nutritional deficiencies                                   | 17<br>(5 - 45)             | 9<br>(2 - 27)            | 1<br>(0 - 2)        | 2<br>(1 - 6)             | 2<br>(0 - 5)             | 4<br>(1 - 10)            |
| Other communicable, maternal, neonatal, and nutritional diseases | 150<br>(88 - 253)          | 45<br>(20 - 86)          | 8<br>(4 - 15)       | 34<br>(17 - 69)          | 34<br>(14 - 74)          | 29<br>(12 - 74)          |
| Sexually transmitted diseases excluding HIV                      | 25<br>(15 - 40)            | 14<br>(6 - 25)           | 2<br>(1 - 3)        | 5<br>(2 - 11)            | 2<br>(1 - 6)             | 2<br>(1 - 5)             |
| Syphilis                                                         | 20<br>(11 - 33)            | 14<br>(6 - 25)           | 1<br>(1 - 3)        | 2<br>(1 - 4)             | 1<br>(0 - 3)             | 2<br>(0 - 4)             |
| Chlamydial infection                                             | 2<br>(1 - 3)               | --                       | 0<br>(0 - 0)        | 1<br>(0 - 2)             | 0<br>(0 - 1)             | 0<br>(0 - 0)             |
| Gonococcal infection                                             | 2<br>(1 - 3)               | --                       | 0<br>(0 - 0)        | 1<br>(0 - 2)             | 0<br>(0 - 1)             | 0<br>(0 - 1)             |
| Other sexually transmitted diseases                              | 2<br>(1 - 3)               | --                       | 0<br>(0 - 0)        | 1<br>(0 - 2)             | 0<br>(0 - 1)             | 0<br>(0 - 0)             |
| Hepatitis                                                        | 20<br>(12 - 33)            | 3<br>(1 - 7)             | 1<br>(0 - 1)        | 6<br>(3 - 10)            | 6<br>(3 - 12)            | 4<br>(2 - 7)             |
| Acute hepatitis A                                                | 3<br>(1 - 6)               | 2<br>(0 - 4)             | 0<br>(0 - 1)        | 0<br>(0 - 1)             | 0<br>(0 - 1)             | 0<br>(0 - 0)             |
| Acute hepatitis B                                                | 11<br>(5 - 21)             | 1<br>(0 - 3)             | 0<br>(0 - 0)        | 2<br>(1 - 4)             | 4<br>(2 - 9)             | 3<br>(2 - 6)             |
| Acute hepatitis C                                                | 1<br>(0 - 2)               | --                       | 0<br>(0 - 0)        | 0<br>(0 - 0)             | 0<br>(0 - 1)             | 0<br>(0 - 0)             |
| Acute hepatitis E                                                | 5<br>(2 - 11)              | 0<br>(0 - 0)             | 0<br>(0 - 1)        | 3<br>(2 - 6)             | 1<br>(0 - 4)             | 1<br>(0 - 2)             |
| Other infectious diseases                                        | 105<br>(55 - 192)          | 28<br>(8 - 66)           | 5<br>(2 - 13)       | 24<br>(10 - 51)          | 25<br>(9 - 63)           | 23<br>(7 - 65)           |
| Non-communicable diseases                                        | 13,153<br>(8,903 - 19,319) | 837<br>(430 - 1,414)     | 191<br>(131 - 257)  | 2,039<br>(1,061 - 3,451) | 4,277<br>(2,527 - 7,028) | 5,810<br>(4,460 - 7,870) |
| Neoplasms                                                        | 1,979<br>(1,199 - 3,141)   | 25<br>(11 - 53)          | 34<br>(23 - 53)     | 508<br>(277 - 876)       | 884<br>(499 - 1,495)     | 528<br>(367 - 746)       |
| Esophageal cancer                                                | 25<br>(14 - 41)            | --                       | --                  | 3<br>(2 - 6)             | 11<br>(5 - 19)           | 11<br>(6 - 17)           |
| Stomach cancer                                                   | 177<br>(102 - 295)         | --                       | --                  | 36<br>(19 - 65)          | 78<br>(41 - 140)         | 63<br>(37 - 101)         |
| Liver cancer                                                     | 94<br>(52 - 161)           | --                       | 1<br>(0 - 1)        | 18<br>(9 - 34)           | 46<br>(22 - 83)          | 29<br>(17 - 48)          |
| Liver cancer due to hepatitis B                                  | 32<br>(11 - 67)            | --                       | 0<br>(0 - 1)        | 7<br>(3 - 16)            | 16<br>(4 - 38)           | 9<br>(3 - 17)            |
| Liver cancer due to hepatitis C                                  | 40<br>(16 - 79)            | --                       | 0<br>(0 - 0)        | 6<br>(2 - 14)            | 19<br>(7 - 44)           | 14<br>(5 - 27)           |
| Liver cancer due to alcohol use                                  | 4<br>(2 - 9)               | --                       | --                  | 0<br>(0 - 1)             | 2<br>(1 - 4)             | 2<br>(1 - 4)             |

Web Table 31- Laos deaths with 95% UI by age, sex, and cause in 2013

| Cause                                         | Females, All Ages        | Females, 0-4 Years | Females, 5-14 Years | Females, 15-49 Years | Females, 50-69 Years     | Females, 70-80 Years     |
|-----------------------------------------------|--------------------------|--------------------|---------------------|----------------------|--------------------------|--------------------------|
| Liver cancer due to other causes              | 18<br>(8 - 42)           | --                 | 0<br>(0 - 1)        | 4<br>(2 - 10)        | 9<br>(3 - 23)            | 5<br>(2 - 11)            |
| Larynx cancer                                 | 9<br>(3 - 24)            | --                 | --                  | 2<br>(1 - 6)         | 4<br>(1 - 12)            | 3<br>(1 - 6)             |
| Tracheal, bronchus and lung cancer            | 294<br>(143 - 487)       | --                 | --                  | 54<br>(22 - 98)      | 152<br>(65 - 269)        | 88<br>(52 - 137)         |
| Breast cancer                                 | 221<br>(121 - 399)       | --                 | --                  | 86<br>(44 - 165)     | 99<br>(52 - 188)         | 35<br>(23 - 55)          |
| Cervical cancer                               | 290<br>(159 - 496)       | --                 | --                  | 97<br>(48 - 173)     | 145<br>(73 - 250)        | 48<br>(28 - 75)          |
| Uterine cancer                                | 36<br>(18 - 65)          | --                 | --                  | 6<br>(2 - 11)        | 21<br>(9 - 40)           | 9<br>(5 - 17)            |
| Prostate cancer                               | --                       | --                 | --                  | --                   | --                       | --                       |
| Colon and rectum cancer                       | 167<br>(104 - 268)       | --                 | --                  | 26<br>(14 - 47)      | 70<br>(40 - 122)         | 70<br>(46 - 106)         |
| Lip and oral cavity cancer                    | 42<br>(18 - 76)          | --                 | --                  | 7<br>(3 - 13)        | 18<br>(7 - 37)           | 17<br>(7 - 31)           |
| Nasopharynx cancer                            | 22<br>(9 - 40)           | --                 | 0<br>(0 - 1)        | 8<br>(3 - 15)        | 10<br>(4 - 20)           | 4<br>(2 - 7)             |
| Other pharynx cancer                          | 15<br>(8 - 25)           | --                 | --                  | 3<br>(1 - 5)         | 8<br>(4 - 15)            | 4<br>(2 - 7)             |
| Gallbladder and biliary tract cancer          | 55<br>(28 - 92)          | --                 | --                  | 7<br>(3 - 14)        | 26<br>(12 - 48)          | 21<br>(11 - 36)          |
| Pancreatic cancer                             | 44<br>(27 - 70)          | --                 | --                  | 6<br>(3 - 10)        | 22<br>(12 - 37)          | 16<br>(11 - 24)          |
| Malignant skin melanoma                       | 9<br>(5 - 16)            | --                 | --                  | 3<br>(1 - 6)         | 4<br>(2 - 7)             | 2<br>(1 - 4)             |
| Non-melanoma skin cancer                      | 7<br>(4 - 14)            | --                 | --                  | 1<br>(1 - 3)         | 2<br>(1 - 4)             | 4<br>(2 - 7)             |
| Ovarian cancer                                | 95<br>(49 - 163)         | --                 | --                  | 30<br>(14 - 55)      | 52<br>(25 - 92)          | 14<br>(8 - 22)           |
| Testicular cancer                             | --                       | --                 | --                  | --                   | --                       | --                       |
| Kidney cancer                                 | 23<br>(12 - 37)          | 2<br>(0 - 5)       | 1<br>(0 - 1)        | 4<br>(2 - 7)         | 10<br>(5 - 18)           | 6<br>(3 - 11)            |
| Bladder cancer                                | 18<br>(10 - 30)          | --                 | --                  | 2<br>(1 - 4)         | 7<br>(3 - 13)            | 9<br>(5 - 13)            |
| Brain and nervous system cancer               | 34<br>(20 - 56)          | 1<br>(0 - 3)       | 3<br>(2 - 5)        | 14<br>(6 - 24)       | 11<br>(6 - 19)           | 5<br>(3 - 8)             |
| Thyroid cancer                                | 16<br>(8 - 29)           | --                 | 0<br>(0 - 0)        | 2<br>(1 - 5)         | 6<br>(3 - 12)            | 7<br>(4 - 12)            |
| Mesothelioma                                  | 5<br>(3 - 9)             | --                 | --                  | 1<br>(1 - 3)         | 3<br>(1 - 6)             | 1<br>(0 - 2)             |
| Hodgkin lymphoma                              | 9<br>(4 - 15)            | 1<br>(0 - 3)       | 1<br>(0 - 2)        | 4<br>(2 - 7)         | 2<br>(1 - 4)             | 1<br>(1 - 2)             |
| Non-Hodgkin lymphoma                          | 48<br>(25 - 90)          | 3<br>(1 - 7)       | 4<br>(2 - 8)        | 14<br>(6 - 27)       | 16<br>(7 - 33)           | 11<br>(6 - 20)           |
| Multiple myeloma                              | 6<br>(3 - 10)            | --                 | --                  | 1<br>(1 - 2)         | 3<br>(1 - 5)             | 2<br>(1 - 3)             |
| Leukemia                                      | 93<br>(58 - 145)         | 8<br>(3 - 22)      | 16<br>(9 - 26)      | 36<br>(19 - 62)      | 19<br>(11 - 32)          | 13<br>(9 - 20)           |
| Other neoplasms                               | 127<br>(62 - 246)        | 10<br>(3 - 28)     | 8<br>(4 - 18)       | 35<br>(15 - 75)      | 39<br>(17 - 82)          | 34<br>(18 - 57)          |
| Cardiovascular diseases                       | 6,448<br>(4,006 - 9,518) | 72<br>(18 - 132)   | 52<br>(21 - 80)     | 819<br>(373 - 1,436) | 2,066<br>(1,094 - 3,402) | 3,438<br>(2,468 - 4,651) |
| Rheumatic heart disease                       | 157<br>(70 - 286)        | 3<br>(1 - 8)       | 14<br>(4 - 26)      | 73<br>(28 - 139)     | 33<br>(13 - 71)          | 34<br>(17 - 61)          |
| Ischemic heart disease                        | 2,777<br>(1,538 - 4,294) | 10<br>(1 - 22)     | 7<br>(1 - 13)       | 298<br>(95 - 538)    | 935<br>(391 - 1,623)     | 1,527<br>(989 - 2,149)   |
| Cerebrovascular disease                       | 2,734<br>(1,685 - 3,983) | 20<br>(5 - 39)     | 14<br>(6 - 24)      | 303<br>(142 - 524)   | 849<br>(450 - 1,369)     | 1,547<br>(1,058 - 2,121) |
| Ischemic stroke                               | 1,443<br>(793 - 2,102)   | 4<br>(0 - 11)      | 2<br>(0 - 5)        | 48<br>(15 - 100)     | 312<br>(137 - 551)       | 1,077<br>(658 - 1,525)   |
| Hemorrhagic stroke                            | 1,290<br>(744 - 2,020)   | 16<br>(4 - 30)     | 12<br>(5 - 21)      | 255<br>(117 - 443)   | 537<br>(274 - 889)       | 470<br>(276 - 796)       |
| Hypertensive heart disease                    | 275<br>(149 - 451)       | 1<br>(0 - 4)       | 1<br>(0 - 1)        | 30<br>(12 - 59)      | 85<br>(40 - 155)         | 158<br>(91 - 261)        |
| Cardiomyopathy and myocarditis                | 107<br>(48 - 170)        | 16<br>(1 - 34)     | 7<br>(2 - 14)       | 30<br>(11 - 54)      | 23<br>(10 - 45)          | 31<br>(16 - 62)          |
| Atrial fibrillation and flutter               | 2<br>(1 - 4)             | --                 | --                  | 0<br>(0 - 1)         | 1<br>(0 - 1)             | 1<br>(0 - 2)             |
| Aortic aneurysm                               | 17<br>(8 - 33)           | --                 | --                  | 3<br>(1 - 7)         | 5<br>(2 - 10)            | 9<br>(5 - 17)            |
| Peripheral vascular disease                   | 1<br>(1 - 2)             | --                 | --                  | 0<br>(0 - 0)         | 0<br>(0 - 1)             | 1<br>(1 - 1)             |
| Endocarditis                                  | 36<br>(17 - 65)          | 5<br>(1 - 17)      | 2<br>(1 - 4)        | 11<br>(4 - 21)       | 9<br>(4 - 17)            | 9<br>(5 - 18)            |
| Other cardiovascular and circulatory diseases | 342<br>(165 - 662)       | 17<br>(5 - 37)     | 8<br>(3 - 15)       | 70<br>(28 - 139)     | 127<br>(52 - 265)        | 120<br>(57 - 237)        |

Web Table 31- Laos deaths with 95% UI by age, sex, and cause in 2013

| Cause                                               | Females, All Ages      | Females, 0-4 Years | Females, 5-14 Years | Females, 15-49 Years | Females, 50-69 Years | Females, 70-80 Years |
|-----------------------------------------------------|------------------------|--------------------|---------------------|----------------------|----------------------|----------------------|
| Chronic respiratory diseases                        | 1,359<br>(864 - 2,183) | 110<br>(56 - 191)  | 21<br>(13 - 32)     | 172<br>(88 - 307)    | 381<br>(200 - 683)   | 675<br>(441 - 1,076) |
| Chronic obstructive pulmonary disease               | 655<br>(310 - 1,080)   | 31<br>(13 - 66)    | 2<br>(1 - 5)        | 37<br>(11 - 76)      | 192<br>(74 - 362)    | 392<br>(195 - 642)   |
| Pneumoconiosis                                      | 3<br>(1 - 5)           | 1<br>(0 - 2)       | 0<br>(0 - 1)        | 1<br>(0 - 2)         | 0<br>(0 - 1)         | 0<br>(0 - 1)         |
| Silicosis                                           | 0<br>(0 - 0)           | 0<br>(0 - 0)       | 0<br>(0 - 0)        | 0<br>(0 - 0)         | 0<br>(0 - 0)         | 0<br>(0 - 0)         |
| Asbestosis                                          | 0<br>(0 - 0)           | 0<br>(0 - 0)       | 0<br>(0 - 0)        | 0<br>(0 - 0)         | 0<br>(0 - 0)         | 0<br>(0 - 0)         |
| Coal workers pneumoconiosis                         | 0<br>(0 - 0)           | 0<br>(0 - 0)       | 0<br>(0 - 0)        | 0<br>(0 - 0)         | 0<br>(0 - 0)         | 0<br>(0 - 0)         |
| Other pneumoconiosis                                | 2<br>(1 - 4)           | 0<br>(0 - 1)       | 0<br>(0 - 0)        | 1<br>(0 - 2)         | 0<br>(0 - 1)         | 0<br>(0 - 1)         |
| Asthma                                              | 602<br>(292 - 1,362)   | 65<br>(29 - 127)   | 17<br>(10 - 27)     | 122<br>(56 - 231)    | 172<br>(68 - 424)    | 225<br>(92 - 606)    |
| Interstitial lung disease and pulmonary sarcoidosis | 39<br>(2 - 108)        | 0<br>(0 - 1)       | 0<br>(0 - 0)        | 1<br>(0 - 4)         | 10<br>(0 - 31)       | 27<br>(1 - 78)       |
| Other chronic respiratory diseases                  | 59<br>(30 - 110)       | 12<br>(6 - 25)     | 1<br>(0 - 2)        | 10<br>(3 - 21)       | 6<br>(2 - 14)        | 29<br>(12 - 59)      |
| Cirrhosis                                           | 284<br>(178 - 448)     | 6<br>(2 - 13)      | 6<br>(4 - 9)        | 88<br>(48 - 151)     | 116<br>(67 - 196)    | 67<br>(43 - 103)     |
| Cirrhosis due to hepatitis B                        | 116<br>(57 - 208)      | 0<br>(0 - 1)       | 1<br>(0 - 2)        | 35<br>(17 - 66)      | 50<br>(23 - 97)      | 30<br>(11 - 52)      |
| Cirrhosis due to hepatitis C                        | 96<br>(33 - 178)       | 0<br>(0 - 1)       | 1<br>(0 - 2)        | 29<br>(10 - 58)      | 43<br>(9 - 86)       | 24<br>(6 - 46)       |
| Cirrhosis due to alcohol use                        | 31<br>(12 - 63)        | --                 | --                  | 7<br>(3 - 16)        | 14<br>(5 - 30)       | 10<br>(3 - 21)       |
| Cirrhosis due to other causes                       | 40<br>(22 - 75)        | 5<br>(2 - 12)      | 4<br>(3 - 7)        | 16<br>(7 - 35)       | 10<br>(4 - 24)       | 4<br>(2 - 8)         |
| Digestive diseases                                  | 431<br>(276 - 687)     | 25<br>(12 - 44)    | 11<br>(6 - 16)      | 89<br>(48 - 156)     | 126<br>(66 - 223)    | 180<br>(120 - 273)   |
| Peptic ulcer disease                                | 150<br>(87 - 259)      | 3<br>(1 - 6)       | 2<br>(1 - 3)        | 23<br>(11 - 45)      | 50<br>(23 - 91)      | 73<br>(43 - 126)     |
| Gastritis and duodenitis                            | 17<br>(7 - 42)         | 2<br>(0 - 4)       | 1<br>(0 - 2)        | 3<br>(1 - 9)         | 4<br>(1 - 11)        | 7<br>(3 - 17)        |
| Appendicitis                                        | 45<br>(25 - 80)        | 5<br>(1 - 12)      | 3<br>(2 - 6)        | 14<br>(7 - 26)       | 12<br>(5 - 23)       | 11<br>(5 - 20)       |
| Paralytic ileus and intestinal obstruction          | 44<br>(22 - 77)        | 4<br>(1 - 9)       | 1<br>(0 - 2)        | 6<br>(2 - 11)        | 11<br>(5 - 23)       | 23<br>(10 - 41)      |
| Inguinal, femoral, and abdominal hernia             | 10<br>(5 - 19)         | 1<br>(0 - 2)       | 0<br>(0 - 1)        | 2<br>(1 - 3)         | 3<br>(1 - 6)         | 4<br>(2 - 9)         |
| Inflammatory bowel disease                          | 17<br>(9 - 30)         | 2<br>(1 - 6)       | 1<br>(0 - 1)        | 5<br>(2 - 8)         | 4<br>(2 - 8)         | 5<br>(2 - 10)        |
| Vascular intestinal disorders                       | 4<br>(2 - 9)           | 0<br>(0 - 1)       | 0<br>(0 - 0)        | 1<br>(0 - 3)         | 1<br>(0 - 2)         | 2<br>(1 - 4)         |
| Gallbladder and biliary diseases                    | 61<br>(34 - 96)        | 3<br>(1 - 6)       | 1<br>(0 - 1)        | 12<br>(6 - 22)       | 18<br>(8 - 33)       | 27<br>(13 - 46)      |
| Pancreatitis                                        | 34<br>(17 - 61)        | 1<br>(0 - 2)       | 1<br>(0 - 1)        | 12<br>(5 - 23)       | 10<br>(4 - 21)       | 10<br>(5 - 19)       |
| Other digestive diseases                            | 51<br>(30 - 85)        | 5<br>(2 - 10)      | 2<br>(1 - 3)        | 11<br>(6 - 21)       | 14<br>(7 - 28)       | 19<br>(10 - 33)      |
| Neurological disorders                              | 391<br>(257 - 561)     | 9<br>(3 - 21)      | 8<br>(4 - 15)       | 35<br>(17 - 61)      | 47<br>(26 - 81)      | 292<br>(183 - 421)   |
| Alzheimer disease and other dementias               | 315<br>(199 - 459)     | --                 | --                  | 0<br>(0 - 1)         | 34<br>(17 - 59)      | 281<br>(175 - 406)   |
| Parkinson disease                                   | 4<br>(2 - 7)           | --                 | --                  | 0<br>(0 - 1)         | 1<br>(1 - 2)         | 2<br>(1 - 4)         |
| Epilepsy                                            | 56<br>(26 - 93)        | 7<br>(1 - 19)      | 7<br>(3 - 14)       | 30<br>(13 - 53)      | 8<br>(4 - 15)        | 5<br>(2 - 9)         |
| Multiple sclerosis                                  | 1<br>(0 - 3)           | --                 | --                  | 1<br>(0 - 2)         | 0<br>(0 - 1)         | 0<br>(0 - 0)         |
| Other neurological disorders                        | 14<br>(9 - 22)         | 2<br>(1 - 3)       | 1<br>(1 - 2)        | 4<br>(2 - 7)         | 4<br>(2 - 6)         | 4<br>(2 - 6)         |
| Mental and substance use disorders                  | 37<br>(15 - 71)        | 4<br>(0 - 13)      | 0<br>(0 - 0)        | 21<br>(7 - 46)       | 10<br>(4 - 20)       | 2<br>(1 - 5)         |
| Schizophrenia                                       | 1<br>(1 - 2)           | --                 | --                  | 0<br>(0 - 1)         | 0<br>(0 - 1)         | 0<br>(0 - 0)         |
| Alcohol use disorders                               | 16<br>(5 - 36)         | --                 | --                  | 8<br>(3 - 18)        | 7<br>(2 - 16)        | 1<br>(1 - 4)         |
| Drug use disorders                                  | 19<br>(5 - 47)         | 4<br>(0 - 13)      | --                  | 13<br>(2 - 35)       | 2<br>(0 - 6)         | 1<br>(0 - 2)         |
| Opioid use disorders                                | 12<br>(3 - 30)         | 2<br>(0 - 8)       | --                  | 8<br>(1 - 22)        | 1<br>(0 - 3)         | 0<br>(0 - 1)         |
| Cocaine use disorders                               | 0<br>(0 - 1)           | 0<br>(0 - 0)       | --                  | 0<br>(0 - 1)         | 0<br>(0 - 0)         | 0<br>(0 - 0)         |
| Amphetamine use disorders                           | 1<br>(0 - 1)           | 0<br>(0 - 0)       | --                  | 0<br>(0 - 1)         | 0<br>(0 - 0)         | 0<br>(0 - 0)         |
| Other drug use disorders                            | 6<br>(1 - 15)          | 1<br>(0 - 4)       | --                  | 4<br>(1 - 11)        | 1<br>(0 - 2)         | 0<br>(0 - 1)         |

Web Table 31- Laos deaths with 95% UI by age, sex, and cause in 2013

| Cause                                               | Females, All Ages      | Females, 0-4 Years   | Females, 5-14 Years | Females, 15-49 Years | Females, 50-69 Years | Females, 70-80 Years |
|-----------------------------------------------------|------------------------|----------------------|---------------------|----------------------|----------------------|----------------------|
| Eating disorders                                    | 0<br>(0 - 1)           | --                   | 0<br>(0 - 0)        | 0<br>(0 - 1)         | --                   | --                   |
| Anorexia nervosa                                    | 0<br>(0 - 1)           | --                   | 0<br>(0 - 0)        | 0<br>(0 - 1)         | --                   | --                   |
| Diabetes, urogenital, blood, and endocrine diseases | 1,544<br>(955 - 2,361) | 54<br>(27 - 87)      | 23<br>(14 - 34)     | 253<br>(131 - 425)   | 620<br>(347 - 1,021) | 595<br>(397 - 858)   |
| Diabetes mellitus                                   | 820<br>(493 - 1,325)   | 1<br>(1 - 3)         | 1<br>(1 - 3)        | 77<br>(40 - 141)     | 367<br>(200 - 636)   | 372<br>(232 - 568)   |
| Acute glomerulonephritis                            | 5<br>(3 - 7)           | 1<br>(0 - 2)         | 1<br>(0 - 1)        | 2<br>(1 - 3)         | 1<br>(0 - 1)         | 1<br>(0 - 1)         |
| Chronic kidney disease                              | 473<br>(261 - 755)     | 10<br>(3 - 20)       | 6<br>(3 - 10)       | 108<br>(52 - 190)    | 190<br>(90 - 330)    | 159<br>(91 - 251)    |
| Chronic kidney disease due to diabetes mellitus     | 31<br>(13 - 60)        | 0<br>(0 - 1)         | 0<br>(0 - 0)        | 5<br>(2 - 10)        | 14<br>(5 - 29)       | 13<br>(5 - 24)       |
| Chronic kidney disease due to hypertension          | 120<br>(48 - 235)      | 1<br>(0 - 3)         | 1<br>(0 - 1)        | 20<br>(6 - 42)       | 52<br>(18 - 106)     | 47<br>(19 - 90)      |
| Chronic kidney disease due to glomerulonephritis    | 86<br>(39 - 155)       | 5<br>(2 - 9)         | 3<br>(2 - 5)        | 30<br>(13 - 52)      | 25<br>(9 - 53)       | 23<br>(10 - 42)      |
| Chronic kidney disease due to other causes          | 236<br>(96 - 440)      | 4<br>(0 - 11)        | 2<br>(1 - 5)        | 53<br>(17 - 107)     | 99<br>(32 - 200)     | 77<br>(26 - 145)     |
| Urinary diseases and male infertility               | 106<br>(57 - 173)      | 4<br>(1 - 9)         | 1<br>(1 - 2)        | 25<br>(12 - 44)      | 36<br>(17 - 65)      | 40<br>(21 - 69)      |
| Interstitial nephritis and urinary tract infections | 74<br>(35 - 119)       | 2<br>(1 - 5)         | 1<br>(0 - 1)        | 17<br>(8 - 32)       | 23<br>(10 - 45)      | 30<br>(14 - 52)      |
| Urolithiasis                                        | 7<br>(3 - 14)          | --                   | 0<br>(0 - 0)        | 2<br>(1 - 5)         | 3<br>(1 - 6)         | 2<br>(1 - 5)         |
| Other urinary diseases                              | 25<br>(13 - 48)        | 2<br>(0 - 5)         | 1<br>(0 - 1)        | 5<br>(2 - 11)        | 10<br>(4 - 20)       | 7<br>(3 - 19)        |
| Gynecological diseases                              | 5<br>(2 - 11)          | --                   | --                  | 4<br>(1 - 8)         | 1<br>(0 - 3)         | 1<br>(0 - 2)         |
| Uterine fibroids                                    | 1<br>(0 - 2)           | --                   | --                  | 1<br>(0 - 1)         | 0<br>(0 - 1)         | 0<br>(0 - 0)         |
| Polycystic ovarian syndrome                         | 0<br>(0 - 1)           | --                   | --                  | 0<br>(0 - 1)         | 0<br>(0 - 0)         | --                   |
| Endometriosis                                       | 1<br>(0 - 1)           | --                   | --                  | 1<br>(0 - 1)         | 0<br>(0 - 0)         | --                   |
| Genital prolapse                                    | 1<br>(0 - 2)           | --                   | --                  | 0<br>(0 - 1)         | 0<br>(0 - 0)         | 0<br>(0 - 0)         |
| Other gynecological diseases                        | 3<br>(1 - 5)           | --                   | --                  | 2<br>(1 - 4)         | 1<br>(0 - 1)         | 0<br>(0 - 1)         |
| Hemoglobinopathies and hemolytic anemias            | 69<br>(29 - 119)       | 26<br>(7 - 54)       | 10<br>(4 - 19)      | 21<br>(8 - 39)       | 7<br>(3 - 14)        | 5<br>(3 - 9)         |
| Thalassemias                                        | 57<br>(23 - 100)       | 25<br>(6 - 51)       | 10<br>(4 - 18)      | 19<br>(7 - 36)       | 3<br>(1 - 7)         | 0<br>(0 - 1)         |
| Sickle cell disorders                               | 0<br>(0 - 0)           | 0<br>(0 - 0)         | 0<br>(0 - 0)        | 0<br>(0 - 0)         | 0<br>(0 - 0)         | 0<br>(0 - 0)         |
| G6PD deficiency                                     | 1<br>(0 - 1)           | 0<br>(0 - 0)         | 0<br>(0 - 0)        | 0<br>(0 - 0)         | 0<br>(0 - 0)         | 0<br>(0 - 0)         |
| Other hemoglobinopathies and hemolytic anemias      | 11<br>(5 - 20)         | 1<br>(0 - 3)         | 0<br>(0 - 0)        | 2<br>(1 - 3)         | 3<br>(1 - 7)         | 5<br>(2 - 8)         |
| Endocrine, metabolic, blood, and immune disorders   | 66<br>(35 - 114)       | 11<br>(3 - 27)       | 3<br>(1 - 5)        | 16<br>(7 - 32)       | 19<br>(9 - 36)       | 17<br>(10 - 28)      |
| Musculoskeletal disorders                           | 25<br>(12 - 56)        | --                   | 2<br>(1 - 4)        | 11<br>(5 - 27)       | 7<br>(3 - 17)        | 4<br>(2 - 10)        |
| Rheumatoid arthritis                                | 6<br>(2 - 14)          | --                   | 0<br>(0 - 1)        | 1<br>(0 - 3)         | 2<br>(1 - 5)         | 2<br>(1 - 5)         |
| Other musculoskeletal disorders                     | 19<br>(9 - 42)         | --                   | 2<br>(1 - 3)        | 10<br>(4 - 24)       | 5<br>(2 - 11)        | 2<br>(1 - 5)         |
| Other non-communicable diseases                     | 656<br>(301 - 1,208)   | 533<br>(206 - 1,067) | 33<br>(15 - 62)     | 43<br>(21 - 75)      | 18<br>(9 - 32)       | 29<br>(18 - 45)      |
| Congenital anomalies                                | 595<br>(254 - 1,157)   | 522<br>(201 - 1,060) | 32<br>(14 - 60)     | 32<br>(15 - 60)      | 5<br>(2 - 10)        | 4<br>(3 - 7)         |
| Neural tube defects                                 | 116<br>(25 - 362)      | 108<br>(21 - 345)    | 3<br>(1 - 9)        | 5<br>(1 - 12)        | 1<br>(0 - 2)         | 0<br>(0 - 0)         |
| Congenital heart anomalies                          | 316<br>(103 - 686)     | 276<br>(78 - 636)    | 19<br>(8 - 39)      | 16<br>(7 - 31)       | 1<br>(1 - 3)         | 3<br>(2 - 5)         |
| Cleft lip and cleft palate                          | 4<br>(0 - 12)          | 4<br>(0 - 12)        | --                  | --                   | --                   | --                   |
| Down syndrome                                       | 18<br>(4 - 42)         | 14<br>(2 - 36)       | 2<br>(1 - 5)        | 2<br>(1 - 3)         | 0<br>(0 - 1)         | 0<br>(0 - 0)         |
| Chromosomal unbalanced rearrangements               | 15<br>(2 - 48)         | 13<br>(2 - 43)       | 0<br>(0 - 1)        | 2<br>(0 - 4)         | 0<br>(0 - 0)         | 0<br>(0 - 0)         |
| Other congenital anomalies                          | 126<br>(46 - 338)      | 107<br>(33 - 308)    | 7<br>(3 - 15)       | 8<br>(4 - 17)        | 2<br>(1 - 5)         | 1<br>(1 - 2)         |
| Skin and subcutaneous diseases                      | 55<br>(32 - 91)        | 6<br>(2 - 14)        | 2<br>(1 - 3)        | 11<br>(5 - 20)       | 13<br>(6 - 24)       | 25<br>(14 - 40)      |
| Cellulitis                                          | 29<br>(16 - 51)        | 4<br>(1 - 10)        | 1<br>(0 - 2)        | 7<br>(3 - 12)        | 8<br>(4 - 15)        | 10<br>(5 - 19)       |
| Pyoderma                                            | 12<br>(5 - 23)         | 2<br>(0 - 5)         | 0<br>(0 - 1)        | 3<br>(1 - 5)         | 3<br>(1 - 6)         | 5<br>(2 - 8)         |

Web Table 31- Laos deaths with 95% UI by age, sex, and cause in 2013

| Cause                                           | Females, All Ages      | Females, 0-4 Years | Females, 5-14 Years | Females, 15-49 Years | Females, 50-69 Years | Females, 70-80 Years |
|-------------------------------------------------|------------------------|--------------------|---------------------|----------------------|----------------------|----------------------|
| Decubitus ulcer                                 | 13<br>(7 - 22)         | 0<br>(0 - 0)       | 0<br>(0 - 0)        | 1<br>(1 - 3)         | 2<br>(1 - 4)         | 10<br>(5 - 17)       |
| Other skin and subcutaneous diseases            | 1<br>(0 - 3)           | 0<br>(0 - 0)       | 0<br>(0 - 0)        | 0<br>(0 - 1)         | 0<br>(0 - 1)         | 0<br>(0 - 1)         |
| Sudden infant death syndrome                    | 5<br>(1 - 24)          | 5<br>(1 - 24)      | --                  | --                   | --                   | --                   |
| Injuries                                        | 1,324<br>(867 - 1,942) | 240<br>(122 - 388) | 149<br>(100 - 205)  | 583<br>(318 - 975)   | 209<br>(119 - 352)   | 142<br>(95 - 210)    |
| Transport injuries                              | 480<br>(289 - 734)     | 63<br>(29 - 113)   | 63<br>(37 - 98)     | 218<br>(111 - 362)   | 90<br>(46 - 158)     | 47<br>(26 - 72)      |
| Road injuries                                   | 450<br>(274 - 689)     | 57<br>(26 - 102)   | 60<br>(35 - 93)     | 207<br>(106 - 347)   | 84<br>(43 - 147)     | 42<br>(24 - 66)      |
| Pedestrian road injuries                        | 100<br>(58 - 156)      | 19<br>(8 - 38)     | 18<br>(9 - 30)      | 31<br>(14 - 55)      | 20<br>(9 - 36)       | 13<br>(7 - 23)       |
| Cyclist road injuries                           | 39<br>(21 - 65)        | 4<br>(1 - 8)       | 6<br>(3 - 11)       | 17<br>(8 - 31)       | 9<br>(4 - 17)        | 4<br>(2 - 7)         |
| Motorcyclist road injuries                      | 141<br>(75 - 246)      | 13<br>(5 - 28)     | 15<br>(7 - 27)      | 83<br>(40 - 153)     | 21<br>(9 - 42)       | 8<br>(4 - 16)        |
| Motor vehicle road injuries                     | 140<br>(68 - 224)      | 16<br>(6 - 34)     | 16<br>(7 - 28)      | 65<br>(29 - 114)     | 29<br>(11 - 55)      | 13<br>(5 - 23)       |
| Other road injuries                             | 31<br>(2 - 54)         | 5<br>(0 - 13)      | 5<br>(0 - 11)       | 11<br>(1 - 22)       | 5<br>(0 - 11)        | 4<br>(0 - 9)         |
| Other transport injuries                        | 30<br>(17 - 47)        | 6<br>(2 - 12)      | 3<br>(1 - 5)        | 10<br>(5 - 19)       | 6<br>(3 - 12)        | 5<br>(2 - 8)         |
| Unintentional injuries                          | 565<br>(365 - 846)     | 175<br>(79 - 301)  | 79<br>(47 - 118)    | 158<br>(87 - 265)    | 76<br>(41 - 132)     | 77<br>(50 - 124)     |
| Falls                                           | 59<br>(35 - 99)        | 8<br>(2 - 18)      | 2<br>(1 - 4)        | 10<br>(5 - 19)       | 13<br>(6 - 24)       | 25<br>(13 - 49)      |
| Drowning                                        | 178<br>(66 - 294)      | 67<br>(15 - 154)   | 44<br>(15 - 74)     | 45<br>(18 - 77)      | 16<br>(6 - 30)       | 8<br>(3 - 13)        |
| Fire, heat, and hot substances                  | 111<br>(66 - 212)      | 38<br>(11 - 87)    | 12<br>(6 - 23)      | 33<br>(17 - 69)      | 15<br>(7 - 33)       | 13<br>(6 - 31)       |
| Poisonings                                      | 66<br>(25 - 135)       | 12<br>(3 - 32)     | 6<br>(2 - 13)       | 32<br>(11 - 66)      | 9<br>(3 - 21)        | 6<br>(2 - 12)        |
| Exposure to mechanical forces                   | 39<br>(23 - 76)        | 8<br>(3 - 20)      | 6<br>(3 - 13)       | 14<br>(7 - 28)       | 7<br>(3 - 13)        | 4<br>(2 - 6)         |
| Unintentional firearm injuries                  | 14<br>(7 - 23)         | 2<br>(1 - 5)       | 1<br>(0 - 2)        | 6<br>(3 - 11)        | 3<br>(1 - 7)         | 1<br>(1 - 2)         |
| Unintentional suffocation                       | 1<br>(0 - 4)           | 0<br>(0 - 2)       | 0<br>(0 - 1)        | 0<br>(0 - 1)         | 0<br>(0 - 0)         | 0<br>(0 - 0)         |
| Other exposure to mechanical forces             | 23<br>(12 - 52)        | 6<br>(2 - 17)      | 5<br>(2 - 11)       | 7<br>(3 - 16)        | 3<br>(1 - 7)         | 2<br>(1 - 4)         |
| Adverse effects of medical treatment            | 37<br>(22 - 59)        | 7<br>(3 - 15)      | 2<br>(1 - 3)        | 9<br>(4 - 16)        | 8<br>(4 - 16)        | 11<br>(5 - 22)       |
| Animal contact                                  | 13<br>(5 - 36)         | 4<br>(1 - 12)      | 2<br>(1 - 7)        | 3<br>(1 - 8)         | 2<br>(1 - 5)         | 1<br>(1 - 3)         |
| Venomous animal contact                         | 10<br>(3 - 30)         | 4<br>(1 - 11)      | 2<br>(1 - 6)        | 2<br>(1 - 7)         | 2<br>(0 - 5)         | 1<br>(0 - 2)         |
| Non-venomous animal contact                     | 3<br>(0 - 7)           | 1<br>(0 - 2)       | 0<br>(0 - 1)        | 1<br>(0 - 2)         | 1<br>(0 - 2)         | 0<br>(0 - 1)         |
| Foreign body                                    | 43<br>(16 - 80)        | 26<br>(6 - 54)     | 2<br>(1 - 4)        | 5<br>(2 - 9)         | 3<br>(1 - 6)         | 7<br>(3 - 12)        |
| Pulmonary aspiration and foreign body in airway | 42<br>(15 - 79)        | 26<br>(6 - 54)     | 2<br>(1 - 4)        | 5<br>(2 - 9)         | 3<br>(1 - 6)         | 6<br>(3 - 11)        |
| Foreign body in other body part                 | 1<br>(0 - 2)           | 0<br>(0 - 1)       | 0<br>(0 - 0)        | 0<br>(0 - 1)         | 0<br>(0 - 0)         | 0<br>(0 - 0)         |
| Other unintentional injuries                    | 20<br>(8 - 34)         | 5<br>(1 - 10)      | 2<br>(1 - 4)        | 7<br>(3 - 13)        | 4<br>(1 - 7)         | 3<br>(1 - 5)         |
| Self-harm and interpersonal violence            | 273<br>(80 - 473)      | 1<br>(0 - 4)       | 7<br>(3 - 16)       | 205<br>(58 - 368)    | 42<br>(11 - 80)      | 18<br>(4 - 31)       |
| Self-harm                                       | 261<br>(57 - 456)      | --                 | 6<br>(1 - 15)       | 196<br>(43 - 357)    | 41<br>(9 - 79)       | 18<br>(4 - 31)       |
| Interpersonal violence                          | 12<br>(6 - 31)         | 1<br>(0 - 4)       | 1<br>(0 - 3)        | 9<br>(4 - 23)        | 1<br>(0 - 3)         | 0<br>(0 - 1)         |
| Assault by firearm                              | 3<br>(1 - 9)           | 0<br>(0 - 1)       | 0<br>(0 - 0)        | 2<br>(1 - 7)         | 0<br>(0 - 1)         | 0<br>(0 - 0)         |
| Assault by sharp object                         | 3<br>(1 - 6)           | 0<br>(0 - 0)       | 0<br>(0 - 0)        | 2<br>(1 - 5)         | 0<br>(0 - 1)         | 0<br>(0 - 0)         |
| Assault by other means                          | 7<br>(3 - 18)          | 1<br>(0 - 3)       | 1<br>(0 - 2)        | 4<br>(2 - 12)        | 0<br>(0 - 2)         | 0<br>(0 - 1)         |
| Forces of nature, war, and legal intervention   | 5<br>(2 - 13)          | 0<br>(0 - 0)       | 0<br>(0 - 1)        | 3<br>(1 - 6)         | 2<br>(1 - 4)         | 1<br>(0 - 2)         |
| Exposure to forces of nature                    | 5<br>(2 - 13)          | 0<br>(0 - 0)       | 0<br>(0 - 1)        | 3<br>(1 - 6)         | 2<br>(1 - 4)         | 1<br>(0 - 2)         |

Web Table 31- Latvia deaths with 95% UI by age, sex, and cause in 2013

| Cause                                                             | Both Sexes, All Ages        | Both Sexes, 0-4 Years | Both Sexes, 5-14 Years | Both Sexes, 15-49 Years  | Both Sexes, 50-69 Years  | Both Sexes, 70-80 Years     |
|-------------------------------------------------------------------|-----------------------------|-----------------------|------------------------|--------------------------|--------------------------|-----------------------------|
| All causes                                                        | 26,953<br>(26,216 - 27,766) | 144<br>(120 - 173)    | 36<br>(32 - 40)        | 1,896<br>(1,817 - 1,980) | 6,502<br>(6,278 - 6,726) | 18,375<br>(17,861 - 18,909) |
| Communicable, maternal, neonatal, and nutritional diseases        | 630<br>(541 - 696)          | 62<br>(49 - 77)       | 2<br>(1 - 3)           | 181<br>(155 - 206)       | 209<br>(178 - 239)       | 175<br>(142 - 203)          |
| HIV/AIDS and tuberculosis                                         | 219<br>(184 - 269)          | 0<br>(0 - 1)          | 0<br>(0 - 0)           | 111<br>(93 - 136)        | 78<br>(62 - 101)         | 30<br>(23 - 39)             |
| Tuberculosis                                                      | 78<br>(67 - 95)             | 0<br>(0 - 0)          | 0<br>(0 - 0)           | 21<br>(17 - 25)          | 38<br>(31 - 47)          | 19<br>(15 - 26)             |
| HIV/AIDS                                                          | 142<br>(108 - 189)          | 0<br>(0 - 1)          | 0<br>(0 - 0)           | 90<br>(73 - 115)         | 40<br>(26 - 63)          | 11<br>(6 - 18)              |
| HIV/AIDS resulting in mycobacterial infection                     | 8<br>(5 - 11)               | 0<br>(0 - 0)          | 0<br>(0 - 0)           | 5<br>(4 - 7)             | 2<br>(1 - 4)             | 1<br>(0 - 1)                |
| HIV/AIDS resulting in other diseases                              | 134<br>(103 - 178)          | 0<br>(0 - 1)          | 0<br>(0 - 0)           | 85<br>(69 - 109)         | 38<br>(24 - 59)          | 10<br>(6 - 17)              |
| Diarrhea, lower respiratory, and other common infectious diseases | 335<br>(255 - 377)          | 13<br>(10 - 17)       | 2<br>(1 - 3)           | 63<br>(46 - 76)          | 121<br>(91 - 142)        | 135<br>(99 - 162)           |
| Diarrheal diseases                                                | 2<br>(2 - 3)                | 1<br>(0 - 1)          | 0<br>(0 - 0)           | 0<br>(0 - 1)             | 1<br>(0 - 1)             | 1<br>(1 - 1)                |
| Intestinal infectious diseases                                    | 4<br>(1 - 10)               | 1<br>(0 - 2)          | 0<br>(0 - 1)           | 1<br>(0 - 3)             | 1<br>(0 - 2)             | 1<br>(0 - 2)                |
| Typhoid fever                                                     | 3<br>(1 - 7)                | 0<br>(0 - 1)          | 0<br>(0 - 1)           | 1<br>(0 - 2)             | 1<br>(0 - 2)             | 1<br>(0 - 2)                |
| Paratyphoid fever                                                 | 1<br>(0 - 2)                | 0<br>(0 - 0)          | 0<br>(0 - 0)           | 0<br>(0 - 1)             | 0<br>(0 - 0)             | 0<br>(0 - 0)                |
| Other intestinal infectious diseases                              | 0<br>(0 - 2)                | 0<br>(0 - 0)          | 0<br>(0 - 0)           | 0<br>(0 - 0)             | 0<br>(0 - 0)             | 0<br>(0 - 1)                |
| Lower respiratory infections                                      | 293<br>(209 - 335)          | 8<br>(5 - 11)         | 1<br>(0 - 1)           | 54<br>(36 - 67)          | 107<br>(75 - 128)        | 123<br>(86 - 150)           |
| Upper respiratory infections                                      | 1<br>(0 - 2)                | 0<br>(0 - 0)          | 0<br>(0 - 0)           | 0<br>(0 - 0)             | 0<br>(0 - 1)             | 0<br>(0 - 2)                |
| Otitis media                                                      | 0<br>(0 - 0)                | 0<br>(0 - 0)          | 0<br>(0 - 0)           | 0<br>(0 - 0)             | 0<br>(0 - 0)             | 0<br>(0 - 0)                |
| Meningitis                                                        | 11<br>(9 - 13)              | 2<br>(1 - 3)          | 0<br>(0 - 0)           | 2<br>(2 - 3)             | 4<br>(3 - 5)             | 2<br>(2 - 3)                |
| Pneumococcal meningitis                                           | 3<br>(2 - 3)                | 0<br>(0 - 1)          | 0<br>(0 - 0)           | 1<br>(0 - 1)             | 1<br>(1 - 1)             | 1<br>(0 - 1)                |
| H influenzae type B meningitis                                    | 2<br>(1 - 2)                | 1<br>(1 - 1)          | 0<br>(0 - 0)           | 0<br>(0 - 0)             | 0<br>(0 - 1)             | 0<br>(0 - 0)                |
| Meningococcal meningitis                                          | 2<br>(2 - 3)                | 0<br>(0 - 1)          | 0<br>(0 - 0)           | 0<br>(0 - 1)             | 1<br>(1 - 1)             | 0<br>(0 - 1)                |
| Other meningitis                                                  | 4<br>(3 - 5)                | 0<br>(0 - 1)          | 0<br>(0 - 0)           | 1<br>(0 - 1)             | 2<br>(1 - 2)             | 1<br>(1 - 1)                |
| Encephalitis                                                      | 21<br>(16 - 32)             | 1<br>(1 - 2)          | 0<br>(0 - 1)           | 5<br>(3 - 8)             | 8<br>(6 - 13)            | 6<br>(4 - 9)                |
| Diphtheria                                                        | 0<br>(0 - 0)                | 0<br>(0 - 0)          | 0<br>(0 - 0)           | 0<br>(0 - 0)             | 0<br>(0 - 0)             | --                          |
| Whooping cough                                                    | 0<br>(0 - 1)                | 0<br>(0 - 0)          | 0<br>(0 - 0)           | 0<br>(0 - 0)             | 0<br>(0 - 0)             | --                          |
| Tetanus                                                           | 0<br>(0 - 0)                | 0<br>(0 - 0)          | 0<br>(0 - 0)           | 0<br>(0 - 0)             | 0<br>(0 - 0)             | 0<br>(0 - 0)                |
| Measles                                                           | 0<br>(0 - 0)                | 0<br>(0 - 0)          | 0<br>(0 - 0)           | 0<br>(0 - 0)             | 0<br>(0 - 0)             | --                          |
| Varicella and herpes zoster                                       | 2<br>(0 - 7)                | 0<br>(0 - 0)          | 0<br>(0 - 0)           | 0<br>(0 - 0)             | 0<br>(0 - 0)             | 1<br>(0 - 6)                |
| Neglected tropical diseases and malaria                           | 2<br>(2 - 2)                | 0<br>(0 - 0)          | 0<br>(0 - 0)           | 1<br>(0 - 1)             | 0<br>(0 - 1)             | 0<br>(0 - 1)                |
| Cysticercosis                                                     | 0<br>(0 - 0)                | 0<br>(0 - 0)          | 0<br>(0 - 0)           | 0<br>(0 - 0)             | 0<br>(0 - 0)             | 0<br>(0 - 0)                |
| Cystic echinococcosis                                             | 0<br>(0 - 0)                | 0<br>(0 - 0)          | 0<br>(0 - 0)           | 0<br>(0 - 0)             | 0<br>(0 - 0)             | 0<br>(0 - 0)                |
| Dengue                                                            | 0<br>(0 - 0)                | 0<br>(0 - 0)          | 0<br>(0 - 0)           | 0<br>(0 - 0)             | 0<br>(0 - 0)             | 0<br>(0 - 0)                |
| Rabies                                                            | 0<br>(0 - 0)                | 0<br>(0 - 0)          | 0<br>(0 - 0)           | 0<br>(0 - 0)             | 0<br>(0 - 0)             | 0<br>(0 - 0)                |
| Other neglected tropical diseases                                 | 1<br>(1 - 1)                | 0<br>(0 - 0)          | 0<br>(0 - 0)           | 0<br>(0 - 0)             | 0<br>(0 - 0)             | 0<br>(0 - 0)                |
| Maternal disorders                                                | 2<br>(1 - 3)                | --                    | 0<br>(0 - 0)           | 2<br>(1 - 3)             | --                       | --                          |
| Maternal hemorrhage                                               | 0<br>(0 - 0)                | --                    | 0<br>(0 - 0)           | 0<br>(0 - 0)             | --                       | --                          |
| Maternal sepsis and other maternal infections                     | 0<br>(0 - 0)                | --                    | 0<br>(0 - 0)           | 0<br>(0 - 0)             | --                       | --                          |
| Maternal hypertensive disorders                                   | 0<br>(0 - 0)                | --                    | 0<br>(0 - 0)           | 0<br>(0 - 0)             | --                       | --                          |
| Maternal obstructed labor                                         | 0<br>(0 - 0)                | --                    | 0<br>(0 - 0)           | 0<br>(0 - 0)             | --                       | --                          |
| Maternal abortive outcome                                         | 0<br>(0 - 1)                | --                    | 0<br>(0 - 0)           | 0<br>(0 - 1)             | --                       | --                          |
| Indirect maternal deaths                                          | 0<br>(0 - 0)                | --                    | 0<br>(0 - 0)           | 0<br>(0 - 0)             | --                       | --                          |

Web Table 31- Latvia deaths with 95% UI by age, sex, and cause in 2013

| Cause                                                            | Both Sexes, All Ages        | Both Sexes, 0-4 Years | Both Sexes, 5-14 Years | Both Sexes, 15-49 Years | Both Sexes, 50-69 Years  | Both Sexes, 70-80 Years     |
|------------------------------------------------------------------|-----------------------------|-----------------------|------------------------|-------------------------|--------------------------|-----------------------------|
| Late maternal deaths                                             | 0<br>(0 - 0)                | --                    | 0<br>(0 - 0)           | 0<br>(0 - 0)            | --                       | --                          |
| Maternal deaths aggravated by HIV/AIDS                           | 0<br>(0 - 0)                | --                    | --                     | 0<br>(0 - 0)            | --                       | --                          |
| Other maternal disorders                                         | 0<br>(0 - 0)                | --                    | 0<br>(0 - 0)           | 0<br>(0 - 0)            | --                       | --                          |
| Neonatal disorders                                               | 46<br>(36 - 57)             | 46<br>(36 - 57)       | --                     | --                      | --                       | --                          |
| Neonatal preterm birth complications                             | 8<br>(4 - 12)               | 8<br>(4 - 12)         | --                     | --                      | --                       | --                          |
| Neonatal encephalopathy due to birth asphyxia and trauma         | 24<br>(15 - 31)             | 24<br>(15 - 31)       | --                     | --                      | --                       | --                          |
| Neonatal sepsis and other neonatal infections                    | 4<br>(2 - 6)                | 4<br>(2 - 6)          | --                     | --                      | --                       | --                          |
| Hemolytic disease and other neonatal jaundice                    | 0<br>(0 - 1)                | 0<br>(0 - 1)          | --                     | --                      | --                       | --                          |
| Other neonatal disorders                                         | 11<br>(7 - 17)              | 11<br>(7 - 17)        | --                     | --                      | --                       | --                          |
| Nutritional deficiencies                                         | 12<br>(10 - 15)             | 0<br>(0 - 1)          | 0<br>(0 - 0)           | 2<br>(1 - 2)            | 5<br>(3 - 6)             | 5<br>(4 - 7)                |
| Protein-energy malnutrition                                      | 2<br>(1 - 3)                | 0<br>(0 - 1)          | 0<br>(0 - 0)           | 1<br>(0 - 1)            | 1<br>(0 - 1)             | 0<br>(0 - 1)                |
| Iodine deficiency                                                | 1<br>(0 - 2)                | 0<br>(0 - 0)          | 0<br>(0 - 0)           | 0<br>(0 - 0)            | 0<br>(0 - 1)             | 0<br>(0 - 1)                |
| Iron-deficiency anemia                                           | 4<br>(2 - 5)                | 0<br>(0 - 0)          | 0<br>(0 - 0)           | 0<br>(0 - 0)            | 1<br>(1 - 2)             | 2<br>(1 - 3)                |
| Other nutritional deficiencies                                   | 6<br>(4 - 8)                | 0<br>(0 - 0)          | 0<br>(0 - 0)           | 1<br>(1 - 1)            | 3<br>(2 - 3)             | 2<br>(1 - 4)                |
| Other communicable, maternal, neonatal, and nutritional diseases | 14<br>(12 - 18)             | 2<br>(2 - 3)          | 0<br>(0 - 0)           | 2<br>(2 - 3)            | 5<br>(4 - 7)             | 4<br>(3 - 6)                |
| Sexually transmitted diseases excluding HIV                      | 3<br>(1 - 5)                | 0<br>(0 - 1)          | 0<br>(0 - 0)           | 0<br>(0 - 1)            | 1<br>(0 - 2)             | 1<br>(0 - 2)                |
| Syphilis                                                         | 2<br>(1 - 4)                | 0<br>(0 - 1)          | 0<br>(0 - 0)           | 0<br>(0 - 0)            | 1<br>(0 - 2)             | 1<br>(0 - 1)                |
| Chlamydial infection                                             | 0<br>(0 - 0)                | --                    | 0<br>(0 - 0)           | 0<br>(0 - 0)            | 0<br>(0 - 0)             | 0<br>(0 - 0)                |
| Gonococcal infection                                             | 0<br>(0 - 1)                | --                    | 0<br>(0 - 0)           | 0<br>(0 - 0)            | 0<br>(0 - 0)             | 0<br>(0 - 0)                |
| Other sexually transmitted diseases                              | 0<br>(0 - 0)                | --                    | 0<br>(0 - 0)           | 0<br>(0 - 0)            | 0<br>(0 - 0)             | 0<br>(0 - 0)                |
| Hepatitis                                                        | 3<br>(2 - 3)                | 0<br>(0 - 1)          | 0<br>(0 - 0)           | 1<br>(1 - 1)            | 1<br>(1 - 1)             | 1<br>(0 - 1)                |
| Acute hepatitis A                                                | 0<br>(0 - 1)                | 0<br>(0 - 0)          | 0<br>(0 - 0)           | 0<br>(0 - 0)            | 0<br>(0 - 0)             | 0<br>(0 - 0)                |
| Acute hepatitis B                                                | 2<br>(2 - 3)                | 0<br>(0 - 0)          | 0<br>(0 - 0)           | 0<br>(0 - 1)            | 1<br>(1 - 1)             | 1<br>(0 - 1)                |
| Acute hepatitis C                                                | 0<br>(0 - 0)                | --                    | 0<br>(0 - 0)           | 0<br>(0 - 0)            | 0<br>(0 - 0)             | 0<br>(0 - 0)                |
| Other infectious diseases                                        | 9<br>(7 - 11)               | 2<br>(1 - 2)          | 0<br>(0 - 0)           | 1<br>(1 - 2)            | 3<br>(2 - 4)             | 3<br>(2 - 4)                |
| Non-communicable diseases                                        | 24,771<br>(24,011 - 25,519) | 62<br>(50 - 77)       | 15<br>(11 - 18)        | 1,092<br>(975 - 1,166)  | 5,749<br>(5,529 - 5,954) | 17,854<br>(17,323 - 18,394) |
| Neoplasms                                                        | 5,192<br>(4,663 - 5,497)    | 4<br>(3 - 6)          | 7<br>(4 - 8)           | 277<br>(246 - 298)      | 1,926<br>(1,762 - 2,029) | 2,977<br>(2,621 - 3,185)    |
| Esophageal cancer                                                | 105<br>(80 - 124)           | --                    | --                     | 6<br>(4 - 8)            | 57<br>(42 - 69)          | 42<br>(32 - 51)             |
| Stomach cancer                                                   | 474<br>(416 - 544)          | --                    | --                     | 26<br>(22 - 31)         | 170<br>(150 - 197)       | 278<br>(236 - 329)          |
| Liver cancer                                                     | 125<br>(88 - 154)           | --                    | 0<br>(0 - 0)           | 6<br>(4 - 8)            | 47<br>(34 - 59)          | 73<br>(47 - 91)             |
| Liver cancer due to hepatitis B                                  | 19<br>(11 - 27)             | --                    | 0<br>(0 - 0)           | 1<br>(1 - 2)            | 8<br>(5 - 13)            | 9<br>(5 - 13)               |
| Liver cancer due to hepatitis C                                  | 60<br>(41 - 77)             | --                    | 0<br>(0 - 0)           | 3<br>(2 - 4)            | 22<br>(15 - 30)          | 35<br>(22 - 47)             |
| Liver cancer due to alcohol use                                  | 33<br>(22 - 46)             | --                    | --                     | 1<br>(1 - 2)            | 11<br>(7 - 16)           | 21<br>(13 - 29)             |
| Liver cancer due to other causes                                 | 14<br>(8 - 20)              | --                    | 0<br>(0 - 0)           | 1<br>(1 - 1)            | 5<br>(3 - 7)             | 8<br>(4 - 12)               |
| Larynx cancer                                                    | 63<br>(42 - 76)             | --                    | --                     | 4<br>(3 - 5)            | 36<br>(25 - 45)          | 23<br>(15 - 29)             |
| Tracheal, bronchus and lung cancer                               | 938<br>(872 - 1,005)        | --                    | --                     | 34<br>(28 - 40)         | 436<br>(401 - 474)       | 468<br>(426 - 508)          |
| Breast cancer                                                    | 358<br>(213 - 426)          | --                    | --                     | 34<br>(24 - 44)         | 148<br>(96 - 181)        | 175<br>(92 - 214)           |
| Cervical cancer                                                  | 95<br>(67 - 120)            | --                    | --                     | 9<br>(6 - 13)           | 36<br>(27 - 46)          | 50<br>(32 - 66)             |
| Uterine cancer                                                   | 101<br>(58 - 127)           | --                    | --                     | 2<br>(1 - 3)            | 35<br>(21 - 46)          | 63<br>(33 - 82)             |
| Prostate cancer                                                  | 317<br>(195 - 402)          | --                    | --                     | 1<br>(1 - 2)            | 63<br>(37 - 85)          | 253<br>(152 - 325)          |

Web Table 31- Latvia deaths with 95% UI by age, sex, and cause in 2013

| Cause                                         | Both Sexes, All Ages        | Both Sexes, 0-4 Years | Both Sexes, 5-14 Years | Both Sexes, 15-49 Years | Both Sexes, 50-69 Years  | Both Sexes, 70-80 Years     |
|-----------------------------------------------|-----------------------------|-----------------------|------------------------|-------------------------|--------------------------|-----------------------------|
| Colon and rectum cancer                       | 691<br>(637 - 751)          | --                    | --                     | 19<br>(16 - 22)         | 187<br>(172 - 203)       | 486<br>(439 - 541)          |
| Lip and oral cavity cancer                    | 83<br>(50 - 96)             | --                    | --                     | 8<br>(4 - 10)           | 45<br>(25 - 55)          | 30<br>(21 - 36)             |
| Nasopharynx cancer                            | 9<br>(7 - 13)               | --                    | 0<br>(0 - 0)           | 1<br>(1 - 2)            | 5<br>(4 - 8)             | 2<br>(2 - 3)                |
| Other pharynx cancer                          | 48<br>(29 - 60)             | --                    | --                     | 3<br>(2 - 4)            | 33<br>(20 - 43)          | 12<br>(8 - 15)              |
| Gallbladder and biliary tract cancer          | 57<br>(41 - 71)             | --                    | --                     | 2<br>(1 - 2)            | 19<br>(14 - 25)          | 36<br>(25 - 47)             |
| Pancreatic cancer                             | 367<br>(337 - 397)          | --                    | --                     | 15<br>(12 - 18)         | 135<br>(123 - 148)       | 217<br>(195 - 241)          |
| Malignant skin melanoma                       | 62<br>(39 - 79)             | --                    | --                     | 7<br>(4 - 10)           | 22<br>(14 - 29)          | 32<br>(21 - 42)             |
| Non-melanoma skin cancer                      | 41<br>(27 - 54)             | --                    | --                     | 1<br>(1 - 1)            | 7<br>(4 - 9)             | 33<br>(22 - 45)             |
| Ovarian cancer                                | 188<br>(137 - 217)          | --                    | --                     | 14<br>(11 - 18)         | 74<br>(59 - 86)          | 100<br>(64 - 124)           |
| Testicular cancer                             | 6<br>(4 - 9)                | --                    | --                     | 3<br>(1 - 5)            | 2<br>(1 - 2)             | 2<br>(1 - 2)                |
| Kidney cancer                                 | 179<br>(150 - 207)          | 0<br>(0 - 0)          | 0<br>(0 - 0)           | 7<br>(5 - 9)            | 69<br>(57 - 81)          | 102<br>(80 - 128)           |
| Bladder cancer                                | 157<br>(111 - 184)          | --                    | --                     | 2<br>(1 - 3)            | 38<br>(27 - 47)          | 117<br>(81 - 140)           |
| Brain and nervous system cancer               | 139<br>(95 - 163)           | 1<br>(1 - 2)          | 2<br>(1 - 3)           | 23<br>(17 - 28)         | 65<br>(49 - 77)          | 47<br>(26 - 61)             |
| Thyroid cancer                                | 25<br>(18 - 31)             | --                    | 0<br>(0 - 0)           | 1<br>(1 - 1)            | 8<br>(6 - 9)             | 17<br>(11 - 22)             |
| Mesothelioma                                  | 6<br>(4 - 7)                | --                    | --                     | 1<br>(0 - 1)            | 3<br>(1 - 4)             | 3<br>(2 - 4)                |
| Hodgkin lymphoma                              | 13<br>(9 - 16)              | 0<br>(0 - 0)          | 0<br>(0 - 0)           | 5<br>(3 - 6)            | 5<br>(3 - 6)             | 3<br>(3 - 5)                |
| Non-Hodgkin lymphoma                          | 107<br>(57 - 142)           | 0<br>(0 - 0)          | 1<br>(0 - 1)           | 9<br>(5 - 12)           | 38<br>(22 - 50)          | 60<br>(28 - 83)             |
| Multiple myeloma                              | 55<br>(35 - 73)             | --                    | --                     | 2<br>(1 - 3)            | 21<br>(13 - 29)          | 31<br>(19 - 44)             |
| Leukemia                                      | 154<br>(129 - 173)          | 2<br>(1 - 3)          | 2<br>(1 - 3)           | 14<br>(11 - 17)         | 48<br>(40 - 55)          | 88<br>(73 - 101)            |
| Other neoplasms                               | 229<br>(184 - 260)          | 1<br>(1 - 2)          | 2<br>(1 - 2)           | 19<br>(14 - 23)         | 74<br>(59 - 85)          | 133<br>(99 - 157)           |
| Cardiovascular diseases                       | 15,552<br>(14,952 - 16,329) | 1<br>(1 - 1)          | 1<br>(0 - 1)           | 441<br>(400 - 479)      | 2,949<br>(2,807 - 3,129) | 12,160<br>(11,668 - 12,835) |
| Rheumatic heart disease                       | 55<br>(45 - 80)             | 0<br>(0 - 0)          | 0<br>(0 - 0)           | 9<br>(6 - 16)           | 27<br>(21 - 44)          | 19<br>(13 - 25)             |
| Ischemic heart disease                        | 8,801<br>(8,196 - 9,996)    | 0<br>(0 - 0)          | 0<br>(0 - 0)           | 170<br>(147 - 208)      | 1,624<br>(1,495 - 1,877) | 7,007<br>(6,482 - 7,933)    |
| Cerebrovascular disease                       | 5,075<br>(4,607 - 5,869)    | 0<br>(0 - 0)          | 0<br>(0 - 0)           | 65<br>(47 - 79)         | 770<br>(669 - 898)       | 4,240<br>(3,839 - 4,966)    |
| Ischemic stroke                               | 3,952<br>(3,429 - 4,407)    | 0<br>(0 - 0)          | 0<br>(0 - 0)           | 16<br>(10 - 21)         | 454<br>(368 - 530)       | 3,483<br>(3,033 - 3,909)    |
| Hemorrhagic stroke                            | 1,122<br>(885 - 1,646)      | 0<br>(0 - 0)          | 0<br>(0 - 0)           | 49<br>(36 - 60)         | 316<br>(260 - 418)       | 757<br>(559 - 1,197)        |
| Hypertensive heart disease                    | 567<br>(271 - 820)          | 0<br>(0 - 0)          | 0<br>(0 - 0)           | 8<br>(3 - 13)           | 86<br>(36 - 142)         | 474<br>(224 - 682)          |
| Cardiomyopathy and myocarditis                | 700<br>(512 - 811)          | 0<br>(0 - 1)          | 0<br>(0 - 0)           | 172<br>(132 - 199)      | 341<br>(264 - 406)       | 186<br>(94 - 233)           |
| Atrial fibrillation and flutter               | 3<br>(3 - 4)                | --                    | --                     | 0<br>(0 - 0)            | 1<br>(1 - 1)             | 3<br>(2 - 3)                |
| Aortic aneurysm                               | 79<br>(65 - 97)             | --                    | --                     | 3<br>(2 - 4)            | 24<br>(19 - 29)          | 52<br>(42 - 66)             |
| Peripheral vascular disease                   | 65<br>(53 - 80)             | --                    | --                     | 0<br>(0 - 0)            | 7<br>(5 - 9)             | 58<br>(46 - 73)             |
| Endocarditis                                  | 14<br>(10 - 20)             | 0<br>(0 - 0)          | 0<br>(0 - 0)           | 4<br>(3 - 6)            | 7<br>(4 - 9)             | 4<br>(2 - 5)                |
| Other cardiovascular and circulatory diseases | 193<br>(70 - 232)           | 0<br>(0 - 0)          | 0<br>(0 - 0)           | 11<br>(4 - 15)          | 62<br>(26 - 76)          | 120<br>(40 - 149)           |
| Chronic respiratory diseases                  | 463<br>(413 - 525)          | 0<br>(0 - 0)          | 0<br>(0 - 0)           | 13<br>(11 - 16)         | 109<br>(96 - 141)        | 340<br>(286 - 377)          |
| Chronic obstructive pulmonary disease         | 368<br>(316 - 419)          | 0<br>(0 - 0)          | 0<br>(0 - 0)           | 7<br>(6 - 9)            | 85<br>(74 - 111)         | 276<br>(226 - 310)          |
| Pneumoconiosis                                | 1<br>(1 - 2)                | 0<br>(0 - 0)          | 0<br>(0 - 0)           | 0<br>(0 - 0)            | 0<br>(0 - 1)             | 1<br>(0 - 2)                |
| Silicosis                                     | 1<br>(0 - 2)                | 0<br>(0 - 0)          | 0<br>(0 - 0)           | 0<br>(0 - 0)            | 0<br>(0 - 0)             | 1<br>(0 - 1)                |
| Asbestosis                                    | 0<br>(0 - 0)                | 0<br>(0 - 0)          | 0<br>(0 - 0)           | 0<br>(0 - 0)            | 0<br>(0 - 0)             | 0<br>(0 - 0)                |
| Coal workers pneumoconiosis                   | 0<br>(0 - 0)                | 0<br>(0 - 0)          | 0<br>(0 - 0)           | 0<br>(0 - 0)            | 0<br>(0 - 0)             | 0<br>(0 - 0)                |
| Other pneumoconiosis                          | 0<br>(0 - 0)                | 0<br>(0 - 0)          | 0<br>(0 - 0)           | 0<br>(0 - 0)            | 0<br>(0 - 0)             | 0<br>(0 - 0)                |



Web Table 31- Latvia deaths with 95% UI by age, sex, and cause in 2013

| Cause                                               | Both Sexes, All Ages     | Both Sexes, 0-4 Years | Both Sexes, 5-14 Years | Both Sexes, 15-49 Years | Both Sexes, 50-69 Years | Both Sexes, 70-80 Years  |
|-----------------------------------------------------|--------------------------|-----------------------|------------------------|-------------------------|-------------------------|--------------------------|
| Asthma                                              | 47<br>(37 - 63)          | 0<br>(0 - 0)          | 0<br>(0 - 0)           | 3<br>(2 - 4)            | 12<br>(10 - 17)         | 32<br>(24 - 44)          |
| Interstitial lung disease and pulmonary sarcoidosis | 38<br>(23 - 53)          | 0<br>(0 - 0)          | 0<br>(0 - 0)           | 2<br>(1 - 3)            | 10<br>(6 - 16)          | 27<br>(15 - 39)          |
| Other chronic respiratory diseases                  | 7<br>(6 - 9)             | 0<br>(0 - 0)          | 0<br>(0 - 0)           | 1<br>(1 - 2)            | 1<br>(1 - 2)            | 4<br>(3 - 7)             |
| Cirrhosis                                           | 363<br>(337 - 390)       | 0<br>(0 - 0)          | 0<br>(0 - 0)           | 92<br>(81 - 104)        | 192<br>(175 - 211)      | 78<br>(71 - 87)          |
| Cirrhosis due to hepatitis B                        | 60<br>(38 - 84)          | 0<br>(0 - 0)          | 0<br>(0 - 0)           | 15<br>(9 - 22)          | 32<br>(20 - 46)         | 13<br>(8 - 18)           |
| Cirrhosis due to hepatitis C                        | 127<br>(88 - 167)        | 0<br>(0 - 0)          | 0<br>(0 - 0)           | 31<br>(18 - 42)         | 68<br>(46 - 92)         | 28<br>(20 - 36)          |
| Cirrhosis due to alcohol use                        | 144<br>(115 - 177)       | --<br>(0 - 0)         | --<br>(0 - 0)          | 34<br>(25 - 44)         | 77<br>(60 - 97)         | 33<br>(26 - 41)          |
| Cirrhosis due to other causes                       | 32<br>(21 - 43)          | 0<br>(0 - 0)          | 0<br>(0 - 0)           | 12<br>(8 - 16)          | 15<br>(9 - 21)          | 4<br>(3 - 6)             |
| Digestive diseases                                  | 476<br>(335 - 534)       | 0<br>(0 - 0)          | 0<br>(0 - 0)           | 40<br>(28 - 47)         | 123<br>(93 - 139)       | 313<br>(207 - 362)       |
| Peptic ulcer disease                                | 86<br>(48 - 119)         | 0<br>(0 - 0)          | 0<br>(0 - 0)           | 7<br>(4 - 10)           | 29<br>(18 - 38)         | 50<br>(24 - 75)          |
| Gastritis and duodenitis                            | 5<br>(3 - 9)             | 0<br>(0 - 0)          | 0<br>(0 - 0)           | 1<br>(0 - 1)            | 2<br>(1 - 3)            | 3<br>(2 - 5)             |
| Appendicitis                                        | 3<br>(2 - 5)             | 0<br>(0 - 0)          | 0<br>(0 - 0)           | 0<br>(0 - 1)            | 1<br>(1 - 2)            | 1<br>(1 - 3)             |
| Paralytic ileus and intestinal obstruction          | 25<br>(14 - 44)          | 0<br>(0 - 0)          | 0<br>(0 - 0)           | 2<br>(1 - 4)            | 6<br>(4 - 11)           | 16<br>(8 - 30)           |
| Inguinal, femoral, and abdominal hernia             | 9<br>(4 - 14)            | 0<br>(0 - 0)          | 0<br>(0 - 0)           | 0<br>(0 - 0)            | 1<br>(1 - 2)            | 7<br>(3 - 12)            |
| Inflammatory bowel disease                          | 11<br>(6 - 14)           | 0<br>(0 - 0)          | 0<br>(0 - 0)           | 1<br>(1 - 2)            | 4<br>(2 - 5)            | 5<br>(3 - 8)             |
| Vascular intestinal disorders                       | 184<br>(121 - 249)       | 0<br>(0 - 0)          | 0<br>(0 - 0)           | 2<br>(1 - 4)            | 28<br>(17 - 45)         | 154<br>(99 - 206)        |
| Gallbladder and biliary diseases                    | 37<br>(21 - 50)          | 0<br>(0 - 0)          | 0<br>(0 - 0)           | 1<br>(0 - 1)            | 7<br>(5 - 9)            | 29<br>(15 - 41)          |
| Pancreatitis                                        | 90<br>(59 - 113)         | 0<br>(0 - 0)          | 0<br>(0 - 0)           | 23<br>(16 - 28)         | 35<br>(23 - 45)         | 32<br>(18 - 45)          |
| Other digestive diseases                            | 26<br>(15 - 35)          | 0<br>(0 - 0)          | 0<br>(0 - 0)           | 2<br>(1 - 3)            | 9<br>(5 - 11)           | 15<br>(8 - 22)           |
| Neurological disorders                              | 1,555<br>(1,340 - 1,763) | 1<br>(1 - 1)          | 1<br>(1 - 1)           | 32<br>(24 - 41)         | 94<br>(80 - 107)        | 1,426<br>(1,216 - 1,626) |
| Alzheimer disease and other dementias               | 1,438<br>(1,225 - 1,640) | --<br>(0 - 0)         | --<br>(0 - 0)          | 0<br>(0 - 0)            | 53<br>(43 - 63)         | 1,385<br>(1,173 - 1,583) |
| Parkinson disease                                   | 32<br>(25 - 39)          | --<br>(0 - 0)         | --<br>(0 - 0)          | 0<br>(0 - 0)            | 4<br>(3 - 5)            | 27<br>(21 - 34)          |
| Epilepsy                                            | 35<br>(22 - 46)          | 0<br>(0 - 0)          | 0<br>(0 - 1)           | 19<br>(11 - 26)         | 13<br>(8 - 18)          | 2<br>(2 - 3)             |
| Multiple sclerosis                                  | 20<br>(15 - 34)          | --<br>(0 - 0)         | --<br>(0 - 0)          | 8<br>(5 - 13)           | 10<br>(7 - 18)          | 2<br>(1 - 3)             |
| Other neurological disorders                        | 29<br>(24 - 33)          | 1<br>(0 - 1)          | 0<br>(0 - 1)           | 5<br>(4 - 6)            | 13<br>(11 - 16)         | 9<br>(8 - 11)            |
| Mental and substance use disorders                  | 307<br>(184 - 352)       | 0<br>(0 - 0)          | 0<br>(0 - 0)           | 132<br>(86 - 154)       | 147<br>(80 - 178)       | 27<br>(16 - 33)          |
| Schizophrenia                                       | 4<br>(2 - 5)             | --<br>(0 - 0)         | --<br>(0 - 0)          | 1<br>(0 - 1)            | 2<br>(1 - 2)            | 1<br>(1 - 2)             |
| Alcohol use disorders                               | 228<br>(116 - 271)       | --<br>(0 - 0)         | --<br>(0 - 0)          | 88<br>(48 - 108)        | 122<br>(57 - 151)       | 17<br>(7 - 23)           |
| Drug use disorders                                  | 75<br>(60 - 87)          | 0<br>(0 - 0)          | --<br>(0 - 0)          | 43<br>(32 - 52)         | 23<br>(18 - 29)         | 8<br>(7 - 11)            |
| Opioid use disorders                                | 32<br>(25 - 37)          | 0<br>(0 - 0)          | --<br>(0 - 0)          | 19<br>(14 - 23)         | 9<br>(7 - 12)           | 4<br>(3 - 5)             |
| Cocaine use disorders                               | 2<br>(1 - 2)             | 0<br>(0 - 0)          | --<br>(0 - 0)          | 1<br>(1 - 2)            | 0<br>(0 - 1)            | 0<br>(0 - 0)             |
| Amphetamine use disorders                           | 2<br>(1 - 2)             | 0<br>(0 - 0)          | --<br>(0 - 0)          | 1<br>(1 - 1)            | 1<br>(0 - 1)            | 0<br>(0 - 0)             |
| Other drug use disorders                            | 39<br>(32 - 46)          | 0<br>(0 - 0)          | --<br>(0 - 0)          | 22<br>(16 - 27)         | 13<br>(10 - 16)         | 4<br>(3 - 6)             |
| Eating disorders                                    | 0<br>(0 - 0)             | --<br>(0 - 0)         | 0<br>(0 - 0)           | 0<br>(0 - 0)            | --<br>(0 - 0)           | --<br>(0 - 0)            |
| Anorexia nervosa                                    | 0<br>(0 - 0)             | --<br>(0 - 0)         | 0<br>(0 - 0)           | 0<br>(0 - 0)            | --<br>(0 - 0)           | --<br>(0 - 0)            |
| Diabetes, urogenital, blood, and endocrine diseases | 693<br>(517 - 756)       | 1<br>(1 - 1)          | 1<br>(1 - 1)           | 40<br>(34 - 44)         | 171<br>(150 - 188)      | 479<br>(330 - 532)       |
| Diabetes mellitus                                   | 319<br>(201 - 356)       | 0<br>(0 - 0)          | 0<br>(0 - 0)           | 17<br>(13 - 20)         | 79<br>(68 - 89)         | 223<br>(118 - 256)       |
| Acute glomerulonephritis                            | 1<br>(0 - 1)             | 0<br>(0 - 0)          | 0<br>(0 - 0)           | 0<br>(0 - 0)            | 0<br>(0 - 0)            | 0<br>(0 - 0)             |
| Chronic kidney disease                              | 170<br>(83 - 197)        | 0<br>(0 - 0)          | 0<br>(0 - 0)           | 11<br>(8 - 13)          | 42<br>(29 - 49)         | 116<br>(45 - 141)        |
| Chronic kidney disease due to diabetes mellitus     | 15<br>(1 - 22)           | 0<br>(0 - 0)          | 0<br>(0 - 0)           | 1<br>(0 - 1)            | 4<br>(0 - 5)            | 11<br>(0 - 16)           |

Web Table 31- Latvia deaths with 95% UI by age, sex, and cause in 2013

| Cause                                               | Both Sexes, All Ages     | Both Sexes, 0-4 Years | Both Sexes, 5-14 Years | Both Sexes, 15-49 Years | Both Sexes, 50-69 Years | Both Sexes, 70-80 Years |
|-----------------------------------------------------|--------------------------|-----------------------|------------------------|-------------------------|-------------------------|-------------------------|
| Chronic kidney disease due to hypertension          | 29<br>(13 - 41)          | 0<br>(0 - 0)          | 0<br>(0 - 0)           | 1<br>(0 - 1)            | 5<br>(3 - 7)            | 22<br>(10 - 33)         |
| Chronic kidney disease due to glomerulonephritis    | 42<br>(24 - 59)          | 0<br>(0 - 0)          | 0<br>(0 - 0)           | 5<br>(3 - 6)            | 12<br>(8 - 16)          | 25<br>(11 - 39)         |
| Chronic kidney disease due to other causes          | 84<br>(34 - 114)         | 0<br>(0 - 0)          | 0<br>(0 - 0)           | 5<br>(3 - 7)            | 20<br>(14 - 27)         | 59<br>(17 - 83)         |
| Urinary diseases and male infertility               | 166<br>(140 - 222)       | 0<br>(0 - 0)          | 0<br>(0 - 0)           | 7<br>(6 - 8)            | 36<br>(29 - 52)         | 123<br>(100 - 166)      |
| Interstitial nephritis and urinary tract infections | 113<br>(93 - 160)        | 0<br>(0 - 0)          | 0<br>(0 - 0)           | 5<br>(4 - 7)            | 27<br>(21 - 41)         | 81<br>(64 - 115)        |
| Urolithiasis                                        | 17<br>(11 - 23)          | --                    | 0<br>(0 - 0)           | 0<br>(0 - 1)            | 4<br>(2 - 5)            | 12<br>(7 - 17)          |
| Other urinary diseases                              | 36<br>(24 - 54)          | 0<br>(0 - 0)          | 0<br>(0 - 0)           | 1<br>(1 - 1)            | 5<br>(3 - 7)            | 30<br>(19 - 46)         |
| Gynecological diseases                              | 0<br>(0 - 0)             | --                    | --                     | 0<br>(0 - 0)            | 0<br>(0 - 0)            | 0<br>(0 - 0)            |
| Uterine fibroids                                    | 0<br>(0 - 0)             | --                    | --                     | 0<br>(0 - 0)            | 0<br>(0 - 0)            | 0<br>(0 - 0)            |
| Polycystic ovarian syndrome                         | 0<br>(0 - 0)             | --                    | --                     | 0<br>(0 - 0)            | 0<br>(0 - 0)            | --                      |
| Endometriosis                                       | 0<br>(0 - 0)             | --                    | --                     | 0<br>(0 - 0)            | 0<br>(0 - 0)            | --                      |
| Genital prolapse                                    | 0<br>(0 - 0)             | --                    | --                     | 0<br>(0 - 0)            | 0<br>(0 - 0)            | 0<br>(0 - 0)            |
| Other gynecological diseases                        | 0<br>(0 - 0)             | --                    | --                     | 0<br>(0 - 0)            | 0<br>(0 - 0)            | 0<br>(0 - 0)            |
| Hemoglobinopathies and hemolytic anemias            | 6<br>(4 - 8)             | 0<br>(0 - 0)          | 0<br>(0 - 0)           | 1<br>(0 - 1)            | 2<br>(1 - 2)            | 3<br>(2 - 5)            |
| Thalassemias                                        | 0<br>(0 - 1)             | 0<br>(0 - 0)          | 0<br>(0 - 0)           | 0<br>(0 - 0)            | 0<br>(0 - 0)            | 0<br>(0 - 0)            |
| Sickle cell disorders                               | 0<br>(0 - 0)             | 0<br>(0 - 0)          | 0<br>(0 - 0)           | 0<br>(0 - 0)            | 0<br>(0 - 0)            | 0<br>(0 - 0)            |
| G6PD deficiency                                     | 0<br>(0 - 0)             | 0<br>(0 - 0)          | 0<br>(0 - 0)           | 0<br>(0 - 0)            | 0<br>(0 - 0)            | 0<br>(0 - 0)            |
| Other hemoglobinopathies and hemolytic anemias      | 6<br>(4 - 8)             | 0<br>(0 - 0)          | 0<br>(0 - 0)           | 0<br>(0 - 1)            | 2<br>(1 - 2)            | 3<br>(2 - 5)            |
| Endocrine, metabolic, blood, and immune disorders   | 31<br>(15 - 38)          | 1<br>(0 - 1)          | 0<br>(0 - 1)           | 4<br>(2 - 5)            | 12<br>(6 - 15)          | 14<br>(6 - 18)          |
| Musculoskeletal disorders                           | 43<br>(36 - 54)          | --                    | 0<br>(0 - 0)           | 5<br>(4 - 7)            | 17<br>(14 - 22)         | 20<br>(16 - 26)         |
| Rheumatoid arthritis                                | 19<br>(15 - 25)          | --                    | 0<br>(0 - 0)           | 1<br>(1 - 1)            | 8<br>(6 - 11)           | 11<br>(7 - 14)          |
| Other musculoskeletal disorders                     | 23<br>(20 - 32)          | --                    | 0<br>(0 - 0)           | 4<br>(3 - 5)            | 9<br>(7 - 13)           | 10<br>(7 - 14)          |
| Other non-communicable diseases                     | 130<br>(98 - 150)        | 54<br>(43 - 68)       | 5<br>(4 - 6)           | 18<br>(15 - 20)         | 21<br>(11 - 24)         | 32<br>(10 - 40)         |
| Congenital anomalies                                | 73<br>(59 - 87)          | 40<br>(30 - 52)       | 5<br>(3 - 6)           | 14<br>(12 - 17)         | 9<br>(7 - 11)           | 5<br>(4 - 6)            |
| Neural tube defects                                 | 0<br>(0 - 1)             | 0<br>(0 - 1)          | 0<br>(0 - 0)           | 0<br>(0 - 0)            | 0<br>(0 - 0)            | 0<br>(0 - 0)            |
| Congenital heart anomalies                          | 32<br>(24 - 39)          | 17<br>(12 - 22)       | 2<br>(1 - 2)           | 7<br>(6 - 9)            | 4<br>(3 - 5)            | 2<br>(1 - 2)            |
| Cleft lip and cleft palate                          | 0<br>(0 - 1)             | 0<br>(0 - 1)          | --                     | --                      | --                      | --                      |
| Down syndrome                                       | 7<br>(5 - 9)             | 2<br>(1 - 4)          | 1<br>(0 - 1)           | 2<br>(2 - 3)            | 1<br>(1 - 1)            | 0<br>(0 - 0)            |
| Chromosomal unbalanced rearrangements               | 4<br>(3 - 6)             | 3<br>(2 - 5)          | 0<br>(0 - 0)           | 0<br>(0 - 0)            | 0<br>(0 - 0)            | 0<br>(0 - 0)            |
| Other congenital anomalies                          | 30<br>(24 - 37)          | 17<br>(13 - 23)       | 2<br>(1 - 3)           | 4<br>(3 - 5)            | 4<br>(3 - 4)            | 3<br>(2 - 3)            |
| Skin and subcutaneous diseases                      | 42<br>(6 - 52)           | 0<br>(0 - 0)          | 0<br>(0 - 0)           | 3<br>(0 - 4)            | 12<br>(2 - 15)          | 27<br>(4 - 36)          |
| Cellulitis                                          | 9<br>(1 - 12)            | 0<br>(0 - 0)          | 0<br>(0 - 0)           | 1<br>(0 - 2)            | 3<br>(0 - 5)            | 4<br>(1 - 7)            |
| Pyoderma                                            | 21<br>(3 - 28)           | 0<br>(0 - 0)          | 0<br>(0 - 0)           | 2<br>(0 - 2)            | 6<br>(1 - 8)            | 14<br>(2 - 19)          |
| Decubitus ulcer                                     | 11<br>(1 - 16)           | 0<br>(0 - 0)          | 0<br>(0 - 0)           | 0<br>(0 - 1)            | 2<br>(0 - 3)            | 9<br>(1 - 13)           |
| Other skin and subcutaneous diseases                | 0<br>(0 - 1)             | 0<br>(0 - 0)          | 0<br>(0 - 0)           | 0<br>(0 - 0)            | 0<br>(0 - 0)            | 0<br>(0 - 1)            |
| Sudden infant death syndrome                        | 15<br>(8 - 22)           | 15<br>(8 - 22)        | --                     | --                      | --                      | --                      |
| Injuries                                            | 1,551<br>(1,383 - 2,023) | 19<br>(14 - 29)       | 19<br>(16 - 24)        | 623<br>(558 - 784)      | 544<br>(484 - 696)      | 346<br>(291 - 506)      |
| Transport injuries                                  | 237<br>(214 - 272)       | 2<br>(1 - 2)          | 5<br>(3 - 6)           | 118<br>(101 - 131)      | 72<br>(63 - 87)         | 41<br>(35 - 57)         |
| Road injuries                                       | 208<br>(185 - 238)       | 1<br>(1 - 2)          | 4<br>(3 - 5)           | 104<br>(88 - 117)       | 62<br>(54 - 76)         | 36<br>(30 - 50)         |
| Pedestrian road injuries                            | 88<br>(66 - 118)         | 1<br>(0 - 1)          | 2<br>(1 - 3)           | 29<br>(18 - 40)         | 32<br>(24 - 43)         | 25<br>(20 - 37)         |

Web Table 31- Latvia deaths with 95% UI by age, sex, and cause in 2013

| Cause                                           | Both Sexes, All Ages | Both Sexes, 0-4 Years | Both Sexes, 5-14 Years | Both Sexes, 15-49 Years | Both Sexes, 50-69 Years | Both Sexes, 70-80 Years |
|-------------------------------------------------|----------------------|-----------------------|------------------------|-------------------------|-------------------------|-------------------------|
| Cyclist road injuries                           | 16<br>(11 - 22)      | 0<br>(0 - 0)          | 0<br>(0 - 1)           | 5<br>(3 - 7)            | 6<br>(4 - 9)            | 4<br>(2 - 6)            |
| Motorcyclist road injuries                      | 11<br>(6 - 15)       | 0<br>(0 - 0)          | 0<br>(0 - 0)           | 8<br>(4 - 11)           | 2<br>(1 - 3)            | 1<br>(0 - 1)            |
| Motor vehicle road injuries                     | 91<br>(69 - 111)     | 1<br>(0 - 1)          | 1<br>(1 - 2)           | 61<br>(47 - 73)         | 22<br>(15 - 29)         | 7<br>(4 - 10)           |
| Other road injuries                             | 1<br>(0 - 3)         | 0<br>(0 - 0)          | 0<br>(0 - 0)           | 1<br>(0 - 2)            | 0<br>(0 - 0)            | 0<br>(0 - 0)            |
| Other transport injuries                        | 29<br>(24 - 37)      | 0<br>(0 - 0)          | 1<br>(0 - 1)           | 13<br>(10 - 17)         | 10<br>(8 - 14)          | 5<br>(3 - 7)            |
| Unintentional injuries                          | 740<br>(626 - 1,071) | 17<br>(12 - 26)       | 12<br>(10 - 19)        | 242<br>(201 - 368)      | 264<br>(228 - 365)      | 205<br>(161 - 318)      |
| Falls                                           | 249<br>(194 - 401)   | 1<br>(1 - 2)          | 1<br>(1 - 1)           | 56<br>(45 - 84)         | 83<br>(66 - 124)        | 107<br>(74 - 203)       |
| Drowning                                        | 179<br>(136 - 364)   | 6<br>(4 - 14)         | 8<br>(6 - 15)          | 88<br>(63 - 178)        | 56<br>(42 - 111)        | 22<br>(17 - 41)         |
| Fire, heat, and hot substances                  | 147<br>(120 - 210)   | 5<br>(3 - 9)          | 2<br>(1 - 2)           | 39<br>(30 - 65)         | 59<br>(46 - 81)         | 43<br>(33 - 61)         |
| Poisonings                                      | 33<br>(27 - 54)      | 1<br>(0 - 1)          | 0<br>(0 - 0)           | 14<br>(10 - 24)         | 14<br>(11 - 22)         | 5<br>(3 - 7)            |
| Exposure to mechanical forces                   | 33<br>(29 - 39)      | 1<br>(0 - 1)          | 1<br>(1 - 1)           | 16<br>(13 - 20)         | 12<br>(10 - 15)         | 3<br>(2 - 4)            |
| Unintentional firearm injuries                  | 1<br>(0 - 1)         | 0<br>(0 - 0)          | 0<br>(0 - 0)           | 0<br>(0 - 1)            | 0<br>(0 - 0)            | 0<br>(0 - 0)            |
| Unintentional suffocation                       | 2<br>(1 - 2)         | 0<br>(0 - 0)          | 0<br>(0 - 0)           | 1<br>(0 - 1)            | 0<br>(0 - 1)            | 0<br>(0 - 0)            |
| Other exposure to mechanical forces             | 31<br>(27 - 37)      | 0<br>(0 - 1)          | 1<br>(1 - 1)           | 15<br>(12 - 19)         | 12<br>(9 - 15)          | 3<br>(2 - 4)            |
| Adverse effects of medical treatment            | 29<br>(21 - 38)      | 0<br>(0 - 1)          | 0<br>(0 - 0)           | 3<br>(2 - 4)            | 9<br>(6 - 11)           | 17<br>(12 - 24)         |
| Animal contact                                  | 3<br>(2 - 7)         | 0<br>(0 - 0)          | 0<br>(0 - 0)           | 1<br>(0 - 1)            | 1<br>(1 - 3)            | 1<br>(1 - 2)            |
| Venomous animal contact                         | 1<br>(1 - 2)         | 0<br>(0 - 0)          | 0<br>(0 - 0)           | 0<br>(0 - 1)            | 1<br>(0 - 1)            | 0<br>(0 - 0)            |
| Non-venomous animal contact                     | 2<br>(1 - 5)         | 0<br>(0 - 0)          | 0<br>(0 - 0)           | 0<br>(0 - 1)            | 1<br>(1 - 2)            | 1<br>(1 - 2)            |
| Foreign body                                    | 51<br>(30 - 74)      | 2<br>(1 - 3)          | 0<br>(0 - 0)           | 17<br>(10 - 24)         | 26<br>(15 - 39)         | 6<br>(4 - 9)            |
| Pulmonary aspiration and foreign body in airway | 50<br>(30 - 74)      | 2<br>(1 - 3)          | 0<br>(0 - 0)           | 17<br>(10 - 24)         | 26<br>(15 - 39)         | 6<br>(4 - 9)            |
| Foreign body in other body part                 | 0<br>(0 - 0)         | 0<br>(0 - 0)          | 0<br>(0 - 0)           | 0<br>(0 - 0)            | 0<br>(0 - 0)            | 0<br>(0 - 0)            |
| Other unintentional injuries                    | 15<br>(12 - 19)      | 0<br>(0 - 1)          | 1<br>(0 - 1)           | 8<br>(5 - 11)           | 5<br>(3 - 8)            | 2<br>(1 - 3)            |
| Self-harm and interpersonal violence            | 574<br>(505 - 751)   | 1<br>(1 - 2)          | 2<br>(1 - 2)           | 264<br>(214 - 333)      | 208<br>(178 - 281)      | 100<br>(84 - 149)       |
| Self-harm                                       | 444<br>(380 - 595)   | --                    | 1<br>(1 - 1)           | 197<br>(154 - 252)      | 160<br>(134 - 228)      | 86<br>(71 - 129)        |
| Interpersonal violence                          | 130<br>(100 - 179)   | 1<br>(1 - 2)          | 1<br>(0 - 1)           | 67<br>(50 - 95)         | 47<br>(34 - 65)         | 14<br>(11 - 23)         |
| Assault by firearm                              | 7<br>(4 - 14)        | 0<br>(0 - 0)          | 0<br>(0 - 0)           | 5<br>(3 - 11)           | 1<br>(1 - 3)            | 0<br>(0 - 1)            |
| Assault by sharp object                         | 67<br>(50 - 106)     | 0<br>(0 - 0)          | 0<br>(0 - 0)           | 35<br>(25 - 55)         | 26<br>(19 - 40)         | 6<br>(4 - 10)           |
| Assault by other means                          | 56<br>(41 - 77)      | 1<br>(1 - 1)          | 0<br>(0 - 0)           | 26<br>(18 - 36)         | 20<br>(13 - 28)         | 9<br>(6 - 13)           |

Web Table 31- Latvia deaths with 95% UI by age, sex, and cause in 2013

| Cause                                                             | Males, All Ages             | Males, 0-4 Years | Males, 5-14 Years | Males, 15-49 Years       | Males, 50-69 Years       | Males, 70-80 Years       |
|-------------------------------------------------------------------|-----------------------------|------------------|-------------------|--------------------------|--------------------------|--------------------------|
| All causes                                                        | 12,692<br>(12,326 - 13,108) | 81<br>(67 - 99)  | 23<br>(20 - 26)   | 1,434<br>(1,365 - 1,509) | 4,352<br>(4,167 - 4,541) | 6,801<br>(6,659 - 6,982) |
| Communicable, maternal, neonatal, and nutritional diseases        | 389<br>(331 - 434)          | 35<br>(28 - 44)  | 1<br>(1 - 2)      | 115<br>(95 - 135)        | 148<br>(124 - 170)       | 90<br>(72 - 107)         |
| HIV/AIDS and tuberculosis                                         | 130<br>(106 - 161)          | 0<br>(0 - 0)     | 0<br>(0 - 0)      | 62<br>(49 - 79)          | 51<br>(40 - 65)          | 17<br>(13 - 24)          |
| Tuberculosis                                                      | 60<br>(50 - 77)             | 0<br>(0 - 0)     | 0<br>(0 - 0)      | 17<br>(13 - 21)          | 31<br>(25 - 41)          | 12<br>(9 - 19)           |
| HIV/AIDS                                                          | 69<br>(47 - 98)             | 0<br>(0 - 0)     | 0<br>(0 - 0)      | 45<br>(32 - 61)          | 19<br>(11 - 31)          | 5<br>(3 - 8)             |
| HIV/AIDS resulting in mycobacterial infection                     | 4<br>(3 - 7)                | 0<br>(0 - 0)     | 0<br>(0 - 0)      | 3<br>(2 - 4)             | 1<br>(1 - 2)             | 0<br>(0 - 1)             |
| HIV/AIDS resulting in other diseases                              | 65<br>(44 - 92)             | 0<br>(0 - 0)     | 0<br>(0 - 0)      | 42<br>(30 - 57)          | 18<br>(10 - 29)          | 5<br>(2 - 8)             |
| Diarrhea, lower respiratory, and other common infectious diseases | 219<br>(161 - 252)          | 7<br>(5 - 10)    | 1<br>(1 - 2)      | 50<br>(35 - 62)          | 92<br>(67 - 110)         | 69<br>(50 - 86)          |
| Diarrheal diseases                                                | 1<br>(1 - 2)                | 0<br>(0 - 0)     | 0<br>(0 - 0)      | 0<br>(0 - 0)             | 0<br>(0 - 1)             | 0<br>(0 - 0)             |
| Intestinal infectious diseases                                    | 2<br>(1 - 5)                | 0<br>(0 - 1)     | 0<br>(0 - 1)      | 1<br>(0 - 2)             | 1<br>(0 - 1)             | 0<br>(0 - 1)             |
| Typhoid fever                                                     | 2<br>(0 - 4)                | 0<br>(0 - 1)     | 0<br>(0 - 0)      | 1<br>(0 - 1)             | 0<br>(0 - 1)             | 0<br>(0 - 1)             |
| Paratyphoid fever                                                 | 0<br>(0 - 1)                | 0<br>(0 - 0)     | 0<br>(0 - 0)      | 0<br>(0 - 0)             | 0<br>(0 - 0)             | 0<br>(0 - 0)             |
| Other intestinal infectious diseases                              | 0<br>(0 - 1)                | 0<br>(0 - 0)     | 0<br>(0 - 0)      | 0<br>(0 - 0)             | 0<br>(0 - 0)             | 0<br>(0 - 0)             |
| Lower respiratory infections                                      | 196<br>(136 - 229)          | 5<br>(3 - 7)     | 0<br>(0 - 1)      | 44<br>(28 - 56)          | 83<br>(57 - 102)         | 64<br>(45 - 82)          |
| Upper respiratory infections                                      | 0<br>(0 - 1)                | 0<br>(0 - 0)     | 0<br>(0 - 0)      | 0<br>(0 - 0)             | 0<br>(0 - 0)             | 0<br>(0 - 1)             |
| Otitis media                                                      | 0<br>(0 - 0)                | 0<br>(0 - 0)     | 0<br>(0 - 0)      | 0<br>(0 - 0)             | 0<br>(0 - 0)             | 0<br>(0 - 0)             |
| Meningitis                                                        | 7<br>(6 - 8)                | 1<br>(1 - 2)     | 0<br>(0 - 0)      | 2<br>(1 - 2)             | 2<br>(2 - 3)             | 1<br>(1 - 2)             |
| Pneumococcal meningitis                                           | 2<br>(1 - 2)                | 0<br>(0 - 0)     | 0<br>(0 - 0)      | 0<br>(0 - 1)             | 1<br>(0 - 1)             | 0<br>(0 - 0)             |
| H influenzae type B meningitis                                    | 1<br>(1 - 2)                | 1<br>(0 - 1)     | 0<br>(0 - 0)      | 0<br>(0 - 0)             | 0<br>(0 - 0)             | 0<br>(0 - 0)             |
| Meningococcal meningitis                                          | 1<br>(1 - 2)                | 0<br>(0 - 1)     | 0<br>(0 - 0)      | 0<br>(0 - 0)             | 0<br>(0 - 1)             | 0<br>(0 - 0)             |
| Other meningitis                                                  | 2<br>(2 - 3)                | 0<br>(0 - 0)     | 0<br>(0 - 0)      | 1<br>(0 - 1)             | 1<br>(1 - 2)             | 0<br>(0 - 1)             |
| Encephalitis                                                      | 12<br>(9 - 18)              | 1<br>(0 - 1)     | 0<br>(0 - 1)      | 3<br>(2 - 5)             | 5<br>(3 - 8)             | 2<br>(2 - 4)             |
| Diphtheria                                                        | 0<br>(0 - 0)                | 0<br>(0 - 0)     | 0<br>(0 - 0)      | 0<br>(0 - 0)             | 0<br>(0 - 0)             | --                       |
| Whooping cough                                                    | 0<br>(0 - 0)                | 0<br>(0 - 0)     | 0<br>(0 - 0)      | 0<br>(0 - 0)             | 0<br>(0 - 0)             | --                       |
| Tetanus                                                           | 0<br>(0 - 0)                | 0<br>(0 - 0)     | 0<br>(0 - 0)      | 0<br>(0 - 0)             | 0<br>(0 - 0)             | 0<br>(0 - 0)             |
| Measles                                                           | 0<br>(0 - 0)                | 0<br>(0 - 0)     | 0<br>(0 - 0)      | 0<br>(0 - 0)             | 0<br>(0 - 0)             | --                       |
| Varicella and herpes zoster                                       | 1<br>(0 - 2)                | 0<br>(0 - 0)     | 0<br>(0 - 0)      | 0<br>(0 - 0)             | 0<br>(0 - 0)             | 0<br>(0 - 2)             |
| Neglected tropical diseases and malaria                           | 1<br>(1 - 1)                | 0<br>(0 - 0)     | 0<br>(0 - 0)      | 0<br>(0 - 0)             | 0<br>(0 - 0)             | 0<br>(0 - 0)             |
| Cysticercosis                                                     | 0<br>(0 - 0)                | 0<br>(0 - 0)     | 0<br>(0 - 0)      | 0<br>(0 - 0)             | 0<br>(0 - 0)             | 0<br>(0 - 0)             |
| Cystic echinococcosis                                             | 0<br>(0 - 0)                | 0<br>(0 - 0)     | 0<br>(0 - 0)      | 0<br>(0 - 0)             | 0<br>(0 - 0)             | 0<br>(0 - 0)             |
| Dengue                                                            | 0<br>(0 - 0)                | 0<br>(0 - 0)     | 0<br>(0 - 0)      | 0<br>(0 - 0)             | 0<br>(0 - 0)             | 0<br>(0 - 0)             |
| Rabies                                                            | 0<br>(0 - 0)                | 0<br>(0 - 0)     | 0<br>(0 - 0)      | 0<br>(0 - 0)             | 0<br>(0 - 0)             | 0<br>(0 - 0)             |
| Other neglected tropical diseases                                 | 1<br>(0 - 1)                | 0<br>(0 - 0)     | 0<br>(0 - 0)      | 0<br>(0 - 0)             | 0<br>(0 - 0)             | 0<br>(0 - 0)             |
| Maternal disorders                                                | --                          | --               | --                | --                       | --                       | --                       |
| Maternal hemorrhage                                               | --                          | --               | --                | --                       | --                       | --                       |
| Maternal sepsis and other maternal infections                     | --                          | --               | --                | --                       | --                       | --                       |
| Maternal hypertensive disorders                                   | --                          | --               | --                | --                       | --                       | --                       |
| Maternal obstructed labor                                         | --                          | --               | --                | --                       | --                       | --                       |
| Maternal abortive outcome                                         | --                          | --               | --                | --                       | --                       | --                       |
| Indirect maternal deaths                                          | --                          | --               | --                | --                       | --                       | --                       |

Web Table 31- Latvia deaths with 95% UI by age, sex, and cause in 2013

| Cause                                                            | Males, All Ages             | Males, 0-4 Years | Males, 5-14 Years | Males, 15-49 Years | Males, 50-69 Years       | Males, 70-80 Years       |
|------------------------------------------------------------------|-----------------------------|------------------|-------------------|--------------------|--------------------------|--------------------------|
| Late maternal deaths                                             | --                          | --               | --                | --                 | --                       | --                       |
| Maternal deaths aggravated by HIV/AIDS                           | --                          | --               | --                | --                 | --                       | --                       |
| Other maternal disorders                                         | --                          | --               | --                | --                 | --                       | --                       |
| Neonatal disorders                                               | 26<br>(19 - 32)             | 26<br>(19 - 32)  | --                | --                 | --                       | --                       |
| Neonatal preterm birth complications                             | 4<br>(2 - 7)                | 4<br>(2 - 7)     | --                | --                 | --                       | --                       |
| Neonatal encephalopathy due to birth asphyxia and trauma         | 13<br>(7 - 17)              | 13<br>(7 - 17)   | --                | --                 | --                       | --                       |
| Neonatal sepsis and other neonatal infections                    | 2<br>(1 - 5)                | 2<br>(1 - 5)     | --                | --                 | --                       | --                       |
| Hemolytic disease and other neonatal jaundice                    | 0<br>(0 - 0)                | 0<br>(0 - 0)     | --                | --                 | --                       | --                       |
| Other neonatal disorders                                         | 6<br>(4 - 11)               | 6<br>(4 - 11)    | --                | --                 | --                       | --                       |
| Nutritional deficiencies                                         | 5<br>(3 - 7)                | 0<br>(0 - 0)     | 0<br>(0 - 0)      | 1<br>(1 - 1)       | 2<br>(1 - 3)             | 2<br>(1 - 2)             |
| Protein-energy malnutrition                                      | 1<br>(1 - 2)                | 0<br>(0 - 0)     | 0<br>(0 - 0)      | 0<br>(0 - 1)       | 0<br>(0 - 1)             | 0<br>(0 - 0)             |
| Iodine deficiency                                                | 0<br>(0 - 1)                | 0<br>(0 - 0)     | 0<br>(0 - 0)      | 0<br>(0 - 0)       | 0<br>(0 - 1)             | 0<br>(0 - 0)             |
| Iron-deficiency anemia                                           | 1<br>(0 - 2)                | 0<br>(0 - 0)     | 0<br>(0 - 0)      | 0<br>(0 - 0)       | 0<br>(0 - 1)             | 0<br>(0 - 1)             |
| Other nutritional deficiencies                                   | 3<br>(2 - 4)                | 0<br>(0 - 0)     | 0<br>(0 - 0)      | 1<br>(0 - 1)       | 1<br>(1 - 2)             | 1<br>(0 - 1)             |
| Other communicable, maternal, neonatal, and nutritional diseases | 8<br>(7 - 11)               | 2<br>(1 - 2)     | 0<br>(0 - 0)      | 1<br>(1 - 2)       | 3<br>(2 - 4)             | 2<br>(1 - 3)             |
| Sexually transmitted diseases excluding HIV                      | 1<br>(0 - 3)                | 0<br>(0 - 0)     | 0<br>(0 - 0)      | 0<br>(0 - 0)       | 0<br>(0 - 2)             | 0<br>(0 - 1)             |
| Syphilis                                                         | 1<br>(0 - 2)                | 0<br>(0 - 0)     | 0<br>(0 - 0)      | 0<br>(0 - 0)       | 0<br>(0 - 1)             | 0<br>(0 - 1)             |
| Chlamydial infection                                             | --                          | --               | --                | --                 | --                       | --                       |
| Gonococcal infection                                             | 0<br>(0 - 0)                | --               | 0<br>(0 - 0)      | 0<br>(0 - 0)       | 0<br>(0 - 0)             | 0<br>(0 - 0)             |
| Other sexually transmitted diseases                              | 0<br>(0 - 0)                | --               | 0<br>(0 - 0)      | 0<br>(0 - 0)       | 0<br>(0 - 0)             | 0<br>(0 - 0)             |
| Hepatitis                                                        | 2<br>(2 - 3)                | 0<br>(0 - 1)     | 0<br>(0 - 0)      | 1<br>(0 - 1)       | 1<br>(0 - 1)             | 0<br>(0 - 1)             |
| Acute hepatitis A                                                | 0<br>(0 - 1)                | 0<br>(0 - 0)     | 0<br>(0 - 0)      | 0<br>(0 - 0)       | 0<br>(0 - 0)             | 0<br>(0 - 0)             |
| Acute hepatitis B                                                | 2<br>(1 - 2)                | 0<br>(0 - 0)     | 0<br>(0 - 0)      | 0<br>(0 - 1)       | 1<br>(0 - 1)             | 0<br>(0 - 1)             |
| Acute hepatitis C                                                | 0<br>(0 - 0)                | --               | 0<br>(0 - 0)      | 0<br>(0 - 0)       | 0<br>(0 - 0)             | 0<br>(0 - 0)             |
| Other infectious diseases                                        | 5<br>(4 - 7)                | 1<br>(1 - 2)     | 0<br>(0 - 0)      | 1<br>(1 - 1)       | 2<br>(1 - 3)             | 1<br>(1 - 2)             |
| Non-communicable diseases                                        | 11,140<br>(10,764 - 11,506) | 35<br>(27 - 44)  | 8<br>(6 - 10)     | 784<br>(675 - 848) | 3,773<br>(3,594 - 3,942) | 6,540<br>(6,393 - 6,710) |
| Neoplasms                                                        | 2,831<br>(2,621 - 2,995)    | 2<br>(1 - 4)     | 4<br>(2 - 5)      | 149<br>(131 - 165) | 1,181<br>(1,103 - 1,251) | 1,494<br>(1,363 - 1,596) |
| Esophageal cancer                                                | 88<br>(62 - 106)            | --               | --                | 5<br>(4 - 7)       | 53<br>(36 - 64)          | 30<br>(20 - 38)          |
| Stomach cancer                                                   | 276<br>(247 - 314)          | --               | --                | 16<br>(13 - 20)    | 114<br>(100 - 134)       | 147<br>(127 - 170)       |
| Liver cancer                                                     | 66<br>(42 - 87)             | --               | 0<br>(0 - 0)      | 4<br>(2 - 6)       | 31<br>(20 - 43)          | 31<br>(19 - 44)          |
| Liver cancer due to hepatitis B                                  | 11<br>(5 - 17)              | --               | 0<br>(0 - 0)      | 1<br>(0 - 2)       | 6<br>(2 - 10)            | 4<br>(2 - 7)             |
| Liver cancer due to hepatitis C                                  | 31<br>(19 - 44)             | --               | 0<br>(0 - 0)      | 2<br>(1 - 3)       | 15<br>(9 - 22)           | 14<br>(8 - 22)           |
| Liver cancer due to alcohol use                                  | 20<br>(12 - 29)             | --               | --                | 1<br>(0 - 1)       | 8<br>(5 - 13)            | 11<br>(6 - 16)           |
| Liver cancer due to other causes                                 | 4<br>(2 - 6)                | --               | 0<br>(0 - 0)      | 0<br>(0 - 1)       | 2<br>(1 - 4)             | 2<br>(1 - 3)             |
| Larynx cancer                                                    | 60<br>(39 - 73)             | --               | --                | 4<br>(2 - 5)       | 35<br>(23 - 44)          | 21<br>(13 - 27)          |
| Tracheal, bronchus and lung cancer                               | 746<br>(688 - 809)          | --               | --                | 28<br>(22 - 34)    | 367<br>(334 - 405)       | 351<br>(319 - 385)       |
| Breast cancer                                                    | 2<br>(0 - 3)                | --               | --                | 0<br>(0 - 0)       | 1<br>(0 - 1)             | 1<br>(0 - 1)             |
| Cervical cancer                                                  | --                          | --               | --                | --                 | --                       | --                       |
| Uterine cancer                                                   | --                          | --               | --                | --                 | --                       | --                       |
| Prostate cancer                                                  | 317<br>(195 - 402)          | --               | --                | 1<br>(1 - 2)       | 63<br>(37 - 85)          | 253<br>(152 - 325)       |

Web Table 31- Latvia deaths with 95% UI by age, sex, and cause in 2013

| Cause                                         | Males, All Ages          | Males, 0-4 Years | Males, 5-14 Years | Males, 15-49 Years | Males, 50-69 Years       | Males, 70-80 Years       |
|-----------------------------------------------|--------------------------|------------------|-------------------|--------------------|--------------------------|--------------------------|
| Colon and rectum cancer                       | 335<br>(308 - 371)       | --               | --                | 11<br>(9 - 13)     | 108<br>(97 - 120)        | 217<br>(192 - 247)       |
| Lip and oral cavity cancer                    | 69<br>(36 - 82)          | --               | --                | 7<br>(3 - 9)       | 41<br>(21 - 51)          | 21<br>(12 - 26)          |
| Nasopharynx cancer                            | 7<br>(5 - 11)            | --               | 0<br>(0 - 0)      | 1<br>(0 - 1)       | 5<br>(3 - 8)             | 2<br>(1 - 3)             |
| Other pharynx cancer                          | 43<br>(25 - 56)          | --               | --                | 3<br>(1 - 4)       | 31<br>(17 - 41)          | 9<br>(5 - 13)            |
| Gallbladder and biliary tract cancer          | 19<br>(12 - 25)          | --               | --                | 1<br>(0 - 1)       | 7<br>(4 - 10)            | 11<br>(7 - 15)           |
| Pancreatic cancer                             | 176<br>(161 - 191)       | --               | --                | 11<br>(8 - 13)     | 85<br>(76 - 95)          | 80<br>(71 - 90)          |
| Malignant skin melanoma                       | 27<br>(12 - 40)          | --               | --                | 4<br>(2 - 6)       | 10<br>(5 - 16)           | 13<br>(6 - 20)           |
| Non-melanoma skin cancer                      | 18<br>(10 - 26)          | --               | --                | 1<br>(0 - 1)       | 4<br>(2 - 7)             | 13<br>(7 - 19)           |
| Ovarian cancer                                | --                       | --               | --                | --                 | --                       | --                       |
| Testicular cancer                             | 6<br>(4 - 9)             | --               | --                | 3<br>(1 - 5)       | 2<br>(1 - 2)             | 2<br>(1 - 2)             |
| Kidney cancer                                 | 116<br>(97 - 136)        | 0<br>(0 - 0)     | 0<br>(0 - 0)      | 5<br>(4 - 7)       | 50<br>(40 - 61)          | 60<br>(47 - 75)          |
| Bladder cancer                                | 118<br>(76 - 143)        | --               | --                | 2<br>(1 - 3)       | 33<br>(22 - 42)          | 84<br>(52 - 103)         |
| Brain and nervous system cancer               | 66<br>(46 - 79)          | 1<br>(0 - 1)     | 1<br>(1 - 2)      | 14<br>(9 - 18)     | 33<br>(24 - 41)          | 17<br>(10 - 24)          |
| Thyroid cancer                                | 7<br>(6 - 9)             | --               | 0<br>(0 - 0)      | 1<br>(0 - 1)       | 3<br>(2 - 4)             | 4<br>(3 - 5)             |
| Mesothelioma                                  | 5<br>(2 - 6)             | --               | --                | 0<br>(0 - 1)       | 2<br>(1 - 3)             | 2<br>(1 - 3)             |
| Hodgkin lymphoma                              | 8<br>(5 - 10)            | 0<br>(0 - 0)     | 0<br>(0 - 0)      | 3<br>(1 - 4)       | 3<br>(2 - 4)             | 2<br>(1 - 2)             |
| Non-Hodgkin lymphoma                          | 56<br>(28 - 72)          | 0<br>(0 - 0)     | 0<br>(0 - 1)      | 6<br>(2 - 8)       | 23<br>(10 - 30)          | 27<br>(13 - 37)          |
| Multiple myeloma                              | 25<br>(12 - 35)          | --               | --                | 1<br>(1 - 2)       | 11<br>(5 - 16)           | 13<br>(6 - 19)           |
| Leukemia                                      | 79<br>(68 - 89)          | 1<br>(0 - 2)     | 1<br>(1 - 2)      | 8<br>(6 - 10)      | 28<br>(23 - 33)          | 41<br>(34 - 48)          |
| Other neoplasms                               | 96<br>(65 - 116)         | 1<br>(0 - 1)     | 1<br>(0 - 1)      | 11<br>(7 - 14)     | 40<br>(26 - 50)          | 44<br>(30 - 57)          |
| Cardiovascular diseases                       | 6,443<br>(6,204 - 6,691) | 0<br>(0 - 0)     | 0<br>(0 - 0)      | 356<br>(314 - 391) | 2,035<br>(1,932 - 2,146) | 4,051<br>(3,903 - 4,226) |
| Rheumatic heart disease                       | 22<br>(16 - 41)          | 0<br>(0 - 0)     | 0<br>(0 - 0)      | 5<br>(3 - 11)      | 12<br>(8 - 23)           | 4<br>(3 - 8)             |
| Ischemic heart disease                        | 3,745<br>(3,407 - 4,267) | 0<br>(0 - 0)     | 0<br>(0 - 0)      | 146<br>(123 - 181) | 1,184<br>(1,075 - 1,340) | 2,415<br>(2,167 - 2,754) |
| Cerebrovascular disease                       | 1,906<br>(1,610 - 2,187) | 0<br>(0 - 0)     | 0<br>(0 - 0)      | 45<br>(28 - 58)    | 482<br>(389 - 573)       | 1,380<br>(1,166 - 1,594) |
| Ischemic stroke                               | 1,419<br>(1,175 - 1,650) | 0<br>(0 - 0)     | 0<br>(0 - 0)      | 11<br>(7 - 17)     | 291<br>(218 - 358)       | 1,116<br>(922 - 1,314)   |
| Hemorrhagic stroke                            | 487<br>(371 - 668)       | 0<br>(0 - 0)     | 0<br>(0 - 0)      | 34<br>(21 - 44)    | 190<br>(143 - 263)       | 263<br>(188 - 387)       |
| Hypertensive heart disease                    | 139<br>(50 - 254)        | 0<br>(0 - 0)     | 0<br>(0 - 0)      | 6<br>(2 - 12)      | 51<br>(17 - 94)          | 82<br>(28 - 152)         |
| Cardiomyopathy and myocarditis                | 455<br>(313 - 556)       | 0<br>(0 - 0)     | 0<br>(0 - 0)      | 141<br>(101 - 167) | 242<br>(166 - 304)       | 72<br>(38 - 100)         |
| Atrial fibrillation and flutter               | 1<br>(1 - 2)             | --               | --                | 0<br>(0 - 0)       | 0<br>(0 - 1)             | 1<br>(1 - 1)             |
| Aortic aneurysm                               | 52<br>(42 - 63)          | --               | --                | 2<br>(1 - 3)       | 19<br>(14 - 23)          | 31<br>(25 - 38)          |
| Peripheral vascular disease                   | 30<br>(23 - 40)          | --               | --                | 0<br>(0 - 0)       | 6<br>(4 - 8)             | 24<br>(18 - 33)          |
| Endocarditis                                  | 10<br>(6 - 15)           | 0<br>(0 - 0)     | 0<br>(0 - 0)      | 3<br>(2 - 5)       | 5<br>(3 - 7)             | 2<br>(1 - 3)             |
| Other cardiovascular and circulatory diseases | 83<br>(29 - 102)         | 0<br>(0 - 0)     | 0<br>(0 - 0)      | 7<br>(2 - 9)       | 35<br>(13 - 45)          | 41<br>(13 - 53)          |
| Chronic respiratory diseases                  | 300<br>(262 - 369)       | 0<br>(0 - 0)     | 0<br>(0 - 0)      | 9<br>(8 - 12)      | 86<br>(74 - 119)         | 205<br>(167 - 240)       |
| Chronic obstructive pulmonary disease         | 256<br>(217 - 308)       | 0<br>(0 - 0)     | 0<br>(0 - 0)      | 6<br>(5 - 7)       | 72<br>(62 - 96)          | 179<br>(140 - 206)       |
| Pneumoconiosis                                | 1<br>(1 - 2)             | 0<br>(0 - 0)     | 0<br>(0 - 0)      | 0<br>(0 - 0)       | 0<br>(0 - 1)             | 1<br>(0 - 2)             |
| Silicosis                                     | 1<br>(0 - 2)             | 0<br>(0 - 0)     | 0<br>(0 - 0)      | 0<br>(0 - 0)       | 0<br>(0 - 0)             | 1<br>(0 - 1)             |
| Asbestosis                                    | 0<br>(0 - 0)             | 0<br>(0 - 0)     | 0<br>(0 - 0)      | 0<br>(0 - 0)       | 0<br>(0 - 0)             | 0<br>(0 - 0)             |
| Coal workers pneumoconiosis                   | 0<br>(0 - 0)             | 0<br>(0 - 0)     | 0<br>(0 - 0)      | 0<br>(0 - 0)       | 0<br>(0 - 0)             | 0<br>(0 - 0)             |
| Other pneumoconiosis                          | 0<br>(0 - 0)             | 0<br>(0 - 0)     | 0<br>(0 - 0)      | 0<br>(0 - 0)       | 0<br>(0 - 0)             | 0<br>(0 - 0)             |

Web Table 31- Latvia deaths with 95% UI by age, sex, and cause in 2013

| Cause                                               | Males, All Ages    | Males, 0-4 Years | Males, 5-14 Years | Males, 15-49 Years | Males, 50-69 Years | Males, 70-80 Years |
|-----------------------------------------------------|--------------------|------------------|-------------------|--------------------|--------------------|--------------------|
| Asthma                                              | 20<br>(16 - 29)    | 0<br>(0 - 0)     | 0<br>(0 - 0)      | 1<br>(1 - 2)       | 6<br>(5 - 10)      | 13<br>(9 - 18)     |
| Interstitial lung disease and pulmonary sarcoidosis | 19<br>(11 - 31)    | 0<br>(0 - 0)     | 0<br>(0 - 0)      | 1<br>(1 - 2)       | 7<br>(4 - 12)      | 12<br>(6 - 18)     |
| Other chronic respiratory diseases                  | 3<br>(3 - 4)       | 0<br>(0 - 0)     | 0<br>(0 - 0)      | 1<br>(1 - 1)       | 1<br>(0 - 1)       | 2<br>(1 - 3)       |
| Cirrhosis                                           | 228<br>(209 - 247) | 0<br>(0 - 0)     | 0<br>(0 - 0)      | 65<br>(56 - 75)    | 121<br>(107 - 134) | 42<br>(36 - 48)    |
| Cirrhosis due to hepatitis B                        | 31<br>(19 - 48)    | 0<br>(0 - 0)     | 0<br>(0 - 0)      | 9<br>(5 - 15)      | 17<br>(10 - 26)    | 6<br>(3 - 9)       |
| Cirrhosis due to hepatitis C                        | 73<br>(37 - 98)    | 0<br>(0 - 0)     | 0<br>(0 - 0)      | 20<br>(8 - 29)     | 39<br>(19 - 54)    | 13<br>(8 - 18)     |
| Cirrhosis due to alcohol use                        | 106<br>(81 - 136)  | --               | --                | 28<br>(20 - 38)    | 57<br>(43 - 75)    | 21<br>(16 - 26)    |
| Cirrhosis due to other causes                       | 17<br>(9 - 25)     | 0<br>(0 - 0)     | 0<br>(0 - 0)      | 8<br>(4 - 11)      | 8<br>(3 - 12)      | 2<br>(1 - 3)       |
| Digestive diseases                                  | 224<br>(165 - 251) | 0<br>(0 - 0)     | 0<br>(0 - 0)      | 32<br>(22 - 38)    | 83<br>(62 - 96)    | 109<br>(77 - 126)  |
| Peptic ulcer disease                                | 49<br>(28 - 70)    | 0<br>(0 - 0)     | 0<br>(0 - 0)      | 6<br>(3 - 8)       | 22<br>(13 - 31)    | 21<br>(10 - 34)    |
| Gastritis and duodenitis                            | 3<br>(2 - 5)       | 0<br>(0 - 0)     | 0<br>(0 - 0)      | 1<br>(0 - 1)       | 1<br>(1 - 2)       | 1<br>(1 - 2)       |
| Appendicitis                                        | 1<br>(1 - 3)       | 0<br>(0 - 0)     | 0<br>(0 - 0)      | 0<br>(0 - 0)       | 1<br>(0 - 1)       | 1<br>(0 - 1)       |
| Paralytic ileus and intestinal obstruction          | 12<br>(6 - 21)     | 0<br>(0 - 0)     | 0<br>(0 - 0)      | 2<br>(1 - 3)       | 4<br>(2 - 8)       | 6<br>(3 - 11)      |
| Inguinal, femoral, and abdominal hernia             | 3<br>(2 - 6)       | 0<br>(0 - 0)     | 0<br>(0 - 0)      | 0<br>(0 - 0)       | 1<br>(0 - 2)       | 2<br>(1 - 4)       |
| Inflammatory bowel disease                          | 4<br>(3 - 7)       | 0<br>(0 - 0)     | 0<br>(0 - 0)      | 1<br>(0 - 1)       | 2<br>(1 - 3)       | 2<br>(1 - 3)       |
| Vascular intestinal disorders                       | 68<br>(36 - 110)   | 0<br>(0 - 0)     | 0<br>(0 - 0)      | 1<br>(0 - 3)       | 18<br>(8 - 34)     | 48<br>(26 - 75)    |
| Gallbladder and biliary diseases                    | 12<br>(8 - 18)     | 0<br>(0 - 0)     | 0<br>(0 - 0)      | 0<br>(0 - 0)       | 3<br>(2 - 4)       | 9<br>(5 - 14)      |
| Pancreatitis                                        | 58<br>(36 - 76)    | 0<br>(0 - 0)     | 0<br>(0 - 0)      | 19<br>(13 - 24)    | 25<br>(15 - 34)    | 14<br>(7 - 21)     |
| Other digestive diseases                            | 13<br>(6 - 18)     | 0<br>(0 - 0)     | 0<br>(0 - 0)      | 2<br>(1 - 3)       | 6<br>(3 - 8)       | 6<br>(3 - 9)       |
| Neurological disorders                              | 540<br>(443 - 631) | 1<br>(0 - 1)     | 1<br>(0 - 1)      | 22<br>(15 - 29)    | 51<br>(41 - 61)    | 466<br>(373 - 554) |
| Alzheimer disease and other dementias               | 476<br>(381 - 565) | --               | --                | 0<br>(0 - 0)       | 27<br>(20 - 34)    | 449<br>(356 - 537) |
| Parkinson disease                                   | 14<br>(11 - 17)    | --               | --                | 0<br>(0 - 0)       | 2<br>(2 - 3)       | 11<br>(8 - 14)     |
| Epilepsy                                            | 28<br>(17 - 38)    | 0<br>(0 - 0)     | 0<br>(0 - 1)      | 15<br>(8 - 22)     | 11<br>(6 - 15)     | 2<br>(1 - 2)       |
| Multiple sclerosis                                  | 8<br>(4 - 16)      | --               | --                | 3<br>(2 - 7)       | 4<br>(2 - 8)       | 1<br>(0 - 1)       |
| Other neurological disorders                        | 15<br>(11 - 18)    | 1<br>(0 - 1)     | 0<br>(0 - 1)      | 4<br>(2 - 4)       | 7<br>(5 - 9)       | 4<br>(3 - 5)       |
| Mental and substance use disorders                  | 249<br>(142 - 291) | 0<br>(0 - 0)     | 0<br>(0 - 0)      | 113<br>(70 - 134)  | 118<br>(60 - 143)  | 18<br>(10 - 24)    |
| Schizophrenia                                       | 2<br>(1 - 3)       | --               | --                | 1<br>(0 - 1)       | 1<br>(0 - 1)       | 0<br>(0 - 1)       |
| Alcohol use disorders                               | 188<br>(87 - 226)  | --               | --                | 76<br>(38 - 95)    | 99<br>(44 - 124)   | 13<br>(4 - 18)     |
| Drug use disorders                                  | 59<br>(46 - 71)    | 0<br>(0 - 0)     | --                | 36<br>(26 - 45)    | 18<br>(13 - 24)    | 5<br>(3 - 7)       |
| Opioid use disorders                                | 26<br>(19 - 31)    | 0<br>(0 - 0)     | --                | 16<br>(12 - 20)    | 7<br>(5 - 10)      | 2<br>(1 - 3)       |
| Cocaine use disorders                               | 1<br>(1 - 2)       | 0<br>(0 - 0)     | --                | 1<br>(1 - 1)       | 0<br>(0 - 0)       | 0<br>(0 - 0)       |
| Amphetamine use disorders                           | 1<br>(1 - 2)       | 0<br>(0 - 0)     | --                | 1<br>(0 - 1)       | 0<br>(0 - 1)       | 0<br>(0 - 0)       |
| Other drug use disorders                            | 31<br>(24 - 38)    | 0<br>(0 - 0)     | --                | 18<br>(13 - 23)    | 10<br>(7 - 13)     | 3<br>(2 - 4)       |
| Eating disorders                                    | 0<br>(0 - 0)       | --               | 0<br>(0 - 0)      | 0<br>(0 - 0)       | --                 | --                 |
| Anorexia nervosa                                    | 0<br>(0 - 0)       | --               | 0<br>(0 - 0)      | 0<br>(0 - 0)       | --                 | --                 |
| Diabetes, urogenital, blood, and endocrine diseases | 252<br>(228 - 280) | 1<br>(0 - 1)     | 1<br>(0 - 1)      | 25<br>(21 - 28)    | 84<br>(75 - 95)    | 142<br>(126 - 163) |
| Diabetes mellitus                                   | 106<br>(97 - 117)  | 0<br>(0 - 0)     | 0<br>(0 - 0)      | 11<br>(9 - 13)     | 39<br>(34 - 45)    | 56<br>(48 - 65)    |
| Acute glomerulonephritis                            | 0<br>(0 - 1)       | 0<br>(0 - 0)     | 0<br>(0 - 0)      | 0<br>(0 - 0)       | 0<br>(0 - 0)       | 0<br>(0 - 0)       |
| Chronic kidney disease                              | 66<br>(42 - 75)    | 0<br>(0 - 0)     | 0<br>(0 - 0)      | 7<br>(5 - 9)       | 23<br>(17 - 27)    | 36<br>(20 - 43)    |
| Chronic kidney disease due to diabetes mellitus     | 3<br>(0 - 5)       | 0<br>(0 - 0)     | 0<br>(0 - 0)      | 0<br>(0 - 1)       | 1<br>(0 - 2)       | 2<br>(0 - 3)       |

Web Table 31- Latvia deaths with 95% UI by age, sex, and cause in 2013

| Cause                                               | Males, All Ages          | Males, 0-4 Years | Males, 5-14 Years | Males, 15-49 Years | Males, 50-69 Years | Males, 70-80 Years |
|-----------------------------------------------------|--------------------------|------------------|-------------------|--------------------|--------------------|--------------------|
| Chronic kidney disease due to hypertension          | 12<br>(5 - 17)           | 0<br>(0 - 0)     | 0<br>(0 - 0)      | 1<br>(0 - 1)       | 3<br>(1 - 5)       | 8<br>(3 - 11)      |
| Chronic kidney disease due to glomerulonephritis    | 20<br>(12 - 25)          | 0<br>(0 - 0)     | 0<br>(0 - 0)      | 3<br>(2 - 4)       | 8<br>(5 - 10)      | 10<br>(5 - 13)     |
| Chronic kidney disease due to other causes          | 30<br>(19 - 43)          | 0<br>(0 - 0)     | 0<br>(0 - 0)      | 3<br>(2 - 4)       | 10<br>(7 - 16)     | 17<br>(9 - 25)     |
| Urinary diseases and male infertility               | 65<br>(55 - 95)          | 0<br>(0 - 0)     | 0<br>(0 - 0)      | 3<br>(3 - 4)       | 16<br>(13 - 24)    | 45<br>(36 - 65)    |
| Interstitial nephritis and urinary tract infections | 41<br>(32 - 63)          | 0<br>(0 - 0)     | 0<br>(0 - 0)      | 3<br>(2 - 4)       | 12<br>(9 - 18)     | 27<br>(20 - 42)    |
| Urolithiasis                                        | 8<br>(4 - 11)            | --               | 0<br>(0 - 0)      | 0<br>(0 - 0)       | 2<br>(1 - 3)       | 6<br>(3 - 9)       |
| Other urinary diseases                              | 16<br>(9 - 25)           | 0<br>(0 - 0)     | 0<br>(0 - 0)      | 1<br>(0 - 1)       | 3<br>(2 - 5)       | 13<br>(7 - 21)     |
| Gynecological diseases                              | --                       | --               | --                | --                 | --                 | --                 |
| Uterine fibroids                                    | --                       | --               | --                | --                 | --                 | --                 |
| Polycystic ovarian syndrome                         | --                       | --               | --                | --                 | --                 | --                 |
| Endometriosis                                       | --                       | --               | --                | --                 | --                 | --                 |
| Genital prolapse                                    | --                       | --               | --                | --                 | --                 | --                 |
| Other gynecological diseases                        | --                       | --               | --                | --                 | --                 | --                 |
| Hemoglobinopathies and hemolytic anemias            | 2<br>(1 - 3)             | 0<br>(0 - 0)     | 0<br>(0 - 0)      | 0<br>(0 - 1)       | 1<br>(0 - 1)       | 1<br>(1 - 1)       |
| Thalassemias                                        | 0<br>(0 - 0)             | 0<br>(0 - 0)     | 0<br>(0 - 0)      | 0<br>(0 - 0)       | 0<br>(0 - 0)       | 0<br>(0 - 0)       |
| Sickle cell disorders                               | 0<br>(0 - 0)             | 0<br>(0 - 0)     | 0<br>(0 - 0)      | 0<br>(0 - 0)       | 0<br>(0 - 0)       | 0<br>(0 - 0)       |
| G6PD deficiency                                     | 0<br>(0 - 0)             | 0<br>(0 - 0)     | 0<br>(0 - 0)      | 0<br>(0 - 0)       | 0<br>(0 - 0)       | 0<br>(0 - 0)       |
| Other hemoglobinopathies and hemolytic anemias      | 2<br>(1 - 3)             | 0<br>(0 - 0)     | 0<br>(0 - 0)      | 0<br>(0 - 0)       | 1<br>(0 - 1)       | 1<br>(1 - 1)       |
| Endocrine, metabolic, blood, and immune disorders   | 12<br>(7 - 15)           | 0<br>(0 - 1)     | 0<br>(0 - 0)      | 2<br>(1 - 3)       | 5<br>(3 - 7)       | 4<br>(2 - 6)       |
| Musculoskeletal disorders                           | 12<br>(9 - 18)           | --               | 0<br>(0 - 0)      | 2<br>(2 - 3)       | 5<br>(4 - 8)       | 5<br>(3 - 7)       |
| Rheumatoid arthritis                                | 3<br>(2 - 5)             | --               | 0<br>(0 - 0)      | 0<br>(0 - 1)       | 1<br>(1 - 2)       | 1<br>(1 - 2)       |
| Other musculoskeletal disorders                     | 9<br>(7 - 13)            | --               | 0<br>(0 - 0)      | 2<br>(1 - 2)       | 3<br>(2 - 6)       | 3<br>(2 - 5)       |
| Other non-communicable diseases                     | 61<br>(50 - 73)          | 30<br>(23 - 39)  | 3<br>(2 - 4)      | 11<br>(9 - 13)     | 10<br>(6 - 13)     | 7<br>(3 - 10)      |
| Congenital anomalies                                | 40<br>(32 - 49)          | 22<br>(16 - 29)  | 3<br>(2 - 4)      | 9<br>(7 - 11)      | 4<br>(3 - 5)       | 2<br>(2 - 3)       |
| Neural tube defects                                 | 0<br>(0 - 0)             | 0<br>(0 - 0)     | 0<br>(0 - 0)      | 0<br>(0 - 0)       | 0<br>(0 - 0)       | 0<br>(0 - 0)       |
| Congenital heart anomalies                          | 17<br>(12 - 22)          | 10<br>(6 - 14)   | 1<br>(1 - 1)      | 4<br>(3 - 5)       | 2<br>(1 - 3)       | 1<br>(0 - 1)       |
| Cleft lip and cleft palate                          | 0<br>(0 - 0)             | 0<br>(0 - 0)     | --                | --                 | --                 | --                 |
| Down syndrome                                       | 3<br>(2 - 5)             | 1<br>(1 - 2)     | 0<br>(0 - 1)      | 1<br>(1 - 2)       | 0<br>(0 - 1)       | 0<br>(0 - 0)       |
| Chromosomal unbalanced rearrangements               | 2<br>(1 - 3)             | 2<br>(1 - 2)     | 0<br>(0 - 0)      | 0<br>(0 - 0)       | 0<br>(0 - 0)       | 0<br>(0 - 0)       |
| Other congenital anomalies                          | 17<br>(13 - 23)          | 10<br>(7 - 14)   | 1<br>(1 - 2)      | 3<br>(2 - 4)       | 2<br>(1 - 3)       | 1<br>(1 - 2)       |
| Skin and subcutaneous diseases                      | 14<br>(2 - 18)           | 0<br>(0 - 0)     | 0<br>(0 - 0)      | 2<br>(0 - 3)       | 6<br>(1 - 8)       | 5<br>(1 - 8)       |
| Cellulitis                                          | 4<br>(1 - 6)             | 0<br>(0 - 0)     | 0<br>(0 - 0)      | 1<br>(0 - 1)       | 2<br>(0 - 3)       | 1<br>(0 - 2)       |
| Pyoderma                                            | 6<br>(1 - 9)             | 0<br>(0 - 0)     | 0<br>(0 - 0)      | 1<br>(0 - 1)       | 3<br>(0 - 4)       | 2<br>(0 - 4)       |
| Decubitus ulcer                                     | 3<br>(0 - 5)             | 0<br>(0 - 0)     | 0<br>(0 - 0)      | 0<br>(0 - 1)       | 1<br>(0 - 2)       | 2<br>(0 - 3)       |
| Other skin and subcutaneous diseases                | 0<br>(0 - 0)             | 0<br>(0 - 0)     | 0<br>(0 - 0)      | 0<br>(0 - 0)       | 0<br>(0 - 0)       | 0<br>(0 - 0)       |
| Sudden infant death syndrome                        | 8<br>(3 - 13)            | 8<br>(3 - 13)    | --                | --                 | --                 | --                 |
| Injuries                                            | 1,163<br>(1,039 - 1,478) | 11<br>(8 - 17)   | 13<br>(11 - 17)   | 535<br>(479 - 671) | 431<br>(380 - 554) | 172<br>(147 - 238) |
| Transport injuries                                  | 172<br>(152 - 190)       | 1<br>(0 - 1)     | 3<br>(2 - 4)      | 95<br>(79 - 109)   | 51<br>(44 - 59)    | 22<br>(18 - 26)    |
| Road injuries                                       | 149<br>(130 - 166)       | 1<br>(0 - 1)     | 3<br>(1 - 4)      | 84<br>(68 - 96)    | 43<br>(37 - 50)    | 19<br>(16 - 23)    |
| Pedestrian road injuries                            | 58<br>(35 - 79)          | 0<br>(0 - 1)     | 1<br>(1 - 2)      | 23<br>(12 - 34)    | 22<br>(14 - 30)    | 11<br>(7 - 15)     |



Web Table 31- Latvia deaths with 95% UI by age, sex, and cause in 2013

| Cause                                           | Males, All Ages    | Males, 0-4 Years | Males, 5-14 Years | Males, 15-49 Years | Males, 50-69 Years | Males, 70-80 Years |
|-------------------------------------------------|--------------------|------------------|-------------------|--------------------|--------------------|--------------------|
| Cyclist road injuries                           | 13<br>(7 - 19)     | 0<br>(0 - 0)     | 0<br>(0 - 1)      | 4<br>(2 - 6)       | 5<br>(3 - 8)       | 3<br>(2 - 5)       |
| Motorcyclist road injuries                      | 10<br>(6 - 15)     | 0<br>(0 - 0)     | 0<br>(0 - 0)      | 8<br>(4 - 11)      | 2<br>(1 - 3)       | 1<br>(0 - 1)       |
| Motor vehicle road injuries                     | 67<br>(47 - 86)    | 0<br>(0 - 1)     | 1<br>(0 - 1)      | 48<br>(35 - 60)    | 14<br>(8 - 21)     | 4<br>(2 - 6)       |
| Other road injuries                             | 1<br>(0 - 2)       | 0<br>(0 - 0)     | 0<br>(0 - 0)      | 1<br>(0 - 2)       | 0<br>(0 - 0)       | 0<br>(0 - 0)       |
| Other transport injuries                        | 22<br>(17 - 30)    | 0<br>(0 - 0)     | 0<br>(0 - 1)      | 12<br>(9 - 16)     | 8<br>(5 - 12)      | 3<br>(2 - 4)       |
| Unintentional injuries                          | 529<br>(450 - 773) | 10<br>(6 - 16)   | 9<br>(7 - 14)     | 211<br>(173 - 327) | 212<br>(180 - 301) | 88<br>(72 - 129)   |
| Falls                                           | 161<br>(131 - 256) | 1<br>(1 - 2)     | 1<br>(0 - 1)      | 51<br>(40 - 77)    | 69<br>(53 - 107)   | 40<br>(30 - 68)    |
| Drowning                                        | 146<br>(107 - 292) | 4<br>(2 - 9)     | 6<br>(4 - 11)     | 79<br>(55 - 163)   | 45<br>(32 - 91)    | 12<br>(9 - 24)     |
| Fire, heat, and hot substances                  | 99<br>(77 - 152)   | 3<br>(2 - 5)     | 1<br>(1 - 2)      | 32<br>(23 - 53)    | 45<br>(33 - 66)    | 18<br>(13 - 28)    |
| Poisonings                                      | 25<br>(20 - 44)    | 0<br>(0 - 1)     | 0<br>(0 - 0)      | 11<br>(8 - 20)     | 11<br>(8 - 19)     | 3<br>(2 - 4)       |
| Exposure to mechanical forces                   | 29<br>(25 - 34)    | 0<br>(0 - 0)     | 1<br>(0 - 1)      | 15<br>(12 - 18)    | 11<br>(9 - 14)     | 2<br>(2 - 3)       |
| Unintentional firearm injuries                  | 0<br>(0 - 1)       | 0<br>(0 - 0)     | 0<br>(0 - 0)      | 0<br>(0 - 1)       | 0<br>(0 - 0)       | 0<br>(0 - 0)       |
| Unintentional suffocation                       | 1<br>(0 - 1)       | 0<br>(0 - 0)     | 0<br>(0 - 0)      | 0<br>(0 - 1)       | 0<br>(0 - 0)       | 0<br>(0 - 0)       |
| Other exposure to mechanical forces             | 28<br>(23 - 33)    | 0<br>(0 - 0)     | 1<br>(0 - 1)      | 14<br>(11 - 18)    | 11<br>(9 - 14)     | 2<br>(2 - 3)       |
| Adverse effects of medical treatment            | 13<br>(10 - 19)    | 0<br>(0 - 0)     | 0<br>(0 - 0)      | 2<br>(1 - 3)       | 4<br>(3 - 7)       | 7<br>(5 - 10)      |
| Animal contact                                  | 2<br>(2 - 5)       | 0<br>(0 - 0)     | 0<br>(0 - 0)      | 0<br>(0 - 1)       | 1<br>(1 - 3)       | 0<br>(0 - 1)       |
| Venomous animal contact                         | 1<br>(1 - 2)       | 0<br>(0 - 0)     | 0<br>(0 - 0)      | 0<br>(0 - 1)       | 1<br>(0 - 1)       | 0<br>(0 - 0)       |
| Non-venomous animal contact                     | 1<br>(1 - 3)       | 0<br>(0 - 0)     | 0<br>(0 - 0)      | 0<br>(0 - 0)       | 1<br>(0 - 1)       | 0<br>(0 - 1)       |
| Foreign body                                    | 40<br>(22 - 64)    | 1<br>(0 - 2)     | 0<br>(0 - 0)      | 14<br>(7 - 21)     | 20<br>(11 - 34)    | 4<br>(2 - 7)       |
| Pulmonary aspiration and foreign body in airway | 40<br>(21 - 64)    | 1<br>(0 - 2)     | 0<br>(0 - 0)      | 14<br>(7 - 21)     | 20<br>(11 - 34)    | 4<br>(2 - 7)       |
| Foreign body in other body part                 | 0<br>(0 - 0)       | 0<br>(0 - 0)     | 0<br>(0 - 0)      | 0<br>(0 - 0)       | 0<br>(0 - 0)       | 0<br>(0 - 0)       |
| Other unintentional injuries                    | 13<br>(10 - 17)    | 0<br>(0 - 0)     | 0<br>(0 - 1)      | 7<br>(5 - 10)      | 4<br>(2 - 7)       | 1<br>(1 - 2)       |
| Self-harm and interpersonal violence            | 462<br>(386 - 591) | 1<br>(0 - 1)     | 1<br>(1 - 2)      | 229<br>(176 - 287) | 169<br>(141 - 224) | 62<br>(49 - 90)    |
| Self-harm                                       | 366<br>(298 - 496) | --               | 1<br>(0 - 1)      | 178<br>(128 - 222) | 133<br>(107 - 190) | 55<br>(43 - 85)    |
| Interpersonal violence                          | 96<br>(64 - 139)   | 1<br>(0 - 1)     | 0<br>(0 - 0)      | 52<br>(34 - 77)    | 36<br>(23 - 54)    | 7<br>(4 - 12)      |
| Assault by firearm                              | 6<br>(3 - 13)      | 0<br>(0 - 0)     | 0<br>(0 - 0)      | 5<br>(2 - 11)      | 1<br>(0 - 2)       | 0<br>(0 - 0)       |
| Assault by sharp object                         | 55<br>(35 - 89)    | 0<br>(0 - 0)     | 0<br>(0 - 0)      | 30<br>(19 - 48)    | 22<br>(13 - 34)    | 3<br>(2 - 6)       |
| Assault by other means                          | 35<br>(20 - 50)    | 1<br>(0 - 1)     | 0<br>(0 - 0)      | 17<br>(9 - 26)     | 14<br>(7 - 20)     | 4<br>(2 - 6)       |

Web Table 31- Latvia deaths with 95% UI by age, sex, and cause in 2013

| Cause                                                             | Females, All Ages           | Females, 0-4 Years | Females, 5-14 Years | Females, 15-49 Years | Females, 50-69 Years     | Females, 70-80 Years        |
|-------------------------------------------------------------------|-----------------------------|--------------------|---------------------|----------------------|--------------------------|-----------------------------|
| All causes                                                        | 14,261<br>(13,584 - 14,896) | 63<br>(52 - 76)    | 13<br>(12 - 14)     | 462<br>(430 - 493)   | 2,150<br>(2,016 - 2,275) | 11,574<br>(11,071 - 12,057) |
| Communicable, maternal, neonatal, and nutritional diseases        | 241<br>(199 - 277)          | 27<br>(21 - 34)    | 1<br>(1 - 1)        | 66<br>(56 - 79)      | 62<br>(49 - 75)          | 86<br>(63 - 106)            |
| HIV/AIDS and tuberculosis                                         | 90<br>(70 - 117)            | 0<br>(0 - 0)       | 0<br>(0 - 0)        | 49<br>(39 - 62)      | 27<br>(19 - 40)          | 13<br>(9 - 18)              |
| Tuberculosis                                                      | 17<br>(14 - 21)             | 0<br>(0 - 0)       | 0<br>(0 - 0)        | 4<br>(3 - 5)         | 6<br>(5 - 8)             | 7<br>(5 - 10)               |
| HIV/AIDS                                                          | 73<br>(53 - 100)            | 0<br>(0 - 0)       | 0<br>(0 - 0)        | 45<br>(35 - 59)      | 21<br>(13 - 34)          | 6<br>(3 - 11)               |
| HIV/AIDS resulting in mycobacterial infection                     | 3<br>(2 - 5)                | 0<br>(0 - 0)       | 0<br>(0 - 0)        | 2<br>(2 - 3)         | 1<br>(1 - 2)             | 0<br>(0 - 1)                |
| HIV/AIDS resulting in other diseases                              | 69<br>(51 - 95)             | 0<br>(0 - 0)       | 0<br>(0 - 0)        | 43<br>(33 - 56)      | 20<br>(12 - 32)          | 6<br>(3 - 11)               |
| Diarrhea, lower respiratory, and other common infectious diseases | 116<br>(81 - 138)           | 6<br>(4 - 8)       | 1<br>(0 - 1)        | 13<br>(10 - 16)      | 29<br>(20 - 36)          | 67<br>(44 - 86)             |
| Diarrheal diseases                                                | 1<br>(1 - 2)                | 0<br>(0 - 1)       | 0<br>(0 - 0)        | 0<br>(0 - 0)         | 0<br>(0 - 0)             | 1<br>(0 - 1)                |
| Intestinal infectious diseases                                    | 2<br>(1 - 5)                | 0<br>(0 - 1)       | 0<br>(0 - 1)        | 1<br>(0 - 1)         | 0<br>(0 - 1)             | 1<br>(0 - 2)                |
| Typhoid fever                                                     | 2<br>(0 - 4)                | 0<br>(0 - 1)       | 0<br>(0 - 0)        | 0<br>(0 - 1)         | 0<br>(0 - 1)             | 0<br>(0 - 1)                |
| Paratyphoid fever                                                 | 0<br>(0 - 1)                | 0<br>(0 - 0)       | 0<br>(0 - 0)        | 0<br>(0 - 0)         | 0<br>(0 - 0)             | 0<br>(0 - 0)                |
| Other intestinal infectious diseases                              | 0<br>(0 - 1)                | 0<br>(0 - 0)       | 0<br>(0 - 0)        | 0<br>(0 - 0)         | 0<br>(0 - 0)             | 0<br>(0 - 1)                |
| Lower respiratory infections                                      | 96<br>(62 - 118)            | 3<br>(2 - 5)       | 0<br>(0 - 1)        | 10<br>(7 - 12)       | 24<br>(15 - 30)          | 59<br>(35 - 79)             |
| Upper respiratory infections                                      | 0<br>(0 - 1)                | 0<br>(0 - 0)       | 0<br>(0 - 0)        | 0<br>(0 - 0)         | 0<br>(0 - 0)             | 0<br>(0 - 1)                |
| Otitis media                                                      | 0<br>(0 - 0)                | 0<br>(0 - 0)       | 0<br>(0 - 0)        | 0<br>(0 - 0)         | 0<br>(0 - 0)             | 0<br>(0 - 0)                |
| Meningitis                                                        | 4<br>(3 - 5)                | 1<br>(1 - 1)       | 0<br>(0 - 0)        | 1<br>(1 - 1)         | 1<br>(1 - 2)             | 1<br>(1 - 2)                |
| Pneumococcal meningitis                                           | 1<br>(1 - 1)                | 0<br>(0 - 0)       | 0<br>(0 - 0)        | 0<br>(0 - 0)         | 0<br>(0 - 1)             | 0<br>(0 - 1)                |
| H influenzae type B meningitis                                    | 1<br>(1 - 1)                | 0<br>(0 - 0)       | 0<br>(0 - 0)        | 0<br>(0 - 0)         | 0<br>(0 - 0)             | 0<br>(0 - 0)                |
| Meningococcal meningitis                                          | 1<br>(1 - 1)                | 0<br>(0 - 0)       | 0<br>(0 - 0)        | 0<br>(0 - 0)         | 0<br>(0 - 0)             | 0<br>(0 - 0)                |
| Other meningitis                                                  | 1<br>(1 - 2)                | 0<br>(0 - 0)       | 0<br>(0 - 0)        | 0<br>(0 - 0)         | 1<br>(0 - 1)             | 0<br>(0 - 1)                |
| Encephalitis                                                      | 10<br>(7 - 15)              | 1<br>(0 - 2)       | 0<br>(0 - 0)        | 2<br>(1 - 3)         | 3<br>(2 - 5)             | 4<br>(2 - 6)                |
| Diphtheria                                                        | 0<br>(0 - 0)                | 0<br>(0 - 0)       | 0<br>(0 - 0)        | 0<br>(0 - 0)         | 0<br>(0 - 0)             | --                          |
| Whooping cough                                                    | 0<br>(0 - 0)                | 0<br>(0 - 0)       | 0<br>(0 - 0)        | 0<br>(0 - 0)         | 0<br>(0 - 0)             | --                          |
| Tetanus                                                           | 0<br>(0 - 0)                | 0<br>(0 - 0)       | 0<br>(0 - 0)        | 0<br>(0 - 0)         | 0<br>(0 - 0)             | 0<br>(0 - 0)                |
| Measles                                                           | 0<br>(0 - 0)                | 0<br>(0 - 0)       | 0<br>(0 - 0)        | 0<br>(0 - 0)         | 0<br>(0 - 0)             | --                          |
| Varicella and herpes zoster                                       | 1<br>(0 - 6)                | 0<br>(0 - 0)       | 0<br>(0 - 0)        | 0<br>(0 - 0)         | 0<br>(0 - 0)             | 1<br>(0 - 5)                |
| Neglected tropical diseases and malaria                           | 1<br>(1 - 1)                | 0<br>(0 - 0)       | 0<br>(0 - 0)        | 0<br>(0 - 0)         | 0<br>(0 - 0)             | 0<br>(0 - 0)                |
| Cysticercosis                                                     | 0<br>(0 - 0)                | 0<br>(0 - 0)       | 0<br>(0 - 0)        | 0<br>(0 - 0)         | 0<br>(0 - 0)             | 0<br>(0 - 0)                |
| Cystic echinococcosis                                             | 0<br>(0 - 0)                | 0<br>(0 - 0)       | 0<br>(0 - 0)        | 0<br>(0 - 0)         | 0<br>(0 - 0)             | 0<br>(0 - 0)                |
| Dengue                                                            | 0<br>(0 - 0)                | 0<br>(0 - 0)       | 0<br>(0 - 0)        | 0<br>(0 - 0)         | 0<br>(0 - 0)             | 0<br>(0 - 0)                |
| Rabies                                                            | 0<br>(0 - 0)                | 0<br>(0 - 0)       | 0<br>(0 - 0)        | 0<br>(0 - 0)         | 0<br>(0 - 0)             | 0<br>(0 - 0)                |
| Other neglected tropical diseases                                 | 0<br>(0 - 0)                | 0<br>(0 - 0)       | 0<br>(0 - 0)        | 0<br>(0 - 0)         | 0<br>(0 - 0)             | 0<br>(0 - 0)                |
| Maternal disorders                                                | 2<br>(1 - 3)                | --                 | 0<br>(0 - 0)        | 2<br>(1 - 3)         | --                       | --                          |
| Maternal hemorrhage                                               | 0<br>(0 - 0)                | --                 | 0<br>(0 - 0)        | 0<br>(0 - 0)         | --                       | --                          |
| Maternal sepsis and other maternal infections                     | 0<br>(0 - 0)                | --                 | 0<br>(0 - 0)        | 0<br>(0 - 0)         | --                       | --                          |
| Maternal hypertensive disorders                                   | 0<br>(0 - 0)                | --                 | 0<br>(0 - 0)        | 0<br>(0 - 0)         | --                       | --                          |
| Maternal obstructed labor                                         | 0<br>(0 - 0)                | --                 | 0<br>(0 - 0)        | 0<br>(0 - 0)         | --                       | --                          |
| Maternal abortive outcome                                         | 0<br>(0 - 1)                | --                 | 0<br>(0 - 0)        | 0<br>(0 - 1)         | --                       | --                          |
| Indirect maternal deaths                                          | 0<br>(0 - 0)                | --                 | 0<br>(0 - 0)        | 0<br>(0 - 0)         | --                       | --                          |

Web Table 31- Latvia deaths with 95% UI by age, sex, and cause in 2013

| Cause                                                            | Females, All Ages           | Females, 0-4 Years | Females, 5-14 Years | Females, 15-49 Years | Females, 50-69 Years     | Females, 70-80 Years        |
|------------------------------------------------------------------|-----------------------------|--------------------|---------------------|----------------------|--------------------------|-----------------------------|
| Late maternal deaths                                             | 0<br>(0 - 0)                | --                 | 0<br>(0 - 0)        | 0<br>(0 - 0)         | --                       | --                          |
| Maternal deaths aggravated by HIV/AIDS                           | 0<br>(0 - 0)                | --                 | --                  | 0<br>(0 - 0)         | --                       | --                          |
| Other maternal disorders                                         | 0<br>(0 - 0)                | --                 | 0<br>(0 - 0)        | 0<br>(0 - 0)         | --                       | --                          |
| Neonatal disorders                                               | 20<br>(15 - 26)             | 20<br>(15 - 26)    | --                  | --                   | --                       | --                          |
| Neonatal preterm birth complications                             | 4<br>(2 - 6)                | 4<br>(2 - 6)       | --                  | --                   | --                       | --                          |
| Neonatal encephalopathy due to birth asphyxia and trauma         | 11<br>(7 - 15)              | 11<br>(7 - 15)     | --                  | --                   | --                       | --                          |
| Neonatal sepsis and other neonatal infections                    | 1<br>(1 - 2)                | 1<br>(1 - 2)       | --                  | --                   | --                       | --                          |
| Hemolytic disease and other neonatal jaundice                    | 0<br>(0 - 0)                | 0<br>(0 - 0)       | --                  | --                   | --                       | --                          |
| Other neonatal disorders                                         | 5<br>(3 - 8)                | 5<br>(3 - 8)       | --                  | --                   | --                       | --                          |
| Nutritional deficiencies                                         | 7<br>(6 - 9)                | 0<br>(0 - 0)       | 0<br>(0 - 0)        | 1<br>(1 - 1)         | 2<br>(2 - 3)             | 4<br>(3 - 5)                |
| Protein-energy malnutrition                                      | 1<br>(1 - 2)                | 0<br>(0 - 0)       | 0<br>(0 - 0)        | 0<br>(0 - 0)         | 0<br>(0 - 1)             | 0<br>(0 - 0)                |
| Iodine deficiency                                                | 0<br>(0 - 1)                | 0<br>(0 - 0)       | 0<br>(0 - 0)        | 0<br>(0 - 0)         | 0<br>(0 - 0)             | 0<br>(0 - 1)                |
| Iron-deficiency anemia                                           | 3<br>(1 - 4)                | 0<br>(0 - 0)       | 0<br>(0 - 0)        | 0<br>(0 - 0)         | 1<br>(0 - 1)             | 2<br>(1 - 3)                |
| Other nutritional deficiencies                                   | 3<br>(2 - 5)                | 0<br>(0 - 0)       | 0<br>(0 - 0)        | 0<br>(0 - 1)         | 1<br>(1 - 2)             | 2<br>(1 - 3)                |
| Other communicable, maternal, neonatal, and nutritional diseases | 6<br>(5 - 8)                | 1<br>(0 - 1)       | 0<br>(0 - 0)        | 1<br>(1 - 1)         | 2<br>(2 - 3)             | 2<br>(2 - 3)                |
| Sexually transmitted diseases excluding HIV                      | 2<br>(1 - 3)                | 0<br>(0 - 0)       | 0<br>(0 - 0)        | 0<br>(0 - 0)         | 1<br>(0 - 1)             | 1<br>(0 - 1)                |
| Syphilis                                                         | 1<br>(1 - 2)                | 0<br>(0 - 0)       | 0<br>(0 - 0)        | 0<br>(0 - 0)         | 0<br>(0 - 1)             | 0<br>(0 - 1)                |
| Chlamydial infection                                             | 0<br>(0 - 0)                | --                 | 0<br>(0 - 0)        | 0<br>(0 - 0)         | 0<br>(0 - 0)             | 0<br>(0 - 0)                |
| Gonococcal infection                                             | 0<br>(0 - 0)                | --                 | 0<br>(0 - 0)        | 0<br>(0 - 0)         | 0<br>(0 - 0)             | 0<br>(0 - 0)                |
| Other sexually transmitted diseases                              | 0<br>(0 - 0)                | --                 | 0<br>(0 - 0)        | 0<br>(0 - 0)         | 0<br>(0 - 0)             | 0<br>(0 - 0)                |
| Hepatitis                                                        | 1<br>(1 - 1)                | 0<br>(0 - 0)       | 0<br>(0 - 0)        | 0<br>(0 - 0)         | 0<br>(0 - 0)             | 0<br>(0 - 0)                |
| Acute hepatitis A                                                | 0<br>(0 - 0)                | 0<br>(0 - 0)       | 0<br>(0 - 0)        | 0<br>(0 - 0)         | 0<br>(0 - 0)             | 0<br>(0 - 0)                |
| Acute hepatitis B                                                | 0<br>(0 - 1)                | 0<br>(0 - 0)       | 0<br>(0 - 0)        | 0<br>(0 - 0)         | 0<br>(0 - 0)             | 0<br>(0 - 0)                |
| Acute hepatitis C                                                | 0<br>(0 - 0)                | --                 | 0<br>(0 - 0)        | 0<br>(0 - 0)         | 0<br>(0 - 0)             | 0<br>(0 - 0)                |
| Other infectious diseases                                        | 4<br>(3 - 5)                | 0<br>(0 - 1)       | 0<br>(0 - 0)        | 0<br>(0 - 1)         | 1<br>(1 - 2)             | 1<br>(1 - 2)                |
| Non-communicable diseases                                        | 13,631<br>(12,973 - 14,266) | 28<br>(21 - 35)    | 6<br>(5 - 7)        | 308<br>(279 - 335)   | 1,976<br>(1,846 - 2,094) | 11,314<br>(10,808 - 11,811) |
| Neoplasms                                                        | 2,361<br>(1,962 - 2,584)    | 2<br>(1 - 3)       | 3<br>(2 - 4)        | 128<br>(109 - 143)   | 745<br>(625 - 814)       | 1,483<br>(1,209 - 1,638)    |
| Esophageal cancer                                                | 17<br>(14 - 21)             | --                 | --                  | 0<br>(0 - 0)         | 4<br>(3 - 6)             | 12<br>(10 - 15)             |
| Stomach cancer                                                   | 198<br>(149 - 259)          | --                 | --                  | 10<br>(7 - 13)       | 56<br>(42 - 75)          | 131<br>(95 - 176)           |
| Liver cancer                                                     | 59<br>(34 - 75)             | --                 | 0<br>(0 - 0)        | 2<br>(1 - 3)         | 16<br>(9 - 20)           | 42<br>(22 - 55)             |
| Liver cancer due to hepatitis B                                  | 8<br>(4 - 12)               | --                 | 0<br>(0 - 0)        | 0<br>(0 - 1)         | 3<br>(1 - 4)             | 4<br>(2 - 7)                |
| Liver cancer due to hepatitis C                                  | 28<br>(15 - 38)             | --                 | 0<br>(0 - 0)        | 1<br>(0 - 1)         | 7<br>(4 - 10)            | 21<br>(10 - 28)             |
| Liver cancer due to alcohol use                                  | 14<br>(7 - 20)              | --                 | --                  | 0<br>(0 - 0)         | 3<br>(1 - 4)             | 11<br>(5 - 17)              |
| Liver cancer due to other causes                                 | 10<br>(5 - 15)              | --                 | 0<br>(0 - 0)        | 1<br>(0 - 1)         | 3<br>(1 - 5)             | 6<br>(3 - 10)               |
| Larynx cancer                                                    | 3<br>(2 - 5)                | --                 | --                  | 0<br>(0 - 0)         | 1<br>(1 - 2)             | 2<br>(1 - 3)                |
| Tracheal, bronchus and lung cancer                               | 192<br>(148 - 223)          | --                 | --                  | 6<br>(4 - 8)         | 69<br>(52 - 81)          | 117<br>(84 - 142)           |
| Breast cancer                                                    | 356<br>(213 - 424)          | --                 | --                  | 34<br>(24 - 44)      | 148<br>(95 - 180)        | 175<br>(91 - 214)           |
| Cervical cancer                                                  | 95<br>(67 - 120)            | --                 | --                  | 9<br>(6 - 13)        | 36<br>(27 - 46)          | 50<br>(32 - 66)             |
| Uterine cancer                                                   | 101<br>(58 - 127)           | --                 | --                  | 2<br>(1 - 3)         | 35<br>(21 - 46)          | 63<br>(33 - 82)             |
| Prostate cancer                                                  | --                          | --                 | --                  | --                   | --                       | --                          |

Web Table 31- Latvia deaths with 95% UI by age, sex, and cause in 2013

| Cause                                         | Females, All Ages        | Females, 0-4 Years | Females, 5-14 Years | Females, 15-49 Years | Females, 50-69 Years | Females, 70-80 Years     |
|-----------------------------------------------|--------------------------|--------------------|---------------------|----------------------|----------------------|--------------------------|
| Colon and rectum cancer                       | 356<br>(310 - 409)       | --                 | --                  | 8<br>(6 - 9)         | 79<br>(68 - 89)      | 269<br>(228 - 316)       |
| Lip and oral cavity cancer                    | 14<br>(11 - 20)          | --                 | --                  | 1<br>(1 - 1)         | 4<br>(3 - 5)         | 10<br>(7 - 14)           |
| Nasopharynx cancer                            | 1<br>(1 - 3)             | --                 | 0<br>(0 - 0)        | 0<br>(0 - 0)         | 1<br>(0 - 1)         | 1<br>(0 - 1)             |
| Other pharynx cancer                          | 5<br>(4 - 6)             | --                 | --                  | 0<br>(0 - 1)         | 2<br>(2 - 3)         | 2<br>(2 - 3)             |
| Gallbladder and biliary tract cancer          | 38<br>(25 - 50)          | --                 | --                  | 1<br>(1 - 1)         | 12<br>(9 - 17)       | 25<br>(15 - 35)          |
| Pancreatic cancer                             | 191<br>(166 - 217)       | --                 | --                  | 4<br>(3 - 6)         | 50<br>(41 - 57)      | 137<br>(118 - 160)       |
| Malignant skin melanoma                       | 35<br>(20 - 44)          | --                 | --                  | 4<br>(2 - 5)         | 12<br>(7 - 16)       | 20<br>(11 - 26)          |
| Non-melanoma skin cancer                      | 22<br>(14 - 33)          | --                 | --                  | 0<br>(0 - 1)         | 2<br>(2 - 3)         | 20<br>(12 - 30)          |
| Ovarian cancer                                | 188<br>(137 - 217)       | --                 | --                  | 14<br>(11 - 18)      | 74<br>(59 - 86)      | 100<br>(64 - 124)        |
| Testicular cancer                             | --                       | --                 | --                  | --                   | --                   | --                       |
| Kidney cancer                                 | 62<br>(41 - 91)          | 0<br>(0 - 0)       | 0<br>(0 - 0)        | 2<br>(1 - 3)         | 19<br>(14 - 26)      | 41<br>(24 - 65)          |
| Bladder cancer                                | 39<br>(23 - 54)          | --                 | --                  | 0<br>(0 - 1)         | 5<br>(3 - 8)         | 33<br>(19 - 47)          |
| Brain and nervous system cancer               | 73<br>(39 - 88)          | 0<br>(0 - 1)       | 1<br>(0 - 1)        | 9<br>(6 - 12)        | 32<br>(20 - 40)      | 30<br>(12 - 40)          |
| Thyroid cancer                                | 18<br>(11 - 23)          | --                 | 0<br>(0 - 0)        | 0<br>(0 - 0)         | 4<br>(3 - 6)         | 13<br>(8 - 18)           |
| Mesothelioma                                  | 1<br>(1 - 2)             | --                 | --                  | 0<br>(0 - 0)         | 0<br>(0 - 1)         | 1<br>(0 - 1)             |
| Hodgkin lymphoma                              | 5<br>(3 - 7)             | 0<br>(0 - 0)       | 0<br>(0 - 0)        | 2<br>(1 - 2)         | 2<br>(1 - 2)         | 2<br>(1 - 3)             |
| Non-Hodgkin lymphoma                          | 52<br>(14 - 74)          | 0<br>(0 - 0)       | 0<br>(0 - 0)        | 3<br>(1 - 5)         | 15<br>(4 - 22)       | 33<br>(9 - 50)           |
| Multiple myeloma                              | 30<br>(17 - 43)          | --                 | --                  | 1<br>(1 - 1)         | 10<br>(6 - 15)       | 18<br>(10 - 29)          |
| Leukemia                                      | 75<br>(52 - 90)          | 1<br>(0 - 1)       | 1<br>(0 - 1)        | 6<br>(4 - 7)         | 20<br>(15 - 25)      | 48<br>(33 - 59)          |
| Other neoplasms                               | 132<br>(96 - 158)        | 1<br>(0 - 1)       | 1<br>(1 - 1)        | 8<br>(6 - 10)        | 34<br>(26 - 42)      | 88<br>(59 - 110)         |
| Cardiovascular diseases                       | 9,109<br>(8,576 - 9,819) | 0<br>(0 - 1)       | 0<br>(0 - 0)        | 86<br>(73 - 105)     | 914<br>(827 - 1,067) | 8,109<br>(7,646 - 8,713) |
| Rheumatic heart disease                       | 33<br>(24 - 49)          | 0<br>(0 - 0)       | 0<br>(0 - 0)        | 3<br>(2 - 6)         | 15<br>(11 - 25)      | 15<br>(9 - 19)           |
| Ischemic heart disease                        | 5,056<br>(4,577 - 5,915) | 0<br>(0 - 0)       | 0<br>(0 - 0)        | 24<br>(18 - 37)      | 440<br>(378 - 566)   | 4,592<br>(4,163 - 5,326) |
| Cerebrovascular disease                       | 3,168<br>(2,803 - 3,931) | 0<br>(0 - 0)       | 0<br>(0 - 0)        | 20<br>(14 - 25)      | 289<br>(246 - 376)   | 2,860<br>(2,518 - 3,552) |
| Ischemic stroke                               | 2,533<br>(2,114 - 2,996) | 0<br>(0 - 0)       | 0<br>(0 - 0)        | 4<br>(2 - 6)         | 162<br>(123 - 208)   | 2,366<br>(1,966 - 2,803) |
| Hemorrhagic stroke                            | 635<br>(465 - 1,122)     | 0<br>(0 - 0)       | 0<br>(0 - 0)        | 15<br>(12 - 19)      | 126<br>(99 - 189)    | 494<br>(342 - 914)       |
| Hypertensive heart disease                    | 428<br>(196 - 613)       | 0<br>(0 - 0)       | 0<br>(0 - 0)        | 2<br>(1 - 3)         | 35<br>(14 - 55)      | 392<br>(180 - 559)       |
| Cardiomyopathy and myocarditis                | 245<br>(142 - 301)       | 0<br>(0 - 0)       | 0<br>(0 - 0)        | 32<br>(24 - 41)      | 99<br>(71 - 127)     | 114<br>(44 - 148)        |
| Atrial fibrillation and flutter               | 2<br>(1 - 3)             | --                 | --                  | 0<br>(0 - 0)         | 0<br>(0 - 0)         | 2<br>(1 - 3)             |
| Aortic aneurysm                               | 27<br>(16 - 39)          | --                 | --                  | 1<br>(0 - 1)         | 5<br>(3 - 8)         | 21<br>(13 - 32)          |
| Peripheral vascular disease                   | 35<br>(26 - 47)          | --                 | --                  | 0<br>(0 - 0)         | 1<br>(1 - 1)         | 34<br>(25 - 45)          |
| Endocarditis                                  | 5<br>(3 - 6)             | 0<br>(0 - 0)       | 0<br>(0 - 0)        | 1<br>(0 - 1)         | 2<br>(1 - 3)         | 2<br>(1 - 3)             |
| Other cardiovascular and circulatory diseases | 110<br>(36 - 140)        | 0<br>(0 - 0)       | 0<br>(0 - 0)        | 4<br>(1 - 6)         | 27<br>(10 - 36)      | 79<br>(23 - 103)         |
| Chronic respiratory diseases                  | 162<br>(130 - 191)       | 0<br>(0 - 0)       | 0<br>(0 - 0)        | 4<br>(3 - 5)         | 23<br>(19 - 30)      | 135<br>(103 - 162)       |
| Chronic obstructive pulmonary disease         | 112<br>(83 - 139)        | 0<br>(0 - 0)       | 0<br>(0 - 0)        | 1<br>(1 - 2)         | 13<br>(10 - 18)      | 98<br>(71 - 122)         |
| Pneumoconiosis                                | 0<br>(0 - 0)             | 0<br>(0 - 0)       | 0<br>(0 - 0)        | 0<br>(0 - 0)         | 0<br>(0 - 0)         | 0<br>(0 - 0)             |
| Silicosis                                     | 0<br>(0 - 0)             | 0<br>(0 - 0)       | 0<br>(0 - 0)        | 0<br>(0 - 0)         | 0<br>(0 - 0)         | 0<br>(0 - 0)             |
| Asbestosis                                    | 0<br>(0 - 0)             | 0<br>(0 - 0)       | 0<br>(0 - 0)        | 0<br>(0 - 0)         | 0<br>(0 - 0)         | 0<br>(0 - 0)             |
| Coal workers pneumoconiosis                   | 0<br>(0 - 0)             | 0<br>(0 - 0)       | 0<br>(0 - 0)        | 0<br>(0 - 0)         | 0<br>(0 - 0)         | 0<br>(0 - 0)             |
| Other pneumoconiosis                          | 0<br>(0 - 0)             | 0<br>(0 - 0)       | 0<br>(0 - 0)        | 0<br>(0 - 0)         | 0<br>(0 - 0)         | 0<br>(0 - 0)             |

Web Table 31- Latvia deaths with 95% UI by age, sex, and cause in 2013

| Cause                                               | Females, All Ages      | Females, 0-4 Years | Females, 5-14 Years | Females, 15-49 Years | Females, 50-69 Years | Females, 70-80 Years |
|-----------------------------------------------------|------------------------|--------------------|---------------------|----------------------|----------------------|----------------------|
| Asthma                                              | 27<br>(17 - 40)        | 0<br>(0 - 0)       | 0<br>(0 - 0)        | 1<br>(1 - 2)         | 6<br>(4 - 9)         | 20<br>(12 - 31)      |
| Interstitial lung disease and pulmonary sarcoidosis | 19<br>(8 - 32)         | 0<br>(0 - 0)       | 0<br>(0 - 0)        | 1<br>(0 - 1)         | 3<br>(1 - 5)         | 15<br>(6 - 26)       |
| Other chronic respiratory diseases                  | 4<br>(2 - 6)           | 0<br>(0 - 0)       | 0<br>(0 - 0)        | 0<br>(0 - 1)         | 1<br>(0 - 1)         | 3<br>(2 - 5)         |
| Cirrhosis                                           | 136<br>(120 - 153)     | 0<br>(0 - 0)       | 0<br>(0 - 0)        | 27<br>(23 - 32)      | 72<br>(61 - 83)      | 37<br>(31 - 43)      |
| Cirrhosis due to hepatitis B                        | 29<br>(13 - 50)        | 0<br>(0 - 0)       | 0<br>(0 - 0)        | 6<br>(3 - 11)        | 15<br>(7 - 27)       | 7<br>(3 - 12)        |
| Cirrhosis due to hepatitis C                        | 54<br>(25 - 79)        | 0<br>(0 - 0)       | 0<br>(0 - 0)        | 11<br>(3 - 16)       | 29<br>(12 - 44)      | 15<br>(8 - 22)       |
| Cirrhosis due to alcohol use                        | 38<br>(24 - 57)        | --                 | --                  | 6<br>(3 - 9)         | 20<br>(12 - 31)      | 13<br>(8 - 18)       |
| Cirrhosis due to other causes                       | 15<br>(9 - 24)         | 0<br>(0 - 0)       | 0<br>(0 - 0)        | 5<br>(3 - 8)         | 8<br>(4 - 12)        | 2<br>(1 - 4)         |
| Digestive diseases                                  | 252<br>(151 - 300)     | 0<br>(0 - 0)       | 0<br>(0 - 0)        | 8<br>(5 - 10)        | 40<br>(27 - 48)      | 204<br>(118 - 246)   |
| Peptic ulcer disease                                | 37<br>(14 - 59)        | 0<br>(0 - 0)       | 0<br>(0 - 0)        | 1<br>(1 - 2)         | 7<br>(3 - 11)        | 29<br>(9 - 47)       |
| Gastritis and duodenitis                            | 3<br>(1 - 5)           | 0<br>(0 - 0)       | 0<br>(0 - 0)        | 0<br>(0 - 0)         | 1<br>(0 - 1)         | 2<br>(1 - 4)         |
| Appendicitis                                        | 1<br>(1 - 2)           | 0<br>(0 - 0)       | 0<br>(0 - 0)        | 0<br>(0 - 0)         | 0<br>(0 - 1)         | 1<br>(0 - 1)         |
| Paralytic ileus and intestinal obstruction          | 13<br>(5 - 27)         | 0<br>(0 - 0)       | 0<br>(0 - 0)        | 1<br>(0 - 1)         | 2<br>(1 - 4)         | 11<br>(4 - 22)       |
| Inguinal, femoral, and abdominal hernia             | 6<br>(2 - 10)          | 0<br>(0 - 0)       | 0<br>(0 - 0)        | 0<br>(0 - 0)         | 1<br>(0 - 1)         | 5<br>(1 - 9)         |
| Inflammatory bowel disease                          | 6<br>(2 - 9)           | 0<br>(0 - 0)       | 0<br>(0 - 0)        | 0<br>(0 - 1)         | 2<br>(1 - 3)         | 4<br>(1 - 6)         |
| Vascular intestinal disorders                       | 116<br>(64 - 166)      | 0<br>(0 - 0)       | 0<br>(0 - 0)        | 1<br>(0 - 1)         | 106<br>(5 - 16)      | 106<br>(58 - 151)    |
| Gallbladder and biliary diseases                    | 25<br>(11 - 36)        | 0<br>(0 - 0)       | 0<br>(0 - 0)        | 0<br>(0 - 1)         | 4<br>(2 - 6)         | 20<br>(8 - 31)       |
| Pancreatitis                                        | 32<br>(17 - 46)        | 0<br>(0 - 0)       | 0<br>(0 - 0)        | 4<br>(2 - 5)         | 10<br>(6 - 14)       | 18<br>(9 - 28)       |
| Other digestive diseases                            | 13<br>(6 - 19)         | 0<br>(0 - 0)       | 0<br>(0 - 0)        | 0<br>(0 - 1)         | 3<br>(2 - 4)         | 10<br>(4 - 15)       |
| Neurological disorders                              | 1,014<br>(819 - 1,201) | 0<br>(0 - 0)       | 0<br>(0 - 0)        | 10<br>(8 - 14)       | 43<br>(35 - 52)      | 960<br>(772 - 1,144) |
| Alzheimer disease and other dementias               | 962<br>(776 - 1,147)   | --                 | --                  | 0<br>(0 - 0)         | 26<br>(19 - 33)      | 936<br>(750 - 1,119) |
| Parkinson disease                                   | 18<br>(12 - 24)        | --                 | --                  | 0<br>(0 - 0)         | 2<br>(1 - 2)         | 16<br>(10 - 22)      |
| Epilepsy                                            | 7<br>(4 - 9)           | 0<br>(0 - 0)       | 0<br>(0 - 0)        | 4<br>(2 - 5)         | 2<br>(1 - 3)         | 1<br>(0 - 1)         |
| Multiple sclerosis                                  | 12<br>(8 - 22)         | --                 | --                  | 5<br>(3 - 8)         | 6<br>(4 - 11)        | 1<br>(1 - 2)         |
| Other neurological disorders                        | 14<br>(12 - 17)        | 0<br>(0 - 0)       | 0<br>(0 - 0)        | 2<br>(1 - 2)         | 7<br>(5 - 8)         | 6<br>(5 - 7)         |
| Mental and substance use disorders                  | 57<br>(30 - 76)        | 0<br>(0 - 0)       | 0<br>(0 - 0)        | 19<br>(11 - 26)      | 29<br>(13 - 42)      | 8<br>(5 - 11)        |
| Schizophrenia                                       | 2<br>(1 - 3)           | --                 | --                  | 0<br>(0 - 0)         | 1<br>(0 - 1)         | 1<br>(0 - 2)         |
| Alcohol use disorders                               | 40<br>(12 - 58)        | --                 | --                  | 12<br>(4 - 20)       | 23<br>(7 - 36)       | 4<br>(1 - 7)         |
| Drug use disorders                                  | 15<br>(12 - 19)        | 0<br>(0 - 0)       | --                  | 7<br>(5 - 9)         | 5<br>(4 - 7)         | 3<br>(2 - 5)         |
| Opioid use disorders                                | 6<br>(5 - 8)           | 0<br>(0 - 0)       | --                  | 3<br>(2 - 4)         | 2<br>(1 - 3)         | 1<br>(1 - 2)         |
| Cocaine use disorders                               | 1<br>(0 - 1)           | 0<br>(0 - 0)       | --                  | 0<br>(0 - 0)         | 0<br>(0 - 0)         | 0<br>(0 - 0)         |
| Amphetamine use disorders                           | 1<br>(0 - 1)           | 0<br>(0 - 0)       | --                  | 0<br>(0 - 0)         | 0<br>(0 - 0)         | 0<br>(0 - 0)         |
| Other drug use disorders                            | 8<br>(6 - 10)          | 0<br>(0 - 0)       | --                  | 3<br>(3 - 4)         | 3<br>(2 - 4)         | 2<br>(1 - 2)         |
| Eating disorders                                    | 0<br>(0 - 0)           | --                 | 0<br>(0 - 0)        | 0<br>(0 - 0)         | --                   | --                   |
| Anorexia nervosa                                    | 0<br>(0 - 0)           | --                 | 0<br>(0 - 0)        | 0<br>(0 - 0)         | --                   | --                   |
| Diabetes, urogenital, blood, and endocrine diseases | 441<br>(283 - 501)     | 0<br>(0 - 1)       | 0<br>(0 - 0)        | 16<br>(11 - 18)      | 87<br>(68 - 99)      | 337<br>(191 - 391)   |
| Diabetes mellitus                                   | 213<br>(96 - 248)      | 0<br>(0 - 0)       | 0<br>(0 - 0)        | 6<br>(4 - 7)         | 40<br>(30 - 48)      | 167<br>(61 - 199)    |
| Acute glomerulonephritis                            | 0<br>(0 - 0)           | 0<br>(0 - 0)       | 0<br>(0 - 0)        | 0<br>(0 - 0)         | 0<br>(0 - 0)         | 0<br>(0 - 0)         |
| Chronic kidney disease                              | 104<br>(35 - 129)      | 0<br>(0 - 0)       | 0<br>(0 - 0)        | 4<br>(2 - 5)         | 19<br>(10 - 24)      | 80<br>(22 - 103)     |
| Chronic kidney disease due to diabetes mellitus     | 12<br>(0 - 18)         | 0<br>(0 - 0)       | 0<br>(0 - 0)        | 0<br>(0 - 0)         | 3<br>(0 - 4)         | 9<br>(0 - 14)        |

Web Table 31- Latvia deaths with 95% UI by age, sex, and cause in 2013

| Cause                                               | Females, All Ages  | Females, 0-4 Years | Females, 5-14 Years | Females, 15-49 Years | Females, 50-69 Years | Females, 70-80 Years |
|-----------------------------------------------------|--------------------|--------------------|---------------------|----------------------|----------------------|----------------------|
| Chronic kidney disease due to hypertension          | 17<br>(5 - 29)     | 0<br>(0 - 0)       | 0<br>(0 - 0)        | 0<br>(0 - 0)         | 2<br>(1 - 4)         | 15<br>(4 - 26)       |
| Chronic kidney disease due to glomerulonephritis    | 22<br>(9 - 35)     | 0<br>(0 - 0)       | 0<br>(0 - 0)        | 2<br>(1 - 2)         | 5<br>(3 - 7)         | 15<br>(5 - 27)       |
| Chronic kidney disease due to other causes          | 54<br>(13 - 79)    | 0<br>(0 - 0)       | 0<br>(0 - 0)        | 2<br>(1 - 3)         | 10<br>(4 - 15)       | 42<br>(7 - 64)       |
| Urinary diseases and male infertility               | 101<br>(77 - 139)  | 0<br>(0 - 0)       | 0<br>(0 - 0)        | 3<br>(3 - 5)         | 20<br>(15 - 30)      | 78<br>(56 - 111)     |
| Interstitial nephritis and urinary tract infections | 72<br>(54 - 104)   | 0<br>(0 - 0)       | 0<br>(0 - 0)        | 3<br>(2 - 4)         | 16<br>(11 - 25)      | 54<br>(36 - 81)      |
| Urolithiasis                                        | 9<br>(4 - 13)      | --                 | 0<br>(0 - 0)        | 0<br>(0 - 0)         | 2<br>(1 - 3)         | 7<br>(3 - 11)        |
| Other urinary diseases                              | 20<br>(11 - 35)    | 0<br>(0 - 0)       | 0<br>(0 - 0)        | 0<br>(0 - 1)         | 2<br>(1 - 3)         | 17<br>(9 - 32)       |
| Gynecological diseases                              | 0<br>(0 - 0)       | --                 | --                  | 0<br>(0 - 0)         | 0<br>(0 - 0)         | 0<br>(0 - 0)         |
| Uterine fibroids                                    | 0<br>(0 - 0)       | --                 | --                  | 0<br>(0 - 0)         | 0<br>(0 - 0)         | 0<br>(0 - 0)         |
| Polycystic ovarian syndrome                         | 0<br>(0 - 0)       | --                 | --                  | 0<br>(0 - 0)         | 0<br>(0 - 0)         | --                   |
| Endometriosis                                       | 0<br>(0 - 0)       | --                 | --                  | 0<br>(0 - 0)         | 0<br>(0 - 0)         | --                   |
| Genital prolapse                                    | 0<br>(0 - 0)       | --                 | --                  | 0<br>(0 - 0)         | 0<br>(0 - 0)         | 0<br>(0 - 0)         |
| Other gynecological diseases                        | 0<br>(0 - 0)       | --                 | --                  | 0<br>(0 - 0)         | 0<br>(0 - 0)         | 0<br>(0 - 0)         |
| Hemoglobinopathies and hemolytic anemias            | 4<br>(2 - 6)       | 0<br>(0 - 0)       | 0<br>(0 - 0)        | 0<br>(0 - 0)         | 1<br>(1 - 2)         | 2<br>(1 - 4)         |
| Thalassemias                                        | 0<br>(0 - 0)       | 0<br>(0 - 0)       | 0<br>(0 - 0)        | 0<br>(0 - 0)         | 0<br>(0 - 0)         | 0<br>(0 - 0)         |
| Sickle cell disorders                               | 0<br>(0 - 0)       | 0<br>(0 - 0)       | 0<br>(0 - 0)        | 0<br>(0 - 0)         | 0<br>(0 - 0)         | 0<br>(0 - 0)         |
| G6PD deficiency                                     | 0<br>(0 - 0)       | 0<br>(0 - 0)       | 0<br>(0 - 0)        | 0<br>(0 - 0)         | 0<br>(0 - 0)         | 0<br>(0 - 0)         |
| Other hemoglobinopathies and hemolytic anemias      | 4<br>(2 - 5)       | 0<br>(0 - 0)       | 0<br>(0 - 0)        | 0<br>(0 - 0)         | 1<br>(1 - 1)         | 2<br>(1 - 4)         |
| Endocrine, metabolic, blood, and immune disorders   | 19<br>(6 - 25)     | 0<br>(0 - 1)       | 0<br>(0 - 0)        | 2<br>(1 - 3)         | 7<br>(2 - 9)         | 10<br>(3 - 14)       |
| Musculoskeletal disorders                           | 31<br>(25 - 39)    | --                 | 0<br>(0 - 0)        | 3<br>(2 - 4)         | 12<br>(9 - 16)       | 16<br>(12 - 21)      |
| Rheumatoid arthritis                                | 16<br>(12 - 21)    | --                 | 0<br>(0 - 0)        | 0<br>(0 - 1)         | 7<br>(5 - 9)         | 9<br>(6 - 13)        |
| Other musculoskeletal disorders                     | 15<br>(12 - 21)    | --                 | 0<br>(0 - 0)        | 3<br>(2 - 3)         | 6<br>(4 - 8)         | 6<br>(4 - 10)        |
| Other non-communicable diseases                     | 68<br>(45 - 81)    | 24<br>(18 - 32)    | 2<br>(2 - 3)        | 7<br>(5 - 8)         | 10<br>(5 - 13)       | 24<br>(5 - 33)       |
| Congenital anomalies                                | 33<br>(25 - 41)    | 18<br>(13 - 24)    | 2<br>(2 - 3)        | 6<br>(4 - 7)         | 5<br>(3 - 6)         | 2<br>(2 - 3)         |
| Neural tube defects                                 | 0<br>(0 - 1)       | 0<br>(0 - 1)       | 0<br>(0 - 0)        | 0<br>(0 - 0)         | 0<br>(0 - 0)         | 0<br>(0 - 0)         |
| Congenital heart anomalies                          | 14<br>(11 - 18)    | 7<br>(5 - 10)      | 1<br>(1 - 1)        | 3<br>(2 - 4)         | 2<br>(2 - 3)         | 1<br>(1 - 1)         |
| Cleft lip and cleft palate                          | 0<br>(0 - 0)       | 0<br>(0 - 0)       | --                  | --                   | --                   | --                   |
| Down syndrome                                       | 3<br>(2 - 5)       | 1<br>(1 - 2)       | 0<br>(0 - 1)        | 1<br>(1 - 2)         | 1<br>(0 - 1)         | 0<br>(0 - 0)         |
| Chromosomal unbalanced rearrangements               | 2<br>(1 - 3)       | 2<br>(1 - 3)       | 0<br>(0 - 0)        | 0<br>(0 - 0)         | 0<br>(0 - 0)         | 0<br>(0 - 0)         |
| Other congenital anomalies                          | 12<br>(9 - 16)     | 7<br>(5 - 10)      | 1<br>(1 - 1)        | 1<br>(1 - 2)         | 2<br>(1 - 2)         | 1<br>(1 - 2)         |
| Skin and subcutaneous diseases                      | 29<br>(4 - 38)     | 0<br>(0 - 0)       | 0<br>(0 - 0)        | 1<br>(0 - 2)         | 6<br>(1 - 8)         | 22<br>(3 - 30)       |
| Cellulitis                                          | 5<br>(1 - 7)       | 0<br>(0 - 0)       | 0<br>(0 - 0)        | 0<br>(0 - 0)         | 1<br>(0 - 2)         | 3<br>(0 - 5)         |
| Pyoderma                                            | 16<br>(2 - 21)     | 0<br>(0 - 0)       | 0<br>(0 - 0)        | 1<br>(0 - 1)         | 3<br>(0 - 5)         | 11<br>(2 - 16)       |
| Decubitus ulcer                                     | 8<br>(1 - 12)      | 0<br>(0 - 0)       | 0<br>(0 - 0)        | 0<br>(0 - 0)         | 1<br>(0 - 1)         | 7<br>(1 - 11)        |
| Other skin and subcutaneous diseases                | 0<br>(0 - 1)       | 0<br>(0 - 0)       | 0<br>(0 - 0)        | 0<br>(0 - 0)         | 0<br>(0 - 0)         | 0<br>(0 - 0)         |
| Sudden infant death syndrome                        | 7<br>(3 - 12)      | 7<br>(3 - 12)      | --                  | --                   | --                   | --                   |
| Injuries                                            | 388<br>(328 - 570) | 8<br>(6 - 12)      | 6<br>(5 - 8)        | 88<br>(76 - 118)     | 113<br>(96 - 154)    | 174<br>(137 - 285)   |
| Transport injuries                                  | 65<br>(54 - 100)   | 1<br>(0 - 1)       | 2<br>(1 - 2)        | 22<br>(18 - 32)      | 21<br>(16 - 33)      | 20<br>(15 - 34)      |
| Road injuries                                       | 58<br>(48 - 93)    | 1<br>(0 - 1)       | 2<br>(1 - 2)        | 20<br>(16 - 30)      | 19<br>(14 - 31)      | 17<br>(13 - 31)      |
| Pedestrian road injuries                            | 31<br>(24 - 55)    | 0<br>(0 - 0)       | 1<br>(1 - 1)        | 6<br>(4 - 10)        | 10<br>(7 - 18)       | 14<br>(10 - 26)      |

Web Table 31- Latvia deaths with 95% UI by age, sex, and cause in 2013

| Cause                                           | Females, All Ages  | Females, 0-4 Years | Females, 5-14 Years | Females, 15-49 Years | Females, 50-69 Years | Females, 70-80 Years |
|-------------------------------------------------|--------------------|--------------------|---------------------|----------------------|----------------------|----------------------|
| Cyclist road injuries                           | 3<br>(2 - 4)       | 0<br>(0 - 0)       | 0<br>(0 - 0)        | 1<br>(1 - 2)         | 1<br>(1 - 2)         | 0<br>(0 - 1)         |
| Motorcyclist road injuries                      | 1<br>(0 - 2)       | 0<br>(0 - 0)       | 0<br>(0 - 0)        | 0<br>(0 - 1)         | 0<br>(0 - 0)         | 0<br>(0 - 0)         |
| Motor vehicle road injuries                     | 24<br>(15 - 34)    | 0<br>(0 - 1)       | 1<br>(0 - 1)        | 13<br>(9 - 18)       | 8<br>(4 - 11)        | 3<br>(1 - 5)         |
| Other road injuries                             | 0<br>(0 - 0)       | 0<br>(0 - 0)       | 0<br>(0 - 0)        | 0<br>(0 - 0)         | 0<br>(0 - 0)         | 0<br>(0 - 0)         |
| Other transport injuries                        | 7<br>(4 - 11)      | 0<br>(0 - 0)       | 0<br>(0 - 0)        | 2<br>(1 - 3)         | 2<br>(1 - 4)         | 2<br>(1 - 4)         |
| Unintentional injuries                          | 211<br>(166 - 332) | 7<br>(5 - 10)      | 3<br>(3 - 5)        | 31<br>(25 - 46)      | 53<br>(44 - 72)      | 117<br>(85 - 202)    |
| Falls                                           | 88<br>(58 - 178)   | 0<br>(0 - 1)       | 0<br>(0 - 0)        | 6<br>(4 - 10)        | 14<br>(10 - 23)      | 67<br>(41 - 145)     |
| Drowning                                        | 33<br>(25 - 69)    | 2<br>(1 - 5)       | 2<br>(1 - 4)        | 9<br>(6 - 19)        | 11<br>(8 - 22)       | 9<br>(7 - 17)        |
| Fire, heat, and hot substances                  | 48<br>(34 - 70)    | 2<br>(1 - 4)       | 0<br>(0 - 1)        | 7<br>(5 - 11)        | 14<br>(9 - 20)       | 24<br>(17 - 38)      |
| Poisonings                                      | 8<br>(6 - 14)      | 0<br>(0 - 1)       | 0<br>(0 - 0)        | 3<br>(2 - 5)         | 3<br>(2 - 5)         | 2<br>(1 - 3)         |
| Exposure to mechanical forces                   | 4<br>(4 - 6)       | 0<br>(0 - 1)       | 0<br>(0 - 0)        | 1<br>(1 - 2)         | 1<br>(1 - 2)         | 1<br>(1 - 1)         |
| Unintentional firearm injuries                  | 0<br>(0 - 0)       | 0<br>(0 - 0)       | 0<br>(0 - 0)        | 0<br>(0 - 0)         | 0<br>(0 - 0)         | 0<br>(0 - 0)         |
| Unintentional suffocation                       | 1<br>(0 - 1)       | 0<br>(0 - 0)       | 0<br>(0 - 0)        | 0<br>(0 - 0)         | 0<br>(0 - 0)         | 0<br>(0 - 0)         |
| Other exposure to mechanical forces             | 3<br>(3 - 5)       | 0<br>(0 - 0)       | 0<br>(0 - 0)        | 1<br>(1 - 2)         | 1<br>(1 - 1)         | 1<br>(1 - 1)         |
| Adverse effects of medical treatment            | 16<br>(10 - 22)    | 0<br>(0 - 0)       | 0<br>(0 - 0)        | 1<br>(1 - 2)         | 4<br>(2 - 6)         | 10<br>(6 - 15)       |
| Animal contact                                  | 1<br>(1 - 3)       | 0<br>(0 - 0)       | 0<br>(0 - 0)        | 0<br>(0 - 0)         | 0<br>(0 - 1)         | 1<br>(0 - 2)         |
| Venomous animal contact                         | 0<br>(0 - 0)       | 0<br>(0 - 0)       | 0<br>(0 - 0)        | 0<br>(0 - 0)         | 0<br>(0 - 0)         | 0<br>(0 - 0)         |
| Non-venomous animal contact                     | 1<br>(1 - 3)       | 0<br>(0 - 0)       | 0<br>(0 - 0)        | 0<br>(0 - 0)         | 0<br>(0 - 1)         | 1<br>(0 - 2)         |
| Foreign body                                    | 10<br>(5 - 15)     | 1<br>(0 - 2)       | 0<br>(0 - 0)        | 3<br>(1 - 4)         | 5<br>(3 - 8)         | 1<br>(1 - 2)         |
| Pulmonary aspiration and foreign body in airway | 10<br>(5 - 15)     | 1<br>(0 - 2)       | 0<br>(0 - 0)        | 3<br>(1 - 4)         | 5<br>(3 - 8)         | 1<br>(1 - 2)         |
| Foreign body in other body part                 | 0<br>(0 - 0)       | 0<br>(0 - 0)       | 0<br>(0 - 0)        | 0<br>(0 - 0)         | 0<br>(0 - 0)         | 0<br>(0 - 0)         |
| Other unintentional injuries                    | 2<br>(2 - 3)       | 0<br>(0 - 0)       | 0<br>(0 - 0)        | 1<br>(0 - 1)         | 1<br>(1 - 2)         | 1<br>(0 - 1)         |
| Self-harm and interpersonal violence            | 113<br>(95 - 172)  | 1<br>(0 - 1)       | 0<br>(0 - 1)        | 34<br>(28 - 48)      | 39<br>(32 - 61)      | 38<br>(30 - 65)      |
| Self-harm                                       | 78<br>(65 - 129)   | --                 | 0<br>(0 - 0)        | 20<br>(16 - 28)      | 28<br>(22 - 47)      | 30<br>(23 - 55)      |
| Interpersonal violence                          | 34<br>(27 - 56)    | 1<br>(0 - 1)       | 0<br>(0 - 1)        | 15<br>(11 - 24)      | 11<br>(8 - 18)       | 8<br>(6 - 13)        |
| Assault by firearm                              | 1<br>(1 - 3)       | 0<br>(0 - 0)       | 0<br>(0 - 0)        | 1<br>(0 - 2)         | 0<br>(0 - 1)         | 0<br>(0 - 0)         |
| Assault by sharp object                         | 13<br>(9 - 23)     | 0<br>(0 - 0)       | 0<br>(0 - 0)        | 5<br>(3 - 9)         | 5<br>(3 - 8)         | 3<br>(2 - 5)         |
| Assault by other means                          | 21<br>(15 - 33)    | 0<br>(0 - 1)       | 0<br>(0 - 0)        | 9<br>(6 - 14)        | 6<br>(4 - 10)        | 5<br>(3 - 8)         |

Web Table 31- Lebanon deaths with 95% UI by age, sex, and cause in 2013

| Cause                                                             | Both Sexes, All Ages        | Both Sexes, 0-4 Years | Both Sexes, 5-14 Years | Both Sexes, 15-49 Years  | Both Sexes, 50-69 Years  | Both Sexes, 70-80 Years     |
|-------------------------------------------------------------------|-----------------------------|-----------------------|------------------------|--------------------------|--------------------------|-----------------------------|
| All causes                                                        | 24,899<br>(21,621 - 29,242) | 829<br>(728 - 948)    | 183<br>(162 - 208)     | 2,676<br>(2,148 - 3,264) | 6,081<br>(4,895 - 7,266) | 15,129<br>(13,576 - 17,602) |
| Communicable, maternal, neonatal, and nutritional diseases        | 1,171<br>(932 - 1,716)      | 413<br>(338 - 504)    | 39<br>(27 - 56)        | 215<br>(118 - 583)       | 125<br>(85 - 261)        | 377<br>(290 - 520)          |
| HIV/AIDS and tuberculosis                                         | 161<br>(52 - 685)           | 3<br>(1 - 13)         | 1<br>(0 - 4)           | 94<br>(17 - 472)         | 33<br>(10 - 149)         | 30<br>(18 - 53)             |
| Tuberculosis                                                      | 45<br>(30 - 61)             | 0<br>(0 - 0)          | 0<br>(0 - 0)           | 9<br>(6 - 13)            | 10<br>(7 - 14)           | 25<br>(16 - 34)             |
| HIV/AIDS                                                          | 116<br>(10 - 645)           | 3<br>(0 - 13)         | 1<br>(0 - 4)           | 84<br>(7 - 465)          | 23<br>(2 - 141)          | 5<br>(0 - 27)               |
| HIV/AIDS resulting in mycobacterial infection                     | 6<br>(1 - 34)               | 0<br>(0 - 1)          | 0<br>(0 - 0)           | 5<br>(0 - 25)            | 1<br>(0 - 8)             | 0<br>(0 - 2)                |
| HIV/AIDS resulting in other diseases                              | 109<br>(9 - 612)            | 3<br>(0 - 12)         | 1<br>(0 - 4)           | 80<br>(7 - 439)          | 22<br>(1 - 132)          | 5<br>(0 - 25)               |
| Diarrhea, lower respiratory, and other common infectious diseases | 571<br>(437 - 770)          | 101<br>(71 - 147)     | 35<br>(23 - 52)        | 91<br>(57 - 136)         | 66<br>(46 - 100)         | 278<br>(200 - 407)          |
| Diarrheal diseases                                                | 56<br>(38 - 85)             | 11<br>(5 - 21)        | 1<br>(1 - 2)           | 5<br>(3 - 7)             | 6<br>(3 - 10)            | 33<br>(19 - 57)             |
| Intestinal infectious diseases                                    | 98<br>(51 - 174)            | 19<br>(9 - 34)        | 22<br>(11 - 38)        | 44<br>(19 - 81)          | 8<br>(3 - 16)            | 6<br>(2 - 11)               |
| Typhoid fever                                                     | 69<br>(33 - 129)            | 12<br>(5 - 23)        | 17<br>(8 - 29)         | 32<br>(13 - 61)          | 5<br>(2 - 11)            | 3<br>(1 - 7)                |
| Paratyphoid fever                                                 | 19<br>(9 - 36)              | 4<br>(2 - 8)          | 5<br>(2 - 9)           | 8<br>(3 - 17)            | 1<br>(0 - 3)             | 1<br>(0 - 2)                |
| Other intestinal infectious diseases                              | 10<br>(4 - 18)              | 3<br>(0 - 8)          | 1<br>(0 - 3)           | 4<br>(1 - 9)             | 1<br>(0 - 5)             | 1<br>(0 - 5)                |
| Lower respiratory infections                                      | 338<br>(241 - 519)          | 46<br>(31 - 67)       | 6<br>(3 - 11)          | 26<br>(15 - 61)          | 42<br>(27 - 72)          | 218<br>(143 - 346)          |
| Upper respiratory infections                                      | 1<br>(0 - 2)                | 0<br>(0 - 0)          | 0<br>(0 - 0)           | 0<br>(0 - 0)             | 0<br>(0 - 0)             | 0<br>(0 - 1)                |
| Otitis media                                                      | 2<br>(2 - 3)                | 0<br>(0 - 0)          | 0<br>(0 - 0)           | 0<br>(0 - 0)             | 0<br>(0 - 1)             | 1<br>(1 - 2)                |
| Meningitis                                                        | 30<br>(20 - 43)             | 5<br>(3 - 8)          | 2<br>(1 - 3)           | 7<br>(4 - 10)            | 5<br>(3 - 8)             | 11<br>(6 - 18)              |
| Pneumococcal meningitis                                           | 7<br>(5 - 11)               | 1<br>(1 - 2)          | 0<br>(0 - 1)           | 2<br>(1 - 3)             | 1<br>(1 - 2)             | 3<br>(2 - 5)                |
| H influenzae type B meningitis                                    | 5<br>(3 - 7)                | 2<br>(1 - 3)          | 0<br>(0 - 1)           | 1<br>(0 - 2)             | 1<br>(0 - 1)             | 1<br>(1 - 2)                |
| Meningococcal meningitis                                          | 8<br>(5 - 12)               | 1<br>(1 - 2)          | 0<br>(0 - 1)           | 2<br>(1 - 3)             | 1<br>(1 - 2)             | 3<br>(2 - 6)                |
| Other meningitis                                                  | 10<br>(6 - 14)              | 1<br>(0 - 1)          | 0<br>(0 - 1)           | 2<br>(1 - 4)             | 2<br>(1 - 4)             | 4<br>(2 - 7)                |
| Encephalitis                                                      | 22<br>(15 - 36)             | 3<br>(2 - 6)          | 2<br>(1 - 3)           | 7<br>(4 - 12)            | 4<br>(2 - 7)             | 6<br>(4 - 10)               |
| Diphtheria                                                        | 0<br>(0 - 1)                | 0<br>(0 - 0)          | 0<br>(0 - 0)           | 0<br>(0 - 0)             | 0<br>(0 - 0)             | --<br>(0 - 0)               |
| Whooping cough                                                    | 7<br>(0 - 33)               | 6<br>(0 - 29)         | 0<br>(0 - 2)           | 0<br>(0 - 1)             | 0<br>(0 - 0)             | --<br>(0 - 0)               |
| Tetanus                                                           | 1<br>(0 - 1)                | 0<br>(0 - 0)          | 0<br>(0 - 0)           | 0<br>(0 - 1)             | 0<br>(0 - 0)             | 0<br>(0 - 0)                |
| Measles                                                           | 13<br>(0 - 76)              | 11<br>(0 - 60)        | 2<br>(0 - 12)          | 1<br>(0 - 4)             | 0<br>(0 - 0)             | --<br>(0 - 0)               |
| Varicella and herpes zoster                                       | 3<br>(1 - 6)                | 0<br>(0 - 1)          | 0<br>(0 - 0)           | 1<br>(0 - 1)             | 0<br>(0 - 1)             | 1<br>(0 - 5)                |
| Neglected tropical diseases and malaria                           | 11<br>(8 - 15)              | 1<br>(1 - 3)          | 1<br>(1 - 1)           | 4<br>(3 - 7)             | 2<br>(1 - 3)             | 2<br>(2 - 3)                |
| Leishmaniasis                                                     | 5<br>(3 - 9)                | 1<br>(0 - 2)          | 0<br>(0 - 1)           | 2<br>(1 - 4)             | 1<br>(0 - 2)             | 1<br>(0 - 1)                |
| Visceral leishmaniasis                                            | 5<br>(3 - 9)                | 1<br>(0 - 2)          | 0<br>(0 - 1)           | 2<br>(1 - 4)             | 1<br>(0 - 2)             | 1<br>(0 - 1)                |
| Cysticercosis                                                     | 0<br>(0 - 0)                | 0<br>(0 - 0)          | 0<br>(0 - 0)           | 0<br>(0 - 0)             | 0<br>(0 - 0)             | 0<br>(0 - 0)                |
| Cystic echinococcosis                                             | 2<br>(2 - 2)                | 0<br>(0 - 0)          | 0<br>(0 - 0)           | 1<br>(1 - 1)             | 1<br>(0 - 1)             | 1<br>(1 - 1)                |
| Dengue                                                            | 1<br>(0 - 1)                | 0<br>(0 - 0)          | 0<br>(0 - 0)           | 0<br>(0 - 0)             | 0<br>(0 - 0)             | 0<br>(0 - 0)                |
| Rabies                                                            | 1<br>(0 - 1)                | 0<br>(0 - 0)          | 0<br>(0 - 0)           | 0<br>(0 - 1)             | 0<br>(0 - 0)             | 0<br>(0 - 0)                |
| Intestinal nematode infections                                    | 0<br>(0 - 2)                | 0<br>(0 - 1)          | 0<br>(0 - 0)           | 0<br>(0 - 0)             | 0<br>(0 - 0)             | 0<br>(0 - 0)                |
| Ascariasis                                                        | 0<br>(0 - 2)                | 0<br>(0 - 1)          | 0<br>(0 - 0)           | 0<br>(0 - 0)             | 0<br>(0 - 0)             | 0<br>(0 - 0)                |
| Other neglected tropical diseases                                 | 2<br>(1 - 3)                | 0<br>(0 - 0)          | 0<br>(0 - 0)           | 1<br>(0 - 1)             | 0<br>(0 - 0)             | 1<br>(1 - 2)                |
| Maternal disorders                                                | 12<br>(8 - 17)              | --                    | 0<br>(0 - 0)           | 12<br>(8 - 17)           | --                       | --                          |
| Maternal hemorrhage                                               | 2<br>(1 - 4)                | --                    | 0<br>(0 - 0)           | 2<br>(1 - 4)             | --                       | --                          |
| Maternal sepsis and other maternal infections                     | 1<br>(1 - 2)                | --                    | 0<br>(0 - 0)           | 1<br>(1 - 2)             | --                       | --                          |



Web Table 31- Lebanon deaths with 95% UI by age, sex, and cause in 2013

| Cause                                                            | Both Sexes, All Ages        | Both Sexes, 0-4 Years | Both Sexes, 5-14 Years | Both Sexes, 15-49 Years  | Both Sexes, 50-69 Years  | Both Sexes, 70-80 Years     |
|------------------------------------------------------------------|-----------------------------|-----------------------|------------------------|--------------------------|--------------------------|-----------------------------|
| Maternal hypertensive disorders                                  | 2<br>(1 - 3)                | --                    | 0<br>(0 - 0)           | 2<br>(1 - 3)             | --                       | --                          |
| Maternal obstructed labor                                        | 1<br>(1 - 2)                | --                    | 0<br>(0 - 0)           | 1<br>(1 - 2)             | --                       | --                          |
| Maternal abortive outcome                                        | 2<br>(1 - 2)                | --                    | 0<br>(0 - 0)           | 2<br>(1 - 2)             | --                       | --                          |
| Indirect maternal deaths                                         | 1<br>(0 - 2)                | --                    | 0<br>(0 - 0)           | 1<br>(0 - 2)             | --                       | --                          |
| Late maternal deaths                                             | 1<br>(1 - 2)                | --                    | 0<br>(0 - 0)           | 1<br>(1 - 2)             | --                       | --                          |
| Maternal deaths aggravated by HIV/AIDS                           | 0<br>(0 - 0)                | --                    | --                     | 0<br>(0 - 0)             | --                       | --                          |
| Other maternal disorders                                         | 2<br>(1 - 3)                | --                    | 0<br>(0 - 0)           | 2<br>(1 - 3)             | --                       | --                          |
| Neonatal disorders                                               | 302<br>(240 - 380)          | 302<br>(240 - 380)    | --                     | --                       | --                       | --                          |
| Neonatal preterm birth complications                             | 197<br>(135 - 260)          | 197<br>(135 - 260)    | --                     | --                       | --                       | --                          |
| Neonatal encephalopathy due to birth asphyxia and trauma         | 43<br>(23 - 72)             | 43<br>(23 - 72)       | --                     | --                       | --                       | --                          |
| Neonatal sepsis and other neonatal infections                    | 24<br>(11 - 42)             | 24<br>(11 - 42)       | --                     | --                       | --                       | --                          |
| Hemolytic disease and other neonatal jaundice                    | 1<br>(0 - 1)                | 1<br>(0 - 1)          | --                     | --                       | --                       | --                          |
| Other neonatal disorders                                         | 38<br>(19 - 70)             | 38<br>(19 - 70)       | --                     | --                       | --                       | --                          |
| Nutritional deficiencies                                         | 48<br>(34 - 71)             | 2<br>(1 - 3)          | 1<br>(1 - 1)           | 5<br>(3 - 7)             | 6<br>(4 - 10)            | 34<br>(23 - 51)             |
| Protein-energy malnutrition                                      | 13<br>(6 - 28)              | 1<br>(0 - 2)          | 0<br>(0 - 1)           | 1<br>(0 - 2)             | 1<br>(1 - 3)             | 10<br>(4 - 21)              |
| Iodine deficiency                                                | 0<br>(0 - 1)                | 0<br>(0 - 0)          | 0<br>(0 - 0)           | 0<br>(0 - 0)             | 0<br>(0 - 0)             | 0<br>(0 - 1)                |
| Iron-deficiency anemia                                           | 31<br>(20 - 46)             | 1<br>(0 - 1)          | 0<br>(0 - 1)           | 3<br>(2 - 5)             | 4<br>(3 - 7)             | 23<br>(13 - 35)             |
| Other nutritional deficiencies                                   | 3<br>(2 - 6)                | 0<br>(0 - 0)          | 0<br>(0 - 0)           | 1<br>(0 - 1)             | 0<br>(0 - 1)             | 2<br>(1 - 4)                |
| Other communicable, maternal, neonatal, and nutritional diseases | 66<br>(48 - 96)             | 5<br>(2 - 9)          | 1<br>(1 - 2)           | 10<br>(7 - 13)           | 18<br>(12 - 28)          | 32<br>(19 - 57)             |
| Sexually transmitted diseases excluding HIV                      | 4<br>(1 - 8)                | 2<br>(0 - 5)          | 0<br>(0 - 0)           | 0<br>(0 - 1)             | 0<br>(0 - 1)             | 1<br>(0 - 3)                |
| Syphilis                                                         | 4<br>(1 - 7)                | 2<br>(0 - 5)          | 0<br>(0 - 0)           | 0<br>(0 - 0)             | 0<br>(0 - 0)             | 1<br>(0 - 2)                |
| Chlamydial infection                                             | 0<br>(0 - 0)                | --                    | 0<br>(0 - 0)           | 0<br>(0 - 0)             | 0<br>(0 - 0)             | 0<br>(0 - 0)                |
| Gonococcal infection                                             | 0<br>(0 - 1)                | --                    | 0<br>(0 - 0)           | 0<br>(0 - 0)             | 0<br>(0 - 0)             | 0<br>(0 - 0)                |
| Other sexually transmitted diseases                              | 0<br>(0 - 0)                | --                    | 0<br>(0 - 0)           | 0<br>(0 - 0)             | 0<br>(0 - 0)             | 0<br>(0 - 0)                |
| Hepatitis                                                        | 28<br>(21 - 38)             | 1<br>(0 - 1)          | 0<br>(0 - 0)           | 5<br>(3 - 7)             | 11<br>(8 - 17)           | 11<br>(8 - 15)              |
| Acute hepatitis A                                                | 1<br>(0 - 3)                | 0<br>(0 - 0)          | 0<br>(0 - 0)           | 1<br>(0 - 1)             | 0<br>(0 - 1)             | 0<br>(0 - 0)                |
| Acute hepatitis B                                                | 21<br>(15 - 29)             | 0<br>(0 - 1)          | 0<br>(0 - 0)           | 3<br>(1 - 4)             | 9<br>(6 - 14)            | 9<br>(6 - 13)               |
| Acute hepatitis C                                                | 3<br>(1 - 8)                | --                    | 0<br>(0 - 0)           | 0<br>(0 - 1)             | 1<br>(0 - 3)             | 1<br>(0 - 4)                |
| Acute hepatitis E                                                | 2<br>(1 - 4)                | 0<br>(0 - 0)          | 0<br>(0 - 0)           | 1<br>(0 - 2)             | 1<br>(0 - 1)             | 0<br>(0 - 1)                |
| Other infectious diseases                                        | 34<br>(19 - 60)             | 2<br>(1 - 5)          | 1<br>(0 - 2)           | 5<br>(3 - 7)             | 7<br>(3 - 14)            | 20<br>(8 - 43)              |
| Non-communicable diseases                                        | 22,479<br>(19,477 - 26,538) | 365<br>(291 - 445)    | 92<br>(74 - 112)       | 1,869<br>(1,409 - 2,296) | 5,767<br>(4,644 - 7,243) | 14,385<br>(12,905 - 16,686) |
| Neoplasms                                                        | 5,522<br>(4,494 - 6,701)    | 11<br>(7 - 15)        | 33<br>(26 - 41)        | 813<br>(609 - 996)       | 2,045<br>(1,610 - 2,539) | 2,620<br>(2,191 - 3,195)    |
| Esophageal cancer                                                | 59<br>(45 - 77)             | --                    | --                     | 9<br>(6 - 12)            | 19<br>(14 - 26)          | 31<br>(23 - 41)             |
| Stomach cancer                                                   | 340<br>(267 - 437)          | --                    | --                     | 45<br>(32 - 60)          | 119<br>(89 - 161)        | 175<br>(135 - 228)          |
| Liver cancer                                                     | 163<br>(128 - 207)          | --                    | 1<br>(0 - 1)           | 22<br>(15 - 30)          | 71<br>(53 - 96)          | 92<br>(53 - 92)             |
| Liver cancer due to hepatitis B                                  | 15<br>(8 - 25)              | --                    | 0<br>(0 - 0)           | 3<br>(2 - 5)             | 7<br>(3 - 13)            | 4<br>(2 - 7)                |
| Liver cancer due to hepatitis C                                  | 116<br>(88 - 151)           | --                    | 0<br>(0 - 0)           | 14<br>(9 - 20)           | 51<br>(38 - 71)          | 51<br>(37 - 68)             |
| Liver cancer due to alcohol use                                  | 16<br>(8 - 25)              | --                    | --                     | 1<br>(0 - 2)             | 6<br>(2 - 10)            | 9<br>(4 - 15)               |
| Liver cancer due to other causes                                 | 17<br>(11 - 26)             | --                    | 0<br>(0 - 1)           | 4<br>(2 - 5)             | 7<br>(4 - 11)            | 6<br>(3 - 11)               |
| Larynx cancer                                                    | 139<br>(96 - 196)           | --                    | --                     | 11<br>(7 - 16)           | 57<br>(38 - 83)          | 71<br>(48 - 104)            |

Web Table 31- Lebanon deaths with 95% UI by age, sex, and cause in 2013

| Cause                                         | Both Sexes, All Ages       | Both Sexes, 0-4 Years | Both Sexes, 5-14 Years | Both Sexes, 15-49 Years | Both Sexes, 50-69 Years  | Both Sexes, 70-80 Years  |
|-----------------------------------------------|----------------------------|-----------------------|------------------------|-------------------------|--------------------------|--------------------------|
| Tracheal, bronchus and lung cancer            | 1,157<br>(923 - 1,485)     | --                    | --                     | 104<br>(74 - 138)       | 524<br>(399 - 691)       | 530<br>(426 - 683)       |
| Breast cancer                                 | 611<br>(422 - 779)         | --                    | --                     | 159<br>(101 - 211)      | 273<br>(181 - 362)       | 179<br>(118 - 229)       |
| Cervical cancer                               | 57<br>(38 - 76)            | --                    | --                     | 10<br>(6 - 14)          | 24<br>(14 - 34)          | 24<br>(16 - 33)          |
| Uterine cancer                                | 42<br>(23 - 60)            | --                    | --                     | 3<br>(1 - 4)            | 13<br>(7 - 20)           | 26<br>(14 - 40)          |
| Prostate cancer                               | 514<br>(299 - 760)         | --                    | --                     | 3<br>(2 - 5)            | 81<br>(46 - 125)         | 430<br>(245 - 638)       |
| Colon and rectum cancer                       | 615<br>(497 - 752)         | --                    | --                     | 72<br>(52 - 92)         | 202<br>(156 - 259)       | 340<br>(274 - 423)       |
| Lip and oral cavity cancer                    | 37<br>(27 - 50)            | --                    | --                     | 8<br>(5 - 11)           | 14<br>(10 - 20)          | 15<br>(11 - 21)          |
| Nasopharynx cancer                            | 24<br>(17 - 34)            | --                    | 1<br>(0 - 2)           | 9<br>(6 - 15)           | 10<br>(6 - 15)           | 4<br>(2 - 6)             |
| Other pharynx cancer                          | 14<br>(10 - 19)            | --                    | --                     | 2<br>(1 - 3)            | 8<br>(5 - 11)            | 4<br>(3 - 6)             |
| Gallbladder and biliary tract cancer          | 59<br>(40 - 81)            | --                    | --                     | 4<br>(3 - 7)            | 21<br>(14 - 31)          | 33<br>(22 - 48)          |
| Pancreatic cancer                             | 205<br>(163 - 252)         | --                    | --                     | 28<br>(19 - 38)         | 95<br>(72 - 121)         | 82<br>(65 - 102)         |
| Malignant skin melanoma                       | 24<br>(17 - 33)            | --                    | --                     | 5<br>(3 - 7)            | 7<br>(5 - 10)            | 12<br>(9 - 17)           |
| Non-melanoma skin cancer                      | 9<br>(6 - 14)              | --                    | --                     | 1<br>(1 - 1)            | 2<br>(1 - 3)             | 6<br>(4 - 10)            |
| Ovarian cancer                                | 174<br>(126 - 231)         | --                    | --                     | 25<br>(17 - 37)         | 74<br>(49 - 108)         | 74<br>(53 - 102)         |
| Testicular cancer                             | 9<br>(5 - 15)              | --                    | --                     | 7<br>(4 - 12)           | 1<br>(1 - 2)             | 1<br>(1 - 2)             |
| Kidney cancer                                 | 121<br>(93 - 157)          | 1<br>(0 - 2)          | 1<br>(1 - 2)           | 15<br>(10 - 21)         | 53<br>(38 - 73)          | 52<br>(38 - 69)          |
| Bladder cancer                                | 112<br>(83 - 149)          | --                    | --                     | 5<br>(3 - 7)            | 38<br>(26 - 53)          | 70<br>(50 - 94)          |
| Brain and nervous system cancer               | 183<br>(127 - 241)         | 2<br>(1 - 4)          | 7<br>(5 - 10)          | 65<br>(41 - 87)         | 74<br>(50 - 102)         | 35<br>(25 - 48)          |
| Thyroid cancer                                | 47<br>(32 - 62)            | --                    | 0<br>(0 - 0)           | 6<br>(4 - 8)            | 15<br>(10 - 21)          | 26<br>(17 - 35)          |
| Mesothelioma                                  | 21<br>(15 - 28)            | --                    | --                     | 6<br>(4 - 9)            | 9<br>(5 - 14)            | 6<br>(4 - 10)            |
| Hodgkin lymphoma                              | 51<br>(30 - 70)            | 0<br>(0 - 0)          | 1<br>(1 - 3)           | 24<br>(13 - 35)         | 13<br>(7 - 20)           | 12<br>(7 - 18)           |
| Non-Hodgkin lymphoma                          | 344<br>(216 - 458)         | 1<br>(1 - 2)          | 5<br>(3 - 7)           | 75<br>(47 - 102)        | 115<br>(73 - 163)        | 148<br>(86 - 205)        |
| Multiple myeloma                              | 70<br>(49 - 93)            | --                    | --                     | 8<br>(6 - 12)           | 26<br>(17 - 38)          | 35<br>(24 - 49)          |
| Leukemia                                      | 185<br>(145 - 225)         | 3<br>(2 - 5)          | 12<br>(9 - 16)         | 54<br>(38 - 69)         | 48<br>(35 - 62)          | 68<br>(53 - 87)          |
| Other neoplasms                               | 135<br>(92 - 177)          | 3<br>(2 - 5)          | 5<br>(3 - 7)           | 28<br>(17 - 39)         | 39<br>(24 - 56)          | 59<br>(41 - 80)          |
| Cardiovascular diseases                       | 11,118<br>(9,662 - 13,140) | 19<br>(13 - 28)       | 15<br>(11 - 20)        | 647<br>(471 - 832)      | 2,607<br>(2,085 - 3,277) | 7,831<br>(6,992 - 9,021) |
| Rheumatic heart disease                       | 43<br>(27 - 61)            | 0<br>(0 - 0)          | 1<br>(0 - 1)           | 8<br>(4 - 12)           | 9<br>(5 - 13)            | 25<br>(16 - 37)          |
| Ischemic heart disease                        | 7,943<br>(6,598 - 9,873)   | 4<br>(2 - 7)          | 4<br>(3 - 6)           | 462<br>(328 - 604)      | 2,000<br>(1,569 - 2,607) | 5,474<br>(4,620 - 6,683) |
| Cerebrovascular disease                       | 2,072<br>(1,020 - 2,830)   | 4<br>(1 - 7)          | 4<br>(2 - 6)           | 79<br>(32 - 117)        | 343<br>(162 - 499)       | 1,641<br>(824 - 2,233)   |
| Ischemic stroke                               | 1,174<br>(352 - 1,639)     | 0<br>(0 - 1)          | 1<br>(0 - 1)           | 15<br>(2 - 28)          | 141<br>(32 - 220)        | 1,017<br>(310 - 1,420)   |
| Hemorrhagic stroke                            | 897<br>(257 - 1,501)       | 4<br>(1 - 7)          | 3<br>(1 - 6)           | 64<br>(23 - 96)         | 202<br>(67 - 333)        | 625<br>(164 - 1,116)     |
| Hypertensive heart disease                    | 414<br>(278 - 637)         | 0<br>(0 - 0)          | 0<br>(0 - 0)           | 18<br>(9 - 26)          | 80<br>(48 - 117)         | 315<br>(204 - 514)       |
| Cardiomyopathy and myocarditis                | 170<br>(122 - 252)         | 5<br>(3 - 8)          | 3<br>(2 - 5)           | 28<br>(19 - 44)         | 43<br>(28 - 70)          | 90<br>(59 - 137)         |
| Atrial fibrillation and flutter               | 14<br>(9 - 21)             | --                    | --                     | 1<br>(0 - 1)            | 3<br>(1 - 4)             | 11<br>(6 - 17)           |
| Aortic aneurysm                               | 65<br>(39 - 193)           | --                    | --                     | 4<br>(2 - 12)           | 23<br>(12 - 64)          | 38<br>(22 - 110)         |
| Peripheral vascular disease                   | 9<br>(6 - 13)              | --                    | --                     | 0<br>(0 - 1)            | 1<br>(1 - 2)             | 7<br>(4 - 10)            |
| Endocarditis                                  | 50<br>(30 - 88)            | 2<br>(1 - 3)          | 1<br>(0 - 1)           | 7<br>(4 - 14)           | 11<br>(6 - 19)           | 30<br>(16 - 55)          |
| Other cardiovascular and circulatory diseases | 339<br>(247 - 576)         | 4<br>(2 - 7)          | 2<br>(1 - 4)           | 39<br>(26 - 59)         | 94<br>(63 - 158)         | 200<br>(133 - 353)       |
| Chronic respiratory diseases                  | 1,407<br>(1,030 - 1,756)   | 4<br>(2 - 6)          | 2<br>(2 - 3)           | 58<br>(34 - 76)         | 264<br>(179 - 351)       | 1,079<br>(801 - 1,357)   |
| Chronic obstructive pulmonary disease         | 1,025<br>(752 - 1,302)     | 2<br>(1 - 3)          | 1<br>(1 - 1)           | 27<br>(15 - 38)         | 185<br>(122 - 254)       | 810<br>(602 - 1,020)     |

Web Table 31- Lebanon deaths with 95% UI by age, sex, and cause in 2013

| Cause                                               | Both Sexes, All Ages     | Both Sexes, 0-4 Years | Both Sexes, 5-14 Years | Both Sexes, 15-49 Years | Both Sexes, 50-69 Years | Both Sexes, 70-80 Years |
|-----------------------------------------------------|--------------------------|-----------------------|------------------------|-------------------------|-------------------------|-------------------------|
| Pneumoconiosis                                      | 17<br>(10 - 25)          | 0<br>(0 - 0)          | 0<br>(0 - 0)           | 4<br>(2 - 6)            | 5<br>(2 - 8)            | 9<br>(5 - 14)           |
| Silicosis                                           | 6<br>(3 - 9)             | 0<br>(0 - 0)          | 0<br>(0 - 0)           | 0<br>(0 - 0)            | 1<br>(0 - 1)            | 5<br>(2 - 8)            |
| Asbestosis                                          | 1<br>(1 - 2)             | 0<br>(0 - 0)          | 0<br>(0 - 0)           | 1<br>(0 - 1)            | 0<br>(0 - 0)            | 0<br>(0 - 0)            |
| Coal workers pneumoconiosis                         | 1<br>(0 - 1)             | 0<br>(0 - 0)          | 0<br>(0 - 0)           | 0<br>(0 - 0)            | 0<br>(0 - 0)            | 0<br>(0 - 0)            |
| Other pneumoconiosis                                | 10<br>(5 - 15)           | 0<br>(0 - 0)          | 0<br>(0 - 0)           | 3<br>(1 - 5)            | 3<br>(2 - 6)            | 4<br>(2 - 6)            |
| Asthma                                              | 128<br>(69 - 191)        | 1<br>(0 - 1)          | 1<br>(0 - 1)           | 14<br>(7 - 20)          | 28<br>(15 - 42)         | 84<br>(44 - 131)        |
| Interstitial lung disease and pulmonary sarcoidosis | 200<br>(121 - 326)       | 0<br>(0 - 0)          | 0<br>(0 - 1)           | 7<br>(4 - 12)           | 42<br>(25 - 66)         | 151<br>(87 - 250)       |
| Other chronic respiratory diseases                  | 37<br>(20 - 59)          | 1<br>(0 - 1)          | 0<br>(0 - 1)           | 6<br>(3 - 9)            | 5<br>(3 - 7)            | 25<br>(13 - 44)         |
| Cirrhosis                                           | 356<br>(276 - 450)       | 1<br>(1 - 2)          | 2<br>(1 - 2)           | 43<br>(30 - 58)         | 124<br>(90 - 166)       | 186<br>(142 - 243)      |
| Cirrhosis due to hepatitis B                        | 131<br>(77 - 191)        | 0<br>(0 - 0)          | 0<br>(0 - 1)           | 16<br>(8 - 28)          | 45<br>(25 - 69)         | 70<br>(38 - 105)        |
| Cirrhosis due to hepatitis C                        | 136<br>(81 - 200)        | 0<br>(0 - 0)          | 0<br>(0 - 0)           | 13<br>(3 - 25)          | 48<br>(25 - 77)         | 76<br>(49 - 108)        |
| Cirrhosis due to alcohol use                        | 54<br>(27 - 97)          | --                    | --                     | 5<br>(2 - 12)           | 19<br>(9 - 39)          | 30<br>(15 - 51)         |
| Cirrhosis due to other causes                       | 35<br>(19 - 59)          | 1<br>(1 - 2)          | 1<br>(1 - 2)           | 9<br>(5 - 18)           | 12<br>(5 - 22)          | 11<br>(6 - 19)          |
| Digestive diseases                                  | 266<br>(212 - 331)       | 1<br>(1 - 2)          | 2<br>(1 - 2)           | 24<br>(18 - 32)         | 52<br>(39 - 69)         | 188<br>(148 - 235)      |
| Peptic ulcer disease                                | 71<br>(48 - 100)         | 0<br>(0 - 0)          | 0<br>(0 - 0)           | 5<br>(3 - 7)            | 14<br>(9 - 20)          | 53<br>(34 - 76)         |
| Gastritis and duodenitis                            | 3<br>(2 - 6)             | 0<br>(0 - 0)          | 0<br>(0 - 0)           | 1<br>(0 - 1)            | 1<br>(0 - 1)            | 2<br>(1 - 4)            |
| Appendicitis                                        | 8<br>(5 - 12)            | 0<br>(0 - 0)          | 0<br>(0 - 0)           | 1<br>(1 - 2)            | 2<br>(1 - 3)            | 4<br>(3 - 7)            |
| Paralytic ileus and intestinal obstruction          | 63<br>(43 - 97)          | 0<br>(0 - 1)          | 0<br>(0 - 1)           | 5<br>(3 - 9)            | 12<br>(7 - 21)          | 45<br>(29 - 69)         |
| Inguinal, femoral, and abdominal hernia             | 5<br>(3 - 8)             | 0<br>(0 - 0)          | 0<br>(0 - 0)           | 1<br>(0 - 1)            | 1<br>(0 - 1)            | 4<br>(2 - 6)            |
| Inflammatory bowel disease                          | 14<br>(8 - 19)           | 0<br>(0 - 0)          | 0<br>(0 - 0)           | 2<br>(1 - 3)            | 2<br>(1 - 4)            | 9<br>(5 - 14)           |
| Vascular intestinal disorders                       | 8<br>(4 - 13)            | 0<br>(0 - 0)          | 0<br>(0 - 0)           | 1<br>(1 - 2)            | 2<br>(1 - 4)            | 5<br>(3 - 8)            |
| Gallbladder and biliary diseases                    | 46<br>(31 - 63)          | 0<br>(0 - 0)          | 0<br>(0 - 0)           | 3<br>(2 - 4)            | 8<br>(5 - 11)           | 36<br>(23 - 52)         |
| Pancreatitis                                        | 18<br>(12 - 26)          | 0<br>(0 - 0)          | 0<br>(0 - 0)           | 3<br>(2 - 5)            | 5<br>(3 - 8)            | 10<br>(6 - 15)          |
| Other digestive diseases                            | 30<br>(21 - 45)          | 0<br>(0 - 0)          | 0<br>(0 - 0)           | 3<br>(2 - 4)            | 6<br>(4 - 10)           | 21<br>(13 - 32)         |
| Neurological disorders                              | 1,370<br>(1,116 - 1,696) | 5<br>(3 - 7)          | 4<br>(2 - 6)           | 28<br>(16 - 41)         | 100<br>(73 - 131)       | 1,234<br>(998 - 1,537)  |
| Alzheimer disease and other dementias               | 1,298<br>(1,050 - 1,616) | --                    | --                     | 0<br>(0 - 1)            | 88<br>(63 - 117)        | 1,210<br>(974 - 1,508)  |
| Parkinson disease                                   | 11<br>(6 - 17)           | --                    | --                     | 0<br>(0 - 0)            | 2<br>(1 - 3)            | 9<br>(4 - 15)           |
| Epilepsy                                            | 39<br>(21 - 57)          | 2<br>(1 - 4)          | 3<br>(1 - 5)           | 21<br>(11 - 33)         | 6<br>(3 - 9)            | 7<br>(4 - 12)           |
| Multiple sclerosis                                  | 4<br>(2 - 7)             | --                    | --                     | 1<br>(1 - 2)            | 1<br>(1 - 2)            | 1<br>(1 - 3)            |
| Other neurological disorders                        | 18<br>(14 - 22)          | 3<br>(2 - 4)          | 1<br>(1 - 1)           | 5<br>(3 - 6)            | 3<br>(2 - 4)            | 7<br>(5 - 8)            |
| Mental and substance use disorders                  | 95<br>(66 - 125)         | 1<br>(0 - 1)          | 0<br>(0 - 0)           | 61<br>(42 - 83)         | 22<br>(15 - 33)         | 10<br>(7 - 13)          |
| Schizophrenia                                       | 1<br>(1 - 2)             | --                    | --                     | 0<br>(0 - 1)            | 0<br>(0 - 0)            | 0<br>(0 - 1)            |
| Alcohol use disorders                               | 6<br>(4 - 11)            | --                    | --                     | 2<br>(1 - 3)            | 3<br>(2 - 5)            | 2<br>(1 - 3)            |
| Drug use disorders                                  | 87<br>(59 - 115)         | 1<br>(0 - 1)          | --                     | 58<br>(39 - 79)         | 20<br>(13 - 29)         | 8<br>(6 - 11)           |
| Opioid use disorders                                | 47<br>(32 - 63)          | 0<br>(0 - 1)          | --                     | 32<br>(22 - 44)         | 10<br>(6 - 15)          | 4<br>(3 - 6)            |
| Cocaine use disorders                               | 1<br>(1 - 2)             | 0<br>(0 - 0)          | --                     | 1<br>(1 - 1)            | 0<br>(0 - 0)            | 0<br>(0 - 0)            |
| Amphetamine use disorders                           | 1<br>(1 - 1)             | 0<br>(0 - 0)          | --                     | 1<br>(0 - 1)            | 0<br>(0 - 0)            | 0<br>(0 - 0)            |
| Other drug use disorders                            | 37<br>(25 - 50)          | 0<br>(0 - 0)          | --                     | 24<br>(16 - 33)         | 9<br>(6 - 14)           | 3<br>(2 - 5)            |
| Eating disorders                                    | 0<br>(0 - 1)             | --                    | 0<br>(0 - 0)           | 0<br>(0 - 1)            | --                      | --                      |
| Anorexia nervosa                                    | 0<br>(0 - 1)             | --                    | 0<br>(0 - 0)           | 0<br>(0 - 1)            | --                      | --                      |

Web Table 31- Lebanon deaths with 95% UI by age, sex, and cause in 2013

| Cause                                               | Both Sexes, All Ages     | Both Sexes, 0-4 Years | Both Sexes, 5-14 Years | Both Sexes, 15-49 Years | Both Sexes, 50-69 Years | Both Sexes, 70-80 Years |
|-----------------------------------------------------|--------------------------|-----------------------|------------------------|-------------------------|-------------------------|-------------------------|
| Diabetes, urogenital, blood, and endocrine diseases | 1,874<br>(1,535 - 2,337) | 17<br>(12 - 22)       | 11<br>(8 - 14)         | 154<br>(111 - 196)      | 531<br>(404 - 691)      | 1,162<br>(951 - 1,455)  |
| Diabetes mellitus                                   | 984<br>(797 - 1,225)     | 1<br>(1 - 2)          | 1<br>(1 - 2)           | 51<br>(37 - 66)         | 277<br>(213 - 365)      | 653<br>(518 - 832)      |
| Acute glomerulonephritis                            | 4<br>(3 - 7)             | 0<br>(0 - 0)          | 0<br>(0 - 0)           | 1<br>(0 - 1)            | 1<br>(1 - 2)            | 2<br>(1 - 4)            |
| Chronic kidney disease                              | 700<br>(512 - 935)       | 3<br>(2 - 5)          | 3<br>(2 - 5)           | 66<br>(41 - 91)         | 220<br>(151 - 304)      | 407<br>(292 - 573)      |
| Chronic kidney disease due to diabetes mellitus     | 21<br>(10 - 32)          | 0<br>(0 - 0)          | 0<br>(0 - 0)           | 3<br>(1 - 5)            | 7<br>(3 - 11)           | 11<br>(5 - 18)          |
| Chronic kidney disease due to hypertension          | 298<br>(205 - 429)       | 0<br>(0 - 1)          | 0<br>(0 - 1)           | 23<br>(14 - 33)         | 92<br>(58 - 133)        | 183<br>(122 - 275)      |
| Chronic kidney disease due to glomerulonephritis    | 21<br>(11 - 32)          | 0<br>(0 - 1)          | 0<br>(0 - 0)           | 3<br>(2 - 5)            | 5<br>(2 - 8)            | 12<br>(6 - 19)          |
| Chronic kidney disease due to other causes          | 360<br>(223 - 541)       | 2<br>(1 - 4)          | 2<br>(1 - 4)           | 37<br>(16 - 58)         | 117<br>(68 - 181)       | 201<br>(111 - 338)      |
| Urinary diseases and male infertility               | 69<br>(51 - 92)          | 1<br>(0 - 1)          | 0<br>(0 - 1)           | 5<br>(3 - 7)            | 12<br>(9 - 19)          | 50<br>(35 - 70)         |
| Interstitial nephritis and urinary tract infections | 35<br>(24 - 53)          | 0<br>(0 - 1)          | 0<br>(0 - 0)           | 3<br>(2 - 5)            | 6<br>(4 - 9)            | 26<br>(16 - 40)         |
| Urolithiasis                                        | 3<br>(2 - 5)             | --                    | 0<br>(0 - 0)           | 0<br>(0 - 1)            | 1<br>(0 - 1)            | 2<br>(1 - 4)            |
| Other urinary diseases                              | 30<br>(21 - 44)          | 0<br>(0 - 0)          | 0<br>(0 - 0)           | 2<br>(1 - 3)            | 6<br>(4 - 10)           | 22<br>(14 - 33)         |
| Gynecological diseases                              | 0<br>(0 - 1)             | --                    | --                     | 0<br>(0 - 0)            | 0<br>(0 - 0)            | 0<br>(0 - 0)            |
| Uterine fibroids                                    | 0<br>(0 - 0)             | --                    | --                     | 0<br>(0 - 0)            | 0<br>(0 - 0)            | 0<br>(0 - 0)            |
| Polycystic ovarian syndrome                         | 0<br>(0 - 0)             | --                    | --                     | 0<br>(0 - 0)            | 0<br>(0 - 0)            | --                      |
| Endometriosis                                       | 0<br>(0 - 0)             | --                    | --                     | 0<br>(0 - 0)            | 0<br>(0 - 0)            | --                      |
| Genital prolapse                                    | 0<br>(0 - 0)             | --                    | --                     | 0<br>(0 - 0)            | 0<br>(0 - 0)            | 0<br>(0 - 0)            |
| Other gynecological diseases                        | 0<br>(0 - 0)             | --                    | --                     | 0<br>(0 - 0)            | 0<br>(0 - 0)            | 0<br>(0 - 0)            |
| Hemoglobinopathies and hemolytic anemias            | 54<br>(37 - 76)          | 5<br>(3 - 7)          | 4<br>(3 - 6)           | 20<br>(13 - 28)         | 7<br>(4 - 11)           | 19<br>(12 - 28)         |
| Thalassemias                                        | 16<br>(11 - 23)          | 3<br>(2 - 5)          | 3<br>(2 - 4)           | 11<br>(7 - 15)          | 0<br>(0 - 0)            | 0<br>(0 - 0)            |
| Sickle cell disorders                               | 14<br>(10 - 21)          | 1<br>(1 - 2)          | 1<br>(1 - 1)           | 7<br>(5 - 11)           | 4<br>(2 - 7)            | 1<br>(0 - 1)            |
| G6PD deficiency                                     | 0<br>(0 - 0)             | 0<br>(0 - 0)          | 0<br>(0 - 0)           | 0<br>(0 - 0)            | 0<br>(0 - 0)            | 0<br>(0 - 0)            |
| Other hemoglobinopathies and hemolytic anemias      | 23<br>(15 - 34)          | 0<br>(0 - 1)          | 0<br>(0 - 0)           | 2<br>(1 - 2)            | 2<br>(1 - 4)            | 18<br>(12 - 27)         |
| Endocrine, metabolic, blood, and immune disorders   | 63<br>(44 - 86)          | 7<br>(4 - 10)         | 2<br>(1 - 4)           | 11<br>(7 - 16)          | 13<br>(8 - 20)          | 31<br>(19 - 45)         |
| Musculoskeletal disorders                           | 61<br>(43 - 86)          | --                    | 1<br>(1 - 2)           | 14<br>(10 - 20)         | 12<br>(7 - 20)          | 34<br>(22 - 49)         |
| Rheumatoid arthritis                                | 8<br>(4 - 12)            | --                    | 0<br>(0 - 0)           | 1<br>(1 - 2)            | 1<br>(1 - 3)            | 5<br>(2 - 8)            |
| Other musculoskeletal disorders                     | 53<br>(37 - 76)          | --                    | 1<br>(1 - 2)           | 13<br>(9 - 19)          | 10<br>(7 - 17)          | 29<br>(19 - 42)         |
| Other non-communicable diseases                     | 409<br>(328 - 490)       | 307<br>(238 - 382)    | 22<br>(15 - 30)        | 27<br>(19 - 36)         | 12<br>(8 - 16)          | 42<br>(31 - 56)         |
| Congenital anomalies                                | 374<br>(293 - 454)       | 299<br>(227 - 374)    | 22<br>(15 - 30)        | 25<br>(17 - 34)         | 8<br>(6 - 11)           | 21<br>(15 - 28)         |
| Neural tube defects                                 | 8<br>(3 - 18)            | 7<br>(2 - 17)         | 0<br>(0 - 0)           | 1<br>(0 - 1)            | 0<br>(0 - 0)            | 0<br>(0 - 0)            |
| Congenital heart anomalies                          | 161<br>(113 - 214)       | 138<br>(94 - 189)     | 10<br>(6 - 15)         | 8<br>(5 - 11)           | 1<br>(1 - 2)            | 4<br>(2 - 6)            |
| Cleft lip and cleft palate                          | 0<br>(0 - 0)             | 0<br>(0 - 0)          | --                     | --                      | --                      | --                      |
| Down syndrome                                       | 9<br>(5 - 15)            | 6<br>(3 - 10)         | 1<br>(1 - 2)           | 2<br>(1 - 3)            | 0<br>(0 - 0)            | 0<br>(0 - 0)            |
| Chromosomal unbalanced rearrangements               | 5<br>(3 - 7)             | 4<br>(2 - 6)          | 0<br>(0 - 0)           | 1<br>(0 - 1)            | 0<br>(0 - 0)            | 0<br>(0 - 0)            |
| Other congenital anomalies                          | 190<br>(143 - 243)       | 144<br>(102 - 193)    | 10<br>(7 - 15)         | 14<br>(9 - 19)          | 6<br>(4 - 8)            | 16<br>(11 - 22)         |
| Skin and subcutaneous diseases                      | 28<br>(18 - 44)          | 0<br>(0 - 1)          | 0<br>(0 - 0)           | 2<br>(1 - 4)            | 4<br>(2 - 7)            | 21<br>(13 - 33)         |
| Cellulitis                                          | 4<br>(2 - 8)             | 0<br>(0 - 0)          | 0<br>(0 - 0)           | 0<br>(0 - 1)            | 1<br>(0 - 2)            | 3<br>(1 - 6)            |
| Pyoderma                                            | 10<br>(6 - 17)           | 0<br>(0 - 0)          | 0<br>(0 - 0)           | 1<br>(0 - 1)            | 2<br>(1 - 3)            | 7<br>(4 - 13)           |
| Decubitus ulcer                                     | 13<br>(7 - 20)           | 0<br>(0 - 0)          | 0<br>(0 - 0)           | 1<br>(0 - 1)            | 1<br>(1 - 2)            | 11<br>(6 - 17)          |
| Other skin and subcutaneous diseases                | 1<br>(0 - 1)             | 0<br>(0 - 0)          | 0<br>(0 - 0)           | 0<br>(0 - 0)            | 0<br>(0 - 0)            | 0<br>(0 - 0)            |

Web Table 31- Lebanon deaths with 95% UI by age, sex, and cause in 2013

| Cause                                           | Both Sexes, All Ages   | Both Sexes, 0-4 Years | Both Sexes, 5-14 Years | Both Sexes, 15-49 Years | Both Sexes, 50-69 Years | Both Sexes, 70-80 Years |
|-------------------------------------------------|------------------------|-----------------------|------------------------|-------------------------|-------------------------|-------------------------|
| Sudden infant death syndrome                    | 8<br>(2 - 24)          | 8<br>(2 - 24)         | --                     | --                      | --                      | --                      |
| Injuries                                        | 1,249<br>(945 - 1,711) | 51<br>(37 - 71)       | 52<br>(41 - 66)        | 591<br>(421 - 809)      | 189<br>(137 - 277)      | 367<br>(275 - 541)      |
| Transport injuries                              | 442<br>(317 - 628)     | 12<br>(6 - 20)        | 23<br>(16 - 31)        | 258<br>(175 - 371)      | 86<br>(59 - 128)        | 63<br>(46 - 92)         |
| Road injuries                                   | 417<br>(297 - 605)     | 11<br>(6 - 19)        | 21<br>(15 - 30)        | 246<br>(166 - 359)      | 80<br>(54 - 120)        | 59<br>(42 - 86)         |
| Pedestrian road injuries                        | 102<br>(61 - 182)      | 4<br>(2 - 8)          | 7<br>(4 - 12)          | 46<br>(24 - 87)         | 23<br>(12 - 42)         | 22<br>(13 - 39)         |
| Cyclist road injuries                           | 16<br>(10 - 27)        | 0<br>(0 - 1)          | 1<br>(1 - 2)           | 7<br>(4 - 11)           | 5<br>(3 - 8)            | 4<br>(2 - 6)            |
| Motorcyclist road injuries                      | 35<br>(20 - 65)        | 0<br>(0 - 1)          | 1<br>(0 - 1)           | 26<br>(14 - 50)         | 5<br>(2 - 9)            | 3<br>(2 - 6)            |
| Motor vehicle road injuries                     | 263<br>(182 - 357)     | 6<br>(3 - 11)         | 12<br>(8 - 17)         | 167<br>(112 - 227)      | 48<br>(32 - 71)         | 29<br>(20 - 45)         |
| Other road injuries                             | 2<br>(1 - 3)           | 0<br>(0 - 0)          | 0<br>(0 - 0)           | 0<br>(0 - 1)            | 0<br>(0 - 1)            | 0<br>(0 - 1)            |
| Other transport injuries                        | 24<br>(15 - 34)        | 1<br>(0 - 1)          | 1<br>(1 - 2)           | 12<br>(7 - 18)          | 6<br>(3 - 9)            | 4<br>(3 - 7)            |
| Unintentional injuries                          | 535<br>(402 - 781)     | 24<br>(15 - 39)       | 23<br>(17 - 31)        | 152<br>(108 - 223)      | 64<br>(46 - 91)         | 272<br>(196 - 418)      |
| Falls                                           | 197<br>(118 - 364)     | 2<br>(1 - 5)          | 1<br>(1 - 4)           | 13<br>(6 - 39)          | 9<br>(5 - 15)           | 172<br>(100 - 312)      |
| Drowning                                        | 80<br>(55 - 131)       | 8<br>(4 - 16)         | 10<br>(6 - 16)         | 44<br>(27 - 74)         | 9<br>(5 - 16)           | 10<br>(6 - 15)          |
| Fire, heat, and hot substances                  | 51<br>(35 - 69)        | 3<br>(2 - 6)          | 2<br>(1 - 3)           | 17<br>(10 - 27)         | 8<br>(5 - 11)           | 21<br>(13 - 30)         |
| Poisonings                                      | 19<br>(10 - 26)        | 1<br>(1 - 2)          | 1<br>(0 - 1)           | 9<br>(4 - 13)           | 3<br>(2 - 4)            | 5<br>(3 - 8)            |
| Exposure to mechanical forces                   | 45<br>(30 - 91)        | 3<br>(1 - 10)         | 3<br>(2 - 6)           | 22<br>(14 - 41)         | 9<br>(5 - 20)           | 8<br>(5 - 17)           |
| Unintentional firearm injuries                  | 10<br>(6 - 15)         | 0<br>(0 - 0)          | 0<br>(0 - 1)           | 6<br>(3 - 10)           | 2<br>(1 - 3)            | 2<br>(1 - 3)            |
| Unintentional suffocation                       | 9<br>(3 - 52)          | 1<br>(0 - 8)          | 1<br>(0 - 4)           | 3<br>(1 - 20)           | 2<br>(1 - 12)           | 1<br>(0 - 9)            |
| Other exposure to mechanical forces             | 26<br>(18 - 39)        | 1<br>(1 - 2)          | 2<br>(1 - 3)           | 13<br>(8 - 20)          | 5<br>(3 - 9)            | 5<br>(3 - 8)            |
| Adverse effects of medical treatment            | 55<br>(39 - 79)        | 2<br>(1 - 3)          | 1<br>(1 - 1)           | 9<br>(6 - 14)           | 14<br>(9 - 23)          | 28<br>(18 - 45)         |
| Animal contact                                  | 11<br>(6 - 17)         | 1<br>(0 - 1)          | 1<br>(0 - 2)           | 3<br>(2 - 5)            | 2<br>(1 - 3)            | 4<br>(2 - 7)            |
| Venomous animal contact                         | 4<br>(2 - 6)           | 0<br>(0 - 1)          | 0<br>(0 - 1)           | 1<br>(0 - 2)            | 1<br>(0 - 1)            | 1<br>(0 - 2)            |
| Non-venomous animal contact                     | 7<br>(4 - 12)          | 0<br>(0 - 1)          | 1<br>(0 - 1)           | 2<br>(1 - 3)            | 1<br>(1 - 2)            | 3<br>(1 - 5)            |
| Foreign body                                    | 21<br>(13 - 29)        | 2<br>(1 - 4)          | 1<br>(1 - 1)           | 3<br>(2 - 4)            | 2<br>(1 - 3)            | 13<br>(7 - 20)          |
| Pulmonary aspiration and foreign body in airway | 20<br>(11 - 28)        | 2<br>(1 - 3)          | 1<br>(0 - 1)           | 2<br>(1 - 3)            | 2<br>(1 - 3)            | 13<br>(7 - 19)          |
| Foreign body in other body part                 | 1<br>(1 - 3)           | 0<br>(0 - 0)          | 0<br>(0 - 0)           | 0<br>(0 - 1)            | 0<br>(0 - 1)            | 0<br>(0 - 1)            |
| Other unintentional injuries                    | 55<br>(34 - 96)        | 2<br>(1 - 4)          | 3<br>(2 - 5)           | 31<br>(18 - 57)         | 8<br>(5 - 15)           | 11<br>(6 - 18)          |
| Self-harm and interpersonal violence            | 258<br>(177 - 422)     | 1<br>(1 - 3)          | 4<br>(3 - 7)           | 181<br>(122 - 298)      | 39<br>(25 - 75)         | 32<br>(22 - 54)         |
| Self-harm                                       | 144<br>(94 - 240)      | --                    | 2<br>(1 - 4)           | 87<br>(53 - 138)        | 27<br>(17 - 50)         | 28<br>(18 - 49)         |
| Interpersonal violence                          | 114<br>(71 - 225)      | 1<br>(1 - 3)          | 2<br>(1 - 5)           | 94<br>(58 - 186)        | 12<br>(6 - 28)          | 4<br>(2 - 8)            |
| Assault by firearm                              | 54<br>(30 - 114)       | 0<br>(0 - 1)          | 1<br>(0 - 2)           | 46<br>(26 - 96)         | 6<br>(3 - 15)           | 1<br>(0 - 3)            |
| Assault by sharp object                         | 35<br>(18 - 76)        | 0<br>(0 - 0)          | 0<br>(0 - 1)           | 30<br>(15 - 64)         | 4<br>(2 - 10)           | 1<br>(0 - 2)            |
| Assault by other means                          | 25<br>(14 - 51)        | 1<br>(0 - 2)          | 1<br>(1 - 2)           | 18<br>(10 - 39)         | 3<br>(1 - 6)            | 2<br>(1 - 4)            |
| Forces of nature, war, and legal intervention   | 15<br>(15 - 15)        | 13<br>(13 - 13)       | 2<br>(2 - 2)           | 0<br>(0 - 0)            | 0<br>(0 - 0)            | 0<br>(0 - 0)            |
| Collective violence and legal intervention      | 15<br>(15 - 15)        | 13<br>(13 - 13)       | 2<br>(2 - 2)           | 0<br>(0 - 0)            | 0<br>(0 - 0)            | 0<br>(0 - 0)            |

Web Table 31- Lebanon deaths with 95% UI by age, sex, and cause in 2013

| Cause                                                             | Males, All Ages             | Males, 0-4 Years   | Males, 5-14 Years | Males, 15-49 Years       | Males, 50-69 Years       | Males, 70-80 Years        |
|-------------------------------------------------------------------|-----------------------------|--------------------|-------------------|--------------------------|--------------------------|---------------------------|
| All causes                                                        | 13,691<br>(11,038 - 18,159) | 455<br>(393 - 533) | 100<br>(85 - 117) | 1,760<br>(1,305 - 2,251) | 3,854<br>(2,878 - 5,360) | 7,522<br>(6,300 - 10,048) |
| Communicable, maternal, neonatal, and nutritional diseases        | 686<br>(510 - 1,091)        | 228<br>(179 - 284) | 19<br>(12 - 29)   | 133<br>(62 - 395)        | 86<br>(51 - 188)         | 221<br>(146 - 353)        |
| HIV/AIDS and tuberculosis                                         | 117<br>(33 - 496)           | 2<br>(0 - 7)       | 0<br>(0 - 2)      | 70<br>(12 - 341)         | 26<br>(7 - 116)          | 19<br>(10 - 38)           |
| Tuberculosis                                                      | 27<br>(18 - 39)             | 0<br>(0 - 0)       | 0<br>(0 - 0)      | 6<br>(3 - 8)             | 7<br>(4 - 11)            | 14<br>(9 - 21)            |
| HIV/AIDS                                                          | 89<br>(8 - 471)             | 2<br>(0 - 7)       | 0<br>(0 - 2)      | 64<br>(6 - 337)          | 19<br>(1 - 111)          | 4<br>(0 - 22)             |
| HIV/AIDS resulting in mycobacterial infection                     | 5<br>(0 - 27)               | 0<br>(0 - 0)       | 0<br>(0 - 0)      | 4<br>(0 - 20)            | 1<br>(0 - 7)             | 0<br>(0 - 1)              |
| HIV/AIDS resulting in other diseases                              | 84<br>(7 - 445)             | 1<br>(0 - 7)       | 0<br>(0 - 2)      | 61<br>(5 - 317)          | 18<br>(1 - 104)          | 4<br>(0 - 20)             |
| Diarrhea, lower respiratory, and other common infectious diseases | 335<br>(232 - 510)          | 53<br>(34 - 81)    | 17<br>(10 - 27)   | 52<br>(28 - 87)          | 42<br>(26 - 74)          | 171<br>(103 - 293)        |
| Diarrheal diseases                                                | 28<br>(15 - 45)             | 6<br>(2 - 16)      | 1<br>(0 - 1)      | 3<br>(1 - 5)             | 3<br>(2 - 7)             | 15<br>(7 - 27)            |
| Intestinal infectious diseases                                    | 52<br>(25 - 97)             | 10<br>(4 - 19)     | 11<br>(5 - 21)    | 24<br>(9 - 48)           | 5<br>(2 - 10)            | 3<br>(1 - 6)              |
| Typhoid fever                                                     | 36<br>(16 - 71)             | 6<br>(3 - 12)      | 8<br>(4 - 16)     | 17<br>(6 - 36)           | 3<br>(1 - 7)             | 2<br>(1 - 4)              |
| Paratyphoid fever                                                 | 10<br>(4 - 20)              | 2<br>(1 - 4)       | 2<br>(1 - 5)      | 4<br>(1 - 10)            | 1<br>(0 - 2)             | 0<br>(0 - 1)              |
| Other intestinal infectious diseases                              | 6<br>(2 - 13)               | 2<br>(0 - 6)       | 0<br>(0 - 2)      | 2<br>(0 - 7)             | 1<br>(0 - 4)             | 1<br>(0 - 4)              |
| Lower respiratory infections                                      | 212<br>(129 - 384)          | 24<br>(14 - 40)    | 2<br>(1 - 5)      | 15<br>(7 - 39)           | 27<br>(15 - 57)          | 143<br>(76 - 261)         |
| Upper respiratory infections                                      | 0<br>(0 - 1)                | 0<br>(0 - 0)       | 0<br>(0 - 0)      | 0<br>(0 - 0)             | 0<br>(0 - 0)             | 0<br>(0 - 1)              |
| Otitis media                                                      | 1<br>(1 - 2)                | 0<br>(0 - 0)       | 0<br>(0 - 0)      | 0<br>(0 - 0)             | 0<br>(0 - 0)             | 1<br>(0 - 1)              |
| Meningitis                                                        | 17<br>(10 - 26)             | 2<br>(1 - 4)       | 1<br>(0 - 2)      | 5<br>(2 - 7)             | 3<br>(2 - 6)             | 6<br>(3 - 11)             |
| Pneumococcal meningitis                                           | 4<br>(2 - 7)                | 0<br>(0 - 1)       | 0<br>(0 - 0)      | 1<br>(1 - 2)             | 1<br>(0 - 2)             | 2<br>(1 - 3)              |
| H influenzae type B meningitis                                    | 3<br>(2 - 4)                | 1<br>(0 - 2)       | 0<br>(0 - 0)      | 1<br>(0 - 1)             | 0<br>(0 - 1)             | 1<br>(0 - 2)              |
| Meningococcal meningitis                                          | 5<br>(3 - 7)                | 1<br>(0 - 1)       | 0<br>(0 - 1)      | 1<br>(1 - 2)             | 1<br>(0 - 2)             | 2<br>(1 - 3)              |
| Other meningitis                                                  | 6<br>(3 - 9)                | 0<br>(0 - 1)       | 0<br>(0 - 0)      | 1<br>(1 - 3)             | 1<br>(1 - 3)             | 2<br>(1 - 4)              |
| Encephalitis                                                      | 12<br>(8 - 22)              | 2<br>(1 - 4)       | 1<br>(0 - 2)      | 4<br>(2 - 8)             | 2<br>(1 - 5)             | 3<br>(2 - 5)              |
| Diphtheria                                                        | 0<br>(0 - 0)                | 0<br>(0 - 0)       | 0<br>(0 - 0)      | 0<br>(0 - 0)             | 0<br>(0 - 0)             | --<br>(0 - 0)             |
| Whooping cough                                                    | 3<br>(0 - 15)               | 3<br>(0 - 14)      | 0<br>(0 - 1)      | 0<br>(0 - 0)             | 0<br>(0 - 0)             | --<br>(0 - 0)             |
| Tetanus                                                           | 0<br>(0 - 1)                | 0<br>(0 - 0)       | 0<br>(0 - 0)      | 0<br>(0 - 0)             | 0<br>(0 - 0)             | 0<br>(0 - 0)              |
| Measles                                                           | 7<br>(0 - 39)               | 6<br>(0 - 31)      | 1<br>(0 - 6)      | 0<br>(0 - 2)             | 0<br>(0 - 0)             | --<br>(0 - 0)             |
| Varicella and herpes zoster                                       | 1<br>(0 - 4)                | 0<br>(0 - 1)       | 0<br>(0 - 0)      | 0<br>(0 - 1)             | 0<br>(0 - 0)             | 1<br>(0 - 3)              |
| Neglected tropical diseases and malaria                           | 7<br>(4 - 11)               | 1<br>(0 - 2)       | 0<br>(0 - 1)      | 3<br>(1 - 5)             | 1<br>(1 - 3)             | 1<br>(1 - 2)              |
| Leishmaniasis                                                     | 4<br>(2 - 7)                | 1<br>(0 - 2)       | 0<br>(0 - 0)      | 2<br>(0 - 4)             | 1<br>(0 - 2)             | 0<br>(0 - 1)              |
| Visceral leishmaniasis                                            | 4<br>(2 - 7)                | 1<br>(0 - 2)       | 0<br>(0 - 0)      | 2<br>(0 - 4)             | 1<br>(0 - 2)             | 0<br>(0 - 1)              |
| Cysticercosis                                                     | 0<br>(0 - 0)                | 0<br>(0 - 0)       | 0<br>(0 - 0)      | 0<br>(0 - 0)             | 0<br>(0 - 0)             | 0<br>(0 - 0)              |
| Cystic echinococcosis                                             | 1<br>(1 - 1)                | 0<br>(0 - 0)       | 0<br>(0 - 0)      | 0<br>(0 - 1)             | 0<br>(0 - 0)             | 0<br>(0 - 0)              |
| Dengue                                                            | 0<br>(0 - 0)                | 0<br>(0 - 0)       | 0<br>(0 - 0)      | 0<br>(0 - 0)             | 0<br>(0 - 0)             | 0<br>(0 - 0)              |
| Rabies                                                            | 0<br>(0 - 1)                | 0<br>(0 - 0)       | 0<br>(0 - 0)      | 0<br>(0 - 0)             | 0<br>(0 - 0)             | 0<br>(0 - 0)              |
| Intestinal nematode infections                                    | 0<br>(0 - 1)                | 0<br>(0 - 0)       | 0<br>(0 - 0)      | 0<br>(0 - 0)             | 0<br>(0 - 0)             | 0<br>(0 - 0)              |
| Ascariasis                                                        | 0<br>(0 - 1)                | 0<br>(0 - 0)       | 0<br>(0 - 0)      | 0<br>(0 - 0)             | 0<br>(0 - 0)             | 0<br>(0 - 0)              |
| Other neglected tropical diseases                                 | 1<br>(1 - 2)                | 0<br>(0 - 0)       | 0<br>(0 - 0)      | 0<br>(0 - 1)             | 0<br>(0 - 0)             | 0<br>(0 - 1)              |
| Maternal disorders                                                | --                          | --                 | --                | --                       | --                       | --                        |
| Maternal hemorrhage                                               | --                          | --                 | --                | --                       | --                       | --                        |
| Maternal sepsis and other maternal infections                     | --                          | --                 | --                | --                       | --                       | --                        |

Web Table 31- Lebanon deaths with 95% UI by age, sex, and cause in 2013

| Cause                                                            | Males, All Ages            | Males, 0-4 Years   | Males, 5-14 Years | Males, 15-49 Years     | Males, 50-69 Years       | Males, 70-80 Years       |
|------------------------------------------------------------------|----------------------------|--------------------|-------------------|------------------------|--------------------------|--------------------------|
| Maternal hypertensive disorders                                  | --                         | --                 | --                | --                     | --                       | --                       |
| Maternal obstructed labor                                        | --                         | --                 | --                | --                     | --                       | --                       |
| Maternal abortive outcome                                        | --                         | --                 | --                | --                     | --                       | --                       |
| Indirect maternal deaths                                         | --                         | --                 | --                | --                     | --                       | --                       |
| Late maternal deaths                                             | --                         | --                 | --                | --                     | --                       | --                       |
| Maternal deaths aggravated by HIV/AIDS                           | --                         | --                 | --                | --                     | --                       | --                       |
| Other maternal disorders                                         | --                         | --                 | --                | --                     | --                       | --                       |
| Neonatal disorders                                               | 169<br>(128 - 218)         | 169<br>(128 - 218) | --                | --                     | --                       | --                       |
| Neonatal preterm birth complications                             | 112<br>(70 - 154)          | 112<br>(70 - 154)  | --                | --                     | --                       | --                       |
| Neonatal encephalopathy due to birth asphyxia and trauma         | 25<br>(11 - 52)            | 25<br>(11 - 52)    | --                | --                     | --                       | --                       |
| Neonatal sepsis and other neonatal infections                    | 13<br>(5 - 29)             | 13<br>(5 - 29)     | --                | --                     | --                       | --                       |
| Hemolytic disease and other neonatal jaundice                    | 0<br>(0 - 1)               | 0<br>(0 - 1)       | --                | --                     | --                       | --                       |
| Other neonatal disorders                                         | 18<br>(7 - 39)             | 18<br>(7 - 39)     | --                | --                     | --                       | --                       |
| Nutritional deficiencies                                         | 22<br>(14 - 41)            | 1<br>(0 - 2)       | 0<br>(0 - 1)      | 2<br>(1 - 4)           | 4<br>(2 - 7)             | 15<br>(9 - 29)           |
| Protein-energy malnutrition                                      | 7<br>(2 - 19)              | 0<br>(0 - 1)       | 0<br>(0 - 0)      | 1<br>(0 - 2)           | 1<br>(0 - 3)             | 5<br>(1 - 13)            |
| Iodine deficiency                                                | 0<br>(0 - 1)               | 0<br>(0 - 0)       | 0<br>(0 - 0)      | 0<br>(0 - 0)           | 0<br>(0 - 0)             | 0<br>(0 - 1)             |
| Iron-deficiency anemia                                           | 14<br>(6 - 24)             | 0<br>(0 - 1)       | 0<br>(0 - 0)      | 1<br>(0 - 2)           | 2<br>(1 - 5)             | 10<br>(4 - 18)           |
| Other nutritional deficiencies                                   | 2<br>(1 - 4)               | 0<br>(0 - 0)       | 0<br>(0 - 0)      | 0<br>(0 - 1)           | 0<br>(0 - 1)             | 1<br>(0 - 3)             |
| Other communicable, maternal, neonatal, and nutritional diseases | 37<br>(24 - 58)            | 2<br>(1 - 5)       | 1<br>(0 - 1)      | 6<br>(4 - 10)          | 12<br>(8 - 22)           | 15<br>(8 - 30)           |
| Sexually transmitted diseases excluding HIV                      | 2<br>(1 - 4)               | 1<br>(0 - 3)       | 0<br>(0 - 0)      | 0<br>(0 - 0)           | 0<br>(0 - 0)             | 0<br>(0 - 1)             |
| Syphilis                                                         | 2<br>(0 - 4)               | 1<br>(0 - 3)       | 0<br>(0 - 0)      | 0<br>(0 - 0)           | 0<br>(0 - 0)             | 0<br>(0 - 1)             |
| Chlamydial infection                                             | --                         | --                 | --                | --                     | --                       | --                       |
| Gonococcal infection                                             | 0<br>(0 - 0)               | --                 | 0<br>(0 - 0)      | 0<br>(0 - 0)           | 0<br>(0 - 0)             | 0<br>(0 - 0)             |
| Other sexually transmitted diseases                              | 0<br>(0 - 0)               | --                 | 0<br>(0 - 0)      | 0<br>(0 - 0)           | 0<br>(0 - 0)             | 0<br>(0 - 0)             |
| Hepatitis                                                        | 17<br>(12 - 27)            | 0<br>(0 - 1)       | 0<br>(0 - 0)      | 3<br>(2 - 5)           | 8<br>(5 - 13)            | 6<br>(4 - 9)             |
| Acute hepatitis A                                                | 1<br>(0 - 2)               | 0<br>(0 - 0)       | 0<br>(0 - 0)      | 0<br>(0 - 1)           | 0<br>(0 - 1)             | 0<br>(0 - 0)             |
| Acute hepatitis B                                                | 14<br>(9 - 21)             | 0<br>(0 - 0)       | 0<br>(0 - 0)      | 2<br>(1 - 4)           | 7<br>(4 - 11)            | 5<br>(3 - 7)             |
| Acute hepatitis C                                                | 2<br>(0 - 5)               | --                 | 0<br>(0 - 0)      | 0<br>(0 - 1)           | 1<br>(0 - 2)             | 1<br>(0 - 2)             |
| Acute hepatitis E                                                | 1<br>(0 - 2)               | 0<br>(0 - 0)       | 0<br>(0 - 0)      | 0<br>(0 - 1)           | 0<br>(0 - 1)             | 0<br>(0 - 0)             |
| Other infectious diseases                                        | 17<br>(9 - 35)             | 1<br>(0 - 3)       | 0<br>(0 - 1)      | 3<br>(1 - 5)           | 4<br>(2 - 10)            | 9<br>(3 - 25)            |
| Non-communicable diseases                                        | 12,080<br>(9,637 - 16,147) | 198<br>(152 - 247) | 47<br>(36 - 60)   | 1,137<br>(764 - 1,502) | 3,625<br>(2,672 - 4,999) | 7,074<br>(5,897 - 9,443) |
| Neoplasms                                                        | 3,292<br>(2,524 - 4,518)   | 6<br>(4 - 10)      | 19<br>(14 - 25)   | 430<br>(290 - 579)     | 1,226<br>(892 - 1,724)   | 1,611<br>(1,266 - 2,195) |
| Esophageal cancer                                                | 38<br>(26 - 55)            | --                 | --                | 5<br>(3 - 8)           | 13<br>(9 - 20)           | 19<br>(13 - 29)          |
| Stomach cancer                                                   | 235<br>(172 - 324)         | --                 | --                | 31<br>(19 - 44)        | 94<br>(65 - 133)         | 111<br>(80 - 156)        |
| Liver cancer                                                     | 103<br>(75 - 144)          | --                 | 0<br>(0 - 1)      | 16<br>(10 - 24)        | 36<br>(35 - 74)          | 36<br>(25 - 53)          |
| Liver cancer due to hepatitis B                                  | 11<br>(5 - 21)             | --                 | 0<br>(0 - 0)      | 3<br>(1 - 5)           | 6<br>(2 - 11)            | 3<br>(1 - 5)             |
| Liver cancer due to hepatitis C                                  | 74<br>(52 - 104)           | --                 | 0<br>(0 - 0)      | 11<br>(6 - 16)         | 37<br>(24 - 55)          | 27<br>(18 - 40)          |
| Liver cancer due to alcohol use                                  | 10<br>(4 - 18)             | --                 | --                | 1<br>(0 - 2)           | 4<br>(1 - 8)             | 5<br>(2 - 8)             |
| Liver cancer due to other causes                                 | 8<br>(4 - 14)              | --                 | 0<br>(0 - 0)      | 2<br>(1 - 4)           | 4<br>(1 - 7)             | 2<br>(1 - 4)             |
| Larynx cancer                                                    | 123<br>(81 - 178)          | --                 | --                | 9<br>(5 - 14)          | 50<br>(31 - 75)          | 65<br>(42 - 97)          |

Web Table 31- Lebanon deaths with 95% UI by age, sex, and cause in 2013

| Cause                                         | Males, All Ages          | Males, 0-4 Years | Males, 5-14 Years | Males, 15-49 Years | Males, 50-69 Years       | Males, 70-80 Years       |
|-----------------------------------------------|--------------------------|------------------|-------------------|--------------------|--------------------------|--------------------------|
| Tracheal, bronchus and lung cancer            | 871<br>(654 - 1,206)     | --               | --                | 75<br>(48 - 109)   | 412<br>(295 - 587)       | 384<br>(295 - 532)       |
| Breast cancer                                 | 10<br>(6 - 15)           | --               | --                | 2<br>(1 - 3)       | 4<br>(2 - 7)             | 4<br>(2 - 8)             |
| Cervical cancer                               | --                       | --               | --                | --                 | --                       | --                       |
| Uterine cancer                                | --                       | --               | --                | --                 | --                       | --                       |
| Prostate cancer                               | 514<br>(299 - 760)       | --               | --                | 3<br>(2 - 5)       | 81<br>(46 - 125)         | 430<br>(245 - 638)       |
| Colon and rectum cancer                       | 357<br>(266 - 483)       | --               | --                | 45<br>(29 - 63)    | 128<br>(89 - 180)        | 184<br>(134 - 250)       |
| Lip and oral cavity cancer                    | 25<br>(16 - 38)          | --               | --                | 5<br>(3 - 8)       | 10<br>(6 - 16)           | 10<br>(6 - 15)           |
| Nasopharynx cancer                            | 20<br>(13 - 30)          | --               | 0<br>(0 - 1)      | 8<br>(5 - 13)      | 8<br>(5 - 14)            | 3<br>(2 - 6)             |
| Other pharynx cancer                          | 11<br>(7 - 16)           | --               | --                | 2<br>(1 - 3)       | 7<br>(4 - 10)            | 3<br>(2 - 4)             |
| Gallbladder and biliary tract cancer          | 39<br>(24 - 58)          | --               | --                | 3<br>(2 - 5)       | 13<br>(8 - 21)           | 23<br>(14 - 35)          |
| Pancreatic cancer                             | 108<br>(78 - 150)        | --               | --                | 21<br>(13 - 30)    | 54<br>(37 - 77)          | 32<br>(24 - 46)          |
| Malignant skin melanoma                       | 14<br>(7 - 23)           | --               | --                | 4<br>(2 - 6)       | 5<br>(2 - 8)             | 6<br>(3 - 10)            |
| Non-melanoma skin cancer                      | 5<br>(3 - 9)             | --               | --                | 1<br>(0 - 1)       | 1<br>(1 - 2)             | 3<br>(2 - 6)             |
| Ovarian cancer                                | --                       | --               | --                | --                 | --                       | --                       |
| Testicular cancer                             | 9<br>(5 - 15)            | --               | --                | 7<br>(4 - 12)      | 1<br>(1 - 2)             | 1<br>(1 - 2)             |
| Kidney cancer                                 | 87<br>(61 - 120)         | 0<br>(0 - 1)     | 0<br>(0 - 0)      | 11<br>(7 - 17)     | 41<br>(27 - 60)          | 34<br>(23 - 51)          |
| Bladder cancer                                | 91<br>(65 - 130)         | --               | --                | 4<br>(2 - 6)       | 33<br>(22 - 48)          | 54<br>(36 - 79)          |
| Brain and nervous system cancer               | 118<br>(65 - 169)        | 1<br>(0 - 3)     | 4<br>(2 - 7)      | 44<br>(22 - 64)    | 50<br>(28 - 76)          | 18<br>(10 - 29)          |
| Thyroid cancer                                | 14<br>(9 - 20)           | --               | 0<br>(0 - 0)      | 4<br>(2 - 5)       | 5<br>(3 - 8)             | 6<br>(4 - 8)             |
| Mesothelioma                                  | 16<br>(11 - 24)          | --               | --                | 4<br>(2 - 6)       | 8<br>(5 - 13)            | 5<br>(3 - 8)             |
| Hodgkin lymphoma                              | 32<br>(17 - 48)          | 0<br>(0 - 0)     | 1<br>(0 - 2)      | 16<br>(8 - 26)     | 9<br>(5 - 15)            | 6<br>(3 - 10)            |
| Non-Hodgkin lymphoma                          | 217<br>(129 - 317)       | 1<br>(0 - 2)     | 3<br>(2 - 5)      | 53<br>(29 - 77)    | 79<br>(46 - 118)         | 81<br>(46 - 127)         |
| Multiple myeloma                              | 38<br>(24 - 56)          | --               | --                | 6<br>(4 - 9)       | 15<br>(9 - 24)           | 17<br>(10 - 27)          |
| Leukemia                                      | 118<br>(86 - 156)        | 2<br>(1 - 3)     | 7<br>(5 - 10)     | 37<br>(23 - 50)    | 30<br>(20 - 43)          | 43<br>(30 - 60)          |
| Other neoplasms                               | 78<br>(44 - 115)         | 2<br>(1 - 3)     | 2<br>(1 - 4)      | 17<br>(8 - 26)     | 26<br>(13 - 41)          | 31<br>(17 - 49)          |
| Cardiovascular diseases                       | 5,632<br>(4,461 - 7,514) | 10<br>(6 - 15)   | 7<br>(5 - 10)     | 456<br>(305 - 611) | 1,698<br>(1,248 - 2,305) | 3,460<br>(2,854 - 4,596) |
| Rheumatic heart disease                       | 18<br>(9 - 28)           | 0<br>(0 - 0)     | 0<br>(0 - 1)      | 4<br>(2 - 7)       | 5<br>(2 - 8)             | 8<br>(4 - 14)            |
| Ischemic heart disease                        | 4,795<br>(3,753 - 6,412) | 3<br>(1 - 6)     | 3<br>(1 - 4)      | 369<br>(240 - 508) | 1,498<br>(1,097 - 2,052) | 2,922<br>(2,360 - 3,860) |
| Cerebrovascular disease                       | 360<br>(199 - 527)       | 1<br>(0 - 2)     | 1<br>(1 - 2)      | 22<br>(13 - 35)    | 62<br>(39 - 97)          | 274<br>(187 - 396)       |
| Ischemic stroke                               | 199<br>(50 - 335)        | 0<br>(0 - 0)     | 0<br>(0 - 0)      | 5<br>(1 - 12)      | 26<br>(4 - 49)           | 168<br>(44 - 281)        |
| Hemorrhagic stroke                            | 161<br>(71 - 354)        | 1<br>(0 - 1)     | 1<br>(0 - 1)      | 17<br>(9 - 30)     | 37<br>(17 - 70)          | 105<br>(38 - 259)        |
| Hypertensive heart disease                    | 134<br>(22 - 231)        | 0<br>(0 - 0)     | 0<br>(0 - 0)      | 11<br>(2 - 19)     | 36<br>(6 - 63)           | 87<br>(14 - 160)         |
| Cardiomyopathy and myocarditis                | 101<br>(67 - 161)        | 3<br>(2 - 5)     | 2<br>(1 - 3)      | 20<br>(12 - 32)    | 30<br>(18 - 50)          | 47<br>(28 - 77)          |
| Atrial fibrillation and flutter               | 8<br>(4 - 14)            | --               | --                | 0<br>(0 - 1)       | 2<br>(1 - 4)             | 5<br>(3 - 10)            |
| Aortic aneurysm                               | 50<br>(25 - 180)         | --               | --                | 3<br>(1 - 10)      | 20<br>(10 - 62)          | 26<br>(13 - 101)         |
| Peripheral vascular disease                   | 4<br>(2 - 7)             | --               | --                | 0<br>(0 - 1)       | 1<br>(0 - 1)             | 3<br>(2 - 5)             |
| Endocarditis                                  | 24<br>(13 - 41)          | 1<br>(0 - 2)     | 0<br>(0 - 1)      | 4<br>(2 - 8)       | 7<br>(3 - 13)            | 11<br>(6 - 20)           |
| Other cardiovascular and circulatory diseases | 139<br>(94 - 243)        | 2<br>(1 - 4)     | 1<br>(1 - 2)      | 22<br>(14 - 35)    | 37<br>(23 - 64)          | 76<br>(49 - 136)         |
| Chronic respiratory diseases                  | 823<br>(553 - 1,114)     | 2<br>(1 - 4)     | 1<br>(1 - 2)      | 34<br>(18 - 49)    | 182<br>(111 - 261)       | 604<br>(416 - 821)       |
| Chronic obstructive pulmonary disease         | 630<br>(424 - 859)       | 1<br>(1 - 2)     | 0<br>(0 - 1)      | 18<br>(9 - 27)     | 132<br>(79 - 193)        | 478<br>(326 - 654)       |



Web Table 31- Lebanon deaths with 95% UI by age, sex, and cause in 2013

| Cause                                               | Males, All Ages    | Males, 0-4 Years | Males, 5-14 Years | Males, 15-49 Years | Males, 50-69 Years | Males, 70-80 Years |
|-----------------------------------------------------|--------------------|------------------|-------------------|--------------------|--------------------|--------------------|
| Pneumoconiosis                                      | 16<br>(9 - 24)     | 0<br>(0 - 0)     | 0<br>(0 - 0)      | 3<br>(1 - 6)       | 4<br>(2 - 7)       | 8<br>(4 - 13)      |
| Silicosis                                           | 5<br>(3 - 9)       | 0<br>(0 - 0)     | 0<br>(0 - 0)      | 0<br>(0 - 0)       | 1<br>(0 - 1)       | 4<br>(2 - 8)       |
| Asbestosis                                          | 1<br>(0 - 1)       | 0<br>(0 - 0)     | 0<br>(0 - 0)      | 0<br>(0 - 1)       | 0<br>(0 - 0)       | 0<br>(0 - 0)       |
| Coal workers pneumoconiosis                         | 0<br>(0 - 0)       | 0<br>(0 - 0)     | 0<br>(0 - 0)      | 0<br>(0 - 0)       | 0<br>(0 - 0)       | 0<br>(0 - 0)       |
| Other pneumoconiosis                                | 9<br>(5 - 15)      | 0<br>(0 - 0)     | 0<br>(0 - 0)      | 2<br>(1 - 4)       | 3<br>(2 - 6)       | 3<br>(2 - 6)       |
| Asthma                                              | 57<br>(34 - 88)    | 0<br>(0 - 1)     | 0<br>(0 - 1)      | 7<br>(4 - 11)      | 16<br>(9 - 26)     | 33<br>(19 - 56)    |
| Interstitial lung disease and pulmonary sarcoidosis | 108<br>(61 - 182)  | 0<br>(0 - 0)     | 0<br>(0 - 0)      | 3<br>(2 - 6)       | 27<br>(14 - 48)    | 78<br>(40 - 134)   |
| Other chronic respiratory diseases                  | 12<br>(6 - 22)     | 0<br>(0 - 1)     | 0<br>(0 - 0)      | 2<br>(1 - 3)       | 3<br>(1 - 5)       | 7<br>(3 - 13)      |
| Cirrhosis                                           | 221<br>(161 - 309) | 1<br>(0 - 1)     | 1<br>(1 - 1)      | 31<br>(20 - 45)    | 89<br>(60 - 129)   | 99<br>(70 - 145)   |
| Cirrhosis due to hepatitis B                        | 73<br>(37 - 117)   | 0<br>(0 - 0)     | 0<br>(0 - 0)      | 11<br>(4 - 22)     | 31<br>(13 - 54)    | 31<br>(14 - 54)    |
| Cirrhosis due to hepatitis C                        | 79<br>(30 - 136)   | 0<br>(0 - 0)     | 0<br>(0 - 0)      | 8<br>(0 - 20)      | 31<br>(8 - 60)     | 40<br>(20 - 64)    |
| Cirrhosis due to alcohol use                        | 45<br>(21 - 85)    | --               | --                | 5<br>(2 - 11)      | 18<br>(7 - 37)     | 23<br>(10 - 40)    |
| Cirrhosis due to other causes                       | 24<br>(10 - 45)    | 1<br>(0 - 1)     | 1<br>(0 - 1)      | 7<br>(2 - 15)      | 9<br>(3 - 19)      | 6<br>(3 - 12)      |
| Digestive diseases                                  | 134<br>(98 - 190)  | 1<br>(0 - 1)     | 1<br>(0 - 1)      | 16<br>(11 - 23)    | 32<br>(22 - 49)    | 85<br>(60 - 122)   |
| Peptic ulcer disease                                | 36<br>(21 - 54)    | 0<br>(0 - 0)     | 0<br>(0 - 0)      | 3<br>(2 - 5)       | 9<br>(5 - 14)      | 23<br>(13 - 37)    |
| Gastritis and duodenitis                            | 2<br>(1 - 3)       | 0<br>(0 - 0)     | 0<br>(0 - 0)      | 0<br>(0 - 1)       | 0<br>(0 - 1)       | 1<br>(0 - 2)       |
| Appendicitis                                        | 4<br>(2 - 7)       | 0<br>(0 - 0)     | 0<br>(0 - 0)      | 1<br>(0 - 2)       | 1<br>(0 - 2)       | 2<br>(1 - 4)       |
| Paralytic ileus and intestinal obstruction          | 31<br>(18 - 58)    | 0<br>(0 - 1)     | 0<br>(0 - 0)      | 3<br>(2 - 6)       | 7<br>(4 - 15)      | 20<br>(11 - 37)    |
| Inguinal, femoral, and abdominal hernia             | 2<br>(1 - 4)       | 0<br>(0 - 0)     | 0<br>(0 - 0)      | 0<br>(0 - 1)       | 0<br>(0 - 1)       | 2<br>(1 - 3)       |
| Inflammatory bowel disease                          | 7<br>(4 - 11)      | 0<br>(0 - 0)     | 0<br>(0 - 0)      | 1<br>(1 - 2)       | 2<br>(1 - 3)       | 4<br>(2 - 8)       |
| Vascular intestinal disorders                       | 4<br>(1 - 9)       | 0<br>(0 - 0)     | 0<br>(0 - 0)      | 1<br>(0 - 2)       | 1<br>(0 - 3)       | 2<br>(1 - 4)       |
| Gallbladder and biliary diseases                    | 21<br>(13 - 33)    | 0<br>(0 - 0)     | 0<br>(0 - 0)      | 1<br>(1 - 2)       | 4<br>(2 - 7)       | 16<br>(9 - 26)     |
| Pancreatitis                                        | 10<br>(6 - 16)     | 0<br>(0 - 0)     | 0<br>(0 - 0)      | 2<br>(1 - 4)       | 3<br>(2 - 5)       | 5<br>(2 - 8)       |
| Other digestive diseases                            | 16<br>(10 - 26)    | 0<br>(0 - 0)     | 0<br>(0 - 0)      | 2<br>(1 - 3)       | 4<br>(2 - 7)       | 10<br>(5 - 18)     |
| Neurological disorders                              | 702<br>(510 - 956) | 2<br>(1 - 4)     | 2<br>(1 - 4)      | 17<br>(9 - 28)     | 59<br>(37 - 85)    | 622<br>(432 - 856) |
| Alzheimer disease and other dementias               | 659<br>(464 - 905) | --               | --                | 0<br>(0 - 1)       | 52<br>(31 - 76)    | 607<br>(417 - 837) |
| Parkinson disease                                   | 8<br>(4 - 15)      | --               | --                | 0<br>(0 - 0)       | 2<br>(1 - 3)       | 7<br>(3 - 12)      |
| Epilepsy                                            | 23<br>(11 - 36)    | 1<br>(0 - 3)     | 1<br>(1 - 3)      | 12<br>(6 - 22)     | 4<br>(2 - 7)       | 4<br>(2 - 7)       |
| Multiple sclerosis                                  | 2<br>(1 - 3)       | --               | --                | 1<br>(0 - 1)       | 1<br>(0 - 1)       | 1<br>(0 - 1)       |
| Other neurological disorders                        | 10<br>(7 - 13)     | 1<br>(1 - 2)     | 0<br>(0 - 1)      | 4<br>(2 - 5)       | 2<br>(1 - 3)       | 3<br>(2 - 5)       |
| Mental and substance use disorders                  | 69<br>(45 - 98)    | 0<br>(0 - 1)     | 0<br>(0 - 0)      | 44<br>(27 - 65)    | 19<br>(12 - 29)    | 5<br>(3 - 7)       |
| Schizophrenia                                       | 1<br>(0 - 1)       | --               | --                | 0<br>(0 - 0)       | 0<br>(0 - 0)       | 0<br>(0 - 0)       |
| Alcohol use disorders                               | 5<br>(3 - 8)       | --               | --                | 2<br>(1 - 3)       | 2<br>(1 - 4)       | 1<br>(1 - 2)       |
| Drug use disorders                                  | 63<br>(40 - 92)    | 0<br>(0 - 1)     | --                | 42<br>(25 - 63)    | 17<br>(10 - 26)    | 4<br>(2 - 5)       |
| Opioid use disorders                                | 34<br>(22 - 49)    | 0<br>(0 - 0)     | --                | 24<br>(14 - 34)    | 9<br>(5 - 13)      | 2<br>(1 - 3)       |
| Cocaine use disorders                               | 1<br>(0 - 1)       | 0<br>(0 - 0)     | --                | 1<br>(0 - 1)       | 0<br>(0 - 0)       | 0<br>(0 - 0)       |
| Amphetamine use disorders                           | 1<br>(0 - 1)       | 0<br>(0 - 0)     | --                | 0<br>(0 - 1)       | 0<br>(0 - 0)       | 0<br>(0 - 0)       |
| Other drug use disorders                            | 27<br>(17 - 40)    | 0<br>(0 - 0)     | --                | 18<br>(11 - 26)    | 8<br>(5 - 12)      | 2<br>(1 - 2)       |
| Eating disorders                                    | 0<br>(0 - 0)       | --               | 0<br>(0 - 0)      | 0<br>(0 - 0)       | --                 | --                 |
| Anorexia nervosa                                    | 0<br>(0 - 0)       | --               | 0<br>(0 - 0)      | 0<br>(0 - 0)       | --                 | --                 |

Web Table 31- Lebanon deaths with 95% UI by age, sex, and cause in 2013

| Cause                                               | Males, All Ages      | Males, 0-4 Years   | Males, 5-14 Years | Males, 15-49 Years | Males, 50-69 Years | Males, 70-80 Years |
|-----------------------------------------------------|----------------------|--------------------|-------------------|--------------------|--------------------|--------------------|
| Diabetes, urogenital, blood, and endocrine diseases | 964<br>(701 - 1,308) | 10<br>(7 - 14)     | 5<br>(4 - 7)      | 88<br>(58 - 122)   | 306<br>(210 - 427) | 555<br>(407 - 754) |
| Diabetes mellitus                                   | 537<br>(389 - 729)   | 1<br>(0 - 1)       | 0<br>(0 - 0)      | 29<br>(19 - 42)    | 164<br>(110 - 234) | 342<br>(241 - 477) |
| Acute glomerulonephritis                            | 3<br>(1 - 4)         | 0<br>(0 - 0)       | 0<br>(0 - 0)      | 0<br>(0 - 1)       | 1<br>(0 - 1)       | 1<br>(1 - 2)       |
| Chronic kidney disease                              | 321<br>(197 - 493)   | 2<br>(1 - 3)       | 2<br>(1 - 2)      | 39<br>(22 - 60)    | 120<br>(70 - 188)  | 158<br>(92 - 261)  |
| Chronic kidney disease due to diabetes mellitus     | 12<br>(4 - 21)       | 0<br>(0 - 0)       | 0<br>(0 - 0)      | 2<br>(1 - 4)       | 3<br>(1 - 8)       | 6<br>(2 - 11)      |
| Chronic kidney disease due to hypertension          | 151<br>(93 - 241)    | 0<br>(0 - 0)       | 0<br>(0 - 0)      | 14<br>(7 - 23)     | 56<br>(31 - 90)    | 80<br>(48 - 137)   |
| Chronic kidney disease due to glomerulonephritis    | 11<br>(5 - 18)       | 0<br>(0 - 0)       | 0<br>(0 - 0)      | 2<br>(1 - 4)       | 3<br>(1 - 6)       | 5<br>(2 - 9)       |
| Chronic kidney disease due to other causes          | 148<br>(63 - 264)    | 1<br>(1 - 2)       | 1<br>(0 - 2)      | 21<br>(8 - 39)     | 57<br>(22 - 110)   | 67<br>(24 - 128)   |
| Urinary diseases and male infertility               | 41<br>(28 - 60)      | 0<br>(0 - 1)       | 0<br>(0 - 0)      | 3<br>(2 - 4)       | 9<br>(5 - 14)      | 29<br>(18 - 44)    |
| Interstitial nephritis and urinary tract infections | 15<br>(8 - 24)       | 0<br>(0 - 1)       | 0<br>(0 - 0)      | 1<br>(1 - 2)       | 3<br>(2 - 5)       | 10<br>(5 - 18)     |
| Urolithiasis                                        | 2<br>(1 - 3)         | --                 | 0<br>(0 - 0)      | 0<br>(0 - 0)       | 0<br>(0 - 1)       | 1<br>(0 - 2)       |
| Other urinary diseases                              | 25<br>(15 - 39)      | 0<br>(0 - 0)       | 0<br>(0 - 0)      | 1<br>(1 - 2)       | 5<br>(3 - 9)       | 18<br>(10 - 29)    |
| Gynecological diseases                              | --                   | --                 | --                | --                 | --                 | --                 |
| Uterine fibroids                                    | --                   | --                 | --                | --                 | --                 | --                 |
| Polycystic ovarian syndrome                         | --                   | --                 | --                | --                 | --                 | --                 |
| Endometriosis                                       | --                   | --                 | --                | --                 | --                 | --                 |
| Genital prolapse                                    | --                   | --                 | --                | --                 | --                 | --                 |
| Other gynecological diseases                        | --                   | --                 | --                | --                 | --                 | --                 |
| Hemoglobinopathies and hemolytic anemias            | 28<br>(17 - 48)      | 3<br>(1 - 5)       | 2<br>(1 - 3)      | 10<br>(5 - 16)     | 4<br>(2 - 8)       | 9<br>(5 - 17)      |
| Thalassemias                                        | 8<br>(5 - 13)        | 2<br>(1 - 3)       | 1<br>(1 - 2)      | 5<br>(3 - 8)       | 0<br>(0 - 0)       | 0<br>(0 - 0)       |
| Sickle cell disorders                               | 8<br>(5 - 14)        | 1<br>(0 - 1)       | 1<br>(0 - 1)      | 4<br>(2 - 7)       | 3<br>(1 - 5)       | 0<br>(0 - 0)       |
| G6PD deficiency                                     | 0<br>(0 - 0)         | 0<br>(0 - 0)       | 0<br>(0 - 0)      | 0<br>(0 - 0)       | 0<br>(0 - 0)       | 0<br>(0 - 0)       |
| Other hemoglobinopathies and hemolytic anemias      | 12<br>(7 - 21)       | 0<br>(0 - 0)       | 0<br>(0 - 0)      | 1<br>(1 - 2)       | 2<br>(1 - 3)       | 9<br>(5 - 16)      |
| Endocrine, metabolic, blood, and immune disorders   | 35<br>(21 - 51)      | 4<br>(2 - 7)       | 1<br>(1 - 2)      | 7<br>(4 - 10)      | 8<br>(5 - 14)      | 15<br>(8 - 23)     |
| Musculoskeletal disorders                           | 28<br>(15 - 43)      | --                 | 1<br>(0 - 1)      | 6<br>(3 - 9)       | 6<br>(4 - 11)      | 15<br>(7 - 24)     |
| Rheumatoid arthritis                                | 3<br>(1 - 6)         | --                 | 0<br>(0 - 0)      | 1<br>(0 - 1)       | 1<br>(0 - 2)       | 2<br>(1 - 3)       |
| Other musculoskeletal disorders                     | 24<br>(13 - 38)      | --                 | 1<br>(0 - 1)      | 5<br>(3 - 8)       | 6<br>(3 - 9)       | 13<br>(7 - 21)     |
| Other non-communicable diseases                     | 216<br>(164 - 272)   | 165<br>(121 - 212) | 10<br>(6 - 16)    | 14<br>(9 - 21)     | 7<br>(5 - 11)      | 19<br>(12 - 30)    |
| Congenital anomalies                                | 199<br>(148 - 251)   | 161<br>(116 - 208) | 10<br>(6 - 16)    | 13<br>(8 - 19)     | 5<br>(3 - 7)       | 10<br>(6 - 15)     |
| Neural tube defects                                 | 3<br>(1 - 7)         | 2<br>(1 - 7)       | 0<br>(0 - 0)      | 0<br>(0 - 0)       | 0<br>(0 - 0)       | 0<br>(0 - 0)       |
| Congenital heart anomalies                          | 83<br>(55 - 118)     | 72<br>(47 - 105)   | 4<br>(2 - 8)      | 4<br>(2 - 6)       | 1<br>(1 - 2)       | 2<br>(1 - 3)       |
| Cleft lip and cleft palate                          | 0<br>(0 - 0)         | 0<br>(0 - 0)       | --                | --                 | --                 | --                 |
| Down syndrome                                       | 6<br>(3 - 10)        | 3<br>(1 - 7)       | 1<br>(0 - 1)      | 2<br>(1 - 3)       | 0<br>(0 - 0)       | 0<br>(0 - 0)       |
| Chromosomal unbalanced rearrangements               | 3<br>(1 - 4)         | 2<br>(1 - 4)       | 0<br>(0 - 0)      | 0<br>(0 - 0)       | 0<br>(0 - 0)       | 0<br>(0 - 0)       |
| Other congenital anomalies                          | 105<br>(72 - 144)    | 81<br>(52 - 117)   | 5<br>(3 - 9)      | 7<br>(4 - 10)      | 4<br>(2 - 6)       | 8<br>(5 - 12)      |
| Skin and subcutaneous diseases                      | 13<br>(8 - 26)       | 0<br>(0 - 0)       | 0<br>(0 - 0)      | 1<br>(1 - 3)       | 2<br>(1 - 5)       | 9<br>(5 - 19)      |
| Cellulitis                                          | 2<br>(1 - 5)         | 0<br>(0 - 0)       | 0<br>(0 - 0)      | 0<br>(0 - 0)       | 0<br>(0 - 1)       | 2<br>(1 - 4)       |
| Pyoderma                                            | 6<br>(3 - 12)        | 0<br>(0 - 0)       | 0<br>(0 - 0)      | 1<br>(0 - 1)       | 1<br>(0 - 2)       | 5<br>(2 - 9)       |
| Decubitus ulcer                                     | 4<br>(2 - 10)        | 0<br>(0 - 0)       | 0<br>(0 - 0)      | 0<br>(0 - 1)       | 1<br>(0 - 2)       | 3<br>(1 - 7)       |
| Other skin and subcutaneous diseases                | 0<br>(0 - 1)         | 0<br>(0 - 0)       | 0<br>(0 - 0)      | 0<br>(0 - 0)       | 0<br>(0 - 0)       | 0<br>(0 - 0)       |

Web Table 31- Lebanon deaths with 95% UI by age, sex, and cause in 2013

| Cause                                           | Males, All Ages      | Males, 0-4 Years | Males, 5-14 Years | Males, 15-49 Years | Males, 50-69 Years | Males, 70-80 Years |
|-------------------------------------------------|----------------------|------------------|-------------------|--------------------|--------------------|--------------------|
| Sudden infant death syndrome                    | 4<br>(0 - 14)        | 4<br>(0 - 14)    | --                | --                 | --                 | --                 |
| Injuries                                        | 925<br>(672 - 1,288) | 30<br>(21 - 45)  | 34<br>(26 - 44)   | 490<br>(337 - 690) | 144<br>(97 - 224)  | 227<br>(163 - 334) |
| Transport injuries                              | 362<br>(243 - 517)   | 8<br>(4 - 14)    | 16<br>(10 - 22)   | 220<br>(142 - 321) | 67<br>(44 - 106)   | 52<br>(35 - 78)    |
| Road injuries                                   | 344<br>(229 - 495)   | 7<br>(3 - 13)    | 15<br>(10 - 21)   | 211<br>(135 - 309) | 63<br>(40 - 101)   | 48<br>(32 - 74)    |
| Pedestrian road injuries                        | 81<br>(44 - 150)     | 3<br>(1 - 6)     | 5<br>(3 - 9)      | 38<br>(19 - 75)    | 17<br>(8 - 34)     | 18<br>(10 - 33)    |
| Cyclist road injuries                           | 13<br>(7 - 23)       | 0<br>(0 - 1)     | 1<br>(0 - 1)      | 6<br>(3 - 10)      | 3<br>(2 - 6)       | 3<br>(2 - 6)       |
| Motorcyclist road injuries                      | 32<br>(18 - 61)      | 0<br>(0 - 1)     | 1<br>(0 - 1)      | 24<br>(12 - 47)    | 4<br>(2 - 8)       | 3<br>(2 - 6)       |
| Motor vehicle road injuries                     | 216<br>(138 - 306)   | 4<br>(2 - 7)     | 8<br>(5 - 12)     | 143<br>(88 - 202)  | 38<br>(23 - 61)    | 24<br>(14 - 39)    |
| Other road injuries                             | 1<br>(1 - 2)         | 0<br>(0 - 0)     | 0<br>(0 - 0)      | 0<br>(0 - 1)       | 0<br>(0 - 0)       | 0<br>(0 - 1)       |
| Other transport injuries                        | 18<br>(10 - 26)      | 1<br>(0 - 1)     | 1<br>(0 - 1)      | 10<br>(5 - 15)     | 4<br>(2 - 7)       | 3<br>(2 - 5)       |
| Unintentional injuries                          | 351<br>(250 - 510)   | 14<br>(8 - 25)   | 15<br>(10 - 22)   | 122<br>(82 - 188)  | 45<br>(30 - 69)    | 155<br>(104 - 240) |
| Falls                                           | 117<br>(67 - 208)    | 1<br>(0 - 3)     | 1<br>(0 - 3)      | 10<br>(4 - 35)     | 6<br>(3 - 11)      | 100<br>(55 - 177)  |
| Drowning                                        | 66<br>(42 - 111)     | 5<br>(2 - 11)    | 7<br>(4 - 12)     | 39<br>(23 - 67)    | 7<br>(4 - 14)      | 7<br>(4 - 12)      |
| Fire, heat, and hot substances                  | 27<br>(16 - 40)      | 2<br>(1 - 4)     | 1<br>(1 - 2)      | 11<br>(6 - 19)     | 5<br>(3 - 7)       | 9<br>(5 - 13)      |
| Poisonings                                      | 12<br>(4 - 17)       | 1<br>(0 - 2)     | 0<br>(0 - 1)      | 6<br>(2 - 10)      | 2<br>(1 - 3)       | 2<br>(1 - 4)       |
| Exposure to mechanical forces                   | 35<br>(22 - 70)      | 1<br>(1 - 7)     | 2<br>(1 - 4)      | 19<br>(12 - 36)    | 7<br>(4 - 16)      | 5<br>(3 - 10)      |
| Unintentional firearm injuries                  | 9<br>(5 - 13)        | 0<br>(0 - 0)     | 0<br>(0 - 0)      | 6<br>(2 - 9)       | 2<br>(1 - 3)       | 1<br>(1 - 2)       |
| Unintentional suffocation                       | 6<br>(2 - 38)        | 1<br>(0 - 6)     | 0<br>(0 - 3)      | 2<br>(1 - 15)      | 1<br>(0 - 8)       | 1<br>(0 - 6)       |
| Other exposure to mechanical forces             | 20<br>(13 - 31)      | 1<br>(0 - 1)     | 1<br>(1 - 2)      | 11<br>(7 - 18)     | 4<br>(2 - 8)       | 3<br>(2 - 5)       |
| Adverse effects of medical treatment            | 31<br>(20 - 49)      | 1<br>(0 - 2)     | 0<br>(0 - 1)      | 6<br>(3 - 9)       | 9<br>(5 - 16)      | 15<br>(8 - 27)     |
| Animal contact                                  | 7<br>(4 - 12)        | 0<br>(0 - 1)     | 1<br>(0 - 1)      | 2<br>(1 - 4)       | 1<br>(1 - 3)       | 2<br>(1 - 5)       |
| Venomous animal contact                         | 3<br>(1 - 5)         | 0<br>(0 - 1)     | 0<br>(0 - 1)      | 1<br>(0 - 1)       | 0<br>(0 - 1)       | 1<br>(0 - 2)       |
| Non-venomous animal contact                     | 4<br>(2 - 8)         | 0<br>(0 - 1)     | 0<br>(0 - 1)      | 1<br>(1 - 2)       | 1<br>(0 - 2)       | 1<br>(1 - 3)       |
| Foreign body                                    | 13<br>(7 - 20)       | 2<br>(1 - 3)     | 1<br>(0 - 1)      | 2<br>(1 - 3)       | 1<br>(1 - 2)       | 8<br>(4 - 13)      |
| Pulmonary aspiration and foreign body in airway | 13<br>(6 - 19)       | 1<br>(1 - 3)     | 0<br>(0 - 1)      | 1<br>(1 - 2)       | 1<br>(1 - 2)       | 8<br>(4 - 12)      |
| Foreign body in other body part                 | 1<br>(0 - 1)         | 0<br>(0 - 0)     | 0<br>(0 - 0)      | 0<br>(0 - 0)       | 0<br>(0 - 0)       | 0<br>(0 - 0)       |
| Other unintentional injuries                    | 44<br>(25 - 84)      | 2<br>(1 - 3)     | 2<br>(1 - 4)      | 27<br>(15 - 53)    | 7<br>(3 - 14)      | 7<br>(3 - 13)      |
| Self-harm and interpersonal violence            | 203<br>(130 - 355)   | 1<br>(0 - 2)     | 3<br>(1 - 5)      | 147<br>(92 - 257)  | 32<br>(19 - 61)    | 21<br>(12 - 37)    |
| Self-harm                                       | 106<br>(60 - 163)    | --               | 1<br>(0 - 3)      | 65<br>(32 - 104)   | 21<br>(12 - 39)    | 18<br>(10 - 34)    |
| Interpersonal violence                          | 98<br>(57 - 202)     | 1<br>(0 - 2)     | 1<br>(1 - 3)      | 82<br>(48 - 169)   | 11<br>(5 - 26)     | 3<br>(1 - 7)       |
| Assault by firearm                              | 50<br>(27 - 108)     | 0<br>(0 - 0)     | 0<br>(0 - 1)      | 44<br>(24 - 92)    | 5<br>(2 - 14)      | 1<br>(0 - 3)       |
| Assault by sharp object                         | 29<br>(13 - 68)      | 0<br>(0 - 0)     | 0<br>(0 - 1)      | 25<br>(11 - 56)    | 4<br>(1 - 10)      | 1<br>(0 - 1)       |
| Assault by other means                          | 18<br>(8 - 41)       | 1<br>(0 - 1)     | 1<br>(0 - 2)      | 13<br>(6 - 31)     | 2<br>(1 - 5)       | 1<br>(0 - 3)       |
| Forces of nature, war, and legal intervention   | 8<br>(8 - 9)         | 7<br>(7 - 8)     | 1<br>(1 - 1)      | 0<br>(0 - 0)       | 0<br>(0 - 0)       | 0<br>(0 - 0)       |
| Collective violence and legal intervention      | 8<br>(8 - 9)         | 7<br>(7 - 8)     | 1<br>(1 - 1)      | 0<br>(0 - 0)       | 0<br>(0 - 0)       | 0<br>(0 - 0)       |

Web Table 31- Lebanon deaths with 95% UI by age, sex, and cause in 2013

| Cause                                                             | Females, All Ages          | Females, 0-4 Years | Females, 5-14 Years | Females, 15-49 Years | Females, 50-69 Years     | Females, 70-80 Years     |
|-------------------------------------------------------------------|----------------------------|--------------------|---------------------|----------------------|--------------------------|--------------------------|
| All causes                                                        | 11,207<br>(9,585 - 12,787) | 374<br>(321 - 435) | 83<br>(72 - 96)     | 916<br>(665 - 1,173) | 2,227<br>(1,672 - 2,804) | 7,608<br>(6,789 - 8,355) |
| Communicable, maternal, neonatal, and nutritional diseases        | 484<br>(388 - 633)         | 186<br>(142 - 239) | 20<br>(14 - 30)     | 82<br>(51 - 186)     | 39<br>(26 - 66)          | 156<br>(111 - 211)       |
| HIV/AIDS and tuberculosis                                         | 44<br>(16 - 187)           | 1<br>(0 - 6)       | 0<br>(0 - 2)        | 23<br>(5 - 128)      | 7<br>(2 - 32)            | 12<br>(6 - 21)           |
| Tuberculosis                                                      | 18<br>(10 - 31)            | 0<br>(0 - 0)       | 0<br>(0 - 0)        | 3<br>(2 - 6)         | 3<br>(2 - 6)             | 11<br>(6 - 19)           |
| HIV/AIDS                                                          | 26<br>(2 - 173)            | 1<br>(0 - 6)       | 0<br>(0 - 2)        | 20<br>(1 - 126)      | 4<br>(0 - 29)            | 1<br>(0 - 5)             |
| HIV/AIDS resulting in mycobacterial infection                     | 1<br>(0 - 7)               | 0<br>(0 - 0)       | 0<br>(0 - 0)        | 1<br>(0 - 5)         | 0<br>(0 - 1)             | 0<br>(0 - 0)             |
| HIV/AIDS resulting in other diseases                              | 25<br>(2 - 166)            | 1<br>(0 - 6)       | 0<br>(0 - 2)        | 19<br>(1 - 121)      | 4<br>(0 - 28)            | 1<br>(0 - 5)             |
| Diarrhea, lower respiratory, and other common infectious diseases | 236<br>(177 - 309)         | 47<br>(31 - 71)    | 18<br>(12 - 27)     | 40<br>(23 - 61)      | 24<br>(15 - 33)          | 107<br>(72 - 152)        |
| Diarrheal diseases                                                | 28<br>(14 - 47)            | 4<br>(1 - 12)      | 1<br>(0 - 1)        | 2<br>(1 - 3)         | 2<br>(1 - 4)             | 19<br>(8 - 36)           |
| Intestinal infectious diseases                                    | 46<br>(23 - 82)            | 9<br>(4 - 16)      | 11<br>(5 - 19)      | 20<br>(8 - 39)       | 3<br>(1 - 7)             | 3<br>(1 - 7)             |
| Typhoid fever                                                     | 33<br>(15 - 61)            | 6<br>(2 - 11)      | 8<br>(4 - 15)       | 15<br>(6 - 30)       | 2<br>(1 - 5)             | 2<br>(1 - 4)             |
| Paratyphoid fever                                                 | 9<br>(4 - 18)              | 2<br>(1 - 4)       | 2<br>(1 - 5)        | 4<br>(1 - 9)         | 1<br>(0 - 1)             | 0<br>(0 - 1)             |
| Other intestinal infectious diseases                              | 4<br>(1 - 9)               | 1<br>(0 - 5)       | 0<br>(0 - 2)        | 1<br>(0 - 5)         | 0<br>(0 - 2)             | 1<br>(0 - 3)             |
| Lower respiratory infections                                      | 126<br>(89 - 180)          | 22<br>(12 - 35)    | 3<br>(2 - 7)        | 11<br>(6 - 26)       | 14<br>(9 - 22)           | 75<br>(45 - 116)         |
| Upper respiratory infections                                      | 0<br>(0 - 1)               | 0<br>(0 - 0)       | 0<br>(0 - 0)        | 0<br>(0 - 0)         | 0<br>(0 - 0)             | 0<br>(0 - 1)             |
| Otitis media                                                      | 1<br>(1 - 2)               | 0<br>(0 - 0)       | 0<br>(0 - 0)        | 0<br>(0 - 0)         | 0<br>(0 - 0)             | 1<br>(1 - 1)             |
| Meningitis                                                        | 13<br>(8 - 19)             | 3<br>(1 - 5)       | 1<br>(0 - 1)        | 2<br>(1 - 4)         | 2<br>(1 - 3)             | 5<br>(3 - 10)            |
| Pneumococcal meningitis                                           | 3<br>(2 - 5)               | 1<br>(0 - 1)       | 0<br>(0 - 0)        | 1<br>(0 - 1)         | 0<br>(0 - 1)             | 1<br>(1 - 3)             |
| H influenzae type B meningitis                                    | 2<br>(1 - 3)               | 1<br>(0 - 2)       | 0<br>(0 - 0)        | 0<br>(0 - 1)         | 0<br>(0 - 0)             | 1<br>(0 - 1)             |
| Meningococcal meningitis                                          | 4<br>(2 - 6)               | 1<br>(0 - 2)       | 0<br>(0 - 0)        | 1<br>(0 - 1)         | 0<br>(0 - 1)             | 2<br>(1 - 3)             |
| Other meningitis                                                  | 4<br>(2 - 7)               | 0<br>(0 - 1)       | 0<br>(0 - 0)        | 1<br>(0 - 1)         | 1<br>(0 - 1)             | 2<br>(1 - 4)             |
| Encephalitis                                                      | 10<br>(7 - 17)             | 2<br>(1 - 3)       | 1<br>(0 - 2)        | 3<br>(2 - 6)         | 1<br>(1 - 3)             | 3<br>(2 - 5)             |
| Diphtheria                                                        | 0<br>(0 - 0)               | 0<br>(0 - 0)       | 0<br>(0 - 0)        | 0<br>(0 - 0)         | 0<br>(0 - 0)             | --<br>(0 - 0)            |
| Whooping cough                                                    | 4<br>(0 - 17)              | 3<br>(0 - 15)      | 0<br>(0 - 1)        | 0<br>(0 - 0)         | 0<br>(0 - 0)             | --<br>(0 - 0)            |
| Tetanus                                                           | 0<br>(0 - 0)               | 0<br>(0 - 0)       | 0<br>(0 - 0)        | 0<br>(0 - 0)         | 0<br>(0 - 0)             | 0<br>(0 - 0)             |
| Measles                                                           | 7<br>(0 - 38)              | 5<br>(0 - 29)      | 1<br>(0 - 6)        | 0<br>(0 - 2)         | 0<br>(0 - 0)             | --<br>(0 - 0)            |
| Varicella and herpes zoster                                       | 1<br>(0 - 4)               | 0<br>(0 - 1)       | 0<br>(0 - 0)        | 0<br>(0 - 1)         | 0<br>(0 - 0)             | 1<br>(0 - 4)             |
| Neglected tropical diseases and malaria                           | 4<br>(3 - 6)               | 1<br>(0 - 1)       | 0<br>(0 - 1)        | 1<br>(1 - 2)         | 1<br>(0 - 1)             | 1<br>(1 - 2)             |
| Leishmaniasis                                                     | 2<br>(1 - 3)               | 0<br>(0 - 1)       | 0<br>(0 - 0)        | 1<br>(0 - 1)         | 0<br>(0 - 1)             | 0<br>(0 - 0)             |
| Visceral leishmaniasis                                            | 2<br>(1 - 3)               | 0<br>(0 - 1)       | 0<br>(0 - 0)        | 1<br>(0 - 1)         | 0<br>(0 - 1)             | 0<br>(0 - 0)             |
| Cysticercosis                                                     | 0<br>(0 - 0)               | 0<br>(0 - 0)       | 0<br>(0 - 0)        | 0<br>(0 - 0)         | 0<br>(0 - 0)             | 0<br>(0 - 0)             |
| Cystic echinococcosis                                             | 1<br>(1 - 1)               | 0<br>(0 - 0)       | 0<br>(0 - 0)        | 0<br>(0 - 0)         | 0<br>(0 - 0)             | 0<br>(0 - 0)             |
| Dengue                                                            | 0<br>(0 - 0)               | 0<br>(0 - 0)       | 0<br>(0 - 0)        | 0<br>(0 - 0)         | 0<br>(0 - 0)             | 0<br>(0 - 0)             |
| Rabies                                                            | 0<br>(0 - 0)               | 0<br>(0 - 0)       | 0<br>(0 - 0)        | 0<br>(0 - 0)         | 0<br>(0 - 0)             | 0<br>(0 - 0)             |
| Intestinal nematode infections                                    | 0<br>(0 - 1)               | 0<br>(0 - 0)       | 0<br>(0 - 0)        | 0<br>(0 - 0)         | 0<br>(0 - 0)             | 0<br>(0 - 0)             |
| Ascariasis                                                        | 0<br>(0 - 1)               | 0<br>(0 - 0)       | 0<br>(0 - 0)        | 0<br>(0 - 0)         | 0<br>(0 - 0)             | 0<br>(0 - 0)             |
| Other neglected tropical diseases                                 | 1<br>(0 - 2)               | 0<br>(0 - 0)       | 0<br>(0 - 0)        | 0<br>(0 - 0)         | 0<br>(0 - 0)             | 1<br>(0 - 1)             |
| Maternal disorders                                                | 12<br>(8 - 17)             | --                 | 0<br>(0 - 0)        | 12<br>(8 - 17)       | --                       | --                       |
| Maternal hemorrhage                                               | 2<br>(1 - 4)               | --                 | 0<br>(0 - 0)        | 2<br>(1 - 4)         | --                       | --                       |
| Maternal sepsis and other maternal infections                     | 1<br>(1 - 2)               | --                 | 0<br>(0 - 0)        | 1<br>(1 - 2)         | --                       | --                       |

Web Table 31- Lebanon deaths with 95% UI by age, sex, and cause in 2013

| Cause                                                            | Females, All Ages          | Females, 0-4 Years | Females, 5-14 Years | Females, 15-49 Years | Females, 50-69 Years     | Females, 70-80 Years     |
|------------------------------------------------------------------|----------------------------|--------------------|---------------------|----------------------|--------------------------|--------------------------|
| Maternal hypertensive disorders                                  | 2<br>(1 - 3)               | --                 | 0<br>(0 - 0)        | 2<br>(1 - 3)         | --                       | --                       |
| Maternal obstructed labor                                        | 1<br>(1 - 2)               | --                 | 0<br>(0 - 0)        | 1<br>(1 - 2)         | --                       | --                       |
| Maternal abortive outcome                                        | 2<br>(1 - 2)               | --                 | 0<br>(0 - 0)        | 2<br>(1 - 2)         | --                       | --                       |
| Indirect maternal deaths                                         | 1<br>(0 - 2)               | --                 | 0<br>(0 - 0)        | 1<br>(0 - 2)         | --                       | --                       |
| Late maternal deaths                                             | 1<br>(1 - 2)               | --                 | 0<br>(0 - 0)        | 1<br>(1 - 2)         | --                       | --                       |
| Maternal deaths aggravated by HIV/AIDS                           | 0<br>(0 - 0)               | --                 | --                  | 0<br>(0 - 0)         | --                       | --                       |
| Other maternal disorders                                         | 2<br>(1 - 3)               | --                 | 0<br>(0 - 0)        | 2<br>(1 - 3)         | --                       | --                       |
| Neonatal disorders                                               | 133<br>(97 - 175)          | 133<br>(97 - 175)  | --                  | --                   | --                       | --                       |
| Neonatal preterm birth complications                             | 85<br>(52 - 121)           | 85<br>(52 - 121)   | --                  | --                   | --                       | --                       |
| Neonatal encephalopathy due to birth asphyxia and trauma         | 18<br>(7 - 33)             | 18<br>(7 - 33)     | --                  | --                   | --                       | --                       |
| Neonatal sepsis and other neonatal infections                    | 10<br>(4 - 21)             | 10<br>(4 - 21)     | --                  | --                   | --                       | --                       |
| Hemolytic disease and other neonatal jaundice                    | 0<br>(0 - 1)               | 0<br>(0 - 1)       | --                  | --                   | --                       | --                       |
| Other neonatal disorders                                         | 20<br>(9 - 40)             | 20<br>(9 - 40)     | --                  | --                   | --                       | --                       |
| Nutritional deficiencies                                         | 26<br>(17 - 39)            | 1<br>(1 - 2)       | 1<br>(0 - 1)        | 3<br>(2 - 4)         | 2<br>(1 - 4)             | 19<br>(11 - 30)          |
| Protein-energy malnutrition                                      | 7<br>(2 - 14)              | 1<br>(0 - 1)       | 0<br>(0 - 0)        | 0<br>(0 - 1)         | 0<br>(0 - 1)             | 5<br>(2 - 12)            |
| Iodine deficiency                                                | 0<br>(0 - 1)               | 0<br>(0 - 0)       | 0<br>(0 - 0)        | 0<br>(0 - 0)         | 0<br>(0 - 0)             | 0<br>(0 - 1)             |
| Iron-deficiency anemia                                           | 18<br>(10 - 28)            | 0<br>(0 - 1)       | 0<br>(0 - 0)        | 2<br>(1 - 3)         | 2<br>(1 - 3)             | 13<br>(7 - 22)           |
| Other nutritional deficiencies                                   | 1<br>(1 - 3)               | 0<br>(0 - 0)       | 0<br>(0 - 0)        | 0<br>(0 - 0)         | 0<br>(0 - 0)             | 1<br>(0 - 2)             |
| Other communicable, maternal, neonatal, and nutritional diseases | 29<br>(18 - 50)            | 2<br>(1 - 5)       | 1<br>(0 - 1)        | 3<br>(2 - 5)         | 6<br>(3 - 10)            | 17<br>(9 - 36)           |
| Sexually transmitted diseases excluding HIV                      | 2<br>(1 - 5)               | 1<br>(0 - 3)       | 0<br>(0 - 0)        | 0<br>(0 - 0)         | 0<br>(0 - 1)             | 1<br>(0 - 2)             |
| Syphilis                                                         | 2<br>(0 - 4)               | 1<br>(0 - 3)       | 0<br>(0 - 0)        | 0<br>(0 - 0)         | 0<br>(0 - 0)             | 1<br>(0 - 2)             |
| Chlamydial infection                                             | 0<br>(0 - 0)               | --                 | 0<br>(0 - 0)        | 0<br>(0 - 0)         | 0<br>(0 - 0)             | 0<br>(0 - 0)             |
| Gonococcal infection                                             | 0<br>(0 - 0)               | --                 | 0<br>(0 - 0)        | 0<br>(0 - 0)         | 0<br>(0 - 0)             | 0<br>(0 - 0)             |
| Other sexually transmitted diseases                              | 0<br>(0 - 0)               | --                 | 0<br>(0 - 0)        | 0<br>(0 - 0)         | 0<br>(0 - 0)             | 0<br>(0 - 0)             |
| Hepatitis                                                        | 11<br>(7 - 14)             | 0<br>(0 - 0)       | 0<br>(0 - 0)        | 1<br>(1 - 2)         | 3<br>(2 - 5)             | 6<br>(4 - 8)             |
| Acute hepatitis A                                                | 1<br>(0 - 1)               | 0<br>(0 - 0)       | 0<br>(0 - 0)        | 0<br>(0 - 0)         | 0<br>(0 - 0)             | 0<br>(0 - 0)             |
| Acute hepatitis B                                                | 8<br>(5 - 11)              | 0<br>(0 - 0)       | 0<br>(0 - 0)        | 1<br>(0 - 1)         | 2<br>(1 - 4)             | 5<br>(3 - 7)             |
| Acute hepatitis C                                                | 1<br>(0 - 3)               | --                 | 0<br>(0 - 0)        | 0<br>(0 - 0)         | 0<br>(0 - 1)             | 1<br>(0 - 2)             |
| Acute hepatitis E                                                | 1<br>(0 - 2)               | 0<br>(0 - 0)       | 0<br>(0 - 0)        | 0<br>(0 - 1)         | 0<br>(0 - 1)             | 0<br>(0 - 1)             |
| Other infectious diseases                                        | 17<br>(7 - 37)             | 1<br>(0 - 3)       | 0<br>(0 - 1)        | 2<br>(1 - 3)         | 3<br>(1 - 6)             | 11<br>(3 - 30)           |
| Non-communicable diseases                                        | 10,398<br>(8,879 - 11,824) | 167<br>(125 - 217) | 45<br>(36 - 56)     | 732<br>(522 - 946)   | 2,143<br>(1,610 - 2,696) | 7,312<br>(6,545 - 8,013) |
| Neoplasms                                                        | 2,229<br>(1,660 - 2,711)   | 4<br>(3 - 7)       | 14<br>(11 - 18)     | 382<br>(264 - 498)   | 819<br>(574 - 1,046)     | 1,010<br>(787 - 1,177)   |
| Esophageal cancer                                                | 21<br>(15 - 27)            | --                 | --                  | 3<br>(2 - 4)         | 6<br>(4 - 9)             | 12<br>(8 - 16)           |
| Stomach cancer                                                   | 105<br>(73 - 138)          | --                 | --                  | 15<br>(10 - 21)      | 26<br>(17 - 36)          | 64<br>(42 - 91)          |
| Liver cancer                                                     | 60<br>(43 - 79)            | --                 | 0<br>(0 - 0)        | 5<br>(3 - 8)         | 20<br>(13 - 29)          | 34<br>(23 - 48)          |
| Liver cancer due to hepatitis B                                  | 3<br>(2 - 5)               | --                 | 0<br>(0 - 0)        | 1<br>(0 - 1)         | 1<br>(0 - 2)             | 1<br>(1 - 3)             |
| Liver cancer due to hepatitis C                                  | 42<br>(27 - 57)            | --                 | 0<br>(0 - 0)        | 3<br>(2 - 5)         | 14<br>(9 - 22)           | 24<br>(15 - 35)          |
| Liver cancer due to alcohol use                                  | 6<br>(2 - 11)              | --                 | --                  | 0<br>(0 - 0)         | 1<br>(0 - 3)             | 5<br>(2 - 9)             |
| Liver cancer due to other causes                                 | 9<br>(4 - 17)              | --                 | 0<br>(0 - 0)        | 1<br>(1 - 2)         | 3<br>(1 - 6)             | 4<br>(1 - 9)             |
| Larynx cancer                                                    | 16<br>(7 - 26)             | --                 | --                  | 2<br>(1 - 3)         | 8<br>(3 - 13)            | 6<br>(3 - 11)            |

Web Table 31- Lebanon deaths with 95% UI by age, sex, and cause in 2013

| Cause                                         | Females, All Ages        | Females, 0-4 Years | Females, 5-14 Years | Females, 15-49 Years | Females, 50-69 Years | Females, 70-80 Years     |
|-----------------------------------------------|--------------------------|--------------------|---------------------|----------------------|----------------------|--------------------------|
| Tracheal, bronchus and lung cancer            | 286<br>(204 - 369)       | --                 | --                  | 29<br>(19 - 41)      | 112<br>(74 - 155)    | 145<br>(104 - 193)       |
| Breast cancer                                 | 601<br>(411 - 768)       | --                 | --                  | 157<br>(100 - 209)   | 269<br>(178 - 358)   | 175<br>(115 - 225)       |
| Cervical cancer                               | 57<br>(38 - 76)          | --                 | --                  | 10<br>(6 - 14)       | 24<br>(14 - 34)      | 24<br>(16 - 33)          |
| Uterine cancer                                | 42<br>(23 - 60)          | --                 | --                  | 3<br>(1 - 4)         | 13<br>(7 - 20)       | 26<br>(14 - 40)          |
| Prostate cancer                               | --                       | --                 | --                  | --                   | --                   | --                       |
| Colon and rectum cancer                       | 258<br>(194 - 324)       | --                 | --                  | 27<br>(19 - 36)      | 74<br>(52 - 101)     | 156<br>(115 - 207)       |
| Lip and oral cavity cancer                    | 12<br>(7 - 16)           | --                 | --                  | 3<br>(1 - 4)         | 4<br>(2 - 6)         | 5<br>(3 - 8)             |
| Nasopharynx cancer                            | 4<br>(2 - 7)             | --                 | 1<br>(0 - 1)        | 2<br>(1 - 3)         | 1<br>(1 - 3)         | 0<br>(0 - 1)             |
| Other pharynx cancer                          | 3<br>(2 - 5)             | --                 | --                  | 0<br>(0 - 1)         | 1<br>(1 - 2)         | 2<br>(1 - 3)             |
| Gallbladder and biliary tract cancer          | 20<br>(12 - 31)          | --                 | --                  | 2<br>(1 - 3)         | 8<br>(5 - 13)        | 10<br>(6 - 17)           |
| Pancreatic cancer                             | 97<br>(72 - 123)         | --                 | --                  | 7<br>(4 - 9)         | 41<br>(28 - 56)      | 50<br>(36 - 66)          |
| Malignant skin melanoma                       | 10<br>(7 - 13)           | --                 | --                  | 1<br>(1 - 2)         | 2<br>(1 - 3)         | 6<br>(4 - 9)             |
| Non-melanoma skin cancer                      | 4<br>(2 - 7)             | --                 | --                  | 0<br>(0 - 1)         | 1<br>(0 - 1)         | 3<br>(2 - 6)             |
| Ovarian cancer                                | 174<br>(126 - 231)       | --                 | --                  | 25<br>(17 - 37)      | 74<br>(49 - 108)     | 74<br>(53 - 102)         |
| Testicular cancer                             | --                       | --                 | --                  | --                   | --                   | --                       |
| Kidney cancer                                 | 35<br>(24 - 47)          | 1<br>(0 - 1)       | 1<br>(1 - 2)        | 3<br>(2 - 5)         | 12<br>(8 - 19)       | 17<br>(11 - 26)          |
| Bladder cancer                                | 22<br>(12 - 35)          | --                 | --                  | 1<br>(0 - 2)         | 5<br>(3 - 9)         | 16<br>(9 - 25)           |
| Brain and nervous system cancer               | 66<br>(45 - 85)          | 1<br>(0 - 2)       | 3<br>(2 - 5)        | 21<br>(14 - 29)      | 24<br>(15 - 34)      | 17<br>(11 - 24)          |
| Thyroid cancer                                | 33<br>(20 - 46)          | --                 | 0<br>(0 - 0)        | 3<br>(1 - 4)         | 10<br>(6 - 15)       | 20<br>(12 - 29)          |
| Mesothelioma                                  | 5<br>(3 - 6)             | --                 | --                  | 2<br>(1 - 4)         | 1<br>(0 - 1)         | 2<br>(1 - 3)             |
| Hodgkin lymphoma                              | 19<br>(9 - 27)           | 0<br>(0 - 0)       | 0<br>(0 - 1)        | 8<br>(4 - 13)        | 4<br>(2 - 7)         | 6<br>(3 - 10)            |
| Non-Hodgkin lymphoma                          | 127<br>(68 - 174)        | 0<br>(0 - 0)       | 2<br>(1 - 2)        | 22<br>(13 - 32)      | 37<br>(19 - 56)      | 66<br>(33 - 97)          |
| Multiple myeloma                              | 31<br>(20 - 45)          | --                 | --                  | 2<br>(1 - 3)         | 11<br>(6 - 17)       | 18<br>(11 - 27)          |
| Leukemia                                      | 67<br>(49 - 85)          | 1<br>(1 - 2)       | 5<br>(3 - 7)        | 17<br>(12 - 23)      | 18<br>(12 - 25)      | 26<br>(18 - 34)          |
| Other neoplasms                               | 56<br>(38 - 77)          | 1<br>(1 - 2)       | 2<br>(1 - 4)        | 11<br>(6 - 16)       | 14<br>(8 - 21)       | 28<br>(18 - 40)          |
| Cardiovascular diseases                       | 5,487<br>(4,639 - 6,697) | 9<br>(5 - 16)      | 7<br>(5 - 11)       | 191<br>(129 - 286)   | 908<br>(655 - 1,284) | 4,371<br>(3,834 - 5,120) |
| Rheumatic heart disease                       | 26<br>(14 - 40)          | 0<br>(0 - 0)       | 0<br>(0 - 1)        | 4<br>(2 - 7)         | 4<br>(2 - 7)         | 17<br>(9 - 27)           |
| Ischemic heart disease                        | 3,149<br>(2,464 - 4,422) | 1<br>(0 - 3)       | 1<br>(1 - 3)        | 93<br>(56 - 166)     | 502<br>(345 - 779)   | 2,551<br>(2,020 - 3,492) |
| Cerebrovascular disease                       | 1,712<br>(679 - 2,458)   | 3<br>(0 - 6)       | 3<br>(1 - 5)        | 57<br>(13 - 91)      | 281<br>(103 - 433)   | 1,368<br>(554 - 1,951)   |
| Ischemic stroke                               | 975<br>(261 - 1,430)     | 0<br>(0 - 1)       | 0<br>(0 - 1)        | 10<br>(1 - 20)       | 116<br>(22 - 193)    | 848<br>(231 - 1,246)     |
| Hemorrhagic stroke                            | 736<br>(131 - 1,306)     | 3<br>(0 - 6)       | 3<br>(1 - 4)        | 47<br>(9 - 77)       | 165<br>(37 - 290)    | 519<br>(85 - 978)        |
| Hypertensive heart disease                    | 280<br>(155 - 498)       | 0<br>(0 - 0)       | 0<br>(0 - 0)        | 7<br>(4 - 12)        | 44<br>(22 - 74)      | 228<br>(125 - 422)       |
| Cardiomyopathy and myocarditis                | 68<br>(42 - 119)         | 2<br>(1 - 5)       | 1<br>(1 - 2)        | 9<br>(5 - 17)        | 12<br>(7 - 25)       | 44<br>(23 - 81)          |
| Atrial fibrillation and flutter               | 6<br>(3 - 11)            | --                 | --                  | 0<br>(0 - 0)         | 1<br>(0 - 1)         | 5<br>(2 - 9)             |
| Aortic aneurysm                               | 15<br>(8 - 27)           | --                 | --                  | 1<br>(1 - 2)         | 2<br>(1 - 5)         | 12<br>(6 - 21)           |
| Peripheral vascular disease                   | 5<br>(2 - 8)             | --                 | --                  | 0<br>(0 - 0)         | 1<br>(0 - 1)         | 4<br>(2 - 7)             |
| Endocarditis                                  | 26<br>(11 - 65)          | 1<br>(0 - 2)       | 0<br>(0 - 1)        | 3<br>(1 - 9)         | 4<br>(1 - 11)        | 19<br>(8 - 44)           |
| Other cardiovascular and circulatory diseases | 201<br>(134 - 340)       | 2<br>(1 - 3)       | 1<br>(1 - 2)        | 17<br>(10 - 30)      | 57<br>(35 - 102)     | 123<br>(78 - 222)        |
| Chronic respiratory diseases                  | 583<br>(376 - 754)       | 2<br>(1 - 3)       | 1<br>(1 - 2)        | 24<br>(13 - 33)      | 82<br>(48 - 116)     | 475<br>(310 - 617)       |
| Chronic obstructive pulmonary disease         | 395<br>(252 - 540)       | 1<br>(0 - 2)       | 0<br>(0 - 1)        | 9<br>(5 - 14)        | 53<br>(30 - 78)      | 332<br>(213 - 457)       |

Web Table 31- Lebanon deaths with 95% UI by age, sex, and cause in 2013

| Cause                                               | Females, All Ages  | Females, 0-4 Years | Females, 5-14 Years | Females, 15-49 Years | Females, 50-69 Years | Females, 70-80 Years |
|-----------------------------------------------------|--------------------|--------------------|---------------------|----------------------|----------------------|----------------------|
| Pneumoconiosis                                      | 1<br>(1 - 2)       | 0<br>(0 - 0)       | 0<br>(0 - 0)        | 0<br>(0 - 0)         | 0<br>(0 - 0)         | 1<br>(0 - 1)         |
| Silicosis                                           | 0<br>(0 - 1)       | 0<br>(0 - 0)       | 0<br>(0 - 0)        | 0<br>(0 - 0)         | 0<br>(0 - 0)         | 0<br>(0 - 0)         |
| Asbestosis                                          | 0<br>(0 - 0)       | 0<br>(0 - 0)       | 0<br>(0 - 0)        | 0<br>(0 - 0)         | 0<br>(0 - 0)         | 0<br>(0 - 0)         |
| Coal workers pneumoconiosis                         | 0<br>(0 - 0)       | 0<br>(0 - 0)       | 0<br>(0 - 0)        | 0<br>(0 - 0)         | 0<br>(0 - 0)         | 0<br>(0 - 0)         |
| Other pneumoconiosis                                | 0<br>(0 - 1)       | 0<br>(0 - 0)       | 0<br>(0 - 0)        | 0<br>(0 - 0)         | 0<br>(0 - 0)         | 0<br>(0 - 1)         |
| Asthma                                              | 70<br>(22 - 117)   | 0<br>(0 - 1)       | 0<br>(0 - 1)        | 7<br>(2 - 11)        | 12<br>(4 - 21)       | 51<br>(16 - 89)      |
| Interstitial lung disease and pulmonary sarcoidosis | 92<br>(44 - 172)   | 0<br>(0 - 0)       | 0<br>(0 - 0)        | 4<br>(2 - 7)         | 15<br>(7 - 28)       | 73<br>(33 - 143)     |
| Other chronic respiratory diseases                  | 25<br>(11 - 44)    | 0<br>(0 - 1)       | 0<br>(0 - 0)        | 4<br>(2 - 6)         | 2<br>(1 - 4)         | 18<br>(7 - 36)       |
| Cirrhosis                                           | 135<br>(99 - 180)  | 1<br>(0 - 1)       | 1<br>(0 - 1)        | 12<br>(8 - 16)       | 35<br>(23 - 50)      | 87<br>(59 - 123)     |
| Cirrhosis due to hepatitis B                        | 57<br>(28 - 94)    | 0<br>(0 - 0)       | 0<br>(0 - 0)        | 5<br>(2 - 8)         | 14<br>(7 - 24)       | 39<br>(16 - 66)      |
| Cirrhosis due to hepatitis C                        | 57<br>(29 - 90)    | 0<br>(0 - 0)       | 0<br>(0 - 0)        | 4<br>(2 - 7)         | 17<br>(8 - 28)       | 36<br>(16 - 64)      |
| Cirrhosis due to alcohol use                        | 9<br>(3 - 18)      | --                 | --                  | 0<br>(0 - 1)         | 2<br>(1 - 3)         | 7<br>(2 - 15)        |
| Cirrhosis due to other causes                       | 11<br>(6 - 21)     | 1<br>(0 - 1)       | 0<br>(0 - 1)        | 3<br>(1 - 4)         | 3<br>(1 - 6)         | 5<br>(2 - 12)        |
| Digestive diseases                                  | 133<br>(99 - 172)  | 1<br>(0 - 1)       | 1<br>(1 - 1)        | 8<br>(5 - 11)        | 20<br>(13 - 28)      | 103<br>(75 - 137)    |
| Peptic ulcer disease                                | 36<br>(21 - 54)    | 0<br>(0 - 0)       | 0<br>(0 - 0)        | 1<br>(1 - 2)         | 5<br>(3 - 8)         | 29<br>(17 - 46)      |
| Gastritis and duodenitis                            | 2<br>(1 - 4)       | 0<br>(0 - 0)       | 0<br>(0 - 0)        | 0<br>(0 - 1)         | 0<br>(0 - 1)         | 1<br>(0 - 2)         |
| Appendicitis                                        | 4<br>(2 - 7)       | 0<br>(0 - 0)       | 0<br>(0 - 0)        | 1<br>(0 - 1)         | 1<br>(0 - 1)         | 2<br>(1 - 5)         |
| Paralytic ileus and intestinal obstruction          | 33<br>(18 - 56)    | 0<br>(0 - 1)       | 0<br>(0 - 0)        | 2<br>(1 - 4)         | 5<br>(2 - 9)         | 25<br>(13 - 44)      |
| Inguinal, femoral, and abdominal hernia             | 3<br>(1 - 5)       | 0<br>(0 - 0)       | 0<br>(0 - 0)        | 0<br>(0 - 0)         | 0<br>(0 - 1)         | 2<br>(1 - 4)         |
| Inflammatory bowel disease                          | 6<br>(3 - 10)      | 0<br>(0 - 0)       | 0<br>(0 - 0)        | 1<br>(0 - 1)         | 1<br>(0 - 2)         | 4<br>(2 - 8)         |
| Vascular intestinal disorders                       | 4<br>(2 - 8)       | 0<br>(0 - 0)       | 0<br>(0 - 0)        | 0<br>(0 - 1)         | 1<br>(0 - 1)         | 3<br>(1 - 6)         |
| Gallbladder and biliary diseases                    | 25<br>(13 - 39)    | 0<br>(0 - 0)       | 0<br>(0 - 0)        | 1<br>(1 - 2)         | 3<br>(2 - 6)         | 20<br>(10 - 34)      |
| Pancreatitis                                        | 8<br>(4 - 13)      | 0<br>(0 - 0)       | 0<br>(0 - 0)        | 1<br>(0 - 1)         | 2<br>(1 - 3)         | 5<br>(2 - 9)         |
| Other digestive diseases                            | 14<br>(8 - 23)     | 0<br>(0 - 0)       | 0<br>(0 - 0)        | 1<br>(1 - 1)         | 2<br>(1 - 3)         | 11<br>(6 - 19)       |
| Neurological disorders                              | 668<br>(499 - 854) | 2<br>(1 - 4)       | 2<br>(1 - 4)        | 11<br>(6 - 18)       | 41<br>(27 - 61)      | 612<br>(450 - 787)   |
| Alzheimer disease and other dementias               | 639<br>(475 - 823) | --                 | --                  | 0<br>(0 - 0)         | 37<br>(24 - 56)      | 602<br>(442 - 776)   |
| Parkinson disease                                   | 2<br>(1 - 4)       | --                 | --                  | 0<br>(0 - 0)         | 0<br>(0 - 0)         | 2<br>(1 - 4)         |
| Epilepsy                                            | 16<br>(8 - 25)     | 1<br>(0 - 2)       | 1<br>(1 - 3)        | 9<br>(4 - 15)        | 2<br>(1 - 3)         | 3<br>(2 - 7)         |
| Multiple sclerosis                                  | 2<br>(1 - 4)       | --                 | --                  | 1<br>(0 - 1)         | 1<br>(0 - 1)         | 1<br>(0 - 2)         |
| Other neurological disorders                        | 8<br>(6 - 10)      | 1<br>(1 - 2)       | 1<br>(0 - 1)        | 1<br>(1 - 2)         | 1<br>(1 - 1)         | 3<br>(2 - 5)         |
| Mental and substance use disorders                  | 26<br>(17 - 36)    | 0<br>(0 - 0)       | 0<br>(0 - 0)        | 17<br>(10 - 24)      | 3<br>(2 - 5)         | 5<br>(3 - 7)         |
| Schizophrenia                                       | 0<br>(0 - 1)       | --                 | --                  | 0<br>(0 - 0)         | 0<br>(0 - 0)         | 0<br>(0 - 0)         |
| Alcohol use disorders                               | 2<br>(1 - 4)       | --                 | --                  | 1<br>(0 - 1)         | 1<br>(0 - 2)         | 1<br>(0 - 1)         |
| Drug use disorders                                  | 23<br>(14 - 33)    | 0<br>(0 - 0)       | --                  | 16<br>(10 - 23)      | 3<br>(1 - 4)         | 4<br>(3 - 7)         |
| Opioid use disorders                                | 13<br>(8 - 18)     | 0<br>(0 - 0)       | --                  | 9<br>(5 - 13)        | 1<br>(1 - 2)         | 2<br>(1 - 4)         |
| Cocaine use disorders                               | 0<br>(0 - 1)       | 0<br>(0 - 0)       | --                  | 0<br>(0 - 1)         | 0<br>(0 - 0)         | 0<br>(0 - 0)         |
| Amphetamine use disorders                           | 0<br>(0 - 1)       | 0<br>(0 - 0)       | --                  | 0<br>(0 - 0)         | 0<br>(0 - 0)         | 0<br>(0 - 0)         |
| Other drug use disorders                            | 10<br>(6 - 14)     | 0<br>(0 - 0)       | --                  | 7<br>(4 - 10)        | 1<br>(1 - 2)         | 2<br>(1 - 3)         |
| Eating disorders                                    | 0<br>(0 - 1)       | --                 | 0<br>(0 - 0)        | 0<br>(0 - 0)         | --                   | --                   |
| Anorexia nervosa                                    | 0<br>(0 - 1)       | --                 | 0<br>(0 - 0)        | 0<br>(0 - 0)         | --                   | --                   |

Web Table 31- Lebanon deaths with 95% UI by age, sex, and cause in 2013

| Cause                                               | Females, All Ages    | Females, 0-4 Years | Females, 5-14 Years | Females, 15-49 Years | Females, 50-69 Years | Females, 70-80 Years |
|-----------------------------------------------------|----------------------|--------------------|---------------------|----------------------|----------------------|----------------------|
| Diabetes, urogenital, blood, and endocrine diseases | 911<br>(699 - 1,179) | 7<br>(4 - 10)      | 6<br>(4 - 8)        | 66<br>(42 - 90)      | 225<br>(152 - 311)   | 607<br>(464 - 783)   |
| Diabetes mellitus                                   | 447<br>(328 - 597)   | 1<br>(0 - 1)       | 1<br>(0 - 1)        | 22<br>(14 - 30)      | 113<br>(75 - 163)    | 311<br>(220 - 421)   |
| Acute glomerulonephritis                            | 2<br>(1 - 3)         | 0<br>(0 - 0)       | 0<br>(0 - 1)        | 0<br>(0 - 1)         | 0<br>(0 - 1)         | 1<br>(1 - 2)         |
| Chronic kidney disease                              | 379<br>(242 - 573)   | 1<br>(0 - 3)       | 2<br>(1 - 3)        | 27<br>(11 - 43)      | 101<br>(59 - 156)    | 248<br>(159 - 387)   |
| Chronic kidney disease due to diabetes mellitus     | 9<br>(4 - 17)        | 0<br>(0 - 0)       | 0<br>(0 - 0)        | 1<br>(0 - 2)         | 3<br>(1 - 6)         | 5<br>(2 - 9)         |
| Chronic kidney disease due to hypertension          | 147<br>(87 - 240)    | 0<br>(0 - 0)       | 0<br>(0 - 0)        | 9<br>(4 - 15)        | 36<br>(19 - 62)      | 103<br>(59 - 173)    |
| Chronic kidney disease due to glomerulonephritis    | 10<br>(5 - 18)       | 0<br>(0 - 0)       | 0<br>(0 - 0)        | 1<br>(1 - 2)         | 2<br>(1 - 4)         | 7<br>(3 - 12)        |
| Chronic kidney disease due to other causes          | 212<br>(96 - 371)    | 1<br>(0 - 2)       | 1<br>(0 - 3)        | 16<br>(4 - 30)       | 60<br>(27 - 105)     | 134<br>(56 - 257)    |
| Urinary diseases and male infertility               | 28<br>(17 - 48)      | 0<br>(0 - 1)       | 0<br>(0 - 0)        | 2<br>(1 - 5)         | 4<br>(2 - 7)         | 21<br>(12 - 37)      |
| Interstitial nephritis and urinary tract infections | 21<br>(13 - 36)      | 0<br>(0 - 0)       | 0<br>(0 - 0)        | 2<br>(1 - 4)         | 3<br>(2 - 5)         | 16<br>(9 - 28)       |
| Urolithiasis                                        | 2<br>(1 - 4)         | --                 | 0<br>(0 - 0)        | 0<br>(0 - 0)         | 0<br>(0 - 1)         | 1<br>(0 - 3)         |
| Other urinary diseases                              | 6<br>(2 - 12)        | 0<br>(0 - 0)       | 0<br>(0 - 0)        | 0<br>(0 - 1)         | 1<br>(0 - 2)         | 4<br>(2 - 10)        |
| Gynecological diseases                              | 0<br>(0 - 1)         | --                 | --                  | 0<br>(0 - 0)         | 0<br>(0 - 0)         | 0<br>(0 - 0)         |
| Uterine fibroids                                    | 0<br>(0 - 0)         | --                 | --                  | 0<br>(0 - 0)         | 0<br>(0 - 0)         | 0<br>(0 - 0)         |
| Polycystic ovarian syndrome                         | 0<br>(0 - 0)         | --                 | --                  | 0<br>(0 - 0)         | 0<br>(0 - 0)         | --                   |
| Endometriosis                                       | 0<br>(0 - 0)         | --                 | --                  | 0<br>(0 - 0)         | 0<br>(0 - 0)         | --                   |
| Genital prolapse                                    | 0<br>(0 - 0)         | --                 | --                  | 0<br>(0 - 0)         | 0<br>(0 - 0)         | 0<br>(0 - 0)         |
| Other gynecological diseases                        | 0<br>(0 - 0)         | --                 | --                  | 0<br>(0 - 0)         | 0<br>(0 - 0)         | 0<br>(0 - 0)         |
| Hemoglobinopathies and hemolytic anemias            | 26<br>(16 - 39)      | 2<br>(1 - 3)       | 2<br>(1 - 3)        | 10<br>(6 - 15)       | 3<br>(1 - 5)         | 10<br>(5 - 16)       |
| Thalassemias                                        | 8<br>(5 - 12)        | 1<br>(1 - 2)       | 1<br>(1 - 2)        | 6<br>(3 - 9)         | 0<br>(0 - 0)         | 0<br>(0 - 0)         |
| Sickle cell disorders                               | 6<br>(4 - 10)        | 0<br>(0 - 1)       | 0<br>(0 - 1)        | 4<br>(2 - 5)         | 2<br>(1 - 3)         | 0<br>(0 - 0)         |
| G6PD deficiency                                     | 0<br>(0 - 0)         | 0<br>(0 - 0)       | 0<br>(0 - 0)        | 0<br>(0 - 0)         | 0<br>(0 - 0)         | 0<br>(0 - 0)         |
| Other hemoglobinopathies and hemolytic anemias      | 11<br>(6 - 18)       | 0<br>(0 - 0)       | 0<br>(0 - 0)        | 1<br>(0 - 1)         | 1<br>(0 - 2)         | 9<br>(5 - 16)        |
| Endocrine, metabolic, blood, and immune disorders   | 28<br>(17 - 43)      | 2<br>(1 - 5)       | 1<br>(0 - 2)        | 4<br>(2 - 7)         | 5<br>(3 - 8)         | 16<br>(8 - 28)       |
| Musculoskeletal disorders                           | 33<br>(20 - 54)      | --                 | 1<br>(0 - 1)        | 8<br>(5 - 14)        | 5<br>(3 - 10)        | 19<br>(10 - 32)      |
| Rheumatoid arthritis                                | 5<br>(2 - 9)         | --                 | 0<br>(0 - 0)        | 1<br>(0 - 1)         | 1<br>(0 - 2)         | 3<br>(1 - 6)         |
| Other musculoskeletal disorders                     | 29<br>(17 - 48)      | --                 | 1<br>(0 - 1)        | 8<br>(4 - 13)        | 5<br>(2 - 9)         | 16<br>(9 - 27)       |
| Other non-communicable diseases                     | 193<br>(145 - 246)   | 142<br>(101 - 188) | 12<br>(7 - 18)      | 12<br>(7 - 18)       | 4<br>(3 - 7)         | 23<br>(16 - 32)      |
| Congenital anomalies                                | 175<br>(126 - 226)   | 137<br>(96 - 185)  | 12<br>(7 - 18)      | 12<br>(7 - 17)       | 3<br>(2 - 5)         | 11<br>(6 - 16)       |
| Neural tube defects                                 | 5<br>(2 - 15)        | 5<br>(1 - 14)      | 0<br>(0 - 0)        | 0<br>(0 - 0)         | 0<br>(0 - 0)         | 0<br>(0 - 0)         |
| Congenital heart anomalies                          | 78<br>(49 - 110)     | 66<br>(39 - 96)    | 6<br>(3 - 9)        | 4<br>(2 - 6)         | 1<br>(0 - 1)         | 2<br>(1 - 4)         |
| Cleft lip and cleft palate                          | 0<br>(0 - 0)         | 0<br>(0 - 0)       | --                  | --                   | --                   | --                   |
| Down syndrome                                       | 4<br>(2 - 6)         | 2<br>(1 - 4)       | 1<br>(0 - 1)        | 1<br>(0 - 1)         | 0<br>(0 - 0)         | 0<br>(0 - 0)         |
| Chromosomal unbalanced rearrangements               | 2<br>(1 - 4)         | 2<br>(1 - 3)       | 0<br>(0 - 0)        | 0<br>(0 - 1)         | 0<br>(0 - 0)         | 0<br>(0 - 0)         |
| Other congenital anomalies                          | 85<br>(60 - 117)     | 63<br>(40 - 93)    | 5<br>(3 - 9)        | 7<br>(4 - 10)        | 2<br>(1 - 3)         | 8<br>(5 - 13)        |
| Skin and subcutaneous diseases                      | 14<br>(9 - 23)       | 0<br>(0 - 0)       | 0<br>(0 - 0)        | 1<br>(0 - 1)         | 2<br>(1 - 3)         | 12<br>(7 - 20)       |
| Cellulitis                                          | 2<br>(1 - 4)         | 0<br>(0 - 0)       | 0<br>(0 - 0)        | 0<br>(0 - 0)         | 0<br>(0 - 1)         | 1<br>(0 - 3)         |
| Pyoderma                                            | 4<br>(2 - 7)         | 0<br>(0 - 0)       | 0<br>(0 - 0)        | 0<br>(0 - 0)         | 1<br>(0 - 1)         | 3<br>(1 - 5)         |
| Decubitus ulcer                                     | 9<br>(4 - 15)        | 0<br>(0 - 0)       | 0<br>(0 - 0)        | 0<br>(0 - 0)         | 1<br>(0 - 1)         | 8<br>(4 - 13)        |
| Other skin and subcutaneous diseases                | 0<br>(0 - 1)         | 0<br>(0 - 0)       | 0<br>(0 - 0)        | 0<br>(0 - 0)         | 0<br>(0 - 0)         | 0<br>(0 - 0)         |



Web Table 31- Lebanon deaths with 95% UI by age, sex, and cause in 2013

| Cause                                           | Females, All Ages  | Females, 0-4 Years | Females, 5-14 Years | Females, 15-49 Years | Females, 50-69 Years | Females, 70-80 Years |
|-------------------------------------------------|--------------------|--------------------|---------------------|----------------------|----------------------|----------------------|
| Sudden infant death syndrome                    | 4<br>(1 - 15)      | 4<br>(1 - 15)      | --                  | --                   | --                   | --                   |
| Injuries                                        | 325<br>(232 - 494) | 21<br>(15 - 29)    | 18<br>(13 - 24)     | 102<br>(68 - 145)    | 45<br>(29 - 68)      | 140<br>(90 - 262)    |
| Transport injuries                              | 80<br>(55 - 127)   | 4<br>(2 - 8)       | 7<br>(4 - 11)       | 38<br>(23 - 63)      | 19<br>(12 - 31)      | 12<br>(8 - 17)       |
| Road injuries                                   | 74<br>(50 - 118)   | 4<br>(2 - 7)       | 7<br>(4 - 11)       | 35<br>(21 - 60)      | 17<br>(10 - 29)      | 10<br>(7 - 16)       |
| Pedestrian road injuries                        | 21<br>(13 - 38)    | 1<br>(1 - 3)       | 2<br>(1 - 4)        | 8<br>(4 - 15)        | 5<br>(3 - 11)        | 4<br>(2 - 7)         |
| Cyclist road injuries                           | 3<br>(2 - 6)       | 0<br>(0 - 0)       | 0<br>(0 - 0)        | 1<br>(1 - 2)         | 1<br>(1 - 2)         | 0<br>(0 - 1)         |
| Motorcyclist road injuries                      | 2<br>(1 - 5)       | 0<br>(0 - 0)       | 0<br>(0 - 0)        | 1<br>(1 - 3)         | 0<br>(0 - 1)         | 0<br>(0 - 0)         |
| Motor vehicle road injuries                     | 47<br>(29 - 76)    | 3<br>(1 - 5)       | 4<br>(2 - 7)        | 25<br>(14 - 42)      | 10<br>(5 - 17)       | 6<br>(3 - 9)         |
| Other road injuries                             | 0<br>(0 - 1)       | 0<br>(0 - 0)       | 0<br>(0 - 0)        | 0<br>(0 - 0)         | 0<br>(0 - 0)         | 0<br>(0 - 0)         |
| Other transport injuries                        | 6<br>(4 - 9)       | 0<br>(0 - 1)       | 0<br>(0 - 1)        | 3<br>(1 - 4)         | 2<br>(1 - 3)         | 1<br>(1 - 2)         |
| Unintentional injuries                          | 184<br>(125 - 310) | 10<br>(6 - 16)     | 8<br>(6 - 11)       | 30<br>(19 - 41)      | 19<br>(12 - 28)      | 117<br>(70 - 237)    |
| Falls                                           | 80<br>(35 - 204)   | 1<br>(0 - 2)       | 1<br>(0 - 1)        | 3<br>(2 - 5)         | 3<br>(2 - 7)         | 72<br>(29 - 190)     |
| Drowning                                        | 14<br>(10 - 25)    | 3<br>(1 - 6)       | 3<br>(1 - 5)        | 5<br>(3 - 9)         | 1<br>(1 - 3)         | 3<br>(2 - 4)         |
| Fire, heat, and hot substances                  | 24<br>(14 - 34)    | 1<br>(1 - 3)       | 1<br>(1 - 2)        | 6<br>(3 - 10)        | 3<br>(2 - 5)         | 12<br>(6 - 20)       |
| Poisonings                                      | 7<br>(3 - 11)      | 0<br>(0 - 1)       | 0<br>(0 - 1)        | 3<br>(1 - 5)         | 1<br>(1 - 2)         | 3<br>(1 - 4)         |
| Exposure to mechanical forces                   | 11<br>(6 - 30)     | 1<br>(0 - 4)       | 1<br>(1 - 3)        | 3<br>(2 - 10)        | 2<br>(1 - 5)         | 3<br>(2 - 8)         |
| Unintentional firearm injuries                  | 1<br>(1 - 2)       | 0<br>(0 - 0)       | 0<br>(0 - 0)        | 1<br>(0 - 1)         | 0<br>(0 - 0)         | 0<br>(0 - 1)         |
| Unintentional suffocation                       | 3<br>(1 - 22)      | 0<br>(0 - 3)       | 0<br>(0 - 2)        | 1<br>(0 - 8)         | 1<br>(0 - 3)         | 1<br>(0 - 4)         |
| Other exposure to mechanical forces             | 6<br>(4 - 10)      | 1<br>(0 - 1)       | 1<br>(0 - 1)        | 2<br>(1 - 3)         | 1<br>(1 - 2)         | 2<br>(1 - 4)         |
| Adverse effects of medical treatment            | 24<br>(15 - 38)    | 1<br>(0 - 2)       | 1<br>(0 - 1)        | 4<br>(2 - 6)         | 5<br>(3 - 9)         | 14<br>(7 - 25)       |
| Animal contact                                  | 4<br>(2 - 8)       | 0<br>(0 - 1)       | 0<br>(0 - 1)        | 1<br>(0 - 2)         | 1<br>(0 - 1)         | 2<br>(1 - 4)         |
| Venomous animal contact                         | 1<br>(0 - 2)       | 0<br>(0 - 0)       | 0<br>(0 - 0)        | 0<br>(0 - 1)         | 0<br>(0 - 0)         | 0<br>(0 - 1)         |
| Non-venomous animal contact                     | 3<br>(1 - 7)       | 0<br>(0 - 1)       | 0<br>(0 - 1)        | 1<br>(0 - 2)         | 0<br>(0 - 1)         | 2<br>(0 - 4)         |
| Foreign body                                    | 8<br>(4 - 13)      | 1<br>(0 - 2)       | 0<br>(0 - 1)        | 1<br>(1 - 2)         | 1<br>(0 - 1)         | 5<br>(2 - 9)         |
| Pulmonary aspiration and foreign body in airway | 7<br>(3 - 13)      | 1<br>(0 - 2)       | 0<br>(0 - 1)        | 1<br>(0 - 1)         | 1<br>(0 - 1)         | 5<br>(2 - 9)         |
| Foreign body in other body part                 | 1<br>(0 - 2)       | 0<br>(0 - 0)       | 0<br>(0 - 0)        | 0<br>(0 - 1)         | 0<br>(0 - 0)         | 0<br>(0 - 1)         |
| Other unintentional injuries                    | 11<br>(6 - 17)     | 1<br>(0 - 1)       | 1<br>(0 - 1)        | 4<br>(2 - 7)         | 1<br>(1 - 2)         | 4<br>(2 - 8)         |
| Self-harm and interpersonal violence            | 55<br>(36 - 80)    | 1<br>(0 - 1)       | 2<br>(1 - 3)        | 34<br>(21 - 54)      | 7<br>(4 - 12)        | 11<br>(7 - 19)       |
| Self-harm                                       | 38<br>(24 - 56)    | --                 | 1<br>(0 - 2)        | 22<br>(12 - 35)      | 6<br>(3 - 9)         | 10<br>(6 - 17)       |
| Interpersonal violence                          | 17<br>(10 - 32)    | 1<br>(0 - 1)       | 1<br>(0 - 2)        | 12<br>(7 - 24)       | 2<br>(1 - 4)         | 1<br>(1 - 3)         |
| Assault by firearm                              | 3<br>(2 - 8)       | 0<br>(0 - 0)       | 0<br>(0 - 1)        | 2<br>(1 - 6)         | 1<br>(0 - 1)         | 0<br>(0 - 1)         |
| Assault by sharp object                         | 6<br>(3 - 12)      | 0<br>(0 - 0)       | 0<br>(0 - 0)        | 5<br>(3 - 11)        | 0<br>(0 - 1)         | 0<br>(0 - 1)         |
| Assault by other means                          | 7<br>(4 - 14)      | 0<br>(0 - 1)       | 0<br>(0 - 1)        | 5<br>(2 - 10)        | 1<br>(0 - 2)         | 1<br>(0 - 2)         |
| Forces of nature, war, and legal intervention   | 7                  | 6                  | 1                   | 0                    | 0                    | 0                    |
| Collective violence and legal intervention      | 7<br>(6 - 7)       | 6<br>(5 - 6)       | 1<br>(1 - 1)        | 0<br>(0 - 0)         | 0<br>(0 - 0)         | 0<br>(0 - 0)         |

Web Table 31- Lesotho deaths with 95% UI by age, sex, and cause in 2013

| Cause                                                              | Both Sexes, All Ages        | Both Sexes, 0-4 Years    | Both Sexes, 5-14 Years | Both Sexes, 15-49 Years     | Both Sexes, 50-69 Years  | Both Sexes, 70-80 Years  |
|--------------------------------------------------------------------|-----------------------------|--------------------------|------------------------|-----------------------------|--------------------------|--------------------------|
| All causes                                                         | 32,963<br>(30,269 - 35,919) | 5,085<br>(4,046 - 6,470) | 1,031<br>(894 - 1,256) | 16,038<br>(13,811 - 17,718) | 5,306<br>(4,665 - 6,052) | 5,503<br>(4,992 - 6,187) |
| Communicable, maternal, neonatal, and nutritional diseases         | 20,778<br>(18,966 - 22,654) | 4,568<br>(3,648 - 5,823) | 863<br>(749 - 1,009)   | 11,427<br>(9,985 - 12,660)  | 2,581<br>(2,223 - 2,911) | 1,338<br>(1,140 - 1,583) |
| HIV/AIDS and tuberculosis                                          | 12,598<br>(11,427 - 13,824) | 462<br>(298 - 659)       | 728<br>(631 - 836)     | 8,842<br>(7,815 - 9,983)    | 2,057<br>(1,717 - 2,370) | 508<br>(406 - 617)       |
| Tuberculosis                                                       | 3,425<br>(2,662 - 4,196)    | 66<br>(36 - 109)         | 29<br>(16 - 53)        | 2,556<br>(1,879 - 3,278)    | 501<br>(359 - 654)       | 273<br>(205 - 360)       |
| HIV/AIDS                                                           | 9,173<br>(8,060 - 10,485)   | 396<br>(237 - 596)       | 699<br>(602 - 809)     | 6,287<br>(5,308 - 7,299)    | 1,556<br>(1,234 - 1,873) | 235<br>(161 - 315)       |
| HIV/AIDS resulting in mycobacterial infection                      | 619<br>(492 - 783)          | 24<br>(14 - 37)          | 41<br>(32 - 52)        | 431<br>(331 - 556)          | 105<br>(77 - 136)        | 16<br>(11 - 23)          |
| HIV/AIDS resulting in other diseases                               | 8,554<br>(7,527 - 9,796)    | 371<br>(223 - 560)       | 658<br>(566 - 760)     | 5,855<br>(4,953 - 6,857)    | 1,451<br>(1,156 - 1,752) | 219<br>(150 - 293)       |
| Diarrrhea, lower respiratory, and other common infectious diseases | 5,211<br>(4,305 - 6,341)    | 1,864<br>(1,339 - 2,613) | 115<br>(73 - 194)      | 1,999<br>(1,425 - 2,623)    | 471<br>(349 - 617)       | 760<br>(590 - 971)       |
| Diarrheal diseases                                                 | 2,255<br>(1,655 - 2,984)    | 949<br>(560 - 1,448)     | 47<br>(25 - 90)        | 784<br>(481 - 1,182)        | 175<br>(104 - 269)       | 299<br>(186 - 460)       |
| Intestinal infectious diseases                                     | 53<br>(27 - 97)             | 19<br>(8 - 37)           | 11<br>(5 - 23)         | 20<br>(9 - 40)              | 2<br>(1 - 4)             | 1<br>(1 - 3)             |
| Typhoid fever                                                      | 38<br>(19 - 71)             | 13<br>(5 - 26)           | 8<br>(4 - 17)          | 15<br>(6 - 30)              | 2<br>(1 - 3)             | 1<br>(0 - 2)             |
| Paratyphoid fever                                                  | 13<br>(6 - 24)              | 5<br>(2 - 9)             | 3<br>(1 - 6)           | 5<br>(2 - 9)                | 0<br>(0 - 1)             | 0<br>(0 - 0)             |
| Other intestinal infectious diseases                               | 2<br>(0 - 7)                | 1<br>(0 - 5)             | 0<br>(0 - 1)           | 1<br>(0 - 3)                | 0<br>(0 - 1)             | 0<br>(0 - 1)             |
| Lower respiratory infections                                       | 2,492<br>(1,987 - 3,058)    | 739<br>(451 - 1,121)     | 33<br>(20 - 60)        | 1,002<br>(694 - 1,384)      | 273<br>(200 - 353)       | 444<br>(333 - 575)       |
| Upper respiratory infections                                       | 3<br>(1 - 5)                | 1<br>(0 - 2)             | 0<br>(0 - 0)           | 1<br>(0 - 3)                | 0<br>(0 - 1)             | 0<br>(0 - 1)             |
| Otitis media                                                       | 1<br>(1 - 1)                | 0<br>(0 - 0)             | 0<br>(0 - 0)           | 0<br>(0 - 1)                | 0<br>(0 - 0)             | 0<br>(0 - 0)             |
| Meningitis                                                         | 298<br>(220 - 384)          | 75<br>(40 - 129)         | 14<br>(8 - 25)         | 177<br>(118 - 254)          | 18<br>(12 - 25)          | 13<br>(8 - 18)           |
| Pneumococcal meningitis                                            | 44<br>(29 - 65)             | 7<br>(3 - 13)            | 2<br>(1 - 4)           | 30<br>(16 - 51)             | 3<br>(1 - 5)             | 2<br>(1 - 4)             |
| H influenzae type B meningitis                                     | 57<br>(38 - 82)             | 28<br>(14 - 48)          | 4<br>(2 - 7)           | 23<br>(13 - 35)             | 2<br>(1 - 3)             | 1<br>(1 - 2)             |
| Meningococcal meningitis                                           | 105<br>(76 - 142)           | 24<br>(12 - 42)          | 6<br>(3 - 10)          | 64<br>(40 - 96)             | 6<br>(4 - 9)             | 5<br>(3 - 7)             |
| Other meningitis                                                   | 92<br>(65 - 125)            | 17<br>(8 - 30)           | 3<br>(2 - 6)           | 61<br>(38 - 90)             | 7<br>(4 - 10)            | 5<br>(3 - 7)             |
| Encephalitis                                                       | 19<br>(13 - 26)             | 5<br>(2 - 8)             | 1<br>(1 - 3)           | 10<br>(6 - 16)              | 2<br>(1 - 3)             | 2<br>(1 - 3)             |
| Diphtheria                                                         | 1<br>(0 - 4)                | 1<br>(0 - 4)             | 0<br>(0 - 1)           | 0<br>(0 - 1)                | 0<br>(0 - 0)             | --<br>(0 - 0)            |
| Whooping cough                                                     | 18<br>(0 - 85)              | 18<br>(0 - 83)           | 1<br>(0 - 3)           | 0<br>(0 - 1)                | 0<br>(0 - 0)             | --<br>(0 - 0)            |
| Tetanus                                                            | 5<br>(3 - 8)                | 1<br>(0 - 3)             | 0<br>(0 - 1)           | 2<br>(1 - 4)                | 1<br>(0 - 2)             | 1<br>(0 - 2)             |
| Measles                                                            | 64<br>(1 - 401)             | 57<br>(1 - 355)          | 6<br>(0 - 38)          | 2<br>(0 - 10)               | 0<br>(0 - 0)             | --<br>(0 - 0)            |
| Varicella and herpes zoster                                        | 1<br>(1 - 3)                | 0<br>(0 - 1)             | 0<br>(0 - 0)           | 0<br>(0 - 1)                | 0<br>(0 - 0)             | 1<br>(0 - 2)             |
| Neglected tropical diseases and malaria                            | 81<br>(51 - 119)            | 15<br>(7 - 26)           | 3<br>(2 - 7)           | 54<br>(29 - 89)             | 5<br>(3 - 8)             | 4<br>(2 - 7)             |
| Leishmaniasis                                                      | 7<br>(5 - 10)               | 2<br>(1 - 4)             | 1<br>(0 - 2)           | 3<br>(2 - 5)                | 0<br>(0 - 1)             | 0<br>(0 - 0)             |
| Visceral leishmaniasis                                             | 7<br>(5 - 10)               | 2<br>(1 - 4)             | 1<br>(0 - 2)           | 3<br>(2 - 5)                | 0<br>(0 - 1)             | 0<br>(0 - 0)             |
| Cysticercosis                                                      | 2<br>(1 - 2)                | 0<br>(0 - 0)             | 0<br>(0 - 0)           | 1<br>(1 - 2)                | 0<br>(0 - 0)             | 0<br>(0 - 0)             |
| Cystic echinococcosis                                              | 2<br>(1 - 2)                | 0<br>(0 - 0)             | 0<br>(0 - 0)           | 1<br>(1 - 2)                | 0<br>(0 - 0)             | 0<br>(0 - 0)             |
| Dengue                                                             | 0<br>(0 - 0)                | 0<br>(0 - 0)             | 0<br>(0 - 0)           | 0<br>(0 - 0)                | 0<br>(0 - 0)             | 0<br>(0 - 0)             |
| Rabies                                                             | 1<br>(0 - 2)                | 0<br>(0 - 0)             | 0<br>(0 - 1)           | 0<br>(0 - 1)                | 0<br>(0 - 0)             | 0<br>(0 - 0)             |
| Intestinal nematode infections                                     | 4<br>(1 - 11)               | 2<br>(0 - 8)             | 1<br>(0 - 3)           | 1<br>(0 - 5)                | 0<br>(0 - 2)             | 0<br>(0 - 2)             |
| Ascariasis                                                         | 4<br>(1 - 11)               | 2<br>(0 - 8)             | 1<br>(0 - 3)           | 1<br>(0 - 5)                | 0<br>(0 - 2)             | 0<br>(0 - 2)             |
| Other neglected tropical diseases                                  | 65<br>(36 - 102)            | 10<br>(5 - 19)           | 1<br>(1 - 3)           | 47<br>(22 - 80)             | 4<br>(2 - 6)             | 3<br>(2 - 6)             |
| Maternal disorders                                                 | 295<br>(175 - 446)          | --                       | 0<br>(0 - 1)           | 295<br>(175 - 446)          | --                       | --                       |
| Maternal hemorrhage                                                | 34<br>(18 - 55)             | --                       | 0<br>(0 - 0)           | 34<br>(18 - 55)             | --                       | --                       |
| Maternal sepsis and other maternal infections                      | 33<br>(18 - 55)             | --                       | 0<br>(0 - 0)           | 33<br>(18 - 55)             | --                       | --                       |

Web Table 31- Lesotho deaths with 95% UI by age, sex, and cause in 2013

| Cause                                                            | Both Sexes, All Ages      | Both Sexes, 0-4 Years    | Both Sexes, 5-14 Years | Both Sexes, 15-49 Years  | Both Sexes, 50-69 Years  | Both Sexes, 70-80 Years  |
|------------------------------------------------------------------|---------------------------|--------------------------|------------------------|--------------------------|--------------------------|--------------------------|
| Maternal hypertensive disorders                                  | 39<br>(20 - 63)           | --                       | 0<br>(0 - 0)           | 39<br>(20 - 63)          | --                       | --                       |
| Maternal obstructed labor                                        | 16<br>(8 - 28)            | --                       | 0<br>(0 - 0)           | 16<br>(8 - 28)           | --                       | --                       |
| Maternal abortive outcome                                        | 50<br>(28 - 81)           | --                       | 0<br>(0 - 0)           | 50<br>(27 - 81)          | --                       | --                       |
| Indirect maternal deaths                                         | 31<br>(17 - 52)           | --                       | 0<br>(0 - 0)           | 31<br>(17 - 52)          | --                       | --                       |
| Late maternal deaths                                             | 36<br>(18 - 65)           | --                       | 0<br>(0 - 0)           | 36<br>(18 - 65)          | --                       | --                       |
| Maternal deaths aggravated by HIV/AIDS                           | 27<br>(15 - 41)           | --                       | --                     | 27<br>(15 - 41)          | --                       | --                       |
| Other maternal disorders                                         | 29<br>(15 - 49)           | --                       | 0<br>(0 - 0)           | 29<br>(15 - 49)          | --                       | --                       |
| Neonatal disorders                                               | 1,919<br>(1,543 - 2,380)  | 1,919<br>(1,543 - 2,380) | --                     | --                       | --                       | --                       |
| Neonatal preterm birth complications                             | 726<br>(451 - 1,053)      | 726<br>(451 - 1,053)     | --                     | --                       | --                       | --                       |
| Neonatal encephalopathy due to birth asphyxia and trauma         | 440<br>(229 - 711)        | 440<br>(229 - 711)       | --                     | --                       | --                       | --                       |
| Neonatal sepsis and other neonatal infections                    | 165<br>(63 - 319)         | 165<br>(63 - 319)        | --                     | --                       | --                       | --                       |
| Hemolytic disease and other neonatal jaundice                    | 13<br>(5 - 29)            | 13<br>(5 - 29)           | --                     | --                       | --                       | --                       |
| Other neonatal disorders                                         | 575<br>(302 - 906)        | 575<br>(302 - 906)       | --                     | --                       | --                       | --                       |
| Nutritional deficiencies                                         | 360<br>(256 - 519)        | 178<br>(96 - 300)        | 7<br>(4 - 14)          | 97<br>(65 - 149)         | 29<br>(19 - 49)          | 49<br>(34 - 77)          |
| Protein-energy malnutrition                                      | 235<br>(147 - 372)        | 171<br>(93 - 290)        | 5<br>(2 - 9)           | 27<br>(12 - 53)          | 12<br>(6 - 24)           | 20<br>(10 - 37)          |
| Iodine deficiency                                                | 0<br>(0 - 1)              | 0<br>(0 - 1)             | 0<br>(0 - 0)           | 0<br>(0 - 1)             | 0<br>(0 - 0)             | 0<br>(0 - 0)             |
| Iron-deficiency anemia                                           | 111<br>(70 - 177)         | 5<br>(2 - 15)            | 2<br>(1 - 5)           | 64<br>(39 - 99)          | 15<br>(8 - 26)           | 24<br>(13 - 43)          |
| Other nutritional deficiencies                                   | 14<br>(7 - 28)            | 1<br>(0 - 3)             | 0<br>(0 - 1)           | 6<br>(3 - 13)            | 3<br>(1 - 5)             | 5<br>(2 - 9)             |
| Other communicable, maternal, neonatal, and nutritional diseases | 314<br>(191 - 469)        | 130<br>(39 - 264)        | 9<br>(4 - 18)          | 140<br>(77 - 215)        | 19<br>(11 - 32)          | 16<br>(9 - 29)           |
| Sexually transmitted diseases excluding HIV                      | 117<br>(18 - 254)         | 100<br>(5 - 230)         | 4<br>(0 - 10)          | 10<br>(2 - 20)           | 1<br>(0 - 3)             | 1<br>(0 - 3)             |
| Syphilis                                                         | 110<br>(12 - 246)         | 100<br>(5 - 230)         | 4<br>(0 - 10)          | 4<br>(1 - 8)             | 1<br>(0 - 2)             | 1<br>(0 - 2)             |
| Chlamydial infection                                             | 2<br>(0 - 4)              | --                       | 0<br>(0 - 0)           | 2<br>(0 - 4)             | 0<br>(0 - 0)             | 0<br>(0 - 0)             |
| Gonococcal infection                                             | 3<br>(1 - 4)              | --                       | 0<br>(0 - 0)           | 2<br>(0 - 4)             | 0<br>(0 - 0)             | 0<br>(0 - 0)             |
| Other sexually transmitted diseases                              | 2<br>(1 - 4)              | --                       | 0<br>(0 - 0)           | 2<br>(0 - 4)             | 0<br>(0 - 0)             | 0<br>(0 - 0)             |
| Hepatitis                                                        | 19<br>(14 - 25)           | 3<br>(1 - 5)             | 1<br>(0 - 1)           | 10<br>(7 - 14)           | 3<br>(2 - 5)             | 2<br>(2 - 3)             |
| Acute hepatitis A                                                | 3<br>(1 - 5)              | 1<br>(0 - 3)             | 0<br>(0 - 1)           | 1<br>(0 - 2)             | 0<br>(0 - 0)             | 0<br>(0 - 0)             |
| Acute hepatitis B                                                | 10<br>(6 - 14)            | 2<br>(1 - 3)             | 0<br>(0 - 0)           | 3<br>(2 - 5)             | 2<br>(1 - 4)             | 2<br>(1 - 3)             |
| Acute hepatitis C                                                | 0<br>(0 - 1)              | --                       | 0<br>(0 - 0)           | 0<br>(0 - 0)             | 0<br>(0 - 0)             | 0<br>(0 - 0)             |
| Acute hepatitis E                                                | 7<br>(4 - 10)             | 0<br>(0 - 0)             | 0<br>(0 - 0)           | 6<br>(3 - 9)             | 1<br>(0 - 1)             | 0<br>(0 - 1)             |
| Other infectious diseases                                        | 178<br>(105 - 268)        | 27<br>(14 - 50)          | 4<br>(2 - 8)           | 120<br>(58 - 191)        | 14<br>(7 - 27)           | 12<br>(6 - 25)           |
| Non-communicable diseases                                        | 9,005<br>(7,819 - 10,368) | 348<br>(228 - 539)       | 70<br>(47 - 117)       | 2,143<br>(1,694 - 2,583) | 2,480<br>(2,005 - 3,046) | 3,964<br>(3,523 - 4,614) |
| Neoplasms                                                        | 1,222<br>(1,016 - 1,465)  | 12<br>(7 - 20)           | 10<br>(7 - 18)         | 200<br>(161 - 252)       | 453<br>(355 - 579)       | 546<br>(442 - 648)       |
| Esophageal cancer                                                | 149<br>(110 - 189)        | --                       | --                     | 17<br>(12 - 22)          | 72<br>(50 - 98)          | 60<br>(42 - 80)          |
| Stomach cancer                                                   | 84<br>(68 - 101)          | --                       | --                     | 13<br>(10 - 16)          | 29<br>(22 - 37)          | 42<br>(32 - 54)          |
| Liver cancer                                                     | 67<br>(51 - 95)           | --                       | 0<br>(0 - 1)           | 15<br>(10 - 24)          | 25<br>(17 - 37)          | 28<br>(20 - 38)          |
| Liver cancer due to hepatitis B                                  | 21<br>(10 - 39)           | --                       | 0<br>(0 - 0)           | 6<br>(3 - 12)            | 8<br>(3 - 16)            | 6<br>(3 - 12)            |
| Liver cancer due to hepatitis C                                  | 26<br>(16 - 39)           | --                       | 0<br>(0 - 0)           | 4<br>(2 - 8)             | 10<br>(5 - 16)           | 12<br>(7 - 18)           |
| Liver cancer due to alcohol use                                  | 12<br>(6 - 20)            | --                       | --                     | 1<br>(1 - 3)             | 4<br>(2 - 8)             | 6<br>(3 - 11)            |
| Liver cancer due to other causes                                 | 9<br>(5 - 14)             | --                       | 0<br>(0 - 0)           | 3<br>(2 - 5)             | 3<br>(1 - 5)             | 3<br>(2 - 5)             |
| Larynx cancer                                                    | 21<br>(16 - 30)           | --                       | --                     | 3<br>(2 - 5)             | 11<br>(8 - 16)           | 7<br>(5 - 10)            |

Web Table 31- Lesotho deaths with 95% UI by age, sex, and cause in 2013

| Cause                                         | Both Sexes, All Ages     | Both Sexes, 0-4 Years | Both Sexes, 5-14 Years | Both Sexes, 15-49 Years | Both Sexes, 50-69 Years | Both Sexes, 70-80 Years  |
|-----------------------------------------------|--------------------------|-----------------------|------------------------|-------------------------|-------------------------|--------------------------|
| Tracheal, bronchus and lung cancer            | 173<br>(129 - 212)       | --                    | --                     | 17<br>(10 - 23)         | 83<br>(57 - 107)        | 73<br>(57 - 90)          |
| Breast cancer                                 | 68<br>(47 - 97)          | --                    | --                     | 14<br>(10 - 26)         | 24<br>(15 - 38)         | 30<br>(20 - 44)          |
| Cervical cancer                               | 93<br>(62 - 131)         | --                    | --                     | 29<br>(21 - 40)         | 36<br>(20 - 61)         | 28<br>(15 - 43)          |
| Uterine cancer                                | 11<br>(5 - 18)           | --                    | --                     | 1<br>(0 - 2)            | 4<br>(2 - 7)            | 7<br>(3 - 11)            |
| Prostate cancer                               | 87<br>(50 - 122)         | --                    | --                     | 1<br>(0 - 1)            | 19<br>(11 - 30)         | 67<br>(38 - 94)          |
| Colon and rectum cancer                       | 93<br>(75 - 114)         | --                    | --                     | 7<br>(6 - 9)            | 28<br>(21 - 36)         | 58<br>(44 - 74)          |
| Lip and oral cavity cancer                    | 29<br>(19 - 38)          | --                    | --                     | 5<br>(3 - 8)            | 13<br>(8 - 19)          | 10<br>(7 - 14)           |
| Nasopharynx cancer                            | 4<br>(3 - 5)             | --                    | 0<br>(0 - 0)           | 2<br>(1 - 2)            | 2<br>(1 - 2)            | 1<br>(1 - 1)             |
| Other pharynx cancer                          | 12<br>(8 - 18)           | --                    | --                     | 1<br>(1 - 2)            | 8<br>(5 - 14)           | 2<br>(1 - 3)             |
| Gallbladder and biliary tract cancer          | 10<br>(7 - 15)           | --                    | --                     | 1<br>(1 - 2)            | 4<br>(3 - 6)            | 5<br>(4 - 8)             |
| Pancreatic cancer                             | 45<br>(37 - 56)          | --                    | --                     | 3<br>(3 - 4)            | 17<br>(13 - 22)         | 25<br>(20 - 33)          |
| Malignant skin melanoma                       | 9<br>(6 - 13)            | --                    | --                     | 2<br>(1 - 3)            | 3<br>(2 - 4)            | 4<br>(3 - 6)             |
| Non-melanoma skin cancer                      | 12<br>(8 - 17)           | --                    | --                     | 3<br>(2 - 5)            | 4<br>(2 - 6)            | 5<br>(3 - 8)             |
| Ovarian cancer                                | 18<br>(10 - 29)          | --                    | --                     | 4<br>(2 - 7)            | 7<br>(4 - 12)           | 7<br>(4 - 12)            |
| Testicular cancer                             | 2<br>(1 - 3)             | --                    | --                     | 1<br>(1 - 1)            | 1<br>(0 - 1)            | 1<br>(0 - 1)             |
| Kidney cancer                                 | 14<br>(11 - 18)          | 1<br>(0 - 1)          | 0<br>(0 - 1)           | 2<br>(1 - 3)            | 5<br>(4 - 8)            | 5<br>(4 - 7)             |
| Bladder cancer                                | 23<br>(17 - 28)          | --                    | --                     | 3<br>(2 - 3)            | 7<br>(5 - 9)            | 13<br>(10 - 17)          |
| Brain and nervous system cancer               | 12<br>(7 - 17)           | 1<br>(0 - 1)          | 1<br>(1 - 2)           | 4<br>(2 - 6)            | 4<br>(2 - 6)            | 3<br>(2 - 5)             |
| Thyroid cancer                                | 5<br>(3 - 7)             | --                    | 0<br>(0 - 0)           | 1<br>(0 - 1)            | 2<br>(1 - 2)            | 2<br>(1 - 3)             |
| Mesothelioma                                  | 4<br>(3 - 7)             | --                    | --                     | 1<br>(0 - 1)            | 2<br>(1 - 3)            | 2<br>(1 - 3)             |
| Hodgkin lymphoma                              | 6<br>(3 - 9)             | 0<br>(0 - 1)          | 0<br>(0 - 1)           | 3<br>(2 - 5)            | 1<br>(1 - 2)            | 1<br>(1 - 2)             |
| Non-Hodgkin lymphoma                          | 49<br>(37 - 66)          | 1<br>(1 - 2)          | 1<br>(1 - 2)           | 13<br>(8 - 21)          | 15<br>(10 - 21)         | 19<br>(13 - 25)          |
| Multiple myeloma                              | 12<br>(9 - 16)           | --                    | --                     | 1<br>(1 - 2)            | 5<br>(3 - 7)            | 6<br>(4 - 8)             |
| Leukemia                                      | 33<br>(27 - 39)          | 2<br>(1 - 3)          | 2<br>(2 - 4)           | 10<br>(7 - 13)          | 7<br>(5 - 9)            | 12<br>(9 - 15)           |
| Other neoplasms                               | 78<br>(60 - 108)         | 8<br>(4 - 13)         | 5<br>(3 - 9)           | 25<br>(16 - 43)         | 19<br>(13 - 27)         | 22<br>(16 - 30)          |
| Cardiovascular diseases                       | 3,648<br>(3,070 - 4,587) | 24<br>(14 - 43)       | 13<br>(8 - 23)         | 610<br>(459 - 816)      | 1,045<br>(821 - 1,367)  | 1,955<br>(1,662 - 2,509) |
| Rheumatic heart disease                       | 82<br>(55 - 150)         | 1<br>(0 - 1)          | 2<br>(1 - 4)           | 38<br>(21 - 84)         | 10<br>(6 - 21)          | 30<br>(20 - 48)          |
| Ischemic heart disease                        | 1,230<br>(961 - 1,689)   | 2<br>(1 - 4)          | 1<br>(1 - 2)           | 148<br>(107 - 200)      | 354<br>(265 - 477)      | 725<br>(546 - 1,085)     |
| Cerebrovascular disease                       | 1,340<br>(1,089 - 1,699) | 6<br>(3 - 11)         | 4<br>(2 - 8)           | 213<br>(157 - 298)      | 395<br>(299 - 528)      | 721<br>(582 - 915)       |
| Ischemic stroke                               | 589<br>(415 - 779)       | 0<br>(0 - 1)          | 0<br>(0 - 1)           | 29<br>(15 - 52)         | 156<br>(98 - 216)       | 404<br>(281 - 539)       |
| Hemorrhagic stroke                            | 751<br>(571 - 1,063)     | 6<br>(3 - 10)         | 4<br>(2 - 7)           | 184<br>(133 - 258)      | 240<br>(168 - 356)      | 317<br>(231 - 478)       |
| Hypertensive heart disease                    | 431<br>(280 - 600)       | 1<br>(0 - 1)          | 0<br>(0 - 1)           | 50<br>(31 - 70)         | 117<br>(71 - 174)       | 263<br>(163 - 378)       |
| Cardiomyopathy and myocarditis                | 232<br>(156 - 303)       | 9<br>(4 - 17)         | 2<br>(1 - 5)           | 85<br>(47 - 132)        | 60<br>(37 - 84)         | 75<br>(45 - 110)         |
| Atrial fibrillation and flutter               | 17<br>(10 - 29)          | --                    | --                     | 1<br>(0 - 1)            | 3<br>(2 - 5)            | 14<br>(8 - 24)           |
| Aortic aneurysm                               | 45<br>(31 - 65)          | --                    | --                     | 6<br>(3 - 9)            | 14<br>(9 - 20)          | 26<br>(18 - 37)          |
| Peripheral vascular disease                   | 9<br>(6 - 12)            | --                    | --                     | 0<br>(0 - 1)            | 3<br>(2 - 4)            | 6<br>(4 - 8)             |
| Endocarditis                                  | 17<br>(12 - 24)          | 2<br>(1 - 3)          | 1<br>(0 - 1)           | 6<br>(3 - 10)           | 3<br>(2 - 5)            | 6<br>(4 - 9)             |
| Other cardiovascular and circulatory diseases | 245<br>(167 - 419)       | 5<br>(2 - 11)         | 2<br>(1 - 5)           | 63<br>(38 - 114)        | 86<br>(53 - 149)        | 89<br>(58 - 150)         |
| Chronic respiratory diseases                  | 1,167<br>(949 - 1,505)   | 19<br>(9 - 36)        | 7<br>(4 - 12)          | 260<br>(191 - 365)      | 345<br>(256 - 463)      | 537<br>(432 - 686)       |
| Chronic obstructive pulmonary disease         | 674<br>(523 - 872)       | 7<br>(3 - 16)         | 1<br>(1 - 3)           | 94<br>(65 - 135)        | 208<br>(150 - 285)      | 363<br>(278 - 464)       |

Web Table 31- Lesotho deaths with 95% UI by age, sex, and cause in 2013

| Cause                                               | Both Sexes, All Ages | Both Sexes, 0-4 Years | Both Sexes, 5-14 Years | Both Sexes, 15-49 Years | Both Sexes, 50-69 Years | Both Sexes, 70-80 Years |
|-----------------------------------------------------|----------------------|-----------------------|------------------------|-------------------------|-------------------------|-------------------------|
| Pneumoconiosis                                      | 49<br>(31 - 80)      | 0<br>(0 - 0)          | 0<br>(0 - 0)           | 10<br>(6 - 18)          | 16<br>(9 - 28)          | 23<br>(14 - 37)         |
| Silicosis                                           | 9<br>(5 - 15)        | 0<br>(0 - 0)          | 0<br>(0 - 0)           | 1<br>(1 - 3)            | 3<br>(1 - 5)            | 5<br>(3 - 9)            |
| Asbestosis                                          | 10<br>(5 - 16)       | 0<br>(0 - 0)          | 0<br>(0 - 0)           | 1<br>(1 - 3)            | 3<br>(2 - 6)            | 5<br>(2 - 9)            |
| Coal workers pneumoconiosis                         | 11<br>(5 - 19)       | 0<br>(0 - 0)          | 0<br>(0 - 0)           | 2<br>(1 - 3)            | 4<br>(2 - 8)            | 5<br>(2 - 9)            |
| Other pneumoconiosis                                | 19<br>(12 - 34)      | 0<br>(0 - 0)          | 0<br>(0 - 0)           | 5<br>(3 - 10)           | 6<br>(3 - 12)           | 8<br>(4 - 13)           |
| Asthma                                              | 390<br>(293 - 557)   | 8<br>(3 - 15)         | 5<br>(3 - 8)           | 140<br>(95 - 213)       | 109<br>(74 - 166)       | 129<br>(90 - 190)       |
| Interstitial lung disease and pulmonary sarcoidosis | 33<br>(4 - 70)       | 1<br>(0 - 3)          | 0<br>(0 - 1)           | 10<br>(1 - 24)          | 8<br>(1 - 18)           | 14<br>(2 - 30)          |
| Other chronic respiratory diseases                  | 22<br>(13 - 35)      | 3<br>(1 - 8)          | 1<br>(0 - 1)           | 7<br>(3 - 12)           | 4<br>(2 - 7)            | 8<br>(4 - 13)           |
| Cirrhosis                                           | 178<br>(110 - 249)   | 2<br>(1 - 4)          | 2<br>(1 - 3)           | 74<br>(44 - 108)        | 62<br>(36 - 94)         | 38<br>(23 - 55)         |
| Cirrhosis due to hepatitis B                        | 29<br>(17 - 48)      | 0<br>(0 - 0)          | 0<br>(0 - 0)           | 12<br>(7 - 21)          | 10<br>(6 - 17)          | 6<br>(3 - 11)           |
| Cirrhosis due to hepatitis C                        | 26<br>(15 - 40)      | 0<br>(0 - 0)          | 0<br>(0 - 0)           | 10<br>(5 - 16)          | 8<br>(5 - 14)           | 7<br>(3 - 12)           |
| Cirrhosis due to alcohol use                        | 93<br>(55 - 135)     | --                    | --                     | 34<br>(18 - 52)         | 37<br>(21 - 58)         | 22<br>(13 - 33)         |
| Cirrhosis due to other causes                       | 30<br>(16 - 47)      | 2<br>(1 - 3)          | 1<br>(1 - 2)           | 18<br>(9 - 30)          | 6<br>(3 - 11)           | 3<br>(1 - 4)            |
| Digestive diseases                                  | 430<br>(341 - 523)   | 10<br>(5 - 18)        | 6<br>(4 - 10)          | 215<br>(158 - 279)      | 82<br>(62 - 107)        | 116<br>(89 - 149)       |
| Peptic ulcer disease                                | 115<br>(82 - 153)    | 1<br>(0 - 2)          | 1<br>(0 - 1)           | 51<br>(34 - 79)         | 26<br>(17 - 38)         | 35<br>(24 - 50)         |
| Gastritis and duodenitis                            | 24<br>(13 - 36)      | 1<br>(0 - 1)          | 0<br>(0 - 1)           | 10<br>(5 - 16)          | 5<br>(2 - 8)            | 8<br>(4 - 14)           |
| Appendicitis                                        | 17<br>(12 - 24)      | 1<br>(0 - 1)          | 1<br>(1 - 2)           | 10<br>(6 - 16)          | 3<br>(2 - 4)            | 3<br>(1 - 4)            |
| Paralytic ileus and intestinal obstruction          | 50<br>(34 - 75)      | 2<br>(1 - 3)          | 1<br>(1 - 2)           | 14<br>(8 - 22)          | 11<br>(7 - 17)          | 22<br>(14 - 33)         |
| Inguinal, femoral, and abdominal hernia             | 8<br>(4 - 12)        | 0<br>(0 - 0)          | 0<br>(0 - 0)           | 2<br>(1 - 4)            | 2<br>(1 - 3)            | 3<br>(2 - 5)            |
| Inflammatory bowel disease                          | 106<br>(76 - 144)    | 4<br>(2 - 9)          | 1<br>(1 - 3)           | 75<br>(49 - 105)        | 12<br>(8 - 17)          | 13<br>(8 - 20)          |
| Vascular intestinal disorders                       | 6<br>(3 - 10)        | 0<br>(0 - 0)          | 0<br>(0 - 0)           | 2<br>(1 - 3)            | 1<br>(1 - 3)            | 2<br>(1 - 4)            |
| Gallbladder and biliary diseases                    | 25<br>(18 - 34)      | 0<br>(0 - 0)          | 0<br>(0 - 0)           | 7<br>(5 - 10)           | 6<br>(4 - 10)           | 11<br>(7 - 17)          |
| Pancreatitis                                        | 25<br>(14 - 39)      | 0<br>(0 - 0)          | 0<br>(0 - 0)           | 16<br>(8 - 25)          | 5<br>(3 - 9)            | 4<br>(2 - 6)            |
| Other digestive diseases                            | 56<br>(40 - 73)      | 1<br>(1 - 3)          | 1<br>(0 - 2)           | 28<br>(19 - 42)         | 10<br>(7 - 15)          | 15<br>(9 - 22)          |
| Neurological disorders                              | 326<br>(239 - 403)   | 11<br>(5 - 19)        | 8<br>(4 - 14)          | 122<br>(67 - 178)       | 41<br>(28 - 58)         | 144<br>(111 - 179)      |
| Alzheimer disease and other dementias               | 118<br>(90 - 149)    | --                    | --                     | 0<br>(0 - 0)            | 7<br>(5 - 9)            | 111<br>(83 - 141)       |
| Parkinson disease                                   | 8<br>(5 - 12)        | --                    | --                     | 0<br>(0 - 0)            | 1<br>(1 - 2)            | 7<br>(4 - 10)           |
| Epilepsy                                            | 187<br>(117 - 249)   | 10<br>(4 - 18)        | 8<br>(4 - 13)          | 118<br>(63 - 174)       | 30<br>(18 - 45)         | 22<br>(14 - 35)         |
| Multiple sclerosis                                  | 1<br>(0 - 2)         | --                    | --                     | 0<br>(0 - 1)            | 0<br>(0 - 1)            | 0<br>(0 - 0)            |
| Other neurological disorders                        | 12<br>(10 - 16)      | 1<br>(1 - 2)          | 0<br>(0 - 1)           | 4<br>(3 - 5)            | 3<br>(2 - 4)            | 4<br>(3 - 5)            |
| Mental and substance use disorders                  | 212<br>(145 - 299)   | 7<br>(2 - 14)         | 0<br>(0 - 0)           | 167<br>(110 - 245)      | 26<br>(17 - 39)         | 13<br>(9 - 17)          |
| Schizophrenia                                       | 10<br>(6 - 19)       | --                    | --                     | 5<br>(2 - 11)           | 3<br>(1 - 5)            | 3<br>(1 - 4)            |
| Alcohol use disorders                               | 94<br>(53 - 158)     | --                    | --                     | 71<br>(38 - 125)        | 18<br>(11 - 32)         | 4<br>(3 - 7)            |
| Drug use disorders                                  | 107<br>(67 - 170)    | 7<br>(2 - 14)         | --                     | 90<br>(56 - 147)        | 5<br>(3 - 7)            | 6<br>(4 - 8)            |
| Opioid use disorders                                | 12<br>(7 - 18)       | 1<br>(0 - 2)          | --                     | 10<br>(6 - 16)          | 0<br>(0 - 1)            | 1<br>(0 - 1)            |
| Cocaine use disorders                               | 0<br>(0 - 1)         | 0<br>(0 - 0)          | --                     | 0<br>(0 - 1)            | 0<br>(0 - 0)            | 0<br>(0 - 0)            |
| Amphetamine use disorders                           | 0<br>(0 - 0)         | 0<br>(0 - 0)          | --                     | 0<br>(0 - 0)            | 0<br>(0 - 0)            | 0<br>(0 - 0)            |
| Other drug use disorders                            | 95<br>(59 - 150)     | 6<br>(2 - 12)         | --                     | 80<br>(49 - 130)        | 4<br>(2 - 7)            | 5<br>(3 - 7)            |
| Eating disorders                                    | 0<br>(0 - 1)         | --                    | 0<br>(0 - 0)           | 0<br>(0 - 0)            | --                      | --                      |
| Anorexia nervosa                                    | 0<br>(0 - 1)         | --                    | 0<br>(0 - 0)           | 0<br>(0 - 0)            | --                      | --                      |

Web Table 31- Lesotho deaths with 95% UI by age, sex, and cause in 2013

| Cause                                               | Both Sexes, All Ages     | Both Sexes, 0-4 Years | Both Sexes, 5-14 Years | Both Sexes, 15-49 Years | Both Sexes, 50-69 Years | Both Sexes, 70-80 Years |
|-----------------------------------------------------|--------------------------|-----------------------|------------------------|-------------------------|-------------------------|-------------------------|
| Diabetes, urogenital, blood, and endocrine diseases | 1,485<br>(1,200 - 1,808) | 72<br>(41 - 119)      | 16<br>(10 - 28)        | 443<br>(308 - 602)      | 399<br>(306 - 516)      | 555<br>(431 - 686)      |
| Diabetes mellitus                                   | 711<br>(566 - 878)       | 1<br>(1 - 2)          | 1<br>(1 - 2)           | 94<br>(76 - 114)        | 264<br>(196 - 341)      | 351<br>(258 - 448)      |
| Acute glomerulonephritis                            | 2<br>(1 - 3)             | 0<br>(0 - 1)          | 0<br>(0 - 1)           | 1<br>(0 - 1)            | 0<br>(0 - 0)            | 0<br>(0 - 0)            |
| Chronic kidney disease                              | 272<br>(210 - 335)       | 5<br>(3 - 8)          | 3<br>(2 - 5)           | 89<br>(61 - 123)        | 66<br>(47 - 87)         | 110<br>(77 - 147)       |
| Chronic kidney disease due to diabetes mellitus     | 1<br>(0 - 1)             | 0<br>(0 - 0)          | 0<br>(0 - 0)           | 1<br>(0 - 1)            | 0<br>(0 - 0)            | 0<br>(0 - 0)            |
| Chronic kidney disease due to hypertension          | 141<br>(102 - 178)       | 0<br>(0 - 1)          | 0<br>(0 - 1)           | 35<br>(22 - 50)         | 38<br>(27 - 52)         | 67<br>(47 - 88)         |
| Chronic kidney disease due to glomerulonephritis    | 43<br>(28 - 60)          | 2<br>(1 - 4)          | 1<br>(1 - 2)           | 25<br>(14 - 38)         | 6<br>(3 - 9)            | 9<br>(5 - 13)           |
| Chronic kidney disease due to other causes          | 87<br>(51 - 128)         | 2<br>(1 - 4)          | 1<br>(0 - 2)           | 29<br>(14 - 52)         | 21<br>(11 - 34)         | 35<br>(16 - 59)         |
| Urinary diseases and male infertility               | 76<br>(60 - 94)          | 3<br>(2 - 6)          | 1<br>(0 - 1)           | 26<br>(17 - 35)         | 15<br>(11 - 21)         | 31<br>(22 - 43)         |
| Interstitial nephritis and urinary tract infections | 33<br>(24 - 44)          | 2<br>(1 - 4)          | 0<br>(0 - 1)           | 11<br>(6 - 17)          | 6<br>(4 - 9)            | 13<br>(9 - 20)          |
| Urolithiasis                                        | 1<br>(1 - 2)             | --                    | 0<br>(0 - 0)           | 1<br>(0 - 1)            | 0<br>(0 - 1)            | 0<br>(0 - 1)            |
| Other urinary diseases                              | 42<br>(32 - 53)          | 1<br>(1 - 3)          | 0<br>(0 - 1)           | 14<br>(9 - 21)          | 9<br>(6 - 13)           | 17<br>(11 - 25)         |
| Gynecological diseases                              | 2<br>(1 - 3)             | --                    | --                     | 2<br>(1 - 3)            | 0<br>(0 - 0)            | 0<br>(0 - 1)            |
| Uterine fibroids                                    | 0<br>(0 - 1)             | --                    | --                     | 0<br>(0 - 0)            | 0<br>(0 - 0)            | 0<br>(0 - 0)            |
| Polycystic ovarian syndrome                         | 0<br>(0 - 0)             | --                    | --                     | 0<br>(0 - 0)            | 0<br>(0 - 0)            | --                      |
| Endometriosis                                       | 0<br>(0 - 0)             | --                    | --                     | 0<br>(0 - 0)            | 0<br>(0 - 0)            | --                      |
| Genital prolapse                                    | 0<br>(0 - 1)             | --                    | --                     | 0<br>(0 - 0)            | 0<br>(0 - 0)            | 0<br>(0 - 0)            |
| Other gynecological diseases                        | 1<br>(1 - 2)             | --                    | --                     | 1<br>(0 - 1)            | 0<br>(0 - 0)            | 0<br>(0 - 0)            |
| Hemoglobinopathies and hemolytic anemias            | 69<br>(39 - 100)         | 10<br>(4 - 18)        | 3<br>(2 - 6)           | 37<br>(17 - 60)         | 7<br>(4 - 11)           | 13<br>(6 - 24)          |
| Thalassemias                                        | 6<br>(4 - 11)            | 4<br>(2 - 7)          | 1<br>(0 - 2)           | 2<br>(1 - 3)            | 0<br>(0 - 0)            | 0<br>(0 - 0)            |
| Sickle cell disorders                               | 12<br>(6 - 20)           | 1<br>(1 - 2)          | 1<br>(0 - 1)           | 10<br>(4 - 17)          | 1<br>(0 - 1)            | 0<br>(0 - 0)            |
| G6PD deficiency                                     | 4<br>(2 - 6)             | 1<br>(0 - 1)          | 0<br>(0 - 0)           | 3<br>(1 - 5)            | 0<br>(0 - 0)            | 0<br>(0 - 0)            |
| Other hemoglobinopathies and hemolytic anemias      | 46<br>(26 - 67)          | 5<br>(2 - 9)          | 1<br>(1 - 3)           | 22<br>(11 - 35)         | 6<br>(3 - 10)           | 13<br>(6 - 24)          |
| Endocrine, metabolic, blood, and immune disorders   | 352<br>(218 - 523)       | 52<br>(28 - 93)       | 8<br>(4 - 16)          | 196<br>(90 - 329)       | 47<br>(29 - 72)         | 49<br>(31 - 71)         |
| Musculoskeletal disorders                           | 38<br>(24 - 54)          | --                    | 1<br>(1 - 2)           | 15<br>(9 - 24)          | 9<br>(5 - 13)           | 13<br>(8 - 21)          |
| Rheumatoid arthritis                                | 13<br>(9 - 19)           | --                    | 0<br>(0 - 0)           | 3<br>(2 - 5)            | 3<br>(2 - 5)            | 7<br>(4 - 10)           |
| Other musculoskeletal disorders                     | 25<br>(14 - 37)          | --                    | 1<br>(0 - 1)           | 12<br>(6 - 19)          | 6<br>(3 - 9)            | 7<br>(3 - 12)           |
| Other non-communicable diseases                     | 299<br>(210 - 443)       | 191<br>(116 - 337)    | 7<br>(4 - 12)          | 36<br>(19 - 55)         | 18<br>(12 - 26)         | 47<br>(32 - 68)         |
| Congenital anomalies                                | 212<br>(135 - 358)       | 178<br>(107 - 324)    | 6<br>(3 - 11)          | 13<br>(7 - 24)          | 5<br>(3 - 7)            | 10<br>(7 - 13)          |
| Neural tube defects                                 | 35<br>(15 - 78)          | 32<br>(13 - 75)       | 1<br>(0 - 1)           | 1<br>(1 - 3)            | 0<br>(0 - 0)            | 0<br>(0 - 0)            |
| Congenital heart anomalies                          | 71<br>(44 - 128)         | 54<br>(30 - 107)      | 3<br>(2 - 5)           | 6<br>(3 - 11)           | 2<br>(1 - 3)            | 6<br>(4 - 9)            |
| Cleft lip and cleft palate                          | 1<br>(0 - 2)             | 1<br>(0 - 2)          | --                     | --                      | --                      | --                      |
| Down syndrome                                       | 18<br>(9 - 33)           | 14<br>(7 - 29)        | 1<br>(0 - 2)           | 2<br>(1 - 3)            | 1<br>(0 - 1)            | 0<br>(0 - 0)            |
| Chromosomal unbalanced rearrangements               | 11<br>(6 - 19)           | 10<br>(5 - 18)        | 0<br>(0 - 0)           | 1<br>(0 - 1)            | 0<br>(0 - 0)            | 0<br>(0 - 0)            |
| Other congenital anomalies                          | 77<br>(44 - 140)         | 66<br>(36 - 125)      | 2<br>(1 - 3)           | 4<br>(2 - 8)            | 2<br>(1 - 3)            | 3<br>(2 - 5)            |
| Skin and subcutaneous diseases                      | 80<br>(53 - 108)         | 5<br>(3 - 9)          | 1<br>(1 - 2)           | 22<br>(11 - 35)         | 14<br>(8 - 20)          | 38<br>(24 - 57)         |
| Cellulitis                                          | 19<br>(11 - 28)          | 1<br>(0 - 3)          | 0<br>(0 - 1)           | 5<br>(3 - 8)            | 4<br>(2 - 6)            | 8<br>(4 - 14)           |
| Pyoderma                                            | 27<br>(17 - 39)          | 4<br>(2 - 7)          | 0<br>(0 - 1)           | 11<br>(5 - 18)          | 5<br>(3 - 7)            | 8<br>(4 - 12)           |
| Decubitus ulcer                                     | 30<br>(19 - 45)          | 0<br>(0 - 0)          | 0<br>(0 - 0)           | 5<br>(2 - 8)            | 4<br>(2 - 7)            | 21<br>(13 - 32)         |
| Other skin and subcutaneous diseases                | 3<br>(2 - 6)             | 0<br>(0 - 1)          | 0<br>(0 - 0)           | 1<br>(1 - 3)            | 1<br>(0 - 1)            | 1<br>(1 - 2)            |

Web Table 31- Lesotho deaths with 95% UI by age, sex, and cause in 2013

| Cause                                           | Both Sexes, All Ages     | Both Sexes, 0-4 Years | Both Sexes, 5-14 Years | Both Sexes, 15-49 Years  | Both Sexes, 50-69 Years | Both Sexes, 70-80 Years |
|-------------------------------------------------|--------------------------|-----------------------|------------------------|--------------------------|-------------------------|-------------------------|
| Sudden infant death syndrome                    | 7<br>(2 - 21)            | 7<br>(2 - 21)         | --                     | --                       | --                      | --                      |
| Injuries                                        | 3,181<br>(2,436 - 3,894) | 169<br>(99 - 271)     | 98<br>(66 - 168)       | 2,468<br>(1,760 - 3,171) | 245<br>(185 - 308)      | 201<br>(158 - 248)      |
| Transport injuries                              | 568<br>(423 - 752)       | 33<br>(18 - 55)       | 33<br>(20 - 57)        | 439<br>(307 - 610)       | 44<br>(31 - 60)         | 18<br>(13 - 24)         |
| Road injuries                                   | 546<br>(407 - 725)       | 31<br>(17 - 51)       | 31<br>(18 - 53)        | 427<br>(300 - 593)       | 41<br>(29 - 56)         | 17<br>(12 - 22)         |
| Pedestrian road injuries                        | 91<br>(63 - 132)         | 13<br>(6 - 23)        | 13<br>(7 - 25)         | 45<br>(27 - 74)          | 11<br>(7 - 17)          | 8<br>(5 - 11)           |
| Cyclist road injuries                           | 52<br>(34 - 83)          | 2<br>(1 - 5)          | 4<br>(2 - 8)           | 34<br>(20 - 56)          | 8<br>(5 - 12)           | 3<br>(2 - 4)            |
| Motorcyclist road injuries                      | 103<br>(66 - 158)        | 1<br>(1 - 2)          | 1<br>(1 - 2)           | 97<br>(60 - 149)         | 4<br>(2 - 6)            | 1<br>(0 - 1)            |
| Motor vehicle road injuries                     | 287<br>(206 - 389)       | 13<br>(7 - 23)        | 11<br>(6 - 19)         | 243<br>(170 - 336)       | 15<br>(10 - 21)         | 4<br>(3 - 6)            |
| Other road injuries                             | 13<br>(6 - 32)           | 1<br>(0 - 2)          | 1<br>(0 - 2)           | 8<br>(3 - 22)            | 3<br>(1 - 6)            | 1<br>(0 - 2)            |
| Other transport injuries                        | 22<br>(15 - 33)          | 3<br>(1 - 5)          | 2<br>(1 - 4)           | 12<br>(7 - 22)           | 3<br>(2 - 5)            | 2<br>(1 - 2)            |
| Unintentional injuries                          | 904<br>(718 - 1,145)     | 115<br>(63 - 194)     | 52<br>(34 - 87)        | 488<br>(342 - 681)       | 107<br>(82 - 136)       | 142<br>(105 - 185)      |
| Falls                                           | 114<br>(78 - 164)        | 4<br>(2 - 8)          | 3<br>(1 - 5)           | 57<br>(33 - 96)          | 14<br>(9 - 22)          | 36<br>(21 - 57)         |
| Drowning                                        | 106<br>(64 - 149)        | 27<br>(12 - 49)       | 21<br>(11 - 40)        | 46<br>(23 - 82)          | 7<br>(4 - 10)           | 5<br>(3 - 7)            |
| Fire, heat, and hot substances                  | 153<br>(99 - 253)        | 25<br>(10 - 52)       | 7<br>(4 - 14)          | 77<br>(37 - 144)         | 15<br>(10 - 24)         | 30<br>(19 - 50)         |
| Poisonings                                      | 53<br>(36 - 102)         | 6<br>(3 - 12)         | 2<br>(1 - 3)           | 34<br>(19 - 74)          | 7<br>(4 - 11)           | 5<br>(3 - 8)            |
| Exposure to mechanical forces                   | 222<br>(142 - 384)       | 11<br>(5 - 23)        | 10<br>(5 - 18)         | 175<br>(103 - 318)       | 19<br>(12 - 32)         | 8<br>(5 - 11)           |
| Unintentional firearm injuries                  | 155<br>(86 - 281)        | 3<br>(1 - 7)          | 3<br>(1 - 6)           | 133<br>(68 - 259)        | 11<br>(6 - 18)          | 5<br>(3 - 9)            |
| Unintentional suffocation                       | 7<br>(1 - 13)            | 1<br>(0 - 4)          | 1<br>(0 - 1)           | 4<br>(0 - 9)             | 1<br>(0 - 1)            | 0<br>(0 - 1)            |
| Other exposure to mechanical forces             | 61<br>(36 - 99)          | 7<br>(3 - 15)         | 6<br>(3 - 13)          | 38<br>(20 - 70)          | 7<br>(4 - 13)           | 2<br>(1 - 3)            |
| Adverse effects of medical treatment            | 132<br>(93 - 175)        | 15<br>(7 - 28)        | 3<br>(2 - 6)           | 43<br>(23 - 71)          | 28<br>(16 - 43)         | 42<br>(19 - 70)         |
| Animal contact                                  | 18<br>(11 - 26)          | 3<br>(1 - 6)          | 2<br>(1 - 4)           | 8<br>(4 - 13)            | 2<br>(1 - 4)            | 2<br>(1 - 3)            |
| Venomous animal contact                         | 14<br>(8 - 21)           | 3<br>(1 - 5)          | 2<br>(1 - 3)           | 6<br>(3 - 11)            | 2<br>(1 - 3)            | 1<br>(1 - 2)            |
| Non-venomous animal contact                     | 4<br>(1 - 7)             | 1<br>(0 - 1)          | 0<br>(0 - 1)           | 2<br>(1 - 4)             | 1<br>(0 - 1)            | 1<br>(0 - 1)            |
| Foreign body                                    | 62<br>(36 - 125)         | 21<br>(8 - 53)        | 3<br>(1 - 5)           | 25<br>(13 - 48)          | 6<br>(3 - 12)           | 7<br>(4 - 13)           |
| Pulmonary aspiration and foreign body in airway | 60<br>(34 - 124)         | 21<br>(7 - 52)        | 2<br>(1 - 5)           | 24<br>(12 - 47)          | 6<br>(3 - 11)           | 7<br>(4 - 13)           |
| Foreign body in other body part                 | 1<br>(1 - 2)             | 0<br>(0 - 1)          | 0<br>(0 - 0)           | 1<br>(0 - 1)             | 0<br>(0 - 0)            | 0<br>(0 - 0)            |
| Other unintentional injuries                    | 43<br>(29 - 59)          | 2<br>(1 - 4)          | 1<br>(1 - 3)           | 24<br>(14 - 34)          | 9<br>(5 - 14)           | 7<br>(4 - 10)           |
| Self-harm and interpersonal violence            | 1,709<br>(926 - 2,276)   | 21<br>(11 - 37)       | 14<br>(7 - 23)         | 1,541<br>(820 - 2,087)   | 93<br>(51 - 135)        | 41<br>(20 - 57)         |
| Self-harm                                       | 671<br>(325 - 1,008)     | --                    | 3<br>(1 - 7)           | 563<br>(260 - 881)       | 67<br>(26 - 103)        | 37<br>(16 - 53)         |
| Interpersonal violence                          | 1,039<br>(554 - 1,508)   | 21<br>(11 - 37)       | 10<br>(5 - 19)         | 977<br>(522 - 1,441)     | 26<br>(14 - 41)         | 4<br>(2 - 7)            |
| Assault by firearm                              | 280<br>(126 - 488)       | 3<br>(1 - 6)          | 2<br>(1 - 4)           | 267<br>(117 - 467)       | 8<br>(3 - 15)           | 1<br>(0 - 1)            |
| Assault by sharp object                         | 396<br>(148 - 628)       | 3<br>(1 - 6)          | 2<br>(1 - 4)           | 382<br>(141 - 609)       | 8<br>(3 - 14)           | 1<br>(1 - 2)            |
| Assault by other means                          | 362<br>(186 - 583)       | 15<br>(8 - 27)        | 7<br>(3 - 13)          | 328<br>(160 - 540)       | 10<br>(5 - 17)          | 2<br>(1 - 4)            |

Web Table 31- Lesotho deaths with 95% UI by age, sex, and cause in 2013

| Cause                                                              | Males, All Ages             | Males, 0-4 Years         | Males, 5-14 Years  | Males, 15-49 Years       | Males, 50-69 Years       | Males, 70-80 Years       |
|--------------------------------------------------------------------|-----------------------------|--------------------------|--------------------|--------------------------|--------------------------|--------------------------|
| All causes                                                         | 17,506<br>(15,982 - 18,948) | 2,797<br>(2,271 - 3,517) | 562<br>(488 - 698) | 8,219<br>(7,006 - 9,176) | 3,221<br>(2,779 - 3,682) | 2,707<br>(2,483 - 2,862) |
| Communicable, maternal, neonatal, and nutritional diseases         | 10,399<br>(9,398 - 11,498)  | 2,514<br>(2,044 - 3,149) | 453<br>(392 - 534) | 5,268<br>(4,535 - 6,012) | 1,447<br>(1,223 - 1,671) | 717<br>(594 - 848)       |
| HIV/AIDS and tuberculosis                                          | 6,366<br>(5,628 - 7,235)    | 235<br>(152 - 334)       | 375<br>(325 - 431) | 4,341<br>(3,678 - 5,122) | 1,100<br>(888 - 1,323)   | 314<br>(242 - 397)       |
| Tuberculosis                                                       | 1,887<br>(1,426 - 2,373)    | 31<br>(14 - 58)          | 15<br>(8 - 28)     | 1,260<br>(891 - 1,665)   | 390<br>(259 - 529)       | 191<br>(133 - 263)       |
| HIV/AIDS                                                           | 4,479<br>(3,813 - 5,359)    | 204<br>(123 - 304)       | 361<br>(310 - 417) | 3,081<br>(2,439 - 3,890) | 710<br>(516 - 944)       | 124<br>(80 - 175)        |
| HIV/AIDS resulting in mycobacterial infection                      | 343<br>(264 - 446)          | 14<br>(8 - 21)           | 24<br>(19 - 30)    | 239<br>(175 - 319)       | 56<br>(39 - 78)          | 10<br>(6 - 15)           |
| HIV/AIDS resulting in other diseases                               | 4,136<br>(3,512 - 4,994)    | 190<br>(115 - 283)       | 337<br>(290 - 389) | 2,841<br>(2,260 - 3,613) | 654<br>(477 - 865)       | 114<br>(74 - 161)        |
| Diarrrhea, lower respiratory, and other common infectious diseases | 2,579<br>(2,100 - 3,139)    | 1,022<br>(698 - 1,433)   | 66<br>(41 - 117)   | 811<br>(560 - 1,083)     | 313<br>(220 - 426)       | 367<br>(270 - 473)       |
| Diarrheal diseases                                                 | 1,108<br>(730 - 1,518)      | 548<br>(271 - 861)       | 27<br>(11 - 55)    | 295<br>(164 - 460)       | 108<br>(57 - 178)        | 130<br>(71 - 213)        |
| Intestinal infectious diseases                                     | 28<br>(13 - 52)             | 9<br>(4 - 20)            | 6<br>(3 - 13)      | 11<br>(4 - 22)           | 1<br>(0 - 2)             | 1<br>(0 - 1)             |
| Typhoid fever                                                      | 19<br>(8 - 36)              | 6<br>(2 - 13)            | 5<br>(2 - 9)       | 7<br>(3 - 16)            | 1<br>(0 - 1)             | 0<br>(0 - 1)             |
| Paratyphoid fever                                                  | 7<br>(3 - 14)               | 2<br>(1 - 5)             | 2<br>(1 - 4)       | 3<br>(1 - 6)             | 0<br>(0 - 0)             | 0<br>(0 - 0)             |
| Other intestinal infectious diseases                               | 1<br>(0 - 5)                | 1<br>(0 - 4)             | 0<br>(0 - 1)       | 0<br>(0 - 2)             | 0<br>(0 - 1)             | 0<br>(0 - 1)             |
| Lower respiratory infections                                       | 1,233<br>(964 - 1,527)      | 382<br>(211 - 595)       | 19<br>(10 - 35)    | 415<br>(278 - 590)       | 190<br>(131 - 259)       | 227<br>(160 - 302)       |
| Upper respiratory infections                                       | 1<br>(1 - 3)                | 0<br>(0 - 1)             | 0<br>(0 - 0)       | 1<br>(0 - 2)             | 0<br>(0 - 1)             | 0<br>(0 - 1)             |
| Otitis media                                                       | 1<br>(0 - 1)                | 0<br>(0 - 0)             | 0<br>(0 - 0)       | 0<br>(0 - 0)             | 0<br>(0 - 0)             | 0<br>(0 - 0)             |
| Meningitis                                                         | 152<br>(104 - 213)          | 40<br>(16 - 81)          | 9<br>(4 - 17)      | 83<br>(51 - 129)         | 12<br>(7 - 19)           | 7<br>(4 - 12)            |
| Pneumococcal meningitis                                            | 22<br>(13 - 33)             | 4<br>(1 - 8)             | 1<br>(0 - 2)       | 14<br>(7 - 25)           | 2<br>(1 - 4)             | 1<br>(1 - 2)             |
| H influenzae type B meningitis                                     | 30<br>(18 - 46)             | 15<br>(6 - 32)           | 2<br>(1 - 5)       | 10<br>(5 - 19)           | 1<br>(1 - 2)             | 1<br>(0 - 1)             |
| Meningococcal meningitis                                           | 51<br>(33 - 73)             | 12<br>(4 - 25)           | 3<br>(1 - 7)       | 29<br>(16 - 47)          | 4<br>(2 - 7)             | 3<br>(1 - 5)             |
| Other meningitis                                                   | 49<br>(31 - 74)             | 9<br>(3 - 20)            | 2<br>(1 - 5)       | 30<br>(15 - 51)          | 5<br>(3 - 8)             | 3<br>(1 - 5)             |
| Encephalitis                                                       | 10<br>(7 - 15)              | 3<br>(1 - 6)             | 1<br>(0 - 2)       | 5<br>(3 - 8)             | 1<br>(1 - 2)             | 1<br>(0 - 1)             |
| Diphtheria                                                         | 1<br>(0 - 3)                | 0<br>(0 - 3)             | 0<br>(0 - 1)       | 0<br>(0 - 1)             | 0<br>(0 - 0)             | --<br>(0 - 0)            |
| Whooping cough                                                     | 9<br>(0 - 40)               | 8<br>(0 - 38)            | 0<br>(0 - 1)       | 0<br>(0 - 0)             | 0<br>(0 - 0)             | --<br>(0 - 0)            |
| Tetanus                                                            | 3<br>(2 - 6)                | 1<br>(0 - 2)             | 0<br>(0 - 1)       | 1<br>(0 - 3)             | 1<br>(0 - 1)             | 0<br>(0 - 1)             |
| Measles                                                            | 33<br>(1 - 203)             | 29<br>(1 - 179)          | 3<br>(0 - 20)      | 1<br>(0 - 4)             | 0<br>(0 - 0)             | --<br>(0 - 0)            |
| Varicella and herpes zoster                                        | 1<br>(0 - 2)                | 0<br>(0 - 1)             | 0<br>(0 - 0)       | 0<br>(0 - 0)             | 0<br>(0 - 0)             | 0<br>(0 - 1)             |
| Neglected tropical diseases and malaria                            | 36<br>(20 - 58)             | 7<br>(3 - 15)            | 2<br>(1 - 4)       | 22<br>(11 - 39)          | 3<br>(1 - 6)             | 2<br>(1 - 4)             |
| Leishmaniasis                                                      | 3<br>(2 - 5)                | 1<br>(0 - 2)             | 1<br>(0 - 1)       | 1<br>(1 - 2)             | 0<br>(0 - 0)             | 0<br>(0 - 0)             |
| Visceral leishmaniasis                                             | 3<br>(2 - 5)                | 1<br>(0 - 2)             | 1<br>(0 - 1)       | 1<br>(1 - 2)             | 0<br>(0 - 0)             | 0<br>(0 - 0)             |
| Cysticercosis                                                      | 1<br>(1 - 1)                | 0<br>(0 - 0)             | 0<br>(0 - 0)       | 1<br>(0 - 1)             | 0<br>(0 - 0)             | 0<br>(0 - 0)             |
| Cystic echinococcosis                                              | 1<br>(1 - 1)                | 0<br>(0 - 0)             | 0<br>(0 - 0)       | 0<br>(0 - 1)             | 0<br>(0 - 0)             | 0<br>(0 - 0)             |
| Dengue                                                             | 0<br>(0 - 0)                | 0<br>(0 - 0)             | 0<br>(0 - 0)       | 0<br>(0 - 0)             | 0<br>(0 - 0)             | 0<br>(0 - 0)             |
| Rabies                                                             | 1<br>(0 - 2)                | 0<br>(0 - 0)             | 0<br>(0 - 0)       | 0<br>(0 - 1)             | 0<br>(0 - 0)             | 0<br>(0 - 0)             |
| Intestinal nematode infections                                     | 2<br>(0 - 7)                | 1<br>(0 - 6)             | 0<br>(0 - 2)       | 0<br>(0 - 3)             | 0<br>(0 - 2)             | 0<br>(0 - 1)             |
| Ascariasis                                                         | 2<br>(0 - 7)                | 1<br>(0 - 6)             | 0<br>(0 - 2)       | 0<br>(0 - 3)             | 0<br>(0 - 2)             | 0<br>(0 - 1)             |
| Other neglected tropical diseases                                  | 29<br>(14 - 50)             | 5<br>(2 - 11)            | 1<br>(0 - 2)       | 18<br>(8 - 36)           | 3<br>(1 - 5)             | 2<br>(1 - 4)             |
| Maternal disorders                                                 | --                          | --                       | --                 | --                       | --                       | --                       |
| Maternal hemorrhage                                                | --                          | --                       | --                 | --                       | --                       | --                       |
| Maternal sepsis and other maternal infections                      | --                          | --                       | --                 | --                       | --                       | --                       |



Web Table 31- Lesotho deaths with 95% UI by age, sex, and cause in 2013

| Cause                                                            | Males, All Ages          | Males, 0-4 Years       | Males, 5-14 Years | Males, 15-49 Years     | Males, 50-69 Years       | Males, 70-80 Years       |
|------------------------------------------------------------------|--------------------------|------------------------|-------------------|------------------------|--------------------------|--------------------------|
| Maternal hypertensive disorders                                  | --                       | --                     | --                | --                     | --                       | --                       |
| Maternal obstructed labor                                        | --                       | --                     | --                | --                     | --                       | --                       |
| Maternal abortive outcome                                        | --                       | --                     | --                | --                     | --                       | --                       |
| Indirect maternal deaths                                         | --                       | --                     | --                | --                     | --                       | --                       |
| Late maternal deaths                                             | --                       | --                     | --                | --                     | --                       | --                       |
| Maternal deaths aggravated by HIV/AIDS                           | --                       | --                     | --                | --                     | --                       | --                       |
| Other maternal disorders                                         | --                       | --                     | --                | --                     | --                       | --                       |
| Neonatal disorders                                               | 1,084<br>(878 - 1,331)   | 1,084<br>(878 - 1,331) | --                | --                     | --                       | --                       |
| Neonatal preterm birth complications                             | 415<br>(210 - 666)       | 415<br>(210 - 666)     | --                | --                     | --                       | --                       |
| Neonatal encephalopathy due to birth asphyxia and trauma         | 252<br>(109 - 448)       | 252<br>(109 - 448)     | --                | --                     | --                       | --                       |
| Neonatal sepsis and other neonatal infections                    | 94<br>(27 - 214)         | 94<br>(27 - 214)       | --                | --                     | --                       | --                       |
| Hemolytic disease and other neonatal jaundice                    | 7<br>(2 - 19)            | 7<br>(2 - 19)          | --                | --                     | --                       | --                       |
| Other neonatal disorders                                         | 317<br>(150 - 548)       | 317<br>(150 - 548)     | --                | --                     | --                       | --                       |
| Nutritional deficiencies                                         | 184<br>(106 - 321)       | 99<br>(43 - 186)       | 5<br>(2 - 10)     | 36<br>(21 - 72)        | 19<br>(11 - 37)          | 25<br>(14 - 48)          |
| Protein-energy malnutrition                                      | 131<br>(65 - 237)        | 96<br>(42 - 183)       | 3<br>(1 - 6)      | 13<br>(5 - 35)         | 8<br>(3 - 20)            | 11<br>(4 - 24)           |
| Iodine deficiency                                                | 0<br>(0 - 1)             | 0<br>(0 - 0)           | 0<br>(0 - 0)      | 0<br>(0 - 0)           | 0<br>(0 - 0)             | 0<br>(0 - 0)             |
| Iron-deficiency anemia                                           | 46<br>(20 - 95)          | 3<br>(0 - 8)           | 1<br>(0 - 4)      | 21<br>(9 - 43)         | 9<br>(4 - 20)            | 12<br>(5 - 26)           |
| Other nutritional deficiencies                                   | 6<br>(2 - 16)            | 0<br>(0 - 1)           | 0<br>(0 - 0)      | 2<br>(1 - 6)           | 1<br>(0 - 4)             | 2<br>(1 - 5)             |
| Other communicable, maternal, neonatal, and nutritional diseases | 149<br>(84 - 236)        | 67<br>(20 - 135)       | 5<br>(2 - 9)      | 58<br>(26 - 104)       | 12<br>(6 - 24)           | 8<br>(4 - 16)            |
| Sexually transmitted diseases excluding HIV                      | 55<br>(4 - 123)          | 51<br>(3 - 117)        | 2<br>(0 - 5)      | 1<br>(0 - 2)           | 0<br>(0 - 1)             | 0<br>(0 - 1)             |
| Syphilis                                                         | 54<br>(4 - 123)          | 51<br>(3 - 117)        | 2<br>(0 - 5)      | 1<br>(0 - 1)           | 0<br>(0 - 1)             | 0<br>(0 - 1)             |
| Chlamydial infection                                             | --                       | --                     | --                | --                     | --                       | --                       |
| Gonococcal infection                                             | 0<br>(0 - 1)             | --                     | 0<br>(0 - 0)      | 0<br>(0 - 1)           | 0<br>(0 - 0)             | 0<br>(0 - 0)             |
| Other sexually transmitted diseases                              | 0<br>(0 - 1)             | --                     | 0<br>(0 - 0)      | 0<br>(0 - 0)           | 0<br>(0 - 0)             | 0<br>(0 - 0)             |
| Hepatitis                                                        | 11<br>(7 - 16)           | 2<br>(1 - 4)           | 0<br>(0 - 1)      | 5<br>(3 - 8)           | 2<br>(1 - 4)             | 1<br>(1 - 2)             |
| Acute hepatitis A                                                | 1<br>(0 - 3)             | 1<br>(0 - 2)           | 0<br>(0 - 0)      | 0<br>(0 - 1)           | 0<br>(0 - 0)             | 0<br>(0 - 0)             |
| Acute hepatitis B                                                | 7<br>(4 - 10)            | 1<br>(0 - 2)           | 0<br>(0 - 0)      | 2<br>(1 - 4)           | 2<br>(1 - 3)             | 1<br>(1 - 2)             |
| Acute hepatitis C                                                | 0<br>(0 - 1)             | --                     | 0<br>(0 - 0)      | 0<br>(0 - 0)           | 0<br>(0 - 0)             | 0<br>(0 - 0)             |
| Acute hepatitis E                                                | 3<br>(2 - 5)             | 0<br>(0 - 0)           | 0<br>(0 - 0)      | 3<br>(1 - 4)           | 0<br>(0 - 1)             | 0<br>(0 - 0)             |
| Other infectious diseases                                        | 83<br>(41 - 143)         | 14<br>(6 - 33)         | 2<br>(1 - 5)      | 51<br>(20 - 97)        | 9<br>(4 - 21)            | 6<br>(2 - 15)            |
| Non-communicable diseases                                        | 4,813<br>(4,119 - 5,494) | 185<br>(114 - 293)     | 41<br>(29 - 67)   | 1,119<br>(866 - 1,392) | 1,584<br>(1,271 - 1,922) | 1,883<br>(1,674 - 2,046) |
| Neoplasms                                                        | 697<br>(570 - 829)       | 7<br>(4 - 12)          | 6<br>(4 - 11)     | 96<br>(74 - 124)       | 282<br>(214 - 364)       | 305<br>(252 - 353)       |
| Esophageal cancer                                                | 104<br>(71 - 138)        | --                     | --                | 13<br>(9 - 19)         | 54<br>(35 - 78)          | 37<br>(24 - 52)          |
| Stomach cancer                                                   | 54<br>(42 - 66)          | --                     | --                | 9<br>(6 - 12)          | 21<br>(15 - 27)          | 25<br>(18 - 32)          |
| Liver cancer                                                     | 43<br>(31 - 63)          | --                     | 0<br>(0 - 0)      | 10<br>(6 - 18)         | 17<br>(11 - 28)          | 15<br>(11 - 22)          |
| Liver cancer due to hepatitis B                                  | 15<br>(7 - 28)           | --                     | 0<br>(0 - 0)      | 5<br>(2 - 9)           | 6<br>(2 - 12)            | 4<br>(2 - 8)             |
| Liver cancer due to hepatitis C                                  | 17<br>(7 - 27)           | --                     | 0<br>(0 - 0)      | 3<br>(1 - 6)           | 7<br>(3 - 13)            | 7<br>(2 - 11)            |
| Liver cancer due to alcohol use                                  | 8<br>(4 - 15)            | --                     | --                | 1<br>(0 - 2)           | 3<br>(1 - 7)             | 4<br>(2 - 7)             |
| Liver cancer due to other causes                                 | 4<br>(2 - 7)             | --                     | 0<br>(0 - 0)      | 1<br>(1 - 3)           | 1<br>(0 - 3)             | 1<br>(0 - 2)             |
| Larynx cancer                                                    | 18<br>(13 - 25)          | --                     | --                | 2<br>(2 - 4)           | 10<br>(6 - 14)           | 6<br>(4 - 8)             |

Web Table 31- Lesotho deaths with 95% UI by age, sex, and cause in 2013

| Cause                                         | Males, All Ages          | Males, 0-4 Years | Males, 5-14 Years | Males, 15-49 Years | Males, 50-69 Years | Males, 70-80 Years |
|-----------------------------------------------|--------------------------|------------------|-------------------|--------------------|--------------------|--------------------|
| Tracheal, bronchus and lung cancer            | 133<br>(97 - 167)        | --               | --                | 13<br>(7 - 19)     | 67<br>(45 - 90)    | 52<br>(40 - 65)    |
| Breast cancer                                 | 3<br>(2 - 5)             | --               | --                | 1<br>(0 - 1)       | 1<br>(1 - 2)       | 1<br>(1 - 2)       |
| Cervical cancer                               | --                       | --               | --                | --                 | --                 | --                 |
| Uterine cancer                                | --                       | --               | --                | --                 | --                 | --                 |
| Prostate cancer                               | 87<br>(50 - 122)         | --               | --                | 1<br>(0 - 1)       | 19<br>(11 - 30)    | 67<br>(38 - 94)    |
| Colon and rectum cancer                       | 45<br>(38 - 53)          | --               | --                | 4<br>(3 - 5)       | 15<br>(11 - 19)    | 26<br>(20 - 33)    |
| Lip and oral cavity cancer                    | 21<br>(13 - 30)          | --               | --                | 4<br>(2 - 7)       | 10<br>(6 - 16)     | 7<br>(4 - 10)      |
| Nasopharynx cancer                            | 2<br>(2 - 3)             | --               | 0<br>(0 - 0)      | 1<br>(1 - 1)       | 1<br>(1 - 2)       | 1<br>(0 - 1)       |
| Other pharynx cancer                          | 10<br>(7 - 17)           | --               | --                | 1<br>(1 - 2)       | 7<br>(5 - 13)      | 2<br>(1 - 3)       |
| Gallbladder and biliary tract cancer          | 4<br>(3 - 7)             | --               | --                | 0<br>(0 - 1)       | 2<br>(1 - 3)       | 2<br>(1 - 4)       |
| Pancreatic cancer                             | 24<br>(19 - 29)          | --               | --                | 2<br>(2 - 3)       | 10<br>(7 - 13)     | 12<br>(9 - 15)     |
| Malignant skin melanoma                       | 5<br>(2 - 8)             | --               | --                | 1<br>(1 - 2)       | 2<br>(1 - 3)       | 2<br>(1 - 3)       |
| Non-melanoma skin cancer                      | 7<br>(4 - 11)            | --               | --                | 2<br>(1 - 3)       | 3<br>(1 - 4)       | 3<br>(1 - 5)       |
| Ovarian cancer                                | --                       | --               | --                | --                 | --                 | --                 |
| Testicular cancer                             | 2<br>(1 - 3)             | --               | --                | 1<br>(1 - 1)       | 1<br>(0 - 1)       | 1<br>(0 - 1)       |
| Kidney cancer                                 | 9<br>(6 - 11)            | 0<br>(0 - 1)     | 0<br>(0 - 0)      | 1<br>(1 - 2)       | 4<br>(2 - 6)       | 3<br>(2 - 4)       |
| Bladder cancer                                | 17<br>(13 - 21)          | --               | --                | 1<br>(1 - 2)       | 6<br>(4 - 8)       | 10<br>(7 - 13)     |
| Brain and nervous system cancer               | 7<br>(3 - 11)            | 0<br>(0 - 1)     | 1<br>(0 - 1)      | 2<br>(1 - 4)       | 3<br>(1 - 4)       | 2<br>(1 - 3)       |
| Thyroid cancer                                | 2<br>(1 - 3)             | --               | 0<br>(0 - 0)      | 0<br>(0 - 1)       | 1<br>(0 - 1)       | 1<br>(0 - 1)       |
| Mesothelioma                                  | 3<br>(2 - 5)             | --               | --                | 0<br>(0 - 1)       | 1<br>(1 - 3)       | 1<br>(1 - 3)       |
| Hodgkin lymphoma                              | 3<br>(2 - 6)             | 0<br>(0 - 0)     | 0<br>(0 - 1)      | 2<br>(1 - 3)       | 1<br>(0 - 2)       | 1<br>(0 - 1)       |
| Non-Hodgkin lymphoma                          | 29<br>(20 - 43)          | 1<br>(0 - 1)     | 1<br>(0 - 1)      | 7<br>(5 - 13)      | 10<br>(6 - 15)     | 11<br>(7 - 15)     |
| Multiple myeloma                              | 6<br>(4 - 9)             | --               | --                | 1<br>(0 - 1)       | 3<br>(2 - 4)       | 3<br>(2 - 4)       |
| Leukemia                                      | 19<br>(15 - 23)          | 1<br>(0 - 2)     | 2<br>(1 - 3)      | 6<br>(4 - 8)       | 4<br>(3 - 6)       | 6<br>(5 - 8)       |
| Other neoplasms                               | 38<br>(29 - 54)          | 4<br>(2 - 8)     | 3<br>(2 - 5)      | 10<br>(7 - 17)     | 11<br>(7 - 16)     | 10<br>(7 - 15)     |
| Cardiovascular diseases                       | 1,796<br>(1,526 - 2,057) | 11<br>(6 - 19)   | 7<br>(4 - 13)     | 312<br>(241 - 390) | 650<br>(517 - 796) | 816<br>(712 - 911) |
| Rheumatic heart disease                       | 33<br>(22 - 67)          | 0<br>(0 - 1)     | 1<br>(1 - 3)      | 15<br>(8 - 33)     | 7<br>(4 - 15)      | 10<br>(6 - 18)     |
| Ischemic heart disease                        | 659<br>(498 - 832)       | 1<br>(0 - 2)     | 1<br>(0 - 1)      | 96<br>(66 - 132)   | 254<br>(187 - 334) | 308<br>(230 - 385) |
| Cerebrovascular disease                       | 689<br>(541 - 860)       | 4<br>(2 - 7)     | 3<br>(1 - 4)      | 120<br>(87 - 161)  | 244<br>(176 - 326) | 319<br>(253 - 396) |
| Ischemic stroke                               | 284<br>(173 - 390)       | 0<br>(0 - 0)     | 0<br>(0 - 0)      | 17<br>(9 - 29)     | 96<br>(51 - 143)   | 170<br>(106 - 228) |
| Hemorrhagic stroke                            | 406<br>(296 - 556)       | 3<br>(2 - 6)     | 2<br>(1 - 4)      | 103<br>(73 - 139)  | 147<br>(96 - 215)  | 149<br>(100 - 218) |
| Hypertensive heart disease                    | 164<br>(83 - 240)        | 0<br>(0 - 1)     | 0<br>(0 - 0)      | 22<br>(7 - 36)     | 59<br>(27 - 96)    | 83<br>(45 - 129)   |
| Cardiomyopathy and myocarditis                | 102<br>(60 - 139)        | 4<br>(2 - 7)     | 1<br>(1 - 3)      | 26<br>(12 - 40)    | 39<br>(21 - 59)    | 32<br>(17 - 51)    |
| Atrial fibrillation and flutter               | 6<br>(2 - 9)             | --               | --                | 0<br>(0 - 0)       | 1<br>(1 - 2)       | 4<br>(2 - 8)       |
| Aortic aneurysm                               | 30<br>(19 - 44)          | --               | --                | 3<br>(1 - 4)       | 11<br>(6 - 16)     | 17<br>(10 - 26)    |
| Peripheral vascular disease                   | 6<br>(4 - 9)             | --               | --                | 0<br>(0 - 1)       | 2<br>(1 - 4)       | 4<br>(2 - 5)       |
| Endocarditis                                  | 9<br>(5 - 14)            | 1<br>(0 - 2)     | 0<br>(0 - 1)      | 3<br>(2 - 5)       | 2<br>(1 - 4)       | 3<br>(1 - 4)       |
| Other cardiovascular and circulatory diseases | 98<br>(66 - 173)         | 2<br>(1 - 5)     | 1<br>(1 - 2)      | 27<br>(17 - 51)    | 30<br>(18 - 55)    | 38<br>(24 - 65)    |
| Chronic respiratory diseases                  | 776<br>(590 - 1,080)     | 11<br>(5 - 24)   | 4<br>(2 - 8)      | 134<br>(91 - 216)  | 268<br>(190 - 382) | 359<br>(274 - 474) |
| Chronic obstructive pulmonary disease         | 473<br>(346 - 665)       | 4<br>(1 - 11)    | 1<br>(0 - 2)      | 53<br>(33 - 87)    | 166<br>(112 - 243) | 248<br>(183 - 338) |

Web Table 31- Lesotho deaths with 95% UI by age, sex, and cause in 2013

| Cause                                               | Males, All Ages    | Males, 0-4 Years | Males, 5-14 Years | Males, 15-49 Years | Males, 50-69 Years | Males, 70-80 Years |
|-----------------------------------------------------|--------------------|------------------|-------------------|--------------------|--------------------|--------------------|
| Pneumoconiosis                                      | 46<br>(28 - 79)    | 0<br>(0 - 0)     | 0<br>(0 - 0)      | 9<br>(5 - 17)      | 16<br>(9 - 27)     | 21<br>(12 - 35)    |
| Silicosis                                           | 9<br>(5 - 15)      | 0<br>(0 - 0)     | 0<br>(0 - 0)      | 1<br>(1 - 3)       | 2<br>(1 - 5)       | 5<br>(3 - 9)       |
| Asbestosis                                          | 9<br>(5 - 16)      | 0<br>(0 - 0)     | 0<br>(0 - 0)      | 1<br>(1 - 3)       | 3<br>(2 - 6)       | 5<br>(2 - 8)       |
| Coal workers pneumoconiosis                         | 11<br>(5 - 19)     | 0<br>(0 - 0)     | 0<br>(0 - 0)      | 2<br>(1 - 3)       | 4<br>(2 - 8)       | 5<br>(2 - 9)       |
| Other pneumoconiosis                                | 17<br>(9 - 31)     | 0<br>(0 - 0)     | 0<br>(0 - 0)      | 5<br>(2 - 9)       | 6<br>(3 - 11)      | 6<br>(3 - 12)      |
| Asthma                                              | 227<br>(154 - 331) | 4<br>(1 - 10)    | 3<br>(2 - 5)      | 65<br>(41 - 108)   | 78<br>(47 - 120)   | 76<br>(47 - 111)   |
| Interstitial lung disease and pulmonary sarcoidosis | 18<br>(2 - 40)     | 1<br>(0 - 2)     | 0<br>(0 - 0)      | 4<br>(0 - 10)      | 6<br>(1 - 14)      | 8<br>(1 - 18)      |
| Other chronic respiratory diseases                  | 13<br>(6 - 24)     | 2<br>(1 - 6)     | 0<br>(0 - 1)      | 3<br>(1 - 6)       | 3<br>(1 - 6)       | 5<br>(2 - 9)       |
| Cirrhosis                                           | 128<br>(75 - 186)  | 1<br>(0 - 3)     | 1<br>(0 - 2)      | 51<br>(28 - 78)    | 49<br>(28 - 78)    | 26<br>(14 - 39)    |
| Cirrhosis due to hepatitis B                        | 19<br>(10 - 33)    | 0<br>(0 - 0)     | 0<br>(0 - 0)      | 7<br>(3 - 13)      | 8<br>(4 - 14)      | 4<br>(2 - 7)       |
| Cirrhosis due to hepatitis C                        | 11<br>(6 - 20)     | 0<br>(0 - 0)     | 0<br>(0 - 0)      | 4<br>(1 - 7)       | 4<br>(2 - 8)       | 3<br>(1 - 6)       |
| Cirrhosis due to alcohol use                        | 78<br>(45 - 119)   | --               | --                | 29<br>(15 - 47)    | 32<br>(18 - 53)    | 17<br>(9 - 27)     |
| Cirrhosis due to other causes                       | 19<br>(10 - 31)    | 1<br>(0 - 3)     | 1<br>(0 - 2)      | 11<br>(5 - 18)     | 5<br>(2 - 9)       | 2<br>(1 - 3)       |
| Digestive diseases                                  | 237<br>(181 - 303) | 5<br>(2 - 11)    | 4<br>(2 - 7)      | 115<br>(80 - 160)  | 57<br>(41 - 79)    | 55<br>(41 - 71)    |
| Peptic ulcer disease                                | 70<br>(46 - 107)   | 0<br>(0 - 1)     | 0<br>(0 - 1)      | 32<br>(19 - 56)    | 19<br>(12 - 30)    | 18<br>(11 - 27)    |
| Gastritis and duodenitis                            | 13<br>(6 - 21)     | 0<br>(0 - 1)     | 0<br>(0 - 0)      | 6<br>(2 - 10)      | 3<br>(1 - 6)       | 4<br>(1 - 7)       |
| Appendicitis                                        | 10<br>(6 - 14)     | 0<br>(0 - 1)     | 1<br>(0 - 2)      | 5<br>(3 - 9)       | 2<br>(1 - 3)       | 1<br>(1 - 3)       |
| Paralytic ileus and intestinal obstruction          | 29<br>(16 - 49)    | 1<br>(0 - 3)     | 1<br>(0 - 2)      | 10<br>(4 - 17)     | 7<br>(4 - 13)      | 10<br>(5 - 18)     |
| Inguinal, femoral, and abdominal hernia             | 5<br>(2 - 9)       | 0<br>(0 - 0)     | 0<br>(0 - 0)      | 2<br>(1 - 3)       | 1<br>(1 - 2)       | 2<br>(1 - 3)       |
| Inflammatory bowel disease                          | 45<br>(29 - 64)    | 2<br>(1 - 5)     | 1<br>(0 - 2)      | 28<br>(17 - 43)    | 8<br>(4 - 12)      | 6<br>(3 - 9)       |
| Vascular intestinal disorders                       | 3<br>(1 - 7)       | 0<br>(0 - 0)     | 0<br>(0 - 0)      | 1<br>(0 - 3)       | 1<br>(0 - 2)       | 1<br>(0 - 3)       |
| Gallbladder and biliary diseases                    | 13<br>(8 - 18)     | 0<br>(0 - 0)     | 0<br>(0 - 0)      | 4<br>(2 - 6)       | 4<br>(2 - 6)       | 5<br>(3 - 8)       |
| Pancreatitis                                        | 19<br>(9 - 32)     | 0<br>(0 - 0)     | 0<br>(0 - 0)      | 13<br>(6 - 22)     | 4<br>(2 - 8)       | 2<br>(1 - 4)       |
| Other digestive diseases                            | 30<br>(19 - 42)    | 1<br>(0 - 2)     | 1<br>(0 - 1)      | 15<br>(9 - 24)     | 7<br>(4 - 11)      | 6<br>(4 - 10)      |
| Neurological disorders                              | 180<br>(123 - 230) | 6<br>(3 - 14)    | 5<br>(3 - 10)     | 73<br>(36 - 108)   | 29<br>(18 - 44)    | 66<br>(50 - 83)    |
| Alzheimer disease and other dementias               | 50<br>(36 - 65)    | --               | --                | 0<br>(0 - 0)       | 3<br>(2 - 5)       | 47<br>(33 - 61)    |
| Parkinson disease                                   | 5<br>(3 - 8)       | --               | --                | 0<br>(0 - 0)       | 1<br>(0 - 1)       | 2<br>(2 - 7)       |
| Epilepsy                                            | 118<br>(65 - 164)  | 6<br>(2 - 13)    | 5<br>(2 - 10)     | 70<br>(33 - 105)   | 23<br>(12 - 37)    | 14<br>(8 - 22)     |
| Multiple sclerosis                                  | 0<br>(0 - 1)       | --               | --                | 0<br>(0 - 0)       | 0<br>(0 - 0)       | 0<br>(0 - 0)       |
| Other neurological disorders                        | 7<br>(5 - 10)      | 1<br>(0 - 1)     | 0<br>(0 - 0)      | 2<br>(1 - 4)       | 2<br>(1 - 3)       | 2<br>(1 - 3)       |
| Mental and substance use disorders                  | 167<br>(110 - 249) | 5<br>(2 - 11)    | 0<br>(0 - 0)      | 134<br>(87 - 209)  | 18<br>(11 - 33)    | 9<br>(6 - 13)      |
| Schizophrenia                                       | 6<br>(3 - 12)      | --               | --                | 3<br>(1 - 7)       | 2<br>(1 - 4)       | 1<br>(1 - 3)       |
| Alcohol use disorders                               | 74<br>(41 - 139)   | --               | --                | 56<br>(29 - 102)   | 15<br>(8 - 30)     | 3<br>(2 - 6)       |
| Drug use disorders                                  | 87<br>(55 - 138)   | 5<br>(2 - 11)    | --                | 76<br>(45 - 125)   | 2<br>(1 - 3)       | 4<br>(3 - 6)       |
| Opioid use disorders                                | 9<br>(6 - 15)      | 1<br>(0 - 1)     | --                | 8<br>(5 - 14)      | 0<br>(0 - 0)       | 0<br>(0 - 1)       |
| Cocaine use disorders                               | 0<br>(0 - 1)       | 0<br>(0 - 0)     | --                | 0<br>(0 - 0)       | 0<br>(0 - 0)       | 0<br>(0 - 0)       |
| Amphetamine use disorders                           | 0<br>(0 - 0)       | 0<br>(0 - 0)     | --                | 0<br>(0 - 0)       | 0<br>(0 - 0)       | 0<br>(0 - 0)       |
| Other drug use disorders                            | 77<br>(49 - 122)   | 5<br>(1 - 10)    | --                | 67<br>(40 - 110)   | 2<br>(1 - 3)       | 4<br>(2 - 5)       |
| Eating disorders                                    | 0<br>(0 - 0)       | --               | 0<br>(0 - 0)      | 0<br>(0 - 0)       | --                 | --                 |
| Anorexia nervosa                                    | 0<br>(0 - 0)       | --               | 0<br>(0 - 0)      | 0<br>(0 - 0)       | --                 | --                 |

Web Table 31- Lesotho deaths with 95% UI by age, sex, and cause in 2013

| Cause                                               | Males, All Ages    | Males, 0-4 Years  | Males, 5-14 Years | Males, 15-49 Years | Males, 50-69 Years | Males, 70-80 Years |
|-----------------------------------------------------|--------------------|-------------------|-------------------|--------------------|--------------------|--------------------|
| Diabetes, urogenital, blood, and endocrine diseases | 659<br>(531 - 783) | 32<br>(16 - 60)   | 9<br>(5 - 15)     | 181<br>(126 - 257) | 214<br>(163 - 270) | 224<br>(181 - 264) |
| Diabetes mellitus                                   | 313<br>(251 - 375) | 1<br>(0 - 1)      | 1<br>(0 - 1)      | 45<br>(34 - 59)    | 134<br>(100 - 178) | 132<br>(100 - 165) |
| Acute glomerulonephritis                            | 1<br>(0 - 2)       | 0<br>(0 - 0)      | 0<br>(0 - 0)      | 0<br>(0 - 1)       | 0<br>(0 - 0)       | 0<br>(0 - 0)       |
| Chronic kidney disease                              | 143<br>(101 - 178) | 3<br>(1 - 5)      | 2<br>(1 - 3)      | 44<br>(26 - 62)    | 41<br>(27 - 57)    | 54<br>(37 - 70)    |
| Chronic kidney disease due to diabetes mellitus     | 0<br>(0 - 1)       | 0<br>(0 - 0)      | 0<br>(0 - 0)      | 0<br>(0 - 0)       | 0<br>(0 - 0)       | 0<br>(0 - 0)       |
| Chronic kidney disease due to hypertension          | 72<br>(46 - 98)    | 0<br>(0 - 1)      | 0<br>(0 - 0)      | 17<br>(10 - 26)    | 23<br>(14 - 34)    | 31<br>(20 - 43)    |
| Chronic kidney disease due to glomerulonephritis    | 25<br>(15 - 36)    | 1<br>(1 - 2)      | 1<br>(0 - 2)      | 13<br>(7 - 21)     | 5<br>(2 - 7)       | 6<br>(3 - 9)       |
| Chronic kidney disease due to other causes          | 45<br>(23 - 66)    | 1<br>(0 - 2)      | 1<br>(0 - 1)      | 14<br>(5 - 24)     | 13<br>(6 - 23)     | 16<br>(7 - 28)     |
| Urinary diseases and male infertility               | 41<br>(30 - 53)    | 2<br>(1 - 4)      | 0<br>(0 - 1)      | 12<br>(8 - 17)     | 10<br>(7 - 14)     | 16<br>(11 - 23)    |
| Interstitial nephritis and urinary tract infections | 14<br>(9 - 20)     | 1<br>(0 - 2)      | 0<br>(0 - 0)      | 4<br>(2 - 7)       | 3<br>(2 - 5)       | 5<br>(3 - 9)       |
| Urolithiasis                                        | 1<br>(0 - 1)       | --                | 0<br>(0 - 0)      | 0<br>(0 - 0)       | 0<br>(0 - 1)       | 0<br>(0 - 1)       |
| Other urinary diseases                              | 26<br>(19 - 34)    | 1<br>(0 - 2)      | 0<br>(0 - 0)      | 8<br>(5 - 12)      | 7<br>(4 - 10)      | 10<br>(6 - 15)     |
| Gynecological diseases                              | --                 | --                | --                | --                 | --                 | --                 |
| Uterine fibroids                                    | --                 | --                | --                | --                 | --                 | --                 |
| Polycystic ovarian syndrome                         | --                 | --                | --                | --                 | --                 | --                 |
| Endometriosis                                       | --                 | --                | --                | --                 | --                 | --                 |
| Genital prolapse                                    | --                 | --                | --                | --                 | --                 | --                 |
| Other gynecological diseases                        | --                 | --                | --                | --                 | --                 | --                 |
| Hemoglobinopathies and hemolytic anemias            | 27<br>(14 - 44)    | 5<br>(2 - 10)     | 2<br>(1 - 4)      | 12<br>(5 - 20)     | 4<br>(2 - 6)       | 5<br>(2 - 9)       |
| Thalassemias                                        | 4<br>(2 - 7)       | 2<br>(1 - 5)      | 1<br>(0 - 1)      | 1<br>(0 - 1)       | 0<br>(0 - 0)       | 0<br>(0 - 0)       |
| Sickle cell disorders                               | 4<br>(2 - 7)       | 1<br>(0 - 1)      | 0<br>(0 - 1)      | 3<br>(1 - 4)       | 0<br>(0 - 1)       | 0<br>(0 - 0)       |
| G6PD deficiency                                     | 2<br>(1 - 3)       | 0<br>(0 - 1)      | 0<br>(0 - 0)      | 1<br>(0 - 2)       | 0<br>(0 - 0)       | 0<br>(0 - 0)       |
| Other hemoglobinopathies and hemolytic anemias      | 18<br>(9 - 28)     | 2<br>(1 - 4)      | 1<br>(0 - 1)      | 8<br>(3 - 12)      | 3<br>(1 - 5)       | 5<br>(2 - 9)       |
| Endocrine, metabolic, blood, and immune disorders   | 135<br>(74 - 211)  | 21<br>(9 - 45)    | 4<br>(2 - 9)      | 67<br>(27 - 124)   | 25<br>(13 - 43)    | 18<br>(10 - 28)    |
| Musculoskeletal disorders                           | 17<br>(9 - 22)     | --                | 1<br>(0 - 1)      | 6<br>(3 - 9)       | 5<br>(2 - 7)       | 5<br>(2 - 8)       |
| Rheumatoid arthritis                                | 5<br>(3 - 7)       | --                | 0<br>(0 - 0)      | 1<br>(1 - 2)       | 2<br>(1 - 3)       | 2<br>(1 - 4)       |
| Other musculoskeletal disorders                     | 11<br>(5 - 15)     | --                | 0<br>(0 - 1)      | 5<br>(2 - 7)       | 3<br>(1 - 5)       | 3<br>(1 - 5)       |
| Other non-communicable diseases                     | 156<br>(104 - 240) | 105<br>(61 - 181) | 4<br>(2 - 8)      | 18<br>(9 - 27)     | 11<br>(6 - 16)     | 18<br>(11 - 26)    |
| Congenital anomalies                                | 113<br>(69 - 194)  | 98<br>(55 - 173)  | 3<br>(2 - 7)      | 6<br>(4 - 11)      | 3<br>(2 - 4)       | 4<br>(3 - 6)       |
| Neural tube defects                                 | 20<br>(6 - 49)     | 18<br>(5 - 47)    | 0<br>(0 - 1)      | 1<br>(0 - 1)       | 0<br>(0 - 0)       | 0<br>(0 - 0)       |
| Congenital heart anomalies                          | 36<br>(20 - 73)    | 29<br>(14 - 63)   | 2<br>(1 - 4)      | 2<br>(1 - 5)       | 2<br>(1 - 2)       | 2<br>(1 - 3)       |
| Cleft lip and cleft palate                          | 0<br>(0 - 1)       | 0<br>(0 - 1)      | --                | --                 | --                 | --                 |
| Down syndrome                                       | 10<br>(4 - 23)     | 8<br>(3 - 20)     | 0<br>(0 - 1)      | 1<br>(0 - 2)       | 0<br>(0 - 1)       | 0<br>(0 - 0)       |
| Chromosomal unbalanced rearrangements               | 5<br>(2 - 10)      | 4<br>(2 - 9)      | 0<br>(0 - 0)      | 0<br>(0 - 0)       | 0<br>(0 - 0)       | 0<br>(0 - 0)       |
| Other congenital anomalies                          | 42<br>(23 - 79)    | 37<br>(18 - 71)   | 1<br>(0 - 2)      | 2<br>(1 - 3)       | 1<br>(1 - 2)       | 2<br>(1 - 3)       |
| Skin and subcutaneous diseases                      | 38<br>(22 - 51)    | 3<br>(1 - 5)      | 1<br>(0 - 1)      | 12<br>(5 - 18)     | 8<br>(4 - 13)      | 14<br>(8 - 22)     |
| Cellulitis                                          | 9<br>(4 - 15)      | 1<br>(0 - 2)      | 0<br>(0 - 0)      | 3<br>(1 - 5)       | 3<br>(1 - 4)       | 3<br>(1 - 6)       |
| Pyoderma                                            | 14<br>(8 - 20)     | 2<br>(1 - 4)      | 0<br>(0 - 0)      | 6<br>(2 - 9)       | 3<br>(1 - 5)       | 3<br>(2 - 5)       |
| Decubitus ulcer                                     | 14<br>(6 - 20)     | 0<br>(0 - 0)      | 0<br>(0 - 0)      | 3<br>(1 - 5)       | 3<br>(1 - 5)       | 7<br>(4 - 12)      |
| Other skin and subcutaneous diseases                | 1<br>(1 - 2)       | 0<br>(0 - 0)      | 0<br>(0 - 0)      | 1<br>(0 - 1)       | 0<br>(0 - 0)       | 0<br>(0 - 1)       |

Web Table 31- Lesotho deaths with 95% UI by age, sex, and cause in 2013

| Cause                                           | Males, All Ages          | Males, 0-4 Years | Males, 5-14 Years | Males, 15-49 Years       | Males, 50-69 Years | Males, 70-80 Years |
|-------------------------------------------------|--------------------------|------------------|-------------------|--------------------------|--------------------|--------------------|
| Sudden infant death syndrome                    | 4<br>(1 - 16)            | 4<br>(1 - 16)    | --                | --                       | --                 | --                 |
| Injuries                                        | 2,295<br>(1,716 - 2,944) | 98<br>(53 - 161) | 68<br>(45 - 115)  | 1,832<br>(1,293 - 2,423) | 190<br>(136 - 250) | 107<br>(83 - 130)  |
| Transport injuries                              | 404<br>(286 - 566)       | 21<br>(10 - 40)  | 23<br>(13 - 42)   | 313<br>(206 - 456)       | 33<br>(22 - 49)    | 14<br>(9 - 19)     |
| Road injuries                                   | 389<br>(276 - 545)       | 19<br>(9 - 37)   | 21<br>(12 - 39)   | 304<br>(202 - 442)       | 32<br>(20 - 46)    | 12<br>(8 - 18)     |
| Pedestrian road injuries                        | 63<br>(38 - 102)         | 9<br>(3 - 17)    | 10<br>(5 - 19)    | 30<br>(16 - 56)          | 8<br>(4 - 14)      | 5<br>(3 - 8)       |
| Cyclist road injuries                           | 42<br>(25 - 71)          | 2<br>(1 - 4)     | 4<br>(2 - 7)      | 27<br>(15 - 50)          | 7<br>(4 - 11)      | 3<br>(2 - 4)       |
| Motorcyclist road injuries                      | 93<br>(58 - 147)         | 1<br>(0 - 2)     | 1<br>(0 - 2)      | 87<br>(53 - 138)         | 4<br>(2 - 6)       | 1<br>(0 - 1)       |
| Motor vehicle road injuries                     | 179<br>(120 - 267)       | 7<br>(3 - 14)    | 7<br>(3 - 12)     | 153<br>(100 - 232)       | 10<br>(6 - 16)     | 3<br>(1 - 5)       |
| Other road injuries                             | 12<br>(5 - 31)           | 1<br>(0 - 2)     | 0<br>(0 - 1)      | 8<br>(3 - 22)            | 3<br>(1 - 6)       | 1<br>(0 - 2)       |
| Other transport injuries                        | 15<br>(9 - 27)           | 2<br>(1 - 4)     | 2<br>(1 - 4)      | 9<br>(4 - 18)            | 2<br>(1 - 3)       | 1<br>(1 - 2)       |
| Unintentional injuries                          | 601<br>(460 - 778)       | 65<br>(34 - 112) | 36<br>(23 - 61)   | 357<br>(244 - 508)       | 76<br>(55 - 101)   | 67<br>(49 - 87)    |
| Falls                                           | 79<br>(52 - 124)         | 3<br>(1 - 6)     | 2<br>(1 - 4)      | 48<br>(27 - 84)          | 12<br>(7 - 20)     | 14<br>(8 - 23)     |
| Drowning                                        | 80<br>(46 - 118)         | 17<br>(6 - 34)   | 16<br>(8 - 31)    | 39<br>(18 - 71)          | 5<br>(3 - 8)       | 3<br>(2 - 4)       |
| Fire, heat, and hot substances                  | 74<br>(48 - 113)         | 13<br>(5 - 26)   | 4<br>(2 - 7)      | 37<br>(19 - 63)          | 9<br>(5 - 13)      | 11<br>(7 - 18)     |
| Poisonings                                      | 30<br>(19 - 70)          | 4<br>(1 - 8)     | 1<br>(1 - 3)      | 18<br>(9 - 48)           | 5<br>(3 - 9)       | 3<br>(2 - 5)       |
| Exposure to mechanical forces                   | 192<br>(115 - 335)       | 7<br>(3 - 16)    | 8<br>(4 - 15)     | 156<br>(85 - 287)        | 16<br>(9 - 27)     | 6<br>(4 - 10)      |
| Unintentional firearm injuries                  | 134<br>(63 - 263)        | 2<br>(1 - 5)     | 2<br>(1 - 5)      | 117<br>(51 - 240)        | 9<br>(4 - 16)      | 4<br>(2 - 8)       |
| Unintentional suffocation                       | 4<br>(0 - 9)             | 1<br>(0 - 2)     | 0<br>(0 - 1)      | 3<br>(0 - 7)             | 0<br>(0 - 1)       | 0<br>(0 - 0)       |
| Other exposure to mechanical forces             | 54<br>(31 - 87)          | 5<br>(2 - 11)    | 5<br>(2 - 11)     | 36<br>(19 - 67)          | 7<br>(3 - 12)      | 2<br>(1 - 3)       |
| Adverse effects of medical treatment            | 69<br>(42 - 96)          | 8<br>(3 - 17)    | 1<br>(1 - 3)      | 23<br>(11 - 37)          | 17<br>(8 - 28)     | 20<br>(8 - 34)     |
| Animal contact                                  | 10<br>(6 - 15)           | 2<br>(1 - 4)     | 1<br>(1 - 3)      | 5<br>(2 - 8)             | 1<br>(1 - 2)       | 1<br>(1 - 2)       |
| Venomous animal contact                         | 7<br>(4 - 12)            | 1<br>(0 - 3)     | 1<br>(0 - 2)      | 3<br>(1 - 6)             | 1<br>(0 - 2)       | 1<br>(0 - 1)       |
| Non-venomous animal contact                     | 3<br>(1 - 6)             | 0<br>(0 - 1)     | 0<br>(0 - 1)      | 2<br>(0 - 3)             | 0<br>(0 - 1)       | 0<br>(0 - 1)       |
| Foreign body                                    | 40<br>(20 - 93)          | 11<br>(3 - 32)   | 2<br>(1 - 4)      | 19<br>(8 - 39)           | 4<br>(2 - 10)      | 4<br>(2 - 10)      |
| Pulmonary aspiration and foreign body in airway | 39<br>(19 - 92)          | 11<br>(3 - 32)   | 2<br>(1 - 4)      | 18<br>(7 - 39)           | 4<br>(2 - 9)       | 4<br>(2 - 10)      |
| Foreign body in other body part                 | 1<br>(0 - 2)             | 0<br>(0 - 0)     | 0<br>(0 - 0)      | 1<br>(0 - 1)             | 0<br>(0 - 0)       | 0<br>(0 - 0)       |
| Other unintentional injuries                    | 27<br>(17 - 41)          | 1<br>(0 - 2)     | 1<br>(0 - 2)      | 15<br>(8 - 24)           | 7<br>(4 - 12)      | 3<br>(2 - 6)       |
| Self-harm and interpersonal violence            | 1,289<br>(698 - 1,795)   | 12<br>(5 - 24)   | 9<br>(5 - 18)     | 1,162<br>(606 - 1,647)   | 80<br>(43 - 121)   | 26<br>(11 - 41)    |
| Self-harm                                       | 528<br>(238 - 849)       | --               | 2<br>(1 - 6)      | 445<br>(202 - 741)       | 57<br>(19 - 93)    | 23<br>(8 - 38)     |
| Interpersonal violence                          | 761<br>(367 - 1,135)     | 12<br>(5 - 24)   | 7<br>(3 - 14)     | 717<br>(344 - 1,075)     | 23<br>(11 - 38)    | 3<br>(1 - 5)       |
| Assault by firearm                              | 192<br>(75 - 379)        | 1<br>(0 - 4)     | 1<br>(0 - 3)      | 182<br>(69 - 360)        | 6<br>(2 - 14)      | 0<br>(0 - 1)       |
| Assault by sharp object                         | 307<br>(110 - 496)       | 2<br>(1 - 5)     | 1<br>(0 - 3)      | 295<br>(105 - 478)       | 7<br>(3 - 14)      | 1<br>(0 - 2)       |
| Assault by other means                          | 263<br>(116 - 446)       | 8<br>(4 - 18)    | 5<br>(2 - 9)      | 239<br>(103 - 414)       | 9<br>(4 - 16)      | 2<br>(1 - 3)       |

Web Table 31- Lesotho deaths with 95% UI by age, sex, and cause in 2013

| Cause                                                              | Females, All Ages           | Females, 0-4 Years       | Females, 5-14 Years | Females, 15-49 Years     | Females, 50-69 Years     | Females, 70-80 Years     |
|--------------------------------------------------------------------|-----------------------------|--------------------------|---------------------|--------------------------|--------------------------|--------------------------|
| All causes                                                         | 15,457<br>(13,559 - 17,663) | 2,288<br>(1,774 - 3,016) | 469<br>(399 - 566)  | 7,819<br>(6,391 - 9,023) | 2,085<br>(1,641 - 2,674) | 2,796<br>(2,409 - 3,524) |
| Communicable, maternal, neonatal, and nutritional diseases         | 10,379<br>(9,141 - 11,707)  | 2,054<br>(1,584 - 2,698) | 411<br>(354 - 479)  | 6,159<br>(5,126 - 7,071) | 1,134<br>(875 - 1,393)   | 621<br>(463 - 807)       |
| HIV/AIDS and tuberculosis                                          | 6,233<br>(5,352 - 7,176)    | 227<br>(145 - 319)       | 353<br>(305 - 408)  | 4,501<br>(3,783 - 5,227) | 958<br>(710 - 1,220)     | 194<br>(128 - 270)       |
| Tuberculosis                                                       | 1,539<br>(979 - 2,165)      | 35<br>(17 - 68)          | 14<br>(7 - 28)      | 1,295<br>(788 - 1,860)   | 111<br>(56 - 203)        | 82<br>(46 - 137)         |
| HIV/AIDS                                                           | 4,694<br>(3,910 - 5,581)    | 192<br>(114 - 292)       | 339<br>(291 - 392)  | 3,206<br>(2,648 - 3,905) | 846<br>(603 - 1,100)     | 111<br>(62 - 169)        |
| HIV/AIDS resulting in mycobacterial infection                      | 275<br>(208 - 352)          | 10<br>(6 - 16)           | 17<br>(13 - 22)     | 192<br>(141 - 250)       | 49<br>(33 - 68)          | 7<br>(3 - 10)            |
| HIV/AIDS resulting in other diseases                               | 4,419<br>(3,693 - 5,258)    | 181<br>(108 - 276)       | 321<br>(276 - 372)  | 3,014<br>(2,498 - 3,650) | 797<br>(568 - 1,037)     | 105<br>(59 - 159)        |
| Diarrrhea, lower respiratory, and other common infectious diseases | 2,631<br>(1,976 - 3,448)    | 843<br>(552 - 1,220)     | 49<br>(27 - 86)     | 1,188<br>(737 - 1,733)   | 159<br>(92 - 258)        | 394<br>(253 - 574)       |
| Diarrheal diseases                                                 | 1,147<br>(733 - 1,644)      | 401<br>(205 - 649)       | 20<br>(8 - 41)      | 489<br>(252 - 823)       | 68<br>(30 - 135)         | 169<br>(83 - 290)        |
| Intestinal infectious diseases                                     | 26<br>(12 - 49)             | 9<br>(4 - 18)            | 5<br>(2 - 10)       | 10<br>(3 - 20)           | 1<br>(0 - 3)             | 1<br>(0 - 2)             |
| Typhoid fever                                                      | 19<br>(8 - 37)              | 7<br>(3 - 14)            | 4<br>(1 - 8)        | 7<br>(2 - 15)            | 1<br>(0 - 2)             | 1<br>(0 - 1)             |
| Paratyphoid fever                                                  | 5<br>(2 - 11)               | 2<br>(1 - 5)             | 1<br>(0 - 3)        | 2<br>(1 - 4)             | 0<br>(0 - 0)             | 0<br>(0 - 0)             |
| Other intestinal infectious diseases                               | 1<br>(0 - 4)                | 1<br>(0 - 3)             | 0<br>(0 - 1)        | 0<br>(0 - 1)             | 0<br>(0 - 1)             | 0<br>(0 - 1)             |
| Lower respiratory infections                                       | 1,258<br>(903 - 1,738)      | 357<br>(189 - 597)       | 14<br>(7 - 29)      | 587<br>(343 - 899)       | 83<br>(47 - 136)         | 217<br>(135 - 338)       |
| Upper respiratory infections                                       | 1<br>(0 - 3)                | 0<br>(0 - 1)             | 0<br>(0 - 0)        | 1<br>(0 - 2)             | 0<br>(0 - 0)             | 0<br>(0 - 1)             |
| Otitis media                                                       | 1<br>(0 - 1)                | 0<br>(0 - 0)             | 0<br>(0 - 0)        | 0<br>(0 - 0)             | 0<br>(0 - 0)             | 0<br>(0 - 0)             |
| Meningitis                                                         | 146<br>(94 - 207)           | 35<br>(17 - 65)          | 5<br>(3 - 11)       | 94<br>(52 - 153)         | 5<br>(3 - 9)             | 6<br>(3 - 9)             |
| Pneumococcal meningitis                                            | 22<br>(13 - 38)             | 3<br>(1 - 6)             | 1<br>(0 - 1)        | 16<br>(7 - 30)           | 1<br>(0 - 2)             | 1<br>(0 - 2)             |
| H influenzae type B meningitis                                     | 27<br>(16 - 43)             | 13<br>(6 - 24)           | 1<br>(1 - 3)        | 12<br>(5 - 22)           | 1<br>(0 - 1)             | 1<br>(0 - 1)             |
| Meningococcal meningitis                                           | 54<br>(33 - 84)             | 12<br>(6 - 23)           | 2<br>(1 - 5)        | 35<br>(17 - 62)          | 2<br>(1 - 4)             | 2<br>(1 - 4)             |
| Other meningitis                                                   | 43<br>(25 - 68)             | 7<br>(3 - 15)            | 1<br>(0 - 2)        | 31<br>(15 - 53)          | 2<br>(1 - 4)             | 2<br>(1 - 4)             |
| Encephalitis                                                       | 9<br>(5 - 13)               | 2<br>(1 - 4)             | 1<br>(0 - 1)        | 5<br>(2 - 9)             | 1<br>(0 - 1)             | 1<br>(0 - 1)             |
| Diphtheria                                                         | 1<br>(0 - 3)                | 0<br>(0 - 2)             | 0<br>(0 - 0)        | 0<br>(0 - 1)             | 0<br>(0 - 0)             | --<br>(0 - 0)            |
| Whooping cough                                                     | 10<br>(0 - 45)              | 9<br>(0 - 43)            | 0<br>(0 - 2)        | 0<br>(0 - 0)             | 0<br>(0 - 0)             | --<br>(0 - 0)            |
| Tetanus                                                            | 1<br>(1 - 3)                | 0<br>(0 - 1)             | 0<br>(0 - 0)        | 0<br>(0 - 1)             | 0<br>(0 - 1)             | 0<br>(0 - 1)             |
| Measles                                                            | 31<br>(1 - 194)             | 28<br>(1 - 170)          | 3<br>(0 - 19)       | 1<br>(0 - 6)             | 0<br>(0 - 0)             | --<br>(0 - 0)            |
| Varicella and herpes zoster                                        | 1<br>(0 - 2)                | 0<br>(0 - 1)             | 0<br>(0 - 0)        | 0<br>(0 - 0)             | 0<br>(0 - 0)             | 0<br>(0 - 1)             |
| Neglected tropical diseases and malaria                            | 45<br>(24 - 79)             | 7<br>(3 - 15)            | 2<br>(1 - 3)        | 32<br>(15 - 63)          | 2<br>(1 - 4)             | 2<br>(1 - 4)             |
| Leishmaniasis                                                      | 4<br>(2 - 6)                | 1<br>(0 - 2)             | 0<br>(0 - 1)        | 2<br>(1 - 3)             | 0<br>(0 - 1)             | 0<br>(0 - 0)             |
| Visceral leishmaniasis                                             | 4<br>(2 - 6)                | 1<br>(0 - 2)             | 0<br>(0 - 1)        | 2<br>(1 - 3)             | 0<br>(0 - 1)             | 0<br>(0 - 0)             |
| Cysticercosis                                                      | 1<br>(1 - 1)                | 0<br>(0 - 0)             | 0<br>(0 - 0)        | 1<br>(1 - 1)             | 0<br>(0 - 0)             | 0<br>(0 - 0)             |
| Cystic echinococcosis                                              | 1<br>(1 - 1)                | 0<br>(0 - 0)             | 0<br>(0 - 0)        | 1<br>(0 - 1)             | 0<br>(0 - 0)             | 0<br>(0 - 0)             |
| Dengue                                                             | 0<br>(0 - 0)                | 0<br>(0 - 0)             | 0<br>(0 - 0)        | 0<br>(0 - 0)             | 0<br>(0 - 0)             | 0<br>(0 - 0)             |
| Rabies                                                             | 0<br>(0 - 1)                | 0<br>(0 - 0)             | 0<br>(0 - 0)        | 0<br>(0 - 0)             | 0<br>(0 - 0)             | 0<br>(0 - 0)             |
| Intestinal nematode infections                                     | 2<br>(0 - 8)                | 1<br>(0 - 5)             | 0<br>(0 - 2)        | 1<br>(0 - 4)             | 0<br>(0 - 1)             | 0<br>(0 - 1)             |
| Ascariasis                                                         | 2<br>(0 - 8)                | 1<br>(0 - 5)             | 0<br>(0 - 2)        | 1<br>(0 - 4)             | 0<br>(0 - 1)             | 0<br>(0 - 1)             |
| Other neglected tropical diseases                                  | 36<br>(17 - 69)             | 5<br>(2 - 11)            | 1<br>(0 - 2)        | 28<br>(11 - 58)          | 1<br>(0 - 3)             | 2<br>(1 - 3)             |
| Maternal disorders                                                 | 295<br>(175 - 446)          | --                       | 0<br>(0 - 1)        | 295<br>(175 - 446)       | --                       | --                       |
| Maternal hemorrhage                                                | 34<br>(18 - 55)             | --                       | 0<br>(0 - 0)        | 34<br>(18 - 55)          | --                       | --                       |
| Maternal sepsis and other maternal infections                      | 33<br>(18 - 55)             | --                       | 0<br>(0 - 0)        | 33<br>(18 - 55)          | --                       | --                       |

Web Table 31- Lesotho deaths with 95% UI by age, sex, and cause in 2013

| Cause                                                            | Females, All Ages        | Females, 0-4 Years   | Females, 5-14 Years | Females, 15-49 Years   | Females, 50-69 Years | Females, 70-80 Years     |
|------------------------------------------------------------------|--------------------------|----------------------|---------------------|------------------------|----------------------|--------------------------|
| Maternal hypertensive disorders                                  | 39<br>(20 - 63)          | --                   | 0<br>(0 - 0)        | 39<br>(20 - 63)        | --                   | --                       |
| Maternal obstructed labor                                        | 16<br>(8 - 28)           | --                   | 0<br>(0 - 0)        | 16<br>(8 - 28)         | --                   | --                       |
| Maternal abortive outcome                                        | 50<br>(28 - 81)          | --                   | 0<br>(0 - 0)        | 50<br>(27 - 81)        | --                   | --                       |
| Indirect maternal deaths                                         | 31<br>(17 - 52)          | --                   | 0<br>(0 - 0)        | 31<br>(17 - 52)        | --                   | --                       |
| Late maternal deaths                                             | 36<br>(18 - 65)          | --                   | 0<br>(0 - 0)        | 36<br>(18 - 65)        | --                   | --                       |
| Maternal deaths aggravated by HIV/AIDS                           | 27<br>(15 - 41)          | --                   | --                  | 27<br>(15 - 41)        | --                   | --                       |
| Other maternal disorders                                         | 29<br>(15 - 49)          | --                   | 0<br>(0 - 0)        | 29<br>(15 - 49)        | --                   | --                       |
| Neonatal disorders                                               | 834<br>(626 - 1,080)     | 834<br>(626 - 1,080) | --                  | --                     | --                   | --                       |
| Neonatal preterm birth complications                             | 311<br>(161 - 509)       | 311<br>(161 - 509)   | --                  | --                     | --                   | --                       |
| Neonatal encephalopathy due to birth asphyxia and trauma         | 189<br>(77 - 343)        | 189<br>(77 - 343)    | --                  | --                     | --                   | --                       |
| Neonatal sepsis and other neonatal infections                    | 71<br>(21 - 157)         | 71<br>(21 - 157)     | --                  | --                     | --                   | --                       |
| Hemolytic disease and other neonatal jaundice                    | 6<br>(1 - 18)            | 6<br>(1 - 18)        | --                  | --                     | --                   | --                       |
| Other neonatal disorders                                         | 258<br>(109 - 453)       | 258<br>(109 - 453)   | --                  | --                     | --                   | --                       |
| Nutritional deficiencies                                         | 177<br>(123 - 256)       | 79<br>(40 - 139)     | 3<br>(1 - 6)        | 61<br>(38 - 93)        | 10<br>(6 - 17)       | 24<br>(15 - 39)          |
| Protein-energy malnutrition                                      | 104<br>(63 - 171)        | 76<br>(38 - 134)     | 2<br>(1 - 4)        | 14<br>(4 - 29)         | 3<br>(1 - 7)         | 9<br>(3 - 19)            |
| Iodine deficiency                                                | 0<br>(0 - 1)             | 0<br>(0 - 0)         | 0<br>(0 - 0)        | 0<br>(0 - 1)           | 0<br>(0 - 0)         | 0<br>(0 - 0)             |
| Iron-deficiency anemia                                           | 65<br>(37 - 105)         | 3<br>(0 - 10)        | 1<br>(0 - 2)        | 44<br>(24 - 73)        | 5<br>(2 - 10)        | 12<br>(5 - 24)           |
| Other nutritional deficiencies                                   | 8<br>(3 - 16)            | 1<br>(0 - 2)         | 0<br>(0 - 0)        | 3<br>(1 - 9)           | 1<br>(0 - 3)         | 3<br>(1 - 6)             |
| Other communicable, maternal, neonatal, and nutritional diseases | 165<br>(90 - 262)        | 64<br>(17 - 130)     | 4<br>(1 - 9)        | 82<br>(38 - 144)       | 7<br>(3 - 14)        | 8<br>(3 - 18)            |
| Sexually transmitted diseases excluding HIV                      | 62<br>(14 - 133)         | 49<br>(2 - 114)      | 2<br>(0 - 5)        | 9<br>(2 - 18)          | 1<br>(0 - 2)         | 1<br>(0 - 2)             |
| Syphilis                                                         | 56<br>(8 - 126)          | 49<br>(2 - 114)      | 2<br>(0 - 5)        | 4<br>(1 - 7)           | 0<br>(0 - 1)         | 1<br>(0 - 2)             |
| Chlamydial infection                                             | 2<br>(0 - 4)             | --                   | 0<br>(0 - 0)        | 2<br>(0 - 4)           | 0<br>(0 - 0)         | 0<br>(0 - 0)             |
| Gonococcal infection                                             | 2<br>(0 - 4)             | --                   | 0<br>(0 - 0)        | 2<br>(0 - 4)           | 0<br>(0 - 0)         | 0<br>(0 - 0)             |
| Other sexually transmitted diseases                              | 2<br>(0 - 4)             | --                   | 0<br>(0 - 0)        | 2<br>(0 - 3)           | 0<br>(0 - 0)         | 0<br>(0 - 0)             |
| Hepatitis                                                        | 8<br>(5 - 12)            | 1<br>(1 - 2)         | 0<br>(0 - 0)        | 5<br>(2 - 7)           | 1<br>(0 - 2)         | 1<br>(1 - 2)             |
| Acute hepatitis A                                                | 1<br>(0 - 2)             | 1<br>(0 - 1)         | 0<br>(0 - 0)        | 0<br>(0 - 1)           | 0<br>(0 - 0)         | 0<br>(0 - 0)             |
| Acute hepatitis B                                                | 3<br>(2 - 5)             | 1<br>(0 - 1)         | 0<br>(0 - 0)        | 1<br>(0 - 2)           | 1<br>(0 - 1)         | 1<br>(0 - 1)             |
| Acute hepatitis C                                                | 0<br>(0 - 0)             | --                   | 0<br>(0 - 0)        | 0<br>(0 - 0)           | 0<br>(0 - 0)         | 0<br>(0 - 0)             |
| Acute hepatitis E                                                | 4<br>(2 - 6)             | 0<br>(0 - 0)         | 0<br>(0 - 0)        | 3<br>(2 - 5)           | 0<br>(0 - 0)         | 0<br>(0 - 0)             |
| Other infectious diseases                                        | 95<br>(48 - 164)         | 13<br>(5 - 28)       | 2<br>(1 - 4)        | 69<br>(27 - 128)       | 5<br>(2 - 12)        | 6<br>(2 - 15)            |
| Non-communicable diseases                                        | 4,192<br>(3,393 - 5,385) | 163<br>(100 - 274)   | 29<br>(17 - 51)     | 1,024<br>(720 - 1,344) | 896<br>(598 - 1,375) | 2,080<br>(1,718 - 2,691) |
| Neoplasms                                                        | 525<br>(375 - 711)       | 5<br>(3 - 9)         | 4<br>(2 - 7)        | 104<br>(78 - 134)      | 171<br>(109 - 269)   | 241<br>(160 - 327)       |
| Esophageal cancer                                                | 44<br>(24 - 69)          | --                   | --                  | 4<br>(2 - 5)           | 18<br>(8 - 32)       | 23<br>(12 - 36)          |
| Stomach cancer                                                   | 30<br>(20 - 42)          | --                   | --                  | 4<br>(3 - 6)           | 8<br>(5 - 13)        | 17<br>(10 - 27)          |
| Liver cancer                                                     | 24<br>(14 - 37)          | --                   | 0<br>(0 - 0)        | 5<br>(3 - 8)           | 7<br>(4 - 13)        | 12<br>(6 - 20)           |
| Liver cancer due to hepatitis B                                  | 6<br>(2 - 12)            | --                   | 0<br>(0 - 0)        | 2<br>(1 - 4)           | 2<br>(0 - 5)         | 2<br>(1 - 5)             |
| Liver cancer due to hepatitis C                                  | 10<br>(4 - 18)           | --                   | 0<br>(0 - 0)        | 1<br>(1 - 3)           | 3<br>(1 - 6)         | 5<br>(2 - 10)            |
| Liver cancer due to alcohol use                                  | 4<br>(2 - 6)             | --                   | --                  | 0<br>(0 - 0)           | 1<br>(0 - 2)         | 2<br>(1 - 5)             |
| Liver cancer due to other causes                                 | 5<br>(3 - 9)             | --                   | 0<br>(0 - 0)        | 1<br>(1 - 3)           | 2<br>(1 - 3)         | 2<br>(1 - 4)             |
| Larynx cancer                                                    | 3<br>(1 - 7)             | --                   | --                  | 1<br>(0 - 2)           | 1<br>(1 - 3)         | 1<br>(0 - 2)             |

Web Table 31- Lesotho deaths with 95% UI by age, sex, and cause in 2013

| Cause                                         | Females, All Ages        | Females, 0-4 Years | Females, 5-14 Years | Females, 15-49 Years | Females, 50-69 Years | Females, 70-80 Years   |
|-----------------------------------------------|--------------------------|--------------------|---------------------|----------------------|----------------------|------------------------|
| Tracheal, bronchus and lung cancer            | 41<br>(26 - 61)          | --                 | --                  | 4<br>(2 - 6)         | 15<br>(9 - 26)       | 21<br>(13 - 33)        |
| Breast cancer                                 | 65<br>(45 - 94)          | --                 | --                  | 13<br>(9 - 25)       | 23<br>(14 - 36)      | 29<br>(19 - 42)        |
| Cervical cancer                               | 93<br>(62 - 131)         | --                 | --                  | 29<br>(21 - 40)      | 36<br>(20 - 61)      | 28<br>(15 - 43)        |
| Uterine cancer                                | 11<br>(5 - 18)           | --                 | --                  | 1<br>(0 - 2)         | 4<br>(2 - 7)         | 7<br>(3 - 11)          |
| Prostate cancer                               | --                       | --                 | --                  | --                   | --                   | --                     |
| Colon and rectum cancer                       | 47<br>(32 - 67)          | --                 | --                  | 3<br>(2 - 4)         | 13<br>(8 - 21)       | 31<br>(20 - 46)        |
| Lip and oral cavity cancer                    | 8<br>(5 - 11)            | --                 | --                  | 1<br>(1 - 2)         | 3<br>(1 - 4)         | 4<br>(2 - 6)           |
| Nasopharynx cancer                            | 2<br>(1 - 3)             | --                 | 0<br>(0 - 0)        | 1<br>(0 - 2)         | 0<br>(0 - 1)         | 0<br>(0 - 1)           |
| Other pharynx cancer                          | 1<br>(1 - 2)             | --                 | --                  | 0<br>(0 - 1)         | 1<br>(0 - 1)         | 0<br>(0 - 1)           |
| Gallbladder and biliary tract cancer          | 6<br>(3 - 9)             | --                 | --                  | 1<br>(0 - 1)         | 2<br>(1 - 3)         | 3<br>(2 - 5)           |
| Pancreatic cancer                             | 22<br>(14 - 32)          | --                 | --                  | 1<br>(1 - 1)         | 7<br>(4 - 11)        | 14<br>(9 - 21)         |
| Malignant skin melanoma                       | 4<br>(3 - 6)             | --                 | --                  | 1<br>(0 - 1)         | 1<br>(1 - 2)         | 2<br>(1 - 4)           |
| Non-melanoma skin cancer                      | 5<br>(2 - 8)             | --                 | --                  | 1<br>(1 - 3)         | 1<br>(0 - 2)         | 2<br>(1 - 4)           |
| Ovarian cancer                                | 18<br>(10 - 29)          | --                 | --                  | 4<br>(2 - 7)         | 7<br>(4 - 12)        | 7<br>(4 - 12)          |
| Testicular cancer                             | --                       | --                 | --                  | --                   | --                   | --                     |
| Kidney cancer                                 | 5<br>(4 - 8)             | 0<br>(0 - 1)       | 0<br>(0 - 0)        | 1<br>(0 - 1)         | 2<br>(1 - 3)         | 2<br>(1 - 4)           |
| Bladder cancer                                | 6<br>(4 - 9)             | --                 | --                  | 1<br>(1 - 2)         | 1<br>(1 - 2)         | 3<br>(2 - 5)           |
| Brain and nervous system cancer               | 5<br>(4 - 7)             | 0<br>(0 - 1)       | 0<br>(0 - 1)        | 1<br>(1 - 2)         | 1<br>(1 - 2)         | 2<br>(1 - 2)           |
| Thyroid cancer                                | 3<br>(2 - 5)             | --                 | 0<br>(0 - 0)        | 0<br>(0 - 1)         | 1<br>(0 - 2)         | 2<br>(1 - 3)           |
| Mesothelioma                                  | 1<br>(1 - 2)             | --                 | --                  | 0<br>(0 - 0)         | 0<br>(0 - 1)         | 1<br>(0 - 1)           |
| Hodgkin lymphoma                              | 2<br>(1 - 5)             | 0<br>(0 - 0)       | 0<br>(0 - 0)        | 1<br>(1 - 3)         | 0<br>(0 - 1)         | 0<br>(0 - 1)           |
| Non-Hodgkin lymphoma                          | 20<br>(13 - 32)          | 0<br>(0 - 1)       | 0<br>(0 - 1)        | 6<br>(3 - 13)        | 5<br>(3 - 9)         | 8<br>(4 - 13)          |
| Multiple myeloma                              | 6<br>(4 - 9)             | --                 | --                  | 0<br>(0 - 1)         | 2<br>(1 - 4)         | 3<br>(2 - 5)           |
| Leukemia                                      | 14<br>(10 - 19)          | 1<br>(0 - 2)       | 1<br>(0 - 2)        | 4<br>(3 - 7)         | 3<br>(2 - 4)         | 5<br>(3 - 8)           |
| Other neoplasms                               | 40<br>(27 - 61)          | 3<br>(2 - 6)       | 2<br>(1 - 4)        | 14<br>(7 - 30)       | 8<br>(5 - 14)        | 12<br>(7 - 18)         |
| Cardiovascular diseases                       | 1,852<br>(1,393 - 2,680) | 13<br>(6 - 29)     | 6<br>(3 - 12)       | 299<br>(175 - 492)   | 395<br>(248 - 678)   | 1,140<br>(880 - 1,670) |
| Rheumatic heart disease                       | 48<br>(29 - 95)          | 0<br>(0 - 1)       | 1<br>(0 - 2)        | 23<br>(11 - 61)      | 3<br>(1 - 8)         | 20<br>(12 - 37)        |
| Ischemic heart disease                        | 571<br>(355 - 1,045)     | 1<br>(0 - 3)       | 0<br>(0 - 1)        | 52<br>(28 - 86)      | 100<br>(51 - 209)    | 418<br>(259 - 778)     |
| Cerebrovascular disease                       | 651<br>(466 - 968)       | 3<br>(1 - 7)       | 2<br>(1 - 3)        | 93<br>(52 - 168)     | 152<br>(90 - 257)    | 402<br>(289 - 583)     |
| Ischemic stroke                               | 306<br>(168 - 489)       | 0<br>(0 - 1)       | 0<br>(0 - 0)        | 12<br>(3 - 33)       | 59<br>(27 - 111)     | 234<br>(128 - 361)     |
| Hemorrhagic stroke                            | 345<br>(232 - 621)       | 2<br>(1 - 6)       | 2<br>(1 - 3)        | 81<br>(46 - 149)     | 93<br>(53 - 174)     | 168<br>(103 - 315)     |
| Hypertensive heart disease                    | 267<br>(147 - 420)       | 0<br>(0 - 1)       | 0<br>(0 - 0)        | 29<br>(13 - 49)      | 57<br>(27 - 108)     | 180<br>(96 - 288)      |
| Cardiomyopathy and myocarditis                | 130<br>(74 - 199)        | 5<br>(2 - 12)      | 1<br>(1 - 3)        | 59<br>(22 - 109)     | 21<br>(11 - 40)      | 43<br>(22 - 75)        |
| Atrial fibrillation and flutter               | 12<br>(5 - 23)           | --                 | --                  | 0<br>(0 - 1)         | 2<br>(1 - 3)         | 10<br>(4 - 20)         |
| Aortic aneurysm                               | 15<br>(8 - 26)           | --                 | --                  | 3<br>(1 - 6)         | 3<br>(1 - 6)         | 9<br>(4 - 17)          |
| Peripheral vascular disease                   | 3<br>(2 - 5)             | --                 | --                  | 0<br>(0 - 0)         | 1<br>(0 - 1)         | 2<br>(1 - 3)           |
| Endocarditis                                  | 8<br>(5 - 14)            | 1<br>(0 - 2)       | 0<br>(0 - 1)        | 3<br>(1 - 6)         | 1<br>(0 - 2)         | 3<br>(2 - 6)           |
| Other cardiovascular and circulatory diseases | 147<br>(89 - 267)        | 2<br>(1 - 6)       | 1<br>(0 - 2)        | 36<br>(18 - 74)      | 56<br>(30 - 110)     | 51<br>(30 - 99)        |
| Chronic respiratory diseases                  | 391<br>(280 - 540)       | 8<br>(4 - 14)      | 3<br>(1 - 5)        | 126<br>(84 - 186)    | 77<br>(43 - 124)     | 178<br>(120 - 261)     |
| Chronic obstructive pulmonary disease         | 201<br>(113 - 294)       | 3<br>(1 - 6)       | 1<br>(0 - 1)        | 41<br>(17 - 67)      | 42<br>(21 - 73)      | 115<br>(65 - 168)      |



Web Table 31- Lesotho deaths with 95% UI by age, sex, and cause in 2013

| Cause                                               | Females, All Ages  | Females, 0-4 Years | Females, 5-14 Years | Females, 15-49 Years | Females, 50-69 Years | Females, 70-80 Years |
|-----------------------------------------------------|--------------------|--------------------|---------------------|----------------------|----------------------|----------------------|
| Pneumoconiosis                                      | 3<br>(1 - 4)       | 0<br>(0 - 0)       | 0<br>(0 - 0)        | 1<br>(0 - 1)         | 1<br>(0 - 1)         | 1<br>(1 - 3)         |
| Silicosis                                           | 0<br>(0 - 0)       | 0<br>(0 - 0)       | 0<br>(0 - 0)        | 0<br>(0 - 0)         | 0<br>(0 - 0)         | 0<br>(0 - 0)         |
| Asbestosis                                          | 0<br>(0 - 0)       | 0<br>(0 - 0)       | 0<br>(0 - 0)        | 0<br>(0 - 0)         | 0<br>(0 - 0)         | 0<br>(0 - 0)         |
| Coal workers pneumoconiosis                         | 0<br>(0 - 0)       | 0<br>(0 - 0)       | 0<br>(0 - 0)        | 0<br>(0 - 0)         | 0<br>(0 - 0)         | 0<br>(0 - 0)         |
| Other pneumoconiosis                                | 2<br>(1 - 4)       | 0<br>(0 - 0)       | 0<br>(0 - 0)        | 1<br>(0 - 1)         | 0<br>(0 - 1)         | 1<br>(1 - 2)         |
| Asthma                                              | 164<br>(104 - 269) | 3<br>(1 - 7)       | 2<br>(1 - 4)        | 75<br>(45 - 129)     | 31<br>(16 - 56)      | 53<br>(29 - 95)      |
| Interstitial lung disease and pulmonary sarcoidosis | 15<br>(1 - 34)     | 0<br>(0 - 1)       | 0<br>(0 - 0)        | 6<br>(1 - 16)        | 2<br>(0 - 5)         | 6<br>(0 - 15)        |
| Other chronic respiratory diseases                  | 9<br>(5 - 16)      | 1<br>(0 - 2)       | 0<br>(0 - 0)        | 4<br>(2 - 8)         | 1<br>(0 - 2)         | 3<br>(1 - 7)         |
| Cirrhosis                                           | 50<br>(29 - 91)    | 1<br>(0 - 2)       | 1<br>(0 - 1)        | 24<br>(13 - 44)      | 13<br>(6 - 28)       | 12<br>(6 - 23)       |
| Cirrhosis due to hepatitis B                        | 10<br>(5 - 23)     | 0<br>(0 - 0)       | 0<br>(0 - 0)        | 5<br>(2 - 11)        | 3<br>(1 - 7)         | 2<br>(1 - 6)         |
| Cirrhosis due to hepatitis C                        | 14<br>(7 - 27)     | 0<br>(0 - 0)       | 0<br>(0 - 0)        | 6<br>(2 - 12)        | 4<br>(2 - 9)         | 4<br>(1 - 9)         |
| Cirrhosis due to alcohol use                        | 14<br>(7 - 26)     | --                 | --                  | 5<br>(2 - 10)        | 5<br>(2 - 9)         | 5<br>(2 - 9)         |
| Cirrhosis due to other causes                       | 11<br>(5 - 21)     | 1<br>(0 - 2)       | 0<br>(0 - 1)        | 7<br>(3 - 15)        | 2<br>(1 - 4)         | 1<br>(0 - 2)         |
| Digestive diseases                                  | 193<br>(137 - 264) | 5<br>(2 - 8)       | 2<br>(1 - 4)        | 100<br>(63 - 143)    | 25<br>(14 - 41)      | 61<br>(37 - 90)      |
| Peptic ulcer disease                                | 44<br>(27 - 65)    | 0<br>(0 - 1)       | 0<br>(0 - 1)        | 20<br>(10 - 32)      | 7<br>(3 - 12)        | 17<br>(9 - 29)       |
| Gastritis and duodenitis                            | 11<br>(4 - 19)     | 0<br>(0 - 1)       | 0<br>(0 - 0)        | 4<br>(1 - 8)         | 1<br>(0 - 3)         | 5<br>(2 - 10)        |
| Appendicitis                                        | 7<br>(4 - 12)      | 0<br>(0 - 1)       | 0<br>(0 - 1)        | 5<br>(2 - 9)         | 1<br>(0 - 2)         | 1<br>(0 - 2)         |
| Paralytic ileus and intestinal obstruction          | 20<br>(11 - 36)    | 1<br>(0 - 1)       | 0<br>(0 - 1)        | 4<br>(2 - 8)         | 4<br>(2 - 8)         | 12<br>(5 - 22)       |
| Inguinal, femoral, and abdominal hernia             | 3<br>(1 - 5)       | 0<br>(0 - 0)       | 0<br>(0 - 0)        | 1<br>(0 - 1)         | 1<br>(0 - 1)         | 2<br>(1 - 3)         |
| Inflammatory bowel disease                          | 61<br>(40 - 93)    | 2<br>(1 - 4)       | 1<br>(0 - 1)        | 47<br>(28 - 72)      | 5<br>(2 - 8)         | 7<br>(3 - 13)        |
| Vascular intestinal disorders                       | 2<br>(1 - 5)       | 0<br>(0 - 0)       | 0<br>(0 - 0)        | 1<br>(0 - 1)         | 0<br>(0 - 1)         | 1<br>(1 - 3)         |
| Gallbladder and biliary diseases                    | 12<br>(7 - 20)     | 0<br>(0 - 0)       | 0<br>(0 - 0)        | 3<br>(2 - 6)         | 3<br>(1 - 5)         | 6<br>(3 - 11)        |
| Pancreatitis                                        | 6<br>(3 - 10)      | 0<br>(0 - 0)       | 0<br>(0 - 0)        | 3<br>(1 - 6)         | 1<br>(0 - 2)         | 2<br>(1 - 3)         |
| Other digestive diseases                            | 26<br>(15 - 38)    | 1<br>(0 - 2)       | 0<br>(0 - 1)        | 13<br>(7 - 22)       | 3<br>(2 - 5)         | 8<br>(4 - 15)        |
| Neurological disorders                              | 146<br>(94 - 205)  | 4<br>(2 - 9)       | 3<br>(1 - 6)        | 50<br>(20 - 88)      | 12<br>(7 - 19)       | 78<br>(48 - 111)     |
| Alzheimer disease and other dementias               | 68<br>(41 - 99)    | --                 | --                  | 0<br>(0 - 0)         | 3<br>(2 - 6)         | 64<br>(39 - 94)      |
| Parkinson disease                                   | 3<br>(2 - 6)       | --                 | --                  | 0<br>(0 - 0)         | 0<br>(0 - 1)         | 3<br>(1 - 5)         |
| Epilepsy                                            | 70<br>(34 - 110)   | 4<br>(1 - 8)       | 3<br>(1 - 5)        | 48<br>(18 - 85)      | 7<br>(3 - 12)        | 9<br>(4 - 18)        |
| Multiple sclerosis                                  | 0<br>(0 - 1)       | --                 | --                  | 0<br>(0 - 0)         | 0<br>(0 - 0)         | 0<br>(0 - 0)         |
| Other neurological disorders                        | 5<br>(4 - 7)       | 0<br>(0 - 1)       | 0<br>(0 - 0)        | 2<br>(1 - 2)         | 1<br>(1 - 2)         | 2<br>(1 - 3)         |
| Mental and substance use disorders                  | 45<br>(24 - 81)    | 1<br>(0 - 3)       | 0<br>(0 - 0)        | 33<br>(17 - 63)      | 7<br>(4 - 13)        | 3<br>(2 - 6)         |
| Schizophrenia                                       | 4<br>(2 - 8)       | --                 | --                  | 2<br>(1 - 5)         | 1<br>(0 - 2)         | 1<br>(1 - 2)         |
| Alcohol use disorders                               | 20<br>(8 - 56)     | --                 | --                  | 16<br>(5 - 45)       | 4<br>(1 - 9)         | 1<br>(0 - 2)         |
| Drug use disorders                                  | 20<br>(11 - 34)    | 1<br>(0 - 3)       | --                  | 15<br>(8 - 26)       | 3<br>(1 - 5)         | 1<br>(1 - 2)         |
| Opioid use disorders                                | 2<br>(1 - 4)       | 0<br>(0 - 0)       | --                  | 2<br>(1 - 3)         | 0<br>(0 - 0)         | 0<br>(0 - 0)         |
| Cocaine use disorders                               | 0<br>(0 - 0)       | 0<br>(0 - 0)       | --                  | 0<br>(0 - 0)         | 0<br>(0 - 0)         | 0<br>(0 - 0)         |
| Amphetamine use disorders                           | 0<br>(0 - 0)       | 0<br>(0 - 0)       | --                  | 0<br>(0 - 0)         | 0<br>(0 - 0)         | 0<br>(0 - 0)         |
| Other drug use disorders                            | 18<br>(10 - 30)    | 1<br>(0 - 3)       | --                  | 13<br>(7 - 23)       | 2<br>(1 - 5)         | 1<br>(0 - 2)         |
| Eating disorders                                    | 0<br>(0 - 0)       | --                 | 0<br>(0 - 0)        | 0<br>(0 - 0)         | --                   | --                   |
| Anorexia nervosa                                    | 0<br>(0 - 0)       | --                 | 0<br>(0 - 0)        | 0<br>(0 - 0)         | --                   | --                   |

Web Table 31- Lesotho deaths with 95% UI by age, sex, and cause in 2013

| Cause                                               | Females, All Ages    | Females, 0-4 Years | Females, 5-14 Years | Females, 15-49 Years | Females, 50-69 Years | Females, 70-80 Years |
|-----------------------------------------------------|----------------------|--------------------|---------------------|----------------------|----------------------|----------------------|
| Diabetes, urogenital, blood, and endocrine diseases | 826<br>(586 - 1,104) | 40<br>(21 - 72)    | 7<br>(4 - 14)       | 262<br>(159 - 388)   | 185<br>(116 - 283)   | 331<br>(219 - 454)   |
| Diabetes mellitus                                   | 399<br>(278 - 557)   | 1<br>(0 - 1)       | 0<br>(0 - 1)        | 49<br>(35 - 64)      | 130<br>(80 - 199)    | 219<br>(139 - 312)   |
| Acute glomerulonephritis                            | 1<br>(0 - 1)         | 0<br>(0 - 0)       | 0<br>(0 - 0)        | 0<br>(0 - 1)         | 0<br>(0 - 0)         | 0<br>(0 - 0)         |
| Chronic kidney disease                              | 129<br>(80 - 190)    | 2<br>(1 - 4)       | 1<br>(1 - 2)        | 45<br>(21 - 76)      | 25<br>(13 - 42)      | 57<br>(30 - 86)      |
| Chronic kidney disease due to diabetes mellitus     | 0<br>(0 - 1)         | 0<br>(0 - 0)       | 0<br>(0 - 0)        | 0<br>(0 - 1)         | 0<br>(0 - 0)         | 0<br>(0 - 0)         |
| Chronic kidney disease due to hypertension          | 68<br>(40 - 107)     | 0<br>(0 - 1)       | 0<br>(0 - 0)        | 17<br>(8 - 34)       | 15<br>(8 - 26)       | 35<br>(19 - 55)      |
| Chronic kidney disease due to glomerulonephritis    | 18<br>(8 - 31)       | 1<br>(0 - 2)       | 1<br>(0 - 1)        | 12<br>(4 - 22)       | 2<br>(1 - 3)         | 3<br>(1 - 6)         |
| Chronic kidney disease due to other causes          | 42<br>(16 - 79)      | 1<br>(0 - 2)       | 0<br>(0 - 1)        | 15<br>(3 - 36)       | 8<br>(2 - 18)        | 18<br>(6 - 39)       |
| Urinary diseases and male infertility               | 35<br>(22 - 51)      | 1<br>(1 - 3)       | 0<br>(0 - 1)        | 13<br>(5 - 22)       | 5<br>(3 - 8)         | 16<br>(9 - 25)       |
| Interstitial nephritis and urinary tract infections | 19<br>(11 - 28)      | 1<br>(0 - 2)       | 0<br>(0 - 0)        | 7<br>(2 - 12)        | 3<br>(1 - 5)         | 8<br>(4 - 14)        |
| Urolithiasis                                        | 1<br>(0 - 1)         | --                 | 0<br>(0 - 0)        | 0<br>(0 - 1)         | 0<br>(0 - 0)         | 0<br>(0 - 0)         |
| Other urinary diseases                              | 16<br>(9 - 25)       | 1<br>(0 - 1)       | 0<br>(0 - 0)        | 6<br>(2 - 12)        | 2<br>(1 - 4)         | 7<br>(3 - 13)        |
| Gynecological diseases                              | 2<br>(1 - 3)         | --                 | --                  | 2<br>(1 - 3)         | 0<br>(0 - 1)         | 0<br>(0 - 1)         |
| Uterine fibroids                                    | 0<br>(0 - 1)         | --                 | --                  | 0<br>(0 - 0)         | 0<br>(0 - 0)         | 0<br>(0 - 0)         |
| Polycystic ovarian syndrome                         | 0<br>(0 - 0)         | --                 | --                  | 0<br>(0 - 0)         | 0<br>(0 - 0)         | --                   |
| Endometriosis                                       | 0<br>(0 - 0)         | --                 | --                  | 0<br>(0 - 0)         | 0<br>(0 - 0)         | --                   |
| Genital prolapse                                    | 0<br>(0 - 1)         | --                 | --                  | 0<br>(0 - 0)         | 0<br>(0 - 0)         | 0<br>(0 - 0)         |
| Other gynecological diseases                        | 1<br>(1 - 2)         | --                 | --                  | 1<br>(0 - 1)         | 0<br>(0 - 0)         | 0<br>(0 - 0)         |
| Hemoglobinopathies and hemolytic anemias            | 42<br>(21 - 70)      | 5<br>(2 - 10)      | 1<br>(1 - 3)        | 25<br>(10 - 47)      | 3<br>(1 - 7)         | 8<br>(3 - 18)        |
| Thalassemias                                        | 3<br>(1 - 5)         | 1<br>(0 - 3)       | 0<br>(0 - 1)        | 1<br>(0 - 3)         | 0<br>(0 - 0)         | 0<br>(0 - 0)         |
| Sickle cell disorders                               | 8<br>(4 - 15)        | 0<br>(0 - 1)       | 0<br>(0 - 1)        | 7<br>(3 - 14)        | 0<br>(0 - 1)         | 0<br>(0 - 0)         |
| G6PD deficiency                                     | 2<br>(1 - 4)         | 0<br>(0 - 0)       | 0<br>(0 - 0)        | 2<br>(1 - 3)         | 0<br>(0 - 0)         | 0<br>(0 - 0)         |
| Other hemoglobinopathies and hemolytic anemias      | 29<br>(14 - 47)      | 3<br>(1 - 6)       | 1<br>(0 - 1)        | 14<br>(6 - 27)       | 3<br>(1 - 6)         | 8<br>(3 - 18)        |
| Endocrine, metabolic, blood, and immune disorders   | 218<br>(119 - 358)   | 32<br>(15 - 61)    | 4<br>(1 - 9)        | 129<br>(50 - 246)    | 22<br>(11 - 40)      | 31<br>(16 - 52)      |
| Musculoskeletal disorders                           | 21<br>(11 - 36)      | --                 | 0<br>(0 - 1)        | 9<br>(4 - 18)        | 4<br>(2 - 7)         | 8<br>(4 - 14)        |
| Rheumatoid arthritis                                | 8<br>(4 - 13)        | --                 | 0<br>(0 - 0)        | 2<br>(1 - 4)         | 1<br>(1 - 3)         | 4<br>(2 - 8)         |
| Other musculoskeletal disorders                     | 14<br>(7 - 25)       | --                 | 0<br>(0 - 1)        | 7<br>(3 - 13)        | 3<br>(1 - 5)         | 4<br>(2 - 8)         |
| Other non-communicable diseases                     | 143<br>(92 - 240)    | 86<br>(45 - 174)   | 3<br>(1 - 6)        | 18<br>(8 - 32)       | 7<br>(4 - 12)        | 29<br>(17 - 46)      |
| Congenital anomalies                                | 98<br>(56 - 190)     | 81<br>(43 - 168)   | 3<br>(1 - 5)        | 7<br>(3 - 15)        | 2<br>(1 - 3)         | 6<br>(3 - 9)         |
| Neural tube defects                                 | 15<br>(4 - 45)       | 14<br>(3 - 43)     | 0<br>(0 - 0)        | 1<br>(0 - 2)         | 0<br>(0 - 0)         | 0<br>(0 - 0)         |
| Congenital heart anomalies                          | 34<br>(18 - 64)      | 25<br>(11 - 53)    | 1<br>(1 - 2)        | 3<br>(1 - 7)         | 1<br>(0 - 2)         | 4<br>(2 - 6)         |
| Cleft lip and cleft palate                          | 1<br>(0 - 2)         | 1<br>(0 - 2)       | --                  | --                   | --                   | --                   |
| Down syndrome                                       | 7<br>(3 - 15)        | 6<br>(2 - 13)      | 0<br>(0 - 1)        | 1<br>(0 - 1)         | 0<br>(0 - 0)         | 0<br>(0 - 0)         |
| Chromosomal unbalanced rearrangements               | 6<br>(3 - 13)        | 5<br>(2 - 12)      | 0<br>(0 - 0)        | 1<br>(0 - 1)         | 0<br>(0 - 0)         | 0<br>(0 - 0)         |
| Other congenital anomalies                          | 35<br>(16 - 75)      | 29<br>(13 - 67)    | 1<br>(0 - 2)        | 2<br>(1 - 6)         | 1<br>(0 - 1)         | 2<br>(1 - 3)         |
| Skin and subcutaneous diseases                      | 42<br>(25 - 63)      | 3<br>(1 - 5)       | 0<br>(0 - 1)        | 10<br>(5 - 20)       | 5<br>(3 - 9)         | 24<br>(13 - 39)      |
| Cellulitis                                          | 10<br>(5 - 16)       | 1<br>(0 - 1)       | 0<br>(0 - 0)        | 3<br>(1 - 5)         | 1<br>(1 - 3)         | 5<br>(2 - 10)        |
| Pyoderma                                            | 13<br>(8 - 22)       | 2<br>(1 - 4)       | 0<br>(0 - 0)        | 5<br>(2 - 10)        | 2<br>(1 - 3)         | 4<br>(2 - 8)         |
| Decubitus ulcer                                     | 17<br>(9 - 27)       | 0<br>(0 - 0)       | 0<br>(0 - 0)        | 2<br>(1 - 4)         | 2<br>(1 - 3)         | 13<br>(7 - 23)       |
| Other skin and subcutaneous diseases                | 2<br>(1 - 4)         | 0<br>(0 - 0)       | 0<br>(0 - 0)        | 1<br>(0 - 2)         | 0<br>(0 - 1)         | 1<br>(0 - 1)         |

Web Table 31- Lesotho deaths with 95% UI by age, sex, and cause in 2013

| Cause                                           | Females, All Ages    | Females, 0-4 Years | Females, 5-14 Years | Females, 15-49 Years | Females, 50-69 Years | Females, 70-80 Years |
|-------------------------------------------------|----------------------|--------------------|---------------------|----------------------|----------------------|----------------------|
| Sudden infant death syndrome                    | 2<br>(0 - 11)        | 2<br>(0 - 11)      | --                  | --                   | --                   | --                   |
| Injuries                                        | 886<br>(586 - 1,208) | 71<br>(39 - 121)   | 30<br>(18 - 52)     | 636<br>(346 - 915)   | 55<br>(34 - 87)      | 94<br>(62 - 136)     |
| Transport injuries                              | 163<br>(107 - 238)   | 12<br>(7 - 23)     | 10<br>(5 - 18)      | 126<br>(72 - 197)    | 11<br>(6 - 18)       | 5<br>(3 - 8)         |
| Road injuries                                   | 157<br>(102 - 230)   | 11<br>(6 - 21)     | 9<br>(5 - 17)       | 122<br>(70 - 193)    | 10<br>(5 - 16)       | 4<br>(3 - 7)         |
| Pedestrian road injuries                        | 28<br>(17 - 44)      | 4<br>(2 - 8)       | 4<br>(2 - 7)        | 15<br>(7 - 28)       | 3<br>(1 - 5)         | 2<br>(1 - 4)         |
| Cyclist road injuries                           | 10<br>(4 - 18)       | 0<br>(0 - 1)       | 1<br>(0 - 1)        | 7<br>(3 - 14)        | 1<br>(1 - 3)         | 0<br>(0 - 1)         |
| Motorcyclist road injuries                      | 11<br>(5 - 22)       | 0<br>(0 - 0)       | 0<br>(0 - 0)        | 10<br>(4 - 21)       | 0<br>(0 - 0)         | 0<br>(0 - 0)         |
| Motor vehicle road injuries                     | 107<br>(66 - 162)    | 6<br>(3 - 11)      | 4<br>(2 - 9)        | 91<br>(51 - 141)     | 5<br>(3 - 9)         | 1<br>(1 - 2)         |
| Other road injuries                             | 1<br>(0 - 2)         | 0<br>(0 - 1)       | 0<br>(0 - 1)        | 0<br>(0 - 1)         | 0<br>(0 - 0)         | 0<br>(0 - 0)         |
| Other transport injuries                        | 7<br>(4 - 11)        | 1<br>(0 - 2)       | 1<br>(0 - 2)        | 3<br>(2 - 6)         | 1<br>(0 - 2)         | 0<br>(0 - 1)         |
| Unintentional injuries                          | 303<br>(226 - 433)   | 50<br>(26 - 91)    | 16<br>(9 - 28)      | 131<br>(79 - 215)    | 31<br>(18 - 51)      | 75<br>(48 - 114)     |
| Falls                                           | 35<br>(21 - 55)      | 2<br>(1 - 3)       | 1<br>(0 - 1)        | 9<br>(4 - 17)        | 2<br>(1 - 4)         | 22<br>(10 - 40)      |
| Drowning                                        | 27<br>(14 - 40)      | 10<br>(4 - 20)     | 5<br>(2 - 11)       | 7<br>(3 - 15)        | 2<br>(1 - 3)         | 2<br>(1 - 4)         |
| Fire, heat, and hot substances                  | 80<br>(43 - 157)     | 13<br>(4 - 32)     | 3<br>(1 - 8)        | 40<br>(14 - 94)      | 6<br>(3 - 13)        | 18<br>(9 - 35)       |
| Poisonings                                      | 23<br>(12 - 51)      | 3<br>(1 - 7)       | 1<br>(0 - 1)        | 16<br>(7 - 40)       | 2<br>(1 - 4)         | 2<br>(1 - 4)         |
| Exposure to mechanical forces                   | 30<br>(16 - 52)      | 4<br>(2 - 7)       | 2<br>(1 - 4)        | 20<br>(8 - 37)       | 3<br>(2 - 6)         | 2<br>(1 - 3)         |
| Unintentional firearm injuries                  | 21<br>(10 - 39)      | 1<br>(0 - 2)       | 1<br>(0 - 1)        | 16<br>(6 - 32)       | 2<br>(1 - 5)         | 1<br>(0 - 2)         |
| Unintentional suffocation                       | 3<br>(0 - 6)         | 1<br>(0 - 2)       | 0<br>(0 - 1)        | 1<br>(0 - 3)         | 0<br>(0 - 0)         | 0<br>(0 - 0)         |
| Other exposure to mechanical forces             | 7<br>(3 - 11)        | 2<br>(1 - 5)       | 1<br>(0 - 3)        | 2<br>(1 - 4)         | 1<br>(0 - 1)         | 0<br>(0 - 1)         |
| Adverse effects of medical treatment            | 63<br>(39 - 94)      | 7<br>(3 - 15)      | 2<br>(1 - 3)        | 21<br>(9 - 40)       | 11<br>(5 - 21)       | 23<br>(8 - 46)       |
| Animal contact                                  | 7<br>(3 - 14)        | 1<br>(1 - 3)       | 1<br>(0 - 2)        | 3<br>(1 - 8)         | 1<br>(0 - 2)         | 1<br>(0 - 2)         |
| Venomous animal contact                         | 6<br>(3 - 13)        | 1<br>(0 - 3)       | 1<br>(0 - 2)        | 3<br>(1 - 7)         | 1<br>(0 - 2)         | 1<br>(0 - 1)         |
| Non-venomous animal contact                     | 1<br>(0 - 2)         | 0<br>(0 - 0)       | 0<br>(0 - 0)        | 0<br>(0 - 1)         | 0<br>(0 - 1)         | 0<br>(0 - 0)         |
| Foreign body                                    | 21<br>(10 - 52)      | 9<br>(3 - 27)      | 1<br>(0 - 2)        | 6<br>(2 - 17)        | 2<br>(1 - 4)         | 3<br>(1 - 6)         |
| Pulmonary aspiration and foreign body in airway | 21<br>(9 - 52)       | 9<br>(3 - 26)      | 1<br>(0 - 2)        | 6<br>(2 - 17)        | 2<br>(1 - 4)         | 3<br>(1 - 6)         |
| Foreign body in other body part                 | 0<br>(0 - 1)         | 0<br>(0 - 0)       | 0<br>(0 - 0)        | 0<br>(0 - 0)         | 0<br>(0 - 0)         | 0<br>(0 - 0)         |
| Other unintentional injuries                    | 16<br>(9 - 27)       | 1<br>(1 - 3)       | 1<br>(0 - 1)        | 9<br>(4 - 17)        | 2<br>(1 - 3)         | 3<br>(1 - 6)         |
| Self-harm and interpersonal violence            | 420<br>(151 - 664)   | 9<br>(4 - 17)      | 4<br>(2 - 9)        | 379<br>(122 - 612)   | 13<br>(5 - 24)       | 14<br>(3 - 25)       |
| Self-harm                                       | 143<br>(47 - 239)    | --                 | 1<br>(0 - 3)        | 118<br>(41 - 209)    | 10<br>(2 - 18)       | 13<br>(2 - 23)       |
| Interpersonal violence                          | 277<br>(71 - 478)    | 9<br>(4 - 17)      | 3<br>(1 - 7)        | 260<br>(56 - 460)    | 3<br>(2 - 6)         | 1<br>(1 - 3)         |
| Assault by firearm                              | 89<br>(20 - 171)     | 2<br>(0 - 3)       | 1<br>(0 - 1)        | 85<br>(16 - 167)     | 1<br>(0 - 3)         | 0<br>(0 - 1)         |
| Assault by sharp object                         | 89<br>(19 - 187)     | 1<br>(0 - 3)       | 0<br>(0 - 1)        | 86<br>(18 - 183)     | 1<br>(0 - 2)         | 0<br>(0 - 1)         |
| Assault by other means                          | 100<br>(29 - 203)    | 6<br>(3 - 12)      | 2<br>(1 - 5)        | 89<br>(19 - 189)     | 1<br>(1 - 2)         | 1<br>(0 - 1)         |

Web Table 31- Liberia deaths with 95% UI by age, sex, and cause in 2013

| Cause                                                             | Both Sexes, All Ages        | Both Sexes, 0-4 Years      | Both Sexes, 5-14 Years   | Both Sexes, 15-49 Years  | Both Sexes, 50-69 Years  | Both Sexes, 70-80 Years  |
|-------------------------------------------------------------------|-----------------------------|----------------------------|--------------------------|--------------------------|--------------------------|--------------------------|
| All causes                                                        | 32,695<br>(30,021 - 35,920) | 11,637<br>(9,949 - 13,707) | 1,293<br>(1,086 - 1,538) | 7,264<br>(6,542 - 8,164) | 6,689<br>(5,729 - 7,600) | 5,812<br>(5,229 - 6,353) |
| Communicable, maternal, neonatal, and nutritional diseases        | 19,783<br>(17,785 - 21,955) | 10,338<br>(8,764 - 12,272) | 942<br>(751 - 1,241)     | 4,534<br>(4,095 - 4,993) | 2,175<br>(1,841 - 2,495) | 1,794<br>(1,407 - 2,089) |
| HIV/AIDS and tuberculosis                                         | 3,546<br>(3,053 - 4,124)    | 108<br>(67 - 165)          | 174<br>(139 - 210)       | 2,169<br>(1,807 - 2,639) | 791<br>(639 - 974)       | 305<br>(209 - 386)       |
| Tuberculosis                                                      | 1,394<br>(1,081 - 1,843)    | 62<br>(31 - 113)           | 23<br>(14 - 36)          | 577<br>(419 - 801)       | 458<br>(321 - 630)       | 273<br>(176 - 351)       |
| HIV/AIDS                                                          | 2,152<br>(1,746 - 2,627)    | 46<br>(23 - 77)            | 150<br>(118 - 185)       | 1,592<br>(1,238 - 2,030) | 333<br>(234 - 471)       | 31<br>(20 - 46)          |
| HIV/AIDS resulting in mycobacterial infection                     | 134<br>(100 - 178)          | 3<br>(1 - 5)               | 8<br>(6 - 11)            | 99<br>(72 - 135)         | 22<br>(14 - 32)          | 2<br>(1 - 3)             |
| HIV/AIDS resulting in other diseases                              | 2,018<br>(1,629 - 2,457)    | 43<br>(22 - 72)            | 142<br>(111 - 175)       | 1,493<br>(1,160 - 1,917) | 311<br>(219 - 442)       | 29<br>(19 - 43)          |
| Diarrhea, lower respiratory, and other common infectious diseases | 7,359<br>(5,714 - 9,287)    | 4,239<br>(2,935 - 5,782)   | 425<br>(284 - 734)       | 819<br>(646 - 1,048)     | 855<br>(642 - 1,096)     | 1,021<br>(745 - 1,257)   |
| Diarrheal diseases                                                | 2,230<br>(1,544 - 3,099)    | 1,255<br>(598 - 2,056)     | 92<br>(47 - 151)         | 301<br>(216 - 425)       | 285<br>(192 - 403)       | 298<br>(203 - 428)       |
| Intestinal infectious diseases                                    | 182<br>(90 - 322)           | 56<br>(20 - 114)           | 55<br>(25 - 97)          | 59<br>(29 - 106)         | 9<br>(4 - 17)            | 3<br>(1 - 6)             |
| Typhoid fever                                                     | 118<br>(54 - 217)           | 34<br>(11 - 75)            | 37<br>(16 - 68)          | 40<br>(18 - 72)          | 6<br>(3 - 11)            | 2<br>(1 - 3)             |
| Paratyphoid fever                                                 | 54<br>(24 - 99)             | 17<br>(5 - 37)             | 17<br>(7 - 34)           | 17<br>(7 - 35)           | 2<br>(1 - 4)             | 1<br>(0 - 1)             |
| Other intestinal infectious diseases                              | 10<br>(4 - 21)              | 5<br>(1 - 13)              | 1<br>(0 - 4)             | 2<br>(0 - 7)             | 1<br>(0 - 5)             | 0<br>(0 - 3)             |
| Lower respiratory infections                                      | 3,214<br>(2,315 - 4,120)    | 1,763<br>(1,011 - 2,530)   | 89<br>(52 - 134)         | 240<br>(175 - 322)       | 457<br>(325 - 617)       | 665<br>(473 - 863)       |
| Upper respiratory infections                                      | 6<br>(3 - 11)               | 2<br>(0 - 6)               | 0<br>(0 - 1)             | 2<br>(1 - 3)             | 1<br>(0 - 3)             | 1<br>(0 - 2)             |
| Otitis media                                                      | 2<br>(1 - 2)                | 0<br>(0 - 1)               | 0<br>(0 - 0)             | 0<br>(0 - 0)             | 0<br>(0 - 1)             | 1<br>(0 - 1)             |
| Meningitis                                                        | 714<br>(477 - 1,003)        | 338<br>(164 - 618)         | 68<br>(37 - 107)         | 173<br>(115 - 236)       | 89<br>(52 - 125)         | 47<br>(24 - 70)          |
| Pneumococcal meningitis                                           | 179<br>(123 - 254)          | 76<br>(36 - 141)           | 19<br>(10 - 32)          | 48<br>(27 - 71)          | 24<br>(14 - 41)          | 13<br>(7 - 21)           |
| H influenzae type B meningitis                                    | 122<br>(68 - 198)           | 80<br>(33 - 152)           | 12<br>(5 - 23)           | 18<br>(11 - 30)          | 8<br>(4 - 13)            | 4<br>(2 - 7)             |
| Meningococcal meningitis                                          | 315<br>(202 - 440)          | 149<br>(67 - 264)          | 30<br>(15 - 50)          | 76<br>(49 - 112)         | 39<br>(22 - 60)          | 21<br>(11 - 33)          |
| Other meningitis                                                  | 99<br>(62 - 143)            | 33<br>(14 - 65)            | 7<br>(3 - 12)            | 31<br>(17 - 48)          | 18<br>(7 - 30)           | 9<br>(4 - 17)            |
| Encephalitis                                                      | 39<br>(27 - 55)             | 14<br>(6 - 27)             | 5<br>(2 - 8)             | 11<br>(7 - 15)           | 6<br>(3 - 9)             | 4<br>(2 - 6)             |
| Diphtheria                                                        | 8<br>(1 - 35)               | 6<br>(0 - 32)              | 1<br>(0 - 8)             | 1<br>(0 - 2)             | 0<br>(0 - 1)             | --                       |
| Whooping cough                                                    | 195<br>(0 - 955)            | 182<br>(0 - 881)           | 11<br>(0 - 54)           | 2<br>(0 - 10)            | 0<br>(0 - 1)             | --                       |
| Tetanus                                                           | 49<br>(29 - 88)             | 25<br>(13 - 49)            | 4<br>(2 - 9)             | 12<br>(7 - 27)           | 6<br>(3 - 13)            | 2<br>(1 - 5)             |
| Measles                                                           | 713<br>(21 - 3,293)         | 595<br>(18 - 2,672)        | 99<br>(3 - 491)          | 18<br>(0 - 106)          | 1<br>(0 - 3)             | --                       |
| Varicella and herpes zoster                                       | 5<br>(2 - 11)               | 2<br>(0 - 7)               | 0<br>(0 - 2)             | 1<br>(0 - 3)             | 1<br>(0 - 1)             | 1<br>(0 - 4)             |
| Neglected tropical diseases and malaria                           | 3,234<br>(1,882 - 5,055)    | 2,125<br>(933 - 3,752)     | 249<br>(127 - 392)       | 353<br>(219 - 572)       | 284<br>(163 - 489)       | 224<br>(109 - 408)       |
| Malaria                                                           | 3,154<br>(1,799 - 4,992)    | 2,111<br>(917 - 3,739)     | 234<br>(111 - 380)       | 322<br>(185 - 539)       | 269<br>(149 - 473)       | 217<br>(104 - 403)       |
| Leishmaniasis                                                     | 0<br>(0 - 0)                | 0<br>(0 - 0)               | 0<br>(0 - 0)             | 0<br>(0 - 0)             | 0<br>(0 - 0)             | 0<br>(0 - 0)             |
| Visceral leishmaniasis                                            | 0<br>(0 - 0)                | 0<br>(0 - 0)               | 0<br>(0 - 0)             | 0<br>(0 - 0)             | 0<br>(0 - 0)             | 0<br>(0 - 0)             |
| Schistosomiasis                                                   | 16<br>(11 - 21)             | 0<br>(0 - 0)               | 0<br>(0 - 1)             | 6<br>(4 - 8)             | 6<br>(4 - 10)            | 3<br>(2 - 4)             |
| Cysticercosis                                                     | 2<br>(2 - 3)                | 0<br>(0 - 0)               | 0<br>(0 - 0)             | 1<br>(1 - 2)             | 1<br>(0 - 1)             | 0<br>(0 - 0)             |
| Cystic echinococcosis                                             | 2<br>(1 - 2)                | 0<br>(0 - 0)               | 0<br>(0 - 0)             | 1<br>(1 - 1)             | 0<br>(0 - 0)             | 0<br>(0 - 0)             |
| Dengue                                                            | 3<br>(1 - 5)                | 1<br>(0 - 1)               | 1<br>(0 - 1)             | 1<br>(0 - 2)             | 0<br>(0 - 1)             | 0<br>(0 - 0)             |
| Yellow fever                                                      | 19<br>(12 - 29)             | 1<br>(0 - 4)               | 4<br>(1 - 8)             | 11<br>(6 - 19)           | 2<br>(1 - 5)             | 1<br>(0 - 2)             |
| Rabies                                                            | 26<br>(14 - 41)             | 4<br>(1 - 10)              | 8<br>(3 - 14)            | 9<br>(5 - 14)            | 4<br>(2 - 5)             | 1<br>(0 - 2)             |
| Intestinal nematode infections                                    | 8<br>(2 - 20)               | 5<br>(1 - 15)              | 1<br>(0 - 6)             | 1<br>(0 - 4)             | 0<br>(0 - 3)             | 0<br>(0 - 2)             |
| Ascariasis                                                        | 8<br>(2 - 20)               | 5<br>(1 - 15)              | 1<br>(0 - 6)             | 1<br>(0 - 4)             | 0<br>(0 - 3)             | 0<br>(0 - 2)             |
| Other neglected tropical diseases                                 | 6<br>(4 - 10)               | 2<br>(1 - 4)               | 0<br>(0 - 1)             | 2<br>(1 - 3)             | 1<br>(1 - 2)             | 1<br>(1 - 1)             |

Web Table 31- Liberia deaths with 95% UI by age, sex, and cause in 2013

| Cause                                                            | Both Sexes, All Ages       | Both Sexes, 0-4 Years    | Both Sexes, 5-14 Years | Both Sexes, 15-49 Years  | Both Sexes, 50-69 Years  | Both Sexes, 70-80 Years  |
|------------------------------------------------------------------|----------------------------|--------------------------|------------------------|--------------------------|--------------------------|--------------------------|
| Maternal disorders                                               | 974<br>(726 - 1,232)       | --                       | 7<br>(2 - 15)          | 967<br>(718 - 1,224)     | --                       | --                       |
| Maternal hemorrhage                                              | 185<br>(125 - 261)         | --                       | 1<br>(0 - 2)           | 184<br>(124 - 260)       | --                       | --                       |
| Maternal sepsis and other maternal infections                    | 53<br>(28 - 87)            | --                       | 0<br>(0 - 1)           | 53<br>(28 - 87)          | --                       | --                       |
| Maternal hypertensive disorders                                  | 75<br>(48 - 109)           | --                       | 1<br>(0 - 1)           | 74<br>(48 - 109)         | --                       | --                       |
| Maternal obstructed labor                                        | 46<br>(27 - 71)            | --                       | 0<br>(0 - 1)           | 46<br>(26 - 71)          | --                       | --                       |
| Maternal abortive outcome                                        | 180<br>(121 - 250)         | --                       | 1<br>(0 - 3)           | 179<br>(120 - 248)       | --                       | --                       |
| Indirect maternal deaths                                         | 97<br>(57 - 141)           | --                       | 1<br>(0 - 1)           | 96<br>(56 - 140)         | --                       | --                       |
| Late maternal deaths                                             | 151<br>(94 - 223)          | --                       | 2<br>(1 - 4)           | 149<br>(93 - 222)        | --                       | --                       |
| Maternal deaths aggravated by HIV/AIDS                           | 3<br>(1 - 5)               | --                       | --                     | 3<br>(1 - 5)             | --                       | --                       |
| Other maternal disorders                                         | 183<br>(124 - 253)         | --                       | 1<br>(0 - 3)           | 181<br>(123 - 252)       | --                       | --                       |
| Neonatal disorders                                               | 2,958<br>(2,491 - 3,483)   | 2,958<br>(2,491 - 3,483) | --                     | --                       | --                       | --                       |
| Neonatal preterm birth complications                             | 1,095<br>(573 - 1,764)     | 1,095<br>(573 - 1,764)   | --                     | --                       | --                       | --                       |
| Neonatal encephalopathy due to birth asphyxia and trauma         | 837<br>(336 - 1,503)       | 837<br>(336 - 1,503)     | --                     | --                       | --                       | --                       |
| Neonatal sepsis and other neonatal infections                    | 743<br>(277 - 1,330)       | 743<br>(277 - 1,330)     | --                     | --                       | --                       | --                       |
| Hemolytic disease and other neonatal jaundice                    | 20<br>(6 - 56)             | 20<br>(6 - 56)           | --                     | --                       | --                       | --                       |
| Other neonatal disorders                                         | 264<br>(123 - 450)         | 264<br>(123 - 450)       | --                     | --                       | --                       | --                       |
| Nutritional deficiencies                                         | 1,244<br>(832 - 1,720)     | 611<br>(280 - 1,001)     | 61<br>(32 - 91)        | 178<br>(128 - 246)       | 192<br>(135 - 257)       | 203<br>(148 - 274)       |
| Protein-energy malnutrition                                      | 898<br>(511 - 1,315)       | 566<br>(239 - 944)       | 49<br>(25 - 75)        | 69<br>(36 - 120)         | 103<br>(60 - 159)        | 111<br>(64 - 172)        |
| Iodine deficiency                                                | 3<br>(1 - 8)               | 1<br>(0 - 5)             | 0<br>(0 - 1)           | 1<br>(0 - 2)             | 1<br>(0 - 3)             | 0<br>(0 - 2)             |
| Iron-deficiency anemia                                           | 338<br>(192 - 530)         | 43<br>(6 - 112)          | 12<br>(4 - 24)         | 107<br>(67 - 156)        | 86<br>(43 - 138)         | 90<br>(50 - 150)         |
| Other nutritional deficiencies                                   | 5<br>(3 - 9)               | 1<br>(0 - 2)             | 0<br>(0 - 0)           | 1<br>(1 - 3)             | 2<br>(1 - 4)             | 1<br>(1 - 2)             |
| Other communicable, maternal, neonatal, and nutritional diseases | 467<br>(312 - 683)         | 297<br>(166 - 496)       | 27<br>(14 - 46)        | 48<br>(34 - 67)          | 53<br>(34 - 77)          | 42<br>(25 - 62)          |
| Sexually transmitted diseases excluding HIV                      | 294<br>(163 - 500)         | 257<br>(136 - 448)       | 21<br>(10 - 38)        | 8<br>(5 - 13)            | 5<br>(3 - 10)            | 4<br>(2 - 8)             |
| Syphilis                                                         | 287<br>(157 - 494)         | 257<br>(136 - 448)       | 20<br>(9 - 37)         | 4<br>(2 - 6)             | 3<br>(2 - 7)             | 3<br>(1 - 6)             |
| Chlamydial infection                                             | 1<br>(1 - 2)               | --                       | 0<br>(0 - 0)           | 1<br>(0 - 1)             | 0<br>(0 - 1)             | 0<br>(0 - 0)             |
| Gonococcal infection                                             | 3<br>(2 - 6)               | --                       | 0<br>(0 - 0)           | 2<br>(1 - 3)             | 1<br>(0 - 2)             | 0<br>(0 - 1)             |
| Other sexually transmitted diseases                              | 3<br>(2 - 4)               | --                       | 0<br>(0 - 0)           | 2<br>(1 - 3)             | 1<br>(0 - 1)             | 0<br>(0 - 0)             |
| Hepatitis                                                        | 86<br>(50 - 122)           | 9<br>(3 - 18)            | 3<br>(2 - 5)           | 26<br>(14 - 39)          | 28<br>(16 - 43)          | 20<br>(10 - 31)          |
| Acute hepatitis A                                                | 5<br>(1 - 11)              | 3<br>(1 - 7)             | 1<br>(0 - 2)           | 1<br>(0 - 2)             | 0<br>(0 - 1)             | 0<br>(0 - 0)             |
| Acute hepatitis B                                                | 58<br>(33 - 85)            | 6<br>(2 - 13)            | 2<br>(1 - 3)           | 11<br>(5 - 19)           | 22<br>(12 - 34)          | 18<br>(9 - 27)           |
| Acute hepatitis C                                                | 3<br>(0 - 7)               | --                       | 0<br>(0 - 0)           | 1<br>(0 - 2)             | 1<br>(0 - 3)             | 1<br>(0 - 3)             |
| Acute hepatitis E                                                | 21<br>(10 - 36)            | 0<br>(0 - 0)             | 1<br>(0 - 1)           | 13<br>(7 - 22)           | 5<br>(2 - 10)            | 2<br>(1 - 5)             |
| Other infectious diseases                                        | 87<br>(54 - 135)           | 31<br>(13 - 66)          | 4<br>(1 - 7)           | 15<br>(8 - 27)           | 20<br>(10 - 37)          | 17<br>(7 - 33)           |
| Non-communicable diseases                                        | 11,202<br>(9,772 - 12,818) | 1,017<br>(523 - 1,677)   | 194<br>(129 - 257)     | 1,966<br>(1,620 - 2,425) | 4,213<br>(3,473 - 4,937) | 3,811<br>(3,310 - 4,369) |
| Neoplasms                                                        | 1,809<br>(1,516 - 2,124)   | 31<br>(14 - 54)          | 33<br>(20 - 48)        | 478<br>(384 - 601)       | 851<br>(683 - 1,027)     | 416<br>(358 - 482)       |
| Esophageal cancer                                                | 47<br>(32 - 69)            | --                       | --                     | 8<br>(5 - 11)            | 26<br>(17 - 40)          | 13<br>(9 - 21)           |
| Stomach cancer                                                   | 175<br>(145 - 208)         | --                       | --                     | 34<br>(27 - 45)          | 99<br>(78 - 122)         | 42<br>(33 - 52)          |
| Liver cancer                                                     | 515<br>(399 - 658)         | --                       | 2<br>(1 - 3)           | 176<br>(126 - 247)       | 237<br>(174 - 314)       | 100<br>(73 - 136)        |
| Liver cancer due to hepatitis B                                  | 197<br>(104 - 301)         | --                       | 1<br>(0 - 1)           | 83<br>(32 - 134)         | 86<br>(43 - 136)         | 27<br>(14 - 42)          |
| Liver cancer due to hepatitis C                                  | 178<br>(118 - 283)         | --                       | 0<br>(0 - 0)           | 43<br>(22 - 86)          | 90<br>(57 - 145)         | 45<br>(30 - 64)          |

Web Table 31- Liberia deaths with 95% UI by age, sex, and cause in 2013

| Cause                                | Both Sexes, All Ages     | Both Sexes, 0-4 Years | Both Sexes, 5-14 Years | Both Sexes, 15-49 Years | Both Sexes, 50-69 Years  | Both Sexes, 70-80 Years  |
|--------------------------------------|--------------------------|-----------------------|------------------------|-------------------------|--------------------------|--------------------------|
| Liver cancer due to alcohol use      | 63<br>(38 - 98)          | --                    | --                     | 15<br>(7 - 31)          | 30<br>(17 - 48)          | 18<br>(11 - 27)          |
| Liver cancer due to other causes     | 77<br>(45 - 121)         | --                    | 1<br>(0 - 2)           | 35<br>(19 - 71)         | 31<br>(15 - 48)          | 10<br>(6 - 17)           |
| Larynx cancer                        | 6<br>(4 - 13)            | --                    | --                     | 1<br>(1 - 2)            | 3<br>(2 - 7)             | 2<br>(1 - 4)             |
| Tracheal, bronchus and lung cancer   | 72<br>(60 - 86)          | --                    | --                     | 8<br>(6 - 10)           | 42<br>(33 - 51)          | 23<br>(19 - 28)          |
| Breast cancer                        | 110<br>(82 - 155)        | --                    | --                     | 39<br>(28 - 53)         | 54<br>(37 - 81)          | 17<br>(13 - 26)          |
| Cervical cancer                      | 260<br>(178 - 352)       | --                    | --                     | 63<br>(43 - 91)         | 154<br>(96 - 223)        | 43<br>(27 - 62)          |
| Uterine cancer                       | 22<br>(11 - 33)          | --                    | --                     | 3<br>(2 - 5)            | 12<br>(6 - 20)           | 7<br>(3 - 11)            |
| Prostate cancer                      | 59<br>(41 - 94)          | --                    | --                     | 1<br>(1 - 2)            | 18<br>(11 - 29)          | 40<br>(27 - 66)          |
| Colon and rectum cancer              | 88<br>(73 - 105)         | --                    | --                     | 24<br>(19 - 30)         | 35<br>(28 - 43)          | 29<br>(24 - 36)          |
| Lip and oral cavity cancer           | 11<br>(8 - 14)           | --                    | --                     | 3<br>(2 - 4)            | 5<br>(4 - 6)             | 3<br>(2 - 4)             |
| Nasopharynx cancer                   | 4<br>(3 - 5)             | --                    | 0<br>(0 - 0)           | 2<br>(1 - 2)            | 2<br>(1 - 2)             | 0<br>(0 - 1)             |
| Other pharynx cancer                 | 4<br>(3 - 6)             | --                    | --                     | 1<br>(1 - 2)            | 2<br>(1 - 3)             | 1<br>(1 - 1)             |
| Gallbladder and biliary tract cancer | 23<br>(16 - 31)          | --                    | --                     | 4<br>(2 - 5)            | 13<br>(8 - 18)           | 6<br>(4 - 10)            |
| Pancreatic cancer                    | 39<br>(31 - 48)          | --                    | --                     | 7<br>(5 - 10)           | 23<br>(17 - 28)          | 9<br>(7 - 12)            |
| Malignant skin melanoma              | 5<br>(4 - 8)             | --                    | --                     | 1<br>(1 - 2)            | 2<br>(2 - 4)             | 1<br>(1 - 2)             |
| Non-melanoma skin cancer             | 4<br>(3 - 6)             | --                    | --                     | 1<br>(1 - 1)            | 1<br>(1 - 2)             | 2<br>(1 - 3)             |
| Ovarian cancer                       | 31<br>(19 - 46)          | --                    | --                     | 7<br>(5 - 10)           | 20<br>(11 - 31)          | 4<br>(2 - 7)             |
| Testicular cancer                    | 2<br>(1 - 3)             | --                    | --                     | 1<br>(1 - 2)            | 0<br>(0 - 0)             | 0<br>(0 - 0)             |
| Kidney cancer                        | 16<br>(11 - 21)          | 1<br>(0 - 3)          | 1<br>(0 - 2)           | 3<br>(2 - 4)            | 8<br>(5 - 11)            | 3<br>(2 - 4)             |
| Bladder cancer                       | 35<br>(28 - 47)          | --                    | --                     | 6<br>(4 - 9)            | 14<br>(10 - 20)          | 15<br>(11 - 21)          |
| Brain and nervous system cancer      | 18<br>(11 - 23)          | 1<br>(0 - 2)          | 2<br>(1 - 3)           | 8<br>(4 - 11)           | 5<br>(3 - 7)             | 2<br>(1 - 3)             |
| Thyroid cancer                       | 5<br>(3 - 7)             | --                    | 0<br>(0 - 0)           | 1<br>(0 - 1)            | 3<br>(2 - 4)             | 2<br>(1 - 3)             |
| Mesothelioma                         | 2<br>(2 - 3)             | --                    | --                     | 0<br>(0 - 1)            | 1<br>(1 - 2)             | 1<br>(0 - 1)             |
| Hodgkin lymphoma                     | 9<br>(6 - 12)            | 1<br>(0 - 1)          | 1<br>(0 - 2)           | 3<br>(2 - 5)            | 2<br>(1 - 3)             | 2<br>(1 - 4)             |
| Non-Hodgkin lymphoma                 | 69<br>(52 - 86)          | 7<br>(2 - 15)         | 10<br>(5 - 17)         | 25<br>(18 - 32)         | 18<br>(14 - 26)          | 9<br>(7 - 13)            |
| Multiple myeloma                     | 10<br>(7 - 15)           | --                    | --                     | 2<br>(1 - 2)            | 5<br>(3 - 8)             | 3<br>(2 - 5)             |
| Leukemia                             | 33<br>(25 - 39)          | 2<br>(1 - 5)          | 5<br>(3 - 7)           | 14<br>(10 - 18)         | 7<br>(5 - 8)             | 5<br>(4 - 6)             |
| Other neoplasms                      | 135<br>(100 - 173)       | 19<br>(9 - 34)        | 13<br>(7 - 20)         | 32<br>(21 - 44)         | 41<br>(28 - 60)          | 30<br>(22 - 42)          |
| Cardiovascular diseases              | 4,721<br>(3,951 - 5,757) | 86<br>(46 - 141)      | 30<br>(19 - 46)        | 549<br>(437 - 709)      | 1,939<br>(1,556 - 2,373) | 2,117<br>(1,792 - 2,583) |
| Rheumatic heart disease              | 49<br>(29 - 115)         | 1<br>(0 - 2)          | 2<br>(1 - 4)           | 12<br>(6 - 33)          | 17<br>(8 - 46)           | 17<br>(11 - 33)          |
| Ischemic heart disease               | 1,195<br>(924 - 1,584)   | 3<br>(1 - 6)          | 3<br>(2 - 6)           | 131<br>(94 - 184)       | 499<br>(370 - 657)       | 558<br>(429 - 758)       |
| Cerebrovascular disease              | 2,422<br>(2,002 - 3,040) | 30<br>(16 - 51)       | 11<br>(7 - 16)         | 240<br>(185 - 317)      | 986<br>(779 - 1,266)     | 1,156<br>(954 - 1,473)   |
| Ischemic stroke                      | 1,465<br>(1,045 - 1,797) | 4<br>(1 - 8)          | 1<br>(1 - 3)           | 54<br>(32 - 87)         | 552<br>(360 - 719)       | 853<br>(645 - 1,031)     |
| Hemorrhagic stroke                   | 957<br>(679 - 1,581)     | 26<br>(14 - 45)       | 9<br>(6 - 14)          | 186<br>(141 - 250)      | 433<br>(289 - 735)       | 303<br>(184 - 579)       |
| Hypertensive heart disease           | 313<br>(165 - 467)       | 1<br>(0 - 2)          | 0<br>(0 - 1)           | 31<br>(13 - 52)         | 122<br>(59 - 192)        | 159<br>(86 - 239)        |
| Cardiomyopathy and myocarditis       | 198<br>(141 - 261)       | 16<br>(6 - 32)        | 5<br>(3 - 9)           | 42<br>(30 - 60)         | 70<br>(44 - 102)         | 65<br>(38 - 94)          |
| Atrial fibrillation and flutter      | 0<br>(0 - 0)             | --                    | --                     | 0<br>(0 - 0)            | 0<br>(0 - 0)             | 0<br>(0 - 0)             |
| Aortic aneurysm                      | 33<br>(24 - 46)          | --                    | --                     | 4<br>(3 - 6)            | 15<br>(10 - 21)          | 14<br>(10 - 21)          |
| Peripheral vascular disease          | 1<br>(1 - 2)             | --                    | --                     | 0<br>(0 - 0)            | 1<br>(0 - 1)             | 1<br>(0 - 1)             |
| Endocarditis                         | 72<br>(51 - 99)          | 11<br>(4 - 23)        | 2<br>(1 - 3)           | 16<br>(11 - 24)         | 21<br>(14 - 32)          | 21<br>(14 - 33)          |

Web Table 31- Liberia deaths with 95% UI by age, sex, and cause in 2013

| Cause                                               | Both Sexes, All Ages | Both Sexes, 0-4 Years | Both Sexes, 5-14 Years | Both Sexes, 15-49 Years | Both Sexes, 50-69 Years | Both Sexes, 70-80 Years |
|-----------------------------------------------------|----------------------|-----------------------|------------------------|-------------------------|-------------------------|-------------------------|
| Other cardiovascular and circulatory diseases       | 438<br>(315 - 731)   | 25<br>(12 - 48)       | 7<br>(4 - 13)          | 72<br>(49 - 123)        | 208<br>(140 - 327)      | 126<br>(83 - 242)       |
| Chronic respiratory diseases                        | 626<br>(492 - 1,030) | 19<br>(9 - 33)        | 6<br>(4 - 9)           | 57<br>(44 - 73)         | 248<br>(182 - 428)      | 296<br>(225 - 514)      |
| Chronic obstructive pulmonary disease               | 402<br>(303 - 700)   | 10<br>(5 - 19)        | 3<br>(2 - 4)           | 20<br>(15 - 27)         | 156<br>(111 - 284)      | 212<br>(157 - 378)      |
| Pneumoconiosis                                      | 27<br>(16 - 54)      | 0<br>(0 - 0)          | 0<br>(0 - 0)           | 4<br>(3 - 7)            | 15<br>(8 - 31)          | 7<br>(3 - 17)           |
| Silicosis                                           | 4<br>(2 - 11)        | 0<br>(0 - 0)          | 0<br>(0 - 0)           | 1<br>(0 - 1)            | 1<br>(0 - 3)            | 2<br>(1 - 7)            |
| Asbestosis                                          | 2<br>(1 - 4)         | 0<br>(0 - 0)          | 0<br>(0 - 0)           | 0<br>(0 - 1)            | 1<br>(0 - 2)            | 0<br>(0 - 1)            |
| Coal workers pneumoconiosis                         | 9<br>(5 - 19)        | 0<br>(0 - 0)          | 0<br>(0 - 0)           | 0<br>(0 - 1)            | 8<br>(4 - 16)           | 1<br>(0 - 3)            |
| Other pneumoconiosis                                | 12<br>(7 - 21)       | 0<br>(0 - 0)          | 0<br>(0 - 0)           | 3<br>(2 - 5)            | 6<br>(3 - 11)           | 3<br>(2 - 7)            |
| Asthma                                              | 118<br>(89 - 183)    | 5<br>(1 - 10)         | 2<br>(1 - 3)           | 21<br>(15 - 27)         | 50<br>(34 - 81)         | 41<br>(28 - 69)         |
| Interstitial lung disease and pulmonary sarcoidosis | 42<br>(10 - 70)      | 0<br>(0 - 0)          | 0<br>(0 - 0)           | 2<br>(1 - 3)            | 16<br>(4 - 27)          | 24<br>(5 - 44)          |
| Other chronic respiratory diseases                  | 36<br>(26 - 55)      | 4<br>(2 - 7)          | 1<br>(1 - 2)           | 10<br>(7 - 13)          | 10<br>(6 - 18)          | 11<br>(7 - 22)          |
| Cirrhosis                                           | 611<br>(481 - 782)   | 7<br>(2 - 15)         | 6<br>(4 - 10)          | 172<br>(125 - 240)      | 294<br>(226 - 379)      | 131<br>(101 - 170)      |
| Cirrhosis due to hepatitis B                        | 171<br>(91 - 257)    | 0<br>(0 - 1)          | 1<br>(0 - 2)           | 47<br>(23 - 78)         | 85<br>(44 - 132)        | 37<br>(19 - 59)         |
| Cirrhosis due to hepatitis C                        | 143<br>(83 - 235)    | 1<br>(0 - 2)          | 1<br>(0 - 3)           | 37<br>(15 - 68)         | 68<br>(32 - 120)        | 35<br>(18 - 53)         |
| Cirrhosis due to alcohol use                        | 219<br>(156 - 310)   | --                    | --                     | 56<br>(36 - 86)         | 113<br>(78 - 164)       | 51<br>(34 - 74)         |
| Cirrhosis due to other causes                       | 78<br>(54 - 113)     | 6<br>(2 - 13)         | 4<br>(2 - 6)           | 32<br>(21 - 46)         | 28<br>(17 - 44)         | 8<br>(5 - 14)           |
| Digestive diseases                                  | 615<br>(447 - 746)   | 17<br>(5 - 32)        | 20<br>(13 - 27)        | 161<br>(110 - 210)      | 224<br>(155 - 286)      | 194<br>(143 - 240)      |
| Peptic ulcer disease                                | 152<br>(98 - 199)    | 1<br>(0 - 4)          | 3<br>(1 - 5)           | 36<br>(21 - 53)         | 59<br>(37 - 81)         | 53<br>(34 - 74)         |
| Gastritis and duodenitis                            | 23<br>(9 - 49)       | 1<br>(0 - 2)          | 1<br>(0 - 2)           | 6<br>(3 - 11)           | 8<br>(3 - 17)           | 8<br>(3 - 21)           |
| Appendicitis                                        | 45<br>(26 - 64)      | 2<br>(1 - 4)          | 3<br>(2 - 6)           | 13<br>(9 - 18)          | 14<br>(7 - 22)          | 12<br>(5 - 23)          |
| Paralytic ileus and intestinal obstruction          | 186<br>(114 - 252)   | 6<br>(2 - 13)         | 6<br>(3 - 10)          | 43<br>(22 - 63)         | 70<br>(40 - 98)         | 60<br>(37 - 92)         |
| Inguinal, femoral, and abdominal hernia             | 13<br>(8 - 20)       | 0<br>(0 - 1)          | 0<br>(0 - 0)           | 3<br>(2 - 5)            | 4<br>(2 - 7)            | 5<br>(3 - 8)            |
| Inflammatory bowel disease                          | 28<br>(10 - 40)      | 2<br>(1 - 5)          | 1<br>(0 - 2)           | 8<br>(3 - 13)           | 9<br>(2 - 14)           | 7<br>(2 - 12)           |
| Vascular intestinal disorders                       | 2<br>(1 - 5)         | 0<br>(0 - 0)          | 0<br>(0 - 0)           | 1<br>(0 - 1)            | 1<br>(0 - 2)            | 1<br>(0 - 2)            |
| Gallbladder and biliary diseases                    | 42<br>(25 - 57)      | 0<br>(0 - 1)          | 1<br>(0 - 2)           | 8<br>(5 - 12)           | 16<br>(9 - 24)          | 16<br>(10 - 24)         |
| Pancreatitis                                        | 37<br>(16 - 61)      | 0<br>(0 - 0)          | 0<br>(0 - 1)           | 16<br>(6 - 27)          | 13<br>(6 - 24)          | 8<br>(3 - 15)           |
| Other digestive diseases                            | 87<br>(60 - 119)     | 3<br>(1 - 7)          | 3<br>(2 - 5)           | 27<br>(16 - 40)         | 31<br>(18 - 44)         | 23<br>(15 - 34)         |
| Neurological disorders                              | 273<br>(225 - 336)   | 25<br>(10 - 51)       | 13<br>(7 - 23)         | 61<br>(40 - 92)         | 34<br>(27 - 43)         | 141<br>(114 - 170)      |
| Alzheimer disease and other dementias               | 143<br>(117 - 172)   | --                    | --                     | 0<br>(0 - 0)            | 16<br>(12 - 21)         | 127<br>(102 - 155)      |
| Parkinson disease                                   | 2<br>(1 - 3)         | --                    | --                     | 0<br>(0 - 0)            | 0<br>(0 - 1)            | 1<br>(1 - 2)            |
| Epilepsy                                            | 96<br>(65 - 147)     | 19<br>(7 - 44)        | 10<br>(5 - 20)         | 50<br>(31 - 79)         | 8<br>(5 - 13)           | 8<br>(5 - 13)           |
| Multiple sclerosis                                  | 0<br>(0 - 1)         | --                    | --                     | 0<br>(0 - 1)            | 0<br>(0 - 1)            | 0<br>(0 - 0)            |
| Other neurological disorders                        | 32<br>(24 - 43)      | 6<br>(3 - 16)         | 2<br>(1 - 4)           | 10<br>(7 - 14)          | 9<br>(7 - 12)           | 5<br>(4 - 6)            |
| Mental and substance use disorders                  | 198<br>(109 - 268)   | 6<br>(2 - 15)         | 0<br>(0 - 0)           | 131<br>(68 - 192)       | 46<br>(25 - 64)         | 14<br>(7 - 20)          |
| Schizophrenia                                       | 1<br>(0 - 1)         | --                    | --                     | 0<br>(0 - 0)            | 0<br>(0 - 0)            | 0<br>(0 - 0)            |
| Alcohol use disorders                               | 89<br>(38 - 126)     | --                    | --                     | 44<br>(20 - 67)         | 35<br>(15 - 51)         | 10<br>(3 - 16)          |
| Drug use disorders                                  | 109<br>(55 - 156)    | 6<br>(2 - 15)         | --                     | 87<br>(39 - 132)        | 11<br>(8 - 15)          | 4<br>(3 - 5)            |
| Opioid use disorders                                | 12<br>(6 - 17)       | 1<br>(0 - 2)          | --                     | 9<br>(4 - 14)           | 1<br>(1 - 1)            | 0<br>(0 - 1)            |
| Cocaine use disorders                               | 0<br>(0 - 1)         | 0<br>(0 - 0)          | --                     | 0<br>(0 - 1)            | 0<br>(0 - 0)            | 0<br>(0 - 0)            |
| Amphetamine use disorders                           | 0<br>(0 - 0)         | 0<br>(0 - 0)          | --                     | 0<br>(0 - 0)            | 0<br>(0 - 0)            | 0<br>(0 - 0)            |

Web Table 31- Liberia deaths with 95% UI by age, sex, and cause in 2013

| Cause                                               | Both Sexes, All Ages     | Both Sexes, 0-4 Years | Both Sexes, 5-14 Years | Both Sexes, 15-49 Years | Both Sexes, 50-69 Years | Both Sexes, 70-80 Years |
|-----------------------------------------------------|--------------------------|-----------------------|------------------------|-------------------------|-------------------------|-------------------------|
| Other drug use disorders                            | 96<br>(48 - 138)         | 5<br>(1 - 13)         | --                     | 77<br>(35 - 116)        | 10<br>(7 - 13)          | 4<br>(3 - 5)            |
| Eating disorders                                    | 0<br>(0 - 0)             | --                    | 0<br>(0 - 0)           | 0<br>(0 - 0)            | --                      | --                      |
| Anorexia nervosa                                    | 0<br>(0 - 0)             | --                    | 0<br>(0 - 0)           | 0<br>(0 - 0)            | --                      | --                      |
| Diabetes, urogenital, blood, and endocrine diseases | 1,473<br>(1,217 - 1,769) | 149<br>(76 - 239)     | 49<br>(29 - 81)        | 294<br>(233 - 380)      | 527<br>(410 - 654)      | 454<br>(354 - 540)      |
| Diabetes mellitus                                   | 614<br>(441 - 763)       | 6<br>(3 - 10)         | 2<br>(1 - 4)           | 70<br>(50 - 92)         | 291<br>(202 - 383)      | 245<br>(168 - 311)      |
| Acute glomerulonephritis                            | 5<br>(3 - 7)             | 0<br>(0 - 1)          | 0<br>(0 - 1)           | 2<br>(1 - 2)            | 2<br>(1 - 2)            | 0<br>(0 - 1)            |
| Chronic kidney disease                              | 264<br>(183 - 350)       | 15<br>(6 - 28)        | 10<br>(5 - 15)         | 79<br>(50 - 111)        | 85<br>(56 - 125)        | 75<br>(51 - 104)        |
| Chronic kidney disease due to diabetes mellitus     | 3<br>(2 - 6)             | 0<br>(0 - 0)          | 0<br>(0 - 0)           | 0<br>(0 - 1)            | 3<br>(1 - 5)            | 0<br>(0 - 1)            |
| Chronic kidney disease due to hypertension          | 99<br>(64 - 159)         | 2<br>(1 - 5)          | 1<br>(0 - 2)           | 21<br>(13 - 34)         | 39<br>(23 - 66)         | 36<br>(22 - 60)         |
| Chronic kidney disease due to glomerulonephritis    | 92<br>(58 - 124)         | 8<br>(3 - 14)         | 6<br>(3 - 8)           | 38<br>(23 - 55)         | 22<br>(13 - 31)         | 19<br>(10 - 26)         |
| Chronic kidney disease due to other causes          | 70<br>(33 - 116)         | 5<br>(2 - 12)         | 3<br>(1 - 6)           | 20<br>(8 - 34)          | 22<br>(9 - 41)          | 20<br>(8 - 39)          |
| Urinary diseases and male infertility               | 237<br>(161 - 298)       | 21<br>(9 - 43)        | 4<br>(2 - 6)           | 53<br>(30 - 76)         | 81<br>(53 - 107)        | 78<br>(56 - 104)        |
| Interstitial nephritis and urinary tract infections | 207<br>(135 - 262)       | 20<br>(8 - 41)        | 3<br>(2 - 5)           | 45<br>(24 - 65)         | 70<br>(44 - 94)         | 70<br>(50 - 93)         |
| Urolithiasis                                        | 4<br>(1 - 12)            | --                    | 0<br>(0 - 1)           | 1<br>(0 - 3)            | 2<br>(0 - 5)            | 1<br>(0 - 3)            |
| Other urinary diseases                              | 26<br>(14 - 38)          | 1<br>(0 - 4)          | 0<br>(0 - 1)           | 7<br>(3 - 12)           | 9<br>(5 - 15)           | 8<br>(4 - 13)           |
| Gynecological diseases                              | 3<br>(2 - 5)             | --                    | --                     | 1<br>(1 - 3)            | 1<br>(0 - 2)            | 0<br>(0 - 1)            |
| Uterine fibroids                                    | 1<br>(0 - 1)             | --                    | --                     | 0<br>(0 - 0)            | 0<br>(0 - 0)            | 0<br>(0 - 0)            |
| Polycystic ovarian syndrome                         | 0<br>(0 - 0)             | --                    | --                     | 0<br>(0 - 0)            | 0<br>(0 - 0)            | --                      |
| Endometriosis                                       | 0<br>(0 - 1)             | --                    | --                     | 0<br>(0 - 1)            | 0<br>(0 - 0)            | --                      |
| Genital prolapse                                    | 0<br>(0 - 1)             | --                    | --                     | 0<br>(0 - 0)            | 0<br>(0 - 0)            | 0<br>(0 - 0)            |
| Other gynecological diseases                        | 1<br>(1 - 2)             | --                    | --                     | 1<br>(0 - 1)            | 1<br>(0 - 1)            | 0<br>(0 - 0)            |
| Hemoglobinopathies and hemolytic anemias            | 152<br>(67 - 320)        | 62<br>(22 - 128)      | 24<br>(10 - 56)        | 40<br>(18 - 103)        | 15<br>(7 - 37)          | 11<br>(4 - 26)          |
| Thalassemias                                        | 9<br>(4 - 18)            | 6<br>(2 - 12)         | 1<br>(1 - 3)           | 2<br>(1 - 4)            | 0<br>(0 - 0)            | 0<br>(0 - 0)            |
| Sickle cell disorders                               | 127<br>(56 - 269)        | 53<br>(19 - 111)      | 22<br>(9 - 52)         | 37<br>(17 - 95)         | 13<br>(6 - 32)          | 2<br>(1 - 5)            |
| G6PD deficiency                                     | 2<br>(1 - 4)             | 1<br>(0 - 2)          | 0<br>(0 - 0)           | 0<br>(0 - 1)            | 0<br>(0 - 1)            | 0<br>(0 - 1)            |
| Other hemoglobinopathies and hemolytic anemias      | 14<br>(6 - 31)           | 2<br>(1 - 4)          | 0<br>(0 - 1)           | 1<br>(0 - 3)            | 2<br>(1 - 5)            | 8<br>(3 - 20)           |
| Endocrine, metabolic, blood, and immune disorders   | 198<br>(139 - 284)       | 44<br>(23 - 84)       | 9<br>(4 - 16)          | 49<br>(33 - 70)         | 53<br>(34 - 74)         | 44<br>(24 - 63)         |
| Musculoskeletal disorders                           | 41<br>(23 - 58)          | --                    | 3<br>(1 - 6)           | 14<br>(7 - 20)          | 14<br>(8 - 20)          | 10<br>(6 - 14)          |
| Rheumatoid arthritis                                | 5<br>(3 - 9)             | --                    | 0<br>(0 - 1)           | 1<br>(1 - 2)            | 2<br>(1 - 3)            | 2<br>(1 - 4)            |
| Other musculoskeletal disorders                     | 36<br>(19 - 50)          | --                    | 3<br>(1 - 5)           | 13<br>(7 - 19)          | 12<br>(6 - 18)          | 7<br>(4 - 11)           |
| Other non-communicable diseases                     | 835<br>(473 - 1,422)     | 677<br>(331 - 1,247)  | 33<br>(17 - 55)        | 50<br>(37 - 66)         | 36<br>(23 - 47)         | 38<br>(25 - 52)         |
| Congenital anomalies                                | 722<br>(368 - 1,302)     | 652<br>(315 - 1,221)  | 31<br>(15 - 53)        | 28<br>(19 - 40)         | 7<br>(5 - 10)           | 5<br>(3 - 7)            |
| Neural tube defects                                 | 186<br>(61 - 413)        | 175<br>(55 - 393)     | 5<br>(2 - 13)          | 5<br>(1 - 12)           | 1<br>(0 - 2)            | 0<br>(0 - 1)            |
| Congenital heart anomalies                          | 288<br>(154 - 514)       | 256<br>(130 - 477)    | 14<br>(7 - 24)         | 12<br>(8 - 18)          | 3<br>(2 - 5)            | 2<br>(1 - 3)            |
| Cleft lip and cleft palate                          | 4<br>(1 - 12)            | 4<br>(1 - 12)         | --                     | --                      | --                      | --                      |
| Down syndrome                                       | 83<br>(26 - 198)         | 73<br>(19 - 188)      | 5<br>(2 - 9)           | 4<br>(3 - 7)            | 1<br>(1 - 2)            | 0<br>(0 - 0)            |
| Chromosomal unbalanced rearrangements               | 25<br>(7 - 68)           | 23<br>(6 - 65)        | 1<br>(0 - 2)           | 1<br>(0 - 2)            | 0<br>(0 - 0)            | 0<br>(0 - 0)            |
| Other congenital anomalies                          | 136<br>(39 - 492)        | 121<br>(30 - 464)     | 5<br>(2 - 17)          | 5<br>(3 - 10)           | 2<br>(1 - 3)            | 2<br>(1 - 3)            |
| Skin and subcutaneous diseases                      | 107<br>(64 - 136)        | 19<br>(8 - 35)        | 3<br>(1 - 4)           | 22<br>(11 - 31)         | 29<br>(17 - 39)         | 34<br>(21 - 47)         |
| Cellulitis                                          | 40<br>(21 - 57)          | 6<br>(2 - 12)         | 1<br>(1 - 2)           | 8<br>(3 - 12)           | 11<br>(5 - 18)          | 14<br>(6 - 24)          |



Web Table 31- Liberia deaths with 95% UI by age, sex, and cause in 2013

| Cause                                           | Both Sexes, All Ages     | Both Sexes, 0-4 Years | Both Sexes, 5-14 Years | Both Sexes, 15-49 Years | Both Sexes, 50-69 Years | Both Sexes, 70-80 Years |
|-------------------------------------------------|--------------------------|-----------------------|------------------------|-------------------------|-------------------------|-------------------------|
| Pyoderma                                        | 61<br>(39 - 83)          | 12<br>(5 - 23)        | 1<br>(1 - 2)           | 13<br>(7 - 18)          | 17<br>(10 - 26)         | 17<br>(10 - 28)         |
| Decubitus ulcer                                 | 2<br>(1 - 4)             | 0<br>(0 - 0)          | 0<br>(0 - 0)           | 0<br>(0 - 1)            | 0<br>(0 - 0)            | 1<br>(1 - 3)            |
| Other skin and subcutaneous diseases            | 3<br>(1 - 4)             | 1<br>(0 - 2)          | 0<br>(0 - 0)           | 1<br>(0 - 2)            | 0<br>(0 - 1)            | 0<br>(0 - 1)            |
| Sudden infant death syndrome                    | 6<br>(2 - 16)            | 6<br>(2 - 16)         | --                     | --                      | --                      | --                      |
| Injuries                                        | 1,710<br>(1,390 - 2,108) | 281<br>(143 - 474)    | 157<br>(105 - 210)     | 763<br>(581 - 1,019)    | 301<br>(234 - 371)      | 208<br>(142 - 263)      |
| Transport injuries                              | 531<br>(424 - 658)       | 63<br>(29 - 103)      | 53<br>(33 - 77)        | 263<br>(194 - 347)      | 105<br>(78 - 139)       | 47<br>(35 - 60)         |
| Road injuries                                   | 505<br>(404 - 626)       | 54<br>(25 - 89)       | 50<br>(31 - 72)        | 257<br>(189 - 339)      | 100<br>(75 - 132)       | 43<br>(33 - 56)         |
| Pedestrian road injuries                        | 146<br>(103 - 197)       | 17<br>(7 - 31)        | 18<br>(10 - 29)        | 61<br>(38 - 89)         | 33<br>(22 - 46)         | 17<br>(12 - 24)         |
| Cyclist road injuries                           | 26<br>(17 - 35)          | 2<br>(1 - 5)          | 4<br>(2 - 7)           | 9<br>(6 - 13)           | 8<br>(4 - 11)           | 2<br>(1 - 4)            |
| Motorcyclist road injuries                      | 59<br>(40 - 86)          | 4<br>(2 - 7)          | 3<br>(2 - 6)           | 39<br>(24 - 62)         | 9<br>(6 - 13)           | 3<br>(2 - 4)            |
| Motor vehicle road injuries                     | 258<br>(202 - 332)       | 27<br>(13 - 45)       | 21<br>(13 - 31)        | 143<br>(105 - 196)      | 48<br>(35 - 67)         | 19<br>(14 - 27)         |
| Other road injuries                             | 15<br>(9 - 27)           | 4<br>(1 - 8)          | 3<br>(1 - 6)           | 4<br>(2 - 10)           | 3<br>(2 - 5)            | 2<br>(1 - 3)            |
| Other transport injuries                        | 26<br>(12 - 39)          | 9<br>(2 - 17)         | 3<br>(1 - 6)           | 6<br>(3 - 10)           | 5<br>(2 - 7)            | 3<br>(1 - 5)            |
| Unintentional injuries                          | 819<br>(623 - 1,120)     | 211<br>(105 - 384)    | 94<br>(61 - 140)       | 248<br>(184 - 338)      | 134<br>(97 - 172)       | 132<br>(82 - 179)       |
| Falls                                           | 195<br>(134 - 260)       | 24<br>(11 - 45)       | 12<br>(6 - 21)         | 58<br>(36 - 93)         | 41<br>(27 - 59)         | 60<br>(34 - 89)         |
| Drowning                                        | 178<br>(114 - 298)       | 58<br>(21 - 145)      | 38<br>(19 - 64)        | 59<br>(35 - 99)         | 15<br>(10 - 22)         | 7<br>(4 - 10)           |
| Fire, heat, and hot substances                  | 99<br>(63 - 154)         | 32<br>(12 - 67)       | 10<br>(5 - 18)         | 27<br>(18 - 41)         | 17<br>(10 - 25)         | 14<br>(8 - 22)          |
| Poisonings                                      | 34<br>(21 - 49)          | 8<br>(3 - 16)         | 3<br>(1 - 5)           | 14<br>(9 - 25)          | 6<br>(3 - 9)            | 2<br>(1 - 4)            |
| Exposure to mechanical forces                   | 106<br>(73 - 148)        | 27<br>(11 - 52)       | 13<br>(7 - 20)         | 42<br>(28 - 62)         | 17<br>(10 - 23)         | 7<br>(3 - 10)           |
| Unintentional firearm injuries                  | 39<br>(27 - 54)          | 6<br>(2 - 15)         | 3<br>(2 - 5)           | 22<br>(13 - 34)         | 6<br>(3 - 8)            | 2<br>(1 - 3)            |
| Unintentional suffocation                       | 16<br>(6 - 46)           | 9<br>(2 - 27)         | 2<br>(1 - 5)           | 4<br>(1 - 11)           | 1<br>(1 - 3)            | 1<br>(0 - 1)            |
| Other exposure to mechanical forces             | 51<br>(19 - 74)          | 12<br>(3 - 26)        | 8<br>(3 - 14)          | 17<br>(9 - 26)          | 10<br>(3 - 15)          | 4<br>(1 - 7)            |
| Adverse effects of medical treatment            | 73<br>(29 - 135)         | 17<br>(5 - 46)        | 3<br>(1 - 7)           | 16<br>(7 - 30)          | 18<br>(6 - 35)          | 19<br>(5 - 38)          |
| Animal contact                                  | 26<br>(12 - 38)          | 4<br>(2 - 8)          | 4<br>(2 - 7)           | 7<br>(3 - 12)           | 6<br>(2 - 10)           | 4<br>(1 - 7)            |
| Venomous animal contact                         | 13<br>(5 - 21)           | 2<br>(1 - 5)          | 2<br>(1 - 4)           | 4<br>(1 - 7)            | 3<br>(1 - 5)            | 2<br>(0 - 4)            |
| Non-venomous animal contact                     | 13<br>(6 - 20)           | 2<br>(1 - 4)          | 2<br>(1 - 4)           | 3<br>(1 - 5)            | 3<br>(1 - 5)            | 3<br>(1 - 4)            |
| Foreign body                                    | 62<br>(33 - 111)         | 34<br>(15 - 69)       | 4<br>(2 - 8)           | 7<br>(4 - 13)           | 6<br>(4 - 10)           | 11<br>(5 - 18)          |
| Pulmonary aspiration and foreign body in airway | 59<br>(30 - 107)         | 33<br>(14 - 68)       | 4<br>(2 - 7)           | 7<br>(4 - 12)           | 6<br>(3 - 9)            | 10<br>(5 - 18)          |
| Foreign body in other body part                 | 3<br>(2 - 4)             | 1<br>(0 - 2)          | 0<br>(0 - 1)           | 1<br>(0 - 1)            | 1<br>(0 - 1)            | 1<br>(0 - 1)            |
| Other unintentional injuries                    | 47<br>(37 - 59)          | 8<br>(4 - 13)         | 7<br>(4 - 10)          | 17<br>(12 - 24)         | 8<br>(6 - 11)           | 7<br>(4 - 10)           |
| Self-harm and interpersonal violence            | 360<br>(256 - 520)       | 8<br>(3 - 14)         | 9<br>(5 - 15)          | 252<br>(175 - 388)      | 61<br>(40 - 86)         | 29<br>(16 - 42)         |
| Self-harm                                       | 214<br>(136 - 347)       | --                    | 4<br>(2 - 9)           | 130<br>(74 - 251)       | 53<br>(33 - 77)         | 28<br>(15 - 40)         |
| Interpersonal violence                          | 145<br>(89 - 210)        | 8<br>(3 - 14)         | 5<br>(3 - 8)           | 123<br>(70 - 181)       | 8<br>(5 - 12)           | 1<br>(1 - 2)            |
| Assault by firearm                              | 77<br>(38 - 120)         | 2<br>(1 - 4)          | 1<br>(1 - 3)           | 70<br>(34 - 111)        | 4<br>(2 - 6)            | 0<br>(0 - 1)            |
| Assault by sharp object                         | 29<br>(16 - 55)          | 2<br>(0 - 4)          | 1<br>(0 - 2)           | 24<br>(13 - 48)         | 2<br>(1 - 4)            | 0<br>(0 - 0)            |
| Assault by other means                          | 39<br>(22 - 60)          | 4<br>(2 - 8)          | 3<br>(1 - 5)           | 29<br>(14 - 47)         | 2<br>(1 - 4)            | 0<br>(0 - 1)            |

Web Table 31- Liberia deaths with 95% UI by age, sex, and cause in 2013

| Cause                                                             | Males, All Ages             | Males, 0-4 Years         | Males, 5-14 Years  | Males, 15-49 Years       | Males, 50-69 Years       | Males, 70-80 Years       |
|-------------------------------------------------------------------|-----------------------------|--------------------------|--------------------|--------------------------|--------------------------|--------------------------|
| All causes                                                        | 16,529<br>(14,580 - 18,396) | 6,333<br>(5,333 - 7,514) | 697<br>(588 - 818) | 3,657<br>(3,069 - 4,399) | 3,236<br>(2,661 - 3,783) | 2,606<br>(2,325 - 2,785) |
| Communicable, maternal, neonatal, and nutritional diseases        | 9,907<br>(8,725 - 11,168)   | 5,628<br>(4,743 - 6,640) | 488<br>(388 - 647) | 1,880<br>(1,593 - 2,205) | 1,073<br>(887 - 1,278)   | 838<br>(666 - 995)       |
| HIV/AIDS and tuberculosis                                         | 1,900<br>(1,597 - 2,364)    | 63<br>(38 - 105)         | 93<br>(74 - 113)   | 1,121<br>(905 - 1,419)   | 442<br>(338 - 594)       | 180<br>(125 - 245)       |
| Tuberculosis                                                      | 837<br>(595 - 1,212)        | 39<br>(18 - 76)          | 13<br>(7 - 24)     | 358<br>(227 - 562)       | 264<br>(173 - 397)       | 163<br>(107 - 225)       |
| HIV/AIDS                                                          | 1,063<br>(842 - 1,343)      | 24<br>(12 - 41)          | 80<br>(63 - 98)    | 763<br>(576 - 1,015)     | 178<br>(120 - 260)       | 17<br>(10 - 27)          |
| HIV/AIDS resulting in mycobacterial infection                     | 75<br>(55 - 101)            | 2<br>(1 - 3)             | 5<br>(4 - 7)       | 54<br>(39 - 75)          | 13<br>(8 - 19)           | 1<br>(1 - 2)             |
| HIV/AIDS resulting in other diseases                              | 988<br>(782 - 1,247)        | 23<br>(12 - 38)          | 75<br>(59 - 92)    | 709<br>(540 - 938)       | 165<br>(111 - 240)       | 16<br>(9 - 25)           |
| Diarrhea, lower respiratory, and other common infectious diseases | 3,916<br>(2,983 - 5,036)    | 2,349<br>(1,576 - 3,287) | 232<br>(155 - 381) | 453<br>(326 - 631)       | 406<br>(292 - 543)       | 475<br>(367 - 611)       |
| Diarrheal diseases                                                | 1,202<br>(743 - 1,836)      | 735<br>(289 - 1,382)     | 53<br>(23 - 98)    | 157<br>(100 - 238)       | 127<br>(72 - 202)        | 129<br>(78 - 202)        |
| Intestinal infectious diseases                                    | 100<br>(48 - 181)           | 28<br>(9 - 62)           | 30<br>(12 - 55)    | 36<br>(16 - 70)          | 4<br>(2 - 8)             | 1<br>(1 - 4)             |
| Typhoid fever                                                     | 63<br>(28 - 120)            | 16<br>(5 - 37)           | 19<br>(8 - 37)     | 24<br>(10 - 47)          | 3<br>(1 - 6)             | 1<br>(0 - 2)             |
| Paratyphoid fever                                                 | 31<br>(13 - 60)             | 9<br>(2 - 21)            | 10<br>(4 - 21)     | 11<br>(3 - 24)           | 1<br>(0 - 3)             | 0<br>(0 - 1)             |
| Other intestinal infectious diseases                              | 6<br>(2 - 14)               | 3<br>(0 - 9)             | 1<br>(0 - 4)       | 2<br>(0 - 6)             | 0<br>(0 - 3)             | 0<br>(0 - 2)             |
| Lower respiratory infections                                      | 1,712<br>(1,184 - 2,305)    | 974<br>(508 - 1,563)     | 50<br>(27 - 82)    | 138<br>(91 - 206)        | 227<br>(151 - 329)       | 323<br>(223 - 432)       |
| Upper respiratory infections                                      | 3<br>(1 - 7)                | 1<br>(0 - 4)             | 0<br>(0 - 1)       | 1<br>(0 - 2)             | 1<br>(0 - 2)             | 0<br>(0 - 1)             |
| Otitis media                                                      | 1<br>(1 - 1)                | 0<br>(0 - 0)             | 0<br>(0 - 0)       | 0<br>(0 - 0)             | 0<br>(0 - 0)             | 0<br>(0 - 0)             |
| Meningitis                                                        | 367<br>(228 - 558)          | 175<br>(68 - 336)        | 38<br>(18 - 70)    | 95<br>(54 - 147)         | 41<br>(22 - 64)          | 18<br>(10 - 29)          |
| Pneumococcal meningitis                                           | 89<br>(54 - 136)            | 37<br>(14 - 75)          | 11<br>(4 - 22)     | 25<br>(12 - 44)          | 11<br>(5 - 21)           | 5<br>(2 - 10)            |
| H influenzae type B meningitis                                    | 66<br>(31 - 119)            | 43<br>(14 - 94)          | 7<br>(2 - 15)      | 11<br>(4 - 19)           | 4<br>(2 - 8)             | 2<br>(1 - 4)             |
| Meningococcal meningitis                                          | 162<br>(96 - 253)           | 78<br>(31 - 157)         | 17<br>(7 - 33)     | 41<br>(23 - 70)          | 18<br>(8 - 31)           | 8<br>(4 - 14)            |
| Other meningitis                                                  | 50<br>(30 - 77)             | 16<br>(4 - 34)           | 4<br>(1 - 9)       | 18<br>(7 - 33)           | 9<br>(3 - 16)            | 3<br>(1 - 7)             |
| Encephalitis                                                      | 23<br>(14 - 36)             | 8<br>(3 - 19)            | 3<br>(1 - 5)       | 7<br>(4 - 11)            | 3<br>(2 - 4)             | 2<br>(1 - 2)             |
| Diphtheria                                                        | 4<br>(0 - 25)               | 3<br>(0 - 25)            | 1<br>(0 - 6)       | 0<br>(0 - 1)             | 0<br>(0 - 1)             | --                       |
| Whooping cough                                                    | 94<br>(0 - 462)             | 88<br>(0 - 437)          | 5<br>(0 - 25)      | 1<br>(0 - 5)             | 0<br>(0 - 1)             | --                       |
| Tetanus                                                           | 29<br>(16 - 58)             | 16<br>(7 - 40)           | 2<br>(1 - 6)       | 7<br>(3 - 14)            | 3<br>(1 - 7)             | 1<br>(0 - 2)             |
| Measles                                                           | 378<br>(11 - 1,734)         | 319<br>(9 - 1,460)       | 50<br>(1 - 252)    | 9<br>(0 - 51)            | 0<br>(0 - 2)             | --                       |
| Varicella and herpes zoster                                       | 3<br>(1 - 6)                | 1<br>(0 - 4)             | 0<br>(0 - 1)       | 1<br>(0 - 2)             | 0<br>(0 - 1)             | 1<br>(0 - 2)             |
| Neglected tropical diseases and malaria                           | 1,513<br>(813 - 2,554)      | 1,022<br>(419 - 1,962)   | 114<br>(54 - 213)  | 180<br>(92 - 363)        | 118<br>(54 - 232)        | 78<br>(31 - 175)         |
| Malaria                                                           | 1,467<br>(765 - 2,519)      | 1,015<br>(411 - 1,955)   | 105<br>(41 - 207)  | 161<br>(73 - 345)        | 111<br>(48 - 225)        | 76<br>(28 - 172)         |
| Leishmaniasis                                                     | 0<br>(0 - 0)                | 0<br>(0 - 0)             | 0<br>(0 - 0)       | 0<br>(0 - 0)             | 0<br>(0 - 0)             | 0<br>(0 - 0)             |
| Visceral leishmaniasis                                            | 0<br>(0 - 0)                | 0<br>(0 - 0)             | 0<br>(0 - 0)       | 0<br>(0 - 0)             | 0<br>(0 - 0)             | 0<br>(0 - 0)             |
| Schistosomiasis                                                   | 8<br>(6 - 12)               | 0<br>(0 - 0)             | 0<br>(0 - 1)       | 4<br>(2 - 5)             | 3<br>(2 - 5)             | 1<br>(1 - 2)             |
| Cysticercosis                                                     | 1<br>(1 - 1)                | 0<br>(0 - 0)             | 0<br>(0 - 0)       | 1<br>(0 - 1)             | 0<br>(0 - 0)             | 0<br>(0 - 0)             |
| Cystic echinococcosis                                             | 1<br>(1 - 1)                | 0<br>(0 - 0)             | 0<br>(0 - 0)       | 0<br>(0 - 0)             | 0<br>(0 - 0)             | 0<br>(0 - 0)             |
| Dengue                                                            | 2<br>(1 - 3)                | 1<br>(0 - 1)             | 0<br>(0 - 1)       | 1<br>(0 - 1)             | 0<br>(0 - 0)             | 0<br>(0 - 0)             |
| Yellow fever                                                      | 14<br>(8 - 23)              | 1<br>(0 - 3)             | 3<br>(1 - 7)       | 8<br>(4 - 16)            | 1<br>(0 - 4)             | 1<br>(0 - 2)             |
| Rabies                                                            | 13<br>(5 - 24)              | 2<br>(0 - 7)             | 5<br>(2 - 11)      | 5<br>(2 - 8)             | 1<br>(0 - 2)             | 0<br>(0 - 0)             |
| Intestinal nematode infections                                    | 4<br>(0 - 13)               | 3<br>(0 - 10)            | 1<br>(0 - 5)       | 0<br>(0 - 3)             | 0<br>(0 - 1)             | 0<br>(0 - 1)             |
| Ascariasis                                                        | 4<br>(0 - 13)               | 3<br>(0 - 10)            | 1<br>(0 - 5)       | 0<br>(0 - 3)             | 0<br>(0 - 1)             | 0<br>(0 - 1)             |
| Other neglected tropical diseases                                 | 3<br>(2 - 4)                | 1<br>(0 - 2)             | 0<br>(0 - 1)       | 1<br>(1 - 2)             | 0<br>(0 - 1)             | 0<br>(0 - 1)             |

Web Table 31- Liberia deaths with 95% UI by age, sex, and cause in 2013

| Cause                                                            | Males, All Ages          | Males, 0-4 Years         | Males, 5-14 Years | Males, 15-49 Years     | Males, 50-69 Years       | Males, 70-80 Years       |
|------------------------------------------------------------------|--------------------------|--------------------------|-------------------|------------------------|--------------------------|--------------------------|
| Maternal disorders                                               | --                       | --                       | --                | --                     | --                       | --                       |
| Maternal hemorrhage                                              | --                       | --                       | --                | --                     | --                       | --                       |
| Maternal sepsis and other maternal infections                    | --                       | --                       | --                | --                     | --                       | --                       |
| Maternal hypertensive disorders                                  | --                       | --                       | --                | --                     | --                       | --                       |
| Maternal obstructed labor                                        | --                       | --                       | --                | --                     | --                       | --                       |
| Maternal abortive outcome                                        | --                       | --                       | --                | --                     | --                       | --                       |
| Indirect maternal deaths                                         | --                       | --                       | --                | --                     | --                       | --                       |
| Late maternal deaths                                             | --                       | --                       | --                | --                     | --                       | --                       |
| Maternal deaths aggravated by HIV/AIDS                           | --                       | --                       | --                | --                     | --                       | --                       |
| Other maternal disorders                                         | --                       | --                       | --                | --                     | --                       | --                       |
| Neonatal disorders                                               | 1,698<br>(1,405 - 2,041) | 1,698<br>(1,405 - 2,041) | --                | --                     | --                       | --                       |
| Neonatal preterm birth complications                             | 601<br>(250 - 1,088)     | 601<br>(250 - 1,088)     | --                | --                     | --                       | --                       |
| Neonatal encephalopathy due to birth asphyxia and trauma         | 444<br>(152 - 907)       | 444<br>(152 - 907)       | --                | --                     | --                       | --                       |
| Neonatal sepsis and other neonatal infections                    | 487<br>(139 - 986)       | 487<br>(139 - 986)       | --                | --                     | --                       | --                       |
| Hemolytic disease and other neonatal jaundice                    | 14<br>(3 - 46)           | 14<br>(3 - 46)           | --                | --                     | --                       | --                       |
| Other neonatal disorders                                         | 152<br>(58 - 311)        | 152<br>(58 - 311)        | --                | --                     | --                       | --                       |
| Nutritional deficiencies                                         | 645<br>(357 - 1,024)     | 344<br>(131 - 650)       | 34<br>(15 - 58)   | 95<br>(54 - 153)       | 84<br>(44 - 128)         | 88<br>(50 - 145)         |
| Protein-energy malnutrition                                      | 492<br>(236 - 829)       | 317<br>(117 - 604)       | 27<br>(12 - 48)   | 50<br>(20 - 97)        | 50<br>(21 - 92)          | 49<br>(21 - 99)          |
| Iodine deficiency                                                | 1<br>(0 - 4)             | 0<br>(0 - 3)             | 0<br>(0 - 1)      | 0<br>(0 - 2)           | 0<br>(0 - 1)             | 0<br>(0 - 1)             |
| Iron-deficiency anemia                                           | 149<br>(57 - 282)        | 27<br>(2 - 76)           | 6<br>(1 - 16)     | 44<br>(17 - 79)        | 34<br>(10 - 66)          | 38<br>(14 - 74)          |
| Other nutritional deficiencies                                   | 3<br>(1 - 5)             | 0<br>(0 - 1)             | 0<br>(0 - 0)      | 1<br>(0 - 2)           | 1<br>(0 - 1)             | 1<br>(0 - 1)             |
| Other communicable, maternal, neonatal, and nutritional diseases | 235<br>(156 - 356)       | 152<br>(82 - 259)        | 14<br>(8 - 23)    | 31<br>(18 - 50)        | 23<br>(13 - 38)          | 16<br>(9 - 27)           |
| Sexually transmitted diseases excluding HIV                      | 150<br>(83 - 259)        | 129<br>(68 - 228)        | 10<br>(5 - 18)    | 5<br>(3 - 10)          | 3<br>(1 - 7)             | 2<br>(1 - 6)             |
| Syphilis                                                         | 146<br>(80 - 254)        | 129<br>(68 - 228)        | 10<br>(5 - 18)    | 3<br>(1 - 5)           | 2<br>(1 - 5)             | 2<br>(1 - 5)             |
| Chlamydial infection                                             | --                       | --                       | --                | --                     | --                       | --                       |
| Gonococcal infection                                             | 2<br>(1 - 4)             | --                       | 0<br>(0 - 0)      | 1<br>(1 - 2)           | 1<br>(0 - 1)             | 0<br>(0 - 1)             |
| Other sexually transmitted diseases                              | 2<br>(1 - 3)             | --                       | 0<br>(0 - 0)      | 1<br>(1 - 2)           | 0<br>(0 - 1)             | 0<br>(0 - 0)             |
| Hepatitis                                                        | 36<br>(21 - 58)          | 5<br>(2 - 13)            | 2<br>(1 - 4)      | 15<br>(8 - 26)         | 9<br>(5 - 16)            | 5<br>(3 - 8)             |
| Acute hepatitis A                                                | 3<br>(1 - 7)             | 1<br>(0 - 4)             | 0<br>(0 - 1)      | 1<br>(0 - 2)           | 0<br>(0 - 0)             | 0<br>(0 - 0)             |
| Acute hepatitis B                                                | 24<br>(13 - 39)          | 4<br>(1 - 10)            | 1<br>(0 - 2)      | 7<br>(3 - 14)          | 7<br>(4 - 13)            | 4<br>(2 - 7)             |
| Acute hepatitis C                                                | 1<br>(0 - 3)             | --                       | 0<br>(0 - 0)      | 1<br>(0 - 2)           | 0<br>(0 - 1)             | 0<br>(0 - 0)             |
| Acute hepatitis E                                                | 9<br>(4 - 18)            | 0<br>(0 - 0)             | 0<br>(0 - 1)      | 7<br>(3 - 14)          | 1<br>(0 - 3)             | 0<br>(0 - 1)             |
| Other infectious diseases                                        | 49<br>(26 - 91)          | 17<br>(5 - 44)           | 2<br>(1 - 5)      | 10<br>(4 - 23)         | 11<br>(4 - 25)           | 9<br>(3 - 20)            |
| Non-communicable diseases                                        | 5,510<br>(4,594 - 6,517) | 540<br>(277 - 973)       | 109<br>(68 - 152) | 1,191<br>(895 - 1,594) | 1,994<br>(1,555 - 2,417) | 1,677<br>(1,468 - 1,864) |
| Neoplasms                                                        | 869<br>(704 - 1,072)     | 21<br>(9 - 39)           | 19<br>(11 - 27)   | 262<br>(190 - 371)     | 352<br>(269 - 442)       | 214<br>(180 - 256)       |
| Esophageal cancer                                                | 35<br>(23 - 56)          | --                       | --                | 7<br>(4 - 10)          | 19<br>(12 - 32)          | 9<br>(6 - 16)            |
| Stomach cancer                                                   | 90<br>(71 - 113)         | --                       | --                | 22<br>(15 - 31)        | 46<br>(34 - 59)          | 23<br>(17 - 29)          |
| Liver cancer                                                     | 364<br>(267 - 496)       | --                       | 1<br>(1 - 3)      | 145<br>(97 - 218)      | 153<br>(106 - 217)       | 65<br>(44 - 93)          |
| Liver cancer due to hepatitis B                                  | 152<br>(70 - 245)        | --                       | 1<br>(0 - 1)      | 71<br>(23 - 121)       | 61<br>(27 - 105)         | 19<br>(8 - 33)           |
| Liver cancer due to hepatitis C                                  | 120<br>(68 - 210)        | --                       | 0<br>(0 - 0)      | 34<br>(14 - 75)        | 57<br>(30 - 100)         | 29<br>(17 - 45)          |

Web Table 31- Liberia deaths with 95% UI by age, sex, and cause in 2013

| Cause                                | Males, All Ages          | Males, 0-4 Years | Males, 5-14 Years | Males, 15-49 Years | Males, 50-69 Years   | Males, 70-80 Years |
|--------------------------------------|--------------------------|------------------|-------------------|--------------------|----------------------|--------------------|
| Liver cancer due to alcohol use      | 48<br>(24 - 81)          | --               | --                | 14<br>(6 - 30)     | 22<br>(11 - 39)      | 13<br>(7 - 22)     |
| Liver cancer due to other causes     | 43<br>(23 - 90)          | --               | 1<br>(0 - 2)      | 26<br>(12 - 61)    | 13<br>(6 - 25)       | 4<br>(2 - 8)       |
| Larynx cancer                        | 5<br>(3 - 12)            | --               | --                | 1<br>(1 - 2)       | 2<br>(1 - 6)         | 2<br>(1 - 4)       |
| Tracheal, bronchus and lung cancer   | 46<br>(36 - 56)          | --               | --                | 5<br>(3 - 7)       | 26<br>(20 - 33)      | 15<br>(12 - 18)    |
| Breast cancer                        | 2<br>(1 - 3)             | --               | --                | 1<br>(0 - 1)       | 1<br>(0 - 2)         | 0<br>(0 - 1)       |
| Cervical cancer                      | --                       | --               | --                | --                 | --                   | --                 |
| Uterine cancer                       | --                       | --               | --                | --                 | --                   | --                 |
| Prostate cancer                      | 59<br>(41 - 94)          | --               | --                | 1<br>(1 - 2)       | 18<br>(11 - 29)      | 40<br>(27 - 66)    |
| Colon and rectum cancer              | 45<br>(35 - 55)          | --               | --                | 14<br>(10 - 19)    | 17<br>(13 - 22)      | 14<br>(11 - 18)    |
| Lip and oral cavity cancer           | 5<br>(4 - 7)             | --               | --                | 1<br>(1 - 2)       | 2<br>(2 - 3)         | 2<br>(1 - 2)       |
| Nasopharynx cancer                   | 2<br>(1 - 3)             | --               | 0<br>(0 - 0)      | 1<br>(1 - 2)       | 1<br>(0 - 1)         | 0<br>(0 - 0)       |
| Other pharynx cancer                 | 3<br>(2 - 4)             | --               | --                | 1<br>(1 - 1)       | 1<br>(1 - 2)         | 1<br>(1 - 1)       |
| Gallbladder and biliary tract cancer | 4<br>(3 - 7)             | --               | --                | 1<br>(1 - 2)       | 2<br>(1 - 3)         | 1<br>(1 - 3)       |
| Pancreatic cancer                    | 21<br>(15 - 27)          | --               | --                | 5<br>(4 - 8)       | 12<br>(8 - 16)       | 4<br>(3 - 5)       |
| Malignant skin melanoma              | 3<br>(1 - 5)             | --               | --                | 1<br>(0 - 2)       | 1<br>(1 - 2)         | 1<br>(0 - 1)       |
| Non-melanoma skin cancer             | 2<br>(1 - 3)             | --               | --                | 0<br>(0 - 1)       | 1<br>(0 - 1)         | 1<br>(1 - 2)       |
| Ovarian cancer                       | --                       | --               | --                | --                 | --                   | --                 |
| Testicular cancer                    | 2<br>(1 - 3)             | --               | --                | 1<br>(1 - 2)       | 0<br>(0 - 0)         | 0<br>(0 - 0)       |
| Kidney cancer                        | 8<br>(5 - 11)            | 1<br>(0 - 2)     | 0<br>(0 - 1)      | 1<br>(1 - 2)       | 4<br>(2 - 6)         | 2<br>(1 - 3)       |
| Bladder cancer                       | 21<br>(16 - 30)          | --               | --                | 4<br>(2 - 6)       | 7<br>(5 - 12)        | 10<br>(7 - 15)     |
| Brain and nervous system cancer      | 8<br>(3 - 12)            | 0<br>(0 - 0)     | 1<br>(0 - 2)      | 4<br>(1 - 6)       | 2<br>(1 - 4)         | 1<br>(0 - 2)       |
| Thyroid cancer                       | 1<br>(1 - 1)             | --               | 0<br>(0 - 0)      | 0<br>(0 - 0)       | 0<br>(0 - 1)         | 0<br>(0 - 0)       |
| Mesothelioma                         | 1<br>(1 - 2)             | --               | --                | 0<br>(0 - 0)       | 1<br>(0 - 1)         | 1<br>(0 - 1)       |
| Hodgkin lymphoma                     | 5<br>(3 - 7)             | 0<br>(0 - 1)     | 1<br>(0 - 1)      | 2<br>(1 - 4)       | 1<br>(1 - 2)         | 0<br>(0 - 1)       |
| Non-Hodgkin lymphoma                 | 44<br>(31 - 59)          | 4<br>(1 - 10)    | 6<br>(3 - 12)     | 16<br>(11 - 24)    | 11<br>(7 - 17)       | 6<br>(4 - 9)       |
| Multiple myeloma                     | 3<br>(2 - 6)             | --               | --                | 1<br>(0 - 2)       | 2<br>(1 - 3)         | 1<br>(0 - 2)       |
| Leukemia                             | 18<br>(13 - 23)          | 2<br>(1 - 4)     | 3<br>(1 - 4)      | 9<br>(6 - 12)      | 2<br>(2 - 3)         | 2<br>(2 - 3)       |
| Other neoplasms                      | 72<br>(49 - 101)         | 14<br>(6 - 25)   | 6<br>(3 - 10)     | 18<br>(11 - 28)    | 20<br>(11 - 33)      | 14<br>(9 - 22)     |
| Cardiovascular diseases              | 2,059<br>(1,711 - 2,410) | 42<br>(20 - 76)  | 16<br>(10 - 25)   | 299<br>(217 - 402) | 875<br>(685 - 1,056) | 827<br>(708 - 936) |
| Rheumatic heart disease              | 16<br>(8 - 42)           | 1<br>(0 - 1)     | 1<br>(0 - 2)      | 5<br>(2 - 14)      | 5<br>(2 - 15)        | 5<br>(3 - 10)      |
| Ischemic heart disease               | 516<br>(383 - 681)       | 2<br>(0 - 4)     | 2<br>(1 - 4)      | 74<br>(48 - 109)   | 242<br>(171 - 325)   | 196<br>(145 - 262) |
| Cerebrovascular disease              | 1,150<br>(909 - 1,420)   | 18<br>(8 - 33)   | 7<br>(4 - 11)     | 140<br>(93 - 203)  | 476<br>(354 - 605)   | 509<br>(404 - 608) |
| Ischemic stroke                      | 674<br>(370 - 915)       | 1<br>(0 - 3)     | 1<br>(0 - 2)      | 34<br>(13 - 62)    | 270<br>(133 - 390)   | 368<br>(223 - 475) |
| Hemorrhagic stroke                   | 476<br>(291 - 759)       | 16<br>(7 - 31)   | 6<br>(3 - 10)     | 106<br>(69 - 150)  | 207<br>(117 - 350)   | 141<br>(71 - 267)  |
| Hypertensive heart disease           | 77<br>(33 - 138)         | 0<br>(0 - 1)     | 0<br>(0 - 0)      | 13<br>(4 - 28)     | 32<br>(13 - 59)      | 32<br>(13 - 55)    |
| Cardiomyopathy and myocarditis       | 90<br>(49 - 141)         | 5<br>(2 - 11)    | 2<br>(1 - 4)      | 21<br>(11 - 35)    | 39<br>(18 - 66)      | 23<br>(10 - 40)    |
| Atrial fibrillation and flutter      | 0<br>(0 - 0)             | --               | --                | 0<br>(0 - 0)       | 0<br>(0 - 0)         | 0<br>(0 - 0)       |
| Aortic aneurysm                      | 16<br>(10 - 22)          | --               | --                | 2<br>(1 - 3)       | 8<br>(5 - 12)        | 6<br>(4 - 8)       |
| Peripheral vascular disease          | 0<br>(0 - 1)             | --               | --                | 0<br>(0 - 0)       | 0<br>(0 - 0)         | 0<br>(0 - 1)       |
| Endocarditis                         | 42<br>(25 - 63)          | 5<br>(1 - 13)    | 1<br>(0 - 2)      | 10<br>(5 - 16)     | 15<br>(8 - 24)       | 12<br>(7 - 19)     |

Web Table 31- Liberia deaths with 95% UI by age, sex, and cause in 2013

| Cause                                               | Males, All Ages    | Males, 0-4 Years | Males, 5-14 Years | Males, 15-49 Years | Males, 50-69 Years | Males, 70-80 Years |
|-----------------------------------------------------|--------------------|------------------|-------------------|--------------------|--------------------|--------------------|
| Other cardiovascular and circulatory diseases       | 152<br>(105 - 289) | 11<br>(5 - 23)   | 3<br>(2 - 6)      | 35<br>(22 - 56)    | 57<br>(35 - 113)   | 45<br>(29 - 101)   |
| Chronic respiratory diseases                        | 336<br>(243 - 618) | 9<br>(4 - 17)    | 3<br>(2 - 4)      | 31<br>(22 - 44)    | 130<br>(86 - 252)  | 163<br>(113 - 325) |
| Chronic obstructive pulmonary disease               | 224<br>(156 - 425) | 5<br>(2 - 10)    | 1<br>(1 - 2)      | 11<br>(8 - 17)     | 81<br>(51 - 162)   | 124<br>(83 - 251)  |
| Pneumoconiosis                                      | 26<br>(15 - 54)    | 0<br>(0 - 0)     | 0<br>(0 - 0)      | 4<br>(2 - 7)       | 15<br>(8 - 31)     | 7<br>(3 - 17)      |
| Silicosis                                           | 4<br>(2 - 10)      | 0<br>(0 - 0)     | 0<br>(0 - 0)      | 1<br>(0 - 1)       | 1<br>(0 - 3)       | 2<br>(1 - 7)       |
| Asbestosis                                          | 2<br>(1 - 4)       | 0<br>(0 - 0)     | 0<br>(0 - 0)      | 0<br>(0 - 1)       | 1<br>(0 - 2)       | 0<br>(0 - 1)       |
| Coal workers pneumoconiosis                         | 9<br>(5 - 19)      | 0<br>(0 - 0)     | 0<br>(0 - 0)      | 0<br>(0 - 1)       | 8<br>(4 - 16)      | 1<br>(0 - 3)       |
| Other pneumoconiosis                                | 11<br>(6 - 20)     | 0<br>(0 - 0)     | 0<br>(0 - 0)      | 3<br>(2 - 5)       | 5<br>(3 - 11)      | 3<br>(2 - 7)       |
| Asthma                                              | 45<br>(30 - 89)    | 2<br>(0 - 4)     | 1<br>(0 - 1)      | 10<br>(7 - 14)     | 19<br>(11 - 39)    | 14<br>(8 - 35)     |
| Interstitial lung disease and pulmonary sarcoidosis | 25<br>(5 - 44)     | 0<br>(0 - 0)     | 0<br>(0 - 0)      | 1<br>(0 - 1)       | 10<br>(2 - 20)     | 14<br>(2 - 26)     |
| Other chronic respiratory diseases                  | 16<br>(11 - 27)    | 2<br>(1 - 4)     | 1<br>(0 - 1)      | 5<br>(3 - 8)       | 5<br>(3 - 10)      | 4<br>(2 - 9)       |
| Cirrhosis                                           | 383<br>(286 - 515) | 4<br>(1 - 11)    | 4<br>(2 - 6)      | 125<br>(84 - 186)  | 182<br>(132 - 249) | 68<br>(50 - 91)    |
| Cirrhosis due to hepatitis B                        | 114<br>(52 - 193)  | 0<br>(0 - 1)     | 1<br>(0 - 1)      | 36<br>(16 - 67)    | 56<br>(24 - 97)    | 21<br>(8 - 35)     |
| Cirrhosis due to hepatitis C                        | 60<br>(19 - 124)   | 0<br>(0 - 1)     | 1<br>(0 - 1)      | 18<br>(2 - 44)     | 28<br>(7 - 62)     | 13<br>(3 - 25)     |
| Cirrhosis due to alcohol use                        | 161<br>(107 - 246) | --               | --                | 48<br>(29 - 78)    | 83<br>(54 - 129)   | 30<br>(19 - 47)    |
| Cirrhosis due to other causes                       | 48<br>(31 - 75)    | 4<br>(1 - 9)     | 2<br>(1 - 4)      | 22<br>(13 - 36)    | 16<br>(8 - 27)     | 4<br>(2 - 7)       |
| Digestive diseases                                  | 342<br>(235 - 434) | 10<br>(3 - 20)   | 11<br>(7 - 17)    | 108<br>(65 - 156)  | 122<br>(78 - 164)  | 90<br>(65 - 115)   |
| Peptic ulcer disease                                | 92<br>(57 - 130)   | 1<br>(0 - 3)     | 2<br>(1 - 4)      | 26<br>(14 - 42)    | 35<br>(20 - 54)    | 28<br>(17 - 41)    |
| Gastritis and duodenitis                            | 10<br>(3 - 28)     | 0<br>(0 - 1)     | 0<br>(0 - 1)      | 3<br>(1 - 8)       | 3<br>(1 - 11)      | 3<br>(1 - 9)       |
| Appendicitis                                        | 15<br>(7 - 23)     | 1<br>(0 - 2)     | 1<br>(1 - 2)      | 5<br>(2 - 8)       | 4<br>(2 - 8)       | 4<br>(1 - 7)       |
| Paralytic ileus and intestinal obstruction          | 112<br>(62 - 160)  | 4<br>(1 - 9)     | 4<br>(2 - 7)      | 32<br>(15 - 51)    | 43<br>(22 - 65)    | 30<br>(17 - 49)    |
| Inguinal, femoral, and abdominal hernia             | 10<br>(5 - 17)     | 0<br>(0 - 0)     | 0<br>(0 - 0)      | 2<br>(1 - 4)       | 4<br>(2 - 6)       | 4<br>(2 - 7)       |
| Inflammatory bowel disease                          | 14<br>(4 - 23)     | 1<br>(0 - 3)     | 0<br>(0 - 1)      | 4<br>(1 - 8)       | 4<br>(1 - 8)       | 3<br>(1 - 6)       |
| Vascular intestinal disorders                       | 1<br>(0 - 3)       | 0<br>(0 - 0)     | 0<br>(0 - 0)      | 0<br>(0 - 1)       | 0<br>(0 - 1)       | 0<br>(0 - 1)       |
| Gallbladder and biliary diseases                    | 17<br>(8 - 25)     | 0<br>(0 - 0)     | 1<br>(0 - 1)      | 5<br>(2 - 8)       | 5<br>(3 - 9)       | 6<br>(3 - 11)      |
| Pancreatitis                                        | 23<br>(8 - 39)     | 0<br>(0 - 0)     | 0<br>(0 - 0)      | 13<br>(4 - 25)     | 6<br>(2 - 11)      | 4<br>(1 - 7)       |
| Other digestive diseases                            | 48<br>(25 - 72)    | 2<br>(0 - 5)     | 2<br>(1 - 4)      | 18<br>(7 - 30)     | 17<br>(8 - 28)     | 9<br>(5 - 16)      |
| Neurological disorders                              | 147<br>(112 - 193) | 13<br>(4 - 30)   | 7<br>(3 - 13)     | 36<br>(22 - 59)    | 18<br>(13 - 24)    | 73<br>(54 - 93)    |
| Alzheimer disease and other dementias               | 76<br>(55 - 97)    | --               | --                | 0<br>(0 - 0)       | 9<br>(6 - 13)      | 67<br>(48 - 86)    |
| Parkinson disease                                   | 1<br>(1 - 2)       | --               | --                | 0<br>(0 - 0)       | 0<br>(0 - 0)       | 1<br>(0 - 2)       |
| Epilepsy                                            | 50<br>(31 - 84)    | 10<br>(3 - 25)   | 5<br>(2 - 11)     | 28<br>(16 - 48)    | 4<br>(2 - 7)       | 3<br>(2 - 5)       |
| Multiple sclerosis                                  | 0<br>(0 - 0)       | --               | --                | 0<br>(0 - 0)       | 0<br>(0 - 0)       | 0<br>(0 - 0)       |
| Other neurological disorders                        | 20<br>(13 - 31)    | 3<br>(1 - 13)    | 1<br>(1 - 3)      | 8<br>(5 - 12)      | 5<br>(3 - 7)       | 2<br>(2 - 4)       |
| Mental and substance use disorders                  | 172<br>(90 - 241)  | 5<br>(1 - 14)    | 0<br>(0 - 0)      | 120<br>(60 - 180)  | 36<br>(19 - 53)    | 11<br>(4 - 17)     |
| Schizophrenia                                       | 0<br>(0 - 0)       | --               | --                | 0<br>(0 - 0)       | 0<br>(0 - 0)       | 0<br>(0 - 0)       |
| Alcohol use disorders                               | 75<br>(33 - 109)   | --               | --                | 38<br>(18 - 60)    | 29<br>(13 - 44)    | 9<br>(2 - 14)      |
| Drug use disorders                                  | 97<br>(44 - 144)   | 5<br>(1 - 14)    | --                | 83<br>(35 - 127)   | 7<br>(4 - 10)      | 2<br>(1 - 3)       |
| Opioid use disorders                                | 10<br>(5 - 15)     | 1<br>(0 - 2)     | --                | 9<br>(4 - 14)      | 1<br>(0 - 1)       | 0<br>(0 - 0)       |
| Cocaine use disorders                               | 0<br>(0 - 1)       | 0<br>(0 - 0)     | --                | 0<br>(0 - 1)       | 0<br>(0 - 0)       | 0<br>(0 - 0)       |
| Amphetamine use disorders                           | 0<br>(0 - 0)       | 0<br>(0 - 0)     | --                | 0<br>(0 - 0)       | 0<br>(0 - 0)       | 0<br>(0 - 0)       |

Web Table 31- Liberia deaths with 95% UI by age, sex, and cause in 2013

| Cause                                               | Males, All Ages      | Males, 0-4 Years   | Males, 5-14 Years | Males, 15-49 Years | Males, 50-69 Years | Males, 70-80 Years |
|-----------------------------------------------------|----------------------|--------------------|-------------------|--------------------|--------------------|--------------------|
| Other drug use disorders                            | 86<br>(39 - 127)     | 4<br>(1 - 12)      | --                | 73<br>(31 - 113)   | 7<br>(4 - 9)       | 2<br>(1 - 3)       |
| Eating disorders                                    | 0<br>(0 - 0)         | --                 | 0<br>(0 - 0)      | 0<br>(0 - 0)       | --                 | --                 |
| Anorexia nervosa                                    | 0<br>(0 - 0)         | --                 | 0<br>(0 - 0)      | 0<br>(0 - 0)       | --                 | --                 |
| Diabetes, urogenital, blood, and endocrine diseases | 777<br>(621 - 1,007) | 95<br>(44 - 173)   | 31<br>(16 - 64)   | 179<br>(128 - 258) | 260<br>(198 - 339) | 213<br>(169 - 258) |
| Diabetes mellitus                                   | 293<br>(205 - 382)   | 6<br>(3 - 10)      | 2<br>(1 - 2)      | 38<br>(25 - 57)    | 141<br>(92 - 200)  | 106<br>(72 - 142)  |
| Acute glomerulonephritis                            | 2<br>(1 - 4)         | 0<br>(0 - 1)       | 0<br>(0 - 1)      | 1<br>(0 - 1)       | 1<br>(0 - 1)       | 0<br>(0 - 1)       |
| Chronic kidney disease                              | 138<br>(97 - 193)    | 8<br>(3 - 15)      | 5<br>(3 - 9)      | 49<br>(28 - 75)    | 39<br>(26 - 57)    | 36<br>(25 - 54)    |
| Chronic kidney disease due to diabetes mellitus     | 2<br>(0 - 3)         | 0<br>(0 - 0)       | 0<br>(0 - 0)      | 0<br>(0 - 0)       | 1<br>(0 - 3)       | 0<br>(0 - 0)       |
| Chronic kidney disease due to hypertension          | 36<br>(22 - 63)      | 1<br>(0 - 3)       | 0<br>(0 - 1)      | 9<br>(5 - 17)      | 13<br>(7 - 24)     | 12<br>(7 - 24)     |
| Chronic kidney disease due to glomerulonephritis    | 64<br>(37 - 90)      | 4<br>(1 - 9)       | 4<br>(2 - 6)      | 27<br>(14 - 41)    | 15<br>(8 - 23)     | 15<br>(7 - 22)     |
| Chronic kidney disease due to other causes          | 36<br>(17 - 66)      | 3<br>(1 - 7)       | 1<br>(0 - 3)      | 13<br>(5 - 26)     | 10<br>(4 - 20)     | 9<br>(4 - 20)      |
| Urinary diseases and male infertility               | 139<br>(82 - 195)    | 14<br>(5 - 34)     | 2<br>(1 - 3)      | 34<br>(15 - 55)    | 42<br>(24 - 64)    | 46<br>(28 - 69)    |
| Interstitial nephritis and urinary tract infections | 121<br>(71 - 174)    | 13<br>(4 - 33)     | 2<br>(1 - 3)      | 28<br>(12 - 47)    | 37<br>(21 - 56)    | 41<br>(25 - 61)    |
| Urolithiasis                                        | 1<br>(0 - 2)         | --                 | 0<br>(0 - 0)      | 0<br>(0 - 1)       | 0<br>(0 - 1)       | 0<br>(0 - 0)       |
| Other urinary diseases                              | 17<br>(8 - 29)       | 1<br>(0 - 2)       | 0<br>(0 - 1)      | 5<br>(2 - 10)      | 6<br>(2 - 10)      | 5<br>(2 - 11)      |
| Gynecological diseases                              | --                   | --                 | --                | --                 | --                 | --                 |
| Uterine fibroids                                    | --                   | --                 | --                | --                 | --                 | --                 |
| Polycystic ovarian syndrome                         | --                   | --                 | --                | --                 | --                 | --                 |
| Endometriosis                                       | --                   | --                 | --                | --                 | --                 | --                 |
| Genital prolapse                                    | --                   | --                 | --                | --                 | --                 | --                 |
| Other gynecological diseases                        | --                   | --                 | --                | --                 | --                 | --                 |
| Hemoglobinopathies and hemolytic anemias            | 98<br>(26 - 282)     | 43<br>(10 - 109)   | 16<br>(4 - 49)    | 26<br>(6 - 94)     | 8<br>(2 - 31)      | 5<br>(2 - 19)      |
| Thalassemias                                        | 6<br>(1 - 16)        | 4<br>(1 - 10)      | 1<br>(0 - 3)      | 1<br>(0 - 4)       | 0<br>(0 - 0)       | 0<br>(0 - 0)       |
| Sickle cell disorders                               | 84<br>(22 - 240)     | 38<br>(9 - 96)     | 15<br>(4 - 46)    | 24<br>(6 - 87)     | 7<br>(2 - 27)      | 1<br>(0 - 4)       |
| G6PD deficiency                                     | 1<br>(0 - 4)         | 0<br>(0 - 1)       | 0<br>(0 - 0)      | 0<br>(0 - 1)       | 0<br>(0 - 1)       | 0<br>(0 - 1)       |
| Other hemoglobinopathies and hemolytic anemias      | 7<br>(2 - 24)        | 1<br>(0 - 3)       | 0<br>(0 - 0)      | 1<br>(0 - 2)       | 1<br>(0 - 4)       | 4<br>(1 - 15)      |
| Endocrine, metabolic, blood, and immune disorders   | 107<br>(70 - 183)    | 23<br>(11 - 64)    | 5<br>(3 - 12)     | 31<br>(18 - 49)    | 28<br>(17 - 43)    | 19<br>(11 - 29)    |
| Musculoskeletal disorders                           | 22<br>(10 - 30)      | --                 | 2<br>(1 - 4)      | 8<br>(3 - 12)      | 7<br>(3 - 10)      | 5<br>(2 - 7)       |
| Rheumatoid arthritis                                | 2<br>(1 - 3)         | --                 | 0<br>(0 - 0)      | 0<br>(0 - 1)       | 1<br>(0 - 1)       | 1<br>(0 - 1)       |
| Other musculoskeletal disorders                     | 20<br>(9 - 28)       | --                 | 2<br>(1 - 3)      | 8<br>(3 - 12)      | 7<br>(3 - 9)       | 4<br>(2 - 6)       |
| Other non-communicable diseases                     | 404<br>(215 - 785)   | 342<br>(158 - 719) | 16<br>(8 - 30)    | 22<br>(15 - 33)    | 12<br>(6 - 16)     | 13<br>(5 - 18)     |
| Congenital anomalies                                | 367<br>(180 - 749)   | 331<br>(150 - 710) | 15<br>(7 - 29)    | 15<br>(9 - 24)     | 3<br>(2 - 5)       | 2<br>(1 - 3)       |
| Neural tube defects                                 | 97<br>(23 - 246)     | 90<br>(20 - 233)   | 3<br>(1 - 7)      | 3<br>(1 - 8)       | 0<br>(0 - 1)       | 0<br>(0 - 1)       |
| Congenital heart anomalies                          | 148<br>(67 - 301)    | 129<br>(53 - 281)  | 8<br>(4 - 15)     | 8<br>(4 - 12)      | 2<br>(1 - 3)       | 1<br>(0 - 2)       |
| Cleft lip and cleft palate                          | 2<br>(0 - 9)         | 2<br>(0 - 9)       | --                | --                 | --                 | --                 |
| Down syndrome                                       | 29<br>(6 - 97)       | 26<br>(4 - 94)     | 1<br>(0 - 2)      | 1<br>(1 - 2)       | 0<br>(0 - 0)       | 0<br>(0 - 0)       |
| Chromosomal unbalanced rearrangements               | 11<br>(2 - 36)       | 10<br>(2 - 33)     | 0<br>(0 - 1)      | 0<br>(0 - 1)       | 0<br>(0 - 0)       | 0<br>(0 - 0)       |
| Other congenital anomalies                          | 81<br>(16 - 348)     | 73<br>(12 - 328)   | 3<br>(1 - 12)     | 3<br>(1 - 6)       | 1<br>(0 - 1)       | 1<br>(0 - 2)       |
| Skin and subcutaneous diseases                      | 33<br>(11 - 44)      | 6<br>(2 - 12)      | 1<br>(0 - 2)      | 7<br>(2 - 10)      | 9<br>(3 - 12)      | 10<br>(3 - 16)     |
| Cellulitis                                          | 14<br>(4 - 21)       | 3<br>(1 - 6)       | 1<br>(0 - 1)      | 3<br>(1 - 4)       | 5<br>(1 - 7)       | 4<br>(1 - 7)       |

Web Table 31- Liberia deaths with 95% UI by age, sex, and cause in 2013

| Cause                                           | Males, All Ages        | Males, 0-4 Years  | Males, 5-14 Years | Males, 15-49 Years | Males, 50-69 Years | Males, 70-80 Years |
|-------------------------------------------------|------------------------|-------------------|-------------------|--------------------|--------------------|--------------------|
| Pyoderma                                        | 17<br>(6 - 25)         | 4<br>(1 - 8)      | 0<br>(0 - 1)      | 4<br>(2 - 6)       | 4<br>(1 - 7)       | 6<br>(2 - 9)       |
| Decubitus ulcer                                 | 1<br>(0 - 2)           | 0<br>(0 - 0)      | 0<br>(0 - 0)      | 0<br>(0 - 0)       | 0<br>(0 - 0)       | 1<br>(0 - 2)       |
| Other skin and subcutaneous diseases            | 0<br>(0 - 0)           | 0<br>(0 - 0)      | 0<br>(0 - 0)      | 0<br>(0 - 0)       | 0<br>(0 - 0)       | 0<br>(0 - 0)       |
| Sudden infant death syndrome                    | 4<br>(1 - 13)          | 4<br>(1 - 13)     | --                | --                 | --                 | --                 |
| Injuries                                        | 1,112<br>(858 - 1,413) | 166<br>(76 - 294) | 101<br>(65 - 141) | 586<br>(417 - 813) | 169<br>(123 - 219) | 91<br>(69 - 115)   |
| Transport injuries                              | 342<br>(252 - 447)     | 36<br>(16 - 63)   | 34<br>(20 - 52)   | 196<br>(134 - 275) | 54<br>(36 - 75)    | 22<br>(16 - 30)    |
| Road injuries                                   | 326<br>(240 - 427)     | 31<br>(13 - 56)   | 31<br>(19 - 48)   | 192<br>(132 - 268) | 51<br>(35 - 71)    | 21<br>(14 - 28)    |
| Pedestrian road injuries                        | 89<br>(57 - 131)       | 10<br>(4 - 20)    | 12<br>(6 - 20)    | 45<br>(25 - 72)    | 15<br>(9 - 24)     | 7<br>(4 - 11)      |
| Cyclist road injuries                           | 17<br>(11 - 24)        | 1<br>(0 - 4)      | 3<br>(1 - 6)      | 8<br>(4 - 12)      | 4<br>(2 - 6)       | 2<br>(1 - 2)       |
| Motorcyclist road injuries                      | 44<br>(26 - 70)        | 3<br>(1 - 5)      | 2<br>(1 - 4)      | 31<br>(17 - 53)    | 6<br>(3 - 10)      | 2<br>(1 - 3)       |
| Motor vehicle road injuries                     | 166<br>(117 - 227)     | 14<br>(6 - 26)    | 12<br>(7 - 20)    | 105<br>(70 - 154)  | 25<br>(16 - 37)    | 9<br>(6 - 14)      |
| Other road injuries                             | 10<br>(4 - 22)         | 2<br>(1 - 6)      | 2<br>(1 - 4)      | 3<br>(1 - 8)       | 2<br>(1 - 4)       | 1<br>(0 - 2)       |
| Other transport injuries                        | 16<br>(9 - 26)         | 6<br>(2 - 12)     | 2<br>(1 - 4)      | 4<br>(2 - 9)       | 3<br>(1 - 4)       | 2<br>(0 - 3)       |
| Unintentional injuries                          | 500<br>(377 - 692)     | 125<br>(55 - 239) | 61<br>(37 - 89)   | 187<br>(129 - 273) | 75<br>(55 - 99)    | 52<br>(37 - 69)    |
| Falls                                           | 123<br>(77 - 187)      | 17<br>(6 - 35)    | 8<br>(4 - 16)     | 48<br>(26 - 83)    | 28<br>(16 - 46)    | 22<br>(13 - 37)    |
| Drowning                                        | 126<br>(75 - 211)      | 38<br>(12 - 100)  | 27<br>(12 - 46)   | 48<br>(25 - 84)    | 9<br>(6 - 15)      | 4<br>(2 - 6)       |
| Fire, heat, and hot substances                  | 50<br>(29 - 84)        | 16<br>(6 - 38)    | 5<br>(2 - 10)     | 16<br>(9 - 26)     | 8<br>(4 - 12)      | 6<br>(3 - 10)      |
| Poisonings                                      | 25<br>(16 - 43)        | 5<br>(2 - 13)     | 2<br>(1 - 4)      | 12<br>(7 - 24)     | 4<br>(2 - 6)       | 1<br>(1 - 2)       |
| Exposure to mechanical forces                   | 75<br>(50 - 111)       | 17<br>(6 - 37)    | 9<br>(4 - 14)     | 35<br>(22 - 53)    | 10<br>(6 - 15)     | 4<br>(2 - 5)       |
| Unintentional firearm injuries                  | 30<br>(19 - 46)        | 5<br>(1 - 13)     | 2<br>(1 - 4)      | 18<br>(10 - 31)    | 4<br>(2 - 6)       | 1<br>(1 - 2)       |
| Unintentional suffocation                       | 12<br>(5 - 40)         | 6<br>(1 - 22)     | 2<br>(0 - 5)      | 3<br>(1 - 11)      | 1<br>(0 - 3)       | 0<br>(0 - 1)       |
| Other exposure to mechanical forces             | 32<br>(14 - 48)        | 6<br>(2 - 15)     | 5<br>(2 - 9)      | 13<br>(7 - 21)     | 6<br>(2 - 9)       | 2<br>(0 - 3)       |
| Adverse effects of medical treatment            | 34<br>(12 - 70)        | 10<br>(2 - 28)    | 2<br>(1 - 4)      | 8<br>(3 - 16)      | 7<br>(2 - 16)      | 8<br>(2 - 17)      |
| Animal contact                                  | 11<br>(4 - 16)         | 2<br>(1 - 4)      | 2<br>(1 - 3)      | 3<br>(1 - 5)       | 2<br>(1 - 4)       | 2<br>(0 - 3)       |
| Venomous animal contact                         | 4<br>(2 - 7)           | 1<br>(0 - 2)      | 1<br>(0 - 1)      | 1<br>(0 - 2)       | 1<br>(0 - 2)       | 1<br>(0 - 2)       |
| Non-venomous animal contact                     | 7<br>(2 - 10)          | 1<br>(0 - 3)      | 1<br>(0 - 2)      | 2<br>(1 - 3)       | 1<br>(0 - 2)       | 1<br>(0 - 2)       |
| Foreign body                                    | 27<br>(10 - 51)        | 16<br>(5 - 34)    | 2<br>(1 - 4)      | 4<br>(2 - 8)       | 3<br>(1 - 5)       | 3<br>(1 - 5)       |
| Pulmonary aspiration and foreign body in airway | 25<br>(8 - 50)         | 15<br>(5 - 33)    | 2<br>(0 - 3)      | 4<br>(1 - 8)       | 2<br>(1 - 4)       | 3<br>(1 - 5)       |
| Foreign body in other body part                 | 2<br>(1 - 3)           | 1<br>(0 - 1)      | 0<br>(0 - 1)      | 0<br>(0 - 1)       | 1<br>(0 - 1)       | 0<br>(0 - 0)       |
| Other unintentional injuries                    | 29<br>(21 - 39)        | 4<br>(2 - 8)      | 4<br>(2 - 6)      | 13<br>(9 - 19)     | 4<br>(3 - 6)       | 3<br>(2 - 4)       |
| Self-harm and interpersonal violence            | 270<br>(176 - 410)     | 5<br>(2 - 9)      | 6<br>(3 - 11)     | 203<br>(131 - 316) | 39<br>(23 - 63)    | 17<br>(7 - 27)     |
| Self-harm                                       | 155<br>(87 - 275)      | --                | 3<br>(1 - 7)      | 102<br>(54 - 201)  | 33<br>(18 - 55)    | 16<br>(7 - 27)     |
| Interpersonal violence                          | 115<br>(62 - 177)      | 5<br>(2 - 9)      | 3<br>(1 - 6)      | 100<br>(54 - 158)  | 6<br>(3 - 10)      | 1<br>(0 - 1)       |
| Assault by firearm                              | 68<br>(30 - 110)       | 1<br>(0 - 3)      | 1<br>(0 - 2)      | 63<br>(28 - 102)   | 3<br>(1 - 5)       | 0<br>(0 - 1)       |
| Assault by sharp object                         | 20<br>(9 - 47)         | 1<br>(0 - 3)      | 1<br>(0 - 1)      | 17<br>(7 - 42)     | 2<br>(1 - 4)       | 0<br>(0 - 0)       |
| Assault by other means                          | 26<br>(12 - 47)        | 3<br>(1 - 5)      | 2<br>(1 - 3)      | 20<br>(8 - 38)     | 1<br>(0 - 3)       | 0<br>(0 - 0)       |

Web Table 31- Liberia deaths with 95% UI by age, sex, and cause in 2013

| Cause                                                             | Females, All Ages           | Females, 0-4 Years       | Females, 5-14 Years | Females, 15-49 Years     | Females, 50-69 Years     | Females, 70-80 Years     |
|-------------------------------------------------------------------|-----------------------------|--------------------------|---------------------|--------------------------|--------------------------|--------------------------|
| All causes                                                        | 16,166<br>(14,362 - 18,230) | 5,304<br>(4,447 - 6,427) | 596<br>(478 - 736)  | 3,607<br>(3,193 - 4,037) | 3,453<br>(2,697 - 4,200) | 3,206<br>(2,645 - 3,705) |
| Communicable, maternal, neonatal, and nutritional diseases        | 9,876<br>(8,691 - 11,170)   | 4,710<br>(3,903 - 5,782) | 454<br>(349 - 616)  | 2,654<br>(2,339 - 2,970) | 1,102<br>(820 - 1,375)   | 956<br>(696 - 1,202)     |
| HIV/AIDS and tuberculosis                                         | 1,646<br>(1,378 - 1,932)    | 45<br>(27 - 69)          | 80<br>(64 - 97)     | 1,047<br>(832 - 1,309)   | 349<br>(263 - 444)       | 124<br>(73 - 172)        |
| Tuberculosis                                                      | 557<br>(388 - 742)          | 24<br>(11 - 44)          | 10<br>(5 - 17)      | 219<br>(149 - 309)       | 194<br>(112 - 273)       | 110<br>(56 - 158)        |
| HIV/AIDS                                                          | 1,089<br>(843 - 1,398)      | 21<br>(11 - 36)          | 70<br>(55 - 87)     | 829<br>(621 - 1,096)     | 155<br>(101 - 224)       | 14<br>(7 - 23)           |
| HIV/AIDS resulting in mycobacterial infection                     | 59<br>(42 - 82)             | 1<br>(1 - 2)             | 3<br>(2 - 5)        | 45<br>(32 - 64)          | 9<br>(5 - 13)            | 1<br>(0 - 1)             |
| HIV/AIDS resulting in other diseases                              | 1,030<br>(796 - 1,319)      | 20<br>(10 - 34)          | 67<br>(53 - 83)     | 783<br>(587 - 1,036)     | 146<br>(95 - 211)        | 13<br>(7 - 21)           |
| Diarrhea, lower respiratory, and other common infectious diseases | 3,443<br>(2,559 - 4,468)    | 1,890<br>(1,244 - 2,680) | 192<br>(107 - 346)  | 366<br>(267 - 490)       | 449<br>(294 - 632)       | 546<br>(344 - 725)       |
| Diarrheal diseases                                                | 1,028<br>(629 - 1,568)      | 519<br>(180 - 1,024)     | 39<br>(16 - 77)     | 143<br>(91 - 217)        | 158<br>(87 - 253)        | 169<br>(96 - 276)        |
| Intestinal infectious diseases                                    | 82<br>(39 - 145)            | 28<br>(9 - 59)           | 25<br>(11 - 47)     | 23<br>(10 - 45)          | 5<br>(2 - 10)            | 2<br>(1 - 3)             |
| Typhoid fever                                                     | 55<br>(25 - 103)            | 18<br>(5 - 39)           | 18<br>(8 - 34)      | 16<br>(7 - 31)           | 3<br>(1 - 6)             | 1<br>(0 - 2)             |
| Paratyphoid fever                                                 | 23<br>(9 - 44)              | 8<br>(2 - 19)            | 7<br>(2 - 16)       | 6<br>(2 - 13)            | 1<br>(0 - 3)             | 0<br>(0 - 1)             |
| Other intestinal infectious diseases                              | 4<br>(1 - 10)               | 2<br>(0 - 7)             | 0<br>(0 - 3)        | 1<br>(0 - 4)             | 0<br>(0 - 3)             | 0<br>(0 - 2)             |
| Lower respiratory infections                                      | 1,502<br>(987 - 2,074)      | 789<br>(403 - 1,258)     | 39<br>(19 - 67)     | 101<br>(66 - 146)        | 230<br>(133 - 346)       | 342<br>(202 - 497)       |
| Upper respiratory infections                                      | 3<br>(1 - 7)                | 1<br>(0 - 4)             | 0<br>(0 - 1)        | 1<br>(0 - 2)             | 1<br>(0 - 2)             | 1<br>(0 - 2)             |
| Otitis media                                                      | 1<br>(1 - 1)                | 0<br>(0 - 0)             | 0<br>(0 - 0)        | 0<br>(0 - 0)             | 0<br>(0 - 0)             | 0<br>(0 - 1)             |
| Meningitis                                                        | 348<br>(216 - 544)          | 163<br>(71 - 352)        | 30<br>(14 - 52)     | 78<br>(49 - 113)         | 48<br>(25 - 78)          | 28<br>(13 - 50)          |
| Pneumococcal meningitis                                           | 91<br>(56 - 154)            | 38<br>(14 - 97)          | 8<br>(3 - 17)       | 23<br>(9 - 39)           | 14<br>(6 - 26)           | 8<br>(3 - 15)            |
| H influenzae type B meningitis                                    | 56<br>(26 - 115)            | 37<br>(12 - 96)          | 5<br>(2 - 11)       | 8<br>(4 - 14)            | 4<br>(1 - 8)             | 2<br>(1 - 5)             |
| Meningococcal meningitis                                          | 153<br>(91 - 230)           | 71<br>(27 - 137)         | 14<br>(6 - 26)      | 35<br>(20 - 55)          | 21<br>(9 - 39)           | 13<br>(6 - 23)           |
| Other meningitis                                                  | 49<br>(25 - 78)             | 18<br>(7 - 46)           | 3<br>(1 - 7)        | 13<br>(5 - 26)           | 9<br>(2 - 20)            | 6<br>(2 - 13)            |
| Encephalitis                                                      | 17<br>(11 - 25)             | 6<br>(2 - 13)            | 2<br>(1 - 3)        | 4<br>(2 - 6)             | 3<br>(1 - 5)             | 2<br>(1 - 4)             |
| Diphtheria                                                        | 4<br>(0 - 24)               | 3<br>(0 - 23)            | 1<br>(0 - 4)        | 0<br>(0 - 1)             | 0<br>(0 - 1)             | --                       |
| Whooping cough                                                    | 101<br>(0 - 493)            | 94<br>(0 - 463)          | 6<br>(0 - 29)       | 1<br>(0 - 5)             | 0<br>(0 - 1)             | --                       |
| Tetanus                                                           | 20<br>(11 - 41)             | 9<br>(4 - 21)            | 2<br>(1 - 4)        | 5<br>(2 - 14)            | 3<br>(1 - 8)             | 1<br>(0 - 3)             |
| Measles                                                           | 335<br>(11 - 1,519)         | 276<br>(9 - 1,254)       | 49<br>(1 - 241)     | 9<br>(0 - 57)            | 0<br>(0 - 2)             | --                       |
| Varicella and herpes zoster                                       | 3<br>(1 - 7)                | 1<br>(0 - 4)             | 0<br>(0 - 1)        | 1<br>(0 - 1)             | 0<br>(0 - 1)             | 1<br>(0 - 3)             |
| Neglected tropical diseases and malaria                           | 1,721<br>(910 - 2,765)      | 1,102<br>(429 - 2,005)   | 134<br>(46 - 249)   | 173<br>(68 - 328)        | 166<br>(59 - 345)        | 145<br>(46 - 329)        |
| Malaria                                                           | 1,686<br>(875 - 2,731)      | 1,096<br>(421 - 2,000)   | 129<br>(40 - 243)   | 161<br>(56 - 316)        | 158<br>(52 - 336)        | 142<br>(42 - 326)        |
| Leishmaniasis                                                     | 0<br>(0 - 0)                | 0<br>(0 - 0)             | 0<br>(0 - 0)        | 0<br>(0 - 0)             | 0<br>(0 - 0)             | 0<br>(0 - 0)             |
| Visceral leishmaniasis                                            | 0<br>(0 - 0)                | 0<br>(0 - 0)             | 0<br>(0 - 0)        | 0<br>(0 - 0)             | 0<br>(0 - 0)             | 0<br>(0 - 0)             |
| Schistosomiasis                                                   | 7<br>(5 - 11)               | 0<br>(0 - 0)             | 0<br>(0 - 0)        | 2<br>(1 - 4)             | 3<br>(2 - 6)             | 2<br>(1 - 3)             |
| Cysticercosis                                                     | 1<br>(1 - 1)                | 0<br>(0 - 0)             | 0<br>(0 - 0)        | 1<br>(0 - 1)             | 0<br>(0 - 0)             | 0<br>(0 - 0)             |
| Cystic echinococcosis                                             | 1<br>(1 - 1)                | 0<br>(0 - 0)             | 0<br>(0 - 0)        | 0<br>(0 - 0)             | 0<br>(0 - 0)             | 0<br>(0 - 0)             |
| Dengue                                                            | 1<br>(0 - 2)                | 0<br>(0 - 1)             | 0<br>(0 - 1)        | 0<br>(0 - 1)             | 0<br>(0 - 0)             | 0<br>(0 - 0)             |
| Yellow fever                                                      | 5<br>(3 - 9)                | 0<br>(0 - 1)             | 1<br>(0 - 3)        | 3<br>(1 - 6)             | 1<br>(0 - 2)             | 0<br>(0 - 1)             |
| Rabies                                                            | 12<br>(6 - 18)              | 2<br>(0 - 4)             | 3<br>(1 - 5)        | 5<br>(2 - 7)             | 2<br>(1 - 4)             | 1<br>(0 - 2)             |
| Intestinal nematode infections                                    | 4<br>(0 - 12)               | 3<br>(0 - 10)            | 1<br>(0 - 4)        | 0<br>(0 - 2)             | 0<br>(0 - 2)             | 0<br>(0 - 1)             |
| Ascariasis                                                        | 4<br>(0 - 12)               | 3<br>(0 - 10)            | 1<br>(0 - 4)        | 0<br>(0 - 2)             | 0<br>(0 - 2)             | 0<br>(0 - 1)             |
| Other neglected tropical diseases                                 | 3<br>(2 - 6)                | 1<br>(0 - 2)             | 0<br>(0 - 1)        | 1<br>(0 - 2)             | 1<br>(0 - 1)             | 1<br>(0 - 1)             |



Web Table 31- Liberia deaths with 95% UI by age, sex, and cause in 2013

| Cause                                                            | Females, All Ages        | Females, 0-4 Years       | Females, 5-14 Years | Females, 15-49 Years | Females, 50-69 Years     | Females, 70-80 Years     |
|------------------------------------------------------------------|--------------------------|--------------------------|---------------------|----------------------|--------------------------|--------------------------|
| Maternal disorders                                               | 974<br>(726 - 1,232)     | --                       | 7<br>(2 - 15)       | 967<br>(718 - 1,224) | --                       | --                       |
| Maternal hemorrhage                                              | 185<br>(125 - 261)       | --                       | 1<br>(0 - 2)        | 184<br>(124 - 260)   | --                       | --                       |
| Maternal sepsis and other maternal infections                    | 53<br>(28 - 87)          | --                       | 0<br>(0 - 1)        | 53<br>(28 - 87)      | --                       | --                       |
| Maternal hypertensive disorders                                  | 75<br>(48 - 109)         | --                       | 1<br>(0 - 1)        | 74<br>(48 - 109)     | --                       | --                       |
| Maternal obstructed labor                                        | 46<br>(27 - 71)          | --                       | 0<br>(0 - 1)        | 46<br>(26 - 71)      | --                       | --                       |
| Maternal abortive outcome                                        | 180<br>(121 - 250)       | --                       | 1<br>(0 - 3)        | 179<br>(120 - 248)   | --                       | --                       |
| Indirect maternal deaths                                         | 97<br>(57 - 141)         | --                       | 1<br>(0 - 1)        | 96<br>(56 - 140)     | --                       | --                       |
| Late maternal deaths                                             | 151<br>(94 - 223)        | --                       | 2<br>(1 - 4)        | 149<br>(93 - 222)    | --                       | --                       |
| Maternal deaths aggravated by HIV/AIDS                           | 3<br>(1 - 5)             | --                       | --                  | 3<br>(1 - 5)         | --                       | --                       |
| Other maternal disorders                                         | 183<br>(124 - 253)       | --                       | 1<br>(0 - 3)        | 181<br>(123 - 252)   | --                       | --                       |
| Neonatal disorders                                               | 1,261<br>(1,007 - 1,614) | 1,261<br>(1,007 - 1,614) | --                  | --                   | --                       | --                       |
| Neonatal preterm birth complications                             | 494<br>(203 - 860)       | 494<br>(203 - 860)       | --                  | --                   | --                       | --                       |
| Neonatal encephalopathy due to birth asphyxia and trauma         | 393<br>(123 - 789)       | 393<br>(123 - 789)       | --                  | --                   | --                       | --                       |
| Neonatal sepsis and other neonatal infections                    | 256<br>(64 - 575)        | 256<br>(64 - 575)        | --                  | --                   | --                       | --                       |
| Hemolytic disease and other neonatal jaundice                    | 6<br>(1 - 18)            | 6<br>(1 - 18)            | --                  | --                   | --                       | --                       |
| Other neonatal disorders                                         | 111<br>(42 - 223)        | 111<br>(42 - 223)        | --                  | --                   | --                       | --                       |
| Nutritional deficiencies                                         | 599<br>(408 - 852)       | 267<br>(110 - 486)       | 27<br>(14 - 46)     | 83<br>(59 - 116)     | 108<br>(68 - 159)        | 114<br>(76 - 168)        |
| Protein-energy malnutrition                                      | 405<br>(224 - 655)       | 250<br>(102 - 456)       | 22<br>(11 - 38)     | 19<br>(8 - 42)       | 53<br>(25 - 91)          | 62<br>(29 - 101)         |
| Iodine deficiency                                                | 2<br>(0 - 6)             | 0<br>(0 - 3)             | 0<br>(0 - 1)        | 0<br>(0 - 2)         | 0<br>(0 - 3)             | 0<br>(0 - 2)             |
| Iron-deficiency anemia                                           | 189<br>(99 - 307)        | 17<br>(1 - 57)           | 5<br>(1 - 12)       | 63<br>(38 - 91)      | 53<br>(23 - 90)          | 52<br>(24 - 94)          |
| Other nutritional deficiencies                                   | 3<br>(1 - 5)             | 0<br>(0 - 1)             | 0<br>(0 - 0)        | 0<br>(0 - 1)         | 2<br>(0 - 3)             | 1<br>(0 - 1)             |
| Other communicable, maternal, neonatal, and nutritional diseases | 232<br>(144 - 350)       | 145<br>(78 - 246)        | 13<br>(6 - 25)      | 17<br>(11 - 25)      | 30<br>(15 - 49)          | 26<br>(12 - 44)          |
| Sexually transmitted diseases excluding HIV                      | 145<br>(77 - 250)        | 128<br>(66 - 224)        | 11<br>(4 - 20)      | 3<br>(1 - 5)         | 2<br>(1 - 6)             | 2<br>(1 - 4)             |
| Syphilis                                                         | 142<br>(74 - 247)        | 128<br>(66 - 224)        | 10<br>(4 - 20)      | 1<br>(1 - 2)         | 1<br>(0 - 3)             | 1<br>(0 - 3)             |
| Chlamydial infection                                             | 1<br>(1 - 2)             | --                       | 0<br>(0 - 0)        | 1<br>(0 - 1)         | 0<br>(0 - 1)             | 0<br>(0 - 0)             |
| Gonococcal infection                                             | 1<br>(1 - 2)             | --                       | 0<br>(0 - 0)        | 1<br>(0 - 1)         | 0<br>(0 - 1)             | 0<br>(0 - 1)             |
| Other sexually transmitted diseases                              | 1<br>(1 - 2)             | --                       | 0<br>(0 - 0)        | 1<br>(0 - 1)         | 0<br>(0 - 1)             | 0<br>(0 - 0)             |
| Hepatitis                                                        | 50<br>(24 - 76)          | 4<br>(1 - 8)             | 1<br>(0 - 2)        | 10<br>(5 - 16)       | 19<br>(8 - 32)           | 16<br>(7 - 26)           |
| Acute hepatitis A                                                | 2<br>(0 - 5)             | 1<br>(0 - 4)             | 0<br>(0 - 1)        | 0<br>(0 - 1)         | 0<br>(0 - 0)             | 0<br>(0 - 0)             |
| Acute hepatitis B                                                | 35<br>(16 - 55)          | 2<br>(1 - 5)             | 0<br>(0 - 1)        | 4<br>(1 - 7)         | 15<br>(6 - 25)           | 13<br>(6 - 22)           |
| Acute hepatitis C                                                | 2<br>(0 - 5)             | --                       | 0<br>(0 - 0)        | 0<br>(0 - 1)         | 1<br>(0 - 2)             | 1<br>(0 - 3)             |
| Acute hepatitis E                                                | 12<br>(4 - 21)           | 0<br>(0 - 0)             | 0<br>(0 - 1)        | 6<br>(3 - 11)        | 4<br>(1 - 8)             | 2<br>(0 - 4)             |
| Other infectious diseases                                        | 37<br>(19 - 69)          | 14<br>(5 - 37)           | 1<br>(0 - 4)        | 4<br>(2 - 7)         | 9<br>(3 - 20)            | 9<br>(2 - 21)            |
| Non-communicable diseases                                        | 5,692<br>(4,475 - 7,010) | 478<br>(231 - 851)       | 86<br>(54 - 123)    | 776<br>(607 - 998)   | 2,219<br>(1,625 - 2,831) | 2,134<br>(1,687 - 2,602) |
| Neoplasms                                                        | 940<br>(707 - 1,188)     | 10<br>(4 - 18)           | 14<br>(8 - 23)      | 216<br>(167 - 274)   | 499<br>(354 - 652)       | 202<br>(154 - 257)       |
| Esophageal cancer                                                | 12<br>(7 - 22)           | --                       | --                  | 1<br>(1 - 2)         | 7<br>(4 - 12)            | 4<br>(2 - 8)             |
| Stomach cancer                                                   | 85<br>(61 - 110)         | --                       | --                  | 13<br>(9 - 18)       | 54<br>(36 - 73)          | 19<br>(12 - 27)          |
| Liver cancer                                                     | 151<br>(103 - 213)       | --                       | 0<br>(0 - 1)        | 31<br>(21 - 46)      | 84<br>(53 - 130)         | 35<br>(21 - 54)          |
| Liver cancer due to hepatitis B                                  | 45<br>(21 - 85)          | --                       | 0<br>(0 - 0)        | 12<br>(6 - 21)       | 25<br>(10 - 52)          | 8<br>(3 - 16)            |
| Liver cancer due to hepatitis C                                  | 57<br>(29 - 93)          | --                       | 0<br>(0 - 0)        | 8<br>(3 - 16)        | 33<br>(14 - 56)          | 17<br>(8 - 28)           |

Web Table 31- Liberia deaths with 95% UI by age, sex, and cause in 2013

| Cause                                | Females, All Ages        | Females, 0-4 Years | Females, 5-14 Years | Females, 15-49 Years | Females, 50-69 Years   | Females, 70-80 Years   |
|--------------------------------------|--------------------------|--------------------|---------------------|----------------------|------------------------|------------------------|
| Liver cancer due to alcohol use      | 15<br>(7 - 25)           | --                 | --                  | 2<br>(1 - 3)         | 8<br>(4 - 15)          | 5<br>(2 - 9)           |
| Liver cancer due to other causes     | 34<br>(15 - 56)          | --                 | 0<br>(0 - 0)        | 9<br>(5 - 15)        | 18<br>(6 - 34)         | 6<br>(2 - 11)          |
| Larynx cancer                        | 1<br>(0 - 1)             | --                 | --                  | 0<br>(0 - 0)         | 0<br>(0 - 1)           | 0<br>(0 - 0)           |
| Tracheal, bronchus and lung cancer   | 27<br>(19 - 36)          | --                 | --                  | 3<br>(2 - 4)         | 16<br>(10 - 22)        | 8<br>(6 - 12)          |
| Breast cancer                        | 108<br>(80 - 153)        | --                 | --                  | 38<br>(27 - 53)      | 53<br>(36 - 80)        | 17<br>(12 - 26)        |
| Cervical cancer                      | 260<br>(178 - 352)       | --                 | --                  | 63<br>(43 - 91)      | 154<br>(96 - 223)      | 43<br>(27 - 62)        |
| Uterine cancer                       | 22<br>(11 - 33)          | --                 | --                  | 3<br>(2 - 5)         | 12<br>(6 - 20)         | 7<br>(3 - 11)          |
| Prostate cancer                      | --                       | --                 | --                  | --                   | --                     | --                     |
| Colon and rectum cancer              | 44<br>(33 - 56)          | --                 | --                  | 10<br>(8 - 13)       | 18<br>(13 - 24)        | 16<br>(11 - 21)        |
| Lip and oral cavity cancer           | 6<br>(4 - 8)             | --                 | --                  | 2<br>(1 - 3)         | 2<br>(1 - 4)           | 2<br>(1 - 3)           |
| Nasopharynx cancer                   | 2<br>(1 - 3)             | --                 | 0<br>(0 - 0)        | 1<br>(0 - 1)         | 1<br>(0 - 1)           | 0<br>(0 - 0)           |
| Other pharynx cancer                 | 2<br>(1 - 2)             | --                 | --                  | 0<br>(0 - 1)         | 1<br>(1 - 2)           | 0<br>(0 - 0)           |
| Gallbladder and biliary tract cancer | 19<br>(12 - 27)          | --                 | --                  | 3<br>(1 - 4)         | 11<br>(6 - 16)         | 5<br>(3 - 8)           |
| Pancreatic cancer                    | 18<br>(13 - 23)          | --                 | --                  | 2<br>(1 - 3)         | 11<br>(7 - 15)         | 5<br>(4 - 7)           |
| Malignant skin melanoma              | 3<br>(2 - 3)             | --                 | --                  | 1<br>(0 - 1)         | 1<br>(1 - 2)           | 0<br>(0 - 1)           |
| Non-melanoma skin cancer             | 2<br>(1 - 4)             | --                 | --                  | 0<br>(0 - 1)         | 1<br>(0 - 1)           | 1<br>(1 - 2)           |
| Ovarian cancer                       | 31<br>(19 - 46)          | --                 | --                  | 7<br>(5 - 10)        | 20<br>(11 - 31)        | 4<br>(2 - 7)           |
| Testicular cancer                    | --                       | --                 | --                  | --                   | --                     | --                     |
| Kidney cancer                        | 8<br>(5 - 11)            | 1<br>(0 - 2)       | 0<br>(0 - 1)        | 1<br>(1 - 2)         | 4<br>(2 - 7)           | 1<br>(1 - 2)           |
| Bladder cancer                       | 14<br>(9 - 22)           | --                 | --                  | 2<br>(1 - 4)         | 6<br>(4 - 11)          | 5<br>(3 - 9)           |
| Brain and nervous system cancer      | 9<br>(6 - 12)            | 1<br>(0 - 1)       | 1<br>(0 - 1)        | 4<br>(2 - 6)         | 3<br>(2 - 4)           | 1<br>(1 - 2)           |
| Thyroid cancer                       | 4<br>(3 - 6)             | --                 | 0<br>(0 - 0)        | 0<br>(0 - 1)         | 2<br>(1 - 4)           | 1<br>(1 - 2)           |
| Mesothelioma                         | 1<br>(1 - 1)             | --                 | --                  | 0<br>(0 - 0)         | 1<br>(0 - 1)           | 0<br>(0 - 0)           |
| Hodgkin lymphoma                     | 4<br>(2 - 6)             | 0<br>(0 - 1)       | 0<br>(0 - 1)        | 1<br>(1 - 2)         | 1<br>(0 - 2)           | 2<br>(1 - 3)           |
| Non-Hodgkin lymphoma                 | 25<br>(16 - 34)          | 2<br>(1 - 6)       | 4<br>(1 - 8)        | 8<br>(5 - 12)        | 8<br>(5 - 12)          | 3<br>(2 - 5)           |
| Multiple myeloma                     | 6<br>(4 - 10)            | --                 | --                  | 1<br>(1 - 1)         | 3<br>(2 - 5)           | 2<br>(1 - 4)           |
| Leukemia                             | 15<br>(11 - 19)          | 1<br>(0 - 1)       | 2<br>(1 - 4)        | 5<br>(3 - 7)         | 4<br>(3 - 6)           | 3<br>(2 - 4)           |
| Other neoplasms                      | 63<br>(45 - 86)          | 6<br>(2 - 11)      | 6<br>(3 - 12)       | 14<br>(9 - 20)       | 21<br>(13 - 33)        | 16<br>(11 - 24)        |
| Cardiovascular diseases              | 2,662<br>(1,980 - 3,645) | 44<br>(20 - 87)    | 14<br>(7 - 30)      | 249<br>(173 - 389)   | 1,064<br>(743 - 1,471) | 1,290<br>(973 - 1,743) |
| Rheumatic heart disease              | 33<br>(18 - 85)          | 0<br>(0 - 1)       | 1<br>(1 - 3)        | 7<br>(3 - 24)        | 11<br>(5 - 35)         | 12<br>(7 - 26)         |
| Ischemic heart disease               | 679<br>(458 - 995)       | 1<br>(0 - 4)       | 1<br>(0 - 4)        | 56<br>(35 - 102)     | 257<br>(161 - 392)     | 363<br>(250 - 533)     |
| Cerebrovascular disease              | 1,273<br>(911 - 1,880)   | 12<br>(5 - 27)     | 4<br>(2 - 9)        | 100<br>(68 - 158)    | 509<br>(342 - 756)     | 647<br>(465 - 958)     |
| Ischemic stroke                      | 791<br>(525 - 1,115)     | 2<br>(1 - 6)       | 1<br>(0 - 2)        | 21<br>(9 - 45)       | 283<br>(164 - 422)     | 485<br>(338 - 664)     |
| Hemorrhagic stroke                   | 481<br>(300 - 929)       | 10<br>(4 - 22)     | 3<br>(2 - 7)        | 80<br>(53 - 126)     | 227<br>(133 - 436)     | 162<br>(88 - 372)      |
| Hypertensive heart disease           | 235<br>(111 - 388)       | 0<br>(0 - 1)       | 0<br>(0 - 1)        | 18<br>(8 - 34)       | 90<br>(39 - 157)       | 127<br>(62 - 213)      |
| Cardiomyopathy and myocarditis       | 108<br>(73 - 164)        | 11<br>(4 - 25)     | 3<br>(1 - 6)        | 22<br>(14 - 38)      | 31<br>(18 - 48)        | 42<br>(22 - 69)        |
| Atrial fibrillation and flutter      | 0<br>(0 - 0)             | --                 | --                  | 0<br>(0 - 0)         | 0<br>(0 - 0)           | 0<br>(0 - 0)           |
| Aortic aneurysm                      | 18<br>(9 - 30)           | --                 | --                  | 2<br>(1 - 4)         | 7<br>(3 - 12)          | 8<br>(4 - 14)          |
| Peripheral vascular disease          | 1<br>(0 - 1)             | --                 | --                  | 0<br>(0 - 0)         | 0<br>(0 - 1)           | 0<br>(0 - 0)           |
| Endocarditis                         | 30<br>(19 - 51)          | 6<br>(2 - 13)      | 1<br>(0 - 2)        | 7<br>(4 - 11)        | 7<br>(4 - 13)          | 10<br>(5 - 20)         |

Web Table 31- Liberia deaths with 95% UI by age, sex, and cause in 2013

| Cause                                               | Females, All Ages  | Females, 0-4 Years | Females, 5-14 Years | Females, 15-49 Years | Females, 50-69 Years | Females, 70-80 Years |
|-----------------------------------------------------|--------------------|--------------------|---------------------|----------------------|----------------------|----------------------|
| Other cardiovascular and circulatory diseases       | 286<br>(190 - 503) | 14<br>(5 - 32)     | 4<br>(2 - 9)        | 37<br>(22 - 74)      | 152<br>(93 - 248)    | 80<br>(50 - 160)     |
| Chronic respiratory diseases                        | 290<br>(207 - 489) | 10<br>(4 - 19)     | 4<br>(2 - 6)        | 26<br>(18 - 34)      | 117<br>(76 - 204)    | 133<br>(91 - 232)    |
| Chronic obstructive pulmonary disease               | 179<br>(120 - 328) | 5<br>(2 - 11)      | 2<br>(1 - 3)        | 9<br>(6 - 13)        | 75<br>(46 - 141)     | 88<br>(57 - 171)     |
| Pneumoconiosis                                      | 1<br>(0 - 1)       | 0<br>(0 - 0)       | 0<br>(0 - 0)        | 0<br>(0 - 0)         | 0<br>(0 - 1)         | 0<br>(0 - 0)         |
| Silicosis                                           | 0<br>(0 - 0)       | 0<br>(0 - 0)       | 0<br>(0 - 0)        | 0<br>(0 - 0)         | 0<br>(0 - 0)         | 0<br>(0 - 0)         |
| Asbestosis                                          | 0<br>(0 - 0)       | 0<br>(0 - 0)       | 0<br>(0 - 0)        | 0<br>(0 - 0)         | 0<br>(0 - 0)         | 0<br>(0 - 0)         |
| Coal workers pneumoconiosis                         | 0<br>(0 - 0)       | 0<br>(0 - 0)       | 0<br>(0 - 0)        | 0<br>(0 - 0)         | 0<br>(0 - 0)         | 0<br>(0 - 0)         |
| Other pneumoconiosis                                | 0<br>(0 - 1)       | 0<br>(0 - 0)       | 0<br>(0 - 0)        | 0<br>(0 - 0)         | 0<br>(0 - 0)         | 0<br>(0 - 0)         |
| Asthma                                              | 73<br>(44 - 114)   | 3<br>(1 - 7)       | 1<br>(1 - 2)        | 11<br>(7 - 16)       | 32<br>(17 - 53)      | 26<br>(14 - 44)      |
| Interstitial lung disease and pulmonary sarcoidosis | 18<br>(4 - 35)     | 0<br>(0 - 0)       | 0<br>(0 - 0)        | 1<br>(0 - 2)         | 5<br>(1 - 11)        | 11<br>(2 - 23)       |
| Other chronic respiratory diseases                  | 20<br>(13 - 33)    | 2<br>(1 - 4)       | 0<br>(0 - 1)        | 5<br>(3 - 7)         | 5<br>(3 - 10)        | 8<br>(4 - 15)        |
| Cirrhosis                                           | 228<br>(154 - 329) | 3<br>(1 - 8)       | 3<br>(1 - 5)        | 47<br>(31 - 69)      | 112<br>(70 - 169)    | 63<br>(40 - 98)      |
| Cirrhosis due to hepatitis B                        | 57<br>(20 - 114)   | 0<br>(0 - 1)       | 0<br>(0 - 1)        | 11<br>(3 - 26)       | 29<br>(10 - 63)      | 16<br>(6 - 31)       |
| Cirrhosis due to hepatitis C                        | 83<br>(44 - 133)   | 0<br>(0 - 1)       | 1<br>(0 - 2)        | 19<br>(6 - 31)       | 41<br>(19 - 69)      | 22<br>(11 - 37)      |
| Cirrhosis due to alcohol use                        | 59<br>(32 - 107)   | --                 | --                  | 8<br>(4 - 15)        | 30<br>(14 - 57)      | 21<br>(11 - 39)      |
| Cirrhosis due to other causes                       | 30<br>(16 - 55)    | 3<br>(1 - 7)       | 2<br>(1 - 3)        | 9<br>(5 - 15)        | 12<br>(5 - 25)       | 5<br>(2 - 10)        |
| Digestive diseases                                  | 273<br>(191 - 355) | 7<br>(2 - 15)      | 8<br>(5 - 12)       | 52<br>(38 - 70)      | 102<br>(66 - 143)    | 104<br>(68 - 141)    |
| Peptic ulcer disease                                | 60<br>(34 - 93)    | 0<br>(0 - 1)       | 1<br>(0 - 2)        | 10<br>(5 - 16)       | 24<br>(13 - 40)      | 25<br>(14 - 42)      |
| Gastritis and duodenitis                            | 13<br>(4 - 38)     | 0<br>(0 - 1)       | 1<br>(0 - 1)        | 3<br>(1 - 7)         | 4<br>(1 - 13)        | 5<br>(1 - 17)        |
| Appendicitis                                        | 30<br>(17 - 46)    | 1<br>(0 - 3)       | 2<br>(1 - 4)        | 8<br>(5 - 12)        | 10<br>(4 - 17)       | 9<br>(3 - 18)        |
| Paralytic ileus and intestinal obstruction          | 73<br>(39 - 113)   | 3<br>(1 - 6)       | 2<br>(1 - 4)        | 11<br>(5 - 17)       | 27<br>(13 - 44)      | 31<br>(16 - 54)      |
| Inguinal, femoral, and abdominal hernia             | 3<br>(1 - 6)       | 0<br>(0 - 1)       | 0<br>(0 - 0)        | 1<br>(0 - 1)         | 1<br>(0 - 2)         | 1<br>(0 - 2)         |
| Inflammatory bowel disease                          | 15<br>(4 - 23)     | 1<br>(0 - 2)       | 0<br>(0 - 1)        | 4<br>(1 - 7)         | 5<br>(1 - 8)         | 4<br>(1 - 8)         |
| Vascular intestinal disorders                       | 1<br>(0 - 3)       | 0<br>(0 - 0)       | 0<br>(0 - 0)        | 0<br>(0 - 1)         | 0<br>(0 - 1)         | 0<br>(0 - 1)         |
| Gallbladder and biliary diseases                    | 25<br>(15 - 38)    | 0<br>(0 - 1)       | 1<br>(0 - 1)        | 4<br>(2 - 6)         | 11<br>(5 - 18)       | 10<br>(5 - 16)       |
| Pancreatitis                                        | 13<br>(5 - 27)     | 0<br>(0 - 0)       | 0<br>(0 - 0)        | 2<br>(1 - 4)         | 7<br>(2 - 15)        | 4<br>(1 - 9)         |
| Other digestive diseases                            | 39<br>(26 - 58)    | 1<br>(0 - 3)       | 1<br>(1 - 2)        | 10<br>(6 - 14)       | 14<br>(7 - 23)       | 14<br>(8 - 23)       |
| Neurological disorders                              | 126<br>(96 - 163)  | 12<br>(4 - 28)     | 6<br>(3 - 11)       | 24<br>(15 - 41)      | 16<br>(11 - 22)      | 68<br>(49 - 91)      |
| Alzheimer disease and other dementias               | 68<br>(49 - 91)    | --                 | --                  | 0<br>(0 - 0)         | 7<br>(5 - 10)        | 60<br>(42 - 82)      |
| Parkinson disease                                   | 0<br>(0 - 1)       | --                 | --                  | 0<br>(0 - 0)         | 0<br>(0 - 0)         | 0<br>(0 - 1)         |
| Epilepsy                                            | 45<br>(28 - 77)    | 9<br>(3 - 25)      | 5<br>(2 - 10)       | 22<br>(13 - 39)      | 4<br>(2 - 8)         | 5<br>(2 - 9)         |
| Multiple sclerosis                                  | 0<br>(0 - 1)       | --                 | --                  | 0<br>(0 - 0)         | 0<br>(0 - 0)         | 0<br>(0 - 0)         |
| Other neurological disorders                        | 12<br>(9 - 16)     | 2<br>(1 - 4)       | 1<br>(1 - 1)        | 3<br>(2 - 3)         | 4<br>(3 - 6)         | 2<br>(2 - 3)         |
| Mental and substance use disorders                  | 26<br>(14 - 38)    | 1<br>(0 - 3)       | 0<br>(0 - 0)        | 11<br>(6 - 17)       | 10<br>(5 - 16)       | 3<br>(2 - 4)         |
| Schizophrenia                                       | 1<br>(0 - 1)       | --                 | --                  | 0<br>(0 - 0)         | 0<br>(0 - 0)         | 0<br>(0 - 0)         |
| Alcohol use disorders                               | 13<br>(2 - 25)     | --                 | --                  | 6<br>(1 - 12)        | 6<br>(1 - 11)        | 1<br>(0 - 2)         |
| Drug use disorders                                  | 12<br>(8 - 16)     | 1<br>(0 - 3)       | --                  | 4<br>(3 - 6)         | 4<br>(3 - 6)         | 2<br>(1 - 3)         |
| Opioid use disorders                                | 1<br>(1 - 2)       | 0<br>(0 - 0)       | --                  | 0<br>(0 - 1)         | 0<br>(0 - 1)         | 0<br>(0 - 0)         |
| Cocaine use disorders                               | 0<br>(0 - 0)       | 0<br>(0 - 0)       | --                  | 0<br>(0 - 0)         | 0<br>(0 - 0)         | 0<br>(0 - 0)         |
| Amphetamine use disorders                           | 0<br>(0 - 0)       | 0<br>(0 - 0)       | --                  | 0<br>(0 - 0)         | 0<br>(0 - 0)         | 0<br>(0 - 0)         |

Web Table 31- Liberia deaths with 95% UI by age, sex, and cause in 2013

| Cause                                               | Females, All Ages  | Females, 0-4 Years | Females, 5-14 Years | Females, 15-49 Years | Females, 50-69 Years | Females, 70-80 Years |
|-----------------------------------------------------|--------------------|--------------------|---------------------|----------------------|----------------------|----------------------|
| Other drug use disorders                            | 11<br>(8 - 15)     | 1<br>(0 - 2)       | --                  | 4<br>(3 - 6)         | 4<br>(2 - 5)         | 2<br>(1 - 3)         |
| Eating disorders                                    | 0<br>(0 - 0)       | --                 | 0<br>(0 - 0)        | 0<br>(0 - 0)         | --                   | --                   |
| Anorexia nervosa                                    | 0<br>(0 - 0)       | --                 | 0<br>(0 - 0)        | 0<br>(0 - 0)         | --                   | --                   |
| Diabetes, urogenital, blood, and endocrine diseases | 697<br>(481 - 895) | 54<br>(26 - 90)    | 18<br>(10 - 29)     | 115<br>(82 - 154)    | 268<br>(172 - 366)   | 241<br>(157 - 319)   |
| Diabetes mellitus                                   | 321<br>(195 - 436) | 1<br>(0 - 2)       | 1<br>(0 - 2)        | 31<br>(19 - 44)      | 150<br>(84 - 216)    | 139<br>(75 - 193)    |
| Acute glomerulonephritis                            | 2<br>(1 - 4)       | 0<br>(0 - 0)       | 0<br>(0 - 0)        | 1<br>(0 - 2)         | 1<br>(0 - 2)         | 0<br>(0 - 0)         |
| Chronic kidney disease                              | 126<br>(71 - 200)  | 8<br>(2 - 16)      | 4<br>(2 - 7)        | 30<br>(16 - 45)      | 46<br>(23 - 81)      | 38<br>(21 - 64)      |
| Chronic kidney disease due to diabetes mellitus     | 2<br>(1 - 4)       | 0<br>(0 - 0)       | 0<br>(0 - 0)        | 0<br>(0 - 0)         | 1<br>(0 - 3)         | 0<br>(0 - 0)         |
| Chronic kidney disease due to hypertension          | 63<br>(31 - 113)   | 1<br>(0 - 3)       | 1<br>(0 - 2)        | 12<br>(4 - 21)       | 26<br>(12 - 48)      | 24<br>(12 - 44)      |
| Chronic kidney disease due to glomerulonephritis    | 28<br>(14 - 42)    | 4<br>(1 - 8)       | 2<br>(1 - 3)        | 12<br>(6 - 18)       | 7<br>(3 - 12)        | 4<br>(1 - 8)         |
| Chronic kidney disease due to other causes          | 34<br>(10 - 68)    | 3<br>(0 - 7)       | 2<br>(0 - 4)        | 7<br>(2 - 12)        | 12<br>(3 - 27)       | 11<br>(2 - 26)       |
| Urinary diseases and male infertility               | 98<br>(63 - 133)   | 7<br>(2 - 16)      | 2<br>(1 - 4)        | 19<br>(12 - 28)      | 38<br>(22 - 57)      | 32<br>(19 - 48)      |
| Interstitial nephritis and urinary tract infections | 87<br>(52 - 118)   | 6<br>(2 - 15)      | 2<br>(0 - 3)        | 17<br>(9 - 25)       | 33<br>(18 - 50)      | 29<br>(17 - 43)      |
| Urolithiasis                                        | 3<br>(1 - 11)      | --                 | 0<br>(0 - 1)        | 1<br>(0 - 3)         | 1<br>(0 - 5)         | 1<br>(0 - 3)         |
| Other urinary diseases                              | 9<br>(4 - 15)      | 1<br>(0 - 2)       | 0<br>(0 - 1)        | 2<br>(1 - 4)         | 4<br>(1 - 7)         | 2<br>(1 - 5)         |
| Gynecological diseases                              | 3<br>(2 - 5)       | --                 | --                  | 1<br>(1 - 3)         | 1<br>(0 - 2)         | 0<br>(0 - 1)         |
| Uterine fibroids                                    | 1<br>(0 - 1)       | --                 | --                  | 0<br>(0 - 0)         | 0<br>(0 - 0)         | 0<br>(0 - 0)         |
| Polycystic ovarian syndrome                         | 0<br>(0 - 0)       | --                 | --                  | 0<br>(0 - 0)         | 0<br>(0 - 0)         | --                   |
| Endometriosis                                       | 0<br>(0 - 1)       | --                 | --                  | 0<br>(0 - 1)         | 0<br>(0 - 0)         | --                   |
| Genital prolapse                                    | 0<br>(0 - 1)       | --                 | --                  | 0<br>(0 - 0)         | 0<br>(0 - 0)         | 0<br>(0 - 0)         |
| Other gynecological diseases                        | 1<br>(1 - 2)       | --                 | --                  | 1<br>(0 - 1)         | 1<br>(0 - 1)         | 0<br>(0 - 0)         |
| Hemoglobinopathies and hemolytic anemias            | 54<br>(25 - 101)   | 19<br>(6 - 42)     | 8<br>(3 - 16)       | 15<br>(7 - 31)       | 8<br>(3 - 13)        | 6<br>(2 - 13)        |
| Thalassemias                                        | 3<br>(1 - 7)       | 2<br>(1 - 5)       | 1<br>(0 - 1)        | 1<br>(0 - 1)         | 0<br>(0 - 0)         | 0<br>(0 - 0)         |
| Sickle cell disorders                               | 43<br>(20 - 83)    | 15<br>(5 - 35)     | 7<br>(3 - 15)       | 13<br>(6 - 28)       | 6<br>(2 - 11)        | 1<br>(0 - 3)         |
| G6PD deficiency                                     | 1<br>(0 - 2)       | 0<br>(0 - 1)       | 0<br>(0 - 0)        | 0<br>(0 - 0)         | 0<br>(0 - 0)         | 0<br>(0 - 1)         |
| Other hemoglobinopathies and hemolytic anemias      | 7<br>(3 - 14)      | 1<br>(0 - 2)       | 0<br>(0 - 0)        | 0<br>(0 - 1)         | 1<br>(0 - 2)         | 5<br>(1 - 10)        |
| Endocrine, metabolic, blood, and immune disorders   | 92<br>(50 - 129)   | 20<br>(9 - 37)     | 3<br>(1 - 7)        | 18<br>(11 - 28)      | 24<br>(13 - 39)      | 26<br>(10 - 42)      |
| Musculoskeletal disorders                           | 19<br>(8 - 32)     | --                 | 1<br>(0 - 3)        | 6<br>(3 - 10)        | 7<br>(3 - 12)        | 5<br>(2 - 9)         |
| Rheumatoid arthritis                                | 4<br>(2 - 7)       | --                 | 0<br>(0 - 0)        | 1<br>(0 - 1)         | 1<br>(1 - 2)         | 2<br>(1 - 4)         |
| Other musculoskeletal disorders                     | 15<br>(5 - 26)     | --                 | 1<br>(0 - 2)        | 5<br>(2 - 9)         | 6<br>(2 - 10)        | 3<br>(1 - 6)         |
| Other non-communicable diseases                     | 431<br>(224 - 773) | 336<br>(140 - 664) | 17<br>(7 - 32)      | 28<br>(19 - 40)      | 24<br>(15 - 34)      | 26<br>(16 - 38)      |
| Congenital anomalies                                | 355<br>(154 - 689) | 321<br>(131 - 646) | 15<br>(6 - 30)      | 13<br>(7 - 22)       | 4<br>(2 - 6)         | 3<br>(2 - 4)         |
| Neural tube defects                                 | 89<br>(20 - 253)   | 84<br>(17 - 242)   | 3<br>(1 - 7)        | 2<br>(1 - 5)         | 0<br>(0 - 1)         | 0<br>(0 - 0)         |
| Congenital heart anomalies                          | 140<br>(63 - 288)  | 126<br>(53 - 271)  | 6<br>(2 - 13)       | 5<br>(2 - 9)         | 2<br>(1 - 3)         | 1<br>(1 - 2)         |
| Cleft lip and cleft palate                          | 2<br>(0 - 6)       | 2<br>(0 - 6)       | --                  | --                   | --                   | --                   |
| Down syndrome                                       | 54<br>(15 - 142)   | 46<br>(10 - 131)   | 4<br>(1 - 8)        | 3<br>(2 - 6)         | 1<br>(0 - 2)         | 0<br>(0 - 0)         |
| Chromosomal unbalanced rearrangements               | 14<br>(3 - 43)     | 13<br>(2 - 41)     | 0<br>(0 - 1)        | 1<br>(0 - 1)         | 0<br>(0 - 0)         | 0<br>(0 - 0)         |
| Other congenital anomalies                          | 55<br>(14 - 215)   | 49<br>(11 - 196)   | 2<br>(1 - 8)        | 2<br>(1 - 6)         | 1<br>(0 - 2)         | 1<br>(0 - 2)         |
| Skin and subcutaneous diseases                      | 74<br>(51 - 99)    | 13<br>(5 - 26)     | 2<br>(1 - 3)        | 15<br>(8 - 23)       | 20<br>(12 - 29)      | 23<br>(14 - 35)      |
| Cellulitis                                          | 26<br>(13 - 38)    | 3<br>(1 - 8)       | 1<br>(0 - 1)        | 5<br>(2 - 9)         | 6<br>(2 - 11)        | 11<br>(4 - 19)       |

Web Table 31- Liberia deaths with 95% UI by age, sex, and cause in 2013

| Cause                                           | Females, All Ages  | Females, 0-4 Years | Females, 5-14 Years | Females, 15-49 Years | Females, 50-69 Years | Females, 70-80 Years |
|-------------------------------------------------|--------------------|--------------------|---------------------|----------------------|----------------------|----------------------|
| Pyoderma                                        | 44<br>(28 - 63)    | 9<br>(3 - 18)      | 1<br>(0 - 1)        | 9<br>(5 - 14)        | 14<br>(8 - 20)       | 12<br>(6 - 21)       |
| Decubitus ulcer                                 | 1<br>(1 - 2)       | 0<br>(0 - 0)       | 0<br>(0 - 0)        | 0<br>(0 - 1)         | 0<br>(0 - 0)         | 0<br>(0 - 1)         |
| Other skin and subcutaneous diseases            | 3<br>(1 - 4)       | 1<br>(0 - 2)       | 0<br>(0 - 0)        | 1<br>(0 - 2)         | 0<br>(0 - 1)         | 0<br>(0 - 1)         |
| Sudden infant death syndrome                    | 2<br>(0 - 7)       | 2<br>(0 - 7)       | --                  | --                   | --                   | --                   |
| Injuries                                        | 598<br>(431 - 787) | 116<br>(57 - 199)  | 56<br>(33 - 83)     | 178<br>(134 - 236)   | 132<br>(86 - 181)    | 116<br>(64 - 163)    |
| Transport injuries                              | 189<br>(133 - 254) | 27<br>(11 - 51)    | 20<br>(10 - 32)     | 68<br>(48 - 95)      | 51<br>(32 - 75)      | 24<br>(14 - 36)      |
| Road injuries                                   | 179<br>(128 - 241) | 23<br>(10 - 43)    | 19<br>(10 - 30)     | 66<br>(47 - 93)      | 49<br>(31 - 72)      | 23<br>(14 - 34)      |
| Pedestrian road injuries                        | 57<br>(35 - 79)    | 7<br>(3 - 14)      | 7<br>(3 - 11)       | 16<br>(9 - 25)       | 17<br>(10 - 28)      | 10<br>(5 - 15)       |
| Cyclist road injuries                           | 9<br>(5 - 14)      | 1<br>(0 - 3)       | 1<br>(1 - 3)        | 2<br>(1 - 3)         | 4<br>(2 - 7)         | 1<br>(0 - 2)         |
| Motorcyclist road injuries                      | 16<br>(10 - 25)    | 2<br>(1 - 3)       | 1<br>(0 - 2)        | 8<br>(5 - 14)        | 3<br>(2 - 6)         | 1<br>(1 - 2)         |
| Motor vehicle road injuries                     | 92<br>(64 - 126)   | 12<br>(5 - 25)     | 9<br>(5 - 16)       | 38<br>(26 - 56)      | 23<br>(14 - 36)      | 10<br>(6 - 16)       |
| Other road injuries                             | 6<br>(2 - 10)      | 1<br>(0 - 3)       | 1<br>(0 - 2)        | 1<br>(1 - 3)         | 1<br>(0 - 3)         | 1<br>(0 - 2)         |
| Other transport injuries                        | 10<br>(1 - 16)     | 4<br>(0 - 8)       | 1<br>(0 - 2)        | 2<br>(0 - 3)         | 2<br>(0 - 4)         | 1<br>(0 - 3)         |
| Unintentional injuries                          | 319<br>(204 - 459) | 86<br>(39 - 154)   | 34<br>(19 - 55)     | 61<br>(43 - 88)      | 59<br>(32 - 86)      | 80<br>(40 - 120)     |
| Falls                                           | 72<br>(35 - 109)   | 7<br>(3 - 15)      | 4<br>(1 - 8)        | 10<br>(5 - 16)       | 13<br>(7 - 21)       | 38<br>(15 - 64)      |
| Drowning                                        | 52<br>(28 - 97)    | 20<br>(7 - 51)     | 12<br>(5 - 23)      | 11<br>(6 - 18)       | 6<br>(3 - 9)         | 3<br>(2 - 5)         |
| Fire, heat, and hot substances                  | 49<br>(28 - 78)    | 15<br>(6 - 33)     | 5<br>(2 - 9)        | 11<br>(7 - 18)       | 9<br>(5 - 15)        | 9<br>(4 - 15)        |
| Poisonings                                      | 9<br>(3 - 15)      | 2<br>(0 - 6)       | 1<br>(0 - 2)        | 2<br>(1 - 4)         | 2<br>(0 - 4)         | 1<br>(0 - 2)         |
| Exposure to mechanical forces                   | 31<br>(14 - 46)    | 10<br>(3 - 20)     | 4<br>(2 - 7)        | 7<br>(4 - 11)        | 7<br>(2 - 10)        | 4<br>(1 - 6)         |
| Unintentional firearm injuries                  | 9<br>(6 - 12)      | 2<br>(1 - 4)       | 1<br>(0 - 2)        | 3<br>(2 - 6)         | 2<br>(1 - 3)         | 1<br>(0 - 2)         |
| Unintentional suffocation                       | 4<br>(1 - 12)      | 2<br>(1 - 9)       | 1<br>(0 - 1)        | 0<br>(0 - 2)         | 0<br>(0 - 1)         | 0<br>(0 - 0)         |
| Other exposure to mechanical forces             | 19<br>(4 - 30)     | 6<br>(1 - 12)      | 3<br>(1 - 6)        | 4<br>(1 - 6)         | 4<br>(1 - 7)         | 3<br>(0 - 4)         |
| Adverse effects of medical treatment            | 38<br>(13 - 73)    | 7<br>(2 - 19)      | 2<br>(1 - 4)        | 8<br>(3 - 15)        | 11<br>(3 - 23)       | 11<br>(3 - 25)       |
| Animal contact                                  | 15<br>(3 - 25)     | 2<br>(1 - 5)       | 2<br>(0 - 5)        | 4<br>(1 - 9)         | 4<br>(1 - 7)         | 2<br>(0 - 5)         |
| Venomous animal contact                         | 8<br>(2 - 17)      | 2<br>(0 - 4)       | 1<br>(0 - 3)        | 3<br>(0 - 6)         | 2<br>(0 - 4)         | 1<br>(0 - 3)         |
| Non-venomous animal contact                     | 6<br>(1 - 12)      | 1<br>(0 - 1)       | 1<br>(0 - 2)        | 2<br>(0 - 4)         | 2<br>(0 - 4)         | 1<br>(0 - 3)         |
| Foreign body                                    | 35<br>(16 - 78)    | 18<br>(5 - 50)     | 2<br>(1 - 5)        | 3<br>(1 - 6)         | 4<br>(2 - 7)         | 8<br>(3 - 15)        |
| Pulmonary aspiration and foreign body in airway | 34<br>(15 - 77)    | 18<br>(5 - 50)     | 2<br>(1 - 5)        | 3<br>(1 - 6)         | 4<br>(2 - 7)         | 8<br>(3 - 15)        |
| Foreign body in other body part                 | 1<br>(1 - 2)       | 0<br>(0 - 0)       | 0<br>(0 - 0)        | 0<br>(0 - 0)         | 0<br>(0 - 0)         | 0<br>(0 - 1)         |
| Other unintentional injuries                    | 18<br>(10 - 26)    | 3<br>(1 - 7)       | 3<br>(1 - 5)        | 4<br>(3 - 7)         | 4<br>(2 - 6)         | 4<br>(1 - 6)         |
| Self-harm and interpersonal violence            | 90<br>(64 - 126)   | 3<br>(1 - 7)       | 3<br>(2 - 5)        | 50<br>(33 - 83)      | 22<br>(12 - 33)      | 12<br>(5 - 19)       |
| Self-harm                                       | 59<br>(39 - 96)    | --                 | 1<br>(0 - 3)        | 27<br>(16 - 65)      | 20<br>(11 - 30)      | 11<br>(4 - 18)       |
| Interpersonal violence                          | 30<br>(16 - 44)    | 3<br>(1 - 7)       | 2<br>(1 - 4)        | 22<br>(11 - 34)      | 2<br>(1 - 3)         | 0<br>(0 - 1)         |
| Assault by firearm                              | 9<br>(3 - 15)      | 1<br>(0 - 2)       | 1<br>(0 - 1)        | 6<br>(2 - 12)        | 1<br>(0 - 1)         | 0<br>(0 - 0)         |
| Assault by sharp object                         | 9<br>(4 - 14)      | 1<br>(0 - 2)       | 0<br>(0 - 1)        | 7<br>(3 - 12)        | 0<br>(0 - 1)         | 0<br>(0 - 0)         |
| Assault by other means                          | 13<br>(7 - 21)     | 2<br>(1 - 4)       | 1<br>(0 - 2)        | 9<br>(4 - 15)        | 1<br>(0 - 2)         | 0<br>(0 - 0)         |

Web Table 31- Libya deaths with 95% UI by age, sex, and cause in 2013

| Cause                                                              | Both Sexes, All Ages        | Both Sexes, 0-4 Years    | Both Sexes, 5-14 Years | Both Sexes, 15-49 Years  | Both Sexes, 50-69 Years  | Both Sexes, 70-80 Years     |
|--------------------------------------------------------------------|-----------------------------|--------------------------|------------------------|--------------------------|--------------------------|-----------------------------|
| All causes                                                         | 26,201<br>(22,477 - 30,028) | 1,852<br>(1,610 - 2,148) | 346<br>(307 - 390)     | 4,489<br>(3,689 - 5,409) | 7,176<br>(5,869 - 8,549) | 12,339<br>(10,575 - 13,922) |
| Communicable, maternal, neonatal, and nutritional diseases         | 1,965<br>(1,696 - 2,246)    | 773<br>(635 - 920)       | 64<br>(46 - 88)        | 297<br>(242 - 370)       | 253<br>(198 - 313)       | 578<br>(441 - 735)          |
| HIV/AIDS and tuberculosis                                          | 86<br>(70 - 103)            | 1<br>(0 - 1)             | 1<br>(1 - 1)           | 33<br>(27 - 41)          | 23<br>(17 - 30)          | 28<br>(21 - 35)             |
| Tuberculosis                                                       | 74<br>(59 - 90)             | 1<br>(0 - 1)             | 1<br>(0 - 1)           | 24<br>(18 - 31)          | 21<br>(16 - 28)          | 28<br>(21 - 35)             |
| HIV/AIDS                                                           | 11<br>(9 - 14)              | 0<br>(0 - 0)             | 0<br>(0 - 0)           | 9<br>(7 - 11)            | 2<br>(1 - 3)             | 0<br>(0 - 0)                |
| HIV/AIDS resulting in mycobacterial infection                      | 1<br>(0 - 1)                | 0<br>(0 - 0)             | 0<br>(0 - 0)           | 0<br>(0 - 1)             | 0<br>(0 - 0)             | 0<br>(0 - 0)                |
| HIV/AIDS resulting in other diseases                               | 11<br>(9 - 13)              | 0<br>(0 - 0)             | 0<br>(0 - 0)           | 9<br>(7 - 10)            | 2<br>(1 - 2)             | 0<br>(0 - 0)                |
| Diarrrhea, lower respiratory, and other common infectious diseases | 1,074<br>(866 - 1,295)      | 171<br>(128 - 230)       | 58<br>(40 - 82)        | 187<br>(140 - 250)       | 182<br>(137 - 236)       | 476<br>(349 - 628)          |
| Diarrheal diseases                                                 | 60<br>(44 - 83)             | 24<br>(12 - 45)          | 2<br>(1 - 3)           | 7<br>(5 - 10)            | 6<br>(4 - 9)             | 20<br>(13 - 31)             |
| Intestinal infectious diseases                                     | 129<br>(62 - 229)           | 29<br>(14 - 53)          | 32<br>(15 - 57)        | 55<br>(24 - 105)         | 9<br>(4 - 18)            | 3<br>(1 - 7)                |
| Typhoid fever                                                      | 99<br>(47 - 179)            | 21<br>(10 - 39)          | 25<br>(11 - 44)        | 43<br>(18 - 82)          | 7<br>(3 - 14)            | 3<br>(1 - 5)                |
| Paratyphoid fever                                                  | 29<br>(13 - 51)             | 7<br>(3 - 14)            | 7<br>(3 - 13)          | 12<br>(4 - 23)           | 2<br>(1 - 4)             | 1<br>(0 - 1)                |
| Other intestinal infectious diseases                               | 2<br>(0 - 6)                | 1<br>(0 - 3)             | 0<br>(0 - 1)           | 1<br>(0 - 4)             | 0<br>(0 - 2)             | 0<br>(0 - 1)                |
| Lower respiratory infections                                       | 796<br>(620 - 992)          | 89<br>(60 - 127)         | 17<br>(11 - 26)        | 99<br>(75 - 132)         | 154<br>(113 - 204)       | 437<br>(313 - 586)          |
| Upper respiratory infections                                       | 1<br>(0 - 2)                | 0<br>(0 - 0)             | 0<br>(0 - 0)           | 0<br>(0 - 1)             | 0<br>(0 - 1)             | 0<br>(0 - 1)                |
| Otitis media                                                       | 2<br>(2 - 3)                | 0<br>(0 - 0)             | 0<br>(0 - 0)           | 0<br>(0 - 1)             | 0<br>(0 - 1)             | 1<br>(1 - 1)                |
| Meningitis                                                         | 43<br>(35 - 52)             | 11<br>(7 - 17)           | 3<br>(2 - 4)           | 13<br>(9 - 17)           | 8<br>(5 - 11)            | 9<br>(6 - 13)               |
| Pneumococcal meningitis                                            | 10<br>(8 - 13)              | 2<br>(1 - 3)             | 1<br>(0 - 1)           | 3<br>(2 - 5)             | 2<br>(1 - 3)             | 2<br>(1 - 4)                |
| H influenzae type B meningitis                                     | 8<br>(6 - 10)               | 4<br>(2 - 7)             | 1<br>(0 - 1)           | 2<br>(1 - 2)             | 1<br>(0 - 1)             | 1<br>(1 - 2)                |
| Meningococcal meningitis                                           | 11<br>(8 - 15)              | 3<br>(2 - 5)             | 1<br>(0 - 1)           | 3<br>(2 - 5)             | 2<br>(1 - 3)             | 2<br>(1 - 4)                |
| Other meningitis                                                   | 14<br>(10 - 18)             | 2<br>(1 - 3)             | 0<br>(0 - 1)           | 5<br>(3 - 7)             | 3<br>(2 - 5)             | 3<br>(2 - 6)                |
| Encephalitis                                                       | 27<br>(19 - 44)             | 7<br>(4 - 12)            | 2<br>(1 - 5)           | 10<br>(5 - 18)           | 4<br>(2 - 7)             | 4<br>(2 - 6)                |
| Diphtheria                                                         | 0<br>(0 - 1)                | 0<br>(0 - 1)             | 0<br>(0 - 0)           | 0<br>(0 - 0)             | 0<br>(0 - 0)             | --<br>(0 - 0)               |
| Whooping cough                                                     | 1<br>(0 - 7)                | 1<br>(0 - 7)             | 0<br>(0 - 0)           | 0<br>(0 - 0)             | 0<br>(0 - 0)             | --<br>(0 - 0)               |
| Tetanus                                                            | 1<br>(0 - 1)                | 0<br>(0 - 0)             | 0<br>(0 - 0)           | 1<br>(0 - 1)             | 0<br>(0 - 0)             | 0<br>(0 - 0)                |
| Measles                                                            | 11<br>(0 - 66)              | 9<br>(0 - 54)            | 1<br>(0 - 9)           | 0<br>(0 - 2)             | 0<br>(0 - 0)             | --<br>(0 - 0)               |
| Varicella and herpes zoster                                        | 3<br>(1 - 5)                | 0<br>(0 - 1)             | 0<br>(0 - 0)           | 1<br>(0 - 2)             | 0<br>(0 - 1)             | 1<br>(0 - 3)                |
| Neglected tropical diseases and malaria                            | 23<br>(18 - 31)             | 1<br>(0 - 5)             | 1<br>(1 - 4)           | 8<br>(6 - 12)            | 7<br>(5 - 10)            | 5<br>(4 - 8)                |
| Leishmaniasis                                                      | 0<br>(0 - 0)                | 0<br>(0 - 0)             | 0<br>(0 - 0)           | 0<br>(0 - 0)             | 0<br>(0 - 0)             | 0<br>(0 - 0)                |
| Visceral leishmaniasis                                             | 0<br>(0 - 0)                | 0<br>(0 - 0)             | 0<br>(0 - 0)           | 0<br>(0 - 0)             | 0<br>(0 - 0)             | 0<br>(0 - 0)                |
| Schistosomiasis                                                    | 11<br>(8 - 15)              | 0<br>(0 - 0)             | 0<br>(0 - 0)           | 4<br>(2 - 5)             | 5<br>(3 - 7)             | 3<br>(2 - 5)                |
| Cysticercosis                                                      | 0<br>(0 - 0)                | 0<br>(0 - 0)             | 0<br>(0 - 0)           | 0<br>(0 - 0)             | 0<br>(0 - 0)             | 0<br>(0 - 0)                |
| Cystic echinococcosis                                              | 4<br>(3 - 5)                | 0<br>(0 - 0)             | 0<br>(0 - 0)           | 2<br>(2 - 2)             | 1<br>(1 - 1)             | 1<br>(1 - 1)                |
| Dengue                                                             | 1<br>(1 - 1)                | 0<br>(0 - 0)             | 0<br>(0 - 0)           | 0<br>(0 - 1)             | 0<br>(0 - 0)             | 0<br>(0 - 0)                |
| Rabies                                                             | 1<br>(1 - 3)                | 0<br>(0 - 0)             | 0<br>(0 - 0)           | 1<br>(0 - 2)             | 0<br>(0 - 0)             | 0<br>(0 - 0)                |
| Intestinal nematode infections                                     | 2<br>(0 - 8)                | 1<br>(0 - 5)             | 0<br>(0 - 3)           | 0<br>(0 - 3)             | 0<br>(0 - 3)             | 0<br>(0 - 3)                |
| Ascariasis                                                         | 2<br>(0 - 8)                | 1<br>(0 - 5)             | 0<br>(0 - 3)           | 0<br>(0 - 3)             | 0<br>(0 - 3)             | 0<br>(0 - 3)                |
| Other neglected tropical diseases                                  | 3<br>(2 - 4)                | 0<br>(0 - 0)             | 0<br>(0 - 0)           | 1<br>(1 - 2)             | 0<br>(0 - 1)             | 1<br>(0 - 1)                |
| Maternal disorders                                                 | 33<br>(22 - 50)             | --                       | 0<br>(0 - 0)           | 33<br>(22 - 50)          | --                       | --                          |
| Maternal hemorrhage                                                | 6<br>(4 - 10)               | --                       | 0<br>(0 - 0)           | 6<br>(4 - 10)            | --                       | --                          |

Web Table 31- Libya deaths with 95% UI by age, sex, and cause in 2013

| Cause                                                            | Both Sexes, All Ages        | Both Sexes, 0-4 Years | Both Sexes, 5-14 Years | Both Sexes, 15-49 Years  | Both Sexes, 50-69 Years  | Both Sexes, 70-80 Years    |
|------------------------------------------------------------------|-----------------------------|-----------------------|------------------------|--------------------------|--------------------------|----------------------------|
| Maternal sepsis and other maternal infections                    | 3<br>(2 - 5)                | --                    | 0<br>(0 - 0)           | 3<br>(2 - 5)             | --                       | --                         |
| Maternal hypertensive disorders                                  | 4<br>(3 - 7)                | --                    | 0<br>(0 - 0)           | 4<br>(3 - 7)             | --                       | --                         |
| Maternal obstructed labor                                        | 3<br>(2 - 5)                | --                    | 0<br>(0 - 0)           | 3<br>(2 - 5)             | --                       | --                         |
| Maternal abortive outcome                                        | 5<br>(3 - 9)                | --                    | 0<br>(0 - 0)           | 5<br>(3 - 9)             | --                       | --                         |
| Indirect maternal deaths                                         | 3<br>(1 - 6)                | --                    | 0<br>(0 - 0)           | 3<br>(1 - 6)             | --                       | --                         |
| Late maternal deaths                                             | 3<br>(1 - 6)                | --                    | 0<br>(0 - 0)           | 3<br>(1 - 6)             | --                       | --                         |
| Maternal deaths aggravated by HIV/AIDS                           | 0<br>(0 - 0)                | --                    | --                     | 0<br>(0 - 0)             | --                       | --                         |
| Other maternal disorders                                         | 5<br>(2 - 9)                | --                    | 0<br>(0 - 0)           | 5<br>(2 - 9)             | --                       | --                         |
| Neonatal disorders                                               | 586<br>(468 - 716)          | 586<br>(468 - 716)    | --                     | --                       | --                       | --                         |
| Neonatal preterm birth complications                             | 406<br>(300 - 519)          | 406<br>(300 - 519)    | --                     | --                       | --                       | --                         |
| Neonatal encephalopathy due to birth asphyxia and trauma         | 64<br>(39 - 104)            | 64<br>(39 - 104)      | --                     | --                       | --                       | --                         |
| Neonatal sepsis and other neonatal infections                    | 44<br>(24 - 77)             | 44<br>(24 - 77)       | --                     | --                       | --                       | --                         |
| Hemolytic disease and other neonatal jaundice                    | 1<br>(1 - 3)                | 1<br>(1 - 3)          | --                     | --                       | --                       | --                         |
| Other neonatal disorders                                         | 70<br>(44 - 110)            | 70<br>(44 - 110)      | --                     | --                       | --                       | --                         |
| Nutritional deficiencies                                         | 81<br>(53 - 172)            | 6<br>(3 - 14)         | 2<br>(1 - 4)           | 16<br>(10 - 35)          | 14<br>(8 - 35)           | 43<br>(25 - 93)            |
| Protein-energy malnutrition                                      | 22<br>(9 - 70)              | 3<br>(1 - 9)          | 1<br>(0 - 2)           | 3<br>(1 - 11)            | 3<br>(1 - 13)            | 12<br>(4 - 37)             |
| Iodine deficiency                                                | 1<br>(0 - 2)                | 0<br>(0 - 0)          | 0<br>(0 - 0)           | 0<br>(0 - 1)             | 0<br>(0 - 1)             | 0<br>(0 - 1)               |
| Iron-deficiency anemia                                           | 52<br>(27 - 108)            | 2<br>(1 - 5)          | 1<br>(0 - 2)           | 11<br>(6 - 23)           | 10<br>(5 - 22)           | 28<br>(14 - 58)            |
| Other nutritional deficiencies                                   | 7<br>(2 - 22)               | 1<br>(0 - 1)          | 0<br>(0 - 1)           | 2<br>(1 - 6)             | 1<br>(0 - 4)             | 3<br>(1 - 9)               |
| Other communicable, maternal, neonatal, and nutritional diseases | 82<br>(63 - 106)            | 9<br>(4 - 15)         | 2<br>(1 - 3)           | 19<br>(14 - 25)          | 27<br>(19 - 37)          | 26<br>(16 - 43)            |
| Sexually transmitted diseases excluding HIV                      | 8<br>(3 - 14)               | 4<br>(0 - 8)          | 0<br>(0 - 1)           | 1<br>(1 - 2)             | 1<br>(0 - 2)             | 1<br>(1 - 3)               |
| Syphilis                                                         | 6<br>(2 - 12)               | 4<br>(0 - 8)          | 0<br>(0 - 1)           | 1<br>(0 - 1)             | 1<br>(0 - 1)             | 1<br>(1 - 3)               |
| Chlamydial infection                                             | 0<br>(0 - 0)                | --                    | 0<br>(0 - 0)           | 0<br>(0 - 0)             | 0<br>(0 - 0)             | 0<br>(0 - 0)               |
| Gonococcal infection                                             | 1<br>(0 - 1)                | --                    | 0<br>(0 - 0)           | 0<br>(0 - 0)             | 0<br>(0 - 0)             | 0<br>(0 - 0)               |
| Other sexually transmitted diseases                              | 0<br>(0 - 1)                | --                    | 0<br>(0 - 0)           | 0<br>(0 - 0)             | 0<br>(0 - 0)             | 0<br>(0 - 0)               |
| Hepatitis                                                        | 37<br>(29 - 47)             | 1<br>(1 - 2)          | 0<br>(0 - 1)           | 9<br>(7 - 12)            | 17<br>(12 - 22)          | 10<br>(7 - 13)             |
| Acute hepatitis A                                                | 2<br>(1 - 5)                | 0<br>(0 - 1)          | 0<br>(0 - 0)           | 1<br>(0 - 2)             | 1<br>(0 - 2)             | 0<br>(0 - 1)               |
| Acute hepatitis B                                                | 24<br>(17 - 33)             | 1<br>(0 - 1)          | 0<br>(0 - 0)           | 4<br>(2 - 6)             | 12<br>(8 - 17)           | 8<br>(5 - 11)              |
| Acute hepatitis C                                                | 3<br>(1 - 7)                | --                    | 0<br>(0 - 0)           | 1<br>(0 - 2)             | 1<br>(0 - 3)             | 1<br>(0 - 2)               |
| Acute hepatitis E                                                | 8<br>(4 - 13)               | 0<br>(0 - 0)          | 0<br>(0 - 0)           | 4<br>(2 - 6)             | 3<br>(1 - 6)             | 1<br>(0 - 2)               |
| Other infectious diseases                                        | 37<br>(24 - 58)             | 4<br>(2 - 9)          | 1<br>(1 - 3)           | 8<br>(5 - 13)            | 9<br>(5 - 18)            | 15<br>(6 - 31)             |
| Non-communicable diseases                                        | 21,819<br>(18,607 - 25,181) | 959<br>(810 - 1,145)  | 171<br>(146 - 199)     | 2,796<br>(2,253 - 3,396) | 6,451<br>(5,262 - 7,707) | 11,442<br>(9,785 - 12,944) |
| Neoplasms                                                        | 3,795<br>(3,087 - 4,468)    | 16<br>(11 - 22)       | 38<br>(30 - 46)        | 781<br>(630 - 962)       | 1,609<br>(1,287 - 1,948) | 1,351<br>(1,102 - 1,582)   |
| Esophageal cancer                                                | 45<br>(30 - 69)             | --                    | --                     | 4<br>(3 - 6)             | 24<br>(16 - 36)          | 17<br>(10 - 28)            |
| Stomach cancer                                                   | 200<br>(156 - 242)          | --                    | --                     | 34<br>(26 - 44)          | 86<br>(66 - 109)         | 79<br>(60 - 100)           |
| Liver cancer                                                     | 235<br>(182 - 300)          | --                    | 2<br>(1 - 3)           | 34<br>(24 - 48)          | 103<br>(77 - 136)        | 97<br>(70 - 132)           |
| Liver cancer due to hepatitis B                                  | 77<br>(51 - 111)            | --                    | 1<br>(0 - 2)           | 15<br>(10 - 23)          | 37<br>(23 - 55)          | 24<br>(14 - 38)            |
| Liver cancer due to hepatitis C                                  | 109<br>(69 - 158)           | --                    | 0<br>(0 - 1)           | 12<br>(7 - 20)           | 47<br>(28 - 71)          | 49<br>(30 - 75)            |
| Liver cancer due to alcohol use                                  | 22<br>(12 - 33)             | --                    | --                     | 2<br>(1 - 3)             | 8<br>(4 - 12)            | 13<br>(6 - 21)             |
| Liver cancer due to other causes                                 | 27<br>(14 - 45)             | --                    | 1<br>(0 - 2)           | 5<br>(3 - 8)             | 11<br>(5 - 19)           | 10<br>(5 - 19)             |

Web Table 31- Libya deaths with 95% UI by age, sex, and cause in 2013

| Cause                                         | Both Sexes, All Ages       | Both Sexes, 0-4 Years | Both Sexes, 5-14 Years | Both Sexes, 15-49 Years | Both Sexes, 50-69 Years  | Both Sexes, 70-80 Years  |
|-----------------------------------------------|----------------------------|-----------------------|------------------------|-------------------------|--------------------------|--------------------------|
| Larynx cancer                                 | 98<br>(64 - 129)           | --                    | --                     | 10<br>(6 - 14)          | 46<br>(30 - 63)          | 42<br>(26 - 58)          |
| Tracheal, bronchus and lung cancer            | 756<br>(580 - 939)         | --                    | --                     | 84<br>(59 - 115)        | 393<br>(292 - 500)       | 279<br>(207 - 351)       |
| Breast cancer                                 | 253<br>(190 - 331)         | --                    | --                     | 112<br>(80 - 154)       | 99<br>(72 - 133)         | 42<br>(31 - 56)          |
| Cervical cancer                               | 132<br>(85 - 182)          | --                    | --                     | 20<br>(13 - 31)         | 65<br>(39 - 94)          | 47<br>(28 - 71)          |
| Uterine cancer                                | 14<br>(9 - 23)             | --                    | --                     | 1<br>(1 - 3)            | 7<br>(4 - 12)            | 5<br>(3 - 9)             |
| Prostate cancer                               | 150<br>(95 - 236)          | --                    | --                     | 2<br>(1 - 4)            | 24<br>(14 - 38)          | 124<br>(76 - 195)        |
| Colon and rectum cancer                       | 373<br>(301 - 452)         | --                    | --                     | 93<br>(72 - 119)        | 154<br>(120 - 192)       | 126<br>(99 - 156)        |
| Lip and oral cavity cancer                    | 25<br>(18 - 32)            | --                    | --                     | 5<br>(4 - 8)            | 12<br>(8 - 16)           | 8<br>(5 - 11)            |
| Nasopharynx cancer                            | 68<br>(43 - 90)            | --                    | 3<br>(1 - 9)           | 22<br>(13 - 33)         | 27<br>(17 - 39)          | 15<br>(9 - 22)           |
| Other pharynx cancer                          | 12<br>(9 - 18)             | --                    | --                     | 5<br>(3 - 8)            | 6<br>(4 - 8)             | 2<br>(1 - 3)             |
| Gallbladder and biliary tract cancer          | 76<br>(47 - 109)           | --                    | --                     | 13<br>(7 - 20)          | 34<br>(20 - 50)          | 29<br>(16 - 46)          |
| Pancreatic cancer                             | 234<br>(187 - 285)         | --                    | --                     | 25<br>(18 - 34)         | 110<br>(84 - 139)        | 100<br>(77 - 125)        |
| Malignant skin melanoma                       | 11<br>(8 - 16)             | --                    | --                     | 4<br>(3 - 6)            | 4<br>(3 - 7)             | 3<br>(2 - 4)             |
| Non-melanoma skin cancer                      | 9<br>(6 - 14)              | --                    | --                     | 2<br>(1 - 3)            | 3<br>(2 - 4)             | 5<br>(3 - 8)             |
| Ovarian cancer                                | 112<br>(82 - 150)          | --                    | --                     | 32<br>(22 - 46)         | 46<br>(31 - 65)          | 33<br>(22 - 47)          |
| Testicular cancer                             | 5<br>(3 - 7)               | --                    | --                     | 3<br>(2 - 4)            | 1<br>(1 - 3)             | 1<br>(0 - 1)             |
| Kidney cancer                                 | 110<br>(85 - 139)          | 1<br>(1 - 3)          | 2<br>(1 - 3)           | 21<br>(16 - 29)         | 46<br>(33 - 62)          | 40<br>(28 - 55)          |
| Bladder cancer                                | 132<br>(101 - 166)         | --                    | --                     | 11<br>(7 - 16)          | 53<br>(38 - 71)          | 69<br>(51 - 89)          |
| Brain and nervous system cancer               | 187<br>(133 - 257)         | 3<br>(1 - 5)          | 7<br>(5 - 10)          | 62<br>(44 - 88)         | 85<br>(55 - 121)         | 31<br>(21 - 46)          |
| Thyroid cancer                                | 21<br>(15 - 28)            | --                    | 0<br>(0 - 0)           | 4<br>(3 - 5)            | 9<br>(6 - 13)            | 8<br>(6 - 12)            |
| Mesothelioma                                  | 8<br>(6 - 10)              | --                    | --                     | 2<br>(2 - 3)            | 3<br>(2 - 5)             | 2<br>(1 - 4)             |
| Hodgkin lymphoma                              | 33<br>(19 - 44)            | 0<br>(0 - 1)          | 2<br>(1 - 4)           | 19<br>(11 - 27)         | 7<br>(4 - 10)            | 4<br>(2 - 7)             |
| Non-Hodgkin lymphoma                          | 133<br>(102 - 167)         | 2<br>(1 - 3)          | 4<br>(3 - 6)           | 38<br>(29 - 49)         | 47<br>(34 - 63)          | 43<br>(31 - 57)          |
| Multiple myeloma                              | 46<br>(32 - 60)            | --                    | --                     | 9<br>(6 - 14)           | 21<br>(15 - 29)          | 16<br>(11 - 21)          |
| Leukemia                                      | 158<br>(132 - 188)         | 4<br>(2 - 7)          | 10<br>(7 - 13)         | 59<br>(47 - 73)         | 46<br>(36 - 56)          | 40<br>(31 - 50)          |
| Other neoplasms                               | 158<br>(121 - 219)         | 6<br>(4 - 10)         | 8<br>(5 - 11)          | 49<br>(35 - 70)         | 50<br>(34 - 74)          | 46<br>(33 - 66)          |
| Cardiovascular diseases                       | 11,438<br>(9,657 - 13,205) | 231<br>(182 - 291)    | 51<br>(40 - 64)        | 1,221<br>(977 - 1,502)  | 3,207<br>(2,622 - 3,834) | 6,728<br>(5,785 - 7,666) |
| Rheumatic heart disease                       | 77<br>(55 - 98)            | 2<br>(1 - 4)          | 3<br>(2 - 4)           | 23<br>(16 - 32)         | 16<br>(12 - 22)          | 32<br>(22 - 43)          |
| Ischemic heart disease                        | 6,328<br>(5,196 - 7,532)   | 35<br>(19 - 59)       | 9<br>(6 - 13)          | 706<br>(546 - 878)      | 2,034<br>(1,590 - 2,470) | 3,544<br>(2,942 - 4,241) |
| Cerebrovascular disease                       | 3,678<br>(2,960 - 4,477)   | 76<br>(53 - 105)      | 22<br>(16 - 29)        | 297<br>(227 - 391)      | 812<br>(634 - 1,028)     | 2,471<br>(1,975 - 2,991) |
| Ischemic stroke                               | 2,012<br>(1,559 - 2,465)   | 5<br>(3 - 9)          | 3<br>(1 - 4)           | 62<br>(40 - 85)         | 352<br>(260 - 464)       | 1,591<br>(1,226 - 1,943) |
| Hemorrhagic stroke                            | 1,665<br>(1,273 - 2,167)   | 70<br>(49 - 98)       | 19<br>(14 - 25)        | 236<br>(177 - 314)      | 460<br>(341 - 622)       | 880<br>(625 - 1,183)     |
| Hypertensive heart disease                    | 462<br>(329 - 630)         | 1<br>(1 - 2)          | 1<br>(0 - 1)           | 38<br>(25 - 53)         | 111<br>(76 - 152)        | 312<br>(218 - 455)       |
| Cardiomyopathy and myocarditis                | 283<br>(219 - 382)         | 61<br>(41 - 89)       | 9<br>(6 - 13)          | 58<br>(42 - 82)         | 59<br>(41 - 92)          | 96<br>(65 - 145)         |
| Atrial fibrillation and flutter               | 18<br>(12 - 25)            | --                    | --                     | 1<br>(1 - 2)            | 4<br>(2 - 6)             | 13<br>(8 - 19)           |
| Aortic aneurysm                               | 80<br>(56 - 108)           | --                    | --                     | 8<br>(6 - 11)           | 31<br>(20 - 44)          | 40<br>(27 - 58)          |
| Peripheral vascular disease                   | 9<br>(5 - 14)              | --                    | --                     | 1<br>(0 - 1)            | 2<br>(1 - 3)             | 7<br>(4 - 10)            |
| Endocarditis                                  | 54<br>(39 - 73)            | 13<br>(8 - 21)        | 1<br>(1 - 2)           | 9<br>(6 - 14)           | 9<br>(6 - 13)            | 21<br>(13 - 30)          |
| Other cardiovascular and circulatory diseases | 449<br>(337 - 620)         | 42<br>(27 - 63)       | 6<br>(4 - 9)           | 79<br>(59 - 108)        | 129<br>(90 - 186)        | 193<br>(129 - 287)       |
| Chronic respiratory diseases                  | 1,354<br>(1,078 - 1,686)   | 8<br>(5 - 11)         | 4<br>(3 - 5)           | 117<br>(89 - 151)       | 366<br>(277 - 477)       | 859<br>(681 - 1,082)     |



Web Table 31- Libya deaths with 95% UI by age, sex, and cause in 2013

| Cause                                               | Both Sexes, All Ages   | Both Sexes, 0-4 Years | Both Sexes, 5-14 Years | Both Sexes, 15-49 Years | Both Sexes, 50-69 Years | Both Sexes, 70-80 Years |
|-----------------------------------------------------|------------------------|-----------------------|------------------------|-------------------------|-------------------------|-------------------------|
| Chronic obstructive pulmonary disease               | 1,080<br>(839 - 1,395) | 5<br>(3 - 7)          | 2<br>(1 - 2)           | 64<br>(46 - 86)         | 286<br>(213 - 379)      | 724<br>(561 - 943)      |
| Pneumoconiosis                                      | 23<br>(15 - 36)        | 0<br>(0 - 0)          | 0<br>(0 - 0)           | 7<br>(4 - 11)           | 7<br>(4 - 12)           | 8<br>(5 - 14)           |
| Silicosis                                           | 6<br>(4 - 11)          | 0<br>(0 - 0)          | 0<br>(0 - 0)           | 0<br>(0 - 1)            | 1<br>(1 - 2)            | 4<br>(2 - 8)            |
| Asbestosis                                          | 2<br>(1 - 3)           | 0<br>(0 - 0)          | 0<br>(0 - 0)           | 1<br>(1 - 2)            | 0<br>(0 - 1)            | 0<br>(0 - 0)            |
| Coal workers pneumoconiosis                         | 1<br>(1 - 1)           | 0<br>(0 - 0)          | 0<br>(0 - 0)           | 0<br>(0 - 1)            | 0<br>(0 - 0)            | 0<br>(0 - 0)            |
| Other pneumoconiosis                                | 14<br>(9 - 22)         | 0<br>(0 - 0)          | 0<br>(0 - 0)           | 5<br>(3 - 8)            | 6<br>(3 - 9)            | 4<br>(2 - 6)            |
| Asthma                                              | 156<br>(106 - 230)     | 2<br>(1 - 3)          | 2<br>(1 - 2)           | 33<br>(23 - 46)         | 47<br>(30 - 70)         | 73<br>(46 - 116)        |
| Interstitial lung disease and pulmonary sarcoidosis | 68<br>(10 - 135)       | 0<br>(0 - 0)          | 0<br>(0 - 0)           | 6<br>(1 - 11)           | 21<br>(3 - 43)          | 42<br>(6 - 91)          |
| Other chronic respiratory diseases                  | 26<br>(17 - 40)        | 1<br>(1 - 2)          | 1<br>(0 - 1)           | 8<br>(5 - 12)           | 4<br>(3 - 8)            | 12<br>(7 - 21)          |
| Cirrhosis                                           | 521<br>(397 - 679)     | 3<br>(2 - 7)          | 3<br>(2 - 4)           | 107<br>(79 - 144)       | 216<br>(159 - 289)      | 191<br>(142 - 260)      |
| Cirrhosis due to hepatitis B                        | 202<br>(112 - 311)     | 0<br>(0 - 0)          | 1<br>(0 - 1)           | 39<br>(19 - 64)         | 81<br>(41 - 134)        | 82<br>(47 - 126)        |
| Cirrhosis due to hepatitis C                        | 214<br>(103 - 340)     | 0<br>(0 - 1)          | 1<br>(0 - 1)           | 45<br>(21 - 76)         | 96<br>(44 - 160)        | 73<br>(33 - 117)        |
| Cirrhosis due to alcohol use                        | 55<br>(31 - 94)        | -                     | -                      | 7<br>(4 - 13)           | 22<br>(11 - 40)         | 25<br>(14 - 46)         |
| Cirrhosis due to other causes                       | 50<br>(31 - 75)        | 3<br>(1 - 6)          | 2<br>(1 - 3)           | 17<br>(10 - 27)         | 17<br>(8 - 31)          | 11<br>(6 - 18)          |
| Digestive diseases                                  | 312<br>(254 - 402)     | 3<br>(2 - 5)          | 3<br>(2 - 4)           | 52<br>(40 - 72)         | 84<br>(65 - 118)        | 169<br>(134 - 213)      |
| Peptic ulcer disease                                | 80<br>(59 - 106)       | 0<br>(0 - 0)          | 0<br>(0 - 0)           | 10<br>(7 - 15)          | 23<br>(16 - 33)         | 47<br>(33 - 65)         |
| Gastritis and duodenitis                            | 4<br>(3 - 8)           | 0<br>(0 - 0)          | 0<br>(0 - 0)           | 1<br>(1 - 2)            | 1<br>(1 - 2)            | 1<br>(1 - 3)            |
| Appendicitis                                        | 13<br>(9 - 18)         | 0<br>(0 - 1)          | 0<br>(0 - 0)           | 4<br>(2 - 5)            | 4<br>(2 - 5)            | 5<br>(3 - 8)            |
| Paralytic ileus and intestinal obstruction          | 63<br>(43 - 102)       | 1<br>(0 - 2)          | 1<br>(0 - 1)           | 10<br>(6 - 18)          | 15<br>(10 - 28)         | 36<br>(23 - 57)         |
| Inguinal, femoral, and abdominal hernia             | 6<br>(4 - 10)          | 0<br>(0 - 0)          | 0<br>(0 - 0)           | 1<br>(1 - 2)            | 1<br>(1 - 2)            | 3<br>(2 - 6)            |
| Inflammatory bowel disease                          | 18<br>(13 - 24)        | 0<br>(0 - 1)          | 0<br>(0 - 0)           | 4<br>(3 - 6)            | 4<br>(3 - 7)            | 8<br>(5 - 12)           |
| Vascular intestinal disorders                       | 11<br>(6 - 21)         | 0<br>(0 - 0)          | 0<br>(0 - 0)           | 3<br>(1 - 5)            | 3<br>(2 - 6)            | 5<br>(3 - 10)           |
| Gallbladder and biliary diseases                    | 55<br>(41 - 75)        | 0<br>(0 - 1)          | 0<br>(0 - 0)           | 6<br>(4 - 9)            | 14<br>(9 - 20)          | 34<br>(23 - 49)         |
| Pancreatitis                                        | 25<br>(18 - 35)        | 0<br>(0 - 0)          | 0<br>(0 - 0)           | 7<br>(5 - 10)           | 8<br>(6 - 12)           | 9<br>(6 - 14)           |
| Other digestive diseases                            | 37<br>(27 - 51)        | 1<br>(0 - 1)          | 0<br>(0 - 1)           | 6<br>(4 - 9)            | 10<br>(7 - 15)          | 20<br>(13 - 29)         |
| Neurological disorders                              | 1,015<br>(831 - 1,210) | 9<br>(5 - 14)         | 6<br>(3 - 9)           | 47<br>(30 - 67)         | 106<br>(78 - 137)       | 849<br>(686 - 1,022)    |
| Alzheimer disease and other dementias               | 922<br>(746 - 1,101)   | -                     | -                      | 0<br>(0 - 1)            | 91<br>(65 - 120)        | 831<br>(668 - 1,003)    |
| Parkinson disease                                   | 9<br>(6 - 14)          | -                     | -                      | 1<br>(0 - 1)            | 2<br>(1 - 3)            | 7<br>(4 - 11)           |
| Epilepsy                                            | 60<br>(35 - 85)        | 4<br>(2 - 8)          | 4<br>(2 - 8)           | 37<br>(21 - 56)         | 9<br>(5 - 13)           | 6<br>(3 - 10)           |
| Multiple sclerosis                                  | 5<br>(3 - 7)           | -                     | -                      | 2<br>(1 - 3)            | 2<br>(1 - 2)            | 1<br>(0 - 1)            |
| Other neurological disorders                        | 20<br>(16 - 25)        | 5<br>(3 - 6)          | 1<br>(1 - 2)           | 7<br>(5 - 9)            | 3<br>(2 - 4)            | 4<br>(3 - 6)            |
| Mental and substance use disorders                  | 126<br>(98 - 162)      | 1<br>(1 - 1)          | 0<br>(0 - 0)           | 93<br>(71 - 121)        | 26<br>(18 - 35)         | 7<br>(5 - 9)            |
| Schizophrenia                                       | 2<br>(1 - 2)           | -                     | -                      | 1<br>(1 - 1)            | 0<br>(0 - 1)            | 0<br>(0 - 1)            |
| Alcohol use disorders                               | 10<br>(7 - 18)         | -                     | -                      | 5<br>(3 - 8)            | 4<br>(3 - 8)            | 1<br>(1 - 2)            |
| Drug use disorders                                  | 113<br>(88 - 147)      | 1<br>(1 - 1)          | -                      | 86<br>(66 - 115)        | 21<br>(15 - 29)         | 5<br>(4 - 6)            |
| Opioid use disorders                                | 62<br>(48 - 81)        | 1<br>(0 - 1)          | -                      | 48<br>(36 - 63)         | 11<br>(7 - 15)          | 3<br>(2 - 4)            |
| Cocaine use disorders                               | 2<br>(1 - 2)           | 0<br>(0 - 0)          | -                      | 1<br>(1 - 2)            | 0<br>(0 - 0)            | 0<br>(0 - 0)            |
| Amphetamine use disorders                           | 1<br>(1 - 2)           | 0<br>(0 - 0)          | -                      | 1<br>(1 - 1)            | 0<br>(0 - 0)            | 0<br>(0 - 0)            |
| Other drug use disorders                            | 48<br>(37 - 63)        | 0<br>(0 - 1)          | -                      | 36<br>(28 - 48)         | 10<br>(7 - 14)          | 2<br>(2 - 3)            |
| Eating disorders                                    | 1<br>(1 - 1)           | -                     | 0<br>(0 - 0)           | 1<br>(1 - 1)            | -                       | -                       |

Web Table 31- Libya deaths with 95% UI by age, sex, and cause in 2013

| Cause                                               | Both Sexes, All Ages     | Both Sexes, 0-4 Years | Both Sexes, 5-14 Years | Both Sexes, 15-49 Years | Both Sexes, 50-69 Years | Both Sexes, 70-80 Years |
|-----------------------------------------------------|--------------------------|-----------------------|------------------------|-------------------------|-------------------------|-------------------------|
| Anorexia nervosa                                    | 1<br>(1 - 1)             | --                    | 0<br>(0 - 0)           | 1<br>(1 - 1)            | --                      | --                      |
| Diabetes, urogenital, blood, and endocrine diseases | 2,364<br>(1,836 - 2,848) | 32<br>(25 - 43)       | 17<br>(14 - 22)        | 297<br>(231 - 381)      | 796<br>(612 - 995)      | 1,221<br>(939 - 1,480)  |
| Diabetes mellitus                                   | 1,173<br>(887 - 1,455)   | 3<br>(2 - 4)          | 2<br>(1 - 3)           | 92<br>(67 - 119)        | 425<br>(315 - 538)      | 653<br>(481 - 828)      |
| Acute glomerulonephritis                            | 4<br>(3 - 5)             | 0<br>(0 - 0)          | 0<br>(0 - 0)           | 1<br>(1 - 2)            | 1<br>(1 - 1)            | 1<br>(1 - 2)            |
| Chronic kidney disease                              | 956<br>(686 - 1,270)     | 6<br>(4 - 10)         | 5<br>(4 - 7)           | 139<br>(97 - 195)       | 324<br>(224 - 440)      | 482<br>(339 - 648)      |
| Chronic kidney disease due to diabetes mellitus     | 34<br>(13 - 59)          | 0<br>(0 - 1)          | 0<br>(0 - 1)           | 8<br>(3 - 14)           | 12<br>(5 - 21)          | 13<br>(5 - 25)          |
| Chronic kidney disease due to hypertension          | 438<br>(319 - 598)       | 1<br>(0 - 2)          | 1<br>(1 - 1)           | 59<br>(41 - 88)         | 155<br>(109 - 219)      | 221<br>(156 - 309)      |
| Chronic kidney disease due to glomerulonephritis    | 24<br>(14 - 34)          | 1<br>(0 - 1)          | 0<br>(0 - 1)           | 6<br>(3 - 9)            | 7<br>(4 - 10)           | 10<br>(6 - 16)          |
| Chronic kidney disease due to other causes          | 460<br>(241 - 690)       | 4<br>(2 - 7)          | 3<br>(2 - 5)           | 66<br>(33 - 109)        | 150<br>(72 - 242)       | 236<br>(117 - 375)      |
| Urinary diseases and male infertility               | 79<br>(60 - 103)         | 1<br>(1 - 3)          | 1<br>(0 - 1)           | 12<br>(9 - 16)          | 19<br>(14 - 28)         | 45<br>(32 - 63)         |
| Interstitial nephritis and urinary tract infections | 41<br>(28 - 56)          | 1<br>(1 - 2)          | 0<br>(0 - 1)           | 7<br>(5 - 10)           | 9<br>(6 - 13)           | 23<br>(14 - 34)         |
| Urolithiasis                                        | 4<br>(2 - 5)             | --                    | 0<br>(0 - 0)           | 1<br>(1 - 1)            | 1<br>(1 - 2)            | 2<br>(1 - 3)            |
| Other urinary diseases                              | 35<br>(25 - 49)          | 0<br>(0 - 1)          | 0<br>(0 - 0)           | 4<br>(3 - 6)            | 9<br>(6 - 15)           | 21<br>(14 - 30)         |
| Gynecological diseases                              | 1<br>(0 - 1)             | --                    | --                     | 0<br>(0 - 1)            | 0<br>(0 - 0)            | 0<br>(0 - 0)            |
| Uterine fibroids                                    | 0<br>(0 - 0)             | --                    | --                     | 0<br>(0 - 0)            | 0<br>(0 - 0)            | 0<br>(0 - 0)            |
| Polycystic ovarian syndrome                         | 0<br>(0 - 0)             | --                    | --                     | 0<br>(0 - 0)            | 0<br>(0 - 0)            | --                      |
| Endometriosis                                       | 0<br>(0 - 0)             | --                    | --                     | 0<br>(0 - 0)            | 0<br>(0 - 0)            | --                      |
| Genital prolapse                                    | 0<br>(0 - 0)             | --                    | --                     | 0<br>(0 - 0)            | 0<br>(0 - 0)            | 0<br>(0 - 0)            |
| Other gynecological diseases                        | 0<br>(0 - 0)             | --                    | --                     | 0<br>(0 - 0)            | 0<br>(0 - 0)            | 0<br>(0 - 0)            |
| Hemoglobinopathies and hemolytic anemias            | 72<br>(50 - 106)         | 9<br>(6 - 13)         | 6<br>(4 - 8)           | 34<br>(22 - 50)         | 9<br>(5 - 16)           | 14<br>(9 - 22)          |
| Thalassemias                                        | 28<br>(20 - 39)          | 7<br>(4 - 10)         | 4<br>(3 - 6)           | 17<br>(11 - 24)         | 0<br>(0 - 0)            | 0<br>(0 - 0)            |
| Sickle cell disorders                               | 22<br>(15 - 34)          | 1<br>(1 - 2)          | 1<br>(1 - 2)           | 13<br>(8 - 20)          | 6<br>(3 - 10)           | 0<br>(0 - 1)            |
| G6PD deficiency                                     | 1<br>(1 - 2)             | 0<br>(0 - 0)          | 0<br>(0 - 0)           | 1<br>(0 - 1)            | 0<br>(0 - 0)            | 0<br>(0 - 0)            |
| Other hemoglobinopathies and hemolytic anemias      | 21<br>(14 - 33)          | 1<br>(1 - 1)          | 0<br>(0 - 0)           | 3<br>(2 - 5)            | 3<br>(2 - 5)            | 14<br>(8 - 21)          |
| Endocrine, metabolic, blood, and immune disorders   | 78<br>(61 - 107)         | 13<br>(8 - 19)        | 4<br>(2 - 5)           | 19<br>(14 - 28)         | 17<br>(12 - 27)         | 25<br>(17 - 40)         |
| Musculoskeletal disorders                           | 70<br>(50 - 89)          | --                    | 2<br>(2 - 3)           | 26<br>(19 - 34)         | 16<br>(11 - 21)         | 26<br>(16 - 36)         |
| Rheumatoid arthritis                                | 8<br>(5 - 11)            | --                    | 0<br>(0 - 1)           | 2<br>(1 - 3)            | 2<br>(1 - 3)            | 3<br>(2 - 5)            |
| Other musculoskeletal disorders                     | 63<br>(45 - 79)          | --                    | 2<br>(1 - 3)           | 24<br>(17 - 31)         | 14<br>(10 - 19)         | 23<br>(14 - 31)         |
| Other non-communicable diseases                     | 823<br>(694 - 978)       | 656<br>(529 - 810)    | 47<br>(35 - 62)        | 55<br>(42 - 71)         | 24<br>(18 - 33)         | 41<br>(31 - 54)         |
| Congenital anomalies                                | 787<br>(658 - 944)       | 647<br>(523 - 799)    | 47<br>(35 - 62)        | 51<br>(39 - 67)         | 19<br>(14 - 27)         | 24<br>(15 - 33)         |
| Neural tube defects                                 | 12<br>(5 - 25)           | 10<br>(4 - 24)        | 0<br>(0 - 1)           | 1<br>(0 - 1)            | 0<br>(0 - 0)            | 0<br>(0 - 0)            |
| Congenital heart anomalies                          | 285<br>(214 - 378)       | 250<br>(182 - 340)    | 17<br>(11 - 25)        | 12<br>(9 - 17)          | 3<br>(2 - 4)            | 3<br>(2 - 5)            |
| Cleft lip and cleft palate                          | 0<br>(0 - 1)             | 0<br>(0 - 1)          | --                     | --                      | --                      | --                      |
| Down syndrome                                       | 27<br>(14 - 43)          | 18<br>(8 - 31)        | 3<br>(2 - 5)           | 5<br>(3 - 9)            | 1<br>(0 - 2)            | 0<br>(0 - 0)            |
| Chromosomal unbalanced rearrangements               | 10<br>(6 - 16)           | 7<br>(4 - 12)         | 1<br>(0 - 1)           | 2<br>(1 - 3)            | 0<br>(0 - 1)            | 0<br>(0 - 1)            |
| Other congenital anomalies                          | 452<br>(341 - 567)       | 362<br>(259 - 467)    | 25<br>(18 - 34)        | 31<br>(22 - 42)         | 15<br>(10 - 21)         | 20<br>(12 - 27)         |
| Skin and subcutaneous diseases                      | 28<br>(21 - 39)          | 1<br>(0 - 1)          | 0<br>(0 - 1)           | 4<br>(3 - 6)            | 5<br>(4 - 7)            | 18<br>(12 - 26)         |
| Cellulitis                                          | 3<br>(2 - 5)             | 0<br>(0 - 0)          | 0<br>(0 - 0)           | 1<br>(0 - 1)            | 1<br>(0 - 1)            | 2<br>(1 - 3)            |
| Pyoderma                                            | 13<br>(9 - 18)           | 1<br>(0 - 1)          | 0<br>(0 - 0)           | 2<br>(1 - 3)            | 3<br>(2 - 4)            | 8<br>(5 - 12)           |
| Decubitus ulcer                                     | 11<br>(7 - 16)           | 0<br>(0 - 0)          | 0<br>(0 - 0)           | 1<br>(1 - 2)            | 2<br>(1 - 2)            | 8<br>(5 - 12)           |

Web Table 31- Libya deaths with 95% UI by age, sex, and cause in 2013

| Cause                                           | Both Sexes, All Ages     | Both Sexes, 0-4 Years | Both Sexes, 5-14 Years | Both Sexes, 15-49 Years  | Both Sexes, 50-69 Years | Both Sexes, 70-80 Years |
|-------------------------------------------------|--------------------------|-----------------------|------------------------|--------------------------|-------------------------|-------------------------|
| Other skin and subcutaneous diseases            | 1<br>(1 - 1)             | 0<br>(0 - 0)          | 0<br>(0 - 0)           | 0<br>(0 - 1)             | 0<br>(0 - 0)            | 0<br>(0 - 0)            |
| Sudden infant death syndrome                    | 8<br>(3 - 21)            | 8<br>(3 - 21)         | --                     | --                       | --                      | --                      |
| Injuries                                        | 2,418<br>(2,006 - 2,917) | 119<br>(93 - 150)     | 111<br>(94 - 131)      | 1,396<br>(1,133 - 1,739) | 472<br>(375 - 601)      | 319<br>(259 - 390)      |
| Transport injuries                              | 1,117<br>(880 - 1,396)   | 41<br>(26 - 61)       | 56<br>(43 - 70)        | 706<br>(550 - 922)       | 207<br>(151 - 273)      | 107<br>(79 - 141)       |
| Road injuries                                   | 1,063<br>(838 - 1,332)   | 39<br>(24 - 58)       | 53<br>(41 - 66)        | 676<br>(523 - 879)       | 195<br>(142 - 260)      | 100<br>(73 - 132)       |
| Pedestrian road injuries                        | 259<br>(182 - 368)       | 14<br>(8 - 21)        | 18<br>(12 - 26)        | 132<br>(88 - 198)        | 56<br>(35 - 84)         | 39<br>(26 - 57)         |
| Cyclist road injuries                           | 47<br>(34 - 61)          | 2<br>(1 - 3)          | 3<br>(2 - 4)           | 22<br>(15 - 30)          | 13<br>(9 - 19)          | 7<br>(4 - 10)           |
| Motorcyclist road injuries                      | 87<br>(58 - 129)         | 1<br>(1 - 2)          | 2<br>(1 - 3)           | 68<br>(45 - 103)         | 11<br>(7 - 17)          | 5<br>(3 - 8)            |
| Motor vehicle road injuries                     | 667<br>(514 - 851)       | 22<br>(13 - 34)       | 30<br>(21 - 39)        | 452<br>(343 - 596)       | 114<br>(83 - 154)       | 49<br>(35 - 67)         |
| Other road injuries                             | 3<br>(2 - 5)             | 1<br>(0 - 1)          | 1<br>(0 - 1)           | 1<br>(1 - 2)             | 1<br>(0 - 1)            | 1<br>(0 - 1)            |
| Other transport injuries                        | 54<br>(30 - 80)          | 2<br>(1 - 4)          | 3<br>(1 - 4)           | 31<br>(16 - 46)          | 12<br>(6 - 19)          | 7<br>(4 - 11)           |
| Unintentional injuries                          | 643<br>(527 - 769)       | 55<br>(40 - 75)       | 40<br>(32 - 51)        | 308<br>(237 - 393)       | 108<br>(83 - 134)       | 131<br>(102 - 166)      |
| Falls                                           | 160<br>(119 - 202)       | 9<br>(5 - 17)         | 6<br>(4 - 9)           | 68<br>(43 - 97)          | 28<br>(18 - 40)         | 48<br>(32 - 74)         |
| Drowning                                        | 124<br>(92 - 182)        | 17<br>(10 - 30)       | 16<br>(11 - 25)        | 70<br>(47 - 109)         | 12<br>(8 - 20)          | 8<br>(5 - 11)           |
| Fire, heat, and hot substances                  | 79<br>(56 - 106)         | 8<br>(4 - 14)         | 4<br>(3 - 6)           | 35<br>(24 - 49)          | 13<br>(8 - 19)          | 19<br>(11 - 28)         |
| Poisonings                                      | 37<br>(25 - 51)          | 3<br>(2 - 6)          | 2<br>(1 - 3)           | 20<br>(12 - 29)          | 6<br>(4 - 9)            | 6<br>(4 - 9)            |
| Exposure to mechanical forces                   | 81<br>(57 - 115)         | 4<br>(2 - 8)          | 5<br>(3 - 8)           | 49<br>(33 - 74)          | 15<br>(10 - 23)         | 8<br>(5 - 11)           |
| Unintentional firearm injuries                  | 24<br>(14 - 39)          | 1<br>(0 - 1)          | 1<br>(0 - 1)           | 16<br>(9 - 29)           | 4<br>(2 - 7)            | 2<br>(1 - 4)            |
| Unintentional suffocation                       | 3<br>(1 - 5)             | 1<br>(0 - 1)          | 0<br>(0 - 1)           | 1<br>(0 - 2)             | 1<br>(0 - 1)            | 0<br>(0 - 0)            |
| Other exposure to mechanical forces             | 54<br>(36 - 82)          | 3<br>(2 - 6)          | 4<br>(2 - 6)           | 31<br>(20 - 51)          | 10<br>(7 - 17)          | 5<br>(3 - 8)            |
| Adverse effects of medical treatment            | 63<br>(46 - 86)          | 4<br>(2 - 6)          | 1<br>(1 - 2)           | 17<br>(12 - 24)          | 19<br>(12 - 28)         | 22<br>(13 - 36)         |
| Animal contact                                  | 12<br>(8 - 21)           | 1<br>(1 - 3)          | 1<br>(1 - 2)           | 4<br>(3 - 7)             | 2<br>(1 - 4)            | 3<br>(2 - 5)            |
| Venomous animal contact                         | 6<br>(4 - 15)            | 1<br>(0 - 2)          | 1<br>(0 - 2)           | 2<br>(1 - 5)             | 1<br>(1 - 3)            | 1<br>(1 - 3)            |
| Non-venomous animal contact                     | 5<br>(3 - 9)             | 0<br>(0 - 1)          | 0<br>(0 - 1)           | 2<br>(1 - 3)             | 1<br>(0 - 1)            | 2<br>(1 - 3)            |
| Foreign body                                    | 28<br>(19 - 40)          | 5<br>(3 - 8)          | 2<br>(1 - 2)           | 5<br>(4 - 8)             | 3<br>(2 - 5)            | 12<br>(8 - 18)          |
| Pulmonary aspiration and foreign body in airway | 27<br>(18 - 39)          | 5<br>(3 - 8)          | 2<br>(1 - 2)           | 5<br>(3 - 8)             | 3<br>(2 - 5)            | 12<br>(7 - 17)          |
| Foreign body in other body part                 | 1<br>(1 - 1)             | 0<br>(0 - 0)          | 0<br>(0 - 0)           | 0<br>(0 - 1)             | 0<br>(0 - 0)            | 0<br>(0 - 0)            |
| Other unintentional injuries                    | 59<br>(42 - 80)          | 3<br>(2 - 5)          | 3<br>(2 - 4)           | 38<br>(26 - 55)          | 8<br>(5 - 12)           | 6<br>(4 - 9)            |
| Self-harm and interpersonal violence            | 339<br>(206 - 448)       | 2<br>(1 - 3)          | 5<br>(3 - 9)           | 259<br>(160 - 347)       | 49<br>(26 - 67)         | 24<br>(10 - 35)         |
| Self-harm                                       | 209<br>(83 - 283)        | --                    | 3<br>(1 - 7)           | 148<br>(59 - 207)        | 37<br>(15 - 53)         | 22<br>(8 - 33)          |
| Interpersonal violence                          | 130<br>(84 - 185)        | 2<br>(1 - 3)          | 2<br>(1 - 4)           | 112<br>(70 - 162)        | 12<br>(7 - 19)          | 2<br>(1 - 4)            |
| Assault by firearm                              | 63<br>(35 - 100)         | 0<br>(0 - 1)          | 1<br>(0 - 1)           | 56<br>(31 - 91)          | 5<br>(3 - 9)            | 1<br>(0 - 1)            |
| Assault by sharp object                         | 37<br>(20 - 62)          | 0<br>(0 - 0)          | 0<br>(0 - 1)           | 33<br>(18 - 54)          | 3<br>(2 - 6)            | 0<br>(0 - 1)            |
| Assault by other means                          | 30<br>(18 - 46)          | 1<br>(1 - 2)          | 1<br>(1 - 2)           | 23<br>(13 - 37)          | 3<br>(2 - 5)            | 1<br>(1 - 2)            |
| Forces of nature, war, and legal intervention   | 318<br>(209 - 559)       | 21<br>(21 - 21)       | 9<br>(7 - 14)          | 122<br>(77 - 237)        | 110<br>(69 - 202)       | 56<br>(34 - 102)        |
| Collective violence and legal intervention      | 318<br>(209 - 559)       | 21<br>(21 - 21)       | 9<br>(7 - 14)          | 122<br>(77 - 237)        | 110<br>(69 - 202)       | 56<br>(34 - 102)        |

Web Table 31- Libya deaths with 95% UI by age, sex, and cause in 2013

| Cause                                                             | Males, All Ages             | Males, 0-4 Years       | Males, 5-14 Years  | Males, 15-49 Years       | Males, 50-69 Years       | Males, 70-80 Years       |
|-------------------------------------------------------------------|-----------------------------|------------------------|--------------------|--------------------------|--------------------------|--------------------------|
| All causes                                                        | 14,183<br>(11,366 - 16,942) | 1,013<br>(854 - 1,188) | 200<br>(173 - 231) | 2,781<br>(2,150 - 3,637) | 4,294<br>(3,252 - 5,386) | 5,894<br>(4,748 - 6,840) |
| Communicable, maternal, neonatal, and nutritional diseases        | 1,037<br>(865 - 1,217)      | 422<br>(333 - 519)     | 32<br>(21 - 47)    | 149<br>(112 - 206)       | 151<br>(108 - 204)       | 283<br>(199 - 397)       |
| HIV/AIDS and tuberculosis                                         | 54<br>(41 - 69)             | 0<br>(0 - 1)           | 0<br>(0 - 1)       | 20<br>(15 - 27)          | 15<br>(11 - 22)          | 17<br>(12 - 24)          |
| Tuberculosis                                                      | 47<br>(34 - 62)             | 0<br>(0 - 1)           | 0<br>(0 - 0)       | 15<br>(10 - 21)          | 14<br>(10 - 21)          | 17<br>(12 - 23)          |
| HIV/AIDS                                                          | 7<br>(5 - 8)                | 0<br>(0 - 0)           | 0<br>(0 - 0)       | 5<br>(4 - 6)             | 1<br>(1 - 2)             | 0<br>(0 - 0)             |
| HIV/AIDS resulting in mycobacterial infection                     | 0<br>(0 - 1)                | 0<br>(0 - 0)           | 0<br>(0 - 0)       | 0<br>(0 - 0)             | 0<br>(0 - 0)             | 0<br>(0 - 0)             |
| HIV/AIDS resulting in other diseases                              | 6<br>(5 - 8)                | 0<br>(0 - 0)           | 0<br>(0 - 0)       | 5<br>(4 - 6)             | 1<br>(1 - 2)             | 0<br>(0 - 0)             |
| Diarrhea, lower respiratory, and other common infectious diseases | 560<br>(424 - 715)          | 87<br>(59 - 126)       | 29<br>(19 - 44)    | 105<br>(73 - 154)        | 107<br>(71 - 152)        | 232<br>(152 - 333)       |
| Diarrheal diseases                                                | 30<br>(19 - 46)             | 12<br>(4 - 27)         | 1<br>(0 - 2)       | 4<br>(3 - 6)             | 4<br>(2 - 6)             | 9<br>(5 - 15)            |
| Intestinal infectious diseases                                    | 65<br>(28 - 120)            | 15<br>(6 - 28)         | 16<br>(7 - 30)     | 28<br>(10 - 60)          | 5<br>(2 - 10)            | 1<br>(1 - 3)             |
| Typhoid fever                                                     | 49<br>(21 - 92)             | 11<br>(4 - 20)         | 12<br>(5 - 23)     | 22<br>(7 - 46)           | 4<br>(1 - 8)             | 1<br>(0 - 2)             |
| Paratyphoid fever                                                 | 15<br>(6 - 28)              | 4<br>(1 - 8)           | 4<br>(1 - 8)       | 6<br>(2 - 14)            | 1<br>(0 - 2)             | 0<br>(0 - 1)             |
| Other intestinal infectious diseases                              | 1<br>(0 - 4)                | 0<br>(0 - 2)           | 0<br>(0 - 1)       | 0<br>(0 - 3)             | 0<br>(0 - 1)             | 0<br>(0 - 1)             |
| Lower respiratory infections                                      | 418<br>(302 - 549)          | 45<br>(28 - 71)        | 9<br>(5 - 14)      | 58<br>(39 - 85)          | 92<br>(59 - 134)         | 214<br>(136 - 312)       |
| Upper respiratory infections                                      | 1<br>(0 - 1)                | 0<br>(0 - 0)           | 0<br>(0 - 0)       | 0<br>(0 - 0)             | 0<br>(0 - 1)             | 0<br>(0 - 1)             |
| Otitis media                                                      | 1<br>(1 - 1)                | 0<br>(0 - 0)           | 0<br>(0 - 0)       | 0<br>(0 - 0)             | 0<br>(0 - 0)             | 0<br>(0 - 1)             |
| Meningitis                                                        | 23<br>(17 - 29)             | 6<br>(3 - 10)          | 1<br>(1 - 2)       | 7<br>(5 - 11)            | 4<br>(3 - 7)             | 4<br>(2 - 7)             |
| Pneumococcal meningitis                                           | 5<br>(4 - 7)                | 1<br>(0 - 2)           | 0<br>(0 - 1)       | 2<br>(1 - 3)             | 1<br>(0 - 2)             | 1<br>(0 - 2)             |
| H influenzae type B meningitis                                    | 4<br>(3 - 6)                | 2<br>(1 - 4)           | 0<br>(0 - 1)       | 1<br>(1 - 2)             | 0<br>(0 - 1)             | 1<br>(0 - 1)             |
| Meningococcal meningitis                                          | 6<br>(4 - 9)                | 2<br>(1 - 3)           | 0<br>(0 - 1)       | 2<br>(1 - 4)             | 1<br>(0 - 2)             | 1<br>(0 - 2)             |
| Other meningitis                                                  | 7<br>(5 - 10)               | 1<br>(0 - 2)           | 0<br>(0 - 1)       | 3<br>(1 - 4)             | 2<br>(1 - 3)             | 2<br>(1 - 3)             |
| Encephalitis                                                      | 15<br>(10 - 26)             | 4<br>(2 - 8)           | 1<br>(1 - 3)       | 6<br>(3 - 10)            | 2<br>(1 - 4)             | 2<br>(1 - 3)             |
| Diphtheria                                                        | 0<br>(0 - 1)                | 0<br>(0 - 0)           | 0<br>(0 - 0)       | 0<br>(0 - 0)             | 0<br>(0 - 0)             | --<br>(0 - 0)            |
| Whooping cough                                                    | 1<br>(0 - 3)                | 1<br>(0 - 3)           | 0<br>(0 - 0)       | 0<br>(0 - 0)             | 0<br>(0 - 0)             | --<br>(0 - 0)            |
| Tetanus                                                           | 1<br>(0 - 1)                | 0<br>(0 - 0)           | 0<br>(0 - 0)       | 0<br>(0 - 0)             | 0<br>(0 - 0)             | 0<br>(0 - 0)             |
| Measles                                                           | 5<br>(0 - 33)               | 4<br>(0 - 27)          | 1<br>(0 - 4)       | 0<br>(0 - 1)             | 0<br>(0 - 0)             | --<br>(0 - 0)            |
| Varicella and herpes zoster                                       | 1<br>(0 - 3)                | 0<br>(0 - 1)           | 0<br>(0 - 0)       | 0<br>(0 - 1)             | 0<br>(0 - 0)             | 0<br>(0 - 2)             |
| Neglected tropical diseases and malaria                           | 13<br>(9 - 19)              | 1<br>(0 - 4)           | 1<br>(0 - 2)       | 5<br>(3 - 8)             | 4<br>(3 - 7)             | 2<br>(1 - 4)             |
| Leishmaniasis                                                     | 0<br>(0 - 0)                | 0<br>(0 - 0)           | 0<br>(0 - 0)       | 0<br>(0 - 0)             | 0<br>(0 - 0)             | 0<br>(0 - 0)             |
| Visceral leishmaniasis                                            | 0<br>(0 - 0)                | 0<br>(0 - 0)           | 0<br>(0 - 0)       | 0<br>(0 - 0)             | 0<br>(0 - 0)             | 0<br>(0 - 0)             |
| Schistosomiasis                                                   | 7<br>(5 - 10)               | 0<br>(0 - 0)           | 0<br>(0 - 0)       | 2<br>(1 - 4)             | 3<br>(2 - 5)             | 2<br>(1 - 3)             |
| Cysticercosis                                                     | 0<br>(0 - 0)                | 0<br>(0 - 0)           | 0<br>(0 - 0)       | 0<br>(0 - 0)             | 0<br>(0 - 0)             | 0<br>(0 - 0)             |
| Cystic echinococcosis                                             | 2<br>(2 - 3)                | 0<br>(0 - 0)           | 0<br>(0 - 0)       | 1<br>(1 - 1)             | 1<br>(0 - 1)             | 0<br>(0 - 0)             |
| Dengue                                                            | 0<br>(0 - 1)                | 0<br>(0 - 0)           | 0<br>(0 - 0)       | 0<br>(0 - 0)             | 0<br>(0 - 0)             | 0<br>(0 - 0)             |
| Rabies                                                            | 1<br>(0 - 2)                | 0<br>(0 - 0)           | 0<br>(0 - 0)       | 0<br>(0 - 1)             | 0<br>(0 - 0)             | 0<br>(0 - 0)             |
| Intestinal nematode infections                                    | 1<br>(0 - 6)                | 0<br>(0 - 3)           | 0<br>(0 - 2)       | 0<br>(0 - 2)             | 0<br>(0 - 2)             | 0<br>(0 - 2)             |
| Ascariasis                                                        | 1<br>(0 - 6)                | 0<br>(0 - 3)           | 0<br>(0 - 2)       | 0<br>(0 - 2)             | 0<br>(0 - 2)             | 0<br>(0 - 2)             |
| Other neglected tropical diseases                                 | 2<br>(1 - 2)                | 0<br>(0 - 0)           | 0<br>(0 - 0)       | 1<br>(0 - 1)             | 0<br>(0 - 0)             | 0<br>(0 - 1)             |
| Maternal disorders                                                | --                          | --                     | --                 | --                       | --                       | --                       |
| Maternal hemorrhage                                               | --                          | --                     | --                 | --                       | --                       | --                       |

Web Table 31- Libya deaths with 95% UI by age, sex, and cause in 2013

| Cause                                                            | Males, All Ages            | Males, 0-4 Years   | Males, 5-14 Years | Males, 15-49 Years       | Males, 50-69 Years       | Males, 70-80 Years       |
|------------------------------------------------------------------|----------------------------|--------------------|-------------------|--------------------------|--------------------------|--------------------------|
| Maternal sepsis and other maternal infections                    | --                         | --                 | --                | --                       | --                       | --                       |
| Maternal hypertensive disorders                                  | --                         | --                 | --                | --                       | --                       | --                       |
| Maternal obstructed labor                                        | --                         | --                 | --                | --                       | --                       | --                       |
| Maternal abortive outcome                                        | --                         | --                 | --                | --                       | --                       | --                       |
| Indirect maternal deaths                                         | --                         | --                 | --                | --                       | --                       | --                       |
| Late maternal deaths                                             | --                         | --                 | --                | --                       | --                       | --                       |
| Maternal deaths aggravated by HIV/AIDS                           | --                         | --                 | --                | --                       | --                       | --                       |
| Other maternal disorders                                         | --                         | --                 | --                | --                       | --                       | --                       |
| Neonatal disorders                                               | 327<br>(247 - 422)         | 327<br>(247 - 422) | --                | --                       | --                       | --                       |
| Neonatal preterm birth complications                             | 229<br>(157 - 303)         | 229<br>(157 - 303) | --                | --                       | --                       | --                       |
| Neonatal encephalopathy due to birth asphyxia and trauma         | 37<br>(18 - 66)            | 37<br>(18 - 66)    | --                | --                       | --                       | --                       |
| Neonatal sepsis and other neonatal infections                    | 24<br>(9 - 53)             | 24<br>(9 - 53)     | --                | --                       | --                       | --                       |
| Hemolytic disease and other neonatal jaundice                    | 1<br>(0 - 2)               | 1<br>(0 - 2)       | --                | --                       | --                       | --                       |
| Other neonatal disorders                                         | 35<br>(19 - 67)            | 35<br>(19 - 67)    | --                | --                       | --                       | --                       |
| Nutritional deficiencies                                         | 39<br>(19 - 120)           | 3<br>(1 - 9)       | 1<br>(0 - 3)      | 7<br>(3 - 22)            | 8<br>(4 - 29)            | 20<br>(9 - 61)           |
| Protein-energy malnutrition                                      | 12<br>(2 - 53)             | 2<br>(0 - 7)       | 0<br>(0 - 1)      | 2<br>(0 - 9)             | 2<br>(0 - 11)            | 6<br>(1 - 28)            |
| Iodine deficiency                                                | 0<br>(0 - 1)               | 0<br>(0 - 0)       | 0<br>(0 - 0)      | 0<br>(0 - 0)             | 0<br>(0 - 1)             | 0<br>(0 - 1)             |
| Iron-deficiency anemia                                           | 23<br>(8 - 62)             | 1<br>(0 - 3)       | 0<br>(0 - 1)      | 4<br>(1 - 11)            | 6<br>(2 - 16)            | 12<br>(4 - 34)           |
| Other nutritional deficiencies                                   | 4<br>(1 - 18)              | 0<br>(0 - 1)       | 0<br>(0 - 1)      | 1<br>(0 - 5)             | 1<br>(0 - 4)             | 2<br>(0 - 8)             |
| Other communicable, maternal, neonatal, and nutritional diseases | 45<br>(32 - 62)            | 4<br>(2 - 8)       | 1<br>(1 - 2)      | 11<br>(8 - 17)           | 16<br>(11 - 25)          | 12<br>(6 - 22)           |
| Sexually transmitted diseases excluding HIV                      | 3<br>(1 - 6)               | 2<br>(0 - 4)       | 0<br>(0 - 0)      | 1<br>(0 - 1)             | 0<br>(0 - 1)             | 1<br>(0 - 1)             |
| Syphilis                                                         | 3<br>(1 - 6)               | 2<br>(0 - 4)       | 0<br>(0 - 0)      | 0<br>(0 - 1)             | 0<br>(0 - 1)             | 0<br>(0 - 1)             |
| Chlamydial infection                                             | --                         | --                 | --                | --                       | --                       | --                       |
| Gonococcal infection                                             | 0<br>(0 - 0)               | --                 | 0<br>(0 - 0)      | 0<br>(0 - 0)             | 0<br>(0 - 0)             | 0<br>(0 - 0)             |
| Other sexually transmitted diseases                              | 0<br>(0 - 0)               | --                 | 0<br>(0 - 0)      | 0<br>(0 - 0)             | 0<br>(0 - 0)             | 0<br>(0 - 0)             |
| Hepatitis                                                        | 22<br>(16 - 30)            | 1<br>(0 - 1)       | 0<br>(0 - 0)      | 6<br>(4 - 9)             | 11<br>(7 - 16)           | 5<br>(3 - 7)             |
| Acute hepatitis A                                                | 1<br>(0 - 3)               | 0<br>(0 - 0)       | 0<br>(0 - 0)      | 1<br>(0 - 1)             | 0<br>(0 - 1)             | 0<br>(0 - 0)             |
| Acute hepatitis B                                                | 15<br>(9 - 22)             | 0<br>(0 - 1)       | 0<br>(0 - 0)      | 3<br>(1 - 5)             | 8<br>(5 - 13)            | 4<br>(2 - 6)             |
| Acute hepatitis C                                                | 1<br>(0 - 4)               | --                 | 0<br>(0 - 0)      | 0<br>(0 - 1)             | 1<br>(0 - 2)             | 0<br>(0 - 1)             |
| Acute hepatitis E                                                | 4<br>(2 - 8)               | 0<br>(0 - 0)       | 0<br>(0 - 0)      | 2<br>(1 - 4)             | 2<br>(0 - 4)             | 0<br>(0 - 1)             |
| Other infectious diseases                                        | 19<br>(11 - 35)            | 2<br>(1 - 5)       | 1<br>(0 - 1)      | 5<br>(3 - 9)             | 5<br>(2 - 12)            | 7<br>(2 - 16)            |
| Non-communicable diseases                                        | 11,383<br>(8,994 - 13,680) | 520<br>(421 - 634) | 94<br>(76 - 114)  | 1,524<br>(1,142 - 2,042) | 3,814<br>(2,875 - 4,808) | 5,431<br>(4,361 - 6,306) |
| Neoplasms                                                        | 2,210<br>(1,701 - 2,753)   | 8<br>(5 - 12)      | 21<br>(16 - 28)   | 354<br>(260 - 474)       | 992<br>(736 - 1,267)     | 835<br>(639 - 1,018)     |
| Esophageal cancer                                                | 38<br>(24 - 61)            | --                 | --                | 2<br>(1 - 4)             | 22<br>(14 - 34)          | 14<br>(8 - 25)           |
| Stomach cancer                                                   | 136<br>(99 - 174)          | --                 | --                | 20<br>(13 - 28)          | 63<br>(44 - 85)          | 54<br>(37 - 72)          |
| Liver cancer                                                     | 128<br>(91 - 174)          | --                 | 2<br>(1 - 3)      | 24<br>(15 - 37)          | 60<br>(40 - 85)          | 43<br>(28 - 66)          |
| Liver cancer due to hepatitis B                                  | 49<br>(26 - 77)            | --                 | 1<br>(0 - 2)      | 12<br>(6 - 19)           | 24<br>(12 - 40)          | 13<br>(6 - 22)           |
| Liver cancer due to hepatitis C                                  | 58<br>(28 - 93)            | --                 | 0<br>(0 - 1)      | 9<br>(4 - 16)            | 27<br>(12 - 45)          | 22<br>(9 - 38)           |
| Liver cancer due to alcohol use                                  | 12<br>(6 - 23)             | --                 | --                | 1<br>(0 - 3)             | 5<br>(2 - 10)            | 6<br>(3 - 12)            |
| Liver cancer due to other causes                                 | 9<br>(3 - 18)              | --                 | 1<br>(0 - 2)      | 2<br>(1 - 5)             | 4<br>(1 - 9)             | 2<br>(1 - 5)             |

Web Table 31- Libya deaths with 95% UI by age, sex, and cause in 2013

| Cause                                         | Males, All Ages          | Males, 0-4 Years  | Males, 5-14 Years | Males, 15-49 Years | Males, 50-69 Years       | Males, 70-80 Years       |
|-----------------------------------------------|--------------------------|-------------------|-------------------|--------------------|--------------------------|--------------------------|
| Larynx cancer                                 | 84<br>(51 - 113)         | --                | --                | 7<br>(4 - 11)      | 40<br>(24 - 57)          | 37<br>(22 - 52)          |
| Tracheal, bronchus and lung cancer            | 665<br>(489 - 845)       | --                | --                | 71<br>(47 - 102)   | 348<br>(251 - 454)       | 247<br>(177 - 319)       |
| Breast cancer                                 | 7<br>(4 - 11)            | --                | --                | 2<br>(1 - 3)       | 3<br>(2 - 5)             | 2<br>(1 - 4)             |
| Cervical cancer                               | --                       | --                | --                | --                 | --                       | --                       |
| Uterine cancer                                | --                       | --                | --                | --                 | --                       | --                       |
| Prostate cancer                               | 150<br>(95 - 236)        | --                | --                | 2<br>(1 - 4)       | 24<br>(14 - 38)          | 124<br>(76 - 195)        |
| Colon and rectum cancer                       | 192<br>(142 - 246)       | --                | --                | 36<br>(26 - 52)    | 88<br>(63 - 117)         | 67<br>(48 - 89)          |
| Lip and oral cavity cancer                    | 12<br>(8 - 19)           | --                | --                | 2<br>(1 - 3)       | 7<br>(4 - 11)            | 3<br>(2 - 6)             |
| Nasopharynx cancer                            | 42<br>(28 - 57)          | --                | 3<br>(1 - 8)      | 12<br>(7 - 17)     | 17<br>(10 - 26)          | 11<br>(6 - 17)           |
| Other pharynx cancer                          | 4<br>(3 - 8)             | --                | --                | 1<br>(0 - 2)       | 2<br>(1 - 4)             | 1<br>(1 - 3)             |
| Gallbladder and biliary tract cancer          | 20<br>(12 - 29)          | --                | --                | 5<br>(2 - 7)       | 10<br>(5 - 16)           | 5<br>(3 - 9)             |
| Pancreatic cancer                             | 139<br>(101 - 184)       | --                | --                | 18<br>(11 - 28)    | 69<br>(48 - 96)          | 52<br>(37 - 69)          |
| Malignant skin melanoma                       | 6<br>(3 - 11)            | --                | --                | 2<br>(1 - 4)       | 2<br>(1 - 4)             | 2<br>(1 - 4)             |
| Non-melanoma skin cancer                      | 5<br>(3 - 9)             | --                | --                | 1<br>(1 - 2)       | 2<br>(1 - 3)             | 2<br>(1 - 4)             |
| Ovarian cancer                                | --                       | --                | --                | --                 | --                       | --                       |
| Testicular cancer                             | 5<br>(3 - 7)             | --                | --                | 3<br>(2 - 4)       | 1<br>(1 - 3)             | 1<br>(0 - 1)             |
| Kidney cancer                                 | 69<br>(48 - 97)          | 1<br>(0 - 2)      | 1<br>(0 - 2)      | 10<br>(7 - 15)     | 34<br>(22 - 50)          | 24<br>(14 - 36)          |
| Bladder cancer                                | 84<br>(62 - 113)         | --                | --                | 6<br>(4 - 10)      | 38<br>(26 - 54)          | 40<br>(28 - 57)          |
| Brain and nervous system cancer               | 123<br>(75 - 186)        | 1<br>(0 - 3)      | 4<br>(2 - 6)      | 41<br>(25 - 65)    | 61<br>(34 - 97)          | 17<br>(9 - 28)           |
| Thyroid cancer                                | 8<br>(5 - 12)            | --                | 0<br>(0 - 0)      | 1<br>(1 - 2)       | 4<br>(2 - 7)             | 3<br>(2 - 4)             |
| Mesothelioma                                  | 6<br>(4 - 8)             | --                | --                | 2<br>(1 - 3)       | 2<br>(1 - 4)             | 2<br>(1 - 3)             |
| Hodgkin lymphoma                              | 14<br>(9 - 20)           | 0<br>(0 - 1)      | 1<br>(0 - 3)      | 8<br>(5 - 12)      | 3<br>(1 - 4)             | 2<br>(1 - 4)             |
| Non-Hodgkin lymphoma                          | 80<br>(54 - 108)         | 0<br>(0 - 1)      | 3<br>(2 - 5)      | 24<br>(16 - 34)    | 29<br>(19 - 43)          | 24<br>(15 - 35)          |
| Multiple myeloma                              | 24<br>(16 - 33)          | --                | --                | 3<br>(2 - 5)       | 12<br>(7 - 17)           | 9<br>(6 - 14)            |
| Leukemia                                      | 79<br>(60 - 101)         | 2<br>(1 - 3)      | 4<br>(2 - 6)      | 25<br>(17 - 34)    | 24<br>(17 - 32)          | 25<br>(18 - 34)          |
| Other neoplasms                               | 87<br>(60 - 126)         | 4<br>(2 - 6)      | 4<br>(2 - 6)      | 27<br>(18 - 41)    | 29<br>(18 - 46)          | 23<br>(14 - 34)          |
| Cardiovascular diseases                       | 5,744<br>(4,510 - 6,906) | 135<br>(99 - 178) | 30<br>(22 - 41)   | 720<br>(526 - 954) | 1,886<br>(1,408 - 2,374) | 2,973<br>(2,370 - 3,495) |
| Rheumatic heart disease                       | 30<br>(20 - 41)          | 1<br>(1 - 3)      | 2<br>(1 - 3)      | 9<br>(5 - 13)      | 7<br>(5 - 11)            | 11<br>(6 - 16)           |
| Ischemic heart disease                        | 3,521<br>(2,642 - 4,354) | 23<br>(10 - 43)   | 6<br>(4 - 9)      | 474<br>(337 - 644) | 1,317<br>(977 - 1,689)   | 1,702<br>(1,289 - 2,090) |
| Cerebrovascular disease                       | 1,567<br>(1,187 - 2,014) | 41<br>(27 - 59)   | 12<br>(8 - 18)    | 134<br>(92 - 193)  | 388<br>(278 - 535)       | 993<br>(747 - 1,263)     |
| Ischemic stroke                               | 862<br>(617 - 1,186)     | 3<br>(1 - 5)      | 1<br>(1 - 2)      | 32<br>(19 - 52)    | 174<br>(116 - 258)       | 652<br>(458 - 872)       |
| Hemorrhagic stroke                            | 705<br>(475 - 977)       | 38<br>(24 - 55)   | 11<br>(7 - 16)    | 102<br>(69 - 147)  | 214<br>(142 - 308)       | 341<br>(206 - 494)       |
| Hypertensive heart disease                    | 166<br>(101 - 248)       | 1<br>(0 - 2)      | 0<br>(0 - 1)      | 20<br>(11 - 32)    | 49<br>(28 - 74)          | 96<br>(53 - 156)         |
| Cardiomyopathy and myocarditis                | 167<br>(110 - 242)       | 36<br>(23 - 55)   | 6<br>(4 - 9)      | 36<br>(22 - 55)    | 40<br>(24 - 68)          | 49<br>(25 - 81)          |
| Atrial fibrillation and flutter               | 11<br>(6 - 17)           | --                | --                | 1<br>(0 - 1)       | 3<br>(2 - 5)             | 7<br>(4 - 12)            |
| Aortic aneurysm                               | 62<br>(39 - 88)          | --                | --                | 5<br>(3 - 8)       | 28<br>(18 - 40)          | 29<br>(17 - 43)          |
| Peripheral vascular disease                   | 6<br>(2 - 9)             | --                | --                | 1<br>(0 - 1)       | 1<br>(1 - 2)             | 4<br>(1 - 6)             |
| Endocarditis                                  | 31<br>(19 - 46)          | 10<br>(5 - 17)    | 1<br>(1 - 2)      | 5<br>(3 - 9)       | 6<br>(4 - 10)            | 9<br>(5 - 14)            |
| Other cardiovascular and circulatory diseases | 183<br>(132 - 271)       | 24<br>(14 - 39)   | 3<br>(2 - 5)      | 37<br>(24 - 56)    | 46<br>(29 - 74)          | 73<br>(47 - 116)         |
| Chronic respiratory diseases                  | 778<br>(565 - 1,057)     | 5<br>(3 - 8)      | 2<br>(1 - 3)      | 63<br>(43 - 93)    | 235<br>(163 - 334)       | 474<br>(340 - 651)       |

Web Table 31- Libya deaths with 95% UI by age, sex, and cause in 2013

| Cause                                               | Males, All Ages    | Males, 0-4 Years | Males, 5-14 Years | Males, 15-49 Years | Males, 50-69 Years | Males, 70-80 Years |
|-----------------------------------------------------|--------------------|------------------|-------------------|--------------------|--------------------|--------------------|
| Chronic obstructive pulmonary disease               | 637<br>(452 - 892) | 3<br>(1 - 5)     | 1<br>(1 - 1)      | 36<br>(24 - 54)    | 187<br>(126 - 273) | 410<br>(289 - 575) |
| Pneumoconiosis                                      | 21<br>(13 - 34)    | 0<br>(0 - 0)     | 0<br>(0 - 0)      | 7<br>(4 - 11)      | 7<br>(4 - 12)      | 8<br>(4 - 13)      |
| Silicosis                                           | 6<br>(3 - 10)      | 0<br>(0 - 0)     | 0<br>(0 - 0)      | 0<br>(0 - 1)       | 1<br>(1 - 2)       | 4<br>(2 - 8)       |
| Asbestosis                                          | 1<br>(1 - 2)       | 0<br>(0 - 0)     | 0<br>(0 - 0)      | 1<br>(1 - 2)       | 0<br>(0 - 1)       | 0<br>(0 - 0)       |
| Coal workers pneumoconiosis                         | 0<br>(0 - 1)       | 0<br>(0 - 0)     | 0<br>(0 - 0)      | 0<br>(0 - 0)       | 0<br>(0 - 0)       | 0<br>(0 - 0)       |
| Other pneumoconiosis                                | 14<br>(8 - 21)     | 0<br>(0 - 0)     | 0<br>(0 - 0)      | 5<br>(3 - 8)       | 5<br>(3 - 9)       | 3<br>(2 - 6)       |
| Asthma                                              | 74<br>(47 - 107)   | 1<br>(0 - 2)     | 1<br>(0 - 1)      | 15<br>(9 - 24)     | 26<br>(15 - 41)    | 30<br>(17 - 49)    |
| Interstitial lung disease and pulmonary sarcoidosis | 35<br>(5 - 79)     | 0<br>(0 - 0)     | 0<br>(0 - 0)      | 2<br>(0 - 5)       | 12<br>(2 - 29)     | 21<br>(3 - 50)     |
| Other chronic respiratory diseases                  | 12<br>(6 - 22)     | 1<br>(0 - 2)     | 0<br>(0 - 1)      | 3<br>(1 - 6)       | 3<br>(1 - 6)       | 5<br>(2 - 10)      |
| Cirrhosis                                           | 303<br>(211 - 427) | 2<br>(1 - 4)     | 2<br>(1 - 3)      | 69<br>(46 - 102)   | 138<br>(92 - 198)  | 92<br>(60 - 134)   |
| Cirrhosis due to hepatitis B                        | 107<br>(35 - 188)  | 0<br>(0 - 0)     | 0<br>(0 - 1)      | 24<br>(7 - 48)     | 49<br>(15 - 93)    | 34<br>(13 - 57)    |
| Cirrhosis due to hepatitis C                        | 120<br>(34 - 219)  | 0<br>(0 - 0)     | 0<br>(0 - 1)      | 28<br>(7 - 55)     | 58<br>(15 - 110)   | 34<br>(7 - 66)     |
| Cirrhosis due to alcohol use                        | 44<br>(22 - 86)    | -                | -                 | 6<br>(3 - 12)      | 19<br>(9 - 38)     | 19<br>(8 - 41)     |
| Cirrhosis due to other causes                       | 31<br>(15 - 56)    | 2<br>(1 - 3)     | 1<br>(1 - 2)      | 11<br>(5 - 21)     | 12<br>(4 - 25)     | 6<br>(2 - 11)      |
| Digestive diseases                                  | 156<br>(116 - 214) | 2<br>(1 - 3)     | 1<br>(1 - 2)      | 32<br>(22 - 47)    | 47<br>(33 - 71)    | 74<br>(53 - 99)    |
| Peptic ulcer disease                                | 44<br>(29 - 63)    | 0<br>(0 - 0)     | 0<br>(0 - 0)      | 7<br>(4 - 11)      | 15<br>(9 - 22)     | 22<br>(14 - 33)    |
| Gastritis and duodenitis                            | 2<br>(1 - 4)       | 0<br>(0 - 0)     | 0<br>(0 - 0)      | 1<br>(0 - 1)       | 0<br>(0 - 1)       | 1<br>(0 - 1)       |
| Appendicitis                                        | 7<br>(4 - 11)      | 0<br>(0 - 0)     | 0<br>(0 - 0)      | 2<br>(1 - 4)       | 2<br>(1 - 3)       | 2<br>(1 - 4)       |
| Paralytic ileus and intestinal obstruction          | 29<br>(18 - 52)    | 0<br>(0 - 1)     | 0<br>(0 - 1)      | 5<br>(3 - 11)      | 8<br>(5 - 17)      | 14<br>(8 - 26)     |
| Inguinal, femoral, and abdominal hernia             | 3<br>(2 - 5)       | 0<br>(0 - 0)     | 0<br>(0 - 0)      | 1<br>(0 - 1)       | 1<br>(0 - 1)       | 1<br>(1 - 3)       |
| Inflammatory bowel disease                          | 9<br>(6 - 14)      | 0<br>(0 - 0)     | 0<br>(0 - 0)      | 2<br>(1 - 4)       | 2<br>(1 - 4)       | 4<br>(2 - 7)       |
| Vascular intestinal disorders                       | 6<br>(2 - 14)      | 0<br>(0 - 0)     | 0<br>(0 - 0)      | 2<br>(1 - 4)       | 2<br>(1 - 5)       | 2<br>(1 - 5)       |
| Gallbladder and biliary diseases                    | 24<br>(15 - 36)    | 0<br>(0 - 0)     | 0<br>(0 - 0)      | 3<br>(2 - 5)       | 6<br>(4 - 10)      | 14<br>(8 - 23)     |
| Pancreatitis                                        | 14<br>(9 - 22)     | 0<br>(0 - 0)     | 0<br>(0 - 0)      | 5<br>(3 - 8)       | 5<br>(3 - 8)       | 4<br>(2 - 7)       |
| Other digestive diseases                            | 19<br>(12 - 29)    | 0<br>(0 - 1)     | 0<br>(0 - 0)      | 4<br>(2 - 6)       | 6<br>(4 - 10)      | 9<br>(5 - 15)      |
| Neurological disorders                              | 512<br>(386 - 655) | 4<br>(2 - 8)     | 3<br>(2 - 5)      | 27<br>(16 - 42)    | 58<br>(39 - 85)    | 421<br>(312 - 538) |
| Alzheimer disease and other dementias               | 459<br>(339 - 591) | -                | -                 | 0<br>(0 - 1)       | 49<br>(31 - 74)    | 410<br>(300 - 526) |
| Parkinson disease                                   | 7<br>(4 - 11)      | -                | -                 | 0<br>(0 - 0)       | 2<br>(1 - 3)       | 5<br>(3 - 9)       |
| Epilepsy                                            | 33<br>(18 - 51)    | 2<br>(1 - 5)     | 2<br>(1 - 5)      | 21<br>(11 - 34)    | 5<br>(3 - 9)       | 3<br>(2 - 5)       |
| Multiple sclerosis                                  | 2<br>(1 - 4)       | -                | -                 | 1<br>(0 - 2)       | 1<br>(0 - 1)       | 0<br>(0 - 1)       |
| Other neurological disorders                        | 11<br>(8 - 15)     | 2<br>(1 - 3)     | 1<br>(0 - 1)      | 5<br>(3 - 7)       | 2<br>(1 - 3)       | 2<br>(1 - 3)       |
| Mental and substance use disorders                  | 95<br>(68 - 129)   | 1<br>(0 - 1)     | 0<br>(0 - 0)      | 69<br>(50 - 97)    | 22<br>(15 - 31)    | 3<br>(2 - 5)       |
| Schizophrenia                                       | 1<br>(1 - 1)       | -                | -                 | 0<br>(0 - 1)       | 0<br>(0 - 0)       | 0<br>(0 - 0)       |
| Alcohol use disorders                               | 8<br>(5 - 14)      | -                | -                 | 4<br>(2 - 6)       | 3<br>(2 - 7)       | 1<br>(1 - 2)       |
| Drug use disorders                                  | 86<br>(62 - 119)   | 1<br>(0 - 1)     | -                 | 65<br>(46 - 91)    | 18<br>(12 - 26)    | 2<br>(2 - 3)       |
| Opioid use disorders                                | 47<br>(34 - 65)    | 0<br>(0 - 1)     | -                 | 36<br>(25 - 51)    | 9<br>(6 - 13)      | 1<br>(1 - 2)       |
| Cocaine use disorders                               | 1<br>(1 - 1)       | 0<br>(0 - 0)     | -                 | 1<br>(1 - 1)       | 0<br>(0 - 0)       | 0<br>(0 - 0)       |
| Amphetamine use disorders                           | 1<br>(1 - 1)       | 0<br>(0 - 0)     | -                 | 1<br>(0 - 1)       | 0<br>(0 - 0)       | 0<br>(0 - 0)       |
| Other drug use disorders                            | 37<br>(26 - 51)    | 0<br>(0 - 0)     | -                 | 27<br>(19 - 38)    | 9<br>(6 - 12)      | 1<br>(1 - 1)       |
| Eating disorders                                    | 0<br>(0 - 0)       | -                | 0<br>(0 - 0)      | 0<br>(0 - 0)       | -                  | -                  |

Web Table 31- Libya deaths with 95% UI by age, sex, and cause in 2013

| Cause                                               | Males, All Ages        | Males, 0-4 Years   | Males, 5-14 Years | Males, 15-49 Years | Males, 50-69 Years | Males, 70-80 Years |
|-----------------------------------------------------|------------------------|--------------------|-------------------|--------------------|--------------------|--------------------|
| Anorexia nervosa                                    | 0<br>(0 - 0)           | --                 | 0<br>(0 - 0)      | 0<br>(0 - 0)       | --                 | --                 |
| Diabetes, urogenital, blood, and endocrine diseases | 1,134<br>(804 - 1,519) | 18<br>(13 - 25)    | 8<br>(6 - 11)     | 154<br>(107 - 227) | 421<br>(289 - 577) | 532<br>(366 - 715) |
| Diabetes mellitus                                   | 518<br>(347 - 708)     | 1<br>(1 - 2)       | 0<br>(0 - 1)      | 47<br>(30 - 71)    | 213<br>(135 - 309) | 256<br>(166 - 360) |
| Acute glomerulonephritis                            | 2<br>(1 - 3)           | 0<br>(0 - 0)       | 0<br>(0 - 0)      | 1<br>(0 - 1)       | 1<br>(0 - 1)       | 1<br>(0 - 1)       |
| Chronic kidney disease                              | 502<br>(306 - 737)     | 4<br>(2 - 6)       | 3<br>(1 - 4)      | 76<br>(43 - 120)   | 182<br>(107 - 280) | 238<br>(137 - 363) |
| Chronic kidney disease due to diabetes mellitus     | 20<br>(4 - 38)         | 0<br>(0 - 1)       | 0<br>(0 - 0)      | 5<br>(1 - 10)      | 6<br>(1 - 13)      | 8<br>(1 - 17)      |
| Chronic kidney disease due to hypertension          | 221<br>(144 - 331)     | 1<br>(0 - 1)       | 0<br>(0 - 1)      | 31<br>(18 - 54)    | 87<br>(53 - 137)   | 102<br>(61 - 159)  |
| Chronic kidney disease due to glomerulonephritis    | 12<br>(6 - 19)         | 0<br>(0 - 1)       | 0<br>(0 - 0)      | 3<br>(1 - 5)       | 4<br>(1 - 6)       | 5<br>(2 - 8)       |
| Chronic kidney disease due to other causes          | 249<br>(96 - 452)      | 2<br>(1 - 5)       | 2<br>(1 - 3)      | 37<br>(12 - 73)    | 85<br>(29 - 164)   | 123<br>(42 - 235)  |
| Urinary diseases and male infertility               | 40<br>(28 - 56)        | 1<br>(0 - 2)       | 0<br>(0 - 0)      | 5<br>(4 - 8)       | 11<br>(7 - 17)     | 22<br>(14 - 34)    |
| Interstitial nephritis and urinary tract infections | 14<br>(8 - 22)         | 1<br>(0 - 1)       | 0<br>(0 - 0)      | 2<br>(1 - 3)       | 4<br>(2 - 6)       | 7<br>(3 - 13)      |
| Urolithiasis                                        | 2<br>(1 - 3)           | --                 | 0<br>(0 - 0)      | 0<br>(0 - 1)       | 1<br>(0 - 1)       | 1<br>(0 - 1)       |
| Other urinary diseases                              | 24<br>(17 - 36)        | 0<br>(0 - 1)       | 0<br>(0 - 0)      | 3<br>(2 - 5)       | 7<br>(4 - 12)      | 14<br>(8 - 23)     |
| Gynecological diseases                              | --                     | --                 | --                | --                 | --                 | --                 |
| Uterine fibroids                                    | --                     | --                 | --                | --                 | --                 | --                 |
| Polycystic ovarian syndrome                         | --                     | --                 | --                | --                 | --                 | --                 |
| Endometriosis                                       | --                     | --                 | --                | --                 | --                 | --                 |
| Genital prolapse                                    | --                     | --                 | --                | --                 | --                 | --                 |
| Other gynecological diseases                        | --                     | --                 | --                | --                 | --                 | --                 |
| Hemoglobinopathies and hemolytic anemias            | 36<br>(23 - 62)        | 5<br>(3 - 8)       | 3<br>(2 - 5)      | 16<br>(9 - 27)     | 5<br>(2 - 10)      | 7<br>(4 - 12)      |
| Thalassemias                                        | 14<br>(8 - 23)         | 3<br>(2 - 6)       | 2<br>(1 - 3)      | 8<br>(5 - 13)      | 0<br>(0 - 0)       | 0<br>(0 - 0)       |
| Sickle cell disorders                               | 11<br>(7 - 20)         | 1<br>(1 - 2)       | 1<br>(0 - 1)      | 6<br>(4 - 11)      | 3<br>(1 - 7)       | 0<br>(0 - 0)       |
| G6PD deficiency                                     | 1<br>(0 - 1)           | 0<br>(0 - 0)       | 0<br>(0 - 0)      | 0<br>(0 - 0)       | 0<br>(0 - 0)       | 0<br>(0 - 0)       |
| Other hemoglobinopathies and hemolytic anemias      | 10<br>(6 - 19)         | 0<br>(0 - 1)       | 0<br>(0 - 0)      | 2<br>(1 - 3)       | 2<br>(1 - 4)       | 7<br>(4 - 12)      |
| Endocrine, metabolic, blood, and immune disorders   | 36<br>(25 - 49)        | 7<br>(4 - 12)      | 2<br>(1 - 3)      | 9<br>(6 - 14)      | 8<br>(5 - 13)      | 9<br>(6 - 15)      |
| Musculoskeletal disorders                           | 28<br>(17 - 39)        | --                 | 1<br>(1 - 1)      | 10<br>(6 - 15)     | 7<br>(5 - 11)      | 10<br>(5 - 15)     |
| Rheumatoid arthritis                                | 3<br>(2 - 5)           | --                 | 0<br>(0 - 0)      | 1<br>(1 - 2)       | 1<br>(0 - 2)       | 1<br>(0 - 2)       |
| Other musculoskeletal disorders                     | 25<br>(15 - 35)        | --                 | 1<br>(0 - 1)      | 9<br>(5 - 13)      | 6<br>(4 - 10)      | 9<br>(4 - 14)      |
| Other non-communicable diseases                     | 422<br>(339 - 521)     | 346<br>(267 - 441) | 26<br>(17 - 36)   | 26<br>(18 - 37)    | 8<br>(6 - 11)      | 17<br>(11 - 23)    |
| Congenital anomalies                                | 405<br>(323 - 501)     | 342<br>(263 - 436) | 25<br>(17 - 36)   | 23<br>(16 - 34)    | 5<br>(3 - 8)       | 9<br>(6 - 14)      |
| Neural tube defects                                 | 4<br>(1 - 8)           | 3<br>(1 - 8)       | 0<br>(0 - 0)      | 0<br>(0 - 1)       | 0<br>(0 - 0)       | 0<br>(0 - 0)       |
| Congenital heart anomalies                          | 138<br>(95 - 191)      | 122<br>(83 - 173)  | 9<br>(4 - 14)     | 5<br>(3 - 9)       | 1<br>(0 - 1)       | 1<br>(1 - 2)       |
| Cleft lip and cleft palate                          | 0<br>(0 - 0)           | 0<br>(0 - 0)       | --                | --                 | --                 | --                 |
| Down syndrome                                       | 15<br>(6 - 29)         | 10<br>(3 - 22)     | 2<br>(1 - 3)      | 3<br>(1 - 6)       | 0<br>(0 - 0)       | 0<br>(0 - 0)       |
| Chromosomal unbalanced rearrangements               | 5<br>(2 - 8)           | 4<br>(2 - 7)       | 0<br>(0 - 1)      | 0<br>(0 - 1)       | 0<br>(0 - 0)       | 0<br>(0 - 0)       |
| Other congenital anomalies                          | 244<br>(177 - 320)     | 203<br>(137 - 278) | 15<br>(10 - 22)   | 14<br>(9 - 21)     | 4<br>(3 - 6)       | 8<br>(5 - 12)      |
| Skin and subcutaneous diseases                      | 13<br>(9 - 21)         | 0<br>(0 - 1)       | 0<br>(0 - 0)      | 2<br>(2 - 4)       | 3<br>(2 - 5)       | 7<br>(4 - 12)      |
| Cellulitis                                          | 2<br>(1 - 3)           | 0<br>(0 - 0)       | 0<br>(0 - 0)      | 0<br>(0 - 0)       | 0<br>(0 - 1)       | 1<br>(0 - 2)       |
| Pyoderma                                            | 7<br>(5 - 12)          | 0<br>(0 - 1)       | 0<br>(0 - 0)      | 1<br>(1 - 2)       | 2<br>(1 - 3)       | 4<br>(2 - 7)       |
| Decubitus ulcer                                     | 4<br>(2 - 7)           | 0<br>(0 - 0)       | 0<br>(0 - 0)      | 1<br>(0 - 1)       | 1<br>(0 - 1)       | 2<br>(1 - 4)       |



Web Table 31- Libya deaths with 95% UI by age, sex, and cause in 2013

| Cause                                           | Males, All Ages          | Males, 0-4 Years | Males, 5-14 Years | Males, 15-49 Years     | Males, 50-69 Years | Males, 70-80 Years |
|-------------------------------------------------|--------------------------|------------------|-------------------|------------------------|--------------------|--------------------|
| Other skin and subcutaneous diseases            | 0<br>(0 - 1)             | 0<br>(0 - 0)     | 0<br>(0 - 0)      | 0<br>(0 - 0)           | 0<br>(0 - 0)       | 0<br>(0 - 0)       |
| Sudden infant death syndrome                    | 4<br>(1 - 11)            | 4<br>(1 - 11)    | --                | --                     | --                 | --                 |
| Injuries                                        | 1,763<br>(1,395 - 2,219) | 71<br>(51 - 95)  | 75<br>(60 - 91)   | 1,109<br>(860 - 1,449) | 329<br>(243 - 439) | 179<br>(134 - 230) |
| Transport injuries                              | 865<br>(659 - 1,147)     | 25<br>(14 - 42)  | 38<br>(28 - 50)   | 580<br>(431 - 795)     | 151<br>(103 - 214) | 71<br>(48 - 102)   |
| Road injuries                                   | 826<br>(626 - 1,100)     | 23<br>(13 - 39)  | 37<br>(27 - 47)   | 556<br>(413 - 767)     | 143<br>(97 - 201)  | 67<br>(45 - 97)    |
| Pedestrian road injuries                        | 194<br>(122 - 296)       | 9<br>(4 - 15)    | 13<br>(8 - 19)    | 106<br>(64 - 170)      | 40<br>(22 - 66)    | 26<br>(15 - 41)    |
| Cyclist road injuries                           | 36<br>(23 - 49)          | 1<br>(1 - 3)     | 2<br>(1 - 4)      | 18<br>(11 - 26)        | 9<br>(5 - 14)      | 5<br>(3 - 8)       |
| Motorcyclist road injuries                      | 78<br>(49 - 121)         | 1<br>(0 - 2)     | 1<br>(1 - 2)      | 62<br>(39 - 97)        | 9<br>(5 - 16)      | 4<br>(2 - 7)       |
| Motor vehicle road injuries                     | 516<br>(377 - 703)       | 12<br>(6 - 21)   | 19<br>(12 - 27)   | 369<br>(268 - 519)     | 84<br>(54 - 123)   | 32<br>(20 - 49)    |
| Other road injuries                             | 2<br>(1 - 3)             | 0<br>(0 - 1)     | 0<br>(0 - 1)      | 1<br>(0 - 1)           | 0<br>(0 - 1)       | 0<br>(0 - 1)       |
| Other transport injuries                        | 39<br>(18 - 61)          | 1<br>(1 - 3)     | 2<br>(1 - 3)      | 24<br>(11 - 39)        | 8<br>(3 - 15)      | 4<br>(2 - 7)       |
| Unintentional injuries                          | 447<br>(345 - 570)       | 33<br>(23 - 48)  | 27<br>(21 - 35)   | 248<br>(183 - 334)     | 73<br>(51 - 100)   | 66<br>(47 - 87)    |
| Falls                                           | 113<br>(77 - 154)        | 6<br>(3 - 12)    | 4<br>(2 - 7)      | 59<br>(35 - 89)        | 21<br>(12 - 33)    | 23<br>(14 - 39)    |
| Drowning                                        | 101<br>(70 - 155)        | 11<br>(5 - 21)   | 12<br>(8 - 20)    | 62<br>(39 - 99)        | 10<br>(6 - 17)     | 6<br>(4 - 8)       |
| Fire, heat, and hot substances                  | 43<br>(28 - 60)          | 4<br>(2 - 8)     | 2<br>(1 - 3)      | 22<br>(13 - 34)        | 7<br>(4 - 11)      | 8<br>(4 - 12)      |
| Poisonings                                      | 22<br>(11 - 31)          | 2<br>(1 - 4)     | 1<br>(0 - 2)      | 13<br>(6 - 20)         | 3<br>(2 - 5)       | 3<br>(1 - 4)       |
| Exposure to mechanical forces                   | 68<br>(46 - 97)          | 3<br>(1 - 5)     | 3<br>(2 - 5)      | 44<br>(29 - 66)        | 13<br>(8 - 19)     | 5<br>(3 - 8)       |
| Unintentional firearm injuries                  | 21<br>(12 - 36)          | 0<br>(0 - 1)     | 1<br>(0 - 1)      | 15<br>(8 - 27)         | 4<br>(2 - 7)       | 2<br>(1 - 3)       |
| Unintentional suffocation                       | 2<br>(0 - 4)             | 0<br>(0 - 1)     | 0<br>(0 - 0)      | 1<br>(0 - 2)           | 0<br>(0 - 1)       | 0<br>(0 - 0)       |
| Other exposure to mechanical forces             | 45<br>(28 - 67)          | 2<br>(1 - 3)     | 2<br>(1 - 4)      | 28<br>(17 - 45)        | 9<br>(5 - 14)      | 3<br>(2 - 5)       |
| Adverse effects of medical treatment            | 34<br>(22 - 52)          | 2<br>(1 - 4)     | 1<br>(0 - 1)      | 10<br>(6 - 15)         | 11<br>(6 - 18)     | 11<br>(6 - 21)     |
| Animal contact                                  | 7<br>(4 - 11)            | 1<br>(0 - 1)     | 1<br>(0 - 1)      | 3<br>(2 - 4)           | 1<br>(1 - 2)       | 1<br>(1 - 2)       |
| Venomous animal contact                         | 4<br>(2 - 8)             | 0<br>(0 - 1)     | 0<br>(0 - 1)      | 1<br>(1 - 3)           | 1<br>(0 - 1)       | 1<br>(0 - 1)       |
| Non-venomous animal contact                     | 3<br>(1 - 5)             | 0<br>(0 - 1)     | 0<br>(0 - 1)      | 1<br>(0 - 2)           | 0<br>(0 - 1)       | 1<br>(0 - 1)       |
| Foreign body                                    | 15<br>(8 - 24)           | 3<br>(1 - 5)     | 1<br>(0 - 2)      | 3<br>(2 - 5)           | 2<br>(1 - 3)       | 6<br>(3 - 10)      |
| Pulmonary aspiration and foreign body in airway | 14<br>(8 - 23)           | 3<br>(1 - 5)     | 1<br>(0 - 2)      | 3<br>(1 - 5)           | 2<br>(1 - 3)       | 6<br>(3 - 10)      |
| Foreign body in other body part                 | 1<br>(0 - 1)             | 0<br>(0 - 0)     | 0<br>(0 - 0)      | 0<br>(0 - 0)           | 0<br>(0 - 0)       | 0<br>(0 - 0)       |
| Other unintentional injuries                    | 46<br>(30 - 66)          | 2<br>(1 - 4)     | 2<br>(1 - 3)      | 32<br>(20 - 48)        | 6<br>(3 - 9)       | 3<br>(2 - 5)       |
| Self-harm and interpersonal violence            | 256<br>(146 - 361)       | 1<br>(0 - 2)     | 3<br>(2 - 6)      | 201<br>(121 - 286)     | 36<br>(17 - 52)    | 15<br>(5 - 24)     |
| Self-harm                                       | 145<br>(46 - 218)        | --               | 2<br>(0 - 5)      | 104<br>(35 - 161)      | 26<br>(9 - 41)     | 13<br>(4 - 22)     |
| Interpersonal violence                          | 111<br>(67 - 166)        | 1<br>(0 - 2)     | 2<br>(1 - 3)      | 97<br>(56 - 147)       | 10<br>(5 - 17)     | 1<br>(1 - 3)       |
| Assault by firearm                              | 59<br>(31 - 96)          | 0<br>(0 - 0)     | 0<br>(0 - 1)      | 53<br>(28 - 87)        | 5<br>(2 - 9)       | 0<br>(0 - 1)       |
| Assault by sharp object                         | 31<br>(14 - 55)          | 0<br>(0 - 0)     | 0<br>(0 - 1)      | 27<br>(12 - 49)        | 3<br>(1 - 6)       | 0<br>(0 - 1)       |
| Assault by other means                          | 21<br>(11 - 37)          | 1<br>(0 - 1)     | 1<br>(0 - 2)      | 17<br>(8 - 31)         | 2<br>(1 - 4)       | 1<br>(0 - 1)       |
| Forces of nature, war, and legal intervention   | 195<br>(114 - 432)       | 12<br>(11 - 12)  | 6<br>(4 - 11)     | 81<br>(45 - 183)       | 69<br>(38 - 160)   | 28<br>(14 - 63)    |
| Collective violence and legal intervention      | 195<br>(114 - 432)       | 12<br>(11 - 12)  | 6<br>(4 - 11)     | 81<br>(45 - 183)       | 69<br>(38 - 160)   | 28<br>(14 - 63)    |

Web Table 31- Libya deaths with 95% UI by age, sex, and cause in 2013

| Cause                                                             | Females, All Ages           | Females, 0-4 Years | Females, 5-14 Years | Females, 15-49 Years     | Females, 50-69 Years     | Females, 70-80 Years     |
|-------------------------------------------------------------------|-----------------------------|--------------------|---------------------|--------------------------|--------------------------|--------------------------|
| All causes                                                        | 12,019<br>(10,004 - 14,335) | 839<br>(723 - 976) | 146<br>(130 - 172)  | 1,707<br>(1,350 - 2,231) | 2,881<br>(2,197 - 3,648) | 6,446<br>(5,473 - 7,464) |
| Communicable, maternal, neonatal, and nutritional diseases        | 928<br>(766 - 1,111)        | 351<br>(278 - 440) | 32<br>(23 - 45)     | 148<br>(114 - 190)       | 102<br>(72 - 139)        | 295<br>(200 - 418)       |
| HIV/AIDS and tuberculosis                                         | 32<br>(25 - 41)             | 0<br>(0 - 1)       | 0<br>(0 - 1)        | 13<br>(10 - 17)          | 7<br>(5 - 10)            | 11<br>(7 - 16)           |
| Tuberculosis                                                      | 27<br>(20 - 36)             | 0<br>(0 - 0)       | 0<br>(0 - 1)        | 9<br>(7 - 12)            | 7<br>(5 - 10)            | 11<br>(7 - 15)           |
| HIV/AIDS                                                          | 5<br>(4 - 6)                | 0<br>(0 - 0)       | 0<br>(0 - 0)        | 4<br>(3 - 5)             | 1<br>(0 - 1)             | 0<br>(0 - 0)             |
| HIV/AIDS resulting in mycobacterial infection                     | 0<br>(0 - 0)                | 0<br>(0 - 0)       | 0<br>(0 - 0)        | 0<br>(0 - 0)             | 0<br>(0 - 0)             | 0<br>(0 - 0)             |
| HIV/AIDS resulting in other diseases                              | 4<br>(3 - 6)                | 0<br>(0 - 0)       | 0<br>(0 - 0)        | 4<br>(3 - 5)             | 1<br>(0 - 1)             | 0<br>(0 - 0)             |
| Diarrhea, lower respiratory, and other common infectious diseases | 514<br>(389 - 666)          | 84<br>(56 - 121)   | 29<br>(20 - 42)     | 82<br>(56 - 120)         | 75<br>(50 - 107)         | 244<br>(153 - 360)       |
| Diarrheal diseases                                                | 30<br>(19 - 48)             | 12<br>(5 - 29)     | 1<br>(0 - 2)        | 3<br>(2 - 5)             | 3<br>(1 - 5)             | 11<br>(6 - 20)           |
| Intestinal infectious diseases                                    | 64<br>(30 - 117)            | 15<br>(7 - 27)     | 16<br>(7 - 28)      | 27<br>(11 - 55)          | 4<br>(1 - 10)            | 2<br>(1 - 4)             |
| Typhoid fever                                                     | 50<br>(22 - 92)             | 11<br>(5 - 20)     | 12<br>(6 - 22)      | 22<br>(8 - 43)           | 3<br>(1 - 8)             | 1<br>(1 - 3)             |
| Paratyphoid fever                                                 | 14<br>(6 - 26)              | 4<br>(1 - 7)       | 4<br>(1 - 7)        | 6<br>(2 - 12)            | 1<br>(0 - 2)             | 0<br>(0 - 1)             |
| Other intestinal infectious diseases                              | 1<br>(0 - 3)                | 0<br>(0 - 2)       | 0<br>(0 - 1)        | 0<br>(0 - 2)             | 0<br>(0 - 1)             | 0<br>(0 - 1)             |
| Lower respiratory infections                                      | 378<br>(267 - 515)          | 43<br>(25 - 69)    | 9<br>(5 - 13)       | 41<br>(28 - 60)          | 62<br>(39 - 91)          | 223<br>(133 - 339)       |
| Upper respiratory infections                                      | 0<br>(0 - 1)                | 0<br>(0 - 0)       | 0<br>(0 - 0)        | 0<br>(0 - 0)             | 0<br>(0 - 0)             | 0<br>(0 - 1)             |
| Otitis media                                                      | 1<br>(1 - 1)                | 0<br>(0 - 0)       | 0<br>(0 - 0)        | 0<br>(0 - 0)             | 0<br>(0 - 0)             | 1<br>(0 - 1)             |
| Meningitis                                                        | 21<br>(15 - 27)             | 5<br>(3 - 9)       | 1<br>(1 - 2)        | 5<br>(3 - 8)             | 4<br>(2 - 6)             | 5<br>(3 - 8)             |
| Pneumococcal meningitis                                           | 5<br>(4 - 7)                | 1<br>(1 - 2)       | 0<br>(0 - 1)        | 1<br>(1 - 2)             | 1<br>(0 - 2)             | 1<br>(1 - 2)             |
| H influenzae type B meningitis                                    | 4<br>(2 - 5)                | 2<br>(1 - 4)       | 0<br>(0 - 1)        | 1<br>(0 - 1)             | 0<br>(0 - 1)             | 0<br>(0 - 1)             |
| Meningococcal meningitis                                          | 5<br>(4 - 8)                | 2<br>(1 - 3)       | 0<br>(0 - 1)        | 1<br>(1 - 2)             | 1<br>(0 - 2)             | 1<br>(1 - 2)             |
| Other meningitis                                                  | 6<br>(4 - 10)               | 1<br>(0 - 2)       | 0<br>(0 - 0)        | 2<br>(1 - 4)             | 1<br>(1 - 3)             | 2<br>(1 - 4)             |
| Encephalitis                                                      | 13<br>(8 - 21)              | 3<br>(1 - 6)       | 1<br>(0 - 2)        | 4<br>(2 - 8)             | 2<br>(1 - 3)             | 2<br>(1 - 4)             |
| Diphtheria                                                        | 0<br>(0 - 1)                | 0<br>(0 - 0)       | 0<br>(0 - 0)        | 0<br>(0 - 0)             | 0<br>(0 - 0)             | --<br>(0 - 0)            |
| Whooping cough                                                    | 1<br>(0 - 4)                | 1<br>(0 - 4)       | 0<br>(0 - 0)        | 0<br>(0 - 0)             | 0<br>(0 - 0)             | --<br>(0 - 0)            |
| Tetanus                                                           | 0<br>(0 - 1)                | 0<br>(0 - 0)       | 0<br>(0 - 0)        | 0<br>(0 - 0)             | 0<br>(0 - 0)             | 0<br>(0 - 0)             |
| Measles                                                           | 5<br>(0 - 33)               | 4<br>(0 - 27)      | 1<br>(0 - 5)        | 0<br>(0 - 1)             | 0<br>(0 - 0)             | --<br>(0 - 0)            |
| Varicella and herpes zoster                                       | 1<br>(0 - 3)                | 0<br>(0 - 1)       | 0<br>(0 - 0)        | 0<br>(0 - 1)             | 0<br>(0 - 0)             | 0<br>(0 - 2)             |
| Neglected tropical diseases and malaria                           | 10<br>(7 - 15)              | 1<br>(0 - 3)       | 1<br>(0 - 2)        | 3<br>(2 - 5)             | 3<br>(2 - 5)             | 3<br>(2 - 5)             |
| Leishmaniasis                                                     | 0<br>(0 - 0)                | 0<br>(0 - 0)       | 0<br>(0 - 0)        | 0<br>(0 - 0)             | 0<br>(0 - 0)             | 0<br>(0 - 0)             |
| Visceral leishmaniasis                                            | 0<br>(0 - 0)                | 0<br>(0 - 0)       | 0<br>(0 - 0)        | 0<br>(0 - 0)             | 0<br>(0 - 0)             | 0<br>(0 - 0)             |
| Schistosomiasis                                                   | 4<br>(3 - 7)                | 0<br>(0 - 0)       | 0<br>(0 - 0)        | 1<br>(1 - 2)             | 2<br>(1 - 3)             | 2<br>(1 - 3)             |
| Cysticercosis                                                     | 0<br>(0 - 0)                | 0<br>(0 - 0)       | 0<br>(0 - 0)        | 0<br>(0 - 0)             | 0<br>(0 - 0)             | 0<br>(0 - 0)             |
| Cystic echinococcosis                                             | 2<br>(2 - 3)                | 0<br>(0 - 0)       | 0<br>(0 - 0)        | 1<br>(1 - 1)             | 1<br>(0 - 1)             | 0<br>(0 - 1)             |
| Dengue                                                            | 0<br>(0 - 1)                | 0<br>(0 - 0)       | 0<br>(0 - 0)        | 0<br>(0 - 0)             | 0<br>(0 - 0)             | 0<br>(0 - 0)             |
| Rabies                                                            | 0<br>(0 - 1)                | 0<br>(0 - 0)       | 0<br>(0 - 0)        | 0<br>(0 - 1)             | 0<br>(0 - 0)             | 0<br>(0 - 0)             |
| Intestinal nematode infections                                    | 1<br>(0 - 5)                | 0<br>(0 - 3)       | 0<br>(0 - 2)        | 0<br>(0 - 2)             | 0<br>(0 - 2)             | 0<br>(0 - 2)             |
| Ascariasis                                                        | 1<br>(0 - 5)                | 0<br>(0 - 3)       | 0<br>(0 - 2)        | 0<br>(0 - 2)             | 0<br>(0 - 2)             | 0<br>(0 - 2)             |
| Other neglected tropical diseases                                 | 1<br>(1 - 2)                | 0<br>(0 - 0)       | 0<br>(0 - 0)        | 0<br>(0 - 1)             | 0<br>(0 - 0)             | 0<br>(0 - 1)             |
| Maternal disorders                                                | 33<br>(22 - 50)             | --                 | 0<br>(0 - 0)        | 33<br>(22 - 50)          | --                       | --                       |
| Maternal hemorrhage                                               | 6<br>(4 - 10)               | --                 | 0<br>(0 - 0)        | 6<br>(4 - 10)            | --                       | --                       |

Web Table 31- Libya deaths with 95% UI by age, sex, and cause in 2013

| Cause                                                            | Females, All Ages          | Females, 0-4 Years | Females, 5-14 Years | Females, 15-49 Years   | Females, 50-69 Years     | Females, 70-80 Years     |
|------------------------------------------------------------------|----------------------------|--------------------|---------------------|------------------------|--------------------------|--------------------------|
| Maternal sepsis and other maternal infections                    | 3<br>(2 - 5)               | --                 | 0<br>(0 - 0)        | 3<br>(2 - 5)           | --                       | --                       |
| Maternal hypertensive disorders                                  | 4<br>(3 - 7)               | --                 | 0<br>(0 - 0)        | 4<br>(3 - 7)           | --                       | --                       |
| Maternal obstructed labor                                        | 3<br>(2 - 5)               | --                 | 0<br>(0 - 0)        | 3<br>(2 - 5)           | --                       | --                       |
| Maternal abortive outcome                                        | 5<br>(3 - 9)               | --                 | 0<br>(0 - 0)        | 5<br>(3 - 9)           | --                       | --                       |
| Indirect maternal deaths                                         | 3<br>(1 - 6)               | --                 | 0<br>(0 - 0)        | 3<br>(1 - 6)           | --                       | --                       |
| Late maternal deaths                                             | 3<br>(1 - 6)               | --                 | 0<br>(0 - 0)        | 3<br>(1 - 6)           | --                       | --                       |
| Maternal deaths aggravated by HIV/AIDS                           | 0<br>(0 - 0)               | --                 | --                  | 0<br>(0 - 0)           | --                       | --                       |
| Other maternal disorders                                         | 5<br>(2 - 9)               | --                 | 0<br>(0 - 0)        | 5<br>(2 - 9)           | --                       | --                       |
| Neonatal disorders                                               | 259<br>(196 - 341)         | 259<br>(196 - 341) | --                  | --                     | --                       | --                       |
| Neonatal preterm birth complications                             | 177<br>(122 - 240)         | 177<br>(122 - 240) | --                  | --                     | --                       | --                       |
| Neonatal encephalopathy due to birth asphyxia and trauma         | 27<br>(14 - 49)            | 27<br>(14 - 49)    | --                  | --                     | --                       | --                       |
| Neonatal sepsis and other neonatal infections                    | 20<br>(9 - 41)             | 20<br>(9 - 41)     | --                  | --                     | --                       | --                       |
| Hemolytic disease and other neonatal jaundice                    | 1<br>(0 - 1)               | 1<br>(0 - 1)       | --                  | --                     | --                       | --                       |
| Other neonatal disorders                                         | 35<br>(20 - 62)            | 35<br>(20 - 62)    | --                  | --                     | --                       | --                       |
| Nutritional deficiencies                                         | 42<br>(29 - 107)           | 3<br>(2 - 8)       | 1<br>(1 - 3)        | 9<br>(6 - 22)          | 6<br>(4 - 15)            | 23<br>(13 - 60)          |
| Protein-energy malnutrition                                      | 11<br>(4 - 27)             | 2<br>(1 - 4)       | 0<br>(0 - 1)        | 1<br>(0 - 3)           | 1<br>(0 - 3)             | 6<br>(2 - 17)            |
| Iodine deficiency                                                | 0<br>(0 - 2)               | 0<br>(0 - 0)       | 0<br>(0 - 0)        | 0<br>(0 - 0)           | 0<br>(0 - 1)             | 0<br>(0 - 1)             |
| Iron-deficiency anemia                                           | 29<br>(10 - 78)            | 1<br>(0 - 3)       | 1<br>(0 - 2)        | 7<br>(3 - 19)          | 4<br>(2 - 11)            | 15<br>(5 - 42)           |
| Other nutritional deficiencies                                   | 3<br>(1 - 7)               | 0<br>(0 - 1)       | 0<br>(0 - 0)        | 1<br>(0 - 2)           | 0<br>(0 - 1)             | 1<br>(0 - 3)             |
| Other communicable, maternal, neonatal, and nutritional diseases | 37<br>(26 - 55)            | 4<br>(2 - 9)       | 1<br>(1 - 2)        | 7<br>(5 - 11)          | 10<br>(6 - 16)           | 15<br>(8 - 29)           |
| Sexually transmitted diseases excluding HIV                      | 4<br>(2 - 8)               | 2<br>(0 - 4)       | 0<br>(0 - 0)        | 1<br>(0 - 1)           | 0<br>(0 - 1)             | 1<br>(0 - 3)             |
| Syphilis                                                         | 3<br>(1 - 6)               | 2<br>(0 - 4)       | 0<br>(0 - 0)        | 0<br>(0 - 1)           | 0<br>(0 - 1)             | 1<br>(0 - 2)             |
| Chlamydial infection                                             | 0<br>(0 - 0)               | --                 | 0<br>(0 - 0)        | 0<br>(0 - 0)           | 0<br>(0 - 0)             | 0<br>(0 - 0)             |
| Gonococcal infection                                             | 0<br>(0 - 1)               | --                 | 0<br>(0 - 0)        | 0<br>(0 - 0)           | 0<br>(0 - 0)             | 0<br>(0 - 0)             |
| Other sexually transmitted diseases                              | 0<br>(0 - 0)               | --                 | 0<br>(0 - 0)        | 0<br>(0 - 0)           | 0<br>(0 - 0)             | 0<br>(0 - 0)             |
| Hepatitis                                                        | 15<br>(11 - 21)            | 1<br>(0 - 1)       | 0<br>(0 - 0)        | 3<br>(2 - 5)           | 6<br>(4 - 9)             | 5<br>(3 - 8)             |
| Acute hepatitis A                                                | 1<br>(0 - 2)               | 0<br>(0 - 1)       | 0<br>(0 - 0)        | 0<br>(0 - 1)           | 0<br>(0 - 1)             | 0<br>(0 - 0)             |
| Acute hepatitis B                                                | 9<br>(6 - 13)              | 0<br>(0 - 1)       | 0<br>(0 - 0)        | 1<br>(0 - 2)           | 4<br>(2 - 6)             | 4<br>(2 - 6)             |
| Acute hepatitis C                                                | 1<br>(0 - 4)               | --                 | 0<br>(0 - 0)        | 0<br>(0 - 1)           | 1<br>(0 - 2)             | 1<br>(0 - 2)             |
| Acute hepatitis E                                                | 4<br>(2 - 7)               | 0<br>(0 - 0)       | 0<br>(0 - 0)        | 2<br>(1 - 3)           | 1<br>(0 - 3)             | 1<br>(0 - 2)             |
| Other infectious diseases                                        | 18<br>(10 - 33)            | 2<br>(1 - 5)       | 1<br>(0 - 2)        | 3<br>(2 - 5)           | 4<br>(2 - 8)             | 8<br>(3 - 22)            |
| Non-communicable diseases                                        | 10,435<br>(8,609 - 12,528) | 439<br>(357 - 532) | 77<br>(64 - 93)     | 1,272<br>(985 - 1,691) | 2,636<br>(2,006 - 3,357) | 6,011<br>(5,106 - 6,988) |
| Neoplasms                                                        | 1,585<br>(1,223 - 2,015)   | 8<br>(5 - 12)      | 17<br>(13 - 21)     | 427<br>(322 - 566)     | 617<br>(452 - 801)       | 517<br>(408 - 646)       |
| Esophageal cancer                                                | 7<br>(5 - 10)              | --                 | --                  | 2<br>(1 - 3)           | 3<br>(2 - 4)             | 3<br>(2 - 4)             |
| Stomach cancer                                                   | 63<br>(46 - 85)            | --                 | --                  | 14<br>(10 - 21)        | 24<br>(16 - 33)          | 25<br>(17 - 38)          |
| Liver cancer                                                     | 107<br>(77 - 147)          | --                 | 0<br>(0 - 1)        | 10<br>(7 - 15)         | 43<br>(28 - 63)          | 53<br>(34 - 82)          |
| Liver cancer due to hepatitis B                                  | 28<br>(13 - 47)            | --                 | 0<br>(0 - 0)        | 4<br>(2 - 6)           | 13<br>(6 - 22)           | 12<br>(5 - 22)           |
| Liver cancer due to hepatitis C                                  | 51<br>(29 - 84)            | --                 | 0<br>(0 - 0)        | 4<br>(2 - 7)           | 20<br>(12 - 34)          | 27<br>(13 - 47)          |
| Liver cancer due to alcohol use                                  | 10<br>(3 - 21)             | --                 | --                  | 0<br>(0 - 1)           | 3<br>(1 - 6)             | 7<br>(2 - 15)            |
| Liver cancer due to other causes                                 | 17<br>(6 - 33)             | --                 | 0<br>(0 - 0)        | 3<br>(1 - 5)           | 7<br>(2 - 14)            | 8<br>(2 - 17)            |

Web Table 31- Libya deaths with 95% UI by age, sex, and cause in 2013

| Cause                                         | Females, All Ages        | Females, 0-4 Years | Females, 5-14 Years | Females, 15-49 Years | Females, 50-69 Years   | Females, 70-80 Years     |
|-----------------------------------------------|--------------------------|--------------------|---------------------|----------------------|------------------------|--------------------------|
| Larynx cancer                                 | 14<br>(6 - 23)           | --                 | --                  | 3<br>(1 - 5)         | 6<br>(3 - 11)          | 5<br>(2 - 9)             |
| Tracheal, bronchus and lung cancer            | 91<br>(66 - 120)         | --                 | --                  | 13<br>(8 - 19)       | 45<br>(31 - 62)        | 32<br>(23 - 45)          |
| Breast cancer                                 | 246<br>(183 - 323)       | --                 | --                  | 110<br>(78 - 152)    | 96<br>(69 - 130)       | 39<br>(29 - 54)          |
| Cervical cancer                               | 132<br>(85 - 182)        | --                 | --                  | 20<br>(13 - 31)      | 65<br>(39 - 94)        | 47<br>(28 - 71)          |
| Uterine cancer                                | 14<br>(9 - 23)           | --                 | --                  | 1<br>(1 - 3)         | 7<br>(4 - 12)          | 5<br>(3 - 9)             |
| Prostate cancer                               | --                       | --                 | --                  | --                   | --                     | --                       |
| Colon and rectum cancer                       | 181<br>(137 - 238)       | --                 | --                  | 57<br>(40 - 80)      | 66<br>(46 - 90)        | 59<br>(42 - 80)          |
| Lip and oral cavity cancer                    | 13<br>(8 - 19)           | --                 | --                  | 4<br>(2 - 6)         | 5<br>(3 - 7)           | 5<br>(3 - 8)             |
| Nasopharynx cancer                            | 26<br>(9 - 41)           | --                 | 0<br>(0 - 1)        | 11<br>(4 - 19)       | 11<br>(4 - 19)         | 4<br>(1 - 8)             |
| Other pharynx cancer                          | 9<br>(4 - 13)            | --                 | --                  | 4<br>(1 - 7)         | 4<br>(2 - 6)           | 1<br>(0 - 1)             |
| Gallbladder and biliary tract cancer          | 56<br>(28 - 85)          | --                 | --                  | 9<br>(5 - 14)        | 24<br>(12 - 38)        | 23<br>(11 - 40)          |
| Pancreatic cancer                             | 95<br>(70 - 130)         | --                 | --                  | 7<br>(4 - 10)        | 41<br>(28 - 57)        | 47<br>(33 - 68)          |
| Malignant skin melanoma                       | 5<br>(3 - 7)             | --                 | --                  | 2<br>(1 - 3)         | 2<br>(1 - 3)           | 1<br>(0 - 1)             |
| Non-melanoma skin cancer                      | 4<br>(2 - 7)             | --                 | --                  | 1<br>(0 - 1)         | 1<br>(1 - 2)           | 2<br>(1 - 4)             |
| Ovarian cancer                                | 112<br>(82 - 150)        | --                 | --                  | 32<br>(22 - 46)      | 46<br>(31 - 65)        | 33<br>(22 - 47)          |
| Testicular cancer                             | --                       | --                 | --                  | --                   | --                     | --                       |
| Kidney cancer                                 | 41<br>(30 - 56)          | 1<br>(0 - 2)       | 1<br>(1 - 2)        | 11<br>(7 - 17)       | 12<br>(7 - 18)         | 17<br>(10 - 26)          |
| Bladder cancer                                | 48<br>(26 - 70)          | --                 | --                  | 5<br>(2 - 8)         | 15<br>(8 - 22)         | 29<br>(15 - 44)          |
| Brain and nervous system cancer               | 64<br>(46 - 85)          | 1<br>(1 - 3)       | 3<br>(2 - 5)        | 21<br>(14 - 31)      | 24<br>(15 - 35)        | 14<br>(8 - 21)           |
| Thyroid cancer                                | 13<br>(9 - 19)           | --                 | 0<br>(0 - 0)        | 2<br>(1 - 3)         | 5<br>(3 - 8)           | 6<br>(3 - 9)             |
| Mesothelioma                                  | 2<br>(1 - 3)             | --                 | --                  | 1<br>(0 - 1)         | 1<br>(0 - 1)           | 1<br>(0 - 1)             |
| Hodgkin lymphoma                              | 18<br>(7 - 27)           | 0<br>(0 - 0)       | 1<br>(0 - 2)        | 11<br>(4 - 18)       | 4<br>(2 - 7)           | 2<br>(1 - 4)             |
| Non-Hodgkin lymphoma                          | 53<br>(37 - 73)          | 1<br>(0 - 2)       | 1<br>(1 - 2)        | 14<br>(9 - 20)       | 18<br>(11 - 26)        | 19<br>(12 - 29)          |
| Multiple myeloma                              | 22<br>(13 - 33)          | --                 | --                  | 6<br>(3 - 10)        | 10<br>(6 - 15)         | 6<br>(4 - 10)            |
| Leukemia                                      | 80<br>(62 - 103)         | 2<br>(1 - 4)       | 6<br>(4 - 9)        | 34<br>(25 - 47)      | 22<br>(15 - 30)        | 15<br>(10 - 21)          |
| Other neoplasms                               | 71<br>(49 - 110)         | 3<br>(1 - 5)       | 3<br>(2 - 6)        | 22<br>(14 - 34)      | 21<br>(13 - 35)        | 23<br>(15 - 37)          |
| Cardiovascular diseases                       | 5,694<br>(4,640 - 6,859) | 95<br>(67 - 134)   | 21<br>(15 - 28)     | 501<br>(373 - 684)   | 1,321<br>(988 - 1,693) | 3,755<br>(3,145 - 4,443) |
| Rheumatic heart disease                       | 47<br>(29 - 67)          | 1<br>(0 - 2)       | 1<br>(1 - 2)        | 14<br>(8 - 22)       | 9<br>(5 - 14)          | 22<br>(13 - 32)          |
| Ischemic heart disease                        | 2,807<br>(2,164 - 3,544) | 12<br>(5 - 24)     | 3<br>(2 - 5)        | 233<br>(161 - 322)   | 717<br>(520 - 939)     | 1,842<br>(1,413 - 2,347) |
| Cerebrovascular disease                       | 2,110<br>(1,523 - 2,756) | 35<br>(19 - 54)    | 9<br>(6 - 14)       | 164<br>(109 - 236)   | 424<br>(292 - 594)     | 1,478<br>(1,065 - 1,941) |
| Ischemic stroke                               | 1,150<br>(773 - 1,518)   | 3<br>(1 - 5)       | 1<br>(1 - 2)        | 30<br>(17 - 46)      | 177<br>(114 - 254)     | 939<br>(643 - 1,242)     |
| Hemorrhagic stroke                            | 960<br>(663 - 1,317)     | 32<br>(18 - 51)    | 8<br>(5 - 12)       | 134<br>(88 - 196)    | 247<br>(163 - 365)     | 539<br>(341 - 771)       |
| Hypertensive heart disease                    | 296<br>(184 - 455)       | 1<br>(0 - 1)       | 0<br>(0 - 0)        | 18<br>(11 - 28)      | 61<br>(36 - 96)        | 215<br>(131 - 355)       |
| Cardiomyopathy and myocarditis                | 116<br>(77 - 198)        | 25<br>(12 - 44)    | 3<br>(2 - 6)        | 22<br>(14 - 39)      | 19<br>(11 - 37)        | 47<br>(25 - 90)          |
| Atrial fibrillation and flutter               | 7<br>(4 - 11)            | --                 | --                  | 0<br>(0 - 1)         | 1<br>(1 - 2)           | 5<br>(3 - 9)             |
| Aortic aneurysm                               | 18<br>(10 - 32)          | --                 | --                  | 3<br>(2 - 5)         | 3<br>(2 - 6)           | 12<br>(6 - 21)           |
| Peripheral vascular disease                   | 4<br>(2 - 7)             | --                 | --                  | 0<br>(0 - 1)         | 1<br>(0 - 1)           | 3<br>(2 - 5)             |
| Endocarditis                                  | 23<br>(14 - 36)          | 4<br>(2 - 7)       | 0<br>(0 - 1)        | 4<br>(2 - 7)         | 3<br>(2 - 5)           | 12<br>(6 - 20)           |
| Other cardiovascular and circulatory diseases | 266<br>(182 - 388)       | 18<br>(10 - 31)    | 3<br>(2 - 5)        | 42<br>(27 - 64)      | 83<br>(52 - 128)       | 120<br>(76 - 187)        |
| Chronic respiratory diseases                  | 575<br>(426 - 763)       | 3<br>(2 - 5)       | 2<br>(1 - 3)        | 55<br>(38 - 76)      | 130<br>(90 - 182)      | 385<br>(280 - 524)       |

Web Table 31- Libya deaths with 95% UI by age, sex, and cause in 2013

| Cause                                               | Females, All Ages  | Females, 0-4 Years | Females, 5-14 Years | Females, 15-49 Years | Females, 50-69 Years | Females, 70-80 Years |
|-----------------------------------------------------|--------------------|--------------------|---------------------|----------------------|----------------------|----------------------|
| Chronic obstructive pulmonary disease               | 444<br>(319 - 606) | 2<br>(1 - 4)       | 1<br>(0 - 1)        | 28<br>(17 - 41)      | 100<br>(65 - 142)    | 313<br>(222 - 437)   |
| Pneumoconiosis                                      | 2<br>(1 - 3)       | 0<br>(0 - 0)       | 0<br>(0 - 0)        | 1<br>(0 - 1)         | 0<br>(0 - 1)         | 1<br>(0 - 1)         |
| Silicosis                                           | 0<br>(0 - 1)       | 0<br>(0 - 0)       | 0<br>(0 - 0)        | 0<br>(0 - 0)         | 0<br>(0 - 0)         | 0<br>(0 - 0)         |
| Asbestosis                                          | 0<br>(0 - 1)       | 0<br>(0 - 0)       | 0<br>(0 - 0)        | 0<br>(0 - 0)         | 0<br>(0 - 0)         | 0<br>(0 - 0)         |
| Coal workers pneumoconiosis                         | 0<br>(0 - 1)       | 0<br>(0 - 0)       | 0<br>(0 - 0)        | 0<br>(0 - 0)         | 0<br>(0 - 0)         | 0<br>(0 - 0)         |
| Other pneumoconiosis                                | 1<br>(0 - 1)       | 0<br>(0 - 0)       | 0<br>(0 - 0)        | 0<br>(0 - 0)         | 0<br>(0 - 0)         | 0<br>(0 - 1)         |
| Asthma                                              | 83<br>(45 - 154)   | 1<br>(0 - 1)       | 1<br>(0 - 1)        | 18<br>(10 - 29)      | 21<br>(10 - 39)      | 43<br>(21 - 85)      |
| Interstitial lung disease and pulmonary sarcoidosis | 33<br>(3 - 72)     | 0<br>(0 - 0)       | 0<br>(0 - 0)        | 4<br>(0 - 8)         | 8<br>(1 - 18)        | 21<br>(2 - 49)       |
| Other chronic respiratory diseases                  | 14<br>(8 - 25)     | 0<br>(0 - 1)       | 0<br>(0 - 0)        | 5<br>(3 - 8)         | 1<br>(1 - 3)         | 7<br>(4 - 15)        |
| Cirrhosis                                           | 218<br>(147 - 304) | 2<br>(1 - 4)       | 1<br>(1 - 2)        | 38<br>(24 - 56)      | 78<br>(49 - 115)     | 99<br>(63 - 148)     |
| Cirrhosis due to hepatitis B                        | 94<br>(50 - 152)   | 0<br>(0 - 0)       | 0<br>(0 - 1)        | 14<br>(8 - 25)       | 32<br>(18 - 54)      | 48<br>(20 - 85)      |
| Cirrhosis due to hepatitis C                        | 94<br>(51 - 152)   | 0<br>(0 - 0)       | 0<br>(0 - 0)        | 17<br>(7 - 29)       | 38<br>(17 - 63)      | 39<br>(21 - 63)      |
| Cirrhosis due to alcohol use                        | 11<br>(4 - 22)     | -                  | -                   | 1<br>(0 - 2)         | 3<br>(1 - 7)         | 7<br>(2 - 14)        |
| Cirrhosis due to other causes                       | 19<br>(10 - 32)    | 1<br>(1 - 3)       | 1<br>(0 - 1)        | 6<br>(3 - 10)        | 6<br>(2 - 11)        | 6<br>(2 - 11)        |
| Digestive diseases                                  | 156<br>(117 - 214) | 2<br>(1 - 3)       | 2<br>(1 - 2)        | 21<br>(14 - 31)      | 37<br>(25 - 56)      | 95<br>(68 - 130)     |
| Peptic ulcer disease                                | 37<br>(24 - 56)    | 0<br>(0 - 0)       | 0<br>(0 - 0)        | 3<br>(2 - 6)         | 8<br>(5 - 14)        | 25<br>(15 - 39)      |
| Gastritis and duodenitis                            | 2<br>(1 - 5)       | 0<br>(0 - 0)       | 0<br>(0 - 0)        | 1<br>(0 - 1)         | 0<br>(0 - 1)         | 1<br>(0 - 1)         |
| Appendicitis                                        | 6<br>(4 - 10)      | 0<br>(0 - 0)       | 0<br>(0 - 0)        | 2<br>(1 - 3)         | 2<br>(1 - 3)         | 3<br>(1 - 5)         |
| Paralytic ileus and intestinal obstruction          | 34<br>(19 - 61)    | 0<br>(0 - 1)       | 0<br>(0 - 1)        | 5<br>(2 - 9)         | 7<br>(4 - 15)        | 21<br>(11 - 39)      |
| Inguinal, femoral, and abdominal hernia             | 3<br>(2 - 6)       | 0<br>(0 - 0)       | 0<br>(0 - 0)        | 0<br>(0 - 1)         | 1<br>(0 - 1)         | 2<br>(1 - 4)         |
| Inflammatory bowel disease                          | 8<br>(5 - 14)      | 0<br>(0 - 0)       | 0<br>(0 - 0)        | 2<br>(1 - 3)         | 2<br>(1 - 3)         | 4<br>(2 - 8)         |
| Vascular intestinal disorders                       | 5<br>(3 - 11)      | 0<br>(0 - 0)       | 0<br>(0 - 0)        | 1<br>(0 - 2)         | 1<br>(1 - 3)         | 3<br>(1 - 6)         |
| Gallbladder and biliary diseases                    | 31<br>(20 - 45)    | 0<br>(0 - 0)       | 0<br>(0 - 0)        | 3<br>(2 - 5)         | 7<br>(4 - 12)        | 20<br>(11 - 32)      |
| Pancreatitis                                        | 11<br>(7 - 17)     | 0<br>(0 - 0)       | 0<br>(0 - 0)        | 2<br>(1 - 3)         | 4<br>(2 - 6)         | 5<br>(3 - 9)         |
| Other digestive diseases                            | 18<br>(12 - 28)    | 0<br>(0 - 1)       | 0<br>(0 - 0)        | 2<br>(2 - 4)         | 4<br>(3 - 7)         | 11<br>(6 - 18)       |
| Neurological disorders                              | 503<br>(379 - 654) | 4<br>(3 - 7)       | 3<br>(2 - 5)        | 20<br>(11 - 32)      | 48<br>(32 - 67)      | 428<br>(318 - 567)   |
| Alzheimer disease and other dementias               | 463<br>(344 - 612) | -                  | -                   | 0<br>(0 - 1)         | 42<br>(27 - 60)      | 421<br>(311 - 560)   |
| Parkinson disease                                   | 2<br>(1 - 4)       | -                  | -                   | 0<br>(0 - 0)         | 0<br>(0 - 1)         | 2<br>(1 - 3)         |
| Epilepsy                                            | 27<br>(14 - 43)    | 2<br>(1 - 4)       | 2<br>(1 - 4)        | 16<br>(8 - 28)       | 4<br>(2 - 6)         | 3<br>(1 - 6)         |
| Multiple sclerosis                                  | 3<br>(1 - 4)       | -                  | -                   | 1<br>(1 - 2)         | 1<br>(0 - 1)         | 1<br>(0 - 1)         |
| Other neurological disorders                        | 9<br>(7 - 11)      | 3<br>(2 - 4)       | 1<br>(1 - 1)        | 2<br>(1 - 3)         | 1<br>(1 - 2)         | 2<br>(2 - 3)         |
| Mental and substance use disorders                  | 31<br>(23 - 42)    | 0<br>(0 - 0)       | 0<br>(0 - 0)        | 23<br>(17 - 33)      | 4<br>(3 - 6)         | 3<br>(2 - 5)         |
| Schizophrenia                                       | 1<br>(0 - 1)       | -                  | -                   | 0<br>(0 - 0)         | 0<br>(0 - 0)         | 0<br>(0 - 0)         |
| Alcohol use disorders                               | 2<br>(1 - 5)       | -                  | -                   | 1<br>(0 - 2)         | 1<br>(0 - 2)         | 0<br>(0 - 1)         |
| Drug use disorders                                  | 27<br>(20 - 37)    | 0<br>(0 - 0)       | -                   | 21<br>(15 - 30)      | 3<br>(2 - 4)         | 3<br>(2 - 4)         |
| Opioid use disorders                                | 15<br>(11 - 20)    | 0<br>(0 - 0)       | -                   | 12<br>(8 - 16)       | 1<br>(1 - 2)         | 1<br>(1 - 2)         |
| Cocaine use disorders                               | 1<br>(0 - 1)       | 0<br>(0 - 0)       | -                   | 0<br>(0 - 1)         | 0<br>(0 - 0)         | 0<br>(0 - 0)         |
| Amphetamine use disorders                           | 0<br>(0 - 1)       | 0<br>(0 - 0)       | -                   | 0<br>(0 - 1)         | 0<br>(0 - 0)         | 0<br>(0 - 0)         |
| Other drug use disorders                            | 11<br>(8 - 16)     | 0<br>(0 - 0)       | -                   | 9<br>(6 - 12)        | 1<br>(1 - 2)         | 1<br>(1 - 2)         |
| Eating disorders                                    | 1<br>(0 - 1)       | -                  | 0<br>(0 - 0)        | 1<br>(0 - 1)         | -                    | -                    |

Web Table 31- Libya deaths with 95% UI by age, sex, and cause in 2013

| Cause                                               | Females, All Ages      | Females, 0-4 Years | Females, 5-14 Years | Females, 15-49 Years | Females, 50-69 Years | Females, 70-80 Years |
|-----------------------------------------------------|------------------------|--------------------|---------------------|----------------------|----------------------|----------------------|
| Anorexia nervosa                                    | 1<br>(0 - 1)           | --                 | 0<br>(0 - 0)        | 1<br>(0 - 1)         | --                   | --                   |
| Diabetes, urogenital, blood, and endocrine diseases | 1,230<br>(927 - 1,574) | 14<br>(10 - 20)    | 9<br>(7 - 12)       | 143<br>(105 - 193)   | 376<br>(272 - 500)   | 689<br>(509 - 888)   |
| Diabetes mellitus                                   | 656<br>(471 - 878)     | 1<br>(1 - 2)       | 1<br>(1 - 2)        | 44<br>(30 - 64)      | 212<br>(144 - 296)   | 397<br>(272 - 551)   |
| Acute glomerulonephritis                            | 2<br>(1 - 3)           | 0<br>(0 - 0)       | 0<br>(0 - 0)        | 1<br>(0 - 1)         | 0<br>(0 - 1)         | 1<br>(0 - 1)         |
| Chronic kidney disease                              | 454<br>(316 - 618)     | 3<br>(1 - 5)       | 3<br>(2 - 4)        | 63<br>(42 - 90)      | 142<br>(95 - 203)    | 244<br>(157 - 352)   |
| Chronic kidney disease due to diabetes mellitus     | 14<br>(6 - 25)         | 0<br>(0 - 0)       | 0<br>(0 - 0)        | 3<br>(1 - 5)         | 6<br>(2 - 11)        | 5<br>(2 - 10)        |
| Chronic kidney disease due to hypertension          | 217<br>(139 - 328)     | 0<br>(0 - 1)       | 0<br>(0 - 1)        | 28<br>(17 - 44)      | 68<br>(41 - 109)     | 119<br>(70 - 185)    |
| Chronic kidney disease due to glomerulonephritis    | 12<br>(6 - 19)         | 0<br>(0 - 1)       | 0<br>(0 - 0)        | 3<br>(1 - 5)         | 3<br>(2 - 6)         | 5<br>(3 - 10)        |
| Chronic kidney disease due to other causes          | 211<br>(111 - 344)     | 2<br>(1 - 3)       | 2<br>(1 - 3)        | 29<br>(15 - 49)      | 65<br>(31 - 111)     | 113<br>(49 - 203)    |
| Urinary diseases and male infertility               | 39<br>(27 - 56)        | 1<br>(0 - 1)       | 0<br>(0 - 1)        | 7<br>(5 - 10)        | 8<br>(5 - 13)        | 23<br>(14 - 37)      |
| Interstitial nephritis and urinary tract infections | 27<br>(18 - 39)        | 0<br>(0 - 1)       | 0<br>(0 - 0)        | 5<br>(3 - 8)         | 5<br>(3 - 9)         | 16<br>(9 - 26)       |
| Urolithiasis                                        | 2<br>(1 - 4)           | --                 | 0<br>(0 - 0)        | 0<br>(0 - 1)         | 0<br>(0 - 1)         | 1<br>(0 - 2)         |
| Other urinary diseases                              | 10<br>(6 - 17)         | 0<br>(0 - 0)       | 0<br>(0 - 0)        | 1<br>(1 - 2)         | 2<br>(1 - 4)         | 7<br>(3 - 12)        |
| Gynecological diseases                              | 1<br>(0 - 1)           | --                 | --                  | 0<br>(0 - 1)         | 0<br>(0 - 0)         | 0<br>(0 - 0)         |
| Uterine fibroids                                    | 0<br>(0 - 0)           | --                 | --                  | 0<br>(0 - 0)         | 0<br>(0 - 0)         | 0<br>(0 - 0)         |
| Polycystic ovarian syndrome                         | 0<br>(0 - 0)           | --                 | --                  | 0<br>(0 - 0)         | 0<br>(0 - 0)         | --                   |
| Endometriosis                                       | 0<br>(0 - 0)           | --                 | --                  | 0<br>(0 - 0)         | 0<br>(0 - 0)         | --                   |
| Genital prolapse                                    | 0<br>(0 - 0)           | --                 | --                  | 0<br>(0 - 0)         | 0<br>(0 - 0)         | 0<br>(0 - 0)         |
| Other gynecological diseases                        | 0<br>(0 - 0)           | --                 | --                  | 0<br>(0 - 0)         | 0<br>(0 - 0)         | 0<br>(0 - 0)         |
| Hemoglobinopathies and hemolytic anemias            | 37<br>(22 - 58)        | 4<br>(2 - 6)       | 3<br>(2 - 5)        | 18<br>(10 - 28)      | 4<br>(2 - 8)         | 8<br>(4 - 13)        |
| Thalassemias                                        | 14<br>(9 - 22)         | 3<br>(2 - 5)       | 2<br>(1 - 3)        | 9<br>(5 - 14)        | 0<br>(0 - 0)         | 0<br>(0 - 0)         |
| Sickle cell disorders                               | 11<br>(6 - 18)         | 1<br>(0 - 1)       | 1<br>(0 - 1)        | 7<br>(4 - 11)        | 3<br>(1 - 5)         | 0<br>(0 - 0)         |
| G6PD deficiency                                     | 1<br>(0 - 1)           | 0<br>(0 - 0)       | 0<br>(0 - 0)        | 0<br>(0 - 1)         | 0<br>(0 - 0)         | 0<br>(0 - 0)         |
| Other hemoglobinopathies and hemolytic anemias      | 11<br>(6 - 18)         | 0<br>(0 - 1)       | 0<br>(0 - 0)        | 2<br>(1 - 2)         | 1<br>(1 - 2)         | 7<br>(4 - 13)        |
| Endocrine, metabolic, blood, and immune disorders   | 42<br>(29 - 70)        | 5<br>(3 - 9)       | 2<br>(1 - 3)        | 10<br>(6 - 17)       | 9<br>(5 - 17)        | 16<br>(9 - 30)       |
| Musculoskeletal disorders                           | 42<br>(27 - 57)        | --                 | 1<br>(1 - 2)        | 16<br>(10 - 23)      | 9<br>(5 - 13)        | 16<br>(9 - 25)       |
| Rheumatoid arthritis                                | 4<br>(2 - 7)           | --                 | 0<br>(0 - 0)        | 1<br>(0 - 2)         | 1<br>(1 - 2)         | 2<br>(1 - 4)         |
| Other musculoskeletal disorders                     | 38<br>(24 - 51)        | --                 | 1<br>(1 - 2)        | 15<br>(10 - 22)      | 7<br>(4 - 11)        | 14<br>(7 - 21)       |
| Other non-communicable diseases                     | 401<br>(319 - 493)     | 310<br>(237 - 394) | 21<br>(14 - 30)     | 29<br>(20 - 42)      | 16<br>(11 - 24)      | 25<br>(16 - 34)      |
| Congenital anomalies                                | 381<br>(300 - 470)     | 305<br>(232 - 390) | 21<br>(14 - 30)     | 27<br>(19 - 40)      | 14<br>(9 - 21)       | 14<br>(7 - 22)       |
| Neural tube defects                                 | 8<br>(3 - 20)          | 7<br>(2 - 19)      | 0<br>(0 - 0)        | 0<br>(0 - 1)         | 0<br>(0 - 0)         | 0<br>(0 - 0)         |
| Congenital heart anomalies                          | 147<br>(101 - 213)     | 127<br>(84 - 191)  | 9<br>(5 - 14)       | 7<br>(4 - 10)        | 2<br>(1 - 4)         | 2<br>(1 - 4)         |
| Cleft lip and cleft palate                          | 0<br>(0 - 0)           | 0<br>(0 - 0)       | --                  | --                   | --                   | --                   |
| Down syndrome                                       | 12<br>(5 - 21)         | 8<br>(3 - 15)      | 2<br>(1 - 3)        | 2<br>(1 - 4)         | 1<br>(0 - 1)         | 0<br>(0 - 0)         |
| Chromosomal unbalanced rearrangements               | 6<br>(3 - 10)          | 4<br>(2 - 7)       | 0<br>(0 - 0)        | 1<br>(1 - 2)         | 0<br>(0 - 1)         | 0<br>(0 - 0)         |
| Other congenital anomalies                          | 208<br>(146 - 273)     | 159<br>(105 - 220) | 10<br>(6 - 16)      | 17<br>(11 - 25)      | 10<br>(7 - 16)       | 12<br>(6 - 18)       |
| Skin and subcutaneous diseases                      | 15<br>(10 - 23)        | 0<br>(0 - 1)       | 0<br>(0 - 0)        | 2<br>(1 - 2)         | 2<br>(2 - 4)         | 10<br>(6 - 16)       |
| Cellulitis                                          | 2<br>(1 - 3)           | 0<br>(0 - 0)       | 0<br>(0 - 0)        | 0<br>(0 - 0)         | 0<br>(0 - 1)         | 1<br>(0 - 2)         |
| Pyoderma                                            | 6<br>(4 - 9)           | 0<br>(0 - 1)       | 0<br>(0 - 0)        | 1<br>(0 - 1)         | 1<br>(1 - 2)         | 4<br>(2 - 7)         |
| Decubitus ulcer                                     | 7<br>(4 - 11)          | 0<br>(0 - 0)       | 0<br>(0 - 0)        | 0<br>(0 - 1)         | 1<br>(0 - 1)         | 6<br>(3 - 10)        |

Web Table 31- Libya deaths with 95% UI by age, sex, and cause in 2013

| Cause                                           | Females, All Ages  | Females, 0-4 Years | Females, 5-14 Years | Females, 15-49 Years | Females, 50-69 Years | Females, 70-80 Years |
|-------------------------------------------------|--------------------|--------------------|---------------------|----------------------|----------------------|----------------------|
| Other skin and subcutaneous diseases            | 0<br>(0 - 1)       | 0<br>(0 - 0)       | 0<br>(0 - 0)        | 0<br>(0 - 0)         | 0<br>(0 - 0)         | 0<br>(0 - 0)         |
| Sudden infant death syndrome                    | 4<br>(1 - 14)      | 4<br>(1 - 14)      | --                  | --                   | --                   | --                   |
| Injuries                                        | 655<br>(528 - 841) | 48<br>(37 - 62)    | 36<br>(28 - 46)     | 287<br>(216 - 385)   | 144<br>(105 - 199)   | 139<br>(105 - 183)   |
| Transport injuries                              | 252<br>(188 - 344) | 16<br>(9 - 26)     | 18<br>(12 - 25)     | 127<br>(88 - 182)    | 55<br>(37 - 82)      | 36<br>(24 - 52)      |
| Road injuries                                   | 237<br>(176 - 325) | 15<br>(9 - 25)     | 17<br>(11 - 24)     | 120<br>(84 - 173)    | 52<br>(34 - 77)      | 33<br>(22 - 48)      |
| Pedestrian road injuries                        | 65<br>(45 - 98)    | 5<br>(2 - 9)       | 5<br>(3 - 9)        | 26<br>(16 - 40)      | 16<br>(9 - 27)       | 13<br>(8 - 21)       |
| Cyclist road injuries                           | 11<br>(7 - 16)     | 0<br>(0 - 1)       | 1<br>(0 - 1)        | 4<br>(3 - 7)         | 4<br>(2 - 7)         | 2<br>(1 - 3)         |
| Motorcyclist road injuries                      | 10<br>(5 - 15)     | 0<br>(0 - 1)       | 0<br>(0 - 1)        | 6<br>(3 - 10)        | 2<br>(1 - 3)         | 1<br>(0 - 1)         |
| Motor vehicle road injuries                     | 150<br>(109 - 205) | 10<br>(5 - 16)     | 11<br>(7 - 16)      | 83<br>(57 - 119)     | 30<br>(19 - 45)      | 17<br>(11 - 27)      |
| Other road injuries                             | 1<br>(1 - 2)       | 0<br>(0 - 0)       | 0<br>(0 - 0)        | 0<br>(0 - 1)         | 0<br>(0 - 0)         | 0<br>(0 - 1)         |
| Other transport injuries                        | 15<br>(9 - 21)     | 1<br>(0 - 1)       | 1<br>(0 - 1)        | 7<br>(4 - 10)        | 4<br>(2 - 6)         | 3<br>(1 - 5)         |
| Unintentional injuries                          | 196<br>(155 - 252) | 22<br>(15 - 31)    | 13<br>(10 - 18)     | 61<br>(45 - 82)      | 34<br>(24 - 48)      | 66<br>(48 - 91)      |
| Falls                                           | 47<br>(31 - 70)    | 3<br>(2 - 7)       | 2<br>(1 - 3)        | 9<br>(6 - 13)        | 7<br>(5 - 12)        | 25<br>(14 - 45)      |
| Drowning                                        | 24<br>(17 - 35)    | 6<br>(3 - 12)      | 4<br>(2 - 7)        | 9<br>(5 - 13)        | 2<br>(1 - 4)         | 2<br>(1 - 4)         |
| Fire, heat, and hot substances                  | 37<br>(23 - 60)    | 4<br>(2 - 7)       | 2<br>(1 - 4)        | 13<br>(8 - 22)       | 6<br>(3 - 11)        | 11<br>(6 - 20)       |
| Poisonings                                      | 15<br>(9 - 25)     | 1<br>(1 - 3)       | 1<br>(0 - 2)        | 7<br>(4 - 12)        | 3<br>(1 - 5)         | 3<br>(2 - 6)         |
| Exposure to mechanical forces                   | 13<br>(9 - 23)     | 2<br>(1 - 4)       | 1<br>(1 - 3)        | 5<br>(3 - 9)         | 3<br>(2 - 4)         | 3<br>(2 - 4)         |
| Unintentional firearm injuries                  | 3<br>(2 - 4)       | 0<br>(0 - 0)       | 0<br>(0 - 0)        | 1<br>(1 - 2)         | 1<br>(0 - 1)         | 1<br>(0 - 1)         |
| Unintentional suffocation                       | 1<br>(0 - 2)       | 0<br>(0 - 1)       | 0<br>(0 - 0)        | 0<br>(0 - 1)         | 0<br>(0 - 1)         | 0<br>(0 - 0)         |
| Other exposure to mechanical forces             | 9<br>(6 - 17)      | 1<br>(1 - 3)       | 1<br>(1 - 2)        | 3<br>(2 - 7)         | 2<br>(1 - 3)         | 2<br>(1 - 3)         |
| Adverse effects of medical treatment            | 29<br>(19 - 43)    | 2<br>(1 - 3)       | 1<br>(0 - 1)        | 7<br>(4 - 11)        | 8<br>(4 - 13)        | 11<br>(6 - 20)       |
| Animal contact                                  | 5<br>(3 - 13)      | 1<br>(0 - 2)       | 1<br>(0 - 1)        | 2<br>(1 - 4)         | 1<br>(0 - 3)         | 1<br>(1 - 3)         |
| Venomous animal contact                         | 3<br>(1 - 8)       | 0<br>(0 - 1)       | 0<br>(0 - 1)        | 1<br>(0 - 3)         | 1<br>(0 - 2)         | 1<br>(0 - 2)         |
| Non-venomous animal contact                     | 2<br>(1 - 5)       | 0<br>(0 - 1)       | 0<br>(0 - 0)        | 1<br>(0 - 2)         | 0<br>(0 - 1)         | 1<br>(0 - 2)         |
| Foreign body                                    | 13<br>(8 - 22)     | 2<br>(1 - 4)       | 1<br>(0 - 1)        | 3<br>(2 - 5)         | 2<br>(1 - 3)         | 6<br>(3 - 11)        |
| Pulmonary aspiration and foreign body in airway | 12<br>(7 - 21)     | 2<br>(1 - 4)       | 1<br>(0 - 1)        | 2<br>(1 - 4)         | 2<br>(1 - 3)         | 6<br>(3 - 10)        |
| Foreign body in other body part                 | 1<br>(0 - 1)       | 0<br>(0 - 0)       | 0<br>(0 - 0)        | 0<br>(0 - 0)         | 0<br>(0 - 0)         | 0<br>(0 - 0)         |
| Other unintentional injuries                    | 14<br>(9 - 20)     | 1<br>(1 - 2)       | 1<br>(1 - 2)        | 6<br>(4 - 10)        | 2<br>(1 - 4)         | 3<br>(2 - 5)         |
| Self-harm and interpersonal violence            | 83<br>(41 - 117)   | 1<br>(0 - 2)       | 2<br>(1 - 4)        | 58<br>(29 - 85)      | 13<br>(6 - 19)       | 10<br>(4 - 16)       |
| Self-harm                                       | 64<br>(20 - 93)    | --                 | 1<br>(0 - 3)        | 43<br>(12 - 67)      | 11<br>(3 - 17)       | 9<br>(3 - 15)        |
| Interpersonal violence                          | 19<br>(11 - 28)    | 1<br>(0 - 2)       | 1<br>(0 - 2)        | 15<br>(8 - 22)       | 2<br>(1 - 4)         | 1<br>(0 - 1)         |
| Assault by firearm                              | 4<br>(2 - 7)       | 0<br>(0 - 0)       | 0<br>(0 - 0)        | 3<br>(1 - 5)         | 1<br>(0 - 1)         | 0<br>(0 - 0)         |
| Assault by sharp object                         | 7<br>(3 - 10)      | 0<br>(0 - 0)       | 0<br>(0 - 0)        | 6<br>(3 - 10)        | 0<br>(0 - 1)         | 0<br>(0 - 0)         |
| Assault by other means                          | 9<br>(5 - 13)      | 0<br>(0 - 1)       | 0<br>(0 - 1)        | 6<br>(3 - 10)        | 1<br>(1 - 2)         | 1<br>(0 - 1)         |
| Forces of nature, war, and legal intervention   | 124<br>(74 - 261)  | 10<br>(9 - 11)     | 4<br>(2 - 6)        | 42<br>(23 - 93)      | 41<br>(23 - 91)      | 28<br>(14 - 59)      |
| Collective violence and legal intervention      | 124<br>(74 - 261)  | 10<br>(9 - 11)     | 4<br>(2 - 6)        | 42<br>(23 - 93)      | 41<br>(23 - 91)      | 28<br>(14 - 59)      |

Web Table 31- Lithuania deaths with 95% UI by age, sex, and cause in 2013

| Cause                                                             | Both Sexes, All Ages        | Both Sexes, 0-4 Years | Both Sexes, 5-14 Years | Both Sexes, 15-49 Years  | Both Sexes, 50-69 Years   | Both Sexes, 70-80 Years     |
|-------------------------------------------------------------------|-----------------------------|-----------------------|------------------------|--------------------------|---------------------------|-----------------------------|
| All causes                                                        | 39,163<br>(38,106 - 40,198) | 155<br>(121 - 189)    | 45<br>(39 - 51)        | 3,221<br>(3,104 - 3,342) | 9,744<br>(9,429 - 10,056) | 25,999<br>(25,336 - 26,695) |
| Communicable, maternal, neonatal, and nutritional diseases        | 937<br>(680 - 1,051)        | 58<br>(44 - 75)       | 3<br>(2 - 4)           | 241<br>(179 - 280)       | 332<br>(242 - 385)        | 303<br>(197 - 366)          |
| HIV/AIDS and tuberculosis                                         | 332<br>(273 - 386)          | 1<br>(1 - 2)          | 0<br>(0 - 1)           | 144<br>(111 - 171)       | 135<br>(109 - 163)        | 52<br>(43 - 63)             |
| Tuberculosis                                                      | 217<br>(168 - 246)          | 0<br>(0 - 0)          | 0<br>(0 - 0)           | 73<br>(49 - 87)          | 101<br>(78 - 119)         | 43<br>(36 - 53)             |
| HIV/AIDS                                                          | 116<br>(77 - 157)           | 1<br>(0 - 2)          | 0<br>(0 - 1)           | 71<br>(49 - 93)          | 35<br>(20 - 53)           | 9<br>(5 - 15)               |
| HIV/AIDS resulting in mycobacterial infection                     | 6<br>(4 - 9)                | 0<br>(0 - 0)          | 0<br>(0 - 0)           | 4<br>(2 - 5)             | 2<br>(1 - 3)              | 0<br>(0 - 1)                |
| HIV/AIDS resulting in other diseases                              | 109<br>(73 - 149)           | 1<br>(0 - 2)          | 0<br>(0 - 1)           | 67<br>(46 - 88)          | 33<br>(19 - 50)           | 8<br>(4 - 14)               |
| Diarrhea, lower respiratory, and other common infectious diseases | 533<br>(321 - 631)          | 13<br>(9 - 18)        | 3<br>(2 - 3)           | 90<br>(55 - 115)         | 186<br>(113 - 229)        | 242<br>(135 - 304)          |
| Diarrheal diseases                                                | 5<br>(4 - 6)                | 1<br>(0 - 1)          | 0<br>(0 - 0)           | 1<br>(1 - 1)             | 1<br>(1 - 2)              | 2<br>(1 - 3)                |
| Intestinal infectious diseases                                    | 4<br>(1 - 8)                | 0<br>(0 - 1)          | 0<br>(0 - 1)           | 1<br>(0 - 3)             | 1<br>(0 - 2)              | 1<br>(0 - 2)                |
| Typhoid fever                                                     | 3<br>(1 - 6)                | 0<br>(0 - 1)          | 0<br>(0 - 1)           | 1<br>(0 - 2)             | 1<br>(0 - 2)              | 1<br>(0 - 2)                |
| Paratyphoid fever                                                 | 1<br>(0 - 2)                | 0<br>(0 - 0)          | 0<br>(0 - 0)           | 0<br>(0 - 1)             | 0<br>(0 - 0)              | 0<br>(0 - 0)                |
| Other intestinal infectious diseases                              | 0<br>(0 - 2)                | 0<br>(0 - 0)          | 0<br>(0 - 0)           | 0<br>(0 - 1)             | 0<br>(0 - 1)              | 0<br>(0 - 1)                |
| Lower respiratory infections                                      | 473<br>(262 - 571)          | 9<br>(6 - 13)         | 1<br>(1 - 2)           | 77<br>(41 - 102)         | 163<br>(91 - 206)         | 223<br>(117 - 287)          |
| Upper respiratory infections                                      | 1<br>(0 - 3)                | 0<br>(0 - 0)          | 0<br>(0 - 0)           | 0<br>(0 - 0)             | 0<br>(0 - 1)              | 1<br>(0 - 2)                |
| Otitis media                                                      | 0<br>(0 - 0)                | 0<br>(0 - 0)          | 0<br>(0 - 0)           | 0<br>(0 - 0)             | 0<br>(0 - 0)              | 0<br>(0 - 0)                |
| Meningitis                                                        | 20<br>(18 - 23)             | 2<br>(1 - 3)          | 0<br>(0 - 0)           | 5<br>(4 - 5)             | 8<br>(7 - 10)             | 6<br>(4 - 7)                |
| Pneumococcal meningitis                                           | 5<br>(4 - 7)                | 0<br>(0 - 1)          | 0<br>(0 - 0)           | 1<br>(1 - 2)             | 2<br>(2 - 3)              | 1<br>(1 - 2)                |
| H influenzae type B meningitis                                    | 3<br>(2 - 4)                | 1<br>(1 - 1)          | 0<br>(0 - 0)           | 1<br>(0 - 1)             | 1<br>(1 - 1)              | 1<br>(0 - 1)                |
| Meningococcal meningitis                                          | 4<br>(3 - 5)                | 1<br>(0 - 1)          | 0<br>(0 - 0)           | 1<br>(1 - 1)             | 1<br>(1 - 2)              | 1<br>(1 - 1)                |
| Other meningitis                                                  | 8<br>(6 - 10)               | 0<br>(0 - 1)          | 0<br>(0 - 0)           | 2<br>(1 - 2)             | 3<br>(2 - 5)              | 2<br>(2 - 3)                |
| Encephalitis                                                      | 26<br>(19 - 34)             | 1<br>(1 - 2)          | 0<br>(0 - 1)           | 6<br>(4 - 9)             | 11<br>(7 - 15)            | 7<br>(5 - 10)               |
| Diphtheria                                                        | 0<br>(0 - 0)                | 0<br>(0 - 0)          | 0<br>(0 - 0)           | 0<br>(0 - 0)             | 0<br>(0 - 0)              | --<br>(0 - 0)               |
| Whooping cough                                                    | 0<br>(0 - 0)                | 0<br>(0 - 0)          | 0<br>(0 - 0)           | 0<br>(0 - 0)             | 0<br>(0 - 0)              | --<br>(0 - 0)               |
| Tetanus                                                           | 1<br>(0 - 1)                | 0<br>(0 - 0)          | 0<br>(0 - 0)           | 0<br>(0 - 0)             | 0<br>(0 - 0)              | 0<br>(0 - 0)                |
| Measles                                                           | 0<br>(0 - 0)                | 0<br>(0 - 0)          | 0<br>(0 - 0)           | 0<br>(0 - 0)             | 0<br>(0 - 0)              | --<br>(0 - 0)               |
| Varicella and herpes zoster                                       | 3<br>(1 - 10)               | 0<br>(0 - 0)          | 0<br>(0 - 0)           | 0<br>(0 - 0)             | 0<br>(0 - 1)              | 2<br>(0 - 9)                |
| Neglected tropical diseases and malaria                           | 2<br>(2 - 2)                | 0<br>(0 - 0)          | 0<br>(0 - 0)           | 1<br>(1 - 1)             | 1<br>(1 - 1)              | 0<br>(0 - 0)                |
| Cysticercosis                                                     | 0<br>(0 - 0)                | 0<br>(0 - 0)          | 0<br>(0 - 0)           | 0<br>(0 - 0)             | 0<br>(0 - 0)              | 0<br>(0 - 0)                |
| Cystic echinococcosis                                             | 1<br>(1 - 1)                | 0<br>(0 - 0)          | 0<br>(0 - 0)           | 0<br>(0 - 0)             | 0<br>(0 - 0)              | 0<br>(0 - 0)                |
| Dengue                                                            | 0<br>(0 - 0)                | 0<br>(0 - 0)          | 0<br>(0 - 0)           | 0<br>(0 - 0)             | 0<br>(0 - 0)              | 0<br>(0 - 0)                |
| Rabies                                                            | 0<br>(0 - 0)                | 0<br>(0 - 0)          | 0<br>(0 - 0)           | 0<br>(0 - 0)             | 0<br>(0 - 0)              | 0<br>(0 - 0)                |
| Other neglected tropical diseases                                 | 1<br>(1 - 1)                | 0<br>(0 - 0)          | 0<br>(0 - 0)           | 0<br>(0 - 0)             | 0<br>(0 - 0)              | 0<br>(0 - 0)                |
| Maternal disorders                                                | 2<br>(2 - 3)                | --                    | 0<br>(0 - 0)           | 2<br>(2 - 3)             | --                        | --                          |
| Maternal hemorrhage                                               | 0<br>(0 - 0)                | --                    | 0<br>(0 - 0)           | 0<br>(0 - 0)             | --                        | --                          |
| Maternal sepsis and other maternal infections                     | 0<br>(0 - 0)                | --                    | 0<br>(0 - 0)           | 0<br>(0 - 0)             | --                        | --                          |
| Maternal hypertensive disorders                                   | 0<br>(0 - 0)                | --                    | 0<br>(0 - 0)           | 0<br>(0 - 0)             | --                        | --                          |
| Maternal obstructed labor                                         | 0<br>(0 - 0)                | --                    | 0<br>(0 - 0)           | 0<br>(0 - 0)             | --                        | --                          |
| Maternal abortive outcome                                         | 0<br>(0 - 1)                | --                    | 0<br>(0 - 0)           | 0<br>(0 - 1)             | --                        | --                          |
| Indirect maternal deaths                                          | 0<br>(0 - 0)                | --                    | 0<br>(0 - 0)           | 0<br>(0 - 0)             | --                        | --                          |



Web Table 31- Lithuania deaths with 95% UI by age, sex, and cause in 2013

| Cause                                                            | Both Sexes, All Ages        | Both Sexes, 0-4 Years | Both Sexes, 5-14 Years | Both Sexes, 15-49 Years  | Both Sexes, 50-69 Years  | Both Sexes, 70-80 Years     |
|------------------------------------------------------------------|-----------------------------|-----------------------|------------------------|--------------------------|--------------------------|-----------------------------|
| Late maternal deaths                                             | 0<br>(0 - 0)                | --                    | 0<br>(0 - 0)           | 0<br>(0 - 0)             | --                       | --                          |
| Maternal deaths aggravated by HIV/AIDS                           | 0<br>(0 - 0)                | --                    | --                     | 0<br>(0 - 0)             | --                       | --                          |
| Other maternal disorders                                         | 0<br>(0 - 1)                | --                    | 0<br>(0 - 0)           | 0<br>(0 - 1)             | --                       | --                          |
| Neonatal disorders                                               | 43<br>(32 - 56)             | 43<br>(32 - 56)       | --                     | --                       | --                       | --                          |
| Neonatal preterm birth complications                             | 17<br>(11 - 24)             | 17<br>(11 - 24)       | --                     | --                       | --                       | --                          |
| Neonatal encephalopathy due to birth asphyxia and trauma         | 13<br>(7 - 20)              | 13<br>(7 - 20)        | --                     | --                       | --                       | --                          |
| Neonatal sepsis and other neonatal infections                    | 5<br>(2 - 12)               | 5<br>(2 - 12)         | --                     | --                       | --                       | --                          |
| Hemolytic disease and other neonatal jaundice                    | 0<br>(0 - 0)                | 0<br>(0 - 0)          | --                     | --                       | --                       | --                          |
| Other neonatal disorders                                         | 8<br>(5 - 11)               | 8<br>(5 - 11)         | --                     | --                       | --                       | --                          |
| Nutritional deficiencies                                         | 9<br>(7 - 15)               | 0<br>(0 - 0)          | 0<br>(0 - 0)           | 1<br>(1 - 2)             | 4<br>(3 - 6)             | 4<br>(3 - 6)                |
| Protein-energy malnutrition                                      | 2<br>(1 - 3)                | 0<br>(0 - 0)          | 0<br>(0 - 0)           | 0<br>(0 - 1)             | 1<br>(1 - 2)             | 0<br>(0 - 1)                |
| Iodine deficiency                                                | 1<br>(0 - 2)                | 0<br>(0 - 0)          | 0<br>(0 - 0)           | 0<br>(0 - 0)             | 0<br>(0 - 1)             | 0<br>(0 - 1)                |
| Iron-deficiency anemia                                           | 5<br>(3 - 8)                | 0<br>(0 - 0)          | 0<br>(0 - 0)           | 1<br>(0 - 1)             | 2<br>(1 - 3)             | 2<br>(2 - 4)                |
| Other nutritional deficiencies                                   | 2<br>(1 - 3)                | 0<br>(0 - 0)          | 0<br>(0 - 0)           | 0<br>(0 - 1)             | 1<br>(0 - 1)             | 1<br>(0 - 2)                |
| Other communicable, maternal, neonatal, and nutritional diseases | 15<br>(13 - 18)             | 1<br>(1 - 2)          | 0<br>(0 - 0)           | 3<br>(3 - 4)             | 6<br>(5 - 8)             | 5<br>(4 - 6)                |
| Sexually transmitted diseases excluding HIV                      | 3<br>(2 - 4)                | 0<br>(0 - 1)          | 0<br>(0 - 0)           | 1<br>(1 - 1)             | 1<br>(0 - 1)             | 1<br>(0 - 1)                |
| Syphilis                                                         | 2<br>(1 - 2)                | 0<br>(0 - 1)          | 0<br>(0 - 0)           | 0<br>(0 - 0)             | 0<br>(0 - 1)             | 1<br>(0 - 1)                |
| Chlamydial infection                                             | 0<br>(0 - 0)                | --                    | 0<br>(0 - 0)           | 0<br>(0 - 0)             | 0<br>(0 - 0)             | 0<br>(0 - 0)                |
| Gonococcal infection                                             | 0<br>(0 - 1)                | --                    | 0<br>(0 - 0)           | 0<br>(0 - 0)             | 0<br>(0 - 0)             | 0<br>(0 - 0)                |
| Other sexually transmitted diseases                              | 0<br>(0 - 0)                | --                    | 0<br>(0 - 0)           | 0<br>(0 - 0)             | 0<br>(0 - 0)             | 0<br>(0 - 0)                |
| Hepatitis                                                        | 4<br>(3 - 5)                | 0<br>(0 - 0)          | 0<br>(0 - 0)           | 1<br>(1 - 1)             | 1<br>(1 - 2)             | 1<br>(1 - 2)                |
| Acute hepatitis A                                                | 0<br>(0 - 1)                | 0<br>(0 - 0)          | 0<br>(0 - 0)           | 0<br>(0 - 0)             | 0<br>(0 - 0)             | 0<br>(0 - 0)                |
| Acute hepatitis B                                                | 3<br>(2 - 4)                | 0<br>(0 - 0)          | 0<br>(0 - 0)           | 1<br>(0 - 1)             | 1<br>(1 - 2)             | 1<br>(1 - 2)                |
| Acute hepatitis C                                                | 0<br>(0 - 1)                | --                    | 0<br>(0 - 0)           | 0<br>(0 - 0)             | 0<br>(0 - 0)             | 0<br>(0 - 0)                |
| Other infectious diseases                                        | 9<br>(7 - 11)               | 1<br>(0 - 1)          | 0<br>(0 - 0)           | 1<br>(1 - 2)             | 4<br>(3 - 5)             | 3<br>(2 - 4)                |
| Non-communicable diseases                                        | 35,307<br>(34,404 - 36,264) | 73<br>(54 - 92)       | 18<br>(14 - 21)        | 1,747<br>(1,629 - 1,851) | 8,320<br>(8,034 - 8,607) | 25,149<br>(24,517 - 25,833) |
| Neoplasms                                                        | 7,324<br>(6,851 - 7,698)    | 5<br>(3 - 8)          | 9<br>(6 - 10)          | 455<br>(420 - 487)       | 2,926<br>(2,757 - 3,086) | 3,929<br>(3,608 - 4,174)    |
| Esophageal cancer                                                | 159<br>(107 - 190)          | --                    | --                     | 12<br>(8 - 17)           | 92<br>(56 - 116)         | 54<br>(41 - 66)             |
| Stomach cancer                                                   | 700<br>(612 - 811)          | --                    | --                     | 43<br>(35 - 52)          | 264<br>(233 - 313)       | 394<br>(329 - 472)          |
| Liver cancer                                                     | 164<br>(116 - 209)          | --                    | 0<br>(0 - 0)           | 8<br>(5 - 10)            | 61<br>(44 - 80)          | 95<br>(63 - 124)            |
| Liver cancer due to hepatitis B                                  | 23<br>(11 - 34)             | --                    | 0<br>(0 - 0)           | 2<br>(1 - 3)             | 10<br>(4 - 16)           | 11<br>(6 - 16)              |
| Liver cancer due to hepatitis C                                  | 78<br>(52 - 105)            | --                    | 0<br>(0 - 0)           | 3<br>(2 - 5)             | 29<br>(19 - 41)          | 46<br>(29 - 63)             |
| Liver cancer due to alcohol use                                  | 45<br>(31 - 66)             | --                    | --                     | 1<br>(1 - 2)             | 15<br>(10 - 24)          | 29<br>(18 - 41)             |
| Liver cancer due to other causes                                 | 18<br>(10 - 26)             | --                    | 0<br>(0 - 0)           | 1<br>(1 - 2)             | 6<br>(3 - 10)            | 10<br>(5 - 16)              |
| Larynx cancer                                                    | 105<br>(75 - 135)           | --                    | --                     | 9<br>(7 - 13)            | 64<br>(47 - 84)          | 32<br>(21 - 41)             |
| Tracheal, bronchus and lung cancer                               | 1,344<br>(1,206 - 1,482)    | --                    | --                     | 55<br>(44 - 69)          | 658<br>(583 - 733)       | 631<br>(560 - 708)          |
| Breast cancer                                                    | 509<br>(354 - 618)          | --                    | --                     | 57<br>(44 - 75)          | 221<br>(160 - 275)       | 231<br>(138 - 290)          |
| Cervical cancer                                                  | 159<br>(129 - 196)          | --                    | --                     | 19<br>(14 - 24)          | 65<br>(51 - 84)          | 75<br>(57 - 100)            |
| Uterine cancer                                                   | 123<br>(98 - 156)           | --                    | --                     | 5<br>(3 - 7)             | 47<br>(36 - 62)          | 71<br>(51 - 95)             |
| Prostate cancer                                                  | 488<br>(320 - 615)          | --                    | --                     | 2<br>(1 - 3)             | 97<br>(54 - 136)         | 389<br>(256 - 506)          |

Web Table 31- Lithuania deaths with 95% UI by age, sex, and cause in 2013

| Cause                                         | Both Sexes, All Ages        | Both Sexes, 0-4 Years | Both Sexes, 5-14 Years | Both Sexes, 15-49 Years | Both Sexes, 50-69 Years  | Both Sexes, 70-80 Years     |
|-----------------------------------------------|-----------------------------|-----------------------|------------------------|-------------------------|--------------------------|-----------------------------|
| Colon and rectum cancer                       | 924<br>(845 - 1,017)        | --                    | --                     | 29<br>(25 - 33)         | 282<br>(258 - 308)       | 612<br>(545 - 696)          |
| Lip and oral cavity cancer                    | 128<br>(86 - 149)           | --                    | --                     | 14<br>(9 - 18)          | 77<br>(46 - 94)          | 38<br>(30 - 46)             |
| Nasopharynx cancer                            | 13<br>(10 - 23)             | --                    | 0<br>(0 - 0)           | 2<br>(1 - 4)            | 8<br>(5 - 13)            | 4<br>(3 - 6)                |
| Other pharynx cancer                          | 89<br>(62 - 113)            | --                    | --                     | 7<br>(5 - 10)           | 65<br>(43 - 86)          | 17<br>(12 - 22)             |
| Gallbladder and biliary tract cancer          | 99<br>(79 - 132)            | --                    | --                     | 3<br>(3 - 5)            | 33<br>(26 - 44)          | 63<br>(47 - 85)             |
| Pancreatic cancer                             | 477<br>(442 - 519)          | --                    | --                     | 24<br>(20 - 29)         | 182<br>(164 - 202)       | 271<br>(241 - 309)          |
| Malignant skin melanoma                       | 78<br>(47 - 100)            | --                    | --                     | 12<br>(7 - 16)          | 30<br>(18 - 40)          | 36<br>(22 - 48)             |
| Non-melanoma skin cancer                      | 42<br>(32 - 55)             | --                    | --                     | 2<br>(1 - 2)            | 8<br>(6 - 12)            | 32<br>(24 - 42)             |
| Ovarian cancer                                | 272<br>(216 - 320)          | --                    | --                     | 25<br>(18 - 31)         | 117<br>(95 - 140)        | 130<br>(94 - 166)           |
| Testicular cancer                             | 7<br>(5 - 9)                | --                    | --                     | 4<br>(2 - 5)            | 2<br>(1 - 3)             | 2<br>(1 - 3)                |
| Kidney cancer                                 | 224<br>(186 - 267)          | 0<br>(0 - 0)          | 0<br>(0 - 0)           | 11<br>(8 - 15)          | 104<br>(86 - 123)        | 108<br>(81 - 145)           |
| Bladder cancer                                | 200<br>(154 - 234)          | --                    | --                     | 3<br>(2 - 4)            | 51<br>(42 - 62)          | 146<br>(110 - 175)          |
| Brain and nervous system cancer               | 196<br>(139 - 229)          | 1<br>(0 - 2)          | 2<br>(2 - 3)           | 34<br>(26 - 41)         | 99<br>(74 - 118)         | 59<br>(34 - 77)             |
| Thyroid cancer                                | 30<br>(23 - 37)             | --                    | 0<br>(0 - 0)           | 1<br>(1 - 2)            | 10<br>(8 - 13)           | 18<br>(13 - 23)             |
| Mesothelioma                                  | 10<br>(7 - 13)              | --                    | --                     | 1<br>(1 - 1)            | 4<br>(3 - 6)             | 5<br>(3 - 6)                |
| Hodgkin lymphoma                              | 22<br>(18 - 35)             | 0<br>(0 - 0)          | 0<br>(0 - 0)           | 7<br>(5 - 9)            | 8<br>(6 - 14)            | 7<br>(5 - 12)               |
| Non-Hodgkin lymphoma                          | 120<br>(66 - 158)           | 0<br>(0 - 1)          | 1<br>(0 - 1)           | 11<br>(7 - 14)          | 41<br>(25 - 54)          | 67<br>(32 - 94)             |
| Multiple myeloma                              | 95<br>(60 - 128)            | --                    | --                     | 4<br>(2 - 6)            | 39<br>(24 - 53)          | 52<br>(32 - 72)             |
| Leukemia                                      | 244<br>(209 - 276)          | 2<br>(1 - 3)          | 3<br>(2 - 4)           | 22<br>(18 - 26)         | 81<br>(69 - 94)          | 136<br>(115 - 160)          |
| Other neoplasms                               | 302<br>(233 - 347)          | 2<br>(2 - 3)          | 2<br>(2 - 3)           | 32<br>(24 - 38)         | 112<br>(86 - 133)        | 154<br>(113 - 184)          |
| Cardiovascular diseases                       | 21,659<br>(20,868 - 22,546) | 1<br>(1 - 1)          | 1<br>(0 - 1)           | 573<br>(516 - 628)      | 3,842<br>(3,653 - 4,058) | 17,242<br>(16,554 - 17,954) |
| Rheumatic heart disease                       | 112<br>(91 - 155)           | 0<br>(0 - 0)          | 0<br>(0 - 0)           | 14<br>(11 - 25)         | 57<br>(45 - 91)          | 40<br>(27 - 50)             |
| Ischemic heart disease                        | 14,716<br>(13,855 - 16,100) | 0<br>(0 - 0)          | 0<br>(0 - 0)           | 285<br>(245 - 331)      | 2,371<br>(2,203 - 2,618) | 12,060<br>(11,318 - 13,291) |
| Cerebrovascular disease                       | 5,195<br>(4,259 - 5,781)    | 0<br>(0 - 0)          | 0<br>(0 - 0)           | 99<br>(78 - 121)        | 821<br>(709 - 948)       | 4,274<br>(3,443 - 4,787)    |
| Ischemic stroke                               | 4,137<br>(3,274 - 4,667)    | 0<br>(0 - 0)          | 0<br>(0 - 0)           | 24<br>(17 - 34)         | 489<br>(396 - 577)       | 3,624<br>(2,814 - 4,104)    |
| Hemorrhagic stroke                            | 1,057<br>(847 - 1,380)      | 0<br>(0 - 0)          | 0<br>(0 - 0)           | 75<br>(58 - 91)         | 332<br>(271 - 413)       | 651<br>(489 - 889)          |
| Hypertensive heart disease                    | 500<br>(321 - 664)          | 0<br>(0 - 0)          | 0<br>(0 - 0)           | 19<br>(11 - 28)         | 106<br>(66 - 147)        | 375<br>(231 - 510)          |
| Cardiomyopathy and myocarditis                | 481<br>(374 - 583)          | 0<br>(0 - 1)          | 0<br>(0 - 0)           | 114<br>(84 - 142)       | 274<br>(206 - 338)       | 92<br>(70 - 113)            |
| Atrial fibrillation and flutter               | 24<br>(19 - 31)             | --                    | --                     | 0<br>(0 - 0)            | 3<br>(2 - 4)             | 21<br>(16 - 27)             |
| Aortic aneurysm                               | 133<br>(109 - 162)          | --                    | --                     | 9<br>(7 - 11)           | 48<br>(39 - 60)          | 76<br>(61 - 95)             |
| Peripheral vascular disease                   | 94<br>(76 - 118)            | --                    | --                     | 1<br>(0 - 1)            | 20<br>(15 - 26)          | 73<br>(57 - 94)             |
| Endocarditis                                  | 29<br>(20 - 38)             | 0<br>(0 - 0)          | 0<br>(0 - 0)           | 7<br>(4 - 9)            | 11<br>(7 - 15)           | 11<br>(7 - 15)              |
| Other cardiovascular and circulatory diseases | 375<br>(191 - 447)          | 0<br>(0 - 0)          | 0<br>(0 - 0)           | 26<br>(12 - 33)         | 129<br>(69 - 157)        | 220<br>(104 - 276)          |
| Chronic respiratory diseases                  | 1,024<br>(913 - 1,312)      | 0<br>(0 - 0)          | 0<br>(0 - 0)           | 23<br>(19 - 31)         | 225<br>(193 - 330)       | 776<br>(683 - 980)          |
| Chronic obstructive pulmonary disease         | 942<br>(837 - 1,218)        | 0<br>(0 - 0)          | 0<br>(0 - 0)           | 17<br>(14 - 23)         | 202<br>(172 - 293)       | 723<br>(634 - 912)          |
| Pneumoconiosis                                | 1<br>(1 - 2)                | 0<br>(0 - 0)          | 0<br>(0 - 0)           | 0<br>(0 - 0)            | 0<br>(0 - 0)             | 1<br>(0 - 1)                |
| Silicosis                                     | 0<br>(0 - 0)                | 0<br>(0 - 0)          | 0<br>(0 - 0)           | 0<br>(0 - 0)            | 0<br>(0 - 0)             | 0<br>(0 - 0)                |
| Asbestosis                                    | 0<br>(0 - 0)                | 0<br>(0 - 0)          | 0<br>(0 - 0)           | 0<br>(0 - 0)            | 0<br>(0 - 0)             | 0<br>(0 - 0)                |
| Coal workers pneumoconiosis                   | 0<br>(0 - 0)                | 0<br>(0 - 0)          | 0<br>(0 - 0)           | 0<br>(0 - 0)            | 0<br>(0 - 0)             | 0<br>(0 - 0)                |
| Other pneumoconiosis                          | 0<br>(0 - 1)                | 0<br>(0 - 0)          | 0<br>(0 - 0)           | 0<br>(0 - 0)            | 0<br>(0 - 0)             | 0<br>(0 - 0)                |

Web Table 31- Lithuania deaths with 95% UI by age, sex, and cause in 2013

| Cause                                               | Both Sexes, All Ages     | Both Sexes, 0-4 Years | Both Sexes, 5-14 Years | Both Sexes, 15-49 Years | Both Sexes, 50-69 Years | Both Sexes, 70-80 Years  |
|-----------------------------------------------------|--------------------------|-----------------------|------------------------|-------------------------|-------------------------|--------------------------|
| Asthma                                              | 44<br>(33 - 61)          | 0<br>(0 - 0)          | 0<br>(0 - 0)           | 3<br>(2 - 4)            | 14<br>(11 - 20)         | 27<br>(19 - 39)          |
| Interstitial lung disease and pulmonary sarcoidosis | 29<br>(19 - 45)          | 0<br>(0 - 0)          | 0<br>(0 - 0)           | 1<br>(1 - 2)            | 7<br>(4 - 12)           | 21<br>(12 - 32)          |
| Other chronic respiratory diseases                  | 8<br>(6 - 11)            | 0<br>(0 - 0)          | 0<br>(0 - 0)           | 2<br>(1 - 3)            | 2<br>(1 - 3)            | 4<br>(3 - 7)             |
| Cirrhosis                                           | 886<br>(822 - 960)       | 0<br>(0 - 0)          | 0<br>(0 - 0)           | 250<br>(220 - 281)      | 508<br>(464 - 556)      | 127<br>(113 - 145)       |
| Cirrhosis due to hepatitis B                        | 142<br>(78 - 195)        | 0<br>(0 - 0)          | 0<br>(0 - 0)           | 40<br>(21 - 59)         | 82<br>(45 - 112)        | 20<br>(10 - 29)          |
| Cirrhosis due to hepatitis C                        | 337<br>(249 - 440)       | 0<br>(0 - 0)          | 0<br>(0 - 0)           | 90<br>(61 - 123)        | 198<br>(144 - 259)      | 49<br>(36 - 64)          |
| Cirrhosis due to alcohol use                        | 321<br>(239 - 425)       | --                    | --                     | 85<br>(56 - 119)        | 186<br>(136 - 249)      | 50<br>(36 - 65)          |
| Cirrhosis due to other causes                       | 86<br>(63 - 112)         | 0<br>(0 - 0)          | 0<br>(0 - 0)           | 35<br>(25 - 48)         | 43<br>(30 - 58)         | 7<br>(5 - 10)            |
| Digestive diseases                                  | 752<br>(468 - 863)       | 0<br>(0 - 0)          | 0<br>(0 - 0)           | 65<br>(40 - 78)         | 198<br>(128 - 230)      | 488<br>(295 - 577)       |
| Peptic ulcer disease                                | 158<br>(82 - 221)        | 0<br>(0 - 0)          | 0<br>(0 - 0)           | 12<br>(7 - 18)          | 50<br>(27 - 68)         | 96<br>(47 - 144)         |
| Gastritis and duodenitis                            | 7<br>(3 - 9)             | 0<br>(0 - 0)          | 0<br>(0 - 0)           | 1<br>(0 - 1)            | 2<br>(1 - 3)            | 4<br>(1 - 6)             |
| Appendicitis                                        | 8<br>(5 - 11)            | 0<br>(0 - 0)          | 0<br>(0 - 0)           | 1<br>(1 - 1)            | 3<br>(2 - 4)            | 5<br>(2 - 7)             |
| Paralytic ileus and intestinal obstruction          | 55<br>(30 - 90)          | 0<br>(0 - 0)          | 0<br>(0 - 0)           | 3<br>(2 - 5)            | 12<br>(7 - 21)          | 39<br>(20 - 67)          |
| Inguinal, femoral, and abdominal hernia             | 21<br>(9 - 35)           | 0<br>(0 - 0)          | 0<br>(0 - 0)           | 1<br>(0 - 1)            | 4<br>(2 - 5)            | 17<br>(7 - 30)           |
| Inflammatory bowel disease                          | 16<br>(9 - 22)           | 0<br>(0 - 0)          | 0<br>(0 - 0)           | 2<br>(1 - 2)            | 5<br>(3 - 7)            | 9<br>(5 - 13)            |
| Vascular intestinal disorders                       | 197<br>(113 - 290)       | 0<br>(0 - 0)          | 0<br>(0 - 0)           | 2<br>(1 - 4)            | 33<br>(18 - 53)         | 162<br>(90 - 235)        |
| Gallbladder and biliary diseases                    | 77<br>(44 - 105)         | 0<br>(0 - 0)          | 0<br>(0 - 0)           | 2<br>(1 - 3)            | 14<br>(9 - 19)          | 61<br>(33 - 86)          |
| Pancreatitis                                        | 163<br>(94 - 206)        | 0<br>(0 - 0)          | 0<br>(0 - 0)           | 38<br>(22 - 47)         | 61<br>(36 - 79)         | 63<br>(34 - 89)          |
| Other digestive diseases                            | 50<br>(29 - 69)          | 0<br>(0 - 0)          | 0<br>(0 - 0)           | 4<br>(2 - 6)            | 14<br>(8 - 19)          | 32<br>(17 - 46)          |
| Neurological disorders                              | 2,359<br>(1,986 - 2,716) | 3<br>(2 - 4)          | 1<br>(1 - 2)           | 57<br>(44 - 70)         | 150<br>(130 - 170)      | 2,148<br>(1,777 - 2,506) |
| Alzheimer disease and other dementias               | 2,136<br>(1,759 - 2,516) | --                    | --                     | 0<br>(0 - 1)            | 75<br>(61 - 92)         | 2,061<br>(1,683 - 2,438) |
| Parkinson disease                                   | 69<br>(29 - 87)          | --                    | --                     | 0<br>(0 - 1)            | 9<br>(5 - 11)           | 60<br>(23 - 77)          |
| Epilepsy                                            | 63<br>(42 - 80)          | 0<br>(0 - 0)          | 1<br>(0 - 1)           | 34<br>(22 - 45)         | 24<br>(16 - 32)         | 4<br>(2 - 5)             |
| Multiple sclerosis                                  | 31<br>(22 - 48)          | --                    | --                     | 12<br>(8 - 20)          | 15<br>(10 - 25)         | 4<br>(2 - 6)             |
| Other neurological disorders                        | 60<br>(52 - 68)          | 2<br>(2 - 3)          | 1<br>(0 - 1)           | 11<br>(9 - 13)          | 27<br>(23 - 32)         | 19<br>(16 - 23)          |
| Mental and substance use disorders                  | 498<br>(374 - 615)       | 0<br>(0 - 1)          | 0<br>(0 - 0)           | 238<br>(178 - 294)      | 230<br>(164 - 303)      | 29<br>(23 - 37)          |
| Schizophrenia                                       | 5<br>(4 - 9)             | --                    | --                     | 1<br>(1 - 2)            | 2<br>(2 - 4)            | 2<br>(1 - 3)             |
| Alcohol use disorders                               | 356<br>(236 - 471)       | --                    | --                     | 151<br>(103 - 207)      | 188<br>(122 - 253)      | 16<br>(11 - 23)          |
| Drug use disorders                                  | 137<br>(101 - 164)       | 0<br>(0 - 1)          | --                     | 85<br>(58 - 104)        | 40<br>(30 - 50)         | 11<br>(9 - 15)           |
| Opioid use disorders                                | 59<br>(42 - 71)          | 0<br>(0 - 0)          | --                     | 37<br>(25 - 47)         | 16<br>(12 - 21)         | 5<br>(4 - 6)             |
| Cocaine use disorders                               | 3<br>(2 - 4)             | 0<br>(0 - 0)          | --                     | 2<br>(2 - 3)            | 1<br>(1 - 1)            | 0<br>(0 - 0)             |
| Amphetamine use disorders                           | 3<br>(2 - 4)             | 0<br>(0 - 0)          | --                     | 2<br>(1 - 2)            | 1<br>(1 - 1)            | 0<br>(0 - 0)             |
| Other drug use disorders                            | 72<br>(53 - 86)          | 0<br>(0 - 0)          | --                     | 44<br>(30 - 54)         | 22<br>(16 - 28)         | 6<br>(5 - 8)             |
| Eating disorders                                    | 0<br>(0 - 0)             | --                    | 0<br>(0 - 0)           | 0<br>(0 - 0)            | --                      | --                       |
| Anorexia nervosa                                    | 0<br>(0 - 0)             | --                    | 0<br>(0 - 0)           | 0<br>(0 - 0)            | --                      | --                       |
| Diabetes, urogenital, blood, and endocrine diseases | 599<br>(551 - 675)       | 2<br>(1 - 3)          | 1<br>(1 - 2)           | 54<br>(49 - 60)         | 188<br>(169 - 225)      | 354<br>(317 - 402)       |
| Diabetes mellitus                                   | 208<br>(189 - 232)       | 0<br>(0 - 0)          | 0<br>(0 - 0)           | 21<br>(19 - 24)         | 73<br>(64 - 86)         | 113<br>(99 - 132)        |
| Acute glomerulonephritis                            | 2<br>(1 - 3)             | 0<br>(0 - 0)          | 0<br>(0 - 0)           | 0<br>(0 - 1)            | 1<br>(0 - 1)            | 1<br>(0 - 1)             |
| Chronic kidney disease                              | 187<br>(164 - 215)       | 0<br>(0 - 0)          | 0<br>(0 - 0)           | 17<br>(15 - 23)         | 60<br>(50 - 77)         | 110<br>(88 - 129)        |
| Chronic kidney disease due to diabetes mellitus     | 36<br>(23 - 47)          | 0<br>(0 - 0)          | 0<br>(0 - 0)           | 3<br>(2 - 4)            | 12<br>(8 - 17)          | 20<br>(12 - 28)          |

Web Table 31- Lithuania deaths with 95% UI by age, sex, and cause in 2013

| Cause                                               | Both Sexes, All Ages     | Both Sexes, 0-4 Years | Both Sexes, 5-14 Years | Both Sexes, 15-49 Years  | Both Sexes, 50-69 Years | Both Sexes, 70-80 Years |
|-----------------------------------------------------|--------------------------|-----------------------|------------------------|--------------------------|-------------------------|-------------------------|
| Chronic kidney disease due to hypertension          | 46<br>(31 - 58)          | 0<br>(0 - 0)          | 0<br>(0 - 0)           | 3<br>(1 - 4)             | 13<br>(9 - 18)          | 30<br>(19 - 39)         |
| Chronic kidney disease due to glomerulonephritis    | 25<br>(19 - 34)          | 0<br>(0 - 0)          | 0<br>(0 - 0)           | 4<br>(3 - 6)             | 10<br>(7 - 13)          | 11<br>(8 - 16)          |
| Chronic kidney disease due to other causes          | 81<br>(63 - 110)         | 0<br>(0 - 0)          | 0<br>(0 - 0)           | 7<br>(5 - 12)            | 24<br>(17 - 42)         | 49<br>(35 - 65)         |
| Urinary diseases and male infertility               | 158<br>(134 - 208)       | 0<br>(0 - 0)          | 0<br>(0 - 0)           | 7<br>(6 - 9)             | 38<br>(31 - 53)         | 112<br>(91 - 149)       |
| Interstitial nephritis and urinary tract infections | 121<br>(101 - 164)       | 0<br>(0 - 0)          | 0<br>(0 - 0)           | 6<br>(5 - 8)             | 29<br>(23 - 43)         | 86<br>(69 - 117)        |
| Urolithiasis                                        | 22<br>(16 - 33)          | --                    | 0<br>(0 - 0)           | 1<br>(1 - 1)             | 6<br>(4 - 9)            | 15<br>(10 - 24)         |
| Other urinary diseases                              | 15<br>(8 - 21)           | 0<br>(0 - 0)          | 0<br>(0 - 0)           | 1<br>(0 - 1)             | 3<br>(2 - 5)            | 11<br>(5 - 16)          |
| Gynecological diseases                              | 0<br>(0 - 1)             | --                    | --                     | 0<br>(0 - 0)             | 0<br>(0 - 0)            | 0<br>(0 - 0)            |
| Uterine fibroids                                    | 0<br>(0 - 0)             | --                    | --                     | 0<br>(0 - 0)             | 0<br>(0 - 0)            | 0<br>(0 - 0)            |
| Polycystic ovarian syndrome                         | 0<br>(0 - 0)             | --                    | --                     | 0<br>(0 - 0)             | 0<br>(0 - 0)            | --                      |
| Endometriosis                                       | 0<br>(0 - 0)             | --                    | --                     | 0<br>(0 - 0)             | 0<br>(0 - 0)            | --                      |
| Genital prolapse                                    | 0<br>(0 - 0)             | --                    | --                     | 0<br>(0 - 0)             | 0<br>(0 - 0)            | 0<br>(0 - 0)            |
| Other gynecological diseases                        | 0<br>(0 - 0)             | --                    | --                     | 0<br>(0 - 0)             | 0<br>(0 - 0)            | 0<br>(0 - 0)            |
| Hemoglobinopathies and hemolytic anemias            | 9<br>(7 - 12)            | 0<br>(0 - 0)          | 0<br>(0 - 0)           | 1<br>(1 - 2)             | 2<br>(2 - 3)            | 5<br>(4 - 7)            |
| Thalassemias                                        | 1<br>(1 - 1)             | 0<br>(0 - 0)          | 0<br>(0 - 0)           | 1<br>(0 - 1)             | 0<br>(0 - 0)            | 0<br>(0 - 0)            |
| Sickle cell disorders                               | 0<br>(0 - 0)             | 0<br>(0 - 0)          | 0<br>(0 - 0)           | 0<br>(0 - 0)             | 0<br>(0 - 0)            | 0<br>(0 - 0)            |
| G6PD deficiency                                     | 0<br>(0 - 0)             | 0<br>(0 - 0)          | 0<br>(0 - 0)           | 0<br>(0 - 0)             | 0<br>(0 - 0)            | 0<br>(0 - 0)            |
| Other hemoglobinopathies and hemolytic anemias      | 8<br>(6 - 11)            | 0<br>(0 - 0)          | 0<br>(0 - 0)           | 1<br>(0 - 1)             | 2<br>(1 - 3)            | 5<br>(4 - 7)            |
| Endocrine, metabolic, blood, and immune disorders   | 34<br>(25 - 40)          | 2<br>(1 - 2)          | 1<br>(0 - 1)           | 6<br>(4 - 8)             | 14<br>(10 - 17)         | 12<br>(8 - 15)          |
| Musculoskeletal disorders                           | 68<br>(56 - 89)          | --                    | 0<br>(0 - 0)           | 8<br>(7 - 10)            | 28<br>(22 - 36)         | 32<br>(24 - 43)         |
| Rheumatoid arthritis                                | 34<br>(26 - 44)          | --                    | 0<br>(0 - 0)           | 2<br>(2 - 3)             | 14<br>(10 - 18)         | 18<br>(13 - 25)         |
| Other musculoskeletal disorders                     | 34<br>(27 - 46)          | --                    | 0<br>(0 - 0)           | 6<br>(5 - 8)             | 14<br>(11 - 20)         | 13<br>(10 - 19)         |
| Other non-communicable diseases                     | 138<br>(110 - 159)       | 62<br>(45 - 78)       | 5<br>(4 - 7)           | 23<br>(19 - 27)          | 24<br>(16 - 28)         | 24<br>(10 - 31)         |
| Congenital anomalies                                | 97<br>(76 - 116)         | 55<br>(38 - 72)       | 5<br>(4 - 7)           | 20<br>(16 - 23)          | 12<br>(10 - 15)         | 5<br>(4 - 6)            |
| Neural tube defects                                 | 1<br>(1 - 2)             | 1<br>(0 - 2)          | 0<br>(0 - 0)           | 0<br>(0 - 0)             | 0<br>(0 - 0)            | 0<br>(0 - 0)            |
| Congenital heart anomalies                          | 41<br>(31 - 51)          | 22<br>(14 - 30)       | 2<br>(1 - 3)           | 10<br>(8 - 12)           | 6<br>(4 - 7)            | 1<br>(1 - 2)            |
| Cleft lip and cleft palate                          | 0<br>(0 - 1)             | 0<br>(0 - 1)          | --                     | --                       | --                      | --                      |
| Down syndrome                                       | 5<br>(4 - 7)             | 2<br>(1 - 3)          | 0<br>(0 - 1)           | 2<br>(2 - 3)             | 1<br>(1 - 1)            | 0<br>(0 - 0)            |
| Chromosomal unbalanced rearrangements               | 5<br>(3 - 7)             | 4<br>(2 - 6)          | 0<br>(0 - 0)           | 1<br>(1 - 1)             | 0<br>(0 - 0)            | 0<br>(0 - 0)            |
| Other congenital anomalies                          | 44<br>(34 - 54)          | 27<br>(19 - 36)       | 2<br>(2 - 3)           | 6<br>(5 - 7)             | 5<br>(4 - 7)            | 3<br>(3 - 4)            |
| Skin and subcutaneous diseases                      | 35<br>(7 - 43)           | 0<br>(0 - 0)          | 0<br>(0 - 0)           | 4<br>(1 - 5)             | 12<br>(2 - 15)          | 19<br>(4 - 26)          |
| Cellulitis                                          | 7<br>(1 - 11)            | 0<br>(0 - 0)          | 0<br>(0 - 0)           | 1<br>(0 - 1)             | 3<br>(0 - 4)            | 3<br>(1 - 6)            |
| Pyoderma                                            | 22<br>(5 - 30)           | 0<br>(0 - 0)          | 0<br>(0 - 0)           | 2<br>(1 - 3)             | 8<br>(2 - 11)           | 12<br>(3 - 17)          |
| Decubitus ulcer                                     | 4<br>(1 - 6)             | 0<br>(0 - 0)          | 0<br>(0 - 0)           | 0<br>(0 - 1)             | 1<br>(0 - 2)            | 3<br>(0 - 5)            |
| Other skin and subcutaneous diseases                | 1<br>(0 - 2)             | 0<br>(0 - 0)          | 0<br>(0 - 0)           | 0<br>(0 - 0)             | 0<br>(0 - 0)            | 1<br>(0 - 2)            |
| Sudden infant death syndrome                        | 7<br>(2 - 12)            | 7<br>(2 - 12)         | --                     | --                       | --                      | --                      |
| Injuries                                            | 2,920<br>(2,707 - 3,306) | 23<br>(17 - 33)       | 24<br>(20 - 29)        | 1,233<br>(1,135 - 1,397) | 1,092<br>(994 - 1,226)  | 547<br>(496 - 634)      |
| Transport injuries                                  | 475<br>(431 - 530)       | 2<br>(1 - 4)          | 7<br>(5 - 9)           | 237<br>(210 - 268)       | 144<br>(127 - 166)      | 84<br>(70 - 110)        |
| Road injuries                                       | 439<br>(397 - 489)       | 2<br>(1 - 3)          | 7<br>(5 - 9)           | 221<br>(194 - 251)       | 132<br>(116 - 152)      | 77<br>(64 - 102)        |
| Pedestrian road injuries                            | 159<br>(115 - 201)       | 1<br>(0 - 1)          | 2<br>(1 - 3)           | 51<br>(32 - 73)          | 61<br>(43 - 77)         | 44<br>(33 - 57)         |

Web Table 31- Lithuania deaths with 95% UI by age, sex, and cause in 2013

| Cause                                           | Both Sexes, All Ages     | Both Sexes, 0-4 Years | Both Sexes, 5-14 Years | Both Sexes, 15-49 Years | Both Sexes, 50-69 Years | Both Sexes, 70-80 Years |
|-------------------------------------------------|--------------------------|-----------------------|------------------------|-------------------------|-------------------------|-------------------------|
| Cyclist road injuries                           | 48<br>(37 - 70)          | 0<br>(0 - 0)          | 1<br>(1 - 2)           | 16<br>(12 - 25)         | 20<br>(14 - 30)         | 11<br>(7 - 17)          |
| Motorcyclist road injuries                      | 27<br>(17 - 40)          | 0<br>(0 - 0)          | 0<br>(0 - 1)           | 19<br>(11 - 27)         | 5<br>(3 - 9)            | 3<br>(2 - 5)            |
| Motor vehicle road injuries                     | 195<br>(144 - 232)       | 1<br>(1 - 2)          | 3<br>(2 - 4)           | 131<br>(98 - 156)       | 43<br>(28 - 57)         | 17<br>(11 - 24)         |
| Other road injuries                             | 10<br>(5 - 29)           | 0<br>(0 - 0)          | 0<br>(0 - 0)           | 4<br>(2 - 13)           | 3<br>(1 - 10)           | 2<br>(1 - 7)            |
| Other transport injuries                        | 36<br>(27 - 47)          | 0<br>(0 - 0)          | 1<br>(0 - 1)           | 16<br>(11 - 22)         | 12<br>(9 - 17)          | 7<br>(5 - 10)           |
| Unintentional injuries                          | 1,253<br>(1,126 - 1,479) | 19<br>(14 - 29)       | 14<br>(11 - 21)        | 417<br>(367 - 544)      | 513<br>(445 - 584)      | 290<br>(249 - 336)      |
| Falls                                           | 402<br>(324 - 487)       | 1<br>(1 - 3)          | 1<br>(1 - 1)           | 95<br>(76 - 122)        | 160<br>(125 - 198)      | 145<br>(110 - 184)      |
| Drowning                                        | 289<br>(227 - 510)       | 6<br>(3 - 14)         | 9<br>(6 - 16)          | 137<br>(103 - 252)      | 96<br>(70 - 162)        | 40<br>(31 - 72)         |
| Fire, heat, and hot substances                  | 122<br>(101 - 164)       | 2<br>(1 - 4)          | 1<br>(1 - 2)           | 35<br>(27 - 48)         | 51<br>(40 - 69)         | 32<br>(25 - 45)         |
| Poisonings                                      | 128<br>(82 - 156)        | 2<br>(1 - 3)          | 1<br>(0 - 1)           | 46<br>(32 - 60)         | 59<br>(31 - 76)         | 21<br>(13 - 27)         |
| Exposure to mechanical forces                   | 60<br>(51 - 72)          | 2<br>(1 - 3)          | 1<br>(1 - 1)           | 29<br>(23 - 36)         | 24<br>(19 - 30)         | 5<br>(4 - 6)            |
| Unintentional firearm injuries                  | 2<br>(2 - 3)             | 0<br>(0 - 0)          | 0<br>(0 - 0)           | 1<br>(1 - 2)            | 0<br>(0 - 1)            | 0<br>(0 - 0)            |
| Unintentional suffocation                       | 4<br>(3 - 6)             | 1<br>(1 - 2)          | 0<br>(0 - 0)           | 1<br>(1 - 2)            | 1<br>(1 - 2)            | 0<br>(0 - 1)            |
| Other exposure to mechanical forces             | 55<br>(45 - 65)          | 0<br>(0 - 1)          | 1<br>(0 - 1)           | 27<br>(21 - 34)         | 23<br>(17 - 29)         | 4<br>(3 - 5)            |
| Adverse effects of medical treatment            | 36<br>(24 - 45)          | 1<br>(0 - 1)          | 0<br>(0 - 0)           | 6<br>(4 - 8)            | 12<br>(8 - 15)          | 17<br>(10 - 23)         |
| Animal contact                                  | 12<br>(9 - 24)           | 0<br>(0 - 0)          | 0<br>(0 - 0)           | 0<br>(1 - 4)            | 6<br>(4 - 11)           | 4<br>(3 - 10)           |
| Venomous animal contact                         | 1<br>(1 - 2)             | 0<br>(0 - 0)          | 0<br>(0 - 0)           | 0<br>(0 - 1)            | 1<br>(0 - 1)            | 0<br>(0 - 0)            |
| Non-venomous animal contact                     | 11<br>(8 - 22)           | 0<br>(0 - 0)          | 0<br>(0 - 0)           | 1<br>(1 - 3)            | 5<br>(3 - 9)            | 4<br>(3 - 9)            |
| Foreign body                                    | 177<br>(101 - 241)       | 5<br>(3 - 9)          | 1<br>(0 - 1)           | 53<br>(30 - 75)         | 95<br>(54 - 131)        | 23<br>(13 - 31)         |
| Pulmonary aspiration and foreign body in airway | 177<br>(101 - 241)       | 5<br>(3 - 9)          | 1<br>(0 - 1)           | 53<br>(30 - 74)         | 95<br>(54 - 131)        | 23<br>(13 - 31)         |
| Foreign body in other body part                 | 0<br>(0 - 1)             | 0<br>(0 - 0)          | 0<br>(0 - 0)           | 0<br>(0 - 0)            | 0<br>(0 - 0)            | 0<br>(0 - 0)            |
| Other unintentional injuries                    | 27<br>(21 - 37)          | 0<br>(0 - 1)          | 1<br>(0 - 1)           | 13<br>(9 - 19)          | 10<br>(6 - 17)          | 3<br>(2 - 5)            |
| Self-harm and interpersonal violence            | 1,192<br>(1,028 - 1,439) | 1<br>(1 - 2)          | 3<br>(2 - 4)           | 579<br>(490 - 697)      | 436<br>(364 - 542)      | 173<br>(145 - 218)      |
| Self-harm                                       | 994<br>(839 - 1,209)     | --                    | 2<br>(1 - 3)           | 475<br>(385 - 571)      | 367<br>(302 - 467)      | 149<br>(122 - 183)      |
| Interpersonal violence                          | 198<br>(156 - 279)       | 1<br>(1 - 2)          | 1<br>(1 - 1)           | 104<br>(81 - 147)       | 68<br>(52 - 101)        | 24<br>(19 - 36)         |
| Assault by firearm                              | 12<br>(7 - 24)           | 0<br>(0 - 0)          | 0<br>(0 - 0)           | 9<br>(5 - 20)           | 2<br>(1 - 4)            | 0<br>(0 - 1)            |
| Assault by sharp object                         | 74<br>(52 - 115)         | 0<br>(0 - 0)          | 0<br>(0 - 0)           | 42<br>(29 - 65)         | 26<br>(17 - 42)         | 5<br>(4 - 9)            |
| Assault by other means                          | 113<br>(85 - 161)        | 1<br>(1 - 2)          | 0<br>(0 - 1)           | 53<br>(38 - 75)         | 41<br>(29 - 60)         | 18<br>(14 - 27)         |

Web Table 31- Lithuania deaths with 95% UI by age, sex, and cause in 2013

| Cause                                                             | Males, All Ages             | Males, 0-4 Years | Males, 5-14 Years | Males, 15-49 Years       | Males, 50-69 Years       | Males, 70-80 Years        |
|-------------------------------------------------------------------|-----------------------------|------------------|-------------------|--------------------------|--------------------------|---------------------------|
| All causes                                                        | 19,184<br>(18,557 - 19,831) | 86<br>(67 - 107) | 29<br>(24 - 33)   | 2,475<br>(2,367 - 2,590) | 6,664<br>(6,405 - 6,937) | 9,930<br>(9,678 - 10,194) |
| Communicable, maternal, neonatal, and nutritional diseases        | 593<br>(429 - 676)          | 32<br>(23 - 42)  | 2<br>(1 - 2)      | 159<br>(114 - 189)       | 246<br>(178 - 291)       | 155<br>(99 - 195)         |
| HIV/AIDS and tuberculosis                                         | 214<br>(172 - 249)          | 1<br>(0 - 1)     | 0<br>(0 - 0)      | 85<br>(63 - 102)         | 97<br>(76 - 117)         | 31<br>(25 - 39)           |
| Tuberculosis                                                      | 176<br>(137 - 205)          | 0<br>(0 - 0)     | 0<br>(0 - 0)      | 61<br>(42 - 75)          | 86<br>(67 - 105)         | 29<br>(23 - 37)           |
| HIV/AIDS                                                          | 38<br>(24 - 55)             | 0<br>(0 - 1)     | 0<br>(0 - 0)      | 24<br>(15 - 33)          | 11<br>(6 - 18)           | 3<br>(1 - 4)              |
| HIV/AIDS resulting in mycobacterial infection                     | 3<br>(1 - 4)                | 0<br>(0 - 0)     | 0<br>(0 - 0)      | 2<br>(1 - 2)             | 1<br>(0 - 1)             | 0<br>(0 - 0)              |
| HIV/AIDS resulting in other diseases                              | 36<br>(22 - 52)             | 0<br>(0 - 1)     | 0<br>(0 - 0)      | 22<br>(14 - 31)          | 10<br>(6 - 16)           | 2<br>(1 - 4)              |
| Diarrhea, lower respiratory, and other common infectious diseases | 342<br>(197 - 416)          | 7<br>(4 - 10)    | 1<br>(1 - 2)      | 71<br>(41 - 94)          | 143<br>(83 - 185)        | 120<br>(65 - 161)         |
| Diarrheal diseases                                                | 2<br>(2 - 3)                | 0<br>(0 - 1)     | 0<br>(0 - 0)      | 1<br>(0 - 1)             | 1<br>(1 - 1)             | 1<br>(0 - 1)              |
| Intestinal infectious diseases                                    | 2<br>(1 - 4)                | 0<br>(0 - 1)     | 0<br>(0 - 0)      | 1<br>(0 - 2)             | 0<br>(0 - 1)             | 0<br>(0 - 1)              |
| Typhoid fever                                                     | 1<br>(0 - 3)                | 0<br>(0 - 0)     | 0<br>(0 - 0)      | 0<br>(0 - 1)             | 0<br>(0 - 1)             | 0<br>(0 - 1)              |
| Paratyphoid fever                                                 | 0<br>(0 - 1)                | 0<br>(0 - 0)     | 0<br>(0 - 0)      | 0<br>(0 - 0)             | 0<br>(0 - 0)             | 0<br>(0 - 0)              |
| Other intestinal infectious diseases                              | 0<br>(0 - 1)                | 0<br>(0 - 0)     | 0<br>(0 - 0)      | 0<br>(0 - 1)             | 0<br>(0 - 0)             | 0<br>(0 - 0)              |
| Lower respiratory infections                                      | 309<br>(164 - 383)          | 5<br>(3 - 7)     | 1<br>(0 - 1)      | 62<br>(32 - 85)          | 130<br>(69 - 172)        | 112<br>(57 - 153)         |
| Upper respiratory infections                                      | 1<br>(0 - 1)                | 0<br>(0 - 0)     | 0<br>(0 - 0)      | 0<br>(0 - 0)             | 0<br>(0 - 1)             | 0<br>(0 - 1)              |
| Otitis media                                                      | 0<br>(0 - 0)                | 0<br>(0 - 0)     | 0<br>(0 - 0)      | 0<br>(0 - 0)             | 0<br>(0 - 0)             | 0<br>(0 - 0)              |
| Meningitis                                                        | 12<br>(10 - 14)             | 1<br>(1 - 2)     | 0<br>(0 - 0)      | 3<br>(3 - 4)             | 5<br>(4 - 6)             | 2<br>(2 - 3)              |
| Pneumococcal meningitis                                           | 3<br>(3 - 5)                | 0<br>(0 - 0)     | 0<br>(0 - 0)      | 1<br>(1 - 2)             | 1<br>(1 - 2)             | 1<br>(0 - 1)              |
| H influenzae type B meningitis                                    | 2<br>(1 - 2)                | 0<br>(0 - 1)     | 0<br>(0 - 0)      | 0<br>(0 - 1)             | 1<br>(0 - 1)             | 0<br>(0 - 0)              |
| Meningococcal meningitis                                          | 2<br>(2 - 3)                | 0<br>(0 - 0)     | 0<br>(0 - 0)      | 1<br>(0 - 1)             | 1<br>(1 - 1)             | 0<br>(0 - 1)              |
| Other meningitis                                                  | 4<br>(3 - 6)                | 0<br>(0 - 0)     | 0<br>(0 - 0)      | 1<br>(1 - 2)             | 2<br>(1 - 3)             | 1<br>(1 - 1)              |
| Encephalitis                                                      | 15<br>(10 - 21)             | 1<br>(0 - 1)     | 0<br>(0 - 1)      | 4<br>(3 - 6)             | 7<br>(4 - 10)            | 3<br>(2 - 5)              |
| Diphtheria                                                        | 0<br>(0 - 0)                | 0<br>(0 - 0)     | 0<br>(0 - 0)      | 0<br>(0 - 0)             | 0<br>(0 - 0)             | --<br>(0 - 0)             |
| Whooping cough                                                    | 0<br>(0 - 0)                | 0<br>(0 - 0)     | 0<br>(0 - 0)      | 0<br>(0 - 0)             | 0<br>(0 - 0)             | --<br>(0 - 0)             |
| Tetanus                                                           | 0<br>(0 - 0)                | 0<br>(0 - 0)     | 0<br>(0 - 0)      | 0<br>(0 - 0)             | 0<br>(0 - 0)             | 0<br>(0 - 0)              |
| Measles                                                           | 0<br>(0 - 0)                | 0<br>(0 - 0)     | 0<br>(0 - 0)      | 0<br>(0 - 0)             | 0<br>(0 - 0)             | --<br>(0 - 0)             |
| Varicella and herpes zoster                                       | 1<br>(0 - 3)                | 0<br>(0 - 0)     | 0<br>(0 - 0)      | 0<br>(0 - 0)             | 0<br>(0 - 0)             | 1<br>(0 - 3)              |
| Neglected tropical diseases and malaria                           | 1<br>(1 - 1)                | 0<br>(0 - 0)     | 0<br>(0 - 0)      | 0<br>(0 - 0)             | 0<br>(0 - 0)             | 0<br>(0 - 0)              |
| Cysticercosis                                                     | 0<br>(0 - 0)                | 0<br>(0 - 0)     | 0<br>(0 - 0)      | 0<br>(0 - 0)             | 0<br>(0 - 0)             | 0<br>(0 - 0)              |
| Cystic echinococcosis                                             | 0<br>(0 - 0)                | 0<br>(0 - 0)     | 0<br>(0 - 0)      | 0<br>(0 - 0)             | 0<br>(0 - 0)             | 0<br>(0 - 0)              |
| Dengue                                                            | 0<br>(0 - 0)                | 0<br>(0 - 0)     | 0<br>(0 - 0)      | 0<br>(0 - 0)             | 0<br>(0 - 0)             | 0<br>(0 - 0)              |
| Rabies                                                            | 0<br>(0 - 0)                | 0<br>(0 - 0)     | 0<br>(0 - 0)      | 0<br>(0 - 0)             | 0<br>(0 - 0)             | 0<br>(0 - 0)              |
| Other neglected tropical diseases                                 | 0<br>(0 - 1)                | 0<br>(0 - 0)     | 0<br>(0 - 0)      | 0<br>(0 - 0)             | 0<br>(0 - 0)             | 0<br>(0 - 0)              |
| Maternal disorders                                                | --                          | --               | --                | --                       | --                       | --                        |
| Maternal hemorrhage                                               | --                          | --               | --                | --                       | --                       | --                        |
| Maternal sepsis and other maternal infections                     | --                          | --               | --                | --                       | --                       | --                        |
| Maternal hypertensive disorders                                   | --                          | --               | --                | --                       | --                       | --                        |
| Maternal obstructed labor                                         | --                          | --               | --                | --                       | --                       | --                        |
| Maternal abortive outcome                                         | --                          | --               | --                | --                       | --                       | --                        |
| Indirect maternal deaths                                          | --                          | --               | --                | --                       | --                       | --                        |

Web Table 31- Lithuania deaths with 95% UI by age, sex, and cause in 2013

| Cause                                                            | Males, All Ages             | Males, 0-4 Years | Males, 5-14 Years | Males, 15-49 Years       | Males, 50-69 Years       | Males, 70-80 Years       |
|------------------------------------------------------------------|-----------------------------|------------------|-------------------|--------------------------|--------------------------|--------------------------|
| Late maternal deaths                                             | --                          | --               | --                | --                       | --                       | --                       |
| Maternal deaths aggravated by HIV/AIDS                           | --                          | --               | --                | --                       | --                       | --                       |
| Other maternal disorders                                         | --                          | --               | --                | --                       | --                       | --                       |
| Neonatal disorders                                               | 24<br>(17 - 32)             | 24<br>(17 - 32)  | --                | --                       | --                       | --                       |
| Neonatal preterm birth complications                             | 10<br>(6 - 14)              | 10<br>(6 - 14)   | --                | --                       | --                       | --                       |
| Neonatal encephalopathy due to birth asphyxia and trauma         | 7<br>(4 - 11)               | 7<br>(4 - 11)    | --                | --                       | --                       | --                       |
| Neonatal sepsis and other neonatal infections                    | 3<br>(1 - 8)                | 3<br>(1 - 8)     | --                | --                       | --                       | --                       |
| Hemolytic disease and other neonatal jaundice                    | 0<br>(0 - 0)                | 0<br>(0 - 0)     | --                | --                       | --                       | --                       |
| Other neonatal disorders                                         | 4<br>(2 - 7)                | 4<br>(2 - 7)     | --                | --                       | --                       | --                       |
| Nutritional deficiencies                                         | 4<br>(3 - 8)                | 0<br>(0 - 0)     | 0<br>(0 - 0)      | 1<br>(1 - 2)             | 2<br>(1 - 4)             | 1<br>(1 - 3)             |
| Protein-energy malnutrition                                      | 1<br>(1 - 3)                | 0<br>(0 - 0)     | 0<br>(0 - 0)      | 0<br>(0 - 0)             | 1<br>(0 - 2)             | 0<br>(0 - 0)             |
| Iodine deficiency                                                | 0<br>(0 - 1)                | 0<br>(0 - 0)     | 0<br>(0 - 0)      | 0<br>(0 - 0)             | 0<br>(0 - 1)             | 0<br>(0 - 0)             |
| Iron-deficiency anemia                                           | 2<br>(1 - 4)                | 0<br>(0 - 0)     | 0<br>(0 - 0)      | 0<br>(0 - 1)             | 1<br>(0 - 1)             | 1<br>(0 - 2)             |
| Other nutritional deficiencies                                   | 1<br>(0 - 2)                | 0<br>(0 - 0)     | 0<br>(0 - 0)      | 0<br>(0 - 1)             | 0<br>(0 - 1)             | 0<br>(0 - 1)             |
| Other communicable, maternal, neonatal, and nutritional diseases | 8<br>(6 - 10)               | 1<br>(0 - 1)     | 0<br>(0 - 0)      | 2<br>(1 - 2)             | 3<br>(3 - 5)             | 2<br>(1 - 3)             |
| Sexually transmitted diseases excluding HIV                      | 1<br>(0 - 1)                | 0<br>(0 - 0)     | 0<br>(0 - 0)      | 0<br>(0 - 0)             | 0<br>(0 - 0)             | 0<br>(0 - 0)             |
| Syphilis                                                         | 0<br>(0 - 1)                | 0<br>(0 - 0)     | 0<br>(0 - 0)      | 0<br>(0 - 0)             | 0<br>(0 - 0)             | 0<br>(0 - 0)             |
| Chlamydial infection                                             | --                          | --               | --                | --                       | --                       | --                       |
| Gonococcal infection                                             | 0<br>(0 - 0)                | --               | 0<br>(0 - 0)      | 0<br>(0 - 0)             | 0<br>(0 - 0)             | 0<br>(0 - 0)             |
| Other sexually transmitted diseases                              | 0<br>(0 - 0)                | --               | 0<br>(0 - 0)      | 0<br>(0 - 0)             | 0<br>(0 - 0)             | 0<br>(0 - 0)             |
| Hepatitis                                                        | 2<br>(2 - 3)                | 0<br>(0 - 0)     | 0<br>(0 - 0)      | 1<br>(0 - 1)             | 1<br>(1 - 2)             | 1<br>(0 - 1)             |
| Acute hepatitis A                                                | 0<br>(0 - 1)                | 0<br>(0 - 0)     | 0<br>(0 - 0)      | 0<br>(0 - 0)             | 0<br>(0 - 0)             | 0<br>(0 - 0)             |
| Acute hepatitis B                                                | 2<br>(1 - 3)                | 0<br>(0 - 0)     | 0<br>(0 - 0)      | 0<br>(0 - 1)             | 1<br>(1 - 1)             | 1<br>(0 - 1)             |
| Acute hepatitis C                                                | 0<br>(0 - 0)                | --               | 0<br>(0 - 0)      | 0<br>(0 - 0)             | 0<br>(0 - 0)             | 0<br>(0 - 0)             |
| Other infectious diseases                                        | 5<br>(3 - 6)                | 0<br>(0 - 1)     | 0<br>(0 - 0)      | 1<br>(1 - 1)             | 2<br>(1 - 3)             | 1<br>(1 - 2)             |
| Non-communicable diseases                                        | 16,332<br>(15,797 - 16,936) | 41<br>(29 - 52)  | 10<br>(7 - 12)    | 1,257<br>(1,145 - 1,356) | 5,543<br>(5,309 - 5,801) | 9,481<br>(9,237 - 9,745) |
| Neoplasms                                                        | 4,167<br>(3,910 - 4,422)    | 3<br>(2 - 4)     | 5<br>(3 - 6)      | 243<br>(219 - 267)       | 1,851<br>(1,733 - 1,968) | 2,065<br>(1,897 - 2,225) |
| Esophageal cancer                                                | 136<br>(83 - 167)           | --               | --                | 11<br>(7 - 16)           | 85<br>(48 - 108)         | 39<br>(26 - 50)          |
| Stomach cancer                                                   | 421<br>(371 - 499)          | --               | --                | 27<br>(21 - 35)          | 181<br>(156 - 220)       | 213<br>(178 - 258)       |
| Liver cancer                                                     | 90<br>(57 - 126)            | --               | 0<br>(0 - 0)      | 5<br>(3 - 7)             | 43<br>(27 - 60)          | 43<br>(24 - 63)          |
| Liver cancer due to hepatitis B                                  | 15<br>(6 - 25)              | --               | 0<br>(0 - 0)      | 1<br>(0 - 2)             | 7<br>(3 - 13)            | 6<br>(3 - 10)            |
| Liver cancer due to hepatitis C                                  | 42<br>(22 - 64)             | --               | 0<br>(0 - 0)      | 2<br>(1 - 3)             | 21<br>(11 - 31)          | 19<br>(9 - 32)           |
| Liver cancer due to alcohol use                                  | 28<br>(16 - 45)             | --               | --                | 1<br>(0 - 2)             | 12<br>(7 - 20)           | 15<br>(8 - 24)           |
| Liver cancer due to other causes                                 | 5<br>(2 - 9)                | --               | 0<br>(0 - 0)      | 0<br>(0 - 1)             | 3<br>(1 - 5)             | 2<br>(1 - 4)             |
| Larynx cancer                                                    | 100<br>(70 - 130)           | --               | --                | 9<br>(6 - 13)            | 62<br>(45 - 83)          | 29<br>(18 - 39)          |
| Tracheal, bronchus and lung cancer                               | 1,105<br>(977 - 1,229)      | --               | --                | 45<br>(34 - 58)          | 575<br>(500 - 651)       | 485<br>(424 - 549)       |
| Breast cancer                                                    | 4<br>(1 - 6)                | --               | --                | 0<br>(0 - 1)             | 1<br>(0 - 3)             | 2<br>(0 - 3)             |
| Cervical cancer                                                  | --                          | --               | --                | --                       | --                       | --                       |
| Uterine cancer                                                   | --                          | --               | --                | --                       | --                       | --                       |
| Prostate cancer                                                  | 488<br>(320 - 615)          | --               | --                | 2<br>(1 - 3)             | 97<br>(54 - 136)         | 389<br>(256 - 506)       |

Web Table 31- Lithuania deaths with 95% UI by age, sex, and cause in 2013

| Cause                                         | Males, All Ages          | Males, 0-4 Years | Males, 5-14 Years | Males, 15-49 Years | Males, 50-69 Years       | Males, 70-80 Years       |
|-----------------------------------------------|--------------------------|------------------|-------------------|--------------------|--------------------------|--------------------------|
| Colon and rectum cancer                       | 484<br>(438 - 537)       | --               | --                | 17<br>(14 - 20)    | 172<br>(153 - 193)       | 295<br>(258 - 338)       |
| Lip and oral cavity cancer                    | 108<br>(65 - 129)        | --               | --                | 12<br>(7 - 17)     | 70<br>(40 - 88)          | 25<br>(17 - 32)          |
| Nasopharynx cancer                            | 10<br>(7 - 19)           | --               | 0<br>(0 - 0)      | 2<br>(1 - 4)       | 6<br>(4 - 12)            | 2<br>(1 - 4)             |
| Other pharynx cancer                          | 82<br>(55 - 106)         | --               | --                | 6<br>(4 - 9)       | 62<br>(40 - 83)          | 14<br>(9 - 19)           |
| Gallbladder and biliary tract cancer          | 29<br>(21 - 43)          | --               | --                | 1<br>(1 - 2)       | 11<br>(8 - 17)           | 17<br>(12 - 25)          |
| Pancreatic cancer                             | 245<br>(221 - 269)       | --               | --                | 18<br>(14 - 22)    | 120<br>(105 - 137)       | 106<br>(92 - 123)        |
| Malignant skin melanoma                       | 33<br>(14 - 47)          | --               | --                | 6<br>(2 - 9)       | 14<br>(6 - 21)           | 13<br>(5 - 20)           |
| Non-melanoma skin cancer                      | 18<br>(11 - 28)          | --               | --                | 1<br>(1 - 2)       | 5<br>(3 - 8)             | 12<br>(7 - 18)           |
| Ovarian cancer                                | --                       | --               | --                | --                 | --                       | --                       |
| Testicular cancer                             | 7<br>(5 - 9)             | --               | --                | 4<br>(2 - 5)       | 2<br>(1 - 3)             | 2<br>(1 - 3)             |
| Kidney cancer                                 | 163<br>(132 - 196)       | 0<br>(0 - 0)     | 0<br>(0 - 0)      | 9<br>(6 - 13)      | 84<br>(65 - 104)         | 70<br>(52 - 91)          |
| Bladder cancer                                | 152<br>(113 - 187)       | --               | --                | 2<br>(2 - 3)       | 44<br>(34 - 55)          | 106<br>(74 - 133)        |
| Brain and nervous system cancer               | 97<br>(65 - 119)         | 0<br>(0 - 1)     | 1<br>(1 - 2)      | 20<br>(14 - 26)    | 51<br>(36 - 64)          | 24<br>(13 - 34)          |
| Thyroid cancer                                | 9<br>(7 - 11)            | --               | 0<br>(0 - 0)      | 1<br>(0 - 1)       | 4<br>(3 - 6)             | 4<br>(3 - 5)             |
| Mesothelioma                                  | 6<br>(3 - 8)             | --               | --                | 1<br>(0 - 1)       | 3<br>(1 - 4)             | 3<br>(1 - 4)             |
| Hodgkin lymphoma                              | 12<br>(9 - 21)           | 0<br>(0 - 0)     | 0<br>(0 - 0)      | 4<br>(3 - 6)       | 5<br>(3 - 10)            | 3<br>(2 - 6)             |
| Non-Hodgkin lymphoma                          | 62<br>(31 - 83)          | 0<br>(0 - 0)     | 0<br>(0 - 1)      | 7<br>(4 - 10)      | 25<br>(13 - 34)          | 29<br>(14 - 41)          |
| Multiple myeloma                              | 41<br>(21 - 57)          | --               | --                | 2<br>(1 - 3)       | 19<br>(9 - 28)           | 20<br>(10 - 29)          |
| Leukemia                                      | 127<br>(106 - 144)       | 1<br>(0 - 2)     | 2<br>(1 - 2)      | 13<br>(10 - 16)    | 46<br>(37 - 54)          | 65<br>(53 - 77)          |
| Other neoplasms                               | 138<br>(88 - 168)        | 1<br>(0 - 2)     | 1<br>(1 - 2)      | 18<br>(11 - 23)    | 62<br>(38 - 77)          | 56<br>(33 - 71)          |
| Cardiovascular diseases                       | 8,920<br>(8,568 - 9,282) | 0<br>(0 - 1)     | 0<br>(0 - 0)      | 459<br>(410 - 510) | 2,674<br>(2,515 - 2,826) | 5,786<br>(5,550 - 6,032) |
| Rheumatic heart disease                       | 45<br>(33 - 77)          | 0<br>(0 - 0)     | 0<br>(0 - 0)      | 9<br>(5 - 16)      | 27<br>(18 - 49)          | 10<br>(6 - 15)           |
| Ischemic heart disease                        | 6,258<br>(5,840 - 6,786) | 0<br>(0 - 0)     | 0<br>(0 - 0)      | 243<br>(206 - 289) | 1,752<br>(1,600 - 1,916) | 4,263<br>(3,963 - 4,584) |
| Cerebrovascular disease                       | 1,778<br>(1,434 - 2,114) | 0<br>(0 - 0)     | 0<br>(0 - 0)      | 66<br>(46 - 86)    | 485<br>(391 - 589)       | 1,227<br>(987 - 1,477)   |
| Ischemic stroke                               | 1,363<br>(1,092 - 1,624) | 0<br>(0 - 0)     | 0<br>(0 - 0)      | 17<br>(11 - 26)    | 303<br>(230 - 376)       | 1,042<br>(828 - 1,256)   |
| Hemorrhagic stroke                            | 415<br>(298 - 547)       | 0<br>(0 - 0)     | 0<br>(0 - 0)      | 49<br>(33 - 64)    | 182<br>(131 - 244)       | 185<br>(121 - 258)       |
| Hypertensive heart disease                    | 138<br>(73 - 209)        | 0<br>(0 - 0)     | 0<br>(0 - 0)      | 15<br>(8 - 24)     | 65<br>(35 - 101)         | 58<br>(27 - 93)          |
| Cardiomyopathy and myocarditis                | 354<br>(250 - 451)       | 0<br>(0 - 0)     | 0<br>(0 - 0)      | 96<br>(65 - 124)   | 208<br>(144 - 268)       | 51<br>(32 - 68)          |
| Atrial fibrillation and flutter               | 8<br>(6 - 11)            | --               | --                | 0<br>(0 - 0)       | 2<br>(1 - 3)             | 6<br>(4 - 9)             |
| Aortic aneurysm                               | 90<br>(73 - 111)         | --               | --                | 7<br>(5 - 9)       | 38<br>(30 - 49)          | 45<br>(36 - 56)          |
| Peripheral vascular disease                   | 58<br>(43 - 76)          | --               | --                | 0<br>(0 - 1)       | 17<br>(12 - 23)          | 40<br>(28 - 55)          |
| Endocarditis                                  | 18<br>(11 - 26)          | 0<br>(0 - 0)     | 0<br>(0 - 0)      | 5<br>(3 - 8)       | 8<br>(4 - 11)            | 5<br>(3 - 7)             |
| Other cardiovascular and circulatory diseases | 173<br>(79 - 206)        | 0<br>(0 - 0)     | 0<br>(0 - 0)      | 17<br>(6 - 22)     | 74<br>(34 - 90)          | 82<br>(33 - 104)         |
| Chronic respiratory diseases                  | 697<br>(614 - 934)       | 0<br>(0 - 0)     | 0<br>(0 - 0)      | 17<br>(14 - 24)    | 184<br>(154 - 276)       | 495<br>(428 - 650)       |
| Chronic obstructive pulmonary disease         | 653<br>(574 - 876)       | 0<br>(0 - 0)     | 0<br>(0 - 0)      | 13<br>(11 - 19)    | 168<br>(141 - 254)       | 471<br>(406 - 618)       |
| Pneumoconiosis                                | 1<br>(0 - 1)             | 0<br>(0 - 0)     | 0<br>(0 - 0)      | 0<br>(0 - 0)       | 0<br>(0 - 0)             | 0<br>(0 - 1)             |
| Silicosis                                     | 0<br>(0 - 0)             | 0<br>(0 - 0)     | 0<br>(0 - 0)      | 0<br>(0 - 0)       | 0<br>(0 - 0)             | 0<br>(0 - 0)             |
| Asbestosis                                    | 0<br>(0 - 0)             | 0<br>(0 - 0)     | 0<br>(0 - 0)      | 0<br>(0 - 0)       | 0<br>(0 - 0)             | 0<br>(0 - 0)             |
| Coal workers pneumoconiosis                   | 0<br>(0 - 0)             | 0<br>(0 - 0)     | 0<br>(0 - 0)      | 0<br>(0 - 0)       | 0<br>(0 - 0)             | 0<br>(0 - 0)             |
| Other pneumoconiosis                          | 0<br>(0 - 1)             | 0<br>(0 - 0)     | 0<br>(0 - 0)      | 0<br>(0 - 0)       | 0<br>(0 - 0)             | 0<br>(0 - 0)             |



Web Table 31- Lithuania deaths with 95% UI by age, sex, and cause in 2013

| Cause                                               | Males, All Ages      | Males, 0-4 Years | Males, 5-14 Years | Males, 15-49 Years | Males, 50-69 Years | Males, 70-80 Years |
|-----------------------------------------------------|----------------------|------------------|-------------------|--------------------|--------------------|--------------------|
| Asthma                                              | 21<br>(17 - 30)      | 0<br>(0 - 0)     | 0<br>(0 - 0)      | 2<br>(1 - 2)       | 9<br>(6 - 13)      | 11<br>(8 - 16)     |
| Interstitial lung disease and pulmonary sarcoidosis | 17<br>(10 - 26)      | 0<br>(0 - 0)     | 0<br>(0 - 0)      | 1<br>(1 - 1)       | 6<br>(3 - 9)       | 10<br>(6 - 16)     |
| Other chronic respiratory diseases                  | 5<br>(3 - 6)         | 0<br>(0 - 0)     | 0<br>(0 - 0)      | 1<br>(1 - 2)       | 1<br>(1 - 2)       | 2<br>(1 - 3)       |
| Cirrhosis                                           | 590<br>(536 - 647)   | 0<br>(0 - 0)     | 0<br>(0 - 0)      | 190<br>(164 - 219) | 330<br>(289 - 373) | 69<br>(59 - 81)    |
| Cirrhosis due to hepatitis B                        | 82<br>(33 - 135)     | 0<br>(0 - 0)     | 0<br>(0 - 0)      | 27<br>(11 - 47)    | 46<br>(19 - 75)    | 9<br>(4 - 15)      |
| Cirrhosis due to hepatitis C                        | 205<br>(109 - 290)   | 0<br>(0 - 0)     | 0<br>(0 - 0)      | 65<br>(35 - 96)    | 116<br>(59 - 166)  | 23<br>(14 - 32)    |
| Cirrhosis due to alcohol use                        | 253<br>(174 - 345)   | --               | --                | 75<br>(46 - 107)   | 146<br>(99 - 203)  | 33<br>(24 - 44)    |
| Cirrhosis due to other causes                       | 50<br>(27 - 74)      | 0<br>(0 - 0)     | 0<br>(0 - 0)      | 24<br>(13 - 37)    | 23<br>(11 - 35)    | 3<br>(2 - 5)       |
| Digestive diseases                                  | 351<br>(217 - 400)   | 0<br>(0 - 0)     | 0<br>(0 - 0)      | 52<br>(31 - 64)    | 133<br>(80 - 158)  | 166<br>(103 - 196) |
| Peptic ulcer disease                                | 80<br>(42 - 114)     | 0<br>(0 - 0)     | 0<br>(0 - 0)      | 10<br>(5 - 15)     | 37<br>(19 - 53)    | 33<br>(17 - 51)    |
| Gastritis and duodenitis                            | 4<br>(2 - 6)         | 0<br>(0 - 0)     | 0<br>(0 - 0)      | 0<br>(0 - 1)       | 1<br>(1 - 2)       | 2<br>(1 - 4)       |
| Appendicitis                                        | 4<br>(2 - 6)         | 0<br>(0 - 0)     | 0<br>(0 - 0)      | 0<br>(0 - 1)       | 2<br>(1 - 3)       | 2<br>(1 - 3)       |
| Paralytic ileus and intestinal obstruction          | 24<br>(13 - 45)      | 0<br>(0 - 0)     | 0<br>(0 - 0)      | 2<br>(1 - 4)       | 8<br>(4 - 15)      | 14<br>(7 - 26)     |
| Inguinal, femoral, and abdominal hernia             | 6<br>(2 - 10)        | 0<br>(0 - 0)     | 0<br>(0 - 0)      | 0<br>(0 - 1)       | 2<br>(1 - 3)       | 4<br>(2 - 7)       |
| Inflammatory bowel disease                          | 7<br>(4 - 10)        | 0<br>(0 - 0)     | 0<br>(0 - 0)      | 1<br>(0 - 1)       | 3<br>(2 - 5)       | 3<br>(2 - 5)       |
| Vascular intestinal disorders                       | 76<br>(35 - 132)     | 0<br>(0 - 0)     | 0<br>(0 - 0)      | 2<br>(1 - 4)       | 21<br>(9 - 41)     | 53<br>(24 - 90)    |
| Gallbladder and biliary diseases                    | 31<br>(18 - 44)      | 0<br>(0 - 0)     | 0<br>(0 - 0)      | 1<br>(0 - 1)       | 8<br>(4 - 11)      | 23<br>(12 - 33)    |
| Pancreatitis                                        | 97<br>(52 - 128)     | 0<br>(0 - 0)     | 0<br>(0 - 0)      | 32<br>(18 - 41)    | 43<br>(21 - 59)    | 23<br>(11 - 34)    |
| Other digestive diseases                            | 20<br>(9 - 30)       | 0<br>(0 - 0)     | 0<br>(0 - 0)      | 3<br>(1 - 5)       | 8<br>(4 - 13)      | 9<br>(3 - 13)      |
| Neurological disorders                              | 864<br>(711 - 1,048) | 1<br>(1 - 2)     | 1<br>(0 - 1)      | 40<br>(29 - 52)    | 81<br>(68 - 95)    | 741<br>(589 - 917) |
| Alzheimer disease and other dementias               | 739<br>(586 - 919)   | --               | --                | 0<br>(0 - 0)       | 37<br>(27 - 48)    | 702<br>(552 - 879) |
| Parkinson disease                                   | 33<br>(14 - 42)      | --               | --                | 0<br>(0 - 0)       | 5<br>(3 - 6)       | 28<br>(11 - 37)    |
| Epilepsy                                            | 51<br>(32 - 68)      | 0<br>(0 - 0)     | 0<br>(0 - 1)      | 28<br>(17 - 38)    | 20<br>(12 - 28)    | 2<br>(2 - 3)       |
| Multiple sclerosis                                  | 12<br>(7 - 25)       | --               | --                | 5<br>(2 - 10)      | 6<br>(3 - 13)      | 1<br>(1 - 2)       |
| Other neurological disorders                        | 29<br>(22 - 36)      | 1<br>(1 - 2)     | 0<br>(0 - 1)      | 7<br>(5 - 9)       | 14<br>(10 - 18)    | 7<br>(5 - 9)       |
| Mental and substance use disorders                  | 396<br>(287 - 513)   | 0<br>(0 - 1)     | 0<br>(0 - 0)      | 204<br>(149 - 254) | 173<br>(116 - 237) | 18<br>(13 - 25)    |
| Schizophrenia                                       | 2<br>(1 - 5)         | --               | --                | 1<br>(0 - 2)       | 1<br>(1 - 3)       | 1<br>(0 - 1)       |
| Alcohol use disorders                               | 278<br>(174 - 392)   | --               | --                | 126<br>(77 - 178)  | 140<br>(86 - 198)  | 11<br>(6 - 17)     |
| Drug use disorders                                  | 116<br>(81 - 142)    | 0<br>(0 - 1)     | --                | 77<br>(50 - 96)    | 31<br>(21 - 42)    | 7<br>(5 - 10)      |
| Opioid use disorders                                | 50<br>(34 - 62)      | 0<br>(0 - 0)     | --                | 34<br>(21 - 43)    | 13<br>(8 - 17)     | 3<br>(2 - 4)       |
| Cocaine use disorders                               | 3<br>(2 - 3)         | 0<br>(0 - 0)     | --                | 2<br>(1 - 3)       | 1<br>(0 - 1)       | 0<br>(0 - 0)       |
| Amphetamine use disorders                           | 2<br>(2 - 3)         | 0<br>(0 - 0)     | --                | 2<br>(1 - 2)       | 1<br>(0 - 1)       | 0<br>(0 - 0)       |
| Other drug use disorders                            | 61<br>(43 - 74)      | 0<br>(0 - 0)     | --                | 39<br>(26 - 50)    | 18<br>(11 - 24)    | 4<br>(2 - 5)       |
| Eating disorders                                    | 0<br>(0 - 0)         | --               | 0<br>(0 - 0)      | 0<br>(0 - 0)       | --                 | --                 |
| Anorexia nervosa                                    | 0<br>(0 - 0)         | --               | 0<br>(0 - 0)      | 0<br>(0 - 0)       | --                 | --                 |
| Diabetes, urogenital, blood, and endocrine diseases | 259<br>(235 - 304)   | 1<br>(1 - 2)     | 1<br>(1 - 1)      | 34<br>(30 - 39)    | 96<br>(85 - 118)   | 126<br>(112 - 150) |
| Diabetes mellitus                                   | 87<br>(78 - 96)      | 0<br>(0 - 0)     | 0<br>(0 - 0)      | 14<br>(12 - 17)    | 38<br>(32 - 45)    | 34<br>(29 - 40)    |
| Acute glomerulonephritis                            | 1<br>(0 - 2)         | 0<br>(0 - 0)     | 0<br>(0 - 0)      | 0<br>(0 - 0)       | 0<br>(0 - 1)       | 0<br>(0 - 1)       |
| Chronic kidney disease                              | 86<br>(73 - 114)     | 0<br>(0 - 0)     | 0<br>(0 - 0)      | 11<br>(8 - 16)     | 33<br>(26 - 47)    | 42<br>(34 - 52)    |
| Chronic kidney disease due to diabetes mellitus     | 13<br>(5 - 19)       | 0<br>(0 - 0)     | 0<br>(0 - 0)      | 1<br>(1 - 2)       | 5<br>(2 - 9)       | 6<br>(2 - 10)      |

Web Table 31- Lithuania deaths with 95% UI by age, sex, and cause in 2013

| Cause                                               | Males, All Ages          | Males, 0-4 Years | Males, 5-14 Years | Males, 15-49 Years     | Males, 50-69 Years | Males, 70-80 Years |
|-----------------------------------------------------|--------------------------|------------------|-------------------|------------------------|--------------------|--------------------|
| Chronic kidney disease due to hypertension          | 23<br>(12 - 30)          | 0<br>(0 - 0)     | 0<br>(0 - 0)      | 2<br>(1 - 3)           | 9<br>(5 - 13)      | 12<br>(6 - 16)     |
| Chronic kidney disease due to glomerulonephritis    | 14<br>(10 - 19)          | 0<br>(0 - 0)     | 0<br>(0 - 0)      | 3<br>(2 - 4)           | 6<br>(4 - 8)       | 5<br>(3 - 8)       |
| Chronic kidney disease due to other causes          | 37<br>(26 - 64)          | 0<br>(0 - 0)     | 0<br>(0 - 0)      | 5<br>(3 - 9)           | 13<br>(8 - 27)     | 19<br>(13 - 29)    |
| Urinary diseases and male infertility               | 66<br>(54 - 95)          | 0<br>(0 - 0)     | 0<br>(0 - 0)      | 4<br>(3 - 6)           | 18<br>(14 - 27)    | 44<br>(35 - 63)    |
| Interstitial nephritis and urinary tract infections | 48<br>(38 - 69)          | 0<br>(0 - 0)     | 0<br>(0 - 0)      | 3<br>(2 - 5)           | 13<br>(10 - 20)    | 32<br>(24 - 47)    |
| Urolithiasis                                        | 9<br>(6 - 17)            | --               | 0<br>(0 - 0)      | 0<br>(0 - 1)           | 3<br>(2 - 5)       | 6<br>(4 - 11)      |
| Other urinary diseases                              | 9<br>(4 - 13)            | 0<br>(0 - 0)     | 0<br>(0 - 0)      | 1<br>(0 - 1)           | 2<br>(1 - 4)       | 6<br>(3 - 9)       |
| Gynecological diseases                              | --                       | --               | --                | --                     | --                 | --                 |
| Uterine fibroids                                    | --                       | --               | --                | --                     | --                 | --                 |
| Polycystic ovarian syndrome                         | --                       | --               | --                | --                     | --                 | --                 |
| Endometriosis                                       | --                       | --               | --                | --                     | --                 | --                 |
| Genital prolapse                                    | --                       | --               | --                | --                     | --                 | --                 |
| Other gynecological diseases                        | --                       | --               | --                | --                     | --                 | --                 |
| Hemoglobinopathies and hemolytic anemias            | 4<br>(2 - 6)             | 0<br>(0 - 0)     | 0<br>(0 - 0)      | 1<br>(0 - 1)           | 1<br>(1 - 1)       | 2<br>(1 - 3)       |
| Thalassemias                                        | 1<br>(0 - 1)             | 0<br>(0 - 0)     | 0<br>(0 - 0)      | 0<br>(0 - 1)           | 0<br>(0 - 0)       | 0<br>(0 - 0)       |
| Sickle cell disorders                               | 0<br>(0 - 0)             | 0<br>(0 - 0)     | 0<br>(0 - 0)      | 0<br>(0 - 0)           | 0<br>(0 - 0)       | 0<br>(0 - 0)       |
| G6PD deficiency                                     | 0<br>(0 - 0)             | 0<br>(0 - 0)     | 0<br>(0 - 0)      | 0<br>(0 - 0)           | 0<br>(0 - 0)       | 0<br>(0 - 0)       |
| Other hemoglobinopathies and hemolytic anemias      | 3<br>(2 - 5)             | 0<br>(0 - 0)     | 0<br>(0 - 0)      | 0<br>(0 - 1)           | 1<br>(1 - 1)       | 2<br>(1 - 3)       |
| Endocrine, metabolic, blood, and immune disorders   | 16<br>(9 - 19)           | 1<br>(1 - 2)     | 1<br>(0 - 1)      | 4<br>(2 - 5)           | 6<br>(4 - 8)       | 4<br>(2 - 6)       |
| Musculoskeletal disorders                           | 18<br>(13 - 24)          | --               | 0<br>(0 - 0)      | 3<br>(2 - 5)           | 8<br>(5 - 10)      | 7<br>(5 - 10)      |
| Rheumatoid arthritis                                | 5<br>(3 - 8)             | --               | 0<br>(0 - 0)      | 1<br>(0 - 1)           | 2<br>(1 - 4)       | 2<br>(1 - 4)       |
| Other musculoskeletal disorders                     | 12<br>(9 - 17)           | --               | 0<br>(0 - 0)      | 3<br>(2 - 4)           | 5<br>(3 - 7)       | 5<br>(3 - 7)       |
| Other non-communicable diseases                     | 71<br>(55 - 84)          | 34<br>(24 - 44)  | 3<br>(2 - 4)      | 13<br>(11 - 16)        | 13<br>(8 - 16)     | 8<br>(3 - 10)      |
| Congenital anomalies                                | 52<br>(39 - 65)          | 31<br>(21 - 41)  | 3<br>(2 - 4)      | 11<br>(9 - 13)         | 6<br>(5 - 8)       | 2<br>(2 - 3)       |
| Neural tube defects                                 | 1<br>(0 - 1)             | 0<br>(0 - 1)     | 0<br>(0 - 0)      | 0<br>(0 - 0)           | 0<br>(0 - 0)       | 0<br>(0 - 0)       |
| Congenital heart anomalies                          | 22<br>(16 - 29)          | 12<br>(7 - 18)   | 1<br>(1 - 2)      | 6<br>(4 - 7)           | 3<br>(2 - 3)       | 0<br>(0 - 1)       |
| Cleft lip and cleft palate                          | 0<br>(0 - 0)             | 0<br>(0 - 0)     | --                | --                     | --                 | --                 |
| Down syndrome                                       | 2<br>(2 - 4)             | 1<br>(0 - 1)     | 0<br>(0 - 0)      | 1<br>(1 - 2)           | 1<br>(0 - 1)       | 0<br>(0 - 0)       |
| Chromosomal unbalanced rearrangements               | 2<br>(1 - 3)             | 1<br>(1 - 2)     | 0<br>(0 - 0)      | 0<br>(0 - 0)           | 0<br>(0 - 0)       | 0<br>(0 - 0)       |
| Other congenital anomalies                          | 25<br>(18 - 32)          | 16<br>(10 - 22)  | 1<br>(1 - 2)      | 4<br>(3 - 5)           | 3<br>(2 - 4)       | 2<br>(1 - 2)       |
| Skin and subcutaneous diseases                      | 15<br>(3 - 20)           | 0<br>(0 - 0)     | 0<br>(0 - 0)      | 2<br>(0 - 3)           | 7<br>(1 - 9)       | 6<br>(1 - 8)       |
| Cellulitis                                          | 3<br>(0 - 5)             | 0<br>(0 - 0)     | 0<br>(0 - 0)      | 1<br>(0 - 1)           | 2<br>(0 - 3)       | 1<br>(0 - 2)       |
| Pyoderma                                            | 10<br>(2 - 14)           | 0<br>(0 - 0)     | 0<br>(0 - 0)      | 1<br>(0 - 2)           | 4<br>(1 - 7)       | 4<br>(1 - 6)       |
| Decubitus ulcer                                     | 2<br>(0 - 3)             | 0<br>(0 - 0)     | 0<br>(0 - 0)      | 0<br>(0 - 0)           | 1<br>(0 - 1)       | 1<br>(0 - 1)       |
| Other skin and subcutaneous diseases                | 0<br>(0 - 0)             | 0<br>(0 - 0)     | 0<br>(0 - 0)      | 0<br>(0 - 0)           | 0<br>(0 - 0)       | 0<br>(0 - 0)       |
| Sudden infant death syndrome                        | 3<br>(1 - 8)             | 3<br>(1 - 8)     | --                | --                     | --                 | --                 |
| Injuries                                            | 2,259<br>(2,068 - 2,564) | 14<br>(9 - 20)   | 17<br>(14 - 21)   | 1,060<br>(968 - 1,204) | 874<br>(779 - 988) | 294<br>(256 - 341) |
| Transport injuries                                  | 346<br>(310 - 383)       | 2<br>(1 - 3)     | 5<br>(3 - 6)      | 196<br>(170 - 225)     | 103<br>(89 - 119)  | 41<br>(34 - 49)    |
| Road injuries                                       | 319<br>(285 - 356)       | 1<br>(1 - 2)     | 4<br>(3 - 6)      | 182<br>(157 - 210)     | 94<br>(81 - 109)   | 37<br>(31 - 45)    |
| Pedestrian road injuries                            | 101<br>(57 - 141)        | 0<br>(0 - 1)     | 1<br>(1 - 2)      | 41<br>(21 - 62)        | 42<br>(24 - 57)    | 17<br>(9 - 23)     |

Web Table 31- Lithuania deaths with 95% UI by age, sex, and cause in 2013

| Cause                                           | Males, All Ages      | Males, 0-4 Years | Males, 5-14 Years | Males, 15-49 Years | Males, 50-69 Years | Males, 70-80 Years |
|-------------------------------------------------|----------------------|------------------|-------------------|--------------------|--------------------|--------------------|
| Cyclist road injuries                           | 38<br>(27 - 58)      | 0<br>(0 - 0)     | 1<br>(0 - 1)      | 13<br>(9 - 21)     | 16<br>(10 - 25)    | 8<br>(5 - 13)      |
| Motorcyclist road injuries                      | 25<br>(16 - 37)      | 0<br>(0 - 0)     | 0<br>(0 - 1)      | 18<br>(11 - 26)    | 5<br>(3 - 8)       | 2<br>(1 - 4)       |
| Motor vehicle road injuries                     | 146<br>(100 - 182)   | 1<br>(0 - 1)     | 2<br>(1 - 2)      | 106<br>(75 - 131)  | 29<br>(17 - 42)    | 8<br>(4 - 13)      |
| Other road injuries                             | 8<br>(4 - 26)        | 0<br>(0 - 0)     | 0<br>(0 - 0)      | 4<br>(2 - 12)      | 3<br>(1 - 9)       | 2<br>(1 - 5)       |
| Other transport injuries                        | 27<br>(19 - 37)      | 0<br>(0 - 0)     | 0<br>(0 - 1)      | 14<br>(9 - 20)     | 9<br>(6 - 14)      | 4<br>(2 - 6)       |
| Unintentional injuries                          | 949<br>(842 - 1,137) | 12<br>(8 - 18)   | 10<br>(8 - 15)    | 364<br>(317 - 484) | 417<br>(353 - 481) | 147<br>(121 - 172) |
| Falls                                           | 286<br>(222 - 349)   | 1<br>(0 - 2)     | 1<br>(0 - 1)      | 83<br>(64 - 107)   | 132<br>(99 - 167)  | 70<br>(50 - 89)    |
| Drowning                                        | 231<br>(175 - 407)   | 4<br>(2 - 10)    | 7<br>(4 - 12)     | 123<br>(90 - 225)  | 78<br>(54 - 126)   | 20<br>(14 - 36)    |
| Fire, heat, and hot substances                  | 86<br>(67 - 122)     | 1<br>(1 - 2)     | 0<br>(0 - 1)      | 29<br>(22 - 41)    | 39<br>(28 - 56)    | 16<br>(11 - 23)    |
| Poisonings                                      | 103<br>(61 - 129)    | 1<br>(0 - 2)     | 0<br>(0 - 1)      | 39<br>(26 - 54)    | 50<br>(24 - 67)    | 12<br>(6 - 17)     |
| Exposure to mechanical forces                   | 55<br>(46 - 66)      | 1<br>(1 - 2)     | 1<br>(0 - 1)      | 27<br>(22 - 35)    | 22<br>(17 - 28)    | 3<br>(2 - 4)       |
| Unintentional firearm injuries                  | 2<br>(1 - 3)         | 0<br>(0 - 0)     | 0<br>(0 - 0)      | 1<br>(1 - 2)       | 0<br>(0 - 1)       | 0<br>(0 - 0)       |
| Unintentional suffocation                       | 2<br>(2 - 4)         | 1<br>(0 - 2)     | 0<br>(0 - 0)      | 1<br>(0 - 1)       | 1<br>(0 - 1)       | 0<br>(0 - 0)       |
| Other exposure to mechanical forces             | 51<br>(41 - 61)      | 0<br>(0 - 0)     | 0<br>(0 - 1)      | 25<br>(19 - 32)    | 22<br>(16 - 27)    | 3<br>(2 - 4)       |
| Adverse effects of medical treatment            | 16<br>(10 - 21)      | 0<br>(0 - 0)     | 0<br>(0 - 0)      | 4<br>(2 - 5)       | 6<br>(4 - 8)       | 6<br>(3 - 8)       |
| Animal contact                                  | 9<br>(6 - 19)        | 0<br>(0 - 0)     | 0<br>(0 - 0)      | 2<br>(1 - 3)       | 5<br>(3 - 9)       | 3<br>(2 - 6)       |
| Venomous animal contact                         | 1<br>(1 - 2)         | 0<br>(0 - 0)     | 0<br>(0 - 0)      | 0<br>(0 - 1)       | 1<br>(0 - 1)       | 0<br>(0 - 0)       |
| Non-venomous animal contact                     | 8<br>(6 - 17)        | 0<br>(0 - 0)     | 0<br>(0 - 0)      | 1<br>(1 - 2)       | 4<br>(3 - 8)       | 3<br>(2 - 6)       |
| Foreign body                                    | 140<br>(70 - 198)    | 3<br>(1 - 5)     | 0<br>(0 - 1)      | 45<br>(22 - 65)    | 76<br>(35 - 111)   | 16<br>(8 - 24)     |
| Pulmonary aspiration and foreign body in airway | 139<br>(70 - 197)    | 3<br>(1 - 5)     | 0<br>(0 - 1)      | 45<br>(21 - 65)    | 76<br>(35 - 111)   | 16<br>(7 - 24)     |
| Foreign body in other body part                 | 0<br>(0 - 0)         | 0<br>(0 - 0)     | 0<br>(0 - 0)      | 0<br>(0 - 0)       | 0<br>(0 - 0)       | 0<br>(0 - 0)       |
| Other unintentional injuries                    | 23<br>(17 - 31)      | 0<br>(0 - 1)     | 0<br>(0 - 1)      | 12<br>(8 - 18)     | 8<br>(5 - 15)      | 2<br>(1 - 3)       |
| Self-harm and interpersonal violence            | 964<br>(792 - 1,183) | 1<br>(0 - 1)     | 2<br>(1 - 3)      | 500<br>(402 - 601) | 355<br>(284 - 452) | 106<br>(80 - 137)  |
| Self-harm                                       | 820<br>(657 - 1,006) | --               | 2<br>(1 - 3)      | 419<br>(325 - 513) | 304<br>(236 - 396) | 95<br>(68 - 123)   |
| Interpersonal violence                          | 144<br>(100 - 216)   | 1<br>(0 - 1)     | 0<br>(0 - 1)      | 81<br>(55 - 122)   | 50<br>(34 - 82)    | 11<br>(8 - 21)     |
| Assault by firearm                              | 9<br>(5 - 21)        | 0<br>(0 - 0)     | 0<br>(0 - 0)      | 8<br>(4 - 18)      | 1<br>(1 - 4)       | 0<br>(0 - 1)       |
| Assault by sharp object                         | 59<br>(37 - 100)     | 0<br>(0 - 0)     | 0<br>(0 - 0)      | 35<br>(21 - 56)    | 21<br>(12 - 36)    | 3<br>(2 - 6)       |
| Assault by other means                          | 76<br>(47 - 116)     | 1<br>(0 - 1)     | 0<br>(0 - 0)      | 38<br>(23 - 57)    | 28<br>(17 - 46)    | 8<br>(5 - 15)      |

Web Table 31- Lithuania deaths with 95% UI by age, sex, and cause in 2013

| Cause                                                             | Females, All Ages           | Females, 0-4 Years | Females, 5-14 Years | Females, 15-49 Years | Females, 50-69 Years     | Females, 70-80 Years        |
|-------------------------------------------------------------------|-----------------------------|--------------------|---------------------|----------------------|--------------------------|-----------------------------|
| All causes                                                        | 19,979<br>(19,155 - 20,798) | 68<br>(54 - 84)    | 16<br>(15 - 18)     | 745<br>(700 - 792)   | 3,080<br>(2,916 - 3,245) | 16,069<br>(15,456 - 16,681) |
| Communicable, maternal, neonatal, and nutritional diseases        | 343<br>(246 - 400)          | 26<br>(18 - 35)    | 1<br>(1 - 2)        | 82<br>(63 - 97)      | 86<br>(62 - 104)         | 148<br>(88 - 190)           |
| HIV/AIDS and tuberculosis                                         | 118<br>(91 - 149)           | 1<br>(0 - 1)       | 0<br>(0 - 0)        | 58<br>(43 - 73)      | 38<br>(27 - 52)          | 21<br>(15 - 28)             |
| Tuberculosis                                                      | 41<br>(29 - 52)             | 0<br>(0 - 0)       | 0<br>(0 - 0)        | 11<br>(6 - 15)       | 15<br>(9 - 20)           | 15<br>(10 - 21)             |
| HIV/AIDS                                                          | 77<br>(52 - 108)            | 0<br>(0 - 1)       | 0<br>(0 - 0)        | 47<br>(32 - 61)      | 24<br>(14 - 38)          | 6<br>(3 - 11)               |
| HIV/AIDS resulting in mycobacterial infection                     | 4<br>(2 - 5)                | 0<br>(0 - 0)       | 0<br>(0 - 0)        | 2<br>(1 - 3)         | 1<br>(1 - 2)             | 0<br>(0 - 1)                |
| HIV/AIDS resulting in other diseases                              | 74<br>(49 - 102)            | 0<br>(0 - 1)       | 0<br>(0 - 0)        | 45<br>(31 - 58)      | 23<br>(13 - 36)          | 6<br>(3 - 10)               |
| Diarrhea, lower respiratory, and other common infectious diseases | 191<br>(107 - 238)          | 6<br>(4 - 9)       | 1<br>(1 - 1)        | 19<br>(12 - 24)      | 43<br>(25 - 53)          | 122<br>(63 - 164)           |
| Diarrheal diseases                                                | 2<br>(2 - 3)                | 0<br>(0 - 1)       | 0<br>(0 - 0)        | 0<br>(0 - 0)         | 1<br>(0 - 1)             | 1<br>(1 - 2)                |
| Intestinal infectious diseases                                    | 2<br>(1 - 4)                | 0<br>(0 - 0)       | 0<br>(0 - 0)        | 1<br>(0 - 1)         | 0<br>(0 - 1)             | 1<br>(0 - 2)                |
| Typhoid fever                                                     | 1<br>(0 - 3)                | 0<br>(0 - 0)       | 0<br>(0 - 0)        | 0<br>(0 - 1)         | 0<br>(0 - 1)             | 0<br>(0 - 1)                |
| Paratyphoid fever                                                 | 0<br>(0 - 1)                | 0<br>(0 - 0)       | 0<br>(0 - 0)        | 0<br>(0 - 0)         | 0<br>(0 - 0)             | 0<br>(0 - 0)                |
| Other intestinal infectious diseases                              | 0<br>(0 - 1)                | 0<br>(0 - 0)       | 0<br>(0 - 0)        | 0<br>(0 - 0)         | 0<br>(0 - 0)             | 0<br>(0 - 1)                |
| Lower respiratory infections                                      | 164<br>(82 - 211)           | 4<br>(2 - 6)       | 1<br>(0 - 1)        | 15<br>(8 - 19)       | 33<br>(16 - 44)          | 111<br>(53 - 152)           |
| Upper respiratory infections                                      | 1<br>(0 - 2)                | 0<br>(0 - 0)       | 0<br>(0 - 0)        | 0<br>(0 - 0)         | 0<br>(0 - 0)             | 0<br>(0 - 2)                |
| Otitis media                                                      | 0<br>(0 - 0)                | 0<br>(0 - 0)       | 0<br>(0 - 0)        | 0<br>(0 - 0)         | 0<br>(0 - 0)             | 0<br>(0 - 0)                |
| Meningitis                                                        | 9<br>(7 - 10)               | 1<br>(1 - 2)       | 0<br>(0 - 0)        | 1<br>(1 - 2)         | 3<br>(2 - 4)             | 3<br>(2 - 4)                |
| Pneumococcal meningitis                                           | 2<br>(1 - 3)                | 0<br>(0 - 0)       | 0<br>(0 - 0)        | 0<br>(0 - 1)         | 1<br>(0 - 1)             | 1<br>(1 - 1)                |
| H influenzae type B meningitis                                    | 1<br>(1 - 2)                | 0<br>(0 - 1)       | 0<br>(0 - 0)        | 0<br>(0 - 0)         | 0<br>(0 - 1)             | 0<br>(0 - 1)                |
| Meningococcal meningitis                                          | 2<br>(1 - 2)                | 0<br>(0 - 0)       | 0<br>(0 - 0)        | 0<br>(0 - 0)         | 1<br>(0 - 1)             | 1<br>(0 - 1)                |
| Other meningitis                                                  | 4<br>(3 - 5)                | 0<br>(0 - 0)       | 0<br>(0 - 0)        | 1<br>(0 - 1)         | 1<br>(1 - 2)             | 1<br>(1 - 2)                |
| Encephalitis                                                      | 11<br>(7 - 16)              | 0<br>(0 - 1)       | 0<br>(0 - 0)        | 2<br>(1 - 3)         | 5<br>(3 - 7)             | 4<br>(2 - 6)                |
| Diphtheria                                                        | 0<br>(0 - 0)                | 0<br>(0 - 0)       | 0<br>(0 - 0)        | 0<br>(0 - 0)         | 0<br>(0 - 0)             | --<br>(0 - 0)               |
| Whooping cough                                                    | 0<br>(0 - 0)                | 0<br>(0 - 0)       | 0<br>(0 - 0)        | 0<br>(0 - 0)         | 0<br>(0 - 0)             | --<br>(0 - 0)               |
| Tetanus                                                           | 0<br>(0 - 1)                | 0<br>(0 - 0)       | 0<br>(0 - 0)        | 0<br>(0 - 0)         | 0<br>(0 - 0)             | 0<br>(0 - 0)                |
| Measles                                                           | 0<br>(0 - 0)                | 0<br>(0 - 0)       | 0<br>(0 - 0)        | 0<br>(0 - 0)         | 0<br>(0 - 0)             | --<br>(0 - 0)               |
| Varicella and herpes zoster                                       | 2<br>(0 - 9)                | 0<br>(0 - 0)       | 0<br>(0 - 0)        | 0<br>(0 - 0)         | 0<br>(0 - 0)             | 2<br>(0 - 9)                |
| Neglected tropical diseases and malaria                           | 1<br>(1 - 1)                | 0<br>(0 - 0)       | 0<br>(0 - 0)        | 0<br>(0 - 0)         | 0<br>(0 - 0)             | 0<br>(0 - 0)                |
| Cysticercosis                                                     | 0<br>(0 - 0)                | 0<br>(0 - 0)       | 0<br>(0 - 0)        | 0<br>(0 - 0)         | 0<br>(0 - 0)             | 0<br>(0 - 0)                |
| Cystic echinococcosis                                             | 0<br>(0 - 0)                | 0<br>(0 - 0)       | 0<br>(0 - 0)        | 0<br>(0 - 0)         | 0<br>(0 - 0)             | 0<br>(0 - 0)                |
| Dengue                                                            | 0<br>(0 - 0)                | 0<br>(0 - 0)       | 0<br>(0 - 0)        | 0<br>(0 - 0)         | 0<br>(0 - 0)             | 0<br>(0 - 0)                |
| Rabies                                                            | 0<br>(0 - 0)                | 0<br>(0 - 0)       | 0<br>(0 - 0)        | 0<br>(0 - 0)         | 0<br>(0 - 0)             | 0<br>(0 - 0)                |
| Other neglected tropical diseases                                 | 0<br>(0 - 0)                | 0<br>(0 - 0)       | 0<br>(0 - 0)        | 0<br>(0 - 0)         | 0<br>(0 - 0)             | 0<br>(0 - 0)                |
| Maternal disorders                                                | 2<br>(2 - 3)                | --                 | 0<br>(0 - 0)        | 2<br>(2 - 3)         | --                       | --                          |
| Maternal hemorrhage                                               | 0<br>(0 - 0)                | --                 | 0<br>(0 - 0)        | 0<br>(0 - 0)         | --                       | --                          |
| Maternal sepsis and other maternal infections                     | 0<br>(0 - 0)                | --                 | 0<br>(0 - 0)        | 0<br>(0 - 0)         | --                       | --                          |
| Maternal hypertensive disorders                                   | 0<br>(0 - 0)                | --                 | 0<br>(0 - 0)        | 0<br>(0 - 0)         | --                       | --                          |
| Maternal obstructed labor                                         | 0<br>(0 - 0)                | --                 | 0<br>(0 - 0)        | 0<br>(0 - 0)         | --                       | --                          |
| Maternal abortive outcome                                         | 0<br>(0 - 1)                | --                 | 0<br>(0 - 0)        | 0<br>(0 - 1)         | --                       | --                          |
| Indirect maternal deaths                                          | 0<br>(0 - 0)                | --                 | 0<br>(0 - 0)        | 0<br>(0 - 0)         | --                       | --                          |

Web Table 31- Lithuania deaths with 95% UI by age, sex, and cause in 2013

| Cause                                                            | Females, All Ages           | Females, 0-4 Years | Females, 5-14 Years | Females, 15-49 Years | Females, 50-69 Years     | Females, 70-80 Years        |
|------------------------------------------------------------------|-----------------------------|--------------------|---------------------|----------------------|--------------------------|-----------------------------|
| Late maternal deaths                                             | 0<br>(0 - 0)                | --                 | 0<br>(0 - 0)        | 0<br>(0 - 0)         | --                       | --                          |
| Maternal deaths aggravated by HIV/AIDS                           | 0<br>(0 - 0)                | --                 | --                  | 0<br>(0 - 0)         | --                       | --                          |
| Other maternal disorders                                         | 0<br>(0 - 1)                | --                 | 0<br>(0 - 0)        | 0<br>(0 - 1)         | --                       | --                          |
| Neonatal disorders                                               | 19<br>(13 - 26)             | 19<br>(13 - 26)    | --                  | --                   | --                       | --                          |
| Neonatal preterm birth complications                             | 7<br>(4 - 11)               | 7<br>(4 - 11)      | --                  | --                   | --                       | --                          |
| Neonatal encephalopathy due to birth asphyxia and trauma         | 6<br>(3 - 10)               | 6<br>(3 - 10)      | --                  | --                   | --                       | --                          |
| Neonatal sepsis and other neonatal infections                    | 2<br>(1 - 5)                | 2<br>(1 - 5)       | --                  | --                   | --                       | --                          |
| Hemolytic disease and other neonatal jaundice                    | 0<br>(0 - 0)                | 0<br>(0 - 0)       | --                  | --                   | --                       | --                          |
| Other neonatal disorders                                         | 3<br>(2 - 5)                | 3<br>(2 - 5)       | --                  | --                   | --                       | --                          |
| Nutritional deficiencies                                         | 5<br>(4 - 8)                | 0<br>(0 - 0)       | 0<br>(0 - 0)        | 1<br>(1 - 1)         | 2<br>(1 - 3)             | 3<br>(2 - 4)                |
| Protein-energy malnutrition                                      | 0<br>(0 - 1)                | 0<br>(0 - 0)       | 0<br>(0 - 0)        | 0<br>(0 - 0)         | 0<br>(0 - 0)             | 0<br>(0 - 0)                |
| Iodine deficiency                                                | 0<br>(0 - 1)                | 0<br>(0 - 0)       | 0<br>(0 - 0)        | 0<br>(0 - 0)         | 0<br>(0 - 1)             | 0<br>(0 - 1)                |
| Iron-deficiency anemia                                           | 3<br>(2 - 5)                | 0<br>(0 - 0)       | 0<br>(0 - 0)        | 0<br>(0 - 1)         | 1<br>(1 - 2)             | 2<br>(1 - 3)                |
| Other nutritional deficiencies                                   | 1<br>(0 - 2)                | 0<br>(0 - 0)       | 0<br>(0 - 0)        | 0<br>(0 - 0)         | 0<br>(0 - 1)             | 1<br>(0 - 1)                |
| Other communicable, maternal, neonatal, and nutritional diseases | 8<br>(6 - 9)                | 0<br>(0 - 1)       | 0<br>(0 - 0)        | 1<br>(1 - 2)         | 3<br>(2 - 4)             | 3<br>(2 - 4)                |
| Sexually transmitted diseases excluding HIV                      | 2<br>(1 - 3)                | 0<br>(0 - 0)       | 0<br>(0 - 0)        | 1<br>(0 - 1)         | 1<br>(0 - 1)             | 1<br>(0 - 1)                |
| Syphilis                                                         | 1<br>(1 - 2)                | 0<br>(0 - 0)       | 0<br>(0 - 0)        | 0<br>(0 - 0)         | 0<br>(0 - 0)             | 1<br>(0 - 1)                |
| Chlamydial infection                                             | 0<br>(0 - 0)                | --                 | 0<br>(0 - 0)        | 0<br>(0 - 0)         | 0<br>(0 - 0)             | 0<br>(0 - 0)                |
| Gonococcal infection                                             | 0<br>(0 - 0)                | --                 | 0<br>(0 - 0)        | 0<br>(0 - 0)         | 0<br>(0 - 0)             | 0<br>(0 - 0)                |
| Other sexually transmitted diseases                              | 0<br>(0 - 0)                | --                 | 0<br>(0 - 0)        | 0<br>(0 - 0)         | 0<br>(0 - 0)             | 0<br>(0 - 0)                |
| Hepatitis                                                        | 1<br>(1 - 2)                | 0<br>(0 - 0)       | 0<br>(0 - 0)        | 0<br>(0 - 0)         | 0<br>(0 - 1)             | 0<br>(0 - 1)                |
| Acute hepatitis A                                                | 0<br>(0 - 0)                | 0<br>(0 - 0)       | 0<br>(0 - 0)        | 0<br>(0 - 0)         | 0<br>(0 - 0)             | 0<br>(0 - 0)                |
| Acute hepatitis B                                                | 1<br>(1 - 1)                | 0<br>(0 - 0)       | 0<br>(0 - 0)        | 0<br>(0 - 0)         | 0<br>(0 - 1)             | 0<br>(0 - 1)                |
| Acute hepatitis C                                                | 0<br>(0 - 0)                | --                 | 0<br>(0 - 0)        | 0<br>(0 - 0)         | 0<br>(0 - 0)             | 0<br>(0 - 0)                |
| Other infectious diseases                                        | 4<br>(3 - 6)                | 0<br>(0 - 0)       | 0<br>(0 - 0)        | 0<br>(0 - 1)         | 2<br>(1 - 3)             | 2<br>(1 - 2)                |
| Non-communicable diseases                                        | 18,975<br>(18,196 - 19,768) | 33<br>(24 - 42)    | 8<br>(6 - 9)        | 490<br>(453 - 530)   | 2,776<br>(2,626 - 2,939) | 15,668<br>(15,081 - 16,266) |
| Neoplasms                                                        | 3,157<br>(2,813 - 3,448)    | 3<br>(2 - 4)       | 4<br>(3 - 5)        | 211<br>(190 - 237)   | 1,075<br>(972 - 1,186)   | 1,864<br>(1,632 - 2,055)    |
| Esophageal cancer                                                | 23<br>(19 - 28)             | --                 | --                  | 1<br>(1 - 1)         | 7<br>(6 - 9)             | 15<br>(12 - 20)             |
| Stomach cancer                                                   | 279<br>(212 - 368)          | --                 | --                  | 15<br>(11 - 21)      | 83<br>(63 - 112)         | 181<br>(130 - 247)          |
| Liver cancer                                                     | 74<br>(45 - 95)             | --                 | 0<br>(0 - 0)        | 3<br>(2 - 4)         | 19<br>(12 - 24)          | 52<br>(32 - 71)             |
| Liver cancer due to hepatitis B                                  | 8<br>(4 - 15)               | --                 | 0<br>(0 - 0)        | 1<br>(0 - 1)         | 3<br>(1 - 5)             | 5<br>(2 - 9)                |
| Liver cancer due to hepatitis C                                  | 36<br>(22 - 50)             | --                 | 0<br>(0 - 0)        | 1<br>(1 - 2)         | 9<br>(5 - 13)            | 26<br>(16 - 38)             |
| Liver cancer due to alcohol use                                  | 17<br>(8 - 27)              | --                 | --                  | 0<br>(0 - 1)         | 3<br>(2 - 6)             | 13<br>(6 - 22)              |
| Liver cancer due to other causes                                 | 12<br>(6 - 20)              | --                 | 0<br>(0 - 0)        | 1<br>(0 - 1)         | 4<br>(2 - 6)             | 8<br>(4 - 14)               |
| Larynx cancer                                                    | 5<br>(3 - 7)                | --                 | --                  | 0<br>(0 - 1)         | 2<br>(1 - 3)             | 2<br>(1 - 3)                |
| Tracheal, bronchus and lung cancer                               | 239<br>(196 - 283)          | --                 | --                  | 11<br>(8 - 14)       | 82<br>(66 - 99)          | 146<br>(115 - 184)          |
| Breast cancer                                                    | 505<br>(352 - 613)          | --                 | --                  | 57<br>(44 - 75)      | 220<br>(159 - 274)       | 229<br>(138 - 289)          |
| Cervical cancer                                                  | 159<br>(129 - 196)          | --                 | --                  | 19<br>(14 - 24)      | 65<br>(51 - 84)          | 75<br>(57 - 100)            |
| Uterine cancer                                                   | 123<br>(98 - 156)           | --                 | --                  | 5<br>(3 - 7)         | 47<br>(36 - 62)          | 71<br>(51 - 95)             |
| Prostate cancer                                                  | --                          | --                 | --                  | --                   | --                       | --                          |

Web Table 31- Lithuania deaths with 95% UI by age, sex, and cause in 2013

| Cause                                         | Females, All Ages           | Females, 0-4 Years | Females, 5-14 Years | Females, 15-49 Years | Females, 50-69 Years     | Females, 70-80 Years        |
|-----------------------------------------------|-----------------------------|--------------------|---------------------|----------------------|--------------------------|-----------------------------|
| Colon and rectum cancer                       | 440<br>(380 - 524)          | --                 | --                  | 13<br>(10 - 15)      | 110<br>(96 - 126)        | 317<br>(265 - 392)          |
| Lip and oral cavity cancer                    | 20<br>(17 - 25)             | --                 | --                  | 1<br>(1 - 2)         | 6<br>(5 - 8)             | 13<br>(10 - 17)             |
| Nasopharynx cancer                            | 3<br>(2 - 6)                | --                 | 0<br>(0 - 0)        | 0<br>(0 - 1)         | 1<br>(1 - 3)             | 1<br>(1 - 3)                |
| Other pharynx cancer                          | 7<br>(5 - 9)                | --                 | --                  | 0<br>(0 - 1)         | 3<br>(2 - 4)             | 3<br>(2 - 4)                |
| Gallbladder and biliary tract cancer          | 70<br>(50 - 96)             | --                 | --                  | 2<br>(1 - 3)         | 22<br>(16 - 31)          | 46<br>(31 - 66)             |
| Pancreatic cancer                             | 233<br>(202 - 268)          | --                 | --                  | 6<br>(5 - 8)         | 62<br>(52 - 72)          | 165<br>(138 - 196)          |
| Malignant skin melanoma                       | 45<br>(27 - 57)             | --                 | --                  | 6<br>(4 - 8)         | 16<br>(10 - 21)          | 23<br>(14 - 32)             |
| Non-melanoma skin cancer                      | 24<br>(17 - 32)             | --                 | --                  | 0<br>(0 - 1)         | 3<br>(3 - 4)             | 20<br>(14 - 28)             |
| Ovarian cancer                                | 272<br>(216 - 320)          | --                 | --                  | 25<br>(18 - 31)      | 117<br>(95 - 140)        | 130<br>(94 - 166)           |
| Testicular cancer                             | --                          | --                 | --                  | --                   | --                       | --                          |
| Kidney cancer                                 | 61<br>(33 - 108)            | 0<br>(0 - 0)       | 0<br>(0 - 0)        | 2<br>(1 - 3)         | 21<br>(12 - 35)          | 38<br>(19 - 73)             |
| Bladder cancer                                | 47<br>(29 - 67)             | --                 | --                  | 1<br>(0 - 1)         | 7<br>(5 - 10)            | 39<br>(24 - 57)             |
| Brain and nervous system cancer               | 99<br>(58 - 120)            | 0<br>(0 - 1)       | 1<br>(1 - 2)        | 14<br>(9 - 17)       | 48<br>(30 - 60)          | 36<br>(16 - 48)             |
| Thyroid cancer                                | 21<br>(14 - 27)             | --                 | 0<br>(0 - 0)        | 1<br>(0 - 1)         | 6<br>(4 - 8)             | 14<br>(9 - 19)              |
| Mesothelioma                                  | 4<br>(3 - 6)                | --                 | --                  | 0<br>(0 - 1)         | 2<br>(1 - 3)             | 2<br>(1 - 3)                |
| Hodgkin lymphoma                              | 10<br>(7 - 16)              | 0<br>(0 - 0)       | 0<br>(0 - 0)        | 3<br>(2 - 4)         | 3<br>(2 - 5)             | 4<br>(3 - 7)                |
| Non-Hodgkin lymphoma                          | 58<br>(18 - 82)             | 0<br>(0 - 0)       | 0<br>(0 - 0)        | 3<br>(1 - 5)         | 16<br>(6 - 23)           | 38<br>(10 - 57)             |
| Multiple myeloma                              | 54<br>(32 - 80)             | --                 | --                  | 2<br>(1 - 3)         | 20<br>(11 - 30)          | 32<br>(18 - 49)             |
| Leukemia                                      | 118<br>(95 - 145)           | 1<br>(0 - 1)       | 1<br>(1 - 2)        | 9<br>(7 - 12)        | 35<br>(28 - 45)          | 71<br>(54 - 91)             |
| Other neoplasms                               | 164<br>(126 - 198)          | 1<br>(1 - 2)       | 1<br>(1 - 2)        | 13<br>(11 - 16)      | 50<br>(39 - 62)          | 98<br>(69 - 126)            |
| Cardiovascular diseases                       | 12,739<br>(12,026 - 13,503) | 0<br>(0 - 1)       | 0<br>(0 - 0)        | 114<br>(95 - 138)    | 1,168<br>(1,059 - 1,325) | 11,456<br>(10,839 - 12,086) |
| Rheumatic heart disease                       | 67<br>(48 - 90)             | 0<br>(0 - 0)       | 0<br>(0 - 0)        | 6<br>(4 - 9)         | 31<br>(23 - 47)          | 31<br>(18 - 40)             |
| Ischemic heart disease                        | 8,458<br>(7,790 - 9,669)    | 0<br>(0 - 0)       | 0<br>(0 - 0)        | 41<br>(32 - 55)      | 619<br>(535 - 746)       | 7,797<br>(7,171 - 8,904)    |
| Cerebrovascular disease                       | 3,416<br>(2,591 - 3,881)    | 0<br>(0 - 0)       | 0<br>(0 - 0)        | 33<br>(25 - 42)      | 336<br>(274 - 420)       | 3,048<br>(2,270 - 3,495)    |
| Ischemic stroke                               | 2,774<br>(1,989 - 3,209)    | 0<br>(0 - 0)       | 0<br>(0 - 0)        | 7<br>(4 - 10)        | 186<br>(135 - 235)       | 2,582<br>(1,833 - 3,000)    |
| Hemorrhagic stroke                            | 642<br>(483 - 911)          | 0<br>(0 - 0)       | 0<br>(0 - 0)        | 26<br>(20 - 33)      | 150<br>(116 - 205)       | 466<br>(313 - 690)          |
| Hypertensive heart disease                    | 362<br>(222 - 496)          | 0<br>(0 - 0)       | 0<br>(0 - 0)        | 4<br>(2 - 5)         | 42<br>(23 - 58)          | 317<br>(190 - 449)          |
| Cardiomyopathy and myocarditis                | 127<br>(95 - 169)           | 0<br>(0 - 1)       | 0<br>(0 - 0)        | 19<br>(13 - 26)      | 66<br>(49 - 94)          | 41<br>(29 - 54)             |
| Atrial fibrillation and flutter               | 16<br>(11 - 22)             | --                 | --                  | 0<br>(0 - 0)         | 1<br>(1 - 2)             | 14<br>(10 - 21)             |
| Aortic aneurysm                               | 43<br>(26 - 64)             | --                 | --                  | 2<br>(1 - 3)         | 10<br>(6 - 15)           | 31<br>(19 - 47)             |
| Peripheral vascular disease                   | 36<br>(26 - 49)             | --                 | --                  | 0<br>(0 - 0)         | 3<br>(2 - 4)             | 33<br>(23 - 46)             |
| Endocarditis                                  | 11<br>(7 - 16)              | 0<br>(0 - 0)       | 0<br>(0 - 0)        | 2<br>(1 - 2)         | 3<br>(2 - 5)             | 6<br>(3 - 9)                |
| Other cardiovascular and circulatory diseases | 202<br>(95 - 260)           | 0<br>(0 - 0)       | 0<br>(0 - 0)        | 9<br>(4 - 13)        | 56<br>(30 - 74)          | 138<br>(58 - 185)           |
| Chronic respiratory diseases                  | 328<br>(274 - 470)          | 0<br>(0 - 0)       | 0<br>(0 - 0)        | 6<br>(5 - 8)         | 41<br>(33 - 61)          | 281<br>(230 - 395)          |
| Chronic obstructive pulmonary disease         | 289<br>(237 - 407)          | 0<br>(0 - 0)       | 0<br>(0 - 0)        | 4<br>(3 - 5)         | 33<br>(27 - 49)          | 252<br>(203 - 357)          |
| Pneumoconiosis                                | 0<br>(0 - 0)                | 0<br>(0 - 0)       | 0<br>(0 - 0)        | 0<br>(0 - 0)         | 0<br>(0 - 0)             | 0<br>(0 - 0)                |
| Silicosis                                     | 0<br>(0 - 0)                | 0<br>(0 - 0)       | 0<br>(0 - 0)        | 0<br>(0 - 0)         | 0<br>(0 - 0)             | 0<br>(0 - 0)                |
| Asbestosis                                    | 0<br>(0 - 0)                | 0<br>(0 - 0)       | 0<br>(0 - 0)        | 0<br>(0 - 0)         | 0<br>(0 - 0)             | 0<br>(0 - 0)                |
| Coal workers pneumoconiosis                   | 0<br>(0 - 0)                | 0<br>(0 - 0)       | 0<br>(0 - 0)        | 0<br>(0 - 0)         | 0<br>(0 - 0)             | 0<br>(0 - 0)                |
| Other pneumoconiosis                          | 0<br>(0 - 0)                | 0<br>(0 - 0)       | 0<br>(0 - 0)        | 0<br>(0 - 0)         | 0<br>(0 - 0)             | 0<br>(0 - 0)                |

Web Table 31- Lithuania deaths with 95% UI by age, sex, and cause in 2013

| Cause                                               | Females, All Ages        | Females, 0-4 Years | Females, 5-14 Years | Females, 15-49 Years | Females, 50-69 Years | Females, 70-80 Years     |
|-----------------------------------------------------|--------------------------|--------------------|---------------------|----------------------|----------------------|--------------------------|
| Asthma                                              | 23<br>(14 - 38)          | 0<br>(0 - 0)       | 0<br>(0 - 0)        | 1<br>(1 - 2)         | 6<br>(3 - 10)        | 16<br>(9 - 27)           |
| Interstitial lung disease and pulmonary sarcoidosis | 12<br>(5 - 24)           | 0<br>(0 - 0)       | 0<br>(0 - 0)        | 0<br>(0 - 1)         | 2<br>(1 - 3)         | 10<br>(4 - 20)           |
| Other chronic respiratory diseases                  | 3<br>(2 - 6)             | 0<br>(0 - 0)       | 0<br>(0 - 0)        | 0<br>(0 - 1)         | 1<br>(0 - 1)         | 2<br>(1 - 5)             |
| Cirrhosis                                           | 296<br>(262 - 332)       | 0<br>(0 - 0)       | 0<br>(0 - 0)        | 60<br>(50 - 70)      | 178<br>(153 - 204)   | 58<br>(49 - 69)          |
| Cirrhosis due to hepatitis B                        | 60<br>(30 - 93)          | 0<br>(0 - 0)       | 0<br>(0 - 0)        | 13<br>(7 - 21)       | 36<br>(18 - 57)      | 11<br>(5 - 18)           |
| Cirrhosis due to hepatitis C                        | 133<br>(84 - 180)        | 0<br>(0 - 0)       | 0<br>(0 - 0)        | 25<br>(13 - 36)      | 81<br>(50 - 113)     | 26<br>(17 - 37)          |
| Cirrhosis due to alcohol use                        | 67<br>(35 - 102)         | --                 | --                  | 10<br>(5 - 17)       | 40<br>(20 - 62)      | 17<br>(8 - 25)           |
| Cirrhosis due to other causes                       | 36<br>(23 - 58)          | 0<br>(0 - 0)       | 0<br>(0 - 0)        | 11<br>(7 - 17)       | 20<br>(12 - 35)      | 4<br>(2 - 7)             |
| Digestive diseases                                  | 401<br>(225 - 483)       | 0<br>(0 - 0)       | 0<br>(0 - 0)        | 13<br>(8 - 17)       | 65<br>(40 - 80)      | 322<br>(177 - 397)       |
| Peptic ulcer disease                                | 78<br>(30 - 125)         | 0<br>(0 - 0)       | 0<br>(0 - 0)        | 3<br>(1 - 4)         | 13<br>(6 - 20)       | 63<br>(23 - 103)         |
| Gastritis and duodenitis                            | 3<br>(1 - 5)             | 0<br>(0 - 0)       | 0<br>(0 - 0)        | 0<br>(0 - 0)         | 1<br>(0 - 1)         | 2<br>(0 - 4)             |
| Appendicitis                                        | 4<br>(2 - 6)             | 0<br>(0 - 0)       | 0<br>(0 - 0)        | 0<br>(0 - 1)         | 1<br>(0 - 2)         | 3<br>(1 - 5)             |
| Paralytic ileus and intestinal obstruction          | 30<br>(12 - 58)          | 0<br>(0 - 0)       | 0<br>(0 - 0)        | 1<br>(0 - 2)         | 5<br>(2 - 8)         | 25<br>(9 - 49)           |
| Inguinal, femoral, and abdominal hernia             | 14<br>(5 - 28)           | 0<br>(0 - 0)       | 0<br>(0 - 0)        | 0<br>(0 - 0)         | 2<br>(1 - 3)         | 12<br>(4 - 24)           |
| Inflammatory bowel disease                          | 9<br>(4 - 14)            | 0<br>(0 - 0)       | 0<br>(0 - 0)        | 1<br>(0 - 1)         | 2<br>(1 - 3)         | 6<br>(2 - 10)            |
| Vascular intestinal disorders                       | 121<br>(60 - 189)        | 0<br>(0 - 0)       | 0<br>(0 - 0)        | 0<br>(0 - 1)         | 11<br>(5 - 18)       | 109<br>(53 - 170)        |
| Gallbladder and biliary diseases                    | 46<br>(22 - 68)          | 0<br>(0 - 0)       | 0<br>(0 - 0)        | 1<br>(1 - 2)         | 6<br>(3 - 9)         | 38<br>(18 - 58)          |
| Pancreatitis                                        | 65<br>(33 - 95)          | 0<br>(0 - 0)       | 0<br>(0 - 0)        | 6<br>(3 - 8)         | 19<br>(10 - 27)      | 41<br>(19 - 64)          |
| Other digestive diseases                            | 30<br>(15 - 43)          | 0<br>(0 - 0)       | 0<br>(0 - 0)        | 1<br>(1 - 1)         | 5<br>(3 - 8)         | 23<br>(11 - 35)          |
| Neurological disorders                              | 1,494<br>(1,154 - 1,859) | 1<br>(1 - 2)       | 1<br>(0 - 1)        | 17<br>(13 - 22)      | 69<br>(56 - 83)      | 1,407<br>(1,058 - 1,770) |
| Alzheimer disease and other dementias               | 1,397<br>(1,051 - 1,764) | --                 | --                  | 0<br>(0 - 0)         | 38<br>(28 - 50)      | 1,359<br>(1,006 - 1,720) |
| Parkinson disease                                   | 36<br>(10 - 49)          | --                 | --                  | 0<br>(0 - 0)         | 4<br>(1 - 5)         | 32<br>(8 - 45)           |
| Epilepsy                                            | 12<br>(8 - 15)           | 0<br>(0 - 0)       | 0<br>(0 - 0)        | 6<br>(4 - 8)         | 4<br>(3 - 6)         | 1<br>(1 - 2)             |
| Multiple sclerosis                                  | 19<br>(11 - 30)          | --                 | --                  | 7<br>(4 - 11)        | 9<br>(5 - 14)        | 3<br>(1 - 4)             |
| Other neurological disorders                        | 31<br>(26 - 35)          | 1<br>(1 - 2)       | 0<br>(0 - 0)        | 3<br>(3 - 4)         | 14<br>(11 - 17)      | 12<br>(10 - 15)          |
| Mental and substance use disorders                  | 102<br>(57 - 151)        | 0<br>(0 - 0)       | 0<br>(0 - 0)        | 34<br>(20 - 51)      | 57<br>(29 - 90)      | 11<br>(7 - 16)           |
| Schizophrenia                                       | 3<br>(2 - 5)             | --                 | --                  | 0<br>(0 - 1)         | 1<br>(1 - 2)         | 1<br>(1 - 2)             |
| Alcohol use disorders                               | 78<br>(32 - 126)         | --                 | --                  | 25<br>(10 - 41)      | 47<br>(19 - 81)      | 5<br>(2 - 9)             |
| Drug use disorders                                  | 21<br>(17 - 26)          | 0<br>(0 - 0)       | --                  | 8<br>(6 - 11)        | 9<br>(6 - 11)        | 4<br>(3 - 6)             |
| Opioid use disorders                                | 9<br>(7 - 11)            | 0<br>(0 - 0)       | --                  | 4<br>(3 - 5)         | 3<br>(2 - 5)         | 2<br>(1 - 3)             |
| Cocaine use disorders                               | 1<br>(1 - 1)             | 0<br>(0 - 0)       | --                  | 0<br>(0 - 0)         | 0<br>(0 - 0)         | 0<br>(0 - 0)             |
| Amphetamine use disorders                           | 1<br>(1 - 1)             | 0<br>(0 - 0)       | --                  | 0<br>(0 - 0)         | 0<br>(0 - 0)         | 0<br>(0 - 0)             |
| Other drug use disorders                            | 11<br>(9 - 14)           | 0<br>(0 - 0)       | --                  | 4<br>(3 - 6)         | 5<br>(3 - 6)         | 2<br>(1 - 3)             |
| Eating disorders                                    | 0<br>(0 - 0)             | --                 | 0<br>(0 - 0)        | 0<br>(0 - 0)         | --                   | --                       |
| Anorexia nervosa                                    | 0<br>(0 - 0)             | --                 | 0<br>(0 - 0)        | 0<br>(0 - 0)         | --                   | --                       |
| Diabetes, urogenital, blood, and endocrine diseases | 340<br>(298 - 393)       | 1<br>(1 - 1)       | 1<br>(0 - 1)        | 20<br>(18 - 23)      | 91<br>(78 - 114)     | 227<br>(192 - 267)       |
| Diabetes mellitus                                   | 122<br>(104 - 143)       | 0<br>(0 - 0)       | 0<br>(0 - 0)        | 7<br>(6 - 9)         | 35<br>(28 - 45)      | 79<br>(66 - 98)          |
| Acute glomerulonephritis                            | 1<br>(1 - 2)             | 0<br>(0 - 0)       | 0<br>(0 - 0)        | 0<br>(0 - 0)         | 0<br>(0 - 1)         | 1<br>(0 - 1)             |
| Chronic kidney disease                              | 102<br>(75 - 120)        | 0<br>(0 - 0)       | 0<br>(0 - 0)        | 7<br>(5 - 8)         | 27<br>(21 - 35)      | 68<br>(44 - 83)          |
| Chronic kidney disease due to diabetes mellitus     | 23<br>(12 - 31)          | 0<br>(0 - 0)       | 0<br>(0 - 0)        | 1<br>(1 - 2)         | 7<br>(4 - 10)        | 14<br>(7 - 20)           |

Web Table 31- Lithuania deaths with 95% UI by age, sex, and cause in 2013

| Cause                                               | Females, All Ages  | Females, 0-4 Years | Females, 5-14 Years | Females, 15-49 Years | Females, 50-69 Years | Females, 70-80 Years |
|-----------------------------------------------------|--------------------|--------------------|---------------------|----------------------|----------------------|----------------------|
| Chronic kidney disease due to hypertension          | 23<br>(12 - 33)    | 0<br>(0 - 0)       | 0<br>(0 - 0)        | 1<br>(0 - 1)         | 5<br>(2 - 7)         | 18<br>(9 - 26)       |
| Chronic kidney disease due to glomerulonephritis    | 11<br>(8 - 17)     | 0<br>(0 - 0)       | 0<br>(0 - 0)        | 2<br>(1 - 2)         | 4<br>(3 - 6)         | 6<br>(3 - 10)        |
| Chronic kidney disease due to other causes          | 44<br>(28 - 61)    | 0<br>(0 - 0)       | 0<br>(0 - 0)        | 3<br>(2 - 4)         | 11<br>(7 - 18)       | 30<br>(16 - 44)      |
| Urinary diseases and male infertility               | 92<br>(71 - 128)   | 0<br>(0 - 0)       | 0<br>(0 - 0)        | 3<br>(2 - 4)         | 20<br>(15 - 31)      | 68<br>(49 - 96)      |
| Interstitial nephritis and urinary tract infections | 73<br>(56 - 108)   | 0<br>(0 - 0)       | 0<br>(0 - 0)        | 3<br>(2 - 4)         | 16<br>(12 - 26)      | 54<br>(38 - 81)      |
| Urolithiasis                                        | 13<br>(8 - 20)     | --                 | 0<br>(0 - 0)        | 0<br>(0 - 1)         | 3<br>(2 - 5)         | 9<br>(5 - 16)        |
| Other urinary diseases                              | 6<br>(2 - 11)      | 0<br>(0 - 0)       | 0<br>(0 - 0)        | 0<br>(0 - 0)         | 1<br>(0 - 1)         | 5<br>(2 - 9)         |
| Gynecological diseases                              | 0<br>(0 - 1)       | --                 | --                  | 0<br>(0 - 0)         | 0<br>(0 - 0)         | 0<br>(0 - 0)         |
| Uterine fibroids                                    | 0<br>(0 - 0)       | --                 | --                  | 0<br>(0 - 0)         | 0<br>(0 - 0)         | 0<br>(0 - 0)         |
| Polycystic ovarian syndrome                         | 0<br>(0 - 0)       | --                 | --                  | 0<br>(0 - 0)         | 0<br>(0 - 0)         | --                   |
| Endometriosis                                       | 0<br>(0 - 0)       | --                 | --                  | 0<br>(0 - 0)         | 0<br>(0 - 0)         | --                   |
| Genital prolapse                                    | 0<br>(0 - 0)       | --                 | --                  | 0<br>(0 - 0)         | 0<br>(0 - 0)         | 0<br>(0 - 0)         |
| Other gynecological diseases                        | 0<br>(0 - 0)       | --                 | --                  | 0<br>(0 - 0)         | 0<br>(0 - 0)         | 0<br>(0 - 0)         |
| Hemoglobinopathies and hemolytic anemias            | 6<br>(3 - 8)       | 0<br>(0 - 0)       | 0<br>(0 - 0)        | 0<br>(0 - 1)         | 1<br>(1 - 2)         | 4<br>(2 - 5)         |
| Thalassemias                                        | 0<br>(0 - 1)       | 0<br>(0 - 0)       | 0<br>(0 - 0)        | 0<br>(0 - 0)         | 0<br>(0 - 0)         | 0<br>(0 - 0)         |
| Sickle cell disorders                               | 0<br>(0 - 0)       | 0<br>(0 - 0)       | 0<br>(0 - 0)        | 0<br>(0 - 0)         | 0<br>(0 - 0)         | 0<br>(0 - 0)         |
| G6PD deficiency                                     | 0<br>(0 - 0)       | 0<br>(0 - 0)       | 0<br>(0 - 0)        | 0<br>(0 - 0)         | 0<br>(0 - 0)         | 0<br>(0 - 0)         |
| Other hemoglobinopathies and hemolytic anemias      | 5<br>(3 - 7)       | 0<br>(0 - 0)       | 0<br>(0 - 0)        | 0<br>(0 - 0)         | 1<br>(1 - 2)         | 4<br>(2 - 5)         |
| Endocrine, metabolic, blood, and immune disorders   | 18<br>(12 - 25)    | 1<br>(0 - 1)       | 0<br>(0 - 0)        | 2<br>(1 - 3)         | 7<br>(5 - 10)        | 8<br>(5 - 11)        |
| Musculoskeletal disorders                           | 50<br>(39 - 68)    | --                 | 0<br>(0 - 0)        | 5<br>(4 - 6)         | 20<br>(15 - 28)      | 25<br>(18 - 36)      |
| Rheumatoid arthritis                                | 29<br>(21 - 39)    | --                 | 0<br>(0 - 0)        | 1<br>(1 - 2)         | 11<br>(8 - 16)       | 16<br>(11 - 23)      |
| Other musculoskeletal disorders                     | 21<br>(16 - 32)    | --                 | 0<br>(0 - 0)        | 3<br>(3 - 4)         | 9<br>(7 - 14)        | 9<br>(6 - 14)        |
| Other non-communicable diseases                     | 67<br>(53 - 79)    | 28<br>(19 - 37)    | 2<br>(2 - 3)        | 10<br>(8 - 12)       | 11<br>(7 - 13)       | 16<br>(7 - 22)       |
| Congenital anomalies                                | 45<br>(33 - 55)    | 24<br>(16 - 33)    | 2<br>(2 - 3)        | 9<br>(7 - 11)        | 6<br>(5 - 8)         | 3<br>(2 - 4)         |
| Neural tube defects                                 | 1<br>(0 - 1)       | 0<br>(0 - 1)       | 0<br>(0 - 0)        | 0<br>(0 - 0)         | 0<br>(0 - 0)         | 0<br>(0 - 0)         |
| Congenital heart anomalies                          | 19<br>(13 - 24)    | 9<br>(5 - 14)      | 1<br>(1 - 1)        | 5<br>(3 - 6)         | 3<br>(2 - 4)         | 1<br>(1 - 1)         |
| Cleft lip and cleft palate                          | 0<br>(0 - 0)       | 0<br>(0 - 0)       | --                  | --                   | --                   | --                   |
| Down syndrome                                       | 3<br>(2 - 4)       | 1<br>(0 - 2)       | 0<br>(0 - 0)        | 1<br>(1 - 2)         | 0<br>(0 - 1)         | 0<br>(0 - 0)         |
| Chromosomal unbalanced rearrangements               | 3<br>(2 - 5)       | 2<br>(1 - 4)       | 0<br>(0 - 0)        | 1<br>(0 - 1)         | 0<br>(0 - 0)         | 0<br>(0 - 0)         |
| Other congenital anomalies                          | 19<br>(14 - 25)    | 12<br>(7 - 16)     | 1<br>(1 - 2)        | 2<br>(2 - 3)         | 2<br>(2 - 3)         | 2<br>(1 - 3)         |
| Skin and subcutaneous diseases                      | 19<br>(4 - 26)     | 0<br>(0 - 0)       | 0<br>(0 - 0)        | 1<br>(0 - 2)         | 5<br>(1 - 7)         | 13<br>(3 - 19)       |
| Cellulitis                                          | 4<br>(1 - 6)       | 0<br>(0 - 0)       | 0<br>(0 - 0)        | 0<br>(0 - 0)         | 1<br>(0 - 2)         | 2<br>(0 - 4)         |
| Pyoderma                                            | 12<br>(3 - 17)     | 0<br>(0 - 0)       | 0<br>(0 - 0)        | 1<br>(0 - 1)         | 3<br>(1 - 5)         | 8<br>(2 - 12)        |
| Decubitus ulcer                                     | 2<br>(0 - 4)       | 0<br>(0 - 0)       | 0<br>(0 - 0)        | 0<br>(0 - 0)         | 0<br>(0 - 0)         | 2<br>(0 - 4)         |
| Other skin and subcutaneous diseases                | 1<br>(0 - 2)       | 0<br>(0 - 0)       | 0<br>(0 - 0)        | 0<br>(0 - 0)         | 0<br>(0 - 0)         | 0<br>(0 - 2)         |
| Sudden infant death syndrome                        | 3<br>(1 - 7)       | 3<br>(1 - 7)       | --                  | --                   | --                   | --                   |
| Injuries                                            | 661<br>(591 - 800) | 9<br>(7 - 14)      | 7<br>(6 - 9)        | 173<br>(155 - 206)   | 218<br>(190 - 267)   | 254<br>(218 - 321)   |
| Transport injuries                                  | 129<br>(107 - 179) | 1<br>(1 - 2)       | 2<br>(2 - 3)        | 41<br>(33 - 53)      | 41<br>(31 - 56)      | 44<br>(33 - 67)      |
| Road injuries                                       | 120<br>(100 - 167) | 1<br>(1 - 1)       | 2<br>(1 - 3)        | 39<br>(31 - 50)      | 38<br>(29 - 52)      | 40<br>(30 - 62)      |
| Pedestrian road injuries                            | 58<br>(43 - 82)    | 0<br>(0 - 1)       | 1<br>(0 - 1)        | 10<br>(7 - 16)       | 19<br>(13 - 27)      | 27<br>(19 - 42)      |



Web Table 31- Lithuania deaths with 95% UI by age, sex, and cause in 2013

| Cause                                           | Females, All Ages  | Females, 0-4 Years | Females, 5-14 Years | Females, 15-49 Years | Females, 50-69 Years | Females, 70-80 Years |
|-------------------------------------------------|--------------------|--------------------|---------------------|----------------------|----------------------|----------------------|
| Cyclist road injuries                           | 10<br>(7 - 17)     | 0<br>(0 - 0)       | 0<br>(0 - 0)        | 3<br>(2 - 5)         | 4<br>(2 - 6)         | 3<br>(2 - 6)         |
| Motorcyclist road injuries                      | 2<br>(1 - 4)       | 0<br>(0 - 0)       | 0<br>(0 - 0)        | 1<br>(0 - 2)         | 0<br>(0 - 1)         | 1<br>(0 - 1)         |
| Motor vehicle road injuries                     | 49<br>(34 - 63)    | 1<br>(0 - 1)       | 1<br>(1 - 2)        | 24<br>(18 - 31)      | 14<br>(8 - 20)       | 9<br>(5 - 15)        |
| Other road injuries                             | 2<br>(1 - 5)       | 0<br>(0 - 0)       | 0<br>(0 - 0)        | 0<br>(0 - 1)         | 1<br>(0 - 2)         | 1<br>(0 - 2)         |
| Other transport injuries                        | 9<br>(6 - 15)      | 0<br>(0 - 0)       | 0<br>(0 - 0)        | 2<br>(1 - 4)         | 3<br>(2 - 5)         | 3<br>(2 - 6)         |
| Unintentional injuries                          | 304<br>(260 - 370) | 8<br>(5 - 12)      | 4<br>(3 - 6)        | 53<br>(44 - 67)      | 96<br>(80 - 114)     | 143<br>(117 - 178)   |
| Falls                                           | 116<br>(87 - 156)  | 1<br>(0 - 1)       | 0<br>(0 - 0)        | 13<br>(9 - 17)       | 28<br>(21 - 37)      | 75<br>(52 - 107)     |
| Drowning                                        | 58<br>(45 - 111)   | 2<br>(1 - 5)       | 2<br>(2 - 5)        | 15<br>(11 - 27)      | 18<br>(13 - 32)      | 20<br>(14 - 39)      |
| Fire, heat, and hot substances                  | 36<br>(26 - 51)    | 1<br>(1 - 2)       | 0<br>(0 - 1)        | 6<br>(4 - 8)         | 12<br>(8 - 17)       | 17<br>(11 - 25)      |
| Poisonings                                      | 25<br>(13 - 32)    | 1<br>(0 - 1)       | 0<br>(0 - 0)        | 6<br>(4 - 9)         | 9<br>(4 - 12)        | 9<br>(4 - 13)        |
| Exposure to mechanical forces                   | 5<br>(4 - 7)       | 1<br>(0 - 1)       | 0<br>(0 - 0)        | 1<br>(1 - 2)         | 2<br>(1 - 2)         | 1<br>(1 - 2)         |
| Unintentional firearm injuries                  | 0<br>(0 - 0)       | 0<br>(0 - 0)       | 0<br>(0 - 0)        | 0<br>(0 - 0)         | 0<br>(0 - 0)         | 0<br>(0 - 0)         |
| Unintentional suffocation                       | 1<br>(1 - 2)       | 0<br>(0 - 1)       | 0<br>(0 - 0)        | 0<br>(0 - 0)         | 0<br>(0 - 0)         | 0<br>(0 - 1)         |
| Other exposure to mechanical forces             | 4<br>(3 - 5)       | 0<br>(0 - 0)       | 0<br>(0 - 0)        | 1<br>(1 - 2)         | 1<br>(1 - 2)         | 1<br>(1 - 1)         |
| Adverse effects of medical treatment            | 20<br>(11 - 27)    | 0<br>(0 - 1)       | 0<br>(0 - 0)        | 2<br>(1 - 3)         | 6<br>(3 - 8)         | 11<br>(6 - 17)       |
| Animal contact                                  | 3<br>(2 - 9)       | 0<br>(0 - 0)       | 0<br>(0 - 0)        | 0<br>(0 - 1)         | 1<br>(1 - 3)         | 2<br>(1 - 5)         |
| Venomous animal contact                         | 0<br>(0 - 1)       | 0<br>(0 - 0)       | 0<br>(0 - 0)        | 0<br>(0 - 0)         | 0<br>(0 - 0)         | 0<br>(0 - 0)         |
| Non-venomous animal contact                     | 3<br>(2 - 9)       | 0<br>(0 - 0)       | 0<br>(0 - 0)        | 0<br>(0 - 1)         | 1<br>(1 - 3)         | 2<br>(1 - 5)         |
| Foreign body                                    | 37<br>(20 - 55)    | 2<br>(1 - 4)       | 0<br>(0 - 0)        | 8<br>(4 - 13)        | 20<br>(10 - 29)      | 7<br>(3 - 10)        |
| Pulmonary aspiration and foreign body in airway | 37<br>(20 - 55)    | 2<br>(1 - 4)       | 0<br>(0 - 0)        | 8<br>(4 - 13)        | 20<br>(10 - 29)      | 7<br>(3 - 10)        |
| Foreign body in other body part                 | 0<br>(0 - 0)       | 0<br>(0 - 0)       | 0<br>(0 - 0)        | 0<br>(0 - 0)         | 0<br>(0 - 0)         | 0<br>(0 - 0)         |
| Other unintentional injuries                    | 4<br>(3 - 7)       | 0<br>(0 - 0)       | 0<br>(0 - 0)        | 1<br>(1 - 2)         | 2<br>(1 - 3)         | 1<br>(1 - 2)         |
| Self-harm and interpersonal violence            | 228<br>(198 - 307) | 1<br>(0 - 1)       | 1<br>(1 - 1)        | 79<br>(67 - 102)     | 81<br>(67 - 113)     | 67<br>(55 - 92)      |
| Self-harm                                       | 174<br>(147 - 244) | --                 | 0<br>(0 - 1)        | 56<br>(45 - 75)      | 63<br>(50 - 95)      | 55<br>(43 - 78)      |
| Interpersonal violence                          | 55<br>(41 - 80)    | 1<br>(0 - 1)       | 0<br>(0 - 1)        | 24<br>(17 - 34)      | 18<br>(13 - 26)      | 12<br>(9 - 19)       |
| Assault by firearm                              | 2<br>(1 - 4)       | 0<br>(0 - 0)       | 0<br>(0 - 0)        | 2<br>(1 - 3)         | 1<br>(0 - 1)         | 0<br>(0 - 1)         |
| Assault by sharp object                         | 15<br>(10 - 25)    | 0<br>(0 - 0)       | 0<br>(0 - 0)        | 7<br>(5 - 12)        | 5<br>(3 - 8)         | 3<br>(1 - 5)         |
| Assault by other means                          | 37<br>(26 - 54)    | 0<br>(0 - 1)       | 0<br>(0 - 0)        | 15<br>(10 - 22)      | 12<br>(8 - 18)       | 9<br>(7 - 15)        |

Web Table 31- Luxembourg deaths with 95% UI by age, sex, and cause in 2013

| Cause                                                             | Both Sexes, All Ages     | Both Sexes, 0-4 Years | Both Sexes, 5-14 Years | Both Sexes, 15-49 Years | Both Sexes, 50-69 Years | Both Sexes, 70-80 Years  |
|-------------------------------------------------------------------|--------------------------|-----------------------|------------------------|-------------------------|-------------------------|--------------------------|
| All causes                                                        | 3,982<br>(3,685 - 4,295) | 17<br>(12 - 24)       | 5<br>(4 - 6)           | 229<br>(204 - 254)      | 759<br>(681 - 837)      | 2,971<br>(2,765 - 3,192) |
| Communicable, maternal, neonatal, and nutritional diseases        | 199<br>(143 - 239)       | 8<br>(6 - 12)         | 0<br>(0 - 1)           | 6<br>(4 - 7)            | 16<br>(12 - 19)         | 169<br>(119 - 207)       |
| HIV/AIDS and tuberculosis                                         | 3<br>(2 - 3)             | 0<br>(0 - 0)          | 0<br>(0 - 0)           | 1<br>(1 - 1)            | 1<br>(1 - 1)            | 1<br>(1 - 2)             |
| Tuberculosis                                                      | 2<br>(2 - 2)             | 0<br>(0 - 0)          | 0<br>(0 - 0)           | 0<br>(0 - 0)            | 1<br>(0 - 1)            | 1<br>(1 - 2)             |
| HIV/AIDS                                                          | 1<br>(1 - 1)             | 0<br>(0 - 0)          | 0<br>(0 - 0)           | 1<br>(0 - 1)            | 0<br>(0 - 0)            | 0<br>(0 - 0)             |
| HIV/AIDS resulting in mycobacterial infection                     | 0<br>(0 - 0)             | 0<br>(0 - 0)          | 0<br>(0 - 0)           | 0<br>(0 - 0)            | 0<br>(0 - 0)            | 0<br>(0 - 0)             |
| HIV/AIDS resulting in other diseases                              | 1<br>(1 - 1)             | 0<br>(0 - 0)          | 0<br>(0 - 0)           | 1<br>(0 - 1)            | 0<br>(0 - 0)            | 0<br>(0 - 0)             |
| Diarrhea, lower respiratory, and other common infectious diseases | 161<br>(111 - 198)       | 1<br>(1 - 2)          | 0<br>(0 - 1)           | 3<br>(2 - 4)            | 11<br>(8 - 14)          | 145<br>(99 - 180)        |
| Diarrheal diseases                                                | 12<br>(8 - 17)           | 0<br>(0 - 0)          | 0<br>(0 - 0)           | 0<br>(0 - 0)            | 1<br>(1 - 1)            | 10<br>(7 - 16)           |
| Intestinal infectious diseases                                    | 1<br>(0 - 2)             | 0<br>(0 - 0)          | 0<br>(0 - 0)           | 0<br>(0 - 1)            | 0<br>(0 - 0)            | 0<br>(0 - 0)             |
| Typhoid fever                                                     | 1<br>(0 - 1)             | 0<br>(0 - 0)          | 0<br>(0 - 0)           | 0<br>(0 - 1)            | 0<br>(0 - 0)            | 0<br>(0 - 0)             |
| Paratyphoid fever                                                 | 0<br>(0 - 0)             | 0<br>(0 - 0)          | 0<br>(0 - 0)           | 0<br>(0 - 0)            | 0<br>(0 - 0)            | 0<br>(0 - 0)             |
| Other intestinal infectious diseases                              | 0<br>(0 - 0)             | 0<br>(0 - 0)          | 0<br>(0 - 0)           | 0<br>(0 - 0)            | 0<br>(0 - 0)            | 0<br>(0 - 0)             |
| Lower respiratory infections                                      | 145<br>(96 - 181)        | 1<br>(0 - 1)          | 0<br>(0 - 0)           | 2<br>(2 - 3)            | 10<br>(7 - 13)          | 133<br>(87 - 167)        |
| Upper respiratory infections                                      | 0<br>(0 - 0)             | 0<br>(0 - 0)          | 0<br>(0 - 0)           | 0<br>(0 - 0)            | 0<br>(0 - 0)            | 0<br>(0 - 0)             |
| Otitis media                                                      | 0<br>(0 - 0)             | 0<br>(0 - 0)          | 0<br>(0 - 0)           | 0<br>(0 - 0)            | 0<br>(0 - 0)            | 0<br>(0 - 0)             |
| Meningitis                                                        | 1<br>(1 - 1)             | 0<br>(0 - 0)          | 0<br>(0 - 0)           | 0<br>(0 - 0)            | 0<br>(0 - 0)            | 1<br>(0 - 1)             |
| Pneumococcal meningitis                                           | 0<br>(0 - 0)             | 0<br>(0 - 0)          | 0<br>(0 - 0)           | 0<br>(0 - 0)            | 0<br>(0 - 0)            | 0<br>(0 - 0)             |
| H influenzae type B meningitis                                    | 0<br>(0 - 0)             | 0<br>(0 - 0)          | 0<br>(0 - 0)           | 0<br>(0 - 0)            | 0<br>(0 - 0)            | 0<br>(0 - 0)             |
| Meningococcal meningitis                                          | 0<br>(0 - 1)             | 0<br>(0 - 0)          | 0<br>(0 - 0)           | 0<br>(0 - 0)            | 0<br>(0 - 0)            | 0<br>(0 - 0)             |
| Other meningitis                                                  | 0<br>(0 - 1)             | 0<br>(0 - 0)          | 0<br>(0 - 0)           | 0<br>(0 - 0)            | 0<br>(0 - 0)            | 0<br>(0 - 0)             |
| Encephalitis                                                      | 1<br>(0 - 1)             | 0<br>(0 - 0)          | 0<br>(0 - 0)           | 0<br>(0 - 0)            | 0<br>(0 - 0)            | 1<br>(0 - 1)             |
| Diphtheria                                                        | 0<br>(0 - 0)             | 0<br>(0 - 0)          | 0<br>(0 - 0)           | 0<br>(0 - 0)            | 0<br>(0 - 0)            | --<br>(0 - 0)            |
| Whooping cough                                                    | 0<br>(0 - 0)             | 0<br>(0 - 0)          | 0<br>(0 - 0)           | 0<br>(0 - 0)            | 0<br>(0 - 0)            | --<br>(0 - 0)            |
| Tetanus                                                           | 0<br>(0 - 0)             | 0<br>(0 - 0)          | 0<br>(0 - 0)           | 0<br>(0 - 0)            | 0<br>(0 - 0)            | 0<br>(0 - 0)             |
| Measles                                                           | 0<br>(0 - 0)             | 0<br>(0 - 0)          | 0<br>(0 - 0)           | 0<br>(0 - 0)            | 0<br>(0 - 0)            | --<br>(0 - 0)            |
| Varicella and herpes zoster                                       | 0<br>(0 - 1)             | 0<br>(0 - 0)          | 0<br>(0 - 0)           | 0<br>(0 - 0)            | 0<br>(0 - 0)            | 0<br>(0 - 1)             |
| Neglected tropical diseases and malaria                           | 1<br>(0 - 1)             | 0<br>(0 - 0)          | 0<br>(0 - 0)           | 0<br>(0 - 0)            | 0<br>(0 - 0)            | 0<br>(0 - 1)             |
| Cysticercosis                                                     | 0<br>(0 - 0)             | 0<br>(0 - 0)          | 0<br>(0 - 0)           | 0<br>(0 - 0)            | 0<br>(0 - 0)            | 0<br>(0 - 0)             |
| Cystic echinococcosis                                             | 0<br>(0 - 0)             | 0<br>(0 - 0)          | 0<br>(0 - 0)           | 0<br>(0 - 0)            | 0<br>(0 - 0)            | 0<br>(0 - 0)             |
| Dengue                                                            | 0<br>(0 - 0)             | 0<br>(0 - 0)          | 0<br>(0 - 0)           | 0<br>(0 - 0)            | 0<br>(0 - 0)            | 0<br>(0 - 0)             |
| Rabies                                                            | 0<br>(0 - 0)             | 0<br>(0 - 0)          | 0<br>(0 - 0)           | 0<br>(0 - 0)            | 0<br>(0 - 0)            | 0<br>(0 - 0)             |
| Other neglected tropical diseases                                 | 1<br>(0 - 1)             | 0<br>(0 - 0)          | 0<br>(0 - 0)           | 0<br>(0 - 0)            | 0<br>(0 - 0)            | 0<br>(0 - 1)             |
| Maternal disorders                                                | 0<br>(0 - 1)             | --                    | 0<br>(0 - 0)           | 0<br>(0 - 1)            | --                      | --                       |
| Maternal hemorrhage                                               | 0<br>(0 - 0)             | --                    | 0<br>(0 - 0)           | 0<br>(0 - 0)            | --                      | --                       |
| Maternal sepsis and other maternal infections                     | 0<br>(0 - 0)             | --                    | 0<br>(0 - 0)           | 0<br>(0 - 0)            | --                      | --                       |
| Maternal hypertensive disorders                                   | 0<br>(0 - 0)             | --                    | 0<br>(0 - 0)           | 0<br>(0 - 0)            | --                      | --                       |
| Maternal obstructed labor                                         | 0<br>(0 - 0)             | --                    | 0<br>(0 - 0)           | 0<br>(0 - 0)            | --                      | --                       |
| Maternal abortive outcome                                         | 0<br>(0 - 0)             | --                    | 0<br>(0 - 0)           | 0<br>(0 - 0)            | --                      | --                       |
| Indirect maternal deaths                                          | 0<br>(0 - 0)             | --                    | 0<br>(0 - 0)           | 0<br>(0 - 0)            | --                      | --                       |

Web Table 31- Luxembourg deaths with 95% UI by age, sex, and cause in 2013

| Cause                                                            | Both Sexes, All Ages     | Both Sexes, 0-4 Years | Both Sexes, 5-14 Years | Both Sexes, 15-49 Years | Both Sexes, 50-69 Years | Both Sexes, 70-80 Years  |
|------------------------------------------------------------------|--------------------------|-----------------------|------------------------|-------------------------|-------------------------|--------------------------|
| Late maternal deaths                                             | 0<br>(0 - 0)             | --                    | 0<br>(0 - 0)           | 0<br>(0 - 0)            | --                      | --                       |
| Maternal deaths aggravated by HIV/AIDS                           | 0<br>(0 - 0)             | --                    | --                     | 0<br>(0 - 0)            | --                      | --                       |
| Other maternal disorders                                         | 0<br>(0 - 0)             | --                    | 0<br>(0 - 0)           | 0<br>(0 - 0)            | --                      | --                       |
| Neonatal disorders                                               | 7<br>(5 - 10)            | 7<br>(5 - 10)         | --                     | --                      | --                      | --                       |
| Neonatal preterm birth complications                             | 2<br>(1 - 4)             | 2<br>(1 - 4)          | --                     | --                      | --                      | --                       |
| Neonatal encephalopathy due to birth asphyxia and trauma         | 2<br>(1 - 3)             | 2<br>(1 - 3)          | --                     | --                      | --                      | --                       |
| Neonatal sepsis and other neonatal infections                    | 0<br>(0 - 0)             | 0<br>(0 - 0)          | --                     | --                      | --                      | --                       |
| Hemolytic disease and other neonatal jaundice                    | 0<br>(0 - 0)             | 0<br>(0 - 0)          | --                     | --                      | --                      | --                       |
| Other neonatal disorders                                         | 2<br>(1 - 4)             | 2<br>(1 - 4)          | --                     | --                      | --                      | --                       |
| Nutritional deficiencies                                         | 18<br>(10 - 24)          | 0<br>(0 - 0)          | 0<br>(0 - 0)           | 0<br>(0 - 1)            | 1<br>(1 - 2)            | 16<br>(9 - 22)           |
| Protein-energy malnutrition                                      | 4<br>(0 - 8)             | 0<br>(0 - 0)          | 0<br>(0 - 0)           | 0<br>(0 - 0)            | 0<br>(0 - 1)            | 4<br>(0 - 8)             |
| Iodine deficiency                                                | 0<br>(0 - 0)             | 0<br>(0 - 0)          | 0<br>(0 - 0)           | 0<br>(0 - 0)            | 0<br>(0 - 0)            | 0<br>(0 - 0)             |
| Iron-deficiency anemia                                           | 14<br>(8 - 19)           | 0<br>(0 - 0)          | 0<br>(0 - 0)           | 0<br>(0 - 0)            | 1<br>(1 - 1)            | 12<br>(7 - 18)           |
| Other nutritional deficiencies                                   | 0<br>(0 - 0)             | 0<br>(0 - 0)          | 0<br>(0 - 0)           | 0<br>(0 - 0)            | 0<br>(0 - 0)            | 0<br>(0 - 0)             |
| Other communicable, maternal, neonatal, and nutritional diseases | 9<br>(6 - 11)            | 0<br>(0 - 0)          | 0<br>(0 - 0)           | 0<br>(0 - 1)            | 2<br>(1 - 3)            | 6<br>(4 - 8)             |
| Sexually transmitted diseases excluding HIV                      | 1<br>(0 - 1)             | 0<br>(0 - 0)          | 0<br>(0 - 0)           | 0<br>(0 - 0)            | 0<br>(0 - 0)            | 0<br>(0 - 1)             |
| Syphilis                                                         | 1<br>(0 - 1)             | 0<br>(0 - 0)          | 0<br>(0 - 0)           | 0<br>(0 - 0)            | 0<br>(0 - 0)            | 0<br>(0 - 1)             |
| Chlamydial infection                                             | 0<br>(0 - 0)             | --                    | 0<br>(0 - 0)           | 0<br>(0 - 0)            | 0<br>(0 - 0)            | 0<br>(0 - 0)             |
| Gonococcal infection                                             | 0<br>(0 - 0)             | --                    | 0<br>(0 - 0)           | 0<br>(0 - 0)            | 0<br>(0 - 0)            | 0<br>(0 - 0)             |
| Other sexually transmitted diseases                              | 0<br>(0 - 0)             | --                    | 0<br>(0 - 0)           | 0<br>(0 - 0)            | 0<br>(0 - 0)            | 0<br>(0 - 0)             |
| Hepatitis                                                        | 0<br>(0 - 0)             | 0<br>(0 - 0)          | 0<br>(0 - 0)           | 0<br>(0 - 0)            | 0<br>(0 - 0)            | 0<br>(0 - 0)             |
| Acute hepatitis A                                                | 0<br>(0 - 0)             | 0<br>(0 - 0)          | 0<br>(0 - 0)           | 0<br>(0 - 0)            | 0<br>(0 - 0)            | 0<br>(0 - 0)             |
| Acute hepatitis B                                                | 0<br>(0 - 0)             | 0<br>(0 - 0)          | 0<br>(0 - 0)           | 0<br>(0 - 0)            | 0<br>(0 - 0)            | 0<br>(0 - 0)             |
| Acute hepatitis C                                                | 0<br>(0 - 0)             | --                    | 0<br>(0 - 0)           | 0<br>(0 - 0)            | 0<br>(0 - 0)            | 0<br>(0 - 0)             |
| Other infectious diseases                                        | 8<br>(5 - 10)            | 0<br>(0 - 0)          | 0<br>(0 - 0)           | 0<br>(0 - 0)            | 2<br>(1 - 3)            | 6<br>(3 - 7)             |
| Non-communicable diseases                                        | 3,535<br>(3,268 - 3,817) | 7<br>(5 - 9)          | 3<br>(2 - 3)           | 151<br>(134 - 169)      | 692<br>(622 - 763)      | 2,683<br>(2,499 - 2,890) |
| Neoplasms                                                        | 1,152<br>(1,039 - 1,274) | 1<br>(0 - 1)          | 1<br>(1 - 2)           | 66<br>(58 - 75)         | 363<br>(322 - 404)      | 720<br>(650 - 803)       |
| Esophageal cancer                                                | 29<br>(24 - 36)          | --                    | --                     | 2<br>(1 - 3)            | 13<br>(10 - 17)         | 14<br>(11 - 17)          |
| Stomach cancer                                                   | 58<br>(49 - 70)          | --                    | --                     | 2<br>(2 - 3)            | 13<br>(11 - 16)         | 42<br>(35 - 52)          |
| Liver cancer                                                     | 37<br>(25 - 46)          | --                    | 0<br>(0 - 0)           | 1<br>(1 - 2)            | 13<br>(8 - 16)          | 23<br>(15 - 30)          |
| Liver cancer due to hepatitis B                                  | 9<br>(5 - 17)            | --                    | 0<br>(0 - 0)           | 1<br>(0 - 1)            | 4<br>(2 - 7)            | 5<br>(2 - 8)             |
| Liver cancer due to hepatitis C                                  | 19<br>(12 - 26)          | --                    | 0<br>(0 - 0)           | 1<br>(0 - 1)            | 6<br>(4 - 10)           | 12<br>(7 - 16)           |
| Liver cancer due to alcohol use                                  | 8<br>(4 - 12)            | --                    | --                     | 0<br>(0 - 0)            | 2<br>(1 - 4)            | 6<br>(3 - 9)             |
| Liver cancer due to other causes                                 | 2<br>(1 - 3)             | --                    | 0<br>(0 - 0)           | 0<br>(0 - 0)            | 0<br>(0 - 1)            | 1<br>(0 - 3)             |
| Larynx cancer                                                    | 7<br>(6 - 11)            | --                    | --                     | 1<br>(0 - 1)            | 4<br>(3 - 6)            | 3<br>(2 - 4)             |
| Tracheal, bronchus and lung cancer                               | 254<br>(223 - 286)       | --                    | --                     | 12<br>(10 - 15)         | 107<br>(92 - 122)       | 135<br>(116 - 152)       |
| Breast cancer                                                    | 97<br>(72 - 122)         | --                    | --                     | 11<br>(8 - 14)          | 33<br>(25 - 42)         | 53<br>(37 - 70)          |
| Cervical cancer                                                  | 11<br>(8 - 14)           | --                    | --                     | 2<br>(1 - 2)            | 4<br>(3 - 5)            | 5<br>(4 - 7)             |
| Uterine cancer                                                   | 13<br>(10 - 20)          | --                    | --                     | 0<br>(0 - 1)            | 4<br>(3 - 6)            | 9<br>(7 - 14)            |
| Prostate cancer                                                  | 76<br>(53 - 123)         | --                    | --                     | 0<br>(0 - 0)            | 9<br>(6 - 15)           | 66<br>(46 - 109)         |

Web Table 31- Luxembourg deaths with 95% UI by age, sex, and cause in 2013

| Cause                                         | Both Sexes, All Ages     | Both Sexes, 0-4 Years | Both Sexes, 5-14 Years | Both Sexes, 15-49 Years | Both Sexes, 50-69 Years | Both Sexes, 70-80 Years  |
|-----------------------------------------------|--------------------------|-----------------------|------------------------|-------------------------|-------------------------|--------------------------|
| Colon and rectum cancer                       | 164<br>(144 - 187)       | --                    | --                     | 5<br>(4 - 6)            | 39<br>(34 - 45)         | 119<br>(103 - 139)       |
| Lip and oral cavity cancer                    | 12<br>(10 - 14)          | --                    | --                     | 1<br>(1 - 2)            | 6<br>(5 - 7)            | 5<br>(4 - 6)             |
| Nasopharynx cancer                            | 1<br>(1 - 2)             | --                    | 0<br>(0 - 0)           | 0<br>(0 - 0)            | 1<br>(1 - 1)            | 0<br>(0 - 1)             |
| Other pharynx cancer                          | 9<br>(7 - 13)            | --                    | --                     | 1<br>(1 - 2)            | 6<br>(4 - 8)            | 2<br>(2 - 3)             |
| Gallbladder and biliary tract cancer          | 9<br>(7 - 17)            | --                    | --                     | 0<br>(0 - 0)            | 2<br>(1 - 3)            | 8<br>(5 - 14)            |
| Pancreatic cancer                             | 79<br>(70 - 90)          | --                    | --                     | 3<br>(2 - 3)            | 23<br>(19 - 26)         | 54<br>(46 - 63)          |
| Malignant skin melanoma                       | 15<br>(10 - 20)          | --                    | --                     | 3<br>(2 - 4)            | 5<br>(3 - 6)            | 8<br>(5 - 11)            |
| Non-melanoma skin cancer                      | 3<br>(2 - 4)             | --                    | --                     | 0<br>(0 - 0)            | 0<br>(0 - 0)            | 3<br>(2 - 4)             |
| Ovarian cancer                                | 36<br>(29 - 45)          | --                    | --                     | 2<br>(2 - 3)            | 13<br>(10 - 17)         | 21<br>(16 - 28)          |
| Testicular cancer                             | 0<br>(0 - 0)             | --                    | --                     | 0<br>(0 - 0)            | 0<br>(0 - 0)            | 0<br>(0 - 0)             |
| Kidney cancer                                 | 23<br>(20 - 28)          | 0<br>(0 - 0)          | 0<br>(0 - 0)           | 1<br>(0 - 1)            | 8<br>(6 - 9)            | 15<br>(12 - 19)          |
| Bladder cancer                                | 33<br>(26 - 40)          | --                    | --                     | 0<br>(0 - 1)            | 6<br>(5 - 7)            | 27<br>(21 - 33)          |
| Brain and nervous system cancer               | 34<br>(28 - 45)          | 0<br>(0 - 0)          | 1<br>(0 - 1)           | 6<br>(5 - 8)            | 15<br>(12 - 19)         | 13<br>(10 - 18)          |
| Thyroid cancer                                | 2<br>(1 - 3)             | --                    | 0<br>(0 - 0)           | 0<br>(0 - 0)            | 0<br>(0 - 1)            | 1<br>(1 - 2)             |
| Mesothelioma                                  | 7<br>(4 - 9)             | --                    | --                     | 0<br>(0 - 1)            | 2<br>(1 - 3)            | 4<br>(2 - 6)             |
| Hodgkin lymphoma                              | 1<br>(0 - 1)             | 0<br>(0 - 0)          | 0<br>(0 - 0)           | 0<br>(0 - 0)            | 0<br>(0 - 0)            | 0<br>(0 - 0)             |
| Non-Hodgkin lymphoma                          | 38<br>(21 - 49)          | 0<br>(0 - 0)          | 0<br>(0 - 0)           | 3<br>(2 - 4)            | 12<br>(6 - 15)          | 24<br>(12 - 32)          |
| Multiple myeloma                              | 19<br>(13 - 27)          | --                    | --                     | 0<br>(0 - 1)            | 6<br>(4 - 9)            | 13<br>(9 - 19)           |
| Leukemia                                      | 46<br>(39 - 53)          | 0<br>(0 - 0)          | 1<br>(0 - 1)           | 3<br>(3 - 4)            | 11<br>(9 - 13)          | 31<br>(25 - 37)          |
| Other neoplasms                               | 37<br>(27 - 45)          | 0<br>(0 - 0)          | 0<br>(0 - 0)           | 4<br>(3 - 5)            | 10<br>(7 - 12)          | 22<br>(14 - 29)          |
| Cardiovascular diseases                       | 1,402<br>(1,234 - 1,590) | 0<br>(0 - 0)          | 0<br>(0 - 0)           | 30<br>(25 - 36)         | 184<br>(157 - 211)      | 1,188<br>(1,041 - 1,348) |
| Rheumatic heart disease                       | 6<br>(3 - 8)             | 0<br>(0 - 0)          | 0<br>(0 - 0)           | 0<br>(0 - 0)            | 1<br>(1 - 2)            | 4<br>(2 - 6)             |
| Ischemic heart disease                        | 709<br>(541 - 812)       | 0<br>(0 - 0)          | 0<br>(0 - 0)           | 17<br>(13 - 20)         | 106<br>(89 - 123)       | 587<br>(436 - 677)       |
| Cerebrovascular disease                       | 448<br>(370 - 597)       | 0<br>(0 - 0)          | 0<br>(0 - 0)           | 7<br>(5 - 8)            | 44<br>(34 - 56)         | 398<br>(329 - 533)       |
| Ischemic stroke                               | 247<br>(193 - 359)       | 0<br>(0 - 0)          | 0<br>(0 - 0)           | 1<br>(1 - 1)            | 14<br>(10 - 20)         | 232<br>(181 - 339)       |
| Hemorrhagic stroke                            | 201<br>(152 - 249)       | 0<br>(0 - 0)          | 0<br>(0 - 0)           | 6<br>(4 - 7)            | 30<br>(23 - 38)         | 165<br>(121 - 209)       |
| Hypertensive heart disease                    | 22<br>(15 - 38)          | 0<br>(0 - 0)          | 0<br>(0 - 0)           | 0<br>(0 - 1)            | 2<br>(1 - 4)            | 20<br>(13 - 34)          |
| Cardiomyopathy and myocarditis                | 38<br>(26 - 48)          | 0<br>(0 - 0)          | 0<br>(0 - 0)           | 2<br>(1 - 2)            | 7<br>(5 - 9)            | 29<br>(18 - 38)          |
| Atrial fibrillation and flutter               | 9<br>(6 - 13)            | --                    | --                     | 0<br>(0 - 0)            | 0<br>(0 - 1)            | 8<br>(6 - 12)            |
| Aortic aneurysm                               | 23<br>(19 - 32)          | --                    | --                     | 0<br>(0 - 1)            | 4<br>(3 - 6)            | 19<br>(15 - 26)          |
| Peripheral vascular disease                   | 6<br>(4 - 8)             | --                    | --                     | 0<br>(0 - 0)            | 1<br>(0 - 1)            | 5<br>(4 - 8)             |
| Endocarditis                                  | 5<br>(3 - 7)             | 0<br>(0 - 0)          | 0<br>(0 - 0)           | 0<br>(0 - 0)            | 1<br>(1 - 1)            | 4<br>(2 - 6)             |
| Other cardiovascular and circulatory diseases | 136<br>(93 - 175)        | 0<br>(0 - 0)          | 0<br>(0 - 0)           | 4<br>(3 - 5)            | 17<br>(13 - 23)         | 115<br>(77 - 151)        |
| Chronic respiratory diseases                  | 239<br>(188 - 274)       | 0<br>(0 - 0)          | 0<br>(0 - 0)           | 4<br>(3 - 5)            | 36<br>(28 - 42)         | 199<br>(155 - 229)       |
| Chronic obstructive pulmonary disease         | 206<br>(161 - 238)       | 0<br>(0 - 0)          | 0<br>(0 - 0)           | 2<br>(2 - 3)            | 30<br>(23 - 35)         | 174<br>(134 - 200)       |
| Pneumoconiosis                                | 5<br>(3 - 7)             | 0<br>(0 - 0)          | 0<br>(0 - 0)           | 0<br>(0 - 0)            | 1<br>(0 - 1)            | 4<br>(3 - 6)             |
| Silicosis                                     | 0<br>(0 - 0)             | 0<br>(0 - 0)          | 0<br>(0 - 0)           | 0<br>(0 - 0)            | 0<br>(0 - 0)            | 0<br>(0 - 0)             |
| Asbestosis                                    | 2<br>(1 - 2)             | 0<br>(0 - 0)          | 0<br>(0 - 0)           | 0<br>(0 - 0)            | 0<br>(0 - 0)            | 1<br>(1 - 2)             |
| Coal workers pneumoconiosis                   | 1<br>(0 - 1)             | 0<br>(0 - 0)          | 0<br>(0 - 0)           | 0<br>(0 - 0)            | 0<br>(0 - 0)            | 0<br>(0 - 1)             |
| Other pneumoconiosis                          | 3<br>(2 - 4)             | 0<br>(0 - 0)          | 0<br>(0 - 0)           | 0<br>(0 - 0)            | 0<br>(0 - 1)            | 2<br>(1 - 4)             |

Web Table 31- Luxembourg deaths with 95% UI by age, sex, and cause in 2013

| Cause                                               | Both Sexes, All Ages | Both Sexes, 0-4 Years | Both Sexes, 5-14 Years | Both Sexes, 15-49 Years | Both Sexes, 50-69 Years | Both Sexes, 70-80 Years |
|-----------------------------------------------------|----------------------|-----------------------|------------------------|-------------------------|-------------------------|-------------------------|
| Asthma                                              | 11<br>(7 - 16)       | 0<br>(0 - 0)          | 0<br>(0 - 0)           | 1<br>(1 - 1)            | 3<br>(2 - 4)            | 7<br>(4 - 10)           |
| Interstitial lung disease and pulmonary sarcoidosis | 16<br>(9 - 23)       | 0<br>(0 - 0)          | 0<br>(0 - 0)           | 1<br>(0 - 1)            | 2<br>(1 - 3)            | 14<br>(7 - 19)          |
| Other chronic respiratory diseases                  | 1<br>(1 - 1)         | 0<br>(0 - 0)          | 0<br>(0 - 0)           | 0<br>(0 - 0)            | 0<br>(0 - 0)            | 0<br>(0 - 1)            |
| Cirrhosis                                           | 94<br>(83 - 105)     | 0<br>(0 - 0)          | 0<br>(0 - 0)           | 15<br>(12 - 17)         | 43<br>(37 - 49)         | 36<br>(30 - 42)         |
| Cirrhosis due to hepatitis B                        | 9<br>(6 - 13)        | 0<br>(0 - 0)          | 0<br>(0 - 0)           | 1<br>(1 - 2)            | 4<br>(3 - 6)            | 4<br>(2 - 5)            |
| Cirrhosis due to hepatitis C                        | 49<br>(31 - 63)      | 0<br>(0 - 0)          | 0<br>(0 - 0)           | 7<br>(4 - 10)           | 23<br>(14 - 30)         | 19<br>(13 - 25)         |
| Cirrhosis due to alcohol use                        | 26<br>(14 - 39)      | --                    | --                     | 3<br>(2 - 5)            | 12<br>(6 - 18)          | 10<br>(5 - 16)          |
| Cirrhosis due to other causes                       | 10<br>(6 - 17)       | 0<br>(0 - 0)          | 0<br>(0 - 0)           | 3<br>(2 - 5)            | 5<br>(2 - 8)            | 3<br>(1 - 5)            |
| Digestive diseases                                  | 91<br>(78 - 113)     | 0<br>(0 - 0)          | 0<br>(0 - 0)           | 3<br>(3 - 4)            | 12<br>(10 - 15)         | 75<br>(64 - 95)         |
| Peptic ulcer disease                                | 11<br>(8 - 15)       | 0<br>(0 - 0)          | 0<br>(0 - 0)           | 1<br>(0 - 1)            | 2<br>(1 - 2)            | 9<br>(6 - 13)           |
| Gastritis and duodenitis                            | 0<br>(0 - 0)         | 0<br>(0 - 0)          | 0<br>(0 - 0)           | 0<br>(0 - 0)            | 0<br>(0 - 0)            | 0<br>(0 - 0)            |
| Appendicitis                                        | 2<br>(1 - 2)         | 0<br>(0 - 0)          | 0<br>(0 - 0)           | 0<br>(0 - 0)            | 0<br>(0 - 1)            | 1<br>(0 - 2)            |
| Paralytic ileus and intestinal obstruction          | 19<br>(13 - 32)      | 0<br>(0 - 0)          | 0<br>(0 - 0)           | 0<br>(0 - 0)            | 2<br>(1 - 3)            | 17<br>(11 - 29)         |
| Inguinal, femoral, and abdominal hernia             | 3<br>(1 - 4)         | 0<br>(0 - 0)          | 0<br>(0 - 0)           | 0<br>(0 - 0)            | 0<br>(0 - 0)            | 2<br>(1 - 4)            |
| Inflammatory bowel disease                          | 6<br>(2 - 10)        | 0<br>(0 - 0)          | 0<br>(0 - 0)           | 0<br>(0 - 0)            | 1<br>(0 - 1)            | 5<br>(1 - 9)            |
| Vascular intestinal disorders                       | 26<br>(17 - 40)      | 0<br>(0 - 0)          | 0<br>(0 - 0)           | 1<br>(0 - 1)            | 3<br>(2 - 5)            | 22<br>(14 - 35)         |
| Gallbladder and biliary diseases                    | 8<br>(6 - 13)        | 0<br>(0 - 0)          | 0<br>(0 - 0)           | 0<br>(0 - 0)            | 1<br>(1 - 1)            | 7<br>(5 - 12)           |
| Pancreatitis                                        | 6<br>(4 - 8)         | 0<br>(0 - 0)          | 0<br>(0 - 0)           | 1<br>(1 - 1)            | 2<br>(1 - 2)            | 3<br>(2 - 5)            |
| Other digestive diseases                            | 11<br>(8 - 15)       | 0<br>(0 - 0)          | 0<br>(0 - 0)           | 0<br>(0 - 1)            | 2<br>(1 - 2)            | 9<br>(6 - 12)           |
| Neurological disorders                              | 342<br>(256 - 446)   | 1<br>(0 - 1)          | 0<br>(0 - 0)           | 5<br>(4 - 6)            | 19<br>(15 - 23)         | 317<br>(232 - 421)      |
| Alzheimer disease and other dementias               | 271<br>(188 - 375)   | --                    | --                     | 0<br>(0 - 0)            | 7<br>(5 - 9)            | 265<br>(181 - 368)      |
| Parkinson disease                                   | 43<br>(33 - 56)      | --                    | --                     | 0<br>(0 - 0)            | 2<br>(2 - 3)            | 40<br>(31 - 53)         |
| Epilepsy                                            | 8<br>(5 - 10)        | 0<br>(0 - 0)          | 0<br>(0 - 0)           | 3<br>(2 - 4)            | 2<br>(1 - 3)            | 3<br>(1 - 4)            |
| Multiple sclerosis                                  | 6<br>(3 - 8)         | --                    | --                     | 1<br>(1 - 2)            | 2<br>(1 - 3)            | 2<br>(1 - 3)            |
| Other neurological disorders                        | 14<br>(12 - 17)      | 0<br>(0 - 1)          | 0<br>(0 - 0)           | 1<br>(1 - 2)            | 5<br>(4 - 7)            | 7<br>(6 - 9)            |
| Mental and substance use disorders                  | 36<br>(28 - 44)      | 0<br>(0 - 0)          | 0<br>(0 - 0)           | 20<br>(16 - 24)         | 11<br>(7 - 14)          | 6<br>(4 - 8)            |
| Schizophrenia                                       | 0<br>(0 - 0)         | --                    | --                     | 0<br>(0 - 0)            | 0<br>(0 - 0)            | 0<br>(0 - 0)            |
| Alcohol use disorders                               | 20<br>(12 - 27)      | --                    | --                     | 5<br>(3 - 8)            | 9<br>(6 - 13)           | 5<br>(3 - 7)            |
| Drug use disorders                                  | 16<br>(13 - 19)      | 0<br>(0 - 0)          | --                     | 14<br>(11 - 17)         | 1<br>(1 - 2)            | 1<br>(1 - 1)            |
| Opioid use disorders                                | 6<br>(5 - 7)         | 0<br>(0 - 0)          | --                     | 5<br>(4 - 6)            | 0<br>(0 - 1)            | 0<br>(0 - 0)            |
| Cocaine use disorders                               | 0<br>(0 - 1)         | 0<br>(0 - 0)          | --                     | 0<br>(0 - 1)            | 0<br>(0 - 0)            | 0<br>(0 - 0)            |
| Amphetamine use disorders                           | 0<br>(0 - 1)         | 0<br>(0 - 0)          | --                     | 0<br>(0 - 1)            | 0<br>(0 - 0)            | 0<br>(0 - 0)            |
| Other drug use disorders                            | 9<br>(7 - 11)        | 0<br>(0 - 0)          | --                     | 8<br>(6 - 10)           | 1<br>(1 - 1)            | 0<br>(0 - 1)            |
| Eating disorders                                    | 0<br>(0 - 0)         | --                    | 0<br>(0 - 0)           | 0<br>(0 - 0)            | --                      | --                      |
| Anorexia nervosa                                    | 0<br>(0 - 0)         | --                    | 0<br>(0 - 0)           | 0<br>(0 - 0)            | --                      | --                      |
| Diabetes, urogenital, blood, and endocrine diseases | 153<br>(138 - 203)   | 0<br>(0 - 1)          | 0<br>(0 - 0)           | 5<br>(4 - 7)            | 21<br>(18 - 28)         | 127<br>(106 - 168)      |
| Diabetes mellitus                                   | 56<br>(48 - 68)      | 0<br>(0 - 0)          | 0<br>(0 - 0)           | 1<br>(1 - 2)            | 10<br>(8 - 12)          | 45<br>(37 - 56)         |
| Acute glomerulonephritis                            | 0<br>(0 - 0)         | 0<br>(0 - 0)          | 0<br>(0 - 0)           | 0<br>(0 - 0)            | 0<br>(0 - 0)            | 0<br>(0 - 0)            |
| Chronic kidney disease                              | 68<br>(54 - 106)     | 0<br>(0 - 0)          | 0<br>(0 - 0)           | 1<br>(1 - 2)            | 7<br>(5 - 10)           | 60<br>(47 - 94)         |
| Chronic kidney disease due to diabetes mellitus     | 9<br>(6 - 15)        | 0<br>(0 - 0)          | 0<br>(0 - 0)           | 0<br>(0 - 0)            | 2<br>(1 - 3)            | 7<br>(4 - 12)           |

Web Table 31- Luxembourg deaths with 95% UI by age, sex, and cause in 2013

| Cause                                               | Both Sexes, All Ages | Both Sexes, 0-4 Years | Both Sexes, 5-14 Years | Both Sexes, 15-49 Years | Both Sexes, 50-69 Years | Both Sexes, 70-80 Years |
|-----------------------------------------------------|----------------------|-----------------------|------------------------|-------------------------|-------------------------|-------------------------|
| Chronic kidney disease due to hypertension          | 29<br>(21 - 49)      | 0<br>(0 - 0)          | 0<br>(0 - 0)           | 0<br>(0 - 0)            | 2<br>(1 - 4)            | 27<br>(20 - 45)         |
| Chronic kidney disease due to glomerulonephritis    | 1<br>(1 - 1)         | 0<br>(0 - 0)          | 0<br>(0 - 0)           | 0<br>(0 - 0)            | 0<br>(0 - 0)            | 1<br>(0 - 1)            |
| Chronic kidney disease due to other causes          | 29<br>(20 - 45)      | 0<br>(0 - 0)          | 0<br>(0 - 0)           | 1<br>(0 - 1)            | 3<br>(2 - 5)            | 25<br>(17 - 40)         |
| Urinary diseases and male infertility               | 12<br>(6 - 17)       | 0<br>(0 - 0)          | 0<br>(0 - 0)           | 0<br>(0 - 1)            | 1<br>(1 - 2)            | 11<br>(5 - 15)          |
| Interstitial nephritis and urinary tract infections | 9<br>(4 - 13)        | 0<br>(0 - 0)          | 0<br>(0 - 0)           | 0<br>(0 - 0)            | 1<br>(0 - 1)            | 8<br>(3 - 12)           |
| Urolithiasis                                        | 0<br>(0 - 1)         | --                    | 0<br>(0 - 0)           | 0<br>(0 - 0)            | 0<br>(0 - 0)            | 0<br>(0 - 1)            |
| Other urinary diseases                              | 3<br>(2 - 5)         | 0<br>(0 - 0)          | 0<br>(0 - 0)           | 0<br>(0 - 0)            | 0<br>(0 - 1)            | 2<br>(1 - 5)            |
| Gynecological diseases                              | 0<br>(0 - 0)         | --                    | --                     | 0<br>(0 - 0)            | 0<br>(0 - 0)            | 0<br>(0 - 0)            |
| Uterine fibroids                                    | 0<br>(0 - 0)         | --                    | --                     | 0<br>(0 - 0)            | 0<br>(0 - 0)            | 0<br>(0 - 0)            |
| Polycystic ovarian syndrome                         | 0<br>(0 - 0)         | --                    | --                     | 0<br>(0 - 0)            | 0<br>(0 - 0)            | --                      |
| Endometriosis                                       | 0<br>(0 - 0)         | --                    | --                     | 0<br>(0 - 0)            | 0<br>(0 - 0)            | --                      |
| Genital prolapse                                    | 0<br>(0 - 0)         | --                    | --                     | 0<br>(0 - 0)            | 0<br>(0 - 0)            | 0<br>(0 - 0)            |
| Other gynecological diseases                        | 0<br>(0 - 0)         | --                    | --                     | 0<br>(0 - 0)            | 0<br>(0 - 0)            | 0<br>(0 - 0)            |
| Hemoglobinopathies and hemolytic anemias            | 2<br>(2 - 3)         | 0<br>(0 - 0)          | 0<br>(0 - 0)           | 0<br>(0 - 0)            | 0<br>(0 - 1)            | 2<br>(1 - 2)            |
| Thalassemias                                        | 0<br>(0 - 0)         | 0<br>(0 - 0)          | 0<br>(0 - 0)           | 0<br>(0 - 0)            | 0<br>(0 - 0)            | 0<br>(0 - 0)            |
| Sickle cell disorders                               | 0<br>(0 - 1)         | 0<br>(0 - 0)          | 0<br>(0 - 0)           | 0<br>(0 - 0)            | 0<br>(0 - 0)            | 0<br>(0 - 0)            |
| G6PD deficiency                                     | 0<br>(0 - 0)         | 0<br>(0 - 0)          | 0<br>(0 - 0)           | 0<br>(0 - 0)            | 0<br>(0 - 0)            | 0<br>(0 - 0)            |
| Other hemoglobinopathies and hemolytic anemias      | 2<br>(1 - 3)         | 0<br>(0 - 0)          | 0<br>(0 - 0)           | 0<br>(0 - 0)            | 0<br>(0 - 0)            | 1<br>(1 - 2)            |
| Endocrine, metabolic, blood, and immune disorders   | 14<br>(10 - 26)      | 0<br>(0 - 1)          | 0<br>(0 - 0)           | 2<br>(1 - 4)            | 3<br>(2 - 5)            | 9<br>(6 - 17)           |
| Musculoskeletal disorders                           | 11<br>(8 - 14)       | --                    | 0<br>(0 - 0)           | 0<br>(0 - 1)            | 2<br>(2 - 3)            | 8<br>(6 - 11)           |
| Rheumatoid arthritis                                | 1<br>(1 - 2)         | --                    | 0<br>(0 - 0)           | 0<br>(0 - 0)            | 0<br>(0 - 0)            | 1<br>(0 - 1)            |
| Other musculoskeletal disorders                     | 10<br>(7 - 13)       | --                    | 0<br>(0 - 0)           | 0<br>(0 - 0)            | 2<br>(2 - 3)            | 7<br>(5 - 10)           |
| Other non-communicable diseases                     | 15<br>(11 - 19)      | 5<br>(3 - 7)          | 0<br>(0 - 0)           | 1<br>(1 - 2)            | 1<br>(1 - 2)            | 7<br>(3 - 10)           |
| Congenital anomalies                                | 6<br>(5 - 8)         | 3<br>(2 - 5)          | 0<br>(0 - 0)           | 1<br>(1 - 2)            | 1<br>(0 - 1)            | 1<br>(0 - 1)            |
| Neural tube defects                                 | 0<br>(0 - 0)         | 0<br>(0 - 0)          | 0<br>(0 - 0)           | 0<br>(0 - 0)            | 0<br>(0 - 0)            | 0<br>(0 - 0)            |
| Congenital heart anomalies                          | 1<br>(1 - 2)         | 1<br>(0 - 1)          | 0<br>(0 - 0)           | 0<br>(0 - 0)            | 0<br>(0 - 0)            | 0<br>(0 - 0)            |
| Cleft lip and cleft palate                          | 0<br>(0 - 0)         | 0<br>(0 - 0)          | --                     | --                      | --                      | --                      |
| Down syndrome                                       | 0<br>(0 - 0)         | 0<br>(0 - 0)          | 0<br>(0 - 0)           | 0<br>(0 - 0)            | 0<br>(0 - 0)            | 0<br>(0 - 0)            |
| Chromosomal unbalanced rearrangements               | 0<br>(0 - 0)         | 0<br>(0 - 0)          | 0<br>(0 - 0)           | 0<br>(0 - 0)            | 0<br>(0 - 0)            | 0<br>(0 - 0)            |
| Other congenital anomalies                          | 4<br>(3 - 6)         | 3<br>(2 - 4)          | 0<br>(0 - 0)           | 1<br>(1 - 1)            | 0<br>(0 - 0)            | 0<br>(0 - 1)            |
| Skin and subcutaneous diseases                      | 8<br>(3 - 11)        | 0<br>(0 - 0)          | 0<br>(0 - 0)           | 0<br>(0 - 0)            | 1<br>(0 - 1)            | 7<br>(3 - 10)           |
| Cellulitis                                          | 0<br>(0 - 1)         | 0<br>(0 - 0)          | 0<br>(0 - 0)           | 0<br>(0 - 0)            | 0<br>(0 - 0)            | 0<br>(0 - 1)            |
| Pyoderma                                            | 3<br>(2 - 5)         | 0<br>(0 - 0)          | 0<br>(0 - 0)           | 0<br>(0 - 0)            | 0<br>(0 - 1)            | 3<br>(2 - 4)            |
| Decubitus ulcer                                     | 4<br>(0 - 6)         | 0<br>(0 - 0)          | 0<br>(0 - 0)           | 0<br>(0 - 0)            | 0<br>(0 - 0)            | 4<br>(0 - 6)            |
| Other skin and subcutaneous diseases                | 0<br>(0 - 0)         | 0<br>(0 - 0)          | 0<br>(0 - 0)           | 0<br>(0 - 0)            | 0<br>(0 - 0)            | 0<br>(0 - 0)            |
| Sudden infant death syndrome                        | 1<br>(0 - 2)         | 1<br>(0 - 2)          | --                     | --                      | --                      | --                      |
| Injuries                                            | 248<br>(214 - 282)   | 2<br>(1 - 3)          | 2<br>(2 - 3)           | 73<br>(64 - 82)         | 51<br>(43 - 60)         | 119<br>(94 - 142)       |
| Transport injuries                                  | 44<br>(38 - 50)      | 0<br>(0 - 1)          | 1<br>(1 - 2)           | 22<br>(18 - 25)         | 10<br>(8 - 12)          | 11<br>(8 - 13)          |
| Road injuries                                       | 41<br>(35 - 47)      | 0<br>(0 - 1)          | 1<br>(1 - 1)           | 21<br>(17 - 24)         | 9<br>(7 - 11)           | 10<br>(8 - 12)          |
| Pedestrian road injuries                            | 7<br>(5 - 10)        | 0<br>(0 - 0)          | 0<br>(0 - 1)           | 2<br>(1 - 3)            | 2<br>(1 - 2)            | 3<br>(2 - 4)            |

Web Table 31- Luxembourg deaths with 95% UI by age, sex, and cause in 2013

| Cause                                           | Both Sexes, All Ages | Both Sexes, 0-4 Years | Both Sexes, 5-14 Years | Both Sexes, 15-49 Years | Both Sexes, 50-69 Years | Both Sexes, 70-80 Years |
|-------------------------------------------------|----------------------|-----------------------|------------------------|-------------------------|-------------------------|-------------------------|
| Cyclist road injuries                           | 2<br>(1 - 4)         | 0<br>(0 - 0)          | 0<br>(0 - 0)           | 1<br>(0 - 1)            | 1<br>(0 - 1)            | 1<br>(0 - 1)            |
| Motorcyclist road injuries                      | 5<br>(3 - 9)         | 0<br>(0 - 0)          | 0<br>(0 - 0)           | 2<br>(1 - 4)            | 1<br>(1 - 2)            | 1<br>(0 - 2)            |
| Motor vehicle road injuries                     | 27<br>(18 - 34)      | 0<br>(0 - 0)          | 1<br>(0 - 1)           | 15<br>(11 - 19)         | 5<br>(3 - 7)            | 5<br>(3 - 7)            |
| Other road injuries                             | 1<br>(0 - 3)         | 0<br>(0 - 0)          | 0<br>(0 - 0)           | 0<br>(0 - 1)            | 0<br>(0 - 1)            | 0<br>(0 - 1)            |
| Other transport injuries                        | 3<br>(2 - 4)         | 0<br>(0 - 0)          | 0<br>(0 - 0)           | 1<br>(1 - 2)            | 1<br>(1 - 1)            | 1<br>(0 - 1)            |
| Unintentional injuries                          | 128<br>(102 - 151)   | 1<br>(1 - 2)          | 1<br>(1 - 1)           | 13<br>(11 - 16)         | 18<br>(14 - 21)         | 95<br>(71 - 115)        |
| Falls                                           | 65<br>(45 - 80)      | 0<br>(0 - 0)          | 0<br>(0 - 0)           | 5<br>(4 - 7)            | 8<br>(6 - 11)           | 51<br>(33 - 65)         |
| Drowning                                        | 3<br>(2 - 5)         | 0<br>(0 - 0)          | 0<br>(0 - 1)           | 1<br>(1 - 2)            | 1<br>(0 - 1)            | 1<br>(0 - 1)            |
| Fire, heat, and hot substances                  | 3<br>(2 - 4)         | 0<br>(0 - 0)          | 0<br>(0 - 0)           | 1<br>(0 - 1)            | 1<br>(0 - 1)            | 2<br>(1 - 2)            |
| Poisonings                                      | 1<br>(1 - 2)         | 0<br>(0 - 0)          | 0<br>(0 - 0)           | 1<br>(0 - 1)            | 0<br>(0 - 0)            | 0<br>(0 - 1)            |
| Exposure to mechanical forces                   | 4<br>(3 - 5)         | 0<br>(0 - 0)          | 0<br>(0 - 0)           | 2<br>(1 - 2)            | 1<br>(1 - 1)            | 1<br>(1 - 1)            |
| Unintentional firearm injuries                  | 0<br>(0 - 0)         | 0<br>(0 - 0)          | 0<br>(0 - 0)           | 0<br>(0 - 0)            | 0<br>(0 - 0)            | 0<br>(0 - 0)            |
| Unintentional suffocation                       | 0<br>(0 - 1)         | 0<br>(0 - 0)          | 0<br>(0 - 0)           | 0<br>(0 - 0)            | 0<br>(0 - 0)            | 0<br>(0 - 0)            |
| Other exposure to mechanical forces             | 3<br>(3 - 4)         | 0<br>(0 - 0)          | 0<br>(0 - 0)           | 2<br>(1 - 2)            | 1<br>(1 - 1)            | 1<br>(0 - 1)            |
| Adverse effects of medical treatment            | 19<br>(12 - 25)      | 0<br>(0 - 0)          | 0<br>(0 - 0)           | 1<br>(0 - 1)            | 2<br>(1 - 3)            | 16<br>(9 - 21)          |
| Animal contact                                  | 2<br>(1 - 5)         | 0<br>(0 - 0)          | 0<br>(0 - 0)           | 0<br>(0 - 0)            | 1<br>(0 - 2)            | 1<br>(0 - 3)            |
| Venomous animal contact                         | 1<br>(0 - 1)         | 0<br>(0 - 0)          | 0<br>(0 - 0)           | 0<br>(0 - 0)            | 0<br>(0 - 1)            | 0<br>(0 - 0)            |
| Non-venomous animal contact                     | 1<br>(1 - 4)         | 0<br>(0 - 0)          | 0<br>(0 - 0)           | 0<br>(0 - 0)            | 0<br>(0 - 1)            | 1<br>(0 - 3)            |
| Foreign body                                    | 26<br>(14 - 37)      | 0<br>(0 - 1)          | 0<br>(0 - 0)           | 2<br>(1 - 2)            | 3<br>(1 - 4)            | 21<br>(11 - 31)         |
| Pulmonary aspiration and foreign body in airway | 26<br>(14 - 37)      | 0<br>(0 - 1)          | 0<br>(0 - 0)           | 2<br>(1 - 2)            | 3<br>(1 - 4)            | 21<br>(11 - 31)         |
| Foreign body in other body part                 | 0<br>(0 - 0)         | 0<br>(0 - 0)          | 0<br>(0 - 0)           | 0<br>(0 - 0)            | 0<br>(0 - 0)            | 0<br>(0 - 0)            |
| Other unintentional injuries                    | 6<br>(4 - 8)         | 0<br>(0 - 0)          | 0<br>(0 - 0)           | 1<br>(1 - 2)            | 1<br>(1 - 2)            | 3<br>(2 - 5)            |
| Self-harm and interpersonal violence            | 76<br>(63 - 95)      | 0<br>(0 - 0)          | 0<br>(0 - 1)           | 38<br>(31 - 46)         | 23<br>(19 - 31)         | 14<br>(11 - 19)         |
| Self-harm                                       | 70<br>(57 - 89)      | 0<br>(0 - 0)          | 0<br>(0 - 0)           | 35<br>(28 - 43)         | 22<br>(17 - 30)         | 13<br>(10 - 18)         |
| Interpersonal violence                          | 6<br>(4 - 7)         | 0<br>(0 - 0)          | 0<br>(0 - 0)           | 3<br>(2 - 4)            | 1<br>(1 - 2)            | 1<br>(1 - 1)            |
| Assault by firearm                              | 1<br>(1 - 2)         | 0<br>(0 - 0)          | 0<br>(0 - 0)           | 1<br>(1 - 1)            | 0<br>(0 - 0)            | 0<br>(0 - 0)            |
| Assault by sharp object                         | 2<br>(1 - 2)         | 0<br>(0 - 0)          | 0<br>(0 - 0)           | 1<br>(1 - 1)            | 0<br>(0 - 1)            | 0<br>(0 - 0)            |
| Assault by other means                          | 3<br>(2 - 4)         | 0<br>(0 - 0)          | 0<br>(0 - 0)           | 2<br>(1 - 2)            | 1<br>(0 - 1)            | 0<br>(0 - 1)            |

Web Table 31- Luxembourg deaths with 95% UI by age, sex, and cause in 2013

| Cause                                                             | Males, All Ages          | Males, 0-4 Years | Males, 5-14 Years | Males, 15-49 Years | Males, 50-69 Years | Males, 70-80 Years       |
|-------------------------------------------------------------------|--------------------------|------------------|-------------------|--------------------|--------------------|--------------------------|
| All causes                                                        | 1,905<br>(1,715 - 2,061) | 10<br>(7 - 13)   | 3<br>(3 - 4)      | 146<br>(127 - 167) | 477<br>(416 - 536) | 1,269<br>(1,159 - 1,345) |
| Communicable, maternal, neonatal, and nutritional diseases        | 78<br>(57 - 97)          | 5<br>(3 - 7)     | 0<br>(0 - 0)      | 3<br>(2 - 4)       | 9<br>(7 - 12)      | 61<br>(43 - 78)          |
| HIV/AIDS and tuberculosis                                         | 1<br>(1 - 2)             | 0<br>(0 - 0)     | 0<br>(0 - 0)      | 0<br>(0 - 1)       | 0<br>(0 - 1)       | 0<br>(0 - 1)             |
| Tuberculosis                                                      | 1<br>(1 - 1)             | 0<br>(0 - 0)     | 0<br>(0 - 0)      | 0<br>(0 - 0)       | 0<br>(0 - 0)       | 0<br>(0 - 1)             |
| HIV/AIDS                                                          | 0<br>(0 - 1)             | 0<br>(0 - 0)     | 0<br>(0 - 0)      | 0<br>(0 - 0)       | 0<br>(0 - 0)       | 0<br>(0 - 0)             |
| HIV/AIDS resulting in mycobacterial infection                     | 0<br>(0 - 0)             | 0<br>(0 - 0)     | 0<br>(0 - 0)      | 0<br>(0 - 0)       | 0<br>(0 - 0)       | 0<br>(0 - 0)             |
| HIV/AIDS resulting in other diseases                              | 0<br>(0 - 1)             | 0<br>(0 - 0)     | 0<br>(0 - 0)      | 0<br>(0 - 0)       | 0<br>(0 - 0)       | 0<br>(0 - 0)             |
| Diarrhea, lower respiratory, and other common infectious diseases | 64<br>(45 - 82)          | 1<br>(0 - 1)     | 0<br>(0 - 0)      | 2<br>(1 - 3)       | 7<br>(5 - 9)       | 55<br>(38 - 71)          |
| Diarrheal diseases                                                | 3<br>(2 - 5)             | 0<br>(0 - 0)     | 0<br>(0 - 0)      | 0<br>(0 - 0)       | 0<br>(0 - 1)       | 2<br>(1 - 4)             |
| Intestinal infectious diseases                                    | 0<br>(0 - 1)             | 0<br>(0 - 0)     | 0<br>(0 - 0)      | 0<br>(0 - 0)       | 0<br>(0 - 0)       | 0<br>(0 - 0)             |
| Typhoid fever                                                     | 0<br>(0 - 1)             | 0<br>(0 - 0)     | 0<br>(0 - 0)      | 0<br>(0 - 0)       | 0<br>(0 - 0)       | 0<br>(0 - 0)             |
| Paratyphoid fever                                                 | 0<br>(0 - 0)             | 0<br>(0 - 0)     | 0<br>(0 - 0)      | 0<br>(0 - 0)       | 0<br>(0 - 0)       | 0<br>(0 - 0)             |
| Other intestinal infectious diseases                              | 0<br>(0 - 0)             | 0<br>(0 - 0)     | 0<br>(0 - 0)      | 0<br>(0 - 0)       | 0<br>(0 - 0)       | 0<br>(0 - 0)             |
| Lower respiratory infections                                      | 60<br>(41 - 77)          | 0<br>(0 - 1)     | 0<br>(0 - 0)      | 1<br>(1 - 2)       | 6<br>(4 - 9)       | 52<br>(35 - 68)          |
| Upper respiratory infections                                      | 0<br>(0 - 0)             | 0<br>(0 - 0)     | 0<br>(0 - 0)      | 0<br>(0 - 0)       | 0<br>(0 - 0)       | 0<br>(0 - 0)             |
| Otitis media                                                      | 0<br>(0 - 0)             | 0<br>(0 - 0)     | 0<br>(0 - 0)      | 0<br>(0 - 0)       | 0<br>(0 - 0)       | 0<br>(0 - 0)             |
| Meningitis                                                        | 1<br>(0 - 1)             | 0<br>(0 - 0)     | 0<br>(0 - 0)      | 0<br>(0 - 0)       | 0<br>(0 - 0)       | 0<br>(0 - 0)             |
| Pneumococcal meningitis                                           | 0<br>(0 - 0)             | 0<br>(0 - 0)     | 0<br>(0 - 0)      | 0<br>(0 - 0)       | 0<br>(0 - 0)       | 0<br>(0 - 0)             |
| H influenzae type B meningitis                                    | 0<br>(0 - 0)             | 0<br>(0 - 0)     | 0<br>(0 - 0)      | 0<br>(0 - 0)       | 0<br>(0 - 0)       | 0<br>(0 - 0)             |
| Meningococcal meningitis                                          | 0<br>(0 - 0)             | 0<br>(0 - 0)     | 0<br>(0 - 0)      | 0<br>(0 - 0)       | 0<br>(0 - 0)       | 0<br>(0 - 0)             |
| Other meningitis                                                  | 0<br>(0 - 0)             | 0<br>(0 - 0)     | 0<br>(0 - 0)      | 0<br>(0 - 0)       | 0<br>(0 - 0)       | 0<br>(0 - 0)             |
| Encephalitis                                                      | 0<br>(0 - 0)             | 0<br>(0 - 0)     | 0<br>(0 - 0)      | 0<br>(0 - 0)       | 0<br>(0 - 0)       | 0<br>(0 - 0)             |
| Diphtheria                                                        | 0<br>(0 - 0)             | 0<br>(0 - 0)     | 0<br>(0 - 0)      | 0<br>(0 - 0)       | 0<br>(0 - 0)       | --                       |
| Whooping cough                                                    | 0<br>(0 - 0)             | 0<br>(0 - 0)     | 0<br>(0 - 0)      | 0<br>(0 - 0)       | 0<br>(0 - 0)       | --                       |
| Tetanus                                                           | 0<br>(0 - 0)             | 0<br>(0 - 0)     | 0<br>(0 - 0)      | 0<br>(0 - 0)       | 0<br>(0 - 0)       | 0<br>(0 - 0)             |
| Measles                                                           | 0<br>(0 - 0)             | 0<br>(0 - 0)     | 0<br>(0 - 0)      | 0<br>(0 - 0)       | 0<br>(0 - 0)       | --                       |
| Varicella and herpes zoster                                       | 0<br>(0 - 1)             | 0<br>(0 - 0)     | 0<br>(0 - 0)      | 0<br>(0 - 0)       | 0<br>(0 - 0)       | 0<br>(0 - 1)             |
| Neglected tropical diseases and malaria                           | 0<br>(0 - 0)             | 0<br>(0 - 0)     | 0<br>(0 - 0)      | 0<br>(0 - 0)       | 0<br>(0 - 0)       | 0<br>(0 - 0)             |
| Cysticercosis                                                     | 0<br>(0 - 0)             | 0<br>(0 - 0)     | 0<br>(0 - 0)      | 0<br>(0 - 0)       | 0<br>(0 - 0)       | 0<br>(0 - 0)             |
| Cystic echinococcosis                                             | 0<br>(0 - 0)             | 0<br>(0 - 0)     | 0<br>(0 - 0)      | 0<br>(0 - 0)       | 0<br>(0 - 0)       | 0<br>(0 - 0)             |
| Dengue                                                            | 0<br>(0 - 0)             | 0<br>(0 - 0)     | 0<br>(0 - 0)      | 0<br>(0 - 0)       | 0<br>(0 - 0)       | 0<br>(0 - 0)             |
| Rabies                                                            | 0<br>(0 - 0)             | 0<br>(0 - 0)     | 0<br>(0 - 0)      | 0<br>(0 - 0)       | 0<br>(0 - 0)       | 0<br>(0 - 0)             |
| Other neglected tropical diseases                                 | 0<br>(0 - 0)             | 0<br>(0 - 0)     | 0<br>(0 - 0)      | 0<br>(0 - 0)       | 0<br>(0 - 0)       | 0<br>(0 - 0)             |
| Maternal disorders                                                | --                       | --               | --                | --                 | --                 | --                       |
| Maternal hemorrhage                                               | --                       | --               | --                | --                 | --                 | --                       |
| Maternal sepsis and other maternal infections                     | --                       | --               | --                | --                 | --                 | --                       |
| Maternal hypertensive disorders                                   | --                       | --               | --                | --                 | --                 | --                       |
| Maternal obstructed labor                                         | --                       | --               | --                | --                 | --                 | --                       |
| Maternal abortive outcome                                         | --                       | --               | --                | --                 | --                 | --                       |
| Indirect maternal deaths                                          | --                       | --               | --                | --                 | --                 | --                       |



Web Table 31- Luxembourg deaths with 95% UI by age, sex, and cause in 2013

| Cause                                                            | Males, All Ages          | Males, 0-4 Years | Males, 5-14 Years | Males, 15-49 Years | Males, 50-69 Years | Males, 70-80 Years       |
|------------------------------------------------------------------|--------------------------|------------------|-------------------|--------------------|--------------------|--------------------------|
| Late maternal deaths                                             | --                       | --               | --                | --                 | --                 | --                       |
| Maternal deaths aggravated by HIV/AIDS                           | --                       | --               | --                | --                 | --                 | --                       |
| Other maternal disorders                                         | --                       | --               | --                | --                 | --                 | --                       |
| Neonatal disorders                                               | 4<br>(3 - 6)             | 4<br>(3 - 6)     | --                | --                 | --                 | --                       |
| Neonatal preterm birth complications                             | 1<br>(1 - 2)             | 1<br>(1 - 2)     | --                | --                 | --                 | --                       |
| Neonatal encephalopathy due to birth asphyxia and trauma         | 1<br>(0 - 2)             | 1<br>(0 - 2)     | --                | --                 | --                 | --                       |
| Neonatal sepsis and other neonatal infections                    | 0<br>(0 - 0)             | 0<br>(0 - 0)     | --                | --                 | --                 | --                       |
| Hemolytic disease and other neonatal jaundice                    | 0<br>(0 - 0)             | 0<br>(0 - 0)     | --                | --                 | --                 | --                       |
| Other neonatal disorders                                         | 2<br>(1 - 3)             | 2<br>(1 - 3)     | --                | --                 | --                 | --                       |
| Nutritional deficiencies                                         | 4<br>(2 - 6)             | 0<br>(0 - 0)     | 0<br>(0 - 0)      | 0<br>(0 - 0)       | 1<br>(0 - 1)       | 3<br>(1 - 5)             |
| Protein-energy malnutrition                                      | 1<br>(0 - 2)             | 0<br>(0 - 0)     | 0<br>(0 - 0)      | 0<br>(0 - 0)       | 0<br>(0 - 0)       | 1<br>(0 - 2)             |
| Iodine deficiency                                                | 0<br>(0 - 0)             | 0<br>(0 - 0)     | 0<br>(0 - 0)      | 0<br>(0 - 0)       | 0<br>(0 - 0)       | 0<br>(0 - 0)             |
| Iron-deficiency anemia                                           | 3<br>(1 - 4)             | 0<br>(0 - 0)     | 0<br>(0 - 0)      | 0<br>(0 - 0)       | 0<br>(0 - 1)       | 2<br>(1 - 4)             |
| Other nutritional deficiencies                                   | 0<br>(0 - 0)             | 0<br>(0 - 0)     | 0<br>(0 - 0)      | 0<br>(0 - 0)       | 0<br>(0 - 0)       | 0<br>(0 - 0)             |
| Other communicable, maternal, neonatal, and nutritional diseases | 4<br>(2 - 6)             | 0<br>(0 - 0)     | 0<br>(0 - 0)      | 0<br>(0 - 0)       | 1<br>(1 - 2)       | 3<br>(1 - 4)             |
| Sexually transmitted diseases excluding HIV                      | 0<br>(0 - 1)             | 0<br>(0 - 0)     | 0<br>(0 - 0)      | 0<br>(0 - 0)       | 0<br>(0 - 0)       | 0<br>(0 - 0)             |
| Syphilis                                                         | 0<br>(0 - 1)             | 0<br>(0 - 0)     | 0<br>(0 - 0)      | 0<br>(0 - 0)       | 0<br>(0 - 0)       | 0<br>(0 - 0)             |
| Chlamydial infection                                             | --                       | --               | --                | --                 | --                 | --                       |
| Gonococcal infection                                             | 0<br>(0 - 0)             | --               | 0<br>(0 - 0)      | 0<br>(0 - 0)       | 0<br>(0 - 0)       | 0<br>(0 - 0)             |
| Other sexually transmitted diseases                              | 0<br>(0 - 0)             | --               | 0<br>(0 - 0)      | 0<br>(0 - 0)       | 0<br>(0 - 0)       | 0<br>(0 - 0)             |
| Hepatitis                                                        | 0<br>(0 - 0)             | 0<br>(0 - 0)     | 0<br>(0 - 0)      | 0<br>(0 - 0)       | 0<br>(0 - 0)       | 0<br>(0 - 0)             |
| Acute hepatitis A                                                | 0<br>(0 - 0)             | 0<br>(0 - 0)     | 0<br>(0 - 0)      | 0<br>(0 - 0)       | 0<br>(0 - 0)       | 0<br>(0 - 0)             |
| Acute hepatitis B                                                | 0<br>(0 - 0)             | 0<br>(0 - 0)     | 0<br>(0 - 0)      | 0<br>(0 - 0)       | 0<br>(0 - 0)       | 0<br>(0 - 0)             |
| Acute hepatitis C                                                | 0<br>(0 - 0)             | --               | 0<br>(0 - 0)      | 0<br>(0 - 0)       | 0<br>(0 - 0)       | 0<br>(0 - 0)             |
| Other infectious diseases                                        | 4<br>(2 - 5)             | 0<br>(0 - 0)     | 0<br>(0 - 0)      | 0<br>(0 - 0)       | 1<br>(1 - 2)       | 2<br>(1 - 3)             |
| Non-communicable diseases                                        | 1,685<br>(1,523 - 1,825) | 4<br>(2 - 5)     | 1<br>(1 - 2)      | 89<br>(76 - 102)   | 432<br>(378 - 487) | 1,160<br>(1,062 - 1,234) |
| Neoplasms                                                        | 633<br>(560 - 712)       | 0<br>(0 - 0)     | 1<br>(1 - 1)      | 33<br>(28 - 39)    | 218<br>(190 - 248) | 381<br>(340 - 430)       |
| Esophageal cancer                                                | 22<br>(17 - 28)          | --               | --                | 2<br>(1 - 3)       | 11<br>(8 - 14)     | 9<br>(7 - 12)            |
| Stomach cancer                                                   | 32<br>(27 - 38)          | --               | --                | 1<br>(1 - 2)       | 9<br>(7 - 11)      | 22<br>(18 - 27)          |
| Liver cancer                                                     | 24<br>(13 - 33)          | --               | 0<br>(0 - 0)      | 1<br>(1 - 2)       | 10<br>(5 - 14)     | 13<br>(6 - 19)           |
| Liver cancer due to hepatitis B                                  | 6<br>(3 - 14)            | --               | 0<br>(0 - 0)      | 0<br>(0 - 1)       | 3<br>(1 - 7)       | 3<br>(1 - 7)             |
| Liver cancer due to hepatitis C                                  | 12<br>(5 - 20)           | --               | 0<br>(0 - 0)      | 0<br>(0 - 1)       | 5<br>(2 - 8)       | 7<br>(3 - 12)            |
| Liver cancer due to alcohol use                                  | 5<br>(2 - 10)            | --               | --                | 0<br>(0 - 0)       | 2<br>(1 - 3)       | 3<br>(1 - 7)             |
| Liver cancer due to other causes                                 | 0<br>(0 - 1)             | --               | 0<br>(0 - 0)      | 0<br>(0 - 0)       | 0<br>(0 - 1)       | 0<br>(0 - 1)             |
| Larynx cancer                                                    | 7<br>(5 - 10)            | --               | --                | 0<br>(0 - 1)       | 3<br>(2 - 5)       | 3<br>(2 - 4)             |
| Tracheal, bronchus and lung cancer                               | 183<br>(159 - 208)       | --               | --                | 8<br>(6 - 10)      | 79<br>(67 - 92)    | 97<br>(83 - 111)         |
| Breast cancer                                                    | 0<br>(0 - 1)             | --               | --                | 0<br>(0 - 0)       | 0<br>(0 - 0)       | 0<br>(0 - 0)             |
| Cervical cancer                                                  | --                       | --               | --                | --                 | --                 | --                       |
| Uterine cancer                                                   | --                       | --               | --                | --                 | --                 | --                       |
| Prostate cancer                                                  | 76<br>(53 - 123)         | --               | --                | 0<br>(0 - 0)       | 9<br>(6 - 15)      | 66<br>(46 - 109)         |

Web Table 31- Luxembourg deaths with 95% UI by age, sex, and cause in 2013

| Cause                                         | Males, All Ages    | Males, 0-4 Years | Males, 5-14 Years | Males, 15-49 Years | Males, 50-69 Years | Males, 70-80 Years |
|-----------------------------------------------|--------------------|------------------|-------------------|--------------------|--------------------|--------------------|
| Colon and rectum cancer                       | 81<br>(70 - 92)    | --               | --                | 3<br>(2 - 4)       | 24<br>(20 - 28)    | 54<br>(45 - 63)    |
| Lip and oral cavity cancer                    | 9<br>(7 - 10)      | --               | --                | 1<br>(1 - 1)       | 4<br>(4 - 5)       | 3<br>(3 - 4)       |
| Nasopharynx cancer                            | 1<br>(1 - 2)       | --               | 0<br>(0 - 0)      | 0<br>(0 - 0)       | 1<br>(0 - 1)       | 0<br>(0 - 0)       |
| Other pharynx cancer                          | 7<br>(6 - 12)      | --               | --                | 1<br>(1 - 1)       | 5<br>(3 - 7)       | 2<br>(1 - 3)       |
| Gallbladder and biliary tract cancer          | 2<br>(2 - 4)       | --               | --                | 0<br>(0 - 0)       | 1<br>(0 - 1)       | 2<br>(1 - 3)       |
| Pancreatic cancer                             | 40<br>(33 - 46)    | --               | --                | 2<br>(1 - 2)       | 15<br>(12 - 18)    | 23<br>(19 - 27)    |
| Malignant skin melanoma                       | 8<br>(4 - 13)      | --               | --                | 2<br>(1 - 3)       | 3<br>(1 - 4)       | 4<br>(2 - 7)       |
| Non-melanoma skin cancer                      | 1<br>(1 - 2)       | --               | --                | 0<br>(0 - 0)       | 0<br>(0 - 0)       | 1<br>(1 - 2)       |
| Ovarian cancer                                | --                 | --               | --                | --                 | --                 | --                 |
| Testicular cancer                             | 0<br>(0 - 0)       | --               | --                | 0<br>(0 - 0)       | 0<br>(0 - 0)       | 0<br>(0 - 0)       |
| Kidney cancer                                 | 14<br>(11 - 17)    | 0<br>(0 - 0)     | 0<br>(0 - 0)      | 0<br>(0 - 1)       | 6<br>(4 - 7)       | 8<br>(6 - 10)      |
| Bladder cancer                                | 24<br>(18 - 29)    | --               | --                | 0<br>(0 - 0)       | 4<br>(3 - 6)       | 19<br>(15 - 24)    |
| Brain and nervous system cancer               | 21<br>(16 - 28)    | 0<br>(0 - 0)     | 0<br>(0 - 0)      | 4<br>(3 - 5)       | 10<br>(7 - 14)     | 7<br>(5 - 9)       |
| Thyroid cancer                                | 1<br>(0 - 1)       | --               | 0<br>(0 - 0)      | 0<br>(0 - 0)       | 0<br>(0 - 0)       | 0<br>(0 - 1)       |
| Mesothelioma                                  | 6<br>(3 - 8)       | --               | --                | 0<br>(0 - 1)       | 2<br>(1 - 3)       | 4<br>(2 - 5)       |
| Hodgkin lymphoma                              | 0<br>(0 - 1)       | 0<br>(0 - 0)     | 0<br>(0 - 0)      | 0<br>(0 - 0)       | 0<br>(0 - 0)       | 0<br>(0 - 0)       |
| Non-Hodgkin lymphoma                          | 22<br>(8 - 30)     | 0<br>(0 - 0)     | 0<br>(0 - 0)      | 2<br>(1 - 3)       | 8<br>(3 - 11)      | 12<br>(4 - 18)     |
| Multiple myeloma                              | 9<br>(5 - 15)      | --               | --                | 0<br>(0 - 0)       | 3<br>(2 - 6)       | 6<br>(3 - 10)      |
| Leukemia                                      | 26<br>(21 - 31)    | 0<br>(0 - 0)     | 0<br>(0 - 1)      | 2<br>(2 - 3)       | 7<br>(5 - 8)       | 16<br>(13 - 20)    |
| Other neoplasms                               | 18<br>(11 - 22)    | 0<br>(0 - 0)     | 0<br>(0 - 0)      | 2<br>(2 - 3)       | 5<br>(3 - 7)       | 10<br>(5 - 13)     |
| Cardiovascular diseases                       | 584<br>(514 - 646) | 0<br>(0 - 0)     | 0<br>(0 - 0)      | 21<br>(17 - 26)    | 124<br>(106 - 143) | 439<br>(390 - 483) |
| Rheumatic heart disease                       | 1<br>(1 - 2)       | 0<br>(0 - 0)     | 0<br>(0 - 0)      | 0<br>(0 - 0)       | 0<br>(0 - 1)       | 1<br>(0 - 2)       |
| Ischemic heart disease                        | 301<br>(251 - 352) | 0<br>(0 - 0)     | 0<br>(0 - 0)      | 13<br>(10 - 16)    | 76<br>(62 - 90)    | 212<br>(175 - 252) |
| Cerebrovascular disease                       | 187<br>(147 - 229) | 0<br>(0 - 0)     | 0<br>(0 - 0)      | 4<br>(3 - 5)       | 28<br>(20 - 35)    | 156<br>(122 - 193) |
| Ischemic stroke                               | 97<br>(73 - 127)   | 0<br>(0 - 0)     | 0<br>(0 - 0)      | 1<br>(0 - 1)       | 9<br>(6 - 13)      | 88<br>(65 - 116)   |
| Hemorrhagic stroke                            | 90<br>(62 - 114)   | 0<br>(0 - 0)     | 0<br>(0 - 0)      | 3<br>(2 - 5)       | 19<br>(13 - 24)    | 68<br>(44 - 88)    |
| Hypertensive heart disease                    | 6<br>(4 - 12)      | 0<br>(0 - 0)     | 0<br>(0 - 0)      | 0<br>(0 - 0)       | 1<br>(1 - 2)       | 5<br>(3 - 9)       |
| Cardiomyopathy and myocarditis                | 17<br>(11 - 22)    | 0<br>(0 - 0)     | 0<br>(0 - 0)      | 1<br>(1 - 2)       | 5<br>(3 - 7)       | 11<br>(6 - 15)     |
| Atrial fibrillation and flutter               | 4<br>(1 - 5)       | --               | --                | 0<br>(0 - 0)       | 0<br>(0 - 0)       | 3<br>(1 - 5)       |
| Aortic aneurysm                               | 15<br>(12 - 19)    | --               | --                | 0<br>(0 - 1)       | 3<br>(3 - 5)       | 11<br>(8 - 15)     |
| Peripheral vascular disease                   | 2<br>(2 - 3)       | --               | --                | 0<br>(0 - 0)       | 0<br>(0 - 1)       | 2<br>(1 - 3)       |
| Endocarditis                                  | 2<br>(1 - 4)       | 0<br>(0 - 0)     | 0<br>(0 - 0)      | 0<br>(0 - 0)       | 1<br>(0 - 1)       | 2<br>(1 - 2)       |
| Other cardiovascular and circulatory diseases | 48<br>(34 - 61)    | 0<br>(0 - 0)     | 0<br>(0 - 0)      | 2<br>(1 - 3)       | 10<br>(7 - 13)     | 36<br>(25 - 47)    |
| Chronic respiratory diseases                  | 136<br>(105 - 156) | 0<br>(0 - 0)     | 0<br>(0 - 0)      | 2<br>(1 - 3)       | 23<br>(18 - 28)    | 111<br>(85 - 129)  |
| Chronic obstructive pulmonary disease         | 116<br>(87 - 133)  | 0<br>(0 - 0)     | 0<br>(0 - 0)      | 1<br>(1 - 1)       | 20<br>(15 - 24)    | 94<br>(70 - 110)   |
| Pneumoconiosis                                | 5<br>(3 - 7)       | 0<br>(0 - 0)     | 0<br>(0 - 0)      | 0<br>(0 - 0)       | 1<br>(0 - 1)       | 4<br>(2 - 6)       |
| Silicosis                                     | 0<br>(0 - 0)       | 0<br>(0 - 0)     | 0<br>(0 - 0)      | 0<br>(0 - 0)       | 0<br>(0 - 0)       | 0<br>(0 - 0)       |
| Asbestosis                                    | 1<br>(1 - 2)       | 0<br>(0 - 0)     | 0<br>(0 - 0)      | 0<br>(0 - 0)       | 0<br>(0 - 0)       | 1<br>(1 - 2)       |
| Coal workers pneumoconiosis                   | 0<br>(0 - 1)       | 0<br>(0 - 0)     | 0<br>(0 - 0)      | 0<br>(0 - 0)       | 0<br>(0 - 0)       | 0<br>(0 - 1)       |
| Other pneumoconiosis                          | 3<br>(2 - 4)       | 0<br>(0 - 0)     | 0<br>(0 - 0)      | 0<br>(0 - 0)       | 0<br>(0 - 1)       | 2<br>(1 - 3)       |

Web Table 31- Luxembourg deaths with 95% UI by age, sex, and cause in 2013

| Cause                                               | Males, All Ages    | Males, 0-4 Years | Males, 5-14 Years | Males, 15-49 Years | Males, 50-69 Years | Males, 70-80 Years |
|-----------------------------------------------------|--------------------|------------------|-------------------|--------------------|--------------------|--------------------|
| Asthma                                              | 3<br>(2 - 4)       | 0<br>(0 - 0)     | 0<br>(0 - 0)      | 0<br>(0 - 0)       | 1<br>(1 - 1)       | 2<br>(1 - 2)       |
| Interstitial lung disease and pulmonary sarcoidosis | 12<br>(7 - 19)     | 0<br>(0 - 0)     | 0<br>(0 - 0)      | 0<br>(0 - 1)       | 1<br>(1 - 2)       | 10<br>(6 - 16)     |
| Other chronic respiratory diseases                  | 0<br>(0 - 0)       | 0<br>(0 - 0)     | 0<br>(0 - 0)      | 0<br>(0 - 0)       | 0<br>(0 - 0)       | 0<br>(0 - 0)       |
| Cirrhosis                                           | 55<br>(47 - 63)    | 0<br>(0 - 0)     | 0<br>(0 - 0)      | 9<br>(7 - 11)      | 29<br>(24 - 34)    | 17<br>(14 - 21)    |
| Cirrhosis due to hepatitis B                        | 4<br>(2 - 7)       | 0<br>(0 - 0)     | 0<br>(0 - 0)      | 1<br>(0 - 1)       | 2<br>(1 - 4)       | 1<br>(1 - 2)       |
| Cirrhosis due to hepatitis C                        | 27<br>(18 - 37)    | 0<br>(0 - 0)     | 0<br>(0 - 0)      | 4<br>(2 - 6)       | 14<br>(9 - 20)     | 8<br>(5 - 12)      |
| Cirrhosis due to alcohol use                        | 19<br>(9 - 28)     | --               | --                | 3<br>(1 - 4)       | 10<br>(5 - 15)     | 7<br>(3 - 10)      |
| Cirrhosis due to other causes                       | 5<br>(2 - 9)       | 0<br>(0 - 0)     | 0<br>(0 - 0)      | 1<br>(1 - 3)       | 3<br>(1 - 5)       | 1<br>(0 - 2)       |
| Digestive diseases                                  | 33<br>(28 - 40)    | 0<br>(0 - 0)     | 0<br>(0 - 0)      | 2<br>(1 - 2)       | 7<br>(6 - 9)       | 25<br>(20 - 29)    |
| Peptic ulcer disease                                | 4<br>(3 - 6)       | 0<br>(0 - 0)     | 0<br>(0 - 0)      | 0<br>(0 - 0)       | 1<br>(1 - 2)       | 3<br>(2 - 4)       |
| Gastritis and duodenitis                            | 0<br>(0 - 0)       | 0<br>(0 - 0)     | 0<br>(0 - 0)      | 0<br>(0 - 0)       | 0<br>(0 - 0)       | 0<br>(0 - 0)       |
| Appendicitis                                        | 1<br>(0 - 1)       | 0<br>(0 - 0)     | 0<br>(0 - 0)      | 0<br>(0 - 0)       | 0<br>(0 - 0)       | 0<br>(0 - 0)       |
| Paralytic ileus and intestinal obstruction          | 6<br>(3 - 9)       | 0<br>(0 - 0)     | 0<br>(0 - 0)      | 0<br>(0 - 0)       | 1<br>(0 - 1)       | 5<br>(3 - 8)       |
| Inguinal, femoral, and abdominal hernia             | 1<br>(0 - 1)       | 0<br>(0 - 0)     | 0<br>(0 - 0)      | 0<br>(0 - 0)       | 0<br>(0 - 0)       | 1<br>(0 - 1)       |
| Inflammatory bowel disease                          | 2<br>(0 - 3)       | 0<br>(0 - 0)     | 0<br>(0 - 0)      | 0<br>(0 - 0)       | 0<br>(0 - 0)       | 1<br>(0 - 3)       |
| Vascular intestinal disorders                       | 9<br>(4 - 16)      | 0<br>(0 - 0)     | 0<br>(0 - 0)      | 0<br>(0 - 1)       | 2<br>(1 - 3)       | 7<br>(3 - 13)      |
| Gallbladder and biliary diseases                    | 3<br>(2 - 5)       | 0<br>(0 - 0)     | 0<br>(0 - 0)      | 0<br>(0 - 0)       | 0<br>(0 - 1)       | 3<br>(2 - 4)       |
| Pancreatitis                                        | 4<br>(2 - 5)       | 0<br>(0 - 0)     | 0<br>(0 - 0)      | 1<br>(0 - 1)       | 1<br>(1 - 2)       | 2<br>(1 - 3)       |
| Other digestive diseases                            | 4<br>(2 - 5)       | 0<br>(0 - 0)     | 0<br>(0 - 0)      | 0<br>(0 - 0)       | 1<br>(1 - 1)       | 3<br>(1 - 4)       |
| Neurological disorders                              | 143<br>(109 - 174) | 0<br>(0 - 1)     | 0<br>(0 - 0)      | 3<br>(2 - 5)       | 10<br>(8 - 13)     | 128<br>(96 - 159)  |
| Alzheimer disease and other dementias               | 104<br>(72 - 134)  | --               | --                | 0<br>(0 - 0)       | 3<br>(2 - 5)       | 101<br>(68 - 130)  |
| Parkinson disease                                   | 24<br>(17 - 32)    | --               | --                | 0<br>(0 - 0)       | 2<br>(1 - 2)       | 22<br>(16 - 30)    |
| Epilepsy                                            | 4<br>(3 - 6)       | 0<br>(0 - 0)     | 0<br>(0 - 0)      | 2<br>(1 - 3)       | 1<br>(1 - 2)       | 1<br>(1 - 1)       |
| Multiple sclerosis                                  | 2<br>(1 - 4)       | --               | --                | 0<br>(0 - 1)       | 1<br>(0 - 2)       | 1<br>(0 - 1)       |
| Other neurological disorders                        | 7<br>(6 - 10)      | 0<br>(0 - 1)     | 0<br>(0 - 0)      | 1<br>(1 - 1)       | 3<br>(2 - 4)       | 3<br>(2 - 4)       |
| Mental and substance use disorders                  | 26<br>(19 - 33)    | 0<br>(0 - 0)     | 0<br>(0 - 0)      | 15<br>(11 - 18)    | 8<br>(5 - 11)      | 4<br>(2 - 6)       |
| Schizophrenia                                       | 0<br>(0 - 0)       | --               | --                | 0<br>(0 - 0)       | 0<br>(0 - 0)       | 0<br>(0 - 0)       |
| Alcohol use disorders                               | 14<br>(8 - 19)     | --               | --                | 4<br>(2 - 5)       | 7<br>(4 - 10)      | 4<br>(2 - 6)       |
| Drug use disorders                                  | 12<br>(9 - 15)     | 0<br>(0 - 0)     | --                | 11<br>(8 - 14)     | 1<br>(1 - 1)       | 0<br>(0 - 0)       |
| Opioid use disorders                                | 5<br>(3 - 6)       | 0<br>(0 - 0)     | --                | 4<br>(3 - 5)       | 0<br>(0 - 0)       | 0<br>(0 - 0)       |
| Cocaine use disorders                               | 0<br>(0 - 0)       | 0<br>(0 - 0)     | --                | 0<br>(0 - 0)       | 0<br>(0 - 0)       | 0<br>(0 - 0)       |
| Amphetamine use disorders                           | 0<br>(0 - 0)       | 0<br>(0 - 0)     | --                | 0<br>(0 - 0)       | 0<br>(0 - 0)       | 0<br>(0 - 0)       |
| Other drug use disorders                            | 7<br>(5 - 9)       | 0<br>(0 - 0)     | --                | 6<br>(4 - 8)       | 1<br>(0 - 1)       | 0<br>(0 - 0)       |
| Eating disorders                                    | 0<br>(0 - 0)       | --               | 0<br>(0 - 0)      | 0<br>(0 - 0)       | --                 | --                 |
| Anorexia nervosa                                    | 0<br>(0 - 0)       | --               | 0<br>(0 - 0)      | 0<br>(0 - 0)       | --                 | --                 |
| Diabetes, urogenital, blood, and endocrine diseases | 65<br>(55 - 83)    | 0<br>(0 - 0)     | 0<br>(0 - 0)      | 3<br>(2 - 4)       | 12<br>(9 - 16)     | 50<br>(42 - 63)    |
| Diabetes mellitus                                   | 23<br>(19 - 27)    | 0<br>(0 - 0)     | 0<br>(0 - 0)      | 1<br>(1 - 1)       | 5<br>(4 - 6)       | 17<br>(14 - 20)    |
| Acute glomerulonephritis                            | 0<br>(0 - 0)       | 0<br>(0 - 0)     | 0<br>(0 - 0)      | 0<br>(0 - 0)       | 0<br>(0 - 0)       | 0<br>(0 - 0)       |
| Chronic kidney disease                              | 30<br>(23 - 47)    | 0<br>(0 - 0)     | 0<br>(0 - 0)      | 1<br>(0 - 1)       | 4<br>(3 - 6)       | 26<br>(19 - 40)    |
| Chronic kidney disease due to diabetes mellitus     | 4<br>(2 - 8)       | 0<br>(0 - 0)     | 0<br>(0 - 0)      | 0<br>(0 - 0)       | 1<br>(1 - 2)       | 2<br>(1 - 5)       |

Web Table 31- Luxembourg deaths with 95% UI by age, sex, and cause in 2013

| Cause                                               | Males, All Ages    | Males, 0-4 Years | Males, 5-14 Years | Males, 15-49 Years | Males, 50-69 Years | Males, 70-80 Years |
|-----------------------------------------------------|--------------------|------------------|-------------------|--------------------|--------------------|--------------------|
| Chronic kidney disease due to hypertension          | 13<br>(9 - 23)     | 0<br>(0 - 0)     | 0<br>(0 - 0)      | 0<br>(0 - 0)       | 1<br>(1 - 2)       | 12<br>(8 - 20)     |
| Chronic kidney disease due to glomerulonephritis    | 0<br>(0 - 0)       | 0<br>(0 - 0)     | 0<br>(0 - 0)      | 0<br>(0 - 0)       | 0<br>(0 - 0)       | 0<br>(0 - 0)       |
| Chronic kidney disease due to other causes          | 14<br>(8 - 21)     | 0<br>(0 - 0)     | 0<br>(0 - 0)      | 0<br>(0 - 1)       | 2<br>(1 - 3)       | 12<br>(6 - 19)     |
| Urinary diseases and male infertility               | 5<br>(2 - 7)       | 0<br>(0 - 0)     | 0<br>(0 - 0)      | 0<br>(0 - 0)       | 1<br>(0 - 1)       | 4<br>(2 - 6)       |
| Interstitial nephritis and urinary tract infections | 3<br>(1 - 4)       | 0<br>(0 - 0)     | 0<br>(0 - 0)      | 0<br>(0 - 0)       | 0<br>(0 - 0)       | 2<br>(1 - 4)       |
| Urolithiasis                                        | 0<br>(0 - 0)       | --               | 0<br>(0 - 0)      | 0<br>(0 - 0)       | 0<br>(0 - 0)       | 0<br>(0 - 0)       |
| Other urinary diseases                              | 2<br>(1 - 3)       | 0<br>(0 - 0)     | 0<br>(0 - 0)      | 0<br>(0 - 0)       | 0<br>(0 - 0)       | 2<br>(1 - 3)       |
| Gynecological diseases                              | --                 | --               | --                | --                 | --                 | --                 |
| Uterine fibroids                                    | --                 | --               | --                | --                 | --                 | --                 |
| Polycystic ovarian syndrome                         | --                 | --               | --                | --                 | --                 | --                 |
| Endometriosis                                       | --                 | --               | --                | --                 | --                 | --                 |
| Genital prolapse                                    | --                 | --               | --                | --                 | --                 | --                 |
| Other gynecological diseases                        | --                 | --               | --                | --                 | --                 | --                 |
| Hemoglobinopathies and hemolytic anemias            | 1<br>(1 - 2)       | 0<br>(0 - 0)     | 0<br>(0 - 0)      | 0<br>(0 - 0)       | 0<br>(0 - 0)       | 1<br>(0 - 1)       |
| Thalassemias                                        | 0<br>(0 - 0)       | 0<br>(0 - 0)     | 0<br>(0 - 0)      | 0<br>(0 - 0)       | 0<br>(0 - 0)       | 0<br>(0 - 0)       |
| Sickle cell disorders                               | 0<br>(0 - 0)       | 0<br>(0 - 0)     | 0<br>(0 - 0)      | 0<br>(0 - 0)       | 0<br>(0 - 0)       | 0<br>(0 - 0)       |
| G6PD deficiency                                     | 0<br>(0 - 0)       | 0<br>(0 - 0)     | 0<br>(0 - 0)      | 0<br>(0 - 0)       | 0<br>(0 - 0)       | 0<br>(0 - 0)       |
| Other hemoglobinopathies and hemolytic anemias      | 1<br>(0 - 1)       | 0<br>(0 - 0)     | 0<br>(0 - 0)      | 0<br>(0 - 0)       | 0<br>(0 - 0)       | 1<br>(0 - 1)       |
| Endocrine, metabolic, blood, and immune disorders   | 6<br>(4 - 13)      | 0<br>(0 - 0)     | 0<br>(0 - 0)      | 1<br>(1 - 2)       | 2<br>(1 - 4)       | 3<br>(2 - 7)       |
| Musculoskeletal disorders                           | 3<br>(1 - 4)       | --               | 0<br>(0 - 0)      | 0<br>(0 - 0)       | 1<br>(0 - 1)       | 2<br>(1 - 3)       |
| Rheumatoid arthritis                                | 0<br>(0 - 0)       | --               | 0<br>(0 - 0)      | 0<br>(0 - 0)       | 0<br>(0 - 0)       | 0<br>(0 - 0)       |
| Other musculoskeletal disorders                     | 3<br>(1 - 3)       | --               | 0<br>(0 - 0)      | 0<br>(0 - 0)       | 0<br>(0 - 1)       | 2<br>(1 - 3)       |
| Other non-communicable diseases                     | 7<br>(5 - 9)       | 3<br>(2 - 4)     | 0<br>(0 - 0)      | 1<br>(1 - 1)       | 1<br>(0 - 1)       | 3<br>(1 - 4)       |
| Congenital anomalies                                | 3<br>(3 - 5)       | 2<br>(1 - 3)     | 0<br>(0 - 0)      | 1<br>(1 - 1)       | 0<br>(0 - 0)       | 0<br>(0 - 0)       |
| Neural tube defects                                 | 0<br>(0 - 0)       | 0<br>(0 - 0)     | 0<br>(0 - 0)      | 0<br>(0 - 0)       | 0<br>(0 - 0)       | 0<br>(0 - 0)       |
| Congenital heart anomalies                          | 1<br>(1 - 1)       | 0<br>(0 - 1)     | 0<br>(0 - 0)      | 0<br>(0 - 0)       | 0<br>(0 - 0)       | 0<br>(0 - 0)       |
| Cleft lip and cleft palate                          | 0<br>(0 - 0)       | 0<br>(0 - 0)     | --                | --                 | --                 | --                 |
| Down syndrome                                       | 0<br>(0 - 0)       | 0<br>(0 - 0)     | 0<br>(0 - 0)      | 0<br>(0 - 0)       | 0<br>(0 - 0)       | 0<br>(0 - 0)       |
| Chromosomal unbalanced rearrangements               | 0<br>(0 - 0)       | 0<br>(0 - 0)     | 0<br>(0 - 0)      | 0<br>(0 - 0)       | 0<br>(0 - 0)       | 0<br>(0 - 0)       |
| Other congenital anomalies                          | 2<br>(2 - 3)       | 2<br>(1 - 2)     | 0<br>(0 - 0)      | 0<br>(0 - 1)       | 0<br>(0 - 0)       | 0<br>(0 - 0)       |
| Skin and subcutaneous diseases                      | 3<br>(1 - 4)       | 0<br>(0 - 0)     | 0<br>(0 - 0)      | 0<br>(0 - 0)       | 0<br>(0 - 1)       | 2<br>(1 - 3)       |
| Cellulitis                                          | 0<br>(0 - 0)       | 0<br>(0 - 0)     | 0<br>(0 - 0)      | 0<br>(0 - 0)       | 0<br>(0 - 0)       | 0<br>(0 - 0)       |
| Pyoderma                                            | 2<br>(1 - 3)       | 0<br>(0 - 0)     | 0<br>(0 - 0)      | 0<br>(0 - 0)       | 0<br>(0 - 0)       | 1<br>(1 - 2)       |
| Decubitus ulcer                                     | 1<br>(0 - 2)       | 0<br>(0 - 0)     | 0<br>(0 - 0)      | 0<br>(0 - 0)       | 0<br>(0 - 0)       | 1<br>(0 - 1)       |
| Other skin and subcutaneous diseases                | 0<br>(0 - 0)       | 0<br>(0 - 0)     | 0<br>(0 - 0)      | 0<br>(0 - 0)       | 0<br>(0 - 0)       | 0<br>(0 - 0)       |
| Sudden infant death syndrome                        | 1<br>(0 - 1)       | 1<br>(0 - 1)     | --                | --                 | --                 | --                 |
| Injuries                                            | 141<br>(118 - 163) | 1<br>(1 - 2)     | 2<br>(1 - 2)      | 55<br>(46 - 64)    | 35<br>(29 - 44)    | 48<br>(38 - 57)    |
| Transport injuries                                  | 30<br>(25 - 34)    | 0<br>(0 - 0)     | 1<br>(1 - 1)      | 16<br>(13 - 19)    | 7<br>(5 - 8)       | 6<br>(4 - 7)       |
| Road injuries                                       | 28<br>(23 - 32)    | 0<br>(0 - 0)     | 1<br>(1 - 1)      | 15<br>(12 - 19)    | 6<br>(5 - 7)       | 5<br>(4 - 7)       |
| Pedestrian road injuries                            | 4<br>(2 - 7)       | 0<br>(0 - 0)     | 0<br>(0 - 0)      | 1<br>(1 - 3)       | 1<br>(0 - 2)       | 2<br>(1 - 3)       |

Web Table 31- Luxembourg deaths with 95% UI by age, sex, and cause in 2013

| Cause                                           | Males, All Ages | Males, 0-4 Years | Males, 5-14 Years | Males, 15-49 Years | Males, 50-69 Years | Males, 70-80 Years |
|-------------------------------------------------|-----------------|------------------|-------------------|--------------------|--------------------|--------------------|
| Cyclist road injuries                           | 1<br>(1 - 3)    | 0<br>(0 - 0)     | 0<br>(0 - 0)      | 1<br>(0 - 1)       | 0<br>(0 - 1)       | 0<br>(0 - 1)       |
| Motorcyclist road injuries                      | 4<br>(2 - 7)    | 0<br>(0 - 0)     | 0<br>(0 - 0)      | 2<br>(1 - 4)       | 1<br>(1 - 2)       | 1<br>(0 - 1)       |
| Motor vehicle road injuries                     | 18<br>(11 - 24) | 0<br>(0 - 0)     | 0<br>(0 - 1)      | 11<br>(7 - 15)     | 4<br>(2 - 5)       | 3<br>(1 - 4)       |
| Other road injuries                             | 0<br>(0 - 2)    | 0<br>(0 - 0)     | 0<br>(0 - 0)      | 0<br>(0 - 1)       | 0<br>(0 - 0)       | 0<br>(0 - 0)       |
| Other transport injuries                        | 2<br>(1 - 3)    | 0<br>(0 - 0)     | 0<br>(0 - 0)      | 1<br>(0 - 1)       | 1<br>(0 - 1)       | 0<br>(0 - 1)       |
| Unintentional injuries                          | 57<br>(44 - 67) | 1<br>(1 - 1)     | 1<br>(0 - 1)      | 11<br>(9 - 13)     | 12<br>(9 - 15)     | 33<br>(24 - 41)    |
| Falls                                           | 28<br>(17 - 35) | 0<br>(0 - 0)     | 0<br>(0 - 0)      | 4<br>(3 - 6)       | 6<br>(4 - 8)       | 17<br>(10 - 22)    |
| Drowning                                        | 2<br>(1 - 3)    | 0<br>(0 - 0)     | 0<br>(0 - 0)      | 1<br>(1 - 2)       | 0<br>(0 - 1)       | 0<br>(0 - 0)       |
| Fire, heat, and hot substances                  | 1<br>(1 - 2)    | 0<br>(0 - 0)     | 0<br>(0 - 0)      | 0<br>(0 - 0)       | 0<br>(0 - 0)       | 1<br>(0 - 1)       |
| Poisonings                                      | 1<br>(1 - 1)    | 0<br>(0 - 0)     | 0<br>(0 - 0)      | 0<br>(0 - 1)       | 0<br>(0 - 0)       | 0<br>(0 - 0)       |
| Exposure to mechanical forces                   | 3<br>(2 - 4)    | 0<br>(0 - 0)     | 0<br>(0 - 0)      | 2<br>(1 - 2)       | 1<br>(1 - 1)       | 0<br>(0 - 1)       |
| Unintentional firearm injuries                  | 0<br>(0 - 0)    | 0<br>(0 - 0)     | 0<br>(0 - 0)      | 0<br>(0 - 0)       | 0<br>(0 - 0)       | 0<br>(0 - 0)       |
| Unintentional suffocation                       | 0<br>(0 - 1)    | 0<br>(0 - 0)     | 0<br>(0 - 0)      | 0<br>(0 - 0)       | 0<br>(0 - 0)       | 0<br>(0 - 0)       |
| Other exposure to mechanical forces             | 2<br>(2 - 3)    | 0<br>(0 - 0)     | 0<br>(0 - 0)      | 1<br>(1 - 2)       | 1<br>(0 - 1)       | 0<br>(0 - 0)       |
| Adverse effects of medical treatment            | 8<br>(4 - 11)   | 0<br>(0 - 0)     | 0<br>(0 - 0)      | 0<br>(0 - 1)       | 1<br>(1 - 2)       | 6<br>(3 - 9)       |
| Animal contact                                  | 0<br>(0 - 1)    | 0<br>(0 - 0)     | 0<br>(0 - 0)      | 0<br>(0 - 0)       | 0<br>(0 - 1)       | 0<br>(0 - 0)       |
| Venomous animal contact                         | 0<br>(0 - 0)    | 0<br>(0 - 0)     | 0<br>(0 - 0)      | 0<br>(0 - 0)       | 0<br>(0 - 0)       | 0<br>(0 - 0)       |
| Non-venomous animal contact                     | 0<br>(0 - 1)    | 0<br>(0 - 0)     | 0<br>(0 - 0)      | 0<br>(0 - 0)       | 0<br>(0 - 1)       | 0<br>(0 - 0)       |
| Foreign body                                    | 9<br>(3 - 13)   | 0<br>(0 - 1)     | 0<br>(0 - 0)      | 1<br>(1 - 2)       | 2<br>(1 - 3)       | 5<br>(2 - 8)       |
| Pulmonary aspiration and foreign body in airway | 9<br>(3 - 13)   | 0<br>(0 - 1)     | 0<br>(0 - 0)      | 1<br>(1 - 2)       | 2<br>(1 - 3)       | 5<br>(2 - 8)       |
| Foreign body in other body part                 | 0<br>(0 - 0)    | 0<br>(0 - 0)     | 0<br>(0 - 0)      | 0<br>(0 - 0)       | 0<br>(0 - 0)       | 0<br>(0 - 0)       |
| Other unintentional injuries                    | 5<br>(4 - 8)    | 0<br>(0 - 0)     | 0<br>(0 - 0)      | 1<br>(1 - 2)       | 1<br>(1 - 2)       | 3<br>(2 - 5)       |
| Self-harm and interpersonal violence            | 55<br>(41 - 71) | 0<br>(0 - 0)     | 0<br>(0 - 0)      | 28<br>(21 - 36)    | 16<br>(12 - 23)    | 10<br>(7 - 14)     |
| Self-harm                                       | 51<br>(38 - 67) | -                | 0<br>(0 - 0)      | 26<br>(19 - 34)    | 15<br>(11 - 22)    | 9<br>(7 - 13)      |
| Interpersonal violence                          | 4<br>(2 - 5)    | 0<br>(0 - 0)     | 0<br>(0 - 0)      | 2<br>(1 - 3)       | 1<br>(1 - 2)       | 0<br>(0 - 1)       |
| Assault by firearm                              | 1<br>(0 - 1)    | 0<br>(0 - 0)     | 0<br>(0 - 0)      | 1<br>(0 - 1)       | 0<br>(0 - 0)       | 0<br>(0 - 0)       |
| Assault by sharp object                         | 1<br>(1 - 2)    | 0<br>(0 - 0)     | 0<br>(0 - 0)      | 1<br>(0 - 1)       | 0<br>(0 - 1)       | 0<br>(0 - 0)       |
| Assault by other means                          | 2<br>(1 - 3)    | 0<br>(0 - 0)     | 0<br>(0 - 0)      | 1<br>(0 - 2)       | 1<br>(0 - 1)       | 0<br>(0 - 0)       |

Web Table 31- Luxembourg deaths with 95% UI by age, sex, and cause in 2013

| Cause                                                             | Females, All Ages        | Females, 0-4 Years | Females, 5-14 Years | Females, 15-49 Years | Females, 50-69 Years | Females, 70-80 Years     |
|-------------------------------------------------------------------|--------------------------|--------------------|---------------------|----------------------|----------------------|--------------------------|
| All causes                                                        | 2,077<br>(1,828 - 2,348) | 7<br>(5 - 10)      | 2<br>(2 - 2)        | 83<br>(69 - 99)      | 283<br>(235 - 337)   | 1,702<br>(1,517 - 1,903) |
| Communicable, maternal, neonatal, and nutritional diseases        | 120<br>(81 - 154)        | 3<br>(2 - 5)       | 0<br>(0 - 0)        | 3<br>(2 - 3)         | 6<br>(5 - 8)         | 108<br>(71 - 140)        |
| HIV/AIDS and tuberculosis                                         | 2<br>(1 - 2)             | 0<br>(0 - 0)       | 0<br>(0 - 0)        | 0<br>(0 - 1)         | 0<br>(0 - 0)         | 1<br>(0 - 1)             |
| Tuberculosis                                                      | 1<br>(1 - 2)             | 0<br>(0 - 0)       | 0<br>(0 - 0)        | 0<br>(0 - 0)         | 0<br>(0 - 0)         | 1<br>(0 - 1)             |
| HIV/AIDS                                                          | 0<br>(0 - 1)             | 0<br>(0 - 0)       | 0<br>(0 - 0)        | 0<br>(0 - 0)         | 0<br>(0 - 0)         | 0<br>(0 - 0)             |
| HIV/AIDS resulting in mycobacterial infection                     | 0<br>(0 - 0)             | 0<br>(0 - 0)       | 0<br>(0 - 0)        | 0<br>(0 - 0)         | 0<br>(0 - 0)         | 0<br>(0 - 0)             |
| HIV/AIDS resulting in other diseases                              | 0<br>(0 - 1)             | 0<br>(0 - 0)       | 0<br>(0 - 0)        | 0<br>(0 - 0)         | 0<br>(0 - 0)         | 0<br>(0 - 0)             |
| Diarrhea, lower respiratory, and other common infectious diseases | 97<br>(60 - 128)         | 0<br>(0 - 1)       | 0<br>(0 - 0)        | 1<br>(1 - 2)         | 5<br>(3 - 6)         | 90<br>(55 - 121)         |
| Diarrheal diseases                                                | 9<br>(5 - 14)            | 0<br>(0 - 0)       | 0<br>(0 - 0)        | 0<br>(0 - 0)         | 0<br>(0 - 1)         | 8<br>(5 - 14)            |
| Intestinal infectious diseases                                    | 0<br>(0 - 1)             | 0<br>(0 - 0)       | 0<br>(0 - 0)        | 0<br>(0 - 0)         | 0<br>(0 - 0)         | 0<br>(0 - 0)             |
| Typhoid fever                                                     | 0<br>(0 - 1)             | 0<br>(0 - 0)       | 0<br>(0 - 0)        | 0<br>(0 - 0)         | 0<br>(0 - 0)         | 0<br>(0 - 0)             |
| Paratyphoid fever                                                 | 0<br>(0 - 0)             | 0<br>(0 - 0)       | 0<br>(0 - 0)        | 0<br>(0 - 0)         | 0<br>(0 - 0)         | 0<br>(0 - 0)             |
| Other intestinal infectious diseases                              | 0<br>(0 - 0)             | 0<br>(0 - 0)       | 0<br>(0 - 0)        | 0<br>(0 - 0)         | 0<br>(0 - 0)         | 0<br>(0 - 0)             |
| Lower respiratory infections                                      | 86<br>(49 - 117)         | 0<br>(0 - 0)       | 0<br>(0 - 0)        | 1<br>(0 - 1)         | 4<br>(2 - 5)         | 81<br>(46 - 111)         |
| Upper respiratory infections                                      | 0<br>(0 - 0)             | 0<br>(0 - 0)       | 0<br>(0 - 0)        | 0<br>(0 - 0)         | 0<br>(0 - 0)         | 0<br>(0 - 0)             |
| Otitis media                                                      | 0<br>(0 - 0)             | 0<br>(0 - 0)       | 0<br>(0 - 0)        | 0<br>(0 - 0)         | 0<br>(0 - 0)         | 0<br>(0 - 0)             |
| Meningitis                                                        | 1<br>(0 - 1)             | 0<br>(0 - 0)       | 0<br>(0 - 0)        | 0<br>(0 - 0)         | 0<br>(0 - 0)         | 0<br>(0 - 1)             |
| Pneumococcal meningitis                                           | 0<br>(0 - 0)             | 0<br>(0 - 0)       | 0<br>(0 - 0)        | 0<br>(0 - 0)         | 0<br>(0 - 0)         | 0<br>(0 - 0)             |
| H influenzae type B meningitis                                    | 0<br>(0 - 0)             | 0<br>(0 - 0)       | 0<br>(0 - 0)        | 0<br>(0 - 0)         | 0<br>(0 - 0)         | 0<br>(0 - 0)             |
| Meningococcal meningitis                                          | 0<br>(0 - 0)             | 0<br>(0 - 0)       | 0<br>(0 - 0)        | 0<br>(0 - 0)         | 0<br>(0 - 0)         | 0<br>(0 - 0)             |
| Other meningitis                                                  | 0<br>(0 - 0)             | 0<br>(0 - 0)       | 0<br>(0 - 0)        | 0<br>(0 - 0)         | 0<br>(0 - 0)         | 0<br>(0 - 0)             |
| Encephalitis                                                      | 1<br>(0 - 1)             | 0<br>(0 - 0)       | 0<br>(0 - 0)        | 0<br>(0 - 0)         | 0<br>(0 - 0)         | 0<br>(0 - 1)             |
| Diphtheria                                                        | 0<br>(0 - 0)             | 0<br>(0 - 0)       | 0<br>(0 - 0)        | 0<br>(0 - 0)         | 0<br>(0 - 0)         | --                       |
| Whooping cough                                                    | 0<br>(0 - 0)             | 0<br>(0 - 0)       | 0<br>(0 - 0)        | 0<br>(0 - 0)         | 0<br>(0 - 0)         | --                       |
| Tetanus                                                           | 0<br>(0 - 0)             | 0<br>(0 - 0)       | 0<br>(0 - 0)        | 0<br>(0 - 0)         | 0<br>(0 - 0)         | 0<br>(0 - 0)             |
| Measles                                                           | 0<br>(0 - 0)             | 0<br>(0 - 0)       | 0<br>(0 - 0)        | 0<br>(0 - 0)         | 0<br>(0 - 0)         | --                       |
| Varicella and herpes zoster                                       | 0<br>(0 - 1)             | 0<br>(0 - 0)       | 0<br>(0 - 0)        | 0<br>(0 - 0)         | 0<br>(0 - 0)         | 0<br>(0 - 1)             |
| Neglected tropical diseases and malaria                           | 0<br>(0 - 1)             | 0<br>(0 - 0)       | 0<br>(0 - 0)        | 0<br>(0 - 0)         | 0<br>(0 - 0)         | 0<br>(0 - 0)             |
| Cysticercosis                                                     | 0<br>(0 - 0)             | 0<br>(0 - 0)       | 0<br>(0 - 0)        | 0<br>(0 - 0)         | 0<br>(0 - 0)         | 0<br>(0 - 0)             |
| Cystic echinococcosis                                             | 0<br>(0 - 0)             | 0<br>(0 - 0)       | 0<br>(0 - 0)        | 0<br>(0 - 0)         | 0<br>(0 - 0)         | 0<br>(0 - 0)             |
| Dengue                                                            | 0<br>(0 - 0)             | 0<br>(0 - 0)       | 0<br>(0 - 0)        | 0<br>(0 - 0)         | 0<br>(0 - 0)         | 0<br>(0 - 0)             |
| Rabies                                                            | 0<br>(0 - 0)             | 0<br>(0 - 0)       | 0<br>(0 - 0)        | 0<br>(0 - 0)         | 0<br>(0 - 0)         | 0<br>(0 - 0)             |
| Other neglected tropical diseases                                 | 0<br>(0 - 1)             | 0<br>(0 - 0)       | 0<br>(0 - 0)        | 0<br>(0 - 0)         | 0<br>(0 - 0)         | 0<br>(0 - 0)             |
| Maternal disorders                                                | 0<br>(0 - 1)             | --                 | 0<br>(0 - 0)        | 0<br>(0 - 1)         | --                   | --                       |
| Maternal hemorrhage                                               | 0<br>(0 - 0)             | --                 | 0<br>(0 - 0)        | 0<br>(0 - 0)         | --                   | --                       |
| Maternal sepsis and other maternal infections                     | 0<br>(0 - 0)             | --                 | 0<br>(0 - 0)        | 0<br>(0 - 0)         | --                   | --                       |
| Maternal hypertensive disorders                                   | 0<br>(0 - 0)             | --                 | 0<br>(0 - 0)        | 0<br>(0 - 0)         | --                   | --                       |
| Maternal obstructed labor                                         | 0<br>(0 - 0)             | --                 | 0<br>(0 - 0)        | 0<br>(0 - 0)         | --                   | --                       |
| Maternal abortive outcome                                         | 0<br>(0 - 0)             | --                 | 0<br>(0 - 0)        | 0<br>(0 - 0)         | --                   | --                       |
| Indirect maternal deaths                                          | 0<br>(0 - 0)             | --                 | 0<br>(0 - 0)        | 0<br>(0 - 0)         | --                   | --                       |

Web Table 31- Luxembourg deaths with 95% UI by age, sex, and cause in 2013

| Cause                                                            | Females, All Ages        | Females, 0-4 Years | Females, 5-14 Years | Females, 15-49 Years | Females, 50-69 Years | Females, 70-80 Years     |
|------------------------------------------------------------------|--------------------------|--------------------|---------------------|----------------------|----------------------|--------------------------|
| Late maternal deaths                                             | 0<br>(0 - 0)             | --                 | 0<br>(0 - 0)        | 0<br>(0 - 0)         | --                   | --                       |
| Maternal deaths aggravated by HIV/AIDS                           | 0<br>(0 - 0)             | --                 | --                  | 0<br>(0 - 0)         | --                   | --                       |
| Other maternal disorders                                         | 0<br>(0 - 0)             | --                 | 0<br>(0 - 0)        | 0<br>(0 - 0)         | --                   | --                       |
| Neonatal disorders                                               | 3<br>(2 - 4)             | 3<br>(2 - 4)       | --                  | --                   | --                   | --                       |
| Neonatal preterm birth complications                             | 1<br>(0 - 2)             | 1<br>(0 - 2)       | --                  | --                   | --                   | --                       |
| Neonatal encephalopathy due to birth asphyxia and trauma         | 1<br>(1 - 2)             | 1<br>(1 - 2)       | --                  | --                   | --                   | --                       |
| Neonatal sepsis and other neonatal infections                    | 0<br>(0 - 0)             | 0<br>(0 - 0)       | --                  | --                   | --                   | --                       |
| Hemolytic disease and other neonatal jaundice                    | 0<br>(0 - 0)             | 0<br>(0 - 0)       | --                  | --                   | --                   | --                       |
| Other neonatal disorders                                         | 1<br>(0 - 1)             | 1<br>(0 - 1)       | --                  | --                   | --                   | --                       |
| Nutritional deficiencies                                         | 14<br>(8 - 19)           | 0<br>(0 - 0)       | 0<br>(0 - 0)        | 0<br>(0 - 0)         | 1<br>(0 - 1)         | 13<br>(7 - 18)           |
| Protein-energy malnutrition                                      | 3<br>(0 - 7)             | 0<br>(0 - 0)       | 0<br>(0 - 0)        | 0<br>(0 - 0)         | 0<br>(0 - 0)         | 3<br>(0 - 7)             |
| Iodine deficiency                                                | 0<br>(0 - 0)             | 0<br>(0 - 0)       | 0<br>(0 - 0)        | 0<br>(0 - 0)         | 0<br>(0 - 0)         | 0<br>(0 - 0)             |
| Iron-deficiency anemia                                           | 11<br>(6 - 16)           | 0<br>(0 - 0)       | 0<br>(0 - 0)        | 0<br>(0 - 0)         | 0<br>(0 - 1)         | 10<br>(5 - 15)           |
| Other nutritional deficiencies                                   | 0<br>(0 - 0)             | 0<br>(0 - 0)       | 0<br>(0 - 0)        | 0<br>(0 - 0)         | 0<br>(0 - 0)         | 0<br>(0 - 0)             |
| Other communicable, maternal, neonatal, and nutritional diseases | 5<br>(3 - 7)             | 0<br>(0 - 0)       | 0<br>(0 - 0)        | 0<br>(0 - 0)         | 1<br>(1 - 1)         | 3<br>(2 - 5)             |
| Sexually transmitted diseases excluding HIV                      | 0<br>(0 - 1)             | 0<br>(0 - 0)       | 0<br>(0 - 0)        | 0<br>(0 - 0)         | 0<br>(0 - 0)         | 0<br>(0 - 1)             |
| Syphilis                                                         | 0<br>(0 - 1)             | 0<br>(0 - 0)       | 0<br>(0 - 0)        | 0<br>(0 - 0)         | 0<br>(0 - 0)         | 0<br>(0 - 0)             |
| Chlamydial infection                                             | 0<br>(0 - 0)             | --                 | 0<br>(0 - 0)        | 0<br>(0 - 0)         | 0<br>(0 - 0)         | 0<br>(0 - 0)             |
| Gonococcal infection                                             | 0<br>(0 - 0)             | --                 | 0<br>(0 - 0)        | 0<br>(0 - 0)         | 0<br>(0 - 0)         | 0<br>(0 - 0)             |
| Other sexually transmitted diseases                              | 0<br>(0 - 0)             | --                 | 0<br>(0 - 0)        | 0<br>(0 - 0)         | 0<br>(0 - 0)         | 0<br>(0 - 0)             |
| Hepatitis                                                        | 0<br>(0 - 0)             | 0<br>(0 - 0)       | 0<br>(0 - 0)        | 0<br>(0 - 0)         | 0<br>(0 - 0)         | 0<br>(0 - 0)             |
| Acute hepatitis A                                                | 0<br>(0 - 0)             | 0<br>(0 - 0)       | 0<br>(0 - 0)        | 0<br>(0 - 0)         | 0<br>(0 - 0)         | 0<br>(0 - 0)             |
| Acute hepatitis B                                                | 0<br>(0 - 0)             | 0<br>(0 - 0)       | 0<br>(0 - 0)        | 0<br>(0 - 0)         | 0<br>(0 - 0)         | 0<br>(0 - 0)             |
| Acute hepatitis C                                                | 0<br>(0 - 0)             | --                 | 0<br>(0 - 0)        | 0<br>(0 - 0)         | 0<br>(0 - 0)         | 0<br>(0 - 0)             |
| Other infectious diseases                                        | 4<br>(2 - 6)             | 0<br>(0 - 0)       | 0<br>(0 - 0)        | 0<br>(0 - 0)         | 1<br>(1 - 1)         | 3<br>(2 - 5)             |
| Non-communicable diseases                                        | 1,849<br>(1,632 - 2,099) | 3<br>(2 - 4)       | 1<br>(1 - 1)        | 62<br>(51 - 74)      | 260<br>(217 - 310)   | 1,523<br>(1,357 - 1,709) |
| Neoplasms                                                        | 519<br>(431 - 614)       | 0<br>(0 - 1)       | 1<br>(0 - 1)        | 33<br>(27 - 40)      | 146<br>(118 - 173)   | 339<br>(276 - 406)       |
| Esophageal cancer                                                | 7<br>(5 - 8)             | --                 | --                  | 0<br>(0 - 0)         | 2<br>(2 - 3)         | 5<br>(3 - 6)             |
| Stomach cancer                                                   | 26<br>(18 - 35)          | --                 | --                  | 1<br>(1 - 1)         | 4<br>(3 - 6)         | 20<br>(14 - 29)          |
| Liver cancer                                                     | 13<br>(9 - 17)           | --                 | 0<br>(0 - 0)        | 0<br>(0 - 0)         | 3<br>(2 - 4)         | 10<br>(7 - 13)           |
| Liver cancer due to hepatitis B                                  | 3<br>(1 - 5)             | --                 | 0<br>(0 - 0)        | 0<br>(0 - 0)         | 1<br>(0 - 1)         | 2<br>(1 - 4)             |
| Liver cancer due to hepatitis C                                  | 6<br>(3 - 10)            | --                 | 0<br>(0 - 0)        | 0<br>(0 - 0)         | 2<br>(1 - 2)         | 5<br>(2 - 8)             |
| Liver cancer due to alcohol use                                  | 3<br>(1 - 4)             | --                 | --                  | 0<br>(0 - 0)         | 0<br>(0 - 1)         | 2<br>(1 - 4)             |
| Liver cancer due to other causes                                 | 1<br>(0 - 3)             | --                 | 0<br>(0 - 0)        | 0<br>(0 - 0)         | 0<br>(0 - 1)         | 1<br>(0 - 2)             |
| Larynx cancer                                                    | 1<br>(0 - 1)             | --                 | --                  | 0<br>(0 - 0)         | 0<br>(0 - 0)         | 0<br>(0 - 1)             |
| Tracheal, bronchus and lung cancer                               | 71<br>(45 - 90)          | --                 | --                  | 5<br>(3 - 6)         | 29<br>(18 - 37)      | 38<br>(21 - 50)          |
| Breast cancer                                                    | 96<br>(72 - 122)         | --                 | --                  | 11<br>(8 - 14)       | 33<br>(25 - 42)      | 53<br>(36 - 69)          |
| Cervical cancer                                                  | 11<br>(8 - 14)           | --                 | --                  | 2<br>(1 - 2)         | 4<br>(3 - 5)         | 5<br>(4 - 7)             |
| Uterine cancer                                                   | 13<br>(10 - 20)          | --                 | --                  | 0<br>(0 - 1)         | 4<br>(3 - 6)         | 9<br>(7 - 14)            |
| Prostate cancer                                                  | --                       | --                 | --                  | --                   | --                   | --                       |

Web Table 31- Luxembourg deaths with 95% UI by age, sex, and cause in 2013

| Cause                                         | Females, All Ages  | Females, 0-4 Years | Females, 5-14 Years | Females, 15-49 Years | Females, 50-69 Years | Females, 70-80 Years |
|-----------------------------------------------|--------------------|--------------------|---------------------|----------------------|----------------------|----------------------|
| Colon and rectum cancer                       | 83<br>(66 - 104)   | --                 | --                  | 2<br>(2 - 3)         | 15<br>(12 - 19)      | 65<br>(52 - 84)      |
| Lip and oral cavity cancer                    | 3<br>(2 - 4)       | --                 | --                  | 0<br>(0 - 1)         | 1<br>(1 - 2)         | 2<br>(1 - 2)         |
| Nasopharynx cancer                            | 0<br>(0 - 0)       | --                 | 0<br>(0 - 0)        | 0<br>(0 - 0)         | 0<br>(0 - 0)         | 0<br>(0 - 0)         |
| Other pharynx cancer                          | 2<br>(1 - 2)       | --                 | --                  | 0<br>(0 - 0)         | 1<br>(1 - 1)         | 0<br>(0 - 1)         |
| Gallbladder and biliary tract cancer          | 7<br>(5 - 13)      | --                 | --                  | 0<br>(0 - 0)         | 1<br>(1 - 2)         | 6<br>(4 - 11)        |
| Pancreatic cancer                             | 40<br>(32 - 50)    | --                 | --                  | 1<br>(1 - 1)         | 8<br>(6 - 10)        | 31<br>(25 - 40)      |
| Malignant skin melanoma                       | 7<br>(5 - 11)      | --                 | --                  | 1<br>(1 - 2)         | 2<br>(1 - 3)         | 4<br>(2 - 6)         |
| Non-melanoma skin cancer                      | 2<br>(1 - 3)       | --                 | --                  | 0<br>(0 - 0)         | 0<br>(0 - 0)         | 2<br>(1 - 2)         |
| Ovarian cancer                                | 36<br>(29 - 45)    | --                 | --                  | 2<br>(2 - 3)         | 13<br>(10 - 17)      | 21<br>(16 - 28)      |
| Testicular cancer                             | --                 | --                 | --                  | --                   | --                   | --                   |
| Kidney cancer                                 | 9<br>(6 - 13)      | 0<br>(0 - 0)       | 0<br>(0 - 0)        | 0<br>(0 - 0)         | 2<br>(2 - 3)         | 7<br>(4 - 11)        |
| Bladder cancer                                | 9<br>(5 - 14)      | --                 | --                  | 0<br>(0 - 0)         | 1<br>(1 - 2)         | 8<br>(4 - 11)        |
| Brain and nervous system cancer               | 13<br>(10 - 21)    | 0<br>(0 - 0)       | 0<br>(0 - 0)        | 2<br>(1 - 3)         | 5<br>(4 - 8)         | 6<br>(4 - 10)        |
| Thyroid cancer                                | 1<br>(1 - 3)       | --                 | 0<br>(0 - 0)        | 0<br>(0 - 0)         | 0<br>(0 - 1)         | 1<br>(1 - 2)         |
| Mesothelioma                                  | 1<br>(1 - 3)       | --                 | --                  | 0<br>(0 - 0)         | 0<br>(0 - 1)         | 1<br>(0 - 2)         |
| Hodgkin lymphoma                              | 0<br>(0 - 1)       | 0<br>(0 - 0)       | 0<br>(0 - 0)        | 0<br>(0 - 0)         | 0<br>(0 - 0)         | 0<br>(0 - 0)         |
| Non-Hodgkin lymphoma                          | 16<br>(7 - 24)     | 0<br>(0 - 0)       | 0<br>(0 - 0)        | 1<br>(0 - 2)         | 4<br>(2 - 6)         | 12<br>(5 - 18)       |
| Multiple myeloma                              | 10<br>(6 - 16)     | --                 | --                  | 0<br>(0 - 0)         | 3<br>(2 - 5)         | 7<br>(4 - 12)        |
| Leukemia                                      | 20<br>(16 - 26)    | 0<br>(0 - 0)       | 0<br>(0 - 0)        | 1<br>(1 - 2)         | 4<br>(3 - 6)         | 15<br>(11 - 20)      |
| Other neoplasms                               | 19<br>(13 - 25)    | 0<br>(0 - 0)       | 0<br>(0 - 0)        | 2<br>(1 - 2)         | 4<br>(3 - 5)         | 13<br>(7 - 18)       |
| Cardiovascular diseases                       | 818<br>(644 - 996) | 0<br>(0 - 0)       | 0<br>(0 - 0)        | 9<br>(5 - 13)        | 59<br>(43 - 84)      | 750<br>(596 - 900)   |
| Rheumatic heart disease                       | 4<br>(2 - 6)       | 0<br>(0 - 0)       | 0<br>(0 - 0)        | 0<br>(0 - 0)         | 1<br>(0 - 1)         | 3<br>(1 - 5)         |
| Ischemic heart disease                        | 408<br>(251 - 496) | 0<br>(0 - 0)       | 0<br>(0 - 0)        | 4<br>(2 - 5)         | 30<br>(19 - 43)      | 374<br>(230 - 455)   |
| Cerebrovascular disease                       | 260<br>(198 - 405) | 0<br>(0 - 0)       | 0<br>(0 - 0)        | 3<br>(2 - 4)         | 16<br>(11 - 28)      | 242<br>(182 - 375)   |
| Ischemic stroke                               | 149<br>(106 - 244) | 0<br>(0 - 0)       | 0<br>(0 - 0)        | 0<br>(0 - 1)         | 5<br>(3 - 10)        | 144<br>(102 - 235)   |
| Hemorrhagic stroke                            | 111<br>(80 - 161)  | 0<br>(0 - 0)       | 0<br>(0 - 0)        | 2<br>(1 - 3)         | 11<br>(8 - 20)       | 97<br>(70 - 142)     |
| Hypertensive heart disease                    | 16<br>(9 - 30)     | 0<br>(0 - 0)       | 0<br>(0 - 0)        | 0<br>(0 - 0)         | 1<br>(1 - 2)         | 15<br>(8 - 28)       |
| Cardiomyopathy and myocarditis                | 21<br>(12 - 30)    | 0<br>(0 - 0)       | 0<br>(0 - 0)        | 1<br>(0 - 1)         | 2<br>(1 - 3)         | 19<br>(10 - 26)      |
| Atrial fibrillation and flutter               | 5<br>(3 - 8)       | --                 | --                  | 0<br>(0 - 0)         | 0<br>(0 - 0)         | 5<br>(3 - 8)         |
| Aortic aneurysm                               | 9<br>(5 - 15)      | --                 | --                  | 0<br>(0 - 0)         | 1<br>(0 - 1)         | 8<br>(4 - 14)        |
| Peripheral vascular disease                   | 4<br>(2 - 6)       | --                 | --                  | 0<br>(0 - 0)         | 0<br>(0 - 0)         | 4<br>(2 - 6)         |
| Endocarditis                                  | 3<br>(1 - 4)       | 0<br>(0 - 0)       | 0<br>(0 - 0)        | 0<br>(0 - 0)         | 0<br>(0 - 1)         | 2<br>(1 - 4)         |
| Other cardiovascular and circulatory diseases | 88<br>(53 - 121)   | 0<br>(0 - 0)       | 0<br>(0 - 0)        | 2<br>(1 - 3)         | 8<br>(4 - 11)        | 78<br>(46 - 109)     |
| Chronic respiratory diseases                  | 103<br>(68 - 129)  | 0<br>(0 - 0)       | 0<br>(0 - 0)        | 2<br>(2 - 3)         | 13<br>(8 - 17)       | 88<br>(57 - 111)     |
| Chronic obstructive pulmonary disease         | 91<br>(59 - 114)   | 0<br>(0 - 0)       | 0<br>(0 - 0)        | 1<br>(1 - 2)         | 10<br>(6 - 13)       | 79<br>(51 - 100)     |
| Pneumoconiosis                                | 0<br>(0 - 1)       | 0<br>(0 - 0)       | 0<br>(0 - 0)        | 0<br>(0 - 0)         | 0<br>(0 - 0)         | 0<br>(0 - 0)         |
| Silicosis                                     | 0<br>(0 - 0)       | 0<br>(0 - 0)       | 0<br>(0 - 0)        | 0<br>(0 - 0)         | 0<br>(0 - 0)         | 0<br>(0 - 0)         |
| Asbestosis                                    | 0<br>(0 - 0)       | 0<br>(0 - 0)       | 0<br>(0 - 0)        | 0<br>(0 - 0)         | 0<br>(0 - 0)         | 0<br>(0 - 0)         |
| Coal workers pneumoconiosis                   | 0<br>(0 - 0)       | 0<br>(0 - 0)       | 0<br>(0 - 0)        | 0<br>(0 - 0)         | 0<br>(0 - 0)         | 0<br>(0 - 0)         |
| Other pneumoconiosis                          | 0<br>(0 - 1)       | 0<br>(0 - 0)       | 0<br>(0 - 0)        | 0<br>(0 - 0)         | 0<br>(0 - 0)         | 0<br>(0 - 0)         |



Web Table 31- Luxembourg deaths with 95% UI by age, sex, and cause in 2013

| Cause                                               | Females, All Ages  | Females, 0-4 Years | Females, 5-14 Years | Females, 15-49 Years | Females, 50-69 Years | Females, 70-80 Years |
|-----------------------------------------------------|--------------------|--------------------|---------------------|----------------------|----------------------|----------------------|
| Asthma                                              | 8<br>(5 - 13)      | 0<br>(0 - 0)       | 0<br>(0 - 0)        | 1<br>(1 - 1)         | 2<br>(1 - 4)         | 5<br>(3 - 8)         |
| Interstitial lung disease and pulmonary sarcoidosis | 4<br>(1 - 8)       | 0<br>(0 - 0)       | 0<br>(0 - 0)        | 0<br>(0 - 0)         | 1<br>(0 - 1)         | 3<br>(1 - 6)         |
| Other chronic respiratory diseases                  | 0<br>(0 - 1)       | 0<br>(0 - 0)       | 0<br>(0 - 0)        | 0<br>(0 - 0)         | 0<br>(0 - 0)         | 0<br>(0 - 0)         |
| Cirrhosis                                           | 38<br>(31 - 46)    | 0<br>(0 - 0)       | 0<br>(0 - 0)        | 6<br>(4 - 7)         | 14<br>(11 - 18)      | 19<br>(14 - 24)      |
| Cirrhosis due to hepatitis B                        | 5<br>(2 - 8)       | 0<br>(0 - 0)       | 0<br>(0 - 0)        | 1<br>(0 - 1)         | 2<br>(1 - 3)         | 2<br>(1 - 4)         |
| Cirrhosis due to hepatitis C                        | 22<br>(10 - 31)    | 0<br>(0 - 0)       | 0<br>(0 - 0)        | 3<br>(1 - 5)         | 8<br>(3 - 12)        | 11<br>(6 - 16)       |
| Cirrhosis due to alcohol use                        | 7<br>(2 - 14)      | --                 | --                  | 1<br>(0 - 2)         | 2<br>(1 - 5)         | 4<br>(1 - 8)         |
| Cirrhosis due to other causes                       | 5<br>(2 - 12)      | 0<br>(0 - 0)       | 0<br>(0 - 0)        | 1<br>(1 - 3)         | 2<br>(1 - 5)         | 2<br>(1 - 4)         |
| Digestive diseases                                  | 58<br>(46 - 78)    | 0<br>(0 - 0)       | 0<br>(0 - 0)        | 2<br>(1 - 2)         | 5<br>(4 - 7)         | 51<br>(40 - 70)      |
| Peptic ulcer disease                                | 7<br>(4 - 10)      | 0<br>(0 - 0)       | 0<br>(0 - 0)        | 0<br>(0 - 0)         | 1<br>(0 - 1)         | 6<br>(4 - 9)         |
| Gastritis and duodenitis                            | 0<br>(0 - 0)       | 0<br>(0 - 0)       | 0<br>(0 - 0)        | 0<br>(0 - 0)         | 0<br>(0 - 0)         | 0<br>(0 - 0)         |
| Appendicitis                                        | 1<br>(0 - 2)       | 0<br>(0 - 0)       | 0<br>(0 - 0)        | 0<br>(0 - 0)         | 0<br>(0 - 0)         | 1<br>(0 - 1)         |
| Paralytic ileus and intestinal obstruction          | 13<br>(8 - 25)     | 0<br>(0 - 0)       | 0<br>(0 - 0)        | 0<br>(0 - 0)         | 1<br>(0 - 2)         | 12<br>(7 - 24)       |
| Inguinal, femoral, and abdominal hernia             | 2<br>(1 - 3)       | 0<br>(0 - 0)       | 0<br>(0 - 0)        | 0<br>(0 - 0)         | 0<br>(0 - 0)         | 2<br>(1 - 3)         |
| Inflammatory bowel disease                          | 4<br>(1 - 7)       | 0<br>(0 - 0)       | 0<br>(0 - 0)        | 0<br>(0 - 0)         | 0<br>(0 - 1)         | 4<br>(1 - 7)         |
| Vascular intestinal disorders                       | 16<br>(9 - 28)     | 0<br>(0 - 0)       | 0<br>(0 - 0)        | 0<br>(0 - 1)         | 1<br>(1 - 2)         | 15<br>(8 - 26)       |
| Gallbladder and biliary diseases                    | 5<br>(3 - 10)      | 0<br>(0 - 0)       | 0<br>(0 - 0)        | 0<br>(0 - 0)         | 0<br>(0 - 1)         | 5<br>(3 - 9)         |
| Pancreatitis                                        | 2<br>(1 - 3)       | 0<br>(0 - 0)       | 0<br>(0 - 0)        | 0<br>(0 - 0)         | 0<br>(0 - 1)         | 1<br>(1 - 2)         |
| Other digestive diseases                            | 7<br>(5 - 11)      | 0<br>(0 - 0)       | 0<br>(0 - 0)        | 0<br>(0 - 0)         | 1<br>(1 - 1)         | 6<br>(4 - 9)         |
| Neurological disorders                              | 199<br>(120 - 297) | 0<br>(0 - 0)       | 0<br>(0 - 0)        | 2<br>(1 - 2)         | 8<br>(6 - 11)        | 189<br>(111 - 287)   |
| Alzheimer disease and other dementias               | 167<br>(87 - 266)  | --                 | --                  | 0<br>(0 - 0)         | 3<br>(2 - 5)         | 164<br>(85 - 262)    |
| Parkinson disease                                   | 19<br>(12 - 29)    | --                 | --                  | 0<br>(0 - 0)         | 1<br>(1 - 1)         | 18<br>(11 - 27)      |
| Epilepsy                                            | 3<br>(1 - 5)       | 0<br>(0 - 0)       | 0<br>(0 - 0)        | 1<br>(0 - 1)         | 1<br>(0 - 1)         | 2<br>(1 - 3)         |
| Multiple sclerosis                                  | 3<br>(2 - 5)       | --                 | --                  | 1<br>(0 - 1)         | 1<br>(1 - 2)         | 1<br>(1 - 2)         |
| Other neurological disorders                        | 7<br>(5 - 9)       | 0<br>(0 - 0)       | 0<br>(0 - 0)        | 0<br>(0 - 0)         | 2<br>(2 - 3)         | 4<br>(3 - 5)         |
| Mental and substance use disorders                  | 10<br>(6 - 14)     | 0<br>(0 - 0)       | 0<br>(0 - 0)        | 5<br>(4 - 7)         | 3<br>(1 - 5)         | 2<br>(1 - 3)         |
| Schizophrenia                                       | 0<br>(0 - 0)       | --                 | --                  | 0<br>(0 - 0)         | 0<br>(0 - 0)         | 0<br>(0 - 0)         |
| Alcohol use disorders                               | 5<br>(2 - 9)       | --                 | --                  | 2<br>(1 - 3)         | 2<br>(1 - 4)         | 1<br>(1 - 3)         |
| Drug use disorders                                  | 4<br>(3 - 5)       | 0<br>(0 - 0)       | --                  | 3<br>(2 - 4)         | 0<br>(0 - 1)         | 0<br>(0 - 1)         |
| Opioid use disorders                                | 1<br>(1 - 2)       | 0<br>(0 - 0)       | --                  | 1<br>(1 - 1)         | 0<br>(0 - 0)         | 0<br>(0 - 0)         |
| Cocaine use disorders                               | 0<br>(0 - 0)       | 0<br>(0 - 0)       | --                  | 0<br>(0 - 0)         | 0<br>(0 - 0)         | 0<br>(0 - 0)         |
| Amphetamine use disorders                           | 0<br>(0 - 0)       | 0<br>(0 - 0)       | --                  | 0<br>(0 - 0)         | 0<br>(0 - 0)         | 0<br>(0 - 0)         |
| Other drug use disorders                            | 2<br>(2 - 3)       | 0<br>(0 - 0)       | --                  | 2<br>(1 - 2)         | 0<br>(0 - 0)         | 0<br>(0 - 0)         |
| Eating disorders                                    | 0<br>(0 - 0)       | --                 | 0<br>(0 - 0)        | 0<br>(0 - 0)         | --                   | --                   |
| Anorexia nervosa                                    | 0<br>(0 - 0)       | --                 | 0<br>(0 - 0)        | 0<br>(0 - 0)         | --                   | --                   |
| Diabetes, urogenital, blood, and endocrine diseases | 88<br>(70 - 126)   | 0<br>(0 - 0)       | 0<br>(0 - 0)        | 2<br>(2 - 3)         | 10<br>(7 - 13)       | 76<br>(59 - 109)     |
| Diabetes mellitus                                   | 34<br>(26 - 46)    | 0<br>(0 - 0)       | 0<br>(0 - 0)        | 1<br>(0 - 1)         | 5<br>(4 - 7)         | 28<br>(22 - 39)      |
| Acute glomerulonephritis                            | 0<br>(0 - 0)       | 0<br>(0 - 0)       | 0<br>(0 - 0)        | 0<br>(0 - 0)         | 0<br>(0 - 0)         | 0<br>(0 - 0)         |
| Chronic kidney disease                              | 38<br>(28 - 63)    | 0<br>(0 - 0)       | 0<br>(0 - 0)        | 1<br>(0 - 1)         | 3<br>(2 - 4)         | 35<br>(25 - 58)      |
| Chronic kidney disease due to diabetes mellitus     | 6<br>(3 - 9)       | 0<br>(0 - 0)       | 0<br>(0 - 0)        | 0<br>(0 - 0)         | 1<br>(0 - 1)         | 5<br>(3 - 8)         |

Web Table 31- Luxembourg deaths with 95% UI by age, sex, and cause in 2013

| Cause                                               | Females, All Ages | Females, 0-4 Years | Females, 5-14 Years | Females, 15-49 Years | Females, 50-69 Years | Females, 70-80 Years |
|-----------------------------------------------------|-------------------|--------------------|---------------------|----------------------|----------------------|----------------------|
| Chronic kidney disease due to hypertension          | 17<br>(10 - 28)   | 0<br>(0 - 0)       | 0<br>(0 - 0)        | 0<br>(0 - 0)         | 1<br>(0 - 2)         | 16<br>(10 - 27)      |
| Chronic kidney disease due to glomerulonephritis    | 1<br>(0 - 1)      | 0<br>(0 - 0)       | 0<br>(0 - 0)        | 0<br>(0 - 0)         | 0<br>(0 - 0)         | 0<br>(0 - 1)         |
| Chronic kidney disease due to other causes          | 15<br>(8 - 28)    | 0<br>(0 - 0)       | 0<br>(0 - 0)        | 0<br>(0 - 0)         | 1<br>(1 - 2)         | 14<br>(7 - 26)       |
| Urinary diseases and male infertility               | 8<br>(3 - 11)     | 0<br>(0 - 0)       | 0<br>(0 - 0)        | 0<br>(0 - 0)         | 1<br>(0 - 1)         | 6<br>(3 - 10)        |
| Interstitial nephritis and urinary tract infections | 7<br>(3 - 10)     | 0<br>(0 - 0)       | 0<br>(0 - 0)        | 0<br>(0 - 0)         | 1<br>(0 - 1)         | 6<br>(2 - 9)         |
| Urolithiasis                                        | 0<br>(0 - 0)      | --                 | 0<br>(0 - 0)        | 0<br>(0 - 0)         | 0<br>(0 - 0)         | 0<br>(0 - 0)         |
| Other urinary diseases                              | 1<br>(0 - 3)      | 0<br>(0 - 0)       | 0<br>(0 - 0)        | 0<br>(0 - 0)         | 0<br>(0 - 0)         | 1<br>(0 - 2)         |
| Gynecological diseases                              | 0<br>(0 - 0)      | --                 | --                  | 0<br>(0 - 0)         | 0<br>(0 - 0)         | 0<br>(0 - 0)         |
| Uterine fibroids                                    | 0<br>(0 - 0)      | --                 | --                  | 0<br>(0 - 0)         | 0<br>(0 - 0)         | 0<br>(0 - 0)         |
| Polycystic ovarian syndrome                         | 0<br>(0 - 0)      | --                 | --                  | 0<br>(0 - 0)         | 0<br>(0 - 0)         | --                   |
| Endometriosis                                       | 0<br>(0 - 0)      | --                 | --                  | 0<br>(0 - 0)         | 0<br>(0 - 0)         | --                   |
| Genital prolapse                                    | 0<br>(0 - 0)      | --                 | --                  | 0<br>(0 - 0)         | 0<br>(0 - 0)         | 0<br>(0 - 0)         |
| Other gynecological diseases                        | 0<br>(0 - 0)      | --                 | --                  | 0<br>(0 - 0)         | 0<br>(0 - 0)         | 0<br>(0 - 0)         |
| Hemoglobinopathies and hemolytic anemias            | 1<br>(1 - 2)      | 0<br>(0 - 0)       | 0<br>(0 - 0)        | 0<br>(0 - 0)         | 0<br>(0 - 0)         | 1<br>(1 - 1)         |
| Thalassemias                                        | 0<br>(0 - 0)      | 0<br>(0 - 0)       | 0<br>(0 - 0)        | 0<br>(0 - 0)         | 0<br>(0 - 0)         | 0<br>(0 - 0)         |
| Sickle cell disorders                               | 0<br>(0 - 0)      | 0<br>(0 - 0)       | 0<br>(0 - 0)        | 0<br>(0 - 0)         | 0<br>(0 - 0)         | 0<br>(0 - 0)         |
| G6PD deficiency                                     | 0<br>(0 - 0)      | 0<br>(0 - 0)       | 0<br>(0 - 0)        | 0<br>(0 - 0)         | 0<br>(0 - 0)         | 0<br>(0 - 0)         |
| Other hemoglobinopathies and hemolytic anemias      | 1<br>(1 - 2)      | 0<br>(0 - 0)       | 0<br>(0 - 0)        | 0<br>(0 - 0)         | 0<br>(0 - 0)         | 1<br>(0 - 1)         |
| Endocrine, metabolic, blood, and immune disorders   | 8<br>(5 - 15)     | 0<br>(0 - 0)       | 0<br>(0 - 0)        | 1<br>(1 - 1)         | 1<br>(1 - 2)         | 6<br>(4 - 11)        |
| Musculoskeletal disorders                           | 8<br>(6 - 12)     | --                 | 0<br>(0 - 0)        | 0<br>(0 - 0)         | 2<br>(1 - 2)         | 6<br>(4 - 9)         |
| Rheumatoid arthritis                                | 1<br>(1 - 1)      | --                 | 0<br>(0 - 0)        | 0<br>(0 - 0)         | 0<br>(0 - 0)         | 1<br>(0 - 1)         |
| Other musculoskeletal disorders                     | 7<br>(5 - 10)     | --                 | 0<br>(0 - 0)        | 0<br>(0 - 0)         | 2<br>(1 - 2)         | 6<br>(4 - 8)         |
| Other non-communicable diseases                     | 8<br>(6 - 11)     | 2<br>(1 - 3)       | 0<br>(0 - 0)        | 1<br>(0 - 1)         | 1<br>(1 - 1)         | 5<br>(2 - 7)         |
| Congenital anomalies                                | 3<br>(2 - 4)      | 1<br>(1 - 2)       | 0<br>(0 - 0)        | 0<br>(0 - 1)         | 0<br>(0 - 0)         | 0<br>(0 - 1)         |
| Neural tube defects                                 | 0<br>(0 - 0)      | 0<br>(0 - 0)       | 0<br>(0 - 0)        | 0<br>(0 - 0)         | 0<br>(0 - 0)         | 0<br>(0 - 0)         |
| Congenital heart anomalies                          | 0<br>(0 - 0)      | 0<br>(0 - 0)       | 0<br>(0 - 0)        | 0<br>(0 - 0)         | 0<br>(0 - 0)         | 0<br>(0 - 0)         |
| Cleft lip and cleft palate                          | 0<br>(0 - 0)      | 0<br>(0 - 0)       | --                  | --                   | --                   | --                   |
| Down syndrome                                       | 0<br>(0 - 0)      | 0<br>(0 - 0)       | 0<br>(0 - 0)        | 0<br>(0 - 0)         | 0<br>(0 - 0)         | 0<br>(0 - 0)         |
| Chromosomal unbalanced rearrangements               | 0<br>(0 - 0)      | 0<br>(0 - 0)       | 0<br>(0 - 0)        | 0<br>(0 - 0)         | 0<br>(0 - 0)         | 0<br>(0 - 0)         |
| Other congenital anomalies                          | 2<br>(1 - 3)      | 1<br>(1 - 2)       | 0<br>(0 - 0)        | 0<br>(0 - 0)         | 0<br>(0 - 0)         | 0<br>(0 - 0)         |
| Skin and subcutaneous diseases                      | 5<br>(2 - 7)      | 0<br>(0 - 0)       | 0<br>(0 - 0)        | 0<br>(0 - 0)         | 0<br>(0 - 1)         | 4<br>(2 - 7)         |
| Cellulitis                                          | 0<br>(0 - 1)      | 0<br>(0 - 0)       | 0<br>(0 - 0)        | 0<br>(0 - 0)         | 0<br>(0 - 0)         | 0<br>(0 - 0)         |
| Pyoderma                                            | 2<br>(1 - 3)      | 0<br>(0 - 0)       | 0<br>(0 - 0)        | 0<br>(0 - 0)         | 0<br>(0 - 0)         | 1<br>(1 - 3)         |
| Decubitus ulcer                                     | 3<br>(0 - 5)      | 0<br>(0 - 0)       | 0<br>(0 - 0)        | 0<br>(0 - 0)         | 0<br>(0 - 0)         | 3<br>(0 - 5)         |
| Other skin and subcutaneous diseases                | 0<br>(0 - 0)      | 0<br>(0 - 0)       | 0<br>(0 - 0)        | 0<br>(0 - 0)         | 0<br>(0 - 0)         | 0<br>(0 - 0)         |
| Sudden infant death syndrome                        | 1<br>(0 - 1)      | 1<br>(0 - 1)       | --                  | --                   | --                   | --                   |
| Injuries                                            | 107<br>(83 - 132) | 1<br>(1 - 1)       | 1<br>(1 - 1)        | 18<br>(15 - 22)      | 16<br>(12 - 20)      | 71<br>(51 - 91)      |
| Transport injuries                                  | 14<br>(9 - 17)    | 0<br>(0 - 0)       | 0<br>(0 - 1)        | 5<br>(3 - 7)         | 3<br>(2 - 4)         | 5<br>(3 - 7)         |
| Road injuries                                       | 13<br>(8 - 16)    | 0<br>(0 - 0)       | 0<br>(0 - 1)        | 5<br>(3 - 6)         | 3<br>(2 - 4)         | 5<br>(3 - 6)         |
| Pedestrian road injuries                            | 3<br>(1 - 4)      | 0<br>(0 - 0)       | 0<br>(0 - 0)        | 0<br>(0 - 1)         | 1<br>(0 - 1)         | 1<br>(1 - 2)         |

Web Table 31- Luxembourg deaths with 95% UI by age, sex, and cause in 2013

| Cause                                           | Females, All Ages | Females, 0-4 Years | Females, 5-14 Years | Females, 15-49 Years | Females, 50-69 Years | Females, 70-80 Years |
|-------------------------------------------------|-------------------|--------------------|---------------------|----------------------|----------------------|----------------------|
| Cyclist road injuries                           | 1<br>(0 - 1)      | 0<br>(0 - 0)       | 0<br>(0 - 0)        | 0<br>(0 - 0)         | 0<br>(0 - 0)         | 0<br>(0 - 0)         |
| Motorcyclist road injuries                      | 1<br>(0 - 2)      | 0<br>(0 - 0)       | 0<br>(0 - 0)        | 0<br>(0 - 1)         | 0<br>(0 - 1)         | 0<br>(0 - 1)         |
| Motor vehicle road injuries                     | 9<br>(4 - 11)     | 0<br>(0 - 0)       | 0<br>(0 - 0)        | 4<br>(2 - 5)         | 2<br>(1 - 2)         | 3<br>(1 - 4)         |
| Other road injuries                             | 1<br>(0 - 2)      | 0<br>(0 - 0)       | 0<br>(0 - 0)        | 0<br>(0 - 0)         | 0<br>(0 - 1)         | 0<br>(0 - 1)         |
| Other transport injuries                        | 1<br>(1 - 2)      | 0<br>(0 - 0)       | 0<br>(0 - 0)        | 0<br>(0 - 1)         | 0<br>(0 - 0)         | 0<br>(0 - 1)         |
| Unintentional injuries                          | 71<br>(51 - 91)   | 1<br>(0 - 1)       | 0<br>(0 - 0)        | 3<br>(2 - 3)         | 6<br>(4 - 7)         | 62<br>(42 - 80)      |
| Falls                                           | 37<br>(23 - 51)   | 0<br>(0 - 0)       | 0<br>(0 - 0)        | 1<br>(1 - 1)         | 2<br>(1 - 3)         | 34<br>(21 - 48)      |
| Drowning                                        | 1<br>(1 - 1)      | 0<br>(0 - 0)       | 0<br>(0 - 0)        | 0<br>(0 - 0)         | 0<br>(0 - 0)         | 0<br>(0 - 1)         |
| Fire, heat, and hot substances                  | 2<br>(1 - 2)      | 0<br>(0 - 0)       | 0<br>(0 - 0)        | 0<br>(0 - 0)         | 0<br>(0 - 0)         | 1<br>(1 - 2)         |
| Poisonings                                      | 1<br>(0 - 1)      | 0<br>(0 - 0)       | 0<br>(0 - 0)        | 0<br>(0 - 1)         | 0<br>(0 - 0)         | 0<br>(0 - 1)         |
| Exposure to mechanical forces                   | 1<br>(1 - 1)      | 0<br>(0 - 0)       | 0<br>(0 - 0)        | 0<br>(0 - 0)         | 0<br>(0 - 0)         | 0<br>(0 - 1)         |
| Unintentional firearm injuries                  | 0<br>(0 - 0)      | 0<br>(0 - 0)       | 0<br>(0 - 0)        | 0<br>(0 - 0)         | 0<br>(0 - 0)         | 0<br>(0 - 0)         |
| Unintentional suffocation                       | 0<br>(0 - 0)      | 0<br>(0 - 0)       | 0<br>(0 - 0)        | 0<br>(0 - 0)         | 0<br>(0 - 0)         | 0<br>(0 - 0)         |
| Other exposure to mechanical forces             | 1<br>(1 - 1)      | 0<br>(0 - 0)       | 0<br>(0 - 0)        | 0<br>(0 - 0)         | 0<br>(0 - 0)         | 0<br>(0 - 0)         |
| Adverse effects of medical treatment            | 11<br>(6 - 16)    | 0<br>(0 - 0)       | 0<br>(0 - 0)        | 0<br>(0 - 0)         | 1<br>(1 - 1)         | 9<br>(5 - 14)        |
| Animal contact                                  | 1<br>(1 - 4)      | 0<br>(0 - 0)       | 0<br>(0 - 0)        | 0<br>(0 - 0)         | 1<br>(0 - 1)         | 1<br>(0 - 3)         |
| Venomous animal contact                         | 0<br>(0 - 1)      | 0<br>(0 - 0)       | 0<br>(0 - 0)        | 0<br>(0 - 0)         | 0<br>(0 - 1)         | 0<br>(0 - 0)         |
| Non-venomous animal contact                     | 1<br>(0 - 3)      | 0<br>(0 - 0)       | 0<br>(0 - 0)        | 0<br>(0 - 0)         | 0<br>(0 - 0)         | 1<br>(0 - 3)         |
| Foreign body                                    | 17<br>(8 - 28)    | 0<br>(0 - 0)       | 0<br>(0 - 0)        | 0<br>(0 - 1)         | 1<br>(1 - 2)         | 15<br>(7 - 26)       |
| Pulmonary aspiration and foreign body in airway | 17<br>(8 - 28)    | 0<br>(0 - 0)       | 0<br>(0 - 0)        | 0<br>(0 - 1)         | 1<br>(1 - 2)         | 15<br>(7 - 26)       |
| Foreign body in other body part                 | 0<br>(0 - 0)      | 0<br>(0 - 0)       | 0<br>(0 - 0)        | 0<br>(0 - 0)         | 0<br>(0 - 0)         | 0<br>(0 - 0)         |
| Other unintentional injuries                    | 0<br>(0 - 2)      | 0<br>(0 - 0)       | 0<br>(0 - 0)        | 0<br>(0 - 0)         | 0<br>(0 - 0)         | 0<br>(0 - 1)         |
| Self-harm and interpersonal violence            | 21<br>(17 - 28)   | 0<br>(0 - 0)       | 0<br>(0 - 0)        | 10<br>(8 - 13)       | 7<br>(5 - 10)        | 4<br>(3 - 6)         |
| Self-harm                                       | 20<br>(15 - 26)   | -                  | 0<br>(0 - 0)        | 9<br>(7 - 11)        | 7<br>(5 - 9)         | 4<br>(3 - 6)         |
| Interpersonal violence                          | 2<br>(1 - 3)      | 0<br>(0 - 0)       | 0<br>(0 - 0)        | 1<br>(1 - 2)         | 0<br>(0 - 1)         | 0<br>(0 - 1)         |
| Assault by firearm                              | 0<br>(0 - 1)      | 0<br>(0 - 0)       | 0<br>(0 - 0)        | 0<br>(0 - 1)         | 0<br>(0 - 0)         | 0<br>(0 - 0)         |
| Assault by sharp object                         | 0<br>(0 - 1)      | 0<br>(0 - 0)       | 0<br>(0 - 0)        | 0<br>(0 - 0)         | 0<br>(0 - 0)         | 0<br>(0 - 0)         |
| Assault by other means                          | 1<br>(1 - 2)      | 0<br>(0 - 0)       | 0<br>(0 - 0)        | 1<br>(0 - 1)         | 0<br>(0 - 0)         | 0<br>(0 - 0)         |

Web Table 31- Macedonia deaths with 95% UI by age, sex, and cause in 2013

| Cause                                                             | Both Sexes, All Ages        | Both Sexes, 0-4 Years | Both Sexes, 5-14 Years | Both Sexes, 15-49 Years  | Both Sexes, 50-69 Years  | Both Sexes, 70-80 Years     |
|-------------------------------------------------------------------|-----------------------------|-----------------------|------------------------|--------------------------|--------------------------|-----------------------------|
| All causes                                                        | 18,141<br>(17,168 - 19,158) | 181<br>(119 - 270)    | 37<br>(28 - 53)        | 1,293<br>(1,207 - 1,388) | 5,050<br>(4,708 - 5,410) | 11,580<br>(10,954 - 12,170) |
| Communicable, maternal, neonatal, and nutritional diseases        | 317<br>(263 - 381)          | 112<br>(75 - 170)     | 4<br>(3 - 6)           | 37<br>(33 - 41)          | 54<br>(47 - 63)          | 110<br>(92 - 132)           |
| HIV/AIDS and tuberculosis                                         | 44<br>(37 - 63)             | 0<br>(0 - 0)          | 0<br>(0 - 0)           | 10<br>(8 - 13)           | 17<br>(14 - 26)          | 17<br>(13 - 24)             |
| Tuberculosis                                                      | 42<br>(36 - 61)             | 0<br>(0 - 0)          | 0<br>(0 - 0)           | 8<br>(7 - 12)            | 17<br>(13 - 26)          | 17<br>(13 - 24)             |
| HIV/AIDS                                                          | 2<br>(1 - 3)                | 0<br>(0 - 0)          | 0<br>(0 - 0)           | 1<br>(1 - 2)             | 1<br>(0 - 1)             | 0<br>(0 - 0)                |
| HIV/AIDS resulting in mycobacterial infection                     | 0<br>(0 - 0)                | 0<br>(0 - 0)          | 0<br>(0 - 0)           | 0<br>(0 - 0)             | 0<br>(0 - 0)             | 0<br>(0 - 0)                |
| HIV/AIDS resulting in other diseases                              | 2<br>(1 - 2)                | 0<br>(0 - 0)          | 0<br>(0 - 0)           | 1<br>(1 - 2)             | 0<br>(0 - 1)             | 0<br>(0 - 0)                |
| Diarrhea, lower respiratory, and other common infectious diseases | 157<br>(133 - 183)          | 21<br>(13 - 32)       | 3<br>(2 - 5)           | 20<br>(17 - 23)          | 31<br>(26 - 36)          | 82<br>(67 - 102)            |
| Diarrheal diseases                                                | 7<br>(5 - 10)               | 4<br>(2 - 7)          | 0<br>(0 - 0)           | 0<br>(0 - 1)             | 1<br>(1 - 1)             | 2<br>(1 - 2)                |
| Intestinal infectious diseases                                    | 4<br>(2 - 8)                | 1<br>(0 - 2)          | 1<br>(0 - 1)           | 2<br>(1 - 3)             | 1<br>(0 - 2)             | 1<br>(0 - 1)                |
| Typhoid fever                                                     | 3<br>(1 - 6)                | 0<br>(0 - 1)          | 0<br>(0 - 1)           | 1<br>(0 - 2)             | 1<br>(0 - 2)             | 0<br>(0 - 1)                |
| Paratyphoid fever                                                 | 1<br>(0 - 2)                | 0<br>(0 - 0)          | 0<br>(0 - 0)           | 0<br>(0 - 1)             | 0<br>(0 - 0)             | 0<br>(0 - 0)                |
| Other intestinal infectious diseases                              | 0<br>(0 - 2)                | 0<br>(0 - 1)          | 0<br>(0 - 0)           | 0<br>(0 - 1)             | 0<br>(0 - 0)             | 0<br>(0 - 0)                |
| Lower respiratory infections                                      | 127<br>(107 - 151)          | 12<br>(7 - 19)        | 1<br>(1 - 2)           | 13<br>(11 - 15)          | 24<br>(19 - 29)          | 77<br>(61 - 96)             |
| Upper respiratory infections                                      | 1<br>(0 - 1)                | 0<br>(0 - 0)          | 0<br>(0 - 0)           | 0<br>(0 - 0)             | 0<br>(0 - 0)             | 0<br>(0 - 1)                |
| Otitis media                                                      | 0<br>(0 - 0)                | 0<br>(0 - 0)          | 0<br>(0 - 0)           | 0<br>(0 - 0)             | 0<br>(0 - 0)             | 0<br>(0 - 0)                |
| Meningitis                                                        | 7<br>(6 - 9)                | 3<br>(1 - 4)          | 0<br>(0 - 0)           | 2<br>(1 - 2)             | 2<br>(2 - 2)             | 1<br>(1 - 1)                |
| Pneumococcal meningitis                                           | 2<br>(1 - 2)                | 0<br>(0 - 1)          | 0<br>(0 - 0)           | 0<br>(0 - 1)             | 1<br>(0 - 1)             | 0<br>(0 - 0)                |
| H influenzae type B meningitis                                    | 1<br>(1 - 2)                | 1<br>(0 - 1)          | 0<br>(0 - 0)           | 0<br>(0 - 0)             | 0<br>(0 - 0)             | 0<br>(0 - 0)                |
| Meningococcal meningitis                                          | 2<br>(1 - 2)                | 1<br>(0 - 1)          | 0<br>(0 - 0)           | 0<br>(0 - 0)             | 0<br>(0 - 1)             | 0<br>(0 - 0)                |
| Other meningitis                                                  | 3<br>(2 - 3)                | 1<br>(0 - 1)          | 0<br>(0 - 0)           | 1<br>(0 - 1)             | 1<br>(1 - 1)             | 0<br>(0 - 0)                |
| Encephalitis                                                      | 8<br>(6 - 11)               | 1<br>(1 - 2)          | 1<br>(0 - 1)           | 3<br>(2 - 4)             | 2<br>(2 - 3)             | 1<br>(1 - 1)                |
| Diphtheria                                                        | 0<br>(0 - 0)                | 0<br>(0 - 0)          | 0<br>(0 - 0)           | 0<br>(0 - 0)             | 0<br>(0 - 0)             | --                          |
| Whooping cough                                                    | 0<br>(0 - 0)                | 0<br>(0 - 0)          | 0<br>(0 - 0)           | 0<br>(0 - 0)             | 0<br>(0 - 0)             | --                          |
| Tetanus                                                           | 0<br>(0 - 0)                | 0<br>(0 - 0)          | 0<br>(0 - 0)           | 0<br>(0 - 0)             | 0<br>(0 - 0)             | 0<br>(0 - 0)                |
| Measles                                                           | 0<br>(0 - 0)                | 0<br>(0 - 0)          | 0<br>(0 - 0)           | 0<br>(0 - 0)             | 0<br>(0 - 0)             | --                          |
| Varicella and herpes zoster                                       | 1<br>(0 - 4)                | 0<br>(0 - 0)          | 0<br>(0 - 0)           | 0<br>(0 - 0)             | 0<br>(0 - 0)             | 1<br>(0 - 3)                |
| Neglected tropical diseases and malaria                           | 4<br>(3 - 5)                | 0<br>(0 - 1)          | 0<br>(0 - 0)           | 1<br>(1 - 2)             | 1<br>(1 - 2)             | 1<br>(0 - 1)                |
| Leishmaniasis                                                     | 2<br>(1 - 4)                | 0<br>(0 - 1)          | 0<br>(0 - 0)           | 1<br>(0 - 1)             | 1<br>(0 - 1)             | 0<br>(0 - 1)                |
| Visceral leishmaniasis                                            | 2<br>(1 - 4)                | 0<br>(0 - 1)          | 0<br>(0 - 0)           | 1<br>(0 - 1)             | 1<br>(0 - 1)             | 0<br>(0 - 1)                |
| Cysticercosis                                                     | 0<br>(0 - 0)                | 0<br>(0 - 0)          | 0<br>(0 - 0)           | 0<br>(0 - 0)             | 0<br>(0 - 0)             | 0<br>(0 - 0)                |
| Cystic echinococcosis                                             | 0<br>(0 - 0)                | 0<br>(0 - 0)          | 0<br>(0 - 0)           | 0<br>(0 - 0)             | 0<br>(0 - 0)             | 0<br>(0 - 0)                |
| Dengue                                                            | 0<br>(0 - 0)                | 0<br>(0 - 0)          | 0<br>(0 - 0)           | 0<br>(0 - 0)             | 0<br>(0 - 0)             | 0<br>(0 - 0)                |
| Rabies                                                            | 0<br>(0 - 0)                | 0<br>(0 - 0)          | 0<br>(0 - 0)           | 0<br>(0 - 0)             | 0<br>(0 - 0)             | 0<br>(0 - 0)                |
| Other neglected tropical diseases                                 | 1<br>(1 - 1)                | 0<br>(0 - 0)          | 0<br>(0 - 0)           | 0<br>(0 - 0)             | 0<br>(0 - 0)             | 0<br>(0 - 0)                |
| Maternal disorders                                                | 2<br>(2 - 3)                | --                    | 0<br>(0 - 0)           | 2<br>(2 - 3)             | --                       | --                          |
| Maternal hemorrhage                                               | 0<br>(0 - 0)                | --                    | 0<br>(0 - 0)           | 0<br>(0 - 0)             | --                       | --                          |
| Maternal sepsis and other maternal infections                     | 0<br>(0 - 0)                | --                    | 0<br>(0 - 0)           | 0<br>(0 - 0)             | --                       | --                          |
| Maternal hypertensive disorders                                   | 0<br>(0 - 0)                | --                    | 0<br>(0 - 0)           | 0<br>(0 - 0)             | --                       | --                          |
| Maternal obstructed labor                                         | 0<br>(0 - 0)                | --                    | 0<br>(0 - 0)           | 0<br>(0 - 0)             | --                       | --                          |

Web Table 31- Macedonia deaths with 95% UI by age, sex, and cause in 2013

| Cause                                                            | Both Sexes, All Ages        | Both Sexes, 0-4 Years | Both Sexes, 5-14 Years | Both Sexes, 15-49 Years | Both Sexes, 50-69 Years  | Both Sexes, 70-80 Years     |
|------------------------------------------------------------------|-----------------------------|-----------------------|------------------------|-------------------------|--------------------------|-----------------------------|
| Maternal abortive outcome                                        | 0<br>(0 - 1)                | --                    | 0<br>(0 - 0)           | 0<br>(0 - 1)            | --                       | --                          |
| Indirect maternal deaths                                         | 0<br>(0 - 0)                | --                    | 0<br>(0 - 0)           | 0<br>(0 - 0)            | --                       | --                          |
| Late maternal deaths                                             | 0<br>(0 - 0)                | --                    | 0<br>(0 - 0)           | 0<br>(0 - 0)            | --                       | --                          |
| Maternal deaths aggravated by HIV/AIDS                           | 0<br>(0 - 0)                | --                    | --                     | 0<br>(0 - 0)            | --                       | --                          |
| Other maternal disorders                                         | 0<br>(0 - 1)                | --                    | 0<br>(0 - 0)           | 0<br>(0 - 1)            | --                       | --                          |
| Neonatal disorders                                               | 88<br>(59 - 136)            | 88<br>(59 - 136)      | --                     | --                      | --                       | --                          |
| Neonatal preterm birth complications                             | 59<br>(36 - 93)             | 59<br>(36 - 93)       | --                     | --                      | --                       | --                          |
| Neonatal encephalopathy due to birth asphyxia and trauma         | 10<br>(5 - 16)              | 10<br>(5 - 16)        | --                     | --                      | --                       | --                          |
| Neonatal sepsis and other neonatal infections                    | 1<br>(0 - 3)                | 1<br>(0 - 3)          | --                     | --                      | --                       | --                          |
| Hemolytic disease and other neonatal jaundice                    | 0<br>(0 - 0)                | 0<br>(0 - 0)          | --                     | --                      | --                       | --                          |
| Other neonatal disorders                                         | 19<br>(11 - 33)             | 19<br>(11 - 33)       | --                     | --                      | --                       | --                          |
| Nutritional deficiencies                                         | 12<br>(9 - 14)              | 0<br>(0 - 1)          | 0<br>(0 - 0)           | 2<br>(1 - 2)            | 2<br>(2 - 3)             | 7<br>(5 - 9)                |
| Protein-energy malnutrition                                      | 1<br>(0 - 1)                | 0<br>(0 - 0)          | 0<br>(0 - 0)           | 0<br>(0 - 0)            | 0<br>(0 - 0)             | 0<br>(0 - 0)                |
| Iodine deficiency                                                | 0<br>(0 - 1)                | 0<br>(0 - 0)          | 0<br>(0 - 0)           | 0<br>(0 - 0)            | 0<br>(0 - 0)             | 0<br>(0 - 1)                |
| Iron-deficiency anemia                                           | 10<br>(8 - 12)              | 0<br>(0 - 0)          | 0<br>(0 - 0)           | 1<br>(1 - 2)            | 2<br>(1 - 3)             | 7<br>(5 - 8)                |
| Other nutritional deficiencies                                   | 1<br>(0 - 1)                | 0<br>(0 - 0)          | 0<br>(0 - 0)           | 0<br>(0 - 0)            | 0<br>(0 - 0)             | 0<br>(0 - 0)                |
| Other communicable, maternal, neonatal, and nutritional diseases | 9<br>(7 - 13)               | 2<br>(1 - 4)          | 0<br>(0 - 1)           | 2<br>(2 - 3)            | 2<br>(2 - 3)             | 3<br>(2 - 5)                |
| Sexually transmitted diseases excluding HIV                      | 2<br>(1 - 4)                | 2<br>(0 - 4)          | 0<br>(0 - 0)           | 0<br>(0 - 0)            | 0<br>(0 - 0)             | 0<br>(0 - 0)                |
| Syphilis                                                         | 2<br>(0 - 4)                | 2<br>(0 - 4)          | 0<br>(0 - 0)           | 0<br>(0 - 0)            | 0<br>(0 - 0)             | 0<br>(0 - 0)                |
| Chlamydial infection                                             | 0<br>(0 - 0)                | --                    | 0<br>(0 - 0)           | 0<br>(0 - 0)            | 0<br>(0 - 0)             | 0<br>(0 - 0)                |
| Gonococcal infection                                             | 0<br>(0 - 0)                | --                    | 0<br>(0 - 0)           | 0<br>(0 - 0)            | 0<br>(0 - 0)             | 0<br>(0 - 0)                |
| Other sexually transmitted diseases                              | 0<br>(0 - 0)                | --                    | 0<br>(0 - 0)           | 0<br>(0 - 0)            | 0<br>(0 - 0)             | 0<br>(0 - 0)                |
| Hepatitis                                                        | 1<br>(1 - 1)                | 0<br>(0 - 0)          | 0<br>(0 - 0)           | 0<br>(0 - 0)            | 0<br>(0 - 0)             | 0<br>(0 - 0)                |
| Acute hepatitis A                                                | 0<br>(0 - 0)                | 0<br>(0 - 0)          | 0<br>(0 - 0)           | 0<br>(0 - 0)            | 0<br>(0 - 0)             | 0<br>(0 - 0)                |
| Acute hepatitis B                                                | 1<br>(0 - 1)                | 0<br>(0 - 0)          | 0<br>(0 - 0)           | 0<br>(0 - 0)            | 0<br>(0 - 0)             | 0<br>(0 - 0)                |
| Acute hepatitis C                                                | 0<br>(0 - 0)                | --                    | 0<br>(0 - 0)           | 0<br>(0 - 0)            | 0<br>(0 - 0)             | 0<br>(0 - 0)                |
| Other infectious diseases                                        | 6<br>(5 - 10)               | 0<br>(0 - 1)          | 0<br>(0 - 0)           | 1<br>(1 - 2)            | 1<br>(1 - 2)             | 3<br>(2 - 5)                |
| Non-communicable diseases                                        | 17,153<br>(16,220 - 18,110) | 59<br>(37 - 89)       | 21<br>(15 - 29)        | 948<br>(882 - 1,024)    | 4,827<br>(4,503 - 5,168) | 11,298<br>(10,691 - 11,875) |
| Neoplasms                                                        | 3,576<br>(3,278 - 3,857)    | 5<br>(3 - 8)          | 11<br>(8 - 15)         | 416<br>(382 - 453)      | 1,750<br>(1,601 - 1,902) | 1,394<br>(1,253 - 1,514)    |
| Esophageal cancer                                                | 31<br>(25 - 36)             | --                    | --                     | 3<br>(2 - 4)            | 16<br>(12 - 20)          | 11<br>(9 - 14)              |
| Stomach cancer                                                   | 381<br>(335 - 434)          | --                    | --                     | 30<br>(25 - 36)         | 169<br>(146 - 195)       | 183<br>(155 - 214)          |
| Liver cancer                                                     | 127<br>(96 - 154)           | --                    | 0<br>(0 - 0)           | 9<br>(7 - 13)           | 60<br>(45 - 74)          | 57<br>(40 - 73)             |
| Liver cancer due to hepatitis B                                  | 27<br>(18 - 39)             | --                    | 0<br>(0 - 0)           | 3<br>(2 - 4)            | 15<br>(10 - 22)          | 9<br>(6 - 15)               |
| Liver cancer due to hepatitis C                                  | 55<br>(38 - 74)             | --                    | 0<br>(0 - 0)           | 4<br>(2 - 6)            | 26<br>(17 - 36)          | 26<br>(17 - 36)             |
| Liver cancer due to alcohol use                                  | 31<br>(20 - 43)             | --                    | --                     | 1<br>(1 - 2)            | 13<br>(8 - 19)           | 17<br>(10 - 24)             |
| Liver cancer due to other causes                                 | 13<br>(8 - 20)              | --                    | 0<br>(0 - 0)           | 1<br>(1 - 2)            | 6<br>(4 - 10)            | 5<br>(3 - 9)                |
| Larynx cancer                                                    | 84<br>(59 - 103)            | --                    | --                     | 8<br>(6 - 12)           | 49<br>(34 - 62)          | 26<br>(18 - 35)             |
| Tracheal, bronchus and lung cancer                               | 836<br>(760 - 920)          | --                    | --                     | 76<br>(64 - 90)         | 507<br>(452 - 567)       | 254<br>(223 - 284)          |
| Breast cancer                                                    | 274<br>(206 - 327)          | --                    | --                     | 50<br>(40 - 62)         | 142<br>(102 - 176)       | 83<br>(57 - 102)            |
| Cervical cancer                                                  | 82<br>(65 - 98)             | --                    | --                     | 20<br>(15 - 26)         | 38<br>(29 - 47)          | 24<br>(18 - 30)             |

Web Table 31- Macedonia deaths with 95% UI by age, sex, and cause in 2013

| Cause                                         | Both Sexes, All Ages       | Both Sexes, 0-4 Years | Both Sexes, 5-14 Years | Both Sexes, 15-49 Years | Both Sexes, 50-69 Years  | Both Sexes, 70-80 Years  |
|-----------------------------------------------|----------------------------|-----------------------|------------------------|-------------------------|--------------------------|--------------------------|
| Uterine cancer                                | 43<br>(29 - 54)            | --                    | --                     | 4<br>(3 - 6)            | 22<br>(14 - 29)          | 17<br>(11 - 22)          |
| Prostate cancer                               | 158<br>(109 - 196)         | --                    | --                     | 2<br>(1 - 2)            | 41<br>(27 - 53)          | 116<br>(75 - 148)        |
| Colon and rectum cancer                       | 404<br>(369 - 443)         | --                    | --                     | 30<br>(26 - 35)         | 178<br>(156 - 200)       | 196<br>(175 - 218)       |
| Lip and oral cavity cancer                    | 36<br>(31 - 40)            | --                    | --                     | 5<br>(4 - 6)            | 16<br>(13 - 19)          | 15<br>(13 - 18)          |
| Nasopharynx cancer                            | 7<br>(5 - 9)               | --                    | 0<br>(0 - 0)           | 2<br>(1 - 2)            | 4<br>(3 - 5)             | 2<br>(1 - 2)             |
| Other pharynx cancer                          | 18<br>(14 - 22)            | --                    | --                     | 4<br>(3 - 5)            | 10<br>(8 - 13)           | 4<br>(3 - 5)             |
| Gallbladder and biliary tract cancer          | 54<br>(37 - 65)            | --                    | --                     | 3<br>(2 - 3)            | 23<br>(17 - 29)          | 28<br>(18 - 35)          |
| Pancreatic cancer                             | 199<br>(181 - 219)         | --                    | --                     | 15<br>(13 - 18)         | 98<br>(87 - 111)         | 86<br>(76 - 97)          |
| Malignant skin melanoma                       | 73<br>(51 - 126)           | --                    | --                     | 14<br>(10 - 23)         | 28<br>(19 - 46)          | 31<br>(22 - 58)          |
| Non-melanoma skin cancer                      | 24<br>(15 - 33)            | --                    | --                     | 1<br>(1 - 2)            | 5<br>(3 - 6)             | 18<br>(11 - 25)          |
| Ovarian cancer                                | 83<br>(69 - 99)            | --                    | --                     | 15<br>(11 - 19)         | 45<br>(36 - 55)          | 23<br>(17 - 29)          |
| Testicular cancer                             | 10<br>(7 - 13)             | --                    | --                     | 6<br>(4 - 9)            | 2<br>(1 - 3)             | 2<br>(1 - 3)             |
| Kidney cancer                                 | 42<br>(36 - 48)            | 0<br>(0 - 0)          | 0<br>(0 - 0)           | 4<br>(3 - 5)            | 22<br>(18 - 26)          | 16<br>(12 - 19)          |
| Bladder cancer                                | 107<br>(85 - 122)          | --                    | --                     | 4<br>(3 - 5)            | 43<br>(35 - 51)          | 60<br>(46 - 70)          |
| Brain and nervous system cancer               | 157<br>(130 - 181)         | 1<br>(1 - 2)          | 4<br>(2 - 5)           | 36<br>(29 - 43)         | 83<br>(68 - 100)         | 32<br>(25 - 40)          |
| Thyroid cancer                                | 9<br>(7 - 11)              | --                    | 0<br>(0 - 0)           | 1<br>(1 - 1)            | 4<br>(3 - 6)             | 3<br>(3 - 5)             |
| Mesothelioma                                  | 8<br>(4 - 23)              | --                    | --                     | 1<br>(1 - 4)            | 4<br>(2 - 12)            | 3<br>(1 - 8)             |
| Hodgkin lymphoma                              | 17<br>(13 - 24)            | 0<br>(0 - 0)          | 0<br>(0 - 0)           | 7<br>(5 - 10)           | 6<br>(4 - 8)             | 3<br>(2 - 5)             |
| Non-Hodgkin lymphoma                          | 44<br>(30 - 58)            | 0<br>(0 - 1)          | 1<br>(0 - 2)           | 10<br>(7 - 14)          | 20<br>(14 - 27)          | 12<br>(8 - 17)           |
| Multiple myeloma                              | 17<br>(11 - 23)            | --                    | --                     | 2<br>(1 - 3)            | 9<br>(6 - 13)            | 5<br>(3 - 8)             |
| Leukemia                                      | 99<br>(87 - 111)           | 1<br>(1 - 2)          | 3<br>(2 - 5)           | 24<br>(21 - 28)         | 39<br>(32 - 46)          | 31<br>(26 - 37)          |
| Other neoplasms                               | 153<br>(108 - 185)         | 2<br>(1 - 3)          | 2<br>(2 - 4)           | 27<br>(19 - 33)         | 67<br>(46 - 83)          | 54<br>(35 - 69)          |
| Cardiovascular diseases                       | 10,509<br>(9,916 - 11,082) | 3<br>(2 - 4)          | 3<br>(2 - 5)           | 360<br>(324 - 399)      | 2,358<br>(2,178 - 2,557) | 7,785<br>(7,352 - 8,186) |
| Rheumatic heart disease                       | 41<br>(33 - 53)            | 0<br>(0 - 0)          | 0<br>(0 - 0)           | 6<br>(5 - 8)            | 15<br>(11 - 21)          | 19<br>(15 - 26)          |
| Ischemic heart disease                        | 3,806<br>(3,377 - 4,292)   | 0<br>(0 - 0)          | 0<br>(0 - 0)           | 200<br>(172 - 228)      | 1,148<br>(1,018 - 1,300) | 2,458<br>(2,136 - 2,834) |
| Cerebrovascular disease                       | 5,341<br>(4,741 - 5,798)   | 1<br>(1 - 2)          | 2<br>(1 - 3)           | 108<br>(86 - 126)       | 961<br>(836 - 1,077)     | 4,270<br>(3,785 - 4,631) |
| Ischemic stroke                               | 4,118<br>(3,593 - 4,487)   | 0<br>(0 - 0)          | 0<br>(0 - 0)           | 19<br>(12 - 25)         | 430<br>(322 - 508)       | 3,668<br>(3,237 - 3,997) |
| Hemorrhagic stroke                            | 1,223<br>(1,027 - 1,454)   | 1<br>(0 - 1)          | 2<br>(1 - 2)           | 88<br>(72 - 103)        | 531<br>(448 - 627)       | 602<br>(472 - 768)       |
| Hypertensive heart disease                    | 799<br>(628 - 1,050)       | 0<br>(0 - 0)          | 0<br>(0 - 0)           | 10<br>(7 - 13)          | 97<br>(73 - 125)         | 692<br>(540 - 926)       |
| Cardiomyopathy and myocarditis                | 283<br>(198 - 401)         | 1<br>(1 - 2)          | 1<br>(0 - 1)           | 19<br>(14 - 29)         | 63<br>(44 - 91)          | 199<br>(126 - 302)       |
| Atrial fibrillation and flutter               | 2<br>(1 - 2)               | --                    | --                     | 0<br>(0 - 0)            | 0<br>(0 - 1)             | 1<br>(1 - 1)             |
| Aortic aneurysm                               | 44<br>(33 - 52)            | --                    | --                     | 4<br>(3 - 5)            | 18<br>(13 - 22)          | 22<br>(16 - 27)          |
| Peripheral vascular disease                   | 1<br>(1 - 2)               | --                    | --                     | 0<br>(0 - 0)            | 1<br>(0 - 1)             | 1<br>(1 - 1)             |
| Endocarditis                                  | 6<br>(4 - 8)               | 0<br>(0 - 0)          | 0<br>(0 - 0)           | 2<br>(1 - 3)            | 2<br>(1 - 3)             | 2<br>(1 - 3)             |
| Other cardiovascular and circulatory diseases | 186<br>(139 - 421)         | 0<br>(0 - 1)          | 0<br>(0 - 1)           | 12<br>(9 - 21)          | 54<br>(39 - 102)         | 120<br>(82 - 297)        |
| Chronic respiratory diseases                  | 707<br>(632 - 830)         | 0<br>(0 - 1)          | 0<br>(0 - 0)           | 14<br>(12 - 17)         | 142<br>(123 - 168)       | 551<br>(489 - 661)       |
| Chronic obstructive pulmonary disease         | 591<br>(527 - 686)         | 0<br>(0 - 0)          | 0<br>(0 - 0)           | 10<br>(8 - 12)          | 111<br>(94 - 131)        | 470<br>(415 - 558)       |
| Pneumoconiosis                                | 14<br>(10 - 20)            | 0<br>(0 - 0)          | 0<br>(0 - 0)           | 1<br>(1 - 1)            | 6<br>(4 - 10)            | 6<br>(4 - 10)            |
| Silicosis                                     | 6<br>(4 - 9)               | 0<br>(0 - 0)          | 0<br>(0 - 0)           | 0<br>(0 - 0)            | 2<br>(1 - 3)             | 3<br>(2 - 5)             |
| Asbestosis                                    | 1<br>(1 - 2)               | 0<br>(0 - 0)          | 0<br>(0 - 0)           | 0<br>(0 - 0)            | 1<br>(0 - 1)             | 0<br>(0 - 1)             |

Web Table 31- Macedonia deaths with 95% UI by age, sex, and cause in 2013

| Cause                                               | Both Sexes, All Ages | Both Sexes, 0-4 Years | Both Sexes, 5-14 Years | Both Sexes, 15-49 Years | Both Sexes, 50-69 Years | Both Sexes, 70-80 Years |
|-----------------------------------------------------|----------------------|-----------------------|------------------------|-------------------------|-------------------------|-------------------------|
| Coal workers pneumoconiosis                         | 2<br>(1 - 3)         | 0<br>(0 - 0)          | 0<br>(0 - 0)           | 0<br>(0 - 0)            | 1<br>(1 - 2)            | 1<br>(0 - 1)            |
| Other pneumoconiosis                                | 5<br>(3 - 8)         | 0<br>(0 - 0)          | 0<br>(0 - 0)           | 0<br>(0 - 1)            | 3<br>(2 - 4)            | 2<br>(1 - 3)            |
| Asthma                                              | 64<br>(50 - 84)      | 0<br>(0 - 0)          | 0<br>(0 - 0)           | 2<br>(1 - 2)            | 15<br>(12 - 20)         | 47<br>(35 - 64)         |
| Interstitial lung disease and pulmonary sarcoidosis | 34<br>(24 - 50)      | 0<br>(0 - 0)          | 0<br>(0 - 0)           | 1<br>(0 - 1)            | 9<br>(6 - 14)           | 24<br>(17 - 38)         |
| Other chronic respiratory diseases                  | 5<br>(4 - 7)         | 0<br>(0 - 0)          | 0<br>(0 - 0)           | 1<br>(1 - 1)            | 1<br>(1 - 1)            | 3<br>(2 - 5)            |
| Cirrhosis                                           | 181<br>(164 - 198)   | 0<br>(0 - 0)          | 0<br>(0 - 0)           | 29<br>(25 - 35)         | 103<br>(91 - 115)       | 49<br>(42 - 55)         |
| Cirrhosis due to hepatitis B                        | 47<br>(32 - 63)      | 0<br>(0 - 0)          | 0<br>(0 - 0)           | 7<br>(5 - 11)           | 27<br>(17 - 36)         | 13<br>(8 - 18)          |
| Cirrhosis due to hepatitis C                        | 52<br>(31 - 74)      | 0<br>(0 - 0)          | 0<br>(0 - 0)           | 7<br>(3 - 11)           | 29<br>(16 - 43)         | 15<br>(10 - 22)         |
| Cirrhosis due to alcohol use                        | 50<br>(32 - 72)      | --                    | --                     | 6<br>(3 - 10)           | 29<br>(18 - 43)         | 15<br>(9 - 21)          |
| Cirrhosis due to other causes                       | 32<br>(22 - 47)      | 0<br>(0 - 0)          | 0<br>(0 - 0)           | 9<br>(6 - 13)           | 17<br>(11 - 27)         | 5<br>(4 - 8)            |
| Digestive diseases                                  | 189<br>(169 - 216)   | 0<br>(0 - 1)          | 0<br>(0 - 1)           | 18<br>(16 - 22)         | 62<br>(53 - 74)         | 109<br>(95 - 125)       |
| Peptic ulcer disease                                | 45<br>(34 - 56)      | 0<br>(0 - 0)          | 0<br>(0 - 0)           | 3<br>(2 - 4)            | 15<br>(11 - 19)         | 27<br>(20 - 35)         |
| Gastritis and duodenitis                            | 1<br>(0 - 1)         | 0<br>(0 - 0)          | 0<br>(0 - 0)           | 0<br>(0 - 0)            | 0<br>(0 - 0)            | 0<br>(0 - 1)            |
| Appendicitis                                        | 2<br>(1 - 3)         | 0<br>(0 - 0)          | 0<br>(0 - 0)           | 0<br>(0 - 0)            | 1<br>(0 - 1)            | 1<br>(1 - 1)            |
| Paralytic ileus and intestinal obstruction          | 55<br>(37 - 71)      | 0<br>(0 - 0)          | 0<br>(0 - 0)           | 4<br>(3 - 6)            | 16<br>(11 - 22)         | 34<br>(23 - 45)         |
| Inguinal, femoral, and abdominal hernia             | 6<br>(4 - 9)         | 0<br>(0 - 0)          | 0<br>(0 - 0)           | 0<br>(0 - 0)            | 2<br>(1 - 3)            | 4<br>(2 - 7)            |
| Inflammatory bowel disease                          | 2<br>(1 - 3)         | 0<br>(0 - 0)          | 0<br>(0 - 0)           | 1<br>(1 - 1)            | 1<br>(0 - 1)            | 1<br>(0 - 1)            |
| Vascular intestinal disorders                       | 35<br>(21 - 53)      | 0<br>(0 - 0)          | 0<br>(0 - 0)           | 2<br>(1 - 3)            | 12<br>(7 - 20)          | 21<br>(13 - 32)         |
| Gallbladder and biliary diseases                    | 9<br>(7 - 12)        | 0<br>(0 - 0)          | 0<br>(0 - 0)           | 1<br>(0 - 1)            | 3<br>(2 - 4)            | 6<br>(4 - 8)            |
| Pancreatitis                                        | 32<br>(23 - 39)      | 0<br>(0 - 0)          | 0<br>(0 - 0)           | 7<br>(5 - 9)            | 11<br>(8 - 15)          | 13<br>(9 - 17)          |
| Other digestive diseases                            | 4<br>(3 - 6)         | 0<br>(0 - 0)          | 0<br>(0 - 0)           | 1<br>(0 - 1)            | 1<br>(1 - 2)            | 2<br>(1 - 2)            |
| Neurological disorders                              | 877<br>(750 - 1,003) | 1<br>(1 - 2)          | 1<br>(1 - 2)           | 22<br>(19 - 28)         | 73<br>(61 - 85)         | 780<br>(659 - 905)      |
| Alzheimer disease and other dementias               | 787<br>(658 - 915)   | --                    | --                     | 0<br>(0 - 0)            | 50<br>(40 - 61)         | 737<br>(612 - 861)      |
| Parkinson disease                                   | 43<br>(31 - 51)      | --                    | --                     | 0<br>(0 - 1)            | 8<br>(5 - 10)           | 35<br>(24 - 42)         |
| Epilepsy                                            | 24<br>(20 - 29)      | 0<br>(0 - 0)          | 1<br>(0 - 1)           | 12<br>(10 - 15)         | 7<br>(5 - 8)            | 4<br>(3 - 5)            |
| Multiple sclerosis                                  | 11<br>(8 - 17)       | --                    | --                     | 4<br>(3 - 7)            | 4<br>(3 - 6)            | 2<br>(2 - 4)            |
| Other neurological disorders                        | 13<br>(11 - 16)      | 1<br>(0 - 1)          | 1<br>(0 - 1)           | 5<br>(4 - 6)            | 4<br>(3 - 5)            | 2<br>(2 - 3)            |
| Mental and substance use disorders                  | 46<br>(36 - 58)      | 1<br>(0 - 1)          | 0<br>(0 - 0)           | 26<br>(21 - 34)         | 15<br>(10 - 19)         | 4<br>(3 - 6)            |
| Schizophrenia                                       | 1<br>(0 - 1)         | --                    | --                     | 0<br>(0 - 0)            | 0<br>(0 - 1)            | 0<br>(0 - 0)            |
| Alcohol use disorders                               | 24<br>(15 - 34)      | --                    | --                     | 9<br>(5 - 13)           | 12<br>(7 - 16)          | 3<br>(2 - 5)            |
| Drug use disorders                                  | 21<br>(17 - 27)      | 1<br>(0 - 1)          | --                     | 17<br>(13 - 22)         | 3<br>(2 - 3)            | 1<br>(1 - 1)            |
| Opioid use disorders                                | 8<br>(7 - 11)        | 0<br>(0 - 0)          | --                     | 7<br>(5 - 9)            | 1<br>(1 - 1)            | 0<br>(0 - 1)            |
| Cocaine use disorders                               | 1<br>(1 - 2)         | 0<br>(0 - 0)          | --                     | 1<br>(1 - 1)            | 0<br>(0 - 0)            | 0<br>(0 - 0)            |
| Amphetamine use disorders                           | 1<br>(1 - 1)         | 0<br>(0 - 0)          | --                     | 1<br>(1 - 1)            | 0<br>(0 - 0)            | 0<br>(0 - 0)            |
| Other drug use disorders                            | 11<br>(9 - 13)       | 0<br>(0 - 1)          | --                     | 9<br>(7 - 11)           | 1<br>(1 - 2)            | 1<br>(0 - 1)            |
| Eating disorders                                    | 0<br>(0 - 0)         | --                    | 0<br>(0 - 0)           | 0<br>(0 - 0)            | --                      | --                      |
| Anorexia nervosa                                    | 0<br>(0 - 0)         | --                    | 0<br>(0 - 0)           | 0<br>(0 - 0)            | --                      | --                      |
| Diabetes, urogenital, blood, and endocrine diseases | 997<br>(911 - 1,101) | 2<br>(1 - 4)          | 2<br>(1 - 2)           | 51<br>(46 - 59)         | 320<br>(283 - 365)      | 622<br>(556 - 700)      |
| Diabetes mellitus                                   | 700<br>(626 - 778)   | 0<br>(0 - 0)          | 0<br>(0 - 0)           | 19<br>(16 - 22)         | 217<br>(188 - 246)      | 464<br>(403 - 526)      |
| Acute glomerulonephritis                            | 0<br>(0 - 1)         | 0<br>(0 - 0)          | 0<br>(0 - 0)           | 0<br>(0 - 0)            | 0<br>(0 - 0)            | 0<br>(0 - 0)            |

Web Table 31- Macedonia deaths with 95% UI by age, sex, and cause in 2013

| Cause                                               | Both Sexes, All Ages | Both Sexes, 0-4 Years | Both Sexes, 5-14 Years | Both Sexes, 15-49 Years | Both Sexes, 50-69 Years | Both Sexes, 70-80 Years |
|-----------------------------------------------------|----------------------|-----------------------|------------------------|-------------------------|-------------------------|-------------------------|
| Chronic kidney disease                              | 269<br>(236 - 328)   | 0<br>(0 - 0)          | 0<br>(0 - 0)           | 24<br>(20 - 28)         | 96<br>(81 - 120)        | 149<br>(127 - 183)      |
| Chronic kidney disease due to diabetes mellitus     | 3<br>(1 - 3)         | 0<br>(0 - 0)          | 0<br>(0 - 0)           | 1<br>(1 - 2)            | 1<br>(0 - 1)            | 0<br>(0 - 0)            |
| Chronic kidney disease due to hypertension          | 87<br>(64 - 114)     | 0<br>(0 - 0)          | 0<br>(0 - 0)           | 7<br>(5 - 10)           | 31<br>(22 - 41)         | 49<br>(34 - 65)         |
| Chronic kidney disease due to glomerulonephritis    | 6<br>(3 - 9)         | 0<br>(0 - 0)          | 0<br>(0 - 0)           | 1<br>(1 - 1)            | 2<br>(1 - 3)            | 3<br>(2 - 5)            |
| Chronic kidney disease due to other causes          | 174<br>(139 - 222)   | 0<br>(0 - 0)          | 0<br>(0 - 0)           | 14<br>(11 - 18)         | 63<br>(49 - 86)         | 97<br>(75 - 128)        |
| Urinary diseases and male infertility               | 6<br>(5 - 7)         | 0<br>(0 - 0)          | 0<br>(0 - 0)           | 1<br>(1 - 1)            | 2<br>(1 - 2)            | 4<br>(3 - 5)            |
| Interstitial nephritis and urinary tract infections | 3<br>(3 - 4)         | 0<br>(0 - 0)          | 0<br>(0 - 0)           | 0<br>(0 - 0)            | 1<br>(1 - 1)            | 2<br>(1 - 2)            |
| Urolithiasis                                        | 1<br>(0 - 1)         | --                    | 0<br>(0 - 0)           | 0<br>(0 - 0)            | 0<br>(0 - 0)            | 0<br>(0 - 0)            |
| Other urinary diseases                              | 3<br>(2 - 3)         | 0<br>(0 - 0)          | 0<br>(0 - 0)           | 0<br>(0 - 0)            | 1<br>(0 - 1)            | 2<br>(1 - 2)            |
| Gynecological diseases                              | 0<br>(0 - 0)         | --                    | --                     | 0<br>(0 - 0)            | 0<br>(0 - 0)            | 0<br>(0 - 0)            |
| Uterine fibroids                                    | 0<br>(0 - 0)         | --                    | --                     | 0<br>(0 - 0)            | 0<br>(0 - 0)            | 0<br>(0 - 0)            |
| Polycystic ovarian syndrome                         | 0<br>(0 - 0)         | --                    | --                     | 0<br>(0 - 0)            | 0<br>(0 - 0)            | --                      |
| Endometriosis                                       | 0<br>(0 - 0)         | --                    | --                     | 0<br>(0 - 0)            | 0<br>(0 - 0)            | --                      |
| Genital prolapse                                    | 0<br>(0 - 0)         | --                    | --                     | 0<br>(0 - 0)            | 0<br>(0 - 0)            | 0<br>(0 - 0)            |
| Other gynecological diseases                        | 0<br>(0 - 0)         | --                    | --                     | 0<br>(0 - 0)            | 0<br>(0 - 0)            | 0<br>(0 - 0)            |
| Hemoglobinopathies and hemolytic anemias            | 8<br>(6 - 12)        | 0<br>(0 - 1)          | 1<br>(0 - 1)           | 4<br>(3 - 5)            | 2<br>(1 - 2)            | 2<br>(2 - 3)            |
| Thalassemias                                        | 2<br>(1 - 3)         | 0<br>(0 - 1)          | 0<br>(0 - 1)           | 1<br>(1 - 2)            | 0<br>(0 - 0)            | 0<br>(0 - 0)            |
| Sickle cell disorders                               | 1<br>(1 - 1)         | 0<br>(0 - 0)          | 0<br>(0 - 0)           | 0<br>(0 - 1)            | 0<br>(0 - 0)            | 0<br>(0 - 0)            |
| G6PD deficiency                                     | 0<br>(0 - 0)         | 0<br>(0 - 0)          | 0<br>(0 - 0)           | 0<br>(0 - 0)            | 0<br>(0 - 0)            | 0<br>(0 - 0)            |
| Other hemoglobinopathies and hemolytic anemias      | 5<br>(4 - 7)         | 0<br>(0 - 0)          | 0<br>(0 - 0)           | 2<br>(1 - 2)            | 1<br>(1 - 2)            | 2<br>(2 - 3)            |
| Endocrine, metabolic, blood, and immune disorders   | 14<br>(11 - 21)      | 2<br>(1 - 3)          | 0<br>(0 - 1)           | 4<br>(3 - 7)            | 4<br>(3 - 6)            | 3<br>(2 - 5)            |
| Musculoskeletal disorders                           | 7<br>(6 - 10)        | --                    | 0<br>(0 - 0)           | 2<br>(2 - 4)            | 3<br>(2 - 4)            | 2<br>(1 - 3)            |
| Rheumatoid arthritis                                | 1<br>(1 - 1)         | --                    | 0<br>(0 - 0)           | 0<br>(0 - 0)            | 0<br>(0 - 0)            | 0<br>(0 - 0)            |
| Other musculoskeletal disorders                     | 6<br>(5 - 10)        | --                    | 0<br>(0 - 0)           | 2<br>(2 - 3)            | 3<br>(2 - 4)            | 2<br>(1 - 2)            |
| Other non-communicable diseases                     | 62<br>(44 - 88)      | 46<br>(29 - 70)       | 3<br>(2 - 4)           | 7<br>(6 - 9)            | 3<br>(3 - 4)            | 4<br>(3 - 5)            |
| Congenital anomalies                                | 59<br>(41 - 85)      | 45<br>(28 - 69)       | 3<br>(2 - 4)           | 7<br>(5 - 8)            | 2<br>(2 - 3)            | 3<br>(2 - 4)            |
| Neural tube defects                                 | 2<br>(1 - 3)         | 1<br>(1 - 3)          | 0<br>(0 - 0)           | 0<br>(0 - 0)            | 0<br>(0 - 0)            | 0<br>(0 - 0)            |
| Congenital heart anomalies                          | 27<br>(18 - 39)      | 20<br>(12 - 32)       | 1<br>(1 - 2)           | 3<br>(2 - 4)            | 1<br>(1 - 1)            | 1<br>(1 - 2)            |
| Cleft lip and cleft palate                          | 1<br>(0 - 2)         | 1<br>(0 - 2)          | --                     | --                      | --                      | --                      |
| Down syndrome                                       | 7<br>(4 - 11)        | 5<br>(3 - 9)          | 0<br>(0 - 1)           | 1<br>(0 - 1)            | 0<br>(0 - 0)            | 0<br>(0 - 0)            |
| Chromosomal unbalanced rearrangements               | 4<br>(2 - 6)         | 3<br>(1 - 5)          | 0<br>(0 - 0)           | 1<br>(1 - 1)            | 0<br>(0 - 0)            | 0<br>(0 - 0)            |
| Other congenital anomalies                          | 20<br>(13 - 29)      | 15<br>(9 - 24)        | 1<br>(0 - 1)           | 2<br>(1 - 2)            | 1<br>(1 - 1)            | 1<br>(1 - 2)            |
| Skin and subcutaneous diseases                      | 3<br>(2 - 3)         | 0<br>(0 - 1)          | 0<br>(0 - 0)           | 1<br>(1 - 1)            | 1<br>(1 - 1)            | 1<br>(0 - 1)            |
| Cellulitis                                          | 1<br>(0 - 1)         | 0<br>(0 - 0)          | 0<br>(0 - 0)           | 0<br>(0 - 0)            | 0<br>(0 - 1)            | 0<br>(0 - 0)            |
| Pyoderma                                            | 1<br>(1 - 1)         | 0<br>(0 - 0)          | 0<br>(0 - 0)           | 0<br>(0 - 0)            | 0<br>(0 - 0)            | 0<br>(0 - 0)            |
| Decubitus ulcer                                     | 0<br>(0 - 1)         | 0<br>(0 - 0)          | 0<br>(0 - 0)           | 0<br>(0 - 0)            | 0<br>(0 - 0)            | 0<br>(0 - 0)            |
| Other skin and subcutaneous diseases                | 0<br>(0 - 1)         | 0<br>(0 - 0)          | 0<br>(0 - 0)           | 0<br>(0 - 0)            | 0<br>(0 - 0)            | 0<br>(0 - 0)            |
| Sudden infant death syndrome                        | 1<br>(0 - 2)         | 1<br>(0 - 2)          | --                     | --                      | --                      | --                      |
| Injuries                                            | 671<br>(607 - 732)   | 10<br>(6 - 15)        | 13<br>(9 - 18)         | 308<br>(279 - 339)      | 169<br>(149 - 190)      | 171<br>(147 - 193)      |
| Transport injuries                                  | 177<br>(154 - 198)   | 3<br>(1 - 4)          | 5<br>(3 - 7)           | 104<br>(90 - 119)       | 41<br>(34 - 48)         | 25<br>(21 - 29)         |



Web Table 31- Macedonia deaths with 95% UI by age, sex, and cause in 2013

| Cause                                           | Both Sexes, All Ages | Both Sexes, 0-4 Years | Both Sexes, 5-14 Years | Both Sexes, 15-49 Years | Both Sexes, 50-69 Years | Both Sexes, 70-80 Years |
|-------------------------------------------------|----------------------|-----------------------|------------------------|-------------------------|-------------------------|-------------------------|
| Road injuries                                   | 167<br>(146 - 187)   | 2<br>(1 - 4)          | 5<br>(3 - 7)           | 98<br>(85 - 112)        | 39<br>(32 - 45)         | 24<br>(20 - 28)         |
| Pedestrian road injuries                        | 30<br>(18 - 47)      | 1<br>(0 - 1)          | 1<br>(1 - 2)           | 14<br>(8 - 24)          | 8<br>(4 - 11)           | 7<br>(4 - 10)           |
| Cyclist road injuries                           | 15<br>(11 - 23)      | 0<br>(0 - 0)          | 0<br>(0 - 1)           | 8<br>(5 - 13)           | 4<br>(3 - 6)            | 2<br>(2 - 4)            |
| Motorcyclist road injuries                      | 23<br>(14 - 43)      | 0<br>(0 - 0)          | 1<br>(0 - 1)           | 14<br>(8 - 26)          | 5<br>(3 - 10)           | 3<br>(2 - 6)            |
| Motor vehicle road injuries                     | 92<br>(54 - 119)     | 1<br>(1 - 2)          | 2<br>(1 - 4)           | 58<br>(34 - 77)         | 20<br>(11 - 27)         | 10<br>(6 - 14)          |
| Other road injuries                             | 7<br>(2 - 26)        | 0<br>(0 - 0)          | 0<br>(0 - 1)           | 4<br>(1 - 15)           | 2<br>(1 - 7)            | 1<br>(0 - 4)            |
| Other transport injuries                        | 10<br>(7 - 13)       | 0<br>(0 - 0)          | 0<br>(0 - 1)           | 6<br>(4 - 8)            | 2<br>(1 - 3)            | 1<br>(1 - 2)            |
| Unintentional injuries                          | 248<br>(212 - 280)   | 7<br>(4 - 11)         | 6<br>(4 - 9)           | 78<br>(67 - 92)         | 56<br>(46 - 67)         | 101<br>(78 - 120)       |
| Falls                                           | 71<br>(44 - 88)      | 1<br>(1 - 2)          | 1<br>(0 - 1)           | 9<br>(6 - 11)           | 13<br>(8 - 16)          | 48<br>(29 - 62)         |
| Drowning                                        | 26<br>(18 - 34)      | 1<br>(1 - 3)          | 2<br>(1 - 4)           | 12<br>(8 - 16)          | 6<br>(3 - 7)            | 4<br>(3 - 6)            |
| Fire, heat, and hot substances                  | 13<br>(10 - 16)      | 1<br>(0 - 2)          | 0<br>(0 - 1)           | 3<br>(2 - 4)            | 3<br>(2 - 4)            | 6<br>(4 - 7)            |
| Poisonings                                      | 10<br>(8 - 13)       | 1<br>(0 - 1)          | 0<br>(0 - 0)           | 4<br>(3 - 5)            | 2<br>(2 - 3)            | 3<br>(2 - 4)            |
| Exposure to mechanical forces                   | 21<br>(16 - 24)      | 1<br>(0 - 1)          | 1<br>(0 - 1)           | 12<br>(9 - 15)          | 5<br>(3 - 6)            | 3<br>(2 - 3)            |
| Unintentional firearm injuries                  | 4<br>(3 - 5)         | 0<br>(0 - 0)          | 0<br>(0 - 0)           | 3<br>(2 - 3)            | 1<br>(0 - 1)            | 0<br>(0 - 1)            |
| Unintentional suffocation                       | 1<br>(0 - 2)         | 0<br>(0 - 0)          | 0<br>(0 - 0)           | 0<br>(0 - 1)            | 0<br>(0 - 0)            | 0<br>(0 - 0)            |
| Other exposure to mechanical forces             | 16<br>(11 - 20)      | 1<br>(0 - 1)          | 0<br>(0 - 1)           | 9<br>(6 - 11)           | 4<br>(2 - 5)            | 2<br>(2 - 3)            |
| Adverse effects of medical treatment            | 23<br>(17 - 27)      | 1<br>(0 - 1)          | 0<br>(0 - 0)           | 3<br>(2 - 4)            | 6<br>(5 - 8)            | 12<br>(9 - 16)          |
| Animal contact                                  | 2<br>(2 - 3)         | 0<br>(0 - 0)          | 0<br>(0 - 0)           | 1<br>(1 - 1)            | 1<br>(0 - 1)            | 1<br>(1 - 1)            |
| Venomous animal contact                         | 1<br>(1 - 1)         | 0<br>(0 - 0)          | 0<br>(0 - 0)           | 0<br>(0 - 1)            | 0<br>(0 - 0)            | 0<br>(0 - 0)            |
| Non-venomous animal contact                     | 2<br>(1 - 2)         | 0<br>(0 - 0)          | 0<br>(0 - 0)           | 0<br>(0 - 0)            | 0<br>(0 - 1)            | 1<br>(0 - 1)            |
| Foreign body                                    | 4<br>(3 - 6)         | 1<br>(0 - 1)          | 0<br>(0 - 0)           | 1<br>(1 - 2)            | 1<br>(1 - 1)            | 1<br>(1 - 2)            |
| Pulmonary aspiration and foreign body in airway | 4<br>(2 - 5)         | 1<br>(0 - 1)          | 0<br>(0 - 0)           | 1<br>(1 - 2)            | 1<br>(1 - 1)            | 1<br>(1 - 2)            |
| Foreign body in other body part                 | 0<br>(0 - 0)         | 0<br>(0 - 0)          | 0<br>(0 - 0)           | 0<br>(0 - 0)            | 0<br>(0 - 0)            | 0<br>(0 - 0)            |
| Other unintentional injuries                    | 77<br>(63 - 95)      | 1<br>(0 - 1)          | 2<br>(1 - 3)           | 32<br>(24 - 43)         | 19<br>(13 - 29)         | 23<br>(16 - 33)         |
| Self-harm and interpersonal violence            | 246<br>(215 - 288)   | 0<br>(0 - 1)          | 2<br>(1 - 2)           | 126<br>(108 - 148)      | 72<br>(60 - 85)         | 45<br>(38 - 57)         |
| Self-harm                                       | 189<br>(162 - 224)   | --                    | 1<br>(1 - 1)           | 88<br>(73 - 105)        | 60<br>(49 - 72)         | 40<br>(33 - 52)         |
| Interpersonal violence                          | 57<br>(42 - 77)      | 0<br>(0 - 1)          | 1<br>(0 - 1)           | 38<br>(27 - 52)         | 13<br>(9 - 18)          | 5<br>(4 - 7)            |
| Assault by firearm                              | 30<br>(18 - 41)      | 0<br>(0 - 0)          | 0<br>(0 - 0)           | 23<br>(14 - 32)         | 6<br>(3 - 8)            | 1<br>(1 - 2)            |
| Assault by sharp object                         | 8<br>(5 - 13)        | 0<br>(0 - 0)          | 0<br>(0 - 0)           | 5<br>(3 - 9)            | 2<br>(1 - 3)            | 1<br>(1 - 1)            |
| Assault by other means                          | 18<br>(13 - 30)      | 0<br>(0 - 0)          | 0<br>(0 - 1)           | 10<br>(6 - 18)          | 5<br>(4 - 8)            | 3<br>(2 - 5)            |
| Forces of nature, war, and legal intervention   | 0<br>(0 - 0)         | 0<br>(0 - 0)          | 0<br>(0 - 0)           | 0<br>(0 - 0)            | 0<br>(0 - 0)            | 0<br>(0 - 0)            |
| Exposure to forces of nature                    | 0<br>(0 - 0)         | 0<br>(0 - 0)          | 0<br>(0 - 0)           | 0<br>(0 - 0)            | 0<br>(0 - 0)            | 0<br>(0 - 0)            |

Web Table 31- Macedonia deaths with 95% UI by age, sex, and cause in 2013

| Cause                                                             | Males, All Ages           | Males, 0-4 Years  | Males, 5-14 Years | Males, 15-49 Years | Males, 50-69 Years       | Males, 70-80 Years       |
|-------------------------------------------------------------------|---------------------------|-------------------|-------------------|--------------------|--------------------------|--------------------------|
| All causes                                                        | 9,987<br>(9,262 - 10,633) | 100<br>(64 - 152) | 23<br>(16 - 31)   | 880<br>(803 - 968) | 3,236<br>(2,972 - 3,513) | 5,749<br>(5,325 - 6,062) |
| Communicable, maternal, neonatal, and nutritional diseases        | 185<br>(152 - 224)        | 62<br>(40 - 97)   | 2<br>(1 - 3)      | 23<br>(20 - 27)    | 37<br>(31 - 46)          | 61<br>(49 - 76)          |
| HIV/AIDS and tuberculosis                                         | 33<br>(27 - 49)           | 0<br>(0 - 0)      | 0<br>(0 - 0)      | 7<br>(5 - 9)       | 14<br>(11 - 21)          | 12<br>(9 - 18)           |
| Tuberculosis                                                      | 32<br>(26 - 47)           | 0<br>(0 - 0)      | 0<br>(0 - 0)      | 6<br>(5 - 9)       | 13<br>(10 - 21)          | 12<br>(9 - 18)           |
| HIV/AIDS                                                          | 1<br>(1 - 2)              | 0<br>(0 - 0)      | 0<br>(0 - 0)      | 1<br>(1 - 1)       | 0<br>(0 - 1)             | 0<br>(0 - 0)             |
| HIV/AIDS resulting in mycobacterial infection                     | 0<br>(0 - 0)              | 0<br>(0 - 0)      | 0<br>(0 - 0)      | 0<br>(0 - 0)       | 0<br>(0 - 0)             | 0<br>(0 - 0)             |
| HIV/AIDS resulting in other diseases                              | 1<br>(1 - 2)              | 0<br>(0 - 0)      | 0<br>(0 - 0)      | 1<br>(1 - 1)       | 0<br>(0 - 1)             | 0<br>(0 - 0)             |
| Diarrhea, lower respiratory, and other common infectious diseases | 90<br>(75 - 109)          | 11<br>(6 - 19)    | 2<br>(1 - 3)      | 13<br>(11 - 16)    | 20<br>(15 - 25)          | 44<br>(34 - 58)          |
| Diarrheal diseases                                                | 4<br>(3 - 6)              | 2<br>(1 - 4)      | 0<br>(0 - 0)      | 0<br>(0 - 0)       | 1<br>(0 - 1)             | 1<br>(1 - 1)             |
| Intestinal infectious diseases                                    | 3<br>(1 - 5)              | 0<br>(0 - 1)      | 0<br>(0 - 1)      | 1<br>(0 - 2)       | 1<br>(0 - 1)             | 0<br>(0 - 1)             |
| Typhoid fever                                                     | 2<br>(1 - 4)              | 0<br>(0 - 1)      | 0<br>(0 - 1)      | 1<br>(0 - 2)       | 0<br>(0 - 1)             | 0<br>(0 - 0)             |
| Paratyphoid fever                                                 | 1<br>(0 - 1)              | 0<br>(0 - 0)      | 0<br>(0 - 0)      | 0<br>(0 - 1)       | 0<br>(0 - 0)             | 0<br>(0 - 0)             |
| Other intestinal infectious diseases                              | 0<br>(0 - 1)              | 0<br>(0 - 0)      | 0<br>(0 - 0)      | 0<br>(0 - 0)       | 0<br>(0 - 0)             | 0<br>(0 - 0)             |
| Lower respiratory infections                                      | 72<br>(58 - 90)           | 6<br>(3 - 11)     | 1<br>(0 - 1)      | 9<br>(7 - 11)      | 15<br>(12 - 21)          | 41<br>(31 - 55)          |
| Upper respiratory infections                                      | 0<br>(0 - 1)              | 0<br>(0 - 0)      | 0<br>(0 - 0)      | 0<br>(0 - 0)       | 0<br>(0 - 0)             | 0<br>(0 - 1)             |
| Otitis media                                                      | 0<br>(0 - 0)              | 0<br>(0 - 0)      | 0<br>(0 - 0)      | 0<br>(0 - 0)       | 0<br>(0 - 0)             | 0<br>(0 - 0)             |
| Meningitis                                                        | 5<br>(4 - 6)              | 2<br>(1 - 3)      | 0<br>(0 - 0)      | 1<br>(1 - 1)       | 1<br>(1 - 2)             | 1<br>(0 - 1)             |
| Pneumococcal meningitis                                           | 1<br>(1 - 2)              | 0<br>(0 - 1)      | 0<br>(0 - 0)      | 0<br>(0 - 0)       | 0<br>(0 - 1)             | 0<br>(0 - 0)             |
| H influenzae type B meningitis                                    | 1<br>(1 - 1)              | 0<br>(0 - 1)      | 0<br>(0 - 0)      | 0<br>(0 - 0)       | 0<br>(0 - 0)             | 0<br>(0 - 0)             |
| Meningococcal meningitis                                          | 1<br>(1 - 1)              | 0<br>(0 - 1)      | 0<br>(0 - 0)      | 0<br>(0 - 0)       | 0<br>(0 - 0)             | 0<br>(0 - 0)             |
| Other meningitis                                                  | 2<br>(1 - 2)              | 0<br>(0 - 1)      | 0<br>(0 - 0)      | 0<br>(0 - 1)       | 1<br>(0 - 1)             | 0<br>(0 - 0)             |
| Encephalitis                                                      | 5<br>(3 - 7)              | 1<br>(0 - 2)      | 0<br>(0 - 1)      | 2<br>(1 - 3)       | 1<br>(1 - 2)             | 1<br>(0 - 1)             |
| Diphtheria                                                        | 0<br>(0 - 0)              | 0<br>(0 - 0)      | 0<br>(0 - 0)      | 0<br>(0 - 0)       | 0<br>(0 - 0)             | --                       |
| Whooping cough                                                    | 0<br>(0 - 0)              | 0<br>(0 - 0)      | 0<br>(0 - 0)      | 0<br>(0 - 0)       | 0<br>(0 - 0)             | --                       |
| Tetanus                                                           | 0<br>(0 - 0)              | 0<br>(0 - 0)      | 0<br>(0 - 0)      | 0<br>(0 - 0)       | 0<br>(0 - 0)             | 0<br>(0 - 0)             |
| Measles                                                           | 0<br>(0 - 0)              | 0<br>(0 - 0)      | 0<br>(0 - 0)      | 0<br>(0 - 0)       | 0<br>(0 - 0)             | --                       |
| Varicella and herpes zoster                                       | 1<br>(0 - 2)              | 0<br>(0 - 0)      | 0<br>(0 - 0)      | 0<br>(0 - 0)       | 0<br>(0 - 0)             | 0<br>(0 - 2)             |
| Neglected tropical diseases and malaria                           | 2<br>(2 - 3)              | 0<br>(0 - 1)      | 0<br>(0 - 0)      | 1<br>(1 - 2)       | 1<br>(0 - 1)             | 0<br>(0 - 0)             |
| Leishmaniasis                                                     | 2<br>(1 - 3)              | 0<br>(0 - 0)      | 0<br>(0 - 0)      | 1<br>(0 - 1)       | 1<br>(0 - 1)             | 0<br>(0 - 0)             |
| Visceral leishmaniasis                                            | 2<br>(1 - 3)              | 0<br>(0 - 0)      | 0<br>(0 - 0)      | 1<br>(0 - 1)       | 1<br>(0 - 1)             | 0<br>(0 - 0)             |
| Cysticercosis                                                     | 0<br>(0 - 0)              | 0<br>(0 - 0)      | 0<br>(0 - 0)      | 0<br>(0 - 0)       | 0<br>(0 - 0)             | 0<br>(0 - 0)             |
| Cystic echinococcosis                                             | 0<br>(0 - 0)              | 0<br>(0 - 0)      | 0<br>(0 - 0)      | 0<br>(0 - 0)       | 0<br>(0 - 0)             | 0<br>(0 - 0)             |
| Dengue                                                            | 0<br>(0 - 0)              | 0<br>(0 - 0)      | 0<br>(0 - 0)      | 0<br>(0 - 0)       | 0<br>(0 - 0)             | 0<br>(0 - 0)             |
| Rabies                                                            | 0<br>(0 - 0)              | 0<br>(0 - 0)      | 0<br>(0 - 0)      | 0<br>(0 - 0)       | 0<br>(0 - 0)             | 0<br>(0 - 0)             |
| Other neglected tropical diseases                                 | 0<br>(0 - 0)              | 0<br>(0 - 0)      | 0<br>(0 - 0)      | 0<br>(0 - 0)       | 0<br>(0 - 0)             | 0<br>(0 - 0)             |
| Maternal disorders                                                | --                        | --                | --                | --                 | --                       | --                       |
| Maternal hemorrhage                                               | --                        | --                | --                | --                 | --                       | --                       |
| Maternal sepsis and other maternal infections                     | --                        | --                | --                | --                 | --                       | --                       |
| Maternal hypertensive disorders                                   | --                        | --                | --                | --                 | --                       | --                       |
| Maternal obstructed labor                                         | --                        | --                | --                | --                 | --                       | --                       |

Web Table 31- Macedonia deaths with 95% UI by age, sex, and cause in 2013

| Cause                                                            | Males, All Ages          | Males, 0-4 Years | Males, 5-14 Years | Males, 15-49 Years | Males, 50-69 Years       | Males, 70-80 Years       |
|------------------------------------------------------------------|--------------------------|------------------|-------------------|--------------------|--------------------------|--------------------------|
| Maternal abortive outcome                                        | --                       | --               | --                | --                 | --                       | --                       |
| Indirect maternal deaths                                         | --                       | --               | --                | --                 | --                       | --                       |
| Late maternal deaths                                             | --                       | --               | --                | --                 | --                       | --                       |
| Maternal deaths aggravated by HIV/AIDS                           | --                       | --               | --                | --                 | --                       | --                       |
| Other maternal disorders                                         | --                       | --               | --                | --                 | --                       | --                       |
| Neonatal disorders                                               | 49<br>(31 - 77)          | 49<br>(31 - 77)  | --                | --                 | --                       | --                       |
| Neonatal preterm birth complications                             | 33<br>(20 - 54)          | 33<br>(20 - 54)  | --                | --                 | --                       | --                       |
| Neonatal encephalopathy due to birth asphyxia and trauma         | 5<br>(2 - 9)             | 5<br>(2 - 9)     | --                | --                 | --                       | --                       |
| Neonatal sepsis and other neonatal infections                    | 1<br>(0 - 2)             | 1<br>(0 - 2)     | --                | --                 | --                       | --                       |
| Hemolytic disease and other neonatal jaundice                    | 0<br>(0 - 0)             | 0<br>(0 - 0)     | --                | --                 | --                       | --                       |
| Other neonatal disorders                                         | 10<br>(5 - 20)           | 10<br>(5 - 20)   | --                | --                 | --                       | --                       |
| Nutritional deficiencies                                         | 5<br>(3 - 7)             | 0<br>(0 - 1)     | 0<br>(0 - 0)      | 1<br>(1 - 1)       | 1<br>(1 - 2)             | 3<br>(2 - 4)             |
| Protein-energy malnutrition                                      | 0<br>(0 - 1)             | 0<br>(0 - 0)     | 0<br>(0 - 0)      | 0<br>(0 - 0)       | 0<br>(0 - 0)             | 0<br>(0 - 0)             |
| Iodine deficiency                                                | 0<br>(0 - 0)             | 0<br>(0 - 0)     | 0<br>(0 - 0)      | 0<br>(0 - 0)       | 0<br>(0 - 0)             | 0<br>(0 - 0)             |
| Iron-deficiency anemia                                           | 4<br>(3 - 6)             | 0<br>(0 - 0)     | 0<br>(0 - 0)      | 1<br>(0 - 1)       | 1<br>(1 - 2)             | 2<br>(1 - 3)             |
| Other nutritional deficiencies                                   | 0<br>(0 - 1)             | 0<br>(0 - 0)     | 0<br>(0 - 0)      | 0<br>(0 - 0)       | 0<br>(0 - 0)             | 0<br>(0 - 0)             |
| Other communicable, maternal, neonatal, and nutritional diseases | 5<br>(3 - 7)             | 1<br>(0 - 2)     | 0<br>(0 - 0)      | 1<br>(1 - 2)       | 1<br>(1 - 2)             | 1<br>(1 - 3)             |
| Sexually transmitted diseases excluding HIV                      | 1<br>(0 - 2)             | 1<br>(0 - 2)     | 0<br>(0 - 0)      | 0<br>(0 - 0)       | 0<br>(0 - 0)             | 0<br>(0 - 0)             |
| Syphilis                                                         | 1<br>(0 - 2)             | 1<br>(0 - 2)     | 0<br>(0 - 0)      | 0<br>(0 - 0)       | 0<br>(0 - 0)             | 0<br>(0 - 0)             |
| Chlamydial infection                                             | --                       | --               | --                | --                 | --                       | --                       |
| Gonococcal infection                                             | 0<br>(0 - 0)             | --               | 0<br>(0 - 0)      | 0<br>(0 - 0)       | 0<br>(0 - 0)             | 0<br>(0 - 0)             |
| Other sexually transmitted diseases                              | 0<br>(0 - 0)             | --               | 0<br>(0 - 0)      | 0<br>(0 - 0)       | 0<br>(0 - 0)             | 0<br>(0 - 0)             |
| Hepatitis                                                        | 0<br>(0 - 1)             | 0<br>(0 - 0)     | 0<br>(0 - 0)      | 0<br>(0 - 0)       | 0<br>(0 - 0)             | 0<br>(0 - 0)             |
| Acute hepatitis A                                                | 0<br>(0 - 0)             | 0<br>(0 - 0)     | 0<br>(0 - 0)      | 0<br>(0 - 0)       | 0<br>(0 - 0)             | 0<br>(0 - 0)             |
| Acute hepatitis B                                                | 0<br>(0 - 0)             | 0<br>(0 - 0)     | 0<br>(0 - 0)      | 0<br>(0 - 0)       | 0<br>(0 - 0)             | 0<br>(0 - 0)             |
| Acute hepatitis C                                                | 0<br>(0 - 0)             | --               | 0<br>(0 - 0)      | 0<br>(0 - 0)       | 0<br>(0 - 0)             | 0<br>(0 - 0)             |
| Other infectious diseases                                        | 3<br>(2 - 6)             | 0<br>(0 - 0)     | 0<br>(0 - 0)      | 1<br>(1 - 2)       | 1<br>(1 - 1)             | 1<br>(1 - 2)             |
| Non-communicable diseases                                        | 9,304<br>(8,638 - 9,890) | 32<br>(20 - 50)  | 12<br>(8 - 16)    | 600<br>(541 - 668) | 3,073<br>(2,816 - 3,340) | 5,587<br>(5,179 - 5,891) |
| Neoplasms                                                        | 2,246<br>(2,051 - 2,434) | 3<br>(2 - 5)     | 6<br>(4 - 9)      | 228<br>(202 - 262) | 1,134<br>(1,032 - 1,241) | 874<br>(781 - 966)       |
| Esophageal cancer                                                | 25<br>(19 - 29)          | --               | --                | 3<br>(2 - 4)       | 14<br>(10 - 17)          | 8<br>(6 - 10)            |
| Stomach cancer                                                   | 265<br>(232 - 297)       | --               | --                | 20<br>(16 - 24)    | 122<br>(105 - 142)       | 122<br>(102 - 143)       |
| Liver cancer                                                     | 77<br>(50 - 103)         | --               | 0<br>(0 - 0)      | 6<br>(4 - 9)       | 40<br>(25 - 53)          | 32<br>(18 - 45)          |
| Liver cancer due to hepatitis B                                  | 19<br>(8 - 31)           | --               | 0<br>(0 - 0)      | 2<br>(1 - 3)       | 11<br>(4 - 18)           | 6<br>(2 - 11)            |
| Liver cancer due to hepatitis C                                  | 35<br>(21 - 52)          | --               | 0<br>(0 - 0)      | 2<br>(1 - 4)       | 18<br>(11 - 27)          | 15<br>(8 - 23)           |
| Liver cancer due to alcohol use                                  | 20<br>(10 - 31)          | --               | --                | 1<br>(0 - 2)       | 9<br>(4 - 15)            | 10<br>(5 - 15)           |
| Liver cancer due to other causes                                 | 4<br>(2 - 6)             | --               | 0<br>(0 - 0)      | 0<br>(0 - 1)       | 2<br>(1 - 3)             | 1<br>(1 - 2)             |
| Larynx cancer                                                    | 77<br>(52 - 96)          | --               | --                | 7<br>(5 - 10)      | 45<br>(30 - 59)          | 24<br>(16 - 32)          |
| Tracheal, bronchus and lung cancer                               | 702<br>(631 - 783)       | --               | --                | 59<br>(47 - 73)    | 435<br>(384 - 492)       | 208<br>(181 - 236)       |
| Breast cancer                                                    | 6<br>(2 - 15)            | --               | --                | 1<br>(0 - 2)       | 2<br>(1 - 6)             | 3<br>(1 - 8)             |
| Cervical cancer                                                  | --                       | --               | --                | --                 | --                       | --                       |

Web Table 31- Macedonia deaths with 95% UI by age, sex, and cause in 2013

| Cause                                         | Males, All Ages          | Males, 0-4 Years | Males, 5-14 Years | Males, 15-49 Years | Males, 50-69 Years       | Males, 70-80 Years       |
|-----------------------------------------------|--------------------------|------------------|-------------------|--------------------|--------------------------|--------------------------|
| Uterine cancer                                | --                       | --               | --                | --                 | --                       | --                       |
| Prostate cancer                               | 158<br>(109 - 196)       | --               | --                | 2<br>(1 - 2)       | 41<br>(27 - 53)          | 116<br>(75 - 148)        |
| Colon and rectum cancer                       | 248<br>(221 - 277)       | --               | --                | 19<br>(16 - 24)    | 114<br>(99 - 131)        | 114<br>(98 - 133)        |
| Lip and oral cavity cancer                    | 27<br>(23 - 31)          | --               | --                | 4<br>(3 - 5)       | 14<br>(11 - 17)          | 9<br>(7 - 12)            |
| Nasopharynx cancer                            | 5<br>(4 - 7)             | --               | 0<br>(0 - 0)      | 1<br>(1 - 2)       | 3<br>(2 - 4)             | 1<br>(1 - 1)             |
| Other pharynx cancer                          | 16<br>(12 - 20)          | --               | --                | 3<br>(2 - 4)       | 10<br>(7 - 12)           | 3<br>(2 - 4)             |
| Gallbladder and biliary tract cancer          | 21<br>(12 - 26)          | --               | --                | 1<br>(1 - 2)       | 9<br>(5 - 12)            | 10<br>(5 - 14)           |
| Pancreatic cancer                             | 123<br>(109 - 137)       | --               | --                | 10<br>(8 - 13)     | 64<br>(55 - 74)          | 49<br>(42 - 57)          |
| Malignant skin melanoma                       | 46<br>(27 - 90)          | --               | --                | 9<br>(5 - 17)      | 18<br>(10 - 36)          | 19<br>(11 - 40)          |
| Non-melanoma skin cancer                      | 14<br>(8 - 20)           | --               | --                | 1<br>(0 - 1)       | 3<br>(2 - 5)             | 10<br>(5 - 15)           |
| Ovarian cancer                                | --                       | --               | --                | --                 | --                       | --                       |
| Testicular cancer                             | 10<br>(7 - 13)           | --               | --                | 6<br>(4 - 9)       | 2<br>(1 - 3)             | 2<br>(1 - 3)             |
| Kidney cancer                                 | 32<br>(27 - 37)          | 0<br>(0 - 0)     | 0<br>(0 - 0)      | 3<br>(2 - 4)       | 16<br>(13 - 20)          | 12<br>(10 - 15)          |
| Bladder cancer                                | 88<br>(68 - 103)         | --               | --                | 3<br>(3 - 4)       | 37<br>(29 - 45)          | 48<br>(36 - 58)          |
| Brain and nervous system cancer               | 96<br>(72 - 117)         | 1<br>(0 - 1)     | 2<br>(1 - 3)      | 24<br>(18 - 31)    | 51<br>(38 - 64)          | 19<br>(12 - 25)          |
| Thyroid cancer                                | 3<br>(3 - 4)             | --               | 0<br>(0 - 0)      | 0<br>(0 - 1)       | 2<br>(1 - 3)             | 1<br>(1 - 2)             |
| Mesothelioma                                  | 6<br>(3 - 17)            | --               | --                | 1<br>(0 - 3)       | 3<br>(1 - 10)            | 2<br>(1 - 5)             |
| Hodgkin lymphoma                              | 11<br>(8 - 18)           | 0<br>(0 - 0)     | 0<br>(0 - 0)      | 5<br>(3 - 8)       | 4<br>(3 - 7)             | 2<br>(1 - 3)             |
| Non-Hodgkin lymphoma                          | 29<br>(17 - 38)          | 0<br>(0 - 1)     | 1<br>(0 - 1)      | 7<br>(4 - 10)      | 13<br>(8 - 18)           | 7<br>(4 - 10)            |
| Multiple myeloma                              | 11<br>(6 - 17)           | --               | --                | 1<br>(1 - 3)       | 6<br>(3 - 10)            | 3<br>(2 - 5)             |
| Leukemia                                      | 63<br>(55 - 73)          | 1<br>(0 - 1)     | 2<br>(1 - 3)      | 15<br>(13 - 18)    | 25<br>(21 - 31)          | 20<br>(16 - 25)          |
| Other neoplasms                               | 88<br>(55 - 109)         | 1<br>(0 - 2)     | 1<br>(1 - 2)      | 17<br>(10 - 21)    | 40<br>(23 - 51)          | 30<br>(18 - 40)          |
| Cardiovascular diseases                       | 5,336<br>(4,934 - 5,678) | 1<br>(1 - 2)     | 2<br>(1 - 3)      | 251<br>(220 - 285) | 1,482<br>(1,345 - 1,619) | 3,599<br>(3,321 - 3,825) |
| Rheumatic heart disease                       | 18<br>(12 - 26)          | 0<br>(0 - 0)     | 0<br>(0 - 0)      | 3<br>(2 - 5)       | 7<br>(5 - 11)            | 8<br>(5 - 12)            |
| Ischemic heart disease                        | 2,222<br>(1,898 - 2,541) | 0<br>(0 - 0)     | 0<br>(0 - 0)      | 155<br>(130 - 181) | 808<br>(692 - 924)       | 1,258<br>(1,023 - 1,489) |
| Cerebrovascular disease                       | 2,501<br>(2,148 - 2,839) | 1<br>(0 - 1)     | 1<br>(0 - 1)      | 60<br>(45 - 76)    | 529<br>(431 - 618)       | 1,911<br>(1,651 - 2,172) |
| Ischemic stroke                               | 1,952<br>(1,657 - 2,226) | 0<br>(0 - 0)     | 0<br>(0 - 0)      | 11<br>(6 - 15)     | 273<br>(201 - 337)       | 1,667<br>(1,422 - 1,906) |
| Hemorrhagic stroke                            | 549<br>(426 - 693)       | 0<br>(0 - 1)     | 1<br>(0 - 1)      | 49<br>(37 - 62)    | 255<br>(197 - 320)       | 243<br>(173 - 336)       |
| Hypertensive heart disease                    | 304<br>(188 - 429)       | 0<br>(0 - 0)     | 0<br>(0 - 0)      | 6<br>(4 - 8)       | 52<br>(31 - 72)          | 245<br>(147 - 356)       |
| Cardiomyopathy and myocarditis                | 154<br>(99 - 231)        | 0<br>(0 - 1)     | 0<br>(0 - 1)      | 14<br>(9 - 25)     | 43<br>(27 - 71)          | 96<br>(55 - 154)         |
| Atrial fibrillation and flutter               | 1<br>(1 - 1)             | --               | --                | 0<br>(0 - 0)       | 0<br>(0 - 0)             | 1<br>(0 - 1)             |
| Aortic aneurysm                               | 37<br>(27 - 44)          | --               | --                | 3<br>(2 - 4)       | 16<br>(11 - 20)          | 18<br>(13 - 22)          |
| Peripheral vascular disease                   | 1<br>(1 - 1)             | --               | --                | 0<br>(0 - 0)       | 0<br>(0 - 1)             | 1<br>(0 - 1)             |
| Endocarditis                                  | 4<br>(3 - 6)             | 0<br>(0 - 0)     | 0<br>(0 - 0)      | 1<br>(1 - 2)       | 1<br>(1 - 2)             | 1<br>(1 - 2)             |
| Other cardiovascular and circulatory diseases | 93<br>(68 - 207)         | 0<br>(0 - 0)     | 0<br>(0 - 0)      | 7<br>(5 - 13)      | 25<br>(19 - 48)          | 60<br>(40 - 149)         |
| Chronic respiratory diseases                  | 471<br>(405 - 581)       | 0<br>(0 - 0)     | 0<br>(0 - 0)      | 8<br>(7 - 11)      | 101<br>(83 - 124)        | 361<br>(313 - 453)       |
| Chronic obstructive pulmonary disease         | 393<br>(338 - 483)       | 0<br>(0 - 0)     | 0<br>(0 - 0)      | 6<br>(5 - 8)       | 76<br>(62 - 93)          | 311<br>(267 - 390)       |
| Pneumoconiosis                                | 14<br>(9 - 20)           | 0<br>(0 - 0)     | 0<br>(0 - 0)      | 1<br>(1 - 1)       | 6<br>(4 - 10)            | 6<br>(4 - 10)            |
| Silicosis                                     | 6<br>(4 - 9)             | 0<br>(0 - 0)     | 0<br>(0 - 0)      | 0<br>(0 - 0)       | 2<br>(1 - 3)             | 3<br>(2 - 5)             |
| Asbestosis                                    | 1<br>(1 - 2)             | 0<br>(0 - 0)     | 0<br>(0 - 0)      | 0<br>(0 - 0)       | 1<br>(0 - 1)             | 0<br>(0 - 1)             |

Web Table 31- Macedonia deaths with 95% UI by age, sex, and cause in 2013

| Cause                                               | Males, All Ages    | Males, 0-4 Years | Males, 5-14 Years | Males, 15-49 Years | Males, 50-69 Years | Males, 70-80 Years |
|-----------------------------------------------------|--------------------|------------------|-------------------|--------------------|--------------------|--------------------|
| Coal workers pneumoconiosis                         | 2<br>(1 - 3)       | 0<br>(0 - 0)     | 0<br>(0 - 0)      | 0<br>(0 - 0)       | 1<br>(1 - 2)       | 1<br>(0 - 1)       |
| Other pneumoconiosis                                | 5<br>(3 - 8)       | 0<br>(0 - 0)     | 0<br>(0 - 0)      | 0<br>(0 - 1)       | 3<br>(2 - 4)       | 2<br>(1 - 3)       |
| Asthma                                              | 39<br>(30 - 50)    | 0<br>(0 - 0)     | 0<br>(0 - 0)      | 1<br>(1 - 1)       | 10<br>(7 - 14)     | 28<br>(20 - 38)    |
| Interstitial lung disease and pulmonary sarcoidosis | 23<br>(16 - 36)    | 0<br>(0 - 0)     | 0<br>(0 - 0)      | 0<br>(0 - 0)       | 8<br>(5 - 13)      | 15<br>(10 - 24)    |
| Other chronic respiratory diseases                  | 2<br>(2 - 3)       | 0<br>(0 - 0)     | 0<br>(0 - 0)      | 1<br>(0 - 1)       | 1<br>(0 - 1)       | 1<br>(1 - 1)       |
| Cirrhosis                                           | 141<br>(125 - 157) | 0<br>(0 - 0)     | 0<br>(0 - 0)      | 24<br>(20 - 30)    | 83<br>(71 - 95)    | 33<br>(28 - 39)    |
| Cirrhosis due to hepatitis B                        | 31<br>(18 - 47)    | 0<br>(0 - 0)     | 0<br>(0 - 0)      | 6<br>(3 - 9)       | 19<br>(11 - 29)    | 7<br>(3 - 11)      |
| Cirrhosis due to hepatitis C                        | 40<br>(21 - 62)    | 0<br>(0 - 0)     | 0<br>(0 - 0)      | 6<br>(2 - 10)      | 23<br>(11 - 37)    | 11<br>(6 - 18)     |
| Cirrhosis due to alcohol use                        | 45<br>(27 - 67)    | --               | --                | 6<br>(3 - 10)      | 27<br>(16 - 41)    | 12<br>(7 - 18)     |
| Cirrhosis due to other causes                       | 24<br>(14 - 39)    | 0<br>(0 - 0)     | 0<br>(0 - 0)      | 7<br>(5 - 11)      | 14<br>(7 - 23)     | 3<br>(2 - 6)       |
| Digestive diseases                                  | 110<br>(96 - 134)  | 0<br>(0 - 0)     | 0<br>(0 - 0)      | 13<br>(11 - 16)    | 40<br>(33 - 51)    | 57<br>(47 - 69)    |
| Peptic ulcer disease                                | 30<br>(22 - 40)    | 0<br>(0 - 0)     | 0<br>(0 - 0)      | 2<br>(2 - 3)       | 11<br>(8 - 16)     | 17<br>(11 - 23)    |
| Gastritis and duodenitis                            | 0<br>(0 - 0)       | 0<br>(0 - 0)     | 0<br>(0 - 0)      | 0<br>(0 - 0)       | 0<br>(0 - 0)       | 0<br>(0 - 0)       |
| Appendicitis                                        | 1<br>(1 - 2)       | 0<br>(0 - 0)     | 0<br>(0 - 0)      | 0<br>(0 - 0)       | 0<br>(0 - 1)       | 0<br>(0 - 1)       |
| Paralytic ileus and intestinal obstruction          | 29<br>(18 - 43)    | 0<br>(0 - 0)     | 0<br>(0 - 0)      | 3<br>(2 - 4)       | 9<br>(6 - 15)      | 17<br>(10 - 24)    |
| Inguinal, femoral, and abdominal hernia             | 2<br>(1 - 4)       | 0<br>(0 - 0)     | 0<br>(0 - 0)      | 0<br>(0 - 0)       | 1<br>(0 - 1)       | 1<br>(1 - 3)       |
| Inflammatory bowel disease                          | 1<br>(1 - 2)       | 0<br>(0 - 0)     | 0<br>(0 - 0)      | 0<br>(0 - 1)       | 0<br>(0 - 1)       | 0<br>(0 - 0)       |
| Vascular intestinal disorders                       | 21<br>(9 - 38)     | 0<br>(0 - 0)     | 0<br>(0 - 0)      | 1<br>(0 - 2)       | 8<br>(4 - 15)      | 12<br>(5 - 22)     |
| Gallbladder and biliary diseases                    | 4<br>(3 - 7)       | 0<br>(0 - 0)     | 0<br>(0 - 0)      | 0<br>(0 - 1)       | 2<br>(1 - 3)       | 2<br>(2 - 4)       |
| Pancreatitis                                        | 19<br>(12 - 26)    | 0<br>(0 - 0)     | 0<br>(0 - 0)      | 6<br>(4 - 7)       | 7<br>(5 - 10)      | 6<br>(4 - 9)       |
| Other digestive diseases                            | 2<br>(2 - 4)       | 0<br>(0 - 0)     | 0<br>(0 - 0)      | 0<br>(0 - 1)       | 1<br>(1 - 2)       | 1<br>(1 - 2)       |
| Neurological disorders                              | 430<br>(330 - 522) | 1<br>(0 - 1)     | 1<br>(0 - 1)      | 15<br>(13 - 20)    | 43<br>(34 - 53)    | 370<br>(275 - 459) |
| Alzheimer disease and other dementias               | 370<br>(274 - 462) | --               | --                | 0<br>(0 - 0)       | 27<br>(20 - 36)    | 343<br>(248 - 431) |
| Parkinson disease                                   | 28<br>(17 - 34)    | --               | --                | 0<br>(0 - 0)       | 5<br>(3 - 7)       | 22<br>(14 - 28)    |
| Epilepsy                                            | 16<br>(13 - 21)    | 0<br>(0 - 0)     | 0<br>(0 - 1)      | 8<br>(6 - 11)      | 5<br>(3 - 6)       | 3<br>(2 - 4)       |
| Multiple sclerosis                                  | 6<br>(3 - 10)      | --               | --                | 2<br>(1 - 5)       | 2<br>(1 - 4)       | 1<br>(0 - 2)       |
| Other neurological disorders                        | 10<br>(8 - 13)     | 0<br>(0 - 1)     | 0<br>(0 - 1)      | 4<br>(3 - 5)       | 3<br>(2 - 4)       | 2<br>(1 - 2)       |
| Mental and substance use disorders                  | 42<br>(32 - 54)    | 0<br>(0 - 1)     | 0<br>(0 - 0)      | 24<br>(19 - 32)    | 14<br>(9 - 18)     | 4<br>(3 - 5)       |
| Schizophrenia                                       | 0<br>(0 - 1)       | --               | --                | 0<br>(0 - 0)       | 0<br>(0 - 0)       | 0<br>(0 - 0)       |
| Alcohol use disorders                               | 23<br>(14 - 33)    | --               | --                | 9<br>(5 - 13)      | 12<br>(7 - 16)     | 3<br>(2 - 4)       |
| Drug use disorders                                  | 19<br>(14 - 24)    | 0<br>(0 - 1)     | --                | 16<br>(12 - 20)    | 2<br>(1 - 3)       | 1<br>(0 - 1)       |
| Opioid use disorders                                | 7<br>(6 - 9)       | 0<br>(0 - 0)     | --                | 6<br>(5 - 8)       | 1<br>(0 - 1)       | 0<br>(0 - 0)       |
| Cocaine use disorders                               | 1<br>(1 - 1)       | 0<br>(0 - 0)     | --                | 1<br>(1 - 1)       | 0<br>(0 - 0)       | 0<br>(0 - 0)       |
| Amphetamine use disorders                           | 1<br>(1 - 1)       | 0<br>(0 - 0)     | --                | 1<br>(0 - 1)       | 0<br>(0 - 0)       | 0<br>(0 - 0)       |
| Other drug use disorders                            | 9<br>(7 - 12)      | 0<br>(0 - 0)     | --                | 8<br>(6 - 10)      | 1<br>(1 - 1)       | 0<br>(0 - 1)       |
| Eating disorders                                    | 0<br>(0 - 0)       | --               | 0<br>(0 - 0)      | 0<br>(0 - 0)       | --                 | --                 |
| Anorexia nervosa                                    | 0<br>(0 - 0)       | --               | 0<br>(0 - 0)      | 0<br>(0 - 0)       | --                 | --                 |
| Diabetes, urogenital, blood, and endocrine diseases | 492<br>(438 - 556) | 2<br>(1 - 3)     | 1<br>(1 - 1)      | 31<br>(26 - 37)    | 173<br>(149 - 201) | 286<br>(247 - 330) |
| Diabetes mellitus                                   | 314<br>(274 - 357) | 0<br>(0 - 0)     | 0<br>(0 - 0)      | 11<br>(9 - 14)     | 112<br>(95 - 131)  | 191<br>(162 - 224) |
| Acute glomerulonephritis                            | 0<br>(0 - 0)       | 0<br>(0 - 0)     | 0<br>(0 - 0)      | 0<br>(0 - 0)       | 0<br>(0 - 0)       | 0<br>(0 - 0)       |

Web Table 31- Macedonia deaths with 95% UI by age, sex, and cause in 2013

| Cause                                               | Males, All Ages    | Males, 0-4 Years | Males, 5-14 Years | Males, 15-49 Years | Males, 50-69 Years | Males, 70-80 Years |
|-----------------------------------------------------|--------------------|------------------|-------------------|--------------------|--------------------|--------------------|
| Chronic kidney disease                              | 162<br>(139 - 204) | 0<br>(0 - 0)     | 0<br>(0 - 0)      | 15<br>(13 - 19)    | 57<br>(46 - 74)    | 89<br>(72 - 116)   |
| Chronic kidney disease due to diabetes mellitus     | 1<br>(0 - 2)       | 0<br>(0 - 0)     | 0<br>(0 - 0)      | 0<br>(0 - 1)       | 0<br>(0 - 1)       | 0<br>(0 - 0)       |
| Chronic kidney disease due to hypertension          | 53<br>(36 - 76)    | 0<br>(0 - 0)     | 0<br>(0 - 0)      | 5<br>(3 - 8)       | 18<br>(12 - 27)    | 29<br>(18 - 42)    |
| Chronic kidney disease due to glomerulonephritis    | 4<br>(2 - 5)       | 0<br>(0 - 0)     | 0<br>(0 - 0)      | 1<br>(0 - 1)       | 1<br>(1 - 2)       | 2<br>(1 - 3)       |
| Chronic kidney disease due to other causes          | 105<br>(80 - 145)  | 0<br>(0 - 0)     | 0<br>(0 - 0)      | 9<br>(6 - 12)      | 37<br>(27 - 54)    | 58<br>(41 - 84)    |
| Urinary diseases and male infertility               | 4<br>(3 - 5)       | 0<br>(0 - 0)     | 0<br>(0 - 0)      | 0<br>(0 - 0)       | 1<br>(1 - 1)       | 2<br>(2 - 3)       |
| Interstitial nephritis and urinary tract infections | 2<br>(1 - 2)       | 0<br>(0 - 0)     | 0<br>(0 - 0)      | 0<br>(0 - 0)       | 1<br>(0 - 1)       | 1<br>(1 - 2)       |
| Urolithiasis                                        | 0<br>(0 - 0)       | --               | 0<br>(0 - 0)      | 0<br>(0 - 0)       | 0<br>(0 - 0)       | 0<br>(0 - 0)       |
| Other urinary diseases                              | 2<br>(1 - 2)       | 0<br>(0 - 0)     | 0<br>(0 - 0)      | 0<br>(0 - 0)       | 0<br>(0 - 1)       | 1<br>(1 - 2)       |
| Gynecological diseases                              | --                 | --               | --                | --                 | --                 | --                 |
| Uterine fibroids                                    | --                 | --               | --                | --                 | --                 | --                 |
| Polycystic ovarian syndrome                         | --                 | --               | --                | --                 | --                 | --                 |
| Endometriosis                                       | --                 | --               | --                | --                 | --                 | --                 |
| Genital prolapse                                    | --                 | --               | --                | --                 | --                 | --                 |
| Other gynecological diseases                        | --                 | --               | --                | --                 | --                 | --                 |
| Hemoglobinopathies and hemolytic anemias            | 4<br>(3 - 7)       | 0<br>(0 - 0)     | 0<br>(0 - 1)      | 2<br>(1 - 3)       | 1<br>(0 - 1)       | 1<br>(1 - 2)       |
| Thalassemias                                        | 1<br>(1 - 2)       | 0<br>(0 - 0)     | 0<br>(0 - 1)      | 1<br>(0 - 1)       | 0<br>(0 - 0)       | 0<br>(0 - 0)       |
| Sickle cell disorders                               | 0<br>(0 - 1)       | 0<br>(0 - 0)     | 0<br>(0 - 0)      | 0<br>(0 - 0)       | 0<br>(0 - 0)       | 0<br>(0 - 0)       |
| G6PD deficiency                                     | 0<br>(0 - 0)       | 0<br>(0 - 0)     | 0<br>(0 - 0)      | 0<br>(0 - 0)       | 0<br>(0 - 0)       | 0<br>(0 - 0)       |
| Other hemoglobinopathies and hemolytic anemias      | 3<br>(2 - 4)       | 0<br>(0 - 0)     | 0<br>(0 - 0)      | 1<br>(1 - 1)       | 1<br>(0 - 1)       | 1<br>(1 - 2)       |
| Endocrine, metabolic, blood, and immune disorders   | 7<br>(5 - 12)      | 1<br>(1 - 2)     | 0<br>(0 - 1)      | 2<br>(2 - 4)       | 2<br>(2 - 4)       | 1<br>(1 - 2)       |
| Musculoskeletal disorders                           | 3<br>(2 - 5)       | --               | 0<br>(0 - 0)      | 1<br>(1 - 2)       | 1<br>(1 - 2)       | 1<br>(1 - 1)       |
| Rheumatoid arthritis                                | 0<br>(0 - 0)       | --               | 0<br>(0 - 0)      | 0<br>(0 - 0)       | 0<br>(0 - 0)       | 0<br>(0 - 0)       |
| Other musculoskeletal disorders                     | 3<br>(2 - 4)       | --               | 0<br>(0 - 0)      | 1<br>(1 - 2)       | 1<br>(1 - 1)       | 1<br>(0 - 1)       |
| Other non-communicable diseases                     | 34<br>(23 - 49)    | 25<br>(15 - 40)  | 1<br>(1 - 2)      | 4<br>(3 - 4)       | 2<br>(1 - 2)       | 1<br>(1 - 2)       |
| Congenital anomalies                                | 32<br>(21 - 47)    | 25<br>(15 - 40)  | 1<br>(1 - 2)      | 3<br>(3 - 4)       | 1<br>(1 - 2)       | 1<br>(1 - 1)       |
| Neural tube defects                                 | 1<br>(1 - 2)       | 1<br>(0 - 2)     | 0<br>(0 - 0)      | 0<br>(0 - 0)       | 0<br>(0 - 0)       | 0<br>(0 - 0)       |
| Congenital heart anomalies                          | 15<br>(9 - 23)     | 12<br>(7 - 20)   | 1<br>(0 - 1)      | 1<br>(1 - 2)       | 1<br>(0 - 1)       | 0<br>(0 - 0)       |
| Cleft lip and cleft palate                          | 0<br>(0 - 1)       | 0<br>(0 - 1)     | --                | --                 | --                 | --                 |
| Down syndrome                                       | 2<br>(1 - 4)       | 1<br>(1 - 3)     | 0<br>(0 - 0)      | 0<br>(0 - 1)       | 0<br>(0 - 0)       | 0<br>(0 - 0)       |
| Chromosomal unbalanced rearrangements               | 3<br>(2 - 5)       | 2<br>(1 - 4)     | 0<br>(0 - 0)      | 1<br>(1 - 1)       | 0<br>(0 - 0)       | 0<br>(0 - 0)       |
| Other congenital anomalies                          | 10<br>(6 - 16)     | 8<br>(4 - 14)    | 0<br>(0 - 1)      | 1<br>(1 - 1)       | 0<br>(0 - 1)       | 1<br>(0 - 1)       |
| Skin and subcutaneous diseases                      | 1<br>(1 - 2)       | 0<br>(0 - 0)     | 0<br>(0 - 0)      | 0<br>(0 - 1)       | 0<br>(0 - 1)       | 0<br>(0 - 0)       |
| Cellulitis                                          | 0<br>(0 - 1)       | 0<br>(0 - 0)     | 0<br>(0 - 0)      | 0<br>(0 - 0)       | 0<br>(0 - 0)       | 0<br>(0 - 0)       |
| Pyoderma                                            | 1<br>(1 - 1)       | 0<br>(0 - 0)     | 0<br>(0 - 0)      | 0<br>(0 - 0)       | 0<br>(0 - 0)       | 0<br>(0 - 0)       |
| Decubitus ulcer                                     | 0<br>(0 - 0)       | 0<br>(0 - 0)     | 0<br>(0 - 0)      | 0<br>(0 - 0)       | 0<br>(0 - 0)       | 0<br>(0 - 0)       |
| Other skin and subcutaneous diseases                | 0<br>(0 - 0)       | 0<br>(0 - 0)     | 0<br>(0 - 0)      | 0<br>(0 - 0)       | 0<br>(0 - 0)       | 0<br>(0 - 0)       |
| Sudden infant death syndrome                        | 0<br>(0 - 1)       | 0<br>(0 - 1)     | --                | --                 | --                 | --                 |
| Injuries                                            | 498<br>(445 - 548) | 5<br>(3 - 8)     | 9<br>(6 - 12)     | 256<br>(230 - 285) | 127<br>(108 - 146) | 102<br>(87 - 115)  |
| Transport injuries                                  | 144<br>(126 - 162) | 1<br>(1 - 2)     | 3<br>(2 - 5)      | 88<br>(76 - 101)   | 32<br>(26 - 39)    | 18<br>(15 - 22)    |

Web Table 31- Macedonia deaths with 95% UI by age, sex, and cause in 2013

| Cause                                           | Males, All Ages    | Males, 0-4 Years | Males, 5-14 Years | Males, 15-49 Years | Males, 50-69 Years | Males, 70-80 Years |
|-------------------------------------------------|--------------------|------------------|-------------------|--------------------|--------------------|--------------------|
| Road injuries                                   | 136<br>(119 - 153) | 1<br>(1 - 2)     | 3<br>(2 - 5)      | 84<br>(72 - 96)    | 30<br>(25 - 37)    | 18<br>(14 - 21)    |
| Pedestrian road injuries                        | 23<br>(12 - 40)    | 0<br>(0 - 1)     | 1<br>(0 - 1)      | 12<br>(6 - 22)     | 6<br>(3 - 9)       | 5<br>(2 - 8)       |
| Cyclist road injuries                           | 13<br>(9 - 21)     | 0<br>(0 - 1)     | 0<br>(0 - 1)      | 7<br>(4 - 12)      | 3<br>(2 - 6)       | 2<br>(1 - 3)       |
| Motorcyclist road injuries                      | 20<br>(13 - 38)    | 0<br>(0 - 0)     | 0<br>(0 - 1)      | 13<br>(7 - 25)     | 4<br>(3 - 9)       | 3<br>(1 - 5)       |
| Motor vehicle road injuries                     | 74<br>(42 - 98)    | 1<br>(0 - 1)     | 2<br>(1 - 3)      | 49<br>(28 - 66)    | 15<br>(8 - 22)     | 7<br>(4 - 11)      |
| Other road injuries                             | 5<br>(2 - 23)      | 0<br>(0 - 0)     | 0<br>(0 - 0)      | 3<br>(1 - 13)      | 1<br>(0 - 6)       | 1<br>(0 - 4)       |
| Other transport injuries                        | 8<br>(5 - 10)      | 0<br>(0 - 0)     | 0<br>(0 - 0)      | 5<br>(3 - 7)       | 2<br>(1 - 3)       | 1<br>(0 - 1)       |
| Unintentional injuries                          | 168<br>(142 - 191) | 4<br>(2 - 6)     | 4<br>(3 - 7)      | 66<br>(55 - 79)    | 43<br>(33 - 53)    | 51<br>(39 - 61)    |
| Falls                                           | 40<br>(25 - 49)    | 1<br>(0 - 1)     | 0<br>(0 - 1)      | 7<br>(5 - 9)       | 10<br>(6 - 13)     | 21<br>(13 - 28)    |
| Drowning                                        | 21<br>(14 - 27)    | 1<br>(0 - 2)     | 2<br>(1 - 3)      | 11<br>(7 - 15)     | 4<br>(2 - 6)       | 3<br>(2 - 4)       |
| Fire, heat, and hot substances                  | 8<br>(6 - 10)      | 0<br>(0 - 1)     | 0<br>(0 - 0)      | 2<br>(2 - 3)       | 2<br>(1 - 3)       | 3<br>(2 - 4)       |
| Poisonings                                      | 7<br>(5 - 9)       | 0<br>(0 - 1)     | 0<br>(0 - 0)      | 3<br>(2 - 4)       | 2<br>(1 - 2)       | 2<br>(1 - 2)       |
| Exposure to mechanical forces                   | 18<br>(14 - 22)    | 0<br>(0 - 1)     | 0<br>(0 - 1)      | 11<br>(8 - 14)     | 4<br>(3 - 5)       | 2<br>(1 - 3)       |
| Unintentional firearm injuries                  | 3<br>(2 - 4)       | 0<br>(0 - 0)     | 0<br>(0 - 0)      | 2<br>(2 - 3)       | 1<br>(0 - 1)       | 0<br>(0 - 1)       |
| Unintentional suffocation                       | 0<br>(0 - 2)       | 0<br>(0 - 0)     | 0<br>(0 - 0)      | 0<br>(0 - 1)       | 0<br>(0 - 0)       | 0<br>(0 - 0)       |
| Other exposure to mechanical forces             | 15<br>(9 - 18)     | 0<br>(0 - 0)     | 0<br>(0 - 1)      | 9<br>(5 - 11)      | 4<br>(2 - 5)       | 2<br>(1 - 2)       |
| Adverse effects of medical treatment            | 12<br>(8 - 15)     | 0<br>(0 - 1)     | 0<br>(0 - 0)      | 2<br>(1 - 3)       | 4<br>(2 - 5)       | 6<br>(4 - 8)       |
| Animal contact                                  | 2<br>(1 - 2)       | 0<br>(0 - 0)     | 0<br>(0 - 0)      | 1<br>(0 - 1)       | 0<br>(0 - 1)       | 1<br>(0 - 1)       |
| Venomous animal contact                         | 1<br>(0 - 1)       | 0<br>(0 - 0)     | 0<br>(0 - 0)      | 0<br>(0 - 1)       | 0<br>(0 - 0)       | 0<br>(0 - 0)       |
| Non-venomous animal contact                     | 1<br>(1 - 1)       | 0<br>(0 - 0)     | 0<br>(0 - 0)      | 0<br>(0 - 0)       | 0<br>(0 - 0)       | 1<br>(0 - 1)       |
| Foreign body                                    | 3<br>(2 - 4)       | 0<br>(0 - 1)     | 0<br>(0 - 0)      | 1<br>(1 - 2)       | 1<br>(0 - 1)       | 1<br>(0 - 1)       |
| Pulmonary aspiration and foreign body in airway | 3<br>(1 - 4)       | 0<br>(0 - 1)     | 0<br>(0 - 0)      | 1<br>(1 - 2)       | 1<br>(0 - 1)       | 1<br>(0 - 1)       |
| Foreign body in other body part                 | 0<br>(0 - 0)       | 0<br>(0 - 0)     | 0<br>(0 - 0)      | 0<br>(0 - 0)       | 0<br>(0 - 0)       | 0<br>(0 - 0)       |
| Other unintentional injuries                    | 58<br>(45 - 72)    | 0<br>(0 - 1)     | 1<br>(1 - 2)      | 28<br>(20 - 38)    | 16<br>(9 - 25)     | 13<br>(8 - 19)     |
| Self-harm and interpersonal violence            | 187<br>(156 - 224) | 0<br>(0 - 0)     | 1<br>(1 - 1)      | 101<br>(84 - 122)  | 52<br>(40 - 65)    | 32<br>(25 - 42)    |
| Self-harm                                       | 142<br>(113 - 172) | --               | 1<br>(0 - 1)      | 70<br>(53 - 85)    | 43<br>(32 - 54)    | 29<br>(22 - 39)    |
| Interpersonal violence                          | 45<br>(31 - 64)    | 0<br>(0 - 0)     | 0<br>(0 - 1)      | 32<br>(21 - 46)    | 9<br>(6 - 15)      | 4<br>(2 - 6)       |
| Assault by firearm                              | 26<br>(14 - 37)    | 0<br>(0 - 0)     | 0<br>(0 - 0)      | 20<br>(11 - 28)    | 5<br>(2 - 7)       | 1<br>(0 - 2)       |
| Assault by sharp object                         | 6<br>(3 - 12)      | 0<br>(0 - 0)     | 0<br>(0 - 0)      | 4<br>(2 - 7)       | 2<br>(1 - 3)       | 1<br>(0 - 1)       |
| Assault by other means                          | 13<br>(8 - 25)     | 0<br>(0 - 0)     | 0<br>(0 - 0)      | 8<br>(4 - 16)      | 3<br>(2 - 7)       | 2<br>(1 - 3)       |
| Forces of nature, war, and legal intervention   | 0<br>(0 - 0)       | 0<br>(0 - 0)     | --                | --                 | --                 | --                 |
| Exposure to forces of nature                    | 0<br>(0 - 0)       | 0<br>(0 - 0)     | --                | --                 | --                 | --                 |

Web Table 31- Macedonia deaths with 95% UI by age, sex, and cause in 2013

| Cause                                                             | Females, All Ages        | Females, 0-4 Years | Females, 5-14 Years | Females, 15-49 Years | Females, 50-69 Years     | Females, 70-80 Years     |
|-------------------------------------------------------------------|--------------------------|--------------------|---------------------|----------------------|--------------------------|--------------------------|
| All causes                                                        | 8,153<br>(7,501 - 8,848) | 81<br>(55 - 120)   | 15<br>(12 - 21)     | 413<br>(374 - 456)   | 1,813<br>(1,608 - 2,033) | 5,831<br>(5,430 - 6,256) |
| Communicable, maternal, neonatal, and nutritional diseases        | 132<br>(107 - 162)       | 50<br>(33 - 77)    | 2<br>(1 - 3)        | 14<br>(12 - 16)      | 17<br>(14 - 21)          | 49<br>(39 - 63)          |
| HIV/AIDS and tuberculosis                                         | 11<br>(9 - 16)           | 0<br>(0 - 0)       | 0<br>(0 - 0)        | 3<br>(2 - 4)         | 4<br>(3 - 6)             | 5<br>(3 - 7)             |
| Tuberculosis                                                      | 11<br>(8 - 16)           | 0<br>(0 - 0)       | 0<br>(0 - 0)        | 2<br>(2 - 3)         | 4<br>(2 - 6)             | 4<br>(3 - 7)             |
| HIV/AIDS                                                          | 1<br>(0 - 1)             | 0<br>(0 - 0)       | 0<br>(0 - 0)        | 0<br>(0 - 1)         | 0<br>(0 - 0)             | 0<br>(0 - 0)             |
| HIV/AIDS resulting in mycobacterial infection                     | 0<br>(0 - 0)             | 0<br>(0 - 0)       | 0<br>(0 - 0)        | 0<br>(0 - 0)         | 0<br>(0 - 0)             | 0<br>(0 - 0)             |
| HIV/AIDS resulting in other diseases                              | 1<br>(0 - 1)             | 0<br>(0 - 0)       | 0<br>(0 - 0)        | 0<br>(0 - 1)         | 0<br>(0 - 0)             | 0<br>(0 - 0)             |
| Diarrhea, lower respiratory, and other common infectious diseases | 67<br>(54 - 82)          | 9<br>(5 - 14)      | 1<br>(1 - 2)        | 7<br>(5 - 8)         | 11<br>(9 - 14)           | 38<br>(28 - 50)          |
| Diarrheal diseases                                                | 3<br>(2 - 5)             | 2<br>(1 - 3)       | 0<br>(0 - 0)        | 0<br>(0 - 0)         | 0<br>(0 - 0)             | 1<br>(0 - 1)             |
| Intestinal infectious diseases                                    | 2<br>(1 - 4)             | 0<br>(0 - 1)       | 0<br>(0 - 1)        | 1<br>(0 - 1)         | 0<br>(0 - 1)             | 0<br>(0 - 1)             |
| Typhoid fever                                                     | 1<br>(1 - 3)             | 0<br>(0 - 0)       | 0<br>(0 - 0)        | 0<br>(0 - 1)         | 0<br>(0 - 1)             | 0<br>(0 - 0)             |
| Paratyphoid fever                                                 | 0<br>(0 - 1)             | 0<br>(0 - 0)       | 0<br>(0 - 0)        | 0<br>(0 - 0)         | 0<br>(0 - 0)             | 0<br>(0 - 0)             |
| Other intestinal infectious diseases                              | 0<br>(0 - 1)             | 0<br>(0 - 0)       | 0<br>(0 - 0)        | 0<br>(0 - 0)         | 0<br>(0 - 0)             | 0<br>(0 - 0)             |
| Lower respiratory infections                                      | 55<br>(44 - 69)          | 5<br>(3 - 9)       | 1<br>(0 - 1)        | 4<br>(3 - 5)         | 9<br>(6 - 11)            | 36<br>(26 - 48)          |
| Upper respiratory infections                                      | 0<br>(0 - 1)             | 0<br>(0 - 0)       | 0<br>(0 - 0)        | 0<br>(0 - 0)         | 0<br>(0 - 0)             | 0<br>(0 - 1)             |
| Otitis media                                                      | 0<br>(0 - 0)             | 0<br>(0 - 0)       | 0<br>(0 - 0)        | 0<br>(0 - 0)         | 0<br>(0 - 0)             | 0<br>(0 - 0)             |
| Meningitis                                                        | 3<br>(2 - 3)             | 1<br>(1 - 2)       | 0<br>(0 - 0)        | 0<br>(0 - 1)         | 1<br>(0 - 1)             | 0<br>(0 - 0)             |
| Pneumococcal meningitis                                           | 1<br>(0 - 1)             | 0<br>(0 - 0)       | 0<br>(0 - 0)        | 0<br>(0 - 0)         | 0<br>(0 - 0)             | 0<br>(0 - 0)             |
| H influenzae type B meningitis                                    | 0<br>(0 - 1)             | 0<br>(0 - 1)       | 0<br>(0 - 0)        | 0<br>(0 - 0)         | 0<br>(0 - 0)             | 0<br>(0 - 0)             |
| Meningococcal meningitis                                          | 1<br>(0 - 1)             | 0<br>(0 - 0)       | 0<br>(0 - 0)        | 0<br>(0 - 0)         | 0<br>(0 - 0)             | 0<br>(0 - 0)             |
| Other meningitis                                                  | 1<br>(1 - 1)             | 0<br>(0 - 1)       | 0<br>(0 - 0)        | 0<br>(0 - 0)         | 0<br>(0 - 0)             | 0<br>(0 - 0)             |
| Encephalitis                                                      | 3<br>(2 - 4)             | 0<br>(0 - 1)       | 0<br>(0 - 0)        | 1<br>(0 - 1)         | 1<br>(1 - 2)             | 0<br>(0 - 1)             |
| Diphtheria                                                        | 0<br>(0 - 0)             | 0<br>(0 - 0)       | 0<br>(0 - 0)        | 0<br>(0 - 0)         | 0<br>(0 - 0)             | --                       |
| Whooping cough                                                    | 0<br>(0 - 0)             | 0<br>(0 - 0)       | 0<br>(0 - 0)        | 0<br>(0 - 0)         | 0<br>(0 - 0)             | --                       |
| Tetanus                                                           | 0<br>(0 - 0)             | 0<br>(0 - 0)       | 0<br>(0 - 0)        | 0<br>(0 - 0)         | 0<br>(0 - 0)             | 0<br>(0 - 0)             |
| Measles                                                           | 0<br>(0 - 0)             | 0<br>(0 - 0)       | 0<br>(0 - 0)        | 0<br>(0 - 0)         | 0<br>(0 - 0)             | --                       |
| Varicella and herpes zoster                                       | 1<br>(0 - 3)             | 0<br>(0 - 0)       | 0<br>(0 - 0)        | 0<br>(0 - 0)         | 0<br>(0 - 0)             | 0<br>(0 - 2)             |
| Neglected tropical diseases and malaria                           | 1<br>(1 - 2)             | 0<br>(0 - 0)       | 0<br>(0 - 0)        | 0<br>(0 - 1)         | 0<br>(0 - 1)             | 0<br>(0 - 1)             |
| Leishmaniasis                                                     | 1<br>(0 - 1)             | 0<br>(0 - 0)       | 0<br>(0 - 0)        | 0<br>(0 - 0)         | 0<br>(0 - 1)             | 0<br>(0 - 0)             |
| Visceral leishmaniasis                                            | 1<br>(0 - 1)             | 0<br>(0 - 0)       | 0<br>(0 - 0)        | 0<br>(0 - 0)         | 0<br>(0 - 1)             | 0<br>(0 - 0)             |
| Cysticercosis                                                     | 0<br>(0 - 0)             | 0<br>(0 - 0)       | 0<br>(0 - 0)        | 0<br>(0 - 0)         | 0<br>(0 - 0)             | 0<br>(0 - 0)             |
| Cystic echinococcosis                                             | 0<br>(0 - 0)             | 0<br>(0 - 0)       | 0<br>(0 - 0)        | 0<br>(0 - 0)         | 0<br>(0 - 0)             | 0<br>(0 - 0)             |
| Dengue                                                            | 0<br>(0 - 0)             | 0<br>(0 - 0)       | 0<br>(0 - 0)        | 0<br>(0 - 0)         | 0<br>(0 - 0)             | 0<br>(0 - 0)             |
| Rabies                                                            | 0<br>(0 - 0)             | 0<br>(0 - 0)       | 0<br>(0 - 0)        | 0<br>(0 - 0)         | 0<br>(0 - 0)             | 0<br>(0 - 0)             |
| Other neglected tropical diseases                                 | 0<br>(0 - 0)             | 0<br>(0 - 0)       | 0<br>(0 - 0)        | 0<br>(0 - 0)         | 0<br>(0 - 0)             | 0<br>(0 - 0)             |
| Maternal disorders                                                | 2<br>(2 - 3)             | --                 | 0<br>(0 - 0)        | 2<br>(2 - 3)         | --                       | --                       |
| Maternal hemorrhage                                               | 0<br>(0 - 0)             | --                 | 0<br>(0 - 0)        | 0<br>(0 - 0)         | --                       | --                       |
| Maternal sepsis and other maternal infections                     | 0<br>(0 - 0)             | --                 | 0<br>(0 - 0)        | 0<br>(0 - 0)         | --                       | --                       |
| Maternal hypertensive disorders                                   | 0<br>(0 - 0)             | --                 | 0<br>(0 - 0)        | 0<br>(0 - 0)         | --                       | --                       |
| Maternal obstructed labor                                         | 0<br>(0 - 0)             | --                 | 0<br>(0 - 0)        | 0<br>(0 - 0)         | --                       | --                       |



Web Table 31- Macedonia deaths with 95% UI by age, sex, and cause in 2013

| Cause                                                            | Females, All Ages        | Females, 0-4 Years | Females, 5-14 Years | Females, 15-49 Years | Females, 50-69 Years     | Females, 70-80 Years     |
|------------------------------------------------------------------|--------------------------|--------------------|---------------------|----------------------|--------------------------|--------------------------|
| Maternal abortive outcome                                        | 0<br>(0 - 1)             | --                 | 0<br>(0 - 0)        | 0<br>(0 - 1)         | --                       | --                       |
| Indirect maternal deaths                                         | 0<br>(0 - 0)             | --                 | 0<br>(0 - 0)        | 0<br>(0 - 0)         | --                       | --                       |
| Late maternal deaths                                             | 0<br>(0 - 0)             | --                 | 0<br>(0 - 0)        | 0<br>(0 - 0)         | --                       | --                       |
| Maternal deaths aggravated by HIV/AIDS                           | 0<br>(0 - 0)             | --                 | --                  | 0<br>(0 - 0)         | --                       | --                       |
| Other maternal disorders                                         | 0<br>(0 - 1)             | --                 | 0<br>(0 - 0)        | 0<br>(0 - 1)         | --                       | --                       |
| Neonatal disorders                                               | 39<br>(26 - 61)          | 39<br>(26 - 61)    | --                  | --                   | --                       | --                       |
| Neonatal preterm birth complications                             | 25<br>(15 - 41)          | 25<br>(15 - 41)    | --                  | --                   | --                       | --                       |
| Neonatal encephalopathy due to birth asphyxia and trauma         | 5<br>(2 - 9)             | 5<br>(2 - 9)       | --                  | --                   | --                       | --                       |
| Neonatal sepsis and other neonatal infections                    | 0<br>(0 - 1)             | 0<br>(0 - 1)       | --                  | --                   | --                       | --                       |
| Hemolytic disease and other neonatal jaundice                    | 0<br>(0 - 0)             | 0<br>(0 - 0)       | --                  | --                   | --                       | --                       |
| Other neonatal disorders                                         | 8<br>(5 - 15)            | 8<br>(5 - 15)      | --                  | --                   | --                       | --                       |
| Nutritional deficiencies                                         | 6<br>(5 - 8)             | 0<br>(0 - 0)       | 0<br>(0 - 0)        | 1<br>(1 - 1)         | 1<br>(1 - 1)             | 4<br>(3 - 6)             |
| Protein-energy malnutrition                                      | 0<br>(0 - 0)             | 0<br>(0 - 0)       | 0<br>(0 - 0)        | 0<br>(0 - 0)         | 0<br>(0 - 0)             | 0<br>(0 - 0)             |
| Iodine deficiency                                                | 0<br>(0 - 1)             | 0<br>(0 - 0)       | 0<br>(0 - 0)        | 0<br>(0 - 0)         | 0<br>(0 - 0)             | 0<br>(0 - 0)             |
| Iron-deficiency anemia                                           | 6<br>(4 - 7)             | 0<br>(0 - 0)       | 0<br>(0 - 0)        | 1<br>(0 - 1)         | 1<br>(1 - 1)             | 4<br>(3 - 6)             |
| Other nutritional deficiencies                                   | 0<br>(0 - 0)             | 0<br>(0 - 0)       | 0<br>(0 - 0)        | 0<br>(0 - 0)         | 0<br>(0 - 0)             | 0<br>(0 - 0)             |
| Other communicable, maternal, neonatal, and nutritional diseases | 5<br>(3 - 7)             | 1<br>(0 - 2)       | 0<br>(0 - 0)        | 1<br>(1 - 1)         | 1<br>(1 - 1)             | 2<br>(1 - 3)             |
| Sexually transmitted diseases excluding HIV                      | 1<br>(0 - 2)             | 1<br>(0 - 2)       | 0<br>(0 - 0)        | 0<br>(0 - 0)         | 0<br>(0 - 0)             | 0<br>(0 - 0)             |
| Syphilis                                                         | 1<br>(0 - 2)             | 1<br>(0 - 2)       | 0<br>(0 - 0)        | 0<br>(0 - 0)         | 0<br>(0 - 0)             | 0<br>(0 - 0)             |
| Chlamydial infection                                             | 0<br>(0 - 0)             | --                 | 0<br>(0 - 0)        | 0<br>(0 - 0)         | 0<br>(0 - 0)             | 0<br>(0 - 0)             |
| Gonococcal infection                                             | 0<br>(0 - 0)             | --                 | 0<br>(0 - 0)        | 0<br>(0 - 0)         | 0<br>(0 - 0)             | 0<br>(0 - 0)             |
| Other sexually transmitted diseases                              | 0<br>(0 - 0)             | --                 | 0<br>(0 - 0)        | 0<br>(0 - 0)         | 0<br>(0 - 0)             | 0<br>(0 - 0)             |
| Hepatitis                                                        | 0<br>(0 - 0)             | 0<br>(0 - 0)       | 0<br>(0 - 0)        | 0<br>(0 - 0)         | 0<br>(0 - 0)             | 0<br>(0 - 0)             |
| Acute hepatitis A                                                | 0<br>(0 - 0)             | 0<br>(0 - 0)       | 0<br>(0 - 0)        | 0<br>(0 - 0)         | 0<br>(0 - 0)             | 0<br>(0 - 0)             |
| Acute hepatitis B                                                | 0<br>(0 - 0)             | 0<br>(0 - 0)       | 0<br>(0 - 0)        | 0<br>(0 - 0)         | 0<br>(0 - 0)             | 0<br>(0 - 0)             |
| Acute hepatitis C                                                | 0<br>(0 - 0)             | --                 | 0<br>(0 - 0)        | 0<br>(0 - 0)         | 0<br>(0 - 0)             | 0<br>(0 - 0)             |
| Other infectious diseases                                        | 3<br>(2 - 5)             | 0<br>(0 - 0)       | 0<br>(0 - 0)        | 0<br>(0 - 1)         | 1<br>(1 - 1)             | 2<br>(1 - 3)             |
| Non-communicable diseases                                        | 7,849<br>(7,219 - 8,507) | 27<br>(17 - 40)    | 9<br>(7 - 13)       | 347<br>(314 - 385)   | 1,754<br>(1,556 - 1,965) | 5,712<br>(5,311 - 6,125) |
| Neoplasms                                                        | 1,330<br>(1,149 - 1,503) | 3<br>(2 - 4)       | 4<br>(3 - 6)        | 188<br>(165 - 211)   | 615<br>(524 - 703)       | 519<br>(448 - 587)       |
| Esophageal cancer                                                | 6<br>(5 - 8)             | --                 | --                  | 1<br>(0 - 1)         | 2<br>(2 - 3)             | 3<br>(2 - 4)             |
| Stomach cancer                                                   | 117<br>(88 - 157)        | --                 | --                  | 10<br>(8 - 14)       | 46<br>(34 - 64)          | 60<br>(44 - 83)          |
| Liver cancer                                                     | 49<br>(38 - 59)          | --                 | 0<br>(0 - 0)        | 3<br>(3 - 5)         | 20<br>(15 - 26)          | 26<br>(17 - 32)          |
| Liver cancer due to hepatitis B                                  | 9<br>(2 - 18)            | --                 | 0<br>(0 - 0)        | 1<br>(0 - 1)         | 4<br>(1 - 9)             | 3<br>(1 - 8)             |
| Liver cancer due to hepatitis C                                  | 20<br>(10 - 30)          | --                 | 0<br>(0 - 0)        | 1<br>(1 - 2)         | 8<br>(4 - 13)            | 11<br>(6 - 16)           |
| Liver cancer due to alcohol use                                  | 11<br>(7 - 18)           | --                 | --                  | 0<br>(0 - 1)         | 4<br>(2 - 7)             | 7<br>(4 - 11)            |
| Liver cancer due to other causes                                 | 9<br>(5 - 17)            | --                 | 0<br>(0 - 0)        | 1<br>(1 - 2)         | 4<br>(2 - 8)             | 4<br>(2 - 7)             |
| Larynx cancer                                                    | 8<br>(5 - 11)            | --                 | --                  | 1<br>(1 - 2)         | 4<br>(3 - 6)             | 2<br>(2 - 4)             |
| Tracheal, bronchus and lung cancer                               | 134<br>(101 - 159)       | --                 | --                  | 17<br>(13 - 21)      | 71<br>(50 - 88)          | 45<br>(31 - 56)          |
| Breast cancer                                                    | 268<br>(197 - 320)       | --                 | --                  | 49<br>(39 - 61)      | 140<br>(100 - 172)       | 80<br>(53 - 98)          |
| Cervical cancer                                                  | 82<br>(65 - 98)          | --                 | --                  | 20<br>(15 - 26)      | 38<br>(29 - 47)          | 24<br>(18 - 30)          |

Web Table 31- Macedonia deaths with 95% UI by age, sex, and cause in 2013

| Cause                                         | Females, All Ages        | Females, 0-4 Years | Females, 5-14 Years | Females, 15-49 Years | Females, 50-69 Years | Females, 70-80 Years     |
|-----------------------------------------------|--------------------------|--------------------|---------------------|----------------------|----------------------|--------------------------|
| Uterine cancer                                | 43<br>(29 - 54)          | --                 | --                  | 4<br>(3 - 6)         | 22<br>(14 - 29)      | 17<br>(11 - 22)          |
| Prostate cancer                               | --                       | --                 | --                  | --                   | --                   | --                       |
| Colon and rectum cancer                       | 156<br>(134 - 179)       | --                 | --                  | 11<br>(9 - 13)       | 63<br>(52 - 76)      | 82<br>(70 - 97)          |
| Lip and oral cavity cancer                    | 9<br>(7 - 11)            | --                 | --                  | 1<br>(1 - 1)         | 2<br>(2 - 3)         | 6<br>(4 - 7)             |
| Nasopharynx cancer                            | 2<br>(1 - 3)             | --                 | 0<br>(0 - 0)        | 0<br>(0 - 1)         | 1<br>(0 - 1)         | 1<br>(0 - 1)             |
| Other pharynx cancer                          | 2<br>(2 - 3)             | --                 | --                  | 1<br>(0 - 1)         | 1<br>(1 - 1)         | 1<br>(1 - 1)             |
| Gallbladder and biliary tract cancer          | 33<br>(22 - 45)          | --                 | --                  | 2<br>(1 - 2)         | 14<br>(9 - 19)       | 17<br>(11 - 24)          |
| Pancreatic cancer                             | 77<br>(66 - 89)          | --                 | --                  | 5<br>(4 - 7)         | 35<br>(29 - 42)      | 37<br>(31 - 44)          |
| Malignant skin melanoma                       | 27<br>(20 - 43)          | --                 | --                  | 6<br>(4 - 8)         | 9<br>(6 - 13)        | 12<br>(8 - 22)           |
| Non-melanoma skin cancer                      | 10<br>(6 - 15)           | --                 | --                  | 1<br>(0 - 1)         | 1<br>(1 - 2)         | 8<br>(5 - 13)            |
| Ovarian cancer                                | 83<br>(69 - 99)          | --                 | --                  | 15<br>(11 - 19)      | 45<br>(36 - 55)      | 23<br>(17 - 29)          |
| Testicular cancer                             | --                       | --                 | --                  | --                   | --                   | --                       |
| Kidney cancer                                 | 11<br>(7 - 15)           | 0<br>(0 - 0)       | 0<br>(0 - 0)        | 1<br>(1 - 2)         | 6<br>(4 - 9)         | 4<br>(2 - 6)             |
| Bladder cancer                                | 19<br>(12 - 26)          | --                 | --                  | 1<br>(1 - 1)         | 6<br>(4 - 9)         | 12<br>(8 - 17)           |
| Brain and nervous system cancer               | 61<br>(45 - 75)          | 1<br>(0 - 1)       | 2<br>(1 - 2)        | 12<br>(9 - 16)       | 33<br>(23 - 42)      | 14<br>(9 - 18)           |
| Thyroid cancer                                | 5<br>(4 - 7)             | --                 | 0<br>(0 - 0)        | 0<br>(0 - 1)         | 2<br>(2 - 4)         | 2<br>(2 - 3)             |
| Mesothelioma                                  | 2<br>(1 - 9)             | --                 | --                  | 0<br>(0 - 1)         | 1<br>(0 - 4)         | 1<br>(0 - 4)             |
| Hodgkin lymphoma                              | 6<br>(4 - 8)             | 0<br>(0 - 0)       | 0<br>(0 - 0)        | 2<br>(2 - 3)         | 2<br>(1 - 3)         | 2<br>(1 - 2)             |
| Non-Hodgkin lymphoma                          | 15<br>(9 - 25)           | 0<br>(0 - 0)       | 0<br>(0 - 0)        | 3<br>(2 - 5)         | 7<br>(4 - 12)        | 5<br>(2 - 8)             |
| Multiple myeloma                              | 6<br>(3 - 9)             | --                 | --                  | 1<br>(0 - 1)         | 3<br>(2 - 5)         | 2<br>(1 - 3)             |
| Leukemia                                      | 35<br>(28 - 42)          | 0<br>(0 - 1)       | 1<br>(1 - 2)        | 9<br>(7 - 12)        | 13<br>(10 - 17)      | 11<br>(8 - 14)           |
| Other neoplasms                               | 65<br>(45 - 82)          | 1<br>(1 - 2)       | 1<br>(1 - 2)        | 11<br>(8 - 13)       | 27<br>(18 - 36)      | 24<br>(15 - 32)          |
| Cardiovascular diseases                       | 5,174<br>(4,737 - 5,604) | 1<br>(1 - 2)       | 2<br>(1 - 3)        | 110<br>(93 - 130)    | 875<br>(764 - 992)   | 4,186<br>(3,858 - 4,497) |
| Rheumatic heart disease                       | 23<br>(17 - 32)          | 0<br>(0 - 0)       | 0<br>(0 - 0)        | 3<br>(2 - 5)         | 8<br>(6 - 12)        | 11<br>(8 - 16)           |
| Ischemic heart disease                        | 1,584<br>(1,323 - 1,962) | 0<br>(0 - 0)       | 0<br>(0 - 0)        | 45<br>(36 - 59)      | 339<br>(281 - 434)   | 1,200<br>(976 - 1,499)   |
| Cerebrovascular disease                       | 2,840<br>(2,340 - 3,219) | 0<br>(0 - 1)       | 1<br>(1 - 2)        | 48<br>(35 - 57)      | 433<br>(347 - 508)   | 2,359<br>(1,923 - 2,654) |
| Ischemic stroke                               | 2,166<br>(1,737 - 2,454) | 0<br>(0 - 0)       | 0<br>(0 - 0)        | 8<br>(4 - 11)        | 157<br>(103 - 197)   | 2,000<br>(1,614 - 2,256) |
| Hemorrhagic stroke                            | 675<br>(520 - 840)       | 0<br>(0 - 1)       | 1<br>(1 - 1)        | 40<br>(28 - 48)      | 276<br>(221 - 342)   | 358<br>(248 - 486)       |
| Hypertensive heart disease                    | 495<br>(365 - 734)       | 0<br>(0 - 0)       | 0<br>(0 - 0)        | 4<br>(3 - 5)         | 45<br>(32 - 61)      | 447<br>(323 - 672)       |
| Cardiomyopathy and myocarditis                | 129<br>(69 - 235)        | 0<br>(0 - 1)       | 0<br>(0 - 0)        | 5<br>(3 - 9)         | 20<br>(11 - 33)      | 104<br>(50 - 201)        |
| Atrial fibrillation and flutter               | 1<br>(1 - 1)             | --                 | --                  | 0<br>(0 - 0)         | 0<br>(0 - 0)         | 1<br>(0 - 1)             |
| Aortic aneurysm                               | 7<br>(4 - 10)            | --                 | --                  | 1<br>(1 - 1)         | 2<br>(1 - 3)         | 4<br>(2 - 6)             |
| Peripheral vascular disease                   | 0<br>(0 - 1)             | --                 | --                  | 0<br>(0 - 0)         | 0<br>(0 - 0)         | 0<br>(0 - 0)             |
| Endocarditis                                  | 2<br>(1 - 3)             | 0<br>(0 - 0)       | 0<br>(0 - 0)        | 1<br>(0 - 1)         | 1<br>(0 - 1)         | 1<br>(1 - 1)             |
| Other cardiovascular and circulatory diseases | 93<br>(64 - 225)         | 0<br>(0 - 0)       | 0<br>(0 - 0)        | 4<br>(3 - 9)         | 28<br>(19 - 57)      | 60<br>(38 - 162)         |
| Chronic respiratory diseases                  | 236<br>(198 - 297)       | 0<br>(0 - 0)       | 0<br>(0 - 0)        | 6<br>(4 - 7)         | 41<br>(33 - 52)      | 189<br>(156 - 240)       |
| Chronic obstructive pulmonary disease         | 198<br>(163 - 247)       | 0<br>(0 - 0)       | 0<br>(0 - 0)        | 4<br>(3 - 5)         | 35<br>(27 - 44)      | 159<br>(130 - 201)       |
| Pneumoconiosis                                | 0<br>(0 - 0)             | 0<br>(0 - 0)       | 0<br>(0 - 0)        | 0<br>(0 - 0)         | 0<br>(0 - 0)         | 0<br>(0 - 0)             |
| Silicosis                                     | 0<br>(0 - 0)             | 0<br>(0 - 0)       | 0<br>(0 - 0)        | 0<br>(0 - 0)         | 0<br>(0 - 0)         | 0<br>(0 - 0)             |
| Asbestosis                                    | 0<br>(0 - 0)             | 0<br>(0 - 0)       | 0<br>(0 - 0)        | 0<br>(0 - 0)         | 0<br>(0 - 0)         | 0<br>(0 - 0)             |

Web Table 31- Macedonia deaths with 95% UI by age, sex, and cause in 2013

| Cause                                               | Females, All Ages  | Females, 0-4 Years | Females, 5-14 Years | Females, 15-49 Years | Females, 50-69 Years | Females, 70-80 Years |
|-----------------------------------------------------|--------------------|--------------------|---------------------|----------------------|----------------------|----------------------|
| Coal workers pneumoconiosis                         | 0<br>(0 - 0)       | 0<br>(0 - 0)       | 0<br>(0 - 0)        | 0<br>(0 - 0)         | 0<br>(0 - 0)         | 0<br>(0 - 0)         |
| Other pneumoconiosis                                | 0<br>(0 - 0)       | 0<br>(0 - 0)       | 0<br>(0 - 0)        | 0<br>(0 - 0)         | 0<br>(0 - 0)         | 0<br>(0 - 0)         |
| Asthma                                              | 24<br>(14 - 43)    | 0<br>(0 - 0)       | 0<br>(0 - 0)        | 1<br>(0 - 1)         | 5<br>(3 - 8)         | 19<br>(11 - 34)      |
| Interstitial lung disease and pulmonary sarcoidosis | 11<br>(5 - 21)     | 0<br>(0 - 0)       | 0<br>(0 - 0)        | 0<br>(0 - 1)         | 1<br>(1 - 3)         | 9<br>(4 - 18)        |
| Other chronic respiratory diseases                  | 3<br>(2 - 5)       | 0<br>(0 - 0)       | 0<br>(0 - 0)        | 0<br>(0 - 1)         | 0<br>(0 - 0)         | 2<br>(1 - 4)         |
| Cirrhosis                                           | 40<br>(34 - 46)    | 0<br>(0 - 0)       | 0<br>(0 - 0)        | 5<br>(4 - 6)         | 19<br>(16 - 24)      | 15<br>(13 - 18)      |
| Cirrhosis due to hepatitis B                        | 16<br>(11 - 22)    | 0<br>(0 - 0)       | 0<br>(0 - 0)        | 2<br>(1 - 3)         | 8<br>(5 - 11)        | 6<br>(4 - 9)         |
| Cirrhosis due to hepatitis C                        | 11<br>(7 - 16)     | 0<br>(0 - 0)       | 0<br>(0 - 0)        | 1<br>(0 - 2)         | 6<br>(3 - 9)         | 4<br>(3 - 7)         |
| Cirrhosis due to alcohol use                        | 5<br>(2 - 8)       | --                 | --                  | 0<br>(0 - 1)         | 2<br>(1 - 4)         | 3<br>(1 - 4)         |
| Cirrhosis due to other causes                       | 8<br>(5 - 12)      | 0<br>(0 - 0)       | 0<br>(0 - 0)        | 2<br>(1 - 2)         | 4<br>(2 - 6)         | 2<br>(1 - 4)         |
| Digestive diseases                                  | 79<br>(64 - 93)    | 0<br>(0 - 0)       | 0<br>(0 - 0)        | 5<br>(4 - 7)         | 21<br>(17 - 27)      | 52<br>(41 - 62)      |
| Peptic ulcer disease                                | 15<br>(10 - 20)    | 0<br>(0 - 0)       | 0<br>(0 - 0)        | 1<br>(0 - 1)         | 4<br>(2 - 5)         | 11<br>(7 - 15)       |
| Gastritis and duodenitis                            | 0<br>(0 - 1)       | 0<br>(0 - 0)       | 0<br>(0 - 0)        | 0<br>(0 - 0)         | 0<br>(0 - 0)         | 0<br>(0 - 1)         |
| Appendicitis                                        | 1<br>(1 - 1)       | 0<br>(0 - 0)       | 0<br>(0 - 0)        | 0<br>(0 - 0)         | 0<br>(0 - 0)         | 0<br>(0 - 1)         |
| Paralytic ileus and intestinal obstruction          | 26<br>(14 - 35)    | 0<br>(0 - 0)       | 0<br>(0 - 0)        | 2<br>(1 - 2)         | 6<br>(3 - 9)         | 17<br>(9 - 24)       |
| Inguinal, femoral, and abdominal hernia             | 3<br>(2 - 6)       | 0<br>(0 - 0)       | 0<br>(0 - 0)        | 0<br>(0 - 0)         | 1<br>(1 - 2)         | 2<br>(1 - 5)         |
| Inflammatory bowel disease                          | 1<br>(1 - 2)       | 0<br>(0 - 0)       | 0<br>(0 - 0)        | 0<br>(0 - 1)         | 0<br>(0 - 0)         | 0<br>(0 - 1)         |
| Vascular intestinal disorders                       | 14<br>(8 - 25)     | 0<br>(0 - 0)       | 0<br>(0 - 0)        | 1<br>(0 - 1)         | 4<br>(3 - 8)         | 9<br>(5 - 16)        |
| Gallbladder and biliary diseases                    | 5<br>(3 - 7)       | 0<br>(0 - 0)       | 0<br>(0 - 0)        | 0<br>(0 - 0)         | 1<br>(1 - 2)         | 3<br>(2 - 5)         |
| Pancreatitis                                        | 12<br>(8 - 17)     | 0<br>(0 - 0)       | 0<br>(0 - 0)        | 1<br>(1 - 2)         | 4<br>(2 - 6)         | 7<br>(4 - 10)        |
| Other digestive diseases                            | 1<br>(1 - 2)       | 0<br>(0 - 0)       | 0<br>(0 - 0)        | 0<br>(0 - 0)         | 0<br>(0 - 1)         | 1<br>(0 - 1)         |
| Neurological disorders                              | 447<br>(355 - 544) | 0<br>(0 - 1)       | 1<br>(0 - 1)        | 6<br>(5 - 8)         | 30<br>(23 - 38)      | 410<br>(320 - 504)   |
| Alzheimer disease and other dementias               | 416<br>(327 - 511) | --                 | --                  | 0<br>(0 - 0)         | 22<br>(16 - 29)      | 394<br>(306 - 489)   |
| Parkinson disease                                   | 16<br>(9 - 20)     | --                 | --                  | 0<br>(0 - 0)         | 3<br>(2 - 4)         | 13<br>(8 - 17)       |
| Epilepsy                                            | 7<br>(5 - 9)       | 0<br>(0 - 0)       | 0<br>(0 - 1)        | 4<br>(3 - 5)         | 2<br>(1 - 2)         | 1<br>(1 - 2)         |
| Multiple sclerosis                                  | 5<br>(3 - 9)       | --                 | --                  | 2<br>(1 - 4)         | 2<br>(1 - 3)         | 1<br>(1 - 3)         |
| Other neurological disorders                        | 3<br>(2 - 3)       | 0<br>(0 - 1)       | 0<br>(0 - 0)        | 1<br>(1 - 1)         | 1<br>(1 - 1)         | 1<br>(0 - 1)         |
| Mental and substance use disorders                  | 4<br>(3 - 6)       | 0<br>(0 - 0)       | 0<br>(0 - 0)        | 2<br>(2 - 3)         | 1<br>(1 - 2)         | 1<br>(0 - 1)         |
| Schizophrenia                                       | 0<br>(0 - 1)       | --                 | --                  | 0<br>(0 - 0)         | 0<br>(0 - 0)         | 0<br>(0 - 0)         |
| Alcohol use disorders                               | 1<br>(0 - 2)       | --                 | --                  | 0<br>(0 - 0)         | 0<br>(0 - 1)         | 0<br>(0 - 1)         |
| Drug use disorders                                  | 3<br>(2 - 4)       | 0<br>(0 - 0)       | --                  | 2<br>(1 - 2)         | 1<br>(0 - 1)         | 0<br>(0 - 1)         |
| Opioid use disorders                                | 1<br>(1 - 1)       | 0<br>(0 - 0)       | --                  | 1<br>(0 - 1)         | 0<br>(0 - 0)         | 0<br>(0 - 0)         |
| Cocaine use disorders                               | 0<br>(0 - 0)       | 0<br>(0 - 0)       | --                  | 0<br>(0 - 0)         | 0<br>(0 - 0)         | 0<br>(0 - 0)         |
| Amphetamine use disorders                           | 0<br>(0 - 0)       | 0<br>(0 - 0)       | --                  | 0<br>(0 - 0)         | 0<br>(0 - 0)         | 0<br>(0 - 0)         |
| Other drug use disorders                            | 1<br>(1 - 2)       | 0<br>(0 - 0)       | --                  | 1<br>(1 - 1)         | 0<br>(0 - 0)         | 0<br>(0 - 0)         |
| Eating disorders                                    | 0<br>(0 - 0)       | --                 | 0<br>(0 - 0)        | 0<br>(0 - 0)         | --                   | --                   |
| Anorexia nervosa                                    | 0<br>(0 - 0)       | --                 | 0<br>(0 - 0)        | 0<br>(0 - 0)         | --                   | --                   |
| Diabetes, urogenital, blood, and endocrine diseases | 506<br>(435 - 585) | 1<br>(1 - 2)       | 1<br>(0 - 1)        | 20<br>(17 - 25)      | 147<br>(123 - 179)   | 336<br>(285 - 392)   |
| Diabetes mellitus                                   | 386<br>(327 - 448) | 0<br>(0 - 0)       | 0<br>(0 - 0)        | 8<br>(6 - 10)        | 105<br>(86 - 129)    | 272<br>(224 - 325)   |
| Acute glomerulonephritis                            | 0<br>(0 - 0)       | 0<br>(0 - 0)       | 0<br>(0 - 0)        | 0<br>(0 - 0)         | 0<br>(0 - 0)         | 0<br>(0 - 0)         |

Web Table 31- Macedonia deaths with 95% UI by age, sex, and cause in 2013

| Cause                                               | Females, All Ages  | Females, 0-4 Years | Females, 5-14 Years | Females, 15-49 Years | Females, 50-69 Years | Females, 70-80 Years |
|-----------------------------------------------------|--------------------|--------------------|---------------------|----------------------|----------------------|----------------------|
| Chronic kidney disease                              | 107<br>(87 - 133)  | 0<br>(0 - 0)       | 0<br>(0 - 0)        | 8<br>(7 - 11)        | 39<br>(29 - 53)      | 60<br>(47 - 75)      |
| Chronic kidney disease due to diabetes mellitus     | 1<br>(1 - 2)       | 0<br>(0 - 0)       | 0<br>(0 - 0)        | 1<br>(1 - 1)         | 0<br>(0 - 1)         | 0<br>(0 - 0)         |
| Chronic kidney disease due to hypertension          | 34<br>(21 - 50)    | 0<br>(0 - 0)       | 0<br>(0 - 0)        | 2<br>(1 - 3)         | 12<br>(7 - 19)       | 20<br>(12 - 29)      |
| Chronic kidney disease due to glomerulonephritis    | 2<br>(1 - 4)       | 0<br>(0 - 0)       | 0<br>(0 - 0)        | 0<br>(0 - 1)         | 1<br>(0 - 1)         | 1<br>(0 - 2)         |
| Chronic kidney disease due to other causes          | 69<br>(48 - 98)    | 0<br>(0 - 0)       | 0<br>(0 - 0)        | 5<br>(3 - 7)         | 26<br>(16 - 38)      | 38<br>(26 - 55)      |
| Urinary diseases and male infertility               | 2<br>(2 - 3)       | 0<br>(0 - 0)       | 0<br>(0 - 0)        | 0<br>(0 - 0)         | 1<br>(0 - 1)         | 1<br>(1 - 2)         |
| Interstitial nephritis and urinary tract infections | 1<br>(1 - 2)       | 0<br>(0 - 0)       | 0<br>(0 - 0)        | 0<br>(0 - 0)         | 0<br>(0 - 1)         | 1<br>(0 - 1)         |
| Urolithiasis                                        | 0<br>(0 - 0)       | --                 | 0<br>(0 - 0)        | 0<br>(0 - 0)         | 0<br>(0 - 0)         | 0<br>(0 - 0)         |
| Other urinary diseases                              | 1<br>(1 - 1)       | 0<br>(0 - 0)       | 0<br>(0 - 0)        | 0<br>(0 - 0)         | 0<br>(0 - 0)         | 0<br>(0 - 1)         |
| Gynecological diseases                              | 0<br>(0 - 0)       | --                 | --                  | 0<br>(0 - 0)         | 0<br>(0 - 0)         | 0<br>(0 - 0)         |
| Uterine fibroids                                    | 0<br>(0 - 0)       | --                 | --                  | 0<br>(0 - 0)         | 0<br>(0 - 0)         | 0<br>(0 - 0)         |
| Polycystic ovarian syndrome                         | 0<br>(0 - 0)       | --                 | --                  | 0<br>(0 - 0)         | 0<br>(0 - 0)         | --                   |
| Endometriosis                                       | 0<br>(0 - 0)       | --                 | --                  | 0<br>(0 - 0)         | 0<br>(0 - 0)         | --                   |
| Genital prolapse                                    | 0<br>(0 - 0)       | --                 | --                  | 0<br>(0 - 0)         | 0<br>(0 - 0)         | 0<br>(0 - 0)         |
| Other gynecological diseases                        | 0<br>(0 - 0)       | --                 | --                  | 0<br>(0 - 0)         | 0<br>(0 - 0)         | 0<br>(0 - 0)         |
| Hemoglobinopathies and hemolytic anemias            | 4<br>(3 - 6)       | 0<br>(0 - 0)       | 0<br>(0 - 0)        | 2<br>(1 - 3)         | 1<br>(1 - 1)         | 1<br>(1 - 1)         |
| Thalassemias                                        | 1<br>(1 - 2)       | 0<br>(0 - 0)       | 0<br>(0 - 0)        | 1<br>(0 - 1)         | 0<br>(0 - 0)         | 0<br>(0 - 0)         |
| Sickle cell disorders                               | 0<br>(0 - 1)       | 0<br>(0 - 0)       | 0<br>(0 - 0)        | 0<br>(0 - 0)         | 0<br>(0 - 0)         | 0<br>(0 - 0)         |
| G6PD deficiency                                     | 0<br>(0 - 0)       | 0<br>(0 - 0)       | 0<br>(0 - 0)        | 0<br>(0 - 0)         | 0<br>(0 - 0)         | 0<br>(0 - 0)         |
| Other hemoglobinopathies and hemolytic anemias      | 3<br>(2 - 4)       | 0<br>(0 - 0)       | 0<br>(0 - 0)        | 1<br>(1 - 1)         | 1<br>(0 - 1)         | 1<br>(1 - 1)         |
| Endocrine, metabolic, blood, and immune disorders   | 6<br>(5 - 11)      | 1<br>(0 - 1)       | 0<br>(0 - 0)        | 2<br>(1 - 4)         | 2<br>(1 - 3)         | 2<br>(1 - 3)         |
| Musculoskeletal disorders                           | 4<br>(3 - 6)       | --                 | 0<br>(0 - 0)        | 1<br>(1 - 2)         | 2<br>(1 - 3)         | 1<br>(1 - 2)         |
| Rheumatoid arthritis                                | 1<br>(0 - 1)       | --                 | 0<br>(0 - 0)        | 0<br>(0 - 0)         | 0<br>(0 - 0)         | 0<br>(0 - 0)         |
| Other musculoskeletal disorders                     | 4<br>(3 - 6)       | --                 | 0<br>(0 - 0)        | 1<br>(1 - 2)         | 2<br>(1 - 3)         | 1<br>(1 - 1)         |
| Other non-communicable diseases                     | 29<br>(20 - 41)    | 21<br>(12 - 32)    | 1<br>(1 - 2)        | 4<br>(3 - 5)         | 1<br>(1 - 2)         | 2<br>(2 - 3)         |
| Congenital anomalies                                | 27<br>(19 - 39)    | 20<br>(12 - 31)    | 1<br>(1 - 2)        | 3<br>(2 - 4)         | 1<br>(1 - 1)         | 2<br>(1 - 3)         |
| Neural tube defects                                 | 1<br>(0 - 1)       | 1<br>(0 - 1)       | 0<br>(0 - 0)        | 0<br>(0 - 0)         | 0<br>(0 - 0)         | 0<br>(0 - 0)         |
| Congenital heart anomalies                          | 11<br>(7 - 17)     | 8<br>(4 - 13)      | 1<br>(0 - 1)        | 2<br>(1 - 2)         | 0<br>(0 - 0)         | 1<br>(1 - 2)         |
| Cleft lip and cleft palate                          | 0<br>(0 - 1)       | 0<br>(0 - 1)       | --                  | --                   | --                   | --                   |
| Down syndrome                                       | 5<br>(3 - 8)       | 4<br>(2 - 7)       | 0<br>(0 - 0)        | 0<br>(0 - 1)         | 0<br>(0 - 0)         | 0<br>(0 - 0)         |
| Chromosomal unbalanced rearrangements               | 1<br>(0 - 2)       | 1<br>(0 - 1)       | 0<br>(0 - 0)        | 0<br>(0 - 0)         | 0<br>(0 - 0)         | 0<br>(0 - 0)         |
| Other congenital anomalies                          | 9<br>(6 - 14)      | 7<br>(4 - 11)      | 0<br>(0 - 1)        | 1<br>(1 - 1)         | 0<br>(0 - 1)         | 1<br>(0 - 1)         |
| Skin and subcutaneous diseases                      | 1<br>(1 - 1)       | 0<br>(0 - 0)       | 0<br>(0 - 0)        | 0<br>(0 - 0)         | 0<br>(0 - 1)         | 0<br>(0 - 0)         |
| Cellulitis                                          | 0<br>(0 - 0)       | 0<br>(0 - 0)       | 0<br>(0 - 0)        | 0<br>(0 - 0)         | 0<br>(0 - 0)         | 0<br>(0 - 0)         |
| Pyoderma                                            | 0<br>(0 - 1)       | 0<br>(0 - 0)       | 0<br>(0 - 0)        | 0<br>(0 - 0)         | 0<br>(0 - 0)         | 0<br>(0 - 0)         |
| Decubitus ulcer                                     | 0<br>(0 - 0)       | 0<br>(0 - 0)       | 0<br>(0 - 0)        | 0<br>(0 - 0)         | 0<br>(0 - 0)         | 0<br>(0 - 0)         |
| Other skin and subcutaneous diseases                | 0<br>(0 - 0)       | 0<br>(0 - 0)       | 0<br>(0 - 0)        | 0<br>(0 - 0)         | 0<br>(0 - 0)         | 0<br>(0 - 0)         |
| Sudden infant death syndrome                        | 0<br>(0 - 1)       | 0<br>(0 - 1)       | --                  | --                   | --                   | --                   |
| Injuries                                            | 173<br>(147 - 201) | 4<br>(3 - 7)       | 4<br>(3 - 6)        | 52<br>(44 - 61)      | 42<br>(35 - 51)      | 70<br>(55 - 85)      |
| Transport injuries                                  | 33<br>(21 - 41)    | 1<br>(1 - 2)       | 2<br>(1 - 3)        | 15<br>(9 - 19)       | 9<br>(6 - 11)        | 6<br>(4 - 8)         |

Web Table 31- Macedonia deaths with 95% UI by age, sex, and cause in 2013

| Cause                                           | Females, All Ages | Females, 0-4 Years | Females, 5-14 Years | Females, 15-49 Years | Females, 50-69 Years | Females, 70-80 Years |
|-------------------------------------------------|-------------------|--------------------|---------------------|----------------------|----------------------|----------------------|
| Road injuries                                   | 31<br>(19 - 38)   | 1<br>(1 - 2)       | 2<br>(1 - 3)        | 14<br>(9 - 18)       | 8<br>(5 - 11)        | 6<br>(4 - 8)         |
| Pedestrian road injuries                        | 7<br>(4 - 10)     | 0<br>(0 - 1)       | 0<br>(0 - 1)        | 2<br>(1 - 3)         | 2<br>(1 - 3)         | 2<br>(1 - 3)         |
| Cyclist road injuries                           | 2<br>(1 - 3)      | 0<br>(0 - 0)       | 0<br>(0 - 0)        | 1<br>(1 - 1)         | 1<br>(0 - 1)         | 0<br>(0 - 1)         |
| Motorcyclist road injuries                      | 3<br>(1 - 6)      | 0<br>(0 - 0)       | 0<br>(0 - 0)        | 1<br>(1 - 3)         | 1<br>(0 - 2)         | 1<br>(0 - 1)         |
| Motor vehicle road injuries                     | 17<br>(8 - 23)    | 1<br>(0 - 1)       | 1<br>(0 - 1)        | 9<br>(4 - 12)        | 4<br>(2 - 6)         | 3<br>(1 - 4)         |
| Other road injuries                             | 2<br>(0 - 5)      | 0<br>(0 - 0)       | 0<br>(0 - 0)        | 1<br>(0 - 2)         | 0<br>(0 - 2)         | 0<br>(0 - 1)         |
| Other transport injuries                        | 2<br>(1 - 4)      | 0<br>(0 - 0)       | 0<br>(0 - 0)        | 1<br>(1 - 2)         | 1<br>(0 - 1)         | 0<br>(0 - 1)         |
| Unintentional injuries                          | 80<br>(63 - 97)   | 3<br>(2 - 5)       | 2<br>(1 - 3)        | 12<br>(10 - 15)      | 13<br>(10 - 17)      | 51<br>(36 - 64)      |
| Falls                                           | 32<br>(17 - 43)   | 0<br>(0 - 1)       | 0<br>(0 - 0)        | 1<br>(1 - 2)         | 3<br>(1 - 4)         | 27<br>(14 - 38)      |
| Drowning                                        | 5<br>(3 - 8)      | 1<br>(0 - 1)       | 0<br>(0 - 1)        | 1<br>(1 - 2)         | 1<br>(1 - 2)         | 2<br>(1 - 2)         |
| Fire, heat, and hot substances                  | 5<br>(3 - 6)      | 0<br>(0 - 1)       | 0<br>(0 - 0)        | 1<br>(0 - 1)         | 1<br>(1 - 1)         | 2<br>(1 - 3)         |
| Poisonings                                      | 4<br>(3 - 6)      | 0<br>(0 - 0)       | 0<br>(0 - 0)        | 1<br>(1 - 2)         | 1<br>(0 - 1)         | 1<br>(1 - 2)         |
| Exposure to mechanical forces                   | 3<br>(2 - 3)      | 0<br>(0 - 1)       | 0<br>(0 - 0)        | 1<br>(1 - 1)         | 0<br>(0 - 1)         | 1<br>(0 - 1)         |
| Unintentional firearm injuries                  | 1<br>(1 - 1)      | 0<br>(0 - 0)       | 0<br>(0 - 0)        | 0<br>(0 - 1)         | 0<br>(0 - 0)         | 0<br>(0 - 0)         |
| Unintentional suffocation                       | 0<br>(0 - 1)      | 0<br>(0 - 0)       | 0<br>(0 - 0)        | 0<br>(0 - 0)         | 0<br>(0 - 0)         | 0<br>(0 - 0)         |
| Other exposure to mechanical forces             | 2<br>(1 - 2)      | 0<br>(0 - 0)       | 0<br>(0 - 0)        | 1<br>(0 - 1)         | 0<br>(0 - 0)         | 1<br>(0 - 1)         |
| Adverse effects of medical treatment            | 11<br>(7 - 15)    | 0<br>(0 - 1)       | 0<br>(0 - 0)        | 1<br>(1 - 2)         | 3<br>(2 - 4)         | 7<br>(4 - 10)        |
| Animal contact                                  | 1<br>(0 - 1)      | 0<br>(0 - 0)       | 0<br>(0 - 0)        | 0<br>(0 - 0)         | 0<br>(0 - 0)         | 0<br>(0 - 1)         |
| Venomous animal contact                         | 0<br>(0 - 0)      | 0<br>(0 - 0)       | 0<br>(0 - 0)        | 0<br>(0 - 0)         | 0<br>(0 - 0)         | 0<br>(0 - 0)         |
| Non-venomous animal contact                     | 0<br>(0 - 1)      | 0<br>(0 - 0)       | 0<br>(0 - 0)        | 0<br>(0 - 0)         | 0<br>(0 - 0)         | 0<br>(0 - 0)         |
| Foreign body                                    | 1<br>(1 - 2)      | 0<br>(0 - 1)       | 0<br>(0 - 0)        | 0<br>(0 - 0)         | 0<br>(0 - 1)         | 0<br>(0 - 0)         |
| Pulmonary aspiration and foreign body in airway | 1<br>(1 - 2)      | 0<br>(0 - 1)       | 0<br>(0 - 0)        | 0<br>(0 - 0)         | 0<br>(0 - 1)         | 0<br>(0 - 0)         |
| Foreign body in other body part                 | 0<br>(0 - 0)      | 0<br>(0 - 0)       | 0<br>(0 - 0)        | 0<br>(0 - 0)         | 0<br>(0 - 0)         | 0<br>(0 - 0)         |
| Other unintentional injuries                    | 20<br>(14 - 29)   | 0<br>(0 - 1)       | 1<br>(0 - 1)        | 5<br>(3 - 7)         | 3<br>(2 - 6)         | 11<br>(6 - 18)       |
| Self-harm and interpersonal violence            | 59<br>(50 - 72)   | 0<br>(0 - 1)       | 1<br>(0 - 1)        | 25<br>(21 - 30)      | 20<br>(16 - 26)      | 13<br>(10 - 19)      |
| Self-harm                                       | 47<br>(39 - 61)   | --                 | 0<br>(0 - 1)        | 18<br>(15 - 23)      | 17<br>(13 - 22)      | 11<br>(9 - 17)       |
| Interpersonal violence                          | 12<br>(7 - 15)    | 0<br>(0 - 1)       | 0<br>(0 - 0)        | 7<br>(4 - 9)         | 3<br>(2 - 4)         | 2<br>(1 - 2)         |
| Assault by firearm                              | 5<br>(3 - 7)      | 0<br>(0 - 0)       | 0<br>(0 - 0)        | 3<br>(2 - 5)         | 1<br>(1 - 2)         | 0<br>(0 - 0)         |
| Assault by sharp object                         | 2<br>(1 - 3)      | 0<br>(0 - 0)       | 0<br>(0 - 0)        | 1<br>(1 - 2)         | 0<br>(0 - 1)         | 0<br>(0 - 0)         |
| Assault by other means                          | 5<br>(3 - 8)      | 0<br>(0 - 0)       | 0<br>(0 - 0)        | 2<br>(1 - 3)         | 2<br>(1 - 3)         | 1<br>(1 - 2)         |
| Forces of nature, war, and legal intervention   | 0<br>(0 - 0)      | 0<br>(0 - 0)       | 0<br>(0 - 0)        | 0<br>(0 - 0)         | 0<br>(0 - 0)         | 0<br>(0 - 0)         |
| Exposure to forces of nature                    | 0<br>(0 - 0)      | 0<br>(0 - 0)       | 0<br>(0 - 0)        | 0<br>(0 - 0)         | 0<br>(0 - 0)         | 0<br>(0 - 0)         |

Web Table 31- Madagascar deaths with 95% UI by age, sex, and cause in 2013

| Cause                                                             | Both Sexes, All Ages           | Both Sexes, 0-4 Years       | Both Sexes, 5-14 Years   | Both Sexes, 15-49 Years     | Both Sexes, 50-69 Years     | Both Sexes, 70-80 Years     |
|-------------------------------------------------------------------|--------------------------------|-----------------------------|--------------------------|-----------------------------|-----------------------------|-----------------------------|
| All causes                                                        | 159,943<br>(138,929 - 185,431) | 45,736<br>(36,344 - 57,714) | 5,655<br>(4,637 - 7,253) | 36,903<br>(29,670 - 44,488) | 36,718<br>(29,758 - 45,964) | 34,931<br>(30,626 - 39,940) |
| Communicable, maternal, neonatal, and nutritional diseases        | 79,087<br>(67,580 - 94,988)    | 40,621<br>(31,903 - 51,393) | 4,218<br>(3,306 - 5,676) | 17,839<br>(14,212 - 23,814) | 8,786<br>(6,806 - 11,389)   | 7,623<br>(6,346 - 9,192)    |
| HIV/AIDS and tuberculosis                                         | 7,429<br>(4,039 - 19,735)      | 398<br>(158 - 1,275)        | 233<br>(90 - 803)        | 4,821<br>(2,420 - 13,567)   | 1,571<br>(901 - 3,661)      | 407<br>(287 - 678)          |
| Tuberculosis                                                      | 3,707<br>(2,528 - 5,317)       | 151<br>(84 - 248)           | 68<br>(40 - 106)         | 2,164<br>(1,337 - 3,124)    | 976<br>(655 - 1,490)        | 349<br>(258 - 503)          |
| HIV/AIDS                                                          | 3,722<br>(653 - 16,368)        | 247<br>(33 - 1,120)         | 165<br>(28 - 753)        | 2,657<br>(465 - 11,819)     | 595<br>(98 - 2,621)         | 58<br>(10 - 262)            |
| HIV/AIDS resulting in mycobacterial infection                     | 224<br>(38 - 1,021)            | 14<br>(2 - 64)              | 9<br>(2 - 40)            | 160<br>(27 - 724)           | 38<br>(6 - 171)             | 4<br>(1 - 17)               |
| HIV/AIDS resulting in other diseases                              | 3,498<br>(613 - 15,360)        | 233<br>(31 - 1,057)         | 156<br>(27 - 710)        | 2,497<br>(436 - 11,095)     | 558<br>(92 - 2,450)         | 54<br>(9 - 247)             |
| Diarrhea, lower respiratory, and other common infectious diseases | 35,436<br>(28,193 - 45,568)    | 17,625<br>(12,100 - 25,267) | 1,773<br>(1,138 - 3,047) | 5,790<br>(3,735 - 7,711)    | 4,881<br>(3,566 - 6,619)    | 5,368<br>(4,228 - 6,717)    |
| Diarrheal diseases                                                | 12,663<br>(8,529 - 17,074)     | 6,345<br>(2,990 - 10,341)   | 508<br>(264 - 837)       | 2,409<br>(1,421 - 3,576)    | 1,828<br>(1,080 - 2,883)    | 1,574<br>(968 - 2,390)      |
| Intestinal infectious diseases                                    | 885<br>(438 - 1,573)           | 291<br>(107 - 554)          | 214<br>(91 - 404)        | 330<br>(155 - 596)          | 38<br>(19 - 71)             | 13<br>(6 - 22)              |
| Typhoid fever                                                     | 628<br>(297 - 1,156)           | 183<br>(61 - 369)           | 163<br>(69 - 318)        | 248<br>(108 - 469)          | 26<br>(11 - 52)             | 8<br>(4 - 14)               |
| Paratyphoid fever                                                 | 159<br>(67 - 310)              | 55<br>(18 - 120)            | 42<br>(16 - 87)          | 56<br>(22 - 109)            | 5<br>(2 - 12)               | 2<br>(1 - 3)                |
| Other intestinal infectious diseases                              | 97<br>(58 - 145)               | 52<br>(22 - 93)             | 9<br>(3 - 17)            | 26<br>(12 - 45)             | 7<br>(2 - 15)               | 4<br>(1 - 9)                |
| Lower respiratory infections                                      | 15,481<br>(11,563 - 19,944)    | 6,885<br>(4,046 - 10,243)   | 450<br>(261 - 721)       | 2,077<br>(1,274 - 2,848)    | 2,512<br>(1,823 - 3,400)    | 3,556<br>(2,680 - 4,593)    |
| Upper respiratory infections                                      | 21<br>(11 - 36)                | 6<br>(1 - 17)               | 1<br>(0 - 2)             | 7<br>(2 - 14)               | 5<br>(1 - 11)               | 3<br>(0 - 9)                |
| Otitis media                                                      | 45<br>(31 - 60)                | 17<br>(7 - 30)              | 5<br>(3 - 8)             | 12<br>(8 - 16)              | 7<br>(5 - 9)                | 3<br>(2 - 4)                |
| Meningitis                                                        | 2,817<br>(2,001 - 4,234)       | 1,169<br>(590 - 2,386)      | 230<br>(127 - 364)       | 773<br>(482 - 1,090)        | 446<br>(279 - 646)          | 199<br>(126 - 288)          |
| Pneumococcal meningitis                                           | 740<br>(498 - 1,291)           | 242<br>(107 - 665)          | 77<br>(40 - 125)         | 234<br>(131 - 361)          | 129<br>(69 - 205)           | 59<br>(35 - 93)             |
| H influenzae type B meningitis                                    | 648<br>(403 - 1,209)           | 413<br>(193 - 964)          | 56<br>(29 - 100)         | 109<br>(59 - 169)           | 48<br>(26 - 77)             | 21<br>(12 - 33)             |
| Meningococcal meningitis                                          | 459<br>(305 - 680)             | 130<br>(51 - 312)           | 26<br>(13 - 46)          | 143<br>(81 - 224)           | 106<br>(51 - 177)           | 54<br>(28 - 83)             |
| Other meningitis                                                  | 970<br>(658 - 1,340)           | 385<br>(202 - 640)          | 71<br>(36 - 118)         | 286<br>(170 - 456)          | 163<br>(88 - 263)           | 66<br>(35 - 106)            |
| Encephalitis                                                      | 104<br>(60 - 164)              | 51<br>(21 - 99)             | 7<br>(3 - 12)            | 25<br>(14 - 40)             | 13<br>(6 - 21)              | 8<br>(3 - 12)               |
| Diphtheria                                                        | 8<br>(1 - 40)                  | 6<br>(0 - 38)               | 1<br>(0 - 7)             | 1<br>(0 - 3)                | 0<br>(0 - 1)                | --                          |
| Whooping cough                                                    | 205<br>(0 - 1,038)             | 193<br>(0 - 985)            | 9<br>(0 - 44)            | 2<br>(0 - 12)               | 0<br>(0 - 1)                | --                          |
| Tetanus                                                           | 181<br>(119 - 287)             | 78<br>(41 - 143)            | 9<br>(4 - 17)            | 60<br>(33 - 99)             | 27<br>(14 - 49)             | 8<br>(4 - 14)               |
| Measles                                                           | 3,007<br>(78 - 14,956)         | 2,578<br>(68 - 12,590)      | 338<br>(8 - 1,869)       | 89<br>(1 - 579)             | 2<br>(0 - 16)               | --                          |
| Varicella and herpes zoster                                       | 19<br>(8 - 37)                 | 6<br>(1 - 21)               | 1<br>(0 - 5)             | 5<br>(1 - 12)               | 2<br>(0 - 4)                | 4<br>(0 - 14)               |
| Neglected tropical diseases and malaria                           | 7,419<br>(5,096 - 10,763)      | 2,313<br>(998 - 4,582)      | 1,298<br>(775 - 2,060)   | 2,552<br>(1,566 - 4,048)    | 838<br>(512 - 1,389)        | 418<br>(221 - 772)          |
| Malaria                                                           | 4,906<br>(2,985 - 7,867)       | 1,767<br>(559 - 3,969)      | 744<br>(369 - 1,299)     | 1,354<br>(635 - 2,564)      | 673<br>(342 - 1,216)        | 369<br>(172 - 730)          |
| Leishmaniasis                                                     | 2,248<br>(1,300 - 3,405)       | 494<br>(188 - 941)          | 521<br>(245 - 869)       | 1,094<br>(543 - 1,769)      | 114<br>(57 - 201)           | 26<br>(10 - 59)             |
| Visceral leishmaniasis                                            | 2,248<br>(1,300 - 3,405)       | 494<br>(188 - 941)          | 521<br>(245 - 869)       | 1,094<br>(543 - 1,769)      | 114<br>(57 - 201)           | 26<br>(10 - 59)             |
| Schistosomiasis                                                   | 73<br>(50 - 101)               | 1<br>(0 - 1)                | 2<br>(1 - 3)             | 31<br>(19 - 47)             | 28<br>(17 - 43)             | 11<br>(7 - 17)              |
| Cysticercosis                                                     | 10<br>(7 - 12)                 | 0<br>(0 - 1)                | 0<br>(0 - 1)             | 6<br>(4 - 8)                | 2<br>(2 - 3)                | 1<br>(0 - 1)                |
| Cystic echinococcosis                                             | 9<br>(7 - 11)                  | 1<br>(0 - 1)                | 1<br>(1 - 2)             | 5<br>(3 - 6)                | 2<br>(1 - 2)                | 1<br>(1 - 1)                |
| Dengue                                                            | 3<br>(1 - 6)                   | 0<br>(0 - 1)                | 0<br>(0 - 1)             | 2<br>(1 - 3)                | 1<br>(0 - 1)                | 0<br>(0 - 0)                |
| Rabies                                                            | 104<br>(55 - 170)              | 17<br>(5 - 38)              | 24<br>(10 - 47)          | 50<br>(25 - 82)             | 11<br>(7 - 19)              | 2<br>(1 - 5)                |
| Intestinal nematode infections                                    | 35<br>(16 - 61)                | 25<br>(9 - 49)              | 4<br>(1 - 11)            | 3<br>(0 - 11)               | 1<br>(0 - 7)                | 1<br>(0 - 5)                |
| Ascariasis                                                        | 35<br>(16 - 61)                | 25<br>(9 - 49)              | 4<br>(1 - 11)            | 3<br>(0 - 11)               | 1<br>(0 - 7)                | 1<br>(0 - 5)                |
| Other neglected tropical diseases                                 | 31<br>(21 - 48)                | 9<br>(5 - 16)               | 1<br>(0 - 2)             | 7<br>(4 - 13)               | 6<br>(4 - 11)               | 7<br>(4 - 13)               |
| Maternal disorders                                                | 2,455<br>(1,438 - 3,699)       | --                          | 13<br>(4 - 32)           | 2,442<br>(1,426 - 3,687)    | --                          | --                          |

Web Table 31- Madagascar deaths with 95% UI by age, sex, and cause in 2013

| Cause                                                            | Both Sexes, All Ages        | Both Sexes, 0-4 Years      | Both Sexes, 5-14 Years | Both Sexes, 15-49 Years    | Both Sexes, 50-69 Years     | Both Sexes, 70-80 Years     |
|------------------------------------------------------------------|-----------------------------|----------------------------|------------------------|----------------------------|-----------------------------|-----------------------------|
| Maternal hemorrhage                                              | 284<br>(143 - 452)          | --                         | 1<br>(0 - 2)           | 283<br>(142 - 451)         | --                          | --                          |
| Maternal sepsis and other maternal infections                    | 244<br>(134 - 400)          | --                         | 2<br>(0 - 4)           | 242<br>(132 - 398)         | --                          | --                          |
| Maternal hypertensive disorders                                  | 246<br>(136 - 397)          | --                         | 2<br>(0 - 4)           | 244<br>(135 - 396)         | --                          | --                          |
| Maternal obstructed labor                                        | 127<br>(69 - 207)           | --                         | 1<br>(0 - 1)           | 127<br>(69 - 206)          | --                          | --                          |
| Maternal abortive outcome                                        | 476<br>(252 - 771)          | --                         | 2<br>(1 - 6)           | 474<br>(250 - 768)         | --                          | --                          |
| Indirect maternal deaths                                         | 182<br>(85 - 311)           | --                         | 1<br>(0 - 2)           | 181<br>(85 - 310)          | --                          | --                          |
| Late maternal deaths                                             | 223<br>(110 - 376)          | --                         | 2<br>(0 - 5)           | 221<br>(109 - 374)         | --                          | --                          |
| Maternal deaths aggravated by HIV/AIDS                           | 3<br>(1 - 5)                | --                         | --                     | 3<br>(1 - 5)               | --                          | --                          |
| Other maternal disorders                                         | 664<br>(386 - 1,012)        | --                         | 3<br>(1 - 8)           | 661<br>(384 - 1,009)       | --                          | --                          |
| Neonatal disorders                                               | 12,024<br>(8,758 - 16,573)  | 12,024<br>(8,758 - 16,573) | --                     | --                         | --                          | --                          |
| Neonatal preterm birth complications                             | 5,011<br>(3,044 - 7,338)    | 5,011<br>(3,044 - 7,338)   | --                     | --                         | --                          | --                          |
| Neonatal encephalopathy due to birth asphyxia and trauma         | 1,655<br>(905 - 2,751)      | 1,655<br>(905 - 2,751)     | --                     | --                         | --                          | --                          |
| Neonatal sepsis and other neonatal infections                    | 2,823<br>(1,443 - 4,687)    | 2,823<br>(1,443 - 4,687)   | --                     | --                         | --                          | --                          |
| Hemolytic disease and other neonatal jaundice                    | 57<br>(24 - 132)            | 57<br>(24 - 132)           | --                     | --                         | --                          | --                          |
| Other neonatal disorders                                         | 2,479<br>(1,107 - 5,156)    | 2,479<br>(1,107 - 5,156)   | --                     | --                         | --                          | --                          |
| Nutritional deficiencies                                         | 8,104<br>(5,237 - 12,386)   | 4,068<br>(1,977 - 6,650)   | 529<br>(298 - 831)     | 1,305<br>(782 - 2,221)     | 1,012<br>(621 - 1,744)      | 1,189<br>(778 - 2,027)      |
| Protein-energy malnutrition                                      | 5,427<br>(3,026 - 8,975)    | 3,367<br>(1,523 - 5,836)   | 377<br>(195 - 633)     | 512<br>(206 - 1,164)       | 524<br>(257 - 1,032)        | 647<br>(341 - 1,163)        |
| Iodine deficiency                                                | 14<br>(2 - 46)              | 6<br>(0 - 36)              | 1<br>(0 - 8)           | 3<br>(0 - 13)              | 2<br>(0 - 8)                | 1<br>(0 - 7)                |
| Iron-deficiency anemia                                           | 2,617<br>(1,322 - 4,299)    | 688<br>(155 - 1,728)       | 149<br>(50 - 285)      | 777<br>(388 - 1,286)       | 478<br>(233 - 882)          | 525<br>(226 - 1,078)        |
| Other nutritional deficiencies                                   | 47<br>(22 - 107)            | 8<br>(1 - 24)              | 2<br>(1 - 7)           | 13<br>(5 - 33)             | 9<br>(3 - 23)               | 16<br>(5 - 35)              |
| Other communicable, maternal, neonatal, and nutritional diseases | 6,220<br>(3,888 - 9,199)    | 4,193<br>(2,084 - 6,865)   | 372<br>(179 - 628)     | 929<br>(602 - 1,335)       | 484<br>(304 - 770)          | 242<br>(139 - 410)          |
| Sexually transmitted diseases excluding HIV                      | 3,977<br>(1,831 - 6,707)    | 3,582<br>(1,609 - 6,080)   | 236<br>(83 - 445)      | 75<br>(39 - 148)           | 53<br>(23 - 115)            | 31<br>(12 - 66)             |
| Syphilis                                                         | 3,907<br>(1,776 - 6,586)    | 3,582<br>(1,609 - 6,080)   | 234<br>(82 - 443)      | 34<br>(18 - 65)            | 33<br>(15 - 70)             | 24<br>(10 - 52)             |
| Chlamydial infection                                             | 15<br>(7 - 30)              | --                         | 0<br>(0 - 1)           | 9<br>(4 - 20)              | 4<br>(1 - 11)               | 1<br>(0 - 3)                |
| Gonococcal infection                                             | 31<br>(18 - 57)             | --                         | 1<br>(0 - 2)           | 17<br>(9 - 32)             | 9<br>(4 - 21)               | 4<br>(1 - 8)                |
| Other sexually transmitted diseases                              | 24<br>(14 - 44)             | --                         | 1<br>(0 - 2)           | 15<br>(8 - 29)             | 7<br>(3 - 15)               | 2<br>(1 - 4)                |
| Hepatitis                                                        | 354<br>(258 - 475)          | 14<br>(5 - 37)             | 12<br>(7 - 22)         | 182<br>(114 - 257)         | 112<br>(76 - 158)           | 34<br>(24 - 46)             |
| Acute hepatitis A                                                | 22<br>(6 - 47)              | 5<br>(1 - 14)              | 4<br>(1 - 9)           | 11<br>(3 - 24)             | 1<br>(0 - 3)                | 0<br>(0 - 0)                |
| Acute hepatitis B                                                | 216<br>(143 - 304)          | 8<br>(2 - 23)              | 5<br>(2 - 11)          | 82<br>(42 - 131)           | 91<br>(58 - 131)            | 30<br>(21 - 41)             |
| Acute hepatitis C                                                | 6<br>(1 - 14)               | --                         | 0<br>(0 - 1)           | 3<br>(0 - 8)               | 2<br>(0 - 5)                | 1<br>(0 - 2)                |
| Acute hepatitis E                                                | 111<br>(58 - 188)           | 0<br>(0 - 0)               | 2<br>(1 - 5)           | 87<br>(46 - 142)           | 18<br>(6 - 39)              | 3<br>(1 - 6)                |
| Other infectious diseases                                        | 1,888<br>(1,205 - 2,962)    | 598<br>(258 - 1,445)       | 123<br>(54 - 271)      | 672<br>(404 - 1,038)       | 318<br>(165 - 588)          | 177<br>(83 - 338)           |
| Non-communicable diseases                                        | 73,120<br>(60,081 - 88,705) | 4,176<br>(2,668 - 6,248)   | 880<br>(571 - 1,239)   | 15,248<br>(9,903 - 19,735) | 26,474<br>(20,952 - 33,951) | 26,342<br>(22,802 - 30,686) |
| Neoplasms                                                        | 8,811<br>(6,813 - 11,042)   | 218<br>(113 - 341)         | 178<br>(105 - 267)     | 2,121<br>(1,295 - 2,914)   | 4,221<br>(3,144 - 5,411)    | 2,072<br>(1,741 - 2,456)    |
| Esophageal cancer                                                | 1,083<br>(758 - 1,453)      | --                         | --                     | 169<br>(88 - 258)          | 633<br>(412 - 891)          | 281<br>(209 - 368)          |
| Stomach cancer                                                   | 561<br>(436 - 708)          | --                         | --                     | 84<br>(52 - 117)           | 302<br>(221 - 396)          | 175<br>(135 - 228)          |
| Liver cancer                                                     | 792<br>(522 - 1,092)        | --                         | 8<br>(3 - 16)          | 264<br>(105 - 425)         | 369<br>(261 - 510)          | 151<br>(111 - 202)          |
| Liver cancer due to hepatitis B                                  | 185<br>(89 - 327)           | --                         | 3<br>(1 - 6)           | 83<br>(32 - 154)           | 76<br>(24 - 140)            | 23<br>(10 - 40)             |
| Liver cancer due to hepatitis C                                  | 394<br>(223 - 623)          | --                         | 2<br>(1 - 4)           | 112<br>(39 - 211)          | 197<br>(115 - 313)          | 84<br>(53 - 123)            |
| Liver cancer due to alcohol use                                  | 89<br>(54 - 132)            | --                         | --                     | 20<br>(6 - 36)             | 44<br>(26 - 68)             | 25<br>(16 - 40)             |

Web Table 31- Madagascar deaths with 95% UI by age, sex, and cause in 2013

| Cause                                         | Both Sexes, All Ages        | Both Sexes, 0-4 Years | Both Sexes, 5-14 Years | Both Sexes, 15-49 Years   | Both Sexes, 50-69 Years     | Both Sexes, 70-80 Years     |
|-----------------------------------------------|-----------------------------|-----------------------|------------------------|---------------------------|-----------------------------|-----------------------------|
| Liver cancer due to other causes              | 124<br>(61 - 196)           | --                    | 4<br>(2 - 8)           | 49<br>(16 - 85)           | 52<br>(27 - 86)             | 19<br>(11 - 30)             |
| Larynx cancer                                 | 51<br>(37 - 74)             | --                    | --                     | 7<br>(4 - 11)             | 27<br>(18 - 41)             | 17<br>(12 - 25)             |
| Tracheal, bronchus and lung cancer            | 418<br>(328 - 549)          | --                    | --                     | 35<br>(20 - 66)           | 269<br>(203 - 363)          | 114<br>(93 - 143)           |
| Breast cancer                                 | 621<br>(365 - 894)          | --                    | --                     | 259<br>(98 - 414)         | 280<br>(177 - 398)          | 82<br>(57 - 113)            |
| Cervical cancer                               | 1,254<br>(720 - 1,803)      | --                    | --                     | 258<br>(133 - 415)        | 810<br>(449 - 1,196)        | 186<br>(111 - 280)          |
| Uterine cancer                                | 54<br>(30 - 82)             | --                    | --                     | 6<br>(3 - 14)             | 32<br>(17 - 50)             | 15<br>(8 - 24)              |
| Prostate cancer                               | 360<br>(229 - 545)          | --                    | --                     | 8<br>(3 - 17)             | 110<br>(64 - 176)           | 241<br>(151 - 382)          |
| Colon and rectum cancer                       | 638<br>(492 - 806)          | --                    | --                     | 185<br>(118 - 246)        | 285<br>(212 - 374)          | 167<br>(134 - 210)          |
| Lip and oral cavity cancer                    | 122<br>(86 - 162)           | --                    | --                     | 30<br>(15 - 50)           | 63<br>(42 - 86)             | 29<br>(20 - 40)             |
| Nasopharynx cancer                            | 37<br>(24 - 53)             | --                    | 1<br>(0 - 2)           | 19<br>(11 - 30)           | 13<br>(8 - 20)              | 4<br>(2 - 6)                |
| Other pharynx cancer                          | 54<br>(39 - 78)             | --                    | --                     | 14<br>(7 - 24)            | 30<br>(21 - 45)             | 10<br>(7 - 14)              |
| Gallbladder and biliary tract cancer          | 96<br>(67 - 132)            | --                    | --                     | 32<br>(17 - 44)           | 45<br>(31 - 68)             | 19<br>(13 - 29)             |
| Pancreatic cancer                             | 206<br>(158 - 264)          | --                    | --                     | 50<br>(31 - 68)           | 115<br>(86 - 151)           | 41<br>(32 - 52)             |
| Malignant skin melanoma                       | 36<br>(24 - 54)             | --                    | --                     | 10<br>(4 - 17)            | 17<br>(11 - 26)             | 9<br>(6 - 13)               |
| Non-melanoma skin cancer                      | 37<br>(22 - 68)             | --                    | --                     | 6<br>(4 - 12)             | 13<br>(7 - 22)              | 18<br>(10 - 37)             |
| Ovarian cancer                                | 163<br>(101 - 243)          | --                    | --                     | 42<br>(17 - 83)           | 96<br>(59 - 144)            | 24<br>(15 - 37)             |
| Testicular cancer                             | 24<br>(15 - 37)             | --                    | --                     | 14<br>(7 - 23)            | 8<br>(4 - 15)               | 2<br>(1 - 4)                |
| Kidney cancer                                 | 122<br>(91 - 165)           | 14<br>(5 - 32)        | 6<br>(3 - 11)          | 19<br>(11 - 31)           | 59<br>(43 - 83)             | 24<br>(17 - 32)             |
| Bladder cancer                                | 148<br>(113 - 200)          | --                    | --                     | 19<br>(11 - 30)           | 63<br>(45 - 90)             | 66<br>(49 - 90)             |
| Brain and nervous system cancer               | 136<br>(82 - 181)           | 5<br>(1 - 10)         | 12<br>(6 - 19)         | 66<br>(32 - 95)           | 37<br>(22 - 54)             | 17<br>(10 - 24)             |
| Thyroid cancer                                | 32<br>(21 - 46)             | --                    | 0<br>(0 - 1)           | 4<br>(2 - 6)              | 20<br>(11 - 31)             | 8<br>(6 - 12)               |
| Mesothelioma                                  | 12<br>(9 - 18)              | --                    | --                     | 2<br>(1 - 3)              | 7<br>(4 - 11)               | 4<br>(2 - 6)                |
| Hodgkin lymphoma                              | 88<br>(58 - 130)            | 3<br>(1 - 6)          | 5<br>(2 - 10)          | 27<br>(14 - 55)           | 31<br>(19 - 47)             | 22<br>(12 - 35)             |
| Non-Hodgkin lymphoma                          | 511<br>(371 - 691)          | 64<br>(25 - 123)      | 58<br>(30 - 100)       | 164<br>(90 - 248)         | 144<br>(99 - 221)           | 81<br>(59 - 113)            |
| Multiple myeloma                              | 74<br>(53 - 97)             | --                    | --                     | 18<br>(10 - 26)           | 35<br>(25 - 48)             | 21<br>(16 - 28)             |
| Leukemia                                      | 172<br>(126 - 215)          | 9<br>(4 - 17)         | 18<br>(10 - 28)        | 82<br>(50 - 108)          | 36<br>(26 - 47)             | 27<br>(21 - 35)             |
| Other neoplasms                               | 909<br>(595 - 1,169)        | 123<br>(61 - 203)     | 69<br>(36 - 109)       | 228<br>(107 - 333)        | 272<br>(188 - 370)          | 215<br>(138 - 287)          |
| Cardiovascular diseases                       | 40,254<br>(32,821 - 49,614) | 272<br>(150 - 500)    | 176<br>(107 - 284)     | 7,601<br>(4,845 - 10,131) | 15,273<br>(11,984 - 19,673) | 16,933<br>(14,534 - 19,773) |
| Rheumatic heart disease                       | 1,028<br>(681 - 1,682)      | 9<br>(3 - 21)         | 36<br>(19 - 61)        | 478<br>(290 - 768)        | 317<br>(194 - 554)          | 188<br>(126 - 322)          |
| Ischemic heart disease                        | 5,391<br>(3,684 - 6,998)    | 1<br>(0 - 3)          | 2<br>(1 - 4)           | 960<br>(528 - 1,367)      | 2,220<br>(1,517 - 3,034)    | 2,209<br>(1,518 - 2,791)    |
| Cerebrovascular disease                       | 26,669<br>(21,649 - 32,954) | 69<br>(40 - 113)      | 41<br>(23 - 66)        | 4,374<br>(2,783 - 5,901)  | 10,258<br>(7,970 - 13,185)  | 11,926<br>(9,982 - 14,015)  |
| Ischemic stroke                               | 10,649<br>(6,421 - 14,005)  | 6<br>(2 - 13)         | 5<br>(2 - 9)           | 630<br>(285 - 958)        | 3,223<br>(1,739 - 4,506)    | 6,786<br>(4,219 - 8,604)    |
| Hemorrhagic stroke                            | 16,019<br>(12,158 - 21,196) | 63<br>(37 - 104)      | 37<br>(21 - 58)        | 3,743<br>(2,417 - 5,002)  | 7,036<br>(5,262 - 9,386)    | 5,141<br>(3,693 - 7,536)    |
| Hypertensive heart disease                    | 2,147<br>(1,425 - 3,272)    | 4<br>(1 - 8)          | 4<br>(2 - 7)           | 282<br>(158 - 450)        | 733<br>(456 - 1,167)        | 1,125<br>(713 - 1,828)      |
| Cardiomyopathy and myocarditis                | 1,198<br>(774 - 1,802)      | 92<br>(38 - 175)      | 39<br>(20 - 73)        | 449<br>(255 - 700)        | 360<br>(229 - 552)          | 259<br>(153 - 439)          |
| Atrial fibrillation and flutter               | 8<br>(5 - 13)               | --                    | --                     | 1<br>(1 - 1)              | 2<br>(1 - 3)                | 5<br>(3 - 8)                |
| Aortic aneurysm                               | 247<br>(170 - 341)          | --                    | --                     | 50<br>(28 - 73)           | 96<br>(64 - 137)            | 101<br>(70 - 140)           |
| Peripheral vascular disease                   | 17<br>(10 - 25)             | --                    | --                     | 1<br>(1 - 2)              | 6<br>(3 - 9)                | 10<br>(6 - 15)              |
| Endocarditis                                  | 477<br>(262 - 943)          | 21<br>(8 - 56)        | 12<br>(5 - 27)         | 178<br>(88 - 321)         | 131<br>(70 - 252)           | 135<br>(66 - 297)           |
| Other cardiovascular and circulatory diseases | 3,072<br>(1,785 - 5,010)    | 77<br>(32 - 177)      | 42<br>(19 - 83)        | 828<br>(438 - 1,337)      | 1,150<br>(649 - 1,917)      | 976<br>(541 - 1,750)        |



Web Table 31- Madagascar deaths with 95% UI by age, sex, and cause in 2013

| Cause                                               | Both Sexes, All Ages     | Both Sexes, 0-4 Years | Both Sexes, 5-14 Years | Both Sexes, 15-49 Years | Both Sexes, 50-69 Years  | Both Sexes, 70-80 Years  |
|-----------------------------------------------------|--------------------------|-----------------------|------------------------|-------------------------|--------------------------|--------------------------|
| Chronic respiratory diseases                        | 7,494<br>(5,732 - 9,187) | 617<br>(325 - 992)    | 88<br>(46 - 133)       | 1,538<br>(997 - 2,003)  | 2,360<br>(1,711 - 3,133) | 2,891<br>(2,290 - 3,544) |
| Chronic obstructive pulmonary disease               | 4,111<br>(3,199 - 5,208) | 161<br>(73 - 296)     | 36<br>(18 - 55)        | 576<br>(359 - 791)      | 1,448<br>(1,049 - 1,991) | 1,890<br>(1,491 - 2,375) |
| Pneumoconiosis                                      | 491<br>(318 - 738)       | 11<br>(3 - 25)        | 5<br>(3 - 9)           | 191<br>(107 - 299)      | 156<br>(93 - 262)        | 128<br>(81 - 199)        |
| Silicosis                                           | 119<br>(70 - 192)        | 3<br>(1 - 7)          | 1<br>(1 - 2)           | 44<br>(22 - 75)         | 37<br>(20 - 65)          | 34<br>(20 - 57)          |
| Asbestosis                                          | 59<br>(35 - 93)          | 2<br>(0 - 5)          | 1<br>(0 - 2)           | 24<br>(13 - 39)         | 21<br>(12 - 37)          | 11<br>(6 - 19)           |
| Coal workers pneumoconiosis                         | 77<br>(39 - 128)         | 1<br>(0 - 3)          | 1<br>(1 - 2)           | 30<br>(14 - 50)         | 26<br>(12 - 48)          | 19<br>(8 - 34)           |
| Other pneumoconiosis                                | 235<br>(150 - 357)       | 5<br>(2 - 11)         | 2<br>(1 - 3)           | 92<br>(54 - 148)        | 72<br>(42 - 122)         | 64<br>(37 - 104)         |
| Asthma                                              | 1,381<br>(763 - 1,862)   | 72<br>(20 - 141)      | 19<br>(8 - 31)         | 368<br>(218 - 504)      | 446<br>(219 - 655)       | 476<br>(233 - 674)       |
| Interstitial lung disease and pulmonary sarcoidosis | 709<br>(236 - 1,207)     | 15<br>(3 - 48)        | 5<br>(2 - 11)          | 153<br>(52 - 278)       | 232<br>(77 - 404)        | 304<br>(90 - 557)        |
| Other chronic respiratory diseases                  | 802<br>(548 - 1,107)     | 358<br>(205 - 575)    | 22<br>(12 - 36)        | 250<br>(160 - 356)      | 78<br>(49 - 119)         | 94<br>(59 - 141)         |
| Cirrhosis                                           | 2,786<br>(2,085 - 3,666) | 25<br>(8 - 52)        | 27<br>(16 - 43)        | 739<br>(447 - 1,033)    | 1,339<br>(973 - 1,851)   | 656<br>(472 - 850)       |
| Cirrhosis due to hepatitis B                        | 727<br>(403 - 1,066)     | 1<br>(0 - 3)          | 5<br>(2 - 9)           | 188<br>(91 - 294)       | 360<br>(193 - 544)       | 173<br>(83 - 272)        |
| Cirrhosis due to hepatitis C                        | 536<br>(290 - 955)       | 2<br>(0 - 5)          | 3<br>(1 - 6)           | 118<br>(45 - 217)       | 266<br>(133 - 482)       | 147<br>(74 - 273)        |
| Cirrhosis due to alcohol use                        | 1,133<br>(792 - 1,603)   | --                    | --                     | 275<br>(151 - 426)      | 569<br>(382 - 849)       | 288<br>(195 - 400)       |
| Cirrhosis due to other causes                       | 391<br>(239 - 561)       | 22<br>(7 - 45)        | 19<br>(10 - 31)        | 158<br>(88 - 241)       | 144<br>(79 - 227)        | 48<br>(26 - 75)          |
| Digestive diseases                                  | 2,958<br>(2,170 - 3,933) | 71<br>(22 - 139)      | 74<br>(44 - 116)       | 814<br>(497 - 1,142)    | 1,001<br>(688 - 1,399)   | 997<br>(736 - 1,310)     |
| Peptic ulcer disease                                | 829<br>(561 - 1,227)     | 5<br>(1 - 13)         | 7<br>(3 - 12)          | 191<br>(105 - 314)      | 309<br>(194 - 481)       | 317<br>(202 - 467)       |
| Gastritis and duodenitis                            | 138<br>(55 - 371)        | 5<br>(1 - 11)         | 5<br>(2 - 12)          | 37<br>(14 - 101)        | 42<br>(16 - 125)         | 49<br>(16 - 141)         |
| Appendicitis                                        | 192<br>(99 - 304)        | 6<br>(2 - 14)         | 12<br>(6 - 21)         | 62<br>(33 - 98)         | 59<br>(26 - 103)         | 54<br>(19 - 104)         |
| Paralytic ileus and intestinal obstruction          | 988<br>(626 - 1,428)     | 22<br>(7 - 48)        | 32<br>(17 - 55)        | 301<br>(155 - 462)      | 326<br>(197 - 504)       | 307<br>(189 - 493)       |
| Inguinal, femoral, and abdominal hernia             | 49<br>(25 - 75)          | 2<br>(0 - 5)          | 1<br>(1 - 2)           | 17<br>(8 - 30)          | 11<br>(5 - 19)           | 18<br>(8 - 30)           |
| Inflammatory bowel disease                          | 153<br>(65 - 235)        | 15<br>(4 - 33)        | 5<br>(2 - 10)          | 45<br>(18 - 78)         | 44<br>(18 - 75)          | 44<br>(15 - 74)          |
| Vascular intestinal disorders                       | 24<br>(11 - 50)          | 0<br>(0 - 1)          | 0<br>(0 - 1)           | 4<br>(2 - 9)            | 8<br>(3 - 16)            | 11<br>(5 - 24)           |
| Gallbladder and biliary diseases                    | 173<br>(108 - 252)       | 2<br>(0 - 4)          | 2<br>(1 - 3)           | 30<br>(17 - 45)         | 62<br>(37 - 98)          | 77<br>(44 - 120)         |
| Pancreatitis                                        | 131<br>(57 - 224)        | 1<br>(0 - 2)          | 1<br>(1 - 2)           | 56<br>(22 - 98)         | 45<br>(20 - 84)          | 28<br>(11 - 50)          |
| Other digestive diseases                            | 281<br>(177 - 481)       | 13<br>(4 - 28)        | 8<br>(4 - 14)          | 72<br>(38 - 146)        | 96<br>(58 - 181)         | 92<br>(54 - 160)         |
| Neurological disorders                              | 1,591<br>(1,256 - 2,045) | 104<br>(44 - 212)     | 82<br>(45 - 158)       | 399<br>(245 - 651)      | 174<br>(129 - 230)       | 833<br>(680 - 1,005)     |
| Alzheimer disease and other dementias               | 814<br>(653 - 1,002)     | --                    | --                     | 1<br>(0 - 2)            | 79<br>(58 - 104)         | 734<br>(586 - 906)       |
| Parkinson disease                                   | 10<br>(6 - 17)           | --                    | --                     | 1<br>(0 - 1)            | 2<br>(1 - 4)             | 7<br>(3 - 14)            |
| Epilepsy                                            | 632<br>(395 - 1,000)     | 82<br>(30 - 189)      | 74<br>(38 - 147)       | 346<br>(199 - 590)      | 58<br>(37 - 89)          | 73<br>(41 - 119)         |
| Multiple sclerosis                                  | 7<br>(2 - 12)            | --                    | --                     | 4<br>(1 - 6)            | 2<br>(1 - 5)             | 1<br>(0 - 1)             |
| Other neurological disorders                        | 128<br>(92 - 164)        | 22<br>(11 - 39)       | 9<br>(5 - 13)          | 47<br>(30 - 64)         | 33<br>(23 - 45)          | 17<br>(12 - 23)          |
| Mental and substance use disorders                  | 844<br>(487 - 1,325)     | 24<br>(7 - 57)        | 0<br>(0 - 0)           | 568<br>(305 - 902)      | 212<br>(123 - 356)       | 38<br>(22 - 63)          |
| Schizophrenia                                       | 36<br>(12 - 81)          | --                    | --                     | 18<br>(6 - 43)          | 12<br>(4 - 27)           | 5<br>(1 - 11)            |
| Alcohol use disorders                               | 513<br>(277 - 871)       | --                    | --                     | 323<br>(157 - 556)      | 166<br>(95 - 292)        | 23<br>(14 - 41)          |
| Drug use disorders                                  | 295<br>(129 - 460)       | 24<br>(7 - 57)        | --                     | 227<br>(102 - 354)      | 34<br>(14 - 58)          | 10<br>(3 - 18)           |
| Opioid use disorders                                | 31<br>(14 - 49)          | 3<br>(1 - 7)          | --                     | 24<br>(11 - 38)         | 3<br>(1 - 6)             | 1<br>(0 - 2)             |
| Cocaine use disorders                               | 1<br>(1 - 2)             | 0<br>(0 - 0)          | --                     | 1<br>(0 - 2)            | 0<br>(0 - 0)             | 0<br>(0 - 0)             |
| Amphetamine use disorders                           | 1<br>(0 - 1)             | 0<br>(0 - 0)          | --                     | 1<br>(0 - 1)            | 0<br>(0 - 0)             | 0<br>(0 - 0)             |
| Other drug use disorders                            | 262<br>(115 - 411)       | 21<br>(6 - 51)        | --                     | 201<br>(90 - 314)       | 31<br>(12 - 53)          | 9<br>(3 - 16)            |

Web Table 31- Madagascar deaths with 95% UI by age, sex, and cause in 2013

| Cause                                               | Both Sexes, All Ages     | Both Sexes, 0-4 Years    | Both Sexes, 5-14 Years | Both Sexes, 15-49 Years | Both Sexes, 50-69 Years  | Both Sexes, 70-80 Years  |
|-----------------------------------------------------|--------------------------|--------------------------|------------------------|-------------------------|--------------------------|--------------------------|
| Eating disorders                                    | 0<br>(0 - 1)             | --                       | 0<br>(0 - 0)           | 0<br>(0 - 0)            | --                       | --                       |
| Anorexia nervosa                                    | 0<br>(0 - 1)             | --                       | 0<br>(0 - 0)           | 0<br>(0 - 0)            | --                       | --                       |
| Diabetes, urogenital, blood, and endocrine diseases | 4,799<br>(3,848 - 5,994) | 339<br>(183 - 526)       | 122<br>(69 - 196)      | 1,099<br>(712 - 1,490)  | 1,643<br>(1,260 - 2,149) | 1,596<br>(1,328 - 1,947) |
| Diabetes mellitus                                   | 2,144<br>(1,717 - 2,723) | 12<br>(7 - 19)           | 6<br>(3 - 9)           | 259<br>(167 - 356)      | 942<br>(707 - 1,261)     | 925<br>(737 - 1,167)     |
| Acute glomerulonephritis                            | 96<br>(48 - 165)         | 7<br>(2 - 16)            | 3<br>(1 - 7)           | 26<br>(11 - 56)         | 38<br>(14 - 66)          | 21<br>(9 - 36)           |
| Chronic kidney disease                              | 776<br>(587 - 1,006)     | 35<br>(15 - 62)          | 20<br>(11 - 32)        | 246<br>(153 - 358)      | 216<br>(152 - 304)       | 260<br>(188 - 349)       |
| Chronic kidney disease due to diabetes mellitus     | 4<br>(2 - 9)             | 0<br>(0 - 0)             | 0<br>(0 - 1)           | 1<br>(0 - 2)            | 2<br>(1 - 4)             | 1<br>(0 - 3)             |
| Chronic kidney disease due to hypertension          | 317<br>(192 - 481)       | 5<br>(2 - 10)            | 2<br>(1 - 4)           | 65<br>(32 - 109)        | 107<br>(61 - 175)        | 138<br>(82 - 208)        |
| Chronic kidney disease due to glomerulonephritis    | 251<br>(162 - 351)       | 22<br>(10 - 37)          | 12<br>(7 - 19)         | 99<br>(60 - 147)        | 62<br>(36 - 94)          | 56<br>(27 - 88)          |
| Chronic kidney disease due to other causes          | 205<br>(102 - 303)       | 9<br>(3 - 20)            | 5<br>(2 - 10)          | 80<br>(33 - 141)        | 46<br>(21 - 75)          | 65<br>(26 - 109)         |
| Urinary diseases and male infertility               | 758<br>(525 - 991)       | 36<br>(16 - 70)          | 11<br>(7 - 18)         | 217<br>(116 - 305)      | 265<br>(166 - 376)       | 229<br>(158 - 319)       |
| Interstitial nephritis and urinary tract infections | 562<br>(368 - 760)       | 27<br>(12 - 57)          | 7<br>(4 - 12)          | 155<br>(80 - 228)       | 194<br>(116 - 287)       | 178<br>(114 - 255)       |
| Urolithiasis                                        | 29<br>(16 - 53)          | --                       | 1<br>(0 - 2)           | 10<br>(5 - 21)          | 12<br>(6 - 21)           | 6<br>(3 - 14)            |
| Other urinary diseases                              | 167<br>(97 - 266)        | 9<br>(3 - 20)            | 3<br>(2 - 5)           | 52<br>(25 - 87)         | 58<br>(29 - 102)         | 45<br>(21 - 83)          |
| Gynecological diseases                              | 9<br>(5 - 14)            | --                       | --                     | 3<br>(1 - 6)            | 4<br>(2 - 8)             | 2<br>(1 - 4)             |
| Uterine fibroids                                    | 2<br>(1 - 4)             | --                       | --                     | 1<br>(0 - 1)            | 1<br>(0 - 2)             | 1<br>(0 - 1)             |
| Polycystic ovarian syndrome                         | 0<br>(0 - 0)             | --                       | --                     | 0<br>(0 - 0)            | 0<br>(0 - 0)             | --                       |
| Endometriosis                                       | 1<br>(0 - 1)             | --                       | --                     | 0<br>(0 - 1)            | 0<br>(0 - 0)             | --                       |
| Genital prolapse                                    | 2<br>(1 - 2)             | --                       | --                     | 0<br>(0 - 1)            | 1<br>(0 - 1)             | 1<br>(0 - 1)             |
| Other gynecological diseases                        | 4<br>(2 - 7)             | --                       | --                     | 1<br>(1 - 3)            | 2<br>(1 - 4)             | 1<br>(0 - 2)             |
| Hemoglobinopathies and hemolytic anemias            | 500<br>(243 - 964)       | 163<br>(66 - 298)        | 65<br>(30 - 131)       | 181<br>(75 - 407)       | 58<br>(26 - 140)         | 32<br>(16 - 83)          |
| Thalassemias                                        | 3<br>(2 - 7)             | 2<br>(1 - 4)             | 0<br>(0 - 1)           | 1<br>(0 - 2)            | 0<br>(0 - 0)             | 0<br>(0 - 0)             |
| Sickle cell disorders                               | 436<br>(208 - 823)       | 148<br>(59 - 271)        | 63<br>(28 - 126)       | 172<br>(72 - 385)       | 50<br>(22 - 120)         | 3<br>(1 - 6)             |
| G6PD deficiency                                     | 9<br>(4 - 17)            | 4<br>(2 - 7)             | 1<br>(0 - 2)           | 2<br>(1 - 5)            | 1<br>(0 - 2)             | 1<br>(0 - 2)             |
| Other hemoglobinopathies and hemolytic anemias      | 52<br>(26 - 122)         | 9<br>(5 - 16)            | 1<br>(1 - 3)           | 6<br>(2 - 15)           | 7<br>(3 - 17)            | 29<br>(14 - 75)          |
| Endocrine, metabolic, blood, and immune disorders   | 516<br>(310 - 711)       | 85<br>(47 - 146)         | 16<br>(7 - 28)         | 168<br>(77 - 261)       | 121<br>(74 - 178)        | 126<br>(59 - 183)        |
| Musculoskeletal disorders                           | 176<br>(113 - 290)       | --                       | 12<br>(6 - 18)         | 75<br>(43 - 119)        | 54<br>(34 - 95)          | 36<br>(23 - 68)          |
| Rheumatoid arthritis                                | 56<br>(30 - 113)         | --                       | 3<br>(1 - 5)           | 15<br>(7 - 32)          | 21<br>(11 - 42)          | 17<br>(9 - 39)           |
| Other musculoskeletal disorders                     | 120<br>(75 - 191)        | --                       | 9<br>(5 - 14)          | 59<br>(35 - 92)         | 33<br>(19 - 59)          | 19<br>(11 - 33)          |
| Other non-communicable diseases                     | 3,408<br>(2,378 - 4,980) | 2,506<br>(1,544 - 4,135) | 121<br>(70 - 187)      | 294<br>(186 - 420)      | 197<br>(132 - 272)       | 290<br>(200 - 403)       |
| Congenital anomalies                                | 2,665<br>(1,712 - 4,327) | 2,352<br>(1,423 - 3,972) | 110<br>(62 - 172)      | 146<br>(95 - 199)       | 29<br>(21 - 39)          | 29<br>(22 - 38)          |
| Neural tube defects                                 | 719<br>(233 - 1,475)     | 669<br>(216 - 1,363)     | 19<br>(5 - 42)         | 25<br>(6 - 61)          | 3<br>(1 - 8)             | 2<br>(1 - 6)             |
| Congenital heart anomalies                          | 1,091<br>(606 - 2,019)   | 941<br>(465 - 1,850)     | 56<br>(28 - 94)        | 71<br>(41 - 102)        | 11<br>(7 - 16)           | 12<br>(7 - 18)           |
| Cleft lip and cleft palate                          | 11<br>(2 - 27)           | 11<br>(2 - 27)           | --                     | --                      | --                       | --                       |
| Down syndrome                                       | 174<br>(66 - 374)        | 139<br>(43 - 333)        | 11<br>(4 - 22)         | 18<br>(9 - 30)          | 4<br>(3 - 7)             | 1<br>(0 - 1)             |
| Chromosomal unbalanced rearrangements               | 96<br>(36 - 230)         | 88<br>(31 - 217)         | 3<br>(1 - 5)           | 5<br>(2 - 7)            | 1<br>(0 - 1)             | 1<br>(0 - 1)             |
| Other congenital anomalies                          | 574<br>(256 - 1,418)     | 505<br>(201 - 1,315)     | 20<br>(8 - 43)         | 27<br>(14 - 45)         | 9<br>(6 - 15)            | 13<br>(9 - 20)           |
| Skin and subcutaneous diseases                      | 713<br>(493 - 980)       | 125<br>(48 - 241)        | 11<br>(6 - 19)         | 148<br>(81 - 231)       | 168<br>(107 - 239)       | 261<br>(173 - 374)       |
| Cellulitis                                          | 457<br>(129 - 797)       | 79<br>(15 - 191)         | 8<br>(2 - 16)          | 97<br>(27 - 190)        | 111<br>(36 - 196)        | 161<br>(43 - 296)        |
| Pyoderma                                            | 213<br>(53 - 471)        | 44<br>(9 - 125)          | 3<br>(1 - 8)           | 43<br>(10 - 103)        | 50<br>(11 - 122)         | 73<br>(19 - 163)         |

Web Table 31- Madagascar deaths with 95% UI by age, sex, and cause in 2013

| Cause                                           | Both Sexes, All Ages     | Both Sexes, 0-4 Years | Both Sexes, 5-14 Years | Both Sexes, 15-49 Years  | Both Sexes, 50-69 Years  | Both Sexes, 70-80 Years |
|-------------------------------------------------|--------------------------|-----------------------|------------------------|--------------------------|--------------------------|-------------------------|
| Decubitus ulcer                                 | 38<br>(9 - 90)           | 1<br>(0 - 2)          | 0<br>(0 - 1)           | 6<br>(1 - 14)            | 6<br>(1 - 16)            | 25<br>(6 - 61)          |
| Other skin and subcutaneous diseases            | 5<br>(1 - 11)            | 1<br>(0 - 2)          | 0<br>(0 - 0)           | 2<br>(0 - 5)             | 1<br>(0 - 3)             | 1<br>(0 - 3)            |
| Sudden infant death syndrome                    | 29<br>(9 - 72)           | 29<br>(9 - 72)        | --                     | --                       | --                       | --                      |
| Injuries                                        | 7,735<br>(5,750 - 9,609) | 939<br>(463 - 1,450)  | 558<br>(357 - 776)     | 3,816<br>(2,587 - 5,005) | 1,457<br>(1,055 - 1,900) | 966<br>(685 - 1,240)    |
| Transport injuries                              | 3,054<br>(2,238 - 3,858) | 191<br>(84 - 331)     | 227<br>(134 - 342)     | 1,610<br>(1,067 - 2,178) | 671<br>(490 - 904)       | 354<br>(252 - 460)      |
| Road injuries                                   | 2,914<br>(2,140 - 3,682) | 170<br>(75 - 299)     | 210<br>(125 - 315)     | 1,563<br>(1,037 - 2,089) | 641<br>(467 - 859)       | 330<br>(240 - 425)      |
| Pedestrian road injuries                        | 1,442<br>(978 - 1,977)   | 95<br>(41 - 177)      | 119<br>(67 - 187)      | 706<br>(419 - 1,025)     | 336<br>(222 - 480)       | 188<br>(129 - 257)      |
| Cyclist road injuries                           | 150<br>(94 - 217)        | 7<br>(2 - 16)         | 14<br>(6 - 24)         | 72<br>(38 - 113)         | 39<br>(25 - 59)          | 18<br>(11 - 28)         |
| Motorcyclist road injuries                      | 177<br>(100 - 292)       | 6<br>(2 - 11)         | 6<br>(3 - 11)          | 125<br>(66 - 216)        | 26<br>(14 - 43)          | 13<br>(7 - 21)          |
| Motor vehicle road injuries                     | 1,129<br>(787 - 1,553)   | 60<br>(25 - 105)      | 70<br>(38 - 110)       | 656<br>(406 - 971)       | 236<br>(160 - 338)       | 108<br>(73 - 151)       |
| Other road injuries                             | 16<br>(10 - 29)          | 3<br>(1 - 6)          | 2<br>(1 - 4)           | 4<br>(2 - 13)            | 4<br>(2 - 9)             | 2<br>(1 - 5)            |
| Other transport injuries                        | 140<br>(101 - 190)       | 21<br>(8 - 36)        | 17<br>(9 - 28)         | 47<br>(27 - 86)          | 30<br>(20 - 44)          | 25<br>(10 - 38)         |
| Unintentional injuries                          | 3,193<br>(2,373 - 3,987) | 728<br>(371 - 1,140)  | 296<br>(175 - 431)     | 1,120<br>(749 - 1,498)   | 548<br>(389 - 736)       | 501<br>(331 - 694)      |
| Falls                                           | 397<br>(211 - 557)       | 30<br>(14 - 57)       | 28<br>(11 - 55)        | 131<br>(63 - 222)        | 78<br>(40 - 118)         | 129<br>(62 - 200)       |
| Drowning                                        | 717<br>(473 - 1,038)     | 171<br>(70 - 326)     | 120<br>(66 - 193)      | 330<br>(196 - 491)       | 68<br>(41 - 103)         | 27<br>(16 - 43)         |
| Fire, heat, and hot substances                  | 457<br>(297 - 708)       | 156<br>(63 - 306)     | 38<br>(20 - 71)        | 124<br>(76 - 211)        | 77<br>(46 - 119)         | 62<br>(39 - 92)         |
| Poisonings                                      | 156<br>(105 - 227)       | 28<br>(12 - 53)       | 6<br>(3 - 11)          | 82<br>(49 - 136)         | 30<br>(17 - 46)          | 9<br>(6 - 14)           |
| Exposure to mechanical forces                   | 472<br>(328 - 652)       | 119<br>(57 - 229)     | 40<br>(20 - 69)        | 186<br>(115 - 280)       | 93<br>(55 - 139)         | 35<br>(20 - 48)         |
| Unintentional firearm injuries                  | 94<br>(63 - 141)         | 9<br>(4 - 16)         | 4<br>(2 - 7)           | 64<br>(38 - 105)         | 11<br>(7 - 18)           | 6<br>(4 - 9)            |
| Unintentional suffocation                       | 94<br>(44 - 184)         | 50<br>(16 - 132)      | 9<br>(3 - 17)          | 18<br>(8 - 31)           | 14<br>(5 - 23)           | 4<br>(2 - 6)            |
| Other exposure to mechanical forces             | 284<br>(198 - 403)       | 60<br>(25 - 126)      | 28<br>(13 - 52)        | 103<br>(61 - 181)        | 68<br>(39 - 110)         | 25<br>(13 - 38)         |
| Adverse effects of medical treatment            | 544<br>(342 - 749)       | 115<br>(56 - 230)     | 16<br>(9 - 26)         | 118<br>(68 - 193)        | 127<br>(75 - 194)        | 167<br>(78 - 277)       |
| Animal contact                                  | 221<br>(138 - 364)       | 35<br>(13 - 87)       | 27<br>(13 - 55)        | 79<br>(43 - 138)         | 49<br>(25 - 78)          | 31<br>(15 - 45)         |
| Venomous animal contact                         | 122<br>(71 - 222)        | 24<br>(8 - 64)        | 13<br>(5 - 30)         | 41<br>(20 - 80)          | 24<br>(13 - 42)          | 20<br>(7 - 31)          |
| Non-venomous animal contact                     | 99<br>(59 - 155)         | 11<br>(4 - 25)        | 15<br>(7 - 28)         | 38<br>(19 - 65)          | 25<br>(11 - 42)          | 11<br>(6 - 18)          |
| Foreign body                                    | 118<br>(70 - 191)        | 58<br>(29 - 113)      | 6<br>(4 - 11)          | 15<br>(9 - 26)           | 10<br>(7 - 15)           | 29<br>(13 - 46)         |
| Pulmonary aspiration and foreign body in airway | 109<br>(62 - 180)        | 56<br>(28 - 110)      | 5<br>(3 - 9)           | 13<br>(7 - 24)           | 7<br>(5 - 13)            | 27<br>(12 - 44)         |
| Foreign body in other body part                 | 9<br>(6 - 13)            | 2<br>(1 - 3)          | 1<br>(1 - 2)           | 2<br>(1 - 3)             | 2<br>(1 - 4)             | 2<br>(1 - 3)            |
| Other unintentional injuries                    | 110<br>(74 - 156)        | 16<br>(8 - 28)        | 13<br>(7 - 22)         | 54<br>(31 - 84)          | 16<br>(10 - 24)          | 12<br>(7 - 16)          |
| Self-harm and interpersonal violence            | 1,459<br>(741 - 2,108)   | 20<br>(6 - 46)        | 33<br>(13 - 64)        | 1,068<br>(537 - 1,565)   | 230<br>(109 - 342)       | 109<br>(43 - 158)       |
| Self-harm                                       | 1,003<br>(472 - 1,526)   | --                    | 19<br>(7 - 45)         | 673<br>(322 - 1,094)     | 204<br>(90 - 309)        | 106<br>(42 - 156)       |
| Interpersonal violence                          | 456<br>(178 - 684)       | 20<br>(6 - 46)        | 13<br>(4 - 28)         | 395<br>(150 - 603)       | 25<br>(11 - 42)          | 3<br>(1 - 4)            |
| Assault by firearm                              | 179<br>(63 - 292)        | 5<br>(1 - 12)         | 3<br>(1 - 8)           | 162<br>(55 - 270)        | 9<br>(4 - 16)            | 0<br>(0 - 1)            |
| Assault by sharp object                         | 110<br>(43 - 186)        | 4<br>(1 - 10)         | 2<br>(1 - 6)           | 96<br>(37 - 167)         | 7<br>(3 - 13)            | 1<br>(0 - 1)            |
| Assault by other means                          | 167<br>(55 - 273)        | 11<br>(4 - 26)        | 7<br>(2 - 16)          | 137<br>(41 - 233)        | 10<br>(3 - 17)           | 1<br>(1 - 2)            |
| Forces of nature, war, and legal intervention   | 30<br>(17 - 64)          | 1<br>(0 - 0)          | 2<br>(1 - 3)           | 17<br>(10 - 35)          | 9<br>(5 - 17)            | 2<br>(1 - 4)            |
| Exposure to forces of nature                    | 30<br>(17 - 64)          | 1<br>(0 - 0)          | 2<br>(1 - 3)           | 17<br>(10 - 35)          | 9<br>(5 - 17)            | 2<br>(1 - 4)            |

Web Table 31- Madagascar deaths with 95% UI by age, sex, and cause in 2013

| Cause                                                             | Males, All Ages              | Males, 0-4 Years            | Males, 5-14 Years        | Males, 15-49 Years          | Males, 50-69 Years          | Males, 70-80 Years          |
|-------------------------------------------------------------------|------------------------------|-----------------------------|--------------------------|-----------------------------|-----------------------------|-----------------------------|
| All causes                                                        | 85,127<br>(71,235 - 103,240) | 24,951<br>(19,788 - 31,054) | 3,072<br>(2,491 - 3,818) | 21,611<br>(15,640 - 27,527) | 19,030<br>(15,145 - 26,149) | 16,463<br>(14,901 - 20,191) |
| Communicable, maternal, neonatal, and nutritional diseases        | 41,461<br>(34,732 - 50,000)  | 22,195<br>(17,369 - 27,903) | 2,225<br>(1,772 - 2,954) | 8,955<br>(6,410 - 12,696)   | 4,492<br>(3,340 - 6,460)    | 3,595<br>(2,826 - 4,651)    |
| HIV/AIDS and tuberculosis                                         | 4,318<br>(2,304 - 10,671)    | 223<br>(84 - 709)           | 126<br>(47 - 435)        | 2,749<br>(1,383 - 7,065)    | 960<br>(527 - 2,103)        | 261<br>(162 - 461)          |
| Tuberculosis                                                      | 2,500<br>(1,536 - 3,896)     | 88<br>(42 - 161)            | 38<br>(20 - 68)          | 1,493<br>(826 - 2,296)      | 652<br>(395 - 1,125)        | 229<br>(147 - 363)          |
| HIV/AIDS                                                          | 1,819<br>(313 - 8,089)       | 135<br>(18 - 616)           | 88<br>(15 - 401)         | 1,255<br>(218 - 5,590)      | 308<br>(47 - 1,495)         | 32<br>(5 - 156)             |
| HIV/AIDS resulting in mycobacterial infection                     | 125<br>(21 - 567)            | 9<br>(1 - 38)               | 5<br>(1 - 24)            | 86<br>(15 - 403)            | 22<br>(3 - 109)             | 2<br>(0 - 12)               |
| HIV/AIDS resulting in other diseases                              | 1,694<br>(294 - 7,536)       | 126<br>(17 - 580)           | 83<br>(14 - 376)         | 1,169<br>(204 - 5,210)      | 286<br>(44 - 1,389)         | 30<br>(5 - 144)             |
| Diarrhea, lower respiratory, and other common infectious diseases | 18,693<br>(14,307 - 24,842)  | 9,389<br>(6,193 - 13,927)   | 940<br>(595 - 1,624)     | 3,404<br>(2,076 - 4,824)    | 2,435<br>(1,681 - 3,650)    | 2,526<br>(1,895 - 3,397)    |
| Diarrheal diseases                                                | 6,479<br>(3,932 - 9,854)     | 3,410<br>(1,365 - 6,124)    | 271<br>(112 - 510)       | 1,314<br>(699 - 2,144)      | 820<br>(425 - 1,514)        | 664<br>(347 - 1,151)        |
| Intestinal infectious diseases                                    | 474<br>(243 - 849)           | 141<br>(52 - 282)           | 108<br>(46 - 208)        | 198<br>(86 - 369)           | 20<br>(9 - 38)              | 6<br>(3 - 12)               |
| Typhoid fever                                                     | 327<br>(155 - 608)           | 84<br>(26 - 174)            | 81<br>(33 - 160)         | 146<br>(59 - 290)           | 13<br>(5 - 27)              | 3<br>(1 - 7)                |
| Paratyphoid fever                                                 | 88<br>(37 - 175)             | 27<br>(8 - 63)              | 22<br>(8 - 47)           | 36<br>(12 - 77)             | 3<br>(1 - 7)                | 1<br>(0 - 1)                |
| Other intestinal infectious diseases                              | 59<br>(33 - 92)              | 31<br>(13 - 57)             | 5<br>(2 - 11)            | 17<br>(7 - 32)              | 4<br>(1 - 10)               | 2<br>(0 - 7)                |
| Lower respiratory infections                                      | 8,338<br>(6,097 - 11,244)    | 3,708<br>(2,073 - 5,895)    | 244<br>(138 - 399)       | 1,299<br>(755 - 1,933)      | 1,334<br>(889 - 2,059)      | 1,752<br>(1,201 - 2,460)    |
| Upper respiratory infections                                      | 12<br>(5 - 24)               | 3<br>(0 - 13)               | 0<br>(0 - 2)             | 4<br>(1 - 11)               | 3<br>(0 - 8)                | 2<br>(0 - 5)                |
| Otitis media                                                      | 30<br>(20 - 42)              | 11<br>(5 - 20)              | 4<br>(2 - 6)             | 10<br>(6 - 13)              | 4<br>(2 - 6)                | 2<br>(1 - 2)                |
| Meningitis                                                        | 1,544<br>(1,047 - 2,208)     | 615<br>(274 - 1,180)        | 128<br>(60 - 221)        | 477<br>(264 - 741)          | 233<br>(125 - 390)          | 92<br>(49 - 153)            |
| Pneumococcal meningitis                                           | 395<br>(242 - 611)           | 115<br>(45 - 250)           | 43<br>(19 - 81)          | 140<br>(65 - 242)           | 69<br>(30 - 138)            | 28<br>(13 - 52)             |
| H influenzae type B meningitis                                    | 354<br>(206 - 580)           | 214<br>(86 - 440)           | 33<br>(14 - 64)          | 72<br>(34 - 124)            | 24<br>(11 - 46)             | 10<br>(5 - 18)              |
| Meningococcal meningitis                                          | 238<br>(137 - 386)           | 67<br>(21 - 147)            | 14<br>(5 - 29)           | 86<br>(40 - 150)            | 48<br>(19 - 94)             | 23<br>(11 - 42)             |
| Other meningitis                                                  | 558<br>(348 - 829)           | 218<br>(90 - 436)           | 38<br>(14 - 75)          | 179<br>(81 - 299)           | 91<br>(36 - 164)            | 31<br>(12 - 59)             |
| Encephalitis                                                      | 58<br>(30 - 103)             | 29<br>(8 - 70)              | 3<br>(1 - 6)             | 17<br>(9 - 29)              | 6<br>(3 - 10)               | 3<br>(1 - 5)                |
| Diphtheria                                                        | 5<br>(0 - 26)                | 3<br>(0 - 25)               | 1<br>(0 - 4)             | 1<br>(0 - 2)                | 0<br>(0 - 1)                | --                          |
| Whooping cough                                                    | 94<br>(0 - 497)              | 89<br>(0 - 474)             | 4<br>(0 - 19)            | 1<br>(0 - 6)                | 0<br>(0 - 1)                | --                          |
| Tetanus                                                           | 106<br>(59 - 181)            | 45<br>(20 - 92)             | 6<br>(2 - 13)            | 38<br>(18 - 71)             | 13<br>(6 - 27)              | 3<br>(2 - 7)                |
| Measles                                                           | 1,543<br>(38 - 8,003)        | 1,329<br>(34 - 6,742)       | 170<br>(4 - 959)         | 42<br>(1 - 288)             | 1<br>(0 - 10)               | --                          |
| Varicella and herpes zoster                                       | 10<br>(3 - 22)               | 3<br>(0 - 13)               | 1<br>(0 - 3)             | 3<br>(0 - 8)                | 1<br>(0 - 3)                | 2<br>(0 - 9)                |
| Neglected tropical diseases and malaria                           | 3,811<br>(2,301 - 6,007)     | 1,203<br>(522 - 2,387)      | 680<br>(379 - 1,097)     | 1,459<br>(749 - 2,438)      | 330<br>(176 - 642)          | 139<br>(59 - 314)           |
| Malaria                                                           | 2,123<br>(986 - 4,137)       | 839<br>(231 - 2,043)        | 296<br>(108 - 654)       | 641<br>(235 - 1,550)        | 236<br>(88 - 557)           | 111<br>(37 - 285)           |
| Leishmaniasis                                                     | 1,547<br>(728 - 2,566)       | 336<br>(114 - 720)          | 365<br>(165 - 663)       | 762<br>(298 - 1,406)        | 66<br>(21 - 134)            | 17<br>(5 - 41)              |
| Visceral leishmaniasis                                            | 1,547<br>(728 - 2,566)       | 336<br>(114 - 720)          | 365<br>(165 - 663)       | 762<br>(298 - 1,406)        | 66<br>(21 - 134)            | 17<br>(5 - 41)              |
| Schistosomiasis                                                   | 43<br>(27 - 64)              | 0<br>(0 - 1)                | 1<br>(0 - 2)             | 21<br>(11 - 34)             | 16<br>(8 - 26)              | 6<br>(3 - 9)                |
| Cysticercosis                                                     | 5<br>(3 - 7)                 | 0<br>(0 - 0)                | 0<br>(0 - 0)             | 3<br>(2 - 5)                | 1<br>(1 - 2)                | 0<br>(0 - 0)                |
| Cystic echinococcosis                                             | 5<br>(3 - 6)                 | 0<br>(0 - 1)                | 1<br>(0 - 1)             | 3<br>(2 - 3)                | 1<br>(1 - 1)                | 0<br>(0 - 0)                |
| Dengue                                                            | 3<br>(1 - 5)                 | 0<br>(0 - 0)                | 0<br>(0 - 0)             | 2<br>(0 - 3)                | 1<br>(0 - 1)                | 0<br>(0 - 0)                |
| Rabies                                                            | 50<br>(26 - 91)              | 9<br>(2 - 24)               | 14<br>(6 - 29)           | 21<br>(11 - 42)             | 5<br>(2 - 10)               | 1<br>(0 - 2)                |
| Intestinal nematode infections                                    | 18<br>(6 - 35)               | 12<br>(4 - 28)              | 2<br>(0 - 7)             | 2<br>(0 - 8)                | 1<br>(0 - 5)                | 0<br>(0 - 3)                |
| Ascariasis                                                        | 18<br>(6 - 35)               | 12<br>(4 - 28)              | 2<br>(0 - 7)             | 2<br>(0 - 8)                | 1<br>(0 - 5)                | 0<br>(0 - 3)                |
| Other neglected tropical diseases                                 | 18<br>(10 - 30)              | 5<br>(2 - 11)               | 1<br>(0 - 1)             | 5<br>(2 - 10)               | 4<br>(2 - 8)                | 3<br>(1 - 7)                |
| Maternal disorders                                                | --                           | --                          | --                       | --                          | --                          | --                          |

Web Table 31- Madagascar deaths with 95% UI by age, sex, and cause in 2013

| Cause                                                            | Males, All Ages             | Males, 0-4 Years         | Males, 5-14 Years  | Males, 15-49 Years        | Males, 50-69 Years          | Males, 70-80 Years          |
|------------------------------------------------------------------|-----------------------------|--------------------------|--------------------|---------------------------|-----------------------------|-----------------------------|
| Maternal hemorrhage                                              | --                          | --                       | --                 | --                        | --                          | --                          |
| Maternal sepsis and other maternal infections                    | --                          | --                       | --                 | --                        | --                          | --                          |
| Maternal hypertensive disorders                                  | --                          | --                       | --                 | --                        | --                          | --                          |
| Maternal obstructed labor                                        | --                          | --                       | --                 | --                        | --                          | --                          |
| Maternal abortive outcome                                        | --                          | --                       | --                 | --                        | --                          | --                          |
| Indirect maternal deaths                                         | --                          | --                       | --                 | --                        | --                          | --                          |
| Late maternal deaths                                             | --                          | --                       | --                 | --                        | --                          | --                          |
| Maternal deaths aggravated by HIV/AIDS                           | --                          | --                       | --                 | --                        | --                          | --                          |
| Other maternal disorders                                         | --                          | --                       | --                 | --                        | --                          | --                          |
| Neonatal disorders                                               | 7,079<br>(5,202 - 9,787)    | 7,079<br>(5,202 - 9,787) | --                 | --                        | --                          | --                          |
| Neonatal preterm birth complications                             | 2,906<br>(1,535 - 4,590)    | 2,906<br>(1,535 - 4,590) | --                 | --                        | --                          | --                          |
| Neonatal encephalopathy due to birth asphyxia and trauma         | 923<br>(413 - 1,724)        | 923<br>(413 - 1,724)     | --                 | --                        | --                          | --                          |
| Neonatal sepsis and other neonatal infections                    | 1,658<br>(657 - 3,198)      | 1,658<br>(657 - 3,198)   | --                 | --                        | --                          | --                          |
| Hemolytic disease and other neonatal jaundice                    | 37<br>(12 - 98)             | 37<br>(12 - 98)          | --                 | --                        | --                          | --                          |
| Other neonatal disorders                                         | 1,555<br>(550 - 3,532)      | 1,555<br>(550 - 3,532)   | --                 | --                        | --                          | --                          |
| Nutritional deficiencies                                         | 4,310<br>(2,598 - 7,854)    | 2,171<br>(942 - 3,919)   | 289<br>(146 - 547) | 772<br>(419 - 1,612)      | 518<br>(272 - 1,111)        | 560<br>(308 - 1,222)        |
| Protein-energy malnutrition                                      | 3,260<br>(1,681 - 6,140)    | 1,884<br>(766 - 3,530)   | 229<br>(107 - 444) | 427<br>(159 - 1,054)      | 350<br>(141 - 804)          | 370<br>(154 - 845)          |
| Iodine deficiency                                                | 7<br>(1 - 32)               | 3<br>(0 - 26)            | 1<br>(0 - 5)       | 2<br>(0 - 12)             | 1<br>(0 - 5)                | 1<br>(0 - 4)                |
| Iron-deficiency anemia                                           | 1,018<br>(409 - 2,407)      | 282<br>(32 - 928)        | 57<br>(14 - 149)   | 332<br>(116 - 751)        | 162<br>(56 - 434)           | 185<br>(61 - 500)           |
| Other nutritional deficiencies                                   | 25<br>(7 - 79)              | 2<br>(0 - 12)            | 2<br>(0 - 6)       | 11<br>(3 - 30)            | 4<br>(1 - 15)               | 5<br>(1 - 18)               |
| Other communicable, maternal, neonatal, and nutritional diseases | 3,250<br>(1,991 - 4,880)    | 2,130<br>(1,057 - 3,685) | 191<br>(93 - 342)  | 572<br>(321 - 894)        | 249<br>(135 - 465)          | 109<br>(52 - 211)           |
| Sexually transmitted diseases excluding HIV                      | 1,976<br>(899 - 3,526)      | 1,797<br>(798 - 3,207)   | 114<br>(44 - 211)  | 29<br>(13 - 69)           | 24<br>(9 - 64)              | 12<br>(4 - 32)              |
| Syphilis                                                         | 1,953<br>(880 - 3,474)      | 1,797<br>(798 - 3,207)   | 113<br>(43 - 210)  | 15<br>(7 - 38)            | 17<br>(7 - 46)              | 10<br>(3 - 27)              |
| Chlamydial infection                                             | --                          | --                       | --                 | --                        | --                          | --                          |
| Gonococcal infection                                             | 14<br>(7 - 32)              | --                       | 1<br>(0 - 2)       | 7<br>(3 - 18)             | 4<br>(2 - 11)               | 1<br>(0 - 4)                |
| Other sexually transmitted diseases                              | 10<br>(5 - 23)              | --                       | 1<br>(0 - 2)       | 6<br>(3 - 14)             | 3<br>(1 - 7)                | 1<br>(0 - 1)                |
| Hepatitis                                                        | 210<br>(135 - 309)          | 8<br>(2 - 23)            | 8<br>(4 - 16)      | 119<br>(65 - 180)         | 61<br>(38 - 100)            | 15<br>(9 - 22)              |
| Acute hepatitis A                                                | 12<br>(3 - 29)              | 3<br>(1 - 9)             | 2<br>(1 - 6)       | 6<br>(2 - 16)             | 1<br>(0 - 2)                | 0<br>(0 - 0)                |
| Acute hepatitis B                                                | 127<br>(77 - 198)           | 5<br>(1 - 16)            | 4<br>(1 - 8)       | 58<br>(27 - 99)           | 48<br>(27 - 79)             | 13<br>(8 - 20)              |
| Acute hepatitis C                                                | 3<br>(1 - 9)                | --                       | 0<br>(0 - 0)       | 2<br>(0 - 6)              | 1<br>(0 - 3)                | 0<br>(0 - 1)                |
| Acute hepatitis E                                                | 67<br>(27 - 124)            | 0<br>(0 - 0)             | 1<br>(0 - 4)       | 53<br>(21 - 96)           | 11<br>(3 - 27)              | 1<br>(0 - 4)                |
| Other infectious diseases                                        | 1,065<br>(600 - 1,842)      | 326<br>(110 - 978)       | 69<br>(25 - 171)   | 424<br>(215 - 727)        | 164<br>(68 - 370)           | 82<br>(29 - 183)            |
| Non-communicable diseases                                        | 38,325<br>(30,432 - 49,732) | 2,252<br>(1,337 - 3,756) | 494<br>(314 - 686) | 9,570<br>(5,865 - 12,752) | 13,639<br>(10,450 - 19,300) | 12,370<br>(10,845 - 15,367) |
| Neoplasms                                                        | 3,845<br>(2,969 - 5,137)    | 115<br>(56 - 196)        | 101<br>(58 - 153)  | 918<br>(553 - 1,288)      | 1,650<br>(1,248 - 2,359)    | 1,061<br>(874 - 1,350)      |
| Esophageal cancer                                                | 453<br>(302 - 660)          | --                       | --                 | 53<br>(27 - 88)           | 269<br>(169 - 413)          | 132<br>(88 - 189)           |
| Stomach cancer                                                   | 324<br>(237 - 445)          | --                       | --                 | 61<br>(36 - 90)           | 155<br>(106 - 228)          | 108<br>(78 - 151)           |
| Liver cancer                                                     | 486<br>(291 - 730)          | --                       | 6<br>(2 - 12)      | 188<br>(67 - 314)         | 214<br>(137 - 328)          | 79<br>(54 - 115)            |
| Liver cancer due to hepatitis B                                  | 133<br>(53 - 269)           | --                       | 2<br>(1 - 5)       | 67<br>(24 - 137)          | 49<br>(10 - 111)            | 14<br>(6 - 27)              |
| Liver cancer due to hepatitis C                                  | 241<br>(112 - 415)          | --                       | 1<br>(0 - 3)       | 80<br>(23 - 163)          | 117<br>(57 - 207)           | 43<br>(23 - 69)             |
| Liver cancer due to alcohol use                                  | 61<br>(32 - 99)             | --                       | --                 | 16<br>(4 - 30)            | 29<br>(15 - 51)             | 15<br>(8 - 27)              |

Web Table 31- Madagascar deaths with 95% UI by age, sex, and cause in 2013

| Cause                                         | Males, All Ages             | Males, 0-4 Years  | Males, 5-14 Years | Males, 15-49 Years       | Males, 50-69 Years        | Males, 70-80 Years       |
|-----------------------------------------------|-----------------------------|-------------------|-------------------|--------------------------|---------------------------|--------------------------|
| Liver cancer due to other causes              | 51<br>(25 - 85)             | --                | 3<br>(1 - 6)      | 25<br>(8 - 46)           | 18<br>(8 - 32)            | 6<br>(3 - 11)            |
| Larynx cancer                                 | 43<br>(29 - 65)             | --                | --                | 6<br>(4 - 10)            | 21<br>(13 - 34)           | 16<br>(10 - 24)          |
| Tracheal, bronchus and lung cancer            | 285<br>(217 - 410)          | --                | --                | 25<br>(14 - 47)          | 186<br>(136 - 271)        | 75<br>(57 - 100)         |
| Breast cancer                                 | 23<br>(12 - 39)             | --                | --                | 5<br>(2 - 11)            | 12<br>(5 - 23)            | 6<br>(3 - 12)            |
| Cervical cancer                               | --                          | --                | --                | --                       | --                        | --                       |
| Uterine cancer                                | --                          | --                | --                | --                       | --                        | --                       |
| Prostate cancer                               | 360<br>(229 - 545)          | --                | --                | 8<br>(3 - 17)            | 110<br>(64 - 176)         | 241<br>(151 - 382)       |
| Colon and rectum cancer                       | 324<br>(234 - 449)          | --                | --                | 105<br>(62 - 148)        | 140<br>(100 - 210)        | 78<br>(59 - 106)         |
| Lip and oral cavity cancer                    | 64<br>(40 - 94)             | --                | --                | 13<br>(7 - 26)           | 33<br>(20 - 53)           | 18<br>(10 - 27)          |
| Nasopharynx cancer                            | 22<br>(14 - 34)             | --                | 1<br>(0 - 2)      | 12<br>(7 - 20)           | 7<br>(4 - 13)             | 2<br>(1 - 3)             |
| Other pharynx cancer                          | 35<br>(23 - 54)             | --                | --                | 9<br>(4 - 15)            | 19<br>(12 - 31)           | 7<br>(5 - 11)            |
| Gallbladder and biliary tract cancer          | 38<br>(25 - 56)             | --                | --                | 15<br>(8 - 22)           | 15<br>(9 - 24)            | 8<br>(5 - 14)            |
| Pancreatic cancer                             | 115<br>(84 - 161)           | --                | --                | 32<br>(18 - 47)          | 63<br>(44 - 91)           | 21<br>(15 - 29)          |
| Malignant skin melanoma                       | 17<br>(8 - 33)              | --                | --                | 7<br>(3 - 14)            | 6<br>(3 - 12)             | 4<br>(2 - 7)             |
| Non-melanoma skin cancer                      | 17<br>(9 - 26)              | --                | --                | 2<br>(1 - 4)             | 7<br>(3 - 12)             | 8<br>(4 - 12)            |
| Ovarian cancer                                | --                          | --                | --                | --                       | --                        | --                       |
| Testicular cancer                             | 24<br>(15 - 37)             | --                | --                | 14<br>(7 - 23)           | 8<br>(4 - 15)             | 2<br>(1 - 4)             |
| Kidney cancer                                 | 77<br>(55 - 109)            | 9<br>(2 - 23)     | 3<br>(1 - 8)      | 11<br>(6 - 19)           | 39<br>(27 - 60)           | 14<br>(10 - 21)          |
| Bladder cancer                                | 112<br>(82 - 159)           | --                | --                | 12<br>(6 - 20)           | 47<br>(32 - 74)           | 52<br>(37 - 74)          |
| Brain and nervous system cancer               | 79<br>(31 - 119)            | 1<br>(0 - 1)      | 8<br>(4 - 15)     | 34<br>(10 - 56)          | 25<br>(11 - 41)           | 11<br>(4 - 18)           |
| Thyroid cancer                                | 9<br>(6 - 13)               | --                | 0<br>(0 - 0)      | 2<br>(1 - 3)             | 4<br>(2 - 6)              | 3<br>(2 - 5)             |
| Mesothelioma                                  | 10<br>(6 - 15)              | --                | --                | 1<br>(1 - 2)             | 6<br>(3 - 10)             | 3<br>(2 - 5)             |
| Hodgkin lymphoma                              | 46<br>(23 - 83)             | 2<br>(1 - 5)      | 3<br>(1 - 8)      | 18<br>(7 - 41)           | 14<br>(7 - 26)            | 9<br>(4 - 16)            |
| Non-Hodgkin lymphoma                          | 307<br>(203 - 434)          | 36<br>(12 - 81)   | 38<br>(18 - 68)   | 108<br>(55 - 167)        | 81<br>(52 - 128)          | 43<br>(28 - 64)          |
| Multiple myeloma                              | 36<br>(24 - 53)             | --                | --                | 9<br>(4 - 15)            | 16<br>(10 - 26)           | 11<br>(7 - 16)           |
| Leukemia                                      | 97<br>(68 - 128)            | 4<br>(2 - 9)      | 8<br>(4 - 14)     | 54<br>(33 - 75)          | 17<br>(11 - 25)           | 13<br>(10 - 19)          |
| Other neoplasms                               | 443<br>(243 - 610)          | 63<br>(29 - 107)  | 33<br>(16 - 54)   | 112<br>(52 - 166)        | 137<br>(71 - 212)         | 98<br>(51 - 143)         |
| Cardiovascular diseases                       | 20,556<br>(16,199 - 27,287) | 139<br>(75 - 228) | 96<br>(58 - 142)  | 4,936<br>(2,986 - 6,806) | 8,032<br>(6,138 - 11,402) | 7,354<br>(6,411 - 9,318) |
| Rheumatic heart disease                       | 511<br>(278 - 969)          | 6<br>(1 - 15)     | 20<br>(10 - 39)   | 261<br>(127 - 490)       | 145<br>(75 - 302)         | 78<br>(41 - 153)         |
| Ischemic heart disease                        | 3,240<br>(2,047 - 4,562)    | 0<br>(0 - 1)      | 1<br>(0 - 2)      | 765<br>(402 - 1,141)     | 1,423<br>(872 - 2,132)    | 1,051<br>(673 - 1,447)   |
| Cerebrovascular disease                       | 13,350<br>(10,487 - 18,134) | 40<br>(21 - 66)   | 26<br>(13 - 44)   | 2,828<br>(1,671 - 3,985) | 5,278<br>(3,972 - 7,589)  | 5,179<br>(4,388 - 6,645) |
| Ischemic stroke                               | 5,163<br>(2,451 - 7,749)    | 3<br>(1 - 8)      | 3<br>(1 - 6)      | 423<br>(144 - 709)       | 1,776<br>(772 - 2,871)    | 2,958<br>(1,496 - 4,222) |
| Hemorrhagic stroke                            | 8,187<br>(5,653 - 11,863)   | 36<br>(20 - 60)   | 23<br>(12 - 38)   | 2,405<br>(1,441 - 3,402) | 3,502<br>(2,397 - 5,310)  | 2,221<br>(1,403 - 3,743) |
| Hypertensive heart disease                    | 917<br>(496 - 1,786)        | 2<br>(1 - 4)      | 2<br>(1 - 4)      | 165<br>(80 - 300)        | 353<br>(177 - 707)        | 395<br>(193 - 841)       |
| Cardiomyopathy and myocarditis                | 642<br>(358 - 1,013)        | 44<br>(11 - 87)   | 19<br>(7 - 36)    | 276<br>(132 - 476)       | 198<br>(107 - 339)        | 105<br>(59 - 179)        |
| Atrial fibrillation and flutter               | 4<br>(2 - 7)                | --                | --                | 1<br>(0 - 1)             | 1<br>(1 - 2)              | 2<br>(1 - 4)             |
| Aortic aneurysm                               | 162<br>(100 - 242)          | --                | --                | 35<br>(19 - 55)          | 66<br>(39 - 103)          | 61<br>(39 - 92)          |
| Peripheral vascular disease                   | 9<br>(4 - 15)               | --                | --                | 1<br>(0 - 2)             | 3<br>(1 - 6)              | 5<br>(2 - 9)             |
| Endocarditis                                  | 246<br>(107 - 459)          | 9<br>(3 - 21)     | 5<br>(2 - 11)     | 106<br>(44 - 203)        | 73<br>(31 - 147)          | 53<br>(23 - 104)         |
| Other cardiovascular and circulatory diseases | 1,476<br>(780 - 2,691)      | 39<br>(17 - 82)   | 22<br>(10 - 41)   | 498<br>(243 - 866)       | 491<br>(244 - 969)        | 425<br>(220 - 816)       |

Web Table 31- Madagascar deaths with 95% UI by age, sex, and cause in 2013

| Cause                                               | Males, All Ages          | Males, 0-4 Years   | Males, 5-14 Years | Males, 15-49 Years   | Males, 50-69 Years     | Males, 70-80 Years       |
|-----------------------------------------------------|--------------------------|--------------------|-------------------|----------------------|------------------------|--------------------------|
| Chronic respiratory diseases                        | 4,180<br>(3,053 - 5,526) | 324<br>(169 - 578) | 47<br>(25 - 71)   | 921<br>(560 - 1,265) | 1,240<br>(839 - 1,829) | 1,648<br>(1,232 - 2,137) |
| Chronic obstructive pulmonary disease               | 2,249<br>(1,664 - 3,074) | 84<br>(28 - 183)   | 23<br>(12 - 35)   | 345<br>(202 - 508)   | 735<br>(498 - 1,111)   | 1,062<br>(800 - 1,429)   |
| Pneumoconiosis                                      | 468<br>(294 - 712)       | 8<br>(2 - 21)      | 4<br>(2 - 7)      | 179<br>(95 - 287)    | 152<br>(89 - 257)      | 125<br>(79 - 196)        |
| Silicosis                                           | 117<br>(68 - 190)        | 3<br>(1 - 7)       | 1<br>(0 - 2)      | 43<br>(21 - 74)      | 36<br>(20 - 65)        | 34<br>(20 - 57)          |
| Asbestosis                                          | 58<br>(33 - 92)          | 2<br>(0 - 4)       | 1<br>(0 - 2)      | 23<br>(13 - 38)      | 21<br>(12 - 37)        | 11<br>(6 - 19)           |
| Coal workers pneumoconiosis                         | 76<br>(37 - 126)         | 1<br>(0 - 3)       | 1<br>(0 - 1)      | 29<br>(13 - 49)      | 26<br>(11 - 48)        | 19<br>(8 - 34)           |
| Other pneumoconiosis                                | 218<br>(132 - 338)       | 3<br>(1 - 8)       | 1<br>(1 - 2)      | 83<br>(45 - 139)     | 69<br>(39 - 118)       | 61<br>(34 - 101)         |
| Asthma                                              | 660<br>(346 - 948)       | 12<br>(3 - 34)     | 5<br>(2 - 9)      | 195<br>(102 - 282)   | 190<br>(96 - 305)      | 257<br>(124 - 404)       |
| Interstitial lung disease and pulmonary sarcoidosis | 362<br>(122 - 644)       | 7<br>(1 - 30)      | 2<br>(1 - 6)      | 68<br>(22 - 137)     | 124<br>(42 - 234)      | 160<br>(48 - 314)        |
| Other chronic respiratory diseases                  | 442<br>(282 - 642)       | 211<br>(113 - 378) | 13<br>(6 - 23)    | 135<br>(74 - 214)    | 39<br>(21 - 69)        | 43<br>(25 - 72)          |
| Cirrhosis                                           | 1,638<br>(1,123 - 2,415) | 13<br>(4 - 31)     | 14<br>(7 - 22)    | 521<br>(290 - 786)   | 779<br>(519 - 1,218)   | 312<br>(214 - 450)       |
| Cirrhosis due to hepatitis B                        | 353<br>(157 - 645)       | 0<br>(0 - 1)       | 2<br>(1 - 4)      | 113<br>(46 - 211)    | 170<br>(71 - 328)      | 67<br>(17 - 134)         |
| Cirrhosis due to hepatitis C                        | 329<br>(182 - 592)       | 1<br>(0 - 4)       | 2<br>(1 - 4)      | 81<br>(30 - 160)     | 164<br>(80 - 301)      | 81<br>(36 - 155)         |
| Cirrhosis due to alcohol use                        | 753<br>(474 - 1,181)     | --                 | --                | 228<br>(118 - 371)   | 378<br>(227 - 620)     | 147<br>(93 - 221)        |
| Cirrhosis due to other causes                       | 203<br>(112 - 340)       | 11<br>(4 - 27)     | 10<br>(5 - 16)    | 99<br>(47 - 174)     | 67<br>(30 - 123)       | 17<br>(8 - 29)           |
| Digestive diseases                                  | 1,757<br>(1,187 - 2,610) | 38<br>(12 - 85)    | 46<br>(26 - 77)   | 593<br>(347 - 873)   | 591<br>(373 - 933)     | 489<br>(329 - 713)       |
| Peptic ulcer disease                                | 526<br>(312 - 862)       | 3<br>(1 - 9)       | 4<br>(2 - 9)      | 150<br>(76 - 259)    | 197<br>(105 - 339)     | 171<br>(95 - 290)        |
| Gastritis and duodenitis                            | 75<br>(25 - 283)         | 2<br>(1 - 6)       | 3<br>(1 - 8)      | 24<br>(8 - 82)       | 23<br>(7 - 89)         | 22<br>(5 - 89)           |
| Appendicitis                                        | 97<br>(43 - 168)         | 2<br>(0 - 6)       | 6<br>(3 - 12)     | 42<br>(19 - 76)      | 27<br>(10 - 55)        | 19<br>(6 - 41)           |
| Paralytic ileus and intestinal obstruction          | 604<br>(324 - 947)       | 11<br>(3 - 28)     | 20<br>(10 - 37)   | 226<br>(104 - 369)   | 198<br>(102 - 337)     | 150<br>(75 - 253)        |
| Inguinal, femoral, and abdominal hernia             | 27<br>(9 - 46)           | 0<br>(0 - 0)       | 1<br>(0 - 2)      | 9<br>(3 - 16)        | 9<br>(3 - 16)          | 9<br>(3 - 17)            |
| Inflammatory bowel disease                          | 76<br>(26 - 145)         | 8<br>(2 - 22)      | 3<br>(1 - 6)      | 26<br>(9 - 56)       | 20<br>(6 - 43)         | 19<br>(5 - 43)           |
| Vascular intestinal disorders                       | 13<br>(4 - 32)           | 0<br>(0 - 1)       | 0<br>(0 - 1)      | 3<br>(1 - 7)         | 4<br>(1 - 11)          | 5<br>(2 - 12)            |
| Gallbladder and biliary diseases                    | 70<br>(39 - 110)         | 1<br>(0 - 2)       | 1<br>(0 - 2)      | 15<br>(7 - 25)       | 23<br>(12 - 40)        | 30<br>(14 - 56)          |
| Pancreatitis                                        | 85<br>(27 - 165)         | 1<br>(0 - 1)       | 1<br>(0 - 2)      | 43<br>(14 - 84)      | 27<br>(8 - 61)         | 13<br>(3 - 30)           |
| Other digestive diseases                            | 184<br>(96 - 396)        | 9<br>(2 - 23)      | 6<br>(3 - 11)     | 55<br>(26 - 123)     | 62<br>(31 - 139)       | 52<br>(23 - 122)         |
| Neurological disorders                              | 892<br>(666 - 1,199)     | 44<br>(17 - 93)    | 51<br>(26 - 106)  | 268<br>(154 - 465)   | 87<br>(63 - 127)       | 442<br>(341 - 570)       |
| Alzheimer disease and other dementias               | 423<br>(323 - 552)       | --                 | --                | 1<br>(0 - 1)         | 43<br>(29 - 63)        | 379<br>(285 - 492)       |
| Parkinson disease                                   | 6<br>(3 - 13)            | --                 | --                | 1<br>(0 - 1)         | 0<br>(0 - 0)           | 6<br>(2 - 12)            |
| Epilepsy                                            | 389<br>(239 - 635)       | 33<br>(10 - 81)    | 47<br>(22 - 101)  | 234<br>(128 - 425)   | 27<br>(16 - 45)        | 48<br>(24 - 85)          |
| Multiple sclerosis                                  | 2<br>(1 - 4)             | --                 | --                | 1<br>(0 - 2)         | 1<br>(0 - 1)           | 0<br>(0 - 0)             |
| Other neurological disorders                        | 72<br>(48 - 100)         | 11<br>(5 - 25)     | 5<br>(3 - 7)      | 32<br>(19 - 47)      | 16<br>(9 - 25)         | 8<br>(4 - 12)            |
| Mental and substance use disorders                  | 655<br>(366 - 1,057)     | 19<br>(3 - 49)     | 0<br>(0 - 0)      | 455<br>(235 - 737)   | 157<br>(91 - 280)      | 24<br>(15 - 41)          |
| Schizophrenia                                       | 13<br>(3 - 44)           | --                 | --                | 7<br>(2 - 25)        | 4<br>(1 - 14)          | 1<br>(0 - 5)             |
| Alcohol use disorders                               | 428<br>(216 - 766)       | --                 | --                | 276<br>(123 - 494)   | 134<br>(73 - 250)      | 18<br>(10 - 33)          |
| Drug use disorders                                  | 214<br>(96 - 328)        | 19<br>(3 - 49)     | --                | 171<br>(77 - 266)    | 19<br>(8 - 32)         | 5<br>(2 - 8)             |
| Opioid use disorders                                | 23<br>(10 - 36)          | 2<br>(0 - 6)       | --                | 18<br>(8 - 29)       | 2<br>(1 - 3)           | 1<br>(0 - 1)             |
| Cocaine use disorders                               | 1<br>(0 - 1)             | 0<br>(0 - 0)       | --                | 1<br>(0 - 1)         | 0<br>(0 - 0)           | 0<br>(0 - 0)             |
| Amphetamine use disorders                           | 1<br>(0 - 1)             | 0<br>(0 - 0)       | --                | 0<br>(0 - 1)         | 0<br>(0 - 0)           | 0<br>(0 - 0)             |
| Other drug use disorders                            | 190<br>(85 - 291)        | 16<br>(3 - 44)     | --                | 152<br>(68 - 235)    | 17<br>(7 - 29)         | 4<br>(2 - 7)             |

Web Table 31- Madagascar deaths with 95% UI by age, sex, and cause in 2013

| Cause                                               | Males, All Ages          | Males, 0-4 Years       | Males, 5-14 Years | Males, 15-49 Years   | Males, 50-69 Years   | Males, 70-80 Years   |
|-----------------------------------------------------|--------------------------|------------------------|-------------------|----------------------|----------------------|----------------------|
| Eating disorders                                    | 0<br>(0 - 0)             | --                     | 0<br>(0 - 0)      | 0<br>(0 - 0)         | --                   | --                   |
| Anorexia nervosa                                    | 0<br>(0 - 0)             | --                     | 0<br>(0 - 0)      | 0<br>(0 - 0)         | --                   | --                   |
| Diabetes, urogenital, blood, and endocrine diseases | 2,916<br>(2,236 - 3,926) | 193<br>(101 - 345)     | 69<br>(37 - 137)  | 746<br>(459 - 1,076) | 988<br>(707 - 1,419) | 920<br>(734 - 1,209) |
| Diabetes mellitus                                   | 1,303<br>(1,002 - 1,767) | 10<br>(6 - 17)         | 4<br>(2 - 6)      | 185<br>(107 - 268)   | 576<br>(402 - 830)   | 528<br>(397 - 714)   |
| Acute glomerulonephritis                            | 42<br>(14 - 76)          | 4<br>(1 - 11)          | 2<br>(1 - 3)      | 3<br>(1 - 8)         | 21<br>(5 - 43)       | 11<br>(3 - 21)       |
| Chronic kidney disease                              | 474<br>(334 - 663)       | 23<br>(10 - 42)        | 10<br>(5 - 16)    | 184<br>(109 - 270)   | 118<br>(79 - 191)    | 139<br>(96 - 199)    |
| Chronic kidney disease due to diabetes mellitus     | 3<br>(1 - 5)             | 0<br>(0 - 0)           | 0<br>(0 - 0)      | 1<br>(0 - 2)         | 1<br>(0 - 2)         | 1<br>(0 - 1)         |
| Chronic kidney disease due to hypertension          | 190<br>(105 - 334)       | 3<br>(1 - 7)           | 1<br>(0 - 2)      | 46<br>(20 - 84)      | 63<br>(32 - 120)     | 77<br>(40 - 133)     |
| Chronic kidney disease due to glomerulonephritis    | 142<br>(84 - 216)        | 14<br>(6 - 25)         | 6<br>(3 - 9)      | 67<br>(36 - 103)     | 28<br>(12 - 50)      | 27<br>(10 - 47)      |
| Chronic kidney disease due to other causes          | 140<br>(64 - 233)        | 6<br>(2 - 16)          | 2<br>(1 - 5)      | 70<br>(26 - 131)     | 26<br>(9 - 53)       | 35<br>(12 - 69)      |
| Urinary diseases and male infertility               | 551<br>(364 - 767)       | 25<br>(9 - 57)         | 8<br>(5 - 13)     | 165<br>(86 - 247)    | 184<br>(110 - 286)   | 170<br>(108 - 250)   |
| Interstitial nephritis and urinary tract infections | 392<br>(250 - 562)       | 19<br>(7 - 45)         | 5<br>(3 - 9)      | 114<br>(54 - 176)    | 128<br>(70 - 207)    | 126<br>(73 - 199)    |
| Urolithiasis                                        | 15<br>(6 - 36)           | --                     | 0<br>(0 - 1)      | 6<br>(2 - 13)        | 5<br>(2 - 15)        | 3<br>(1 - 11)        |
| Other urinary diseases                              | 145<br>(78 - 244)        | 6<br>(2 - 15)          | 2<br>(1 - 4)      | 46<br>(19 - 78)      | 50<br>(22 - 94)      | 41<br>(17 - 79)      |
| Gynecological diseases                              | --                       | --                     | --                | --                   | --                   | --                   |
| Uterine fibroids                                    | --                       | --                     | --                | --                   | --                   | --                   |
| Polycystic ovarian syndrome                         | --                       | --                     | --                | --                   | --                   | --                   |
| Endometriosis                                       | --                       | --                     | --                | --                   | --                   | --                   |
| Genital prolapse                                    | --                       | --                     | --                | --                   | --                   | --                   |
| Other gynecological diseases                        | --                       | --                     | --                | --                   | --                   | --                   |
| Hemoglobinopathies and hemolytic anemias            | 269<br>(95 - 737)        | 87<br>(31 - 206)       | 36<br>(11 - 99)   | 100<br>(28 - 315)    | 28<br>(8 - 105)      | 18<br>(6 - 66)       |
| Thalassemias                                        | 2<br>(1 - 6)             | 2<br>(1 - 4)           | 0<br>(0 - 1)      | 1<br>(0 - 2)         | 0<br>(0 - 0)         | 0<br>(0 - 0)         |
| Sickle cell disorders                               | 234<br>(82 - 640)        | 80<br>(28 - 189)       | 34<br>(11 - 95)   | 94<br>(26 - 297)     | 24<br>(7 - 91)       | 1<br>(0 - 5)         |
| G6PD deficiency                                     | 5<br>(2 - 13)            | 2<br>(1 - 4)           | 0<br>(0 - 1)      | 1<br>(0 - 4)         | 1<br>(0 - 2)         | 0<br>(0 - 2)         |
| Other hemoglobinopathies and hemolytic anemias      | 28<br>(10 - 95)          | 4<br>(2 - 11)          | 1<br>(0 - 2)      | 4<br>(1 - 13)        | 4<br>(1 - 13)        | 16<br>(5 - 59)       |
| Endocrine, metabolic, blood, and immune disorders   | 276<br>(151 - 401)       | 43<br>(21 - 81)        | 10<br>(4 - 18)    | 108<br>(43 - 178)    | 61<br>(32 - 96)      | 54<br>(21 - 88)      |
| Musculoskeletal disorders                           | 115<br>(52 - 200)        | --                     | 9<br>(4 - 14)     | 49<br>(21 - 80)      | 34<br>(15 - 64)      | 23<br>(10 - 47)      |
| Rheumatoid arthritis                                | 23<br>(8 - 52)           | --                     | 1<br>(1 - 3)      | 7<br>(2 - 13)        | 8<br>(3 - 18)        | 7<br>(2 - 19)        |
| Other musculoskeletal disorders                     | 92<br>(43 - 152)         | --                     | 8<br>(3 - 12)     | 42<br>(19 - 68)      | 26<br>(11 - 47)      | 16<br>(7 - 30)       |
| Other non-communicable diseases                     | 1,770<br>(1,115 - 3,053) | 1,367<br>(730 - 2,636) | 61<br>(33 - 104)  | 163<br>(102 - 229)   | 81<br>(51 - 125)     | 98<br>(61 - 145)     |
| Congenital anomalies                                | 1,482<br>(853 - 2,765)   | 1,306<br>(689 - 2,576) | 57<br>(29 - 99)   | 93<br>(55 - 135)     | 15<br>(10 - 22)      | 13<br>(9 - 18)       |
| Neural tube defects                                 | 407<br>(88 - 910)        | 376<br>(80 - 858)      | 10<br>(2 - 27)    | 18<br>(3 - 44)       | 2<br>(0 - 5)         | 1<br>(0 - 3)         |
| Congenital heart anomalies                          | 611<br>(249 - 1,334)     | 526<br>(179 - 1,246)   | 30<br>(13 - 56)   | 45<br>(24 - 70)      | 6<br>(3 - 10)        | 5<br>(3 - 8)         |
| Cleft lip and cleft palate                          | 6<br>(1 - 20)            | 6<br>(1 - 20)          | --                | --                   | --                   | --                   |
| Down syndrome                                       | 91<br>(24 - 233)         | 73<br>(13 - 209)       | 5<br>(1 - 11)     | 11<br>(5 - 19)       | 2<br>(1 - 3)         | 0<br>(0 - 1)         |
| Chromosomal unbalanced rearrangements               | 33<br>(8 - 105)          | 30<br>(5 - 100)        | 1<br>(0 - 3)      | 2<br>(1 - 3)         | 0<br>(0 - 1)         | 0<br>(0 - 0)         |
| Other congenital anomalies                          | 334<br>(95 - 991)        | 295<br>(69 - 935)      | 11<br>(3 - 28)    | 17<br>(8 - 31)       | 5<br>(3 - 8)         | 6<br>(4 - 10)        |
| Skin and subcutaneous diseases                      | 267<br>(181 - 382)       | 40<br>(16 - 91)        | 5<br>(3 - 8)      | 70<br>(39 - 112)     | 66<br>(39 - 104)     | 85<br>(50 - 131)     |
| Cellulitis                                          | 155<br>(42 - 321)        | 23<br>(3 - 72)         | 3<br>(1 - 7)      | 42<br>(10 - 93)      | 39<br>(11 - 83)      | 47<br>(12 - 101)     |
| Pyoderma                                            | 95<br>(13 - 218)         | 16<br>(2 - 42)         | 1<br>(0 - 4)      | 24<br>(3 - 58)       | 24<br>(3 - 60)       | 30<br>(4 - 72)       |



Web Table 31- Madagascar deaths with 95% UI by age, sex, and cause in 2013

| Cause                                           | Males, All Ages          | Males, 0-4 Years   | Males, 5-14 Years  | Males, 15-49 Years       | Males, 50-69 Years   | Males, 70-80 Years |
|-------------------------------------------------|--------------------------|--------------------|--------------------|--------------------------|----------------------|--------------------|
| Decubitus ulcer                                 | 15<br>(1 - 44)           | 0<br>(0 - 2)       | 0<br>(0 - 1)       | 3<br>(0 - 10)            | 3<br>(0 - 9)         | 8<br>(1 - 23)      |
| Other skin and subcutaneous diseases            | 2<br>(0 - 6)             | 0<br>(0 - 1)       | 0<br>(0 - 0)       | 1<br>(0 - 3)             | 0<br>(0 - 1)         | 0<br>(0 - 1)       |
| Sudden infant death syndrome                    | 21<br>(5 - 60)           | 21<br>(5 - 60)     | --                 | --                       | --                   | --                 |
| Injuries                                        | 5,341<br>(3,697 - 7,031) | 504<br>(254 - 811) | 353<br>(223 - 495) | 3,086<br>(1,998 - 4,165) | 900<br>(603 - 1,301) | 498<br>(332 - 692) |
| Transport injuries                              | 2,196<br>(1,540 - 2,931) | 109<br>(43 - 215)  | 145<br>(82 - 223)  | 1,328<br>(827 - 1,863)   | 409<br>(275 - 619)   | 205<br>(136 - 290) |
| Road injuries                                   | 2,110<br>(1,463 - 2,814) | 98<br>(39 - 194)   | 134<br>(76 - 207)  | 1,294<br>(801 - 1,815)   | 392<br>(264 - 589)   | 192<br>(129 - 271) |
| Pedestrian road injuries                        | 1,013<br>(620 - 1,502)   | 56<br>(20 - 118)   | 74<br>(38 - 122)   | 588<br>(312 - 924)       | 193<br>(114 - 309)   | 101<br>(65 - 151)  |
| Cyclist road injuries                           | 128<br>(75 - 192)        | 5<br>(1 - 14)      | 11<br>(5 - 21)     | 67<br>(35 - 109)         | 29<br>(16 - 49)      | 15<br>(8 - 25)     |
| Motorcyclist road injuries                      | 155<br>(79 - 270)        | 4<br>(1 - 9)       | 5<br>(2 - 10)      | 115<br>(55 - 205)        | 21<br>(10 - 38)      | 10<br>(5 - 19)     |
| Motor vehicle road injuries                     | 803<br>(485 - 1,192)     | 30<br>(10 - 61)    | 42<br>(19 - 73)    | 521<br>(295 - 830)       | 147<br>(84 - 235)    | 64<br>(36 - 100)   |
| Other road injuries                             | 11<br>(6 - 23)           | 2<br>(1 - 5)       | 2<br>(1 - 4)       | 3<br>(1 - 10)            | 2<br>(1 - 6)         | 2<br>(1 - 4)       |
| Other transport injuries                        | 86<br>(57 - 125)         | 11<br>(4 - 23)     | 11<br>(5 - 19)     | 34<br>(17 - 66)          | 17<br>(10 - 29)      | 13<br>(5 - 24)     |
| Unintentional injuries                          | 1,913<br>(1,384 - 2,461) | 384<br>(193 - 642) | 183<br>(111 - 268) | 821<br>(535 - 1,117)     | 308<br>(208 - 448)   | 217<br>(139 - 319) |
| Falls                                           | 240<br>(115 - 356)       | 17<br>(6 - 38)     | 21<br>(7 - 42)     | 108<br>(50 - 182)        | 48<br>(20 - 79)      | 46<br>(18 - 75)    |
| Drowning                                        | 507<br>(316 - 756)       | 93<br>(31 - 201)   | 82<br>(44 - 140)   | 275<br>(161 - 423)       | 41<br>(22 - 66)      | 16<br>(8 - 28)     |
| Fire, heat, and hot substances                  | 243<br>(149 - 393)       | 79<br>(30 - 177)   | 19<br>(9 - 35)     | 75<br>(42 - 126)         | 41<br>(23 - 72)      | 30<br>(16 - 49)    |
| Poisonings                                      | 104<br>(64 - 172)        | 14<br>(6 - 31)     | 4<br>(2 - 7)       | 66<br>(36 - 117)         | 15<br>(8 - 25)       | 4<br>(3 - 8)       |
| Exposure to mechanical forces                   | 311<br>(206 - 440)       | 61<br>(26 - 131)   | 26<br>(14 - 42)    | 141<br>(85 - 223)        | 67<br>(36 - 109)     | 16<br>(9 - 23)     |
| Unintentional firearm injuries                  | 61<br>(37 - 102)         | 4<br>(2 - 9)       | 2<br>(1 - 4)       | 47<br>(25 - 84)          | 5<br>(3 - 10)        | 3<br>(1 - 5)       |
| Unintentional suffocation                       | 63<br>(26 - 129)         | 29<br>(6 - 88)     | 5<br>(1 - 12)      | 15<br>(6 - 27)           | 11<br>(2 - 20)       | 2<br>(1 - 4)       |
| Other exposure to mechanical forces             | 186<br>(124 - 267)       | 28<br>(11 - 59)    | 18<br>(9 - 32)     | 79<br>(45 - 144)         | 50<br>(26 - 90)      | 11<br>(5 - 16)     |
| Adverse effects of medical treatment            | 270<br>(158 - 411)       | 67<br>(28 - 155)   | 8<br>(4 - 13)      | 62<br>(33 - 110)         | 59<br>(30 - 104)     | 74<br>(30 - 143)   |
| Animal contact                                  | 100<br>(58 - 152)        | 12<br>(4 - 30)     | 12<br>(6 - 24)     | 39<br>(18 - 70)          | 21<br>(10 - 35)      | 17<br>(6 - 26)     |
| Venomous animal contact                         | 44<br>(22 - 67)          | 3<br>(1 - 11)      | 2<br>(1 - 5)       | 16<br>(7 - 29)           | 11<br>(4 - 20)       | 11<br>(2 - 19)     |
| Non-venomous animal contact                     | 56<br>(31 - 92)          | 8<br>(3 - 20)      | 10<br>(4 - 20)     | 23<br>(10 - 45)          | 10<br>(5 - 18)       | 5<br>(2 - 10)      |
| Foreign body                                    | 61<br>(35 - 110)         | 31<br>(14 - 64)    | 4<br>(2 - 7)       | 11<br>(6 - 19)           | 6<br>(4 - 11)        | 9<br>(4 - 14)      |
| Pulmonary aspiration and foreign body in airway | 55<br>(30 - 101)         | 30<br>(13 - 62)    | 3<br>(2 - 6)       | 9<br>(5 - 17)            | 4<br>(2 - 8)         | 8<br>(4 - 13)      |
| Foreign body in other body part                 | 6<br>(3 - 10)            | 1<br>(1 - 3)       | 1<br>(0 - 1)       | 1<br>(1 - 3)             | 2<br>(1 - 3)         | 1<br>(0 - 1)       |
| Other unintentional injuries                    | 78<br>(47 - 118)         | 9<br>(4 - 17)      | 9<br>(4 - 15)      | 44<br>(24 - 74)          | 10<br>(6 - 17)       | 6<br>(3 - 8)       |
| Self-harm and interpersonal violence            | 1,212<br>(581 - 1,804)   | 11<br>(3 - 26)     | 24<br>(9 - 52)     | 925<br>(422 - 1,403)     | 177<br>(76 - 285)    | 75<br>(27 - 119)   |
| Self-harm                                       | 833<br>(360 - 1,330)     | --                 | 16<br>(5 - 41)     | 587<br>(256 - 994)       | 157<br>(63 - 259)    | 73<br>(25 - 118)   |
| Interpersonal violence                          | 379<br>(141 - 585)       | 11<br>(3 - 26)     | 8<br>(2 - 17)      | 338<br>(122 - 531)       | 20<br>(8 - 36)       | 2<br>(1 - 3)       |
| Assault by firearm                              | 160<br>(54 - 267)        | 3<br>(1 - 8)       | 2<br>(1 - 6)       | 147<br>(48 - 252)        | 7<br>(3 - 14)        | 0<br>(0 - 1)       |
| Assault by sharp object                         | 89<br>(31 - 157)         | 2<br>(0 - 6)       | 1<br>(0 - 4)       | 79<br>(27 - 141)         | 6<br>(2 - 12)        | 0<br>(0 - 1)       |
| Assault by other means                          | 130<br>(39 - 231)        | 6<br>(2 - 15)      | 4<br>(1 - 9)       | 112<br>(31 - 206)        | 7<br>(2 - 14)        | 1<br>(0 - 2)       |
| Forces of nature, war, and legal intervention   | 19<br>(10 - 47)          | 0<br>(0 - 0)       | 1<br>(1 - 2)       | 11<br>(6 - 27)           | 5<br>(3 - 12)        | 1<br>(0 - 2)       |
| Exposure to forces of nature                    | 19<br>(10 - 47)          | 0<br>(0 - 0)       | 1<br>(1 - 2)       | 11<br>(6 - 27)           | 5<br>(3 - 12)        | 1<br>(0 - 2)       |

Web Table 31- Madagascar deaths with 95% UI by age, sex, and cause in 2013

| Cause                                                             | Females, All Ages           | Females, 0-4 Years          | Females, 5-14 Years      | Females, 15-49 Years        | Females, 50-69 Years        | Females, 70-80 Years        |
|-------------------------------------------------------------------|-----------------------------|-----------------------------|--------------------------|-----------------------------|-----------------------------|-----------------------------|
| All causes                                                        | 74,816<br>(61,328 - 89,625) | 20,785<br>(16,161 - 27,054) | 2,583<br>(2,009 - 3,553) | 15,292<br>(12,069 - 20,113) | 17,688<br>(12,052 - 22,903) | 18,468<br>(14,673 - 22,018) |
| Communicable, maternal, neonatal, and nutritional diseases        | 37,626<br>(31,323 - 46,252) | 18,426<br>(14,167 - 24,141) | 1,993<br>(1,484 - 2,790) | 8,884<br>(6,734 - 11,774)   | 4,295<br>(2,942 - 5,993)    | 4,029<br>(3,053 - 5,104)    |
| HIV/AIDS and tuberculosis                                         | 3,111<br>(1,415 - 9,683)    | 175<br>(67 - 583)           | 107<br>(41 - 371)        | 2,072<br>(851 - 6,790)      | 611<br>(301 - 1,555)        | 146<br>(89 - 258)           |
| Tuberculosis                                                      | 1,208<br>(722 - 1,901)      | 63<br>(31 - 106)            | 30<br>(16 - 55)          | 671<br>(351 - 1,167)        | 324<br>(182 - 531)          | 120<br>(77 - 189)           |
| HIV/AIDS                                                          | 1,904<br>(335 - 8,507)      | 112<br>(15 - 505)           | 77<br>(13 - 352)         | 1,402<br>(239 - 6,154)      | 287<br>(48 - 1,270)         | 26<br>(4 - 114)             |
| HIV/AIDS resulting in mycobacterial infection                     | 100<br>(17 - 455)           | 6<br>(1 - 26)               | 4<br>(1 - 16)            | 74<br>(12 - 336)            | 16<br>(2 - 70)              | 1<br>(0 - 6)                |
| HIV/AIDS resulting in other diseases                              | 1,804<br>(319 - 8,056)      | 107<br>(14 - 480)           | 73<br>(13 - 334)         | 1,328<br>(227 - 5,830)      | 271<br>(45 - 1,199)         | 25<br>(4 - 108)             |
| Diarrhea, lower respiratory, and other common infectious diseases | 16,743<br>(12,588 - 22,201) | 8,236<br>(5,271 - 12,249)   | 833<br>(486 - 1,445)     | 2,386<br>(1,392 - 3,640)    | 2,446<br>(1,467 - 3,677)    | 2,842<br>(2,010 - 3,816)    |
| Diarrheal diseases                                                | 6,184<br>(3,865 - 9,024)    | 2,934<br>(1,185 - 5,289)    | 237<br>(93 - 448)        | 1,095<br>(514 - 1,940)      | 1,008<br>(472 - 1,780)      | 910<br>(458 - 1,580)        |
| Intestinal infectious diseases                                    | 412<br>(179 - 770)          | 149<br>(51 - 308)           | 105<br>(40 - 212)        | 132<br>(54 - 254)           | 19<br>(7 - 38)              | 7<br>(3 - 13)               |
| Typhoid fever                                                     | 302<br>(124 - 587)          | 100<br>(30 - 216)           | 82<br>(31 - 163)         | 102<br>(41 - 202)           | 13<br>(5 - 29)              | 4<br>(2 - 9)                |
| Paratyphoid fever                                                 | 72<br>(27 - 146)            | 29<br>(8 - 65)              | 20<br>(6 - 48)           | 20<br>(7 - 42)              | 2<br>(1 - 6)                | 1<br>(0 - 2)                |
| Other intestinal infectious diseases                              | 38<br>(19 - 65)             | 21<br>(8 - 43)              | 3<br>(1 - 8)             | 9<br>(3 - 20)               | 3<br>(0 - 8)                | 2<br>(0 - 5)                |
| Lower respiratory infections                                      | 7,142<br>(4,858 - 9,818)    | 3,177<br>(1,592 - 5,288)    | 206<br>(101 - 352)       | 778<br>(432 - 1,160)        | 1,178<br>(715 - 1,745)      | 1,803<br>(1,219 - 2,533)    |
| Upper respiratory infections                                      | 9<br>(3 - 19)               | 3<br>(0 - 10)               | 0<br>(0 - 1)             | 2<br>(0 - 6)                | 2<br>(0 - 7)                | 2<br>(0 - 6)                |
| Otitis media                                                      | 15<br>(10 - 22)             | 6<br>(3 - 12)               | 2<br>(1 - 3)             | 3<br>(2 - 4)                | 3<br>(2 - 4)                | 2<br>(1 - 2)                |
| Meningitis                                                        | 1,272<br>(818 - 2,430)      | 554<br>(255 - 1,526)        | 101<br>(50 - 178)        | 296<br>(158 - 479)          | 213<br>(109 - 366)          | 107<br>(57 - 176)           |
| Pneumococcal meningitis                                           | 344<br>(196 - 822)          | 127<br>(46 - 492)           | 33<br>(15 - 61)          | 94<br>(43 - 161)            | 60<br>(25 - 110)            | 30<br>(14 - 56)             |
| H influenzae type B meningitis                                    | 294<br>(146 - 737)          | 199<br>(73 - 622)           | 24<br>(9 - 49)           | 37<br>(16 - 76)             | 24<br>(10 - 48)             | 11<br>(5 - 20)              |
| Meningococcal meningitis                                          | 221<br>(137 - 357)          | 63<br>(20 - 206)            | 12<br>(5 - 25)           | 58<br>(24 - 106)            | 57<br>(21 - 110)            | 31<br>(13 - 54)             |
| Other meningitis                                                  | 413<br>(228 - 620)          | 166<br>(48 - 323)           | 32<br>(12 - 66)          | 108<br>(52 - 198)           | 72<br>(31 - 139)            | 35<br>(15 - 64)             |
| Encephalitis                                                      | 46<br>(25 - 72)             | 21<br>(8 - 41)              | 4<br>(2 - 7)             | 9<br>(3 - 16)               | 7<br>(3 - 13)               | 5<br>(2 - 8)                |
| Diphtheria                                                        | 4<br>(0 - 23)               | 3<br>(0 - 22)               | 0<br>(0 - 4)             | 0<br>(0 - 1)                | 0<br>(0 - 1)                | --                          |
| Whooping cough                                                    | 111<br>(0 - 541)            | 104<br>(0 - 515)            | 5<br>(0 - 25)            | 1<br>(0 - 6)                | 0<br>(0 - 1)                | --                          |
| Tetanus                                                           | 75<br>(42 - 134)            | 33<br>(13 - 71)             | 3<br>(1 - 7)             | 21<br>(9 - 44)              | 14<br>(5 - 30)              | 4<br>(2 - 9)                |
| Measles                                                           | 1,464<br>(40 - 7,210)       | 1,248<br>(35 - 6,056)       | 168<br>(4 - 923)         | 47<br>(1 - 307)             | 1<br>(0 - 7)                | --                          |
| Varicella and herpes zoster                                       | 9<br>(3 - 24)               | 3<br>(0 - 15)               | 1<br>(0 - 3)             | 2<br>(0 - 6)                | 1<br>(0 - 3)                | 2<br>(0 - 10)               |
| Neglected tropical diseases and malaria                           | 3,608<br>(2,128 - 5,740)    | 1,110<br>(366 - 2,263)      | 618<br>(304 - 1,083)     | 1,093<br>(522 - 2,156)      | 509<br>(195 - 1,053)        | 279<br>(100 - 649)          |
| Malaria                                                           | 2,783<br>(1,420 - 4,868)    | 928<br>(255 - 2,022)        | 448<br>(155 - 887)       | 713<br>(215 - 1,788)        | 437<br>(135 - 979)          | 258<br>(75 - 631)           |
| Leishmaniasis                                                     | 701<br>(216 - 1,385)        | 157<br>(14 - 390)           | 155<br>(23 - 334)        | 332<br>(88 - 711)           | 48<br>(12 - 108)            | 9<br>(2 - 21)               |
| Visceral leishmaniasis                                            | 701<br>(216 - 1,385)        | 157<br>(14 - 390)           | 155<br>(23 - 334)        | 332<br>(88 - 711)           | 48<br>(12 - 108)            | 9<br>(2 - 21)               |
| Schistosomiasis                                                   | 30<br>(19 - 45)             | 0<br>(0 - 1)                | 1<br>(0 - 1)             | 11<br>(6 - 18)              | 12<br>(6 - 21)              | 6<br>(3 - 10)               |
| Cysticercosis                                                     | 5<br>(3 - 7)                | 0<br>(0 - 0)                | 0<br>(0 - 0)             | 3<br>(2 - 4)                | 1<br>(1 - 2)                | 0<br>(0 - 0)                |
| Cystic echinococcosis                                             | 5<br>(3 - 6)                | 0<br>(0 - 1)                | 1<br>(0 - 1)             | 2<br>(1 - 3)                | 1<br>(1 - 1)                | 0<br>(0 - 1)                |
| Dengue                                                            | 1<br>(0 - 1)                | 0<br>(0 - 0)                | 0<br>(0 - 0)             | 0<br>(0 - 1)                | 0<br>(0 - 0)                | 0<br>(0 - 0)                |
| Rabies                                                            | 54<br>(24 - 97)             | 8<br>(2 - 20)               | 10<br>(3 - 23)           | 28<br>(11 - 53)             | 6<br>(3 - 11)               | 1<br>(0 - 3)                |
| Intestinal nematode infections                                    | 17<br>(6 - 33)              | 12<br>(3 - 27)              | 2<br>(0 - 7)             | 1<br>(0 - 6)                | 1<br>(0 - 4)                | 1<br>(0 - 4)                |
| Ascariasis                                                        | 17<br>(6 - 33)              | 12<br>(3 - 27)              | 2<br>(0 - 7)             | 1<br>(0 - 6)                | 1<br>(0 - 4)                | 1<br>(0 - 4)                |
| Other neglected tropical diseases                                 | 13<br>(7 - 24)              | 4<br>(1 - 8)                | 0<br>(0 - 1)             | 2<br>(1 - 5)                | 3<br>(1 - 5)                | 4<br>(1 - 8)                |
| Maternal disorders                                                | 2,455<br>(1,438 - 3,699)    | --                          | 13<br>(4 - 32)           | 2,442<br>(1,426 - 3,687)    | --                          | --                          |

Web Table 31- Madagascar deaths with 95% UI by age, sex, and cause in 2013

| Cause                                                            | Females, All Ages           | Females, 0-4 Years       | Females, 5-14 Years | Females, 15-49 Years     | Females, 50-69 Years       | Females, 70-80 Years        |
|------------------------------------------------------------------|-----------------------------|--------------------------|---------------------|--------------------------|----------------------------|-----------------------------|
| Maternal hemorrhage                                              | 284<br>(143 - 452)          | --                       | 1<br>(0 - 2)        | 283<br>(142 - 451)       | --                         | --                          |
| Maternal sepsis and other maternal infections                    | 244<br>(134 - 400)          | --                       | 2<br>(0 - 4)        | 242<br>(132 - 398)       | --                         | --                          |
| Maternal hypertensive disorders                                  | 246<br>(136 - 397)          | --                       | 2<br>(0 - 4)        | 244<br>(135 - 396)       | --                         | --                          |
| Maternal obstructed labor                                        | 127<br>(69 - 207)           | --                       | 1<br>(0 - 1)        | 127<br>(69 - 206)        | --                         | --                          |
| Maternal abortive outcome                                        | 476<br>(252 - 771)          | --                       | 2<br>(1 - 6)        | 474<br>(250 - 768)       | --                         | --                          |
| Indirect maternal deaths                                         | 182<br>(85 - 311)           | --                       | 1<br>(0 - 2)        | 181<br>(85 - 310)        | --                         | --                          |
| Late maternal deaths                                             | 223<br>(110 - 376)          | --                       | 2<br>(0 - 5)        | 221<br>(109 - 374)       | --                         | --                          |
| Maternal deaths aggravated by HIV/AIDS                           | 3<br>(1 - 5)                | --                       | --                  | 3<br>(1 - 5)             | --                         | --                          |
| Other maternal disorders                                         | 664<br>(386 - 1,012)        | --                       | 3<br>(1 - 8)        | 661<br>(384 - 1,009)     | --                         | --                          |
| Neonatal disorders                                               | 4,945<br>(3,317 - 7,502)    | 4,945<br>(3,317 - 7,502) | --                  | --                       | --                         | --                          |
| Neonatal preterm birth complications                             | 2,105<br>(1,051 - 3,488)    | 2,105<br>(1,051 - 3,488) | --                  | --                       | --                         | --                          |
| Neonatal encephalopathy due to birth asphyxia and trauma         | 732<br>(301 - 1,435)        | 732<br>(301 - 1,435)     | --                  | --                       | --                         | --                          |
| Neonatal sepsis and other neonatal infections                    | 1,165<br>(434 - 2,229)      | 1,165<br>(434 - 2,229)   | --                  | --                       | --                         | --                          |
| Hemolytic disease and other neonatal jaundice                    | 19<br>(6 - 53)              | 19<br>(6 - 53)           | --                  | --                       | --                         | --                          |
| Other neonatal disorders                                         | 923<br>(360 - 2,342)        | 923<br>(360 - 2,342)     | --                  | --                       | --                         | --                          |
| Nutritional deficiencies                                         | 3,794<br>(2,385 - 5,500)    | 1,897<br>(888 - 3,226)   | 240<br>(125 - 382)  | 533<br>(307 - 847)       | 494<br>(263 - 830)         | 629<br>(386 - 1,037)        |
| Protein-energy malnutrition                                      | 2,167<br>(962 - 3,730)      | 1,482<br>(555 - 2,769)   | 148<br>(53 - 283)   | 86<br>(23 - 251)         | 173<br>(62 - 383)          | 278<br>(94 - 544)           |
| Iodine deficiency                                                | 6<br>(0 - 30)               | 3<br>(0 - 28)            | 1<br>(0 - 5)        | 1<br>(0 - 5)             | 1<br>(0 - 5)               | 1<br>(0 - 5)                |
| Iron-deficiency anemia                                           | 1,599<br>(698 - 2,730)      | 407<br>(57 - 1,175)      | 91<br>(22 - 196)    | 445<br>(203 - 736)       | 316<br>(124 - 575)         | 340<br>(119 - 690)          |
| Other nutritional deficiencies                                   | 22<br>(7 - 50)              | 5<br>(1 - 17)            | 1<br>(0 - 2)        | 2<br>(0 - 5)             | 4<br>(1 - 10)              | 10<br>(2 - 29)              |
| Other communicable, maternal, neonatal, and nutritional diseases | 2,969<br>(1,740 - 4,581)    | 2,063<br>(998 - 3,476)   | 181<br>(76 - 335)   | 358<br>(205 - 598)       | 235<br>(118 - 426)         | 133<br>(60 - 267)           |
| Sexually transmitted diseases excluding HIV                      | 2,001<br>(918 - 3,406)      | 1,785<br>(776 - 3,124)   | 122<br>(40 - 244)   | 46<br>(22 - 101)         | 29<br>(9 - 75)             | 19<br>(6 - 48)              |
| Syphilis                                                         | 1,954<br>(878 - 3,372)      | 1,785<br>(776 - 3,124)   | 121<br>(40 - 242)   | 18<br>(9 - 40)           | 16<br>(5 - 40)             | 14<br>(4 - 37)              |
| Chlamydial infection                                             | 15<br>(7 - 30)              | --                       | 0<br>(0 - 1)        | 9<br>(4 - 20)            | 4<br>(1 - 11)              | 1<br>(0 - 3)                |
| Gonococcal infection                                             | 17<br>(9 - 35)              | --                       | 0<br>(0 - 1)        | 9<br>(4 - 21)            | 5<br>(2 - 14)              | 2<br>(1 - 6)                |
| Other sexually transmitted diseases                              | 14<br>(7 - 29)              | --                       | 0<br>(0 - 1)        | 9<br>(4 - 19)            | 4<br>(1 - 11)              | 1<br>(0 - 3)                |
| Hepatitis                                                        | 145<br>(94 - 206)           | 6<br>(2 - 16)            | 4<br>(2 - 8)        | 64<br>(36 - 97)          | 51<br>(29 - 84)            | 19<br>(12 - 30)             |
| Acute hepatitis A                                                | 9<br>(3 - 20)               | 3<br>(1 - 7)             | 2<br>(1 - 4)        | 4<br>(1 - 10)            | 1<br>(0 - 2)               | 0<br>(0 - 0)                |
| Acute hepatitis B                                                | 89<br>(54 - 131)            | 3<br>(1 - 9)             | 2<br>(1 - 4)        | 24<br>(11 - 42)          | 43<br>(24 - 69)            | 17<br>(11 - 27)             |
| Acute hepatitis C                                                | 2<br>(0 - 6)                | --                       | 0<br>(0 - 0)        | 1<br>(0 - 3)             | 1<br>(0 - 3)               | 0<br>(0 - 1)                |
| Acute hepatitis E                                                | 44<br>(22 - 77)             | 0<br>(0 - 0)             | 1<br>(0 - 2)        | 35<br>(18 - 60)          | 7<br>(2 - 18)              | 1<br>(0 - 4)                |
| Other infectious diseases                                        | 824<br>(475 - 1,423)        | 272<br>(99 - 746)        | 55<br>(17 - 158)    | 248<br>(119 - 450)       | 154<br>(60 - 343)          | 95<br>(32 - 227)            |
| Non-communicable diseases                                        | 34,795<br>(25,946 - 44,282) | 1,924<br>(1,143 - 2,947) | 386<br>(230 - 576)  | 5,678<br>(3,552 - 8,270) | 12,836<br>(8,671 - 16,991) | 13,971<br>(11,028 - 16,919) |
| Neoplasms                                                        | 4,966<br>(3,348 - 6,737)    | 103<br>(48 - 175)        | 77<br>(42 - 128)    | 1,204<br>(659 - 1,797)   | 2,571<br>(1,668 - 3,534)   | 1,011<br>(760 - 1,289)      |
| Esophageal cancer                                                | 630<br>(357 - 962)          | --                       | --                  | 117<br>(44 - 196)        | 364<br>(178 - 593)         | 149<br>(95 - 222)           |
| Stomach cancer                                                   | 236<br>(152 - 339)          | --                       | --                  | 22<br>(12 - 36)          | 147<br>(88 - 217)          | 67<br>(43 - 100)            |
| Liver cancer                                                     | 306<br>(187 - 454)          | --                       | 2<br>(1 - 5)        | 76<br>(26 - 149)         | 155<br>(93 - 230)          | 73<br>(44 - 108)            |
| Liver cancer due to hepatitis B                                  | 52<br>(13 - 110)            | --                       | 0<br>(0 - 1)        | 16<br>(3 - 36)           | 27<br>(7 - 62)             | 9<br>(2 - 20)               |
| Liver cancer due to hepatitis C                                  | 153<br>(80 - 253)           | --                       | 1<br>(0 - 1)        | 33<br>(8 - 70)           | 79<br>(39 - 134)           | 41<br>(23 - 65)             |
| Liver cancer due to alcohol use                                  | 29<br>(14 - 49)             | --                       | --                  | 4<br>(1 - 9)             | 15<br>(7 - 26)             | 10<br>(4 - 19)              |

Web Table 31- Madagascar deaths with 95% UI by age, sex, and cause in 2013

| Cause                                         | Females, All Ages           | Females, 0-4 Years | Females, 5-14 Years | Females, 15-49 Years     | Females, 50-69 Years     | Females, 70-80 Years      |
|-----------------------------------------------|-----------------------------|--------------------|---------------------|--------------------------|--------------------------|---------------------------|
| Liver cancer due to other causes              | 72<br>(31 - 131)            | --                 | 2<br>(1 - 3)        | 24<br>(7 - 51)           | 34<br>(13 - 64)          | 13<br>(6 - 23)            |
| Larynx cancer                                 | 8<br>(4 - 16)               | --                 | --                  | 1<br>(0 - 2)             | 6<br>(3 - 12)            | 1<br>(1 - 3)              |
| Tracheal, bronchus and lung cancer            | 133<br>(87 - 184)           | --                 | --                  | 10<br>(5 - 22)           | 83<br>(51 - 118)         | 40<br>(27 - 56)           |
| Breast cancer                                 | 599<br>(346 - 868)          | --                 | --                  | 254<br>(95 - 410)        | 268<br>(167 - 385)       | 76<br>(52 - 106)          |
| Cervical cancer                               | 1,254<br>(720 - 1,803)      | --                 | --                  | 258<br>(133 - 415)       | 810<br>(449 - 1,196)     | 186<br>(111 - 280)        |
| Uterine cancer                                | 54<br>(30 - 82)             | --                 | --                  | 6<br>(3 - 14)            | 32<br>(17 - 50)          | 15<br>(8 - 24)            |
| Prostate cancer                               | --                          | --                 | --                  | --                       | --                       | --                        |
| Colon and rectum cancer                       | 315<br>(214 - 425)          | --                 | --                  | 80<br>(44 - 120)         | 145<br>(91 - 202)        | 90<br>(62 - 121)          |
| Lip and oral cavity cancer                    | 58<br>(35 - 91)             | --                 | --                  | 17<br>(6 - 35)           | 30<br>(17 - 48)          | 11<br>(6 - 19)            |
| Nasopharynx cancer                            | 15<br>(7 - 25)              | --                 | 0<br>(0 - 1)        | 7<br>(3 - 15)            | 5<br>(3 - 9)             | 2<br>(1 - 4)              |
| Other pharynx cancer                          | 19<br>(10 - 34)             | --                 | --                  | 5<br>(2 - 13)            | 11<br>(6 - 19)           | 3<br>(2 - 4)              |
| Gallbladder and biliary tract cancer          | 58<br>(35 - 92)             | --                 | --                  | 17<br>(7 - 26)           | 31<br>(18 - 51)          | 10<br>(6 - 19)            |
| Pancreatic cancer                             | 91<br>(61 - 126)            | --                 | --                  | 18<br>(10 - 28)          | 52<br>(32 - 75)          | 20<br>(14 - 28)           |
| Malignant skin melanoma                       | 19<br>(12 - 28)             | --                 | --                  | 3<br>(1 - 5)             | 11<br>(6 - 18)           | 5<br>(3 - 7)              |
| Non-melanoma skin cancer                      | 21<br>(9 - 50)              | --                 | --                  | 4<br>(2 - 9)             | 6<br>(3 - 14)            | 10<br>(4 - 29)            |
| Ovarian cancer                                | 163<br>(101 - 243)          | --                 | --                  | 42<br>(17 - 83)          | 96<br>(59 - 144)         | 24<br>(15 - 37)           |
| Testicular cancer                             | --                          | --                 | --                  | --                       | --                       | --                        |
| Kidney cancer                                 | 45<br>(28 - 67)             | 6<br>(2 - 14)      | 2<br>(1 - 5)        | 8<br>(4 - 17)            | 20<br>(11 - 31)          | 9<br>(5 - 15)             |
| Bladder cancer                                | 36<br>(21 - 60)             | --                 | --                  | 7<br>(3 - 14)            | 16<br>(9 - 27)           | 13<br>(8 - 24)            |
| Brain and nervous system cancer               | 57<br>(32 - 80)             | 4<br>(1 - 9)       | 3<br>(2 - 6)        | 31<br>(13 - 48)          | 11<br>(7 - 18)           | 6<br>(4 - 9)              |
| Thyroid cancer                                | 23<br>(12 - 36)             | --                 | 0<br>(0 - 0)        | 2<br>(1 - 4)             | 16<br>(7 - 27)           | 5<br>(3 - 9)              |
| Mesothelioma                                  | 3<br>(2 - 4)                | --                 | --                  | 1<br>(0 - 2)             | 1<br>(1 - 2)             | 1<br>(0 - 1)              |
| Hodgkin lymphoma                              | 42<br>(25 - 65)             | 1<br>(0 - 2)       | 1<br>(0 - 4)        | 9<br>(4 - 18)            | 17<br>(8 - 32)           | 14<br>(6 - 25)            |
| Non-Hodgkin lymphoma                          | 204<br>(120 - 307)          | 27<br>(8 - 60)     | 20<br>(7 - 42)      | 56<br>(23 - 104)         | 62<br>(35 - 105)         | 38<br>(24 - 61)           |
| Multiple myeloma                              | 37<br>(23 - 54)             | --                 | --                  | 9<br>(4 - 14)            | 19<br>(11 - 29)          | 10<br>(6 - 15)            |
| Leukemia                                      | 75<br>(50 - 104)            | 5<br>(2 - 11)      | 10<br>(4 - 16)      | 27<br>(11 - 43)          | 19<br>(12 - 29)          | 14<br>(9 - 20)            |
| Other neoplasms                               | 466<br>(291 - 653)          | 60<br>(26 - 113)   | 37<br>(17 - 68)     | 116<br>(43 - 200)        | 135<br>(81 - 212)        | 117<br>(70 - 173)         |
| Cardiovascular diseases                       | 19,698<br>(14,451 - 25,596) | 133<br>(60 - 367)  | 80<br>(40 - 178)    | 2,665<br>(1,584 - 4,070) | 9,579<br>(4,820 - 9,790) | 9,579<br>(7,529 - 11,748) |
| Rheumatic heart disease                       | 517<br>(306 - 958)          | 4<br>(1 - 12)      | 15<br>(7 - 32)      | 217<br>(108 - 415)       | 172<br>(90 - 334)        | 109<br>(65 - 227)         |
| Ischemic heart disease                        | 2,150<br>(1,313 - 2,986)    | 1<br>(0 - 3)       | 1<br>(0 - 3)        | 195<br>(92 - 342)        | 796<br>(469 - 1,179)     | 1,158<br>(735 - 1,581)    |
| Cerebrovascular disease                       | 13,319<br>(9,543 - 17,232)  | 29<br>(13 - 67)    | 16<br>(7 - 33)      | 1,546<br>(884 - 2,307)   | 4,980<br>(3,288 - 6,719) | 6,748<br>(5,114 - 8,371)  |
| Ischemic stroke                               | 5,486<br>(3,341 - 7,575)    | 2<br>(1 - 8)       | 2<br>(1 - 4)        | 208<br>(90 - 356)        | 1,446<br>(751 - 2,171)   | 3,828<br>(2,398 - 5,117)  |
| Hemorrhagic stroke                            | 7,832<br>(5,265 - 11,071)   | 27<br>(12 - 61)    | 14<br>(6 - 30)      | 1,338<br>(766 - 1,986)   | 2,734<br>(2,259 - 4,938) | 2,920<br>(1,919 - 4,468)  |
| Hypertensive heart disease                    | 1,231<br>(734 - 2,159)      | 2<br>(1 - 6)       | 2<br>(1 - 4)        | 117<br>(59 - 209)        | 380<br>(213 - 667)       | 730<br>(422 - 1,367)      |
| Cardiomyopathy and myocarditis                | 557<br>(294 - 1,043)        | 48<br>(16 - 117)   | 20<br>(7 - 52)      | 173<br>(77 - 332)        | 162<br>(75 - 312)        | 154<br>(67 - 335)         |
| Atrial fibrillation and flutter               | 4<br>(2 - 8)                | --                 | --                  | 0<br>(0 - 1)             | 1<br>(0 - 2)             | 3<br>(1 - 6)              |
| Aortic aneurysm                               | 85<br>(46 - 139)            | --                 | --                  | 15<br>(7 - 28)           | 30<br>(15 - 49)          | 40<br>(21 - 68)           |
| Peripheral vascular disease                   | 7<br>(4 - 12)               | --                 | --                  | 0<br>(0 - 1)             | 2<br>(1 - 4)             | 5<br>(3 - 8)              |
| Endocarditis                                  | 231<br>(72 - 768)           | 12<br>(3 - 48)     | 6<br>(2 - 23)       | 72<br>(23 - 241)         | 58<br>(15 - 196)         | 82<br>(19 - 265)          |
| Other cardiovascular and circulatory diseases | 1,597<br>(861 - 3,134)      | 37<br>(12 - 122)   | 19<br>(8 - 51)      | 329<br>(153 - 637)       | 659<br>(335 - 1,221)     | 551<br>(284 - 1,176)      |

Web Table 31- Madagascar deaths with 95% UI by age, sex, and cause in 2013

| Cause                                               | Females, All Ages        | Females, 0-4 Years | Females, 5-14 Years | Females, 15-49 Years | Females, 50-69 Years   | Females, 70-80 Years   |
|-----------------------------------------------------|--------------------------|--------------------|---------------------|----------------------|------------------------|------------------------|
| Chronic respiratory diseases                        | 3,314<br>(2,251 - 4,368) | 293<br>(141 - 527) | 41<br>(17 - 68)     | 617<br>(345 - 918)   | 1,119<br>(679 - 1,601) | 1,243<br>(876 - 1,641) |
| Chronic obstructive pulmonary disease               | 1,861<br>(1,248 - 2,592) | 77<br>(28 - 169)   | 13<br>(6 - 24)      | 231<br>(122 - 372)   | 712<br>(422 - 1,061)   | 827<br>(566 - 1,150)   |
| Pneumoconiosis                                      | 23<br>(13 - 35)          | 2<br>(1 - 6)       | 1<br>(1 - 2)        | 12<br>(6 - 20)       | 4<br>(2 - 7)           | 3<br>(1 - 5)           |
| Silicosis                                           | 2<br>(1 - 3)             | 0<br>(0 - 1)       | 0<br>(0 - 0)        | 1<br>(1 - 2)         | 0<br>(0 - 0)           | 0<br>(0 - 0)           |
| Asbestosis                                          | 2<br>(1 - 3)             | 0<br>(0 - 1)       | 0<br>(0 - 0)        | 1<br>(0 - 2)         | 0<br>(0 - 0)           | 0<br>(0 - 0)           |
| Coal workers pneumoconiosis                         | 2<br>(1 - 3)             | 0<br>(0 - 1)       | 0<br>(0 - 0)        | 1<br>(0 - 2)         | 0<br>(0 - 0)           | 0<br>(0 - 0)           |
| Other pneumoconiosis                                | 18<br>(10 - 27)          | 2<br>(0 - 4)       | 1<br>(0 - 1)        | 9<br>(5 - 15)        | 4<br>(2 - 7)           | 3<br>(1 - 5)           |
| Asthma                                              | 722<br>(339 - 1,082)     | 59<br>(15 - 123)   | 14<br>(5 - 25)      | 173<br>(89 - 291)    | 257<br>(100 - 421)     | 218<br>(80 - 361)      |
| Interstitial lung disease and pulmonary sarcoidosis | 347<br>(81 - 666)        | 8<br>(1 - 25)      | 3<br>(1 - 7)        | 85<br>(21 - 172)     | 108<br>(25 - 213)      | 144<br>(29 - 315)      |
| Other chronic respiratory diseases                  | 360<br>(218 - 554)       | 147<br>(71 - 273)  | 9<br>(4 - 17)       | 115<br>(58 - 192)    | 38<br>(19 - 70)        | 51<br>(25 - 92)        |
| Cirrhosis                                           | 1,148<br>(697 - 1,615)   | 12<br>(3 - 26)     | 14<br>(6 - 26)      | 218<br>(113 - 348)   | 560<br>(324 - 810)     | 344<br>(210 - 504)     |
| Cirrhosis due to hepatitis B                        | 374<br>(194 - 601)       | 1<br>(0 - 2)       | 3<br>(1 - 6)        | 76<br>(34 - 130)     | 190<br>(96 - 318)      | 105<br>(49 - 175)      |
| Cirrhosis due to hepatitis C                        | 207<br>(65 - 497)        | 0<br>(0 - 1)       | 1<br>(0 - 3)        | 37<br>(9 - 94)       | 102<br>(28 - 261)      | 66<br>(20 - 148)       |
| Cirrhosis due to alcohol use                        | 380<br>(212 - 607)       | --                 | --                  | 47<br>(20 - 85)      | 191<br>(98 - 325)      | 141<br>(76 - 238)      |
| Cirrhosis due to other causes                       | 187<br>(99 - 298)        | 11<br>(3 - 24)     | 10<br>(4 - 19)      | 59<br>(26 - 98)      | 77<br>(34 - 134)       | 31<br>(12 - 57)        |
| Digestive diseases                                  | 1,202<br>(787 - 1,699)   | 33<br>(9 - 69)     | 29<br>(15 - 48)     | 221<br>(122 - 342)   | 411<br>(246 - 614)     | 508<br>(332 - 713)     |
| Peptic ulcer disease                                | 304<br>(163 - 487)       | 2<br>(0 - 6)       | 2<br>(1 - 5)        | 41<br>(18 - 73)      | 111<br>(57 - 189)      | 146<br>(75 - 236)      |
| Gastritis and duodenitis                            | 63<br>(19 - 206)         | 2<br>(0 - 7)       | 2<br>(1 - 6)        | 12<br>(4 - 38)       | 19<br>(5 - 59)         | 27<br>(7 - 97)         |
| Appendicitis                                        | 96<br>(41 - 165)         | 4<br>(1 - 10)      | 5<br>(2 - 11)       | 20<br>(10 - 36)      | 32<br>(12 - 61)        | 35<br>(10 - 74)        |
| Paralytic ileus and intestinal obstruction          | 383<br>(212 - 645)       | 11<br>(3 - 26)     | 12<br>(5 - 24)      | 75<br>(33 - 125)     | 128<br>(64 - 227)      | 157<br>(79 - 289)      |
| Inguinal, femoral, and abdominal hernia             | 22<br>(9 - 40)           | 2<br>(0 - 5)       | 0<br>(0 - 1)        | 9<br>(2 - 19)        | 2<br>(1 - 5)           | 10<br>(3 - 18)         |
| Inflammatory bowel disease                          | 77<br>(28 - 130)         | 7<br>(1 - 16)      | 2<br>(1 - 4)        | 19<br>(7 - 35)       | 24<br>(8 - 47)         | 25<br>(8 - 49)         |
| Vascular intestinal disorders                       | 11<br>(4 - 29)           | 0<br>(0 - 0)       | 0<br>(0 - 0)        | 1<br>(0 - 4)         | 4<br>(1 - 9)           | 6<br>(2 - 16)          |
| Gallbladder and biliary diseases                    | 103<br>(53 - 161)        | 1<br>(0 - 2)       | 1<br>(0 - 2)        | 15<br>(7 - 27)       | 39<br>(19 - 67)        | 47<br>(21 - 82)        |
| Pancreatitis                                        | 46<br>(20 - 89)          | 0<br>(0 - 1)       | 1<br>(0 - 1)        | 12<br>(5 - 24)       | 18<br>(8 - 37)         | 15<br>(6 - 29)         |
| Other digestive diseases                            | 97<br>(48 - 171)         | 4<br>(1 - 10)      | 2<br>(1 - 5)        | 16<br>(7 - 30)       | 34<br>(15 - 65)        | 40<br>(17 - 79)        |
| Neurological disorders                              | 699<br>(514 - 976)       | 60<br>(22 - 145)   | 31<br>(14 - 63)     | 130<br>(61 - 274)    | 87<br>(54 - 127)       | 391<br>(297 - 511)     |
| Alzheimer disease and other dementias               | 391<br>(295 - 519)       | --                 | --                  | 0<br>(0 - 1)         | 36<br>(23 - 52)        | 355<br>(266 - 475)     |
| Parkinson disease                                   | 4<br>(2 - 7)             | --                 | --                  | 0<br>(0 - 1)         | 2<br>(1 - 4)           | 2<br>(1 - 3)           |
| Epilepsy                                            | 244<br>(126 - 477)       | 48<br>(15 - 131)   | 27<br>(11 - 59)     | 112<br>(48 - 252)    | 31<br>(16 - 55)        | 25<br>(12 - 49)        |
| Multiple sclerosis                                  | 5<br>(1 - 9)             | --                 | --                  | 2<br>(1 - 5)         | 2<br>(1 - 4)           | 1<br>(0 - 1)           |
| Other neurological disorders                        | 56<br>(37 - 81)          | 11<br>(5 - 19)     | 4<br>(2 - 7)        | 15<br>(9 - 23)       | 16<br>(10 - 25)        | 9<br>(6 - 14)          |
| Mental and substance use disorders                  | 189<br>(80 - 415)        | 6<br>(2 - 10)      | 0<br>(0 - 0)        | 113<br>(45 - 254)    | 55<br>(24 - 131)       | 14<br>(5 - 32)         |
| Schizophrenia                                       | 23<br>(5 - 45)           | --                 | --                  | 11<br>(2 - 23)       | 8<br>(2 - 17)          | 4<br>(1 - 8)           |
| Alcohol use disorders                               | 84<br>(29 - 247)         | --                 | --                  | 46<br>(14 - 133)     | 33<br>(11 - 99)        | 5<br>(2 - 17)          |
| Drug use disorders                                  | 81<br>(28 - 177)         | 6<br>(2 - 10)      | --                  | 56<br>(18 - 127)     | 15<br>(4 - 35)         | 5<br>(1 - 13)          |
| Opioid use disorders                                | 8<br>(3 - 18)            | 1<br>(0 - 1)       | --                  | 6<br>(2 - 13)        | 1<br>(0 - 3)           | 1<br>(0 - 1)           |
| Cocaine use disorders                               | 0<br>(0 - 1)             | 0<br>(0 - 0)       | --                  | 0<br>(0 - 1)         | 0<br>(0 - 0)           | 0<br>(0 - 0)           |
| Amphetamine use disorders                           | 0<br>(0 - 1)             | 0<br>(0 - 0)       | --                  | 0<br>(0 - 1)         | 0<br>(0 - 0)           | 0<br>(0 - 0)           |
| Other drug use disorders                            | 72<br>(25 - 157)         | 5<br>(1 - 9)       | --                  | 50<br>(16 - 113)     | 13<br>(4 - 32)         | 4<br>(1 - 12)          |

Web Table 31- Madagascar deaths with 95% UI by age, sex, and cause in 2013

| Cause                                               | Females, All Ages        | Females, 0-4 Years     | Females, 5-14 Years | Females, 15-49 Years | Females, 50-69 Years | Females, 70-80 Years |
|-----------------------------------------------------|--------------------------|------------------------|---------------------|----------------------|----------------------|----------------------|
| Eating disorders                                    | 0<br>(0 - 0)             | --                     | 0<br>(0 - 0)        | 0<br>(0 - 0)         | --                   | --                   |
| Anorexia nervosa                                    | 0<br>(0 - 0)             | --                     | 0<br>(0 - 0)        | 0<br>(0 - 0)         | --                   | --                   |
| Diabetes, urogenital, blood, and endocrine diseases | 1,883<br>(1,297 - 2,520) | 146<br>(68 - 250)      | 53<br>(27 - 85)     | 353<br>(205 - 540)   | 655<br>(417 - 915)   | 676<br>(490 - 896)   |
| Diabetes mellitus                                   | 841<br>(567 - 1,199)     | 2<br>(1 - 3)           | 2<br>(1 - 5)        | 74<br>(41 - 117)     | 366<br>(224 - 553)   | 397<br>(277 - 567)   |
| Acute glomerulonephritis                            | 54<br>(28 - 104)         | 3<br>(1 - 8)           | 2<br>(1 - 4)        | 22<br>(9 - 53)       | 17<br>(7 - 31)       | 10<br>(4 - 18)       |
| Chronic kidney disease                              | 302<br>(166 - 465)       | 12<br>(4 - 30)         | 10<br>(4 - 19)      | 62<br>(29 - 133)     | 98<br>(53 - 157)     | 120<br>(63 - 187)    |
| Chronic kidney disease due to diabetes mellitus     | 2<br>(0 - 5)             | 0<br>(0 - 0)           | 0<br>(0 - 0)        | 0<br>(0 - 1)         | 1<br>(0 - 2)         | 1<br>(0 - 2)         |
| Chronic kidney disease due to hypertension          | 127<br>(64 - 219)        | 1<br>(0 - 4)           | 1<br>(0 - 3)        | 19<br>(7 - 38)       | 44<br>(21 - 81)      | 61<br>(31 - 104)     |
| Chronic kidney disease due to glomerulonephritis    | 109<br>(53 - 184)        | 8<br>(3 - 18)          | 6<br>(2 - 11)       | 32<br>(15 - 68)      | 33<br>(14 - 60)      | 29<br>(10 - 52)      |
| Chronic kidney disease due to other causes          | 65<br>(17 - 132)         | 3<br>(0 - 9)           | 3<br>(0 - 8)        | 10<br>(2 - 34)       | 20<br>(6 - 44)       | 29<br>(6 - 66)       |
| Urinary diseases and male infertility               | 207<br>(119 - 302)       | 12<br>(4 - 28)         | 3<br>(1 - 8)        | 51<br>(24 - 98)      | 81<br>(41 - 133)     | 59<br>(35 - 95)      |
| Interstitial nephritis and urinary tract infections | 170<br>(97 - 252)        | 9<br>(3 - 21)          | 2<br>(1 - 5)        | 41<br>(18 - 77)      | 66<br>(33 - 109)     | 52<br>(30 - 84)      |
| Urolithiasis                                        | 14<br>(7 - 26)           | --                     | 1<br>(0 - 1)        | 5<br>(2 - 10)        | 6<br>(2 - 13)        | 3<br>(1 - 6)         |
| Other urinary diseases                              | 22<br>(10 - 40)          | 3<br>(1 - 8)           | 1<br>(0 - 2)        | 6<br>(2 - 14)        | 8<br>(3 - 16)        | 4<br>(2 - 9)         |
| Gynecological diseases                              | 9<br>(5 - 14)            | --                     | --                  | 3<br>(1 - 6)         | 4<br>(2 - 8)         | 2<br>(1 - 4)         |
| Uterine fibroids                                    | 2<br>(1 - 4)             | --                     | --                  | 1<br>(0 - 1)         | 1<br>(0 - 2)         | 1<br>(0 - 1)         |
| Polycystic ovarian syndrome                         | 0<br>(0 - 0)             | --                     | --                  | 0<br>(0 - 0)         | 0<br>(0 - 0)         | --                   |
| Endometriosis                                       | 1<br>(0 - 1)             | --                     | --                  | 0<br>(0 - 1)         | 0<br>(0 - 0)         | --                   |
| Genital prolapse                                    | 2<br>(1 - 2)             | --                     | --                  | 0<br>(0 - 1)         | 1<br>(0 - 1)         | 1<br>(0 - 1)         |
| Other gynecological diseases                        | 4<br>(2 - 7)             | --                     | --                  | 1<br>(1 - 3)         | 2<br>(1 - 4)         | 1<br>(0 - 2)         |
| Hemoglobinopathies and hemolytic anemias            | 231<br>(106 - 390)       | 76<br>(25 - 143)       | 30<br>(11 - 56)     | 81<br>(34 - 160)     | 30<br>(14 - 56)      | 15<br>(7 - 30)       |
| Thalassemias                                        | 1<br>(0 - 2)             | 1<br>(0 - 1)           | 0<br>(0 - 0)        | 0<br>(0 - 0)         | 0<br>(0 - 0)         | 0<br>(0 - 0)         |
| Sickle cell disorders                               | 202<br>(92 - 341)        | 68<br>(22 - 131)       | 29<br>(11 - 54)     | 78<br>(33 - 154)     | 26<br>(12 - 49)      | 1<br>(1 - 3)         |
| G6PD deficiency                                     | 4<br>(2 - 7)             | 2<br>(1 - 4)           | 0<br>(0 - 1)        | 1<br>(0 - 2)         | 0<br>(0 - 1)         | 0<br>(0 - 1)         |
| Other hemoglobinopathies and hemolytic anemias      | 24<br>(12 - 44)          | 5<br>(2 - 9)           | 1<br>(0 - 1)        | 2<br>(1 - 4)         | 3<br>(2 - 6)         | 13<br>(6 - 27)       |
| Endocrine, metabolic, blood, and immune disorders   | 240<br>(126 - 380)       | 42<br>(16 - 88)        | 6<br>(2 - 13)       | 60<br>(25 - 119)     | 60<br>(30 - 98)      | 73<br>(31 - 115)     |
| Musculoskeletal disorders                           | 61<br>(28 - 147)         | --                     | 3<br>(1 - 7)        | 26<br>(11 - 59)      | 19<br>(8 - 48)       | 13<br>(5 - 36)       |
| Rheumatoid arthritis                                | 33<br>(14 - 86)          | --                     | 1<br>(0 - 3)        | 9<br>(3 - 25)        | 13<br>(5 - 34)       | 10<br>(4 - 29)       |
| Other musculoskeletal disorders                     | 28<br>(13 - 60)          | --                     | 2<br>(1 - 4)        | 17<br>(7 - 37)       | 6<br>(2 - 15)        | 3<br>(1 - 9)         |
| Other non-communicable diseases                     | 1,637<br>(1,092 - 2,372) | 1,139<br>(662 - 1,892) | 59<br>(31 - 100)    | 131<br>(64 - 225)    | 116<br>(62 - 182)    | 191<br>(112 - 295)   |
| Congenital anomalies                                | 1,183<br>(707 - 1,922)   | 1,047<br>(590 - 1,759) | 53<br>(27 - 91)     | 53<br>(29 - 86)      | 14<br>(9 - 21)       | 16<br>(11 - 23)      |
| Neural tube defects                                 | 312<br>(86 - 779)        | 293<br>(77 - 740)      | 9<br>(2 - 21)       | 8<br>(2 - 19)        | 1<br>(0 - 4)         | 1<br>(0 - 2)         |
| Congenital heart anomalies                          | 480<br>(245 - 867)       | 415<br>(193 - 794)     | 27<br>(12 - 50)     | 26<br>(12 - 44)      | 5<br>(3 - 9)         | 7<br>(3 - 12)        |
| Cleft lip and cleft palate                          | 5<br>(1 - 14)            | 5<br>(1 - 14)          | --                  | --                   | --                   | --                   |
| Down syndrome                                       | 83<br>(28 - 200)         | 66<br>(18 - 174)       | 7<br>(2 - 15)       | 7<br>(3 - 15)        | 3<br>(1 - 4)         | 0<br>(0 - 1)         |
| Chromosomal unbalanced rearrangements               | 63<br>(19 - 150)         | 58<br>(16 - 144)       | 2<br>(0 - 4)        | 3<br>(1 - 5)         | 1<br>(0 - 1)         | 0<br>(0 - 1)         |
| Other congenital anomalies                          | 240<br>(100 - 554)       | 210<br>(79 - 490)      | 9<br>(3 - 19)       | 10<br>(4 - 20)       | 5<br>(2 - 8)         | 7<br>(4 - 12)        |
| Skin and subcutaneous diseases                      | 446<br>(243 - 686)       | 84<br>(25 - 187)       | 6<br>(3 - 13)       | 78<br>(29 - 151)     | 102<br>(51 - 164)    | 175<br>(96 - 276)    |
| Cellulitis                                          | 302<br>(62 - 565)        | 56<br>(8 - 151)        | 5<br>(1 - 11)       | 55<br>(10 - 126)     | 72<br>(18 - 136)     | 114<br>(23 - 222)    |
| Pyoderma                                            | 118<br>(28 - 344)        | 28<br>(4 - 107)        | 2<br>(0 - 6)        | 19<br>(4 - 70)       | 26<br>(5 - 77)       | 43<br>(9 - 123)      |

Web Table 31- Madagascar deaths with 95% UI by age, sex, and cause in 2013

| Cause                                           | Females, All Ages        | Females, 0-4 Years | Females, 5-14 Years | Females, 15-49 Years | Females, 50-69 Years | Females, 70-80 Years |
|-------------------------------------------------|--------------------------|--------------------|---------------------|----------------------|----------------------|----------------------|
| Decubitus ulcer                                 | 23<br>(5 - 78)           | 0<br>(0 - 1)       | 0<br>(0 - 1)        | 3<br>(0 - 12)        | 3<br>(1 - 12)        | 17<br>(4 - 54)       |
| Other skin and subcutaneous diseases            | 3<br>(1 - 8)             | 0<br>(0 - 2)       | 0<br>(0 - 0)        | 1<br>(0 - 4)         | 1<br>(0 - 2)         | 1<br>(0 - 2)         |
| Sudden infant death syndrome                    | 8<br>(1 - 27)            | 8<br>(1 - 27)      | --                  | --                   | --                   | --                   |
| Injuries                                        | 2,395<br>(1,739 - 3,144) | 434<br>(207 - 709) | 205<br>(120 - 323)  | 730<br>(457 - 1,093) | 557<br>(349 - 779)   | 468<br>(310 - 629)   |
| Transport injuries                              | 857<br>(581 - 1,215)     | 81<br>(34 - 147)   | 83<br>(42 - 145)    | 282<br>(164 - 481)   | 261<br>(153 - 394)   | 149<br>(93 - 218)    |
| Road injuries                                   | 804<br>(542 - 1,132)     | 72<br>(30 - 132)   | 76<br>(39 - 132)    | 269<br>(157 - 449)   | 248<br>(145 - 376)   | 138<br>(87 - 200)    |
| Pedestrian road injuries                        | 429<br>(267 - 633)       | 38<br>(14 - 75)    | 44<br>(21 - 79)     | 118<br>(59 - 211)    | 142<br>(78 - 223)    | 86<br>(50 - 130)     |
| Cyclist road injuries                           | 22<br>(13 - 37)          | 1<br>(0 - 4)       | 2<br>(1 - 5)        | 4<br>(2 - 12)        | 10<br>(5 - 17)       | 3<br>(2 - 6)         |
| Motorcyclist road injuries                      | 22<br>(12 - 41)          | 2<br>(1 - 4)       | 1<br>(0 - 3)        | 11<br>(5 - 23)       | 5<br>(2 - 10)        | 3<br>(1 - 5)         |
| Motor vehicle road injuries                     | 326<br>(209 - 477)       | 30<br>(12 - 59)    | 28<br>(12 - 53)     | 135<br>(76 - 220)    | 89<br>(48 - 147)     | 44<br>(25 - 72)      |
| Other road injuries                             | 5<br>(3 - 12)            | 1<br>(0 - 2)       | 1<br>(0 - 2)        | 1<br>(0 - 3)         | 2<br>(1 - 5)         | 1<br>(0 - 2)         |
| Other transport injuries                        | 54<br>(34 - 86)          | 9<br>(3 - 20)      | 7<br>(3 - 13)       | 13<br>(6 - 33)       | 13<br>(7 - 21)       | 11<br>(4 - 20)       |
| Unintentional injuries                          | 1,279<br>(912 - 1,727)   | 343<br>(161 - 575) | 113<br>(61 - 185)   | 299<br>(172 - 473)   | 240<br>(142 - 346)   | 284<br>(169 - 413)   |
| Falls                                           | 157<br>(77 - 240)        | 13<br>(6 - 28)     | 7<br>(3 - 17)       | 24<br>(10 - 51)      | 30<br>(15 - 47)      | 84<br>(37 - 143)     |
| Drowning                                        | 210<br>(125 - 369)       | 78<br>(30 - 167)   | 39<br>(17 - 75)     | 54<br>(26 - 111)     | 28<br>(13 - 46)      | 11<br>(6 - 18)       |
| Fire, heat, and hot substances                  | 214<br>(122 - 350)       | 76<br>(25 - 166)   | 19<br>(9 - 41)      | 50<br>(25 - 100)     | 36<br>(17 - 59)      | 33<br>(17 - 53)      |
| Poisonings                                      | 52<br>(28 - 81)          | 13<br>(5 - 30)     | 3<br>(1 - 5)        | 16<br>(8 - 32)       | 15<br>(6 - 28)       | 5<br>(2 - 8)         |
| Exposure to mechanical forces                   | 161<br>(104 - 256)       | 58<br>(25 - 125)   | 14<br>(6 - 30)      | 45<br>(23 - 78)      | 26<br>(14 - 41)      | 18<br>(10 - 28)      |
| Unintentional firearm injuries                  | 33<br>(19 - 56)          | 5<br>(2 - 11)      | 2<br>(1 - 3)        | 17<br>(8 - 35)       | 6<br>(3 - 10)        | 3<br>(2 - 5)         |
| Unintentional suffocation                       | 31<br>(9 - 76)           | 21<br>(4 - 62)     | 4<br>(1 - 8)        | 3<br>(1 - 6)         | 3<br>(1 - 5)         | 1<br>(0 - 2)         |
| Other exposure to mechanical forces             | 98<br>(60 - 166)         | 32<br>(11 - 79)    | 9<br>(4 - 23)       | 24<br>(12 - 47)      | 17<br>(9 - 29)       | 14<br>(6 - 23)       |
| Adverse effects of medical treatment            | 274<br>(152 - 413)       | 48<br>(18 - 111)   | 9<br>(4 - 16)       | 56<br>(25 - 106)     | 68<br>(34 - 116)     | 93<br>(39 - 167)     |
| Animal contact                                  | 121<br>(54 - 245)        | 23<br>(7 - 64)     | 15<br>(5 - 36)      | 40<br>(15 - 86)      | 28<br>(9 - 55)       | 14<br>(4 - 26)       |
| Venomous animal contact                         | 78<br>(35 - 169)         | 21<br>(6 - 56)     | 10<br>(3 - 26)      | 25<br>(9 - 61)       | 13<br>(5 - 30)       | 8<br>(2 - 16)        |
| Non-venomous animal contact                     | 43<br>(14 - 84)          | 2<br>(1 - 9)       | 5<br>(1 - 12)       | 15<br>(4 - 32)       | 15<br>(3 - 30)       | 6<br>(2 - 12)        |
| Foreign body                                    | 57<br>(25 - 108)         | 27<br>(11 - 62)    | 2<br>(1 - 5)        | 4<br>(2 - 11)        | 4<br>(2 - 7)         | 19<br>(6 - 36)       |
| Pulmonary aspiration and foreign body in airway | 54<br>(22 - 105)         | 26<br>(10 - 62)    | 2<br>(1 - 5)        | 4<br>(1 - 10)        | 3<br>(1 - 6)         | 18<br>(6 - 34)       |
| Foreign body in other body part                 | 3<br>(2 - 5)             | 1<br>(0 - 1)       | 0<br>(0 - 0)        | 1<br>(0 - 1)         | 1<br>(0 - 1)         | 1<br>(0 - 2)         |
| Other unintentional injuries                    | 33<br>(19 - 59)          | 6<br>(2 - 14)      | 4<br>(2 - 9)        | 10<br>(4 - 23)       | 6<br>(3 - 10)        | 6<br>(3 - 10)        |
| Self-harm and interpersonal violence            | 247<br>(118 - 362)       | 9<br>(2 - 25)      | 8<br>(3 - 18)       | 143<br>(66 - 235)    | 53<br>(23 - 84)      | 34<br>(11 - 56)      |
| Self-harm                                       | 170<br>(77 - 290)        | --                 | 3<br>(1 - 8)        | 86<br>(38 - 193)     | 47<br>(19 - 78)      | 33<br>(11 - 55)      |
| Interpersonal violence                          | 77<br>(26 - 143)         | 9<br>(2 - 25)      | 5<br>(1 - 14)       | 57<br>(18 - 106)     | 5<br>(2 - 10)        | 1<br>(0 - 2)         |
| Assault by firearm                              | 20<br>(5 - 42)           | 2<br>(0 - 6)       | 1<br>(0 - 3)        | 15<br>(4 - 32)       | 1<br>(0 - 3)         | 0<br>(0 - 0)         |
| Assault by sharp object                         | 21<br>(8 - 41)           | 2<br>(0 - 6)       | 1<br>(0 - 2)        | 17<br>(6 - 33)       | 1<br>(0 - 2)         | 0<br>(0 - 1)         |
| Assault by other means                          | 37<br>(11 - 73)          | 5<br>(1 - 15)      | 3<br>(1 - 9)        | 25<br>(7 - 52)       | 3<br>(1 - 5)         | 0<br>(0 - 1)         |
| Forces of nature, war, and legal intervention   | 11<br>(6 - 27)           | 0<br>(0 - 0)       | 1<br>(0 - 1)        | 6<br>(3 - 14)        | 4<br>(2 - 8)         | 1<br>(0 - 2)         |
| Exposure to forces of nature                    | 11<br>(6 - 27)           | 0<br>(0 - 0)       | 1<br>(0 - 1)        | 6<br>(3 - 14)        | 4<br>(2 - 8)         | 1<br>(0 - 2)         |

Web Table 31- Malawi deaths with 95% UI by age, sex, and cause in 2013

| Cause                                                             | Both Sexes, All Ages           | Both Sexes, 0-4 Years       | Both Sexes, 5-14 Years   | Both Sexes, 15-49 Years     | Both Sexes, 50-69 Years     | Both Sexes, 70-80 Years     |
|-------------------------------------------------------------------|--------------------------------|-----------------------------|--------------------------|-----------------------------|-----------------------------|-----------------------------|
| All causes                                                        | 166,145<br>(154,753 - 178,686) | 57,179<br>(48,663 - 65,885) | 7,036<br>(6,138 - 8,505) | 54,011<br>(48,748 - 58,556) | 25,161<br>(22,268 - 28,210) | 22,759<br>(20,743 - 25,007) |
| Communicable, maternal, neonatal, and nutritional diseases        | 118,567<br>(109,385 - 128,768) | 49,073<br>(41,423 - 57,353) | 5,656<br>(4,874 - 6,728) | 41,090<br>(37,543 - 44,435) | 13,997<br>(11,632 - 16,498) | 8,751<br>(7,813 - 9,762)    |
| HIV/AIDS and tuberculosis                                         | 50,137<br>(45,245 - 54,579)    | 3,417<br>(2,677 - 4,167)    | 3,411<br>(2,817 - 4,054) | 31,142<br>(28,622 - 34,208) | 9,881<br>(7,417 - 12,528)   | 2,286<br>(1,844 - 2,783)    |
| Tuberculosis                                                      | 8,302<br>(6,970 - 9,744)       | 728<br>(486 - 1,061)        | 97<br>(64 - 148)         | 4,235<br>(3,297 - 5,299)    | 1,800<br>(1,335 - 2,280)    | 1,443<br>(1,143 - 1,742)    |
| HIV/AIDS                                                          | 41,835<br>(37,165 - 46,538)    | 2,689<br>(1,999 - 3,447)    | 3,314<br>(2,699 - 3,954) | 26,908<br>(24,585 - 29,875) | 8,081<br>(5,439 - 11,038)   | 843<br>(538 - 1,278)        |
| HIV/AIDS resulting in mycobacterial infection                     | 2,682<br>(2,116 - 3,359)       | 160<br>(115 - 216)          | 182<br>(136 - 233)       | 1,728<br>(1,387 - 2,148)    | 551<br>(351 - 786)          | 60<br>(37 - 95)             |
| HIV/AIDS resulting in other diseases                              | 39,153<br>(34,977 - 43,694)    | 2,529<br>(1,897 - 3,239)    | 3,132<br>(2,553 - 3,727) | 25,180<br>(23,008 - 27,966) | 7,529<br>(5,063 - 10,288)   | 783<br>(500 - 1,193)        |
| Diarrhea, lower respiratory, and other common infectious diseases | 38,136<br>(32,431 - 44,480)    | 23,050<br>(18,048 - 28,706) | 1,249<br>(912 - 1,817)   | 5,250<br>(4,082 - 6,515)    | 3,289<br>(2,511 - 4,244)    | 5,298<br>(4,451 - 6,271)    |
| Diarrheal diseases                                                | 15,649<br>(11,751 - 20,410)    | 8,520<br>(5,118 - 12,787)   | 466<br>(267 - 776)       | 2,655<br>(1,905 - 3,573)    | 1,635<br>(1,082 - 2,373)    | 2,373<br>(1,697 - 3,155)    |
| Intestinal infectious diseases                                    | 732<br>(393 - 1,278)           | 379<br>(191 - 686)          | 151<br>(74 - 273)        | 176<br>(78 - 334)           | 18<br>(9 - 35)              | 9<br>(4 - 15)               |
| Typhoid fever                                                     | 543<br>(278 - 951)             | 269<br>(127 - 492)          | 117<br>(56 - 215)        | 138<br>(58 - 265)           | 14<br>(6 - 28)              | 6<br>(3 - 12)               |
| Paratyphoid fever                                                 | 147<br>(71 - 268)              | 80<br>(35 - 157)            | 31<br>(14 - 61)          | 32<br>(13 - 65)             | 3<br>(1 - 6)                | 1<br>(1 - 3)                |
| Other intestinal infectious diseases                              | 42<br>(24 - 67)                | 30<br>(14 - 52)             | 3<br>(1 - 7)             | 6<br>(2 - 13)               | 1<br>(0 - 5)                | 1<br>(0 - 5)                |
| Lower respiratory infections                                      | 17,411<br>(13,971 - 21,449)    | 11,468<br>(8,418 - 15,348)  | 348<br>(224 - 536)       | 1,449<br>(1,087 - 1,860)    | 1,386<br>(1,023 - 1,851)    | 2,761<br>(2,186 - 3,415)    |
| Upper respiratory infections                                      | 30<br>(13 - 61)                | 15<br>(2 - 44)              | 1<br>(0 - 3)             | 9<br>(3 - 18)               | 3<br>(1 - 7)                | 3<br>(0 - 7)                |
| Otitis media                                                      | 15<br>(11 - 21)                | 9<br>(5 - 15)               | 1<br>(0 - 1)             | 2<br>(1 - 3)                | 1<br>(1 - 2)                | 2<br>(2 - 3)                |
| Meningitis                                                        | 3,795<br>(2,851 - 4,976)       | 2,276<br>(1,410 - 3,363)    | 259<br>(163 - 421)       | 898<br>(641 - 1,222)        | 225<br>(156 - 313)          | 138<br>(99 - 192)           |
| Pneumococcal meningitis                                           | 824<br>(594 - 1,120)           | 407<br>(232 - 649)          | 72<br>(40 - 121)         | 254<br>(161 - 376)          | 57<br>(33 - 86)             | 35<br>(19 - 52)             |
| H influenzae type B meningitis                                    | 788<br>(520 - 1,154)           | 604<br>(372 - 948)          | 52<br>(27 - 93)          | 101<br>(55 - 160)           | 20<br>(11 - 32)             | 12<br>(7 - 19)              |
| Meningococcal meningitis                                          | 459<br>(322 - 626)             | 202<br>(102 - 346)          | 25<br>(12 - 46)          | 154<br>(94 - 245)           | 47<br>(26 - 75)             | 31<br>(19 - 49)             |
| Other meningitis                                                  | 1,724<br>(1,271 - 2,294)       | 1,064<br>(650 - 1,608)      | 110<br>(61 - 182)        | 390<br>(269 - 554)          | 100<br>(64 - 149)           | 60<br>(39 - 88)             |
| Encephalitis                                                      | 109<br>(78 - 162)              | 69<br>(39 - 118)            | 6<br>(3 - 10)            | 20<br>(12 - 31)             | 8<br>(4 - 13)               | 6<br>(3 - 10)               |
| Diphtheria                                                        | 14<br>(1 - 71)                 | 12<br>(0 - 67)              | 1<br>(0 - 7)             | 1<br>(0 - 3)                | 0<br>(0 - 0)                | --<br>(0 - 0)               |
| Whooping cough                                                    | 74<br>(0 - 368)                | 72<br>(0 - 356)             | 2<br>(0 - 10)            | 0<br>(0 - 2)                | 0<br>(0 - 0)                | --<br>(0 - 0)               |
| Tetanus                                                           | 142<br>(66 - 233)              | 83<br>(38 - 165)            | 7<br>(3 - 15)            | 39<br>(13 - 76)             | 11<br>(4 - 21)              | 4<br>(2 - 8)                |
| Measles                                                           | 153<br>(35 - 448)              | 143<br>(33 - 411)           | 9<br>(2 - 28)            | 1<br>(0 - 4)                | 0<br>(0 - 0)                | --<br>(0 - 0)               |
| Varicella and herpes zoster                                       | 11<br>(4 - 25)                 | 6<br>(1 - 20)               | 1<br>(0 - 2)             | 2<br>(1 - 4)                | 1<br>(0 - 2)                | 2<br>(0 - 7)                |
| Neglected tropical diseases and malaria                           | 6,511<br>(4,127 - 10,238)      | 3,936<br>(1,955 - 7,231)    | 701<br>(363 - 1,196)     | 1,416<br>(922 - 2,009)      | 251<br>(162 - 374)          | 208<br>(108 - 346)          |
| Malaria                                                           | 4,603<br>(2,546 - 8,195)       | 3,241<br>(1,493 - 6,477)    | 372<br>(170 - 753)       | 664<br>(342 - 1,232)        | 161<br>(84 - 284)           | 164<br>(76 - 307)           |
| Leishmaniasis                                                     | 1,611<br>(701 - 2,617)         | 596<br>(117 - 1,250)        | 298<br>(93 - 619)        | 632<br>(243 - 1,141)        | 59<br>(27 - 105)            | 26<br>(9 - 53)              |
| Visceral leishmaniasis                                            | 1,611<br>(701 - 2,617)         | 596<br>(117 - 1,250)        | 298<br>(93 - 619)        | 632<br>(243 - 1,141)        | 59<br>(27 - 105)            | 26<br>(9 - 53)              |
| African trypanosomiasis                                           | 35<br>(16 - 59)                | 4<br>(2 - 7)                | 3<br>(1 - 6)             | 23<br>(11 - 40)             | 4<br>(2 - 7)                | 1<br>(1 - 2)                |
| Schistosomiasis                                                   | 62<br>(45 - 84)                | 2<br>(1 - 4)                | 2<br>(1 - 3)             | 36<br>(24 - 52)             | 14<br>(9 - 22)              | 9<br>(5 - 13)               |
| Cysticercosis                                                     | 6<br>(5 - 8)                   | 1<br>(0 - 1)                | 0<br>(0 - 0)             | 5<br>(4 - 6)                | 1<br>(0 - 1)                | 0<br>(0 - 0)                |
| Cystic echinococcosis                                             | 10<br>(8 - 12)                 | 2<br>(1 - 3)                | 1<br>(1 - 2)             | 5<br>(4 - 7)                | 1<br>(1 - 1)                | 0<br>(0 - 1)                |
| Dengue                                                            | 4<br>(3 - 5)                   | 1<br>(0 - 2)                | 0<br>(0 - 1)             | 2<br>(1 - 3)                | 0<br>(0 - 1)                | 0<br>(0 - 0)                |
| Rabies                                                            | 96<br>(60 - 137)               | 28<br>(14 - 51)             | 19<br>(11 - 33)          | 42<br>(26 - 57)             | 6<br>(3 - 9)                | 1<br>(0 - 3)                |
| Intestinal nematode infections                                    | 58<br>(30 - 96)                | 50<br>(24 - 89)             | 4<br>(1 - 10)            | 3<br>(0 - 11)               | 1<br>(0 - 3)                | 0<br>(0 - 4)                |
| Ascariasis                                                        | 58<br>(30 - 96)                | 50<br>(24 - 89)             | 4<br>(1 - 10)            | 3<br>(0 - 11)               | 1<br>(0 - 3)                | 0<br>(0 - 4)                |
| Other neglected tropical diseases                                 | 26<br>(15 - 50)                | 12<br>(7 - 21)              | 1<br>(0 - 2)             | 5<br>(2 - 11)               | 4<br>(2 - 8)                | 5<br>(2 - 12)               |



Web Table 31- Malawi deaths with 95% UI by age, sex, and cause in 2013

| Cause                                                            | Both Sexes, All Ages        | Both Sexes, 0-4 Years       | Both Sexes, 5-14 Years | Both Sexes, 15-49 Years  | Both Sexes, 50-69 Years    | Both Sexes, 70-80 Years     |
|------------------------------------------------------------------|-----------------------------|-----------------------------|------------------------|--------------------------|----------------------------|-----------------------------|
| Maternal disorders                                               | 2,260<br>(1,516 - 3,140)    | --                          | 6<br>(2 - 13)          | 2,254<br>(1,511 - 3,135) | --                         | --                          |
| Maternal hemorrhage                                              | 265<br>(158 - 413)          | --                          | 0<br>(0 - 1)           | 265<br>(157 - 413)       | --                         | --                          |
| Maternal sepsis and other maternal infections                    | 207<br>(120 - 319)          | --                          | 1<br>(0 - 2)           | 206<br>(119 - 318)       | --                         | --                          |
| Maternal hypertensive disorders                                  | 224<br>(138 - 340)          | --                          | 1<br>(0 - 2)           | 224<br>(138 - 339)       | --                         | --                          |
| Maternal obstructed labor                                        | 115<br>(68 - 175)           | --                          | 0<br>(0 - 1)           | 114<br>(68 - 174)        | --                         | --                          |
| Maternal abortive outcome                                        | 416<br>(243 - 616)          | --                          | 1<br>(0 - 3)           | 415<br>(243 - 615)       | --                         | --                          |
| Indirect maternal deaths                                         | 175<br>(81 - 306)           | --                          | 0<br>(0 - 1)           | 174<br>(81 - 306)        | --                         | --                          |
| Late maternal deaths                                             | 200<br>(109 - 341)          | --                          | 1<br>(0 - 2)           | 199<br>(108 - 341)       | --                         | --                          |
| Maternal deaths aggravated by HIV/AIDS                           | 88<br>(49 - 134)            | --                          | --                     | 88<br>(49 - 134)         | --                         | --                          |
| Other maternal disorders                                         | 566<br>(357 - 831)          | --                          | 1<br>(0 - 3)           | 564<br>(356 - 829)       | --                         | --                          |
| Neonatal disorders                                               | 12,794<br>(10,511 - 15,055) | 12,794<br>(10,511 - 15,055) | --                     | --                       | --                         | --                          |
| Neonatal preterm birth complications                             | 3,894<br>(2,501 - 5,659)    | 3,894<br>(2,501 - 5,659)    | --                     | --                       | --                         | --                          |
| Neonatal encephalopathy due to birth asphyxia and trauma         | 3,269<br>(1,980 - 4,841)    | 3,269<br>(1,980 - 4,841)    | --                     | --                       | --                         | --                          |
| Neonatal sepsis and other neonatal infections                    | 3,099<br>(1,686 - 5,076)    | 3,099<br>(1,686 - 5,076)    | --                     | --                       | --                         | --                          |
| Hemolytic disease and other neonatal jaundice                    | 55<br>(22 - 130)            | 55<br>(22 - 130)            | --                     | --                       | --                         | --                          |
| Other neonatal disorders                                         | 2,476<br>(1,269 - 4,002)    | 2,476<br>(1,269 - 4,002)    | --                     | --                       | --                         | --                          |
| Nutritional deficiencies                                         | 6,952<br>(5,134 - 9,469)    | 4,626<br>(2,944 - 6,927)    | 217<br>(134 - 359)     | 778<br>(582 - 1,042)     | 473<br>(333 - 651)         | 859<br>(638 - 1,146)        |
| Protein-energy malnutrition                                      | 5,761<br>(3,992 - 8,201)    | 4,266<br>(2,699 - 6,483)    | 181<br>(104 - 301)     | 343<br>(180 - 533)       | 332<br>(210 - 480)         | 640<br>(410 - 870)          |
| Iodine deficiency                                                | 15<br>(2 - 57)              | 8<br>(0 - 47)               | 1<br>(0 - 4)           | 4<br>(0 - 13)            | 1<br>(0 - 5)               | 1<br>(0 - 8)                |
| Iron-deficiency anemia                                           | 1,150<br>(695 - 1,972)      | 345<br>(100 - 852)          | 35<br>(16 - 81)        | 426<br>(275 - 631)       | 136<br>(72 - 249)          | 208<br>(100 - 429)          |
| Other nutritional deficiencies                                   | 26<br>(12 - 47)             | 7<br>(2 - 19)               | 1<br>(0 - 1)           | 5<br>(2 - 10)            | 4<br>(2 - 7)               | 10<br>(3 - 22)              |
| Other communicable, maternal, neonatal, and nutritional diseases | 1,778<br>(973 - 2,970)      | 1,250<br>(499 - 2,354)      | 74<br>(31 - 141)       | 250<br>(143 - 348)       | 104<br>(54 - 173)          | 100<br>(46 - 189)           |
| Sexually transmitted diseases excluding HIV                      | 1,027<br>(253 - 2,087)      | 911<br>(177 - 1,895)        | 47<br>(9 - 107)        | 44<br>(13 - 83)          | 12<br>(5 - 29)             | 11<br>(5 - 26)              |
| Syphilis                                                         | 993<br>(220 - 2,031)        | 911<br>(177 - 1,895)        | 47<br>(9 - 106)        | 19<br>(6 - 34)           | 8<br>(3 - 17)              | 9<br>(4 - 20)               |
| Chlamydial infection                                             | 9<br>(3 - 17)               | --                          | 0<br>(0 - 0)           | 7<br>(2 - 15)            | 1<br>(0 - 3)               | 0<br>(0 - 1)                |
| Gonococcal infection                                             | 13<br>(5 - 24)              | --                          | 0<br>(0 - 0)           | 10<br>(3 - 17)           | 2<br>(1 - 5)               | 1<br>(1 - 3)                |
| Other sexually transmitted diseases                              | 11<br>(4 - 20)              | --                          | 0<br>(0 - 0)           | 9<br>(3 - 16)            | 1<br>(1 - 4)               | 1<br>(0 - 2)                |
| Hepatitis                                                        | 156<br>(122 - 223)          | 30<br>(18 - 52)             | 6<br>(4 - 10)          | 88<br>(61 - 134)         | 22<br>(15 - 32)            | 10<br>(7 - 13)              |
| Acute hepatitis A                                                | 21<br>(6 - 42)              | 12<br>(4 - 25)              | 2<br>(1 - 5)           | 6<br>(2 - 15)            | 0<br>(0 - 1)               | 0<br>(0 - 0)                |
| Acute hepatitis B                                                | 89<br>(60 - 127)            | 18<br>(8 - 33)              | 3<br>(1 - 6)           | 40<br>(21 - 64)          | 19<br>(13 - 27)            | 9<br>(7 - 12)               |
| Acute hepatitis C                                                | 2<br>(0 - 5)                | --                          | 0<br>(0 - 0)           | 1<br>(0 - 3)             | 0<br>(0 - 1)               | 0<br>(0 - 0)                |
| Acute hepatitis E                                                | 44<br>(24 - 75)             | 0<br>(0 - 1)                | 1<br>(0 - 2)           | 40<br>(22 - 69)          | 2<br>(1 - 5)               | 1<br>(0 - 1)                |
| Other infectious diseases                                        | 595<br>(287 - 986)          | 308<br>(136 - 664)          | 20<br>(8 - 41)         | 118<br>(33 - 198)        | 69<br>(25 - 133)           | 79<br>(29 - 166)            |
| Non-communicable diseases                                        | 37,750<br>(33,381 - 43,386) | 5,907<br>(4,053 - 9,321)    | 805<br>(577 - 1,210)   | 7,672<br>(6,339 - 8,989) | 10,222<br>(8,217 - 12,607) | 13,143<br>(11,583 - 14,832) |
| Neoplasms                                                        | 6,654<br>(5,641 - 7,869)    | 612<br>(394 - 963)          | 327<br>(200 - 537)     | 1,630<br>(1,335 - 1,944) | 2,665<br>(2,098 - 3,386)   | 1,420<br>(1,218 - 1,640)    |
| Esophageal cancer                                                | 1,397<br>(1,052 - 1,762)    | --                          | --                     | 291<br>(221 - 374)       | 735<br>(506 - 1,006)       | 371<br>(277 - 478)          |
| Stomach cancer                                                   | 127<br>(106 - 154)          | --                          | --                     | 31<br>(24 - 40)          | 60<br>(46 - 79)            | 36<br>(28 - 47)             |
| Liver cancer                                                     | 415<br>(306 - 521)          | --                          | 9<br>(4 - 15)          | 169<br>(102 - 236)       | 158<br>(113 - 211)         | 80<br>(61 - 103)            |
| Liver cancer due to hepatitis B                                  | 118<br>(65 - 188)           | --                          | 3<br>(1 - 6)           | 66<br>(28 - 114)         | 37<br>(19 - 63)            | 13<br>(8 - 22)              |
| Liver cancer due to hepatitis C                                  | 174<br>(114 - 235)          | --                          | 1<br>(0 - 3)           | 53<br>(28 - 88)          | 78<br>(48 - 115)           | 43<br>(28 - 60)             |

Web Table 31- Malawi deaths with 95% UI by age, sex, and cause in 2013

| Cause                                | Both Sexes, All Ages        | Both Sexes, 0-4 Years | Both Sexes, 5-14 Years | Both Sexes, 15-49 Years  | Both Sexes, 50-69 Years  | Both Sexes, 70-80 Years  |
|--------------------------------------|-----------------------------|-----------------------|------------------------|--------------------------|--------------------------|--------------------------|
| Liver cancer due to alcohol use      | 47<br>(29 - 71)             | --                    | --                     | 12<br>(6 - 20)           | 21<br>(12 - 34)          | 14<br>(9 - 22)           |
| Liver cancer due to other causes     | 75<br>(48 - 110)            | --                    | 5<br>(2 - 9)           | 38<br>(21 - 58)          | 23<br>(13 - 39)          | 10<br>(6 - 16)           |
| Larynx cancer                        | 29<br>(21 - 40)             | --                    | --                     | 5<br>(4 - 8)             | 14<br>(9 - 21)           | 10<br>(7 - 14)           |
| Tracheal, bronchus and lung cancer   | 182<br>(145 - 227)          | --                    | --                     | 18<br>(13 - 29)          | 107<br>(80 - 139)        | 57<br>(47 - 70)          |
| Breast cancer                        | 239<br>(165 - 303)          | --                    | --                     | 89<br>(48 - 118)         | 107<br>(75 - 145)        | 42<br>(31 - 56)          |
| Cervical cancer                      | 973<br>(652 - 1,311)        | --                    | --                     | 236<br>(158 - 318)       | 590<br>(376 - 860)       | 147<br>(95 - 209)        |
| Uterine cancer                       | 20<br>(13 - 33)             | --                    | --                     | 4<br>(2 - 8)             | 9<br>(5 - 16)            | 7<br>(4 - 12)            |
| Prostate cancer                      | 149<br>(97 - 254)           | --                    | --                     | 2<br>(1 - 4)             | 43<br>(25 - 72)          | 104<br>(64 - 180)        |
| Colon and rectum cancer              | 182<br>(154 - 213)          | --                    | --                     | 76<br>(61 - 92)          | 65<br>(50 - 83)          | 41<br>(34 - 49)          |
| Lip and oral cavity cancer           | 60<br>(44 - 82)             | --                    | --                     | 19<br>(13 - 27)          | 26<br>(19 - 37)          | 14<br>(10 - 22)          |
| Nasopharynx cancer                   | 24<br>(16 - 33)             | --                    | 1<br>(0 - 2)           | 11<br>(8 - 15)           | 9<br>(5 - 14)            | 4<br>(2 - 6)             |
| Other pharynx cancer                 | 19<br>(14 - 29)             | --                    | --                     | 5<br>(3 - 8)             | 9<br>(6 - 16)            | 5<br>(3 - 7)             |
| Gallbladder and biliary tract cancer | 25<br>(18 - 44)             | --                    | --                     | 8<br>(5 - 11)            | 12<br>(8 - 19)           | 6<br>(3 - 16)            |
| Pancreatic cancer                    | 136<br>(111 - 166)          | --                    | --                     | 22<br>(17 - 28)          | 76<br>(58 - 99)          | 38<br>(30 - 47)          |
| Malignant skin melanoma              | 38<br>(29 - 51)             | --                    | --                     | 9<br>(5 - 13)            | 18<br>(13 - 25)          | 11<br>(8 - 15)           |
| Non-melanoma skin cancer             | 33<br>(20 - 54)             | --                    | --                     | 7<br>(3 - 14)            | 9<br>(5 - 16)            | 17<br>(9 - 33)           |
| Ovarian cancer                       | 108<br>(69 - 159)           | --                    | --                     | 46<br>(24 - 77)          | 49<br>(30 - 73)          | 14<br>(9 - 20)           |
| Testicular cancer                    | 17<br>(10 - 25)             | --                    | --                     | 5<br>(3 - 9)             | 6<br>(3 - 10)            | 6<br>(2 - 10)            |
| Kidney cancer                        | 125<br>(85 - 195)           | 64<br>(31 - 123)      | 18<br>(9 - 34)         | 15<br>(11 - 21)          | 23<br>(16 - 32)          | 6<br>(4 - 8)             |
| Bladder cancer                       | 431<br>(319 - 547)          | --                    | --                     | 100<br>(66 - 139)        | 197<br>(137 - 268)       | 134<br>(98 - 173)        |
| Brain and nervous system cancer      | 46<br>(33 - 78)             | 6<br>(3 - 11)         | 5<br>(3 - 10)          | 15<br>(9 - 32)           | 11<br>(8 - 17)           | 8<br>(5 - 15)            |
| Thyroid cancer                       | 51<br>(32 - 71)             | --                    | 0<br>(0 - 0)           | 4<br>(2 - 6)             | 29<br>(18 - 43)          | 18<br>(10 - 27)          |
| Mesothelioma                         | 6<br>(4 - 8)                | --                    | --                     | 2<br>(1 - 2)             | 2<br>(1 - 3)             | 2<br>(1 - 3)             |
| Hodgkin lymphoma                     | 44<br>(34 - 58)             | 3<br>(1 - 6)          | 3<br>(1 - 6)           | 13<br>(8 - 20)           | 12<br>(8 - 19)           | 12<br>(7 - 18)           |
| Non-Hodgkin lymphoma                 | 919<br>(549 - 1,364)        | 346<br>(170 - 645)    | 228<br>(104 - 415)     | 225<br>(143 - 324)       | 87<br>(63 - 120)         | 32<br>(24 - 43)          |
| Multiple myeloma                     | 30<br>(16 - 49)             | --                    | --                     | 7<br>(5 - 9)             | 17<br>(7 - 31)           | 5<br>(2 - 11)            |
| Leukemia                             | 111<br>(88 - 131)           | 9<br>(5 - 16)         | 10<br>(6 - 16)         | 56<br>(41 - 72)          | 20<br>(15 - 26)          | 16<br>(12 - 19)          |
| Other neoplasms                      | 717<br>(562 - 863)          | 184<br>(121 - 268)    | 53<br>(33 - 83)        | 137<br>(100 - 201)       | 165<br>(105 - 226)       | 179<br>(102 - 239)       |
| Cardiovascular diseases              | 14,034<br>(12,015 - 16,481) | 372<br>(246 - 556)    | 76<br>(50 - 119)       | 2,034<br>(1,628 - 2,548) | 4,336<br>(3,442 - 5,470) | 7,216<br>(6,246 - 8,284) |
| Rheumatic heart disease              | 555<br>(387 - 882)          | 17<br>(6 - 37)        | 15<br>(9 - 27)         | 262<br>(172 - 439)       | 136<br>(85 - 229)        | 126<br>(82 - 210)        |
| Ischemic heart disease               | 3,440<br>(2,694 - 4,304)    | 3<br>(1 - 7)          | 3<br>(2 - 6)           | 387<br>(282 - 547)       | 1,128<br>(818 - 1,487)   | 1,919<br>(1,503 - 2,395) |
| Cerebrovascular disease              | 5,501<br>(4,443 - 6,623)    | 37<br>(21 - 61)       | 9<br>(5 - 14)          | 430<br>(326 - 550)       | 9<br>(1,375 - 2,290)     | 3,241<br>(2,627 - 3,874) |
| Ischemic stroke                      | 2,246<br>(914 - 3,274)      | 3<br>(1 - 7)          | 1<br>(0 - 2)           | 56<br>(19 - 89)          | 515<br>(167 - 829)       | 1,671<br>(698 - 2,395)   |
| Hemorrhagic stroke                   | 3,255<br>(2,402 - 4,703)    | 33<br>(20 - 55)       | 8<br>(5 - 13)          | 375<br>(282 - 495)       | 1,270<br>(921 - 1,750)   | 1,570<br>(1,036 - 2,545) |
| Hypertensive heart disease           | 1,336<br>(905 - 2,022)      | 7<br>(3 - 14)         | 2<br>(1 - 3)           | 125<br>(77 - 186)        | 384<br>(243 - 586)       | 818<br>(513 - 1,355)     |
| Cardiomyopathy and myocarditis       | 801<br>(502 - 1,202)        | 153<br>(66 - 267)     | 21<br>(10 - 37)        | 247<br>(114 - 411)       | 183<br>(114 - 303)       | 198<br>(115 - 342)       |
| Atrial fibrillation and flutter      | 4<br>(2 - 7)                | --                    | --                     | 0<br>(0 - 0)             | 1<br>(0 - 2)             | 3<br>(1 - 5)             |
| Aortic aneurysm                      | 168<br>(103 - 296)          | --                    | --                     | 30<br>(14 - 57)          | 55<br>(33 - 95)          | 83<br>(50 - 148)         |
| Peripheral vascular disease          | 11<br>(5 - 19)              | --                    | --                     | 0<br>(0 - 1)             | 3<br>(1 - 5)             | 8<br>(4 - 13)            |
| Endocarditis                         | 153<br>(103 - 218)          | 16<br>(7 - 40)        | 3<br>(1 - 5)           | 34<br>(18 - 60)          | 41<br>(26 - 62)          | 59<br>(39 - 86)          |

Web Table 31- Malawi deaths with 95% UI by age, sex, and cause in 2013

| Cause                                               | Both Sexes, All Ages     | Both Sexes, 0-4 Years | Both Sexes, 5-14 Years | Both Sexes, 15-49 Years | Both Sexes, 50-69 Years | Both Sexes, 70-80 Years |
|-----------------------------------------------------|--------------------------|-----------------------|------------------------|-------------------------|-------------------------|-------------------------|
| Other cardiovascular and circulatory diseases       | 2,065<br>(1,243 - 3,399) | 140<br>(49 - 264)     | 23<br>(10 - 45)        | 519<br>(250 - 884)      | 621<br>(361 - 1,000)    | 762<br>(447 - 1,264)    |
| Chronic respiratory diseases                        | 2,278<br>(1,940 - 2,663) | 219<br>(141 - 331)    | 25<br>(17 - 40)        | 309<br>(245 - 374)      | 608<br>(466 - 771)      | 1,116<br>(935 - 1,319)  |
| Chronic obstructive pulmonary disease               | 1,261<br>(1,027 - 1,606) | 52<br>(28 - 87)       | 9<br>(6 - 15)          | 119<br>(91 - 158)       | 365<br>(270 - 491)      | 715<br>(569 - 924)      |
| Pneumoconiosis                                      | 123<br>(85 - 175)        | 6<br>(2 - 12)         | 1<br>(1 - 2)           | 32<br>(21 - 48)         | 38<br>(23 - 59)         | 47<br>(29 - 71)         |
| Silicosis                                           | 32<br>(20 - 48)          | 1<br>(0 - 3)          | 0<br>(0 - 1)           | 7<br>(3 - 12)           | 9<br>(5 - 15)           | 15<br>(8 - 24)          |
| Asbestosis                                          | 14<br>(8 - 21)           | 1<br>(0 - 2)          | 0<br>(0 - 0)           | 4<br>(2 - 7)            | 5<br>(3 - 8)            | 4<br>(2 - 6)            |
| Coal workers pneumoconiosis                         | 16<br>(10 - 25)          | 0<br>(0 - 1)          | 0<br>(0 - 0)           | 3<br>(2 - 5)            | 6<br>(3 - 10)           | 6<br>(3 - 11)           |
| Other pneumoconiosis                                | 61<br>(42 - 94)          | 3<br>(1 - 7)          | 1<br>(0 - 1)           | 19<br>(12 - 30)         | 17<br>(10 - 28)         | 22<br>(13 - 35)         |
| Asthma                                              | 442<br>(257 - 578)       | 45<br>(21 - 86)       | 7<br>(4 - 12)          | 74<br>(49 - 99)         | 123<br>(61 - 181)       | 193<br>(88 - 273)       |
| Interstitial lung disease and pulmonary sarcoidosis | 221<br>(86 - 351)        | 7<br>(2 - 22)         | 1<br>(0 - 3)           | 26<br>(8 - 57)          | 63<br>(23 - 106)        | 125<br>(41 - 223)       |
| Other chronic respiratory diseases                  | 230<br>(174 - 320)       | 109<br>(67 - 173)     | 6<br>(4 - 12)          | 57<br>(39 - 82)         | 19<br>(13 - 29)         | 37<br>(24 - 56)         |
| Cirrhosis                                           | 1,994<br>(1,693 - 2,358) | 68<br>(34 - 123)      | 24<br>(16 - 36)        | 697<br>(553 - 859)      | 738<br>(563 - 946)      | 467<br>(372 - 585)      |
| Cirrhosis due to hepatitis B                        | 488<br>(300 - 687)       | 3<br>(1 - 6)          | 3<br>(2 - 6)           | 162<br>(106 - 240)      | 193<br>(107 - 289)      | 127<br>(61 - 190)       |
| Cirrhosis due to hepatitis C                        | 349<br>(198 - 515)       | 4<br>(1 - 11)         | 2<br>(1 - 4)           | 107<br>(59 - 175)       | 147<br>(73 - 228)       | 89<br>(46 - 137)        |
| Cirrhosis due to alcohol use                        | 793<br>(593 - 1,022)     | --                    | --                     | 259<br>(181 - 349)      | 319<br>(222 - 451)      | 215<br>(154 - 296)      |
| Cirrhosis due to other causes                       | 364<br>(270 - 473)       | 61<br>(31 - 112)      | 19<br>(12 - 29)        | 169<br>(119 - 237)      | 78<br>(49 - 118)        | 36<br>(24 - 56)         |
| Digestive diseases                                  | 2,408<br>(2,036 - 2,808) | 191<br>(109 - 331)    | 64<br>(43 - 97)        | 831<br>(654 - 1,026)    | 561<br>(430 - 720)      | 761<br>(630 - 902)      |
| Peptic ulcer disease                                | 615<br>(438 - 861)       | 16<br>(6 - 37)        | 6<br>(3 - 11)          | 212<br>(129 - 328)      | 157<br>(102 - 233)      | 224<br>(148 - 313)      |
| Gastritis and duodenitis                            | 108<br>(60 - 201)        | 12<br>(4 - 23)        | 4<br>(2 - 8)           | 37<br>(20 - 62)         | 20<br>(9 - 47)          | 34<br>(12 - 92)         |
| Appendicitis                                        | 190<br>(128 - 271)       | 19<br>(6 - 43)        | 10<br>(6 - 16)         | 88<br>(58 - 127)        | 33<br>(17 - 59)         | 40<br>(17 - 77)         |
| Paralytic ileus and intestinal obstruction          | 735<br>(537 - 1,034)     | 42<br>(17 - 94)       | 24<br>(14 - 38)        | 202<br>(127 - 294)      | 206<br>(136 - 293)      | 260<br>(174 - 395)      |
| Inguinal, femoral, and abdominal hernia             | 31<br>(18 - 43)          | 3<br>(1 - 6)          | 1<br>(0 - 1)           | 11<br>(6 - 17)          | 5<br>(3 - 8)            | 11<br>(6 - 18)          |
| Inflammatory bowel disease                          | 193<br>(135 - 263)       | 52<br>(22 - 98)       | 7<br>(4 - 11)          | 75<br>(50 - 107)        | 24<br>(14 - 38)         | 35<br>(18 - 56)         |
| Vascular intestinal disorders                       | 21<br>(11 - 40)          | 1<br>(0 - 3)          | 0<br>(0 - 1)           | 5<br>(2 - 10)           | 5<br>(2 - 11)           | 10<br>(4 - 22)          |
| Gallbladder and biliary diseases                    | 150<br>(105 - 197)       | 6<br>(2 - 12)         | 2<br>(1 - 3)           | 44<br>(29 - 60)         | 37<br>(23 - 56)         | 61<br>(37 - 92)         |
| Pancreatitis                                        | 122<br>(61 - 192)        | 3<br>(1 - 7)          | 1<br>(1 - 3)           | 70<br>(32 - 122)        | 25<br>(11 - 44)         | 23<br>(9 - 41)          |
| Other digestive diseases                            | 244<br>(176 - 331)       | 38<br>(17 - 74)       | 8<br>(4 - 13)          | 86<br>(51 - 125)        | 48<br>(32 - 75)         | 64<br>(40 - 98)         |
| Neurological disorders                              | 1,390<br>(1,158 - 1,658) | 213<br>(123 - 369)    | 66<br>(40 - 108)       | 342<br>(227 - 482)      | 108<br>(83 - 136)       | 662<br>(545 - 793)      |
| Alzheimer disease and other dementias               | 639<br>(519 - 782)       | --                    | --                     | 0<br>(0 - 0)            | 57<br>(43 - 74)         | 582<br>(469 - 718)      |
| Parkinson disease                                   | 10<br>(6 - 18)           | --                    | --                     | 1<br>(1 - 1)            | 1<br>(1 - 2)            | 8<br>(4 - 15)           |
| Epilepsy                                            | 635<br>(457 - 847)       | 179<br>(97 - 324)     | 60<br>(35 - 101)       | 312<br>(203 - 447)      | 29<br>(18 - 43)         | 56<br>(31 - 91)         |
| Multiple sclerosis                                  | 5<br>(3 - 9)             | --                    | --                     | 3<br>(1 - 7)            | 1<br>(1 - 2)            | 1<br>(0 - 1)            |
| Other neurological disorders                        | 101<br>(73 - 145)        | 34<br>(21 - 73)       | 6<br>(4 - 9)           | 26<br>(17 - 36)         | 20<br>(14 - 26)         | 15<br>(11 - 19)         |
| Mental and substance use disorders                  | 719<br>(529 - 996)       | 41<br>(14 - 81)       | 0<br>(0 - 0)           | 552<br>(380 - 773)      | 97<br>(62 - 149)        | 30<br>(18 - 46)         |
| Schizophrenia                                       | 30<br>(13 - 63)          | --                    | --                     | 21<br>(7 - 45)          | 6<br>(3 - 12)           | 4<br>(2 - 8)            |
| Alcohol use disorders                               | 409<br>(233 - 626)       | --                    | --                     | 322<br>(159 - 506)      | 71<br>(43 - 113)        | 17<br>(10 - 26)         |
| Drug use disorders                                  | 279<br>(189 - 363)       | 41<br>(14 - 81)       | --                     | 209<br>(146 - 277)      | 19<br>(8 - 35)          | 9<br>(3 - 18)           |
| Opioid use disorders                                | 30<br>(20 - 39)          | 5<br>(2 - 9)          | --                     | 22<br>(15 - 30)         | 2<br>(1 - 3)            | 1<br>(0 - 2)            |
| Cocaine use disorders                               | 1<br>(1 - 2)             | 0<br>(0 - 0)          | --                     | 1<br>(1 - 1)            | 0<br>(0 - 0)            | 0<br>(0 - 0)            |
| Amphetamine use disorders                           | 1<br>(1 - 1)             | 0<br>(0 - 0)          | --                     | 1<br>(0 - 1)            | 0<br>(0 - 0)            | 0<br>(0 - 0)            |

Web Table 31- Malawi deaths with 95% UI by age, sex, and cause in 2013

| Cause                                               | Both Sexes, All Ages     | Both Sexes, 0-4 Years    | Both Sexes, 5-14 Years | Both Sexes, 15-49 Years | Both Sexes, 50-69 Years | Both Sexes, 70-80 Years  |
|-----------------------------------------------------|--------------------------|--------------------------|------------------------|-------------------------|-------------------------|--------------------------|
| Other drug use disorders                            | 247<br>(166 - 323)       | 36<br>(12 - 72)          | --                     | 185<br>(129 - 244)      | 18<br>(7 - 31)          | 8<br>(3 - 16)            |
| Eating disorders                                    | 0<br>(0 - 1)             | --                       | 0<br>(0 - 0)           | 0<br>(0 - 1)            | --                      | --                       |
| Anorexia nervosa                                    | 0<br>(0 - 1)             | --                       | 0<br>(0 - 0)           | 0<br>(0 - 1)            | --                      | --                       |
| Diabetes, urogenital, blood, and endocrine diseases | 4,066<br>(3,434 - 4,726) | 674<br>(403 - 996)       | 107<br>(72 - 167)      | 990<br>(773 - 1,233)    | 1,001<br>(792 - 1,259)  | 1,293<br>(1,088 - 1,517) |
| Diabetes mellitus                                   | 1,648<br>(1,388 - 1,975) | 21<br>(13 - 33)          | 7<br>(4 - 12)          | 247<br>(193 - 301)      | 607<br>(465 - 781)      | 765<br>(626 - 942)       |
| Acute glomerulonephritis                            | 46<br>(22 - 69)          | 8<br>(4 - 14)            | 2<br>(1 - 3)           | 14<br>(7 - 25)          | 11<br>(4 - 20)          | 10<br>(4 - 17)           |
| Chronic kidney disease                              | 690<br>(523 - 883)       | 89<br>(56 - 135)         | 20<br>(12 - 32)        | 239<br>(169 - 323)      | 129<br>(91 - 182)       | 214<br>(147 - 288)       |
| Chronic kidney disease due to diabetes mellitus     | 3<br>(1 - 6)             | 0<br>(0 - 0)             | 0<br>(0 - 0)           | 1<br>(0 - 2)            | 1<br>(0 - 2)            | 1<br>(0 - 2)             |
| Chronic kidney disease due to hypertension          | 284<br>(195 - 403)       | 14<br>(6 - 28)           | 3<br>(1 - 5)           | 70<br>(42 - 118)        | 73<br>(48 - 110)        | 125<br>(81 - 177)        |
| Chronic kidney disease due to glomerulonephritis    | 222<br>(154 - 290)       | 51<br>(33 - 80)          | 11<br>(7 - 17)         | 96<br>(66 - 132)        | 28<br>(14 - 43)         | 35<br>(14 - 56)          |
| Chronic kidney disease due to other causes          | 180<br>(83 - 278)        | 23<br>(10 - 44)          | 6<br>(2 - 11)          | 71<br>(34 - 117)        | 27<br>(11 - 50)         | 53<br>(16 - 97)          |
| Urinary diseases and male infertility               | 578<br>(415 - 720)       | 72<br>(40 - 131)         | 11<br>(7 - 17)         | 192<br>(123 - 258)      | 143<br>(92 - 197)       | 161<br>(112 - 214)       |
| Interstitial nephritis and urinary tract infections | 392<br>(257 - 506)       | 46<br>(23 - 91)          | 6<br>(3 - 9)           | 112<br>(55 - 164)       | 104<br>(64 - 151)       | 124<br>(82 - 171)        |
| Urolithiasis                                        | 22<br>(12 - 35)          | --                       | 1<br>(0 - 2)           | 10<br>(4 - 19)          | 6<br>(3 - 13)           | 4<br>(2 - 10)            |
| Other urinary diseases                              | 165<br>(114 - 236)       | 26<br>(12 - 53)          | 4<br>(2 - 7)           | 69<br>(43 - 105)        | 33<br>(18 - 57)         | 33<br>(17 - 61)          |
| Gynecological diseases                              | 13<br>(3 - 72)           | --                       | --                     | 8<br>(1 - 56)           | 3<br>(1 - 9)            | 2<br>(1 - 7)             |
| Uterine fibroids                                    | 2<br>(1 - 11)            | --                       | --                     | 1<br>(0 - 7)            | 1<br>(0 - 2)            | 1<br>(0 - 2)             |
| Polycystic ovarian syndrome                         | 1<br>(0 - 4)             | --                       | --                     | 1<br>(0 - 4)            | 0<br>(0 - 0)            | --                       |
| Endometriosis                                       | 1<br>(0 - 10)            | --                       | --                     | 1<br>(0 - 9)            | 0<br>(0 - 0)            | --                       |
| Genital prolapse                                    | 2<br>(0 - 11)            | --                       | --                     | 1<br>(0 - 8)            | 0<br>(0 - 2)            | 1<br>(0 - 2)             |
| Other gynecological diseases                        | 6<br>(1 - 36)            | --                       | --                     | 4<br>(1 - 28)           | 1<br>(0 - 5)            | 1<br>(0 - 3)             |
| Hemoglobinopathies and hemolytic anemias            | 620<br>(285 - 1,003)     | 341<br>(113 - 620)       | 54<br>(27 - 94)        | 167<br>(70 - 275)       | 30<br>(14 - 66)         | 28<br>(13 - 71)          |
| Thalassemias                                        | 27<br>(10 - 48)          | 20<br>(7 - 38)           | 2<br>(1 - 3)           | 5<br>(2 - 8)            | 0<br>(0 - 0)            | 0<br>(0 - 0)             |
| Sickle cell disorders                               | 474<br>(200 - 777)       | 264<br>(82 - 483)        | 47<br>(23 - 82)        | 141<br>(59 - 233)       | 20<br>(9 - 43)          | 2<br>(1 - 4)             |
| G6PD deficiency                                     | 43<br>(19 - 70)          | 27<br>(10 - 48)          | 3<br>(1 - 5)           | 10<br>(4 - 17)          | 2<br>(1 - 4)            | 1<br>(1 - 4)             |
| Other hemoglobinopathies and hemolytic anemias      | 76<br>(44 - 125)         | 29<br>(12 - 51)          | 2<br>(1 - 4)           | 11<br>(5 - 18)          | 8<br>(4 - 19)           | 25<br>(12 - 64)          |
| Endocrine, metabolic, blood, and immune disorders   | 470<br>(363 - 597)       | 142<br>(90 - 240)        | 13<br>(8 - 24)         | 124<br>(85 - 178)       | 78<br>(47 - 113)        | 113<br>(53 - 159)        |
| Musculoskeletal disorders                           | 147<br>(110 - 197)       | --                       | 11<br>(6 - 17)         | 82<br>(46 - 124)        | 28<br>(19 - 43)         | 26<br>(18 - 47)          |
| Rheumatoid arthritis                                | 37<br>(26 - 57)          | --                       | 2<br>(1 - 4)           | 12<br>(6 - 21)          | 11<br>(7 - 21)          | 12<br>(7 - 26)           |
| Other musculoskeletal disorders                     | 110<br>(72 - 149)        | --                       | 9<br>(5 - 14)          | 70<br>(38 - 105)        | 17<br>(11 - 27)         | 14<br>(9 - 25)           |
| Other non-communicable diseases                     | 4,061<br>(2,457 - 7,720) | 3,517<br>(1,986 - 6,896) | 106<br>(53 - 222)      | 205<br>(125 - 340)      | 81<br>(60 - 111)        | 152<br>(114 - 208)       |
| Congenital anomalies                                | 3,605<br>(2,030 - 7,171) | 3,340<br>(1,832 - 6,691) | 100<br>(48 - 213)      | 128<br>(66 - 245)       | 16<br>(11 - 24)         | 21<br>(15 - 29)          |
| Neural tube defects                                 | 1,069<br>(329 - 2,529)   | 1,016<br>(310 - 2,443)   | 20<br>(5 - 55)         | 29<br>(8 - 81)          | 2<br>(1 - 4)            | 1<br>(0 - 3)             |
| Congenital heart anomalies                          | 1,493<br>(642 - 3,329)   | 1,364<br>(562 - 3,103)   | 52<br>(22 - 116)       | 61<br>(25 - 134)        | 7<br>(4 - 10)           | 9<br>(5 - 15)            |
| Cleft lip and cleft palate                          | 17<br>(2 - 53)           | 17<br>(2 - 53)           | --                     | --                      | --                      | --                       |
| Down syndrome                                       | 254<br>(59 - 719)        | 225<br>(47 - 666)        | 10<br>(3 - 25)         | 17<br>(4 - 37)          | 2<br>(1 - 4)            | 1<br>(0 - 1)             |
| Chromosomal unbalanced rearrangements               | 129<br>(38 - 368)        | 122<br>(34 - 354)        | 2<br>(1 - 7)           | 4<br>(1 - 11)           | 1<br>(0 - 1)            | 1<br>(0 - 1)             |
| Other congenital anomalies                          | 643<br>(225 - 2,036)     | 596<br>(201 - 1,945)     | 15<br>(5 - 45)         | 17<br>(7 - 51)          | 5<br>(3 - 9)            | 9<br>(5 - 15)            |
| Skin and subcutaneous diseases                      | 420<br>(330 - 517)       | 141<br>(85 - 215)        | 6<br>(4 - 10)          | 77<br>(51 - 112)        | 65<br>(46 - 89)         | 131<br>(94 - 188)        |
| Cellulitis                                          | 133<br>(80 - 209)        | 44<br>(19 - 89)          | 2<br>(1 - 4)           | 26<br>(15 - 41)         | 23<br>(13 - 37)         | 37<br>(20 - 62)          |

Web Table 31- Malawi deaths with 95% UI by age, sex, and cause in 2013

| Cause                                           | Both Sexes, All Ages      | Both Sexes, 0-4 Years    | Both Sexes, 5-14 Years | Both Sexes, 15-49 Years  | Both Sexes, 50-69 Years | Both Sexes, 70-80 Years |
|-------------------------------------------------|---------------------------|--------------------------|------------------------|--------------------------|-------------------------|-------------------------|
| Pyoderma                                        | 233<br>(159 - 314)        | 90<br>(51 - 149)         | 3<br>(2 - 5)           | 42<br>(23 - 65)          | 34<br>(21 - 52)         | 63<br>(40 - 94)         |
| Decubitus ulcer                                 | 41<br>(27 - 61)           | 2<br>(0 - 6)             | 0<br>(0 - 1)           | 5<br>(2 - 9)             | 6<br>(3 - 9)            | 27<br>(15 - 43)         |
| Other skin and subcutaneous diseases            | 13<br>(6 - 24)            | 4<br>(1 - 11)            | 0<br>(0 - 1)           | 4<br>(1 - 9)             | 2<br>(1 - 3)            | 3<br>(2 - 5)            |
| Sudden infant death syndrome                    | 36<br>(12 - 90)           | 36<br>(12 - 90)          | --                     | --                       | --                      | --                      |
| Injuries                                        | 9,828<br>(7,842 - 12,055) | 2,199<br>(1,467 - 3,368) | 574<br>(428 - 848)     | 5,249<br>(3,888 - 6,744) | 941<br>(672 - 1,236)    | 864<br>(629 - 1,103)    |
| Transport injuries                              | 3,093<br>(2,493 - 3,892)  | 500<br>(291 - 804)       | 244<br>(163 - 379)     | 1,723<br>(1,253 - 2,373) | 355<br>(261 - 461)      | 271<br>(195 - 343)      |
| Road injuries                                   | 2,936<br>(2,367 - 3,724)  | 446<br>(257 - 714)       | 227<br>(149 - 352)     | 1,674<br>(1,218 - 2,293) | 337<br>(247 - 436)      | 252<br>(187 - 318)      |
| Pedestrian road injuries                        | 1,387<br>(1,049 - 1,800)  | 246<br>(132 - 419)       | 125<br>(80 - 201)      | 707<br>(476 - 1,006)     | 172<br>(120 - 236)      | 138<br>(98 - 182)       |
| Cyclist road injuries                           | 146<br>(93 - 227)         | 22<br>(8 - 50)           | 14<br>(7 - 25)         | 76<br>(41 - 125)         | 21<br>(14 - 30)         | 15<br>(9 - 22)          |
| Motorcyclist road injuries                      | 182<br>(111 - 283)        | 15<br>(8 - 27)           | 6<br>(3 - 12)          | 135<br>(75 - 223)        | 15<br>(9 - 23)          | 11<br>(6 - 16)          |
| Motor vehicle road injuries                     | 1,209<br>(862 - 1,639)    | 159<br>(85 - 263)        | 80<br>(47 - 125)       | 754<br>(494 - 1,113)     | 128<br>(88 - 174)       | 88<br>(59 - 116)        |
| Other road injuries                             | 12<br>(5 - 27)            | 4<br>(2 - 10)            | 2<br>(1 - 4)           | 3<br>(1 - 8)             | 2<br>(1 - 4)            | 1<br>(1 - 4)            |
| Other transport injuries                        | 157<br>(116 - 221)        | 54<br>(28 - 94)          | 18<br>(10 - 29)        | 49<br>(29 - 98)          | 18<br>(10 - 28)         | 19<br>(7 - 30)          |
| Unintentional injuries                          | 3,683<br>(2,669 - 4,903)  | 1,648<br>(1,023 - 2,642) | 286<br>(200 - 437)     | 1,031<br>(714 - 1,354)   | 312<br>(213 - 437)      | 406<br>(263 - 566)      |
| Falls                                           | 329<br>(200 - 435)        | 59<br>(32 - 94)          | 22<br>(11 - 38)        | 103<br>(60 - 155)        | 47<br>(22 - 71)         | 98<br>(49 - 151)        |
| Drowning                                        | 863<br>(547 - 1,295)      | 399<br>(206 - 737)       | 112<br>(67 - 178)      | 292<br>(160 - 459)       | 37<br>(23 - 54)         | 23<br>(14 - 35)         |
| Fire, heat, and hot substances                  | 579<br>(325 - 869)        | 344<br>(150 - 611)       | 38<br>(21 - 64)        | 114<br>(66 - 170)        | 39<br>(22 - 62)         | 45<br>(25 - 68)         |
| Poisonings                                      | 177<br>(117 - 257)        | 66<br>(32 - 119)         | 6<br>(4 - 11)          | 83<br>(52 - 125)         | 15<br>(7 - 24)          | 7<br>(4 - 10)           |
| Exposure to mechanical forces                   | 628<br>(354 - 2,073)      | 326<br>(126 - 1,373)     | 46<br>(23 - 134)       | 179<br>(104 - 469)       | 49<br>(24 - 83)         | 27<br>(11 - 45)         |
| Unintentional firearm injuries                  | 79<br>(52 - 117)          | 14<br>(8 - 24)           | 3<br>(2 - 5)           | 54<br>(31 - 87)          | 5<br>(3 - 7)            | 4<br>(2 - 6)            |
| Unintentional suffocation                       | 302<br>(78 - 1,753)       | 210<br>(43 - 1,209)      | 20<br>(5 - 112)        | 49<br>(10 - 312)         | 16<br>(5 - 57)          | 6<br>(2 - 30)           |
| Other exposure to mechanical forces             | 247<br>(151 - 372)        | 102<br>(47 - 198)        | 23<br>(11 - 41)        | 76<br>(37 - 129)         | 29<br>(10 - 45)         | 17<br>(4 - 26)          |
| Adverse effects of medical treatment            | 583<br>(345 - 854)        | 222<br>(105 - 416)       | 16<br>(9 - 26)         | 113<br>(55 - 192)        | 85<br>(48 - 140)        | 148<br>(69 - 256)       |
| Animal contact                                  | 221<br>(134 - 387)        | 75<br>(35 - 173)         | 24<br>(13 - 47)        | 74<br>(37 - 119)         | 25<br>(12 - 39)         | 23<br>(10 - 35)         |
| Venomous animal contact                         | 134<br>(70 - 241)         | 51<br>(21 - 133)         | 12<br>(5 - 24)         | 45<br>(19 - 78)          | 13<br>(6 - 21)          | 14<br>(4 - 23)          |
| Non-venomous animal contact                     | 87<br>(52 - 152)          | 24<br>(10 - 57)          | 13<br>(7 - 25)         | 29<br>(14 - 49)          | 12<br>(5 - 21)          | 9<br>(4 - 16)           |
| Foreign body                                    | 171<br>(114 - 273)        | 119<br>(73 - 210)        | 7<br>(4 - 12)          | 15<br>(9 - 27)           | 6<br>(4 - 10)           | 25<br>(12 - 38)         |
| Pulmonary aspiration and foreign body in airway | 160<br>(104 - 261)        | 114<br>(69 - 204)        | 6<br>(4 - 10)          | 13<br>(8 - 22)           | 4<br>(3 - 7)            | 23<br>(10 - 36)         |
| Foreign body in other body part                 | 11<br>(6 - 32)            | 4<br>(2 - 15)            | 1<br>(0 - 4)           | 2<br>(1 - 8)             | 2<br>(1 - 4)            | 2<br>(1 - 4)            |
| Other unintentional injuries                    | 131<br>(97 - 170)         | 40<br>(24 - 60)          | 14<br>(9 - 23)         | 58<br>(40 - 83)          | 9<br>(6 - 13)           | 10<br>(6 - 14)          |
| Self-harm and interpersonal violence            | 3,052<br>(1,804 - 4,350)  | 52<br>(21 - 124)         | 44<br>(14 - 81)        | 2,494<br>(1,414 - 3,678) | 275<br>(162 - 393)      | 187<br>(119 - 253)      |
| Self-harm                                       | 1,395<br>(1,008 - 2,005)  | --                       | 13<br>(5 - 27)         | 1,059<br>(694 - 1,626)   | 176<br>(122 - 254)      | 146<br>(104 - 205)      |
| Interpersonal violence                          | 1,657<br>(519 - 2,764)    | 52<br>(21 - 124)         | 31<br>(6 - 64)         | 1,435<br>(445 - 2,446)   | 99<br>(15 - 175)        | 41<br>(4 - 80)          |
| Assault by firearm                              | 627<br>(198 - 1,266)      | 13<br>(4 - 37)           | 7<br>(1 - 17)          | 569<br>(181 - 1,163)     | 31<br>(5 - 63)          | 6<br>(1 - 15)           |
| Assault by sharp object                         | 353<br>(79 - 686)         | 10<br>(2 - 25)           | 5<br>(1 - 11)          | 298<br>(69 - 608)        | 28<br>(3 - 55)          | 13<br>(1 - 28)          |
| Assault by other means                          | 677<br>(179 - 1,142)      | 29<br>(11 - 70)          | 19<br>(4 - 39)         | 568<br>(137 - 980)       | 40<br>(5 - 75)          | 21<br>(2 - 44)          |
| Forces of nature, war, and legal intervention   | 0<br>(0 - 0)              | 0<br>(0 - 0)             | --                     | --                       | --                      | --                      |
| Exposure to forces of nature                    | 0<br>(0 - 0)              | 0<br>(0 - 0)             | --                     | --                       | --                      | --                      |

Web Table 31- Malawi deaths with 95% UI by age, sex, and cause in 2013

| Cause                                                             | Males, All Ages             | Males, 0-4 Years            | Males, 5-14 Years        | Males, 15-49 Years          | Males, 50-69 Years          | Males, 70-80 Years         |
|-------------------------------------------------------------------|-----------------------------|-----------------------------|--------------------------|-----------------------------|-----------------------------|----------------------------|
| All causes                                                        | 87,103<br>(80,263 - 94,912) | 30,793<br>(26,156 - 35,678) | 3,635<br>(3,141 - 4,455) | 28,306<br>(24,803 - 31,400) | 13,513<br>(11,252 - 15,763) | 10,856<br>(9,421 - 12,516) |
| Communicable, maternal, neonatal, and nutritional diseases        | 61,469<br>(55,739 - 67,440) | 26,470<br>(22,175 - 31,215) | 2,835<br>(2,407 - 3,419) | 19,979<br>(17,803 - 22,333) | 7,855<br>(6,352 - 9,350)    | 4,330<br>(3,713 - 4,979)   |
| HIV/AIDS and tuberculosis                                         | 26,678<br>(23,818 - 29,705) | 1,718<br>(1,346 - 2,115)    | 1,669<br>(1,380 - 1,979) | 16,086<br>(14,099 - 18,365) | 5,854<br>(4,338 - 7,541)    | 1,350<br>(1,049 - 1,690)   |
| Tuberculosis                                                      | 4,849<br>(3,792 - 6,091)    | 396<br>(240 - 633)          | 48<br>(28 - 81)          | 2,519<br>(1,728 - 3,350)    | 1,062<br>(684 - 1,438)      | 823<br>(609 - 1,067)       |
| HIV/AIDS                                                          | 21,829<br>(19,080 - 24,746) | 1,322<br>(976 - 1,695)      | 1,622<br>(1,320 - 1,935) | 13,567<br>(11,666 - 15,880) | 4,791<br>(3,202 - 6,616)    | 527<br>(314 - 801)         |
| HIV/AIDS resulting in mycobacterial infection                     | 1,578<br>(1,234 - 1,976)    | 89<br>(64 - 120)            | 100<br>(76 - 128)        | 986<br>(760 - 1,274)        | 362<br>(232 - 513)          | 41<br>(24 - 66)            |
| HIV/AIDS resulting in other diseases                              | 20,250<br>(17,670 - 23,048) | 1,233<br>(918 - 1,570)      | 1,521<br>(1,240 - 1,808) | 12,581<br>(10,665 - 14,712) | 4,429<br>(2,944 - 6,118)    | 486<br>(291 - 737)         |
| Diarrhea, lower respiratory, and other common infectious diseases | 19,613<br>(16,035 - 23,696) | 12,307<br>(9,149 - 15,830)  | 650<br>(447 - 990)       | 2,637<br>(1,897 - 3,427)    | 1,581<br>(1,082 - 2,237)    | 2,437<br>(1,904 - 3,064)   |
| Diarrheal diseases                                                | 8,054<br>(5,374 - 11,586)   | 4,806<br>(2,455 - 8,125)    | 239<br>(113 - 453)       | 1,260<br>(811 - 1,837)      | 738<br>(422 - 1,219)        | 1,011<br>(636 - 1,481)     |
| Intestinal infectious diseases                                    | 358<br>(187 - 623)          | 178<br>(82 - 335)           | 73<br>(34 - 137)         | 95<br>(31 - 195)            | 8<br>(3 - 16)               | 4<br>(1 - 8)               |
| Typhoid fever                                                     | 260<br>(129 - 469)          | 122<br>(52 - 238)           | 55<br>(24 - 106)         | 74<br>(23 - 150)            | 6<br>(2 - 12)               | 3<br>(1 - 5)               |
| Paratyphoid fever                                                 | 74<br>(34 - 142)            | 38<br>(15 - 82)             | 16<br>(7 - 34)           | 18<br>(5 - 40)              | 1<br>(0 - 3)                | 1<br>(0 - 1)               |
| Other intestinal infectious diseases                              | 24<br>(12 - 42)             | 18<br>(7 - 34)              | 2<br>(0 - 5)             | 4<br>(1 - 10)               | 1<br>(0 - 3)                | 1<br>(0 - 4)               |
| Lower respiratory infections                                      | 8,920<br>(6,696 - 11,456)   | 5,899<br>(3,856 - 8,349)    | 181<br>(99 - 310)        | 774<br>(507 - 1,089)        | 712<br>(462 - 1,033)        | 1,354<br>(993 - 1,782)     |
| Upper respiratory infections                                      | 16<br>(4 - 43)              | 8<br>(0 - 32)               | 0<br>(0 - 2)             | 5<br>(1 - 13)               | 1<br>(0 - 4)                | 1<br>(0 - 4)               |
| Otitis media                                                      | 8<br>(5 - 12)               | 4<br>(2 - 8)                | 0<br>(0 - 1)             | 2<br>(1 - 2)                | 1<br>(0 - 1)                | 1<br>(1 - 1)               |
| Meningitis                                                        | 1,983<br>(1,352 - 2,935)    | 1,201<br>(621 - 2,089)      | 143<br>(74 - 261)        | 464<br>(292 - 682)          | 113<br>(68 - 173)           | 61<br>(37 - 94)            |
| Pneumococcal meningitis                                           | 415<br>(263 - 616)          | 199<br>(89 - 363)           | 38<br>(17 - 78)          | 132<br>(68 - 221)           | 30<br>(14 - 51)             | 15<br>(7 - 26)             |
| H influenzae type B meningitis                                    | 428<br>(239 - 698)          | 332<br>(151 - 592)          | 28<br>(11 - 59)          | 52<br>(23 - 96)             | 10<br>(4 - 18)              | 6<br>(2 - 11)              |
| Meningococcal meningitis                                          | 229<br>(139 - 349)          | 102<br>(42 - 210)           | 14<br>(5 - 30)           | 79<br>(35 - 146)            | 22<br>(9 - 41)              | 12<br>(6 - 22)             |
| Other meningitis                                                  | 911<br>(599 - 1,403)        | 568<br>(297 - 1,031)        | 63<br>(28 - 121)         | 201<br>(112 - 336)          | 51<br>(28 - 89)             | 28<br>(16 - 45)            |
| Encephalitis                                                      | 65<br>(42 - 108)            | 45<br>(24 - 88)             | 3<br>(2 - 7)             | 11<br>(6 - 18)              | 3<br>(2 - 5)                | 2<br>(1 - 4)               |
| Diphtheria                                                        | 6<br>(0 - 42)               | 6<br>(0 - 41)               | 1<br>(0 - 4)             | 0<br>(0 - 2)                | 0<br>(0 - 0)                | --                         |
| Whooping cough                                                    | 33<br>(0 - 166)             | 32<br>(0 - 161)             | 1<br>(0 - 4)             | 0<br>(0 - 1)                | 0<br>(0 - 0)                | --                         |
| Tetanus                                                           | 88<br>(42 - 170)            | 53<br>(22 - 122)            | 4<br>(2 - 10)            | 23<br>(8 - 55)              | 5<br>(2 - 13)               | 2<br>(1 - 4)               |
| Measles                                                           | 75<br>(17 - 224)            | 70<br>(16 - 207)            | 4<br>(1 - 13)            | 1<br>(0 - 2)                | 0<br>(0 - 0)                | --                         |
| Varicella and herpes zoster                                       | 5<br>(1 - 16)               | 3<br>(0 - 14)               | 0<br>(0 - 2)             | 1<br>(0 - 3)                | 0<br>(0 - 1)                | 1<br>(0 - 4)               |
| Neglected tropical diseases and malaria                           | 3,279<br>(1,925 - 5,138)    | 1,983<br>(889 - 3,723)      | 364<br>(150 - 687)       | 733<br>(427 - 1,102)        | 114<br>(65 - 178)           | 85<br>(44 - 147)           |
| Malaria                                                           | 2,147<br>(1,094 - 3,889)    | 1,564<br>(620 - 3,176)      | 167<br>(73 - 344)        | 298<br>(158 - 539)          | 60<br>(29 - 107)            | 58<br>(25 - 114)           |
| Leishmaniasis                                                     | 981<br>(335 - 1,782)        | 368<br>(38 - 906)           | 181<br>(33 - 434)        | 376<br>(129 - 666)          | 38<br>(12 - 75)             | 18<br>(2 - 46)             |
| Visceral leishmaniasis                                            | 981<br>(335 - 1,782)        | 368<br>(38 - 906)           | 181<br>(33 - 434)        | 376<br>(129 - 666)          | 38<br>(12 - 75)             | 18<br>(2 - 46)             |
| African trypanosomiasis                                           | 18<br>(8 - 31)              | 2<br>(1 - 3)                | 2<br>(1 - 3)             | 12<br>(6 - 22)              | 2<br>(1 - 3)                | 1<br>(0 - 1)               |
| Schistosomiasis                                                   | 35<br>(24 - 50)             | 1<br>(0 - 2)                | 1<br>(0 - 2)             | 21<br>(12 - 33)             | 8<br>(4 - 13)               | 4<br>(2 - 7)               |
| Cysticercosis                                                     | 3<br>(2 - 4)                | 0<br>(0 - 0)                | 0<br>(0 - 0)             | 2<br>(2 - 3)                | 0<br>(0 - 0)                | 0<br>(0 - 0)               |
| Cystic echinococcosis                                             | 4<br>(3 - 5)                | 1<br>(1 - 1)                | 0<br>(0 - 1)             | 2<br>(2 - 3)                | 0<br>(0 - 0)                | 0<br>(0 - 0)               |
| Dengue                                                            | 3<br>(2 - 4)                | 1<br>(0 - 2)                | 0<br>(0 - 1)             | 2<br>(1 - 2)                | 0<br>(0 - 1)                | 0<br>(0 - 0)               |
| Rabies                                                            | 44<br>(22 - 69)             | 15<br>(6 - 33)              | 11<br>(5 - 20)           | 15<br>(8 - 22)              | 2<br>(1 - 4)                | 0<br>(0 - 1)               |
| Intestinal nematode infections                                    | 28<br>(11 - 55)             | 24<br>(9 - 49)              | 2<br>(0 - 6)             | 1<br>(0 - 6)                | 0<br>(0 - 2)                | 0<br>(0 - 2)               |
| Ascariasis                                                        | 28<br>(11 - 55)             | 24<br>(9 - 49)              | 2<br>(0 - 6)             | 1<br>(0 - 6)                | 0<br>(0 - 2)                | 0<br>(0 - 2)               |
| Other neglected tropical diseases                                 | 15<br>(8 - 31)              | 7<br>(3 - 14)               | 0<br>(0 - 1)             | 3<br>(1 - 8)                | 2<br>(1 - 5)                | 3<br>(1 - 6)               |

Web Table 31- Malawi deaths with 95% UI by age, sex, and cause in 2013

| Cause                                                            | Males, All Ages             | Males, 0-4 Years         | Males, 5-14 Years  | Males, 15-49 Years       | Males, 50-69 Years       | Males, 70-80 Years       |
|------------------------------------------------------------------|-----------------------------|--------------------------|--------------------|--------------------------|--------------------------|--------------------------|
| Maternal disorders                                               | --                          | --                       | --                 | --                       | --                       | --                       |
| Maternal hemorrhage                                              | --                          | --                       | --                 | --                       | --                       | --                       |
| Maternal sepsis and other maternal infections                    | --                          | --                       | --                 | --                       | --                       | --                       |
| Maternal hypertensive disorders                                  | --                          | --                       | --                 | --                       | --                       | --                       |
| Maternal obstructed labor                                        | --                          | --                       | --                 | --                       | --                       | --                       |
| Maternal abortive outcome                                        | --                          | --                       | --                 | --                       | --                       | --                       |
| Indirect maternal deaths                                         | --                          | --                       | --                 | --                       | --                       | --                       |
| Late maternal deaths                                             | --                          | --                       | --                 | --                       | --                       | --                       |
| Maternal deaths aggravated by HIV/AIDS                           | --                          | --                       | --                 | --                       | --                       | --                       |
| Other maternal disorders                                         | --                          | --                       | --                 | --                       | --                       | --                       |
| Neonatal disorders                                               | 7,284<br>(5,998 - 8,734)    | 7,284<br>(5,998 - 8,734) | --                 | --                       | --                       | --                       |
| Neonatal preterm birth complications                             | 2,169<br>(1,067 - 3,512)    | 2,169<br>(1,067 - 3,512) | --                 | --                       | --                       | --                       |
| Neonatal encephalopathy due to birth asphyxia and trauma         | 1,788<br>(905 - 3,098)      | 1,788<br>(905 - 3,098)   | --                 | --                       | --                       | --                       |
| Neonatal sepsis and other neonatal infections                    | 1,910<br>(804 - 3,570)      | 1,910<br>(804 - 3,570)   | --                 | --                       | --                       | --                       |
| Hemolytic disease and other neonatal jaundice                    | 40<br>(12 - 111)            | 40<br>(12 - 111)         | --                 | --                       | --                       | --                       |
| Other neonatal disorders                                         | 1,378<br>(573 - 2,630)      | 1,378<br>(573 - 2,630)   | --                 | --                       | --                       | --                       |
| Nutritional deficiencies                                         | 3,727<br>(2,250 - 5,845)    | 2,559<br>(1,320 - 4,376) | 116<br>(61 - 215)  | 392<br>(252 - 607)       | 247<br>(147 - 389)       | 412<br>(259 - 640)       |
| Protein-energy malnutrition                                      | 3,156<br>(1,829 - 5,079)    | 2,359<br>(1,225 - 4,139) | 96<br>(46 - 184)   | 219<br>(99 - 386)        | 180<br>(90 - 303)        | 302<br>(152 - 482)       |
| Iodine deficiency                                                | 6<br>(0 - 29)               | 3<br>(0 - 24)            | 0<br>(0 - 2)       | 2<br>(0 - 8)             | 0<br>(0 - 2)             | 0<br>(0 - 3)             |
| Iron-deficiency anemia                                           | 557<br>(246 - 1,176)        | 196<br>(30 - 623)        | 20<br>(6 - 53)     | 167<br>(73 - 331)        | 66<br>(24 - 152)         | 108<br>(37 - 254)        |
| Other nutritional deficiencies                                   | 8<br>(3 - 17)               | 1<br>(0 - 4)             | 0<br>(0 - 1)       | 4<br>(1 - 8)             | 1<br>(0 - 2)             | 2<br>(1 - 5)             |
| Other communicable, maternal, neonatal, and nutritional diseases | 889<br>(474 - 1,464)        | 618<br>(240 - 1,169)     | 35<br>(15 - 65)    | 131<br>(71 - 202)        | 60<br>(30 - 112)         | 45<br>(19 - 97)          |
| Sexually transmitted diseases excluding HIV                      | 491<br>(104 - 1,019)        | 454<br>(89 - 962)        | 22<br>(4 - 49)     | 8<br>(3 - 14)            | 4<br>(1 - 9)             | 3<br>(1 - 7)             |
| Syphilis                                                         | 485<br>(100 - 1,014)        | 454<br>(89 - 962)        | 21<br>(4 - 49)     | 4<br>(2 - 8)             | 3<br>(1 - 7)             | 3<br>(1 - 6)             |
| Chlamydial infection                                             | --                          | --                       | --                 | --                       | --                       | --                       |
| Gonococcal infection                                             | 3<br>(1 - 5)                | --                       | 0<br>(0 - 0)       | 2<br>(1 - 4)             | 1<br>(0 - 2)             | 0<br>(0 - 1)             |
| Other sexually transmitted diseases                              | 2<br>(1 - 4)                | --                       | 0<br>(0 - 0)       | 2<br>(1 - 3)             | 0<br>(0 - 1)             | 0<br>(0 - 0)             |
| Hepatitis                                                        | 93<br>(68 - 131)            | 15<br>(7 - 27)           | 3<br>(2 - 6)       | 52<br>(33 - 82)          | 16<br>(10 - 24)          | 7<br>(4 - 10)            |
| Acute hepatitis A                                                | 10<br>(3 - 22)              | 5<br>(1 - 12)            | 1<br>(0 - 3)       | 3<br>(1 - 8)             | 0<br>(0 - 0)             | 0<br>(0 - 0)             |
| Acute hepatitis B                                                | 62<br>(40 - 89)             | 9<br>(4 - 19)            | 2<br>(1 - 3)       | 30<br>(15 - 50)          | 14<br>(9 - 22)           | 6<br>(4 - 9)             |
| Acute hepatitis C                                                | 1<br>(0 - 3)                | --                       | 0<br>(0 - 0)       | 1<br>(0 - 3)             | 0<br>(0 - 1)             | 0<br>(0 - 0)             |
| Acute hepatitis E                                                | 20<br>(7 - 42)              | 0<br>(0 - 0)             | 0<br>(0 - 1)       | 17<br>(6 - 37)           | 2<br>(0 - 4)             | 0<br>(0 - 1)             |
| Other infectious diseases                                        | 305<br>(126 - 535)          | 149<br>(51 - 358)        | 10<br>(3 - 22)     | 72<br>(19 - 131)         | 39<br>(12 - 90)          | 35<br>(10 - 85)          |
| Non-communicable diseases                                        | 19,172<br>(15,823 - 22,982) | 3,100<br>(1,907 - 5,644) | 452<br>(309 - 704) | 4,454<br>(3,328 - 5,455) | 5,087<br>(3,667 - 6,765) | 6,080<br>(5,094 - 7,270) |
| Neoplasms                                                        | 3,102<br>(2,452 - 3,828)    | 342<br>(185 - 590)       | 198<br>(104 - 362) | 717<br>(529 - 899)       | 1,093<br>(772 - 1,479)   | 753<br>(597 - 910)       |
| Esophageal cancer                                                | 828<br>(544 - 1,100)        | --                       | --                 | 151<br>(100 - 212)       | 426<br>(256 - 623)       | 251<br>(171 - 339)       |
| Stomach cancer                                                   | 68<br>(53 - 87)             | --                       | --                 | 25<br>(17 - 33)          | 25<br>(17 - 36)          | 18<br>(14 - 24)          |
| Liver cancer                                                     | 258<br>(189 - 343)          | --                       | 6<br>(3 - 10)      | 122<br>(72 - 178)        | 90<br>(58 - 133)         | 40<br>(28 - 55)          |
| Liver cancer due to hepatitis B                                  | 90<br>(44 - 152)            | --                       | 2<br>(0 - 5)       | 54<br>(21 - 95)          | 25<br>(8 - 50)           | 8<br>(4 - 17)            |
| Liver cancer due to hepatitis C                                  | 99<br>(43 - 153)            | --                       | 1<br>(0 - 3)       | 37<br>(11 - 74)          | 42<br>(19 - 71)          | 20<br>(9 - 33)           |

Web Table 31- Malawi deaths with 95% UI by age, sex, and cause in 2013

| Cause                                | Males, All Ages          | Males, 0-4 Years   | Males, 5-14 Years | Males, 15-49 Years     | Males, 50-69 Years       | Males, 70-80 Years       |
|--------------------------------------|--------------------------|--------------------|-------------------|------------------------|--------------------------|--------------------------|
| Liver cancer due to alcohol use      | 34<br>(18 - 56)          | --                 | --                | 11<br>(4 - 18)         | 14<br>(7 - 27)           | 9<br>(5 - 16)            |
| Liver cancer due to other causes     | 36<br>(19 - 57)          | --                 | 3<br>(1 - 6)      | 21<br>(8 - 36)         | 8<br>(4 - 17)            | 3<br>(1 - 6)             |
| Larynx cancer                        | 21<br>(15 - 33)          | --                 | --                | 5<br>(3 - 7)           | 8<br>(5 - 14)            | 9<br>(6 - 13)            |
| Tracheal, bronchus and lung cancer   | 130<br>(99 - 171)        | --                 | --                | 15<br>(10 - 23)        | 80<br>(56 - 110)         | 35<br>(27 - 46)          |
| Breast cancer                        | 19<br>(11 - 30)          | --                 | --                | 5<br>(3 - 9)           | 12<br>(5 - 21)           | 2<br>(1 - 4)             |
| Cervical cancer                      | --                       | --                 | --                | --                     | --                       | --                       |
| Uterine cancer                       | --                       | --                 | --                | --                     | --                       | --                       |
| Prostate cancer                      | 149<br>(97 - 254)        | --                 | --                | 2<br>(1 - 4)           | 43<br>(25 - 72)          | 104<br>(64 - 180)        |
| Colon and rectum cancer              | 87<br>(67 - 109)         | --                 | --                | 33<br>(24 - 43)        | 35<br>(24 - 48)          | 19<br>(15 - 24)          |
| Lip and oral cavity cancer           | 27<br>(19 - 38)          | --                 | --                | 8<br>(5 - 13)          | 12<br>(7 - 18)           | 7<br>(4 - 10)            |
| Nasopharynx cancer                   | 10<br>(7 - 14)           | --                 | 0<br>(0 - 1)      | 6<br>(4 - 9)           | 3<br>(2 - 4)             | 1<br>(1 - 2)             |
| Other pharynx cancer                 | 15<br>(10 - 23)          | --                 | --                | 4<br>(2 - 6)           | 7<br>(4 - 14)            | 4<br>(3 - 6)             |
| Gallbladder and biliary tract cancer | 8<br>(5 - 17)            | --                 | --                | 2<br>(2 - 4)           | 4<br>(2 - 9)             | 2<br>(1 - 6)             |
| Pancreatic cancer                    | 72<br>(54 - 96)          | --                 | --                | 14<br>(10 - 20)        | 39<br>(26 - 56)          | 19<br>(14 - 25)          |
| Malignant skin melanoma              | 14<br>(7 - 22)           | --                 | --                | 6<br>(3 - 9)           | 4<br>(2 - 8)             | 4<br>(2 - 6)             |
| Non-melanoma skin cancer             | 14<br>(8 - 20)           | --                 | --                | 2<br>(1 - 4)           | 5<br>(2 - 9)             | 7<br>(3 - 11)            |
| Ovarian cancer                       | --                       | --                 | --                | --                     | --                       | --                       |
| Testicular cancer                    | 17<br>(10 - 25)          | --                 | --                | 5<br>(3 - 9)           | 6<br>(3 - 10)            | 6<br>(2 - 10)            |
| Kidney cancer                        | 68<br>(38 - 126)         | 41<br>(14 - 95)    | 8<br>(4 - 18)     | 6<br>(4 - 10)          | 10<br>(6 - 15)           | 3<br>(2 - 4)             |
| Bladder cancer                       | 290<br>(205 - 376)       | --                 | --                | 58<br>(36 - 80)        | 131<br>(86 - 188)        | 102<br>(70 - 138)        |
| Brain and nervous system cancer      | 22<br>(13 - 50)          | 1<br>(0 - 3)       | 4<br>(2 - 8)      | 10<br>(4 - 27)         | 3<br>(2 - 6)             | 4<br>(2 - 10)            |
| Thyroid cancer                       | 9<br>(6 - 12)            | --                 | 0<br>(0 - 0)      | 2<br>(1 - 4)           | 5<br>(3 - 7)             | 1<br>(1 - 2)             |
| Mesothelioma                         | 3<br>(2 - 5)             | --                 | --                | 0<br>(0 - 1)           | 1<br>(1 - 2)             | 1<br>(1 - 2)             |
| Hodgkin lymphoma                     | 21<br>(14 - 30)          | 2<br>(1 - 5)       | 2<br>(1 - 5)      | 9<br>(5 - 13)          | 4<br>(2 - 7)             | 4<br>(2 - 7)             |
| Non-Hodgkin lymphoma                 | 558<br>(302 - 883)       | 204<br>(77 - 419)  | 149<br>(57 - 298) | 131<br>(77 - 192)      | 52<br>(33 - 75)          | 23<br>(16 - 33)          |
| Multiple myeloma                     | 12<br>(5 - 24)           | --                 | --                | 2<br>(1 - 3)           | 7<br>(3 - 14)            | 3<br>(1 - 8)             |
| Leukemia                             | 59<br>(44 - 74)          | 5<br>(2 - 11)      | 6<br>(4 - 11)     | 34<br>(23 - 47)        | 7<br>(4 - 9)             | 7<br>(5 - 9)             |
| Other neoplasms                      | 322<br>(233 - 413)       | 89<br>(53 - 146)   | 22<br>(13 - 36)   | 59<br>(40 - 89)        | 76<br>(37 - 116)         | 77<br>(32 - 116)         |
| Cardiovascular diseases              | 6,536<br>(5,278 - 8,060) | 178<br>(104 - 274) | 40<br>(24 - 66)   | 1,162<br>(868 - 1,468) | 2,165<br>(1,546 - 2,885) | 2,991<br>(2,495 - 3,617) |
| Rheumatic heart disease              | 243<br>(154 - 459)       | 9<br>(3 - 25)      | 8<br>(4 - 17)     | 118<br>(66 - 221)      | 57<br>(30 - 114)         | 51<br>(30 - 96)          |
| Ischemic heart disease               | 1,743<br>(1,269 - 2,238) | 2<br>(0 - 4)       | 2<br>(1 - 3)      | 247<br>(168 - 341)     | 659<br>(444 - 899)       | 833<br>(604 - 1,066)     |
| Cerebrovascular disease              | 2,408<br>(1,844 - 3,108) | 19<br>(10 - 33)    | 6<br>(3 - 10)     | 254<br>(173 - 351)     | 843<br>(587 - 1,177)     | 1,286<br>(1,005 - 1,613) |
| Ischemic stroke                      | 974<br>(242 - 1,514)     | 2<br>(0 - 5)       | 1<br>(0 - 1)      | 35<br>(9 - 64)         | 266<br>(54 - 458)        | 671<br>(173 - 1,005)     |
| Hemorrhagic stroke                   | 1,434<br>(948 - 2,267)   | 17<br>(9 - 30)     | 5<br>(3 - 10)     | 219<br>(152 - 313)     | 577<br>(366 - 887)       | 615<br>(368 - 1,099)     |
| Hypertensive heart disease           | 554<br>(325 - 996)       | 3<br>(1 - 7)       | 1<br>(0 - 2)      | 69<br>(27 - 112)       | 179<br>(92 - 343)        | 302<br>(156 - 611)       |
| Cardiomyopathy and myocarditis       | 411<br>(159 - 674)       | 71<br>(11 - 141)   | 10<br>(2 - 21)    | 147<br>(36 - 262)      | 99<br>(46 - 180)         | 84<br>(44 - 146)         |
| Atrial fibrillation and flutter      | 1<br>(1 - 2)             | --                 | --                | 0<br>(0 - 0)           | 0<br>(0 - 1)             | 1<br>(0 - 2)             |
| Aortic aneurysm                      | 102<br>(56 - 164)        | --                 | --                | 19<br>(7 - 33)         | 35<br>(18 - 61)          | 48<br>(26 - 81)          |
| Peripheral vascular disease          | 7<br>(3 - 12)            | --                 | --                | 0<br>(0 - 1)           | 2<br>(1 - 4)             | 4<br>(2 - 8)             |
| Endocarditis                         | 83<br>(47 - 132)         | 6<br>(3 - 13)      | 1<br>(1 - 3)      | 19<br>(10 - 31)        | 26<br>(13 - 45)          | 31<br>(17 - 52)          |



Web Table 31- Malawi deaths with 95% UI by age, sex, and cause in 2013

| Cause                                               | Males, All Ages          | Males, 0-4 Years  | Males, 5-14 Years | Males, 15-49 Years | Males, 50-69 Years | Males, 70-80 Years |
|-----------------------------------------------------|--------------------------|-------------------|-------------------|--------------------|--------------------|--------------------|
| Other cardiovascular and circulatory diseases       | 984<br>(519 - 1,831)     | 68<br>(24 - 141)  | 12<br>(5 - 25)    | 289<br>(132 - 515) | 264<br>(129 - 537) | 351<br>(179 - 672) |
| Chronic respiratory diseases                        | 1,258<br>(993 - 1,556)   | 98<br>(53 - 169)  | 11<br>(7 - 18)    | 162<br>(115 - 211) | 345<br>(239 - 467) | 642<br>(506 - 806) |
| Chronic obstructive pulmonary disease               | 712<br>(542 - 937)       | 27<br>(11 - 53)   | 5<br>(3 - 9)      | 68<br>(47 - 96)    | 205<br>(137 - 291) | 407<br>(302 - 548) |
| Pneumoconiosis                                      | 115<br>(78 - 168)        | 4<br>(1 - 9)      | 1<br>(0 - 2)      | 28<br>(17 - 44)    | 37<br>(21 - 58)    | 46<br>(28 - 70)    |
| Silicosis                                           | 32<br>(20 - 48)          | 1<br>(0 - 3)      | 0<br>(0 - 0)      | 6<br>(3 - 11)      | 9<br>(5 - 15)      | 15<br>(8 - 24)     |
| Asbestosis                                          | 13<br>(7 - 21)           | 1<br>(0 - 2)      | 0<br>(0 - 0)      | 4<br>(1 - 7)       | 5<br>(3 - 8)       | 4<br>(2 - 6)       |
| Coal workers pneumoconiosis                         | 16<br>(10 - 25)          | 0<br>(0 - 1)      | 0<br>(0 - 0)      | 3<br>(2 - 5)       | 6<br>(3 - 10)      | 6<br>(3 - 11)      |
| Other pneumoconiosis                                | 55<br>(35 - 88)          | 2<br>(0 - 5)      | 1<br>(0 - 1)      | 16<br>(9 - 28)     | 16<br>(9 - 27)     | 21<br>(12 - 34)    |
| Asthma                                              | 212<br>(88 - 300)        | 7<br>(2 - 15)     | 2<br>(1 - 3)      | 33<br>(16 - 48)    | 60<br>(23 - 96)    | 111<br>(42 - 169)  |
| Interstitial lung disease and pulmonary sarcoidosis | 110<br>(43 - 187)        | 3<br>(0 - 12)     | 0<br>(0 - 1)      | 10<br>(3 - 25)     | 34<br>(11 - 63)    | 63<br>(20 - 116)   |
| Other chronic respiratory diseases                  | 109<br>(75 - 161)        | 58<br>(29 - 101)  | 3<br>(1 - 6)      | 23<br>(14 - 34)    | 10<br>(5 - 16)     | 16<br>(9 - 25)     |
| Cirrhosis                                           | 1,207<br>(943 - 1,509)   | 38<br>(13 - 81)   | 12<br>(7 - 19)    | 486<br>(352 - 636) | 437<br>(296 - 611) | 234<br>(172 - 314) |
| Cirrhosis due to hepatitis B                        | 256<br>(126 - 417)       | 1<br>(0 - 3)      | 1<br>(0 - 3)      | 98<br>(53 - 164)   | 99<br>(40 - 179)   | 56<br>(18 - 98)    |
| Cirrhosis due to hepatitis C                        | 210<br>(100 - 350)       | 3<br>(0 - 10)     | 1<br>(0 - 3)      | 67<br>(30 - 120)   | 87<br>(35 - 154)   | 52<br>(17 - 95)    |
| Cirrhosis due to alcohol use                        | 545<br>(383 - 736)       | --                | --                | 219<br>(146 - 310) | 213<br>(133 - 316) | 113<br>(75 - 165)  |
| Cirrhosis due to other causes                       | 196<br>(128 - 290)       | 33<br>(11 - 73)   | 9<br>(5 - 15)     | 102<br>(62 - 163)  | 38<br>(19 - 67)    | 13<br>(7 - 23)     |
| Digestive diseases                                  | 1,380<br>(1,093 - 1,722) | 102<br>(47 - 195) | 37<br>(22 - 62)   | 550<br>(390 - 718) | 323<br>(219 - 444) | 368<br>(284 - 478) |
| Peptic ulcer disease                                | 395<br>(246 - 616)       | 10<br>(2 - 28)    | 4<br>(2 - 8)      | 158<br>(85 - 263)  | 100<br>(56 - 171)  | 124<br>(74 - 197)  |
| Gastritis and duodenitis                            | 55<br>(25 - 120)         | 6<br>(2 - 14)     | 2<br>(1 - 5)      | 22<br>(9 - 43)     | 11<br>(4 - 32)     | 14<br>(4 - 49)     |
| Appendicitis                                        | 88<br>(51 - 135)         | 7<br>(2 - 17)     | 5<br>(2 - 9)      | 47<br>(25 - 77)    | 15<br>(7 - 31)     | 14<br>(6 - 29)     |
| Paralytic ileus and intestinal obstruction          | 430<br>(273 - 664)       | 21<br>(6 - 56)    | 15<br>(8 - 27)    | 150<br>(82 - 236)  | 121<br>(67 - 190)  | 123<br>(72 - 204)  |
| Inguinal, femoral, and abdominal hernia             | 16<br>(7 - 25)           | 0<br>(0 - 1)      | 0<br>(0 - 1)      | 6<br>(2 - 11)      | 4<br>(2 - 7)       | 5<br>(2 - 9)       |
| Inflammatory bowel disease                          | 95<br>(54 - 141)         | 28<br>(7 - 59)    | 3<br>(1 - 7)      | 36<br>(18 - 59)    | 12<br>(5 - 24)     | 15<br>(6 - 34)     |
| Vascular intestinal disorders                       | 11<br>(4 - 25)           | 1<br>(0 - 3)      | 0<br>(0 - 1)      | 3<br>(1 - 7)       | 3<br>(1 - 7)       | 4<br>(1 - 11)      |
| Gallbladder and biliary diseases                    | 62<br>(39 - 92)          | 3<br>(1 - 7)      | 1<br>(0 - 2)      | 19<br>(9 - 31)     | 14<br>(7 - 26)     | 24<br>(13 - 44)    |
| Pancreatitis                                        | 80<br>(31 - 145)         | 2<br>(0 - 5)      | 1<br>(0 - 2)      | 52<br>(21 - 101)   | 15<br>(4 - 31)     | 11<br>(3 - 25)     |
| Other digestive diseases                            | 148<br>(100 - 216)       | 24<br>(8 - 58)    | 5<br>(2 - 9)      | 57<br>(30 - 91)    | 29<br>(15 - 49)    | 32<br>(17 - 56)    |
| Neurological disorders                              | 712<br>(550 - 902)       | 94<br>(43 - 190)  | 41<br>(22 - 76)   | 207<br>(125 - 305) | 50<br>(34 - 70)    | 321<br>(247 - 409) |
| Alzheimer disease and other dementias               | 300<br>(225 - 384)       | --                | --                | 0<br>(0 - 0)       | 28<br>(18 - 39)    | 272<br>(201 - 351) |
| Parkinson disease                                   | 7<br>(3 - 14)            | --                | --                | 0<br>(0 - 1)       | 0<br>(0 - 0)       | 6<br>(3 - 13)      |
| Epilepsy                                            | 347<br>(227 - 502)       | 75<br>(29 - 171)  | 37<br>(19 - 72)   | 187<br>(109 - 281) | 13<br>(7 - 21)     | 36<br>(17 - 63)    |
| Multiple sclerosis                                  | 1<br>(1 - 3)             | --                | --                | 1<br>(0 - 2)       | 0<br>(0 - 1)       | 0<br>(0 - 0)       |
| Other neurological disorders                        | 57<br>(30 - 99)          | 19<br>(8 - 57)    | 3<br>(2 - 6)      | 18<br>(10 - 28)    | 9<br>(5 - 14)      | 7<br>(4 - 11)      |
| Mental and substance use disorders                  | 557<br>(377 - 793)       | 32<br>(8 - 72)    | 0<br>(0 - 0)      | 430<br>(265 - 633) | 74<br>(43 - 121)   | 20<br>(12 - 31)    |
| Schizophrenia                                       | 12<br>(3 - 35)           | --                | --                | 8<br>(1 - 28)      | 2<br>(1 - 7)       | 1<br>(0 - 4)       |
| Alcohol use disorders                               | 353<br>(187 - 550)       | --                | --                | 279<br>(127 - 455) | 61<br>(33 - 102)   | 14<br>(8 - 23)     |
| Drug use disorders                                  | 191<br>(128 - 258)       | 32<br>(8 - 72)    | --                | 143<br>(91 - 205)  | 11<br>(5 - 18)     | 5<br>(2 - 8)       |
| Opioid use disorders                                | 21<br>(13 - 28)          | 4<br>(1 - 8)      | --                | 16<br>(10 - 22)    | 1<br>(0 - 2)       | 1<br>(0 - 1)       |
| Cocaine use disorders                               | 1<br>(0 - 1)             | 0<br>(0 - 0)      | --                | 1<br>(0 - 1)       | 0<br>(0 - 0)       | 0<br>(0 - 0)       |
| Amphetamine use disorders                           | 0<br>(0 - 1)             | 0<br>(0 - 0)      | --                | 0<br>(0 - 1)       | 0<br>(0 - 0)       | 0<br>(0 - 0)       |

Web Table 31- Malawi deaths with 95% UI by age, sex, and cause in 2013

| Cause                                               | Males, All Ages          | Males, 0-4 Years       | Males, 5-14 Years | Males, 15-49 Years | Males, 50-69 Years | Males, 70-80 Years |
|-----------------------------------------------------|--------------------------|------------------------|-------------------|--------------------|--------------------|--------------------|
| Other drug use disorders                            | 169<br>(113 - 229)       | 28<br>(7 - 63)         | --                | 126<br>(80 - 182)  | 10<br>(5 - 16)     | 4<br>(2 - 7)       |
| Eating disorders                                    | 0<br>(0 - 0)             | --                     | 0<br>(0 - 0)      | 0<br>(0 - 0)       | --                 | --                 |
| Anorexia nervosa                                    | 0<br>(0 - 0)             | --                     | 0<br>(0 - 0)      | 0<br>(0 - 0)       | --                 | --                 |
| Diabetes, urogenital, blood, and endocrine diseases | 2,258<br>(1,833 - 2,780) | 374<br>(212 - 595)     | 58<br>(35 - 100)  | 599<br>(431 - 763) | 548<br>(395 - 752) | 679<br>(532 - 864) |
| Diabetes mellitus                                   | 930<br>(739 - 1,201)     | 16<br>(10 - 26)        | 4<br>(2 - 8)      | 165<br>(119 - 212) | 339<br>(237 - 472) | 405<br>(304 - 532) |
| Acute glomerulonephritis                            | 18<br>(7 - 30)           | 5<br>(2 - 9)           | 1<br>(0 - 2)      | 1<br>(1 - 3)       | 6<br>(2 - 13)      | 5<br>(1 - 11)      |
| Chronic kidney disease                              | 372<br>(270 - 501)       | 52<br>(30 - 86)        | 9<br>(5 - 15)     | 153<br>(97 - 222)  | 62<br>(40 - 95)    | 96<br>(66 - 140)   |
| Chronic kidney disease due to diabetes mellitus     | 2<br>(0 - 3)             | 0<br>(0 - 0)           | 0<br>(0 - 0)      | 1<br>(0 - 1)       | 0<br>(0 - 1)       | 0<br>(0 - 1)       |
| Chronic kidney disease due to hypertension          | 154<br>(100 - 265)       | 9<br>(2 - 22)          | 1<br>(1 - 3)      | 45<br>(23 - 93)    | 39<br>(22 - 66)    | 60<br>(36 - 99)    |
| Chronic kidney disease due to glomerulonephritis    | 111<br>(67 - 154)        | 29<br>(15 - 51)        | 5<br>(3 - 8)      | 51<br>(29 - 77)    | 11<br>(4 - 20)     | 14<br>(5 - 26)     |
| Chronic kidney disease due to other causes          | 105<br>(49 - 168)        | 14<br>(5 - 29)         | 2<br>(1 - 5)      | 56<br>(24 - 97)    | 11<br>(3 - 23)     | 21<br>(5 - 44)     |
| Urinary diseases and male infertility               | 407<br>(267 - 536)       | 48<br>(20 - 105)       | 7<br>(4 - 10)     | 142<br>(77 - 201)  | 96<br>(57 - 143)   | 115<br>(74 - 164)  |
| Interstitial nephritis and urinary tract infections | 271<br>(161 - 374)       | 33<br>(13 - 77)        | 4<br>(2 - 7)      | 84<br>(34 - 131)   | 66<br>(36 - 102)   | 84<br>(50 - 128)   |
| Urolithiasis                                        | 9<br>(5 - 22)            | --                     | 0<br>(0 - 1)      | 4<br>(2 - 8)       | 3<br>(1 - 8)       | 2<br>(1 - 7)       |
| Other urinary diseases                              | 127<br>(84 - 193)        | 15<br>(4 - 40)         | 2<br>(1 - 4)      | 53<br>(31 - 85)    | 27<br>(13 - 52)    | 29<br>(12 - 56)    |
| Gynecological diseases                              | --                       | --                     | --                | --                 | --                 | --                 |
| Uterine fibroids                                    | --                       | --                     | --                | --                 | --                 | --                 |
| Polycystic ovarian syndrome                         | --                       | --                     | --                | --                 | --                 | --                 |
| Endometriosis                                       | --                       | --                     | --                | --                 | --                 | --                 |
| Genital prolapse                                    | --                       | --                     | --                | --                 | --                 | --                 |
| Other gynecological diseases                        | --                       | --                     | --                | --                 | --                 | --                 |
| Hemoglobinopathies and hemolytic anemias            | 326<br>(145 - 591)       | 190<br>(58 - 377)      | 30<br>(13 - 63)   | 76<br>(34 - 150)   | 15<br>(5 - 50)     | 15<br>(5 - 52)     |
| Thalassemias                                        | 11<br>(4 - 21)           | 9<br>(3 - 17)          | 1<br>(0 - 2)      | 1<br>(1 - 3)       | 0<br>(0 - 0)       | 0<br>(0 - 0)       |
| Sickle cell disorders                               | 252<br>(106 - 459)       | 152<br>(45 - 304)      | 26<br>(11 - 55)   | 64<br>(29 - 125)   | 10<br>(3 - 32)     | 1<br>(0 - 3)       |
| G6PD deficiency                                     | 25<br>(11 - 45)          | 17<br>(5 - 32)         | 2<br>(1 - 3)      | 5<br>(2 - 9)       | 1<br>(0 - 3)       | 1<br>(0 - 3)       |
| Other hemoglobinopathies and hemolytic anemias      | 38<br>(18 - 93)          | 13<br>(5 - 23)         | 1<br>(1 - 3)      | 6<br>(3 - 12)      | 4<br>(1 - 14)      | 13<br>(5 - 47)     |
| Endocrine, metabolic, blood, and immune disorders   | 204<br>(141 - 284)       | 62<br>(35 - 117)       | 8<br>(4 - 15)     | 61<br>(35 - 88)    | 31<br>(17 - 49)    | 42<br>(17 - 65)    |
| Musculoskeletal disorders                           | 86<br>(50 - 115)         | --                     | 8<br>(4 - 13)     | 45<br>(21 - 65)    | 17<br>(9 - 29)     | 16<br>(9 - 32)     |
| Rheumatoid arthritis                                | 16<br>(8 - 28)           | --                     | 1<br>(0 - 3)      | 5<br>(2 - 11)      | 4<br>(2 - 10)      | 5<br>(2 - 14)      |
| Other musculoskeletal disorders                     | 70<br>(40 - 96)          | --                     | 7<br>(3 - 11)     | 40<br>(18 - 58)    | 13<br>(7 - 21)     | 11<br>(5 - 20)     |
| Other non-communicable diseases                     | 2,077<br>(1,165 - 4,705) | 1,843<br>(955 - 4,404) | 49<br>(23 - 116)  | 95<br>(62 - 146)   | 34<br>(23 - 49)    | 56<br>(37 - 80)    |
| Congenital anomalies                                | 1,865<br>(966 - 4,501)   | 1,752<br>(881 - 4,315) | 46<br>(21 - 112)  | 53<br>(30 - 99)    | 7<br>(4 - 10)      | 8<br>(5 - 11)      |
| Neural tube defects                                 | 547<br>(117 - 1,253)     | 525<br>(109 - 1,192)   | 9<br>(2 - 23)     | 12<br>(2 - 27)     | 1<br>(0 - 3)       | 1<br>(0 - 2)       |
| Congenital heart anomalies                          | 781<br>(260 - 2,240)     | 725<br>(223 - 2,119)   | 24<br>(9 - 68)    | 26<br>(12 - 55)    | 3<br>(2 - 5)       | 3<br>(2 - 5)       |
| Cleft lip and cleft palate                          | 11<br>(1 - 38)           | 11<br>(1 - 38)         | --                | --                 | --                 | --                 |
| Down syndrome                                       | 127<br>(18 - 447)        | 116<br>(13 - 426)      | 4<br>(1 - 12)     | 7<br>(2 - 15)      | 1<br>(0 - 1)       | 0<br>(0 - 0)       |
| Chromosomal unbalanced rearrangements               | 40<br>(8 - 149)          | 37<br>(7 - 143)        | 1<br>(0 - 3)      | 1<br>(0 - 3)       | 0<br>(0 - 0)       | 0<br>(0 - 0)       |
| Other congenital anomalies                          | 360<br>(82 - 1,479)      | 339<br>(68 - 1,422)    | 7<br>(2 - 27)     | 8<br>(3 - 23)      | 2<br>(1 - 4)       | 4<br>(2 - 6)       |
| Skin and subcutaneous diseases                      | 185<br>(138 - 247)       | 64<br>(35 - 109)       | 3<br>(2 - 6)      | 42<br>(25 - 59)    | 28<br>(17 - 41)    | 48<br>(31 - 71)    |
| Cellulitis                                          | 59<br>(26 - 113)         | 20<br>(6 - 51)         | 1<br>(0 - 2)      | 14<br>(6 - 26)     | 10<br>(4 - 19)     | 14<br>(6 - 28)     |

Web Table 31- Malawi deaths with 95% UI by age, sex, and cause in 2013

| Cause                                           | Males, All Ages          | Males, 0-4 Years       | Males, 5-14 Years  | Males, 15-49 Years       | Males, 50-69 Years | Males, 70-80 Years |
|-------------------------------------------------|--------------------------|------------------------|--------------------|--------------------------|--------------------|--------------------|
| Pyoderma                                        | 104<br>(60 - 152)        | 41<br>(18 - 73)        | 2<br>(1 - 3)       | 23<br>(11 - 36)          | 15<br>(8 - 23)     | 25<br>(12 - 40)    |
| Decubitus ulcer                                 | 17<br>(8 - 28)           | 2<br>(0 - 5)           | 0<br>(0 - 1)       | 4<br>(1 - 7)             | 3<br>(1 - 5)       | 9<br>(4 - 16)      |
| Other skin and subcutaneous diseases            | 5<br>(1 - 12)            | 2<br>(0 - 7)           | 0<br>(0 - 1)       | 2<br>(0 - 4)             | 1<br>(0 - 1)       | 1<br>(0 - 1)       |
| Sudden infant death syndrome                    | 27<br>(7 - 75)           | 27<br>(7 - 75)         | --                 | --                       | --                 | --                 |
| Injuries                                        | 6,461<br>(4,905 - 8,208) | 1,223<br>(747 - 2,086) | 348<br>(249 - 535) | 3,874<br>(2,701 - 5,101) | 571<br>(382 - 795) | 446<br>(319 - 578) |
| Transport injuries                              | 2,157<br>(1,643 - 2,815) | 303<br>(154 - 572)     | 152<br>(96 - 242)  | 1,321<br>(907 - 1,844)   | 219<br>(143 - 304) | 163<br>(110 - 220) |
| Road injuries                                   | 2,066<br>(1,572 - 2,697) | 273<br>(135 - 512)     | 141<br>(89 - 228)  | 1,291<br>(889 - 1,801)   | 208<br>(137 - 288) | 152<br>(105 - 207) |
| Pedestrian road injuries                        | 939<br>(634 - 1,340)     | 153<br>(69 - 298)      | 75<br>(43 - 128)   | 537<br>(321 - 819)       | 97<br>(59 - 150)   | 76<br>(47 - 113)   |
| Cyclist road injuries                           | 127<br>(74 - 203)        | 18<br>(5 - 45)         | 11<br>(5 - 22)     | 70<br>(36 - 115)         | 15<br>(9 - 25)     | 13<br>(7 - 20)     |
| Motorcyclist road injuries                      | 156<br>(88 - 257)        | 12<br>(5 - 25)         | 5<br>(2 - 10)      | 118<br>(61 - 208)        | 12<br>(6 - 20)     | 9<br>(5 - 14)      |
| Motor vehicle road injuries                     | 836<br>(549 - 1,242)     | 87<br>(35 - 174)       | 48<br>(25 - 83)    | 563<br>(330 - 877)       | 82<br>(50 - 122)   | 55<br>(33 - 79)    |
| Other road injuries                             | 9<br>(3 - 23)            | 3<br>(1 - 9)           | 1<br>(0 - 3)       | 2<br>(0 - 7)             | 1<br>(0 - 3)       | 1<br>(0 - 3)       |
| Other transport injuries                        | 91<br>(61 - 136)         | 30<br>(12 - 62)        | 10<br>(5 - 18)     | 30<br>(16 - 62)          | 11<br>(5 - 19)     | 10<br>(4 - 17)     |
| Unintentional injuries                          | 2,074<br>(1,446 - 2,915) | 893<br>(506 - 1,618)   | 170<br>(113 - 293) | 678<br>(443 - 935)       | 163<br>(105 - 243) | 170<br>(107 - 257) |
| Falls                                           | 185<br>(108 - 255)       | 32<br>(14 - 61)        | 15<br>(7 - 29)     | 76<br>(42 - 124)         | 28<br>(11 - 47)    | 33<br>(15 - 53)    |
| Drowning                                        | 549<br>(303 - 898)       | 223<br>(83 - 475)      | 73<br>(40 - 130)   | 219<br>(112 - 356)       | 21<br>(11 - 34)    | 13<br>(7 - 23)     |
| Fire, heat, and hot substances                  | 289<br>(152 - 489)       | 177<br>(65 - 359)      | 17<br>(9 - 30)     | 56<br>(31 - 88)          | 19<br>(10 - 33)    | 21<br>(10 - 34)    |
| Poisonings                                      | 109<br>(61 - 179)        | 35<br>(14 - 76)        | 3<br>(2 - 7)       | 61<br>(32 - 98)          | 7<br>(3 - 12)      | 3<br>(2 - 6)       |
| Exposure to mechanical forces                   | 390<br>(204 - 1,136)     | 188<br>(61 - 605)      | 29<br>(13 - 78)    | 127<br>(66 - 326)        | 33<br>(16 - 61)    | 13<br>(5 - 23)     |
| Unintentional firearm injuries                  | 44<br>(26 - 72)          | 6<br>(3 - 12)          | 1<br>(1 - 3)       | 33<br>(17 - 59)          | 2<br>(1 - 4)       | 2<br>(1 - 3)       |
| Unintentional suffocation                       | 197<br>(43 - 910)        | 130<br>(19 - 556)      | 13<br>(2 - 65)     | 37<br>(8 - 201)          | 13<br>(4 - 45)     | 4<br>(1 - 18)      |
| Other exposure to mechanical forces             | 150<br>(79 - 241)        | 52<br>(22 - 101)       | 15<br>(7 - 28)     | 57<br>(24 - 102)         | 19<br>(6 - 32)     | 7<br>(2 - 11)      |
| Adverse effects of medical treatment            | 292<br>(162 - 461)       | 130<br>(49 - 261)      | 8<br>(3 - 14)      | 55<br>(22 - 98)          | 36<br>(17 - 64)    | 63<br>(27 - 127)   |
| Animal contact                                  | 88<br>(56 - 160)         | 26<br>(10 - 72)        | 11<br>(5 - 21)     | 29<br>(15 - 50)          | 11<br>(5 - 18)     | 12<br>(4 - 19)     |
| Venomous animal contact                         | 39<br>(23 - 64)          | 8<br>(2 - 28)          | 3<br>(1 - 7)       | 14<br>(6 - 25)           | 6<br>(2 - 11)      | 8<br>(1 - 14)      |
| Non-venomous animal contact                     | 49<br>(28 - 87)          | 18<br>(6 - 44)         | 8<br>(4 - 15)      | 15<br>(7 - 27)           | 5<br>(2 - 9)       | 4<br>(2 - 8)       |
| Foreign body                                    | 80<br>(48 - 152)         | 58<br>(30 - 119)       | 4<br>(2 - 7)       | 9<br>(5 - 17)            | 3<br>(2 - 6)       | 7<br>(3 - 10)      |
| Pulmonary aspiration and foreign body in airway | 73<br>(41 - 143)         | 55<br>(28 - 115)       | 3<br>(1 - 5)       | 7<br>(4 - 15)            | 2<br>(1 - 4)       | 6<br>(3 - 9)       |
| Foreign body in other body part                 | 7<br>(4 - 24)            | 3<br>(1 - 10)          | 1<br>(0 - 3)       | 1<br>(0 - 5)             | 1<br>(1 - 3)       | 1<br>(0 - 1)       |
| Other unintentional injuries                    | 92<br>(60 - 128)         | 25<br>(13 - 45)        | 11<br>(6 - 19)     | 45<br>(28 - 68)          | 6<br>(3 - 9)       | 5<br>(3 - 7)       |
| Self-harm and interpersonal violence            | 2,230<br>(1,226 - 3,166) | 27<br>(9 - 69)         | 26<br>(9 - 48)     | 1,875<br>(985 - 2,738)   | 190<br>(100 - 296) | 113<br>(63 - 166)  |
| Self-harm                                       | 1,050<br>(696 - 1,585)   | --                     | 10<br>(3 - 24)     | 826<br>(494 - 1,316)     | 121<br>(76 - 187)  | 93<br>(57 - 145)   |
| Interpersonal violence                          | 1,179<br>(348 - 1,916)   | 27<br>(9 - 69)         | 15<br>(3 - 32)     | 1,049<br>(304 - 1,733)   | 68<br>(10 - 128)   | 21<br>(2 - 45)     |
| Assault by firearm                              | 511<br>(151 - 1,051)     | 7<br>(2 - 25)          | 5<br>(1 - 11)      | 472<br>(141 - 978)       | 23<br>(4 - 51)     | 5<br>(0 - 12)      |
| Assault by sharp object                         | 219<br>(46 - 482)        | 4<br>(1 - 13)          | 3<br>(0 - 6)       | 187<br>(41 - 427)        | 21<br>(2 - 44)     | 5<br>(0 - 13)      |
| Assault by other means                          | 449<br>(105 - 780)       | 15<br>(5 - 38)         | 8<br>(2 - 18)      | 390<br>(85 - 700)        | 24<br>(3 - 50)     | 11<br>(1 - 24)     |
| Forces of nature, war, and legal intervention   | 0<br>(0 - 0)             | 0<br>(0 - 0)           | --                 | --                       | --                 | --                 |
| Exposure to forces of nature                    | 0<br>(0 - 0)             | 0<br>(0 - 0)           | --                 | --                       | --                 | --                 |

Web Table 31- Malawi deaths with 95% UI by age, sex, and cause in 2013

| Cause                                                             | Females, All Ages           | Females, 0-4 Years          | Females, 5-14 Years      | Females, 15-49 Years        | Females, 50-69 Years        | Females, 70-80 Years        |
|-------------------------------------------------------------------|-----------------------------|-----------------------------|--------------------------|-----------------------------|-----------------------------|-----------------------------|
| All causes                                                        | 79,042<br>(72,203 - 85,652) | 26,387<br>(21,944 - 31,139) | 3,401<br>(2,944 - 4,105) | 25,705<br>(22,485 - 29,016) | 11,648<br>(10,080 - 14,149) | 11,902<br>(10,455 - 13,763) |
| Communicable, maternal, neonatal, and nutritional diseases        | 57,098<br>(51,350 - 63,286) | 22,603<br>(18,592 - 26,924) | 2,821<br>(2,418 - 3,420) | 21,111<br>(18,496 - 23,919) | 6,142<br>(4,930 - 7,653)    | 4,421<br>(3,673 - 5,274)    |
| HIV/AIDS and tuberculosis                                         | 23,460<br>(19,695 - 27,644) | 1,699<br>(1,313 - 2,110)    | 1,741<br>(1,435 - 2,066) | 15,056<br>(12,864 - 17,732) | 4,027<br>(2,757 - 5,621)    | 936<br>(692 - 1,248)        |
| Tuberculosis                                                      | 3,453<br>(2,663 - 4,329)    | 332<br>(186 - 557)          | 49<br>(27 - 82)          | 1,715<br>(1,207 - 2,312)    | 738<br>(512 - 1,028)        | 620<br>(440 - 830)          |
| HIV/AIDS                                                          | 20,006<br>(16,290 - 24,470) | 1,368<br>(1,023 - 1,753)    | 1,692<br>(1,378 - 2,019) | 13,341<br>(11,174 - 16,102) | 3,289<br>(1,990 - 4,938)    | 316<br>(163 - 554)          |
| HIV/AIDS resulting in mycobacterial infection                     | 1,104<br>(821 - 1,444)      | 71<br>(51 - 96)             | 82<br>(62 - 106)         | 742<br>(567 - 969)          | 189<br>(109 - 296)          | 19<br>(10 - 34)             |
| HIV/AIDS resulting in other diseases                              | 18,902<br>(15,341 - 23,112) | 1,296<br>(974 - 1,665)      | 1,610<br>(1,313 - 1,920) | 12,598<br>(10,542 - 15,202) | 3,100<br>(1,876 - 4,662)    | 297<br>(154 - 519)          |
| Diarrhea, lower respiratory, and other common infectious diseases | 18,523<br>(15,282 - 21,928) | 10,743<br>(8,056 - 13,928)  | 599<br>(397 - 906)       | 2,613<br>(1,782 - 3,575)    | 1,708<br>(1,198 - 2,374)    | 2,860<br>(2,184 - 3,632)    |
| Diarrheal diseases                                                | 7,595<br>(5,333 - 10,623)   | 3,714<br>(1,713 - 6,345)    | 226<br>(107 - 429)       | 1,394<br>(871 - 2,115)      | 898<br>(514 - 1,413)        | 1,362<br>(867 - 2,012)      |
| Intestinal infectious diseases                                    | 374<br>(189 - 681)          | 201<br>(90 - 393)           | 77<br>(38 - 153)         | 81<br>(33 - 173)            | 10<br>(4 - 22)              | 5<br>(2 - 10)               |
| Typhoid fever                                                     | 284<br>(137 - 527)          | 146<br>(63 - 290)           | 62<br>(29 - 120)         | 64<br>(25 - 139)            | 8<br>(3 - 17)               | 4<br>(1 - 7)                |
| Paratyphoid fever                                                 | 73<br>(33 - 141)            | 42<br>(16 - 90)             | 15<br>(6 - 31)           | 14<br>(5 - 32)              | 2<br>(1 - 4)                | 1<br>(0 - 2)                |
| Other intestinal infectious diseases                              | 18<br>(8 - 33)              | 13<br>(4 - 27)              | 1<br>(0 - 4)             | 2<br>(0 - 7)                | 1<br>(0 - 3)                | 1<br>(0 - 3)                |
| Lower respiratory infections                                      | 8,491<br>(6,293 - 10,950)   | 5,568<br>(3,584 - 8,007)    | 167<br>(91 - 282)        | 675<br>(448 - 965)          | 675<br>(460 - 982)          | 1,406<br>(978 - 1,876)      |
| Upper respiratory infections                                      | 14<br>(4 - 33)              | 7<br>(0 - 24)               | 0<br>(0 - 2)             | 4<br>(1 - 11)               | 1<br>(0 - 4)                | 1<br>(0 - 5)                |
| Otitis media                                                      | 8<br>(5 - 11)               | 5<br>(2 - 8)                | 0<br>(0 - 0)             | 1<br>(0 - 1)                | 1<br>(1 - 1)                | 1<br>(1 - 2)                |
| Meningitis                                                        | 1,813<br>(1,266 - 2,474)    | 1,075<br>(619 - 1,746)      | 116<br>(62 - 207)        | 433<br>(273 - 653)          | 112<br>(70 - 172)           | 77<br>(48 - 121)            |
| Pneumococcal meningitis                                           | 409<br>(249 - 617)          | 207<br>(94 - 395)           | 34<br>(14 - 66)          | 122<br>(60 - 214)           | 27<br>(11 - 49)             | 19<br>(9 - 33)              |
| H influenzae type B meningitis                                    | 361<br>(214 - 576)          | 272<br>(138 - 478)          | 24<br>(11 - 49)          | 48<br>(21 - 88)             | 10<br>(5 - 19)              | 6<br>(3 - 11)               |
| Meningococcal meningitis                                          | 230<br>(142 - 341)          | 100<br>(44 - 191)           | 11<br>(4 - 23)           | 75<br>(31 - 140)            | 26<br>(11 - 46)             | 19<br>(9 - 33)              |
| Other meningitis                                                  | 812<br>(530 - 1,169)        | 495<br>(268 - 834)          | 47<br>(20 - 88)          | 188<br>(105 - 305)          | 49<br>(27 - 81)             | 32<br>(18 - 53)             |
| Encephalitis                                                      | 43<br>(30 - 67)             | 24<br>(12 - 45)             | 3<br>(1 - 5)             | 8<br>(5 - 16)               | 5<br>(2 - 9)                | 4<br>(1 - 7)                |
| Diphtheria                                                        | 7<br>(0 - 50)               | 6<br>(0 - 49)               | 1<br>(0 - 4)             | 0<br>(0 - 2)                | 0<br>(0 - 0)                | --                          |
| Whooping cough                                                    | 41<br>(0 - 207)             | 39<br>(0 - 201)             | 1<br>(0 - 5)             | 0<br>(0 - 1)                | 0<br>(0 - 0)                | --                          |
| Tetanus                                                           | 54<br>(18 - 102)            | 29<br>(9 - 66)              | 2<br>(1 - 6)             | 15<br>(3 - 27)              | 5<br>(1 - 11)               | 2<br>(1 - 5)                |
| Measles                                                           | 78<br>(17 - 234)            | 72<br>(16 - 218)            | 5<br>(1 - 14)            | 1<br>(0 - 2)                | 0<br>(0 - 0)                | --                          |
| Varicella and herpes zoster                                       | 6<br>(1 - 16)               | 3<br>(0 - 12)               | 0<br>(0 - 1)             | 1<br>(0 - 3)                | 0<br>(0 - 1)                | 1<br>(0 - 5)                |
| Neglected tropical diseases and malaria                           | 3,233<br>(1,800 - 5,561)    | 1,952<br>(823 - 4,088)      | 336<br>(161 - 670)       | 683<br>(364 - 1,193)        | 137<br>(66 - 258)           | 124<br>(38 - 253)           |
| Malaria                                                           | 2,456<br>(1,061 - 4,910)    | 1,677<br>(598 - 3,919)      | 205<br>(51 - 523)        | 366<br>(90 - 860)           | 101<br>(29 - 218)           | 106<br>(22 - 236)           |
| Leishmaniasis                                                     | 630<br>(219 - 1,053)        | 229<br>(43 - 512)           | 117<br>(34 - 224)        | 256<br>(82 - 569)           | 21<br>(6 - 42)              | 8<br>(2 - 17)               |
| Visceral leishmaniasis                                            | 630<br>(219 - 1,053)        | 229<br>(43 - 512)           | 117<br>(34 - 224)        | 256<br>(82 - 569)           | 21<br>(6 - 42)              | 8<br>(2 - 17)               |
| African trypanosomiasis                                           | 17<br>(8 - 30)              | 2<br>(1 - 3)                | 2<br>(1 - 3)             | 11<br>(5 - 20)              | 2<br>(1 - 4)                | 1<br>(0 - 1)                |
| Schistosomiasis                                                   | 27<br>(18 - 40)             | 1<br>(0 - 2)                | 1<br>(0 - 1)             | 15<br>(9 - 24)              | 7<br>(4 - 11)               | 4<br>(2 - 8)                |
| Cysticercosis                                                     | 3<br>(3 - 4)                | 0<br>(0 - 0)                | 0<br>(0 - 0)             | 3<br>(2 - 3)                | 0<br>(0 - 0)                | 0<br>(0 - 0)                |
| Cystic echinococcosis                                             | 6<br>(4 - 7)                | 1<br>(1 - 2)                | 1<br>(0 - 1)             | 3<br>(2 - 4)                | 0<br>(0 - 1)                | 0<br>(0 - 0)                |
| Dengue                                                            | 1<br>(1 - 2)                | 0<br>(0 - 1)                | 0<br>(0 - 0)             | 0<br>(0 - 1)                | 0<br>(0 - 0)                | 0<br>(0 - 0)                |
| Rabies                                                            | 52<br>(28 - 75)             | 12<br>(5 - 24)              | 8<br>(4 - 16)            | 26<br>(14 - 39)             | 4<br>(2 - 6)                | 1<br>(0 - 2)                |
| Intestinal nematode infections                                    | 29<br>(13 - 56)             | 25<br>(10 - 51)             | 2<br>(0 - 7)             | 1<br>(0 - 7)                | 0<br>(0 - 3)                | 0<br>(0 - 3)                |
| Ascariasis                                                        | 29<br>(13 - 56)             | 25<br>(10 - 51)             | 2<br>(0 - 7)             | 1<br>(0 - 7)                | 0<br>(0 - 3)                | 0<br>(0 - 3)                |
| Other neglected tropical diseases                                 | 11<br>(6 - 22)              | 5<br>(2 - 9)                | 0<br>(0 - 1)             | 1<br>(1 - 4)                | 1<br>(1 - 4)                | 3<br>(1 - 7)                |

Web Table 31- Malawi deaths with 95% UI by age, sex, and cause in 2013

| Cause                                                            | Females, All Ages           | Females, 0-4 Years       | Females, 5-14 Years | Females, 15-49 Years     | Females, 50-69 Years     | Females, 70-80 Years     |
|------------------------------------------------------------------|-----------------------------|--------------------------|---------------------|--------------------------|--------------------------|--------------------------|
| Maternal disorders                                               | 2,260<br>(1,516 - 3,140)    | --                       | 6<br>(2 - 13)       | 2,254<br>(1,511 - 3,135) | --                       | --                       |
| Maternal hemorrhage                                              | 265<br>(158 - 413)          | --                       | 0<br>(0 - 1)        | 265<br>(157 - 413)       | --                       | --                       |
| Maternal sepsis and other maternal infections                    | 207<br>(120 - 319)          | --                       | 1<br>(0 - 2)        | 206<br>(119 - 318)       | --                       | --                       |
| Maternal hypertensive disorders                                  | 224<br>(138 - 340)          | --                       | 1<br>(0 - 2)        | 224<br>(138 - 339)       | --                       | --                       |
| Maternal obstructed labor                                        | 115<br>(68 - 175)           | --                       | 0<br>(0 - 1)        | 114<br>(68 - 174)        | --                       | --                       |
| Maternal abortive outcome                                        | 416<br>(243 - 616)          | --                       | 1<br>(0 - 3)        | 415<br>(243 - 615)       | --                       | --                       |
| Indirect maternal deaths                                         | 175<br>(81 - 306)           | --                       | 0<br>(0 - 1)        | 174<br>(81 - 306)        | --                       | --                       |
| Late maternal deaths                                             | 200<br>(109 - 341)          | --                       | 1<br>(0 - 2)        | 199<br>(108 - 341)       | --                       | --                       |
| Maternal deaths aggravated by HIV/AIDS                           | 88<br>(49 - 134)            | --                       | --                  | 88<br>(49 - 134)         | --                       | --                       |
| Other maternal disorders                                         | 566<br>(357 - 831)          | --                       | 1<br>(0 - 3)        | 564<br>(356 - 829)       | --                       | --                       |
| Neonatal disorders                                               | 5,509<br>(4,302 - 6,805)    | 5,509<br>(4,302 - 6,805) | --                  | --                       | --                       | --                       |
| Neonatal preterm birth complications                             | 1,725<br>(822 - 2,740)      | 1,725<br>(822 - 2,740)   | --                  | --                       | --                       | --                       |
| Neonatal encephalopathy due to birth asphyxia and trauma         | 1,481<br>(744 - 2,491)      | 1,481<br>(744 - 2,491)   | --                  | --                       | --                       | --                       |
| Neonatal sepsis and other neonatal infections                    | 1,189<br>(583 - 2,170)      | 1,189<br>(583 - 2,170)   | --                  | --                       | --                       | --                       |
| Hemolytic disease and other neonatal jaundice                    | 15<br>(5 - 44)              | 15<br>(5 - 44)           | --                  | --                       | --                       | --                       |
| Other neonatal disorders                                         | 1,098<br>(509 - 1,927)      | 1,098<br>(509 - 1,927)   | --                  | --                       | --                       | --                       |
| Nutritional deficiencies                                         | 3,225<br>(2,211 - 4,472)    | 2,066<br>(1,157 - 3,319) | 100<br>(57 - 174)   | 386<br>(257 - 540)       | 226<br>(147 - 343)       | 447<br>(310 - 639)       |
| Protein-energy malnutrition                                      | 2,605<br>(1,657 - 3,813)    | 1,907<br>(1,019 - 3,101) | 85<br>(44 - 152)    | 124<br>(47 - 235)        | 152<br>(88 - 240)        | 338<br>(187 - 515)       |
| Iodine deficiency                                                | 9<br>(1 - 41)               | 5<br>(0 - 37)            | 0<br>(0 - 3)        | 2<br>(0 - 10)            | 1<br>(0 - 4)             | 1<br>(0 - 6)             |
| Iron-deficiency anemia                                           | 594<br>(305 - 1,088)        | 149<br>(28 - 453)        | 15<br>(5 - 39)      | 259<br>(151 - 393)       | 71<br>(26 - 137)         | 100<br>(41 - 239)        |
| Other nutritional deficiencies                                   | 18<br>(5 - 37)              | 6<br>(1 - 18)            | 0<br>(0 - 1)        | 2<br>(1 - 4)             | 3<br>(1 - 6)             | 8<br>(1 - 20)            |
| Other communicable, maternal, neonatal, and nutritional diseases | 889<br>(440 - 1,532)        | 632<br>(240 - 1,226)     | 39<br>(16 - 77)     | 119<br>(59 - 184)        | 44<br>(17 - 93)          | 55<br>(16 - 126)         |
| Sexually transmitted diseases excluding HIV                      | 536<br>(143 - 1,090)        | 458<br>(86 - 975)        | 26<br>(5 - 58)      | 37<br>(8 - 72)           | 8<br>(2 - 23)            | 8<br>(2 - 22)            |
| Syphilis                                                         | 508<br>(117 - 1,059)        | 458<br>(86 - 975)        | 25<br>(4 - 58)      | 15<br>(3 - 29)           | 5<br>(1 - 13)            | 6<br>(2 - 17)            |
| Chlamydial infection                                             | 9<br>(3 - 17)               | --                       | 0<br>(0 - 0)        | 7<br>(2 - 15)            | 1<br>(0 - 3)             | 0<br>(0 - 1)             |
| Gonococcal infection                                             | 10<br>(3 - 20)              | --                       | 0<br>(0 - 0)        | 7<br>(2 - 15)            | 1<br>(0 - 4)             | 1<br>(0 - 3)             |
| Other sexually transmitted diseases                              | 9<br>(3 - 17)               | --                       | 0<br>(0 - 0)        | 7<br>(2 - 14)            | 1<br>(0 - 3)             | 0<br>(0 - 1)             |
| Hepatitis                                                        | 63<br>(43 - 102)            | 16<br>(8 - 32)           | 3<br>(2 - 6)        | 36<br>(20 - 60)          | 6<br>(4 - 9)             | 3<br>(2 - 4)             |
| Acute hepatitis A                                                | 11<br>(4 - 24)              | 7<br>(2 - 15)            | 1<br>(0 - 3)        | 3<br>(1 - 7)             | 0<br>(0 - 0)             | 0<br>(0 - 0)             |
| Acute hepatitis B                                                | 27<br>(16 - 46)             | 9<br>(3 - 19)            | 1<br>(0 - 3)        | 9<br>(4 - 20)            | 5<br>(3 - 7)             | 3<br>(2 - 4)             |
| Acute hepatitis C                                                | 1<br>(0 - 1)                | --                       | 0<br>(0 - 0)        | 0<br>(0 - 1)             | 0<br>(0 - 0)             | 0<br>(0 - 0)             |
| Acute hepatitis E                                                | 25<br>(13 - 43)             | 0<br>(0 - 1)             | 0<br>(0 - 1)        | 23<br>(12 - 41)          | 1<br>(0 - 2)             | 0<br>(0 - 1)             |
| Other infectious diseases                                        | 289<br>(95 - 600)           | 159<br>(49 - 431)        | 10<br>(2 - 28)      | 46<br>(8 - 88)           | 30<br>(8 - 77)           | 44<br>(9 - 114)          |
| Non-communicable diseases                                        | 18,578<br>(15,718 - 22,033) | 2,807<br>(1,736 - 4,674) | 353<br>(237 - 526)  | 3,219<br>(2,442 - 3,995) | 5,135<br>(4,030 - 6,853) | 7,063<br>(5,939 - 8,430) |
| Neoplasms                                                        | 3,552<br>(2,825 - 4,388)    | 270<br>(152 - 463)       | 129<br>(72 - 223)   | 913<br>(697 - 1,149)     | 1,572<br>(1,182 - 2,112) | 668<br>(533 - 823)       |
| Esophageal cancer                                                | 569<br>(406 - 774)          | --                       | --                  | 140<br>(92 - 196)        | 309<br>(204 - 466)       | 120<br>(81 - 171)        |
| Stomach cancer                                                   | 59<br>(45 - 79)             | --                       | --                  | 7<br>(5 - 9)             | 34<br>(24 - 48)          | 18<br>(12 - 27)          |
| Liver cancer                                                     | 157<br>(104 - 217)          | --                       | 3<br>(1 - 5)        | 47<br>(24 - 75)          | 68<br>(43 - 102)         | 39<br>(25 - 57)          |
| Liver cancer due to hepatitis B                                  | 29<br>(13 - 51)             | --                       | 1<br>(0 - 1)        | 12<br>(4 - 23)           | 11<br>(4 - 23)           | 5<br>(2 - 8)             |
| Liver cancer due to hepatitis C                                  | 75<br>(44 - 109)            | --                       | 0<br>(0 - 1)        | 16<br>(5 - 31)           | 36<br>(20 - 59)          | 23<br>(13 - 35)          |

Web Table 31- Malawi deaths with 95% UI by age, sex, and cause in 2013

| Cause                                | Females, All Ages        | Females, 0-4 Years | Females, 5-14 Years | Females, 15-49 Years | Females, 50-69 Years     | Females, 70-80 Years     |
|--------------------------------------|--------------------------|--------------------|---------------------|----------------------|--------------------------|--------------------------|
| Liver cancer due to alcohol use      | 14<br>(7 - 24)           | --                 | --                  | 2<br>(1 - 4)         | 6<br>(3 - 13)            | 5<br>(3 - 10)            |
| Liver cancer due to other causes     | 39<br>(23 - 68)          | --                 | 2<br>(1 - 4)        | 17<br>(8 - 29)       | 14<br>(7 - 29)           | 7<br>(3 - 12)            |
| Larynx cancer                        | 8<br>(3 - 14)            | --                 | --                  | 1<br>(0 - 2)         | 6<br>(2 - 11)            | 1<br>(0 - 2)             |
| Tracheal, bronchus and lung cancer   | 52<br>(39 - 73)          | --                 | --                  | 4<br>(2 - 7)         | 26<br>(18 - 40)          | 22<br>(15 - 30)          |
| Breast cancer                        | 220<br>(147 - 282)       | --                 | --                  | 84<br>(44 - 113)     | 95<br>(65 - 132)         | 41<br>(30 - 55)          |
| Cervical cancer                      | 973<br>(652 - 1,311)     | --                 | --                  | 236<br>(158 - 318)   | 590<br>(376 - 860)       | 147<br>(95 - 209)        |
| Uterine cancer                       | 20<br>(13 - 33)          | --                 | --                  | 4<br>(2 - 8)         | 9<br>(5 - 16)            | 7<br>(4 - 12)            |
| Prostate cancer                      | --                       | --                 | --                  | --                   | --                       | --                       |
| Colon and rectum cancer              | 95<br>(73 - 117)         | --                 | --                  | 43<br>(32 - 56)      | 30<br>(21 - 41)          | 22<br>(16 - 29)          |
| Lip and oral cavity cancer           | 33<br>(21 - 50)          | --                 | --                  | 10<br>(5 - 18)       | 15<br>(9 - 24)           | 8<br>(4 - 14)            |
| Nasopharynx cancer                   | 14<br>(7 - 21)           | --                 | 0<br>(0 - 1)        | 5<br>(3 - 8)         | 6<br>(2 - 11)            | 3<br>(1 - 5)             |
| Other pharynx cancer                 | 4<br>(3 - 8)             | --                 | --                  | 1<br>(1 - 3)         | 2<br>(1 - 3)             | 1<br>(1 - 2)             |
| Gallbladder and biliary tract cancer | 17<br>(12 - 28)          | --                 | --                  | 5<br>(3 - 8)         | 8<br>(5 - 13)            | 4<br>(1 - 12)            |
| Pancreatic cancer                    | 65<br>(48 - 84)          | --                 | --                  | 8<br>(6 - 11)        | 37<br>(26 - 53)          | 19<br>(14 - 26)          |
| Malignant skin melanoma              | 24<br>(17 - 33)          | --                 | --                  | 3<br>(2 - 5)         | 14<br>(9 - 20)           | 7<br>(5 - 10)            |
| Non-melanoma skin cancer             | 19<br>(9 - 39)           | --                 | --                  | 5<br>(1 - 10)        | 4<br>(2 - 10)            | 10<br>(4 - 26)           |
| Ovarian cancer                       | 108<br>(69 - 159)        | --                 | --                  | 46<br>(24 - 77)      | 49<br>(30 - 73)          | 14<br>(9 - 20)           |
| Testicular cancer                    | --                       | --                 | --                  | --                   | --                       | --                       |
| Kidney cancer                        | 57<br>(36 - 89)          | 23<br>(9 - 48)     | 10<br>(4 - 21)      | 8<br>(6 - 13)        | 13<br>(8 - 20)           | 3<br>(2 - 5)             |
| Bladder cancer                       | 140<br>(79 - 213)        | --                 | --                  | 42<br>(22 - 79)      | 65<br>(36 - 106)         | 32<br>(19 - 50)          |
| Brain and nervous system cancer      | 24<br>(17 - 33)          | 5<br>(2 - 10)      | 1<br>(1 - 2)        | 5<br>(3 - 7)         | 8<br>(5 - 13)            | 5<br>(3 - 7)             |
| Thyroid cancer                       | 43<br>(24 - 61)          | --                 | 0<br>(0 - 0)        | 2<br>(1 - 3)         | 25<br>(14 - 37)          | 16<br>(8 - 26)           |
| Mesothelioma                         | 2<br>(1 - 4)             | --                 | --                  | 1<br>(1 - 2)         | 1<br>(0 - 1)             | 0<br>(0 - 1)             |
| Hodgkin lymphoma                     | 23<br>(15 - 33)          | 1<br>(0 - 2)       | 1<br>(0 - 2)        | 5<br>(3 - 8)         | 9<br>(5 - 15)            | 8<br>(4 - 14)            |
| Non-Hodgkin lymphoma                 | 361<br>(170 - 607)       | 142<br>(50 - 305)  | 79<br>(28 - 165)    | 95<br>(48 - 160)     | 36<br>(22 - 58)          | 9<br>(6 - 14)            |
| Multiple myeloma                     | 18<br>(10 - 30)          | --                 | --                  | 5<br>(3 - 7)         | 11<br>(4 - 21)           | 2<br>(1 - 3)             |
| Leukemia                             | 52<br>(38 - 64)          | 4<br>(2 - 8)       | 4<br>(2 - 6)        | 22<br>(14 - 29)      | 14<br>(9 - 20)           | 9<br>(6 - 12)            |
| Other neoplasms                      | 395<br>(293 - 511)       | 95<br>(52 - 161)   | 31<br>(17 - 53)     | 78<br>(51 - 125)     | 89<br>(56 - 132)         | 102<br>(59 - 148)        |
| Cardiovascular diseases              | 7,498<br>(6,094 - 9,451) | 194<br>(116 - 336) | 36<br>(21 - 61)     | 872<br>(608 - 1,322) | 2,171<br>(1,633 - 2,972) | 4,225<br>(3,432 - 5,148) |
| Rheumatic heart disease              | 311<br>(192 - 541)       | 7<br>(2 - 20)      | 7<br>(3 - 13)       | 144<br>(80 - 267)    | 79<br>(44 - 142)         | 75<br>(43 - 135)         |
| Ischemic heart disease               | 1,697<br>(1,202 - 2,348) | 1<br>(0 - 5)       | 1<br>(0 - 3)        | 140<br>(81 - 295)    | 469<br>(303 - 698)       | 1,086<br>(762 - 1,473)   |
| Cerebrovascular disease              | 3,093<br>(2,303 - 3,939) | 18<br>(8 - 37)     | 3<br>(1 - 6)        | 176<br>(119 - 260)   | 942<br>(663 - 1,299)     | 1,954<br>(1,459 - 2,501) |
| Ischemic stroke                      | 1,272<br>(492 - 1,969)   | 1<br>(0 - 4)       | 0<br>(0 - 1)        | 21<br>(6 - 41)       | 249<br>(78 - 458)        | 1,000<br>(395 - 1,500)   |
| Hemorrhagic stroke                   | 1,821<br>(1,276 - 2,813) | 17<br>(7 - 36)     | 3<br>(1 - 5)        | 155<br>(100 - 238)   | 693<br>(469 - 1,010)     | 954<br>(598 - 1,682)     |
| Hypertensive heart disease           | 783<br>(441 - 1,498)     | 4<br>(1 - 10)      | 1<br>(0 - 2)        | 56<br>(28 - 93)      | 205<br>(102 - 400)       | 517<br>(274 - 1,085)     |
| Cardiomyopathy and myocarditis       | 390<br>(220 - 680)       | 82<br>(33 - 158)   | 11<br>(4 - 22)      | 100<br>(36 - 206)    | 84<br>(37 - 168)         | 113<br>(48 - 247)        |
| Atrial fibrillation and flutter      | 3<br>(1 - 5)             | --                 | --                  | 0<br>(0 - 0)         | 1<br>(0 - 1)             | 2<br>(1 - 4)             |
| Aortic aneurysm                      | 65<br>(31 - 163)         | --                 | --                  | 11<br>(2 - 30)       | 20<br>(8 - 50)           | 35<br>(16 - 85)          |
| Peripheral vascular disease          | 4<br>(2 - 8)             | --                 | --                  | 0<br>(0 - 0)         | 1<br>(1 - 2)             | 3<br>(2 - 6)             |
| Endocarditis                         | 70<br>(40 - 119)         | 10<br>(3 - 31)     | 1<br>(1 - 3)        | 15<br>(6 - 36)       | 15<br>(8 - 27)           | 29<br>(13 - 54)          |

Web Table 31- Malawi deaths with 95% UI by age, sex, and cause in 2013

| Cause                                               | Females, All Ages      | Females, 0-4 Years | Females, 5-14 Years | Females, 15-49 Years | Females, 50-69 Years | Females, 70-80 Years |
|-----------------------------------------------------|------------------------|--------------------|---------------------|----------------------|----------------------|----------------------|
| Other cardiovascular and circulatory diseases       | 1,081<br>(647 - 1,898) | 72<br>(23 - 163)   | 11<br>(4 - 24)      | 230<br>(69 - 435)    | 357<br>(199 - 638)   | 411<br>(229 - 810)   |
| Chronic respiratory diseases                        | 1,020<br>(821 - 1,275) | 121<br>(71 - 211)  | 14<br>(9 - 23)      | 147<br>(104 - 195)   | 264<br>(187 - 370)   | 474<br>(363 - 608)   |
| Chronic obstructive pulmonary disease               | 550<br>(381 - 747)     | 25<br>(10 - 48)    | 4<br>(2 - 8)        | 51<br>(31 - 77)      | 160<br>(103 - 241)   | 309<br>(213 - 420)   |
| Pneumoconiosis                                      | 8<br>(5 - 12)          | 2<br>(1 - 4)       | 0<br>(0 - 1)        | 4<br>(2 - 6)         | 1<br>(1 - 2)         | 1<br>(1 - 2)         |
| Silicosis                                           | 1<br>(0 - 1)           | 0<br>(0 - 1)       | 0<br>(0 - 0)        | 0<br>(0 - 1)         | 0<br>(0 - 0)         | 0<br>(0 - 0)         |
| Asbestosis                                          | 0<br>(0 - 1)           | 0<br>(0 - 0)       | 0<br>(0 - 0)        | 0<br>(0 - 0)         | 0<br>(0 - 0)         | 0<br>(0 - 0)         |
| Coal workers pneumoconiosis                         | 0<br>(0 - 1)           | 0<br>(0 - 0)       | 0<br>(0 - 0)        | 0<br>(0 - 0)         | 0<br>(0 - 0)         | 0<br>(0 - 0)         |
| Other pneumoconiosis                                | 7<br>(4 - 10)          | 1<br>(0 - 3)       | 0<br>(0 - 0)        | 3<br>(2 - 5)         | 1<br>(0 - 1)         | 1<br>(1 - 2)         |
| Asthma                                              | 230<br>(118 - 334)     | 39<br>(14 - 80)    | 5<br>(2 - 10)       | 41<br>(19 - 66)      | 63<br>(28 - 105)     | 82<br>(33 - 138)     |
| Interstitial lung disease and pulmonary sarcoidosis | 111<br>(32 - 197)      | 4<br>(1 - 15)      | 1<br>(0 - 2)        | 16<br>(4 - 36)       | 29<br>(8 - 58)       | 61<br>(13 - 128)     |
| Other chronic respiratory diseases                  | 121<br>(78 - 186)      | 52<br>(27 - 94)    | 3<br>(2 - 7)        | 35<br>(20 - 57)      | 10<br>(5 - 18)       | 21<br>(11 - 37)      |
| Cirrhosis                                           | 787<br>(625 - 972)     | 30<br>(12 - 60)    | 13<br>(7 - 21)      | 210<br>(149 - 275)   | 300<br>(212 - 414)   | 233<br>(165 - 305)   |
| Cirrhosis due to hepatitis B                        | 232<br>(122 - 342)     | 1<br>(0 - 4)       | 2<br>(1 - 4)        | 64<br>(34 - 99)      | 94<br>(45 - 153)     | 71<br>(31 - 119)     |
| Cirrhosis due to hepatitis C                        | 139<br>(63 - 256)      | 1<br>(0 - 3)       | 1<br>(0 - 2)        | 39<br>(13 - 78)      | 60<br>(23 - 119)     | 37<br>(13 - 79)      |
| Cirrhosis due to alcohol use                        | 248<br>(155 - 368)     | --                 | --                  | 40<br>(18 - 66)      | 106<br>(61 - 170)    | 102<br>(61 - 162)    |
| Cirrhosis due to other causes                       | 168<br>(114 - 242)     | 28<br>(12 - 56)    | 10<br>(5 - 16)      | 67<br>(38 - 105)     | 40<br>(21 - 68)      | 23<br>(12 - 41)      |
| Digestive diseases                                  | 1,028<br>(824 - 1,270) | 90<br>(44 - 165)   | 27<br>(17 - 41)     | 281<br>(194 - 379)   | 238<br>(170 - 328)   | 393<br>(297 - 503)   |
| Peptic ulcer disease                                | 220<br>(131 - 319)     | 7<br>(2 - 15)      | 2<br>(1 - 4)        | 54<br>(30 - 88)      | 56<br>(31 - 92)      | 100<br>(56 - 161)    |
| Gastritis and duodenitis                            | 53<br>(20 - 125)       | 6<br>(2 - 14)      | 2<br>(1 - 5)        | 15<br>(6 - 29)       | 10<br>(3 - 30)       | 20<br>(5 - 71)       |
| Appendicitis                                        | 101<br>(61 - 154)      | 12<br>(3 - 29)     | 5<br>(2 - 9)        | 41<br>(22 - 68)      | 18<br>(7 - 35)       | 25<br>(9 - 54)       |
| Paralytic ileus and intestinal obstruction          | 305<br>(189 - 477)     | 21<br>(6 - 46)     | 9<br>(5 - 16)       | 53<br>(28 - 82)      | 86<br>(46 - 136)     | 137<br>(76 - 235)    |
| Inguinal, femoral, and abdominal hernia             | 15<br>(7 - 24)         | 3<br>(1 - 6)       | 0<br>(0 - 0)        | 5<br>(2 - 9)         | 1<br>(1 - 2)         | 6<br>(2 - 11)        |
| Inflammatory bowel disease                          | 99<br>(57 - 156)       | 24<br>(9 - 52)     | 3<br>(1 - 6)        | 39<br>(21 - 66)      | 13<br>(6 - 23)       | 20<br>(9 - 34)       |
| Vascular intestinal disorders                       | 10<br>(4 - 24)         | 0<br>(0 - 1)       | 0<br>(0 - 0)        | 2<br>(1 - 3)         | 2<br>(1 - 6)         | 6<br>(2 - 16)        |
| Gallbladder and biliary diseases                    | 88<br>(55 - 126)       | 3<br>(1 - 6)       | 1<br>(0 - 2)        | 25<br>(14 - 39)      | 22<br>(12 - 39)      | 37<br>(19 - 61)      |
| Pancreatitis                                        | 42<br>(21 - 74)        | 1<br>(0 - 3)       | 1<br>(0 - 1)        | 18<br>(5 - 35)       | 10<br>(4 - 20)       | 12<br>(5 - 25)       |
| Other digestive diseases                            | 96<br>(61 - 143)       | 13<br>(5 - 28)     | 3<br>(1 - 6)        | 28<br>(15 - 48)      | 20<br>(10 - 37)      | 32<br>(16 - 61)      |
| Neurological disorders                              | 678<br>(528 - 861)     | 119<br>(59 - 226)  | 25<br>(14 - 45)     | 135<br>(72 - 219)    | 58<br>(42 - 79)      | 340<br>(262 - 437)   |
| Alzheimer disease and other dementias               | 339<br>(257 - 442)     | --                 | --                  | 0<br>(0 - 0)         | 29<br>(20 - 41)      | 310<br>(234 - 406)   |
| Parkinson disease                                   | 3<br>(2 - 6)           | --                 | --                  | 0<br>(0 - 1)         | 1<br>(1 - 2)         | 2<br>(1 - 4)         |
| Epilepsy                                            | 287<br>(175 - 428)     | 104<br>(46 - 213)  | 23<br>(12 - 42)     | 125<br>(64 - 209)    | 16<br>(9 - 28)       | 20<br>(10 - 42)      |
| Multiple sclerosis                                  | 4<br>(2 - 8)           | --                 | --                  | 2<br>(1 - 6)         | 1<br>(1 - 2)         | 0<br>(0 - 1)         |
| Other neurological disorders                        | 44<br>(34 - 55)        | 15<br>(9 - 24)     | 3<br>(2 - 4)        | 8<br>(5 - 10)        | 10<br>(8 - 15)       | 8<br>(6 - 11)        |
| Mental and substance use disorders                  | 162<br>(107 - 233)     | 9<br>(3 - 15)      | 0<br>(0 - 0)        | 121<br>(75 - 181)    | 22<br>(13 - 41)      | 10<br>(4 - 19)       |
| Schizophrenia                                       | 18<br>(5 - 37)         | --                 | --                  | 12<br>(2 - 26)       | 4<br>(1 - 8)         | 2<br>(1 - 5)         |
| Alcohol use disorders                               | 56<br>(18 - 96)        | --                 | --                  | 42<br>(10 - 77)      | 11<br>(4 - 20)       | 3<br>(1 - 5)         |
| Drug use disorders                                  | 87<br>(48 - 134)       | 9<br>(3 - 15)      | --                  | 66<br>(38 - 104)     | 8<br>(2 - 20)        | 5<br>(1 - 12)        |
| Opioid use disorders                                | 9<br>(5 - 14)          | 1<br>(0 - 2)       | --                  | 7<br>(4 - 11)        | 1<br>(0 - 2)         | 0<br>(0 - 1)         |
| Cocaine use disorders                               | 1<br>(0 - 1)           | 0<br>(0 - 0)       | --                  | 0<br>(0 - 1)         | 0<br>(0 - 0)         | 0<br>(0 - 0)         |
| Amphetamine use disorders                           | 0<br>(0 - 1)           | 0<br>(0 - 0)       | --                  | 0<br>(0 - 0)         | 0<br>(0 - 0)         | 0<br>(0 - 0)         |

Web Table 31- Malawi deaths with 95% UI by age, sex, and cause in 2013

| Cause                                               | Females, All Ages        | Females, 0-4 Years     | Females, 5-14 Years | Females, 15-49 Years | Females, 50-69 Years | Females, 70-80 Years |
|-----------------------------------------------------|--------------------------|------------------------|---------------------|----------------------|----------------------|----------------------|
| Other drug use disorders                            | 77<br>(42 - 119)         | 8<br>(2 - 13)          | --                  | 59<br>(34 - 92)      | 7<br>(2 - 18)        | 4<br>(1 - 10)        |
| Eating disorders                                    | 0<br>(0 - 1)             | --                     | 0<br>(0 - 0)        | 0<br>(0 - 1)         | --                   | --                   |
| Anorexia nervosa                                    | 0<br>(0 - 1)             | --                     | 0<br>(0 - 0)        | 0<br>(0 - 1)         | --                   | --                   |
| Diabetes, urogenital, blood, and endocrine diseases | 1,808<br>(1,375 - 2,248) | 300<br>(149 - 518)     | 49<br>(28 - 83)     | 391<br>(265 - 535)   | 453<br>(330 - 618)   | 615<br>(464 - 781)   |
| Diabetes mellitus                                   | 718<br>(552 - 918)       | 5<br>(2 - 10)          | 3<br>(1 - 6)        | 81<br>(58 - 107)     | 269<br>(186 - 383)   | 359<br>(264 - 472)   |
| Acute glomerulonephritis                            | 28<br>(13 - 42)          | 3<br>(2 - 7)           | 1<br>(0 - 2)        | 13<br>(5 - 24)       | 5<br>(2 - 9)         | 5<br>(2 - 8)         |
| Chronic kidney disease                              | 318<br>(212 - 456)       | 36<br>(19 - 67)        | 11<br>(6 - 20)      | 85<br>(54 - 130)     | 67<br>(40 - 107)     | 118<br>(61 - 183)    |
| Chronic kidney disease due to diabetes mellitus     | 2<br>(0 - 4)             | 0<br>(0 - 0)           | 0<br>(0 - 0)        | 0<br>(0 - 1)         | 0<br>(0 - 1)         | 1<br>(0 - 2)         |
| Chronic kidney disease due to hypertension          | 130<br>(72 - 208)        | 5<br>(1 - 14)          | 1<br>(0 - 3)        | 25<br>(11 - 47)      | 34<br>(18 - 59)      | 65<br>(33 - 105)     |
| Chronic kidney disease due to glomerulonephritis    | 110<br>(69 - 165)        | 22<br>(11 - 37)        | 6<br>(3 - 10)       | 45<br>(23 - 72)      | 17<br>(7 - 29)       | 21<br>(7 - 40)       |
| Chronic kidney disease due to other causes          | 76<br>(25 - 150)         | 9<br>(2 - 22)          | 4<br>(1 - 8)        | 15<br>(6 - 32)       | 16<br>(5 - 36)       | 32<br>(6 - 71)       |
| Urinary diseases and male infertility               | 171<br>(119 - 231)       | 24<br>(13 - 43)        | 4<br>(2 - 8)        | 50<br>(27 - 76)      | 47<br>(26 - 74)      | 46<br>(28 - 70)      |
| Interstitial nephritis and urinary tract infections | 121<br>(74 - 166)        | 13<br>(6 - 27)         | 2<br>(1 - 4)        | 28<br>(14 - 46)      | 38<br>(20 - 61)      | 40<br>(24 - 62)      |
| Urolithiasis                                        | 12<br>(5 - 23)           | --                     | 1<br>(0 - 2)        | 6<br>(1 - 15)        | 3<br>(1 - 7)         | 2<br>(1 - 5)         |
| Other urinary diseases                              | 38<br>(21 - 57)          | 11<br>(4 - 21)         | 1<br>(1 - 3)        | 16<br>(6 - 26)       | 5<br>(2 - 11)        | 4<br>(2 - 9)         |
| Gynecological diseases                              | 13<br>(3 - 72)           | --                     | --                  | 8<br>(1 - 56)        | 3<br>(1 - 9)         | 2<br>(1 - 7)         |
| Uterine fibroids                                    | 2<br>(1 - 11)            | --                     | --                  | 1<br>(0 - 7)         | 1<br>(0 - 2)         | 1<br>(0 - 2)         |
| Polycystic ovarian syndrome                         | 1<br>(0 - 4)             | --                     | --                  | 1<br>(0 - 4)         | 0<br>(0 - 0)         | --                   |
| Endometriosis                                       | 1<br>(0 - 10)            | --                     | --                  | 1<br>(0 - 9)         | 0<br>(0 - 0)         | --                   |
| Genital prolapse                                    | 2<br>(0 - 11)            | --                     | --                  | 1<br>(0 - 8)         | 0<br>(0 - 2)         | 1<br>(0 - 2)         |
| Other gynecological diseases                        | 6<br>(1 - 36)            | --                     | --                  | 4<br>(1 - 28)        | 1<br>(0 - 5)         | 1<br>(0 - 3)         |
| Hemoglobinopathies and hemolytic anemias            | 294<br>(85 - 591)        | 151<br>(34 - 335)      | 24<br>(8 - 50)      | 91<br>(21 - 192)     | 15<br>(7 - 30)       | 13<br>(6 - 27)       |
| Thalassemias                                        | 16<br>(4 - 34)           | 12<br>(3 - 26)         | 1<br>(0 - 2)        | 3<br>(1 - 7)         | 0<br>(0 - 0)         | 0<br>(0 - 0)         |
| Sickle cell disorders                               | 222<br>(58 - 455)        | 112<br>(24 - 250)      | 21<br>(7 - 43)      | 77<br>(18 - 164)     | 10<br>(4 - 20)       | 1<br>(0 - 1)         |
| G6PD deficiency                                     | 18<br>(5 - 37)           | 11<br>(2 - 23)         | 1<br>(0 - 2)        | 5<br>(1 - 11)        | 1<br>(0 - 2)         | 1<br>(0 - 1)         |
| Other hemoglobinopathies and hemolytic anemias      | 38<br>(18 - 67)          | 16<br>(5 - 35)         | 1<br>(0 - 2)        | 5<br>(1 - 11)        | 4<br>(2 - 9)         | 12<br>(5 - 25)       |
| Endocrine, metabolic, blood, and immune disorders   | 266<br>(178 - 371)       | 80<br>(41 - 150)       | 6<br>(3 - 12)       | 62<br>(36 - 110)     | 47<br>(23 - 77)      | 71<br>(29 - 111)     |
| Musculoskeletal disorders                           | 61<br>(40 - 107)         | --                     | 3<br>(2 - 5)        | 38<br>(17 - 73)      | 11<br>(6 - 23)       | 10<br>(5 - 23)       |
| Rheumatoid arthritis                                | 21<br>(13 - 40)          | --                     | 1<br>(0 - 2)        | 7<br>(2 - 15)        | 6<br>(3 - 15)        | 7<br>(3 - 18)        |
| Other musculoskeletal disorders                     | 40<br>(24 - 73)          | --                     | 2<br>(1 - 4)        | 30<br>(13 - 59)      | 4<br>(2 - 12)        | 3<br>(1 - 11)        |
| Other non-communicable diseases                     | 1,984<br>(1,057 - 3,937) | 1,673<br>(792 - 3,478) | 57<br>(24 - 129)    | 111<br>(51 - 223)    | 47<br>(32 - 71)      | 96<br>(64 - 142)     |
| Congenital anomalies                                | 1,740<br>(823 - 3,693)   | 1,587<br>(726 - 3,392) | 54<br>(21 - 126)    | 75<br>(28 - 175)     | 10<br>(6 - 16)       | 13<br>(8 - 20)       |
| Neural tube defects                                 | 522<br>(122 - 1,804)     | 491<br>(109 - 1,690)   | 11<br>(3 - 36)      | 18<br>(4 - 69)       | 1<br>(0 - 2)         | 1<br>(0 - 2)         |
| Congenital heart anomalies                          | 712<br>(274 - 1,600)     | 640<br>(232 - 1,445)   | 28<br>(9 - 68)      | 35<br>(10 - 92)      | 4<br>(2 - 7)         | 6<br>(3 - 11)        |
| Cleft lip and cleft palate                          | 7<br>(0 - 23)            | 7<br>(0 - 23)          | --                  | --                   | --                   | --                   |
| Down syndrome                                       | 127<br>(27 - 337)        | 109<br>(21 - 303)      | 6<br>(1 - 17)       | 10<br>(2 - 25)       | 1<br>(1 - 3)         | 0<br>(0 - 1)         |
| Chromosomal unbalanced rearrangements               | 90<br>(21 - 248)         | 84<br>(19 - 238)       | 2<br>(0 - 4)        | 3<br>(1 - 9)         | 0<br>(0 - 1)         | 0<br>(0 - 1)         |
| Other congenital anomalies                          | 283<br>(95 - 775)        | 257<br>(80 - 691)      | 8<br>(3 - 23)       | 9<br>(3 - 34)        | 3<br>(2 - 6)         | 6<br>(3 - 10)        |
| Skin and subcutaneous diseases                      | 234<br>(168 - 311)       | 77<br>(39 - 140)       | 3<br>(2 - 5)        | 35<br>(20 - 58)      | 37<br>(24 - 58)      | 83<br>(53 - 126)     |
| Cellulitis                                          | 74<br>(31 - 130)         | 24<br>(4 - 60)         | 1<br>(0 - 2)        | 13<br>(2 - 22)       | 13<br>(6 - 23)       | 23<br>(10 - 44)      |



Web Table 31- Malawi deaths with 95% UI by age, sex, and cause in 2013

| Cause                                           | Females, All Ages        | Females, 0-4 Years   | Females, 5-14 Years | Females, 15-49 Years   | Females, 50-69 Years | Females, 70-80 Years |
|-------------------------------------------------|--------------------------|----------------------|---------------------|------------------------|----------------------|----------------------|
| Pyoderma                                        | 129<br>(77 - 204)        | 50<br>(22 - 102)     | 1<br>(1 - 3)        | 19<br>(8 - 35)         | 19<br>(11 - 33)      | 39<br>(22 - 62)      |
| Decubitus ulcer                                 | 24<br>(14 - 39)          | 0<br>(0 - 2)         | 0<br>(0 - 0)        | 1<br>(0 - 4)           | 3<br>(2 - 6)         | 19<br>(9 - 31)       |
| Other skin and subcutaneous diseases            | 8<br>(4 - 14)            | 2<br>(0 - 6)         | 0<br>(0 - 0)        | 2<br>(1 - 5)           | 1<br>(1 - 3)         | 2<br>(1 - 4)         |
| Sudden infant death syndrome                    | 9<br>(2 - 33)            | 9<br>(2 - 33)        | --                  | --                     | --                   | --                   |
| Injuries                                        | 3,367<br>(2,466 - 4,341) | 977<br>(597 - 1,642) | 226<br>(156 - 339)  | 1,375<br>(860 - 1,927) | 371<br>(241 - 524)   | 418<br>(270 - 574)   |
| Transport injuries                              | 936<br>(704 - 1,254)     | 197<br>(99 - 334)    | 93<br>(52 - 157)    | 402<br>(256 - 628)     | 136<br>(86 - 194)    | 109<br>(67 - 154)    |
| Road injuries                                   | 870<br>(657 - 1,154)     | 173<br>(89 - 297)    | 85<br>(47 - 145)    | 383<br>(245 - 591)     | 129<br>(82 - 183)    | 100<br>(63 - 141)    |
| Pedestrian road injuries                        | 449<br>(321 - 616)       | 93<br>(43 - 168)     | 50<br>(27 - 87)     | 169<br>(99 - 274)      | 74<br>(43 - 110)     | 62<br>(37 - 91)      |
| Cyclist road injuries                           | 19<br>(12 - 37)          | 4<br>(1 - 9)         | 3<br>(1 - 5)        | 6<br>(2 - 17)          | 5<br>(3 - 8)         | 2<br>(1 - 4)         |
| Motorcyclist road injuries                      | 26<br>(13 - 51)          | 3<br>(2 - 7)         | 1<br>(0 - 3)        | 16<br>(6 - 36)         | 3<br>(1 - 6)         | 2<br>(1 - 4)         |
| Motor vehicle road injuries                     | 373<br>(263 - 532)       | 72<br>(33 - 137)     | 31<br>(15 - 57)     | 191<br>(114 - 307)     | 46<br>(28 - 70)      | 33<br>(19 - 50)      |
| Other road injuries                             | 3<br>(1 - 10)            | 1<br>(0 - 3)         | 0<br>(0 - 1)        | 1<br>(0 - 2)           | 1<br>(0 - 3)         | 0<br>(0 - 2)         |
| Other transport injuries                        | 66<br>(45 - 107)         | 23<br>(10 - 45)      | 7<br>(3 - 13)       | 19<br>(10 - 46)        | 7<br>(4 - 12)        | 9<br>(3 - 16)        |
| Unintentional injuries                          | 1,609<br>(1,121 - 2,256) | 755<br>(438 - 1,326) | 116<br>(76 - 188)   | 354<br>(219 - 523)     | 149<br>(90 - 227)    | 236<br>(138 - 352)   |
| Falls                                           | 144<br>(77 - 207)        | 26<br>(13 - 48)      | 7<br>(3 - 12)       | 27<br>(13 - 41)        | 19<br>(10 - 32)      | 65<br>(27 - 112)     |
| Drowning                                        | 314<br>(198 - 509)       | 176<br>(88 - 333)    | 39<br>(20 - 67)     | 72<br>(37 - 127)       | 17<br>(9 - 27)       | 10<br>(5 - 16)       |
| Fire, heat, and hot substances                  | 290<br>(150 - 469)       | 167<br>(65 - 334)    | 21<br>(10 - 41)     | 58<br>(27 - 100)       | 20<br>(10 - 35)      | 24<br>(12 - 41)      |
| Poisonings                                      | 68<br>(35 - 111)         | 31<br>(12 - 65)      | 3<br>(1 - 6)        | 22<br>(12 - 40)        | 8<br>(2 - 15)        | 4<br>(1 - 6)         |
| Exposure to mechanical forces                   | 238<br>(111 - 1,005)     | 138<br>(48 - 663)    | 17<br>(8 - 60)      | 52<br>(24 - 179)       | 16<br>(7 - 29)       | 15<br>(5 - 24)       |
| Unintentional firearm injuries                  | 35<br>(18 - 59)          | 8<br>(3 - 15)        | 2<br>(1 - 3)        | 21<br>(8 - 42)         | 3<br>(1 - 5)         | 2<br>(1 - 4)         |
| Unintentional suffocation                       | 105<br>(19 - 886)        | 80<br>(12 - 618)     | 7<br>(2 - 50)       | 12<br>(2 - 151)        | 3<br>(1 - 17)        | 2<br>(1 - 12)        |
| Other exposure to mechanical forces             | 98<br>(50 - 159)         | 50<br>(21 - 111)     | 8<br>(4 - 16)       | 19<br>(9 - 33)         | 10<br>(3 - 16)       | 11<br>(2 - 17)       |
| Adverse effects of medical treatment            | 291<br>(159 - 454)       | 91<br>(35 - 192)     | 8<br>(4 - 15)       | 58<br>(24 - 107)       | 49<br>(24 - 91)      | 85<br>(34 - 155)     |
| Animal contact                                  | 133<br>(56 - 278)        | 49<br>(18 - 134)     | 14<br>(5 - 33)      | 45<br>(15 - 87)        | 14<br>(4 - 24)       | 11<br>(3 - 20)       |
| Venomous animal contact                         | 96<br>(33 - 205)         | 43<br>(15 - 115)     | 9<br>(3 - 20)       | 31<br>(9 - 61)         | 7<br>(1 - 13)        | 6<br>(1 - 12)        |
| Non-venomous animal contact                     | 37<br>(12 - 87)          | 6<br>(1 - 24)        | 5<br>(1 - 14)       | 14<br>(4 - 30)         | 7<br>(1 - 15)        | 5<br>(1 - 11)        |
| Foreign body                                    | 91<br>(52 - 150)         | 61<br>(32 - 113)     | 3<br>(2 - 6)        | 6<br>(4 - 14)          | 3<br>(2 - 5)         | 18<br>(7 - 31)       |
| Pulmonary aspiration and foreign body in airway | 87<br>(49 - 147)         | 59<br>(31 - 112)     | 3<br>(1 - 5)        | 6<br>(3 - 10)          | 2<br>(1 - 4)         | 17<br>(6 - 29)       |
| Foreign body in other body part                 | 5<br>(2 - 20)            | 2<br>(1 - 8)         | 0<br>(0 - 2)        | 1<br>(0 - 6)           | 1<br>(0 - 2)         | 1<br>(1 - 3)         |
| Other unintentional injuries                    | 39<br>(26 - 55)          | 14<br>(7 - 25)       | 4<br>(2 - 6)        | 13<br>(7 - 21)         | 3<br>(2 - 5)         | 5<br>(2 - 8)         |
| Self-harm and interpersonal violence            | 822<br>(416 - 1,343)     | 25<br>(7 - 77)       | 18<br>(4 - 43)      | 620<br>(277 - 1,080)   | 85<br>(44 - 129)     | 74<br>(40 - 113)     |
| Self-harm                                       | 344<br>(227 - 539)       | --                   | 3<br>(1 - 6)        | 233<br>(140 - 402)     | 55<br>(33 - 83)      | 54<br>(34 - 81)      |
| Interpersonal violence                          | 478<br>(111 - 987)       | 25<br>(7 - 77)       | 16<br>(2 - 40)      | 386<br>(88 - 837)      | 30<br>(4 - 61)       | 20<br>(1 - 45)       |
| Assault by firearm                              | 116<br>(25 - 275)        | 6<br>(1 - 18)        | 3<br>(0 - 8)        | 98<br>(20 - 243)       | 8<br>(1 - 18)        | 2<br>(0 - 4)         |
| Assault by sharp object                         | 134<br>(22 - 304)        | 6<br>(1 - 18)        | 2<br>(0 - 6)        | 111<br>(18 - 266)      | 7<br>(1 - 16)        | 8<br>(0 - 19)        |
| Assault by other means                          | 228<br>(46 - 503)        | 14<br>(4 - 42)       | 11<br>(1 - 27)      | 177<br>(32 - 404)      | 16<br>(2 - 33)       | 11<br>(1 - 25)       |
| Forces of nature, war, and legal intervention   | 0<br>(0 - 0)             | 0<br>(0 - 0)         | --                  | --                     | --                   | --                   |
| Exposure to forces of nature                    | 0<br>(0 - 0)             | 0<br>(0 - 0)         | --                  | --                     | --                   | --                   |

Web Table 31- Malaysia deaths with 95% UI by age, sex, and cause in 2013

| Cause                                                              | Both Sexes, All Ages           | Both Sexes, 0-4 Years    | Both Sexes, 5-14 Years | Both Sexes, 15-49 Years     | Both Sexes, 50-69 Years     | Both Sexes, 70-80 Years     |
|--------------------------------------------------------------------|--------------------------------|--------------------------|------------------------|-----------------------------|-----------------------------|-----------------------------|
| All causes                                                         | 144,793<br>(135,526 - 153,779) | 3,349<br>(2,853 - 3,952) | 1,039<br>(919 - 1,164) | 24,760<br>(22,629 - 27,260) | 51,810<br>(47,524 - 55,743) | 63,835<br>(61,126 - 66,276) |
| Communicable, maternal, neonatal, and nutritional diseases         | 20,993<br>(17,299 - 23,345)    | 1,722<br>(1,429 - 2,076) | 259<br>(203 - 330)     | 4,658<br>(4,161 - 5,145)    | 6,141<br>(4,745 - 7,191)    | 8,213<br>(6,152 - 9,787)    |
| HIV/AIDS and tuberculosis                                          | 3,848<br>(3,390 - 4,433)       | 8<br>(5 - 11)            | 9<br>(4 - 19)          | 1,925<br>(1,658 - 2,303)    | 1,137<br>(953 - 1,349)      | 769<br>(569 - 934)          |
| Tuberculosis                                                       | 1,723<br>(1,311 - 1,991)       | 4<br>(2 - 6)             | 4<br>(3 - 6)           | 396<br>(292 - 484)          | 614<br>(467 - 734)          | 705<br>(495 - 870)          |
| HIV/AIDS                                                           | 2,125<br>(1,774 - 2,652)       | 4<br>(1 - 7)             | 5<br>(0 - 15)          | 1,529<br>(1,277 - 1,897)    | 523<br>(371 - 719)          | 64<br>(41 - 93)             |
| HIV/AIDS resulting in mycobacterial infection                      | 136<br>(103 - 178)             | 0<br>(0 - 0)             | 0<br>(0 - 1)           | 96<br>(73 - 127)            | 35<br>(24 - 50)             | 5<br>(3 - 7)                |
| HIV/AIDS resulting in other diseases                               | 1,990<br>(1,657 - 2,483)       | 4<br>(1 - 7)             | 5<br>(0 - 15)          | 1,434<br>(1,195 - 1,792)    | 488<br>(346 - 672)          | 59<br>(38 - 86)             |
| Diarrrhea, lower respiratory, and other common infectious diseases | 14,303<br>(10,542 - 16,560)    | 558<br>(419 - 748)       | 217<br>(162 - 287)     | 2,047<br>(1,575 - 2,453)    | 4,481<br>(3,120 - 5,479)    | 7,000<br>(4,972 - 8,597)    |
| Diarrheal diseases                                                 | 398<br>(327 - 487)             | 39<br>(21 - 67)          | 6<br>(4 - 10)          | 64<br>(49 - 83)             | 98<br>(73 - 129)            | 191<br>(135 - 262)          |
| Intestinal infectious diseases                                     | 345<br>(164 - 621)             | 103<br>(44 - 195)        | 90<br>(42 - 160)       | 117<br>(48 - 229)           | 28<br>(11 - 62)             | 8<br>(3 - 16)               |
| Typhoid fever                                                      | 266<br>(125 - 485)             | 75<br>(32 - 144)         | 69<br>(32 - 124)       | 92<br>(37 - 186)            | 23<br>(9 - 51)              | 7<br>(3 - 13)               |
| Paratyphoid fever                                                  | 76<br>(36 - 138)               | 27<br>(11 - 52)          | 20<br>(9 - 38)         | 23<br>(9 - 45)              | 4<br>(2 - 10)               | 1<br>(0 - 3)                |
| Other intestinal infectious diseases                               | 4<br>(1 - 10)                  | 2<br>(0 - 5)             | 0<br>(0 - 2)           | 1<br>(0 - 5)                | 1<br>(0 - 3)                | 0<br>(0 - 2)                |
| Lower respiratory infections                                       | 12,426<br>(8,686 - 14,646)     | 218<br>(157 - 302)       | 57<br>(39 - 79)        | 1,482<br>(1,062 - 1,857)    | 4,051<br>(2,703 - 5,028)    | 6,618<br>(4,562 - 8,504)    |
| Upper respiratory infections                                       | 5<br>(2 - 9)                   | 0<br>(0 - 0)             | 0<br>(0 - 0)           | 1<br>(0 - 3)                | 2<br>(0 - 4)                | 2<br>(0 - 4)                |
| Otitis media                                                       | 23<br>(20 - 27)                | 0<br>(0 - 0)             | 0<br>(0 - 1)           | 2<br>(2 - 3)                | 9<br>(8 - 12)               | 10<br>(8 - 13)              |
| Meningitis                                                         | 525<br>(436 - 610)             | 72<br>(46 - 108)         | 19<br>(13 - 28)        | 167<br>(129 - 214)          | 156<br>(118 - 200)          | 112<br>(81 - 155)           |
| Pneumococcal meningitis                                            | 176<br>(140 - 219)             | 16<br>(10 - 26)          | 7<br>(4 - 10)          | 59<br>(43 - 82)             | 54<br>(34 - 78)             | 39<br>(25 - 57)             |
| H influenzae type B meningitis                                     | 85<br>(67 - 106)               | 26<br>(16 - 39)          | 5<br>(3 - 8)           | 22<br>(15 - 31)             | 18<br>(12 - 27)             | 14<br>(9 - 20)              |
| Meningococcal meningitis                                           | 76<br>(58 - 100)               | 5<br>(3 - 7)             | 2<br>(1 - 3)           | 26<br>(16 - 37)             | 25<br>(14 - 40)             | 19<br>(12 - 31)             |
| Other meningitis                                                   | 188<br>(144 - 231)             | 24<br>(15 - 38)          | 6<br>(3 - 9)           | 59<br>(40 - 83)             | 58<br>(37 - 83)             | 41<br>(26 - 59)             |
| Encephalitis                                                       | 443<br>(348 - 539)             | 29<br>(18 - 44)          | 30<br>(20 - 41)        | 206<br>(156 - 263)          | 130<br>(93 - 163)           | 49<br>(34 - 63)             |
| Diphtheria                                                         | 1<br>(0 - 3)                   | 0<br>(0 - 1)             | 0<br>(0 - 1)           | 0<br>(0 - 1)                | 0<br>(0 - 1)                | --                          |
| Whooping cough                                                     | 16<br>(0 - 71)                 | 15<br>(0 - 65)           | 1<br>(0 - 4)           | 0<br>(0 - 1)                | 0<br>(0 - 0)                | --                          |
| Tetanus                                                            | 14<br>(10 - 19)                | 1<br>(0 - 1)             | 0<br>(0 - 1)           | 2<br>(1 - 3)                | 5<br>(4 - 8)                | 6<br>(4 - 9)                |
| Measles                                                            | 95<br>(10 - 337)               | 79<br>(9 - 278)          | 13<br>(1 - 45)         | 3<br>(0 - 12)               | 0<br>(0 - 0)                | --                          |
| Varicella and herpes zoster                                        | 12<br>(5 - 23)                 | 2<br>(0 - 7)             | 1<br>(0 - 2)           | 3<br>(1 - 7)                | 2<br>(0 - 4)                | 4<br>(0 - 14)               |
| Neglected tropical diseases and malaria                            | 218<br>(179 - 263)             | 13<br>(9 - 19)           | 19<br>(14 - 25)        | 108<br>(89 - 132)           | 53<br>(42 - 65)             | 25<br>(20 - 31)             |
| Malaria                                                            | 15<br>(10 - 23)                | 1<br>(0 - 1)             | 0<br>(0 - 1)           | 7<br>(4 - 11)               | 5<br>(3 - 9)                | 2<br>(1 - 4)                |
| Leishmaniasis                                                      | 0                              | 0                        | 0                      | 0                           | 0                           | 0                           |
| Visceral leishmaniasis                                             | 0                              | 0                        | 0                      | 0                           | 0                           | 0                           |
| Cysticercosis                                                      | 0                              | 0                        | 0                      | 0                           | 0                           | 0                           |
| Cystic echinococcosis                                              | 2<br>(2 - 2)                   | 0<br>(0 - 0)             | 0<br>(0 - 0)           | 1<br>(1 - 1)                | 1<br>(1 - 1)                | 0<br>(0 - 0)                |
| Dengue                                                             | 168<br>(133 - 205)             | 10<br>(6 - 15)           | 17<br>(12 - 22)        | 90<br>(72 - 112)            | 38<br>(29 - 46)             | 14<br>(11 - 17)             |
| Rabies                                                             | 3<br>(2 - 3)                   | 0<br>(0 - 0)             | 0<br>(0 - 1)           | 1<br>(1 - 2)                | 0<br>(0 - 1)                | 0<br>(0 - 0)                |
| Intestinal nematode infections                                     | 3                              | 1                        | 0                      | 1                           | 1                           | 1                           |
| Ascariasis                                                         | 3<br>(0 - 10)                  | 1<br>(0 - 3)             | 0<br>(0 - 3)           | 1<br>(0 - 4)                | 1<br>(0 - 4)                | 1<br>(0 - 4)                |
| Other neglected tropical diseases                                  | 27<br>(21 - 33)                | 2<br>(1 - 3)             | 1<br>(1 - 1)           | 8<br>(6 - 11)               | 8<br>(6 - 12)               | 8<br>(6 - 11)               |
| Maternal disorders                                                 | 291<br>(226 - 369)             | --                       | 0<br>(0 - 1)           | 291<br>(225 - 369)          | --                          | --                          |
| Maternal hemorrhage                                                | 39<br>(27 - 54)                | --                       | 0<br>(0 - 0)           | 39<br>(27 - 54)             | --                          | --                          |

Web Table 31- Malaysia deaths with 95% UI by age, sex, and cause in 2013

| Cause                                                            | Both Sexes, All Ages          | Both Sexes, 0-4 Years    | Both Sexes, 5-14 Years | Both Sexes, 15-49 Years     | Both Sexes, 50-69 Years     | Both Sexes, 70-80 Years     |
|------------------------------------------------------------------|-------------------------------|--------------------------|------------------------|-----------------------------|-----------------------------|-----------------------------|
| Maternal sepsis and other maternal infections                    | 49<br>(36 - 66)               | --                       | 0<br>(0 - 0)           | 49<br>(36 - 66)             | --                          | --                          |
| Maternal hypertensive disorders                                  | 22<br>(14 - 35)               | --                       | 0<br>(0 - 0)           | 22<br>(14 - 35)             | --                          | --                          |
| Maternal obstructed labor                                        | 18<br>(8 - 27)                | --                       | 0<br>(0 - 0)           | 18<br>(8 - 27)              | --                          | --                          |
| Maternal abortive outcome                                        | 39<br>(27 - 54)               | --                       | 0<br>(0 - 0)           | 38<br>(27 - 54)             | --                          | --                          |
| Indirect maternal deaths                                         | 32<br>(21 - 47)               | --                       | 0<br>(0 - 0)           | 32<br>(21 - 47)             | --                          | --                          |
| Late maternal deaths                                             | 32<br>(19 - 46)               | --                       | 0<br>(0 - 0)           | 32<br>(19 - 46)             | --                          | --                          |
| Maternal deaths aggravated by HIV/AIDS                           | 0<br>(0 - 0)                  | --                       | --                     | 0<br>(0 - 0)                | --                          | --                          |
| Other maternal disorders                                         | 61<br>(43 - 85)               | --                       | 0<br>(0 - 0)           | 61<br>(43 - 85)             | --                          | --                          |
| Neonatal disorders                                               | 1,074<br>(878 - 1,303)        | 1,074<br>(878 - 1,303)   | --                     | --                          | --                          | --                          |
| Neonatal preterm birth complications                             | 401<br>(257 - 552)            | 401<br>(257 - 552)       | --                     | --                          | --                          | --                          |
| Neonatal encephalopathy due to birth asphyxia and trauma         | 214<br>(132 - 308)            | 214<br>(132 - 308)       | --                     | --                          | --                          | --                          |
| Neonatal sepsis and other neonatal infections                    | 211<br>(135 - 325)            | 211<br>(135 - 325)       | --                     | --                          | --                          | --                          |
| Hemolytic disease and other neonatal jaundice                    | 4<br>(2 - 8)                  | 4<br>(2 - 8)             | --                     | --                          | --                          | --                          |
| Other neonatal disorders                                         | 244<br>(150 - 415)            | 244<br>(150 - 415)       | --                     | --                          | --                          | --                          |
| Nutritional deficiencies                                         | 215<br>(170 - 333)            | 6<br>(4 - 9)             | 3<br>(2 - 4)           | 36<br>(28 - 53)             | 53<br>(39 - 80)             | 118<br>(85 - 191)           |
| Protein-energy malnutrition                                      | 61<br>(36 - 114)              | 3<br>(2 - 5)             | 1<br>(0 - 2)           | 7<br>(4 - 14)               | 13<br>(7 - 26)              | 37<br>(19 - 69)             |
| Iodine deficiency                                                | 7<br>(2 - 17)                 | 0<br>(0 - 1)             | 0<br>(0 - 1)           | 1<br>(0 - 4)                | 2<br>(0 - 8)                | 3<br>(0 - 12)               |
| Iron-deficiency anemia                                           | 137<br>(100 - 213)            | 2<br>(1 - 4)             | 1<br>(1 - 2)           | 25<br>(18 - 37)             | 35<br>(24 - 57)             | 74<br>(49 - 120)            |
| Other nutritional deficiencies                                   | 10<br>(6 - 19)                | 0<br>(0 - 1)             | 0<br>(0 - 1)           | 2<br>(1 - 4)                | 2<br>(1 - 5)                | 5<br>(2 - 10)               |
| Other communicable, maternal, neonatal, and nutritional diseases | 1,043<br>(832 - 1,296)        | 63<br>(20 - 119)         | 11<br>(7 - 18)         | 251<br>(193 - 327)          | 417<br>(320 - 548)          | 301<br>(194 - 479)          |
| Sexually transmitted diseases excluding HIV                      | 65<br>(22 - 123)              | 40<br>(0 - 93)           | 3<br>(0 - 6)           | 8<br>(5 - 14)               | 6<br>(3 - 12)               | 7<br>(4 - 14)               |
| Syphilis                                                         | 56<br>(13 - 112)              | 40<br>(0 - 93)           | 3<br>(0 - 6)           | 4<br>(2 - 6)                | 4<br>(2 - 7)                | 6<br>(3 - 11)               |
| Chlamydial infection                                             | 2<br>(2 - 4)                  | --                       | 0<br>(0 - 0)           | 1<br>(1 - 3)                | 1<br>(0 - 1)                | 0<br>(0 - 1)                |
| Gonococcal infection                                             | 4<br>(3 - 6)                  | --                       | 0<br>(0 - 0)           | 2<br>(1 - 3)                | 1<br>(1 - 2)                | 1<br>(0 - 2)                |
| Other sexually transmitted diseases                              | 3<br>(2 - 4)                  | --                       | 0<br>(0 - 0)           | 2<br>(1 - 3)                | 1<br>(0 - 2)                | 0<br>(0 - 1)                |
| Hepatitis                                                        | 360<br>(302 - 424)            | 2<br>(1 - 3)             | 1<br>(0 - 1)           | 109<br>(82 - 148)           | 178<br>(140 - 223)          | 70<br>(55 - 90)             |
| Acute hepatitis A                                                | 22<br>(6 - 47)                | 1<br>(0 - 2)             | 0<br>(0 - 0)           | 10<br>(3 - 23)              | 9<br>(2 - 21)               | 2<br>(0 - 5)                |
| Acute hepatitis B                                                | 257<br>(191 - 325)            | 1<br>(0 - 2)             | 0<br>(0 - 0)           | 61<br>(35 - 94)             | 135<br>(95 - 178)           | 60<br>(45 - 78)             |
| Acute hepatitis C                                                | 6<br>(1 - 16)                 | --                       | 0<br>(0 - 0)           | 2<br>(0 - 5)                | 3<br>(0 - 8)                | 1<br>(0 - 4)                |
| Acute hepatitis E                                                | 74<br>(37 - 132)              | 0<br>(0 - 0)             | 0<br>(0 - 0)           | 36<br>(18 - 63)             | 31<br>(13 - 61)             | 7<br>(3 - 15)               |
| Other infectious diseases                                        | 619<br>(423 - 852)            | 20<br>(11 - 41)          | 8<br>(4 - 13)          | 134<br>(89 - 195)           | 233<br>(143 - 357)          | 224<br>(118 - 401)          |
| Non-communicable diseases                                        | 106,129<br>(98,866 - 113,685) | 1,313<br>(1,042 - 1,613) | 396<br>(336 - 460)     | 12,824<br>(11,484 - 14,419) | 40,596<br>(36,885 - 43,995) | 50,999<br>(48,036 - 53,983) |
| Neoplasms                                                        | 21,345<br>(19,565 - 23,077)   | 102<br>(70 - 140)        | 149<br>(121 - 181)     | 3,383<br>(2,998 - 3,840)    | 9,529<br>(8,601 - 10,394)   | 8,183<br>(7,510 - 8,929)    |
| Esophageal cancer                                                | 467<br>(381 - 562)            | --                       | --                     | 44<br>(34 - 57)             | 207<br>(162 - 259)          | 216<br>(168 - 269)          |
| Stomach cancer                                                   | 1,298<br>(1,133 - 1,483)      | --                       | --                     | 135<br>(111 - 164)          | 500<br>(428 - 585)          | 663<br>(551 - 803)          |
| Liver cancer                                                     | 1,810<br>(1,555 - 2,116)      | --                       | 2<br>(1 - 3)           | 211<br>(161 - 269)          | 902<br>(740 - 1,104)        | 695<br>(551 - 874)          |
| Liver cancer due to hepatitis B                                  | 1,121<br>(892 - 1,368)        | --                       | 1<br>(1 - 2)           | 152<br>(114 - 198)          | 600<br>(456 - 774)          | 368<br>(269 - 485)          |
| Liver cancer due to hepatitis C                                  | 308<br>(170 - 440)            | --                       | 0<br>(0 - 0)           | 21<br>(9 - 39)              | 134<br>(67 - 209)           | 154<br>(81 - 237)           |
| Liver cancer due to alcohol use                                  | 160<br>(111 - 228)            | --                       | --                     | 10<br>(6 - 15)              | 66<br>(43 - 101)            | 85<br>(54 - 130)            |
| Liver cancer due to other causes                                 | 220<br>(148 - 318)            | --                       | 1<br>(1 - 2)           | 29<br>(19 - 43)             | 102<br>(62 - 156)           | 88<br>(58 - 131)            |

Web Table 31- Malaysia deaths with 95% UI by age, sex, and cause in 2013

| Cause                                         | Both Sexes, All Ages        | Both Sexes, 0-4 Years | Both Sexes, 5-14 Years | Both Sexes, 15-49 Years  | Both Sexes, 50-69 Years     | Both Sexes, 70-80 Years     |
|-----------------------------------------------|-----------------------------|-----------------------|------------------------|--------------------------|-----------------------------|-----------------------------|
| Larynx cancer                                 | 164<br>(132 - 226)          | --                    | --                     | 12<br>(9 - 18)           | 69<br>(53 - 93)             | 83<br>(63 - 119)            |
| Tracheal, bronchus and lung cancer            | 4,818<br>(4,308 - 5,362)    | --                    | --                     | 403<br>(331 - 490)       | 2,286<br>(1,981 - 2,611)    | 2,129<br>(1,833 - 2,460)    |
| Breast cancer                                 | 1,753<br>(1,457 - 2,056)    | --                    | --                     | 586<br>(464 - 728)       | 900<br>(717 - 1,079)        | 268<br>(219 - 324)          |
| Cervical cancer                               | 647<br>(515 - 807)          | --                    | --                     | 157<br>(115 - 220)       | 328<br>(248 - 420)          | 161<br>(119 - 213)          |
| Uterine cancer                                | 148<br>(88 - 195)           | --                    | --                     | 18<br>(10 - 27)          | 85<br>(48 - 120)            | 44<br>(26 - 64)             |
| Prostate cancer                               | 543<br>(320 - 765)          | --                    | --                     | 3<br>(2 - 4)             | 106<br>(65 - 153)           | 435<br>(252 - 621)          |
| Colon and rectum cancer                       | 2,487<br>(2,222 - 2,820)    | --                    | --                     | 260<br>(218 - 304)       | 1,002<br>(874 - 1,138)      | 1,224<br>(1,047 - 1,460)    |
| Lip and oral cavity cancer                    | 331<br>(264 - 410)          | --                    | --                     | 52<br>(40 - 69)          | 152<br>(119 - 192)          | 127<br>(97 - 162)           |
| Nasopharynx cancer                            | 749<br>(604 - 937)          | --                    | 2<br>(1 - 5)           | 219<br>(159 - 296)       | 371<br>(277 - 499)          | 156<br>(112 - 213)          |
| Other pharynx cancer                          | 181<br>(148 - 220)          | --                    | --                     | 24<br>(18 - 32)          | 92<br>(72 - 118)            | 65<br>(48 - 87)             |
| Gallbladder and biliary tract cancer          | 208<br>(153 - 266)          | --                    | --                     | 18<br>(12 - 24)          | 87<br>(63 - 115)            | 103<br>(71 - 140)           |
| Pancreatic cancer                             | 810<br>(711 - 916)          | --                    | --                     | 79<br>(65 - 97)          | 401<br>(342 - 468)          | 330<br>(277 - 390)          |
| Malignant skin melanoma                       | 100<br>(77 - 132)           | --                    | --                     | 31<br>(24 - 40)          | 43<br>(33 - 59)             | 25<br>(18 - 36)             |
| Non-melanoma skin cancer                      | 94<br>(68 - 126)            | --                    | --                     | 8<br>(6 - 11)            | 35<br>(25 - 48)             | 51<br>(35 - 69)             |
| Ovarian cancer                                | 612<br>(489 - 746)          | --                    | --                     | 152<br>(110 - 201)       | 348<br>(265 - 447)          | 113<br>(83 - 154)           |
| Testicular cancer                             | 21<br>(13 - 28)             | --                    | --                     | 13<br>(7 - 18)           | 5<br>(3 - 8)                | 3<br>(2 - 5)                |
| Kidney cancer                                 | 345<br>(290 - 401)          | 3<br>(2 - 6)          | 2<br>(1 - 3)           | 42<br>(33 - 53)          | 179<br>(141 - 221)          | 119<br>(94 - 148)           |
| Bladder cancer                                | 335<br>(278 - 404)          | --                    | --                     | 13<br>(10 - 18)          | 115<br>(89 - 144)           | 206<br>(166 - 262)          |
| Brain and nervous system cancer               | 289<br>(233 - 380)          | 7<br>(4 - 12)         | 18<br>(12 - 25)        | 107<br>(84 - 145)        | 116<br>(90 - 156)           | 41<br>(31 - 55)             |
| Thyroid cancer                                | 158<br>(114 - 193)          | --                    | 0<br>(0 - 0)           | 13<br>(10 - 17)          | 70<br>(49 - 90)             | 75<br>(53 - 99)             |
| Mesothelioma                                  | 16<br>(13 - 19)             | --                    | --                     | 3<br>(2 - 4)             | 8<br>(6 - 11)               | 4<br>(3 - 6)                |
| Hodgkin lymphoma                              | 54<br>(45 - 66)             | 1<br>(1 - 2)          | 1<br>(1 - 2)           | 23<br>(18 - 29)          | 19<br>(14 - 27)             | 9<br>(7 - 13)               |
| Non-Hodgkin lymphoma                          | 750<br>(559 - 882)          | 8<br>(5 - 13)         | 13<br>(9 - 19)         | 166<br>(129 - 200)       | 317<br>(225 - 392)          | 246<br>(175 - 312)          |
| Multiple myeloma                              | 165<br>(135 - 203)          | --                    | --                     | 20<br>(15 - 25)          | 90<br>(71 - 117)            | 55<br>(42 - 69)             |
| Leukemia                                      | 907<br>(806 - 1,012)        | 37<br>(22 - 56)       | 67<br>(51 - 85)        | 302<br>(257 - 356)       | 276<br>(232 - 321)          | 225<br>(190 - 268)          |
| Other neoplasms                               | 1,088<br>(887 - 1,255)      | 46<br>(26 - 69)       | 44<br>(29 - 61)        | 269<br>(220 - 325)       | 418<br>(337 - 503)          | 311<br>(244 - 391)          |
| Cardiovascular diseases                       | 52,208<br>(48,048 - 57,386) | 82<br>(57 - 114)      | 72<br>(56 - 92)        | 5,110<br>(4,519 - 5,839) | 20,376<br>(18,259 - 22,609) | 26,567<br>(24,733 - 29,275) |
| Rheumatic heart disease                       | 491<br>(367 - 608)          | 1<br>(1 - 2)          | 10<br>(6 - 15)         | 119<br>(90 - 156)        | 133<br>(99 - 170)           | 228<br>(160 - 290)          |
| Ischemic heart disease                        | 30,790<br>(27,651 - 33,929) | 9<br>(5 - 15)         | 7<br>(5 - 10)          | 2,724<br>(2,317 - 3,167) | 12,439<br>(10,993 - 13,971) | 15,612<br>(14,027 - 17,244) |
| Cerebrovascular disease                       | 14,933<br>(12,963 - 18,390) | 20<br>(13 - 29)       | 24<br>(17 - 32)        | 1,322<br>(1,083 - 1,704) | 5,678<br>(4,790 - 6,927)    | 7,889<br>(6,733 - 9,853)    |
| Ischemic stroke                               | 7,658<br>(6,486 - 9,931)    | 1<br>(1 - 2)          | 1<br>(1 - 2)           | 195<br>(140 - 278)       | 2,174<br>(1,745 - 2,887)    | 5,287<br>(4,439 - 6,789)    |
| Hemorrhagic stroke                            | 7,274<br>(6,195 - 8,957)    | 19<br>(12 - 27)       | 22<br>(16 - 30)        | 1,127<br>(921 - 1,449)   | 3,505<br>(2,907 - 4,342)    | 2,602<br>(2,108 - 3,257)    |
| Hypertensive heart disease                    | 1,251<br>(1,000 - 1,704)    | 0<br>(0 - 0)          | 0<br>(0 - 1)           | 94<br>(69 - 130)         | 382<br>(286 - 504)          | 774<br>(592 - 1,100)        |
| Cardiomyopathy and myocarditis                | 785<br>(664 - 1,060)        | 26<br>(17 - 41)       | 14<br>(10 - 19)        | 202<br>(163 - 268)       | 295<br>(236 - 418)          | 249<br>(197 - 330)          |
| Atrial fibrillation and flutter               | 362<br>(291 - 459)          | --                    | --                     | 14<br>(11 - 19)          | 87<br>(67 - 107)            | 262<br>(201 - 345)          |
| Aortic aneurysm                               | 751<br>(625 - 1,029)        | --                    | --                     | 42<br>(33 - 57)          | 202<br>(161 - 307)          | 507<br>(411 - 673)          |
| Peripheral vascular disease                   | 20<br>(17 - 26)             | --                    | --                     | 1<br>(1 - 1)             | 5<br>(4 - 7)                | 14<br>(11 - 19)             |
| Endocarditis                                  | 725<br>(507 - 925)          | 12<br>(7 - 20)        | 7<br>(5 - 11)          | 241<br>(168 - 325)       | 266<br>(176 - 348)          | 198<br>(128 - 262)          |
| Other cardiovascular and circulatory diseases | 2,099<br>(1,749 - 2,789)    | 13<br>(8 - 21)        | 10<br>(7 - 15)         | 352<br>(282 - 454)       | 888<br>(708 - 1,208)        | 834<br>(648 - 1,139)        |
| Chronic respiratory diseases                  | 8,870<br>(6,740 - 9,892)    | 39<br>(24 - 59)       | 18<br>(12 - 23)        | 571<br>(399 - 678)       | 2,599<br>(1,941 - 3,037)    | 5,643<br>(4,265 - 6,398)    |

Web Table 31- Malaysia deaths with 95% UI by age, sex, and cause in 2013

| Cause                                               | Both Sexes, All Ages     | Both Sexes, 0-4 Years | Both Sexes, 5-14 Years | Both Sexes, 15-49 Years | Both Sexes, 50-69 Years  | Both Sexes, 70-80 Years  |
|-----------------------------------------------------|--------------------------|-----------------------|------------------------|-------------------------|--------------------------|--------------------------|
| Chronic obstructive pulmonary disease               | 5,787<br>(4,319 - 6,724) | 19<br>(12 - 30)       | 4<br>(3 - 6)           | 143<br>(97 - 181)       | 1,564<br>(1,160 - 1,864) | 4,057<br>(2,927 - 4,788) |
| Pneumoconiosis                                      | 283<br>(172 - 427)       | 0<br>(0 - 0)          | 0<br>(0 - 1)           | 15<br>(8 - 21)          | 119<br>(70 - 181)        | 149<br>(90 - 237)        |
| Silicosis                                           | 156<br>(95 - 243)        | 0<br>(0 - 0)          | 0<br>(0 - 0)           | 1<br>(1 - 1)            | 32<br>(19 - 52)          | 123<br>(74 - 195)        |
| Asbestosis                                          | 24<br>(13 - 39)          | 0<br>(0 - 0)          | 0<br>(0 - 0)           | 2<br>(1 - 4)            | 21<br>(12 - 35)          | 0<br>(0 - 0)             |
| Coal workers pneumoconiosis                         | 58<br>(34 - 85)          | 0<br>(0 - 0)          | 0<br>(0 - 0)           | 8<br>(4 - 12)           | 46<br>(27 - 69)          | 4<br>(2 - 7)             |
| Other pneumoconiosis                                | 44<br>(28 - 68)          | 0<br>(0 - 0)          | 0<br>(0 - 0)           | 3<br>(2 - 5)            | 20<br>(12 - 31)          | 21<br>(12 - 36)          |
| Asthma                                              | 1,462<br>(970 - 1,739)   | 14<br>(7 - 24)        | 12<br>(8 - 16)         | 367<br>(241 - 441)      | 585<br>(379 - 729)       | 484<br>(308 - 617)       |
| Interstitial lung disease and pulmonary sarcoidosis | 1,107<br>(746 - 1,859)   | 0<br>(0 - 1)          | 1<br>(0 - 1)           | 25<br>(16 - 45)         | 297<br>(202 - 481)       | 784<br>(497 - 1,348)     |
| Other chronic respiratory diseases                  | 231<br>(157 - 305)       | 5<br>(3 - 8)          | 1<br>(1 - 2)           | 21<br>(14 - 27)         | 35<br>(23 - 47)          | 170<br>(111 - 236)       |
| Cirrhosis                                           | 2,141<br>(1,866 - 2,439) | 5<br>(3 - 8)          | 5<br>(4 - 7)           | 481<br>(394 - 585)      | 1,103<br>(926 - 1,293)   | 547<br>(460 - 652)       |
| Cirrhosis due to hepatitis B                        | 1,057<br>(884 - 1,270)   | 0<br>(0 - 1)          | 2<br>(1 - 3)           | 240<br>(187 - 313)      | 541<br>(435 - 678)       | 273<br>(214 - 336)       |
| Cirrhosis due to hepatitis C                        | 441<br>(254 - 678)       | 0<br>(0 - 1)          | 1<br>(0 - 1)           | 95<br>(41 - 158)        | 232<br>(120 - 373)       | 113<br>(68 - 172)        |
| Cirrhosis due to alcohol use                        | 505<br>(363 - 671)       | --                    | --                     | 96<br>(61 - 143)        | 268<br>(186 - 362)       | 141<br>(100 - 194)       |
| Cirrhosis due to other causes                       | 138<br>(94 - 191)        | 4<br>(2 - 7)          | 3<br>(2 - 4)           | 49<br>(32 - 70)         | 62<br>(37 - 94)          | 20<br>(12 - 30)          |
| Digestive diseases                                  | 2,773<br>(2,459 - 3,194) | 10<br>(7 - 15)        | 11<br>(9 - 14)         | 360<br>(306 - 426)      | 933<br>(798 - 1,088)     | 1,460<br>(1,282 - 1,717) |
| Peptic ulcer disease                                | 768<br>(609 - 1,032)     | 1<br>(0 - 1)          | 1<br>(1 - 1)           | 68<br>(49 - 92)         | 234<br>(175 - 316)       | 465<br>(348 - 633)       |
| Gastritis and duodenitis                            | 20<br>(13 - 30)          | 0<br>(0 - 0)          | 0<br>(0 - 1)           | 4<br>(3 - 7)            | 6<br>(4 - 9)             | 9<br>(6 - 14)            |
| Appendicitis                                        | 128<br>(80 - 186)        | 1<br>(0 - 2)          | 2<br>(1 - 4)           | 32<br>(19 - 49)         | 46<br>(26 - 71)          | 47<br>(28 - 72)          |
| Paralytic ileus and intestinal obstruction          | 485<br>(355 - 731)       | 4<br>(2 - 6)          | 2<br>(1 - 4)           | 44<br>(29 - 73)         | 137<br>(94 - 213)        | 298<br>(210 - 454)       |
| Inguinal, femoral, and abdominal hernia             | 52<br>(34 - 75)          | 0<br>(0 - 0)          | 0<br>(0 - 1)           | 5<br>(3 - 7)            | 18<br>(12 - 27)          | 28<br>(17 - 41)          |
| Inflammatory bowel disease                          | 34<br>(24 - 42)          | 0<br>(0 - 1)          | 0<br>(0 - 1)           | 7<br>(5 - 10)           | 12<br>(8 - 16)           | 14<br>(9 - 19)           |
| Vascular intestinal disorders                       | 128<br>(76 - 213)        | 1<br>(0 - 2)          | 1<br>(0 - 1)           | 15<br>(8 - 27)          | 38<br>(20 - 68)          | 74<br>(42 - 124)         |
| Gallbladder and biliary diseases                    | 452<br>(330 - 548)       | 1<br>(0 - 1)          | 1<br>(1 - 1)           | 45<br>(32 - 57)         | 156<br>(109 - 200)       | 250<br>(183 - 329)       |
| Pancreatitis                                        | 383<br>(303 - 510)       | 0<br>(0 - 0)          | 1<br>(1 - 2)           | 80<br>(58 - 105)        | 154<br>(117 - 210)       | 148<br>(110 - 209)       |
| Other digestive diseases                            | 324<br>(250 - 392)       | 2<br>(1 - 4)          | 2<br>(1 - 3)           | 61<br>(46 - 78)         | 132<br>(97 - 167)        | 127<br>(92 - 167)        |
| Neurological disorders                              | 4,102<br>(3,538 - 4,672) | 31<br>(21 - 46)       | 22<br>(16 - 31)        | 186<br>(151 - 228)      | 666<br>(552 - 788)       | 3,196<br>(2,692 - 3,712) |
| Alzheimer disease and other dementias               | 3,498<br>(2,946 - 4,049) | --                    | --                     | 4<br>(1 - 7)            | 473<br>(370 - 579)       | 3,021<br>(2,520 - 3,529) |
| Parkinson disease                                   | 159<br>(121 - 220)       | --                    | --                     | 9<br>(7 - 12)           | 54<br>(40 - 72)          | 96<br>(65 - 146)         |
| Epilepsy                                            | 296<br>(227 - 358)       | 19<br>(11 - 32)       | 16<br>(11 - 25)        | 128<br>(93 - 169)       | 78<br>(55 - 103)         | 54<br>(37 - 74)          |
| Multiple sclerosis                                  | 11<br>(7 - 17)           | --                    | --                     | 4<br>(3 - 8)            | 4<br>(3 - 7)             | 2<br>(1 - 3)             |
| Other neurological disorders                        | 138<br>(121 - 170)       | 12<br>(9 - 17)        | 5<br>(4 - 7)           | 41<br>(34 - 50)         | 56<br>(47 - 73)          | 23<br>(19 - 29)          |
| Mental and substance use disorders                  | 1,357<br>(1,127 - 1,666) | 3<br>(2 - 4)          | 0<br>(0 - 0)           | 950<br>(762 - 1,203)    | 361<br>(286 - 469)       | 43<br>(34 - 54)          |
| Schizophrenia                                       | 11<br>(8 - 15)           | --                    | --                     | 3<br>(3 - 5)            | 5<br>(4 - 7)             | 2<br>(2 - 3)             |
| Alcohol use disorders                               | 145<br>(102 - 222)       | --                    | --                     | 50<br>(35 - 77)         | 79<br>(53 - 118)         | 16<br>(11 - 24)          |
| Drug use disorders                                  | 1,197<br>(988 - 1,497)   | 3<br>(2 - 4)          | --                     | 894<br>(711 - 1,144)    | 276<br>(210 - 371)       | 25<br>(18 - 32)          |
| Opioid use disorders                                | 762<br>(627 - 950)       | 2<br>(1 - 3)          | --                     | 576<br>(460 - 741)      | 168<br>(128 - 226)       | 16<br>(11 - 20)          |
| Cocaine use disorders                               | 18<br>(14 - 23)          | 0<br>(0 - 0)          | --                     | 14<br>(11 - 19)         | 3<br>(2 - 4)             | 0<br>(0 - 0)             |
| Amphetamine use disorders                           | 19<br>(15 - 24)          | 0<br>(0 - 0)          | --                     | 14<br>(11 - 19)         | 4<br>(3 - 6)             | 0<br>(0 - 1)             |
| Other drug use disorders                            | 399<br>(324 - 498)       | 1<br>(0 - 1)          | --                     | 289<br>(226 - 376)      | 101<br>(75 - 138)        | 8<br>(6 - 11)            |
| Eating disorders                                    | 3<br>(2 - 5)             | --                    | 0<br>(0 - 0)           | 3<br>(2 - 5)            | --                       | --                       |

Web Table 31- Malaysia deaths with 95% UI by age, sex, and cause in 2013

| Cause                                               | Both Sexes, All Ages       | Both Sexes, 0-4 Years | Both Sexes, 5-14 Years | Both Sexes, 15-49 Years  | Both Sexes, 50-69 Years  | Both Sexes, 70-80 Years  |
|-----------------------------------------------------|----------------------------|-----------------------|------------------------|--------------------------|--------------------------|--------------------------|
| Anorexia nervosa                                    | 3<br>(2 - 5)               | --                    | 0<br>(0 - 0)           | 3<br>(2 - 5)             | --                       | --                       |
| Diabetes, urogenital, blood, and endocrine diseases | 10,311<br>(9,233 - 12,411) | 65<br>(47 - 88)       | 45<br>(36 - 58)        | 1,277<br>(1,105 - 1,588) | 4,369<br>(3,852 - 5,230) | 4,555<br>(4,004 - 5,491) |
| Diabetes mellitus                                   | 4,297<br>(3,792 - 5,079)   | 2<br>(1 - 3)          | 5<br>(3 - 7)           | 399<br>(334 - 488)       | 1,945<br>(1,659 - 2,312) | 1,947<br>(1,661 - 2,365) |
| Acute glomerulonephritis                            | 5<br>(4 - 7)               | 0<br>(0 - 1)          | 1<br>(0 - 1)           | 2<br>(2 - 3)             | 1<br>(1 - 2)             | 1<br>(0 - 1)             |
| Chronic kidney disease                              | 3,575<br>(3,050 - 5,201)   | 6<br>(4 - 9)          | 9<br>(6 - 14)          | 441<br>(355 - 709)       | 1,599<br>(1,326 - 2,279) | 1,521<br>(1,251 - 2,259) |
| Chronic kidney disease due to diabetes mellitus     | 28<br>(20 - 65)            | 0<br>(0 - 1)          | 0<br>(0 - 1)           | 4<br>(3 - 9)             | 6<br>(4 - 9)             | 18<br>(11 - 46)          |
| Chronic kidney disease due to hypertension          | 711<br>(510 - 1,158)       | 0<br>(0 - 1)          | 1<br>(0 - 1)           | 102<br>(74 - 169)        | 362<br>(253 - 595)       | 246<br>(160 - 433)       |
| Chronic kidney disease due to glomerulonephritis    | 370<br>(222 - 515)         | 2<br>(1 - 2)          | 2<br>(1 - 3)           | 30<br>(20 - 41)          | 143<br>(83 - 208)        | 193<br>(107 - 278)       |
| Chronic kidney disease due to other causes          | 2,466<br>(1,959 - 3,924)   | 3<br>(2 - 6)          | 6<br>(4 - 11)          | 304<br>(226 - 527)       | 1,088<br>(812 - 1,672)   | 1,064<br>(806 - 1,708)   |
| Urinary diseases and male infertility               | 1,559<br>(1,133 - 1,870)   | 10<br>(6 - 17)        | 5<br>(3 - 7)           | 210<br>(156 - 269)       | 550<br>(394 - 681)       | 784<br>(536 - 1,023)     |
| Interstitial nephritis and urinary tract infections | 493<br>(366 - 659)         | 9<br>(5 - 15)         | 3<br>(2 - 4)           | 115<br>(82 - 157)        | 172<br>(120 - 243)       | 193<br>(123 - 282)       |
| Urolithiasis                                        | 18<br>(12 - 27)            | --                    | 0<br>(0 - 1)           | 3<br>(2 - 5)             | 7<br>(4 - 11)            | 8<br>(4 - 14)            |
| Other urinary diseases                              | 1,048<br>(706 - 1,314)     | 2<br>(1 - 3)          | 1<br>(1 - 2)           | 91<br>(59 - 120)         | 371<br>(240 - 483)       | 583<br>(374 - 789)       |
| Gynecological diseases                              | 3<br>(2 - 4)               | --                    | --                     | 2<br>(1 - 2)             | 1<br>(1 - 2)             | 1<br>(0 - 1)             |
| Uterine fibroids                                    | 1<br>(1 - 1)               | --                    | --                     | 0<br>(0 - 0)             | 0<br>(0 - 0)             | 0<br>(0 - 0)             |
| Polycystic ovarian syndrome                         | 0<br>(0 - 0)               | --                    | --                     | 0<br>(0 - 0)             | 0<br>(0 - 0)             | --                       |
| Endometriosis                                       | 0<br>(0 - 0)               | --                    | --                     | 0<br>(0 - 0)             | 0<br>(0 - 0)             | --                       |
| Genital prolapse                                    | 1<br>(0 - 1)               | --                    | --                     | 0<br>(0 - 0)             | 0<br>(0 - 0)             | 0<br>(0 - 0)             |
| Other gynecological diseases                        | 2<br>(1 - 2)               | --                    | --                     | 1<br>(0 - 1)             | 1<br>(0 - 1)             | 0<br>(0 - 1)             |
| Hemoglobinopathies and hemolytic anemias            | 265<br>(190 - 360)         | 21<br>(14 - 32)       | 15<br>(10 - 21)        | 89<br>(64 - 120)         | 69<br>(48 - 95)          | 71<br>(49 - 100)         |
| Thalassemias                                        | 119<br>(86 - 159)          | 19<br>(12 - 28)       | 14<br>(9 - 19)         | 64<br>(46 - 87)          | 20<br>(14 - 28)          | 3<br>(2 - 4)             |
| Sickle cell disorders                               | 0<br>(0 - 0)               | 0<br>(0 - 0)          | 0<br>(0 - 0)           | 0<br>(0 - 0)             | 0<br>(0 - 0)             | 0<br>(0 - 0)             |
| G6PD deficiency                                     | 9<br>(7 - 13)              | 0<br>(0 - 1)          | 0<br>(0 - 0)           | 4<br>(3 - 5)             | 4<br>(3 - 5)             | 1<br>(1 - 2)             |
| Other hemoglobinopathies and hemolytic anemias      | 137<br>(97 - 188)          | 2<br>(2 - 4)          | 1<br>(1 - 1)           | 22<br>(15 - 30)          | 45<br>(31 - 61)          | 67<br>(46 - 95)          |
| Endocrine, metabolic, blood, and immune disorders   | 607<br>(504 - 808)         | 25<br>(16 - 39)       | 11<br>(7 - 16)         | 134<br>(107 - 180)       | 204<br>(160 - 272)       | 232<br>(174 - 323)       |
| Musculoskeletal disorders                           | 676<br>(561 - 859)         | --                    | 12<br>(8 - 17)         | 235<br>(188 - 309)       | 259<br>(204 - 333)       | 170<br>(136 - 227)       |
| Rheumatoid arthritis                                | 33<br>(24 - 45)            | --                    | 1<br>(0 - 1)           | 4<br>(3 - 6)             | 11<br>(6 - 17)           | 17<br>(12 - 26)          |
| Other musculoskeletal disorders                     | 643<br>(531 - 819)         | --                    | 11<br>(8 - 16)         | 231<br>(185 - 304)       | 248<br>(195 - 319)       | 153<br>(120 - 202)       |
| Other non-communicable diseases                     | 2,345<br>(2,016 - 2,706)   | 975<br>(745 - 1,223)  | 61<br>(45 - 80)        | 272<br>(229 - 327)       | 402<br>(329 - 487)       | 634<br>(488 - 804)       |
| Congenital anomalies                                | 1,287<br>(1,036 - 1,550)   | 951<br>(723 - 1,199)  | 57<br>(41 - 76)        | 155<br>(123 - 201)       | 63<br>(48 - 84)          | 61<br>(47 - 81)          |
| Neural tube defects                                 | 58<br>(36 - 90)            | 55<br>(32 - 87)       | 1<br>(0 - 1)           | 2<br>(1 - 3)             | 1<br>(1 - 1)             | 0<br>(0 - 0)             |
| Congenital heart anomalies                          | 645<br>(495 - 804)         | 412<br>(266 - 573)    | 41<br>(29 - 55)        | 117<br>(93 - 154)        | 33<br>(25 - 46)          | 41<br>(31 - 56)          |
| Cleft lip and cleft palate                          | 2<br>(0 - 3)               | 2<br>(0 - 3)          | --                     | --                       | --                       | --                       |
| Down syndrome                                       | 40<br>(26 - 60)            | 22<br>(13 - 39)       | 4<br>(2 - 7)           | 10<br>(7 - 14)           | 3<br>(2 - 5)             | 0<br>(0 - 1)             |
| Chromosomal unbalanced rearrangements               | 129<br>(88 - 181)          | 121<br>(81 - 172)     | 1<br>(1 - 2)           | 5<br>(3 - 8)             | 1<br>(1 - 2)             | 1<br>(0 - 1)             |
| Other congenital anomalies                          | 414<br>(311 - 529)         | 340<br>(242 - 457)    | 10<br>(6 - 15)         | 21<br>(16 - 28)          | 24<br>(18 - 34)          | 19<br>(13 - 26)          |
| Skin and subcutaneous diseases                      | 1,042<br>(843 - 1,232)     | 8<br>(5 - 13)         | 4<br>(3 - 5)           | 117<br>(93 - 146)        | 339<br>(269 - 422)       | 573<br>(429 - 743)       |
| Cellulitis                                          | 172<br>(107 - 241)         | 2<br>(1 - 3)          | 1<br>(0 - 1)           | 22<br>(14 - 32)          | 70<br>(42 - 101)         | 77<br>(39 - 127)         |
| Pyoderma                                            | 394<br>(318 - 483)         | 6<br>(4 - 9)          | 2<br>(1 - 2)           | 59<br>(46 - 76)          | 159<br>(118 - 202)       | 168<br>(117 - 236)       |
| Decubitus ulcer                                     | 425<br>(321 - 545)         | 0<br>(0 - 0)          | 1<br>(0 - 1)           | 26<br>(19 - 34)          | 92<br>(65 - 123)         | 307<br>(218 - 411)       |

Web Table 31- Malaysia deaths with 95% UI by age, sex, and cause in 2013

| Cause                                           | Both Sexes, All Ages        | Both Sexes, 0-4 Years | Both Sexes, 5-14 Years | Both Sexes, 15-49 Years  | Both Sexes, 50-69 Years  | Both Sexes, 70-80 Years  |
|-------------------------------------------------|-----------------------------|-----------------------|------------------------|--------------------------|--------------------------|--------------------------|
| Other skin and subcutaneous diseases            | 51<br>(35 - 72)             | 0<br>(0 - 1)          | 1<br>(1 - 1)           | 10<br>(7 - 14)           | 18<br>(11 - 28)          | 22<br>(12 - 40)          |
| Sudden infant death syndrome                    | 16<br>(7 - 31)              | 16<br>(7 - 31)        | --                     | --                       | --                       | --                       |
| Injuries                                        | 17,671<br>(14,863 - 20,039) | 315<br>(234 - 407)    | 383<br>(321 - 452)     | 7,277<br>(6,162 - 8,350) | 5,073<br>(4,146 - 5,896) | 4,623<br>(3,826 - 5,400) |
| Transport injuries                              | 8,027<br>(6,333 - 9,128)    | 74<br>(48 - 108)      | 179<br>(138 - 226)     | 4,158<br>(3,349 - 4,805) | 2,302<br>(1,730 - 2,710) | 1,314<br>(981 - 1,595)   |
| Road injuries                                   | 7,471<br>(5,878 - 8,491)    | 70<br>(45 - 102)      | 170<br>(131 - 214)     | 3,887<br>(3,129 - 4,491) | 2,136<br>(1,619 - 2,518) | 1,208<br>(905 - 1,476)   |
| Pedestrian road injuries                        | 1,902<br>(1,403 - 2,416)    | 28<br>(18 - 42)       | 67<br>(49 - 89)        | 563<br>(399 - 760)       | 681<br>(496 - 884)       | 563<br>(406 - 733)       |
| Cyclist road injuries                           | 567<br>(421 - 724)          | 5<br>(2 - 8)          | 17<br>(11 - 24)        | 233<br>(177 - 297)       | 200<br>(142 - 264)       | 112<br>(73 - 159)        |
| Motorcyclist road injuries                      | 785<br>(563 - 1,071)        | 5<br>(3 - 8)          | 11<br>(7 - 17)         | 597<br>(425 - 821)       | 115<br>(75 - 162)        | 58<br>(35 - 89)          |
| Motor vehicle road injuries                     | 4,187<br>(3,152 - 4,880)    | 32<br>(19 - 48)       | 74<br>(52 - 97)        | 2,481<br>(1,934 - 2,924) | 1,132<br>(798 - 1,383)   | 468<br>(314 - 609)       |
| Other road injuries                             | 29<br>(21 - 49)             | 1<br>(0 - 1)          | 1<br>(1 - 2)           | 12<br>(8 - 21)           | 7<br>(5 - 13)            | 8<br>(5 - 14)            |
| Other transport injuries                        | 556<br>(388 - 678)          | 4<br>(3 - 7)          | 9<br>(6 - 13)          | 271<br>(188 - 348)       | 166<br>(107 - 218)       | 106<br>(69 - 143)        |
| Unintentional injuries                          | 6,719<br>(5,607 - 7,828)    | 226<br>(162 - 302)    | 182<br>(144 - 252)     | 1,409<br>(1,193 - 1,692) | 1,972<br>(1,584 - 2,415) | 2,929<br>(2,285 - 3,611) |
| Falls                                           | 700<br>(551 - 1,106)        | 8<br>(4 - 13)         | 9<br>(6 - 15)          | 140<br>(101 - 239)       | 207<br>(149 - 360)       | 337<br>(243 - 523)       |
| Drowning                                        | 674<br>(529 - 909)          | 61<br>(36 - 104)      | 115<br>(82 - 178)      | 321<br>(234 - 431)       | 118<br>(87 - 160)        | 60<br>(44 - 83)          |
| Fire, heat, and hot substances                  | 349<br>(284 - 421)          | 12<br>(6 - 19)        | 11<br>(7 - 15)         | 90<br>(70 - 115)         | 104<br>(79 - 130)        | 132<br>(99 - 170)        |
| Poisonings                                      | 231<br>(175 - 304)          | 3<br>(2 - 6)          | 3<br>(2 - 4)           | 98<br>(71 - 132)         | 85<br>(58 - 117)         | 42<br>(29 - 61)          |
| Exposure to mechanical forces                   | 461<br>(385 - 601)          | 8<br>(5 - 13)         | 11<br>(7 - 16)         | 203<br>(156 - 271)       | 145<br>(112 - 194)       | 95<br>(69 - 140)         |
| Unintentional firearm injuries                  | 235<br>(182 - 304)          | 1<br>(0 - 1)          | 1<br>(1 - 1)           | 113<br>(77 - 162)        | 72<br>(49 - 103)         | 49<br>(31 - 73)          |
| Unintentional suffocation                       | 92<br>(68 - 171)            | 3<br>(2 - 6)          | 4<br>(2 - 8)           | 29<br>(20 - 61)          | 29<br>(18 - 57)          | 27<br>(16 - 59)          |
| Other exposure to mechanical forces             | 134<br>(111 - 165)          | 4<br>(2 - 7)          | 6<br>(4 - 9)           | 60<br>(45 - 81)          | 44<br>(32 - 59)          | 19<br>(14 - 27)          |
| Adverse effects of medical treatment            | 2,680<br>(1,822 - 3,622)    | 22<br>(13 - 37)       | 9<br>(6 - 14)          | 307<br>(195 - 421)       | 888<br>(579 - 1,248)     | 1,454<br>(933 - 2,083)   |
| Animal contact                                  | 50<br>(36 - 74)             | 2<br>(1 - 3)          | 3<br>(2 - 5)           | 15<br>(10 - 22)          | 16<br>(10 - 24)          | 15<br>(9 - 23)           |
| Venomous animal contact                         | 33<br>(23 - 49)             | 1<br>(1 - 2)          | 2<br>(1 - 4)           | 9<br>(6 - 13)            | 11<br>(7 - 16)           | 10<br>(6 - 16)           |
| Non-venomous animal contact                     | 17<br>(11 - 25)             | 0<br>(0 - 1)          | 1<br>(0 - 1)           | 6<br>(4 - 10)            | 5<br>(3 - 8)             | 4<br>(2 - 7)             |
| Foreign body                                    | 1,406<br>(934 - 1,834)      | 108<br>(71 - 156)     | 15<br>(10 - 21)        | 162<br>(105 - 226)       | 359<br>(232 - 491)       | 762<br>(481 - 1,012)     |
| Pulmonary aspiration and foreign body in airway | 1,394<br>(922 - 1,824)      | 107<br>(71 - 155)     | 15<br>(9 - 21)         | 160<br>(103 - 224)       | 353<br>(226 - 484)       | 760<br>(478 - 1,010)     |
| Foreign body in other body part                 | 12<br>(8 - 19)              | 1<br>(0 - 1)          | 1<br>(0 - 1)           | 3<br>(2 - 4)             | 6<br>(4 - 11)            | 2<br>(1 - 5)             |
| Other unintentional injuries                    | 167<br>(143 - 197)          | 4<br>(2 - 5)          | 6<br>(4 - 8)           | 75<br>(58 - 94)          | 50<br>(38 - 63)          | 34<br>(26 - 42)          |
| Self-harm and interpersonal violence            | 2,925<br>(2,063 - 3,535)    | 15<br>(4 - 29)        | 22<br>(11 - 33)        | 1,711<br>(1,230 - 2,116) | 799<br>(544 - 1,018)     | 380<br>(242 - 512)       |
| Self-harm                                       | 1,804<br>(1,454 - 2,142)    | --                    | 6<br>(3 - 10)          | 945<br>(717 - 1,151)     | 569<br>(431 - 717)       | 284<br>(198 - 381)       |
| Interpersonal violence                          | 1,122<br>(506 - 1,502)      | 15<br>(4 - 29)        | 16<br>(6 - 26)         | 765<br>(373 - 1,027)     | 230<br>(82 - 371)        | 95<br>(21 - 180)         |
| Assault by firearm                              | 175<br>(67 - 301)           | 1<br>(0 - 2)          | 1<br>(0 - 2)           | 131<br>(54 - 228)        | 35<br>(10 - 64)          | 7<br>(1 - 15)            |
| Assault by sharp object                         | 265<br>(112 - 387)          | 2<br>(0 - 4)          | 2<br>(1 - 4)           | 203<br>(91 - 303)        | 45<br>(14 - 79)          | 13<br>(3 - 27)           |
| Assault by other means                          | 682<br>(285 - 941)          | 12<br>(3 - 24)        | 13<br>(5 - 21)         | 431<br>(200 - 596)       | 150<br>(48 - 243)        | 76<br>(16 - 143)         |

Web Table 31- Malaysia deaths with 95% UI by age, sex, and cause in 2013

| Cause                                                              | Males, All Ages             | Males, 0-4 Years         | Males, 5-14 Years  | Males, 15-49 Years          | Males, 50-69 Years          | Males, 70-80 Years          |
|--------------------------------------------------------------------|-----------------------------|--------------------------|--------------------|-----------------------------|-----------------------------|-----------------------------|
| All causes                                                         | 91,247<br>(83,495 - 98,900) | 1,876<br>(1,576 - 2,243) | 600<br>(512 - 677) | 17,513<br>(15,750 - 19,751) | 33,520<br>(29,767 - 36,989) | 37,739<br>(35,497 - 39,713) |
| Communicable, maternal, neonatal, and nutritional diseases         | 13,465<br>(11,060 - 15,378) | 958<br>(764 - 1,172)     | 134<br>(98 - 181)  | 3,380<br>(2,977 - 3,827)    | 4,091<br>(3,128 - 4,918)    | 4,903<br>(3,635 - 6,178)    |
| HIV/AIDS and tuberculosis                                          | 3,328<br>(2,916 - 3,861)    | 4<br>(3 - 6)             | 4<br>(2 - 9)       | 1,715<br>(1,470 - 2,070)    | 973<br>(796 - 1,180)        | 631<br>(465 - 794)          |
| Tuberculosis                                                       | 1,334<br>(1,016 - 1,599)    | 2<br>(1 - 3)             | 2<br>(1 - 3)       | 293<br>(214 - 374)          | 469<br>(352 - 582)          | 568<br>(402 - 727)          |
| HIV/AIDS                                                           | 1,994<br>(1,680 - 2,469)    | 2<br>(1 - 4)             | 2<br>(0 - 7)       | 1,423<br>(1,186 - 1,768)    | 504<br>(359 - 681)          | 63<br>(40 - 91)             |
| HIV/AIDS resulting in mycobacterial infection                      | 129<br>(98 - 169)           | 0<br>(0 - 0)             | 0<br>(0 - 0)       | 91<br>(69 - 120)            | 34<br>(24 - 49)             | 5<br>(3 - 7)                |
| HIV/AIDS resulting in other diseases                               | 1,864<br>(1,563 - 2,301)    | 2<br>(1 - 3)             | 2<br>(0 - 7)       | 1,332<br>(1,111 - 1,664)    | 470<br>(334 - 634)          | 58<br>(37 - 85)             |
| Diarrrhea, lower respiratory, and other common infectious diseases | 8,602<br>(6,138 - 10,345)   | 299<br>(212 - 415)       | 113<br>(78 - 160)  | 1,394<br>(1,027 - 1,756)    | 2,779<br>(1,821 - 3,610)    | 4,016<br>(2,737 - 5,210)    |
| Diarrrheal diseases                                                | 210<br>(163 - 269)          | 23<br>(10 - 46)          | 3<br>(2 - 6)       | 40<br>(28 - 55)             | 54<br>(34 - 80)             | 91<br>(58 - 140)            |
| Intestinal infectious diseases                                     | 176<br>(78 - 336)           | 50<br>(18 - 107)         | 46<br>(18 - 92)    | 61<br>(23 - 129)            | 15<br>(5 - 37)              | 5<br>(2 - 11)               |
| Typhoid fever                                                      | 136<br>(58 - 261)           | 36<br>(11 - 79)          | 35<br>(13 - 72)    | 48<br>(17 - 103)            | 12<br>(4 - 31)              | 4<br>(1 - 9)                |
| Paratyphoid fever                                                  | 38<br>(16 - 73)             | 13<br>(4 - 31)           | 10<br>(4 - 22)     | 12<br>(4 - 25)              | 2<br>(1 - 6)                | 1<br>(0 - 2)                |
| Other intestinal infectious diseases                               | 2<br>(0 - 8)                | 1<br>(0 - 4)             | 0<br>(0 - 2)       | 1<br>(0 - 4)                | 0<br>(0 - 2)                | 0<br>(0 - 2)                |
| Lower respiratory infections                                       | 7,554<br>(5,096 - 9,260)    | 124<br>(79 - 183)        | 31<br>(18 - 47)    | 1,055<br>(719 - 1,393)      | 2,534<br>(1,582 - 3,365)    | 3,810<br>(2,512 - 5,024)    |
| Upper respiratory infections                                       | 3<br>(1 - 7)                | 0<br>(0 - 0)             | 0<br>(0 - 0)       | 1<br>(0 - 2)                | 1<br>(0 - 4)                | 1<br>(0 - 3)                |
| Otitis media                                                       | 13<br>(10 - 16)             | 0<br>(0 - 0)             | 0<br>(0 - 0)       | 1<br>(1 - 1)                | 6<br>(4 - 7)                | 6<br>(4 - 8)                |
| Meningitis                                                         | 325<br>(258 - 401)          | 39<br>(21 - 68)          | 11<br>(7 - 18)     | 111<br>(80 - 153)           | 95<br>(65 - 132)            | 69<br>(43 - 108)            |
| Pneumococcal meningitis                                            | 110<br>(82 - 145)           | 8<br>(4 - 16)            | 4<br>(2 - 7)       | 40<br>(25 - 60)             | 34<br>(19 - 53)             | 24<br>(13 - 40)             |
| H influenzae type B meningitis                                     | 52<br>(36 - 70)             | 15<br>(7 - 26)           | 3<br>(1 - 5)       | 15<br>(9 - 24)              | 11<br>(5 - 19)              | 8<br>(4 - 15)               |
| Meningococcal meningitis                                           | 47<br>(32 - 67)             | 3<br>(1 - 5)             | 1<br>(0 - 2)       | 17<br>(8 - 27)              | 15<br>(7 - 27)              | 12<br>(5 - 23)              |
| Other meningitis                                                   | 116<br>(82 - 149)           | 14<br>(7 - 24)           | 3<br>(2 - 6)       | 39<br>(23 - 60)             | 36<br>(18 - 55)             | 25<br>(13 - 41)             |
| Encephalitis                                                       | 249<br>(169 - 324)          | 14<br>(8 - 24)           | 15<br>(9 - 24)     | 121<br>(80 - 167)           | 71<br>(45 - 98)             | 28<br>(18 - 39)             |
| Diphtheria                                                         | 1<br>(0 - 2)                | 0<br>(0 - 1)             | 0<br>(0 - 1)       | 0<br>(0 - 1)                | 0<br>(0 - 1)                | --<br>(0 - 1)               |
| Whooping cough                                                     | 7<br>(0 - 33)               | 7<br>(0 - 31)            | 0<br>(0 - 2)       | 0<br>(0 - 1)                | 0<br>(0 - 0)                | --<br>(0 - 0)               |
| Tetanus                                                            | 8<br>(6 - 12)               | 0<br>(0 - 1)             | 0<br>(0 - 0)       | 1<br>(1 - 2)                | 3<br>(2 - 6)                | 3<br>(2 - 5)                |
| Measles                                                            | 48<br>(5 - 170)             | 41<br>(4 - 145)          | 6<br>(1 - 22)      | 1<br>(0 - 5)                | 0<br>(0 - 0)                | --<br>(0 - 0)               |
| Varicella and herpes zoster                                        | 6<br>(2 - 15)               | 1<br>(0 - 5)             | 0<br>(0 - 1)       | 2<br>(0 - 4)                | 1<br>(0 - 3)                | 2<br>(0 - 10)               |
| Neglected tropical diseases and malaria                            | 121<br>(96 - 146)           | 6<br>(4 - 10)            | 9<br>(6 - 13)      | 60<br>(47 - 75)             | 31<br>(23 - 39)             | 15<br>(12 - 19)             |
| Malaria                                                            | 11<br>(8 - 19)              | 0<br>(0 - 0)             | 0<br>(0 - 1)       | 6<br>(3 - 9)                | 4<br>(2 - 8)                | 1<br>(1 - 3)                |
| Leishmaniasis                                                      | 0<br>(0 - 0)                | 0<br>(0 - 0)             | 0<br>(0 - 0)       | 0<br>(0 - 0)                | 0<br>(0 - 0)                | 0<br>(0 - 0)                |
| Visceral leishmaniasis                                             | 0<br>(0 - 0)                | 0<br>(0 - 0)             | 0<br>(0 - 0)       | 0<br>(0 - 0)                | 0<br>(0 - 0)                | 0<br>(0 - 0)                |
| Cysticercosis                                                      | 0<br>(0 - 0)                | 0<br>(0 - 0)             | 0<br>(0 - 0)       | 0<br>(0 - 0)                | 0<br>(0 - 0)                | 0<br>(0 - 0)                |
| Cystic echinococcosis                                              | 1<br>(1 - 1)                | 0<br>(0 - 0)             | 0<br>(0 - 0)       | 1<br>(0 - 1)                | 0<br>(0 - 0)                | 0<br>(0 - 0)                |
| Dengue                                                             | 89<br>(68 - 108)            | 4<br>(2 - 7)             | 8<br>(5 - 11)      | 48<br>(36 - 60)             | 20<br>(14 - 24)             | 9<br>(7 - 11)               |
| Rabies                                                             | 1<br>(1 - 2)                | 0<br>(0 - 0)             | 0<br>(0 - 0)       | 1<br>(0 - 1)                | 0<br>(0 - 0)                | 0<br>(0 - 0)                |
| Intestinal nematode infections                                     | 2<br>(0 - 6)                | 0<br>(0 - 3)             | 0<br>(0 - 1)       | 0<br>(0 - 3)                | 0<br>(0 - 3)                | 0<br>(0 - 3)                |
| Ascariasis                                                         | 2<br>(0 - 6)                | 0<br>(0 - 3)             | 0<br>(0 - 1)       | 0<br>(0 - 3)                | 0<br>(0 - 3)                | 0<br>(0 - 3)                |
| Other neglected tropical diseases                                  | 17<br>(13 - 21)             | 1<br>(0 - 2)             | 0<br>(0 - 1)       | 5<br>(3 - 8)                | 6<br>(3 - 8)                | 4<br>(2 - 6)                |
| Maternal disorders                                                 | --                          | --                       | --                 | --                          | --                          | --                          |
| Maternal hemorrhage                                                | --                          | --                       | --                 | --                          | --                          | --                          |



Web Table 31- Malaysia deaths with 95% UI by age, sex, and cause in 2013

| Cause                                                            | Males, All Ages             | Males, 0-4 Years   | Males, 5-14 Years  | Males, 15-49 Years       | Males, 50-69 Years          | Males, 70-80 Years          |
|------------------------------------------------------------------|-----------------------------|--------------------|--------------------|--------------------------|-----------------------------|-----------------------------|
| Maternal sepsis and other maternal infections                    | --                          | --                 | --                 | --                       | --                          | --                          |
| Maternal hypertensive disorders                                  | --                          | --                 | --                 | --                       | --                          | --                          |
| Maternal obstructed labor                                        | --                          | --                 | --                 | --                       | --                          | --                          |
| Maternal abortive outcome                                        | --                          | --                 | --                 | --                       | --                          | --                          |
| Indirect maternal deaths                                         | --                          | --                 | --                 | --                       | --                          | --                          |
| Late maternal deaths                                             | --                          | --                 | --                 | --                       | --                          | --                          |
| Maternal deaths aggravated by HIV/AIDS                           | --                          | --                 | --                 | --                       | --                          | --                          |
| Other maternal disorders                                         | --                          | --                 | --                 | --                       | --                          | --                          |
| Neonatal disorders                                               | 613<br>(483 - 761)          | 613<br>(483 - 761) | --                 | --                       | --                          | --                          |
| Neonatal preterm birth complications                             | 228<br>(121 - 326)          | 228<br>(121 - 326) | --                 | --                       | --                          | --                          |
| Neonatal encephalopathy due to birth asphyxia and trauma         | 122<br>(63 - 198)           | 122<br>(63 - 198)  | --                 | --                       | --                          | --                          |
| Neonatal sepsis and other neonatal infections                    | 122<br>(60 - 217)           | 122<br>(60 - 217)  | --                 | --                       | --                          | --                          |
| Hemolytic disease and other neonatal jaundice                    | 3<br>(1 - 7)                | 3<br>(1 - 7)       | --                 | --                       | --                          | --                          |
| Other neonatal disorders                                         | 139<br>(72 - 249)           | 139<br>(72 - 249)  | --                 | --                       | --                          | --                          |
| Nutritional deficiencies                                         | 119<br>(84 - 218)           | 3<br>(1 - 5)       | 1<br>(1 - 3)       | 17<br>(12 - 31)          | 31<br>(20 - 58)             | 67<br>(42 - 128)            |
| Protein-energy malnutrition                                      | 34<br>(16 - 78)             | 2<br>(1 - 3)       | 0<br>(0 - 1)       | 5<br>(2 - 11)            | 9<br>(4 - 20)               | 19<br>(8 - 45)              |
| Iodine deficiency                                                | 3<br>(0 - 11)               | 0<br>(0 - 1)       | 0<br>(0 - 0)       | 1<br>(0 - 3)             | 1<br>(0 - 5)                | 1<br>(0 - 7)                |
| Iron-deficiency anemia                                           | 76<br>(48 - 144)            | 1<br>(0 - 2)       | 1<br>(0 - 2)       | 11<br>(6 - 19)           | 20<br>(12 - 41)             | 44<br>(24 - 82)             |
| Other nutritional deficiencies                                   | 5<br>(2 - 12)               | 0<br>(0 - 1)       | 0<br>(0 - 0)       | 1<br>(1 - 3)             | 1<br>(0 - 3)                | 2<br>(1 - 6)                |
| Other communicable, maternal, neonatal, and nutritional diseases | 682<br>(514 - 891)          | 32<br>(11 - 64)    | 6<br>(3 - 9)       | 193<br>(144 - 260)       | 277<br>(191 - 395)          | 173<br>(100 - 297)          |
| Sexually transmitted diseases excluding HIV                      | 26<br>(5 - 54)              | 20<br>(0 - 46)     | 1<br>(0 - 3)       | 1<br>(1 - 1)             | 2<br>(1 - 3)                | 2<br>(1 - 5)                |
| Syphilis                                                         | 25<br>(4 - 53)              | 20<br>(0 - 46)     | 1<br>(0 - 3)       | 0<br>(0 - 1)             | 1<br>(1 - 2)                | 2<br>(1 - 4)                |
| Chlamydial infection                                             | --                          | --                 | --                 | --                       | --                          | --                          |
| Gonococcal infection                                             | 1<br>(0 - 1)                | --                 | 0<br>(0 - 0)       | 0<br>(0 - 0)             | 0<br>(0 - 1)                | 0<br>(0 - 1)                |
| Other sexually transmitted diseases                              | 0<br>(0 - 1)                | --                 | 0<br>(0 - 0)       | 0<br>(0 - 0)             | 0<br>(0 - 0)                | 0<br>(0 - 0)                |
| Hepatitis                                                        | 276<br>(223 - 335)          | 1<br>(0 - 2)       | 0<br>(0 - 0)       | 98<br>(72 - 136)         | 134<br>(99 - 176)           | 43<br>(30 - 59)             |
| Acute hepatitis A                                                | 17<br>(4 - 36)              | 0<br>(0 - 1)       | 0<br>(0 - 0)       | 9<br>(2 - 20)            | 6<br>(1 - 15)               | 1<br>(0 - 3)                |
| Acute hepatitis B                                                | 198<br>(140 - 257)          | 1<br>(0 - 1)       | 0<br>(0 - 0)       | 56<br>(32 - 88)          | 103<br>(69 - 142)           | 37<br>(25 - 52)             |
| Acute hepatitis C                                                | 4<br>(1 - 11)               | --                 | 0<br>(0 - 0)       | 1<br>(0 - 4)             | 2<br>(0 - 6)                | 1<br>(0 - 2)                |
| Acute hepatitis E                                                | 57<br>(25 - 105)            | 0<br>(0 - 0)       | 0<br>(0 - 0)       | 31<br>(14 - 57)          | 22<br>(8 - 46)              | 4<br>(1 - 10)               |
| Other infectious diseases                                        | 380<br>(234 - 576)          | 11<br>(4 - 28)     | 4<br>(2 - 8)       | 94<br>(56 - 152)         | 142<br>(72 - 253)           | 129<br>(57 - 254)           |
| Non-communicable diseases                                        | 64,616<br>(58,277 - 70,613) | 732<br>(557 - 937) | 207<br>(167 - 247) | 8,144<br>(7,058 - 9,388) | 25,744<br>(22,677 - 28,697) | 29,790<br>(27,602 - 31,889) |
| Neoplasms                                                        | 12,143<br>(10,829 - 13,443) | 61<br>(39 - 91)    | 83<br>(63 - 106)   | 1,532<br>(1,301 - 1,772) | 5,331<br>(4,641 - 6,012)    | 5,136<br>(4,608 - 5,731)    |
| Esophageal cancer                                                | 327<br>(241 - 420)          | --                 | --                 | 32<br>(23 - 44)          | 148<br>(106 - 196)          | 147<br>(105 - 195)          |
| Stomach cancer                                                   | 826<br>(694 - 986)          | --                 | --                 | 77<br>(59 - 98)          | 327<br>(266 - 404)          | 422<br>(328 - 535)          |
| Liver cancer                                                     | 1,316<br>(1,088 - 1,587)    | --                 | 1<br>(1 - 2)       | 163<br>(119 - 216)       | 687<br>(534 - 876)          | 464<br>(346 - 611)          |
| Liver cancer due to hepatitis B                                  | 877<br>(669 - 1,103)        | --                 | 1<br>(0 - 1)       | 123<br>(86 - 169)        | 483<br>(352 - 652)          | 270<br>(186 - 371)          |
| Liver cancer due to hepatitis C                                  | 219<br>(101 - 336)          | --                 | 0<br>(0 - 0)       | 17<br>(7 - 33)           | 103<br>(45 - 170)           | 99<br>(37 - 175)            |
| Liver cancer due to alcohol use                                  | 125<br>(76 - 194)           | --                 | --                 | 8<br>(4 - 14)            | 54<br>(32 - 89)             | 63<br>(33 - 108)            |
| Liver cancer due to other causes                                 | 96<br>(44 - 158)            | --                 | 1<br>(0 - 1)       | 15<br>(8 - 25)           | 48<br>(21 - 82)             | 32<br>(13 - 58)             |

Web Table 31- Malaysia deaths with 95% UI by age, sex, and cause in 2013

| Cause                                         | Males, All Ages             | Males, 0-4 Years | Males, 5-14 Years | Males, 15-49 Years       | Males, 50-69 Years          | Males, 70-80 Years          |
|-----------------------------------------------|-----------------------------|------------------|-------------------|--------------------------|-----------------------------|-----------------------------|
| Larynx cancer                                 | 149<br>(116 - 208)          | --               | --                | 11<br>(8 - 16)           | 63<br>(46 - 86)             | 75<br>(56 - 111)            |
| Tracheal, bronchus and lung cancer            | 3,507<br>(3,032 - 3,967)    | --               | --                | 258<br>(203 - 327)       | 1,668<br>(1,404 - 1,956)    | 1,581<br>(1,319 - 1,855)    |
| Breast cancer                                 | 14<br>(10 - 20)             | --               | --                | 2<br>(1 - 4)             | 6<br>(3 - 9)                | 6<br>(3 - 10)               |
| Cervical cancer                               | --                          | --               | --                | --                       | --                          | --                          |
| Uterine cancer                                | --                          | --               | --                | --                       | --                          | --                          |
| Prostate cancer                               | 543<br>(320 - 765)          | --               | --                | 3<br>(2 - 4)             | 106<br>(65 - 153)           | 435<br>(252 - 621)          |
| Colon and rectum cancer                       | 1,406<br>(1,213 - 1,636)    | --               | --                | 141<br>(115 - 175)       | 575<br>(476 - 686)          | 689<br>(565 - 861)          |
| Lip and oral cavity cancer                    | 205<br>(153 - 269)          | --               | --                | 35<br>(24 - 51)          | 98<br>(69 - 131)            | 73<br>(51 - 104)            |
| Nasopharynx cancer                            | 570<br>(446 - 721)          | --               | 1<br>(0 - 4)      | 163<br>(112 - 235)       | 280<br>(197 - 386)          | 126<br>(84 - 177)           |
| Other pharynx cancer                          | 141<br>(108 - 178)          | --               | --                | 17<br>(12 - 24)          | 71<br>(52 - 95)             | 53<br>(36 - 74)             |
| Gallbladder and biliary tract cancer          | 86<br>(56 - 117)            | --               | --                | 8<br>(5 - 12)            | 36<br>(22 - 51)             | 43<br>(27 - 62)             |
| Pancreatic cancer                             | 481<br>(406 - 563)          | --               | --                | 49<br>(38 - 63)          | 247<br>(201 - 303)          | 185<br>(147 - 236)          |
| Malignant skin melanoma                       | 53<br>(28 - 83)             | --               | --                | 15<br>(8 - 22)           | 22<br>(12 - 37)             | 16<br>(8 - 25)              |
| Non-melanoma skin cancer                      | 64<br>(42 - 90)             | --               | --                | 5<br>(3 - 8)             | 24<br>(16 - 35)             | 35<br>(22 - 49)             |
| Ovarian cancer                                | --                          | --               | --                | --                       | --                          | --                          |
| Testicular cancer                             | 21<br>(13 - 28)             | --               | --                | 13<br>(7 - 18)           | 5<br>(3 - 8)                | 3<br>(2 - 5)                |
| Kidney cancer                                 | 246<br>(199 - 300)          | 2<br>(1 - 4)     | 1<br>(0 - 1)      | 30<br>(22 - 41)          | 133<br>(98 - 173)           | 80<br>(58 - 105)            |
| Bladder cancer                                | 274<br>(222 - 336)          | --               | --                | 10<br>(7 - 15)           | 96<br>(72 - 124)            | 168<br>(128 - 220)          |
| Brain and nervous system cancer               | 174<br>(122 - 256)          | 4<br>(1 - 8)     | 10<br>(6 - 16)    | 65<br>(44 - 100)         | 72<br>(49 - 105)            | 24<br>(16 - 37)             |
| Thyroid cancer                                | 57<br>(45 - 73)             | --               | 0<br>(0 - 0)      | 5<br>(4 - 7)             | 26<br>(19 - 36)             | 26<br>(19 - 36)             |
| Mesothelioma                                  | 10<br>(7 - 13)              | --               | --                | 2<br>(1 - 3)             | 4<br>(3 - 6)                | 4<br>(2 - 6)                |
| Hodgkin lymphoma                              | 33<br>(25 - 43)             | 1<br>(0 - 1)     | 1<br>(0 - 2)      | 13<br>(10 - 18)          | 13<br>(8 - 20)              | 5<br>(3 - 8)                |
| Non-Hodgkin lymphoma                          | 482<br>(342 - 598)          | 5<br>(3 - 9)     | 8<br>(5 - 13)     | 109<br>(79 - 138)        | 201<br>(137 - 263)          | 158<br>(106 - 211)          |
| Multiple myeloma                              | 95<br>(72 - 125)            | --               | --                | 12<br>(9 - 16)           | 53<br>(38 - 74)             | 30<br>(21 - 41)             |
| Leukemia                                      | 496<br>(427 - 576)          | 22<br>(11 - 38)  | 36<br>(25 - 50)   | 157<br>(127 - 194)       | 154<br>(123 - 193)          | 127<br>(102 - 159)          |
| Other neoplasms                               | 567<br>(465 - 676)          | 28<br>(15 - 44)  | 25<br>(15 - 37)   | 136<br>(106 - 172)       | 215<br>(167 - 278)          | 163<br>(117 - 217)          |
| Cardiovascular diseases                       | 32,570<br>(29,153 - 36,228) | 47<br>(30 - 69)  | 35<br>(25 - 48)   | 3,749<br>(3,191 - 4,413) | 13,743<br>(11,961 - 15,466) | 14,996<br>(13,642 - 16,637) |
| Rheumatic heart disease                       | 221<br>(142 - 282)          | 1<br>(0 - 1)     | 4<br>(2 - 6)      | 49<br>(33 - 68)          | 68<br>(41 - 92)             | 100<br>(57 - 137)           |
| Ischemic heart disease                        | 20,367<br>(17,962 - 23,032) | 5<br>(2 - 11)    | 4<br>(2 - 6)      | 2,218<br>(1,842 - 2,653) | 8,992<br>(7,725 - 10,334)   | 9,149<br>(7,971 - 10,511)   |
| Cerebrovascular disease                       | 8,551<br>(6,947 - 10,923)   | 13<br>(7 - 20)   | 13<br>(9 - 19)    | 862<br>(649 - 1,179)     | 3,476<br>(2,728 - 4,450)    | 4,188<br>(3,374 - 5,455)    |
| Ischemic stroke                               | 4,323<br>(3,410 - 5,933)    | 1<br>(0 - 1)     | 1<br>(0 - 1)      | 135<br>(85 - 212)        | 1,400<br>(1,010 - 1,965)    | 2,788<br>(2,144 - 3,838)    |
| Hemorrhagic stroke                            | 4,228<br>(3,289 - 5,377)    | 12<br>(7 - 19)   | 12<br>(8 - 18)    | 727<br>(547 - 988)       | 2,076<br>(1,560 - 2,663)    | 1,400<br>(1,009 - 1,863)    |
| Hypertensive heart disease                    | 709<br>(502 - 1,047)        | 0<br>(0 - 0)     | 0<br>(0 - 0)      | 64<br>(42 - 96)          | 237<br>(157 - 336)          | 408<br>(273 - 639)          |
| Cardiomyopathy and myocarditis                | 519<br>(407 - 733)          | 15<br>(9 - 24)   | 6<br>(4 - 9)      | 134<br>(99 - 185)        | 208<br>(157 - 311)          | 157<br>(112 - 229)          |
| Atrial fibrillation and flutter               | 147<br>(110 - 200)          | --               | --                | 5<br>(4 - 8)             | 39<br>(28 - 54)             | 102<br>(71 - 147)           |
| Aortic aneurysm                               | 569<br>(468 - 811)          | --               | --                | 31<br>(24 - 44)          | 158<br>(123 - 259)          | 381<br>(303 - 516)          |
| Peripheral vascular disease                   | 13<br>(10 - 17)             | --               | --                | 1<br>(0 - 1)             | 4<br>(3 - 5)                | 9<br>(6 - 13)               |
| Endocarditis                                  | 463<br>(283 - 654)          | 7<br>(4 - 13)    | 4<br>(2 - 7)      | 178<br>(111 - 263)       | 160<br>(94 - 231)           | 114<br>(62 - 170)           |
| Other cardiovascular and circulatory diseases | 1,011<br>(806 - 1,484)      | 6<br>(3 - 11)    | 4<br>(2 - 6)      | 209<br>(158 - 288)       | 402<br>(299 - 610)          | 390<br>(285 - 588)          |
| Chronic respiratory diseases                  | 6,163<br>(4,322 - 7,090)    | 23<br>(12 - 37)  | 10<br>(6 - 13)    | 341<br>(207 - 425)       | 1,840<br>(1,270 - 2,218)    | 3,950<br>(2,823 - 4,636)    |

Web Table 31- Malaysia deaths with 95% UI by age, sex, and cause in 2013

| Cause                                               | Males, All Ages          | Males, 0-4 Years | Males, 5-14 Years | Males, 15-49 Years   | Males, 50-69 Years     | Males, 70-80 Years       |
|-----------------------------------------------------|--------------------------|------------------|-------------------|----------------------|------------------------|--------------------------|
| Chronic obstructive pulmonary disease               | 4,215<br>(2,961 - 4,978) | 11<br>(6 - 19)   | 2<br>(1 - 3)      | 90<br>(54 - 118)     | 1,128<br>(794 - 1,391) | 2,983<br>(2,064 - 3,600) |
| Pneumoconiosis                                      | 281<br>(171 - 425)       | 0<br>(0 - 0)     | 0<br>(0 - 0)      | 14<br>(8 - 20)       | 119<br>(70 - 181)      | 148<br>(90 - 237)        |
| Silicosis                                           | 156<br>(95 - 242)        | 0<br>(0 - 0)     | 0<br>(0 - 0)      | 1<br>(0 - 1)         | 32<br>(19 - 52)        | 123<br>(74 - 195)        |
| Asbestosis                                          | 24<br>(13 - 38)          | 0<br>(0 - 0)     | 0<br>(0 - 0)      | 2<br>(1 - 3)         | 21<br>(12 - 35)        | 0<br>(0 - 0)             |
| Coal workers pneumoconiosis                         | 58<br>(34 - 85)          | 0<br>(0 - 0)     | 0<br>(0 - 0)      | 8<br>(4 - 12)        | 46<br>(27 - 69)        | 4<br>(2 - 7)             |
| Other pneumoconiosis                                | 44<br>(27 - 67)          | 0<br>(0 - 0)     | 0<br>(0 - 0)      | 3<br>(2 - 5)         | 19<br>(12 - 31)        | 21<br>(12 - 36)          |
| Asthma                                              | 890<br>(545 - 1,083)     | 7<br>(3 - 15)    | 6<br>(3 - 8)      | 213<br>(126 - 268)   | 369<br>(221 - 486)     | 294<br>(180 - 389)       |
| Interstitial lung disease and pulmonary sarcoidosis | 670<br>(426 - 1,209)     | 0<br>(0 - 1)     | 0<br>(0 - 1)      | 12<br>(7 - 25)       | 203<br>(121 - 352)     | 454<br>(268 - 866)       |
| Other chronic respiratory diseases                  | 108<br>(67 - 147)        | 4<br>(2 - 7)     | 1<br>(0 - 1)      | 12<br>(7 - 18)       | 21<br>(12 - 30)        | 70<br>(42 - 103)         |
| Cirrhosis                                           | 1,574<br>(1,326 - 1,845) | 3<br>(1 - 5)     | 2<br>(1 - 3)      | 401<br>(316 - 505)   | 838<br>(666 - 1,020)   | 331<br>(263 - 413)       |
| Cirrhosis due to hepatitis B                        | 726<br>(570 - 926)       | 0<br>(0 - 1)     | 1<br>(0 - 1)      | 197<br>(143 - 268)   | 387<br>(286 - 516)     | 141<br>(96 - 197)        |
| Cirrhosis due to hepatitis C                        | 310<br>(129 - 544)       | 0<br>(0 - 1)     | 0<br>(0 - 1)      | 76<br>(28 - 139)     | 168<br>(63 - 308)      | 66<br>(21 - 123)         |
| Cirrhosis due to alcohol use                        | 442<br>(308 - 610)       | -                | -                 | 89<br>(54 - 138)     | 240<br>(157 - 335)     | 113<br>(76 - 161)        |
| Cirrhosis due to other causes                       | 96<br>(53 - 143)         | 2<br>(1 - 4)     | 1<br>(1 - 2)      | 38<br>(21 - 58)      | 44<br>(22 - 73)        | 11<br>(5 - 19)           |
| Digestive diseases                                  | 1,692<br>(1,450 - 2,046) | 5<br>(3 - 8)     | 6<br>(4 - 7)      | 257<br>(209 - 319)   | 593<br>(490 - 738)     | 831<br>(700 - 1,014)     |
| Peptic ulcer disease                                | 497<br>(372 - 696)       | 0<br>(0 - 1)     | 1<br>(0 - 1)      | 53<br>(37 - 78)      | 163<br>(112 - 233)     | 280<br>(193 - 404)       |
| Gastritis and duodenitis                            | 12<br>(6 - 18)           | 0<br>(0 - 0)     | 0<br>(0 - 0)      | 2<br>(1 - 4)         | 3<br>(2 - 5)           | 5<br>(3 - 9)             |
| Appendicitis                                        | 76<br>(44 - 118)         | 1<br>(0 - 1)     | 1<br>(1 - 2)      | 24<br>(13 - 39)      | 25<br>(13 - 43)        | 25<br>(13 - 41)          |
| Paralytic ileus and intestinal obstruction          | 273<br>(175 - 471)       | 2<br>(1 - 3)     | 1<br>(1 - 2)      | 27<br>(17 - 51)      | 83<br>(50 - 151)       | 160<br>(94 - 274)        |
| Inguinal, femoral, and abdominal hernia             | 34<br>(19 - 53)          | 0<br>(0 - 0)     | 0<br>(0 - 0)      | 4<br>(2 - 6)         | 13<br>(7 - 21)         | 17<br>(9 - 28)           |
| Inflammatory bowel disease                          | 23<br>(15 - 31)          | 0<br>(0 - 0)     | 0<br>(0 - 0)      | 5<br>(3 - 7)         | 8<br>(5 - 12)          | 10<br>(6 - 14)           |
| Vascular intestinal disorders                       | 73<br>(29 - 154)         | 1<br>(0 - 2)     | 0<br>(0 - 1)      | 11<br>(4 - 23)       | 25<br>(10 - 53)        | 35<br>(14 - 76)          |
| Gallbladder and biliary diseases                    | 252<br>(161 - 336)       | 0<br>(0 - 1)     | 1<br>(0 - 1)      | 29<br>(19 - 40)      | 89<br>(54 - 126)       | 133<br>(82 - 201)        |
| Pancreatitis                                        | 241<br>(174 - 349)       | 0<br>(0 - 0)     | 0<br>(0 - 1)      | 59<br>(40 - 83)      | 101<br>(70 - 149)      | 81<br>(54 - 129)         |
| Other digestive diseases                            | 211<br>(149 - 272)       | 1<br>(1 - 3)     | 1<br>(0 - 1)      | 42<br>(30 - 57)      | 82<br>(51 - 112)       | 84<br>(52 - 121)         |
| Neurological disorders                              | 2,302<br>(1,857 - 2,753) | 17<br>(9 - 29)   | 13<br>(8 - 19)    | 121<br>(92 - 156)    | 372<br>(284 - 468)     | 1,780<br>(1,385 - 2,193) |
| Alzheimer disease and other dementias               | 1,932<br>(1,502 - 2,379) | -                | -                 | 2<br>(0 - 4)         | 256<br>(174 - 336)     | 1,674<br>(1,275 - 2,080) |
| Parkinson disease                                   | 101<br>(71 - 150)        | -                | -                 | 6<br>(4 - 8)         | 34<br>(22 - 49)        | 62<br>(36 - 103)         |
| Epilepsy                                            | 188<br>(134 - 241)       | 11<br>(5 - 22)   | 10<br>(6 - 16)    | 86<br>(59 - 118)     | 49<br>(31 - 69)        | 33<br>(20 - 49)          |
| Multiple sclerosis                                  | 4<br>(2 - 7)             | -                | -                 | 1<br>(1 - 2)         | 2<br>(1 - 3)           | 1<br>(0 - 2)             |
| Other neurological disorders                        | 76<br>(63 - 108)         | 6<br>(4 - 10)    | 3<br>(2 - 4)      | 26<br>(20 - 35)      | 31<br>(24 - 45)        | 11<br>(8 - 15)           |
| Mental and substance use disorders                  | 1,152<br>(929 - 1,470)   | 1<br>(0 - 1)     | 0<br>(0 - 0)      | 820<br>(645 - 1,083) | 301<br>(227 - 409)     | 30<br>(21 - 40)          |
| Schizophrenia                                       | 6<br>(4 - 10)            | -                | -                 | 2<br>(1 - 3)         | 3<br>(2 - 5)           | 1<br>(1 - 2)             |
| Alcohol use disorders                               | 130<br>(88 - 201)        | -                | -                 | 45<br>(30 - 73)      | 70<br>(45 - 107)       | 14<br>(9 - 21)           |
| Drug use disorders                                  | 1,015<br>(809 - 1,300)   | 1<br>(0 - 1)     | -                 | 772<br>(599 - 1,030) | 228<br>(162 - 321)     | 15<br>(7 - 21)           |
| Opioid use disorders                                | 648<br>(517 - 828)       | 0<br>(0 - 1)     | -                 | 499<br>(384 - 666)   | 139<br>(98 - 198)      | 10<br>(5 - 14)           |
| Cocaine use disorders                               | 14<br>(11 - 19)          | 0<br>(0 - 0)     | -                 | 11<br>(8 - 16)       | 2<br>(2 - 4)           | 0<br>(0 - 0)             |
| Amphetamine use disorders                           | 14<br>(11 - 20)          | 0<br>(0 - 0)     | -                 | 11<br>(8 - 16)       | 3<br>(2 - 5)           | 0<br>(0 - 0)             |
| Other drug use disorders                            | 339<br>(266 - 439)       | 0<br>(0 - 0)     | -                 | 251<br>(191 - 339)   | 83<br>(58 - 121)       | 5<br>(2 - 7)             |
| Eating disorders                                    | 1<br>(0 - 1)             | -                | 0<br>(0 - 0)      | 1<br>(0 - 1)         | -                      | -                        |

Web Table 31- Malaysia deaths with 95% UI by age, sex, and cause in 2013

| Cause                                               | Males, All Ages          | Males, 0-4 Years   | Males, 5-14 Years | Males, 15-49 Years | Males, 50-69 Years       | Males, 70-80 Years       |
|-----------------------------------------------------|--------------------------|--------------------|-------------------|--------------------|--------------------------|--------------------------|
| Anorexia nervosa                                    | 1<br>(0 - 1)             | --                 | 0<br>(0 - 0)      | 1<br>(0 - 1)       | --                       | --                       |
| Diabetes, urogenital, blood, and endocrine diseases | 5,413<br>(4,736 - 6,409) | 39<br>(26 - 58)    | 24<br>(18 - 32)   | 686<br>(569 - 884) | 2,370<br>(2,023 - 2,809) | 2,293<br>(1,958 - 2,785) |
| Diabetes mellitus                                   | 2,158<br>(1,850 - 2,517) | 1<br>(1 - 2)       | 2<br>(1 - 3)      | 217<br>(170 - 276) | 1,043<br>(846 - 1,284)   | 896<br>(718 - 1,107)     |
| Acute glomerulonephritis                            | 3<br>(2 - 4)             | 0<br>(0 - 0)       | 0<br>(0 - 0)      | 1<br>(1 - 2)       | 1<br>(0 - 1)             | 1<br>(0 - 1)             |
| Chronic kidney disease                              | 2,047<br>(1,693 - 3,026) | 3<br>(2 - 6)       | 5<br>(3 - 8)      | 262<br>(201 - 437) | 918<br>(722 - 1,315)     | 858<br>(667 - 1,321)     |
| Chronic kidney disease due to diabetes mellitus     | 13<br>(8 - 43)           | 0<br>(0 - 0)       | 0<br>(0 - 1)      | 2<br>(1 - 6)       | 2<br>(1 - 3)             | 9<br>(5 - 34)            |
| Chronic kidney disease due to hypertension          | 379<br>(270 - 732)       | 0<br>(0 - 0)       | 0<br>(0 - 1)      | 61<br>(43 - 108)   | 211<br>(144 - 391)       | 106<br>(66 - 229)        |
| Chronic kidney disease due to glomerulonephritis    | 247<br>(134 - 351)       | 1<br>(1 - 2)       | 1<br>(1 - 2)      | 17<br>(10 - 23)    | 89<br>(42 - 136)         | 139<br>(70 - 205)        |
| Chronic kidney disease due to other causes          | 1,407<br>(1,058 - 2,311) | 2<br>(1 - 4)       | 3<br>(2 - 6)      | 182<br>(120 - 339) | 617<br>(412 - 995)       | 603<br>(418 - 989)       |
| Urinary diseases and male infertility               | 760<br>(478 - 955)       | 6<br>(3 - 12)      | 2<br>(1 - 3)      | 89<br>(60 - 120)   | 276<br>(171 - 360)       | 387<br>(232 - 534)       |
| Interstitial nephritis and urinary tract infections | 146<br>(84 - 228)        | 5<br>(3 - 10)      | 2<br>(1 - 2)      | 26<br>(15 - 39)    | 48<br>(25 - 80)          | 64<br>(32 - 116)         |
| Urolithiasis                                        | 12<br>(7 - 20)           | --                 | 0<br>(0 - 0)      | 2<br>(1 - 3)       | 4<br>(2 - 8)             | 6<br>(3 - 12)            |
| Other urinary diseases                              | 602<br>(379 - 773)       | 1<br>(0 - 2)       | 1<br>(0 - 1)      | 61<br>(38 - 83)    | 223<br>(136 - 295)       | 317<br>(185 - 448)       |
| Gynecological diseases                              | --                       | --                 | --                | --                 | --                       | --                       |
| Uterine fibroids                                    | --                       | --                 | --                | --                 | --                       | --                       |
| Polycystic ovarian syndrome                         | --                       | --                 | --                | --                 | --                       | --                       |
| Endometriosis                                       | --                       | --                 | --                | --                 | --                       | --                       |
| Genital prolapse                                    | --                       | --                 | --                | --                 | --                       | --                       |
| Other gynecological diseases                        | --                       | --                 | --                | --                 | --                       | --                       |
| Hemoglobinopathies and hemolytic anemias            | 148<br>(92 - 224)        | 12<br>(6 - 20)     | 8<br>(5 - 13)     | 48<br>(30 - 73)    | 38<br>(23 - 59)          | 41<br>(25 - 65)          |
| Thalassemias                                        | 64<br>(39 - 98)          | 10<br>(6 - 18)     | 8<br>(4 - 12)     | 33<br>(21 - 50)    | 11<br>(7 - 17)           | 1<br>(1 - 2)             |
| Sickle cell disorders                               | 0<br>(0 - 0)             | 0<br>(0 - 0)       | 0<br>(0 - 0)      | 0<br>(0 - 0)       | 0<br>(0 - 0)             | 0<br>(0 - 0)             |
| G6PD deficiency                                     | 6<br>(3 - 8)             | 0<br>(0 - 0)       | 0<br>(0 - 0)      | 2<br>(1 - 3)       | 2<br>(1 - 4)             | 1<br>(0 - 1)             |
| Other hemoglobinopathies and hemolytic anemias      | 79<br>(48 - 119)         | 1<br>(1 - 2)       | 1<br>(0 - 1)      | 13<br>(8 - 20)     | 25<br>(15 - 37)          | 39<br>(24 - 61)          |
| Endocrine, metabolic, blood, and immune disorders   | 297<br>(228 - 446)       | 16<br>(9 - 28)     | 7<br>(4 - 10)     | 68<br>(49 - 102)   | 95<br>(68 - 150)         | 111<br>(73 - 175)        |
| Musculoskeletal disorders                           | 301<br>(234 - 440)       | --                 | 4<br>(3 - 6)      | 87<br>(64 - 127)   | 125<br>(91 - 192)        | 85<br>(61 - 128)         |
| Rheumatoid arthritis                                | 16<br>(9 - 25)           | --                 | 0<br>(0 - 0)      | 2<br>(1 - 3)       | 6<br>(3 - 12)            | 8<br>(4 - 13)            |
| Other musculoskeletal disorders                     | 285<br>(221 - 415)       | --                 | 4<br>(2 - 6)      | 85<br>(63 - 124)   | 119<br>(87 - 182)        | 78<br>(54 - 119)         |
| Other non-communicable diseases                     | 1,306<br>(1,092 - 1,543) | 535<br>(382 - 713) | 31<br>(20 - 43)   | 151<br>(121 - 191) | 231<br>(176 - 300)       | 357<br>(249 - 486)       |
| Congenital anomalies                                | 684<br>(526 - 862)       | 522<br>(372 - 699) | 29<br>(18 - 41)   | 74<br>(56 - 105)   | 29<br>(21 - 44)          | 29<br>(21 - 42)          |
| Neural tube defects                                 | 32<br>(17 - 57)          | 31<br>(15 - 55)    | 0<br>(0 - 1)      | 1<br>(1 - 1)       | 0<br>(0 - 0)             | 0<br>(0 - 0)             |
| Congenital heart anomalies                          | 337<br>(238 - 448)       | 225<br>(131 - 329) | 21<br>(13 - 31)   | 56<br>(42 - 80)    | 16<br>(11 - 25)          | 18<br>(13 - 27)          |
| Cleft lip and cleft palate                          | 0<br>(0 - 0)             | 0<br>(0 - 0)       | --                | --                 | --                       | --                       |
| Down syndrome                                       | 18<br>(10 - 35)          | 11<br>(4 - 25)     | 2<br>(1 - 3)      | 4<br>(2 - 6)       | 1<br>(1 - 2)             | 0<br>(0 - 0)             |
| Chromosomal unbalanced rearrangements               | 61<br>(36 - 95)          | 58<br>(33 - 92)    | 1<br>(0 - 1)      | 2<br>(1 - 3)       | 1<br>(0 - 1)             | 0<br>(0 - 0)             |
| Other congenital anomalies                          | 235<br>(162 - 328)       | 197<br>(126 - 292) | 5<br>(2 - 8)      | 11<br>(7 - 17)     | 11<br>(8 - 17)           | 10<br>(7 - 16)           |
| Skin and subcutaneous diseases                      | 612<br>(471 - 774)       | 4<br>(2 - 7)       | 2<br>(1 - 3)      | 77<br>(57 - 99)    | 202<br>(150 - 268)       | 328<br>(221 - 457)       |
| Cellulitis                                          | 126<br>(69 - 189)        | 1<br>(0 - 2)       | 0<br>(0 - 1)      | 16<br>(9 - 26)     | 49<br>(26 - 79)          | 60<br>(27 - 107)         |
| Pyoderma                                            | 233<br>(172 - 307)       | 3<br>(1 - 5)       | 1<br>(1 - 1)      | 42<br>(30 - 58)    | 91<br>(61 - 131)         | 97<br>(57 - 151)         |
| Decubitus ulcer                                     | 228<br>(150 - 315)       | 0<br>(0 - 0)       | 0<br>(0 - 0)      | 15<br>(10 - 22)    | 53<br>(33 - 79)          | 160<br>(96 - 243)        |

Web Table 31- Malaysia deaths with 95% UI by age, sex, and cause in 2013

| Cause                                           | Males, All Ages             | Males, 0-4 Years   | Males, 5-14 Years  | Males, 15-49 Years       | Males, 50-69 Years       | Males, 70-80 Years       |
|-------------------------------------------------|-----------------------------|--------------------|--------------------|--------------------------|--------------------------|--------------------------|
| Other skin and subcutaneous diseases            | 25<br>(15 - 39)             | 0<br>(0 - 0)       | 0<br>(0 - 1)       | 4<br>(3 - 6)             | 8<br>(4 - 14)            | 12<br>(5 - 26)           |
| Sudden infant death syndrome                    | 10<br>(3 - 23)              | 10<br>(3 - 23)     | --                 | --                       | --                       | --                       |
| Injuries                                        | 13,166<br>(10,860 - 15,185) | 187<br>(133 - 259) | 259<br>(210 - 312) | 5,988<br>(4,984 - 7,037) | 3,685<br>(2,884 - 4,427) | 3,047<br>(2,398 - 3,637) |
| Transport injuries                              | 6,436<br>(4,968 - 7,488)    | 42<br>(24 - 68)    | 120<br>(87 - 155)  | 3,520<br>(2,806 - 4,162) | 1,726<br>(1,243 - 2,115) | 1,028<br>(732 - 1,299)   |
| Road injuries                                   | 5,984<br>(4,584 - 6,958)    | 40<br>(22 - 64)    | 113<br>(82 - 147)  | 3,273<br>(2,607 - 3,873) | 1,601<br>(1,148 - 1,968) | 956<br>(682 - 1,218)     |
| Pedestrian road injuries                        | 1,468<br>(997 - 1,981)      | 16<br>(8 - 28)     | 45<br>(30 - 66)    | 463<br>(299 - 660)       | 504<br>(330 - 706)       | 439<br>(285 - 604)       |
| Cyclist road injuries                           | 470<br>(331 - 627)          | 3<br>(1 - 6)       | 13<br>(8 - 19)     | 185<br>(132 - 249)       | 168<br>(113 - 232)       | 101<br>(64 - 149)        |
| Motorcyclist road injuries                      | 704<br>(487 - 988)          | 4<br>(2 - 7)       | 9<br>(5 - 14)      | 546<br>(378 - 776)       | 94<br>(56 - 138)         | 51<br>(29 - 81)          |
| Motor vehicle road injuries                     | 3,319<br>(2,437 - 3,997)    | 16<br>(9 - 28)     | 46<br>(30 - 63)    | 2,069<br>(1,570 - 2,481) | 830<br>(561 - 1,073)     | 359<br>(225 - 488)       |
| Other road injuries                             | 23<br>(15 - 42)             | 0<br>(0 - 1)       | 1<br>(0 - 2)       | 10<br>(6 - 19)           | 6<br>(3 - 10)            | 6<br>(3 - 12)            |
| Other transport injuries                        | 453<br>(309 - 565)          | 3<br>(1 - 4)       | 6<br>(4 - 10)      | 247<br>(170 - 322)       | 125<br>(74 - 173)        | 72<br>(42 - 103)         |
| Unintentional injuries                          | 4,460<br>(3,569 - 5,359)    | 137<br>(92 - 195)  | 127<br>(95 - 174)  | 1,120<br>(924 - 1,382)   | 1,347<br>(1,015 - 1,756) | 1,728<br>(1,260 - 2,245) |
| Falls                                           | 460<br>(347 - 806)          | 5<br>(2 - 9)       | 7<br>(4 - 12)      | 118<br>(82 - 214)        | 157<br>(103 - 299)       | 173<br>(113 - 308)       |
| Drowning                                        | 556<br>(414 - 762)          | 41<br>(22 - 75)    | 87<br>(59 - 131)   | 288<br>(202 - 394)       | 94<br>(64 - 133)         | 46<br>(33 - 67)          |
| Fire, heat, and hot substances                  | 200<br>(151 - 256)          | 7<br>(3 - 12)      | 5<br>(3 - 8)       | 58<br>(41 - 81)          | 58<br>(40 - 81)          | 72<br>(50 - 101)         |
| Poisonings                                      | 171<br>(117 - 230)          | 2<br>(1 - 4)       | 1<br>(1 - 2)       | 75<br>(49 - 108)         | 66<br>(38 - 96)          | 27<br>(17 - 43)          |
| Exposure to mechanical forces                   | 380<br>(309 - 506)          | 5<br>(3 - 9)       | 7<br>(4 - 11)      | 183<br>(137 - 247)       | 116<br>(86 - 161)        | 70<br>(48 - 102)         |
| Unintentional firearm injuries                  | 207<br>(154 - 273)          | 0<br>(0 - 1)       | 0<br>(0 - 1)       | 105<br>(70 - 154)        | 58<br>(36 - 87)          | 43<br>(26 - 67)          |
| Unintentional suffocation                       | 68<br>(48 - 141)            | 3<br>(1 - 5)       | 2<br>(1 - 5)       | 23<br>(14 - 47)          | 23<br>(13 - 49)          | 17<br>(9 - 37)           |
| Other exposure to mechanical forces             | 106<br>(85 - 133)           | 2<br>(1 - 4)       | 4<br>(2 - 6)       | 55<br>(41 - 75)          | 35<br>(24 - 48)          | 10<br>(7 - 14)           |
| Adverse effects of medical treatment            | 1,698<br>(1,064 - 2,406)    | 12<br>(6 - 22)     | 5<br>(3 - 8)       | 213<br>(124 - 314)       | 585<br>(350 - 900)       | 883<br>(506 - 1,370)     |
| Animal contact                                  | 37<br>(25 - 55)             | 1<br>(0 - 2)       | 2<br>(1 - 3)       | 12<br>(8 - 19)           | 11<br>(7 - 18)           | 10<br>(6 - 17)           |
| Venomous animal contact                         | 25<br>(16 - 37)             | 1<br>(0 - 1)       | 1<br>(1 - 2)       | 7<br>(4 - 11)            | 8<br>(5 - 13)            | 7<br>(4 - 12)            |
| Non-venomous animal contact                     | 12<br>(7 - 17)              | 0<br>(0 - 0)       | 0<br>(0 - 1)       | 5<br>(3 - 8)             | 3<br>(1 - 6)             | 3<br>(2 - 5)             |
| Foreign body                                    | 833<br>(444 - 1,181)        | 63<br>(32 - 99)    | 9<br>(5 - 14)      | 106<br>(56 - 159)        | 228<br>(115 - 345)       | 427<br>(219 - 636)       |
| Pulmonary aspiration and foreign body in airway | 825<br>(435 - 1,171)        | 62<br>(32 - 98)    | 9<br>(4 - 14)      | 104<br>(55 - 157)        | 222<br>(109 - 336)       | 427<br>(219 - 636)       |
| Foreign body in other body part                 | 8<br>(5 - 15)               | 0<br>(0 - 1)       | 0<br>(0 - 0)       | 1<br>(1 - 2)             | 6<br>(3 - 11)            | 0<br>(0 - 0)             |
| Other unintentional injuries                    | 125<br>(102 - 152)          | 2<br>(1 - 4)       | 4<br>(2 - 5)       | 67<br>(51 - 87)          | 33<br>(23 - 44)          | 19<br>(14 - 26)          |
| Self-harm and interpersonal violence            | 2,270<br>(1,533 - 2,850)    | 8<br>(2 - 17)      | 12<br>(5 - 19)     | 1,348<br>(906 - 1,717)   | 612<br>(377 - 816)       | 290<br>(172 - 408)       |
| Self-harm                                       | 1,376<br>(1,001 - 1,702)    | --                 | 4<br>(1 - 7)       | 719<br>(493 - 921)       | 429<br>(293 - 576)       | 225<br>(143 - 319)       |
| Interpersonal violence                          | 894<br>(372 - 1,240)        | 8<br>(2 - 17)      | 8<br>(3 - 15)      | 629<br>(289 - 863)       | 183<br>(56 - 308)        | 65<br>(12 - 133)         |
| Assault by firearm                              | 160<br>(58 - 286)           | 0<br>(0 - 1)       | 1<br>(0 - 1)       | 122<br>(47 - 218)        | 31<br>(8 - 60)           | 6<br>(1 - 14)            |
| Assault by sharp object                         | 218<br>(83 - 333)           | 1<br>(0 - 3)       | 1<br>(0 - 3)       | 171<br>(70 - 265)        | 35<br>(9 - 64)           | 9<br>(1 - 21)            |
| Assault by other means                          | 516<br>(197 - 742)          | 6<br>(1 - 13)      | 7<br>(2 - 12)      | 336<br>(145 - 481)       | 117<br>(34 - 203)        | 50<br>(9 - 104)          |

Web Table 31- Malaysia deaths with 95% UI by age, sex, and cause in 2013

| Cause                                                             | Females, All Ages           | Females, 0-4 Years       | Females, 5-14 Years | Females, 15-49 Years     | Females, 50-69 Years        | Females, 70-80 Years        |
|-------------------------------------------------------------------|-----------------------------|--------------------------|---------------------|--------------------------|-----------------------------|-----------------------------|
| All causes                                                        | 53,545<br>(47,982 - 57,834) | 1,473<br>(1,223 - 1,749) | 439<br>(380 - 509)  | 7,247<br>(6,293 - 8,448) | 18,290<br>(15,819 - 20,083) | 26,096<br>(24,057 - 27,281) |
| Communicable, maternal, neonatal, and nutritional diseases        | 7,528<br>(5,823 - 8,826)    | 764<br>(617 - 938)       | 126<br>(95 - 166)   | 1,278<br>(1,049 - 1,489) | 2,050<br>(1,469 - 2,537)    | 3,311<br>(2,278 - 4,239)    |
| HIV/AIDS and tuberculosis                                         | 520<br>(382 - 631)          | 4<br>(2 - 6)             | 5<br>(2 - 11)       | 210<br>(156 - 285)       | 164<br>(108 - 209)          | 138<br>(84 - 184)           |
| Tuberculosis                                                      | 389<br>(236 - 483)          | 2<br>(1 - 3)             | 2<br>(1 - 4)        | 103<br>(61 - 138)        | 145<br>(87 - 187)           | 136<br>(83 - 182)           |
| HIV/AIDS                                                          | 131<br>(74 - 226)           | 2<br>(1 - 3)             | 3<br>(0 - 8)        | 106<br>(63 - 178)        | 19<br>(8 - 39)              | 1<br>(0 - 3)                |
| HIV/AIDS resulting in mycobacterial infection                     | 6<br>(3 - 11)               | 0<br>(0 - 0)             | 0<br>(0 - 0)        | 5<br>(3 - 8)             | 1<br>(0 - 2)                | 0<br>(0 - 0)                |
| HIV/AIDS resulting in other diseases                              | 125<br>(71 - 214)           | 2<br>(1 - 3)             | 2<br>(0 - 8)        | 102<br>(60 - 169)        | 18<br>(8 - 37)              | 1<br>(0 - 3)                |
| Diarrhea, lower respiratory, and other common infectious diseases | 5,701<br>(4,012 - 6,931)    | 259<br>(185 - 351)       | 104<br>(74 - 144)   | 653<br>(469 - 835)       | 1,701<br>(1,128 - 2,169)    | 2,984<br>(1,963 - 3,912)    |
| Diarrheal diseases                                                | 188<br>(143 - 250)          | 16<br>(7 - 34)           | 3<br>(2 - 6)        | 25<br>(17 - 35)          | 44<br>(27 - 68)             | 100<br>(63 - 157)           |
| Intestinal infectious diseases                                    | 169<br>(76 - 329)           | 54<br>(23 - 104)         | 44<br>(18 - 85)     | 56<br>(18 - 122)         | 13<br>(5 - 30)              | 3<br>(1 - 6)                |
| Typhoid fever                                                     | 130<br>(57 - 253)           | 39<br>(17 - 76)          | 33<br>(13 - 66)     | 44<br>(14 - 97)          | 11<br>(4 - 25)              | 2<br>(1 - 5)                |
| Paratyphoid fever                                                 | 37<br>(16 - 73)             | 14<br>(5 - 29)           | 10<br>(4 - 21)      | 11<br>(3 - 25)           | 2<br>(1 - 5)                | 0<br>(0 - 1)                |
| Other intestinal infectious diseases                              | 2<br>(0 - 6)                | 1<br>(0 - 3)             | 0<br>(0 - 1)        | 1<br>(0 - 3)             | 0<br>(0 - 2)                | 0<br>(0 - 1)                |
| Lower respiratory infections                                      | 4,872<br>(3,187 - 6,027)    | 94<br>(58 - 143)         | 27<br>(16 - 41)     | 426<br>(269 - 578)       | 1,518<br>(964 - 1,979)      | 2,807<br>(1,781 - 3,741)    |
| Upper respiratory infections                                      | 2<br>(1 - 4)                | 0<br>(0 - 0)             | 0<br>(0 - 0)        | 0<br>(0 - 1)             | 1<br>(0 - 2)                | 1<br>(0 - 3)                |
| Otitis media                                                      | 10<br>(8 - 12)              | 0<br>(0 - 0)             | 0<br>(0 - 0)        | 1<br>(1 - 2)             | 4<br>(3 - 5)                | 4<br>(3 - 6)                |
| Meningitis                                                        | 200<br>(152 - 246)          | 32<br>(20 - 48)          | 8<br>(5 - 13)       | 56<br>(39 - 77)          | 61<br>(41 - 88)             | 43<br>(28 - 61)             |
| Pneumococcal meningitis                                           | 66<br>(46 - 88)             | 8<br>(4 - 13)            | 3<br>(1 - 5)        | 20<br>(11 - 29)          | 21<br>(12 - 36)             | 14<br>(8 - 23)              |
| H influenzae type B meningitis                                    | 33<br>(24 - 44)             | 11<br>(6 - 18)           | 2<br>(1 - 4)        | 7<br>(4 - 12)            | 7<br>(4 - 12)               | 5<br>(3 - 9)                |
| Meningococcal meningitis                                          | 29<br>(19 - 43)             | 2<br>(1 - 4)             | 1<br>(0 - 2)        | 9<br>(5 - 14)            | 10<br>(5 - 19)              | 7<br>(3 - 13)               |
| Other meningitis                                                  | 72<br>(51 - 97)             | 11<br>(6 - 17)           | 2<br>(1 - 4)        | 21<br>(11 - 31)          | 22<br>(9 - 37)              | 16<br>(9 - 26)              |
| Encephalitis                                                      | 193<br>(142 - 261)          | 15<br>(9 - 26)           | 14<br>(9 - 22)      | 84<br>(59 - 125)         | 59<br>(39 - 83)             | 20<br>(13 - 29)             |
| Diphtheria                                                        | 0<br>(0 - 1)                | 0<br>(0 - 1)             | 0<br>(0 - 1)        | 0<br>(0 - 0)             | 0<br>(0 - 0)                | --<br>(0 - 0)               |
| Whooping cough                                                    | 9<br>(0 - 39)               | 8<br>(0 - 36)            | 0<br>(0 - 2)        | 0<br>(0 - 1)             | 0<br>(0 - 0)                | --<br>(0 - 0)               |
| Tetanus                                                           | 6<br>(4 - 8)                | 0<br>(0 - 0)             | 0<br>(0 - 0)        | 1<br>(1 - 1)             | 2<br>(1 - 3)                | 3<br>(1 - 4)                |
| Measles                                                           | 47<br>(5 - 165)             | 38<br>(4 - 133)          | 7<br>(1 - 25)       | 2<br>(0 - 7)             | 0<br>(0 - 0)                | --<br>(0 - 0)               |
| Varicella and herpes zoster                                       | 6<br>(2 - 14)               | 1<br>(0 - 5)             | 0<br>(0 - 1)        | 2<br>(0 - 4)             | 1<br>(0 - 3)                | 2<br>(0 - 9)                |
| Neglected tropical diseases and malaria                           | 96<br>(69 - 123)            | 7<br>(4 - 11)            | 10<br>(6 - 14)      | 47<br>(34 - 63)          | 23<br>(16 - 29)             | 10<br>(7 - 14)              |
| Malaria                                                           | 3<br>(3 - 5)                | 0<br>(0 - 1)             | 0<br>(0 - 0)        | 1<br>(1 - 2)             | 1<br>(1 - 1)                | 1<br>(0 - 1)                |
| Leishmaniasis                                                     | 0<br>(0 - 0)                | 0<br>(0 - 0)             | 0<br>(0 - 0)        | 0<br>(0 - 0)             | 0<br>(0 - 0)                | 0<br>(0 - 0)                |
| Visceral leishmaniasis                                            | 0<br>(0 - 0)                | 0<br>(0 - 0)             | 0<br>(0 - 0)        | 0<br>(0 - 0)             | 0<br>(0 - 0)                | 0<br>(0 - 0)                |
| Cysticercosis                                                     | 0<br>(0 - 0)                | 0<br>(0 - 0)             | 0<br>(0 - 0)        | 0<br>(0 - 0)             | 0<br>(0 - 0)                | 0<br>(0 - 0)                |
| Cystic echinococcosis                                             | 1<br>(1 - 1)                | 0<br>(0 - 0)             | 0<br>(0 - 0)        | 0<br>(0 - 0)             | 0<br>(0 - 0)                | 0<br>(0 - 0)                |
| Dengue                                                            | 79<br>(53 - 105)            | 6<br>(3 - 9)             | 9<br>(5 - 13)       | 42<br>(29 - 58)          | 18<br>(12 - 24)             | 5<br>(3 - 7)                |
| Rabies                                                            | 1<br>(1 - 2)                | 0<br>(0 - 0)             | 0<br>(0 - 0)        | 1<br>(0 - 1)             | 0<br>(0 - 0)                | 0<br>(0 - 0)                |
| Intestinal nematode infections                                    | 1<br>(0 - 5)                | 0<br>(0 - 2)             | 0<br>(0 - 2)        | 0<br>(0 - 2)             | 0<br>(0 - 2)                | 0<br>(0 - 3)                |
| Ascariasis                                                        | 1<br>(0 - 5)                | 0<br>(0 - 2)             | 0<br>(0 - 2)        | 0<br>(0 - 2)             | 0<br>(0 - 2)                | 0<br>(0 - 3)                |
| Other neglected tropical diseases                                 | 10<br>(7 - 14)              | 1<br>(0 - 1)             | 0<br>(0 - 1)        | 3<br>(2 - 4)             | 3<br>(2 - 4)                | 4<br>(2 - 7)                |
| Maternal disorders                                                | 291<br>(226 - 369)          | --                       | 0<br>(0 - 1)        | 291<br>(225 - 369)       | --                          | --                          |
| Maternal hemorrhage                                               | 39<br>(27 - 54)             | --                       | 0<br>(0 - 0)        | 39<br>(27 - 54)          | --                          | --                          |

Web Table 31- Malaysia deaths with 95% UI by age, sex, and cause in 2013

| Cause                                                            | Females, All Ages           | Females, 0-4 Years | Females, 5-14 Years | Females, 15-49 Years     | Females, 50-69 Years        | Females, 70-80 Years        |
|------------------------------------------------------------------|-----------------------------|--------------------|---------------------|--------------------------|-----------------------------|-----------------------------|
| Maternal sepsis and other maternal infections                    | 49<br>(36 - 66)             | --                 | 0<br>(0 - 0)        | 49<br>(36 - 66)          | --                          | --                          |
| Maternal hypertensive disorders                                  | 22<br>(14 - 35)             | --                 | 0<br>(0 - 0)        | 22<br>(14 - 35)          | --                          | --                          |
| Maternal obstructed labor                                        | 18<br>(8 - 27)              | --                 | 0<br>(0 - 0)        | 18<br>(8 - 27)           | --                          | --                          |
| Maternal abortive outcome                                        | 39<br>(27 - 54)             | --                 | 0<br>(0 - 0)        | 38<br>(27 - 54)          | --                          | --                          |
| Indirect maternal deaths                                         | 32<br>(21 - 47)             | --                 | 0<br>(0 - 0)        | 32<br>(21 - 47)          | --                          | --                          |
| Late maternal deaths                                             | 32<br>(19 - 46)             | --                 | 0<br>(0 - 0)        | 32<br>(19 - 46)          | --                          | --                          |
| Maternal deaths aggravated by HIV/AIDS                           | 0<br>(0 - 0)                | --                 | --                  | 0<br>(0 - 0)             | --                          | --                          |
| Other maternal disorders                                         | 61<br>(43 - 85)             | --                 | 0<br>(0 - 0)        | 61<br>(43 - 85)          | --                          | --                          |
| Neonatal disorders                                               | 461<br>(362 - 575)          | 461<br>(362 - 575) | --                  | --                       | --                          | --                          |
| Neonatal preterm birth complications                             | 173<br>(92 - 256)           | 173<br>(92 - 256)  | --                  | --                       | --                          | --                          |
| Neonatal encephalopathy due to birth asphyxia and trauma         | 92<br>(48 - 148)            | 92<br>(48 - 148)   | --                  | --                       | --                          | --                          |
| Neonatal sepsis and other neonatal infections                    | 89<br>(50 - 154)            | 89<br>(50 - 154)   | --                  | --                       | --                          | --                          |
| Hemolytic disease and other neonatal jaundice                    | 1<br>(0 - 3)                | 1<br>(0 - 3)       | --                  | --                       | --                          | --                          |
| Other neonatal disorders                                         | 106<br>(59 - 189)           | 106<br>(59 - 189)  | --                  | --                       | --                          | --                          |
| Nutritional deficiencies                                         | 96<br>(75 - 134)            | 3<br>(2 - 5)       | 1<br>(1 - 2)        | 19<br>(14 - 26)          | 22<br>(16 - 31)             | 52<br>(36 - 78)             |
| Protein-energy malnutrition                                      | 26<br>(13 - 46)             | 2<br>(1 - 3)       | 0<br>(0 - 1)        | 3<br>(1 - 5)             | 4<br>(2 - 8)                | 17<br>(7 - 31)              |
| Iodine deficiency                                                | 3<br>(0 - 11)               | 0<br>(0 - 1)       | 0<br>(0 - 0)        | 1<br>(0 - 3)             | 1<br>(0 - 5)                | 2<br>(0 - 8)                |
| Iron-deficiency anemia                                           | 61<br>(39 - 90)             | 1<br>(0 - 2)       | 1<br>(0 - 1)        | 14<br>(9 - 21)           | 15<br>(9 - 23)              | 30<br>(18 - 48)             |
| Other nutritional deficiencies                                   | 5<br>(2 - 11)               | 0<br>(0 - 0)       | 0<br>(0 - 0)        | 1<br>(0 - 2)             | 1<br>(1 - 3)                | 2<br>(1 - 6)                |
| Other communicable, maternal, neonatal, and nutritional diseases | 362<br>(260 - 506)          | 30<br>(8 - 61)     | 6<br>(3 - 10)       | 58<br>(39 - 87)          | 140<br>(90 - 220)           | 128<br>(68 - 257)           |
| Sexually transmitted diseases excluding HIV                      | 39<br>(16 - 70)             | 20<br>(0 - 47)     | 2<br>(0 - 3)        | 7<br>(5 - 13)            | 4<br>(2 - 10)               | 5<br>(2 - 12)               |
| Syphilis                                                         | 31<br>(9 - 61)              | 20<br>(0 - 47)     | 1<br>(0 - 3)        | 3<br>(2 - 5)             | 2<br>(1 - 6)                | 4<br>(2 - 9)                |
| Chlamydial infection                                             | 2<br>(2 - 4)                | --                 | 0<br>(0 - 0)        | 1<br>(1 - 3)             | 1<br>(0 - 1)                | 0<br>(0 - 1)                |
| Gonococcal infection                                             | 3<br>(2 - 5)                | --                 | 0<br>(0 - 0)        | 2<br>(1 - 3)             | 1<br>(0 - 2)                | 1<br>(0 - 1)                |
| Other sexually transmitted diseases                              | 2<br>(1 - 4)                | --                 | 0<br>(0 - 0)        | 1<br>(1 - 2)             | 1<br>(0 - 1)                | 0<br>(0 - 1)                |
| Hepatitis                                                        | 84<br>(66 - 106)            | 1<br>(0 - 1)       | 0<br>(0 - 0)        | 11<br>(8 - 16)           | 44<br>(31 - 59)             | 28<br>(20 - 39)             |
| Acute hepatitis A                                                | 5<br>(1 - 11)               | 0<br>(0 - 1)       | 0<br>(0 - 0)        | 1<br>(0 - 3)             | 3<br>(1 - 6)                | 1<br>(0 - 2)                |
| Acute hepatitis B                                                | 60<br>(42 - 80)             | 0<br>(0 - 1)       | 0<br>(0 - 0)        | 5<br>(2 - 9)             | 32<br>(20 - 46)             | 23<br>(15 - 32)             |
| Acute hepatitis C                                                | 2<br>(0 - 6)                | --                 | 0<br>(0 - 0)        | 0<br>(0 - 1)             | 1<br>(0 - 3)                | 1<br>(0 - 2)                |
| Acute hepatitis E                                                | 17<br>(7 - 31)              | 0<br>(0 - 0)       | 0<br>(0 - 0)        | 5<br>(2 - 8)             | 9<br>(3 - 17)               | 3<br>(1 - 8)                |
| Other infectious diseases                                        | 239<br>(148 - 380)          | 9<br>(4 - 21)      | 4<br>(2 - 8)        | 40<br>(23 - 65)          | 91<br>(47 - 168)            | 95<br>(36 - 221)            |
| Non-communicable diseases                                        | 41,512<br>(37,042 - 45,367) | 581<br>(450 - 747) | 189<br>(154 - 229)  | 4,680<br>(3,979 - 5,561) | 14,853<br>(12,843 - 16,469) | 21,209<br>(19,340 - 22,808) |
| Neoplasms                                                        | 9,202<br>(8,040 - 10,311)   | 40<br>(25 - 60)    | 66<br>(50 - 84)     | 1,851<br>(1,557 - 2,221) | 4,198<br>(3,591 - 4,747)    | 3,047<br>(2,679 - 3,447)    |
| Esophageal cancer                                                | 140<br>(109 - 176)          | --                 | --                  | 12<br>(8 - 16)           | 59<br>(43 - 79)             | 69<br>(50 - 92)             |
| Stomach cancer                                                   | 472<br>(386 - 580)          | --                 | --                  | 58<br>(43 - 78)          | 173<br>(135 - 218)          | 241<br>(175 - 325)          |
| Liver cancer                                                     | 494<br>(387 - 624)          | --                 | 1<br>(0 - 1)        | 48<br>(34 - 67)          | 215<br>(159 - 280)          | 231<br>(161 - 322)          |
| Liver cancer due to hepatitis B                                  | 244<br>(167 - 337)          | --                 | 0<br>(0 - 0)        | 29<br>(19 - 41)          | 117<br>(76 - 169)           | 98<br>(58 - 153)            |
| Liver cancer due to hepatitis C                                  | 89<br>(45 - 150)            | --                 | 0<br>(0 - 0)        | 4<br>(1 - 8)             | 31<br>(13 - 57)             | 54<br>(28 - 96)             |
| Liver cancer due to alcohol use                                  | 36<br>(17 - 59)             | --                 | --                  | 1<br>(1 - 3)             | 12<br>(6 - 23)              | 22<br>(10 - 38)             |
| Liver cancer due to other causes                                 | 125<br>(73 - 196)           | --                 | 0<br>(0 - 1)        | 14<br>(8 - 22)           | 54<br>(30 - 91)             | 56<br>(30 - 95)             |

Web Table 31- Malaysia deaths with 95% UI by age, sex, and cause in 2013

| Cause                                         | Females, All Ages           | Females, 0-4 Years | Females, 5-14 Years | Females, 15-49 Years     | Females, 50-69 Years     | Females, 70-80 Years        |
|-----------------------------------------------|-----------------------------|--------------------|---------------------|--------------------------|--------------------------|-----------------------------|
| Larynx cancer                                 | 15<br>(8 - 28)              | --                 | --                  | 1<br>(1 - 3)             | 6<br>(3 - 12)            | 8<br>(4 - 14)               |
| Tracheal, bronchus and lung cancer            | 1,311<br>(1,094 - 1,554)    | --                 | --                  | 145<br>(108 - 189)       | 618<br>(500 - 769)       | 549<br>(430 - 685)          |
| Breast cancer                                 | 1,739<br>(1,443 - 2,041)    | --                 | --                  | 583<br>(462 - 727)       | 894<br>(711 - 1,074)     | 262<br>(214 - 317)          |
| Cervical cancer                               | 647<br>(515 - 807)          | --                 | --                  | 157<br>(115 - 220)       | 328<br>(248 - 420)       | 161<br>(119 - 213)          |
| Uterine cancer                                | 148<br>(88 - 195)           | --                 | --                  | 18<br>(10 - 27)          | 85<br>(48 - 120)         | 44<br>(26 - 64)             |
| Prostate cancer                               | --                          | --                 | --                  | --                       | --                       | --                          |
| Colon and rectum cancer                       | 1,081<br>(918 - 1,288)      | --                 | --                  | 119<br>(92 - 151)        | 427<br>(349 - 511)       | 535<br>(424 - 690)          |
| Lip and oral cavity cancer                    | 126<br>(90 - 167)           | --                 | --                  | 17<br>(11 - 25)          | 54<br>(38 - 76)          | 55<br>(36 - 77)             |
| Nasopharynx cancer                            | 179<br>(116 - 277)          | --                 | 1<br>(0 - 1)        | 57<br>(35 - 92)          | 91<br>(54 - 152)         | 30<br>(18 - 50)             |
| Other pharynx cancer                          | 39<br>(29 - 52)             | --                 | --                  | 6<br>(4 - 10)            | 21<br>(14 - 29)          | 12<br>(8 - 18)              |
| Gallbladder and biliary tract cancer          | 121<br>(83 - 165)           | --                 | --                  | 10<br>(6 - 15)           | 52<br>(34 - 73)          | 60<br>(37 - 91)             |
| Pancreatic cancer                             | 329<br>(273 - 392)          | --                 | --                  | 29<br>(22 - 39)          | 154<br>(120 - 192)       | 146<br>(114 - 184)          |
| Malignant skin melanoma                       | 47<br>(37 - 56)             | --                 | --                  | 16<br>(12 - 21)          | 21<br>(15 - 27)          | 10<br>(7 - 13)              |
| Non-melanoma skin cancer                      | 30<br>(18 - 46)             | --                 | --                  | 3<br>(2 - 5)             | 10<br>(7 - 16)           | 16<br>(9 - 27)              |
| Ovarian cancer                                | 612<br>(489 - 746)          | --                 | --                  | 152<br>(110 - 201)       | 348<br>(265 - 447)       | 113<br>(83 - 154)           |
| Testicular cancer                             | --                          | --                 | --                  | --                       | --                       | --                          |
| Kidney cancer                                 | 99<br>(77 - 125)            | 1<br>(1 - 2)       | 1<br>(0 - 2)        | 12<br>(8 - 16)           | 46<br>(33 - 64)          | 39<br>(26 - 55)             |
| Bladder cancer                                | 61<br>(43 - 89)             | --                 | --                  | 3<br>(2 - 4)             | 19<br>(13 - 28)          | 39<br>(26 - 58)             |
| Brain and nervous system cancer               | 114<br>(91 - 140)           | 3<br>(1 - 5)       | 8<br>(5 - 12)       | 42<br>(32 - 55)          | 45<br>(34 - 58)          | 16<br>(12 - 23)             |
| Thyroid cancer                                | 100<br>(59 - 134)           | --                 | 0<br>(0 - 0)        | 8<br>(5 - 12)            | 44<br>(25 - 61)          | 49<br>(28 - 72)             |
| Mesothelioma                                  | 6<br>(4 - 8)                | --                 | --                  | 1<br>(1 - 2)             | 4<br>(3 - 6)             | 1<br>(0 - 1)                |
| Hodgkin lymphoma                              | 21<br>(16 - 28)             | 0<br>(0 - 1)       | 1<br>(0 - 1)        | 10<br>(7 - 14)           | 7<br>(4 - 10)            | 4<br>(2 - 6)                |
| Non-Hodgkin lymphoma                          | 268<br>(165 - 333)          | 3<br>(1 - 5)       | 5<br>(3 - 7)        | 58<br>(37 - 75)          | 115<br>(71 - 153)        | 88<br>(51 - 120)            |
| Multiple myeloma                              | 70<br>(53 - 93)             | --                 | --                  | 7<br>(5 - 10)            | 37<br>(27 - 53)          | 25<br>(18 - 34)             |
| Leukemia                                      | 411<br>(346 - 483)          | 15<br>(8 - 27)     | 31<br>(21 - 44)     | 145<br>(116 - 183)       | 122<br>(97 - 149)        | 98<br>(78 - 124)            |
| Other neoplasms                               | 521<br>(368 - 652)          | 18<br>(7 - 33)     | 19<br>(9 - 30)      | 133<br>(94 - 181)        | 203<br>(141 - 269)       | 148<br>(101 - 204)          |
| Cardiovascular diseases                       | 19,638<br>(17,228 - 22,691) | 35<br>(23 - 53)    | 37<br>(27 - 53)     | 1,361<br>(1,096 - 1,735) | 6,633<br>(5,613 - 7,823) | 11,571<br>(10,325 - 13,230) |
| Rheumatic heart disease                       | 270<br>(185 - 360)          | 0<br>(0 - 1)       | 6<br>(3 - 10)       | 70<br>(46 - 100)         | 65<br>(43 - 94)          | 128<br>(85 - 182)           |
| Ischemic heart disease                        | 10,423<br>(8,571 - 12,008)  | 3<br>(2 - 7)       | 3<br>(2 - 6)        | 506<br>(362 - 660)       | 3,447<br>(2,750 - 4,123) | 6,463<br>(5,345 - 7,378)    |
| Cerebrovascular disease                       | 6,382<br>(5,358 - 8,302)    | 7<br>(4 - 12)      | 11<br>(7 - 17)      | 460<br>(354 - 646)       | 2,203<br>(1,738 - 2,920) | 3,701<br>(3,042 - 4,903)    |
| Ischemic stroke                               | 3,335<br>(2,697 - 4,427)    | 1<br>(0 - 1)       | 1<br>(0 - 1)        | 61<br>(38 - 89)          | 774<br>(569 - 1,109)     | 2,499<br>(2,006 - 3,332)    |
| Hemorrhagic stroke                            | 3,047<br>(2,443 - 4,192)    | 7<br>(4 - 11)      | 10<br>(7 - 16)      | 399<br>(306 - 569)       | 1,429<br>(1,101 - 1,942) | 1,202<br>(885 - 1,726)      |
| Hypertensive heart disease                    | 542<br>(395 - 814)          | 0<br>(0 - 0)       | 0<br>(0 - 0)        | 30<br>(20 - 44)          | 145<br>(99 - 215)        | 366<br>(249 - 578)          |
| Cardiomyopathy and myocarditis                | 266<br>(214 - 395)          | 11<br>(7 - 19)     | 8<br>(5 - 13)       | 68<br>(51 - 105)         | 87<br>(65 - 136)         | 92<br>(67 - 129)            |
| Atrial fibrillation and flutter               | 216<br>(160 - 296)          | --                 | --                  | 9<br>(6 - 13)            | 47<br>(34 - 65)          | 160<br>(112 - 230)          |
| Aortic aneurysm                               | 182<br>(117 - 293)          | --                 | --                  | 11<br>(7 - 18)           | 44<br>(28 - 74)          | 127<br>(79 - 208)           |
| Peripheral vascular disease                   | 7<br>(5 - 10)               | --                 | --                  | 0<br>(0 - 1)             | 2<br>(1 - 2)             | 5<br>(3 - 8)                |
| Endocarditis                                  | 262<br>(151 - 354)          | 5<br>(3 - 9)       | 3<br>(1 - 5)        | 63<br>(38 - 90)          | 106<br>(55 - 152)        | 84<br>(45 - 124)            |
| Other cardiovascular and circulatory diseases | 1,088<br>(844 - 1,479)      | 7<br>(4 - 12)      | 6<br>(4 - 10)       | 144<br>(99 - 212)        | 487<br>(361 - 676)       | 445<br>(322 - 625)          |
| Chronic respiratory diseases                  | 2,707<br>(2,006 - 3,147)    | 17<br>(10 - 25)    | 9<br>(6 - 12)       | 230<br>(157 - 288)       | 759<br>(536 - 934)       | 1,693<br>(1,266 - 2,035)    |



Web Table 31- Malaysia deaths with 95% UI by age, sex, and cause in 2013

| Cause                                               | Females, All Ages        | Females, 0-4 Years | Females, 5-14 Years | Females, 15-49 Years | Females, 50-69 Years | Females, 70-80 Years     |
|-----------------------------------------------------|--------------------------|--------------------|---------------------|----------------------|----------------------|--------------------------|
| Chronic obstructive pulmonary disease               | 1,572<br>(1,107 - 2,004) | 8<br>(5 - 14)      | 2<br>(1 - 3)        | 53<br>(32 - 79)      | 436<br>(284 - 564)   | 1,074<br>(714 - 1,397)   |
| Pneumoconiosis                                      | 2<br>(1 - 2)             | 0<br>(0 - 0)       | 0<br>(0 - 0)        | 1<br>(1 - 1)         | 0<br>(0 - 0)         | 0<br>(0 - 0)             |
| Silicosis                                           | 0<br>(0 - 0)             | 0<br>(0 - 0)       | 0<br>(0 - 0)        | 0<br>(0 - 0)         | 0<br>(0 - 0)         | 0<br>(0 - 0)             |
| Asbestosis                                          | 0<br>(0 - 0)             | 0<br>(0 - 0)       | 0<br>(0 - 0)        | 0<br>(0 - 0)         | 0<br>(0 - 0)         | 0<br>(0 - 0)             |
| Coal workers pneumoconiosis                         | 0<br>(0 - 0)             | 0<br>(0 - 0)       | 0<br>(0 - 0)        | 0<br>(0 - 0)         | 0<br>(0 - 0)         | 0<br>(0 - 0)             |
| Other pneumoconiosis                                | 1<br>(1 - 1)             | 0<br>(0 - 0)       | 0<br>(0 - 0)        | 0<br>(0 - 1)         | 0<br>(0 - 0)         | 0<br>(0 - 0)             |
| Asthma                                              | 573<br>(336 - 759)       | 7<br>(3 - 12)      | 6<br>(4 - 9)        | 155<br>(97 - 202)    | 216<br>(117 - 302)   | 189<br>(95 - 281)        |
| Interstitial lung disease and pulmonary sarcoidosis | 437<br>(258 - 825)       | 0<br>(0 - 0)       | 0<br>(0 - 0)        | 13<br>(7 - 27)       | 94<br>(55 - 175)     | 330<br>(182 - 648)       |
| Other chronic respiratory diseases                  | 123<br>(74 - 190)        | 1<br>(1 - 2)       | 0<br>(0 - 0)        | 8<br>(5 - 12)        | 14<br>(8 - 22)       | 100<br>(56 - 164)        |
| Cirrhosis                                           | 567<br>(473 - 671)       | 2<br>(1 - 4)       | 3<br>(2 - 5)        | 80<br>(63 - 105)     | 265<br>(209 - 322)   | 216<br>(167 - 279)       |
| Cirrhosis due to hepatitis B                        | 331<br>(251 - 414)       | 0<br>(0 - 0)       | 1<br>(0 - 2)        | 43<br>(29 - 59)      | 154<br>(113 - 202)   | 132<br>(93 - 177)        |
| Cirrhosis due to hepatitis C                        | 131<br>(75 - 197)        | 0<br>(0 - 0)       | 0<br>(0 - 1)        | 19<br>(10 - 33)      | 64<br>(36 - 100)     | 47<br>(24 - 75)          |
| Cirrhosis due to alcohol use                        | 63<br>(37 - 98)          | --                 | --                  | 7<br>(3 - 11)        | 28<br>(16 - 44)      | 28<br>(15 - 48)          |
| Cirrhosis due to other causes                       | 43<br>(28 - 63)          | 2<br>(1 - 4)       | 2<br>(1 - 3)        | 11<br>(7 - 17)       | 18<br>(10 - 29)      | 9<br>(5 - 15)            |
| Digestive diseases                                  | 1,081<br>(907 - 1,274)   | 5<br>(3 - 7)       | 5<br>(4 - 7)        | 103<br>(83 - 128)    | 340<br>(279 - 408)   | 628<br>(519 - 774)       |
| Peptic ulcer disease                                | 271<br>(195 - 382)       | 0<br>(0 - 1)       | 0<br>(0 - 1)        | 14<br>(10 - 20)      | 71<br>(48 - 98)      | 186<br>(125 - 275)       |
| Gastritis and duodenitis                            | 8<br>(5 - 17)            | 0<br>(0 - 0)       | 0<br>(0 - 0)        | 2<br>(1 - 4)         | 2<br>(1 - 6)         | 3<br>(2 - 7)             |
| Appendicitis                                        | 52<br>(29 - 79)          | 0<br>(0 - 1)       | 1<br>(1 - 2)        | 8<br>(4 - 13)        | 20<br>(11 - 35)      | 22<br>(12 - 38)          |
| Paralytic ileus and intestinal obstruction          | 212<br>(126 - 334)       | 2<br>(1 - 4)       | 1<br>(0 - 2)        | 16<br>(10 - 30)      | 55<br>(31 - 90)      | 138<br>(78 - 222)        |
| Inguinal, femoral, and abdominal hernia             | 18<br>(8 - 29)           | 0<br>(0 - 0)       | 0<br>(0 - 0)        | 1<br>(0 - 1)         | 6<br>(3 - 9)         | 11<br>(5 - 19)           |
| Inflammatory bowel disease                          | 11<br>(6 - 15)           | 0<br>(0 - 0)       | 0<br>(0 - 0)        | 3<br>(2 - 4)         | 4<br>(2 - 6)         | 4<br>(2 - 6)             |
| Vascular intestinal disorders                       | 55<br>(27 - 107)         | 0<br>(0 - 0)       | 0<br>(0 - 1)        | 4<br>(2 - 7)         | 12<br>(6 - 24)       | 38<br>(18 - 75)          |
| Gallbladder and biliary diseases                    | 200<br>(141 - 264)       | 1<br>(0 - 1)       | 0<br>(0 - 0)        | 16<br>(10 - 22)      | 67<br>(44 - 92)      | 117<br>(74 - 167)        |
| Pancreatitis                                        | 142<br>(97 - 212)        | 0<br>(0 - 0)       | 1<br>(0 - 1)        | 21<br>(14 - 29)      | 53<br>(35 - 81)      | 67<br>(41 - 106)         |
| Other digestive diseases                            | 113<br>(83 - 145)        | 1<br>(0 - 2)       | 1<br>(1 - 2)        | 19<br>(13 - 25)      | 50<br>(34 - 68)      | 42<br>(28 - 61)          |
| Neurological disorders                              | 1,799<br>(1,475 - 2,152) | 14<br>(9 - 23)     | 9<br>(6 - 14)       | 65<br>(47 - 86)      | 295<br>(228 - 371)   | 1,416<br>(1,135 - 1,738) |
| Alzheimer disease and other dementias               | 1,566<br>(1,258 - 1,904) | --                 | --                  | 2<br>(1 - 4)         | 217<br>(153 - 287)   | 1,347<br>(1,067 - 1,664) |
| Parkinson disease                                   | 58<br>(40 - 85)          | --                 | --                  | 3<br>(2 - 5)         | 21<br>(14 - 31)      | 34<br>(21 - 55)          |
| Epilepsy                                            | 108<br>(72 - 141)        | 8<br>(4 - 16)      | 7<br>(4 - 12)       | 42<br>(26 - 62)      | 29<br>(19 - 42)      | 21<br>(12 - 35)          |
| Multiple sclerosis                                  | 7<br>(4 - 11)            | --                 | --                  | 3<br>(2 - 6)         | 2<br>(1 - 4)         | 1<br>(0 - 2)             |
| Other neurological disorders                        | 62<br>(52 - 72)          | 6<br>(4 - 9)       | 2<br>(2 - 3)        | 15<br>(12 - 18)      | 26<br>(20 - 32)      | 13<br>(10 - 16)          |
| Mental and substance use disorders                  | 205<br>(161 - 251)       | 2<br>(1 - 3)       | 0<br>(0 - 0)        | 130<br>(100 - 166)   | 60<br>(45 - 78)      | 12<br>(9 - 17)           |
| Schizophrenia                                       | 5<br>(3 - 6)             | --                 | --                  | 1<br>(1 - 2)         | 2<br>(1 - 3)         | 1<br>(1 - 2)             |
| Alcohol use disorders                               | 15<br>(7 - 30)           | --                 | --                  | 4<br>(2 - 8)         | 9<br>(4 - 18)        | 2<br>(1 - 4)             |
| Drug use disorders                                  | 182<br>(142 - 224)       | 2<br>(1 - 3)       | --                  | 122<br>(93 - 157)    | 49<br>(36 - 65)      | 9<br>(6 - 13)            |
| Opioid use disorders                                | 114<br>(89 - 139)        | 1<br>(1 - 2)       | --                  | 78<br>(58 - 100)     | 29<br>(21 - 39)      | 6<br>(4 - 8)             |
| Cocaine use disorders                               | 4<br>(3 - 5)             | 0<br>(0 - 0)       | --                  | 3<br>(2 - 4)         | 1<br>(1 - 1)         | 0<br>(0 - 0)             |
| Amphetamine use disorders                           | 4<br>(3 - 6)             | 0<br>(0 - 0)       | --                  | 3<br>(2 - 4)         | 1<br>(1 - 2)         | 0<br>(0 - 0)             |
| Other drug use disorders                            | 60<br>(46 - 74)          | 1<br>(0 - 1)       | --                  | 39<br>(29 - 50)      | 17<br>(13 - 24)      | 3<br>(2 - 4)             |
| Eating disorders                                    | 3<br>(1 - 4)             | --                 | 0<br>(0 - 0)        | 2<br>(1 - 4)         | --                   | --                       |

Web Table 31- Malaysia deaths with 95% UI by age, sex, and cause in 2013

| Cause                                               | Females, All Ages        | Females, 0-4 Years | Females, 5-14 Years | Females, 15-49 Years | Females, 50-69 Years     | Females, 70-80 Years     |
|-----------------------------------------------------|--------------------------|--------------------|---------------------|----------------------|--------------------------|--------------------------|
| Anorexia nervosa                                    | 3<br>(1 - 4)             | --                 | 0<br>(0 - 0)        | 2<br>(1 - 4)         | --                       | --                       |
| Diabetes, urogenital, blood, and endocrine diseases | 4,899<br>(4,193 - 6,091) | 26<br>(18 - 37)    | 21<br>(16 - 29)     | 591<br>(484 - 762)   | 1,999<br>(1,655 - 2,527) | 2,261<br>(1,900 - 2,803) |
| Diabetes mellitus                                   | 2,139<br>(1,751 - 2,732) | 1<br>(1 - 2)       | 3<br>(1 - 5)        | 182<br>(142 - 247)   | 902<br>(714 - 1,174)     | 1,051<br>(827 - 1,375)   |
| Acute glomerulonephritis                            | 2<br>(2 - 3)             | 0<br>(0 - 0)       | 0<br>(0 - 0)        | 1<br>(1 - 1)         | 1<br>(0 - 1)             | 0<br>(0 - 0)             |
| Chronic kidney disease                              | 1,528<br>(1,216 - 2,236) | 2<br>(1 - 4)       | 4<br>(2 - 7)        | 179<br>(133 - 299)   | 680<br>(514 - 953)       | 663<br>(502 - 970)       |
| Chronic kidney disease due to diabetes mellitus     | 15<br>(11 - 22)          | 0<br>(0 - 0)       | 0<br>(0 - 0)        | 2<br>(1 - 3)         | 4<br>(2 - 6)             | 9<br>(5 - 14)            |
| Chronic kidney disease due to hypertension          | 332<br>(195 - 577)       | 0<br>(0 - 0)       | 0<br>(0 - 1)        | 41<br>(23 - 78)      | 150<br>(87 - 271)        | 140<br>(76 - 249)        |
| Chronic kidney disease due to glomerulonephritis    | 122<br>(69 - 187)        | 0<br>(0 - 1)       | 1<br>(0 - 1)        | 13<br>(8 - 21)       | 55<br>(29 - 87)          | 54<br>(27 - 89)          |
| Chronic kidney disease due to other causes          | 1,058<br>(759 - 1,699)   | 2<br>(1 - 3)       | 3<br>(1 - 5)        | 123<br>(80 - 219)    | 471<br>(306 - 728)       | 460<br>(299 - 749)       |
| Urinary diseases and male infertility               | 799<br>(544 - 1,055)     | 4<br>(2 - 7)       | 3<br>(2 - 4)        | 121<br>(83 - 169)    | 274<br>(181 - 376)       | 397<br>(252 - 593)       |
| Interstitial nephritis and urinary tract infections | 347<br>(238 - 486)       | 3<br>(2 - 6)       | 1<br>(1 - 3)        | 89<br>(60 - 127)     | 124<br>(80 - 186)        | 129<br>(71 - 208)        |
| Urolithiasis                                        | 6<br>(3 - 9)             | --                 | 0<br>(0 - 0)        | 1<br>(1 - 2)         | 2<br>(1 - 5)             | 2<br>(1 - 4)             |
| Other urinary diseases                              | 446<br>(257 - 640)       | 1<br>(0 - 1)       | 1<br>(0 - 2)        | 31<br>(16 - 50)      | 148<br>(77 - 221)        | 266<br>(146 - 421)       |
| Gynecological diseases                              | 3<br>(2 - 4)             | --                 | --                  | 2<br>(1 - 2)         | 1<br>(1 - 2)             | 1<br>(0 - 1)             |
| Uterine fibroids                                    | 1<br>(1 - 1)             | --                 | --                  | 0<br>(0 - 0)         | 0<br>(0 - 0)             | 0<br>(0 - 0)             |
| Polycystic ovarian syndrome                         | 0<br>(0 - 0)             | --                 | --                  | 0<br>(0 - 0)         | 0<br>(0 - 0)             | --                       |
| Endometriosis                                       | 0<br>(0 - 0)             | --                 | --                  | 0<br>(0 - 0)         | 0<br>(0 - 0)             | --                       |
| Genital prolapse                                    | 1<br>(0 - 1)             | --                 | --                  | 0<br>(0 - 0)         | 0<br>(0 - 0)             | 0<br>(0 - 0)             |
| Other gynecological diseases                        | 2<br>(1 - 2)             | --                 | --                  | 1<br>(0 - 1)         | 1<br>(0 - 1)             | 0<br>(0 - 1)             |
| Hemoglobinopathies and hemolytic anemias            | 117<br>(76 - 172)        | 10<br>(5 - 15)     | 7<br>(4 - 11)       | 41<br>(26 - 61)      | 31<br>(19 - 46)          | 29<br>(18 - 45)          |
| Thalassemias                                        | 55<br>(36 - 81)          | 8<br>(5 - 13)      | 6<br>(3 - 10)       | 31<br>(20 - 46)      | 9<br>(6 - 14)            | 1<br>(1 - 2)             |
| Sickle cell disorders                               | 0<br>(0 - 0)             | 0<br>(0 - 0)       | 0<br>(0 - 0)        | 0<br>(0 - 0)         | 0<br>(0 - 0)             | 0<br>(0 - 0)             |
| G6PD deficiency                                     | 4<br>(2 - 5)             | 0<br>(0 - 0)       | 0<br>(0 - 0)        | 1<br>(1 - 2)         | 1<br>(1 - 2)             | 0<br>(0 - 1)             |
| Other hemoglobinopathies and hemolytic anemias      | 59<br>(37 - 86)          | 1<br>(1 - 2)       | 0<br>(0 - 1)        | 9<br>(5 - 13)        | 20<br>(13 - 31)          | 28<br>(17 - 42)          |
| Endocrine, metabolic, blood, and immune disorders   | 309<br>(228 - 431)       | 9<br>(5 - 16)      | 5<br>(2 - 8)        | 66<br>(46 - 97)      | 110<br>(75 - 158)        | 120<br>(78 - 182)        |
| Musculoskeletal disorders                           | 375<br>(293 - 465)       | --                 | 8<br>(5 - 12)       | 149<br>(111 - 200)   | 134<br>(96 - 175)        | 85<br>(63 - 115)         |
| Rheumatoid arthritis                                | 17<br>(12 - 24)          | --                 | 0<br>(0 - 1)        | 2<br>(1 - 4)         | 5<br>(3 - 7)             | 10<br>(6 - 16)           |
| Other musculoskeletal disorders                     | 358<br>(279 - 444)       | --                 | 7<br>(5 - 12)       | 146<br>(109 - 197)   | 129<br>(93 - 168)        | 75<br>(56 - 103)         |
| Other non-communicable diseases                     | 1,039<br>(851 - 1,263)   | 440<br>(321 - 589) | 30<br>(19 - 44)     | 121<br>(91 - 158)    | 171<br>(127 - 222)       | 277<br>(191 - 392)       |
| Congenital anomalies                                | 604<br>(448 - 761)       | 429<br>(314 - 578) | 28<br>(18 - 42)     | 81<br>(55 - 111)     | 33<br>(23 - 47)          | 32<br>(22 - 45)          |
| Neural tube defects                                 | 26<br>(13 - 44)          | 24<br>(11 - 42)    | 0<br>(0 - 1)        | 1<br>(1 - 2)         | 1<br>(0 - 1)             | 0<br>(0 - 0)             |
| Congenital heart anomalies                          | 308<br>(220 - 398)       | 188<br>(121 - 274) | 20<br>(12 - 29)     | 61<br>(42 - 85)      | 17<br>(11 - 26)          | 23<br>(15 - 33)          |
| Cleft lip and cleft palate                          | 1<br>(0 - 3)             | 1<br>(0 - 3)       | --                  | --                   | --                       | --                       |
| Down syndrome                                       | 22<br>(12 - 33)          | 11<br>(5 - 19)     | 2<br>(1 - 4)        | 6<br>(3 - 10)        | 2<br>(1 - 3)             | 0<br>(0 - 0)             |
| Chromosomal unbalanced rearrangements               | 68<br>(40 - 110)         | 63<br>(36 - 102)   | 1<br>(0 - 1)        | 3<br>(2 - 6)         | 1<br>(0 - 2)             | 0<br>(0 - 1)             |
| Other congenital anomalies                          | 179<br>(126 - 245)       | 142<br>(92 - 206)  | 6<br>(3 - 9)        | 10<br>(6 - 15)       | 13<br>(8 - 20)           | 8<br>(5 - 13)            |
| Skin and subcutaneous diseases                      | 429<br>(320 - 554)       | 4<br>(2 - 8)       | 2<br>(1 - 3)        | 40<br>(28 - 56)      | 137<br>(96 - 187)        | 245<br>(161 - 356)       |
| Cellulitis                                          | 46<br>(24 - 69)          | 1<br>(0 - 2)       | 0<br>(0 - 1)        | 6<br>(3 - 10)        | 20<br>(10 - 34)          | 18<br>(8 - 34)           |
| Pyoderma                                            | 161<br>(117 - 215)       | 3<br>(2 - 5)       | 1<br>(0 - 1)        | 18<br>(12 - 26)      | 68<br>(46 - 96)          | 71<br>(42 - 110)         |
| Decubitus ulcer                                     | 197<br>(134 - 269)       | 0<br>(0 - 0)       | 0<br>(0 - 0)        | 10<br>(6 - 16)       | 39<br>(24 - 57)          | 147<br>(90 - 220)        |

Web Table 31- Malaysia deaths with 95% UI by age, sex, and cause in 2013

| Cause                                           | Females, All Ages        | Females, 0-4 Years | Females, 5-14 Years | Females, 15-49 Years     | Females, 50-69 Years     | Females, 70-80 Years     |
|-------------------------------------------------|--------------------------|--------------------|---------------------|--------------------------|--------------------------|--------------------------|
| Other skin and subcutaneous diseases            | 26<br>(16 - 43)          | 0<br>(0 - 0)       | 0<br>(0 - 1)        | 6<br>(4 - 10)            | 10<br>(5 - 19)           | 9<br>(4 - 20)            |
| Sudden infant death syndrome                    | 6<br>(1 - 14)            | 6<br>(1 - 14)      | --                  | --                       | --                       | --                       |
| Injuries                                        | 4,505<br>(3,632 - 5,271) | 128<br>(92 - 171)  | 124<br>(99 - 160)   | 1,289<br>(1,006 - 1,588) | 1,387<br>(1,063 - 1,662) | 1,576<br>(1,219 - 1,972) |
| Transport injuries                              | 1,591<br>(1,108 - 1,923) | 32<br>(19 - 50)    | 60<br>(40 - 84)     | 637<br>(438 - 813)       | 576<br>(382 - 738)       | 286<br>(184 - 378)       |
| Road injuries                                   | 1,487<br>(1,038 - 1,804) | 30<br>(17 - 47)    | 57<br>(38 - 81)     | 614<br>(423 - 786)       | 534<br>(353 - 685)       | 252<br>(163 - 331)       |
| Pedestrian road injuries                        | 434<br>(295 - 560)       | 12<br>(6 - 20)     | 22<br>(14 - 32)     | 100<br>(65 - 135)        | 177<br>(114 - 246)       | 123<br>(77 - 175)        |
| Cyclist road injuries                           | 97<br>(66 - 126)         | 1<br>(1 - 3)       | 4<br>(2 - 6)        | 48<br>(33 - 66)          | 32<br>(19 - 46)          | 11<br>(6 - 16)           |
| Motorcyclist road injuries                      | 81<br>(50 - 125)         | 1<br>(0 - 2)       | 2<br>(1 - 4)        | 51<br>(30 - 79)          | 20<br>(11 - 34)          | 7<br>(4 - 12)            |
| Motor vehicle road injuries                     | 868<br>(558 - 1,075)     | 16<br>(8 - 25)     | 29<br>(18 - 43)     | 413<br>(270 - 537)       | 302<br>(179 - 400)       | 109<br>(63 - 152)        |
| Other road injuries                             | 6<br>(4 - 12)            | 0<br>(0 - 1)       | 0<br>(0 - 1)        | 2<br>(1 - 4)             | 2<br>(1 - 4)             | 2<br>(1 - 3)             |
| Other transport injuries                        | 104<br>(61 - 137)        | 2<br>(1 - 3)       | 3<br>(1 - 5)        | 24<br>(14 - 33)          | 41<br>(23 - 60)          | 34<br>(18 - 52)          |
| Unintentional injuries                          | 2,259<br>(1,764 - 2,757) | 89<br>(61 - 126)   | 55<br>(40 - 81)     | 289<br>(226 - 361)       | 625<br>(471 - 798)       | 1,201<br>(886 - 1,568)   |
| Falls                                           | 241<br>(171 - 364)       | 3<br>(1 - 6)       | 2<br>(1 - 4)        | 22<br>(15 - 32)          | 50<br>(34 - 75)          | 164<br>(105 - 264)       |
| Drowning                                        | 118<br>(88 - 173)        | 19<br>(10 - 37)    | 28<br>(17 - 50)     | 33<br>(23 - 52)          | 24<br>(17 - 37)          | 13<br>(8 - 21)           |
| Fire, heat, and hot substances                  | 149<br>(109 - 199)       | 5<br>(2 - 9)       | 5<br>(3 - 9)        | 32<br>(22 - 46)          | 47<br>(31 - 66)          | 60<br>(40 - 89)          |
| Poisonings                                      | 60<br>(39 - 84)          | 1<br>(1 - 3)       | 2<br>(1 - 2)        | 23<br>(14 - 34)          | 19<br>(12 - 29)          | 14<br>(9 - 23)           |
| Exposure to mechanical forces                   | 80<br>(64 - 130)         | 3<br>(2 - 5)       | 4<br>(3 - 7)        | 20<br>(14 - 32)          | 29<br>(21 - 40)          | 25<br>(17 - 50)          |
| Unintentional firearm injuries                  | 28<br>(20 - 38)          | 0<br>(0 - 0)       | 0<br>(0 - 1)        | 8<br>(5 - 12)            | 14<br>(9 - 22)           | 5<br>(3 - 9)             |
| Unintentional suffocation                       | 24<br>(16 - 64)          | 1<br>(0 - 2)       | 1<br>(1 - 4)        | 7<br>(4 - 16)            | 6<br>(3 - 12)            | 10<br>(5 - 34)           |
| Other exposure to mechanical forces             | 28<br>(21 - 43)          | 2<br>(1 - 4)       | 2<br>(1 - 4)        | 5<br>(4 - 7)             | 9<br>(6 - 13)            | 10<br>(7 - 16)           |
| Adverse effects of medical treatment            | 982<br>(569 - 1,417)     | 10<br>(5 - 20)     | 5<br>(2 - 8)        | 93<br>(53 - 137)         | 303<br>(168 - 459)       | 571<br>(304 - 930)       |
| Animal contact                                  | 13<br>(7 - 25)           | 1<br>(0 - 2)       | 1<br>(1 - 3)        | 2<br>(1 - 6)             | 4<br>(2 - 8)             | 5<br>(2 - 9)             |
| Venomous animal contact                         | 8<br>(4 - 16)            | 1<br>(0 - 1)       | 1<br>(0 - 2)        | 1<br>(1 - 3)             | 3<br>(1 - 5)             | 3<br>(1 - 6)             |
| Non-venomous animal contact                     | 5<br>(2 - 11)            | 0<br>(0 - 0)       | 0<br>(0 - 1)        | 1<br>(0 - 3)             | 2<br>(1 - 4)             | 1<br>(1 - 3)             |
| Foreign body                                    | 574<br>(354 - 894)       | 45<br>(25 - 77)    | 6<br>(3 - 10)       | 57<br>(33 - 85)          | 132<br>(79 - 209)        | 335<br>(196 - 520)       |
| Pulmonary aspiration and foreign body in airway | 570<br>(350 - 891)       | 45<br>(25 - 76)    | 6<br>(3 - 10)       | 55<br>(32 - 84)          | 131<br>(79 - 208)        | 333<br>(195 - 518)       |
| Foreign body in other body part                 | 4<br>(2 - 7)             | 0<br>(0 - 0)       | 0<br>(0 - 0)        | 1<br>(1 - 2)             | 1<br>(0 - 1)             | 2<br>(1 - 4)             |
| Other unintentional injuries                    | 43<br>(32 - 54)          | 1<br>(1 - 2)       | 2<br>(1 - 4)        | 8<br>(6 - 11)            | 17<br>(12 - 23)          | 15<br>(9 - 20)           |
| Self-harm and interpersonal violence            | 655<br>(470 - 820)       | 7<br>(2 - 15)      | 10<br>(4 - 17)      | 363<br>(265 - 466)       | 187<br>(128 - 251)       | 89<br>(52 - 134)         |
| Self-harm                                       | 427<br>(324 - 553)       | --                 | 2<br>(1 - 4)        | 226<br>(162 - 307)       | 140<br>(95 - 195)        | 59<br>(38 - 88)          |
| Interpersonal violence                          | 228<br>(86 - 331)        | 7<br>(2 - 15)      | 7<br>(2 - 15)       | 136<br>(57 - 204)        | 47<br>(15 - 80)          | 30<br>(6 - 61)           |
| Assault by firearm                              | 15<br>(5 - 27)           | 0<br>(0 - 1)       | 0<br>(0 - 1)        | 10<br>(3 - 17)           | 4<br>(1 - 8)             | 1<br>(0 - 2)             |
| Assault by sharp object                         | 48<br>(18 - 76)          | 0<br>(0 - 1)       | 1<br>(0 - 2)        | 32<br>(13 - 52)          | 10<br>(3 - 20)           | 4<br>(1 - 9)             |
| Assault by other means                          | 165<br>(59 - 244)        | 6<br>(1 - 14)      | 6<br>(2 - 12)       | 94<br>(37 - 147)         | 33<br>(10 - 57)          | 26<br>(5 - 52)           |

Web Table 31- Maldives deaths with 95% UI by age, sex, and cause in 2013

| Cause                                                             | Both Sexes, All Ages     | Both Sexes, 0-4 Years | Both Sexes, 5-14 Years | Both Sexes, 15-49 Years | Both Sexes, 50-69 Years | Both Sexes, 70-80 Years |
|-------------------------------------------------------------------|--------------------------|-----------------------|------------------------|-------------------------|-------------------------|-------------------------|
| All causes                                                        | 1,084<br>(1,007 - 1,166) | 122<br>(102 - 148)    | 17<br>(15 - 20)        | 158<br>(139 - 179)      | 212<br>(191 - 238)      | 574<br>(540 - 610)      |
| Communicable, maternal, neonatal, and nutritional diseases        | 150<br>(129 - 176)       | 78<br>(60 - 100)      | 4<br>(3 - 7)           | 17<br>(15 - 21)         | 13<br>(11 - 14)         | 38<br>(33 - 44)         |
| HIV/AIDS and tuberculosis                                         | 8<br>(6 - 10)            | 0<br>(0 - 0)          | 0<br>(0 - 0)           | 2<br>(1 - 2)            | 3<br>(2 - 3)            | 3<br>(2 - 4)            |
| Tuberculosis                                                      | 8<br>(6 - 9)             | 0<br>(0 - 0)          | 0<br>(0 - 0)           | 2<br>(1 - 2)            | 3<br>(2 - 3)            | 3<br>(2 - 4)            |
| HIV/AIDS                                                          | 0<br>(0 - 0)             | 0<br>(0 - 0)          | 0<br>(0 - 0)           | 0<br>(0 - 0)            | 0<br>(0 - 0)            | 0<br>(0 - 0)            |
| HIV/AIDS resulting in mycobacterial infection                     | 0<br>(0 - 0)             | 0<br>(0 - 0)          | 0<br>(0 - 0)           | 0<br>(0 - 0)            | 0<br>(0 - 0)            | 0<br>(0 - 0)            |
| HIV/AIDS resulting in other diseases                              | 0<br>(0 - 0)             | 0<br>(0 - 0)          | 0<br>(0 - 0)           | 0<br>(0 - 0)            | 0<br>(0 - 0)            | 0<br>(0 - 0)            |
| Diarrhea, lower respiratory, and other common infectious diseases | 56<br>(46 - 77)          | 10<br>(5 - 26)        | 3<br>(2 - 6)           | 9<br>(7 - 12)           | 8<br>(6 - 9)            | 26<br>(21 - 31)         |
| Diarrheal diseases                                                | 4<br>(3 - 5)             | 1<br>(1 - 1)          | 0<br>(0 - 0)           | 0<br>(0 - 0)            | 0<br>(0 - 1)            | 3<br>(2 - 4)            |
| Intestinal infectious diseases                                    | 6<br>(3 - 10)            | 2<br>(1 - 4)          | 2<br>(1 - 3)           | 2<br>(1 - 4)            | 0<br>(0 - 1)            | 0<br>(0 - 0)            |
| Typhoid fever                                                     | 4<br>(2 - 8)             | 1<br>(0 - 3)          | 1<br>(0 - 2)           | 2<br>(1 - 3)            | 0<br>(0 - 1)            | 0<br>(0 - 0)            |
| Paratyphoid fever                                                 | 1<br>(1 - 2)             | 0<br>(0 - 1)          | 0<br>(0 - 1)           | 0<br>(0 - 1)            | 0<br>(0 - 0)            | 0<br>(0 - 0)            |
| Other intestinal infectious diseases                              | 0<br>(0 - 1)             | 0<br>(0 - 0)          | 0<br>(0 - 0)           | 0<br>(0 - 0)            | 0<br>(0 - 0)            | 0<br>(0 - 0)            |
| Lower respiratory infections                                      | 35<br>(28 - 41)          | 2<br>(1 - 2)          | 0<br>(0 - 1)           | 5<br>(4 - 6)            | 6<br>(5 - 8)            | 22<br>(17 - 27)         |
| Upper respiratory infections                                      | 0<br>(0 - 0)             | 0<br>(0 - 0)          | 0<br>(0 - 0)           | 0<br>(0 - 0)            | 0<br>(0 - 0)            | 0<br>(0 - 0)            |
| Otitis media                                                      | 0<br>(0 - 0)             | 0<br>(0 - 0)          | 0<br>(0 - 0)           | 0<br>(0 - 0)            | 0<br>(0 - 0)            | 0<br>(0 - 0)            |
| Meningitis                                                        | 2<br>(1 - 2)             | 0<br>(0 - 0)          | 0<br>(0 - 0)           | 0<br>(0 - 1)            | 0<br>(0 - 1)            | 1<br>(1 - 1)            |
| Pneumococcal meningitis                                           | 1<br>(0 - 1)             | 0<br>(0 - 0)          | 0<br>(0 - 0)           | 0<br>(0 - 0)            | 0<br>(0 - 0)            | 0<br>(0 - 0)            |
| H influenzae type B meningitis                                    | 0<br>(0 - 0)             | 0<br>(0 - 0)          | 0<br>(0 - 0)           | 0<br>(0 - 0)            | 0<br>(0 - 0)            | 0<br>(0 - 0)            |
| Meningococcal meningitis                                          | 0<br>(0 - 0)             | 0<br>(0 - 0)          | 0<br>(0 - 0)           | 0<br>(0 - 0)            | 0<br>(0 - 0)            | 0<br>(0 - 0)            |
| Other meningitis                                                  | 1<br>(0 - 1)             | 0<br>(0 - 0)          | 0<br>(0 - 0)           | 0<br>(0 - 0)            | 0<br>(0 - 0)            | 0<br>(0 - 0)            |
| Encephalitis                                                      | 3<br>(2 - 5)             | 1<br>(0 - 1)          | 0<br>(0 - 0)           | 1<br>(1 - 2)            | 0<br>(0 - 0)            | 1<br>(1 - 1)            |
| Diphtheria                                                        | 0<br>(0 - 0)             | 0<br>(0 - 0)          | 0<br>(0 - 0)           | 0<br>(0 - 0)            | 0<br>(0 - 0)            | --<br>(0 - 0)           |
| Whooping cough                                                    | 0<br>(0 - 1)             | 0<br>(0 - 1)          | 0<br>(0 - 0)           | 0<br>(0 - 0)            | 0<br>(0 - 0)            | --<br>(0 - 0)           |
| Tetanus                                                           | 0<br>(0 - 0)             | 0<br>(0 - 0)          | 0<br>(0 - 0)           | 0<br>(0 - 0)            | 0<br>(0 - 0)            | 0<br>(0 - 0)            |
| Measles                                                           | 6<br>(0 - 28)            | 5<br>(0 - 23)         | 1<br>(0 - 4)           | 0<br>(0 - 1)            | 0<br>(0 - 0)            | --<br>(0 - 0)           |
| Varicella and herpes zoster                                       | 0<br>(0 - 0)             | 0<br>(0 - 0)          | 0<br>(0 - 0)           | 0<br>(0 - 0)            | 0<br>(0 - 0)            | 0<br>(0 - 0)            |
| Neglected tropical diseases and malaria                           | 3<br>(2 - 4)             | 1<br>(0 - 1)          | 1<br>(0 - 1)           | 0<br>(0 - 1)            | 0<br>(0 - 0)            | 1<br>(1 - 1)            |
| Leishmaniasis                                                     | 0<br>(0 - 0)             | 0<br>(0 - 0)          | 0<br>(0 - 0)           | 0<br>(0 - 0)            | 0<br>(0 - 0)            | 0<br>(0 - 0)            |
| Visceral leishmaniasis                                            | 0<br>(0 - 0)             | 0<br>(0 - 0)          | 0<br>(0 - 0)           | 0<br>(0 - 0)            | 0<br>(0 - 0)            | 0<br>(0 - 0)            |
| Cysticercosis                                                     | 0<br>(0 - 0)             | 0<br>(0 - 0)          | 0<br>(0 - 0)           | 0<br>(0 - 0)            | 0<br>(0 - 0)            | 0<br>(0 - 0)            |
| Cystic echinococcosis                                             | 0<br>(0 - 0)             | 0<br>(0 - 0)          | 0<br>(0 - 0)           | 0<br>(0 - 0)            | 0<br>(0 - 0)            | 0<br>(0 - 0)            |
| Dengue                                                            | 2<br>(1 - 3)             | 1<br>(0 - 1)          | 1<br>(0 - 1)           | 0<br>(0 - 0)            | 0<br>(0 - 0)            | 0<br>(0 - 1)            |
| Rabies                                                            | 0<br>(0 - 0)             | 0<br>(0 - 0)          | 0<br>(0 - 0)           | 0<br>(0 - 0)            | 0<br>(0 - 0)            | 0<br>(0 - 0)            |
| Intestinal nematode infections                                    | 0<br>(0 - 0)             | 0<br>(0 - 0)          | --<br>(0 - 0)          | --<br>(0 - 0)           | --<br>(0 - 0)           | --<br>(0 - 0)           |
| Ascariasis                                                        | 0<br>(0 - 0)             | 0<br>(0 - 0)          | --<br>(0 - 0)          | --<br>(0 - 0)           | --<br>(0 - 0)           | --<br>(0 - 0)           |
| Other neglected tropical diseases                                 | 1<br>(1 - 1)             | 0<br>(0 - 0)          | 0<br>(0 - 0)           | 0<br>(0 - 0)            | 0<br>(0 - 0)            | 0<br>(0 - 1)            |
| Maternal disorders                                                | 4<br>(3 - 5)             | --                    | 0<br>(0 - 0)           | 4<br>(3 - 5)            | --                      | --                      |
| Maternal hemorrhage                                               | 1<br>(0 - 1)             | --                    | 0<br>(0 - 0)           | 1<br>(0 - 1)            | --                      | --                      |
| Maternal sepsis and other maternal infections                     | 0<br>(0 - 1)             | --                    | 0<br>(0 - 0)           | 0<br>(0 - 1)            | --                      | --                      |

Web Table 31- Maldives deaths with 95% UI by age, sex, and cause in 2013

| Cause                                                            | Both Sexes, All Ages | Both Sexes, 0-4 Years | Both Sexes, 5-14 Years | Both Sexes, 15-49 Years | Both Sexes, 50-69 Years | Both Sexes, 70-80 Years |
|------------------------------------------------------------------|----------------------|-----------------------|------------------------|-------------------------|-------------------------|-------------------------|
| Maternal hypertensive disorders                                  | 0<br>(0 - 1)         | --                    | 0<br>(0 - 0)           | 0<br>(0 - 1)            | --                      | --                      |
| Maternal obstructed labor                                        | 0<br>(0 - 0)         | --                    | 0<br>(0 - 0)           | 0<br>(0 - 0)            | --                      | --                      |
| Maternal abortive outcome                                        | 1<br>(0 - 1)         | --                    | 0<br>(0 - 0)           | 1<br>(0 - 1)            | --                      | --                      |
| Indirect maternal deaths                                         | 0<br>(0 - 1)         | --                    | 0<br>(0 - 0)           | 0<br>(0 - 1)            | --                      | --                      |
| Late maternal deaths                                             | 0<br>(0 - 1)         | --                    | 0<br>(0 - 0)           | 0<br>(0 - 1)            | --                      | --                      |
| Maternal deaths aggravated by HIV/AIDS                           | 0<br>(0 - 0)         | --                    | --                     | 0<br>(0 - 0)            | --                      | --                      |
| Other maternal disorders                                         | 1<br>(0 - 1)         | --                    | 0<br>(0 - 0)           | 1<br>(0 - 1)            | --                      | --                      |
| Neonatal disorders                                               | 65<br>(50 - 80)      | 65<br>(50 - 80)       | --                     | --                      | --                      | --                      |
| Neonatal preterm birth complications                             | 21<br>(9 - 33)       | 21<br>(9 - 33)        | --                     | --                      | --                      | --                      |
| Neonatal encephalopathy due to birth asphyxia and trauma         | 23<br>(17 - 33)      | 23<br>(17 - 33)       | --                     | --                      | --                      | --                      |
| Neonatal sepsis and other neonatal infections                    | 0<br>(0 - 1)         | 0<br>(0 - 1)          | --                     | --                      | --                      | --                      |
| Hemolytic disease and other neonatal jaundice                    | 0<br>(0 - 0)         | 0<br>(0 - 0)          | --                     | --                      | --                      | --                      |
| Other neonatal disorders                                         | 20<br>(15 - 30)      | 20<br>(15 - 30)       | --                     | --                      | --                      | --                      |
| Nutritional deficiencies                                         | 7<br>(5 - 9)         | 1<br>(1 - 2)          | 0<br>(0 - 0)           | 1<br>(1 - 1)            | 1<br>(0 - 1)            | 5<br>(3 - 6)            |
| Protein-energy malnutrition                                      | 1<br>(1 - 2)         | 0<br>(0 - 0)          | 0<br>(0 - 0)           | 0<br>(0 - 0)            | 0<br>(0 - 0)            | 1<br>(0 - 2)            |
| Iodine deficiency                                                | 0<br>(0 - 0)         | 0<br>(0 - 0)          | 0<br>(0 - 0)           | 0<br>(0 - 0)            | 0<br>(0 - 0)            | 0<br>(0 - 0)            |
| Iron-deficiency anemia                                           | 4<br>(3 - 6)         | 1<br>(0 - 1)          | 0<br>(0 - 0)           | 1<br>(0 - 1)            | 0<br>(0 - 0)            | 3<br>(2 - 4)            |
| Other nutritional deficiencies                                   | 1<br>(1 - 2)         | 0<br>(0 - 0)          | 0<br>(0 - 0)           | 0<br>(0 - 0)            | 0<br>(0 - 0)            | 1<br>(0 - 1)            |
| Other communicable, maternal, neonatal, and nutritional diseases | 7<br>(6 - 9)         | 1<br>(0 - 1)          | 0<br>(0 - 0)           | 1<br>(1 - 2)            | 1<br>(1 - 2)            | 3<br>(3 - 5)            |
| Sexually transmitted diseases excluding HIV                      | 1<br>(1 - 1)         | 0<br>(0 - 1)          | 0<br>(0 - 0)           | 0<br>(0 - 0)            | 0<br>(0 - 0)            | 0<br>(0 - 1)            |
| Syphilis                                                         | 1<br>(0 - 1)         | 0<br>(0 - 1)          | 0<br>(0 - 0)           | 0<br>(0 - 0)            | 0<br>(0 - 0)            | 0<br>(0 - 1)            |
| Chlamydial infection                                             | 0<br>(0 - 0)         | --                    | 0<br>(0 - 0)           | 0<br>(0 - 0)            | 0<br>(0 - 0)            | 0<br>(0 - 0)            |
| Gonococcal infection                                             | 0<br>(0 - 0)         | --                    | 0<br>(0 - 0)           | 0<br>(0 - 0)            | 0<br>(0 - 0)            | 0<br>(0 - 0)            |
| Other sexually transmitted diseases                              | 0<br>(0 - 0)         | --                    | 0<br>(0 - 0)           | 0<br>(0 - 0)            | 0<br>(0 - 0)            | 0<br>(0 - 0)            |
| Hepatitis                                                        | 1<br>(1 - 2)         | 0<br>(0 - 0)          | 0<br>(0 - 0)           | 0<br>(0 - 0)            | 1<br>(0 - 1)            | 1<br>(1 - 1)            |
| Acute hepatitis A                                                | 0<br>(0 - 0)         | 0<br>(0 - 0)          | 0<br>(0 - 0)           | 0<br>(0 - 0)            | 0<br>(0 - 0)            | 0<br>(0 - 0)            |
| Acute hepatitis B                                                | 1<br>(1 - 1)         | 0<br>(0 - 0)          | 0<br>(0 - 0)           | 0<br>(0 - 0)            | 0<br>(0 - 1)            | 1<br>(0 - 1)            |
| Acute hepatitis C                                                | 0<br>(0 - 0)         | --                    | 0<br>(0 - 0)           | 0<br>(0 - 0)            | 0<br>(0 - 0)            | 0<br>(0 - 0)            |
| Acute hepatitis E                                                | 0<br>(0 - 0)         | 0<br>(0 - 0)          | 0<br>(0 - 0)           | 0<br>(0 - 0)            | 0<br>(0 - 0)            | 0<br>(0 - 0)            |
| Other infectious diseases                                        | 4<br>(3 - 7)         | 0<br>(0 - 1)          | 0<br>(0 - 0)           | 1<br>(1 - 1)            | 1<br>(1 - 1)            | 2<br>(2 - 3)            |
| Non-communicable diseases                                        | 802<br>(739 - 867)   | 31<br>(21 - 40)       | 8<br>(6 - 9)           | 97<br>(84 - 111)        | 177<br>(157 - 198)      | 489<br>(458 - 523)      |
| Neoplasms                                                        | 81<br>(72 - 93)      | 1<br>(1 - 2)          | 1<br>(1 - 1)           | 22<br>(19 - 25)         | 26<br>(22 - 30)         | 31<br>(28 - 36)         |
| Esophageal cancer                                                | 1<br>(1 - 1)         | --                    | --                     | 0<br>(0 - 0)            | 0<br>(0 - 0)            | 0<br>(0 - 0)            |
| Stomach cancer                                                   | 4<br>(3 - 5)         | --                    | --                     | 1<br>(1 - 1)            | 1<br>(1 - 1)            | 2<br>(2 - 3)            |
| Liver cancer                                                     | 5<br>(4 - 6)         | --                    | 0<br>(0 - 0)           | 1<br>(1 - 1)            | 2<br>(2 - 3)            | 2<br>(1 - 2)            |
| Liver cancer due to hepatitis B                                  | 2<br>(1 - 3)         | --                    | 0<br>(0 - 0)           | 0<br>(0 - 1)            | 1<br>(1 - 1)            | 1<br>(0 - 1)            |
| Liver cancer due to hepatitis C                                  | 2<br>(1 - 3)         | --                    | 0<br>(0 - 0)           | 0<br>(0 - 1)            | 1<br>(0 - 1)            | 1<br>(1 - 1)            |
| Liver cancer due to alcohol use                                  | 0<br>(0 - 0)         | --                    | --                     | 0<br>(0 - 0)            | 0<br>(0 - 0)            | 0<br>(0 - 0)            |
| Liver cancer due to other causes                                 | 0<br>(0 - 1)         | --                    | 0<br>(0 - 0)           | 0<br>(0 - 0)            | 0<br>(0 - 0)            | 0<br>(0 - 0)            |
| Larynx cancer                                                    | 0<br>(0 - 0)         | --                    | --                     | 0<br>(0 - 0)            | 0<br>(0 - 0)            | 0<br>(0 - 0)            |

Web Table 31- Maldives deaths with 95% UI by age, sex, and cause in 2013

| Cause                                         | Both Sexes, All Ages | Both Sexes, 0-4 Years | Both Sexes, 5-14 Years | Both Sexes, 15-49 Years | Both Sexes, 50-69 Years | Both Sexes, 70-80 Years |
|-----------------------------------------------|----------------------|-----------------------|------------------------|-------------------------|-------------------------|-------------------------|
| Tracheal, bronchus and lung cancer            | 12<br>(10 - 14)      | --                    | --                     | 2<br>(1 - 2)            | 5<br>(4 - 6)            | 5<br>(4 - 6)            |
| Breast cancer                                 | 8<br>(6 - 10)        | --                    | --                     | 4<br>(3 - 6)            | 2<br>(2 - 3)            | 1<br>(1 - 2)            |
| Cervical cancer                               | 2<br>(1 - 2)         | --                    | --                     | 0<br>(0 - 1)            | 1<br>(1 - 1)            | 0<br>(0 - 0)            |
| Uterine cancer                                | 0<br>(0 - 1)         | --                    | --                     | 0<br>(0 - 0)            | 0<br>(0 - 0)            | 0<br>(0 - 0)            |
| Prostate cancer                               | 2<br>(1 - 2)         | --                    | --                     | 0<br>(0 - 0)            | 0<br>(0 - 0)            | 1<br>(1 - 2)            |
| Colon and rectum cancer                       | 7<br>(6 - 8)         | --                    | --                     | 1<br>(1 - 2)            | 2<br>(2 - 3)            | 3<br>(3 - 4)            |
| Lip and oral cavity cancer                    | 4<br>(3 - 5)         | --                    | --                     | 1<br>(1 - 1)            | 1<br>(1 - 2)            | 2<br>(1 - 2)            |
| Nasopharynx cancer                            | 0<br>(0 - 0)         | --                    | 0<br>(0 - 0)           | 0<br>(0 - 0)            | 0<br>(0 - 0)            | 0<br>(0 - 0)            |
| Other pharynx cancer                          | 1<br>(0 - 1)         | --                    | --                     | 0<br>(0 - 0)            | 0<br>(0 - 0)            | 0<br>(0 - 0)            |
| Gallbladder and biliary tract cancer          | 1<br>(0 - 1)         | --                    | --                     | 0<br>(0 - 0)            | 0<br>(0 - 0)            | 0<br>(0 - 0)            |
| Pancreatic cancer                             | 3<br>(2 - 3)         | --                    | --                     | 1<br>(0 - 1)            | 1<br>(1 - 1)            | 1<br>(1 - 2)            |
| Malignant skin melanoma                       | 2<br>(1 - 3)         | --                    | --                     | 1<br>(0 - 1)            | 0<br>(0 - 1)            | 1<br>(1 - 1)            |
| Non-melanoma skin cancer                      | 1<br>(1 - 1)         | --                    | --                     | 0<br>(0 - 0)            | 0<br>(0 - 0)            | 1<br>(0 - 1)            |
| Ovarian cancer                                | 1<br>(1 - 2)         | --                    | --                     | 0<br>(0 - 0)            | 1<br>(1 - 1)            | 0<br>(0 - 0)            |
| Testicular cancer                             | 0<br>(0 - 0)         | --                    | --                     | 0<br>(0 - 0)            | 0<br>(0 - 0)            | 0<br>(0 - 0)            |
| Kidney cancer                                 | 1<br>(1 - 1)         | 0<br>(0 - 0)          | 0<br>(0 - 0)           | 0<br>(0 - 0)            | 1<br>(0 - 1)            | 1<br>(0 - 1)            |
| Bladder cancer                                | 1<br>(1 - 2)         | --                    | --                     | 0<br>(0 - 0)            | 0<br>(0 - 0)            | 1<br>(1 - 1)            |
| Brain and nervous system cancer               | 2<br>(1 - 3)         | 0<br>(0 - 0)          | 0<br>(0 - 0)           | 1<br>(1 - 1)            | 1<br>(0 - 1)            | 0<br>(0 - 1)            |
| Thyroid cancer                                | 0<br>(0 - 0)         | --                    | 0<br>(0 - 0)           | 0<br>(0 - 0)            | 0<br>(0 - 0)            | 0<br>(0 - 0)            |
| Mesothelioma                                  | 0<br>(0 - 0)         | --                    | --                     | 0<br>(0 - 0)            | 0<br>(0 - 0)            | 0<br>(0 - 0)            |
| Hodgkin lymphoma                              | 1<br>(1 - 1)         | 0<br>(0 - 0)          | 0<br>(0 - 0)           | 0<br>(0 - 1)            | 0<br>(0 - 0)            | 0<br>(0 - 0)            |
| Non-Hodgkin lymphoma                          | 7<br>(5 - 12)        | 0<br>(0 - 0)          | 0<br>(0 - 0)           | 1<br>(1 - 2)            | 3<br>(2 - 4)            | 3<br>(2 - 5)            |
| Multiple myeloma                              | 1<br>(0 - 1)         | --                    | --                     | 0<br>(0 - 0)            | 0<br>(0 - 0)            | 0<br>(0 - 0)            |
| Leukemia                                      | 4<br>(4 - 5)         | 0<br>(0 - 0)          | 0<br>(0 - 0)           | 2<br>(2 - 2)            | 1<br>(1 - 1)            | 1<br>(1 - 1)            |
| Other neoplasms                               | 12<br>(9 - 15)       | 1<br>(1 - 2)          | 1<br>(0 - 1)           | 4<br>(3 - 5)            | 2<br>(2 - 3)            | 4<br>(3 - 6)            |
| Cardiovascular diseases                       | 401<br>(356 - 441)   | 3<br>(2 - 5)          | 2<br>(2 - 3)           | 35<br>(28 - 42)         | 90<br>(77 - 103)        | 270<br>(244 - 294)      |
| Rheumatic heart disease                       | 5<br>(4 - 7)         | 0<br>(0 - 0)          | 0<br>(0 - 0)           | 2<br>(1 - 2)            | 1<br>(1 - 1)            | 2<br>(2 - 3)            |
| Ischemic heart disease                        | 218<br>(169 - 249)   | 0<br>(0 - 0)          | 0<br>(0 - 0)           | 17<br>(12 - 21)         | 56<br>(44 - 65)         | 145<br>(111 - 165)      |
| Cerebrovascular disease                       | 133<br>(107 - 157)   | 2<br>(1 - 2)          | 1<br>(1 - 1)           | 11<br>(8 - 13)          | 25<br>(20 - 31)         | 95<br>(76 - 113)        |
| Ischemic stroke                               | 93<br>(70 - 111)     | 0<br>(0 - 0)          | 0<br>(0 - 0)           | 2<br>(1 - 3)            | 11<br>(8 - 15)          | 79<br>(59 - 94)         |
| Hemorrhagic stroke                            | 40<br>(31 - 54)      | 2<br>(1 - 2)          | 1<br>(0 - 1)           | 9<br>(7 - 11)           | 14<br>(10 - 18)         | 15<br>(11 - 25)         |
| Hypertensive heart disease                    | 15<br>(11 - 20)      | 0<br>(0 - 0)          | 0<br>(0 - 0)           | 1<br>(1 - 1)            | 3<br>(2 - 4)            | 11<br>(8 - 15)          |
| Cardiomyopathy and myocarditis                | 4<br>(3 - 5)         | 0<br>(0 - 0)          | 0<br>(0 - 0)           | 1<br>(1 - 1)            | 0<br>(0 - 1)            | 2<br>(1 - 3)            |
| Atrial fibrillation and flutter               | 0<br>(0 - 0)         | --                    | --                     | 0<br>(0 - 0)            | 0<br>(0 - 0)            | 0<br>(0 - 0)            |
| Aortic aneurysm                               | 2<br>(1 - 2)         | --                    | --                     | 0<br>(0 - 0)            | 0<br>(0 - 0)            | 2<br>(1 - 2)            |
| Peripheral vascular disease                   | 3<br>(2 - 4)         | --                    | --                     | 0<br>(0 - 0)            | 0<br>(0 - 1)            | 2<br>(2 - 3)            |
| Endocarditis                                  | 2<br>(1 - 2)         | 0<br>(0 - 0)          | 0<br>(0 - 0)           | 0<br>(0 - 0)            | 0<br>(0 - 1)            | 1<br>(1 - 1)            |
| Other cardiovascular and circulatory diseases | 19<br>(15 - 28)      | 1<br>(1 - 1)          | 0<br>(0 - 1)           | 3<br>(2 - 4)            | 4<br>(3 - 6)            | 10<br>(7 - 16)          |
| Chronic respiratory diseases                  | 104<br>(78 - 118)    | 1<br>(0 - 1)          | 0<br>(0 - 1)           | 8<br>(6 - 10)           | 23<br>(18 - 27)         | 72<br>(52 - 83)         |
| Chronic obstructive pulmonary disease         | 78<br>(54 - 91)      | 0<br>(0 - 0)          | 0<br>(0 - 0)           | 6<br>(4 - 7)            | 16<br>(11 - 19)         | 56<br>(39 - 66)         |

Web Table 31- Maldives deaths with 95% UI by age, sex, and cause in 2013

| Cause                                               | Both Sexes, All Ages | Both Sexes, 0-4 Years | Both Sexes, 5-14 Years | Both Sexes, 15-49 Years | Both Sexes, 50-69 Years | Both Sexes, 70-80 Years |
|-----------------------------------------------------|----------------------|-----------------------|------------------------|-------------------------|-------------------------|-------------------------|
| Pneumoconiosis                                      | 2<br>(1 - 3)         | 0<br>(0 - 0)          | 0<br>(0 - 0)           | 0<br>(0 - 1)            | 1<br>(0 - 1)            | 1<br>(1 - 2)            |
| Silicosis                                           | 1<br>(1 - 1)         | 0<br>(0 - 0)          | 0<br>(0 - 0)           | 0<br>(0 - 0)            | 0<br>(0 - 0)            | 1<br>(0 - 1)            |
| Asbestosis                                          | 0<br>(0 - 0)         | 0<br>(0 - 0)          | 0<br>(0 - 0)           | 0<br>(0 - 0)            | 0<br>(0 - 0)            | 0<br>(0 - 0)            |
| Coal workers pneumoconiosis                         | 0<br>(0 - 1)         | 0<br>(0 - 0)          | 0<br>(0 - 0)           | 0<br>(0 - 0)            | 0<br>(0 - 0)            | 0<br>(0 - 0)            |
| Other pneumoconiosis                                | 1<br>(0 - 1)         | 0<br>(0 - 0)          | 0<br>(0 - 0)           | 0<br>(0 - 0)            | 0<br>(0 - 0)            | 0<br>(0 - 0)            |
| Asthma                                              | 5<br>(4 - 7)         | 0<br>(0 - 0)          | 0<br>(0 - 0)           | 0<br>(0 - 0)            | 1<br>(1 - 2)            | 3<br>(2 - 4)            |
| Interstitial lung disease and pulmonary sarcoidosis | 15<br>(9 - 20)       | 0<br>(0 - 0)          | 0<br>(0 - 0)           | 1<br>(0 - 1)            | 5<br>(3 - 6)            | 9<br>(5 - 13)           |
| Other chronic respiratory diseases                  | 5<br>(4 - 6)         | 0<br>(0 - 1)          | 0<br>(0 - 0)           | 1<br>(1 - 2)            | 1<br>(0 - 1)            | 3<br>(2 - 4)            |
| Cirrhosis                                           | 15<br>(13 - 17)      | 0<br>(0 - 0)          | 0<br>(0 - 0)           | 2<br>(2 - 3)            | 4<br>(3 - 5)            | 9<br>(7 - 10)           |
| Cirrhosis due to hepatitis B                        | 6<br>(3 - 8)         | 0<br>(0 - 0)          | 0<br>(0 - 0)           | 1<br>(1 - 1)            | 2<br>(1 - 2)            | 3<br>(2 - 5)            |
| Cirrhosis due to hepatitis C                        | 4<br>(2 - 7)         | 0<br>(0 - 0)          | 0<br>(0 - 0)           | 1<br>(0 - 1)            | 1<br>(1 - 2)            | 3<br>(1 - 4)            |
| Cirrhosis due to alcohol use                        | 4<br>(2 - 6)         | --                    | --                     | 0<br>(0 - 1)            | 1<br>(1 - 2)            | 2<br>(1 - 4)            |
| Cirrhosis due to other causes                       | 1<br>(1 - 2)         | 0<br>(0 - 0)          | 0<br>(0 - 0)           | 0<br>(0 - 1)            | 0<br>(0 - 1)            | 0<br>(0 - 1)            |
| Digestive diseases                                  | 10<br>(9 - 12)       | 0<br>(0 - 0)          | 0<br>(0 - 0)           | 2<br>(2 - 2)            | 2<br>(2 - 2)            | 6<br>(5 - 7)            |
| Peptic ulcer disease                                | 2<br>(1 - 2)         | 0<br>(0 - 0)          | 0<br>(0 - 0)           | 0<br>(0 - 0)            | 0<br>(0 - 1)            | 1<br>(1 - 2)            |
| Gastritis and duodenitis                            | 0<br>(0 - 1)         | 0<br>(0 - 0)          | 0<br>(0 - 0)           | 0<br>(0 - 0)            | 0<br>(0 - 0)            | 0<br>(0 - 0)            |
| Appendicitis                                        | 1<br>(0 - 1)         | 0<br>(0 - 0)          | 0<br>(0 - 0)           | 0<br>(0 - 0)            | 0<br>(0 - 0)            | 0<br>(0 - 0)            |
| Paralytic ileus and intestinal obstruction          | 1<br>(0 - 1)         | 0<br>(0 - 0)          | 0<br>(0 - 0)           | 0<br>(0 - 0)            | 0<br>(0 - 0)            | 0<br>(0 - 0)            |
| Inguinal, femoral, and abdominal hernia             | 0<br>(0 - 1)         | 0<br>(0 - 0)          | 0<br>(0 - 0)           | 0<br>(0 - 0)            | 0<br>(0 - 0)            | 0<br>(0 - 0)            |
| Inflammatory bowel disease                          | 1<br>(1 - 2)         | 0<br>(0 - 0)          | 0<br>(0 - 0)           | 0<br>(0 - 0)            | 0<br>(0 - 0)            | 1<br>(1 - 1)            |
| Vascular intestinal disorders                       | 0<br>(0 - 0)         | 0<br>(0 - 0)          | 0<br>(0 - 0)           | 0<br>(0 - 0)            | 0<br>(0 - 0)            | 0<br>(0 - 0)            |
| Gallbladder and biliary diseases                    | 2<br>(1 - 3)         | 0<br>(0 - 0)          | 0<br>(0 - 0)           | 1<br>(0 - 1)            | 0<br>(0 - 1)            | 1<br>(1 - 2)            |
| Pancreatitis                                        | 1<br>(0 - 1)         | 0<br>(0 - 0)          | 0<br>(0 - 0)           | 0<br>(0 - 1)            | 0<br>(0 - 0)            | 0<br>(0 - 0)            |
| Other digestive diseases                            | 2<br>(2 - 3)         | 0<br>(0 - 0)          | 0<br>(0 - 0)           | 0<br>(0 - 0)            | 0<br>(0 - 1)            | 2<br>(1 - 2)            |
| Neurological disorders                              | 52<br>(43 - 62)      | 1<br>(0 - 2)          | 0<br>(0 - 1)           | 2<br>(1 - 3)            | 4<br>(3 - 6)            | 44<br>(36 - 53)         |
| Alzheimer disease and other dementias               | 46<br>(38 - 55)      | --                    | --                     | 0<br>(0 - 0)            | 4<br>(3 - 5)            | 42<br>(35 - 51)         |
| Parkinson disease                                   | 0<br>(0 - 0)         | --                    | --                     | 0<br>(0 - 0)            | 0<br>(0 - 0)            | 0<br>(0 - 0)            |
| Epilepsy                                            | 3<br>(2 - 4)         | 0<br>(0 - 1)          | 0<br>(0 - 0)           | 1<br>(1 - 2)            | 0<br>(0 - 1)            | 1<br>(0 - 1)            |
| Multiple sclerosis                                  | 0<br>(0 - 0)         | --                    | --                     | 0<br>(0 - 0)            | 0<br>(0 - 0)            | 0<br>(0 - 0)            |
| Other neurological disorders                        | 2<br>(2 - 3)         | 0<br>(0 - 1)          | 0<br>(0 - 0)           | 1<br>(0 - 1)            | 0<br>(0 - 1)            | 1<br>(1 - 1)            |
| Mental and substance use disorders                  | 6<br>(3 - 9)         | 0<br>(0 - 0)          | 0<br>(0 - 0)           | 4<br>(2 - 6)            | 1<br>(1 - 2)            | 1<br>(1 - 2)            |
| Schizophrenia                                       | 0<br>(0 - 0)         | --                    | --                     | 0<br>(0 - 0)            | 0<br>(0 - 0)            | 0<br>(0 - 0)            |
| Alcohol use disorders                               | 2<br>(1 - 3)         | --                    | --                     | 0<br>(0 - 0)            | 1<br>(0 - 1)            | 1<br>(0 - 2)            |
| Drug use disorders                                  | 4<br>(2 - 6)         | 0<br>(0 - 0)          | --                     | 4<br>(1 - 5)            | 0<br>(0 - 1)            | 0<br>(0 - 0)            |
| Opioid use disorders                                | 3<br>(1 - 4)         | 0<br>(0 - 0)          | --                     | 2<br>(1 - 3)            | 0<br>(0 - 0)            | 0<br>(0 - 0)            |
| Cocaine use disorders                               | 0<br>(0 - 0)         | 0<br>(0 - 0)          | --                     | 0<br>(0 - 0)            | 0<br>(0 - 0)            | 0<br>(0 - 0)            |
| Amphetamine use disorders                           | 0<br>(0 - 0)         | 0<br>(0 - 0)          | --                     | 0<br>(0 - 0)            | 0<br>(0 - 0)            | 0<br>(0 - 0)            |
| Other drug use disorders                            | 1<br>(1 - 2)         | 0<br>(0 - 0)          | --                     | 1<br>(0 - 2)            | 0<br>(0 - 0)            | 0<br>(0 - 0)            |
| Eating disorders                                    | 0<br>(0 - 0)         | --                    | 0<br>(0 - 0)           | 0<br>(0 - 0)            | --                      | --                      |
| Anorexia nervosa                                    | 0<br>(0 - 0)         | --                    | 0<br>(0 - 0)           | 0<br>(0 - 0)            | --                      | --                      |

Web Table 31- Maldives deaths with 95% UI by age, sex, and cause in 2013

| Cause                                               | Both Sexes, All Ages | Both Sexes, 0-4 Years | Both Sexes, 5-14 Years | Both Sexes, 15-49 Years | Both Sexes, 50-69 Years | Both Sexes, 70-80 Years |
|-----------------------------------------------------|----------------------|-----------------------|------------------------|-------------------------|-------------------------|-------------------------|
| Diabetes, urogenital, blood, and endocrine diseases | 87<br>(77 - 100)     | 5<br>(3 - 8)          | 1<br>(1 - 2)           | 14<br>(12 - 17)         | 21<br>(17 - 25)         | 46<br>(41 - 53)         |
| Diabetes mellitus                                   | 28<br>(25 - 32)      | 0<br>(0 - 0)          | 0<br>(0 - 0)           | 3<br>(2 - 3)            | 7<br>(5 - 8)            | 19<br>(16 - 22)         |
| Acute glomerulonephritis                            | 0<br>(0 - 0)         | 0<br>(0 - 0)          | 0<br>(0 - 0)           | 0<br>(0 - 0)            | 0<br>(0 - 0)            | 0<br>(0 - 0)            |
| Chronic kidney disease                              | 36<br>(24 - 43)      | 0<br>(0 - 1)          | 0<br>(0 - 0)           | 6<br>(4 - 8)            | 10<br>(6 - 13)          | 19<br>(13 - 23)         |
| Chronic kidney disease due to diabetes mellitus     | 2<br>(1 - 3)         | 0<br>(0 - 0)          | 0<br>(0 - 0)           | 0<br>(0 - 1)            | 0<br>(0 - 1)            | 1<br>(1 - 2)            |
| Chronic kidney disease due to hypertension          | 11<br>(7 - 14)       | 0<br>(0 - 0)          | 0<br>(0 - 0)           | 1<br>(1 - 1)            | 3<br>(2 - 4)            | 7<br>(4 - 9)            |
| Chronic kidney disease due to glomerulonephritis    | 2<br>(2 - 3)         | 0<br>(0 - 0)          | 0<br>(0 - 0)           | 1<br>(0 - 1)            | 0<br>(0 - 1)            | 1<br>(1 - 1)            |
| Chronic kidney disease due to other causes          | 21<br>(12 - 28)      | 0<br>(0 - 1)          | 0<br>(0 - 0)           | 4<br>(2 - 6)            | 6<br>(3 - 8)            | 10<br>(6 - 14)          |
| Urinary diseases and male infertility               | 6<br>(5 - 10)        | 0<br>(0 - 0)          | 0<br>(0 - 0)           | 1<br>(1 - 1)            | 1<br>(1 - 2)            | 4<br>(3 - 6)            |
| Interstitial nephritis and urinary tract infections | 3<br>(2 - 4)         | 0<br>(0 - 0)          | 0<br>(0 - 0)           | 0<br>(0 - 1)            | 1<br>(0 - 1)            | 2<br>(1 - 3)            |
| Urolithiasis                                        | 0<br>(0 - 1)         | --                    | 0<br>(0 - 0)           | 0<br>(0 - 0)            | 0<br>(0 - 0)            | 0<br>(0 - 0)            |
| Other urinary diseases                              | 3<br>(2 - 6)         | 0<br>(0 - 0)          | 0<br>(0 - 0)           | 0<br>(0 - 1)            | 1<br>(0 - 2)            | 2<br>(1 - 3)            |
| Gynecological diseases                              | 0<br>(0 - 0)         | --                    | --                     | 0<br>(0 - 0)            | 0<br>(0 - 0)            | 0<br>(0 - 0)            |
| Uterine fibroids                                    | 0<br>(0 - 0)         | --                    | --                     | 0<br>(0 - 0)            | 0<br>(0 - 0)            | 0<br>(0 - 0)            |
| Polycystic ovarian syndrome                         | 0<br>(0 - 0)         | --                    | --                     | 0<br>(0 - 0)            | 0<br>(0 - 0)            | --                      |
| Endometriosis                                       | 0<br>(0 - 0)         | --                    | --                     | 0<br>(0 - 0)            | 0<br>(0 - 0)            | --                      |
| Genital prolapse                                    | 0<br>(0 - 0)         | --                    | --                     | 0<br>(0 - 0)            | 0<br>(0 - 0)            | 0<br>(0 - 0)            |
| Other gynecological diseases                        | 0<br>(0 - 0)         | --                    | --                     | 0<br>(0 - 0)            | 0<br>(0 - 0)            | 0<br>(0 - 0)            |
| Hemoglobinopathies and hemolytic anemias            | 9<br>(6 - 12)        | 3<br>(2 - 5)          | 1<br>(0 - 1)           | 3<br>(2 - 4)            | 0<br>(0 - 1)            | 1<br>(1 - 2)            |
| Thalassemias                                        | 7<br>(5 - 10)        | 3<br>(2 - 5)          | 1<br>(0 - 1)           | 3<br>(2 - 4)            | 0<br>(0 - 0)            | 0<br>(0 - 0)            |
| Sickle cell disorders                               | 0<br>(0 - 0)         | 0<br>(0 - 0)          | 0<br>(0 - 0)           | 0<br>(0 - 0)            | 0<br>(0 - 0)            | 0<br>(0 - 0)            |
| G6PD deficiency                                     | 0<br>(0 - 0)         | 0<br>(0 - 0)          | 0<br>(0 - 0)           | 0<br>(0 - 0)            | 0<br>(0 - 0)            | 0<br>(0 - 0)            |
| Other hemoglobinopathies and hemolytic anemias      | 2<br>(1 - 2)         | 0<br>(0 - 0)          | 0<br>(0 - 0)           | 0<br>(0 - 0)            | 0<br>(0 - 0)            | 1<br>(1 - 2)            |
| Endocrine, metabolic, blood, and immune disorders   | 8<br>(6 - 10)        | 1<br>(0 - 1)          | 0<br>(0 - 0)           | 1<br>(1 - 2)            | 2<br>(1 - 3)            | 4<br>(3 - 5)            |
| Musculoskeletal disorders                           | 4<br>(4 - 6)         | --                    | 0<br>(0 - 0)           | 2<br>(1 - 3)            | 1<br>(1 - 2)            | 1<br>(1 - 2)            |
| Rheumatoid arthritis                                | 1<br>(1 - 1)         | --                    | 0<br>(0 - 0)           | 0<br>(0 - 1)            | 0<br>(0 - 0)            | 0<br>(0 - 1)            |
| Other musculoskeletal disorders                     | 3<br>(3 - 5)         | --                    | 0<br>(0 - 0)           | 1<br>(1 - 2)            | 1<br>(1 - 1)            | 1<br>(1 - 2)            |
| Other non-communicable diseases                     | 41<br>(34 - 48)      | 19<br>(14 - 25)       | 2<br>(1 - 3)           | 6<br>(5 - 8)            | 5<br>(4 - 6)            | 8<br>(7 - 10)           |
| Congenital anomalies                                | 31<br>(25 - 37)      | 18<br>(13 - 23)       | 2<br>(1 - 3)           | 5<br>(4 - 6)            | 3<br>(2 - 4)            | 4<br>(3 - 4)            |
| Neural tube defects                                 | 0<br>(0 - 1)         | 0<br>(0 - 1)          | 0<br>(0 - 0)           | 0<br>(0 - 0)            | 0<br>(0 - 0)            | 0<br>(0 - 0)            |
| Congenital heart anomalies                          | 10<br>(7 - 13)       | 7<br>(5 - 10)         | 1<br>(0 - 1)           | 1<br>(1 - 1)            | 0<br>(0 - 1)            | 1<br>(1 - 1)            |
| Cleft lip and cleft palate                          | 0<br>(0 - 0)         | 0<br>(0 - 0)          | --                     | --                      | --                      | --                      |
| Down syndrome                                       | 0<br>(0 - 1)         | 0<br>(0 - 0)          | 0<br>(0 - 0)           | 0<br>(0 - 0)            | 0<br>(0 - 0)            | 0<br>(0 - 0)            |
| Chromosomal unbalanced rearrangements               | 1<br>(1 - 2)         | 1<br>(0 - 1)          | 0<br>(0 - 0)           | 0<br>(0 - 0)            | 0<br>(0 - 0)            | 0<br>(0 - 0)            |
| Other congenital anomalies                          | 19<br>(15 - 23)      | 9<br>(7 - 13)         | 1<br>(1 - 1)           | 3<br>(3 - 4)            | 3<br>(2 - 3)            | 3<br>(2 - 3)            |
| Skin and subcutaneous diseases                      | 8<br>(6 - 10)        | 0<br>(0 - 0)          | 0<br>(0 - 0)           | 1<br>(1 - 2)            | 1<br>(1 - 2)            | 5<br>(4 - 7)            |
| Cellulitis                                          | 1<br>(0 - 1)         | 0<br>(0 - 0)          | 0<br>(0 - 0)           | 0<br>(0 - 0)            | 0<br>(0 - 0)            | 0<br>(0 - 1)            |
| Pyoderma                                            | 4<br>(3 - 5)         | 0<br>(0 - 0)          | 0<br>(0 - 0)           | 1<br>(1 - 1)            | 1<br>(1 - 1)            | 2<br>(1 - 3)            |
| Decubitus ulcer                                     | 3<br>(2 - 4)         | 0<br>(0 - 0)          | 0<br>(0 - 0)           | 0<br>(0 - 1)            | 0<br>(0 - 1)            | 2<br>(2 - 3)            |
| Other skin and subcutaneous diseases                | 0<br>(0 - 1)         | 0<br>(0 - 0)          | 0<br>(0 - 0)           | 0<br>(0 - 0)            | 0<br>(0 - 0)            | 0<br>(0 - 0)            |



Web Table 31- Maldives deaths with 95% UI by age, sex, and cause in 2013

| Cause                                           | Both Sexes, All Ages | Both Sexes, 0-4 Years | Both Sexes, 5-14 Years | Both Sexes, 15-49 Years | Both Sexes, 50-69 Years | Both Sexes, 70-80 Years |
|-------------------------------------------------|----------------------|-----------------------|------------------------|-------------------------|-------------------------|-------------------------|
| Sudden infant death syndrome                    | 2<br>(0 - 6)         | 2<br>(0 - 6)          | --                     | --                      | --                      | --                      |
| Injuries                                        | 132<br>(115 - 162)   | 14<br>(9 - 20)        | 6<br>(4 - 7)           | 43<br>(36 - 51)         | 23<br>(20 - 29)         | 46<br>(40 - 61)         |
| Transport injuries                              | 26<br>(22 - 31)      | 3<br>(2 - 5)          | 1<br>(1 - 1)           | 10<br>(8 - 13)          | 5<br>(4 - 6)            | 7<br>(6 - 9)            |
| Road injuries                                   | 22<br>(19 - 26)      | 2<br>(2 - 4)          | 1<br>(1 - 1)           | 9<br>(7 - 11)           | 4<br>(3 - 5)            | 6<br>(5 - 8)            |
| Pedestrian road injuries                        | 4<br>(3 - 5)         | 1<br>(1 - 2)          | 0<br>(0 - 1)           | 1<br>(1 - 2)            | 1<br>(0 - 1)            | 1<br>(1 - 1)            |
| Cyclist road injuries                           | 3<br>(2 - 3)         | 0<br>(0 - 0)          | 0<br>(0 - 0)           | 1<br>(1 - 1)            | 1<br>(0 - 1)            | 1<br>(1 - 1)            |
| Motorcyclist road injuries                      | 5<br>(4 - 6)         | 0<br>(0 - 0)          | 0<br>(0 - 0)           | 3<br>(2 - 4)            | 1<br>(1 - 1)            | 1<br>(1 - 1)            |
| Motor vehicle road injuries                     | 10<br>(8 - 12)       | 1<br>(1 - 1)          | 0<br>(0 - 0)           | 4<br>(3 - 5)            | 2<br>(1 - 2)            | 3<br>(2 - 4)            |
| Other road injuries                             | 1<br>(0 - 1)         | 0<br>(0 - 0)          | 0<br>(0 - 0)           | 0<br>(0 - 0)            | 0<br>(0 - 0)            | 0<br>(0 - 0)            |
| Other transport injuries                        | 4<br>(3 - 5)         | 1<br>(0 - 1)          | 0<br>(0 - 0)           | 1<br>(1 - 1)            | 1<br>(1 - 1)            | 1<br>(1 - 2)            |
| Unintentional injuries                          | 81<br>(69 - 102)     | 10<br>(6 - 15)        | 4<br>(3 - 6)           | 22<br>(18 - 27)         | 14<br>(11 - 17)         | 31<br>(26 - 39)         |
| Falls                                           | 12<br>(10 - 18)      | 1<br>(1 - 2)          | 0<br>(0 - 0)           | 2<br>(1 - 3)            | 2<br>(2 - 3)            | 7<br>(5 - 10)           |
| Drowning                                        | 27<br>(21 - 37)      | 5<br>(3 - 8)          | 3<br>(2 - 4)           | 11<br>(8 - 14)          | 4<br>(3 - 6)            | 5<br>(4 - 7)            |
| Fire, heat, and hot substances                  | 5<br>(4 - 7)         | 1<br>(0 - 1)          | 0<br>(0 - 0)           | 1<br>(1 - 2)            | 1<br>(1 - 1)            | 2<br>(2 - 3)            |
| Poisonings                                      | 2<br>(1 - 4)         | 0<br>(0 - 0)          | 0<br>(0 - 0)           | 0<br>(0 - 1)            | 0<br>(0 - 1)            | 1<br>(1 - 2)            |
| Exposure to mechanical forces                   | 9<br>(7 - 12)        | 1<br>(1 - 2)          | 0<br>(0 - 1)           | 3<br>(2 - 4)            | 2<br>(1 - 3)            | 3<br>(2 - 4)            |
| Unintentional firearm injuries                  | 3<br>(2 - 4)         | 0<br>(0 - 0)          | 0<br>(0 - 0)           | 1<br>(1 - 1)            | 1<br>(0 - 1)            | 1<br>(1 - 2)            |
| Unintentional suffocation                       | 1<br>(1 - 2)         | 0<br>(0 - 0)          | 0<br>(0 - 0)           | 0<br>(0 - 1)            | 0<br>(0 - 0)            | 0<br>(0 - 0)            |
| Other exposure to mechanical forces             | 5<br>(4 - 6)         | 1<br>(0 - 1)          | 0<br>(0 - 0)           | 2<br>(1 - 2)            | 1<br>(1 - 1)            | 1<br>(1 - 2)            |
| Adverse effects of medical treatment            | 12<br>(9 - 19)       | 1<br>(1 - 3)          | 0<br>(0 - 0)           | 3<br>(2 - 4)            | 2<br>(2 - 3)            | 6<br>(4 - 10)           |
| Animal contact                                  | 2<br>(1 - 4)         | 0<br>(0 - 1)          | 0<br>(0 - 0)           | 0<br>(0 - 1)            | 0<br>(0 - 1)            | 1<br>(1 - 2)            |
| Venomous animal contact                         | 1<br>(0 - 1)         | 0<br>(0 - 0)          | 0<br>(0 - 0)           | 0<br>(0 - 0)            | 0<br>(0 - 0)            | 0<br>(0 - 1)            |
| Non-venomous animal contact                     | 1<br>(1 - 3)         | 0<br>(0 - 0)          | 0<br>(0 - 0)           | 0<br>(0 - 1)            | 0<br>(0 - 0)            | 1<br>(0 - 1)            |
| Foreign body                                    | 8<br>(5 - 10)        | 1<br>(0 - 1)          | 0<br>(0 - 0)           | 1<br>(1 - 2)            | 1<br>(1 - 1)            | 5<br>(3 - 6)            |
| Pulmonary aspiration and foreign body in airway | 7<br>(5 - 9)         | 1<br>(0 - 1)          | 0<br>(0 - 0)           | 1<br>(1 - 2)            | 1<br>(1 - 1)            | 5<br>(3 - 6)            |
| Foreign body in other body part                 | 0<br>(0 - 0)         | 0<br>(0 - 0)          | 0<br>(0 - 0)           | 0<br>(0 - 0)            | 0<br>(0 - 0)            | 0<br>(0 - 0)            |
| Other unintentional injuries                    | 3<br>(3 - 4)         | 0<br>(0 - 0)          | 0<br>(0 - 0)           | 1<br>(0 - 1)            | 1<br>(0 - 1)            | 2<br>(1 - 2)            |
| Self-harm and interpersonal violence            | 25<br>(20 - 36)      | 1<br>(0 - 1)          | 0<br>(0 - 0)           | 11<br>(9 - 15)          | 5<br>(4 - 7)            | 9<br>(7 - 14)           |
| Self-harm                                       | 18<br>(15 - 30)      | --                    | 0<br>(0 - 0)           | 7<br>(5 - 10)           | 4<br>(3 - 7)            | 8<br>(6 - 14)           |
| Interpersonal violence                          | 7<br>(4 - 9)         | 1<br>(0 - 1)          | 0<br>(0 - 0)           | 4<br>(2 - 6)            | 1<br>(0 - 1)            | 1<br>(0 - 2)            |
| Assault by firearm                              | 2<br>(1 - 4)         | 0<br>(0 - 0)          | 0<br>(0 - 0)           | 1<br>(1 - 2)            | 0<br>(0 - 1)            | 0<br>(0 - 1)            |
| Assault by sharp object                         | 3<br>(1 - 4)         | 0<br>(0 - 0)          | 0<br>(0 - 0)           | 2<br>(1 - 3)            | 0<br>(0 - 1)            | 0<br>(0 - 0)            |
| Assault by other means                          | 2<br>(1 - 3)         | 0<br>(0 - 1)          | 0<br>(0 - 0)           | 1<br>(0 - 1)            | 0<br>(0 - 0)            | 0<br>(0 - 1)            |

Web Table 31- Maldives deaths with 95% UI by age, sex, and cause in 2013

| Cause                                                             | Males, All Ages    | Males, 0-4 Years | Males, 5-14 Years | Males, 15-49 Years | Males, 50-69 Years | Males, 70-80 Years |
|-------------------------------------------------------------------|--------------------|------------------|-------------------|--------------------|--------------------|--------------------|
| All causes                                                        | 661<br>(601 - 730) | 69<br>(57 - 83)  | 10<br>(8 - 12)    | 105<br>(88 - 124)  | 132<br>(113 - 153) | 346<br>(317 - 378) |
| Communicable, maternal, neonatal, and nutritional diseases        | 85<br>(72 - 100)   | 43<br>(33 - 55)  | 2<br>(1 - 3)      | 9<br>(7 - 11)      | 8<br>(7 - 10)      | 23<br>(19 - 27)    |
| HIV/AIDS and tuberculosis                                         | 7<br>(4 - 8)       | 0<br>(0 - 0)     | 0<br>(0 - 0)      | 2<br>(1 - 2)       | 2<br>(1 - 3)       | 3<br>(2 - 3)       |
| Tuberculosis                                                      | 6<br>(4 - 8)       | 0<br>(0 - 0)     | 0<br>(0 - 0)      | 2<br>(1 - 2)       | 2<br>(1 - 3)       | 3<br>(2 - 3)       |
| HIV/AIDS                                                          | 0<br>(0 - 0)       | 0<br>(0 - 0)     | 0<br>(0 - 0)      | 0<br>(0 - 0)       | 0<br>(0 - 0)       | 0<br>(0 - 0)       |
| HIV/AIDS resulting in mycobacterial infection                     | 0<br>(0 - 0)       | 0<br>(0 - 0)     | 0<br>(0 - 0)      | 0<br>(0 - 0)       | 0<br>(0 - 0)       | 0<br>(0 - 0)       |
| HIV/AIDS resulting in other diseases                              | 0<br>(0 - 0)       | 0<br>(0 - 0)     | 0<br>(0 - 0)      | 0<br>(0 - 0)       | 0<br>(0 - 0)       | 0<br>(0 - 0)       |
| Diarrhea, lower respiratory, and other common infectious diseases | 33<br>(26 - 44)    | 5<br>(3 - 14)    | 2<br>(1 - 3)      | 6<br>(5 - 8)       | 5<br>(4 - 6)       | 15<br>(12 - 19)    |
| Diarrheal diseases                                                | 2<br>(2 - 3)       | 1<br>(0 - 1)     | 0<br>(0 - 0)      | 0<br>(0 - 0)       | 0<br>(0 - 0)       | 1<br>(1 - 2)       |
| Intestinal infectious diseases                                    | 3<br>(1 - 6)       | 1<br>(0 - 2)     | 1<br>(0 - 2)      | 1<br>(0 - 2)       | 0<br>(0 - 0)       | 0<br>(0 - 0)       |
| Typhoid fever                                                     | 2<br>(1 - 4)       | 1<br>(0 - 2)     | 1<br>(0 - 1)      | 1<br>(0 - 2)       | 0<br>(0 - 0)       | 0<br>(0 - 0)       |
| Paratyphoid fever                                                 | 1<br>(0 - 1)       | 0<br>(0 - 1)     | 0<br>(0 - 0)      | 0<br>(0 - 0)       | 0<br>(0 - 0)       | 0<br>(0 - 0)       |
| Other intestinal infectious diseases                              | 0<br>(0 - 0)       | 0<br>(0 - 0)     | 0<br>(0 - 0)      | 0<br>(0 - 0)       | 0<br>(0 - 0)       | 0<br>(0 - 0)       |
| Lower respiratory infections                                      | 21<br>(17 - 26)    | 1<br>(1 - 1)     | 0<br>(0 - 1)      | 4<br>(3 - 5)       | 4<br>(3 - 5)       | 13<br>(9 - 17)     |
| Upper respiratory infections                                      | 0<br>(0 - 0)       | 0<br>(0 - 0)     | 0<br>(0 - 0)      | 0<br>(0 - 0)       | 0<br>(0 - 0)       | 0<br>(0 - 0)       |
| Otitis media                                                      | 0<br>(0 - 0)       | 0<br>(0 - 0)     | 0<br>(0 - 0)      | 0<br>(0 - 0)       | 0<br>(0 - 0)       | 0<br>(0 - 0)       |
| Meningitis                                                        | 1<br>(1 - 1)       | 0<br>(0 - 0)     | 0<br>(0 - 0)      | 0<br>(0 - 0)       | 0<br>(0 - 0)       | 0<br>(0 - 0)       |
| Pneumococcal meningitis                                           | 0<br>(0 - 0)       | 0<br>(0 - 0)     | 0<br>(0 - 0)      | 0<br>(0 - 0)       | 0<br>(0 - 0)       | 0<br>(0 - 0)       |
| H influenzae type B meningitis                                    | 0<br>(0 - 0)       | 0<br>(0 - 0)     | 0<br>(0 - 0)      | 0<br>(0 - 0)       | 0<br>(0 - 0)       | 0<br>(0 - 0)       |
| Meningococcal meningitis                                          | 0<br>(0 - 0)       | 0<br>(0 - 0)     | 0<br>(0 - 0)      | 0<br>(0 - 0)       | 0<br>(0 - 0)       | 0<br>(0 - 0)       |
| Other meningitis                                                  | 0<br>(0 - 0)       | 0<br>(0 - 0)     | 0<br>(0 - 0)      | 0<br>(0 - 0)       | 0<br>(0 - 0)       | 0<br>(0 - 0)       |
| Encephalitis                                                      | 2<br>(1 - 3)       | 0<br>(0 - 1)     | 0<br>(0 - 0)      | 1<br>(0 - 2)       | 0<br>(0 - 0)       | 1<br>(0 - 1)       |
| Diphtheria                                                        | 0<br>(0 - 0)       | 0<br>(0 - 0)     | 0<br>(0 - 0)      | 0<br>(0 - 0)       | 0<br>(0 - 0)       | --<br>(0 - 0)      |
| Whooping cough                                                    | 0<br>(0 - 1)       | 0<br>(0 - 0)     | 0<br>(0 - 0)      | 0<br>(0 - 0)       | 0<br>(0 - 0)       | --<br>(0 - 0)      |
| Tetanus                                                           | 0<br>(0 - 0)       | 0<br>(0 - 0)     | 0<br>(0 - 0)      | 0<br>(0 - 0)       | 0<br>(0 - 0)       | 0<br>(0 - 0)       |
| Measles                                                           | 3<br>(0 - 14)      | 2<br>(0 - 11)    | 0<br>(0 - 2)      | 0<br>(0 - 1)       | 0<br>(0 - 0)       | --<br>(0 - 0)      |
| Varicella and herpes zoster                                       | 0<br>(0 - 0)       | 0<br>(0 - 0)     | 0<br>(0 - 0)      | 0<br>(0 - 0)       | 0<br>(0 - 0)       | 0<br>(0 - 0)       |
| Neglected tropical diseases and malaria                           | 1<br>(1 - 2)       | 0<br>(0 - 0)     | 0<br>(0 - 0)      | 0<br>(0 - 0)       | 0<br>(0 - 0)       | 0<br>(0 - 1)       |
| Leishmaniasis                                                     | 0<br>(0 - 0)       | 0<br>(0 - 0)     | 0<br>(0 - 0)      | 0<br>(0 - 0)       | 0<br>(0 - 0)       | 0<br>(0 - 0)       |
| Visceral leishmaniasis                                            | 0<br>(0 - 0)       | 0<br>(0 - 0)     | 0<br>(0 - 0)      | 0<br>(0 - 0)       | 0<br>(0 - 0)       | 0<br>(0 - 0)       |
| Cysticercosis                                                     | 0<br>(0 - 0)       | 0<br>(0 - 0)     | 0<br>(0 - 0)      | 0<br>(0 - 0)       | 0<br>(0 - 0)       | 0<br>(0 - 0)       |
| Cystic echinococcosis                                             | 0<br>(0 - 0)       | 0<br>(0 - 0)     | 0<br>(0 - 0)      | 0<br>(0 - 0)       | 0<br>(0 - 0)       | 0<br>(0 - 0)       |
| Dengue                                                            | 1<br>(0 - 1)       | 0<br>(0 - 0)     | 0<br>(0 - 0)      | 0<br>(0 - 0)       | 0<br>(0 - 0)       | 0<br>(0 - 0)       |
| Rabies                                                            | 0<br>(0 - 0)       | 0<br>(0 - 0)     | 0<br>(0 - 0)      | 0<br>(0 - 0)       | 0<br>(0 - 0)       | 0<br>(0 - 0)       |
| Intestinal nematode infections                                    | 0<br>(0 - 0)       | 0<br>(0 - 0)     | --<br>(0 - 0)     | --<br>(0 - 0)      | --<br>(0 - 0)      | --<br>(0 - 0)      |
| Ascariasis                                                        | 0<br>(0 - 0)       | 0<br>(0 - 0)     | --<br>(0 - 0)     | --<br>(0 - 0)      | --<br>(0 - 0)      | --<br>(0 - 0)      |
| Other neglected tropical diseases                                 | 1<br>(0 - 1)       | 0<br>(0 - 0)     | 0<br>(0 - 0)      | 0<br>(0 - 0)       | 0<br>(0 - 0)       | 0<br>(0 - 0)       |
| Maternal disorders                                                | --                 | --               | --                | --                 | --                 | --                 |
| Maternal hemorrhage                                               | --                 | --               | --                | --                 | --                 | --                 |
| Maternal sepsis and other maternal infections                     | --                 | --               | --                | --                 | --                 | --                 |

Web Table 31- Maldives deaths with 95% UI by age, sex, and cause in 2013

| Cause                                                            | Males, All Ages    | Males, 0-4 Years | Males, 5-14 Years | Males, 15-49 Years | Males, 50-69 Years | Males, 70-80 Years |
|------------------------------------------------------------------|--------------------|------------------|-------------------|--------------------|--------------------|--------------------|
| Maternal hypertensive disorders                                  | --                 | --               | --                | --                 | --                 | --                 |
| Maternal obstructed labor                                        | --                 | --               | --                | --                 | --                 | --                 |
| Maternal abortive outcome                                        | --                 | --               | --                | --                 | --                 | --                 |
| Indirect maternal deaths                                         | --                 | --               | --                | --                 | --                 | --                 |
| Late maternal deaths                                             | --                 | --               | --                | --                 | --                 | --                 |
| Maternal deaths aggravated by HIV/AIDS                           | --                 | --               | --                | --                 | --                 | --                 |
| Other maternal disorders                                         | --                 | --               | --                | --                 | --                 | --                 |
| Neonatal disorders                                               | 37<br>(28 - 45)    | 37<br>(28 - 45)  | --                | --                 | --                 | --                 |
| Neonatal preterm birth complications                             | 10<br>(3 - 19)     | 10<br>(3 - 19)   | --                | --                 | --                 | --                 |
| Neonatal encephalopathy due to birth asphyxia and trauma         | 12<br>(8 - 20)     | 12<br>(8 - 20)   | --                | --                 | --                 | --                 |
| Neonatal sepsis and other neonatal infections                    | 0<br>(0 - 1)       | 0<br>(0 - 1)     | --                | --                 | --                 | --                 |
| Hemolytic disease and other neonatal jaundice                    | 0<br>(0 - 0)       | 0<br>(0 - 0)     | --                | --                 | --                 | --                 |
| Other neonatal disorders                                         | 14<br>(9 - 21)     | 14<br>(9 - 21)   | --                | --                 | --                 | --                 |
| Nutritional deficiencies                                         | 3<br>(2 - 5)       | 0<br>(0 - 0)     | 0<br>(0 - 0)      | 1<br>(0 - 1)       | 0<br>(0 - 0)       | 2<br>(1 - 4)       |
| Protein-energy malnutrition                                      | 1<br>(0 - 2)       | 0<br>(0 - 0)     | 0<br>(0 - 0)      | 0<br>(0 - 0)       | 0<br>(0 - 0)       | 1<br>(0 - 1)       |
| Iodine deficiency                                                | 0<br>(0 - 0)       | 0<br>(0 - 0)     | 0<br>(0 - 0)      | 0<br>(0 - 0)       | 0<br>(0 - 0)       | 0<br>(0 - 0)       |
| Iron-deficiency anemia                                           | 2<br>(1 - 3)       | 0<br>(0 - 0)     | 0<br>(0 - 0)      | 0<br>(0 - 0)       | 0<br>(0 - 0)       | 1<br>(1 - 2)       |
| Other nutritional deficiencies                                   | 1<br>(0 - 1)       | 0<br>(0 - 0)     | 0<br>(0 - 0)      | 0<br>(0 - 0)       | 0<br>(0 - 0)       | 0<br>(0 - 1)       |
| Other communicable, maternal, neonatal, and nutritional diseases | 4<br>(3 - 6)       | 0<br>(0 - 1)     | 0<br>(0 - 0)      | 1<br>(1 - 1)       | 1<br>(1 - 1)       | 2<br>(1 - 3)       |
| Sexually transmitted diseases excluding HIV                      | 1<br>(0 - 1)       | 0<br>(0 - 0)     | 0<br>(0 - 0)      | 0<br>(0 - 0)       | 0<br>(0 - 0)       | 0<br>(0 - 0)       |
| Syphilis                                                         | 0<br>(0 - 1)       | 0<br>(0 - 0)     | 0<br>(0 - 0)      | 0<br>(0 - 0)       | 0<br>(0 - 0)       | 0<br>(0 - 0)       |
| Chlamydial infection                                             | --                 | --               | --                | --                 | --                 | --                 |
| Gonococcal infection                                             | 0<br>(0 - 0)       | --               | 0<br>(0 - 0)      | 0<br>(0 - 0)       | 0<br>(0 - 0)       | 0<br>(0 - 0)       |
| Other sexually transmitted diseases                              | 0<br>(0 - 0)       | --               | 0<br>(0 - 0)      | 0<br>(0 - 0)       | 0<br>(0 - 0)       | 0<br>(0 - 0)       |
| Hepatitis                                                        | 1<br>(1 - 1)       | 0<br>(0 - 0)     | 0<br>(0 - 0)      | 0<br>(0 - 0)       | 0<br>(0 - 0)       | 1<br>(0 - 1)       |
| Acute hepatitis A                                                | 0<br>(0 - 0)       | 0<br>(0 - 0)     | 0<br>(0 - 0)      | 0<br>(0 - 0)       | 0<br>(0 - 0)       | 0<br>(0 - 0)       |
| Acute hepatitis B                                                | 1<br>(1 - 1)       | 0<br>(0 - 0)     | 0<br>(0 - 0)      | 0<br>(0 - 0)       | 0<br>(0 - 0)       | 0<br>(0 - 1)       |
| Acute hepatitis C                                                | 0<br>(0 - 0)       | --               | 0<br>(0 - 0)      | 0<br>(0 - 0)       | 0<br>(0 - 0)       | 0<br>(0 - 0)       |
| Acute hepatitis E                                                | 0<br>(0 - 0)       | 0<br>(0 - 0)     | 0<br>(0 - 0)      | 0<br>(0 - 0)       | 0<br>(0 - 0)       | 0<br>(0 - 0)       |
| Other infectious diseases                                        | 3<br>(2 - 4)       | 0<br>(0 - 1)     | 0<br>(0 - 0)      | 1<br>(0 - 1)       | 0<br>(0 - 1)       | 1<br>(1 - 2)       |
| Non-communicable diseases                                        | 488<br>(440 - 545) | 18<br>(12 - 24)  | 4<br>(3 - 5)      | 63<br>(52 - 74)    | 109<br>(93 - 126)  | 295<br>(269 - 324) |
| Neoplasms                                                        | 49<br>(42 - 56)    | 1<br>(0 - 1)     | 1<br>(1 - 1)      | 12<br>(10 - 15)    | 15<br>(13 - 18)    | 20<br>(18 - 23)    |
| Esophageal cancer                                                | 1<br>(0 - 1)       | --               | --                | 0<br>(0 - 0)       | 0<br>(0 - 0)       | 0<br>(0 - 0)       |
| Stomach cancer                                                   | 3<br>(2 - 3)       | --               | --                | 0<br>(0 - 1)       | 1<br>(1 - 1)       | 1<br>(1 - 2)       |
| Liver cancer                                                     | 4<br>(3 - 5)       | --               | 0<br>(0 - 0)      | 1<br>(1 - 1)       | 2<br>(1 - 2)       | 1<br>(1 - 2)       |
| Liver cancer due to hepatitis B                                  | 2<br>(1 - 3)       | --               | 0<br>(0 - 0)      | 0<br>(0 - 1)       | 1<br>(1 - 1)       | 1<br>(0 - 1)       |
| Liver cancer due to hepatitis C                                  | 2<br>(1 - 3)       | --               | 0<br>(0 - 0)      | 0<br>(0 - 0)       | 1<br>(0 - 1)       | 1<br>(0 - 1)       |
| Liver cancer due to alcohol use                                  | 0<br>(0 - 0)       | --               | --                | 0<br>(0 - 0)       | 0<br>(0 - 0)       | 0<br>(0 - 0)       |
| Liver cancer due to other causes                                 | 0<br>(0 - 0)       | --               | 0<br>(0 - 0)      | 0<br>(0 - 0)       | 0<br>(0 - 0)       | 0<br>(0 - 0)       |
| Larynx cancer                                                    | 0<br>(0 - 0)       | --               | --                | 0<br>(0 - 0)       | 0<br>(0 - 0)       | 0<br>(0 - 0)       |

Web Table 31- Maldives deaths with 95% UI by age, sex, and cause in 2013

| Cause                                         | Males, All Ages    | Males, 0-4 Years | Males, 5-14 Years | Males, 15-49 Years | Males, 50-69 Years | Males, 70-80 Years |
|-----------------------------------------------|--------------------|------------------|-------------------|--------------------|--------------------|--------------------|
| Tracheal, bronchus and lung cancer            | 9<br>(7 - 10)      | --               | --                | 1<br>(1 - 1)       | 4<br>(3 - 5)       | 4<br>(3 - 5)       |
| Breast cancer                                 | 0<br>(0 - 1)       | --               | --                | 0<br>(0 - 0)       | 0<br>(0 - 0)       | 0<br>(0 - 0)       |
| Cervical cancer                               | --                 | --               | --                | --                 | --                 | --                 |
| Uterine cancer                                | --                 | --               | --                | --                 | --                 | --                 |
| Prostate cancer                               | 2<br>(1 - 2)       | --               | --                | 0<br>(0 - 0)       | 0<br>(0 - 0)       | 1<br>(1 - 2)       |
| Colon and rectum cancer                       | 4<br>(3 - 5)       | --               | --                | 1<br>(1 - 1)       | 1<br>(1 - 2)       | 2<br>(1 - 2)       |
| Lip and oral cavity cancer                    | 2<br>(2 - 3)       | --               | --                | 1<br>(1 - 1)       | 1<br>(0 - 1)       | 1<br>(1 - 1)       |
| Nasopharynx cancer                            | 0<br>(0 - 0)       | --               | 0<br>(0 - 0)      | 0<br>(0 - 0)       | 0<br>(0 - 0)       | 0<br>(0 - 0)       |
| Other pharynx cancer                          | 0<br>(0 - 1)       | --               | --                | 0<br>(0 - 0)       | 0<br>(0 - 0)       | 0<br>(0 - 0)       |
| Gallbladder and biliary tract cancer          | 0<br>(0 - 0)       | --               | --                | 0<br>(0 - 0)       | 0<br>(0 - 0)       | 0<br>(0 - 0)       |
| Pancreatic cancer                             | 2<br>(2 - 2)       | --               | --                | 0<br>(0 - 0)       | 1<br>(1 - 1)       | 1<br>(1 - 1)       |
| Malignant skin melanoma                       | 1<br>(1 - 2)       | --               | --                | 0<br>(0 - 0)       | 0<br>(0 - 1)       | 0<br>(0 - 1)       |
| Non-melanoma skin cancer                      | 0<br>(0 - 1)       | --               | --                | 0<br>(0 - 0)       | 0<br>(0 - 0)       | 0<br>(0 - 0)       |
| Ovarian cancer                                | --                 | --               | --                | --                 | --                 | --                 |
| Testicular cancer                             | 0<br>(0 - 0)       | --               | --                | 0<br>(0 - 0)       | 0<br>(0 - 0)       | 0<br>(0 - 0)       |
| Kidney cancer                                 | 1<br>(1 - 1)       | 0<br>(0 - 0)     | 0<br>(0 - 0)      | 0<br>(0 - 0)       | 0<br>(0 - 0)       | 0<br>(0 - 0)       |
| Bladder cancer                                | 1<br>(1 - 2)       | --               | --                | 0<br>(0 - 0)       | 0<br>(0 - 0)       | 1<br>(1 - 1)       |
| Brain and nervous system cancer               | 2<br>(1 - 2)       | 0<br>(0 - 0)     | 0<br>(0 - 0)      | 1<br>(0 - 1)       | 1<br>(0 - 1)       | 0<br>(0 - 1)       |
| Thyroid cancer                                | 0<br>(0 - 0)       | --               | 0<br>(0 - 0)      | 0<br>(0 - 0)       | 0<br>(0 - 0)       | 0<br>(0 - 0)       |
| Mesothelioma                                  | 0<br>(0 - 0)       | --               | --                | 0<br>(0 - 0)       | 0<br>(0 - 0)       | 0<br>(0 - 0)       |
| Hodgkin lymphoma                              | 0<br>(0 - 1)       | 0<br>(0 - 0)     | 0<br>(0 - 0)      | 0<br>(0 - 0)       | 0<br>(0 - 0)       | 0<br>(0 - 0)       |
| Non-Hodgkin lymphoma                          | 5<br>(4 - 8)       | 0<br>(0 - 0)     | 0<br>(0 - 0)      | 1<br>(1 - 2)       | 2<br>(1 - 3)       | 2<br>(2 - 4)       |
| Multiple myeloma                              | 0<br>(0 - 0)       | --               | --                | 0<br>(0 - 0)       | 0<br>(0 - 0)       | 0<br>(0 - 0)       |
| Leukemia                                      | 3<br>(3 - 4)       | 0<br>(0 - 0)     | 0<br>(0 - 0)      | 2<br>(1 - 2)       | 1<br>(1 - 1)       | 0<br>(0 - 1)       |
| Other neoplasms                               | 7<br>(6 - 9)       | 1<br>(0 - 1)     | 1<br>(0 - 1)      | 3<br>(2 - 3)       | 1<br>(1 - 2)       | 2<br>(2 - 3)       |
| Cardiovascular diseases                       | 260<br>(231 - 293) | 2<br>(2 - 3)     | 1<br>(1 - 1)      | 25<br>(21 - 30)    | 61<br>(51 - 71)    | 171<br>(154 - 190) |
| Rheumatic heart disease                       | 3<br>(2 - 4)       | 0<br>(0 - 0)     | 0<br>(0 - 0)      | 1<br>(1 - 2)       | 1<br>(0 - 1)       | 1<br>(1 - 2)       |
| Ischemic heart disease                        | 158<br>(118 - 184) | 0<br>(0 - 0)     | 0<br>(0 - 0)      | 14<br>(10 - 17)    | 42<br>(33 - 50)    | 102<br>(75 - 118)  |
| Cerebrovascular disease                       | 75<br>(59 - 107)   | 1<br>(1 - 2)     | 0<br>(0 - 1)      | 7<br>(5 - 9)       | 14<br>(10 - 20)    | 52<br>(40 - 76)    |
| Ischemic stroke                               | 52<br>(40 - 75)    | 0<br>(0 - 0)     | 0<br>(0 - 0)      | 1<br>(1 - 2)       | 6<br>(4 - 9)       | 44<br>(34 - 63)    |
| Hemorrhagic stroke                            | 23<br>(16 - 36)    | 1<br>(1 - 2)     | 0<br>(0 - 0)      | 6<br>(4 - 7)       | 7<br>(5 - 12)      | 8<br>(5 - 17)      |
| Hypertensive heart disease                    | 8<br>(5 - 11)      | 0<br>(0 - 0)     | 0<br>(0 - 0)      | 1<br>(0 - 1)       | 2<br>(1 - 2)       | 6<br>(3 - 8)       |
| Cardiomyopathy and myocarditis                | 2<br>(1 - 3)       | 0<br>(0 - 0)     | 0<br>(0 - 0)      | 1<br>(0 - 1)       | 0<br>(0 - 0)       | 1<br>(1 - 1)       |
| Atrial fibrillation and flutter               | 0<br>(0 - 0)       | --               | --                | 0<br>(0 - 0)       | 0<br>(0 - 0)       | 0<br>(0 - 0)       |
| Aortic aneurysm                               | 1<br>(1 - 2)       | --               | --                | 0<br>(0 - 0)       | 0<br>(0 - 0)       | 1<br>(1 - 2)       |
| Peripheral vascular disease                   | 1<br>(1 - 2)       | --               | --                | 0<br>(0 - 0)       | 0<br>(0 - 0)       | 1<br>(1 - 2)       |
| Endocarditis                                  | 1<br>(1 - 1)       | 0<br>(0 - 0)     | 0<br>(0 - 0)      | 0<br>(0 - 0)       | 0<br>(0 - 0)       | 1<br>(0 - 1)       |
| Other cardiovascular and circulatory diseases | 10<br>(8 - 15)     | 0<br>(0 - 1)     | 0<br>(0 - 0)      | 2<br>(1 - 3)       | 2<br>(1 - 3)       | 5<br>(4 - 9)       |
| Chronic respiratory diseases                  | 54<br>(35 - 64)    | 0<br>(0 - 1)     | 0<br>(0 - 0)      | 4<br>(3 - 5)       | 11<br>(7 - 14)     | 38<br>(24 - 46)    |
| Chronic obstructive pulmonary disease         | 41<br>(24 - 50)    | 0<br>(0 - 0)     | 0<br>(0 - 0)      | 3<br>(2 - 3)       | 7<br>(4 - 9)       | 31<br>(18 - 38)    |

Web Table 31- Maldives deaths with 95% UI by age, sex, and cause in 2013

| Cause                                               | Males, All Ages | Males, 0-4 Years | Males, 5-14 Years | Males, 15-49 Years | Males, 50-69 Years | Males, 70-80 Years |
|-----------------------------------------------------|-----------------|------------------|-------------------|--------------------|--------------------|--------------------|
| Pneumoconiosis                                      | 2<br>(1 - 3)    | 0<br>(0 - 0)     | 0<br>(0 - 0)      | 0<br>(0 - 0)       | 1<br>(0 - 1)       | 1<br>(1 - 1)       |
| Silicosis                                           | 1<br>(1 - 1)    | 0<br>(0 - 0)     | 0<br>(0 - 0)      | 0<br>(0 - 0)       | 0<br>(0 - 0)       | 1<br>(0 - 1)       |
| Asbestosis                                          | 0<br>(0 - 0)    | 0<br>(0 - 0)     | 0<br>(0 - 0)      | 0<br>(0 - 0)       | 0<br>(0 - 0)       | 0<br>(0 - 0)       |
| Coal workers pneumoconiosis                         | 0<br>(0 - 1)    | 0<br>(0 - 0)     | 0<br>(0 - 0)      | 0<br>(0 - 0)       | 0<br>(0 - 0)       | 0<br>(0 - 0)       |
| Other pneumoconiosis                                | 0<br>(0 - 1)    | 0<br>(0 - 0)     | 0<br>(0 - 0)      | 0<br>(0 - 0)       | 0<br>(0 - 0)       | 0<br>(0 - 0)       |
| Asthma                                              | 2<br>(1 - 2)    | 0<br>(0 - 0)     | 0<br>(0 - 0)      | 0<br>(0 - 0)       | 0<br>(0 - 1)       | 1<br>(1 - 2)       |
| Interstitial lung disease and pulmonary sarcoidosis | 7<br>(4 - 10)   | 0<br>(0 - 0)     | 0<br>(0 - 0)      | 0<br>(0 - 0)       | 3<br>(2 - 4)       | 4<br>(2 - 6)       |
| Other chronic respiratory diseases                  | 2<br>(1 - 3)    | 0<br>(0 - 0)     | 0<br>(0 - 0)      | 1<br>(0 - 1)       | 0<br>(0 - 1)       | 1<br>(1 - 1)       |
| Cirrhosis                                           | 9<br>(8 - 11)   | 0<br>(0 - 0)     | 0<br>(0 - 0)      | 2<br>(1 - 2)       | 3<br>(2 - 3)       | 5<br>(4 - 7)       |
| Cirrhosis due to hepatitis B                        | 3<br>(2 - 5)    | 0<br>(0 - 0)     | 0<br>(0 - 0)      | 1<br>(0 - 1)       | 1<br>(1 - 2)       | 2<br>(1 - 3)       |
| Cirrhosis due to hepatitis C                        | 2<br>(1 - 4)    | 0<br>(0 - 0)     | 0<br>(0 - 0)      | 0<br>(0 - 1)       | 1<br>(0 - 1)       | 1<br>(0 - 3)       |
| Cirrhosis due to alcohol use                        | 3<br>(2 - 5)    | --               | --                | 0<br>(0 - 1)       | 1<br>(0 - 1)       | 2<br>(1 - 3)       |
| Cirrhosis due to other causes                       | 1<br>(0 - 1)    | 0<br>(0 - 0)     | 0<br>(0 - 0)      | 0<br>(0 - 0)       | 0<br>(0 - 0)       | 0<br>(0 - 0)       |
| Digestive diseases                                  | 6<br>(5 - 8)    | 0<br>(0 - 0)     | 0<br>(0 - 0)      | 1<br>(1 - 2)       | 1<br>(1 - 2)       | 3<br>(3 - 4)       |
| Peptic ulcer disease                                | 1<br>(1 - 2)    | 0<br>(0 - 0)     | 0<br>(0 - 0)      | 0<br>(0 - 0)       | 0<br>(0 - 0)       | 1<br>(0 - 1)       |
| Gastritis and duodenitis                            | 0<br>(0 - 1)    | 0<br>(0 - 0)     | 0<br>(0 - 0)      | 0<br>(0 - 0)       | 0<br>(0 - 0)       | 0<br>(0 - 0)       |
| Appendicitis                                        | 0<br>(0 - 0)    | 0<br>(0 - 0)     | 0<br>(0 - 0)      | 0<br>(0 - 0)       | 0<br>(0 - 0)       | 0<br>(0 - 0)       |
| Paralytic ileus and intestinal obstruction          | 0<br>(0 - 1)    | 0<br>(0 - 0)     | 0<br>(0 - 0)      | 0<br>(0 - 0)       | 0<br>(0 - 0)       | 0<br>(0 - 0)       |
| Inguinal, femoral, and abdominal hernia             | 0<br>(0 - 0)    | 0<br>(0 - 0)     | 0<br>(0 - 0)      | 0<br>(0 - 0)       | 0<br>(0 - 0)       | 0<br>(0 - 0)       |
| Inflammatory bowel disease                          | 1<br>(1 - 1)    | 0<br>(0 - 0)     | 0<br>(0 - 0)      | 0<br>(0 - 0)       | 0<br>(0 - 0)       | 1<br>(0 - 1)       |
| Vascular intestinal disorders                       | 0<br>(0 - 0)    | 0<br>(0 - 0)     | 0<br>(0 - 0)      | 0<br>(0 - 0)       | 0<br>(0 - 0)       | 0<br>(0 - 0)       |
| Gallbladder and biliary diseases                    | 1<br>(1 - 2)    | 0<br>(0 - 0)     | 0<br>(0 - 0)      | 0<br>(0 - 1)       | 0<br>(0 - 0)       | 0<br>(0 - 1)       |
| Pancreatitis                                        | 0<br>(0 - 1)    | 0<br>(0 - 0)     | 0<br>(0 - 0)      | 0<br>(0 - 0)       | 0<br>(0 - 0)       | 0<br>(0 - 0)       |
| Other digestive diseases                            | 2<br>(1 - 2)    | 0<br>(0 - 0)     | 0<br>(0 - 0)      | 0<br>(0 - 0)       | 0<br>(0 - 0)       | 1<br>(1 - 1)       |
| Neurological disorders                              | 31<br>(25 - 38) | 1<br>(0 - 1)     | 0<br>(0 - 0)      | 1<br>(1 - 2)       | 2<br>(2 - 3)       | 27<br>(21 - 33)    |
| Alzheimer disease and other dementias               | 28<br>(22 - 34) | --               | --                | 0<br>(0 - 0)       | 2<br>(2 - 3)       | 26<br>(20 - 32)    |
| Parkinson disease                                   | 0<br>(0 - 0)    | --               | --                | 0<br>(0 - 0)       | 0<br>(0 - 0)       | 0<br>(0 - 0)       |
| Epilepsy                                            | 2<br>(1 - 2)    | 0<br>(0 - 1)     | 0<br>(0 - 0)      | 1<br>(0 - 1)       | 0<br>(0 - 0)       | 0<br>(0 - 0)       |
| Multiple sclerosis                                  | 0<br>(0 - 0)    | --               | --                | 0<br>(0 - 0)       | 0<br>(0 - 0)       | 0<br>(0 - 0)       |
| Other neurological disorders                        | 2<br>(1 - 3)    | 0<br>(0 - 1)     | 0<br>(0 - 0)      | 1<br>(0 - 1)       | 0<br>(0 - 0)       | 0<br>(0 - 1)       |
| Mental and substance use disorders                  | 5<br>(2 - 7)    | 0<br>(0 - 0)     | 0<br>(0 - 0)      | 4<br>(1 - 5)       | 1<br>(0 - 1)       | 1<br>(0 - 1)       |
| Schizophrenia                                       | 0<br>(0 - 0)    | --               | --                | 0<br>(0 - 0)       | 0<br>(0 - 0)       | 0<br>(0 - 0)       |
| Alcohol use disorders                               | 1<br>(1 - 2)    | --               | --                | 0<br>(0 - 0)       | 0<br>(0 - 1)       | 0<br>(0 - 1)       |
| Drug use disorders                                  | 4<br>(1 - 6)    | 0<br>(0 - 0)     | --                | 3<br>(1 - 5)       | 0<br>(0 - 1)       | 0<br>(0 - 0)       |
| Opioid use disorders                                | 3<br>(1 - 4)    | 0<br>(0 - 0)     | --                | 2<br>(1 - 3)       | 0<br>(0 - 0)       | 0<br>(0 - 0)       |
| Cocaine use disorders                               | 0<br>(0 - 0)    | 0<br>(0 - 0)     | --                | 0<br>(0 - 0)       | 0<br>(0 - 0)       | 0<br>(0 - 0)       |
| Amphetamine use disorders                           | 0<br>(0 - 0)    | 0<br>(0 - 0)     | --                | 0<br>(0 - 0)       | 0<br>(0 - 0)       | 0<br>(0 - 0)       |
| Other drug use disorders                            | 1<br>(0 - 2)    | 0<br>(0 - 0)     | --                | 1<br>(0 - 2)       | 0<br>(0 - 0)       | 0<br>(0 - 0)       |
| Eating disorders                                    | 0<br>(0 - 0)    | --               | 0<br>(0 - 0)      | 0<br>(0 - 0)       | --                 | --                 |
| Anorexia nervosa                                    | 0<br>(0 - 0)    | --               | 0<br>(0 - 0)      | 0<br>(0 - 0)       | --                 | --                 |

Web Table 31- Maldives deaths with 95% UI by age, sex, and cause in 2013

| Cause                                               | Males, All Ages | Males, 0-4 Years | Males, 5-14 Years | Males, 15-49 Years | Males, 50-69 Years | Males, 70-80 Years |
|-----------------------------------------------------|-----------------|------------------|-------------------|--------------------|--------------------|--------------------|
| Diabetes, urogenital, blood, and endocrine diseases | 47<br>(40 - 55) | 3<br>(2 - 5)     | 1<br>(1 - 1)      | 8<br>(6 - 10)      | 11<br>(8 - 13)     | 25<br>(21 - 29)    |
| Diabetes mellitus                                   | 14<br>(12 - 17) | 0<br>(0 - 0)     | 0<br>(0 - 0)      | 2<br>(1 - 2)       | 4<br>(3 - 4)       | 9<br>(7 - 11)      |
| Acute glomerulonephritis                            | 0<br>(0 - 0)    | 0<br>(0 - 0)     | 0<br>(0 - 0)      | 0<br>(0 - 0)       | 0<br>(0 - 0)       | 0<br>(0 - 0)       |
| Chronic kidney disease                              | 21<br>(12 - 25) | 0<br>(0 - 0)     | 0<br>(0 - 0)      | 4<br>(2 - 5)       | 5<br>(3 - 7)       | 11<br>(7 - 14)     |
| Chronic kidney disease due to diabetes mellitus     | 1<br>(1 - 2)    | 0<br>(0 - 0)     | 0<br>(0 - 0)      | 0<br>(0 - 0)       | 0<br>(0 - 1)       | 1<br>(0 - 1)       |
| Chronic kidney disease due to hypertension          | 7<br>(3 - 9)    | 0<br>(0 - 0)     | 0<br>(0 - 0)      | 1<br>(0 - 1)       | 2<br>(1 - 3)       | 4<br>(2 - 6)       |
| Chronic kidney disease due to glomerulonephritis    | 1<br>(1 - 2)    | 0<br>(0 - 0)     | 0<br>(0 - 0)      | 0<br>(0 - 0)       | 0<br>(0 - 0)       | 1<br>(0 - 1)       |
| Chronic kidney disease due to other causes          | 12<br>(6 - 16)  | 0<br>(0 - 0)     | 0<br>(0 - 0)      | 2<br>(1 - 3)       | 3<br>(2 - 4)       | 6<br>(3 - 9)       |
| Urinary diseases and male infertility               | 3<br>(2 - 5)    | 0<br>(0 - 0)     | 0<br>(0 - 0)      | 0<br>(0 - 1)       | 1<br>(0 - 1)       | 2<br>(1 - 3)       |
| Interstitial nephritis and urinary tract infections | 1<br>(1 - 1)    | 0<br>(0 - 0)     | 0<br>(0 - 0)      | 0<br>(0 - 0)       | 0<br>(0 - 0)       | 1<br>(0 - 1)       |
| Urolithiasis                                        | 0<br>(0 - 0)    | --               | 0<br>(0 - 0)      | 0<br>(0 - 0)       | 0<br>(0 - 0)       | 0<br>(0 - 0)       |
| Other urinary diseases                              | 2<br>(1 - 4)    | 0<br>(0 - 0)     | 0<br>(0 - 0)      | 0<br>(0 - 1)       | 0<br>(0 - 1)       | 1<br>(1 - 2)       |
| Gynecological diseases                              | --              | --               | --                | --                 | --                 | --                 |
| Uterine fibroids                                    | --              | --               | --                | --                 | --                 | --                 |
| Polycystic ovarian syndrome                         | --              | --               | --                | --                 | --                 | --                 |
| Endometriosis                                       | --              | --               | --                | --                 | --                 | --                 |
| Genital prolapse                                    | --              | --               | --                | --                 | --                 | --                 |
| Other gynecological diseases                        | --              | --               | --                | --                 | --                 | --                 |
| Hemoglobinopathies and hemolytic anemias            | 5<br>(3 - 8)    | 2<br>(1 - 3)     | 0<br>(0 - 1)      | 2<br>(1 - 3)       | 0<br>(0 - 0)       | 1<br>(0 - 1)       |
| Thalassemias                                        | 4<br>(2 - 6)    | 2<br>(1 - 3)     | 0<br>(0 - 1)      | 2<br>(1 - 2)       | 0<br>(0 - 0)       | 0<br>(0 - 0)       |
| Sickle cell disorders                               | 0<br>(0 - 0)    | 0<br>(0 - 0)     | 0<br>(0 - 0)      | 0<br>(0 - 0)       | 0<br>(0 - 0)       | 0<br>(0 - 0)       |
| G6PD deficiency                                     | 0<br>(0 - 0)    | 0<br>(0 - 0)     | 0<br>(0 - 0)      | 0<br>(0 - 0)       | 0<br>(0 - 0)       | 0<br>(0 - 0)       |
| Other hemoglobinopathies and hemolytic anemias      | 1<br>(1 - 2)    | 0<br>(0 - 0)     | 0<br>(0 - 0)      | 0<br>(0 - 0)       | 0<br>(0 - 0)       | 1<br>(0 - 1)       |
| Endocrine, metabolic, blood, and immune disorders   | 4<br>(3 - 6)    | 1<br>(0 - 1)     | 0<br>(0 - 0)      | 1<br>(0 - 1)       | 1<br>(1 - 1)       | 2<br>(1 - 3)       |
| Musculoskeletal disorders                           | 3<br>(2 - 4)    | --               | 0<br>(0 - 0)      | 1<br>(1 - 2)       | 1<br>(1 - 1)       | 1<br>(1 - 1)       |
| Rheumatoid arthritis                                | 1<br>(0 - 1)    | --               | 0<br>(0 - 0)      | 0<br>(0 - 0)       | 0<br>(0 - 0)       | 0<br>(0 - 0)       |
| Other musculoskeletal disorders                     | 2<br>(2 - 4)    | --               | 0<br>(0 - 0)      | 1<br>(1 - 1)       | 1<br>(0 - 1)       | 1<br>(0 - 1)       |
| Other non-communicable diseases                     | 23<br>(19 - 28) | 11<br>(7 - 15)   | 1<br>(1 - 2)      | 4<br>(3 - 5)       | 3<br>(2 - 3)       | 4<br>(3 - 5)       |
| Congenital anomalies                                | 17<br>(13 - 21) | 9<br>(6 - 13)    | 1<br>(1 - 2)      | 3<br>(2 - 4)       | 2<br>(1 - 2)       | 2<br>(1 - 2)       |
| Neural tube defects                                 | 0<br>(0 - 1)    | 0<br>(0 - 0)     | 0<br>(0 - 0)      | 0<br>(0 - 0)       | 0<br>(0 - 0)       | 0<br>(0 - 0)       |
| Congenital heart anomalies                          | 6<br>(5 - 9)    | 4<br>(3 - 6)     | 0<br>(0 - 1)      | 1<br>(1 - 1)       | 0<br>(0 - 1)       | 0<br>(0 - 1)       |
| Cleft lip and cleft palate                          | 0<br>(0 - 0)    | 0<br>(0 - 0)     | --                | --                 | --                 | --                 |
| Down syndrome                                       | 0<br>(0 - 0)    | 0<br>(0 - 0)     | 0<br>(0 - 0)      | 0<br>(0 - 0)       | 0<br>(0 - 0)       | 0<br>(0 - 0)       |
| Chromosomal unbalanced rearrangements               | 1<br>(0 - 1)    | 0<br>(0 - 1)     | 0<br>(0 - 0)      | 0<br>(0 - 0)       | 0<br>(0 - 0)       | 0<br>(0 - 0)       |
| Other congenital anomalies                          | 9<br>(7 - 12)   | 4<br>(3 - 6)     | 0<br>(0 - 1)      | 2<br>(2 - 3)       | 1<br>(1 - 2)       | 1<br>(1 - 2)       |
| Skin and subcutaneous diseases                      | 5<br>(4 - 6)    | 0<br>(0 - 0)     | 0<br>(0 - 0)      | 1<br>(1 - 1)       | 1<br>(1 - 1)       | 2<br>(2 - 3)       |
| Cellulitis                                          | 0<br>(0 - 1)    | 0<br>(0 - 0)     | 0<br>(0 - 0)      | 0<br>(0 - 0)       | 0<br>(0 - 0)       | 0<br>(0 - 0)       |
| Pyoderma                                            | 2<br>(2 - 3)    | 0<br>(0 - 0)     | 0<br>(0 - 0)      | 1<br>(0 - 1)       | 1<br>(0 - 1)       | 1<br>(1 - 2)       |
| Decubitus ulcer                                     | 2<br>(1 - 2)    | 0<br>(0 - 0)     | 0<br>(0 - 0)      | 0<br>(0 - 0)       | 0<br>(0 - 0)       | 1<br>(1 - 1)       |
| Other skin and subcutaneous diseases                | 0<br>(0 - 0)    | 0<br>(0 - 0)     | 0<br>(0 - 0)      | 0<br>(0 - 0)       | 0<br>(0 - 0)       | 0<br>(0 - 0)       |

Web Table 31- Maldives deaths with 95% UI by age, sex, and cause in 2013

| Cause                                           | Males, All Ages  | Males, 0-4 Years | Males, 5-14 Years | Males, 15-49 Years | Males, 50-69 Years | Males, 70-80 Years |
|-------------------------------------------------|------------------|------------------|-------------------|--------------------|--------------------|--------------------|
| Sudden infant death syndrome                    | 2<br>(0 - 6)     | 2<br>(0 - 6)     | --                | --                 | --                 | --                 |
| Injuries                                        | 88<br>(75 - 106) | 8<br>(5 - 12)    | 4<br>(3 - 5)      | 33<br>(27 - 40)    | 15<br>(12 - 19)    | 29<br>(24 - 36)    |
| Transport injuries                              | 17<br>(14 - 21)  | 2<br>(1 - 3)     | 1<br>(0 - 1)      | 8<br>(6 - 10)      | 3<br>(2 - 4)       | 4<br>(3 - 6)       |
| Road injuries                                   | 15<br>(12 - 18)  | 1<br>(1 - 2)     | 1<br>(0 - 1)      | 7<br>(5 - 9)       | 2<br>(2 - 3)       | 4<br>(3 - 5)       |
| Pedestrian road injuries                        | 2<br>(2 - 3)     | 1<br>(0 - 1)     | 0<br>(0 - 0)      | 1<br>(0 - 1)       | 0<br>(0 - 0)       | 1<br>(0 - 1)       |
| Cyclist road injuries                           | 2<br>(1 - 2)     | 0<br>(0 - 0)     | 0<br>(0 - 0)      | 1<br>(0 - 1)       | 0<br>(0 - 1)       | 1<br>(0 - 1)       |
| Motorcyclist road injuries                      | 4<br>(3 - 5)     | 0<br>(0 - 0)     | 0<br>(0 - 0)      | 2<br>(2 - 3)       | 1<br>(0 - 1)       | 1<br>(0 - 1)       |
| Motor vehicle road injuries                     | 7<br>(5 - 8)     | 0<br>(0 - 1)     | 0<br>(0 - 0)      | 3<br>(2 - 4)       | 1<br>(1 - 1)       | 2<br>(1 - 2)       |
| Other road injuries                             | 0<br>(0 - 1)     | 0<br>(0 - 0)     | 0<br>(0 - 0)      | 0<br>(0 - 0)       | 0<br>(0 - 0)       | 0<br>(0 - 0)       |
| Other transport injuries                        | 2<br>(2 - 3)     | 0<br>(0 - 1)     | 0<br>(0 - 0)      | 1<br>(1 - 1)       | 0<br>(0 - 1)       | 1<br>(0 - 1)       |
| Unintentional injuries                          | 53<br>(44 - 65)  | 6<br>(4 - 10)    | 3<br>(2 - 4)      | 17<br>(14 - 21)    | 9<br>(7 - 12)      | 18<br>(15 - 22)    |
| Falls                                           | 8<br>(6 - 11)    | 1<br>(0 - 1)     | 0<br>(0 - 0)      | 2<br>(1 - 2)       | 2<br>(1 - 3)       | 4<br>(2 - 6)       |
| Drowning                                        | 21<br>(16 - 29)  | 4<br>(2 - 6)     | 2<br>(1 - 3)      | 9<br>(6 - 12)      | 3<br>(2 - 5)       | 4<br>(3 - 6)       |
| Fire, heat, and hot substances                  | 3<br>(2 - 4)     | 0<br>(0 - 0)     | 0<br>(0 - 0)      | 1<br>(1 - 1)       | 0<br>(0 - 1)       | 1<br>(1 - 2)       |
| Poisonings                                      | 1<br>(1 - 2)     | 0<br>(0 - 0)     | 0<br>(0 - 0)      | 0<br>(0 - 0)       | 0<br>(0 - 0)       | 0<br>(0 - 1)       |
| Exposure to mechanical forces                   | 6<br>(5 - 8)     | 0<br>(0 - 1)     | 0<br>(0 - 0)      | 2<br>(2 - 3)       | 1<br>(1 - 2)       | 2<br>(2 - 3)       |
| Unintentional firearm injuries                  | 2<br>(2 - 3)     | 0<br>(0 - 0)     | 0<br>(0 - 0)      | 1<br>(0 - 1)       | 0<br>(0 - 1)       | 1<br>(1 - 2)       |
| Unintentional suffocation                       | 1<br>(0 - 2)     | 0<br>(0 - 0)     | 0<br>(0 - 0)      | 0<br>(0 - 1)       | 0<br>(0 - 0)       | 0<br>(0 - 0)       |
| Other exposure to mechanical forces             | 3<br>(3 - 4)     | 0<br>(0 - 1)     | 0<br>(0 - 0)      | 1<br>(1 - 2)       | 1<br>(1 - 1)       | 1<br>(1 - 1)       |
| Adverse effects of medical treatment            | 7<br>(5 - 11)    | 1<br>(0 - 2)     | 0<br>(0 - 0)      | 2<br>(1 - 3)       | 1<br>(1 - 2)       | 3<br>(2 - 5)       |
| Animal contact                                  | 1<br>(1 - 2)     | 0<br>(0 - 0)     | 0<br>(0 - 0)      | 0<br>(0 - 1)       | 0<br>(0 - 0)       | 1<br>(0 - 1)       |
| Venomous animal contact                         | 0<br>(0 - 1)     | 0<br>(0 - 0)     | 0<br>(0 - 0)      | 0<br>(0 - 0)       | 0<br>(0 - 0)       | 0<br>(0 - 0)       |
| Non-venomous animal contact                     | 1<br>(1 - 1)     | 0<br>(0 - 0)     | 0<br>(0 - 0)      | 0<br>(0 - 0)       | 0<br>(0 - 0)       | 0<br>(0 - 1)       |
| Foreign body                                    | 3<br>(2 - 5)     | 0<br>(0 - 1)     | 0<br>(0 - 0)      | 1<br>(0 - 1)       | 0<br>(0 - 1)       | 2<br>(1 - 3)       |
| Pulmonary aspiration and foreign body in airway | 3<br>(1 - 5)     | 0<br>(0 - 1)     | 0<br>(0 - 0)      | 1<br>(0 - 1)       | 0<br>(0 - 1)       | 2<br>(1 - 3)       |
| Foreign body in other body part                 | 0<br>(0 - 0)     | 0<br>(0 - 0)     | 0<br>(0 - 0)      | 0<br>(0 - 0)       | 0<br>(0 - 0)       | 0<br>(0 - 0)       |
| Other unintentional injuries                    | 2<br>(1 - 3)     | 0<br>(0 - 0)     | 0<br>(0 - 0)      | 0<br>(0 - 1)       | 0<br>(0 - 1)       | 1<br>(1 - 2)       |
| Self-harm and interpersonal violence            | 18<br>(14 - 26)  | 0<br>(0 - 1)     | 0<br>(0 - 0)      | 8<br>(6 - 11)      | 3<br>(2 - 4)       | 7<br>(5 - 11)      |
| Self-harm                                       | 13<br>(10 - 22)  | --               | 0<br>(0 - 0)      | 5<br>(4 - 7)       | 2<br>(2 - 4)       | 6<br>(4 - 11)      |
| Interpersonal violence                          | 5<br>(2 - 7)     | 0<br>(0 - 1)     | 0<br>(0 - 0)      | 3<br>(2 - 5)       | 1<br>(1 - 1)       | 1<br>(0 - 1)       |
| Assault by firearm                              | 2<br>(1 - 3)     | 0<br>(0 - 0)     | 0<br>(0 - 0)      | 1<br>(0 - 2)       | 0<br>(0 - 1)       | 0<br>(0 - 0)       |
| Assault by sharp object                         | 2<br>(1 - 4)     | 0<br>(0 - 0)     | 0<br>(0 - 0)      | 2<br>(1 - 3)       | 0<br>(0 - 1)       | 0<br>(0 - 0)       |
| Assault by other means                          | 1<br>(0 - 2)     | 0<br>(0 - 0)     | 0<br>(0 - 0)      | 1<br>(0 - 1)       | 0<br>(0 - 0)       | 0<br>(0 - 1)       |

Web Table 31- Maldives deaths with 95% UI by age, sex, and cause in 2013

| Cause                                                             | Females, All Ages  | Females, 0-4 Years | Females, 5-14 Years | Females, 15-49 Years | Females, 50-69 Years | Females, 70-80 Years |
|-------------------------------------------------------------------|--------------------|--------------------|---------------------|----------------------|----------------------|----------------------|
| All causes                                                        | 423<br>(380 - 477) | 53<br>(44 - 65)    | 7<br>(7 - 9)        | 53<br>(44 - 65)      | 80<br>(68 - 97)      | 228<br>(208 - 253)   |
| Communicable, maternal, neonatal, and nutritional diseases        | 65<br>(54 - 79)    | 35<br>(25 - 45)    | 2<br>(1 - 4)        | 8<br>(7 - 10)        | 4<br>(4 - 6)         | 16<br>(13 - 19)      |
| HIV/AIDS and tuberculosis                                         | 2<br>(1 - 2)       | 0<br>(0 - 0)       | 0<br>(0 - 0)        | 0<br>(0 - 1)         | 0<br>(0 - 1)         | 1<br>(1 - 1)         |
| Tuberculosis                                                      | 2<br>(1 - 2)       | 0<br>(0 - 0)       | 0<br>(0 - 0)        | 0<br>(0 - 1)         | 0<br>(0 - 1)         | 1<br>(1 - 1)         |
| HIV/AIDS                                                          | 0<br>(0 - 0)       | 0<br>(0 - 0)       | 0<br>(0 - 0)        | 0<br>(0 - 0)         | 0<br>(0 - 0)         | 0<br>(0 - 0)         |
| HIV/AIDS resulting in mycobacterial infection                     | 0<br>(0 - 0)       | 0<br>(0 - 0)       | 0<br>(0 - 0)        | 0<br>(0 - 0)         | 0<br>(0 - 0)         | 0<br>(0 - 0)         |
| HIV/AIDS resulting in other diseases                              | 0<br>(0 - 0)       | 0<br>(0 - 0)       | 0<br>(0 - 0)        | 0<br>(0 - 0)         | 0<br>(0 - 0)         | 0<br>(0 - 0)         |
| Diarrhea, lower respiratory, and other common infectious diseases | 23<br>(17 - 35)    | 5<br>(2 - 13)      | 2<br>(1 - 3)        | 3<br>(2 - 4)         | 3<br>(2 - 4)         | 11<br>(8 - 14)       |
| Diarrheal diseases                                                | 2<br>(1 - 2)       | 0<br>(0 - 0)       | 0<br>(0 - 0)        | 0<br>(0 - 0)         | 0<br>(0 - 0)         | 1<br>(1 - 2)         |
| Intestinal infectious diseases                                    | 3<br>(1 - 5)       | 1<br>(0 - 2)       | 1<br>(0 - 2)        | 1<br>(0 - 2)         | 0<br>(0 - 0)         | 0<br>(0 - 0)         |
| Typhoid fever                                                     | 2<br>(1 - 4)       | 1<br>(0 - 1)       | 1<br>(0 - 1)        | 1<br>(0 - 2)         | 0<br>(0 - 0)         | 0<br>(0 - 0)         |
| Paratyphoid fever                                                 | 1<br>(0 - 1)       | 0<br>(0 - 1)       | 0<br>(0 - 0)        | 0<br>(0 - 0)         | 0<br>(0 - 0)         | 0<br>(0 - 0)         |
| Other intestinal infectious diseases                              | 0<br>(0 - 0)       | 0<br>(0 - 0)       | 0<br>(0 - 0)        | 0<br>(0 - 0)         | 0<br>(0 - 0)         | 0<br>(0 - 0)         |
| Lower respiratory infections                                      | 13<br>(10 - 17)    | 1<br>(1 - 1)       | 0<br>(0 - 0)        | 1<br>(1 - 2)         | 2<br>(2 - 3)         | 9<br>(6 - 12)        |
| Upper respiratory infections                                      | 0<br>(0 - 0)       | 0<br>(0 - 0)       | 0<br>(0 - 0)        | 0<br>(0 - 0)         | 0<br>(0 - 0)         | 0<br>(0 - 0)         |
| Otitis media                                                      | 0<br>(0 - 0)       | 0<br>(0 - 0)       | 0<br>(0 - 0)        | 0<br>(0 - 0)         | 0<br>(0 - 0)         | 0<br>(0 - 0)         |
| Meningitis                                                        | 1<br>(1 - 1)       | 0<br>(0 - 0)       | 0<br>(0 - 0)        | 0<br>(0 - 0)         | 0<br>(0 - 0)         | 0<br>(0 - 1)         |
| Pneumococcal meningitis                                           | 0<br>(0 - 0)       | 0<br>(0 - 0)       | 0<br>(0 - 0)        | 0<br>(0 - 0)         | 0<br>(0 - 0)         | 0<br>(0 - 0)         |
| H influenzae type B meningitis                                    | 0<br>(0 - 0)       | 0<br>(0 - 0)       | 0<br>(0 - 0)        | 0<br>(0 - 0)         | 0<br>(0 - 0)         | 0<br>(0 - 0)         |
| Meningococcal meningitis                                          | 0<br>(0 - 0)       | 0<br>(0 - 0)       | 0<br>(0 - 0)        | 0<br>(0 - 0)         | 0<br>(0 - 0)         | 0<br>(0 - 0)         |
| Other meningitis                                                  | 0<br>(0 - 0)       | 0<br>(0 - 0)       | 0<br>(0 - 0)        | 0<br>(0 - 0)         | 0<br>(0 - 0)         | 0<br>(0 - 0)         |
| Encephalitis                                                      | 1<br>(1 - 2)       | 0<br>(0 - 0)       | 0<br>(0 - 0)        | 0<br>(0 - 1)         | 0<br>(0 - 0)         | 0<br>(0 - 0)         |
| Diphtheria                                                        | 0<br>(0 - 0)       | 0<br>(0 - 0)       | 0<br>(0 - 0)        | 0<br>(0 - 0)         | 0<br>(0 - 0)         | --                   |
| Whooping cough                                                    | 0<br>(0 - 1)       | 0<br>(0 - 1)       | 0<br>(0 - 0)        | 0<br>(0 - 0)         | 0<br>(0 - 0)         | --                   |
| Tetanus                                                           | 0<br>(0 - 0)       | 0<br>(0 - 0)       | 0<br>(0 - 0)        | 0<br>(0 - 0)         | 0<br>(0 - 0)         | 0<br>(0 - 0)         |
| Measles                                                           | 3<br>(0 - 14)      | 3<br>(0 - 12)      | 0<br>(0 - 2)        | 0<br>(0 - 1)         | 0<br>(0 - 0)         | --                   |
| Varicella and herpes zoster                                       | 0<br>(0 - 0)       | 0<br>(0 - 0)       | 0<br>(0 - 0)        | 0<br>(0 - 0)         | 0<br>(0 - 0)         | 0<br>(0 - 0)         |
| Neglected tropical diseases and malaria                           | 2<br>(1 - 2)       | 1<br>(0 - 1)       | 1<br>(0 - 1)        | 0<br>(0 - 0)         | 0<br>(0 - 0)         | 0<br>(0 - 1)         |
| Leishmaniasis                                                     | 0<br>(0 - 0)       | 0<br>(0 - 0)       | 0<br>(0 - 0)        | 0<br>(0 - 0)         | 0<br>(0 - 0)         | 0<br>(0 - 0)         |
| Visceral leishmaniasis                                            | 0<br>(0 - 0)       | 0<br>(0 - 0)       | 0<br>(0 - 0)        | 0<br>(0 - 0)         | 0<br>(0 - 0)         | 0<br>(0 - 0)         |
| Cysticercosis                                                     | 0<br>(0 - 0)       | 0<br>(0 - 0)       | 0<br>(0 - 0)        | 0<br>(0 - 0)         | 0<br>(0 - 0)         | 0<br>(0 - 0)         |
| Cystic echinococcosis                                             | 0<br>(0 - 0)       | 0<br>(0 - 0)       | 0<br>(0 - 0)        | 0<br>(0 - 0)         | 0<br>(0 - 0)         | 0<br>(0 - 0)         |
| Dengue                                                            | 1<br>(1 - 2)       | 1<br>(0 - 1)       | 1<br>(0 - 1)        | 0<br>(0 - 0)         | 0<br>(0 - 0)         | 0<br>(0 - 0)         |
| Rabies                                                            | 0<br>(0 - 0)       | 0<br>(0 - 0)       | 0<br>(0 - 0)        | 0<br>(0 - 0)         | 0<br>(0 - 0)         | 0<br>(0 - 0)         |
| Intestinal nematode infections                                    | 0<br>(0 - 0)       | 0<br>(0 - 0)       | --                  | --                   | --                   | --                   |
| Ascariasis                                                        | 0<br>(0 - 0)       | 0<br>(0 - 0)       | --                  | --                   | --                   | --                   |
| Other neglected tropical diseases                                 | 0<br>(0 - 1)       | 0<br>(0 - 0)       | 0<br>(0 - 0)        | 0<br>(0 - 0)         | 0<br>(0 - 0)         | 0<br>(0 - 0)         |
| Maternal disorders                                                | 4<br>(3 - 5)       | --                 | 0<br>(0 - 0)        | 4<br>(3 - 5)         | --                   | --                   |
| Maternal hemorrhage                                               | 1<br>(0 - 1)       | --                 | 0<br>(0 - 0)        | 1<br>(0 - 1)         | --                   | --                   |
| Maternal sepsis and other maternal infections                     | 0<br>(0 - 1)       | --                 | 0<br>(0 - 0)        | 0<br>(0 - 1)         | --                   | --                   |



Web Table 31- Maldives deaths with 95% UI by age, sex, and cause in 2013

| Cause                                                            | Females, All Ages  | Females, 0-4 Years | Females, 5-14 Years | Females, 15-49 Years | Females, 50-69 Years | Females, 70-80 Years |
|------------------------------------------------------------------|--------------------|--------------------|---------------------|----------------------|----------------------|----------------------|
| Maternal hypertensive disorders                                  | 0<br>(0 - 1)       | --                 | 0<br>(0 - 0)        | 0<br>(0 - 1)         | --                   | --                   |
| Maternal obstructed labor                                        | 0<br>(0 - 0)       | --                 | 0<br>(0 - 0)        | 0<br>(0 - 0)         | --                   | --                   |
| Maternal abortive outcome                                        | 1<br>(0 - 1)       | --                 | 0<br>(0 - 0)        | 1<br>(0 - 1)         | --                   | --                   |
| Indirect maternal deaths                                         | 0<br>(0 - 1)       | --                 | 0<br>(0 - 0)        | 0<br>(0 - 1)         | --                   | --                   |
| Late maternal deaths                                             | 0<br>(0 - 1)       | --                 | 0<br>(0 - 0)        | 0<br>(0 - 1)         | --                   | --                   |
| Maternal deaths aggravated by HIV/AIDS                           | 0<br>(0 - 0)       | --                 | --                  | 0<br>(0 - 0)         | --                   | --                   |
| Other maternal disorders                                         | 1<br>(0 - 1)       | --                 | 0<br>(0 - 0)        | 1<br>(0 - 1)         | --                   | --                   |
| Neonatal disorders                                               | 28<br>(21 - 37)    | 28<br>(21 - 37)    | --                  | --                   | --                   | --                   |
| Neonatal preterm birth complications                             | 10<br>(5 - 16)     | 10<br>(5 - 16)     | --                  | --                   | --                   | --                   |
| Neonatal encephalopathy due to birth asphyxia and trauma         | 11<br>(7 - 17)     | 11<br>(7 - 17)     | --                  | --                   | --                   | --                   |
| Neonatal sepsis and other neonatal infections                    | 0<br>(0 - 0)       | 0<br>(0 - 0)       | --                  | --                   | --                   | --                   |
| Hemolytic disease and other neonatal jaundice                    | 0<br>(0 - 0)       | 0<br>(0 - 0)       | --                  | --                   | --                   | --                   |
| Other neonatal disorders                                         | 7<br>(4 - 10)      | 7<br>(4 - 10)      | --                  | --                   | --                   | --                   |
| Nutritional deficiencies                                         | 4<br>(3 - 5)       | 1<br>(0 - 1)       | 0<br>(0 - 0)        | 0<br>(0 - 1)         | 0<br>(0 - 1)         | 2<br>(2 - 3)         |
| Protein-energy malnutrition                                      | 0<br>(0 - 1)       | 0<br>(0 - 0)       | 0<br>(0 - 0)        | 0<br>(0 - 0)         | 0<br>(0 - 0)         | 0<br>(0 - 1)         |
| Iodine deficiency                                                | 0<br>(0 - 0)       | 0<br>(0 - 0)       | 0<br>(0 - 0)        | 0<br>(0 - 0)         | 0<br>(0 - 0)         | 0<br>(0 - 0)         |
| Iron-deficiency anemia                                           | 3<br>(1 - 3)       | 1<br>(0 - 1)       | 0<br>(0 - 0)        | 0<br>(0 - 0)         | 0<br>(0 - 0)         | 1<br>(1 - 2)         |
| Other nutritional deficiencies                                   | 1<br>(0 - 1)       | 0<br>(0 - 0)       | 0<br>(0 - 0)        | 0<br>(0 - 0)         | 0<br>(0 - 0)         | 0<br>(0 - 1)         |
| Other communicable, maternal, neonatal, and nutritional diseases | 3<br>(2 - 4)       | 0<br>(0 - 0)       | 0<br>(0 - 0)        | 0<br>(0 - 1)         | 1<br>(0 - 1)         | 1<br>(1 - 2)         |
| Sexually transmitted diseases excluding HIV                      | 0<br>(0 - 1)       | 0<br>(0 - 0)       | 0<br>(0 - 0)        | 0<br>(0 - 0)         | 0<br>(0 - 0)         | 0<br>(0 - 0)         |
| Syphilis                                                         | 0<br>(0 - 1)       | 0<br>(0 - 0)       | 0<br>(0 - 0)        | 0<br>(0 - 0)         | 0<br>(0 - 0)         | 0<br>(0 - 0)         |
| Chlamydial infection                                             | 0<br>(0 - 0)       | --                 | 0<br>(0 - 0)        | 0<br>(0 - 0)         | 0<br>(0 - 0)         | 0<br>(0 - 0)         |
| Gonococcal infection                                             | 0<br>(0 - 0)       | --                 | 0<br>(0 - 0)        | 0<br>(0 - 0)         | 0<br>(0 - 0)         | 0<br>(0 - 0)         |
| Other sexually transmitted diseases                              | 0<br>(0 - 0)       | --                 | 0<br>(0 - 0)        | 0<br>(0 - 0)         | 0<br>(0 - 0)         | 0<br>(0 - 0)         |
| Hepatitis                                                        | 1<br>(0 - 1)       | 0<br>(0 - 0)       | 0<br>(0 - 0)        | 0<br>(0 - 0)         | 0<br>(0 - 0)         | 0<br>(0 - 0)         |
| Acute hepatitis A                                                | 0<br>(0 - 0)       | 0<br>(0 - 0)       | 0<br>(0 - 0)        | 0<br>(0 - 0)         | 0<br>(0 - 0)         | 0<br>(0 - 0)         |
| Acute hepatitis B                                                | 0<br>(0 - 1)       | 0<br>(0 - 0)       | 0<br>(0 - 0)        | 0<br>(0 - 0)         | 0<br>(0 - 0)         | 0<br>(0 - 0)         |
| Acute hepatitis C                                                | 0<br>(0 - 0)       | --                 | 0<br>(0 - 0)        | 0<br>(0 - 0)         | 0<br>(0 - 0)         | 0<br>(0 - 0)         |
| Acute hepatitis E                                                | 0<br>(0 - 0)       | 0<br>(0 - 0)       | 0<br>(0 - 0)        | 0<br>(0 - 0)         | 0<br>(0 - 0)         | 0<br>(0 - 0)         |
| Other infectious diseases                                        | 2<br>(1 - 3)       | 0<br>(0 - 0)       | 0<br>(0 - 0)        | 0<br>(0 - 1)         | 0<br>(0 - 1)         | 1<br>(1 - 2)         |
| Non-communicable diseases                                        | 314<br>(277 - 358) | 13<br>(8 - 18)     | 3<br>(2 - 4)        | 35<br>(28 - 43)      | 68<br>(57 - 83)      | 195<br>(175 - 215)   |
| Neoplasms                                                        | 32<br>(26 - 41)    | 1<br>(0 - 1)       | 0<br>(0 - 0)        | 9<br>(7 - 12)        | 10<br>(8 - 13)       | 11<br>(10 - 15)      |
| Esophageal cancer                                                | 0<br>(0 - 0)       | --                 | --                  | 0<br>(0 - 0)         | 0<br>(0 - 0)         | 0<br>(0 - 0)         |
| Stomach cancer                                                   | 1<br>(1 - 1)       | --                 | --                  | 0<br>(0 - 0)         | 0<br>(0 - 0)         | 1<br>(1 - 1)         |
| Liver cancer                                                     | 1<br>(1 - 1)       | --                 | 0<br>(0 - 0)        | 0<br>(0 - 0)         | 0<br>(0 - 0)         | 0<br>(0 - 0)         |
| Liver cancer due to hepatitis B                                  | 0<br>(0 - 0)       | --                 | 0<br>(0 - 0)        | 0<br>(0 - 0)         | 0<br>(0 - 0)         | 0<br>(0 - 0)         |
| Liver cancer due to hepatitis C                                  | 0<br>(0 - 0)       | --                 | 0<br>(0 - 0)        | 0<br>(0 - 0)         | 0<br>(0 - 0)         | 0<br>(0 - 0)         |
| Liver cancer due to alcohol use                                  | 0<br>(0 - 0)       | --                 | --                  | 0<br>(0 - 0)         | 0<br>(0 - 0)         | 0<br>(0 - 0)         |
| Liver cancer due to other causes                                 | 0<br>(0 - 0)       | --                 | 0<br>(0 - 0)        | 0<br>(0 - 0)         | 0<br>(0 - 0)         | 0<br>(0 - 0)         |
| Larynx cancer                                                    | 0<br>(0 - 0)       | --                 | --                  | 0<br>(0 - 0)         | 0<br>(0 - 0)         | 0<br>(0 - 0)         |

Web Table 31- Maldives deaths with 95% UI by age, sex, and cause in 2013

| Cause                                         | Females, All Ages  | Females, 0-4 Years | Females, 5-14 Years | Females, 15-49 Years | Females, 50-69 Years | Females, 70-80 Years |
|-----------------------------------------------|--------------------|--------------------|---------------------|----------------------|----------------------|----------------------|
| Tracheal, bronchus and lung cancer            | 3<br>(2 - 4)       | --                 | --                  | 1<br>(0 - 1)         | 1<br>(1 - 1)         | 1<br>(1 - 2)         |
| Breast cancer                                 | 8<br>(6 - 10)      | --                 | --                  | 4<br>(3 - 6)         | 2<br>(2 - 3)         | 1<br>(1 - 2)         |
| Cervical cancer                               | 2<br>(1 - 2)       | --                 | --                  | 0<br>(0 - 1)         | 1<br>(1 - 1)         | 0<br>(0 - 0)         |
| Uterine cancer                                | 0<br>(0 - 1)       | --                 | --                  | 0<br>(0 - 0)         | 0<br>(0 - 0)         | 0<br>(0 - 0)         |
| Prostate cancer                               | --                 | --                 | --                  | --                   | --                   | --                   |
| Colon and rectum cancer                       | 3<br>(2 - 3)       | --                 | --                  | 0<br>(0 - 0)         | 1<br>(1 - 1)         | 1<br>(1 - 2)         |
| Lip and oral cavity cancer                    | 1<br>(1 - 2)       | --                 | --                  | 0<br>(0 - 0)         | 1<br>(0 - 1)         | 1<br>(0 - 1)         |
| Nasopharynx cancer                            | 0<br>(0 - 0)       | --                 | 0<br>(0 - 0)        | 0<br>(0 - 0)         | 0<br>(0 - 0)         | 0<br>(0 - 0)         |
| Other pharynx cancer                          | 0<br>(0 - 0)       | --                 | --                  | 0<br>(0 - 0)         | 0<br>(0 - 0)         | 0<br>(0 - 0)         |
| Gallbladder and biliary tract cancer          | 0<br>(0 - 0)       | --                 | --                  | 0<br>(0 - 0)         | 0<br>(0 - 0)         | 0<br>(0 - 0)         |
| Pancreatic cancer                             | 1<br>(1 - 1)       | --                 | --                  | 0<br>(0 - 0)         | 0<br>(0 - 1)         | 0<br>(0 - 1)         |
| Malignant skin melanoma                       | 1<br>(1 - 1)       | --                 | --                  | 0<br>(0 - 0)         | 0<br>(0 - 0)         | 0<br>(0 - 0)         |
| Non-melanoma skin cancer                      | 0<br>(0 - 1)       | --                 | --                  | 0<br>(0 - 0)         | 0<br>(0 - 0)         | 0<br>(0 - 1)         |
| Ovarian cancer                                | 1<br>(1 - 2)       | --                 | --                  | 0<br>(0 - 0)         | 1<br>(1 - 1)         | 0<br>(0 - 0)         |
| Testicular cancer                             | --                 | --                 | --                  | --                   | --                   | --                   |
| Kidney cancer                                 | 0<br>(0 - 1)       | 0<br>(0 - 0)       | 0<br>(0 - 0)        | 0<br>(0 - 0)         | 0<br>(0 - 0)         | 0<br>(0 - 0)         |
| Bladder cancer                                | 0<br>(0 - 0)       | --                 | --                  | 0<br>(0 - 0)         | 0<br>(0 - 0)         | 0<br>(0 - 0)         |
| Brain and nervous system cancer               | 0<br>(0 - 1)       | 0<br>(0 - 0)       | 0<br>(0 - 0)        | 0<br>(0 - 0)         | 0<br>(0 - 0)         | 0<br>(0 - 0)         |
| Thyroid cancer                                | 0<br>(0 - 0)       | --                 | 0<br>(0 - 0)        | 0<br>(0 - 0)         | 0<br>(0 - 0)         | 0<br>(0 - 0)         |
| Mesothelioma                                  | 0<br>(0 - 0)       | --                 | --                  | 0<br>(0 - 0)         | 0<br>(0 - 0)         | 0<br>(0 - 0)         |
| Hodgkin lymphoma                              | 0<br>(0 - 1)       | 0<br>(0 - 0)       | 0<br>(0 - 0)        | 0<br>(0 - 0)         | 0<br>(0 - 0)         | 0<br>(0 - 0)         |
| Non-Hodgkin lymphoma                          | 2<br>(1 - 4)       | 0<br>(0 - 0)       | 0<br>(0 - 0)        | 0<br>(0 - 1)         | 1<br>(0 - 2)         | 1<br>(0 - 2)         |
| Multiple myeloma                              | 0<br>(0 - 1)       | --                 | --                  | 0<br>(0 - 0)         | 0<br>(0 - 0)         | 0<br>(0 - 0)         |
| Leukemia                                      | 1<br>(1 - 1)       | 0<br>(0 - 0)       | 0<br>(0 - 0)        | 0<br>(0 - 0)         | 0<br>(0 - 0)         | 0<br>(0 - 1)         |
| Other neoplasms                               | 4<br>(3 - 7)       | 0<br>(0 - 1)       | 0<br>(0 - 0)        | 1<br>(1 - 2)         | 1<br>(1 - 1)         | 2<br>(1 - 3)         |
| Cardiovascular diseases                       | 141<br>(105 - 166) | 1<br>(1 - 2)       | 1<br>(1 - 1)        | 10<br>(6 - 13)       | 29<br>(21 - 37)      | 100<br>(76 - 115)    |
| Rheumatic heart disease                       | 2<br>(1 - 3)       | 0<br>(0 - 0)       | 0<br>(0 - 0)        | 1<br>(0 - 1)         | 0<br>(0 - 1)         | 1<br>(1 - 2)         |
| Ischemic heart disease                        | 59<br>(40 - 75)    | 0<br>(0 - 0)       | 0<br>(0 - 0)        | 3<br>(2 - 5)         | 13<br>(8 - 18)       | 43<br>(29 - 52)      |
| Cerebrovascular disease                       | 59<br>(36 - 72)    | 0<br>(0 - 1)       | 0<br>(0 - 0)        | 4<br>(2 - 6)         | 11<br>(7 - 15)       | 43<br>(26 - 52)      |
| Ischemic stroke                               | 41<br>(23 - 52)    | 0<br>(0 - 0)       | 0<br>(0 - 0)        | 1<br>(0 - 1)         | 5<br>(3 - 7)         | 35<br>(20 - 44)      |
| Hemorrhagic stroke                            | 18<br>(11 - 22)    | 0<br>(0 - 0)       | 0<br>(0 - 0)        | 4<br>(2 - 5)         | 6<br>(4 - 8)         | 8<br>(4 - 11)        |
| Hypertensive heart disease                    | 8<br>(5 - 10)      | 0<br>(0 - 0)       | 0<br>(0 - 0)        | 0<br>(0 - 1)         | 1<br>(1 - 2)         | 6<br>(3 - 9)         |
| Cardiomyopathy and myocarditis                | 2<br>(1 - 3)       | 0<br>(0 - 0)       | 0<br>(0 - 0)        | 0<br>(0 - 0)         | 0<br>(0 - 1)         | 1<br>(1 - 2)         |
| Atrial fibrillation and flutter               | 0<br>(0 - 0)       | --                 | --                  | 0<br>(0 - 0)         | 0<br>(0 - 0)         | 0<br>(0 - 0)         |
| Aortic aneurysm                               | 0<br>(0 - 1)       | --                 | --                  | 0<br>(0 - 0)         | 0<br>(0 - 0)         | 0<br>(0 - 0)         |
| Peripheral vascular disease                   | 1<br>(1 - 2)       | --                 | --                  | 0<br>(0 - 0)         | 0<br>(0 - 0)         | 1<br>(1 - 2)         |
| Endocarditis                                  | 1<br>(0 - 1)       | 0<br>(0 - 0)       | 0<br>(0 - 0)        | 0<br>(0 - 0)         | 0<br>(0 - 0)         | 0<br>(0 - 0)         |
| Other cardiovascular and circulatory diseases | 9<br>(7 - 14)      | 1<br>(0 - 1)       | 0<br>(0 - 0)        | 1<br>(1 - 2)         | 2<br>(2 - 4)         | 5<br>(3 - 8)         |
| Chronic respiratory diseases                  | 50<br>(39 - 62)    | 0<br>(0 - 1)       | 0<br>(0 - 0)        | 4<br>(3 - 5)         | 12<br>(9 - 15)       | 34<br>(25 - 42)      |
| Chronic obstructive pulmonary disease         | 37<br>(28 - 46)    | 0<br>(0 - 0)       | 0<br>(0 - 0)        | 3<br>(2 - 4)         | 9<br>(7 - 12)        | 25<br>(18 - 32)      |

Web Table 31- Maldives deaths with 95% UI by age, sex, and cause in 2013

| Cause                                               | Females, All Ages | Females, 0-4 Years | Females, 5-14 Years | Females, 15-49 Years | Females, 50-69 Years | Females, 70-80 Years |
|-----------------------------------------------------|-------------------|--------------------|---------------------|----------------------|----------------------|----------------------|
| Pneumoconiosis                                      | 0<br>(0 - 0)      | 0<br>(0 - 0)       | 0<br>(0 - 0)        | 0<br>(0 - 0)         | 0<br>(0 - 0)         | 0<br>(0 - 0)         |
| Silicosis                                           | 0<br>(0 - 0)      | 0<br>(0 - 0)       | 0<br>(0 - 0)        | 0<br>(0 - 0)         | 0<br>(0 - 0)         | 0<br>(0 - 0)         |
| Asbestosis                                          | 0<br>(0 - 0)      | 0<br>(0 - 0)       | 0<br>(0 - 0)        | 0<br>(0 - 0)         | 0<br>(0 - 0)         | 0<br>(0 - 0)         |
| Coal workers pneumoconiosis                         | 0<br>(0 - 0)      | 0<br>(0 - 0)       | 0<br>(0 - 0)        | 0<br>(0 - 0)         | 0<br>(0 - 0)         | 0<br>(0 - 0)         |
| Other pneumoconiosis                                | 0<br>(0 - 0)      | 0<br>(0 - 0)       | 0<br>(0 - 0)        | 0<br>(0 - 0)         | 0<br>(0 - 0)         | 0<br>(0 - 0)         |
| Asthma                                              | 3<br>(2 - 5)      | 0<br>(0 - 0)       | 0<br>(0 - 0)        | 0<br>(0 - 0)         | 1<br>(0 - 1)         | 2<br>(1 - 3)         |
| Interstitial lung disease and pulmonary sarcoidosis | 7<br>(4 - 12)     | 0<br>(0 - 0)       | 0<br>(0 - 0)        | 0<br>(0 - 1)         | 2<br>(1 - 3)         | 5<br>(2 - 8)         |
| Other chronic respiratory diseases                  | 3<br>(2 - 4)      | 0<br>(0 - 1)       | 0<br>(0 - 0)        | 0<br>(0 - 1)         | 0<br>(0 - 0)         | 2<br>(1 - 3)         |
| Cirrhosis                                           | 6<br>(5 - 7)      | 0<br>(0 - 0)       | 0<br>(0 - 0)        | 1<br>(1 - 1)         | 1<br>(1 - 2)         | 3<br>(2 - 5)         |
| Cirrhosis due to hepatitis B                        | 2<br>(1 - 4)      | 0<br>(0 - 0)       | 0<br>(0 - 0)        | 0<br>(0 - 1)         | 1<br>(0 - 1)         | 2<br>(0 - 3)         |
| Cirrhosis due to hepatitis C                        | 2<br>(1 - 3)      | 0<br>(0 - 0)       | 0<br>(0 - 0)        | 0<br>(0 - 0)         | 0<br>(0 - 1)         | 1<br>(1 - 2)         |
| Cirrhosis due to alcohol use                        | 1<br>(0 - 2)      | --                 | --                  | 0<br>(0 - 0)         | 0<br>(0 - 0)         | 1<br>(0 - 1)         |
| Cirrhosis due to other causes                       | 1<br>(0 - 1)      | 0<br>(0 - 0)       | 0<br>(0 - 0)        | 0<br>(0 - 0)         | 0<br>(0 - 0)         | 0<br>(0 - 0)         |
| Digestive diseases                                  | 4<br>(3 - 5)      | 0<br>(0 - 0)       | 0<br>(0 - 0)        | 1<br>(0 - 1)         | 1<br>(0 - 1)         | 2<br>(2 - 4)         |
| Peptic ulcer disease                                | 1<br>(0 - 1)      | 0<br>(0 - 0)       | 0<br>(0 - 0)        | 0<br>(0 - 0)         | 0<br>(0 - 0)         | 1<br>(0 - 1)         |
| Gastritis and duodenitis                            | 0<br>(0 - 0)      | 0<br>(0 - 0)       | 0<br>(0 - 0)        | 0<br>(0 - 0)         | 0<br>(0 - 0)         | 0<br>(0 - 0)         |
| Appendicitis                                        | 0<br>(0 - 0)      | 0<br>(0 - 0)       | 0<br>(0 - 0)        | 0<br>(0 - 0)         | 0<br>(0 - 0)         | 0<br>(0 - 0)         |
| Paralytic ileus and intestinal obstruction          | 0<br>(0 - 0)      | 0<br>(0 - 0)       | 0<br>(0 - 0)        | 0<br>(0 - 0)         | 0<br>(0 - 0)         | 0<br>(0 - 0)         |
| Inguinal, femoral, and abdominal hernia             | 0<br>(0 - 0)      | 0<br>(0 - 0)       | 0<br>(0 - 0)        | 0<br>(0 - 0)         | 0<br>(0 - 0)         | 0<br>(0 - 0)         |
| Inflammatory bowel disease                          | 0<br>(0 - 1)      | 0<br>(0 - 0)       | 0<br>(0 - 0)        | 0<br>(0 - 0)         | 0<br>(0 - 0)         | 0<br>(0 - 1)         |
| Vascular intestinal disorders                       | 0<br>(0 - 0)      | 0<br>(0 - 0)       | 0<br>(0 - 0)        | 0<br>(0 - 0)         | 0<br>(0 - 0)         | 0<br>(0 - 0)         |
| Gallbladder and biliary diseases                    | 1<br>(0 - 1)      | 0<br>(0 - 0)       | 0<br>(0 - 0)        | 0<br>(0 - 0)         | 0<br>(0 - 0)         | 1<br>(0 - 1)         |
| Pancreatitis                                        | 0<br>(0 - 0)      | 0<br>(0 - 0)       | 0<br>(0 - 0)        | 0<br>(0 - 0)         | 0<br>(0 - 0)         | 0<br>(0 - 0)         |
| Other digestive diseases                            | 1<br>(1 - 1)      | 0<br>(0 - 0)       | 0<br>(0 - 0)        | 0<br>(0 - 0)         | 0<br>(0 - 0)         | 1<br>(0 - 1)         |
| Neurological disorders                              | 20<br>(15 - 27)   | 0<br>(0 - 0)       | 0<br>(0 - 0)        | 1<br>(0 - 1)         | 2<br>(1 - 3)         | 17<br>(13 - 23)      |
| Alzheimer disease and other dementias               | 18<br>(13 - 24)   | --                 | --                  | 0<br>(0 - 0)         | 1<br>(1 - 2)         | 17<br>(12 - 22)      |
| Parkinson disease                                   | 0<br>(0 - 0)      | --                 | --                  | 0<br>(0 - 0)         | 0<br>(0 - 0)         | 0<br>(0 - 0)         |
| Epilepsy                                            | 1<br>(1 - 2)      | 0<br>(0 - 0)       | 0<br>(0 - 0)        | 1<br>(0 - 1)         | 0<br>(0 - 0)         | 0<br>(0 - 0)         |
| Multiple sclerosis                                  | 0<br>(0 - 0)      | --                 | --                  | 0<br>(0 - 0)         | 0<br>(0 - 0)         | 0<br>(0 - 0)         |
| Other neurological disorders                        | 1<br>(1 - 1)      | 0<br>(0 - 0)       | 0<br>(0 - 0)        | 0<br>(0 - 0)         | 0<br>(0 - 0)         | 0<br>(0 - 1)         |
| Mental and substance use disorders                  | 1<br>(1 - 2)      | 0<br>(0 - 0)       | 0<br>(0 - 0)        | 0<br>(0 - 1)         | 0<br>(0 - 1)         | 0<br>(0 - 1)         |
| Schizophrenia                                       | 0<br>(0 - 0)      | --                 | --                  | 0<br>(0 - 0)         | 0<br>(0 - 0)         | 0<br>(0 - 0)         |
| Alcohol use disorders                               | 1<br>(0 - 2)      | --                 | --                  | 0<br>(0 - 0)         | 0<br>(0 - 1)         | 0<br>(0 - 1)         |
| Drug use disorders                                  | 0<br>(0 - 1)      | 0<br>(0 - 0)       | --                  | 0<br>(0 - 0)         | 0<br>(0 - 0)         | 0<br>(0 - 0)         |
| Opioid use disorders                                | 0<br>(0 - 0)      | 0<br>(0 - 0)       | --                  | 0<br>(0 - 0)         | 0<br>(0 - 0)         | 0<br>(0 - 0)         |
| Cocaine use disorders                               | 0<br>(0 - 0)      | 0<br>(0 - 0)       | --                  | 0<br>(0 - 0)         | 0<br>(0 - 0)         | 0<br>(0 - 0)         |
| Amphetamine use disorders                           | 0<br>(0 - 0)      | 0<br>(0 - 0)       | --                  | 0<br>(0 - 0)         | 0<br>(0 - 0)         | 0<br>(0 - 0)         |
| Other drug use disorders                            | 0<br>(0 - 0)      | 0<br>(0 - 0)       | --                  | 0<br>(0 - 0)         | 0<br>(0 - 0)         | 0<br>(0 - 0)         |
| Eating disorders                                    | 0<br>(0 - 0)      | --                 | 0<br>(0 - 0)        | 0<br>(0 - 0)         | --                   | --                   |
| Anorexia nervosa                                    | 0<br>(0 - 0)      | --                 | 0<br>(0 - 0)        | 0<br>(0 - 0)         | --                   | --                   |

Web Table 31- Maldives deaths with 95% UI by age, sex, and cause in 2013

| Cause                                               | Females, All Ages | Females, 0-4 Years | Females, 5-14 Years | Females, 15-49 Years | Females, 50-69 Years | Females, 70-80 Years |
|-----------------------------------------------------|-------------------|--------------------|---------------------|----------------------|----------------------|----------------------|
| Diabetes, urogenital, blood, and endocrine diseases | 40<br>(33 - 49)   | 2<br>(1 - 3)       | 0<br>(0 - 1)        | 6<br>(5 - 8)         | 10<br>(8 - 13)       | 21<br>(18 - 27)      |
| Diabetes mellitus                                   | 14<br>(11 - 17)   | 0<br>(0 - 0)       | 0<br>(0 - 0)        | 1<br>(1 - 2)         | 3<br>(2 - 4)         | 9<br>(7 - 12)        |
| Acute glomerulonephritis                            | 0<br>(0 - 0)      | 0<br>(0 - 0)       | 0<br>(0 - 0)        | 0<br>(0 - 0)         | 0<br>(0 - 0)         | 0<br>(0 - 0)         |
| Chronic kidney disease                              | 16<br>(10 - 20)   | 0<br>(0 - 0)       | 0<br>(0 - 0)        | 3<br>(2 - 4)         | 5<br>(3 - 7)         | 8<br>(6 - 11)        |
| Chronic kidney disease due to diabetes mellitus     | 1<br>(0 - 1)      | 0<br>(0 - 0)       | 0<br>(0 - 0)        | 0<br>(0 - 0)         | 0<br>(0 - 0)         | 1<br>(0 - 1)         |
| Chronic kidney disease due to hypertension          | 4<br>(3 - 6)      | 0<br>(0 - 0)       | 0<br>(0 - 0)        | 0<br>(0 - 0)         | 1<br>(1 - 2)         | 3<br>(2 - 4)         |
| Chronic kidney disease due to glomerulonephritis    | 1<br>(1 - 1)      | 0<br>(0 - 0)       | 0<br>(0 - 0)        | 0<br>(0 - 0)         | 0<br>(0 - 0)         | 0<br>(0 - 1)         |
| Chronic kidney disease due to other causes          | 10<br>(5 - 14)    | 0<br>(0 - 0)       | 0<br>(0 - 0)        | 2<br>(1 - 3)         | 3<br>(1 - 5)         | 4<br>(2 - 7)         |
| Urinary diseases and male infertility               | 3<br>(2 - 5)      | 0<br>(0 - 0)       | 0<br>(0 - 0)        | 0<br>(0 - 1)         | 1<br>(1 - 1)         | 2<br>(1 - 3)         |
| Interstitial nephritis and urinary tract infections | 2<br>(1 - 3)      | 0<br>(0 - 0)       | 0<br>(0 - 0)        | 0<br>(0 - 0)         | 0<br>(0 - 1)         | 1<br>(1 - 2)         |
| Urolithiasis                                        | 0<br>(0 - 0)      | --                 | 0<br>(0 - 0)        | 0<br>(0 - 0)         | 0<br>(0 - 0)         | 0<br>(0 - 0)         |
| Other urinary diseases                              | 1<br>(0 - 2)      | 0<br>(0 - 0)       | 0<br>(0 - 0)        | 0<br>(0 - 0)         | 0<br>(0 - 1)         | 1<br>(0 - 1)         |
| Gynecological diseases                              | 0<br>(0 - 0)      | --                 | --                  | 0<br>(0 - 0)         | 0<br>(0 - 0)         | 0<br>(0 - 0)         |
| Uterine fibroids                                    | 0<br>(0 - 0)      | --                 | --                  | 0<br>(0 - 0)         | 0<br>(0 - 0)         | 0<br>(0 - 0)         |
| Polycystic ovarian syndrome                         | 0<br>(0 - 0)      | --                 | --                  | 0<br>(0 - 0)         | 0<br>(0 - 0)         | --                   |
| Endometriosis                                       | 0<br>(0 - 0)      | --                 | --                  | 0<br>(0 - 0)         | 0<br>(0 - 0)         | --                   |
| Genital prolapse                                    | 0<br>(0 - 0)      | --                 | --                  | 0<br>(0 - 0)         | 0<br>(0 - 0)         | 0<br>(0 - 0)         |
| Other gynecological diseases                        | 0<br>(0 - 0)      | --                 | --                  | 0<br>(0 - 0)         | 0<br>(0 - 0)         | 0<br>(0 - 0)         |
| Hemoglobinopathies and hemolytic anemias            | 4<br>(2 - 6)      | 2<br>(1 - 3)       | 0<br>(0 - 0)        | 1<br>(1 - 2)         | 0<br>(0 - 0)         | 0<br>(0 - 1)         |
| Thalassemias                                        | 3<br>(2 - 5)      | 1<br>(1 - 3)       | 0<br>(0 - 0)        | 1<br>(1 - 2)         | 0<br>(0 - 0)         | 0<br>(0 - 0)         |
| Sickle cell disorders                               | 0<br>(0 - 0)      | 0<br>(0 - 0)       | 0<br>(0 - 0)        | 0<br>(0 - 0)         | 0<br>(0 - 0)         | 0<br>(0 - 0)         |
| G6PD deficiency                                     | 0<br>(0 - 0)      | 0<br>(0 - 0)       | 0<br>(0 - 0)        | 0<br>(0 - 0)         | 0<br>(0 - 0)         | 0<br>(0 - 0)         |
| Other hemoglobinopathies and hemolytic anemias      | 1<br>(0 - 1)      | 0<br>(0 - 0)       | 0<br>(0 - 0)        | 0<br>(0 - 0)         | 0<br>(0 - 0)         | 0<br>(0 - 1)         |
| Endocrine, metabolic, blood, and immune disorders   | 4<br>(3 - 6)      | 0<br>(0 - 0)       | 0<br>(0 - 0)        | 1<br>(0 - 1)         | 1<br>(1 - 1)         | 2<br>(1 - 3)         |
| Musculoskeletal disorders                           | 2<br>(1 - 2)      | --                 | 0<br>(0 - 0)        | 1<br>(1 - 1)         | 0<br>(0 - 1)         | 1<br>(0 - 1)         |
| Rheumatoid arthritis                                | 0<br>(0 - 1)      | --                 | 0<br>(0 - 0)        | 0<br>(0 - 0)         | 0<br>(0 - 0)         | 0<br>(0 - 0)         |
| Other musculoskeletal disorders                     | 1<br>(1 - 2)      | --                 | 0<br>(0 - 0)        | 1<br>(0 - 1)         | 0<br>(0 - 1)         | 0<br>(0 - 1)         |
| Other non-communicable diseases                     | 18<br>(14 - 22)   | 9<br>(6 - 12)      | 1<br>(1 - 1)        | 2<br>(2 - 3)         | 2<br>(1 - 3)         | 4<br>(3 - 6)         |
| Congenital anomalies                                | 14<br>(11 - 18)   | 9<br>(6 - 12)      | 1<br>(1 - 1)        | 2<br>(1 - 2)         | 1<br>(1 - 2)         | 2<br>(1 - 2)         |
| Neural tube defects                                 | 0<br>(0 - 0)      | 0<br>(0 - 0)       | 0<br>(0 - 0)        | 0<br>(0 - 0)         | 0<br>(0 - 0)         | 0<br>(0 - 0)         |
| Congenital heart anomalies                          | 4<br>(2 - 5)      | 3<br>(1 - 4)       | 0<br>(0 - 0)        | 0<br>(0 - 0)         | 0<br>(0 - 0)         | 0<br>(0 - 1)         |
| Cleft lip and cleft palate                          | 0<br>(0 - 0)      | 0<br>(0 - 0)       | --                  | --                   | --                   | --                   |
| Down syndrome                                       | 0<br>(0 - 0)      | 0<br>(0 - 0)       | 0<br>(0 - 0)        | 0<br>(0 - 0)         | 0<br>(0 - 0)         | 0<br>(0 - 0)         |
| Chromosomal unbalanced rearrangements               | 1<br>(0 - 1)      | 0<br>(0 - 1)       | 0<br>(0 - 0)        | 0<br>(0 - 0)         | 0<br>(0 - 0)         | 0<br>(0 - 0)         |
| Other congenital anomalies                          | 10<br>(8 - 13)    | 5<br>(4 - 8)       | 0<br>(0 - 1)        | 1<br>(1 - 2)         | 1<br>(1 - 2)         | 1<br>(1 - 2)         |
| Skin and subcutaneous diseases                      | 3<br>(2 - 5)      | 0<br>(0 - 0)       | 0<br>(0 - 0)        | 0<br>(0 - 1)         | 0<br>(0 - 1)         | 2<br>(2 - 4)         |
| Cellulitis                                          | 0<br>(0 - 1)      | 0<br>(0 - 0)       | 0<br>(0 - 0)        | 0<br>(0 - 0)         | 0<br>(0 - 0)         | 0<br>(0 - 0)         |
| Pyoderma                                            | 1<br>(1 - 2)      | 0<br>(0 - 0)       | 0<br>(0 - 0)        | 0<br>(0 - 0)         | 0<br>(0 - 0)         | 1<br>(1 - 2)         |
| Decubitus ulcer                                     | 2<br>(1 - 2)      | 0<br>(0 - 0)       | 0<br>(0 - 0)        | 0<br>(0 - 0)         | 0<br>(0 - 0)         | 1<br>(1 - 2)         |
| Other skin and subcutaneous diseases                | 0<br>(0 - 0)      | 0<br>(0 - 0)       | 0<br>(0 - 0)        | 0<br>(0 - 0)         | 0<br>(0 - 0)         | 0<br>(0 - 0)         |

Web Table 31- Maldives deaths with 95% UI by age, sex, and cause in 2013

| Cause                                           | Females, All Ages | Females, 0-4 Years | Females, 5-14 Years | Females, 15-49 Years | Females, 50-69 Years | Females, 70-80 Years |
|-------------------------------------------------|-------------------|--------------------|---------------------|----------------------|----------------------|----------------------|
| Sudden infant death syndrome                    | 0<br>(0 - 0)      | 0<br>(0 - 0)       | --                  | --                   | --                   | --                   |
| Injuries                                        | 44<br>(36 - 61)   | 6<br>(3 - 9)       | 2<br>(1 - 3)        | 10<br>(8 - 14)       | 8<br>(6 - 12)        | 18<br>(14 - 26)      |
| Transport injuries                              | 9<br>(7 - 12)     | 2<br>(1 - 2)       | 0<br>(0 - 1)        | 2<br>(2 - 3)         | 2<br>(1 - 2)         | 3<br>(2 - 4)         |
| Road injuries                                   | 7<br>(6 - 10)     | 1<br>(1 - 2)       | 0<br>(0 - 1)        | 2<br>(2 - 3)         | 1<br>(1 - 2)         | 2<br>(1 - 3)         |
| Pedestrian road injuries                        | 2<br>(1 - 3)      | 1<br>(0 - 1)       | 0<br>(0 - 0)        | 1<br>(0 - 1)         | 0<br>(0 - 0)         | 0<br>(0 - 0)         |
| Cyclist road injuries                           | 1<br>(0 - 1)      | 0<br>(0 - 0)       | 0<br>(0 - 0)        | 0<br>(0 - 0)         | 0<br>(0 - 0)         | 0<br>(0 - 0)         |
| Motorcyclist road injuries                      | 1<br>(1 - 2)      | 0<br>(0 - 0)       | 0<br>(0 - 0)        | 0<br>(0 - 1)         | 0<br>(0 - 0)         | 0<br>(0 - 0)         |
| Motor vehicle road injuries                     | 3<br>(3 - 5)      | 0<br>(0 - 1)       | 0<br>(0 - 0)        | 1<br>(1 - 1)         | 1<br>(1 - 1)         | 1<br>(1 - 2)         |
| Other road injuries                             | 0<br>(0 - 0)      | 0<br>(0 - 0)       | 0<br>(0 - 0)        | 0<br>(0 - 0)         | 0<br>(0 - 0)         | 0<br>(0 - 0)         |
| Other transport injuries                        | 2<br>(1 - 3)      | 0<br>(0 - 1)       | 0<br>(0 - 0)        | 0<br>(0 - 1)         | 0<br>(0 - 0)         | 1<br>(0 - 1)         |
| Unintentional injuries                          | 28<br>(22 - 40)   | 4<br>(2 - 6)       | 1<br>(1 - 2)        | 5<br>(4 - 7)         | 4<br>(3 - 7)         | 13<br>(10 - 19)      |
| Falls                                           | 4<br>(3 - 8)      | 0<br>(0 - 1)       | 0<br>(0 - 0)        | 0<br>(0 - 1)         | 0<br>(0 - 1)         | 3<br>(2 - 5)         |
| Drowning                                        | 6<br>(4 - 10)     | 1<br>(1 - 3)       | 1<br>(0 - 1)        | 2<br>(1 - 3)         | 1<br>(1 - 2)         | 1<br>(1 - 1)         |
| Fire, heat, and hot substances                  | 2<br>(2 - 3)      | 0<br>(0 - 1)       | 0<br>(0 - 0)        | 1<br>(0 - 1)         | 1<br>(0 - 1)         | 1<br>(1 - 1)         |
| Poisonings                                      | 1<br>(0 - 2)      | 0<br>(0 - 0)       | 0<br>(0 - 0)        | 0<br>(0 - 0)         | 0<br>(0 - 0)         | 0<br>(0 - 1)         |
| Exposure to mechanical forces                   | 3<br>(2 - 4)      | 1<br>(0 - 1)       | 0<br>(0 - 0)        | 1<br>(0 - 1)         | 1<br>(0 - 1)         | 1<br>(1 - 1)         |
| Unintentional firearm injuries                  | 1<br>(1 - 1)      | 0<br>(0 - 0)       | 0<br>(0 - 0)        | 0<br>(0 - 0)         | 0<br>(0 - 0)         | 0<br>(0 - 0)         |
| Unintentional suffocation                       | 0<br>(0 - 1)      | 0<br>(0 - 0)       | 0<br>(0 - 0)        | 0<br>(0 - 0)         | 0<br>(0 - 0)         | 0<br>(0 - 0)         |
| Other exposure to mechanical forces             | 2<br>(1 - 3)      | 0<br>(0 - 1)       | 0<br>(0 - 0)        | 0<br>(0 - 1)         | 0<br>(0 - 0)         | 0<br>(0 - 1)         |
| Adverse effects of medical treatment            | 6<br>(4 - 10)     | 0<br>(0 - 1)       | 0<br>(0 - 0)        | 1<br>(1 - 2)         | 1<br>(1 - 2)         | 3<br>(2 - 6)         |
| Animal contact                                  | 1<br>(0 - 2)      | 0<br>(0 - 0)       | 0<br>(0 - 0)        | 0<br>(0 - 0)         | 0<br>(0 - 0)         | 0<br>(0 - 1)         |
| Venomous animal contact                         | 0<br>(0 - 1)      | 0<br>(0 - 0)       | 0<br>(0 - 0)        | 0<br>(0 - 0)         | 0<br>(0 - 0)         | 0<br>(0 - 0)         |
| Non-venomous animal contact                     | 1<br>(0 - 1)      | 0<br>(0 - 0)       | 0<br>(0 - 0)        | 0<br>(0 - 0)         | 0<br>(0 - 0)         | 0<br>(0 - 1)         |
| Foreign body                                    | 4<br>(2 - 6)      | 0<br>(0 - 1)       | 0<br>(0 - 0)        | 0<br>(0 - 1)         | 0<br>(0 - 1)         | 3<br>(1 - 4)         |
| Pulmonary aspiration and foreign body in airway | 4<br>(2 - 6)      | 0<br>(0 - 1)       | 0<br>(0 - 0)        | 0<br>(0 - 1)         | 0<br>(0 - 1)         | 3<br>(1 - 4)         |
| Foreign body in other body part                 | 0<br>(0 - 0)      | 0<br>(0 - 0)       | 0<br>(0 - 0)        | 0<br>(0 - 0)         | 0<br>(0 - 0)         | 0<br>(0 - 0)         |
| Other unintentional injuries                    | 1<br>(1 - 2)      | 0<br>(0 - 0)       | 0<br>(0 - 0)        | 0<br>(0 - 0)         | 0<br>(0 - 0)         | 1<br>(0 - 1)         |
| Self-harm and interpersonal violence            | 7<br>(5 - 12)     | 0<br>(0 - 1)       | 0<br>(0 - 0)        | 3<br>(2 - 4)         | 2<br>(1 - 4)         | 2<br>(1 - 4)         |
| Self-harm                                       | 5<br>(4 - 10)     | --                 | 0<br>(0 - 0)        | 2<br>(1 - 3)         | 2<br>(1 - 3)         | 2<br>(1 - 4)         |
| Interpersonal violence                          | 2<br>(1 - 3)      | 0<br>(0 - 1)       | 0<br>(0 - 0)        | 1<br>(0 - 1)         | 0<br>(0 - 0)         | 0<br>(0 - 1)         |
| Assault by firearm                              | 1<br>(0 - 1)      | 0<br>(0 - 0)       | 0<br>(0 - 0)        | 0<br>(0 - 1)         | 0<br>(0 - 0)         | 0<br>(0 - 0)         |
| Assault by sharp object                         | 0<br>(0 - 1)      | 0<br>(0 - 0)       | 0<br>(0 - 0)        | 0<br>(0 - 1)         | 0<br>(0 - 0)         | 0<br>(0 - 0)         |
| Assault by other means                          | 1<br>(0 - 1)      | 0<br>(0 - 0)       | 0<br>(0 - 0)        | 0<br>(0 - 0)         | 0<br>(0 - 0)         | 0<br>(0 - 0)         |

Web Table 31- Mali deaths with 95% UI by age, sex, and cause in 2013

| Cause                                                             | Both Sexes, All Ages           | Both Sexes, 0-4 Years         | Both Sexes, 5-14 Years    | Both Sexes, 15-49 Years     | Both Sexes, 50-69 Years     | Both Sexes, 70-80 Years     |
|-------------------------------------------------------------------|--------------------------------|-------------------------------|---------------------------|-----------------------------|-----------------------------|-----------------------------|
| All causes                                                        | 180,550<br>(162,540 - 201,968) | 104,164<br>(88,475 - 122,990) | 9,372<br>(7,951 - 11,009) | 27,217<br>(24,501 - 30,267) | 20,492<br>(17,377 - 24,507) | 19,305<br>(17,294 - 21,890) |
| Communicable, maternal, neonatal, and nutritional diseases        | 127,344<br>(111,660 - 147,076) | 94,468<br>(80,909 - 112,591)  | 6,213<br>(5,049 - 7,425)  | 14,136<br>(12,719 - 15,897) | 6,026<br>(5,076 - 7,359)    | 6,501<br>(5,544 - 7,740)    |
| HIV/AIDS and tuberculosis                                         | 8,896<br>(7,174 - 11,105)      | 334<br>(188 - 505)            | 406<br>(310 - 569)        | 5,072<br>(3,767 - 6,777)    | 1,791<br>(1,430 - 2,251)    | 1,293<br>(990 - 1,695)      |
| Tuberculosis                                                      | 4,050<br>(3,212 - 5,232)       | 35<br>(18 - 63)               | 72<br>(41 - 167)          | 1,522<br>(1,148 - 2,046)    | 1,194<br>(904 - 1,602)      | 1,226<br>(927 - 1,628)      |
| HIV/AIDS                                                          | 4,846<br>(3,188 - 6,966)       | 299<br>(154 - 460)            | 334<br>(252 - 424)        | 3,550<br>(2,258 - 5,338)    | 597<br>(385 - 841)          | 67<br>(40 - 99)             |
| HIV/AIDS resulting in mycobacterial infection                     | 298<br>(192 - 442)             | 16<br>(8 - 25)                | 18<br>(13 - 24)           | 220<br>(134 - 338)          | 39<br>(25 - 58)             | 5<br>(3 - 8)                |
| HIV/AIDS resulting in other diseases                              | 4,548<br>(3,000 - 6,553)       | 283<br>(146 - 433)            | 316<br>(239 - 402)        | 3,330<br>(2,121 - 5,027)    | 557<br>(360 - 784)          | 62<br>(37 - 91)             |
| Diarrhea, lower respiratory, and other common infectious diseases | 45,234<br>(35,434 - 56,736)    | 32,176<br>(22,716 - 42,771)   | 3,006<br>(2,151 - 4,030)  | 3,677<br>(2,971 - 4,424)    | 2,777<br>(2,157 - 3,526)    | 3,598<br>(2,919 - 4,386)    |
| Diarrheal diseases                                                | 19,727<br>(13,871 - 27,431)    | 14,876<br>(9,164 - 22,272)    | 1,037<br>(602 - 1,640)    | 1,540<br>(1,172 - 1,976)    | 1,067<br>(711 - 1,527)      | 1,207<br>(842 - 1,689)      |
| Intestinal infectious diseases                                    | 688<br>(361 - 1,207)           | 221<br>(109 - 407)            | 247<br>(118 - 443)        | 188<br>(96 - 337)           | 23<br>(11 - 43)             | 9<br>(5 - 17)               |
| Typhoid fever                                                     | 434<br>(216 - 771)             | 126<br>(54 - 249)             | 160<br>(73 - 303)         | 127<br>(61 - 236)           | 15<br>(6 - 29)              | 6<br>(3 - 10)               |
| Paratyphoid fever                                                 | 204<br>(96 - 383)              | 66<br>(28 - 135)              | 80<br>(31 - 158)          | 51<br>(22 - 101)            | 5<br>(2 - 11)               | 2<br>(1 - 4)                |
| Other intestinal infectious diseases                              | 50<br>(31 - 75)                | 28<br>(15 - 47)               | 7<br>(2 - 16)             | 10<br>(4 - 20)              | 3<br>(0 - 8)                | 2<br>(0 - 6)                |
| Lower respiratory infections                                      | 19,064<br>(14,511 - 24,801)    | 13,774<br>(9,406 - 19,048)    | 813<br>(514 - 1,226)      | 947<br>(736 - 1,211)        | 1,367<br>(995 - 1,829)      | 2,164<br>(1,627 - 2,781)    |
| Upper respiratory infections                                      | 25<br>(11 - 54)                | 14<br>(2 - 43)                | 2<br>(0 - 6)              | 4<br>(1 - 8)                | 3<br>(1 - 7)                | 2<br>(0 - 6)                |
| Otitis media                                                      | 12<br>(9 - 15)                 | 5<br>(3 - 8)                  | 1<br>(1 - 2)              | 1<br>(1 - 2)                | 2<br>(1 - 3)                | 2<br>(2 - 3)                |
| Meningitis                                                        | 4,326<br>(3,163 - 5,820)       | 2,349<br>(1,384 - 3,685)      | 699<br>(414 - 1,108)      | 829<br>(582 - 1,160)        | 261<br>(172 - 390)          | 188<br>(120 - 282)          |
| Pneumococcal meningitis                                           | 1,105<br>(777 - 1,564)         | 552<br>(307 - 910)            | 199<br>(104 - 341)        | 237<br>(156 - 354)          | 71<br>(36 - 117)            | 48<br>(26 - 76)             |
| H influenzae type B meningitis                                    | 696<br>(428 - 1,098)           | 479<br>(252 - 843)            | 100<br>(50 - 174)         | 85<br>(47 - 129)            | 20<br>(10 - 37)             | 12<br>(5 - 23)              |
| Meningococcal meningitis                                          | 2,026<br>(1,442 - 2,791)       | 1,102<br>(636 - 1,749)        | 332<br>(173 - 553)        | 379<br>(243 - 576)          | 122<br>(73 - 195)           | 90<br>(55 - 139)            |
| Other meningitis                                                  | 499<br>(332 - 704)             | 217<br>(105 - 382)            | 68<br>(30 - 122)          | 128<br>(65 - 219)           | 48<br>(27 - 81)             | 38<br>(18 - 72)             |
| Encephalitis                                                      | 159<br>(121 - 223)             | 74<br>(46 - 122)              | 27<br>(15 - 58)           | 33<br>(24 - 45)             | 15<br>(8 - 22)              | 10<br>(4 - 16)              |
| Diphtheria                                                        | 20<br>(1 - 98)                 | 15<br>(0 - 93)                | 4<br>(0 - 23)             | 1<br>(0 - 2)                | 0<br>(0 - 1)                | --                          |
| Whooping cough                                                    | 268<br>(1 - 1,305)             | 247<br>(1 - 1,197)            | 18<br>(0 - 101)           | 2<br>(0 - 12)               | 0<br>(0 - 1)                | --                          |
| Tetanus                                                           | 295<br>(204 - 427)             | 67<br>(37 - 120)              | 62<br>(34 - 110)          | 117<br>(71 - 175)           | 38<br>(23 - 61)             | 11<br>(6 - 23)              |
| Measles                                                           | 627<br>(66 - 2,538)            | 524<br>(54 - 2,138)           | 94<br>(10 - 390)          | 10<br>(1 - 38)              | 0<br>(0 - 1)                | --                          |
| Varicella and herpes zoster                                       | 22<br>(10 - 40)                | 8<br>(1 - 25)                 | 3<br>(0 - 10)             | 5<br>(1 - 10)               | 2<br>(0 - 4)                | 4<br>(0 - 15)               |
| Neglected tropical diseases and malaria                           | 36,008<br>(23,791 - 50,735)    | 31,651<br>(19,712 - 46,471)   | 1,747<br>(836 - 3,160)    | 1,056<br>(524 - 2,289)      | 780<br>(288 - 2,149)        | 774<br>(272 - 2,074)        |
| Malaria                                                           | 35,690<br>(23,410 - 50,450)    | 31,541<br>(19,570 - 46,376)   | 1,667<br>(761 - 3,075)    | 978<br>(443 - 2,209)        | 746<br>(254 - 2,120)        | 758<br>(253 - 2,061)        |
| Leishmaniasis                                                     | 0<br>(0 - 1)                   | 0<br>(0 - 0)                  | 0<br>(0 - 0)              | 0<br>(0 - 0)                | 0<br>(0 - 0)                | 0<br>(0 - 0)                |
| Visceral leishmaniasis                                            | 0<br>(0 - 1)                   | 0<br>(0 - 0)                  | 0<br>(0 - 0)              | 0<br>(0 - 0)                | 0<br>(0 - 0)                | 0<br>(0 - 0)                |
| Schistosomiasis                                                   | 51<br>(38 - 67)                | 2<br>(1 - 4)                  | 4<br>(2 - 7)              | 21<br>(14 - 28)             | 17<br>(11 - 25)             | 8<br>(5 - 12)               |
| Cysticercosis                                                     | 5<br>(1 - 13)                  | 1<br>(0 - 2)                  | 1<br>(0 - 2)              | 2<br>(1 - 7)                | 1<br>(0 - 2)                | 0<br>(0 - 1)                |
| Cystic echinococcosis                                             | 11<br>(9 - 13)                 | 3<br>(2 - 4)                  | 3<br>(2 - 4)              | 3<br>(3 - 4)                | 1<br>(1 - 1)                | 0<br>(0 - 1)                |
| Dengue                                                            | 8<br>(5 - 12)                  | 4<br>(1 - 8)                  | 2<br>(1 - 4)              | 1<br>(1 - 3)                | 0<br>(0 - 1)                | 0<br>(0 - 0)                |
| Yellow fever                                                      | 5<br>(3 - 7)                   | 0<br>(0 - 1)                  | 1<br>(0 - 3)              | 3<br>(1 - 5)                | 0<br>(0 - 1)                | 0<br>(0 - 1)                |
| Rabies                                                            | 145<br>(79 - 209)              | 37<br>(10 - 79)               | 56<br>(29 - 95)           | 38<br>(26 - 53)             | 10<br>(5 - 16)              | 3<br>(1 - 6)                |
| Intestinal nematode infections                                    | 58<br>(31 - 95)                | 47<br>(23 - 85)               | 8<br>(1 - 22)             | 1<br>(0 - 7)                | 0<br>(0 - 3)                | 0<br>(0 - 4)                |
| Ascariasis                                                        | 58<br>(31 - 95)                | 47<br>(23 - 85)               | 8<br>(1 - 22)             | 1<br>(0 - 7)                | 0<br>(0 - 3)                | 0<br>(0 - 4)                |
| Other neglected tropical diseases                                 | 36<br>(24 - 85)                | 16<br>(8 - 43)                | 4<br>(2 - 11)             | 8<br>(5 - 17)               | 4<br>(2 - 7)                | 4<br>(2 - 6)                |

Web Table 31- Mali deaths with 95% UI by age, sex, and cause in 2013

| Cause                                                            | Both Sexes, All Ages        | Both Sexes, 0-4 Years       | Both Sexes, 5-14 Years   | Both Sexes, 15-49 Years   | Both Sexes, 50-69 Years     | Both Sexes, 70-80 Years     |
|------------------------------------------------------------------|-----------------------------|-----------------------------|--------------------------|---------------------------|-----------------------------|-----------------------------|
| Maternal disorders                                               | 2,966<br>(2,295 - 3,722)    | --                          | 44<br>(16 - 100)         | 2,922<br>(2,263 - 3,674)  | --                          | --                          |
| Maternal hemorrhage                                              | 537<br>(381 - 749)          | --                          | 5<br>(1 - 10)            | 533<br>(378 - 745)        | --                          | --                          |
| Maternal sepsis and other maternal infections                    | 161<br>(89 - 239)           | --                          | 3<br>(1 - 6)             | 158<br>(86 - 235)         | --                          | --                          |
| Maternal hypertensive disorders                                  | 223<br>(139 - 315)          | --                          | 3<br>(1 - 8)             | 219<br>(138 - 310)        | --                          | --                          |
| Maternal obstructed labor                                        | 151<br>(96 - 224)           | --                          | 2<br>(0 - 4)             | 150<br>(95 - 223)         | --                          | --                          |
| Maternal abortive outcome                                        | 521<br>(359 - 708)          | --                          | 8<br>(3 - 19)            | 513<br>(354 - 695)        | --                          | --                          |
| Indirect maternal deaths                                         | 308<br>(202 - 439)          | --                          | 4<br>(1 - 9)             | 304<br>(200 - 435)        | --                          | --                          |
| Late maternal deaths                                             | 487<br>(313 - 685)          | --                          | 12<br>(3 - 29)           | 475<br>(307 - 668)        | --                          | --                          |
| Maternal deaths aggravated by HIV/AIDS                           | 10<br>(5 - 15)              | --                          | --                       | 10<br>(5 - 15)            | --                          | --                          |
| Other maternal disorders                                         | 562<br>(385 - 791)          | --                          | 8<br>(2 - 21)            | 554<br>(379 - 780)        | --                          | --                          |
| Neonatal disorders                                               | 20,563<br>(16,662 - 24,712) | 20,563<br>(16,662 - 24,712) | --                       | --                        | --                          | --                          |
| Neonatal preterm birth complications                             | 8,004<br>(4,667 - 12,784)   | 8,004<br>(4,667 - 12,784)   | --                       | --                        | --                          | --                          |
| Neonatal encephalopathy due to birth asphyxia and trauma         | 6,441<br>(3,406 - 10,510)   | 6,441<br>(3,406 - 10,510)   | --                       | --                        | --                          | --                          |
| Neonatal sepsis and other neonatal infections                    | 4,109<br>(1,870 - 7,371)    | 4,109<br>(1,870 - 7,371)    | --                       | --                        | --                          | --                          |
| Hemolytic disease and other neonatal jaundice                    | 168<br>(67 - 368)           | 168<br>(67 - 368)           | --                       | --                        | --                          | --                          |
| Other neonatal disorders                                         | 1,840<br>(1,018 - 2,945)    | 1,840<br>(1,018 - 2,945)    | --                       | --                        | --                          | --                          |
| Nutritional deficiencies                                         | 11,221<br>(7,548 - 16,006)  | 7,985<br>(4,582 - 12,274)   | 793<br>(520 - 1,131)     | 1,212<br>(915 - 1,547)    | 525<br>(372 - 727)          | 706<br>(511 - 991)          |
| Protein-energy malnutrition                                      | 8,777<br>(5,402 - 13,019)   | 7,283<br>(4,125 - 11,284)   | 555<br>(325 - 842)       | 357<br>(205 - 683)        | 244<br>(147 - 414)          | 338<br>(199 - 595)          |
| Iodine deficiency                                                | 11<br>(1 - 42)              | 6<br>(0 - 38)               | 2<br>(0 - 10)            | 2<br>(0 - 9)              | 1<br>(0 - 4)                | 1<br>(0 - 4)                |
| Iron-deficiency anemia                                           | 2,397<br>(1,300 - 3,673)    | 683<br>(120 - 1,724)        | 234<br>(111 - 402)       | 844<br>(513 - 1,158)      | 273<br>(146 - 410)          | 363<br>(208 - 557)          |
| Other nutritional deficiencies                                   | 36<br>(14 - 70)             | 13<br>(2 - 40)              | 3<br>(1 - 7)             | 8<br>(4 - 16)             | 7<br>(2 - 16)               | 4<br>(2 - 7)                |
| Other communicable, maternal, neonatal, and nutritional diseases | 2,456<br>(1,599 - 3,693)    | 1,761<br>(976 - 2,833)      | 216<br>(127 - 340)       | 197<br>(148 - 263)        | 153<br>(106 - 217)          | 130<br>(88 - 188)           |
| Sexually transmitted diseases excluding HIV                      | 1,720<br>(912 - 2,844)      | 1,473<br>(743 - 2,500)      | 160<br>(82 - 271)        | 46<br>(30 - 80)           | 22<br>(11 - 44)             | 18<br>(8 - 39)              |
| Syphilis                                                         | 1,680<br>(881 - 2,806)      | 1,473<br>(743 - 2,500)      | 156<br>(78 - 265)        | 22<br>(14 - 39)           | 15<br>(7 - 29)              | 15<br>(6 - 31)              |
| Chlamydial infection                                             | 5<br>(3 - 9)                | --                          | 0<br>(0 - 1)             | 3<br>(2 - 6)              | 1<br>(0 - 3)                | 0<br>(0 - 1)                |
| Gonococcal infection                                             | 19<br>(13 - 32)             | --                          | 2<br>(1 - 4)             | 11<br>(7 - 19)            | 4<br>(2 - 8)                | 2<br>(1 - 5)                |
| Other sexually transmitted diseases                              | 15<br>(10 - 25)             | --                          | 2<br>(1 - 4)             | 10<br>(6 - 17)            | 2<br>(1 - 5)                | 1<br>(0 - 2)                |
| Hepatitis                                                        | 341<br>(232 - 444)          | 75<br>(27 - 133)            | 27<br>(14 - 40)          | 98<br>(70 - 131)          | 79<br>(50 - 118)            | 61<br>(40 - 90)             |
| Acute hepatitis A                                                | 34<br>(9 - 73)              | 23<br>(5 - 53)              | 7<br>(2 - 15)            | 3<br>(1 - 8)              | 1<br>(0 - 2)                | 0<br>(0 - 0)                |
| Acute hepatitis B                                                | 215<br>(139 - 297)          | 52<br>(17 - 97)             | 14<br>(6 - 24)           | 35<br>(19 - 57)           | 62<br>(37 - 93)             | 52<br>(34 - 78)             |
| Acute hepatitis C                                                | 9<br>(2 - 24)               | --                          | 2<br>(0 - 5)             | 3<br>(0 - 8)              | 2<br>(0 - 6)                | 2<br>(0 - 7)                |
| Acute hepatitis E                                                | 83<br>(49 - 128)            | 1<br>(0 - 3)                | 4<br>(2 - 8)             | 56<br>(35 - 82)           | 15<br>(6 - 29)              | 7<br>(2 - 16)               |
| Other infectious diseases                                        | 395<br>(240 - 709)          | 212<br>(101 - 447)          | 28<br>(11 - 57)          | 53<br>(27 - 102)          | 51<br>(24 - 107)            | 50<br>(21 - 110)            |
| Non-communicable diseases                                        | 44,489<br>(38,011 - 52,419) | 7,272<br>(4,029 - 12,583)   | 1,691<br>(1,300 - 2,196) | 9,790<br>(8,265 - 11,573) | 13,581<br>(11,220 - 16,591) | 12,155<br>(10,511 - 14,042) |
| Neoplasms                                                        | 8,174<br>(6,805 - 9,785)    | 151<br>(91 - 249)           | 185<br>(130 - 248)       | 2,730<br>(2,228 - 3,296)  | 3,643<br>(2,877 - 4,568)    | 1,466<br>(1,212 - 1,771)    |
| Esophageal cancer                                                | 182<br>(139 - 238)          | --                          | --                       | 50<br>(37 - 66)           | 87<br>(63 - 118)            | 44<br>(32 - 62)             |
| Stomach cancer                                                   | 1,251<br>(1,019 - 1,552)    | --                          | --                       | 324<br>(254 - 407)        | 703<br>(546 - 908)          | 224<br>(171 - 287)          |
| Liver cancer                                                     | 2,671<br>(2,083 - 3,332)    | --                          | 24<br>(12 - 42)          | 1,142<br>(834 - 1,505)    | 1,153<br>(845 - 1,474)      | 353<br>(250 - 473)          |
| Liver cancer due to hepatitis B                                  | 1,221<br>(721 - 1,766)      | --                          | 11<br>(5 - 22)           | 620<br>(394 - 923)        | 478<br>(216 - 742)          | 111<br>(59 - 179)           |
| Liver cancer due to hepatitis C                                  | 900<br>(578 - 1,360)        | --                          | 2<br>(1 - 5)             | 282<br>(146 - 454)        | 452<br>(271 - 685)          | 164<br>(97 - 241)           |

Web Table 31- Mali deaths with 95% UI by age, sex, and cause in 2013

| Cause                                | Both Sexes, All Ages        | Both Sexes, 0-4 Years | Both Sexes, 5-14 Years | Both Sexes, 15-49 Years  | Both Sexes, 50-69 Years  | Both Sexes, 70-80 Years  |
|--------------------------------------|-----------------------------|-----------------------|------------------------|--------------------------|--------------------------|--------------------------|
| Liver cancer due to alcohol use      | 201<br>(84 - 327)           | --                    | --                     | 54<br>(20 - 96)          | 98<br>(43 - 168)         | 49<br>(18 - 82)          |
| Liver cancer due to other causes     | 350<br>(240 - 490)          | --                    | 10<br>(5 - 19)         | 186<br>(122 - 271)       | 124<br>(76 - 191)        | 28<br>(17 - 44)          |
| Larynx cancer                        | 55<br>(35 - 82)             | --                    | --                     | 14<br>(8 - 23)           | 25<br>(15 - 40)          | 16<br>(10 - 24)          |
| Tracheal, bronchus and lung cancer   | 245<br>(201 - 297)          | --                    | --                     | 50<br>(40 - 63)          | 123<br>(97 - 157)        | 72<br>(58 - 89)          |
| Breast cancer                        | 395<br>(293 - 534)          | --                    | --                     | 140<br>(104 - 184)       | 181<br>(125 - 268)       | 75<br>(52 - 105)         |
| Cervical cancer                      | 956<br>(679 - 1,305)        | --                    | --                     | 294<br>(203 - 406)       | 526<br>(349 - 774)       | 136<br>(91 - 196)        |
| Uterine cancer                       | 28<br>(18 - 60)             | --                    | --                     | 10<br>(6 - 15)           | 14<br>(8 - 28)           | 5<br>(2 - 17)            |
| Prostate cancer                      | 110<br>(75 - 176)           | --                    | --                     | 6<br>(4 - 9)             | 31<br>(18 - 52)          | 73<br>(49 - 117)         |
| Colon and rectum cancer              | 355<br>(296 - 425)          | --                    | --                     | 121<br>(97 - 148)        | 134<br>(106 - 171)       | 100<br>(79 - 123)        |
| Lip and oral cavity cancer           | 46<br>(36 - 60)             | --                    | --                     | 16<br>(12 - 23)          | 17<br>(12 - 23)          | 13<br>(10 - 18)          |
| Nasopharynx cancer                   | 23<br>(15 - 32)             | --                    | 2<br>(1 - 5)           | 12<br>(7 - 17)           | 7<br>(4 - 11)            | 3<br>(1 - 4)             |
| Other pharynx cancer                 | 25<br>(19 - 32)             | --                    | --                     | 6<br>(5 - 9)             | 13<br>(9 - 18)           | 6<br>(4 - 8)             |
| Gallbladder and biliary tract cancer | 126<br>(65 - 173)           | --                    | --                     | 24<br>(10 - 34)          | 67<br>(33 - 101)         | 34<br>(19 - 51)          |
| Pancreatic cancer                    | 160<br>(131 - 198)          | --                    | --                     | 39<br>(30 - 50)          | 79<br>(60 - 101)         | 42<br>(33 - 54)          |
| Malignant skin melanoma              | 22<br>(17 - 29)             | --                    | --                     | 6<br>(4 - 8)             | 11<br>(8 - 15)           | 5<br>(4 - 7)             |
| Non-melanoma skin cancer             | 11<br>(8 - 17)              | --                    | --                     | 3<br>(2 - 4)             | 3<br>(2 - 5)             | 6<br>(3 - 9)             |
| Ovarian cancer                       | 104<br>(75 - 143)           | --                    | --                     | 30<br>(21 - 41)          | 58<br>(40 - 84)          | 16<br>(10 - 24)          |
| Testicular cancer                    | 8<br>(4 - 12)               | --                    | --                     | 6<br>(3 - 9)             | 1<br>(0 - 2)             | 1<br>(0 - 1)             |
| Kidney cancer                        | 94<br>(73 - 123)            | 7<br>(3 - 14)         | 5<br>(3 - 8)           | 15<br>(11 - 20)          | 53<br>(38 - 76)          | 14<br>(10 - 20)          |
| Bladder cancer                       | 228<br>(165 - 317)          | --                    | --                     | 84<br>(55 - 124)         | 96<br>(63 - 141)         | 48<br>(35 - 65)          |
| Brain and nervous system cancer      | 78<br>(45 - 100)            | 6<br>(2 - 13)         | 15<br>(7 - 23)         | 28<br>(17 - 36)          | 17<br>(10 - 23)          | 12<br>(6 - 17)           |
| Thyroid cancer                       | 41<br>(26 - 57)             | --                    | 1<br>(1 - 3)           | 8<br>(5 - 11)            | 19<br>(11 - 29)          | 13<br>(8 - 19)           |
| Mesothelioma                         | 7<br>(5 - 9)                | --                    | --                     | 2<br>(1 - 2)             | 3<br>(2 - 4)             | 2<br>(1 - 4)             |
| Hodgkin lymphoma                     | 53<br>(34 - 72)             | 4<br>(2 - 9)          | 8<br>(3 - 17)          | 21<br>(14 - 29)          | 12<br>(6 - 21)           | 8<br>(4 - 14)            |
| Non-Hodgkin lymphoma                 | 229<br>(185 - 287)          | 31<br>(17 - 54)       | 44<br>(26 - 68)        | 84<br>(65 - 109)         | 39<br>(29 - 54)          | 30<br>(21 - 44)          |
| Multiple myeloma                     | 25<br>(17 - 36)             | --                    | --                     | 5<br>(4 - 6)             | 13<br>(8 - 19)           | 7<br>(4 - 12)            |
| Leukemia                             | 189<br>(156 - 225)          | 5<br>(3 - 9)          | 20<br>(13 - 29)        | 87<br>(69 - 105)         | 54<br>(38 - 72)          | 23<br>(18 - 30)          |
| Other neoplasms                      | 455<br>(340 - 632)          | 96<br>(54 - 186)      | 67<br>(41 - 112)       | 102<br>(73 - 143)        | 104<br>(67 - 167)        | 86<br>(58 - 132)         |
| Cardiovascular diseases              | 15,510<br>(13,072 - 18,275) | 573<br>(382 - 853)    | 214<br>(145 - 307)     | 2,905<br>(2,343 - 3,527) | 5,323<br>(4,215 - 6,636) | 6,496<br>(5,496 - 7,680) |
| Rheumatic heart disease              | 283<br>(168 - 683)          | 18<br>(8 - 37)        | 20<br>(10 - 41)        | 106<br>(54 - 285)        | 65<br>(31 - 187)         | 74<br>(46 - 149)         |
| Ischemic heart disease               | 4,088<br>(3,215 - 5,242)    | 22<br>(9 - 47)        | 26<br>(16 - 41)        | 701<br>(511 - 903)       | 1,471<br>(1,104 - 1,939) | 1,868<br>(1,453 - 2,439) |
| Cerebrovascular disease              | 7,018<br>(5,550 - 8,549)    | 188<br>(120 - 282)    | 65<br>(42 - 99)        | 1,088<br>(763 - 1,380)   | 2,446<br>(1,842 - 3,158) | 3,231<br>(2,619 - 3,925) |
| Ischemic stroke                      | 4,046<br>(2,443 - 5,114)    | 22<br>(9 - 46)        | 8<br>(4 - 16)          | 231<br>(135 - 349)       | 1,378<br>(741 - 1,888)   | 2,407<br>(1,470 - 3,050) |
| Hemorrhagic stroke                   | 2,972<br>(2,102 - 4,169)    | 166<br>(102 - 252)    | 57<br>(35 - 89)        | 857<br>(591 - 1,094)     | 1,069<br>(704 - 1,668)   | 824<br>(467 - 1,478)     |
| Hypertensive heart disease           | 1,133<br>(642 - 1,618)      | 7<br>(2 - 13)         | 3<br>(1 - 6)           | 184<br>(81 - 295)        | 387<br>(201 - 607)       | 552<br>(327 - 773)       |
| Cardiomyopathy and myocarditis       | 757<br>(481 - 986)          | 96<br>(50 - 163)      | 32<br>(17 - 51)        | 242<br>(146 - 332)       | 183<br>(104 - 269)       | 205<br>(100 - 310)       |
| Atrial fibrillation and flutter      | 1<br>(1 - 1)                | --                    | --                     | 0<br>(0 - 0)             | 0<br>(0 - 0)             | 0<br>(0 - 1)             |
| Aortic aneurysm                      | 123<br>(81 - 189)           | --                    | --                     | 25<br>(14 - 42)          | 47<br>(29 - 71)          | 51<br>(32 - 83)          |
| Peripheral vascular disease          | 5<br>(3 - 7)                | --                    | --                     | 0<br>(0 - 1)             | 2<br>(1 - 4)             | 2<br>(1 - 3)             |
| Endocarditis                         | 352<br>(258 - 492)          | 60<br>(21 - 119)      | 12<br>(7 - 21)         | 115<br>(81 - 165)        | 73<br>(47 - 115)         | 93<br>(61 - 154)         |



Web Table 31- Mali deaths with 95% UI by age, sex, and cause in 2013

| Cause                                               | Both Sexes, All Ages     | Both Sexes, 0-4 Years | Both Sexes, 5-14 Years | Both Sexes, 15-49 Years | Both Sexes, 50-69 Years  | Both Sexes, 70-80 Years  |
|-----------------------------------------------------|--------------------------|-----------------------|------------------------|-------------------------|--------------------------|--------------------------|
| Other cardiovascular and circulatory diseases       | 1,749<br>(1,278 - 3,064) | 183<br>(92 - 342)     | 55<br>(30 - 96)        | 444<br>(315 - 738)      | 648<br>(428 - 1,035)     | 420<br>(280 - 848)       |
| Chronic respiratory diseases                        | 5,005<br>(3,940 - 5,996) | 632<br>(310 - 1,042)  | 219<br>(155 - 300)     | 1,147<br>(852 - 1,422)  | 1,620<br>(1,248 - 2,040) | 1,386<br>(1,096 - 1,690) |
| Chronic obstructive pulmonary disease               | 2,606<br>(2,039 - 3,213) | 248<br>(112 - 439)    | 87<br>(48 - 125)       | 359<br>(247 - 473)      | 961<br>(734 - 1,252)     | 951<br>(740 - 1,191)     |
| Pneumoconiosis                                      | 266<br>(165 - 388)       | 7<br>(2 - 19)         | 9<br>(4 - 15)          | 98<br>(56 - 153)        | 117<br>(67 - 180)        | 35<br>(19 - 59)          |
| Silicosis                                           | 51<br>(31 - 79)          | 2<br>(1 - 7)          | 3<br>(1 - 5)           | 20<br>(10 - 36)         | 11<br>(6 - 20)           | 14<br>(7 - 25)           |
| Asbestosis                                          | 20<br>(13 - 31)          | 1<br>(0 - 4)          | 2<br>(1 - 3)           | 7<br>(4 - 12)           | 9<br>(4 - 15)            | 1<br>(1 - 2)             |
| Coal workers pneumoconiosis                         | 69<br>(40 - 103)         | 1<br>(0 - 3)          | 2<br>(1 - 3)           | 7<br>(4 - 12)           | 53<br>(31 - 80)          | 5<br>(2 - 9)             |
| Other pneumoconiosis                                | 127<br>(74 - 189)        | 2<br>(1 - 6)          | 3<br>(1 - 5)           | 63<br>(35 - 99)         | 44<br>(23 - 72)          | 15<br>(9 - 25)           |
| Asthma                                              | 1,301<br>(980 - 1,661)   | 239<br>(106 - 441)    | 68<br>(47 - 97)        | 422<br>(317 - 530)      | 358<br>(241 - 497)       | 215<br>(140 - 304)       |
| Interstitial lung disease and pulmonary sarcoidosis | 257<br>(77 - 452)        | 4<br>(1 - 14)         | 3<br>(2 - 6)           | 30<br>(13 - 49)         | 103<br>(26 - 197)        | 117<br>(22 - 225)        |
| Other chronic respiratory diseases                  | 574<br>(412 - 770)       | 134<br>(69 - 228)     | 51<br>(31 - 81)        | 238<br>(160 - 320)      | 82<br>(52 - 122)         | 69<br>(45 - 106)         |
| Cirrhosis                                           | 1,890<br>(1,495 - 2,424) | 112<br>(50 - 220)     | 57<br>(40 - 82)        | 575<br>(434 - 760)      | 773<br>(574 - 1,028)     | 372<br>(279 - 500)       |
| Cirrhosis due to hepatitis B                        | 530<br>(327 - 810)       | 7<br>(2 - 16)         | 11<br>(5 - 19)         | 165<br>(95 - 269)       | 234<br>(138 - 367)       | 113<br>(62 - 178)        |
| Cirrhosis due to hepatitis C                        | 459<br>(257 - 737)       | 6<br>(2 - 14)         | 8<br>(3 - 15)          | 138<br>(52 - 242)       | 204<br>(105 - 345)       | 103<br>(62 - 169)        |
| Cirrhosis due to alcohol use                        | 529<br>(329 - 802)       | --                    | --                     | 149<br>(78 - 246)       | 252<br>(154 - 391)       | 128<br>(86 - 188)        |
| Cirrhosis due to other causes                       | 372<br>(251 - 537)       | 99<br>(44 - 196)      | 39<br>(25 - 57)        | 122<br>(70 - 183)       | 83<br>(46 - 136)         | 29<br>(17 - 47)          |
| Digestive diseases                                  | 2,387<br>(2,019 - 2,875) | 300<br>(144 - 581)    | 188<br>(131 - 257)     | 642<br>(500 - 811)      | 651<br>(506 - 844)       | 606<br>(491 - 750)       |
| Peptic ulcer disease                                | 589<br>(448 - 776)       | 39<br>(14 - 87)       | 30<br>(17 - 51)        | 159<br>(111 - 224)      | 186<br>(126 - 264)       | 174<br>(123 - 234)       |
| Gastritis and duodenitis                            | 112<br>(63 - 229)        | 20<br>(5 - 46)        | 12<br>(6 - 24)         | 26<br>(14 - 54)         | 26<br>(11 - 62)          | 29<br>(11 - 79)          |
| Appendicitis                                        | 242<br>(177 - 343)       | 54<br>(20 - 142)      | 41<br>(20 - 69)        | 65<br>(45 - 97)         | 44<br>(24 - 68)          | 38<br>(16 - 68)          |
| Paralytic ileus and intestinal obstruction          | 605<br>(376 - 810)       | 43<br>(15 - 90)       | 39<br>(21 - 64)        | 147<br>(74 - 219)       | 191<br>(105 - 279)       | 185<br>(122 - 269)       |
| Inguinal, femoral, and abdominal hernia             | 62<br>(39 - 106)         | 4<br>(1 - 11)         | 3<br>(1 - 7)           | 16<br>(9 - 30)          | 18<br>(10 - 31)          | 20<br>(12 - 33)          |
| Inflammatory bowel disease                          | 154<br>(76 - 227)        | 57<br>(19 - 120)      | 10<br>(5 - 19)         | 36<br>(12 - 56)         | 27<br>(7 - 45)           | 23<br>(6 - 38)           |
| Vascular intestinal disorders                       | 10<br>(4 - 21)           | 2<br>(0 - 6)          | 1<br>(0 - 2)           | 2<br>(1 - 5)            | 2<br>(1 - 6)             | 3<br>(1 - 7)             |
| Gallbladder and biliary diseases                    | 162<br>(117 - 210)       | 11<br>(5 - 22)        | 14<br>(6 - 23)         | 38<br>(23 - 53)         | 47<br>(31 - 72)          | 51<br>(34 - 73)          |
| Pancreatitis                                        | 128<br>(75 - 185)        | 4<br>(1 - 9)          | 4<br>(2 - 7)           | 59<br>(31 - 92)         | 37<br>(21 - 60)          | 23<br>(11 - 38)          |
| Other digestive diseases                            | 324<br>(244 - 454)       | 64<br>(26 - 143)      | 33<br>(19 - 53)        | 93<br>(64 - 130)        | 74<br>(50 - 108)         | 60<br>(39 - 91)          |
| Neurological disorders                              | 994<br>(800 - 1,240)     | 163<br>(80 - 305)     | 84<br>(46 - 141)       | 206<br>(144 - 291)      | 85<br>(64 - 114)         | 455<br>(351 - 569)       |
| Alzheimer disease and other dementias               | 459<br>(351 - 579)       | --                    | --                     | 0<br>(0 - 0)            | 42<br>(31 - 55)          | 417<br>(315 - 528)       |
| Parkinson disease                                   | 4<br>(2 - 9)             | --                    | --                     | 1<br>(0 - 1)            | 1<br>(0 - 1)             | 3<br>(1 - 7)             |
| Epilepsy                                            | 434<br>(316 - 606)       | 142<br>(61 - 278)     | 74<br>(37 - 131)       | 176<br>(115 - 257)      | 21<br>(13 - 35)          | 22<br>(13 - 35)          |
| Multiple sclerosis                                  | 1<br>(0 - 5)             | --                    | --                     | 1<br>(0 - 2)            | 0<br>(0 - 2)             | 0<br>(0 - 1)             |
| Other neurological disorders                        | 95<br>(74 - 146)         | 21<br>(11 - 69)       | 10<br>(6 - 17)         | 29<br>(22 - 39)         | 21<br>(15 - 29)          | 13<br>(9 - 18)           |
| Mental and substance use disorders                  | 420<br>(239 - 603)       | 20<br>(5 - 46)        | 0<br>(0 - 0)           | 299<br>(162 - 448)      | 74<br>(44 - 116)         | 26<br>(16 - 40)          |
| Schizophrenia                                       | 2<br>(1 - 3)             | --                    | --                     | 1<br>(1 - 2)            | 1<br>(0 - 1)             | 0<br>(0 - 0)             |
| Alcohol use disorders                               | 147<br>(59 - 275)        | --                    | --                     | 82<br>(34 - 159)        | 49<br>(20 - 92)          | 15<br>(5 - 30)           |
| Drug use disorders                                  | 271<br>(147 - 395)       | 20<br>(5 - 46)        | --                     | 215<br>(106 - 331)      | 24<br>(17 - 33)          | 11<br>(8 - 15)           |
| Opioid use disorders                                | 29<br>(15 - 43)          | 2<br>(0 - 5)          | --                     | 23<br>(11 - 37)         | 2<br>(1 - 3)             | 1<br>(1 - 2)             |
| Cocaine use disorders                               | 1<br>(1 - 2)             | 0<br>(0 - 0)          | --                     | 1<br>(0 - 1)            | 0<br>(0 - 1)             | 0<br>(0 - 0)             |
| Amphetamine use disorders                           | 1<br>(0 - 1)             | 0<br>(0 - 0)          | --                     | 1<br>(0 - 1)            | 0<br>(0 - 0)             | 0<br>(0 - 0)             |

Web Table 31- Mali deaths with 95% UI by age, sex, and cause in 2013

| Cause                                               | Both Sexes, All Ages     | Both Sexes, 0-4 Years    | Both Sexes, 5-14 Years | Both Sexes, 15-49 Years | Both Sexes, 50-69 Years | Both Sexes, 70-80 Years |
|-----------------------------------------------------|--------------------------|--------------------------|------------------------|-------------------------|-------------------------|-------------------------|
| Other drug use disorders                            | 240<br>(131 - 351)       | 18<br>(4 - 41)           | --                     | 190<br>(94 - 292)       | 22<br>(15 - 30)         | 10<br>(7 - 13)          |
| Eating disorders                                    | 0<br>(0 - 1)             | --                       | 0<br>(0 - 0)           | 0<br>(0 - 1)            | --                      | --                      |
| Anorexia nervosa                                    | 0<br>(0 - 1)             | --                       | 0<br>(0 - 0)           | 0<br>(0 - 1)            | --                      | --                      |
| Diabetes, urogenital, blood, and endocrine diseases | 5,457<br>(4,287 - 7,167) | 1,413<br>(715 - 2,797)   | 504<br>(304 - 800)     | 1,061<br>(840 - 1,388)  | 1,278<br>(997 - 1,636)  | 1,201<br>(973 - 1,480)  |
| Diabetes mellitus                                   | 1,590<br>(1,269 - 1,980) | 38<br>(23 - 55)          | 16<br>(11 - 24)        | 214<br>(167 - 265)      | 691<br>(511 - 900)      | 631<br>(482 - 814)      |
| Acute glomerulonephritis                            | 20<br>(14 - 35)          | 4<br>(1 - 12)            | 3<br>(2 - 8)           | 7<br>(5 - 10)           | 5<br>(3 - 7)            | 2<br>(1 - 3)            |
| Chronic kidney disease                              | 910<br>(691 - 1,193)     | 135<br>(69 - 224)        | 77<br>(47 - 110)       | 275<br>(190 - 363)      | 214<br>(152 - 325)      | 208<br>(150 - 321)      |
| Chronic kidney disease due to diabetes mellitus     | 8<br>(4 - 14)            | 0<br>(0 - 1)             | 1<br>(0 - 1)           | 1<br>(0 - 1)            | 6<br>(2 - 11)           | 0<br>(0 - 1)            |
| Chronic kidney disease due to hypertension          | 275<br>(177 - 421)       | 13<br>(2 - 32)           | 6<br>(2 - 13)          | 63<br>(32 - 96)         | 95<br>(59 - 153)        | 97<br>(61 - 165)        |
| Chronic kidney disease due to glomerulonephritis    | 403<br>(298 - 510)       | 86<br>(47 - 142)         | 50<br>(33 - 72)        | 152<br>(106 - 202)      | 61<br>(40 - 92)         | 55<br>(36 - 81)         |
| Chronic kidney disease due to other causes          | 224<br>(125 - 335)       | 36<br>(9 - 73)           | 21<br>(8 - 38)         | 60<br>(32 - 102)        | 52<br>(26 - 98)         | 56<br>(25 - 98)         |
| Urinary diseases and male infertility               | 750<br>(558 - 947)       | 129<br>(61 - 241)        | 31<br>(19 - 49)        | 176<br>(106 - 236)      | 199<br>(140 - 273)      | 215<br>(158 - 301)      |
| Interstitial nephritis and urinary tract infections | 654<br>(461 - 834)       | 111<br>(44 - 219)        | 23<br>(12 - 40)        | 151<br>(85 - 204)       | 174<br>(122 - 242)      | 195<br>(140 - 275)      |
| Urolithiasis                                        | 12<br>(4 - 39)           | --                       | 2<br>(1 - 7)           | 4<br>(1 - 14)           | 4<br>(1 - 14)           | 2<br>(0 - 9)            |
| Other urinary diseases                              | 84<br>(55 - 125)         | 18<br>(7 - 44)           | 5<br>(2 - 11)          | 21<br>(11 - 36)         | 21<br>(10 - 32)         | 19<br>(9 - 33)          |
| Gynecological diseases                              | 15<br>(6 - 34)           | --                       | --                     | 9<br>(4 - 23)           | 4<br>(2 - 9)            | 2<br>(1 - 4)            |
| Uterine fibroids                                    | 3<br>(1 - 7)             | --                       | --                     | 1<br>(1 - 3)            | 1<br>(0 - 2)            | 1<br>(0 - 1)            |
| Polycystic ovarian syndrome                         | 1<br>(0 - 2)             | --                       | --                     | 1<br>(0 - 2)            | 0<br>(0 - 0)            | --                      |
| Endometriosis                                       | 2<br>(1 - 4)             | --                       | --                     | 1<br>(1 - 4)            | 0<br>(0 - 0)            | --                      |
| Genital prolapse                                    | 2<br>(1 - 6)             | --                       | --                     | 1<br>(0 - 3)            | 1<br>(0 - 2)            | 1<br>(0 - 1)            |
| Other gynecological diseases                        | 7<br>(3 - 17)            | --                       | --                     | 4<br>(2 - 11)           | 2<br>(1 - 5)            | 1<br>(0 - 2)            |
| Hemoglobinopathies and hemolytic anemias            | 1,555<br>(601 - 3,051)   | 902<br>(284 - 2,165)     | 331<br>(135 - 628)     | 244<br>(103 - 591)      | 49<br>(24 - 113)        | 30<br>(13 - 67)         |
| Thalassemias                                        | 8<br>(3 - 16)            | 6<br>(2 - 14)            | 1<br>(1 - 2)           | 1<br>(0 - 2)            | 0<br>(0 - 0)            | 0<br>(0 - 0)            |
| Sickle cell disorders                               | 1,497<br>(570 - 2,971)   | 877<br>(274 - 2,116)     | 326<br>(133 - 620)     | 239<br>(101 - 578)      | 45<br>(22 - 104)        | 11<br>(5 - 22)          |
| G6PD deficiency                                     | 10<br>(4 - 18)           | 5<br>(2 - 12)            | 2<br>(1 - 3)           | 2<br>(1 - 4)            | 1<br>(0 - 1)            | 1<br>(0 - 2)            |
| Other hemoglobinopathies and hemolytic anemias      | 41<br>(20 - 78)          | 14<br>(6 - 24)           | 2<br>(1 - 3)           | 3<br>(1 - 7)            | 4<br>(2 - 8)            | 19<br>(8 - 44)          |
| Endocrine, metabolic, blood, and immune disorders   | 617<br>(400 - 1,025)     | 206<br>(90 - 456)        | 45<br>(23 - 112)       | 137<br>(92 - 204)       | 117<br>(80 - 171)       | 113<br>(71 - 160)       |
| Musculoskeletal disorders                           | 131<br>(87 - 182)        | --                       | 25<br>(11 - 38)        | 46<br>(28 - 67)         | 34<br>(22 - 50)         | 26<br>(17 - 41)         |
| Rheumatoid arthritis                                | 17<br>(9 - 27)           | --                       | 3<br>(1 - 5)           | 3<br>(2 - 6)            | 4<br>(2 - 8)            | 7<br>(4 - 11)           |
| Other musculoskeletal disorders                     | 114<br>(75 - 157)        | --                       | 22<br>(10 - 35)        | 42<br>(26 - 62)         | 30<br>(19 - 43)         | 20<br>(13 - 30)         |
| Other non-communicable diseases                     | 4,521<br>(2,125 - 8,771) | 3,907<br>(1,587 - 8,097) | 215<br>(100 - 432)     | 180<br>(136 - 240)      | 99<br>(69 - 138)        | 120<br>(83 - 168)       |
| Congenital anomalies                                | 4,088<br>(1,704 - 8,334) | 3,764<br>(1,485 - 7,908) | 197<br>(83 - 405)      | 96<br>(62 - 152)        | 18<br>(12 - 27)         | 14<br>(9 - 20)          |
| Neural tube defects                                 | 1,183<br>(364 - 3,159)   | 1,118<br>(331 - 2,942)   | 44<br>(12 - 139)       | 18<br>(5 - 45)          | 1<br>(0 - 4)            | 1<br>(0 - 3)            |
| Congenital heart anomalies                          | 1,533<br>(635 - 3,207)   | 1,393<br>(542 - 3,005)   | 84<br>(31 - 185)       | 41<br>(25 - 61)         | 9<br>(6 - 12)           | 6<br>(4 - 9)            |
| Cleft lip and cleft palate                          | 21<br>(4 - 64)           | 21<br>(4 - 64)           | --                     | --                      | --                      | --                      |
| Down syndrome                                       | 463<br>(117 - 1,136)     | 412<br>(86 - 1,083)      | 31<br>(11 - 66)        | 16<br>(9 - 29)          | 3<br>(1 - 6)            | 0<br>(0 - 1)            |
| Chromosomal unbalanced rearrangements               | 130<br>(31 - 358)        | 120<br>(26 - 343)        | 5<br>(1 - 13)          | 4<br>(2 - 6)            | 0<br>(0 - 1)            | 0<br>(0 - 1)            |
| Other congenital anomalies                          | 759<br>(172 - 3,057)     | 699<br>(141 - 2,892)     | 32<br>(8 - 115)        | 17<br>(9 - 35)          | 4<br>(2 - 7)            | 6<br>(3 - 9)            |
| Skin and subcutaneous diseases                      | 403<br>(298 - 513)       | 113<br>(47 - 202)        | 18<br>(12 - 27)        | 84<br>(52 - 112)        | 82<br>(54 - 119)        | 106<br>(71 - 155)       |
| Cellulitis                                          | 199<br>(133 - 281)       | 47<br>(20 - 90)          | 11<br>(7 - 19)         | 40<br>(23 - 61)         | 41<br>(24 - 63)         | 59<br>(36 - 93)         |

Web Table 31- Mali deaths with 95% UI by age, sex, and cause in 2013

| Cause                                           | Both Sexes, All Ages      | Both Sexes, 0-4 Years    | Both Sexes, 5-14 Years   | Both Sexes, 15-49 Years  | Both Sexes, 50-69 Years | Both Sexes, 70-80 Years |
|-------------------------------------------------|---------------------------|--------------------------|--------------------------|--------------------------|-------------------------|-------------------------|
| Pyoderma                                        | 191<br>(113 - 276)        | 62<br>(19 - 131)         | 6<br>(3 - 12)            | 40<br>(23 - 59)          | 40<br>(23 - 62)         | 42<br>(23 - 69)         |
| Decubitus ulcer                                 | 6<br>(3 - 9)              | 0<br>(0 - 1)             | 0<br>(0 - 1)             | 1<br>(1 - 2)             | 1<br>(0 - 1)            | 4<br>(2 - 7)            |
| Other skin and subcutaneous diseases            | 8<br>(3 - 18)             | 3<br>(0 - 12)            | 0<br>(0 - 1)             | 3<br>(1 - 5)             | 1<br>(0 - 1)            | 1<br>(0 - 2)            |
| Sudden infant death syndrome                    | 30<br>(10 - 77)           | 30<br>(10 - 77)          | --                       | --                       | --                      | --                      |
| Injuries                                        | 8,717<br>(6,845 - 10,597) | 2,424<br>(1,350 - 3,683) | 1,469<br>(1,038 - 1,963) | 3,291<br>(2,601 - 4,025) | 884<br>(669 - 1,121)    | 649<br>(470 - 816)      |
| Transport injuries                              | 3,978<br>(3,014 - 5,236)  | 732<br>(380 - 1,286)     | 711<br>(454 - 1,047)     | 1,886<br>(1,412 - 2,447) | 433<br>(311 - 574)      | 215<br>(150 - 283)      |
| Road injuries                                   | 3,807<br>(2,892 - 4,987)  | 665<br>(343 - 1,163)     | 673<br>(432 - 983)       | 1,850<br>(1,384 - 2,406) | 416<br>(300 - 548)      | 202<br>(143 - 265)      |
| Pedestrian road injuries                        | 1,106<br>(760 - 1,600)    | 233<br>(105 - 464)       | 243<br>(142 - 388)       | 427<br>(274 - 626)       | 129<br>(83 - 180)       | 74<br>(50 - 107)        |
| Cyclist road injuries                           | 222<br>(154 - 322)        | 51<br>(21 - 104)         | 62<br>(36 - 105)         | 66<br>(44 - 93)          | 32<br>(17 - 46)         | 11<br>(6 - 17)          |
| Motorcyclist road injuries                      | 444<br>(299 - 673)        | 51<br>(23 - 98)          | 46<br>(25 - 78)          | 294<br>(183 - 460)       | 39<br>(24 - 59)         | 14<br>(9 - 22)          |
| Motor vehicle road injuries                     | 1,913<br>(1,452 - 2,424)  | 296<br>(152 - 532)       | 288<br>(184 - 419)       | 1,033<br>(767 - 1,336)   | 202<br>(139 - 278)      | 93<br>(63 - 128)        |
| Other road injuries                             | 121<br>(72 - 188)         | 34<br>(9 - 78)           | 34<br>(15 - 62)          | 31<br>(16 - 59)          | 14<br>(7 - 23)          | 9<br>(4 - 15)           |
| Other transport injuries                        | 172<br>(92 - 266)         | 67<br>(23 - 134)         | 38<br>(19 - 69)          | 36<br>(23 - 56)          | 18<br>(7 - 27)          | 13<br>(3 - 23)          |
| Unintentional injuries                          | 3,998<br>(2,999 - 5,077)  | 1,649<br>(818 - 2,499)   | 717<br>(505 - 1,010)     | 906<br>(692 - 1,183)     | 347<br>(262 - 441)      | 379<br>(267 - 496)      |
| Falls                                           | 707<br>(546 - 920)        | 161<br>(71 - 304)        | 80<br>(46 - 128)         | 190<br>(128 - 281)       | 102<br>(71 - 158)       | 174<br>(114 - 245)      |
| Drowning                                        | 1,030<br>(524 - 1,769)    | 491<br>(134 - 984)       | 273<br>(138 - 496)       | 210<br>(123 - 354)       | 38<br>(27 - 52)         | 18<br>(12 - 26)         |
| Fire, heat, and hot substances                  | 501<br>(273 - 744)        | 260<br>(84 - 482)        | 71<br>(37 - 111)         | 91<br>(65 - 131)         | 41<br>(25 - 61)         | 38<br>(22 - 60)         |
| Poisonings                                      | 226<br>(142 - 395)        | 103<br>(44 - 212)        | 32<br>(17 - 57)          | 64<br>(40 - 140)         | 20<br>(12 - 28)         | 8<br>(5 - 12)           |
| Exposure to mechanical forces                   | 555<br>(415 - 741)        | 196<br>(104 - 333)       | 109<br>(68 - 172)        | 178<br>(122 - 268)       | 49<br>(31 - 69)         | 23<br>(12 - 32)         |
| Unintentional firearm injuries                  | 210<br>(148 - 317)        | 57<br>(28 - 109)         | 30<br>(16 - 54)          | 98<br>(60 - 160)         | 17<br>(11 - 27)         | 8<br>(5 - 11)           |
| Unintentional suffocation                       | 42<br>(20 - 83)           | 25<br>(8 - 61)           | 7<br>(3 - 13)            | 6<br>(3 - 11)            | 2<br>(1 - 3)            | 1<br>(0 - 1)            |
| Other exposure to mechanical forces             | 303<br>(209 - 438)        | 114<br>(49 - 219)        | 72<br>(39 - 124)         | 74<br>(47 - 122)         | 30<br>(13 - 47)         | 14<br>(4 - 22)          |
| Adverse effects of medical treatment            | 252<br>(102 - 402)        | 91<br>(20 - 189)         | 20<br>(7 - 35)           | 48<br>(24 - 78)          | 43<br>(16 - 79)         | 50<br>(15 - 99)         |
| Animal contact                                  | 134<br>(76 - 202)         | 41<br>(15 - 81)          | 34<br>(17 - 59)          | 30<br>(15 - 45)          | 16<br>(8 - 26)          | 14<br>(5 - 22)          |
| Venomous animal contact                         | 77<br>(41 - 139)          | 26<br>(8 - 62)           | 19<br>(8 - 42)           | 18<br>(8 - 29)           | 8<br>(3 - 14)           | 6<br>(2 - 11)           |
| Non-venomous animal contact                     | 58<br>(27 - 84)           | 15<br>(5 - 30)           | 15<br>(7 - 28)           | 12<br>(5 - 19)           | 8<br>(3 - 14)           | 8<br>(3 - 12)           |
| Foreign body                                    | 344<br>(182 - 665)        | 231<br>(99 - 493)        | 36<br>(16 - 71)          | 26<br>(17 - 45)          | 17<br>(11 - 27)         | 32<br>(19 - 48)         |
| Pulmonary aspiration and foreign body in airway | 334<br>(176 - 655)        | 228<br>(97 - 489)        | 35<br>(15 - 69)          | 25<br>(15 - 43)          | 15<br>(10 - 26)         | 31<br>(18 - 47)         |
| Foreign body in other body part                 | 9<br>(6 - 14)             | 3<br>(1 - 6)             | 2<br>(1 - 3)             | 1<br>(1 - 2)             | 2<br>(1 - 2)            | 1<br>(1 - 2)            |
| Other unintentional injuries                    | 249<br>(185 - 327)        | 76<br>(39 - 128)         | 61<br>(38 - 92)          | 69<br>(49 - 94)          | 22<br>(16 - 29)         | 21<br>(14 - 30)         |
| Self-harm and interpersonal violence            | 720<br>(521 - 962)        | 42<br>(20 - 76)          | 39<br>(23 - 61)          | 487<br>(347 - 690)       | 98<br>(61 - 139)        | 54<br>(23 - 80)         |
| Self-harm                                       | 423<br>(280 - 616)        | --                       | 15<br>(6 - 33)           | 270<br>(179 - 442)       | 86<br>(47 - 126)        | 52<br>(20 - 77)         |
| Interpersonal violence                          | 296<br>(203 - 416)        | 42<br>(20 - 76)          | 23<br>(14 - 38)          | 217<br>(138 - 321)       | 12<br>(8 - 19)          | 2<br>(1 - 4)            |
| Assault by firearm                              | 138<br>(72 - 209)         | 10<br>(4 - 21)           | 6<br>(3 - 11)            | 117<br>(58 - 182)        | 5<br>(3 - 9)            | 1<br>(0 - 1)            |
| Assault by sharp object                         | 60<br>(36 - 99)           | 7<br>(2 - 15)            | 4<br>(2 - 7)             | 45<br>(25 - 86)          | 3<br>(2 - 6)            | 1<br>(0 - 1)            |
| Assault by other means                          | 98<br>(66 - 161)          | 25<br>(12 - 50)          | 13<br>(8 - 22)           | 56<br>(34 - 97)          | 4<br>(2 - 6)            | 1<br>(1 - 2)            |
| Forces of nature, war, and legal intervention   | 21<br>(12 - 44)           | 1<br>(0 - 1)             | 2<br>(1 - 4)             | 12<br>(7 - 25)           | 5<br>(3 - 9)            | 1<br>(1 - 3)            |
| Exposure to forces of nature                    | 21<br>(12 - 44)           | 1<br>(0 - 1)             | 2<br>(1 - 4)             | 12<br>(7 - 25)           | 5<br>(3 - 9)            | 1<br>(1 - 3)            |

Web Table 31- Mali deaths with 95% UI by age, sex, and cause in 2013

| Cause                                                             | Males, All Ages              | Males, 0-4 Years            | Males, 5-14 Years        | Males, 15-49 Years          | Males, 50-69 Years        | Males, 70-80 Years       |
|-------------------------------------------------------------------|------------------------------|-----------------------------|--------------------------|-----------------------------|---------------------------|--------------------------|
| All causes                                                        | 89,596<br>(79,798 - 102,776) | 55,025<br>(46,211 - 65,930) | 4,749<br>(3,993 - 5,593) | 12,963<br>(10,802 - 15,249) | 8,798<br>(7,246 - 10,722) | 8,060<br>(7,155 - 9,343) |
| Communicable, maternal, neonatal, and nutritional diseases        | 64,047<br>(54,907 - 74,738)  | 49,869<br>(41,518 - 60,382) | 2,900<br>(2,330 - 3,543) | 5,676<br>(4,818 - 6,649)    | 2,733<br>(2,259 - 3,285)  | 2,869<br>(2,368 - 3,453) |
| HIV/AIDS and tuberculosis                                         | 5,299<br>(4,260 - 6,667)     | 177<br>(101 - 262)          | 223<br>(166 - 331)       | 2,970<br>(2,220 - 3,836)    | 1,134<br>(866 - 1,502)    | 795<br>(573 - 1,078)     |
| Tuberculosis                                                      | 2,682<br>(1,849 - 3,673)     | 22<br>(10 - 41)             | 49<br>(23 - 134)         | 1,079<br>(687 - 1,557)      | 781<br>(499 - 1,121)      | 752<br>(528 - 1,035)     |
| HIV/AIDS                                                          | 2,616<br>(1,762 - 3,605)     | 154<br>(80 - 237)           | 174<br>(132 - 221)       | 1,891<br>(1,166 - 2,788)    | 353<br>(238 - 493)        | 43<br>(24 - 65)          |
| HIV/AIDS resulting in mycobacterial infection                     | 181<br>(117 - 269)           | 9<br>(5 - 15)               | 10<br>(7 - 14)           | 132<br>(79 - 205)           | 26<br>(16 - 38)           | 3<br>(2 - 5)             |
| HIV/AIDS resulting in other diseases                              | 2,435<br>(1,640 - 3,363)     | 145<br>(76 - 222)           | 164<br>(124 - 209)       | 1,759<br>(1,087 - 2,606)    | 327<br>(221 - 456)        | 40<br>(22 - 60)          |
| Diarrhea, lower respiratory, and other common infectious diseases | 23,528<br>(17,790 - 30,304)  | 17,211<br>(11,591 - 23,702) | 1,608<br>(1,056 - 2,214) | 1,866<br>(1,398 - 2,447)    | 1,201<br>(854 - 1,639)    | 1,642<br>(1,248 - 2,118) |
| Diarrheal diseases                                                | 10,262<br>(6,581 - 15,523)   | 8,029<br>(4,469 - 13,241)   | 550<br>(259 - 1,021)     | 699<br>(476 - 985)          | 455<br>(262 - 696)        | 529<br>(319 - 824)       |
| Intestinal infectious diseases                                    | 369<br>(192 - 664)           | 111<br>(47 - 213)           | 136<br>(63 - 254)        | 108<br>(50 - 211)           | 10<br>(5 - 18)            | 4<br>(2 - 8)             |
| Typhoid fever                                                     | 226<br>(109 - 406)           | 61<br>(24 - 126)            | 85<br>(38 - 168)         | 72<br>(30 - 146)            | 6<br>(2 - 12)             | 2<br>(1 - 4)             |
| Paratyphoid fever                                                 | 112<br>(46 - 217)            | 33<br>(11 - 78)             | 46<br>(15 - 97)          | 30<br>(9 - 63)              | 2<br>(1 - 6)              | 1<br>(0 - 2)             |
| Other intestinal infectious diseases                              | 30<br>(15 - 50)              | 17<br>(7 - 32)              | 4<br>(1 - 11)            | 7<br>(2 - 14)               | 1<br>(0 - 5)              | 1<br>(0 - 4)             |
| Lower respiratory infections                                      | 9,795<br>(6,826 - 13,640)    | 7,273<br>(4,350 - 10,924)   | 424<br>(229 - 723)       | 472<br>(318 - 665)          | 605<br>(397 - 877)        | 1,020<br>(694 - 1,438)   |
| Upper respiratory infections                                      | 13<br>(4 - 34)               | 8<br>(0 - 29)               | 1<br>(0 - 4)             | 2<br>(0 - 5)                | 1<br>(0 - 3)              | 1<br>(0 - 3)             |
| Otitis media                                                      | 5<br>(4 - 7)                 | 2<br>(1 - 4)                | 1<br>(0 - 1)             | 1<br>(1 - 1)                | 1<br>(0 - 1)              | 1<br>(1 - 1)             |
| Meningitis                                                        | 2,376<br>(1,563 - 3,596)     | 1,318<br>(656 - 2,444)      | 390<br>(183 - 710)       | 488<br>(300 - 765)          | 104<br>(59 - 175)         | 76<br>(40 - 133)         |
| Pneumococcal meningitis                                           | 592<br>(365 - 938)           | 302<br>(141 - 602)          | 110<br>(41 - 228)        | 134<br>(60 - 230)           | 27<br>(11 - 52)           | 19<br>(9 - 35)           |
| H influenzae type B meningitis                                    | 426<br>(228 - 739)           | 297<br>(122 - 602)          | 60<br>(21 - 121)         | 53<br>(23 - 95)             | 11<br>(4 - 21)            | 6<br>(2 - 13)            |
| Meningococcal meningitis                                          | 1,086<br>(661 - 1,653)       | 598<br>(279 - 1,145)        | 182<br>(72 - 347)        | 222<br>(124 - 365)          | 47<br>(24 - 84)           | 37<br>(18 - 71)          |
| Other meningitis                                                  | 273<br>(154 - 430)           | 121<br>(41 - 246)           | 39<br>(12 - 84)          | 79<br>(33 - 146)            | 19<br>(5 - 40)            | 15<br>(4 - 42)           |
| Encephalitis                                                      | 95<br>(64 - 147)             | 46<br>(24 - 90)             | 17<br>(9 - 38)           | 21<br>(13 - 31)             | 7<br>(4 - 10)             | 5<br>(2 - 8)             |
| Diphtheria                                                        | 10<br>(0 - 59)               | 8<br>(0 - 57)               | 2<br>(0 - 16)            | 0<br>(0 - 1)                | 0<br>(0 - 0)              | --<br>(0 - 0)            |
| Whooping cough                                                    | 123<br>(0 - 595)             | 113<br>(0 - 553)            | 8<br>(0 - 43)            | 1<br>(0 - 7)                | 0<br>(0 - 0)              | --<br>(0 - 0)            |
| Tetanus                                                           | 152<br>(91 - 242)            | 33<br>(14 - 71)             | 32<br>(15 - 70)          | 66<br>(31 - 108)            | 18<br>(9 - 32)            | 4<br>(2 - 10)            |
| Measles                                                           | 317<br>(31 - 1,275)          | 266<br>(25 - 1,082)         | 47<br>(5 - 191)          | 5<br>(0 - 18)               | 0<br>(0 - 0)              | --<br>(0 - 0)            |
| Varicella and herpes zoster                                       | 11<br>(4 - 26)               | 4<br>(0 - 19)               | 1<br>(0 - 6)             | 3<br>(0 - 7)                | 1<br>(0 - 2)              | 2<br>(0 - 9)             |
| Neglected tropical diseases and malaria                           | 16,691<br>(10,022 - 25,019)  | 15,445<br>(9,147 - 23,443)  | 574<br>(201 - 1,420)     | 339<br>(130 - 904)          | 158<br>(51 - 453)         | 176<br>(44 - 593)        |
| Malaria                                                           | 16,526<br>(9,857 - 24,875)   | 15,388<br>(9,096 - 23,373)  | 524<br>(148 - 1,379)     | 300<br>(87 - 871)           | 144<br>(37 - 440)         | 170<br>(38 - 587)        |
| Leishmaniasis                                                     | 0<br>(0 - 0)                 | 0<br>(0 - 0)                | 0<br>(0 - 0)             | 0<br>(0 - 0)                | 0<br>(0 - 0)              | 0<br>(0 - 0)             |
| Visceral leishmaniasis                                            | 0<br>(0 - 0)                 | 0<br>(0 - 0)                | 0<br>(0 - 0)             | 0<br>(0 - 0)                | 0<br>(0 - 0)              | 0<br>(0 - 0)             |
| Schistosomiasis                                                   | 25<br>(17 - 35)              | 1<br>(0 - 3)                | 2<br>(1 - 4)             | 11<br>(7 - 16)              | 7<br>(4 - 12)             | 3<br>(2 - 6)             |
| Cysticercosis                                                     | 2<br>(0 - 5)                 | 0<br>(0 - 1)                | 0<br>(0 - 1)             | 1<br>(0 - 3)                | 0<br>(0 - 1)              | 0<br>(0 - 0)             |
| Cystic echinococcosis                                             | 4<br>(3 - 6)                 | 1<br>(1 - 2)                | 1<br>(1 - 2)             | 1<br>(1 - 2)                | 0<br>(0 - 0)              | 0<br>(0 - 0)             |
| Dengue                                                            | 5<br>(2 - 9)                 | 3<br>(0 - 6)                | 2<br>(1 - 3)             | 1<br>(0 - 2)                | 0<br>(0 - 0)              | 0<br>(0 - 0)             |
| Yellow fever                                                      | 3<br>(2 - 6)                 | 0<br>(0 - 1)                | 1<br>(0 - 2)             | 2<br>(1 - 4)                | 0<br>(0 - 1)              | 0<br>(0 - 0)             |
| Rabies                                                            | 81<br>(32 - 135)             | 22<br>(4 - 60)              | 37<br>(13 - 70)          | 18<br>(9 - 28)              | 4<br>(1 - 7)              | 0<br>(0 - 1)             |
| Intestinal nematode infections                                    | 27<br>(11 - 53)              | 22<br>(8 - 46)              | 4<br>(0 - 14)            | 1<br>(0 - 5)                | 0<br>(0 - 2)              | 0<br>(0 - 2)             |
| Ascariasis                                                        | 27<br>(11 - 53)              | 22<br>(8 - 46)              | 4<br>(0 - 14)            | 1<br>(0 - 5)                | 0<br>(0 - 2)              | 0<br>(0 - 2)             |
| Other neglected tropical diseases                                 | 16<br>(9 - 28)               | 6<br>(3 - 15)               | 2<br>(1 - 4)             | 5<br>(2 - 9)                | 2<br>(1 - 3)              | 2<br>(1 - 3)             |

Web Table 31- Mali deaths with 95% UI by age, sex, and cause in 2013

| Cause                                                            | Males, All Ages             | Males, 0-4 Years           | Males, 5-14 Years    | Males, 15-49 Years       | Males, 50-69 Years       | Males, 70-80 Years       |
|------------------------------------------------------------------|-----------------------------|----------------------------|----------------------|--------------------------|--------------------------|--------------------------|
| Maternal disorders                                               | --                          | --                         | --                   | --                       | --                       | --                       |
| Maternal hemorrhage                                              | --                          | --                         | --                   | --                       | --                       | --                       |
| Maternal sepsis and other maternal infections                    | --                          | --                         | --                   | --                       | --                       | --                       |
| Maternal hypertensive disorders                                  | --                          | --                         | --                   | --                       | --                       | --                       |
| Maternal obstructed labor                                        | --                          | --                         | --                   | --                       | --                       | --                       |
| Maternal abortive outcome                                        | --                          | --                         | --                   | --                       | --                       | --                       |
| Indirect maternal deaths                                         | --                          | --                         | --                   | --                       | --                       | --                       |
| Late maternal deaths                                             | --                          | --                         | --                   | --                       | --                       | --                       |
| Maternal deaths aggravated by HIV/AIDS                           | --                          | --                         | --                   | --                       | --                       | --                       |
| Other maternal disorders                                         | --                          | --                         | --                   | --                       | --                       | --                       |
| Neonatal disorders                                               | 12,163<br>(9,938 - 14,900)  | 12,163<br>(9,938 - 14,900) | --                   | --                       | --                       | --                       |
| Neonatal preterm birth complications                             | 4,602<br>(2,027 - 7,777)    | 4,602<br>(2,027 - 7,777)   | --                   | --                       | --                       | --                       |
| Neonatal encephalopathy due to birth asphyxia and trauma         | 3,603<br>(1,642 - 6,548)    | 3,603<br>(1,642 - 6,548)   | --                   | --                       | --                       | --                       |
| Neonatal sepsis and other neonatal infections                    | 2,751<br>(1,043 - 5,384)    | 2,751<br>(1,043 - 5,384)   | --                   | --                       | --                       | --                       |
| Hemolytic disease and other neonatal jaundice                    | 110<br>(35 - 308)           | 110<br>(35 - 308)          | --                   | --                       | --                       | --                       |
| Other neonatal disorders                                         | 1,097<br>(511 - 2,064)      | 1,097<br>(511 - 2,064)     | --                   | --                       | --                       | --                       |
| Nutritional deficiencies                                         | 5,133<br>(2,492 - 8,298)    | 3,979<br>(1,732 - 6,987)   | 383<br>(189 - 632)   | 385<br>(201 - 585)       | 178<br>(89 - 289)        | 207<br>(108 - 367)       |
| Protein-energy malnutrition                                      | 4,304<br>(2,047 - 7,210)    | 3,626<br>(1,594 - 6,398)   | 277<br>(125 - 493)   | 191<br>(88 - 355)        | 102<br>(48 - 192)        | 109<br>(47 - 246)        |
| Iodine deficiency                                                | 4<br>(0 - 18)               | 2<br>(0 - 15)              | 1<br>(0 - 6)         | 1<br>(0 - 4)             | 0<br>(0 - 1)             | 0<br>(0 - 1)             |
| Iron-deficiency anemia                                           | 814<br>(213 - 1,773)        | 349<br>(25 - 1,169)        | 104<br>(26 - 225)    | 189<br>(61 - 319)        | 75<br>(22 - 138)         | 97<br>(35 - 181)         |
| Other nutritional deficiencies                                   | 11<br>(4 - 22)              | 2<br>(0 - 7)               | 2<br>(1 - 4)         | 5<br>(1 - 12)            | 1<br>(0 - 3)             | 1<br>(0 - 3)             |
| Other communicable, maternal, neonatal, and nutritional diseases | 1,234<br>(788 - 1,905)      | 895<br>(489 - 1,476)       | 112<br>(65 - 179)    | 116<br>(77 - 180)        | 62<br>(37 - 109)         | 50<br>(28 - 96)          |
| Sexually transmitted diseases excluding HIV                      | 877<br>(459 - 1,495)        | 743<br>(366 - 1,289)       | 79<br>(41 - 140)     | 29<br>(17 - 59)          | 13<br>(6 - 34)           | 12<br>(4 - 30)           |
| Syphilis                                                         | 854<br>(440 - 1,471)        | 743<br>(366 - 1,289)       | 76<br>(37 - 134)     | 15<br>(9 - 31)           | 10<br>(4 - 25)           | 10<br>(4 - 26)           |
| Chlamydial infection                                             | --                          | --                         | --                   | --                       | --                       | --                       |
| Gonococcal infection                                             | 13<br>(8 - 27)              | --                         | 2<br>(1 - 4)         | 8<br>(4 - 16)            | 2<br>(1 - 6)             | 1<br>(1 - 4)             |
| Other sexually transmitted diseases                              | 10<br>(6 - 20)              | --                         | 2<br>(1 - 4)         | 6<br>(4 - 13)            | 1<br>(1 - 3)             | 1<br>(0 - 1)             |
| Hepatitis                                                        | 146<br>(96 - 207)           | 40<br>(11 - 81)            | 17<br>(8 - 26)       | 53<br>(33 - 82)          | 23<br>(14 - 40)          | 14<br>(8 - 23)           |
| Acute hepatitis A                                                | 17<br>(4 - 40)              | 10<br>(2 - 28)             | 4<br>(1 - 9)         | 2<br>(1 - 5)             | 0<br>(0 - 0)             | 0<br>(0 - 0)             |
| Acute hepatitis B                                                | 90<br>(55 - 133)            | 29<br>(8 - 62)             | 9<br>(4 - 17)        | 22<br>(11 - 39)          | 18<br>(10 - 32)          | 12<br>(7 - 21)           |
| Acute hepatitis C                                                | 4<br>(1 - 11)               | --                         | 1<br>(0 - 3)         | 2<br>(0 - 5)             | 1<br>(0 - 2)             | 0<br>(0 - 1)             |
| Acute hepatitis E                                                | 35<br>(18 - 58)             | 0<br>(0 - 1)               | 2<br>(1 - 5)         | 27<br>(14 - 45)          | 4<br>(2 - 9)             | 1<br>(0 - 3)             |
| Other infectious diseases                                        | 210<br>(104 - 401)          | 111<br>(38 - 264)          | 16<br>(5 - 38)       | 33<br>(13 - 75)          | 25<br>(10 - 63)          | 24<br>(7 - 70)           |
| Non-communicable diseases                                        | 20,032<br>(16,219 - 25,296) | 3,737<br>(1,909 - 7,548)   | 912<br>(629 - 1,327) | 4,887<br>(3,828 - 6,127) | 5,594<br>(4,398 - 7,142) | 4,902<br>(4,159 - 5,859) |
| Neoplasms                                                        | 3,813<br>(2,977 - 4,795)    | 94<br>(48 - 173)           | 107<br>(71 - 151)    | 1,401<br>(1,037 - 1,804) | 1,460<br>(1,075 - 1,907) | 751<br>(593 - 942)       |
| Esophageal cancer                                                | 112<br>(78 - 159)           | --                         | --                   | 26<br>(17 - 37)          | 57<br>(37 - 85)          | 29<br>(19 - 43)          |
| Stomach cancer                                                   | 596<br>(463 - 773)          | --                         | --                   | 164<br>(119 - 223)       | 307<br>(228 - 414)       | 125<br>(91 - 168)        |
| Liver cancer                                                     | 1,790<br>(1,284 - 2,373)    | --                         | 17<br>(7 - 35)       | 838<br>(562 - 1,170)     | 691<br>(463 - 960)       | 244<br>(159 - 351)       |
| Liver cancer due to hepatitis B                                  | 886<br>(447 - 1,386)        | --                         | 9<br>(3 - 20)        | 490<br>(268 - 775)       | 306<br>(86 - 530)        | 80<br>(34 - 147)         |
| Liver cancer due to hepatitis C                                  | 575<br>(297 - 975)          | --                         | 1<br>(0 - 4)         | 195<br>(82 - 358)        | 267<br>(125 - 465)       | 112<br>(55 - 184)        |

Web Table 31- Mali deaths with 95% UI by age, sex, and cause in 2013

| Cause                                | Males, All Ages          | Males, 0-4 Years   | Males, 5-14 Years | Males, 15-49 Years     | Males, 50-69 Years       | Males, 70-80 Years       |
|--------------------------------------|--------------------------|--------------------|-------------------|------------------------|--------------------------|--------------------------|
| Liver cancer due to alcohol use      | 152<br>(42 - 272)        | --                 | --                | 45<br>(12 - 85)        | 68<br>(18 - 138)         | 38<br>(9 - 72)           |
| Liver cancer due to other causes     | 177<br>(93 - 296)        | --                 | 7<br>(3 - 15)     | 108<br>(51 - 193)      | 49<br>(22 - 95)          | 13<br>(6 - 24)           |
| Larynx cancer                        | 33<br>(23 - 49)          | --                 | --                | 7<br>(4 - 10)          | 19<br>(13 - 32)          | 7<br>(5 - 10)            |
| Tracheal, bronchus and lung cancer   | 140<br>(110 - 177)       | --                 | --                | 24<br>(17 - 32)        | 74<br>(54 - 99)          | 42<br>(32 - 54)          |
| Breast cancer                        | 14<br>(4 - 22)           | --                 | --                | 6<br>(2 - 10)          | 5<br>(1 - 10)            | 3<br>(1 - 5)             |
| Cervical cancer                      | --                       | --                 | --                | --                     | --                       | --                       |
| Uterine cancer                       | --                       | --                 | --                | --                     | --                       | --                       |
| Prostate cancer                      | 110<br>(75 - 176)        | --                 | --                | 6<br>(4 - 9)           | 31<br>(18 - 52)          | 73<br>(49 - 117)         |
| Colon and rectum cancer              | 194<br>(154 - 243)       | --                 | --                | 66<br>(49 - 87)        | 62<br>(47 - 83)          | 65<br>(49 - 85)          |
| Lip and oral cavity cancer           | 17<br>(12 - 24)          | --                 | --                | 5<br>(3 - 7)           | 8<br>(5 - 12)            | 4<br>(3 - 6)             |
| Nasopharynx cancer                   | 10<br>(7 - 14)           | --                 | 1<br>(0 - 2)      | 5<br>(3 - 7)           | 3<br>(2 - 5)             | 1<br>(1 - 2)             |
| Other pharynx cancer                 | 13<br>(9 - 18)           | --                 | --                | 3<br>(2 - 4)           | 6<br>(4 - 10)            | 4<br>(2 - 5)             |
| Gallbladder and biliary tract cancer | 24<br>(16 - 31)          | --                 | --                | 8<br>(4 - 12)          | 9<br>(6 - 13)            | 7<br>(5 - 10)            |
| Pancreatic cancer                    | 100<br>(76 - 130)        | --                 | --                | 28<br>(20 - 38)        | 47<br>(34 - 65)          | 25<br>(19 - 35)          |
| Malignant skin melanoma              | 8<br>(4 - 12)            | --                 | --                | 3<br>(1 - 5)           | 3<br>(1 - 4)             | 2<br>(1 - 4)             |
| Non-melanoma skin cancer             | 5<br>(3 - 9)             | --                 | --                | 1<br>(1 - 2)           | 2<br>(1 - 3)             | 2<br>(1 - 4)             |
| Ovarian cancer                       | --                       | --                 | --                | --                     | --                       | --                       |
| Testicular cancer                    | 8<br>(4 - 12)            | --                 | --                | 6<br>(3 - 9)           | 1<br>(0 - 2)             | 1<br>(0 - 1)             |
| Kidney cancer                        | 37<br>(27 - 49)          | 4<br>(1 - 11)      | 3<br>(1 - 5)      | 6<br>(4 - 9)           | 19<br>(12 - 27)          | 5<br>(4 - 8)             |
| Bladder cancer                       | 55<br>(41 - 83)          | --                 | --                | 11<br>(7 - 16)         | 18<br>(11 - 31)          | 27<br>(18 - 43)          |
| Brain and nervous system cancer      | 37<br>(14 - 54)          | 2<br>(0 - 4)       | 9<br>(2 - 16)     | 13<br>(5 - 20)         | 8<br>(3 - 12)            | 7<br>(2 - 12)            |
| Thyroid cancer                       | 9<br>(4 - 13)            | --                 | 1<br>(1 - 2)      | 4<br>(2 - 6)           | 2<br>(1 - 4)             | 2<br>(1 - 3)             |
| Mesothelioma                         | 4<br>(2 - 6)             | --                 | --                | 1<br>(0 - 1)           | 1<br>(1 - 2)             | 2<br>(1 - 3)             |
| Hodgkin lymphoma                     | 29<br>(17 - 43)          | 3<br>(1 - 7)       | 6<br>(2 - 15)     | 15<br>(9 - 21)         | 4<br>(2 - 6)             | 2<br>(1 - 3)             |
| Non-Hodgkin lymphoma                 | 138<br>(100 - 183)       | 18<br>(7 - 37)     | 30<br>(15 - 50)   | 54<br>(38 - 75)        | 20<br>(14 - 29)          | 16<br>(10 - 25)          |
| Multiple myeloma                     | 8<br>(5 - 11)            | --                 | --                | 2<br>(2 - 3)           | 4<br>(2 - 6)             | 2<br>(1 - 3)             |
| Leukemia                             | 81<br>(63 - 102)         | 3<br>(1 - 6)       | 9<br>(5 - 14)     | 45<br>(32 - 59)        | 11<br>(8 - 15)           | 14<br>(10 - 19)          |
| Other neoplasms                      | 240<br>(164 - 354)       | 65<br>(33 - 131)   | 32<br>(17 - 51)   | 55<br>(34 - 86)        | 49<br>(27 - 93)          | 41<br>(23 - 75)          |
| Cardiovascular diseases              | 5,383<br>(4,418 - 6,580) | 287<br>(179 - 452) | 116<br>(71 - 181) | 1,041<br>(790 - 1,342) | 1,820<br>(1,384 - 2,376) | 2,119<br>(1,746 - 2,583) |
| Rheumatic heart disease              | 91<br>(45 - 228)         | 12<br>(4 - 28)     | 8<br>(3 - 23)     | 30<br>(12 - 92)        | 20<br>(8 - 60)           | 21<br>(11 - 50)          |
| Ischemic heart disease               | 1,592<br>(1,185 - 2,109) | 16<br>(5 - 39)     | 19<br>(10 - 32)   | 300<br>(207 - 410)     | 620<br>(431 - 858)       | 636<br>(475 - 868)       |
| Cerebrovascular disease              | 2,401<br>(1,841 - 3,079) | 104<br>(56 - 171)  | 38<br>(21 - 62)   | 367<br>(245 - 495)     | 803<br>(580 - 1,101)     | 1,088<br>(850 - 1,379)   |
| Ischemic stroke                      | 1,395<br>(809 - 1,893)   | 9<br>(2 - 27)      | 5<br>(2 - 11)     | 95<br>(41 - 158)       | 477<br>(237 - 699)       | 809<br>(492 - 1,086)     |
| Hemorrhagic stroke                   | 1,007<br>(654 - 1,507)   | 95<br>(46 - 156)   | 32<br>(16 - 54)   | 273<br>(179 - 385)     | 327<br>(185 - 557)       | 279<br>(137 - 526)       |
| Hypertensive heart disease           | 233<br>(108 - 418)       | 3<br>(0 - 8)       | 1<br>(0 - 3)      | 49<br>(15 - 108)       | 80<br>(33 - 145)         | 101<br>(45 - 185)        |
| Cardiomyopathy and myocarditis       | 297<br>(172 - 457)       | 37<br>(11 - 87)    | 17<br>(7 - 30)    | 83<br>(46 - 134)       | 91<br>(38 - 165)         | 69<br>(29 - 132)         |
| Atrial fibrillation and flutter      | 0<br>(0 - 0)             | --                 | --                | 0<br>(0 - 0)           | 0<br>(0 - 0)             | 0<br>(0 - 0)             |
| Aortic aneurysm                      | 46<br>(31 - 66)          | --                 | --                | 8<br>(5 - 11)          | 21<br>(13 - 32)          | 18<br>(11 - 28)          |
| Peripheral vascular disease          | 1<br>(1 - 3)             | --                 | --                | 0<br>(0 - 0)           | 0<br>(0 - 1)             | 1<br>(1 - 2)             |
| Endocarditis                         | 180<br>(114 - 277)       | 28<br>(9 - 59)     | 6<br>(3 - 11)     | 51<br>(31 - 84)        | 46<br>(27 - 79)          | 49<br>(29 - 82)          |

Web Table 31- Mali deaths with 95% UI by age, sex, and cause in 2013

| Cause                                               | Males, All Ages          | Males, 0-4 Years   | Males, 5-14 Years | Males, 15-49 Years | Males, 50-69 Years   | Males, 70-80 Years |
|-----------------------------------------------------|--------------------------|--------------------|-------------------|--------------------|----------------------|--------------------|
| Other cardiovascular and circulatory diseases       | 540<br>(380 - 952)       | 87<br>(43 - 157)   | 28<br>(15 - 50)   | 152<br>(99 - 248)  | 138<br>(84 - 275)    | 135<br>(83 - 304)  |
| Chronic respiratory diseases                        | 2,643<br>(1,863 - 3,362) | 327<br>(131 - 656) | 112<br>(72 - 161) | 627<br>(422 - 847) | 848<br>(613 - 1,136) | 728<br>(538 - 947) |
| Chronic obstructive pulmonary disease               | 1,415<br>(1,010 - 1,816) | 133<br>(48 - 278)  | 42<br>(24 - 64)   | 197<br>(125 - 275) | 503<br>(351 - 706)   | 540<br>(394 - 725) |
| Pneumoconiosis                                      | 255<br>(155 - 376)       | 6<br>(1 - 17)      | 6<br>(2 - 11)     | 94<br>(52 - 149)   | 115<br>(65 - 178)    | 35<br>(19 - 58)    |
| Silicosis                                           | 50<br>(30 - 78)          | 2<br>(0 - 7)       | 2<br>(1 - 4)      | 20<br>(10 - 36)    | 11<br>(6 - 20)       | 14<br>(7 - 25)     |
| Asbestosis                                          | 19<br>(12 - 30)          | 1<br>(0 - 3)       | 1<br>(0 - 2)      | 7<br>(4 - 12)      | 9<br>(4 - 15)        | 1<br>(1 - 2)       |
| Coal workers pneumoconiosis                         | 67<br>(39 - 102)         | 1<br>(0 - 2)       | 1<br>(0 - 2)      | 7<br>(4 - 12)      | 53<br>(31 - 80)      | 5<br>(2 - 9)       |
| Other pneumoconiosis                                | 119<br>(66 - 181)        | 2<br>(0 - 5)       | 2<br>(1 - 3)      | 59<br>(31 - 95)    | 42<br>(21 - 70)      | 15<br>(8 - 25)     |
| Asthma                                              | 520<br>(355 - 706)       | 104<br>(31 - 250)  | 27<br>(16 - 42)   | 196<br>(131 - 268) | 123<br>(77 - 191)    | 69<br>(43 - 107)   |
| Interstitial lung disease and pulmonary sarcoidosis | 142<br>(32 - 285)        | 2<br>(0 - 9)       | 2<br>(1 - 3)      | 12<br>(5 - 22)     | 66<br>(12 - 145)     | 61<br>(9 - 137)    |
| Other chronic respiratory diseases                  | 312<br>(199 - 464)       | 82<br>(34 - 161)   | 36<br>(19 - 59)   | 129<br>(78 - 197)  | 42<br>(23 - 73)      | 23<br>(13 - 39)    |
| Cirrhosis                                           | 1,098<br>(817 - 1,479)   | 61<br>(20 - 138)   | 31<br>(19 - 49)   | 378<br>(260 - 543) | 443<br>(313 - 622)   | 185<br>(132 - 251) |
| Cirrhosis due to hepatitis B                        | 202<br>(83 - 365)        | 3<br>(0 - 7)       | 5<br>(1 - 10)     | 79<br>(34 - 148)   | 83<br>(30 - 158)     | 33<br>(9 - 66)     |
| Cirrhosis due to hepatitis C                        | 314<br>(139 - 550)       | 4<br>(1 - 11)      | 4<br>(1 - 11)     | 102<br>(20 - 198)  | 143<br>(62 - 271)    | 61<br>(34 - 102)   |
| Cirrhosis due to alcohol use                        | 376<br>(206 - 595)       | --                 | --                | 122<br>(57 - 215)  | 176<br>(95 - 291)    | 78<br>(45 - 118)   |
| Cirrhosis due to other causes                       | 205<br>(125 - 312)       | 54<br>(18 - 123)   | 22<br>(13 - 36)   | 76<br>(39 - 125)   | 41<br>(19 - 69)      | 12<br>(6 - 21)     |
| Digestive diseases                                  | 1,320<br>(1,029 - 1,673) | 164<br>(68 - 369)  | 108<br>(67 - 161) | 411<br>(286 - 557) | 348<br>(244 - 474)   | 287<br>(216 - 374) |
| Peptic ulcer disease                                | 362<br>(253 - 516)       | 27<br>(7 - 70)     | 21<br>(10 - 39)   | 114<br>(72 - 174)  | 108<br>(67 - 172)    | 92<br>(56 - 140)   |
| Gastritis and duodenitis                            | 50<br>(24 - 115)         | 10<br>(1 - 29)     | 5<br>(2 - 12)     | 12<br>(5 - 32)     | 11<br>(4 - 35)       | 11<br>(3 - 36)     |
| Appendicitis                                        | 88<br>(54 - 142)         | 19<br>(5 - 53)     | 17<br>(7 - 34)    | 24<br>(13 - 42)    | 15<br>(7 - 27)       | 12<br>(4 - 24)     |
| Paralytic ileus and intestinal obstruction          | 363<br>(183 - 512)       | 25<br>(6 - 63)     | 26<br>(12 - 46)   | 107<br>(45 - 173)  | 114<br>(53 - 177)    | 92<br>(54 - 145)   |
| Inguinal, femoral, and abdominal hernia             | 48<br>(28 - 93)          | 2<br>(0 - 8)       | 2<br>(1 - 7)      | 13<br>(7 - 27)     | 15<br>(8 - 27)       | 16<br>(8 - 30)     |
| Inflammatory bowel disease                          | 76<br>(22 - 131)         | 32<br>(6 - 82)     | 5<br>(2 - 11)     | 16<br>(3 - 36)     | 13<br>(2 - 26)       | 9<br>(2 - 18)      |
| Vascular intestinal disorders                       | 6<br>(2 - 14)            | 2<br>(0 - 6)       | 1<br>(0 - 2)      | 1<br>(0 - 3)       | 1<br>(0 - 2)         | 1<br>(0 - 3)       |
| Gallbladder and biliary diseases                    | 64<br>(36 - 92)          | 4<br>(1 - 11)      | 7<br>(2 - 12)     | 19<br>(7 - 33)     | 15<br>(8 - 26)       | 20<br>(10 - 33)    |
| Pancreatitis                                        | 82<br>(40 - 131)         | 2<br>(0 - 7)       | 2<br>(1 - 5)      | 48<br>(21 - 82)    | 18<br>(9 - 32)       | 12<br>(4 - 21)     |
| Other digestive diseases                            | 180<br>(119 - 281)       | 41<br>(13 - 113)   | 21<br>(10 - 37)   | 56<br>(29 - 91)    | 39<br>(22 - 64)      | 22<br>(12 - 40)    |
| Neurological disorders                              | 523<br>(391 - 681)       | 83<br>(30 - 200)   | 43<br>(20 - 80)   | 111<br>(72 - 172)  | 41<br>(29 - 58)      | 245<br>(174 - 323) |
| Alzheimer disease and other dementias               | 250<br>(180 - 330)       | --                 | --                | 0<br>(0 - 0)       | 22<br>(14 - 32)      | 228<br>(159 - 305) |
| Parkinson disease                                   | 3<br>(1 - 6)             | --                 | --                | 0<br>(0 - 0)       | 0<br>(0 - 0)         | 3<br>(1 - 5)       |
| Epilepsy                                            | 214<br>(136 - 330)       | 71<br>(23 - 174)   | 37<br>(15 - 74)   | 89<br>(54 - 146)   | 9<br>(5 - 16)        | 9<br>(5 - 15)      |
| Multiple sclerosis                                  | 0<br>(0 - 1)             | --                 | --                | 0<br>(0 - 0)       | 0<br>(0 - 0)         | 0<br>(0 - 0)       |
| Other neurological disorders                        | 55<br>(38 - 104)         | 12<br>(5 - 59)     | 6<br>(3 - 13)     | 21<br>(14 - 30)    | 10<br>(5 - 15)       | 6<br>(3 - 9)       |
| Mental and substance use disorders                  | 347<br>(187 - 522)       | 16<br>(3 - 40)     | 0<br>(0 - 0)      | 264<br>(136 - 411) | 50<br>(26 - 85)      | 18<br>(7 - 31)     |
| Schizophrenia                                       | 0<br>(0 - 1)             | --                 | --                | 0<br>(0 - 0)       | 0<br>(0 - 0)         | 0<br>(0 - 0)       |
| Alcohol use disorders                               | 111<br>(44 - 218)        | --                 | --                | 62<br>(27 - 125)   | 36<br>(14 - 73)      | 13<br>(3 - 27)     |
| Drug use disorders                                  | 236<br>(115 - 358)       | 16<br>(3 - 40)     | --                | 201<br>(92 - 319)  | 14<br>(8 - 22)       | 5<br>(3 - 8)       |
| Opioid use disorders                                | 25<br>(12 - 40)          | 2<br>(0 - 5)       | --                | 22<br>(10 - 36)    | 1<br>(1 - 2)         | 1<br>(0 - 1)       |
| Cocaine use disorders                               | 1<br>(0 - 1)             | 0<br>(0 - 0)       | --                | 1<br>(0 - 1)       | 0<br>(0 - 0)         | 0<br>(0 - 0)       |
| Amphetamine use disorders                           | 1<br>(0 - 1)             | 0<br>(0 - 0)       | --                | 1<br>(0 - 1)       | 0<br>(0 - 0)         | 0<br>(0 - 0)       |

Web Table 31- Mali deaths with 95% UI by age, sex, and cause in 2013

| Cause                                               | Males, All Ages          | Males, 0-4 Years       | Males, 5-14 Years  | Males, 15-49 Years | Males, 50-69 Years | Males, 70-80 Years |
|-----------------------------------------------------|--------------------------|------------------------|--------------------|--------------------|--------------------|--------------------|
| Other drug use disorders                            | 209<br>(101 - 316)       | 14<br>(3 - 35)         | --                 | 178<br>(82 - 281)  | 12<br>(7 - 20)     | 5<br>(2 - 7)       |
| Eating disorders                                    | 0<br>(0 - 0)             | --                     | 0<br>(0 - 0)       | 0<br>(0 - 0)       | --                 | --                 |
| Anorexia nervosa                                    | 0<br>(0 - 0)             | --                     | 0<br>(0 - 0)       | 0<br>(0 - 0)       | --                 | --                 |
| Diabetes, urogenital, blood, and endocrine diseases | 2,721<br>(1,823 - 4,380) | 818<br>(292 - 2,136)   | 284<br>(123 - 618) | 560<br>(379 - 886) | 539<br>(408 - 703) | 519<br>(408 - 653) |
| Diabetes mellitus                                   | 647<br>(498 - 820)       | 30<br>(17 - 46)        | 9<br>(5 - 14)      | 92<br>(64 - 121)   | 277<br>(194 - 372) | 239<br>(176 - 319) |
| Acute glomerulonephritis                            | 8<br>(5 - 21)            | 2<br>(1 - 8)           | 2<br>(1 - 5)       | 2<br>(1 - 5)       | 2<br>(1 - 3)       | 1<br>(0 - 2)       |
| Chronic kidney disease                              | 464<br>(343 - 612)       | 69<br>(32 - 130)       | 42<br>(24 - 68)    | 161<br>(96 - 225)  | 92<br>(63 - 130)   | 100<br>(68 - 142)  |
| Chronic kidney disease due to diabetes mellitus     | 4<br>(1 - 7)             | 0<br>(0 - 0)           | 0<br>(0 - 0)       | 0<br>(0 - 1)       | 3<br>(0 - 5)       | 0<br>(0 - 1)       |
| Chronic kidney disease due to hypertension          | 92<br>(36 - 150)         | 5<br>(0 - 14)          | 2<br>(0 - 4)       | 25<br>(6 - 46)     | 28<br>(11 - 49)    | 32<br>(14 - 55)    |
| Chronic kidney disease due to glomerulonephritis    | 262<br>(189 - 373)       | 47<br>(21 - 89)        | 33<br>(20 - 50)    | 100<br>(66 - 143)  | 40<br>(25 - 66)    | 43<br>(26 - 68)    |
| Chronic kidney disease due to other causes          | 106<br>(58 - 163)        | 17<br>(3 - 43)         | 8<br>(2 - 17)      | 36<br>(13 - 72)    | 21<br>(10 - 39)    | 25<br>(11 - 45)    |
| Urinary diseases and male infertility               | 415<br>(267 - 572)       | 80<br>(33 - 174)       | 15<br>(9 - 23)     | 101<br>(50 - 160)  | 96<br>(56 - 146)   | 123<br>(82 - 185)  |
| Interstitial nephritis and urinary tract infections | 362<br>(224 - 504)       | 70<br>(26 - 155)       | 12<br>(7 - 19)     | 86<br>(43 - 135)   | 84<br>(50 - 131)   | 110<br>(70 - 165)  |
| Urolithiasis                                        | 2<br>(1 - 5)             | --                     | 0<br>(0 - 1)       | 1<br>(0 - 3)       | 0<br>(0 - 1)       | 0<br>(0 - 1)       |
| Other urinary diseases                              | 51<br>(27 - 83)          | 10<br>(3 - 28)         | 2<br>(1 - 5)       | 15<br>(5 - 27)     | 11<br>(4 - 21)     | 13<br>(5 - 27)     |
| Gynecological diseases                              | --                       | --                     | --                 | --                 | --                 | --                 |
| Uterine fibroids                                    | --                       | --                     | --                 | --                 | --                 | --                 |
| Polycystic ovarian syndrome                         | --                       | --                     | --                 | --                 | --                 | --                 |
| Endometriosis                                       | --                       | --                     | --                 | --                 | --                 | --                 |
| Genital prolapse                                    | --                       | --                     | --                 | --                 | --                 | --                 |
| Other gynecological diseases                        | --                       | --                     | --                 | --                 | --                 | --                 |
| Hemoglobinopathies and hemolytic anemias            | 921<br>(173 - 2,499)     | 557<br>(99 - 1,826)    | 195<br>(36 - 534)  | 133<br>(21 - 507)  | 22<br>(5 - 96)     | 13<br>(4 - 52)     |
| Thalassemias                                        | 5<br>(1 - 14)            | 4<br>(1 - 12)          | 1<br>(0 - 2)       | 0<br>(0 - 2)       | 0<br>(0 - 0)       | 0<br>(0 - 0)       |
| Sickle cell disorders                               | 891<br>(165 - 2,429)     | 544<br>(96 - 1,787)    | 193<br>(36 - 527)  | 130<br>(21 - 495)  | 20<br>(4 - 88)     | 4<br>(1 - 17)      |
| G6PD deficiency                                     | 6<br>(1 - 15)            | 3<br>(1 - 10)          | 1<br>(0 - 3)       | 1<br>(0 - 3)       | 0<br>(0 - 1)       | 0<br>(0 - 1)       |
| Other hemoglobinopathies and hemolytic anemias      | 20<br>(5 - 63)           | 7<br>(1 - 17)          | 1<br>(0 - 3)       | 2<br>(0 - 6)       | 2<br>(0 - 6)       | 9<br>(3 - 34)      |
| Endocrine, metabolic, blood, and immune disorders   | 264<br>(164 - 402)       | 80<br>(39 - 200)       | 21<br>(11 - 49)    | 70<br>(40 - 101)   | 51<br>(26 - 77)    | 42<br>(21 - 66)    |
| Musculoskeletal disorders                           | 64<br>(37 - 92)          | --                     | 15<br>(6 - 28)     | 23<br>(12 - 35)    | 15<br>(8 - 23)     | 12<br>(6 - 19)     |
| Rheumatoid arthritis                                | 5<br>(2 - 9)             | --                     | 1<br>(0 - 3)       | 1<br>(0 - 2)       | 1<br>(0 - 2)       | 2<br>(1 - 3)       |
| Other musculoskeletal disorders                     | 59<br>(35 - 85)          | --                     | 14<br>(6 - 26)     | 22<br>(11 - 33)    | 13<br>(7 - 21)     | 10<br>(6 - 17)     |
| Other non-communicable diseases                     | 2,120<br>(935 - 4,974)   | 1,887<br>(742 - 4,688) | 95<br>(43 - 229)   | 71<br>(47 - 104)   | 29<br>(17 - 42)    | 38<br>(16 - 58)    |
| Congenital anomalies                                | 1,977<br>(797 - 4,825)   | 1,826<br>(693 - 4,620) | 88<br>(37 - 222)   | 49<br>(29 - 78)    | 7<br>(4 - 12)      | 7<br>(4 - 10)      |
| Neural tube defects                                 | 557<br>(96 - 1,419)      | 528<br>(86 - 1,369)    | 18<br>(4 - 47)     | 9<br>(2 - 25)      | 1<br>(0 - 2)       | 0<br>(0 - 2)       |
| Congenital heart anomalies                          | 744<br>(278 - 1,831)     | 670<br>(223 - 1,721)   | 44<br>(17 - 122)   | 23<br>(13 - 38)    | 4<br>(2 - 6)       | 3<br>(1 - 4)       |
| Cleft lip and cleft palate                          | 11<br>(1 - 48)           | 11<br>(1 - 48)         | --                 | --                 | --                 | --                 |
| Down syndrome                                       | 152<br>(25 - 518)        | 141<br>(18 - 503)      | 6<br>(1 - 15)      | 4<br>(2 - 9)       | 1<br>(0 - 1)       | 0<br>(0 - 0)       |
| Chromosomal unbalanced rearrangements               | 55<br>(10 - 177)         | 51<br>(8 - 170)        | 2<br>(0 - 7)       | 2<br>(1 - 3)       | 0<br>(0 - 0)       | 0<br>(0 - 0)       |
| Other congenital anomalies                          | 458<br>(63 - 2,052)      | 426<br>(49 - 1,987)    | 17<br>(3 - 72)     | 10<br>(4 - 18)     | 2<br>(1 - 3)       | 3<br>(1 - 5)       |
| Skin and subcutaneous diseases                      | 124<br>(49 - 168)        | 41<br>(12 - 80)        | 7<br>(4 - 11)      | 22<br>(10 - 33)    | 22<br>(8 - 32)     | 31<br>(10 - 50)    |
| Cellulitis                                          | 68<br>(29 - 109)         | 23<br>(7 - 51)         | 5<br>(3 - 9)       | 11<br>(5 - 18)     | 14<br>(5 - 21)     | 15<br>(5 - 26)     |



Web Table 31- Mali deaths with 95% UI by age, sex, and cause in 2013

| Cause                                           | Males, All Ages          | Males, 0-4 Years       | Males, 5-14 Years    | Males, 15-49 Years       | Males, 50-69 Years | Males, 70-80 Years |
|-------------------------------------------------|--------------------------|------------------------|----------------------|--------------------------|--------------------|--------------------|
| Pyoderma                                        | 52<br>(20 - 82)          | 18<br>(3 - 42)         | 2<br>(1 - 4)         | 11<br>(5 - 17)           | 7<br>(3 - 13)      | 13<br>(4 - 23)     |
| Decubitus ulcer                                 | 3<br>(1 - 6)             | 0<br>(0 - 0)           | 0<br>(0 - 0)         | 0<br>(0 - 1)             | 0<br>(0 - 0)       | 3<br>(0 - 5)       |
| Other skin and subcutaneous diseases            | 0<br>(0 - 1)             | 0<br>(0 - 0)           | 0<br>(0 - 0)         | 0<br>(0 - 0)             | 0<br>(0 - 0)       | 0<br>(0 - 0)       |
| Sudden infant death syndrome                    | 20<br>(5 - 60)           | 20<br>(5 - 60)         | --                   | --                       | --                 | --                 |
| Injuries                                        | 5,517<br>(4,161 - 7,035) | 1,419<br>(676 - 2,386) | 937<br>(616 - 1,325) | 2,401<br>(1,775 - 3,027) | 471<br>(345 - 624) | 289<br>(218 - 374) |
| Transport injuries                              | 2,572<br>(1,789 - 3,508) | 435<br>(177 - 897)     | 451<br>(267 - 715)   | 1,357<br>(932 - 1,823)   | 221<br>(146 - 310) | 107<br>(68 - 154)  |
| Road injuries                                   | 2,460<br>(1,715 - 3,352) | 390<br>(158 - 800)     | 424<br>(250 - 672)   | 1,333<br>(913 - 1,792)   | 213<br>(140 - 297) | 100<br>(65 - 144)  |
| Pedestrian road injuries                        | 725<br>(435 - 1,188)     | 155<br>(55 - 356)      | 161<br>(81 - 293)    | 312<br>(176 - 489)       | 62<br>(37 - 95)    | 34<br>(20 - 53)    |
| Cyclist road injuries                           | 142<br>(89 - 223)        | 30<br>(10 - 74)        | 41<br>(20 - 78)      | 50<br>(30 - 76)          | 14<br>(8 - 22)     | 7<br>(4 - 12)      |
| Motorcyclist road injuries                      | 313<br>(179 - 532)       | 31<br>(11 - 73)        | 32<br>(14 - 62)      | 217<br>(112 - 384)       | 25<br>(14 - 42)    | 8<br>(4 - 14)      |
| Motor vehicle road injuries                     | 1,204<br>(824 - 1,616)   | 152<br>(59 - 303)      | 166<br>(89 - 269)    | 735<br>(490 - 1,008)     | 105<br>(65 - 154)  | 46<br>(27 - 71)    |
| Other road injuries                             | 76<br>(34 - 140)         | 22<br>(4 - 56)         | 23<br>(8 - 50)       | 19<br>(8 - 44)           | 7<br>(3 - 14)      | 4<br>(1 - 9)       |
| Other transport injuries                        | 112<br>(64 - 184)        | 44<br>(14 - 102)       | 27<br>(13 - 53)      | 24<br>(12 - 47)          | 9<br>(5 - 15)      | 7<br>(2 - 13)      |
| Unintentional injuries                          | 2,430<br>(1,799 - 3,366) | 961<br>(421 - 1,622)   | 460<br>(299 - 702)   | 668<br>(467 - 942)       | 189<br>(140 - 259) | 151<br>(109 - 210) |
| Falls                                           | 436<br>(316 - 665)       | 102<br>(38 - 213)      | 53<br>(26 - 96)      | 150<br>(89 - 251)        | 66<br>(39 - 113)   | 65<br>(37 - 121)   |
| Drowning                                        | 730<br>(359 - 1,380)     | 328<br>(70 - 794)      | 196<br>(86 - 388)    | 172<br>(87 - 303)        | 24<br>(15 - 37)    | 11<br>(7 - 17)     |
| Fire, heat, and hot substances                  | 248<br>(131 - 424)       | 132<br>(32 - 294)      | 34<br>(17 - 56)      | 50<br>(31 - 81)          | 17<br>(9 - 30)     | 16<br>(8 - 27)     |
| Poisonings                                      | 158<br>(86 - 345)        | 67<br>(23 - 172)       | 22<br>(10 - 48)      | 52<br>(28 - 129)         | 12<br>(7 - 22)     | 5<br>(3 - 9)       |
| Exposure to mechanical forces                   | 391<br>(276 - 554)       | 126<br>(61 - 228)      | 78<br>(45 - 130)     | 146<br>(94 - 229)        | 30<br>(19 - 46)    | 11<br>(6 - 17)     |
| Unintentional firearm injuries                  | 161<br>(101 - 262)       | 42<br>(17 - 95)        | 21<br>(9 - 45)       | 82<br>(45 - 142)         | 11<br>(6 - 19)     | 5<br>(2 - 8)       |
| Unintentional suffocation                       | 29<br>(10 - 65)          | 16<br>(4 - 51)         | 5<br>(2 - 11)        | 6<br>(3 - 10)            | 1<br>(1 - 3)       | 1<br>(0 - 1)       |
| Other exposure to mechanical forces             | 202<br>(128 - 304)       | 68<br>(24 - 136)       | 52<br>(25 - 92)      | 58<br>(36 - 103)         | 17<br>(8 - 30)     | 6<br>(2 - 11)      |
| Adverse effects of medical treatment            | 123<br>(43 - 223)        | 54<br>(8 - 127)        | 10<br>(3 - 20)       | 23<br>(10 - 43)          | 16<br>(5 - 35)     | 20<br>(5 - 44)     |
| Animal contact                                  | 57<br>(27 - 83)          | 18<br>(5 - 40)         | 15<br>(6 - 29)       | 11<br>(5 - 19)           | 6<br>(2 - 11)      | 7<br>(1 - 12)      |
| Venomous animal contact                         | 22<br>(11 - 35)          | 6<br>(2 - 16)          | 5<br>(2 - 12)        | 5<br>(2 - 9)             | 2<br>(1 - 5)       | 3<br>(0 - 6)       |
| Non-venomous animal contact                     | 35<br>(14 - 53)          | 11<br>(3 - 26)         | 10<br>(4 - 20)       | 6<br>(2 - 11)            | 4<br>(1 - 8)       | 4<br>(1 - 7)       |
| Foreign body                                    | 132<br>(65 - 236)        | 90<br>(34 - 182)       | 14<br>(7 - 26)       | 14<br>(7 - 22)           | 6<br>(3 - 9)       | 8<br>(3 - 12)      |
| Pulmonary aspiration and foreign body in airway | 126<br>(60 - 230)        | 88<br>(32 - 179)       | 13<br>(6 - 25)       | 13<br>(6 - 21)           | 5<br>(2 - 8)       | 7<br>(3 - 12)      |
| Foreign body in other body part                 | 6<br>(3 - 10)            | 2<br>(1 - 5)           | 1<br>(1 - 3)         | 1<br>(0 - 2)             | 1<br>(0 - 2)       | 0<br>(0 - 1)       |
| Other unintentional injuries                    | 155<br>(106 - 216)       | 45<br>(17 - 86)        | 38<br>(21 - 58)      | 51<br>(33 - 74)          | 11<br>(7 - 17)     | 10<br>(6 - 14)     |
| Self-harm and interpersonal violence            | 502<br>(335 - 736)       | 23<br>(9 - 49)         | 24<br>(12 - 42)      | 368<br>(240 - 553)       | 58<br>(34 - 93)    | 30<br>(13 - 51)    |
| Self-harm                                       | 287<br>(168 - 464)       | --                     | 11<br>(3 - 26)       | 198<br>(114 - 344)       | 49<br>(25 - 83)    | 29<br>(11 - 50)    |
| Interpersonal violence                          | 215<br>(127 - 336)       | 23<br>(9 - 49)         | 13<br>(7 - 23)       | 169<br>(96 - 275)        | 8<br>(5 - 15)      | 1<br>(1 - 3)       |
| Assault by firearm                              | 113<br>(51 - 184)        | 5<br>(1 - 12)          | 3<br>(1 - 7)         | 102<br>(45 - 167)        | 4<br>(1 - 7)       | 0<br>(0 - 1)       |
| Assault by sharp object                         | 38<br>(18 - 81)          | 3<br>(0 - 10)          | 2<br>(1 - 5)         | 29<br>(12 - 71)          | 3<br>(1 - 5)       | 0<br>(0 - 1)       |
| Assault by other means                          | 64<br>(36 - 120)         | 15<br>(6 - 38)         | 8<br>(4 - 15)        | 38<br>(18 - 76)          | 2<br>(1 - 5)       | 1<br>(0 - 1)       |
| Forces of nature, war, and legal intervention   | 13<br>(7 - 32)           | 0<br>(0 - 1)           | 1<br>(1 - 3)         | 8<br>(4 - 19)            | 3<br>(2 - 7)       | 1<br>(0 - 2)       |
| Exposure to forces of nature                    | 13<br>(7 - 32)           | 0<br>(0 - 1)           | 1<br>(1 - 3)         | 8<br>(4 - 19)            | 3<br>(2 - 7)       | 1<br>(0 - 2)       |

Web Table 31- Mali deaths with 95% UI by age, sex, and cause in 2013

| Cause                                                              | Females, All Ages            | Females, 0-4 Years          | Females, 5-14 Years      | Females, 15-49 Years        | Females, 50-69 Years       | Females, 70-80 Years       |
|--------------------------------------------------------------------|------------------------------|-----------------------------|--------------------------|-----------------------------|----------------------------|----------------------------|
| All causes                                                         | 90,954<br>(79,425 - 103,130) | 49,139<br>(40,805 - 58,636) | 4,623<br>(3,779 - 5,649) | 14,253<br>(12,601 - 15,989) | 11,694<br>(9,331 - 14,856) | 11,245<br>(9,476 - 13,168) |
| Communicable, maternal, neonatal, and nutritional diseases         | 63,297<br>(54,151 - 73,795)  | 44,599<br>(36,619 - 53,938) | 3,313<br>(2,509 - 4,188) | 8,460<br>(7,464 - 9,717)    | 3,293<br>(2,522 - 4,421)   | 3,632<br>(2,853 - 4,639)   |
| HIV/AIDS and tuberculosis                                          | 3,598<br>(2,542 - 4,971)     | 157<br>(86 - 248)           | 183<br>(140 - 246)       | 2,102<br>(1,401 - 3,155)    | 657<br>(445 - 917)         | 498<br>(328 - 753)         |
| Tuberculosis                                                       | 1,368<br>(972 - 1,939)       | 13<br>(6 - 36)              | 24<br>(12 - 50)          | 443<br>(307 - 652)          | 414<br>(264 - 622)         | 474<br>(305 - 726)         |
| HIV/AIDS                                                           | 2,230<br>(1,576 - 3,417)     | 144<br>(75 - 223)           | 160<br>(120 - 202)       | 1,659<br>(987 - 2,677)      | 243<br>(134 - 379)         | 24<br>(10 - 41)            |
| HIV/AIDS resulting in mycobacterial infection                      | 117<br>(71 - 183)            | 7<br>(3 - 11)               | 7<br>(5 - 10)            | 88<br>(51 - 142)            | 14<br>(7 - 22)             | 1<br>(1 - 3)               |
| HIV/AIDS resulting in other diseases                               | 2,113<br>(1,514 - 3,230)     | 138<br>(71 - 212)           | 152<br>(115 - 193)       | 1,571<br>(934 - 2,544)      | 230<br>(126 - 357)         | 22<br>(9 - 39)             |
| Diarrrhea, lower respiratory, and other common infectious diseases | 21,706<br>(16,366 - 28,176)  | 14,965<br>(9,809 - 21,283)  | 1,397<br>(883 - 2,001)   | 1,811<br>(1,377 - 2,269)    | 1,576<br>(1,085 - 2,205)   | 1,956<br>(1,421 - 2,663)   |
| Diarrrheal diseases                                                | 9,466<br>(6,186 - 14,493)    | 6,847<br>(3,602 - 11,736)   | 487<br>(232 - 874)       | 840<br>(577 - 1,163)        | 612<br>(341 - 990)         | 678<br>(384 - 1,040)       |
| Intestinal infectious diseases                                     | 319<br>(157 - 563)           | 109<br>(49 - 220)           | 111<br>(47 - 215)        | 80<br>(38 - 148)            | 13<br>(5 - 27)             | 5<br>(2 - 10)              |
| Typhoid fever                                                      | 208<br>(96 - 392)            | 65<br>(25 - 140)            | 74<br>(28 - 149)         | 56<br>(25 - 108)            | 9<br>(3 - 19)              | 4<br>(2 - 7)               |
| Paratyphoid fever                                                  | 91<br>(39 - 182)             | 33<br>(11 - 74)             | 34<br>(11 - 76)          | 21<br>(8 - 45)              | 3<br>(1 - 7)               | 1<br>(0 - 2)               |
| Other intestinal infectious diseases                               | 20<br>(10 - 33)              | 11<br>(5 - 22)              | 3<br>(0 - 9)             | 4<br>(1 - 10)               | 1<br>(0 - 6)               | 1<br>(0 - 4)               |
| Lower respiratory infections                                       | 9,269<br>(6,584 - 12,661)    | 6,501<br>(3,908 - 9,745)    | 388<br>(210 - 639)       | 475<br>(338 - 658)          | 762<br>(493 - 1,112)       | 1,143<br>(774 - 1,613)     |
| Upper respiratory infections                                       | 12<br>(4 - 33)               | 6<br>(0 - 27)               | 1<br>(0 - 4)             | 2<br>(0 - 5)                | 2<br>(0 - 5)               | 1<br>(0 - 4)               |
| Otitis media                                                       | 7<br>(5 - 9)                 | 3<br>(1 - 5)                | 1<br>(0 - 1)             | 1<br>(0 - 1)                | 1<br>(1 - 2)               | 2<br>(1 - 2)               |
| Meningitis                                                         | 1,950<br>(1,330 - 2,882)     | 1,032<br>(513 - 1,954)      | 309<br>(148 - 532)       | 341<br>(215 - 517)          | 157<br>(89 - 262)          | 111<br>(61 - 187)          |
| Pneumococcal meningitis                                            | 514<br>(332 - 802)           | 249<br>(106 - 494)          | 89<br>(39 - 171)         | 103<br>(55 - 176)           | 44<br>(15 - 86)            | 29<br>(12 - 57)            |
| H influenzae type B meningitis                                     | 270<br>(136 - 518)           | 182<br>(75 - 412)           | 40<br>(10 - 83)          | 32<br>(15 - 58)             | 9<br>(3 - 24)              | 6<br>(2 - 16)              |
| Meningococcal meningitis                                           | 940<br>(622 - 1,425)         | 504<br>(240 - 945)          | 150<br>(67 - 282)        | 157<br>(85 - 270)           | 75<br>(37 - 137)           | 53<br>(26 - 95)            |
| Other meningitis                                                   | 227<br>(137 - 372)           | 96<br>(26 - 219)            | 30<br>(9 - 65)           | 49<br>(20 - 94)             | 29<br>(12 - 57)            | 23<br>(8 - 47)             |
| Encephalitis                                                       | 64<br>(44 - 91)              | 28<br>(14 - 53)             | 10<br>(5 - 22)           | 13<br>(8 - 19)              | 8<br>(4 - 13)              | 5<br>(2 - 9)               |
| Diphtheria                                                         | 10<br>(0 - 64)               | 8<br>(0 - 60)               | 2<br>(0 - 15)            | 0<br>(0 - 1)                | 0<br>(0 - 0)               | --<br>(0 - 0)              |
| Whooping cough                                                     | 145<br>(0 - 717)             | 134<br>(0 - 656)            | 10<br>(0 - 53)           | 1<br>(0 - 6)                | 0<br>(0 - 1)               | --<br>(0 - 1)              |
| Tetanus                                                            | 143<br>(86 - 229)            | 35<br>(15 - 64)             | 31<br>(14 - 57)          | 51<br>(28 - 85)             | 19<br>(9 - 37)             | 7<br>(3 - 16)              |
| Measles                                                            | 310<br>(32 - 1,275)          | 258<br>(27 - 1,053)         | 47<br>(5 - 193)          | 5<br>(1 - 21)               | 0<br>(0 - 0)               | --<br>(0 - 0)              |
| Varicella and herpes zoster                                        | 11<br>(3 - 25)               | 4<br>(0 - 16)               | 1<br>(0 - 6)             | 2<br>(0 - 5)                | 1<br>(0 - 3)               | 2<br>(0 - 11)              |
| Neglected tropical diseases and malaria                            | 19,317<br>(11,591 - 27,243)  | 16,206<br>(8,964 - 23,904)  | 1,174<br>(238 - 2,218)   | 718<br>(109 - 1,790)        | 622<br>(89 - 1,932)        | 598<br>(70 - 1,831)        |
| Malaria                                                            | 19,164<br>(11,403 - 27,092)  | 16,153<br>(8,868 - 23,868)  | 1,142<br>(201 - 2,198)   | 679<br>(72 - 1,758)         | 602<br>(64 - 1,912)        | 588<br>(59 - 1,820)        |
| Leishmaniasis                                                      | 0<br>(0 - 0)                 | 0<br>(0 - 0)                | 0<br>(0 - 0)             | 0<br>(0 - 0)                | 0<br>(0 - 0)               | 0<br>(0 - 0)               |
| Visceral leishmaniasis                                             | 0<br>(0 - 0)                 | 0<br>(0 - 0)                | 0<br>(0 - 0)             | 0<br>(0 - 0)                | 0<br>(0 - 0)               | 0<br>(0 - 0)               |
| Schistosomiasis                                                    | 26<br>(18 - 37)              | 1<br>(0 - 2)                | 2<br>(1 - 4)             | 10<br>(6 - 14)              | 9<br>(5 - 16)              | 4<br>(2 - 8)               |
| Cysticercosis                                                      | 3<br>(1 - 8)                 | 0<br>(0 - 1)                | 0<br>(0 - 1)             | 1<br>(0 - 4)                | 0<br>(0 - 1)               | 0<br>(0 - 0)               |
| Cystic echinococcosis                                              | 7<br>(5 - 8)                 | 2<br>(1 - 3)                | 2<br>(1 - 3)             | 2<br>(2 - 2)                | 1<br>(1 - 1)               | 0<br>(0 - 0)               |
| Dengue                                                             | 3<br>(2 - 4)                 | 1<br>(0 - 3)                | 1<br>(0 - 2)             | 1<br>(0 - 1)                | 0<br>(0 - 0)               | 0<br>(0 - 0)               |
| Yellow fever                                                       | 1<br>(1 - 3)                 | 0<br>(0 - 0)                | 0<br>(0 - 1)             | 1<br>(0 - 2)                | 0<br>(0 - 0)               | 0<br>(0 - 0)               |
| Rabies                                                             | 64<br>(38 - 94)              | 14<br>(4 - 34)              | 19<br>(10 - 37)          | 20<br>(12 - 29)             | 7<br>(3 - 11)              | 3<br>(1 - 6)               |
| Intestinal nematode infections                                     | 30<br>(13 - 57)              | 25<br>(10 - 49)             | 4<br>(0 - 13)            | 1<br>(0 - 4)                | 0<br>(0 - 2)               | 0<br>(0 - 2)               |
| Ascariasis                                                         | 30<br>(13 - 57)              | 25<br>(10 - 49)             | 4<br>(0 - 13)            | 1<br>(0 - 4)                | 0<br>(0 - 2)               | 0<br>(0 - 2)               |
| Other neglected tropical diseases                                  | 20<br>(11 - 56)              | 10<br>(4 - 30)              | 2<br>(1 - 7)             | 4<br>(2 - 10)               | 2<br>(1 - 4)               | 2<br>(1 - 4)               |

Web Table 31- Mali deaths with 95% UI by age, sex, and cause in 2013

| Cause                                                            | Females, All Ages           | Females, 0-4 Years        | Females, 5-14 Years  | Females, 15-49 Years     | Females, 50-69 Years      | Females, 70-80 Years     |
|------------------------------------------------------------------|-----------------------------|---------------------------|----------------------|--------------------------|---------------------------|--------------------------|
| Maternal disorders                                               | 2,966<br>(2,295 - 3,722)    | --                        | 44<br>(16 - 100)     | 2,922<br>(2,263 - 3,674) | --                        | --                       |
| Maternal hemorrhage                                              | 537<br>(381 - 749)          | --                        | 5<br>(1 - 10)        | 533<br>(378 - 745)       | --                        | --                       |
| Maternal sepsis and other maternal infections                    | 161<br>(89 - 239)           | --                        | 3<br>(1 - 6)         | 158<br>(86 - 235)        | --                        | --                       |
| Maternal hypertensive disorders                                  | 223<br>(139 - 315)          | --                        | 3<br>(1 - 8)         | 219<br>(138 - 310)       | --                        | --                       |
| Maternal obstructed labor                                        | 151<br>(96 - 224)           | --                        | 2<br>(0 - 4)         | 150<br>(95 - 223)        | --                        | --                       |
| Maternal abortive outcome                                        | 521<br>(359 - 708)          | --                        | 8<br>(3 - 19)        | 513<br>(354 - 695)       | --                        | --                       |
| Indirect maternal deaths                                         | 308<br>(202 - 439)          | --                        | 4<br>(1 - 9)         | 304<br>(200 - 435)       | --                        | --                       |
| Late maternal deaths                                             | 487<br>(313 - 685)          | --                        | 12<br>(3 - 29)       | 475<br>(307 - 668)       | --                        | --                       |
| Maternal deaths aggravated by HIV/AIDS                           | 10<br>(5 - 15)              | --                        | --                   | 10<br>(5 - 15)           | --                        | --                       |
| Other maternal disorders                                         | 562<br>(385 - 791)          | --                        | 8<br>(2 - 21)        | 554<br>(379 - 780)       | --                        | --                       |
| Neonatal disorders                                               | 8,400<br>(6,255 - 10,886)   | 8,400<br>(6,255 - 10,886) | --                   | --                       | --                        | --                       |
| Neonatal preterm birth complications                             | 3,402<br>(1,530 - 5,799)    | 3,402<br>(1,530 - 5,799)  | --                   | --                       | --                        | --                       |
| Neonatal encephalopathy due to birth asphyxia and trauma         | 2,838<br>(1,177 - 5,118)    | 2,838<br>(1,177 - 5,118)  | --                   | --                       | --                        | --                       |
| Neonatal sepsis and other neonatal infections                    | 1,358<br>(455 - 3,051)      | 1,358<br>(455 - 3,051)    | --                   | --                       | --                        | --                       |
| Hemolytic disease and other neonatal jaundice                    | 57<br>(15 - 172)            | 57<br>(15 - 172)          | --                   | --                       | --                        | --                       |
| Other neonatal disorders                                         | 743<br>(328 - 1,453)        | 743<br>(328 - 1,453)      | --                   | --                       | --                        | --                       |
| Nutritional deficiencies                                         | 6,088<br>(3,887 - 9,050)    | 4,006<br>(2,060 - 6,804)  | 410<br>(234 - 647)   | 826<br>(605 - 1,091)     | 347<br>(220 - 515)        | 499<br>(323 - 741)       |
| Protein-energy malnutrition                                      | 4,473<br>(2,475 - 7,266)    | 3,657<br>(1,772 - 6,265)  | 278<br>(133 - 474)   | 166<br>(73 - 393)        | 143<br>(69 - 275)         | 229<br>(107 - 435)       |
| Iodine deficiency                                                | 8<br>(0 - 35)               | 4<br>(0 - 32)             | 1<br>(0 - 8)         | 1<br>(0 - 7)             | 1<br>(0 - 4)              | 1<br>(0 - 4)             |
| Iron-deficiency anemia                                           | 1,583<br>(811 - 2,495)      | 334<br>(49 - 1,039)       | 129<br>(49 - 258)    | 655<br>(353 - 915)       | 197<br>(88 - 315)         | 267<br>(129 - 448)       |
| Other nutritional deficiencies                                   | 25<br>(6 - 59)              | 11<br>(1 - 38)            | 2<br>(0 - 4)         | 3<br>(1 - 7)             | 6<br>(1 - 14)             | 3<br>(1 - 6)             |
| Other communicable, maternal, neonatal, and nutritional diseases | 1,222<br>(786 - 1,863)      | 866<br>(467 - 1,473)      | 104<br>(54 - 182)    | 81<br>(56 - 114)         | 91<br>(55 - 144)          | 80<br>(47 - 129)         |
| Sexually transmitted diseases excluding HIV                      | 843<br>(437 - 1,442)        | 730<br>(360 - 1,285)      | 81<br>(36 - 149)     | 17<br>(9 - 28)           | 9<br>(3 - 23)             | 7<br>(2 - 16)            |
| Syphilis                                                         | 826<br>(421 - 1,424)        | 730<br>(360 - 1,285)      | 80<br>(35 - 148)     | 7<br>(3 - 12)            | 5<br>(2 - 12)             | 5<br>(2 - 12)            |
| Chlamydial infection                                             | 5<br>(3 - 9)                | --                        | 0<br>(0 - 1)         | 3<br>(2 - 6)             | 1<br>(0 - 3)              | 0<br>(0 - 1)             |
| Gonococcal infection                                             | 6<br>(4 - 10)               | --                        | 0<br>(0 - 1)         | 3<br>(2 - 6)             | 2<br>(0 - 4)              | 1<br>(0 - 2)             |
| Other sexually transmitted diseases                              | 5<br>(3 - 8)                | --                        | 0<br>(0 - 1)         | 3<br>(2 - 5)             | 1<br>(0 - 3)              | 0<br>(0 - 1)             |
| Hepatitis                                                        | 195<br>(117 - 279)          | 36<br>(12 - 73)           | 10<br>(5 - 18)       | 45<br>(26 - 68)          | 56<br>(31 - 94)           | 48<br>(27 - 77)          |
| Acute hepatitis A                                                | 17<br>(4 - 38)              | 12<br>(3 - 29)            | 3<br>(1 - 7)         | 1<br>(0 - 3)             | 0<br>(0 - 1)              | 0<br>(0 - 0)             |
| Acute hepatitis B                                                | 124<br>(72 - 187)           | 23<br>(7 - 48)            | 5<br>(2 - 10)        | 13<br>(5 - 25)           | 43<br>(23 - 73)           | 41<br>(23 - 66)          |
| Acute hepatitis C                                                | 5<br>(1 - 15)               | --                        | 1<br>(0 - 2)         | 1<br>(0 - 3)             | 1<br>(0 - 5)              | 2<br>(0 - 6)             |
| Acute hepatitis E                                                | 48<br>(23 - 82)             | 1<br>(0 - 3)              | 2<br>(1 - 5)         | 29<br>(15 - 46)          | 11<br>(3 - 23)            | 5<br>(1 - 13)            |
| Other infectious diseases                                        | 185<br>(97 - 380)           | 101<br>(38 - 258)         | 12<br>(4 - 32)       | 19<br>(9 - 43)           | 26<br>(9 - 64)            | 26<br>(7 - 68)           |
| Non-communicable diseases                                        | 24,457<br>(19,665 - 29,734) | 3,535<br>(1,700 - 6,087)  | 779<br>(519 - 1,096) | 4,903<br>(3,907 - 5,928) | 7,987<br>(6,015 - 10,511) | 7,253<br>(5,860 - 8,817) |
| Neoplasms                                                        | 4,362<br>(3,374 - 5,438)    | 57<br>(30 - 104)          | 78<br>(47 - 126)     | 1,329<br>(1,029 - 1,636) | 2,183<br>(1,607 - 2,887)  | 715<br>(555 - 901)       |
| Esophageal cancer                                                | 70<br>(49 - 99)             | --                        | --                   | 24<br>(16 - 37)          | 30<br>(18 - 46)           | 16<br>(10 - 24)          |
| Stomach cancer                                                   | 654<br>(481 - 876)          | --                        | --                   | 160<br>(112 - 221)       | 397<br>(272 - 553)        | 98<br>(65 - 141)         |
| Liver cancer                                                     | 881<br>(631 - 1,174)        | --                        | 7<br>(3 - 13)        | 304<br>(211 - 417)       | 462<br>(301 - 677)        | 109<br>(69 - 170)        |
| Liver cancer due to hepatitis B                                  | 335<br>(193 - 522)          | --                        | 2<br>(1 - 4)         | 130<br>(76 - 201)        | 172<br>(84 - 299)         | 31<br>(15 - 55)          |
| Liver cancer due to hepatitis C                                  | 325<br>(151 - 511)          | --                        | 1<br>(0 - 2)         | 87<br>(39 - 149)         | 185<br>(72 - 310)         | 52<br>(24 - 89)          |

Web Table 31- Mali deaths with 95% UI by age, sex, and cause in 2013

| Cause                                | Females, All Ages          | Females, 0-4 Years | Females, 5-14 Years | Females, 15-49 Years     | Females, 50-69 Years     | Females, 70-80 Years     |
|--------------------------------------|----------------------------|--------------------|---------------------|--------------------------|--------------------------|--------------------------|
| Liver cancer due to alcohol use      | 49<br>(23 - 90)            | --                 | --                  | 9<br>(3 - 18)            | 30<br>(13 - 59)          | 10<br>(4 - 20)           |
| Liver cancer due to other causes     | 173<br>(102 - 268)         | --                 | 4<br>(2 - 8)        | 78<br>(45 - 117)         | 76<br>(35 - 137)         | 15<br>(7 - 27)           |
| Larynx cancer                        | 22<br>(7 - 46)             | --                 | --                  | 7<br>(2 - 15)            | 6<br>(1 - 18)            | 9<br>(4 - 17)            |
| Tracheal, bronchus and lung cancer   | 105<br>(80 - 137)          | --                 | --                  | 26<br>(19 - 35)          | 49<br>(34 - 68)          | 30<br>(21 - 42)          |
| Breast cancer                        | 381<br>(282 - 523)         | --                 | --                  | 133<br>(98 - 178)        | 176<br>(119 - 262)       | 72<br>(50 - 103)         |
| Cervical cancer                      | 956<br>(679 - 1,305)       | --                 | --                  | 294<br>(203 - 406)       | 526<br>(349 - 774)       | 136<br>(91 - 196)        |
| Uterine cancer                       | 28<br>(18 - 60)            | --                 | --                  | 10<br>(6 - 15)           | 14<br>(8 - 28)           | 5<br>(2 - 17)            |
| Prostate cancer                      | --                         | --                 | --                  | --                       | --                       | --                       |
| Colon and rectum cancer              | 162<br>(123 - 207)         | --                 | --                  | 55<br>(41 - 71)          | 72<br>(51 - 102)         | 34<br>(24 - 47)          |
| Lip and oral cavity cancer           | 30<br>(20 - 41)            | --                 | --                  | 12<br>(7 - 18)           | 9<br>(5 - 14)            | 9<br>(6 - 13)            |
| Nasopharynx cancer                   | 13<br>(5 - 21)             | --                 | 1<br>(0 - 3)        | 7<br>(3 - 11)            | 4<br>(1 - 7)             | 1<br>(0 - 3)             |
| Other pharynx cancer                 | 12<br>(7 - 17)             | --                 | --                  | 4<br>(2 - 6)             | 7<br>(3 - 10)            | 2<br>(1 - 3)             |
| Gallbladder and biliary tract cancer | 102<br>(43 - 149)          | --                 | --                  | 16<br>(5 - 26)           | 59<br>(25 - 92)          | 27<br>(12 - 44)          |
| Pancreatic cancer                    | 60<br>(45 - 79)            | --                 | --                  | 11<br>(8 - 15)           | 32<br>(22 - 46)          | 17<br>(12 - 24)          |
| Malignant skin melanoma              | 14<br>(10 - 19)            | --                 | --                  | 3<br>(2 - 5)             | 8<br>(5 - 12)            | 3<br>(2 - 4)             |
| Non-melanoma skin cancer             | 6<br>(3 - 10)              | --                 | --                  | 2<br>(1 - 3)             | 1<br>(1 - 3)             | 3<br>(2 - 6)             |
| Ovarian cancer                       | 104<br>(75 - 143)          | --                 | --                  | 30<br>(21 - 41)          | 58<br>(40 - 84)          | 16<br>(10 - 24)          |
| Testicular cancer                    | --                         | --                 | --                  | --                       | --                       | --                       |
| Kidney cancer                        | 57<br>(38 - 83)            | 3<br>(1 - 6)       | 2<br>(1 - 4)        | 8<br>(5 - 12)            | 34<br>(20 - 57)          | 9<br>(5 - 14)            |
| Bladder cancer                       | 173<br>(111 - 252)         | --                 | --                  | 73<br>(45 - 112)         | 78<br>(47 - 123)         | 22<br>(12 - 34)          |
| Brain and nervous system cancer      | 40<br>(23 - 51)            | 5<br>(2 - 11)      | 6<br>(3 - 10)       | 15<br>(9 - 19)           | 9<br>(5 - 13)            | 5<br>(3 - 8)             |
| Thyroid cancer                       | 32<br>(19 - 46)            | --                 | 0<br>(0 - 1)        | 4<br>(2 - 6)             | 17<br>(9 - 26)           | 11<br>(6 - 17)           |
| Mesothelioma                         | 3<br>(2 - 5)               | --                 | --                  | 1<br>(1 - 2)             | 2<br>(1 - 3)             | 0<br>(0 - 1)             |
| Hodgkin lymphoma                     | 25<br>(15 - 37)            | 2<br>(1 - 3)       | 2<br>(1 - 4)        | 7<br>(4 - 10)            | 8<br>(3 - 17)            | 7<br>(3 - 13)            |
| Non-Hodgkin lymphoma                 | 90<br>(61 - 127)           | 13<br>(6 - 27)     | 14<br>(6 - 27)      | 31<br>(19 - 43)          | 19<br>(12 - 30)          | 14<br>(8 - 23)           |
| Multiple myeloma                     | 17<br>(10 - 27)            | --                 | --                  | 3<br>(2 - 3)             | 9<br>(5 - 14)            | 6<br>(3 - 10)            |
| Leukemia                             | 107<br>(81 - 135)          | 3<br>(1 - 5)       | 11<br>(6 - 17)      | 42<br>(31 - 53)          | 43<br>(28 - 61)          | 9<br>(6 - 13)            |
| Other neoplasms                      | 214<br>(147 - 348)         | 32<br>(14 - 76)    | 35<br>(17 - 71)     | 47<br>(32 - 74)          | 55<br>(33 - 94)          | 45<br>(29 - 69)          |
| Cardiovascular diseases              | 10,127<br>(7,786 - 12,555) | 286<br>(151 - 535) | 98<br>(57 - 180)    | 1,864<br>(1,359 - 2,372) | 3,502<br>(2,537 - 4,629) | 4,377<br>(3,444 - 5,416) |
| Rheumatic heart disease              | 192<br>(108 - 497)         | 6<br>(2 - 14)      | 12<br>(5 - 23)      | 75<br>(37 - 219)         | 45<br>(19 - 143)         | 53<br>(32 - 110)         |
| Ischemic heart disease               | 2,496<br>(1,747 - 3,403)   | 6<br>(2 - 15)      | 8<br>(3 - 16)       | 401<br>(246 - 560)       | 851<br>(542 - 1,231)     | 1,231<br>(839 - 1,672)   |
| Cerebrovascular disease              | 4,617<br>(3,297 - 5,967)   | 83<br>(43 - 164)   | 28<br>(14 - 57)     | 720<br>(455 - 957)       | 1,643<br>(1,085 - 2,236) | 2,143<br>(1,570 - 2,772) |
| Ischemic stroke                      | 2,652<br>(1,359 - 3,578)   | 12<br>(4 - 29)     | 3<br>(1 - 7)        | 137<br>(62 - 221)        | 901<br>(385 - 1,341)     | 1,599<br>(887 - 2,133)   |
| Hemorrhagic stroke                   | 1,966<br>(1,331 - 3,048)   | 71<br>(36 - 142)   | 25<br>(12 - 54)     | 584<br>(336 - 788)       | 742<br>(459 - 1,253)     | 544<br>(306 - 1,097)     |
| Hypertensive heart disease           | 900<br>(482 - 1,328)       | 4<br>(1 - 8)       | 2<br>(1 - 4)        | 136<br>(56 - 239)        | 308<br>(143 - 505)       | 451<br>(247 - 677)       |
| Cardiomyopathy and myocarditis       | 460<br>(259 - 675)         | 59<br>(21 - 106)   | 15<br>(6 - 28)      | 159<br>(82 - 250)        | 92<br>(52 - 147)         | 136<br>(55 - 226)        |
| Atrial fibrillation and flutter      | 1<br>(0 - 1)               | --                 | --                  | 0<br>(0 - 0)             | 0<br>(0 - 0)             | 0<br>(0 - 1)             |
| Aortic aneurysm                      | 76<br>(39 - 137)           | --                 | --                  | 17<br>(8 - 33)           | 26<br>(13 - 48)          | 33<br>(17 - 60)          |
| Peripheral vascular disease          | 3<br>(2 - 5)               | --                 | --                  | 0<br>(0 - 0)             | 2<br>(1 - 3)             | 1<br>(1 - 1)             |
| Endocarditis                         | 172<br>(115 - 268)         | 32<br>(8 - 72)     | 6<br>(2 - 14)       | 64<br>(37 - 100)         | 26<br>(15 - 55)          | 44<br>(22 - 89)          |

Web Table 31- Mali deaths with 95% UI by age, sex, and cause in 2013

| Cause                                               | Females, All Ages        | Females, 0-4 Years | Females, 5-14 Years | Females, 15-49 Years | Females, 50-69 Years | Females, 70-80 Years |
|-----------------------------------------------------|--------------------------|--------------------|---------------------|----------------------|----------------------|----------------------|
| Other cardiovascular and circulatory diseases       | 1,209<br>(812 - 2,090)   | 96<br>(38 - 243)   | 27<br>(12 - 62)     | 291<br>(190 - 517)   | 509<br>(309 - 852)   | 285<br>(179 - 549)   |
| Chronic respiratory diseases                        | 2,361<br>(1,734 - 3,070) | 305<br>(142 - 546) | 106<br>(66 - 157)   | 520<br>(367 - 679)   | 772<br>(515 - 1,086) | 658<br>(470 - 885)   |
| Chronic obstructive pulmonary disease               | 1,191<br>(818 - 1,656)   | 115<br>(45 - 220)  | 45<br>(20 - 76)     | 163<br>(95 - 250)    | 458<br>(300 - 688)   | 411<br>(281 - 582)   |
| Pneumoconiosis                                      | 11<br>(7 - 17)           | 2<br>(1 - 5)       | 3<br>(1 - 5)        | 4<br>(2 - 6)         | 2<br>(1 - 4)         | 0<br>(0 - 1)         |
| Silicosis                                           | 1<br>(1 - 2)             | 0<br>(0 - 1)       | 1<br>(0 - 1)        | 0<br>(0 - 0)         | 0<br>(0 - 0)         | 0<br>(0 - 0)         |
| Asbestosis                                          | 1<br>(1 - 2)             | 0<br>(0 - 1)       | 1<br>(0 - 1)        | 0<br>(0 - 0)         | 0<br>(0 - 0)         | 0<br>(0 - 0)         |
| Coal workers pneumoconiosis                         | 1<br>(1 - 2)             | 0<br>(0 - 1)       | 1<br>(0 - 1)        | 0<br>(0 - 0)         | 0<br>(0 - 0)         | 0<br>(0 - 0)         |
| Other pneumoconiosis                                | 8<br>(5 - 12)            | 1<br>(0 - 2)       | 1<br>(1 - 2)        | 4<br>(2 - 5)         | 2<br>(1 - 3)         | 0<br>(0 - 1)         |
| Asthma                                              | 782<br>(501 - 1,108)     | 135<br>(51 - 284)  | 41<br>(23 - 66)     | 226<br>(145 - 306)   | 235<br>(120 - 378)   | 145<br>(72 - 226)    |
| Interstitial lung disease and pulmonary sarcoidosis | 115<br>(30 - 207)        | 2<br>(0 - 8)       | 2<br>(1 - 4)        | 19<br>(6 - 33)       | 37<br>(9 - 72)       | 56<br>(9 - 115)      |
| Other chronic respiratory diseases                  | 262<br>(167 - 381)       | 52<br>(24 - 97)    | 15<br>(6 - 28)      | 109<br>(66 - 164)    | 40<br>(21 - 69)      | 46<br>(25 - 79)      |
| Cirrhosis                                           | 792<br>(526 - 1,169)     | 51<br>(17 - 116)   | 26<br>(15 - 42)     | 196<br>(134 - 285)   | 330<br>(200 - 505)   | 188<br>(114 - 299)   |
| Cirrhosis due to hepatitis B                        | 328<br>(167 - 540)       | 4<br>(1 - 11)      | 6<br>(2 - 12)       | 86<br>(44 - 143)     | 152<br>(74 - 270)    | 80<br>(32 - 144)     |
| Cirrhosis due to hepatitis C                        | 144<br>(67 - 300)        | 2<br>(0 - 6)       | 3<br>(1 - 8)        | 36<br>(17 - 79)      | 61<br>(24 - 136)     | 41<br>(15 - 93)      |
| Cirrhosis due to alcohol use                        | 153<br>(80 - 266)        | --                 | --                  | 27<br>(11 - 50)      | 76<br>(37 - 139)     | 50<br>(24 - 90)      |
| Cirrhosis due to other causes                       | 167<br>(98 - 284)        | 45<br>(15 - 104)   | 16<br>(8 - 28)      | 47<br>(24 - 84)      | 42<br>(20 - 81)      | 17<br>(9 - 30)       |
| Digestive diseases                                  | 1,067<br>(826 - 1,341)   | 135<br>(58 - 272)  | 80<br>(47 - 122)    | 230<br>(173 - 296)   | 303<br>(210 - 419)   | 318<br>(233 - 428)   |
| Peptic ulcer disease                                | 226<br>(147 - 317)       | 12<br>(3 - 32)     | 9<br>(4 - 18)       | 46<br>(27 - 69)      | 77<br>(45 - 122)     | 82<br>(49 - 130)     |
| Gastritis and duodenitis                            | 62<br>(26 - 154)         | 9<br>(2 - 24)      | 6<br>(2 - 16)       | 14<br>(6 - 34)       | 14<br>(5 - 41)       | 18<br>(5 - 59)       |
| Appendicitis                                        | 154<br>(102 - 243)       | 35<br>(10 - 98)    | 24<br>(10 - 46)     | 40<br>(25 - 65)      | 29<br>(15 - 49)      | 25<br>(9 - 49)       |
| Paralytic ileus and intestinal obstruction          | 242<br>(146 - 378)       | 19<br>(5 - 48)     | 13<br>(5 - 24)      | 40<br>(20 - 63)      | 77<br>(42 - 128)     | 93<br>(51 - 163)     |
| Inguinal, femoral, and abdominal hernia             | 14<br>(6 - 22)           | 2<br>(0 - 6)       | 1<br>(0 - 1)        | 3<br>(1 - 6)         | 3<br>(1 - 5)         | 5<br>(1 - 9)         |
| Inflammatory bowel disease                          | 78<br>(20 - 134)         | 25<br>(5 - 62)     | 5<br>(2 - 11)       | 20<br>(4 - 31)       | 14<br>(3 - 26)       | 14<br>(3 - 25)       |
| Vascular intestinal disorders                       | 4<br>(1 - 13)            | 0<br>(0 - 1)       | 0<br>(0 - 1)        | 1<br>(0 - 3)         | 1<br>(0 - 4)         | 1<br>(0 - 5)         |
| Gallbladder and biliary diseases                    | 98<br>(66 - 140)         | 7<br>(3 - 16)      | 7<br>(2 - 14)       | 19<br>(12 - 29)      | 33<br>(18 - 57)      | 31<br>(17 - 51)      |
| Pancreatitis                                        | 46<br>(22 - 76)          | 2<br>(0 - 6)       | 2<br>(1 - 4)        | 11<br>(6 - 18)       | 19<br>(8 - 39)       | 12<br>(5 - 23)       |
| Other digestive diseases                            | 144<br>(100 - 209)       | 23<br>(8 - 51)     | 12<br>(6 - 22)      | 36<br>(24 - 54)      | 35<br>(20 - 59)      | 37<br>(20 - 62)      |
| Neurological disorders                              | 470<br>(356 - 626)       | 80<br>(30 - 167)   | 41<br>(18 - 75)     | 96<br>(61 - 143)     | 44<br>(30 - 63)      | 210<br>(149 - 282)   |
| Alzheimer disease and other dementias               | 209<br>(147 - 283)       | --                 | --                  | 0<br>(0 - 0)         | 20<br>(13 - 28)      | 189<br>(131 - 258)   |
| Parkinson disease                                   | 1<br>(1 - 4)             | --                 | --                  | 0<br>(0 - 0)         | 0<br>(0 - 1)         | 1<br>(0 - 2)         |
| Epilepsy                                            | 219<br>(140 - 332)       | 71<br>(22 - 157)   | 37<br>(15 - 70)     | 86<br>(53 - 132)     | 12<br>(6 - 22)       | 13<br>(7 - 25)       |
| Multiple sclerosis                                  | 1<br>(0 - 4)             | --                 | --                  | 0<br>(0 - 2)         | 0<br>(0 - 2)         | 0<br>(0 - 1)         |
| Other neurological disorders                        | 40<br>(30 - 53)          | 9<br>(5 - 15)      | 4<br>(2 - 6)        | 9<br>(6 - 11)        | 11<br>(8 - 17)       | 7<br>(5 - 10)        |
| Mental and substance use disorders                  | 72<br>(43 - 109)         | 5<br>(1 - 10)      | 0<br>(0 - 0)        | 35<br>(18 - 56)      | 24<br>(13 - 39)      | 8<br>(5 - 12)        |
| Schizophrenia                                       | 2<br>(1 - 2)             | --                 | --                  | 1<br>(0 - 1)         | 1<br>(0 - 1)         | 0<br>(0 - 0)         |
| Alcohol use disorders                               | 36<br>(8 - 68)           | --                 | --                  | 21<br>(4 - 40)       | 13<br>(3 - 26)       | 2<br>(1 - 4)         |
| Drug use disorders                                  | 35<br>(24 - 47)          | 5<br>(1 - 10)      | --                  | 14<br>(9 - 21)       | 10<br>(7 - 15)       | 6<br>(4 - 9)         |
| Opioid use disorders                                | 3<br>(2 - 5)             | 1<br>(0 - 1)       | --                  | 1<br>(1 - 2)         | 1<br>(1 - 1)         | 1<br>(0 - 1)         |
| Cocaine use disorders                               | 0<br>(0 - 0)             | 0<br>(0 - 0)       | --                  | 0<br>(0 - 0)         | 0<br>(0 - 0)         | 0<br>(0 - 0)         |
| Amphetamine use disorders                           | 0<br>(0 - 0)             | 0<br>(0 - 0)       | --                  | 0<br>(0 - 0)         | 0<br>(0 - 0)         | 0<br>(0 - 0)         |

Web Table 31- Mali deaths with 95% UI by age, sex, and cause in 2013

| Cause                                               | Females, All Ages        | Females, 0-4 Years     | Females, 5-14 Years | Females, 15-49 Years | Females, 50-69 Years | Females, 70-80 Years |
|-----------------------------------------------------|--------------------------|------------------------|---------------------|----------------------|----------------------|----------------------|
| Other drug use disorders                            | 31<br>(22 - 42)          | 4<br>(1 - 9)           | --                  | 12<br>(8 - 19)       | 9<br>(6 - 13)        | 5<br>(3 - 8)         |
| Eating disorders                                    | 0<br>(0 - 1)             | --                     | 0<br>(0 - 0)        | 0<br>(0 - 0)         | --                   | --                   |
| Anorexia nervosa                                    | 0<br>(0 - 1)             | --                     | 0<br>(0 - 0)        | 0<br>(0 - 0)         | --                   | --                   |
| Diabetes, urogenital, blood, and endocrine diseases | 2,737<br>(2,063 - 3,545) | 595<br>(301 - 1,113)   | 220<br>(129 - 380)  | 501<br>(368 - 641)   | 739<br>(529 - 1,021) | 682<br>(514 - 897)   |
| Diabetes mellitus                                   | 943<br>(681 - 1,255)     | 8<br>(3 - 15)          | 8<br>(3 - 14)       | 122<br>(85 - 165)    | 414<br>(275 - 592)   | 392<br>(264 - 537)   |
| Acute glomerulonephritis                            | 12<br>(8 - 16)           | 2<br>(1 - 5)           | 2<br>(1 - 4)        | 4<br>(3 - 7)         | 3<br>(1 - 5)         | 1<br>(0 - 2)         |
| Chronic kidney disease                              | 445<br>(283 - 671)       | 65<br>(23 - 128)       | 35<br>(19 - 58)     | 114<br>(71 - 164)    | 122<br>(70 - 214)    | 108<br>(64 - 198)    |
| Chronic kidney disease due to diabetes mellitus     | 5<br>(2 - 10)            | 0<br>(0 - 1)           | 0<br>(0 - 1)        | 0<br>(0 - 1)         | 4<br>(1 - 8)         | 0<br>(0 - 0)         |
| Chronic kidney disease due to hypertension          | 182<br>(94 - 332)        | 8<br>(1 - 23)          | 5<br>(1 - 11)       | 38<br>(15 - 69)      | 66<br>(33 - 126)     | 65<br>(34 - 132)     |
| Chronic kidney disease due to glomerulonephritis    | 141<br>(75 - 208)        | 39<br>(15 - 74)        | 17<br>(9 - 28)      | 52<br>(28 - 77)      | 21<br>(9 - 38)       | 12<br>(4 - 25)       |
| Chronic kidney disease due to other causes          | 118<br>(38 - 214)        | 19<br>(3 - 44)         | 13<br>(3 - 27)      | 24<br>(8 - 45)       | 32<br>(8 - 70)       | 31<br>(7 - 70)       |
| Urinary diseases and male infertility               | 334<br>(214 - 450)       | 49<br>(14 - 100)       | 16<br>(6 - 31)      | 75<br>(45 - 104)     | 103<br>(60 - 161)    | 92<br>(53 - 145)     |
| Interstitial nephritis and urinary tract infections | 292<br>(189 - 402)       | 41<br>(10 - 92)        | 12<br>(3 - 26)      | 65<br>(37 - 95)      | 90<br>(52 - 140)     | 85<br>(49 - 133)     |
| Urolithiasis                                        | 10<br>(3 - 36)           | --                     | 2<br>(0 - 6)        | 3<br>(1 - 12)        | 4<br>(1 - 14)        | 2<br>(0 - 8)         |
| Other urinary diseases                              | 33<br>(15 - 64)          | 8<br>(1 - 24)          | 3<br>(1 - 7)        | 7<br>(3 - 16)        | 9<br>(4 - 19)        | 6<br>(2 - 13)        |
| Gynecological diseases                              | 15<br>(6 - 34)           | --                     | --                  | 9<br>(4 - 23)        | 4<br>(2 - 9)         | 2<br>(1 - 4)         |
| Uterine fibroids                                    | 3<br>(1 - 7)             | --                     | --                  | 1<br>(1 - 3)         | 1<br>(0 - 2)         | 1<br>(0 - 1)         |
| Polycystic ovarian syndrome                         | 1<br>(0 - 2)             | --                     | --                  | 1<br>(0 - 2)         | 0<br>(0 - 0)         | --                   |
| Endometriosis                                       | 2<br>(1 - 4)             | --                     | --                  | 1<br>(1 - 4)         | 0<br>(0 - 0)         | --                   |
| Genital prolapse                                    | 2<br>(1 - 6)             | --                     | --                  | 1<br>(0 - 3)         | 1<br>(0 - 2)         | 1<br>(0 - 1)         |
| Other gynecological diseases                        | 7<br>(3 - 17)            | --                     | --                  | 4<br>(2 - 11)        | 2<br>(1 - 5)         | 1<br>(0 - 2)         |
| Hemoglobinopathies and hemolytic anemias            | 634<br>(265 - 1,328)     | 345<br>(106 - 852)     | 135<br>(56 - 295)   | 110<br>(52 - 217)    | 27<br>(12 - 48)      | 17<br>(6 - 33)       |
| Thalassemias                                        | 3<br>(1 - 7)             | 2<br>(1 - 5)           | 1<br>(0 - 1)        | 0<br>(0 - 1)         | 0<br>(0 - 0)         | 0<br>(0 - 0)         |
| Sickle cell disorders                               | 606<br>(245 - 1,282)     | 333<br>(101 - 828)     | 133<br>(55 - 291)   | 108<br>(51 - 214)    | 25<br>(11 - 43)      | 6<br>(2 - 13)        |
| G6PD deficiency                                     | 4<br>(2 - 7)             | 2<br>(1 - 4)           | 1<br>(0 - 1)        | 1<br>(0 - 1)         | 0<br>(0 - 1)         | 1<br>(0 - 1)         |
| Other hemoglobinopathies and hemolytic anemias      | 21<br>(11 - 34)          | 8<br>(4 - 17)          | 1<br>(0 - 2)        | 1<br>(0 - 2)         | 2<br>(1 - 4)         | 10<br>(4 - 19)       |
| Endocrine, metabolic, blood, and immune disorders   | 353<br>(192 - 729)       | 126<br>(39 - 332)      | 24<br>(8 - 75)      | 67<br>(36 - 137)     | 65<br>(37 - 118)     | 71<br>(39 - 110)     |
| Musculoskeletal disorders                           | 67<br>(37 - 111)         | --                     | 10<br>(4 - 20)      | 23<br>(12 - 43)      | 19<br>(11 - 33)      | 15<br>(8 - 27)       |
| Rheumatoid arthritis                                | 12<br>(6 - 21)           | --                     | 2<br>(0 - 4)        | 2<br>(1 - 5)         | 3<br>(1 - 7)         | 5<br>(2 - 10)        |
| Other musculoskeletal disorders                     | 55<br>(26 - 92)          | --                     | 9<br>(3 - 17)       | 21<br>(10 - 38)      | 16<br>(7 - 28)       | 10<br>(4 - 18)       |
| Other non-communicable diseases                     | 2,401<br>(960 - 5,017)   | 2,020<br>(632 - 4,479) | 120<br>(42 - 298)   | 109<br>(75 - 159)    | 71<br>(46 - 103)     | 82<br>(53 - 124)     |
| Congenital anomalies                                | 2,112<br>(680 - 4,676)   | 1,938<br>(587 - 4,382) | 109<br>(33 - 287)   | 48<br>(25 - 94)      | 10<br>(6 - 17)       | 7<br>(5 - 11)        |
| Neural tube defects                                 | 626<br>(117 - 2,110)     | 590<br>(107 - 1,990)   | 26<br>(5 - 99)      | 9<br>(3 - 30)        | 1<br>(0 - 2)         | 0<br>(0 - 1)         |
| Congenital heart anomalies                          | 789<br>(224 - 1,764)     | 723<br>(185 - 1,651)   | 40<br>(10 - 110)    | 17<br>(8 - 36)       | 5<br>(3 - 8)         | 3<br>(2 - 6)         |
| Cleft lip and cleft palate                          | 10<br>(1 - 33)           | 10<br>(1 - 33)         | --                  | --                   | --                   | --                   |
| Down syndrome                                       | 311<br>(64 - 815)        | 271<br>(46 - 763)      | 25<br>(7 - 61)      | 12<br>(6 - 24)       | 2<br>(1 - 5)         | 0<br>(0 - 1)         |
| Chromosomal unbalanced rearrangements               | 75<br>(13 - 223)         | 70<br>(11 - 215)       | 3<br>(0 - 8)        | 2<br>(1 - 4)         | 0<br>(0 - 0)         | 0<br>(0 - 0)         |
| Other congenital anomalies                          | 301<br>(60 - 1,316)      | 274<br>(47 - 1,264)    | 15<br>(3 - 58)      | 7<br>(3 - 21)        | 2<br>(1 - 4)         | 3<br>(1 - 5)         |
| Skin and subcutaneous diseases                      | 280<br>(201 - 386)       | 72<br>(26 - 152)       | 11<br>(7 - 19)      | 61<br>(38 - 87)      | 60<br>(38 - 92)      | 75<br>(47 - 116)     |
| Cellulitis                                          | 131<br>(83 - 195)        | 25<br>(7 - 55)         | 6<br>(3 - 11)       | 29<br>(16 - 46)      | 27<br>(14 - 47)      | 44<br>(25 - 76)      |

Web Table 31- Mali deaths with 95% UI by age, sex, and cause in 2013

| Cause                                           | Females, All Ages        | Females, 0-4 Years     | Females, 5-14 Years | Females, 15-49 Years | Females, 50-69 Years | Females, 70-80 Years |
|-------------------------------------------------|--------------------------|------------------------|---------------------|----------------------|----------------------|----------------------|
| Pyoderma                                        | 139<br>(79 - 213)        | 44<br>(11 - 97)        | 4<br>(1 - 10)       | 29<br>(16 - 46)      | 32<br>(18 - 54)      | 29<br>(14 - 52)      |
| Decubitus ulcer                                 | 3<br>(2 - 5)             | 0<br>(0 - 1)           | 0<br>(0 - 1)        | 1<br>(0 - 1)         | 0<br>(0 - 1)         | 1<br>(0 - 3)         |
| Other skin and subcutaneous diseases            | 7<br>(2 - 17)            | 3<br>(0 - 11)          | 0<br>(0 - 1)        | 2<br>(1 - 4)         | 1<br>(0 - 1)         | 1<br>(0 - 2)         |
| Sudden infant death syndrome                    | 10<br>(2 - 29)           | 10<br>(2 - 29)         | --                  | --                   | --                   | --                   |
| Injuries                                        | 3,201<br>(2,350 - 4,088) | 1,005<br>(544 - 1,606) | 532<br>(341 - 781)  | 890<br>(674 - 1,129) | 413<br>(271 - 570)   | 360<br>(230 - 489)   |
| Transport injuries                              | 1,406<br>(1,019 - 1,902) | 298<br>(125 - 579)     | 260<br>(138 - 430)  | 528<br>(368 - 730)   | 212<br>(134 - 315)   | 108<br>(64 - 159)    |
| Road injuries                                   | 1,347<br>(983 - 1,824)   | 275<br>(115 - 532)     | 249<br>(133 - 408)  | 517<br>(360 - 714)   | 203<br>(130 - 303)   | 102<br>(62 - 150)    |
| Pedestrian road injuries                        | 381<br>(256 - 552)       | 78<br>(29 - 168)       | 82<br>(39 - 142)    | 114<br>(71 - 171)    | 67<br>(38 - 104)     | 40<br>(22 - 66)      |
| Cyclist road injuries                           | 80<br>(47 - 127)         | 21<br>(5 - 52)         | 21<br>(9 - 38)      | 16<br>(9 - 28)       | 18<br>(7 - 30)       | 4<br>(2 - 8)         |
| Motorcyclist road injuries                      | 131<br>(80 - 197)        | 19<br>(7 - 43)         | 14<br>(6 - 29)      | 77<br>(45 - 125)     | 14<br>(7 - 24)       | 6<br>(2 - 11)        |
| Motor vehicle road injuries                     | 709<br>(493 - 985)       | 144<br>(58 - 292)      | 122<br>(59 - 209)   | 298<br>(200 - 421)   | 98<br>(59 - 152)     | 47<br>(27 - 72)      |
| Other road injuries                             | 45<br>(15 - 80)          | 12<br>(2 - 33)         | 10<br>(3 - 24)      | 11<br>(4 - 23)       | 7<br>(2 - 13)        | 4<br>(1 - 8)         |
| Other transport injuries                        | 60<br>(16 - 101)         | 23<br>(5 - 52)         | 11<br>(3 - 22)      | 11<br>(4 - 18)       | 9<br>(2 - 16)        | 6<br>(1 - 12)        |
| Unintentional injuries                          | 1,568<br>(988 - 2,104)   | 688<br>(329 - 1,141)   | 256<br>(149 - 389)  | 238<br>(149 - 307)   | 159<br>(99 - 229)    | 228<br>(139 - 330)   |
| Falls                                           | 271<br>(164 - 376)       | 59<br>(21 - 120)       | 28<br>(12 - 50)     | 39<br>(22 - 55)      | 36<br>(22 - 54)      | 109<br>(57 - 175)    |
| Drowning                                        | 300<br>(134 - 518)       | 163<br>(45 - 355)      | 77<br>(33 - 146)    | 38<br>(22 - 60)      | 14<br>(8 - 23)       | 7<br>(4 - 12)        |
| Fire, heat, and hot substances                  | 253<br>(128 - 411)       | 128<br>(40 - 269)      | 37<br>(16 - 68)     | 41<br>(26 - 62)      | 23<br>(13 - 38)      | 23<br>(12 - 38)      |
| Poisonings                                      | 68<br>(25 - 135)         | 36<br>(9 - 97)         | 10<br>(4 - 20)      | 12<br>(6 - 18)       | 7<br>(2 - 13)        | 3<br>(1 - 5)         |
| Exposure to mechanical forces                   | 164<br>(111 - 237)       | 70<br>(30 - 135)       | 31<br>(17 - 52)     | 32<br>(22 - 46)      | 19<br>(9 - 29)       | 11<br>(5 - 16)       |
| Unintentional firearm injuries                  | 50<br>(33 - 72)          | 16<br>(6 - 33)         | 8<br>(3 - 17)       | 17<br>(10 - 27)      | 6<br>(3 - 10)        | 3<br>(1 - 5)         |
| Unintentional suffocation                       | 12<br>(3 - 29)           | 9<br>(2 - 25)          | 2<br>(1 - 4)        | 1<br>(0 - 1)         | 1<br>(0 - 1)         | 0<br>(0 - 1)         |
| Other exposure to mechanical forces             | 102<br>(62 - 156)        | 46<br>(17 - 96)        | 20<br>(10 - 36)     | 15<br>(10 - 23)      | 13<br>(5 - 20)       | 8<br>(2 - 12)        |
| Adverse effects of medical treatment            | 129<br>(47 - 214)        | 37<br>(8 - 83)         | 10<br>(3 - 19)      | 25<br>(10 - 43)      | 27<br>(9 - 53)       | 30<br>(8 - 63)       |
| Animal contact                                  | 77<br>(31 - 140)         | 23<br>(6 - 60)         | 19<br>(7 - 44)      | 19<br>(6 - 31)       | 10<br>(3 - 18)       | 7<br>(1 - 13)        |
| Venomous animal contact                         | 55<br>(23 - 116)         | 19<br>(5 - 54)         | 14<br>(5 - 37)      | 12<br>(4 - 22)       | 6<br>(2 - 11)        | 3<br>(1 - 7)         |
| Non-venomous animal contact                     | 23<br>(6 - 40)           | 3<br>(1 - 10)          | 5<br>(1 - 12)       | 6<br>(1 - 11)        | 5<br>(1 - 9)         | 4<br>(1 - 7)         |
| Foreign body                                    | 211<br>(84 - 514)        | 141<br>(39 - 376)      | 22<br>(7 - 55)      | 12<br>(6 - 27)       | 11<br>(6 - 21)       | 25<br>(13 - 41)      |
| Pulmonary aspiration and foreign body in airway | 208<br>(81 - 511)        | 140<br>(38 - 376)      | 22<br>(7 - 54)      | 12<br>(5 - 26)       | 11<br>(6 - 21)       | 24<br>(12 - 40)      |
| Foreign body in other body part                 | 3<br>(2 - 4)             | 1<br>(0 - 2)           | 0<br>(0 - 1)        | 1<br>(0 - 1)         | 1<br>(0 - 1)         | 1<br>(0 - 2)         |
| Other unintentional injuries                    | 95<br>(59 - 134)         | 30<br>(11 - 62)        | 24<br>(11 - 40)     | 18<br>(12 - 26)      | 11<br>(6 - 16)       | 12<br>(5 - 19)       |
| Self-harm and interpersonal violence            | 218<br>(147 - 294)       | 19<br>(7 - 41)         | 15<br>(7 - 26)      | 120<br>(81 - 169)    | 41<br>(19 - 63)      | 24<br>(7 - 39)       |
| Self-harm                                       | 137<br>(81 - 196)        | --                     | 5<br>(2 - 11)       | 72<br>(44 - 111)     | 37<br>(15 - 59)      | 23<br>(6 - 38)       |
| Interpersonal violence                          | 81<br>(53 - 121)         | 19<br>(7 - 41)         | 10<br>(5 - 19)      | 48<br>(28 - 73)      | 4<br>(2 - 7)         | 1<br>(0 - 2)         |
| Assault by firearm                              | 25<br>(13 - 41)          | 6<br>(2 - 14)          | 3<br>(1 - 6)        | 15<br>(7 - 26)       | 1<br>(1 - 3)         | 0<br>(0 - 0)         |
| Assault by sharp object                         | 21<br>(11 - 34)          | 3<br>(1 - 8)           | 2<br>(1 - 4)        | 15<br>(7 - 26)       | 1<br>(0 - 1)         | 0<br>(0 - 0)         |
| Assault by other means                          | 35<br>(21 - 59)          | 10<br>(4 - 22)         | 5<br>(2 - 11)       | 18<br>(10 - 30)      | 2<br>(1 - 3)         | 0<br>(0 - 1)         |
| Forces of nature, war, and legal intervention   | 8<br>(4 - 20)            | 0<br>(0 - 1)           | 1<br>(0 - 1)        | 4<br>(2 - 11)        | 2<br>(1 - 4)         | 0<br>(0 - 1)         |
| Exposure to forces of nature                    | 8<br>(4 - 20)            | 0<br>(0 - 1)           | 1<br>(0 - 1)        | 4<br>(2 - 11)        | 2<br>(1 - 4)         | 0<br>(0 - 1)         |

Web Table 31- Malta deaths with 95% UI by age, sex, and cause in 2013

| Cause                                                             | Both Sexes, All Ages     | Both Sexes, 0-4 Years | Both Sexes, 5-14 Years | Both Sexes, 15-49 Years | Both Sexes, 50-69 Years | Both Sexes, 70-80 Years  |
|-------------------------------------------------------------------|--------------------------|-----------------------|------------------------|-------------------------|-------------------------|--------------------------|
| All causes                                                        | 2,868<br>(2,672 - 3,104) | 28<br>(20 - 38)       | 5<br>(4 - 7)           | 135<br>(120 - 154)      | 647<br>(584 - 728)      | 2,053<br>(1,935 - 2,181) |
| Communicable, maternal, neonatal, and nutritional diseases        | 132<br>(103 - 159)       | 12<br>(8 - 16)        | 1<br>(0 - 1)           | 3<br>(3 - 4)            | 10<br>(7 - 12)          | 107<br>(79 - 132)        |
| HIV/AIDS and tuberculosis                                         | 1<br>(1 - 2)             | 0<br>(0 - 0)          | 0<br>(0 - 0)           | 0<br>(0 - 0)            | 0<br>(0 - 0)            | 0<br>(0 - 1)             |
| Tuberculosis                                                      | 1<br>(1 - 1)             | 0<br>(0 - 0)          | 0<br>(0 - 0)           | 0<br>(0 - 0)            | 0<br>(0 - 0)            | 0<br>(0 - 0)             |
| HIV/AIDS                                                          | 0<br>(0 - 1)             | 0<br>(0 - 0)          | 0<br>(0 - 0)           | 0<br>(0 - 0)            | 0<br>(0 - 0)            | 0<br>(0 - 0)             |
| HIV/AIDS resulting in mycobacterial infection                     | 0<br>(0 - 0)             | 0<br>(0 - 0)          | 0<br>(0 - 0)           | 0<br>(0 - 0)            | 0<br>(0 - 0)            | 0<br>(0 - 0)             |
| HIV/AIDS resulting in other diseases                              | 0<br>(0 - 1)             | 0<br>(0 - 0)          | 0<br>(0 - 0)           | 0<br>(0 - 0)            | 0<br>(0 - 0)            | 0<br>(0 - 0)             |
| Diarrhea, lower respiratory, and other common infectious diseases | 115<br>(84 - 141)        | 2<br>(1 - 3)          | 0<br>(0 - 1)           | 2<br>(2 - 3)            | 8<br>(5 - 10)           | 102<br>(74 - 127)        |
| Diarrheal diseases                                                | 1<br>(1 - 1)             | 0<br>(0 - 0)          | 0<br>(0 - 0)           | 0<br>(0 - 0)            | 0<br>(0 - 0)            | 1<br>(0 - 1)             |
| Intestinal infectious diseases                                    | 1<br>(0 - 1)             | 0<br>(0 - 0)          | 0<br>(0 - 0)           | 0<br>(0 - 1)            | 0<br>(0 - 0)            | 0<br>(0 - 0)             |
| Typhoid fever                                                     | 0<br>(0 - 1)             | 0<br>(0 - 0)          | 0<br>(0 - 0)           | 0<br>(0 - 0)            | 0<br>(0 - 0)            | 0<br>(0 - 0)             |
| Paratyphoid fever                                                 | 0<br>(0 - 0)             | 0<br>(0 - 0)          | 0<br>(0 - 0)           | 0<br>(0 - 0)            | 0<br>(0 - 0)            | 0<br>(0 - 0)             |
| Other intestinal infectious diseases                              | 0<br>(0 - 0)             | 0<br>(0 - 0)          | 0<br>(0 - 0)           | 0<br>(0 - 0)            | 0<br>(0 - 0)            | 0<br>(0 - 0)             |
| Lower respiratory infections                                      | 111<br>(81 - 138)        | 2<br>(1 - 3)          | 0<br>(0 - 0)           | 2<br>(1 - 2)            | 7<br>(5 - 9)            | 101<br>(72 - 126)        |
| Upper respiratory infections                                      | 0<br>(0 - 0)             | 0<br>(0 - 0)          | 0<br>(0 - 0)           | 0<br>(0 - 0)            | 0<br>(0 - 0)            | 0<br>(0 - 0)             |
| Otitis media                                                      | 0<br>(0 - 0)             | 0<br>(0 - 0)          | 0<br>(0 - 0)           | 0<br>(0 - 0)            | 0<br>(0 - 0)            | 0<br>(0 - 0)             |
| Meningitis                                                        | 1<br>(1 - 1)             | 0<br>(0 - 0)          | 0<br>(0 - 0)           | 0<br>(0 - 0)            | 0<br>(0 - 0)            | 0<br>(0 - 0)             |
| Pneumococcal meningitis                                           | 0<br>(0 - 0)             | 0<br>(0 - 0)          | 0<br>(0 - 0)           | 0<br>(0 - 0)            | 0<br>(0 - 0)            | 0<br>(0 - 0)             |
| H influenzae type B meningitis                                    | 0<br>(0 - 0)             | 0<br>(0 - 0)          | 0<br>(0 - 0)           | 0<br>(0 - 0)            | 0<br>(0 - 0)            | 0<br>(0 - 0)             |
| Meningococcal meningitis                                          | 0<br>(0 - 0)             | 0<br>(0 - 0)          | 0<br>(0 - 0)           | 0<br>(0 - 0)            | 0<br>(0 - 0)            | 0<br>(0 - 0)             |
| Other meningitis                                                  | 0<br>(0 - 0)             | 0<br>(0 - 0)          | 0<br>(0 - 0)           | 0<br>(0 - 0)            | 0<br>(0 - 0)            | 0<br>(0 - 0)             |
| Encephalitis                                                      | 0<br>(0 - 1)             | 0<br>(0 - 0)          | 0<br>(0 - 0)           | 0<br>(0 - 0)            | 0<br>(0 - 0)            | 0<br>(0 - 0)             |
| Diphtheria                                                        | 0<br>(0 - 0)             | 0<br>(0 - 0)          | 0<br>(0 - 0)           | 0<br>(0 - 0)            | 0<br>(0 - 0)            | --                       |
| Whooping cough                                                    | 0<br>(0 - 0)             | 0<br>(0 - 0)          | 0<br>(0 - 0)           | 0<br>(0 - 0)            | 0<br>(0 - 0)            | --                       |
| Tetanus                                                           | 0<br>(0 - 0)             | 0<br>(0 - 0)          | 0<br>(0 - 0)           | 0<br>(0 - 0)            | 0<br>(0 - 0)            | 0<br>(0 - 0)             |
| Measles                                                           | 0<br>(0 - 0)             | 0<br>(0 - 0)          | 0<br>(0 - 0)           | 0<br>(0 - 0)            | 0<br>(0 - 0)            | --                       |
| Varicella and herpes zoster                                       | 0<br>(0 - 1)             | 0<br>(0 - 0)          | 0<br>(0 - 0)           | 0<br>(0 - 0)            | 0<br>(0 - 0)            | 0<br>(0 - 1)             |
| Neglected tropical diseases and malaria                           | 1<br>(1 - 2)             | 0<br>(0 - 0)          | 0<br>(0 - 0)           | 0<br>(0 - 1)            | 0<br>(0 - 1)            | 0<br>(0 - 0)             |
| Leishmaniasis                                                     | 1<br>(1 - 2)             | 0<br>(0 - 0)          | 0<br>(0 - 0)           | 0<br>(0 - 0)            | 0<br>(0 - 1)            | 0<br>(0 - 0)             |
| Visceral leishmaniasis                                            | 1<br>(1 - 2)             | 0<br>(0 - 0)          | 0<br>(0 - 0)           | 0<br>(0 - 0)            | 0<br>(0 - 1)            | 0<br>(0 - 0)             |
| Cysticercosis                                                     | 0<br>(0 - 0)             | 0<br>(0 - 0)          | 0<br>(0 - 0)           | 0<br>(0 - 0)            | 0<br>(0 - 0)            | 0<br>(0 - 0)             |
| Cystic echinococcosis                                             | 0<br>(0 - 0)             | 0<br>(0 - 0)          | 0<br>(0 - 0)           | 0<br>(0 - 0)            | 0<br>(0 - 0)            | 0<br>(0 - 0)             |
| Dengue                                                            | 0<br>(0 - 0)             | 0<br>(0 - 0)          | 0<br>(0 - 0)           | 0<br>(0 - 0)            | 0<br>(0 - 0)            | 0<br>(0 - 0)             |
| Rabies                                                            | 0<br>(0 - 0)             | 0<br>(0 - 0)          | 0<br>(0 - 0)           | 0<br>(0 - 0)            | 0<br>(0 - 0)            | 0<br>(0 - 0)             |
| Other neglected tropical diseases                                 | 0<br>(0 - 0)             | 0<br>(0 - 0)          | 0<br>(0 - 0)           | 0<br>(0 - 0)            | 0<br>(0 - 0)            | 0<br>(0 - 0)             |
| Maternal disorders                                                | 0<br>(0 - 0)             | --                    | 0<br>(0 - 0)           | 0<br>(0 - 0)            | --                      | --                       |
| Maternal hemorrhage                                               | 0<br>(0 - 0)             | --                    | 0<br>(0 - 0)           | 0<br>(0 - 0)            | --                      | --                       |
| Maternal sepsis and other maternal infections                     | 0<br>(0 - 0)             | --                    | 0<br>(0 - 0)           | 0<br>(0 - 0)            | --                      | --                       |
| Maternal hypertensive disorders                                   | 0<br>(0 - 0)             | --                    | 0<br>(0 - 0)           | 0<br>(0 - 0)            | --                      | --                       |
| Maternal obstructed labor                                         | 0<br>(0 - 0)             | --                    | 0<br>(0 - 0)           | 0<br>(0 - 0)            | --                      | --                       |



Web Table 31- Malta deaths with 95% UI by age, sex, and cause in 2013

| Cause                                                            | Both Sexes, All Ages     | Both Sexes, 0-4 Years | Both Sexes, 5-14 Years | Both Sexes, 15-49 Years | Both Sexes, 50-69 Years | Both Sexes, 70-80 Years  |
|------------------------------------------------------------------|--------------------------|-----------------------|------------------------|-------------------------|-------------------------|--------------------------|
| Maternal abortive outcome                                        | 0<br>(0 - 0)             | --                    | 0<br>(0 - 0)           | 0<br>(0 - 0)            | --                      | --                       |
| Indirect maternal deaths                                         | 0<br>(0 - 0)             | --                    | 0<br>(0 - 0)           | 0<br>(0 - 0)            | --                      | --                       |
| Late maternal deaths                                             | 0<br>(0 - 0)             | --                    | 0<br>(0 - 0)           | 0<br>(0 - 0)            | --                      | --                       |
| Maternal deaths aggravated by HIV/AIDS                           | 0<br>(0 - 0)             | --                    | --                     | 0<br>(0 - 0)            | --                      | --                       |
| Other maternal disorders                                         | 0<br>(0 - 0)             | --                    | 0<br>(0 - 0)           | 0<br>(0 - 0)            | --                      | --                       |
| Neonatal disorders                                               | 9<br>(7 - 13)            | 9<br>(7 - 13)         | --                     | --                      | --                      | --                       |
| Neonatal preterm birth complications                             | 7<br>(5 - 10)            | 7<br>(5 - 10)         | --                     | --                      | --                      | --                       |
| Neonatal encephalopathy due to birth asphyxia and trauma         | 2<br>(1 - 3)             | 2<br>(1 - 3)          | --                     | --                      | --                      | --                       |
| Neonatal sepsis and other neonatal infections                    | 0<br>(0 - 0)             | 0<br>(0 - 0)          | --                     | --                      | --                      | --                       |
| Hemolytic disease and other neonatal jaundice                    | 0<br>(0 - 0)             | 0<br>(0 - 0)          | --                     | --                      | --                      | --                       |
| Other neonatal disorders                                         | 1<br>(0 - 2)             | 1<br>(0 - 2)          | --                     | --                      | --                      | --                       |
| Nutritional deficiencies                                         | 5<br>(4 - 6)             | 0<br>(0 - 0)          | 0<br>(0 - 0)           | 0<br>(0 - 0)            | 0<br>(0 - 1)            | 4<br>(3 - 5)             |
| Protein-energy malnutrition                                      | 0<br>(0 - 0)             | 0<br>(0 - 0)          | 0<br>(0 - 0)           | 0<br>(0 - 0)            | 0<br>(0 - 0)            | 0<br>(0 - 0)             |
| Iodine deficiency                                                | 0<br>(0 - 0)             | 0<br>(0 - 0)          | 0<br>(0 - 0)           | 0<br>(0 - 0)            | 0<br>(0 - 0)            | 0<br>(0 - 0)             |
| Iron-deficiency anemia                                           | 4<br>(3 - 6)             | 0<br>(0 - 0)          | 0<br>(0 - 0)           | 0<br>(0 - 0)            | 0<br>(0 - 1)            | 4<br>(3 - 5)             |
| Other nutritional deficiencies                                   | 0<br>(0 - 0)             | 0<br>(0 - 0)          | 0<br>(0 - 0)           | 0<br>(0 - 0)            | 0<br>(0 - 0)            | 0<br>(0 - 0)             |
| Other communicable, maternal, neonatal, and nutritional diseases | 1<br>(1 - 2)             | 0<br>(0 - 0)          | 0<br>(0 - 0)           | 0<br>(0 - 0)            | 0<br>(0 - 1)            | 0<br>(0 - 1)             |
| Sexually transmitted diseases excluding HIV                      | 0<br>(0 - 0)             | 0<br>(0 - 0)          | 0<br>(0 - 0)           | 0<br>(0 - 0)            | 0<br>(0 - 0)            | 0<br>(0 - 0)             |
| Syphilis                                                         | 0<br>(0 - 0)             | 0<br>(0 - 0)          | 0<br>(0 - 0)           | 0<br>(0 - 0)            | 0<br>(0 - 0)            | 0<br>(0 - 0)             |
| Chlamydial infection                                             | 0<br>(0 - 0)             | --                    | 0<br>(0 - 0)           | 0<br>(0 - 0)            | 0<br>(0 - 0)            | 0<br>(0 - 0)             |
| Gonococcal infection                                             | 0<br>(0 - 0)             | --                    | 0<br>(0 - 0)           | 0<br>(0 - 0)            | 0<br>(0 - 0)            | 0<br>(0 - 0)             |
| Other sexually transmitted diseases                              | 0<br>(0 - 0)             | --                    | 0<br>(0 - 0)           | 0<br>(0 - 0)            | 0<br>(0 - 0)            | 0<br>(0 - 0)             |
| Hepatitis                                                        | 0<br>(0 - 0)             | 0<br>(0 - 0)          | 0<br>(0 - 0)           | 0<br>(0 - 0)            | 0<br>(0 - 0)            | 0<br>(0 - 0)             |
| Acute hepatitis A                                                | 0<br>(0 - 0)             | 0<br>(0 - 0)          | 0<br>(0 - 0)           | 0<br>(0 - 0)            | 0<br>(0 - 0)            | 0<br>(0 - 0)             |
| Acute hepatitis B                                                | 0<br>(0 - 0)             | 0<br>(0 - 0)          | 0<br>(0 - 0)           | 0<br>(0 - 0)            | 0<br>(0 - 0)            | 0<br>(0 - 0)             |
| Acute hepatitis C                                                | 0<br>(0 - 0)             | --                    | 0<br>(0 - 0)           | 0<br>(0 - 0)            | 0<br>(0 - 0)            | 0<br>(0 - 0)             |
| Other infectious diseases                                        | 1<br>(1 - 2)             | 0<br>(0 - 0)          | 0<br>(0 - 0)           | 0<br>(0 - 0)            | 0<br>(0 - 1)            | 0<br>(0 - 1)             |
| Non-communicable diseases                                        | 2,632<br>(2,446 - 2,840) | 15<br>(11 - 20)       | 4<br>(3 - 5)           | 98<br>(87 - 112)        | 618<br>(558 - 696)      | 1,897<br>(1,786 - 2,022) |
| Neoplasms                                                        | 794<br>(718 - 877)       | 1<br>(0 - 1)          | 2<br>(2 - 2)           | 46<br>(40 - 53)         | 306<br>(272 - 344)      | 440<br>(400 - 484)       |
| Esophageal cancer                                                | 13<br>(11 - 16)          | --                    | --                     | 0<br>(0 - 1)            | 5<br>(4 - 7)            | 7<br>(6 - 9)             |
| Stomach cancer                                                   | 45<br>(38 - 53)          | --                    | --                     | 2<br>(1 - 2)            | 14<br>(12 - 17)         | 29<br>(25 - 35)          |
| Liver cancer                                                     | 17<br>(12 - 21)          | --                    | 0<br>(0 - 0)           | 1<br>(1 - 1)            | 7<br>(5 - 10)           | 9<br>(6 - 11)            |
| Liver cancer due to hepatitis B                                  | 3<br>(2 - 6)             | --                    | 0<br>(0 - 0)           | 0<br>(0 - 0)            | 2<br>(1 - 3)            | 1<br>(1 - 2)             |
| Liver cancer due to hepatitis C                                  | 10<br>(7 - 13)           | --                    | 0<br>(0 - 0)           | 0<br>(0 - 1)            | 4<br>(2 - 6)            | 5<br>(4 - 7)             |
| Liver cancer due to alcohol use                                  | 3<br>(2 - 5)             | --                    | --                     | 0<br>(0 - 0)            | 1<br>(1 - 2)            | 2<br>(1 - 3)             |
| Liver cancer due to other causes                                 | 1<br>(0 - 1)             | --                    | 0<br>(0 - 0)           | 0<br>(0 - 0)            | 0<br>(0 - 0)            | 0<br>(0 - 1)             |
| Larynx cancer                                                    | 6<br>(5 - 8)             | --                    | --                     | 0<br>(0 - 0)            | 3<br>(2 - 4)            | 3<br>(2 - 4)             |
| Tracheal, bronchus and lung cancer                               | 160<br>(141 - 183)       | --                    | --                     | 5<br>(4 - 6)            | 71<br>(61 - 83)         | 84<br>(73 - 96)          |
| Breast cancer                                                    | 83<br>(59 - 101)         | --                    | --                     | 7<br>(5 - 9)            | 36<br>(26 - 44)         | 40<br>(28 - 50)          |
| Cervical cancer                                                  | 5<br>(4 - 6)             | --                    | --                     | 1<br>(1 - 1)            | 2<br>(1 - 3)            | 2<br>(2 - 3)             |

Web Table 31- Malta deaths with 95% UI by age, sex, and cause in 2013

| Cause                                         | Both Sexes, All Ages     | Both Sexes, 0-4 Years | Both Sexes, 5-14 Years | Both Sexes, 15-49 Years | Both Sexes, 50-69 Years | Both Sexes, 70-80 Years |
|-----------------------------------------------|--------------------------|-----------------------|------------------------|-------------------------|-------------------------|-------------------------|
| Uterine cancer                                | 11<br>(6 - 14)           | --                    | --                     | 0<br>(0 - 0)            | 5<br>(3 - 7)            | 6<br>(3 - 8)            |
| Prostate cancer                               | 45<br>(35 - 64)          | --                    | --                     | 0<br>(0 - 0)            | 8<br>(6 - 12)           | 37<br>(28 - 53)         |
| Colon and rectum cancer                       | 114<br>(101 - 128)       | --                    | --                     | 5<br>(4 - 5)            | 40<br>(35 - 46)         | 69<br>(61 - 79)         |
| Lip and oral cavity cancer                    | 6<br>(5 - 7)             | --                    | --                     | 1<br>(0 - 1)            | 3<br>(2 - 3)            | 3<br>(2 - 4)            |
| Nasopharynx cancer                            | 3<br>(3 - 4)             | --                    | 0<br>(0 - 0)           | 1<br>(1 - 1)            | 2<br>(1 - 2)            | 1<br>(0 - 1)            |
| Other pharynx cancer                          | 4<br>(2 - 5)             | --                    | --                     | 0<br>(0 - 0)            | 2<br>(1 - 3)            | 1<br>(1 - 2)            |
| Gallbladder and biliary tract cancer          | 6<br>(4 - 7)             | --                    | --                     | 0<br>(0 - 0)            | 2<br>(1 - 2)            | 4<br>(2 - 5)            |
| Pancreatic cancer                             | 65<br>(58 - 73)          | --                    | --                     | 2<br>(2 - 2)            | 25<br>(22 - 29)         | 37<br>(32 - 43)         |
| Malignant skin melanoma                       | 7<br>(5 - 10)            | --                    | --                     | 1<br>(1 - 2)            | 3<br>(2 - 4)            | 3<br>(2 - 4)            |
| Non-melanoma skin cancer                      | 2<br>(2 - 3)             | --                    | --                     | 0<br>(0 - 0)            | 0<br>(0 - 0)            | 2<br>(1 - 2)            |
| Ovarian cancer                                | 30<br>(24 - 37)          | --                    | --                     | 2<br>(2 - 3)            | 14<br>(11 - 18)         | 14<br>(10 - 18)         |
| Testicular cancer                             | 0<br>(0 - 0)             | --                    | --                     | 0<br>(0 - 0)            | 0<br>(0 - 0)            | 0<br>(0 - 0)            |
| Kidney cancer                                 | 22<br>(18 - 26)          | 0<br>(0 - 0)          | 0<br>(0 - 0)           | 1<br>(1 - 2)            | 10<br>(8 - 12)          | 11<br>(9 - 14)          |
| Bladder cancer                                | 26<br>(21 - 31)          | --                    | --                     | 0<br>(0 - 0)            | 7<br>(6 - 9)            | 19<br>(15 - 23)         |
| Brain and nervous system cancer               | 21<br>(16 - 25)          | 0<br>(0 - 0)          | 0<br>(0 - 1)           | 4<br>(3 - 5)            | 11<br>(8 - 13)          | 5<br>(4 - 7)            |
| Thyroid cancer                                | 3<br>(2 - 4)             | --                    | 0<br>(0 - 0)           | 0<br>(0 - 0)            | 1<br>(1 - 1)            | 2<br>(1 - 3)            |
| Mesothelioma                                  | 6<br>(3 - 8)             | --                    | --                     | 0<br>(0 - 1)            | 3<br>(1 - 4)            | 3<br>(1 - 4)            |
| Hodgkin lymphoma                              | 2<br>(1 - 2)             | 0<br>(0 - 0)          | 0<br>(0 - 0)           | 1<br>(0 - 1)            | 1<br>(0 - 1)            | 1<br>(0 - 1)            |
| Non-Hodgkin lymphoma                          | 25<br>(17 - 31)          | 0<br>(0 - 0)          | 0<br>(0 - 0)           | 3<br>(2 - 4)            | 10<br>(6 - 13)          | 13<br>(8 - 16)          |
| Multiple myeloma                              | 12<br>(8 - 16)           | --                    | --                     | 0<br>(0 - 1)            | 4<br>(3 - 6)            | 7<br>(5 - 10)           |
| Leukemia                                      | 24<br>(20 - 27)          | 0<br>(0 - 0)          | 1<br>(1 - 1)           | 4<br>(3 - 5)            | 7<br>(6 - 9)            | 12<br>(10 - 14)         |
| Other neoplasms                               | 32<br>(24 - 38)          | 0<br>(0 - 0)          | 0<br>(0 - 1)           | 4<br>(3 - 5)            | 10<br>(8 - 12)          | 17<br>(13 - 22)         |
| Cardiovascular diseases                       | 1,204<br>(1,104 - 1,329) | 0<br>(0 - 0)          | 0<br>(0 - 0)           | 25<br>(21 - 29)         | 210<br>(185 - 243)      | 969<br>(891 - 1,062)    |
| Rheumatic heart disease                       | 5<br>(3 - 6)             | 0<br>(0 - 0)          | 0<br>(0 - 0)           | 1<br>(0 - 1)            | 1<br>(1 - 2)            | 3<br>(2 - 4)            |
| Ischemic heart disease                        | 781<br>(707 - 886)       | 0<br>(0 - 0)          | 0<br>(0 - 0)           | 17<br>(14 - 20)         | 149<br>(129 - 176)      | 615<br>(556 - 697)      |
| Cerebrovascular disease                       | 305<br>(255 - 352)       | 0<br>(0 - 0)          | 0<br>(0 - 0)           | 4<br>(3 - 6)            | 40<br>(33 - 49)         | 260<br>(215 - 300)      |
| Ischemic stroke                               | 181<br>(143 - 214)       | 0<br>(0 - 0)          | 0<br>(0 - 0)           | 1<br>(1 - 1)            | 16<br>(12 - 20)         | 165<br>(129 - 195)      |
| Hemorrhagic stroke                            | 124<br>(100 - 151)       | 0<br>(0 - 0)          | 0<br>(0 - 0)           | 4<br>(3 - 5)            | 25<br>(20 - 31)         | 95<br>(76 - 119)        |
| Hypertensive heart disease                    | 16<br>(12 - 23)          | 0<br>(0 - 0)          | 0<br>(0 - 0)           | 0<br>(0 - 0)            | 3<br>(2 - 4)            | 13<br>(9 - 18)          |
| Cardiomyopathy and myocarditis                | 17<br>(10 - 49)          | 0<br>(0 - 0)          | 0<br>(0 - 0)           | 1<br>(1 - 2)            | 2<br>(1 - 5)            | 14<br>(7 - 42)          |
| Atrial fibrillation and flutter               | 16<br>(11 - 22)          | --                    | --                     | 0<br>(0 - 0)            | 1<br>(1 - 1)            | 15<br>(10 - 21)         |
| Aortic aneurysm                               | 13<br>(9 - 16)           | --                    | --                     | 0<br>(0 - 1)            | 3<br>(2 - 4)            | 9<br>(6 - 12)           |
| Peripheral vascular disease                   | 13<br>(10 - 17)          | --                    | --                     | 0<br>(0 - 0)            | 2<br>(1 - 2)            | 12<br>(9 - 15)          |
| Endocarditis                                  | 4<br>(3 - 6)             | 0<br>(0 - 0)          | 0<br>(0 - 0)           | 0<br>(0 - 1)            | 1<br>(1 - 2)            | 2<br>(1 - 3)            |
| Other cardiovascular and circulatory diseases | 33<br>(25 - 44)          | 0<br>(0 - 0)          | 0<br>(0 - 0)           | 1<br>(1 - 2)            | 6<br>(4 - 8)            | 26<br>(19 - 36)         |
| Chronic respiratory diseases                  | 133<br>(112 - 151)       | 0<br>(0 - 0)          | 0<br>(0 - 0)           | 3<br>(2 - 3)            | 22<br>(17 - 27)         | 108<br>(92 - 122)       |
| Chronic obstructive pulmonary disease         | 102<br>(86 - 118)        | 0<br>(0 - 0)          | 0<br>(0 - 0)           | 1<br>(1 - 1)            | 15<br>(11 - 19)         | 86<br>(73 - 99)         |
| Pneumoconiosis                                | 3<br>(2 - 5)             | 0<br>(0 - 0)          | 0<br>(0 - 0)           | 0<br>(0 - 0)            | 1<br>(0 - 1)            | 3<br>(2 - 4)            |
| Silicosis                                     | 0<br>(0 - 0)             | 0<br>(0 - 0)          | 0<br>(0 - 0)           | 0<br>(0 - 0)            | 0<br>(0 - 0)            | 0<br>(0 - 0)            |
| Asbestosis                                    | 2<br>(1 - 3)             | 0<br>(0 - 0)          | 0<br>(0 - 0)           | 0<br>(0 - 0)            | 0<br>(0 - 0)            | 1<br>(1 - 2)            |

Web Table 31- Malta deaths with 95% UI by age, sex, and cause in 2013

| Cause                                               | Both Sexes, All Ages | Both Sexes, 0-4 Years | Both Sexes, 5-14 Years | Both Sexes, 15-49 Years | Both Sexes, 50-69 Years | Both Sexes, 70-80 Years |
|-----------------------------------------------------|----------------------|-----------------------|------------------------|-------------------------|-------------------------|-------------------------|
| Coal workers pneumoconiosis                         | 0<br>(0 - 0)         | 0<br>(0 - 0)          | 0<br>(0 - 0)           | 0<br>(0 - 0)            | 0<br>(0 - 0)            | 0<br>(0 - 0)            |
| Other pneumoconiosis                                | 1<br>(1 - 2)         | 0<br>(0 - 0)          | 0<br>(0 - 0)           | 0<br>(0 - 0)            | 0<br>(0 - 0)            | 1<br>(1 - 2)            |
| Asthma                                              | 5<br>(3 - 7)         | 0<br>(0 - 0)          | 0<br>(0 - 0)           | 1<br>(0 - 1)            | 1<br>(1 - 2)            | 3<br>(2 - 5)            |
| Interstitial lung disease and pulmonary sarcoidosis | 22<br>(13 - 29)      | 0<br>(0 - 0)          | 0<br>(0 - 0)           | 1<br>(0 - 1)            | 5<br>(3 - 7)            | 16<br>(9 - 22)          |
| Other chronic respiratory diseases                  | 0<br>(0 - 1)         | 0<br>(0 - 0)          | 0<br>(0 - 0)           | 0<br>(0 - 0)            | 0<br>(0 - 0)            | 0<br>(0 - 0)            |
| Cirrhosis                                           | 34<br>(30 - 39)      | 0<br>(0 - 0)          | 0<br>(0 - 0)           | 4<br>(4 - 5)            | 15<br>(13 - 18)         | 14<br>(12 - 17)         |
| Cirrhosis due to hepatitis B                        | 4<br>(2 - 5)         | 0<br>(0 - 0)          | 0<br>(0 - 0)           | 2<br>(0 - 1)            | 2<br>(1 - 3)            | 2<br>(1 - 3)            |
| Cirrhosis due to hepatitis C                        | 17<br>(12 - 22)      | 0<br>(0 - 0)          | 0<br>(0 - 0)           | 2<br>(1 - 3)            | 7<br>(4 - 11)           | 8<br>(6 - 10)           |
| Cirrhosis due to alcohol use                        | 10<br>(5 - 14)       | --                    | --                     | 1<br>(0 - 2)            | 5<br>(2 - 7)            | 4<br>(2 - 6)            |
| Cirrhosis due to other causes                       | 3<br>(2 - 5)         | 0<br>(0 - 0)          | 0<br>(0 - 0)           | 1<br>(0 - 1)            | 1<br>(1 - 3)            | 1<br>(1 - 2)            |
| Digestive diseases                                  | 60<br>(48 - 69)      | 0<br>(0 - 0)          | 0<br>(0 - 0)           | 2<br>(2 - 2)            | 9<br>(7 - 11)           | 49<br>(39 - 56)         |
| Peptic ulcer disease                                | 11<br>(9 - 15)       | 0<br>(0 - 0)          | 0<br>(0 - 0)           | 0<br>(0 - 0)            | 2<br>(1 - 3)            | 9<br>(7 - 12)           |
| Gastritis and duodenitis                            | 1<br>(0 - 1)         | 0<br>(0 - 0)          | 0<br>(0 - 0)           | 0<br>(0 - 0)            | 0<br>(0 - 0)            | 0<br>(0 - 1)            |
| Appendicitis                                        | 0<br>(0 - 1)         | 0<br>(0 - 0)          | 0<br>(0 - 0)           | 0<br>(0 - 0)            | 0<br>(0 - 0)            | 0<br>(0 - 0)            |
| Paralytic ileus and intestinal obstruction          | 12<br>(8 - 17)       | 0<br>(0 - 0)          | 0<br>(0 - 0)           | 0<br>(0 - 1)            | 1<br>(1 - 2)            | 10<br>(6 - 15)          |
| Inguinal, femoral, and abdominal hernia             | 1<br>(1 - 3)         | 0<br>(0 - 0)          | 0<br>(0 - 0)           | 0<br>(0 - 0)            | 0<br>(0 - 0)            | 1<br>(1 - 2)            |
| Inflammatory bowel disease                          | 2<br>(1 - 4)         | 0<br>(0 - 0)          | 0<br>(0 - 0)           | 0<br>(0 - 0)            | 0<br>(0 - 1)            | 2<br>(1 - 3)            |
| Vascular intestinal disorders                       | 9<br>(5 - 14)        | 0<br>(0 - 0)          | 0<br>(0 - 0)           | 0<br>(0 - 0)            | 2<br>(1 - 3)            | 7<br>(4 - 11)           |
| Gallbladder and biliary diseases                    | 9<br>(5 - 12)        | 0<br>(0 - 0)          | 0<br>(0 - 0)           | 0<br>(0 - 0)            | 1<br>(0 - 1)            | 8<br>(4 - 11)           |
| Pancreatitis                                        | 5<br>(3 - 6)         | 0<br>(0 - 0)          | 0<br>(0 - 0)           | 0<br>(0 - 1)            | 1<br>(1 - 2)            | 3<br>(2 - 4)            |
| Other digestive diseases                            | 9<br>(7 - 12)        | 0<br>(0 - 0)          | 0<br>(0 - 0)           | 0<br>(0 - 0)            | 1<br>(1 - 2)            | 7<br>(6 - 10)           |
| Neurological disorders                              | 170<br>(129 - 211)   | 0<br>(0 - 1)          | 0<br>(0 - 0)           | 4<br>(3 - 5)            | 15<br>(12 - 18)         | 151<br>(111 - 190)      |
| Alzheimer disease and other dementias               | 122<br>(81 - 163)    | --                    | --                     | 0<br>(0 - 0)            | 5<br>(3 - 7)            | 117<br>(76 - 157)       |
| Parkinson disease                                   | 31<br>(8 - 39)       | --                    | --                     | 0<br>(0 - 0)            | 3<br>(1 - 4)            | 28<br>(7 - 36)          |
| Epilepsy                                            | 2<br>(1 - 2)         | 0<br>(0 - 0)          | 0<br>(0 - 0)           | 1<br>(1 - 1)            | 0<br>(0 - 1)            | 1<br>(0 - 1)            |
| Multiple sclerosis                                  | 1<br>(0 - 1)         | --                    | --                     | 0<br>(0 - 0)            | 0<br>(0 - 0)            | 0<br>(0 - 0)            |
| Other neurological disorders                        | 15<br>(12 - 17)      | 0<br>(0 - 1)          | 0<br>(0 - 0)           | 3<br>(2 - 3)            | 6<br>(5 - 8)            | 5<br>(4 - 6)            |
| Mental and substance use disorders                  | 5<br>(4 - 6)         | 0<br>(0 - 0)          | 0<br>(0 - 0)           | 4<br>(3 - 5)            | 1<br>(0 - 1)            | 1<br>(0 - 1)            |
| Schizophrenia                                       | 0<br>(0 - 0)         | --                    | --                     | 0<br>(0 - 0)            | 0<br>(0 - 0)            | 0<br>(0 - 0)            |
| Alcohol use disorders                               | 1<br>(0 - 1)         | --                    | --                     | 0<br>(0 - 0)            | 0<br>(0 - 1)            | 0<br>(0 - 0)            |
| Drug use disorders                                  | 4<br>(3 - 5)         | 0<br>(0 - 0)          | --                     | 3<br>(3 - 4)            | 0<br>(0 - 0)            | 0<br>(0 - 0)            |
| Opioid use disorders                                | 2<br>(1 - 2)         | 0<br>(0 - 0)          | --                     | 1<br>(1 - 2)            | 0<br>(0 - 0)            | 0<br>(0 - 0)            |
| Cocaine use disorders                               | 0<br>(0 - 0)         | 0<br>(0 - 0)          | --                     | 0<br>(0 - 0)            | 0<br>(0 - 0)            | 0<br>(0 - 0)            |
| Amphetamine use disorders                           | 0<br>(0 - 0)         | 0<br>(0 - 0)          | --                     | 0<br>(0 - 0)            | 0<br>(0 - 0)            | 0<br>(0 - 0)            |
| Other drug use disorders                            | 2<br>(2 - 3)         | 0<br>(0 - 0)          | --                     | 2<br>(1 - 2)            | 0<br>(0 - 0)            | 0<br>(0 - 0)            |
| Eating disorders                                    | 0<br>(0 - 0)         | --                    | 0<br>(0 - 0)           | 0<br>(0 - 0)            | --                      | --                      |
| Anorexia nervosa                                    | 0<br>(0 - 0)         | --                    | 0<br>(0 - 0)           | 0<br>(0 - 0)            | --                      | --                      |
| Diabetes, urogenital, blood, and endocrine diseases | 175<br>(151 - 245)   | 1<br>(1 - 1)          | 0<br>(0 - 0)           | 6<br>(5 - 9)            | 35<br>(29 - 51)         | 133<br>(114 - 186)      |
| Diabetes mellitus                                   | 80<br>(69 - 100)     | 0<br>(0 - 0)          | 0<br>(0 - 0)           | 1<br>(1 - 1)            | 16<br>(14 - 20)         | 63<br>(53 - 79)         |
| Acute glomerulonephritis                            | 0<br>(0 - 0)         | 0<br>(0 - 0)          | 0<br>(0 - 0)           | 0<br>(0 - 0)            | 0<br>(0 - 0)            | 0<br>(0 - 0)            |

Web Table 31- Malta deaths with 95% UI by age, sex, and cause in 2013

| Cause                                               | Both Sexes, All Ages | Both Sexes, 0-4 Years | Both Sexes, 5-14 Years | Both Sexes, 15-49 Years | Both Sexes, 50-69 Years | Both Sexes, 70-80 Years |
|-----------------------------------------------------|----------------------|-----------------------|------------------------|-------------------------|-------------------------|-------------------------|
| Chronic kidney disease                              | 69<br>(55 - 126)     | 0<br>(0 - 0)          | 0<br>(0 - 0)           | 3<br>(2 - 6)            | 14<br>(11 - 28)         | 52<br>(40 - 92)         |
| Chronic kidney disease due to diabetes mellitus     | 22<br>(16 - 47)      | 0<br>(0 - 0)          | 0<br>(0 - 0)           | 1<br>(1 - 2)            | 5<br>(4 - 11)           | 16<br>(11 - 34)         |
| Chronic kidney disease due to hypertension          | 9<br>(5 - 13)        | 0<br>(0 - 0)          | 0<br>(0 - 0)           | 0<br>(0 - 1)            | 2<br>(1 - 3)            | 6<br>(4 - 10)           |
| Chronic kidney disease due to glomerulonephritis    | 2<br>(1 - 3)         | 0<br>(0 - 0)          | 0<br>(0 - 0)           | 0<br>(0 - 0)            | 0<br>(0 - 1)            | 1<br>(1 - 2)            |
| Chronic kidney disease due to other causes          | 37<br>(25 - 73)      | 0<br>(0 - 0)          | 0<br>(0 - 0)           | 2<br>(1 - 4)            | 7<br>(4 - 15)           | 28<br>(19 - 55)         |
| Urinary diseases and male infertility               | 16<br>(12 - 20)      | 0<br>(0 - 0)          | 0<br>(0 - 0)           | 0<br>(0 - 1)            | 2<br>(2 - 3)            | 13<br>(10 - 17)         |
| Interstitial nephritis and urinary tract infections | 14<br>(11 - 17)      | 0<br>(0 - 0)          | 0<br>(0 - 0)           | 0<br>(0 - 0)            | 2<br>(1 - 2)            | 12<br>(8 - 15)          |
| Urolithiasis                                        | 0<br>(0 - 1)         | --                    | 0<br>(0 - 0)           | 0<br>(0 - 0)            | 0<br>(0 - 0)            | 0<br>(0 - 0)            |
| Other urinary diseases                              | 2<br>(1 - 3)         | 0<br>(0 - 0)          | 0<br>(0 - 0)           | 0<br>(0 - 0)            | 0<br>(0 - 0)            | 1<br>(1 - 2)            |
| Gynecological diseases                              | 0<br>(0 - 0)         | --                    | --                     | 0<br>(0 - 0)            | 0<br>(0 - 0)            | 0<br>(0 - 0)            |
| Uterine fibroids                                    | 0<br>(0 - 0)         | --                    | --                     | 0<br>(0 - 0)            | 0<br>(0 - 0)            | 0<br>(0 - 0)            |
| Polycystic ovarian syndrome                         | 0<br>(0 - 0)         | --                    | --                     | 0<br>(0 - 0)            | 0<br>(0 - 0)            | --                      |
| Endometriosis                                       | 0<br>(0 - 0)         | --                    | --                     | 0<br>(0 - 0)            | 0<br>(0 - 0)            | --                      |
| Genital prolapse                                    | 0<br>(0 - 0)         | --                    | --                     | 0<br>(0 - 0)            | 0<br>(0 - 0)            | 0<br>(0 - 0)            |
| Other gynecological diseases                        | 0<br>(0 - 0)         | --                    | --                     | 0<br>(0 - 0)            | 0<br>(0 - 0)            | 0<br>(0 - 0)            |
| Hemoglobinopathies and hemolytic anemias            | 1<br>(1 - 2)         | 0<br>(0 - 0)          | 0<br>(0 - 0)           | 0<br>(0 - 0)            | 0<br>(0 - 0)            | 1<br>(0 - 1)            |
| Thalassemias                                        | 0<br>(0 - 0)         | 0<br>(0 - 0)          | 0<br>(0 - 0)           | 0<br>(0 - 0)            | 0<br>(0 - 0)            | 0<br>(0 - 0)            |
| Sickle cell disorders                               | 0<br>(0 - 0)         | 0<br>(0 - 0)          | 0<br>(0 - 0)           | 0<br>(0 - 0)            | 0<br>(0 - 0)            | 0<br>(0 - 0)            |
| G6PD deficiency                                     | 0<br>(0 - 0)         | 0<br>(0 - 0)          | 0<br>(0 - 0)           | 0<br>(0 - 0)            | 0<br>(0 - 0)            | 0<br>(0 - 0)            |
| Other hemoglobinopathies and hemolytic anemias      | 1<br>(1 - 1)         | 0<br>(0 - 0)          | 0<br>(0 - 0)           | 0<br>(0 - 0)            | 0<br>(0 - 0)            | 1<br>(0 - 1)            |
| Endocrine, metabolic, blood, and immune disorders   | 9<br>(6 - 11)        | 1<br>(0 - 1)          | 0<br>(0 - 0)           | 1<br>(1 - 1)            | 2<br>(1 - 3)            | 5<br>(3 - 6)            |
| Musculoskeletal disorders                           | 8<br>(6 - 10)        | --                    | 0<br>(0 - 0)           | 1<br>(1 - 2)            | 2<br>(2 - 3)            | 4<br>(3 - 6)            |
| Rheumatoid arthritis                                | 2<br>(0 - 2)         | --                    | 0<br>(0 - 0)           | 0<br>(0 - 0)            | 0<br>(0 - 1)            | 1<br>(0 - 2)            |
| Other musculoskeletal disorders                     | 6<br>(5 - 8)         | --                    | 0<br>(0 - 0)           | 1<br>(1 - 1)            | 2<br>(1 - 2)            | 3<br>(2 - 4)            |
| Other non-communicable diseases                     | 49<br>(36 - 60)      | 12<br>(9 - 17)        | 1<br>(1 - 1)           | 4<br>(3 - 4)            | 3<br>(3 - 4)            | 29<br>(17 - 38)         |
| Congenital anomalies                                | 19<br>(15 - 24)      | 11<br>(8 - 16)        | 1<br>(1 - 1)           | 3<br>(3 - 4)            | 2<br>(1 - 2)            | 1<br>(1 - 2)            |
| Neural tube defects                                 | 0<br>(0 - 0)         | 0<br>(0 - 0)          | 0<br>(0 - 0)           | 0<br>(0 - 0)            | 0<br>(0 - 0)            | 0<br>(0 - 0)            |
| Congenital heart anomalies                          | 6<br>(5 - 8)         | 3<br>(2 - 5)          | 0<br>(0 - 1)           | 1<br>(1 - 2)            | 1<br>(0 - 1)            | 0<br>(0 - 0)            |
| Cleft lip and cleft palate                          | 0<br>(0 - 0)         | 0<br>(0 - 0)          | --                     | --                      | --                      | --                      |
| Down syndrome                                       | 0<br>(0 - 1)         | 0<br>(0 - 0)          | 0<br>(0 - 0)           | 0<br>(0 - 0)            | 0<br>(0 - 0)            | 0<br>(0 - 0)            |
| Chromosomal unbalanced rearrangements               | 0<br>(0 - 1)         | 0<br>(0 - 1)          | 0<br>(0 - 0)           | 0<br>(0 - 0)            | 0<br>(0 - 0)            | 0<br>(0 - 0)            |
| Other congenital anomalies                          | 12<br>(9 - 15)       | 7<br>(5 - 10)         | 0<br>(0 - 1)           | 2<br>(1 - 2)            | 1<br>(1 - 1)            | 1<br>(1 - 2)            |
| Skin and subcutaneous diseases                      | 29<br>(16 - 39)      | 0<br>(0 - 0)          | 0<br>(0 - 0)           | 0<br>(0 - 0)            | 2<br>(1 - 2)            | 27<br>(15 - 37)         |
| Cellulitis                                          | 1<br>(0 - 1)         | 0<br>(0 - 0)          | 0<br>(0 - 0)           | 0<br>(0 - 0)            | 0<br>(0 - 0)            | 1<br>(0 - 1)            |
| Pyoderma                                            | 0<br>(0 - 1)         | 0<br>(0 - 0)          | 0<br>(0 - 0)           | 0<br>(0 - 0)            | 0<br>(0 - 0)            | 0<br>(0 - 0)            |
| Decubitus ulcer                                     | 28<br>(15 - 37)      | 0<br>(0 - 0)          | 0<br>(0 - 0)           | 0<br>(0 - 0)            | 1<br>(1 - 2)            | 26<br>(14 - 36)         |
| Other skin and subcutaneous diseases                | 0<br>(0 - 0)         | 0<br>(0 - 0)          | 0<br>(0 - 0)           | 0<br>(0 - 0)            | 0<br>(0 - 0)            | 0<br>(0 - 0)            |
| Sudden infant death syndrome                        | 1<br>(0 - 3)         | 1<br>(0 - 3)          | --                     | --                      | --                      | --                      |
| Injuries                                            | 103<br>(90 - 117)    | 1<br>(1 - 1)          | 1<br>(1 - 1)           | 33<br>(28 - 39)         | 19<br>(16 - 23)         | 48<br>(40 - 57)         |
| Transport injuries                                  | 18<br>(15 - 20)      | 0<br>(0 - 0)          | 1<br>(0 - 1)           | 9<br>(8 - 11)           | 4<br>(3 - 4)            | 4<br>(3 - 5)            |

Web Table 31- Malta deaths with 95% UI by age, sex, and cause in 2013

| Cause                                           | Both Sexes, All Ages | Both Sexes, 0-4 Years | Both Sexes, 5-14 Years | Both Sexes, 15-49 Years | Both Sexes, 50-69 Years | Both Sexes, 70-80 Years |
|-------------------------------------------------|----------------------|-----------------------|------------------------|-------------------------|-------------------------|-------------------------|
| Road injuries                                   | 17<br>(15 - 20)      | 0<br>(0 - 0)          | 1<br>(0 - 1)           | 9<br>(7 - 10)           | 3<br>(3 - 4)            | 4<br>(3 - 5)            |
| Pedestrian road injuries                        | 5<br>(3 - 6)         | 0<br>(0 - 0)          | 0<br>(0 - 0)           | 1<br>(0 - 1)            | 1<br>(1 - 2)            | 2<br>(1 - 3)            |
| Cyclist road injuries                           | 0<br>(0 - 1)         | 0<br>(0 - 0)          | 0<br>(0 - 0)           | 0<br>(0 - 0)            | 0<br>(0 - 0)            | 0<br>(0 - 0)            |
| Motorcyclist road injuries                      | 3<br>(2 - 5)         | 0<br>(0 - 0)          | 0<br>(0 - 0)           | 3<br>(2 - 4)            | 0<br>(0 - 0)            | 0<br>(0 - 0)            |
| Motor vehicle road injuries                     | 8<br>(6 - 10)        | 0<br>(0 - 0)          | 0<br>(0 - 0)           | 5<br>(4 - 7)            | 1<br>(1 - 2)            | 1<br>(1 - 2)            |
| Other road injuries                             | 0<br>(0 - 0)         | 0<br>(0 - 0)          | 0<br>(0 - 0)           | 0<br>(0 - 0)            | 0<br>(0 - 0)            | 0<br>(0 - 0)            |
| Other transport injuries                        | 1<br>(1 - 1)         | 0<br>(0 - 0)          | 0<br>(0 - 0)           | 0<br>(0 - 1)            | 0<br>(0 - 0)            | 0<br>(0 - 0)            |
| Unintentional injuries                          | 60<br>(51 - 70)      | 1<br>(0 - 1)          | 1<br>(0 - 1)           | 9<br>(8 - 11)           | 9<br>(7 - 10)           | 41<br>(33 - 49)         |
| Falls                                           | 40<br>(32 - 49)      | 0<br>(0 - 0)          | 0<br>(0 - 0)           | 3<br>(3 - 4)            | 4<br>(3 - 6)            | 32<br>(25 - 40)         |
| Drowning                                        | 3<br>(2 - 5)         | 0<br>(0 - 0)          | 0<br>(0 - 0)           | 2<br>(1 - 3)            | 1<br>(0 - 1)            | 0<br>(0 - 1)            |
| Fire, heat, and hot substances                  | 1<br>(1 - 2)         | 0<br>(0 - 0)          | 0<br>(0 - 0)           | 0<br>(0 - 0)            | 0<br>(0 - 1)            | 0<br>(0 - 1)            |
| Poisonings                                      | 0<br>(0 - 0)         | 0<br>(0 - 0)          | 0<br>(0 - 0)           | 0<br>(0 - 0)            | 0<br>(0 - 0)            | 0<br>(0 - 0)            |
| Exposure to mechanical forces                   | 3<br>(2 - 4)         | 0<br>(0 - 0)          | 0<br>(0 - 0)           | 2<br>(1 - 3)            | 1<br>(0 - 1)            | 0<br>(0 - 1)            |
| Unintentional firearm injuries                  | 0<br>(0 - 0)         | 0<br>(0 - 0)          | 0<br>(0 - 0)           | 0<br>(0 - 0)            | 0<br>(0 - 0)            | 0<br>(0 - 0)            |
| Unintentional suffocation                       | 0<br>(0 - 0)         | 0<br>(0 - 0)          | 0<br>(0 - 0)           | 0<br>(0 - 0)            | 0<br>(0 - 0)            | 0<br>(0 - 0)            |
| Other exposure to mechanical forces             | 3<br>(2 - 4)         | 0<br>(0 - 0)          | 0<br>(0 - 0)           | 2<br>(1 - 3)            | 1<br>(0 - 1)            | 0<br>(0 - 0)            |
| Adverse effects of medical treatment            | 4<br>(3 - 8)         | 0<br>(0 - 0)          | 0<br>(0 - 0)           | 0<br>(0 - 0)            | 1<br>(1 - 2)            | 3<br>(2 - 6)            |
| Animal contact                                  | 0<br>(0 - 0)         | 0<br>(0 - 0)          | 0<br>(0 - 0)           | 0<br>(0 - 0)            | 0<br>(0 - 0)            | 0<br>(0 - 0)            |
| Venomous animal contact                         | 0<br>(0 - 0)         | 0<br>(0 - 0)          | 0<br>(0 - 0)           | 0<br>(0 - 0)            | 0<br>(0 - 0)            | 0<br>(0 - 0)            |
| Non-venomous animal contact                     | 0<br>(0 - 0)         | 0<br>(0 - 0)          | 0<br>(0 - 0)           | 0<br>(0 - 0)            | 0<br>(0 - 0)            | 0<br>(0 - 0)            |
| Foreign body                                    | 7<br>(3 - 10)        | 0<br>(0 - 1)          | 0<br>(0 - 0)           | 1<br>(0 - 1)            | 1<br>(1 - 2)            | 4<br>(2 - 7)            |
| Pulmonary aspiration and foreign body in airway | 7<br>(3 - 10)        | 0<br>(0 - 1)          | 0<br>(0 - 0)           | 1<br>(0 - 1)            | 1<br>(1 - 2)            | 4<br>(2 - 7)            |
| Foreign body in other body part                 | 0<br>(0 - 0)         | 0<br>(0 - 0)          | 0<br>(0 - 0)           | 0<br>(0 - 0)            | 0<br>(0 - 0)            | 0<br>(0 - 0)            |
| Other unintentional injuries                    | 1<br>(1 - 1)         | 0<br>(0 - 0)          | 0<br>(0 - 0)           | 1<br>(0 - 1)            | 0<br>(0 - 0)            | 0<br>(0 - 0)            |
| Self-harm and interpersonal violence            | 25<br>(17 - 31)      | 0<br>(0 - 0)          | 0<br>(0 - 0)           | 15<br>(10 - 18)         | 7<br>(4 - 9)            | 3<br>(2 - 4)            |
| Self-harm                                       | 23<br>(14 - 28)      | -                     | 0<br>(0 - 0)           | 13<br>(8 - 16)          | 7<br>(4 - 9)            | 3<br>(2 - 4)            |
| Interpersonal violence                          | 3<br>(2 - 4)         | 0<br>(0 - 0)          | 0<br>(0 - 0)           | 2<br>(1 - 3)            | 1<br>(0 - 1)            | 0<br>(0 - 1)            |
| Assault by firearm                              | 1<br>(1 - 2)         | 0<br>(0 - 0)          | 0<br>(0 - 0)           | 1<br>(0 - 2)            | 0<br>(0 - 1)            | 0<br>(0 - 0)            |
| Assault by sharp object                         | 0<br>(0 - 1)         | 0<br>(0 - 0)          | 0<br>(0 - 0)           | 0<br>(0 - 0)            | 0<br>(0 - 0)            | 0<br>(0 - 0)            |
| Assault by other means                          | 1<br>(1 - 2)         | 0<br>(0 - 0)          | 0<br>(0 - 0)           | 1<br>(0 - 1)            | 0<br>(0 - 0)            | 0<br>(0 - 0)            |

Web Table 31- Malta deaths with 95% UI by age, sex, and cause in 2013

| Cause                                                             | Males, All Ages          | Males, 0-4 Years | Males, 5-14 Years | Males, 15-49 Years | Males, 50-69 Years | Males, 70-80 Years   |
|-------------------------------------------------------------------|--------------------------|------------------|-------------------|--------------------|--------------------|----------------------|
| All causes                                                        | 1,499<br>(1,349 - 1,678) | 16<br>(11 - 21)  | 3<br>(2 - 4)      | 92<br>(78 - 108)   | 420<br>(363 - 489) | 969<br>(888 - 1,063) |
| Communicable, maternal, neonatal, and nutritional diseases        | 61<br>(47 - 76)          | 6<br>(4 - 9)     | 0<br>(0 - 0)      | 2<br>(2 - 3)       | 6<br>(5 - 8)       | 46<br>(33 - 60)      |
| HIV/AIDS and tuberculosis                                         | 1<br>(1 - 1)             | 0<br>(0 - 0)     | 0<br>(0 - 0)      | 0<br>(0 - 0)       | 0<br>(0 - 0)       | 0<br>(0 - 0)         |
| Tuberculosis                                                      | 0<br>(0 - 1)             | 0<br>(0 - 0)     | 0<br>(0 - 0)      | 0<br>(0 - 0)       | 0<br>(0 - 0)       | 0<br>(0 - 0)         |
| HIV/AIDS                                                          | 0<br>(0 - 1)             | 0<br>(0 - 0)     | 0<br>(0 - 0)      | 0<br>(0 - 0)       | 0<br>(0 - 0)       | 0<br>(0 - 0)         |
| HIV/AIDS resulting in mycobacterial infection                     | 0<br>(0 - 0)             | 0<br>(0 - 0)     | 0<br>(0 - 0)      | 0<br>(0 - 0)       | 0<br>(0 - 0)       | 0<br>(0 - 0)         |
| HIV/AIDS resulting in other diseases                              | 0<br>(0 - 1)             | 0<br>(0 - 0)     | 0<br>(0 - 0)      | 0<br>(0 - 0)       | 0<br>(0 - 0)       | 0<br>(0 - 0)         |
| Diarrhea, lower respiratory, and other common infectious diseases | 52<br>(37 - 68)          | 1<br>(1 - 2)     | 0<br>(0 - 0)      | 1<br>(1 - 2)       | 5<br>(3 - 7)       | 44<br>(31 - 59)      |
| Diarrheal diseases                                                | 0<br>(0 - 0)             | 0<br>(0 - 0)     | 0<br>(0 - 0)      | 0<br>(0 - 0)       | 0<br>(0 - 0)       | 0<br>(0 - 0)         |
| Intestinal infectious diseases                                    | 0<br>(0 - 1)             | 0<br>(0 - 0)     | 0<br>(0 - 0)      | 0<br>(0 - 0)       | 0<br>(0 - 0)       | 0<br>(0 - 0)         |
| Typhoid fever                                                     | 0<br>(0 - 1)             | 0<br>(0 - 0)     | 0<br>(0 - 0)      | 0<br>(0 - 0)       | 0<br>(0 - 0)       | 0<br>(0 - 0)         |
| Paratyphoid fever                                                 | 0<br>(0 - 0)             | 0<br>(0 - 0)     | 0<br>(0 - 0)      | 0<br>(0 - 0)       | 0<br>(0 - 0)       | 0<br>(0 - 0)         |
| Other intestinal infectious diseases                              | 0<br>(0 - 0)             | 0<br>(0 - 0)     | 0<br>(0 - 0)      | 0<br>(0 - 0)       | 0<br>(0 - 0)       | 0<br>(0 - 0)         |
| Lower respiratory infections                                      | 51<br>(36 - 66)          | 1<br>(1 - 2)     | 0<br>(0 - 0)      | 1<br>(1 - 1)       | 5<br>(3 - 6)       | 44<br>(30 - 58)      |
| Upper respiratory infections                                      | 0<br>(0 - 0)             | 0<br>(0 - 0)     | 0<br>(0 - 0)      | 0<br>(0 - 0)       | 0<br>(0 - 0)       | 0<br>(0 - 0)         |
| Otitis media                                                      | 0<br>(0 - 0)             | 0<br>(0 - 0)     | 0<br>(0 - 0)      | 0<br>(0 - 0)       | 0<br>(0 - 0)       | 0<br>(0 - 0)         |
| Meningitis                                                        | 0<br>(0 - 0)             | 0<br>(0 - 0)     | 0<br>(0 - 0)      | 0<br>(0 - 0)       | 0<br>(0 - 0)       | 0<br>(0 - 0)         |
| Pneumococcal meningitis                                           | 0<br>(0 - 0)             | 0<br>(0 - 0)     | 0<br>(0 - 0)      | 0<br>(0 - 0)       | 0<br>(0 - 0)       | 0<br>(0 - 0)         |
| H influenzae type B meningitis                                    | 0<br>(0 - 0)             | 0<br>(0 - 0)     | 0<br>(0 - 0)      | 0<br>(0 - 0)       | 0<br>(0 - 0)       | 0<br>(0 - 0)         |
| Meningococcal meningitis                                          | 0<br>(0 - 0)             | 0<br>(0 - 0)     | 0<br>(0 - 0)      | 0<br>(0 - 0)       | 0<br>(0 - 0)       | 0<br>(0 - 0)         |
| Other meningitis                                                  | 0<br>(0 - 0)             | 0<br>(0 - 0)     | 0<br>(0 - 0)      | 0<br>(0 - 0)       | 0<br>(0 - 0)       | 0<br>(0 - 0)         |
| Encephalitis                                                      | 0<br>(0 - 0)             | 0<br>(0 - 0)     | 0<br>(0 - 0)      | 0<br>(0 - 0)       | 0<br>(0 - 0)       | 0<br>(0 - 0)         |
| Diphtheria                                                        | 0<br>(0 - 0)             | 0<br>(0 - 0)     | 0<br>(0 - 0)      | 0<br>(0 - 0)       | 0<br>(0 - 0)       | --                   |
| Whooping cough                                                    | 0<br>(0 - 0)             | 0<br>(0 - 0)     | 0<br>(0 - 0)      | 0<br>(0 - 0)       | 0<br>(0 - 0)       | --                   |
| Tetanus                                                           | 0<br>(0 - 0)             | 0<br>(0 - 0)     | 0<br>(0 - 0)      | 0<br>(0 - 0)       | 0<br>(0 - 0)       | 0<br>(0 - 0)         |
| Measles                                                           | 0<br>(0 - 0)             | 0<br>(0 - 0)     | 0<br>(0 - 0)      | 0<br>(0 - 0)       | 0<br>(0 - 0)       | --                   |
| Varicella and herpes zoster                                       | 0<br>(0 - 0)             | 0<br>(0 - 0)     | 0<br>(0 - 0)      | 0<br>(0 - 0)       | 0<br>(0 - 0)       | 0<br>(0 - 0)         |
| Neglected tropical diseases and malaria                           | 1<br>(1 - 2)             | 0<br>(0 - 0)     | 0<br>(0 - 0)      | 0<br>(0 - 0)       | 0<br>(0 - 1)       | 0<br>(0 - 0)         |
| Leishmaniasis                                                     | 1<br>(0 - 1)             | 0<br>(0 - 0)     | 0<br>(0 - 0)      | 0<br>(0 - 0)       | 0<br>(0 - 1)       | 0<br>(0 - 0)         |
| Visceral leishmaniasis                                            | 1<br>(0 - 1)             | 0<br>(0 - 0)     | 0<br>(0 - 0)      | 0<br>(0 - 0)       | 0<br>(0 - 1)       | 0<br>(0 - 0)         |
| Cysticercosis                                                     | 0<br>(0 - 0)             | 0<br>(0 - 0)     | 0<br>(0 - 0)      | 0<br>(0 - 0)       | 0<br>(0 - 0)       | 0<br>(0 - 0)         |
| Cystic echinococcosis                                             | 0<br>(0 - 0)             | 0<br>(0 - 0)     | 0<br>(0 - 0)      | 0<br>(0 - 0)       | 0<br>(0 - 0)       | 0<br>(0 - 0)         |
| Dengue                                                            | 0<br>(0 - 0)             | 0<br>(0 - 0)     | 0<br>(0 - 0)      | 0<br>(0 - 0)       | 0<br>(0 - 0)       | 0<br>(0 - 0)         |
| Rabies                                                            | 0<br>(0 - 0)             | 0<br>(0 - 0)     | 0<br>(0 - 0)      | 0<br>(0 - 0)       | 0<br>(0 - 0)       | 0<br>(0 - 0)         |
| Other neglected tropical diseases                                 | 0<br>(0 - 0)             | 0<br>(0 - 0)     | 0<br>(0 - 0)      | 0<br>(0 - 0)       | 0<br>(0 - 0)       | 0<br>(0 - 0)         |
| Maternal disorders                                                | --                       | --               | --                | --                 | --                 | --                   |
| Maternal hemorrhage                                               | --                       | --               | --                | --                 | --                 | --                   |
| Maternal sepsis and other maternal infections                     | --                       | --               | --                | --                 | --                 | --                   |
| Maternal hypertensive disorders                                   | --                       | --               | --                | --                 | --                 | --                   |
| Maternal obstructed labor                                         | --                       | --               | --                | --                 | --                 | --                   |

Web Table 31- Malta deaths with 95% UI by age, sex, and cause in 2013

| Cause                                                            | Males, All Ages          | Males, 0-4 Years | Males, 5-14 Years | Males, 15-49 Years | Males, 50-69 Years | Males, 70-80 Years |
|------------------------------------------------------------------|--------------------------|------------------|-------------------|--------------------|--------------------|--------------------|
| Maternal abortive outcome                                        | --                       | --               | --                | --                 | --                 | --                 |
| Indirect maternal deaths                                         | --                       | --               | --                | --                 | --                 | --                 |
| Late maternal deaths                                             | --                       | --               | --                | --                 | --                 | --                 |
| Maternal deaths aggravated by HIV/AIDS                           | --                       | --               | --                | --                 | --                 | --                 |
| Other maternal disorders                                         | --                       | --               | --                | --                 | --                 | --                 |
| Neonatal disorders                                               | 5<br>(4 - 7)             | 5<br>(4 - 7)     | --                | --                 | --                 | --                 |
| Neonatal preterm birth complications                             | 4<br>(2 - 6)             | 4<br>(2 - 6)     | --                | --                 | --                 | --                 |
| Neonatal encephalopathy due to birth asphyxia and trauma         | 1<br>(1 - 2)             | 1<br>(1 - 2)     | --                | --                 | --                 | --                 |
| Neonatal sepsis and other neonatal infections                    | 0<br>(0 - 0)             | 0<br>(0 - 0)     | --                | --                 | --                 | --                 |
| Hemolytic disease and other neonatal jaundice                    | 0<br>(0 - 0)             | 0<br>(0 - 0)     | --                | --                 | --                 | --                 |
| Other neonatal disorders                                         | 0<br>(0 - 1)             | 0<br>(0 - 1)     | --                | --                 | --                 | --                 |
| Nutritional deficiencies                                         | 1<br>(1 - 2)             | 0<br>(0 - 0)     | 0<br>(0 - 0)      | 0<br>(0 - 0)       | 0<br>(0 - 0)       | 1<br>(1 - 2)       |
| Protein-energy malnutrition                                      | 0<br>(0 - 0)             | 0<br>(0 - 0)     | 0<br>(0 - 0)      | 0<br>(0 - 0)       | 0<br>(0 - 0)       | 0<br>(0 - 0)       |
| Iodine deficiency                                                | 0<br>(0 - 0)             | 0<br>(0 - 0)     | 0<br>(0 - 0)      | 0<br>(0 - 0)       | 0<br>(0 - 0)       | 0<br>(0 - 0)       |
| Iron-deficiency anemia                                           | 1<br>(1 - 2)             | 0<br>(0 - 0)     | 0<br>(0 - 0)      | 0<br>(0 - 0)       | 0<br>(0 - 0)       | 1<br>(1 - 2)       |
| Other nutritional deficiencies                                   | 0<br>(0 - 0)             | 0<br>(0 - 0)     | 0<br>(0 - 0)      | 0<br>(0 - 0)       | 0<br>(0 - 0)       | 0<br>(0 - 0)       |
| Other communicable, maternal, neonatal, and nutritional diseases | 1<br>(0 - 1)             | 0<br>(0 - 0)     | 0<br>(0 - 0)      | 0<br>(0 - 0)       | 0<br>(0 - 0)       | 0<br>(0 - 0)       |
| Sexually transmitted diseases excluding HIV                      | 0<br>(0 - 0)             | 0<br>(0 - 0)     | 0<br>(0 - 0)      | 0<br>(0 - 0)       | 0<br>(0 - 0)       | 0<br>(0 - 0)       |
| Syphilis                                                         | 0<br>(0 - 0)             | 0<br>(0 - 0)     | 0<br>(0 - 0)      | 0<br>(0 - 0)       | 0<br>(0 - 0)       | 0<br>(0 - 0)       |
| Chlamydial infection                                             | --                       | --               | --                | --                 | --                 | --                 |
| Gonococcal infection                                             | 0<br>(0 - 0)             | --               | 0<br>(0 - 0)      | 0<br>(0 - 0)       | 0<br>(0 - 0)       | 0<br>(0 - 0)       |
| Other sexually transmitted diseases                              | 0<br>(0 - 0)             | --               | 0<br>(0 - 0)      | 0<br>(0 - 0)       | 0<br>(0 - 0)       | 0<br>(0 - 0)       |
| Hepatitis                                                        | 0<br>(0 - 0)             | 0<br>(0 - 0)     | 0<br>(0 - 0)      | 0<br>(0 - 0)       | 0<br>(0 - 0)       | 0<br>(0 - 0)       |
| Acute hepatitis A                                                | 0<br>(0 - 0)             | 0<br>(0 - 0)     | 0<br>(0 - 0)      | 0<br>(0 - 0)       | 0<br>(0 - 0)       | 0<br>(0 - 0)       |
| Acute hepatitis B                                                | 0<br>(0 - 0)             | 0<br>(0 - 0)     | 0<br>(0 - 0)      | 0<br>(0 - 0)       | 0<br>(0 - 0)       | 0<br>(0 - 0)       |
| Acute hepatitis C                                                | 0<br>(0 - 0)             | --               | 0<br>(0 - 0)      | 0<br>(0 - 0)       | 0<br>(0 - 0)       | 0<br>(0 - 0)       |
| Other infectious diseases                                        | 1<br>(0 - 1)             | 0<br>(0 - 0)     | 0<br>(0 - 0)      | 0<br>(0 - 0)       | 0<br>(0 - 0)       | 0<br>(0 - 0)       |
| Non-communicable diseases                                        | 1,371<br>(1,232 - 1,532) | 8<br>(6 - 12)    | 2<br>(2 - 3)      | 61<br>(52 - 73)    | 399<br>(345 - 464) | 901<br>(824 - 989) |
| Neoplasms                                                        | 459<br>(403 - 524)       | 0<br>(0 - 0)     | 1<br>(1 - 1)      | 23<br>(19 - 28)    | 182<br>(157 - 214) | 252<br>(223 - 284) |
| Esophageal cancer                                                | 9<br>(7 - 12)            | --               | --                | 0<br>(0 - 1)       | 4<br>(3 - 6)       | 5<br>(4 - 6)       |
| Stomach cancer                                                   | 29<br>(25 - 35)          | --               | --                | 1<br>(1 - 1)       | 10<br>(8 - 13)     | 18<br>(15 - 22)    |
| Liver cancer                                                     | 11<br>(7 - 15)           | --               | 0<br>(0 - 0)      | 1<br>(0 - 1)       | 6<br>(4 - 8)       | 5<br>(3 - 7)       |
| Liver cancer due to hepatitis B                                  | 2<br>(0 - 5)             | --               | 0<br>(0 - 0)      | 0<br>(0 - 0)       | 1<br>(0 - 3)       | 1<br>(0 - 2)       |
| Liver cancer due to hepatitis C                                  | 6<br>(3 - 10)            | --               | 0<br>(0 - 0)      | 0<br>(0 - 0)       | 3<br>(1 - 5)       | 3<br>(2 - 4)       |
| Liver cancer due to alcohol use                                  | 2<br>(1 - 4)             | --               | --                | 0<br>(0 - 0)       | 1<br>(0 - 2)       | 1<br>(0 - 2)       |
| Liver cancer due to other causes                                 | 0<br>(0 - 1)             | --               | 0<br>(0 - 0)      | 0<br>(0 - 0)       | 0<br>(0 - 0)       | 0<br>(0 - 0)       |
| Larynx cancer                                                    | 6<br>(5 - 8)             | --               | --                | 0<br>(0 - 0)       | 3<br>(2 - 4)       | 3<br>(2 - 4)       |
| Tracheal, bronchus and lung cancer                               | 134<br>(115 - 156)       | --               | --                | 4<br>(3 - 5)       | 60<br>(50 - 72)    | 71<br>(61 - 82)    |
| Breast cancer                                                    | 0<br>(0 - 0)             | --               | --                | 0<br>(0 - 0)       | 0<br>(0 - 0)       | 0<br>(0 - 0)       |
| Cervical cancer                                                  | --                       | --               | --                | --                 | --                 | --                 |

Web Table 31- Malta deaths with 95% UI by age, sex, and cause in 2013

| Cause                                         | Males, All Ages    | Males, 0-4 Years | Males, 5-14 Years | Males, 15-49 Years | Males, 50-69 Years | Males, 70-80 Years |
|-----------------------------------------------|--------------------|------------------|-------------------|--------------------|--------------------|--------------------|
| Uterine cancer                                | --                 | --               | --                | --                 | --                 | --                 |
| Prostate cancer                               | 45<br>(35 - 64)    | --               | --                | 0<br>(0 - 0)       | 8<br>(6 - 12)      | 37<br>(28 - 53)    |
| Colon and rectum cancer                       | 66<br>(57 - 77)    | --               | --                | 3<br>(2 - 3)       | 26<br>(21 - 31)    | 38<br>(32 - 44)    |
| Lip and oral cavity cancer                    | 5<br>(4 - 6)       | --               | --                | 1<br>(0 - 1)       | 2<br>(2 - 3)       | 2<br>(2 - 3)       |
| Nasopharynx cancer                            | 3<br>(2 - 4)       | --               | 0<br>(0 - 0)      | 1<br>(0 - 1)       | 2<br>(1 - 2)       | 1<br>(0 - 1)       |
| Other pharynx cancer                          | 4<br>(2 - 5)       | --               | --                | 0<br>(0 - 0)       | 2<br>(1 - 3)       | 1<br>(0 - 1)       |
| Gallbladder and biliary tract cancer          | 2<br>(1 - 3)       | --               | --                | 0<br>(0 - 0)       | 1<br>(1 - 1)       | 1<br>(1 - 2)       |
| Pancreatic cancer                             | 35<br>(30 - 41)    | --               | --                | 1<br>(1 - 2)       | 16<br>(13 - 19)    | 18<br>(15 - 22)    |
| Malignant skin melanoma                       | 4<br>(2 - 7)       | --               | --                | 1<br>(0 - 1)       | 2<br>(1 - 3)       | 1<br>(1 - 2)       |
| Non-melanoma skin cancer                      | 1<br>(1 - 2)       | --               | --                | 0<br>(0 - 0)       | 0<br>(0 - 0)       | 1<br>(1 - 1)       |
| Ovarian cancer                                | --                 | --               | --                | --                 | --                 | --                 |
| Testicular cancer                             | 0<br>(0 - 0)       | --               | --                | 0<br>(0 - 0)       | 0<br>(0 - 0)       | 0<br>(0 - 0)       |
| Kidney cancer                                 | 15<br>(12 - 18)    | 0<br>(0 - 0)     | 0<br>(0 - 0)      | 1<br>(1 - 1)       | 7<br>(5 - 9)       | 7<br>(5 - 9)       |
| Bladder cancer                                | 20<br>(16 - 24)    | --               | --                | 0<br>(0 - 0)       | 6<br>(4 - 7)       | 14<br>(11 - 17)    |
| Brain and nervous system cancer               | 12<br>(9 - 16)     | 0<br>(0 - 0)     | 0<br>(0 - 0)      | 3<br>(2 - 3)       | 7<br>(5 - 9)       | 3<br>(2 - 4)       |
| Thyroid cancer                                | 1<br>(1 - 1)       | --               | 0<br>(0 - 0)      | 0<br>(0 - 0)       | 0<br>(0 - 0)       | 0<br>(0 - 1)       |
| Mesothelioma                                  | 5<br>(2 - 7)       | --               | --                | 0<br>(0 - 1)       | 2<br>(1 - 3)       | 2<br>(1 - 4)       |
| Hodgkin lymphoma                              | 1<br>(1 - 1)       | 0<br>(0 - 0)     | 0<br>(0 - 0)      | 0<br>(0 - 0)       | 0<br>(0 - 1)       | 0<br>(0 - 0)       |
| Non-Hodgkin lymphoma                          | 15<br>(8 - 19)     | 0<br>(0 - 0)     | 0<br>(0 - 0)      | 2<br>(1 - 3)       | 6<br>(3 - 8)       | 7<br>(3 - 9)       |
| Multiple myeloma                              | 6<br>(3 - 9)       | --               | --                | 0<br>(0 - 0)       | 3<br>(1 - 4)       | 3<br>(2 - 5)       |
| Leukemia                                      | 15<br>(12 - 17)    | 0<br>(0 - 0)     | 1<br>(0 - 1)      | 2<br>(2 - 3)       | 5<br>(4 - 6)       | 7<br>(5 - 8)       |
| Other neoplasms                               | 14<br>(9 - 18)     | 0<br>(0 - 0)     | 0<br>(0 - 0)      | 2<br>(1 - 3)       | 6<br>(3 - 7)       | 7<br>(4 - 9)       |
| Cardiovascular diseases                       | 577<br>(519 - 644) | 0<br>(0 - 0)     | 0<br>(0 - 0)      | 19<br>(16 - 23)    | 148<br>(127 - 173) | 409<br>(372 - 452) |
| Rheumatic heart disease                       | 1<br>(1 - 1)       | 0<br>(0 - 0)     | 0<br>(0 - 0)      | 0<br>(0 - 0)       | 0<br>(0 - 0)       | 1<br>(0 - 1)       |
| Ischemic heart disease                        | 396<br>(347 - 452) | 0<br>(0 - 0)     | 0<br>(0 - 0)      | 14<br>(11 - 17)    | 111<br>(94 - 131)  | 271<br>(238 - 308) |
| Cerebrovascular disease                       | 129<br>(102 - 159) | 0<br>(0 - 0)     | 0<br>(0 - 0)      | 3<br>(2 - 4)       | 25<br>(19 - 31)    | 102<br>(80 - 125)  |
| Ischemic stroke                               | 73<br>(54 - 92)    | 0<br>(0 - 0)     | 0<br>(0 - 0)      | 1<br>(0 - 1)       | 9<br>(6 - 13)      | 63<br>(46 - 80)    |
| Hemorrhagic stroke                            | 57<br>(41 - 72)    | 0<br>(0 - 0)     | 0<br>(0 - 0)      | 2<br>(2 - 3)       | 15<br>(11 - 20)    | 39<br>(27 - 51)    |
| Hypertensive heart disease                    | 6<br>(4 - 8)       | 0<br>(0 - 0)     | 0<br>(0 - 0)      | 0<br>(0 - 0)       | 2<br>(1 - 3)       | 4<br>(2 - 5)       |
| Cardiomyopathy and myocarditis                | 9<br>(4 - 20)      | 0<br>(0 - 0)     | 0<br>(0 - 0)      | 1<br>(0 - 2)       | 2<br>(1 - 3)       | 6<br>(3 - 15)      |
| Atrial fibrillation and flutter               | 3<br>(2 - 5)       | --               | --                | 0<br>(0 - 0)       | 1<br>(0 - 1)       | 3<br>(2 - 4)       |
| Aortic aneurysm                               | 11<br>(7 - 14)     | --               | --                | 0<br>(0 - 1)       | 3<br>(2 - 4)       | 8<br>(5 - 10)      |
| Peripheral vascular disease                   | 6<br>(4 - 8)       | --               | --                | 0<br>(0 - 0)       | 1<br>(1 - 1)       | 5<br>(3 - 6)       |
| Endocarditis                                  | 2<br>(1 - 4)       | 0<br>(0 - 0)     | 0<br>(0 - 0)      | 0<br>(0 - 0)       | 1<br>(1 - 2)       | 1<br>(1 - 2)       |
| Other cardiovascular and circulatory diseases | 13<br>(10 - 18)    | 0<br>(0 - 0)     | 0<br>(0 - 0)      | 1<br>(0 - 1)       | 3<br>(2 - 4)       | 9<br>(7 - 13)      |
| Chronic respiratory diseases                  | 99<br>(81 - 115)   | 0<br>(0 - 0)     | 0<br>(0 - 0)      | 2<br>(1 - 2)       | 17<br>(13 - 22)    | 79<br>(65 - 94)    |
| Chronic obstructive pulmonary disease         | 79<br>(63 - 93)    | 0<br>(0 - 0)     | 0<br>(0 - 0)      | 1<br>(1 - 1)       | 13<br>(9 - 17)     | 65<br>(52 - 76)    |
| Pneumoconiosis                                | 3<br>(2 - 5)       | 0<br>(0 - 0)     | 0<br>(0 - 0)      | 0<br>(0 - 0)       | 0<br>(0 - 1)       | 3<br>(2 - 4)       |
| Silicosis                                     | 0<br>(0 - 0)       | 0<br>(0 - 0)     | 0<br>(0 - 0)      | 0<br>(0 - 0)       | 0<br>(0 - 0)       | 0<br>(0 - 0)       |
| Asbestosis                                    | 2<br>(1 - 3)       | 0<br>(0 - 0)     | 0<br>(0 - 0)      | 0<br>(0 - 0)       | 0<br>(0 - 0)       | 1<br>(1 - 2)       |



Web Table 31- Malta deaths with 95% UI by age, sex, and cause in 2013

| Cause                                               | Males, All Ages  | Males, 0-4 Years | Males, 5-14 Years | Males, 15-49 Years | Males, 50-69 Years | Males, 70-80 Years |
|-----------------------------------------------------|------------------|------------------|-------------------|--------------------|--------------------|--------------------|
| Coal workers pneumoconiosis                         | 0<br>(0 - 0)     | 0<br>(0 - 0)     | 0<br>(0 - 0)      | 0<br>(0 - 0)       | 0<br>(0 - 0)       | 0<br>(0 - 0)       |
| Other pneumoconiosis                                | 1<br>(1 - 2)     | 0<br>(0 - 0)     | 0<br>(0 - 0)      | 0<br>(0 - 0)       | 0<br>(0 - 0)       | 1<br>(1 - 2)       |
| Asthma                                              | 1<br>(1 - 2)     | 0<br>(0 - 0)     | 0<br>(0 - 0)      | 0<br>(0 - 0)       | 0<br>(0 - 0)       | 1<br>(1 - 1)       |
| Interstitial lung disease and pulmonary sarcoidosis | 15<br>(9 - 20)   | 0<br>(0 - 0)     | 0<br>(0 - 0)      | 0<br>(0 - 1)       | 3<br>(2 - 5)       | 11<br>(7 - 16)     |
| Other chronic respiratory diseases                  | 0<br>(0 - 0)     | 0<br>(0 - 0)     | 0<br>(0 - 0)      | 0<br>(0 - 0)       | 0<br>(0 - 0)       | 0<br>(0 - 0)       |
| Cirrhosis                                           | 24<br>(20 - 29)  | 0<br>(0 - 0)     | 0<br>(0 - 0)      | 3<br>(3 - 4)       | 12<br>(10 - 15)    | 8<br>(7 - 10)      |
| Cirrhosis due to hepatitis B                        | 2<br>(1 - 4)     | 0<br>(0 - 0)     | 0<br>(0 - 0)      | 0<br>(0 - 1)       | 1<br>(1 - 2)       | 1<br>(0 - 1)       |
| Cirrhosis due to hepatitis C                        | 11<br>(7 - 16)   | 0<br>(0 - 0)     | 0<br>(0 - 0)      | 2<br>(1 - 3)       | 6<br>(3 - 9)       | 4<br>(2 - 5)       |
| Cirrhosis due to alcohol use                        | 8<br>(4 - 12)    | --               | --                | 1<br>(0 - 2)       | 4<br>(2 - 7)       | 3<br>(1 - 5)       |
| Cirrhosis due to other causes                       | 2<br>(1 - 4)     | 0<br>(0 - 0)     | 0<br>(0 - 0)      | 0<br>(0 - 1)       | 1<br>(0 - 2)       | 0<br>(0 - 1)       |
| Digestive diseases                                  | 26<br>(21 - 31)  | 0<br>(0 - 0)     | 0<br>(0 - 0)      | 1<br>(1 - 2)       | 6<br>(4 - 7)       | 19<br>(15 - 23)    |
| Peptic ulcer disease                                | 7<br>(5 - 9)     | 0<br>(0 - 0)     | 0<br>(0 - 0)      | 0<br>(0 - 0)       | 1<br>(1 - 2)       | 5<br>(4 - 7)       |
| Gastritis and duodenitis                            | 0<br>(0 - 0)     | 0<br>(0 - 0)     | 0<br>(0 - 0)      | 0<br>(0 - 0)       | 0<br>(0 - 0)       | 0<br>(0 - 0)       |
| Appendicitis                                        | 0<br>(0 - 0)     | 0<br>(0 - 0)     | 0<br>(0 - 0)      | 0<br>(0 - 0)       | 0<br>(0 - 0)       | 0<br>(0 - 0)       |
| Paralytic ileus and intestinal obstruction          | 4<br>(3 - 8)     | 0<br>(0 - 0)     | 0<br>(0 - 0)      | 0<br>(0 - 0)       | 1<br>(0 - 1)       | 4<br>(2 - 6)       |
| Inguinal, femoral, and abdominal hernia             | 1<br>(0 - 1)     | 0<br>(0 - 0)     | 0<br>(0 - 0)      | 0<br>(0 - 0)       | 0<br>(0 - 0)       | 1<br>(0 - 1)       |
| Inflammatory bowel disease                          | 1<br>(0 - 2)     | 0<br>(0 - 0)     | 0<br>(0 - 0)      | 0<br>(0 - 0)       | 0<br>(0 - 0)       | 1<br>(0 - 1)       |
| Vascular intestinal disorders                       | 3<br>(1 - 6)     | 0<br>(0 - 0)     | 0<br>(0 - 0)      | 0<br>(0 - 0)       | 1<br>(0 - 2)       | 2<br>(1 - 4)       |
| Gallbladder and biliary diseases                    | 4<br>(2 - 5)     | 0<br>(0 - 0)     | 0<br>(0 - 0)      | 0<br>(0 - 0)       | 0<br>(0 - 1)       | 3<br>(2 - 4)       |
| Pancreatitis                                        | 3<br>(2 - 4)     | 0<br>(0 - 0)     | 0<br>(0 - 0)      | 0<br>(0 - 1)       | 1<br>(0 - 1)       | 2<br>(1 - 2)       |
| Other digestive diseases                            | 4<br>(2 - 5)     | 0<br>(0 - 0)     | 0<br>(0 - 0)      | 0<br>(0 - 0)       | 1<br>(1 - 1)       | 2<br>(1 - 3)       |
| Neurological disorders                              | 78<br>(57 - 102) | 0<br>(0 - 1)     | 0<br>(0 - 0)      | 3<br>(2 - 3)       | 10<br>(7 - 12)     | 65<br>(46 - 88)    |
| Alzheimer disease and other dementias               | 48<br>(28 - 69)  | --               | --                | 0<br>(0 - 0)       | 3<br>(2 - 4)       | 45<br>(26 - 66)    |
| Parkinson disease                                   | 20<br>(4 - 25)   | --               | --                | 0<br>(0 - 0)       | 2<br>(1 - 3)       | 17<br>(4 - 23)     |
| Epilepsy                                            | 1<br>(1 - 2)     | 0<br>(0 - 0)     | 0<br>(0 - 0)      | 1<br>(0 - 1)       | 0<br>(0 - 0)       | 0<br>(0 - 0)       |
| Multiple sclerosis                                  | 0<br>(0 - 0)     | --               | --                | 0<br>(0 - 0)       | 0<br>(0 - 0)       | 0<br>(0 - 0)       |
| Other neurological disorders                        | 9<br>(7 - 11)    | 0<br>(0 - 0)     | 0<br>(0 - 0)      | 2<br>(1 - 3)       | 4<br>(3 - 5)       | 3<br>(2 - 4)       |
| Mental and substance use disorders                  | 4<br>(3 - 6)     | 0<br>(0 - 0)     | 0<br>(0 - 0)      | 3<br>(2 - 4)       | 1<br>(0 - 1)       | 0<br>(0 - 1)       |
| Schizophrenia                                       | 0<br>(0 - 0)     | --               | --                | 0<br>(0 - 0)       | 0<br>(0 - 0)       | 0<br>(0 - 0)       |
| Alcohol use disorders                               | 1<br>(0 - 1)     | --               | --                | 0<br>(0 - 0)       | 0<br>(0 - 1)       | 0<br>(0 - 0)       |
| Drug use disorders                                  | 3<br>(2 - 4)     | 0<br>(0 - 0)     | --                | 3<br>(2 - 4)       | 0<br>(0 - 0)       | 0<br>(0 - 0)       |
| Opioid use disorders                                | 1<br>(1 - 2)     | 0<br>(0 - 0)     | --                | 1<br>(1 - 2)       | 0<br>(0 - 0)       | 0<br>(0 - 0)       |
| Cocaine use disorders                               | 0<br>(0 - 0)     | 0<br>(0 - 0)     | --                | 0<br>(0 - 0)       | 0<br>(0 - 0)       | 0<br>(0 - 0)       |
| Amphetamine use disorders                           | 0<br>(0 - 0)     | 0<br>(0 - 0)     | --                | 0<br>(0 - 0)       | 0<br>(0 - 0)       | 0<br>(0 - 0)       |
| Other drug use disorders                            | 2<br>(1 - 2)     | 0<br>(0 - 0)     | --                | 2<br>(1 - 2)       | 0<br>(0 - 0)       | 0<br>(0 - 0)       |
| Eating disorders                                    | 0<br>(0 - 0)     | --               | 0<br>(0 - 0)      | 0<br>(0 - 0)       | --                 | --                 |
| Anorexia nervosa                                    | 0<br>(0 - 0)     | --               | 0<br>(0 - 0)      | 0<br>(0 - 0)       | --                 | --                 |
| Diabetes, urogenital, blood, and endocrine diseases | 83<br>(69 - 123) | 0<br>(0 - 1)     | 0<br>(0 - 0)      | 4<br>(3 - 6)       | 21<br>(16 - 32)    | 58<br>(48 - 84)    |
| Diabetes mellitus                                   | 36<br>(31 - 44)  | 0<br>(0 - 0)     | 0<br>(0 - 0)      | 1<br>(1 - 1)       | 10<br>(8 - 13)     | 26<br>(21 - 31)    |
| Acute glomerulonephritis                            | 0<br>(0 - 0)     | 0<br>(0 - 0)     | 0<br>(0 - 0)      | 0<br>(0 - 0)       | 0<br>(0 - 0)       | 0<br>(0 - 0)       |

Web Table 31- Malta deaths with 95% UI by age, sex, and cause in 2013

| Cause                                               | Males, All Ages | Males, 0-4 Years | Males, 5-14 Years | Males, 15-49 Years | Males, 50-69 Years | Males, 70-80 Years |
|-----------------------------------------------------|-----------------|------------------|-------------------|--------------------|--------------------|--------------------|
| Chronic kidney disease                              | 35<br>(26 - 75) | 0<br>(0 - 0)     | 0<br>(0 - 0)      | 2<br>(1 - 4)       | 9<br>(6 - 20)      | 25<br>(18 - 51)    |
| Chronic kidney disease due to diabetes mellitus     | 14<br>(9 - 34)  | 0<br>(0 - 0)     | 0<br>(0 - 0)      | 1<br>(0 - 2)       | 4<br>(2 - 9)       | 9<br>(6 - 23)      |
| Chronic kidney disease due to hypertension          | 3<br>(1 - 6)    | 0<br>(0 - 0)     | 0<br>(0 - 0)      | 0<br>(0 - 0)       | 1<br>(0 - 2)       | 2<br>(1 - 4)       |
| Chronic kidney disease due to glomerulonephritis    | 1<br>(0 - 1)    | 0<br>(0 - 0)     | 0<br>(0 - 0)      | 0<br>(0 - 0)       | 0<br>(0 - 0)       | 0<br>(0 - 1)       |
| Chronic kidney disease due to other causes          | 18<br>(7 - 39)  | 0<br>(0 - 0)     | 0<br>(0 - 0)      | 1<br>(0 - 2)       | 4<br>(1 - 9)       | 13<br>(5 - 27)     |
| Urinary diseases and male infertility               | 7<br>(5 - 10)   | 0<br>(0 - 0)     | 0<br>(0 - 0)      | 0<br>(0 - 0)       | 1<br>(1 - 1)       | 6<br>(4 - 8)       |
| Interstitial nephritis and urinary tract infections | 6<br>(4 - 8)    | 0<br>(0 - 0)     | 0<br>(0 - 0)      | 0<br>(0 - 0)       | 1<br>(1 - 1)       | 5<br>(3 - 7)       |
| Urolithiasis                                        | 0<br>(0 - 0)    | --               | 0<br>(0 - 0)      | 0<br>(0 - 0)       | 0<br>(0 - 0)       | 0<br>(0 - 0)       |
| Other urinary diseases                              | 1<br>(1 - 2)    | 0<br>(0 - 0)     | 0<br>(0 - 0)      | 0<br>(0 - 0)       | 0<br>(0 - 0)       | 1<br>(1 - 2)       |
| Gynecological diseases                              | --              | --               | --                | --                 | --                 | --                 |
| Uterine fibroids                                    | --              | --               | --                | --                 | --                 | --                 |
| Polycystic ovarian syndrome                         | --              | --               | --                | --                 | --                 | --                 |
| Endometriosis                                       | --              | --               | --                | --                 | --                 | --                 |
| Genital prolapse                                    | --              | --               | --                | --                 | --                 | --                 |
| Other gynecological diseases                        | --              | --               | --                | --                 | --                 | --                 |
| Hemoglobinopathies and hemolytic anemias            | 0<br>(0 - 1)    | 0<br>(0 - 0)     | 0<br>(0 - 0)      | 0<br>(0 - 0)       | 0<br>(0 - 0)       | 0<br>(0 - 0)       |
| Thalassemias                                        | 0<br>(0 - 0)    | 0<br>(0 - 0)     | 0<br>(0 - 0)      | 0<br>(0 - 0)       | 0<br>(0 - 0)       | 0<br>(0 - 0)       |
| Sickle cell disorders                               | 0<br>(0 - 0)    | 0<br>(0 - 0)     | 0<br>(0 - 0)      | 0<br>(0 - 0)       | 0<br>(0 - 0)       | 0<br>(0 - 0)       |
| G6PD deficiency                                     | 0<br>(0 - 0)    | 0<br>(0 - 0)     | 0<br>(0 - 0)      | 0<br>(0 - 0)       | 0<br>(0 - 0)       | 0<br>(0 - 0)       |
| Other hemoglobinopathies and hemolytic anemias      | 0<br>(0 - 1)    | 0<br>(0 - 0)     | 0<br>(0 - 0)      | 0<br>(0 - 0)       | 0<br>(0 - 0)       | 0<br>(0 - 0)       |
| Endocrine, metabolic, blood, and immune disorders   | 3<br>(3 - 5)    | 0<br>(0 - 1)     | 0<br>(0 - 0)      | 1<br>(1 - 1)       | 1<br>(1 - 1)       | 1<br>(1 - 2)       |
| Musculoskeletal disorders                           | 2<br>(1 - 3)    | --               | 0<br>(0 - 0)      | 0<br>(0 - 0)       | 1<br>(0 - 1)       | 1<br>(1 - 2)       |
| Rheumatoid arthritis                                | 0<br>(0 - 0)    | --               | 0<br>(0 - 0)      | 0<br>(0 - 0)       | 0<br>(0 - 0)       | 0<br>(0 - 0)       |
| Other musculoskeletal disorders                     | 2<br>(1 - 2)    | --               | 0<br>(0 - 0)      | 0<br>(0 - 0)       | 0<br>(0 - 1)       | 1<br>(1 - 1)       |
| Other non-communicable diseases                     | 19<br>(14 - 23) | 7<br>(5 - 10)    | 0<br>(0 - 1)      | 2<br>(2 - 3)       | 2<br>(1 - 2)       | 7<br>(4 - 10)      |
| Congenital anomalies                                | 11<br>(8 - 14)  | 7<br>(5 - 9)     | 0<br>(0 - 1)      | 2<br>(2 - 3)       | 1<br>(1 - 1)       | 1<br>(0 - 1)       |
| Neural tube defects                                 | 0<br>(0 - 0)    | 0<br>(0 - 0)     | 0<br>(0 - 0)      | 0<br>(0 - 0)       | 0<br>(0 - 0)       | 0<br>(0 - 0)       |
| Congenital heart anomalies                          | 3<br>(2 - 4)    | 1<br>(1 - 2)     | 0<br>(0 - 0)      | 1<br>(1 - 1)       | 0<br>(0 - 0)       | 0<br>(0 - 0)       |
| Cleft lip and cleft palate                          | 0<br>(0 - 0)    | 0<br>(0 - 0)     | --                | --                 | --                 | --                 |
| Down syndrome                                       | 0<br>(0 - 0)    | 0<br>(0 - 0)     | 0<br>(0 - 0)      | 0<br>(0 - 0)       | 0<br>(0 - 0)       | 0<br>(0 - 0)       |
| Chromosomal unbalanced rearrangements               | 0<br>(0 - 1)    | 0<br>(0 - 1)     | 0<br>(0 - 0)      | 0<br>(0 - 0)       | 0<br>(0 - 0)       | 0<br>(0 - 0)       |
| Other congenital anomalies                          | 8<br>(6 - 10)   | 5<br>(3 - 7)     | 0<br>(0 - 0)      | 1<br>(1 - 2)       | 1<br>(0 - 1)       | 1<br>(0 - 1)       |
| Skin and subcutaneous diseases                      | 7<br>(4 - 10)   | 0<br>(0 - 0)     | 0<br>(0 - 0)      | 0<br>(0 - 0)       | 1<br>(0 - 1)       | 7<br>(3 - 9)       |
| Cellulitis                                          | 0<br>(0 - 0)    | 0<br>(0 - 0)     | 0<br>(0 - 0)      | 0<br>(0 - 0)       | 0<br>(0 - 0)       | 0<br>(0 - 0)       |
| Pyoderma                                            | 0<br>(0 - 0)    | 0<br>(0 - 0)     | 0<br>(0 - 0)      | 0<br>(0 - 0)       | 0<br>(0 - 0)       | 0<br>(0 - 0)       |
| Decubitus ulcer                                     | 7<br>(4 - 10)   | 0<br>(0 - 0)     | 0<br>(0 - 0)      | 0<br>(0 - 0)       | 1<br>(0 - 1)       | 6<br>(3 - 9)       |
| Other skin and subcutaneous diseases                | 0<br>(0 - 0)    | 0<br>(0 - 0)     | 0<br>(0 - 0)      | 0<br>(0 - 0)       | 0<br>(0 - 0)       | 0<br>(0 - 0)       |
| Sudden infant death syndrome                        | 1<br>(0 - 1)    | 1<br>(0 - 1)     | --                | --                 | --                 | --                 |
| Injuries                                            | 67<br>(57 - 79) | 1<br>(0 - 1)     | 1<br>(1 - 1)      | 28<br>(23 - 34)    | 15<br>(12 - 18)    | 22<br>(18 - 27)    |
| Transport injuries                                  | 13<br>(11 - 16) | 0<br>(0 - 0)     | 0<br>(0 - 0)      | 8<br>(6 - 9)       | 3<br>(2 - 3)       | 3<br>(2 - 3)       |

Web Table 31- Malta deaths with 95% UI by age, sex, and cause in 2013

| Cause                                           | Males, All Ages | Males, 0-4 Years | Males, 5-14 Years | Males, 15-49 Years | Males, 50-69 Years | Males, 70-80 Years |
|-------------------------------------------------|-----------------|------------------|-------------------|--------------------|--------------------|--------------------|
| Road injuries                                   | 13<br>(11 - 15) | 0<br>(0 - 0)     | 0<br>(0 - 0)      | 7<br>(6 - 9)       | 2<br>(2 - 3)       | 3<br>(2 - 3)       |
| Pedestrian road injuries                        | 3<br>(2 - 4)    | 0<br>(0 - 0)     | 0<br>(0 - 0)      | 0<br>(0 - 1)       | 1<br>(1 - 1)       | 1<br>(1 - 2)       |
| Cyclist road injuries                           | 0<br>(0 - 0)    | 0<br>(0 - 0)     | 0<br>(0 - 0)      | 0<br>(0 - 0)       | 0<br>(0 - 0)       | 0<br>(0 - 0)       |
| Motorcyclist road injuries                      | 3<br>(2 - 5)    | 0<br>(0 - 0)     | 0<br>(0 - 0)      | 3<br>(1 - 4)       | 0<br>(0 - 0)       | 0<br>(0 - 0)       |
| Motor vehicle road injuries                     | 6<br>(4 - 9)    | 0<br>(0 - 0)     | 0<br>(0 - 0)      | 4<br>(3 - 6)       | 1<br>(1 - 2)       | 1<br>(0 - 1)       |
| Other road injuries                             | 0<br>(0 - 0)    | 0<br>(0 - 0)     | 0<br>(0 - 0)      | 0<br>(0 - 0)       | 0<br>(0 - 0)       | 0<br>(0 - 0)       |
| Other transport injuries                        | 0<br>(0 - 1)    | 0<br>(0 - 0)     | 0<br>(0 - 0)      | 0<br>(0 - 1)       | 0<br>(0 - 0)       | 0<br>(0 - 0)       |
| Unintentional injuries                          | 32<br>(27 - 39) | 1<br>(0 - 1)     | 0<br>(0 - 1)      | 8<br>(7 - 10)      | 6<br>(5 - 8)       | 17<br>(13 - 21)    |
| Falls                                           | 19<br>(14 - 23) | 0<br>(0 - 0)     | 0<br>(0 - 0)      | 3<br>(2 - 4)       | 3<br>(2 - 4)       | 13<br>(9 - 16)     |
| Drowning                                        | 3<br>(2 - 4)    | 0<br>(0 - 0)     | 0<br>(0 - 0)      | 2<br>(1 - 2)       | 1<br>(0 - 1)       | 0<br>(0 - 1)       |
| Fire, heat, and hot substances                  | 1<br>(1 - 1)    | 0<br>(0 - 0)     | 0<br>(0 - 0)      | 0<br>(0 - 0)       | 0<br>(0 - 0)       | 0<br>(0 - 1)       |
| Poisonings                                      | 0<br>(0 - 0)    | 0<br>(0 - 0)     | 0<br>(0 - 0)      | 0<br>(0 - 0)       | 0<br>(0 - 0)       | 0<br>(0 - 0)       |
| Exposure to mechanical forces                   | 3<br>(2 - 4)    | 0<br>(0 - 0)     | 0<br>(0 - 0)      | 2<br>(1 - 3)       | 1<br>(0 - 1)       | 0<br>(0 - 0)       |
| Unintentional firearm injuries                  | 0<br>(0 - 0)    | 0<br>(0 - 0)     | 0<br>(0 - 0)      | 0<br>(0 - 0)       | 0<br>(0 - 0)       | 0<br>(0 - 0)       |
| Unintentional suffocation                       | 0<br>(0 - 0)    | 0<br>(0 - 0)     | 0<br>(0 - 0)      | 0<br>(0 - 0)       | 0<br>(0 - 0)       | 0<br>(0 - 0)       |
| Other exposure to mechanical forces             | 3<br>(2 - 4)    | 0<br>(0 - 0)     | 0<br>(0 - 0)      | 2<br>(1 - 3)       | 1<br>(0 - 1)       | 0<br>(0 - 0)       |
| Adverse effects of medical treatment            | 2<br>(1 - 3)    | 0<br>(0 - 0)     | 0<br>(0 - 0)      | 0<br>(0 - 0)       | 1<br>(0 - 1)       | 1<br>(1 - 2)       |
| Animal contact                                  | 0<br>(0 - 0)    | 0<br>(0 - 0)     | 0<br>(0 - 0)      | 0<br>(0 - 0)       | 0<br>(0 - 0)       | 0<br>(0 - 0)       |
| Venomous animal contact                         | 0<br>(0 - 0)    | 0<br>(0 - 0)     | 0<br>(0 - 0)      | 0<br>(0 - 0)       | 0<br>(0 - 0)       | 0<br>(0 - 0)       |
| Non-venomous animal contact                     | 0<br>(0 - 0)    | 0<br>(0 - 0)     | 0<br>(0 - 0)      | 0<br>(0 - 0)       | 0<br>(0 - 0)       | 0<br>(0 - 0)       |
| Foreign body                                    | 4<br>(1 - 6)    | 0<br>(0 - 0)     | 0<br>(0 - 0)      | 1<br>(0 - 1)       | 1<br>(0 - 1)       | 2<br>(1 - 3)       |
| Pulmonary aspiration and foreign body in airway | 4<br>(1 - 6)    | 0<br>(0 - 0)     | 0<br>(0 - 0)      | 1<br>(0 - 1)       | 1<br>(0 - 1)       | 2<br>(1 - 3)       |
| Foreign body in other body part                 | 0<br>(0 - 0)    | 0<br>(0 - 0)     | 0<br>(0 - 0)      | 0<br>(0 - 0)       | 0<br>(0 - 0)       | 0<br>(0 - 0)       |
| Other unintentional injuries                    | 1<br>(1 - 1)    | 0<br>(0 - 0)     | 0<br>(0 - 0)      | 1<br>(0 - 1)       | 0<br>(0 - 0)       | 0<br>(0 - 0)       |
| Self-harm and interpersonal violence            | 21<br>(13 - 27) | 0<br>(0 - 0)     | 0<br>(0 - 0)      | 13<br>(8 - 16)     | 6<br>(3 - 8)       | 3<br>(2 - 4)       |
| Self-harm                                       | 20<br>(11 - 25) | -                | 0<br>(0 - 0)      | 11<br>(7 - 14)     | 6<br>(3 - 8)       | 3<br>(1 - 3)       |
| Interpersonal violence                          | 2<br>(1 - 3)    | 0<br>(0 - 0)     | 0<br>(0 - 0)      | 1<br>(1 - 2)       | 0<br>(0 - 1)       | 0<br>(0 - 0)       |
| Assault by firearm                              | 1<br>(1 - 2)    | 0<br>(0 - 0)     | 0<br>(0 - 0)      | 1<br>(0 - 1)       | 0<br>(0 - 0)       | 0<br>(0 - 0)       |
| Assault by sharp object                         | 0<br>(0 - 0)    | 0<br>(0 - 0)     | 0<br>(0 - 0)      | 0<br>(0 - 0)       | 0<br>(0 - 0)       | 0<br>(0 - 0)       |
| Assault by other means                          | 1<br>(0 - 1)    | 0<br>(0 - 0)     | 0<br>(0 - 0)      | 0<br>(0 - 1)       | 0<br>(0 - 0)       | 0<br>(0 - 0)       |

Web Table 31- Malta deaths with 95% UI by age, sex, and cause in 2013

| Cause                                                             | Females, All Ages        | Females, 0-4 Years | Females, 5-14 Years | Females, 15-49 Years | Females, 50-69 Years | Females, 70-80 Years   |
|-------------------------------------------------------------------|--------------------------|--------------------|---------------------|----------------------|----------------------|------------------------|
| All causes                                                        | 1,369<br>(1,241 - 1,509) | 12<br>(9 - 16)     | 2<br>(2 - 3)        | 43<br>(35 - 53)      | 227<br>(192 - 267)   | 1,084<br>(997 - 1,176) |
| Communicable, maternal, neonatal, and nutritional diseases        | 72<br>(50 - 95)          | 5<br>(4 - 7)       | 0<br>(0 - 0)        | 1<br>(1 - 2)         | 3<br>(2 - 5)         | 61<br>(41 - 84)        |
| HIV/AIDS and tuberculosis                                         | 0<br>(0 - 0)             | 0<br>(0 - 0)       | 0<br>(0 - 0)        | 0<br>(0 - 0)         | 0<br>(0 - 0)         | 0<br>(0 - 0)           |
| Tuberculosis                                                      | 0<br>(0 - 0)             | 0<br>(0 - 0)       | 0<br>(0 - 0)        | 0<br>(0 - 0)         | 0<br>(0 - 0)         | 0<br>(0 - 0)           |
| HIV/AIDS                                                          | 0<br>(0 - 0)             | 0<br>(0 - 0)       | 0<br>(0 - 0)        | 0<br>(0 - 0)         | 0<br>(0 - 0)         | 0<br>(0 - 0)           |
| HIV/AIDS resulting in mycobacterial infection                     | 0<br>(0 - 0)             | 0<br>(0 - 0)       | 0<br>(0 - 0)        | 0<br>(0 - 0)         | 0<br>(0 - 0)         | 0<br>(0 - 0)           |
| HIV/AIDS resulting in other diseases                              | 0<br>(0 - 0)             | 0<br>(0 - 0)       | 0<br>(0 - 0)        | 0<br>(0 - 0)         | 0<br>(0 - 0)         | 0<br>(0 - 0)           |
| Diarrhea, lower respiratory, and other common infectious diseases | 63<br>(42 - 85)          | 1<br>(1 - 1)       | 0<br>(0 - 0)        | 1<br>(1 - 1)         | 3<br>(2 - 4)         | 58<br>(37 - 80)        |
| Diarrheal diseases                                                | 1<br>(0 - 1)             | 0<br>(0 - 0)       | 0<br>(0 - 0)        | 0<br>(0 - 0)         | 0<br>(0 - 0)         | 0<br>(0 - 1)           |
| Intestinal infectious diseases                                    | 0<br>(0 - 1)             | 0<br>(0 - 0)       | 0<br>(0 - 0)        | 0<br>(0 - 0)         | 0<br>(0 - 0)         | 0<br>(0 - 0)           |
| Typhoid fever                                                     | 0<br>(0 - 0)             | 0<br>(0 - 0)       | 0<br>(0 - 0)        | 0<br>(0 - 0)         | 0<br>(0 - 0)         | 0<br>(0 - 0)           |
| Paratyphoid fever                                                 | 0<br>(0 - 0)             | 0<br>(0 - 0)       | 0<br>(0 - 0)        | 0<br>(0 - 0)         | 0<br>(0 - 0)         | 0<br>(0 - 0)           |
| Other intestinal infectious diseases                              | 0<br>(0 - 0)             | 0<br>(0 - 0)       | 0<br>(0 - 0)        | 0<br>(0 - 0)         | 0<br>(0 - 0)         | 0<br>(0 - 0)           |
| Lower respiratory infections                                      | 61<br>(40 - 83)          | 1<br>(0 - 1)       | 0<br>(0 - 0)        | 1<br>(0 - 1)         | 3<br>(1 - 4)         | 57<br>(36 - 79)        |
| Upper respiratory infections                                      | 0<br>(0 - 0)             | 0<br>(0 - 0)       | 0<br>(0 - 0)        | 0<br>(0 - 0)         | 0<br>(0 - 0)         | 0<br>(0 - 0)           |
| Otitis media                                                      | 0<br>(0 - 0)             | 0<br>(0 - 0)       | 0<br>(0 - 0)        | 0<br>(0 - 0)         | 0<br>(0 - 0)         | 0<br>(0 - 0)           |
| Meningitis                                                        | 0<br>(0 - 0)             | 0<br>(0 - 0)       | 0<br>(0 - 0)        | 0<br>(0 - 0)         | 0<br>(0 - 0)         | 0<br>(0 - 0)           |
| Pneumococcal meningitis                                           | 0<br>(0 - 0)             | 0<br>(0 - 0)       | 0<br>(0 - 0)        | 0<br>(0 - 0)         | 0<br>(0 - 0)         | 0<br>(0 - 0)           |
| H influenzae type B meningitis                                    | 0<br>(0 - 0)             | 0<br>(0 - 0)       | 0<br>(0 - 0)        | 0<br>(0 - 0)         | 0<br>(0 - 0)         | 0<br>(0 - 0)           |
| Meningococcal meningitis                                          | 0<br>(0 - 0)             | 0<br>(0 - 0)       | 0<br>(0 - 0)        | 0<br>(0 - 0)         | 0<br>(0 - 0)         | 0<br>(0 - 0)           |
| Other meningitis                                                  | 0<br>(0 - 0)             | 0<br>(0 - 0)       | 0<br>(0 - 0)        | 0<br>(0 - 0)         | 0<br>(0 - 0)         | 0<br>(0 - 0)           |
| Encephalitis                                                      | 0<br>(0 - 0)             | 0<br>(0 - 0)       | 0<br>(0 - 0)        | 0<br>(0 - 0)         | 0<br>(0 - 0)         | 0<br>(0 - 0)           |
| Diphtheria                                                        | 0<br>(0 - 0)             | 0<br>(0 - 0)       | 0<br>(0 - 0)        | 0<br>(0 - 0)         | 0<br>(0 - 0)         | --                     |
| Whooping cough                                                    | 0<br>(0 - 0)             | 0<br>(0 - 0)       | 0<br>(0 - 0)        | 0<br>(0 - 0)         | 0<br>(0 - 0)         | --                     |
| Tetanus                                                           | 0<br>(0 - 0)             | 0<br>(0 - 0)       | 0<br>(0 - 0)        | 0<br>(0 - 0)         | 0<br>(0 - 0)         | 0<br>(0 - 0)           |
| Measles                                                           | 0<br>(0 - 0)             | 0<br>(0 - 0)       | 0<br>(0 - 0)        | 0<br>(0 - 0)         | 0<br>(0 - 0)         | --                     |
| Varicella and herpes zoster                                       | 0<br>(0 - 1)             | 0<br>(0 - 0)       | 0<br>(0 - 0)        | 0<br>(0 - 0)         | 0<br>(0 - 0)         | 0<br>(0 - 1)           |
| Neglected tropical diseases and malaria                           | 0<br>(0 - 0)             | 0<br>(0 - 0)       | 0<br>(0 - 0)        | 0<br>(0 - 0)         | 0<br>(0 - 0)         | 0<br>(0 - 0)           |
| Leishmaniasis                                                     | 0<br>(0 - 0)             | 0<br>(0 - 0)       | 0<br>(0 - 0)        | 0<br>(0 - 0)         | 0<br>(0 - 0)         | 0<br>(0 - 0)           |
| Visceral leishmaniasis                                            | 0<br>(0 - 0)             | 0<br>(0 - 0)       | 0<br>(0 - 0)        | 0<br>(0 - 0)         | 0<br>(0 - 0)         | 0<br>(0 - 0)           |
| Cysticercosis                                                     | 0<br>(0 - 0)             | 0<br>(0 - 0)       | 0<br>(0 - 0)        | 0<br>(0 - 0)         | 0<br>(0 - 0)         | 0<br>(0 - 0)           |
| Cystic echinococcosis                                             | 0<br>(0 - 0)             | 0<br>(0 - 0)       | 0<br>(0 - 0)        | 0<br>(0 - 0)         | 0<br>(0 - 0)         | 0<br>(0 - 0)           |
| Dengue                                                            | 0<br>(0 - 0)             | 0<br>(0 - 0)       | 0<br>(0 - 0)        | 0<br>(0 - 0)         | 0<br>(0 - 0)         | 0<br>(0 - 0)           |
| Rabies                                                            | 0<br>(0 - 0)             | 0<br>(0 - 0)       | 0<br>(0 - 0)        | 0<br>(0 - 0)         | 0<br>(0 - 0)         | 0<br>(0 - 0)           |
| Other neglected tropical diseases                                 | 0<br>(0 - 0)             | 0<br>(0 - 0)       | 0<br>(0 - 0)        | 0<br>(0 - 0)         | 0<br>(0 - 0)         | 0<br>(0 - 0)           |
| Maternal disorders                                                | 0<br>(0 - 0)             | --                 | 0<br>(0 - 0)        | 0<br>(0 - 0)         | --                   | --                     |
| Maternal hemorrhage                                               | 0<br>(0 - 0)             | --                 | 0<br>(0 - 0)        | 0<br>(0 - 0)         | --                   | --                     |
| Maternal sepsis and other maternal infections                     | 0<br>(0 - 0)             | --                 | 0<br>(0 - 0)        | 0<br>(0 - 0)         | --                   | --                     |
| Maternal hypertensive disorders                                   | 0<br>(0 - 0)             | --                 | 0<br>(0 - 0)        | 0<br>(0 - 0)         | --                   | --                     |
| Maternal obstructed labor                                         | 0<br>(0 - 0)             | --                 | 0<br>(0 - 0)        | 0<br>(0 - 0)         | --                   | --                     |

Web Table 31- Malta deaths with 95% UI by age, sex, and cause in 2013

| Cause                                                            | Females, All Ages        | Females, 0-4 Years | Females, 5-14 Years | Females, 15-49 Years | Females, 50-69 Years | Females, 70-80 Years |
|------------------------------------------------------------------|--------------------------|--------------------|---------------------|----------------------|----------------------|----------------------|
| Maternal abortive outcome                                        | 0<br>(0 - 0)             | --                 | 0<br>(0 - 0)        | 0<br>(0 - 0)         | --                   | --                   |
| Indirect maternal deaths                                         | 0<br>(0 - 0)             | --                 | 0<br>(0 - 0)        | 0<br>(0 - 0)         | --                   | --                   |
| Late maternal deaths                                             | 0<br>(0 - 0)             | --                 | 0<br>(0 - 0)        | 0<br>(0 - 0)         | --                   | --                   |
| Maternal deaths aggravated by HIV/AIDS                           | 0<br>(0 - 0)             | --                 | --                  | 0<br>(0 - 0)         | --                   | --                   |
| Other maternal disorders                                         | 0<br>(0 - 0)             | --                 | 0<br>(0 - 0)        | 0<br>(0 - 0)         | --                   | --                   |
| Neonatal disorders                                               | 4<br>(3 - 6)             | 4<br>(3 - 6)       | --                  | --                   | --                   | --                   |
| Neonatal preterm birth complications                             | 3<br>(2 - 5)             | 3<br>(2 - 5)       | --                  | --                   | --                   | --                   |
| Neonatal encephalopathy due to birth asphyxia and trauma         | 1<br>(0 - 1)             | 1<br>(0 - 1)       | --                  | --                   | --                   | --                   |
| Neonatal sepsis and other neonatal infections                    | 0<br>(0 - 0)             | 0<br>(0 - 0)       | --                  | --                   | --                   | --                   |
| Hemolytic disease and other neonatal jaundice                    | 0<br>(0 - 0)             | 0<br>(0 - 0)       | --                  | --                   | --                   | --                   |
| Other neonatal disorders                                         | 0<br>(0 - 1)             | 0<br>(0 - 1)       | --                  | --                   | --                   | --                   |
| Nutritional deficiencies                                         | 3<br>(2 - 5)             | 0<br>(0 - 0)       | 0<br>(0 - 0)        | 0<br>(0 - 0)         | 0<br>(0 - 0)         | 3<br>(2 - 4)         |
| Protein-energy malnutrition                                      | 0<br>(0 - 0)             | 0<br>(0 - 0)       | 0<br>(0 - 0)        | 0<br>(0 - 0)         | 0<br>(0 - 0)         | 0<br>(0 - 0)         |
| Iodine deficiency                                                | 0<br>(0 - 0)             | 0<br>(0 - 0)       | 0<br>(0 - 0)        | 0<br>(0 - 0)         | 0<br>(0 - 0)         | 0<br>(0 - 0)         |
| Iron-deficiency anemia                                           | 3<br>(2 - 5)             | 0<br>(0 - 0)       | 0<br>(0 - 0)        | 0<br>(0 - 0)         | 0<br>(0 - 0)         | 3<br>(2 - 4)         |
| Other nutritional deficiencies                                   | 0<br>(0 - 0)             | 0<br>(0 - 0)       | 0<br>(0 - 0)        | 0<br>(0 - 0)         | 0<br>(0 - 0)         | 0<br>(0 - 0)         |
| Other communicable, maternal, neonatal, and nutritional diseases | 1<br>(0 - 1)             | 0<br>(0 - 0)       | 0<br>(0 - 0)        | 0<br>(0 - 0)         | 0<br>(0 - 0)         | 0<br>(0 - 1)         |
| Sexually transmitted diseases excluding HIV                      | 0<br>(0 - 0)             | 0<br>(0 - 0)       | 0<br>(0 - 0)        | 0<br>(0 - 0)         | 0<br>(0 - 0)         | 0<br>(0 - 0)         |
| Syphilis                                                         | 0<br>(0 - 0)             | 0<br>(0 - 0)       | 0<br>(0 - 0)        | 0<br>(0 - 0)         | 0<br>(0 - 0)         | 0<br>(0 - 0)         |
| Chlamydial infection                                             | 0<br>(0 - 0)             | --                 | 0<br>(0 - 0)        | 0<br>(0 - 0)         | 0<br>(0 - 0)         | 0<br>(0 - 0)         |
| Gonococcal infection                                             | 0<br>(0 - 0)             | --                 | 0<br>(0 - 0)        | 0<br>(0 - 0)         | 0<br>(0 - 0)         | 0<br>(0 - 0)         |
| Other sexually transmitted diseases                              | 0<br>(0 - 0)             | --                 | 0<br>(0 - 0)        | 0<br>(0 - 0)         | 0<br>(0 - 0)         | 0<br>(0 - 0)         |
| Hepatitis                                                        | 0<br>(0 - 0)             | 0<br>(0 - 0)       | 0<br>(0 - 0)        | 0<br>(0 - 0)         | 0<br>(0 - 0)         | 0<br>(0 - 0)         |
| Acute hepatitis A                                                | 0<br>(0 - 0)             | 0<br>(0 - 0)       | 0<br>(0 - 0)        | 0<br>(0 - 0)         | 0<br>(0 - 0)         | 0<br>(0 - 0)         |
| Acute hepatitis B                                                | 0<br>(0 - 0)             | 0<br>(0 - 0)       | 0<br>(0 - 0)        | 0<br>(0 - 0)         | 0<br>(0 - 0)         | 0<br>(0 - 0)         |
| Acute hepatitis C                                                | 0<br>(0 - 0)             | --                 | 0<br>(0 - 0)        | 0<br>(0 - 0)         | 0<br>(0 - 0)         | 0<br>(0 - 0)         |
| Other infectious diseases                                        | 1<br>(0 - 1)             | 0<br>(0 - 0)       | 0<br>(0 - 0)        | 0<br>(0 - 0)         | 0<br>(0 - 0)         | 0<br>(0 - 0)         |
| Non-communicable diseases                                        | 1,261<br>(1,139 - 1,390) | 6<br>(4 - 9)       | 2<br>(1 - 2)        | 37<br>(30 - 45)      | 220<br>(185 - 258)   | 997<br>(911 - 1,079) |
| Neoplasms                                                        | 335<br>(281 - 388)       | 0<br>(0 - 0)       | 1<br>(1 - 1)        | 23<br>(18 - 28)      | 124<br>(100 - 147)   | 188<br>(157 - 216)   |
| Esophageal cancer                                                | 3<br>(3 - 4)             | --                 | --                  | 0<br>(0 - 0)         | 1<br>(1 - 1)         | 2<br>(2 - 3)         |
| Stomach cancer                                                   | 15<br>(11 - 21)          | --                 | --                  | 1<br>(0 - 1)         | 4<br>(3 - 5)         | 11<br>(8 - 15)       |
| Liver cancer                                                     | 6<br>(4 - 7)             | --                 | 0<br>(0 - 0)        | 0<br>(0 - 0)         | 2<br>(1 - 2)         | 4<br>(3 - 5)         |
| Liver cancer due to hepatitis B                                  | 1<br>(0 - 2)             | --                 | 0<br>(0 - 0)        | 0<br>(0 - 0)         | 0<br>(0 - 1)         | 0<br>(0 - 1)         |
| Liver cancer due to hepatitis C                                  | 3<br>(2 - 5)             | --                 | 0<br>(0 - 0)        | 0<br>(0 - 0)         | 1<br>(0 - 1)         | 2<br>(1 - 4)         |
| Liver cancer due to alcohol use                                  | 1<br>(0 - 2)             | --                 | --                  | 0<br>(0 - 0)         | 0<br>(0 - 0)         | 1<br>(0 - 1)         |
| Liver cancer due to other causes                                 | 0<br>(0 - 1)             | --                 | 0<br>(0 - 0)        | 0<br>(0 - 0)         | 0<br>(0 - 0)         | 0<br>(0 - 1)         |
| Larynx cancer                                                    | 0<br>(0 - 0)             | --                 | --                  | 0<br>(0 - 0)         | 0<br>(0 - 0)         | 0<br>(0 - 0)         |
| Tracheal, bronchus and lung cancer                               | 26<br>(18 - 32)          | --                 | --                  | 1<br>(1 - 2)         | 11<br>(8 - 15)       | 13<br>(8 - 16)       |
| Breast cancer                                                    | 83<br>(59 - 101)         | --                 | --                  | 7<br>(5 - 9)         | 36<br>(26 - 44)      | 40<br>(28 - 50)      |
| Cervical cancer                                                  | 5<br>(4 - 6)             | --                 | --                  | 1<br>(1 - 1)         | 2<br>(1 - 3)         | 2<br>(2 - 3)         |

Web Table 31- Malta deaths with 95% UI by age, sex, and cause in 2013

| Cause                                         | Females, All Ages  | Females, 0-4 Years | Females, 5-14 Years | Females, 15-49 Years | Females, 50-69 Years | Females, 70-80 Years |
|-----------------------------------------------|--------------------|--------------------|---------------------|----------------------|----------------------|----------------------|
| Uterine cancer                                | 11<br>(6 - 14)     | --                 | --                  | 0<br>(0 - 0)         | 5<br>(3 - 7)         | 6<br>(3 - 8)         |
| Prostate cancer                               | --                 | --                 | --                  | --                   | --                   | --                   |
| Colon and rectum cancer                       | 48<br>(40 - 57)    | --                 | --                  | 2<br>(1 - 2)         | 14<br>(11 - 18)      | 32<br>(26 - 39)      |
| Lip and oral cavity cancer                    | 1<br>(1 - 2)       | --                 | --                  | 0<br>(0 - 0)         | 0<br>(0 - 1)         | 1<br>(1 - 1)         |
| Nasopharynx cancer                            | 0<br>(0 - 1)       | --                 | 0<br>(0 - 0)        | 0<br>(0 - 0)         | 0<br>(0 - 0)         | 0<br>(0 - 0)         |
| Other pharynx cancer                          | 0<br>(0 - 0)       | --                 | --                  | 0<br>(0 - 0)         | 0<br>(0 - 0)         | 0<br>(0 - 0)         |
| Gallbladder and biliary tract cancer          | 4<br>(2 - 5)       | --                 | --                  | 0<br>(0 - 0)         | 1<br>(1 - 1)         | 3<br>(2 - 4)         |
| Pancreatic cancer                             | 30<br>(24 - 36)    | --                 | --                  | 1<br>(1 - 1)         | 10<br>(7 - 12)       | 19<br>(16 - 24)      |
| Malignant skin melanoma                       | 3<br>(2 - 4)       | --                 | --                  | 0<br>(0 - 1)         | 1<br>(1 - 1)         | 1<br>(1 - 2)         |
| Non-melanoma skin cancer                      | 1<br>(1 - 1)       | --                 | --                  | 0<br>(0 - 0)         | 0<br>(0 - 0)         | 1<br>(1 - 1)         |
| Ovarian cancer                                | 30<br>(24 - 37)    | --                 | --                  | 2<br>(2 - 3)         | 14<br>(11 - 18)      | 14<br>(10 - 18)      |
| Testicular cancer                             | --                 | --                 | --                  | --                   | --                   | --                   |
| Kidney cancer                                 | 7<br>(5 - 10)      | 0<br>(0 - 0)       | 0<br>(0 - 0)        | 0<br>(0 - 0)         | 3<br>(2 - 4)         | 4<br>(2 - 5)         |
| Bladder cancer                                | 7<br>(4 - 10)      | --                 | --                  | 0<br>(0 - 0)         | 1<br>(1 - 2)         | 5<br>(3 - 8)         |
| Brain and nervous system cancer               | 8<br>(6 - 10)      | 0<br>(0 - 0)       | 0<br>(0 - 0)        | 2<br>(1 - 2)         | 4<br>(3 - 5)         | 3<br>(2 - 3)         |
| Thyroid cancer                                | 2<br>(1 - 3)       | --                 | 0<br>(0 - 0)        | 0<br>(0 - 0)         | 1<br>(0 - 1)         | 2<br>(1 - 2)         |
| Mesothelioma                                  | 1<br>(0 - 1)       | --                 | --                  | 0<br>(0 - 0)         | 0<br>(0 - 1)         | 0<br>(0 - 1)         |
| Hodgkin lymphoma                              | 1<br>(0 - 1)       | 0<br>(0 - 0)       | 0<br>(0 - 0)        | 0<br>(0 - 0)         | 0<br>(0 - 0)         | 0<br>(0 - 1)         |
| Non-Hodgkin lymphoma                          | 11<br>(5 - 15)     | 0<br>(0 - 0)       | 0<br>(0 - 0)        | 1<br>(0 - 1)         | 4<br>(2 - 6)         | 6<br>(3 - 9)         |
| Multiple myeloma                              | 5<br>(3 - 9)       | --                 | --                  | 0<br>(0 - 0)         | 2<br>(1 - 3)         | 3<br>(2 - 6)         |
| Leukemia                                      | 9<br>(7 - 11)      | 0<br>(0 - 0)       | 0<br>(0 - 0)        | 1<br>(1 - 2)         | 2<br>(2 - 3)         | 5<br>(3 - 6)         |
| Other neoplasms                               | 17<br>(13 - 22)    | 0<br>(0 - 0)       | 0<br>(0 - 0)        | 2<br>(1 - 2)         | 5<br>(3 - 6)         | 11<br>(7 - 14)       |
| Cardiovascular diseases                       | 627<br>(549 - 731) | 0<br>(0 - 0)       | 0<br>(0 - 0)        | 6<br>(4 - 7)         | 62<br>(49 - 83)      | 559<br>(495 - 644)   |
| Rheumatic heart disease                       | 4<br>(2 - 5)       | 0<br>(0 - 0)       | 0<br>(0 - 0)        | 0<br>(0 - 1)         | 1<br>(0 - 1)         | 2<br>(1 - 3)         |
| Ischemic heart disease                        | 385<br>(329 - 472) | 0<br>(0 - 0)       | 0<br>(0 - 0)        | 3<br>(2 - 4)         | 38<br>(30 - 54)      | 344<br>(295 - 420)   |
| Cerebrovascular disease                       | 175<br>(134 - 214) | 0<br>(0 - 0)       | 0<br>(0 - 0)        | 2<br>(1 - 2)         | 16<br>(12 - 22)      | 158<br>(121 - 192)   |
| Ischemic stroke                               | 108<br>(79 - 134)  | 0<br>(0 - 0)       | 0<br>(0 - 0)        | 0<br>(0 - 0)         | 6<br>(4 - 9)         | 102<br>(73 - 125)    |
| Hemorrhagic stroke                            | 67<br>(49 - 90)    | 0<br>(0 - 0)       | 0<br>(0 - 0)        | 1<br>(1 - 2)         | 10<br>(7 - 14)       | 56<br>(40 - 78)      |
| Hypertensive heart disease                    | 11<br>(7 - 16)     | 0<br>(0 - 0)       | 0<br>(0 - 0)        | 0<br>(0 - 0)         | 1<br>(1 - 2)         | 9<br>(6 - 14)        |
| Cardiomyopathy and myocarditis                | 8<br>(4 - 33)      | 0<br>(0 - 0)       | 0<br>(0 - 0)        | 0<br>(0 - 1)         | 1<br>(0 - 2)         | 8<br>(4 - 31)        |
| Atrial fibrillation and flutter               | 13<br>(9 - 18)     | --                 | --                  | 0<br>(0 - 0)         | 0<br>(0 - 1)         | 12<br>(8 - 18)       |
| Aortic aneurysm                               | 2<br>(1 - 3)       | --                 | --                  | 0<br>(0 - 0)         | 0<br>(0 - 1)         | 1<br>(1 - 2)         |
| Peripheral vascular disease                   | 8<br>(5 - 11)      | --                 | --                  | 0<br>(0 - 0)         | 0<br>(0 - 1)         | 7<br>(5 - 10)        |
| Endocarditis                                  | 1<br>(1 - 3)       | 0<br>(0 - 0)       | 0<br>(0 - 0)        | 0<br>(0 - 0)         | 0<br>(0 - 1)         | 1<br>(1 - 2)         |
| Other cardiovascular and circulatory diseases | 20<br>(13 - 27)    | 0<br>(0 - 0)       | 0<br>(0 - 0)        | 1<br>(0 - 1)         | 3<br>(2 - 4)         | 17<br>(11 - 23)      |
| Chronic respiratory diseases                  | 35<br>(27 - 42)    | 0<br>(0 - 0)       | 0<br>(0 - 0)        | 1<br>(1 - 1)         | 5<br>(3 - 6)         | 29<br>(22 - 36)      |
| Chronic obstructive pulmonary disease         | 24<br>(17 - 32)    | 0<br>(0 - 0)       | 0<br>(0 - 0)        | 0<br>(0 - 1)         | 2<br>(1 - 3)         | 21<br>(15 - 29)      |
| Pneumoconiosis                                | 0<br>(0 - 0)       | 0<br>(0 - 0)       | 0<br>(0 - 0)        | 0<br>(0 - 0)         | 0<br>(0 - 0)         | 0<br>(0 - 0)         |
| Silicosis                                     | 0<br>(0 - 0)       | 0<br>(0 - 0)       | 0<br>(0 - 0)        | 0<br>(0 - 0)         | 0<br>(0 - 0)         | 0<br>(0 - 0)         |
| Asbestosis                                    | 0<br>(0 - 0)       | 0<br>(0 - 0)       | 0<br>(0 - 0)        | 0<br>(0 - 0)         | 0<br>(0 - 0)         | 0<br>(0 - 0)         |

Web Table 31- Malta deaths with 95% UI by age, sex, and cause in 2013

| Cause                                               | Females, All Ages | Females, 0-4 Years | Females, 5-14 Years | Females, 15-49 Years | Females, 50-69 Years | Females, 70-80 Years |
|-----------------------------------------------------|-------------------|--------------------|---------------------|----------------------|----------------------|----------------------|
| Coal workers pneumoconiosis                         | 0<br>(0 - 0)      | 0<br>(0 - 0)       | 0<br>(0 - 0)        | 0<br>(0 - 0)         | 0<br>(0 - 0)         | 0<br>(0 - 0)         |
| Other pneumoconiosis                                | 0<br>(0 - 0)      | 0<br>(0 - 0)       | 0<br>(0 - 0)        | 0<br>(0 - 0)         | 0<br>(0 - 0)         | 0<br>(0 - 0)         |
| Asthma                                              | 4<br>(2 - 6)      | 0<br>(0 - 0)       | 0<br>(0 - 0)        | 0<br>(0 - 0)         | 1<br>(0 - 1)         | 3<br>(1 - 4)         |
| Interstitial lung disease and pulmonary sarcoidosis | 7<br>(2 - 13)     | 0<br>(0 - 0)       | 0<br>(0 - 0)        | 0<br>(0 - 0)         | 2<br>(1 - 3)         | 5<br>(1 - 9)         |
| Other chronic respiratory diseases                  | 0<br>(0 - 0)      | 0<br>(0 - 0)       | 0<br>(0 - 0)        | 0<br>(0 - 0)         | 0<br>(0 - 0)         | 0<br>(0 - 0)         |
| Cirrhosis                                           | 10<br>(8 - 12)    | 0<br>(0 - 0)       | 0<br>(0 - 0)        | 1<br>(1 - 1)         | 3<br>(2 - 4)         | 6<br>(5 - 8)         |
| Cirrhosis due to hepatitis B                        | 1<br>(1 - 2)      | 0<br>(0 - 0)       | 0<br>(0 - 0)        | 0<br>(0 - 0)         | 0<br>(0 - 1)         | 1<br>(0 - 1)         |
| Cirrhosis due to hepatitis C                        | 6<br>(4 - 8)      | 0<br>(0 - 0)       | 0<br>(0 - 0)        | 0<br>(0 - 1)         | 2<br>(1 - 2)         | 4<br>(2 - 5)         |
| Cirrhosis due to alcohol use                        | 2<br>(1 - 3)      | --                 | --                  | 0<br>(0 - 0)         | 0<br>(0 - 1)         | 1<br>(1 - 2)         |
| Cirrhosis due to other causes                       | 1<br>(0 - 2)      | 0<br>(0 - 0)       | 0<br>(0 - 0)        | 0<br>(0 - 0)         | 0<br>(0 - 1)         | 0<br>(0 - 1)         |
| Digestive diseases                                  | 34<br>(25 - 41)   | 0<br>(0 - 0)       | 0<br>(0 - 0)        | 1<br>(0 - 1)         | 4<br>(3 - 5)         | 30<br>(22 - 36)      |
| Peptic ulcer disease                                | 5<br>(3 - 7)      | 0<br>(0 - 0)       | 0<br>(0 - 0)        | 0<br>(0 - 0)         | 0<br>(0 - 1)         | 4<br>(3 - 6)         |
| Gastritis and duodenitis                            | 0<br>(0 - 1)      | 0<br>(0 - 0)       | 0<br>(0 - 0)        | 0<br>(0 - 0)         | 0<br>(0 - 0)         | 0<br>(0 - 0)         |
| Appendicitis                                        | 0<br>(0 - 0)      | 0<br>(0 - 0)       | 0<br>(0 - 0)        | 0<br>(0 - 0)         | 0<br>(0 - 0)         | 0<br>(0 - 0)         |
| Paralytic ileus and intestinal obstruction          | 7<br>(4 - 11)     | 0<br>(0 - 0)       | 0<br>(0 - 0)        | 0<br>(0 - 0)         | 1<br>(0 - 1)         | 7<br>(3 - 10)        |
| Inguinal, femoral, and abdominal hernia             | 1<br>(0 - 2)      | 0<br>(0 - 0)       | 0<br>(0 - 0)        | 0<br>(0 - 0)         | 0<br>(0 - 0)         | 1<br>(0 - 2)         |
| Inflammatory bowel disease                          | 1<br>(1 - 2)      | 0<br>(0 - 0)       | 0<br>(0 - 0)        | 0<br>(0 - 0)         | 0<br>(0 - 0)         | 1<br>(0 - 2)         |
| Vascular intestinal disorders                       | 6<br>(3 - 10)     | 0<br>(0 - 0)       | 0<br>(0 - 0)        | 0<br>(0 - 0)         | 1<br>(0 - 1)         | 5<br>(2 - 8)         |
| Gallbladder and biliary diseases                    | 5<br>(2 - 8)      | 0<br>(0 - 0)       | 0<br>(0 - 0)        | 0<br>(0 - 0)         | 0<br>(0 - 1)         | 5<br>(2 - 7)         |
| Pancreatitis                                        | 2<br>(1 - 3)      | 0<br>(0 - 0)       | 0<br>(0 - 0)        | 0<br>(0 - 0)         | 0<br>(0 - 1)         | 1<br>(1 - 2)         |
| Other digestive diseases                            | 6<br>(4 - 8)      | 0<br>(0 - 0)       | 0<br>(0 - 0)        | 0<br>(0 - 0)         | 0<br>(0 - 1)         | 5<br>(3 - 7)         |
| Neurological disorders                              | 92<br>(59 - 127)  | 0<br>(0 - 0)       | 0<br>(0 - 0)        | 1<br>(1 - 2)         | 5<br>(4 - 7)         | 85<br>(53 - 120)     |
| Alzheimer disease and other dementias               | 75<br>(42 - 109)  | --                 | --                  | 0<br>(0 - 0)         | 2<br>(1 - 4)         | 72<br>(40 - 106)     |
| Parkinson disease                                   | 11<br>(2 - 16)    | --                 | --                  | 0<br>(0 - 0)         | 1<br>(0 - 1)         | 11<br>(1 - 15)       |
| Epilepsy                                            | 1<br>(0 - 1)      | 0<br>(0 - 0)       | 0<br>(0 - 0)        | 0<br>(0 - 0)         | 0<br>(0 - 0)         | 0<br>(0 - 0)         |
| Multiple sclerosis                                  | 0<br>(0 - 0)      | --                 | --                  | 0<br>(0 - 0)         | 0<br>(0 - 0)         | 0<br>(0 - 0)         |
| Other neurological disorders                        | 5<br>(4 - 6)      | 0<br>(0 - 0)       | 0<br>(0 - 0)        | 1<br>(1 - 1)         | 2<br>(2 - 3)         | 2<br>(2 - 3)         |
| Mental and substance use disorders                  | 1<br>(1 - 1)      | 0<br>(0 - 0)       | 0<br>(0 - 0)        | 1<br>(0 - 1)         | 0<br>(0 - 0)         | 0<br>(0 - 0)         |
| Schizophrenia                                       | 0<br>(0 - 0)      | --                 | --                  | 0<br>(0 - 0)         | 0<br>(0 - 0)         | 0<br>(0 - 0)         |
| Alcohol use disorders                               | 0<br>(0 - 0)      | --                 | --                  | 0<br>(0 - 0)         | 0<br>(0 - 0)         | 0<br>(0 - 0)         |
| Drug use disorders                                  | 1<br>(0 - 1)      | 0<br>(0 - 0)       | --                  | 0<br>(0 - 1)         | 0<br>(0 - 0)         | 0<br>(0 - 0)         |
| Opioid use disorders                                | 0<br>(0 - 0)      | 0<br>(0 - 0)       | --                  | 0<br>(0 - 0)         | 0<br>(0 - 0)         | 0<br>(0 - 0)         |
| Cocaine use disorders                               | 0<br>(0 - 0)      | 0<br>(0 - 0)       | --                  | 0<br>(0 - 0)         | 0<br>(0 - 0)         | 0<br>(0 - 0)         |
| Amphetamine use disorders                           | 0<br>(0 - 0)      | 0<br>(0 - 0)       | --                  | 0<br>(0 - 0)         | 0<br>(0 - 0)         | 0<br>(0 - 0)         |
| Other drug use disorders                            | 0<br>(0 - 0)      | 0<br>(0 - 0)       | --                  | 0<br>(0 - 0)         | 0<br>(0 - 0)         | 0<br>(0 - 0)         |
| Eating disorders                                    | 0<br>(0 - 0)      | --                 | 0<br>(0 - 0)        | 0<br>(0 - 0)         | --                   | --                   |
| Anorexia nervosa                                    | 0<br>(0 - 0)      | --                 | 0<br>(0 - 0)        | 0<br>(0 - 0)         | --                   | --                   |
| Diabetes, urogenital, blood, and endocrine diseases | 92<br>(75 - 128)  | 0<br>(0 - 1)       | 0<br>(0 - 0)        | 2<br>(2 - 3)         | 14<br>(11 - 21)      | 75<br>(61 - 105)     |
| Diabetes mellitus                                   | 44<br>(35 - 62)   | 0<br>(0 - 0)       | 0<br>(0 - 0)        | 0<br>(0 - 1)         | 6<br>(5 - 9)         | 37<br>(29 - 53)      |
| Acute glomerulonephritis                            | 0<br>(0 - 0)      | 0<br>(0 - 0)       | 0<br>(0 - 0)        | 0<br>(0 - 0)         | 0<br>(0 - 0)         | 0<br>(0 - 0)         |

Web Table 31- Malta deaths with 95% UI by age, sex, and cause in 2013

| Cause                                               | Females, All Ages | Females, 0-4 Years | Females, 5-14 Years | Females, 15-49 Years | Females, 50-69 Years | Females, 70-80 Years |
|-----------------------------------------------------|-------------------|--------------------|---------------------|----------------------|----------------------|----------------------|
| Chronic kidney disease                              | 34<br>(26 - 55)   | 0<br>(0 - 0)       | 0<br>(0 - 0)        | 1<br>(1 - 2)         | 6<br>(4 - 10)        | 27<br>(20 - 44)      |
| Chronic kidney disease due to diabetes mellitus     | 8<br>(5 - 16)     | 0<br>(0 - 0)       | 0<br>(0 - 0)        | 0<br>(0 - 0)         | 1<br>(1 - 3)         | 6<br>(4 - 13)        |
| Chronic kidney disease due to hypertension          | 6<br>(3 - 9)      | 0<br>(0 - 0)       | 0<br>(0 - 0)        | 0<br>(0 - 0)         | 1<br>(1 - 2)         | 4<br>(2 - 7)         |
| Chronic kidney disease due to glomerulonephritis    | 1<br>(1 - 2)      | 0<br>(0 - 0)       | 0<br>(0 - 0)        | 0<br>(0 - 0)         | 0<br>(0 - 0)         | 1<br>(0 - 1)         |
| Chronic kidney disease due to other causes          | 19<br>(13 - 37)   | 0<br>(0 - 0)       | 0<br>(0 - 0)        | 1<br>(0 - 1)         | 3<br>(2 - 6)         | 16<br>(10 - 29)      |
| Urinary diseases and male infertility               | 8<br>(6 - 12)     | 0<br>(0 - 0)       | 0<br>(0 - 0)        | 0<br>(0 - 0)         | 1<br>(1 - 1)         | 7<br>(4 - 10)        |
| Interstitial nephritis and urinary tract infections | 8<br>(5 - 11)     | 0<br>(0 - 0)       | 0<br>(0 - 0)        | 0<br>(0 - 0)         | 1<br>(1 - 1)         | 7<br>(4 - 10)        |
| Urolithiasis                                        | 0<br>(0 - 0)      | --                 | 0<br>(0 - 0)        | 0<br>(0 - 0)         | 0<br>(0 - 0)         | 0<br>(0 - 0)         |
| Other urinary diseases                              | 0<br>(0 - 1)      | 0<br>(0 - 0)       | 0<br>(0 - 0)        | 0<br>(0 - 0)         | 0<br>(0 - 0)         | 0<br>(0 - 1)         |
| Gynecological diseases                              | 0<br>(0 - 0)      | --                 | --                  | 0<br>(0 - 0)         | 0<br>(0 - 0)         | 0<br>(0 - 0)         |
| Uterine fibroids                                    | 0<br>(0 - 0)      | --                 | --                  | 0<br>(0 - 0)         | 0<br>(0 - 0)         | 0<br>(0 - 0)         |
| Polycystic ovarian syndrome                         | 0<br>(0 - 0)      | --                 | --                  | 0<br>(0 - 0)         | 0<br>(0 - 0)         | --                   |
| Endometriosis                                       | 0<br>(0 - 0)      | --                 | --                  | 0<br>(0 - 0)         | 0<br>(0 - 0)         | --                   |
| Genital prolapse                                    | 0<br>(0 - 0)      | --                 | --                  | 0<br>(0 - 0)         | 0<br>(0 - 0)         | 0<br>(0 - 0)         |
| Other gynecological diseases                        | 0<br>(0 - 0)      | --                 | --                  | 0<br>(0 - 0)         | 0<br>(0 - 0)         | 0<br>(0 - 0)         |
| Hemoglobinopathies and hemolytic anemias            | 1<br>(0 - 1)      | 0<br>(0 - 0)       | 0<br>(0 - 0)        | 0<br>(0 - 0)         | 0<br>(0 - 0)         | 0<br>(0 - 1)         |
| Thalassemias                                        | 0<br>(0 - 0)      | 0<br>(0 - 0)       | 0<br>(0 - 0)        | 0<br>(0 - 0)         | 0<br>(0 - 0)         | 0<br>(0 - 0)         |
| Sickle cell disorders                               | 0<br>(0 - 0)      | 0<br>(0 - 0)       | 0<br>(0 - 0)        | 0<br>(0 - 0)         | 0<br>(0 - 0)         | 0<br>(0 - 0)         |
| G6PD deficiency                                     | 0<br>(0 - 0)      | 0<br>(0 - 0)       | 0<br>(0 - 0)        | 0<br>(0 - 0)         | 0<br>(0 - 0)         | 0<br>(0 - 0)         |
| Other hemoglobinopathies and hemolytic anemias      | 0<br>(0 - 1)      | 0<br>(0 - 0)       | 0<br>(0 - 0)        | 0<br>(0 - 0)         | 0<br>(0 - 0)         | 0<br>(0 - 1)         |
| Endocrine, metabolic, blood, and immune disorders   | 5<br>(3 - 7)      | 0<br>(0 - 1)       | 0<br>(0 - 0)        | 0<br>(0 - 0)         | 1<br>(1 - 2)         | 3<br>(2 - 5)         |
| Musculoskeletal disorders                           | 6<br>(4 - 7)      | --                 | 0<br>(0 - 0)        | 1<br>(1 - 1)         | 2<br>(1 - 2)         | 3<br>(2 - 4)         |
| Rheumatoid arthritis                                | 1<br>(0 - 2)      | --                 | 0<br>(0 - 0)        | 0<br>(0 - 0)         | 0<br>(0 - 1)         | 1<br>(0 - 2)         |
| Other musculoskeletal disorders                     | 4<br>(3 - 6)      | --                 | 0<br>(0 - 0)        | 1<br>(1 - 1)         | 1<br>(1 - 2)         | 2<br>(1 - 3)         |
| Other non-communicable diseases                     | 30<br>(20 - 39)   | 5<br>(4 - 7)       | 0<br>(0 - 1)        | 1<br>(1 - 2)         | 2<br>(1 - 2)         | 21<br>(12 - 30)      |
| Congenital anomalies                                | 8<br>(6 - 10)     | 5<br>(3 - 7)       | 0<br>(0 - 1)        | 1<br>(1 - 2)         | 1<br>(1 - 1)         | 1<br>(0 - 1)         |
| Neural tube defects                                 | 0<br>(0 - 0)      | 0<br>(0 - 0)       | 0<br>(0 - 0)        | 0<br>(0 - 0)         | 0<br>(0 - 0)         | 0<br>(0 - 0)         |
| Congenital heart anomalies                          | 3<br>(2 - 5)      | 2<br>(1 - 3)       | 0<br>(0 - 0)        | 1<br>(0 - 1)         | 0<br>(0 - 1)         | 0<br>(0 - 0)         |
| Cleft lip and cleft palate                          | 0<br>(0 - 0)      | 0<br>(0 - 0)       | --                  | --                   | --                   | --                   |
| Down syndrome                                       | 0<br>(0 - 0)      | 0<br>(0 - 0)       | 0<br>(0 - 0)        | 0<br>(0 - 0)         | 0<br>(0 - 0)         | 0<br>(0 - 0)         |
| Chromosomal unbalanced rearrangements               | 0<br>(0 - 0)      | 0<br>(0 - 0)       | 0<br>(0 - 0)        | 0<br>(0 - 0)         | 0<br>(0 - 0)         | 0<br>(0 - 0)         |
| Other congenital anomalies                          | 4<br>(3 - 6)      | 2<br>(2 - 4)       | 0<br>(0 - 0)        | 1<br>(0 - 1)         | 0<br>(0 - 1)         | 1<br>(0 - 1)         |
| Skin and subcutaneous diseases                      | 22<br>(11 - 31)   | 0<br>(0 - 0)       | 0<br>(0 - 0)        | 0<br>(0 - 0)         | 1<br>(0 - 1)         | 21<br>(11 - 30)      |
| Cellulitis                                          | 1<br>(0 - 1)      | 0<br>(0 - 0)       | 0<br>(0 - 0)        | 0<br>(0 - 0)         | 0<br>(0 - 0)         | 0<br>(0 - 1)         |
| Pyoderma                                            | 0<br>(0 - 0)      | 0<br>(0 - 0)       | 0<br>(0 - 0)        | 0<br>(0 - 0)         | 0<br>(0 - 0)         | 0<br>(0 - 0)         |
| Decubitus ulcer                                     | 21<br>(10 - 30)   | 0<br>(0 - 0)       | 0<br>(0 - 0)        | 0<br>(0 - 0)         | 1<br>(0 - 1)         | 20<br>(10 - 29)      |
| Other skin and subcutaneous diseases                | 0<br>(0 - 0)      | 0<br>(0 - 0)       | 0<br>(0 - 0)        | 0<br>(0 - 0)         | 0<br>(0 - 0)         | 0<br>(0 - 0)         |
| Sudden infant death syndrome                        | 1<br>(0 - 2)      | 1<br>(0 - 2)       | --                  | --                   | --                   | --                   |
| Injuries                                            | 36<br>(29 - 45)   | 0<br>(0 - 1)       | 0<br>(0 - 1)        | 5<br>(4 - 6)         | 4<br>(3 - 5)         | 26<br>(20 - 35)      |
| Transport injuries                                  | 4<br>(3 - 5)      | 0<br>(0 - 0)       | 0<br>(0 - 0)        | 2<br>(1 - 2)         | 1<br>(1 - 1)         | 1<br>(1 - 2)         |



Web Table 31- Malta deaths with 95% UI by age, sex, and cause in 2013

| Cause                                           | Females, All Ages | Females, 0-4 Years | Females, 5-14 Years | Females, 15-49 Years | Females, 50-69 Years | Females, 70-80 Years |
|-------------------------------------------------|-------------------|--------------------|---------------------|----------------------|----------------------|----------------------|
| Road injuries                                   | 4<br>(3 - 5)      | 0<br>(0 - 0)       | 0<br>(0 - 0)        | 1<br>(1 - 2)         | 1<br>(1 - 1)         | 1<br>(1 - 2)         |
| Pedestrian road injuries                        | 2<br>(1 - 2)      | 0<br>(0 - 0)       | 0<br>(0 - 0)        | 0<br>(0 - 0)         | 0<br>(0 - 1)         | 1<br>(0 - 1)         |
| Cyclist road injuries                           | 0<br>(0 - 0)      | 0<br>(0 - 0)       | 0<br>(0 - 0)        | 0<br>(0 - 0)         | 0<br>(0 - 0)         | 0<br>(0 - 0)         |
| Motorcyclist road injuries                      | 0<br>(0 - 0)      | 0<br>(0 - 0)       | 0<br>(0 - 0)        | 0<br>(0 - 0)         | 0<br>(0 - 0)         | 0<br>(0 - 0)         |
| Motor vehicle road injuries                     | 2<br>(1 - 3)      | 0<br>(0 - 0)       | 0<br>(0 - 0)        | 1<br>(1 - 1)         | 0<br>(0 - 0)         | 0<br>(0 - 1)         |
| Other road injuries                             | 0<br>(0 - 0)      | 0<br>(0 - 0)       | 0<br>(0 - 0)        | 0<br>(0 - 0)         | 0<br>(0 - 0)         | 0<br>(0 - 0)         |
| Other transport injuries                        | 0<br>(0 - 0)      | 0<br>(0 - 0)       | 0<br>(0 - 0)        | 0<br>(0 - 0)         | 0<br>(0 - 0)         | 0<br>(0 - 0)         |
| Unintentional injuries                          | 28<br>(21 - 37)   | 0<br>(0 - 0)       | 0<br>(0 - 0)        | 1<br>(1 - 2)         | 2<br>(2 - 3)         | 24<br>(18 - 32)      |
| Falls                                           | 21<br>(15 - 29)   | 0<br>(0 - 0)       | 0<br>(0 - 0)        | 0<br>(0 - 1)         | 1<br>(1 - 2)         | 19<br>(14 - 27)      |
| Drowning                                        | 0<br>(0 - 1)      | 0<br>(0 - 0)       | 0<br>(0 - 0)        | 0<br>(0 - 0)         | 0<br>(0 - 0)         | 0<br>(0 - 0)         |
| Fire, heat, and hot substances                  | 0<br>(0 - 0)      | 0<br>(0 - 0)       | 0<br>(0 - 0)        | 0<br>(0 - 0)         | 0<br>(0 - 0)         | 0<br>(0 - 0)         |
| Poisonings                                      | 0<br>(0 - 0)      | 0<br>(0 - 0)       | 0<br>(0 - 0)        | 0<br>(0 - 0)         | 0<br>(0 - 0)         | 0<br>(0 - 0)         |
| Exposure to mechanical forces                   | 0<br>(0 - 1)      | 0<br>(0 - 0)       | 0<br>(0 - 0)        | 0<br>(0 - 0)         | 0<br>(0 - 0)         | 0<br>(0 - 0)         |
| Unintentional firearm injuries                  | 0<br>(0 - 0)      | 0<br>(0 - 0)       | 0<br>(0 - 0)        | 0<br>(0 - 0)         | 0<br>(0 - 0)         | 0<br>(0 - 0)         |
| Unintentional suffocation                       | 0<br>(0 - 0)      | 0<br>(0 - 0)       | 0<br>(0 - 0)        | 0<br>(0 - 0)         | 0<br>(0 - 0)         | 0<br>(0 - 0)         |
| Other exposure to mechanical forces             | 0<br>(0 - 0)      | 0<br>(0 - 0)       | 0<br>(0 - 0)        | 0<br>(0 - 0)         | 0<br>(0 - 0)         | 0<br>(0 - 0)         |
| Adverse effects of medical treatment            | 2<br>(1 - 5)      | 0<br>(0 - 0)       | 0<br>(0 - 0)        | 0<br>(0 - 0)         | 0<br>(0 - 1)         | 2<br>(1 - 4)         |
| Animal contact                                  | 0<br>(0 - 0)      | 0<br>(0 - 0)       | 0<br>(0 - 0)        | 0<br>(0 - 0)         | 0<br>(0 - 0)         | 0<br>(0 - 0)         |
| Venomous animal contact                         | 0<br>(0 - 0)      | 0<br>(0 - 0)       | 0<br>(0 - 0)        | 0<br>(0 - 0)         | 0<br>(0 - 0)         | 0<br>(0 - 0)         |
| Non-venomous animal contact                     | 0<br>(0 - 0)      | 0<br>(0 - 0)       | 0<br>(0 - 0)        | 0<br>(0 - 0)         | 0<br>(0 - 0)         | 0<br>(0 - 0)         |
| Foreign body                                    | 3<br>(1 - 5)      | 0<br>(0 - 0)       | 0<br>(0 - 0)        | 0<br>(0 - 0)         | 0<br>(0 - 1)         | 2<br>(1 - 4)         |
| Pulmonary aspiration and foreign body in airway | 3<br>(1 - 5)      | 0<br>(0 - 0)       | 0<br>(0 - 0)        | 0<br>(0 - 0)         | 0<br>(0 - 1)         | 2<br>(1 - 4)         |
| Foreign body in other body part                 | 0<br>(0 - 0)      | 0<br>(0 - 0)       | 0<br>(0 - 0)        | 0<br>(0 - 0)         | 0<br>(0 - 0)         | 0<br>(0 - 0)         |
| Other unintentional injuries                    | 0<br>(0 - 0)      | 0<br>(0 - 0)       | 0<br>(0 - 0)        | 0<br>(0 - 0)         | 0<br>(0 - 0)         | 0<br>(0 - 0)         |
| Self-harm and interpersonal violence            | 4<br>(3 - 5)      | 0<br>(0 - 0)       | 0<br>(0 - 0)        | 2<br>(2 - 3)         | 1<br>(1 - 1)         | 1<br>(1 - 1)         |
| Self-harm                                       | 3<br>(2 - 4)      | -                  | 0<br>(0 - 0)        | 2<br>(1 - 2)         | 1<br>(1 - 1)         | 1<br>(0 - 1)         |
| Interpersonal violence                          | 1<br>(1 - 1)      | 0<br>(0 - 0)       | 0<br>(0 - 0)        | 0<br>(0 - 1)         | 0<br>(0 - 0)         | 0<br>(0 - 0)         |
| Assault by firearm                              | 0<br>(0 - 0)      | 0<br>(0 - 0)       | 0<br>(0 - 0)        | 0<br>(0 - 0)         | 0<br>(0 - 0)         | 0<br>(0 - 0)         |
| Assault by sharp object                         | 0<br>(0 - 0)      | 0<br>(0 - 0)       | 0<br>(0 - 0)        | 0<br>(0 - 0)         | 0<br>(0 - 0)         | 0<br>(0 - 0)         |
| Assault by other means                          | 1<br>(0 - 1)      | 0<br>(0 - 0)       | 0<br>(0 - 0)        | 0<br>(0 - 0)         | 0<br>(0 - 0)         | 0<br>(0 - 0)         |

Web Table 31- Marshall Islands deaths with 95% UI by age, sex, and cause in 2013

| Cause                                                             | Both Sexes, All Ages | Both Sexes, 0-4 Years | Both Sexes, 5-14 Years | Both Sexes, 15-49 Years | Both Sexes, 50-69 Years | Both Sexes, 70-80 Years |
|-------------------------------------------------------------------|----------------------|-----------------------|------------------------|-------------------------|-------------------------|-------------------------|
| All causes                                                        | 513<br>(407 - 629)   | 61<br>(37 - 99)       | 10<br>(8 - 14)         | 133<br>(96 - 180)       | 171<br>(129 - 216)      | 137<br>(118 - 155)      |
| Communicable, maternal, neonatal, and nutritional diseases        | 100<br>(75 - 131)    | 44<br>(27 - 70)       | 3<br>(2 - 5)           | 20<br>(14 - 25)         | 15<br>(11 - 20)         | 18<br>(14 - 23)         |
| HIV/AIDS and tuberculosis                                         | 6<br>(5 - 8)         | 0<br>(0 - 0)          | 0<br>(0 - 0)           | 3<br>(2 - 4)            | 2<br>(1 - 3)            | 1<br>(1 - 2)            |
| Tuberculosis                                                      | 5<br>(4 - 7)         | 0<br>(0 - 0)          | 0<br>(0 - 0)           | 2<br>(1 - 3)            | 2<br>(1 - 2)            | 1<br>(1 - 2)            |
| HIV/AIDS                                                          | 1<br>(1 - 1)         | 0<br>(0 - 0)          | 0<br>(0 - 0)           | 1<br>(1 - 1)            | 0<br>(0 - 0)            | 0<br>(0 - 0)            |
| HIV/AIDS resulting in mycobacterial infection                     | 0<br>(0 - 0)         | 0<br>(0 - 0)          | 0<br>(0 - 0)           | 0<br>(0 - 0)            | 0<br>(0 - 0)            | 0<br>(0 - 0)            |
| HIV/AIDS resulting in other diseases                              | 1<br>(1 - 1)         | 0<br>(0 - 0)          | 0<br>(0 - 0)           | 1<br>(1 - 1)            | 0<br>(0 - 0)            | 0<br>(0 - 0)            |
| Diarrhea, lower respiratory, and other common infectious diseases | 48<br>(36 - 63)      | 14<br>(8 - 25)        | 2<br>(1 - 3)           | 9<br>(6 - 12)           | 10<br>(6 - 13)          | 14<br>(10 - 18)         |
| Diarrheal diseases                                                | 11<br>(7 - 16)       | 3<br>(1 - 6)          | 0<br>(0 - 1)           | 1<br>(1 - 2)            | 2<br>(1 - 3)            | 4<br>(2 - 7)            |
| Intestinal infectious diseases                                    | 1<br>(1 - 3)         | 1<br>(0 - 1)          | 0<br>(0 - 1)           | 0<br>(0 - 1)            | 0<br>(0 - 0)            | 0<br>(0 - 0)            |
| Typhoid fever                                                     | 1<br>(0 - 2)         | 0<br>(0 - 1)          | 0<br>(0 - 0)           | 0<br>(0 - 0)            | 0<br>(0 - 0)            | 0<br>(0 - 0)            |
| Paratyphoid fever                                                 | 0<br>(0 - 1)         | 0<br>(0 - 0)          | 0<br>(0 - 0)           | 0<br>(0 - 0)            | 0<br>(0 - 0)            | 0<br>(0 - 0)            |
| Other intestinal infectious diseases                              | 0<br>(0 - 0)         | 0<br>(0 - 0)          | 0<br>(0 - 0)           | 0<br>(0 - 0)            | 0<br>(0 - 0)            | 0<br>(0 - 0)            |
| Lower respiratory infections                                      | 29<br>(22 - 39)      | 8<br>(4 - 14)         | 1<br>(0 - 1)           | 5<br>(3 - 8)            | 7<br>(4 - 10)           | 9<br>(7 - 12)           |
| Upper respiratory infections                                      | 0<br>(0 - 0)         | 0<br>(0 - 0)          | 0<br>(0 - 0)           | 0<br>(0 - 0)            | 0<br>(0 - 0)            | 0<br>(0 - 0)            |
| Otitis media                                                      | 0<br>(0 - 0)         | 0<br>(0 - 0)          | 0<br>(0 - 0)           | 0<br>(0 - 0)            | 0<br>(0 - 0)            | 0<br>(0 - 0)            |
| Meningitis                                                        | 4<br>(3 - 6)         | 2<br>(1 - 3)          | 0<br>(0 - 1)           | 1<br>(1 - 2)            | 1<br>(0 - 1)            | 0<br>(0 - 0)            |
| Pneumococcal meningitis                                           | 2<br>(1 - 2)         | 1<br>(0 - 1)          | 0<br>(0 - 0)           | 1<br>(0 - 1)            | 0<br>(0 - 0)            | 0<br>(0 - 0)            |
| H influenzae type B meningitis                                    | 1<br>(0 - 1)         | 0<br>(0 - 1)          | 0<br>(0 - 0)           | 0<br>(0 - 0)            | 0<br>(0 - 0)            | 0<br>(0 - 0)            |
| Meningococcal meningitis                                          | 1<br>(1 - 1)         | 0<br>(0 - 1)          | 0<br>(0 - 0)           | 0<br>(0 - 0)            | 0<br>(0 - 0)            | 0<br>(0 - 0)            |
| Other meningitis                                                  | 1<br>(1 - 2)         | 1<br>(0 - 1)          | 0<br>(0 - 0)           | 0<br>(0 - 1)            | 0<br>(0 - 0)            | 0<br>(0 - 0)            |
| Encephalitis                                                      | 0<br>(0 - 1)         | 0<br>(0 - 0)          | 0<br>(0 - 0)           | 0<br>(0 - 0)            | 0<br>(0 - 0)            | 0<br>(0 - 0)            |
| Diphtheria                                                        | 0<br>(0 - 0)         | 0<br>(0 - 0)          | 0<br>(0 - 0)           | 0<br>(0 - 0)            | 0<br>(0 - 0)            | --                      |
| Whooping cough                                                    | 0<br>(0 - 1)         | 0<br>(0 - 1)          | 0<br>(0 - 0)           | 0<br>(0 - 0)            | 0<br>(0 - 0)            | --                      |
| Tetanus                                                           | 0<br>(0 - 0)         | 0<br>(0 - 0)          | 0<br>(0 - 0)           | 0<br>(0 - 0)            | 0<br>(0 - 0)            | 0<br>(0 - 0)            |
| Measles                                                           | 1<br>(0 - 4)         | 1<br>(0 - 3)          | 0<br>(0 - 0)           | 0<br>(0 - 0)            | 0<br>(0 - 0)            | --                      |
| Varicella and herpes zoster                                       | 0<br>(0 - 0)         | 0<br>(0 - 0)          | 0<br>(0 - 0)           | 0<br>(0 - 0)            | 0<br>(0 - 0)            | 0<br>(0 - 0)            |
| Neglected tropical diseases and malaria                           | 2<br>(1 - 3)         | 0<br>(0 - 1)          | 0<br>(0 - 0)           | 1<br>(0 - 1)            | 0<br>(0 - 0)            | 0<br>(0 - 1)            |
| Leishmaniasis                                                     | 0<br>(0 - 0)         | 0<br>(0 - 0)          | 0<br>(0 - 0)           | 0<br>(0 - 0)            | 0<br>(0 - 0)            | 0<br>(0 - 0)            |
| Visceral leishmaniasis                                            | 0<br>(0 - 0)         | 0<br>(0 - 0)          | 0<br>(0 - 0)           | 0<br>(0 - 0)            | 0<br>(0 - 0)            | 0<br>(0 - 0)            |
| Cysticercosis                                                     | 0<br>(0 - 0)         | 0<br>(0 - 0)          | 0<br>(0 - 0)           | 0<br>(0 - 0)            | 0<br>(0 - 0)            | 0<br>(0 - 0)            |
| Cystic echinococcosis                                             | 0<br>(0 - 0)         | 0<br>(0 - 0)          | 0<br>(0 - 0)           | 0<br>(0 - 0)            | 0<br>(0 - 0)            | 0<br>(0 - 0)            |
| Dengue                                                            | 1<br>(1 - 2)         | 0<br>(0 - 1)          | 0<br>(0 - 0)           | 0<br>(0 - 1)            | 0<br>(0 - 0)            | 0<br>(0 - 0)            |
| Rabies                                                            | 0<br>(0 - 0)         | 0<br>(0 - 0)          | 0<br>(0 - 0)           | 0<br>(0 - 0)            | 0<br>(0 - 0)            | 0<br>(0 - 0)            |
| Intestinal nematode infections                                    | 0<br>(0 - 1)         | 0<br>(0 - 0)          | 0<br>(0 - 0)           | 0<br>(0 - 0)            | 0<br>(0 - 0)            | 0<br>(0 - 0)            |
| Ascariasis                                                        | 0<br>(0 - 1)         | 0<br>(0 - 0)          | 0<br>(0 - 0)           | 0<br>(0 - 0)            | 0<br>(0 - 0)            | 0<br>(0 - 0)            |
| Other neglected tropical diseases                                 | 0<br>(0 - 0)         | 0<br>(0 - 0)          | 0<br>(0 - 0)           | 0<br>(0 - 0)            | 0<br>(0 - 0)            | 0<br>(0 - 0)            |
| Maternal disorders                                                | 2<br>(1 - 3)         | --                    | 0<br>(0 - 0)           | 2<br>(1 - 3)            | --                      | --                      |
| Maternal hemorrhage                                               | 0<br>(0 - 1)         | --                    | 0<br>(0 - 0)           | 0<br>(0 - 1)            | --                      | --                      |
| Maternal sepsis and other maternal infections                     | 0<br>(0 - 0)         | --                    | 0<br>(0 - 0)           | 0<br>(0 - 0)            | --                      | --                      |

Web Table 31- Marshall Islands deaths with 95% UI by age, sex, and cause in 2013

| Cause                                                            | Both Sexes, All Ages | Both Sexes, 0-4 Years | Both Sexes, 5-14 Years | Both Sexes, 15-49 Years | Both Sexes, 50-69 Years | Both Sexes, 70-80 Years |
|------------------------------------------------------------------|----------------------|-----------------------|------------------------|-------------------------|-------------------------|-------------------------|
| Maternal hypertensive disorders                                  | 0<br>(0 - 0)         | --                    | 0<br>(0 - 0)           | 0<br>(0 - 0)            | --                      | --                      |
| Maternal obstructed labor                                        | 0<br>(0 - 0)         | --                    | 0<br>(0 - 0)           | 0<br>(0 - 0)            | --                      | --                      |
| Maternal abortive outcome                                        | 0<br>(0 - 0)         | --                    | 0<br>(0 - 0)           | 0<br>(0 - 0)            | --                      | --                      |
| Indirect maternal deaths                                         | 0<br>(0 - 0)         | --                    | 0<br>(0 - 0)           | 0<br>(0 - 0)            | --                      | --                      |
| Late maternal deaths                                             | 0<br>(0 - 0)         | --                    | 0<br>(0 - 0)           | 0<br>(0 - 0)            | --                      | --                      |
| Maternal deaths aggravated by HIV/AIDS                           | 0<br>(0 - 0)         | --                    | --                     | 0<br>(0 - 0)            | --                      | --                      |
| Other maternal disorders                                         | 0<br>(0 - 0)         | --                    | 0<br>(0 - 0)           | 0<br>(0 - 0)            | --                      | --                      |
| Neonatal disorders                                               | 25<br>(16 - 37)      | 25<br>(16 - 37)       | --                     | --                      | --                      | --                      |
| Neonatal preterm birth complications                             | 9<br>(5 - 15)        | 9<br>(5 - 15)         | --                     | --                      | --                      | --                      |
| Neonatal encephalopathy due to birth asphyxia and trauma         | 4<br>(2 - 8)         | 4<br>(2 - 8)          | --                     | --                      | --                      | --                      |
| Neonatal sepsis and other neonatal infections                    | 4<br>(1 - 8)         | 4<br>(1 - 8)          | --                     | --                      | --                      | --                      |
| Hemolytic disease and other neonatal jaundice                    | 0<br>(0 - 0)         | 0<br>(0 - 0)          | --                     | --                      | --                      | --                      |
| Other neonatal disorders                                         | 8<br>(4 - 13)        | 8<br>(4 - 13)         | --                     | --                      | --                      | --                      |
| Nutritional deficiencies                                         | 8<br>(5 - 10)        | 2<br>(1 - 4)          | 0<br>(0 - 1)           | 2<br>(1 - 3)            | 1<br>(1 - 2)            | 2<br>(1 - 3)            |
| Protein-energy malnutrition                                      | 4<br>(2 - 6)         | 2<br>(1 - 3)          | 0<br>(0 - 0)           | 1<br>(0 - 1)            | 1<br>(0 - 1)            | 1<br>(0 - 2)            |
| Iodine deficiency                                                | 0<br>(0 - 0)         | 0<br>(0 - 0)          | 0<br>(0 - 0)           | 0<br>(0 - 0)            | 0<br>(0 - 0)            | 0<br>(0 - 0)            |
| Iron-deficiency anemia                                           | 3<br>(2 - 5)         | 0<br>(0 - 0)          | 0<br>(0 - 0)           | 1<br>(1 - 2)            | 1<br>(0 - 1)            | 1<br>(0 - 2)            |
| Other nutritional deficiencies                                   | 0<br>(0 - 1)         | 0<br>(0 - 0)          | 0<br>(0 - 0)           | 0<br>(0 - 0)            | 0<br>(0 - 0)            | 0<br>(0 - 0)            |
| Other communicable, maternal, neonatal, and nutritional diseases | 10<br>(6 - 14)       | 2<br>(1 - 5)          | 1<br>(0 - 1)           | 4<br>(2 - 6)            | 2<br>(1 - 3)            | 1<br>(1 - 2)            |
| Sexually transmitted diseases excluding HIV                      | 2<br>(1 - 4)         | 1<br>(0 - 3)          | 0<br>(0 - 0)           | 0<br>(0 - 1)            | 0<br>(0 - 0)            | 0<br>(0 - 0)            |
| Syphilis                                                         | 2<br>(1 - 4)         | 1<br>(0 - 3)          | 0<br>(0 - 0)           | 0<br>(0 - 0)            | 0<br>(0 - 0)            | 0<br>(0 - 0)            |
| Chlamydial infection                                             | 0<br>(0 - 0)         | --                    | 0<br>(0 - 0)           | 0<br>(0 - 0)            | 0<br>(0 - 0)            | 0<br>(0 - 0)            |
| Gonococcal infection                                             | 0<br>(0 - 0)         | --                    | 0<br>(0 - 0)           | 0<br>(0 - 0)            | 0<br>(0 - 0)            | 0<br>(0 - 0)            |
| Other sexually transmitted diseases                              | 0<br>(0 - 0)         | --                    | 0<br>(0 - 0)           | 0<br>(0 - 0)            | 0<br>(0 - 0)            | 0<br>(0 - 0)            |
| Hepatitis                                                        | 4<br>(3 - 5)         | 0<br>(0 - 0)          | 0<br>(0 - 0)           | 2<br>(1 - 2)            | 1<br>(1 - 2)            | 0<br>(0 - 1)            |
| Acute hepatitis A                                                | 0<br>(0 - 0)         | 0<br>(0 - 0)          | 0<br>(0 - 0)           | 0<br>(0 - 0)            | 0<br>(0 - 0)            | 0<br>(0 - 0)            |
| Acute hepatitis B                                                | 3<br>(2 - 4)         | 0<br>(0 - 0)          | 0<br>(0 - 0)           | 1<br>(0 - 2)            | 1<br>(1 - 1)            | 0<br>(0 - 1)            |
| Acute hepatitis C                                                | 0<br>(0 - 0)         | --                    | 0<br>(0 - 0)           | 0<br>(0 - 0)            | 0<br>(0 - 0)            | 0<br>(0 - 0)            |
| Acute hepatitis E                                                | 1<br>(0 - 1)         | 0<br>(0 - 0)          | 0<br>(0 - 0)           | 1<br>(0 - 1)            | 0<br>(0 - 0)            | 0<br>(0 - 0)            |
| Other infectious diseases                                        | 4<br>(2 - 7)         | 1<br>(0 - 2)          | 0<br>(0 - 0)           | 2<br>(1 - 3)            | 1<br>(0 - 2)            | 1<br>(0 - 1)            |
| Non-communicable diseases                                        | 373<br>(297 - 458)   | 14<br>(8 - 25)        | 4<br>(3 - 6)           | 89<br>(63 - 122)        | 150<br>(112 - 190)      | 115<br>(99 - 132)       |
| Neoplasms                                                        | 28<br>(20 - 38)      | 0<br>(0 - 1)          | 0<br>(0 - 1)           | 10<br>(6 - 14)          | 11<br>(8 - 15)          | 6<br>(5 - 8)            |
| Esophageal cancer                                                | 0<br>(0 - 1)         | --                    | --                     | 0<br>(0 - 0)            | 0<br>(0 - 0)            | 0<br>(0 - 0)            |
| Stomach cancer                                                   | 2<br>(1 - 2)         | --                    | --                     | 0<br>(0 - 1)            | 1<br>(1 - 1)            | 1<br>(0 - 1)            |
| Liver cancer                                                     | 1<br>(1 - 3)         | --                    | 0<br>(0 - 0)           | 0<br>(0 - 1)            | 1<br>(0 - 2)            | 0<br>(0 - 1)            |
| Liver cancer due to hepatitis B                                  | 1<br>(0 - 1)         | --                    | 0<br>(0 - 0)           | 0<br>(0 - 0)            | 0<br>(0 - 1)            | 0<br>(0 - 0)            |
| Liver cancer due to hepatitis C                                  | 0<br>(0 - 1)         | --                    | 0<br>(0 - 0)           | 0<br>(0 - 0)            | 0<br>(0 - 1)            | 0<br>(0 - 0)            |
| Liver cancer due to alcohol use                                  | 0<br>(0 - 0)         | --                    | --                     | 0<br>(0 - 0)            | 0<br>(0 - 0)            | 0<br>(0 - 0)            |
| Liver cancer due to other causes                                 | 0<br>(0 - 1)         | --                    | 0<br>(0 - 0)           | 0<br>(0 - 0)            | 0<br>(0 - 0)            | 0<br>(0 - 0)            |
| Larynx cancer                                                    | 0<br>(0 - 0)         | --                    | --                     | 0<br>(0 - 0)            | 0<br>(0 - 0)            | 0<br>(0 - 0)            |

Web Table 31- Marshall Islands deaths with 95% UI by age, sex, and cause in 2013

| Cause                                         | Both Sexes, All Ages | Both Sexes, 0-4 Years | Both Sexes, 5-14 Years | Both Sexes, 15-49 Years | Both Sexes, 50-69 Years | Both Sexes, 70-80 Years |
|-----------------------------------------------|----------------------|-----------------------|------------------------|-------------------------|-------------------------|-------------------------|
| Tracheal, bronchus and lung cancer            | 4<br>(3 - 6)         | --                    | --                     | 1<br>(1 - 2)            | 2<br>(1 - 3)            | 1<br>(1 - 2)            |
| Breast cancer                                 | 8<br>(4 - 12)        | --                    | --                     | 3<br>(2 - 5)            | 3<br>(2 - 5)            | 1<br>(1 - 2)            |
| Cervical cancer                               | 3<br>(2 - 5)         | --                    | --                     | 1<br>(1 - 2)            | 1<br>(1 - 2)            | 1<br>(0 - 1)            |
| Uterine cancer                                | 1<br>(0 - 1)         | --                    | --                     | 0<br>(0 - 0)            | 0<br>(0 - 1)            | 0<br>(0 - 0)            |
| Prostate cancer                               | 1<br>(0 - 2)         | --                    | --                     | 0<br>(0 - 0)            | 0<br>(0 - 1)            | 0<br>(0 - 1)            |
| Colon and rectum cancer                       | 2<br>(1 - 2)         | --                    | --                     | 0<br>(0 - 1)            | 1<br>(0 - 1)            | 1<br>(0 - 1)            |
| Lip and oral cavity cancer                    | 0<br>(0 - 1)         | --                    | --                     | 0<br>(0 - 0)            | 0<br>(0 - 0)            | 0<br>(0 - 0)            |
| Nasopharynx cancer                            | 0<br>(0 - 0)         | --                    | 0<br>(0 - 0)           | 0<br>(0 - 0)            | 0<br>(0 - 0)            | 0<br>(0 - 0)            |
| Other pharynx cancer                          | 0<br>(0 - 0)         | --                    | --                     | 0<br>(0 - 0)            | 0<br>(0 - 0)            | 0<br>(0 - 0)            |
| Gallbladder and biliary tract cancer          | 0<br>(0 - 0)         | --                    | --                     | 0<br>(0 - 0)            | 0<br>(0 - 0)            | 0<br>(0 - 0)            |
| Pancreatic cancer                             | 0<br>(0 - 0)         | --                    | --                     | 0<br>(0 - 0)            | 0<br>(0 - 0)            | 0<br>(0 - 0)            |
| Malignant skin melanoma                       | 0<br>(0 - 0)         | --                    | --                     | 0<br>(0 - 0)            | 0<br>(0 - 0)            | 0<br>(0 - 0)            |
| Non-melanoma skin cancer                      | 0<br>(0 - 0)         | --                    | --                     | 0<br>(0 - 0)            | 0<br>(0 - 0)            | 0<br>(0 - 0)            |
| Ovarian cancer                                | 0<br>(0 - 0)         | --                    | --                     | 0<br>(0 - 0)            | 0<br>(0 - 0)            | 0<br>(0 - 0)            |
| Testicular cancer                             | 0<br>(0 - 0)         | --                    | --                     | 0<br>(0 - 0)            | 0<br>(0 - 0)            | 0<br>(0 - 0)            |
| Kidney cancer                                 | 0<br>(0 - 0)         | 0<br>(0 - 0)          | 0<br>(0 - 0)           | 0<br>(0 - 0)            | 0<br>(0 - 0)            | 0<br>(0 - 0)            |
| Bladder cancer                                | 0<br>(0 - 0)         | --                    | --                     | 0<br>(0 - 0)            | 0<br>(0 - 0)            | 0<br>(0 - 0)            |
| Brain and nervous system cancer               | 0<br>(0 - 0)         | 0<br>(0 - 0)          | 0<br>(0 - 0)           | 0<br>(0 - 0)            | 0<br>(0 - 0)            | 0<br>(0 - 0)            |
| Thyroid cancer                                | 0<br>(0 - 0)         | --                    | 0<br>(0 - 0)           | 0<br>(0 - 0)            | 0<br>(0 - 0)            | 0<br>(0 - 0)            |
| Mesothelioma                                  | 0<br>(0 - 0)         | --                    | --                     | 0<br>(0 - 0)            | 0<br>(0 - 0)            | 0<br>(0 - 0)            |
| Hodgkin lymphoma                              | 0<br>(0 - 0)         | 0<br>(0 - 0)          | 0<br>(0 - 0)           | 0<br>(0 - 0)            | 0<br>(0 - 0)            | 0<br>(0 - 0)            |
| Non-Hodgkin lymphoma                          | 0<br>(0 - 1)         | 0<br>(0 - 0)          | 0<br>(0 - 0)           | 0<br>(0 - 0)            | 0<br>(0 - 0)            | 0<br>(0 - 0)            |
| Multiple myeloma                              | 0<br>(0 - 0)         | --                    | --                     | 0<br>(0 - 0)            | 0<br>(0 - 0)            | 0<br>(0 - 0)            |
| Leukemia                                      | 1<br>(1 - 2)         | 0<br>(0 - 0)          | 0<br>(0 - 0)           | 1<br>(0 - 1)            | 0<br>(0 - 0)            | 0<br>(0 - 0)            |
| Other neoplasms                               | 2<br>(1 - 3)         | 0<br>(0 - 0)          | 0<br>(0 - 0)           | 1<br>(1 - 1)            | 1<br>(0 - 1)            | 0<br>(0 - 0)            |
| Cardiovascular diseases                       | 150<br>(110 - 190)   | 2<br>(1 - 3)          | 1<br>(1 - 2)           | 38<br>(25 - 54)         | 62<br>(43 - 82)         | 47<br>(38 - 56)         |
| Rheumatic heart disease                       | 3<br>(2 - 5)         | 0<br>(0 - 0)          | 0<br>(0 - 0)           | 2<br>(1 - 3)            | 1<br>(0 - 1)            | 0<br>(0 - 1)            |
| Ischemic heart disease                        | 79<br>(57 - 101)     | 0<br>(0 - 1)          | 0<br>(0 - 0)           | 21<br>(13 - 30)         | 35<br>(25 - 47)         | 22<br>(17 - 28)         |
| Cerebrovascular disease                       | 48<br>(32 - 63)      | 1<br>(0 - 1)          | 0<br>(0 - 1)           | 9<br>(6 - 13)           | 19<br>(12 - 27)         | 19<br>(13 - 24)         |
| Ischemic stroke                               | 17<br>(10 - 22)      | 0<br>(0 - 0)          | 0<br>(0 - 0)           | 2<br>(1 - 3)            | 5<br>(3 - 8)            | 10<br>(6 - 12)          |
| Hemorrhagic stroke                            | 31<br>(20 - 42)      | 0<br>(0 - 1)          | 0<br>(0 - 0)           | 7<br>(5 - 11)           | 14<br>(9 - 20)          | 9<br>(6 - 12)           |
| Hypertensive heart disease                    | 3<br>(2 - 5)         | 0<br>(0 - 0)          | 0<br>(0 - 0)           | 1<br>(0 - 1)            | 1<br>(1 - 2)            | 1<br>(1 - 2)            |
| Cardiomyopathy and myocarditis                | 6<br>(3 - 9)         | 0<br>(0 - 1)          | 0<br>(0 - 0)           | 3<br>(1 - 5)            | 2<br>(1 - 3)            | 1<br>(0 - 1)            |
| Atrial fibrillation and flutter               | 2<br>(0 - 3)         | --                    | --                     | 0<br>(0 - 0)            | 0<br>(0 - 1)            | 1<br>(0 - 2)            |
| Aortic aneurysm                               | 1<br>(1 - 2)         | --                    | --                     | 0<br>(0 - 1)            | 0<br>(0 - 1)            | 0<br>(0 - 1)            |
| Peripheral vascular disease                   | 0<br>(0 - 1)         | --                    | --                     | 0<br>(0 - 0)            | 0<br>(0 - 0)            | 0<br>(0 - 1)            |
| Endocarditis                                  | 2<br>(1 - 2)         | 0<br>(0 - 0)          | 0<br>(0 - 0)           | 1<br>(0 - 1)            | 0<br>(0 - 1)            | 0<br>(0 - 0)            |
| Other cardiovascular and circulatory diseases | 6<br>(4 - 9)         | 0<br>(0 - 0)          | 0<br>(0 - 0)           | 2<br>(1 - 3)            | 2<br>(1 - 4)            | 1<br>(1 - 2)            |
| Chronic respiratory diseases                  | 34<br>(25 - 43)      | 1<br>(0 - 1)          | 0<br>(0 - 0)           | 5<br>(3 - 7)            | 13<br>(9 - 17)          | 16<br>(12 - 19)         |
| Chronic obstructive pulmonary disease         | 14<br>(10 - 18)      | 0<br>(0 - 1)          | 0<br>(0 - 0)           | 1<br>(1 - 2)            | 4<br>(3 - 6)            | 8<br>(6 - 10)           |

Web Table 31- Marshall Islands deaths with 95% UI by age, sex, and cause in 2013

| Cause                                               | Both Sexes, All Ages | Both Sexes, 0-4 Years | Both Sexes, 5-14 Years | Both Sexes, 15-49 Years | Both Sexes, 50-69 Years | Both Sexes, 70-80 Years |
|-----------------------------------------------------|----------------------|-----------------------|------------------------|-------------------------|-------------------------|-------------------------|
| Pneumoconiosis                                      | 3<br>(1 - 4)         | 0<br>(0 - 0)          | 0<br>(0 - 0)           | 0<br>(0 - 1)            | 1<br>(1 - 2)            | 1<br>(0 - 1)            |
| Silicosis                                           | 1<br>(0 - 1)         | 0<br>(0 - 0)          | 0<br>(0 - 0)           | 0<br>(0 - 0)            | 0<br>(0 - 1)            | 0<br>(0 - 0)            |
| Asbestosis                                          | 0<br>(0 - 1)         | 0<br>(0 - 0)          | 0<br>(0 - 0)           | 0<br>(0 - 0)            | 0<br>(0 - 0)            | 0<br>(0 - 0)            |
| Coal workers pneumoconiosis                         | 0<br>(0 - 1)         | 0<br>(0 - 0)          | 0<br>(0 - 0)           | 0<br>(0 - 0)            | 0<br>(0 - 0)            | 0<br>(0 - 0)            |
| Other pneumoconiosis                                | 1<br>(1 - 2)         | 0<br>(0 - 0)          | 0<br>(0 - 0)           | 0<br>(0 - 0)            | 1<br>(0 - 1)            | 1<br>(0 - 1)            |
| Asthma                                              | 13<br>(8 - 18)       | 0<br>(0 - 0)          | 0<br>(0 - 0)           | 2<br>(1 - 4)            | 5<br>(3 - 8)            | 5<br>(3 - 7)            |
| Interstitial lung disease and pulmonary sarcoidosis | 2<br>(1 - 3)         | 0<br>(0 - 0)          | 0<br>(0 - 0)           | 0<br>(0 - 1)            | 1<br>(0 - 1)            | 1<br>(1 - 2)            |
| Other chronic respiratory diseases                  | 3<br>(2 - 4)         | 0<br>(0 - 0)          | 0<br>(0 - 0)           | 1<br>(0 - 1)            | 1<br>(0 - 1)            | 1<br>(1 - 2)            |
| Cirrhosis                                           | 9<br>(6 - 12)        | 0<br>(0 - 0)          | 0<br>(0 - 0)           | 4<br>(3 - 6)            | 3<br>(2 - 4)            | 1<br>(1 - 2)            |
| Cirrhosis due to hepatitis B                        | 5<br>(3 - 7)         | 0<br>(0 - 0)          | 0<br>(0 - 0)           | 3<br>(2 - 4)            | 2<br>(1 - 2)            | 1<br>(0 - 1)            |
| Cirrhosis due to hepatitis C                        | 1<br>(1 - 2)         | 0<br>(0 - 0)          | 0<br>(0 - 0)           | 1<br>(0 - 1)            | 0<br>(0 - 1)            | 0<br>(0 - 0)            |
| Cirrhosis due to alcohol use                        | 1<br>(1 - 2)         | --                    | --                     | 1<br>(0 - 1)            | 1<br>(0 - 1)            | 0<br>(0 - 0)            |
| Cirrhosis due to other causes                       | 1<br>(1 - 1)         | 0<br>(0 - 0)          | 0<br>(0 - 0)           | 0<br>(0 - 1)            | 0<br>(0 - 0)            | 0<br>(0 - 0)            |
| Digestive diseases                                  | 21<br>(16 - 28)      | 0<br>(0 - 1)          | 1<br>(0 - 1)           | 7<br>(5 - 10)           | 7<br>(5 - 10)           | 6<br>(4 - 7)            |
| Peptic ulcer disease                                | 3<br>(2 - 5)         | 0<br>(0 - 0)          | 0<br>(0 - 0)           | 1<br>(1 - 2)            | 1<br>(1 - 2)            | 1<br>(1 - 1)            |
| Gastritis and duodenitis                            | 0<br>(0 - 0)         | 0<br>(0 - 0)          | 0<br>(0 - 0)           | 0<br>(0 - 0)            | 0<br>(0 - 0)            | 0<br>(0 - 0)            |
| Appendicitis                                        | 2<br>(1 - 3)         | 0<br>(0 - 0)          | 0<br>(0 - 0)           | 1<br>(0 - 1)            | 0<br>(0 - 1)            | 0<br>(0 - 0)            |
| Paralytic ileus and intestinal obstruction          | 4<br>(3 - 6)         | 0<br>(0 - 0)          | 0<br>(0 - 0)           | 1<br>(1 - 2)            | 1<br>(1 - 2)            | 1<br>(1 - 2)            |
| Inguinal, femoral, and abdominal hernia             | 0<br>(0 - 1)         | 0<br>(0 - 0)          | 0<br>(0 - 0)           | 0<br>(0 - 0)            | 0<br>(0 - 0)            | 0<br>(0 - 0)            |
| Inflammatory bowel disease                          | 1<br>(0 - 1)         | 0<br>(0 - 0)          | 0<br>(0 - 0)           | 0<br>(0 - 0)            | 0<br>(0 - 0)            | 0<br>(0 - 0)            |
| Vascular intestinal disorders                       | 0<br>(0 - 0)         | 0<br>(0 - 0)          | 0<br>(0 - 0)           | 0<br>(0 - 0)            | 0<br>(0 - 0)            | 0<br>(0 - 0)            |
| Gallbladder and biliary diseases                    | 3<br>(2 - 4)         | 0<br>(0 - 0)          | 0<br>(0 - 0)           | 1<br>(1 - 1)            | 1<br>(1 - 2)            | 1<br>(1 - 1)            |
| Pancreatitis                                        | 1<br>(0 - 1)         | 0<br>(0 - 0)          | 0<br>(0 - 0)           | 0<br>(0 - 1)            | 0<br>(0 - 0)            | 0<br>(0 - 0)            |
| Other digestive diseases                            | 7<br>(4 - 10)        | 0<br>(0 - 0)          | 0<br>(0 - 0)           | 2<br>(1 - 4)            | 3<br>(2 - 4)            | 2<br>(1 - 3)            |
| Neurological disorders                              | 7<br>(5 - 9)         | 0<br>(0 - 0)          | 0<br>(0 - 0)           | 1<br>(0 - 1)            | 1<br>(1 - 1)            | 5<br>(4 - 6)            |
| Alzheimer disease and other dementias               | 6<br>(4 - 7)         | --                    | --                     | 0<br>(0 - 0)            | 1<br>(0 - 1)            | 5<br>(4 - 6)            |
| Parkinson disease                                   | 0<br>(0 - 0)         | --                    | --                     | 0<br>(0 - 0)            | 0<br>(0 - 0)            | 0<br>(0 - 0)            |
| Epilepsy                                            | 1<br>(0 - 1)         | 0<br>(0 - 0)          | 0<br>(0 - 0)           | 1<br>(0 - 1)            | 0<br>(0 - 0)            | 0<br>(0 - 0)            |
| Multiple sclerosis                                  | 0<br>(0 - 0)         | --                    | --                     | 0<br>(0 - 0)            | 0<br>(0 - 0)            | 0<br>(0 - 0)            |
| Other neurological disorders                        | 1<br>(0 - 1)         | 0<br>(0 - 0)          | 0<br>(0 - 0)           | 0<br>(0 - 0)            | 0<br>(0 - 0)            | 0<br>(0 - 0)            |
| Mental and substance use disorders                  | 1<br>(1 - 1)         | 0<br>(0 - 0)          | 0<br>(0 - 0)           | 1<br>(0 - 1)            | 0<br>(0 - 0)            | 0<br>(0 - 0)            |
| Schizophrenia                                       | 0<br>(0 - 0)         | --                    | --                     | 0<br>(0 - 0)            | 0<br>(0 - 0)            | 0<br>(0 - 0)            |
| Alcohol use disorders                               | 1<br>(0 - 1)         | --                    | --                     | 1<br>(0 - 1)            | 0<br>(0 - 0)            | 0<br>(0 - 0)            |
| Drug use disorders                                  | 0<br>(0 - 0)         | 0<br>(0 - 0)          | --                     | 0<br>(0 - 0)            | 0<br>(0 - 0)            | 0<br>(0 - 0)            |
| Opioid use disorders                                | 0<br>(0 - 0)         | 0<br>(0 - 0)          | --                     | 0<br>(0 - 0)            | 0<br>(0 - 0)            | 0<br>(0 - 0)            |
| Cocaine use disorders                               | 0<br>(0 - 0)         | 0<br>(0 - 0)          | --                     | 0<br>(0 - 0)            | 0<br>(0 - 0)            | 0<br>(0 - 0)            |
| Amphetamine use disorders                           | 0<br>(0 - 0)         | 0<br>(0 - 0)          | --                     | 0<br>(0 - 0)            | 0<br>(0 - 0)            | 0<br>(0 - 0)            |
| Other drug use disorders                            | 0<br>(0 - 0)         | 0<br>(0 - 0)          | --                     | 0<br>(0 - 0)            | 0<br>(0 - 0)            | 0<br>(0 - 0)            |
| Eating disorders                                    | 0<br>(0 - 0)         | --                    | 0<br>(0 - 0)           | 0<br>(0 - 0)            | --                      | --                      |
| Anorexia nervosa                                    | 0<br>(0 - 0)         | --                    | 0<br>(0 - 0)           | 0<br>(0 - 0)            | --                      | --                      |

Web Table 31- Marshall Islands deaths with 95% UI by age, sex, and cause in 2013

| Cause                                               | Both Sexes, All Ages | Both Sexes, 0-4 Years | Both Sexes, 5-14 Years | Both Sexes, 15-49 Years | Both Sexes, 50-69 Years | Both Sexes, 70-80 Years |
|-----------------------------------------------------|----------------------|-----------------------|------------------------|-------------------------|-------------------------|-------------------------|
| Diabetes, urogenital, blood, and endocrine diseases | 108<br>(72 - 166)    | 1<br>(1 - 3)          | 1<br>(0 - 1)           | 22<br>(13 - 37)         | 52<br>(35 - 76)         | 33<br>(23 - 49)         |
| Diabetes mellitus                                   | 80<br>(56 - 113)     | 0<br>(0 - 0)          | 0<br>(0 - 0)           | 13<br>(8 - 20)          | 42<br>(28 - 59)         | 26<br>(19 - 36)         |
| Acute glomerulonephritis                            | 0<br>(0 - 0)         | 0<br>(0 - 0)          | 0<br>(0 - 0)           | 0<br>(0 - 0)            | 0<br>(0 - 0)            | 0<br>(0 - 0)            |
| Chronic kidney disease                              | 22<br>(8 - 66)       | 0<br>(0 - 1)          | 0<br>(0 - 1)           | 7<br>(3 - 19)           | 9<br>(3 - 25)           | 6<br>(2 - 19)           |
| Chronic kidney disease due to diabetes mellitus     | 7<br>(1 - 12)        | 0<br>(0 - 0)          | 0<br>(0 - 0)           | 2<br>(0 - 4)            | 3<br>(1 - 6)            | 2<br>(0 - 3)            |
| Chronic kidney disease due to hypertension          | 3<br>(1 - 5)         | 0<br>(0 - 0)          | 0<br>(0 - 0)           | 1<br>(0 - 1)            | 1<br>(0 - 2)            | 1<br>(0 - 2)            |
| Chronic kidney disease due to glomerulonephritis    | 1<br>(0 - 1)         | 0<br>(0 - 0)          | 0<br>(0 - 0)           | 0<br>(0 - 0)            | 0<br>(0 - 0)            | 0<br>(0 - 0)            |
| Chronic kidney disease due to other causes          | 12<br>(1 - 54)       | 0<br>(0 - 1)          | 0<br>(0 - 1)           | 4<br>(1 - 15)           | 4<br>(0 - 20)           | 3<br>(0 - 16)           |
| Urinary diseases and male infertility               | 1<br>(1 - 2)         | 0<br>(0 - 0)          | 0<br>(0 - 0)           | 0<br>(0 - 1)            | 0<br>(0 - 1)            | 0<br>(0 - 1)            |
| Interstitial nephritis and urinary tract infections | 1<br>(0 - 1)         | 0<br>(0 - 0)          | 0<br>(0 - 0)           | 0<br>(0 - 0)            | 0<br>(0 - 0)            | 0<br>(0 - 0)            |
| Urolithiasis                                        | 0<br>(0 - 0)         | --                    | 0<br>(0 - 0)           | 0<br>(0 - 0)            | 0<br>(0 - 0)            | 0<br>(0 - 0)            |
| Other urinary diseases                              | 1<br>(1 - 1)         | 0<br>(0 - 0)          | 0<br>(0 - 0)           | 0<br>(0 - 0)            | 0<br>(0 - 0)            | 0<br>(0 - 0)            |
| Gynecological diseases                              | 0<br>(0 - 0)         | --                    | --                     | 0<br>(0 - 0)            | 0<br>(0 - 0)            | 0<br>(0 - 0)            |
| Uterine fibroids                                    | 0<br>(0 - 0)         | --                    | --                     | 0<br>(0 - 0)            | 0<br>(0 - 0)            | 0<br>(0 - 0)            |
| Polycystic ovarian syndrome                         | 0<br>(0 - 0)         | --                    | --                     | 0<br>(0 - 0)            | 0<br>(0 - 0)            | --                      |
| Endometriosis                                       | 0<br>(0 - 0)         | --                    | --                     | 0<br>(0 - 0)            | 0<br>(0 - 0)            | --                      |
| Genital prolapse                                    | 0<br>(0 - 0)         | --                    | --                     | 0<br>(0 - 0)            | 0<br>(0 - 0)            | 0<br>(0 - 0)            |
| Other gynecological diseases                        | 0<br>(0 - 0)         | --                    | --                     | 0<br>(0 - 0)            | 0<br>(0 - 0)            | 0<br>(0 - 0)            |
| Hemoglobinopathies and hemolytic anemias            | 2<br>(1 - 2)         | 0<br>(0 - 1)          | 0<br>(0 - 0)           | 1<br>(0 - 1)            | 0<br>(0 - 0)            | 0<br>(0 - 0)            |
| Thalassemias                                        | 1<br>(1 - 1)         | 0<br>(0 - 1)          | 0<br>(0 - 0)           | 0<br>(0 - 1)            | 0<br>(0 - 0)            | 0<br>(0 - 0)            |
| Sickle cell disorders                               | 0<br>(0 - 0)         | 0<br>(0 - 0)          | 0<br>(0 - 0)           | 0<br>(0 - 0)            | 0<br>(0 - 0)            | 0<br>(0 - 0)            |
| G6PD deficiency                                     | 0<br>(0 - 0)         | 0<br>(0 - 0)          | 0<br>(0 - 0)           | 0<br>(0 - 0)            | 0<br>(0 - 0)            | 0<br>(0 - 0)            |
| Other hemoglobinopathies and hemolytic anemias      | 1<br>(0 - 1)         | 0<br>(0 - 0)          | 0<br>(0 - 0)           | 0<br>(0 - 0)            | 0<br>(0 - 0)            | 0<br>(0 - 0)            |
| Endocrine, metabolic, blood, and immune disorders   | 3<br>(2 - 5)         | 0<br>(0 - 1)          | 0<br>(0 - 0)           | 1<br>(0 - 1)            | 1<br>(1 - 2)            | 1<br>(0 - 1)            |
| Musculoskeletal disorders                           | 1<br>(0 - 1)         | --                    | 0<br>(0 - 0)           | 0<br>(0 - 0)            | 0<br>(0 - 0)            | 0<br>(0 - 0)            |
| Rheumatoid arthritis                                | 0<br>(0 - 0)         | --                    | 0<br>(0 - 0)           | 0<br>(0 - 0)            | 0<br>(0 - 0)            | 0<br>(0 - 0)            |
| Other musculoskeletal disorders                     | 1<br>(0 - 1)         | --                    | 0<br>(0 - 0)           | 0<br>(0 - 0)            | 0<br>(0 - 0)            | 0<br>(0 - 0)            |
| Other non-communicable diseases                     | 13<br>(9 - 21)       | 9<br>(5 - 16)         | 1<br>(1 - 2)           | 2<br>(1 - 2)            | 1<br>(0 - 1)            | 1<br>(0 - 1)            |
| Congenital anomalies                                | 12<br>(8 - 20)       | 9<br>(5 - 16)         | 1<br>(1 - 2)           | 1<br>(1 - 2)            | 0<br>(0 - 1)            | 0<br>(0 - 0)            |
| Neural tube defects                                 | 0<br>(0 - 0)         | 0<br>(0 - 0)          | 0<br>(0 - 0)           | 0<br>(0 - 0)            | 0<br>(0 - 0)            | 0<br>(0 - 0)            |
| Congenital heart anomalies                          | 3<br>(1 - 6)         | 2<br>(1 - 4)          | 0<br>(0 - 1)           | 0<br>(0 - 1)            | 0<br>(0 - 0)            | 0<br>(0 - 0)            |
| Cleft lip and cleft palate                          | 0<br>(0 - 0)         | 0<br>(0 - 0)          | --                     | --                      | --                      | --                      |
| Down syndrome                                       | 1<br>(0 - 1)         | 0<br>(0 - 1)          | 0<br>(0 - 0)           | 0<br>(0 - 0)            | 0<br>(0 - 0)            | 0<br>(0 - 0)            |
| Chromosomal unbalanced rearrangements               | 0<br>(0 - 1)         | 0<br>(0 - 1)          | 0<br>(0 - 0)           | 0<br>(0 - 0)            | 0<br>(0 - 0)            | 0<br>(0 - 0)            |
| Other congenital anomalies                          | 9<br>(5 - 15)        | 7<br>(4 - 12)         | 1<br>(0 - 1)           | 1<br>(1 - 2)            | 0<br>(0 - 0)            | 0<br>(0 - 0)            |
| Skin and subcutaneous diseases                      | 1<br>(1 - 2)         | 0<br>(0 - 0)          | 0<br>(0 - 0)           | 0<br>(0 - 0)            | 0<br>(0 - 0)            | 0<br>(0 - 1)            |
| Cellulitis                                          | 0<br>(0 - 0)         | 0<br>(0 - 0)          | 0<br>(0 - 0)           | 0<br>(0 - 0)            | 0<br>(0 - 0)            | 0<br>(0 - 0)            |
| Pyoderma                                            | 1<br>(0 - 1)         | 0<br>(0 - 0)          | 0<br>(0 - 0)           | 0<br>(0 - 0)            | 0<br>(0 - 0)            | 0<br>(0 - 0)            |
| Decubitus ulcer                                     | 0<br>(0 - 0)         | 0<br>(0 - 0)          | 0<br>(0 - 0)           | 0<br>(0 - 0)            | 0<br>(0 - 0)            | 0<br>(0 - 0)            |
| Other skin and subcutaneous diseases                | 0<br>(0 - 0)         | 0<br>(0 - 0)          | 0<br>(0 - 0)           | 0<br>(0 - 0)            | 0<br>(0 - 0)            | 0<br>(0 - 0)            |

Web Table 31- Marshall Islands deaths with 95% UI by age, sex, and cause in 2013

| Cause                                           | Both Sexes, All Ages | Both Sexes, 0-4 Years | Both Sexes, 5-14 Years | Both Sexes, 15-49 Years | Both Sexes, 50-69 Years | Both Sexes, 70-80 Years |
|-------------------------------------------------|----------------------|-----------------------|------------------------|-------------------------|-------------------------|-------------------------|
| Sudden infant death syndrome                    | 0<br>(0 - 0)         | 0<br>(0 - 0)          | --                     | --                      | --                      | --                      |
| Injuries                                        | 40<br>(28 - 56)      | 3<br>(2 - 8)          | 3<br>(2 - 4)           | 25<br>(17 - 35)         | 6<br>(4 - 9)            | 4<br>(2 - 5)            |
| Transport injuries                              | 13<br>(10 - 18)      | 1<br>(0 - 1)          | 1<br>(1 - 2)           | 8<br>(6 - 12)           | 2<br>(1 - 3)            | 1<br>(1 - 2)            |
| Road injuries                                   | 13<br>(9 - 17)       | 1<br>(0 - 1)          | 1<br>(1 - 2)           | 8<br>(5 - 11)           | 2<br>(1 - 3)            | 1<br>(1 - 1)            |
| Pedestrian road injuries                        | 2<br>(1 - 2)         | 0<br>(0 - 0)          | 0<br>(0 - 0)           | 1<br>(0 - 1)            | 0<br>(0 - 0)            | 0<br>(0 - 0)            |
| Cyclist road injuries                           | 0<br>(0 - 1)         | 0<br>(0 - 0)          | 0<br>(0 - 0)           | 0<br>(0 - 0)            | 0<br>(0 - 0)            | 0<br>(0 - 0)            |
| Motorcyclist road injuries                      | 1<br>(1 - 2)         | 0<br>(0 - 0)          | 0<br>(0 - 0)           | 1<br>(1 - 2)            | 0<br>(0 - 0)            | 0<br>(0 - 0)            |
| Motor vehicle road injuries                     | 9<br>(6 - 12)        | 0<br>(0 - 1)          | 1<br>(1 - 1)           | 5<br>(4 - 8)            | 1<br>(1 - 2)            | 1<br>(1 - 1)            |
| Other road injuries                             | 0<br>(0 - 0)         | 0<br>(0 - 0)          | 0<br>(0 - 0)           | 0<br>(0 - 0)            | 0<br>(0 - 0)            | 0<br>(0 - 0)            |
| Other transport injuries                        | 1<br>(0 - 1)         | 0<br>(0 - 0)          | 0<br>(0 - 0)           | 0<br>(0 - 1)            | 0<br>(0 - 0)            | 0<br>(0 - 0)            |
| Unintentional injuries                          | 14<br>(8 - 27)       | 3<br>(1 - 8)          | 1<br>(1 - 2)           | 6<br>(4 - 13)           | 2<br>(1 - 4)            | 2<br>(1 - 3)            |
| Falls                                           | 1<br>(0 - 1)         | 0<br>(0 - 0)          | 0<br>(0 - 0)           | 0<br>(0 - 1)            | 0<br>(0 - 0)            | 0<br>(0 - 1)            |
| Drowning                                        | 3<br>(2 - 4)         | 1<br>(0 - 2)          | 0<br>(0 - 1)           | 1<br>(1 - 2)            | 0<br>(0 - 0)            | 0<br>(0 - 0)            |
| Fire, heat, and hot substances                  | 1<br>(1 - 1)         | 0<br>(0 - 0)          | 0<br>(0 - 0)           | 0<br>(0 - 1)            | 0<br>(0 - 0)            | 0<br>(0 - 0)            |
| Poisonings                                      | 0<br>(0 - 1)         | 0<br>(0 - 0)          | 0<br>(0 - 0)           | 0<br>(0 - 0)            | 0<br>(0 - 0)            | 0<br>(0 - 0)            |
| Exposure to mechanical forces                   | 3<br>(1 - 20)        | 1<br>(0 - 6)          | 0<br>(0 - 2)           | 1<br>(0 - 9)            | 0<br>(0 - 3)            | 0<br>(0 - 1)            |
| Unintentional firearm injuries                  | 0<br>(0 - 0)         | 0<br>(0 - 0)          | 0<br>(0 - 0)           | 0<br>(0 - 0)            | 0<br>(0 - 0)            | 0<br>(0 - 0)            |
| Unintentional suffocation                       | 2<br>(0 - 19)        | 0<br>(0 - 6)          | 0<br>(0 - 1)           | 1<br>(0 - 9)            | 0<br>(0 - 3)            | 0<br>(0 - 1)            |
| Other exposure to mechanical forces             | 1<br>(0 - 1)         | 0<br>(0 - 0)          | 0<br>(0 - 0)           | 0<br>(0 - 1)            | 0<br>(0 - 0)            | 0<br>(0 - 0)            |
| Adverse effects of medical treatment            | 3<br>(1 - 4)         | 0<br>(0 - 1)          | 0<br>(0 - 0)           | 1<br>(0 - 2)            | 1<br>(0 - 1)            | 1<br>(0 - 1)            |
| Animal contact                                  | 0<br>(0 - 0)         | 0<br>(0 - 0)          | 0<br>(0 - 0)           | 0<br>(0 - 0)            | 0<br>(0 - 0)            | 0<br>(0 - 0)            |
| Venomous animal contact                         | 0<br>(0 - 0)         | 0<br>(0 - 0)          | 0<br>(0 - 0)           | 0<br>(0 - 0)            | 0<br>(0 - 0)            | 0<br>(0 - 0)            |
| Non-venomous animal contact                     | 0<br>(0 - 0)         | 0<br>(0 - 0)          | 0<br>(0 - 0)           | 0<br>(0 - 0)            | 0<br>(0 - 0)            | 0<br>(0 - 0)            |
| Foreign body                                    | 1<br>(1 - 2)         | 1<br>(0 - 1)          | 0<br>(0 - 0)           | 0<br>(0 - 1)            | 0<br>(0 - 0)            | 0<br>(0 - 0)            |
| Pulmonary aspiration and foreign body in airway | 1<br>(1 - 2)         | 1<br>(0 - 1)          | 0<br>(0 - 0)           | 0<br>(0 - 0)            | 0<br>(0 - 0)            | 0<br>(0 - 0)            |
| Foreign body in other body part                 | 0<br>(0 - 1)         | 0<br>(0 - 0)          | 0<br>(0 - 0)           | 0<br>(0 - 0)            | 0<br>(0 - 0)            | 0<br>(0 - 0)            |
| Other unintentional injuries                    | 2<br>(1 - 2)         | 0<br>(0 - 0)          | 0<br>(0 - 0)           | 1<br>(1 - 2)            | 0<br>(0 - 0)            | 0<br>(0 - 0)            |
| Self-harm and interpersonal violence            | 13<br>(9 - 20)       | 0<br>(0 - 0)          | 0<br>(0 - 1)           | 10<br>(7 - 16)          | 2<br>(1 - 3)            | 1<br>(0 - 1)            |
| Self-harm                                       | 8<br>(5 - 13)        | --                    | 0<br>(0 - 0)           | 6<br>(4 - 9)            | 1<br>(1 - 3)            | 1<br>(0 - 1)            |
| Interpersonal violence                          | 5<br>(3 - 8)         | 0<br>(0 - 0)          | 0<br>(0 - 0)           | 4<br>(3 - 7)            | 0<br>(0 - 1)            | 0<br>(0 - 0)            |
| Assault by firearm                              | 2<br>(1 - 4)         | 0<br>(0 - 0)          | 0<br>(0 - 0)           | 2<br>(1 - 3)            | 0<br>(0 - 0)            | 0<br>(0 - 0)            |
| Assault by sharp object                         | 2<br>(1 - 3)         | 0<br>(0 - 0)          | 0<br>(0 - 0)           | 2<br>(1 - 3)            | 0<br>(0 - 0)            | 0<br>(0 - 0)            |
| Assault by other means                          | 1<br>(1 - 2)         | 0<br>(0 - 0)          | 0<br>(0 - 0)           | 1<br>(1 - 2)            | 0<br>(0 - 0)            | 0<br>(0 - 0)            |

Web Table 31- Marshall Islands deaths with 95% UI by age, sex, and cause in 2013

| Cause                                                             | Males, All Ages    | Males, 0-4 Years | Males, 5-14 Years | Males, 15-49 Years | Males, 50-69 Years | Males, 70-80 Years |
|-------------------------------------------------------------------|--------------------|------------------|-------------------|--------------------|--------------------|--------------------|
| All causes                                                        | 285<br>(207 - 379) | 34<br>(20 - 55)  | 6<br>(4 - 8)      | 85<br>(55 - 126)   | 98<br>(66 - 136)   | 62<br>(49 - 70)    |
| Communicable, maternal, neonatal, and nutritional diseases        | 52<br>(38 - 69)    | 24<br>(14 - 38)  | 2<br>(1 - 3)      | 10<br>(7 - 15)     | 8<br>(5 - 11)      | 7<br>(5 - 9)       |
| HIV/AIDS and tuberculosis                                         | 3<br>(2 - 5)       | 0<br>(0 - 0)     | 0<br>(0 - 0)      | 2<br>(1 - 2)       | 1<br>(1 - 1)       | 0<br>(0 - 1)       |
| Tuberculosis                                                      | 3<br>(2 - 4)       | 0<br>(0 - 0)     | 0<br>(0 - 0)      | 1<br>(1 - 2)       | 1<br>(0 - 1)       | 0<br>(0 - 1)       |
| HIV/AIDS                                                          | 1<br>(0 - 1)       | 0<br>(0 - 0)     | 0<br>(0 - 0)      | 0<br>(0 - 1)       | 0<br>(0 - 0)       | 0<br>(0 - 0)       |
| HIV/AIDS resulting in mycobacterial infection                     | 0<br>(0 - 0)       | 0<br>(0 - 0)     | 0<br>(0 - 0)      | 0<br>(0 - 0)       | 0<br>(0 - 0)       | 0<br>(0 - 0)       |
| HIV/AIDS resulting in other diseases                              | 0<br>(0 - 1)       | 0<br>(0 - 0)     | 0<br>(0 - 0)      | 0<br>(0 - 0)       | 0<br>(0 - 0)       | 0<br>(0 - 0)       |
| Diarrhea, lower respiratory, and other common infectious diseases | 25<br>(17 - 34)    | 7<br>(4 - 13)    | 1<br>(1 - 2)      | 5<br>(3 - 8)       | 5<br>(3 - 8)       | 5<br>(4 - 7)       |
| Diarrheal diseases                                                | 5<br>(3 - 8)       | 1<br>(0 - 4)     | 0<br>(0 - 1)      | 1<br>(0 - 1)       | 1<br>(0 - 2)       | 1<br>(1 - 2)       |
| Intestinal infectious diseases                                    | 1<br>(0 - 1)       | 0<br>(0 - 1)     | 0<br>(0 - 0)      | 0<br>(0 - 0)       | 0<br>(0 - 0)       | 0<br>(0 - 0)       |
| Typhoid fever                                                     | 0<br>(0 - 1)       | 0<br>(0 - 0)     | 0<br>(0 - 0)      | 0<br>(0 - 0)       | 0<br>(0 - 0)       | 0<br>(0 - 0)       |
| Paratyphoid fever                                                 | 0<br>(0 - 0)       | 0<br>(0 - 0)     | 0<br>(0 - 0)      | 0<br>(0 - 0)       | 0<br>(0 - 0)       | 0<br>(0 - 0)       |
| Other intestinal infectious diseases                              | 0<br>(0 - 0)       | 0<br>(0 - 0)     | 0<br>(0 - 0)      | 0<br>(0 - 0)       | 0<br>(0 - 0)       | 0<br>(0 - 0)       |
| Lower respiratory infections                                      | 16<br>(11 - 22)    | 4<br>(2 - 8)     | 0<br>(0 - 1)      | 3<br>(2 - 5)       | 4<br>(2 - 6)       | 4<br>(3 - 6)       |
| Upper respiratory infections                                      | 0<br>(0 - 0)       | 0<br>(0 - 0)     | 0<br>(0 - 0)      | 0<br>(0 - 0)       | 0<br>(0 - 0)       | 0<br>(0 - 0)       |
| Otitis media                                                      | 0<br>(0 - 0)       | 0<br>(0 - 0)     | 0<br>(0 - 0)      | 0<br>(0 - 0)       | 0<br>(0 - 0)       | 0<br>(0 - 0)       |
| Meningitis                                                        | 2<br>(1 - 3)       | 1<br>(0 - 2)     | 0<br>(0 - 0)      | 1<br>(1 - 1)       | 0<br>(0 - 1)       | 0<br>(0 - 0)       |
| Pneumococcal meningitis                                           | 1<br>(1 - 1)       | 0<br>(0 - 0)     | 0<br>(0 - 0)      | 0<br>(0 - 1)       | 0<br>(0 - 0)       | 0<br>(0 - 0)       |
| H influenzae type B meningitis                                    | 0<br>(0 - 0)       | 0<br>(0 - 0)     | 0<br>(0 - 0)      | 0<br>(0 - 0)       | 0<br>(0 - 0)       | 0<br>(0 - 0)       |
| Meningococcal meningitis                                          | 0<br>(0 - 1)       | 0<br>(0 - 0)     | 0<br>(0 - 0)      | 0<br>(0 - 0)       | 0<br>(0 - 0)       | 0<br>(0 - 0)       |
| Other meningitis                                                  | 1<br>(0 - 1)       | 0<br>(0 - 0)     | 0<br>(0 - 0)      | 0<br>(0 - 0)       | 0<br>(0 - 0)       | 0<br>(0 - 0)       |
| Encephalitis                                                      | 0<br>(0 - 0)       | 0<br>(0 - 0)     | 0<br>(0 - 0)      | 0<br>(0 - 0)       | 0<br>(0 - 0)       | 0<br>(0 - 0)       |
| Diphtheria                                                        | 0<br>(0 - 0)       | 0<br>(0 - 0)     | 0<br>(0 - 0)      | 0<br>(0 - 0)       | 0<br>(0 - 0)       | --                 |
| Whooping cough                                                    | 0<br>(0 - 0)       | 0<br>(0 - 0)     | 0<br>(0 - 0)      | 0<br>(0 - 0)       | 0<br>(0 - 0)       | --                 |
| Tetanus                                                           | 0<br>(0 - 0)       | 0<br>(0 - 0)     | 0<br>(0 - 0)      | 0<br>(0 - 0)       | 0<br>(0 - 0)       | 0<br>(0 - 0)       |
| Measles                                                           | 1<br>(0 - 2)       | 1<br>(0 - 2)     | 0<br>(0 - 0)      | 0<br>(0 - 0)       | 0<br>(0 - 0)       | --                 |
| Varicella and herpes zoster                                       | 0<br>(0 - 0)       | 0<br>(0 - 0)     | 0<br>(0 - 0)      | 0<br>(0 - 0)       | 0<br>(0 - 0)       | 0<br>(0 - 0)       |
| Neglected tropical diseases and malaria                           | 1<br>(1 - 2)       | 0<br>(0 - 0)     | 0<br>(0 - 0)      | 0<br>(0 - 1)       | 0<br>(0 - 0)       | 0<br>(0 - 0)       |
| Leishmaniasis                                                     | 0<br>(0 - 0)       | 0<br>(0 - 0)     | 0<br>(0 - 0)      | 0<br>(0 - 0)       | 0<br>(0 - 0)       | 0<br>(0 - 0)       |
| Visceral leishmaniasis                                            | 0<br>(0 - 0)       | 0<br>(0 - 0)     | 0<br>(0 - 0)      | 0<br>(0 - 0)       | 0<br>(0 - 0)       | 0<br>(0 - 0)       |
| Cysticercosis                                                     | 0<br>(0 - 0)       | 0<br>(0 - 0)     | 0<br>(0 - 0)      | 0<br>(0 - 0)       | 0<br>(0 - 0)       | 0<br>(0 - 0)       |
| Cystic echinococcosis                                             | 0<br>(0 - 0)       | 0<br>(0 - 0)     | 0<br>(0 - 0)      | 0<br>(0 - 0)       | 0<br>(0 - 0)       | 0<br>(0 - 0)       |
| Dengue                                                            | 1<br>(0 - 1)       | 0<br>(0 - 0)     | 0<br>(0 - 0)      | 0<br>(0 - 0)       | 0<br>(0 - 0)       | 0<br>(0 - 0)       |
| Rabies                                                            | 0<br>(0 - 0)       | 0<br>(0 - 0)     | 0<br>(0 - 0)      | 0<br>(0 - 0)       | 0<br>(0 - 0)       | 0<br>(0 - 0)       |
| Intestinal nematode infections                                    | 0<br>(0 - 0)       | 0<br>(0 - 0)     | 0<br>(0 - 0)      | 0<br>(0 - 0)       | 0<br>(0 - 0)       | 0<br>(0 - 0)       |
| Ascariasis                                                        | 0<br>(0 - 0)       | 0<br>(0 - 0)     | 0<br>(0 - 0)      | 0<br>(0 - 0)       | 0<br>(0 - 0)       | 0<br>(0 - 0)       |
| Other neglected tropical diseases                                 | 0<br>(0 - 0)       | 0<br>(0 - 0)     | 0<br>(0 - 0)      | 0<br>(0 - 0)       | 0<br>(0 - 0)       | 0<br>(0 - 0)       |
| Maternal disorders                                                | --                 | --               | --                | --                 | --                 | --                 |
| Maternal hemorrhage                                               | --                 | --               | --                | --                 | --                 | --                 |
| Maternal sepsis and other maternal infections                     | --                 | --               | --                | --                 | --                 | --                 |



Web Table 31- Marshall Islands deaths with 95% UI by age, sex, and cause in 2013

| Cause                                                            | Males, All Ages    | Males, 0-4 Years | Males, 5-14 Years | Males, 15-49 Years | Males, 50-69 Years | Males, 70-80 Years |
|------------------------------------------------------------------|--------------------|------------------|-------------------|--------------------|--------------------|--------------------|
| Maternal hypertensive disorders                                  | --                 | --               | --                | --                 | --                 | --                 |
| Maternal obstructed labor                                        | --                 | --               | --                | --                 | --                 | --                 |
| Maternal abortive outcome                                        | --                 | --               | --                | --                 | --                 | --                 |
| Indirect maternal deaths                                         | --                 | --               | --                | --                 | --                 | --                 |
| Late maternal deaths                                             | --                 | --               | --                | --                 | --                 | --                 |
| Maternal deaths aggravated by HIV/AIDS                           | --                 | --               | --                | --                 | --                 | --                 |
| Other maternal disorders                                         | --                 | --               | --                | --                 | --                 | --                 |
| Neonatal disorders                                               | 14<br>(9 - 21)     | 14<br>(9 - 21)   | --                | --                 | --                 | --                 |
| Neonatal preterm birth complications                             | 4<br>(2 - 8)       | 4<br>(2 - 8)     | --                | --                 | --                 | --                 |
| Neonatal encephalopathy due to birth asphyxia and trauma         | 3<br>(1 - 6)       | 3<br>(1 - 6)     | --                | --                 | --                 | --                 |
| Neonatal sepsis and other neonatal infections                    | 2<br>(1 - 6)       | 2<br>(1 - 6)     | --                | --                 | --                 | --                 |
| Hemolytic disease and other neonatal jaundice                    | 0<br>(0 - 0)       | 0<br>(0 - 0)     | --                | --                 | --                 | --                 |
| Other neonatal disorders                                         | 4<br>(2 - 8)       | 4<br>(2 - 8)     | --                | --                 | --                 | --                 |
| Nutritional deficiencies                                         | 3<br>(2 - 5)       | 1<br>(0 - 2)     | 0<br>(0 - 0)      | 1<br>(0 - 1)       | 1<br>(0 - 1)       | 1<br>(0 - 1)       |
| Protein-energy malnutrition                                      | 2<br>(1 - 3)       | 1<br>(0 - 2)     | 0<br>(0 - 0)      | 0<br>(0 - 1)       | 0<br>(0 - 1)       | 0<br>(0 - 0)       |
| Iodine deficiency                                                | 0<br>(0 - 0)       | 0<br>(0 - 0)     | 0<br>(0 - 0)      | 0<br>(0 - 0)       | 0<br>(0 - 0)       | 0<br>(0 - 0)       |
| Iron-deficiency anemia                                           | 1<br>(0 - 2)       | 0<br>(0 - 0)     | 0<br>(0 - 0)      | 0<br>(0 - 1)       | 0<br>(0 - 0)       | 0<br>(0 - 0)       |
| Other nutritional deficiencies                                   | 0<br>(0 - 0)       | 0<br>(0 - 0)     | 0<br>(0 - 0)      | 0<br>(0 - 0)       | 0<br>(0 - 0)       | 0<br>(0 - 0)       |
| Other communicable, maternal, neonatal, and nutritional diseases | 6<br>(3 - 8)       | 1<br>(0 - 3)     | 0<br>(0 - 1)      | 2<br>(1 - 4)       | 1<br>(1 - 2)       | 1<br>(0 - 1)       |
| Sexually transmitted diseases excluding HIV                      | 1<br>(0 - 2)       | 1<br>(0 - 1)     | 0<br>(0 - 0)      | 0<br>(0 - 0)       | 0<br>(0 - 0)       | 0<br>(0 - 0)       |
| Syphilis                                                         | 1<br>(0 - 2)       | 1<br>(0 - 1)     | 0<br>(0 - 0)      | 0<br>(0 - 0)       | 0<br>(0 - 0)       | 0<br>(0 - 0)       |
| Chlamydial infection                                             | --                 | --               | --                | --                 | --                 | --                 |
| Gonococcal infection                                             | 0<br>(0 - 0)       | --               | 0<br>(0 - 0)      | 0<br>(0 - 0)       | 0<br>(0 - 0)       | 0<br>(0 - 0)       |
| Other sexually transmitted diseases                              | 0<br>(0 - 0)       | --               | 0<br>(0 - 0)      | 0<br>(0 - 0)       | 0<br>(0 - 0)       | 0<br>(0 - 0)       |
| Hepatitis                                                        | 2<br>(2 - 4)       | 0<br>(0 - 0)     | 0<br>(0 - 0)      | 1<br>(1 - 2)       | 1<br>(0 - 1)       | 0<br>(0 - 0)       |
| Acute hepatitis A                                                | 0<br>(0 - 0)       | 0<br>(0 - 0)     | 0<br>(0 - 0)      | 0<br>(0 - 0)       | 0<br>(0 - 0)       | 0<br>(0 - 0)       |
| Acute hepatitis B                                                | 2<br>(1 - 3)       | 0<br>(0 - 0)     | 0<br>(0 - 0)      | 1<br>(0 - 1)       | 1<br>(0 - 1)       | 0<br>(0 - 0)       |
| Acute hepatitis C                                                | 0<br>(0 - 0)       | --               | 0<br>(0 - 0)      | 0<br>(0 - 0)       | 0<br>(0 - 0)       | 0<br>(0 - 0)       |
| Acute hepatitis E                                                | 1<br>(0 - 1)       | 0<br>(0 - 0)     | 0<br>(0 - 0)      | 0<br>(0 - 1)       | 0<br>(0 - 0)       | 0<br>(0 - 0)       |
| Other infectious diseases                                        | 2<br>(1 - 4)       | 0<br>(0 - 1)     | 0<br>(0 - 0)      | 1<br>(0 - 2)       | 0<br>(0 - 1)       | 0<br>(0 - 1)       |
| Non-communicable diseases                                        | 206<br>(145 - 277) | 8<br>(5 - 15)    | 2<br>(2 - 3)      | 56<br>(34 - 85)    | 87<br>(58 - 121)   | 53<br>(42 - 61)    |
| Neoplasms                                                        | 10<br>(7 - 15)     | 0<br>(0 - 1)     | 0<br>(0 - 0)      | 3<br>(2 - 5)       | 4<br>(3 - 6)       | 2<br>(2 - 3)       |
| Esophageal cancer                                                | 0<br>(0 - 1)       | --               | --                | 0<br>(0 - 0)       | 0<br>(0 - 0)       | 0<br>(0 - 0)       |
| Stomach cancer                                                   | 1<br>(1 - 1)       | --               | --                | 0<br>(0 - 0)       | 0<br>(0 - 1)       | 0<br>(0 - 0)       |
| Liver cancer                                                     | 0<br>(0 - 0)       | --               | 0<br>(0 - 0)      | 0<br>(0 - 0)       | 0<br>(0 - 0)       | 0<br>(0 - 0)       |
| Liver cancer due to hepatitis B                                  | 0<br>(0 - 0)       | --               | 0<br>(0 - 0)      | 0<br>(0 - 0)       | 0<br>(0 - 0)       | 0<br>(0 - 0)       |
| Liver cancer due to hepatitis C                                  | 0<br>(0 - 0)       | --               | 0<br>(0 - 0)      | 0<br>(0 - 0)       | 0<br>(0 - 0)       | 0<br>(0 - 0)       |
| Liver cancer due to alcohol use                                  | 0<br>(0 - 0)       | --               | --                | 0<br>(0 - 0)       | 0<br>(0 - 0)       | 0<br>(0 - 0)       |
| Liver cancer due to other causes                                 | 0<br>(0 - 0)       | --               | 0<br>(0 - 0)      | 0<br>(0 - 0)       | 0<br>(0 - 0)       | 0<br>(0 - 0)       |
| Larynx cancer                                                    | 0<br>(0 - 0)       | --               | --                | 0<br>(0 - 0)       | 0<br>(0 - 0)       | 0<br>(0 - 0)       |

Web Table 31- Marshall Islands deaths with 95% UI by age, sex, and cause in 2013

| Cause                                         | Males, All Ages  | Males, 0-4 Years | Males, 5-14 Years | Males, 15-49 Years | Males, 50-69 Years | Males, 70-80 Years |
|-----------------------------------------------|------------------|------------------|-------------------|--------------------|--------------------|--------------------|
| Tracheal, bronchus and lung cancer            | 3<br>(2 - 4)     | --               | --                | 1<br>(1 - 2)       | 1<br>(1 - 2)       | 1<br>(0 - 1)       |
| Breast cancer                                 | 0<br>(0 - 0)     | --               | --                | 0<br>(0 - 0)       | 0<br>(0 - 0)       | 0<br>(0 - 0)       |
| Cervical cancer                               | --               | --               | --                | --                 | --                 | --                 |
| Uterine cancer                                | --               | --               | --                | --                 | --                 | --                 |
| Prostate cancer                               | 1<br>(0 - 2)     | --               | --                | 0<br>(0 - 0)       | 0<br>(0 - 1)       | 0<br>(0 - 1)       |
| Colon and rectum cancer                       | 1<br>(1 - 1)     | --               | --                | 0<br>(0 - 0)       | 0<br>(0 - 1)       | 0<br>(0 - 0)       |
| Lip and oral cavity cancer                    | 0<br>(0 - 1)     | --               | --                | 0<br>(0 - 0)       | 0<br>(0 - 0)       | 0<br>(0 - 0)       |
| Nasopharynx cancer                            | 0<br>(0 - 0)     | --               | 0<br>(0 - 0)      | 0<br>(0 - 0)       | 0<br>(0 - 0)       | 0<br>(0 - 0)       |
| Other pharynx cancer                          | 0<br>(0 - 0)     | --               | --                | 0<br>(0 - 0)       | 0<br>(0 - 0)       | 0<br>(0 - 0)       |
| Gallbladder and biliary tract cancer          | 0<br>(0 - 0)     | --               | --                | 0<br>(0 - 0)       | 0<br>(0 - 0)       | 0<br>(0 - 0)       |
| Pancreatic cancer                             | 0<br>(0 - 0)     | --               | --                | 0<br>(0 - 0)       | 0<br>(0 - 0)       | 0<br>(0 - 0)       |
| Malignant skin melanoma                       | 0<br>(0 - 0)     | --               | --                | 0<br>(0 - 0)       | 0<br>(0 - 0)       | 0<br>(0 - 0)       |
| Non-melanoma skin cancer                      | 0<br>(0 - 0)     | --               | --                | 0<br>(0 - 0)       | 0<br>(0 - 0)       | 0<br>(0 - 0)       |
| Ovarian cancer                                | --               | --               | --                | --                 | --                 | --                 |
| Testicular cancer                             | 0<br>(0 - 0)     | --               | --                | 0<br>(0 - 0)       | 0<br>(0 - 0)       | 0<br>(0 - 0)       |
| Kidney cancer                                 | 0<br>(0 - 0)     | 0<br>(0 - 0)     | 0<br>(0 - 0)      | 0<br>(0 - 0)       | 0<br>(0 - 0)       | 0<br>(0 - 0)       |
| Bladder cancer                                | 0<br>(0 - 0)     | --               | --                | 0<br>(0 - 0)       | 0<br>(0 - 0)       | 0<br>(0 - 0)       |
| Brain and nervous system cancer               | 0<br>(0 - 0)     | 0<br>(0 - 0)     | 0<br>(0 - 0)      | 0<br>(0 - 0)       | 0<br>(0 - 0)       | 0<br>(0 - 0)       |
| Thyroid cancer                                | 0<br>(0 - 0)     | --               | 0<br>(0 - 0)      | 0<br>(0 - 0)       | 0<br>(0 - 0)       | 0<br>(0 - 0)       |
| Mesothelioma                                  | 0<br>(0 - 0)     | --               | --                | 0<br>(0 - 0)       | 0<br>(0 - 0)       | 0<br>(0 - 0)       |
| Hodgkin lymphoma                              | 0<br>(0 - 0)     | 0<br>(0 - 0)     | 0<br>(0 - 0)      | 0<br>(0 - 0)       | 0<br>(0 - 0)       | 0<br>(0 - 0)       |
| Non-Hodgkin lymphoma                          | 0<br>(0 - 0)     | 0<br>(0 - 0)     | 0<br>(0 - 0)      | 0<br>(0 - 0)       | 0<br>(0 - 0)       | 0<br>(0 - 0)       |
| Multiple myeloma                              | 0<br>(0 - 0)     | --               | --                | 0<br>(0 - 0)       | 0<br>(0 - 0)       | 0<br>(0 - 0)       |
| Leukemia                                      | 1<br>(0 - 1)     | 0<br>(0 - 0)     | 0<br>(0 - 0)      | 0<br>(0 - 1)       | 0<br>(0 - 0)       | 0<br>(0 - 0)       |
| Other neoplasms                               | 1<br>(1 - 2)     | 0<br>(0 - 0)     | 0<br>(0 - 0)      | 1<br>(0 - 1)       | 0<br>(0 - 1)       | 0<br>(0 - 0)       |
| Cardiovascular diseases                       | 95<br>(66 - 131) | 1<br>(1 - 2)     | 1<br>(0 - 1)      | 28<br>(17 - 43)    | 43<br>(28 - 60)    | 23<br>(18 - 27)    |
| Rheumatic heart disease                       | 2<br>(1 - 3)     | 0<br>(0 - 0)     | 0<br>(0 - 0)      | 1<br>(0 - 1)       | 1<br>(0 - 1)       | 0<br>(0 - 0)       |
| Ischemic heart disease                        | 54<br>(36 - 76)  | 0<br>(0 - 1)     | 0<br>(0 - 0)      | 17<br>(10 - 26)    | 26<br>(17 - 37)    | 11<br>(8 - 14)     |
| Cerebrovascular disease                       | 29<br>(19 - 40)  | 0<br>(0 - 1)     | 0<br>(0 - 0)      | 6<br>(4 - 10)      | 12<br>(7 - 18)     | 10<br>(7 - 12)     |
| Ischemic stroke                               | 10<br>(5 - 14)   | 0<br>(0 - 0)     | 0<br>(0 - 0)      | 1<br>(0 - 2)       | 3<br>(2 - 5)       | 5<br>(3 - 7)       |
| Hemorrhagic stroke                            | 19<br>(12 - 28)  | 0<br>(0 - 1)     | 0<br>(0 - 0)      | 5<br>(3 - 8)       | 9<br>(5 - 13)      | 5<br>(3 - 6)       |
| Hypertensive heart disease                    | 1<br>(1 - 2)     | 0<br>(0 - 0)     | 0<br>(0 - 0)      | 0<br>(0 - 1)       | 1<br>(0 - 1)       | 0<br>(0 - 1)       |
| Cardiomyopathy and myocarditis                | 4<br>(1 - 6)     | 0<br>(0 - 0)     | 0<br>(0 - 0)      | 2<br>(1 - 4)       | 1<br>(0 - 2)       | 0<br>(0 - 1)       |
| Atrial fibrillation and flutter               | 1<br>(0 - 2)     | --               | --                | 0<br>(0 - 0)       | 0<br>(0 - 1)       | 1<br>(0 - 1)       |
| Aortic aneurysm                               | 1<br>(0 - 1)     | --               | --                | 0<br>(0 - 0)       | 0<br>(0 - 0)       | 0<br>(0 - 0)       |
| Peripheral vascular disease                   | 0<br>(0 - 0)     | --               | --                | 0<br>(0 - 0)       | 0<br>(0 - 0)       | 0<br>(0 - 0)       |
| Endocarditis                                  | 1<br>(1 - 2)     | 0<br>(0 - 0)     | 0<br>(0 - 0)      | 1<br>(0 - 1)       | 0<br>(0 - 0)       | 0<br>(0 - 0)       |
| Other cardiovascular and circulatory diseases | 3<br>(2 - 5)     | 0<br>(0 - 0)     | 0<br>(0 - 0)      | 1<br>(1 - 2)       | 1<br>(1 - 2)       | 1<br>(0 - 1)       |
| Chronic respiratory diseases                  | 23<br>(16 - 30)  | 0<br>(0 - 1)     | 0<br>(0 - 0)      | 3<br>(2 - 5)       | 9<br>(6 - 13)      | 10<br>(7 - 12)     |
| Chronic obstructive pulmonary disease         | 9<br>(6 - 11)    | 0<br>(0 - 0)     | 0<br>(0 - 0)      | 1<br>(0 - 1)       | 3<br>(2 - 4)       | 5<br>(3 - 6)       |

Web Table 31- Marshall Islands deaths with 95% UI by age, sex, and cause in 2013

| Cause                                               | Males, All Ages | Males, 0-4 Years | Males, 5-14 Years | Males, 15-49 Years | Males, 50-69 Years | Males, 70-80 Years |
|-----------------------------------------------------|-----------------|------------------|-------------------|--------------------|--------------------|--------------------|
| Pneumoconiosis                                      | 2<br>(1 - 4)    | 0<br>(0 - 0)     | 0<br>(0 - 0)      | 0<br>(0 - 1)       | 1<br>(1 - 2)       | 1<br>(0 - 1)       |
| Silicosis                                           | 1<br>(0 - 1)    | 0<br>(0 - 0)     | 0<br>(0 - 0)      | 0<br>(0 - 0)       | 0<br>(0 - 1)       | 0<br>(0 - 0)       |
| Asbestosis                                          | 0<br>(0 - 1)    | 0<br>(0 - 0)     | 0<br>(0 - 0)      | 0<br>(0 - 0)       | 0<br>(0 - 0)       | 0<br>(0 - 0)       |
| Coal workers pneumoconiosis                         | 0<br>(0 - 1)    | 0<br>(0 - 0)     | 0<br>(0 - 0)      | 0<br>(0 - 0)       | 0<br>(0 - 0)       | 0<br>(0 - 0)       |
| Other pneumoconiosis                                | 1<br>(1 - 2)    | 0<br>(0 - 0)     | 0<br>(0 - 0)      | 0<br>(0 - 0)       | 1<br>(0 - 1)       | 0<br>(0 - 1)       |
| Asthma                                              | 8<br>(5 - 12)   | 0<br>(0 - 0)     | 0<br>(0 - 0)      | 1<br>(1 - 2)       | 4<br>(2 - 6)       | 3<br>(2 - 5)       |
| Interstitial lung disease and pulmonary sarcoidosis | 1<br>(1 - 2)    | 0<br>(0 - 0)     | 0<br>(0 - 0)      | 0<br>(0 - 0)       | 1<br>(0 - 1)       | 1<br>(0 - 1)       |
| Other chronic respiratory diseases                  | 2<br>(1 - 3)    | 0<br>(0 - 0)     | 0<br>(0 - 0)      | 0<br>(0 - 1)       | 1<br>(0 - 1)       | 1<br>(0 - 1)       |
| Cirrhosis                                           | 6<br>(4 - 9)    | 0<br>(0 - 0)     | 0<br>(0 - 0)      | 3<br>(2 - 5)       | 2<br>(1 - 3)       | 1<br>(0 - 1)       |
| Cirrhosis due to hepatitis B                        | 3<br>(2 - 5)    | 0<br>(0 - 0)     | 0<br>(0 - 0)      | 2<br>(1 - 3)       | 1<br>(1 - 2)       | 0<br>(0 - 0)       |
| Cirrhosis due to hepatitis C                        | 1<br>(0 - 2)    | 0<br>(0 - 0)     | 0<br>(0 - 0)      | 0<br>(0 - 1)       | 0<br>(0 - 1)       | 0<br>(0 - 0)       |
| Cirrhosis due to alcohol use                        | 1<br>(1 - 2)    | --               | --                | 0<br>(0 - 1)       | 0<br>(0 - 1)       | 0<br>(0 - 0)       |
| Cirrhosis due to other causes                       | 0<br>(0 - 1)    | 0<br>(0 - 0)     | 0<br>(0 - 0)      | 0<br>(0 - 0)       | 0<br>(0 - 0)       | 0<br>(0 - 0)       |
| Digestive diseases                                  | 12<br>(8 - 17)  | 0<br>(0 - 0)     | 0<br>(0 - 0)      | 5<br>(3 - 7)       | 4<br>(3 - 6)       | 3<br>(2 - 4)       |
| Peptic ulcer disease                                | 3<br>(1 - 4)    | 0<br>(0 - 0)     | 0<br>(0 - 0)      | 1<br>(1 - 2)       | 1<br>(0 - 2)       | 1<br>(0 - 1)       |
| Gastritis and duodenitis                            | 0<br>(0 - 0)    | 0<br>(0 - 0)     | 0<br>(0 - 0)      | 0<br>(0 - 0)       | 0<br>(0 - 0)       | 0<br>(0 - 0)       |
| Appendicitis                                        | 1<br>(0 - 1)    | 0<br>(0 - 0)     | 0<br>(0 - 0)      | 0<br>(0 - 1)       | 0<br>(0 - 0)       | 0<br>(0 - 0)       |
| Paralytic ileus and intestinal obstruction          | 3<br>(1 - 4)    | 0<br>(0 - 0)     | 0<br>(0 - 0)      | 1<br>(0 - 2)       | 1<br>(0 - 1)       | 1<br>(0 - 1)       |
| Inguinal, femoral, and abdominal hernia             | 0<br>(0 - 0)    | 0<br>(0 - 0)     | 0<br>(0 - 0)      | 0<br>(0 - 0)       | 0<br>(0 - 0)       | 0<br>(0 - 0)       |
| Inflammatory bowel disease                          | 0<br>(0 - 1)    | 0<br>(0 - 0)     | 0<br>(0 - 0)      | 0<br>(0 - 0)       | 0<br>(0 - 0)       | 0<br>(0 - 0)       |
| Vascular intestinal disorders                       | 0<br>(0 - 0)    | 0<br>(0 - 0)     | 0<br>(0 - 0)      | 0<br>(0 - 0)       | 0<br>(0 - 0)       | 0<br>(0 - 0)       |
| Gallbladder and biliary diseases                    | 2<br>(1 - 3)    | 0<br>(0 - 0)     | 0<br>(0 - 0)      | 1<br>(0 - 1)       | 1<br>(0 - 1)       | 0<br>(0 - 1)       |
| Pancreatitis                                        | 0<br>(0 - 1)    | 0<br>(0 - 0)     | 0<br>(0 - 0)      | 0<br>(0 - 0)       | 0<br>(0 - 0)       | 0<br>(0 - 0)       |
| Other digestive diseases                            | 3<br>(2 - 6)    | 0<br>(0 - 0)     | 0<br>(0 - 0)      | 1<br>(1 - 2)       | 1<br>(1 - 2)       | 1<br>(0 - 1)       |
| Neurological disorders                              | 3<br>(2 - 4)    | 0<br>(0 - 0)     | 0<br>(0 - 0)      | 1<br>(0 - 1)       | 0<br>(0 - 1)       | 2<br>(2 - 3)       |
| Alzheimer disease and other dementias               | 2<br>(2 - 3)    | --               | --                | 0<br>(0 - 0)       | 0<br>(0 - 1)       | 2<br>(1 - 3)       |
| Parkinson disease                                   | 0<br>(0 - 0)    | --               | --                | 0<br>(0 - 0)       | 0<br>(0 - 0)       | 0<br>(0 - 0)       |
| Epilepsy                                            | 1<br>(0 - 1)    | 0<br>(0 - 0)     | 0<br>(0 - 0)      | 0<br>(0 - 1)       | 0<br>(0 - 0)       | 0<br>(0 - 0)       |
| Multiple sclerosis                                  | 0<br>(0 - 0)    | --               | --                | 0<br>(0 - 0)       | 0<br>(0 - 0)       | 0<br>(0 - 0)       |
| Other neurological disorders                        | 0<br>(0 - 1)    | 0<br>(0 - 0)     | 0<br>(0 - 0)      | 0<br>(0 - 0)       | 0<br>(0 - 0)       | 0<br>(0 - 0)       |
| Mental and substance use disorders                  | 1<br>(0 - 1)    | 0<br>(0 - 0)     | 0<br>(0 - 0)      | 1<br>(0 - 1)       | 0<br>(0 - 0)       | 0<br>(0 - 0)       |
| Schizophrenia                                       | 0<br>(0 - 0)    | --               | --                | 0<br>(0 - 0)       | 0<br>(0 - 0)       | 0<br>(0 - 0)       |
| Alcohol use disorders                               | 1<br>(0 - 1)    | --               | --                | 0<br>(0 - 1)       | 0<br>(0 - 0)       | 0<br>(0 - 0)       |
| Drug use disorders                                  | 0<br>(0 - 0)    | 0<br>(0 - 0)     | --                | 0<br>(0 - 0)       | 0<br>(0 - 0)       | 0<br>(0 - 0)       |
| Opioid use disorders                                | 0<br>(0 - 0)    | 0<br>(0 - 0)     | --                | 0<br>(0 - 0)       | 0<br>(0 - 0)       | 0<br>(0 - 0)       |
| Cocaine use disorders                               | 0<br>(0 - 0)    | 0<br>(0 - 0)     | --                | 0<br>(0 - 0)       | 0<br>(0 - 0)       | 0<br>(0 - 0)       |
| Amphetamine use disorders                           | 0<br>(0 - 0)    | 0<br>(0 - 0)     | --                | 0<br>(0 - 0)       | 0<br>(0 - 0)       | 0<br>(0 - 0)       |
| Other drug use disorders                            | 0<br>(0 - 0)    | 0<br>(0 - 0)     | --                | 0<br>(0 - 0)       | 0<br>(0 - 0)       | 0<br>(0 - 0)       |
| Eating disorders                                    | 0<br>(0 - 0)    | --               | 0<br>(0 - 0)      | 0<br>(0 - 0)       | --                 | --                 |
| Anorexia nervosa                                    | 0<br>(0 - 0)    | --               | 0<br>(0 - 0)      | 0<br>(0 - 0)       | --                 | --                 |

Web Table 31- Marshall Islands deaths with 95% UI by age, sex, and cause in 2013

| Cause                                               | Males, All Ages | Males, 0-4 Years | Males, 5-14 Years | Males, 15-49 Years | Males, 50-69 Years | Males, 70-80 Years |
|-----------------------------------------------------|-----------------|------------------|-------------------|--------------------|--------------------|--------------------|
| Diabetes, urogenital, blood, and endocrine diseases | 48<br>(29 - 74) | 1<br>(0 - 2)     | 0<br>(0 - 1)      | 11<br>(6 - 19)     | 23<br>(14 - 37)    | 12<br>(8 - 19)     |
| Diabetes mellitus                                   | 35<br>(21 - 58) | 0<br>(0 - 0)     | 0<br>(0 - 0)      | 7<br>(3 - 13)      | 19<br>(11 - 31)    | 10<br>(6 - 15)     |
| Acute glomerulonephritis                            | 0<br>(0 - 0)    | 0<br>(0 - 0)     | 0<br>(0 - 0)      | 0<br>(0 - 0)       | 0<br>(0 - 0)       | 0<br>(0 - 0)       |
| Chronic kidney disease                              | 9<br>(3 - 18)   | 0<br>(0 - 0)     | 0<br>(0 - 0)      | 3<br>(1 - 7)       | 3<br>(1 - 7)       | 2<br>(1 - 4)       |
| Chronic kidney disease due to diabetes mellitus     | 2<br>(1 - 6)    | 0<br>(0 - 0)     | 0<br>(0 - 0)      | 1<br>(0 - 2)       | 1<br>(0 - 3)       | 0<br>(0 - 1)       |
| Chronic kidney disease due to hypertension          | 1<br>(0 - 3)    | 0<br>(0 - 0)     | 0<br>(0 - 0)      | 0<br>(0 - 1)       | 1<br>(0 - 1)       | 0<br>(0 - 1)       |
| Chronic kidney disease due to glomerulonephritis    | 0<br>(0 - 0)    | 0<br>(0 - 0)     | 0<br>(0 - 0)      | 0<br>(0 - 0)       | 0<br>(0 - 0)       | 0<br>(0 - 0)       |
| Chronic kidney disease due to other causes          | 5<br>(1 - 11)   | 0<br>(0 - 0)     | 0<br>(0 - 0)      | 2<br>(0 - 5)       | 2<br>(0 - 5)       | 1<br>(0 - 3)       |
| Urinary diseases and male infertility               | 1<br>(1 - 1)    | 0<br>(0 - 0)     | 0<br>(0 - 0)      | 0<br>(0 - 0)       | 0<br>(0 - 0)       | 0<br>(0 - 0)       |
| Interstitial nephritis and urinary tract infections | 0<br>(0 - 0)    | 0<br>(0 - 0)     | 0<br>(0 - 0)      | 0<br>(0 - 0)       | 0<br>(0 - 0)       | 0<br>(0 - 0)       |
| Urolithiasis                                        | 0<br>(0 - 0)    | --               | 0<br>(0 - 0)      | 0<br>(0 - 0)       | 0<br>(0 - 0)       | 0<br>(0 - 0)       |
| Other urinary diseases                              | 1<br>(0 - 1)    | 0<br>(0 - 0)     | 0<br>(0 - 0)      | 0<br>(0 - 0)       | 0<br>(0 - 0)       | 0<br>(0 - 0)       |
| Gynecological diseases                              | --              | --               | --                | --                 | --                 | --                 |
| Uterine fibroids                                    | --              | --               | --                | --                 | --                 | --                 |
| Polycystic ovarian syndrome                         | --              | --               | --                | --                 | --                 | --                 |
| Endometriosis                                       | --              | --               | --                | --                 | --                 | --                 |
| Genital prolapse                                    | --              | --               | --                | --                 | --                 | --                 |
| Other gynecological diseases                        | --              | --               | --                | --                 | --                 | --                 |
| Hemoglobinopathies and hemolytic anemias            | 1<br>(0 - 1)    | 0<br>(0 - 0)     | 0<br>(0 - 0)      | 0<br>(0 - 1)       | 0<br>(0 - 0)       | 0<br>(0 - 0)       |
| Thalassemias                                        | 0<br>(0 - 1)    | 0<br>(0 - 0)     | 0<br>(0 - 0)      | 0<br>(0 - 0)       | 0<br>(0 - 0)       | 0<br>(0 - 0)       |
| Sickle cell disorders                               | 0<br>(0 - 0)    | 0<br>(0 - 0)     | 0<br>(0 - 0)      | 0<br>(0 - 0)       | 0<br>(0 - 0)       | 0<br>(0 - 0)       |
| G6PD deficiency                                     | 0<br>(0 - 0)    | 0<br>(0 - 0)     | 0<br>(0 - 0)      | 0<br>(0 - 0)       | 0<br>(0 - 0)       | 0<br>(0 - 0)       |
| Other hemoglobinopathies and hemolytic anemias      | 0<br>(0 - 1)    | 0<br>(0 - 0)     | 0<br>(0 - 0)      | 0<br>(0 - 0)       | 0<br>(0 - 0)       | 0<br>(0 - 0)       |
| Endocrine, metabolic, blood, and immune disorders   | 2<br>(1 - 4)    | 0<br>(0 - 1)     | 0<br>(0 - 0)      | 1<br>(0 - 1)       | 1<br>(0 - 1)       | 0<br>(0 - 1)       |
| Musculoskeletal disorders                           | 0<br>(0 - 0)    | --               | 0<br>(0 - 0)      | 0<br>(0 - 0)       | 0<br>(0 - 0)       | 0<br>(0 - 0)       |
| Rheumatoid arthritis                                | 0<br>(0 - 0)    | --               | 0<br>(0 - 0)      | 0<br>(0 - 0)       | 0<br>(0 - 0)       | 0<br>(0 - 0)       |
| Other musculoskeletal disorders                     | 0<br>(0 - 0)    | --               | 0<br>(0 - 0)      | 0<br>(0 - 0)       | 0<br>(0 - 0)       | 0<br>(0 - 0)       |
| Other non-communicable diseases                     | 8<br>(5 - 13)   | 6<br>(3 - 10)    | 1<br>(0 - 1)      | 1<br>(1 - 2)       | 0<br>(0 - 1)       | 0<br>(0 - 0)       |
| Congenital anomalies                                | 7<br>(4 - 12)   | 5<br>(3 - 10)    | 1<br>(0 - 1)      | 1<br>(0 - 1)       | 0<br>(0 - 0)       | 0<br>(0 - 0)       |
| Neural tube defects                                 | 0<br>(0 - 0)    | 0<br>(0 - 0)     | 0<br>(0 - 0)      | 0<br>(0 - 0)       | 0<br>(0 - 0)       | 0<br>(0 - 0)       |
| Congenital heart anomalies                          | 1<br>(0 - 4)    | 1<br>(0 - 3)     | 0<br>(0 - 0)      | 0<br>(0 - 0)       | 0<br>(0 - 0)       | 0<br>(0 - 0)       |
| Cleft lip and cleft palate                          | 0<br>(0 - 0)    | 0<br>(0 - 0)     | --                | --                 | --                 | --                 |
| Down syndrome                                       | 0<br>(0 - 1)    | 0<br>(0 - 1)     | 0<br>(0 - 0)      | 0<br>(0 - 0)       | 0<br>(0 - 0)       | 0<br>(0 - 0)       |
| Chromosomal unbalanced rearrangements               | 0<br>(0 - 1)    | 0<br>(0 - 1)     | 0<br>(0 - 0)      | 0<br>(0 - 0)       | 0<br>(0 - 0)       | 0<br>(0 - 0)       |
| Other congenital anomalies                          | 5<br>(3 - 10)   | 4<br>(2 - 8)     | 0<br>(0 - 1)      | 1<br>(0 - 1)       | 0<br>(0 - 0)       | 0<br>(0 - 0)       |
| Skin and subcutaneous diseases                      | 1<br>(0 - 1)    | 0<br>(0 - 0)     | 0<br>(0 - 0)      | 0<br>(0 - 0)       | 0<br>(0 - 0)       | 0<br>(0 - 0)       |
| Cellulitis                                          | 0<br>(0 - 0)    | 0<br>(0 - 0)     | 0<br>(0 - 0)      | 0<br>(0 - 0)       | 0<br>(0 - 0)       | 0<br>(0 - 0)       |
| Pyoderma                                            | 0<br>(0 - 1)    | 0<br>(0 - 0)     | 0<br>(0 - 0)      | 0<br>(0 - 0)       | 0<br>(0 - 0)       | 0<br>(0 - 0)       |
| Decubitus ulcer                                     | 0<br>(0 - 0)    | 0<br>(0 - 0)     | 0<br>(0 - 0)      | 0<br>(0 - 0)       | 0<br>(0 - 0)       | 0<br>(0 - 0)       |
| Other skin and subcutaneous diseases                | 0<br>(0 - 0)    | 0<br>(0 - 0)     | 0<br>(0 - 0)      | 0<br>(0 - 0)       | 0<br>(0 - 0)       | 0<br>(0 - 0)       |

Web Table 31- Marshall Islands deaths with 95% UI by age, sex, and cause in 2013

| Cause                                           | Males, All Ages | Males, 0-4 Years | Males, 5-14 Years | Males, 15-49 Years | Males, 50-69 Years | Males, 70-80 Years |
|-------------------------------------------------|-----------------|------------------|-------------------|--------------------|--------------------|--------------------|
| Sudden infant death syndrome                    | 0<br>(0 - 0)    | 0<br>(0 - 0)     | --                | --                 | --                 | --                 |
| Injuries                                        | 28<br>(18 - 42) | 2<br>(1 - 4)     | 2<br>(1 - 2)      | 19<br>(12 - 29)    | 4<br>(2 - 6)       | 2<br>(1 - 2)       |
| Transport injuries                              | 9<br>(6 - 14)   | 0<br>(0 - 1)     | 1<br>(0 - 1)      | 6<br>(4 - 10)      | 1<br>(1 - 2)       | 1<br>(0 - 1)       |
| Road injuries                                   | 9<br>(6 - 13)   | 0<br>(0 - 1)     | 1<br>(0 - 1)      | 6<br>(4 - 9)       | 1<br>(1 - 2)       | 1<br>(0 - 1)       |
| Pedestrian road injuries                        | 1<br>(0 - 2)    | 0<br>(0 - 0)     | 0<br>(0 - 0)      | 1<br>(0 - 1)       | 0<br>(0 - 0)       | 0<br>(0 - 0)       |
| Cyclist road injuries                           | 0<br>(0 - 0)    | 0<br>(0 - 0)     | 0<br>(0 - 0)      | 0<br>(0 - 0)       | 0<br>(0 - 0)       | 0<br>(0 - 0)       |
| Motorcyclist road injuries                      | 1<br>(1 - 2)    | 0<br>(0 - 0)     | 0<br>(0 - 0)      | 1<br>(1 - 2)       | 0<br>(0 - 0)       | 0<br>(0 - 0)       |
| Motor vehicle road injuries                     | 6<br>(4 - 9)    | 0<br>(0 - 0)     | 1<br>(0 - 1)      | 4<br>(3 - 6)       | 1<br>(1 - 1)       | 0<br>(0 - 1)       |
| Other road injuries                             | 0<br>(0 - 0)    | 0<br>(0 - 0)     | 0<br>(0 - 0)      | 0<br>(0 - 0)       | 0<br>(0 - 0)       | 0<br>(0 - 0)       |
| Other transport injuries                        | 1<br>(0 - 1)    | 0<br>(0 - 0)     | 0<br>(0 - 0)      | 0<br>(0 - 1)       | 0<br>(0 - 0)       | 0<br>(0 - 0)       |
| Unintentional injuries                          | 8<br>(5 - 13)   | 1<br>(1 - 4)     | 1<br>(0 - 1)      | 4<br>(3 - 7)       | 1<br>(1 - 2)       | 1<br>(0 - 1)       |
| Falls                                           | 1<br>(0 - 1)    | 0<br>(0 - 0)     | 0<br>(0 - 0)      | 0<br>(0 - 1)       | 0<br>(0 - 0)       | 0<br>(0 - 0)       |
| Drowning                                        | 2<br>(1 - 3)    | 0<br>(0 - 1)     | 0<br>(0 - 0)      | 1<br>(1 - 2)       | 0<br>(0 - 0)       | 0<br>(0 - 0)       |
| Fire, heat, and hot substances                  | 0<br>(0 - 1)    | 0<br>(0 - 0)     | 0<br>(0 - 0)      | 0<br>(0 - 0)       | 0<br>(0 - 0)       | 0<br>(0 - 0)       |
| Poisonings                                      | 0<br>(0 - 0)    | 0<br>(0 - 0)     | 0<br>(0 - 0)      | 0<br>(0 - 0)       | 0<br>(0 - 0)       | 0<br>(0 - 0)       |
| Exposure to mechanical forces                   | 1<br>(0 - 6)    | 0<br>(0 - 2)     | 0<br>(0 - 1)      | 1<br>(0 - 3)       | 0<br>(0 - 1)       | 0<br>(0 - 0)       |
| Unintentional firearm injuries                  | 0<br>(0 - 0)    | 0<br>(0 - 0)     | 0<br>(0 - 0)      | 0<br>(0 - 0)       | 0<br>(0 - 0)       | 0<br>(0 - 0)       |
| Unintentional suffocation                       | 1<br>(0 - 6)    | 0<br>(0 - 2)     | 0<br>(0 - 1)      | 0<br>(0 - 2)       | 0<br>(0 - 1)       | 0<br>(0 - 0)       |
| Other exposure to mechanical forces             | 0<br>(0 - 1)    | 0<br>(0 - 0)     | 0<br>(0 - 0)      | 0<br>(0 - 1)       | 0<br>(0 - 0)       | 0<br>(0 - 0)       |
| Adverse effects of medical treatment            | 2<br>(1 - 3)    | 0<br>(0 - 1)     | 0<br>(0 - 0)      | 1<br>(0 - 1)       | 0<br>(0 - 0)       | 0<br>(0 - 0)       |
| Animal contact                                  | 0<br>(0 - 0)    | 0<br>(0 - 0)     | 0<br>(0 - 0)      | 0<br>(0 - 0)       | 0<br>(0 - 0)       | 0<br>(0 - 0)       |
| Venomous animal contact                         | 0<br>(0 - 0)    | 0<br>(0 - 0)     | 0<br>(0 - 0)      | 0<br>(0 - 0)       | 0<br>(0 - 0)       | 0<br>(0 - 0)       |
| Non-venomous animal contact                     | 0<br>(0 - 0)    | 0<br>(0 - 0)     | 0<br>(0 - 0)      | 0<br>(0 - 0)       | 0<br>(0 - 0)       | 0<br>(0 - 0)       |
| Foreign body                                    | 1<br>(0 - 1)    | 0<br>(0 - 1)     | 0<br>(0 - 0)      | 0<br>(0 - 0)       | 0<br>(0 - 0)       | 0<br>(0 - 0)       |
| Pulmonary aspiration and foreign body in airway | 1<br>(0 - 1)    | 0<br>(0 - 1)     | 0<br>(0 - 0)      | 0<br>(0 - 0)       | 0<br>(0 - 0)       | 0<br>(0 - 0)       |
| Foreign body in other body part                 | 0<br>(0 - 0)    | 0<br>(0 - 0)     | 0<br>(0 - 0)      | 0<br>(0 - 0)       | 0<br>(0 - 0)       | 0<br>(0 - 0)       |
| Other unintentional injuries                    | 1<br>(1 - 2)    | 0<br>(0 - 0)     | 0<br>(0 - 0)      | 1<br>(1 - 1)       | 0<br>(0 - 0)       | 0<br>(0 - 0)       |
| Self-harm and interpersonal violence            | 10<br>(6 - 16)  | 0<br>(0 - 0)     | 0<br>(0 - 0)      | 8<br>(5 - 13)      | 1<br>(1 - 2)       | 0<br>(0 - 1)       |
| Self-harm                                       | 6<br>(3 - 10)   | --               | 0<br>(0 - 0)      | 5<br>(2 - 8)       | 1<br>(0 - 1)       | 0<br>(0 - 1)       |
| Interpersonal violence                          | 4<br>(2 - 7)    | 0<br>(0 - 0)     | 0<br>(0 - 0)      | 4<br>(2 - 7)       | 0<br>(0 - 1)       | 0<br>(0 - 0)       |
| Assault by firearm                              | 2<br>(1 - 4)    | 0<br>(0 - 0)     | 0<br>(0 - 0)      | 1<br>(1 - 3)       | 0<br>(0 - 0)       | 0<br>(0 - 0)       |
| Assault by sharp object                         | 2<br>(1 - 3)    | 0<br>(0 - 0)     | 0<br>(0 - 0)      | 2<br>(1 - 3)       | 0<br>(0 - 0)       | 0<br>(0 - 0)       |
| Assault by other means                          | 1<br>(1 - 2)    | 0<br>(0 - 0)     | 0<br>(0 - 0)      | 1<br>(0 - 2)       | 0<br>(0 - 0)       | 0<br>(0 - 0)       |

Web Table 31- Marshall Islands deaths with 95% UI by age, sex, and cause in 2013

| Cause                                                             | Females, All Ages  | Females, 0-4 Years | Females, 5-14 Years | Females, 15-49 Years | Females, 50-69 Years | Females, 70-80 Years |
|-------------------------------------------------------------------|--------------------|--------------------|---------------------|----------------------|----------------------|----------------------|
| All causes                                                        | 227<br>(168 - 297) | 27<br>(16 - 45)    | 4<br>(3 - 6)        | 48<br>(28 - 71)      | 73<br>(47 - 100)     | 75<br>(60 - 92)      |
| Communicable, maternal, neonatal, and nutritional diseases        | 48<br>(35 - 64)    | 20<br>(12 - 33)    | 2<br>(1 - 2)        | 9<br>(6 - 13)        | 7<br>(4 - 11)        | 11<br>(7 - 16)       |
| HIV/AIDS and tuberculosis                                         | 3<br>(2 - 5)       | 0<br>(0 - 0)       | 0<br>(0 - 0)        | 1<br>(1 - 2)         | 1<br>(0 - 2)         | 1<br>(0 - 1)         |
| Tuberculosis                                                      | 2<br>(1 - 4)       | 0<br>(0 - 0)       | 0<br>(0 - 0)        | 1<br>(0 - 2)         | 1<br>(0 - 1)         | 1<br>(0 - 1)         |
| HIV/AIDS                                                          | 1<br>(0 - 1)       | 0<br>(0 - 0)       | 0<br>(0 - 0)        | 0<br>(0 - 1)         | 0<br>(0 - 0)         | 0<br>(0 - 0)         |
| HIV/AIDS resulting in mycobacterial infection                     | 0<br>(0 - 0)       | 0<br>(0 - 0)       | 0<br>(0 - 0)        | 0<br>(0 - 0)         | 0<br>(0 - 0)         | 0<br>(0 - 0)         |
| HIV/AIDS resulting in other diseases                              | 1<br>(0 - 1)       | 0<br>(0 - 0)       | 0<br>(0 - 0)        | 0<br>(0 - 1)         | 0<br>(0 - 0)         | 0<br>(0 - 0)         |
| Diarrhea, lower respiratory, and other common infectious diseases | 23<br>(16 - 32)    | 6<br>(3 - 12)      | 1<br>(1 - 1)        | 3<br>(2 - 6)         | 4<br>(2 - 7)         | 8<br>(5 - 12)        |
| Diarrheal diseases                                                | 6<br>(3 - 9)       | 1<br>(0 - 3)       | 0<br>(0 - 0)        | 1<br>(0 - 1)         | 1<br>(1 - 2)         | 3<br>(1 - 5)         |
| Intestinal infectious diseases                                    | 1<br>(0 - 1)       | 0<br>(0 - 1)       | 0<br>(0 - 0)        | 0<br>(0 - 0)         | 0<br>(0 - 0)         | 0<br>(0 - 0)         |
| Typhoid fever                                                     | 0<br>(0 - 1)       | 0<br>(0 - 1)       | 0<br>(0 - 0)        | 0<br>(0 - 0)         | 0<br>(0 - 0)         | 0<br>(0 - 0)         |
| Paratyphoid fever                                                 | 0<br>(0 - 0)       | 0<br>(0 - 0)       | 0<br>(0 - 0)        | 0<br>(0 - 0)         | 0<br>(0 - 0)         | 0<br>(0 - 0)         |
| Other intestinal infectious diseases                              | 0<br>(0 - 0)       | 0<br>(0 - 0)       | 0<br>(0 - 0)        | 0<br>(0 - 0)         | 0<br>(0 - 0)         | 0<br>(0 - 0)         |
| Lower respiratory infections                                      | 13<br>(8 - 19)     | 3<br>(2 - 6)       | 0<br>(0 - 1)        | 2<br>(1 - 3)         | 3<br>(1 - 5)         | 5<br>(3 - 8)         |
| Upper respiratory infections                                      | 0<br>(0 - 0)       | 0<br>(0 - 0)       | 0<br>(0 - 0)        | 0<br>(0 - 0)         | 0<br>(0 - 0)         | 0<br>(0 - 0)         |
| Otitis media                                                      | 0<br>(0 - 0)       | 0<br>(0 - 0)       | 0<br>(0 - 0)        | 0<br>(0 - 0)         | 0<br>(0 - 0)         | 0<br>(0 - 0)         |
| Meningitis                                                        | 2<br>(1 - 3)       | 1<br>(0 - 2)       | 0<br>(0 - 0)        | 1<br>(0 - 1)         | 0<br>(0 - 0)         | 0<br>(0 - 0)         |
| Pneumococcal meningitis                                           | 1<br>(0 - 1)       | 0<br>(0 - 1)       | 0<br>(0 - 0)        | 0<br>(0 - 0)         | 0<br>(0 - 0)         | 0<br>(0 - 0)         |
| H influenzae type B meningitis                                    | 0<br>(0 - 1)       | 0<br>(0 - 0)       | 0<br>(0 - 0)        | 0<br>(0 - 0)         | 0<br>(0 - 0)         | 0<br>(0 - 0)         |
| Meningococcal meningitis                                          | 0<br>(0 - 1)       | 0<br>(0 - 0)       | 0<br>(0 - 0)        | 0<br>(0 - 0)         | 0<br>(0 - 0)         | 0<br>(0 - 0)         |
| Other meningitis                                                  | 1<br>(0 - 1)       | 0<br>(0 - 1)       | 0<br>(0 - 0)        | 0<br>(0 - 0)         | 0<br>(0 - 0)         | 0<br>(0 - 0)         |
| Encephalitis                                                      | 0<br>(0 - 0)       | 0<br>(0 - 0)       | 0<br>(0 - 0)        | 0<br>(0 - 0)         | 0<br>(0 - 0)         | 0<br>(0 - 0)         |
| Diphtheria                                                        | 0<br>(0 - 0)       | 0<br>(0 - 0)       | 0<br>(0 - 0)        | 0<br>(0 - 0)         | 0<br>(0 - 0)         | --                   |
| Whooping cough                                                    | 0<br>(0 - 0)       | 0<br>(0 - 0)       | 0<br>(0 - 0)        | 0<br>(0 - 0)         | 0<br>(0 - 0)         | --                   |
| Tetanus                                                           | 0<br>(0 - 0)       | 0<br>(0 - 0)       | 0<br>(0 - 0)        | 0<br>(0 - 0)         | 0<br>(0 - 0)         | 0<br>(0 - 0)         |
| Measles                                                           | 1<br>(0 - 2)       | 1<br>(0 - 2)       | 0<br>(0 - 0)        | 0<br>(0 - 0)         | 0<br>(0 - 0)         | --                   |
| Varicella and herpes zoster                                       | 0<br>(0 - 0)       | 0<br>(0 - 0)       | 0<br>(0 - 0)        | 0<br>(0 - 0)         | 0<br>(0 - 0)         | 0<br>(0 - 0)         |
| Neglected tropical diseases and malaria                           | 1<br>(1 - 2)       | 0<br>(0 - 0)       | 0<br>(0 - 0)        | 0<br>(0 - 0)         | 0<br>(0 - 0)         | 0<br>(0 - 0)         |
| Leishmaniasis                                                     | 0<br>(0 - 0)       | 0<br>(0 - 0)       | 0<br>(0 - 0)        | 0<br>(0 - 0)         | 0<br>(0 - 0)         | 0<br>(0 - 0)         |
| Visceral leishmaniasis                                            | 0<br>(0 - 0)       | 0<br>(0 - 0)       | 0<br>(0 - 0)        | 0<br>(0 - 0)         | 0<br>(0 - 0)         | 0<br>(0 - 0)         |
| Cysticercosis                                                     | 0<br>(0 - 0)       | 0<br>(0 - 0)       | 0<br>(0 - 0)        | 0<br>(0 - 0)         | 0<br>(0 - 0)         | 0<br>(0 - 0)         |
| Cystic echinococcosis                                             | 0<br>(0 - 0)       | 0<br>(0 - 0)       | 0<br>(0 - 0)        | 0<br>(0 - 0)         | 0<br>(0 - 0)         | 0<br>(0 - 0)         |
| Dengue                                                            | 1<br>(0 - 1)       | 0<br>(0 - 0)       | 0<br>(0 - 0)        | 0<br>(0 - 0)         | 0<br>(0 - 0)         | 0<br>(0 - 0)         |
| Rabies                                                            | 0<br>(0 - 0)       | 0<br>(0 - 0)       | 0<br>(0 - 0)        | 0<br>(0 - 0)         | 0<br>(0 - 0)         | 0<br>(0 - 0)         |
| Intestinal nematode infections                                    | 0<br>(0 - 0)       | 0<br>(0 - 0)       | 0<br>(0 - 0)        | 0<br>(0 - 0)         | 0<br>(0 - 0)         | 0<br>(0 - 0)         |
| Ascariasis                                                        | 0<br>(0 - 0)       | 0<br>(0 - 0)       | 0<br>(0 - 0)        | 0<br>(0 - 0)         | 0<br>(0 - 0)         | 0<br>(0 - 0)         |
| Other neglected tropical diseases                                 | 0<br>(0 - 0)       | 0<br>(0 - 0)       | 0<br>(0 - 0)        | 0<br>(0 - 0)         | 0<br>(0 - 0)         | 0<br>(0 - 0)         |
| Maternal disorders                                                | 2<br>(1 - 3)       | --                 | 0<br>(0 - 0)        | 2<br>(1 - 3)         | --                   | --                   |
| Maternal hemorrhage                                               | 0<br>(0 - 1)       | --                 | 0<br>(0 - 0)        | 0<br>(0 - 1)         | --                   | --                   |
| Maternal sepsis and other maternal infections                     | 0<br>(0 - 0)       | --                 | 0<br>(0 - 0)        | 0<br>(0 - 0)         | --                   | --                   |

Web Table 31- Marshall Islands deaths with 95% UI by age, sex, and cause in 2013

| Cause                                                            | Females, All Ages  | Females, 0-4 Years | Females, 5-14 Years | Females, 15-49 Years | Females, 50-69 Years | Females, 70-80 Years |
|------------------------------------------------------------------|--------------------|--------------------|---------------------|----------------------|----------------------|----------------------|
| Maternal hypertensive disorders                                  | 0<br>(0 - 0)       | --                 | 0<br>(0 - 0)        | 0<br>(0 - 0)         | --                   | --                   |
| Maternal obstructed labor                                        | 0<br>(0 - 0)       | --                 | 0<br>(0 - 0)        | 0<br>(0 - 0)         | --                   | --                   |
| Maternal abortive outcome                                        | 0<br>(0 - 0)       | --                 | 0<br>(0 - 0)        | 0<br>(0 - 0)         | --                   | --                   |
| Indirect maternal deaths                                         | 0<br>(0 - 0)       | --                 | 0<br>(0 - 0)        | 0<br>(0 - 0)         | --                   | --                   |
| Late maternal deaths                                             | 0<br>(0 - 0)       | --                 | 0<br>(0 - 0)        | 0<br>(0 - 0)         | --                   | --                   |
| Maternal deaths aggravated by HIV/AIDS                           | 0<br>(0 - 0)       | --                 | --                  | 0<br>(0 - 0)         | --                   | --                   |
| Other maternal disorders                                         | 0<br>(0 - 0)       | --                 | 0<br>(0 - 0)        | 0<br>(0 - 0)         | --                   | --                   |
| Neonatal disorders                                               | 11<br>(7 - 17)     | 11<br>(7 - 17)     | --                  | --                   | --                   | --                   |
| Neonatal preterm birth complications                             | 5<br>(2 - 8)       | 5<br>(2 - 8)       | --                  | --                   | --                   | --                   |
| Neonatal encephalopathy due to birth asphyxia and trauma         | 1<br>(1 - 3)       | 1<br>(1 - 3)       | --                  | --                   | --                   | --                   |
| Neonatal sepsis and other neonatal infections                    | 2<br>(0 - 4)       | 2<br>(0 - 4)       | --                  | --                   | --                   | --                   |
| Hemolytic disease and other neonatal jaundice                    | 0<br>(0 - 0)       | 0<br>(0 - 0)       | --                  | --                   | --                   | --                   |
| Other neonatal disorders                                         | 3<br>(1 - 6)       | 3<br>(1 - 6)       | --                  | --                   | --                   | --                   |
| Nutritional deficiencies                                         | 4<br>(3 - 6)       | 1<br>(0 - 2)       | 0<br>(0 - 0)        | 1<br>(1 - 2)         | 1<br>(0 - 1)         | 2<br>(1 - 3)         |
| Protein-energy malnutrition                                      | 2<br>(1 - 3)       | 1<br>(0 - 1)       | 0<br>(0 - 0)        | 0<br>(0 - 0)         | 0<br>(0 - 0)         | 1<br>(0 - 2)         |
| Iodine deficiency                                                | 0<br>(0 - 0)       | 0<br>(0 - 0)       | 0<br>(0 - 0)        | 0<br>(0 - 0)         | 0<br>(0 - 0)         | 0<br>(0 - 0)         |
| Iron-deficiency anemia                                           | 2<br>(1 - 3)       | 0<br>(0 - 0)       | 0<br>(0 - 0)        | 1<br>(0 - 2)         | 0<br>(0 - 1)         | 1<br>(0 - 1)         |
| Other nutritional deficiencies                                   | 0<br>(0 - 0)       | 0<br>(0 - 0)       | 0<br>(0 - 0)        | 0<br>(0 - 0)         | 0<br>(0 - 0)         | 0<br>(0 - 0)         |
| Other communicable, maternal, neonatal, and nutritional diseases | 4<br>(2 - 7)       | 1<br>(0 - 3)       | 0<br>(0 - 0)        | 1<br>(1 - 2)         | 1<br>(1 - 2)         | 1<br>(0 - 1)         |
| Sexually transmitted diseases excluding HIV                      | 1<br>(1 - 2)       | 1<br>(0 - 2)       | 0<br>(0 - 0)        | 0<br>(0 - 1)         | 0<br>(0 - 0)         | 0<br>(0 - 0)         |
| Syphilis                                                         | 1<br>(0 - 2)       | 1<br>(0 - 2)       | 0<br>(0 - 0)        | 0<br>(0 - 0)         | 0<br>(0 - 0)         | 0<br>(0 - 0)         |
| Chlamydial infection                                             | 0<br>(0 - 0)       | --                 | 0<br>(0 - 0)        | 0<br>(0 - 0)         | 0<br>(0 - 0)         | 0<br>(0 - 0)         |
| Gonococcal infection                                             | 0<br>(0 - 0)       | --                 | 0<br>(0 - 0)        | 0<br>(0 - 0)         | 0<br>(0 - 0)         | 0<br>(0 - 0)         |
| Other sexually transmitted diseases                              | 0<br>(0 - 0)       | --                 | 0<br>(0 - 0)        | 0<br>(0 - 0)         | 0<br>(0 - 0)         | 0<br>(0 - 0)         |
| Hepatitis                                                        | 1<br>(1 - 2)       | 0<br>(0 - 0)       | 0<br>(0 - 0)        | 0<br>(0 - 0)         | 1<br>(0 - 1)         | 0<br>(0 - 0)         |
| Acute hepatitis A                                                | 0<br>(0 - 0)       | 0<br>(0 - 0)       | 0<br>(0 - 0)        | 0<br>(0 - 0)         | 0<br>(0 - 0)         | 0<br>(0 - 0)         |
| Acute hepatitis B                                                | 1<br>(0 - 1)       | 0<br>(0 - 0)       | 0<br>(0 - 0)        | 0<br>(0 - 0)         | 0<br>(0 - 1)         | 0<br>(0 - 0)         |
| Acute hepatitis C                                                | 0<br>(0 - 0)       | --                 | 0<br>(0 - 0)        | 0<br>(0 - 0)         | 0<br>(0 - 0)         | 0<br>(0 - 0)         |
| Acute hepatitis E                                                | 0<br>(0 - 1)       | 0<br>(0 - 0)       | 0<br>(0 - 0)        | 0<br>(0 - 0)         | 0<br>(0 - 0)         | 0<br>(0 - 0)         |
| Other infectious diseases                                        | 2<br>(1 - 4)       | 0<br>(0 - 1)       | 0<br>(0 - 0)        | 1<br>(0 - 1)         | 0<br>(0 - 1)         | 0<br>(0 - 1)         |
| Non-communicable diseases                                        | 167<br>(116 - 222) | 6<br>(3 - 10)      | 2<br>(1 - 3)        | 33<br>(19 - 50)      | 64<br>(41 - 88)      | 62<br>(49 - 77)      |
| Neoplasms                                                        | 18<br>(11 - 26)    | 0<br>(0 - 0)       | 0<br>(0 - 0)        | 6<br>(3 - 10)        | 7<br>(4 - 11)        | 4<br>(3 - 6)         |
| Esophageal cancer                                                | 0<br>(0 - 0)       | --                 | --                  | 0<br>(0 - 0)         | 0<br>(0 - 0)         | 0<br>(0 - 0)         |
| Stomach cancer                                                   | 1<br>(0 - 1)       | --                 | --                  | 0<br>(0 - 0)         | 0<br>(0 - 1)         | 0<br>(0 - 0)         |
| Liver cancer                                                     | 1<br>(0 - 2)       | --                 | 0<br>(0 - 0)        | 0<br>(0 - 1)         | 0<br>(0 - 1)         | 0<br>(0 - 1)         |
| Liver cancer due to hepatitis B                                  | 0<br>(0 - 1)       | --                 | 0<br>(0 - 0)        | 0<br>(0 - 0)         | 0<br>(0 - 1)         | 0<br>(0 - 0)         |
| Liver cancer due to hepatitis C                                  | 0<br>(0 - 1)       | --                 | 0<br>(0 - 0)        | 0<br>(0 - 0)         | 0<br>(0 - 1)         | 0<br>(0 - 0)         |
| Liver cancer due to alcohol use                                  | 0<br>(0 - 0)       | --                 | --                  | 0<br>(0 - 0)         | 0<br>(0 - 0)         | 0<br>(0 - 0)         |
| Liver cancer due to other causes                                 | 0<br>(0 - 1)       | --                 | 0<br>(0 - 0)        | 0<br>(0 - 0)         | 0<br>(0 - 0)         | 0<br>(0 - 0)         |
| Larynx cancer                                                    | 0<br>(0 - 0)       | --                 | --                  | 0<br>(0 - 0)         | 0<br>(0 - 0)         | 0<br>(0 - 0)         |

Web Table 31- Marshall Islands deaths with 95% UI by age, sex, and cause in 2013

| Cause                                         | Females, All Ages | Females, 0-4 Years | Females, 5-14 Years | Females, 15-49 Years | Females, 50-69 Years | Females, 70-80 Years |
|-----------------------------------------------|-------------------|--------------------|---------------------|----------------------|----------------------|----------------------|
| Tracheal, bronchus and lung cancer            | 1<br>(1 - 2)      | --                 | --                  | 0<br>(0 - 0)         | 0<br>(0 - 1)         | 1<br>(0 - 1)         |
| Breast cancer                                 | 8<br>(4 - 12)     | --                 | --                  | 3<br>(2 - 5)         | 3<br>(2 - 5)         | 1<br>(1 - 2)         |
| Cervical cancer                               | 3<br>(2 - 5)      | --                 | --                  | 1<br>(1 - 2)         | 1<br>(1 - 2)         | 1<br>(0 - 1)         |
| Uterine cancer                                | 1<br>(0 - 1)      | --                 | --                  | 0<br>(0 - 0)         | 0<br>(0 - 1)         | 0<br>(0 - 0)         |
| Prostate cancer                               | --                | --                 | --                  | --                   | --                   | --                   |
| Colon and rectum cancer                       | 1<br>(0 - 1)      | --                 | --                  | 0<br>(0 - 0)         | 0<br>(0 - 0)         | 0<br>(0 - 0)         |
| Lip and oral cavity cancer                    | 0<br>(0 - 0)      | --                 | --                  | 0<br>(0 - 0)         | 0<br>(0 - 0)         | 0<br>(0 - 0)         |
| Nasopharynx cancer                            | 0<br>(0 - 0)      | --                 | 0<br>(0 - 0)        | 0<br>(0 - 0)         | 0<br>(0 - 0)         | 0<br>(0 - 0)         |
| Other pharynx cancer                          | 0<br>(0 - 0)      | --                 | --                  | 0<br>(0 - 0)         | 0<br>(0 - 0)         | 0<br>(0 - 0)         |
| Gallbladder and biliary tract cancer          | 0<br>(0 - 0)      | --                 | --                  | 0<br>(0 - 0)         | 0<br>(0 - 0)         | 0<br>(0 - 0)         |
| Pancreatic cancer                             | 0<br>(0 - 0)      | --                 | --                  | 0<br>(0 - 0)         | 0<br>(0 - 0)         | 0<br>(0 - 0)         |
| Malignant skin melanoma                       | 0<br>(0 - 0)      | --                 | --                  | 0<br>(0 - 0)         | 0<br>(0 - 0)         | 0<br>(0 - 0)         |
| Non-melanoma skin cancer                      | 0<br>(0 - 0)      | --                 | --                  | 0<br>(0 - 0)         | 0<br>(0 - 0)         | 0<br>(0 - 0)         |
| Ovarian cancer                                | 0<br>(0 - 0)      | --                 | --                  | 0<br>(0 - 0)         | 0<br>(0 - 0)         | 0<br>(0 - 0)         |
| Testicular cancer                             | --                | --                 | --                  | --                   | --                   | --                   |
| Kidney cancer                                 | 0<br>(0 - 0)      | 0<br>(0 - 0)       | 0<br>(0 - 0)        | 0<br>(0 - 0)         | 0<br>(0 - 0)         | 0<br>(0 - 0)         |
| Bladder cancer                                | 0<br>(0 - 0)      | --                 | --                  | 0<br>(0 - 0)         | 0<br>(0 - 0)         | 0<br>(0 - 0)         |
| Brain and nervous system cancer               | 0<br>(0 - 0)      | 0<br>(0 - 0)       | 0<br>(0 - 0)        | 0<br>(0 - 0)         | 0<br>(0 - 0)         | 0<br>(0 - 0)         |
| Thyroid cancer                                | 0<br>(0 - 0)      | --                 | 0<br>(0 - 0)        | 0<br>(0 - 0)         | 0<br>(0 - 0)         | 0<br>(0 - 0)         |
| Mesothelioma                                  | 0<br>(0 - 0)      | --                 | --                  | 0<br>(0 - 0)         | 0<br>(0 - 0)         | 0<br>(0 - 0)         |
| Hodgkin lymphoma                              | 0<br>(0 - 0)      | 0<br>(0 - 0)       | 0<br>(0 - 0)        | 0<br>(0 - 0)         | 0<br>(0 - 0)         | 0<br>(0 - 0)         |
| Non-Hodgkin lymphoma                          | 0<br>(0 - 1)      | 0<br>(0 - 0)       | 0<br>(0 - 0)        | 0<br>(0 - 0)         | 0<br>(0 - 0)         | 0<br>(0 - 0)         |
| Multiple myeloma                              | 0<br>(0 - 0)      | --                 | --                  | 0<br>(0 - 0)         | 0<br>(0 - 0)         | 0<br>(0 - 0)         |
| Leukemia                                      | 1<br>(0 - 1)      | 0<br>(0 - 0)       | 0<br>(0 - 0)        | 0<br>(0 - 0)         | 0<br>(0 - 0)         | 0<br>(0 - 0)         |
| Other neoplasms                               | 1<br>(0 - 1)      | 0<br>(0 - 0)       | 0<br>(0 - 0)        | 0<br>(0 - 0)         | 0<br>(0 - 0)         | 0<br>(0 - 0)         |
| Cardiovascular diseases                       | 54<br>(35 - 76)   | 1<br>(0 - 1)       | 1<br>(0 - 1)        | 9<br>(5 - 15)        | 19<br>(11 - 29)      | 24<br>(17 - 32)      |
| Rheumatic heart disease                       | 2<br>(1 - 3)      | 0<br>(0 - 0)       | 0<br>(0 - 0)        | 1<br>(0 - 2)         | 0<br>(0 - 1)         | 0<br>(0 - 0)         |
| Ischemic heart disease                        | 25<br>(15 - 36)   | 0<br>(0 - 0)       | 0<br>(0 - 0)        | 3<br>(2 - 6)         | 9<br>(5 - 14)        | 12<br>(8 - 18)       |
| Cerebrovascular disease                       | 19<br>(11 - 28)   | 0<br>(0 - 0)       | 0<br>(0 - 0)        | 3<br>(1 - 5)         | 7<br>(3 - 10)        | 9<br>(6 - 13)        |
| Ischemic stroke                               | 7<br>(4 - 11)     | 0<br>(0 - 0)       | 0<br>(0 - 0)        | 1<br>(0 - 1)         | 2<br>(1 - 3)         | 5<br>(3 - 7)         |
| Hemorrhagic stroke                            | 12<br>(7 - 18)    | 0<br>(0 - 0)       | 0<br>(0 - 0)        | 2<br>(1 - 3)         | 5<br>(2 - 8)         | 5<br>(3 - 7)         |
| Hypertensive heart disease                    | 2<br>(1 - 3)      | 0<br>(0 - 0)       | 0<br>(0 - 0)        | 0<br>(0 - 0)         | 1<br>(0 - 1)         | 1<br>(0 - 2)         |
| Cardiomyopathy and myocarditis                | 2<br>(1 - 4)      | 0<br>(0 - 0)       | 0<br>(0 - 0)        | 1<br>(0 - 2)         | 1<br>(0 - 1)         | 0<br>(0 - 1)         |
| Atrial fibrillation and flutter               | 1<br>(0 - 2)      | --                 | --                  | 0<br>(0 - 0)         | 0<br>(0 - 1)         | 0<br>(0 - 1)         |
| Aortic aneurysm                               | 0<br>(0 - 1)      | --                 | --                  | 0<br>(0 - 0)         | 0<br>(0 - 0)         | 0<br>(0 - 0)         |
| Peripheral vascular disease                   | 0<br>(0 - 1)      | --                 | --                  | 0<br>(0 - 0)         | 0<br>(0 - 0)         | 0<br>(0 - 0)         |
| Endocarditis                                  | 1<br>(0 - 1)      | 0<br>(0 - 0)       | 0<br>(0 - 0)        | 0<br>(0 - 0)         | 0<br>(0 - 0)         | 0<br>(0 - 0)         |
| Other cardiovascular and circulatory diseases | 3<br>(2 - 5)      | 0<br>(0 - 0)       | 0<br>(0 - 0)        | 1<br>(0 - 1)         | 1<br>(1 - 2)         | 1<br>(0 - 1)         |
| Chronic respiratory diseases                  | 12<br>(7 - 17)    | 0<br>(0 - 0)       | 0<br>(0 - 0)        | 2<br>(1 - 3)         | 3<br>(2 - 6)         | 6<br>(4 - 8)         |
| Chronic obstructive pulmonary disease         | 5<br>(3 - 8)      | 0<br>(0 - 0)       | 0<br>(0 - 0)        | 0<br>(0 - 1)         | 2<br>(1 - 3)         | 3<br>(2 - 5)         |



Web Table 31- Marshall Islands deaths with 95% UI by age, sex, and cause in 2013

| Cause                                               | Females, All Ages | Females, 0-4 Years | Females, 5-14 Years | Females, 15-49 Years | Females, 50-69 Years | Females, 70-80 Years |
|-----------------------------------------------------|-------------------|--------------------|---------------------|----------------------|----------------------|----------------------|
| Pneumoconiosis                                      | 0<br>(0 - 0)      | 0<br>(0 - 0)       | 0<br>(0 - 0)        | 0<br>(0 - 0)         | 0<br>(0 - 0)         | 0<br>(0 - 0)         |
| Silicosis                                           | 0<br>(0 - 0)      | 0<br>(0 - 0)       | 0<br>(0 - 0)        | 0<br>(0 - 0)         | 0<br>(0 - 0)         | 0<br>(0 - 0)         |
| Asbestosis                                          | 0<br>(0 - 0)      | 0<br>(0 - 0)       | 0<br>(0 - 0)        | 0<br>(0 - 0)         | 0<br>(0 - 0)         | 0<br>(0 - 0)         |
| Coal workers pneumoconiosis                         | 0<br>(0 - 0)      | 0<br>(0 - 0)       | 0<br>(0 - 0)        | 0<br>(0 - 0)         | 0<br>(0 - 0)         | 0<br>(0 - 0)         |
| Other pneumoconiosis                                | 0<br>(0 - 0)      | 0<br>(0 - 0)       | 0<br>(0 - 0)        | 0<br>(0 - 0)         | 0<br>(0 - 0)         | 0<br>(0 - 0)         |
| Asthma                                              | 5<br>(2 - 8)      | 0<br>(0 - 0)       | 0<br>(0 - 0)        | 1<br>(0 - 2)         | 2<br>(1 - 3)         | 2<br>(1 - 3)         |
| Interstitial lung disease and pulmonary sarcoidosis | 1<br>(0 - 1)      | 0<br>(0 - 0)       | 0<br>(0 - 0)        | 0<br>(0 - 0)         | 0<br>(0 - 0)         | 0<br>(0 - 1)         |
| Other chronic respiratory diseases                  | 1<br>(1 - 2)      | 0<br>(0 - 0)       | 0<br>(0 - 0)        | 0<br>(0 - 1)         | 0<br>(0 - 0)         | 1<br>(0 - 1)         |
| Cirrhosis                                           | 3<br>(2 - 5)      | 0<br>(0 - 0)       | 0<br>(0 - 0)        | 1<br>(1 - 2)         | 1<br>(1 - 2)         | 1<br>(0 - 1)         |
| Cirrhosis due to hepatitis B                        | 2<br>(1 - 3)      | 0<br>(0 - 0)       | 0<br>(0 - 0)        | 1<br>(0 - 1)         | 1<br>(0 - 1)         | 0<br>(0 - 1)         |
| Cirrhosis due to hepatitis C                        | 0<br>(0 - 1)      | 0<br>(0 - 0)       | 0<br>(0 - 0)        | 0<br>(0 - 0)         | 0<br>(0 - 0)         | 0<br>(0 - 0)         |
| Cirrhosis due to alcohol use                        | 0<br>(0 - 1)      | --                 | --                  | 0<br>(0 - 0)         | 0<br>(0 - 0)         | 0<br>(0 - 0)         |
| Cirrhosis due to other causes                       | 0<br>(0 - 1)      | 0<br>(0 - 0)       | 0<br>(0 - 0)        | 0<br>(0 - 0)         | 0<br>(0 - 0)         | 0<br>(0 - 0)         |
| Digestive diseases                                  | 9<br>(6 - 13)     | 0<br>(0 - 0)       | 0<br>(0 - 0)        | 3<br>(1 - 4)         | 3<br>(2 - 5)         | 3<br>(2 - 4)         |
| Peptic ulcer disease                                | 1<br>(0 - 1)      | 0<br>(0 - 0)       | 0<br>(0 - 0)        | 0<br>(0 - 0)         | 0<br>(0 - 1)         | 0<br>(0 - 1)         |
| Gastritis and duodenitis                            | 0<br>(0 - 0)      | 0<br>(0 - 0)       | 0<br>(0 - 0)        | 0<br>(0 - 0)         | 0<br>(0 - 0)         | 0<br>(0 - 0)         |
| Appendicitis                                        | 1<br>(0 - 2)      | 0<br>(0 - 0)       | 0<br>(0 - 0)        | 0<br>(0 - 1)         | 0<br>(0 - 1)         | 0<br>(0 - 0)         |
| Paralytic ileus and intestinal obstruction          | 2<br>(1 - 3)      | 0<br>(0 - 0)       | 0<br>(0 - 0)        | 0<br>(0 - 1)         | 1<br>(0 - 1)         | 1<br>(0 - 1)         |
| Inguinal, femoral, and abdominal hernia             | 0<br>(0 - 0)      | 0<br>(0 - 0)       | 0<br>(0 - 0)        | 0<br>(0 - 0)         | 0<br>(0 - 0)         | 0<br>(0 - 0)         |
| Inflammatory bowel disease                          | 0<br>(0 - 0)      | 0<br>(0 - 0)       | 0<br>(0 - 0)        | 0<br>(0 - 0)         | 0<br>(0 - 0)         | 0<br>(0 - 0)         |
| Vascular intestinal disorders                       | 0<br>(0 - 0)      | 0<br>(0 - 0)       | 0<br>(0 - 0)        | 0<br>(0 - 0)         | 0<br>(0 - 0)         | 0<br>(0 - 0)         |
| Gallbladder and biliary diseases                    | 1<br>(1 - 2)      | 0<br>(0 - 0)       | 0<br>(0 - 0)        | 0<br>(0 - 1)         | 0<br>(0 - 1)         | 0<br>(0 - 1)         |
| Pancreatitis                                        | 0<br>(0 - 1)      | 0<br>(0 - 0)       | 0<br>(0 - 0)        | 0<br>(0 - 0)         | 0<br>(0 - 0)         | 0<br>(0 - 0)         |
| Other digestive diseases                            | 4<br>(1 - 6)      | 0<br>(0 - 0)       | 0<br>(0 - 0)        | 1<br>(0 - 2)         | 1<br>(0 - 2)         | 1<br>(0 - 2)         |
| Neurological disorders                              | 4<br>(2 - 5)      | 0<br>(0 - 0)       | 0<br>(0 - 0)        | 0<br>(0 - 0)         | 0<br>(0 - 1)         | 3<br>(2 - 4)         |
| Alzheimer disease and other dementias               | 3<br>(2 - 4)      | --                 | --                  | 0<br>(0 - 0)         | 0<br>(0 - 0)         | 3<br>(2 - 4)         |
| Parkinson disease                                   | 0<br>(0 - 0)      | --                 | --                  | 0<br>(0 - 0)         | 0<br>(0 - 0)         | 0<br>(0 - 0)         |
| Epilepsy                                            | 0<br>(0 - 0)      | 0<br>(0 - 0)       | 0<br>(0 - 0)        | 0<br>(0 - 0)         | 0<br>(0 - 0)         | 0<br>(0 - 0)         |
| Multiple sclerosis                                  | 0<br>(0 - 0)      | --                 | --                  | 0<br>(0 - 0)         | 0<br>(0 - 0)         | 0<br>(0 - 0)         |
| Other neurological disorders                        | 0<br>(0 - 0)      | 0<br>(0 - 0)       | 0<br>(0 - 0)        | 0<br>(0 - 0)         | 0<br>(0 - 0)         | 0<br>(0 - 0)         |
| Mental and substance use disorders                  | 0<br>(0 - 0)      | 0<br>(0 - 0)       | 0<br>(0 - 0)        | 0<br>(0 - 0)         | 0<br>(0 - 0)         | 0<br>(0 - 0)         |
| Schizophrenia                                       | 0<br>(0 - 0)      | --                 | --                  | 0<br>(0 - 0)         | 0<br>(0 - 0)         | 0<br>(0 - 0)         |
| Alcohol use disorders                               | 0<br>(0 - 0)      | --                 | --                  | 0<br>(0 - 0)         | 0<br>(0 - 0)         | 0<br>(0 - 0)         |
| Drug use disorders                                  | 0<br>(0 - 0)      | 0<br>(0 - 0)       | --                  | 0<br>(0 - 0)         | 0<br>(0 - 0)         | 0<br>(0 - 0)         |
| Opioid use disorders                                | 0<br>(0 - 0)      | 0<br>(0 - 0)       | --                  | 0<br>(0 - 0)         | 0<br>(0 - 0)         | 0<br>(0 - 0)         |
| Cocaine use disorders                               | 0<br>(0 - 0)      | 0<br>(0 - 0)       | --                  | 0<br>(0 - 0)         | 0<br>(0 - 0)         | 0<br>(0 - 0)         |
| Amphetamine use disorders                           | 0<br>(0 - 0)      | 0<br>(0 - 0)       | --                  | 0<br>(0 - 0)         | 0<br>(0 - 0)         | 0<br>(0 - 0)         |
| Other drug use disorders                            | 0<br>(0 - 0)      | 0<br>(0 - 0)       | --                  | 0<br>(0 - 0)         | 0<br>(0 - 0)         | 0<br>(0 - 0)         |
| Eating disorders                                    | 0<br>(0 - 0)      | --                 | 0<br>(0 - 0)        | 0<br>(0 - 0)         | --                   | --                   |
| Anorexia nervosa                                    | 0<br>(0 - 0)      | --                 | 0<br>(0 - 0)        | 0<br>(0 - 0)         | --                   | --                   |

Web Table 31- Marshall Islands deaths with 95% UI by age, sex, and cause in 2013

| Cause                                               | Females, All Ages | Females, 0-4 Years | Females, 5-14 Years | Females, 15-49 Years | Females, 50-69 Years | Females, 70-80 Years |
|-----------------------------------------------------|-------------------|--------------------|---------------------|----------------------|----------------------|----------------------|
| Diabetes, urogenital, blood, and endocrine diseases | 61<br>(36 - 100)  | 1<br>(0 - 2)       | 0<br>(0 - 1)        | 11<br>(5 - 21)       | 29<br>(17 - 45)      | 21<br>(13 - 33)      |
| Diabetes mellitus                                   | 45<br>(26 - 72)   | 0<br>(0 - 0)       | 0<br>(0 - 0)        | 6<br>(3 - 11)        | 23<br>(13 - 36)      | 16<br>(10 - 25)      |
| Acute glomerulonephritis                            | 0                 | 0                  | 0                   | 0                    | 0                    | 0                    |
| Chronic kidney disease                              | 13<br>(4 - 49)    | 0<br>(0 - 1)       | 0<br>(0 - 1)        | 4<br>(1 - 13)        | 5<br>(2 - 19)        | 4<br>(1 - 16)        |
| Chronic kidney disease due to diabetes mellitus     | 4<br>(1 - 11)     | 0<br>(0 - 0)       | 0<br>(0 - 0)        | 1<br>(0 - 3)         | 2<br>(0 - 5)         | 1<br>(0 - 3)         |
| Chronic kidney disease due to hypertension          | 1                 | 0                  | 0                   | 0                    | 1                    | 0                    |
| Chronic kidney disease due to glomerulonephritis    | 0                 | 0                  | 0                   | 0                    | 0                    | 0                    |
| Chronic kidney disease due to other causes          | 8<br>(1 - 44)     | 0<br>(0 - 1)       | 0<br>(0 - 1)        | 2<br>(0 - 11)        | 3<br>(0 - 16)        | 2<br>(0 - 13)        |
| Urinary diseases and male infertility               | 1                 | 0                  | 0                   | 0                    | 0                    | 0                    |
| Interstitial nephritis and urinary tract infections | 0<br>(0 - 1)      | 0<br>(0 - 0)       | 0<br>(0 - 0)        | 0<br>(0 - 0)         | 0<br>(0 - 0)         | 0<br>(0 - 0)         |
| Urolithiasis                                        | 0<br>(0 - 0)      | --                 | 0<br>(0 - 0)        | 0<br>(0 - 0)         | 0<br>(0 - 0)         | 0<br>(0 - 0)         |
| Other urinary diseases                              | 0<br>(0 - 0)      | 0<br>(0 - 0)       | 0<br>(0 - 0)        | 0<br>(0 - 0)         | 0<br>(0 - 0)         | 0<br>(0 - 0)         |
| Gynecological diseases                              | 0<br>(0 - 0)      | --                 | --                  | 0<br>(0 - 0)         | 0<br>(0 - 0)         | 0<br>(0 - 0)         |
| Uterine fibroids                                    | 0<br>(0 - 0)      | --                 | --                  | 0<br>(0 - 0)         | 0<br>(0 - 0)         | 0<br>(0 - 0)         |
| Polycystic ovarian syndrome                         | 0<br>(0 - 0)      | --                 | --                  | 0<br>(0 - 0)         | 0<br>(0 - 0)         | --                   |
| Endometriosis                                       | 0<br>(0 - 0)      | --                 | --                  | 0<br>(0 - 0)         | 0<br>(0 - 0)         | --                   |
| Genital prolapse                                    | 0<br>(0 - 0)      | --                 | --                  | 0<br>(0 - 0)         | 0<br>(0 - 0)         | 0<br>(0 - 0)         |
| Other gynecological diseases                        | 0<br>(0 - 0)      | --                 | --                  | 0<br>(0 - 0)         | 0<br>(0 - 0)         | 0<br>(0 - 0)         |
| Hemoglobinopathies and hemolytic anemias            | 1<br>(0 - 1)      | 0<br>(0 - 0)       | 0<br>(0 - 0)        | 0<br>(0 - 1)         | 0<br>(0 - 0)         | 0<br>(0 - 0)         |
| Thalassemias                                        | 0<br>(0 - 1)      | 0<br>(0 - 0)       | 0<br>(0 - 0)        | 0<br>(0 - 0)         | 0<br>(0 - 0)         | 0<br>(0 - 0)         |
| Sickle cell disorders                               | 0<br>(0 - 0)      | 0<br>(0 - 0)       | 0<br>(0 - 0)        | 0<br>(0 - 0)         | 0<br>(0 - 0)         | 0<br>(0 - 0)         |
| G6PD deficiency                                     | 0<br>(0 - 0)      | 0<br>(0 - 0)       | 0<br>(0 - 0)        | 0<br>(0 - 0)         | 0<br>(0 - 0)         | 0<br>(0 - 0)         |
| Other hemoglobinopathies and hemolytic anemias      | 0<br>(0 - 0)      | 0<br>(0 - 0)       | 0<br>(0 - 0)        | 0<br>(0 - 0)         | 0<br>(0 - 0)         | 0<br>(0 - 0)         |
| Endocrine, metabolic, blood, and immune disorders   | 1<br>(1 - 1)      | 0<br>(0 - 0)       | 0<br>(0 - 0)        | 0<br>(0 - 0)         | 0<br>(0 - 1)         | 0<br>(0 - 0)         |
| Musculoskeletal disorders                           | 0<br>(0 - 0)      | --                 | 0<br>(0 - 0)        | 0<br>(0 - 0)         | 0<br>(0 - 0)         | 0<br>(0 - 0)         |
| Rheumatoid arthritis                                | 0<br>(0 - 0)      | --                 | 0<br>(0 - 0)        | 0<br>(0 - 0)         | 0<br>(0 - 0)         | 0<br>(0 - 0)         |
| Other musculoskeletal disorders                     | 0<br>(0 - 0)      | --                 | 0<br>(0 - 0)        | 0<br>(0 - 0)         | 0<br>(0 - 0)         | 0<br>(0 - 0)         |
| Other non-communicable diseases                     | 5<br>(3 - 9)      | 4<br>(2 - 7)       | 0<br>(0 - 1)        | 1<br>(0 - 1)         | 0<br>(0 - 0)         | 0<br>(0 - 1)         |
| Congenital anomalies                                | 5<br>(3 - 8)      | 4<br>(2 - 7)       | 0<br>(0 - 1)        | 0<br>(0 - 1)         | 0<br>(0 - 0)         | 0<br>(0 - 0)         |
| Neural tube defects                                 | 0<br>(0 - 0)      | 0<br>(0 - 0)       | 0<br>(0 - 0)        | 0<br>(0 - 0)         | 0<br>(0 - 0)         | 0<br>(0 - 0)         |
| Congenital heart anomalies                          | 1<br>(0 - 4)      | 1<br>(0 - 3)       | 0<br>(0 - 0)        | 0<br>(0 - 0)         | 0<br>(0 - 0)         | 0<br>(0 - 0)         |
| Cleft lip and cleft palate                          | 0<br>(0 - 0)      | 0<br>(0 - 0)       | --                  | --                   | --                   | --                   |
| Down syndrome                                       | 0<br>(0 - 1)      | 0<br>(0 - 1)       | 0<br>(0 - 0)        | 0<br>(0 - 0)         | 0<br>(0 - 0)         | 0<br>(0 - 0)         |
| Chromosomal unbalanced rearrangements               | 0<br>(0 - 0)      | 0<br>(0 - 0)       | 0<br>(0 - 0)        | 0<br>(0 - 0)         | 0<br>(0 - 0)         | 0<br>(0 - 0)         |
| Other congenital anomalies                          | 3<br>(1 - 7)      | 3<br>(1 - 6)       | 0<br>(0 - 0)        | 0<br>(0 - 1)         | 0<br>(0 - 0)         | 0<br>(0 - 0)         |
| Skin and subcutaneous diseases                      | 1<br>(0 - 1)      | 0<br>(0 - 0)       | 0<br>(0 - 0)        | 0<br>(0 - 0)         | 0<br>(0 - 0)         | 0<br>(0 - 0)         |
| Cellulitis                                          | 0<br>(0 - 0)      | 0<br>(0 - 0)       | 0<br>(0 - 0)        | 0<br>(0 - 0)         | 0<br>(0 - 0)         | 0<br>(0 - 0)         |
| Pyoderma                                            | 0<br>(0 - 0)      | 0<br>(0 - 0)       | 0<br>(0 - 0)        | 0<br>(0 - 0)         | 0<br>(0 - 0)         | 0<br>(0 - 0)         |
| Decubitus ulcer                                     | 0<br>(0 - 0)      | 0<br>(0 - 0)       | 0<br>(0 - 0)        | 0<br>(0 - 0)         | 0<br>(0 - 0)         | 0<br>(0 - 0)         |
| Other skin and subcutaneous diseases                | 0<br>(0 - 0)      | 0<br>(0 - 0)       | 0<br>(0 - 0)        | 0<br>(0 - 0)         | 0<br>(0 - 0)         | 0<br>(0 - 0)         |

Web Table 31- Marshall Islands deaths with 95% UI by age, sex, and cause in 2013

| Cause                                           | Females, All Ages | Females, 0-4 Years | Females, 5-14 Years | Females, 15-49 Years | Females, 50-69 Years | Females, 70-80 Years |
|-------------------------------------------------|-------------------|--------------------|---------------------|----------------------|----------------------|----------------------|
| Sudden infant death syndrome                    | 0<br>(0 - 0)      | 0<br>(0 - 0)       | --                  | --                   | --                   | --                   |
| Injuries                                        | 12<br>(7 - 22)    | 2<br>(1 - 5)       | 1<br>(1 - 2)        | 6<br>(3 - 10)        | 2<br>(1 - 4)         | 2<br>(1 - 3)         |
| Transport injuries                              | 4<br>(2 - 6)      | 0<br>(0 - 1)       | 0<br>(0 - 1)        | 2<br>(1 - 3)         | 1<br>(0 - 1)         | 1<br>(0 - 1)         |
| Road injuries                                   | 4<br>(2 - 5)      | 0<br>(0 - 1)       | 0<br>(0 - 1)        | 2<br>(1 - 3)         | 1<br>(0 - 1)         | 1<br>(0 - 1)         |
| Pedestrian road injuries                        | 1<br>(0 - 1)      | 0<br>(0 - 0)       | 0<br>(0 - 0)        | 0<br>(0 - 0)         | 0<br>(0 - 0)         | 0<br>(0 - 0)         |
| Cyclist road injuries                           | 0<br>(0 - 0)      | 0<br>(0 - 0)       | 0<br>(0 - 0)        | 0<br>(0 - 0)         | 0<br>(0 - 0)         | 0<br>(0 - 0)         |
| Motorcyclist road injuries                      | 0<br>(0 - 0)      | 0<br>(0 - 0)       | 0<br>(0 - 0)        | 0<br>(0 - 0)         | 0<br>(0 - 0)         | 0<br>(0 - 0)         |
| Motor vehicle road injuries                     | 3<br>(2 - 4)      | 0<br>(0 - 0)       | 0<br>(0 - 0)        | 1<br>(1 - 2)         | 1<br>(0 - 1)         | 0<br>(0 - 1)         |
| Other road injuries                             | 0<br>(0 - 0)      | 0<br>(0 - 0)       | 0<br>(0 - 0)        | 0<br>(0 - 0)         | 0<br>(0 - 0)         | 0<br>(0 - 0)         |
| Other transport injuries                        | 0<br>(0 - 1)      | 0<br>(0 - 0)       | 0<br>(0 - 0)        | 0<br>(0 - 0)         | 0<br>(0 - 0)         | 0<br>(0 - 0)         |
| Unintentional injuries                          | 5<br>(3 - 15)     | 1<br>(0 - 5)       | 0<br>(0 - 1)        | 2<br>(1 - 6)         | 1<br>(0 - 2)         | 1<br>(0 - 2)         |
| Falls                                           | 0<br>(0 - 1)      | 0<br>(0 - 0)       | 0<br>(0 - 0)        | 0<br>(0 - 0)         | 0<br>(0 - 0)         | 0<br>(0 - 0)         |
| Drowning                                        | 1<br>(0 - 2)      | 0<br>(0 - 1)       | 0<br>(0 - 0)        | 0<br>(0 - 0)         | 0<br>(0 - 0)         | 0<br>(0 - 0)         |
| Fire, heat, and hot substances                  | 0<br>(0 - 1)      | 0<br>(0 - 0)       | 0<br>(0 - 0)        | 0<br>(0 - 0)         | 0<br>(0 - 0)         | 0<br>(0 - 0)         |
| Poisonings                                      | 0<br>(0 - 0)      | 0<br>(0 - 0)       | 0<br>(0 - 0)        | 0<br>(0 - 0)         | 0<br>(0 - 0)         | 0<br>(0 - 0)         |
| Exposure to mechanical forces                   | 1<br>(0 - 12)     | 0<br>(0 - 4)       | 0<br>(0 - 1)        | 1<br>(0 - 5)         | 0<br>(0 - 2)         | 0<br>(0 - 1)         |
| Unintentional firearm injuries                  | 0<br>(0 - 0)      | 0<br>(0 - 0)       | 0<br>(0 - 0)        | 0<br>(0 - 0)         | 0<br>(0 - 0)         | 0<br>(0 - 0)         |
| Unintentional suffocation                       | 1<br>(0 - 12)     | 0<br>(0 - 4)       | 0<br>(0 - 1)        | 1<br>(0 - 5)         | 0<br>(0 - 2)         | 0<br>(0 - 0)         |
| Other exposure to mechanical forces             | 0<br>(0 - 0)      | 0<br>(0 - 0)       | 0<br>(0 - 0)        | 0<br>(0 - 0)         | 0<br>(0 - 0)         | 0<br>(0 - 0)         |
| Adverse effects of medical treatment            | 1<br>(0 - 2)      | 0<br>(0 - 0)       | 0<br>(0 - 0)        | 0<br>(0 - 1)         | 0<br>(0 - 0)         | 0<br>(0 - 1)         |
| Animal contact                                  | 0<br>(0 - 0)      | 0<br>(0 - 0)       | 0<br>(0 - 0)        | 0<br>(0 - 0)         | 0<br>(0 - 0)         | 0<br>(0 - 0)         |
| Venomous animal contact                         | 0<br>(0 - 0)      | 0<br>(0 - 0)       | 0<br>(0 - 0)        | 0<br>(0 - 0)         | 0<br>(0 - 0)         | 0<br>(0 - 0)         |
| Non-venomous animal contact                     | 0<br>(0 - 0)      | 0<br>(0 - 0)       | 0<br>(0 - 0)        | 0<br>(0 - 0)         | 0<br>(0 - 0)         | 0<br>(0 - 0)         |
| Foreign body                                    | 1<br>(0 - 1)      | 0<br>(0 - 1)       | 0<br>(0 - 0)        | 0<br>(0 - 0)         | 0<br>(0 - 0)         | 0<br>(0 - 0)         |
| Pulmonary aspiration and foreign body in airway | 0<br>(0 - 1)      | 0<br>(0 - 0)       | 0<br>(0 - 0)        | 0<br>(0 - 0)         | 0<br>(0 - 0)         | 0<br>(0 - 0)         |
| Foreign body in other body part                 | 0<br>(0 - 1)      | 0<br>(0 - 0)       | 0<br>(0 - 0)        | 0<br>(0 - 0)         | 0<br>(0 - 0)         | 0<br>(0 - 0)         |
| Other unintentional injuries                    | 0<br>(0 - 1)      | 0<br>(0 - 0)       | 0<br>(0 - 0)        | 0<br>(0 - 0)         | 0<br>(0 - 0)         | 0<br>(0 - 0)         |
| Self-harm and interpersonal violence            | 3<br>(2 - 6)      | 0<br>(0 - 0)       | 0<br>(0 - 0)        | 2<br>(1 - 4)         | 1<br>(0 - 1)         | 0<br>(0 - 1)         |
| Self-harm                                       | 2<br>(1 - 6)      | --                 | 0<br>(0 - 0)        | 1<br>(1 - 4)         | 0<br>(0 - 1)         | 0<br>(0 - 1)         |
| Interpersonal violence                          | 1<br>(0 - 1)      | 0<br>(0 - 0)       | 0<br>(0 - 0)        | 1<br>(0 - 1)         | 0<br>(0 - 0)         | 0<br>(0 - 0)         |
| Assault by firearm                              | 0<br>(0 - 0)      | 0<br>(0 - 0)       | 0<br>(0 - 0)        | 0<br>(0 - 0)         | 0<br>(0 - 0)         | 0<br>(0 - 0)         |
| Assault by sharp object                         | 0<br>(0 - 0)      | 0<br>(0 - 0)       | 0<br>(0 - 0)        | 0<br>(0 - 0)         | 0<br>(0 - 0)         | 0<br>(0 - 0)         |
| Assault by other means                          | 0<br>(0 - 1)      | 0<br>(0 - 0)       | 0<br>(0 - 0)        | 0<br>(0 - 0)         | 0<br>(0 - 0)         | 0<br>(0 - 0)         |

Web Table 31- Mauritania deaths with 95% UI by age, sex, and cause in 2013

| Cause                                                             | Both Sexes, All Ages        | Both Sexes, 0-4 Years     | Both Sexes, 5-14 Years | Both Sexes, 15-49 Years  | Both Sexes, 50-69 Years  | Both Sexes, 70-80 Years  |
|-------------------------------------------------------------------|-----------------------------|---------------------------|------------------------|--------------------------|--------------------------|--------------------------|
| All causes                                                        | 27,280<br>(24,327 - 30,464) | 9,073<br>(7,661 - 10,777) | 990<br>(831 - 1,182)   | 5,651<br>(4,782 - 6,825) | 5,944<br>(4,972 - 7,035) | 5,623<br>(4,998 - 6,268) |
| Communicable, maternal, neonatal, and nutritional diseases        | 14,183<br>(12,419 - 16,192) | 7,886<br>(6,532 - 9,423)  | 584<br>(464 - 738)     | 2,517<br>(2,074 - 3,510) | 1,600<br>(1,279 - 1,955) | 1,596<br>(1,251 - 1,879) |
| HIV/AIDS and tuberculosis                                         | 1,277<br>(732 - 3,388)      | 38<br>(13 - 172)          | 50<br>(18 - 188)       | 638<br>(288 - 2,174)     | 372<br>(239 - 656)       | 180<br>(129 - 238)       |
| Tuberculosis                                                      | 824<br>(589 - 1,108)        | 18<br>(9 - 32)            | 13<br>(8 - 21)         | 308<br>(184 - 454)       | 311<br>(216 - 420)       | 174<br>(126 - 223)       |
| HIV/AIDS                                                          | 453<br>(40 - 2,640)         | 20<br>(1 - 147)           | 37<br>(6 - 177)        | 330<br>(28 - 1,942)      | 61<br>(4 - 372)          | 6<br>(0 - 44)            |
| HIV/AIDS resulting in mycobacterial infection                     | 27<br>(2 - 161)             | 1<br>(0 - 9)              | 2<br>(0 - 10)          | 19<br>(2 - 113)          | 4<br>(0 - 24)            | 0<br>(0 - 3)             |
| HIV/AIDS resulting in other diseases                              | 427<br>(38 - 2,477)         | 19<br>(1 - 139)           | 35<br>(5 - 169)        | 311<br>(27 - 1,822)      | 57<br>(3 - 349)          | 6<br>(0 - 41)            |
| Diarrhea, lower respiratory, and other common infectious diseases | 5,832<br>(4,692 - 7,094)    | 2,869<br>(2,017 - 3,873)  | 310<br>(219 - 422)     | 721<br>(506 - 943)       | 855<br>(643 - 1,080)     | 1,077<br>(787 - 1,344)   |
| Diarrheal diseases                                                | 1,674<br>(1,258 - 2,212)    | 828<br>(471 - 1,309)      | 69<br>(38 - 109)       | 235<br>(157 - 325)       | 262<br>(175 - 368)       | 279<br>(191 - 382)       |
| Intestinal infectious diseases                                    | 190<br>(102 - 331)          | 59<br>(24 - 117)          | 57<br>(28 - 102)       | 61<br>(29 - 110)         | 10<br>(5 - 19)           | 3<br>(1 - 7)             |
| Typhoid fever                                                     | 124<br>(64 - 222)           | 35<br>(14 - 71)           | 38<br>(18 - 71)        | 42<br>(19 - 75)          | 7<br>(3 - 13)            | 2<br>(1 - 4)             |
| Paratyphoid fever                                                 | 55<br>(26 - 99)             | 18<br>(7 - 39)            | 17<br>(8 - 33)         | 17<br>(7 - 32)           | 2<br>(1 - 5)             | 1<br>(0 - 1)             |
| Other intestinal infectious diseases                              | 11<br>(4 - 22)              | 6<br>(2 - 14)             | 1<br>(0 - 5)           | 3<br>(0 - 9)             | 1<br>(0 - 5)             | 0<br>(0 - 4)             |
| Lower respiratory infections                                      | 2,908<br>(2,226 - 3,644)    | 1,382<br>(934 - 1,976)    | 82<br>(51 - 121)       | 235<br>(157 - 323)       | 472<br>(321 - 623)       | 737<br>(488 - 976)       |
| Upper respiratory infections                                      | 3<br>(2 - 5)                | 1<br>(0 - 3)              | 0<br>(0 - 0)           | 1<br>(0 - 2)             | 1<br>(0 - 2)             | 1<br>(0 - 1)             |
| Otitis media                                                      | 3<br>(2 - 4)                | 1<br>(0 - 1)              | 0<br>(0 - 0)           | 0<br>(0 - 1)             | 1<br>(1 - 1)             | 1<br>(1 - 2)             |
| Meningitis                                                        | 611<br>(448 - 782)          | 260<br>(152 - 404)        | 62<br>(37 - 93)        | 150<br>(92 - 211)        | 91<br>(55 - 129)         | 48<br>(27 - 69)          |
| Pneumococcal meningitis                                           | 154<br>(110 - 206)          | 56<br>(31 - 90)           | 17<br>(8 - 31)         | 44<br>(27 - 64)          | 25<br>(13 - 40)          | 13<br>(5 - 22)           |
| H influenzae type B meningitis                                    | 105<br>(66 - 152)           | 67<br>(37 - 109)          | 11<br>(5 - 18)         | 16<br>(8 - 26)           | 8<br>(4 - 13)            | 3<br>(2 - 5)             |
| Meningococcal meningitis                                          | 272<br>(191 - 366)          | 114<br>(61 - 192)         | 28<br>(15 - 45)        | 67<br>(37 - 99)          | 41<br>(25 - 62)          | 22<br>(13 - 34)          |
| Other meningitis                                                  | 80<br>(54 - 111)            | 24<br>(12 - 40)           | 6<br>(3 - 12)          | 23<br>(11 - 40)          | 17<br>(9 - 28)           | 10<br>(4 - 18)           |
| Encephalitis                                                      | 35<br>(23 - 48)             | 11<br>(5 - 21)            | 4<br>(2 - 7)           | 10<br>(5 - 15)           | 6<br>(3 - 8)             | 3<br>(1 - 5)             |
| Diphtheria                                                        | 4<br>(0 - 19)               | 3<br>(0 - 17)             | 1<br>(0 - 5)           | 0<br>(0 - 1)             | 0<br>(0 - 1)             | -                        |
| Whooping cough                                                    | 160<br>(0 - 771)            | 148<br>(0 - 711)          | 10<br>(0 - 49)         | 2<br>(0 - 9)             | 0<br>(0 - 1)             | -                        |
| Tetanus                                                           | 97<br>(47 - 160)            | 56<br>(13 - 111)          | 6<br>(3 - 10)          | 21<br>(11 - 36)          | 11<br>(6 - 19)           | 3<br>(2 - 5)             |
| Measles                                                           | 141<br>(4 - 824)            | 119<br>(3 - 674)          | 19<br>(0 - 105)        | 3<br>(0 - 16)            | 0<br>(0 - 1)             | -                        |
| Varicella and herpes zoster                                       | 6<br>(3 - 12)               | 2<br>(0 - 6)              | 0<br>(0 - 2)           | 1<br>(0 - 3)             | 1<br>(0 - 2)             | 1<br>(0 - 5)             |
| Neglected tropical diseases and malaria                           | 1,856<br>(915 - 3,156)      | 1,255<br>(395 - 2,538)    | 139<br>(70 - 239)      | 209<br>(101 - 376)       | 147<br>(68 - 262)        | 105<br>(41 - 234)        |
| Malaria                                                           | 1,795<br>(844 - 3,103)      | 1,243<br>(377 - 2,526)    | 128<br>(58 - 227)      | 188<br>(80 - 357)        | 135<br>(56 - 251)        | 100<br>(36 - 228)        |
| Leishmaniasis                                                     | 0<br>(0 - 0)                | 0<br>(0 - 0)              | 0<br>(0 - 0)           | 0<br>(0 - 0)             | 0<br>(0 - 0)             | 0<br>(0 - 0)             |
| Visceral leishmaniasis                                            | 0<br>(0 - 0)                | 0<br>(0 - 0)              | 0<br>(0 - 0)           | 0<br>(0 - 0)             | 0<br>(0 - 0)             | 0<br>(0 - 0)             |
| Schistosomiasis                                                   | 15<br>(10 - 20)             | 0<br>(0 - 0)              | 0<br>(0 - 1)           | 5<br>(3 - 8)             | 6<br>(4 - 9)             | 3<br>(2 - 4)             |
| Cysticercosis                                                     | 1<br>(0 - 3)                | 0<br>(0 - 0)              | 0<br>(0 - 1)           | 1<br>(0 - 2)             | 0<br>(0 - 1)             | 0<br>(0 - 0)             |
| Cystic echinococcosis                                             | 3<br>(2 - 3)                | 0<br>(0 - 1)              | 1<br>(0 - 1)           | 1<br>(1 - 2)             | 1<br>(0 - 1)             | 0<br>(0 - 0)             |
| Dengue                                                            | 1<br>(1 - 1)                | 0<br>(0 - 0)              | 0<br>(0 - 0)           | 0<br>(0 - 1)             | 0<br>(0 - 0)             | 0<br>(0 - 0)             |
| Yellow fever                                                      | 1<br>(1 - 2)                | 0<br>(0 - 0)              | 0<br>(0 - 1)           | 1<br>(0 - 1)             | 0<br>(0 - 0)             | 0<br>(0 - 0)             |
| Rabies                                                            | 30<br>(16 - 49)             | 5<br>(2 - 13)             | 8<br>(4 - 16)          | 11<br>(6 - 17)           | 4<br>(2 - 6)             | 1<br>(0 - 3)             |
| Intestinal nematode infections                                    | 6<br>(1 - 18)               | 4<br>(0 - 14)             | 1<br>(0 - 6)           | 0<br>(0 - 3)             | 0<br>(0 - 2)             | 0<br>(0 - 2)             |
| Ascariasis                                                        | 6<br>(1 - 18)               | 4<br>(0 - 14)             | 1<br>(0 - 6)           | 0<br>(0 - 3)             | 0<br>(0 - 2)             | 0<br>(0 - 2)             |
| Other neglected tropical diseases                                 | 5<br>(3 - 9)                | 1<br>(1 - 3)              | 0<br>(0 - 1)           | 1<br>(1 - 3)             | 1<br>(1 - 2)             | 1<br>(0 - 1)             |

Web Table 31- Mauritania deaths with 95% UI by age, sex, and cause in 2013

| Cause                                                            | Both Sexes, All Ages       | Both Sexes, 0-4 Years    | Both Sexes, 5-14 Years | Both Sexes, 15-49 Years  | Both Sexes, 50-69 Years  | Both Sexes, 70-80 Years  |
|------------------------------------------------------------------|----------------------------|--------------------------|------------------------|--------------------------|--------------------------|--------------------------|
| Maternal disorders                                               | 761<br>(487 - 1,062)       | --                       | 5<br>(2 - 11)          | 757<br>(485 - 1,057)     | --                       | --                       |
| Maternal hemorrhage                                              | 145<br>(81 - 219)          | --                       | 0<br>(0 - 1)           | 145<br>(80 - 219)        | --                       | --                       |
| Maternal sepsis and other maternal infections                    | 44<br>(24 - 68)            | --                       | 0<br>(0 - 1)           | 43<br>(23 - 68)          | --                       | --                       |
| Maternal hypertensive disorders                                  | 55<br>(30 - 84)            | --                       | 0<br>(0 - 1)           | 54<br>(30 - 83)          | --                       | --                       |
| Maternal obstructed labor                                        | 38<br>(19 - 61)            | --                       | 0<br>(0 - 0)           | 38<br>(19 - 61)          | --                       | --                       |
| Maternal abortive outcome                                        | 134<br>(79 - 205)          | --                       | 1<br>(0 - 2)           | 133<br>(78 - 204)        | --                       | --                       |
| Indirect maternal deaths                                         | 73<br>(43 - 108)           | --                       | 0<br>(0 - 1)           | 73<br>(42 - 108)         | --                       | --                       |
| Late maternal deaths                                             | 120<br>(62 - 179)          | --                       | 1<br>(0 - 4)           | 119<br>(61 - 177)        | --                       | --                       |
| Maternal deaths aggravated by HIV/AIDS                           | 1<br>(0 - 1)               | --                       | --                     | 1<br>(0 - 1)             | --                       | --                       |
| Other maternal disorders                                         | 151<br>(86 - 225)          | --                       | 1<br>(0 - 2)           | 150<br>(85 - 224)        | --                       | --                       |
| Neonatal disorders                                               | 3,046<br>(2,449 - 3,701)   | 3,046<br>(2,449 - 3,701) | --                     | --                       | --                       | --                       |
| Neonatal preterm birth complications                             | 1,015<br>(596 - 1,527)     | 1,015<br>(596 - 1,527)   | --                     | --                       | --                       | --                       |
| Neonatal encephalopathy due to birth asphyxia and trauma         | 1,047<br>(653 - 1,514)     | 1,047<br>(653 - 1,514)   | --                     | --                       | --                       | --                       |
| Neonatal sepsis and other neonatal infections                    | 696<br>(356 - 1,216)       | 696<br>(356 - 1,216)     | --                     | --                       | --                       | --                       |
| Hemolytic disease and other neonatal jaundice                    | 20<br>(8 - 46)             | 20<br>(8 - 46)           | --                     | --                       | --                       | --                       |
| Other neonatal disorders                                         | 268<br>(142 - 464)         | 268<br>(142 - 464)       | --                     | --                       | --                       | --                       |
| Nutritional deficiencies                                         | 988<br>(692 - 1,319)       | 418<br>(213 - 689)       | 54<br>(34 - 79)        | 149<br>(94 - 218)        | 175<br>(121 - 237)       | 193<br>(143 - 265)       |
| Protein-energy malnutrition                                      | 635<br>(398 - 926)         | 364<br>(181 - 605)       | 37<br>(22 - 58)        | 53<br>(28 - 96)          | 84<br>(51 - 126)         | 95<br>(58 - 143)         |
| Iodine deficiency                                                | 5<br>(1 - 16)              | 2<br>(0 - 10)            | 0<br>(0 - 3)           | 1<br>(0 - 4)             | 1<br>(0 - 6)             | 1<br>(0 - 5)             |
| Iron-deficiency anemia                                           | 342<br>(201 - 512)         | 52<br>(10 - 130)         | 15<br>(7 - 27)         | 93<br>(52 - 136)         | 87<br>(47 - 132)         | 96<br>(56 - 145)         |
| Other nutritional deficiencies                                   | 6<br>(2 - 10)              | 1<br>(0 - 2)             | 0<br>(0 - 0)           | 1<br>(0 - 3)             | 2<br>(1 - 4)             | 1<br>(1 - 2)             |
| Other communicable, maternal, neonatal, and nutritional diseases | 423<br>(284 - 620)         | 261<br>(134 - 440)       | 26<br>(14 - 43)        | 45<br>(29 - 66)          | 51<br>(34 - 73)          | 41<br>(26 - 60)          |
| Sexually transmitted diseases excluding HIV                      | 270<br>(135 - 461)         | 231<br>(106 - 405)       | 20<br>(9 - 35)         | 8<br>(5 - 15)            | 6<br>(3 - 12)            | 4<br>(2 - 9)             |
| Syphilis                                                         | 262<br>(128 - 452)         | 231<br>(106 - 405)       | 20<br>(9 - 35)         | 4<br>(2 - 8)             | 4<br>(2 - 8)             | 4<br>(2 - 8)             |
| Chlamydial infection                                             | 1<br>(1 - 2)               | --                       | 0<br>(0 - 0)           | 1<br>(0 - 1)             | 0<br>(0 - 1)             | 0<br>(0 - 0)             |
| Gonococcal infection                                             | 4<br>(2 - 7)               | --                       | 0<br>(0 - 0)           | 2<br>(1 - 4)             | 1<br>(1 - 2)             | 1<br>(0 - 1)             |
| Other sexually transmitted diseases                              | 3<br>(2 - 5)               | --                       | 0<br>(0 - 0)           | 2<br>(1 - 3)             | 1<br>(0 - 1)             | 0<br>(0 - 0)             |
| Hepatitis                                                        | 80<br>(49 - 111)           | 7<br>(3 - 13)            | 3<br>(2 - 5)           | 23<br>(13 - 36)          | 27<br>(15 - 41)          | 20<br>(10 - 32)          |
| Acute hepatitis A                                                | 4<br>(1 - 9)               | 2<br>(0 - 5)             | 1<br>(0 - 2)           | 1<br>(0 - 3)             | 0<br>(0 - 1)             | 0<br>(0 - 0)             |
| Acute hepatitis B                                                | 58<br>(34 - 84)            | 5<br>(2 - 10)            | 1<br>(1 - 3)           | 11<br>(6 - 20)           | 23<br>(13 - 35)          | 18<br>(10 - 29)          |
| Acute hepatitis C                                                | 3<br>(1 - 8)               | --                       | 0<br>(0 - 0)           | 1<br>(0 - 3)             | 1<br>(0 - 3)             | 1<br>(0 - 3)             |
| Acute hepatitis E                                                | 15<br>(6 - 28)             | 0<br>(0 - 0)             | 0<br>(0 - 1)           | 10<br>(5 - 18)           | 3<br>(1 - 7)             | 1<br>(0 - 3)             |
| Other infectious diseases                                        | 74<br>(48 - 114)           | 24<br>(11 - 48)          | 3<br>(1 - 6)           | 13<br>(6 - 24)           | 18<br>(9 - 34)           | 16<br>(7 - 33)           |
| Non-communicable diseases                                        | 10,738<br>(8,910 - 12,600) | 921<br>(597 - 1,348)     | 182<br>(133 - 236)     | 1,896<br>(1,304 - 2,482) | 3,948<br>(3,153 - 4,827) | 3,791<br>(3,258 - 4,376) |
| Neoplasms                                                        | 1,817<br>(1,445 - 2,212)   | 33<br>(18 - 54)          | 34<br>(22 - 48)        | 508<br>(342 - 673)       | 835<br>(654 - 1,048)     | 407<br>(342 - 497)       |
| Esophageal cancer                                                | 47<br>(32 - 69)            | --                       | --                     | 8<br>(5 - 13)            | 26<br>(17 - 39)          | 13<br>(8 - 19)           |
| Stomach cancer                                                   | 168<br>(132 - 208)         | --                       | --                     | 35<br>(23 - 48)          | 94<br>(71 - 120)         | 39<br>(30 - 51)          |
| Liver cancer                                                     | 503<br>(366 - 643)         | --                       | 2<br>(1 - 3)           | 186<br>(109 - 274)       | 226<br>(163 - 294)       | 90<br>(67 - 118)         |
| Liver cancer due to hepatitis B                                  | 238<br>(149 - 334)         | --                       | 1<br>(0 - 2)           | 108<br>(61 - 166)        | 99<br>(59 - 145)         | 30<br>(17 - 44)          |
| Liver cancer due to hepatitis C                                  | 142<br>(84 - 216)          | --                       | 0<br>(0 - 0)           | 34<br>(13 - 67)          | 72<br>(43 - 110)         | 35<br>(22 - 52)          |

Web Table 31- Mauritania deaths with 95% UI by age, sex, and cause in 2013

| Cause                                | Both Sexes, All Ages     | Both Sexes, 0-4 Years | Both Sexes, 5-14 Years | Both Sexes, 15-49 Years | Both Sexes, 50-69 Years  | Both Sexes, 70-80 Years  |
|--------------------------------------|--------------------------|-----------------------|------------------------|-------------------------|--------------------------|--------------------------|
| Liver cancer due to alcohol use      | 51<br>(29 - 81)          | --                    | --                     | 12<br>(5 - 23)          | 24<br>(13 - 39)          | 15<br>(8 - 24)           |
| Liver cancer due to other causes     | 73<br>(43 - 121)         | --                    | 1<br>(0 - 1)           | 32<br>(16 - 54)         | 30<br>(17 - 51)          | 11<br>(6 - 18)           |
| Larynx cancer                        | 6<br>(4 - 15)            | --                    | --                     | 1<br>(1 - 2)            | 3<br>(2 - 8)             | 2<br>(1 - 4)             |
| Tracheal, bronchus and lung cancer   | 82<br>(63 - 109)         | --                    | --                     | 10<br>(6 - 18)          | 46<br>(35 - 62)          | 25<br>(20 - 31)          |
| Breast cancer                        | 107<br>(69 - 152)        | --                    | --                     | 41<br>(24 - 62)         | 49<br>(30 - 76)          | 17<br>(11 - 25)          |
| Cervical cancer                      | 252<br>(161 - 361)       | --                    | --                     | 60<br>(33 - 92)         | 147<br>(89 - 214)        | 45<br>(28 - 67)          |
| Uterine cancer                       | 23<br>(14 - 34)          | --                    | --                     | 3<br>(2 - 6)            | 12<br>(7 - 20)           | 7<br>(5 - 12)            |
| Prostate cancer                      | 57<br>(38 - 93)          | --                    | --                     | 1<br>(1 - 3)            | 17<br>(11 - 28)          | 39<br>(25 - 65)          |
| Colon and rectum cancer              | 84<br>(67 - 103)         | --                    | --                     | 25<br>(17 - 34)         | 32<br>(25 - 41)          | 27<br>(21 - 33)          |
| Lip and oral cavity cancer           | 11<br>(8 - 15)           | --                    | --                     | 3<br>(2 - 5)            | 5<br>(3 - 7)             | 3<br>(2 - 5)             |
| Nasopharynx cancer                   | 4<br>(3 - 5)             | --                    | 0<br>(0 - 0)           | 2<br>(1 - 2)            | 1<br>(1 - 2)             | 0<br>(0 - 1)             |
| Other pharynx cancer                 | 4<br>(3 - 6)             | --                    | --                     | 1<br>(1 - 2)            | 2<br>(1 - 3)             | 1<br>(1 - 1)             |
| Gallbladder and biliary tract cancer | 25<br>(18 - 35)          | --                    | --                     | 5<br>(3 - 7)            | 14<br>(9 - 20)           | 7<br>(4 - 10)            |
| Pancreatic cancer                    | 47<br>(37 - 59)          | --                    | --                     | 10<br>(7 - 14)          | 26<br>(20 - 33)          | 11<br>(9 - 14)           |
| Malignant skin melanoma              | 4<br>(3 - 6)             | --                    | --                     | 1<br>(1 - 2)            | 2<br>(1 - 3)             | 1<br>(1 - 1)             |
| Non-melanoma skin cancer             | 4<br>(2 - 5)             | --                    | --                     | 1<br>(0 - 1)            | 1<br>(1 - 2)             | 2<br>(1 - 3)             |
| Ovarian cancer                       | 39<br>(26 - 55)          | --                    | --                     | 10<br>(6 - 15)          | 24<br>(15 - 36)          | 6<br>(4 - 8)             |
| Testicular cancer                    | 2<br>(1 - 3)             | --                    | --                     | 1<br>(1 - 2)            | 0<br>(0 - 0)             | 0<br>(0 - 0)             |
| Kidney cancer                        | 17<br>(13 - 22)          | 2<br>(1 - 4)          | 1<br>(1 - 2)           | 3<br>(2 - 4)            | 8<br>(6 - 12)            | 3<br>(2 - 5)             |
| Bladder cancer                       | 35<br>(26 - 50)          | --                    | --                     | 7<br>(4 - 11)           | 13<br>(9 - 20)           | 14<br>(10 - 23)          |
| Brain and nervous system cancer      | 20<br>(13 - 25)          | 1<br>(0 - 2)          | 2<br>(1 - 3)           | 9<br>(5 - 13)           | 5<br>(4 - 7)             | 2<br>(2 - 3)             |
| Thyroid cancer                       | 5<br>(3 - 8)             | --                    | 0<br>(0 - 0)           | 1<br>(0 - 1)            | 3<br>(2 - 4)             | 2<br>(1 - 3)             |
| Mesothelioma                         | 2<br>(2 - 3)             | --                    | --                     | 0<br>(0 - 1)            | 1<br>(1 - 2)             | 1<br>(0 - 1)             |
| Hodgkin lymphoma                     | 12<br>(6 - 17)           | 1<br>(0 - 2)          | 1<br>(0 - 3)           | 4<br>(2 - 8)            | 3<br>(1 - 4)             | 3<br>(1 - 5)             |
| Non-Hodgkin lymphoma                 | 77<br>(55 - 106)         | 8<br>(3 - 15)         | 11<br>(6 - 17)         | 28<br>(18 - 40)         | 21<br>(14 - 33)          | 10<br>(6 - 17)           |
| Multiple myeloma                     | 10<br>(7 - 15)           | --                    | --                     | 2<br>(1 - 3)            | 5<br>(3 - 8)             | 3<br>(2 - 5)             |
| Leukemia                             | 31<br>(24 - 38)          | 2<br>(1 - 4)          | 4<br>(3 - 6)           | 14<br>(9 - 18)          | 6<br>(5 - 8)             | 5<br>(4 - 6)             |
| Other neoplasms                      | 139<br>(96 - 196)        | 20<br>(10 - 34)       | 13<br>(8 - 20)         | 34<br>(19 - 52)         | 42<br>(26 - 69)          | 30<br>(21 - 46)          |
| Cardiovascular diseases              | 4,389<br>(3,596 - 5,398) | 62<br>(41 - 92)       | 28<br>(18 - 41)        | 512<br>(345 - 699)      | 1,741<br>(1,375 - 2,174) | 2,046<br>(1,699 - 2,514) |
| Rheumatic heart disease              | 49<br>(29 - 122)         | 1<br>(0 - 3)          | 2<br>(1 - 4)           | 11<br>(5 - 31)          | 17<br>(8 - 48)           | 18<br>(11 - 36)          |
| Ischemic heart disease               | 1,223<br>(948 - 1,696)   | 2<br>(1 - 5)          | 3<br>(2 - 6)           | 137<br>(84 - 197)       | 496<br>(373 - 679)       | 585<br>(445 - 838)       |
| Cerebrovascular disease              | 2,041<br>(1,664 - 2,535) | 18<br>(12 - 28)       | 8<br>(5 - 12)          | 196<br>(131 - 275)      | 792<br>(605 - 1,010)     | 1,026<br>(839 - 1,271)   |
| Ischemic stroke                      | 1,256<br>(811 - 1,599)   | 2<br>(1 - 4)          | 1<br>(0 - 2)           | 46<br>(20 - 78)         | 449<br>(242 - 617)       | 759<br>(517 - 945)       |
| Hemorrhagic stroke                   | 784<br>(500 - 1,332)     | 17<br>(10 - 26)       | 7<br>(4 - 10)          | 151<br>(98 - 210)       | 343<br>(212 - 589)       | 267<br>(139 - 548)       |
| Hypertensive heart disease           | 326<br>(179 - 476)       | 1<br>(0 - 2)          | 0<br>(0 - 1)           | 32<br>(14 - 58)         | 122<br>(61 - 193)        | 171<br>(97 - 249)        |
| Cardiomyopathy and myocarditis       | 200<br>(128 - 272)       | 12<br>(6 - 25)        | 5<br>(3 - 9)           | 42<br>(24 - 69)         | 72<br>(43 - 101)         | 69<br>(37 - 103)         |
| Atrial fibrillation and flutter      | 0<br>(0 - 0)             | --                    | --                     | 0<br>(0 - 0)            | 0<br>(0 - 0)             | 0<br>(0 - 0)             |
| Aortic aneurysm                      | 49<br>(35 - 71)          | --                    | --                     | 6<br>(4 - 9)            | 22<br>(15 - 31)          | 21<br>(14 - 34)          |
| Peripheral vascular disease          | 2<br>(2 - 3)             | --                    | --                     | 0<br>(0 - 0)            | 1<br>(1 - 2)             | 1<br>(1 - 2)             |
| Endocarditis                         | 85<br>(60 - 129)         | 10<br>(4 - 18)        | 2<br>(1 - 4)           | 21<br>(12 - 33)         | 26<br>(17 - 44)          | 26<br>(17 - 44)          |

Web Table 31- Mauritania deaths with 95% UI by age, sex, and cause in 2013

| Cause                                               | Both Sexes, All Ages | Both Sexes, 0-4 Years | Both Sexes, 5-14 Years | Both Sexes, 15-49 Years | Both Sexes, 50-69 Years | Both Sexes, 70-80 Years |
|-----------------------------------------------------|----------------------|-----------------------|------------------------|-------------------------|-------------------------|-------------------------|
| Other cardiovascular and circulatory diseases       | 413<br>(296 - 738)   | 18<br>(10 - 30)       | 7<br>(4 - 11)          | 66<br>(41 - 112)        | 194<br>(128 - 321)      | 128<br>(83 - 278)       |
| Chronic respiratory diseases                        | 731<br>(572 - 1,168) | 19<br>(10 - 34)       | 7<br>(5 - 12)          | 79<br>(53 - 130)        | 277<br>(203 - 462)      | 349<br>(273 - 556)      |
| Chronic obstructive pulmonary disease               | 417<br>(304 - 669)   | 7<br>(3 - 13)         | 2<br>(1 - 4)           | 22<br>(13 - 36)         | 159<br>(109 - 270)      | 227<br>(165 - 366)      |
| Pneumoconiosis                                      | 37<br>(22 - 65)      | 0<br>(0 - 1)          | 0<br>(0 - 0)           | 7<br>(3 - 12)           | 20<br>(11 - 36)         | 9<br>(4 - 19)           |
| Silicosis                                           | 7<br>(3 - 17)        | 0<br>(0 - 0)          | 0<br>(0 - 0)           | 1<br>(1 - 3)            | 2<br>(1 - 5)            | 3<br>(1 - 9)            |
| Asbestosis                                          | 3<br>(1 - 5)         | 0<br>(0 - 0)          | 0<br>(0 - 0)           | 0<br>(0 - 1)            | 2<br>(1 - 4)            | 0<br>(0 - 1)            |
| Coal workers pneumoconiosis                         | 10<br>(6 - 18)       | 0<br>(0 - 0)          | 0<br>(0 - 0)           | 1<br>(0 - 1)            | 8<br>(5 - 15)           | 1<br>(0 - 2)            |
| Other pneumoconiosis                                | 17<br>(10 - 27)      | 0<br>(0 - 0)          | 0<br>(0 - 0)           | 5<br>(2 - 8)            | 8<br>(4 - 14)           | 4<br>(2 - 8)            |
| Asthma                                              | 142<br>(85 - 241)    | 6<br>(2 - 12)         | 2<br>(1 - 4)           | 25<br>(14 - 45)         | 57<br>(31 - 103)        | 53<br>(30 - 87)         |
| Interstitial lung disease and pulmonary sarcoidosis | 57<br>(14 - 102)     | 0<br>(0 - 0)          | 0<br>(0 - 0)           | 3<br>(1 - 5)            | 20<br>(5 - 37)          | 34<br>(7 - 63)          |
| Other chronic respiratory diseases                  | 78<br>(45 - 144)     | 6<br>(3 - 12)         | 2<br>(1 - 3)           | 23<br>(13 - 42)         | 21<br>(11 - 41)         | 27<br>(14 - 53)         |
| Cirrhosis                                           | 536<br>(423 - 653)   | 7<br>(3 - 15)         | 5<br>(4 - 8)           | 154<br>(97 - 213)       | 257<br>(200 - 318)      | 112<br>(88 - 137)       |
| Cirrhosis due to hepatitis B                        | 162<br>(60 - 241)    | 0<br>(0 - 1)          | 1<br>(0 - 2)           | 49<br>(22 - 80)         | 80<br>(28 - 121)        | 32<br>(8 - 55)          |
| Cirrhosis due to hepatitis C                        | 134<br>(75 - 230)    | 0<br>(0 - 1)          | 1<br>(0 - 2)           | 36<br>(17 - 63)         | 66<br>(34 - 120)        | 31<br>(13 - 57)         |
| Cirrhosis due to alcohol use                        | 163<br>(99 - 242)    | --                    | --                     | 39<br>(19 - 70)         | 83<br>(47 - 126)        | 40<br>(25 - 59)         |
| Cirrhosis due to other causes                       | 76<br>(47 - 110)     | 7<br>(2 - 13)         | 4<br>(2 - 6)           | 30<br>(16 - 47)         | 27<br>(15 - 44)         | 9<br>(5 - 14)           |
| Digestive diseases                                  | 609<br>(478 - 740)   | 19<br>(8 - 34)        | 18<br>(12 - 25)        | 152<br>(101 - 213)      | 223<br>(170 - 285)      | 196<br>(152 - 238)      |
| Peptic ulcer disease                                | 146<br>(106 - 193)   | 2<br>(1 - 4)          | 2<br>(1 - 4)           | 33<br>(19 - 51)         | 58<br>(39 - 81)         | 52<br>(36 - 72)         |
| Gastritis and duodenitis                            | 26<br>(13 - 60)      | 1<br>(0 - 2)          | 1<br>(1 - 2)           | 6<br>(3 - 14)           | 8<br>(4 - 20)           | 9<br>(4 - 23)           |
| Appendicitis                                        | 43<br>(27 - 60)      | 2<br>(1 - 5)          | 3<br>(2 - 5)           | 11<br>(7 - 16)          | 15<br>(8 - 22)          | 13<br>(5 - 23)          |
| Paralytic ileus and intestinal obstruction          | 191<br>(116 - 254)   | 7<br>(2 - 14)         | 6<br>(3 - 10)          | 45<br>(21 - 70)         | 71<br>(39 - 101)        | 62<br>(40 - 88)         |
| Inguinal, femoral, and abdominal hernia             | 17<br>(11 - 28)      | 0<br>(0 - 1)          | 0<br>(0 - 1)           | 4<br>(2 - 7)            | 6<br>(4 - 10)           | 6<br>(4 - 11)           |
| Inflammatory bowel disease                          | 29<br>(10 - 43)      | 3<br>(1 - 7)          | 1<br>(0 - 1)           | 8<br>(2 - 13)           | 10<br>(3 - 15)          | 8<br>(2 - 13)           |
| Vascular intestinal disorders                       | 3<br>(1 - 8)         | 0<br>(0 - 0)          | 0<br>(0 - 0)           | 1<br>(0 - 2)            | 1<br>(0 - 3)            | 1<br>(0 - 3)            |
| Gallbladder and biliary diseases                    | 44<br>(28 - 60)      | 1<br>(0 - 1)          | 1<br>(0 - 2)           | 8<br>(4 - 13)           | 16<br>(10 - 25)         | 18<br>(11 - 26)         |
| Pancreatitis                                        | 44<br>(27 - 64)      | 0<br>(0 - 1)          | 0<br>(0 - 1)           | 19<br>(9 - 31)          | 15<br>(9 - 23)          | 9<br>(5 - 14)           |
| Other digestive diseases                            | 64<br>(45 - 92)      | 3<br>(1 - 7)          | 2<br>(1 - 4)           | 18<br>(11 - 27)         | 23<br>(15 - 34)         | 19<br>(12 - 29)         |
| Neurological disorders                              | 283<br>(230 - 347)   | 21<br>(10 - 42)       | 12<br>(6 - 20)         | 53<br>(34 - 82)         | 34<br>(26 - 45)         | 162<br>(133 - 197)      |
| Alzheimer disease and other dementias               | 164<br>(135 - 199)   | --                    | --                     | 0<br>(0 - 0)            | 16<br>(12 - 21)         | 148<br>(120 - 182)      |
| Parkinson disease                                   | 2<br>(1 - 4)         | --                    | --                     | 0<br>(0 - 0)            | 0<br>(0 - 1)            | 1<br>(1 - 3)            |
| Epilepsy                                            | 84<br>(53 - 130)     | 16<br>(6 - 36)        | 10<br>(4 - 18)         | 42<br>(25 - 70)         | 8<br>(5 - 13)           | 8<br>(5 - 12)           |
| Multiple sclerosis                                  | 1<br>(0 - 3)         | --                    | --                     | 0<br>(0 - 1)            | 0<br>(0 - 1)            | 0<br>(0 - 0)            |
| Other neurological disorders                        | 32<br>(25 - 40)      | 5<br>(3 - 9)          | 2<br>(2 - 3)           | 10<br>(7 - 14)          | 9<br>(6 - 12)           | 5<br>(3 - 6)            |
| Mental and substance use disorders                  | 147<br>(82 - 221)    | 5<br>(1 - 11)         | 0<br>(0 - 0)           | 104<br>(53 - 166)       | 29<br>(17 - 50)         | 9<br>(5 - 15)           |
| Schizophrenia                                       | 0<br>(0 - 1)         | --                    | --                     | 0<br>(0 - 0)            | 0<br>(0 - 0)            | 0<br>(0 - 0)            |
| Alcohol use disorders                               | 43<br>(16 - 96)      | --                    | --                     | 20<br>(8 - 50)          | 18<br>(6 - 39)          | 5<br>(1 - 11)           |
| Drug use disorders                                  | 103<br>(55 - 155)    | 5<br>(1 - 11)         | --                     | 84<br>(39 - 134)        | 11<br>(7 - 15)          | 4<br>(3 - 6)            |
| Opioid use disorders                                | 11<br>(6 - 17)       | 1<br>(0 - 1)          | --                     | 9<br>(4 - 15)           | 1<br>(1 - 1)            | 0<br>(0 - 1)            |
| Cocaine use disorders                               | 0<br>(0 - 1)         | 0<br>(0 - 0)          | --                     | 0<br>(0 - 1)            | 0<br>(0 - 0)            | 0<br>(0 - 0)            |
| Amphetamine use disorders                           | 0<br>(0 - 0)         | 0<br>(0 - 0)          | --                     | 0<br>(0 - 0)            | 0<br>(0 - 0)            | 0<br>(0 - 0)            |

Web Table 31- Mauritania deaths with 95% UI by age, sex, and cause in 2013

| Cause                                               | Both Sexes, All Ages     | Both Sexes, 0-4 Years | Both Sexes, 5-14 Years | Both Sexes, 15-49 Years | Both Sexes, 50-69 Years | Both Sexes, 70-80 Years |
|-----------------------------------------------------|--------------------------|-----------------------|------------------------|-------------------------|-------------------------|-------------------------|
| Other drug use disorders                            | 92<br>(49 - 137)         | 4<br>(1 - 10)         | --                     | 74<br>(35 - 119)        | 10<br>(7 - 13)          | 4<br>(3 - 5)            |
| Eating disorders                                    | 0<br>(0 - 0)             | --                    | 0<br>(0 - 0)           | 0<br>(0 - 0)            | --                      | --                      |
| Anorexia nervosa                                    | 0<br>(0 - 0)             | --                    | 0<br>(0 - 0)           | 0<br>(0 - 0)            | --                      | --                      |
| Diabetes, urogenital, blood, and endocrine diseases | 1,310<br>(1,037 - 1,561) | 99<br>(59 - 148)      | 38<br>(25 - 51)        | 255<br>(178 - 337)      | 481<br>(361 - 600)      | 437<br>(338 - 534)      |
| Diabetes mellitus                                   | 547<br>(414 - 680)       | 5<br>(3 - 9)          | 2<br>(1 - 4)           | 61<br>(40 - 85)         | 253<br>(186 - 325)      | 225<br>(162 - 290)      |
| Acute glomerulonephritis                            | 5<br>(3 - 7)             | 0<br>(0 - 1)          | 0<br>(0 - 1)           | 2<br>(1 - 3)            | 2<br>(1 - 2)            | 0<br>(0 - 1)            |
| Chronic kidney disease                              | 256<br>(180 - 352)       | 13<br>(5 - 25)        | 10<br>(5 - 15)         | 72<br>(41 - 114)        | 84<br>(57 - 123)        | 77<br>(54 - 107)        |
| Chronic kidney disease due to diabetes mellitus     | 3<br>(1 - 6)             | 0<br>(0 - 0)          | 0<br>(0 - 0)           | 0<br>(0 - 0)            | 2<br>(1 - 5)            | 0<br>(0 - 0)            |
| Chronic kidney disease due to hypertension          | 105<br>(67 - 157)        | 2<br>(0 - 4)          | 1<br>(0 - 2)           | 22<br>(11 - 36)         | 40<br>(23 - 63)         | 40<br>(26 - 59)         |
| Chronic kidney disease due to glomerulonephritis    | 86<br>(58 - 118)         | 7<br>(3 - 13)         | 5<br>(3 - 8)           | 34<br>(19 - 51)         | 22<br>(14 - 33)         | 17<br>(11 - 25)         |
| Chronic kidney disease due to other causes          | 62<br>(30 - 103)         | 4<br>(1 - 10)         | 3<br>(1 - 6)           | 16<br>(7 - 34)          | 20<br>(9 - 35)          | 19<br>(8 - 36)          |
| Urinary diseases and male infertility               | 243<br>(174 - 306)       | 15<br>(7 - 29)        | 4<br>(2 - 7)           | 53<br>(29 - 79)         | 85<br>(56 - 116)        | 85<br>(59 - 111)        |
| Interstitial nephritis and urinary tract infections | 215<br>(153 - 274)       | 14<br>(6 - 28)        | 4<br>(2 - 6)           | 46<br>(25 - 67)         | 75<br>(49 - 101)        | 76<br>(53 - 100)        |
| Urolithiasis                                        | 4<br>(1 - 10)            | --                    | 0<br>(0 - 1)           | 1<br>(0 - 3)            | 2<br>(0 - 5)            | 1<br>(0 - 3)            |
| Other urinary diseases                              | 24<br>(13 - 36)          | 1<br>(0 - 3)          | 0<br>(0 - 1)           | 6<br>(3 - 11)           | 9<br>(4 - 15)           | 7<br>(4 - 12)           |
| Gynecological diseases                              | 2<br>(1 - 3)             | --                    | --                     | 1<br>(0 - 1)            | 1<br>(0 - 1)            | 0<br>(0 - 1)            |
| Uterine fibroids                                    | 0<br>(0 - 1)             | --                    | --                     | 0<br>(0 - 0)            | 0<br>(0 - 0)            | 0<br>(0 - 0)            |
| Polycystic ovarian syndrome                         | 0<br>(0 - 0)             | --                    | --                     | 0<br>(0 - 0)            | 0<br>(0 - 0)            | --                      |
| Endometriosis                                       | 0<br>(0 - 0)             | --                    | --                     | 0<br>(0 - 0)            | 0<br>(0 - 0)            | --                      |
| Genital prolapse                                    | 0<br>(0 - 1)             | --                    | --                     | 0<br>(0 - 0)            | 0<br>(0 - 0)            | 0<br>(0 - 0)            |
| Other gynecological diseases                        | 1<br>(0 - 2)             | --                    | --                     | 0<br>(0 - 1)            | 0<br>(0 - 1)            | 0<br>(0 - 0)            |
| Hemoglobinopathies and hemolytic anemias            | 90<br>(46 - 138)         | 31<br>(14 - 56)       | 14<br>(7 - 23)         | 25<br>(12 - 48)         | 11<br>(6 - 19)          | 8<br>(4 - 15)           |
| Thalassemias                                        | 2<br>(1 - 3)             | 1<br>(0 - 2)          | 0<br>(0 - 0)           | 0<br>(0 - 1)            | 0<br>(0 - 0)            | 0<br>(0 - 0)            |
| Sickle cell disorders                               | 74<br>(39 - 117)         | 28<br>(13 - 50)       | 13<br>(7 - 22)         | 23<br>(12 - 45)         | 9<br>(5 - 15)           | 1<br>(1 - 2)            |
| G6PD deficiency                                     | 2<br>(1 - 3)             | 1<br>(0 - 1)          | 0<br>(0 - 0)           | 0<br>(0 - 1)            | 0<br>(0 - 0)            | 0<br>(0 - 0)            |
| Other hemoglobinopathies and hemolytic anemias      | 12<br>(6 - 19)           | 2<br>(1 - 3)          | 0<br>(0 - 0)           | 1<br>(0 - 2)            | 2<br>(1 - 3)            | 7<br>(3 - 12)           |
| Endocrine, metabolic, blood, and immune disorders   | 169<br>(109 - 238)       | 33<br>(18 - 58)       | 7<br>(4 - 13)          | 41<br>(24 - 61)         | 45<br>(29 - 69)         | 42<br>(22 - 60)         |
| Musculoskeletal disorders                           | 52<br>(35 - 77)          | --                    | 4<br>(3 - 7)           | 17<br>(10 - 27)         | 18<br>(11 - 27)         | 13<br>(8 - 20)          |
| Rheumatoid arthritis                                | 7<br>(4 - 13)            | --                    | 0<br>(0 - 1)           | 1<br>(1 - 2)            | 2<br>(1 - 5)            | 3<br>(2 - 6)            |
| Other musculoskeletal disorders                     | 44<br>(30 - 65)          | --                    | 4<br>(2 - 6)           | 15<br>(9 - 25)          | 16<br>(10 - 23)         | 9<br>(6 - 15)           |
| Other non-communicable diseases                     | 865<br>(594 - 1,285)     | 656<br>(393 - 1,056)  | 36<br>(21 - 56)        | 62<br>(37 - 87)         | 51<br>(33 - 71)         | 60<br>(39 - 84)         |
| Congenital anomalies                                | 695<br>(427 - 1,092)     | 625<br>(368 - 1,013)  | 31<br>(18 - 52)        | 26<br>(16 - 39)         | 7<br>(5 - 10)           | 5<br>(3 - 7)            |
| Neural tube defects                                 | 104<br>(37 - 219)        | 99<br>(34 - 213)      | 3<br>(1 - 5)           | 2<br>(1 - 4)            | 0<br>(0 - 1)            | 0<br>(0 - 0)            |
| Congenital heart anomalies                          | 287<br>(171 - 467)       | 257<br>(150 - 435)    | 14<br>(7 - 23)         | 11<br>(6 - 17)          | 3<br>(2 - 5)            | 2<br>(1 - 3)            |
| Cleft lip and cleft palate                          | 2<br>(1 - 5)             | 2<br>(1 - 5)          | --                     | --                      | --                      | --                      |
| Down syndrome                                       | 96<br>(45 - 188)         | 82<br>(33 - 173)      | 7<br>(3 - 13)          | 6<br>(2 - 10)           | 2<br>(1 - 3)            | 0<br>(0 - 0)            |
| Chromosomal unbalanced rearrangements               | 31<br>(13 - 62)          | 28<br>(12 - 59)       | 1<br>(0 - 2)           | 1<br>(1 - 2)            | 0<br>(0 - 0)            | 0<br>(0 - 0)            |
| Other congenital anomalies                          | 174<br>(67 - 555)        | 156<br>(54 - 512)     | 7<br>(3 - 22)          | 7<br>(4 - 12)           | 2<br>(1 - 3)            | 3<br>(2 - 4)            |
| Skin and subcutaneous diseases                      | 162<br>(102 - 210)       | 23<br>(11 - 43)       | 4<br>(2 - 7)           | 35<br>(17 - 55)         | 44<br>(27 - 63)         | 55<br>(35 - 79)         |
| Cellulitis                                          | 65<br>(38 - 94)          | 8<br>(3 - 16)         | 2<br>(1 - 4)           | 13<br>(6 - 21)          | 17<br>(9 - 28)          | 25<br>(12 - 42)         |



Web Table 31- Mauritania deaths with 95% UI by age, sex, and cause in 2013

| Cause                                           | Both Sexes, All Ages     | Both Sexes, 0-4 Years | Both Sexes, 5-14 Years | Both Sexes, 15-49 Years | Both Sexes, 50-69 Years | Both Sexes, 70-80 Years |
|-------------------------------------------------|--------------------------|-----------------------|------------------------|-------------------------|-------------------------|-------------------------|
| Pyoderma                                        | 90<br>(57 - 129)         | 14<br>(7 - 28)        | 2<br>(1 - 3)           | 20<br>(10 - 33)         | 26<br>(16 - 40)         | 27<br>(16 - 44)         |
| Decubitus ulcer                                 | 3<br>(2 - 5)             | 0<br>(0 - 0)          | 0<br>(0 - 0)           | 1<br>(0 - 1)            | 0<br>(0 - 1)            | 2<br>(1 - 4)            |
| Other skin and subcutaneous diseases            | 4<br>(2 - 7)             | 1<br>(0 - 3)          | 0<br>(0 - 0)           | 2<br>(1 - 3)            | 0<br>(0 - 1)            | 1<br>(0 - 2)            |
| Sudden infant death syndrome                    | 8<br>(3 - 22)            | 8<br>(3 - 22)         | --                     | --                      | --                      | --                      |
| Injuries                                        | 2,358<br>(1,818 - 2,907) | 265<br>(143 - 435)    | 224<br>(158 - 297)     | 1,238<br>(877 - 1,626)  | 396<br>(307 - 488)      | 236<br>(172 - 292)      |
| Transport injuries                              | 1,378<br>(1,024 - 1,729) | 74<br>(34 - 125)      | 131<br>(87 - 182)      | 873<br>(612 - 1,166)    | 221<br>(167 - 281)      | 79<br>(61 - 99)         |
| Road injuries                                   | 1,348<br>(1,002 - 1,690) | 68<br>(31 - 115)      | 127<br>(84 - 175)      | 864<br>(606 - 1,154)    | 214<br>(162 - 272)      | 74<br>(57 - 94)         |
| Pedestrian road injuries                        | 344<br>(218 - 471)       | 22<br>(9 - 43)        | 43<br>(25 - 64)        | 190<br>(106 - 283)      | 62<br>(41 - 85)         | 26<br>(18 - 36)         |
| Cyclist road injuries                           | 65<br>(43 - 87)          | 5<br>(2 - 10)         | 11<br>(6 - 17)         | 30<br>(18 - 44)         | 16<br>(9 - 22)          | 4<br>(3 - 6)            |
| Motorcyclist road injuries                      | 158<br>(99 - 234)        | 4<br>(2 - 9)          | 7<br>(4 - 12)          | 121<br>(70 - 188)       | 20<br>(13 - 30)         | 5<br>(3 - 7)            |
| Motor vehicle road injuries                     | 747<br>(545 - 965)       | 32<br>(15 - 56)       | 60<br>(39 - 87)        | 509<br>(349 - 684)      | 110<br>(80 - 148)       | 36<br>(26 - 49)         |
| Other road injuries                             | 33<br>(21 - 50)          | 4<br>(1 - 9)          | 7<br>(3 - 12)          | 14<br>(7 - 24)          | 6<br>(3 - 10)           | 3<br>(1 - 5)            |
| Other transport injuries                        | 31<br>(19 - 39)          | 6<br>(2 - 10)         | 4<br>(2 - 7)           | 9<br>(6 - 15)           | 7<br>(3 - 10)           | 5<br>(1 - 8)            |
| Unintentional injuries                          | 777<br>(595 - 1,018)     | 187<br>(101 - 327)    | 87<br>(58 - 121)       | 230<br>(155 - 327)      | 135<br>(101 - 173)      | 138<br>(91 - 179)       |
| Falls                                           | 196<br>(138 - 272)       | 22<br>(11 - 44)       | 12<br>(7 - 21)         | 57<br>(33 - 92)         | 41<br>(28 - 60)         | 64<br>(39 - 93)         |
| Drowning                                        | 156<br>(100 - 237)       | 52<br>(20 - 114)      | 32<br>(18 - 50)        | 51<br>(28 - 86)         | 15<br>(10 - 20)         | 6<br>(4 - 9)            |
| Fire, heat, and hot substances                  | 80<br>(47 - 135)         | 24<br>(10 - 54)       | 8<br>(4 - 14)          | 21<br>(12 - 35)         | 14<br>(8 - 22)          | 13<br>(6 - 20)          |
| Poisonings                                      | 34<br>(23 - 53)          | 7<br>(3 - 15)         | 3<br>(2 - 5)           | 14<br>(8 - 28)          | 7<br>(4 - 11)           | 3<br>(2 - 4)            |
| Exposure to mechanical forces                   | 109<br>(79 - 147)        | 23<br>(13 - 40)       | 13<br>(8 - 21)         | 45<br>(29 - 69)         | 20<br>(12 - 29)         | 8<br>(4 - 11)           |
| Unintentional firearm injuries                  | 39<br>(27 - 54)          | 5<br>(3 - 10)         | 3<br>(2 - 5)           | 22<br>(13 - 34)         | 6<br>(4 - 10)           | 2<br>(2 - 4)            |
| Unintentional suffocation                       | 10<br>(5 - 21)           | 5<br>(2 - 14)         | 1<br>(1 - 3)           | 2<br>(1 - 5)            | 1<br>(1 - 2)            | 0<br>(0 - 1)            |
| Other exposure to mechanical forces             | 61<br>(41 - 90)          | 13<br>(6 - 25)        | 9<br>(5 - 16)          | 21<br>(12 - 37)         | 13<br>(6 - 20)          | 5<br>(2 - 8)            |
| Adverse effects of medical treatment            | 66<br>(26 - 116)         | 14<br>(4 - 33)        | 3<br>(1 - 6)           | 14<br>(6 - 26)          | 17<br>(6 - 31)          | 18<br>(5 - 34)          |
| Animal contact                                  | 25<br>(15 - 40)          | 4<br>(2 - 9)          | 4<br>(2 - 8)           | 7<br>(4 - 12)           | 6<br>(3 - 9)            | 4<br>(2 - 7)            |
| Venomous animal contact                         | 13<br>(7 - 25)           | 2<br>(1 - 6)          | 2<br>(1 - 5)           | 4<br>(2 - 8)            | 3<br>(1 - 6)            | 2<br>(1 - 3)            |
| Non-venomous animal contact                     | 12<br>(6 - 17)           | 2<br>(1 - 3)          | 2<br>(1 - 3)           | 3<br>(1 - 5)            | 3<br>(1 - 5)            | 2<br>(1 - 4)            |
| Foreign body                                    | 70<br>(45 - 120)         | 33<br>(16 - 68)       | 6<br>(3 - 10)          | 8<br>(5 - 14)           | 8<br>(5 - 13)           | 15<br>(9 - 24)          |
| Pulmonary aspiration and foreign body in airway | 68<br>(43 - 117)         | 33<br>(16 - 68)       | 5<br>(3 - 9)           | 8<br>(4 - 13)           | 7<br>(4 - 12)           | 15<br>(8 - 23)          |
| Foreign body in other body part                 | 3<br>(2 - 3)             | 1<br>(0 - 1)          | 0<br>(0 - 1)           | 0<br>(0 - 1)            | 1<br>(0 - 1)            | 0<br>(0 - 1)            |
| Other unintentional injuries                    | 41<br>(29 - 55)          | 6<br>(3 - 10)         | 6<br>(4 - 9)           | 15<br>(9 - 23)          | 7<br>(5 - 10)           | 7<br>(4 - 9)            |
| Self-harm and interpersonal violence            | 198<br>(135 - 271)       | 5<br>(2 - 10)         | 6<br>(3 - 9)           | 132<br>(83 - 196)       | 38<br>(22 - 55)         | 18<br>(7 - 28)          |
| Self-harm                                       | 129<br>(76 - 189)        | --                    | 3<br>(1 - 5)           | 75<br>(43 - 125)        | 33<br>(17 - 50)         | 17<br>(7 - 27)          |
| Interpersonal violence                          | 70<br>(41 - 111)         | 5<br>(2 - 10)         | 3<br>(2 - 6)           | 56<br>(31 - 92)         | 5<br>(3 - 7)            | 1<br>(0 - 1)            |
| Assault by firearm                              | 35<br>(16 - 59)          | 1<br>(0 - 3)          | 1<br>(0 - 2)           | 31<br>(13 - 53)         | 2<br>(1 - 3)            | 0<br>(0 - 0)            |
| Assault by sharp object                         | 15<br>(8 - 32)           | 1<br>(0 - 2)          | 1<br>(0 - 1)           | 12<br>(6 - 28)          | 1<br>(1 - 2)            | 0<br>(0 - 0)            |
| Assault by other means                          | 19<br>(11 - 32)          | 3<br>(1 - 5)          | 2<br>(1 - 3)           | 13<br>(7 - 23)          | 1<br>(1 - 2)            | 0<br>(0 - 1)            |
| Forces of nature, war, and legal intervention   | 5<br>(3 - 11)            | 0<br>(0 - 0)          | 0<br>(0 - 1)           | 3<br>(2 - 6)            | 2<br>(1 - 3)            | 0<br>(0 - 1)            |
| Exposure to forces of nature                    | 5<br>(3 - 11)            | 0<br>(0 - 0)          | 0<br>(0 - 1)           | 3<br>(2 - 6)            | 2<br>(1 - 3)            | 0<br>(0 - 1)            |

Web Table 31- Mauritania deaths with 95% UI by age, sex, and cause in 2013

| Cause                                                             | Males, All Ages             | Males, 0-4 Years         | Males, 5-14 Years  | Males, 15-49 Years       | Males, 50-69 Years       | Males, 70-80 Years       |
|-------------------------------------------------------------------|-----------------------------|--------------------------|--------------------|--------------------------|--------------------------|--------------------------|
| All causes                                                        | 13,989<br>(12,063 - 15,970) | 4,978<br>(4,169 - 5,892) | 538<br>(446 - 640) | 3,123<br>(2,428 - 4,087) | 2,962<br>(2,352 - 3,530) | 2,388<br>(2,098 - 2,565) |
| Communicable, maternal, neonatal, and nutritional diseases        | 7,285<br>(6,308 - 8,589)    | 4,324<br>(3,541 - 5,200) | 319<br>(254 - 406) | 1,043<br>(755 - 1,527)   | 853<br>(655 - 1,077)     | 746<br>(586 - 895)       |
| HIV/AIDS and tuberculosis                                         | 707<br>(405 - 1,657)        | 21<br>(7 - 91)           | 26<br>(9 - 97)     | 335<br>(153 - 996)       | 221<br>(135 - 355)       | 104<br>(68 - 149)        |
| Tuberculosis                                                      | 503<br>(329 - 759)          | 11<br>(5 - 21)           | 7<br>(4 - 12)      | 192<br>(104 - 331)       | 193<br>(123 - 277)       | 101<br>(66 - 142)        |
| HIV/AIDS                                                          | 204<br>(21 - 1,193)         | 10<br>(1 - 78)           | 19<br>(3 - 92)     | 143<br>(14 - 835)        | 28<br>(2 - 174)          | 3<br>(0 - 19)            |
| HIV/AIDS resulting in mycobacterial infection                     | 14<br>(1 - 81)              | 1<br>(0 - 5)             | 1<br>(0 - 6)       | 10<br>(1 - 57)           | 2<br>(0 - 12)            | 0<br>(0 - 1)             |
| HIV/AIDS resulting in other diseases                              | 190<br>(19 - 1,110)         | 10<br>(1 - 73)           | 18<br>(3 - 87)     | 134<br>(13 - 776)        | 26<br>(2 - 162)          | 3<br>(0 - 17)            |
| Diarrhea, lower respiratory, and other common infectious diseases | 3,067<br>(2,346 - 3,894)    | 1,587<br>(1,030 - 2,304) | 154<br>(102 - 213) | 424<br>(279 - 605)       | 422<br>(294 - 559)       | 480<br>(347 - 610)       |
| Diarrheal diseases                                                | 882<br>(608 - 1,279)        | 470<br>(224 - 846)       | 35<br>(15 - 68)    | 133<br>(78 - 204)        | 126<br>(74 - 201)        | 118<br>(74 - 180)        |
| Intestinal infectious diseases                                    | 100<br>(51 - 179)           | 31<br>(11 - 64)          | 27<br>(12 - 52)    | 36<br>(15 - 67)          | 5<br>(2 - 9)             | 1<br>(0 - 3)             |
| Typhoid fever                                                     | 62<br>(29 - 114)            | 18<br>(6 - 39)           | 18<br>(7 - 34)     | 23<br>(9 - 46)           | 3<br>(1 - 6)             | 1<br>(0 - 1)             |
| Paratyphoid fever                                                 | 31<br>(14 - 58)             | 9<br>(3 - 21)            | 9<br>(3 - 20)      | 11<br>(4 - 23)           | 1<br>(0 - 3)             | 0<br>(0 - 1)             |
| Other intestinal infectious diseases                              | 7<br>(2 - 17)               | 4<br>(0 - 11)            | 1<br>(0 - 4)       | 2<br>(0 - 7)             | 0<br>(0 - 3)             | 0<br>(0 - 2)             |
| Lower respiratory infections                                      | 1,527<br>(1,097 - 2,000)    | 763<br>(467 - 1,168)     | 41<br>(22 - 68)    | 144<br>(86 - 217)        | 238<br>(148 - 338)       | 340<br>(211 - 471)       |
| Upper respiratory infections                                      | 2<br>(1 - 3)                | 1<br>(0 - 2)             | 0<br>(0 - 0)       | 0<br>(0 - 1)             | 0<br>(0 - 1)             | 0<br>(0 - 1)             |
| Otitis media                                                      | 1<br>(1 - 2)                | 0<br>(0 - 1)             | 0<br>(0 - 0)       | 0<br>(0 - 1)             | 0<br>(0 - 0)             | 0<br>(0 - 1)             |
| Meningitis                                                        | 320<br>(216 - 454)          | 140<br>(63 - 260)        | 32<br>(17 - 55)    | 88<br>(51 - 139)         | 43<br>(24 - 69)          | 18<br>(10 - 28)          |
| Pneumococcal meningitis                                           | 80<br>(52 - 117)            | 27<br>(12 - 53)          | 8<br>(3 - 16)      | 26<br>(14 - 45)          | 13<br>(6 - 25)           | 5<br>(2 - 10)            |
| H influenzae type B meningitis                                    | 58<br>(31 - 101)            | 37<br>(15 - 77)          | 6<br>(2 - 12)      | 10<br>(4 - 20)           | 4<br>(1 - 9)             | 1<br>(0 - 3)             |
| Meningococcal meningitis                                          | 141<br>(84 - 215)           | 62<br>(23 - 127)         | 15<br>(7 - 28)     | 38<br>(19 - 63)          | 18<br>(9 - 33)           | 8<br>(4 - 13)            |
| Other meningitis                                                  | 41<br>(23 - 64)             | 13<br>(5 - 27)           | 3<br>(1 - 7)       | 14<br>(5 - 27)           | 7<br>(3 - 14)            | 4<br>(1 - 7)             |
| Encephalitis                                                      | 20<br>(12 - 30)             | 7<br>(3 - 15)            | 2<br>(1 - 4)       | 6<br>(3 - 11)            | 3<br>(2 - 4)             | 1<br>(1 - 2)             |
| Diphtheria                                                        | 2<br>(0 - 13)               | 2<br>(0 - 12)            | 0<br>(0 - 4)       | 0<br>(0 - 1)             | 0<br>(0 - 0)             | -<br>(0 - 0)             |
| Whooping cough                                                    | 77<br>(0 - 391)             | 72<br>(0 - 362)          | 4<br>(0 - 19)      | 1<br>(0 - 5)             | 0<br>(0 - 1)             | -<br>(0 - 1)             |
| Tetanus                                                           | 60<br>(27 - 114)            | 37<br>(8 - 83)           | 3<br>(1 - 6)       | 13<br>(6 - 25)           | 6<br>(3 - 12)            | 1<br>(1 - 2)             |
| Measles                                                           | 74<br>(2 - 432)             | 64<br>(2 - 364)          | 8<br>(0 - 47)      | 1<br>(0 - 7)             | 0<br>(0 - 0)             | -<br>(0 - 0)             |
| Varicella and herpes zoster                                       | 3<br>(1 - 7)                | 1<br>(0 - 5)             | 0<br>(0 - 1)       | 1<br>(0 - 2)             | 0<br>(0 - 1)             | 1<br>(0 - 2)             |
| Neglected tropical diseases and malaria                           | 1,005<br>(482 - 1,862)      | 550<br>(102 - 1,364)     | 101<br>(46 - 172)  | 171<br>(68 - 340)        | 111<br>(38 - 214)        | 71<br>(21 - 154)         |
| Malaria                                                           | 974<br>(444 - 1,838)        | 544<br>(96 - 1,359)      | 95<br>(38 - 168)   | 160<br>(59 - 331)        | 106<br>(33 - 209)        | 69<br>(19 - 153)         |
| Leishmaniasis                                                     | 0<br>(0 - 0)                | 0<br>(0 - 0)             | 0<br>(0 - 0)       | 0<br>(0 - 0)             | 0<br>(0 - 0)             | 0<br>(0 - 0)             |
| Visceral leishmaniasis                                            | 0<br>(0 - 0)                | 0<br>(0 - 0)             | 0<br>(0 - 0)       | 0<br>(0 - 0)             | 0<br>(0 - 0)             | 0<br>(0 - 0)             |
| Schistosomiasis                                                   | 8<br>(5 - 11)               | 0<br>(0 - 0)             | 0<br>(0 - 0)       | 3<br>(2 - 5)             | 3<br>(2 - 5)             | 1<br>(1 - 2)             |
| Cysticercosis                                                     | 0<br>(0 - 1)                | 0<br>(0 - 0)             | 0<br>(0 - 0)       | 0<br>(0 - 1)             | 0<br>(0 - 0)             | 0<br>(0 - 0)             |
| Cystic echinococcosis                                             | 1<br>(1 - 2)                | 0<br>(0 - 0)             | 0<br>(0 - 0)       | 1<br>(0 - 1)             | 0<br>(0 - 0)             | 0<br>(0 - 0)             |
| Dengue                                                            | 1<br>(0 - 1)                | 0<br>(0 - 0)             | 0<br>(0 - 0)       | 0<br>(0 - 0)             | 0<br>(0 - 0)             | 0<br>(0 - 0)             |
| Yellow fever                                                      | 1<br>(0 - 1)                | 0<br>(0 - 0)             | 0<br>(0 - 0)       | 0<br>(0 - 1)             | 0<br>(0 - 0)             | 0<br>(0 - 0)             |
| Rabies                                                            | 15<br>(6 - 28)              | 3<br>(1 - 9)             | 5<br>(2 - 11)      | 5<br>(2 - 9)             | 1<br>(0 - 3)             | 0<br>(0 - 0)             |
| Intestinal nematode infections                                    | 3<br>(0 - 12)               | 2<br>(0 - 9)             | 0<br>(0 - 4)       | 0<br>(0 - 2)             | 0<br>(0 - 1)             | 0<br>(0 - 0)             |
| Ascariasis                                                        | 3<br>(0 - 12)               | 2<br>(0 - 9)             | 0<br>(0 - 4)       | 0<br>(0 - 2)             | 0<br>(0 - 1)             | 0<br>(0 - 0)             |
| Other neglected tropical diseases                                 | 2<br>(1 - 5)                | 1<br>(0 - 1)             | 0<br>(0 - 0)       | 1<br>(0 - 2)             | 0<br>(0 - 1)             | 0<br>(0 - 1)             |

Web Table 31- Mauritania deaths with 95% UI by age, sex, and cause in 2013

| Cause                                                            | Males, All Ages          | Males, 0-4 Years         | Males, 5-14 Years | Males, 15-49 Years     | Males, 50-69 Years       | Males, 70-80 Years       |
|------------------------------------------------------------------|--------------------------|--------------------------|-------------------|------------------------|--------------------------|--------------------------|
| Maternal disorders                                               | --                       | --                       | --                | --                     | --                       | --                       |
| Maternal hemorrhage                                              | --                       | --                       | --                | --                     | --                       | --                       |
| Maternal sepsis and other maternal infections                    | --                       | --                       | --                | --                     | --                       | --                       |
| Maternal hypertensive disorders                                  | --                       | --                       | --                | --                     | --                       | --                       |
| Maternal obstructed labor                                        | --                       | --                       | --                | --                     | --                       | --                       |
| Maternal abortive outcome                                        | --                       | --                       | --                | --                     | --                       | --                       |
| Indirect maternal deaths                                         | --                       | --                       | --                | --                     | --                       | --                       |
| Late maternal deaths                                             | --                       | --                       | --                | --                     | --                       | --                       |
| Maternal deaths aggravated by HIV/AIDS                           | --                       | --                       | --                | --                     | --                       | --                       |
| Other maternal disorders                                         | --                       | --                       | --                | --                     | --                       | --                       |
| Neonatal disorders                                               | 1,804<br>(1,426 - 2,223) | 1,804<br>(1,426 - 2,223) | --                | --                     | --                       | --                       |
| Neonatal preterm birth complications                             | 575<br>(243 - 995)       | 575<br>(243 - 995)       | --                | --                     | --                       | --                       |
| Neonatal encephalopathy due to birth asphyxia and trauma         | 593<br>(286 - 963)       | 593<br>(286 - 963)       | --                | --                     | --                       | --                       |
| Neonatal sepsis and other neonatal infections                    | 464<br>(200 - 903)       | 464<br>(200 - 903)       | --                | --                     | --                       | --                       |
| Hemolytic disease and other neonatal jaundice                    | 13<br>(4 - 36)           | 13<br>(4 - 36)           | --                | --                     | --                       | --                       |
| Other neonatal disorders                                         | 159<br>(67 - 318)        | 159<br>(67 - 318)        | --                | --                     | --                       | --                       |
| Nutritional deficiencies                                         | 494<br>(254 - 750)       | 228<br>(86 - 436)        | 27<br>(13 - 45)   | 85<br>(42 - 137)       | 77<br>(39 - 118)         | 77<br>(46 - 120)         |
| Protein-energy malnutrition                                      | 326<br>(161 - 571)       | 190<br>(67 - 379)        | 18<br>(8 - 32)    | 39<br>(16 - 76)        | 41<br>(19 - 69)          | 38<br>(17 - 71)          |
| Iodine deficiency                                                | 2<br>(0 - 8)             | 1<br>(0 - 7)             | 0<br>(0 - 2)      | 1<br>(0 - 3)           | 0<br>(0 - 2)             | 0<br>(0 - 2)             |
| Iron-deficiency anemia                                           | 163<br>(60 - 278)        | 37<br>(4 - 107)          | 8<br>(2 - 17)     | 44<br>(16 - 79)        | 35<br>(11 - 62)          | 39<br>(15 - 64)          |
| Other nutritional deficiencies                                   | 3<br>(1 - 5)             | 0<br>(0 - 1)             | 0<br>(0 - 0)      | 1<br>(0 - 2)           | 1<br>(0 - 1)             | 1<br>(0 - 1)             |
| Other communicable, maternal, neonatal, and nutritional diseases | 209<br>(133 - 321)       | 133<br>(65 - 236)        | 12<br>(7 - 20)    | 29<br>(16 - 50)        | 22<br>(13 - 37)          | 14<br>(8 - 26)           |
| Sexually transmitted diseases excluding HIV                      | 138<br>(65 - 246)        | 117<br>(52 - 215)        | 9<br>(4 - 15)     | 6<br>(3 - 12)          | 4<br>(2 - 8)             | 3<br>(1 - 7)             |
| Syphilis                                                         | 133<br>(62 - 241)        | 117<br>(52 - 215)        | 8<br>(4 - 15)     | 3<br>(1 - 7)           | 3<br>(1 - 6)             | 2<br>(1 - 6)             |
| Chlamydial infection                                             | --                       | --                       | --                | --                     | --                       | --                       |
| Gonococcal infection                                             | 3<br>(1 - 5)             | --                       | 0<br>(0 - 0)      | 1<br>(1 - 3)           | 1<br>(0 - 1)             | 0<br>(0 - 1)             |
| Other sexually transmitted diseases                              | 2<br>(1 - 4)             | --                       | 0<br>(0 - 0)      | 1<br>(1 - 3)           | 0<br>(0 - 1)             | 0<br>(0 - 0)             |
| Hepatitis                                                        | 33<br>(20 - 53)          | 4<br>(1 - 9)             | 2<br>(1 - 3)      | 14<br>(7 - 27)         | 9<br>(5 - 15)            | 4<br>(2 - 7)             |
| Acute hepatitis A                                                | 2<br>(1 - 5)             | 1<br>(0 - 3)             | 0<br>(0 - 1)      | 1<br>(0 - 2)           | 0<br>(0 - 0)             | 0<br>(0 - 0)             |
| Acute hepatitis B                                                | 22<br>(13 - 37)          | 3<br>(1 - 7)             | 1<br>(0 - 2)      | 7<br>(3 - 15)          | 7<br>(4 - 12)            | 4<br>(2 - 6)             |
| Acute hepatitis C                                                | 1<br>(0 - 3)             | --                       | 0<br>(0 - 0)      | 1<br>(0 - 2)           | 0<br>(0 - 1)             | 0<br>(0 - 0)             |
| Acute hepatitis E                                                | 8<br>(3 - 15)            | 0<br>(0 - 0)             | 0<br>(0 - 1)      | 6<br>(2 - 12)          | 1<br>(0 - 3)             | 0<br>(0 - 1)             |
| Other infectious diseases                                        | 39<br>(20 - 69)          | 12<br>(4 - 26)           | 2<br>(0 - 4)      | 9<br>(3 - 19)          | 9<br>(4 - 22)            | 7<br>(2 - 18)            |
| Non-communicable diseases                                        | 5,180<br>(4,119 - 6,144) | 498<br>(294 - 795)       | 90<br>(63 - 121)  | 1,163<br>(756 - 1,615) | 1,882<br>(1,427 - 2,298) | 1,546<br>(1,319 - 1,747) |
| Neoplasms                                                        | 855<br>(629 - 1,084)     | 23<br>(11 - 41)          | 18<br>(11 - 25)   | 282<br>(175 - 404)     | 341<br>(246 - 440)       | 192<br>(153 - 241)       |
| Esophageal cancer                                                | 31<br>(18 - 52)          | --                       | --                | 6<br>(3 - 11)          | 17<br>(9 - 30)           | 8<br>(4 - 14)            |
| Stomach cancer                                                   | 85<br>(62 - 109)         | --                       | --                | 22<br>(13 - 34)        | 43<br>(31 - 57)          | 19<br>(14 - 25)          |
| Liver cancer                                                     | 353<br>(240 - 471)       | --                       | 1<br>(0 - 3)      | 153<br>(84 - 233)      | 144<br>(97 - 198)        | 55<br>(38 - 76)          |
| Liver cancer due to hepatitis B                                  | 186<br>(105 - 274)       | --                       | 1<br>(0 - 2)      | 95<br>(51 - 151)       | 70<br>(32 - 112)         | 20<br>(10 - 32)          |
| Liver cancer due to hepatitis C                                  | 88<br>(38 - 153)         | --                       | 0<br>(0 - 0)      | 25<br>(6 - 56)         | 43<br>(17 - 77)          | 20<br>(10 - 35)          |

Web Table 31- Mauritania deaths with 95% UI by age, sex, and cause in 2013

| Cause                                | Males, All Ages          | Males, 0-4 Years | Males, 5-14 Years | Males, 15-49 Years | Males, 50-69 Years   | Males, 70-80 Years |
|--------------------------------------|--------------------------|------------------|-------------------|--------------------|----------------------|--------------------|
| Liver cancer due to alcohol use      | 40<br>(18 - 69)          | --               | --                | 10<br>(4 - 22)     | 18<br>(7 - 34)       | 11<br>(5 - 19)     |
| Liver cancer due to other causes     | 39<br>(19 - 75)          | --               | 1<br>(0 - 1)      | 22<br>(10 - 43)    | 12<br>(5 - 27)       | 4<br>(2 - 7)       |
| Larynx cancer                        | 6<br>(3 - 14)            | --               | --                | 1<br>(1 - 2)       | 3<br>(1 - 8)         | 2<br>(1 - 4)       |
| Tracheal, bronchus and lung cancer   | 53<br>(38 - 74)          | --               | --                | 7<br>(4 - 13)      | 30<br>(21 - 43)      | 15<br>(12 - 20)    |
| Breast cancer                        | 1<br>(1 - 2)             | --               | --                | 1<br>(0 - 1)       | 1<br>(0 - 1)         | 0<br>(0 - 1)       |
| Cervical cancer                      | --                       | --               | --                | --                 | --                   | --                 |
| Uterine cancer                       | --                       | --               | --                | --                 | --                   | --                 |
| Prostate cancer                      | 57<br>(38 - 93)          | --               | --                | 1<br>(1 - 3)       | 17<br>(11 - 28)      | 39<br>(25 - 65)    |
| Colon and rectum cancer              | 41<br>(31 - 54)          | --               | --                | 14<br>(9 - 21)     | 15<br>(11 - 20)      | 11<br>(9 - 15)     |
| Lip and oral cavity cancer           | 5<br>(3 - 8)             | --               | --                | 1<br>(1 - 3)       | 2<br>(2 - 4)         | 1<br>(1 - 2)       |
| Nasopharynx cancer                   | 2<br>(1 - 3)             | --               | 0<br>(0 - 0)      | 1<br>(1 - 2)       | 1<br>(0 - 1)         | 0<br>(0 - 0)       |
| Other pharynx cancer                 | 2<br>(1 - 4)             | --               | --                | 1<br>(0 - 1)       | 1<br>(1 - 2)         | 1<br>(0 - 1)       |
| Gallbladder and biliary tract cancer | 5<br>(3 - 7)             | --               | --                | 1<br>(1 - 2)       | 2<br>(1 - 3)         | 1<br>(1 - 2)       |
| Pancreatic cancer                    | 24<br>(17 - 31)          | --               | --                | 7<br>(5 - 11)      | 12<br>(9 - 17)       | 4<br>(3 - 5)       |
| Malignant skin melanoma              | 2<br>(1 - 4)             | --               | --                | 1<br>(0 - 2)       | 1<br>(0 - 2)         | 0<br>(0 - 1)       |
| Non-melanoma skin cancer             | 2<br>(1 - 3)             | --               | --                | 0<br>(0 - 1)       | 1<br>(0 - 1)         | 1<br>(0 - 1)       |
| Ovarian cancer                       | --                       | --               | --                | --                 | --                   | --                 |
| Testicular cancer                    | 2<br>(1 - 3)             | --               | --                | 1<br>(1 - 2)       | 0<br>(0 - 0)         | 0<br>(0 - 0)       |
| Kidney cancer                        | 8<br>(6 - 11)            | 1<br>(0 - 3)     | 0<br>(0 - 1)      | 2<br>(1 - 2)       | 4<br>(3 - 5)         | 2<br>(1 - 2)       |
| Bladder cancer                       | 20<br>(15 - 31)          | --               | --                | 4<br>(2 - 7)       | 7<br>(5 - 12)        | 9<br>(6 - 15)      |
| Brain and nervous system cancer      | 9<br>(4 - 13)            | 0<br>(0 - 1)     | 1<br>(0 - 2)      | 4<br>(2 - 7)       | 2<br>(1 - 4)         | 1<br>(0 - 1)       |
| Thyroid cancer                       | 1<br>(1 - 1)             | --               | 0<br>(0 - 0)      | 0<br>(0 - 0)       | 0<br>(0 - 1)         | 0<br>(0 - 0)       |
| Mesothelioma                         | 1<br>(1 - 2)             | --               | --                | 0<br>(0 - 0)       | 1<br>(0 - 1)         | 1<br>(0 - 1)       |
| Hodgkin lymphoma                     | 6<br>(2 - 11)            | 1<br>(0 - 1)     | 1<br>(0 - 2)      | 3<br>(1 - 6)       | 1<br>(1 - 3)         | 1<br>(0 - 1)       |
| Non-Hodgkin lymphoma                 | 48<br>(34 - 65)          | 5<br>(2 - 11)    | 6<br>(3 - 11)     | 19<br>(11 - 29)    | 12<br>(7 - 18)       | 6<br>(4 - 10)      |
| Multiple myeloma                     | 3<br>(2 - 4)             | --               | --                | 1<br>(0 - 1)       | 1<br>(1 - 2)         | 0<br>(0 - 1)       |
| Leukemia                             | 16<br>(12 - 21)          | 2<br>(1 - 3)     | 2<br>(1 - 3)      | 9<br>(5 - 12)      | 2<br>(2 - 3)         | 2<br>(1 - 2)       |
| Other neoplasms                      | 72<br>(44 - 113)         | 14<br>(6 - 27)   | 6<br>(3 - 9)      | 19<br>(10 - 34)    | 20<br>(10 - 39)      | 13<br>(7 - 23)     |
| Cardiovascular diseases              | 1,951<br>(1,535 - 2,352) | 32<br>(19 - 53)  | 14<br>(9 - 21)    | 305<br>(194 - 442) | 837<br>(618 - 1,036) | 761<br>(644 - 864) |
| Rheumatic heart disease              | 18<br>(10 - 43)          | 1<br>(0 - 2)     | 1<br>(0 - 2)      | 5<br>(2 - 15)      | 6<br>(3 - 17)        | 5<br>(3 - 11)      |
| Ischemic heart disease               | 625<br>(467 - 846)       | 2<br>(0 - 4)     | 2<br>(1 - 4)      | 94<br>(56 - 141)   | 292<br>(206 - 402)   | 235<br>(175 - 324) |
| Cerebrovascular disease              | 883<br>(679 - 1,113)     | 11<br>(6 - 19)   | 4<br>(3 - 7)      | 112<br>(66 - 172)  | 366<br>(258 - 476)   | 390<br>(314 - 469) |
| Ischemic stroke                      | 546<br>(288 - 738)       | 1<br>(0 - 2)     | 1<br>(0 - 1)      | 30<br>(11 - 57)    | 220<br>(107 - 319)   | 293<br>(173 - 381) |
| Hemorrhagic stroke                   | 338<br>(195 - 548)       | 10<br>(5 - 18)   | 4<br>(2 - 6)      | 82<br>(48 - 126)   | 146<br>(78 - 256)    | 96<br>(44 - 193)   |
| Hypertensive heart disease           | 89<br>(38 - 154)         | 0<br>(0 - 1)     | 0<br>(0 - 0)      | 16<br>(4 - 34)     | 37<br>(15 - 67)      | 36<br>(16 - 59)    |
| Cardiomyopathy and myocarditis       | 102<br>(56 - 149)        | 5<br>(2 - 10)    | 2<br>(1 - 4)      | 24<br>(12 - 41)    | 45<br>(21 - 72)      | 26<br>(13 - 44)    |
| Atrial fibrillation and flutter      | 0<br>(0 - 0)             | --               | --                | 0<br>(0 - 0)       | 0<br>(0 - 0)         | 0<br>(0 - 0)       |
| Aortic aneurysm                      | 25<br>(17 - 37)          | --               | --                | 3<br>(2 - 5)       | 13<br>(8 - 19)       | 9<br>(6 - 15)      |
| Peripheral vascular disease          | 1<br>(1 - 2)             | --               | --                | 0<br>(0 - 0)       | 0<br>(0 - 1)         | 1<br>(0 - 1)       |
| Endocarditis                         | 55<br>(35 - 89)          | 5<br>(2 - 11)    | 1<br>(1 - 2)      | 14<br>(8 - 25)     | 19<br>(11 - 34)      | 15<br>(9 - 25)     |

Web Table 31- Mauritania deaths with 95% UI by age, sex, and cause in 2013

| Cause                                               | Males, All Ages    | Males, 0-4 Years | Males, 5-14 Years | Males, 15-49 Years | Males, 50-69 Years | Males, 70-80 Years |
|-----------------------------------------------------|--------------------|------------------|-------------------|--------------------|--------------------|--------------------|
| Other cardiovascular and circulatory diseases       | 152<br>(103 - 241) | 9<br>(4 - 16)    | 3<br>(2 - 5)      | 36<br>(20 - 59)    | 59<br>(38 - 94)    | 45<br>(29 - 86)    |
| Chronic respiratory diseases                        | 406<br>(296 - 722) | 10<br>(4 - 21)   | 3<br>(2 - 6)      | 49<br>(30 - 92)    | 154<br>(102 - 277) | 189<br>(141 - 331) |
| Chronic obstructive pulmonary disease               | 247<br>(170 - 434) | 4<br>(1 - 9)     | 1<br>(1 - 2)      | 14<br>(7 - 27)     | 89<br>(56 - 165)   | 139<br>(97 - 242)  |
| Pneumoconiosis                                      | 36<br>(21 - 64)    | 0<br>(0 - 0)     | 0<br>(0 - 0)      | 7<br>(3 - 12)      | 20<br>(11 - 35)    | 9<br>(4 - 19)      |
| Silicosis                                           | 7<br>(3 - 17)      | 0<br>(0 - 0)     | 0<br>(0 - 0)      | 1<br>(0 - 3)       | 2<br>(1 - 5)       | 3<br>(1 - 9)       |
| Asbestosis                                          | 3<br>(1 - 5)       | 0<br>(0 - 0)     | 0<br>(0 - 0)      | 0<br>(0 - 1)       | 2<br>(1 - 4)       | 0<br>(0 - 1)       |
| Coal workers pneumoconiosis                         | 10<br>(6 - 18)     | 0<br>(0 - 0)     | 0<br>(0 - 0)      | 0<br>(0 - 1)       | 8<br>(5 - 15)      | 1<br>(0 - 2)       |
| Other pneumoconiosis                                | 16<br>(10 - 26)    | 0<br>(0 - 0)     | 0<br>(0 - 0)      | 5<br>(2 - 7)       | 8<br>(4 - 13)      | 4<br>(2 - 8)       |
| Asthma                                              | 54<br>(25 - 115)   | 3<br>(1 - 6)     | 1<br>(0 - 1)      | 13<br>(6 - 26)     | 21<br>(8 - 47)     | 17<br>(6 - 40)     |
| Interstitial lung disease and pulmonary sarcoidosis | 29<br>(5 - 53)     | 0<br>(0 - 0)     | 0<br>(0 - 0)      | 1<br>(0 - 2)       | 12<br>(2 - 24)     | 16<br>(2 - 31)     |
| Other chronic respiratory diseases                  | 40<br>(18 - 87)    | 4<br>(1 - 8)     | 1<br>(1 - 3)      | 14<br>(7 - 30)     | 12<br>(4 - 26)     | 9<br>(3 - 21)      |
| Cirrhosis                                           | 343<br>(259 - 448) | 4<br>(1 - 11)    | 3<br>(2 - 4)      | 117<br>(69 - 172)  | 163<br>(120 - 212) | 55<br>(42 - 71)    |
| Cirrhosis due to hepatitis B                        | 113<br>(40 - 177)  | 0<br>(0 - 1)     | 1<br>(0 - 1)      | 37<br>(14 - 66)    | 55<br>(18 - 87)    | 20<br>(5 - 32)     |
| Cirrhosis due to hepatitis C                        | 69<br>(19 - 136)   | 0<br>(0 - 1)     | 0<br>(0 - 1)      | 26<br>(8 - 50)     | 33<br>(5 - 69)     | 9<br>(1 - 23)      |
| Cirrhosis due to alcohol use                        | 116<br>(66 - 186)  | --               | --                | 33<br>(16 - 61)    | 60<br>(33 - 96)    | 23<br>(13 - 37)    |
| Cirrhosis due to other causes                       | 45<br>(26 - 75)    | 4<br>(1 - 9)     | 2<br>(1 - 3)      | 20<br>(10 - 35)    | 15<br>(7 - 30)     | 4<br>(2 - 7)       |
| Digestive diseases                                  | 345<br>(249 - 446) | 11<br>(4 - 23)   | 10<br>(6 - 14)    | 109<br>(63 - 163)  | 127<br>(88 - 172)  | 88<br>(66 - 112)   |
| Peptic ulcer disease                                | 93<br>(60 - 133)   | 1<br>(0 - 3)     | 1<br>(1 - 3)      | 26<br>(13 - 43)    | 38<br>(23 - 58)    | 27<br>(16 - 41)    |
| Gastritis and duodenitis                            | 12<br>(6 - 31)     | 1<br>(0 - 1)     | 0<br>(0 - 1)      | 3<br>(1 - 9)       | 4<br>(2 - 11)      | 3<br>(1 - 10)      |
| Appendicitis                                        | 18<br>(10 - 26)    | 1<br>(0 - 2)     | 1<br>(1 - 2)      | 5<br>(3 - 9)       | 6<br>(3 - 10)      | 4<br>(2 - 8)       |
| Paralytic ileus and intestinal obstruction          | 110<br>(55 - 157)  | 4<br>(1 - 9)     | 4<br>(2 - 6)      | 33<br>(13 - 57)    | 42<br>(19 - 63)    | 27<br>(14 - 42)    |
| Inguinal, femoral, and abdominal hernia             | 14<br>(8 - 25)     | 0<br>(0 - 0)     | 0<br>(0 - 0)      | 3<br>(2 - 6)       | 5<br>(3 - 10)      | 5<br>(3 - 9)       |
| Inflammatory bowel disease                          | 15<br>(3 - 25)     | 2<br>(0 - 5)     | 0<br>(0 - 1)      | 4<br>(1 - 10)      | 5<br>(1 - 9)       | 3<br>(1 - 6)       |
| Vascular intestinal disorders                       | 2<br>(0 - 4)       | 0<br>(0 - 0)     | 0<br>(0 - 0)      | 0<br>(0 - 1)       | 0<br>(0 - 1)       | 1<br>(0 - 1)       |
| Gallbladder and biliary diseases                    | 19<br>(10 - 28)    | 0<br>(0 - 0)     | 1<br>(0 - 1)      | 5<br>(2 - 10)      | 6<br>(3 - 10)      | 7<br>(3 - 11)      |
| Pancreatitis                                        | 29<br>(16 - 47)    | 0<br>(0 - 0)     | 0<br>(0 - 0)      | 16<br>(7 - 29)     | 8<br>(5 - 15)      | 4<br>(2 - 7)       |
| Other digestive diseases                            | 34<br>(21 - 53)    | 2<br>(0 - 6)     | 1<br>(1 - 2)      | 12<br>(6 - 20)     | 12<br>(7 - 20)     | 6<br>(3 - 11)      |
| Neurological disorders                              | 136<br>(105 - 181) | 11<br>(4 - 28)   | 5<br>(3 - 10)     | 31<br>(19 - 50)    | 17<br>(12 - 22)    | 72<br>(54 - 92)    |
| Alzheimer disease and other dementias               | 75<br>(56 - 96)    | --               | --                | 0<br>(0 - 0)       | 8<br>(6 - 12)      | 67<br>(49 - 87)    |
| Parkinson disease                                   | 1<br>(1 - 3)       | --               | --                | 0<br>(0 - 0)       | 0<br>(0 - 0)       | 1<br>(0 - 2)       |
| Epilepsy                                            | 42<br>(26 - 72)    | 8<br>(2 - 24)    | 4<br>(2 - 8)      | 23<br>(13 - 42)    | 4<br>(2 - 6)       | 3<br>(2 - 4)       |
| Multiple sclerosis                                  | 0<br>(0 - 0)       | --               | --                | 0<br>(0 - 0)       | 0<br>(0 - 0)       | 0<br>(0 - 0)       |
| Other neurological disorders                        | 18<br>(12 - 24)    | 3<br>(1 - 6)     | 1<br>(1 - 2)      | 7<br>(4 - 11)      | 4<br>(2 - 6)       | 2<br>(1 - 3)       |
| Mental and substance use disorders                  | 127<br>(68 - 196)  | 3<br>(0 - 10)    | 0<br>(0 - 0)      | 96<br>(47 - 156)   | 21<br>(11 - 38)    | 6<br>(2 - 11)      |
| Schizophrenia                                       | 0<br>(0 - 0)       | --               | --                | 0<br>(0 - 0)       | 0<br>(0 - 0)       | 0<br>(0 - 0)       |
| Alcohol use disorders                               | 36<br>(13 - 82)    | --               | --                | 17<br>(6 - 43)     | 14<br>(5 - 32)     | 4<br>(1 - 9)       |
| Drug use disorders                                  | 91<br>(46 - 144)   | 3<br>(0 - 10)    | --                | 79<br>(37 - 131)   | 7<br>(4 - 10)      | 2<br>(1 - 3)       |
| Opioid use disorders                                | 10<br>(5 - 16)     | 0<br>(0 - 1)     | --                | 9<br>(4 - 15)      | 1<br>(0 - 1)       | 0<br>(0 - 0)       |
| Cocaine use disorders                               | 0<br>(0 - 1)       | 0<br>(0 - 0)     | --                | 0<br>(0 - 1)       | 0<br>(0 - 0)       | 0<br>(0 - 0)       |
| Amphetamine use disorders                           | 0<br>(0 - 0)       | 0<br>(0 - 0)     | --                | 0<br>(0 - 0)       | 0<br>(0 - 0)       | 0<br>(0 - 0)       |

Web Table 31- Mauritania deaths with 95% UI by age, sex, and cause in 2013

| Cause                                               | Males, All Ages    | Males, 0-4 Years   | Males, 5-14 Years | Males, 15-49 Years | Males, 50-69 Years | Males, 70-80 Years |
|-----------------------------------------------------|--------------------|--------------------|-------------------|--------------------|--------------------|--------------------|
| Other drug use disorders                            | 80<br>(40 - 127)   | 3<br>(0 - 9)       | --                | 70<br>(32 - 115)   | 6<br>(3 - 9)       | 2<br>(1 - 2)       |
| Eating disorders                                    | 0<br>(0 - 0)       | --                 | 0<br>(0 - 0)      | 0<br>(0 - 0)       | --                 | --                 |
| Anorexia nervosa                                    | 0<br>(0 - 0)       | --                 | 0<br>(0 - 0)      | 0<br>(0 - 0)       | --                 | --                 |
| Diabetes, urogenital, blood, and endocrine diseases | 580<br>(445 - 729) | 55<br>(31 - 88)    | 19<br>(12 - 28)   | 142<br>(91 - 205)  | 201<br>(146 - 264) | 163<br>(128 - 198) |
| Diabetes mellitus                                   | 212<br>(160 - 276) | 4<br>(2 - 7)       | 1<br>(1 - 1)      | 30<br>(18 - 45)    | 103<br>(72 - 140)  | 74<br>(56 - 98)    |
| Acute glomerulonephritis                            | 2<br>(1 - 5)       | 0<br>(0 - 1)       | 0<br>(0 - 1)      | 1<br>(0 - 2)       | 1<br>(0 - 1)       | 0<br>(0 - 1)       |
| Chronic kidney disease                              | 116<br>(74 - 185)  | 6<br>(2 - 13)      | 4<br>(2 - 8)      | 42<br>(21 - 80)    | 34<br>(22 - 51)    | 30<br>(20 - 44)    |
| Chronic kidney disease due to diabetes mellitus     | 1<br>(0 - 2)       | 0<br>(0 - 0)       | 0<br>(0 - 0)      | 0<br>(0 - 0)       | 1<br>(0 - 2)       | 0<br>(0 - 0)       |
| Chronic kidney disease due to hypertension          | 35<br>(17 - 61)    | 1<br>(0 - 2)       | 0<br>(0 - 1)      | 10<br>(3 - 20)     | 12<br>(6 - 23)     | 11<br>(6 - 19)     |
| Chronic kidney disease due to glomerulonephritis    | 57<br>(37 - 86)    | 4<br>(2 - 8)       | 3<br>(2 - 5)      | 23<br>(12 - 38)    | 14<br>(8 - 23)     | 13<br>(7 - 19)     |
| Chronic kidney disease due to other causes          | 24<br>(11 - 51)    | 2<br>(0 - 5)       | 1<br>(0 - 2)      | 9<br>(3 - 25)      | 6<br>(3 - 13)      | 6<br>(2 - 13)      |
| Urinary diseases and male infertility               | 126<br>(76 - 170)  | 9<br>(3 - 19)      | 2<br>(1 - 3)      | 32<br>(15 - 54)    | 40<br>(24 - 58)    | 43<br>(28 - 61)    |
| Interstitial nephritis and urinary tract infections | 110<br>(67 - 149)  | 8<br>(3 - 19)      | 1<br>(1 - 2)      | 27<br>(13 - 45)    | 35<br>(22 - 50)    | 38<br>(24 - 55)    |
| Urolithiasis                                        | 1<br>(0 - 1)       | --                 | 0<br>(0 - 0)      | 0<br>(0 - 1)       | 0<br>(0 - 0)       | 0<br>(0 - 0)       |
| Other urinary diseases                              | 16<br>(7 - 25)     | 1<br>(0 - 2)       | 0<br>(0 - 0)      | 5<br>(1 - 9)       | 5<br>(2 - 9)       | 5<br>(2 - 9)       |
| Gynecological diseases                              | --                 | --                 | --                | --                 | --                 | --                 |
| Uterine fibroids                                    | --                 | --                 | --                | --                 | --                 | --                 |
| Polycystic ovarian syndrome                         | --                 | --                 | --                | --                 | --                 | --                 |
| Endometriosis                                       | --                 | --                 | --                | --                 | --                 | --                 |
| Genital prolapse                                    | --                 | --                 | --                | --                 | --                 | --                 |
| Other gynecological diseases                        | --                 | --                 | --                | --                 | --                 | --                 |
| Hemoglobinopathies and hemolytic anemias            | 53<br>(22 - 112)   | 21<br>(8 - 42)     | 8<br>(3 - 17)     | 15<br>(5 - 43)     | 5<br>(2 - 15)      | 3<br>(1 - 10)      |
| Thalassemias                                        | 1<br>(1 - 2)       | 1<br>(0 - 2)       | 0<br>(0 - 0)      | 0<br>(0 - 1)       | 0<br>(0 - 0)       | 0<br>(0 - 0)       |
| Sickle cell disorders                               | 45<br>(19 - 93)    | 19<br>(7 - 38)     | 8<br>(3 - 16)     | 14<br>(5 - 40)     | 4<br>(2 - 12)      | 0<br>(0 - 1)       |
| G6PD deficiency                                     | 1<br>(1 - 3)       | 1<br>(0 - 1)       | 0<br>(0 - 0)      | 0<br>(0 - 1)       | 0<br>(0 - 0)       | 0<br>(0 - 0)       |
| Other hemoglobinopathies and hemolytic anemias      | 5<br>(2 - 14)      | 1<br>(0 - 2)       | 0<br>(0 - 0)      | 1<br>(0 - 2)       | 1<br>(0 - 2)       | 3<br>(1 - 8)       |
| Endocrine, metabolic, blood, and immune disorders   | 70<br>(35 - 98)    | 14<br>(6 - 26)     | 3<br>(2 - 6)      | 22<br>(9 - 38)     | 19<br>(9 - 28)     | 12<br>(5 - 18)     |
| Musculoskeletal disorders                           | 21<br>(12 - 35)    | --                 | 2<br>(1 - 3)      | 8<br>(4 - 14)      | 7<br>(4 - 12)      | 4<br>(3 - 8)       |
| Rheumatoid arthritis                                | 1<br>(1 - 2)       | --                 | 0<br>(0 - 0)      | 0<br>(0 - 1)       | 0<br>(0 - 1)       | 0<br>(0 - 1)       |
| Other musculoskeletal disorders                     | 19<br>(12 - 32)    | --                 | 2<br>(1 - 3)      | 7<br>(4 - 14)      | 6<br>(4 - 10)      | 4<br>(2 - 7)       |
| Other non-communicable diseases                     | 418<br>(242 - 702) | 347<br>(184 - 633) | 16<br>(8 - 29)    | 25<br>(14 - 38)    | 14<br>(7 - 20)     | 15<br>(6 - 23)     |
| Congenital anomalies                                | 371<br>(202 - 656) | 336<br>(173 - 616) | 15<br>(7 - 28)    | 15<br>(8 - 25)     | 3<br>(2 - 5)       | 2<br>(1 - 3)       |
| Neural tube defects                                 | 58<br>(13 - 155)   | 55<br>(12 - 152)   | 1<br>(0 - 3)      | 1<br>(0 - 3)       | 0<br>(0 - 0)       | 0<br>(0 - 0)       |
| Congenital heart anomalies                          | 156<br>(79 - 280)  | 139<br>(67 - 259)  | 8<br>(3 - 14)     | 7<br>(3 - 13)      | 1<br>(1 - 3)       | 1<br>(0 - 1)       |
| Cleft lip and cleft palate                          | 1<br>(0 - 3)       | 1<br>(0 - 3)       | --                | --                 | --                 | --                 |
| Down syndrome                                       | 37<br>(13 - 86)    | 33<br>(10 - 82)    | 1<br>(0 - 3)      | 2<br>(1 - 4)       | 0<br>(0 - 1)       | 0<br>(0 - 0)       |
| Chromosomal unbalanced rearrangements               | 15<br>(5 - 38)     | 13<br>(4 - 36)     | 1<br>(0 - 1)      | 1<br>(0 - 1)       | 0<br>(0 - 0)       | 0<br>(0 - 0)       |
| Other congenital anomalies                          | 104<br>(30 - 359)  | 93<br>(25 - 333)   | 4<br>(1 - 14)     | 4<br>(2 - 8)       | 1<br>(0 - 2)       | 1<br>(1 - 2)       |
| Skin and subcutaneous diseases                      | 41<br>(14 - 55)    | 6<br>(2 - 11)      | 1<br>(1 - 2)      | 9<br>(4 - 15)      | 11<br>(4 - 17)     | 13<br>(4 - 20)     |
| Cellulitis                                          | 19<br>(6 - 28)     | 3<br>(1 - 6)       | 1<br>(0 - 1)      | 4<br>(1 - 6)       | 6<br>(2 - 10)      | 5<br>(2 - 9)       |

Web Table 31- Mauritania deaths with 95% UI by age, sex, and cause in 2013

| Cause                                           | Males, All Ages          | Males, 0-4 Years  | Males, 5-14 Years | Males, 15-49 Years   | Males, 50-69 Years | Males, 70-80 Years |
|-------------------------------------------------|--------------------------|-------------------|-------------------|----------------------|--------------------|--------------------|
| Pyoderma                                        | 21<br>(8 - 31)           | 3<br>(1 - 6)      | 0<br>(0 - 1)      | 5<br>(2 - 9)         | 5<br>(2 - 9)       | 7<br>(2 - 12)      |
| Decubitus ulcer                                 | 1<br>(0 - 3)             | 0<br>(0 - 0)      | 0<br>(0 - 0)      | 0<br>(0 - 0)         | 0<br>(0 - 0)       | 1<br>(0 - 2)       |
| Other skin and subcutaneous diseases            | 0<br>(0 - 0)             | 0<br>(0 - 0)      | 0<br>(0 - 0)      | 0<br>(0 - 0)         | 0<br>(0 - 0)       | 0<br>(0 - 0)       |
| Sudden infant death syndrome                    | 6<br>(1 - 17)            | 6<br>(1 - 17)     | --                | --                   | --                 | --                 |
| Injuries                                        | 1,524<br>(1,112 - 1,961) | 156<br>(74 - 271) | 129<br>(87 - 177) | 916<br>(628 - 1,267) | 227<br>(165 - 292) | 96<br>(73 - 119)   |
| Transport injuries                              | 911<br>(637 - 1,218)     | 43<br>(17 - 85)   | 73<br>(47 - 107)  | 631<br>(407 - 893)   | 125<br>(88 - 166)  | 39<br>(29 - 51)    |
| Road injuries                                   | 892<br>(623 - 1,195)     | 39<br>(15 - 77)   | 71<br>(45 - 103)  | 624<br>(401 - 886)   | 122<br>(85 - 161)  | 36<br>(27 - 48)    |
| Pedestrian road injuries                        | 226<br>(127 - 335)       | 15<br>(4 - 34)    | 25<br>(14 - 43)   | 140<br>(69 - 222)    | 34<br>(20 - 50)    | 12<br>(7 - 18)     |
| Cyclist road injuries                           | 43<br>(26 - 62)          | 3<br>(1 - 7)      | 7<br>(4 - 11)     | 23<br>(12 - 37)      | 8<br>(4 - 13)      | 3<br>(1 - 4)       |
| Motorcyclist road injuries                      | 122<br>(67 - 201)        | 3<br>(1 - 7)      | 5<br>(3 - 9)      | 96<br>(48 - 164)     | 14<br>(8 - 23)     | 3<br>(2 - 5)       |
| Motor vehicle road injuries                     | 483<br>(330 - 671)       | 16<br>(6 - 34)    | 29<br>(17 - 46)   | 357<br>(227 - 516)   | 63<br>(43 - 88)    | 18<br>(12 - 24)    |
| Other road injuries                             | 19<br>(10 - 33)          | 3<br>(1 - 7)      | 4<br>(1 - 8)      | 8<br>(4 - 16)        | 3<br>(1 - 6)       | 1<br>(1 - 2)       |
| Other transport injuries                        | 19<br>(13 - 26)          | 4<br>(1 - 8)      | 3<br>(1 - 5)      | 6<br>(4 - 13)        | 4<br>(2 - 6)       | 2<br>(1 - 4)       |
| Unintentional injuries                          | 464<br>(341 - 639)       | 110<br>(53 - 212) | 52<br>(34 - 73)   | 178<br>(110 - 267)   | 76<br>(55 - 103)   | 48<br>(34 - 62)    |
| Falls                                           | 118<br>(76 - 183)        | 16<br>(6 - 34)    | 8<br>(4 - 14)     | 47<br>(26 - 82)      | 27<br>(17 - 44)    | 21<br>(13 - 36)    |
| Drowning                                        | 115<br>(67 - 182)        | 37<br>(12 - 85)   | 22<br>(11 - 37)   | 43<br>(22 - 78)      | 10<br>(6 - 15)     | 3<br>(2 - 5)       |
| Fire, heat, and hot substances                  | 41<br>(21 - 74)          | 13<br>(4 - 32)    | 4<br>(2 - 7)      | 13<br>(7 - 23)       | 7<br>(3 - 11)      | 5<br>(2 - 8)       |
| Poisonings                                      | 25<br>(16 - 46)          | 5<br>(2 - 12)     | 2<br>(1 - 3)      | 12<br>(6 - 26)       | 5<br>(3 - 8)       | 2<br>(1 - 3)       |
| Exposure to mechanical forces                   | 76<br>(51 - 108)         | 14<br>(7 - 25)    | 8<br>(5 - 14)     | 37<br>(23 - 58)      | 13<br>(8 - 20)     | 4<br>(2 - 5)       |
| Unintentional firearm injuries                  | 29<br>(19 - 44)          | 3<br>(1 - 8)      | 2<br>(1 - 4)      | 18<br>(10 - 30)      | 4<br>(2 - 7)       | 1<br>(1 - 2)       |
| Unintentional suffocation                       | 7<br>(3 - 18)            | 3<br>(1 - 12)     | 1<br>(0 - 2)      | 2<br>(1 - 4)         | 1<br>(0 - 1)       | 0<br>(0 - 0)       |
| Other exposure to mechanical forces             | 39<br>(24 - 64)          | 7<br>(2 - 15)     | 6<br>(3 - 11)     | 17<br>(9 - 32)       | 8<br>(4 - 14)      | 2<br>(1 - 4)       |
| Adverse effects of medical treatment            | 30<br>(11 - 58)          | 8<br>(2 - 22)     | 1<br>(0 - 3)      | 7<br>(3 - 14)        | 7<br>(2 - 13)      | 6<br>(2 - 14)      |
| Animal contact                                  | 10<br>(5 - 16)           | 2<br>(1 - 4)      | 2<br>(1 - 3)      | 3<br>(1 - 5)         | 2<br>(1 - 4)       | 2<br>(0 - 3)       |
| Venomous animal contact                         | 4<br>(2 - 7)             | 1<br>(0 - 2)      | 1<br>(0 - 1)      | 1<br>(1 - 2)         | 1<br>(0 - 2)       | 1<br>(0 - 2)       |
| Non-venomous animal contact                     | 6<br>(2 - 11)            | 1<br>(0 - 3)      | 1<br>(0 - 2)      | 1<br>(1 - 3)         | 1<br>(0 - 2)       | 1<br>(0 - 2)       |
| Foreign body                                    | 25<br>(11 - 46)          | 13<br>(5 - 28)    | 2<br>(1 - 3)      | 5<br>(2 - 8)         | 3<br>(1 - 4)       | 3<br>(1 - 5)       |
| Pulmonary aspiration and foreign body in airway | 24<br>(10 - 45)          | 13<br>(5 - 27)    | 2<br>(1 - 3)      | 4<br>(2 - 8)         | 2<br>(1 - 4)       | 3<br>(1 - 5)       |
| Foreign body in other body part                 | 2<br>(1 - 2)             | 0<br>(0 - 1)      | 0<br>(0 - 0)      | 0<br>(0 - 1)         | 0<br>(0 - 1)       | 0<br>(0 - 0)       |
| Other unintentional injuries                    | 24<br>(15 - 35)          | 4<br>(2 - 7)      | 3<br>(2 - 5)      | 11<br>(6 - 19)       | 4<br>(2 - 6)       | 3<br>(2 - 4)       |
| Self-harm and interpersonal violence            | 146<br>(90 - 217)        | 3<br>(1 - 6)      | 3<br>(2 - 6)      | 106<br>(62 - 168)    | 24<br>(13 - 39)    | 9<br>(4 - 17)      |
| Self-harm                                       | 92<br>(50 - 150)         | --                | 2<br>(0 - 4)      | 60<br>(30 - 108)     | 21<br>(11 - 35)    | 9<br>(3 - 16)      |
| Interpersonal violence                          | 54<br>(29 - 89)          | 3<br>(1 - 6)      | 2<br>(1 - 3)      | 46<br>(23 - 77)      | 3<br>(2 - 6)       | 0<br>(0 - 1)       |
| Assault by firearm                              | 31<br>(12 - 53)          | 1<br>(0 - 2)      | 0<br>(0 - 1)      | 28<br>(11 - 49)      | 1<br>(1 - 3)       | 0<br>(0 - 0)       |
| Assault by sharp object                         | 11<br>(5 - 26)           | 1<br>(0 - 2)      | 0<br>(0 - 1)      | 8<br>(3 - 22)        | 1<br>(0 - 2)       | 0<br>(0 - 0)       |
| Assault by other means                          | 13<br>(7 - 26)           | 2<br>(1 - 4)      | 1<br>(0 - 2)      | 10<br>(4 - 20)       | 1<br>(0 - 2)       | 0<br>(0 - 0)       |
| Forces of nature, war, and legal intervention   | 3<br>(2 - 8)             | 0<br>(0 - 0)      | 0<br>(0 - 0)      | 2<br>(1 - 4)         | 1<br>(0 - 2)       | 0<br>(0 - 0)       |
| Exposure to forces of nature                    | 3<br>(2 - 8)             | 0<br>(0 - 0)      | 0<br>(0 - 0)      | 2<br>(1 - 4)         | 1<br>(0 - 2)       | 0<br>(0 - 0)       |

Web Table 31- Mauritania deaths with 95% UI by age, sex, and cause in 2013

| Cause                                                             | Females, All Ages           | Females, 0-4 Years       | Females, 5-14 Years | Females, 15-49 Years     | Females, 50-69 Years     | Females, 70-80 Years     |
|-------------------------------------------------------------------|-----------------------------|--------------------------|---------------------|--------------------------|--------------------------|--------------------------|
| All causes                                                        | 13,291<br>(11,364 - 15,468) | 4,095<br>(3,374 - 4,983) | 451<br>(357 - 573)  | 2,528<br>(2,118 - 3,031) | 2,982<br>(2,175 - 3,859) | 3,235<br>(2,603 - 3,833) |
| Communicable, maternal, neonatal, and nutritional diseases        | 6,898<br>(5,906 - 8,030)    | 3,563<br>(2,845 - 4,373) | 264<br>(198 - 357)  | 1,474<br>(1,196 - 1,966) | 747<br>(533 - 1,010)     | 850<br>(613 - 1,081)     |
| HIV/AIDS and tuberculosis                                         | 571<br>(274 - 1,767)        | 16<br>(5 - 80)           | 24<br>(9 - 91)      | 303<br>(110 - 1,188)     | 151<br>(80 - 307)        | 76<br>(45 - 121)         |
| Tuberculosis                                                      | 321<br>(200 - 483)          | 7<br>(3 - 15)            | 7<br>(3 - 11)       | 116<br>(62 - 187)        | 118<br>(68 - 188)        | 73<br>(44 - 112)         |
| HIV/AIDS                                                          | 249<br>(19 - 1,486)         | 9<br>(1 - 69)            | 18<br>(3 - 85)      | 186<br>(14 - 1,102)      | 33<br>(1 - 206)          | 3<br>(0 - 23)            |
| HIV/AIDS resulting in mycobacterial infection                     | 13<br>(1 - 81)              | 0<br>(0 - 3)             | 1<br>(0 - 4)        | 10<br>(1 - 58)           | 2<br>(0 - 11)            | 0<br>(0 - 1)             |
| HIV/AIDS resulting in other diseases                              | 237<br>(18 - 1,400)         | 9<br>(1 - 65)            | 17<br>(3 - 82)      | 177<br>(13 - 1,038)      | 31<br>(1 - 194)          | 3<br>(0 - 22)            |
| Diarrhea, lower respiratory, and other common infectious diseases | 2,765<br>(2,144 - 3,437)    | 1,282<br>(873 - 1,808)   | 156<br>(101 - 227)  | 297<br>(201 - 398)       | 433<br>(275 - 611)       | 597<br>(399 - 813)       |
| Diarrheal diseases                                                | 792<br>(535 - 1,140)        | 357<br>(160 - 687)       | 34<br>(15 - 64)     | 103<br>(60 - 150)        | 137<br>(74 - 222)        | 161<br>(88 - 251)        |
| Intestinal infectious diseases                                    | 91<br>(46 - 162)            | 28<br>(11 - 62)          | 29<br>(14 - 55)     | 26<br>(10 - 49)          | 5<br>(2 - 12)            | 2<br>(1 - 5)             |
| Typhoid fever                                                     | 62<br>(31 - 113)            | 18<br>(6 - 39)           | 21<br>(9 - 41)      | 19<br>(8 - 37)           | 4<br>(1 - 8)             | 1<br>(1 - 3)             |
| Paratyphoid fever                                                 | 24<br>(10 - 45)             | 9<br>(3 - 20)            | 8<br>(3 - 17)       | 6<br>(2 - 12)            | 1<br>(0 - 2)             | 0<br>(0 - 1)             |
| Other intestinal infectious diseases                              | 4<br>(1 - 12)               | 2<br>(0 - 7)             | 1<br>(0 - 3)        | 1<br>(0 - 5)             | 0<br>(0 - 3)             | 0<br>(0 - 3)             |
| Lower respiratory infections                                      | 1,380<br>(1,003 - 1,804)    | 618<br>(384 - 942)       | 40<br>(21 - 64)     | 91<br>(58 - 130)         | 234<br>(139 - 348)       | 398<br>(249 - 578)       |
| Upper respiratory infections                                      | 2<br>(1 - 3)                | 0<br>(0 - 2)             | 0<br>(0 - 0)        | 0<br>(0 - 1)             | 0<br>(0 - 1)             | 0<br>(0 - 1)             |
| Otitis media                                                      | 2<br>(1 - 3)                | 0<br>(0 - 1)             | 0<br>(0 - 0)        | 0<br>(0 - 0)             | 0<br>(0 - 1)             | 1<br>(0 - 1)             |
| Meningitis                                                        | 291<br>(201 - 391)          | 120<br>(66 - 200)        | 31<br>(16 - 50)     | 62<br>(35 - 93)          | 48<br>(26 - 75)          | 30<br>(15 - 49)          |
| Pneumococcal meningitis                                           | 75<br>(48 - 106)            | 29<br>(14 - 49)          | 9<br>(3 - 18)       | 17<br>(9 - 29)           | 12<br>(6 - 23)           | 8<br>(2 - 16)            |
| H influenzae type B meningitis                                    | 47<br>(27 - 77)             | 30<br>(15 - 56)          | 5<br>(2 - 10)       | 6<br>(3 - 12)            | 3<br>(1 - 7)             | 2<br>(1 - 4)             |
| Meningococcal meningitis                                          | 131<br>(85 - 190)           | 51<br>(23 - 96)          | 13<br>(5 - 26)      | 29<br>(15 - 46)          | 23<br>(11 - 40)          | 14<br>(7 - 24)           |
| Other meningitis                                                  | 39<br>(24 - 59)             | 11<br>(4 - 21)           | 3<br>(1 - 6)        | 10<br>(4 - 18)           | 10<br>(3 - 19)           | 6<br>(2 - 13)            |
| Encephalitis                                                      | 15<br>(10 - 23)             | 5<br>(2 - 9)             | 2<br>(1 - 3)        | 3<br>(2 - 6)             | 3<br>(1 - 5)             | 2<br>(1 - 4)             |
| Diphtheria                                                        | 2<br>(0 - 12)               | 1<br>(0 - 11)            | 0<br>(0 - 3)        | 0<br>(0 - 1)             | 0<br>(0 - 0)             | -<br>(0 - 0)             |
| Whooping cough                                                    | 83<br>(0 - 404)             | 76<br>(0 - 371)          | 6<br>(0 - 30)       | 1<br>(0 - 4)             | 0<br>(0 - 1)             | -<br>(0 - 1)             |
| Tetanus                                                           | 37<br>(16 - 67)             | 19<br>(3 - 46)           | 3<br>(1 - 6)        | 8<br>(4 - 14)            | 5<br>(3 - 10)            | 2<br>(1 - 3)             |
| Measles                                                           | 67<br>(2 - 396)             | 55<br>(1 - 315)          | 11<br>(0 - 59)      | 2<br>(0 - 8)             | 0<br>(0 - 0)             | -<br>(0 - 0)             |
| Varicella and herpes zoster                                       | 3<br>(1 - 8)                | 1<br>(0 - 4)             | 0<br>(0 - 1)        | 1<br>(0 - 2)             | 0<br>(0 - 1)             | 1<br>(0 - 4)             |
| Neglected tropical diseases and malaria                           | 851<br>(329 - 1,491)        | 705<br>(203 - 1,380)     | 38<br>(7 - 114)     | 38<br>(11 - 102)         | 36<br>(9 - 116)          | 34<br>(6 - 134)          |
| Malaria                                                           | 820<br>(290 - 1,460)        | 699<br>(196 - 1,377)     | 33<br>(3 - 111)     | 28<br>(2 - 94)           | 29<br>(3 - 109)          | 31<br>(2 - 130)          |
| Leishmaniasis                                                     | 0<br>(0 - 0)                | 0<br>(0 - 0)             | 0<br>(0 - 0)        | 0<br>(0 - 0)             | 0<br>(0 - 0)             | 0<br>(0 - 0)             |
| Visceral leishmaniasis                                            | 0<br>(0 - 0)                | 0<br>(0 - 0)             | 0<br>(0 - 0)        | 0<br>(0 - 0)             | 0<br>(0 - 0)             | 0<br>(0 - 0)             |
| Schistosomiasis                                                   | 7<br>(4 - 10)               | 0<br>(0 - 0)             | 0<br>(0 - 0)        | 2<br>(1 - 3)             | 3<br>(2 - 5)             | 2<br>(1 - 3)             |
| Cysticercosis                                                     | 1<br>(0 - 2)                | 0<br>(0 - 0)             | 0<br>(0 - 0)        | 0<br>(0 - 1)             | 0<br>(0 - 0)             | 0<br>(0 - 0)             |
| Cystic echinococcosis                                             | 2<br>(1 - 2)                | 0<br>(0 - 0)             | 0<br>(0 - 0)        | 1<br>(0 - 1)             | 0<br>(0 - 1)             | 0<br>(0 - 0)             |
| Dengue                                                            | 0<br>(0 - 1)                | 0<br>(0 - 0)             | 0<br>(0 - 0)        | 0<br>(0 - 0)             | 0<br>(0 - 0)             | 0<br>(0 - 0)             |
| Yellow fever                                                      | 0<br>(0 - 1)                | 0<br>(0 - 0)             | 0<br>(0 - 0)        | 0<br>(0 - 0)             | 0<br>(0 - 0)             | 0<br>(0 - 0)             |
| Rabies                                                            | 15<br>(7 - 24)              | 2<br>(1 - 5)             | 3<br>(1 - 7)        | 6<br>(2 - 10)            | 3<br>(1 - 4)             | 1<br>(0 - 2)             |
| Intestinal nematode infections                                    | 3<br>(0 - 11)               | 2<br>(0 - 9)             | 1<br>(0 - 5)        | 0<br>(0 - 2)             | 0<br>(0 - 1)             | 0<br>(0 - 2)             |
| Ascariasis                                                        | 3<br>(0 - 11)               | 2<br>(0 - 9)             | 1<br>(0 - 5)        | 0<br>(0 - 2)             | 0<br>(0 - 1)             | 0<br>(0 - 2)             |
| Other neglected tropical diseases                                 | 3<br>(1 - 6)                | 1<br>(0 - 2)             | 0<br>(0 - 1)        | 1<br>(0 - 2)             | 1<br>(0 - 1)             | 1<br>(0 - 1)             |



Web Table 31- Mauritania deaths with 95% UI by age, sex, and cause in 2013

| Cause                                                            | Females, All Ages        | Females, 0-4 Years     | Females, 5-14 Years | Females, 15-49 Years | Females, 50-69 Years     | Females, 70-80 Years     |
|------------------------------------------------------------------|--------------------------|------------------------|---------------------|----------------------|--------------------------|--------------------------|
| Maternal disorders                                               | 761<br>(487 - 1,062)     | --                     | 5<br>(2 - 11)       | 757<br>(485 - 1,057) | --                       | --                       |
| Maternal hemorrhage                                              | 145<br>(81 - 219)        | --                     | 0<br>(0 - 1)        | 145<br>(80 - 219)    | --                       | --                       |
| Maternal sepsis and other maternal infections                    | 44<br>(24 - 68)          | --                     | 0<br>(0 - 1)        | 43<br>(23 - 68)      | --                       | --                       |
| Maternal hypertensive disorders                                  | 55<br>(30 - 84)          | --                     | 0<br>(0 - 1)        | 54<br>(30 - 83)      | --                       | --                       |
| Maternal obstructed labor                                        | 38<br>(19 - 61)          | --                     | 0<br>(0 - 0)        | 38<br>(19 - 61)      | --                       | --                       |
| Maternal abortive outcome                                        | 134<br>(79 - 205)        | --                     | 1<br>(0 - 2)        | 133<br>(78 - 204)    | --                       | --                       |
| Indirect maternal deaths                                         | 73<br>(43 - 108)         | --                     | 0<br>(0 - 1)        | 73<br>(42 - 108)     | --                       | --                       |
| Late maternal deaths                                             | 120<br>(62 - 179)        | --                     | 1<br>(0 - 4)        | 119<br>(61 - 177)    | --                       | --                       |
| Maternal deaths aggravated by HIV/AIDS                           | 1<br>(0 - 1)             | --                     | --                  | 1<br>(0 - 1)         | --                       | --                       |
| Other maternal disorders                                         | 151<br>(86 - 225)        | --                     | 1<br>(0 - 2)        | 150<br>(85 - 224)    | --                       | --                       |
| Neonatal disorders                                               | 1,242<br>(935 - 1,582)   | 1,242<br>(935 - 1,582) | --                  | --                   | --                       | --                       |
| Neonatal preterm birth complications                             | 440<br>(211 - 712)       | 440<br>(211 - 712)     | --                  | --                   | --                       | --                       |
| Neonatal encephalopathy due to birth asphyxia and trauma         | 454<br>(244 - 732)       | 454<br>(244 - 732)     | --                  | --                   | --                       | --                       |
| Neonatal sepsis and other neonatal infections                    | 232<br>(94 - 479)        | 232<br>(94 - 479)      | --                  | --                   | --                       | --                       |
| Hemolytic disease and other neonatal jaundice                    | 7<br>(2 - 21)            | 7<br>(2 - 21)          | --                  | --                   | --                       | --                       |
| Other neonatal disorders                                         | 109<br>(49 - 218)        | 109<br>(49 - 218)      | --                  | --                   | --                       | --                       |
| Nutritional deficiencies                                         | 494<br>(351 - 674)       | 190<br>(88 - 347)      | 27<br>(15 - 44)     | 64<br>(41 - 97)      | 97<br>(61 - 146)         | 116<br>(78 - 172)        |
| Protein-energy malnutrition                                      | 309<br>(183 - 473)       | 174<br>(77 - 327)      | 19<br>(10 - 32)     | 15<br>(6 - 37)       | 43<br>(21 - 77)          | 58<br>(28 - 98)          |
| Iodine deficiency                                                | 3<br>(0 - 11)            | 1<br>(0 - 6)           | 0<br>(0 - 2)        | 0<br>(0 - 2)         | 1<br>(0 - 5)             | 1<br>(0 - 4)             |
| Iron-deficiency anemia                                           | 179<br>(99 - 272)        | 14<br>(3 - 48)         | 7<br>(2 - 15)       | 49<br>(26 - 72)      | 52<br>(23 - 86)          | 57<br>(28 - 97)          |
| Other nutritional deficiencies                                   | 3<br>(1 - 6)             | 0<br>(0 - 1)           | 0<br>(0 - 0)        | 0<br>(0 - 1)         | 2<br>(0 - 4)             | 1<br>(0 - 1)             |
| Other communicable, maternal, neonatal, and nutritional diseases | 214<br>(137 - 324)       | 128<br>(62 - 221)      | 14<br>(7 - 25)      | 16<br>(9 - 24)       | 30<br>(16 - 49)          | 27<br>(13 - 44)          |
| Sexually transmitted diseases excluding HIV                      | 132<br>(63 - 229)        | 114<br>(51 - 201)      | 12<br>(5 - 22)      | 3<br>(1 - 5)         | 2<br>(1 - 6)             | 2<br>(1 - 5)             |
| Syphilis                                                         | 129<br>(60 - 226)        | 114<br>(51 - 201)      | 11<br>(5 - 22)      | 1<br>(1 - 2)         | 1<br>(0 - 3)             | 1<br>(0 - 3)             |
| Chlamydial infection                                             | 1<br>(1 - 2)             | --                     | 0<br>(0 - 0)        | 1<br>(0 - 1)         | 0<br>(0 - 1)             | 0<br>(0 - 0)             |
| Gonococcal infection                                             | 1<br>(1 - 2)             | --                     | 0<br>(0 - 0)        | 1<br>(0 - 1)         | 0<br>(0 - 1)             | 0<br>(0 - 1)             |
| Other sexually transmitted diseases                              | 1<br>(1 - 2)             | --                     | 0<br>(0 - 0)        | 1<br>(0 - 1)         | 0<br>(0 - 1)             | 0<br>(0 - 0)             |
| Hepatitis                                                        | 47<br>(23 - 73)          | 3<br>(1 - 6)           | 1<br>(0 - 2)        | 9<br>(4 - 15)        | 18<br>(8 - 31)           | 16<br>(7 - 27)           |
| Acute hepatitis A                                                | 2<br>(0 - 5)             | 1<br>(0 - 2)           | 0<br>(0 - 1)        | 0<br>(0 - 1)         | 0<br>(0 - 1)             | 0<br>(0 - 0)             |
| Acute hepatitis B                                                | 36<br>(17 - 60)          | 2<br>(0 - 4)           | 1<br>(0 - 1)        | 4<br>(1 - 8)         | 15<br>(7 - 27)           | 15<br>(6 - 25)           |
| Acute hepatitis C                                                | 2<br>(0 - 6)             | --                     | 0<br>(0 - 0)        | 0<br>(0 - 1)         | 1<br>(0 - 3)             | 1<br>(0 - 3)             |
| Acute hepatitis E                                                | 7<br>(3 - 15)            | 0<br>(0 - 0)           | 0<br>(0 - 0)        | 4<br>(2 - 8)         | 2<br>(0 - 5)             | 1<br>(0 - 3)             |
| Other infectious diseases                                        | 35<br>(19 - 60)          | 11<br>(4 - 29)         | 2<br>(0 - 4)        | 4<br>(2 - 8)         | 9<br>(3 - 19)            | 9<br>(3 - 23)            |
| Non-communicable diseases                                        | 5,559<br>(4,299 - 6,951) | 424<br>(249 - 686)     | 92<br>(60 - 128)    | 733<br>(487 - 1,020) | 2,066<br>(1,441 - 2,753) | 2,245<br>(1,762 - 2,724) |
| Neoplasms                                                        | 962<br>(695 - 1,267)     | 10<br>(5 - 18)         | 16<br>(9 - 26)      | 226<br>(144 - 316)   | 494<br>(337 - 671)       | 216<br>(161 - 285)       |
| Esophageal cancer                                                | 16<br>(9 - 25)           | --                     | --                  | 2<br>(1 - 3)         | 9<br>(5 - 15)            | 5<br>(2 - 8)             |
| Stomach cancer                                                   | 83<br>(56 - 117)         | --                     | --                  | 12<br>(7 - 19)       | 19<br>(33 - 74)          | 19<br>(12 - 30)          |
| Liver cancer                                                     | 151<br>(100 - 217)       | --                     | 0<br>(0 - 1)        | 33<br>(18 - 55)      | 82<br>(50 - 122)         | 36<br>(22 - 57)          |
| Liver cancer due to hepatitis B                                  | 52<br>(24 - 87)          | --                     | 0<br>(0 - 0)        | 13<br>(5 - 23)       | 29<br>(12 - 52)          | 10<br>(4 - 18)           |
| Liver cancer due to hepatitis C                                  | 53<br>(25 - 92)          | --                     | 0<br>(0 - 0)        | 9<br>(3 - 18)        | 29<br>(13 - 52)          | 15<br>(7 - 30)           |

Web Table 31- Mauritania deaths with 95% UI by age, sex, and cause in 2013

| Cause                                | Females, All Ages        | Females, 0-4 Years | Females, 5-14 Years | Females, 15-49 Years | Females, 50-69 Years | Females, 70-80 Years   |
|--------------------------------------|--------------------------|--------------------|---------------------|----------------------|----------------------|------------------------|
| Liver cancer due to alcohol use      | 11<br>(5 - 20)           | --                 | --                  | 1<br>(0 - 3)         | 6<br>(2 - 11)        | 4<br>(2 - 8)           |
| Liver cancer due to other causes     | 35<br>(18 - 58)          | --                 | 0<br>(0 - 1)        | 10<br>(4 - 18)       | 18<br>(8 - 34)       | 7<br>(3 - 13)          |
| Larynx cancer                        | 1<br>(0 - 1)             | --                 | --                  | 0<br>(0 - 0)         | 0<br>(0 - 1)         | 0<br>(0 - 0)           |
| Tracheal, bronchus and lung cancer   | 29<br>(20 - 42)          | --                 | --                  | 3<br>(2 - 6)         | 16<br>(10 - 25)      | 10<br>(7 - 14)         |
| Breast cancer                        | 105<br>(67 - 151)        | --                 | --                  | 41<br>(23 - 62)      | 48<br>(30 - 76)      | 16<br>(11 - 25)        |
| Cervical cancer                      | 252<br>(161 - 361)       | --                 | --                  | 60<br>(33 - 92)      | 147<br>(89 - 214)    | 45<br>(28 - 67)        |
| Uterine cancer                       | 23<br>(14 - 34)          | --                 | --                  | 3<br>(2 - 6)         | 12<br>(7 - 20)       | 7<br>(5 - 12)          |
| Prostate cancer                      | --                       | --                 | --                  | --                   | --                   | --                     |
| Colon and rectum cancer              | 43<br>(30 - 57)          | --                 | --                  | 11<br>(6 - 15)       | 17<br>(11 - 24)      | 15<br>(10 - 21)        |
| Lip and oral cavity cancer           | 6<br>(4 - 9)             | --                 | --                  | 2<br>(1 - 3)         | 2<br>(1 - 4)         | 2<br>(1 - 3)           |
| Nasopharynx cancer                   | 2<br>(1 - 2)             | --                 | 0<br>(0 - 0)        | 1<br>(0 - 1)         | 1<br>(0 - 1)         | 0<br>(0 - 0)           |
| Other pharynx cancer                 | 2<br>(1 - 3)             | --                 | --                  | 0<br>(0 - 1)         | 1<br>(1 - 2)         | 0<br>(0 - 1)           |
| Gallbladder and biliary tract cancer | 21<br>(13 - 29)          | --                 | --                  | 3<br>(2 - 5)         | 12<br>(7 - 18)       | 5<br>(3 - 9)           |
| Pancreatic cancer                    | 24<br>(16 - 32)          | --                 | --                  | 3<br>(2 - 5)         | 13<br>(8 - 19)       | 7<br>(5 - 10)          |
| Malignant skin melanoma              | 2<br>(1 - 3)             | --                 | --                  | 0<br>(0 - 1)         | 1<br>(1 - 2)         | 0<br>(0 - 1)           |
| Non-melanoma skin cancer             | 2<br>(1 - 3)             | --                 | --                  | 0<br>(0 - 1)         | 0<br>(0 - 1)         | 1<br>(1 - 2)           |
| Ovarian cancer                       | 39<br>(26 - 55)          | --                 | --                  | 10<br>(6 - 15)       | 24<br>(15 - 36)      | 6<br>(4 - 8)           |
| Testicular cancer                    | --                       | --                 | --                  | --                   | --                   | --                     |
| Kidney cancer                        | 9<br>(6 - 13)            | 1<br>(0 - 2)       | 1<br>(0 - 1)        | 2<br>(1 - 2)         | 5<br>(3 - 8)         | 2<br>(1 - 3)           |
| Bladder cancer                       | 14<br>(9 - 24)           | --                 | --                  | 2<br>(1 - 5)         | 6<br>(4 - 11)        | 6<br>(3 - 11)          |
| Brain and nervous system cancer      | 11<br>(7 - 14)           | 1<br>(0 - 1)       | 1<br>(0 - 1)        | 5<br>(2 - 7)         | 3<br>(2 - 4)         | 1<br>(1 - 2)           |
| Thyroid cancer                       | 4<br>(3 - 7)             | --                 | 0<br>(0 - 0)        | 0<br>(0 - 1)         | 3<br>(1 - 4)         | 1<br>(1 - 3)           |
| Mesothelioma                         | 1<br>(1 - 1)             | --                 | --                  | 0<br>(0 - 0)         | 1<br>(0 - 1)         | 0<br>(0 - 0)           |
| Hodgkin lymphoma                     | 5<br>(3 - 9)             | 0<br>(0 - 1)       | 0<br>(0 - 1)        | 1<br>(1 - 2)         | 1<br>(0 - 2)         | 2<br>(1 - 5)           |
| Non-Hodgkin lymphoma                 | 29<br>(16 - 47)          | 3<br>(1 - 6)       | 4<br>(2 - 8)        | 9<br>(4 - 14)        | 9<br>(5 - 18)        | 4<br>(2 - 8)           |
| Multiple myeloma                     | 7<br>(4 - 12)            | --                 | --                  | 1<br>(1 - 2)         | 4<br>(2 - 7)         | 3<br>(1 - 5)           |
| Leukemia                             | 15<br>(10 - 19)          | 1<br>(0 - 1)       | 2<br>(1 - 4)        | 5<br>(3 - 7)         | 4<br>(3 - 6)         | 3<br>(2 - 4)           |
| Other neoplasms                      | 67<br>(45 - 98)          | 6<br>(2 - 11)      | 7<br>(3 - 13)       | 14<br>(7 - 23)       | 22<br>(13 - 38)      | 17<br>(11 - 27)        |
| Cardiovascular diseases              | 2,439<br>(1,781 - 3,297) | 30<br>(15 - 55)    | 13<br>(7 - 25)      | 206<br>(129 - 327)   | 904<br>(606 - 1,263) | 1,285<br>(940 - 1,727) |
| Rheumatic heart disease              | 31<br>(16 - 87)          | 0<br>(0 - 1)       | 1<br>(1 - 3)        | 6<br>(2 - 20)        | 10<br>(4 - 34)       | 13<br>(7 - 28)         |
| Ischemic heart disease               | 598<br>(386 - 962)       | 1<br>(0 - 2)       | 1<br>(0 - 2)        | 43<br>(23 - 76)      | 204<br>(119 - 342)   | 350<br>(222 - 562)     |
| Cerebrovascular disease              | 1,157<br>(832 - 1,591)   | 7<br>(3 - 15)      | 3<br>(2 - 7)        | 84<br>(48 - 127)     | 426<br>(282 - 612)   | 636<br>(467 - 869)     |
| Ischemic stroke                      | 711<br>(405 - 974)       | 1<br>(0 - 2)       | 0<br>(0 - 1)        | 15<br>(6 - 29)       | 229<br>(104 - 353)   | 466<br>(288 - 619)     |
| Hemorrhagic stroke                   | 446<br>(265 - 859)       | 6<br>(3 - 13)      | 3<br>(2 - 6)        | 69<br>(40 - 108)     | 198<br>(112 - 370)   | 171<br>(87 - 394)      |
| Hypertensive heart disease           | 238<br>(117 - 363)       | 0<br>(0 - 1)       | 0<br>(0 - 0)        | 16<br>(6 - 31)       | 85<br>(34 - 144)     | 136<br>(69 - 202)      |
| Cardiomyopathy and myocarditis       | 98<br>(53 - 176)         | 7<br>(3 - 17)      | 3<br>(1 - 6)        | 18<br>(8 - 43)       | 27<br>(14 - 50)      | 43<br>(19 - 78)        |
| Atrial fibrillation and flutter      | 0<br>(0 - 0)             | --                 | --                  | 0<br>(0 - 0)         | 0<br>(0 - 0)         | 0<br>(0 - 0)           |
| Aortic aneurysm                      | 24<br>(12 - 44)          | --                 | --                  | 3<br>(1 - 5)         | 9<br>(4 - 17)        | 12<br>(6 - 24)         |
| Peripheral vascular disease          | 1<br>(1 - 2)             | --                 | --                  | 0<br>(0 - 0)         | 1<br>(0 - 1)         | 0<br>(0 - 1)           |
| Endocarditis                         | 31<br>(18 - 56)          | 5<br>(1 - 10)      | 1<br>(1 - 2)        | 7<br>(3 - 12)        | 7<br>(4 - 15)        | 11<br>(6 - 24)         |

Web Table 31- Mauritania deaths with 95% UI by age, sex, and cause in 2013

| Cause                                               | Females, All Ages  | Females, 0-4 Years | Females, 5-14 Years | Females, 15-49 Years | Females, 50-69 Years | Females, 70-80 Years |
|-----------------------------------------------------|--------------------|--------------------|---------------------|----------------------|----------------------|----------------------|
| Other cardiovascular and circulatory diseases       | 261<br>(161 - 510) | 9<br>(4 - 19)      | 4<br>(2 - 7)        | 30<br>(16 - 66)      | 135<br>(79 - 244)    | 83<br>(48 - 197)     |
| Chronic respiratory diseases                        | 326<br>(229 - 542) | 8<br>(4 - 16)      | 4<br>(2 - 6)        | 30<br>(18 - 51)      | 124<br>(77 - 219)    | 160<br>(110 - 265)   |
| Chronic obstructive pulmonary disease               | 170<br>(102 - 327) | 3<br>(1 - 6)       | 1<br>(1 - 2)        | 8<br>(4 - 14)        | 70<br>(39 - 143)     | 88<br>(53 - 167)     |
| Pneumoconiosis                                      | 1<br>(1 - 2)       | 0<br>(0 - 0)       | 0<br>(0 - 0)        | 0<br>(0 - 0)         | 0<br>(0 - 1)         | 0<br>(0 - 0)         |
| Silicosis                                           | 0<br>(0 - 0)       | 0<br>(0 - 0)       | 0<br>(0 - 0)        | 0<br>(0 - 0)         | 0<br>(0 - 0)         | 0<br>(0 - 0)         |
| Asbestosis                                          | 0<br>(0 - 0)       | 0<br>(0 - 0)       | 0<br>(0 - 0)        | 0<br>(0 - 0)         | 0<br>(0 - 0)         | 0<br>(0 - 0)         |
| Coal workers pneumoconiosis                         | 0<br>(0 - 0)       | 0<br>(0 - 0)       | 0<br>(0 - 0)        | 0<br>(0 - 0)         | 0<br>(0 - 0)         | 0<br>(0 - 0)         |
| Other pneumoconiosis                                | 1<br>(0 - 1)       | 0<br>(0 - 0)       | 0<br>(0 - 0)        | 0<br>(0 - 0)         | 0<br>(0 - 1)         | 0<br>(0 - 0)         |
| Asthma                                              | 88<br>(47 - 150)   | 3<br>(1 - 7)       | 1<br>(1 - 3)        | 11<br>(6 - 22)       | 36<br>(17 - 65)      | 36<br>(17 - 64)      |
| Interstitial lung disease and pulmonary sarcoidosis | 29<br>(6 - 58)     | 0<br>(0 - 0)       | 0<br>(0 - 0)        | 2<br>(0 - 4)         | 8<br>(2 - 18)        | 18<br>(3 - 39)       |
| Other chronic respiratory diseases                  | 38<br>(19 - 79)    | 2<br>(1 - 5)       | 1<br>(0 - 1)        | 9<br>(4 - 18)        | 9<br>(4 - 21)        | 17<br>(8 - 38)       |
| Cirrhosis                                           | 193<br>(135 - 264) | 3<br>(1 - 7)       | 3<br>(1 - 4)        | 37<br>(23 - 54)      | 94<br>(60 - 134)     | 56<br>(38 - 80)      |
| Cirrhosis due to hepatitis B                        | 50<br>(13 - 108)   | 0<br>(0 - 1)       | 1<br>(0 - 1)        | 12<br>(4 - 23)       | 25<br>(6 - 54)       | 12<br>(2 - 32)       |
| Cirrhosis due to hepatitis C                        | 65<br>(24 - 126)   | 0<br>(0 - 1)       | 0<br>(0 - 1)        | 10<br>(2 - 24)       | 33<br>(11 - 67)      | 22<br>(8 - 38)       |
| Cirrhosis due to alcohol use                        | 47<br>(22 - 85)    | --                 | --                  | 6<br>(1 - 14)        | 23<br>(10 - 46)      | 17<br>(9 - 31)       |
| Cirrhosis due to other causes                       | 31<br>(17 - 54)    | 3<br>(1 - 7)       | 2<br>(1 - 3)        | 9<br>(4 - 17)        | 12<br>(5 - 24)       | 5<br>(2 - 10)        |
| Digestive diseases                                  | 264<br>(187 - 349) | 8<br>(3 - 17)      | 8<br>(5 - 13)       | 44<br>(27 - 61)      | 96<br>(63 - 140)     | 108<br>(74 - 144)    |
| Peptic ulcer disease                                | 53<br>(30 - 79)    | 0<br>(0 - 1)       | 1<br>(0 - 2)        | 7<br>(4 - 12)        | 20<br>(11 - 32)      | 25<br>(13 - 39)      |
| Gastritis and duodenitis                            | 14<br>(6 - 37)     | 1<br>(0 - 1)       | 1<br>(0 - 2)        | 3<br>(1 - 7)         | 4<br>(2 - 13)        | 6<br>(2 - 18)        |
| Appendicitis                                        | 26<br>(14 - 39)    | 1<br>(0 - 3)       | 2<br>(1 - 3)        | 6<br>(3 - 9)         | 9<br>(4 - 15)        | 8<br>(3 - 17)        |
| Paralytic ileus and intestinal obstruction          | 81<br>(47 - 125)   | 3<br>(1 - 7)       | 3<br>(1 - 5)        | 11<br>(5 - 18)       | 29<br>(15 - 49)      | 35<br>(19 - 60)      |
| Inguinal, femoral, and abdominal hernia             | 4<br>(1 - 6)       | 0<br>(0 - 1)       | 0<br>(0 - 0)        | 1<br>(0 - 2)         | 1<br>(0 - 2)         | 1<br>(0 - 3)         |
| Inflammatory bowel disease                          | 15<br>(3 - 23)     | 1<br>(0 - 3)       | 0<br>(0 - 1)        | 3<br>(1 - 6)         | 5<br>(1 - 9)         | 5<br>(1 - 8)         |
| Vascular intestinal disorders                       | 1<br>(0 - 5)       | 0<br>(0 - 0)       | 0<br>(0 - 0)        | 0<br>(0 - 1)         | 1<br>(0 - 2)         | 1<br>(0 - 2)         |
| Gallbladder and biliary diseases                    | 25<br>(15 - 39)    | 0<br>(0 - 1)       | 1<br>(0 - 1)        | 3<br>(2 - 5)         | 10<br>(5 - 18)       | 11<br>(6 - 18)       |
| Pancreatitis                                        | 14<br>(7 - 25)     | 0<br>(0 - 0)       | 0<br>(0 - 0)        | 3<br>(1 - 5)         | 7<br>(3 - 13)        | 4<br>(2 - 8)         |
| Other digestive diseases                            | 31<br>(18 - 48)    | 1<br>(0 - 3)       | 1<br>(0 - 2)        | 6<br>(3 - 11)        | 10<br>(5 - 18)       | 12<br>(6 - 20)       |
| Neurological disorders                              | 146<br>(109 - 192) | 10<br>(4 - 22)     | 6<br>(3 - 12)       | 23<br>(13 - 40)      | 18<br>(11 - 27)      | 89<br>(63 - 117)     |
| Alzheimer disease and other dementias               | 89<br>(62 - 118)   | --                 | --                  | 0<br>(0 - 0)         | 8<br>(5 - 12)        | 81<br>(57 - 108)     |
| Parkinson disease                                   | 1<br>(0 - 2)       | --                 | --                  | 0<br>(0 - 0)         | 0<br>(0 - 1)         | 0<br>(0 - 1)         |
| Epilepsy                                            | 42<br>(24 - 73)    | 8<br>(3 - 20)      | 5<br>(2 - 11)       | 19<br>(10 - 37)      | 4<br>(2 - 9)         | 5<br>(2 - 9)         |
| Multiple sclerosis                                  | 1<br>(0 - 3)       | --                 | --                  | 0<br>(0 - 1)         | 0<br>(0 - 1)         | 0<br>(0 - 0)         |
| Other neurological disorders                        | 14<br>(11 - 18)    | 2<br>(1 - 4)       | 1<br>(1 - 2)        | 3<br>(2 - 4)         | 5<br>(3 - 7)         | 3<br>(2 - 4)         |
| Mental and substance use disorders                  | 21<br>(13 - 33)    | 1<br>(0 - 2)       | 0<br>(0 - 0)        | 8<br>(5 - 14)        | 8<br>(4 - 15)        | 3<br>(2 - 5)         |
| Schizophrenia                                       | 0<br>(0 - 1)       | --                 | --                  | 0<br>(0 - 0)         | 0<br>(0 - 0)         | 0<br>(0 - 0)         |
| Alcohol use disorders                               | 8<br>(1 - 19)      | --                 | --                  | 3<br>(0 - 9)         | 4<br>(0 - 9)         | 1<br>(0 - 1)         |
| Drug use disorders                                  | 13<br>(9 - 18)     | 1<br>(0 - 2)       | --                  | 5<br>(3 - 8)         | 4<br>(3 - 7)         | 2<br>(2 - 4)         |
| Opioid use disorders                                | 1<br>(1 - 2)       | 0<br>(0 - 0)       | --                  | 0<br>(0 - 1)         | 0<br>(0 - 1)         | 0<br>(0 - 0)         |
| Cocaine use disorders                               | 0<br>(0 - 0)       | 0<br>(0 - 0)       | --                  | 0<br>(0 - 0)         | 0<br>(0 - 0)         | 0<br>(0 - 0)         |
| Amphetamine use disorders                           | 0<br>(0 - 0)       | 0<br>(0 - 0)       | --                  | 0<br>(0 - 0)         | 0<br>(0 - 0)         | 0<br>(0 - 0)         |

Web Table 31- Mauritania deaths with 95% UI by age, sex, and cause in 2013

| Cause                                               | Females, All Ages  | Females, 0-4 Years | Females, 5-14 Years | Females, 15-49 Years | Females, 50-69 Years | Females, 70-80 Years |
|-----------------------------------------------------|--------------------|--------------------|---------------------|----------------------|----------------------|----------------------|
| Other drug use disorders                            | 11<br>(8 - 16)     | 1<br>(0 - 2)       | --                  | 4<br>(2 - 7)         | 4<br>(3 - 6)         | 2<br>(1 - 3)         |
| Eating disorders                                    | 0<br>(0 - 0)       | --                 | 0<br>(0 - 0)        | 0<br>(0 - 0)         | --                   | --                   |
| Anorexia nervosa                                    | 0<br>(0 - 0)       | --                 | 0<br>(0 - 0)        | 0<br>(0 - 0)         | --                   | --                   |
| Diabetes, urogenital, blood, and endocrine diseases | 730<br>(512 - 943) | 44<br>(21 - 75)    | 19<br>(11 - 30)     | 113<br>(69 - 157)    | 280<br>(177 - 388)   | 275<br>(190 - 361)   |
| Diabetes mellitus                                   | 335<br>(218 - 456) | 1<br>(1 - 2)       | 1<br>(1 - 2)        | 31<br>(18 - 47)      | 150<br>(90 - 213)    | 151<br>(96 - 211)    |
| Acute glomerulonephritis                            | 3<br>(2 - 4)       | 0<br>(0 - 0)       | 0<br>(0 - 1)        | 1<br>(1 - 2)         | 1<br>(0 - 2)         | 0<br>(0 - 1)         |
| Chronic kidney disease                              | 139<br>(75 - 215)  | 7<br>(2 - 15)      | 5<br>(2 - 9)        | 30<br>(14 - 51)      | 50<br>(26 - 85)      | 46<br>(25 - 77)      |
| Chronic kidney disease due to diabetes mellitus     | 2<br>(1 - 4)       | 0<br>(0 - 0)       | 0<br>(0 - 0)        | 0<br>(0 - 0)         | 2<br>(1 - 4)         | 0<br>(0 - 0)         |
| Chronic kidney disease due to hypertension          | 70<br>(36 - 113)   | 1<br>(0 - 2)       | 1<br>(0 - 2)        | 12<br>(4 - 22)       | 27<br>(13 - 48)      | 29<br>(16 - 46)      |
| Chronic kidney disease due to glomerulonephritis    | 29<br>(15 - 47)    | 4<br>(1 - 7)       | 2<br>(1 - 3)        | 11<br>(5 - 19)       | 8<br>(3 - 15)        | 5<br>(2 - 10)        |
| Chronic kidney disease due to other causes          | 38<br>(12 - 75)    | 2<br>(0 - 7)       | 2<br>(1 - 5)        | 7<br>(2 - 17)        | 13<br>(4 - 30)       | 13<br>(3 - 30)       |
| Urinary diseases and male infertility               | 117<br>(75 - 161)  | 6<br>(2 - 14)      | 3<br>(1 - 5)        | 21<br>(12 - 34)      | 45<br>(24 - 72)      | 41<br>(23 - 63)      |
| Interstitial nephritis and urinary tract infections | 105<br>(67 - 146)  | 6<br>(2 - 13)      | 2<br>(1 - 4)        | 19<br>(10 - 29)      | 40<br>(21 - 63)      | 38<br>(21 - 58)      |
| Urolithiasis                                        | 3<br>(1 - 10)      | --                 | 0<br>(0 - 1)        | 1<br>(0 - 2)         | 1<br>(0 - 5)         | 1<br>(0 - 3)         |
| Other urinary diseases                              | 9<br>(4 - 15)      | 0<br>(0 - 2)       | 0<br>(0 - 1)        | 1<br>(1 - 4)         | 4<br>(1 - 8)         | 2<br>(1 - 5)         |
| Gynecological diseases                              | 2<br>(1 - 3)       | --                 | --                  | 1<br>(0 - 1)         | 1<br>(0 - 1)         | 0<br>(0 - 1)         |
| Uterine fibroids                                    | 0<br>(0 - 1)       | --                 | --                  | 0<br>(0 - 0)         | 0<br>(0 - 0)         | 0<br>(0 - 0)         |
| Polycystic ovarian syndrome                         | 0<br>(0 - 0)       | --                 | --                  | 0<br>(0 - 0)         | 0<br>(0 - 0)         | --                   |
| Endometriosis                                       | 0<br>(0 - 0)       | --                 | --                  | 0<br>(0 - 0)         | 0<br>(0 - 0)         | --                   |
| Genital prolapse                                    | 0<br>(0 - 1)       | --                 | --                  | 0<br>(0 - 0)         | 0<br>(0 - 0)         | 0<br>(0 - 0)         |
| Other gynecological diseases                        | 1<br>(0 - 2)       | --                 | --                  | 0<br>(0 - 1)         | 0<br>(0 - 1)         | 0<br>(0 - 0)         |
| Hemoglobinopathies and hemolytic anemias            | 36<br>(13 - 77)    | 10<br>(3 - 27)     | 6<br>(2 - 14)       | 9<br>(3 - 22)        | 6<br>(2 - 13)        | 5<br>(1 - 10)        |
| Thalassemias                                        | 0<br>(0 - 1)       | 0<br>(0 - 0)       | 0<br>(0 - 0)        | 0<br>(0 - 0)         | 0<br>(0 - 0)         | 0<br>(0 - 0)         |
| Sickle cell disorders                               | 29<br>(10 - 65)    | 9<br>(2 - 24)      | 5<br>(2 - 13)       | 9<br>(3 - 21)        | 5<br>(1 - 10)        | 1<br>(0 - 2)         |
| G6PD deficiency                                     | 1<br>(0 - 1)       | 0<br>(0 - 0)       | 0<br>(0 - 0)        | 0<br>(0 - 0)         | 0<br>(0 - 0)         | 0<br>(0 - 0)         |
| Other hemoglobinopathies and hemolytic anemias      | 7<br>(2 - 12)      | 1<br>(0 - 2)       | 0<br>(0 - 0)        | 0<br>(0 - 1)         | 1<br>(0 - 2)         | 4<br>(1 - 8)         |
| Endocrine, metabolic, blood, and immune disorders   | 99<br>(60 - 170)   | 19<br>(9 - 40)     | 4<br>(2 - 10)       | 19<br>(10 - 39)      | 27<br>(14 - 52)      | 30<br>(15 - 46)      |
| Musculoskeletal disorders                           | 31<br>(15 - 52)    | --                 | 3<br>(1 - 5)        | 9<br>(4 - 17)        | 11<br>(5 - 20)       | 9<br>(4 - 15)        |
| Rheumatoid arthritis                                | 6<br>(3 - 11)      | --                 | 0<br>(0 - 1)        | 1<br>(0 - 2)         | 2<br>(1 - 4)         | 3<br>(1 - 6)         |
| Other musculoskeletal disorders                     | 25<br>(12 - 41)    | --                 | 2<br>(1 - 4)        | 8<br>(3 - 15)        | 9<br>(3 - 17)        | 6<br>(2 - 10)        |
| Other non-communicable diseases                     | 448<br>(289 - 683) | 309<br>(160 - 544) | 20<br>(11 - 35)     | 37<br>(19 - 58)      | 37<br>(21 - 57)      | 45<br>(24 - 68)      |
| Congenital anomalies                                | 324<br>(171 - 556) | 289<br>(143 - 518) | 17<br>(8 - 32)      | 11<br>(7 - 18)       | 4<br>(2 - 7)         | 3<br>(2 - 4)         |
| Neural tube defects                                 | 46<br>(12 - 122)   | 44<br>(10 - 119)   | 1<br>(0 - 3)        | 1<br>(0 - 1)         | 0<br>(0 - 0)         | 0<br>(0 - 0)         |
| Congenital heart anomalies                          | 131<br>(62 - 249)  | 118<br>(52 - 234)  | 6<br>(3 - 13)       | 4<br>(2 - 6)         | 2<br>(1 - 3)         | 1<br>(1 - 2)         |
| Cleft lip and cleft palate                          | 1<br>(0 - 3)       | 1<br>(0 - 3)       | --                  | --                   | --                   | --                   |
| Down syndrome                                       | 59<br>(22 - 129)   | 49<br>(15 - 115)   | 5<br>(2 - 11)       | 4<br>(1 - 7)         | 1<br>(0 - 2)         | 0<br>(0 - 0)         |
| Chromosomal unbalanced rearrangements               | 16<br>(5 - 35)     | 15<br>(4 - 33)     | 1<br>(0 - 1)        | 1<br>(0 - 1)         | 0<br>(0 - 0)         | 0<br>(0 - 0)         |
| Other congenital anomalies                          | 71<br>(26 - 199)   | 62<br>(20 - 183)   | 4<br>(1 - 10)       | 2<br>(1 - 5)         | 1<br>(0 - 2)         | 1<br>(1 - 2)         |
| Skin and subcutaneous diseases                      | 121<br>(71 - 166)  | 17<br>(6 - 36)     | 3<br>(1 - 5)        | 26<br>(11 - 44)      | 33<br>(18 - 52)      | 42<br>(22 - 64)      |
| Cellulitis                                          | 46<br>(22 - 73)    | 5<br>(1 - 12)      | 1<br>(1 - 3)        | 9<br>(3 - 17)        | 11<br>(4 - 20)       | 20<br>(8 - 35)       |

Web Table 31- Mauritania deaths with 95% UI by age, sex, and cause in 2013

| Cause                                           | Females, All Ages    | Females, 0-4 Years | Females, 5-14 Years | Females, 15-49 Years | Females, 50-69 Years | Females, 70-80 Years |
|-------------------------------------------------|----------------------|--------------------|---------------------|----------------------|----------------------|----------------------|
| Pyoderma                                        | 69<br>(41 - 105)     | 11<br>(4 - 24)     | 1<br>(1 - 2)        | 15<br>(7 - 26)       | 22<br>(11 - 35)      | 20<br>(10 - 36)      |
| Decubitus ulcer                                 | 2<br>(1 - 3)         | 0<br>(0 - 0)       | 0<br>(0 - 0)        | 1<br>(0 - 1)         | 0<br>(0 - 1)         | 1<br>(0 - 2)         |
| Other skin and subcutaneous diseases            | 3<br>(2 - 6)         | 1<br>(0 - 3)       | 0<br>(0 - 0)        | 1<br>(0 - 3)         | 0<br>(0 - 1)         | 1<br>(0 - 2)         |
| Sudden infant death syndrome                    | 3<br>(0 - 9)         | 3<br>(0 - 9)       | --                  | --                   | --                   | --                   |
| Injuries                                        | 834<br>(573 - 1,055) | 109<br>(59 - 189)  | 95<br>(60 - 135)    | 321<br>(211 - 417)   | 169<br>(112 - 233)   | 140<br>(85 - 189)    |
| Transport injuries                              | 467<br>(321 - 591)   | 31<br>(12 - 60)    | 58<br>(34 - 87)     | 242<br>(155 - 324)   | 96<br>(61 - 139)     | 40<br>(26 - 59)      |
| Road injuries                                   | 455<br>(316 - 576)   | 29<br>(11 - 57)    | 56<br>(33 - 85)     | 240<br>(154 - 320)   | 93<br>(59 - 134)     | 38<br>(25 - 56)      |
| Pedestrian road injuries                        | 118<br>(72 - 166)    | 7<br>(2 - 17)      | 17<br>(9 - 29)      | 51<br>(26 - 77)      | 29<br>(16 - 44)      | 14<br>(8 - 23)       |
| Cyclist road injuries                           | 22<br>(12 - 32)      | 2<br>(0 - 5)       | 4<br>(2 - 8)        | 6<br>(3 - 10)        | 8<br>(3 - 13)        | 2<br>(1 - 3)         |
| Motorcyclist road injuries                      | 37<br>(19 - 57)      | 1<br>(0 - 3)       | 2<br>(1 - 4)        | 25<br>(12 - 42)      | 6<br>(3 - 10)        | 2<br>(1 - 4)         |
| Motor vehicle road injuries                     | 264<br>(181 - 348)   | 16<br>(6 - 34)     | 30<br>(16 - 48)     | 152<br>(96 - 210)    | 47<br>(28 - 73)      | 19<br>(12 - 29)      |
| Other road injuries                             | 14<br>(7 - 23)       | 2<br>(0 - 4)       | 3<br>(1 - 5)        | 6<br>(3 - 11)        | 3<br>(1 - 5)         | 1<br>(1 - 3)         |
| Other transport injuries                        | 12<br>(4 - 18)       | 2<br>(1 - 4)       | 1<br>(0 - 3)        | 3<br>(1 - 4)         | 3<br>(1 - 6)         | 2<br>(0 - 4)         |
| Unintentional injuries                          | 313<br>(206 - 415)   | 77<br>(41 - 139)   | 35<br>(21 - 53)     | 53<br>(34 - 77)      | 58<br>(33 - 83)      | 90<br>(47 - 131)     |
| Falls                                           | 78<br>(40 - 115)     | 7<br>(3 - 13)      | 4<br>(2 - 9)        | 9<br>(5 - 17)        | 14<br>(7 - 22)       | 44<br>(19 - 72)      |
| Drowning                                        | 41<br>(24 - 71)      | 16<br>(6 - 39)     | 10<br>(5 - 18)      | 8<br>(4 - 13)        | 5<br>(3 - 8)         | 3<br>(1 - 4)         |
| Fire, heat, and hot substances                  | 39<br>(21 - 67)      | 11<br>(4 - 28)     | 4<br>(2 - 9)        | 8<br>(4 - 14)        | 8<br>(4 - 12)        | 8<br>(4 - 14)        |
| Poisonings                                      | 9<br>(3 - 15)        | 2<br>(1 - 7)       | 1<br>(0 - 2)        | 2<br>(1 - 3)         | 2<br>(1 - 4)         | 1<br>(0 - 2)         |
| Exposure to mechanical forces                   | 34<br>(22 - 49)      | 9<br>(4 - 17)      | 5<br>(2 - 9)        | 8<br>(4 - 12)        | 7<br>(4 - 11)        | 4<br>(2 - 7)         |
| Unintentional firearm injuries                  | 9<br>(6 - 15)        | 2<br>(1 - 4)       | 1<br>(0 - 2)        | 3<br>(2 - 6)         | 2<br>(1 - 4)         | 1<br>(1 - 2)         |
| Unintentional suffocation                       | 3<br>(1 - 6)         | 2<br>(0 - 5)       | 0<br>(0 - 1)        | 0<br>(0 - 1)         | 0<br>(0 - 0)         | 0<br>(0 - 0)         |
| Other exposure to mechanical forces             | 22<br>(12 - 33)      | 6<br>(2 - 13)      | 3<br>(1 - 7)        | 4<br>(2 - 7)         | 5<br>(2 - 8)         | 3<br>(1 - 5)         |
| Adverse effects of medical treatment            | 36<br>(13 - 66)      | 6<br>(2 - 14)      | 2<br>(1 - 4)        | 7<br>(3 - 14)        | 10<br>(3 - 21)       | 12<br>(3 - 24)       |
| Animal contact                                  | 15<br>(6 - 28)       | 2<br>(1 - 6)       | 2<br>(1 - 6)        | 4<br>(1 - 9)         | 3<br>(1 - 7)         | 2<br>(1 - 5)         |
| Venomous animal contact                         | 9<br>(4 - 20)        | 2<br>(1 - 5)       | 2<br>(1 - 5)        | 2<br>(1 - 6)         | 2<br>(1 - 4)         | 1<br>(0 - 2)         |
| Non-venomous animal contact                     | 6<br>(2 - 10)        | 0<br>(0 - 1)       | 1<br>(0 - 2)        | 2<br>(0 - 3)         | 2<br>(0 - 3)         | 1<br>(0 - 3)         |
| Foreign body                                    | 45<br>(24 - 88)      | 20<br>(8 - 48)     | 4<br>(2 - 8)        | 4<br>(2 - 7)         | 5<br>(2 - 11)        | 12<br>(6 - 21)       |
| Pulmonary aspiration and foreign body in airway | 44<br>(23 - 87)      | 20<br>(8 - 48)     | 4<br>(2 - 7)        | 3<br>(1 - 7)         | 5<br>(2 - 10)        | 12<br>(6 - 20)       |
| Foreign body in other body part                 | 1<br>(0 - 1)         | 0<br>(0 - 0)       | 0<br>(0 - 0)        | 0<br>(0 - 0)         | 0<br>(0 - 0)         | 0<br>(0 - 1)         |
| Other unintentional injuries                    | 17<br>(10 - 26)      | 3<br>(1 - 6)       | 3<br>(1 - 6)        | 4<br>(2 - 6)         | 3<br>(2 - 6)         | 4<br>(2 - 7)         |
| Self-harm and interpersonal violence            | 53<br>(33 - 74)      | 2<br>(1 - 5)       | 2<br>(1 - 4)        | 25<br>(15 - 37)      | 14<br>(7 - 23)       | 9<br>(3 - 15)        |
| Self-harm                                       | 37<br>(20 - 54)      | --                 | 1<br>(0 - 2)        | 15<br>(8 - 26)       | 13<br>(6 - 22)       | 8<br>(2 - 14)        |
| Interpersonal violence                          | 15<br>(8 - 27)       | 2<br>(1 - 5)       | 1<br>(1 - 3)        | 10<br>(5 - 19)       | 1<br>(1 - 2)         | 0<br>(0 - 1)         |
| Assault by firearm                              | 5<br>(2 - 10)        | 1<br>(0 - 2)       | 0<br>(0 - 1)        | 3<br>(1 - 7)         | 1<br>(0 - 1)         | 0<br>(0 - 0)         |
| Assault by sharp object                         | 5<br>(2 - 9)         | 0<br>(0 - 1)       | 0<br>(0 - 1)        | 4<br>(2 - 7)         | 0<br>(0 - 1)         | 0<br>(0 - 0)         |
| Assault by other means                          | 6<br>(3 - 11)        | 1<br>(0 - 2)       | 1<br>(0 - 2)        | 3<br>(1 - 6)         | 1<br>(0 - 1)         | 0<br>(0 - 0)         |
| Forces of nature, war, and legal intervention   | 2<br>(1 - 5)         | 0<br>(0 - 0)       | 0<br>(0 - 0)        | 1<br>(1 - 2)         | 1<br>(0 - 1)         | 0<br>(0 - 0)         |
| Exposure to forces of nature                    | 2<br>(1 - 5)         | 0<br>(0 - 0)       | 0<br>(0 - 0)        | 1<br>(1 - 2)         | 1<br>(0 - 1)         | 0<br>(0 - 0)         |

Web Table 31- Mauritius deaths with 95% UI by age, sex, and cause in 2013

| Cause                                                             | Both Sexes, All Ages       | Both Sexes, 0-4 Years | Both Sexes, 5-14 Years | Both Sexes, 15-49 Years  | Both Sexes, 50-69 Years  | Both Sexes, 70-80 Years  |
|-------------------------------------------------------------------|----------------------------|-----------------------|------------------------|--------------------------|--------------------------|--------------------------|
| All causes                                                        | 10,253<br>(9,679 - 10,812) | 200<br>(175 - 229)    | 41<br>(38 - 44)        | 1,275<br>(1,170 - 1,373) | 3,677<br>(3,427 - 3,939) | 5,060<br>(4,818 - 5,290) |
| Communicable, maternal, neonatal, and nutritional diseases        | 664<br>(604 - 732)         | 119<br>(100 - 143)    | 8<br>(6 - 13)          | 95<br>(84 - 106)         | 130<br>(113 - 150)       | 312<br>(267 - 366)       |
| HIV/AIDS and tuberculosis                                         | 46<br>(40 - 57)            | 0<br>(0 - 0)          | 0<br>(0 - 0)           | 27<br>(24 - 34)          | 14<br>(11 - 19)          | 5<br>(4 - 6)             |
| Tuberculosis                                                      | 14<br>(12 - 17)            | 0<br>(0 - 0)          | 0<br>(0 - 0)           | 4<br>(3 - 5)             | 6<br>(5 - 8)             | 4<br>(3 - 5)             |
| HIV/AIDS                                                          | 32<br>(26 - 42)            | 0<br>(0 - 0)          | 0<br>(0 - 0)           | 23<br>(20 - 30)          | 8<br>(5 - 12)            | 1<br>(0 - 1)             |
| HIV/AIDS resulting in mycobacterial infection                     | 2<br>(1 - 3)               | 0<br>(0 - 0)          | 0<br>(0 - 0)           | 1<br>(1 - 2)             | 0<br>(0 - 1)             | 0<br>(0 - 0)             |
| HIV/AIDS resulting in other diseases                              | 30<br>(25 - 40)            | 0<br>(0 - 0)          | 0<br>(0 - 0)           | 22<br>(19 - 28)          | 7<br>(5 - 11)            | 1<br>(0 - 1)             |
| Diarrhea, lower respiratory, and other common infectious diseases | 443<br>(385 - 509)         | 28<br>(20 - 47)       | 8<br>(5 - 12)          | 46<br>(38 - 55)          | 96<br>(79 - 114)         | 265<br>(223 - 322)       |
| Diarrheal diseases                                                | 28<br>(23 - 35)            | 4<br>(3 - 5)          | 0<br>(0 - 0)           | 3<br>(2 - 3)             | 6<br>(5 - 8)             | 15<br>(11 - 22)          |
| Intestinal infectious diseases                                    | 14<br>(7 - 27)             | 4<br>(1 - 8)          | 3<br>(1 - 7)           | 5<br>(2 - 10)            | 2<br>(1 - 4)             | 1<br>(0 - 1)             |
| Typhoid fever                                                     | 11<br>(5 - 21)             | 3<br>(1 - 6)          | 3<br>(1 - 5)           | 4<br>(2 - 8)             | 1<br>(0 - 3)             | 0<br>(0 - 1)             |
| Paratyphoid fever                                                 | 3<br>(1 - 6)               | 1<br>(0 - 2)          | 1<br>(0 - 2)           | 1<br>(0 - 2)             | 0<br>(0 - 1)             | 0<br>(0 - 0)             |
| Other intestinal infectious diseases                              | 0<br>(0 - 1)               | 0<br>(0 - 0)          | 0<br>(0 - 0)           | 0<br>(0 - 0)             | 0<br>(0 - 0)             | 0<br>(0 - 0)             |
| Lower respiratory infections                                      | 373<br>(322 - 440)         | 11<br>(8 - 15)        | 2<br>(1 - 2)           | 31<br>(25 - 39)          | 83<br>(67 - 100)         | 246<br>(205 - 303)       |
| Upper respiratory infections                                      | 0<br>(0 - 1)               | 0<br>(0 - 0)          | 0<br>(0 - 0)           | 0<br>(0 - 0)             | 0<br>(0 - 0)             | 0<br>(0 - 0)             |
| Otitis media                                                      | 0<br>(0 - 0)               | 0<br>(0 - 0)          | 0<br>(0 - 0)           | 0<br>(0 - 0)             | 0<br>(0 - 0)             | 0<br>(0 - 0)             |
| Meningitis                                                        | 11<br>(9 - 13)             | 2<br>(1 - 2)          | 1<br>(0 - 1)           | 4<br>(3 - 5)             | 3<br>(2 - 4)             | 2<br>(2 - 3)             |
| Pneumococcal meningitis                                           | 4<br>(3 - 5)               | 0<br>(0 - 1)          | 0<br>(0 - 0)           | 1<br>(1 - 2)             | 1<br>(1 - 2)             | 1<br>(1 - 1)             |
| H influenzae type B meningitis                                    | 2<br>(2 - 2)               | 1<br>(0 - 1)          | 0<br>(0 - 0)           | 1<br>(0 - 1)             | 0<br>(0 - 1)             | 0<br>(0 - 0)             |
| Meningococcal meningitis                                          | 2<br>(1 - 2)               | 0<br>(0 - 0)          | 0<br>(0 - 0)           | 1<br>(0 - 1)             | 1<br>(0 - 1)             | 0<br>(0 - 1)             |
| Other meningitis                                                  | 4<br>(3 - 5)               | 1<br>(0 - 1)          | 0<br>(0 - 0)           | 1<br>(1 - 2)             | 1<br>(1 - 2)             | 1<br>(0 - 1)             |
| Encephalitis                                                      | 7<br>(5 - 8)               | 1<br>(0 - 1)          | 0<br>(0 - 1)           | 3<br>(2 - 3)             | 2<br>(1 - 3)             | 1<br>(1 - 2)             |
| Diphtheria                                                        | 0<br>(0 - 0)               | 0<br>(0 - 0)          | 0<br>(0 - 0)           | 0<br>(0 - 0)             | 0<br>(0 - 0)             | 0<br>(0 - 0)             |
| Whooping cough                                                    | 1<br>(0 - 5)               | 1<br>(0 - 5)          | 0<br>(0 - 0)           | 0<br>(0 - 0)             | 0<br>(0 - 0)             | 0<br>(0 - 0)             |
| Tetanus                                                           | 0<br>(0 - 0)               | 0<br>(0 - 0)          | 0<br>(0 - 0)           | 0<br>(0 - 0)             | 0<br>(0 - 0)             | 0<br>(0 - 0)             |
| Measles                                                           | 7<br>(0 - 38)              | 5<br>(0 - 30)         | 1<br>(0 - 6)           | 0<br>(0 - 2)             | 0<br>(0 - 0)             | 0<br>(0 - 0)             |
| Varicella and herpes zoster                                       | 1<br>(0 - 2)               | 0<br>(0 - 0)          | 0<br>(0 - 0)           | 0<br>(0 - 0)             | 0<br>(0 - 0)             | 0<br>(0 - 1)             |
| Neglected tropical diseases and malaria                           | 7<br>(6 - 9)               | 0<br>(0 - 0)          | 0<br>(0 - 0)           | 2<br>(2 - 2)             | 3<br>(2 - 4)             | 2<br>(2 - 3)             |
| Malaria                                                           | 0<br>(0 - 0)               | 0<br>(0 - 0)          | 0<br>(0 - 0)           | 0<br>(0 - 0)             | 0<br>(0 - 0)             | 0<br>(0 - 0)             |
| Leishmaniasis                                                     | 0<br>(0 - 0)               | 0<br>(0 - 0)          | 0<br>(0 - 0)           | 0<br>(0 - 0)             | 0<br>(0 - 0)             | 0<br>(0 - 0)             |
| Visceral leishmaniasis                                            | 0<br>(0 - 0)               | 0<br>(0 - 0)          | 0<br>(0 - 0)           | 0<br>(0 - 0)             | 0<br>(0 - 0)             | 0<br>(0 - 0)             |
| Schistosomiasis                                                   | 4<br>(3 - 5)               | 0<br>(0 - 0)          | 0<br>(0 - 0)           | 1<br>(1 - 1)             | 2<br>(1 - 3)             | 1<br>(1 - 2)             |
| Cysticercosis                                                     | 0<br>(0 - 0)               | 0<br>(0 - 0)          | 0<br>(0 - 0)           | 0<br>(0 - 0)             | 0<br>(0 - 0)             | 0<br>(0 - 0)             |
| Cystic echinococcosis                                             | 0<br>(0 - 0)               | 0<br>(0 - 0)          | 0<br>(0 - 0)           | 0<br>(0 - 0)             | 0<br>(0 - 0)             | 0<br>(0 - 0)             |
| Dengue                                                            | 2<br>(2 - 3)               | 0<br>(0 - 0)          | 0<br>(0 - 0)           | 1<br>(0 - 1)             | 1<br>(0 - 1)             | 1<br>(0 - 1)             |
| Rabies                                                            | 0<br>(0 - 1)               | 0<br>(0 - 0)          | 0<br>(0 - 0)           | 0<br>(0 - 0)             | 0<br>(0 - 0)             | 0<br>(0 - 0)             |
| Intestinal nematode infections                                    | 0<br>(0 - 1)               | 0<br>(0 - 0)          | 0<br>(0 - 0)           | 0<br>(0 - 0)             | 0<br>(0 - 0)             | 0<br>(0 - 0)             |
| Ascariasis                                                        | 0<br>(0 - 1)               | 0<br>(0 - 0)          | 0<br>(0 - 0)           | 0<br>(0 - 0)             | 0<br>(0 - 0)             | 0<br>(0 - 0)             |
| Other neglected tropical diseases                                 | 0<br>(0 - 0)               | 0<br>(0 - 0)          | 0<br>(0 - 0)           | 0<br>(0 - 0)             | 0<br>(0 - 0)             | 0<br>(0 - 0)             |
| Maternal disorders                                                | 6<br>(5 - 8)               | 0                     | 0<br>(0 - 0)           | 6<br>(5 - 8)             | 0                        | 0                        |

Web Table 31- Mauritius deaths with 95% UI by age, sex, and cause in 2013

| Cause                                                            | Both Sexes, All Ages     | Both Sexes, 0-4 Years | Both Sexes, 5-14 Years | Both Sexes, 15-49 Years | Both Sexes, 50-69 Years  | Both Sexes, 70-80 Years  |
|------------------------------------------------------------------|--------------------------|-----------------------|------------------------|-------------------------|--------------------------|--------------------------|
| Maternal hemorrhage                                              | 1<br>(0 - 1)             | --                    | 0<br>(0 - 0)           | 1<br>(0 - 1)            | --                       | --                       |
| Maternal sepsis and other maternal infections                    | 1<br>(1 - 1)             | --                    | 0<br>(0 - 0)           | 1<br>(1 - 1)            | --                       | --                       |
| Maternal hypertensive disorders                                  | 1<br>(0 - 1)             | --                    | 0<br>(0 - 0)           | 1<br>(0 - 1)            | --                       | --                       |
| Maternal obstructed labor                                        | 0<br>(0 - 1)             | --                    | 0<br>(0 - 0)           | 0<br>(0 - 1)            | --                       | --                       |
| Maternal abortive outcome                                        | 1<br>(1 - 2)             | --                    | 0<br>(0 - 0)           | 1<br>(1 - 2)            | --                       | --                       |
| Indirect maternal deaths                                         | 1<br>(1 - 1)             | --                    | 0<br>(0 - 0)           | 1<br>(1 - 1)            | --                       | --                       |
| Late maternal deaths                                             | 1<br>(0 - 1)             | --                    | 0<br>(0 - 0)           | 1<br>(0 - 1)            | --                       | --                       |
| Maternal deaths aggravated by HIV/AIDS                           | 0<br>(0 - 0)             | --                    | --                     | 0<br>(0 - 0)            | --                       | --                       |
| Other maternal disorders                                         | 1<br>(1 - 2)             | --                    | 0<br>(0 - 0)           | 1<br>(1 - 2)            | --                       | --                       |
| Neonatal disorders                                               | 89<br>(73 - 106)         | 89<br>(73 - 106)      | --                     | --                      | --                       | --                       |
| Neonatal preterm birth complications                             | 50<br>(39 - 63)          | 50<br>(39 - 63)       | --                     | --                      | --                       | --                       |
| Neonatal encephalopathy due to birth asphyxia and trauma         | 18<br>(12 - 27)          | 18<br>(12 - 27)       | --                     | --                      | --                       | --                       |
| Neonatal sepsis and other neonatal infections                    | 10<br>(6 - 18)           | 10<br>(6 - 18)        | --                     | --                      | --                       | --                       |
| Hemolytic disease and other neonatal jaundice                    | 0<br>(0 - 0)             | 0<br>(0 - 0)          | --                     | --                      | --                       | --                       |
| Other neonatal disorders                                         | 10<br>(5 - 15)           | 10<br>(5 - 15)        | --                     | --                      | --                       | --                       |
| Nutritional deficiencies                                         | 53<br>(40 - 63)          | 1<br>(1 - 2)          | 0<br>(0 - 0)           | 5<br>(4 - 7)            | 11<br>(8 - 15)           | 35<br>(25 - 45)          |
| Protein-energy malnutrition                                      | 24<br>(15 - 34)          | 1<br>(0 - 1)          | 0<br>(0 - 0)           | 2<br>(1 - 3)            | 5<br>(3 - 7)             | 17<br>(9 - 24)           |
| Iodine deficiency                                                | 1<br>(0 - 3)             | 0<br>(0 - 0)          | 0<br>(0 - 0)           | 0<br>(0 - 0)            | 0<br>(0 - 1)             | 1<br>(0 - 3)             |
| Iron-deficiency anemia                                           | 27<br>(17 - 38)          | 0<br>(0 - 1)          | 0<br>(0 - 0)           | 3<br>(2 - 4)            | 6<br>(4 - 8)             | 18<br>(11 - 26)          |
| Other nutritional deficiencies                                   | 0<br>(0 - 1)             | 0<br>(0 - 0)          | 0<br>(0 - 0)           | 0<br>(0 - 0)            | 0<br>(0 - 0)             | 0<br>(0 - 0)             |
| Other communicable, maternal, neonatal, and nutritional diseases | 20<br>(14 - 24)          | 1<br>(0 - 2)          | 0<br>(0 - 0)           | 9<br>(5 - 11)           | 6<br>(4 - 8)             | 4<br>(3 - 6)             |
| Sexually transmitted diseases excluding HIV                      | 1<br>(1 - 2)             | 1<br>(0 - 1)          | 0<br>(0 - 0)           | 0<br>(0 - 0)            | 0<br>(0 - 0)             | 0<br>(0 - 0)             |
| Syphilis                                                         | 1<br>(0 - 2)             | 1<br>(0 - 1)          | 0<br>(0 - 0)           | 0<br>(0 - 0)            | 0<br>(0 - 0)             | 0<br>(0 - 0)             |
| Chlamydial infection                                             | 0<br>(0 - 0)             | --                    | 0<br>(0 - 0)           | 0<br>(0 - 0)            | 0<br>(0 - 0)             | 0<br>(0 - 0)             |
| Gonococcal infection                                             | 0<br>(0 - 0)             | --                    | 0<br>(0 - 0)           | 0<br>(0 - 0)            | 0<br>(0 - 0)             | 0<br>(0 - 0)             |
| Other sexually transmitted diseases                              | 0<br>(0 - 0)             | --                    | 0<br>(0 - 0)           | 0<br>(0 - 0)            | 0<br>(0 - 0)             | 0<br>(0 - 0)             |
| Hepatitis                                                        | 7<br>(6 - 9)             | 0<br>(0 - 0)          | 0<br>(0 - 0)           | 3<br>(2 - 4)            | 3<br>(2 - 3)             | 1<br>(1 - 2)             |
| Acute hepatitis A                                                | 1<br>(0 - 1)             | 0<br>(0 - 0)          | 0<br>(0 - 0)           | 0<br>(0 - 1)            | 0<br>(0 - 0)             | 0<br>(0 - 0)             |
| Acute hepatitis B                                                | 5<br>(4 - 6)             | 0<br>(0 - 0)          | 0<br>(0 - 0)           | 2<br>(1 - 3)            | 2<br>(1 - 3)             | 1<br>(1 - 2)             |
| Acute hepatitis C                                                | 0<br>(0 - 1)             | --                    | 0<br>(0 - 0)           | 0<br>(0 - 0)            | 0<br>(0 - 0)             | 0<br>(0 - 0)             |
| Acute hepatitis E                                                | 2<br>(1 - 3)             | 0<br>(0 - 0)          | 0<br>(0 - 0)           | 1<br>(1 - 2)            | 0<br>(0 - 1)             | 0<br>(0 - 0)             |
| Other infectious diseases                                        | 12<br>(6 - 15)           | 0<br>(0 - 0)          | 0<br>(0 - 0)           | 5<br>(2 - 7)            | 3<br>(2 - 5)             | 3<br>(1 - 4)             |
| Non-communicable diseases                                        | 9,016<br>(8,501 - 9,541) | 68<br>(53 - 81)       | 22<br>(18 - 25)        | 891<br>(817 - 971)      | 3,379<br>(3,145 - 3,618) | 4,657<br>(4,432 - 4,880) |
| Neoplasms                                                        | 1,204<br>(1,080 - 1,301) | 3<br>(2 - 5)          | 7<br>(5 - 8)           | 153<br>(137 - 168)      | 548<br>(488 - 598)       | 494<br>(439 - 536)       |
| Esophageal cancer                                                | 33<br>(26 - 39)          | --                    | --                     | 3<br>(3 - 4)            | 17<br>(12 - 20)          | 13<br>(10 - 16)          |
| Stomach cancer                                                   | 113<br>(102 - 126)       | --                    | --                     | 9<br>(8 - 11)           | 50<br>(44 - 58)          | 54<br>(46 - 62)          |
| Liver cancer                                                     | 56<br>(50 - 64)          | --                    | 0<br>(0 - 0)           | 5<br>(4 - 6)            | 24<br>(21 - 28)          | 27<br>(23 - 32)          |
| Liver cancer due to hepatitis B                                  | 20<br>(13 - 27)          | --                    | 0<br>(0 - 0)           | 2<br>(2 - 3)            | 10<br>(6 - 13)           | 8<br>(5 - 11)            |
| Liver cancer due to hepatitis C                                  | 26<br>(19 - 34)          | --                    | 0<br>(0 - 0)           | 2<br>(1 - 2)            | 10<br>(7 - 15)           | 14<br>(10 - 18)          |
| Liver cancer due to alcohol use                                  | 4<br>(3 - 6)             | --                    | --                     | 0<br>(0 - 0)            | 1<br>(1 - 2)             | 2<br>(1 - 3)             |

Web Table 31- Mauritius deaths with 95% UI by age, sex, and cause in 2013

| Cause                                         | Both Sexes, All Ages     | Both Sexes, 0-4 Years | Both Sexes, 5-14 Years | Both Sexes, 15-49 Years | Both Sexes, 50-69 Years  | Both Sexes, 70-80 Years  |
|-----------------------------------------------|--------------------------|-----------------------|------------------------|-------------------------|--------------------------|--------------------------|
| Liver cancer due to other causes              | 6<br>(4 - 10)            | --                    | 0<br>(0 - 0)           | 1<br>(0 - 1)            | 3<br>(2 - 4)             | 3<br>(2 - 4)             |
| Larynx cancer                                 | 18<br>(15 - 25)          | --                    | --                     | 2<br>(1 - 2)            | 10<br>(8 - 13)           | 7<br>(5 - 10)            |
| Tracheal, bronchus and lung cancer            | 184<br>(165 - 213)       | --                    | --                     | 14<br>(12 - 17)         | 92<br>(79 - 108)         | 79<br>(68 - 91)          |
| Breast cancer                                 | 130<br>(104 - 151)       | --                    | --                     | 30<br>(24 - 37)         | 67<br>(51 - 80)          | 32<br>(25 - 40)          |
| Cervical cancer                               | 47<br>(36 - 62)          | --                    | --                     | 9<br>(7 - 12)           | 23<br>(17 - 31)          | 15<br>(11 - 19)          |
| Uterine cancer                                | 19<br>(13 - 28)          | --                    | --                     | 1<br>(1 - 1)            | 9<br>(6 - 13)            | 9<br>(6 - 14)            |
| Prostate cancer                               | 75<br>(41 - 97)          | --                    | --                     | 0<br>(0 - 1)            | 17<br>(10 - 24)          | 57<br>(29 - 77)          |
| Colon and rectum cancer                       | 151<br>(135 - 166)       | --                    | --                     | 14<br>(12 - 15)         | 65<br>(57 - 73)          | 72<br>(63 - 82)          |
| Lip and oral cavity cancer                    | 33<br>(21 - 40)          | --                    | --                     | 5<br>(3 - 6)            | 17<br>(10 - 21)          | 12<br>(8 - 14)           |
| Nasopharynx cancer                            | 6<br>(5 - 7)             | --                    | 0<br>(0 - 0)           | 2<br>(1 - 2)            | 3<br>(3 - 4)             | 1<br>(1 - 2)             |
| Other pharynx cancer                          | 14<br>(10 - 16)          | --                    | --                     | 2<br>(1 - 2)            | 8<br>(6 - 9)             | 4<br>(3 - 5)             |
| Gallbladder and biliary tract cancer          | 18<br>(14 - 24)          | --                    | --                     | 1<br>(1 - 1)            | 8<br>(6 - 11)            | 9<br>(7 - 13)            |
| Pancreatic cancer                             | 65<br>(58 - 73)          | --                    | --                     | 6<br>(5 - 7)            | 33<br>(29 - 38)          | 26<br>(22 - 30)          |
| Malignant skin melanoma                       | 4<br>(3 - 6)             | --                    | --                     | 1<br>(1 - 1)            | 2<br>(1 - 2)             | 2<br>(1 - 2)             |
| Non-melanoma skin cancer                      | 2<br>(1 - 3)             | --                    | --                     | 0<br>(0 - 0)            | 1<br>(0 - 1)             | 1<br>(1 - 2)             |
| Ovarian cancer                                | 31<br>(26 - 38)          | --                    | --                     | 6<br>(5 - 8)            | 18<br>(14 - 22)          | 7<br>(6 - 9)             |
| Testicular cancer                             | 1<br>(1 - 1)             | --                    | --                     | 0<br>(0 - 0)            | 0<br>(0 - 0)             | 0<br>(0 - 0)             |
| Kidney cancer                                 | 18<br>(16 - 21)          | 0<br>(0 - 0)          | 0<br>(0 - 0)           | 2<br>(2 - 2)            | 10<br>(8 - 11)           | 7<br>(6 - 8)             |
| Bladder cancer                                | 25<br>(22 - 32)          | --                    | --                     | 1<br>(1 - 2)            | 10<br>(8 - 13)           | 14<br>(12 - 18)          |
| Brain and nervous system cancer               | 19<br>(14 - 26)          | 0<br>(0 - 0)          | 1<br>(0 - 1)           | 6<br>(5 - 8)            | 8<br>(6 - 11)            | 4<br>(3 - 6)             |
| Thyroid cancer                                | 5<br>(3 - 6)             | --                    | 0<br>(0 - 0)           | 0<br>(0 - 1)            | 2<br>(1 - 2)             | 2<br>(1 - 3)             |
| Mesothelioma                                  | 2<br>(1 - 2)             | --                    | --                     | 0<br>(0 - 0)            | 1<br>(1 - 1)             | 1<br>(0 - 1)             |
| Hodgkin lymphoma                              | 2<br>(2 - 4)             | 0<br>(0 - 0)          | 0<br>(0 - 0)           | 1<br>(1 - 1)            | 1<br>(1 - 2)             | 0<br>(0 - 1)             |
| Non-Hodgkin lymphoma                          | 20<br>(12 - 24)          | 0<br>(0 - 0)          | 1<br>(0 - 1)           | 4<br>(3 - 5)            | 9<br>(6 - 11)            | 5<br>(3 - 7)             |
| Multiple myeloma                              | 7<br>(4 - 9)             | --                    | --                     | 1<br>(0 - 1)            | 4<br>(2 - 5)             | 2<br>(1 - 3)             |
| Leukemia                                      | 36<br>(32 - 39)          | 1<br>(1 - 2)          | 3<br>(2 - 4)           | 11<br>(10 - 13)         | 12<br>(10 - 13)          | 8<br>(7 - 10)            |
| Other neoplasms                               | 70<br>(48 - 85)          | 1<br>(1 - 2)          | 2<br>(2 - 3)           | 15<br>(10 - 18)         | 29<br>(19 - 36)          | 23<br>(14 - 29)          |
| Cardiovascular diseases                       | 3,636<br>(3,331 - 4,189) | 2<br>(1 - 2)          | 3<br>(2 - 4)           | 295<br>(262 - 344)      | 1,213<br>(1,086 - 1,448) | 2,123<br>(1,959 - 2,407) |
| Rheumatic heart disease                       | 32<br>(16 - 40)          | 0<br>(0 - 0)          | 1<br>(1 - 1)           | 7<br>(4 - 9)            | 7<br>(3 - 9)             | 17<br>(8 - 23)           |
| Ischemic heart disease                        | 1,834<br>(1,618 - 2,356) | 0<br>(0 - 0)          | 0<br>(0 - 1)           | 157<br>(132 - 209)      | 644<br>(553 - 870)       | 1,031<br>(905 - 1,297)   |
| Cerebrovascular disease                       | 1,287<br>(1,138 - 1,503) | 0<br>(0 - 1)          | 1<br>(0 - 1)           | 85<br>(70 - 102)        | 409<br>(349 - 483)       | 792<br>(694 - 932)       |
| Ischemic stroke                               | 900<br>(770 - 1,038)     | 0<br>(0 - 0)          | 0<br>(0 - 0)           | 17<br>(11 - 22)         | 188<br>(140 - 232)       | 695<br>(605 - 804)       |
| Hemorrhagic stroke                            | 387<br>(307 - 498)       | 0<br>(0 - 0)          | 1<br>(0 - 1)           | 68<br>(56 - 83)         | 221<br>(174 - 284)       | 97<br>(70 - 147)         |
| Hypertensive heart disease                    | 319<br>(226 - 389)       | 0<br>(0 - 0)          | 0<br>(0 - 0)           | 17<br>(11 - 23)         | 92<br>(65 - 117)         | 209<br>(145 - 263)       |
| Cardiomyopathy and myocarditis                | 42<br>(33 - 50)          | 1<br>(0 - 1)          | 0<br>(0 - 1)           | 12<br>(9 - 14)          | 14<br>(11 - 18)          | 15<br>(11 - 18)          |
| Atrial fibrillation and flutter               | 18<br>(14 - 22)          | --                    | --                     | 1<br>(1 - 1)            | 5<br>(4 - 6)             | 12<br>(9 - 16)           |
| Aortic aneurysm                               | 11<br>(9 - 13)           | --                    | --                     | 1<br>(1 - 2)            | 3<br>(2 - 4)             | 7<br>(5 - 8)             |
| Peripheral vascular disease                   | 2<br>(2 - 3)             | --                    | --                     | 0<br>(0 - 0)            | 0<br>(0 - 1)             | 2<br>(1 - 2)             |
| Endocarditis                                  | 11<br>(8 - 15)           | 0<br>(0 - 0)          | 0<br>(0 - 0)           | 4<br>(3 - 5)            | 4<br>(2 - 5)             | 3<br>(2 - 5)             |
| Other cardiovascular and circulatory diseases | 80<br>(64 - 110)         | 0<br>(0 - 0)          | 0<br>(0 - 0)           | 11<br>(8 - 14)          | 34<br>(25 - 49)          | 36<br>(26 - 52)          |



Web Table 31- Mauritius deaths with 95% UI by age, sex, and cause in 2013

| Cause                                               | Both Sexes, All Ages | Both Sexes, 0-4 Years | Both Sexes, 5-14 Years | Both Sexes, 15-49 Years | Both Sexes, 50-69 Years | Both Sexes, 70-80 Years |
|-----------------------------------------------------|----------------------|-----------------------|------------------------|-------------------------|-------------------------|-------------------------|
| Chronic respiratory diseases                        | 596<br>(532 - 784)   | 4<br>(2 - 6)          | 1<br>(1 - 1)           | 32<br>(28 - 40)         | 163<br>(142 - 209)      | 396<br>(345 - 540)      |
| Chronic obstructive pulmonary disease               | 221<br>(176 - 300)   | 1<br>(1 - 2)          | 0<br>(0 - 0)           | 8<br>(6 - 11)           | 53<br>(42 - 72)         | 158<br>(123 - 221)      |
| Pneumoconiosis                                      | 31<br>(22 - 45)      | 0<br>(0 - 0)          | 0<br>(0 - 0)           | 3<br>(2 - 4)            | 14<br>(9 - 21)          | 14<br>(10 - 22)         |
| Silicosis                                           | 15<br>(11 - 23)      | 0<br>(0 - 0)          | 0<br>(0 - 0)           | 0<br>(0 - 0)            | 3<br>(2 - 5)            | 12<br>(8 - 18)          |
| Asbestosis                                          | 3<br>(2 - 4)         | 0<br>(0 - 0)          | 0<br>(0 - 0)           | 0<br>(0 - 1)            | 3<br>(2 - 4)            | 0<br>(0 - 0)            |
| Coal workers pneumoconiosis                         | 8<br>(5 - 11)        | 0<br>(0 - 0)          | 0<br>(0 - 0)           | 1<br>(1 - 2)            | 6<br>(4 - 9)            | 0<br>(0 - 1)            |
| Other pneumoconiosis                                | 5<br>(4 - 8)         | 0<br>(0 - 0)          | 0<br>(0 - 0)           | 1<br>(1 - 1)            | 2<br>(1 - 4)            | 2<br>(1 - 4)            |
| Asthma                                              | 187<br>(153 - 227)   | 2<br>(1 - 2)          | 1<br>(1 - 1)           | 17<br>(14 - 20)         | 55<br>(44 - 67)         | 113<br>(87 - 142)       |
| Interstitial lung disease and pulmonary sarcoidosis | 130<br>(96 - 221)    | 0<br>(0 - 0)          | 0<br>(0 - 0)           | 2<br>(1 - 4)            | 36<br>(27 - 60)         | 91<br>(65 - 160)        |
| Other chronic respiratory diseases                  | 27<br>(20 - 35)      | 1<br>(0 - 1)          | 0<br>(0 - 0)           | 3<br>(2 - 4)            | 4<br>(3 - 6)            | 19<br>(13 - 26)         |
| Cirrhosis                                           | 324<br>(292 - 362)   | 0<br>(0 - 0)          | 1<br>(0 - 1)           | 101<br>(88 - 117)       | 165<br>(143 - 188)      | 58<br>(50 - 66)         |
| Cirrhosis due to hepatitis B                        | 98<br>(55 - 136)     | 0<br>(0 - 0)          | 0<br>(0 - 0)           | 32<br>(19 - 46)         | 48<br>(24 - 69)         | 18<br>(9 - 25)          |
| Cirrhosis due to hepatitis C                        | 85<br>(38 - 148)     | 0<br>(0 - 0)          | 0<br>(0 - 0)           | 25<br>(10 - 44)         | 44<br>(17 - 77)         | 16<br>(9 - 25)          |
| Cirrhosis due to alcohol use                        | 114<br>(74 - 156)    | --                    | --                     | 31<br>(18 - 45)         | 62<br>(39 - 87)         | 22<br>(13 - 30)         |
| Cirrhosis due to other causes                       | 28<br>(17 - 41)      | 0<br>(0 - 0)          | 0<br>(0 - 0)           | 13<br>(8 - 20)          | 12<br>(6 - 18)          | 3<br>(2 - 4)            |
| Digestive diseases                                  | 127<br>(114 - 144)   | 0<br>(0 - 1)          | 0<br>(0 - 1)           | 28<br>(24 - 34)         | 47<br>(40 - 54)         | 52<br>(45 - 60)         |
| Peptic ulcer disease                                | 40<br>(33 - 49)      | 0<br>(0 - 0)          | 0<br>(0 - 0)           | 5<br>(4 - 7)            | 15<br>(12 - 18)         | 20<br>(16 - 25)         |
| Gastritis and duodenitis                            | 5<br>(3 - 6)         | 0<br>(0 - 0)          | 0<br>(0 - 0)           | 1<br>(0 - 1)            | 1<br>(1 - 2)            | 3<br>(1 - 4)            |
| Appendicitis                                        | 3<br>(2 - 4)         | 0<br>(0 - 0)          | 0<br>(0 - 0)           | 1<br>(0 - 1)            | 1<br>(1 - 2)            | 1<br>(1 - 1)            |
| Paralytic ileus and intestinal obstruction          | 16<br>(11 - 22)      | 0<br>(0 - 0)          | 0<br>(0 - 0)           | 1<br>(1 - 2)            | 5<br>(3 - 7)            | 9<br>(6 - 13)           |
| Inguinal, femoral, and abdominal hernia             | 1<br>(0 - 1)         | 0<br>(0 - 0)          | 0<br>(0 - 0)           | 0<br>(0 - 0)            | 0<br>(0 - 0)            | 0<br>(0 - 1)            |
| Inflammatory bowel disease                          | 2<br>(1 - 3)         | 0<br>(0 - 0)          | 0<br>(0 - 0)           | 0<br>(0 - 1)            | 1<br>(0 - 1)            | 1<br>(0 - 1)            |
| Vascular intestinal disorders                       | 1<br>(0 - 1)         | 0<br>(0 - 0)          | 0<br>(0 - 0)           | 0<br>(0 - 0)            | 0<br>(0 - 0)            | 0<br>(0 - 1)            |
| Gallbladder and biliary diseases                    | 9<br>(7 - 11)        | 0<br>(0 - 0)          | 0<br>(0 - 0)           | 1<br>(1 - 1)            | 3<br>(2 - 4)            | 5<br>(4 - 6)            |
| Pancreatitis                                        | 37<br>(30 - 49)      | 0<br>(0 - 0)          | 0<br>(0 - 0)           | 15<br>(12 - 21)         | 15<br>(12 - 21)         | 6<br>(5 - 9)            |
| Other digestive diseases                            | 14<br>(10 - 16)      | 0<br>(0 - 0)          | 0<br>(0 - 0)           | 2<br>(1 - 3)            | 5<br>(3 - 7)            | 6<br>(4 - 8)            |
| Neurological disorders                              | 296<br>(250 - 344)   | 1<br>(1 - 2)          | 2<br>(1 - 2)           | 17<br>(13 - 20)         | 39<br>(32 - 46)         | 238<br>(197 - 282)      |
| Alzheimer disease and other dementias               | 249<br>(206 - 294)   | --                    | --                     | 0<br>(0 - 0)            | 25<br>(20 - 32)         | 223<br>(183 - 266)      |
| Parkinson disease                                   | 11<br>(8 - 14)       | --                    | --                     | 0<br>(0 - 0)            | 2<br>(2 - 3)            | 8<br>(6 - 10)           |
| Epilepsy                                            | 26<br>(21 - 31)      | 1<br>(0 - 1)          | 1<br>(1 - 1)           | 13<br>(10 - 16)         | 7<br>(6 - 9)            | 4<br>(3 - 5)            |
| Multiple sclerosis                                  | 1<br>(0 - 1)         | --                    | --                     | 0<br>(0 - 0)            | 0<br>(0 - 0)            | 0<br>(0 - 0)            |
| Other neurological disorders                        | 10<br>(7 - 12)       | 0<br>(0 - 1)          | 1<br>(0 - 1)           | 3<br>(2 - 4)            | 3<br>(2 - 4)            | 3<br>(2 - 4)            |
| Mental and substance use disorders                  | 89<br>(52 - 108)     | 0<br>(0 - 0)          | 0<br>(0 - 0)           | 41<br>(26 - 52)         | 41<br>(21 - 53)         | 6<br>(3 - 8)            |
| Schizophrenia                                       | 1<br>(1 - 2)         | --                    | --                     | 0<br>(0 - 0)            | 0<br>(0 - 1)            | 1<br>(0 - 1)            |
| Alcohol use disorders                               | 75<br>(38 - 93)      | --                    | --                     | 32<br>(18 - 42)         | 38<br>(18 - 50)         | 5<br>(2 - 7)            |
| Drug use disorders                                  | 12<br>(8 - 15)       | 0<br>(0 - 0)          | --                     | 9<br>(5 - 11)           | 3<br>(2 - 4)            | 1<br>(1 - 1)            |
| Opioid use disorders                                | 8<br>(5 - 10)        | 0<br>(0 - 0)          | --                     | 6<br>(3 - 7)            | 2<br>(1 - 2)            | 0<br>(0 - 1)            |
| Cocaine use disorders                               | 0<br>(0 - 0)         | 0<br>(0 - 0)          | --                     | 0<br>(0 - 0)            | 0<br>(0 - 0)            | 0<br>(0 - 0)            |
| Amphetamine use disorders                           | 0<br>(0 - 0)         | 0<br>(0 - 0)          | --                     | 0<br>(0 - 0)            | 0<br>(0 - 0)            | 0<br>(0 - 0)            |
| Other drug use disorders                            | 4<br>(3 - 5)         | 0<br>(0 - 0)          | --                     | 3<br>(2 - 4)            | 1<br>(1 - 1)            | 0<br>(0 - 0)            |

Web Table 31- Mauritius deaths with 95% UI by age, sex, and cause in 2013

| Cause                                               | Both Sexes, All Ages     | Both Sexes, 0-4 Years | Both Sexes, 5-14 Years | Both Sexes, 15-49 Years | Both Sexes, 50-69 Years | Both Sexes, 70-80 Years |
|-----------------------------------------------------|--------------------------|-----------------------|------------------------|-------------------------|-------------------------|-------------------------|
| Eating disorders                                    | 0<br>(0 - 0)             | --                    | 0<br>(0 - 0)           | 0<br>(0 - 0)            | --                      | --                      |
| Anorexia nervosa                                    | 0<br>(0 - 0)             | --                    | 0<br>(0 - 0)           | 0<br>(0 - 0)            | --                      | --                      |
| Diabetes, urogenital, blood, and endocrine diseases | 2,630<br>(2,005 - 2,868) | 3<br>(2 - 4)          | 4<br>(3 - 4)           | 209<br>(180 - 233)      | 1,148<br>(924 - 1,268)  | 1,265<br>(886 - 1,401)  |
| Diabetes mellitus                                   | 1,685<br>(1,361 - 1,835) | 0<br>(0 - 0)          | 1<br>(0 - 1)           | 101<br>(88 - 116)       | 722<br>(634 - 801)      | 861<br>(598 - 959)      |
| Acute glomerulonephritis                            | 0<br>(0 - 1)             | 0<br>(0 - 0)          | 0<br>(0 - 0)           | 0<br>(0 - 0)            | 0<br>(0 - 0)            | 0<br>(0 - 0)            |
| Chronic kidney disease                              | 884<br>(529 - 997)       | 1<br>(1 - 2)          | 2<br>(1 - 2)           | 96<br>(68 - 110)        | 405<br>(221 - 469)      | 380<br>(227 - 441)      |
| Chronic kidney disease due to diabetes mellitus     | 438<br>(223 - 522)       | 0<br>(0 - 0)          | 0<br>(0 - 0)           | 40<br>(22 - 50)         | 213<br>(102 - 263)      | 186<br>(97 - 227)       |
| Chronic kidney disease due to hypertension          | 130<br>(78 - 173)        | 0<br>(0 - 0)          | 0<br>(0 - 0)           | 15<br>(10 - 21)         | 52<br>(30 - 73)         | 62<br>(35 - 82)         |
| Chronic kidney disease due to glomerulonephritis    | 3<br>(2 - 4)             | 0<br>(0 - 0)          | 0<br>(0 - 0)           | 1<br>(1 - 1)            | 1<br>(0 - 1)            | 1<br>(0 - 1)            |
| Chronic kidney disease due to other causes          | 313<br>(156 - 389)       | 1<br>(0 - 1)          | 1<br>(1 - 2)           | 40<br>(23 - 52)         | 140<br>(66 - 186)       | 131<br>(59 - 174)       |
| Urinary diseases and male infertility               | 22<br>(13 - 27)          | 0<br>(0 - 0)          | 0<br>(0 - 0)           | 3<br>(2 - 4)            | 8<br>(4 - 10)           | 11<br>(6 - 14)          |
| Interstitial nephritis and urinary tract infections | 13<br>(8 - 17)           | 0<br>(0 - 0)          | 0<br>(0 - 0)           | 2<br>(1 - 3)            | 4<br>(2 - 6)            | 7<br>(4 - 9)            |
| Urolithiasis                                        | 1<br>(0 - 1)             | --                    | 0<br>(0 - 0)           | 0<br>(0 - 0)            | 0<br>(0 - 1)            | 0<br>(0 - 1)            |
| Other urinary diseases                              | 8<br>(4 - 10)            | 0<br>(0 - 0)          | 0<br>(0 - 0)           | 1<br>(1 - 2)            | 3<br>(1 - 4)            | 3<br>(2 - 5)            |
| Gynecological diseases                              | 0<br>(0 - 0)             | --                    | --                     | 0<br>(0 - 0)            | 0<br>(0 - 0)            | 0<br>(0 - 0)            |
| Uterine fibroids                                    | 0<br>(0 - 0)             | --                    | --                     | 0<br>(0 - 0)            | 0<br>(0 - 0)            | 0<br>(0 - 0)            |
| Polycystic ovarian syndrome                         | 0<br>(0 - 0)             | --                    | --                     | 0<br>(0 - 0)            | 0<br>(0 - 0)            | --                      |
| Endometriosis                                       | 0<br>(0 - 0)             | --                    | --                     | 0<br>(0 - 0)            | 0<br>(0 - 0)            | --                      |
| Genital prolapse                                    | 0<br>(0 - 0)             | --                    | --                     | 0<br>(0 - 0)            | 0<br>(0 - 0)            | 0<br>(0 - 0)            |
| Other gynecological diseases                        | 0<br>(0 - 0)             | --                    | --                     | 0<br>(0 - 0)            | 0<br>(0 - 0)            | 0<br>(0 - 0)            |
| Hemoglobinopathies and hemolytic anemias            | 13<br>(9 - 17)           | 1<br>(0 - 1)          | 1<br>(1 - 1)           | 5<br>(3 - 6)            | 4<br>(3 - 5)            | 3<br>(2 - 4)            |
| Thalassemias                                        | 6<br>(4 - 8)             | 1<br>(0 - 1)          | 1<br>(1 - 1)           | 3<br>(2 - 5)            | 1<br>(1 - 2)            | 0<br>(0 - 0)            |
| Sickle cell disorders                               | 0<br>(0 - 0)             | 0<br>(0 - 0)          | 0<br>(0 - 0)           | 0<br>(0 - 0)            | 0<br>(0 - 0)            | 0<br>(0 - 0)            |
| G6PD deficiency                                     | 0<br>(0 - 0)             | 0<br>(0 - 0)          | 0<br>(0 - 0)           | 0<br>(0 - 0)            | 0<br>(0 - 0)            | 0<br>(0 - 0)            |
| Other hemoglobinopathies and hemolytic anemias      | 6<br>(5 - 9)             | 0<br>(0 - 0)          | 0<br>(0 - 0)           | 1<br>(1 - 1)            | 3<br>(2 - 4)            | 3<br>(2 - 4)            |
| Endocrine, metabolic, blood, and immune disorders   | 26<br>(21 - 35)          | 1<br>(0 - 1)          | 0<br>(0 - 1)           | 5<br>(4 - 6)            | 9<br>(8 - 14)           | 11<br>(8 - 15)          |
| Musculoskeletal disorders                           | 15<br>(11 - 23)          | --                    | 0<br>(0 - 0)           | 4<br>(3 - 7)            | 6<br>(4 - 8)            | 5<br>(3 - 7)            |
| Rheumatoid arthritis                                | 2<br>(1 - 3)             | --                    | 0<br>(0 - 0)           | 0<br>(0 - 0)            | 1<br>(0 - 1)            | 1<br>(0 - 1)            |
| Other musculoskeletal disorders                     | 13<br>(10 - 22)          | --                    | 0<br>(0 - 0)           | 3<br>(2 - 7)            | 5<br>(4 - 7)            | 4<br>(3 - 6)            |
| Other non-communicable diseases                     | 99<br>(80 - 112)         | 54<br>(42 - 65)       | 5<br>(4 - 6)           | 11<br>(9 - 13)          | 9<br>(6 - 11)           | 20<br>(12 - 26)         |
| Congenital anomalies                                | 68<br>(56 - 80)          | 49<br>(39 - 60)       | 5<br>(4 - 6)           | 8<br>(6 - 9)            | 2<br>(2 - 3)            | 5<br>(4 - 6)            |
| Neural tube defects                                 | 1<br>(1 - 1)             | 1<br>(0 - 1)          | 0<br>(0 - 0)           | 0<br>(0 - 0)            | 0<br>(0 - 0)            | 0<br>(0 - 0)            |
| Congenital heart anomalies                          | 35<br>(28 - 41)          | 22<br>(17 - 28)       | 3<br>(2 - 4)           | 5<br>(4 - 6)            | 1<br>(1 - 1)            | 3<br>(3 - 4)            |
| Cleft lip and cleft palate                          | 0<br>(0 - 0)             | 0<br>(0 - 0)          | --                     | --                      | --                      | --                      |
| Down syndrome                                       | 0<br>(0 - 1)             | 0<br>(0 - 0)          | 0<br>(0 - 0)           | 0<br>(0 - 0)            | 0<br>(0 - 0)            | 0<br>(0 - 0)            |
| Chromosomal unbalanced rearrangements               | 0<br>(0 - 0)             | 0<br>(0 - 0)          | 0<br>(0 - 0)           | 0<br>(0 - 0)            | 0<br>(0 - 0)            | 0<br>(0 - 0)            |
| Other congenital anomalies                          | 32<br>(25 - 39)          | 26<br>(19 - 33)       | 2<br>(1 - 3)           | 2<br>(2 - 3)            | 1<br>(1 - 1)            | 1<br>(1 - 1)            |
| Skin and subcutaneous diseases                      | 27<br>(14 - 33)          | 0<br>(0 - 1)          | 0<br>(0 - 0)           | 3<br>(2 - 4)            | 7<br>(4 - 9)            | 16<br>(7 - 21)          |
| Cellulitis                                          | 5<br>(4 - 7)             | 0<br>(0 - 0)          | 0<br>(0 - 0)           | 1<br>(1 - 1)            | 2<br>(1 - 3)            | 2<br>(1 - 3)            |
| Pyoderma                                            | 7<br>(6 - 9)             | 0<br>(0 - 0)          | 0<br>(0 - 0)           | 1<br>(1 - 2)            | 3<br>(2 - 3)            | 3<br>(2 - 5)            |

Web Table 31- Mauritius deaths with 95% UI by age, sex, and cause in 2013

| Cause                                           | Both Sexes, All Ages | Both Sexes, 0-4 Years | Both Sexes, 5-14 Years | Both Sexes, 15-49 Years | Both Sexes, 50-69 Years | Both Sexes, 70-80 Years |
|-------------------------------------------------|----------------------|-----------------------|------------------------|-------------------------|-------------------------|-------------------------|
| Decubitus ulcer                                 | 13<br>(2 - 18)       | 0<br>(0 - 0)          | 0<br>(0 - 0)           | 1<br>(0 - 1)            | 2<br>(0 - 3)            | 10<br>(2 - 15)          |
| Other skin and subcutaneous diseases            | 1<br>(1 - 1)         | 0<br>(0 - 0)          | 0<br>(0 - 0)           | 0<br>(0 - 0)            | 0<br>(0 - 1)            | 0<br>(0 - 1)            |
| Sudden infant death syndrome                    | 4<br>(2 - 7)         | 4<br>(2 - 7)          | --                     | --                      | --                      | --                      |
| Injuries                                        | 572<br>(480 - 635)   | 14<br>(8 - 17)        | 11<br>(9 - 12)         | 289<br>(251 - 318)      | 168<br>(132 - 192)      | 91<br>(71 - 106)        |
| Transport injuries                              | 182<br>(112 - 212)   | 1<br>(1 - 2)          | 4<br>(3 - 5)           | 85<br>(50 - 101)        | 62<br>(35 - 75)         | 30<br>(19 - 36)         |
| Road injuries                                   | 176<br>(110 - 204)   | 1<br>(1 - 2)          | 4<br>(3 - 5)           | 83<br>(50 - 99)         | 60<br>(35 - 72)         | 28<br>(19 - 33)         |
| Pedestrian road injuries                        | 36<br>(20 - 47)      | 0<br>(0 - 1)          | 1<br>(1 - 1)           | 12<br>(7 - 16)          | 14<br>(8 - 20)          | 9<br>(5 - 12)           |
| Cyclist road injuries                           | 17<br>(11 - 24)      | 0<br>(0 - 0)          | 0<br>(0 - 1)           | 7<br>(5 - 11)           | 7<br>(4 - 9)            | 3<br>(2 - 4)            |
| Motorcyclist road injuries                      | 35<br>(23 - 48)      | 0<br>(0 - 0)          | 1<br>(0 - 1)           | 20<br>(13 - 29)         | 9<br>(6 - 13)           | 5<br>(3 - 7)            |
| Motor vehicle road injuries                     | 84<br>(42 - 106)     | 1<br>(0 - 1)          | 1<br>(1 - 2)           | 43<br>(20 - 55)         | 29<br>(14 - 38)         | 11<br>(6 - 14)          |
| Other road injuries                             | 4<br>(2 - 14)        | 0<br>(0 - 0)          | 0<br>(0 - 0)           | 2<br>(1 - 6)            | 1<br>(1 - 5)            | 1<br>(0 - 3)            |
| Other transport injuries                        | 6<br>(2 - 8)         | 0<br>(0 - 0)          | 0<br>(0 - 0)           | 2<br>(1 - 3)            | 2<br>(0 - 3)            | 2<br>(1 - 3)            |
| Unintentional injuries                          | 212<br>(171 - 240)   | 12<br>(7 - 15)        | 5<br>(4 - 7)           | 85<br>(72 - 100)        | 61<br>(46 - 73)         | 48<br>(36 - 58)         |
| Falls                                           | 42<br>(32 - 50)      | 0<br>(0 - 1)          | 1<br>(0 - 1)           | 15<br>(12 - 19)         | 16<br>(11 - 19)         | 10<br>(8 - 14)          |
| Drowning                                        | 51<br>(34 - 75)      | 1<br>(1 - 2)          | 2<br>(1 - 3)           | 28<br>(20 - 42)         | 13<br>(8 - 20)          | 7<br>(4 - 9)            |
| Fire, heat, and hot substances                  | 41<br>(33 - 50)      | 1<br>(1 - 2)          | 1<br>(1 - 1)           | 18<br>(14 - 24)         | 9<br>(7 - 11)           | 12<br>(8 - 16)          |
| Poisonings                                      | 3<br>(2 - 4)         | 0<br>(0 - 0)          | 0<br>(0 - 0)           | 2<br>(1 - 2)            | 1<br>(0 - 1)            | 1<br>(0 - 1)            |
| Exposure to mechanical forces                   | 4<br>(3 - 7)         | 0<br>(0 - 0)          | 0<br>(0 - 0)           | 2<br>(2 - 3)            | 1<br>(1 - 2)            | 1<br>(0 - 1)            |
| Unintentional firearm injuries                  | 1<br>(0 - 1)         | 0<br>(0 - 0)          | 0<br>(0 - 0)           | 0<br>(0 - 0)            | 0<br>(0 - 0)            | 0<br>(0 - 0)            |
| Unintentional suffocation                       | 0<br>(0 - 1)         | 0<br>(0 - 0)          | 0<br>(0 - 0)           | 0<br>(0 - 0)            | 0<br>(0 - 0)            | 0<br>(0 - 0)            |
| Other exposure to mechanical forces             | 3<br>(2 - 6)         | 0<br>(0 - 0)          | 0<br>(0 - 0)           | 1<br>(1 - 3)            | 1<br>(1 - 1)            | 0<br>(0 - 1)            |
| Adverse effects of medical treatment            | 36<br>(21 - 49)      | 1<br>(1 - 2)          | 1<br>(0 - 1)           | 9<br>(5 - 12)           | 14<br>(7 - 19)          | 12<br>(6 - 18)          |
| Animal contact                                  | 0<br>(0 - 1)         | 0<br>(0 - 0)          | 0<br>(0 - 0)           | 0<br>(0 - 0)            | 0<br>(0 - 0)            | 0<br>(0 - 0)            |
| Venomous animal contact                         | 0<br>(0 - 0)         | 0<br>(0 - 0)          | 0<br>(0 - 0)           | 0<br>(0 - 0)            | 0<br>(0 - 0)            | 0<br>(0 - 0)            |
| Non-venomous animal contact                     | 0<br>(0 - 0)         | 0<br>(0 - 0)          | 0<br>(0 - 0)           | 0<br>(0 - 0)            | 0<br>(0 - 0)            | 0<br>(0 - 0)            |
| Foreign body                                    | 27<br>(15 - 35)      | 7<br>(4 - 10)         | 1<br>(0 - 1)           | 8<br>(4 - 11)           | 6<br>(3 - 9)            | 4<br>(2 - 7)            |
| Pulmonary aspiration and foreign body in airway | 27<br>(14 - 35)      | 7<br>(4 - 10)         | 1<br>(0 - 1)           | 8<br>(4 - 11)           | 6<br>(3 - 9)            | 4<br>(2 - 7)            |
| Foreign body in other body part                 | 0<br>(0 - 0)         | 0<br>(0 - 0)          | 0<br>(0 - 0)           | 0<br>(0 - 0)            | 0<br>(0 - 0)            | 0<br>(0 - 0)            |
| Other unintentional injuries                    | 6<br>(5 - 8)         | 0<br>(0 - 0)          | 0<br>(0 - 0)           | 3<br>(2 - 4)            | 2<br>(1 - 2)            | 1<br>(1 - 2)            |
| Self-harm and interpersonal violence            | 165<br>(145 - 204)   | 1<br>(0 - 1)          | 2<br>(1 - 2)           | 114<br>(99 - 143)       | 38<br>(31 - 48)         | 11<br>(9 - 13)          |
| Self-harm                                       | 126<br>(110 - 167)   | --                    | 1<br>(1 - 2)           | 87<br>(75 - 118)        | 29<br>(24 - 38)         | 9<br>(7 - 11)           |
| Interpersonal violence                          | 39<br>(24 - 50)      | 1<br>(0 - 1)          | 1<br>(0 - 1)           | 27<br>(16 - 35)         | 8<br>(5 - 12)           | 2<br>(1 - 3)            |
| Assault by firearm                              | 8<br>(2 - 14)        | 0<br>(0 - 0)          | 0<br>(0 - 0)           | 6<br>(1 - 11)           | 2<br>(0 - 3)            | 0<br>(0 - 0)            |
| Assault by sharp object                         | 10<br>(5 - 14)       | 0<br>(0 - 0)          | 0<br>(0 - 0)           | 8<br>(4 - 11)           | 2<br>(1 - 3)            | 0<br>(0 - 0)            |
| Assault by other means                          | 20<br>(14 - 31)      | 0<br>(0 - 1)          | 0<br>(0 - 1)           | 13<br>(8 - 22)          | 5<br>(3 - 8)            | 2<br>(1 - 3)            |
| Forces of nature, war, and legal intervention   | 13<br>(7 - 28)       | 0<br>(0 - 0)          | 0<br>(0 - 0)           | 4<br>(2 - 9)            | 7<br>(3 - 14)           | 2<br>(1 - 5)            |
| Exposure to forces of nature                    | 13<br>(7 - 28)       | 0<br>(0 - 0)          | 0<br>(0 - 0)           | 4<br>(2 - 9)            | 7<br>(3 - 14)           | 2<br>(1 - 5)            |

Web Table 31- Mauritius deaths with 95% UI by age, sex, and cause in 2013

| Cause                                                             | Males, All Ages          | Males, 0-4 Years  | Males, 5-14 Years | Males, 15-49 Years   | Males, 50-69 Years       | Males, 70-80 Years       |
|-------------------------------------------------------------------|--------------------------|-------------------|-------------------|----------------------|--------------------------|--------------------------|
| All causes                                                        | 5,879<br>(5,468 - 6,309) | 112<br>(97 - 131) | 24<br>(22 - 26)   | 921<br>(832 - 1,010) | 2,395<br>(2,195 - 2,620) | 2,427<br>(2,303 - 2,542) |
| Communicable, maternal, neonatal, and nutritional diseases        | 396<br>(353 - 447)       | 68<br>(56 - 82)   | 5<br>(3 - 7)      | 68<br>(59 - 78)      | 97<br>(81 - 115)         | 159<br>(130 - 195)       |
| HIV/AIDS and tuberculosis                                         | 39<br>(33 - 49)          | 0<br>(0 - 0)      | 0<br>(0 - 0)      | 23<br>(20 - 29)      | 12<br>(9 - 17)           | 4<br>(3 - 5)             |
| Tuberculosis                                                      | 12<br>(9 - 15)           | 0<br>(0 - 0)      | 0<br>(0 - 0)      | 3<br>(2 - 4)         | 6<br>(4 - 7)             | 3<br>(2 - 4)             |
| HIV/AIDS                                                          | 28<br>(22 - 37)          | 0<br>(0 - 0)      | 0<br>(0 - 0)      | 20<br>(17 - 26)      | 7<br>(4 - 11)            | 1<br>(0 - 1)             |
| HIV/AIDS resulting in mycobacterial infection                     | 2<br>(1 - 2)             | 0<br>(0 - 0)      | 0<br>(0 - 0)      | 1<br>(1 - 2)         | 0<br>(0 - 1)             | 0<br>(0 - 0)             |
| HIV/AIDS resulting in other diseases                              | 26<br>(21 - 35)          | 0<br>(0 - 0)      | 0<br>(0 - 0)      | 19<br>(16 - 24)      | 7<br>(4 - 10)            | 1<br>(0 - 1)             |
| Diarrhea, lower respiratory, and other common infectious diseases | 263<br>(225 - 314)       | 15<br>(11 - 26)   | 4<br>(3 - 7)      | 34<br>(28 - 42)      | 72<br>(57 - 88)          | 138<br>(109 - 175)       |
| Diarrheal diseases                                                | 13<br>(11 - 17)          | 2<br>(1 - 3)      | 0<br>(0 - 0)      | 2<br>(1 - 2)         | 4<br>(3 - 5)             | 6<br>(4 - 9)             |
| Intestinal infectious diseases                                    | 8<br>(3 - 16)            | 2<br>(1 - 4)      | 2<br>(1 - 4)      | 3<br>(1 - 7)         | 1<br>(0 - 3)             | 0<br>(0 - 1)             |
| Typhoid fever                                                     | 6<br>(3 - 13)            | 1<br>(0 - 3)      | 1<br>(1 - 3)      | 2<br>(1 - 5)         | 1<br>(0 - 2)             | 0<br>(0 - 1)             |
| Paratyphoid fever                                                 | 2<br>(1 - 4)             | 1<br>(0 - 1)      | 0<br>(0 - 1)      | 1<br>(0 - 1)         | 0<br>(0 - 0)             | 0<br>(0 - 0)             |
| Other intestinal infectious diseases                              | 0<br>(0 - 1)             | 0<br>(0 - 0)      | 0<br>(0 - 0)      | 0<br>(0 - 0)         | 0<br>(0 - 0)             | 0<br>(0 - 0)             |
| Lower respiratory infections                                      | 225<br>(189 - 276)       | 7<br>(5 - 10)     | 1<br>(1 - 2)      | 24<br>(19 - 31)      | 63<br>(48 - 79)          | 130<br>(102 - 168)       |
| Upper respiratory infections                                      | 0<br>(0 - 0)             | 0<br>(0 - 0)      | 0<br>(0 - 0)      | 0<br>(0 - 0)         | 0<br>(0 - 0)             | 0<br>(0 - 0)             |
| Otitis media                                                      | 0<br>(0 - 0)             | 0<br>(0 - 0)      | 0<br>(0 - 0)      | 0<br>(0 - 0)         | 0<br>(0 - 0)             | 0<br>(0 - 0)             |
| Meningitis                                                        | 8<br>(6 - 9)             | 1<br>(1 - 1)      | 0<br>(0 - 1)      | 3<br>(2 - 4)         | 2<br>(2 - 3)             | 1<br>(1 - 1)             |
| Pneumococcal meningitis                                           | 3<br>(2 - 4)             | 0<br>(0 - 0)      | 0<br>(0 - 0)      | 1<br>(1 - 2)         | 1<br>(1 - 1)             | 0<br>(0 - 1)             |
| H influenzae type B meningitis                                    | 1<br>(1 - 2)             | 0<br>(0 - 1)      | 0<br>(0 - 0)      | 0<br>(0 - 1)         | 0<br>(0 - 0)             | 0<br>(0 - 0)             |
| Meningococcal meningitis                                          | 1<br>(1 - 2)             | 0<br>(0 - 0)      | 0<br>(0 - 0)      | 1<br>(0 - 1)         | 0<br>(0 - 1)             | 0<br>(0 - 0)             |
| Other meningitis                                                  | 3<br>(1 - 4)             | 0<br>(0 - 1)      | 0<br>(0 - 0)      | 1<br>(0 - 2)         | 1<br>(0 - 1)             | 0<br>(0 - 1)             |
| Encephalitis                                                      | 4<br>(3 - 5)             | 0<br>(0 - 1)      | 0<br>(0 - 0)      | 2<br>(1 - 2)         | 1<br>(1 - 2)             | 1<br>(0 - 1)             |
| Diphtheria                                                        | 0<br>(0 - 0)             | 0<br>(0 - 0)      | 0<br>(0 - 0)      | 0<br>(0 - 0)         | 0<br>(0 - 0)             | 0<br>(0 - 0)             |
| Whooping cough                                                    | 1<br>(0 - 2)             | 0<br>(0 - 2)      | 0<br>(0 - 0)      | 0<br>(0 - 0)         | 0<br>(0 - 0)             | 0<br>(0 - 0)             |
| Tetanus                                                           | 0<br>(0 - 0)             | 0<br>(0 - 0)      | 0<br>(0 - 0)      | 0<br>(0 - 0)         | 0<br>(0 - 0)             | 0<br>(0 - 0)             |
| Measles                                                           | 3<br>(0 - 19)            | 3<br>(0 - 15)     | 0<br>(0 - 3)      | 0<br>(0 - 1)         | 0<br>(0 - 0)             | 0<br>(0 - 0)             |
| Varicella and herpes zoster                                       | 0<br>(0 - 1)             | 0<br>(0 - 0)      | 0<br>(0 - 0)      | 0<br>(0 - 0)         | 0<br>(0 - 0)             | 0<br>(0 - 1)             |
| Neglected tropical diseases and malaria                           | 5<br>(4 - 6)             | 0<br>(0 - 0)      | 0<br>(0 - 0)      | 1<br>(1 - 2)         | 2<br>(1 - 3)             | 1<br>(1 - 2)             |
| Malaria                                                           | 0<br>(0 - 0)             | 0<br>(0 - 0)      | 0<br>(0 - 0)      | 0<br>(0 - 0)         | 0<br>(0 - 0)             | 0<br>(0 - 0)             |
| Leishmaniasis                                                     | 0<br>(0 - 0)             | 0<br>(0 - 0)      | 0<br>(0 - 0)      | 0<br>(0 - 0)         | 0<br>(0 - 0)             | 0<br>(0 - 0)             |
| Visceral leishmaniasis                                            | 0<br>(0 - 0)             | 0<br>(0 - 0)      | 0<br>(0 - 0)      | 0<br>(0 - 0)         | 0<br>(0 - 0)             | 0<br>(0 - 0)             |
| Schistosomiasis                                                   | 3<br>(2 - 3)             | 0<br>(0 - 0)      | 0<br>(0 - 0)      | 1<br>(0 - 1)         | 1<br>(1 - 2)             | 1<br>(0 - 1)             |
| Cysticercosis                                                     | 0<br>(0 - 0)             | 0<br>(0 - 0)      | 0<br>(0 - 0)      | 0<br>(0 - 0)         | 0<br>(0 - 0)             | 0<br>(0 - 0)             |
| Cystic echinococcosis                                             | 0<br>(0 - 0)             | 0<br>(0 - 0)      | 0<br>(0 - 0)      | 0<br>(0 - 0)         | 0<br>(0 - 0)             | 0<br>(0 - 0)             |
| Dengue                                                            | 1<br>(1 - 2)             | 0<br>(0 - 0)      | 0<br>(0 - 0)      | 0<br>(0 - 1)         | 0<br>(0 - 1)             | 0<br>(0 - 1)             |
| Rabies                                                            | 0<br>(0 - 0)             | 0<br>(0 - 0)      | 0<br>(0 - 0)      | 0<br>(0 - 0)         | 0<br>(0 - 0)             | 0<br>(0 - 0)             |
| Intestinal nematode infections                                    | 0<br>(0 - 0)             | 0<br>(0 - 0)      | 0<br>(0 - 0)      | 0<br>(0 - 0)         | 0<br>(0 - 0)             | 0<br>(0 - 0)             |
| Ascariasis                                                        | 0<br>(0 - 0)             | 0<br>(0 - 0)      | 0<br>(0 - 0)      | 0<br>(0 - 0)         | 0<br>(0 - 0)             | 0<br>(0 - 0)             |
| Other neglected tropical diseases                                 | 0<br>(0 - 0)             | 0<br>(0 - 0)      | 0<br>(0 - 0)      | 0<br>(0 - 0)         | 0<br>(0 - 0)             | 0<br>(0 - 0)             |
| Maternal disorders                                                | --                       | --                | --                | --                   | --                       | --                       |

Web Table 31- Mauritius deaths with 95% UI by age, sex, and cause in 2013

| Cause                                                            | Males, All Ages          | Males, 0-4 Years | Males, 5-14 Years | Males, 15-49 Years | Males, 50-69 Years       | Males, 70-80 Years       |
|------------------------------------------------------------------|--------------------------|------------------|-------------------|--------------------|--------------------------|--------------------------|
| Maternal hemorrhage                                              | --                       | --               | --                | --                 | --                       | --                       |
| Maternal sepsis and other maternal infections                    | --                       | --               | --                | --                 | --                       | --                       |
| Maternal hypertensive disorders                                  | --                       | --               | --                | --                 | --                       | --                       |
| Maternal obstructed labor                                        | --                       | --               | --                | --                 | --                       | --                       |
| Maternal abortive outcome                                        | --                       | --               | --                | --                 | --                       | --                       |
| Indirect maternal deaths                                         | --                       | --               | --                | --                 | --                       | --                       |
| Late maternal deaths                                             | --                       | --               | --                | --                 | --                       | --                       |
| Maternal deaths aggravated by HIV/AIDS                           | --                       | --               | --                | --                 | --                       | --                       |
| Other maternal disorders                                         | --                       | --               | --                | --                 | --                       | --                       |
| Neonatal disorders                                               | 51<br>(43 - 61)          | 51<br>(43 - 61)  | --                | --                 | --                       | --                       |
| Neonatal preterm birth complications                             | 28<br>(20 - 38)          | 28<br>(20 - 38)  | --                | --                 | --                       | --                       |
| Neonatal encephalopathy due to birth asphyxia and trauma         | 11<br>(7 - 16)           | 11<br>(7 - 16)   | --                | --                 | --                       | --                       |
| Neonatal sepsis and other neonatal infections                    | 7<br>(3 - 12)            | 7<br>(3 - 12)    | --                | --                 | --                       | --                       |
| Hemolytic disease and other neonatal jaundice                    | 0<br>(0 - 0)             | 0<br>(0 - 0)     | --                | --                 | --                       | --                       |
| Other neonatal disorders                                         | 6<br>(2 - 9)             | 6<br>(2 - 9)     | --                | --                 | --                       | --                       |
| Nutritional deficiencies                                         | 24<br>(14 - 34)          | 1<br>(0 - 1)     | 0<br>(0 - 0)      | 3<br>(2 - 4)       | 7<br>(4 - 11)            | 14<br>(8 - 19)           |
| Protein-energy malnutrition                                      | 12<br>(6 - 19)           | 0<br>(0 - 1)     | 0<br>(0 - 0)      | 1<br>(1 - 2)       | 3<br>(2 - 6)             | 7<br>(3 - 11)            |
| Iodine deficiency                                                | 0<br>(0 - 2)             | 0<br>(0 - 0)     | 0<br>(0 - 0)      | 0<br>(0 - 0)       | 0<br>(0 - 1)             | 0<br>(0 - 1)             |
| Iron-deficiency anemia                                           | 11<br>(5 - 19)           | 0<br>(0 - 1)     | 0<br>(0 - 0)      | 1<br>(1 - 2)       | 3<br>(2 - 6)             | 6<br>(3 - 11)            |
| Other nutritional deficiencies                                   | 0<br>(0 - 0)             | 0<br>(0 - 0)     | 0<br>(0 - 0)      | 0<br>(0 - 0)       | 0<br>(0 - 0)             | 0<br>(0 - 0)             |
| Other communicable, maternal, neonatal, and nutritional diseases | 14<br>(9 - 18)           | 0<br>(0 - 1)     | 0<br>(0 - 0)      | 7<br>(4 - 10)      | 4<br>(3 - 6)             | 2<br>(1 - 3)             |
| Sexually transmitted diseases excluding HIV                      | 0                        | 0                | 0                 | 0                  | 0                        | 0                        |
| Syphilis                                                         | 0<br>(0 - 1)             | 0<br>(0 - 1)     | 0<br>(0 - 0)      | 0<br>(0 - 0)       | 0<br>(0 - 0)             | 0<br>(0 - 0)             |
| Chlamydial infection                                             | --                       | --               | --                | --                 | --                       | --                       |
| Gonococcal infection                                             | 0<br>(0 - 0)             | --               | 0<br>(0 - 0)      | 0<br>(0 - 0)       | 0<br>(0 - 0)             | 0<br>(0 - 0)             |
| Other sexually transmitted diseases                              | 0<br>(0 - 0)             | --               | 0<br>(0 - 0)      | 0<br>(0 - 0)       | 0<br>(0 - 0)             | 0<br>(0 - 0)             |
| Hepatitis                                                        | 6<br>(5 - 7)             | 0<br>(0 - 0)     | 0<br>(0 - 0)      | 3<br>(2 - 4)       | 2<br>(1 - 3)             | 1<br>(1 - 1)             |
| Acute hepatitis A                                                | 0<br>(0 - 1)             | 0<br>(0 - 0)     | 0<br>(0 - 0)      | 0<br>(0 - 1)       | 0<br>(0 - 0)             | 0<br>(0 - 0)             |
| Acute hepatitis B                                                | 4<br>(3 - 5)             | 0<br>(0 - 0)     | 0<br>(0 - 0)      | 2<br>(1 - 2)       | 1<br>(1 - 2)             | 1<br>(1 - 1)             |
| Acute hepatitis C                                                | 0<br>(0 - 0)             | --               | 0<br>(0 - 0)      | 0<br>(0 - 0)       | 0<br>(0 - 0)             | 0<br>(0 - 0)             |
| Acute hepatitis E                                                | 1<br>(1 - 2)             | 0<br>(0 - 0)     | 0<br>(0 - 0)      | 1<br>(0 - 2)       | 0<br>(0 - 1)             | 0<br>(0 - 0)             |
| Other infectious diseases                                        | 8<br>(3 - 11)            | 0<br>(0 - 0)     | 0<br>(0 - 0)      | 4<br>(1 - 6)       | 2<br>(1 - 3)             | 1<br>(1 - 3)             |
| Non-communicable diseases                                        | 5,045<br>(4,679 - 5,416) | 37<br>(28 - 45)  | 12<br>(10 - 14)   | 615<br>(552 - 683) | 2,165<br>(1,981 - 2,369) | 2,217<br>(2,095 - 2,323) |
| Neoplasms                                                        | 652<br>(588 - 714)       | 2<br>(1 - 3)     | 4<br>(3 - 4)      | 68<br>(60 - 76)    | 297<br>(265 - 334)       | 282<br>(247 - 309)       |
| Esophageal cancer                                                | 21<br>(15 - 27)          | --               | --                | 2<br>(1 - 3)       | 12<br>(8 - 15)           | 7<br>(5 - 10)            |
| Stomach cancer                                                   | 75<br>(66 - 85)          | --               | --                | 6<br>(5 - 7)       | 36<br>(30 - 43)          | 33<br>(27 - 39)          |
| Liver cancer                                                     | 32<br>(27 - 37)          | --               | 0<br>(0 - 0)      | 3<br>(3 - 4)       | 14<br>(12 - 17)          | 14<br>(12 - 18)          |
| Liver cancer due to hepatitis B                                  | 13<br>(8 - 18)           | --               | 0<br>(0 - 0)      | 2<br>(1 - 2)       | 7<br>(4 - 9)             | 5<br>(3 - 8)             |
| Liver cancer due to hepatitis C                                  | 14<br>(9 - 19)           | --               | 0<br>(0 - 0)      | 1<br>(0 - 2)       | 6<br>(3 - 8)             | 7<br>(4 - 10)            |
| Liver cancer due to alcohol use                                  | 2<br>(1 - 4)             | --               | --                | 0<br>(0 - 0)       | 1<br>(0 - 2)             | 1<br>(1 - 2)             |

Web Table 31- Mauritius deaths with 95% UI by age, sex, and cause in 2013

| Cause                                         | Males, All Ages          | Males, 0-4 Years | Males, 5-14 Years | Males, 15-49 Years | Males, 50-69 Years | Males, 70-80 Years   |
|-----------------------------------------------|--------------------------|------------------|-------------------|--------------------|--------------------|----------------------|
| Liver cancer due to other causes              | 2<br>(1 - 3)             | --               | 0<br>(0 - 0)      | 0<br>(0 - 1)       | 1<br>(0 - 2)       | 1<br>(0 - 1)         |
| Larynx cancer                                 | 15<br>(12 - 22)          | --               | --                | 1<br>(1 - 2)       | 8<br>(6 - 12)      | 6<br>(4 - 8)         |
| Tracheal, bronchus and lung cancer            | 138<br>(120 - 161)       | --               | --                | 9<br>(7 - 11)      | 70<br>(58 - 85)    | 59<br>(50 - 70)      |
| Breast cancer                                 | 1<br>(0 - 1)             | --               | --                | 0<br>(0 - 0)       | 0<br>(0 - 0)       | 0<br>(0 - 0)         |
| Cervical cancer                               | --                       | --               | --                | --                 | --                 | --                   |
| Uterine cancer                                | --                       | --               | --                | --                 | --                 | --                   |
| Prostate cancer                               | 75<br>(41 - 97)          | --               | --                | 0<br>(0 - 1)       | 17<br>(10 - 24)    | 57<br>(29 - 77)      |
| Colon and rectum cancer                       | 84<br>(74 - 95)          | --               | --                | 8<br>(7 - 10)      | 38<br>(32 - 45)    | 37<br>(31 - 44)      |
| Lip and oral cavity cancer                    | 25<br>(14 - 30)          | --               | --                | 4<br>(2 - 5)       | 14<br>(8 - 17)     | 7<br>(4 - 9)         |
| Nasopharynx cancer                            | 5<br>(4 - 5)             | --               | 0<br>(0 - 0)      | 1<br>(1 - 2)       | 2<br>(2 - 3)       | 1<br>(1 - 1)         |
| Other pharynx cancer                          | 12<br>(8 - 14)           | --               | --                | 2<br>(1 - 2)       | 7<br>(5 - 9)       | 3<br>(2 - 4)         |
| Gallbladder and biliary tract cancer          | 6<br>(4 - 9)             | --               | --                | 0<br>(0 - 0)       | 3<br>(2 - 4)       | 3<br>(2 - 4)         |
| Pancreatic cancer                             | 39<br>(34 - 44)          | --               | --                | 4<br>(3 - 5)       | 21<br>(18 - 25)    | 13<br>(11 - 16)      |
| Malignant skin melanoma                       | 2<br>(1 - 4)             | --               | --                | 0<br>(0 - 1)       | 1<br>(0 - 1)       | 1<br>(0 - 2)         |
| Non-melanoma skin cancer                      | 1<br>(1 - 2)             | --               | --                | 0<br>(0 - 0)       | 0<br>(0 - 1)       | 1<br>(0 - 1)         |
| Ovarian cancer                                | --                       | --               | --                | --                 | --                 | --                   |
| Testicular cancer                             | 1<br>(1 - 1)             | --               | --                | 0<br>(0 - 0)       | 0<br>(0 - 0)       | 0<br>(0 - 0)         |
| Kidney cancer                                 | 12<br>(11 - 15)          | 0<br>(0 - 0)     | 0<br>(0 - 0)      | 1<br>(1 - 2)       | 7<br>(6 - 8)       | 4<br>(3 - 5)         |
| Bladder cancer                                | 20<br>(17 - 25)          | --               | --                | 1<br>(1 - 1)       | 8<br>(6 - 10)      | 11<br>(9 - 14)       |
| Brain and nervous system cancer               | 11<br>(7 - 17)           | 0<br>(0 - 0)     | 0<br>(0 - 1)      | 4<br>(3 - 6)       | 5<br>(3 - 8)       | 2<br>(1 - 4)         |
| Thyroid cancer                                | 1<br>(1 - 2)             | --               | 0<br>(0 - 0)      | 0<br>(0 - 0)       | 1<br>(1 - 1)       | 0<br>(0 - 0)         |
| Mesothelioma                                  | 1<br>(1 - 1)             | --               | --                | 0<br>(0 - 0)       | 1<br>(0 - 1)       | 0<br>(0 - 0)         |
| Hodgkin lymphoma                              | 1<br>(1 - 3)             | 0<br>(0 - 0)     | 0<br>(0 - 0)      | 1<br>(0 - 1)       | 0<br>(0 - 1)       | 0<br>(0 - 0)         |
| Non-Hodgkin lymphoma                          | 13<br>(8 - 15)           | 0<br>(0 - 0)     | 0<br>(0 - 0)      | 3<br>(2 - 4)       | 6<br>(4 - 8)       | 3<br>(2 - 4)         |
| Multiple myeloma                              | 4<br>(2 - 6)             | --               | --                | 0<br>(0 - 0)       | 3<br>(1 - 4)       | 1<br>(1 - 2)         |
| Leukemia                                      | 20<br>(17 - 22)          | 1<br>(0 - 1)     | 2<br>(1 - 2)      | 6<br>(5 - 8)       | 6<br>(5 - 7)       | 5<br>(4 - 6)         |
| Other neoplasms                               | 38<br>(25 - 46)          | 1<br>(0 - 1)     | 1<br>(1 - 1)      | 9<br>(6 - 11)      | 17<br>(10 - 21)    | 11<br>(7 - 14)       |
| Cardiovascular diseases                       | 1,989<br>(1,836 - 2,182) | 1<br>(1 - 1)     | 1<br>(1 - 2)      | 216<br>(189 - 250) | 812<br>(733 - 914) | 959<br>(891 - 1,034) |
| Rheumatic heart disease                       | 12<br>(6 - 17)           | 0<br>(0 - 0)     | 0<br>(0 - 1)      | 3<br>(2 - 4)       | 3<br>(1 - 5)       | 6<br>(2 - 9)         |
| Ischemic heart disease                        | 1,014<br>(885 - 1,308)   | 0<br>(0 - 0)     | 0<br>(0 - 0)      | 124<br>(102 - 166) | 430<br>(368 - 563) | 459<br>(397 - 584)   |
| Cerebrovascular disease                       | 733<br>(579 - 844)       | 0<br>(0 - 0)     | 0<br>(0 - 0)      | 61<br>(45 - 76)    | 291<br>(227 - 347) | 381<br>(298 - 441)   |
| Ischemic stroke                               | 484<br>(366 - 572)       | 0<br>(0 - 0)     | 0<br>(0 - 0)      | 12<br>(7 - 17)     | 139<br>(97 - 180)  | 333<br>(255 - 390)   |
| Hemorrhagic stroke                            | 249<br>(184 - 331)       | 0<br>(0 - 0)     | 0<br>(0 - 0)      | 48<br>(35 - 61)    | 152<br>(109 - 203) | 48<br>(32 - 76)      |
| Hypertensive heart disease                    | 149<br>(91 - 196)        | 0<br>(0 - 0)     | 0<br>(0 - 0)      | 11<br>(6 - 16)     | 56<br>(33 - 77)    | 82<br>(48 - 111)     |
| Cardiomyopathy and myocarditis                | 27<br>(19 - 34)          | 0<br>(0 - 1)     | 0<br>(0 - 0)      | 8<br>(5 - 10)      | 10<br>(7 - 13)     | 8<br>(5 - 12)        |
| Atrial fibrillation and flutter               | 7<br>(5 - 8)             | --               | --                | 0<br>(0 - 1)       | 3<br>(2 - 4)       | 3<br>(2 - 5)         |
| Aortic aneurysm                               | 8<br>(6 - 10)            | --               | --                | 1<br>(1 - 1)       | 2<br>(2 - 3)       | 5<br>(4 - 6)         |
| Peripheral vascular disease                   | 1<br>(1 - 1)             | --               | --                | 0<br>(0 - 0)       | 0<br>(0 - 0)       | 1<br>(0 - 1)         |
| Endocarditis                                  | 7<br>(4 - 9)             | 0<br>(0 - 0)     | 0<br>(0 - 0)      | 3<br>(1 - 4)       | 2<br>(1 - 3)       | 2<br>(1 - 3)         |
| Other cardiovascular and circulatory diseases | 32<br>(25 - 44)          | 0<br>(0 - 0)     | 0<br>(0 - 0)      | 6<br>(4 - 8)       | 14<br>(10 - 19)    | 13<br>(9 - 18)       |

Web Table 31- Mauritius deaths with 95% UI by age, sex, and cause in 2013

| Cause                                               | Males, All Ages    | Males, 0-4 Years | Males, 5-14 Years | Males, 15-49 Years | Males, 50-69 Years | Males, 70-80 Years |
|-----------------------------------------------------|--------------------|------------------|-------------------|--------------------|--------------------|--------------------|
| Chronic respiratory diseases                        | 368<br>(322 - 491) | 2<br>(1 - 3)     | 1<br>(0 - 1)      | 21<br>(17 - 28)    | 115<br>(96 - 159)  | 230<br>(198 - 311) |
| Chronic obstructive pulmonary disease               | 139<br>(112 - 196) | 1<br>(0 - 1)     | 0<br>(0 - 0)      | 5<br>(4 - 8)       | 38<br>(29 - 56)    | 95<br>(74 - 136)   |
| Pneumoconiosis                                      | 31<br>(22 - 45)    | 0<br>(0 - 0)     | 0<br>(0 - 0)      | 3<br>(2 - 4)       | 14<br>(9 - 21)     | 14<br>(9 - 22)     |
| Silicosis                                           | 15<br>(11 - 23)    | 0<br>(0 - 0)     | 0<br>(0 - 0)      | 0<br>(0 - 0)       | 3<br>(2 - 5)       | 12<br>(8 - 18)     |
| Asbestosis                                          | 3<br>(2 - 4)       | 0<br>(0 - 0)     | 0<br>(0 - 0)      | 0<br>(0 - 1)       | 3<br>(2 - 4)       | 0<br>(0 - 0)       |
| Coal workers pneumoconiosis                         | 8<br>(5 - 11)      | 0<br>(0 - 0)     | 0<br>(0 - 0)      | 1<br>(1 - 2)       | 6<br>(4 - 9)       | 0<br>(0 - 1)       |
| Other pneumoconiosis                                | 5<br>(3 - 8)       | 0<br>(0 - 0)     | 0<br>(0 - 0)      | 1<br>(0 - 1)       | 2<br>(1 - 4)       | 2<br>(1 - 3)       |
| Asthma                                              | 110<br>(89 - 143)  | 1<br>(0 - 1)     | 0<br>(0 - 0)      | 9<br>(7 - 12)      | 35<br>(26 - 46)    | 65<br>(51 - 84)    |
| Interstitial lung disease and pulmonary sarcoidosis | 76<br>(54 - 128)   | 0<br>(0 - 0)     | 0<br>(0 - 0)      | 1<br>(1 - 3)       | 26<br>(18 - 45)    | 49<br>(33 - 86)    |
| Other chronic respiratory diseases                  | 12<br>(9 - 17)     | 0<br>(0 - 1)     | 0<br>(0 - 0)      | 2<br>(1 - 3)       | 3<br>(2 - 4)       | 7<br>(5 - 10)      |
| Cirrhosis                                           | 267<br>(236 - 302) | 0<br>(0 - 0)     | 0<br>(0 - 0)      | 88<br>(75 - 103)   | 141<br>(120 - 163) | 38<br>(33 - 45)    |
| Cirrhosis due to hepatitis B                        | 72<br>(29 - 111)   | 0<br>(0 - 0)     | 0<br>(0 - 0)      | 27<br>(13 - 42)    | 37<br>(13 - 58)    | 8<br>(2 - 16)      |
| Cirrhosis due to hepatitis C                        | 67<br>(22 - 125)   | 0<br>(0 - 0)     | 0<br>(0 - 0)      | 21<br>(6 - 40)     | 36<br>(10 - 67)    | 10<br>(4 - 18)     |
| Cirrhosis due to alcohol use                        | 106<br>(67 - 147)  | --               | --                | 29<br>(17 - 42)    | 59<br>(36 - 83)    | 18<br>(11 - 26)    |
| Cirrhosis due to other causes                       | 22<br>(12 - 35)    | 0<br>(0 - 0)     | 0<br>(0 - 0)      | 11<br>(6 - 17)     | 10<br>(4 - 16)     | 2<br>(1 - 3)       |
| Digestive diseases                                  | 83<br>(71 - 96)    | 0<br>(0 - 0)     | 0<br>(0 - 0)      | 23<br>(19 - 29)    | 35<br>(28 - 42)    | 24<br>(20 - 29)    |
| Peptic ulcer disease                                | 25<br>(19 - 31)    | 0<br>(0 - 0)     | 0<br>(0 - 0)      | 4<br>(3 - 6)       | 11<br>(8 - 14)     | 9<br>(7 - 12)      |
| Gastritis and duodenitis                            | 3<br>(1 - 4)       | 0<br>(0 - 0)     | 0<br>(0 - 0)      | 1<br>(0 - 1)       | 1<br>(0 - 2)       | 1<br>(1 - 2)       |
| Appendicitis                                        | 2<br>(1 - 2)       | 0<br>(0 - 0)     | 0<br>(0 - 0)      | 1<br>(0 - 1)       | 1<br>(0 - 1)       | 0<br>(0 - 1)       |
| Paralytic ileus and intestinal obstruction          | 7<br>(4 - 11)      | 0<br>(0 - 0)     | 0<br>(0 - 0)      | 1<br>(0 - 1)       | 3<br>(1 - 4)       | 3<br>(2 - 5)       |
| Inguinal, femoral, and abdominal hernia             | 1<br>(0 - 1)       | 0<br>(0 - 0)     | 0<br>(0 - 0)      | 0<br>(0 - 0)       | 0<br>(0 - 0)       | 0<br>(0 - 0)       |
| Inflammatory bowel disease                          | 1<br>(0 - 2)       | 0<br>(0 - 0)     | 0<br>(0 - 0)      | 0<br>(0 - 0)       | 0<br>(0 - 1)       | 1<br>(0 - 1)       |
| Vascular intestinal disorders                       | 0<br>(0 - 1)       | 0<br>(0 - 0)     | 0<br>(0 - 0)      | 0<br>(0 - 0)       | 0<br>(0 - 0)       | 0<br>(0 - 0)       |
| Gallbladder and biliary diseases                    | 4<br>(3 - 5)       | 0<br>(0 - 0)     | 0<br>(0 - 0)      | 1<br>(0 - 1)       | 2<br>(1 - 2)       | 2<br>(1 - 2)       |
| Pancreatitis                                        | 32<br>(25 - 43)    | 0<br>(0 - 0)     | 0<br>(0 - 0)      | 14<br>(11 - 19)    | 14<br>(10 - 19)    | 4<br>(3 - 6)       |
| Other digestive diseases                            | 9<br>(5 - 11)      | 0<br>(0 - 0)     | 0<br>(0 - 0)      | 2<br>(1 - 2)       | 4<br>(2 - 5)       | 3<br>(2 - 4)       |
| Neurological disorders                              | 137<br>(113 - 160) | 1<br>(0 - 1)     | 1<br>(1 - 1)      | 12<br>(9 - 15)     | 22<br>(18 - 27)    | 101<br>(79 - 121)  |
| Alzheimer disease and other dementias               | 107<br>(85 - 129)  | --               | --                | 0<br>(0 - 0)       | 14<br>(10 - 18)    | 94<br>(72 - 114)   |
| Parkinson disease                                   | 5<br>(4 - 6)       | --               | --                | 0<br>(0 - 0)       | 1<br>(1 - 2)       | 4<br>(3 - 5)       |
| Epilepsy                                            | 18<br>(14 - 23)    | 0<br>(0 - 1)     | 1<br>(0 - 1)      | 9<br>(7 - 12)      | 6<br>(4 - 7)       | 2<br>(1 - 3)       |
| Multiple sclerosis                                  | 0<br>(0 - 0)       | --               | --                | 0<br>(0 - 0)       | 0<br>(0 - 0)       | 0<br>(0 - 0)       |
| Other neurological disorders                        | 6<br>(3 - 8)       | 0<br>(0 - 0)     | 0<br>(0 - 1)      | 2<br>(1 - 3)       | 2<br>(1 - 2)       | 1<br>(1 - 2)       |
| Mental and substance use disorders                  | 84<br>(49 - 103)   | 0<br>(0 - 0)     | 0<br>(0 - 0)      | 39<br>(24 - 50)    | 39<br>(19 - 51)    | 5<br>(3 - 7)       |
| Schizophrenia                                       | 0<br>(0 - 1)       | --               | --                | 0<br>(0 - 0)       | 0<br>(0 - 0)       | 0<br>(0 - 0)       |
| Alcohol use disorders                               | 73<br>(37 - 90)    | --               | --                | 31<br>(17 - 41)    | 37<br>(17 - 48)    | 5<br>(2 - 7)       |
| Drug use disorders                                  | 11<br>(7 - 14)     | 0<br>(0 - 0)     | --                | 8<br>(5 - 10)      | 3<br>(2 - 4)       | 0<br>(0 - 0)       |
| Opioid use disorders                                | 7<br>(4 - 9)       | 0<br>(0 - 0)     | --                | 5<br>(3 - 7)       | 2<br>(1 - 2)       | 0<br>(0 - 0)       |
| Cocaine use disorders                               | 0<br>(0 - 0)       | 0<br>(0 - 0)     | --                | 0<br>(0 - 0)       | 0<br>(0 - 0)       | 0<br>(0 - 0)       |
| Amphetamine use disorders                           | 0<br>(0 - 0)       | 0<br>(0 - 0)     | --                | 0<br>(0 - 0)       | 0<br>(0 - 0)       | 0<br>(0 - 0)       |
| Other drug use disorders                            | 4<br>(2 - 5)       | 0<br>(0 - 0)     | --                | 3<br>(2 - 4)       | 1<br>(1 - 1)       | 0<br>(0 - 0)       |

Web Table 31- Mauritius deaths with 95% UI by age, sex, and cause in 2013

| Cause                                               | Males, All Ages          | Males, 0-4 Years | Males, 5-14 Years | Males, 15-49 Years | Males, 50-69 Years | Males, 70-80 Years |
|-----------------------------------------------------|--------------------------|------------------|-------------------|--------------------|--------------------|--------------------|
| Eating disorders                                    | 0<br>(0 - 0)             | --               | 0<br>(0 - 0)      | 0<br>(0 - 0)       | --                 | --                 |
| Anorexia nervosa                                    | 0<br>(0 - 0)             | --               | 0<br>(0 - 0)      | 0<br>(0 - 0)       | --                 | --                 |
| Diabetes, urogenital, blood, and endocrine diseases | 1,410<br>(1,243 - 1,544) | 2<br>(1 - 3)     | 2<br>(2 - 3)      | 140<br>(120 - 161) | 696<br>(604 - 781) | 569<br>(494 - 623) |
| Diabetes mellitus                                   | 883<br>(797 - 982)       | 0<br>(0 - 0)     | 0<br>(0 - 0)      | 71<br>(59 - 85)    | 443<br>(388 - 509) | 368<br>(327 - 413) |
| Acute glomerulonephritis                            | 0<br>(0 - 0)             | 0<br>(0 - 0)     | 0<br>(0 - 0)      | 0<br>(0 - 0)       | 0<br>(0 - 0)       | 0<br>(0 - 0)       |
| Chronic kidney disease                              | 494<br>(290 - 563)       | 1<br>(0 - 1)     | 1<br>(1 - 2)      | 62<br>(44 - 74)    | 241<br>(129 - 285) | 189<br>(115 - 222) |
| Chronic kidney disease due to diabetes mellitus     | 240<br>(102 - 302)       | 0<br>(0 - 0)     | 0<br>(0 - 0)      | 26<br>(12 - 35)    | 124<br>(46 - 164)  | 89<br>(36 - 115)   |
| Chronic kidney disease due to hypertension          | 76<br>(37 - 109)         | 0<br>(0 - 0)     | 0<br>(0 - 0)      | 10<br>(5 - 15)     | 33<br>(15 - 49)    | 33<br>(15 - 49)    |
| Chronic kidney disease due to glomerulonephritis    | 2<br>(1 - 2)             | 0<br>(0 - 0)     | 0<br>(0 - 0)      | 1<br>(0 - 1)       | 0<br>(0 - 1)       | 0<br>(0 - 1)       |
| Chronic kidney disease due to other causes          | 177<br>(90 - 249)        | 1<br>(0 - 1)     | 1<br>(1 - 1)      | 26<br>(14 - 36)    | 83<br>(41 - 129)   | 66<br>(30 - 97)    |
| Urinary diseases and male infertility               | 13<br>(7 - 16)           | 0<br>(0 - 0)     | 0<br>(0 - 0)      | 2<br>(1 - 3)       | 5<br>(2 - 6)       | 6<br>(3 - 8)       |
| Interstitial nephritis and urinary tract infections | 6<br>(3 - 9)             | 0<br>(0 - 0)     | 0<br>(0 - 0)      | 1<br>(0 - 1)       | 2<br>(1 - 3)       | 3<br>(1 - 4)       |
| Urolithiasis                                        | 1<br>(0 - 1)             | --               | 0<br>(0 - 0)      | 0<br>(0 - 0)       | 0<br>(0 - 0)       | 0<br>(0 - 0)       |
| Other urinary diseases                              | 6<br>(3 - 8)             | 0<br>(0 - 0)     | 0<br>(0 - 0)      | 1<br>(0 - 1)       | 2<br>(1 - 3)       | 3<br>(1 - 4)       |
| Gynecological diseases                              | --                       | --               | --                | --                 | --                 | --                 |
| Uterine fibroids                                    | --                       | --               | --                | --                 | --                 | --                 |
| Polycystic ovarian syndrome                         | --                       | --               | --                | --                 | --                 | --                 |
| Endometriosis                                       | --                       | --               | --                | --                 | --                 | --                 |
| Genital prolapse                                    | --                       | --               | --                | --                 | --                 | --                 |
| Other gynecological diseases                        | --                       | --               | --                | --                 | --                 | --                 |
| Hemoglobinopathies and hemolytic anemias            | 7<br>(4 - 11)            | 0<br>(0 - 1)     | 0<br>(0 - 1)      | 3<br>(2 - 4)       | 2<br>(1 - 4)       | 1<br>(1 - 2)       |
| Thalassemias                                        | 4<br>(2 - 5)             | 0<br>(0 - 1)     | 0<br>(0 - 1)      | 2<br>(1 - 3)       | 1<br>(0 - 1)       | 0<br>(0 - 0)       |
| Sickle cell disorders                               | 0<br>(0 - 0)             | 0<br>(0 - 0)     | 0<br>(0 - 0)      | 0<br>(0 - 0)       | 0<br>(0 - 0)       | 0<br>(0 - 0)       |
| G6PD deficiency                                     | 0<br>(0 - 0)             | 0<br>(0 - 0)     | 0<br>(0 - 0)      | 0<br>(0 - 0)       | 0<br>(0 - 0)       | 0<br>(0 - 0)       |
| Other hemoglobinopathies and hemolytic anemias      | 3<br>(2 - 5)             | 0<br>(0 - 0)     | 0<br>(0 - 0)      | 1<br>(0 - 1)       | 1<br>(1 - 2)       | 1<br>(1 - 2)       |
| Endocrine, metabolic, blood, and immune disorders   | 12<br>(9 - 19)           | 0<br>(0 - 0)     | 0<br>(0 - 0)      | 3<br>(2 - 4)       | 5<br>(3 - 8)       | 4<br>(3 - 7)       |
| Musculoskeletal disorders                           | 3<br>(2 - 5)             | --               | 0<br>(0 - 0)      | 1<br>(1 - 1)       | 1<br>(1 - 2)       | 1<br>(1 - 2)       |
| Rheumatoid arthritis                                | 0<br>(0 - 1)             | --               | 0<br>(0 - 0)      | 0<br>(0 - 0)       | 0<br>(0 - 0)       | 0<br>(0 - 0)       |
| Other musculoskeletal disorders                     | 3<br>(2 - 4)             | --               | 0<br>(0 - 0)      | 1<br>(1 - 1)       | 1<br>(1 - 2)       | 1<br>(1 - 1)       |
| Other non-communicable diseases                     | 51<br>(42 - 59)          | 29<br>(22 - 36)  | 3<br>(2 - 4)      | 7<br>(6 - 8)       | 6<br>(4 - 7)       | 7<br>(4 - 9)       |
| Congenital anomalies                                | 38<br>(31 - 45)          | 27<br>(21 - 34)  | 3<br>(2 - 3)      | 5<br>(4 - 6)       | 2<br>(1 - 2)       | 2<br>(2 - 3)       |
| Neural tube defects                                 | 1<br>(0 - 1)             | 1<br>(0 - 1)     | 0<br>(0 - 0)      | 0<br>(0 - 0)       | 0<br>(0 - 0)       | 0<br>(0 - 0)       |
| Congenital heart anomalies                          | 20<br>(16 - 24)          | 12<br>(9 - 16)   | 2<br>(1 - 2)      | 3<br>(3 - 4)       | 1<br>(1 - 1)       | 1<br>(1 - 2)       |
| Cleft lip and cleft palate                          | 0<br>(0 - 0)             | 0<br>(0 - 0)     | --                | --                 | --                 | --                 |
| Down syndrome                                       | 0<br>(0 - 0)             | 0<br>(0 - 0)     | 0<br>(0 - 0)      | 0<br>(0 - 0)       | 0<br>(0 - 0)       | 0<br>(0 - 0)       |
| Chromosomal unbalanced rearrangements               | 0<br>(0 - 0)             | 0<br>(0 - 0)     | 0<br>(0 - 0)      | 0<br>(0 - 0)       | 0<br>(0 - 0)       | 0<br>(0 - 0)       |
| Other congenital anomalies                          | 17<br>(13 - 22)          | 14<br>(10 - 19)  | 1<br>(1 - 2)      | 1<br>(1 - 2)       | 1<br>(0 - 1)       | 1<br>(0 - 1)       |
| Skin and subcutaneous diseases                      | 12<br>(6 - 14)           | 0<br>(0 - 0)     | 0<br>(0 - 0)      | 2<br>(1 - 3)       | 4<br>(2 - 6)       | 5<br>(2 - 7)       |
| Cellulitis                                          | 4<br>(2 - 5)             | 0<br>(0 - 0)     | 0<br>(0 - 0)      | 1<br>(0 - 1)       | 2<br>(1 - 2)       | 1<br>(1 - 2)       |
| Pyoderma                                            | 5<br>(3 - 6)             | 0<br>(0 - 0)     | 0<br>(0 - 0)      | 1<br>(1 - 1)       | 2<br>(1 - 2)       | 2<br>(1 - 3)       |



Web Table 31- Mauritius deaths with 95% UI by age, sex, and cause in 2013

| Cause                                           | Males, All Ages    | Males, 0-4 Years | Males, 5-14 Years | Males, 15-49 Years | Males, 50-69 Years | Males, 70-80 Years |
|-------------------------------------------------|--------------------|------------------|-------------------|--------------------|--------------------|--------------------|
| Decubitus ulcer                                 | 3<br>(1 - 4)       | 0<br>(0 - 0)     | 0<br>(0 - 0)      | 0<br>(0 - 0)       | 1<br>(0 - 1)       | 2<br>(0 - 3)       |
| Other skin and subcutaneous diseases            | 0<br>(0 - 1)       | 0<br>(0 - 0)     | 0<br>(0 - 0)      | 0<br>(0 - 0)       | 0<br>(0 - 0)       | 0<br>(0 - 0)       |
| Sudden infant death syndrome                    | 1<br>(0 - 3)       | 1<br>(0 - 3)     | --                | --                 | --                 | --                 |
| Injuries                                        | 438<br>(360 - 491) | 8<br>(5 - 11)    | 7<br>(6 - 8)      | 238<br>(201 - 266) | 134<br>(103 - 155) | 52<br>(40 - 60)    |
| Transport injuries                              | 152<br>(89 - 178)  | 1<br>(0 - 1)     | 3<br>(2 - 3)      | 78<br>(45 - 93)    | 52<br>(29 - 64)    | 19<br>(11 - 23)    |
| Road injuries                                   | 148<br>(88 - 173)  | 1<br>(0 - 1)     | 2<br>(2 - 3)      | 76<br>(45 - 91)    | 51<br>(29 - 63)    | 18<br>(11 - 22)    |
| Pedestrian road injuries                        | 27<br>(15 - 37)    | 0<br>(0 - 0)     | 1<br>(0 - 1)      | 10<br>(6 - 15)     | 12<br>(6 - 17)     | 4<br>(3 - 6)       |
| Cyclist road injuries                           | 15<br>(10 - 21)    | 0<br>(0 - 0)     | 0<br>(0 - 0)      | 7<br>(4 - 10)      | 6<br>(3 - 8)       | 2<br>(2 - 3)       |
| Motorcyclist road injuries                      | 32<br>(21 - 46)    | 0<br>(0 - 0)     | 0<br>(0 - 1)      | 19<br>(12 - 28)    | 9<br>(5 - 13)      | 4<br>(2 - 6)       |
| Motor vehicle road injuries                     | 70<br>(33 - 90)    | 0<br>(0 - 0)     | 1<br>(1 - 1)      | 39<br>(17 - 50)    | 24<br>(11 - 32)    | 7<br>(3 - 9)       |
| Other road injuries                             | 3<br>(1 - 12)      | 0<br>(0 - 0)     | 0<br>(0 - 0)      | 2<br>(1 - 6)       | 1<br>(0 - 4)       | 1<br>(0 - 2)       |
| Other transport injuries                        | 4<br>(1 - 6)       | 0<br>(0 - 0)     | 0<br>(0 - 0)      | 2<br>(0 - 3)       | 1<br>(0 - 2)       | 1<br>(0 - 1)       |
| Unintentional injuries                          | 147<br>(116 - 170) | 7<br>(4 - 10)    | 4<br>(3 - 5)      | 65<br>(54 - 78)    | 47<br>(35 - 57)    | 25<br>(18 - 30)    |
| Falls                                           | 36<br>(26 - 44)    | 0<br>(0 - 0)     | 0<br>(0 - 1)      | 15<br>(11 - 19)    | 14<br>(9 - 18)     | 6<br>(5 - 8)       |
| Drowning                                        | 43<br>(29 - 65)    | 1<br>(0 - 1)     | 2<br>(1 - 2)      | 26<br>(18 - 39)    | 11<br>(6 - 17)     | 5<br>(3 - 7)       |
| Fire, heat, and hot substances                  | 16<br>(13 - 22)    | 1<br>(0 - 1)     | 0<br>(0 - 1)      | 7<br>(5 - 10)      | 5<br>(3 - 6)       | 3<br>(2 - 4)       |
| Poisonings                                      | 2<br>(1 - 2)       | 0<br>(0 - 0)     | 0<br>(0 - 0)      | 1<br>(1 - 1)       | 1<br>(0 - 1)       | 0<br>(0 - 0)       |
| Exposure to mechanical forces                   | 3<br>(2 - 5)       | 0<br>(0 - 0)     | 0<br>(0 - 0)      | 2<br>(1 - 3)       | 1<br>(0 - 1)       | 0<br>(0 - 0)       |
| Unintentional firearm injuries                  | 0<br>(0 - 1)       | 0<br>(0 - 0)     | 0<br>(0 - 0)      | 0<br>(0 - 0)       | 0<br>(0 - 0)       | 0<br>(0 - 0)       |
| Unintentional suffocation                       | 0<br>(0 - 0)       | 0<br>(0 - 0)     | 0<br>(0 - 0)      | 0<br>(0 - 0)       | 0<br>(0 - 0)       | 0<br>(0 - 0)       |
| Other exposure to mechanical forces             | 2<br>(1 - 4)       | 0<br>(0 - 0)     | 0<br>(0 - 0)      | 1<br>(1 - 2)       | 0<br>(0 - 1)       | 0<br>(0 - 0)       |
| Adverse effects of medical treatment            | 23<br>(12 - 31)    | 1<br>(0 - 1)     | 0<br>(0 - 0)      | 5<br>(3 - 7)       | 10<br>(5 - 14)     | 7<br>(3 - 10)      |
| Animal contact                                  | 0<br>(0 - 0)       | 0<br>(0 - 0)     | 0<br>(0 - 0)      | 0<br>(0 - 0)       | 0<br>(0 - 0)       | 0<br>(0 - 0)       |
| Venomous animal contact                         | 0<br>(0 - 0)       | 0<br>(0 - 0)     | 0<br>(0 - 0)      | 0<br>(0 - 0)       | 0<br>(0 - 0)       | 0<br>(0 - 0)       |
| Non-venomous animal contact                     | 0<br>(0 - 0)       | 0<br>(0 - 0)     | 0<br>(0 - 0)      | 0<br>(0 - 0)       | 0<br>(0 - 0)       | 0<br>(0 - 0)       |
| Foreign body                                    | 19<br>(8 - 26)     | 4<br>(2 - 7)     | 1<br>(0 - 1)      | 6<br>(3 - 9)       | 5<br>(2 - 7)       | 2<br>(1 - 4)       |
| Pulmonary aspiration and foreign body in airway | 19<br>(8 - 25)     | 4<br>(2 - 7)     | 1<br>(0 - 1)      | 6<br>(3 - 9)       | 5<br>(2 - 7)       | 2<br>(1 - 4)       |
| Foreign body in other body part                 | 0<br>(0 - 0)       | 0<br>(0 - 0)     | 0<br>(0 - 0)      | 0<br>(0 - 0)       | 0<br>(0 - 0)       | 0<br>(0 - 0)       |
| Other unintentional injuries                    | 5<br>(4 - 7)       | 0<br>(0 - 0)     | 0<br>(0 - 0)      | 3<br>(2 - 4)       | 1<br>(1 - 2)       | 1<br>(1 - 1)       |
| Self-harm and interpersonal violence            | 131<br>(112 - 168) | 0<br>(0 - 0)     | 1<br>(0 - 1)      | 92<br>(77 - 119)   | 31<br>(25 - 41)    | 8<br>(6 - 10)      |
| Self-harm                                       | 100<br>(85 - 136)  | --               | 0<br>(0 - 1)      | 69<br>(58 - 97)    | 24<br>(19 - 32)    | 6<br>(5 - 8)       |
| Interpersonal violence                          | 31<br>(19 - 44)    | 0<br>(0 - 0)     | 0<br>(0 - 1)      | 23<br>(13 - 31)    | 7<br>(4 - 11)      | 1<br>(1 - 2)       |
| Assault by firearm                              | 8<br>(2 - 14)      | 0<br>(0 - 0)     | 0<br>(0 - 0)      | 6<br>(1 - 11)      | 2<br>(0 - 3)       | 0<br>(0 - 0)       |
| Assault by sharp object                         | 8<br>(4 - 13)      | 0<br>(0 - 0)     | 0<br>(0 - 0)      | 6<br>(3 - 10)      | 2<br>(1 - 3)       | 0<br>(0 - 0)       |
| Assault by other means                          | 15<br>(9 - 27)     | 0<br>(0 - 0)     | 0<br>(0 - 0)      | 10<br>(6 - 19)     | 3<br>(2 - 7)       | 1<br>(0 - 2)       |
| Forces of nature, war, and legal intervention   | 7<br>(3 - 18)      | 0<br>(0 - 0)     | 0<br>(0 - 0)      | 3<br>(1 - 7)       | 4<br>(2 - 9)       | 1<br>(0 - 2)       |
| Exposure to forces of nature                    | 7<br>(3 - 18)      | 0<br>(0 - 0)     | 0<br>(0 - 0)      | 3<br>(1 - 7)       | 4<br>(2 - 9)       | 1<br>(0 - 2)       |

Web Table 31- Mauritius deaths with 95% UI by age, sex, and cause in 2013

| Cause                                                             | Females, All Ages        | Females, 0-4 Years | Females, 5-14 Years | Females, 15-49 Years | Females, 50-69 Years     | Females, 70-80 Years     |
|-------------------------------------------------------------------|--------------------------|--------------------|---------------------|----------------------|--------------------------|--------------------------|
| All causes                                                        | 4,374<br>(3,996 - 4,749) | 88<br>(75 - 102)   | 17<br>(16 - 19)     | 354<br>(314 - 399)   | 1,281<br>(1,146 - 1,423) | 2,633<br>(2,430 - 2,823) |
| Communicable, maternal, neonatal, and nutritional diseases        | 268<br>(230 - 319)       | 51<br>(41 - 63)    | 4<br>(2 - 6)        | 27<br>(23 - 31)      | 33<br>(26 - 40)          | 153<br>(120 - 200)       |
| HIV/AIDS and tuberculosis                                         | 7<br>(6 - 9)             | 0<br>(0 - 0)       | 0<br>(0 - 0)        | 4<br>(3 - 5)         | 2<br>(1 - 2)             | 1<br>(1 - 1)             |
| Tuberculosis                                                      | 2<br>(2 - 3)             | 0<br>(0 - 0)       | 0<br>(0 - 0)        | 1<br>(0 - 1)         | 1<br>(1 - 1)             | 1<br>(1 - 1)             |
| HIV/AIDS                                                          | 5<br>(3 - 6)             | 0<br>(0 - 0)       | 0<br>(0 - 0)        | 4<br>(3 - 5)         | 1<br>(0 - 1)             | 0<br>(0 - 0)             |
| HIV/AIDS resulting in mycobacterial infection                     | 0<br>(0 - 0)             | 0<br>(0 - 0)       | 0<br>(0 - 0)        | 0<br>(0 - 0)         | 0<br>(0 - 0)             | 0<br>(0 - 0)             |
| HIV/AIDS resulting in other diseases                              | 4<br>(3 - 6)             | 0<br>(0 - 0)       | 0<br>(0 - 0)        | 3<br>(3 - 5)         | 1<br>(0 - 1)             | 0<br>(0 - 0)             |
| Diarrhea, lower respiratory, and other common infectious diseases | 179<br>(144 - 232)       | 12<br>(8 - 21)     | 3<br>(2 - 6)        | 12<br>(9 - 15)       | 25<br>(18 - 31)          | 127<br>(96 - 175)        |
| Diarrheal diseases                                                | 15<br>(11 - 20)          | 2<br>(1 - 3)       | 0<br>(0 - 0)        | 1<br>(1 - 1)         | 3<br>(2 - 4)             | 9<br>(6 - 14)            |
| Intestinal infectious diseases                                    | 6<br>(3 - 13)            | 2<br>(1 - 4)       | 2<br>(0 - 3)        | 2<br>(1 - 5)         | 1<br>(0 - 2)             | 0<br>(0 - 1)             |
| Typhoid fever                                                     | 5<br>(2 - 10)            | 1<br>(0 - 3)       | 1<br>(0 - 2)        | 2<br>(1 - 4)         | 1<br>(0 - 2)             | 0<br>(0 - 0)             |
| Paratyphoid fever                                                 | 1<br>(0 - 3)             | 0<br>(0 - 1)       | 0<br>(0 - 1)        | 0<br>(0 - 1)         | 0<br>(0 - 0)             | 0<br>(0 - 0)             |
| Other intestinal infectious diseases                              | 0<br>(0 - 0)             | 0<br>(0 - 0)       | 0<br>(0 - 0)        | 0<br>(0 - 0)         | 0<br>(0 - 0)             | 0<br>(0 - 0)             |
| Lower respiratory infections                                      | 148<br>(114 - 196)       | 4<br>(3 - 6)       | 1<br>(0 - 1)        | 7<br>(5 - 9)         | 20<br>(14 - 26)          | 116<br>(86 - 162)        |
| Upper respiratory infections                                      | 0<br>(0 - 0)             | 0<br>(0 - 0)       | 0<br>(0 - 0)        | 0<br>(0 - 0)         | 0<br>(0 - 0)             | 0<br>(0 - 0)             |
| Otitis media                                                      | 0<br>(0 - 0)             | 0<br>(0 - 0)       | 0<br>(0 - 0)        | 0<br>(0 - 0)         | 0<br>(0 - 0)             | 0<br>(0 - 0)             |
| Meningitis                                                        | 3<br>(3 - 4)             | 1<br>(0 - 1)       | 0<br>(0 - 0)        | 1<br>(1 - 1)         | 1<br>(1 - 1)             | 1<br>(1 - 1)             |
| Pneumococcal meningitis                                           | 1<br>(1 - 1)             | 0<br>(0 - 0)       | 0<br>(0 - 0)        | 0<br>(0 - 0)         | 0<br>(0 - 0)             | 0<br>(0 - 1)             |
| H influenzae type B meningitis                                    | 1<br>(0 - 1)             | 0<br>(0 - 0)       | 0<br>(0 - 0)        | 0<br>(0 - 0)         | 0<br>(0 - 0)             | 0<br>(0 - 0)             |
| Meningococcal meningitis                                          | 0<br>(0 - 1)             | 0<br>(0 - 0)       | 0<br>(0 - 0)        | 0<br>(0 - 0)         | 0<br>(0 - 0)             | 0<br>(0 - 0)             |
| Other meningitis                                                  | 1<br>(1 - 2)             | 0<br>(0 - 0)       | 0<br>(0 - 0)        | 0<br>(0 - 0)         | 0<br>(0 - 0)             | 0<br>(0 - 1)             |
| Encephalitis                                                      | 3<br>(2 - 3)             | 0<br>(0 - 0)       | 0<br>(0 - 0)        | 1<br>(1 - 1)         | 1<br>(0 - 1)             | 0<br>(0 - 1)             |
| Diphtheria                                                        | 0<br>(0 - 0)             | 0<br>(0 - 0)       | 0<br>(0 - 0)        | 0<br>(0 - 0)         | 0<br>(0 - 0)             | --                       |
| Whooping cough                                                    | 1<br>(0 - 3)             | 1<br>(0 - 3)       | 0<br>(0 - 0)        | 0<br>(0 - 0)         | 0<br>(0 - 0)             | --                       |
| Tetanus                                                           | 0<br>(0 - 0)             | 0<br>(0 - 0)       | 0<br>(0 - 0)        | 0<br>(0 - 0)         | 0<br>(0 - 0)             | 0<br>(0 - 0)             |
| Measles                                                           | 3<br>(0 - 19)            | 3<br>(0 - 15)      | 0<br>(0 - 3)        | 0<br>(0 - 1)         | 0<br>(0 - 0)             | --                       |
| Varicella and herpes zoster                                       | 0<br>(0 - 1)             | 0<br>(0 - 0)       | 0<br>(0 - 0)        | 0<br>(0 - 0)         | 0<br>(0 - 0)             | 0<br>(0 - 1)             |
| Neglected tropical diseases and malaria                           | 3<br>(2 - 4)             | 0<br>(0 - 0)       | 0<br>(0 - 0)        | 1<br>(0 - 1)         | 1<br>(1 - 1)             | 1<br>(1 - 2)             |
| Malaria                                                           | 0<br>(0 - 0)             | 0<br>(0 - 0)       | 0<br>(0 - 0)        | 0<br>(0 - 0)         | 0<br>(0 - 0)             | 0<br>(0 - 0)             |
| Leishmaniasis                                                     | 0<br>(0 - 0)             | 0<br>(0 - 0)       | 0<br>(0 - 0)        | 0<br>(0 - 0)         | 0<br>(0 - 0)             | 0<br>(0 - 0)             |
| Visceral leishmaniasis                                            | 0<br>(0 - 0)             | 0<br>(0 - 0)       | 0<br>(0 - 0)        | 0<br>(0 - 0)         | 0<br>(0 - 0)             | 0<br>(0 - 0)             |
| Schistosomiasis                                                   | 1<br>(1 - 2)             | 0<br>(0 - 0)       | 0<br>(0 - 0)        | 0<br>(0 - 0)         | 1<br>(0 - 1)             | 1<br>(0 - 1)             |
| Cysticercosis                                                     | 0<br>(0 - 0)             | 0<br>(0 - 0)       | 0<br>(0 - 0)        | 0<br>(0 - 0)         | 0<br>(0 - 0)             | 0<br>(0 - 0)             |
| Cystic echinococcosis                                             | 0<br>(0 - 0)             | 0<br>(0 - 0)       | 0<br>(0 - 0)        | 0<br>(0 - 0)         | 0<br>(0 - 0)             | 0<br>(0 - 0)             |
| Dengue                                                            | 1<br>(0 - 1)             | 0<br>(0 - 0)       | 0<br>(0 - 0)        | 0<br>(0 - 0)         | 0<br>(0 - 0)             | 0<br>(0 - 1)             |
| Rabies                                                            | 0<br>(0 - 0)             | 0<br>(0 - 0)       | 0<br>(0 - 0)        | 0<br>(0 - 0)         | 0<br>(0 - 0)             | 0<br>(0 - 0)             |
| Intestinal nematode infections                                    | 0<br>(0 - 0)             | 0<br>(0 - 0)       | 0<br>(0 - 0)        | 0<br>(0 - 0)         | 0<br>(0 - 0)             | 0<br>(0 - 0)             |
| Ascariasis                                                        | 0<br>(0 - 0)             | 0<br>(0 - 0)       | 0<br>(0 - 0)        | 0<br>(0 - 0)         | 0<br>(0 - 0)             | 0<br>(0 - 0)             |
| Other neglected tropical diseases                                 | 0<br>(0 - 0)             | 0<br>(0 - 0)       | 0<br>(0 - 0)        | 0<br>(0 - 0)         | 0<br>(0 - 0)             | 0<br>(0 - 0)             |
| Maternal disorders                                                | 6<br>(5 - 8)             | --                 | 0<br>(0 - 0)        | 6<br>(5 - 8)         | --                       | --                       |

Web Table 31- Mauritius deaths with 95% UI by age, sex, and cause in 2013

| Cause                                                            | Females, All Ages        | Females, 0-4 Years | Females, 5-14 Years | Females, 15-49 Years | Females, 50-69 Years     | Females, 70-80 Years     |
|------------------------------------------------------------------|--------------------------|--------------------|---------------------|----------------------|--------------------------|--------------------------|
| Maternal hemorrhage                                              | 1<br>(0 - 1)             | --                 | 0<br>(0 - 0)        | 1<br>(0 - 1)         | --                       | --                       |
| Maternal sepsis and other maternal infections                    | 1<br>(1 - 1)             | --                 | 0<br>(0 - 0)        | 1<br>(1 - 1)         | --                       | --                       |
| Maternal hypertensive disorders                                  | 1<br>(0 - 1)             | --                 | 0<br>(0 - 0)        | 1<br>(0 - 1)         | --                       | --                       |
| Maternal obstructed labor                                        | 0<br>(0 - 1)             | --                 | 0<br>(0 - 0)        | 0<br>(0 - 1)         | --                       | --                       |
| Maternal abortive outcome                                        | 1<br>(1 - 2)             | --                 | 0<br>(0 - 0)        | 1<br>(1 - 2)         | --                       | --                       |
| Indirect maternal deaths                                         | 1<br>(1 - 1)             | --                 | 0<br>(0 - 0)        | 1<br>(1 - 1)         | --                       | --                       |
| Late maternal deaths                                             | 1<br>(0 - 1)             | --                 | 0<br>(0 - 0)        | 1<br>(0 - 1)         | --                       | --                       |
| Maternal deaths aggravated by HIV/AIDS                           | 0<br>(0 - 0)             | --                 | --                  | 0<br>(0 - 0)         | --                       | --                       |
| Other maternal disorders                                         | 1<br>(1 - 2)             | --                 | 0<br>(0 - 0)        | 1<br>(1 - 2)         | --                       | --                       |
| Neonatal disorders                                               | 38<br>(30 - 47)          | 38<br>(30 - 47)    | --                  | --                   | --                       | --                       |
| Neonatal preterm birth complications                             | 23<br>(16 - 30)          | 23<br>(16 - 30)    | --                  | --                   | --                       | --                       |
| Neonatal encephalopathy due to birth asphyxia and trauma         | 7<br>(4 - 12)            | 7<br>(4 - 12)      | --                  | --                   | --                       | --                       |
| Neonatal sepsis and other neonatal infections                    | 4<br>(2 - 8)             | 4<br>(2 - 8)       | --                  | --                   | --                       | --                       |
| Hemolytic disease and other neonatal jaundice                    | 0<br>(0 - 0)             | 0<br>(0 - 0)       | --                  | --                   | --                       | --                       |
| Other neonatal disorders                                         | 5<br>(2 - 7)             | 5<br>(2 - 7)       | --                  | --                   | --                       | --                       |
| Nutritional deficiencies                                         | 29<br>(21 - 36)          | 1<br>(0 - 1)       | 0<br>(0 - 0)        | 2<br>(2 - 3)         | 4<br>(3 - 5)             | 22<br>(15 - 29)          |
| Protein-energy malnutrition                                      | 12<br>(6 - 20)           | 0<br>(0 - 1)       | 0<br>(0 - 0)        | 0<br>(0 - 1)         | 1<br>(1 - 3)             | 10<br>(4 - 16)           |
| Iodine deficiency                                                | 1<br>(0 - 3)             | 0<br>(0 - 0)       | 0<br>(0 - 0)        | 0<br>(0 - 0)         | 0<br>(0 - 1)             | 0<br>(0 - 2)             |
| Iron-deficiency anemia                                           | 16<br>(8 - 23)           | 0<br>(0 - 0)       | 0<br>(0 - 0)        | 2<br>(1 - 2)         | 3<br>(1 - 4)             | 12<br>(5 - 18)           |
| Other nutritional deficiencies                                   | 0<br>(0 - 0)             | 0<br>(0 - 0)       | 0<br>(0 - 0)        | 0<br>(0 - 0)         | 0<br>(0 - 0)             | 0<br>(0 - 0)             |
| Other communicable, maternal, neonatal, and nutritional diseases | 6<br>(4 - 7)             | 0<br>(0 - 1)       | 0<br>(0 - 0)        | 1<br>(1 - 2)         | 2<br>(1 - 2)             | 2<br>(1 - 3)             |
| Sexually transmitted diseases excluding HIV                      | 1<br>(0 - 1)             | 0<br>(0 - 1)       | 0<br>(0 - 0)        | 0<br>(0 - 0)         | 0<br>(0 - 0)             | 0<br>(0 - 0)             |
| Syphilis                                                         | 1<br>(0 - 1)             | 0<br>(0 - 1)       | 0<br>(0 - 0)        | 0<br>(0 - 0)         | 0<br>(0 - 0)             | 0<br>(0 - 0)             |
| Chlamydial infection                                             | 0<br>(0 - 0)             | --                 | 0<br>(0 - 0)        | 0<br>(0 - 0)         | 0<br>(0 - 0)             | 0<br>(0 - 0)             |
| Gonococcal infection                                             | 0<br>(0 - 0)             | --                 | 0<br>(0 - 0)        | 0<br>(0 - 0)         | 0<br>(0 - 0)             | 0<br>(0 - 0)             |
| Other sexually transmitted diseases                              | 0<br>(0 - 0)             | --                 | 0<br>(0 - 0)        | 0<br>(0 - 0)         | 0<br>(0 - 0)             | 0<br>(0 - 0)             |
| Hepatitis                                                        | 2<br>(1 - 2)             | 0<br>(0 - 0)       | 0<br>(0 - 0)        | 0<br>(0 - 1)         | 1<br>(0 - 1)             | 0<br>(0 - 1)             |
| Acute hepatitis A                                                | 0<br>(0 - 0)             | 0<br>(0 - 0)       | 0<br>(0 - 0)        | 0<br>(0 - 0)         | 0<br>(0 - 0)             | 0<br>(0 - 0)             |
| Acute hepatitis B                                                | 1<br>(1 - 1)             | 0<br>(0 - 0)       | 0<br>(0 - 0)        | 0<br>(0 - 0)         | 0<br>(0 - 1)             | 0<br>(0 - 1)             |
| Acute hepatitis C                                                | 0<br>(0 - 0)             | --                 | 0<br>(0 - 0)        | 0<br>(0 - 0)         | 0<br>(0 - 0)             | 0<br>(0 - 0)             |
| Acute hepatitis E                                                | 0<br>(0 - 1)             | 0<br>(0 - 0)       | 0<br>(0 - 0)        | 0<br>(0 - 0)         | 0<br>(0 - 0)             | 0<br>(0 - 0)             |
| Other infectious diseases                                        | 4<br>(2 - 4)             | 0<br>(0 - 0)       | 0<br>(0 - 0)        | 1<br>(1 - 1)         | 1<br>(1 - 1)             | 1<br>(1 - 2)             |
| Non-communicable diseases                                        | 3,971<br>(3,634 - 4,321) | 31<br>(23 - 38)    | 10<br>(8 - 11)      | 276<br>(244 - 313)   | 1,214<br>(1,088 - 1,350) | 2,440<br>(2,250 - 2,622) |
| Neoplasms                                                        | 552<br>(463 - 623)       | 2<br>(1 - 2)       | 3<br>(2 - 4)        | 85<br>(72 - 97)      | 251<br>(205 - 289)       | 212<br>(176 - 242)       |
| Esophageal cancer                                                | 12<br>(9 - 15)           | --                 | --                  | 1<br>(1 - 1)         | 5<br>(3 - 6)             | 6<br>(4 - 8)             |
| Stomach cancer                                                   | 38<br>(31 - 47)          | --                 | --                  | 3<br>(3 - 4)         | 14<br>(11 - 18)          | 21<br>(16 - 26)          |
| Liver cancer                                                     | 25<br>(20 - 30)          | --                 | 0<br>(0 - 0)        | 2<br>(2 - 3)         | 10<br>(8 - 13)           | 12<br>(9 - 16)           |
| Liver cancer due to hepatitis B                                  | 7<br>(3 - 11)            | --                 | 0<br>(0 - 0)        | 1<br>(0 - 1)         | 3<br>(1 - 6)             | 3<br>(1 - 5)             |
| Liver cancer due to hepatitis C                                  | 12<br>(6 - 18)           | --                 | 0<br>(0 - 0)        | 1<br>(0 - 1)         | 5<br>(2 - 7)             | 7<br>(4 - 10)            |
| Liver cancer due to alcohol use                                  | 1<br>(1 - 2)             | --                 | --                  | 0<br>(0 - 0)         | 0<br>(0 - 1)             | 1<br>(0 - 1)             |

Web Table 31- Mauritius deaths with 95% UI by age, sex, and cause in 2013

| Cause                                         | Females, All Ages        | Females, 0-4 Years | Females, 5-14 Years | Females, 15-49 Years | Females, 50-69 Years | Females, 70-80 Years     |
|-----------------------------------------------|--------------------------|--------------------|---------------------|----------------------|----------------------|--------------------------|
| Liver cancer due to other causes              | 4<br>(2 - 7)             | --                 | 0<br>(0 - 0)        | 0<br>(0 - 1)         | 2<br>(1 - 3)         | 2<br>(1 - 3)             |
| Larynx cancer                                 | 3<br>(1 - 5)             | --                 | --                  | 0<br>(0 - 1)         | 1<br>(1 - 2)         | 1<br>(1 - 2)             |
| Tracheal, bronchus and lung cancer            | 47<br>(39 - 55)          | --                 | --                  | 5<br>(4 - 6)         | 22<br>(17 - 27)      | 20<br>(15 - 25)          |
| Breast cancer                                 | 129<br>(103 - 151)       | --                 | --                  | 30<br>(23 - 37)      | 67<br>(51 - 80)      | 32<br>(25 - 40)          |
| Cervical cancer                               | 47<br>(36 - 62)          | --                 | --                  | 9<br>(7 - 12)        | 23<br>(17 - 31)      | 15<br>(11 - 19)          |
| Uterine cancer                                | 19<br>(13 - 28)          | --                 | --                  | 1<br>(1 - 1)         | 9<br>(6 - 13)        | 9<br>(6 - 14)            |
| Prostate cancer                               | --                       | --                 | --                  | --                   | --                   | --                       |
| Colon and rectum cancer                       | 67<br>(55 - 79)          | --                 | --                  | 5<br>(4 - 6)         | 26<br>(21 - 32)      | 35<br>(27 - 43)          |
| Lip and oral cavity cancer                    | 8<br>(5 - 11)            | --                 | --                  | 1<br>(1 - 1)         | 3<br>(2 - 4)         | 4<br>(3 - 6)             |
| Nasopharynx cancer                            | 1<br>(1 - 2)             | --                 | 0<br>(0 - 0)        | 0<br>(0 - 1)         | 1<br>(0 - 1)         | 0<br>(0 - 1)             |
| Other pharynx cancer                          | 2<br>(1 - 2)             | --                 | --                  | 0<br>(0 - 0)         | 1<br>(1 - 1)         | 1<br>(1 - 1)             |
| Gallbladder and biliary tract cancer          | 12<br>(8 - 17)           | --                 | --                  | 1<br>(0 - 1)         | 5<br>(3 - 8)         | 6<br>(4 - 9)             |
| Pancreatic cancer                             | 26<br>(21 - 31)          | --                 | --                  | 2<br>(2 - 3)         | 12<br>(9 - 14)       | 12<br>(10 - 16)          |
| Malignant skin melanoma                       | 2<br>(2 - 3)             | --                 | --                  | 1<br>(0 - 1)         | 1<br>(1 - 1)         | 1<br>(1 - 1)             |
| Non-melanoma skin cancer                      | 1<br>(0 - 1)             | --                 | --                  | 0<br>(0 - 0)         | 0<br>(0 - 0)         | 0<br>(0 - 1)             |
| Ovarian cancer                                | 31<br>(26 - 38)          | --                 | --                  | 6<br>(5 - 8)         | 18<br>(14 - 22)      | 7<br>(6 - 9)             |
| Testicular cancer                             | --                       | --                 | --                  | --                   | --                   | --                       |
| Kidney cancer                                 | 6<br>(5 - 7)             | 0<br>(0 - 0)       | 0<br>(0 - 0)        | 1<br>(0 - 1)         | 3<br>(2 - 3)         | 3<br>(2 - 3)             |
| Bladder cancer                                | 6<br>(4 - 10)            | --                 | --                  | 0<br>(0 - 1)         | 2<br>(2 - 4)         | 3<br>(2 - 6)             |
| Brain and nervous system cancer               | 7<br>(6 - 10)            | 0<br>(0 - 0)       | 0<br>(0 - 0)        | 2<br>(2 - 3)         | 3<br>(2 - 4)         | 2<br>(1 - 2)             |
| Thyroid cancer                                | 3<br>(2 - 4)             | --                 | 0<br>(0 - 0)        | 0<br>(0 - 0)         | 1<br>(1 - 2)         | 2<br>(1 - 2)             |
| Mesothelioma                                  | 0<br>(0 - 1)             | --                 | --                  | 0<br>(0 - 0)         | 0<br>(0 - 0)         | 0<br>(0 - 0)             |
| Hodgkin lymphoma                              | 1<br>(1 - 1)             | 0<br>(0 - 0)       | 0<br>(0 - 0)        | 0<br>(0 - 0)         | 0<br>(0 - 0)         | 0<br>(0 - 0)             |
| Non-Hodgkin lymphoma                          | 7<br>(3 - 9)             | 0<br>(0 - 0)       | 0<br>(0 - 0)        | 1<br>(1 - 2)         | 3<br>(1 - 4)         | 2<br>(1 - 4)             |
| Multiple myeloma                              | 3<br>(1 - 4)             | --                 | --                  | 0<br>(0 - 0)         | 1<br>(1 - 2)         | 1<br>(0 - 1)             |
| Leukemia                                      | 16<br>(14 - 19)          | 1<br>(0 - 1)       | 1<br>(1 - 2)        | 5<br>(4 - 6)         | 5<br>(4 - 7)         | 4<br>(3 - 5)             |
| Other neoplasms                               | 32<br>(17 - 42)          | 1<br>(0 - 1)       | 1<br>(1 - 2)        | 6<br>(4 - 8)         | 12<br>(6 - 16)       | 12<br>(6 - 17)           |
| Cardiovascular diseases                       | 1,646<br>(1,425 - 2,083) | 1<br>(1 - 1)       | 1<br>(1 - 2)        | 79<br>(64 - 104)     | 401<br>(324 - 568)   | 1,164<br>(1,024 - 1,415) |
| Rheumatic heart disease                       | 19<br>(9 - 25)           | 0<br>(0 - 0)       | 0<br>(0 - 1)        | 4<br>(2 - 6)         | 3<br>(2 - 4)         | 11<br>(5 - 16)           |
| Ischemic heart disease                        | 820<br>(678 - 1,163)     | 0<br>(0 - 0)       | 0<br>(0 - 0)        | 34<br>(26 - 52)      | 214<br>(166 - 338)   | 572<br>(476 - 780)       |
| Cerebrovascular disease                       | 554<br>(459 - 761)       | 0<br>(0 - 0)       | 0<br>(0 - 1)        | 24<br>(19 - 33)      | 118<br>(90 - 186)    | 411<br>(342 - 545)       |
| Ischemic stroke                               | 416<br>(336 - 553)       | 0<br>(0 - 0)       | 0<br>(0 - 0)        | 4<br>(3 - 6)         | 49<br>(32 - 76)      | 362<br>(296 - 477)       |
| Hemorrhagic stroke                            | 138<br>(101 - 227)       | 0<br>(0 - 0)       | 0<br>(0 - 0)        | 20<br>(15 - 28)      | 68<br>(48 - 116)     | 49<br>(32 - 91)          |
| Hypertensive heart disease                    | 170<br>(108 - 222)       | 0<br>(0 - 0)       | 0<br>(0 - 0)        | 6<br>(4 - 8)         | 37<br>(23 - 49)      | 127<br>(78 - 171)        |
| Cardiomyopathy and myocarditis                | 15<br>(11 - 19)          | 0<br>(0 - 0)       | 0<br>(0 - 0)        | 4<br>(3 - 5)         | 4<br>(3 - 6)         | 7<br>(4 - 9)             |
| Atrial fibrillation and flutter               | 11<br>(8 - 15)           | --                 | --                  | 0<br>(0 - 1)         | 2<br>(2 - 3)         | 8<br>(6 - 12)            |
| Aortic aneurysm                               | 3<br>(2 - 5)             | --                 | --                  | 0<br>(0 - 1)         | 1<br>(0 - 1)         | 2<br>(1 - 3)             |
| Peripheral vascular disease                   | 1<br>(1 - 2)             | --                 | --                  | 0<br>(0 - 0)         | 0<br>(0 - 0)         | 1<br>(1 - 1)             |
| Endocarditis                                  | 5<br>(3 - 7)             | 0<br>(0 - 0)       | 0<br>(0 - 0)        | 1<br>(1 - 2)         | 1<br>(1 - 2)         | 2<br>(1 - 3)             |
| Other cardiovascular and circulatory diseases | 48<br>(35 - 72)          | 0<br>(0 - 0)       | 0<br>(0 - 0)        | 5<br>(3 - 7)         | 20<br>(13 - 31)      | 23<br>(16 - 36)          |

Web Table 31- Mauritius deaths with 95% UI by age, sex, and cause in 2013

| Cause                                               | Females, All Ages  | Females, 0-4 Years | Females, 5-14 Years | Females, 15-49 Years | Females, 50-69 Years | Females, 70-80 Years |
|-----------------------------------------------------|--------------------|--------------------|---------------------|----------------------|----------------------|----------------------|
| Chronic respiratory diseases                        | 228<br>(181 - 329) | 2<br>(1 - 3)       | 1<br>(0 - 1)        | 12<br>(10 - 15)      | 48<br>(37 - 60)      | 166<br>(129 - 254)   |
| Chronic obstructive pulmonary disease               | 82<br>(53 - 118)   | 1<br>(0 - 1)       | 0<br>(0 - 0)        | 2<br>(1 - 4)         | 15<br>(10 - 22)      | 63<br>(40 - 94)      |
| Pneumoconiosis                                      | 0<br>(0 - 1)       | 0<br>(0 - 0)       | 0<br>(0 - 0)        | 0<br>(0 - 0)         | 0<br>(0 - 0)         | 0<br>(0 - 0)         |
| Silicosis                                           | 0<br>(0 - 0)       | 0<br>(0 - 0)       | 0<br>(0 - 0)        | 0<br>(0 - 0)         | 0<br>(0 - 0)         | 0<br>(0 - 0)         |
| Asbestosis                                          | 0<br>(0 - 0)       | 0<br>(0 - 0)       | 0<br>(0 - 0)        | 0<br>(0 - 0)         | 0<br>(0 - 0)         | 0<br>(0 - 0)         |
| Coal workers pneumoconiosis                         | 0<br>(0 - 0)       | 0<br>(0 - 0)       | 0<br>(0 - 0)        | 0<br>(0 - 0)         | 0<br>(0 - 0)         | 0<br>(0 - 0)         |
| Other pneumoconiosis                                | 0<br>(0 - 0)       | 0<br>(0 - 0)       | 0<br>(0 - 0)        | 0<br>(0 - 0)         | 0<br>(0 - 0)         | 0<br>(0 - 0)         |
| Asthma                                              | 77<br>(51 - 104)   | 1<br>(0 - 2)       | 0<br>(0 - 1)        | 8<br>(5 - 10)        | 20<br>(12 - 28)      | 48<br>(29 - 71)      |
| Interstitial lung disease and pulmonary sarcoidosis | 54<br>(35 - 105)   | 0<br>(0 - 0)       | 0<br>(0 - 0)        | 1<br>(0 - 2)         | 10<br>(6 - 19)       | 43<br>(27 - 89)      |
| Other chronic respiratory diseases                  | 14<br>(9 - 22)     | 0<br>(0 - 0)       | 0<br>(0 - 0)        | 1<br>(1 - 1)         | 2<br>(1 - 2)         | 12<br>(7 - 18)       |
| Cirrhosis                                           | 57<br>(47 - 68)    | 0<br>(0 - 0)       | 0<br>(0 - 0)        | 13<br>(11 - 16)      | 24<br>(19 - 30)      | 19<br>(15 - 24)      |
| Cirrhosis due to hepatitis B                        | 26<br>(15 - 39)    | 0<br>(0 - 0)       | 0<br>(0 - 0)        | 5<br>(2 - 8)         | 11<br>(6 - 17)       | 9<br>(5 - 14)        |
| Cirrhosis due to hepatitis C                        | 18<br>(7 - 30)     | 0<br>(0 - 0)       | 0<br>(0 - 0)        | 5<br>(2 - 8)         | 8<br>(2 - 14)        | 6<br>(2 - 10)        |
| Cirrhosis due to alcohol use                        | 8<br>(4 - 14)      | 0<br>(0 - 0)       | 0<br>(0 - 0)        | 1<br>(1 - 3)         | 3<br>(2 - 6)         | 3<br>(1 - 6)         |
| Cirrhosis due to other causes                       | 6<br>(3 - 9)       | 0<br>(0 - 0)       | 0<br>(0 - 0)        | 2<br>(1 - 4)         | 2<br>(1 - 3)         | 1<br>(0 - 2)         |
| Digestive diseases                                  | 44<br>(36 - 54)    | 0<br>(0 - 0)       | 0<br>(0 - 0)        | 5<br>(4 - 6)         | 12<br>(9 - 14)       | 27<br>(22 - 34)      |
| Peptic ulcer disease                                | 15<br>(11 - 21)    | 0<br>(0 - 0)       | 0<br>(0 - 0)        | 1<br>(1 - 1)         | 4<br>(3 - 5)         | 10<br>(7 - 15)       |
| Gastritis and duodenitis                            | 2<br>(1 - 3)       | 0<br>(0 - 0)       | 0<br>(0 - 0)        | 0<br>(0 - 0)         | 0<br>(0 - 1)         | 1<br>(0 - 2)         |
| Appendicitis                                        | 1<br>(1 - 2)       | 0<br>(0 - 0)       | 0<br>(0 - 0)        | 0<br>(0 - 0)         | 0<br>(0 - 1)         | 0<br>(0 - 1)         |
| Paralytic ileus and intestinal obstruction          | 9<br>(5 - 14)      | 0<br>(0 - 0)       | 0<br>(0 - 0)        | 1<br>(0 - 1)         | 2<br>(1 - 3)         | 6<br>(3 - 9)         |
| Inguinal, femoral, and abdominal hernia             | 0<br>(0 - 1)       | 0<br>(0 - 0)       | 0<br>(0 - 0)        | 0<br>(0 - 0)         | 0<br>(0 - 0)         | 0<br>(0 - 0)         |
| Inflammatory bowel disease                          | 1<br>(0 - 1)       | 0<br>(0 - 0)       | 0<br>(0 - 0)        | 0<br>(0 - 0)         | 0<br>(0 - 0)         | 0<br>(0 - 1)         |
| Vascular intestinal disorders                       | 1<br>(0 - 1)       | 0<br>(0 - 0)       | 0<br>(0 - 0)        | 0<br>(0 - 0)         | 0<br>(0 - 0)         | 0<br>(0 - 1)         |
| Gallbladder and biliary diseases                    | 5<br>(3 - 7)       | 0<br>(0 - 0)       | 0<br>(0 - 0)        | 0<br>(0 - 1)         | 1<br>(1 - 2)         | 3<br>(2 - 5)         |
| Pancreatitis                                        | 5<br>(4 - 8)       | 0<br>(0 - 0)       | 0<br>(0 - 0)        | 1<br>(1 - 2)         | 2<br>(1 - 3)         | 2<br>(1 - 3)         |
| Other digestive diseases                            | 5<br>(4 - 7)       | 0<br>(0 - 0)       | 0<br>(0 - 0)        | 1<br>(0 - 1)         | 1<br>(1 - 2)         | 3<br>(2 - 4)         |
| Neurological disorders                              | 160<br>(123 - 199) | 0<br>(0 - 1)       | 1<br>(0 - 1)        | 5<br>(3 - 6)         | 16<br>(12 - 21)      | 137<br>(102 - 176)   |
| Alzheimer disease and other dementias               | 141<br>(107 - 181) | 0<br>(0 - 0)       | 0<br>(0 - 0)        | 0<br>(0 - 0)         | 12<br>(8 - 16)       | 129<br>(96 - 167)    |
| Parkinson disease                                   | 6<br>(4 - 8)       | 0<br>(0 - 0)       | 0<br>(0 - 0)        | 0<br>(0 - 0)         | 1<br>(1 - 2)         | 4<br>(3 - 7)         |
| Epilepsy                                            | 8<br>(5 - 10)      | 0<br>(0 - 0)       | 0<br>(0 - 1)        | 4<br>(2 - 5)         | 2<br>(1 - 3)         | 2<br>(1 - 3)         |
| Multiple sclerosis                                  | 0<br>(0 - 0)       | 0<br>(0 - 0)       | 0<br>(0 - 0)        | 0<br>(0 - 0)         | 0<br>(0 - 0)         | 0<br>(0 - 0)         |
| Other neurological disorders                        | 4<br>(3 - 5)       | 0<br>(0 - 0)       | 0<br>(0 - 0)        | 1<br>(1 - 1)         | 1<br>(1 - 2)         | 2<br>(1 - 2)         |
| Mental and substance use disorders                  | 5<br>(2 - 6)       | 0<br>(0 - 0)       | 0<br>(0 - 0)        | 2<br>(1 - 3)         | 2<br>(1 - 3)         | 1<br>(0 - 1)         |
| Schizophrenia                                       | 1<br>(0 - 1)       | 0<br>(0 - 0)       | 0<br>(0 - 0)        | 0<br>(0 - 0)         | 0<br>(0 - 0)         | 0<br>(0 - 1)         |
| Alcohol use disorders                               | 3<br>(1 - 4)       | 0<br>(0 - 0)       | 0<br>(0 - 0)        | 1<br>(0 - 2)         | 1<br>(0 - 2)         | 0<br>(0 - 0)         |
| Drug use disorders                                  | 1<br>(1 - 1)       | 0<br>(0 - 0)       | 0<br>(0 - 0)        | 1<br>(0 - 1)         | 0<br>(0 - 0)         | 0<br>(0 - 1)         |
| Opioid use disorders                                | 1<br>(1 - 1)       | 0<br>(0 - 0)       | 0<br>(0 - 0)        | 0<br>(0 - 0)         | 0<br>(0 - 0)         | 0<br>(0 - 0)         |
| Cocaine use disorders                               | 0<br>(0 - 0)       | 0<br>(0 - 0)       | 0<br>(0 - 0)        | 0<br>(0 - 0)         | 0<br>(0 - 0)         | 0<br>(0 - 0)         |
| Amphetamine use disorders                           | 0<br>(0 - 0)       | 0<br>(0 - 0)       | 0<br>(0 - 0)        | 0<br>(0 - 0)         | 0<br>(0 - 0)         | 0<br>(0 - 0)         |
| Other drug use disorders                            | 0<br>(0 - 0)       | 0<br>(0 - 0)       | 0<br>(0 - 0)        | 0<br>(0 - 0)         | 0<br>(0 - 0)         | 0<br>(0 - 0)         |

Web Table 31- Mauritius deaths with 95% UI by age, sex, and cause in 2013

| Cause                                               | Females, All Ages      | Females, 0-4 Years | Females, 5-14 Years | Females, 15-49 Years | Females, 50-69 Years | Females, 70-80 Years |
|-----------------------------------------------------|------------------------|--------------------|---------------------|----------------------|----------------------|----------------------|
| Eating disorders                                    | 0<br>(0 - 0)           | --                 | 0<br>(0 - 0)        | 0<br>(0 - 0)         | --                   | --                   |
| Anorexia nervosa                                    | 0<br>(0 - 0)           | --                 | 0<br>(0 - 0)        | 0<br>(0 - 0)         | --                   | --                   |
| Diabetes, urogenital, blood, and endocrine diseases | 1,220<br>(744 - 1,403) | 1<br>(1 - 2)       | 1<br>(1 - 2)        | 69<br>(52 - 81)      | 452<br>(305 - 530)   | 696<br>(379 - 812)   |
| Diabetes mellitus                                   | 802<br>(463 - 924)     | 0<br>(0 - 0)       | 0<br>(0 - 0)        | 30<br>(23 - 37)      | 278<br>(200 - 329)   | 493<br>(228 - 582)   |
| Acute glomerulonephritis                            | 0<br>(0 - 0)           | 0<br>(0 - 0)       | 0<br>(0 - 0)        | 0<br>(0 - 0)         | 0<br>(0 - 0)         | 0<br>(0 - 0)         |
| Chronic kidney disease                              | 390<br>(193 - 468)     | 0<br>(0 - 1)       | 1<br>(0 - 1)        | 33<br>(21 - 41)      | 165<br>(79 - 207)    | 190<br>(90 - 236)    |
| Chronic kidney disease due to diabetes mellitus     | 199<br>(102 - 247)     | 0<br>(0 - 0)       | 0<br>(0 - 0)        | 13<br>(8 - 18)       | 89<br>(46 - 114)     | 96<br>(49 - 124)     |
| Chronic kidney disease due to hypertension          | 54<br>(24 - 87)        | 0<br>(0 - 0)       | 0<br>(0 - 0)        | 6<br>(3 - 9)         | 20<br>(9 - 35)       | 28<br>(12 - 46)      |
| Chronic kidney disease due to glomerulonephritis    | 1<br>(0 - 2)           | 0<br>(0 - 0)       | 0<br>(0 - 0)        | 0<br>(0 - 1)         | 0<br>(0 - 0)         | 0<br>(0 - 1)         |
| Chronic kidney disease due to other causes          | 136<br>(43 - 184)      | 0<br>(0 - 0)       | 0<br>(0 - 1)        | 14<br>(6 - 19)       | 56<br>(15 - 82)      | 65<br>(18 - 96)      |
| Urinary diseases and male infertility               | 9<br>(5 - 12)          | 0<br>(0 - 0)       | 0<br>(0 - 0)        | 1<br>(1 - 2)         | 3<br>(1 - 4)         | 5<br>(2 - 7)         |
| Interstitial nephritis and urinary tract infections | 7<br>(4 - 10)          | 0<br>(0 - 0)       | 0<br>(0 - 0)        | 1<br>(1 - 1)         | 2<br>(1 - 3)         | 4<br>(2 - 6)         |
| Urolithiasis                                        | 0<br>(0 - 1)           | --                 | 0<br>(0 - 0)        | 0<br>(0 - 0)         | 0<br>(0 - 0)         | 0<br>(0 - 0)         |
| Other urinary diseases                              | 1<br>(1 - 2)           | 0<br>(0 - 0)       | 0<br>(0 - 0)        | 0<br>(0 - 0)         | 1<br>(0 - 1)         | 1<br>(0 - 1)         |
| Gynecological diseases                              | 0<br>(0 - 0)           | --                 | --                  | 0<br>(0 - 0)         | 0<br>(0 - 0)         | 0<br>(0 - 0)         |
| Uterine fibroids                                    | 0<br>(0 - 0)           | --                 | --                  | 0<br>(0 - 0)         | 0<br>(0 - 0)         | 0<br>(0 - 0)         |
| Polycystic ovarian syndrome                         | 0<br>(0 - 0)           | --                 | --                  | 0<br>(0 - 0)         | 0<br>(0 - 0)         | --                   |
| Endometriosis                                       | 0<br>(0 - 0)           | --                 | --                  | 0<br>(0 - 0)         | 0<br>(0 - 0)         | --                   |
| Genital prolapse                                    | 0<br>(0 - 0)           | --                 | --                  | 0<br>(0 - 0)         | 0<br>(0 - 0)         | 0<br>(0 - 0)         |
| Other gynecological diseases                        | 0<br>(0 - 0)           | --                 | --                  | 0<br>(0 - 0)         | 0<br>(0 - 0)         | 0<br>(0 - 0)         |
| Hemoglobinopathies and hemolytic anemias            | 6<br>(4 - 9)           | 0<br>(0 - 1)       | 0<br>(0 - 1)        | 2<br>(1 - 3)         | 2<br>(1 - 3)         | 1<br>(1 - 2)         |
| Thalassemias                                        | 3<br>(2 - 4)           | 0<br>(0 - 0)       | 0<br>(0 - 1)        | 1<br>(1 - 2)         | 0<br>(0 - 1)         | 0<br>(0 - 0)         |
| Sickle cell disorders                               | 0<br>(0 - 0)           | 0<br>(0 - 0)       | 0<br>(0 - 0)        | 0<br>(0 - 0)         | 0<br>(0 - 0)         | 0<br>(0 - 0)         |
| G6PD deficiency                                     | 0<br>(0 - 0)           | 0<br>(0 - 0)       | 0<br>(0 - 0)        | 0<br>(0 - 0)         | 0<br>(0 - 0)         | 0<br>(0 - 0)         |
| Other hemoglobinopathies and hemolytic anemias      | 3<br>(2 - 5)           | 0<br>(0 - 0)       | 0<br>(0 - 0)        | 0<br>(0 - 1)         | 1<br>(1 - 2)         | 1<br>(1 - 2)         |
| Endocrine, metabolic, blood, and immune disorders   | 13<br>(10 - 20)        | 0<br>(0 - 1)       | 0<br>(0 - 0)        | 2<br>(1 - 3)         | 5<br>(3 - 7)         | 6<br>(4 - 10)        |
| Musculoskeletal disorders                           | 11<br>(8 - 18)         | --                 | 0<br>(0 - 0)        | 3<br>(2 - 6)         | 5<br>(3 - 7)         | 3<br>(2 - 6)         |
| Rheumatoid arthritis                                | 1<br>(1 - 2)           | --                 | 0<br>(0 - 0)        | 0<br>(0 - 0)         | 1<br>(0 - 1)         | 1<br>(0 - 1)         |
| Other musculoskeletal disorders                     | 10<br>(7 - 17)         | --                 | 0<br>(0 - 0)        | 3<br>(2 - 6)         | 4<br>(3 - 6)         | 3<br>(2 - 5)         |
| Other non-communicable diseases                     | 48<br>(36 - 57)        | 25<br>(18 - 31)    | 2<br>(1 - 3)        | 4<br>(3 - 5)         | 3<br>(2 - 4)         | 14<br>(7 - 19)       |
| Congenital anomalies                                | 30<br>(23 - 37)        | 22<br>(16 - 28)    | 2<br>(1 - 3)        | 3<br>(2 - 4)         | 1<br>(0 - 1)         | 3<br>(2 - 4)         |
| Neural tube defects                                 | 0<br>(0 - 0)           | 0<br>(0 - 0)       | 0<br>(0 - 0)        | 0<br>(0 - 0)         | 0<br>(0 - 0)         | 0<br>(0 - 0)         |
| Congenital heart anomalies                          | 15<br>(11 - 19)        | 10<br>(7 - 13)     | 1<br>(1 - 2)        | 2<br>(1 - 2)         | 0<br>(0 - 0)         | 2<br>(1 - 3)         |
| Cleft lip and cleft palate                          | 0<br>(0 - 0)           | 0<br>(0 - 0)       | --                  | --                   | --                   | --                   |
| Down syndrome                                       | 0<br>(0 - 1)           | 0<br>(0 - 0)       | 0<br>(0 - 0)        | 0<br>(0 - 0)         | 0<br>(0 - 0)         | 0<br>(0 - 0)         |
| Chromosomal unbalanced rearrangements               | 0<br>(0 - 0)           | 0<br>(0 - 0)       | 0<br>(0 - 0)        | 0<br>(0 - 0)         | 0<br>(0 - 0)         | 0<br>(0 - 0)         |
| Other congenital anomalies                          | 15<br>(10 - 19)        | 12<br>(8 - 16)     | 1<br>(1 - 1)        | 1<br>(1 - 1)         | 0<br>(0 - 0)         | 0<br>(0 - 1)         |
| Skin and subcutaneous diseases                      | 15<br>(7 - 21)         | 0<br>(0 - 0)       | 0<br>(0 - 0)        | 1<br>(1 - 2)         | 3<br>(1 - 4)         | 11<br>(5 - 16)       |
| Cellulitis                                          | 2<br>(1 - 3)           | 0<br>(0 - 0)       | 0<br>(0 - 0)        | 0<br>(0 - 0)         | 1<br>(0 - 1)         | 1<br>(0 - 2)         |
| Pyoderma                                            | 3<br>(2 - 4)           | 0<br>(0 - 0)       | 0<br>(0 - 0)        | 0<br>(0 - 1)         | 1<br>(1 - 1)         | 2<br>(1 - 3)         |

Web Table 31- Mauritius deaths with 95% UI by age, sex, and cause in 2013

| Cause                                           | Females, All Ages  | Females, 0-4 Years | Females, 5-14 Years | Females, 15-49 Years | Females, 50-69 Years | Females, 70-80 Years |
|-------------------------------------------------|--------------------|--------------------|---------------------|----------------------|----------------------|----------------------|
| Decubitus ulcer                                 | 10<br>(2 - 14)     | 0<br>(0 - 0)       | 0<br>(0 - 0)        | 0<br>(0 - 1)         | 1<br>(0 - 1)         | 8<br>(1 - 13)        |
| Other skin and subcutaneous diseases            | 1<br>(0 - 1)       | 0<br>(0 - 0)       | 0<br>(0 - 0)        | 0<br>(0 - 0)         | 0<br>(0 - 0)         | 0<br>(0 - 1)         |
| Sudden infant death syndrome                    | 2<br>(1 - 5)       | 2<br>(1 - 5)       | --                  | --                   | --                   | --                   |
| Injuries                                        | 135<br>(106 - 156) | 6<br>(3 - 7)       | 4<br>(3 - 5)        | 51<br>(43 - 59)      | 34<br>(24 - 42)      | 40<br>(28 - 50)      |
| Transport injuries                              | 30<br>(17 - 38)    | 1<br>(0 - 1)       | 1<br>(1 - 2)        | 7<br>(4 - 10)        | 10<br>(5 - 13)       | 11<br>(6 - 15)       |
| Road injuries                                   | 28<br>(16 - 35)    | 1<br>(0 - 1)       | 1<br>(1 - 2)        | 7<br>(4 - 9)         | 9<br>(5 - 12)        | 10<br>(6 - 13)       |
| Pedestrian road injuries                        | 9<br>(4 - 13)      | 0<br>(0 - 0)       | 0<br>(0 - 1)        | 1<br>(1 - 2)         | 3<br>(1 - 4)         | 4<br>(2 - 6)         |
| Cyclist road injuries                           | 2<br>(1 - 3)       | 0<br>(0 - 0)       | 0<br>(0 - 0)        | 1<br>(0 - 1)         | 1<br>(0 - 1)         | 1<br>(0 - 1)         |
| Motorcyclist road injuries                      | 3<br>(2 - 4)       | 0<br>(0 - 0)       | 0<br>(0 - 0)        | 1<br>(0 - 1)         | 1<br>(0 - 1)         | 1<br>(1 - 2)         |
| Motor vehicle road injuries                     | 14<br>(7 - 19)     | 0<br>(0 - 0)       | 1<br>(0 - 1)        | 4<br>(2 - 6)         | 5<br>(2 - 7)         | 4<br>(2 - 6)         |
| Other road injuries                             | 1<br>(0 - 3)       | 0<br>(0 - 0)       | 0<br>(0 - 0)        | 0<br>(0 - 1)         | 0<br>(0 - 1)         | 0<br>(0 - 1)         |
| Other transport injuries                        | 2<br>(1 - 3)       | 0<br>(0 - 0)       | 0<br>(0 - 0)        | 0<br>(0 - 1)         | 1<br>(0 - 1)         | 1<br>(0 - 2)         |
| Unintentional injuries                          | 64<br>(49 - 76)    | 5<br>(3 - 6)       | 2<br>(1 - 2)        | 20<br>(16 - 25)      | 14<br>(10 - 18)      | 23<br>(16 - 30)      |
| Falls                                           | 6<br>(5 - 9)       | 0<br>(0 - 0)       | 0<br>(0 - 0)        | 1<br>(0 - 1)         | 1<br>(1 - 2)         | 4<br>(3 - 6)         |
| Drowning                                        | 7<br>(5 - 10)      | 0<br>(0 - 1)       | 0<br>(0 - 1)        | 3<br>(2 - 4)         | 2<br>(1 - 3)         | 2<br>(1 - 2)         |
| Fire, heat, and hot substances                  | 25<br>(17 - 32)    | 1<br>(0 - 1)       | 1<br>(0 - 1)        | 11<br>(8 - 15)       | 4<br>(3 - 5)         | 9<br>(5 - 13)        |
| Poisonings                                      | 1<br>(1 - 2)       | 0<br>(0 - 0)       | 0<br>(0 - 0)        | 1<br>(0 - 1)         | 0<br>(0 - 0)         | 0<br>(0 - 1)         |
| Exposure to mechanical forces                   | 2<br>(1 - 2)       | 0<br>(0 - 0)       | 0<br>(0 - 0)        | 0<br>(0 - 1)         | 1<br>(0 - 1)         | 0<br>(0 - 1)         |
| Unintentional firearm injuries                  | 0<br>(0 - 0)       | 0<br>(0 - 0)       | 0<br>(0 - 0)        | 0<br>(0 - 0)         | 0<br>(0 - 0)         | 0<br>(0 - 0)         |
| Unintentional suffocation                       | 0<br>(0 - 0)       | 0<br>(0 - 0)       | 0<br>(0 - 0)        | 0<br>(0 - 0)         | 0<br>(0 - 0)         | 0<br>(0 - 0)         |
| Other exposure to mechanical forces             | 1<br>(1 - 2)       | 0<br>(0 - 0)       | 0<br>(0 - 0)        | 0<br>(0 - 0)         | 0<br>(0 - 1)         | 0<br>(0 - 1)         |
| Adverse effects of medical treatment            | 14<br>(7 - 20)     | 1<br>(0 - 1)       | 0<br>(0 - 0)        | 3<br>(2 - 5)         | 4<br>(2 - 6)         | 5<br>(2 - 8)         |
| Animal contact                                  | 0<br>(0 - 0)       | 0<br>(0 - 0)       | 0<br>(0 - 0)        | 0<br>(0 - 0)         | 0<br>(0 - 0)         | 0<br>(0 - 0)         |
| Venomous animal contact                         | 0<br>(0 - 0)       | 0<br>(0 - 0)       | 0<br>(0 - 0)        | 0<br>(0 - 0)         | 0<br>(0 - 0)         | 0<br>(0 - 0)         |
| Non-venomous animal contact                     | 0<br>(0 - 0)       | 0<br>(0 - 0)       | 0<br>(0 - 0)        | 0<br>(0 - 0)         | 0<br>(0 - 0)         | 0<br>(0 - 0)         |
| Foreign body                                    | 8<br>(4 - 11)      | 3<br>(1 - 4)       | 0<br>(0 - 0)        | 2<br>(1 - 2)         | 1<br>(1 - 2)         | 2<br>(1 - 3)         |
| Pulmonary aspiration and foreign body in airway | 8<br>(4 - 11)      | 3<br>(1 - 4)       | 0<br>(0 - 0)        | 1<br>(1 - 2)         | 1<br>(1 - 2)         | 2<br>(1 - 3)         |
| Foreign body in other body part                 | 0<br>(0 - 0)       | 0<br>(0 - 0)       | 0<br>(0 - 0)        | 0<br>(0 - 0)         | 0<br>(0 - 0)         | 0<br>(0 - 0)         |
| Other unintentional injuries                    | 1<br>(1 - 2)       | 0<br>(0 - 0)       | 0<br>(0 - 0)        | 0<br>(0 - 0)         | 0<br>(0 - 0)         | 0<br>(0 - 1)         |
| Self-harm and interpersonal violence            | 34<br>(28 - 43)    | 0<br>(0 - 1)       | 1<br>(1 - 1)        | 22<br>(18 - 28)      | 7<br>(5 - 9)         | 4<br>(2 - 5)         |
| Self-harm                                       | 26<br>(22 - 37)    | --                 | 1<br>(0 - 1)        | 18<br>(15 - 24)      | 5<br>(4 - 7)         | 3<br>(2 - 4)         |
| Interpersonal violence                          | 8<br>(4 - 10)      | 0<br>(0 - 1)       | 0<br>(0 - 0)        | 4<br>(2 - 6)         | 2<br>(1 - 3)         | 1<br>(0 - 2)         |
| Assault by firearm                              | 1<br>(0 - 1)       | 0<br>(0 - 0)       | 0<br>(0 - 0)        | 0<br>(0 - 1)         | 0<br>(0 - 0)         | 0<br>(0 - 0)         |
| Assault by sharp object                         | 2<br>(1 - 2)       | 0<br>(0 - 0)       | 0<br>(0 - 0)        | 1<br>(1 - 2)         | 0<br>(0 - 1)         | 0<br>(0 - 0)         |
| Assault by other means                          | 6<br>(3 - 8)       | 0<br>(0 - 0)       | 0<br>(0 - 0)        | 3<br>(1 - 5)         | 1<br>(1 - 2)         | 1<br>(0 - 1)         |
| Forces of nature, war, and legal intervention   | 6<br>(3 - 14)      | 0<br>(0 - 0)       | 0<br>(0 - 0)        | 1<br>(1 - 3)         | 3<br>(1 - 7)         | 2<br>(1 - 4)         |
| Exposure to forces of nature                    | 6<br>(3 - 14)      | 0<br>(0 - 0)       | 0<br>(0 - 0)        | 1<br>(1 - 3)         | 3<br>(1 - 7)         | 2<br>(1 - 4)         |

Web Table 31- Mexico deaths with 95% UI by age, sex, and cause in 2013

| Cause                                                             | Both Sexes, All Ages           | Both Sexes, 0-4 Years       | Both Sexes, 5-14 Years   | Both Sexes, 15-49 Years        | Both Sexes, 50-69 Years        | Both Sexes, 70-80 Years        |
|-------------------------------------------------------------------|--------------------------------|-----------------------------|--------------------------|--------------------------------|--------------------------------|--------------------------------|
| All causes                                                        | 656,054<br>(646,411 - 665,152) | 38,097<br>(34,665 - 42,047) | 6,763<br>(6,377 - 7,164) | 117,775<br>(115,390 - 120,104) | 178,369<br>(175,190 - 181,569) | 315,051<br>(311,997 - 318,252) |
| Communicable, maternal, neonatal, and nutritional diseases        | 68,624<br>(65,265 - 74,100)    | 21,637<br>(19,476 - 23,924) | 1,120<br>(955 - 1,339)   | 10,353<br>(9,606 - 11,506)     | 8,931<br>(8,365 - 9,810)       | 26,583<br>(24,951 - 30,780)    |
| HIV/AIDS and tuberculosis                                         | 6,398<br>(5,509 - 8,050)       | 27<br>(20 - 38)             | 24<br>(19 - 31)          | 3,620<br>(3,039 - 4,756)       | 1,737<br>(1,400 - 2,304)       | 991<br>(881 - 1,402)           |
| Tuberculosis                                                      | 2,808<br>(2,607 - 3,614)       | 22<br>(17 - 28)             | 20<br>(18 - 26)          | 893<br>(824 - 1,056)           | 987<br>(899 - 1,283)           | 886<br>(797 - 1,283)           |
| HIV/AIDS                                                          | 3,590<br>(2,763 - 5,024)       | 5<br>(1 - 14)               | 3<br>(0 - 8)             | 2,726<br>(2,150 - 3,887)       | 751<br>(433 - 1,236)           | 105<br>(52 - 179)              |
| HIV/AIDS resulting in mycobacterial infection                     | 217<br>(151 - 320)             | 0<br>(0 - 1)                | 0<br>(0 - 0)             | 162<br>(116 - 240)             | 47<br>(26 - 80)                | 7<br>(3 - 13)                  |
| HIV/AIDS resulting in other diseases                              | 3,373<br>(2,607 - 4,731)       | 5<br>(1 - 13)               | 3<br>(0 - 8)             | 2,564<br>(2,023 - 3,655)       | 703<br>(406 - 1,166)           | 98<br>(48 - 167)               |
| Diarrhea, lower respiratory, and other common infectious diseases | 31,710<br>(29,731 - 34,342)    | 6,728<br>(5,881 - 7,601)    | 849<br>(687 - 1,075)     | 3,923<br>(3,374 - 4,302)       | 5,006<br>(4,481 - 5,320)       | 15,204<br>(14,087 - 17,896)    |
| Diarrheal diseases                                                | 4,781<br>(4,445 - 5,117)       | 1,419<br>(1,209 - 1,654)    | 120<br>(102 - 138)       | 514<br>(477 - 551)             | 758<br>(699 - 821)             | 1,970<br>(1,788 - 2,186)       |
| Intestinal infectious diseases                                    | 1,233<br>(649 - 2,160)         | 391<br>(202 - 692)          | 337<br>(173 - 582)       | 417<br>(213 - 732)             | 59<br>(31 - 102)               | 29<br>(17 - 46)                |
| Typhoid fever                                                     | 906<br>(443 - 1,641)           | 274<br>(127 - 507)          | 260<br>(132 - 451)       | 313<br>(150 - 561)             | 41<br>(19 - 76)                | 17<br>(9 - 31)                 |
| Paratyphoid fever                                                 | 247<br>(119 - 442)             | 80<br>(37 - 149)            | 69<br>(35 - 120)         | 83<br>(40 - 149)               | 10<br>(5 - 19)                 | 4<br>(2 - 7)                   |
| Other intestinal infectious diseases                              | 81<br>(60 - 105)               | 37<br>(23 - 56)             | 7<br>(2 - 14)            | 21<br>(12 - 34)                | 8<br>(3 - 15)                  | 7<br>(3 - 14)                  |
| Lower respiratory infections                                      | 23,668<br>(21,884 - 26,483)    | 4,249<br>(3,691 - 4,894)    | 220<br>(194 - 253)       | 2,400<br>(1,907 - 2,600)       | 3,866<br>(3,318 - 4,178)       | 12,933<br>(11,899 - 15,599)    |
| Upper respiratory infections                                      | 23<br>(20 - 27)                | 2<br>(1 - 3)                | 0<br>(0 - 1)             | 6<br>(5 - 7)                   | 6<br>(5 - 8)                   | 9<br>(6 - 12)                  |
| Otitis media                                                      | 27<br>(25 - 28)                | 3<br>(3 - 4)                | 3<br>(2 - 3)             | 10<br>(9 - 10)                 | 5<br>(5 - 5)                   | 6<br>(6 - 7)                   |
| Meningitis                                                        | 816<br>(749 - 908)             | 247<br>(187 - 319)          | 58<br>(51 - 66)          | 239<br>(223 - 261)             | 150<br>(140 - 162)             | 123<br>(114 - 136)             |
| Pneumococcal meningitis                                           | 274<br>(254 - 307)             | 68<br>(51 - 89)             | 21<br>(18 - 24)          | 86<br>(80 - 97)                | 54<br>(50 - 59)                | 45<br>(41 - 51)                |
| H influenzae type B meningitis                                    | 153<br>(131 - 181)             | 90<br>(68 - 117)            | 13<br>(11 - 15)          | 25<br>(23 - 28)                | 13<br>(12 - 14)                | 11<br>(10 - 13)                |
| Meningococcal meningitis                                          | 94<br>(86 - 104)               | 23<br>(18 - 30)             | 7<br>(6 - 8)             | 30<br>(27 - 34)                | 17<br>(16 - 20)                | 16<br>(14 - 18)                |
| Other meningitis                                                  | 296<br>(274 - 325)             | 66<br>(49 - 85)             | 16<br>(14 - 19)          | 98<br>(88 - 108)               | 66<br>(60 - 72)                | 51<br>(46 - 56)                |
| Encephalitis                                                      | 1,017<br>(803 - 1,151)         | 355<br>(252 - 465)          | 101<br>(70 - 125)        | 306<br>(229 - 370)             | 148<br>(105 - 172)             | 106<br>(73 - 123)              |
| Diphtheria                                                        | 10<br>(6 - 15)                 | 5<br>(2 - 10)               | 2<br>(1 - 3)             | 2<br>(1 - 4)                   | 1<br>(0 - 2)                   | --                             |
| Whooping cough                                                    | 52<br>(31 - 87)                | 41<br>(19 - 76)             | 3<br>(3 - 4)             | 7<br>(6 - 8)                   | 1<br>(1 - 1)                   | --                             |
| Tetanus                                                           | 23<br>(18 - 44)                | 3<br>(2 - 7)                | 2<br>(1 - 3)             | 10<br>(8 - 17)                 | 6<br>(4 - 13)                  | 3<br>(1 - 8)                   |
| Measles                                                           | 0<br>(0 - 1)                   | 0<br>(0 - 0)                | 0<br>(0 - 0)             | 0<br>(0 - 0)                   | 0<br>(0 - 0)                   | --                             |
| Varicella and herpes zoster                                       | 59<br>(48 - 72)                | 12<br>(8 - 17)              | 3<br>(2 - 5)             | 12<br>(10 - 15)                | 6<br>(4 - 8)                   | 26<br>(17 - 38)                |
| Neglected tropical diseases and malaria                           | 259<br>(218 - 324)             | 36<br>(27 - 50)             | 20<br>(17 - 28)          | 83<br>(71 - 99)                | 52<br>(43 - 65)                | 68<br>(49 - 97)                |
| Malaria                                                           | 1<br>(0 - 4)                   | 0<br>(0 - 0)                | 0<br>(0 - 0)             | 0<br>(0 - 1)                   | 0<br>(0 - 1)                   | 0<br>(0 - 1)                   |
| Chagas disease                                                    | 40<br>(15 - 109)               | 2<br>(1 - 5)                | 3<br>(1 - 7)             | 9<br>(3 - 25)                  | 8<br>(3 - 22)                  | 19<br>(6 - 50)                 |
| Leishmaniasis                                                     | 9<br>(7 - 10)                  | 2<br>(2 - 3)                | 1<br>(0 - 1)             | 3<br>(3 - 4)                   | 2<br>(1 - 2)                   | 1<br>(1 - 1)                   |
| Visceral leishmaniasis                                            | 9<br>(7 - 10)                  | 2<br>(2 - 3)                | 1<br>(0 - 1)             | 3<br>(3 - 4)                   | 2<br>(1 - 2)                   | 1<br>(1 - 1)                   |
| Cysticercosis                                                     | 38<br>(35 - 41)                | 0<br>(0 - 0)                | 1<br>(1 - 1)             | 20<br>(19 - 22)                | 11<br>(11 - 12)                | 4<br>(4 - 5)                   |
| Cystic echinococcosis                                             | 11<br>(10 - 12)                | 0<br>(0 - 0)                | 1<br>(1 - 1)             | 5<br>(5 - 5)                   | 3<br>(3 - 3)                   | 2<br>(2 - 2)                   |
| Dengue                                                            | 54<br>(31 - 60)                | 4<br>(2 - 4)                | 4<br>(3 - 5)             | 20<br>(13 - 22)                | 11<br>(6 - 13)                 | 15<br>(6 - 19)                 |
| Rabies                                                            | 14<br>(12 - 19)                | 1<br>(1 - 2)                | 3<br>(2 - 5)             | 7<br>(5 - 9)                   | 2<br>(2 - 4)                   | 1<br>(1 - 2)                   |
| Intestinal nematode infections                                    | 19<br>(8 - 34)                 | 8<br>(2 - 19)               | 3<br>(0 - 9)             | 3<br>(0 - 11)                  | 2<br>(0 - 8)                   | 3<br>(0 - 10)                  |
| Ascariasis                                                        | 19<br>(8 - 34)                 | 8<br>(2 - 19)               | 3<br>(0 - 9)             | 3<br>(0 - 11)                  | 2<br>(0 - 8)                   | 3<br>(0 - 10)                  |
| Other neglected tropical diseases                                 | 74<br>(67 - 85)                | 19<br>(15 - 24)             | 6<br>(5 - 6)             | 15<br>(13 - 17)                | 12<br>(10 - 14)                | 23<br>(19 - 27)                |
| Maternal disorders                                                | 1,224<br>(1,139 - 1,320)       | --                          | 5<br>(4 - 6)             | 1,219<br>(1,134 - 1,315)       | --                             | --                             |



Web Table 31- Mexico deaths with 95% UI by age, sex, and cause in 2013

| Cause                                                            | Both Sexes, All Ages           | Both Sexes, 0-4 Years       | Both Sexes, 5-14 Years   | Both Sexes, 15-49 Years     | Both Sexes, 50-69 Years        | Both Sexes, 70-80 Years        |
|------------------------------------------------------------------|--------------------------------|-----------------------------|--------------------------|-----------------------------|--------------------------------|--------------------------------|
| Maternal hemorrhage                                              | 215<br>(198 - 234)             | --                          | 1<br>(1 - 1)             | 214<br>(197 - 234)          | --                             | --                             |
| Maternal sepsis and other maternal infections                    | 82<br>(74 - 91)                | --                          | 1<br>(0 - 1)             | 81<br>(73 - 90)             | --                             | --                             |
| Maternal hypertensive disorders                                  | 236<br>(216 - 259)             | --                          | 1<br>(1 - 2)             | 235<br>(215 - 258)          | --                             | --                             |
| Maternal obstructed labor                                        | 92<br>(83 - 102)               | --                          | 0<br>(0 - 0)             | 92<br>(83 - 101)            | --                             | --                             |
| Maternal abortive outcome                                        | 138<br>(127 - 151)             | --                          | 0<br>(0 - 1)             | 138<br>(127 - 151)          | --                             | --                             |
| Indirect maternal deaths                                         | 193<br>(177 - 211)             | --                          | 1<br>(1 - 1)             | 193<br>(177 - 210)          | --                             | --                             |
| Late maternal deaths                                             | 91<br>(82 - 101)               | --                          | 0<br>(0 - 1)             | 91<br>(81 - 101)            | --                             | --                             |
| Maternal deaths aggravated by HIV/AIDS                           | 0<br>(0 - 0)                   | --                          | --                       | 0<br>(0 - 0)                | --                             | --                             |
| Other maternal disorders                                         | 174<br>(159 - 192)             | --                          | 1<br>(1 - 1)             | 173<br>(158 - 191)          | --                             | --                             |
| Neonatal disorders                                               | 13,619<br>(12,130 - 15,167)    | 13,619<br>(12,130 - 15,167) | --                       | --                          | --                             | --                             |
| Neonatal preterm birth complications                             | 6,280<br>(4,610 - 7,567)       | 6,280<br>(4,610 - 7,567)    | --                       | --                          | --                             | --                             |
| Neonatal encephalopathy due to birth asphyxia and trauma         | 2,850<br>(2,304 - 3,667)       | 2,850<br>(2,304 - 3,667)    | --                       | --                          | --                             | --                             |
| Neonatal sepsis and other neonatal infections                    | 2,975<br>(1,979 - 4,329)       | 2,975<br>(1,979 - 4,329)    | --                       | --                          | --                             | --                             |
| Hemolytic disease and other neonatal jaundice                    | 65<br>(40 - 98)                | 65<br>(40 - 98)             | --                       | --                          | --                             | --                             |
| Other neonatal disorders                                         | 1,449<br>(1,108 - 1,805)       | 1,449<br>(1,108 - 1,805)    | --                       | --                          | --                             | --                             |
| Nutritional deficiencies                                         | 13,961<br>(11,966 - 17,688)    | 952<br>(735 - 1,174)        | 161<br>(127 - 195)       | 1,149<br>(916 - 1,454)      | 1,748<br>(1,454 - 2,326)       | 9,951<br>(8,559 - 12,607)      |
| Protein-energy malnutrition                                      | 10,118<br>(8,193 - 12,932)     | 832<br>(617 - 1,038)        | 114<br>(83 - 140)        | 661<br>(472 - 913)          | 1,076<br>(810 - 1,530)         | 7,436<br>(6,076 - 9,517)       |
| Iodine deficiency                                                | 7<br>(5 - 11)                  | 1<br>(0 - 2)                | 0<br>(0 - 1)             | 2<br>(1 - 3)                | 2<br>(1 - 3)                   | 3<br>(1 - 6)                   |
| Iron-deficiency anemia                                           | 2,686<br>(1,487 - 4,274)       | 70<br>(27 - 136)            | 31<br>(16 - 50)          | 359<br>(212 - 539)          | 479<br>(280 - 758)             | 1,746<br>(929 - 2,822)         |
| Other nutritional deficiencies                                   | 1,149<br>(818 - 2,143)         | 49<br>(24 - 100)            | 15<br>(10 - 26)          | 127<br>(85 - 223)           | 191<br>(133 - 356)             | 766<br>(540 - 1,495)           |
| Other communicable, maternal, neonatal, and nutritional diseases | 1,453<br>(1,295 - 1,726)       | 275<br>(195 - 395)          | 61<br>(51 - 77)          | 359<br>(318 - 434)          | 388<br>(347 - 462)             | 370<br>(326 - 454)             |
| Sexually transmitted diseases excluding HIV                      | 287<br>(201 - 412)             | 169<br>(94 - 285)           | 14<br>(9 - 23)           | 48<br>(36 - 59)             | 26<br>(19 - 32)                | 30<br>(21 - 38)                |
| Syphilis                                                         | 240<br>(160 - 363)             | 169<br>(94 - 285)           | 13<br>(7 - 22)           | 20<br>(15 - 24)             | 15<br>(11 - 18)                | 23<br>(17 - 29)                |
| Chlamydial infection                                             | 14<br>(10 - 17)                | --                          | 0<br>(0 - 0)             | 9<br>(6 - 11)               | 3<br>(2 - 4)                   | 2<br>(1 - 2)                   |
| Gonococcal infection                                             | 19<br>(14 - 23)                | --                          | 0<br>(0 - 1)             | 10<br>(7 - 12)              | 5<br>(3 - 6)                   | 3<br>(2 - 4)                   |
| Other sexually transmitted diseases                              | 15<br>(11 - 18)                | --                          | 0<br>(0 - 1)             | 9<br>(7 - 11)               | 3<br>(3 - 4)                   | 2<br>(1 - 2)                   |
| Hepatitis                                                        | 434<br>(399 - 460)             | 22<br>(18 - 27)             | 9<br>(8 - 10)            | 113<br>(101 - 124)          | 172<br>(152 - 190)             | 117<br>(104 - 132)             |
| Acute hepatitis A                                                | 109<br>(46 - 179)              | 16<br>(9 - 21)              | 6<br>(4 - 8)             | 49<br>(22 - 76)             | 29<br>(9 - 57)                 | 9<br>(2 - 20)                  |
| Acute hepatitis B                                                | 264<br>(190 - 337)             | 6<br>(2 - 12)               | 2<br>(1 - 3)             | 47<br>(25 - 71)             | 120<br>(86 - 152)              | 90<br>(69 - 110)               |
| Acute hepatitis C                                                | 60<br>(15 - 124)               | --                          | 1<br>(0 - 3)             | 17<br>(4 - 38)              | 23<br>(6 - 50)                 | 19<br>(5 - 38)                 |
| Other infectious diseases                                        | 733<br>(630 - 995)             | 85<br>(68 - 110)            | 37<br>(32 - 51)          | 198<br>(164 - 274)          | 190<br>(157 - 263)             | 222<br>(184 - 309)             |
| Non-communicable diseases                                        | 512,395<br>(501,596 - 520,857) | 13,613<br>(12,147 - 15,305) | 3,025<br>(2,733 - 3,265) | 62,843<br>(60,582 - 65,118) | 156,207<br>(152,656 - 159,280) | 276,707<br>(270,691 - 280,362) |
| Neoplasms                                                        | 85,339<br>(81,080 - 88,337)    | 869<br>(678 - 1,055)        | 1,164<br>(1,035 - 1,263) | 14,207<br>(13,505 - 14,819) | 31,853<br>(30,211 - 32,964)    | 37,246<br>(34,851 - 38,841)    |
| Esophageal cancer                                                | 1,560<br>(1,312 - 1,837)       | --                          | --                       | 131<br>(108 - 157)          | 588<br>(475 - 705)             | 842<br>(710 - 991)             |
| Stomach cancer                                                   | 8,364<br>(8,069 - 8,690)       | --                          | --                       | 1,026<br>(965 - 1,081)      | 3,178<br>(3,050 - 3,307)       | 4,160<br>(3,992 - 4,350)       |
| Liver cancer                                                     | 6,594<br>(6,229 - 7,052)       | --                          | 16<br>(14 - 17)          | 574<br>(534 - 625)          | 2,621<br>(2,444 - 2,848)       | 3,383<br>(3,178 - 3,629)       |
| Liver cancer due to hepatitis B                                  | 1,487<br>(1,329 - 1,655)       | --                          | 6<br>(5 - 7)             | 203<br>(181 - 222)          | 674<br>(592 - 754)             | 605<br>(528 - 693)             |
| Liver cancer due to hepatitis C                                  | 3,282<br>(3,031 - 3,572)       | --                          | 2<br>(2 - 3)             | 228<br>(201 - 256)          | 1,288<br>(1,161 - 1,435)       | 1,764<br>(1,625 - 1,913)       |
| Liver cancer due to alcohol use                                  | 1,211<br>(1,066 - 1,360)       | --                          | --                       | 54<br>(46 - 63)             | 400<br>(345 - 454)             | 757<br>(667 - 854)             |
| Liver cancer due to other causes                                 | 613<br>(538 - 700)             | --                          | 8<br>(7 - 9)             | 90<br>(79 - 105)            | 259<br>(220 - 303)             | 257<br>(227 - 290)             |

Web Table 31- Mexico deaths with 95% UI by age, sex, and cause in 2013

| Cause                                         | Both Sexes, All Ages           | Both Sexes, 0-4 Years | Both Sexes, 5-14 Years | Both Sexes, 15-49 Years     | Both Sexes, 50-69 Years     | Both Sexes, 70-80 Years      |
|-----------------------------------------------|--------------------------------|-----------------------|------------------------|-----------------------------|-----------------------------|------------------------------|
| Larynx cancer                                 | 1,098<br>(922 - 1,534)         | --                    | --                     | 79<br>(66 - 107)            | 474<br>(404 - 662)          | 545<br>(459 - 764)           |
| Tracheal, bronchus and lung cancer            | 8,687<br>(8,280 - 9,035)       | --                    | --                     | 689<br>(643 - 736)          | 3,477<br>(3,282 - 3,626)    | 4,521<br>(4,288 - 4,727)     |
| Breast cancer                                 | 5,902<br>(5,529 - 6,379)       | --                    | --                     | 1,735<br>(1,609 - 1,881)    | 2,694<br>(2,490 - 2,924)    | 1,473<br>(1,368 - 1,617)     |
| Cervical cancer                               | 5,842<br>(5,388 - 8,207)       | --                    | --                     | 1,644<br>(1,505 - 2,138)    | 2,481<br>(2,257 - 3,545)    | 1,718<br>(1,554 - 2,564)     |
| Uterine cancer                                | 606<br>(451 - 894)             | --                    | --                     | 91<br>(71 - 137)            | 299<br>(218 - 438)          | 217<br>(166 - 333)           |
| Prostate cancer                               | 6,520<br>(4,465 - 8,835)       | --                    | --                     | 62<br>(45 - 88)             | 1,376<br>(986 - 1,928)      | 5,081<br>(3,379 - 6,830)     |
| Colon and rectum cancer                       | 6,255<br>(6,061 - 6,516)       | --                    | --                     | 874<br>(839 - 920)          | 2,317<br>(2,225 - 2,425)    | 3,064<br>(2,940 - 3,235)     |
| Lip and oral cavity cancer                    | 914<br>(748 - 1,082)           | --                    | --                     | 116<br>(95 - 142)           | 360<br>(292 - 424)          | 438<br>(353 - 522)           |
| Nasopharynx cancer                            | 138<br>(118 - 154)             | --                    | 3<br>(2 - 3)           | 38<br>(33 - 42)             | 58<br>(49 - 66)             | 39<br>(32 - 45)              |
| Other pharynx cancer                          | 281<br>(246 - 320)             | --                    | --                     | 29<br>(25 - 31)             | 130<br>(113 - 147)          | 123<br>(105 - 138)           |
| Gallbladder and biliary tract cancer          | 2,011<br>(1,641 - 2,465)       | --                    | --                     | 166<br>(139 - 215)          | 875<br>(712 - 1,097)        | 970<br>(772 - 1,194)         |
| Pancreatic cancer                             | 4,516<br>(4,341 - 4,739)       | --                    | --                     | 437<br>(416 - 460)          | 1,956<br>(1,868 - 2,062)    | 2,123<br>(2,016 - 2,252)     |
| Malignant skin melanoma                       | 602<br>(455 - 748)             | --                    | --                     | 116<br>(87 - 147)           | 221<br>(164 - 276)          | 265<br>(200 - 324)           |
| Non-melanoma skin cancer                      | 1,167<br>(893 - 1,585)         | --                    | --                     | 128<br>(101 - 182)          | 322<br>(251 - 455)          | 718<br>(534 - 966)           |
| Ovarian cancer                                | 2,336<br>(2,148 - 2,494)       | --                    | --                     | 581<br>(529 - 630)          | 1,110<br>(1,000 - 1,208)    | 644<br>(592 - 696)           |
| Testicular cancer                             | 427<br>(284 - 532)             | --                    | --                     | 331<br>(219 - 414)          | 44<br>(28 - 54)             | 53<br>(34 - 66)              |
| Kidney cancer                                 | 2,351<br>(2,194 - 2,479)       | 48<br>(39 - 60)       | 25<br>(23 - 28)        | 308<br>(280 - 329)          | 1,097<br>(1,013 - 1,172)    | 873<br>(808 - 928)           |
| Bladder cancer                                | 1,084<br>(903 - 1,198)         | --                    | --                     | 65<br>(53 - 74)             | 343<br>(288 - 378)          | 677<br>(561 - 749)           |
| Brain and nervous system cancer               | 2,204<br>(1,671 - 2,538)       | 78<br>(52 - 105)      | 156<br>(118 - 178)     | 663<br>(505 - 789)          | 805<br>(600 - 919)          | 501<br>(372 - 565)           |
| Thyroid cancer                                | 669<br>(506 - 757)             | --                    | 1<br>(1 - 1)           | 70<br>(57 - 82)             | 279<br>(213 - 318)          | 319<br>(235 - 359)           |
| Mesothelioma                                  | 293<br>(277 - 312)             | --                    | --                     | 55<br>(51 - 60)             | 135<br>(126 - 147)          | 102<br>(95 - 110)            |
| Hodgkin lymphoma                              | 643<br>(576 - 873)             | 18<br>(14 - 35)       | 30<br>(26 - 45)        | 210<br>(185 - 284)          | 204<br>(179 - 285)          | 180<br>(161 - 240)           |
| Non-Hodgkin lymphoma                          | 3,424<br>(2,379 - 3,853)       | 139<br>(106 - 190)    | 93<br>(71 - 107)       | 791<br>(579 - 885)          | 1,205<br>(803 - 1,384)      | 1,196<br>(756 - 1,386)       |
| Multiple myeloma                              | 975<br>(775 - 1,115)           | --                    | --                     | 130<br>(108 - 157)          | 499<br>(397 - 583)          | 345<br>(268 - 397)           |
| Leukemia                                      | 4,344<br>(4,161 - 4,571)       | 291<br>(223 - 357)    | 591<br>(535 - 642)     | 1,650<br>(1,568 - 1,762)    | 948<br>(903 - 1,018)        | 865<br>(823 - 919)           |
| Other neoplasms                               | 5,532<br>(4,336 - 6,105)       | 295<br>(163 - 382)    | 249<br>(181 - 286)     | 1,418<br>(1,149 - 1,561)    | 1,757<br>(1,343 - 1,996)    | 1,813<br>(1,324 - 2,061)     |
| Cardiovascular diseases                       | 147,475<br>(136,955 - 156,344) | 444<br>(384 - 525)    | 280<br>(242 - 311)     | 12,036<br>(11,382 - 13,180) | 37,041<br>(35,043 - 40,593) | 97,674<br>(88,548 - 101,931) |
| Rheumatic heart disease                       | 1,117<br>(832 - 1,417)         | 6<br>(3 - 8)          | 12<br>(8 - 15)         | 273<br>(217 - 376)          | 454<br>(341 - 594)          | 373<br>(249 - 437)           |
| Ischemic heart disease                        | 87,727<br>(76,336 - 92,874)    | 57<br>(42 - 72)       | 69<br>(55 - 80)        | 6,852<br>(6,142 - 7,513)    | 22,415<br>(20,132 - 24,455) | 58,333<br>(48,998 - 61,691)  |
| Cerebrovascular disease                       | 40,719<br>(36,792 - 47,692)    | 118<br>(95 - 141)     | 104<br>(89 - 120)      | 3,157<br>(2,787 - 3,780)    | 9,823<br>(8,802 - 11,751)   | 27,517<br>(24,353 - 32,053)  |
| Ischemic stroke                               | 12,218<br>(10,716 - 15,927)    | 8<br>(5 - 12)         | 12<br>(9 - 16)         | 493<br>(404 - 651)          | 2,380<br>(1,966 - 3,262)    | 9,326<br>(8,095 - 12,222)    |
| Hemorrhagic stroke                            | 28,501<br>(24,804 - 32,865)    | 110<br>(88 - 131)     | 93<br>(79 - 107)       | 2,664<br>(2,358 - 3,176)    | 7,443<br>(6,629 - 8,786)    | 18,191<br>(15,278 - 20,809)  |
| Hypertensive heart disease                    | 7,822<br>(6,326 - 10,077)      | 5<br>(4 - 9)          | 4<br>(3 - 5)           | 243<br>(193 - 334)          | 1,385<br>(1,128 - 1,817)    | 6,184<br>(4,924 - 8,027)     |
| Cardiomyopathy and myocarditis                | 1,745<br>(1,471 - 2,256)       | 141<br>(115 - 194)    | 45<br>(36 - 57)        | 533<br>(443 - 700)          | 531<br>(436 - 701)          | 495<br>(402 - 648)           |
| Atrial fibrillation and flutter               | 1,382<br>(1,202 - 1,620)       | --                    | --                     | 40<br>(34 - 48)             | 222<br>(190 - 264)          | 1,121<br>(963 - 1,329)       |
| Aortic aneurysm                               | 670<br>(579 - 833)             | --                    | --                     | 74<br>(63 - 96)             | 187<br>(161 - 229)          | 410<br>(348 - 511)           |
| Peripheral vascular disease                   | 452<br>(392 - 505)             | --                    | --                     | 13<br>(11 - 15)             | 75<br>(64 - 86)             | 364<br>(312 - 411)           |
| Endocarditis                                  | 463<br>(340 - 589)             | 41<br>(31 - 58)       | 12<br>(9 - 16)         | 139<br>(105 - 187)          | 123<br>(88 - 155)           | 148<br>(101 - 189)           |
| Other cardiovascular and circulatory diseases | 5,379<br>(4,670 - 6,504)       | 75<br>(56 - 92)       | 33<br>(26 - 39)        | 715<br>(582 - 827)          | 1,828<br>(1,561 - 2,298)    | 2,728<br>(2,366 - 3,307)     |
| Chronic respiratory diseases                  | 38,727<br>(34,618 - 41,573)    | 748<br>(644 - 879)    | 110<br>(90 - 122)      | 1,774<br>(1,541 - 1,901)    | 7,021<br>(6,371 - 7,676)    | 29,074<br>(25,863 - 31,298)  |

Web Table 31- Mexico deaths with 95% UI by age, sex, and cause in 2013

| Cause                                               | Both Sexes, All Ages        | Both Sexes, 0-4 Years | Both Sexes, 5-14 Years | Both Sexes, 15-49 Years     | Both Sexes, 50-69 Years     | Both Sexes, 70-80 Years     |
|-----------------------------------------------------|-----------------------------|-----------------------|------------------------|-----------------------------|-----------------------------|-----------------------------|
| Chronic obstructive pulmonary disease               | 32,401<br>(29,053 - 35,162) | 525<br>(443 - 618)    | 59<br>(46 - 68)        | 1,044<br>(876 - 1,156)      | 5,349<br>(4,828 - 5,996)    | 25,424<br>(22,921 - 27,740) |
| Pneumoconiosis                                      | 394<br>(299 - 566)          | 2<br>(1 - 3)          | 3<br>(2 - 4)           | 40<br>(30 - 55)             | 130<br>(94 - 187)           | 219<br>(163 - 327)          |
| Silicosis                                           | 94<br>(68 - 136)            | 0<br>(0 - 1)          | 1<br>(1 - 1)           | 11<br>(8 - 16)              | 32<br>(22 - 47)             | 49<br>(34 - 74)             |
| Asbestosis                                          | 58<br>(42 - 85)             | 0<br>(0 - 1)          | 1<br>(1 - 1)           | 5<br>(4 - 7)                | 24<br>(17 - 36)             | 27<br>(19 - 41)             |
| Coal workers pneumoconiosis                         | 41<br>(30 - 59)             | 0<br>(0 - 1)          | 1<br>(1 - 1)           | 5<br>(4 - 6)                | 12<br>(9 - 18)              | 23<br>(16 - 34)             |
| Other pneumoconiosis                                | 201<br>(155 - 284)          | 0<br>(0 - 1)          | 1<br>(1 - 1)           | 19<br>(14 - 25)             | 61<br>(45 - 89)             | 119<br>(90 - 175)           |
| Asthma                                              | 2,089<br>(1,683 - 2,697)    | 49<br>(32 - 67)       | 20<br>(16 - 24)        | 227<br>(179 - 265)          | 505<br>(410 - 641)          | 1,288<br>(1,021 - 1,757)    |
| Interstitial lung disease and pulmonary sarcoidosis | 2,949<br>(1,954 - 3,717)    | 19<br>(11 - 30)       | 14<br>(10 - 18)        | 325<br>(241 - 403)          | 884<br>(614 - 1,113)        | 1,707<br>(1,074 - 2,230)    |
| Other chronic respiratory diseases                  | 894<br>(746 - 1,068)        | 154<br>(131 - 179)    | 14<br>(11 - 17)        | 137<br>(112 - 158)          | 153<br>(128 - 182)          | 435<br>(344 - 560)          |
| Cirrhosis                                           | 41,204<br>(40,104 - 42,780) | 46<br>(34 - 58)       | 55<br>(51 - 60)        | 10,969<br>(10,444 - 11,549) | 18,514<br>(17,959 - 19,314) | 11,620<br>(11,228 - 12,193) |
| Cirrhosis due to hepatitis B                        | 1,405<br>(1,270 - 1,556)    | 0<br>(0 - 0)          | 1<br>(1 - 2)           | 375<br>(338 - 420)          | 643<br>(582 - 713)          | 385<br>(339 - 432)          |
| Cirrhosis due to hepatitis C                        | 15,358<br>(14,405 - 16,337) | 3<br>(2 - 4)          | 11<br>(10 - 13)        | 3,220<br>(2,944 - 3,512)    | 6,948<br>(6,478 - 7,442)    | 5,176<br>(4,843 - 5,520)    |
| Cirrhosis due to alcohol use                        | 19,033<br>(18,000 - 20,219) | --                    | --                     | 5,105<br>(4,726 - 5,487)    | 8,738<br>(8,241 - 9,356)    | 5,189<br>(4,883 - 5,511)    |
| Cirrhosis due to other causes                       | 5,407<br>(4,940 - 5,880)    | 42<br>(32 - 54)       | 42<br>(38 - 46)        | 2,269<br>(2,047 - 2,468)    | 2,185<br>(1,956 - 2,426)    | 869<br>(791 - 956)          |
| Digestive diseases                                  | 20,332<br>(17,830 - 21,314) | 102<br>(72 - 131)     | 116<br>(93 - 127)      | 2,685<br>(2,299 - 2,850)    | 5,358<br>(4,745 - 5,633)    | 12,071<br>(10,494 - 12,684) |
| Peptic ulcer disease                                | 4,150<br>(3,523 - 5,000)    | 2<br>(1 - 3)          | 6<br>(5 - 8)           | 368<br>(302 - 441)          | 1,004<br>(852 - 1,217)      | 2,771<br>(2,334 - 3,395)    |
| Gastritis and duodenitis                            | 1,406<br>(959 - 2,078)      | 6<br>(3 - 9)          | 5<br>(3 - 7)           | 156<br>(105 - 232)          | 326<br>(221 - 485)          | 913<br>(598 - 1,368)        |
| Appendicitis                                        | 672<br>(465 - 828)          | 6<br>(2 - 10)         | 16<br>(9 - 22)         | 183<br>(123 - 226)          | 204<br>(138 - 256)          | 263<br>(186 - 326)          |
| Paralytic ileus and intestinal obstruction          | 2,684<br>(1,809 - 3,689)    | 48<br>(31 - 67)       | 37<br>(27 - 49)        | 271<br>(190 - 389)          | 603<br>(404 - 851)          | 1,725<br>(1,128 - 2,386)    |
| Inguinal, femoral, and abdominal hernia             | 1,002<br>(586 - 1,241)      | 2<br>(1 - 3)          | 3<br>(2 - 4)           | 61<br>(38 - 79)             | 265<br>(161 - 333)          | 670<br>(374 - 840)          |
| Inflammatory bowel disease                          | 482<br>(385 - 622)          | 6<br>(3 - 8)          | 5<br>(4 - 6)           | 87<br>(68 - 108)            | 150<br>(121 - 192)          | 233<br>(183 - 314)          |
| Vascular intestinal disorders                       | 2,525<br>(1,543 - 3,747)    | 3<br>(1 - 8)          | 5<br>(1 - 9)           | 150<br>(88 - 251)           | 598<br>(361 - 923)          | 1,769<br>(1,064 - 2,630)    |
| Gallbladder and biliary diseases                    | 2,916<br>(2,315 - 3,280)    | 3<br>(2 - 4)          | 6<br>(4 - 7)           | 351<br>(270 - 396)          | 835<br>(679 - 951)          | 1,721<br>(1,330 - 1,989)    |
| Pancreatitis                                        | 2,108<br>(1,603 - 2,643)    | 3<br>(2 - 5)          | 11<br>(8 - 14)         | 742<br>(577 - 897)          | 685<br>(504 - 866)          | 667<br>(477 - 872)          |
| Other digestive diseases                            | 2,389<br>(1,922 - 2,718)    | 23<br>(13 - 32)       | 22<br>(16 - 26)        | 315<br>(244 - 357)          | 689<br>(564 - 783)          | 1,339<br>(1,092 - 1,566)    |
| Neurological disorders                              | 29,158<br>(27,606 - 31,218) | 224<br>(181 - 327)    | 180<br>(157 - 216)     | 1,819<br>(1,629 - 2,100)    | 2,538<br>(2,364 - 2,708)    | 24,398<br>(22,939 - 26,291) |
| Alzheimer disease and other dementias               | 23,868<br>(22,409 - 25,919) | --                    | --                     | 9<br>(7 - 11)               | 1,297<br>(1,202 - 1,407)    | 22,562<br>(21,113 - 24,517) |
| Parkinson disease                                   | 1,426<br>(1,080 - 1,558)    | --                    | --                     | 34<br>(28 - 38)             | 245<br>(193 - 272)          | 1,147<br>(848 - 1,264)      |
| Epilepsy                                            | 2,107<br>(1,834 - 2,562)    | 110<br>(82 - 183)     | 115<br>(95 - 143)      | 1,172<br>(1,003 - 1,445)    | 410<br>(332 - 501)          | 301<br>(241 - 377)          |
| Multiple sclerosis                                  | 313<br>(170 - 364)          | --                    | --                     | 136<br>(76 - 163)           | 123<br>(65 - 144)           | 54<br>(28 - 65)             |
| Other neurological disorders                        | 1,444<br>(1,235 - 1,598)    | 114<br>(94 - 157)     | 65<br>(54 - 78)        | 467<br>(391 - 529)          | 463<br>(391 - 500)          | 335<br>(284 - 366)          |
| Mental and substance use disorders                  | 5,440<br>(4,748 - 9,320)    | 27<br>(21 - 48)       | 1<br>(1 - 2)           | 2,528<br>(2,190 - 4,391)    | 1,917<br>(1,626 - 3,411)    | 966<br>(833 - 1,551)        |
| Schizophrenia                                       | 126<br>(108 - 165)          | --                    | --                     | 44<br>(37 - 59)             | 47<br>(39 - 61)             | 35<br>(30 - 46)             |
| Alcohol use disorders                               | 4,412<br>(3,733 - 8,258)    | --                    | --                     | 1,931<br>(1,610 - 3,744)    | 1,726<br>(1,435 - 3,238)    | 755<br>(629 - 1,342)        |
| Drug use disorders                                  | 886<br>(814 - 1,121)        | 27<br>(21 - 48)       | --                     | 539<br>(485 - 683)          | 145<br>(131 - 174)          | 176<br>(159 - 209)          |
| Opioid use disorders                                | 189<br>(170 - 239)          | 6<br>(4 - 11)         | --                     | 116<br>(101 - 148)          | 28<br>(24 - 34)             | 39<br>(33 - 48)             |
| Cocaine use disorders                               | 24<br>(21 - 30)             | 1<br>(1 - 2)          | --                     | 16<br>(14 - 19)             | 3<br>(3 - 4)                | 4<br>(3 - 5)                |
| Amphetamine use disorders                           | 19<br>(17 - 23)             | 1<br>(1 - 2)          | --                     | 12<br>(10 - 14)             | 3<br>(3 - 4)                | 4<br>(3 - 5)                |
| Other drug use disorders                            | 653<br>(599 - 817)          | 19<br>(15 - 33)       | --                     | 394<br>(354 - 503)          | 111<br>(100 - 134)          | 130<br>(116 - 152)          |
| Eating disorders                                    | 16<br>(14 - 18)             | --                    | 1<br>(1 - 2)           | 15<br>(13 - 16)             | --                          | --                          |

Web Table 31- Mexico deaths with 95% UI by age, sex, and cause in 2013

| Cause                                               | Both Sexes, All Ages           | Both Sexes, 0-4 Years      | Both Sexes, 5-14 Years | Both Sexes, 15-49 Years     | Both Sexes, 50-69 Years     | Both Sexes, 70-80 Years     |
|-----------------------------------------------------|--------------------------------|----------------------------|------------------------|-----------------------------|-----------------------------|-----------------------------|
| Anorexia nervosa                                    | 16<br>(14 - 18)                | --                         | 1<br>(1 - 2)           | 15<br>(13 - 16)             | --                          | --                          |
| Diabetes, urogenital, blood, and endocrine diseases | 127,192<br>(117,973 - 131,628) | 863<br>(745 - 1,003)       | 458<br>(406 - 508)     | 14,644<br>(13,232 - 15,324) | 50,299<br>(45,101 - 52,281) | 60,928<br>(57,528 - 63,757) |
| Diabetes mellitus                                   | 58,590<br>(56,487 - 62,621)    | 91<br>(73 - 115)           | 48<br>(36 - 66)        | 5,262<br>(5,000 - 5,618)    | 22,871<br>(21,961 - 25,545) | 30,318<br>(29,049 - 32,249) |
| Acute glomerulonephritis                            | 55<br>(47 - 73)                | 2<br>(1 - 3)               | 2<br>(1 - 3)           | 9<br>(8 - 12)               | 14<br>(12 - 20)             | 27<br>(22 - 39)             |
| Chronic kidney disease                              | 57,674<br>(48,012 - 61,019)    | 223<br>(184 - 264)         | 226<br>(198 - 257)     | 7,375<br>(6,149 - 7,920)    | 24,401<br>(18,102 - 26,132) | 25,449<br>(22,592 - 27,424) |
| Chronic kidney disease due to diabetes mellitus     | 34,573<br>(25,908 - 37,077)    | 34<br>(24 - 45)            | 20<br>(15 - 28)        | 3,848<br>(2,884 - 4,209)    | 16,343<br>(11,341 - 17,670) | 14,328<br>(11,510 - 15,518) |
| Chronic kidney disease due to hypertension          | 6,988<br>(4,543 - 9,072)       | 56<br>(37 - 74)            | 53<br>(36 - 70)        | 1,134<br>(739 - 1,486)      | 1,993<br>(1,236 - 2,780)    | 3,752<br>(2,432 - 4,877)    |
| Chronic kidney disease due to glomerulonephritis    | 842<br>(605 - 1,047)           | 20<br>(12 - 27)            | 24<br>(16 - 30)        | 234<br>(163 - 278)          | 180<br>(124 - 235)          | 384<br>(269 - 491)          |
| Chronic kidney disease due to other causes          | 15,271<br>(12,150 - 18,854)    | 113<br>(84 - 145)          | 128<br>(106 - 159)     | 2,159<br>(1,629 - 2,701)    | 5,885<br>(4,013 - 9,023)    | 6,985<br>(5,731 - 9,298)    |
| Urinary diseases and male infertility               | 4,729<br>(4,192 - 5,289)       | 109<br>(90 - 131)          | 26<br>(23 - 30)        | 528<br>(470 - 601)          | 1,221<br>(1,032 - 1,353)    | 2,844<br>(2,520 - 3,259)    |
| Interstitial nephritis and urinary tract infections | 3,552<br>(2,892 - 3,886)       | 85<br>(69 - 103)           | 17<br>(14 - 20)        | 353<br>(299 - 398)          | 869<br>(675 - 961)          | 2,227<br>(1,811 - 2,481)    |
| Urolithiasis                                        | 335<br>(285 - 464)             | --                         | 3<br>(2 - 3)           | 67<br>(56 - 88)             | 131<br>(109 - 182)          | 135<br>(112 - 193)          |
| Other urinary diseases                              | 843<br>(695 - 1,267)           | 24<br>(17 - 32)            | 7<br>(5 - 9)           | 108<br>(87 - 145)           | 222<br>(186 - 318)          | 482<br>(371 - 784)          |
| Gynecological diseases                              | 77<br>(53 - 86)                | --                         | --                     | 29<br>(19 - 32)             | 18<br>(12 - 20)             | 30<br>(21 - 38)             |
| Uterine fibroids                                    | 19<br>(13 - 22)                | --                         | --                     | 5<br>(4 - 6)                | 5<br>(3 - 6)                | 9<br>(6 - 11)               |
| Polycystic ovarian syndrome                         | 2<br>(1 - 2)                   | --                         | --                     | 2<br>(1 - 2)                | 0<br>(0 - 0)                | --                          |
| Endometriosis                                       | 5<br>(3 - 5)                   | --                         | --                     | 4<br>(3 - 5)                | 0<br>(0 - 0)                | --                          |
| Genital prolapse                                    | 15<br>(10 - 17)                | --                         | --                     | 4<br>(2 - 4)                | 3<br>(2 - 4)                | 8<br>(5 - 10)               |
| Other gynecological diseases                        | 36<br>(25 - 40)                | --                         | --                     | 14<br>(9 - 15)              | 9<br>(6 - 10)               | 13<br>(9 - 17)              |
| Hemoglobinopathies and hemolytic anemias            | 743<br>(525 - 979)             | 63<br>(40 - 101)           | 55<br>(37 - 72)        | 231<br>(161 - 305)          | 176<br>(120 - 233)          | 218<br>(154 - 300)          |
| Thalassemias                                        | 8<br>(5 - 10)                  | 2<br>(2 - 4)               | 2<br>(1 - 2)           | 3<br>(2 - 4)                | 0<br>(0 - 0)                | 0<br>(0 - 0)                |
| Sickle cell disorders                               | 300<br>(211 - 389)             | 35<br>(22 - 56)            | 39<br>(26 - 51)        | 149<br>(104 - 197)          | 70<br>(48 - 92)             | 6<br>(4 - 9)                |
| G6PD deficiency                                     | 20<br>(14 - 27)                | 3<br>(2 - 5)               | 2<br>(2 - 3)           | 8<br>(5 - 10)               | 5<br>(3 - 7)                | 2<br>(1 - 3)                |
| Other hemoglobinopathies and hemolytic anemias      | 416<br>(295 - 556)             | 23<br>(14 - 35)            | 12<br>(8 - 16)         | 70<br>(49 - 93)             | 101<br>(69 - 135)           | 210<br>(148 - 289)          |
| Endocrine, metabolic, blood, and immune disorders   | 5,324<br>(3,723 - 5,750)       | 373<br>(273 - 458)         | 99<br>(73 - 114)       | 1,212<br>(866 - 1,345)      | 1,598<br>(1,100 - 1,797)    | 2,041<br>(1,362 - 2,270)    |
| Musculoskeletal disorders                           | 3,035<br>(2,660 - 3,719)       | --                         | 55<br>(47 - 66)        | 871<br>(763 - 1,016)        | 950<br>(822 - 1,096)        | 1,159<br>(1,001 - 1,500)    |
| Rheumatoid arthritis                                | 1,076<br>(892 - 1,243)         | --                         | 4<br>(3 - 5)           | 100<br>(81 - 120)           | 374<br>(309 - 435)          | 599<br>(484 - 715)          |
| Other musculoskeletal disorders                     | 1,958<br>(1,736 - 2,502)       | --                         | 51<br>(44 - 62)        | 772<br>(670 - 906)          | 576<br>(496 - 679)          | 560<br>(467 - 839)          |
| Other non-communicable diseases                     | 14,493<br>(12,986 - 15,931)    | 10,291<br>(8,901 - 11,663) | 606<br>(512 - 687)     | 1,310<br>(1,163 - 1,524)    | 714<br>(649 - 801)          | 1,572<br>(1,434 - 1,750)    |
| Congenital anomalies                                | 12,271<br>(10,754 - 13,658)    | 9,837<br>(8,502 - 11,214)  | 588<br>(491 - 668)     | 1,107<br>(921 - 1,324)      | 354<br>(278 - 429)          | 386<br>(318 - 465)          |
| Neural tube defects                                 | 533<br>(441 - 639)             | 445<br>(359 - 550)         | 18<br>(14 - 22)        | 28<br>(23 - 33)             | 8<br>(6 - 9)                | 34<br>(27 - 42)             |
| Congenital heart anomalies                          | 6,440<br>(5,365 - 7,204)       | 5,133<br>(4,262 - 5,881)   | 352<br>(288 - 402)     | 642<br>(532 - 787)          | 170<br>(133 - 217)          | 143<br>(113 - 184)          |
| Cleft lip and cleft palate                          | 11<br>(5 - 22)                 | 11<br>(5 - 22)             | --                     | --                          | --                          | --                          |
| Down syndrome                                       | 476<br>(300 - 627)             | 293<br>(169 - 444)         | 38<br>(25 - 49)        | 107<br>(72 - 133)           | 33<br>(21 - 43)             | 5<br>(3 - 7)                |
| Chromosomal unbalanced rearrangements               | 129<br>(91 - 165)              | 106<br>(73 - 139)          | 5<br>(3 - 6)           | 11<br>(8 - 14)              | 3<br>(2 - 3)                | 5<br>(3 - 6)                |
| Other congenital anomalies                          | 4,682<br>(4,051 - 5,372)       | 3,848<br>(3,277 - 4,525)   | 176<br>(146 - 202)     | 319<br>(271 - 383)          | 141<br>(117 - 171)          | 199<br>(166 - 243)          |
| Skin and subcutaneous diseases                      | 1,827<br>(1,708 - 2,037)       | 60<br>(49 - 75)            | 19<br>(16 - 21)        | 203<br>(187 - 242)          | 360<br>(333 - 402)          | 1,186<br>(1,084 - 1,338)    |
| Cellulitis                                          | 163<br>(106 - 195)             | 10<br>(7 - 15)             | 3<br>(2 - 3)           | 32<br>(21 - 38)             | 52<br>(34 - 64)             | 66<br>(38 - 83)             |
| Pyoderma                                            | 679<br>(620 - 755)             | 44<br>(35 - 58)            | 11<br>(9 - 12)         | 91<br>(83 - 103)            | 162<br>(146 - 180)          | 371<br>(323 - 417)          |
| Decubitus ulcer                                     | 919<br>(838 - 1,130)           | 1<br>(1 - 2)               | 2<br>(2 - 3)           | 60<br>(54 - 82)             | 128<br>(116 - 176)          | 727<br>(655 - 852)          |

Web Table 31- Mexico deaths with 95% UI by age, sex, and cause in 2013

| Cause                                           | Both Sexes, All Ages        | Both Sexes, 0-4 Years    | Both Sexes, 5-14 Years   | Both Sexes, 15-49 Years     | Both Sexes, 50-69 Years     | Both Sexes, 70-80 Years     |
|-------------------------------------------------|-----------------------------|--------------------------|--------------------------|-----------------------------|-----------------------------|-----------------------------|
| Other skin and subcutaneous diseases            | 67<br>(28 - 80)             | 4<br>(2 - 5)             | 3<br>(2 - 3)             | 20<br>(12 - 22)             | 18<br>(6 - 23)              | 23<br>(5 - 32)              |
| Sudden infant death syndrome                    | 395<br>(237 - 605)          | 395<br>(237 - 605)       | --                       | --                          | --                          | --                          |
| Injuries                                        | 75,035<br>(71,710 - 82,227) | 2,847<br>(2,371 - 3,739) | 2,619<br>(2,400 - 2,920) | 44,578<br>(41,642 - 46,844) | 13,231<br>(12,400 - 15,576) | 11,760<br>(10,845 - 14,240) |
| Transport injuries                              | 24,627<br>(23,355 - 29,024) | 635<br>(493 - 779)       | 1,161<br>(1,061 - 1,280) | 14,782<br>(13,917 - 17,295) | 4,690<br>(4,419 - 5,763)    | 3,358<br>(3,116 - 4,365)    |
| Road injuries                                   | 24,016<br>(22,794 - 28,195) | 620<br>(480 - 761)       | 1,134<br>(1,034 - 1,247) | 14,447<br>(13,591 - 16,847) | 4,565<br>(4,299 - 5,580)    | 3,250<br>(3,016 - 4,185)    |
| Pedestrian road injuries                        | 10,773<br>(9,216 - 13,392)  | 324<br>(241 - 406)       | 584<br>(500 - 677)       | 4,821<br>(3,896 - 6,090)    | 2,712<br>(2,346 - 3,435)    | 2,331<br>(2,068 - 3,057)    |
| Cyclist road injuries                           | 1,008<br>(814 - 1,280)      | 22<br>(14 - 33)          | 74<br>(58 - 95)          | 514<br>(424 - 654)          | 253<br>(192 - 338)          | 145<br>(107 - 202)          |
| Motorcyclist road injuries                      | 1,796<br>(1,298 - 2,300)    | 24<br>(16 - 32)          | 53<br>(38 - 69)          | 1,308<br>(938 - 1,664)      | 290<br>(202 - 396)          | 121<br>(87 - 173)           |
| Motor vehicle road injuries                     | 9,878<br>(8,526 - 11,870)   | 234<br>(176 - 290)       | 391<br>(318 - 461)       | 7,506<br>(6,511 - 9,047)    | 1,171<br>(943 - 1,414)      | 577<br>(447 - 758)          |
| Other road injuries                             | 560<br>(408 - 1,118)        | 16<br>(10 - 41)          | 31<br>(22 - 64)          | 298<br>(220 - 608)          | 139<br>(94 - 272)           | 76<br>(51 - 156)            |
| Other transport injuries                        | 611<br>(542 - 872)          | 15<br>(12 - 19)          | 28<br>(24 - 36)          | 335<br>(291 - 477)          | 125<br>(109 - 178)          | 108<br>(92 - 168)           |
| Unintentional injuries                          | 21,744<br>(19,547 - 27,179) | 2,022<br>(1,627 - 2,959) | 1,006<br>(872 - 1,325)   | 7,798<br>(6,851 - 10,105)   | 4,239<br>(3,777 - 5,287)    | 6,678<br>(6,005 - 8,246)    |
| Falls                                           | 7,057<br>(6,337 - 9,509)    | 98<br>(76 - 155)         | 127<br>(112 - 164)       | 1,579<br>(1,391 - 2,263)    | 1,719<br>(1,516 - 2,427)    | 3,533<br>(3,106 - 4,852)    |
| Drowning                                        | 3,527<br>(2,852 - 5,681)    | 375<br>(256 - 792)       | 407<br>(331 - 689)       | 1,998<br>(1,569 - 3,131)    | 454<br>(364 - 652)          | 294<br>(233 - 417)          |
| Fire, heat, and hot substances                  | 1,249<br>(1,083 - 1,492)    | 105<br>(81 - 160)        | 39<br>(34 - 50)          | 300<br>(259 - 371)          | 194<br>(153 - 226)          | 611<br>(484 - 746)          |
| Poisonings                                      | 733<br>(643 - 1,105)        | 50<br>(39 - 69)          | 31<br>(25 - 43)          | 362<br>(313 - 571)          | 150<br>(129 - 225)          | 140<br>(118 - 208)          |
| Exposure to mechanical forces                   | 1,998<br>(1,848 - 2,427)    | 88<br>(72 - 111)         | 120<br>(105 - 138)       | 1,225<br>(1,118 - 1,509)    | 365<br>(329 - 449)          | 199<br>(181 - 246)          |
| Unintentional firearm injuries                  | 690<br>(622 - 809)          | 8<br>(7 - 11)            | 28<br>(23 - 33)          | 483<br>(428 - 565)          | 119<br>(103 - 143)          | 53<br>(46 - 65)             |
| Unintentional suffocation                       | 453<br>(288 - 562)          | 38<br>(28 - 54)          | 39<br>(24 - 49)          | 263<br>(162 - 326)          | 73<br>(46 - 91)             | 41<br>(25 - 55)             |
| Other exposure to mechanical forces             | 855<br>(761 - 1,087)        | 41<br>(33 - 53)          | 54<br>(45 - 65)          | 480<br>(424 - 626)          | 174<br>(150 - 221)          | 106<br>(92 - 139)           |
| Adverse effects of medical treatment            | 1,839<br>(1,575 - 2,431)    | 119<br>(87 - 205)        | 25<br>(21 - 34)          | 296<br>(253 - 384)          | 440<br>(365 - 599)          | 958<br>(784 - 1,321)        |
| Animal contact                                  | 504<br>(404 - 1,017)        | 121<br>(84 - 259)        | 34<br>(26 - 64)          | 110<br>(87 - 229)           | 112<br>(86 - 233)           | 127<br>(97 - 259)           |
| Venomous animal contact                         | 368<br>(292 - 749)          | 111<br>(77 - 234)        | 23<br>(17 - 43)          | 74<br>(58 - 157)            | 75<br>(57 - 162)            | 85<br>(64 - 181)            |
| Non-venomous animal contact                     | 135<br>(98 - 279)           | 10<br>(6 - 25)           | 11<br>(8 - 22)           | 36<br>(26 - 76)             | 36<br>(25 - 75)             | 43<br>(30 - 85)             |
| Foreign body                                    | 4,103<br>(3,099 - 6,390)    | 1,044<br>(707 - 1,567)   | 204<br>(157 - 303)       | 1,408<br>(1,032 - 2,370)    | 728<br>(519 - 1,241)        | 718<br>(509 - 1,190)        |
| Pulmonary aspiration and foreign body in airway | 4,080<br>(3,078 - 6,368)    | 1,041<br>(703 - 1,564)   | 201<br>(154 - 300)       | 1,400<br>(1,024 - 2,361)    | 723<br>(515 - 1,236)        | 715<br>(506 - 1,187)        |
| Foreign body in other body part                 | 23<br>(16 - 30)             | 3<br>(2 - 5)             | 3<br>(2 - 4)             | 8<br>(6 - 12)               | 5<br>(3 - 7)                | 3<br>(2 - 5)                |
| Other unintentional injuries                    | 735<br>(669 - 813)          | 21<br>(17 - 26)          | 19<br>(15 - 23)          | 520<br>(460 - 591)          | 79<br>(67 - 94)             | 97<br>(84 - 113)            |
| Self-harm and interpersonal violence            | 28,664<br>(22,082 - 32,848) | 189<br>(136 - 266)       | 451<br>(354 - 545)       | 21,998<br>(16,383 - 24,068) | 4,301<br>(3,545 - 5,841)    | 1,724<br>(1,509 - 2,527)    |
| Self-harm                                       | 6,444<br>(4,530 - 6,932)    | --                       | 135<br>(83 - 155)        | 4,691<br>(3,259 - 5,116)    | 1,034<br>(760 - 1,129)      | 584<br>(433 - 635)          |
| Interpersonal violence                          | 22,220<br>(16,014 - 26,887) | 189<br>(136 - 266)       | 316<br>(237 - 416)       | 17,307<br>(12,115 - 19,367) | 3,267<br>(2,535 - 4,884)    | 1,139<br>(934 - 1,924)      |
| Assault by firearm                              | 15,003<br>(9,640 - 17,553)  | 54<br>(32 - 80)          | 162<br>(105 - 211)       | 12,296<br>(7,742 - 14,341)  | 2,040<br>(1,391 - 2,959)    | 451<br>(315 - 816)          |
| Assault by sharp object                         | 3,666<br>(2,340 - 5,557)    | 25<br>(16 - 43)          | 36<br>(24 - 56)          | 2,776<br>(1,741 - 4,287)    | 576<br>(364 - 930)          | 252<br>(162 - 416)          |
| Assault by other means                          | 3,551<br>(2,836 - 5,543)    | 111<br>(77 - 152)        | 118<br>(91 - 167)        | 2,235<br>(1,687 - 3,378)    | 651<br>(467 - 1,218)        | 436<br>(312 - 815)          |
| Forces of nature, war, and legal intervention   | 1<br>(0 - 0)                | 1<br>(0 - 0)             | --                       | --                          | --                          | --                          |
| Exposure to forces of nature                    | 1<br>(0 - 0)                | 1<br>(0 - 0)             | --                       | --                          | --                          | --                          |

Web Table 31- Mexico deaths with 95% UI by age, sex, and cause in 2013

| Cause                                                             | Males, All Ages                | Males, 0-4 Years            | Males, 5-14 Years        | Males, 15-49 Years          | Males, 50-69 Years            | Males, 70-80 Years             |
|-------------------------------------------------------------------|--------------------------------|-----------------------------|--------------------------|-----------------------------|-------------------------------|--------------------------------|
| All causes                                                        | 363,096<br>(355,958 - 370,189) | 21,533<br>(19,277 - 23,844) | 4,008<br>(3,730 - 4,274) | 83,554<br>(81,504 - 85,609) | 101,736<br>(99,358 - 104,228) | 152,265<br>(150,300 - 154,293) |
| Communicable, maternal, neonatal, and nutritional diseases        | 37,606<br>(34,834 - 41,677)    | 12,596<br>(11,176 - 14,043) | 605<br>(502 - 745)       | 6,325<br>(5,660 - 7,366)    | 5,406<br>(4,885 - 6,205)      | 12,673<br>(11,302 - 15,352)    |
| HIV/AIDS and tuberculosis                                         | 5,142<br>(4,347 - 6,646)       | 19<br>(14 - 26)             | 17<br>(14 - 22)          | 2,976<br>(2,437 - 3,957)    | 1,396<br>(1,089 - 1,893)      | 734<br>(640 - 1,085)           |
| Tuberculosis                                                      | 2,067<br>(1,900 - 2,795)       | 16<br>(12 - 21)             | 16<br>(13 - 20)          | 674<br>(610 - 829)          | 724<br>(650 - 985)            | 637<br>(566 - 969)             |
| HIV/AIDS                                                          | 3,076<br>(2,343 - 4,368)       | 2<br>(1 - 7)                | 2<br>(0 - 4)             | 2,302<br>(1,781 - 3,284)    | 672<br>(389 - 1,103)          | 97<br>(49 - 169)               |
| HIV/AIDS resulting in mycobacterial infection                     | 193<br>(134 - 289)             | 0<br>(0 - 0)                | 0<br>(0 - 0)             | 143<br>(102 - 216)          | 44<br>(24 - 75)               | 7<br>(3 - 12)                  |
| HIV/AIDS resulting in other diseases                              | 2,882<br>(2,203 - 4,117)       | 2<br>(1 - 7)                | 2<br>(0 - 4)             | 2,160<br>(1,670 - 3,085)    | 628<br>(365 - 1,030)          | 90<br>(46 - 157)               |
| Diarrhea, lower respiratory, and other common infectious diseases | 16,926<br>(15,168 - 18,359)    | 3,831<br>(3,275 - 4,410)    | 457<br>(358 - 598)       | 2,460<br>(1,978 - 2,729)    | 2,839<br>(2,372 - 3,091)      | 7,338<br>(6,555 - 8,746)       |
| Diarrheal diseases                                                | 2,324<br>(2,111 - 2,534)       | 788<br>(627 - 939)          | 63<br>(52 - 75)          | 285<br>(258 - 313)          | 374<br>(339 - 415)            | 815<br>(728 - 916)             |
| Intestinal infectious diseases                                    | 642<br>(329 - 1,117)           | 206<br>(106 - 371)          | 193<br>(98 - 335)        | 205<br>(106 - 366)          | 26<br>(13 - 44)               | 13<br>(7 - 21)                 |
| Typhoid fever                                                     | 470<br>(226 - 842)             | 143<br>(65 - 270)           | 149<br>(75 - 261)        | 153<br>(73 - 280)           | 17<br>(8 - 33)                | 7<br>(4 - 13)                  |
| Paratyphoid fever                                                 | 127<br>(60 - 226)              | 41<br>(19 - 77)             | 40<br>(20 - 68)          | 40<br>(19 - 74)             | 4<br>(2 - 7)                  | 2<br>(1 - 3)                   |
| Other intestinal infectious diseases                              | 46<br>(31 - 67)                | 22<br>(11 - 37)             | 4<br>(1 - 10)            | 12<br>(5 - 21)              | 4<br>(1 - 10)                 | 4<br>(1 - 9)                   |
| Lower respiratory infections                                      | 12,821<br>(11,209 - 14,456)    | 2,473<br>(2,091 - 2,903)    | 103<br>(84 - 125)        | 1,615<br>(1,137 - 1,799)    | 2,257<br>(1,821 - 2,497)      | 6,373<br>(5,619 - 7,756)       |
| Upper respiratory infections                                      | 13<br>(11 - 16)                | 1<br>(1 - 2)                | 0<br>(0 - 0)             | 4<br>(3 - 5)                | 4<br>(3 - 5)                  | 4<br>(3 - 6)                   |
| Otitis media                                                      | 14<br>(13 - 14)                | 2<br>(1 - 2)                | 1<br>(1 - 2)             | 5<br>(5 - 6)                | 2<br>(2 - 3)                  | 3<br>(3 - 3)                   |
| Meningitis                                                        | 475<br>(414 - 558)             | 141<br>(85 - 208)           | 33<br>(28 - 38)          | 149<br>(137 - 167)          | 87<br>(80 - 94)               | 65<br>(58 - 72)                |
| Pneumococcal meningitis                                           | 162<br>(144 - 188)             | 39<br>(24 - 58)             | 13<br>(10 - 15)          | 54<br>(49 - 62)             | 32<br>(29 - 36)               | 24<br>(21 - 27)                |
| H influenzae type B meningitis                                    | 86<br>(66 - 112)               | 51<br>(30 - 76)             | 7<br>(6 - 9)             | 15<br>(13 - 17)             | 7<br>(7 - 8)                  | 6<br>(5 - 7)                   |
| Meningococcal meningitis                                          | 54<br>(47 - 62)                | 13<br>(8 - 20)              | 4<br>(3 - 5)             | 19<br>(16 - 22)             | 10<br>(9 - 11)                | 8<br>(7 - 9)                   |
| Other meningitis                                                  | 172<br>(152 - 196)             | 38<br>(23 - 56)             | 9<br>(8 - 11)            | 61<br>(53 - 69)             | 38<br>(34 - 42)               | 27<br>(24 - 30)                |
| Encephalitis                                                      | 567<br>(415 - 681)             | 191<br>(113 - 281)          | 58<br>(37 - 80)          | 181<br>(121 - 230)          | 82<br>(53 - 101)              | 55<br>(33 - 66)                |
| Diphtheria                                                        | 6<br>(3 - 10)                  | 3<br>(1 - 7)                | 1<br>(0 - 2)             | 2<br>(1 - 3)                | 0<br>(0 - 1)                  | --                             |
| Whooping cough                                                    | 26<br>(13 - 51)                | 20<br>(7 - 45)              | 2<br>(1 - 2)             | 4<br>(3 - 4)                | 1<br>(0 - 1)                  | --                             |
| Tetanus                                                           | 12<br>(9 - 25)                 | 2<br>(1 - 5)                | 1<br>(1 - 2)             | 5<br>(4 - 10)               | 3<br>(2 - 7)                  | 1<br>(0 - 3)                   |
| Measles                                                           | 0<br>(0 - 0)                   | 0<br>(0 - 0)                | 0<br>(0 - 0)             | 0<br>(0 - 0)                | 0<br>(0 - 0)                  | --                             |
| Varicella and herpes zoster                                       | 27<br>(20 - 36)                | 6<br>(4 - 10)               | 2<br>(1 - 3)             | 6<br>(4 - 8)                | 3<br>(2 - 4)                  | 11<br>(6 - 18)                 |
| Neglected tropical diseases and malaria                           | 140<br>(115 - 176)             | 21<br>(15 - 32)             | 11<br>(9 - 17)           | 48<br>(40 - 59)             | 27<br>(22 - 36)               | 32<br>(22 - 46)                |
| Malaria                                                           | 1<br>(0 - 2)                   | 0<br>(0 - 0)                | 0<br>(0 - 0)             | 0<br>(0 - 1)                | 0<br>(0 - 1)                  | 0<br>(0 - 1)                   |
| Chagas disease                                                    | 19<br>(3 - 53)                 | 1<br>(0 - 3)                | 1<br>(0 - 4)             | 4<br>(1 - 13)               | 4<br>(1 - 12)                 | 9<br>(1 - 22)                  |
| Leishmaniasis                                                     | 8<br>(7 - 9)                   | 2<br>(1 - 3)                | 1<br>(0 - 1)             | 3<br>(2 - 4)                | 2<br>(1 - 2)                  | 1<br>(1 - 1)                   |
| Visceral leishmaniasis                                            | 8<br>(7 - 9)                   | 2<br>(1 - 3)                | 1<br>(0 - 1)             | 3<br>(2 - 4)                | 2<br>(1 - 2)                  | 1<br>(1 - 1)                   |
| Cysticercosis                                                     | 21<br>(19 - 23)                | 0<br>(0 - 0)                | 0<br>(0 - 1)             | 13<br>(12 - 15)             | 6<br>(5 - 6)                  | 2<br>(2 - 2)                   |
| Cystic echinococcosis                                             | 6<br>(5 - 6)                   | 0<br>(0 - 0)                | 0<br>(0 - 0)             | 3<br>(3 - 3)                | 1<br>(1 - 2)                  | 1<br>(1 - 1)                   |
| Dengue                                                            | 25<br>(13 - 28)                | 2<br>(1 - 3)                | 2<br>(1 - 2)             | 9<br>(6 - 10)               | 5<br>(3 - 6)                  | 7<br>(3 - 9)                   |
| Rabies                                                            | 7<br>(6 - 12)                  | 1<br>(0 - 1)                | 2<br>(1 - 3)             | 3<br>(2 - 5)                | 1<br>(1 - 2)                  | 0<br>(0 - 1)                   |
| Intestinal nematode infections                                    | 10<br>(3 - 21)                 | 4<br>(0 - 13)               | 1<br>(0 - 6)             | 2<br>(0 - 9)                | 1<br>(0 - 5)                  | 1<br>(0 - 6)                   |
| Ascariasis                                                        | 10<br>(3 - 21)                 | 4<br>(0 - 13)               | 1<br>(0 - 6)             | 2<br>(0 - 9)                | 1<br>(0 - 5)                  | 1<br>(0 - 6)                   |
| Other neglected tropical diseases                                 | 42<br>(38 - 49)                | 12<br>(8 - 16)              | 3<br>(3 - 4)             | 9<br>(8 - 10)               | 7<br>(6 - 8)                  | 11<br>(9 - 14)                 |
| Maternal disorders                                                | --                             | --                          | --                       | --                          | --                            | --                             |

Web Table 31- Mexico deaths with 95% UI by age, sex, and cause in 2013

| Cause                                                            | Males, All Ages                | Males, 0-4 Years         | Males, 5-14 Years        | Males, 15-49 Years          | Males, 50-69 Years          | Males, 70-80 Years             |
|------------------------------------------------------------------|--------------------------------|--------------------------|--------------------------|-----------------------------|-----------------------------|--------------------------------|
| Maternal hemorrhage                                              | --                             | --                       | --                       | --                          | --                          | --                             |
| Maternal sepsis and other maternal infections                    | --                             | --                       | --                       | --                          | --                          | --                             |
| Maternal hypertensive disorders                                  | --                             | --                       | --                       | --                          | --                          | --                             |
| Maternal obstructed labor                                        | --                             | --                       | --                       | --                          | --                          | --                             |
| Maternal abortive outcome                                        | --                             | --                       | --                       | --                          | --                          | --                             |
| Indirect maternal deaths                                         | --                             | --                       | --                       | --                          | --                          | --                             |
| Late maternal deaths                                             | --                             | --                       | --                       | --                          | --                          | --                             |
| Maternal deaths aggravated by HIV/AIDS                           | --                             | --                       | --                       | --                          | --                          | --                             |
| Other maternal disorders                                         | --                             | --                       | --                       | --                          | --                          | --                             |
| Neonatal disorders                                               | 8,063<br>(7,116 - 9,009)       | 8,063<br>(7,116 - 9,009) | --                       | --                          | --                          | --                             |
| Neonatal preterm birth complications                             | 3,765<br>(2,527 - 4,720)       | 3,765<br>(2,527 - 4,720) | --                       | --                          | --                          | --                             |
| Neonatal encephalopathy due to birth asphyxia and trauma         | 1,662<br>(1,204 - 2,336)       | 1,662<br>(1,204 - 2,336) | --                       | --                          | --                          | --                             |
| Neonatal sepsis and other neonatal infections                    | 1,755<br>(905 - 2,857)         | 1,755<br>(905 - 2,857)   | --                       | --                          | --                          | --                             |
| Hemolytic disease and other neonatal jaundice                    | 42<br>(22 - 73)                | 42<br>(22 - 73)          | --                       | --                          | --                          | --                             |
| Other neonatal disorders                                         | 840<br>(588 - 1,176)           | 840<br>(588 - 1,176)     | --                       | --                          | --                          | --                             |
| Nutritional deficiencies                                         | 6,629<br>(4,664 - 9,777)       | 518<br>(327 - 711)       | 85<br>(53 - 116)         | 652<br>(426 - 974)          | 968<br>(658 - 1,513)        | 4,405<br>(3,048 - 6,603)       |
| Protein-energy malnutrition                                      | 4,892<br>(3,214 - 7,304)       | 451<br>(277 - 622)       | 60<br>(33 - 85)          | 413<br>(242 - 640)          | 633<br>(388 - 1,030)        | 3,335<br>(2,186 - 5,049)       |
| Iodine deficiency                                                | 3<br>(2 - 5)                   | 0<br>(0 - 1)             | 0<br>(0 - 0)             | 1<br>(0 - 2)                | 1<br>(0 - 1)                | 1<br>(0 - 2)                   |
| Iron-deficiency anemia                                           | 1,193<br>(482 - 2,084)         | 40<br>(11 - 91)          | 17<br>(6 - 31)           | 173<br>(72 - 296)           | 234<br>(100 - 423)          | 729<br>(283 - 1,316)           |
| Other nutritional deficiencies                                   | 540<br>(264 - 1,214)           | 27<br>(9 - 73)           | 8<br>(4 - 16)            | 64<br>(33 - 131)            | 101<br>(55 - 222)           | 340<br>(161 - 784)             |
| Other communicable, maternal, neonatal, and nutritional diseases | 706<br>(610 - 911)             | 143<br>(100 - 202)       | 34<br>(27 - 46)          | 190<br>(163 - 256)          | 176<br>(151 - 233)          | 163<br>(135 - 226)             |
| Sexually transmitted diseases excluding HIV                      | 98<br>(56 - 160)               | 84<br>(47 - 142)         | 7<br>(4 - 11)            | 4<br>(2 - 5)                | 1<br>(1 - 2)                | 1<br>(1 - 3)                   |
| Syphilis                                                         | 95<br>(54 - 157)               | 84<br>(47 - 142)         | 6<br>(3 - 10)            | 2<br>(1 - 3)                | 1<br>(1 - 2)                | 1<br>(1 - 2)                   |
| Chlamydial infection                                             | --                             | --                       | --                       | --                          | --                          | --                             |
| Gonococcal infection                                             | 2<br>(1 - 2)                   | --                       | 0<br>(0 - 0)             | 1<br>(1 - 1)                | 0<br>(0 - 0)                | 0<br>(0 - 0)                   |
| Other sexually transmitted diseases                              | 1<br>(1 - 2)                   | --                       | 0<br>(0 - 0)             | 1<br>(1 - 1)                | 0<br>(0 - 0)                | 0<br>(0 - 0)                   |
| Hepatitis                                                        | 208<br>(192 - 224)             | 12<br>(9 - 16)           | 5<br>(5 - 6)             | 66<br>(58 - 74)             | 73<br>(63 - 82)             | 52<br>(45 - 60)                |
| Acute hepatitis A                                                | 52<br>(21 - 87)                | 8<br>(4 - 12)            | 4<br>(2 - 5)             | 26<br>(11 - 42)             | 11<br>(3 - 22)              | 3<br>(1 - 8)                   |
| Acute hepatitis B                                                | 130<br>(95 - 166)              | 4<br>(2 - 8)             | 1<br>(0 - 2)             | 30<br>(17 - 45)             | 54<br>(40 - 67)             | 41<br>(32 - 51)                |
| Acute hepatitis C                                                | 25<br>(6 - 55)                 | --                       | 1<br>(0 - 2)             | 9<br>(2 - 19)               | 8<br>(2 - 19)               | 7<br>(2 - 16)                  |
| Other infectious diseases                                        | 401<br>(327 - 604)             | 47<br>(34 - 70)          | 22<br>(17 - 32)          | 120<br>(95 - 185)           | 102<br>(79 - 160)           | 110<br>(82 - 172)              |
| Non-communicable diseases                                        | 266,212<br>(258,754 - 272,079) | 7,500<br>(6,525 - 8,505) | 1,682<br>(1,485 - 1,840) | 38,250<br>(36,131 - 40,632) | 85,890<br>(82,945 - 88,289) | 132,890<br>(129,219 - 135,158) |
| Neoplasms                                                        | 41,911<br>(38,787 - 43,786)    | 479<br>(349 - 610)       | 680<br>(589 - 753)       | 5,906<br>(5,431 - 6,264)    | 14,699<br>(13,757 - 15,337) | 20,147<br>(18,125 - 21,529)    |
| Esophageal cancer                                                | 1,061<br>(822 - 1,327)         | --                       | --                       | 96<br>(74 - 122)            | 444<br>(339 - 559)          | 521<br>(399 - 666)             |
| Stomach cancer                                                   | 4,695<br>(4,524 - 4,880)       | --                       | --                       | 580<br>(546 - 619)          | 1,856<br>(1,764 - 1,956)    | 2,259<br>(2,156 - 2,362)       |
| Liver cancer                                                     | 3,127<br>(2,962 - 3,370)       | --                       | 9<br>(8 - 11)            | 266<br>(245 - 295)          | 1,224<br>(1,143 - 1,333)    | 1,628<br>(1,521 - 1,758)       |
| Liver cancer due to hepatitis B                                  | 860<br>(729 - 1,011)           | --                       | 4<br>(3 - 5)             | 113<br>(98 - 130)           | 384<br>(321 - 457)          | 359<br>(295 - 425)             |
| Liver cancer due to hepatitis C                                  | 1,531<br>(1,372 - 1,685)       | --                       | 2<br>(1 - 2)             | 103<br>(87 - 118)           | 587<br>(511 - 664)          | 839<br>(746 - 930)             |
| Liver cancer due to alcohol use                                  | 574<br>(490 - 673)             | --                       | --                       | 25<br>(21 - 31)             | 189<br>(158 - 225)          | 360<br>(306 - 422)             |
| Liver cancer due to other causes                                 | 163<br>(141 - 192)             | --                       | 4<br>(3 - 4)             | 25<br>(22 - 29)             | 64<br>(53 - 77)             | 70<br>(60 - 84)                |

Web Table 31- Mexico deaths with 95% UI by age, sex, and cause in 2013

| Cause                                         | Males, All Ages             | Males, 0-4 Years   | Males, 5-14 Years  | Males, 15-49 Years       | Males, 50-69 Years          | Males, 70-80 Years          |
|-----------------------------------------------|-----------------------------|--------------------|--------------------|--------------------------|-----------------------------|-----------------------------|
| Larynx cancer                                 | 902<br>(732 - 1,295)        | --                 | --                 | 62<br>(51 - 88)          | 395<br>(328 - 567)          | 445<br>(356 - 636)          |
| Tracheal, bronchus and lung cancer            | 5,672<br>(5,408 - 5,903)    | --                 | --                 | 405<br>(374 - 442)       | 2,298<br>(2,168 - 2,412)    | 2,968<br>(2,814 - 3,117)    |
| Breast cancer                                 | 50<br>(44 - 61)             | --                 | --                 | 11<br>(10 - 14)          | 19<br>(16 - 24)             | 20<br>(17 - 25)             |
| Cervical cancer                               | --                          | --                 | --                 | --                       | --                          | --                          |
| Uterine cancer                                | --                          | --                 | --                 | --                       | --                          | --                          |
| Prostate cancer                               | 6,520<br>(4,465 - 8,835)    | --                 | --                 | 62<br>(45 - 88)          | 1,376<br>(986 - 1,928)      | 5,081<br>(3,379 - 6,830)    |
| Colon and rectum cancer                       | 3,163<br>(3,040 - 3,293)    | --                 | --                 | 502<br>(475 - 541)       | 1,212<br>(1,151 - 1,276)    | 1,448<br>(1,371 - 1,522)    |
| Lip and oral cavity cancer                    | 580<br>(423 - 746)          | --                 | --                 | 67<br>(49 - 84)          | 245<br>(180 - 310)          | 268<br>(194 - 344)          |
| Nasopharynx cancer                            | 90<br>(85 - 96)             | --                 | 1<br>(1 - 2)       | 28<br>(26 - 31)          | 39<br>(36 - 42)             | 22<br>(20 - 24)             |
| Other pharynx cancer                          | 225<br>(186 - 266)          | --                 | --                 | 21<br>(17 - 24)          | 109<br>(92 - 128)           | 95<br>(77 - 112)            |
| Gallbladder and biliary tract cancer          | 608<br>(499 - 727)          | --                 | --                 | 53<br>(42 - 64)          | 233<br>(189 - 277)          | 322<br>(258 - 383)          |
| Pancreatic cancer                             | 2,115<br>(2,019 - 2,210)    | --                 | --                 | 236<br>(219 - 253)       | 963<br>(903 - 1,025)        | 916<br>(860 - 974)          |
| Malignant skin melanoma                       | 326<br>(179 - 465)          | --                 | --                 | 67<br>(38 - 99)          | 125<br>(68 - 179)           | 134<br>(71 - 192)           |
| Non-melanoma skin cancer                      | 631<br>(445 - 930)          | --                 | --                 | 71<br>(51 - 108)         | 202<br>(148 - 306)          | 358<br>(249 - 521)          |
| Ovarian cancer                                | --                          | --                 | --                 | --                       | --                          | --                          |
| Testicular cancer                             | 427<br>(284 - 532)          | --                 | --                 | 331<br>(219 - 414)       | 44<br>(28 - 54)             | 53<br>(34 - 66)             |
| Kidney cancer                                 | 1,427<br>(1,314 - 1,530)    | 27<br>(21 - 35)    | 13<br>(11 - 14)    | 186<br>(166 - 205)       | 687<br>(624 - 749)          | 513<br>(471 - 553)          |
| Bladder cancer                                | 715<br>(598 - 765)          | --                 | --                 | 38<br>(33 - 42)          | 233<br>(202 - 251)          | 444<br>(370 - 481)          |
| Brain and nervous system cancer               | 1,231<br>(762 - 1,519)      | 42<br>(20 - 64)    | 86<br>(49 - 107)   | 389<br>(244 - 507)       | 452<br>(276 - 565)          | 261<br>(150 - 316)          |
| Thyroid cancer                                | 218<br>(170 - 239)          | --                 | 1<br>(1 - 1)       | 29<br>(23 - 33)          | 93<br>(72 - 104)            | 96<br>(72 - 105)            |
| Mesothelioma                                  | 189<br>(177 - 206)          | --                 | --                 | 37<br>(33 - 41)          | 87<br>(80 - 96)             | 65<br>(60 - 71)             |
| Hodgkin lymphoma                              | 389<br>(334 - 586)          | 11<br>(7 - 22)     | 21<br>(17 - 34)    | 136<br>(114 - 205)       | 123<br>(103 - 197)          | 99<br>(84 - 149)            |
| Non-Hodgkin lymphoma                          | 1,812<br>(1,207 - 2,058)    | 77<br>(50 - 118)   | 60<br>(43 - 74)    | 456<br>(324 - 523)       | 608<br>(395 - 708)          | 611<br>(369 - 722)          |
| Multiple myeloma                              | 518<br>(364 - 624)          | --                 | --                 | 72<br>(52 - 92)          | 264<br>(182 - 327)          | 183<br>(127 - 226)          |
| Leukemia                                      | 2,372<br>(2,246 - 2,520)    | 153<br>(107 - 199) | 347<br>(306 - 385) | 936<br>(873 - 1,028)     | 466<br>(440 - 498)          | 470<br>(439 - 502)          |
| Other neoplasms                               | 2,849<br>(2,213 - 3,149)    | 169<br>(86 - 221)  | 141<br>(94 - 165)  | 768<br>(616 - 858)       | 902<br>(683 - 1,027)        | 868<br>(632 - 994)          |
| Cardiovascular diseases                       | 75,027<br>(72,947 - 77,529) | 251<br>(212 - 290) | 158<br>(140 - 176) | 7,879<br>(7,470 - 8,435) | 22,086<br>(21,318 - 22,959) | 44,653<br>(43,242 - 45,980) |
| Rheumatic heart disease                       | 284<br>(190 - 367)          | 3<br>(2 - 6)       | 4<br>(2 - 5)       | 62<br>(48 - 103)         | 117<br>(76 - 154)           | 99<br>(56 - 121)            |
| Ischemic heart disease                        | 47,784<br>(42,841 - 50,789) | 34<br>(23 - 43)    | 42<br>(32 - 49)    | 5,044<br>(4,492 - 5,461) | 14,680<br>(13,490 - 15,639) | 27,985<br>(24,675 - 29,942) |
| Cerebrovascular disease                       | 19,386<br>(16,444 - 23,717) | 70<br>(52 - 88)    | 60<br>(49 - 72)    | 1,717<br>(1,412 - 2,197) | 5,277<br>(4,438 - 6,467)    | 12,262<br>(10,261 - 15,230) |
| Ischemic stroke                               | 5,691<br>(4,489 - 8,068)    | 5<br>(3 - 8)       | 6<br>(5 - 9)       | 271<br>(203 - 374)       | 1,317<br>(1,020 - 1,813)    | 4,091<br>(3,209 - 5,889)    |
| Hemorrhagic stroke                            | 13,696<br>(11,295 - 16,775) | 65<br>(48 - 82)    | 54<br>(43 - 65)    | 1,445<br>(1,178 - 1,827) | 3,960<br>(3,259 - 4,842)    | 8,172<br>(6,541 - 10,099)   |
| Hypertensive heart disease                    | 2,755<br>(1,985 - 3,635)    | 3<br>(2 - 6)       | 2<br>(1 - 3)       | 110<br>(81 - 159)        | 632<br>(458 - 873)          | 2,008<br>(1,426 - 2,660)    |
| Cardiomyopathy and myocarditis                | 985<br>(757 - 1,313)        | 81<br>(60 - 108)   | 25<br>(18 - 32)    | 323<br>(249 - 448)       | 337<br>(257 - 476)          | 218<br>(158 - 296)          |
| Atrial fibrillation and flutter               | 529<br>(444 - 621)          | --                 | --                 | 20<br>(16 - 24)          | 97<br>(80 - 116)            | 413<br>(346 - 489)          |
| Aortic aneurysm                               | 451<br>(398 - 559)          | --                 | --                 | 48<br>(42 - 62)          | 135<br>(117 - 167)          | 268<br>(237 - 331)          |
| Peripheral vascular disease                   | 196<br>(171 - 232)          | --                 | --                 | 6<br>(5 - 7)             | 38<br>(32 - 45)             | 152<br>(130 - 183)          |
| Endocarditis                                  | 263<br>(180 - 368)          | 28<br>(18 - 42)    | 8<br>(5 - 11)      | 91<br>(63 - 133)         | 67<br>(44 - 92)             | 70<br>(46 - 100)            |
| Other cardiovascular and circulatory diseases | 2,392<br>(1,983 - 2,974)    | 32<br>(22 - 40)    | 18<br>(13 - 21)    | 458<br>(364 - 539)       | 708<br>(559 - 870)          | 1,177<br>(1,021 - 1,503)    |
| Chronic respiratory diseases                  | 20,760<br>(17,447 - 23,327) | 411<br>(327 - 503) | 59<br>(43 - 68)    | 982<br>(799 - 1,108)     | 3,982<br>(3,327 - 4,580)    | 15,326<br>(12,769 - 17,245) |



Web Table 31- Mexico deaths with 95% UI by age, sex, and cause in 2013

| Cause                                               | Males, All Ages             | Males, 0-4 Years   | Males, 5-14 Years | Males, 15-49 Years       | Males, 50-69 Years          | Males, 70-80 Years          |
|-----------------------------------------------------|-----------------------------|--------------------|-------------------|--------------------------|-----------------------------|-----------------------------|
| Chronic obstructive pulmonary disease               | 17,577<br>(14,937 - 19,872) | 288<br>(227 - 357) | 33<br>(24 - 38)   | 625<br>(508 - 711)       | 3,121<br>(2,669 - 3,632)    | 13,510<br>(11,330 - 15,291) |
| Pneumoconiosis                                      | 361<br>(263 - 528)          | 1<br>(0 - 1)       | 2<br>(1 - 2)      | 34<br>(24 - 49)          | 123<br>(86 - 180)           | 201<br>(142 - 309)          |
| Silicosis                                           | 91<br>(65 - 133)            | 0<br>(0 - 0)       | 0<br>(0 - 1)      | 10<br>(7 - 15)           | 31<br>(22 - 46)             | 49<br>(34 - 74)             |
| Asbestosis                                          | 56<br>(39 - 83)             | 0<br>(0 - 0)       | 0<br>(0 - 1)      | 4<br>(3 - 6)             | 24<br>(16 - 35)             | 27<br>(19 - 41)             |
| Coal workers pneumoconiosis                         | 38<br>(28 - 56)             | 0<br>(0 - 0)       | 0<br>(0 - 1)      | 4<br>(3 - 5)             | 12<br>(8 - 17)              | 22<br>(16 - 34)             |
| Other pneumoconiosis                                | 175<br>(130 - 260)          | 0<br>(0 - 0)       | 0<br>(0 - 1)      | 15<br>(11 - 22)          | 56<br>(40 - 83)             | 103<br>(73 - 159)           |
| Asthma                                              | 948<br>(756 - 1,085)        | 24<br>(14 - 34)    | 10<br>(7 - 12)    | 102<br>(80 - 116)        | 229<br>(182 - 269)          | 583<br>(461 - 681)          |
| Interstitial lung disease and pulmonary sarcoidosis | 1,447<br>(901 - 1,940)      | 10<br>(6 - 17)     | 6<br>(4 - 9)      | 150<br>(100 - 202)       | 432<br>(273 - 586)          | 849<br>(492 - 1,144)        |
| Other chronic respiratory diseases                  | 428<br>(346 - 491)          | 88<br>(68 - 106)   | 8<br>(6 - 10)     | 72<br>(56 - 82)          | 78<br>(62 - 93)             | 182<br>(143 - 219)          |
| Cirrhosis                                           | 29,425<br>(28,395 - 30,609) | 23<br>(16 - 31)    | 30<br>(26 - 33)   | 9,234<br>(8,729 - 9,788) | 13,251<br>(12,751 - 13,809) | 6,887<br>(6,609 - 7,194)    |
| Cirrhosis due to hepatitis B                        | 926<br>(817 - 1,041)        | 0<br>(0 - 0)       | 1<br>(1 - 1)      | 297<br>(261 - 338)       | 420<br>(369 - 474)          | 208<br>(176 - 242)          |
| Cirrhosis due to hepatitis C                        | 8,693<br>(7,961 - 9,419)    | 2<br>(1 - 2)       | 5<br>(4 - 6)      | 2,323<br>(2,043 - 2,589) | 3,981<br>(3,607 - 4,325)    | 2,383<br>(2,193 - 2,586)    |
| Cirrhosis due to alcohol use                        | 16,151<br>(15,240 - 17,265) | --                 | --                | 4,806<br>(4,431 - 5,194) | 7,474<br>(7,012 - 8,054)    | 3,871<br>(3,643 - 4,135)    |
| Cirrhosis due to other causes                       | 3,654<br>(3,248 - 4,101)    | 22<br>(15 - 29)    | 24<br>(21 - 27)   | 1,808<br>(1,608 - 2,004) | 1,376<br>(1,175 - 1,593)    | 425<br>(368 - 484)          |
| Digestive diseases                                  | 9,721<br>(8,094 - 10,252)   | 53<br>(34 - 72)    | 63<br>(46 - 72)   | 1,648<br>(1,383 - 1,777) | 2,754<br>(2,302 - 2,936)    | 5,202<br>(4,300 - 5,532)    |
| Peptic ulcer disease                                | 2,077<br>(1,688 - 2,493)    | 1<br>(0 - 1)       | 3<br>(2 - 4)      | 241<br>(189 - 299)       | 566<br>(458 - 688)          | 1,266<br>(1,019 - 1,554)    |
| Gastritis and duodenitis                            | 668<br>(352 - 1,047)        | 3<br>(1 - 4)       | 2<br>(1 - 4)      | 106<br>(58 - 170)        | 175<br>(95 - 276)           | 382<br>(191 - 607)          |
| Appendicitis                                        | 433<br>(293 - 551)          | 2<br>(1 - 3)       | 10<br>(6 - 14)    | 144<br>(96 - 182)        | 135<br>(89 - 174)           | 142<br>(93 - 189)           |
| Paralytic ileus and intestinal obstruction          | 1,197<br>(690 - 1,780)      | 26<br>(15 - 38)    | 21<br>(14 - 30)   | 150<br>(87 - 233)        | 294<br>(169 - 449)          | 706<br>(395 - 1,026)        |
| Inguinal, femoral, and abdominal hernia             | 444<br>(241 - 591)          | 1<br>(0 - 2)       | 2<br>(1 - 2)      | 34<br>(20 - 47)          | 115<br>(65 - 153)           | 292<br>(156 - 388)          |
| Inflammatory bowel disease                          | 234<br>(178 - 315)          | 3<br>(1 - 5)       | 2<br>(1 - 3)      | 49<br>(37 - 67)          | 75<br>(56 - 103)            | 104<br>(77 - 144)           |
| Vascular intestinal disorders                       | 1,120<br>(483 - 2,143)      | 2<br>(1 - 6)       | 4<br>(1 - 8)      | 85<br>(34 - 176)         | 308<br>(131 - 593)          | 722<br>(311 - 1,379)        |
| Gallbladder and biliary diseases                    | 1,133<br>(791 - 1,320)      | 2<br>(1 - 2)       | 3<br>(2 - 4)      | 123<br>(83 - 146)        | 321<br>(230 - 376)          | 684<br>(473 - 816)          |
| Pancreatitis                                        | 1,290<br>(895 - 1,682)      | 2<br>(1 - 3)       | 5<br>(3 - 7)      | 538<br>(384 - 680)       | 416<br>(277 - 548)          | 329<br>(202 - 454)          |
| Other digestive diseases                            | 1,124<br>(795 - 1,357)      | 12<br>(6 - 17)     | 11<br>(6 - 14)    | 178<br>(127 - 218)       | 348<br>(251 - 418)          | 575<br>(388 - 710)          |
| Neurological disorders                              | 14,266<br>(13,377 - 15,165) | 129<br>(97 - 207)  | 111<br>(92 - 140) | 1,107<br>(946 - 1,350)   | 1,422<br>(1,303 - 1,552)    | 11,497<br>(10,711 - 12,265) |
| Alzheimer disease and other dementias               | 11,212<br>(10,404 - 11,997) | --                 | --                | 4<br>(3 - 6)             | 723<br>(654 - 810)          | 10,485<br>(9,692 - 11,256)  |
| Parkinson disease                                   | 807<br>(591 - 880)          | --                 | --                | 18<br>(15 - 20)          | 150<br>(121 - 167)          | 640<br>(466 - 705)          |
| Epilepsy                                            | 1,269<br>(1,054 - 1,644)    | 61<br>(41 - 107)   | 67<br>(52 - 90)   | 723<br>(585 - 936)       | 246<br>(188 - 323)          | 171<br>(135 - 225)          |
| Multiple sclerosis                                  | 129<br>(46 - 161)           | --                 | --                | 55<br>(20 - 70)          | 51<br>(18 - 65)             | 24<br>(8 - 31)              |
| Other neurological disorders                        | 848<br>(647 - 1,007)        | 68<br>(51 - 112)   | 44<br>(34 - 57)   | 307<br>(232 - 363)       | 252<br>(181 - 289)          | 177<br>(129 - 201)          |
| Mental and substance use disorders                  | 4,752<br>(4,097 - 8,581)    | 15<br>(11 - 28)    | 0<br>(0 - 0)      | 2,229<br>(1,906 - 4,051) | 1,724<br>(1,441 - 3,195)    | 783<br>(664 - 1,365)        |
| Schizophrenia                                       | 69<br>(51 - 101)            | --                 | --                | 27<br>(19 - 40)          | 26<br>(19 - 38)             | 15<br>(11 - 22)             |
| Alcohol use disorders                               | 4,121<br>(3,464 - 7,893)    | --                 | --                | 1,832<br>(1,521 - 3,625) | 1,609<br>(1,328 - 3,086)    | 680<br>(561 - 1,246)        |
| Drug use disorders                                  | 558<br>(496 - 798)          | 15<br>(11 - 28)    | --                | 366<br>(319 - 522)       | 89<br>(78 - 125)            | 88<br>(76 - 125)            |
| Opioid use disorders                                | 122<br>(105 - 178)          | 4<br>(2 - 7)       | --                | 80<br>(67 - 118)         | 18<br>(14 - 25)             | 20<br>(16 - 28)             |
| Cocaine use disorders                               | 13<br>(11 - 19)             | 0<br>(0 - 1)       | --                | 9<br>(7 - 14)            | 2<br>(1 - 2)                | 2<br>(1 - 2)                |
| Amphetamine use disorders                           | 10<br>(8 - 14)              | 0<br>(0 - 1)       | --                | 7<br>(5 - 9)             | 2<br>(1 - 2)                | 1<br>(1 - 2)                |
| Other drug use disorders                            | 414<br>(367 - 592)          | 11<br>(8 - 20)     | --                | 269<br>(232 - 393)       | 68<br>(59 - 96)             | 65<br>(56 - 94)             |
| Eating disorders                                    | 4<br>(3 - 4)                | --                 | 0<br>(0 - 0)      | 4<br>(3 - 4)             | --                          | --                          |

Web Table 31- Mexico deaths with 95% UI by age, sex, and cause in 2013

| Cause                                               | Males, All Ages             | Males, 0-4 Years         | Males, 5-14 Years  | Males, 15-49 Years       | Males, 50-69 Years          | Males, 70-80 Years          |
|-----------------------------------------------------|-----------------------------|--------------------------|--------------------|--------------------------|-----------------------------|-----------------------------|
| Anorexia nervosa                                    | 4<br>(3 - 4)                | --                       | 0<br>(0 - 0)       | 4<br>(3 - 4)             | --                          | --                          |
| Diabetes, urogenital, blood, and endocrine diseases | 61,861<br>(55,157 - 64,456) | 494<br>(398 - 609)       | 238<br>(201 - 270) | 8,387<br>(7,148 - 8,929) | 25,374<br>(21,856 - 28,629) | 27,367<br>(25,204 - 28,539) |
| Diabetes mellitus                                   | 28,047<br>(27,037 - 29,195) | 51<br>(44 - 59)          | 21<br>(19 - 24)    | 3,164<br>(2,976 - 3,394) | 11,799<br>(11,308 - 13,390) | 13,011<br>(12,464 - 13,597) |
| Acute glomerulonephritis                            | 28<br>(21 - 39)             | 1<br>(1 - 2)             | 1<br>(1 - 2)       | 5<br>(4 - 7)             | 8<br>(6 - 11)               | 13<br>(10 - 20)             |
| Chronic kidney disease                              | 28,606<br>(21,897 - 30,520) | 123<br>(93 - 153)        | 115<br>(94 - 133)  | 4,194<br>(3,165 - 4,573) | 12,164<br>(8,346 - 13,152)  | 12,011<br>(9,887 - 12,870)  |
| Chronic kidney disease due to diabetes mellitus     | 16,968<br>(11,779 - 18,333) | 18<br>(11 - 28)          | 10<br>(7 - 18)     | 2,146<br>(1,411 - 2,404) | 8,099<br>(5,020 - 8,855)    | 6,694<br>(4,906 - 7,390)    |
| Chronic kidney disease due to hypertension          | 3,530<br>(1,530 - 4,656)    | 33<br>(16 - 46)          | 29<br>(14 - 37)    | 650<br>(298 - 850)       | 1,036<br>(456 - 1,528)      | 1,782<br>(747 - 2,183)      |
| Chronic kidney disease due to glomerulonephritis    | 469<br>(279 - 600)          | 11<br>(6 - 16)           | 13<br>(7 - 16)     | 145<br>(87 - 184)        | 100<br>(58 - 135)           | 200<br>(116 - 270)          |
| Chronic kidney disease due to other causes          | 7,640<br>(5,285 - 10,125)   | 60<br>(38 - 83)          | 63<br>(47 - 77)    | 1,252<br>(797 - 1,615)   | 2,929<br>(2,019 - 3,988)    | 3,335<br>(2,312 - 4,426)    |
| Urinary diseases and male infertility               | 2,213<br>(1,933 - 2,597)    | 55<br>(42 - 69)          | 12<br>(10 - 14)    | 235<br>(199 - 275)       | 543<br>(446 - 622)          | 1,368<br>(1,197 - 1,664)    |
| Interstitial nephritis and urinary tract infections | 1,427<br>(1,039 - 1,632)    | 43<br>(33 - 57)          | 8<br>(6 - 10)      | 140<br>(106 - 165)       | 322<br>(225 - 371)          | 914<br>(651 - 1,045)        |
| Urolithiasis                                        | 167<br>(132 - 243)          | --                       | 1<br>(1 - 2)       | 30<br>(23 - 42)          | 63<br>(49 - 92)             | 73<br>(56 - 109)            |
| Other urinary diseases                              | 618<br>(484 - 929)          | 13<br>(8 - 19)           | 3<br>(2 - 4)       | 65<br>(48 - 91)          | 157<br>(120 - 228)          | 381<br>(293 - 606)          |
| Gynecological diseases                              | --                          | --                       | --                 | --                       | --                          | --                          |
| Uterine fibroids                                    | --                          | --                       | --                 | --                       | --                          | --                          |
| Polycystic ovarian syndrome                         | --                          | --                       | --                 | --                       | --                          | --                          |
| Endometriosis                                       | --                          | --                       | --                 | --                       | --                          | --                          |
| Genital prolapse                                    | --                          | --                       | --                 | --                       | --                          | --                          |
| Other gynecological diseases                        | --                          | --                       | --                 | --                       | --                          | --                          |
| Hemoglobinopathies and hemolytic anemias            | 348<br>(216 - 492)          | 36<br>(19 - 60)          | 32<br>(18 - 45)    | 109<br>(67 - 158)        | 75<br>(45 - 107)            | 95<br>(58 - 141)            |
| Thalassemias                                        | 4<br>(2 - 6)                | 1<br>(1 - 2)             | 1<br>(1 - 1)       | 1<br>(1 - 2)             | 0<br>(0 - 0)                | 0<br>(0 - 0)                |
| Sickle cell disorders                               | 144<br>(87 - 198)           | 21<br>(11 - 35)          | 23<br>(13 - 32)    | 70<br>(43 - 100)         | 27<br>(17 - 39)             | 3<br>(2 - 4)                |
| G6PD deficiency                                     | 13<br>(8 - 18)              | 2<br>(1 - 4)             | 2<br>(1 - 2)       | 5<br>(3 - 7)             | 3<br>(2 - 4)                | 1<br>(1 - 2)                |
| Other hemoglobinopathies and hemolytic anemias      | 187<br>(117 - 270)          | 11<br>(6 - 18)           | 6<br>(4 - 9)       | 34<br>(21 - 48)          | 44<br>(27 - 63)             | 91<br>(56 - 135)            |
| Endocrine, metabolic, blood, and immune disorders   | 2,619<br>(1,619 - 2,892)    | 227<br>(147 - 306)       | 57<br>(37 - 68)    | 680<br>(417 - 780)       | 786<br>(467 - 906)          | 868<br>(485 - 989)          |
| Musculoskeletal disorders                           | 857<br>(701 - 1,210)        | --                       | 18<br>(14 - 26)    | 174<br>(140 - 240)       | 242<br>(200 - 338)          | 423<br>(346 - 636)          |
| Rheumatoid arthritis                                | 178<br>(105 - 238)          | --                       | 2<br>(1 - 3)       | 10<br>(7 - 16)           | 49<br>(32 - 67)             | 117<br>(65 - 164)           |
| Other musculoskeletal disorders                     | 679<br>(570 - 1,006)        | --                       | 16<br>(13 - 23)    | 163<br>(133 - 226)       | 193<br>(161 - 273)          | 307<br>(237 - 501)          |
| Other non-communicable diseases                     | 7,633<br>(6,827 - 8,413)    | 5,646<br>(4,875 - 6,395) | 324<br>(268 - 372) | 703<br>(611 - 842)       | 356<br>(323 - 405)          | 605<br>(549 - 677)          |
| Congenital anomalies                                | 6,658<br>(5,837 - 7,422)    | 5,399<br>(4,639 - 6,145) | 315<br>(258 - 362) | 589<br>(496 - 729)       | 173<br>(140 - 219)          | 182<br>(153 - 228)          |
| Neural tube defects                                 | 258<br>(200 - 324)          | 213<br>(161 - 274)       | 9<br>(6 - 11)      | 15<br>(12 - 19)          | 4<br>(3 - 5)                | 17<br>(13 - 22)             |
| Congenital heart anomalies                          | 3,500<br>(2,817 - 3,958)    | 2,792<br>(2,164 - 3,206) | 197<br>(154 - 231) | 354<br>(299 - 444)       | 91<br>(74 - 120)            | 68<br>(54 - 91)             |
| Cleft lip and cleft palate                          | 7<br>(2 - 18)               | 7<br>(2 - 18)            | --                 | --                       | --                          | --                          |
| Down syndrome                                       | 241<br>(130 - 356)          | 140<br>(67 - 232)        | 18<br>(10 - 25)    | 61<br>(36 - 81)          | 19<br>(10 - 27)             | 3<br>(1 - 4)                |
| Chromosomal unbalanced rearrangements               | 63<br>(35 - 79)             | 52<br>(27 - 67)          | 3<br>(2 - 3)       | 4<br>(3 - 5)             | 1<br>(1 - 2)                | 3<br>(1 - 4)                |
| Other congenital anomalies                          | 2,587<br>(2,222 - 3,032)    | 2,195<br>(1,830 - 2,609) | 88<br>(70 - 108)   | 155<br>(127 - 197)       | 58<br>(47 - 74)             | 92<br>(76 - 115)            |
| Skin and subcutaneous diseases                      | 756<br>(705 - 825)          | 28<br>(22 - 37)          | 9<br>(8 - 11)      | 114<br>(102 - 129)       | 182<br>(164 - 202)          | 423<br>(380 - 480)          |
| Cellulitis                                          | 81<br>(47 - 103)            | 5<br>(3 - 8)             | 1<br>(1 - 2)       | 18<br>(10 - 24)          | 28<br>(16 - 36)             | 28<br>(15 - 38)             |
| Pyoderma                                            | 308<br>(258 - 345)          | 22<br>(17 - 30)          | 5<br>(4 - 6)       | 51<br>(43 - 60)          | 84<br>(73 - 97)             | 145<br>(113 - 169)          |
| Decubitus ulcer                                     | 357<br>(320 - 446)          | 1<br>(0 - 1)             | 1<br>(1 - 2)       | 39<br>(34 - 51)          | 68<br>(58 - 92)             | 249<br>(219 - 304)          |

Web Table 31- Mexico deaths with 95% UI by age, sex, and cause in 2013

| Cause                                           | Males, All Ages             | Males, 0-4 Years         | Males, 5-14 Years        | Males, 15-49 Years          | Males, 50-69 Years         | Males, 70-80 Years       |
|-------------------------------------------------|-----------------------------|--------------------------|--------------------------|-----------------------------|----------------------------|--------------------------|
| Other skin and subcutaneous diseases            | 11<br>(7 - 13)              | 1<br>(1 - 1)             | 1<br>(1 - 2)             | 5<br>(3 - 7)                | 2<br>(1 - 3)               | 1<br>(0 - 2)             |
| Sudden infant death syndrome                    | 219<br>(98 - 330)           | 219<br>(98 - 330)        | --                       | --                          | --                         | --                       |
| Injuries                                        | 59,278<br>(55,790 - 65,120) | 1,437<br>(1,121 - 1,914) | 1,721<br>(1,568 - 1,924) | 38,978<br>(36,023 - 41,274) | 10,440<br>(9,657 - 12,589) | 6,701<br>(6,121 - 8,447) |
| Transport injuries                              | 19,192<br>(18,060 - 23,321) | 354<br>(263 - 449)       | 774<br>(688 - 867)       | 12,477<br>(11,655 - 15,007) | 3,447<br>(3,210 - 4,381)   | 2,140<br>(1,964 - 2,933) |
| Road injuries                                   | 18,707<br>(17,632 - 22,671) | 347<br>(256 - 440)       | 756<br>(672 - 847)       | 12,188<br>(11,384 - 14,568) | 3,348<br>(3,125 - 4,239)   | 2,068<br>(1,900 - 2,809) |
| Pedestrian road injuries                        | 8,048<br>(6,560 - 10,257)   | 164<br>(110 - 224)       | 364<br>(287 - 440)       | 3,961<br>(3,049 - 5,208)    | 2,082<br>(1,737 - 2,712)   | 1,477<br>(1,255 - 2,022) |
| Cyclist road injuries                           | 877<br>(677 - 1,142)        | 19<br>(11 - 28)          | 64<br>(48 - 84)          | 450<br>(360 - 587)          | 225<br>(162 - 307)         | 119<br>(81 - 175)        |
| Motorcyclist road injuries                      | 1,605<br>(1,115 - 2,097)    | 17<br>(10 - 24)          | 40<br>(27 - 55)          | 1,208<br>(844 - 1,557)      | 253<br>(164 - 356)         | 87<br>(55 - 134)         |
| Motor vehicle road injuries                     | 7,719<br>(6,445 - 9,647)    | 137<br>(95 - 181)        | 265<br>(201 - 327)       | 6,317<br>(5,350 - 7,884)    | 669<br>(484 - 866)         | 330<br>(229 - 480)       |
| Other road injuries                             | 459<br>(319 - 997)          | 10<br>(6 - 25)           | 23<br>(15 - 47)          | 252<br>(178 - 554)          | 119<br>(77 - 255)          | 55<br>(34 - 124)         |
| Other transport injuries                        | 484<br>(419 - 728)          | 7<br>(6 - 11)            | 18<br>(15 - 26)          | 289<br>(247 - 427)          | 98<br>(83 - 151)           | 71<br>(58 - 121)         |
| Unintentional injuries                          | 14,795<br>(13,107 - 19,022) | 980<br>(724 - 1,435)     | 641<br>(549 - 866)       | 6,699<br>(5,817 - 8,782)    | 3,254<br>(2,873 - 4,196)   | 3,221<br>(2,857 - 4,137) |
| Falls                                           | 4,386<br>(3,934 - 6,426)    | 62<br>(45 - 103)         | 97<br>(83 - 130)         | 1,450<br>(1,267 - 2,114)    | 1,381<br>(1,213 - 2,056)   | 1,396<br>(1,234 - 2,054) |
| Drowning                                        | 2,888<br>(2,292 - 4,622)    | 198<br>(121 - 438)       | 277<br>(218 - 480)       | 1,803<br>(1,401 - 2,869)    | 391<br>(310 - 583)         | 219<br>(170 - 326)       |
| Fire, heat, and hot substances                  | 728<br>(613 - 895)          | 54<br>(38 - 87)          | 14<br>(11 - 20)          | 199<br>(167 - 255)          | 108<br>(82 - 126)          | 353<br>(280 - 445)       |
| Poisonings                                      | 455<br>(386 - 748)          | 25<br>(17 - 35)          | 15<br>(12 - 23)          | 245<br>(206 - 430)          | 103<br>(84 - 161)          | 68<br>(56 - 107)         |
| Exposure to mechanical forces                   | 1,611<br>(1,474 - 2,033)    | 41<br>(31 - 54)          | 77<br>(65 - 91)          | 1,058<br>(957 - 1,329)      | 299<br>(266 - 377)         | 136<br>(121 - 172)       |
| Unintentional firearm injuries                  | 591<br>(521 - 688)          | 4<br>(3 - 6)             | 19<br>(15 - 24)          | 425<br>(369 - 503)          | 103<br>(88 - 127)          | 39<br>(32 - 47)          |
| Unintentional suffocation                       | 361<br>(219 - 464)          | 24<br>(16 - 34)          | 30<br>(18 - 39)          | 217<br>(126 - 270)          | 61<br>(39 - 75)            | 29<br>(18 - 38)          |
| Other exposure to mechanical forces             | 660<br>(574 - 857)          | 13<br>(10 - 17)          | 28<br>(23 - 33)          | 416<br>(365 - 548)          | 135<br>(113 - 171)         | 68<br>(57 - 88)          |
| Adverse effects of medical treatment            | 801<br>(659 - 1,158)        | 64<br>(42 - 120)         | 13<br>(10 - 19)          | 143<br>(117 - 204)          | 197<br>(157 - 291)         | 385<br>(299 - 564)       |
| Animal contact                                  | 345<br>(283 - 748)          | 57<br>(40 - 114)         | 23<br>(18 - 44)          | 87<br>(69 - 198)            | 85<br>(66 - 189)           | 93<br>(73 - 218)         |
| Venomous animal contact                         | 246<br>(201 - 540)          | 53<br>(37 - 106)         | 14<br>(11 - 28)          | 58<br>(46 - 131)            | 58<br>(44 - 130)           | 64<br>(49 - 142)         |
| Non-venomous animal contact                     | 99<br>(73 - 220)            | 4<br>(3 - 10)            | 8<br>(6 - 18)            | 29<br>(21 - 66)             | 28<br>(19 - 63)            | 30<br>(21 - 67)          |
| Foreign body                                    | 2,936<br>(1,911 - 5,013)    | 468<br>(234 - 751)       | 110<br>(67 - 183)        | 1,208<br>(809 - 2,154)      | 623<br>(403 - 1,116)       | 528<br>(338 - 970)       |
| Pulmonary aspiration and foreign body in airway | 2,924<br>(1,898 - 5,002)    | 466<br>(232 - 749)       | 109<br>(66 - 182)        | 1,204<br>(805 - 2,151)      | 619<br>(399 - 1,113)       | 526<br>(337 - 968)       |
| Foreign body in other body part                 | 12<br>(7 - 19)              | 2<br>(1 - 3)             | 1<br>(1 - 2)             | 4<br>(3 - 7)                | 4<br>(2 - 5)               | 1<br>(1 - 2)             |
| Other unintentional injuries                    | 643<br>(575 - 719)          | 12<br>(9 - 15)           | 14<br>(11 - 18)          | 506<br>(444 - 578)          | 67<br>(56 - 81)            | 44<br>(38 - 51)          |
| Self-harm and interpersonal violence            | 25,292<br>(18,911 - 29,643) | 103<br>(65 - 159)        | 307<br>(222 - 393)       | 19,802<br>(14,342 - 21,794) | 3,739<br>(2,920 - 5,320)   | 1,341<br>(1,139 - 2,084) |
| Self-harm                                       | 5,276<br>(3,537 - 5,727)    | --                       | 85<br>(48 - 100)         | 3,860<br>(2,557 - 4,252)    | 862<br>(605 - 951)         | 468<br>(328 - 522)       |
| Interpersonal violence                          | 20,016<br>(13,963 - 24,907) | 103<br>(65 - 159)        | 222<br>(152 - 309)       | 15,942<br>(10,794 - 18,296) | 2,877<br>(2,127 - 4,490)   | 873<br>(686 - 1,626)     |
| Assault by firearm                              | 14,114<br>(8,844 - 16,492)  | 36<br>(19 - 60)          | 130<br>(76 - 178)        | 11,669<br>(7,185 - 13,659)  | 1,885<br>(1,261 - 2,827)   | 394<br>(262 - 749)       |
| Assault by sharp object                         | 3,159<br>(1,880 - 5,129)    | 15<br>(8 - 31)           | 23<br>(13 - 42)          | 2,454<br>(1,449 - 3,978)    | 479<br>(270 - 832)         | 189<br>(100 - 348)       |
| Assault by other means                          | 2,742<br>(2,074 - 4,694)    | 53<br>(31 - 78)          | 69<br>(45 - 112)         | 1,818<br>(1,319 - 2,915)    | 514<br>(344 - 1,058)       | 289<br>(177 - 624)       |
| Forces of nature, war, and legal intervention   | 0<br>(0 - 0)                | 0<br>(0 - 0)             | --                       | --                          | --                         | --                       |
| Exposure to forces of nature                    | 0<br>(0 - 0)                | 0<br>(0 - 0)             | --                       | --                          | --                         | --                       |

Web Table 31- Mexico deaths with 95% UI by age, sex, and cause in 2013

| Cause                                                             | Females, All Ages              | Females, 0-4 Years          | Females, 5-14 Years      | Females, 15-49 Years        | Females, 50-69 Years        | Females, 70-80 Years           |
|-------------------------------------------------------------------|--------------------------------|-----------------------------|--------------------------|-----------------------------|-----------------------------|--------------------------------|
| All causes                                                        | 292,958<br>(287,881 - 298,792) | 16,564<br>(14,672 - 19,008) | 2,755<br>(2,576 - 2,972) | 34,220<br>(33,264 - 35,269) | 76,633<br>(74,639 - 78,673) | 162,786<br>(160,427 - 165,212) |
| Communicable, maternal, neonatal, and nutritional diseases        | 31,018<br>(29,144 - 33,834)    | 9,040<br>(7,722 - 10,474)   | 515<br>(440 - 607)       | 4,028<br>(3,805 - 4,292)    | 3,525<br>(3,299 - 3,869)    | 13,910<br>(12,907 - 16,512)    |
| HIV/AIDS and tuberculosis                                         | 1,256<br>(1,057 - 1,585)       | 8<br>(6 - 13)               | 6<br>(4 - 9)             | 643<br>(505 - 862)          | 342<br>(284 - 448)          | 256<br>(220 - 350)             |
| Tuberculosis                                                      | 742<br>(665 - 934)             | 5<br>(4 - 7)                | 5<br>(4 - 6)             | 219<br>(193 - 257)          | 263<br>(229 - 336)          | 249<br>(214 - 343)             |
| HIV/AIDS                                                          | 514<br>(339 - 800)             | 2<br>(1 - 7)                | 2<br>(0 - 4)             | 424<br>(288 - 638)          | 79<br>(36 - 149)            | 7<br>(2 - 17)                  |
| HIV/AIDS resulting in mycobacterial infection                     | 24<br>(15 - 38)                | 0<br>(0 - 0)                | 0<br>(0 - 0)             | 20<br>(12 - 30)             | 4<br>(2 - 7)                | 0<br>(0 - 1)                   |
| HIV/AIDS resulting in other diseases                              | 490<br>(323 - 762)             | 2<br>(1 - 7)                | 2<br>(0 - 4)             | 405<br>(276 - 610)          | 75<br>(35 - 142)            | 7<br>(2 - 16)                  |
| Diarrhea, lower respiratory, and other common infectious diseases | 14,783<br>(13,703 - 16,841)    | 2,896<br>(2,469 - 3,424)    | 392<br>(323 - 487)       | 1,463<br>(1,320 - 1,645)    | 2,167<br>(1,966 - 2,407)    | 7,865<br>(7,073 - 9,730)       |
| Diarrheal diseases                                                | 2,457<br>(2,243 - 2,713)       | 632<br>(512 - 767)          | 57<br>(47 - 69)          | 229<br>(206 - 254)          | 384<br>(343 - 429)          | 1,155<br>(1,002 - 1,346)       |
| Intestinal infectious diseases                                    | 591<br>(310 - 1,027)           | 185<br>(95 - 326)           | 144<br>(74 - 251)        | 212<br>(109 - 368)          | 33<br>(16 - 58)             | 16<br>(9 - 27)                 |
| Typhoid fever                                                     | 436<br>(216 - 781)             | 131<br>(61 - 238)           | 111<br>(56 - 195)        | 160<br>(79 - 286)           | 24<br>(11 - 44)             | 10<br>(5 - 18)                 |
| Paratyphoid fever                                                 | 120<br>(59 - 216)              | 39<br>(18 - 71)             | 30<br>(15 - 51)          | 43<br>(21 - 77)             | 6<br>(3 - 11)               | 3<br>(1 - 5)                   |
| Other intestinal infectious diseases                              | 34<br>(23 - 49)                | 15<br>(7 - 26)              | 3<br>(0 - 8)             | 9<br>(4 - 18)               | 4<br>(1 - 9)                | 4<br>(1 - 9)                   |
| Lower respiratory infections                                      | 10,848<br>(9,918 - 12,839)     | 1,776<br>(1,463 - 2,169)    | 118<br>(101 - 142)       | 785<br>(694 - 869)          | 1,609<br>(1,427 - 1,821)    | 6,560<br>(5,844 - 8,361)       |
| Upper respiratory infections                                      | 10<br>(8 - 13)                 | 1<br>(1 - 1)                | 0<br>(0 - 0)             | 2<br>(1 - 2)                | 3<br>(2 - 4)                | 4<br>(3 - 7)                   |
| Otitis media                                                      | 13<br>(12 - 14)                | 2<br>(1 - 2)                | 1<br>(1 - 1)             | 4<br>(4 - 5)                | 3<br>(2 - 3)                | 3<br>(3 - 4)                   |
| Meningitis                                                        | 342<br>(315 - 385)             | 106<br>(89 - 129)           | 25<br>(21 - 30)          | 90<br>(80 - 101)            | 63<br>(56 - 71)             | 58<br>(51 - 68)                |
| Pneumococcal meningitis                                           | 112<br>(102 - 127)             | 29<br>(24 - 35)             | 9<br>(7 - 11)            | 32<br>(28 - 36)             | 22<br>(19 - 26)             | 21<br>(18 - 26)                |
| H influenzae type B meningitis                                    | 66<br>(58 - 76)                | 39<br>(32 - 48)             | 6<br>(5 - 7)             | 10<br>(9 - 11)              | 6<br>(5 - 6)                | 6<br>(5 - 7)                   |
| Meningococcal meningitis                                          | 40<br>(36 - 45)                | 10<br>(9 - 13)              | 3<br>(3 - 4)             | 12<br>(10 - 13)             | 7<br>(6 - 9)                | 7<br>(6 - 9)                   |
| Other meningitis                                                  | 123<br>(110 - 138)             | 28<br>(22 - 33)             | 7<br>(6 - 8)             | 37<br>(32 - 42)             | 28<br>(23 - 32)             | 24<br>(20 - 28)                |
| Encephalitis                                                      | 450<br>(337 - 544)             | 164<br>(106 - 242)          | 42<br>(28 - 55)          | 126<br>(86 - 168)           | 66<br>(42 - 81)             | 51<br>(33 - 64)                |
| Diphtheria                                                        | 4<br>(2 - 7)                   | 2<br>(1 - 6)                | 1<br>(0 - 2)             | 1<br>(0 - 1)                | 0<br>(0 - 1)                | --                             |
| Whooping cough                                                    | 27<br>(14 - 51)                | 21<br>(8 - 45)              | 2<br>(1 - 2)             | 4<br>(3 - 5)                | 1<br>(0 - 1)                | --                             |
| Tetanus                                                           | 11<br>(9 - 21)                 | 1<br>(1 - 3)                | 1<br>(0 - 1)             | 4<br>(3 - 7)                | 3<br>(2 - 7)                | 2<br>(1 - 5)                   |
| Measles                                                           | 0<br>(0 - 0)                   | 0<br>(0 - 0)                | 0<br>(0 - 0)             | 0<br>(0 - 0)                | 0<br>(0 - 0)                | --                             |
| Varicella and herpes zoster                                       | 32<br>(24 - 44)                | 6<br>(3 - 9)                | 1<br>(1 - 3)             | 6<br>(5 - 9)                | 3<br>(2 - 5)                | 15<br>(8 - 26)                 |
| Neglected tropical diseases and malaria                           | 120<br>(91 - 163)              | 15<br>(10 - 25)             | 9<br>(7 - 14)            | 35<br>(27 - 45)             | 25<br>(19 - 35)             | 36<br>(24 - 57)                |
| Malaria                                                           | 0<br>(0 - 2)                   | 0<br>(0 - 0)                | 0<br>(0 - 0)             | 0<br>(0 - 0)                | 0<br>(0 - 0)                | 0<br>(0 - 1)                   |
| Chagas disease                                                    | 21<br>(4 - 61)                 | 1<br>(0 - 2)                | 1<br>(0 - 4)             | 4<br>(1 - 14)               | 4<br>(1 - 13)               | 11<br>(2 - 33)                 |
| Leishmaniasis                                                     | 1<br>(1 - 1)                   | 0<br>(0 - 1)                | 0<br>(0 - 0)             | 0<br>(0 - 0)                | 0<br>(0 - 0)                | 0<br>(0 - 0)                   |
| Visceral leishmaniasis                                            | 1<br>(1 - 1)                   | 0<br>(0 - 1)                | 0<br>(0 - 0)             | 0<br>(0 - 0)                | 0<br>(0 - 0)                | 0<br>(0 - 0)                   |
| Cysticercosis                                                     | 17<br>(15 - 18)                | 0<br>(0 - 0)                | 0<br>(0 - 1)             | 7<br>(7 - 8)                | 6<br>(5 - 7)                | 3<br>(2 - 3)                   |
| Cystic echinococcosis                                             | 5<br>(5 - 5)                   | 0<br>(0 - 0)                | 0<br>(0 - 0)             | 2<br>(2 - 2)                | 2<br>(1 - 2)                | 1<br>(1 - 1)                   |
| Dengue                                                            | 29<br>(14 - 33)                | 2<br>(1 - 2)                | 2<br>(1 - 2)             | 11<br>(6 - 12)              | 6<br>(3 - 7)                | 8<br>(3 - 10)                  |
| Rabies                                                            | 7<br>(5 - 10)                  | 1<br>(0 - 1)                | 1<br>(1 - 2)             | 3<br>(2 - 4)                | 1<br>(1 - 2)                | 0<br>(0 - 1)                   |
| Intestinal nematode infections                                    | 9<br>(2 - 20)                  | 4<br>(0 - 12)               | 1<br>(0 - 5)             | 1<br>(0 - 5)                | 1<br>(0 - 5)                | 2<br>(0 - 7)                   |
| Ascariasis                                                        | 9<br>(2 - 20)                  | 4<br>(0 - 12)               | 1<br>(0 - 5)             | 1<br>(0 - 5)                | 1<br>(0 - 5)                | 2<br>(0 - 7)                   |
| Other neglected tropical diseases                                 | 32<br>(28 - 39)                | 7<br>(5 - 10)               | 2<br>(2 - 3)             | 6<br>(5 - 7)                | 5<br>(4 - 6)                | 11<br>(9 - 15)                 |
| Maternal disorders                                                | 1,224<br>(1,139 - 1,320)       | --                          | 5<br>(4 - 6)             | 1,219<br>(1,134 - 1,315)    | --                          | --                             |

Web Table 31- Mexico deaths with 95% UI by age, sex, and cause in 2013

| Cause                                                            | Females, All Ages              | Females, 0-4 Years       | Females, 5-14 Years      | Females, 15-49 Years        | Females, 50-69 Years        | Females, 70-80 Years           |
|------------------------------------------------------------------|--------------------------------|--------------------------|--------------------------|-----------------------------|-----------------------------|--------------------------------|
| Maternal hemorrhage                                              | 215<br>(198 - 234)             | --                       | 1<br>(1 - 1)             | 214<br>(197 - 234)          | --                          | --                             |
| Maternal sepsis and other maternal infections                    | 82<br>(74 - 91)                | --                       | 1<br>(0 - 1)             | 81<br>(73 - 90)             | --                          | --                             |
| Maternal hypertensive disorders                                  | 236<br>(216 - 259)             | --                       | 1<br>(1 - 2)             | 235<br>(215 - 258)          | --                          | --                             |
| Maternal obstructed labor                                        | 92<br>(83 - 102)               | --                       | 0<br>(0 - 0)             | 92<br>(83 - 101)            | --                          | --                             |
| Maternal abortive outcome                                        | 138<br>(127 - 151)             | --                       | 0<br>(0 - 1)             | 138<br>(127 - 151)          | --                          | --                             |
| Indirect maternal deaths                                         | 193<br>(177 - 211)             | --                       | 1<br>(1 - 1)             | 193<br>(177 - 210)          | --                          | --                             |
| Late maternal deaths                                             | 91<br>(82 - 101)               | --                       | 0<br>(0 - 1)             | 91<br>(81 - 101)            | --                          | --                             |
| Maternal deaths aggravated by HIV/AIDS                           | 0<br>(0 - 0)                   | --                       | --                       | 0<br>(0 - 0)                | --                          | --                             |
| Other maternal disorders                                         | 174<br>(159 - 192)             | --                       | 1<br>(1 - 1)             | 173<br>(158 - 191)          | --                          | --                             |
| Neonatal disorders                                               | 5,556<br>(4,603 - 6,538)       | 5,556<br>(4,603 - 6,538) | --                       | --                          | --                          | --                             |
| Neonatal preterm birth complications                             | 2,515<br>(1,675 - 3,266)       | 2,515<br>(1,675 - 3,266) | --                       | --                          | --                          | --                             |
| Neonatal encephalopathy due to birth asphyxia and trauma         | 1,188<br>(914 - 1,610)         | 1,188<br>(914 - 1,610)   | --                       | --                          | --                          | --                             |
| Neonatal sepsis and other neonatal infections                    | 1,220<br>(744 - 1,815)         | 1,220<br>(744 - 1,815)   | --                       | --                          | --                          | --                             |
| Hemolytic disease and other neonatal jaundice                    | 24<br>(10 - 42)                | 24<br>(10 - 42)          | --                       | --                          | --                          | --                             |
| Other neonatal disorders                                         | 609<br>(433 - 798)             | 609<br>(433 - 798)       | --                       | --                          | --                          | --                             |
| Nutritional deficiencies                                         | 7,332<br>(6,696 - 8,335)       | 433<br>(351 - 514)       | 75<br>(63 - 87)          | 497<br>(443 - 548)          | 780<br>(705 - 894)          | 5,546<br>(5,029 - 6,295)       |
| Protein-energy malnutrition                                      | 5,226<br>(4,062 - 6,629)       | 381<br>(283 - 468)       | 53<br>(39 - 66)          | 248<br>(155 - 337)          | 443<br>(298 - 592)          | 4,101<br>(3,224 - 5,165)       |
| Iodine deficiency                                                | 4<br>(2 - 7)                   | 1<br>(0 - 1)             | 0<br>(0 - 0)             | 1<br>(0 - 1)                | 1<br>(0 - 2)                | 2<br>(1 - 5)                   |
| Iron-deficiency anemia                                           | 1,493<br>(644 - 2,528)         | 30<br>(7 - 73)           | 15<br>(6 - 26)           | 186<br>(94 - 290)           | 245<br>(115 - 401)          | 1,017<br>(410 - 1,760)         |
| Other nutritional deficiencies                                   | 609<br>(367 - 1,221)           | 22<br>(7 - 51)           | 7<br>(4 - 13)            | 63<br>(37 - 122)            | 91<br>(56 - 187)            | 427<br>(259 - 874)             |
| Other communicable, maternal, neonatal, and nutritional diseases | 747<br>(652 - 885)             | 132<br>(92 - 191)        | 27<br>(22 - 35)          | 170<br>(148 - 199)          | 211<br>(184 - 249)          | 206<br>(175 - 259)             |
| Sexually transmitted diseases excluding HIV                      | 189<br>(140 - 252)             | 85<br>(47 - 144)         | 8<br>(5 - 12)            | 44<br>(33 - 54)             | 24<br>(18 - 31)             | 28<br>(20 - 37)                |
| Syphilis                                                         | 145<br>(101 - 207)             | 85<br>(47 - 144)         | 7<br>(4 - 12)            | 18<br>(13 - 22)             | 14<br>(10 - 17)             | 22<br>(15 - 28)                |
| Chlamydial infection                                             | 14<br>(10 - 17)                | --                       | 0<br>(0 - 0)             | 9<br>(6 - 11)               | 3<br>(2 - 4)                | 2<br>(1 - 2)                   |
| Gonococcal infection                                             | 17<br>(13 - 21)                | --                       | 0<br>(0 - 0)             | 9<br>(7 - 11)               | 4<br>(3 - 5)                | 3<br>(2 - 4)                   |
| Other sexually transmitted diseases                              | 13<br>(10 - 16)                | --                       | 0<br>(0 - 0)             | 8<br>(6 - 10)               | 3<br>(2 - 4)                | 2<br>(1 - 2)                   |
| Hepatitis                                                        | 226<br>(200 - 249)             | 10<br>(8 - 12)           | 4<br>(3 - 4)             | 48<br>(41 - 54)             | 99<br>(84 - 115)            | 66<br>(55 - 78)                |
| Acute hepatitis A                                                | 57<br>(24 - 93)                | 7<br>(5 - 10)            | 3<br>(2 - 4)             | 23<br>(10 - 34)             | 18<br>(5 - 35)              | 6<br>(1 - 13)                  |
| Acute hepatitis B                                                | 134<br>(93 - 179)              | 2<br>(1 - 5)             | 0<br>(0 - 1)             | 17<br>(9 - 28)              | 66<br>(45 - 88)             | 48<br>(34 - 63)                |
| Acute hepatitis C                                                | 35<br>(9 - 72)                 | --                       | 0<br>(0 - 1)             | 8<br>(2 - 18)               | 15<br>(4 - 32)              | 11<br>(3 - 23)                 |
| Other infectious diseases                                        | 332<br>(275 - 459)             | 38<br>(28 - 50)          | 16<br>(13 - 23)          | 78<br>(64 - 110)            | 88<br>(70 - 125)            | 112<br>(88 - 167)              |
| Non-communicable diseases                                        | 246,183<br>(240,099 - 251,298) | 6,112<br>(5,244 - 7,116) | 1,343<br>(1,199 - 1,473) | 24,593<br>(23,667 - 25,498) | 70,317<br>(68,364 - 72,219) | 143,817<br>(140,260 - 146,359) |
| Neoplasms                                                        | 43,428<br>(40,758 - 45,864)    | 390<br>(313 - 470)       | 484<br>(418 - 533)       | 8,301<br>(7,807 - 8,791)    | 17,154<br>(16,064 - 18,224) | 17,099<br>(15,923 - 18,261)    |
| Esophageal cancer                                                | 499<br>(424 - 545)             | --                       | --                       | 34<br>(30 - 37)             | 144<br>(123 - 158)          | 322<br>(277 - 353)             |
| Stomach cancer                                                   | 3,669<br>(3,446 - 3,957)       | --                       | --                       | 445<br>(411 - 483)          | 1,322<br>(1,229 - 1,419)    | 1,902<br>(1,772 - 2,083)       |
| Liver cancer                                                     | 3,467<br>(3,188 - 3,786)       | --                       | 6<br>(6 - 7)             | 308<br>(279 - 344)          | 1,397<br>(1,258 - 1,567)    | 1,755<br>(1,594 - 1,929)       |
| Liver cancer due to hepatitis B                                  | 628<br>(518 - 762)             | --                       | 2<br>(1 - 2)             | 90<br>(76 - 109)            | 291<br>(229 - 362)          | 245<br>(202 - 300)             |
| Liver cancer due to hepatitis C                                  | 1,752<br>(1,545 - 1,972)       | --                       | 1<br>(1 - 1)             | 125<br>(107 - 145)          | 701<br>(606 - 808)          | 925<br>(812 - 1,036)           |
| Liver cancer due to alcohol use                                  | 637<br>(540 - 737)             | --                       | --                       | 28<br>(23 - 36)             | 211<br>(175 - 255)          | 398<br>(334 - 463)             |
| Liver cancer due to other causes                                 | 451<br>(385 - 526)             | --                       | 4<br>(3 - 4)             | 65<br>(55 - 78)             | 195<br>(160 - 233)          | 187<br>(159 - 215)             |

Web Table 31- Mexico deaths with 95% UI by age, sex, and cause in 2013

| Cause                                         | Females, All Ages           | Females, 0-4 Years | Females, 5-14 Years | Females, 15-49 Years     | Females, 50-69 Years        | Females, 70-80 Years        |
|-----------------------------------------------|-----------------------------|--------------------|---------------------|--------------------------|-----------------------------|-----------------------------|
| Larynx cancer                                 | 195<br>(109 - 368)          | --                 | --                  | 17<br>(9 - 31)           | 79<br>(44 - 150)            | 100<br>(55 - 191)           |
| Tracheal, bronchus and lung cancer            | 3,016<br>(2,766 - 3,229)    | --                 | --                  | 284<br>(261 - 310)       | 1,179<br>(1,070 - 1,261)    | 1,553<br>(1,426 - 1,712)    |
| Breast cancer                                 | 5,853<br>(5,474 - 6,330)    | --                 | --                  | 1,724<br>(1,598 - 1,870) | 2,675<br>(2,472 - 2,904)    | 1,454<br>(1,347 - 1,597)    |
| Cervical cancer                               | 5,842<br>(5,388 - 8,207)    | --                 | --                  | 1,644<br>(1,505 - 2,138) | 2,481<br>(2,257 - 3,545)    | 1,718<br>(1,554 - 2,564)    |
| Uterine cancer                                | 606<br>(451 - 894)          | --                 | --                  | 91<br>(71 - 137)         | 299<br>(218 - 438)          | 217<br>(166 - 333)          |
| Prostate cancer                               | --                          | --                 | --                  | --                       | --                          | --                          |
| Colon and rectum cancer                       | 3,092<br>(2,942 - 3,302)    | --                 | --                  | 372<br>(350 - 394)       | 1,104<br>(1,041 - 1,181)    | 1,616<br>(1,515 - 1,762)    |
| Lip and oral cavity cancer                    | 334<br>(244 - 426)          | --                 | --                  | 49<br>(37 - 67)          | 116<br>(83 - 147)           | 169<br>(120 - 213)          |
| Nasopharynx cancer                            | 48<br>(30 - 61)             | --                 | 1<br>(1 - 1)        | 10<br>(6 - 13)           | 20<br>(12 - 26)             | 17<br>(10 - 22)             |
| Other pharynx cancer                          | 56<br>(47 - 62)             | --                 | --                  | 8<br>(7 - 8)             | 21<br>(17 - 23)             | 28<br>(24 - 31)             |
| Gallbladder and biliary tract cancer          | 1,403<br>(1,039 - 1,730)    | --                 | --                  | 113<br>(88 - 156)        | 642<br>(481 - 820)          | 648<br>(463 - 783)          |
| Pancreatic cancer                             | 2,401<br>(2,254 - 2,619)    | --                 | --                  | 201<br>(187 - 218)       | 993<br>(919 - 1,086)        | 1,207<br>(1,115 - 1,325)    |
| Malignant skin melanoma                       | 276<br>(256 - 296)          | --                 | --                  | 50<br>(45 - 53)          | 96<br>(87 - 104)            | 131<br>(119 - 144)          |
| Non-melanoma skin cancer                      | 536<br>(359 - 787)          | --                 | --                  | 57<br>(40 - 88)          | 120<br>(80 - 187)           | 360<br>(237 - 516)          |
| Ovarian cancer                                | 2,336<br>(2,148 - 2,494)    | --                 | --                  | 581<br>(529 - 630)       | 1,110<br>(1,000 - 1,208)    | 644<br>(592 - 696)          |
| Testicular cancer                             | --                          | --                 | --                  | --                       | --                          | --                          |
| Kidney cancer                                 | 924<br>(829 - 987)          | 21<br>(17 - 26)    | 13<br>(11 - 14)     | 121<br>(108 - 131)       | 410<br>(361 - 443)          | 359<br>(320 - 392)          |
| Bladder cancer                                | 369<br>(237 - 467)          | --                 | --                  | 27<br>(17 - 34)          | 110<br>(71 - 139)           | 233<br>(147 - 293)          |
| Brain and nervous system cancer               | 973<br>(747 - 1,037)        | 36<br>(26 - 45)    | 70<br>(55 - 79)     | 274<br>(224 - 294)       | 353<br>(262 - 384)          | 240<br>(171 - 263)          |
| Thyroid cancer                                | 451<br>(303 - 535)          | --                 | 1<br>(0 - 1)        | 41<br>(30 - 53)          | 186<br>(126 - 229)          | 223<br>(146 - 260)          |
| Mesothelioma                                  | 104<br>(92 - 113)           | --                 | --                  | 18<br>(16 - 20)          | 49<br>(42 - 55)             | 37<br>(32 - 42)             |
| Hodgkin lymphoma                              | 253<br>(218 - 331)          | 8<br>(6 - 13)      | 9<br>(8 - 12)       | 74<br>(64 - 102)         | 80<br>(67 - 106)            | 82<br>(67 - 110)            |
| Non-Hodgkin lymphoma                          | 1,612<br>(918 - 1,833)      | 62<br>(32 - 87)    | 33<br>(19 - 40)     | 335<br>(207 - 380)       | 597<br>(338 - 700)          | 585<br>(320 - 684)          |
| Multiple myeloma                              | 457<br>(345 - 557)          | --                 | --                  | 59<br>(47 - 78)          | 236<br>(179 - 297)          | 162<br>(119 - 197)          |
| Leukemia                                      | 1,972<br>(1,866 - 2,107)    | 137<br>(108 - 163) | 244<br>(215 - 273)  | 714<br>(668 - 774)       | 482<br>(445 - 532)          | 395<br>(363 - 436)          |
| Other neoplasms                               | 2,683<br>(1,848 - 3,011)    | 126<br>(66 - 177)  | 108<br>(72 - 127)   | 650<br>(457 - 743)       | 855<br>(578 - 995)          | 945<br>(591 - 1,103)        |
| Cardiovascular diseases                       | 72,448<br>(62,228 - 80,403) | 193<br>(138 - 279) | 121<br>(92 - 147)   | 4,157<br>(3,598 - 5,045) | 14,955<br>(12,845 - 18,097) | 53,021<br>(44,511 - 57,363) |
| Rheumatic heart disease                       | 832<br>(571 - 1,153)        | 2<br>(1 - 3)       | 8<br>(5 - 11)       | 211<br>(153 - 307)       | 337<br>(231 - 476)          | 274<br>(174 - 352)          |
| Ischemic heart disease                        | 39,942<br>(30,826 - 43,494) | 23<br>(13 - 36)    | 28<br>(18 - 35)     | 1,807<br>(1,412 - 2,233) | 7,735<br>(6,033 - 9,360)    | 30,349<br>(22,964 - 32,800) |
| Cerebrovascular disease                       | 21,333<br>(17,312 - 26,537) | 48<br>(32 - 62)    | 44<br>(32 - 56)     | 1,440<br>(1,192 - 1,856) | 4,546<br>(3,785 - 6,119)    | 15,255<br>(12,048 - 18,577) |
| Ischemic stroke                               | 6,528<br>(5,017 - 8,960)    | 3<br>(2 - 5)       | 5<br>(3 - 7)        | 221<br>(159 - 321)       | 1,062<br>(814 - 1,622)      | 5,236<br>(3,947 - 7,101)    |
| Hemorrhagic stroke                            | 14,805<br>(11,564 - 18,475) | 45<br>(29 - 57)    | 39<br>(29 - 49)     | 1,219<br>(1,011 - 1,592) | 3,483<br>(2,931 - 4,668)    | 10,019<br>(7,460 - 12,253)  |
| Hypertensive heart disease                    | 5,066<br>(3,888 - 7,124)    | 2<br>(2 - 4)       | 2<br>(1 - 3)        | 133<br>(101 - 199)       | 753<br>(590 - 1,110)        | 4,176<br>(3,172 - 5,850)    |
| Cardiomyopathy and myocarditis                | 760<br>(590 - 1,131)        | 61<br>(43 - 101)   | 20<br>(14 - 29)     | 209<br>(162 - 317)       | 193<br>(142 - 287)          | 276<br>(210 - 416)          |
| Atrial fibrillation and flutter               | 853<br>(689 - 1,052)        | --                 | --                  | 20<br>(17 - 26)          | 125<br>(100 - 159)          | 708<br>(559 - 884)          |
| Aortic aneurysm                               | 219<br>(140 - 342)          | --                 | --                  | 25<br>(16 - 40)          | 52<br>(33 - 82)             | 141<br>(90 - 226)           |
| Peripheral vascular disease                   | 256<br>(197 - 301)          | --                 | --                  | 7<br>(5 - 8)             | 37<br>(27 - 45)             | 212<br>(163 - 252)          |
| Endocarditis                                  | 200<br>(124 - 296)          | 13<br>(8 - 24)     | 5<br>(3 - 7)        | 48<br>(32 - 75)          | 56<br>(32 - 83)             | 78<br>(44 - 116)            |
| Other cardiovascular and circulatory diseases | 2,987<br>(2,325 - 3,929)    | 43<br>(28 - 57)    | 15<br>(10 - 19)     | 257<br>(170 - 329)       | 1,120<br>(874 - 1,523)      | 1,552<br>(1,191 - 1,989)    |
| Chronic respiratory diseases                  | 17,967<br>(15,767 - 20,053) | 337<br>(282 - 400) | 51<br>(42 - 58)     | 791<br>(656 - 853)       | 3,040<br>(2,668 - 3,416)    | 13,748<br>(11,945 - 15,636) |

Web Table 31- Mexico deaths with 95% UI by age, sex, and cause in 2013

| Cause                                               | Females, All Ages           | Females, 0-4 Years | Females, 5-14 Years | Females, 15-49 Years     | Females, 50-69 Years     | Females, 70-80 Years        |
|-----------------------------------------------------|-----------------------------|--------------------|---------------------|--------------------------|--------------------------|-----------------------------|
| Chronic obstructive pulmonary disease               | 14,824<br>(12,826 - 16,861) | 237<br>(190 - 288) | 26<br>(19 - 33)     | 419<br>(321 - 514)       | 2,228<br>(1,855 - 2,587) | 11,914<br>(10,329 - 13,710) |
| Pneumoconiosis                                      | 33<br>(23 - 46)             | 1<br>(1 - 1)       | 2<br>(1 - 2)        | 7<br>(5 - 8)             | 7<br>(5 - 10)            | 18<br>(12 - 26)             |
| Silicosis                                           | 3<br>(2 - 4)                | 0<br>(0 - 0)       | 0<br>(0 - 1)        | 1<br>(1 - 1)             | 1<br>(0 - 1)             | 0<br>(0 - 1)                |
| Asbestosis                                          | 2<br>(2 - 3)                | 0<br>(0 - 0)       | 0<br>(0 - 0)        | 1<br>(1 - 1)             | 1<br>(0 - 1)             | 0<br>(0 - 0)                |
| Coal workers pneumoconiosis                         | 3<br>(2 - 4)                | 0<br>(0 - 0)       | 0<br>(0 - 1)        | 1<br>(1 - 1)             | 1<br>(0 - 1)             | 1<br>(0 - 1)                |
| Other pneumoconiosis                                | 25<br>(17 - 36)             | 0<br>(0 - 0)       | 0<br>(0 - 0)        | 3<br>(2 - 4)             | 5<br>(3 - 7)             | 16<br>(11 - 24)             |
| Asthma                                              | 1,141<br>(770 - 1,836)      | 25<br>(15 - 36)    | 10<br>(7 - 13)      | 125<br>(85 - 162)        | 276<br>(186 - 419)       | 706<br>(461 - 1,212)        |
| Interstitial lung disease and pulmonary sarcoidosis | 1,502<br>(883 - 2,260)      | 8<br>(4 - 16)      | 7<br>(5 - 11)       | 175<br>(113 - 250)       | 453<br>(270 - 679)       | 858<br>(449 - 1,342)        |
| Other chronic respiratory diseases                  | 467<br>(331 - 642)          | 67<br>(53 - 85)    | 6<br>(4 - 8)        | 65<br>(47 - 83)          | 76<br>(51 - 104)         | 253<br>(167 - 377)          |
| Cirrhosis                                           | 11,779<br>(11,201 - 12,651) | 22<br>(18 - 27)    | 25<br>(23 - 28)     | 1,735<br>(1,635 - 1,843) | 5,263<br>(4,971 - 5,653) | 4,733<br>(4,466 - 5,179)    |
| Cirrhosis due to hepatitis B                        | 479<br>(399 - 577)          | 0<br>(0 - 0)       | 1<br>(0 - 1)        | 78<br>(64 - 96)          | 224<br>(185 - 274)       | 177<br>(141 - 208)          |
| Cirrhosis due to hepatitis C                        | 6,665<br>(6,064 - 7,289)    | 1<br>(1 - 2)       | 7<br>(5 - 8)        | 897<br>(790 - 999)       | 2,967<br>(2,659 - 3,286) | 2,793<br>(2,533 - 3,072)    |
| Cirrhosis due to alcohol use                        | 2,882<br>(2,553 - 3,273)    | --                 | --                  | 299<br>(259 - 351)       | 1,319<br>(1,106 - 1,459) | 1,319<br>(1,161 - 1,520)    |
| Cirrhosis due to other causes                       | 1,753<br>(1,524 - 2,011)    | 21<br>(16 - 25)    | 18<br>(16 - 21)     | 461<br>(397 - 526)       | 809<br>(688 - 948)       | 444<br>(382 - 520)          |
| Digestive diseases                                  | 10,611<br>(8,872 - 11,470)  | 49<br>(36 - 60)    | 52<br>(42 - 59)     | 1,036<br>(851 - 1,117)   | 2,604<br>(2,179 - 2,835) | 6,869<br>(5,746 - 7,471)    |
| Peptic ulcer disease                                | 2,074<br>(1,632 - 2,742)    | 1<br>(0 - 1)       | 3<br>(2 - 4)        | 127<br>(94 - 161)        | 438<br>(350 - 580)       | 1,504<br>(1,166 - 2,016)    |
| Gastritis and duodenitis                            | 738<br>(399 - 1,299)        | 3<br>(1 - 6)       | 3<br>(1 - 5)        | 50<br>(27 - 91)          | 151<br>(79 - 273)        | 531<br>(284 - 934)          |
| Appendicitis                                        | 238<br>(142 - 317)          | 4<br>(1 - 7)       | 6<br>(3 - 10)       | 39<br>(22 - 55)          | 68<br>(40 - 94)          | 121<br>(74 - 163)           |
| Paralytic ileus and intestinal obstruction          | 1,487<br>(823 - 2,355)      | 22<br>(14 - 34)    | 16<br>(10 - 23)     | 121<br>(70 - 204)        | 308<br>(163 - 486)       | 1,019<br>(557 - 1,604)      |
| Inguinal, femoral, and abdominal hernia             | 558<br>(256 - 761)          | 1<br>(0 - 2)       | 1<br>(1 - 2)        | 27<br>(13 - 38)          | 150<br>(74 - 211)        | 378<br>(161 - 514)          |
| Inflammatory bowel disease                          | 248<br>(166 - 361)          | 3<br>(1 - 4)       | 3<br>(2 - 4)        | 38<br>(24 - 51)          | 75<br>(51 - 109)         | 129<br>(85 - 194)           |
| Vascular intestinal disorders                       | 1,405<br>(732 - 2,248)      | 1<br>(0 - 5)       | 1<br>(0 - 5)        | 65<br>(35 - 116)         | 290<br>(156 - 491)       | 1,047<br>(521 - 1,654)      |
| Gallbladder and biliary diseases                    | 1,783<br>(1,327 - 2,174)    | 1<br>(1 - 2)       | 3<br>(2 - 3)        | 228<br>(165 - 266)       | 514<br>(405 - 636)       | 1,037<br>(751 - 1,294)      |
| Pancreatitis                                        | 818<br>(544 - 1,152)        | 2<br>(1 - 3)       | 6<br>(4 - 9)        | 204<br>(138 - 269)       | 269<br>(179 - 382)       | 338<br>(212 - 490)          |
| Other digestive diseases                            | 1,264<br>(999 - 1,513)      | 11<br>(6 - 16)     | 11<br>(8 - 14)      | 137<br>(102 - 159)       | 341<br>(269 - 404)       | 764<br>(595 - 944)          |
| Neurological disorders                              | 14,893<br>(13,840 - 16,578) | 95<br>(79 - 130)   | 70<br>(58 - 85)     | 711<br>(607 - 849)       | 1,116<br>(997 - 1,212)   | 12,901<br>(11,889 - 14,450) |
| Alzheimer disease and other dementias               | 12,656<br>(11,612 - 14,238) | --                 | --                  | 5<br>(4 - 6)             | 575<br>(519 - 647)       | 12,077<br>(11,051 - 13,638) |
| Parkinson disease                                   | 619<br>(366 - 715)          | --                 | --                  | 16<br>(11 - 19)          | 95<br>(60 - 111)         | 507<br>(299 - 589)          |
| Epilepsy                                            | 838<br>(663 - 1,089)        | 49<br>(36 - 86)    | 48<br>(38 - 62)     | 448<br>(357 - 589)       | 163<br>(118 - 210)       | 129<br>(89 - 175)           |
| Multiple sclerosis                                  | 184<br>(92 - 219)           | --                 | --                  | 81<br>(42 - 103)         | 72<br>(35 - 86)          | 30<br>(14 - 38)             |
| Other neurological disorders                        | 596<br>(567 - 627)          | 46<br>(39 - 54)    | 22<br>(19 - 24)     | 160<br>(150 - 171)       | 211<br>(197 - 226)       | 158<br>(146 - 172)          |
| Mental and substance use disorders                  | 688<br>(531 - 1,023)        | 12<br>(8 - 21)     | 1<br>(1 - 1)        | 300<br>(243 - 410)       | 193<br>(131 - 335)       | 183<br>(142 - 274)          |
| Schizophrenia                                       | 58<br>(48 - 75)             | --                 | --                  | 17<br>(14 - 22)          | 20<br>(17 - 27)          | 20<br>(17 - 27)             |
| Alcohol use disorders                               | 291<br>(151 - 635)          | --                 | --                  | 99<br>(52 - 215)         | 117<br>(60 - 262)        | 75<br>(38 - 169)            |
| Drug use disorders                                  | 328<br>(289 - 359)          | 12<br>(8 - 21)     | --                  | 173<br>(148 - 193)       | 55<br>(47 - 62)          | 88<br>(76 - 100)            |
| Opioid use disorders                                | 68<br>(58 - 76)             | 3<br>(2 - 4)       | --                  | 36<br>(30 - 41)          | 10<br>(8 - 12)           | 19<br>(15 - 23)             |
| Cocaine use disorders                               | 11<br>(10 - 13)             | 1<br>(0 - 1)       | --                  | 7<br>(6 - 8)             | 2<br>(1 - 2)             | 2<br>(2 - 3)                |
| Amphetamine use disorders                           | 10<br>(8 - 11)              | 0<br>(0 - 1)       | --                  | 5<br>(4 - 6)             | 2<br>(1 - 2)             | 2<br>(2 - 3)                |
| Other drug use disorders                            | 239<br>(210 - 263)          | 8<br>(6 - 14)      | --                  | 125<br>(107 - 139)       | 42<br>(36 - 47)          | 64<br>(55 - 74)             |
| Eating disorders                                    | 12<br>(11 - 14)             | --                 | 1<br>(1 - 1)        | 11<br>(10 - 13)          | --                       | --                          |

Web Table 31- Mexico deaths with 95% UI by age, sex, and cause in 2013

| Cause                                               | Females, All Ages           | Females, 0-4 Years       | Females, 5-14 Years | Females, 15-49 Years     | Females, 50-69 Years        | Females, 70-80 Years        |
|-----------------------------------------------------|-----------------------------|--------------------------|---------------------|--------------------------|-----------------------------|-----------------------------|
| Anorexia nervosa                                    | 12<br>(11 - 14)             | --                       | 1<br>(1 - 1)        | 11<br>(10 - 13)          | --                          | --                          |
| Diabetes, urogenital, blood, and endocrine diseases | 65,331<br>(59,964 - 69,152) | 369<br>(310 - 443)       | 219<br>(191 - 257)  | 6,257<br>(5,712 - 6,651) | 24,925<br>(22,145 - 26,197) | 33,561<br>(31,225 - 36,805) |
| Diabetes mellitus                                   | 30,543<br>(28,795 - 34,165) | 40<br>(24 - 64)          | 27<br>(16 - 44)     | 2,097<br>(1,942 - 2,298) | 11,072<br>(10,376 - 13,485) | 17,307<br>(16,225 - 19,202) |
| Acute glomerulonephritis                            | 27<br>(22 - 38)             | 1<br>(1 - 1)             | 1<br>(1 - 1)        | 4<br>(4 - 6)             | 7<br>(5 - 10)               | 14<br>(11 - 21)             |
| Chronic kidney disease                              | 29,068<br>(23,888 - 31,462) | 100<br>(77 - 127)        | 112<br>(95 - 137)   | 3,181<br>(2,676 - 3,506) | 12,237<br>(8,933 - 13,273)  | 13,438<br>(11,736 - 15,690) |
| Chronic kidney disease due to diabetes mellitus     | 17,604<br>(13,178 - 19,399) | 16<br>(11 - 21)          | 10<br>(7 - 12)      | 1,702<br>(1,309 - 1,920) | 8,244<br>(5,833 - 9,093)    | 7,634<br>(6,070 - 8,758)    |
| Chronic kidney disease due to hypertension          | 3,458<br>(1,721 - 5,346)    | 23<br>(12 - 35)          | 25<br>(14 - 39)     | 483<br>(250 - 759)       | 957<br>(455 - 1,584)        | 1,971<br>(987 - 3,072)      |
| Chronic kidney disease due to glomerulonephritis    | 373<br>(245 - 507)          | 9<br>(5 - 12)            | 11<br>(7 - 15)      | 89<br>(57 - 116)         | 81<br>(51 - 106)            | 184<br>(115 - 270)          |
| Chronic kidney disease due to other causes          | 7,632<br>(5,314 - 9,562)    | 53<br>(35 - 74)          | 65<br>(51 - 89)     | 907<br>(693 - 1,180)     | 2,956<br>(1,700 - 3,545)    | 3,650<br>(2,936 - 5,306)    |
| Urinary diseases and male infertility               | 2,516<br>(2,017 - 2,984)    | 54<br>(42 - 71)          | 14<br>(12 - 17)     | 292<br>(252 - 356)       | 679<br>(523 - 794)          | 1,476<br>(1,175 - 1,826)    |
| Interstitial nephritis and urinary tract infections | 2,124<br>(1,632 - 2,442)    | 43<br>(32 - 56)          | 9<br>(7 - 12)       | 212<br>(172 - 260)       | 547<br>(392 - 631)          | 1,313<br>(1,001 - 1,570)    |
| Urolithiasis                                        | 168<br>(129 - 262)          | --                       | 1<br>(1 - 2)        | 37<br>(28 - 52)          | 68<br>(50 - 108)            | 62<br>(45 - 106)            |
| Other urinary diseases                              | 224<br>(161 - 415)          | 12<br>(7 - 17)           | 4<br>(3 - 6)        | 43<br>(30 - 62)          | 65<br>(45 - 120)            | 101<br>(59 - 222)           |
| Gynecological diseases                              | 77<br>(53 - 86)             | --                       | --                  | 29<br>(19 - 32)          | 18<br>(12 - 20)             | 30<br>(21 - 38)             |
| Uterine fibroids                                    | 19<br>(13 - 22)             | --                       | --                  | 5<br>(4 - 6)             | 5<br>(3 - 6)                | 9<br>(6 - 11)               |
| Polycystic ovarian syndrome                         | 2<br>(1 - 2)                | --                       | --                  | 2<br>(1 - 2)             | 0<br>(0 - 0)                | --                          |
| Endometriosis                                       | 5<br>(3 - 5)                | --                       | --                  | 4<br>(3 - 5)             | 0<br>(0 - 0)                | --                          |
| Genital prolapse                                    | 15<br>(10 - 17)             | --                       | --                  | 4<br>(2 - 4)             | 3<br>(2 - 4)                | 8<br>(5 - 10)               |
| Other gynecological diseases                        | 36<br>(25 - 40)             | --                       | --                  | 14<br>(9 - 15)           | 9<br>(6 - 10)               | 13<br>(9 - 17)              |
| Hemoglobinopathies and hemolytic anemias            | 396<br>(255 - 573)          | 27<br>(16 - 48)          | 23<br>(14 - 35)     | 121<br>(78 - 177)        | 102<br>(63 - 146)           | 123<br>(75 - 187)           |
| Thalassemias                                        | 4<br>(2 - 6)                | 1<br>(1 - 2)             | 1<br>(1 - 1)        | 2<br>(1 - 3)             | 0<br>(0 - 0)                | 0<br>(0 - 0)                |
| Sickle cell disorders                               | 156<br>(99 - 225)           | 14<br>(8 - 25)           | 16<br>(10 - 24)     | 80<br>(51 - 116)         | 43<br>(26 - 61)             | 4<br>(2 - 5)                |
| G6PD deficiency                                     | 7<br>(5 - 10)               | 1<br>(0 - 1)             | 1<br>(0 - 1)        | 3<br>(2 - 5)             | 2<br>(1 - 3)                | 1<br>(0 - 1)                |
| Other hemoglobinopathies and hemolytic anemias      | 229<br>(147 - 336)          | 11<br>(6 - 20)           | 6<br>(3 - 8)        | 37<br>(23 - 54)          | 57<br>(35 - 83)             | 119<br>(73 - 181)           |
| Endocrine, metabolic, blood, and immune disorders   | 2,705<br>(1,820 - 3,379)    | 146<br>(91 - 191)        | 42<br>(29 - 51)     | 532<br>(372 - 653)       | 812<br>(549 - 1,037)        | 1,173<br>(765 - 1,460)      |
| Musculoskeletal disorders                           | 2,178<br>(1,869 - 2,587)    | --                       | 37<br>(31 - 44)     | 698<br>(604 - 791)       | 708<br>(604 - 810)          | 735<br>(607 - 1,028)        |
| Rheumatoid arthritis                                | 899<br>(747 - 1,074)        | --                       | 2<br>(2 - 3)        | 89<br>(70 - 110)         | 325<br>(266 - 380)          | 482<br>(394 - 621)          |
| Other musculoskeletal disorders                     | 1,279<br>(1,087 - 1,560)    | --                       | 35<br>(29 - 42)     | 609<br>(523 - 688)       | 383<br>(315 - 436)          | 254<br>(198 - 435)          |
| Other non-communicable diseases                     | 6,860<br>(5,967 - 7,813)    | 4,645<br>(3,771 - 5,528) | 283<br>(232 - 335)  | 607<br>(521 - 713)       | 359<br>(308 - 412)          | 967<br>(847 - 1,097)        |
| Congenital anomalies                                | 5,614<br>(4,720 - 6,461)    | 4,438<br>(3,585 - 5,260) | 273<br>(223 - 325)  | 518<br>(425 - 620)       | 180<br>(134 - 222)          | 204<br>(162 - 257)          |
| Neural tube defects                                 | 274<br>(208 - 347)          | 232<br>(170 - 303)       | 9<br>(7 - 12)       | 13<br>(9 - 16)           | 4<br>(2 - 4)                | 17<br>(13 - 22)             |
| Congenital heart anomalies                          | 2,939<br>(2,366 - 3,373)    | 2,342<br>(1,823 - 2,777) | 155<br>(125 - 189)  | 288<br>(226 - 365)       | 79<br>(55 - 105)            | 75<br>(57 - 101)            |
| Cleft lip and cleft palate                          | 4<br>(2 - 8)                | 4<br>(2 - 8)             | --                  | --                       | --                          | --                          |
| Down syndrome                                       | 235<br>(122 - 351)          | 153<br>(74 - 258)        | 20<br>(10 - 27)     | 46<br>(25 - 61)          | 14<br>(7 - 19)              | 2<br>(1 - 4)                |
| Chromosomal unbalanced rearrangements               | 66<br>(32 - 102)            | 54<br>(25 - 85)          | 2<br>(1 - 3)        | 7<br>(4 - 10)            | 1<br>(1 - 2)                | 2<br>(1 - 3)                |
| Other congenital anomalies                          | 2,095<br>(1,756 - 2,456)    | 1,654<br>(1,320 - 2,005) | 87<br>(70 - 108)    | 164<br>(130 - 211)       | 83<br>(66 - 109)            | 108<br>(85 - 142)           |
| Skin and subcutaneous diseases                      | 1,071<br>(971 - 1,222)      | 31<br>(24 - 44)          | 10<br>(8 - 12)      | 89<br>(81 - 108)         | 178<br>(159 - 201)          | 762<br>(674 - 875)          |
| Cellulitis                                          | 82<br>(48 - 107)            | 5<br>(3 - 9)             | 1<br>(1 - 2)        | 14<br>(8 - 18)           | 25<br>(14 - 33)             | 37<br>(18 - 52)             |
| Pyoderma                                            | 371<br>(326 - 427)          | 23<br>(17 - 33)          | 6<br>(5 - 7)        | 40<br>(35 - 49)          | 77<br>(67 - 90)             | 226<br>(189 - 268)          |
| Decubitus ulcer                                     | 562<br>(495 - 671)          | 1<br>(1 - 1)             | 1<br>(1 - 2)        | 21<br>(18 - 35)          | 61<br>(52 - 84)             | 478<br>(416 - 575)          |



Web Table 31- Mexico deaths with 95% UI by age, sex, and cause in 2013

| Cause                                           | Females, All Ages           | Females, 0-4 Years       | Females, 5-14 Years  | Females, 15-49 Years     | Females, 50-69 Years     | Females, 70-80 Years     |
|-------------------------------------------------|-----------------------------|--------------------------|----------------------|--------------------------|--------------------------|--------------------------|
| Other skin and subcutaneous diseases            | 56<br>(19 - 69)             | 3<br>(1 - 4)             | 1<br>(1 - 2)         | 14<br>(7 - 17)           | 16<br>(5 - 20)           | 21<br>(4 - 31)           |
| Sudden infant death syndrome                    | 175<br>(78 - 365)           | 175<br>(78 - 365)        | --                   | --                       | --                       | --                       |
| Injuries                                        | 15,757<br>(14,811 - 17,982) | 1,411<br>(1,167 - 2,006) | 897<br>(803 - 1,026) | 5,600<br>(5,079 - 6,028) | 2,791<br>(2,592 - 3,294) | 5,059<br>(4,594 - 6,322) |
| Transport injuries                              | 5,435<br>(5,034 - 6,399)    | 281<br>(215 - 333)       | 387<br>(341 - 449)   | 2,305<br>(2,065 - 2,658) | 1,244<br>(1,127 - 1,535) | 1,219<br>(1,096 - 1,583) |
| Road injuries                                   | 5,308<br>(4,915 - 6,265)    | 273<br>(209 - 325)       | 378<br>(333 - 439)   | 2,259<br>(2,029 - 2,599) | 1,217<br>(1,103 - 1,502) | 1,182<br>(1,059 - 1,533) |
| Pedestrian road injuries                        | 2,725<br>(2,418 - 3,451)    | 160<br>(115 - 199)       | 220<br>(185 - 263)   | 860<br>(722 - 1,075)     | 630<br>(537 - 848)       | 855<br>(757 - 1,154)     |
| Cyclist road injuries                           | 132<br>(108 - 182)          | 4<br>(2 - 5)             | 10<br>(8 - 14)       | 64<br>(52 - 86)          | 28<br>(22 - 41)          | 26<br>(19 - 40)          |
| Motorcyclist road injuries                      | 191<br>(121 - 273)          | 7<br>(4 - 11)            | 13<br>(8 - 19)       | 100<br>(63 - 138)        | 37<br>(23 - 57)          | 34<br>(21 - 53)          |
| Motor vehicle road injuries                     | 2,160<br>(1,709 - 2,522)    | 97<br>(66 - 122)         | 126<br>(93 - 153)    | 1,189<br>(964 - 1,375)   | 502<br>(391 - 618)       | 246<br>(172 - 317)       |
| Other road injuries                             | 101<br>(73 - 267)           | 6<br>(3 - 18)            | 9<br>(6 - 23)        | 47<br>(32 - 120)         | 20<br>(13 - 50)          | 20<br>(13 - 51)          |
| Other transport injuries                        | 127<br>(108 - 166)          | 8<br>(5 - 9)             | 9<br>(7 - 12)        | 46<br>(38 - 58)          | 27<br>(22 - 36)          | 37<br>(30 - 54)          |
| Unintentional injuries                          | 6,949<br>(6,248 - 8,724)    | 1,043<br>(809 - 1,667)   | 365<br>(307 - 488)   | 1,099<br>(984 - 1,371)   | 985<br>(870 - 1,224)     | 3,457<br>(3,043 - 4,478) |
| Falls                                           | 2,671<br>(2,273 - 3,821)    | 36<br>(28 - 52)          | 30<br>(25 - 40)      | 129<br>(112 - 177)       | 338<br>(284 - 487)       | 2,137<br>(1,796 - 3,075) |
| Drowning                                        | 639<br>(530 - 1,118)        | 177<br>(125 - 361)       | 130<br>(103 - 216)   | 195<br>(154 - 329)       | 62<br>(49 - 93)          | 75<br>(60 - 113)         |
| Fire, heat, and hot substances                  | 521<br>(418 - 656)          | 51<br>(39 - 82)          | 25<br>(21 - 33)      | 102<br>(84 - 130)        | 85<br>(63 - 111)         | 257<br>(187 - 336)       |
| Poisonings                                      | 278<br>(214 - 437)          | 16<br>(18 - 39)          | 16<br>(11 - 24)      | 117<br>(91 - 185)        | 47<br>(36 - 77)          | 73<br>(54 - 114)         |
| Exposure to mechanical forces                   | 387<br>(337 - 474)          | 47<br>(39 - 62)          | 43<br>(37 - 52)      | 167<br>(144 - 203)       | 67<br>(57 - 81)          | 63<br>(54 - 80)          |
| Unintentional firearm injuries                  | 100<br>(88 - 110)           | 4<br>(3 - 5)             | 9<br>(7 - 11)        | 57<br>(50 - 67)          | 16<br>(13 - 18)          | 14<br>(11 - 17)          |
| Unintentional suffocation                       | 92<br>(52 - 142)            | 15<br>(9 - 23)           | 9<br>(5 - 13)        | 45<br>(25 - 70)          | 11<br>(6 - 17)           | 12<br>(6 - 19)           |
| Other exposure to mechanical forces             | 195<br>(172 - 262)          | 28<br>(23 - 38)          | 25<br>(21 - 34)      | 64<br>(55 - 89)          | 39<br>(33 - 54)          | 38<br>(31 - 51)          |
| Adverse effects of medical treatment            | 1,037<br>(765 - 1,444)      | 55<br>(38 - 104)         | 12<br>(10 - 18)      | 153<br>(124 - 212)       | 243<br>(170 - 352)       | 574<br>(395 - 823)       |
| Animal contact                                  | 158<br>(102 - 412)          | 64<br>(39 - 172)         | 11<br>(6 - 27)       | 23<br>(15 - 59)          | 26<br>(16 - 71)          | 34<br>(21 - 96)          |
| Venomous animal contact                         | 122<br>(75 - 320)           | 59<br>(35 - 156)         | 8<br>(5 - 21)        | 16<br>(9 - 41)           | 18<br>(10 - 50)          | 21<br>(11 - 60)          |
| Non-venomous animal contact                     | 36<br>(16 - 100)            | 6<br>(2 - 18)            | 2<br>(1 - 7)         | 7<br>(3 - 18)            | 9<br>(4 - 23)            | 13<br>(6 - 33)           |
| Foreign body                                    | 1,167<br>(791 - 1,876)      | 577<br>(352 - 991)       | 94<br>(65 - 156)     | 200<br>(137 - 328)       | 106<br>(68 - 175)        | 191<br>(122 - 324)       |
| Pulmonary aspiration and foreign body in airway | 1,156<br>(780 - 1,867)      | 575<br>(351 - 989)       | 92<br>(64 - 154)     | 196<br>(134 - 323)       | 104<br>(66 - 174)        | 189<br>(120 - 322)       |
| Foreign body in other body part                 | 10<br>(7 - 13)              | 2<br>(1 - 2)             | 1<br>(1 - 2)         | 4<br>(3 - 6)             | 2<br>(1 - 2)             | 2<br>(1 - 3)             |
| Other unintentional injuries                    | 92<br>(80 - 131)            | 9<br>(7 - 13)            | 4<br>(3 - 7)         | 14<br>(11 - 27)          | 11<br>(9 - 20)           | 53<br>(44 - 67)          |
| Self-harm and interpersonal violence            | 3,372<br>(2,698 - 3,790)    | 87<br>(56 - 125)         | 145<br>(114 - 168)   | 2,196<br>(1,670 - 2,397) | 562<br>(463 - 683)       | 383<br>(333 - 531)       |
| Self-harm                                       | 1,168<br>(820 - 1,270)      | --                       | 50<br>(31 - 57)      | 830<br>(567 - 911)       | 172<br>(125 - 190)       | 116<br>(86 - 131)        |
| Interpersonal violence                          | 2,204<br>(1,597 - 2,701)    | 87<br>(56 - 125)         | 95<br>(69 - 122)     | 1,366<br>(927 - 1,539)   | 390<br>(303 - 521)       | 267<br>(224 - 414)       |
| Assault by firearm                              | 889<br>(494 - 1,132)        | 18<br>(8 - 30)           | 33<br>(18 - 48)      | 626<br>(334 - 785)       | 155<br>(90 - 218)        | 57<br>(29 - 102)         |
| Assault by sharp object                         | 506<br>(308 - 738)          | 10<br>(6 - 19)           | 13<br>(7 - 20)       | 322<br>(188 - 473)       | 98<br>(57 - 140)         | 63<br>(37 - 99)          |
| Assault by other means                          | 809<br>(598 - 1,150)        | 58<br>(38 - 83)          | 49<br>(35 - 69)      | 417<br>(279 - 601)       | 137<br>(103 - 215)       | 147<br>(114 - 252)       |
| Forces of nature, war, and legal intervention   | 0<br>(0 - 0)                | 0<br>(0 - 0)             | --                   | --                       | --                       | --                       |
| Exposure to forces of nature                    | 0<br>(0 - 0)                | 0<br>(0 - 0)             | --                   | --                       | --                       | --                       |

Web Table 31- Moldova deaths with 95% UI by age, sex, and cause in 2013

| Cause                                                             | Both Sexes, All Ages        | Both Sexes, 0-4 Years | Both Sexes, 5-14 Years | Both Sexes, 15-49 Years  | Both Sexes, 50-69 Years     | Both Sexes, 70-80 Years     |
|-------------------------------------------------------------------|-----------------------------|-----------------------|------------------------|--------------------------|-----------------------------|-----------------------------|
| All causes                                                        | 39,436<br>(38,283 - 40,383) | 541<br>(391 - 702)    | 108<br>(89 - 124)      | 4,246<br>(4,053 - 4,428) | 13,346<br>(13,028 - 13,672) | 21,196<br>(20,458 - 21,674) |
| Communicable, maternal, neonatal, and nutritional diseases        | 1,627<br>(1,349 - 1,799)    | 261<br>(186 - 346)    | 11<br>(9 - 14)         | 602<br>(492 - 680)       | 599<br>(463 - 685)          | 154<br>(132 - 176)          |
| HIV/AIDS and tuberculosis                                         | 648<br>(514 - 757)          | 4<br>(3 - 6)          | 1<br>(1 - 2)           | 381<br>(302 - 446)       | 231<br>(178 - 278)          | 30<br>(23 - 38)             |
| Tuberculosis                                                      | 384<br>(258 - 429)          | 1<br>(1 - 2)          | 0<br>(0 - 0)           | 200<br>(126 - 232)       | 163<br>(111 - 190)          | 20<br>(15 - 23)             |
| HIV/AIDS                                                          | 264<br>(162 - 359)          | 3<br>(2 - 5)          | 1<br>(1 - 2)           | 181<br>(116 - 239)       | 68<br>(36 - 109)            | 11<br>(5 - 17)              |
| HIV/AIDS resulting in mycobacterial infection                     | 18<br>(11 - 26)             | 0<br>(0 - 0)          | 0<br>(0 - 0)           | 12<br>(7 - 17)           | 5<br>(2 - 8)                | 1<br>(0 - 1)                |
| HIV/AIDS resulting in other diseases                              | 247<br>(152 - 334)          | 3<br>(2 - 5)          | 1<br>(1 - 1)           | 169<br>(108 - 223)       | 63<br>(34 - 101)            | 10<br>(5 - 16)              |
| Diarrhea, lower respiratory, and other common infectious diseases | 809<br>(640 - 904)          | 115<br>(83 - 149)     | 9<br>(7 - 12)          | 204<br>(160 - 239)       | 361<br>(258 - 430)          | 120<br>(100 - 141)          |
| Diarrheal diseases                                                | 11<br>(8 - 15)              | 9<br>(5 - 13)         | 0<br>(0 - 0)           | 1<br>(1 - 1)             | 1<br>(1 - 1)                | 1<br>(0 - 1)                |
| Intestinal infectious diseases                                    | 9<br>(5 - 16)               | 2<br>(1 - 3)          | 1<br>(1 - 2)           | 3<br>(2 - 7)             | 2<br>(1 - 4)                | 1<br>(0 - 2)                |
| Typhoid fever                                                     | 7<br>(3 - 12)               | 1<br>(0 - 2)          | 1<br>(0 - 2)           | 3<br>(1 - 5)             | 2<br>(1 - 3)                | 1<br>(0 - 1)                |
| Paratyphoid fever                                                 | 2<br>(1 - 4)                | 0<br>(0 - 1)          | 0<br>(0 - 1)           | 1<br>(0 - 2)             | 0<br>(0 - 1)                | 0<br>(0 - 0)                |
| Other intestinal infectious diseases                              | 1<br>(0 - 3)                | 0<br>(0 - 1)          | 0<br>(0 - 0)           | 0<br>(0 - 1)             | 0<br>(0 - 1)                | 0<br>(0 - 1)                |
| Lower respiratory infections                                      | 728<br>(561 - 819)          | 94<br>(66 - 124)      | 5<br>(4 - 7)           | 179<br>(135 - 214)       | 337<br>(235 - 406)          | 113<br>(93 - 133)           |
| Upper respiratory infections                                      | 2<br>(1 - 5)                | 0<br>(0 - 0)          | 0<br>(0 - 0)           | 0<br>(0 - 1)             | 1<br>(0 - 2)                | 1<br>(0 - 3)                |
| Otitis media                                                      | 0<br>(0 - 0)                | 0<br>(0 - 0)          | 0<br>(0 - 0)           | 0<br>(0 - 0)             | 0<br>(0 - 0)                | 0<br>(0 - 0)                |
| Meningitis                                                        | 26<br>(23 - 32)             | 7<br>(5 - 11)         | 1<br>(1 - 1)           | 8<br>(7 - 10)            | 8<br>(7 - 10)               | 2<br>(2 - 2)                |
| Pneumococcal meningitis                                           | 6<br>(5 - 8)                | 1<br>(1 - 2)          | 0<br>(0 - 0)           | 2<br>(2 - 3)             | 2<br>(2 - 3)                | 1<br>(0 - 1)                |
| H influenzae type B meningitis                                    | 5<br>(4 - 7)                | 3<br>(2 - 5)          | 0<br>(0 - 0)           | 1<br>(1 - 1)             | 1<br>(1 - 1)                | 0<br>(0 - 0)                |
| Meningococcal meningitis                                          | 5<br>(4 - 7)                | 2<br>(1 - 3)          | 0<br>(0 - 0)           | 2<br>(1 - 2)             | 2<br>(1 - 2)                | 0<br>(0 - 1)                |
| Other meningitis                                                  | 9<br>(7 - 11)               | 1<br>(1 - 2)          | 0<br>(0 - 0)           | 3<br>(2 - 4)             | 4<br>(3 - 5)                | 1<br>(1 - 1)                |
| Encephalitis                                                      | 29<br>(19 - 35)             | 3<br>(2 - 5)          | 2<br>(1 - 2)           | 12<br>(7 - 15)           | 11<br>(6 - 14)              | 2<br>(1 - 2)                |
| Diphtheria                                                        | 0<br>(0 - 1)                | 0<br>(0 - 0)          | 0<br>(0 - 0)           | 0<br>(0 - 0)             | 0<br>(0 - 0)                | --                          |
| Whooping cough                                                    | 0<br>(0 - 0)                | 0<br>(0 - 0)          | 0<br>(0 - 0)           | 0<br>(0 - 0)             | 0<br>(0 - 0)                | --                          |
| Tetanus                                                           | 0<br>(0 - 0)                | 0<br>(0 - 0)          | 0<br>(0 - 0)           | 0<br>(0 - 0)             | 0<br>(0 - 0)                | 0<br>(0 - 0)                |
| Measles                                                           | 0<br>(0 - 0)                | 0<br>(0 - 0)          | 0<br>(0 - 0)           | 0<br>(0 - 0)             | 0<br>(0 - 0)                | --                          |
| Varicella and herpes zoster                                       | 2<br>(1 - 6)                | 0<br>(0 - 1)          | 0<br>(0 - 0)           | 0<br>(0 - 1)             | 0<br>(0 - 1)                | 1<br>(0 - 5)                |
| Neglected tropical diseases and malaria                           | 2<br>(2 - 2)                | 0<br>(0 - 0)          | 0<br>(0 - 0)           | 1<br>(1 - 1)             | 1<br>(1 - 1)                | 0<br>(0 - 0)                |
| Cysticercosis                                                     | 0<br>(0 - 0)                | 0<br>(0 - 0)          | 0<br>(0 - 0)           | 0<br>(0 - 0)             | 0<br>(0 - 0)                | 0<br>(0 - 0)                |
| Cystic echinococcosis                                             | 1<br>(1 - 1)                | 0<br>(0 - 0)          | 0<br>(0 - 0)           | 0<br>(0 - 0)             | 0<br>(0 - 0)                | 0<br>(0 - 0)                |
| Dengue                                                            | 0<br>(0 - 0)                | 0<br>(0 - 0)          | 0<br>(0 - 0)           | 0<br>(0 - 0)             | 0<br>(0 - 0)                | 0<br>(0 - 0)                |
| Rabies                                                            | 0<br>(0 - 0)                | 0<br>(0 - 0)          | 0<br>(0 - 0)           | 0<br>(0 - 0)             | 0<br>(0 - 0)                | 0<br>(0 - 0)                |
| Other neglected tropical diseases                                 | 0<br>(0 - 1)                | 0<br>(0 - 0)          | 0<br>(0 - 0)           | 0<br>(0 - 0)             | 0<br>(0 - 0)                | 0<br>(0 - 0)                |
| Maternal disorders                                                | 9<br>(7 - 12)               | --                    | 0<br>(0 - 0)           | 9<br>(7 - 12)            | --                          | --                          |
| Maternal hemorrhage                                               | 1<br>(1 - 1)                | --                    | 0<br>(0 - 0)           | 1<br>(1 - 1)             | --                          | --                          |
| Maternal sepsis and other maternal infections                     | 1<br>(1 - 2)                | --                    | 0<br>(0 - 0)           | 1<br>(1 - 2)             | --                          | --                          |
| Maternal hypertensive disorders                                   | 1<br>(0 - 2)                | --                    | 0<br>(0 - 0)           | 1<br>(0 - 2)             | --                          | --                          |
| Maternal obstructed labor                                         | 1<br>(1 - 1)                | --                    | 0<br>(0 - 0)           | 1<br>(1 - 1)             | --                          | --                          |
| Maternal abortive outcome                                         | 2<br>(1 - 2)                | --                    | 0<br>(0 - 0)           | 2<br>(1 - 2)             | --                          | --                          |
| Indirect maternal deaths                                          | 1<br>(1 - 2)                | --                    | 0<br>(0 - 0)           | 1<br>(1 - 2)             | --                          | --                          |

Web Table 31- Moldova deaths with 95% UI by age, sex, and cause in 2013

| Cause                                                            | Both Sexes, All Ages        | Both Sexes, 0-4 Years | Both Sexes, 5-14 Years | Both Sexes, 15-49 Years  | Both Sexes, 50-69 Years     | Both Sexes, 70-80 Years     |
|------------------------------------------------------------------|-----------------------------|-----------------------|------------------------|--------------------------|-----------------------------|-----------------------------|
| Late maternal deaths                                             | 1<br>(0 - 1)                | --                    | 0<br>(0 - 0)           | 1<br>(0 - 1)             | --                          | --                          |
| Maternal deaths aggravated by HIV/AIDS                           | 0<br>(0 - 0)                | --                    | --                     | 0<br>(0 - 0)             | --                          | --                          |
| Other maternal disorders                                         | 1<br>(1 - 2)                | --                    | 0<br>(0 - 0)           | 1<br>(1 - 2)             | --                          | --                          |
| Neonatal disorders                                               | 137<br>(93 - 189)           | 137<br>(93 - 189)     | --                     | --                       | --                          | --                          |
| Neonatal preterm birth complications                             | 33<br>(18 - 51)             | 33<br>(18 - 51)       | --                     | --                       | --                          | --                          |
| Neonatal encephalopathy due to birth asphyxia and trauma         | 52<br>(31 - 79)             | 52<br>(31 - 79)       | --                     | --                       | --                          | --                          |
| Neonatal sepsis and other neonatal infections                    | 35<br>(19 - 66)             | 35<br>(19 - 66)       | --                     | --                       | --                          | --                          |
| Hemolytic disease and other neonatal jaundice                    | 1<br>(0 - 2)                | 1<br>(0 - 2)          | --                     | --                       | --                          | --                          |
| Other neonatal disorders                                         | 16<br>(5 - 28)              | 16<br>(5 - 28)        | --                     | --                       | --                          | --                          |
| Nutritional deficiencies                                         | 6<br>(4 - 12)               | 0<br>(0 - 1)          | 0<br>(0 - 0)           | 2<br>(1 - 4)             | 2<br>(2 - 5)                | 1<br>(1 - 2)                |
| Protein-energy malnutrition                                      | 3<br>(2 - 7)                | 0<br>(0 - 0)          | 0<br>(0 - 0)           | 1<br>(1 - 3)             | 1<br>(1 - 3)                | 0<br>(0 - 1)                |
| Iodine deficiency                                                | 1<br>(0 - 1)                | 0<br>(0 - 0)          | 0<br>(0 - 0)           | 0<br>(0 - 0)             | 0<br>(0 - 1)                | 0<br>(0 - 0)                |
| Iron-deficiency anemia                                           | 1<br>(1 - 3)                | 0<br>(0 - 0)          | 0<br>(0 - 0)           | 0<br>(0 - 1)             | 1<br>(0 - 1)                | 0<br>(0 - 1)                |
| Other nutritional deficiencies                                   | 1<br>(1 - 3)                | 0<br>(0 - 0)          | 0<br>(0 - 0)           | 0<br>(0 - 1)             | 1<br>(0 - 1)                | 0<br>(0 - 0)                |
| Other communicable, maternal, neonatal, and nutritional diseases | 15<br>(12 - 20)             | 4<br>(1 - 8)          | 0<br>(0 - 1)           | 5<br>(4 - 7)             | 4<br>(3 - 5)                | 2<br>(1 - 2)                |
| Sexually transmitted diseases excluding HIV                      | 5<br>(2 - 10)               | 2<br>(0 - 7)          | 0<br>(0 - 1)           | 2<br>(1 - 3)             | 1<br>(1 - 1)                | 0<br>(0 - 1)                |
| Syphilis                                                         | 4<br>(1 - 9)                | 2<br>(0 - 7)          | 0<br>(0 - 1)           | 1<br>(0 - 1)             | 0<br>(0 - 1)                | 0<br>(0 - 0)                |
| Chlamydial infection                                             | 0<br>(0 - 1)                | --                    | 0<br>(0 - 0)           | 0<br>(0 - 1)             | 0<br>(0 - 0)                | 0<br>(0 - 0)                |
| Gonococcal infection                                             | 1<br>(0 - 1)                | --                    | 0<br>(0 - 0)           | 0<br>(0 - 1)             | 0<br>(0 - 0)                | 0<br>(0 - 0)                |
| Other sexually transmitted diseases                              | 0<br>(0 - 1)                | --                    | 0<br>(0 - 0)           | 0<br>(0 - 1)             | 0<br>(0 - 0)                | 0<br>(0 - 0)                |
| Hepatitis                                                        | 2<br>(2 - 3)                | 0<br>(0 - 0)          | 0<br>(0 - 0)           | 1<br>(1 - 2)             | 0<br>(0 - 0)                | 0<br>(0 - 0)                |
| Acute hepatitis A                                                | 1<br>(0 - 1)                | 0<br>(0 - 0)          | 0<br>(0 - 0)           | 1<br>(0 - 1)             | 0<br>(0 - 0)                | 0<br>(0 - 0)                |
| Acute hepatitis B                                                | 1<br>(1 - 2)                | 0<br>(0 - 0)          | 0<br>(0 - 0)           | 1<br>(0 - 1)             | 0<br>(0 - 0)                | 0<br>(0 - 0)                |
| Acute hepatitis C                                                | 0<br>(0 - 0)                | --                    | 0<br>(0 - 0)           | 0<br>(0 - 0)             | 0<br>(0 - 0)                | 0<br>(0 - 0)                |
| Other infectious diseases                                        | 8<br>(6 - 10)               | 1<br>(1 - 2)          | 0<br>(0 - 0)           | 2<br>(2 - 3)             | 3<br>(2 - 4)                | 1<br>(1 - 2)                |
| Non-communicable diseases                                        | 35,283<br>(34,310 - 36,107) | 208<br>(149 - 277)    | 42<br>(33 - 50)        | 2,413<br>(2,284 - 2,539) | 11,866<br>(11,559 - 12,178) | 20,755<br>(20,031 - 21,218) |
| Neoplasms                                                        | 5,392<br>(5,098 - 5,655)    | 13<br>(8 - 19)        | 20<br>(16 - 25)        | 656<br>(612 - 704)       | 3,067<br>(2,907 - 3,225)    | 1,635<br>(1,494 - 1,740)    |
| Esophageal cancer                                                | 77<br>(66 - 96)             | --                    | --                     | 7<br>(5 - 10)            | 51<br>(42 - 64)             | 19<br>(16 - 23)             |
| Stomach cancer                                                   | 478<br>(430 - 534)          | --                    | --                     | 52<br>(44 - 59)          | 260<br>(233 - 294)          | 166<br>(144 - 193)          |
| Liver cancer                                                     | 356<br>(253 - 427)          | --                    | 1<br>(0 - 1)           | 33<br>(23 - 42)          | 202<br>(143 - 248)          | 120<br>(76 - 150)           |
| Liver cancer due to hepatitis B                                  | 57<br>(32 - 85)             | --                    | 0<br>(0 - 0)           | 7<br>(4 - 11)            | 35<br>(18 - 54)             | 15<br>(8 - 23)              |
| Liver cancer due to hepatitis C                                  | 174<br>(117 - 225)          | --                    | 0<br>(0 - 0)           | 15<br>(9 - 21)           | 100<br>(67 - 132)           | 59<br>(36 - 79)             |
| Liver cancer due to alcohol use                                  | 87<br>(54 - 123)            | --                    | --                     | 5<br>(3 - 8)             | 48<br>(29 - 69)             | 34<br>(19 - 49)             |
| Liver cancer due to other causes                                 | 37<br>(24 - 52)             | --                    | 0<br>(0 - 0)           | 5<br>(3 - 7)             | 19<br>(12 - 28)             | 12<br>(7 - 17)              |
| Larynx cancer                                                    | 132<br>(88 - 161)           | --                    | --                     | 15<br>(11 - 22)          | 98<br>(62 - 120)            | 19<br>(12 - 25)             |
| Tracheal, bronchus and lung cancer                               | 992<br>(887 - 1,087)        | --                    | --                     | 87<br>(71 - 103)         | 650<br>(572 - 726)          | 255<br>(227 - 284)          |
| Breast cancer                                                    | 435<br>(297 - 505)          | --                    | --                     | 67<br>(52 - 87)          | 245<br>(167 - 286)          | 123<br>(78 - 145)           |
| Cervical cancer                                                  | 170<br>(132 - 200)          | --                    | --                     | 43<br>(28 - 58)          | 82<br>(63 - 100)            | 45<br>(35 - 57)             |
| Uterine cancer                                                   | 69<br>(48 - 83)             | --                    | --                     | 6<br>(4 - 9)             | 39<br>(25 - 48)             | 24<br>(16 - 31)             |
| Prostate cancer                                                  | 162<br>(99 - 205)           | --                    | --                     | 2<br>(1 - 3)             | 72<br>(42 - 93)             | 87<br>(50 - 115)            |

Web Table 31- Moldova deaths with 95% UI by age, sex, and cause in 2013

| Cause                                         | Both Sexes, All Ages        | Both Sexes, 0-4 Years | Both Sexes, 5-14 Years | Both Sexes, 15-49 Years | Both Sexes, 50-69 Years  | Both Sexes, 70-80 Years     |
|-----------------------------------------------|-----------------------------|-----------------------|------------------------|-------------------------|--------------------------|-----------------------------|
| Colon and rectum cancer                       | 760<br>(714 - 806)          | --                    | --                     | 49<br>(44 - 56)         | 394<br>(364 - 424)       | 316<br>(290 - 346)          |
| Lip and oral cavity cancer                    | 116<br>(104 - 129)          | --                    | --                     | 15<br>(12 - 18)         | 78<br>(67 - 89)          | 24<br>(20 - 28)             |
| Nasopharynx cancer                            | 30<br>(25 - 39)             | --                    | 0<br>(0 - 0)           | 7<br>(5 - 10)           | 19<br>(15 - 25)          | 3<br>(3 - 5)                |
| Other pharynx cancer                          | 111<br>(73 - 133)           | --                    | --                     | 11<br>(8 - 14)          | 90<br>(56 - 110)         | 10<br>(7 - 13)              |
| Gallbladder and biliary tract cancer          | 47<br>(38 - 62)             | --                    | --                     | 3<br>(2 - 4)            | 26<br>(21 - 35)          | 18<br>(14 - 24)             |
| Pancreatic cancer                             | 350<br>(328 - 374)          | --                    | --                     | 34<br>(29 - 39)         | 198<br>(183 - 217)       | 118<br>(107 - 131)          |
| Malignant skin melanoma                       | 45<br>(31 - 66)             | --                    | --                     | 11<br>(8 - 17)          | 21<br>(14 - 31)          | 13<br>(9 - 19)              |
| Non-melanoma skin cancer                      | 37<br>(28 - 49)             | --                    | --                     | 3<br>(2 - 4)            | 11<br>(8 - 16)           | 23<br>(17 - 30)             |
| Ovarian cancer                                | 108<br>(94 - 123)           | --                    | --                     | 20<br>(16 - 25)         | 64<br>(54 - 74)          | 24<br>(20 - 29)             |
| Testicular cancer                             | 9<br>(6 - 12)               | --                    | --                     | 5<br>(4 - 8)            | 2<br>(2 - 3)             | 1<br>(1 - 2)                |
| Kidney cancer                                 | 101<br>(91 - 113)           | 1<br>(0 - 1)          | 0<br>(0 - 1)           | 10<br>(8 - 12)          | 65<br>(57 - 75)          | 25<br>(21 - 30)             |
| Bladder cancer                                | 127<br>(111 - 146)          | --                    | --                     | 5<br>(4 - 6)            | 58<br>(49 - 70)          | 64<br>(54 - 75)             |
| Brain and nervous system cancer               | 135<br>(107 - 155)          | 2<br>(1 - 4)          | 5<br>(3 - 6)           | 43<br>(35 - 50)         | 74<br>(57 - 88)          | 11<br>(8 - 14)              |
| Thyroid cancer                                | 19<br>(12 - 23)             | --                    | 0<br>(0 - 0)           | 2<br>(1 - 3)            | 11<br>(7 - 14)           | 6<br>(3 - 7)                |
| Mesothelioma                                  | 5<br>(4 - 7)                | --                    | --                     | 1<br>(1 - 1)            | 3<br>(2 - 5)             | 1<br>(1 - 1)                |
| Hodgkin lymphoma                              | 31<br>(25 - 46)             | 0<br>(0 - 0)          | 1<br>(0 - 1)           | 15<br>(12 - 22)         | 11<br>(8 - 16)           | 5<br>(4 - 7)                |
| Non-Hodgkin lymphoma                          | 113<br>(76 - 143)           | 2<br>(1 - 3)          | 3<br>(2 - 4)           | 25<br>(17 - 33)         | 59<br>(39 - 77)          | 24<br>(15 - 33)             |
| Multiple myeloma                              | 28<br>(19 - 39)             | --                    | --                     | 4<br>(2 - 5)            | 18<br>(12 - 26)          | 6<br>(4 - 9)                |
| Leukemia                                      | 117<br>(103 - 130)          | 3<br>(2 - 5)          | 6<br>(5 - 8)           | 32<br>(26 - 37)         | 48<br>(41 - 56)          | 27<br>(23 - 32)             |
| Other neoplasms                               | 233<br>(200 - 265)          | 5<br>(3 - 7)          | 5<br>(3 - 6)           | 50<br>(42 - 58)         | 116<br>(98 - 136)        | 58<br>(44 - 69)             |
| Cardiovascular diseases                       | 22,475<br>(21,713 - 23,134) | 2<br>(1 - 2)          | 2<br>(1 - 2)           | 688<br>(633 - 744)      | 5,828<br>(5,604 - 6,092) | 15,955<br>(15,353 - 16,411) |
| Rheumatic heart disease                       | 122<br>(102 - 161)          | 0<br>(0 - 0)          | 0<br>(0 - 0)           | 34<br>(26 - 55)         | 74<br>(59 - 97)          | 14<br>(8 - 17)              |
| Ischemic heart disease                        | 15,317<br>(14,514 - 16,337) | 0<br>(0 - 0)          | 0<br>(0 - 0)           | 361<br>(306 - 402)      | 3,395<br>(3,109 - 3,683) | 11,561<br>(10,936 - 12,385) |
| Cerebrovascular disease                       | 6,055<br>(5,466 - 6,666)    | 0<br>(0 - 0)          | 0<br>(0 - 0)           | 195<br>(165 - 234)      | 1,983<br>(1,780 - 2,240) | 3,876<br>(3,426 - 4,312)    |
| Ischemic stroke                               | 3,353<br>(2,552 - 3,768)    | 0<br>(0 - 0)          | 0<br>(0 - 0)           | 31<br>(19 - 42)         | 743<br>(534 - 880)       | 2,579<br>(1,988 - 2,898)    |
| Hemorrhagic stroke                            | 2,702<br>(2,334 - 3,498)    | 0<br>(0 - 0)          | 0<br>(0 - 0)           | 164<br>(138 - 203)      | 1,240<br>(1,065 - 1,567) | 1,297<br>(1,085 - 1,792)    |
| Hypertensive heart disease                    | 584<br>(273 - 870)          | 0<br>(0 - 0)          | 0<br>(0 - 0)           | 13<br>(8 - 17)          | 161<br>(96 - 216)        | 409<br>(164 - 651)          |
| Cardiomyopathy and myocarditis                | 193<br>(145 - 225)          | 1<br>(1 - 2)          | 1<br>(0 - 1)           | 54<br>(41 - 67)         | 107<br>(79 - 128)        | 30<br>(20 - 36)             |
| Atrial fibrillation and flutter               | 0<br>(0 - 0)                | --                    | --                     | 0<br>(0 - 0)            | 0<br>(0 - 0)             | 0<br>(0 - 0)                |
| Aortic aneurysm                               | 48<br>(39 - 57)             | --                    | --                     | 7<br>(6 - 9)            | 26<br>(21 - 30)          | 16<br>(12 - 19)             |
| Peripheral vascular disease                   | 29<br>(24 - 35)             | --                    | --                     | 1<br>(0 - 1)            | 10<br>(8 - 13)           | 18<br>(15 - 22)             |
| Endocarditis                                  | 14<br>(8 - 18)              | 0<br>(0 - 0)          | 0<br>(0 - 0)           | 5<br>(3 - 7)            | 7<br>(4 - 9)             | 1<br>(1 - 2)                |
| Other cardiovascular and circulatory diseases | 114<br>(73 - 133)           | 0<br>(0 - 0)          | 0<br>(0 - 0)           | 19<br>(13 - 24)         | 65<br>(39 - 79)          | 30<br>(19 - 38)             |
| Chronic respiratory diseases                  | 1,263<br>(1,144 - 1,699)    | 0<br>(0 - 0)          | 0<br>(0 - 0)           | 40<br>(34 - 60)         | 373<br>(323 - 569)       | 849<br>(761 - 1,093)        |
| Chronic obstructive pulmonary disease         | 1,203<br>(1,089 - 1,612)    | 0<br>(0 - 0)          | 0<br>(0 - 0)           | 34<br>(28 - 51)         | 347<br>(300 - 532)       | 821<br>(735 - 1,051)        |
| Pneumoconiosis                                | 0<br>(0 - 1)                | 0<br>(0 - 0)          | 0<br>(0 - 0)           | 0<br>(0 - 0)            | 0<br>(0 - 0)             | 0<br>(0 - 0)                |
| Silicosis                                     | 0<br>(0 - 0)                | 0<br>(0 - 0)          | 0<br>(0 - 0)           | 0<br>(0 - 0)            | 0<br>(0 - 0)             | 0<br>(0 - 0)                |
| Asbestosis                                    | 0<br>(0 - 0)                | 0<br>(0 - 0)          | 0<br>(0 - 0)           | 0<br>(0 - 0)            | 0<br>(0 - 0)             | 0<br>(0 - 0)                |
| Coal workers pneumoconiosis                   | 0<br>(0 - 0)                | 0<br>(0 - 0)          | 0<br>(0 - 0)           | 0<br>(0 - 0)            | 0<br>(0 - 0)             | 0<br>(0 - 0)                |
| Other pneumoconiosis                          | 0<br>(0 - 0)                | 0<br>(0 - 0)          | 0<br>(0 - 0)           | 0<br>(0 - 0)            | 0<br>(0 - 0)             | 0<br>(0 - 0)                |

Web Table 31- Moldova deaths with 95% UI by age, sex, and cause in 2013

| Cause                                               | Both Sexes, All Ages     | Both Sexes, 0-4 Years | Both Sexes, 5-14 Years | Both Sexes, 15-49 Years | Both Sexes, 50-69 Years  | Both Sexes, 70-80 Years  |
|-----------------------------------------------------|--------------------------|-----------------------|------------------------|-------------------------|--------------------------|--------------------------|
| Asthma                                              | 55<br>(43 - 81)          | 0<br>(0 - 0)          | 0<br>(0 - 0)           | 4<br>(3 - 7)            | 23<br>(18 - 36)          | 27<br>(20 - 42)          |
| Interstitial lung disease and pulmonary sarcoidosis | 3<br>(2 - 5)             | 0<br>(0 - 0)          | 0<br>(0 - 0)           | 1<br>(0 - 1)            | 2<br>(1 - 2)             | 1<br>(0 - 1)             |
| Other chronic respiratory diseases                  | 2<br>(1 - 2)             | 0<br>(0 - 0)          | 0<br>(0 - 0)           | 1<br>(1 - 2)            | 0<br>(0 - 1)             | 0<br>(0 - 0)             |
| Cirrhosis                                           | 2,747<br>(2,598 - 2,897) | 0<br>(0 - 0)          | 1<br>(1 - 1)           | 473<br>(435 - 515)      | 1,612<br>(1,507 - 1,716) | 661<br>(603 - 730)       |
| Cirrhosis due to hepatitis B                        | 481<br>(316 - 661)       | 0<br>(0 - 0)          | 0<br>(0 - 0)           | 80<br>(46 - 118)        | 280<br>(181 - 388)       | 122<br>(75 - 167)        |
| Cirrhosis due to hepatitis C                        | 1,184<br>(891 - 1,460)   | 0<br>(0 - 0)          | 0<br>(0 - 0)           | 189<br>(130 - 244)      | 711<br>(524 - 884)       | 284<br>(213 - 354)       |
| Cirrhosis due to alcohol use                        | 817<br>(598 - 1,017)     | --                    | --                     | 132<br>(92 - 171)       | 475<br>(345 - 599)       | 211<br>(148 - 272)       |
| Cirrhosis due to other causes                       | 264<br>(137 - 400)       | 0<br>(0 - 0)          | 1<br>(0 - 1)           | 73<br>(35 - 107)        | 146<br>(74 - 231)        | 44<br>(23 - 73)          |
| Digestive diseases                                  | 650<br>(558 - 703)       | 1<br>(0 - 1)          | 1<br>(1 - 1)           | 144<br>(128 - 168)      | 317<br>(271 - 351)       | 186<br>(138 - 210)       |
| Peptic ulcer disease                                | 139<br>(96 - 173)        | 0<br>(0 - 0)          | 0<br>(0 - 0)           | 28<br>(18 - 37)         | 73<br>(49 - 94)          | 38<br>(23 - 50)          |
| Gastritis and duodenitis                            | 1<br>(1 - 2)             | 0<br>(0 - 0)          | 0<br>(0 - 0)           | 0<br>(0 - 1)            | 1<br>(0 - 1)             | 0<br>(0 - 0)             |
| Appendicitis                                        | 8<br>(6 - 10)            | 0<br>(0 - 0)          | 0<br>(0 - 0)           | 2<br>(1 - 2)            | 4<br>(2 - 5)             | 2<br>(2 - 4)             |
| Paralytic ileus and intestinal obstruction          | 39<br>(26 - 63)          | 0<br>(0 - 1)          | 0<br>(0 - 0)           | 6<br>(4 - 9)            | 17<br>(11 - 28)          | 16<br>(10 - 27)          |
| Inguinal, femoral, and abdominal hernia             | 16<br>(10 - 25)          | 0<br>(0 - 0)          | 0<br>(0 - 0)           | 1<br>(1 - 1)            | 6<br>(4 - 10)            | 9<br>(5 - 15)            |
| Inflammatory bowel disease                          | 13<br>(8 - 17)           | 0<br>(0 - 0)          | 0<br>(0 - 0)           | 3<br>(2 - 4)            | 6<br>(4 - 8)             | 4<br>(2 - 5)             |
| Vascular intestinal disorders                       | 117<br>(71 - 170)        | 0<br>(0 - 0)          | 0<br>(0 - 0)           | 5<br>(2 - 10)           | 44<br>(25 - 72)          | 69<br>(41 - 93)          |
| Gallbladder and biliary diseases                    | 36<br>(28 - 45)          | 0<br>(0 - 0)          | 0<br>(0 - 0)           | 2<br>(2 - 3)            | 15<br>(11 - 18)          | 19<br>(14 - 25)          |
| Pancreatitis                                        | 259<br>(219 - 315)       | 0<br>(0 - 0)          | 0<br>(0 - 0)           | 92<br>(78 - 113)        | 141<br>(114 - 177)       | 25<br>(16 - 34)          |
| Other digestive diseases                            | 20<br>(14 - 25)          | 0<br>(0 - 0)          | 0<br>(0 - 0)           | 4<br>(3 - 5)            | 11<br>(7 - 14)           | 5<br>(4 - 7)             |
| Neurological disorders                              | 1,388<br>(1,198 - 1,594) | 2<br>(2 - 3)          | 3<br>(2 - 4)           | 68<br>(59 - 81)         | 124<br>(105 - 145)       | 1,191<br>(1,003 - 1,383) |
| Alzheimer disease and other dementias               | 1,264<br>(1,075 - 1,466) | --                    | --                     | 0<br>(0 - 1)            | 83<br>(64 - 102)         | 1,180<br>(993 - 1,373)   |
| Parkinson disease                                   | 8<br>(6 - 9)             | --                    | --                     | 0<br>(0 - 1)            | 4<br>(3 - 5)             | 4<br>(3 - 5)             |
| Epilepsy                                            | 71<br>(61 - 90)          | 0<br>(0 - 1)          | 2<br>(1 - 3)           | 47<br>(39 - 60)         | 20<br>(16 - 24)          | 2<br>(2 - 3)             |
| Multiple sclerosis                                  | 11<br>(6 - 14)           | --                    | --                     | 6<br>(3 - 9)            | 4<br>(2 - 6)             | 1<br>(0 - 1)             |
| Other neurological disorders                        | 34<br>(27 - 38)          | 2<br>(1 - 3)          | 1<br>(1 - 1)           | 14<br>(11 - 17)         | 13<br>(11 - 15)          | 3<br>(3 - 4)             |
| Mental and substance use disorders                  | 448<br>(331 - 543)       | 1<br>(1 - 2)          | 0<br>(0 - 0)           | 202<br>(151 - 248)      | 217<br>(151 - 275)       | 28<br>(21 - 35)          |
| Schizophrenia                                       | 3<br>(2 - 6)             | --                    | --                     | 1<br>(1 - 2)            | 2<br>(1 - 3)             | 0<br>(0 - 1)             |
| Alcohol use disorders                               | 289<br>(183 - 380)       | --                    | --                     | 106<br>(68 - 143)       | 169<br>(104 - 227)       | 13<br>(8 - 18)           |
| Drug use disorders                                  | 157<br>(100 - 179)       | 1<br>(1 - 2)          | --                     | 94<br>(57 - 113)        | 46<br>(29 - 56)          | 15<br>(12 - 18)          |
| Opioid use disorders                                | 67<br>(42 - 77)          | 1<br>(0 - 1)          | --                     | 41<br>(25 - 50)         | 18<br>(12 - 22)          | 6<br>(5 - 8)             |
| Cocaine use disorders                               | 4<br>(2 - 5)             | 0<br>(0 - 0)          | --                     | 3<br>(2 - 3)            | 1<br>(1 - 1)             | 0<br>(0 - 0)             |
| Amphetamine use disorders                           | 4<br>(2 - 4)             | 0<br>(0 - 0)          | --                     | 2<br>(1 - 3)            | 1<br>(1 - 1)             | 0<br>(0 - 0)             |
| Other drug use disorders                            | 82<br>(52 - 95)          | 1<br>(0 - 1)          | --                     | 48<br>(28 - 58)         | 26<br>(16 - 31)          | 8<br>(6 - 10)            |
| Eating disorders                                    | 0<br>(0 - 0)             | --                    | 0<br>(0 - 0)           | 0<br>(0 - 0)            | --                       | --                       |
| Anorexia nervosa                                    | 0<br>(0 - 0)             | --                    | 0<br>(0 - 0)           | 0<br>(0 - 0)            | --                       | --                       |
| Diabetes, urogenital, blood, and endocrine diseases | 638<br>(545 - 693)       | 5<br>(3 - 7)          | 4<br>(2 - 4)           | 100<br>(88 - 110)       | 294<br>(257 - 321)       | 235<br>(184 - 265)       |
| Diabetes mellitus                                   | 232<br>(213 - 267)       | 0<br>(0 - 0)          | 0<br>(0 - 1)           | 25<br>(22 - 28)         | 117<br>(104 - 138)       | 89<br>(79 - 104)         |
| Acute glomerulonephritis                            | 2<br>(1 - 3)             | 0<br>(0 - 0)          | 0<br>(0 - 0)           | 1<br>(1 - 1)            | 1<br>(0 - 1)             | 0<br>(0 - 0)             |
| Chronic kidney disease                              | 120<br>(95 - 133)        | 0<br>(0 - 0)          | 1<br>(0 - 1)           | 32<br>(28 - 38)         | 60<br>(44 - 68)          | 28<br>(19 - 33)          |
| Chronic kidney disease due to diabetes mellitus     | 31<br>(4 - 40)           | 0<br>(0 - 0)          | 0<br>(0 - 0)           | 4<br>(1 - 5)            | 20<br>(2 - 26)           | 8<br>(1 - 10)            |

Web Table 31- Moldova deaths with 95% UI by age, sex, and cause in 2013

| Cause                                               | Both Sexes, All Ages     | Both Sexes, 0-4 Years | Both Sexes, 5-14 Years | Both Sexes, 15-49 Years  | Both Sexes, 50-69 Years | Both Sexes, 70-80 Years |
|-----------------------------------------------------|--------------------------|-----------------------|------------------------|--------------------------|-------------------------|-------------------------|
| Chronic kidney disease due to hypertension          | 1<br>(1 - 1)             | 0<br>(0 - 0)          | 0<br>(0 - 0)           | 0<br>(0 - 0)             | 0<br>(0 - 1)            | 0<br>(0 - 0)            |
| Chronic kidney disease due to glomerulonephritis    | 51<br>(42 - 68)          | 0<br>(0 - 0)          | 0<br>(0 - 0)           | 19<br>(15 - 23)          | 22<br>(17 - 33)         | 10<br>(8 - 13)          |
| Chronic kidney disease due to other causes          | 36<br>(27 - 48)          | 0<br>(0 - 0)          | 0<br>(0 - 0)           | 9<br>(6 - 13)            | 18<br>(11 - 25)         | 9<br>(6 - 13)           |
| Urinary diseases and male infertility               | 209<br>(163 - 240)       | 0<br>(0 - 0)          | 1<br>(0 - 1)           | 25<br>(21 - 30)          | 86<br>(71 - 102)        | 97<br>(65 - 118)        |
| Interstitial nephritis and urinary tract infections | 165<br>(130 - 190)       | 0<br>(0 - 0)          | 1<br>(0 - 1)           | 19<br>(16 - 23)          | 66<br>(55 - 80)         | 79<br>(53 - 97)         |
| Urolithiasis                                        | 21<br>(13 - 29)          | --                    | 0<br>(0 - 0)           | 2<br>(1 - 2)             | 8<br>(5 - 11)           | 11<br>(5 - 17)          |
| Other urinary diseases                              | 23<br>(15 - 30)          | 0<br>(0 - 0)          | 0<br>(0 - 0)           | 4<br>(3 - 6)             | 11<br>(7 - 15)          | 8<br>(4 - 11)           |
| Gynecological diseases                              | 1<br>(1 - 1)             | --                    | --                     | 0<br>(0 - 1)             | 0<br>(0 - 1)            | 0<br>(0 - 0)            |
| Uterine fibroids                                    | 0<br>(0 - 0)             | --                    | --                     | 0<br>(0 - 0)             | 0<br>(0 - 0)            | 0<br>(0 - 0)            |
| Polycystic ovarian syndrome                         | 0<br>(0 - 0)             | --                    | --                     | 0<br>(0 - 0)             | 0<br>(0 - 0)            | --                      |
| Endometriosis                                       | 0<br>(0 - 0)             | --                    | --                     | 0<br>(0 - 0)             | 0<br>(0 - 0)            | --                      |
| Genital prolapse                                    | 0<br>(0 - 0)             | --                    | --                     | 0<br>(0 - 0)             | 0<br>(0 - 0)            | 0<br>(0 - 0)            |
| Other gynecological diseases                        | 1<br>(0 - 1)             | --                    | --                     | 0<br>(0 - 0)             | 0<br>(0 - 0)            | 0<br>(0 - 0)            |
| Hemoglobinopathies and hemolytic anemias            | 5<br>(4 - 8)             | 0<br>(0 - 1)          | 0<br>(0 - 1)           | 2<br>(2 - 3)             | 1<br>(1 - 2)            | 1<br>(0 - 1)            |
| Thalassemias                                        | 2<br>(1 - 3)             | 0<br>(0 - 1)          | 0<br>(0 - 1)           | 1<br>(1 - 2)             | 0<br>(0 - 0)            | 0<br>(0 - 0)            |
| Sickle cell disorders                               | 0<br>(0 - 0)             | 0<br>(0 - 0)          | 0<br>(0 - 0)           | 0<br>(0 - 0)             | 0<br>(0 - 0)            | 0<br>(0 - 0)            |
| G6PD deficiency                                     | 0<br>(0 - 0)             | 0<br>(0 - 0)          | 0<br>(0 - 0)           | 0<br>(0 - 0)             | 0<br>(0 - 0)            | 0<br>(0 - 0)            |
| Other hemoglobinopathies and hemolytic anemias      | 3<br>(2 - 4)             | 0<br>(0 - 0)          | 0<br>(0 - 0)           | 1<br>(1 - 1)             | 1<br>(1 - 2)            | 1<br>(0 - 1)            |
| Endocrine, metabolic, blood, and immune disorders   | 68<br>(26 - 84)          | 4<br>(2 - 6)          | 1<br>(1 - 2)           | 14<br>(6 - 18)           | 29<br>(11 - 36)         | 20<br>(6 - 27)          |
| Musculoskeletal disorders                           | 28<br>(24 - 38)          | --                    | 1<br>(1 - 1)           | 9<br>(7 - 12)            | 13<br>(10 - 18)         | 6<br>(5 - 8)            |
| Rheumatoid arthritis                                | 9<br>(7 - 12)            | --                    | 0<br>(0 - 0)           | 1<br>(1 - 2)             | 4<br>(3 - 6)            | 3<br>(2 - 4)            |
| Other musculoskeletal disorders                     | 19<br>(17 - 26)          | --                    | 1<br>(1 - 1)           | 7<br>(6 - 10)            | 8<br>(7 - 12)           | 3<br>(2 - 4)            |
| Other non-communicable diseases                     | 254<br>(196 - 321)       | 183<br>(131 - 245)    | 11<br>(8 - 14)         | 32<br>(26 - 36)          | 20<br>(13 - 23)         | 9<br>(4 - 11)           |
| Congenital anomalies                                | 215<br>(161 - 279)       | 171<br>(121 - 229)    | 11<br>(8 - 13)         | 24<br>(20 - 29)          | 8<br>(6 - 9)            | 1<br>(1 - 2)            |
| Neural tube defects                                 | 6<br>(4 - 9)             | 5<br>(3 - 8)          | 0<br>(0 - 0)           | 0<br>(0 - 0)             | 0<br>(0 - 0)            | 0<br>(0 - 0)            |
| Congenital heart anomalies                          | 87<br>(64 - 114)         | 65<br>(44 - 89)       | 4<br>(3 - 6)           | 14<br>(11 - 17)          | 3<br>(2 - 4)            | 1<br>(1 - 1)            |
| Cleft lip and cleft palate                          | 1<br>(0 - 3)             | 1<br>(0 - 3)          | --                     | --                       | --                      | --                      |
| Down syndrome                                       | 5<br>(3 - 6)             | 1<br>(1 - 2)          | 1<br>(0 - 1)           | 2<br>(2 - 3)             | 1<br>(1 - 1)            | 0<br>(0 - 0)            |
| Chromosomal unbalanced rearrangements               | 4<br>(3 - 5)             | 3<br>(2 - 4)          | 0<br>(0 - 0)           | 0<br>(0 - 1)             | 0<br>(0 - 0)            | 0<br>(0 - 0)            |
| Other congenital anomalies                          | 111<br>(80 - 147)        | 95<br>(66 - 131)      | 5<br>(3 - 7)           | 7<br>(6 - 9)             | 3<br>(3 - 4)            | 0<br>(0 - 0)            |
| Skin and subcutaneous diseases                      | 28<br>(12 - 33)          | 1<br>(0 - 1)          | 0<br>(0 - 0)           | 7<br>(3 - 9)             | 13<br>(6 - 15)          | 7<br>(3 - 9)            |
| Cellulitis                                          | 16<br>(7 - 20)           | 0<br>(0 - 0)          | 0<br>(0 - 0)           | 4<br>(2 - 5)             | 8<br>(3 - 10)           | 4<br>(2 - 5)            |
| Pyoderma                                            | 10<br>(5 - 15)           | 0<br>(0 - 0)          | 0<br>(0 - 0)           | 2<br>(1 - 3)             | 5<br>(2 - 7)            | 3<br>(1 - 5)            |
| Decubitus ulcer                                     | 1<br>(0 - 1)             | 0<br>(0 - 0)          | 0<br>(0 - 0)           | 0<br>(0 - 0)             | 0<br>(0 - 0)            | 0<br>(0 - 0)            |
| Other skin and subcutaneous diseases                | 1<br>(0 - 1)             | 0<br>(0 - 0)          | 0<br>(0 - 0)           | 0<br>(0 - 1)             | 0<br>(0 - 1)            | 0<br>(0 - 0)            |
| Sudden infant death syndrome                        | 12<br>(5 - 21)           | 12<br>(5 - 21)        | --                     | --                       | --                      | --                      |
| Injuries                                            | 2,526<br>(2,345 - 2,866) | 72<br>(52 - 98)       | 55<br>(43 - 67)        | 1,230<br>(1,126 - 1,380) | 881<br>(811 - 993)      | 287<br>(264 - 335)      |
| Transport injuries                                  | 466<br>(423 - 508)       | 5<br>(3 - 8)          | 14<br>(10 - 18)        | 340<br>(304 - 377)       | 80<br>(70 - 92)         | 27<br>(23 - 35)         |
| Road injuries                                       | 438<br>(396 - 480)       | 5<br>(3 - 8)          | 14<br>(10 - 17)        | 325<br>(289 - 360)       | 71<br>(62 - 82)         | 24<br>(20 - 31)         |
| Pedestrian road injuries                            | 91<br>(67 - 134)         | 2<br>(1 - 3)          | 6<br>(4 - 8)           | 37<br>(23 - 63)          | 32<br>(24 - 43)         | 15<br>(11 - 21)         |

Web Table 31- Moldova deaths with 95% UI by age, sex, and cause in 2013

| Cause                                           | Both Sexes, All Ages     | Both Sexes, 0-4 Years | Both Sexes, 5-14 Years | Both Sexes, 15-49 Years | Both Sexes, 50-69 Years | Both Sexes, 70-80 Years |
|-------------------------------------------------|--------------------------|-----------------------|------------------------|-------------------------|-------------------------|-------------------------|
| Cyclist road injuries                           | 12<br>(8 - 18)           | 0<br>(0 - 0)          | 1<br>(0 - 1)           | 5<br>(4 - 8)            | 4<br>(2 - 6)            | 1<br>(1 - 2)            |
| Motorcyclist road injuries                      | 47<br>(31 - 76)          | 0<br>(0 - 0)          | 0<br>(0 - 0)           | 42<br>(28 - 71)         | 4<br>(2 - 5)            | 1<br>(0 - 1)            |
| Motor vehicle road injuries                     | 122<br>(77 - 159)        | 1<br>(1 - 2)          | 3<br>(1 - 4)           | 96<br>(58 - 128)        | 18<br>(12 - 24)         | 3<br>(2 - 5)            |
| Other road injuries                             | 167<br>(96 - 212)        | 2<br>(1 - 3)          | 5<br>(2 - 7)           | 144<br>(85 - 182)       | 13<br>(6 - 20)          | 4<br>(2 - 6)            |
| Other transport injuries                        | 27<br>(22 - 38)          | 0<br>(0 - 1)          | 0<br>(0 - 1)           | 15<br>(12 - 22)         | 8<br>(6 - 12)           | 3<br>(2 - 4)            |
| Unintentional injuries                          | 1,135<br>(1,018 - 1,303) | 63<br>(45 - 88)       | 37<br>(28 - 49)        | 396<br>(345 - 474)      | 453<br>(390 - 509)      | 185<br>(166 - 209)      |
| Falls                                           | 240<br>(207 - 289)       | 4<br>(3 - 6)          | 2<br>(1 - 3)           | 67<br>(56 - 83)         | 113<br>(95 - 136)       | 54<br>(45 - 69)         |
| Drowning                                        | 248<br>(200 - 365)       | 10<br>(6 - 21)        | 23<br>(17 - 35)        | 128<br>(98 - 194)       | 68<br>(52 - 100)        | 19<br>(15 - 29)         |
| Fire, heat, and hot substances                  | 151<br>(112 - 185)       | 9<br>(6 - 15)         | 3<br>(2 - 4)           | 38<br>(27 - 49)         | 58<br>(41 - 74)         | 44<br>(32 - 54)         |
| Poisonings                                      | 162<br>(122 - 197)       | 7<br>(4 - 11)         | 3<br>(2 - 4)           | 53<br>(37 - 66)         | 63<br>(44 - 79)         | 36<br>(27 - 49)         |
| Exposure to mechanical forces                   | 34<br>(28 - 57)          | 4<br>(3 - 7)          | 2<br>(1 - 2)           | 17<br>(14 - 30)         | 9<br>(7 - 16)           | 2<br>(1 - 3)            |
| Unintentional firearm injuries                  | 2<br>(2 - 3)             | 0<br>(0 - 0)          | 0<br>(0 - 0)           | 2<br>(1 - 3)            | 0<br>(0 - 1)            | 0<br>(0 - 0)            |
| Unintentional suffocation                       | 7<br>(5 - 11)            | 3<br>(2 - 5)          | 0<br>(0 - 1)           | 2<br>(1 - 3)            | 1<br>(1 - 2)            | 1<br>(0 - 1)            |
| Other exposure to mechanical forces             | 24<br>(20 - 43)          | 1<br>(0 - 1)          | 1<br>(1 - 2)           | 13<br>(10 - 25)         | 8<br>(6 - 14)           | 1<br>(1 - 2)            |
| Adverse effects of medical treatment            | 22<br>(18 - 31)          | 1<br>(1 - 3)          | 0<br>(0 - 1)           | 5<br>(4 - 8)            | 8<br>(6 - 11)           | 7<br>(5 - 10)           |
| Animal contact                                  | 8<br>(6 - 11)            | 0<br>(0 - 0)          | 0<br>(0 - 0)           | 2<br>(1 - 3)            | 4<br>(3 - 6)            | 1<br>(1 - 2)            |
| Venomous animal contact                         | 2<br>(1 - 2)             | 0<br>(0 - 0)          | 0<br>(0 - 0)           | 1<br>(0 - 1)            | 1<br>(0 - 2)            | 0<br>(0 - 0)            |
| Non-venomous animal contact                     | 6<br>(5 - 9)             | 0<br>(0 - 0)          | 0<br>(0 - 0)           | 1<br>(1 - 2)            | 3<br>(2 - 5)            | 1<br>(1 - 2)            |
| Foreign body                                    | 227<br>(136 - 307)       | 27<br>(17 - 38)       | 1<br>(1 - 2)           | 61<br>(34 - 83)         | 119<br>(70 - 166)       | 20<br>(12 - 27)         |
| Pulmonary aspiration and foreign body in airway | 226<br>(136 - 307)       | 27<br>(17 - 38)       | 1<br>(1 - 2)           | 60<br>(34 - 83)         | 118<br>(69 - 166)       | 20<br>(12 - 27)         |
| Foreign body in other body part                 | 0<br>(0 - 1)             | 0<br>(0 - 0)          | 0<br>(0 - 0)           | 0<br>(0 - 0)            | 0<br>(0 - 0)            | 0<br>(0 - 0)            |
| Other unintentional injuries                    | 42<br>(35 - 51)          | 1<br>(0 - 2)          | 3<br>(1 - 4)           | 26<br>(19 - 33)         | 11<br>(8 - 16)          | 2<br>(2 - 3)            |
| Self-harm and interpersonal violence            | 926<br>(812 - 1,208)     | 3<br>(2 - 6)          | 4<br>(3 - 6)           | 494<br>(421 - 626)      | 349<br>(301 - 459)      | 76<br>(65 - 104)        |
| Self-harm                                       | 646<br>(559 - 805)       | --                    | 2<br>(2 - 4)           | 338<br>(278 - 405)      | 254<br>(218 - 325)      | 51<br>(42 - 69)         |
| Interpersonal violence                          | 280<br>(225 - 454)       | 3<br>(2 - 6)          | 2<br>(1 - 3)           | 156<br>(122 - 248)      | 94<br>(72 - 172)        | 25<br>(19 - 42)         |
| Assault by firearm                              | 20<br>(12 - 43)          | 0<br>(0 - 0)          | 0<br>(0 - 0)           | 17<br>(10 - 36)         | 3<br>(1 - 6)            | 0<br>(0 - 0)            |
| Assault by sharp object                         | 92<br>(67 - 162)         | 1<br>(0 - 1)          | 0<br>(0 - 1)           | 52<br>(37 - 88)         | 34<br>(23 - 67)         | 4<br>(3 - 8)            |
| Assault by other means                          | 168<br>(131 - 274)       | 3<br>(2 - 5)          | 1<br>(1 - 2)           | 86<br>(66 - 143)        | 57<br>(42 - 103)        | 21<br>(16 - 35)         |

Web Table 31- Moldova deaths with 95% UI by age, sex, and cause in 2013

| Cause                                                             | Males, All Ages             | Males, 0-4 Years   | Males, 5-14 Years | Males, 15-49 Years       | Males, 50-69 Years       | Males, 70-80 Years       |
|-------------------------------------------------------------------|-----------------------------|--------------------|-------------------|--------------------------|--------------------------|--------------------------|
| All causes                                                        | 20,767<br>(20,187 - 21,338) | 312<br>(219 - 414) | 68<br>(54 - 80)   | 3,193<br>(3,019 - 3,363) | 8,659<br>(8,412 - 8,913) | 8,535<br>(8,206 - 8,707) |
| Communicable, maternal, neonatal, and nutritional diseases        | 1,246<br>(1,014 - 1,392)    | 151<br>(103 - 204) | 6<br>(4 - 8)      | 497<br>(400 - 569)       | 499<br>(376 - 579)       | 93<br>(76 - 111)         |
| HIV/AIDS and tuberculosis                                         | 561<br>(442 - 661)          | 2<br>(1 - 3)       | 1<br>(0 - 1)      | 331<br>(262 - 391)       | 204<br>(155 - 249)       | 24<br>(18 - 31)          |
| Tuberculosis                                                      | 328<br>(218 - 369)          | 1<br>(0 - 1)       | 0<br>(0 - 0)      | 171<br>(107 - 201)       | 142<br>(96 - 166)        | 14<br>(10 - 17)          |
| HIV/AIDS                                                          | 233<br>(139 - 321)          | 2<br>(1 - 3)       | 1<br>(0 - 1)      | 159<br>(101 - 213)       | 62<br>(32 - 101)         | 10<br>(5 - 16)           |
| HIV/AIDS resulting in mycobacterial infection                     | 16<br>(9 - 24)              | 0<br>(0 - 0)       | 0<br>(0 - 0)      | 11<br>(7 - 16)           | 4<br>(2 - 7)             | 1<br>(0 - 1)             |
| HIV/AIDS resulting in other diseases                              | 217<br>(129 - 299)          | 2<br>(1 - 2)       | 0<br>(0 - 1)      | 148<br>(92 - 198)        | 58<br>(30 - 93)          | 9<br>(4 - 15)            |
| Diarrhea, lower respiratory, and other common infectious diseases | 594<br>(451 - 677)          | 66<br>(45 - 90)    | 5<br>(4 - 7)      | 162<br>(119 - 194)       | 292<br>(198 - 356)       | 69<br>(54 - 85)          |
| Diarrheal diseases                                                | 6<br>(4 - 10)               | 5<br>(3 - 8)       | 0<br>(0 - 0)      | 1<br>(0 - 1)             | 0<br>(0 - 1)             | 0<br>(0 - 0)             |
| Intestinal infectious diseases                                    | 5<br>(2 - 9)                | 1<br>(0 - 2)       | 1<br>(0 - 1)      | 2<br>(1 - 4)             | 1<br>(0 - 3)             | 0<br>(0 - 1)             |
| Typhoid fever                                                     | 4<br>(2 - 7)                | 1<br>(0 - 1)       | 0<br>(0 - 1)      | 1<br>(0 - 3)             | 1<br>(0 - 2)             | 0<br>(0 - 1)             |
| Paratyphoid fever                                                 | 1<br>(0 - 2)                | 0<br>(0 - 0)       | 0<br>(0 - 0)      | 0<br>(0 - 1)             | 0<br>(0 - 1)             | 0<br>(0 - 0)             |
| Other intestinal infectious diseases                              | 0<br>(0 - 2)                | 0<br>(0 - 1)       | 0<br>(0 - 0)      | 0<br>(0 - 1)             | 0<br>(0 - 1)             | 0<br>(0 - 1)             |
| Lower respiratory infections                                      | 544<br>(397 - 625)          | 54<br>(36 - 75)    | 3<br>(2 - 4)      | 146<br>(104 - 177)       | 276<br>(185 - 340)       | 65<br>(50 - 82)          |
| Upper respiratory infections                                      | 1<br>(0 - 3)                | 0<br>(0 - 0)       | 0<br>(0 - 0)      | 0<br>(0 - 1)             | 1<br>(0 - 2)             | 0<br>(0 - 2)             |
| Otitis media                                                      | 0<br>(0 - 0)                | 0<br>(0 - 0)       | 0<br>(0 - 0)      | 0<br>(0 - 0)             | 0<br>(0 - 0)             | 0<br>(0 - 0)             |
| Meningitis                                                        | 17<br>(14 - 21)             | 4<br>(3 - 8)       | 0<br>(0 - 1)      | 5<br>(5 - 7)             | 5<br>(4 - 7)             | 1<br>(1 - 1)             |
| Pneumococcal meningitis                                           | 4<br>(3 - 5)                | 1<br>(0 - 1)       | 0<br>(0 - 0)      | 1<br>(1 - 2)             | 1<br>(1 - 2)             | 0<br>(0 - 0)             |
| H influenzae type B meningitis                                    | 3<br>(2 - 5)                | 2<br>(1 - 3)       | 0<br>(0 - 0)      | 2<br>(0 - 1)             | 1<br>(0 - 1)             | 0<br>(0 - 0)             |
| Meningococcal meningitis                                          | 3<br>(3 - 4)                | 1<br>(1 - 2)       | 0<br>(0 - 0)      | 1<br>(1 - 2)             | 1<br>(0 - 2)             | 0<br>(0 - 0)             |
| Other meningitis                                                  | 6<br>(4 - 8)                | 1<br>(0 - 2)       | 0<br>(0 - 0)      | 2<br>(2 - 3)             | 2<br>(1 - 4)             | 0<br>(0 - 1)             |
| Encephalitis                                                      | 19<br>(11 - 24)             | 2<br>(1 - 3)       | 1<br>(0 - 2)      | 8<br>(4 - 10)            | 7<br>(4 - 10)            | 1<br>(0 - 1)             |
| Diphtheria                                                        | 0<br>(0 - 0)                | 0<br>(0 - 0)       | 0<br>(0 - 0)      | 0<br>(0 - 0)             | 0<br>(0 - 0)             | --                       |
| Whooping cough                                                    | 0<br>(0 - 0)                | 0<br>(0 - 0)       | 0<br>(0 - 0)      | 0<br>(0 - 0)             | 0<br>(0 - 0)             | --                       |
| Tetanus                                                           | 0<br>(0 - 0)                | 0<br>(0 - 0)       | 0<br>(0 - 0)      | 0<br>(0 - 0)             | 0<br>(0 - 0)             | 0<br>(0 - 0)             |
| Measles                                                           | 0<br>(0 - 0)                | 0<br>(0 - 0)       | 0<br>(0 - 0)      | 0<br>(0 - 0)             | 0<br>(0 - 0)             | --                       |
| Varicella and herpes zoster                                       | 1<br>(0 - 2)                | 0<br>(0 - 0)       | 0<br>(0 - 0)      | 0<br>(0 - 0)             | 0<br>(0 - 0)             | 0<br>(0 - 2)             |
| Neglected tropical diseases and malaria                           | 1<br>(1 - 1)                | 0<br>(0 - 0)       | 0<br>(0 - 0)      | 0<br>(0 - 1)             | 0<br>(0 - 0)             | 0<br>(0 - 0)             |
| Cysticercosis                                                     | 0<br>(0 - 0)                | 0<br>(0 - 0)       | 0<br>(0 - 0)      | 0<br>(0 - 0)             | 0<br>(0 - 0)             | 0<br>(0 - 0)             |
| Cystic echinococcosis                                             | 1<br>(1 - 1)                | 0<br>(0 - 0)       | 0<br>(0 - 0)      | 0<br>(0 - 0)             | 0<br>(0 - 0)             | 0<br>(0 - 0)             |
| Dengue                                                            | 0<br>(0 - 0)                | 0<br>(0 - 0)       | 0<br>(0 - 0)      | 0<br>(0 - 0)             | 0<br>(0 - 0)             | 0<br>(0 - 0)             |
| Rabies                                                            | 0<br>(0 - 0)                | 0<br>(0 - 0)       | 0<br>(0 - 0)      | 0<br>(0 - 0)             | 0<br>(0 - 0)             | 0<br>(0 - 0)             |
| Other neglected tropical diseases                                 | 0<br>(0 - 0)                | 0<br>(0 - 0)       | 0<br>(0 - 0)      | 0<br>(0 - 0)             | 0<br>(0 - 0)             | 0<br>(0 - 0)             |
| Maternal disorders                                                | --                          | --                 | --                | --                       | --                       | --                       |
| Maternal hemorrhage                                               | --                          | --                 | --                | --                       | --                       | --                       |
| Maternal sepsis and other maternal infections                     | --                          | --                 | --                | --                       | --                       | --                       |
| Maternal hypertensive disorders                                   | --                          | --                 | --                | --                       | --                       | --                       |
| Maternal obstructed labor                                         | --                          | --                 | --                | --                       | --                       | --                       |
| Maternal abortive outcome                                         | --                          | --                 | --                | --                       | --                       | --                       |
| Indirect maternal deaths                                          | --                          | --                 | --                | --                       | --                       | --                       |



Web Table 31- Moldova deaths with 95% UI by age, sex, and cause in 2013

| Cause                                                            | Males, All Ages             | Males, 0-4 Years  | Males, 5-14 Years | Males, 15-49 Years       | Males, 50-69 Years       | Males, 70-80 Years       |
|------------------------------------------------------------------|-----------------------------|-------------------|-------------------|--------------------------|--------------------------|--------------------------|
| Late maternal deaths                                             | --                          | --                | --                | --                       | --                       | --                       |
| Maternal deaths aggravated by HIV/AIDS                           | --                          | --                | --                | --                       | --                       | --                       |
| Other maternal disorders                                         | --                          | --                | --                | --                       | --                       | --                       |
| Neonatal disorders                                               | 80<br>(52 - 113)            | 80<br>(52 - 113)  | --                | --                       | --                       | --                       |
| Neonatal preterm birth complications                             | 19<br>(8 - 33)              | 19<br>(8 - 33)    | --                | --                       | --                       | --                       |
| Neonatal encephalopathy due to birth asphyxia and trauma         | 29<br>(16 - 49)             | 29<br>(16 - 49)   | --                | --                       | --                       | --                       |
| Neonatal sepsis and other neonatal infections                    | 21<br>(10 - 43)             | 21<br>(10 - 43)   | --                | --                       | --                       | --                       |
| Hemolytic disease and other neonatal jaundice                    | 1<br>(0 - 1)                | 1<br>(0 - 1)      | --                | --                       | --                       | --                       |
| Other neonatal disorders                                         | 10<br>(4 - 17)              | 10<br>(4 - 17)    | --                | --                       | --                       | --                       |
| Nutritional deficiencies                                         | 3<br>(2 - 9)                | 0<br>(0 - 0)      | 0<br>(0 - 0)      | 1<br>(1 - 3)             | 1<br>(1 - 4)             | 0<br>(0 - 1)             |
| Protein-energy malnutrition                                      | 2<br>(1 - 5)                | 0<br>(0 - 0)      | 0<br>(0 - 0)      | 1<br>(0 - 2)             | 1<br>(0 - 2)             | 0<br>(0 - 1)             |
| Iodine deficiency                                                | 0<br>(0 - 1)                | 0<br>(0 - 0)      | 0<br>(0 - 0)      | 0<br>(0 - 0)             | 0<br>(0 - 0)             | 0<br>(0 - 0)             |
| Iron-deficiency anemia                                           | 1<br>(0 - 1)                | 0<br>(0 - 0)      | 0<br>(0 - 0)      | 0<br>(0 - 1)             | 0<br>(0 - 1)             | 0<br>(0 - 0)             |
| Other nutritional deficiencies                                   | 1<br>(0 - 2)                | 0<br>(0 - 0)      | 0<br>(0 - 0)      | 0<br>(0 - 1)             | 0<br>(0 - 1)             | 0<br>(0 - 0)             |
| Other communicable, maternal, neonatal, and nutritional diseases | 7<br>(5 - 10)               | 2<br>(1 - 4)      | 0<br>(0 - 0)      | 2<br>(2 - 3)             | 2<br>(1 - 3)             | 0<br>(0 - 1)             |
| Sexually transmitted diseases excluding HIV                      | 1<br>(0 - 4)                | 1<br>(0 - 3)      | 0<br>(0 - 0)      | 0<br>(0 - 0)             | 0<br>(0 - 0)             | 0<br>(0 - 0)             |
| Syphilis                                                         | 1<br>(0 - 4)                | 1<br>(0 - 3)      | 0<br>(0 - 0)      | 0<br>(0 - 0)             | 0<br>(0 - 0)             | 0<br>(0 - 0)             |
| Chlamydial infection                                             | --                          | --                | --                | --                       | --                       | --                       |
| Gonococcal infection                                             | 0<br>(0 - 0)                | --                | 0<br>(0 - 0)      | 0<br>(0 - 0)             | 0<br>(0 - 0)             | 0<br>(0 - 0)             |
| Other sexually transmitted diseases                              | 0<br>(0 - 0)                | --                | 0<br>(0 - 0)      | 0<br>(0 - 0)             | 0<br>(0 - 0)             | 0<br>(0 - 0)             |
| Hepatitis                                                        | 1<br>(1 - 1)                | 0<br>(0 - 0)      | 0<br>(0 - 0)      | 1<br>(0 - 1)             | 0<br>(0 - 0)             | 0<br>(0 - 0)             |
| Acute hepatitis A                                                | 0<br>(0 - 1)                | 0<br>(0 - 0)      | 0<br>(0 - 0)      | 0<br>(0 - 0)             | 0<br>(0 - 0)             | 0<br>(0 - 0)             |
| Acute hepatitis B                                                | 1<br>(1 - 1)                | 0<br>(0 - 0)      | 0<br>(0 - 0)      | 0<br>(0 - 1)             | 0<br>(0 - 0)             | 0<br>(0 - 0)             |
| Acute hepatitis C                                                | 0<br>(0 - 0)                | --                | 0<br>(0 - 0)      | 0<br>(0 - 0)             | 0<br>(0 - 0)             | 0<br>(0 - 0)             |
| Other infectious diseases                                        | 4<br>(3 - 6)                | 1<br>(1 - 1)      | 0<br>(0 - 0)      | 1<br>(1 - 2)             | 2<br>(1 - 2)             | 0<br>(0 - 1)             |
| Non-communicable diseases                                        | 17,516<br>(17,034 - 17,987) | 119<br>(82 - 160) | 23<br>(17 - 28)   | 1,626<br>(1,509 - 1,735) | 7,463<br>(7,227 - 7,698) | 8,286<br>(7,957 - 8,456) |
| Neoplasms                                                        | 3,217<br>(3,054 - 3,401)    | 7<br>(4 - 11)     | 11<br>(9 - 15)    | 351<br>(321 - 385)       | 1,994<br>(1,886 - 2,113) | 854<br>(782 - 919)       |
| Esophageal cancer                                                | 67<br>(56 - 85)             | --                | --                | 6<br>(5 - 10)            | 47<br>(38 - 60)          | 13<br>(10 - 18)          |
| Stomach cancer                                                   | 317<br>(293 - 346)          | --                | --                | 33<br>(28 - 38)          | 186<br>(168 - 207)       | 98<br>(88 - 110)         |
| Liver cancer                                                     | 227<br>(145 - 288)          | --                | 0<br>(0 - 1)      | 22<br>(13 - 30)          | 144<br>(91 - 189)        | 61<br>(32 - 84)          |
| Liver cancer due to hepatitis B                                  | 38<br>(13 - 63)             | --                | 0<br>(0 - 0)      | 5<br>(2 - 9)             | 25<br>(8 - 43)           | 8<br>(3 - 14)            |
| Liver cancer due to hepatitis C                                  | 112<br>(69 - 157)           | --                | 0<br>(0 - 0)      | 10<br>(6 - 16)           | 73<br>(44 - 104)         | 29<br>(15 - 44)          |
| Liver cancer due to alcohol use                                  | 63<br>(32 - 98)             | --                | --                | 4<br>(2 - 7)             | 38<br>(20 - 60)          | 20<br>(9 - 33)           |
| Liver cancer due to other causes                                 | 14<br>(7 - 24)              | --                | 0<br>(0 - 0)      | 2<br>(1 - 4)             | 9<br>(4 - 15)            | 3<br>(1 - 5)             |
| Larynx cancer                                                    | 127<br>(82 - 156)           | --                | --                | 15<br>(10 - 21)          | 95<br>(59 - 117)         | 18<br>(11 - 23)          |
| Tracheal, bronchus and lung cancer                               | 809<br>(710 - 894)          | --                | --                | 69<br>(54 - 84)          | 559<br>(485 - 626)       | 181<br>(158 - 206)       |
| Breast cancer                                                    | 8<br>(1 - 13)               | --                | --                | 1<br>(0 - 2)             | 5<br>(1 - 8)             | 2<br>(0 - 4)             |
| Cervical cancer                                                  | --                          | --                | --                | --                       | --                       | --                       |
| Uterine cancer                                                   | --                          | --                | --                | --                       | --                       | --                       |
| Prostate cancer                                                  | 162<br>(99 - 205)           | --                | --                | 2<br>(1 - 3)             | 72<br>(42 - 93)          | 87<br>(50 - 115)         |

Web Table 31- Moldova deaths with 95% UI by age, sex, and cause in 2013

| Cause                                         | Males, All Ages            | Males, 0-4 Years | Males, 5-14 Years | Males, 15-49 Years | Males, 50-69 Years       | Males, 70-80 Years       |
|-----------------------------------------------|----------------------------|------------------|-------------------|--------------------|--------------------------|--------------------------|
| Colon and rectum cancer                       | 435<br>(404 - 466)         | --               | --                | 30<br>(25 - 35)    | 245<br>(221 - 269)       | 160<br>(144 - 177)       |
| Lip and oral cavity cancer                    | 101<br>(89 - 113)          | --               | --                | 13<br>(11 - 16)    | 72<br>(62 - 83)          | 16<br>(13 - 19)          |
| Nasopharynx cancer                            | 24<br>(20 - 32)            | --               | 0<br>(0 - 0)      | 5<br>(4 - 7)       | 16<br>(13 - 22)          | 2<br>(2 - 3)             |
| Other pharynx cancer                          | 108<br>(70 - 130)          | --               | --                | 10<br>(7 - 13)     | 88<br>(54 - 108)         | 9<br>(6 - 12)            |
| Gallbladder and biliary tract cancer          | 16<br>(12 - 26)            | --               | --                | 1<br>(1 - 2)       | 9<br>(6 - 15)            | 6<br>(4 - 10)            |
| Pancreatic cancer                             | 215<br>(198 - 234)         | --               | --                | 25<br>(21 - 30)    | 133<br>(119 - 148)       | 56<br>(50 - 64)          |
| Malignant skin melanoma                       | 24<br>(12 - 42)            | --               | --                | 6<br>(3 - 11)      | 12<br>(6 - 20)           | 6<br>(3 - 11)            |
| Non-melanoma skin cancer                      | 20<br>(12 - 31)            | --               | --                | 2<br>(1 - 3)       | 8<br>(5 - 12)            | 10<br>(6 - 16)           |
| Ovarian cancer                                | --                         | --               | --                | --                 | --                       | --                       |
| Testicular cancer                             | 9<br>(6 - 12)              | --               | --                | 5<br>(4 - 8)       | 2<br>(2 - 3)             | 1<br>(1 - 2)             |
| Kidney cancer                                 | 72<br>(63 - 81)            | 0<br>(0 - 1)     | 0<br>(0 - 0)      | 7<br>(5 - 9)       | 50<br>(42 - 58)          | 15<br>(12 - 18)          |
| Bladder cancer                                | 103<br>(88 - 120)          | --               | --                | 4<br>(3 - 5)       | 51<br>(42 - 62)          | 48<br>(39 - 57)          |
| Brain and nervous system cancer               | 77<br>(57 - 92)            | 1<br>(1 - 2)     | 2<br>(2 - 3)      | 24<br>(18 - 30)    | 43<br>(31 - 54)          | 6<br>(4 - 8)             |
| Thyroid cancer                                | 8<br>(5 - 10)              | --               | 0<br>(0 - 0)      | 1<br>(1 - 1)       | 5<br>(3 - 7)             | 2<br>(1 - 2)             |
| Mesothelioma                                  | 3<br>(2 - 5)               | --               | --                | 0<br>(0 - 1)       | 2<br>(1 - 4)             | 0<br>(0 - 1)             |
| Hodgkin lymphoma                              | 18<br>(14 - 30)            | 0<br>(0 - 0)     | 0<br>(0 - 1)      | 8<br>(6 - 14)      | 7<br>(5 - 11)            | 2<br>(1 - 4)             |
| Non-Hodgkin lymphoma                          | 68<br>(42 - 88)            | 1<br>(1 - 2)     | 2<br>(1 - 3)      | 15<br>(9 - 20)     | 37<br>(23 - 49)          | 12<br>(7 - 17)           |
| Multiple myeloma                              | 14<br>(8 - 23)             | --               | --                | 2<br>(1 - 3)       | 10<br>(5 - 16)           | 3<br>(2 - 5)             |
| Leukemia                                      | 67<br>(59 - 76)            | 2<br>(1 - 3)     | 3<br>(2 - 5)      | 18<br>(14 - 21)    | 30<br>(25 - 36)          | 15<br>(12 - 18)          |
| Other neoplasms                               | 122<br>(98 - 149)          | 2<br>(1 - 4)     | 3<br>(2 - 4)      | 28<br>(22 - 34)    | 67<br>(54 - 84)          | 22<br>(16 - 29)          |
| Cardiovascular diseases                       | 10,262<br>(9,951 - 10,551) | 1<br>(1 - 1)     | 1<br>(1 - 1)      | 519<br>(473 - 566) | 3,684<br>(3,537 - 3,837) | 6,037<br>(5,818 - 6,229) |
| Rheumatic heart disease                       | 56<br>(42 - 94)            | 0<br>(0 - 0)     | 0<br>(0 - 0)      | 20<br>(13 - 36)    | 33<br>(22 - 54)          | 4<br>(3 - 6)             |
| Ischemic heart disease                        | 6,894<br>(6,404 - 7,393)   | 0<br>(0 - 0)     | 0<br>(0 - 0)      | 294<br>(244 - 333) | 2,217<br>(2,012 - 2,424) | 4,383<br>(4,076 - 4,715) |
| Cerebrovascular disease                       | 2,837<br>(2,442 - 3,294)   | 0<br>(0 - 0)     | 0<br>(0 - 0)      | 133<br>(104 - 168) | 1,203<br>(1,027 - 1,415) | 1,501<br>(1,269 - 1,767) |
| Ischemic stroke                               | 1,511<br>(1,156 - 1,787)   | 0<br>(0 - 0)     | 0<br>(0 - 0)      | 22<br>(13 - 31)    | 472<br>(338 - 584)       | 1,017<br>(789 - 1,210)   |
| Hemorrhagic stroke                            | 1,326<br>(1,081 - 1,712)   | 0<br>(0 - 0)     | 0<br>(0 - 0)      | 111<br>(87 - 142)  | 731<br>(595 - 936)       | 484<br>(374 - 685)       |
| Hypertensive heart disease                    | 210<br>(98 - 332)          | 0<br>(0 - 0)     | 0<br>(0 - 0)      | 8<br>(5 - 13)      | 80<br>(45 - 114)         | 121<br>(45 - 216)        |
| Cardiomyopathy and myocarditis                | 134<br>(90 - 166)          | 1<br>(1 - 1)     | 0<br>(0 - 0)      | 42<br>(29 - 54)    | 77<br>(50 - 97)          | 14<br>(9 - 19)           |
| Atrial fibrillation and flutter               | 0<br>(0 - 0)               | --               | --                | 0<br>(0 - 0)       | 0<br>(0 - 0)             | 0<br>(0 - 0)             |
| Aortic aneurysm                               | 32<br>(26 - 38)            | --               | --                | 5<br>(4 - 7)       | 19<br>(15 - 23)          | 8<br>(6 - 10)            |
| Peripheral vascular disease                   | 19<br>(16 - 24)            | --               | --                | 0<br>(0 - 1)       | 9<br>(6 - 11)            | 10<br>(8 - 13)           |
| Endocarditis                                  | 9<br>(5 - 12)              | 0<br>(0 - 0)     | 0<br>(0 - 0)      | 4<br>(2 - 5)       | 5<br>(2 - 6)             | 1<br>(0 - 1)             |
| Other cardiovascular and circulatory diseases | 69<br>(40 - 80)            | 0<br>(0 - 0)     | 0<br>(0 - 0)      | 12<br>(8 - 15)     | 43<br>(24 - 52)          | 14<br>(8 - 17)           |
| Chronic respiratory diseases                  | 794<br>(711 - 1,120)       | 0<br>(0 - 0)     | 0<br>(0 - 0)      | 32<br>(25 - 50)    | 296<br>(251 - 472)       | 466<br>(411 - 605)       |
| Chronic obstructive pulmonary disease         | 757<br>(676 - 1,067)       | 0<br>(0 - 0)     | 0<br>(0 - 0)      | 27<br>(22 - 44)    | 278<br>(234 - 444)       | 452<br>(398 - 586)       |
| Pneumoconiosis                                | 0<br>(0 - 0)               | 0<br>(0 - 0)     | 0<br>(0 - 0)      | 0<br>(0 - 0)       | 0<br>(0 - 0)             | 0<br>(0 - 0)             |
| Silicosis                                     | 0<br>(0 - 0)               | 0<br>(0 - 0)     | 0<br>(0 - 0)      | 0<br>(0 - 0)       | 0<br>(0 - 0)             | 0<br>(0 - 0)             |
| Asbestosis                                    | 0<br>(0 - 0)               | 0<br>(0 - 0)     | 0<br>(0 - 0)      | 0<br>(0 - 0)       | 0<br>(0 - 0)             | 0<br>(0 - 0)             |
| Coal workers pneumoconiosis                   | 0<br>(0 - 0)               | 0<br>(0 - 0)     | 0<br>(0 - 0)      | 0<br>(0 - 0)       | 0<br>(0 - 0)             | 0<br>(0 - 0)             |
| Other pneumoconiosis                          | 0<br>(0 - 0)               | 0<br>(0 - 0)     | 0<br>(0 - 0)      | 0<br>(0 - 0)       | 0<br>(0 - 0)             | 0<br>(0 - 0)             |

Web Table 31- Moldova deaths with 95% UI by age, sex, and cause in 2013

| Cause                                               | Males, All Ages          | Males, 0-4 Years | Males, 5-14 Years | Males, 15-49 Years | Males, 50-69 Years | Males, 70-80 Years |
|-----------------------------------------------------|--------------------------|------------------|-------------------|--------------------|--------------------|--------------------|
| Asthma                                              | 33<br>(27 - 48)          | 0<br>(0 - 0)     | 0<br>(0 - 0)      | 3<br>(2 - 5)       | 17<br>(13 - 26)    | 13<br>(10 - 18)    |
| Interstitial lung disease and pulmonary sarcoidosis | 2<br>(1 - 3)             | 0<br>(0 - 0)     | 0<br>(0 - 0)      | 0<br>(0 - 1)       | 1<br>(0 - 2)       | 1<br>(0 - 1)       |
| Other chronic respiratory diseases                  | 1<br>(1 - 2)             | 0<br>(0 - 0)     | 0<br>(0 - 0)      | 1<br>(1 - 1)       | 0<br>(0 - 1)       | 0<br>(0 - 0)       |
| Cirrhosis                                           | 1,438<br>(1,346 - 1,537) | 0<br>(0 - 0)     | 0<br>(0 - 1)      | 308<br>(276 - 342) | 858<br>(788 - 932) | 271<br>(244 - 303) |
| Cirrhosis due to hepatitis B                        | 211<br>(97 - 339)        | 0<br>(0 - 0)     | 0<br>(0 - 0)      | 45<br>(15 - 79)    | 125<br>(57 - 205)  | 41<br>(17 - 65)    |
| Cirrhosis due to hepatitis C                        | 556<br>(324 - 735)       | 0<br>(0 - 0)     | 0<br>(0 - 0)      | 111<br>(62 - 153)  | 339<br>(193 - 450) | 105<br>(67 - 140)  |
| Cirrhosis due to alcohol use                        | 549<br>(380 - 712)       | --               | --                | 109<br>(70 - 147)  | 330<br>(223 - 434) | 111<br>(78 - 143)  |
| Cirrhosis due to other causes                       | 122<br>(58 - 177)        | 0<br>(0 - 0)     | 0<br>(0 - 0)      | 43<br>(19 - 67)    | 64<br>(30 - 95)    | 15<br>(7 - 22)     |
| Digestive diseases                                  | 426<br>(359 - 474)       | 1<br>(0 - 1)     | 0<br>(0 - 1)      | 117<br>(102 - 140) | 225<br>(187 - 256) | 83<br>(59 - 97)    |
| Peptic ulcer disease                                | 106<br>(71 - 134)        | 0<br>(0 - 0)     | 0<br>(0 - 0)      | 25<br>(16 - 34)    | 60<br>(38 - 78)    | 21<br>(12 - 30)    |
| Gastritis and duodenitis                            | 1<br>(0 - 1)             | 0<br>(0 - 0)     | 0<br>(0 - 0)      | 0<br>(0 - 0)       | 0<br>(0 - 1)       | 0<br>(0 - 0)       |
| Appendicitis                                        | 5<br>(3 - 6)             | 0<br>(0 - 0)     | 0<br>(0 - 0)      | 1<br>(1 - 2)       | 2<br>(1 - 3)       | 1<br>(1 - 2)       |
| Paralytic ileus and intestinal obstruction          | 22<br>(13 - 40)          | 0<br>(0 - 1)     | 0<br>(0 - 0)      | 4<br>(2 - 7)       | 11<br>(6 - 21)     | 7<br>(3 - 13)      |
| Inguinal, femoral, and abdominal hernia             | 7<br>(4 - 11)            | 0<br>(0 - 0)     | 0<br>(0 - 0)      | 1<br>(0 - 1)       | 3<br>(1 - 5)       | 4<br>(2 - 6)       |
| Inflammatory bowel disease                          | 9<br>(6 - 12)            | 0<br>(0 - 0)     | 0<br>(0 - 0)      | 2<br>(1 - 3)       | 5<br>(3 - 7)       | 2<br>(1 - 3)       |
| Vascular intestinal disorders                       | 59<br>(26 - 105)         | 0<br>(0 - 0)     | 0<br>(0 - 0)      | 4<br>(1 - 9)       | 29<br>(12 - 56)    | 25<br>(12 - 43)    |
| Gallbladder and biliary diseases                    | 16<br>(11 - 21)          | 0<br>(0 - 0)     | 0<br>(0 - 0)      | 1<br>(1 - 2)       | 7<br>(5 - 9)       | 8<br>(5 - 11)      |
| Pancreatitis                                        | 188<br>(151 - 236)       | 0<br>(0 - 0)     | 0<br>(0 - 0)      | 75<br>(61 - 95)    | 99<br>(76 - 132)   | 13<br>(7 - 19)     |
| Other digestive diseases                            | 14<br>(9 - 18)           | 0<br>(0 - 0)     | 0<br>(0 - 0)      | 3<br>(2 - 4)       | 8<br>(5 - 11)      | 3<br>(2 - 4)       |
| Neurological disorders                              | 559<br>(460 - 659)       | 1<br>(1 - 2)     | 1<br>(1 - 2)      | 47<br>(39 - 58)    | 71<br>(57 - 87)    | 438<br>(345 - 532) |
| Alzheimer disease and other dementias               | 477<br>(380 - 572)       | --               | --                | 0<br>(0 - 0)       | 44<br>(30 - 60)    | 432<br>(339 - 526) |
| Parkinson disease                                   | 6<br>(3 - 7)             | --               | --                | 0<br>(0 - 0)       | 3<br>(2 - 4)       | 3<br>(1 - 3)       |
| Epilepsy                                            | 51<br>(41 - 67)          | 0<br>(0 - 0)     | 1<br>(1 - 1)      | 34<br>(27 - 45)    | 15<br>(11 - 19)    | 1<br>(1 - 2)       |
| Multiple sclerosis                                  | 4<br>(2 - 6)             | --               | --                | 3<br>(1 - 4)       | 2<br>(1 - 3)       | 0<br>(0 - 0)       |
| Other neurological disorders                        | 21<br>(16 - 25)          | 1<br>(1 - 2)     | 0<br>(0 - 1)      | 10<br>(7 - 12)     | 8<br>(6 - 10)      | 2<br>(1 - 2)       |
| Mental and substance use disorders                  | 357<br>(237 - 432)       | 1<br>(0 - 1)     | 0<br>(0 - 0)      | 171<br>(117 - 211) | 168<br>(103 - 211) | 17<br>(10 - 21)    |
| Schizophrenia                                       | 1<br>(1 - 3)             | --               | --                | 1<br>(0 - 2)       | 1<br>(0 - 2)       | 0<br>(0 - 0)       |
| Alcohol use disorders                               | 226<br>(131 - 297)       | --               | --                | 88<br>(54 - 122)   | 130<br>(69 - 176)  | 9<br>(4 - 12)      |
| Drug use disorders                                  | 129<br>(71 - 152)        | 1<br>(0 - 1)     | --                | 83<br>(45 - 102)   | 38<br>(22 - 48)    | 8<br>(4 - 11)      |
| Opioid use disorders                                | 56<br>(30 - 66)          | 0<br>(0 - 1)     | --                | 37<br>(20 - 45)    | 15<br>(9 - 19)     | 3<br>(2 - 5)       |
| Cocaine use disorders                               | 3<br>(2 - 4)             | 0<br>(0 - 0)     | --                | 2<br>(1 - 3)       | 1<br>(0 - 1)       | 0<br>(0 - 0)       |
| Amphetamine use disorders                           | 3<br>(1 - 3)             | 0<br>(0 - 0)     | --                | 2<br>(1 - 2)       | 1<br>(0 - 1)       | 0<br>(0 - 0)       |
| Other drug use disorders                            | 68<br>(38 - 81)          | 0<br>(0 - 1)     | --                | 43<br>(22 - 53)    | 21<br>(12 - 27)    | 4<br>(2 - 6)       |
| Eating disorders                                    | 0<br>(0 - 0)             | --               | 0<br>(0 - 0)      | 0<br>(0 - 0)       | --                 | --                 |
| Anorexia nervosa                                    | 0<br>(0 - 0)             | --               | 0<br>(0 - 0)      | 0<br>(0 - 0)       | --                 | --                 |
| Diabetes, urogenital, blood, and endocrine diseases | 312<br>(265 - 339)       | 3<br>(2 - 5)     | 2<br>(1 - 3)      | 60<br>(51 - 67)    | 151<br>(129 - 167) | 96<br>(76 - 109)   |
| Diabetes mellitus                                   | 103<br>(93 - 113)        | 0<br>(0 - 0)     | 0<br>(0 - 0)      | 15<br>(13 - 17)    | 56<br>(49 - 64)    | 32<br>(27 - 37)    |
| Acute glomerulonephritis                            | 1<br>(1 - 1)             | 0<br>(0 - 0)     | 0<br>(0 - 0)      | 0<br>(0 - 1)       | 0<br>(0 - 1)       | 0<br>(0 - 0)       |
| Chronic kidney disease                              | 67<br>(57 - 78)          | 0<br>(0 - 0)     | 0<br>(0 - 0)      | 21<br>(17 - 26)    | 35<br>(27 - 42)    | 11<br>(8 - 13)     |
| Chronic kidney disease due to diabetes mellitus     | 13<br>(1 - 18)           | 0<br>(0 - 0)     | 0<br>(0 - 0)      | 2<br>(0 - 3)       | 9<br>(0 - 14)      | 2<br>(0 - 3)       |

Web Table 31- Moldova deaths with 95% UI by age, sex, and cause in 2013

| Cause                                               | Males, All Ages          | Males, 0-4 Years  | Males, 5-14 Years | Males, 15-49 Years     | Males, 50-69 Years | Males, 70-80 Years |
|-----------------------------------------------------|--------------------------|-------------------|-------------------|------------------------|--------------------|--------------------|
| Chronic kidney disease due to hypertension          | 0<br>(0 - 1)             | 0<br>(0 - 0)      | 0<br>(0 - 0)      | 0<br>(0 - 0)           | 0<br>(0 - 0)       | 0<br>(0 - 0)       |
| Chronic kidney disease due to glomerulonephritis    | 33<br>(25 - 48)          | 0<br>(0 - 0)      | 0<br>(0 - 0)      | 13<br>(10 - 17)        | 15<br>(10 - 25)    | 5<br>(4 - 7)       |
| Chronic kidney disease due to other causes          | 20<br>(13 - 30)          | 0<br>(0 - 0)      | 0<br>(0 - 0)      | 6<br>(3 - 9)           | 10<br>(5 - 17)     | 4<br>(2 - 6)       |
| Urinary diseases and male infertility               | 103<br>(79 - 118)        | 0<br>(0 - 0)      | 0<br>(0 - 0)      | 13<br>(10 - 16)        | 44<br>(34 - 54)    | 46<br>(30 - 56)    |
| Interstitial nephritis and urinary tract infections | 79<br>(59 - 93)          | 0<br>(0 - 0)      | 0<br>(0 - 0)      | 9<br>(7 - 12)          | 33<br>(25 - 41)    | 37<br>(23 - 46)    |
| Urolithiasis                                        | 10<br>(7 - 14)           | --                | 0<br>(0 - 0)      | 1<br>(1 - 1)           | 4<br>(3 - 6)       | 5<br>(3 - 8)       |
| Other urinary diseases                              | 14<br>(8 - 18)           | 0<br>(0 - 0)      | 0<br>(0 - 0)      | 3<br>(2 - 4)           | 7<br>(4 - 10)      | 4<br>(2 - 6)       |
| Gynecological diseases                              | --                       | --                | --                | --                     | --                 | --                 |
| Uterine fibroids                                    | --                       | --                | --                | --                     | --                 | --                 |
| Polycystic ovarian syndrome                         | --                       | --                | --                | --                     | --                 | --                 |
| Endometriosis                                       | --                       | --                | --                | --                     | --                 | --                 |
| Genital prolapse                                    | --                       | --                | --                | --                     | --                 | --                 |
| Other gynecological diseases                        | --                       | --                | --                | --                     | --                 | --                 |
| Hemoglobinopathies and hemolytic anemias            | 3<br>(2 - 5)             | 0<br>(0 - 0)      | 0<br>(0 - 1)      | 2<br>(1 - 2)           | 1<br>(0 - 1)       | 0<br>(0 - 1)       |
| Thalassemias                                        | 1<br>(1 - 2)             | 0<br>(0 - 0)      | 0<br>(0 - 0)      | 1<br>(0 - 1)           | 0<br>(0 - 0)       | 0<br>(0 - 0)       |
| Sickle cell disorders                               | 0<br>(0 - 0)             | 0<br>(0 - 0)      | 0<br>(0 - 0)      | 0<br>(0 - 0)           | 0<br>(0 - 0)       | 0<br>(0 - 0)       |
| G6PD deficiency                                     | 0<br>(0 - 0)             | 0<br>(0 - 0)      | 0<br>(0 - 0)      | 0<br>(0 - 0)           | 0<br>(0 - 0)       | 0<br>(0 - 0)       |
| Other hemoglobinopathies and hemolytic anemias      | 2<br>(1 - 3)             | 0<br>(0 - 0)      | 0<br>(0 - 0)      | 1<br>(0 - 1)           | 1<br>(0 - 1)       | 0<br>(0 - 1)       |
| Endocrine, metabolic, blood, and immune disorders   | 35<br>(12 - 44)          | 3<br>(1 - 4)      | 1<br>(0 - 1)      | 9<br>(3 - 12)          | 16<br>(5 - 21)     | 7<br>(2 - 10)      |
| Musculoskeletal disorders                           | 10<br>(8 - 16)           | --                | 0<br>(0 - 1)      | 3<br>(3 - 5)           | 4<br>(4 - 8)       | 2<br>(1 - 3)       |
| Rheumatoid arthritis                                | 2<br>(1 - 3)             | --                | 0<br>(0 - 0)      | 1<br>(0 - 1)           | 1<br>(0 - 2)       | 0<br>(0 - 1)       |
| Other musculoskeletal disorders                     | 8<br>(7 - 13)            | --                | 0<br>(0 - 1)      | 3<br>(2 - 4)           | 4<br>(3 - 6)       | 1<br>(1 - 2)       |
| Other non-communicable diseases                     | 140<br>(105 - 181)       | 105<br>(73 - 143) | 6<br>(4 - 8)      | 18<br>(14 - 21)        | 10<br>(6 - 11)     | 2<br>(1 - 3)       |
| Congenital anomalies                                | 122<br>(89 - 161)        | 98<br>(67 - 135)  | 6<br>(4 - 8)      | 13<br>(11 - 16)        | 4<br>(3 - 5)       | 1<br>(0 - 1)       |
| Neural tube defects                                 | 3<br>(2 - 5)             | 2<br>(1 - 4)      | 0<br>(0 - 0)      | 0<br>(0 - 0)           | 0<br>(0 - 0)       | 0<br>(0 - 0)       |
| Congenital heart anomalies                          | 48<br>(35 - 65)          | 36<br>(24 - 52)   | 2<br>(1 - 4)      | 8<br>(6 - 10)          | 2<br>(1 - 2)       | 0<br>(0 - 0)       |
| Cleft lip and cleft palate                          | 1<br>(0 - 1)             | 1<br>(0 - 1)      | --                | --                     | --                 | --                 |
| Down syndrome                                       | 2<br>(1 - 3)             | 0<br>(0 - 1)      | 0<br>(0 - 0)      | 1<br>(1 - 2)           | 0<br>(0 - 1)       | 0<br>(0 - 0)       |
| Chromosomal unbalanced rearrangements               | 2<br>(1 - 2)             | 1<br>(0 - 2)      | 0<br>(0 - 0)      | 0<br>(0 - 0)           | 0<br>(0 - 0)       | 0<br>(0 - 0)       |
| Other congenital anomalies                          | 66<br>(46 - 91)          | 58<br>(39 - 81)   | 3<br>(2 - 4)      | 4<br>(3 - 5)           | 2<br>(1 - 2)       | 0<br>(0 - 0)       |
| Skin and subcutaneous diseases                      | 12<br>(6 - 15)           | 0<br>(0 - 0)      | 0<br>(0 - 0)      | 4<br>(2 - 6)           | 6<br>(2 - 7)       | 2<br>(1 - 3)       |
| Cellulitis                                          | 8<br>(4 - 10)            | 0<br>(0 - 0)      | 0<br>(0 - 0)      | 3<br>(1 - 4)           | 4<br>(1 - 5)       | 1<br>(1 - 2)       |
| Pyoderma                                            | 4<br>(2 - 6)             | 0<br>(0 - 0)      | 0<br>(0 - 0)      | 1<br>(1 - 2)           | 2<br>(1 - 3)       | 0<br>(0 - 1)       |
| Decubitus ulcer                                     | 0<br>(0 - 0)             | 0<br>(0 - 0)      | 0<br>(0 - 0)      | 0<br>(0 - 0)           | 0<br>(0 - 0)       | 0<br>(0 - 0)       |
| Other skin and subcutaneous diseases                | 0<br>(0 - 1)             | 0<br>(0 - 0)      | 0<br>(0 - 0)      | 0<br>(0 - 0)           | 0<br>(0 - 0)       | 0<br>(0 - 0)       |
| Sudden infant death syndrome                        | 6<br>(2 - 11)            | 6<br>(2 - 11)     | --                | --                     | --                 | --                 |
| Injuries                                            | 2,005<br>(1,858 - 2,242) | 43<br>(29 - 62)   | 39<br>(31 - 48)   | 1,070<br>(973 - 1,199) | 697<br>(632 - 789) | 156<br>(140 - 178) |
| Transport injuries                                  | 401<br>(361 - 441)       | 4<br>(2 - 6)      | 10<br>(7 - 14)    | 313<br>(279 - 349)     | 57<br>(49 - 67)    | 16<br>(13 - 20)    |
| Road injuries                                       | 379<br>(338 - 419)       | 3<br>(2 - 6)      | 10<br>(7 - 13)    | 300<br>(263 - 335)     | 51<br>(43 - 60)    | 15<br>(12 - 18)    |
| Pedestrian road injuries                            | 64<br>(37 - 101)         | 1<br>(0 - 2)      | 3<br>(2 - 6)      | 30<br>(15 - 54)        | 23<br>(14 - 33)    | 7<br>(5 - 10)      |

Web Table 31- Moldova deaths with 95% UI by age, sex, and cause in 2013

| Cause                                           | Males, All Ages    | Males, 0-4 Years | Males, 5-14 Years | Males, 15-49 Years | Males, 50-69 Years | Males, 70-80 Years |
|-------------------------------------------------|--------------------|------------------|-------------------|--------------------|--------------------|--------------------|
| Cyclist road injuries                           | 9<br>(6 - 15)      | 0<br>(0 - 0)     | 1<br>(0 - 1)      | 4<br>(2 - 6)       | 4<br>(2 - 6)       | 1<br>(1 - 2)       |
| Motorcyclist road injuries                      | 46<br>(29 - 74)    | 0<br>(0 - 0)     | 0<br>(0 - 0)      | 41<br>(26 - 69)    | 3<br>(2 - 5)       | 1<br>(0 - 1)       |
| Motor vehicle road injuries                     | 95<br>(53 - 130)   | 1<br>(0 - 1)     | 1<br>(1 - 2)      | 82<br>(46 - 114)   | 9<br>(4 - 13)      | 2<br>(1 - 3)       |
| Other road injuries                             | 164<br>(95 - 209)  | 1<br>(1 - 3)     | 4<br>(2 - 7)      | 143<br>(85 - 181)  | 12<br>(6 - 19)     | 3<br>(1 - 6)       |
| Other transport injuries                        | 22<br>(17 - 32)    | 0<br>(0 - 0)     | 0<br>(0 - 1)      | 14<br>(10 - 20)    | 7<br>(4 - 10)      | 1<br>(1 - 2)       |
| Unintentional injuries                          | 859<br>(740 - 986) | 38<br>(26 - 54)  | 26<br>(20 - 35)   | 342<br>(292 - 409) | 360<br>(295 - 412) | 94<br>(79 - 106)   |
| Falls                                           | 179<br>(150 - 215) | 3<br>(2 - 4)     | 2<br>(1 - 2)      | 57<br>(46 - 72)    | 91<br>(70 - 110)   | 27<br>(22 - 33)    |
| Drowning                                        | 203<br>(155 - 297) | 7<br>(3 - 14)    | 17<br>(12 - 27)   | 114<br>(86 - 176)  | 55<br>(39 - 76)    | 10<br>(7 - 14)     |
| Fire, heat, and hot substances                  | 97<br>(65 - 123)   | 5<br>(3 - 8)     | 1<br>(1 - 2)      | 31<br>(21 - 41)    | 42<br>(26 - 56)    | 17<br>(11 - 23)    |
| Poisonings                                      | 119<br>(77 - 148)  | 4<br>(2 - 7)     | 2<br>(1 - 2)      | 44<br>(28 - 56)    | 50<br>(31 - 66)    | 19<br>(12 - 26)    |
| Exposure to mechanical forces                   | 27<br>(23 - 48)    | 2<br>(1 - 4)     | 1<br>(1 - 2)      | 15<br>(12 - 27)    | 8<br>(6 - 14)      | 1<br>(1 - 2)       |
| Unintentional firearm injuries                  | 2<br>(2 - 3)       | 0<br>(0 - 0)     | 0<br>(0 - 0)      | 2<br>(1 - 2)       | 0<br>(0 - 0)       | 0<br>(0 - 0)       |
| Unintentional suffocation                       | 4<br>(3 - 7)       | 2<br>(1 - 4)     | 0<br>(0 - 0)      | 1<br>(1 - 2)       | 1<br>(0 - 1)       | 0<br>(0 - 0)       |
| Other exposure to mechanical forces             | 21<br>(17 - 39)    | 0<br>(0 - 1)     | 1<br>(0 - 1)      | 12<br>(10 - 23)    | 7<br>(5 - 13)      | 1<br>(1 - 1)       |
| Adverse effects of medical treatment            | 9<br>(7 - 14)      | 1<br>(0 - 1)     | 0<br>(0 - 0)      | 2<br>(2 - 4)       | 3<br>(2 - 4)       | 3<br>(2 - 4)       |
| Animal contact                                  | 6<br>(5 - 9)       | 0<br>(0 - 0)     | 0<br>(0 - 0)      | 1<br>(1 - 2)       | 4<br>(2 - 5)       | 1<br>(1 - 2)       |
| Venomous animal contact                         | 1<br>(1 - 2)       | 0<br>(0 - 0)     | 0<br>(0 - 0)      | 1<br>(0 - 1)       | 1<br>(0 - 1)       | 0<br>(0 - 0)       |
| Non-venomous animal contact                     | 5<br>(4 - 8)       | 0<br>(0 - 0)     | 0<br>(0 - 0)      | 1<br>(1 - 1)       | 3<br>(2 - 5)       | 1<br>(1 - 2)       |
| Foreign body                                    | 184<br>(96 - 265)  | 16<br>(8 - 24)   | 1<br>(1 - 2)      | 53<br>(27 - 75)    | 99<br>(50 - 147)   | 15<br>(7 - 22)     |
| Pulmonary aspiration and foreign body in airway | 184<br>(96 - 264)  | 16<br>(8 - 24)   | 1<br>(0 - 2)      | 53<br>(26 - 75)    | 99<br>(50 - 147)   | 15<br>(7 - 22)     |
| Foreign body in other body part                 | 0<br>(0 - 0)       | 0<br>(0 - 0)     | 0<br>(0 - 0)      | 0<br>(0 - 0)       | 0<br>(0 - 0)       | 0<br>(0 - 0)       |
| Other unintentional injuries                    | 35<br>(28 - 44)    | 1<br>(0 - 1)     | 2<br>(1 - 3)      | 23<br>(17 - 30)    | 9<br>(5 - 13)      | 1<br>(1 - 2)       |
| Self-harm and interpersonal violence            | 745<br>(641 - 989) | 2<br>(1 - 3)     | 3<br>(2 - 4)      | 415<br>(349 - 532) | 280<br>(235 - 380) | 46<br>(37 - 66)    |
| Self-harm                                       | 542<br>(451 - 689) | --               | 2<br>(1 - 3)      | 294<br>(236 - 357) | 212<br>(171 - 275) | 34<br>(27 - 47)    |
| Interpersonal violence                          | 203<br>(155 - 371) | 2<br>(1 - 3)     | 1<br>(1 - 2)      | 121<br>(91 - 211)  | 68<br>(49 - 134)   | 12<br>(8 - 24)     |
| Assault by firearm                              | 18<br>(9 - 39)     | 0<br>(0 - 0)     | 0<br>(0 - 0)      | 15<br>(8 - 33)     | 2<br>(1 - 5)       | 0<br>(0 - 0)       |
| Assault by sharp object                         | 74<br>(50 - 137)   | 0<br>(0 - 1)     | 0<br>(0 - 0)      | 43<br>(28 - 75)    | 28<br>(18 - 58)    | 2<br>(1 - 5)       |
| Assault by other means                          | 112<br>(78 - 211)  | 1<br>(1 - 3)     | 1<br>(0 - 1)      | 62<br>(43 - 116)   | 38<br>(24 - 81)    | 10<br>(7 - 19)     |

Web Table 31- Moldova deaths with 95% UI by age, sex, and cause in 2013

| Cause                                                             | Females, All Ages           | Females, 0-4 Years | Females, 5-14 Years | Females, 15-49 Years   | Females, 50-69 Years     | Females, 70-80 Years        |
|-------------------------------------------------------------------|-----------------------------|--------------------|---------------------|------------------------|--------------------------|-----------------------------|
| All causes                                                        | 18,669<br>(17,970 - 19,301) | 228<br>(169 - 297) | 40<br>(34 - 46)     | 1,053<br>(977 - 1,129) | 4,687<br>(4,479 - 4,884) | 12,661<br>(12,213 - 13,019) |
| Communicable, maternal, neonatal, and nutritional diseases        | 381<br>(322 - 431)          | 110<br>(79 - 150)  | 5<br>(4 - 6)        | 106<br>(86 - 121)      | 100<br>(79 - 115)        | 60<br>(49 - 73)             |
| HIV/AIDS and tuberculosis                                         | 87<br>(63 - 105)            | 2<br>(1 - 3)       | 1<br>(0 - 1)        | 50<br>(37 - 63)        | 27<br>(19 - 34)          | 6<br>(5 - 8)                |
| Tuberculosis                                                      | 56<br>(32 - 67)             | 1<br>(0 - 1)       | 0<br>(0 - 0)        | 28<br>(15 - 36)        | 21<br>(13 - 27)          | 6<br>(4 - 8)                |
| HIV/AIDS                                                          | 31<br>(20 - 46)             | 2<br>(1 - 3)       | 0<br>(0 - 1)        | 22<br>(14 - 34)        | 6<br>(3 - 10)            | 1<br>(0 - 2)                |
| HIV/AIDS resulting in mycobacterial infection                     | 2<br>(1 - 2)                | 0<br>(0 - 0)       | 0<br>(0 - 0)        | 1<br>(1 - 2)           | 0<br>(0 - 1)             | 0<br>(0 - 0)                |
| HIV/AIDS resulting in other diseases                              | 29<br>(19 - 44)             | 2<br>(1 - 2)       | 0<br>(0 - 1)        | 21<br>(13 - 32)        | 6<br>(3 - 10)            | 1<br>(0 - 2)                |
| Diarrhea, lower respiratory, and other common infectious diseases | 216<br>(176 - 243)          | 49<br>(35 - 65)    | 4<br>(3 - 5)        | 42<br>(33 - 50)        | 69<br>(53 - 81)          | 52<br>(40 - 64)             |
| Diarrheal diseases                                                | 5<br>(3 - 7)                | 4<br>(2 - 6)       | 0<br>(0 - 0)        | 0<br>(0 - 0)           | 0<br>(0 - 0)             | 0<br>(0 - 0)                |
| Intestinal infectious diseases                                    | 4<br>(2 - 8)                | 1<br>(0 - 2)       | 1<br>(0 - 1)        | 2<br>(0 - 3)           | 1<br>(0 - 2)             | 1<br>(0 - 1)                |
| Typhoid fever                                                     | 3<br>(1 - 6)                | 1<br>(0 - 1)       | 0<br>(0 - 1)        | 1<br>(0 - 2)           | 1<br>(0 - 1)             | 0<br>(0 - 1)                |
| Paratyphoid fever                                                 | 1<br>(0 - 2)                | 0<br>(0 - 0)       | 0<br>(0 - 0)        | 0<br>(0 - 1)           | 0<br>(0 - 0)             | 0<br>(0 - 0)                |
| Other intestinal infectious diseases                              | 0<br>(0 - 2)                | 0<br>(0 - 1)       | 0<br>(0 - 0)        | 0<br>(0 - 1)           | 0<br>(0 - 1)             | 0<br>(0 - 1)                |
| Lower respiratory infections                                      | 184<br>(146 - 211)          | 40<br>(27 - 55)    | 2<br>(2 - 3)        | 33<br>(25 - 41)        | 61<br>(44 - 74)          | 47<br>(36 - 59)             |
| Upper respiratory infections                                      | 1<br>(0 - 3)                | 0<br>(0 - 0)       | 0<br>(0 - 0)        | 0<br>(0 - 0)           | 0<br>(0 - 1)             | 1<br>(0 - 3)                |
| Otitis media                                                      | 0<br>(0 - 0)                | 0<br>(0 - 0)       | 0<br>(0 - 0)        | 0<br>(0 - 0)           | 0<br>(0 - 0)             | 0<br>(0 - 0)                |
| Meningitis                                                        | 9<br>(8 - 12)               | 3<br>(2 - 4)       | 0<br>(0 - 0)        | 2<br>(2 - 3)           | 3<br>(2 - 4)             | 1<br>(1 - 1)                |
| Pneumococcal meningitis                                           | 2<br>(2 - 3)                | 1<br>(0 - 1)       | 0<br>(0 - 0)        | 1<br>(0 - 1)           | 1<br>(0 - 1)             | 0<br>(0 - 0)                |
| H influenzae type B meningitis                                    | 2<br>(1 - 3)                | 1<br>(1 - 2)       | 0<br>(0 - 0)        | 0<br>(0 - 0)           | 0<br>(0 - 1)             | 0<br>(0 - 0)                |
| Meningococcal meningitis                                          | 2<br>(2 - 3)                | 1<br>(0 - 1)       | 0<br>(0 - 0)        | 1<br>(0 - 1)           | 1<br>(0 - 1)             | 0<br>(0 - 0)                |
| Other meningitis                                                  | 3<br>(2 - 4)                | 0<br>(0 - 1)       | 0<br>(0 - 0)        | 1<br>(1 - 1)           | 1<br>(1 - 2)             | 0<br>(0 - 1)                |
| Encephalitis                                                      | 10<br>(7 - 13)              | 1<br>(1 - 3)       | 0<br>(0 - 1)        | 4<br>(2 - 6)           | 3<br>(2 - 5)             | 1<br>(1 - 1)                |
| Diphtheria                                                        | 0<br>(0 - 0)                | 0<br>(0 - 0)       | 0<br>(0 - 0)        | 0<br>(0 - 0)           | 0<br>(0 - 0)             | --                          |
| Whooping cough                                                    | 0<br>(0 - 0)                | 0<br>(0 - 0)       | 0<br>(0 - 0)        | 0<br>(0 - 0)           | 0<br>(0 - 0)             | --                          |
| Tetanus                                                           | 0<br>(0 - 0)                | 0<br>(0 - 0)       | 0<br>(0 - 0)        | 0<br>(0 - 0)           | 0<br>(0 - 0)             | 0<br>(0 - 0)                |
| Measles                                                           | 0<br>(0 - 0)                | 0<br>(0 - 0)       | 0<br>(0 - 0)        | 0<br>(0 - 0)           | 0<br>(0 - 0)             | --                          |
| Varicella and herpes zoster                                       | 1<br>(0 - 5)                | 0<br>(0 - 0)       | 0<br>(0 - 0)        | 0<br>(0 - 0)           | 0<br>(0 - 1)             | 1<br>(0 - 4)                |
| Neglected tropical diseases and malaria                           | 1<br>(1 - 1)                | 0<br>(0 - 0)       | 0<br>(0 - 0)        | 0<br>(0 - 0)           | 0<br>(0 - 0)             | 0<br>(0 - 0)                |
| Cysticercosis                                                     | 0<br>(0 - 0)                | 0<br>(0 - 0)       | 0<br>(0 - 0)        | 0<br>(0 - 0)           | 0<br>(0 - 0)             | 0<br>(0 - 0)                |
| Cystic echinococcosis                                             | 0<br>(0 - 1)                | 0<br>(0 - 0)       | 0<br>(0 - 0)        | 0<br>(0 - 0)           | 0<br>(0 - 0)             | 0<br>(0 - 0)                |
| Dengue                                                            | 0<br>(0 - 0)                | 0<br>(0 - 0)       | 0<br>(0 - 0)        | 0<br>(0 - 0)           | 0<br>(0 - 0)             | 0<br>(0 - 0)                |
| Rabies                                                            | 0<br>(0 - 0)                | 0<br>(0 - 0)       | 0<br>(0 - 0)        | 0<br>(0 - 0)           | 0<br>(0 - 0)             | 0<br>(0 - 0)                |
| Other neglected tropical diseases                                 | 0<br>(0 - 0)                | 0<br>(0 - 0)       | 0<br>(0 - 0)        | 0<br>(0 - 0)           | 0<br>(0 - 0)             | 0<br>(0 - 0)                |
| Maternal disorders                                                | 9<br>(7 - 12)               | --                 | 0<br>(0 - 0)        | 9<br>(7 - 12)          | --                       | --                          |
| Maternal hemorrhage                                               | 1<br>(1 - 1)                | --                 | 0<br>(0 - 0)        | 1<br>(1 - 1)           | --                       | --                          |
| Maternal sepsis and other maternal infections                     | 1<br>(1 - 2)                | --                 | 0<br>(0 - 0)        | 1<br>(1 - 2)           | --                       | --                          |
| Maternal hypertensive disorders                                   | 1<br>(0 - 2)                | --                 | 0<br>(0 - 0)        | 1<br>(0 - 2)           | --                       | --                          |
| Maternal obstructed labor                                         | 1<br>(1 - 1)                | --                 | 0<br>(0 - 0)        | 1<br>(1 - 1)           | --                       | --                          |
| Maternal abortive outcome                                         | 2<br>(1 - 2)                | --                 | 0<br>(0 - 0)        | 2<br>(1 - 2)           | --                       | --                          |
| Indirect maternal deaths                                          | 1<br>(1 - 2)                | --                 | 0<br>(0 - 0)        | 1<br>(1 - 2)           | --                       | --                          |

Web Table 31- Moldova deaths with 95% UI by age, sex, and cause in 2013

| Cause                                                            | Females, All Ages           | Females, 0-4 Years | Females, 5-14 Years | Females, 15-49 Years | Females, 50-69 Years     | Females, 70-80 Years        |
|------------------------------------------------------------------|-----------------------------|--------------------|---------------------|----------------------|--------------------------|-----------------------------|
| Late maternal deaths                                             | 1<br>(0 - 1)                | --                 | 0<br>(0 - 0)        | 1<br>(0 - 1)         | --                       | --                          |
| Maternal deaths aggravated by HIV/AIDS                           | 0<br>(0 - 0)                | --                 | --                  | 0<br>(0 - 0)         | --                       | --                          |
| Other maternal disorders                                         | 1<br>(1 - 2)                | --                 | 0<br>(0 - 0)        | 1<br>(1 - 2)         | --                       | --                          |
| Neonatal disorders                                               | 57<br>(38 - 81)             | 57<br>(38 - 81)    | --                  | --                   | --                       | --                          |
| Neonatal preterm birth complications                             | 14<br>(7 - 23)              | 14<br>(7 - 23)     | --                  | --                   | --                       | --                          |
| Neonatal encephalopathy due to birth asphyxia and trauma         | 23<br>(13 - 35)             | 23<br>(13 - 35)    | --                  | --                   | --                       | --                          |
| Neonatal sepsis and other neonatal infections                    | 14<br>(7 - 28)              | 14<br>(7 - 28)     | --                  | --                   | --                       | --                          |
| Hemolytic disease and other neonatal jaundice                    | 0<br>(0 - 0)                | 0<br>(0 - 0)       | --                  | --                   | --                       | --                          |
| Other neonatal disorders                                         | 6<br>(1 - 12)               | 6<br>(1 - 12)      | --                  | --                   | --                       | --                          |
| Nutritional deficiencies                                         | 3<br>(2 - 5)                | 0<br>(0 - 0)       | 0<br>(0 - 0)        | 1<br>(1 - 1)         | 1<br>(1 - 2)             | 1<br>(0 - 1)                |
| Protein-energy malnutrition                                      | 1<br>(1 - 2)                | 0<br>(0 - 0)       | 0<br>(0 - 0)        | 0<br>(0 - 1)         | 0<br>(0 - 1)             | 0<br>(0 - 1)                |
| Iodine deficiency                                                | 0<br>(0 - 1)                | 0<br>(0 - 0)       | 0<br>(0 - 0)        | 0<br>(0 - 0)         | 0<br>(0 - 0)             | 0<br>(0 - 0)                |
| Iron-deficiency anemia                                           | 1<br>(0 - 2)                | 0<br>(0 - 0)       | 0<br>(0 - 0)        | 0<br>(0 - 0)         | 0<br>(0 - 1)             | 0<br>(0 - 1)                |
| Other nutritional deficiencies                                   | 0<br>(0 - 1)                | 0<br>(0 - 0)       | 0<br>(0 - 0)        | 0<br>(0 - 0)         | 0<br>(0 - 0)             | 0<br>(0 - 0)                |
| Other communicable, maternal, neonatal, and nutritional diseases | 8<br>(6 - 11)               | 2<br>(1 - 4)       | 0<br>(0 - 0)        | 3<br>(2 - 4)         | 2<br>(2 - 3)             | 1<br>(1 - 2)                |
| Sexually transmitted diseases excluding HIV                      | 4<br>(2 - 6)                | 1<br>(0 - 3)       | 0<br>(0 - 0)        | 1<br>(1 - 3)         | 1<br>(0 - 1)             | 0<br>(0 - 1)                |
| Syphilis                                                         | 2<br>(1 - 5)                | 1<br>(0 - 3)       | 0<br>(0 - 0)        | 1<br>(0 - 1)         | 0<br>(0 - 1)             | 0<br>(0 - 0)                |
| Chlamydial infection                                             | 0<br>(0 - 1)                | --                 | 0<br>(0 - 0)        | 0<br>(0 - 1)         | 0<br>(0 - 0)             | 0<br>(0 - 0)                |
| Gonococcal infection                                             | 0<br>(0 - 1)                | --                 | 0<br>(0 - 0)        | 0<br>(0 - 1)         | 0<br>(0 - 0)             | 0<br>(0 - 0)                |
| Other sexually transmitted diseases                              | 0<br>(0 - 1)                | --                 | 0<br>(0 - 0)        | 0<br>(0 - 0)         | 0<br>(0 - 0)             | 0<br>(0 - 0)                |
| Hepatitis                                                        | 1<br>(1 - 2)                | 0<br>(0 - 0)       | 0<br>(0 - 0)        | 1<br>(1 - 1)         | 0<br>(0 - 0)             | 0<br>(0 - 0)                |
| Acute hepatitis A                                                | 0<br>(0 - 1)                | 0<br>(0 - 0)       | 0<br>(0 - 0)        | 0<br>(0 - 1)         | 0<br>(0 - 0)             | 0<br>(0 - 0)                |
| Acute hepatitis B                                                | 1<br>(0 - 1)                | 0<br>(0 - 0)       | 0<br>(0 - 0)        | 0<br>(0 - 1)         | 0<br>(0 - 0)             | 0<br>(0 - 0)                |
| Acute hepatitis C                                                | 0<br>(0 - 0)                | --                 | 0<br>(0 - 0)        | 0<br>(0 - 0)         | 0<br>(0 - 0)             | 0<br>(0 - 0)                |
| Other infectious diseases                                        | 4<br>(3 - 4)                | 1<br>(0 - 1)       | 0<br>(0 - 0)        | 1<br>(0 - 1)         | 1<br>(1 - 2)             | 1<br>(1 - 1)                |
| Non-communicable diseases                                        | 17,768<br>(17,124 - 18,343) | 89<br>(63 - 118)   | 19<br>(15 - 23)     | 787<br>(723 - 848)   | 4,403<br>(4,206 - 4,597) | 12,469<br>(12,029 - 12,806) |
| Neoplasms                                                        | 2,175<br>(1,936 - 2,349)    | 6<br>(4 - 8)       | 9<br>(7 - 11)       | 305<br>(273 - 336)   | 1,073<br>(957 - 1,167)   | 782<br>(686 - 854)          |
| Esophageal cancer                                                | 10<br>(8 - 12)              | --                 | --                  | 1<br>(0 - 1)         | 4<br>(3 - 5)             | 5<br>(4 - 7)                |
| Stomach cancer                                                   | 160<br>(121 - 208)          | --                 | --                  | 19<br>(14 - 25)      | 74<br>(54 - 98)          | 68<br>(50 - 90)             |
| Liver cancer                                                     | 129<br>(78 - 153)           | --                 | 0<br>(0 - 0)        | 11<br>(6 - 15)       | 58<br>(38 - 70)          | 60<br>(30 - 75)             |
| Liver cancer due to hepatitis B                                  | 19<br>(9 - 34)              | --                 | 0<br>(0 - 0)        | 2<br>(1 - 4)         | 10<br>(4 - 19)           | 7<br>(3 - 12)               |
| Liver cancer due to hepatitis C                                  | 62<br>(32 - 83)             | --                 | 0<br>(0 - 0)        | 5<br>(2 - 7)         | 28<br>(14 - 38)          | 30<br>(15 - 42)             |
| Liver cancer due to alcohol use                                  | 25<br>(11 - 36)             | --                 | --                  | 1<br>(0 - 2)         | 9<br>(4 - 15)            | 14<br>(6 - 21)              |
| Liver cancer due to other causes                                 | 23<br>(13 - 32)             | --                 | 0<br>(0 - 0)        | 3<br>(1 - 4)         | 11<br>(6 - 16)           | 9<br>(5 - 14)               |
| Larynx cancer                                                    | 5<br>(3 - 7)                | --                 | --                  | 1<br>(0 - 1)         | 3<br>(2 - 4)             | 1<br>(1 - 2)                |
| Tracheal, bronchus and lung cancer                               | 183<br>(155 - 214)          | --                 | --                  | 18<br>(14 - 23)      | 92<br>(75 - 114)         | 74<br>(54 - 90)             |
| Breast cancer                                                    | 427<br>(290 - 496)          | --                 | --                  | 66<br>(51 - 86)      | 240<br>(163 - 280)       | 121<br>(76 - 143)           |
| Cervical cancer                                                  | 170<br>(132 - 200)          | --                 | --                  | 43<br>(28 - 58)      | 82<br>(63 - 100)         | 45<br>(35 - 57)             |
| Uterine cancer                                                   | 69<br>(48 - 83)             | --                 | --                  | 6<br>(4 - 9)         | 39<br>(25 - 48)          | 24<br>(16 - 31)             |
| Prostate cancer                                                  | --                          | --                 | --                  | --                   | --                       | --                          |

Web Table 31- Moldova deaths with 95% UI by age, sex, and cause in 2013

| Cause                                         | Females, All Ages           | Females, 0-4 Years | Females, 5-14 Years | Females, 15-49 Years | Females, 50-69 Years     | Females, 70-80 Years      |
|-----------------------------------------------|-----------------------------|--------------------|---------------------|----------------------|--------------------------|---------------------------|
| Colon and rectum cancer                       | 325<br>(292 - 357)          | --                 | --                  | 20<br>(16 - 24)      | 149<br>(131 - 169)       | 156<br>(137 - 177)        |
| Lip and oral cavity cancer                    | 15<br>(12 - 18)             | --                 | --                  | 2<br>(1 - 2)         | 6<br>(4 - 7)             | 8<br>(6 - 9)              |
| Nasopharynx cancer                            | 6<br>(2 - 10)               | --                 | 0<br>(0 - 0)        | 2<br>(1 - 4)         | 3<br>(1 - 5)             | 1<br>(0 - 2)              |
| Other pharynx cancer                          | 4<br>(3 - 4)                | --                 | --                  | 1<br>(1 - 1)         | 2<br>(1 - 2)             | 1<br>(1 - 1)              |
| Gallbladder and biliary tract cancer          | 32<br>(23 - 41)             | --                 | --                  | 2<br>(1 - 3)         | 18<br>(12 - 23)          | 12<br>(8 - 17)            |
| Pancreatic cancer                             | 135<br>(120 - 151)          | --                 | --                  | 8<br>(7 - 10)        | 65<br>(56 - 75)          | 62<br>(54 - 71)           |
| Malignant skin melanoma                       | 21<br>(14 - 28)             | --                 | --                  | 5<br>(3 - 7)         | 9<br>(6 - 12)            | 7<br>(4 - 9)              |
| Non-melanoma skin cancer                      | 17<br>(13 - 22)             | --                 | --                  | 1<br>(1 - 1)         | 4<br>(3 - 5)             | 13<br>(9 - 16)            |
| Ovarian cancer                                | 108<br>(94 - 123)           | --                 | --                  | 20<br>(16 - 25)      | 64<br>(54 - 74)          | 24<br>(20 - 29)           |
| Testicular cancer                             | --                          | --                 | --                  | --                   | --                       | --                        |
| Kidney cancer                                 | 29<br>(23 - 36)             | 0<br>(0 - 1)       | 0<br>(0 - 0)        | 3<br>(2 - 4)         | 16<br>(12 - 20)          | 10<br>(7 - 14)            |
| Bladder cancer                                | 24<br>(16 - 34)             | --                 | --                  | 1<br>(0 - 1)         | 8<br>(5 - 11)            | 16<br>(10 - 22)           |
| Brain and nervous system cancer               | 58<br>(41 - 68)             | 1<br>(1 - 2)       | 3<br>(2 - 3)        | 19<br>(14 - 24)      | 31<br>(20 - 37)          | 5<br>(3 - 6)              |
| Thyroid cancer                                | 11<br>(6 - 14)              | --                 | 0<br>(0 - 0)        | 1<br>(1 - 2)         | 6<br>(3 - 8)             | 4<br>(2 - 5)              |
| Mesothelioma                                  | 2<br>(1 - 2)                | --                 | --                  | 0<br>(0 - 1)         | 1<br>(1 - 1)             | 0<br>(0 - 1)              |
| Hodgkin lymphoma                              | 14<br>(9 - 19)              | 0<br>(0 - 0)       | 0<br>(0 - 0)        | 7<br>(4 - 10)        | 4<br>(3 - 6)             | 3<br>(2 - 4)              |
| Non-Hodgkin lymphoma                          | 46<br>(22 - 66)             | 0<br>(0 - 1)       | 1<br>(0 - 1)        | 10<br>(4 - 15)       | 22<br>(10 - 33)          | 12<br>(6 - 18)            |
| Multiple myeloma                              | 14<br>(8 - 21)              | --                 | --                  | 2<br>(1 - 3)         | 9<br>(5 - 13)            | 3<br>(2 - 5)              |
| Leukemia                                      | 49<br>(41 - 59)             | 1<br>(1 - 2)       | 3<br>(2 - 4)        | 14<br>(10 - 18)      | 19<br>(14 - 23)          | 12<br>(10 - 16)           |
| Other neoplasms                               | 111<br>(88 - 130)           | 3<br>(2 - 4)       | 2<br>(2 - 3)        | 22<br>(18 - 26)      | 49<br>(38 - 59)          | 36<br>(25 - 45)           |
| Cardiovascular diseases                       | 12,213<br>(11,667 - 12,721) | 1<br>(0 - 1)       | 1<br>(1 - 1)        | 169<br>(141 - 207)   | 2,144<br>(1,967 - 2,351) | 9,898<br>(9,496 - 10,262) |
| Rheumatic heart disease                       | 66<br>(45 - 85)             | 0<br>(0 - 0)       | 0<br>(0 - 0)        | 14<br>(11 - 22)      | 42<br>(28 - 55)          | 10<br>(5 - 13)            |
| Ischemic heart disease                        | 8,422<br>(7,915 - 9,215)    | 0<br>(0 - 0)       | 0<br>(0 - 0)        | 67<br>(48 - 90)      | 1,177<br>(1,008 - 1,369) | 7,178<br>(6,767 - 7,821)  |
| Cerebrovascular disease                       | 3,217<br>(2,690 - 3,719)    | 0<br>(0 - 0)       | 0<br>(0 - 0)        | 62<br>(48 - 82)      | 780<br>(661 - 970)       | 2,375<br>(1,955 - 2,767)  |
| Ischemic stroke                               | 1,842<br>(1,250 - 2,106)    | 0<br>(0 - 0)       | 0<br>(0 - 0)        | 10<br>(4 - 14)       | 271<br>(152 - 328)       | 1,562<br>(1,078 - 1,799)  |
| Hemorrhagic stroke                            | 1,375<br>(1,162 - 2,012)    | 0<br>(0 - 0)       | 0<br>(0 - 0)        | 53<br>(42 - 72)      | 509<br>(426 - 718)       | 813<br>(657 - 1,222)      |
| Hypertensive heart disease                    | 374<br>(149 - 568)          | 0<br>(0 - 0)       | 0<br>(0 - 0)        | 4<br>(2 - 6)         | 82<br>(40 - 115)         | 288<br>(102 - 458)        |
| Cardiomyopathy and myocarditis                | 59<br>(41 - 75)             | 1<br>(0 - 1)       | 0<br>(0 - 1)        | 11<br>(8 - 18)       | 31<br>(22 - 40)          | 16<br>(10 - 20)           |
| Atrial fibrillation and flutter               | 0<br>(0 - 0)                | --                 | --                  | 0<br>(0 - 0)         | 0<br>(0 - 0)             | 0<br>(0 - 0)              |
| Aortic aneurysm                               | 16<br>(9 - 22)              | --                 | --                  | 2<br>(1 - 2)         | 7<br>(4 - 10)            | 7<br>(4 - 11)             |
| Peripheral vascular disease                   | 9<br>(7 - 12)               | --                 | --                  | 0<br>(0 - 0)         | 2<br>(1 - 2)             | 8<br>(6 - 11)             |
| Endocarditis                                  | 5<br>(2 - 7)                | 0<br>(0 - 0)       | 0<br>(0 - 0)        | 2<br>(1 - 2)         | 2<br>(1 - 3)             | 1<br>(0 - 1)              |
| Other cardiovascular and circulatory diseases | 45<br>(29 - 56)             | 0<br>(0 - 0)       | 0<br>(0 - 0)        | 6<br>(4 - 9)         | 22<br>(13 - 29)          | 16<br>(10 - 21)           |
| Chronic respiratory diseases                  | 469<br>(405 - 677)          | 0<br>(0 - 0)       | 0<br>(0 - 0)        | 9<br>(7 - 12)        | 77<br>(65 - 123)         | 383<br>(328 - 552)        |
| Chronic obstructive pulmonary disease         | 446<br>(385 - 630)          | 0<br>(0 - 0)       | 0<br>(0 - 0)        | 7<br>(5 - 9)         | 70<br>(58 - 109)         | 369<br>(316 - 510)        |
| Pneumoconiosis                                | 0<br>(0 - 0)                | 0<br>(0 - 0)       | 0<br>(0 - 0)        | 0<br>(0 - 0)         | 0<br>(0 - 0)             | 0<br>(0 - 0)              |
| Silicosis                                     | 0<br>(0 - 0)                | 0<br>(0 - 0)       | 0<br>(0 - 0)        | 0<br>(0 - 0)         | 0<br>(0 - 0)             | 0<br>(0 - 0)              |
| Asbestosis                                    | 0<br>(0 - 0)                | 0<br>(0 - 0)       | 0<br>(0 - 0)        | 0<br>(0 - 0)         | 0<br>(0 - 0)             | 0<br>(0 - 0)              |
| Coal workers pneumoconiosis                   | 0<br>(0 - 0)                | 0<br>(0 - 0)       | 0<br>(0 - 0)        | 0<br>(0 - 0)         | 0<br>(0 - 0)             | 0<br>(0 - 0)              |
| Other pneumoconiosis                          | 0<br>(0 - 0)                | 0<br>(0 - 0)       | 0<br>(0 - 0)        | 0<br>(0 - 0)         | 0<br>(0 - 0)             | 0<br>(0 - 0)              |



Web Table 31- Moldova deaths with 95% UI by age, sex, and cause in 2013

| Cause                                               | Females, All Ages        | Females, 0-4 Years | Females, 5-14 Years | Females, 15-49 Years | Females, 50-69 Years | Females, 70-80 Years |
|-----------------------------------------------------|--------------------------|--------------------|---------------------|----------------------|----------------------|----------------------|
| Asthma                                              | 22<br>(13 - 43)          | 0<br>(0 - 0)       | 0<br>(0 - 0)        | 1<br>(1 - 3)         | 7<br>(4 - 13)        | 14<br>(8 - 29)       |
| Interstitial lung disease and pulmonary sarcoidosis | 1<br>(0 - 2)             | 0<br>(0 - 0)       | 0<br>(0 - 0)        | 0<br>(0 - 1)         | 1<br>(0 - 1)         | 0<br>(0 - 0)         |
| Other chronic respiratory diseases                  | 0<br>(0 - 1)             | 0<br>(0 - 0)       | 0<br>(0 - 0)        | 0<br>(0 - 0)         | 0<br>(0 - 0)         | 0<br>(0 - 0)         |
| Cirrhosis                                           | 1,309<br>(1,186 - 1,424) | 0<br>(0 - 0)       | 0<br>(0 - 0)        | 165<br>(142 - 188)   | 754<br>(673 - 831)   | 389<br>(343 - 449)   |
| Cirrhosis due to hepatitis B                        | 270<br>(138 - 386)       | 0<br>(0 - 0)       | 0<br>(0 - 0)        | 35<br>(17 - 50)      | 155<br>(78 - 226)    | 81<br>(41 - 123)     |
| Cirrhosis due to hepatitis C                        | 628<br>(426 - 820)       | 0<br>(0 - 0)       | 0<br>(0 - 0)        | 77<br>(50 - 106)     | 372<br>(248 - 489)   | 179<br>(116 - 240)   |
| Cirrhosis due to alcohol use                        | 268<br>(126 - 404)       | --                 | --                  | 23<br>(10 - 38)      | 145<br>(68 - 224)    | 100<br>(42 - 155)    |
| Cirrhosis due to other causes                       | 142<br>(74 - 248)        | 0<br>(0 - 0)       | 0<br>(0 - 0)        | 30<br>(15 - 49)      | 82<br>(39 - 148)     | 30<br>(14 - 54)      |
| Digestive diseases                                  | 224<br>(169 - 253)       | 0<br>(0 - 1)       | 0<br>(0 - 0)        | 28<br>(23 - 33)      | 92<br>(74 - 107)     | 103<br>(68 - 121)    |
| Peptic ulcer disease                                | 33<br>(19 - 44)          | 0<br>(0 - 0)       | 0<br>(0 - 0)        | 3<br>(2 - 4)         | 13<br>(8 - 19)       | 17<br>(9 - 24)       |
| Gastritis and duodenitis                            | 0<br>(0 - 1)             | 0<br>(0 - 0)       | 0<br>(0 - 0)        | 0<br>(0 - 0)         | 0<br>(0 - 0)         | 0<br>(0 - 0)         |
| Appendicitis                                        | 3<br>(2 - 5)             | 0<br>(0 - 0)       | 0<br>(0 - 0)        | 1<br>(0 - 1)         | 1<br>(1 - 2)         | 1<br>(1 - 2)         |
| Paralytic ileus and intestinal obstruction          | 17<br>(9 - 31)           | 0<br>(0 - 0)       | 0<br>(0 - 0)        | 2<br>(1 - 3)         | 6<br>(3 - 11)        | 9<br>(4 - 18)        |
| Inguinal, femoral, and abdominal hernia             | 9<br>(5 - 16)            | 0<br>(0 - 0)       | 0<br>(0 - 0)        | 0<br>(0 - 1)         | 3<br>(2 - 6)         | 5<br>(2 - 10)        |
| Inflammatory bowel disease                          | 4<br>(2 - 5)             | 0<br>(0 - 0)       | 0<br>(0 - 0)        | 1<br>(1 - 1)         | 1<br>(1 - 2)         | 1<br>(1 - 2)         |
| Vascular intestinal disorders                       | 59<br>(29 - 81)          | 0<br>(0 - 0)       | 0<br>(0 - 0)        | 1<br>(1 - 2)         | 14<br>(7 - 23)       | 43<br>(21 - 58)      |
| Gallbladder and biliary diseases                    | 20<br>(14 - 28)          | 0<br>(0 - 0)       | 0<br>(0 - 0)        | 1<br>(1 - 2)         | 8<br>(5 - 11)        | 11<br>(7 - 17)       |
| Pancreatitis                                        | 71<br>(55 - 93)          | 0<br>(0 - 0)       | 0<br>(0 - 0)        | 17<br>(13 - 21)      | 42<br>(32 - 55)      | 12<br>(7 - 19)       |
| Other digestive diseases                            | 6<br>(4 - 8)             | 0<br>(0 - 0)       | 0<br>(0 - 0)        | 1<br>(1 - 1)         | 3<br>(2 - 4)         | 3<br>(2 - 4)         |
| Neurological disorders                              | 828<br>(666 - 1,007)     | 1<br>(1 - 1)       | 1<br>(1 - 2)        | 21<br>(17 - 27)      | 53<br>(41 - 66)      | 752<br>(592 - 931)   |
| Alzheimer disease and other dementias               | 787<br>(627 - 966)       | --                 | --                  | 0<br>(0 - 0)         | 39<br>(28 - 52)      | 748<br>(588 - 927)   |
| Parkinson disease                                   | 2<br>(2 - 3)             | --                 | --                  | 0<br>(0 - 0)         | 1<br>(1 - 1)         | 1<br>(1 - 2)         |
| Epilepsy                                            | 20<br>(15 - 28)          | 0<br>(0 - 0)       | 1<br>(1 - 1)        | 13<br>(10 - 19)      | 5<br>(4 - 7)         | 1<br>(1 - 2)         |
| Multiple sclerosis                                  | 7<br>(3 - 9)             | --                 | --                  | 4<br>(1 - 5)         | 2<br>(1 - 4)         | 0<br>(0 - 1)         |
| Other neurological disorders                        | 12<br>(11 - 14)          | 1<br>(0 - 1)       | 0<br>(0 - 1)        | 4<br>(4 - 5)         | 5<br>(4 - 6)         | 2<br>(1 - 2)         |
| Mental and substance use disorders                  | 91<br>(56 - 140)         | 0<br>(0 - 1)       | 0<br>(0 - 0)        | 31<br>(20 - 45)      | 49<br>(25 - 78)      | 11<br>(8 - 16)       |
| Schizophrenia                                       | 2<br>(1 - 3)             | --                 | --                  | 1<br>(0 - 1)         | 1<br>(1 - 1)         | 0<br>(0 - 0)         |
| Alcohol use disorders                               | 63<br>(26 - 109)         | --                 | --                  | 18<br>(7 - 33)       | 40<br>(16 - 68)      | 4<br>(2 - 8)         |
| Drug use disorders                                  | 27<br>(22 - 33)          | 0<br>(0 - 1)       | --                  | 12<br>(9 - 15)       | 8<br>(6 - 10)        | 7<br>(5 - 9)         |
| Opioid use disorders                                | 11<br>(9 - 14)           | 0<br>(0 - 0)       | --                  | 5<br>(4 - 7)         | 3<br>(2 - 4)         | 3<br>(2 - 4)         |
| Cocaine use disorders                               | 1<br>(1 - 1)             | 0<br>(0 - 0)       | --                  | 0<br>(0 - 1)         | 0<br>(0 - 0)         | 0<br>(0 - 0)         |
| Amphetamine use disorders                           | 1<br>(1 - 1)             | 0<br>(0 - 0)       | --                  | 0<br>(0 - 1)         | 0<br>(0 - 0)         | 0<br>(0 - 0)         |
| Other drug use disorders                            | 14<br>(11 - 17)          | 0<br>(0 - 0)       | --                  | 6<br>(4 - 8)         | 4<br>(3 - 6)         | 4<br>(3 - 5)         |
| Eating disorders                                    | 0<br>(0 - 0)             | --                 | 0<br>(0 - 0)        | 0<br>(0 - 0)         | --                   | --                   |
| Anorexia nervosa                                    | 0<br>(0 - 0)             | --                 | 0<br>(0 - 0)        | 0<br>(0 - 0)         | --                   | --                   |
| Diabetes, urogenital, blood, and endocrine diseases | 326<br>(263 - 366)       | 2<br>(1 - 3)       | 2<br>(1 - 2)        | 40<br>(33 - 46)      | 143<br>(117 - 165)   | 139<br>(102 - 162)   |
| Diabetes mellitus                                   | 129<br>(112 - 163)       | 0<br>(0 - 0)       | 0<br>(0 - 0)        | 10<br>(8 - 12)       | 62<br>(51 - 82)      | 58<br>(49 - 72)      |
| Acute glomerulonephritis                            | 1<br>(1 - 1)             | 0<br>(0 - 0)       | 0<br>(0 - 0)        | 0<br>(0 - 1)         | 0<br>(0 - 0)         | 0<br>(0 - 0)         |
| Chronic kidney disease                              | 53<br>(33 - 62)          | 0<br>(0 - 0)       | 0<br>(0 - 0)        | 11<br>(8 - 14)       | 25<br>(14 - 30)      | 17<br>(9 - 21)       |
| Chronic kidney disease due to diabetes mellitus     | 18<br>(2 - 24)           | 0<br>(0 - 0)       | 0<br>(0 - 0)        | 2<br>(1 - 2)         | 10<br>(1 - 14)       | 6<br>(0 - 8)         |

Web Table 31- Moldova deaths with 95% UI by age, sex, and cause in 2013

| Cause                                               | Females, All Ages  | Females, 0-4 Years | Females, 5-14 Years | Females, 15-49 Years | Females, 50-69 Years | Females, 70-80 Years |
|-----------------------------------------------------|--------------------|--------------------|---------------------|----------------------|----------------------|----------------------|
| Chronic kidney disease due to hypertension          | 0<br>(0 - 1)       | 0<br>(0 - 0)       | 0<br>(0 - 0)        | 0<br>(0 - 0)         | 0<br>(0 - 0)         | 0<br>(0 - 0)         |
| Chronic kidney disease due to glomerulonephritis    | 18<br>(13 - 23)    | 0<br>(0 - 0)       | 0<br>(0 - 0)        | 6<br>(4 - 7)         | 7<br>(4 - 10)        | 5<br>(3 - 8)         |
| Chronic kidney disease due to other causes          | 16<br>(8 - 23)     | 0<br>(0 - 0)       | 0<br>(0 - 0)        | 3<br>(2 - 5)         | 7<br>(3 - 12)        | 5<br>(2 - 9)         |
| Urinary diseases and male infertility               | 106<br>(71 - 131)  | 0<br>(0 - 0)       | 0<br>(0 - 1)        | 12<br>(8 - 16)       | 42<br>(30 - 56)      | 51<br>(28 - 68)      |
| Interstitial nephritis and urinary tract infections | 86<br>(58 - 107)   | 0<br>(0 - 0)       | 0<br>(0 - 1)        | 10<br>(7 - 13)       | 34<br>(25 - 45)      | 42<br>(23 - 56)      |
| Urolithiasis                                        | 11<br>(4 - 17)     | --                 | 0<br>(0 - 0)        | 1<br>(0 - 1)         | 4<br>(2 - 7)         | 5<br>(2 - 10)        |
| Other urinary diseases                              | 9<br>(5 - 14)      | 0<br>(0 - 0)       | 0<br>(0 - 0)        | 1<br>(1 - 2)         | 4<br>(2 - 7)         | 4<br>(2 - 7)         |
| Gynecological diseases                              | 1<br>(1 - 1)       | --                 | --                  | 0<br>(0 - 1)         | 0<br>(0 - 1)         | 0<br>(0 - 0)         |
| Uterine fibroids                                    | 0<br>(0 - 0)       | --                 | --                  | 0<br>(0 - 0)         | 0<br>(0 - 0)         | 0<br>(0 - 0)         |
| Polycystic ovarian syndrome                         | 0<br>(0 - 0)       | --                 | --                  | 0<br>(0 - 0)         | 0<br>(0 - 0)         | --                   |
| Endometriosis                                       | 0<br>(0 - 0)       | --                 | --                  | 0<br>(0 - 0)         | 0<br>(0 - 0)         | --                   |
| Genital prolapse                                    | 0<br>(0 - 0)       | --                 | --                  | 0<br>(0 - 0)         | 0<br>(0 - 0)         | 0<br>(0 - 0)         |
| Other gynecological diseases                        | 1<br>(0 - 1)       | --                 | --                  | 0<br>(0 - 0)         | 0<br>(0 - 0)         | 0<br>(0 - 0)         |
| Hemoglobinopathies and hemolytic anemias            | 2<br>(1 - 3)       | 0<br>(0 - 0)       | 0<br>(0 - 0)        | 1<br>(1 - 1)         | 1<br>(0 - 1)         | 0<br>(0 - 0)         |
| Thalassemias                                        | 1<br>(1 - 1)       | 0<br>(0 - 0)       | 0<br>(0 - 0)        | 1<br>(0 - 1)         | 0<br>(0 - 0)         | 0<br>(0 - 0)         |
| Sickle cell disorders                               | 0<br>(0 - 0)       | 0<br>(0 - 0)       | 0<br>(0 - 0)        | 0<br>(0 - 0)         | 0<br>(0 - 0)         | 0<br>(0 - 0)         |
| G6PD deficiency                                     | 0<br>(0 - 0)       | 0<br>(0 - 0)       | 0<br>(0 - 0)        | 0<br>(0 - 0)         | 0<br>(0 - 0)         | 0<br>(0 - 0)         |
| Other hemoglobinopathies and hemolytic anemias      | 1<br>(1 - 2)       | 0<br>(0 - 0)       | 0<br>(0 - 0)        | 0<br>(0 - 0)         | 1<br>(0 - 1)         | 0<br>(0 - 0)         |
| Endocrine, metabolic, blood, and immune disorders   | 33<br>(11 - 43)    | 2<br>(1 - 3)       | 1<br>(0 - 1)        | 6<br>(2 - 8)         | 13<br>(4 - 18)       | 13<br>(3 - 18)       |
| Musculoskeletal disorders                           | 18<br>(15 - 22)    | --                 | 0<br>(0 - 1)        | 5<br>(4 - 7)         | 8<br>(6 - 11)        | 4<br>(3 - 6)         |
| Rheumatoid arthritis                                | 7<br>(5 - 9)       | --                 | 0<br>(0 - 0)        | 1<br>(0 - 1)         | 4<br>(3 - 5)         | 3<br>(2 - 4)         |
| Other musculoskeletal disorders                     | 11<br>(9 - 15)     | --                 | 0<br>(0 - 1)        | 5<br>(4 - 6)         | 5<br>(3 - 6)         | 1<br>(1 - 2)         |
| Other non-communicable diseases                     | 114<br>(87 - 144)  | 79<br>(55 - 105)   | 5<br>(4 - 7)        | 14<br>(11 - 17)      | 11<br>(7 - 13)       | 6<br>(3 - 8)         |
| Congenital anomalies                                | 93<br>(67 - 121)   | 72<br>(49 - 98)    | 5<br>(3 - 7)        | 11<br>(8 - 13)       | 4<br>(3 - 5)         | 1<br>(1 - 1)         |
| Neural tube defects                                 | 3<br>(2 - 5)       | 3<br>(2 - 5)       | 0<br>(0 - 0)        | 0<br>(0 - 0)         | 0<br>(0 - 0)         | 0<br>(0 - 0)         |
| Congenital heart anomalies                          | 39<br>(27 - 51)    | 29<br>(18 - 40)    | 2<br>(1 - 3)        | 6<br>(5 - 8)         | 2<br>(1 - 2)         | 1<br>(0 - 1)         |
| Cleft lip and cleft palate                          | 1<br>(0 - 2)       | 1<br>(0 - 2)       | --                  | --                   | --                   | --                   |
| Down syndrome                                       | 2<br>(1 - 4)       | 1<br>(0 - 1)       | 0<br>(0 - 1)        | 1<br>(0 - 1)         | 0<br>(0 - 1)         | 0<br>(0 - 0)         |
| Chromosomal unbalanced rearrangements               | 2<br>(1 - 3)       | 2<br>(1 - 3)       | 0<br>(0 - 0)        | 0<br>(0 - 0)         | 0<br>(0 - 0)         | 0<br>(0 - 0)         |
| Other congenital anomalies                          | 45<br>(32 - 62)    | 38<br>(25 - 53)    | 2<br>(2 - 3)        | 3<br>(2 - 4)         | 2<br>(1 - 2)         | 0<br>(0 - 0)         |
| Skin and subcutaneous diseases                      | 16<br>(6 - 19)     | 0<br>(0 - 0)       | 0<br>(0 - 0)        | 3<br>(1 - 4)         | 7<br>(3 - 9)         | 5<br>(2 - 7)         |
| Cellulitis                                          | 8<br>(3 - 11)      | 0<br>(0 - 0)       | 0<br>(0 - 0)        | 2<br>(1 - 2)         | 4<br>(2 - 6)         | 3<br>(1 - 4)         |
| Pyoderma                                            | 7<br>(3 - 10)      | 0<br>(0 - 0)       | 0<br>(0 - 0)        | 1<br>(0 - 2)         | 3<br>(1 - 4)         | 3<br>(1 - 4)         |
| Decubitus ulcer                                     | 0<br>(0 - 0)       | 0<br>(0 - 0)       | 0<br>(0 - 0)        | 0<br>(0 - 0)         | 0<br>(0 - 0)         | 0<br>(0 - 0)         |
| Other skin and subcutaneous diseases                | 1<br>(0 - 1)       | 0<br>(0 - 0)       | 0<br>(0 - 0)        | 0<br>(0 - 0)         | 0<br>(0 - 0)         | 0<br>(0 - 0)         |
| Sudden infant death syndrome                        | 6<br>(2 - 14)      | 6<br>(2 - 14)      | --                  | --                   | --                   | --                   |
| Injuries                                            | 521<br>(463 - 655) | 29<br>(21 - 42)    | 16<br>(12 - 20)     | 160<br>(140 - 203)   | 184<br>(162 - 234)   | 132<br>(115 - 169)   |
| Transport injuries                                  | 65<br>(55 - 95)    | 2<br>(1 - 3)       | 4<br>(3 - 5)        | 27<br>(21 - 38)      | 22<br>(17 - 33)      | 10<br>(8 - 19)       |
| Road injuries                                       | 60<br>(50 - 89)    | 2<br>(1 - 3)       | 4<br>(2 - 5)        | 25<br>(20 - 35)      | 21<br>(16 - 31)      | 9<br>(7 - 17)        |
| Pedestrian road injuries                            | 27<br>(21 - 45)    | 1<br>(0 - 1)       | 2<br>(1 - 3)        | 7<br>(5 - 12)        | 10<br>(7 - 16)       | 7<br>(5 - 14)        |

Web Table 31- Moldova deaths with 95% UI by age, sex, and cause in 2013

| Cause                                           | Females, All Ages  | Females, 0-4 Years | Females, 5-14 Years | Females, 15-49 Years | Females, 50-69 Years | Females, 70-80 Years |
|-------------------------------------------------|--------------------|--------------------|---------------------|----------------------|----------------------|----------------------|
| Cyclist road injuries                           | 2<br>(2 - 4)       | 0<br>(0 - 0)       | 0<br>(0 - 0)        | 2<br>(1 - 3)         | 0<br>(0 - 0)         | 0<br>(0 - 0)         |
| Motorcyclist road injuries                      | 1<br>(1 - 3)       | 0<br>(0 - 0)       | 0<br>(0 - 0)        | 1<br>(0 - 2)         | 0<br>(0 - 0)         | 0<br>(0 - 0)         |
| Motor vehicle road injuries                     | 27<br>(17 - 35)    | 1<br>(0 - 1)       | 1<br>(1 - 2)        | 14<br>(9 - 18)       | 10<br>(6 - 13)       | 1<br>(1 - 3)         |
| Other road injuries                             | 3<br>(1 - 5)       | 0<br>(0 - 0)       | 0<br>(0 - 0)        | 1<br>(0 - 2)         | 1<br>(0 - 2)         | 0<br>(0 - 1)         |
| Other transport injuries                        | 5<br>(3 - 8)       | 0<br>(0 - 0)       | 0<br>(0 - 0)        | 2<br>(1 - 3)         | 2<br>(1 - 3)         | 1<br>(1 - 2)         |
| Unintentional injuries                          | 275<br>(239 - 345) | 26<br>(18 - 38)    | 11<br>(8 - 14)      | 55<br>(46 - 70)      | 93<br>(79 - 117)     | 91<br>(78 - 111)     |
| Falls                                           | 61<br>(50 - 83)    | 1<br>(1 - 2)       | 0<br>(0 - 1)        | 10<br>(7 - 13)       | 22<br>(17 - 31)      | 27<br>(21 - 39)      |
| Drowning                                        | 45<br>(35 - 83)    | 4<br>(2 - 8)       | 6<br>(4 - 10)       | 13<br>(10 - 25)      | 13<br>(10 - 23)      | 9<br>(7 - 15)        |
| Fire, heat, and hot substances                  | 55<br>(40 - 71)    | 4<br>(3 - 7)       | 1<br>(1 - 2)        | 7<br>(5 - 10)        | 16<br>(11 - 21)      | 27<br>(18 - 36)      |
| Poisonings                                      | 44<br>(28 - 62)    | 3<br>(2 - 5)       | 1<br>(1 - 2)        | 9<br>(6 - 13)        | 13<br>(8 - 19)       | 17<br>(10 - 27)      |
| Exposure to mechanical forces                   | 6<br>(5 - 10)      | 2<br>(1 - 3)       | 1<br>(0 - 1)        | 2<br>(2 - 3)         | 1<br>(1 - 2)         | 1<br>(1 - 1)         |
| Unintentional firearm injuries                  | 0<br>(0 - 0)       | 0<br>(0 - 0)       | 0<br>(0 - 0)        | 0<br>(0 - 0)         | 0<br>(0 - 0)         | 0<br>(0 - 0)         |
| Unintentional suffocation                       | 3<br>(2 - 5)       | 1<br>(1 - 2)       | 0<br>(0 - 0)        | 1<br>(0 - 1)         | 1<br>(0 - 1)         | 0<br>(0 - 1)         |
| Other exposure to mechanical forces             | 3<br>(2 - 5)       | 0<br>(0 - 1)       | 0<br>(0 - 1)        | 1<br>(1 - 2)         | 1<br>(1 - 1)         | 0<br>(0 - 1)         |
| Adverse effects of medical treatment            | 14<br>(9 - 20)     | 1<br>(0 - 2)       | 0<br>(0 - 0)        | 3<br>(2 - 5)         | 5<br>(3 - 7)         | 4<br>(3 - 7)         |
| Animal contact                                  | 1<br>(1 - 3)       | 0<br>(0 - 0)       | 0<br>(0 - 0)        | 0<br>(0 - 1)         | 1<br>(0 - 1)         | 0<br>(0 - 0)         |
| Venomous animal contact                         | 0<br>(0 - 1)       | 0<br>(0 - 0)       | 0<br>(0 - 0)        | 0<br>(0 - 0)         | 0<br>(0 - 0)         | 0<br>(0 - 0)         |
| Non-venomous animal contact                     | 1<br>(0 - 2)       | 0<br>(0 - 0)       | 0<br>(0 - 0)        | 0<br>(0 - 1)         | 1<br>(0 - 1)         | 0<br>(0 - 0)         |
| Foreign body                                    | 43<br>(25 - 65)    | 11<br>(6 - 18)     | 0<br>(0 - 0)        | 8<br>(4 - 12)        | 19<br>(11 - 30)      | 5<br>(3 - 8)         |
| Pulmonary aspiration and foreign body in airway | 42<br>(25 - 65)    | 11<br>(6 - 18)     | 0<br>(0 - 0)        | 8<br>(4 - 12)        | 19<br>(11 - 30)      | 5<br>(3 - 7)         |
| Foreign body in other body part                 | 0<br>(0 - 0)       | 0<br>(0 - 0)       | 0<br>(0 - 0)        | 0<br>(0 - 0)         | 0<br>(0 - 0)         | 0<br>(0 - 0)         |
| Other unintentional injuries                    | 7<br>(4 - 9)       | 0<br>(0 - 1)       | 1<br>(0 - 1)        | 3<br>(1 - 4)         | 2<br>(1 - 4)         | 1<br>(0 - 1)         |
| Self-harm and interpersonal violence            | 180<br>(156 - 248) | 2<br>(1 - 3)       | 1<br>(1 - 2)        | 79<br>(66 - 109)     | 69<br>(58 - 97)      | 30<br>(24 - 44)      |
| Self-harm                                       | 104<br>(88 - 144)  | --                 | 1<br>(0 - 1)        | 44<br>(35 - 59)      | 43<br>(35 - 64)      | 17<br>(13 - 26)      |
| Interpersonal violence                          | 77<br>(61 - 122)   | 2<br>(1 - 3)       | 1<br>(0 - 1)        | 35<br>(26 - 55)      | 26<br>(20 - 43)      | 13<br>(10 - 22)      |
| Assault by firearm                              | 3<br>(1 - 5)       | 0<br>(0 - 0)       | 0<br>(0 - 0)        | 2<br>(1 - 3)         | 1<br>(0 - 2)         | 0<br>(0 - 0)         |
| Assault by sharp object                         | 18<br>(12 - 31)    | 0<br>(0 - 0)       | 0<br>(0 - 0)        | 9<br>(6 - 16)        | 6<br>(4 - 11)        | 2<br>(1 - 4)         |
| Assault by other means                          | 56<br>(43 - 91)    | 1<br>(1 - 3)       | 0<br>(0 - 1)        | 24<br>(17 - 39)      | 19<br>(14 - 32)      | 11<br>(8 - 19)       |

Web Table 31- Mongolia deaths with 95% UI by age, sex, and cause in 2013

| Cause                                                             | Both Sexes, All Ages        | Both Sexes, 0-4 Years    | Both Sexes, 5-14 Years | Both Sexes, 15-49 Years  | Both Sexes, 50-69 Years  | Both Sexes, 70-80 Years  |
|-------------------------------------------------------------------|-----------------------------|--------------------------|------------------------|--------------------------|--------------------------|--------------------------|
| All causes                                                        | 22,565<br>(20,392 - 24,723) | 2,734<br>(2,478 - 3,029) | 328<br>(296 - 360)     | 6,298<br>(5,417 - 7,362) | 7,177<br>(6,364 - 8,005) | 6,028<br>(5,631 - 6,377) |
| Communicable, maternal, neonatal, and nutritional diseases        | 2,813<br>(2,577 - 3,107)    | 1,918<br>(1,712 - 2,126) | 58<br>(45 - 81)        | 569<br>(479 - 704)       | 198<br>(168 - 236)       | 71<br>(56 - 104)         |
| HIV/AIDS and tuberculosis                                         | 506<br>(381 - 627)          | 10<br>(5 - 15)           | 7<br>(4 - 9)           | 364<br>(264 - 468)       | 115<br>(90 - 141)        | 10<br>(8 - 13)           |
| Tuberculosis                                                      | 505<br>(380 - 624)          | 10<br>(5 - 15)           | 7<br>(4 - 9)           | 363<br>(262 - 465)       | 115<br>(90 - 141)        | 10<br>(8 - 13)           |
| HIV/AIDS                                                          | 1<br>(0 - 6)                | 0<br>(0 - 0)             | 0<br>(0 - 0)           | 1<br>(0 - 4)             | 0<br>(0 - 1)             | 0<br>(0 - 0)             |
| HIV/AIDS resulting in mycobacterial infection                     | 0<br>(0 - 0)                | 0<br>(0 - 0)             | 0<br>(0 - 0)           | 0<br>(0 - 0)             | 0<br>(0 - 0)             | 0<br>(0 - 0)             |
| HIV/AIDS resulting in other diseases                              | 1<br>(0 - 5)                | 0<br>(0 - 0)             | 0<br>(0 - 0)           | 1<br>(0 - 4)             | 0<br>(0 - 1)             | 0<br>(0 - 0)             |
| Diarrhea, lower respiratory, and other common infectious diseases | 1,132<br>(936 - 1,389)      | 847<br>(685 - 1,024)     | 39<br>(28 - 60)        | 121<br>(89 - 197)        | 70<br>(51 - 103)         | 55<br>(40 - 85)          |
| Diarrheal diseases                                                | 5<br>(3 - 9)                | 4<br>(2 - 8)             | 0<br>(0 - 0)           | 0<br>(0 - 1)             | 0<br>(0 - 0)             | 0<br>(0 - 0)             |
| Intestinal infectious diseases                                    | 10<br>(5 - 19)              | 4<br>(1 - 10)            | 1<br>(0 - 4)           | 3<br>(1 - 9)             | 1<br>(0 - 3)             | 0<br>(0 - 2)             |
| Typhoid fever                                                     | 3<br>(1 - 5)                | 1<br>(0 - 2)             | 1<br>(0 - 1)           | 1<br>(0 - 2)             | 0<br>(0 - 0)             | 0<br>(0 - 0)             |
| Paratyphoid fever                                                 | 1<br>(0 - 2)                | 0<br>(0 - 1)             | 0<br>(0 - 0)           | 0<br>(0 - 1)             | 0<br>(0 - 0)             | 0<br>(0 - 0)             |
| Other intestinal infectious diseases                              | 7<br>(2 - 16)               | 3<br>(0 - 9)             | 1<br>(0 - 4)           | 2<br>(0 - 7)             | 1<br>(0 - 3)             | 0<br>(0 - 2)             |
| Lower respiratory infections                                      | 1,027<br>(845 - 1,257)      | 790<br>(630 - 954)       | 28<br>(19 - 44)        | 95<br>(69 - 150)         | 63<br>(46 - 95)          | 51<br>(37 - 81)          |
| Upper respiratory infections                                      | 2<br>(1 - 3)                | 0<br>(0 - 1)             | 0<br>(0 - 0)           | 1<br>(0 - 1)             | 0<br>(0 - 1)             | 0<br>(0 - 1)             |
| Otitis media                                                      | 1<br>(1 - 1)                | 0<br>(0 - 0)             | 0<br>(0 - 0)           | 0<br>(0 - 0)             | 0<br>(0 - 0)             | 0<br>(0 - 0)             |
| Meningitis                                                        | 49<br>(31 - 103)            | 24<br>(10 - 51)          | 5<br>(3 - 13)          | 15<br>(10 - 37)          | 3<br>(2 - 7)             | 1<br>(1 - 3)             |
| Pneumococcal meningitis                                           | 12<br>(8 - 27)              | 5<br>(2 - 10)            | 2<br>(1 - 4)           | 5<br>(3 - 12)            | 1<br>(1 - 2)             | 0<br>(0 - 1)             |
| H influenzae type B meningitis                                    | 17<br>(9 - 34)              | 11<br>(5 - 24)           | 2<br>(1 - 4)           | 3<br>(2 - 6)             | 1<br>(0 - 1)             | 0<br>(0 - 0)             |
| Meningococcal meningitis                                          | 11<br>(7 - 24)              | 5<br>(2 - 12)            | 1<br>(1 - 3)           | 3<br>(2 - 9)             | 1<br>(0 - 1)             | 0<br>(0 - 1)             |
| Other meningitis                                                  | 9<br>(6 - 20)               | 3<br>(1 - 7)             | 1<br>(0 - 2)           | 4<br>(3 - 9)             | 1<br>(1 - 3)             | 0<br>(0 - 1)             |
| Encephalitis                                                      | 35<br>(19 - 58)             | 23<br>(9 - 45)           | 4<br>(2 - 6)           | 5<br>(4 - 8)             | 2<br>(1 - 2)             | 1<br>(1 - 2)             |
| Diphtheria                                                        | 1<br>(0 - 2)                | 0<br>(0 - 2)             | 0<br>(0 - 1)           | 0<br>(0 - 0)             | 0<br>(0 - 0)             | --<br>(0 - 0)            |
| Whooping cough                                                    | 1<br>(0 - 1)                | 0<br>(0 - 1)             | 0<br>(0 - 0)           | 0<br>(0 - 0)             | 0<br>(0 - 0)             | --<br>(0 - 0)            |
| Tetanus                                                           | 0<br>(0 - 1)                | 0<br>(0 - 0)             | 0<br>(0 - 0)           | 0<br>(0 - 0)             | 0<br>(0 - 0)             | 0<br>(0 - 0)             |
| Measles                                                           | 0<br>(0 - 0)                | 0<br>(0 - 0)             | 0<br>(0 - 0)           | 0<br>(0 - 0)             | 0<br>(0 - 0)             | --<br>(0 - 0)            |
| Varicella and herpes zoster                                       | 1<br>(1 - 2)                | 0<br>(0 - 1)             | 0<br>(0 - 0)           | 0<br>(0 - 1)             | 0<br>(0 - 0)             | 0<br>(0 - 1)             |
| Neglected tropical diseases and malaria                           | 30<br>(23 - 38)             | 4<br>(1 - 9)             | 3<br>(2 - 5)           | 15<br>(12 - 20)          | 6<br>(5 - 8)             | 2<br>(2 - 3)             |
| Leishmaniasis                                                     | 5<br>(3 - 9)                | 1<br>(0 - 4)             | 1<br>(0 - 1)           | 2<br>(1 - 4)             | 1<br>(0 - 1)             | 0<br>(0 - 0)             |
| Visceral leishmaniasis                                            | 5<br>(3 - 9)                | 1<br>(0 - 4)             | 1<br>(0 - 1)           | 2<br>(1 - 4)             | 1<br>(0 - 1)             | 0<br>(0 - 0)             |
| Cysticercosis                                                     | 0<br>(0 - 0)                | 0<br>(0 - 0)             | 0<br>(0 - 0)           | 0<br>(0 - 0)             | 0<br>(0 - 0)             | 0<br>(0 - 0)             |
| Cystic echinococcosis                                             | 21<br>(17 - 25)             | 1<br>(1 - 1)             | 2<br>(1 - 2)           | 11<br>(9 - 14)           | 5<br>(4 - 6)             | 2<br>(1 - 2)             |
| Dengue                                                            | 0<br>(0 - 1)                | 0<br>(0 - 0)             | 0<br>(0 - 0)           | 0<br>(0 - 0)             | 0<br>(0 - 0)             | 0<br>(0 - 0)             |
| Rabies                                                            | 1<br>(0 - 2)                | 0<br>(0 - 0)             | 0<br>(0 - 0)           | 0<br>(0 - 1)             | 0<br>(0 - 0)             | 0<br>(0 - 0)             |
| Intestinal nematode infections                                    | 2<br>(0 - 7)                | 1<br>(0 - 6)             | 0<br>(0 - 3)           | 0<br>(0 - 3)             | 0<br>(0 - 1)             | 0<br>(0 - 1)             |
| Ascariasis                                                        | 2<br>(0 - 7)                | 1<br>(0 - 6)             | 0<br>(0 - 3)           | 0<br>(0 - 3)             | 0<br>(0 - 1)             | 0<br>(0 - 1)             |
| Other neglected tropical diseases                                 | 1<br>(1 - 1)                | 0<br>(0 - 0)             | 0<br>(0 - 0)           | 0<br>(0 - 1)             | 0<br>(0 - 0)             | 0<br>(0 - 0)             |
| Maternal disorders                                                | 33<br>(22 - 46)             | --                       | 0<br>(0 - 0)           | 32<br>(22 - 46)          | --                       | --                       |
| Maternal hemorrhage                                               | 5<br>(3 - 8)                | --                       | 0<br>(0 - 0)           | 5<br>(3 - 8)             | --                       | --                       |
| Maternal sepsis and other maternal infections                     | 4<br>(2 - 6)                | --                       | 0<br>(0 - 0)           | 4<br>(2 - 6)             | --                       | --                       |

Web Table 31- Mongolia deaths with 95% UI by age, sex, and cause in 2013

| Cause                                                            | Both Sexes, All Ages        | Both Sexes, 0-4 Years  | Both Sexes, 5-14 Years | Both Sexes, 15-49 Years  | Both Sexes, 50-69 Years  | Both Sexes, 70-80 Years  |
|------------------------------------------------------------------|-----------------------------|------------------------|------------------------|--------------------------|--------------------------|--------------------------|
| Maternal hypertensive disorders                                  | 3<br>(2 - 5)                | --                     | 0<br>(0 - 0)           | 3<br>(2 - 5)             | --                       | --                       |
| Maternal obstructed labor                                        | 3<br>(2 - 5)                | --                     | 0<br>(0 - 0)           | 3<br>(2 - 5)             | --                       | --                       |
| Maternal abortive outcome                                        | 5<br>(3 - 7)                | --                     | 0<br>(0 - 0)           | 5<br>(3 - 7)             | --                       | --                       |
| Indirect maternal deaths                                         | 3<br>(1 - 6)                | --                     | 0<br>(0 - 0)           | 3<br>(1 - 6)             | --                       | --                       |
| Late maternal deaths                                             | 4<br>(2 - 6)                | --                     | 0<br>(0 - 0)           | 4<br>(2 - 6)             | --                       | --                       |
| Maternal deaths aggravated by HIV/AIDS                           | 0<br>(0 - 0)                | --                     | --                     | 0<br>(0 - 0)             | --                       | --                       |
| Other maternal disorders                                         | 5<br>(3 - 8)                | --                     | 0<br>(0 - 0)           | 5<br>(3 - 8)             | --                       | --                       |
| Neonatal disorders                                               | 1,025<br>(890 - 1,176)      | 1,025<br>(890 - 1,176) | --                     | --                       | --                       | --                       |
| Neonatal preterm birth complications                             | 345<br>(220 - 495)          | 345<br>(220 - 495)     | --                     | --                       | --                       | --                       |
| Neonatal encephalopathy due to birth asphyxia and trauma         | 566<br>(419 - 719)          | 566<br>(419 - 719)     | --                     | --                       | --                       | --                       |
| Neonatal sepsis and other neonatal infections                    | 46<br>(22 - 81)             | 46<br>(22 - 81)        | --                     | --                       | --                       | --                       |
| Hemolytic disease and other neonatal jaundice                    | 5<br>(3 - 11)               | 5<br>(3 - 11)          | --                     | --                       | --                       | --                       |
| Other neonatal disorders                                         | 62<br>(37 - 96)             | 62<br>(37 - 96)        | --                     | --                       | --                       | --                       |
| Nutritional deficiencies                                         | 20<br>(14 - 43)             | 4<br>(2 - 10)          | 1<br>(0 - 1)           | 10<br>(6 - 21)           | 3<br>(2 - 6)             | 2<br>(2 - 5)             |
| Protein-energy malnutrition                                      | 6<br>(3 - 15)               | 2<br>(1 - 5)           | 0<br>(0 - 0)           | 4<br>(2 - 9)             | 1<br>(0 - 2)             | 0<br>(0 - 0)             |
| Iodine deficiency                                                | 1<br>(0 - 2)                | 0<br>(0 - 1)           | 0<br>(0 - 0)           | 0<br>(0 - 1)             | 0<br>(0 - 1)             | 0<br>(0 - 0)             |
| Iron-deficiency anemia                                           | 11<br>(7 - 23)              | 1<br>(0 - 4)           | 0<br>(0 - 1)           | 5<br>(3 - 11)            | 2<br>(1 - 4)             | 2<br>(2 - 4)             |
| Other nutritional deficiencies                                   | 2<br>(1 - 6)                | 1<br>(0 - 3)           | 0<br>(0 - 1)           | 1<br>(0 - 2)             | 0<br>(0 - 1)             | 0<br>(0 - 0)             |
| Other communicable, maternal, neonatal, and nutritional diseases | 68<br>(48 - 98)             | 29<br>(13 - 52)        | 8<br>(6 - 11)          | 26<br>(20 - 35)          | 4<br>(2 - 7)             | 1<br>(1 - 3)             |
| Sexually transmitted diseases excluding HIV                      | 21<br>(5 - 45)              | 16<br>(2 - 37)         | 2<br>(0 - 4)           | 2<br>(1 - 3)             | 1<br>(0 - 3)             | 0<br>(0 - 0)             |
| Syphilis                                                         | 19<br>(3 - 43)              | 16<br>(2 - 37)         | 2<br>(0 - 4)           | 1<br>(0 - 1)             | 1<br>(0 - 2)             | 0<br>(0 - 0)             |
| Chlamydial infection                                             | 0<br>(0 - 1)                | --                     | 0<br>(0 - 0)           | 0<br>(0 - 1)             | 0<br>(0 - 0)             | 0<br>(0 - 0)             |
| Gonococcal infection                                             | 1<br>(0 - 1)                | --                     | 0<br>(0 - 0)           | 0<br>(0 - 1)             | 0<br>(0 - 1)             | 0<br>(0 - 0)             |
| Other sexually transmitted diseases                              | 1<br>(0 - 1)                | --                     | 0<br>(0 - 0)           | 0<br>(0 - 1)             | 0<br>(0 - 0)             | 0<br>(0 - 0)             |
| Hepatitis                                                        | 38<br>(30 - 48)             | 9<br>(6 - 14)          | 6<br>(4 - 8)           | 22<br>(16 - 29)          | 1<br>(1 - 1)             | 0<br>(0 - 1)             |
| Acute hepatitis A                                                | 7<br>(2 - 13)               | 3<br>(1 - 6)           | 2<br>(1 - 3)           | 2<br>(1 - 4)             | 0<br>(0 - 0)             | 0<br>(0 - 0)             |
| Acute hepatitis B                                                | 18<br>(12 - 26)             | 6<br>(3 - 10)          | 3<br>(1 - 4)           | 9<br>(5 - 13)            | 1<br>(1 - 1)             | 0<br>(0 - 1)             |
| Acute hepatitis C                                                | 2<br>(0 - 5)                | --                     | 1<br>(0 - 2)           | 2<br>(0 - 4)             | 0<br>(0 - 0)             | 0<br>(0 - 0)             |
| Acute hepatitis E                                                | 10<br>(6 - 16)              | 0<br>(0 - 0)           | 1<br>(0 - 1)           | 9<br>(6 - 15)            | 0<br>(0 - 0)             | 0<br>(0 - 0)             |
| Other infectious diseases                                        | 9<br>(5 - 16)               | 3<br>(1 - 7)           | 1<br>(0 - 1)           | 3<br>(1 - 5)             | 1<br>(1 - 3)             | 1<br>(0 - 3)             |
| Non-communicable diseases                                        | 17,216<br>(15,426 - 18,964) | 535<br>(421 - 669)     | 110<br>(91 - 140)      | 3,941<br>(3,321 - 4,683) | 6,715<br>(5,921 - 7,477) | 5,915<br>(5,525 - 6,262) |
| Neoplasms                                                        | 4,400<br>(3,862 - 4,990)    | 18<br>(11 - 27)        | 24<br>(19 - 33)        | 877<br>(700 - 1,096)     | 2,136<br>(1,860 - 2,422) | 1,345<br>(1,208 - 1,491) |
| Esophageal cancer                                                | 340<br>(279 - 402)          | --                     | --                     | 32<br>(24 - 43)          | 150<br>(117 - 186)       | 158<br>(128 - 192)       |
| Stomach cancer                                                   | 705<br>(609 - 814)          | --                     | --                     | 167<br>(131 - 210)       | 324<br>(272 - 385)       | 214<br>(180 - 253)       |
| Liver cancer                                                     | 1,883<br>(1,608 - 2,186)    | --                     | 2<br>(1 - 3)           | 300<br>(219 - 389)       | 972<br>(810 - 1,154)     | 609<br>(504 - 732)       |
| Liver cancer due to hepatitis B                                  | 743<br>(605 - 895)          | --                     | 1<br>(0 - 1)           | 138<br>(98 - 188)        | 412<br>(327 - 510)       | 192<br>(151 - 239)       |
| Liver cancer due to hepatitis C                                  | 612<br>(490 - 762)          | --                     | 0<br>(0 - 1)           | 88<br>(61 - 123)         | 306<br>(236 - 393)       | 217<br>(169 - 275)       |
| Liver cancer due to alcohol use                                  | 358<br>(256 - 471)          | --                     | --                     | 40<br>(24 - 63)          | 170<br>(119 - 233)       | 148<br>(102 - 201)       |
| Liver cancer due to other causes                                 | 171<br>(116 - 233)          | --                     | 1<br>(0 - 2)           | 34<br>(23 - 49)          | 84<br>(54 - 116)         | 53<br>(31 - 77)          |
| Larynx cancer                                                    | 24<br>(19 - 32)             | --                     | --                     | 3<br>(2 - 6)             | 11<br>(8 - 15)           | 10<br>(7 - 14)           |

Web Table 31- Mongolia deaths with 95% UI by age, sex, and cause in 2013

| Cause                                         | Both Sexes, All Ages     | Both Sexes, 0-4 Years | Both Sexes, 5-14 Years | Both Sexes, 15-49 Years  | Both Sexes, 50-69 Years  | Both Sexes, 70-80 Years  |
|-----------------------------------------------|--------------------------|-----------------------|------------------------|--------------------------|--------------------------|--------------------------|
| Tracheal, bronchus and lung cancer            | 440<br>(382 - 505)       | --                    | --                     | 50<br>(37 - 66)          | 232<br>(194 - 275)       | 158<br>(138 - 182)       |
| Breast cancer                                 | 62<br>(48 - 81)          | --                    | --                     | 28<br>(20 - 39)          | 26<br>(20 - 34)          | 8<br>(7 - 11)            |
| Cervical cancer                               | 141<br>(105 - 190)       | --                    | --                     | 60<br>(42 - 87)          | 57<br>(40 - 75)          | 25<br>(18 - 34)          |
| Uterine cancer                                | 27<br>(19 - 42)          | --                    | --                     | 9<br>(6 - 14)            | 11<br>(7 - 18)           | 8<br>(5 - 12)            |
| Prostate cancer                               | 23<br>(15 - 43)          | --                    | --                     | 2<br>(1 - 5)             | 11<br>(6 - 21)           | 10<br>(7 - 17)           |
| Colon and rectum cancer                       | 105<br>(90 - 119)        | --                    | --                     | 27<br>(21 - 33)          | 48<br>(40 - 55)          | 31<br>(26 - 36)          |
| Lip and oral cavity cancer                    | 33<br>(26 - 45)          | --                    | --                     | 8<br>(6 - 12)            | 17<br>(13 - 23)          | 7<br>(5 - 10)            |
| Nasopharynx cancer                            | 11<br>(8 - 15)           | --                    | 0<br>(0 - 0)           | 5<br>(4 - 8)             | 4<br>(3 - 6)             | 1<br>(1 - 2)             |
| Other pharynx cancer                          | 12<br>(9 - 19)           | --                    | --                     | 2<br>(2 - 5)             | 7<br>(6 - 12)            | 2<br>(2 - 3)             |
| Gallbladder and biliary tract cancer          | 13<br>(10 - 18)          | --                    | --                     | 2<br>(2 - 4)             | 7<br>(5 - 9)             | 4<br>(3 - 6)             |
| Pancreatic cancer                             | 85<br>(73 - 100)         | --                    | --                     | 13<br>(9 - 16)           | 50<br>(41 - 61)          | 22<br>(19 - 27)          |
| Malignant skin melanoma                       | 6<br>(4 - 12)            | --                    | --                     | 3<br>(1 - 5)             | 3<br>(2 - 5)             | 1<br>(1 - 2)             |
| Non-melanoma skin cancer                      | 11<br>(6 - 16)           | --                    | --                     | 3<br>(2 - 5)             | 5<br>(3 - 7)             | 3<br>(2 - 5)             |
| Ovarian cancer                                | 39<br>(30 - 51)          | --                    | --                     | 12<br>(8 - 17)           | 21<br>(15 - 28)          | 7<br>(5 - 9)             |
| Testicular cancer                             | 3<br>(2 - 4)             | --                    | --                     | 2<br>(1 - 3)             | 1<br>(0 - 1)             | 0<br>(0 - 0)             |
| Kidney cancer                                 | 35<br>(29 - 41)          | 1<br>(0 - 2)          | 0<br>(0 - 0)           | 6<br>(5 - 9)             | 19<br>(15 - 23)          | 9<br>(7 - 11)            |
| Bladder cancer                                | 20<br>(15 - 30)          | --                    | --                     | 3<br>(2 - 5)             | 10<br>(7 - 15)           | 7<br>(5 - 11)            |
| Brain and nervous system cancer               | 71<br>(53 - 87)          | 2<br>(1 - 3)          | 3<br>(2 - 5)           | 29<br>(21 - 38)          | 30<br>(21 - 38)          | 7<br>(5 - 10)            |
| Thyroid cancer                                | 7<br>(6 - 10)            | --                    | 0<br>(0 - 0)           | 1<br>(0 - 1)             | 5<br>(3 - 6)             | 2<br>(1 - 3)             |
| Mesothelioma                                  | 4<br>(3 - 5)             | --                    | --                     | 1<br>(0 - 1)             | 2<br>(1 - 3)             | 1<br>(1 - 2)             |
| Hodgkin lymphoma                              | 5<br>(3 - 10)            | 0<br>(0 - 0)          | 0<br>(0 - 1)           | 3<br>(1 - 5)             | 2<br>(1 - 3)             | 0<br>(0 - 1)             |
| Non-Hodgkin lymphoma                          | 38<br>(30 - 54)          | 1<br>(1 - 2)          | 1<br>(1 - 2)           | 11<br>(7 - 18)           | 17<br>(13 - 23)          | 8<br>(6 - 10)            |
| Multiple myeloma                              | 4<br>(2 - 8)             | --                    | --                     | 2<br>(1 - 3)             | 2<br>(1 - 3)             | 1<br>(0 - 2)             |
| Leukemia                                      | 75<br>(62 - 90)          | 10<br>(5 - 17)        | 14<br>(11 - 19)        | 31<br>(25 - 40)          | 17<br>(13 - 20)          | 3<br>(2 - 3)             |
| Other neoplasms                               | 176<br>(127 - 265)       | 4<br>(2 - 6)          | 3<br>(2 - 6)           | 64<br>(40 - 109)         | 78<br>(56 - 111)         | 27<br>(19 - 42)          |
| Cardiovascular diseases                       | 8,438<br>(7,606 - 9,296) | 22<br>(15 - 30)       | 13<br>(10 - 18)        | 1,538<br>(1,273 - 1,889) | 3,335<br>(2,941 - 3,729) | 3,530<br>(3,276 - 3,779) |
| Rheumatic heart disease                       | 133<br>(100 - 231)       | 0<br>(0 - 1)          | 1<br>(1 - 3)           | 59<br>(40 - 113)         | 48<br>(36 - 76)          | 24<br>(18 - 41)          |
| Ischemic heart disease                        | 4,226<br>(3,714 - 4,860) | 3<br>(1 - 5)          | 4<br>(3 - 5)           | 715<br>(566 - 940)       | 1,524<br>(1,294 - 1,790) | 1,981<br>(1,792 - 2,195) |
| Cerebrovascular disease                       | 3,612<br>(3,145 - 4,112) | 12<br>(8 - 17)        | 6<br>(5 - 9)           | 634<br>(519 - 790)       | 1,586<br>(1,357 - 1,833) | 1,373<br>(1,153 - 1,550) |
| Ischemic stroke                               | 544<br>(446 - 701)       | 2<br>(1 - 3)          | 0<br>(0 - 1)           | 42<br>(29 - 71)          | 162<br>(128 - 225)       | 337<br>(264 - 421)       |
| Hemorrhagic stroke                            | 3,069<br>(2,600 - 3,507) | 10<br>(7 - 15)        | 6<br>(4 - 8)           | 592<br>(485 - 724)       | 1,424<br>(1,209 - 1,645) | 1,036<br>(836 - 1,184)   |
| Hypertensive heart disease                    | 185<br>(144 - 258)       | 0<br>(0 - 0)          | 0<br>(0 - 0)           | 28<br>(19 - 44)          | 69<br>(51 - 97)          | 88<br>(64 - 127)         |
| Cardiomyopathy and myocarditis                | 148<br>(102 - 191)       | 2<br>(1 - 4)          | 1<br>(0 - 1)           | 67<br>(42 - 95)          | 51<br>(31 - 71)          | 26<br>(18 - 36)          |
| Atrial fibrillation and flutter               | 3<br>(2 - 4)             | --                    | --                     | 2<br>(1 - 3)             | 1<br>(1 - 2)             | 0<br>(0 - 0)             |
| Aortic aneurysm                               | 11<br>(8 - 15)           | --                    | --                     | 2<br>(1 - 4)             | 3<br>(2 - 5)             | 5<br>(4 - 7)             |
| Peripheral vascular disease                   | 0<br>(0 - 0)             | --                    | --                     | 0<br>(0 - 0)             | 0<br>(0 - 0)             | 0<br>(0 - 0)             |
| Endocarditis                                  | 8<br>(6 - 12)            | 1<br>(0 - 1)          | 0<br>(0 - 0)           | 1<br>(1 - 2)             | 4<br>(2 - 6)             | 3<br>(2 - 4)             |
| Other cardiovascular and circulatory diseases | 113<br>(93 - 141)        | 3<br>(2 - 5)          | 1<br>(1 - 1)           | 30<br>(22 - 41)          | 49<br>(37 - 63)          | 30<br>(23 - 39)          |
| Chronic respiratory diseases                  | 425<br>(358 - 595)       | 17<br>(12 - 30)       | 4<br>(3 - 7)           | 57<br>(43 - 87)          | 154<br>(125 - 206)       | 192<br>(160 - 276)       |
| Chronic obstructive pulmonary disease         | 266<br>(218 - 390)       | 4<br>(2 - 8)          | 1<br>(1 - 2)           | 40<br>(30 - 60)          | 96<br>(76 - 133)         | 125<br>(99 - 192)        |

Web Table 31- Mongolia deaths with 95% UI by age, sex, and cause in 2013

| Cause                                               | Both Sexes, All Ages     | Both Sexes, 0-4 Years | Both Sexes, 5-14 Years | Both Sexes, 15-49 Years | Both Sexes, 50-69 Years | Both Sexes, 70-80 Years |
|-----------------------------------------------------|--------------------------|-----------------------|------------------------|-------------------------|-------------------------|-------------------------|
| Pneumoconiosis                                      | 21<br>(14 - 33)          | 0<br>(0 - 0)          | 1<br>(0 - 1)           | 2<br>(2 - 4)            | 11<br>(7 - 18)          | 7<br>(4 - 11)           |
| Silicosis                                           | 3<br>(2 - 4)             | 0<br>(0 - 0)          | 0<br>(0 - 0)           | 1<br>(0 - 1)            | 2<br>(1 - 3)            | 0<br>(0 - 0)            |
| Asbestosis                                          | 4<br>(3 - 7)             | 0<br>(0 - 0)          | 0<br>(0 - 0)           | 0<br>(0 - 1)            | 1<br>(1 - 2)            | 2<br>(1 - 4)            |
| Coal workers pneumoconiosis                         | 10<br>(6 - 16)           | 0<br>(0 - 0)          | 0<br>(0 - 0)           | 0<br>(0 - 1)            | 6<br>(4 - 10)           | 3<br>(2 - 5)            |
| Other pneumoconiosis                                | 4<br>(3 - 6)             | 0<br>(0 - 0)          | 0<br>(0 - 0)           | 1<br>(0 - 1)            | 2<br>(1 - 3)            | 1<br>(1 - 2)            |
| Asthma                                              | 90<br>(71 - 124)         | 0<br>(0 - 1)          | 0<br>(0 - 1)           | 6<br>(4 - 12)           | 37<br>(28 - 49)         | 46<br>(34 - 66)         |
| Interstitial lung disease and pulmonary sarcoidosis | 33<br>(24 - 51)          | 7<br>(4 - 13)         | 2<br>(1 - 3)           | 5<br>(2 - 10)           | 8<br>(5 - 13)           | 12<br>(7 - 19)          |
| Other chronic respiratory diseases                  | 15<br>(12 - 21)          | 6<br>(4 - 11)         | 0<br>(0 - 1)           | 3<br>(3 - 5)            | 3<br>(2 - 4)            | 2<br>(1 - 3)            |
| Cirrhosis                                           | 1,336<br>(1,138 - 1,550) | 2<br>(1 - 3)          | 4<br>(3 - 6)           | 456<br>(358 - 577)      | 526<br>(434 - 619)      | 348<br>(295 - 407)      |
| Cirrhosis due to hepatitis B                        | 592<br>(472 - 747)       | 0<br>(0 - 0)          | 1<br>(1 - 2)           | 207<br>(151 - 278)      | 230<br>(176 - 296)      | 154<br>(113 - 196)      |
| Cirrhosis due to hepatitis C                        | 339<br>(231 - 463)       | 0<br>(0 - 0)          | 0<br>(0 - 1)           | 99<br>(60 - 142)        | 142<br>(87 - 203)       | 98<br>(64 - 139)        |
| Cirrhosis due to alcohol use                        | 269<br>(174 - 391)       | --                    | --                     | 80<br>(45 - 127)        | 112<br>(70 - 167)       | 76<br>(50 - 113)        |
| Cirrhosis due to other causes                       | 136<br>(83 - 190)        | 2<br>(1 - 3)          | 2<br>(2 - 3)           | 69<br>(42 - 97)         | 43<br>(23 - 64)         | 20<br>(12 - 31)         |
| Digestive diseases                                  | 524<br>(447 - 639)       | 40<br>(22 - 70)       | 15<br>(11 - 21)        | 161<br>(126 - 234)      | 182<br>(149 - 216)      | 126<br>(107 - 147)      |
| Peptic ulcer disease                                | 194<br>(155 - 236)       | 1<br>(0 - 3)          | 0<br>(0 - 1)           | 55<br>(39 - 80)         | 74<br>(55 - 95)         | 63<br>(50 - 78)         |
| Gastritis and duodenitis                            | 19<br>(8 - 27)           | 0<br>(0 - 1)          | 0<br>(0 - 0)           | 6<br>(3 - 10)           | 6<br>(2 - 11)           | 6<br>(3 - 10)           |
| Appendicitis                                        | 33<br>(18 - 59)          | 7<br>(3 - 15)         | 8<br>(5 - 12)          | 14<br>(7 - 27)          | 4<br>(2 - 8)            | 1<br>(0 - 1)            |
| Paralytic ileus and intestinal obstruction          | 88<br>(65 - 136)         | 6<br>(2 - 15)         | 3<br>(1 - 5)           | 34<br>(23 - 57)         | 32<br>(22 - 46)         | 12<br>(7 - 21)          |
| Inguinal, femoral, and abdominal hernia             | 5<br>(3 - 11)            | 1<br>(0 - 2)          | 1<br>(0 - 2)           | 2<br>(1 - 4)            | 1<br>(0 - 2)            | 1<br>(0 - 3)            |
| Inflammatory bowel disease                          | 15<br>(5 - 23)           | 4<br>(1 - 9)          | 1<br>(0 - 2)           | 5<br>(2 - 9)            | 3<br>(1 - 5)            | 2<br>(1 - 3)            |
| Vascular intestinal disorders                       | 17<br>(8 - 29)           | 7<br>(2 - 15)         | 0<br>(0 - 0)           | 2<br>(1 - 4)            | 7<br>(4 - 13)           | 0<br>(0 - 0)            |
| Gallbladder and biliary diseases                    | 51<br>(39 - 73)          | 1<br>(0 - 4)          | 0<br>(0 - 1)           | 12<br>(7 - 25)          | 18<br>(13 - 25)         | 19<br>(14 - 27)         |
| Pancreatitis                                        | 26<br>(16 - 38)          | 1<br>(0 - 1)          | 0<br>(0 - 1)           | 14<br>(8 - 21)          | 9<br>(5 - 13)           | 3<br>(2 - 4)            |
| Other digestive diseases                            | 76<br>(62 - 100)         | 11<br>(5 - 22)        | 2<br>(1 - 2)           | 17<br>(12 - 28)         | 28<br>(20 - 38)         | 19<br>(14 - 25)         |
| Neurological disorders                              | 398<br>(343 - 457)       | 3<br>(1 - 6)          | 7<br>(4 - 11)          | 90<br>(66 - 118)        | 49<br>(40 - 61)         | 249<br>(209 - 290)      |
| Alzheimer disease and other dementias               | 273<br>(230 - 315)       | --                    | --                     | 0<br>(0 - 0)            | 28<br>(22 - 36)         | 244<br>(204 - 285)      |
| Parkinson disease                                   | 5<br>(4 - 8)             | --                    | --                     | 0<br>(0 - 0)            | 2<br>(1 - 4)            | 3<br>(2 - 5)            |
| Epilepsy                                            | 100<br>(75 - 130)        | 3<br>(1 - 6)          | 6<br>(4 - 10)          | 80<br>(57 - 106)        | 11<br>(7 - 16)          | 0<br>(0 - 1)            |
| Multiple sclerosis                                  | 8<br>(5 - 13)            | --                    | --                     | 5<br>(3 - 8)            | 2<br>(1 - 4)            | 1<br>(1 - 3)            |
| Other neurological disorders                        | 11<br>(9 - 17)           | 0<br>(0 - 0)          | 1<br>(0 - 1)           | 5<br>(4 - 8)            | 5<br>(4 - 8)            | 0<br>(0 - 0)            |
| Mental and substance use disorders                  | 558<br>(161 - 782)       | 1<br>(0 - 1)          | 0<br>(0 - 0)           | 425<br>(127 - 598)      | 123<br>(30 - 186)       | 8<br>(3 - 12)           |
| Schizophrenia                                       | 9<br>(6 - 12)            | --                    | --                     | 7<br>(5 - 9)            | 2<br>(1 - 3)            | 0<br>(0 - 0)            |
| Alcohol use disorders                               | 510<br>(114 - 728)       | --                    | --                     | 388<br>(87 - 557)       | 116<br>(24 - 178)       | 6<br>(2 - 10)           |
| Drug use disorders                                  | 38<br>(29 - 49)          | 1<br>(0 - 1)          | --                     | 31<br>(23 - 42)         | 5<br>(3 - 6)            | 2<br>(1 - 2)            |
| Opioid use disorders                                | 8<br>(6 - 11)            | 0<br>(0 - 0)          | --                     | 7<br>(5 - 9)            | 1<br>(1 - 1)            | 0<br>(0 - 0)            |
| Cocaine use disorders                               | 1<br>(1 - 1)             | 0<br>(0 - 0)          | --                     | 1<br>(1 - 1)            | 0<br>(0 - 0)            | 0<br>(0 - 0)            |
| Amphetamine use disorders                           | 1<br>(1 - 1)             | 0<br>(0 - 0)          | --                     | 1<br>(0 - 1)            | 0<br>(0 - 1)            | 0<br>(0 - 0)            |
| Other drug use disorders                            | 28<br>(21 - 37)          | 1<br>(0 - 1)          | --                     | 22<br>(17 - 31)         | 4<br>(3 - 5)            | 1<br>(1 - 2)            |
| Eating disorders                                    | 0<br>(0 - 0)             | --                    | 0<br>(0 - 0)           | 0<br>(0 - 0)            | --                      | --                      |
| Anorexia nervosa                                    | 0<br>(0 - 0)             | --                    | 0<br>(0 - 0)           | 0<br>(0 - 0)            | --                      | --                      |

Web Table 31- Mongolia deaths with 95% UI by age, sex, and cause in 2013

| Cause                                               | Both Sexes, All Ages | Both Sexes, 0-4 Years | Both Sexes, 5-14 Years | Both Sexes, 15-49 Years | Both Sexes, 50-69 Years | Both Sexes, 70-80 Years |
|-----------------------------------------------------|----------------------|-----------------------|------------------------|-------------------------|-------------------------|-------------------------|
| Diabetes, urogenital, blood, and endocrine diseases | 639<br>(537 - 844)   | 32<br>(23 - 44)       | 16<br>(12 - 21)        | 281<br>(224 - 391)      | 198<br>(164 - 252)      | 112<br>(94 - 152)       |
| Diabetes mellitus                                   | 115<br>(97 - 136)    | 0<br>(0 - 0)          | 1<br>(1 - 2)           | 51<br>(40 - 66)         | 44<br>(36 - 53)         | 19<br>(16 - 24)         |
| Acute glomerulonephritis                            | 1<br>(1 - 4)         | 0<br>(0 - 0)          | 0<br>(0 - 0)           | 1<br>(0 - 3)            | 0<br>(0 - 1)            | 0<br>(0 - 0)            |
| Chronic kidney disease                              | 351<br>(291 - 497)   | 4<br>(3 - 7)          | 4<br>(3 - 6)           | 163<br>(126 - 246)      | 110<br>(89 - 144)       | 69<br>(55 - 99)         |
| Chronic kidney disease due to diabetes mellitus     | 1<br>(1 - 3)         | 0<br>(0 - 0)          | 0<br>(0 - 0)           | 1<br>(0 - 2)            | 0<br>(0 - 0)            | 0<br>(0 - 1)            |
| Chronic kidney disease due to hypertension          | 86<br>(65 - 117)     | 0<br>(0 - 1)          | 0<br>(0 - 0)           | 26<br>(16 - 45)         | 34<br>(24 - 47)         | 26<br>(18 - 34)         |
| Chronic kidney disease due to glomerulonephritis    | 65<br>(44 - 103)     | 1<br>(0 - 2)          | 1<br>(1 - 1)           | 47<br>(33 - 72)         | 15<br>(7 - 28)          | 1<br>(0 - 2)            |
| Chronic kidney disease due to other causes          | 199<br>(153 - 296)   | 3<br>(2 - 5)          | 3<br>(2 - 5)           | 90<br>(64 - 142)        | 60<br>(42 - 84)         | 42<br>(30 - 70)         |
| Urinary diseases and male infertility               | 78<br>(57 - 131)     | 0<br>(0 - 1)          | 1<br>(0 - 3)           | 25<br>(15 - 46)         | 31<br>(23 - 51)         | 20<br>(14 - 32)         |
| Interstitial nephritis and urinary tract infections | 64<br>(47 - 109)     | 0<br>(0 - 1)          | 1<br>(0 - 2)           | 21<br>(13 - 39)         | 25<br>(18 - 43)         | 17<br>(11 - 27)         |
| Urolithiasis                                        | 3<br>(2 - 7)         | --                    | 0<br>(0 - 0)           | 2<br>(1 - 5)            | 0<br>(0 - 1)            | 0<br>(0 - 1)            |
| Other urinary diseases                              | 10<br>(6 - 17)       | 0<br>(0 - 0)          | 0<br>(0 - 0)           | 1<br>(1 - 3)            | 5<br>(3 - 9)            | 3<br>(1 - 6)            |
| Gynecological diseases                              | 1<br>(1 - 2)         | --                    | --                     | 1<br>(1 - 2)            | 0<br>(0 - 0)            | 0<br>(0 - 0)            |
| Uterine fibroids                                    | 0<br>(0 - 0)         | --                    | --                     | 0<br>(0 - 0)            | 0<br>(0 - 0)            | 0<br>(0 - 0)            |
| Polycystic ovarian syndrome                         | 0<br>(0 - 0)         | --                    | --                     | 0<br>(0 - 0)            | 0<br>(0 - 0)            | --                      |
| Endometriosis                                       | 0<br>(0 - 0)         | --                    | --                     | 0<br>(0 - 0)            | 0<br>(0 - 0)            | --                      |
| Genital prolapse                                    | 0<br>(0 - 0)         | --                    | --                     | 0<br>(0 - 0)            | 0<br>(0 - 0)            | 0<br>(0 - 0)            |
| Other gynecological diseases                        | 1<br>(0 - 1)         | --                    | --                     | 0<br>(0 - 1)            | 0<br>(0 - 0)            | 0<br>(0 - 0)            |
| Hemoglobinopathies and hemolytic anemias            | 23<br>(16 - 34)      | 8<br>(5 - 16)         | 3<br>(2 - 4)           | 9<br>(6 - 14)           | 2<br>(1 - 3)            | 1<br>(1 - 2)            |
| Thalassemias                                        | 12<br>(7 - 19)       | 5<br>(3 - 11)         | 2<br>(1 - 3)           | 4<br>(3 - 6)            | 0<br>(0 - 0)            | 0<br>(0 - 0)            |
| Sickle cell disorders                               | 1<br>(0 - 1)         | 0<br>(0 - 0)          | 0<br>(0 - 0)           | 0<br>(0 - 0)            | 0<br>(0 - 0)            | 0<br>(0 - 0)            |
| G6PD deficiency                                     | 0<br>(0 - 1)         | 0<br>(0 - 0)          | 0<br>(0 - 0)           | 0<br>(0 - 0)            | 0<br>(0 - 0)            | 0<br>(0 - 0)            |
| Other hemoglobinopathies and hemolytic anemias      | 10<br>(7 - 15)       | 3<br>(2 - 5)          | 1<br>(0 - 1)           | 4<br>(3 - 7)            | 2<br>(1 - 3)            | 1<br>(1 - 2)            |
| Endocrine, metabolic, blood, and immune disorders   | 70<br>(54 - 89)      | 18<br>(12 - 27)       | 7<br>(5 - 10)          | 31<br>(22 - 43)         | 11<br>(8 - 16)          | 2<br>(2 - 4)            |
| Musculoskeletal disorders                           | 19<br>(14 - 31)      | --                    | 2<br>(2 - 5)           | 13<br>(10 - 20)         | 2<br>(2 - 6)            | 1<br>(1 - 2)            |
| Rheumatoid arthritis                                | 3<br>(2 - 5)         | --                    | 0<br>(0 - 0)           | 1<br>(1 - 2)            | 1<br>(0 - 2)            | 1<br>(0 - 1)            |
| Other musculoskeletal disorders                     | 17<br>(12 - 27)      | --                    | 2<br>(1 - 4)           | 12<br>(9 - 19)          | 2<br>(1 - 4)            | 0<br>(0 - 1)            |
| Other non-communicable diseases                     | 479<br>(380 - 591)   | 401<br>(311 - 509)    | 24<br>(17 - 32)        | 42<br>(32 - 54)         | 8<br>(7 - 10)           | 3<br>(2 - 3)            |
| Congenital anomalies                                | 464<br>(366 - 575)   | 393<br>(302 - 499)    | 23<br>(16 - 32)        | 39<br>(30 - 51)         | 6<br>(5 - 8)            | 2<br>(2 - 3)            |
| Neural tube defects                                 | 9<br>(3 - 21)        | 8<br>(3 - 20)         | 0<br>(0 - 0)           | 1<br>(0 - 2)            | 0<br>(0 - 0)            | 0<br>(0 - 0)            |
| Congenital heart anomalies                          | 219<br>(166 - 282)   | 157<br>(112 - 213)    | 20<br>(14 - 27)        | 35<br>(26 - 46)         | 6<br>(4 - 7)            | 2<br>(2 - 3)            |
| Cleft lip and cleft palate                          | 3<br>(1 - 6)         | 3<br>(1 - 6)          | --                     | --                      | --                      | --                      |
| Down syndrome                                       | 20<br>(11 - 33)      | 18<br>(10 - 31)       | 0<br>(0 - 0)           | 2<br>(1 - 3)            | 0<br>(0 - 0)            | 0<br>(0 - 0)            |
| Chromosomal unbalanced rearrangements               | 2<br>(1 - 3)         | 1<br>(1 - 3)          | 0<br>(0 - 0)           | 0<br>(0 - 0)            | 0<br>(0 - 0)            | 0<br>(0 - 0)            |
| Other congenital anomalies                          | 212<br>(153 - 275)   | 206<br>(148 - 270)    | 3<br>(2 - 5)           | 2<br>(1 - 3)            | 0<br>(0 - 1)            | 0<br>(0 - 0)            |
| Skin and subcutaneous diseases                      | 9<br>(7 - 12)        | 3<br>(1 - 4)          | 0<br>(0 - 1)           | 3<br>(2 - 4)            | 2<br>(1 - 3)            | 0<br>(0 - 1)            |
| Cellulitis                                          | 2<br>(1 - 3)         | 0<br>(0 - 0)          | 0<br>(0 - 0)           | 1<br>(0 - 1)            | 1<br>(0 - 1)            | 0<br>(0 - 0)            |
| Pyoderma                                            | 6<br>(4 - 8)         | 2<br>(1 - 4)          | 0<br>(0 - 0)           | 2<br>(1 - 3)            | 1<br>(1 - 2)            | 0<br>(0 - 1)            |
| Decubitus ulcer                                     | 0<br>(0 - 1)         | 0<br>(0 - 0)          | 0<br>(0 - 0)           | 0<br>(0 - 0)            | 0<br>(0 - 0)            | 0<br>(0 - 0)            |
| Other skin and subcutaneous diseases                | 1<br>(0 - 1)         | 0<br>(0 - 1)          | 0<br>(0 - 0)           | 0<br>(0 - 0)            | 0<br>(0 - 0)            | 0<br>(0 - 0)            |



Web Table 31- Mongolia deaths with 95% UI by age, sex, and cause in 2013

| Cause                                           | Both Sexes, All Ages     | Both Sexes, 0-4 Years | Both Sexes, 5-14 Years | Both Sexes, 15-49 Years  | Both Sexes, 50-69 Years | Both Sexes, 70-80 Years |
|-------------------------------------------------|--------------------------|-----------------------|------------------------|--------------------------|-------------------------|-------------------------|
| Sudden infant death syndrome                    | 6<br>(2 - 16)            | 6<br>(2 - 16)         | -                      | -                        | -                       | -                       |
| Injuries                                        | 2,537<br>(1,858 - 3,077) | 281<br>(189 - 382)    | 161<br>(113 - 192)     | 1,789<br>(1,320 - 2,204) | 264<br>(156 - 332)      | 42<br>(25 - 52)         |
| Transport injuries                              | 665<br>(235 - 855)       | 30<br>(10 - 49)       | 60<br>(21 - 80)        | 478<br>(171 - 635)       | 85<br>(27 - 114)        | 11<br>(3 - 15)          |
| Road injuries                                   | 643<br>(227 - 826)       | 26<br>(9 - 42)        | 59<br>(20 - 78)        | 463<br>(166 - 618)       | 84<br>(26 - 112)        | 11<br>(3 - 15)          |
| Pedestrian road injuries                        | 141<br>(46 - 198)        | 10<br>(3 - 18)        | 27<br>(9 - 38)         | 80<br>(26 - 117)         | 19<br>(6 - 28)          | 6<br>(2 - 8)            |
| Cyclist road injuries                           | 6<br>(2 - 9)             | 1<br>(0 - 1)          | 0<br>(0 - 0)           | 3<br>(1 - 5)             | 2<br>(1 - 3)            | 0<br>(0 - 0)            |
| Motorcyclist road injuries                      | 119<br>(39 - 176)        | 1<br>(1 - 4)          | 2<br>(1 - 4)           | 102<br>(34 - 153)        | 13<br>(3 - 20)          | 0<br>(0 - 0)            |
| Motor vehicle road injuries                     | 350<br>(122 - 461)       | 14<br>(4 - 23)        | 22<br>(7 - 32)         | 266<br>(94 - 361)        | 45<br>(14 - 62)         | 2<br>(1 - 4)            |
| Other road injuries                             | 27<br>(6 - 41)           | 0<br>(0 - 1)          | 8<br>(2 - 15)          | 12<br>(2 - 20)           | 4<br>(1 - 8)            | 2<br>(0 - 4)            |
| Other transport injuries                        | 22<br>(7 - 31)           | 4<br>(1 - 7)          | 1<br>(0 - 2)           | 15<br>(4 - 22)           | 2<br>(1 - 2)            | 0<br>(0 - 0)            |
| Unintentional injuries                          | 866<br>(675 - 1,042)     | 243<br>(163 - 335)    | 76<br>(61 - 94)        | 427<br>(329 - 538)       | 97<br>(60 - 126)        | 23<br>(13 - 30)         |
| Falls                                           | 162<br>(24 - 238)        | 16<br>(3 - 28)        | 7<br>(1 - 12)          | 97<br>(13 - 151)         | 34<br>(4 - 55)          | 10<br>(1 - 16)          |
| Drowning                                        | 245<br>(181 - 351)       | 47<br>(24 - 82)       | 35<br>(24 - 51)        | 133<br>(92 - 199)        | 25<br>(17 - 38)         | 5<br>(4 - 8)            |
| Fire, heat, and hot substances                  | 97<br>(24 - 192)         | 57<br>(10 - 133)      | 11<br>(2 - 24)         | 25<br>(8 - 45)           | 4<br>(2 - 7)            | 0<br>(0 - 0)            |
| Poisonings                                      | 89<br>(66 - 138)         | 17<br>(8 - 33)        | 8<br>(4 - 14)          | 47<br>(32 - 82)          | 13<br>(9 - 21)          | 4<br>(3 - 6)            |
| Exposure to mechanical forces                   | 120<br>(48 - 186)        | 46<br>(18 - 108)      | 6<br>(1 - 10)          | 59<br>(12 - 86)          | 9<br>(2 - 13)           | 0<br>(0 - 0)            |
| Unintentional firearm injuries                  | 2<br>(1 - 2)             | 0<br>(0 - 0)          | 0<br>(0 - 0)           | 1<br>(1 - 1)             | 0<br>(0 - 1)            | 0<br>(0 - 0)            |
| Unintentional suffocation                       | 43<br>(15 - 106)         | 42<br>(15 - 105)      | 0<br>(0 - 0)           | 1<br>(0 - 1)             | 0<br>(0 - 0)            | 0<br>(0 - 0)            |
| Other exposure to mechanical forces             | 75<br>(13 - 106)         | 3<br>(0 - 6)          | 6<br>(1 - 10)          | 58<br>(10 - 85)          | 8<br>(2 - 13)           | 0<br>(0 - 0)            |
| Adverse effects of medical treatment            | 15<br>(10 - 19)          | 3<br>(2 - 5)          | 0<br>(0 - 1)           | 5<br>(3 - 7)             | 4<br>(2 - 6)            | 2<br>(1 - 4)            |
| Animal contact                                  | 7<br>(4 - 13)            | 2<br>(1 - 5)          | 3<br>(2 - 5)           | 1<br>(0 - 2)             | 1<br>(0 - 2)            | 0<br>(0 - 0)            |
| Venomous animal contact                         | 2<br>(1 - 5)             | 1<br>(0 - 3)          | 0<br>(0 - 1)           | 0<br>(0 - 1)             | 0<br>(0 - 1)            | 0<br>(0 - 0)            |
| Non-venomous animal contact                     | 5<br>(3 - 9)             | 1<br>(0 - 3)          | 3<br>(2 - 5)           | 1<br>(0 - 2)             | 0<br>(0 - 0)            | 0<br>(0 - 0)            |
| Foreign body                                    | 88<br>(61 - 142)         | 53<br>(34 - 79)       | 3<br>(1 - 6)           | 26<br>(17 - 48)          | 5<br>(2 - 11)           | 1<br>(1 - 1)            |
| Pulmonary aspiration and foreign body in airway | 87<br>(59 - 141)         | 52<br>(33 - 79)       | 2<br>(1 - 6)           | 26<br>(17 - 48)          | 5<br>(2 - 11)           | 1<br>(1 - 1)            |
| Foreign body in other body part                 | 1<br>(1 - 2)             | 1<br>(0 - 1)          | 0<br>(0 - 1)           | 0<br>(0 - 0)             | 0<br>(0 - 0)            | 0<br>(0 - 0)            |
| Other unintentional injuries                    | 43<br>(32 - 61)          | 3<br>(2 - 4)          | 3<br>(2 - 4)           | 34<br>(24 - 51)          | 2<br>(2 - 3)            | 0<br>(0 - 1)            |
| Self-harm and interpersonal violence            | 1,006<br>(788 - 1,257)   | 8<br>(3 - 14)         | 25<br>(15 - 38)        | 884<br>(692 - 1,114)     | 82<br>(55 - 110)        | 8<br>(6 - 11)           |
| Self-harm                                       | 723<br>(558 - 947)       | -                     | 20<br>(11 - 33)        | 644<br>(492 - 851)       | 6<br>(37 - 76)          | 6<br>(4 - 9)            |
| Interpersonal violence                          | 283<br>(121 - 398)       | 8<br>(3 - 14)         | 5<br>(2 - 7)           | 240<br>(100 - 340)       | 29<br>(11 - 47)         | 2<br>(1 - 3)            |
| Assault by firearm                              | 12<br>(5 - 27)           | 0<br>(0 - 0)          | 0<br>(0 - 0)           | 11<br>(4 - 25)           | 1<br>(0 - 1)            | 0<br>(0 - 0)            |
| Assault by sharp object                         | 94<br>(38 - 139)         | 2<br>(1 - 5)          | 1<br>(1 - 3)           | 84<br>(34 - 127)         | 6<br>(2 - 10)           | 0<br>(0 - 0)            |
| Assault by other means                          | 178<br>(73 - 259)        | 6<br>(2 - 10)         | 3<br>(1 - 5)           | 145<br>(58 - 214)        | 23<br>(8 - 37)          | 2<br>(1 - 3)            |

Web Table 31- Mongolia deaths with 95% UI by age, sex, and cause in 2013

| Cause                                                             | Males, All Ages             | Males, 0-4 Years         | Males, 5-14 Years  | Males, 15-49 Years       | Males, 50-69 Years       | Males, 70-80 Years       |
|-------------------------------------------------------------------|-----------------------------|--------------------------|--------------------|--------------------------|--------------------------|--------------------------|
| All causes                                                        | 13,551<br>(11,925 - 15,512) | 1,512<br>(1,339 - 1,724) | 197<br>(173 - 222) | 4,494<br>(3,737 - 5,470) | 4,534<br>(3,884 - 5,221) | 2,812<br>(2,611 - 2,963) |
| Communicable, maternal, neonatal, and nutritional diseases        | 1,657<br>(1,487 - 1,882)    | 1,083<br>(949 - 1,225)   | 30<br>(20 - 47)    | 366<br>(288 - 487)       | 142<br>(116 - 179)       | 37<br>(26 - 58)          |
| HIV/AIDS and tuberculosis                                         | 365<br>(268 - 473)          | 5<br>(3 - 8)             | 2<br>(1 - 4)       | 268<br>(191 - 363)       | 87<br>(65 - 111)         | 3<br>(2 - 6)             |
| Tuberculosis                                                      | 364<br>(265 - 470)          | 5<br>(3 - 8)             | 2<br>(1 - 4)       | 267<br>(190 - 362)       | 87<br>(64 - 111)         | 3<br>(2 - 6)             |
| HIV/AIDS                                                          | 1<br>(0 - 4)                | 0<br>(0 - 0)             | 0<br>(0 - 0)       | 1<br>(0 - 3)             | 0<br>(0 - 1)             | 0<br>(0 - 0)             |
| HIV/AIDS resulting in mycobacterial infection                     | 0<br>(0 - 0)                | 0<br>(0 - 0)             | 0<br>(0 - 0)       | 0<br>(0 - 0)             | 0<br>(0 - 0)             | 0<br>(0 - 0)             |
| HIV/AIDS resulting in other diseases                              | 1<br>(0 - 4)                | 0<br>(0 - 0)             | 0<br>(0 - 0)       | 1<br>(0 - 3)             | 0<br>(0 - 1)             | 0<br>(0 - 0)             |
| Diarrhea, lower respiratory, and other common infectious diseases | 652<br>(518 - 832)          | 477<br>(363 - 603)       | 22<br>(13 - 37)    | 73<br>(49 - 129)         | 49<br>(33 - 78)          | 31<br>(21 - 50)          |
| Diarrheal diseases                                                | 4<br>(2 - 8)                | 3<br>(1 - 7)             | 0<br>(0 - 0)       | 0<br>(0 - 0)             | 0<br>(0 - 0)             | 0<br>(0 - 0)             |
| Intestinal infectious diseases                                    | 6<br>(2 - 12)               | 2<br>(0 - 7)             | 1<br>(0 - 3)       | 2<br>(0 - 6)             | 0<br>(0 - 2)             | 0<br>(0 - 1)             |
| Typhoid fever                                                     | 1<br>(1 - 3)                | 0<br>(0 - 1)             | 0<br>(0 - 1)       | 1<br>(0 - 1)             | 0<br>(0 - 0)             | 0<br>(0 - 0)             |
| Paratyphoid fever                                                 | 0<br>(0 - 1)                | 0<br>(0 - 0)             | 0<br>(0 - 0)       | 0<br>(0 - 0)             | 0<br>(0 - 0)             | 0<br>(0 - 0)             |
| Other intestinal infectious diseases                              | 4<br>(1 - 10)               | 2<br>(0 - 7)             | 0<br>(0 - 3)       | 1<br>(0 - 5)             | 0<br>(0 - 2)             | 0<br>(0 - 1)             |
| Lower respiratory infections                                      | 594<br>(470 - 752)          | 448<br>(338 - 564)       | 17<br>(10 - 29)    | 56<br>(35 - 100)         | 45<br>(29 - 73)          | 29<br>(19 - 47)          |
| Upper respiratory infections                                      | 1<br>(0 - 2)                | 0<br>(0 - 0)             | 0<br>(0 - 0)       | 0<br>(0 - 1)             | 0<br>(0 - 1)             | 0<br>(0 - 0)             |
| Otitis media                                                      | 0<br>(0 - 0)                | 0<br>(0 - 0)             | 0<br>(0 - 0)       | 0<br>(0 - 0)             | 0<br>(0 - 0)             | 0<br>(0 - 0)             |
| Meningitis                                                        | 34<br>(20 - 67)             | 17<br>(6 - 41)           | 3<br>(1 - 8)       | 10<br>(6 - 25)           | 2<br>(1 - 4)             | 1<br>(1 - 2)             |
| Pneumococcal meningitis                                           | 8<br>(5 - 17)               | 3<br>(1 - 8)             | 1<br>(0 - 2)       | 3<br>(2 - 9)             | 1<br>(0 - 1)             | 0<br>(0 - 1)             |
| H influenzae type B meningitis                                    | 12<br>(5 - 24)              | 8<br>(3 - 19)            | 1<br>(0 - 2)       | 2<br>(1 - 5)             | 0<br>(0 - 1)             | 0<br>(0 - 0)             |
| Meningococcal meningitis                                          | 8<br>(4 - 16)               | 4<br>(1 - 9)             | 1<br>(0 - 2)       | 2<br>(1 - 6)             | 0<br>(0 - 1)             | 0<br>(0 - 0)             |
| Other meningitis                                                  | 6<br>(4 - 13)               | 2<br>(1 - 5)             | 0<br>(0 - 1)       | 3<br>(2 - 6)             | 1<br>(0 - 2)             | 0<br>(0 - 1)             |
| Encephalitis                                                      | 11<br>(7 - 19)              | 5<br>(2 - 10)            | 1<br>(0 - 3)       | 4<br>(2 - 7)             | 1<br>(1 - 1)             | 1<br>(0 - 1)             |
| Diphtheria                                                        | 0<br>(0 - 2)                | 0<br>(0 - 1)             | 0<br>(0 - 1)       | 0<br>(0 - 0)             | 0<br>(0 - 0)             | --<br>(0 - 0)            |
| Whooping cough                                                    | 0<br>(0 - 1)                | 0<br>(0 - 1)             | 0<br>(0 - 0)       | 0<br>(0 - 0)             | 0<br>(0 - 0)             | --<br>(0 - 0)            |
| Tetanus                                                           | 0<br>(0 - 0)                | 0<br>(0 - 0)             | 0<br>(0 - 0)       | 0<br>(0 - 0)             | 0<br>(0 - 0)             | 0<br>(0 - 0)             |
| Measles                                                           | 0<br>(0 - 0)                | 0<br>(0 - 0)             | 0<br>(0 - 0)       | 0<br>(0 - 0)             | 0<br>(0 - 0)             | --<br>(0 - 0)            |
| Varicella and herpes zoster                                       | 1<br>(0 - 1)                | 0<br>(0 - 1)             | 0<br>(0 - 0)       | 0<br>(0 - 0)             | 0<br>(0 - 0)             | 0<br>(0 - 0)             |
| Neglected tropical diseases and malaria                           | 17<br>(13 - 24)             | 2<br>(1 - 6)             | 2<br>(1 - 3)       | 9<br>(7 - 13)            | 4<br>(3 - 5)             | 1<br>(1 - 1)             |
| Leishmaniasis                                                     | 4<br>(2 - 8)                | 1<br>(0 - 3)             | 0<br>(0 - 1)       | 2<br>(1 - 4)             | 1<br>(0 - 1)             | 0<br>(0 - 0)             |
| Visceral leishmaniasis                                            | 4<br>(2 - 8)                | 1<br>(0 - 3)             | 0<br>(0 - 1)       | 2<br>(1 - 4)             | 1<br>(0 - 1)             | 0<br>(0 - 0)             |
| Cysticercosis                                                     | 0<br>(0 - 0)                | 0<br>(0 - 0)             | 0<br>(0 - 0)       | 0<br>(0 - 0)             | 0<br>(0 - 0)             | 0<br>(0 - 0)             |
| Cystic echinococcosis                                             | 12<br>(9 - 15)              | 0<br>(0 - 1)             | 1<br>(1 - 1)       | 7<br>(5 - 9)             | 3<br>(2 - 3)             | 1<br>(1 - 1)             |
| Dengue                                                            | 0<br>(0 - 0)                | 0<br>(0 - 0)             | 0<br>(0 - 0)       | 0<br>(0 - 0)             | 0<br>(0 - 0)             | 0<br>(0 - 0)             |
| Rabies                                                            | 0<br>(0 - 1)                | 0<br>(0 - 0)             | 0<br>(0 - 0)       | 0<br>(0 - 1)             | 0<br>(0 - 0)             | 0<br>(0 - 0)             |
| Intestinal nematode infections                                    | 1<br>(0 - 6)                | 0<br>(0 - 4)             | 0<br>(0 - 1)       | 0<br>(0 - 2)             | 0<br>(0 - 1)             | 0<br>(0 - 0)             |
| Ascariasis                                                        | 1<br>(0 - 6)                | 0<br>(0 - 4)             | 0<br>(0 - 1)       | 0<br>(0 - 2)             | 0<br>(0 - 1)             | 0<br>(0 - 0)             |
| Other neglected tropical diseases                                 | 0<br>(0 - 1)                | 0<br>(0 - 0)             | 0<br>(0 - 0)       | 0<br>(0 - 1)             | 0<br>(0 - 0)             | 0<br>(0 - 0)             |
| Maternal disorders                                                | --                          | --                       | --                 | --                       | --                       | --                       |
| Maternal hemorrhage                                               | --                          | --                       | --                 | --                       | --                       | --                       |
| Maternal sepsis and other maternal infections                     | --                          | --                       | --                 | --                       | --                       | --                       |

Web Table 31- Mongolia deaths with 95% UI by age, sex, and cause in 2013

| Cause                                                            | Males, All Ages           | Males, 0-4 Years   | Males, 5-14 Years | Males, 15-49 Years       | Males, 50-69 Years       | Males, 70-80 Years       |
|------------------------------------------------------------------|---------------------------|--------------------|-------------------|--------------------------|--------------------------|--------------------------|
| Maternal hypertensive disorders                                  | --                        | --                 | --                | --                       | --                       | --                       |
| Maternal obstructed labor                                        | --                        | --                 | --                | --                       | --                       | --                       |
| Maternal abortive outcome                                        | --                        | --                 | --                | --                       | --                       | --                       |
| Indirect maternal deaths                                         | --                        | --                 | --                | --                       | --                       | --                       |
| Late maternal deaths                                             | --                        | --                 | --                | --                       | --                       | --                       |
| Maternal deaths aggravated by HIV/AIDS                           | --                        | --                 | --                | --                       | --                       | --                       |
| Other maternal disorders                                         | --                        | --                 | --                | --                       | --                       | --                       |
| Neonatal disorders                                               | 583<br>(499 - 682)        | 583<br>(499 - 682) | --                | --                       | --                       | --                       |
| Neonatal preterm birth complications                             | 200<br>(106 - 313)        | 200<br>(106 - 313) | --                | --                       | --                       | --                       |
| Neonatal encephalopathy due to birth asphyxia and trauma         | 324<br>(209 - 435)        | 324<br>(209 - 435) | --                | --                       | --                       | --                       |
| Neonatal sepsis and other neonatal infections                    | 26<br>(8 - 54)            | 26<br>(8 - 54)     | --                | --                       | --                       | --                       |
| Hemolytic disease and other neonatal jaundice                    | 4<br>(1 - 9)              | 4<br>(1 - 9)       | --                | --                       | --                       | --                       |
| Other neonatal disorders                                         | 29<br>(13 - 53)           | 29<br>(13 - 53)    | --                | --                       | --                       | --                       |
| Nutritional deficiencies                                         | 11<br>(6 - 29)            | 3<br>(1 - 8)       | 0<br>(0 - 1)      | 5<br>(3 - 14)            | 2<br>(1 - 4)             | 1<br>(0 - 2)             |
| Protein-energy malnutrition                                      | 4<br>(2 - 11)             | 1<br>(0 - 3)       | 0<br>(0 - 0)      | 3<br>(1 - 8)             | 0<br>(0 - 1)             | 0<br>(0 - 0)             |
| Iodine deficiency                                                | 0<br>(0 - 1)              | 0<br>(0 - 1)       | 0<br>(0 - 0)      | 0<br>(0 - 0)             | 0<br>(0 - 0)             | 0<br>(0 - 0)             |
| Iron-deficiency anemia                                           | 5<br>(3 - 14)             | 1<br>(0 - 4)       | 0<br>(0 - 0)      | 2<br>(1 - 5)             | 1<br>(1 - 3)             | 1<br>(0 - 2)             |
| Other nutritional deficiencies                                   | 1<br>(1 - 5)              | 1<br>(0 - 3)       | 0<br>(0 - 0)      | 0<br>(0 - 2)             | 0<br>(0 - 0)             | 0<br>(0 - 0)             |
| Other communicable, maternal, neonatal, and nutritional diseases | 28<br>(18 - 44)           | 12<br>(5 - 24)     | 4<br>(2 - 5)      | 11<br>(7 - 16)           | 1<br>(1 - 3)             | 1<br>(0 - 2)             |
| Sexually transmitted diseases excluding HIV                      | 9<br>(1 - 21)             | 8<br>(1 - 19)      | 1<br>(0 - 2)      | 0<br>(0 - 1)             | 0<br>(0 - 1)             | 0<br>(0 - 0)             |
| Syphilis                                                         | 9<br>(1 - 21)             | 8<br>(1 - 19)      | 1<br>(0 - 2)      | 0<br>(0 - 0)             | 0<br>(0 - 1)             | 0<br>(0 - 0)             |
| Chlamydial infection                                             | --                        | --                 | --                | --                       | --                       | --                       |
| Gonococcal infection                                             | 0<br>(0 - 0)              | --                 | 0<br>(0 - 0)      | 0<br>(0 - 0)             | 0<br>(0 - 0)             | 0<br>(0 - 0)             |
| Other sexually transmitted diseases                              | 0<br>(0 - 0)              | --                 | 0<br>(0 - 0)      | 0<br>(0 - 0)             | 0<br>(0 - 0)             | 0<br>(0 - 0)             |
| Hepatitis                                                        | 17<br>(13 - 23)           | 4<br>(2 - 7)       | 3<br>(2 - 4)      | 10<br>(7 - 14)           | 1<br>(0 - 1)             | 0<br>(0 - 1)             |
| Acute hepatitis A                                                | 3<br>(1 - 6)              | 1<br>(0 - 3)       | 1<br>(0 - 1)      | 1<br>(0 - 2)             | 0<br>(0 - 0)             | 0<br>(0 - 0)             |
| Acute hepatitis B                                                | 10<br>(6 - 15)            | 3<br>(1 - 5)       | 1<br>(1 - 2)      | 5<br>(3 - 8)             | 0<br>(0 - 1)             | 0<br>(0 - 0)             |
| Acute hepatitis C                                                | 1<br>(0 - 3)              | --                 | 0<br>(0 - 1)      | 1<br>(0 - 2)             | 0<br>(0 - 0)             | 0<br>(0 - 0)             |
| Acute hepatitis E                                                | 3<br>(2 - 6)              | 0<br>(0 - 0)       | 0<br>(0 - 1)      | 3<br>(1 - 5)             | 0<br>(0 - 0)             | 0<br>(0 - 0)             |
| Other infectious diseases                                        | 2<br>(0 - 6)              | 0<br>(0 - 1)       | 0<br>(0 - 1)      | 1<br>(0 - 3)             | 0<br>(0 - 1)             | 0<br>(0 - 2)             |
| Non-communicable diseases                                        | 9,889<br>(8,599 - 11,377) | 272<br>(201 - 354) | 55<br>(44 - 77)   | 2,631<br>(2,132 - 3,294) | 4,186<br>(3,575 - 4,848) | 2,744<br>(2,549 - 2,893) |
| Neoplasms                                                        | 2,535<br>(2,149 - 2,969)  | 6<br>(3 - 9)       | 12<br>(9 - 18)    | 531<br>(402 - 715)       | 1,313<br>(1,084 - 1,560) | 674<br>(593 - 750)       |
| Esophageal cancer                                                | 186<br>(137 - 237)        | --                 | --                | 23<br>(16 - 33)          | 87<br>(58 - 116)         | 77<br>(55 - 101)         |
| Stomach cancer                                                   | 458<br>(381 - 546)        | --                 | --                | 120<br>(88 - 159)        | 216<br>(170 - 269)       | 123<br>(98 - 150)        |
| Liver cancer                                                     | 1,102<br>(897 - 1,325)    | --                 | 2<br>(1 - 3)      | 215<br>(148 - 304)       | 608<br>(471 - 764)       | 278<br>(217 - 344)       |
| Liver cancer due to hepatitis B                                  | 489<br>(375 - 633)        | --                 | 1<br>(0 - 1)      | 106<br>(70 - 156)        | 279<br>(208 - 367)       | 103<br>(75 - 136)        |
| Liver cancer due to hepatitis C                                  | 347<br>(258 - 462)        | --                 | 0<br>(0 - 1)      | 63<br>(40 - 95)          | 189<br>(132 - 264)       | 95<br>(67 - 130)         |
| Liver cancer due to alcohol use                                  | 213<br>(137 - 304)        | --                 | --                | 31<br>(15 - 53)          | 112<br>(68 - 168)        | 70<br>(44 - 101)         |
| Liver cancer due to other causes                                 | 52<br>(31 - 79)           | --                 | 1<br>(0 - 1)      | 14<br>(8 - 23)           | 27<br>(16 - 43)          | 10<br>(6 - 15)           |
| Larynx cancer                                                    | 19<br>(13 - 24)           | --                 | --                | 2<br>(1 - 2)             | 9<br>(6 - 12)            | 8<br>(5 - 11)            |

Web Table 31- Mongolia deaths with 95% UI by age, sex, and cause in 2013

| Cause                                         | Males, All Ages          | Males, 0-4 Years | Males, 5-14 Years | Males, 15-49 Years     | Males, 50-69 Years       | Males, 70-80 Years       |
|-----------------------------------------------|--------------------------|------------------|-------------------|------------------------|--------------------------|--------------------------|
| Tracheal, bronchus and lung cancer            | 339<br>(283 - 398)       | --               | --                | 40<br>(28 - 55)        | 188<br>(150 - 229)       | 112<br>(96 - 131)        |
| Breast cancer                                 | 0<br>(0 - 0)             | --               | --                | 0<br>(0 - 0)           | 0<br>(0 - 0)             | 0<br>(0 - 0)             |
| Cervical cancer                               | --                       | --               | --                | --                     | --                       | --                       |
| Uterine cancer                                | --                       | --               | --                | --                     | --                       | --                       |
| Prostate cancer                               | 23<br>(15 - 43)          | --               | --                | 2<br>(1 - 5)           | 11<br>(6 - 21)           | 10<br>(7 - 17)           |
| Colon and rectum cancer                       | 55<br>(46 - 66)          | --               | --                | 18<br>(13 - 24)        | 25<br>(20 - 31)          | 13<br>(11 - 16)          |
| Lip and oral cavity cancer                    | 20<br>(15 - 29)          | --               | --                | 6<br>(4 - 9)           | 12<br>(8 - 16)           | 3<br>(2 - 4)             |
| Nasopharynx cancer                            | 6<br>(4 - 9)             | --               | 0<br>(0 - 0)      | 3<br>(2 - 5)           | 2<br>(2 - 4)             | 1<br>(0 - 1)             |
| Other pharynx cancer                          | 9<br>(7 - 16)            | --               | --                | 2<br>(1 - 5)           | 6<br>(4 - 10)            | 1<br>(1 - 2)             |
| Gallbladder and biliary tract cancer          | 7<br>(5 - 10)            | --               | --                | 1<br>(1 - 2)           | 4<br>(3 - 6)             | 2<br>(1 - 3)             |
| Pancreatic cancer                             | 51<br>(42 - 63)          | --               | --                | 9<br>(6 - 13)          | 31<br>(24 - 39)          | 11<br>(9 - 15)           |
| Malignant skin melanoma                       | 3<br>(1 - 8)             | --               | --                | 1<br>(0 - 4)           | 1<br>(1 - 3)             | 0<br>(0 - 1)             |
| Non-melanoma skin cancer                      | 4<br>(2 - 6)             | --               | --                | 1<br>(1 - 2)           | 2<br>(1 - 3)             | 1<br>(1 - 2)             |
| Ovarian cancer                                | --                       | --               | --                | --                     | --                       | --                       |
| Testicular cancer                             | 3<br>(2 - 4)             | --               | --                | 2<br>(1 - 3)           | 1<br>(0 - 1)             | 0<br>(0 - 0)             |
| Kidney cancer                                 | 19<br>(16 - 24)          | 0<br>(0 - 1)     | 0<br>(0 - 0)      | 3<br>(2 - 5)           | 12<br>(9 - 15)           | 4<br>(3 - 6)             |
| Bladder cancer                                | 11<br>(8 - 14)           | --               | --                | 1<br>(0 - 1)           | 6<br>(4 - 8)             | 4<br>(3 - 6)             |
| Brain and nervous system cancer               | 43<br>(26 - 59)          | 1<br>(0 - 2)     | 3<br>(1 - 5)      | 18<br>(11 - 26)        | 18<br>(10 - 25)          | 4<br>(2 - 5)             |
| Thyroid cancer                                | 4<br>(3 - 5)             | --               | 0<br>(0 - 0)      | 0<br>(0 - 1)           | 2<br>(2 - 4)             | 1<br>(0 - 1)             |
| Mesothelioma                                  | 3<br>(2 - 4)             | --               | --                | 0<br>(0 - 1)           | 2<br>(1 - 2)             | 1<br>(1 - 1)             |
| Hodgkin lymphoma                              | 4<br>(2 - 7)             | 0<br>(0 - 0)     | 0<br>(0 - 1)      | 2<br>(1 - 4)           | 1<br>(1 - 2)             | 0<br>(0 - 0)             |
| Non-Hodgkin lymphoma                          | 27<br>(20 - 37)          | 1<br>(0 - 1)     | 1<br>(0 - 1)      | 8<br>(5 - 13)          | 13<br>(9 - 18)           | 5<br>(4 - 7)             |
| Multiple myeloma                              | 3<br>(1 - 5)             | --               | --                | 1<br>(0 - 2)           | 1<br>(0 - 2)             | 1<br>(0 - 1)             |
| Leukemia                                      | 31<br>(25 - 40)          | 2<br>(1 - 3)     | 5<br>(3 - 8)      | 16<br>(12 - 23)        | 6<br>(5 - 9)             | 1<br>(1 - 2)             |
| Other neoplasms                               | 105<br>(66 - 176)        | 2<br>(1 - 4)     | 2<br>(1 - 3)      | 37<br>(21 - 70)        | 51<br>(32 - 85)          | 13<br>(8 - 23)           |
| Cardiovascular diseases                       | 4,729<br>(4,113 - 5,392) | 11<br>(7 - 17)   | 6<br>(4 - 9)      | 1,004<br>(785 - 1,321) | 2,111<br>(1,803 - 2,421) | 1,596<br>(1,466 - 1,705) |
| Rheumatic heart disease                       | 77<br>(55 - 142)         | 0<br>(0 - 1)     | 1<br>(0 - 1)      | 34<br>(20 - 73)        | 29<br>(20 - 49)          | 13<br>(9 - 20)           |
| Ischemic heart disease                        | 2,554<br>(2,154 - 3,021) | 1<br>(0 - 1)     | 1<br>(1 - 2)      | 523<br>(390 - 736)     | 1,085<br>(890 - 1,310)   | 945<br>(827 - 1,050)     |
| Cerebrovascular disease                       | 1,820<br>(1,507 - 2,221) | 6<br>(4 - 9)     | 3<br>(2 - 5)      | 356<br>(264 - 483)     | 883<br>(710 - 1,087)     | 572<br>(483 - 669)       |
| Ischemic stroke                               | 260<br>(198 - 383)       | 1<br>(0 - 1)     | 0<br>(0 - 0)      | 25<br>(16 - 49)        | 96<br>(68 - 148)         | 138<br>(103 - 193)       |
| Hemorrhagic stroke                            | 1,560<br>(1,278 - 1,889) | 5<br>(3 - 8)     | 3<br>(2 - 4)      | 330<br>(245 - 445)     | 787<br>(634 - 973)       | 434<br>(345 - 521)       |
| Hypertensive heart disease                    | 102<br>(71 - 153)        | 0<br>(0 - 0)     | 0<br>(0 - 0)      | 20<br>(12 - 34)        | 45<br>(29 - 70)          | 37<br>(24 - 62)          |
| Cardiomyopathy and myocarditis                | 99<br>(55 - 140)         | 2<br>(1 - 3)     | 1<br>(0 - 1)      | 50<br>(26 - 78)        | 36<br>(19 - 54)          | 11<br>(6 - 16)           |
| Atrial fibrillation and flutter               | 3<br>(2 - 4)             | --               | --                | 2<br>(1 - 3)           | 1<br>(1 - 2)             | 0<br>(0 - 0)             |
| Aortic aneurysm                               | 4<br>(3 - 6)             | --               | --                | 1<br>(0 - 1)           | 1<br>(1 - 3)             | 2<br>(2 - 3)             |
| Peripheral vascular disease                   | 0<br>(0 - 0)             | --               | --                | 0<br>(0 - 0)           | 0<br>(0 - 0)             | 0<br>(0 - 0)             |
| Endocarditis                                  | 5<br>(3 - 8)             | 1<br>(0 - 1)     | 0<br>(0 - 0)      | 0<br>(0 - 0)           | 3<br>(2 - 6)             | 1<br>(0 - 1)             |
| Other cardiovascular and circulatory diseases | 64<br>(48 - 85)          | 2<br>(1 - 3)     | 1<br>(0 - 1)      | 19<br>(13 - 28)        | 27<br>(18 - 37)          | 15<br>(11 - 21)          |
| Chronic respiratory diseases                  | 266<br>(215 - 395)       | 10<br>(6 - 17)   | 3<br>(2 - 4)      | 40<br>(29 - 66)        | 107<br>(83 - 152)        | 106<br>(85 - 161)        |
| Chronic obstructive pulmonary disease         | 166<br>(131 - 251)       | 2<br>(1 - 5)     | 0<br>(0 - 1)      | 30<br>(21 - 48)        | 65<br>(49 - 95)          | 68<br>(51 - 108)         |

Web Table 31- Mongolia deaths with 95% UI by age, sex, and cause in 2013

| Cause                                               | Males, All Ages    | Males, 0-4 Years | Males, 5-14 Years | Males, 15-49 Years | Males, 50-69 Years | Males, 70-80 Years |
|-----------------------------------------------------|--------------------|------------------|-------------------|--------------------|--------------------|--------------------|
| Pneumoconiosis                                      | 19<br>(12 - 32)    | 0<br>(0 - 0)     | 0<br>(0 - 1)      | 2<br>(1 - 3)       | 10<br>(6 - 17)     | 7<br>(4 - 11)      |
| Silicosis                                           | 3<br>(2 - 4)       | 0<br>(0 - 0)     | 0<br>(0 - 0)      | 1<br>(0 - 1)       | 2<br>(1 - 3)       | 0<br>(0 - 0)       |
| Asbestosis                                          | 4<br>(2 - 6)       | 0<br>(0 - 0)     | 0<br>(0 - 0)      | 0<br>(0 - 1)       | 1<br>(1 - 2)       | 2<br>(1 - 4)       |
| Coal workers pneumoconiosis                         | 9<br>(6 - 15)      | 0<br>(0 - 0)     | 0<br>(0 - 0)      | 0<br>(0 - 1)       | 6<br>(4 - 10)      | 3<br>(2 - 5)       |
| Other pneumoconiosis                                | 3<br>(2 - 6)       | 0<br>(0 - 0)     | 0<br>(0 - 0)      | 0<br>(0 - 1)       | 2<br>(1 - 3)       | 1<br>(1 - 2)       |
| Asthma                                              | 54<br>(41 - 78)    | 0<br>(0 - 0)     | 0<br>(0 - 0)      | 4<br>(2 - 7)       | 24<br>(17 - 36)    | 25<br>(18 - 39)    |
| Interstitial lung disease and pulmonary sarcoidosis | 20<br>(13 - 33)    | 4<br>(2 - 8)     | 1<br>(1 - 2)      | 3<br>(1 - 8)       | 6<br>(3 - 10)      | 5<br>(3 - 9)       |
| Other chronic respiratory diseases                  | 7<br>(6 - 12)      | 3<br>(2 - 6)     | 0<br>(0 - 1)      | 1<br>(1 - 2)       | 2<br>(1 - 3)       | 1<br>(0 - 1)       |
| Cirrhosis                                           | 759<br>(623 - 926) | 1<br>(1 - 3)     | 3<br>(2 - 5)      | 319<br>(238 - 432) | 298<br>(234 - 369) | 137<br>(112 - 163) |
| Cirrhosis due to hepatitis B                        | 327<br>(239 - 441) | 0<br>(0 - 0)     | 1<br>(1 - 2)      | 146<br>(99 - 210)  | 127<br>(90 - 176)  | 52<br>(32 - 72)    |
| Cirrhosis due to hepatitis C                        | 134<br>(49 - 222)  | 0<br>(0 - 0)     | 0<br>(0 - 1)      | 53<br>(16 - 89)    | 54<br>(17 - 98)    | 27<br>(9 - 46)     |
| Cirrhosis due to alcohol use                        | 219<br>(133 - 330) | --               | --                | 73<br>(39 - 120)   | 94<br>(56 - 147)   | 51<br>(33 - 83)    |
| Cirrhosis due to other causes                       | 80<br>(41 - 125)   | 1<br>(0 - 2)     | 2<br>(1 - 3)      | 47<br>(24 - 75)    | 22<br>(9 - 39)     | 7<br>(3 - 13)      |
| Digestive diseases                                  | 303<br>(246 - 400) | 21<br>(10 - 38)  | 9<br>(6 - 14)     | 112<br>(81 - 175)  | 107<br>(84 - 134)  | 54<br>(43 - 66)    |
| Peptic ulcer disease                                | 126<br>(96 - 162)  | 1<br>(0 - 2)     | 0<br>(0 - 0)      | 43<br>(29 - 67)    | 52<br>(37 - 69)    | 30<br>(22 - 40)    |
| Gastritis and duodenitis                            | 8<br>(3 - 13)      | 0<br>(0 - 0)     | 0<br>(0 - 0)      | 5<br>(2 - 9)       | 2<br>(0 - 4)       | 1<br>(0 - 2)       |
| Appendicitis                                        | 21<br>(10 - 38)    | 2<br>(1 - 5)     | 5<br>(3 - 9)      | 11<br>(4 - 21)     | 3<br>(1 - 6)       | 0<br>(0 - 0)       |
| Paralytic ileus and intestinal obstruction          | 44<br>(27 - 84)    | 6<br>(2 - 14)    | 2<br>(1 - 3)      | 19<br>(11 - 38)    | 13<br>(7 - 24)     | 5<br>(2 - 12)      |
| Inguinal, femoral, and abdominal hernia             | 3<br>(1 - 8)       | 1<br>(0 - 2)     | 0<br>(0 - 0)      | 1<br>(1 - 4)       | 0<br>(0 - 2)       | 0<br>(0 - 1)       |
| Inflammatory bowel disease                          | 6<br>(1 - 13)      | 1<br>(0 - 2)     | 0<br>(0 - 1)      | 2<br>(1 - 6)       | 2<br>(0 - 4)       | 1<br>(0 - 2)       |
| Vascular intestinal disorders                       | 13<br>(5 - 26)     | 7<br>(2 - 15)    | 0<br>(0 - 0)      | 1<br>(0 - 3)       | 5<br>(2 - 10)      | 0<br>(0 - 0)       |
| Gallbladder and biliary diseases                    | 24<br>(17 - 39)    | 0<br>(0 - 1)     | 0<br>(0 - 0)      | 6<br>(3 - 14)      | 10<br>(6 - 16)     | 8<br>(5 - 13)      |
| Pancreatitis                                        | 19<br>(11 - 30)    | 0<br>(0 - 1)     | 0<br>(0 - 0)      | 11<br>(6 - 18)     | 6<br>(3 - 11)      | 1<br>(1 - 3)       |
| Other digestive diseases                            | 37<br>(28 - 56)    | 3<br>(1 - 7)     | 1<br>(0 - 1)      | 12<br>(8 - 23)     | 15<br>(10 - 22)    | 7<br>(4 - 10)      |
| Neurological disorders                              | 192<br>(158 - 228) | 2<br>(0 - 4)     | 2<br>(1 - 3)      | 51<br>(35 - 73)    | 28<br>(21 - 36)    | 110<br>(91 - 130)  |
| Alzheimer disease and other dementias               | 121<br>(101 - 143) | --               | --                | 0<br>(0 - 0)       | 15<br>(11 - 20)    | 106<br>(87 - 127)  |
| Parkinson disease                                   | 5<br>(3 - 8)       | --               | --                | 0<br>(0 - 0)       | 2<br>(1 - 4)       | 3<br>(1 - 5)       |
| Epilepsy                                            | 55<br>(38 - 78)    | 1<br>(0 - 3)     | 2<br>(1 - 3)      | 45<br>(30 - 65)    | 7<br>(4 - 11)      | 0<br>(0 - 1)       |
| Multiple sclerosis                                  | 2<br>(1 - 5)       | --               | --                | 1<br>(1 - 3)       | 1<br>(0 - 1)       | 1<br>(0 - 1)       |
| Other neurological disorders                        | 8<br>(5 - 13)      | 0<br>(0 - 0)     | 0<br>(0 - 0)      | 5<br>(3 - 7)       | 3<br>(2 - 6)       | 0<br>(0 - 0)       |
| Mental and substance use disorders                  | 500<br>(134 - 710) | 1<br>(0 - 1)     | 0<br>(0 - 0)      | 383<br>(107 - 551) | 110<br>(24 - 168)  | 6<br>(1 - 9)       |
| Schizophrenia                                       | 5<br>(3 - 7)       | --               | --                | 4<br>(2 - 6)       | 1<br>(1 - 2)       | 0<br>(0 - 0)       |
| Alcohol use disorders                               | 462<br>(98 - 671)  | --               | --                | 351<br>(74 - 516)  | 106<br>(20 - 163)  | 6<br>(1 - 9)       |
| Drug use disorders                                  | 33<br>(24 - 44)    | 1<br>(0 - 1)     | --                | 28<br>(20 - 38)    | 4<br>(2 - 5)       | 0<br>(0 - 0)       |
| Opioid use disorders                                | 7<br>(5 - 10)      | 0<br>(0 - 0)     | --                | 6<br>(4 - 9)       | 1<br>(0 - 1)       | 0<br>(0 - 0)       |
| Cocaine use disorders                               | 1<br>(1 - 1)       | 0<br>(0 - 0)     | --                | 1<br>(0 - 1)       | 0<br>(0 - 0)       | 0<br>(0 - 0)       |
| Amphetamine use disorders                           | 1<br>(0 - 1)       | 0<br>(0 - 0)     | --                | 1<br>(0 - 1)       | 0<br>(0 - 0)       | 0<br>(0 - 0)       |
| Other drug use disorders                            | 24<br>(17 - 32)    | 1<br>(0 - 1)     | --                | 20<br>(14 - 28)    | 3<br>(2 - 4)       | 0<br>(0 - 0)       |
| Eating disorders                                    | 0<br>(0 - 0)       | --               | 0<br>(0 - 0)      | 0<br>(0 - 0)       | --                 | --                 |
| Anorexia nervosa                                    | 0<br>(0 - 0)       | --               | 0<br>(0 - 0)      | 0<br>(0 - 0)       | --                 | --                 |

Web Table 31- Mongolia deaths with 95% UI by age, sex, and cause in 2013

| Cause                                               | Males, All Ages    | Males, 0-4 Years   | Males, 5-14 Years | Males, 15-49 Years | Males, 50-69 Years | Males, 70-80 Years |
|-----------------------------------------------------|--------------------|--------------------|-------------------|--------------------|--------------------|--------------------|
| Diabetes, urogenital, blood, and endocrine diseases | 361<br>(293 - 502) | 19<br>(13 - 29)    | 10<br>(7 - 14)    | 166<br>(124 - 255) | 107<br>(85 - 139)  | 59<br>(48 - 81)    |
| Diabetes mellitus                                   | 71<br>(57 - 89)    | 0<br>(0 - 0)       | 0<br>(0 - 0)      | 36<br>(27 - 49)    | 25<br>(19 - 33)    | 9<br>(7 - 12)      |
| Acute glomerulonephritis                            | 1<br>(0 - 3)       | 0<br>(0 - 0)       | 0<br>(0 - 0)      | 1<br>(0 - 2)       | 0<br>(0 - 1)       | 0<br>(0 - 0)       |
| Chronic kidney disease                              | 198<br>(154 - 304) | 3<br>(1 - 4)       | 3<br>(2 - 4)      | 100<br>(72 - 170)  | 57<br>(42 - 78)    | 35<br>(26 - 54)    |
| Chronic kidney disease due to diabetes mellitus     | 1<br>(0 - 3)       | 0<br>(0 - 0)       | 0<br>(0 - 0)      | 0<br>(0 - 1)       | 0<br>(0 - 0)       | 0<br>(0 - 1)       |
| Chronic kidney disease due to hypertension          | 54<br>(38 - 80)    | 0<br>(0 - 1)       | 0<br>(0 - 0)      | 20<br>(11 - 38)    | 21<br>(13 - 30)    | 13<br>(8 - 19)     |
| Chronic kidney disease due to glomerulonephritis    | 30<br>(16 - 59)    | 0<br>(0 - 1)       | 0<br>(0 - 0)      | 21<br>(12 - 41)    | 7<br>(3 - 16)      | 1<br>(0 - 2)       |
| Chronic kidney disease due to other causes          | 113<br>(79 - 178)  | 2<br>(1 - 4)       | 2<br>(1 - 4)      | 59<br>(37 - 97)    | 28<br>(17 - 43)    | 21<br>(12 - 38)    |
| Urinary diseases and male infertility               | 47<br>(35 - 78)    | 0<br>(0 - 1)       | 1<br>(0 - 1)      | 15<br>(10 - 28)    | 18<br>(13 - 31)    | 12<br>(9 - 19)     |
| Interstitial nephritis and urinary tract infections | 36<br>(26 - 61)    | 0<br>(0 - 1)       | 0<br>(0 - 1)      | 13<br>(8 - 24)     | 13<br>(9 - 24)     | 9<br>(6 - 15)      |
| Urolithiasis                                        | 2<br>(1 - 5)       | --                 | 0<br>(0 - 0)      | 2<br>(1 - 3)       | 0<br>(0 - 1)       | 0<br>(0 - 1)       |
| Other urinary diseases                              | 9<br>(5 - 15)      | 0<br>(0 - 0)       | 0<br>(0 - 0)      | 1<br>(0 - 2)       | 5<br>(3 - 9)       | 3<br>(1 - 5)       |
| Gynecological diseases                              | --                 | --                 | --                | --                 | --                 | --                 |
| Uterine fibroids                                    | --                 | --                 | --                | --                 | --                 | --                 |
| Polycystic ovarian syndrome                         | --                 | --                 | --                | --                 | --                 | --                 |
| Endometriosis                                       | --                 | --                 | --                | --                 | --                 | --                 |
| Genital prolapse                                    | --                 | --                 | --                | --                 | --                 | --                 |
| Other gynecological diseases                        | --                 | --                 | --                | --                 | --                 | --                 |
| Hemoglobinopathies and hemolytic anemias            | 12<br>(7 - 18)     | 5<br>(2 - 10)      | 2<br>(1 - 3)      | 4<br>(2 - 7)       | 1<br>(0 - 1)       | 1<br>(0 - 1)       |
| Thalassemias                                        | 5<br>(3 - 10)      | 3<br>(1 - 7)       | 1<br>(1 - 2)      | 1<br>(1 - 2)       | 0<br>(0 - 0)       | 0<br>(0 - 0)       |
| Sickle cell disorders                               | 0<br>(0 - 1)       | 0<br>(0 - 0)       | 0<br>(0 - 0)      | 0<br>(0 - 0)       | 0<br>(0 - 0)       | 0<br>(0 - 0)       |
| G6PD deficiency                                     | 0<br>(0 - 0)       | 0<br>(0 - 0)       | 0<br>(0 - 0)      | 0<br>(0 - 0)       | 0<br>(0 - 0)       | 0<br>(0 - 0)       |
| Other hemoglobinopathies and hemolytic anemias      | 6<br>(3 - 9)       | 1<br>(1 - 3)       | 0<br>(0 - 1)      | 2<br>(1 - 5)       | 1<br>(0 - 1)       | 1<br>(0 - 1)       |
| Endocrine, metabolic, blood, and immune disorders   | 33<br>(23 - 45)    | 12<br>(6 - 19)     | 5<br>(3 - 8)      | 10<br>(6 - 14)     | 6<br>(4 - 9)       | 1<br>(1 - 2)       |
| Musculoskeletal disorders                           | 7<br>(4 - 18)      | --                 | 1<br>(1 - 3)      | 4<br>(2 - 9)       | 1<br>(1 - 5)       | 0<br>(0 - 0)       |
| Rheumatoid arthritis                                | 1<br>(0 - 2)       | --                 | 0<br>(0 - 0)      | 0<br>(0 - 1)       | 0<br>(0 - 1)       | 0<br>(0 - 0)       |
| Other musculoskeletal disorders                     | 6<br>(4 - 16)      | --                 | 1<br>(1 - 3)      | 4<br>(2 - 9)       | 1<br>(1 - 4)       | 0<br>(0 - 0)       |
| Other non-communicable diseases                     | 237<br>(180 - 305) | 202<br>(146 - 265) | 10<br>(6 - 15)    | 21<br>(15 - 30)    | 4<br>(3 - 5)       | 1<br>(1 - 1)       |
| Congenital anomalies                                | 228<br>(171 - 294) | 197<br>(141 - 261) | 9<br>(6 - 14)     | 19<br>(13 - 27)    | 2<br>(2 - 3)       | 1<br>(1 - 1)       |
| Neural tube defects                                 | 5<br>(1 - 15)      | 5<br>(1 - 15)      | 0<br>(0 - 0)      | 0<br>(0 - 1)       | 0<br>(0 - 0)       | 0<br>(0 - 0)       |
| Congenital heart anomalies                          | 87<br>(61 - 119)   | 60<br>(37 - 92)    | 7<br>(4 - 11)     | 17<br>(11 - 24)    | 2<br>(1 - 3)       | 1<br>(0 - 1)       |
| Cleft lip and cleft palate                          | 2<br>(0 - 4)       | 2<br>(0 - 4)       | --                | --                 | --                 | --                 |
| Down syndrome                                       | 7<br>(3 - 14)      | 5<br>(2 - 12)      | 0<br>(0 - 0)      | 1<br>(0 - 3)       | 0<br>(0 - 0)       | 0<br>(0 - 0)       |
| Chromosomal unbalanced rearrangements               | 2<br>(1 - 3)       | 1<br>(1 - 2)       | 0<br>(0 - 0)      | 0<br>(0 - 0)       | 0<br>(0 - 0)       | 0<br>(0 - 0)       |
| Other congenital anomalies                          | 126<br>(85 - 173)  | 123<br>(82 - 169)  | 2<br>(1 - 3)      | 1<br>(0 - 1)       | 0<br>(0 - 0)       | 0<br>(0 - 0)       |
| Skin and subcutaneous diseases                      | 5<br>(4 - 7)       | 1<br>(0 - 2)       | 0<br>(0 - 0)      | 2<br>(2 - 3)       | 2<br>(1 - 2)       | 0<br>(0 - 0)       |
| Cellulitis                                          | 1<br>(1 - 2)       | 0<br>(0 - 0)       | 0<br>(0 - 0)      | 1<br>(0 - 1)       | 1<br>(0 - 1)       | 0<br>(0 - 0)       |
| Pyoderma                                            | 4<br>(3 - 5)       | 1<br>(0 - 2)       | 0<br>(0 - 0)      | 2<br>(1 - 2)       | 1<br>(1 - 2)       | 0<br>(0 - 0)       |
| Decubitus ulcer                                     | 0<br>(0 - 0)       | 0<br>(0 - 0)       | 0<br>(0 - 0)      | 0<br>(0 - 0)       | 0<br>(0 - 0)       | 0<br>(0 - 0)       |
| Other skin and subcutaneous diseases                | 0<br>(0 - 0)       | 0<br>(0 - 0)       | 0<br>(0 - 0)      | 0<br>(0 - 0)       | 0<br>(0 - 0)       | 0<br>(0 - 0)       |

Web Table 31- Mongolia deaths with 95% UI by age, sex, and cause in 2013

| Cause                                           | Males, All Ages          | Males, 0-4 Years   | Males, 5-14 Years | Males, 15-49 Years       | Males, 50-69 Years | Males, 70-80 Years |
|-------------------------------------------------|--------------------------|--------------------|-------------------|--------------------------|--------------------|--------------------|
| Sudden infant death syndrome                    | 4<br>(1 - 9)             | 4<br>(1 - 9)       | --                | --                       | --                 | --                 |
| Injuries                                        | 2,005<br>(1,466 - 2,499) | 158<br>(104 - 224) | 112<br>(78 - 137) | 1,497<br>(1,092 - 1,912) | 206<br>(116 - 267) | 32<br>(17 - 39)    |
| Transport injuries                              | 511<br>(178 - 685)       | 15<br>(4 - 28)     | 40<br>(13 - 55)   | 386<br>(136 - 535)       | 60<br>(16 - 83)    | 9<br>(3 - 13)      |
| Road injuries                                   | 494<br>(173 - 664)       | 12<br>(3 - 22)     | 39<br>(13 - 53)   | 375<br>(133 - 519)       | 59<br>(16 - 82)    | 9<br>(3 - 13)      |
| Pedestrian road injuries                        | 92<br>(27 - 137)         | 6<br>(1 - 12)      | 18<br>(5 - 26)    | 51<br>(16 - 84)          | 12<br>(3 - 19)     | 5<br>(1 - 7)       |
| Cyclist road injuries                           | 5<br>(2 - 8)             | 1<br>(0 - 1)       | 0<br>(0 - 0)      | 3<br>(1 - 5)             | 1<br>(0 - 2)       | 0<br>(0 - 0)       |
| Motorcyclist road injuries                      | 114<br>(37 - 171)        | 0<br>(0 - 1)       | 2<br>(1 - 4)      | 100<br>(32 - 150)        | 13<br>(3 - 20)     | 0<br>(0 - 0)       |
| Motor vehicle road injuries                     | 258<br>(90 - 358)        | 5<br>(1 - 10)      | 12<br>(4 - 19)    | 210<br>(74 - 296)        | 29<br>(8 - 42)     | 2<br>(1 - 3)       |
| Other road injuries                             | 25<br>(5 - 39)           | 0<br>(0 - 1)       | 8<br>(2 - 14)     | 11<br>(2 - 19)           | 4<br>(1 - 8)       | 2<br>(0 - 4)       |
| Other transport injuries                        | 17<br>(5 - 25)           | 3<br>(1 - 6)       | 1<br>(0 - 2)      | 12<br>(3 - 19)           | 1<br>(0 - 2)       | 0<br>(0 - 0)       |
| Unintentional injuries                          | 654<br>(494 - 806)       | 139<br>(91 - 202)  | 54<br>(41 - 70)   | 366<br>(274 - 481)       | 79<br>(45 - 107)   | 16<br>(8 - 21)     |
| Falls                                           | 132<br>(14 - 202)        | 10<br>(1 - 21)     | 6<br>(1 - 12)     | 82<br>(9 - 134)          | 27<br>(2 - 46)     | 7<br>(1 - 11)      |
| Drowning                                        | 202<br>(145 - 306)       | 35<br>(15 - 66)    | 25<br>(16 - 37)   | 115<br>(76 - 182)        | 23<br>(15 - 34)    | 5<br>(3 - 8)       |
| Fire, heat, and hot substances                  | 60<br>(17 - 117)         | 28<br>(5 - 72)     | 6<br>(1 - 12)     | 22<br>(7 - 41)           | 4<br>(1 - 6)       | 0<br>(0 - 0)       |
| Poisonings                                      | 62<br>(43 - 104)         | 10<br>(4 - 23)     | 5<br>(3 - 9)      | 33<br>(21 - 66)          | 11<br>(7 - 18)     | 2<br>(1 - 4)       |
| Exposure to mechanical forces                   | 89<br>(26 - 133)         | 21<br>(7 - 61)     | 5<br>(1 - 9)      | 55<br>(9 - 82)           | 7<br>(1 - 11)      | 0<br>(0 - 0)       |
| Unintentional firearm injuries                  | 1<br>(1 - 1)             | 0<br>(0 - 0)       | 0<br>(0 - 0)      | 0<br>(0 - 1)             | 0<br>(0 - 0)       | 0<br>(0 - 0)       |
| Unintentional suffocation                       | 19<br>(5 - 60)           | 18<br>(5 - 59)     | 0<br>(0 - 0)      | 0<br>(0 - 1)             | 0<br>(0 - 0)       | 0<br>(0 - 0)       |
| Other exposure to mechanical forces             | 69<br>(10 - 99)          | 3<br>(0 - 5)       | 5<br>(1 - 9)      | 55<br>(8 - 81)           | 7<br>(1 - 10)      | 0<br>(0 - 0)       |
| Adverse effects of medical treatment            | 8<br>(5 - 11)            | 1<br>(0 - 1)       | 0<br>(0 - 0)      | 4<br>(2 - 6)             | 3<br>(1 - 4)       | 1<br>(0 - 1)       |
| Animal contact                                  | 5<br>(3 - 8)             | 1<br>(1 - 3)       | 3<br>(2 - 5)      | 1<br>(0 - 1)             | 0<br>(0 - 0)       | 0<br>(0 - 0)       |
| Venomous animal contact                         | 1<br>(1 - 3)             | 1<br>(0 - 2)       | 0<br>(0 - 0)      | 0<br>(0 - 0)             | 0<br>(0 - 0)       | 0<br>(0 - 0)       |
| Non-venomous animal contact                     | 4<br>(2 - 6)             | 1<br>(0 - 1)       | 3<br>(1 - 5)      | 0<br>(0 - 1)             | 0<br>(0 - 0)       | 0<br>(0 - 0)       |
| Foreign body                                    | 57<br>(35 - 106)         | 31<br>(17 - 58)    | 1<br>(0 - 2)      | 22<br>(13 - 41)          | 4<br>(2 - 9)       | 0<br>(0 - 0)       |
| Pulmonary aspiration and foreign body in airway | 56<br>(35 - 105)         | 30<br>(17 - 58)    | 1<br>(0 - 2)      | 22<br>(13 - 41)          | 4<br>(2 - 9)       | 0<br>(0 - 0)       |
| Foreign body in other body part                 | 1<br>(0 - 1)             | 1<br>(0 - 1)       | 0<br>(0 - 0)      | 0<br>(0 - 0)             | 0<br>(0 - 0)       | 0<br>(0 - 0)       |
| Other unintentional injuries                    | 38<br>(27 - 55)          | 2<br>(1 - 2)       | 3<br>(2 - 4)      | 32<br>(22 - 48)          | 1<br>(1 - 2)       | 0<br>(0 - 1)       |
| Self-harm and interpersonal violence            | 840<br>(641 - 1,089)     | 4<br>(1 - 8)       | 18<br>(9 - 30)    | 745<br>(559 - 975)       | 67<br>(42 - 95)    | 7<br>(4 - 10)      |
| Self-harm                                       | 604<br>(447 - 823)       | --                 | 16<br>(7 - 28)    | 540<br>(393 - 746)       | 43<br>(28 - 66)    | 6<br>(3 - 9)       |
| Interpersonal violence                          | 236<br>(94 - 345)        | 4<br>(1 - 8)       | 2<br>(1 - 4)      | 204<br>(82 - 301)        | 24<br>(8 - 41)     | 1<br>(0 - 2)       |
| Assault by firearm                              | 11<br>(4 - 26)           | 0<br>(0 - 0)       | 0<br>(0 - 0)      | 11<br>(4 - 25)           | 0<br>(0 - 1)       | 0<br>(0 - 0)       |
| Assault by sharp object                         | 78<br>(28 - 123)         | 1<br>(0 - 2)       | 1<br>(1 - 3)      | 72<br>(25 - 114)         | 4<br>(1 - 9)       | 0<br>(0 - 0)       |
| Assault by other means                          | 146<br>(54 - 220)        | 3<br>(1 - 6)       | 1<br>(0 - 1)      | 122<br>(45 - 188)        | 20<br>(6 - 33)     | 1<br>(0 - 2)       |

Web Table 31- Mongolia deaths with 95% UI by age, sex, and cause in 2013

| Cause                                                             | Females, All Ages         | Females, 0-4 Years       | Females, 5-14 Years | Females, 15-49 Years     | Females, 50-69 Years     | Females, 70-80 Years     |
|-------------------------------------------------------------------|---------------------------|--------------------------|---------------------|--------------------------|--------------------------|--------------------------|
| All causes                                                        | 9,015<br>(7,881 - 10,284) | 1,221<br>(1,058 - 1,388) | 131<br>(113 - 149)  | 1,804<br>(1,478 - 2,252) | 2,642<br>(2,205 - 3,097) | 3,216<br>(2,928 - 3,548) |
| Communicable, maternal, neonatal, and nutritional diseases        | 1,156<br>(1,011 - 1,315)  | 835<br>(709 - 971)       | 28<br>(21 - 36)     | 202<br>(168 - 247)       | 56<br>(44 - 70)          | 34<br>(25 - 51)          |
| HIV/AIDS and tuberculosis                                         | 141<br>(91 - 184)         | 5<br>(2 - 9)             | 4<br>(2 - 6)        | 96<br>(55 - 132)         | 29<br>(20 - 38)          | 7<br>(5 - 9)             |
| Tuberculosis                                                      | 141<br>(90 - 183)         | 5<br>(2 - 9)             | 4<br>(2 - 6)        | 96<br>(54 - 131)         | 28<br>(20 - 38)          | 7<br>(5 - 9)             |
| HIV/AIDS                                                          | 0<br>(0 - 1)              | 0<br>(0 - 0)             | 0<br>(0 - 0)        | 0<br>(0 - 1)             | 0<br>(0 - 0)             | 0<br>(0 - 0)             |
| HIV/AIDS resulting in mycobacterial infection                     | 0<br>(0 - 0)              | 0<br>(0 - 0)             | 0<br>(0 - 0)        | 0<br>(0 - 0)             | 0<br>(0 - 0)             | 0<br>(0 - 0)             |
| HIV/AIDS resulting in other diseases                              | 0<br>(0 - 1)              | 0<br>(0 - 0)             | 0<br>(0 - 0)        | 0<br>(0 - 1)             | 0<br>(0 - 0)             | 0<br>(0 - 0)             |
| Diarrhea, lower respiratory, and other common infectious diseases | 479<br>(375 - 604)        | 370<br>(280 - 469)       | 18<br>(12 - 25)     | 48<br>(34 - 73)          | 21<br>(14 - 31)          | 24<br>(15 - 40)          |
| Diarrheal diseases                                                | 1<br>(1 - 3)              | 1<br>(0 - 2)             | 0<br>(0 - 0)        | 0<br>(0 - 0)             | 0<br>(0 - 0)             | 0<br>(0 - 0)             |
| Intestinal infectious diseases                                    | 4<br>(1 - 10)             | 2<br>(0 - 6)             | 1<br>(0 - 2)        | 1<br>(0 - 5)             | 0<br>(0 - 2)             | 0<br>(0 - 1)             |
| Typhoid fever                                                     | 1<br>(1 - 2)              | 0<br>(0 - 1)             | 0<br>(0 - 1)        | 0<br>(0 - 1)             | 0<br>(0 - 0)             | 0<br>(0 - 0)             |
| Paratyphoid fever                                                 | 0<br>(0 - 1)              | 0<br>(0 - 0)             | 0<br>(0 - 0)        | 0<br>(0 - 0)             | 0<br>(0 - 0)             | 0<br>(0 - 0)             |
| Other intestinal infectious diseases                              | 3<br>(0 - 9)              | 1<br>(0 - 6)             | 0<br>(0 - 2)        | 1<br>(0 - 4)             | 0<br>(0 - 2)             | 0<br>(0 - 1)             |
| Lower respiratory infections                                      | 433<br>(333 - 554)        | 342<br>(249 - 443)       | 11<br>(7 - 17)      | 39<br>(27 - 59)          | 18<br>(12 - 27)          | 22<br>(14 - 38)          |
| Upper respiratory infections                                      | 1<br>(0 - 1)              | 0<br>(0 - 0)             | 0<br>(0 - 0)        | 0<br>(0 - 0)             | 0<br>(0 - 0)             | 0<br>(0 - 1)             |
| Otitis media                                                      | 0<br>(0 - 0)              | 0<br>(0 - 0)             | 0<br>(0 - 0)        | 0<br>(0 - 0)             | 0<br>(0 - 0)             | 0<br>(0 - 0)             |
| Meningitis                                                        | 15<br>(10 - 40)           | 7<br>(3 - 20)            | 2<br>(1 - 6)        | 5<br>(3 - 12)            | 1<br>(1 - 3)             | 0<br>(0 - 1)             |
| Pneumococcal meningitis                                           | 4<br>(2 - 10)             | 1<br>(1 - 4)             | 1<br>(0 - 2)        | 1<br>(1 - 4)             | 0<br>(0 - 1)             | 0<br>(0 - 0)             |
| H influenzae type B meningitis                                    | 5<br>(3 - 13)             | 3<br>(2 - 9)             | 1<br>(0 - 2)        | 1<br>(0 - 2)             | 0<br>(0 - 0)             | 0<br>(0 - 0)             |
| Meningococcal meningitis                                          | 3<br>(2 - 9)              | 2<br>(1 - 5)             | 1<br>(0 - 1)        | 1<br>(1 - 3)             | 0<br>(0 - 1)             | 0<br>(0 - 0)             |
| Other meningitis                                                  | 3<br>(2 - 7)              | 1<br>(0 - 2)             | 0<br>(0 - 1)        | 1<br>(1 - 3)             | 0<br>(0 - 1)             | 0<br>(0 - 0)             |
| Encephalitis                                                      | 24<br>(7 - 48)            | 18<br>(4 - 40)           | 3<br>(1 - 6)        | 1<br>(1 - 2)             | 1<br>(0 - 1)             | 0<br>(0 - 1)             |
| Diphtheria                                                        | 0<br>(0 - 1)              | 0<br>(0 - 1)             | 0<br>(0 - 0)        | 0<br>(0 - 0)             | 0<br>(0 - 0)             | --                       |
| Whooping cough                                                    | 0<br>(0 - 1)              | 0<br>(0 - 1)             | 0<br>(0 - 0)        | 0<br>(0 - 0)             | 0<br>(0 - 0)             | --                       |
| Tetanus                                                           | 0<br>(0 - 0)              | 0<br>(0 - 0)             | 0<br>(0 - 0)        | 0<br>(0 - 0)             | 0<br>(0 - 0)             | 0<br>(0 - 0)             |
| Measles                                                           | 0<br>(0 - 0)              | 0<br>(0 - 0)             | 0<br>(0 - 0)        | 0<br>(0 - 0)             | 0<br>(0 - 0)             | --                       |
| Varicella and herpes zoster                                       | 1<br>(0 - 1)              | 0<br>(0 - 1)             | 0<br>(0 - 0)        | 0<br>(0 - 0)             | 0<br>(0 - 0)             | 0<br>(0 - 1)             |
| Neglected tropical diseases and malaria                           | 12<br>(9 - 17)            | 1<br>(1 - 5)             | 1<br>(1 - 2)        | 5<br>(4 - 7)             | 3<br>(2 - 4)             | 1<br>(1 - 2)             |
| Leishmaniasis                                                     | 2<br>(1 - 3)              | 0<br>(0 - 1)             | 0<br>(0 - 0)        | 1<br>(0 - 2)             | 0<br>(0 - 1)             | 0<br>(0 - 0)             |
| Visceral leishmaniasis                                            | 2<br>(1 - 3)              | 0<br>(0 - 1)             | 0<br>(0 - 0)        | 1<br>(0 - 2)             | 0<br>(0 - 1)             | 0<br>(0 - 0)             |
| Cysticercosis                                                     | 0<br>(0 - 0)              | 0<br>(0 - 0)             | 0<br>(0 - 0)        | 0<br>(0 - 0)             | 0<br>(0 - 0)             | 0<br>(0 - 0)             |
| Cystic echinococcosis                                             | 9<br>(7 - 11)             | 1<br>(0 - 1)             | 1<br>(1 - 1)        | 4<br>(3 - 6)             | 2<br>(2 - 3)             | 1<br>(1 - 1)             |
| Dengue                                                            | 0<br>(0 - 0)              | 0<br>(0 - 0)             | 0<br>(0 - 0)        | 0<br>(0 - 0)             | 0<br>(0 - 0)             | 0<br>(0 - 0)             |
| Rabies                                                            | 0<br>(0 - 1)              | 0<br>(0 - 0)             | 0<br>(0 - 0)        | 0<br>(0 - 0)             | 0<br>(0 - 0)             | 0<br>(0 - 0)             |
| Intestinal nematode infections                                    | 1<br>(0 - 5)              | 0<br>(0 - 4)             | 0<br>(0 - 1)        | 0<br>(0 - 1)             | 0<br>(0 - 1)             | 0<br>(0 - 1)             |
| Ascariasis                                                        | 1<br>(0 - 5)              | 0<br>(0 - 4)             | 0<br>(0 - 1)        | 0<br>(0 - 1)             | 0<br>(0 - 1)             | 0<br>(0 - 1)             |
| Other neglected tropical diseases                                 | 0<br>(0 - 0)              | 0<br>(0 - 0)             | 0<br>(0 - 0)        | 0<br>(0 - 0)             | 0<br>(0 - 0)             | 0<br>(0 - 0)             |
| Maternal disorders                                                | 33<br>(22 - 46)           | --                       | 0<br>(0 - 0)        | 32<br>(22 - 46)          | --                       | --                       |
| Maternal hemorrhage                                               | 5<br>(3 - 8)              | --                       | 0<br>(0 - 0)        | 5<br>(3 - 8)             | --                       | --                       |
| Maternal sepsis and other maternal infections                     | 4<br>(2 - 6)              | --                       | 0<br>(0 - 0)        | 4<br>(2 - 6)             | --                       | --                       |



Web Table 31- Mongolia deaths with 95% UI by age, sex, and cause in 2013

| Cause                                                            | Females, All Ages        | Females, 0-4 Years | Females, 5-14 Years | Females, 15-49 Years     | Females, 50-69 Years     | Females, 70-80 Years     |
|------------------------------------------------------------------|--------------------------|--------------------|---------------------|--------------------------|--------------------------|--------------------------|
| Maternal hypertensive disorders                                  | 3<br>(2 - 5)             | --                 | 0<br>(0 - 0)        | 3<br>(2 - 5)             | --                       | --                       |
| Maternal obstructed labor                                        | 3<br>(2 - 5)             | --                 | 0<br>(0 - 0)        | 3<br>(2 - 5)             | --                       | --                       |
| Maternal abortive outcome                                        | 5<br>(3 - 7)             | --                 | 0<br>(0 - 0)        | 5<br>(3 - 7)             | --                       | --                       |
| Indirect maternal deaths                                         | 3<br>(1 - 6)             | --                 | 0<br>(0 - 0)        | 3<br>(1 - 6)             | --                       | --                       |
| Late maternal deaths                                             | 4<br>(2 - 6)             | --                 | 0<br>(0 - 0)        | 4<br>(2 - 6)             | --                       | --                       |
| Maternal deaths aggravated by HIV/AIDS                           | 0<br>(0 - 0)             | --                 | --                  | 0<br>(0 - 0)             | --                       | --                       |
| Other maternal disorders                                         | 5<br>(3 - 8)             | --                 | 0<br>(0 - 0)        | 5<br>(3 - 8)             | --                       | --                       |
| Neonatal disorders                                               | 441<br>(366 - 539)       | 441<br>(366 - 539) | --                  | --                       | --                       | --                       |
| Neonatal preterm birth complications                             | 145<br>(79 - 233)        | 145<br>(79 - 233)  | --                  | --                       | --                       | --                       |
| Neonatal encephalopathy due to birth asphyxia and trauma         | 242<br>(157 - 329)       | 242<br>(157 - 329) | --                  | --                       | --                       | --                       |
| Neonatal sepsis and other neonatal infections                    | 20<br>(8 - 39)           | 20<br>(8 - 39)     | --                  | --                       | --                       | --                       |
| Hemolytic disease and other neonatal jaundice                    | 2<br>(1 - 3)             | 2<br>(1 - 3)       | --                  | --                       | --                       | --                       |
| Other neonatal disorders                                         | 33<br>(17 - 60)          | 33<br>(17 - 60)    | --                  | --                       | --                       | --                       |
| Nutritional deficiencies                                         | 9<br>(7 - 17)            | 1<br>(1 - 3)       | 0<br>(0 - 0)        | 5<br>(3 - 8)             | 1<br>(1 - 2)             | 2<br>(1 - 3)             |
| Protein-energy malnutrition                                      | 2<br>(1 - 4)             | 1<br>(0 - 2)       | 0<br>(0 - 0)        | 1<br>(0 - 1)             | 0<br>(0 - 1)             | 0<br>(0 - 0)             |
| Iodine deficiency                                                | 0<br>(0 - 1)             | 0<br>(0 - 0)       | 0<br>(0 - 0)        | 0<br>(0 - 0)             | 0<br>(0 - 0)             | 0<br>(0 - 0)             |
| Iron-deficiency anemia                                           | 6<br>(4 - 11)            | 0<br>(0 - 1)       | 0<br>(0 - 0)        | 3<br>(2 - 6)             | 1<br>(0 - 1)             | 2<br>(1 - 3)             |
| Other nutritional deficiencies                                   | 1<br>(0 - 2)             | 0<br>(0 - 0)       | 0<br>(0 - 0)        | 0<br>(0 - 1)             | 0<br>(0 - 0)             | 0<br>(0 - 0)             |
| Other communicable, maternal, neonatal, and nutritional diseases | 40<br>(28 - 55)          | 16<br>(8 - 28)     | 4<br>(3 - 6)        | 16<br>(11 - 22)          | 2<br>(1 - 5)             | 1<br>(0 - 2)             |
| Sexually transmitted diseases excluding HIV                      | 11<br>(3 - 24)           | 8<br>(1 - 19)      | 1<br>(0 - 2)        | 2<br>(1 - 3)             | 1<br>(0 - 3)             | 0<br>(0 - 0)             |
| Syphilis                                                         | 10<br>(2 - 22)           | 8<br>(1 - 19)      | 1<br>(0 - 2)        | 1<br>(0 - 1)             | 0<br>(0 - 1)             | 0<br>(0 - 0)             |
| Chlamydial infection                                             | 0<br>(0 - 1)             | --                 | 0<br>(0 - 0)        | 0<br>(0 - 1)             | 0<br>(0 - 0)             | 0<br>(0 - 0)             |
| Gonococcal infection                                             | 0<br>(0 - 1)             | --                 | 0<br>(0 - 0)        | 0<br>(0 - 1)             | 0<br>(0 - 1)             | 0<br>(0 - 0)             |
| Other sexually transmitted diseases                              | 0<br>(0 - 1)             | --                 | 0<br>(0 - 0)        | 0<br>(0 - 1)             | 0<br>(0 - 0)             | 0<br>(0 - 0)             |
| Hepatitis                                                        | 21<br>(15 - 28)          | 5<br>(3 - 9)       | 3<br>(2 - 5)        | 12<br>(8 - 18)           | 0<br>(0 - 1)             | 0<br>(0 - 0)             |
| Acute hepatitis A                                                | 4<br>(1 - 8)             | 2<br>(1 - 4)       | 1<br>(0 - 2)        | 1<br>(0 - 3)             | 0<br>(0 - 0)             | 0<br>(0 - 0)             |
| Acute hepatitis B                                                | 9<br>(5 - 14)            | 3<br>(1 - 6)       | 1<br>(1 - 2)        | 4<br>(2 - 7)             | 0<br>(0 - 0)             | 0<br>(0 - 0)             |
| Acute hepatitis C                                                | 1<br>(0 - 3)             | --                 | 0<br>(0 - 1)        | 1<br>(0 - 2)             | 0<br>(0 - 0)             | 0<br>(0 - 0)             |
| Acute hepatitis E                                                | 7<br>(4 - 11)            | 0<br>(0 - 0)       | 0<br>(0 - 1)        | 6<br>(3 - 10)            | 0<br>(0 - 0)             | 0<br>(0 - 0)             |
| Other infectious diseases                                        | 7<br>(4 - 12)            | 3<br>(1 - 7)       | 0<br>(0 - 1)        | 2<br>(1 - 3)             | 1<br>(1 - 3)             | 1<br>(0 - 2)             |
| Non-communicable diseases                                        | 7,327<br>(6,321 - 8,460) | 263<br>(190 - 349) | 55<br>(43 - 69)     | 1,310<br>(1,032 - 1,680) | 2,528<br>(2,095 - 2,979) | 3,171<br>(2,887 - 3,496) |
| Neoplasms                                                        | 1,866<br>(1,553 - 2,235) | 12<br>(7 - 20)     | 12<br>(9 - 18)      | 347<br>(263 - 459)       | 823<br>(670 - 1,007)     | 671<br>(565 - 791)       |
| Esophageal cancer                                                | 153<br>(116 - 193)       | --                 | --                  | 9<br>(6 - 13)            | 63<br>(44 - 86)          | 81<br>(59 - 107)         |
| Stomach cancer                                                   | 247<br>(197 - 311)       | --                 | --                  | 48<br>(35 - 66)          | 108<br>(83 - 139)        | 92<br>(68 - 122)         |
| Liver cancer                                                     | 782<br>(628 - 966)       | --                 | 0<br>(0 - 0)        | 86<br>(58 - 123)         | 364<br>(278 - 478)       | 332<br>(244 - 431)       |
| Liver cancer due to hepatitis B                                  | 253<br>(194 - 323)       | --                 | 0<br>(0 - 0)        | 32<br>(21 - 47)          | 133<br>(96 - 178)        | 89<br>(60 - 121)         |
| Liver cancer due to hepatitis C                                  | 265<br>(189 - 353)       | --                 | 0<br>(0 - 0)        | 25<br>(16 - 39)          | 117<br>(81 - 167)        | 122<br>(81 - 170)        |
| Liver cancer due to alcohol use                                  | 145<br>(88 - 213)        | --                 | --                  | 9<br>(5 - 15)            | 58<br>(35 - 88)          | 78<br>(43 - 122)         |
| Liver cancer due to other causes                                 | 119<br>(66 - 172)        | --                 | 0<br>(0 - 0)        | 19<br>(11 - 30)          | 56<br>(30 - 86)          | 43<br>(21 - 66)          |
| Larynx cancer                                                    | 6<br>(3 - 11)            | --                 | --                  | 2<br>(1 - 4)             | 2<br>(1 - 3)             | 2<br>(1 - 4)             |

Web Table 31- Mongolia deaths with 95% UI by age, sex, and cause in 2013

| Cause                                         | Females, All Ages        | Females, 0-4 Years | Females, 5-14 Years | Females, 15-49 Years | Females, 50-69 Years     | Females, 70-80 Years     |
|-----------------------------------------------|--------------------------|--------------------|---------------------|----------------------|--------------------------|--------------------------|
| Tracheal, bronchus and lung cancer            | 101<br>(80 - 127)        | --                 | --                  | 11<br>(7 - 15)       | 44<br>(34 - 59)          | 46<br>(35 - 60)          |
| Breast cancer                                 | 62<br>(48 - 80)          | --                 | --                  | 28<br>(20 - 39)      | 26<br>(20 - 34)          | 8<br>(7 - 11)            |
| Cervical cancer                               | 141<br>(105 - 190)       | --                 | --                  | 60<br>(42 - 87)      | 57<br>(40 - 75)          | 25<br>(18 - 34)          |
| Uterine cancer                                | 27<br>(19 - 42)          | --                 | --                  | 9<br>(6 - 14)        | 11<br>(7 - 18)           | 8<br>(5 - 12)            |
| Prostate cancer                               | --                       | --                 | --                  | --                   | --                       | --                       |
| Colon and rectum cancer                       | 50<br>(40 - 60)          | --                 | --                  | 9<br>(6 - 12)        | 23<br>(18 - 28)          | 18<br>(14 - 22)          |
| Lip and oral cavity cancer                    | 12<br>(9 - 19)           | --                 | --                  | 3<br>(1 - 4)         | 5<br>(4 - 8)             | 4<br>(3 - 7)             |
| Nasopharynx cancer                            | 4<br>(3 - 7)             | --                 | 0<br>(0 - 0)        | 2<br>(1 - 3)         | 2<br>(1 - 3)             | 1<br>(1 - 2)             |
| Other pharynx cancer                          | 3<br>(2 - 4)             | --                 | --                  | 0<br>(0 - 0)         | 2<br>(1 - 3)             | 1<br>(1 - 1)             |
| Gallbladder and biliary tract cancer          | 6<br>(4 - 9)             | --                 | --                  | 1<br>(1 - 2)         | 3<br>(2 - 4)             | 2<br>(1 - 3)             |
| Pancreatic cancer                             | 34<br>(27 - 42)          | --                 | --                  | 3<br>(2 - 5)         | 19<br>(14 - 25)          | 11<br>(8 - 15)           |
| Malignant skin melanoma                       | 4<br>(3 - 5)             | --                 | --                  | 1<br>(1 - 2)         | 1<br>(1 - 2)             | 1<br>(1 - 1)             |
| Non-melanoma skin cancer                      | 7<br>(3 - 12)            | --                 | --                  | 2<br>(1 - 4)         | 3<br>(1 - 5)             | 2<br>(1 - 4)             |
| Ovarian cancer                                | 39<br>(30 - 51)          | --                 | --                  | 12<br>(8 - 17)       | 21<br>(15 - 28)          | 7<br>(5 - 9)             |
| Testicular cancer                             | --                       | --                 | --                  | --                   | --                       | --                       |
| Kidney cancer                                 | 15<br>(12 - 20)          | 1<br>(0 - 1)       | 0<br>(0 - 0)        | 3<br>(2 - 5)         | 7<br>(5 - 10)            | 4<br>(3 - 6)             |
| Bladder cancer                                | 9<br>(6 - 18)            | --                 | --                  | 2<br>(1 - 5)         | 4<br>(2 - 8)             | 3<br>(2 - 6)             |
| Brain and nervous system cancer               | 28<br>(20 - 36)          | 1<br>(0 - 2)       | 0<br>(0 - 1)        | 11<br>(8 - 16)       | 12<br>(8 - 16)           | 4<br>(2 - 5)             |
| Thyroid cancer                                | 4<br>(3 - 5)             | --                 | 0<br>(0 - 0)        | 0<br>(0 - 0)         | 2<br>(1 - 4)             | 1<br>(1 - 2)             |
| Mesothelioma                                  | 1<br>(1 - 2)             | --                 | --                  | 0<br>(0 - 0)         | 1<br>(0 - 1)             | 0<br>(0 - 1)             |
| Hodgkin lymphoma                              | 2<br>(1 - 3)             | 0<br>(0 - 0)       | 0<br>(0 - 0)        | 1<br>(0 - 1)         | 1<br>(0 - 1)             | 0<br>(0 - 0)             |
| Non-Hodgkin lymphoma                          | 11<br>(8 - 19)           | 1<br>(0 - 1)       | 1<br>(0 - 1)        | 3<br>(1 - 6)         | 5<br>(3 - 7)             | 3<br>(2 - 4)             |
| Multiple myeloma                              | 2<br>(1 - 3)             | --                 | --                  | 1<br>(0 - 1)         | 1<br>(0 - 1)             | 0<br>(0 - 1)             |
| Leukemia                                      | 44<br>(34 - 57)          | 8<br>(4 - 15)      | 9<br>(6 - 14)       | 15<br>(11 - 20)      | 10<br>(8 - 13)           | 1<br>(1 - 2)             |
| Other neoplasms                               | 71<br>(52 - 105)         | 2<br>(1 - 3)       | 2<br>(1 - 3)        | 27<br>(17 - 47)      | 27<br>(18 - 37)          | 14<br>(10 - 22)          |
| Cardiovascular diseases                       | 3,709<br>(3,188 - 4,338) | 11<br>(7 - 18)     | 7<br>(5 - 10)       | 533<br>(418 - 713)   | 1,225<br>(1,004 - 1,469) | 1,934<br>(1,722 - 2,159) |
| Rheumatic heart disease                       | 56<br>(37 - 110)         | 0<br>(0 - 0)       | 1<br>(0 - 2)        | 25<br>(16 - 50)      | 19<br>(12 - 35)          | 11<br>(7 - 26)           |
| Ischemic heart disease                        | 1,671<br>(1,389 - 2,061) | 2<br>(1 - 4)       | 2<br>(1 - 4)        | 192<br>(141 - 277)   | 439<br>(335 - 590)       | 1,036<br>(888 - 1,211)   |
| Cerebrovascular disease                       | 1,792<br>(1,397 - 2,159) | 6<br>(4 - 11)      | 3<br>(2 - 5)        | 279<br>(206 - 369)   | 703<br>(545 - 864)       | 801<br>(617 - 945)       |
| Ischemic stroke                               | 284<br>(200 - 360)       | 1<br>(0 - 2)       | 0<br>(0 - 0)        | 16<br>(11 - 27)      | 66<br>(48 - 93)          | 200<br>(134 - 254)       |
| Hemorrhagic stroke                            | 1,509<br>(1,146 - 1,831) | 5<br>(3 - 10)      | 3<br>(2 - 5)        | 262<br>(194 - 347)   | 637<br>(477 - 788)       | 601<br>(455 - 714)       |
| Hypertensive heart disease                    | 83<br>(60 - 125)         | 0<br>(0 - 0)       | 0<br>(0 - 0)        | 8<br>(5 - 14)        | 24<br>(16 - 37)          | 51<br>(34 - 79)          |
| Cardiomyopathy and myocarditis                | 48<br>(33 - 66)          | 0<br>(0 - 2)       | 0<br>(0 - 0)        | 17<br>(11 - 27)      | 15<br>(10 - 22)          | 15<br>(9 - 25)           |
| Atrial fibrillation and flutter               | 0<br>(0 - 0)             | --                 | --                  | 0<br>(0 - 0)         | 0<br>(0 - 0)             | 0<br>(0 - 0)             |
| Aortic aneurysm                               | 7<br>(4 - 10)            | --                 | --                  | 2<br>(1 - 3)         | 2<br>(1 - 3)             | 3<br>(2 - 4)             |
| Peripheral vascular disease                   | 0<br>(0 - 0)             | --                 | --                  | 0<br>(0 - 0)         | 0<br>(0 - 0)             | 0<br>(0 - 0)             |
| Endocarditis                                  | 3<br>(2 - 5)             | 0<br>(0 - 0)       | 0<br>(0 - 0)        | 1<br>(0 - 1)         | 0<br>(0 - 1)             | 2<br>(1 - 3)             |
| Other cardiovascular and circulatory diseases | 49<br>(37 - 65)          | 1<br>(1 - 3)       | 0<br>(0 - 1)        | 10<br>(7 - 16)       | 22<br>(14 - 30)          | 15<br>(11 - 20)          |
| Chronic respiratory diseases                  | 159<br>(129 - 240)       | 8<br>(5 - 15)      | 2<br>(1 - 3)        | 17<br>(12 - 25)      | 47<br>(35 - 65)          | 86<br>(67 - 132)         |
| Chronic obstructive pulmonary disease         | 101<br>(76 - 149)        | 2<br>(1 - 3)       | 1<br>(1 - 2)        | 10<br>(7 - 14)       | 31<br>(22 - 45)          | 57<br>(41 - 90)          |

Web Table 31- Mongolia deaths with 95% UI by age, sex, and cause in 2013

| Cause                                               | Females, All Ages  | Females, 0-4 Years | Females, 5-14 Years | Females, 15-49 Years | Females, 50-69 Years | Females, 70-80 Years |
|-----------------------------------------------------|--------------------|--------------------|---------------------|----------------------|----------------------|----------------------|
| Pneumoconiosis                                      | 1<br>(1 - 2)       | 0<br>(0 - 0)       | 0<br>(0 - 0)        | 1<br>(0 - 1)         | 1<br>(0 - 1)         | 0<br>(0 - 0)         |
| Silicosis                                           | 0<br>(0 - 0)       | 0<br>(0 - 0)       | 0<br>(0 - 0)        | 0<br>(0 - 0)         | 0<br>(0 - 0)         | 0<br>(0 - 0)         |
| Asbestosis                                          | 0<br>(0 - 0)       | 0<br>(0 - 0)       | 0<br>(0 - 0)        | 0<br>(0 - 0)         | 0<br>(0 - 0)         | 0<br>(0 - 0)         |
| Coal workers pneumoconiosis                         | 0<br>(0 - 0)       | 0<br>(0 - 0)       | 0<br>(0 - 0)        | 0<br>(0 - 0)         | 0<br>(0 - 0)         | 0<br>(0 - 0)         |
| Other pneumoconiosis                                | 1<br>(0 - 1)       | 0<br>(0 - 0)       | 0<br>(0 - 0)        | 0<br>(0 - 0)         | 0<br>(0 - 1)         | 0<br>(0 - 0)         |
| Asthma                                              | 36<br>(23 - 60)    | 0<br>(0 - 1)       | 0<br>(0 - 1)        | 2<br>(1 - 6)         | 12<br>(8 - 20)       | 21<br>(12 - 35)      |
| Interstitial lung disease and pulmonary sarcoidosis | 14<br>(9 - 23)     | 3<br>(1 - 6)       | 0<br>(0 - 1)        | 2<br>(1 - 3)         | 2<br>(1 - 4)         | 7<br>(3 - 12)        |
| Other chronic respiratory diseases                  | 7<br>(5 - 12)      | 3<br>(2 - 6)       | 0<br>(0 - 0)        | 2<br>(2 - 4)         | 1<br>(0 - 1)         | 1<br>(1 - 2)         |
| Cirrhosis                                           | 577<br>(477 - 707) | 1<br>(0 - 1)       | 1<br>(1 - 1)        | 136<br>(101 - 185)   | 228<br>(178 - 285)   | 211<br>(165 - 266)   |
| Cirrhosis due to hepatitis B                        | 265<br>(187 - 365) | 0<br>(0 - 0)       | 0<br>(0 - 1)        | 61<br>(39 - 93)      | 102<br>(68 - 148)    | 102<br>(67 - 140)    |
| Cirrhosis due to hepatitis C                        | 205<br>(122 - 298) | 0<br>(0 - 0)       | 0<br>(0 - 0)        | 46<br>(25 - 72)      | 88<br>(48 - 131)     | 71<br>(41 - 108)     |
| Cirrhosis due to alcohol use                        | 50<br>(23 - 80)    | --                 | --                  | 7<br>(3 - 14)        | 18<br>(8 - 30)       | 25<br>(10 - 43)      |
| Cirrhosis due to other causes                       | 56<br>(31 - 90)    | 0<br>(0 - 1)       | 0<br>(0 - 1)        | 22<br>(12 - 35)      | 20<br>(9 - 35)       | 13<br>(6 - 23)       |
| Digestive diseases                                  | 221<br>(179 - 271) | 19<br>(9 - 36)     | 6<br>(5 - 9)        | 49<br>(36 - 70)      | 75<br>(53 - 96)      | 71<br>(55 - 89)      |
| Peptic ulcer disease                                | 68<br>(47 - 90)    | 0<br>(0 - 1)       | 0<br>(0 - 0)        | 12<br>(8 - 18)       | 23<br>(13 - 35)      | 33<br>(23 - 45)      |
| Gastritis and duodenitis                            | 11<br>(3 - 17)     | 0<br>(0 - 0)       | 0<br>(0 - 0)        | 1<br>(1 - 2)         | 4<br>(1 - 8)         | 5<br>(2 - 9)         |
| Appendicitis                                        | 12<br>(6 - 24)     | 4<br>(1 - 11)      | 2<br>(1 - 4)        | 4<br>(2 - 8)         | 1<br>(0 - 3)         | 1<br>(0 - 1)         |
| Paralytic ileus and intestinal obstruction          | 44<br>(28 - 70)    | 1<br>(0 - 2)       | 1<br>(1 - 3)        | 15<br>(10 - 26)      | 20<br>(11 - 30)      | 7<br>(4 - 12)        |
| Inguinal, femoral, and abdominal hernia             | 2<br>(1 - 5)       | 0<br>(0 - 1)       | 1<br>(0 - 2)        | 0<br>(0 - 0)         | 0<br>(0 - 1)         | 1<br>(0 - 2)         |
| Inflammatory bowel disease                          | 8<br>(2 - 18)      | 3<br>(1 - 8)       | 1<br>(0 - 1)        | 3<br>(0 - 6)         | 1<br>(0 - 3)         | 1<br>(0 - 2)         |
| Vascular intestinal disorders                       | 3<br>(2 - 8)       | 0<br>(0 - 1)       | 0<br>(0 - 0)        | 0<br>(0 - 1)         | 3<br>(1 - 6)         | 0<br>(0 - 0)         |
| Gallbladder and biliary diseases                    | 27<br>(19 - 39)    | 1<br>(0 - 3)       | 0<br>(0 - 0)        | 6<br>(4 - 12)        | 8<br>(5 - 13)        | 11<br>(6 - 17)       |
| Pancreatitis                                        | 7<br>(3 - 11)      | 0<br>(0 - 1)       | 0<br>(0 - 0)        | 3<br>(1 - 5)         | 2<br>(1 - 4)         | 1<br>(1 - 2)         |
| Other digestive diseases                            | 38<br>(29 - 52)    | 8<br>(4 - 16)      | 1<br>(1 - 2)        | 5<br>(3 - 7)         | 13<br>(8 - 19)       | 12<br>(8 - 18)       |
| Neurological disorders                              | 206<br>(163 - 257) | 1<br>(0 - 3)       | 5<br>(3 - 8)        | 39<br>(25 - 59)      | 22<br>(16 - 28)      | 139<br>(105 - 173)   |
| Alzheimer disease and other dementias               | 152<br>(116 - 188) | --                 | --                  | 0<br>(0 - 0)         | 13<br>(9 - 19)       | 138<br>(104 - 173)   |
| Parkinson disease                                   | 0<br>(0 - 1)       | --                 | --                  | 0<br>(0 - 0)         | 0<br>(0 - 1)         | 0<br>(0 - 0)         |
| Epilepsy                                            | 45<br>(29 - 66)    | 1<br>(0 - 3)       | 5<br>(3 - 8)        | 35<br>(21 - 54)      | 4<br>(2 - 7)         | 0<br>(0 - 0)         |
| Multiple sclerosis                                  | 6<br>(3 - 9)       | --                 | --                  | 3<br>(2 - 6)         | 2<br>(1 - 3)         | 1<br>(0 - 2)         |
| Other neurological disorders                        | 4<br>(3 - 5)       | 0<br>(0 - 0)       | 0<br>(0 - 1)        | 1<br>(0 - 1)         | 2<br>(2 - 3)         | 0<br>(0 - 0)         |
| Mental and substance use disorders                  | 58<br>(16 - 104)   | 0<br>(0 - 0)       | 0<br>(0 - 0)        | 43<br>(11 - 79)      | 13<br>(3 - 24)       | 2<br>(1 - 3)         |
| Schizophrenia                                       | 4<br>(2 - 6)       | --                 | --                  | 3<br>(2 - 4)         | 1<br>(1 - 1)         | 0<br>(0 - 0)         |
| Alcohol use disorders                               | 48<br>(7 - 92)     | --                 | --                  | 36<br>(5 - 72)       | 11<br>(2 - 21)       | 1<br>(0 - 1)         |
| Drug use disorders                                  | 6<br>(4 - 7)       | 0<br>(0 - 0)       | --                  | 3<br>(2 - 4)         | 1<br>(1 - 1)         | 1<br>(1 - 2)         |
| Opioid use disorders                                | 1<br>(1 - 1)       | 0<br>(0 - 0)       | --                  | 1<br>(0 - 1)         | 0<br>(0 - 0)         | 0<br>(0 - 0)         |
| Cocaine use disorders                               | 0<br>(0 - 0)       | 0<br>(0 - 0)       | --                  | 0<br>(0 - 0)         | 0<br>(0 - 0)         | 0<br>(0 - 0)         |
| Amphetamine use disorders                           | 0<br>(0 - 0)       | 0<br>(0 - 0)       | --                  | 0<br>(0 - 0)         | 0<br>(0 - 0)         | 0<br>(0 - 0)         |
| Other drug use disorders                            | 4<br>(3 - 5)       | 0<br>(0 - 0)       | --                  | 2<br>(2 - 3)         | 1<br>(1 - 1)         | 1<br>(1 - 1)         |
| Eating disorders                                    | 0<br>(0 - 0)       | --                 | 0<br>(0 - 0)        | 0<br>(0 - 0)         | --                   | --                   |
| Anorexia nervosa                                    | 0<br>(0 - 0)       | --                 | 0<br>(0 - 0)        | 0<br>(0 - 0)         | --                   | --                   |

Web Table 31- Mongolia deaths with 95% UI by age, sex, and cause in 2013

| Cause                                               | Females, All Ages  | Females, 0-4 Years | Females, 5-14 Years | Females, 15-49 Years | Females, 50-69 Years | Females, 70-80 Years |
|-----------------------------------------------------|--------------------|--------------------|---------------------|----------------------|----------------------|----------------------|
| Diabetes, urogenital, blood, and endocrine diseases | 278<br>(221 - 362) | 12<br>(8 - 18)     | 6<br>(4 - 9)        | 115<br>(86 - 156)    | 91<br>(69 - 121)     | 54<br>(42 - 75)      |
| Diabetes mellitus                                   | 44<br>(34 - 56)    | 0<br>(0 - 0)       | 1<br>(0 - 2)        | 14<br>(11 - 20)      | 18<br>(13 - 24)      | 10<br>(7 - 13)       |
| Acute glomerulonephritis                            | 0<br>(0 - 1)       | 0<br>(0 - 0)       | 0<br>(0 - 0)        | 0<br>(0 - 1)         | 0<br>(0 - 0)         | 0<br>(0 - 0)         |
| Chronic kidney disease                              | 153<br>(118 - 214) | 2<br>(1 - 3)       | 2<br>(1 - 2)        | 63<br>(46 - 91)      | 53<br>(38 - 73)      | 34<br>(24 - 50)      |
| Chronic kidney disease due to diabetes mellitus     | 0<br>(0 - 0)       | 0<br>(0 - 0)       | 0<br>(0 - 0)        | 0<br>(0 - 0)         | 0<br>(0 - 0)         | 0<br>(0 - 0)         |
| Chronic kidney disease due to hypertension          | 31<br>(19 - 48)    | 0<br>(0 - 0)       | 0<br>(0 - 0)        | 6<br>(3 - 10)        | 13<br>(7 - 21)       | 13<br>(7 - 19)       |
| Chronic kidney disease due to glomerulonephritis    | 35<br>(24 - 52)    | 1<br>(0 - 1)       | 1<br>(0 - 1)        | 26<br>(18 - 37)      | 8<br>(4 - 15)        | 0<br>(0 - 0)         |
| Chronic kidney disease due to other causes          | 86<br>(60 - 130)   | 1<br>(0 - 2)       | 1<br>(0 - 1)        | 32<br>(20 - 52)      | 32<br>(19 - 47)      | 21<br>(12 - 37)      |
| Urinary diseases and male infertility               | 31<br>(19 - 60)    | 0<br>(0 - 0)       | 0<br>(0 - 1)        | 10<br>(5 - 21)       | 13<br>(7 - 24)       | 8<br>(5 - 16)        |
| Interstitial nephritis and urinary tract infections | 29<br>(18 - 56)    | 0<br>(0 - 0)       | 0<br>(0 - 1)        | 8<br>(4 - 19)        | 12<br>(7 - 23)       | 8<br>(4 - 15)        |
| Urolithiasis                                        | 1<br>(0 - 3)       | --<br>(0 - 0)      | 0<br>(0 - 0)        | 1<br>(0 - 2)         | 0<br>(0 - 0)         | 0<br>(0 - 1)         |
| Other urinary diseases                              | 1<br>(0 - 2)       | 0<br>(0 - 0)       | 0<br>(0 - 0)        | 0<br>(0 - 1)         | 1<br>(0 - 1)         | 0<br>(0 - 0)         |
| Gynecological diseases                              | 1<br>(1 - 2)       | --<br>(0 - 0)      | --<br>(0 - 0)       | 1<br>(1 - 2)         | 0<br>(0 - 0)         | 0<br>(0 - 0)         |
| Uterine fibroids                                    | 0<br>(0 - 0)       | --<br>(0 - 0)      | --<br>(0 - 0)       | 0<br>(0 - 0)         | 0<br>(0 - 0)         | 0<br>(0 - 0)         |
| Polycystic ovarian syndrome                         | 0<br>(0 - 0)       | --<br>(0 - 0)      | --<br>(0 - 0)       | 0<br>(0 - 0)         | 0<br>(0 - 0)         | --<br>(0 - 0)        |
| Endometriosis                                       | 0<br>(0 - 0)       | --<br>(0 - 0)      | --<br>(0 - 0)       | 0<br>(0 - 0)         | 0<br>(0 - 0)         | --<br>(0 - 0)        |
| Genital prolapse                                    | 0<br>(0 - 0)       | --<br>(0 - 0)      | --<br>(0 - 0)       | 0<br>(0 - 0)         | 0<br>(0 - 0)         | 0<br>(0 - 0)         |
| Other gynecological diseases                        | 1<br>(0 - 1)       | --<br>(0 - 1)      | --<br>(0 - 1)       | 0<br>(0 - 1)         | 0<br>(0 - 0)         | 0<br>(0 - 0)         |
| Hemoglobinopathies and hemolytic anemias            | 12<br>(7 - 19)     | 4<br>(2 - 7)       | 1<br>(1 - 2)        | 5<br>(3 - 9)         | 1<br>(1 - 2)         | 1<br>(0 - 1)         |
| Thalassemias                                        | 6<br>(4 - 11)      | 2<br>(1 - 5)       | 1<br>(0 - 2)        | 3<br>(2 - 5)         | 0<br>(0 - 0)         | 0<br>(0 - 0)         |
| Sickle cell disorders                               | 0<br>(0 - 0)       | 0<br>(0 - 0)       | 0<br>(0 - 0)        | 0<br>(0 - 0)         | 0<br>(0 - 0)         | 0<br>(0 - 0)         |
| G6PD deficiency                                     | 0<br>(0 - 0)       | 0<br>(0 - 0)       | 0<br>(0 - 0)        | 0<br>(0 - 0)         | 0<br>(0 - 0)         | 0<br>(0 - 0)         |
| Other hemoglobinopathies and hemolytic anemias      | 5<br>(3 - 8)       | 1<br>(1 - 2)       | 0<br>(0 - 0)        | 2<br>(1 - 3)         | 1<br>(1 - 1)         | 1<br>(0 - 1)         |
| Endocrine, metabolic, blood, and immune disorders   | 37<br>(25 - 52)    | 7<br>(4 - 11)      | 2<br>(1 - 3)        | 22<br>(13 - 32)      | 5<br>(3 - 9)         | 1<br>(1 - 2)         |
| Musculoskeletal disorders                           | 12<br>(9 - 17)     | --<br>(1 - 1)      | 1<br>(1 - 1)        | 9<br>(6 - 13)        | 1<br>(1 - 2)         | 1<br>(1 - 1)         |
| Rheumatoid arthritis                                | 2<br>(1 - 4)       | --<br>(0 - 0)      | 0<br>(0 - 0)        | 1<br>(0 - 2)         | 1<br>(0 - 1)         | 1<br>(0 - 1)         |
| Other musculoskeletal disorders                     | 10<br>(7 - 15)     | --<br>(1 - 1)      | 1<br>(1 - 1)        | 9<br>(6 - 13)        | 0<br>(0 - 1)         | 0<br>(0 - 0)         |
| Other non-communicable diseases                     | 241<br>(174 - 318) | 200<br>(140 - 272) | 14<br>(9 - 21)      | 21<br>(14 - 29)      | 4<br>(3 - 6)         | 2<br>(1 - 2)         |
| Congenital anomalies                                | 236<br>(169 - 313) | 196<br>(137 - 269) | 14<br>(9 - 21)      | 20<br>(13 - 28)      | 4<br>(3 - 6)         | 1<br>(1 - 2)         |
| Neural tube defects                                 | 4<br>(1 - 11)      | 3<br>(1 - 10)      | 0<br>(0 - 0)        | 0<br>(0 - 1)         | 0<br>(0 - 0)         | 0<br>(0 - 0)         |
| Congenital heart anomalies                          | 132<br>(91 - 176)  | 96<br>(59 - 139)   | 12<br>(8 - 19)      | 18<br>(12 - 26)      | 4<br>(3 - 5)         | 1<br>(1 - 2)         |
| Cleft lip and cleft palate                          | 1<br>(0 - 2)       | 1<br>(0 - 2)       | --<br>(0 - 0)       | --<br>(0 - 0)        | --<br>(0 - 0)        | --<br>(0 - 0)        |
| Down syndrome                                       | 13<br>(7 - 25)     | 13<br>(6 - 25)     | 0<br>(0 - 0)        | 0<br>(0 - 0)         | 0<br>(0 - 0)         | 0<br>(0 - 0)         |
| Chromosomal unbalanced rearrangements               | 0<br>(0 - 1)       | 0<br>(0 - 0)       | 0<br>(0 - 0)        | 0<br>(0 - 0)         | 0<br>(0 - 0)         | 0<br>(0 - 0)         |
| Other congenital anomalies                          | 85<br>(52 - 126)   | 82<br>(50 - 123)   | 1<br>(1 - 2)        | 1<br>(1 - 2)         | 0<br>(0 - 0)         | 0<br>(0 - 0)         |
| Skin and subcutaneous diseases                      | 3<br>(2 - 5)       | 2<br>(1 - 3)       | 0<br>(0 - 0)        | 1<br>(1 - 1)         | 0<br>(0 - 1)         | 0<br>(0 - 1)         |
| Cellulitis                                          | 1<br>(0 - 1)       | 0<br>(0 - 0)       | 0<br>(0 - 0)        | 0<br>(0 - 1)         | 0<br>(0 - 0)         | 0<br>(0 - 0)         |
| Pyoderma                                            | 2<br>(1 - 4)       | 1<br>(1 - 3)       | 0<br>(0 - 0)        | 0<br>(0 - 1)         | 0<br>(0 - 0)         | 0<br>(0 - 0)         |
| Decubitus ulcer                                     | 0<br>(0 - 0)       | 0<br>(0 - 0)       | 0<br>(0 - 0)        | 0<br>(0 - 0)         | 0<br>(0 - 0)         | 0<br>(0 - 0)         |
| Other skin and subcutaneous diseases                | 0<br>(0 - 1)       | 0<br>(0 - 1)       | 0<br>(0 - 0)        | 0<br>(0 - 0)         | 0<br>(0 - 0)         | 0<br>(0 - 0)         |

Web Table 31- Mongolia deaths with 95% UI by age, sex, and cause in 2013

| Cause                                           | Females, All Ages  | Females, 0-4 Years | Females, 5-14 Years | Females, 15-49 Years | Females, 50-69 Years | Females, 70-80 Years |
|-------------------------------------------------|--------------------|--------------------|---------------------|----------------------|----------------------|----------------------|
| Sudden infant death syndrome                    | 2<br>(0 - 10)      | 2<br>(0 - 10)      | --                  | --                   | --                   | --                   |
| Injuries                                        | 532<br>(354 - 674) | 123<br>(68 - 188)  | 48<br>(32 - 62)     | 292<br>(191 - 390)   | 58<br>(34 - 78)      | 11<br>(7 - 15)       |
| Transport injuries                              | 154<br>(49 - 222)  | 15<br>(4 - 26)     | 20<br>(6 - 30)      | 92<br>(28 - 141)     | 26<br>(8 - 39)       | 2<br>(1 - 3)         |
| Road injuries                                   | 149<br>(47 - 216)  | 14<br>(4 - 25)     | 20<br>(6 - 30)      | 89<br>(27 - 136)     | 25<br>(8 - 38)       | 2<br>(1 - 3)         |
| Pedestrian road injuries                        | 50<br>(15 - 74)    | 4<br>(1 - 9)       | 9<br>(3 - 16)       | 28<br>(7 - 46)       | 7<br>(2 - 12)        | 1<br>(0 - 2)         |
| Cyclist road injuries                           | 1<br>(0 - 2)       | 0<br>(0 - 0)       | 0<br>(0 - 0)        | 0<br>(0 - 0)         | 1<br>(0 - 1)         | 0<br>(0 - 0)         |
| Motorcyclist road injuries                      | 5<br>(2 - 11)      | 1<br>(0 - 3)       | 0<br>(0 - 0)        | 3<br>(1 - 6)         | 1<br>(0 - 1)         | 0<br>(0 - 0)         |
| Motor vehicle road injuries                     | 92<br>(28 - 135)   | 9<br>(2 - 17)      | 10<br>(2 - 16)      | 56<br>(17 - 88)      | 17<br>(5 - 26)       | 1<br>(0 - 1)         |
| Other road injuries                             | 2<br>(0 - 3)       | 0<br>(0 - 0)       | 0<br>(0 - 1)        | 1<br>(0 - 2)         | 0<br>(0 - 0)         | 0<br>(0 - 0)         |
| Other transport injuries                        | 5<br>(1 - 7)       | 1<br>(0 - 2)       | 0<br>(0 - 1)        | 3<br>(1 - 5)         | 0<br>(0 - 1)         | 0<br>(0 - 0)         |
| Unintentional injuries                          | 213<br>(147 - 282) | 104<br>(55 - 168)  | 22<br>(15 - 30)     | 61<br>(45 - 82)      | 18<br>(12 - 24)      | 8<br>(4 - 11)        |
| Falls                                           | 30<br>(7 - 48)     | 6<br>(2 - 12)      | 0<br>(0 - 1)        | 15<br>(3 - 25)       | 6<br>(1 - 11)        | 3<br>(1 - 6)         |
| Drowning                                        | 43<br>(28 - 70)    | 12<br>(5 - 22)     | 11<br>(6 - 18)      | 18<br>(11 - 30)      | 2<br>(1 - 5)         | 0<br>(0 - 0)         |
| Fire, heat, and hot substances                  | 37<br>(6 - 87)     | 29<br>(4 - 72)     | 5<br>(1 - 13)       | 3<br>(1 - 6)         | 1<br>(0 - 1)         | 0<br>(0 - 0)         |
| Poisonings                                      | 27<br>(16 - 48)    | 7<br>(2 - 15)      | 3<br>(1 - 6)        | 13<br>(8 - 25)       | 3<br>(1 - 6)         | 2<br>(1 - 3)         |
| Exposure to mechanical forces                   | 31<br>(11 - 84)    | 25<br>(6 - 77)     | 0<br>(0 - 1)        | 4<br>(2 - 6)         | 2<br>(1 - 3)         | 0<br>(0 - 0)         |
| Unintentional firearm injuries                  | 1<br>(1 - 1)       | 0<br>(0 - 0)       | 0<br>(0 - 0)        | 0<br>(0 - 1)         | 0<br>(0 - 0)         | 0<br>(0 - 0)         |
| Unintentional suffocation                       | 24<br>(5 - 77)     | 24<br>(5 - 77)     | 0<br>(0 - 0)        | 0<br>(0 - 0)         | 0<br>(0 - 0)         | 0<br>(0 - 0)         |
| Other exposure to mechanical forces             | 6<br>(2 - 8)       | 0<br>(0 - 1)       | 0<br>(0 - 1)        | 3<br>(1 - 5)         | 2<br>(1 - 3)         | 0<br>(0 - 0)         |
| Adverse effects of medical treatment            | 7<br>(4 - 10)      | 2<br>(1 - 4)       | 0<br>(0 - 0)        | 1<br>(1 - 1)         | 2<br>(1 - 3)         | 2<br>(1 - 3)         |
| Animal contact                                  | 2<br>(1 - 6)       | 1<br>(0 - 3)       | 0<br>(0 - 0)        | 0<br>(0 - 1)         | 0<br>(0 - 1)         | 0<br>(0 - 0)         |
| Venomous animal contact                         | 1<br>(0 - 2)       | 0<br>(0 - 1)       | 0<br>(0 - 0)        | 0<br>(0 - 0)         | 0<br>(0 - 1)         | 0<br>(0 - 0)         |
| Non-venomous animal contact                     | 1<br>(1 - 3)       | 1<br>(0 - 2)       | 0<br>(0 - 0)        | 0<br>(0 - 1)         | 0<br>(0 - 0)         | 0<br>(0 - 0)         |
| Foreign body                                    | 31<br>(18 - 48)    | 22<br>(11 - 38)    | 2<br>(1 - 5)        | 5<br>(2 - 10)        | 1<br>(1 - 3)         | 0<br>(0 - 1)         |
| Pulmonary aspiration and foreign body in airway | 30<br>(17 - 47)    | 22<br>(11 - 38)    | 2<br>(0 - 4)        | 5<br>(2 - 10)        | 1<br>(1 - 3)         | 0<br>(0 - 1)         |
| Foreign body in other body part                 | 0<br>(0 - 1)       | 0<br>(0 - 0)       | 0<br>(0 - 1)        | 0<br>(0 - 0)         | 0<br>(0 - 0)         | 0<br>(0 - 0)         |
| Other unintentional injuries                    | 5<br>(4 - 7)       | 1<br>(1 - 2)       | 0<br>(0 - 0)        | 2<br>(1 - 3)         | 1<br>(1 - 2)         | 0<br>(0 - 0)         |
| Self-harm and interpersonal violence            | 166<br>(121 - 216) | 4<br>(1 - 9)       | 7<br>(3 - 11)       | 139<br>(99 - 187)    | 14<br>(10 - 20)      | 1<br>(1 - 2)         |
| Self-harm                                       | 119<br>(84 - 163)  | --                 | 4<br>(2 - 9)        | 104<br>(72 - 143)    | 10<br>(6 - 16)       | 1<br>(0 - 1)         |
| Interpersonal violence                          | 47<br>(20 - 71)    | 4<br>(1 - 9)       | 2<br>(1 - 4)        | 35<br>(15 - 55)      | 5<br>(2 - 8)         | 1<br>(0 - 1)         |
| Assault by firearm                              | 1<br>(0 - 2)       | 0<br>(0 - 0)       | 0<br>(0 - 0)        | 0<br>(0 - 1)         | 0<br>(0 - 0)         | 0<br>(0 - 0)         |
| Assault by sharp object                         | 15<br>(6 - 26)     | 1<br>(0 - 3)       | 0<br>(0 - 0)        | 13<br>(5 - 21)       | 1<br>(0 - 2)         | 0<br>(0 - 0)         |
| Assault by other means                          | 31<br>(12 - 47)    | 3<br>(1 - 6)       | 2<br>(1 - 4)        | 23<br>(8 - 36)       | 3<br>(1 - 5)         | 1<br>(0 - 1)         |

Web Table 31- Montenegro deaths with 95% UI by age, sex, and cause in 2013

| Cause                                                             | Both Sexes, All Ages     | Both Sexes, 0-4 Years | Both Sexes, 5-14 Years | Both Sexes, 15-49 Years | Both Sexes, 50-69 Years  | Both Sexes, 70-80 Years  |
|-------------------------------------------------------------------|--------------------------|-----------------------|------------------------|-------------------------|--------------------------|--------------------------|
| All causes                                                        | 6,170<br>(5,657 - 6,650) | 46<br>(26 - 76)       | 12<br>(9 - 17)         | 437<br>(378 - 499)      | 1,749<br>(1,527 - 1,949) | 3,926<br>(3,671 - 4,159) |
| Communicable, maternal, neonatal, and nutritional diseases        | 116<br>(96 - 143)        | 31<br>(18 - 50)       | 1<br>(0 - 1)           | 10<br>(9 - 12)          | 22<br>(18 - 28)          | 52<br>(42 - 65)          |
| HIV/AIDS and tuberculosis                                         | 3<br>(3 - 5)             | 0<br>(0 - 0)          | 0<br>(0 - 0)           | 1<br>(1 - 2)            | 2<br>(1 - 2)             | 1<br>(0 - 1)             |
| Tuberculosis                                                      | 2<br>(2 - 4)             | 0<br>(0 - 0)          | 0<br>(0 - 0)           | 1<br>(0 - 1)            | 1<br>(1 - 2)             | 1<br>(0 - 1)             |
| HIV/AIDS                                                          | 1<br>(1 - 2)             | 0<br>(0 - 0)          | 0<br>(0 - 0)           | 1<br>(0 - 1)            | 0<br>(0 - 0)             | 0<br>(0 - 0)             |
| HIV/AIDS resulting in mycobacterial infection                     | 0<br>(0 - 0)             | 0<br>(0 - 0)          | 0<br>(0 - 0)           | 0<br>(0 - 0)            | 0<br>(0 - 0)             | 0<br>(0 - 0)             |
| HIV/AIDS resulting in other diseases                              | 1<br>(0 - 1)             | 0<br>(0 - 0)          | 0<br>(0 - 0)           | 1<br>(0 - 1)            | 0<br>(0 - 0)             | 0<br>(0 - 0)             |
| Diarrhea, lower respiratory, and other common infectious diseases | 75<br>(63 - 91)          | 3<br>(2 - 6)          | 1<br>(0 - 1)           | 6<br>(5 - 8)            | 18<br>(14 - 23)          | 47<br>(37 - 60)          |
| Diarrheal diseases                                                | 1<br>(0 - 1)             | 0<br>(0 - 0)          | 0<br>(0 - 0)           | 0<br>(0 - 0)            | 0<br>(0 - 0)             | 0<br>(0 - 0)             |
| Intestinal infectious diseases                                    | 1<br>(1 - 2)             | 0<br>(0 - 0)          | 0<br>(0 - 0)           | 0<br>(0 - 1)            | 0<br>(0 - 0)             | 0<br>(0 - 0)             |
| Typhoid fever                                                     | 1<br>(0 - 2)             | 0<br>(0 - 0)          | 0<br>(0 - 0)           | 0<br>(0 - 1)            | 0<br>(0 - 0)             | 0<br>(0 - 0)             |
| Paratyphoid fever                                                 | 0<br>(0 - 1)             | 0<br>(0 - 0)          | 0<br>(0 - 0)           | 0<br>(0 - 0)            | 0<br>(0 - 0)             | 0<br>(0 - 0)             |
| Other intestinal infectious diseases                              | 0<br>(0 - 1)             | 0<br>(0 - 0)          | 0<br>(0 - 0)           | 0<br>(0 - 0)            | 0<br>(0 - 0)             | 0<br>(0 - 0)             |
| Lower respiratory infections                                      | 71<br>(58 - 86)          | 3<br>(1 - 5)          | 0<br>(0 - 0)           | 5<br>(4 - 7)            | 16<br>(13 - 21)          | 46<br>(36 - 59)          |
| Upper respiratory infections                                      | 0<br>(0 - 0)             | 0<br>(0 - 0)          | 0<br>(0 - 0)           | 0<br>(0 - 0)            | 0<br>(0 - 0)             | 0<br>(0 - 0)             |
| Otitis media                                                      | 0<br>(0 - 0)             | 0<br>(0 - 0)          | 0<br>(0 - 0)           | 0<br>(0 - 0)            | 0<br>(0 - 0)             | 0<br>(0 - 0)             |
| Meningitis                                                        | 1<br>(1 - 1)             | 0<br>(0 - 0)          | 0<br>(0 - 0)           | 0<br>(0 - 0)            | 1<br>(0 - 1)             | 0<br>(0 - 0)             |
| Pneumococcal meningitis                                           | 0<br>(0 - 0)             | 0<br>(0 - 0)          | 0<br>(0 - 0)           | 0<br>(0 - 0)            | 0<br>(0 - 0)             | 0<br>(0 - 0)             |
| H influenzae type B meningitis                                    | 0<br>(0 - 0)             | 0<br>(0 - 0)          | 0<br>(0 - 0)           | 0<br>(0 - 0)            | 0<br>(0 - 0)             | 0<br>(0 - 0)             |
| Meningococcal meningitis                                          | 0<br>(0 - 0)             | 0<br>(0 - 0)          | 0<br>(0 - 0)           | 0<br>(0 - 0)            | 0<br>(0 - 0)             | 0<br>(0 - 0)             |
| Other meningitis                                                  | 0<br>(0 - 1)             | 0<br>(0 - 0)          | 0<br>(0 - 0)           | 0<br>(0 - 0)            | 0<br>(0 - 0)             | 0<br>(0 - 0)             |
| Encephalitis                                                      | 1<br>(0 - 1)             | 0<br>(0 - 0)          | 0<br>(0 - 0)           | 0<br>(0 - 0)            | 0<br>(0 - 1)             | 0<br>(0 - 0)             |
| Diphtheria                                                        | 0<br>(0 - 0)             | 0<br>(0 - 0)          | 0<br>(0 - 0)           | 0<br>(0 - 0)            | 0<br>(0 - 0)             | --                       |
| Whooping cough                                                    | 0<br>(0 - 0)             | 0<br>(0 - 0)          | 0<br>(0 - 0)           | 0<br>(0 - 0)            | 0<br>(0 - 0)             | --                       |
| Tetanus                                                           | 0<br>(0 - 0)             | 0<br>(0 - 0)          | 0<br>(0 - 0)           | 0<br>(0 - 0)            | 0<br>(0 - 0)             | 0<br>(0 - 0)             |
| Measles                                                           | 0<br>(0 - 0)             | 0<br>(0 - 0)          | 0<br>(0 - 0)           | 0<br>(0 - 0)            | 0<br>(0 - 0)             | --                       |
| Varicella and herpes zoster                                       | 1<br>(0 - 1)             | 0<br>(0 - 0)          | 0<br>(0 - 0)           | 0<br>(0 - 0)            | 0<br>(0 - 0)             | 0<br>(0 - 1)             |
| Neglected tropical diseases and malaria                           | 1<br>(1 - 1)             | 0<br>(0 - 0)          | 0<br>(0 - 0)           | 0<br>(0 - 0)            | 0<br>(0 - 0)             | 0<br>(0 - 0)             |
| Leishmaniasis                                                     | 0<br>(0 - 0)             | 0<br>(0 - 0)          | 0<br>(0 - 0)           | 0<br>(0 - 0)            | 0<br>(0 - 0)             | 0<br>(0 - 0)             |
| Visceral leishmaniasis                                            | 0<br>(0 - 0)             | 0<br>(0 - 0)          | 0<br>(0 - 0)           | 0<br>(0 - 0)            | 0<br>(0 - 0)             | 0<br>(0 - 0)             |
| Cysticercosis                                                     | 0<br>(0 - 0)             | 0<br>(0 - 0)          | 0<br>(0 - 0)           | 0<br>(0 - 0)            | 0<br>(0 - 0)             | 0<br>(0 - 0)             |
| Cystic echinococcosis                                             | 0<br>(0 - 0)             | 0<br>(0 - 0)          | 0<br>(0 - 0)           | 0<br>(0 - 0)            | 0<br>(0 - 0)             | 0<br>(0 - 0)             |
| Dengue                                                            | 0<br>(0 - 0)             | 0<br>(0 - 0)          | 0<br>(0 - 0)           | 0<br>(0 - 0)            | 0<br>(0 - 0)             | 0<br>(0 - 0)             |
| Rabies                                                            | 0<br>(0 - 0)             | 0<br>(0 - 0)          | 0<br>(0 - 0)           | 0<br>(0 - 0)            | 0<br>(0 - 0)             | 0<br>(0 - 0)             |
| Other neglected tropical diseases                                 | 0<br>(0 - 0)             | 0<br>(0 - 0)          | 0<br>(0 - 0)           | 0<br>(0 - 0)            | 0<br>(0 - 0)             | 0<br>(0 - 0)             |
| Maternal disorders                                                | 1<br>(1 - 1)             | --                    | 0<br>(0 - 0)           | 1<br>(1 - 1)            | --                       | --                       |
| Maternal hemorrhage                                               | 0<br>(0 - 0)             | --                    | 0<br>(0 - 0)           | 0<br>(0 - 0)            | --                       | --                       |
| Maternal sepsis and other maternal infections                     | 0<br>(0 - 0)             | --                    | 0<br>(0 - 0)           | 0<br>(0 - 0)            | --                       | --                       |
| Maternal hypertensive disorders                                   | 0<br>(0 - 0)             | --                    | 0<br>(0 - 0)           | 0<br>(0 - 0)            | --                       | --                       |
| Maternal obstructed labor                                         | 0<br>(0 - 0)             | --                    | 0<br>(0 - 0)           | 0<br>(0 - 0)            | --                       | --                       |

Web Table 31- Montenegro deaths with 95% UI by age, sex, and cause in 2013

| Cause                                                            | Both Sexes, All Ages     | Both Sexes, 0-4 Years | Both Sexes, 5-14 Years | Both Sexes, 15-49 Years | Both Sexes, 50-69 Years  | Both Sexes, 70-80 Years  |
|------------------------------------------------------------------|--------------------------|-----------------------|------------------------|-------------------------|--------------------------|--------------------------|
| Maternal abortive outcome                                        | 0<br>(0 - 0)             | --                    | 0<br>(0 - 0)           | 0<br>(0 - 0)            | --                       | --                       |
| Indirect maternal deaths                                         | 0<br>(0 - 0)             | --                    | 0<br>(0 - 0)           | 0<br>(0 - 0)            | --                       | --                       |
| Late maternal deaths                                             | 0<br>(0 - 0)             | --                    | 0<br>(0 - 0)           | 0<br>(0 - 0)            | --                       | --                       |
| Maternal deaths aggravated by HIV/AIDS                           | 0<br>(0 - 0)             | --                    | --                     | 0<br>(0 - 0)            | --                       | --                       |
| Other maternal disorders                                         | 0<br>(0 - 0)             | --                    | 0<br>(0 - 0)           | 0<br>(0 - 0)            | --                       | --                       |
| Neonatal disorders                                               | 27<br>(15 - 44)          | 27<br>(15 - 44)       | --                     | --                      | --                       | --                       |
| Neonatal preterm birth complications                             | 11<br>(5 - 19)           | 11<br>(5 - 19)        | --                     | --                      | --                       | --                       |
| Neonatal encephalopathy due to birth asphyxia and trauma         | 9<br>(5 - 17)            | 9<br>(5 - 17)         | --                     | --                      | --                       | --                       |
| Neonatal sepsis and other neonatal infections                    | 1<br>(0 - 2)             | 1<br>(0 - 2)          | --                     | --                      | --                       | --                       |
| Hemolytic disease and other neonatal jaundice                    | 0<br>(0 - 0)             | 0<br>(0 - 0)          | --                     | --                      | --                       | --                       |
| Other neonatal disorders                                         | 5<br>(2 - 10)            | 5<br>(2 - 10)         | --                     | --                      | --                       | --                       |
| Nutritional deficiencies                                         | 4<br>(3 - 5)             | 0<br>(0 - 0)          | 0<br>(0 - 0)           | 0<br>(0 - 1)            | 1<br>(1 - 2)             | 2<br>(2 - 3)             |
| Protein-energy malnutrition                                      | 1<br>(0 - 1)             | 0<br>(0 - 0)          | 0<br>(0 - 0)           | 0<br>(0 - 0)            | 0<br>(0 - 1)             | 0<br>(0 - 0)             |
| Iodine deficiency                                                | 0<br>(0 - 0)             | 0<br>(0 - 0)          | 0<br>(0 - 0)           | 0<br>(0 - 0)            | 0<br>(0 - 0)             | 0<br>(0 - 0)             |
| Iron-deficiency anemia                                           | 3<br>(2 - 4)             | 0<br>(0 - 0)          | 0<br>(0 - 0)           | 0<br>(0 - 0)            | 1<br>(0 - 1)             | 2<br>(1 - 3)             |
| Other nutritional deficiencies                                   | 0<br>(0 - 1)             | 0<br>(0 - 0)          | 0<br>(0 - 0)           | 0<br>(0 - 0)            | 0<br>(0 - 0)             | 0<br>(0 - 0)             |
| Other communicable, maternal, neonatal, and nutritional diseases | 5<br>(4 - 7)             | 1<br>(0 - 2)          | 0<br>(0 - 0)           | 1<br>(1 - 1)            | 2<br>(1 - 2)             | 2<br>(1 - 3)             |
| Sexually transmitted diseases excluding HIV                      | 1<br>(1 - 2)             | 1<br>(0 - 1)          | 0<br>(0 - 0)           | 0<br>(0 - 0)            | 0<br>(0 - 0)             | 0<br>(0 - 0)             |
| Syphilis                                                         | 1<br>(0 - 2)             | 1<br>(0 - 1)          | 0<br>(0 - 0)           | 0<br>(0 - 0)            | 0<br>(0 - 0)             | 0<br>(0 - 0)             |
| Chlamydial infection                                             | 0<br>(0 - 0)             | --                    | 0<br>(0 - 0)           | 0<br>(0 - 0)            | 0<br>(0 - 0)             | 0<br>(0 - 0)             |
| Gonococcal infection                                             | 0<br>(0 - 0)             | --                    | 0<br>(0 - 0)           | 0<br>(0 - 0)            | 0<br>(0 - 0)             | 0<br>(0 - 0)             |
| Other sexually transmitted diseases                              | 0<br>(0 - 0)             | --                    | 0<br>(0 - 0)           | 0<br>(0 - 0)            | 0<br>(0 - 0)             | 0<br>(0 - 0)             |
| Hepatitis                                                        | 2<br>(1 - 2)             | 0<br>(0 - 0)          | 0<br>(0 - 0)           | 0<br>(0 - 0)            | 1<br>(1 - 1)             | 0<br>(0 - 1)             |
| Acute hepatitis A                                                | 0<br>(0 - 1)             | 0<br>(0 - 0)          | 0<br>(0 - 0)           | 0<br>(0 - 0)            | 0<br>(0 - 0)             | 0<br>(0 - 0)             |
| Acute hepatitis B                                                | 1<br>(1 - 2)             | 0<br>(0 - 0)          | 0<br>(0 - 0)           | 0<br>(0 - 0)            | 1<br>(1 - 1)             | 0<br>(0 - 0)             |
| Acute hepatitis C                                                | 0<br>(0 - 0)             | --                    | 0<br>(0 - 0)           | 0<br>(0 - 0)            | 0<br>(0 - 0)             | 0<br>(0 - 0)             |
| Other infectious diseases                                        | 2<br>(2 - 4)             | 0<br>(0 - 0)          | 0<br>(0 - 0)           | 1<br>(0 - 1)            | 1<br>(0 - 1)             | 1<br>(1 - 2)             |
| Non-communicable diseases                                        | 5,725<br>(5,239 - 6,169) | 11<br>(6 - 20)        | 6<br>(4 - 8)           | 304<br>(261 - 350)      | 1,617<br>(1,409 - 1,806) | 3,787<br>(3,541 - 4,016) |
| Neoplasms                                                        | 1,194<br>(1,065 - 1,316) | 1<br>(1 - 3)          | 1<br>(1 - 2)           | 100<br>(85 - 118)       | 566<br>(490 - 637)       | 525<br>(478 - 579)       |
| Esophageal cancer                                                | 18<br>(15 - 22)          | --                    | --                     | 1<br>(1 - 1)            | 11<br>(9 - 14)           | 6<br>(5 - 7)             |
| Stomach cancer                                                   | 73<br>(62 - 84)          | --                    | --                     | 7<br>(5 - 9)            | 30<br>(24 - 35)          | 36<br>(30 - 44)          |
| Liver cancer                                                     | 56<br>(45 - 72)          | --                    | 0<br>(0 - 0)           | 3<br>(2 - 4)            | 23<br>(17 - 29)          | 31<br>(24 - 41)          |
| Liver cancer due to hepatitis B                                  | 12<br>(7 - 17)           | --                    | 0<br>(0 - 0)           | 1<br>(0 - 1)            | 6<br>(3 - 9)             | 5<br>(3 - 8)             |
| Liver cancer due to hepatitis C                                  | 26<br>(17 - 36)          | --                    | 0<br>(0 - 0)           | 1<br>(1 - 2)            | 10<br>(7 - 15)           | 14<br>(10 - 21)          |
| Liver cancer due to alcohol use                                  | 14<br>(9 - 19)           | --                    | --                     | 0<br>(0 - 1)            | 5<br>(3 - 7)             | 9<br>(6 - 12)            |
| Liver cancer due to other causes                                 | 5<br>(3 - 8)             | --                    | 0<br>(0 - 0)           | 0<br>(0 - 0)            | 2<br>(1 - 3)             | 3<br>(2 - 5)             |
| Larynx cancer                                                    | 40<br>(30 - 50)          | --                    | --                     | 3<br>(2 - 4)            | 24<br>(17 - 30)          | 14<br>(10 - 18)          |
| Tracheal, bronchus and lung cancer                               | 383<br>(335 - 431)       | --                    | --                     | 24<br>(19 - 30)         | 216<br>(183 - 249)       | 143<br>(125 - 162)       |
| Breast cancer                                                    | 100<br>(75 - 126)        | --                    | --                     | 17<br>(12 - 22)         | 51<br>(37 - 65)          | 32<br>(25 - 43)          |
| Cervical cancer                                                  | 18<br>(14 - 23)          | --                    | --                     | 5<br>(4 - 7)            | 9<br>(7 - 12)            | 4<br>(3 - 6)             |

Web Table 31- Montenegro deaths with 95% UI by age, sex, and cause in 2013

| Cause                                         | Both Sexes, All Ages     | Both Sexes, 0-4 Years | Both Sexes, 5-14 Years | Both Sexes, 15-49 Years | Both Sexes, 50-69 Years | Both Sexes, 70-80 Years  |
|-----------------------------------------------|--------------------------|-----------------------|------------------------|-------------------------|-------------------------|--------------------------|
| Uterine cancer                                | 13<br>(10 - 17)          | --                    | --                     | 1<br>(0 - 1)            | 7<br>(5 - 9)            | 6<br>(4 - 8)             |
| Prostate cancer                               | 73<br>(56 - 100)         | --                    | --                     | 0<br>(0 - 0)            | 15<br>(11 - 21)         | 57<br>(42 - 79)          |
| Colon and rectum cancer                       | 106<br>(93 - 118)        | --                    | --                     | 7<br>(5 - 8)            | 42<br>(36 - 48)         | 57<br>(50 - 66)          |
| Lip and oral cavity cancer                    | 10<br>(8 - 12)           | --                    | --                     | 2<br>(1 - 2)            | 5<br>(4 - 7)            | 3<br>(2 - 4)             |
| Nasopharynx cancer                            | 1<br>(1 - 1)             | --                    | 0<br>(0 - 0)           | 0<br>(0 - 0)            | 0<br>(0 - 1)            | 0<br>(0 - 0)             |
| Other pharynx cancer                          | 3<br>(2 - 6)             | --                    | --                     | 0<br>(0 - 1)            | 2<br>(1 - 4)            | 0<br>(0 - 1)             |
| Gallbladder and biliary tract cancer          | 15<br>(12 - 20)          | --                    | --                     | 1<br>(0 - 1)            | 6<br>(5 - 8)            | 8<br>(6 - 11)            |
| Pancreatic cancer                             | 69<br>(60 - 78)          | --                    | --                     | 3<br>(3 - 4)            | 31<br>(26 - 36)         | 35<br>(30 - 40)          |
| Malignant skin melanoma                       | 9<br>(7 - 14)            | --                    | --                     | 2<br>(1 - 3)            | 4<br>(3 - 7)            | 4<br>(2 - 5)             |
| Non-melanoma skin cancer                      | 4<br>(3 - 6)             | --                    | --                     | 0<br>(0 - 1)            | 1<br>(0 - 1)            | 3<br>(2 - 4)             |
| Ovarian cancer                                | 23<br>(19 - 28)          | --                    | --                     | 3<br>(2 - 4)            | 12<br>(9 - 16)          | 8<br>(6 - 11)            |
| Testicular cancer                             | 2<br>(2 - 3)             | --                    | --                     | 2<br>(1 - 2)            | 0<br>(0 - 1)            | 0<br>(0 - 0)             |
| Kidney cancer                                 | 25<br>(21 - 30)          | 0<br>(0 - 0)          | 0<br>(0 - 0)           | 2<br>(1 - 2)            | 13<br>(11 - 17)         | 10<br>(7 - 12)           |
| Bladder cancer                                | 26<br>(22 - 33)          | --                    | --                     | 0<br>(0 - 0)            | 8<br>(6 - 10)           | 18<br>(15 - 23)          |
| Brain and nervous system cancer               | 48<br>(39 - 58)          | 0<br>(0 - 0)          | 0<br>(0 - 1)           | 8<br>(7 - 11)           | 24<br>(19 - 30)         | 15<br>(11 - 19)          |
| Thyroid cancer                                | 4<br>(3 - 5)             | --                    | 0<br>(0 - 0)           | 0<br>(0 - 1)            | 1<br>(1 - 2)            | 2<br>(2 - 3)             |
| Mesothelioma                                  | 1<br>(0 - 1)             | --                    | --                     | 0<br>(0 - 0)            | 0<br>(0 - 1)            | 0<br>(0 - 0)             |
| Hodgkin lymphoma                              | 4<br>(3 - 6)             | 0<br>(0 - 0)          | 0<br>(0 - 0)           | 1<br>(1 - 1)            | 2<br>(1 - 3)            | 1<br>(1 - 2)             |
| Non-Hodgkin lymphoma                          | 20<br>(14 - 27)          | 0<br>(0 - 0)          | 0<br>(0 - 0)           | 3<br>(2 - 4)            | 9<br>(6 - 12)           | 8<br>(6 - 11)            |
| Multiple myeloma                              | 6<br>(4 - 9)             | --                    | --                     | 1<br>(0 - 1)            | 2<br>(2 - 4)            | 3<br>(2 - 4)             |
| Leukemia                                      | 19<br>(16 - 22)          | 0<br>(0 - 0)          | 0<br>(0 - 0)           | 2<br>(2 - 3)            | 7<br>(6 - 9)            | 9<br>(8 - 11)            |
| Other neoplasms                               | 24<br>(19 - 31)          | 1<br>(0 - 2)          | 1<br>(0 - 1)           | 4<br>(3 - 5)            | 9<br>(7 - 11)           | 10<br>(7 - 13)           |
| Cardiovascular diseases                       | 3,761<br>(3,460 - 4,032) | 4<br>(2 - 8)          | 3<br>(2 - 4)           | 148<br>(125 - 172)      | 871<br>(754 - 975)      | 2,734<br>(2,554 - 2,899) |
| Rheumatic heart disease                       | 10<br>(8 - 15)           | 0<br>(0 - 0)          | 0<br>(0 - 0)           | 2<br>(1 - 2)            | 3<br>(2 - 5)            | 5<br>(4 - 8)             |
| Ischemic heart disease                        | 1,524<br>(1,336 - 1,733) | 1<br>(0 - 1)          | 1<br>(0 - 1)           | 71<br>(58 - 85)         | 429<br>(362 - 498)      | 1,023<br>(884 - 1,180)   |
| Cerebrovascular disease                       | 1,781<br>(1,563 - 1,985) | 2<br>(1 - 4)          | 1<br>(1 - 2)           | 48<br>(39 - 59)         | 324<br>(271 - 379)      | 1,405<br>(1,229 - 1,566) |
| Ischemic stroke                               | 415<br>(279 - 507)       | 0<br>(0 - 0)          | 0<br>(0 - 1)           | 7<br>(5 - 9)            | 66<br>(46 - 85)         | 342<br>(224 - 421)       |
| Hemorrhagic stroke                            | 1,366<br>(1,206 - 1,565) | 2<br>(1 - 4)          | 1<br>(1 - 2)           | 42<br>(34 - 51)         | 258<br>(213 - 304)      | 1,063<br>(942 - 1,226)   |
| Hypertensive heart disease                    | 45<br>(34 - 64)          | 0<br>(0 - 0)          | 0<br>(0 - 0)           | 2<br>(1 - 2)            | 8<br>(6 - 11)           | 36<br>(26 - 53)          |
| Cardiomyopathy and myocarditis                | 160<br>(120 - 208)       | 1<br>(0 - 1)          | 1<br>(0 - 1)           | 12<br>(9 - 17)          | 36<br>(27 - 48)         | 110<br>(76 - 157)        |
| Atrial fibrillation and flutter               | 86<br>(65 - 108)         | --                    | --                     | 2<br>(1 - 3)            | 17<br>(12 - 23)         | 67<br>(49 - 87)          |
| Aortic aneurysm                               | 81<br>(61 - 98)          | --                    | --                     | 3<br>(2 - 4)            | 28<br>(21 - 35)         | 51<br>(37 - 64)          |
| Peripheral vascular disease                   | 3<br>(2 - 3)             | --                    | --                     | 0<br>(0 - 1)            | 1<br>(1 - 1)            | 1<br>(1 - 2)             |
| Endocarditis                                  | 3<br>(2 - 4)             | 0<br>(0 - 0)          | 0<br>(0 - 0)           | 1<br>(0 - 1)            | 1<br>(0 - 1)            | 1<br>(1 - 2)             |
| Other cardiovascular and circulatory diseases | 67<br>(54 - 96)          | 1<br>(0 - 1)          | 0<br>(0 - 1)           | 6<br>(5 - 9)            | 25<br>(19 - 34)         | 35<br>(26 - 55)          |
| Chronic respiratory diseases                  | 47<br>(40 - 55)          | 0<br>(0 - 0)          | 0<br>(0 - 0)           | 1<br>(1 - 2)            | 10<br>(8 - 13)          | 35<br>(29 - 41)          |
| Chronic obstructive pulmonary disease         | 37<br>(31 - 45)          | 0<br>(0 - 0)          | 0<br>(0 - 0)           | 1<br>(0 - 1)            | 7<br>(6 - 9)            | 29<br>(24 - 35)          |
| Pneumoconiosis                                | 2<br>(2 - 3)             | 0<br>(0 - 0)          | 0<br>(0 - 0)           | 0<br>(0 - 0)            | 1<br>(1 - 1)            | 1<br>(1 - 2)             |
| Silicosis                                     | 1<br>(1 - 1)             | 0<br>(0 - 0)          | 0<br>(0 - 0)           | 0<br>(0 - 0)            | 0<br>(0 - 0)            | 1<br>(0 - 1)             |
| Asbestosis                                    | 0<br>(0 - 0)             | 0<br>(0 - 0)          | 0<br>(0 - 0)           | 0<br>(0 - 0)            | 0<br>(0 - 0)            | 0<br>(0 - 0)             |



Web Table 31- Montenegro deaths with 95% UI by age, sex, and cause in 2013

| Cause                                               | Both Sexes, All Ages | Both Sexes, 0-4 Years | Both Sexes, 5-14 Years | Both Sexes, 15-49 Years | Both Sexes, 50-69 Years | Both Sexes, 70-80 Years |
|-----------------------------------------------------|----------------------|-----------------------|------------------------|-------------------------|-------------------------|-------------------------|
| Coal workers pneumoconiosis                         | 0<br>(0 - 1)         | 0<br>(0 - 0)          | 0<br>(0 - 0)           | 0<br>(0 - 0)            | 0<br>(0 - 0)            | 0<br>(0 - 0)            |
| Other pneumoconiosis                                | 1<br>(1 - 1)         | 0<br>(0 - 0)          | 0<br>(0 - 0)           | 0<br>(0 - 0)            | 0<br>(0 - 1)            | 0<br>(0 - 1)            |
| Asthma                                              | 1<br>(1 - 1)         | 0<br>(0 - 0)          | 0<br>(0 - 0)           | 0<br>(0 - 0)            | 0<br>(0 - 0)            | 0<br>(0 - 0)            |
| Interstitial lung disease and pulmonary sarcoidosis | 4<br>(3 - 6)         | 0<br>(0 - 0)          | 0<br>(0 - 0)           | 0<br>(0 - 0)            | 1<br>(1 - 2)            | 3<br>(2 - 4)            |
| Other chronic respiratory diseases                  | 2<br>(1 - 3)         | 0<br>(0 - 0)          | 0<br>(0 - 0)           | 0<br>(0 - 0)            | 0<br>(0 - 1)            | 1<br>(1 - 2)            |
| Cirrhosis                                           | 41<br>(34 - 48)      | 0<br>(0 - 0)          | 0<br>(0 - 0)           | 7<br>(5 - 9)            | 24<br>(19 - 30)         | 10<br>(8 - 12)          |
| Cirrhosis due to hepatitis B                        | 11<br>(7 - 16)       | 0<br>(0 - 0)          | 0<br>(0 - 0)           | 2<br>(1 - 3)            | 6<br>(4 - 10)           | 3<br>(2 - 4)            |
| Cirrhosis due to hepatitis C                        | 10<br>(6 - 15)       | 0<br>(0 - 0)          | 0<br>(0 - 0)           | 2<br>(1 - 3)            | 6<br>(3 - 10)           | 2<br>(1 - 3)            |
| Cirrhosis due to alcohol use                        | 13<br>(7 - 19)       | --                    | --                     | 2<br>(1 - 3)            | 8<br>(4 - 12)           | 3<br>(2 - 5)            |
| Cirrhosis due to other causes                       | 7<br>(4 - 10)        | 0<br>(0 - 0)          | 0<br>(0 - 0)           | 2<br>(1 - 3)            | 4<br>(2 - 6)            | 1<br>(1 - 2)            |
| Digestive diseases                                  | 101<br>(87 - 116)    | 0<br>(0 - 0)          | 0<br>(0 - 0)           | 7<br>(6 - 9)            | 30<br>(24 - 36)         | 64<br>(54 - 75)         |
| Peptic ulcer disease                                | 23<br>(16 - 30)      | 0<br>(0 - 0)          | 0<br>(0 - 0)           | 2<br>(1 - 2)            | 6<br>(4 - 9)            | 15<br>(10 - 21)         |
| Gastritis and duodenitis                            | 0<br>(0 - 0)         | 0<br>(0 - 0)          | 0<br>(0 - 0)           | 0<br>(0 - 0)            | 0<br>(0 - 0)            | 0<br>(0 - 0)            |
| Appendicitis                                        | 1<br>(1 - 1)         | 0<br>(0 - 0)          | 0<br>(0 - 0)           | 0<br>(0 - 0)            | 0<br>(0 - 1)            | 0<br>(0 - 1)            |
| Paralytic ileus and intestinal obstruction          | 18<br>(12 - 26)      | 0<br>(0 - 0)          | 0<br>(0 - 0)           | 1<br>(0 - 1)            | 5<br>(3 - 7)            | 13<br>(8 - 18)          |
| Inguinal, femoral, and abdominal hernia             | 1<br>(1 - 2)         | 0<br>(0 - 0)          | 0<br>(0 - 0)           | 0<br>(0 - 0)            | 0<br>(0 - 0)            | 1<br>(0 - 1)            |
| Inflammatory bowel disease                          | 3<br>(2 - 4)         | 0<br>(0 - 0)          | 0<br>(0 - 0)           | 1<br>(0 - 1)            | 1<br>(0 - 1)            | 2<br>(1 - 2)            |
| Vascular intestinal disorders                       | 39<br>(27 - 54)      | 0<br>(0 - 0)          | 0<br>(0 - 0)           | 2<br>(1 - 3)            | 11<br>(7 - 16)          | 26<br>(18 - 36)         |
| Gallbladder and biliary diseases                    | 8<br>(5 - 11)        | 0<br>(0 - 0)          | 0<br>(0 - 0)           | 1<br>(1 - 1)            | 4<br>(3 - 6)            | 3<br>(2 - 4)            |
| Pancreatitis                                        | 6<br>(4 - 9)         | 0<br>(0 - 0)          | 0<br>(0 - 0)           | 1<br>(1 - 1)            | 1<br>(1 - 2)            | 4<br>(2 - 6)            |
| Other digestive diseases                            | 2<br>(2 - 3)         | 0<br>(0 - 0)          | 0<br>(0 - 0)           | 0<br>(0 - 1)            | 1<br>(1 - 2)            | 1<br>(1 - 1)            |
| Neurological disorders                              | 267<br>(230 - 309)   | 0<br>(0 - 0)          | 0<br>(0 - 0)           | 2<br>(2 - 4)            | 18<br>(15 - 23)         | 246<br>(210 - 285)      |
| Alzheimer disease and other dementias               | 255<br>(218 - 295)   | --                    | --                     | 0<br>(0 - 0)            | 15<br>(12 - 18)         | 240<br>(205 - 278)      |
| Parkinson disease                                   | 5<br>(3 - 7)         | --                    | --                     | 0<br>(0 - 0)            | 0<br>(0 - 1)            | 4<br>(3 - 7)            |
| Epilepsy                                            | 2<br>(2 - 3)         | 0<br>(0 - 0)          | 0<br>(0 - 0)           | 1<br>(1 - 1)            | 1<br>(0 - 1)            | 0<br>(0 - 0)            |
| Multiple sclerosis                                  | 4<br>(3 - 7)         | --                    | --                     | 1<br>(1 - 2)            | 2<br>(1 - 4)            | 1<br>(1 - 2)            |
| Other neurological disorders                        | 1<br>(1 - 2)         | 0<br>(0 - 0)          | 0<br>(0 - 0)           | 0<br>(0 - 1)            | 0<br>(0 - 1)            | 0<br>(0 - 0)            |
| Mental and substance use disorders                  | 32<br>(27 - 40)      | 0<br>(0 - 0)          | 0<br>(0 - 0)           | 17<br>(14 - 21)         | 10<br>(8 - 14)          | 4<br>(4 - 6)            |
| Schizophrenia                                       | 1<br>(1 - 2)         | --                    | --                     | 0<br>(0 - 0)            | 1<br>(0 - 1)            | 0<br>(0 - 1)            |
| Alcohol use disorders                               | 8<br>(6 - 13)        | --                    | --                     | 2<br>(1 - 3)            | 5<br>(3 - 8)            | 2<br>(1 - 3)            |
| Drug use disorders                                  | 23<br>(19 - 28)      | 0<br>(0 - 0)          | --                     | 15<br>(12 - 19)         | 5<br>(4 - 6)            | 2<br>(2 - 3)            |
| Opioid use disorders                                | 9<br>(7 - 11)        | 0<br>(0 - 0)          | --                     | 6<br>(5 - 8)            | 2<br>(1 - 2)            | 1<br>(1 - 1)            |
| Cocaine use disorders                               | 1<br>(1 - 2)         | 0<br>(0 - 0)          | --                     | 1<br>(1 - 1)            | 0<br>(0 - 0)            | 0<br>(0 - 0)            |
| Amphetamine use disorders                           | 1<br>(1 - 1)         | 0<br>(0 - 0)          | --                     | 1<br>(1 - 1)            | 0<br>(0 - 0)            | 0<br>(0 - 0)            |
| Other drug use disorders                            | 12<br>(10 - 14)      | 0<br>(0 - 0)          | --                     | 8<br>(6 - 10)           | 3<br>(2 - 3)            | 1<br>(1 - 2)            |
| Eating disorders                                    | 0<br>(0 - 0)         | --                    | 0<br>(0 - 0)           | 0<br>(0 - 0)            | --                      | --                      |
| Anorexia nervosa                                    | 0<br>(0 - 0)         | --                    | 0<br>(0 - 0)           | 0<br>(0 - 0)            | --                      | --                      |
| Diabetes, urogenital, blood, and endocrine diseases | 264<br>(233 - 299)   | 1<br>(0 - 1)          | 0<br>(0 - 1)           | 16<br>(13 - 19)         | 83<br>(70 - 96)         | 164<br>(141 - 187)      |
| Diabetes mellitus                                   | 138<br>(119 - 160)   | 0<br>(0 - 0)          | 0<br>(0 - 0)           | 7<br>(6 - 9)            | 43<br>(36 - 52)         | 87<br>(73 - 105)        |
| Acute glomerulonephritis                            | 0<br>(0 - 0)         | 0<br>(0 - 0)          | 0<br>(0 - 0)           | 0<br>(0 - 0)            | 0<br>(0 - 0)            | 0<br>(0 - 0)            |

Web Table 31- Montenegro deaths with 95% UI by age, sex, and cause in 2013

| Cause                                               | Both Sexes, All Ages | Both Sexes, 0-4 Years | Both Sexes, 5-14 Years | Both Sexes, 15-49 Years | Both Sexes, 50-69 Years | Both Sexes, 70-80 Years |
|-----------------------------------------------------|----------------------|-----------------------|------------------------|-------------------------|-------------------------|-------------------------|
| Chronic kidney disease                              | 111<br>(93 - 131)    | 0<br>(0 - 0)          | 0<br>(0 - 0)           | 6<br>(5 - 7)            | 34<br>(27 - 42)         | 71<br>(57 - 84)         |
| Chronic kidney disease due to diabetes mellitus     | 5<br>(2 - 7)         | 0<br>(0 - 0)          | 0<br>(0 - 0)           | 0<br>(0 - 0)            | 2<br>(1 - 3)            | 3<br>(1 - 4)            |
| Chronic kidney disease due to hypertension          | 22<br>(15 - 31)      | 0<br>(0 - 0)          | 0<br>(0 - 0)           | 1<br>(1 - 2)            | 7<br>(5 - 11)           | 14<br>(9 - 20)          |
| Chronic kidney disease due to glomerulonephritis    | 12<br>(8 - 16)       | 0<br>(0 - 0)          | 0<br>(0 - 0)           | 1<br>(0 - 1)            | 4<br>(2 - 6)            | 7<br>(5 - 10)           |
| Chronic kidney disease due to other causes          | 72<br>(56 - 90)      | 0<br>(0 - 0)          | 0<br>(0 - 0)           | 4<br>(3 - 5)            | 21<br>(15 - 28)         | 47<br>(34 - 62)         |
| Urinary diseases and male infertility               | 3<br>(3 - 4)         | 0<br>(0 - 0)          | 0<br>(0 - 0)           | 0<br>(0 - 1)            | 1<br>(1 - 1)            | 2<br>(1 - 3)            |
| Interstitial nephritis and urinary tract infections | 2<br>(2 - 3)         | 0<br>(0 - 0)          | 0<br>(0 - 0)           | 0<br>(0 - 0)            | 1<br>(0 - 1)            | 1<br>(1 - 1)            |
| Urolithiasis                                        | 0<br>(0 - 0)         | --                    | 0<br>(0 - 0)           | 0<br>(0 - 0)            | 0<br>(0 - 0)            | 0<br>(0 - 0)            |
| Other urinary diseases                              | 1<br>(1 - 2)         | 0<br>(0 - 0)          | 0<br>(0 - 0)           | 0<br>(0 - 0)            | 0<br>(0 - 0)            | 1<br>(0 - 1)            |
| Gynecological diseases                              | 0<br>(0 - 0)         | --                    | --                     | 0<br>(0 - 0)            | 0<br>(0 - 0)            | 0<br>(0 - 0)            |
| Uterine fibroids                                    | 0<br>(0 - 0)         | --                    | --                     | 0<br>(0 - 0)            | 0<br>(0 - 0)            | 0<br>(0 - 0)            |
| Polycystic ovarian syndrome                         | 0<br>(0 - 0)         | --                    | --                     | 0<br>(0 - 0)            | 0<br>(0 - 0)            | --                      |
| Endometriosis                                       | 0<br>(0 - 0)         | --                    | --                     | 0<br>(0 - 0)            | 0<br>(0 - 0)            | --                      |
| Genital prolapse                                    | 0<br>(0 - 0)         | --                    | --                     | 0<br>(0 - 0)            | 0<br>(0 - 0)            | 0<br>(0 - 0)            |
| Other gynecological diseases                        | 0<br>(0 - 0)         | --                    | --                     | 0<br>(0 - 0)            | 0<br>(0 - 0)            | 0<br>(0 - 0)            |
| Hemoglobinopathies and hemolytic anemias            | 3<br>(2 - 4)         | 0<br>(0 - 0)          | 0<br>(0 - 0)           | 1<br>(0 - 1)            | 1<br>(1 - 1)            | 1<br>(1 - 1)            |
| Thalassemias                                        | 0<br>(0 - 1)         | 0<br>(0 - 0)          | 0<br>(0 - 0)           | 0<br>(0 - 0)            | 0<br>(0 - 0)            | 0<br>(0 - 0)            |
| Sickle cell disorders                               | 0<br>(0 - 0)         | 0<br>(0 - 0)          | 0<br>(0 - 0)           | 0<br>(0 - 0)            | 0<br>(0 - 0)            | 0<br>(0 - 0)            |
| G6PD deficiency                                     | 0<br>(0 - 0)         | 0<br>(0 - 0)          | 0<br>(0 - 0)           | 0<br>(0 - 0)            | 0<br>(0 - 0)            | 0<br>(0 - 0)            |
| Other hemoglobinopathies and hemolytic anemias      | 2<br>(1 - 3)         | 0<br>(0 - 0)          | 0<br>(0 - 0)           | 0<br>(0 - 1)            | 1<br>(0 - 1)            | 1<br>(1 - 1)            |
| Endocrine, metabolic, blood, and immune disorders   | 9<br>(7 - 11)        | 0<br>(0 - 1)          | 0<br>(0 - 0)           | 2<br>(1 - 2)            | 3<br>(2 - 4)            | 4<br>(3 - 5)            |
| Musculoskeletal disorders                           | 8<br>(7 - 11)        | --                    | 0<br>(0 - 0)           | 2<br>(2 - 3)            | 3<br>(2 - 3)            | 3<br>(2 - 5)            |
| Rheumatoid arthritis                                | 3<br>(2 - 3)         | --                    | 0<br>(0 - 0)           | 1<br>(0 - 1)            | 1<br>(0 - 1)            | 1<br>(1 - 2)            |
| Other musculoskeletal disorders                     | 6<br>(4 - 8)         | --                    | 0<br>(0 - 0)           | 2<br>(1 - 3)            | 2<br>(1 - 2)            | 2<br>(1 - 3)            |
| Other non-communicable diseases                     | 11<br>(8 - 15)       | 4<br>(2 - 8)          | 0<br>(0 - 1)           | 3<br>(2 - 3)            | 2<br>(1 - 2)            | 2<br>(1 - 2)            |
| Congenital anomalies                                | 8<br>(5 - 11)        | 4<br>(2 - 7)          | 0<br>(0 - 1)           | 1<br>(1 - 2)            | 1<br>(1 - 1)            | 1<br>(1 - 1)            |
| Neural tube defects                                 | 0<br>(0 - 0)         | 0<br>(0 - 0)          | 0<br>(0 - 0)           | 0<br>(0 - 0)            | 0<br>(0 - 0)            | 0<br>(0 - 0)            |
| Congenital heart anomalies                          | 2<br>(2 - 4)         | 1<br>(1 - 2)          | 0<br>(0 - 0)           | 0<br>(0 - 1)            | 0<br>(0 - 0)            | 0<br>(0 - 0)            |
| Cleft lip and cleft palate                          | 0<br>(0 - 0)         | 0<br>(0 - 0)          | --                     | --                      | --                      | --                      |
| Down syndrome                                       | 1<br>(0 - 2)         | 1<br>(0 - 2)          | 0<br>(0 - 0)           | 0<br>(0 - 0)            | 0<br>(0 - 0)            | 0<br>(0 - 0)            |
| Chromosomal unbalanced rearrangements               | 0<br>(0 - 0)         | 0<br>(0 - 0)          | 0<br>(0 - 0)           | 0<br>(0 - 0)            | 0<br>(0 - 0)            | 0<br>(0 - 0)            |
| Other congenital anomalies                          | 4<br>(2 - 5)         | 2<br>(1 - 3)          | 0<br>(0 - 0)           | 1<br>(0 - 1)            | 0<br>(0 - 1)            | 1<br>(0 - 1)            |
| Skin and subcutaneous diseases                      | 3<br>(2 - 4)         | 0<br>(0 - 0)          | 0<br>(0 - 0)           | 1<br>(1 - 1)            | 1<br>(1 - 1)            | 1<br>(1 - 1)            |
| Cellulitis                                          | 0<br>(0 - 1)         | 0<br>(0 - 0)          | 0<br>(0 - 0)           | 0<br>(0 - 0)            | 0<br>(0 - 0)            | 0<br>(0 - 0)            |
| Pyoderma                                            | 2<br>(1 - 2)         | 0<br>(0 - 0)          | 0<br>(0 - 0)           | 1<br>(0 - 1)            | 0<br>(0 - 1)            | 0<br>(0 - 1)            |
| Decubitus ulcer                                     | 1<br>(1 - 1)         | 0<br>(0 - 0)          | 0<br>(0 - 0)           | 0<br>(0 - 1)            | 0<br>(0 - 0)            | 0<br>(0 - 0)            |
| Other skin and subcutaneous diseases                | 0<br>(0 - 0)         | 0<br>(0 - 0)          | 0<br>(0 - 0)           | 0<br>(0 - 0)            | 0<br>(0 - 0)            | 0<br>(0 - 0)            |
| Sudden infant death syndrome                        | 0<br>(0 - 0)         | 0<br>(0 - 0)          | --                     | --                      | --                      | --                      |
| Injuries                                            | 328<br>(285 - 374)   | 4<br>(2 - 7)          | 6<br>(4 - 8)           | 123<br>(103 - 143)      | 110<br>(90 - 130)       | 87<br>(74 - 100)        |
| Transport injuries                                  | 86<br>(73 - 100)     | 1<br>(1 - 2)          | 2<br>(1 - 3)           | 41<br>(34 - 49)         | 25<br>(20 - 29)         | 17<br>(14 - 21)         |

Web Table 31- Montenegro deaths with 95% UI by age, sex, and cause in 2013

| Cause                                           | Both Sexes, All Ages | Both Sexes, 0-4 Years | Both Sexes, 5-14 Years | Both Sexes, 15-49 Years | Both Sexes, 50-69 Years | Both Sexes, 70-80 Years |
|-------------------------------------------------|----------------------|-----------------------|------------------------|-------------------------|-------------------------|-------------------------|
| Road injuries                                   | 81<br>(69 - 93)      | 1<br>(1 - 2)          | 2<br>(1 - 3)           | 38<br>(32 - 45)         | 23<br>(19 - 28)         | 17<br>(14 - 20)         |
| Pedestrian road injuries                        | 42<br>(29 - 53)      | 1<br>(0 - 1)          | 1<br>(1 - 2)           | 19<br>(12 - 25)         | 12<br>(8 - 16)          | 10<br>(7 - 12)          |
| Cyclist road injuries                           | 3<br>(2 - 5)         | 0<br>(0 - 0)          | 0<br>(0 - 0)           | 1<br>(1 - 1)            | 1<br>(1 - 2)            | 1<br>(0 - 1)            |
| Motorcyclist road injuries                      | 7<br>(4 - 11)        | 0<br>(0 - 0)          | 0<br>(0 - 0)           | 4<br>(3 - 7)            | 2<br>(1 - 3)            | 1<br>(1 - 2)            |
| Motor vehicle road injuries                     | 28<br>(20 - 38)      | 0<br>(0 - 1)          | 1<br>(0 - 1)           | 14<br>(9 - 19)          | 8<br>(5 - 11)           | 5<br>(4 - 8)            |
| Other road injuries                             | 1<br>(0 - 1)         | 0<br>(0 - 0)          | 0<br>(0 - 0)           | 0<br>(0 - 1)            | 0<br>(0 - 0)            | 0<br>(0 - 0)            |
| Other transport injuries                        | 5<br>(4 - 7)         | 0<br>(0 - 0)          | 0<br>(0 - 0)           | 3<br>(2 - 4)            | 1<br>(1 - 2)            | 1<br>(0 - 1)            |
| Unintentional injuries                          | 77<br>(67 - 90)      | 2<br>(1 - 4)          | 2<br>(2 - 4)           | 22<br>(17 - 26)         | 25<br>(21 - 30)         | 26<br>(22 - 31)         |
| Falls                                           | 20<br>(16 - 26)      | 0<br>(0 - 1)          | 0<br>(0 - 1)           | 5<br>(3 - 7)            | 8<br>(6 - 12)           | 6<br>(4 - 9)            |
| Drowning                                        | 15<br>(10 - 20)      | 1<br>(0 - 2)          | 1<br>(1 - 2)           | 8<br>(5 - 11)           | 3<br>(2 - 5)            | 2<br>(2 - 3)            |
| Fire, heat, and hot substances                  | 6<br>(5 - 8)         | 0<br>(0 - 0)          | 0<br>(0 - 0)           | 1<br>(1 - 1)            | 2<br>(1 - 3)            | 3<br>(2 - 4)            |
| Poisonings                                      | 8<br>(6 - 10)        | 0<br>(0 - 0)          | 0<br>(0 - 0)           | 1<br>(1 - 1)            | 3<br>(2 - 4)            | 4<br>(3 - 6)            |
| Exposure to mechanical forces                   | 7<br>(5 - 8)         | 0<br>(0 - 1)          | 0<br>(0 - 0)           | 2<br>(2 - 3)            | 2<br>(2 - 3)            | 2<br>(1 - 2)            |
| Unintentional firearm injuries                  | 2<br>(1 - 2)         | 0<br>(0 - 0)          | 0<br>(0 - 0)           | 1<br>(0 - 1)            | 1<br>(0 - 1)            | 1<br>(0 - 1)            |
| Unintentional suffocation                       | 0<br>(0 - 1)         | 0<br>(0 - 0)          | 0<br>(0 - 0)           | 0<br>(0 - 0)            | 0<br>(0 - 0)            | 0<br>(0 - 0)            |
| Other exposure to mechanical forces             | 5<br>(4 - 6)         | 0<br>(0 - 1)          | 0<br>(0 - 0)           | 1<br>(1 - 2)            | 2<br>(1 - 2)            | 1<br>(1 - 1)            |
| Adverse effects of medical treatment            | 11<br>(9 - 16)       | 0<br>(0 - 1)          | 0<br>(0 - 0)           | 2<br>(2 - 3)            | 3<br>(2 - 5)            | 6<br>(4 - 9)            |
| Animal contact                                  | 1<br>(1 - 2)         | 0<br>(0 - 0)          | 0<br>(0 - 0)           | 0<br>(0 - 1)            | 0<br>(0 - 1)            | 1<br>(0 - 1)            |
| Venomous animal contact                         | 1<br>(0 - 1)         | 0<br>(0 - 0)          | 0<br>(0 - 0)           | 0<br>(0 - 0)            | 0<br>(0 - 0)            | 0<br>(0 - 1)            |
| Non-venomous animal contact                     | 1<br>(1 - 1)         | 0<br>(0 - 0)          | 0<br>(0 - 0)           | 0<br>(0 - 0)            | 0<br>(0 - 0)            | 0<br>(0 - 1)            |
| Foreign body                                    | 2<br>(1 - 3)         | 0<br>(0 - 0)          | 0<br>(0 - 0)           | 0<br>(0 - 1)            | 1<br>(0 - 1)            | 1<br>(0 - 1)            |
| Pulmonary aspiration and foreign body in airway | 2<br>(1 - 3)         | 0<br>(0 - 0)          | 0<br>(0 - 0)           | 0<br>(0 - 1)            | 1<br>(0 - 1)            | 1<br>(0 - 1)            |
| Foreign body in other body part                 | 0<br>(0 - 0)         | 0<br>(0 - 0)          | 0<br>(0 - 0)           | 0<br>(0 - 0)            | 0<br>(0 - 0)            | 0<br>(0 - 0)            |
| Other unintentional injuries                    | 7<br>(6 - 8)         | 0<br>(0 - 0)          | 0<br>(0 - 0)           | 2<br>(2 - 3)            | 2<br>(2 - 3)            | 3<br>(2 - 3)            |
| Self-harm and interpersonal violence            | 165<br>(127 - 194)   | 0<br>(0 - 0)          | 1<br>(1 - 2)           | 60<br>(42 - 74)         | 60<br>(46 - 75)         | 43<br>(32 - 56)         |
| Self-harm                                       | 143<br>(108 - 171)   | --                    | 1<br>(0 - 1)           | 49<br>(33 - 61)         | 54<br>(40 - 69)         | 40<br>(29 - 52)         |
| Interpersonal violence                          | 21<br>(14 - 28)      | 0<br>(0 - 0)          | 0<br>(0 - 1)           | 11<br>(7 - 15)          | 6<br>(4 - 9)            | 4<br>(2 - 6)            |
| Assault by firearm                              | 14<br>(8 - 19)       | 0<br>(0 - 0)          | 0<br>(0 - 1)           | 8<br>(5 - 11)           | 4<br>(2 - 5)            | 2<br>(1 - 4)            |
| Assault by sharp object                         | 4<br>(2 - 7)         | 0<br>(0 - 0)          | 0<br>(0 - 0)           | 2<br>(1 - 3)            | 2<br>(1 - 3)            | 0<br>(0 - 1)            |
| Assault by other means                          | 3<br>(2 - 5)         | 0<br>(0 - 0)          | 0<br>(0 - 0)           | 1<br>(1 - 2)            | 1<br>(0 - 1)            | 1<br>(0 - 2)            |

| Web Table 31- Montenegro deaths with 95% UI by age, sex, and cause in 2013 |                          |                  |                   |                    |                        |                          |
|----------------------------------------------------------------------------|--------------------------|------------------|-------------------|--------------------|------------------------|--------------------------|
| Cause                                                                      | Males, All Ages          | Males, 0-4 Years | Males, 5-14 Years | Males, 15-49 Years | Males, 50-69 Years     | Males, 70-80 Years       |
| All causes                                                                 | 3,320<br>(2,923 - 3,670) | 26<br>(14 - 45)  | 7<br>(5 - 11)     | 301<br>(252 - 352) | 1,121<br>(940 - 1,296) | 1,865<br>(1,713 - 1,990) |
| Communicable, maternal, neonatal, and nutritional diseases                 | 70<br>(56 - 87)          | 17<br>(10 - 29)  | 0<br>(0 - 1)      | 7<br>(6 - 9)       | 16<br>(13 - 21)        | 29<br>(21 - 39)          |
| HIV/AIDS and tuberculosis                                                  | 2<br>(2 - 4)             | 0<br>(0 - 0)     | 0<br>(0 - 0)      | 1<br>(1 - 1)       | 1<br>(1 - 2)           | 0<br>(0 - 1)             |
| Tuberculosis                                                               | 2<br>(1 - 3)             | 0<br>(0 - 0)     | 0<br>(0 - 0)      | 0<br>(0 - 1)       | 1<br>(1 - 2)           | 0<br>(0 - 1)             |
| HIV/AIDS                                                                   | 1<br>(0 - 1)             | 0<br>(0 - 0)     | 0<br>(0 - 0)      | 0<br>(0 - 1)       | 0<br>(0 - 0)           | 0<br>(0 - 0)             |
| HIV/AIDS resulting in mycobacterial infection                              | 0<br>(0 - 0)             | 0<br>(0 - 0)     | 0<br>(0 - 0)      | 0<br>(0 - 0)       | 0<br>(0 - 0)           | 0<br>(0 - 0)             |
| HIV/AIDS resulting in other diseases                                       | 1<br>(0 - 1)             | 0<br>(0 - 0)     | 0<br>(0 - 0)      | 0<br>(0 - 1)       | 0<br>(0 - 0)           | 0<br>(0 - 0)             |
| Diarrhea, lower respiratory, and other common infectious diseases          | 46<br>(36 - 58)          | 2<br>(1 - 4)     | 0<br>(0 - 1)      | 5<br>(3 - 6)       | 13<br>(9 - 18)         | 26<br>(18 - 36)          |
| Diarrheal diseases                                                         | 0<br>(0 - 0)             | 0<br>(0 - 0)     | 0<br>(0 - 0)      | 0<br>(0 - 0)       | 0<br>(0 - 0)           | 0<br>(0 - 0)             |
| Intestinal infectious diseases                                             | 1<br>(0 - 1)             | 0<br>(0 - 0)     | 0<br>(0 - 0)      | 0<br>(0 - 1)       | 0<br>(0 - 0)           | 0<br>(0 - 0)             |
| Typhoid fever                                                              | 0<br>(0 - 1)             | 0<br>(0 - 0)     | 0<br>(0 - 0)      | 0<br>(0 - 0)       | 0<br>(0 - 0)           | 0<br>(0 - 0)             |
| Paratyphoid fever                                                          | 0<br>(0 - 0)             | 0<br>(0 - 0)     | 0<br>(0 - 0)      | 0<br>(0 - 0)       | 0<br>(0 - 0)           | 0<br>(0 - 0)             |
| Other intestinal infectious diseases                                       | 0<br>(0 - 0)             | 0<br>(0 - 0)     | 0<br>(0 - 0)      | 0<br>(0 - 0)       | 0<br>(0 - 0)           | 0<br>(0 - 0)             |
| Lower respiratory infections                                               | 43<br>(34 - 55)          | 2<br>(1 - 3)     | 0<br>(0 - 0)      | 4<br>(3 - 6)       | 12<br>(9 - 16)         | 25<br>(18 - 35)          |
| Upper respiratory infections                                               | 0<br>(0 - 0)             | 0<br>(0 - 0)     | 0<br>(0 - 0)      | 0<br>(0 - 0)       | 0<br>(0 - 0)           | 0<br>(0 - 0)             |
| Otitis media                                                               | 0<br>(0 - 0)             | 0<br>(0 - 0)     | 0<br>(0 - 0)      | 0<br>(0 - 0)       | 0<br>(0 - 0)           | 0<br>(0 - 0)             |
| Meningitis                                                                 | 1<br>(1 - 1)             | 0<br>(0 - 0)     | 0<br>(0 - 0)      | 0<br>(0 - 0)       | 1<br>(0 - 1)           | 0<br>(0 - 0)             |
| Pneumococcal meningitis                                                    | 0<br>(0 - 0)             | 0<br>(0 - 0)     | 0<br>(0 - 0)      | 0<br>(0 - 0)       | 0<br>(0 - 0)           | 0<br>(0 - 0)             |
| H influenzae type B meningitis                                             | 0<br>(0 - 0)             | 0<br>(0 - 0)     | 0<br>(0 - 0)      | 0<br>(0 - 0)       | 0<br>(0 - 0)           | 0<br>(0 - 0)             |
| Meningococcal meningitis                                                   | 0<br>(0 - 0)             | 0<br>(0 - 0)     | 0<br>(0 - 0)      | 0<br>(0 - 0)       | 0<br>(0 - 0)           | 0<br>(0 - 0)             |
| Other meningitis                                                           | 0<br>(0 - 0)             | 0<br>(0 - 0)     | 0<br>(0 - 0)      | 0<br>(0 - 0)       | 0<br>(0 - 0)           | 0<br>(0 - 0)             |
| Encephalitis                                                               | 0<br>(0 - 1)             | 0<br>(0 - 0)     | 0<br>(0 - 0)      | 0<br>(0 - 0)       | 0<br>(0 - 0)           | 0<br>(0 - 0)             |
| Diphtheria                                                                 | 0<br>(0 - 0)             | 0<br>(0 - 0)     | 0<br>(0 - 0)      | 0<br>(0 - 0)       | 0<br>(0 - 0)           | --                       |
| Whooping cough                                                             | 0<br>(0 - 0)             | 0<br>(0 - 0)     | 0<br>(0 - 0)      | 0<br>(0 - 0)       | 0<br>(0 - 0)           | --                       |
| Tetanus                                                                    | 0<br>(0 - 0)             | 0<br>(0 - 0)     | 0<br>(0 - 0)      | 0<br>(0 - 0)       | 0<br>(0 - 0)           | 0<br>(0 - 0)             |
| Measles                                                                    | 0<br>(0 - 0)             | 0<br>(0 - 0)     | 0<br>(0 - 0)      | 0<br>(0 - 0)       | 0<br>(0 - 0)           | --                       |
| Varicella and herpes zoster                                                | 0<br>(0 - 1)             | 0<br>(0 - 0)     | 0<br>(0 - 0)      | 0<br>(0 - 0)       | 0<br>(0 - 0)           | 0<br>(0 - 1)             |
| Neglected tropical diseases and malaria                                    | 1<br>(0 - 1)             | 0<br>(0 - 0)     | 0<br>(0 - 0)      | 0<br>(0 - 0)       | 0<br>(0 - 0)           | 0<br>(0 - 0)             |
| Leishmaniasis                                                              | 0<br>(0 - 0)             | 0<br>(0 - 0)     | 0<br>(0 - 0)      | 0<br>(0 - 0)       | 0<br>(0 - 0)           | 0<br>(0 - 0)             |
| Visceral leishmaniasis                                                     | 0<br>(0 - 0)             | 0<br>(0 - 0)     | 0<br>(0 - 0)      | 0<br>(0 - 0)       | 0<br>(0 - 0)           | 0<br>(0 - 0)             |
| Cysticercosis                                                              | 0<br>(0 - 0)             | 0<br>(0 - 0)     | 0<br>(0 - 0)      | 0<br>(0 - 0)       | 0<br>(0 - 0)           | 0<br>(0 - 0)             |
| Cystic echinococcosis                                                      | 0<br>(0 - 0)             | 0<br>(0 - 0)     | 0<br>(0 - 0)      | 0<br>(0 - 0)       | 0<br>(0 - 0)           | 0<br>(0 - 0)             |
| Dengue                                                                     | 0<br>(0 - 0)             | 0<br>(0 - 0)     | 0<br>(0 - 0)      | 0<br>(0 - 0)       | 0<br>(0 - 0)           | 0<br>(0 - 0)             |
| Rabies                                                                     | 0<br>(0 - 0)             | 0<br>(0 - 0)     | 0<br>(0 - 0)      | 0<br>(0 - 0)       | 0<br>(0 - 0)           | 0<br>(0 - 0)             |
| Other neglected tropical diseases                                          | 0<br>(0 - 0)             | 0<br>(0 - 0)     | 0<br>(0 - 0)      | 0<br>(0 - 0)       | 0<br>(0 - 0)           | 0<br>(0 - 0)             |
| Maternal disorders                                                         | --                       | --               | --                | --                 | --                     | --                       |
| Maternal hemorrhage                                                        | --                       | --               | --                | --                 | --                     | --                       |
| Maternal sepsis and other maternal infections                              | --                       | --               | --                | --                 | --                     | --                       |
| Maternal hypertensive disorders                                            | --                       | --               | --                | --                 | --                     | --                       |
| Maternal obstructed labor                                                  | --                       | --               | --                | --                 | --                     | --                       |

Web Table 31- Montenegro deaths with 95% UI by age, sex, and cause in 2013

| Cause                                                            | Males, All Ages          | Males, 0-4 Years | Males, 5-14 Years | Males, 15-49 Years | Males, 50-69 Years     | Males, 70-80 Years       |
|------------------------------------------------------------------|--------------------------|------------------|-------------------|--------------------|------------------------|--------------------------|
| Maternal abortive outcome                                        | --                       | --               | --                | --                 | --                     | --                       |
| Indirect maternal deaths                                         | --                       | --               | --                | --                 | --                     | --                       |
| Late maternal deaths                                             | --                       | --               | --                | --                 | --                     | --                       |
| Maternal deaths aggravated by HIV/AIDS                           | --                       | --               | --                | --                 | --                     | --                       |
| Other maternal disorders                                         | --                       | --               | --                | --                 | --                     | --                       |
| Neonatal disorders                                               | 15<br>(8 - 25)           | 15<br>(8 - 25)   | --                | --                 | --                     | --                       |
| Neonatal preterm birth complications                             | 6<br>(3 - 12)            | 6<br>(3 - 12)    | --                | --                 | --                     | --                       |
| Neonatal encephalopathy due to birth asphyxia and trauma         | 6<br>(3 - 11)            | 6<br>(3 - 11)    | --                | --                 | --                     | --                       |
| Neonatal sepsis and other neonatal infections                    | 0<br>(0 - 1)             | 0<br>(0 - 1)     | --                | --                 | --                     | --                       |
| Hemolytic disease and other neonatal jaundice                    | 0<br>(0 - 0)             | 0<br>(0 - 0)     | --                | --                 | --                     | --                       |
| Other neonatal disorders                                         | 2<br>(1 - 5)             | 2<br>(1 - 5)     | --                | --                 | --                     | --                       |
| Nutritional deficiencies                                         | 3<br>(2 - 4)             | 0<br>(0 - 0)     | 0<br>(0 - 0)      | 0<br>(0 - 1)       | 1<br>(1 - 1)           | 2<br>(1 - 3)             |
| Protein-energy malnutrition                                      | 0<br>(0 - 1)             | 0<br>(0 - 0)     | 0<br>(0 - 0)      | 0<br>(0 - 0)       | 0<br>(0 - 0)           | 0<br>(0 - 0)             |
| Iodine deficiency                                                | 0<br>(0 - 0)             | 0<br>(0 - 0)     | 0<br>(0 - 0)      | 0<br>(0 - 0)       | 0<br>(0 - 0)           | 0<br>(0 - 0)             |
| Iron-deficiency anemia                                           | 2<br>(1 - 3)             | 0<br>(0 - 0)     | 0<br>(0 - 0)      | 0<br>(0 - 0)       | 1<br>(0 - 1)           | 1<br>(1 - 2)             |
| Other nutritional deficiencies                                   | 0<br>(0 - 0)             | 0<br>(0 - 0)     | 0<br>(0 - 0)      | 0<br>(0 - 0)       | 0<br>(0 - 0)           | 0<br>(0 - 0)             |
| Other communicable, maternal, neonatal, and nutritional diseases | 3<br>(3 - 5)             | 0<br>(0 - 1)     | 0<br>(0 - 0)      | 1<br>(1 - 1)       | 1<br>(1 - 2)           | 1<br>(1 - 2)             |
| Sexually transmitted diseases excluding HIV                      | 1<br>(0 - 1)             | 0<br>(0 - 1)     | 0<br>(0 - 0)      | 0<br>(0 - 0)       | 0<br>(0 - 0)           | 0<br>(0 - 0)             |
| Syphilis                                                         | 0<br>(0 - 1)             | 0<br>(0 - 1)     | 0<br>(0 - 0)      | 0<br>(0 - 0)       | 0<br>(0 - 0)           | 0<br>(0 - 0)             |
| Chlamydial infection                                             | --                       | --               | --                | --                 | --                     | --                       |
| Gonococcal infection                                             | 0<br>(0 - 0)             | --               | 0<br>(0 - 0)      | 0<br>(0 - 0)       | 0<br>(0 - 0)           | 0<br>(0 - 0)             |
| Other sexually transmitted diseases                              | 0<br>(0 - 0)             | --               | 0<br>(0 - 0)      | 0<br>(0 - 0)       | 0<br>(0 - 0)           | 0<br>(0 - 0)             |
| Hepatitis                                                        | 1<br>(1 - 2)             | 0<br>(0 - 0)     | 0<br>(0 - 0)      | 0<br>(0 - 0)       | 1<br>(1 - 1)           | 0<br>(0 - 0)             |
| Acute hepatitis A                                                | 0<br>(0 - 0)             | 0<br>(0 - 0)     | 0<br>(0 - 0)      | 0<br>(0 - 0)       | 0<br>(0 - 0)           | 0<br>(0 - 0)             |
| Acute hepatitis B                                                | 1<br>(1 - 1)             | 0<br>(0 - 0)     | 0<br>(0 - 0)      | 0<br>(0 - 0)       | 1<br>(0 - 1)           | 0<br>(0 - 0)             |
| Acute hepatitis C                                                | 0<br>(0 - 0)             | --               | 0<br>(0 - 0)      | 0<br>(0 - 0)       | 0<br>(0 - 0)           | 0<br>(0 - 0)             |
| Other infectious diseases                                        | 2<br>(1 - 3)             | 0<br>(0 - 0)     | 0<br>(0 - 0)      | 0<br>(0 - 1)       | 0<br>(0 - 1)           | 1<br>(0 - 1)             |
| Non-communicable diseases                                        | 3,010<br>(2,656 - 3,325) | 7<br>(3 - 12)    | 3<br>(2 - 5)      | 197<br>(162 - 233) | 1,024<br>(858 - 1,183) | 1,779<br>(1,631 - 1,898) |
| Neoplasms                                                        | 721<br>(624 - 817)       | 1<br>(0 - 1)     | 1<br>(1 - 1)      | 52<br>(42 - 64)    | 349<br>(290 - 405)     | 319<br>(286 - 354)       |
| Esophageal cancer                                                | 14<br>(10 - 17)          | --               | --                | 1<br>(0 - 1)       | 9<br>(6 - 12)          | 4<br>(3 - 5)             |
| Stomach cancer                                                   | 48<br>(40 - 57)          | --               | --                | 4<br>(3 - 5)       | 23<br>(18 - 28)        | 21<br>(16 - 26)          |
| Liver cancer                                                     | 33<br>(24 - 47)          | --               | 0<br>(0 - 0)      | 2<br>(1 - 3)       | 15<br>(11 - 21)        | 16<br>(11 - 24)          |
| Liver cancer due to hepatitis B                                  | 8<br>(3 - 13)            | --               | 0<br>(0 - 0)      | 1<br>(0 - 1)       | 4<br>(1 - 7)           | 3<br>(1 - 5)             |
| Liver cancer due to hepatitis C                                  | 15<br>(9 - 23)           | --               | 0<br>(0 - 0)      | 1<br>(0 - 1)       | 7<br>(4 - 11)          | 7<br>(4 - 12)            |
| Liver cancer due to alcohol use                                  | 9<br>(5 - 14)            | --               | --                | 0<br>(0 - 1)       | 3<br>(2 - 5)           | 5<br>(3 - 8)             |
| Liver cancer due to other causes                                 | 1<br>(1 - 3)             | --               | 0<br>(0 - 0)      | 0<br>(0 - 0)       | 1<br>(0 - 1)           | 1<br>(0 - 1)             |
| Larynx cancer                                                    | 33<br>(23 - 43)          | --               | --                | 2<br>(1 - 3)       | 20<br>(13 - 26)        | 12<br>(8 - 16)           |
| Tracheal, bronchus and lung cancer                               | 293<br>(249 - 335)       | --               | --                | 18<br>(13 - 23)    | 164<br>(134 - 194)     | 111<br>(95 - 126)        |
| Breast cancer                                                    | 2<br>(1 - 5)             | --               | --                | 0<br>(0 - 1)       | 1<br>(0 - 2)           | 1<br>(0 - 2)             |
| Cervical cancer                                                  | --                       | --               | --                | --                 | --                     | --                       |

Web Table 31- Montenegro deaths with 95% UI by age, sex, and cause in 2013

| Cause                                         | Males, All Ages          | Males, 0-4 Years | Males, 5-14 Years | Males, 15-49 Years | Males, 50-69 Years | Males, 70-80 Years       |
|-----------------------------------------------|--------------------------|------------------|-------------------|--------------------|--------------------|--------------------------|
| Uterine cancer                                | --                       | --               | --                | --                 | --                 | --                       |
| Prostate cancer                               | 73<br>(56 - 100)         | --               | --                | 0<br>(0 - 0)       | 15<br>(11 - 21)    | 57<br>(42 - 79)          |
| Colon and rectum cancer                       | 57<br>(48 - 64)          | --               | --                | 4<br>(3 - 5)       | 24<br>(20 - 29)    | 28<br>(23 - 33)          |
| Lip and oral cavity cancer                    | 8<br>(7 - 10)            | --               | --                | 1<br>(1 - 2)       | 5<br>(4 - 6)       | 2<br>(2 - 3)             |
| Nasopharynx cancer                            | 1<br>(0 - 1)             | --               | 0<br>(0 - 0)      | 0<br>(0 - 0)       | 0<br>(0 - 1)       | 0<br>(0 - 0)             |
| Other pharynx cancer                          | 3<br>(2 - 5)             | --               | --                | 0<br>(0 - 1)       | 2<br>(1 - 4)       | 0<br>(0 - 1)             |
| Gallbladder and biliary tract cancer          | 5<br>(3 - 7)             | --               | --                | 0<br>(0 - 0)       | 2<br>(1 - 3)       | 3<br>(2 - 4)             |
| Pancreatic cancer                             | 37<br>(31 - 43)          | --               | --                | 2<br>(2 - 3)       | 19<br>(15 - 23)    | 16<br>(13 - 19)          |
| Malignant skin melanoma                       | 3<br>(2 - 7)             | --               | --                | 1<br>(0 - 2)       | 2<br>(1 - 4)       | 1<br>(0 - 2)             |
| Non-melanoma skin cancer                      | 2<br>(1 - 3)             | --               | --                | 0<br>(0 - 0)       | 0<br>(0 - 1)       | 1<br>(1 - 2)             |
| Ovarian cancer                                | --                       | --               | --                | --                 | --                 | --                       |
| Testicular cancer                             | 2<br>(2 - 3)             | --               | --                | 2<br>(1 - 2)       | 0<br>(0 - 1)       | 0<br>(0 - 0)             |
| Kidney cancer                                 | 16<br>(13 - 20)          | 0<br>(0 - 0)     | 0<br>(0 - 0)      | 1<br>(1 - 2)       | 9<br>(6 - 11)      | 6<br>(4 - 8)             |
| Bladder cancer                                | 18<br>(14 - 23)          | --               | --                | 0<br>(0 - 0)       | 5<br>(4 - 7)       | 12<br>(10 - 16)          |
| Brain and nervous system cancer               | 29<br>(22 - 37)          | 0<br>(0 - 0)     | 0<br>(0 - 0)      | 5<br>(4 - 7)       | 15<br>(11 - 19)    | 9<br>(6 - 12)            |
| Thyroid cancer                                | 1<br>(0 - 1)             | --               | 0<br>(0 - 0)      | 0<br>(0 - 0)       | 0<br>(0 - 0)       | 0<br>(0 - 1)             |
| Mesothelioma                                  | 0<br>(0 - 1)             | --               | --                | 0<br>(0 - 0)       | 0<br>(0 - 0)       | 0<br>(0 - 0)             |
| Hodgkin lymphoma                              | 3<br>(2 - 5)             | 0<br>(0 - 0)     | 0<br>(0 - 0)      | 1<br>(0 - 1)       | 2<br>(1 - 3)       | 1<br>(0 - 1)             |
| Non-Hodgkin lymphoma                          | 13<br>(8 - 17)           | 0<br>(0 - 0)     | 0<br>(0 - 0)      | 3<br>(2 - 4)       | 6<br>(3 - 8)       | 4<br>(3 - 6)             |
| Multiple myeloma                              | 3<br>(2 - 5)             | --               | --                | 0<br>(0 - 1)       | 1<br>(1 - 2)       | 1<br>(1 - 2)             |
| Leukemia                                      | 12<br>(10 - 14)          | 0<br>(0 - 0)     | 0<br>(0 - 0)      | 1<br>(1 - 1)       | 4<br>(3 - 5)       | 6<br>(5 - 8)             |
| Other neoplasms                               | 12<br>(9 - 17)           | 0<br>(0 - 1)     | 0<br>(0 - 1)      | 3<br>(2 - 4)       | 4<br>(3 - 6)       | 5<br>(3 - 7)             |
| Cardiovascular diseases                       | 1,870<br>(1,664 - 2,056) | 2<br>(1 - 4)     | 1<br>(1 - 2)      | 103<br>(84 - 123)  | 557<br>(469 - 649) | 1,205<br>(1,100 - 1,293) |
| Rheumatic heart disease                       | 6<br>(5 - 10)            | 0<br>(0 - 0)     | 0<br>(0 - 0)      | 1<br>(1 - 2)       | 2<br>(2 - 4)       | 3<br>(2 - 5)             |
| Ischemic heart disease                        | 875<br>(740 - 1,018)     | 0<br>(0 - 1)     | 0<br>(0 - 0)      | 57<br>(45 - 70)    | 304<br>(247 - 363) | 513<br>(426 - 603)       |
| Cerebrovascular disease                       | 753<br>(622 - 886)       | 1<br>(1 - 2)     | 1<br>(0 - 1)      | 26<br>(19 - 34)    | 180<br>(138 - 225) | 545<br>(451 - 634)       |
| Ischemic stroke                               | 188<br>(124 - 243)       | 0<br>(0 - 0)     | 0<br>(0 - 0)      | 4<br>(3 - 6)       | 40<br>(27 - 55)    | 144<br>(91 - 190)        |
| Hemorrhagic stroke                            | 565<br>(461 - 672)       | 1<br>(1 - 2)     | 1<br>(0 - 1)      | 22<br>(16 - 29)    | 140<br>(106 - 177) | 400<br>(326 - 480)       |
| Hypertensive heart disease                    | 16<br>(11 - 24)          | 0<br>(0 - 0)     | 0<br>(0 - 0)      | 1<br>(1 - 2)       | 5<br>(3 - 7)       | 10<br>(6 - 16)           |
| Cardiomyopathy and myocarditis                | 79<br>(57 - 110)         | 0<br>(0 - 1)     | 0<br>(0 - 1)      | 9<br>(6 - 14)      | 24<br>(16 - 34)    | 46<br>(30 - 69)          |
| Atrial fibrillation and flutter               | 53<br>(38 - 72)          | --               | --                | 1<br>(1 - 2)       | 12<br>(8 - 18)     | 39<br>(25 - 56)          |
| Aortic aneurysm                               | 58<br>(43 - 73)          | --               | --                | 3<br>(2 - 4)       | 19<br>(14 - 26)    | 36<br>(25 - 47)          |
| Peripheral vascular disease                   | 1<br>(1 - 2)             | --               | --                | 0<br>(0 - 0)       | 1<br>(1 - 1)       | 0<br>(0 - 1)             |
| Endocarditis                                  | 2<br>(1 - 2)             | 0<br>(0 - 0)     | 0<br>(0 - 0)      | 0<br>(0 - 1)       | 0<br>(0 - 1)       | 1<br>(0 - 1)             |
| Other cardiovascular and circulatory diseases | 26<br>(20 - 39)          | 0<br>(0 - 1)     | 0<br>(0 - 0)      | 4<br>(3 - 5)       | 10<br>(7 - 15)     | 12<br>(9 - 20)           |
| Chronic respiratory diseases                  | 33<br>(28 - 41)          | 0<br>(0 - 0)     | 0<br>(0 - 0)      | 1<br>(1 - 1)       | 8<br>(6 - 10)      | 24<br>(20 - 31)          |
| Chronic obstructive pulmonary disease         | 27<br>(22 - 34)          | 0<br>(0 - 0)     | 0<br>(0 - 0)      | 0<br>(0 - 1)       | 6<br>(4 - 7)       | 21<br>(17 - 27)          |
| Pneumoconiosis                                | 2<br>(1 - 3)             | 0<br>(0 - 0)     | 0<br>(0 - 0)      | 0<br>(0 - 0)       | 1<br>(1 - 1)       | 1<br>(1 - 2)             |
| Silicosis                                     | 1<br>(1 - 1)             | 0<br>(0 - 0)     | 0<br>(0 - 0)      | 0<br>(0 - 0)       | 0<br>(0 - 0)       | 1<br>(0 - 1)             |
| Asbestosis                                    | 0<br>(0 - 0)             | 0<br>(0 - 0)     | 0<br>(0 - 0)      | 0<br>(0 - 0)       | 0<br>(0 - 0)       | 0<br>(0 - 0)             |

Web Table 31- Montenegro deaths with 95% UI by age, sex, and cause in 2013

| Cause                                               | Males, All Ages    | Males, 0-4 Years | Males, 5-14 Years | Males, 15-49 Years | Males, 50-69 Years | Males, 70-80 Years |
|-----------------------------------------------------|--------------------|------------------|-------------------|--------------------|--------------------|--------------------|
| Coal workers pneumoconiosis                         | 0<br>(0 - 1)       | 0<br>(0 - 0)     | 0<br>(0 - 0)      | 0<br>(0 - 0)       | 0<br>(0 - 0)       | 0<br>(0 - 0)       |
| Other pneumoconiosis                                | 1<br>(1 - 1)       | 0<br>(0 - 0)     | 0<br>(0 - 0)      | 0<br>(0 - 0)       | 0<br>(0 - 1)       | 0<br>(0 - 1)       |
| Asthma                                              | 0<br>(0 - 0)       | 0<br>(0 - 0)     | 0<br>(0 - 0)      | 0<br>(0 - 0)       | 0<br>(0 - 0)       | 0<br>(0 - 0)       |
| Interstitial lung disease and pulmonary sarcoidosis | 3<br>(2 - 5)       | 0<br>(0 - 0)     | 0<br>(0 - 0)      | 0<br>(0 - 0)       | 1<br>(1 - 2)       | 2<br>(1 - 3)       |
| Other chronic respiratory diseases                  | 1<br>(1 - 1)       | 0<br>(0 - 0)     | 0<br>(0 - 0)      | 0<br>(0 - 0)       | 0<br>(0 - 0)       | 0<br>(0 - 0)       |
| Cirrhosis                                           | 32<br>(26 - 39)    | 0<br>(0 - 0)     | 0<br>(0 - 0)      | 6<br>(4 - 8)       | 20<br>(16 - 26)    | 6<br>(5 - 7)       |
| Cirrhosis due to hepatitis B                        | 7<br>(4 - 12)      | 0<br>(0 - 0)     | 0<br>(0 - 0)      | 1<br>(1 - 2)       | 5<br>(2 - 8)       | 1<br>(1 - 2)       |
| Cirrhosis due to hepatitis C                        | 9<br>(4 - 14)      | 0<br>(0 - 0)     | 0<br>(0 - 0)      | 1<br>(1 - 2)       | 5<br>(2 - 9)       | 2<br>(1 - 3)       |
| Cirrhosis due to alcohol use                        | 11<br>(6 - 17)     | --               | --                | 1<br>(0 - 3)       | 7<br>(3 - 12)      | 2<br>(1 - 4)       |
| Cirrhosis due to other causes                       | 5<br>(3 - 8)       | 0<br>(0 - 0)     | 0<br>(0 - 0)      | 1<br>(1 - 2)       | 3<br>(1 - 5)       | 1<br>(0 - 1)       |
| Digestive diseases                                  | 55<br>(44 - 66)    | 0<br>(0 - 0)     | 0<br>(0 - 0)      | 5<br>(4 - 7)       | 21<br>(16 - 26)    | 29<br>(23 - 37)    |
| Peptic ulcer disease                                | 14<br>(8 - 20)     | 0<br>(0 - 0)     | 0<br>(0 - 0)      | 1<br>(1 - 2)       | 5<br>(3 - 7)       | 8<br>(4 - 12)      |
| Gastritis and duodenitis                            | 0<br>(0 - 0)       | 0<br>(0 - 0)     | 0<br>(0 - 0)      | 0<br>(0 - 0)       | 0<br>(0 - 0)       | 0<br>(0 - 0)       |
| Appendicitis                                        | 1<br>(0 - 1)       | 0<br>(0 - 0)     | 0<br>(0 - 0)      | 0<br>(0 - 0)       | 0<br>(0 - 1)       | 0<br>(0 - 0)       |
| Paralytic ileus and intestinal obstruction          | 9<br>(5 - 14)      | 0<br>(0 - 0)     | 0<br>(0 - 0)      | 1<br>(0 - 1)       | 2<br>(1 - 4)       | 6<br>(3 - 10)      |
| Inguinal, femoral, and abdominal hernia             | 1<br>(0 - 1)       | 0<br>(0 - 0)     | 0<br>(0 - 0)      | 0<br>(0 - 0)       | 0<br>(0 - 0)       | 0<br>(0 - 1)       |
| Inflammatory bowel disease                          | 2<br>(1 - 2)       | 0<br>(0 - 0)     | 0<br>(0 - 0)      | 0<br>(0 - 0)       | 0<br>(0 - 1)       | 1<br>(0 - 1)       |
| Vascular intestinal disorders                       | 21<br>(11 - 34)    | 0<br>(0 - 0)     | 0<br>(0 - 0)      | 1<br>(1 - 2)       | 8<br>(4 - 13)      | 12<br>(6 - 19)     |
| Gallbladder and biliary diseases                    | 5<br>(3 - 8)       | 0<br>(0 - 0)     | 0<br>(0 - 0)      | 1<br>(0 - 1)       | 3<br>(1 - 5)       | 2<br>(1 - 3)       |
| Pancreatitis                                        | 1<br>(1 - 2)       | 0<br>(0 - 0)     | 0<br>(0 - 0)      | 1<br>(0 - 1)       | 0<br>(0 - 1)       | 0<br>(0 - 1)       |
| Other digestive diseases                            | 2<br>(1 - 3)       | 0<br>(0 - 0)     | 0<br>(0 - 0)      | 0<br>(0 - 1)       | 1<br>(1 - 2)       | 1<br>(0 - 1)       |
| Neurological disorders                              | 127<br>(101 - 155) | 0<br>(0 - 0)     | 0<br>(0 - 0)      | 1<br>(1 - 2)       | 10<br>(7 - 13)     | 115<br>(91 - 142)  |
| Alzheimer disease and other dementias               | 120<br>(95 - 147)  | --               | --                | 0<br>(0 - 0)       | 8<br>(6 - 10)      | 112<br>(87 - 138)  |
| Parkinson disease                                   | 3<br>(2 - 5)       | --               | --                | 0<br>(0 - 0)       | 0<br>(0 - 1)       | 3<br>(1 - 4)       |
| Epilepsy                                            | 1<br>(1 - 2)       | 0<br>(0 - 0)     | 0<br>(0 - 0)      | 1<br>(0 - 1)       | 0<br>(0 - 1)       | 0<br>(0 - 0)       |
| Multiple sclerosis                                  | 2<br>(1 - 4)       | --               | --                | 0<br>(0 - 1)       | 1<br>(1 - 2)       | 1<br>(0 - 1)       |
| Other neurological disorders                        | 1<br>(0 - 1)       | 0<br>(0 - 0)     | 0<br>(0 - 0)      | 0<br>(0 - 0)       | 0<br>(0 - 1)       | 0<br>(0 - 0)       |
| Mental and substance use disorders                  | 26<br>(21 - 32)    | 0<br>(0 - 0)     | 0<br>(0 - 0)      | 15<br>(12 - 19)    | 8<br>(6 - 11)      | 3<br>(2 - 3)       |
| Schizophrenia                                       | 0<br>(0 - 1)       | --               | --                | 0<br>(0 - 0)       | 0<br>(0 - 0)       | 0<br>(0 - 0)       |
| Alcohol use disorders                               | 6<br>(4 - 10)      | --               | --                | 1<br>(1 - 2)       | 4<br>(3 - 7)       | 1<br>(1 - 1)       |
| Drug use disorders                                  | 19<br>(15 - 24)    | 0<br>(0 - 0)     | --                | 14<br>(11 - 18)    | 4<br>(3 - 5)       | 2<br>(1 - 2)       |
| Opioid use disorders                                | 8<br>(6 - 9)       | 0<br>(0 - 0)     | --                | 6<br>(4 - 7)       | 1<br>(1 - 2)       | 1<br>(0 - 1)       |
| Cocaine use disorders                               | 1<br>(1 - 1)       | 0<br>(0 - 0)     | --                | 1<br>(1 - 1)       | 0<br>(0 - 0)       | 0<br>(0 - 0)       |
| Amphetamine use disorders                           | 1<br>(1 - 1)       | 0<br>(0 - 0)     | --                | 1<br>(0 - 1)       | 0<br>(0 - 0)       | 0<br>(0 - 0)       |
| Other drug use disorders                            | 10<br>(8 - 12)     | 0<br>(0 - 0)     | --                | 7<br>(5 - 9)       | 2<br>(1 - 3)       | 1<br>(1 - 1)       |
| Eating disorders                                    | 0<br>(0 - 0)       | --               | 0<br>(0 - 0)      | 0<br>(0 - 0)       | --                 | --                 |
| Anorexia nervosa                                    | 0<br>(0 - 0)       | --               | 0<br>(0 - 0)      | 0<br>(0 - 0)       | --                 | --                 |
| Diabetes, urogenital, blood, and endocrine diseases | 136<br>(117 - 157) | 0<br>(0 - 1)     | 0<br>(0 - 0)      | 10<br>(8 - 12)     | 50<br>(40 - 61)    | 76<br>(63 - 89)    |
| Diabetes mellitus                                   | 62<br>(51 - 73)    | 0<br>(0 - 0)     | 0<br>(0 - 0)      | 4<br>(3 - 5)       | 25<br>(19 - 31)    | 33<br>(26 - 41)    |
| Acute glomerulonephritis                            | 0<br>(0 - 0)       | 0<br>(0 - 0)     | 0<br>(0 - 0)      | 0<br>(0 - 0)       | 0<br>(0 - 0)       | 0<br>(0 - 0)       |

Web Table 31- Montenegro deaths with 95% UI by age, sex, and cause in 2013

| Cause                                               | Males, All Ages    | Males, 0-4 Years | Males, 5-14 Years | Males, 15-49 Years | Males, 50-69 Years | Males, 70-80 Years |
|-----------------------------------------------------|--------------------|------------------|-------------------|--------------------|--------------------|--------------------|
| Chronic kidney disease                              | 65<br>(53 - 79)    | 0<br>(0 - 0)     | 0<br>(0 - 0)      | 4<br>(3 - 5)       | 22<br>(17 - 28)    | 39<br>(30 - 50)    |
| Chronic kidney disease due to diabetes mellitus     | 4<br>(1 - 6)       | 0<br>(0 - 0)     | 0<br>(0 - 0)      | 0<br>(0 - 0)       | 2<br>(1 - 3)       | 2<br>(1 - 3)       |
| Chronic kidney disease due to hypertension          | 15<br>(8 - 22)     | 0<br>(0 - 0)     | 0<br>(0 - 0)      | 1<br>(0 - 1)       | 5<br>(3 - 8)       | 9<br>(5 - 14)      |
| Chronic kidney disease due to glomerulonephritis    | 8<br>(4 - 11)      | 0<br>(0 - 0)     | 0<br>(0 - 0)      | 0<br>(0 - 1)       | 3<br>(1 - 4)       | 4<br>(2 - 7)       |
| Chronic kidney disease due to other causes          | 39<br>(27 - 53)    | 0<br>(0 - 0)     | 0<br>(0 - 0)      | 2<br>(2 - 4)       | 13<br>(8 - 18)     | 24<br>(15 - 34)    |
| Urinary diseases and male infertility               | 2<br>(2 - 3)       | 0<br>(0 - 0)     | 0<br>(0 - 0)      | 0<br>(0 - 0)       | 1<br>(0 - 1)       | 1<br>(1 - 2)       |
| Interstitial nephritis and urinary tract infections | 1<br>(1 - 1)       | 0<br>(0 - 0)     | 0<br>(0 - 0)      | 0<br>(0 - 0)       | 0<br>(0 - 0)       | 0<br>(0 - 1)       |
| Urolithiasis                                        | 0<br>(0 - 0)       | --               | 0<br>(0 - 0)      | 0<br>(0 - 0)       | 0<br>(0 - 0)       | 0<br>(0 - 0)       |
| Other urinary diseases                              | 1<br>(1 - 1)       | 0<br>(0 - 0)     | 0<br>(0 - 0)      | 0<br>(0 - 0)       | 0<br>(0 - 0)       | 1<br>(0 - 1)       |
| Gynecological diseases                              | --                 | --               | --                | --                 | --                 | --                 |
| Uterine fibroids                                    | --                 | --               | --                | --                 | --                 | --                 |
| Polycystic ovarian syndrome                         | --                 | --               | --                | --                 | --                 | --                 |
| Endometriosis                                       | --                 | --               | --                | --                 | --                 | --                 |
| Genital prolapse                                    | --                 | --               | --                | --                 | --                 | --                 |
| Other gynecological diseases                        | --                 | --               | --                | --                 | --                 | --                 |
| Hemoglobinopathies and hemolytic anemias            | 2<br>(1 - 3)       | 0<br>(0 - 0)     | 0<br>(0 - 0)      | 0<br>(0 - 1)       | 0<br>(0 - 1)       | 1<br>(0 - 1)       |
| Thalassemias                                        | 0<br>(0 - 0)       | 0<br>(0 - 0)     | 0<br>(0 - 0)      | 0<br>(0 - 0)       | 0<br>(0 - 0)       | 0<br>(0 - 0)       |
| Sickle cell disorders                               | 0<br>(0 - 0)       | 0<br>(0 - 0)     | 0<br>(0 - 0)      | 0<br>(0 - 0)       | 0<br>(0 - 0)       | 0<br>(0 - 0)       |
| G6PD deficiency                                     | 0<br>(0 - 0)       | 0<br>(0 - 0)     | 0<br>(0 - 0)      | 0<br>(0 - 0)       | 0<br>(0 - 0)       | 0<br>(0 - 0)       |
| Other hemoglobinopathies and hemolytic anemias      | 1<br>(1 - 2)       | 0<br>(0 - 0)     | 0<br>(0 - 0)      | 0<br>(0 - 0)       | 0<br>(0 - 1)       | 1<br>(0 - 1)       |
| Endocrine, metabolic, blood, and immune disorders   | 6<br>(4 - 8)       | 0<br>(0 - 0)     | 0<br>(0 - 0)      | 1<br>(1 - 2)       | 2<br>(1 - 3)       | 2<br>(1 - 3)       |
| Musculoskeletal disorders                           | 4<br>(3 - 6)       | --               | 0<br>(0 - 0)      | 1<br>(1 - 2)       | 1<br>(1 - 1)       | 2<br>(1 - 3)       |
| Rheumatoid arthritis                                | 1<br>(1 - 2)       | --               | 0<br>(0 - 0)      | 0<br>(0 - 1)       | 0<br>(0 - 0)       | 1<br>(0 - 1)       |
| Other musculoskeletal disorders                     | 3<br>(2 - 4)       | --               | 0<br>(0 - 0)      | 1<br>(1 - 2)       | 1<br>(0 - 1)       | 1<br>(0 - 1)       |
| Other non-communicable diseases                     | 7<br>(5 - 9)       | 3<br>(1 - 5)     | 0<br>(0 - 0)      | 2<br>(1 - 2)       | 1<br>(1 - 1)       | 1<br>(1 - 1)       |
| Congenital anomalies                                | 5<br>(3 - 7)       | 3<br>(1 - 5)     | 0<br>(0 - 0)      | 1<br>(1 - 1)       | 1<br>(0 - 1)       | 0<br>(0 - 1)       |
| Neural tube defects                                 | 0<br>(0 - 0)       | 0<br>(0 - 0)     | 0<br>(0 - 0)      | 0<br>(0 - 0)       | 0<br>(0 - 0)       | 0<br>(0 - 0)       |
| Congenital heart anomalies                          | 1<br>(1 - 2)       | 1<br>(0 - 2)     | 0<br>(0 - 0)      | 0<br>(0 - 0)       | 0<br>(0 - 0)       | 0<br>(0 - 0)       |
| Cleft lip and cleft palate                          | 0<br>(0 - 0)       | 0<br>(0 - 0)     | --                | --                 | --                 | --                 |
| Down syndrome                                       | 1<br>(0 - 1)       | 0<br>(0 - 1)     | 0<br>(0 - 0)      | 0<br>(0 - 0)       | 0<br>(0 - 0)       | 0<br>(0 - 0)       |
| Chromosomal unbalanced rearrangements               | 0<br>(0 - 0)       | 0<br>(0 - 0)     | 0<br>(0 - 0)      | 0<br>(0 - 0)       | 0<br>(0 - 0)       | 0<br>(0 - 0)       |
| Other congenital anomalies                          | 2<br>(2 - 4)       | 1<br>(1 - 2)     | 0<br>(0 - 0)      | 0<br>(0 - 1)       | 0<br>(0 - 0)       | 0<br>(0 - 0)       |
| Skin and subcutaneous diseases                      | 2<br>(1 - 2)       | 0<br>(0 - 0)     | 0<br>(0 - 0)      | 1<br>(0 - 1)       | 0<br>(0 - 1)       | 0<br>(0 - 1)       |
| Cellulitis                                          | 0<br>(0 - 0)       | 0<br>(0 - 0)     | 0<br>(0 - 0)      | 0<br>(0 - 0)       | 0<br>(0 - 0)       | 0<br>(0 - 0)       |
| Pyoderma                                            | 1<br>(1 - 1)       | 0<br>(0 - 0)     | 0<br>(0 - 0)      | 0<br>(0 - 1)       | 0<br>(0 - 0)       | 0<br>(0 - 0)       |
| Decubitus ulcer                                     | 1<br>(0 - 1)       | 0<br>(0 - 0)     | 0<br>(0 - 0)      | 0<br>(0 - 0)       | 0<br>(0 - 0)       | 0<br>(0 - 0)       |
| Other skin and subcutaneous diseases                | 0<br>(0 - 0)       | 0<br>(0 - 0)     | 0<br>(0 - 0)      | 0<br>(0 - 0)       | 0<br>(0 - 0)       | 0<br>(0 - 0)       |
| Sudden infant death syndrome                        | 0<br>(0 - 0)       | 0<br>(0 - 0)     | --                | --                 | --                 | --                 |
| Injuries                                            | 240<br>(200 - 280) | 2<br>(1 - 4)     | 4<br>(3 - 6)      | 97<br>(79 - 115)   | 80<br>(64 - 99)    | 57<br>(45 - 70)    |
| Transport injuries                                  | 62<br>(52 - 72)    | 1<br>(0 - 1)     | 1<br>(1 - 2)      | 33<br>(27 - 40)    | 17<br>(13 - 21)    | 10<br>(8 - 13)     |



Web Table 31- Montenegro deaths with 95% UI by age, sex, and cause in 2013

| Cause                                           | Males, All Ages   | Males, 0-4 Years | Males, 5-14 Years | Males, 15-49 Years | Males, 50-69 Years | Males, 70-80 Years |
|-------------------------------------------------|-------------------|------------------|-------------------|--------------------|--------------------|--------------------|
| Road injuries                                   | 58<br>(49 - 68)   | 1<br>(0 - 1)     | 1<br>(1 - 2)      | 30<br>(25 - 37)    | 16<br>(12 - 20)    | 10<br>(8 - 12)     |
| Pedestrian road injuries                        | 30<br>(19 - 40)   | 0<br>(0 - 1)     | 1<br>(0 - 1)      | 15<br>(10 - 21)    | 8<br>(5 - 11)      | 6<br>(3 - 8)       |
| Cyclist road injuries                           | 2<br>(1 - 4)      | 0<br>(0 - 0)     | 0<br>(0 - 0)      | 1<br>(0 - 1)       | 1<br>(0 - 1)       | 1<br>(0 - 1)       |
| Motorcyclist road injuries                      | 6<br>(4 - 10)     | 0<br>(0 - 0)     | 0<br>(0 - 0)      | 4<br>(2 - 6)       | 1<br>(1 - 2)       | 1<br>(1 - 2)       |
| Motor vehicle road injuries                     | 19<br>(11 - 28)   | 0<br>(0 - 0)     | 0<br>(0 - 1)      | 10<br>(6 - 16)     | 5<br>(3 - 8)       | 3<br>(1 - 4)       |
| Other road injuries                             | 1<br>(0 - 1)      | 0<br>(0 - 0)     | 0<br>(0 - 0)      | 0<br>(0 - 1)       | 0<br>(0 - 0)       | 0<br>(0 - 0)       |
| Other transport injuries                        | 4<br>(2 - 5)      | 0<br>(0 - 0)     | 0<br>(0 - 0)      | 2<br>(1 - 4)       | 1<br>(1 - 2)       | 0<br>(0 - 0)       |
| Unintentional injuries                          | 56<br>(47 - 67)   | 1<br>(1 - 3)     | 2<br>(1 - 2)      | 18<br>(14 - 22)    | 19<br>(15 - 24)    | 17<br>(14 - 20)    |
| Falls                                           | 17<br>(13 - 22)   | 0<br>(0 - 0)     | 0<br>(0 - 1)      | 4<br>(3 - 6)       | 7<br>(5 - 11)      | 5<br>(3 - 8)       |
| Drowning                                        | 12<br>(7 - 16)    | 1<br>(0 - 1)     | 1<br>(0 - 1)      | 7<br>(4 - 10)      | 2<br>(1 - 3)       | 1<br>(1 - 2)       |
| Fire, heat, and hot substances                  | 3<br>(2 - 5)      | 0<br>(0 - 0)     | 0<br>(0 - 0)      | 1<br>(0 - 1)       | 1<br>(1 - 1)       | 1<br>(1 - 2)       |
| Poisonings                                      | 5<br>(4 - 8)      | 0<br>(0 - 0)     | 0<br>(0 - 0)      | 0<br>(0 - 1)       | 2<br>(1 - 4)       | 3<br>(2 - 4)       |
| Exposure to mechanical forces                   | 5<br>(4 - 6)      | 0<br>(0 - 0)     | 0<br>(0 - 0)      | 2<br>(1 - 2)       | 2<br>(1 - 3)       | 1<br>(1 - 2)       |
| Unintentional firearm injuries                  | 1<br>(1 - 2)      | 0<br>(0 - 0)     | 0<br>(0 - 0)      | 0<br>(0 - 1)       | 0<br>(0 - 1)       | 0<br>(0 - 1)       |
| Unintentional suffocation                       | 0<br>(0 - 0)      | 0<br>(0 - 0)     | 0<br>(0 - 0)      | 0<br>(0 - 0)       | 0<br>(0 - 0)       | 0<br>(0 - 0)       |
| Other exposure to mechanical forces             | 4<br>(3 - 5)      | 0<br>(0 - 0)     | 0<br>(0 - 0)      | 1<br>(1 - 2)       | 1<br>(1 - 2)       | 1<br>(0 - 1)       |
| Adverse effects of medical treatment            | 6<br>(5 - 10)     | 0<br>(0 - 0)     | 0<br>(0 - 0)      | 1<br>(1 - 2)       | 2<br>(1 - 3)       | 3<br>(2 - 5)       |
| Animal contact                                  | 1<br>(1 - 1)      | 0<br>(0 - 0)     | 0<br>(0 - 0)      | 0<br>(0 - 0)       | 0<br>(0 - 0)       | 0<br>(0 - 1)       |
| Venomous animal contact                         | 0<br>(0 - 1)      | 0<br>(0 - 0)     | 0<br>(0 - 0)      | 0<br>(0 - 0)       | 0<br>(0 - 0)       | 0<br>(0 - 0)       |
| Non-venomous animal contact                     | 1<br>(0 - 1)      | 0<br>(0 - 0)     | 0<br>(0 - 0)      | 0<br>(0 - 0)       | 0<br>(0 - 0)       | 0<br>(0 - 0)       |
| Foreign body                                    | 1<br>(1 - 2)      | 0<br>(0 - 0)     | 0<br>(0 - 0)      | 0<br>(0 - 1)       | 1<br>(0 - 1)       | 0<br>(0 - 1)       |
| Pulmonary aspiration and foreign body in airway | 1<br>(1 - 2)      | 0<br>(0 - 0)     | 0<br>(0 - 0)      | 0<br>(0 - 1)       | 1<br>(0 - 1)       | 0<br>(0 - 0)       |
| Foreign body in other body part                 | 0<br>(0 - 0)      | 0<br>(0 - 0)     | 0<br>(0 - 0)      | 0<br>(0 - 0)       | 0<br>(0 - 0)       | 0<br>(0 - 0)       |
| Other unintentional injuries                    | 5<br>(4 - 6)      | 0<br>(0 - 0)     | 0<br>(0 - 0)      | 2<br>(1 - 2)       | 2<br>(1 - 2)       | 1<br>(1 - 2)       |
| Self-harm and interpersonal violence            | 122<br>(87 - 150) | 0<br>(0 - 0)     | 1<br>(1 - 2)      | 46<br>(30 - 58)    | 45<br>(31 - 59)    | 30<br>(20 - 43)    |
| Self-harm                                       | 105<br>(74 - 130) | --               | 1<br>(0 - 1)      | 37<br>(22 - 48)    | 40<br>(27 - 54)    | 28<br>(18 - 40)    |
| Interpersonal violence                          | 17<br>(9 - 23)    | 0<br>(0 - 0)     | 0<br>(0 - 1)      | 9<br>(5 - 13)      | 5<br>(3 - 7)       | 2<br>(1 - 4)       |
| Assault by firearm                              | 11<br>(6 - 16)    | 0<br>(0 - 0)     | 0<br>(0 - 1)      | 7<br>(4 - 10)      | 3<br>(1 - 4)       | 2<br>(1 - 3)       |
| Assault by sharp object                         | 3<br>(2 - 6)      | 0<br>(0 - 0)     | 0<br>(0 - 0)      | 1<br>(0 - 2)       | 2<br>(1 - 3)       | 0<br>(0 - 1)       |
| Assault by other means                          | 2<br>(1 - 4)      | 0<br>(0 - 0)     | 0<br>(0 - 0)      | 1<br>(1 - 2)       | 0<br>(0 - 1)       | 1<br>(0 - 1)       |

Web Table 31- Montenegro deaths with 95% UI by age, sex, and cause in 2013

| Cause                                                             | Females, All Ages        | Females, 0-4 Years | Females, 5-14 Years | Females, 15-49 Years | Females, 50-69 Years | Females, 70-80 Years     |
|-------------------------------------------------------------------|--------------------------|--------------------|---------------------|----------------------|----------------------|--------------------------|
| All causes                                                        | 2,850<br>(2,496 - 3,153) | 20<br>(12 - 32)    | 5<br>(4 - 7)        | 136<br>(113 - 169)   | 629<br>(511 - 734)   | 2,061<br>(1,849 - 2,229) |
| Communicable, maternal, neonatal, and nutritional diseases        | 46<br>(36 - 59)          | 14<br>(8 - 22)     | 0<br>(0 - 0)        | 3<br>(3 - 4)         | 6<br>(5 - 8)         | 23<br>(16 - 33)          |
| HIV/AIDS and tuberculosis                                         | 1<br>(1 - 1)             | 0<br>(0 - 0)       | 0<br>(0 - 0)        | 0<br>(0 - 0)         | 0<br>(0 - 1)         | 0<br>(0 - 0)             |
| Tuberculosis                                                      | 1<br>(1 - 1)             | 0<br>(0 - 0)       | 0<br>(0 - 0)        | 0<br>(0 - 0)         | 0<br>(0 - 0)         | 0<br>(0 - 0)             |
| HIV/AIDS                                                          | 0<br>(0 - 1)             | 0<br>(0 - 0)       | 0<br>(0 - 0)        | 0<br>(0 - 0)         | 0<br>(0 - 0)         | 0<br>(0 - 0)             |
| HIV/AIDS resulting in mycobacterial infection                     | 0<br>(0 - 0)             | 0<br>(0 - 0)       | 0<br>(0 - 0)        | 0<br>(0 - 0)         | 0<br>(0 - 0)         | 0<br>(0 - 0)             |
| HIV/AIDS resulting in other diseases                              | 0<br>(0 - 1)             | 0<br>(0 - 0)       | 0<br>(0 - 0)        | 0<br>(0 - 0)         | 0<br>(0 - 0)         | 0<br>(0 - 0)             |
| Diarrhea, lower respiratory, and other common infectious diseases | 29<br>(21 - 39)          | 1<br>(1 - 2)       | 0<br>(0 - 0)        | 2<br>(1 - 2)         | 5<br>(4 - 7)         | 21<br>(15 - 31)          |
| Diarrheal diseases                                                | 0<br>(0 - 0)             | 0<br>(0 - 0)       | 0<br>(0 - 0)        | 0<br>(0 - 0)         | 0<br>(0 - 0)         | 0<br>(0 - 0)             |
| Intestinal infectious diseases                                    | 1<br>(0 - 1)             | 0<br>(0 - 0)       | 0<br>(0 - 0)        | 0<br>(0 - 0)         | 0<br>(0 - 0)         | 0<br>(0 - 0)             |
| Typhoid fever                                                     | 0<br>(0 - 1)             | 0<br>(0 - 0)       | 0<br>(0 - 0)        | 0<br>(0 - 0)         | 0<br>(0 - 0)         | 0<br>(0 - 0)             |
| Paratyphoid fever                                                 | 0<br>(0 - 0)             | 0<br>(0 - 0)       | 0<br>(0 - 0)        | 0<br>(0 - 0)         | 0<br>(0 - 0)         | 0<br>(0 - 0)             |
| Other intestinal infectious diseases                              | 0<br>(0 - 0)             | 0<br>(0 - 0)       | 0<br>(0 - 0)        | 0<br>(0 - 0)         | 0<br>(0 - 0)         | 0<br>(0 - 0)             |
| Lower respiratory infections                                      | 27<br>(20 - 37)          | 1<br>(0 - 2)       | 0<br>(0 - 0)        | 1<br>(1 - 2)         | 4<br>(3 - 6)         | 21<br>(14 - 30)          |
| Upper respiratory infections                                      | 0<br>(0 - 0)             | 0<br>(0 - 0)       | 0<br>(0 - 0)        | 0<br>(0 - 0)         | 0<br>(0 - 0)         | 0<br>(0 - 0)             |
| Otitis media                                                      | 0<br>(0 - 0)             | 0<br>(0 - 0)       | 0<br>(0 - 0)        | 0<br>(0 - 0)         | 0<br>(0 - 0)         | 0<br>(0 - 0)             |
| Meningitis                                                        | 0<br>(0 - 0)             | 0<br>(0 - 0)       | 0<br>(0 - 0)        | 0<br>(0 - 0)         | 0<br>(0 - 0)         | 0<br>(0 - 0)             |
| Pneumococcal meningitis                                           | 0<br>(0 - 0)             | 0<br>(0 - 0)       | 0<br>(0 - 0)        | 0<br>(0 - 0)         | 0<br>(0 - 0)         | 0<br>(0 - 0)             |
| H influenzae type B meningitis                                    | 0<br>(0 - 0)             | 0<br>(0 - 0)       | 0<br>(0 - 0)        | 0<br>(0 - 0)         | 0<br>(0 - 0)         | 0<br>(0 - 0)             |
| Meningococcal meningitis                                          | 0<br>(0 - 0)             | 0<br>(0 - 0)       | 0<br>(0 - 0)        | 0<br>(0 - 0)         | 0<br>(0 - 0)         | 0<br>(0 - 0)             |
| Other meningitis                                                  | 0<br>(0 - 0)             | 0<br>(0 - 0)       | 0<br>(0 - 0)        | 0<br>(0 - 0)         | 0<br>(0 - 0)         | 0<br>(0 - 0)             |
| Encephalitis                                                      | 0<br>(0 - 1)             | 0<br>(0 - 0)       | 0<br>(0 - 0)        | 0<br>(0 - 0)         | 0<br>(0 - 0)         | 0<br>(0 - 0)             |
| Diphtheria                                                        | 0<br>(0 - 0)             | 0<br>(0 - 0)       | 0<br>(0 - 0)        | 0<br>(0 - 0)         | 0<br>(0 - 0)         | 0<br>(0 - 0)             |
| Whooping cough                                                    | 0<br>(0 - 0)             | 0<br>(0 - 0)       | 0<br>(0 - 0)        | 0<br>(0 - 0)         | 0<br>(0 - 0)         | 0<br>(0 - 0)             |
| Tetanus                                                           | 0<br>(0 - 0)             | 0<br>(0 - 0)       | 0<br>(0 - 0)        | 0<br>(0 - 0)         | 0<br>(0 - 0)         | 0<br>(0 - 0)             |
| Measles                                                           | 0<br>(0 - 0)             | 0<br>(0 - 0)       | 0<br>(0 - 0)        | 0<br>(0 - 0)         | 0<br>(0 - 0)         | 0<br>(0 - 0)             |
| Varicella and herpes zoster                                       | 0<br>(0 - 1)             | 0<br>(0 - 0)       | 0<br>(0 - 0)        | 0<br>(0 - 0)         | 0<br>(0 - 0)         | 0<br>(0 - 1)             |
| Neglected tropical diseases and malaria                           | 0<br>(0 - 0)             | 0<br>(0 - 0)       | 0<br>(0 - 0)        | 0<br>(0 - 0)         | 0<br>(0 - 0)         | 0<br>(0 - 0)             |
| Leishmaniasis                                                     | 0<br>(0 - 0)             | 0<br>(0 - 0)       | 0<br>(0 - 0)        | 0<br>(0 - 0)         | 0<br>(0 - 0)         | 0<br>(0 - 0)             |
| Visceral leishmaniasis                                            | 0<br>(0 - 0)             | 0<br>(0 - 0)       | 0<br>(0 - 0)        | 0<br>(0 - 0)         | 0<br>(0 - 0)         | 0<br>(0 - 0)             |
| Cysticercosis                                                     | 0<br>(0 - 0)             | 0<br>(0 - 0)       | 0<br>(0 - 0)        | 0<br>(0 - 0)         | 0<br>(0 - 0)         | 0<br>(0 - 0)             |
| Cystic echinococcosis                                             | 0<br>(0 - 0)             | 0<br>(0 - 0)       | 0<br>(0 - 0)        | 0<br>(0 - 0)         | 0<br>(0 - 0)         | 0<br>(0 - 0)             |
| Dengue                                                            | 0<br>(0 - 0)             | 0<br>(0 - 0)       | 0<br>(0 - 0)        | 0<br>(0 - 0)         | 0<br>(0 - 0)         | 0<br>(0 - 0)             |
| Rabies                                                            | 0<br>(0 - 0)             | 0<br>(0 - 0)       | 0<br>(0 - 0)        | 0<br>(0 - 0)         | 0<br>(0 - 0)         | 0<br>(0 - 0)             |
| Other neglected tropical diseases                                 | 0<br>(0 - 0)             | 0<br>(0 - 0)       | 0<br>(0 - 0)        | 0<br>(0 - 0)         | 0<br>(0 - 0)         | 0<br>(0 - 0)             |
| Maternal disorders                                                | 1<br>(1 - 1)             | --                 | 0<br>(0 - 0)        | 1<br>(1 - 1)         | --                   | --                       |
| Maternal hemorrhage                                               | 0<br>(0 - 0)             | --                 | 0<br>(0 - 0)        | 0<br>(0 - 0)         | --                   | --                       |
| Maternal sepsis and other maternal infections                     | 0<br>(0 - 0)             | --                 | 0<br>(0 - 0)        | 0<br>(0 - 0)         | --                   | --                       |
| Maternal hypertensive disorders                                   | 0<br>(0 - 0)             | --                 | 0<br>(0 - 0)        | 0<br>(0 - 0)         | --                   | --                       |
| Maternal obstructed labor                                         | 0<br>(0 - 0)             | --                 | 0<br>(0 - 0)        | 0<br>(0 - 0)         | --                   | --                       |

Web Table 31- Montenegro deaths with 95% UI by age, sex, and cause in 2013

| Cause                                                            | Females, All Ages        | Females, 0-4 Years | Females, 5-14 Years | Females, 15-49 Years | Females, 50-69 Years | Females, 70-80 Years     |
|------------------------------------------------------------------|--------------------------|--------------------|---------------------|----------------------|----------------------|--------------------------|
| Maternal abortive outcome                                        | 0<br>(0 - 0)             | --                 | 0<br>(0 - 0)        | 0<br>(0 - 0)         | --                   | --                       |
| Indirect maternal deaths                                         | 0<br>(0 - 0)             | --                 | 0<br>(0 - 0)        | 0<br>(0 - 0)         | --                   | --                       |
| Late maternal deaths                                             | 0<br>(0 - 0)             | --                 | 0<br>(0 - 0)        | 0<br>(0 - 0)         | --                   | --                       |
| Maternal deaths aggravated by HIV/AIDS                           | 0<br>(0 - 0)             | --                 | --                  | 0<br>(0 - 0)         | --                   | --                       |
| Other maternal disorders                                         | 0<br>(0 - 0)             | --                 | 0<br>(0 - 0)        | 0<br>(0 - 0)         | --                   | --                       |
| Neonatal disorders                                               | 12<br>(7 - 20)           | 12<br>(7 - 20)     | --                  | --                   | --                   | --                       |
| Neonatal preterm birth complications                             | 5<br>(2 - 9)             | 5<br>(2 - 9)       | --                  | --                   | --                   | --                       |
| Neonatal encephalopathy due to birth asphyxia and trauma         | 3<br>(2 - 6)             | 3<br>(2 - 6)       | --                  | --                   | --                   | --                       |
| Neonatal sepsis and other neonatal infections                    | 1<br>(0 - 1)             | 1<br>(0 - 1)       | --                  | --                   | --                   | --                       |
| Hemolytic disease and other neonatal jaundice                    | 0<br>(0 - 0)             | 0<br>(0 - 0)       | --                  | --                   | --                   | --                       |
| Other neonatal disorders                                         | 3<br>(1 - 6)             | 3<br>(1 - 6)       | --                  | --                   | --                   | --                       |
| Nutritional deficiencies                                         | 1<br>(1 - 1)             | 0<br>(0 - 0)       | 0<br>(0 - 0)        | 0<br>(0 - 0)         | 0<br>(0 - 0)         | 1<br>(0 - 1)             |
| Protein-energy malnutrition                                      | 0<br>(0 - 0)             | 0<br>(0 - 0)       | 0<br>(0 - 0)        | 0<br>(0 - 0)         | 0<br>(0 - 0)         | 0<br>(0 - 0)             |
| Iodine deficiency                                                | 0<br>(0 - 0)             | 0<br>(0 - 0)       | 0<br>(0 - 0)        | 0<br>(0 - 0)         | 0<br>(0 - 0)         | 0<br>(0 - 0)             |
| Iron-deficiency anemia                                           | 1<br>(0 - 1)             | 0<br>(0 - 0)       | 0<br>(0 - 0)        | 0<br>(0 - 0)         | 0<br>(0 - 0)         | 1<br>(0 - 1)             |
| Other nutritional deficiencies                                   | 0<br>(0 - 0)             | 0<br>(0 - 0)       | 0<br>(0 - 0)        | 0<br>(0 - 0)         | 0<br>(0 - 0)         | 0<br>(0 - 0)             |
| Other communicable, maternal, neonatal, and nutritional diseases | 2<br>(1 - 3)             | 0<br>(0 - 1)       | 0<br>(0 - 0)        | 0<br>(0 - 0)         | 1<br>(0 - 1)         | 1<br>(0 - 1)             |
| Sexually transmitted diseases excluding HIV                      | 1<br>(0 - 1)             | 0<br>(0 - 1)       | 0<br>(0 - 0)        | 0<br>(0 - 0)         | 0<br>(0 - 0)         | 0<br>(0 - 0)             |
| Syphilis                                                         | 0<br>(0 - 1)             | 0<br>(0 - 1)       | 0<br>(0 - 0)        | 0<br>(0 - 0)         | 0<br>(0 - 0)         | 0<br>(0 - 0)             |
| Chlamydial infection                                             | 0<br>(0 - 0)             | --                 | 0<br>(0 - 0)        | 0<br>(0 - 0)         | 0<br>(0 - 0)         | 0<br>(0 - 0)             |
| Gonococcal infection                                             | 0<br>(0 - 0)             | --                 | 0<br>(0 - 0)        | 0<br>(0 - 0)         | 0<br>(0 - 0)         | 0<br>(0 - 0)             |
| Other sexually transmitted diseases                              | 0<br>(0 - 0)             | --                 | 0<br>(0 - 0)        | 0<br>(0 - 0)         | 0<br>(0 - 0)         | 0<br>(0 - 0)             |
| Hepatitis                                                        | 0<br>(0 - 1)             | 0<br>(0 - 0)       | 0<br>(0 - 0)        | 0<br>(0 - 0)         | 0<br>(0 - 0)         | 0<br>(0 - 0)             |
| Acute hepatitis A                                                | 0<br>(0 - 0)             | 0<br>(0 - 0)       | 0<br>(0 - 0)        | 0<br>(0 - 0)         | 0<br>(0 - 0)         | 0<br>(0 - 0)             |
| Acute hepatitis B                                                | 0<br>(0 - 0)             | 0<br>(0 - 0)       | 0<br>(0 - 0)        | 0<br>(0 - 0)         | 0<br>(0 - 0)         | 0<br>(0 - 0)             |
| Acute hepatitis C                                                | 0<br>(0 - 0)             | --                 | 0<br>(0 - 0)        | 0<br>(0 - 0)         | 0<br>(0 - 0)         | 0<br>(0 - 0)             |
| Other infectious diseases                                        | 1<br>(1 - 2)             | 0<br>(0 - 0)       | 0<br>(0 - 0)        | 0<br>(0 - 0)         | 0<br>(0 - 1)         | 0<br>(0 - 1)             |
| Non-communicable diseases                                        | 2,715<br>(2,379 - 2,996) | 5<br>(3 - 8)       | 3<br>(2 - 4)        | 107<br>(88 - 133)    | 593<br>(483 - 692)   | 2,008<br>(1,802 - 2,173) |
| Neoplasms                                                        | 473<br>(396 - 550)       | 1<br>(0 - 1)       | 1<br>(0 - 1)        | 48<br>(39 - 62)      | 217<br>(176 - 258)   | 206<br>(176 - 239)       |
| Esophageal cancer                                                | 4<br>(3 - 5)             | --                 | --                  | 0<br>(0 - 0)         | 2<br>(2 - 3)         | 2<br>(1 - 2)             |
| Stomach cancer                                                   | 25<br>(18 - 33)          | --                 | --                  | 3<br>(2 - 4)         | 7<br>(5 - 9)         | 15<br>(11 - 21)          |
| Liver cancer                                                     | 23<br>(17 - 30)          | --                 | 0<br>(0 - 0)        | 1<br>(0 - 1)         | 7<br>(5 - 10)        | 15<br>(10 - 21)          |
| Liver cancer due to hepatitis B                                  | 4<br>(1 - 6)             | --                 | 0<br>(0 - 0)        | 0<br>(0 - 0)         | 2<br>(1 - 3)         | 2<br>(1 - 3)             |
| Liver cancer due to hepatitis C                                  | 11<br>(7 - 16)           | --                 | 0<br>(0 - 0)        | 0<br>(0 - 1)         | 3<br>(2 - 5)         | 7<br>(4 - 11)            |
| Liver cancer due to alcohol use                                  | 5<br>(3 - 7)             | --                 | --                  | 0<br>(0 - 0)         | 1<br>(1 - 2)         | 3<br>(2 - 5)             |
| Liver cancer due to other causes                                 | 4<br>(2 - 6)             | --                 | 0<br>(0 - 0)        | 0<br>(0 - 0)         | 1<br>(1 - 2)         | 2<br>(1 - 4)             |
| Larynx cancer                                                    | 7<br>(4 - 11)            | --                 | --                  | 1<br>(0 - 1)         | 4<br>(3 - 6)         | 2<br>(1 - 4)             |
| Tracheal, bronchus and lung cancer                               | 90<br>(69 - 111)         | --                 | --                  | 7<br>(5 - 9)         | 51<br>(38 - 64)      | 32<br>(24 - 43)          |
| Breast cancer                                                    | 98<br>(73 - 124)         | --                 | --                  | 16<br>(12 - 22)      | 50<br>(36 - 64)      | 32<br>(24 - 43)          |
| Cervical cancer                                                  | 18<br>(14 - 23)          | --                 | --                  | 5<br>(4 - 7)         | 9<br>(7 - 12)        | 4<br>(3 - 6)             |

Web Table 31- Montenegro deaths with 95% UI by age, sex, and cause in 2013

| Cause                                         | Females, All Ages        | Females, 0-4 Years | Females, 5-14 Years | Females, 15-49 Years | Females, 50-69 Years | Females, 70-80 Years     |
|-----------------------------------------------|--------------------------|--------------------|---------------------|----------------------|----------------------|--------------------------|
| Uterine cancer                                | 13<br>(10 - 17)          | --                 | --                  | 1<br>(0 - 1)         | 7<br>(5 - 9)         | 6<br>(4 - 8)             |
| Prostate cancer                               | --                       | --                 | --                  | --                   | --                   | --                       |
| Colon and rectum cancer                       | 50<br>(40 - 60)          | --                 | --                  | 2<br>(2 - 3)         | 18<br>(14 - 22)      | 29<br>(23 - 37)          |
| Lip and oral cavity cancer                    | 2<br>(1 - 2)             | --                 | --                  | 0<br>(0 - 1)         | 1<br>(0 - 1)         | 1<br>(1 - 1)             |
| Nasopharynx cancer                            | 0<br>(0 - 0)             | --                 | 0<br>(0 - 0)        | 0<br>(0 - 0)         | 0<br>(0 - 0)         | 0<br>(0 - 0)             |
| Other pharynx cancer                          | 0<br>(0 - 0)             | --                 | --                  | 0<br>(0 - 0)         | 0<br>(0 - 0)         | 0<br>(0 - 0)             |
| Gallbladder and biliary tract cancer          | 10<br>(7 - 14)           | --                 | --                  | 1<br>(0 - 1)         | 4<br>(3 - 6)         | 5<br>(3 - 8)             |
| Pancreatic cancer                             | 32<br>(26 - 39)          | --                 | --                  | 1<br>(1 - 1)         | 12<br>(9 - 15)       | 19<br>(15 - 24)          |
| Malignant skin melanoma                       | 6<br>(4 - 9)             | --                 | --                  | 1<br>(0 - 1)         | 3<br>(2 - 4)         | 3<br>(2 - 4)             |
| Non-melanoma skin cancer                      | 2<br>(1 - 4)             | --                 | --                  | 0<br>(0 - 1)         | 0<br>(0 - 1)         | 2<br>(1 - 3)             |
| Ovarian cancer                                | 23<br>(19 - 28)          | --                 | --                  | 3<br>(2 - 4)         | 12<br>(9 - 16)       | 8<br>(6 - 11)            |
| Testicular cancer                             | --                       | --                 | --                  | --                   | --                   | --                       |
| Kidney cancer                                 | 9<br>(6 - 12)            | 0<br>(0 - 0)       | 0<br>(0 - 0)        | 0<br>(0 - 0)         | 5<br>(3 - 7)         | 4<br>(2 - 6)             |
| Bladder cancer                                | 8<br>(6 - 12)            | --                 | --                  | 0<br>(0 - 0)         | 2<br>(1 - 4)         | 6<br>(4 - 9)             |
| Brain and nervous system cancer               | 19<br>(14 - 25)          | 0<br>(0 - 0)       | 0<br>(0 - 0)        | 3<br>(3 - 5)         | 9<br>(7 - 12)        | 6<br>(4 - 8)             |
| Thyroid cancer                                | 3<br>(2 - 4)             | --                 | 0<br>(0 - 0)        | 0<br>(0 - 0)         | 1<br>(1 - 2)         | 2<br>(1 - 3)             |
| Mesothelioma                                  | 0<br>(0 - 1)             | --                 | --                  | 0<br>(0 - 0)         | 0<br>(0 - 0)         | 0<br>(0 - 0)             |
| Hodgkin lymphoma                              | 1<br>(1 - 2)             | 0<br>(0 - 0)       | 0<br>(0 - 0)        | 0<br>(0 - 0)         | 0<br>(0 - 1)         | 1<br>(0 - 1)             |
| Non-Hodgkin lymphoma                          | 8<br>(4 - 12)            | 0<br>(0 - 0)       | 0<br>(0 - 0)        | 1<br>(0 - 1)         | 3<br>(2 - 5)         | 4<br>(2 - 6)             |
| Multiple myeloma                              | 3<br>(2 - 5)             | --                 | --                  | 0<br>(0 - 1)         | 1<br>(1 - 2)         | 2<br>(1 - 3)             |
| Leukemia                                      | 7<br>(6 - 9)             | 0<br>(0 - 0)       | 0<br>(0 - 0)        | 1<br>(1 - 1)         | 3<br>(2 - 4)         | 3<br>(2 - 4)             |
| Other neoplasms                               | 12<br>(9 - 16)           | 0<br>(0 - 1)       | 0<br>(0 - 0)        | 1<br>(1 - 1)         | 5<br>(3 - 6)         | 5<br>(4 - 7)             |
| Cardiovascular diseases                       | 1,891<br>(1,670 - 2,082) | 2<br>(1 - 4)       | 2<br>(1 - 2)        | 44<br>(35 - 57)      | 314<br>(256 - 368)   | 1,529<br>(1,374 - 1,663) |
| Rheumatic heart disease                       | 3<br>(2 - 6)             | 0<br>(0 - 0)       | 0<br>(0 - 0)        | 0<br>(0 - 1)         | 1<br>(1 - 2)         | 2<br>(1 - 3)             |
| Ischemic heart disease                        | 649<br>(516 - 798)       | 0<br>(0 - 1)       | 0<br>(0 - 1)        | 14<br>(10 - 19)      | 125<br>(92 - 157)    | 510<br>(400 - 637)       |
| Cerebrovascular disease                       | 1,028<br>(854 - 1,176)   | 1<br>(0 - 2)       | 1<br>(1 - 1)        | 22<br>(17 - 29)      | 144<br>(113 - 175)   | 860<br>(715 - 981)       |
| Ischemic stroke                               | 227<br>(132 - 289)       | 0<br>(0 - 0)       | 0<br>(0 - 0)        | 3<br>(2 - 4)         | 27<br>(16 - 36)      | 198<br>(112 - 254)       |
| Hemorrhagic stroke                            | 801<br>(681 - 959)       | 1<br>(0 - 2)       | 1<br>(0 - 1)        | 20<br>(15 - 26)      | 117<br>(92 - 147)    | 663<br>(561 - 793)       |
| Hypertensive heart disease                    | 30<br>(20 - 47)          | 0<br>(0 - 0)       | 0<br>(0 - 0)        | 0<br>(0 - 0)         | 3<br>(2 - 5)         | 26<br>(17 - 42)          |
| Cardiomyopathy and myocarditis                | 81<br>(48 - 122)         | 0<br>(0 - 1)       | 0<br>(0 - 0)        | 3<br>(2 - 5)         | 12<br>(8 - 17)       | 64<br>(35 - 105)         |
| Atrial fibrillation and flutter               | 33<br>(22 - 48)          | --                 | --                  | 1<br>(0 - 1)         | 5<br>(3 - 7)         | 28<br>(17 - 42)          |
| Aortic aneurysm                               | 24<br>(13 - 34)          | --                 | --                  | 1<br>(0 - 1)         | 8<br>(5 - 13)        | 15<br>(8 - 22)           |
| Peripheral vascular disease                   | 1<br>(1 - 2)             | --                 | --                  | 0<br>(0 - 0)         | 0<br>(0 - 0)         | 1<br>(1 - 1)             |
| Endocarditis                                  | 1<br>(1 - 1)             | 0<br>(0 - 0)       | 0<br>(0 - 0)        | 0<br>(0 - 0)         | 0<br>(0 - 0)         | 1<br>(0 - 1)             |
| Other cardiovascular and circulatory diseases | 41<br>(31 - 61)          | 0<br>(0 - 1)       | 0<br>(0 - 0)        | 3<br>(2 - 4)         | 15<br>(10 - 22)      | 23<br>(16 - 39)          |
| Chronic respiratory diseases                  | 13<br>(11 - 16)          | 0<br>(0 - 0)       | 0<br>(0 - 0)        | 1<br>(0 - 1)         | 2<br>(2 - 3)         | 10<br>(8 - 13)           |
| Chronic obstructive pulmonary disease         | 10<br>(8 - 12)           | 0<br>(0 - 0)       | 0<br>(0 - 0)        | 0<br>(0 - 0)         | 2<br>(1 - 2)         | 8<br>(6 - 10)            |
| Pneumoconiosis                                | 0<br>(0 - 0)             | 0<br>(0 - 0)       | 0<br>(0 - 0)        | 0<br>(0 - 0)         | 0<br>(0 - 0)         | 0<br>(0 - 0)             |
| Silicosis                                     | 0<br>(0 - 0)             | 0<br>(0 - 0)       | 0<br>(0 - 0)        | 0<br>(0 - 0)         | 0<br>(0 - 0)         | 0<br>(0 - 0)             |
| Asbestosis                                    | 0<br>(0 - 0)             | 0<br>(0 - 0)       | 0<br>(0 - 0)        | 0<br>(0 - 0)         | 0<br>(0 - 0)         | 0<br>(0 - 0)             |

Web Table 31- Montenegro deaths with 95% UI by age, sex, and cause in 2013

| Cause                                               | Females, All Ages  | Females, 0-4 Years | Females, 5-14 Years | Females, 15-49 Years | Females, 50-69 Years | Females, 70-80 Years |
|-----------------------------------------------------|--------------------|--------------------|---------------------|----------------------|----------------------|----------------------|
| Coal workers pneumoconiosis                         | 0<br>(0 - 0)       | 0<br>(0 - 0)       | 0<br>(0 - 0)        | 0<br>(0 - 0)         | 0<br>(0 - 0)         | 0<br>(0 - 0)         |
| Other pneumoconiosis                                | 0<br>(0 - 0)       | 0<br>(0 - 0)       | 0<br>(0 - 0)        | 0<br>(0 - 0)         | 0<br>(0 - 0)         | 0<br>(0 - 0)         |
| Asthma                                              | 0<br>(0 - 1)       | 0<br>(0 - 0)       | 0<br>(0 - 0)        | 0<br>(0 - 0)         | 0<br>(0 - 0)         | 0<br>(0 - 0)         |
| Interstitial lung disease and pulmonary sarcoidosis | 1<br>(1 - 2)       | 0<br>(0 - 0)       | 0<br>(0 - 0)        | 0<br>(0 - 0)         | 0<br>(0 - 1)         | 1<br>(1 - 2)         |
| Other chronic respiratory diseases                  | 1<br>(1 - 2)       | 0<br>(0 - 0)       | 0<br>(0 - 0)        | 0<br>(0 - 0)         | 0<br>(0 - 0)         | 1<br>(0 - 1)         |
| Cirrhosis                                           | 9<br>(7 - 11)      | 0<br>(0 - 0)       | 0<br>(0 - 0)        | 1<br>(1 - 1)         | 4<br>(3 - 5)         | 4<br>(3 - 5)         |
| Cirrhosis due to hepatitis B                        | 4<br>(2 - 5)       | 0<br>(0 - 0)       | 0<br>(0 - 0)        | 0<br>(0 - 1)         | 2<br>(1 - 2)         | 2<br>(1 - 3)         |
| Cirrhosis due to hepatitis C                        | 2<br>(0 - 3)       | 0<br>(0 - 0)       | 0<br>(0 - 0)        | 0<br>(0 - 0)         | 1<br>(0 - 2)         | 0<br>(0 - 1)         |
| Cirrhosis due to alcohol use                        | 2<br>(1 - 3)       | --                 | --                  | 0<br>(0 - 0)         | 1<br>(0 - 1)         | 1<br>(1 - 2)         |
| Cirrhosis due to other causes                       | 2<br>(1 - 3)       | 0<br>(0 - 0)       | 0<br>(0 - 0)        | 0<br>(0 - 0)         | 1<br>(0 - 1)         | 1<br>(0 - 1)         |
| Digestive diseases                                  | 46<br>(36 - 56)    | 0<br>(0 - 0)       | 0<br>(0 - 0)        | 2<br>(1 - 2)         | 9<br>(7 - 12)        | 35<br>(27 - 43)      |
| Peptic ulcer disease                                | 9<br>(6 - 13)      | 0<br>(0 - 0)       | 0<br>(0 - 0)        | 0<br>(0 - 1)         | 1<br>(1 - 2)         | 7<br>(4 - 11)        |
| Gastritis and duodenitis                            | 0<br>(0 - 0)       | 0<br>(0 - 0)       | 0<br>(0 - 0)        | 0<br>(0 - 0)         | 0<br>(0 - 0)         | 0<br>(0 - 0)         |
| Appendicitis                                        | 0<br>(0 - 0)       | 0<br>(0 - 0)       | 0<br>(0 - 0)        | 0<br>(0 - 0)         | 0<br>(0 - 0)         | 0<br>(0 - 0)         |
| Paralytic ileus and intestinal obstruction          | 9<br>(5 - 15)      | 0<br>(0 - 0)       | 0<br>(0 - 0)        | 0<br>(0 - 0)         | 3<br>(1 - 4)         | 7<br>(3 - 11)        |
| Inguinal, femoral, and abdominal hernia             | 1<br>(0 - 1)       | 0<br>(0 - 0)       | 0<br>(0 - 0)        | 0<br>(0 - 0)         | 0<br>(0 - 0)         | 0<br>(0 - 1)         |
| Inflammatory bowel disease                          | 1<br>(1 - 2)       | 0<br>(0 - 0)       | 0<br>(0 - 0)        | 0<br>(0 - 0)         | 0<br>(0 - 0)         | 1<br>(0 - 1)         |
| Vascular intestinal disorders                       | 18<br>(10 - 27)    | 0<br>(0 - 0)       | 0<br>(0 - 0)        | 0<br>(0 - 1)         | 3<br>(2 - 5)         | 15<br>(8 - 22)       |
| Gallbladder and biliary diseases                    | 3<br>(2 - 4)       | 0<br>(0 - 0)       | 0<br>(0 - 0)        | 0<br>(0 - 0)         | 1<br>(1 - 2)         | 1<br>(1 - 2)         |
| Pancreatitis                                        | 5<br>(3 - 7)       | 0<br>(0 - 0)       | 0<br>(0 - 0)        | 0<br>(0 - 1)         | 1<br>(0 - 1)         | 3<br>(2 - 6)         |
| Other digestive diseases                            | 1<br>(0 - 1)       | 0<br>(0 - 0)       | 0<br>(0 - 0)        | 0<br>(0 - 0)         | 0<br>(0 - 0)         | 0<br>(0 - 1)         |
| Neurological disorders                              | 140<br>(113 - 176) | 0<br>(0 - 0)       | 0<br>(0 - 0)        | 1<br>(1 - 2)         | 8<br>(6 - 11)        | 131<br>(104 - 164)   |
| Alzheimer disease and other dementias               | 135<br>(108 - 171) | --                 | --                  | 0<br>(0 - 0)         | 7<br>(5 - 9)         | 128<br>(102 - 162)   |
| Parkinson disease                                   | 2<br>(1 - 4)       | --                 | --                  | 0<br>(0 - 0)         | 0<br>(0 - 0)         | 2<br>(1 - 3)         |
| Epilepsy                                            | 1<br>(1 - 1)       | 0<br>(0 - 0)       | 0<br>(0 - 0)        | 0<br>(0 - 1)         | 0<br>(0 - 1)         | 0<br>(0 - 0)         |
| Multiple sclerosis                                  | 2<br>(1 - 3)       | --                 | --                  | 1<br>(0 - 1)         | 1<br>(1 - 2)         | 0<br>(0 - 1)         |
| Other neurological disorders                        | 0<br>(0 - 1)       | 0<br>(0 - 0)       | 0<br>(0 - 0)        | 0<br>(0 - 0)         | 0<br>(0 - 0)         | 0<br>(0 - 0)         |
| Mental and substance use disorders                  | 7<br>(5 - 9)       | 0<br>(0 - 0)       | 0<br>(0 - 0)        | 2<br>(2 - 3)         | 3<br>(2 - 4)         | 2<br>(1 - 3)         |
| Schizophrenia                                       | 1<br>(1 - 1)       | --                 | --                  | 0<br>(0 - 0)         | 0<br>(0 - 1)         | 0<br>(0 - 1)         |
| Alcohol use disorders                               | 2<br>(1 - 4)       | --                 | --                  | 0<br>(0 - 1)         | 1<br>(0 - 2)         | 1<br>(0 - 2)         |
| Drug use disorders                                  | 4<br>(3 - 5)       | 0<br>(0 - 0)       | --                  | 1<br>(1 - 2)         | 1<br>(1 - 2)         | 1<br>(1 - 1)         |
| Opioid use disorders                                | 1<br>(1 - 2)       | 0<br>(0 - 0)       | --                  | 1<br>(0 - 1)         | 0<br>(0 - 1)         | 0<br>(0 - 0)         |
| Cocaine use disorders                               | 0<br>(0 - 0)       | 0<br>(0 - 0)       | --                  | 0<br>(0 - 0)         | 0<br>(0 - 0)         | 0<br>(0 - 0)         |
| Amphetamine use disorders                           | 0<br>(0 - 0)       | 0<br>(0 - 0)       | --                  | 0<br>(0 - 0)         | 0<br>(0 - 0)         | 0<br>(0 - 0)         |
| Other drug use disorders                            | 2<br>(1 - 2)       | 0<br>(0 - 0)       | --                  | 1<br>(1 - 1)         | 1<br>(1 - 1)         | 0<br>(0 - 1)         |
| Eating disorders                                    | 0<br>(0 - 0)       | --                 | 0<br>(0 - 0)        | 0<br>(0 - 0)         | --                   | --                   |
| Anorexia nervosa                                    | 0<br>(0 - 0)       | --                 | 0<br>(0 - 0)        | 0<br>(0 - 0)         | --                   | --                   |
| Diabetes, urogenital, blood, and endocrine diseases | 128<br>(104 - 153) | 0<br>(0 - 1)       | 0<br>(0 - 0)        | 6<br>(5 - 8)         | 33<br>(26 - 41)      | 88<br>(71 - 108)     |
| Diabetes mellitus                                   | 76<br>(61 - 96)    | 0<br>(0 - 0)       | 0<br>(0 - 0)        | 3<br>(2 - 4)         | 19<br>(14 - 25)      | 54<br>(42 - 70)      |
| Acute glomerulonephritis                            | 0<br>(0 - 0)       | 0<br>(0 - 0)       | 0<br>(0 - 0)        | 0<br>(0 - 0)         | 0<br>(0 - 0)         | 0<br>(0 - 0)         |

Web Table 31- Montenegro deaths with 95% UI by age, sex, and cause in 2013

| Cause                                               | Females, All Ages | Females, 0-4 Years | Females, 5-14 Years | Females, 15-49 Years | Females, 50-69 Years | Females, 70-80 Years |
|-----------------------------------------------------|-------------------|--------------------|---------------------|----------------------|----------------------|----------------------|
| Chronic kidney disease                              | 46<br>(35 - 59)   | 0<br>(0 - 0)       | 0<br>(0 - 0)        | 2<br>(2 - 3)         | 12<br>(9 - 17)       | 31<br>(23 - 42)      |
| Chronic kidney disease due to diabetes mellitus     | 1<br>(1 - 2)      | 0<br>(0 - 0)       | 0<br>(0 - 0)        | 0<br>(0 - 0)         | 1<br>(0 - 1)         | 1<br>(0 - 1)         |
| Chronic kidney disease due to hypertension          | 7<br>(4 - 12)     | 0<br>(0 - 0)       | 0<br>(0 - 0)        | 0<br>(0 - 1)         | 2<br>(1 - 4)         | 4<br>(2 - 8)         |
| Chronic kidney disease due to glomerulonephritis    | 4<br>(3 - 6)      | 0<br>(0 - 0)       | 0<br>(0 - 0)        | 0<br>(0 - 0)         | 1<br>(1 - 2)         | 3<br>(2 - 4)         |
| Chronic kidney disease due to other causes          | 33<br>(23 - 44)   | 0<br>(0 - 0)       | 0<br>(0 - 0)        | 1<br>(1 - 2)         | 8<br>(5 - 12)        | 23<br>(16 - 33)      |
| Urinary diseases and male infertility               | 1<br>(1 - 2)      | 0<br>(0 - 0)       | 0<br>(0 - 0)        | 0<br>(0 - 0)         | 0<br>(0 - 1)         | 1<br>(0 - 1)         |
| Interstitial nephritis and urinary tract infections | 1<br>(1 - 2)      | 0<br>(0 - 0)       | 0<br>(0 - 0)        | 0<br>(0 - 0)         | 0<br>(0 - 0)         | 1<br>(0 - 1)         |
| Urolithiasis                                        | 0<br>(0 - 0)      | --                 | 0<br>(0 - 0)        | 0<br>(0 - 0)         | 0<br>(0 - 0)         | 0<br>(0 - 0)         |
| Other urinary diseases                              | 0<br>(0 - 0)      | 0<br>(0 - 0)       | 0<br>(0 - 0)        | 0<br>(0 - 0)         | 0<br>(0 - 0)         | 0<br>(0 - 0)         |
| Gynecological diseases                              | 0<br>(0 - 0)      | --                 | --                  | 0<br>(0 - 0)         | 0<br>(0 - 0)         | 0<br>(0 - 0)         |
| Uterine fibroids                                    | 0<br>(0 - 0)      | --                 | --                  | 0<br>(0 - 0)         | 0<br>(0 - 0)         | 0<br>(0 - 0)         |
| Polycystic ovarian syndrome                         | 0<br>(0 - 0)      | --                 | --                  | 0<br>(0 - 0)         | 0<br>(0 - 0)         | --                   |
| Endometriosis                                       | 0<br>(0 - 0)      | --                 | --                  | 0<br>(0 - 0)         | 0<br>(0 - 0)         | --                   |
| Genital prolapse                                    | 0<br>(0 - 0)      | --                 | --                  | 0<br>(0 - 0)         | 0<br>(0 - 0)         | 0<br>(0 - 0)         |
| Other gynecological diseases                        | 0<br>(0 - 0)      | --                 | --                  | 0<br>(0 - 0)         | 0<br>(0 - 0)         | 0<br>(0 - 0)         |
| Hemoglobinopathies and hemolytic anemias            | 1<br>(1 - 2)      | 0<br>(0 - 0)       | 0<br>(0 - 0)        | 0<br>(0 - 0)         | 0<br>(0 - 1)         | 0<br>(0 - 0)         |
| Thalassemias                                        | 0<br>(0 - 0)      | 0<br>(0 - 0)       | 0<br>(0 - 0)        | 0<br>(0 - 0)         | 0<br>(0 - 0)         | 0<br>(0 - 0)         |
| Sickle cell disorders                               | 0<br>(0 - 0)      | 0<br>(0 - 0)       | 0<br>(0 - 0)        | 0<br>(0 - 0)         | 0<br>(0 - 0)         | 0<br>(0 - 0)         |
| G6PD deficiency                                     | 0<br>(0 - 0)      | 0<br>(0 - 0)       | 0<br>(0 - 0)        | 0<br>(0 - 0)         | 0<br>(0 - 0)         | 0<br>(0 - 0)         |
| Other hemoglobinopathies and hemolytic anemias      | 1<br>(0 - 1)      | 0<br>(0 - 0)       | 0<br>(0 - 0)        | 0<br>(0 - 0)         | 0<br>(0 - 1)         | 0<br>(0 - 0)         |
| Endocrine, metabolic, blood, and immune disorders   | 3<br>(2 - 5)      | 0<br>(0 - 0)       | 0<br>(0 - 0)        | 0<br>(0 - 1)         | 1<br>(1 - 2)         | 2<br>(1 - 2)         |
| Musculoskeletal disorders                           | 4<br>(3 - 6)      | --                 | 0<br>(0 - 0)        | 1<br>(1 - 1)         | 2<br>(1 - 2)         | 2<br>(1 - 2)         |
| Rheumatoid arthritis                                | 1<br>(1 - 2)      | --                 | 0<br>(0 - 0)        | 0<br>(0 - 0)         | 0<br>(0 - 1)         | 1<br>(0 - 1)         |
| Other musculoskeletal disorders                     | 3<br>(2 - 4)      | --                 | 0<br>(0 - 0)        | 1<br>(1 - 1)         | 1<br>(1 - 2)         | 1<br>(1 - 2)         |
| Other non-communicable diseases                     | 4<br>(3 - 6)      | 2<br>(1 - 3)       | 0<br>(0 - 0)        | 1<br>(1 - 1)         | 1<br>(1 - 1)         | 1<br>(1 - 1)         |
| Congenital anomalies                                | 3<br>(2 - 4)      | 1<br>(1 - 3)       | 0<br>(0 - 0)        | 0<br>(0 - 1)         | 0<br>(0 - 0)         | 0<br>(0 - 1)         |
| Neural tube defects                                 | 0<br>(0 - 0)      | 0<br>(0 - 0)       | 0<br>(0 - 0)        | 0<br>(0 - 0)         | 0<br>(0 - 0)         | 0<br>(0 - 0)         |
| Congenital heart anomalies                          | 1<br>(1 - 2)      | 1<br>(0 - 1)       | 0<br>(0 - 0)        | 0<br>(0 - 0)         | 0<br>(0 - 0)         | 0<br>(0 - 0)         |
| Cleft lip and cleft palate                          | 0<br>(0 - 0)      | 0<br>(0 - 0)       | --                  | --                   | --                   | --                   |
| Down syndrome                                       | 0<br>(0 - 1)      | 0<br>(0 - 1)       | 0<br>(0 - 0)        | 0<br>(0 - 0)         | 0<br>(0 - 0)         | 0<br>(0 - 0)         |
| Chromosomal unbalanced rearrangements               | 0<br>(0 - 0)      | 0<br>(0 - 0)       | 0<br>(0 - 0)        | 0<br>(0 - 0)         | 0<br>(0 - 0)         | 0<br>(0 - 0)         |
| Other congenital anomalies                          | 1<br>(1 - 2)      | 1<br>(0 - 1)       | 0<br>(0 - 0)        | 0<br>(0 - 0)         | 0<br>(0 - 0)         | 0<br>(0 - 0)         |
| Skin and subcutaneous diseases                      | 1<br>(1 - 2)      | 0<br>(0 - 0)       | 0<br>(0 - 0)        | 0<br>(0 - 1)         | 0<br>(0 - 1)         | 0<br>(0 - 1)         |
| Cellulitis                                          | 0<br>(0 - 0)      | 0<br>(0 - 0)       | 0<br>(0 - 0)        | 0<br>(0 - 0)         | 0<br>(0 - 0)         | 0<br>(0 - 0)         |
| Pyoderma                                            | 1<br>(0 - 1)      | 0<br>(0 - 0)       | 0<br>(0 - 0)        | 0<br>(0 - 0)         | 0<br>(0 - 0)         | 0<br>(0 - 0)         |
| Decubitus ulcer                                     | 0<br>(0 - 1)      | 0<br>(0 - 0)       | 0<br>(0 - 0)        | 0<br>(0 - 0)         | 0<br>(0 - 0)         | 0<br>(0 - 0)         |
| Other skin and subcutaneous diseases                | 0<br>(0 - 0)      | 0<br>(0 - 0)       | 0<br>(0 - 0)        | 0<br>(0 - 0)         | 0<br>(0 - 0)         | 0<br>(0 - 0)         |
| Sudden infant death syndrome                        | 0<br>(0 - 0)      | 0<br>(0 - 0)       | --                  | --                   | --                   | --                   |
| Injuries                                            | 88<br>(72 - 107)  | 1<br>(1 - 3)       | 2<br>(1 - 2)        | 26<br>(20 - 33)      | 30<br>(22 - 38)      | 30<br>(24 - 37)      |
| Transport injuries                                  | 25<br>(19 - 31)   | 0<br>(0 - 1)       | 1<br>(0 - 1)        | 8<br>(6 - 11)        | 8<br>(6 - 11)        | 7<br>(5 - 10)        |

Web Table 31- Montenegro deaths with 95% UI by age, sex, and cause in 2013

| Cause                                           | Females, All Ages | Females, 0-4 Years | Females, 5-14 Years | Females, 15-49 Years | Females, 50-69 Years | Females, 70-80 Years |
|-------------------------------------------------|-------------------|--------------------|---------------------|----------------------|----------------------|----------------------|
| Road injuries                                   | 23<br>(17 - 29)   | 0<br>(0 - 1)       | 1<br>(0 - 1)        | 8<br>(5 - 10)        | 8<br>(5 - 10)        | 7<br>(5 - 9)         |
| Pedestrian road injuries                        | 12<br>(8 - 16)    | 0<br>(0 - 0)       | 0<br>(0 - 1)        | 3<br>(2 - 5)         | 4<br>(3 - 6)         | 4<br>(2 - 5)         |
| Cyclist road injuries                           | 1<br>(1 - 1)      | 0<br>(0 - 0)       | 0<br>(0 - 0)        | 0<br>(0 - 0)         | 1<br>(0 - 1)         | 0<br>(0 - 0)         |
| Motorcyclist road injuries                      | 1<br>(0 - 2)      | 0<br>(0 - 0)       | 0<br>(0 - 0)        | 1<br>(0 - 1)         | 0<br>(0 - 0)         | 0<br>(0 - 0)         |
| Motor vehicle road injuries                     | 9<br>(6 - 13)     | 0<br>(0 - 0)       | 0<br>(0 - 0)        | 3<br>(2 - 5)         | 2<br>(1 - 4)         | 3<br>(2 - 4)         |
| Other road injuries                             | 0<br>(0 - 0)      | 0<br>(0 - 0)       | 0<br>(0 - 0)        | 0<br>(0 - 0)         | 0<br>(0 - 0)         | 0<br>(0 - 0)         |
| Other transport injuries                        | 2<br>(1 - 3)      | 0<br>(0 - 0)       | 0<br>(0 - 0)        | 1<br>(0 - 1)         | 0<br>(0 - 1)         | 0<br>(0 - 1)         |
| Unintentional injuries                          | 21<br>(17 - 28)   | 1<br>(1 - 2)       | 1<br>(1 - 1)        | 4<br>(3 - 5)         | 6<br>(5 - 8)         | 9<br>(7 - 12)        |
| Falls                                           | 3<br>(2 - 4)      | 0<br>(0 - 0)       | 0<br>(0 - 0)        | 1<br>(0 - 1)         | 1<br>(1 - 1)         | 1<br>(1 - 2)         |
| Drowning                                        | 3<br>(2 - 5)      | 0<br>(0 - 1)       | 0<br>(0 - 1)        | 1<br>(1 - 1)         | 1<br>(1 - 1)         | 1<br>(1 - 2)         |
| Fire, heat, and hot substances                  | 3<br>(2 - 4)      | 0<br>(0 - 0)       | 0<br>(0 - 0)        | 0<br>(0 - 1)         | 1<br>(1 - 1)         | 1<br>(1 - 2)         |
| Poisonings                                      | 2<br>(1 - 4)      | 0<br>(0 - 0)       | 0<br>(0 - 0)        | 0<br>(0 - 0)         | 0<br>(0 - 1)         | 1<br>(1 - 2)         |
| Exposure to mechanical forces                   | 2<br>(1 - 2)      | 0<br>(0 - 0)       | 0<br>(0 - 0)        | 1<br>(0 - 1)         | 1<br>(0 - 1)         | 0<br>(0 - 1)         |
| Unintentional firearm injuries                  | 1<br>(0 - 1)      | 0<br>(0 - 0)       | 0<br>(0 - 0)        | 0<br>(0 - 0)         | 0<br>(0 - 0)         | 0<br>(0 - 0)         |
| Unintentional suffocation                       | 0<br>(0 - 0)      | 0<br>(0 - 0)       | 0<br>(0 - 0)        | 0<br>(0 - 0)         | 0<br>(0 - 0)         | 0<br>(0 - 0)         |
| Other exposure to mechanical forces             | 1<br>(1 - 1)      | 0<br>(0 - 0)       | 0<br>(0 - 0)        | 0<br>(0 - 0)         | 0<br>(0 - 0)         | 0<br>(0 - 0)         |
| Adverse effects of medical treatment            | 5<br>(3 - 8)      | 0<br>(0 - 0)       | 0<br>(0 - 0)        | 1<br>(0 - 1)         | 2<br>(1 - 3)         | 3<br>(1 - 5)         |
| Animal contact                                  | 1<br>(0 - 1)      | 0<br>(0 - 0)       | 0<br>(0 - 0)        | 0<br>(0 - 0)         | 0<br>(0 - 0)         | 0<br>(0 - 1)         |
| Venomous animal contact                         | 0<br>(0 - 0)      | 0<br>(0 - 0)       | 0<br>(0 - 0)        | 0<br>(0 - 0)         | 0<br>(0 - 0)         | 0<br>(0 - 0)         |
| Non-venomous animal contact                     | 0<br>(0 - 1)      | 0<br>(0 - 0)       | 0<br>(0 - 0)        | 0<br>(0 - 0)         | 0<br>(0 - 0)         | 0<br>(0 - 0)         |
| Foreign body                                    | 1<br>(0 - 1)      | 0<br>(0 - 0)       | 0<br>(0 - 0)        | 0<br>(0 - 0)         | 0<br>(0 - 0)         | 0<br>(0 - 1)         |
| Pulmonary aspiration and foreign body in airway | 1<br>(0 - 1)      | 0<br>(0 - 0)       | 0<br>(0 - 0)        | 0<br>(0 - 0)         | 0<br>(0 - 0)         | 0<br>(0 - 1)         |
| Foreign body in other body part                 | 0<br>(0 - 0)      | 0<br>(0 - 0)       | 0<br>(0 - 0)        | 0<br>(0 - 0)         | 0<br>(0 - 0)         | 0<br>(0 - 0)         |
| Other unintentional injuries                    | 2<br>(1 - 3)      | 0<br>(0 - 0)       | 0<br>(0 - 0)        | 0<br>(0 - 0)         | 0<br>(0 - 1)         | 1<br>(1 - 2)         |
| Self-harm and interpersonal violence            | 43<br>(32 - 54)   | 0<br>(0 - 0)       | 0<br>(0 - 0)        | 14<br>(10 - 18)      | 15<br>(10 - 21)      | 13<br>(9 - 19)       |
| Self-harm                                       | 38<br>(28 - 49)   | --                 | 0<br>(0 - 0)        | 12<br>(8 - 16)       | 14<br>(9 - 20)       | 12<br>(8 - 17)       |
| Interpersonal violence                          | 5<br>(3 - 6)      | 0<br>(0 - 0)       | 0<br>(0 - 0)        | 2<br>(1 - 3)         | 1<br>(1 - 2)         | 1<br>(1 - 2)         |
| Assault by firearm                              | 3<br>(2 - 4)      | 0<br>(0 - 0)       | 0<br>(0 - 0)        | 1<br>(1 - 2)         | 1<br>(0 - 1)         | 1<br>(0 - 1)         |
| Assault by sharp object                         | 1<br>(0 - 1)      | 0<br>(0 - 0)       | 0<br>(0 - 0)        | 0<br>(0 - 1)         | 0<br>(0 - 1)         | 0<br>(0 - 0)         |
| Assault by other means                          | 1<br>(0 - 2)      | 0<br>(0 - 0)       | 0<br>(0 - 0)        | 0<br>(0 - 0)         | 0<br>(0 - 0)         | 0<br>(0 - 1)         |

Web Table 31- Morocco deaths with 95% UI by age, sex, and cause in 2013

| Cause                                                             | Both Sexes, All Ages           | Both Sexes, 0-4 Years       | Both Sexes, 5-14 Years   | Both Sexes, 15-49 Years     | Both Sexes, 50-69 Years     | Both Sexes, 70-80 Years     |
|-------------------------------------------------------------------|--------------------------------|-----------------------------|--------------------------|-----------------------------|-----------------------------|-----------------------------|
| All causes                                                        | 164,553<br>(144,667 - 189,617) | 19,441<br>(17,209 - 22,076) | 2,392<br>(2,202 - 2,601) | 27,597<br>(22,498 - 32,747) | 45,223<br>(37,735 - 55,779) | 69,900<br>(62,657 - 80,363) |
| Communicable, maternal, neonatal, and nutritional diseases        | 26,551<br>(23,997 - 29,096)    | 13,565<br>(11,983 - 15,423) | 590<br>(474 - 740)       | 3,752<br>(3,156 - 4,360)    | 3,645<br>(2,950 - 4,479)    | 4,999<br>(4,252 - 5,870)    |
| HIV/AIDS and tuberculosis                                         | 3,304<br>(2,625 - 3,991)       | 59<br>(43 - 78)             | 25<br>(18 - 33)          | 1,090<br>(838 - 1,337)      | 1,028<br>(787 - 1,311)      | 1,102<br>(828 - 1,377)      |
| Tuberculosis                                                      | 3,135<br>(2,448 - 3,831)       | 55<br>(39 - 74)             | 23<br>(16 - 31)          | 957<br>(718 - 1,202)        | 1,000<br>(763 - 1,284)      | 1,100<br>(825 - 1,373)      |
| HIV/AIDS                                                          | 169<br>(117 - 255)             | 4<br>(1 - 12)               | 2<br>(0 - 5)             | 133<br>(99 - 185)           | 28<br>(15 - 49)             | 3<br>(1 - 5)                |
| HIV/AIDS resulting in mycobacterial infection                     | 10<br>(7 - 16)                 | 0<br>(0 - 1)                | 0<br>(0 - 0)             | 8<br>(5 - 11)               | 2<br>(1 - 3)                | 0<br>(0 - 0)                |
| HIV/AIDS resulting in other diseases                              | 159<br>(110 - 240)             | 4<br>(1 - 11)               | 2<br>(0 - 5)             | 125<br>(93 - 174)           | 26<br>(14 - 46)             | 2<br>(1 - 5)                |
| Diarrhea, lower respiratory, and other common infectious diseases | 9,317<br>(7,922 - 11,031)      | 2,394<br>(1,827 - 3,112)    | 467<br>(353 - 618)       | 1,769<br>(1,356 - 2,240)    | 2,019<br>(1,482 - 2,665)    | 2,668<br>(2,149 - 3,313)    |
| Diarrheal diseases                                                | 774<br>(598 - 1,015)           | 325<br>(187 - 533)          | 26<br>(16 - 41)          | 116<br>(87 - 151)           | 96<br>(67 - 136)            | 211<br>(147 - 300)          |
| Intestinal infectious diseases                                    | 917<br>(501 - 1,508)           | 254<br>(136 - 436)          | 216<br>(116 - 364)       | 344<br>(168 - 618)          | 74<br>(36 - 141)            | 28<br>(14 - 50)             |
| Typhoid fever                                                     | 676<br>(356 - 1,153)           | 174<br>(87 - 312)           | 165<br>(85 - 277)        | 261<br>(124 - 472)          | 55<br>(24 - 109)            | 20<br>(10 - 37)             |
| Paratyphoid fever                                                 | 196<br>(100 - 333)             | 60<br>(29 - 113)            | 47<br>(22 - 87)          | 70<br>(31 - 131)            | 13<br>(5 - 27)              | 5<br>(2 - 11)               |
| Other intestinal infectious diseases                              | 46<br>(30 - 64)                | 20<br>(11 - 32)             | 4<br>(1 - 9)             | 14<br>(7 - 24)              | 5<br>(1 - 12)               | 3<br>(1 - 8)                |
| Lower respiratory infections                                      | 6,152<br>(5,034 - 7,431)       | 1,211<br>(851 - 1,626)      | 100<br>(72 - 133)        | 933<br>(688 - 1,206)        | 1,643<br>(1,150 - 2,202)    | 2,265<br>(1,790 - 3,368)    |
| Upper respiratory infections                                      | 9<br>(5 - 17)                  | 1<br>(0 - 3)                | 0<br>(0 - 1)             | 2<br>(1 - 4)                | 3<br>(1 - 6)                | 3<br>(1 - 9)                |
| Otitis media                                                      | 12<br>(10 - 14)                | 1<br>(1 - 1)                | 1<br>(0 - 1)             | 2<br>(2 - 2)                | 3<br>(3 - 4)                | 5<br>(4 - 7)                |
| Meningitis                                                        | 817<br>(663 - 1,017)           | 326<br>(220 - 484)          | 70<br>(49 - 99)          | 212<br>(156 - 271)          | 114<br>(82 - 159)           | 94<br>(67 - 130)            |
| Pneumococcal meningitis                                           | 253<br>(196 - 322)             | 91<br>(59 - 136)            | 25<br>(17 - 37)          | 72<br>(48 - 106)            | 34<br>(22 - 52)             | 31<br>(19 - 45)             |
| H influenzae type B meningitis                                    | 139<br>(102 - 192)             | 86<br>(55 - 133)            | 13<br>(8 - 20)           | 22<br>(14 - 32)             | 10<br>(6 - 16)              | 7<br>(5 - 11)               |
| Meningococcal meningitis                                          | 257<br>(203 - 328)             | 117<br>(74 - 181)           | 23<br>(14 - 35)          | 58<br>(39 - 82)             | 30<br>(18 - 47)             | 28<br>(18 - 43)             |
| Other meningitis                                                  | 168<br>(123 - 217)             | 33<br>(19 - 52)             | 9<br>(4 - 14)            | 60<br>(38 - 87)             | 39<br>(23 - 59)             | 27<br>(17 - 42)             |
| Encephalitis                                                      | 386<br>(305 - 487)             | 89<br>(54 - 140)            | 30<br>(19 - 43)          | 139<br>(100 - 185)          | 75<br>(54 - 105)            | 52<br>(38 - 71)             |
| Diphtheria                                                        | 2<br>(0 - 7)                   | 1<br>(0 - 6)                | 0<br>(0 - 2)             | 0<br>(0 - 1)                | 0<br>(0 - 1)                | --                          |
| Whooping cough                                                    | 13<br>(0 - 68)                 | 12<br>(0 - 64)              | 1<br>(0 - 3)             | 0<br>(0 - 1)                | 0<br>(0 - 0)                | --                          |
| Tetanus                                                           | 28<br>(21 - 40)                | 9<br>(6 - 16)               | 1<br>(1 - 2)             | 9<br>(6 - 13)               | 7<br>(5 - 12)               | 1<br>(1 - 2)                |
| Measles                                                           | 186<br>(4 - 1,007)             | 160<br>(3 - 855)            | 22<br>(0 - 117)          | 5<br>(0 - 26)               | 0<br>(0 - 1)                | --                          |
| Varicella and herpes zoster                                       | 22<br>(10 - 46)                | 5<br>(1 - 15)               | 1<br>(0 - 3)             | 5<br>(1 - 11)               | 2<br>(0 - 6)                | 8<br>(1 - 32)               |
| Neglected tropical diseases and malaria                           | 178<br>(148 - 214)             | 33<br>(22 - 48)             | 12<br>(9 - 17)           | 57<br>(44 - 72)             | 44<br>(33 - 57)             | 32<br>(25 - 42)             |
| Malaria                                                           | 7<br>(6 - 10)                  | 0<br>(0 - 1)                | 1<br>(1 - 2)             | 4<br>(3 - 6)                | 1<br>(1 - 2)                | 1<br>(0 - 1)                |
| Leishmaniasis                                                     | 39<br>(30 - 50)                | 16<br>(11 - 24)             | 4<br>(3 - 5)             | 13<br>(9 - 17)              | 5<br>(4 - 8)                | 1<br>(1 - 2)                |
| Visceral leishmaniasis                                            | 39<br>(30 - 50)                | 16<br>(11 - 24)             | 4<br>(3 - 5)             | 13<br>(9 - 17)              | 5<br>(4 - 8)                | 1<br>(1 - 2)                |
| Schistosomiasis                                                   | 54<br>(41 - 69)                | 0<br>(0 - 0)                | 1<br>(0 - 1)             | 15<br>(10 - 21)             | 23<br>(15 - 33)             | 15<br>(10 - 22)             |
| Cysticercosis                                                     | 0<br>(0 - 0)                   | 0<br>(0 - 0)                | 0<br>(0 - 0)             | 0<br>(0 - 0)                | 0<br>(0 - 0)                | 0<br>(0 - 0)                |
| Cystic echinococcosis                                             | 23<br>(19 - 27)                | 1<br>(1 - 1)                | 2<br>(2 - 2)             | 9<br>(8 - 11)               | 7<br>(5 - 8)                | 4<br>(3 - 5)                |
| Dengue                                                            | 3<br>(3 - 5)                   | 0<br>(0 - 1)                | 0<br>(0 - 1)             | 2<br>(1 - 2)                | 0<br>(0 - 1)                | 0<br>(0 - 0)                |
| Rabies                                                            | 17<br>(11 - 32)                | 2<br>(1 - 6)                | 2<br>(1 - 3)             | 8<br>(5 - 13)               | 3<br>(2 - 8)                | 2<br>(1 - 4)                |
| Intestinal nematode infections                                    | 9<br>(2 - 19)                  | 4<br>(1 - 12)               | 1<br>(0 - 6)             | 1<br>(0 - 6)                | 1<br>(0 - 4)                | 1<br>(0 - 6)                |
| Ascariasis                                                        | 9<br>(2 - 19)                  | 4<br>(1 - 12)               | 1<br>(0 - 6)             | 1<br>(0 - 6)                | 1<br>(0 - 4)                | 1<br>(0 - 6)                |
| Other neglected tropical diseases                                 | 25<br>(20 - 33)                | 8<br>(5 - 14)               | 1<br>(1 - 2)             | 4<br>(3 - 5)                | 3<br>(2 - 5)                | 9<br>(6 - 13)               |
| Maternal disorders                                                | 472<br>(334 - 635)             | --                          | 1<br>(0 - 2)             | 472<br>(333 - 634)          | --                          | --                          |



Web Table 31- Morocco deaths with 95% UI by age, sex, and cause in 2013

| Cause                                                            | Both Sexes, All Ages           | Both Sexes, 0-4 Years      | Both Sexes, 5-14 Years | Both Sexes, 15-49 Years     | Both Sexes, 50-69 Years     | Both Sexes, 70-80 Years     |
|------------------------------------------------------------------|--------------------------------|----------------------------|------------------------|-----------------------------|-----------------------------|-----------------------------|
| Maternal hemorrhage                                              | 78<br>(52 - 110)               | --                         | 0<br>(0 - 0)           | 78<br>(52 - 110)            | --                          | --                          |
| Maternal sepsis and other maternal infections                    | 30<br>(16 - 46)                | --                         | 0<br>(0 - 0)           | 30<br>(16 - 46)             | --                          | --                          |
| Maternal hypertensive disorders                                  | 84<br>(56 - 118)               | --                         | 0<br>(0 - 0)           | 83<br>(56 - 118)            | --                          | --                          |
| Maternal obstructed labor                                        | 49<br>(33 - 69)                | --                         | 0<br>(0 - 0)           | 48<br>(33 - 68)             | --                          | --                          |
| Maternal abortive outcome                                        | 76<br>(51 - 108)               | --                         | 0<br>(0 - 0)           | 76<br>(51 - 108)            | --                          | --                          |
| Indirect maternal deaths                                         | 42<br>(24 - 66)                | --                         | 0<br>(0 - 0)           | 42<br>(24 - 66)             | --                          | --                          |
| Late maternal deaths                                             | 43<br>(22 - 66)                | --                         | 0<br>(0 - 0)           | 43<br>(22 - 66)             | --                          | --                          |
| Maternal deaths aggravated by HIV/AIDS                           | 0<br>(0 - 0)                   | --                         | --                     | 0<br>(0 - 0)                | --                          | --                          |
| Other maternal disorders                                         | 70<br>(46 - 102)               | --                         | 0<br>(0 - 0)           | 70<br>(46 - 102)            | --                          | --                          |
| Neonatal disorders                                               | 10,244<br>(8,880 - 11,792)     | 10,244<br>(8,880 - 11,792) | --                     | --                          | --                          | --                          |
| Neonatal preterm birth complications                             | 5,299<br>(3,710 - 6,675)       | 5,299<br>(3,710 - 6,675)   | --                     | --                          | --                          | --                          |
| Neonatal encephalopathy due to birth asphyxia and trauma         | 2,590<br>(1,762 - 3,728)       | 2,590<br>(1,762 - 3,728)   | --                     | --                          | --                          | --                          |
| Neonatal sepsis and other neonatal infections                    | 1,789<br>(1,044 - 2,976)       | 1,789<br>(1,044 - 2,976)   | --                     | --                          | --                          | --                          |
| Hemolytic disease and other neonatal jaundice                    | 70<br>(33 - 133)               | 70<br>(33 - 133)           | --                     | --                          | --                          | --                          |
| Other neonatal disorders                                         | 495<br>(302 - 769)             | 495<br>(302 - 769)         | --                     | --                          | --                          | --                          |
| Nutritional deficiencies                                         | 1,265<br>(961 - 1,559)         | 188<br>(117 - 285)         | 30<br>(21 - 41)        | 197<br>(146 - 254)          | 232<br>(173 - 311)          | 616<br>(440 - 817)          |
| Protein-energy malnutrition                                      | 200<br>(120 - 309)             | 100<br>(50 - 162)          | 7<br>(4 - 12)          | 13<br>(7 - 24)              | 19<br>(10 - 38)             | 61<br>(28 - 118)            |
| Iodine deficiency                                                | 12<br>(2 - 40)                 | 2<br>(0 - 11)              | 1<br>(0 - 3)           | 2<br>(0 - 7)                | 3<br>(0 - 12)               | 5<br>(0 - 27)               |
| Iron-deficiency anemia                                           | 911<br>(640 - 1,173)           | 71<br>(30 - 123)           | 17<br>(10 - 25)        | 164<br>(119 - 212)          | 184<br>(133 - 254)          | 475<br>(319 - 649)          |
| Other nutritional deficiencies                                   | 141<br>(72 - 222)              | 15<br>(7 - 29)             | 6<br>(3 - 9)           | 18<br>(9 - 30)              | 26<br>(13 - 44)             | 76<br>(34 - 134)            |
| Other communicable, maternal, neonatal, and nutritional diseases | 1,770<br>(1,354 - 2,297)       | 647<br>(344 - 1,067)       | 55<br>(33 - 88)        | 167<br>(121 - 223)          | 322<br>(245 - 425)          | 579<br>(447 - 767)          |
| Sexually transmitted diseases excluding HIV                      | 704<br>(382 - 1,160)           | 586<br>(290 - 1,007)       | 42<br>(21 - 72)        | 19<br>(12 - 29)             | 18<br>(10 - 29)             | 38<br>(18 - 76)             |
| Syphilis                                                         | 679<br>(362 - 1,134)           | 586<br>(290 - 1,007)       | 42<br>(21 - 72)        | 9<br>(6 - 15)               | 12<br>(7 - 20)              | 30<br>(14 - 59)             |
| Chlamydial infection                                             | 4<br>(3 - 8)                   | --                         | 0<br>(0 - 0)           | 2<br>(1 - 3)                | 1<br>(0 - 2)                | 2<br>(1 - 4)                |
| Gonococcal infection                                             | 12<br>(8 - 18)                 | --                         | 0<br>(0 - 0)           | 4<br>(3 - 7)                | 3<br>(2 - 5)                | 4<br>(2 - 9)                |
| Other sexually transmitted diseases                              | 8<br>(5 - 12)                  | --                         | 0<br>(0 - 0)           | 4<br>(2 - 6)                | 2<br>(1 - 3)                | 2<br>(1 - 4)                |
| Hepatitis                                                        | 677<br>(546 - 844)             | 9<br>(6 - 15)              | 4<br>(3 - 6)           | 47<br>(34 - 64)             | 198<br>(148 - 259)          | 418<br>(325 - 550)          |
| Acute hepatitis A                                                | 21<br>(6 - 44)                 | 4<br>(1 - 8)               | 2<br>(1 - 3)           | 4<br>(1 - 9)                | 6<br>(1 - 13)               | 5<br>(1 - 14)               |
| Acute hepatitis B                                                | 499<br>(360 - 664)             | 5<br>(2 - 9)               | 1<br>(1 - 3)           | 21<br>(11 - 36)             | 144<br>(101 - 200)          | 327<br>(217 - 453)          |
| Acute hepatitis C                                                | 57<br>(10 - 161)               | --                         | 0<br>(0 - 1)           | 3<br>(1 - 9)                | 13<br>(2 - 37)              | 40<br>(6 - 126)             |
| Acute hepatitis E                                                | 100<br>(44 - 200)              | 0<br>(0 - 0)               | 1<br>(0 - 1)           | 19<br>(10 - 30)             | 35<br>(15 - 67)             | 46<br>(15 - 109)            |
| Other infectious diseases                                        | 390<br>(256 - 551)             | 52<br>(27 - 100)           | 8<br>(5 - 14)          | 100<br>(62 - 150)           | 107<br>(56 - 173)           | 123<br>(59 - 264)           |
| Non-communicable diseases                                        | 124,672<br>(107,996 - 145,968) | 4,552<br>(3,610 - 5,704)   | 931<br>(804 - 1,060)   | 18,001<br>(14,430 - 21,616) | 38,752<br>(32,134 - 47,910) | 62,437<br>(55,707 - 72,157) |
| Neoplasms                                                        | 25,389<br>(21,469 - 30,382)    | 281<br>(200 - 376)         | 256<br>(211 - 302)     | 4,850<br>(3,870 - 5,861)    | 10,711<br>(8,837 - 13,256)  | 9,291<br>(7,733 - 11,035)   |
| Esophageal cancer                                                | 444<br>(341 - 564)             | --                         | --                     | 91<br>(67 - 118)            | 171<br>(128 - 228)          | 183<br>(129 - 239)          |
| Stomach cancer                                                   | 2,375<br>(1,951 - 2,885)       | --                         | --                     | 365<br>(281 - 465)          | 1,017<br>(805 - 1,309)      | 992<br>(783 - 1,246)        |
| Liver cancer                                                     | 1,425<br>(1,152 - 1,762)       | --                         | 5<br>(3 - 7)           | 144<br>(108 - 187)          | 583<br>(450 - 760)          | 694<br>(537 - 899)          |
| Liver cancer due to hepatitis B                                  | 456<br>(326 - 608)             | --                         | 2<br>(1 - 4)           | 69<br>(49 - 94)             | 217<br>(150 - 304)          | 168<br>(112 - 233)          |
| Liver cancer due to hepatitis C                                  | 679<br>(513 - 883)             | --                         | 0<br>(0 - 1)           | 48<br>(32 - 68)             | 262<br>(186 - 356)          | 369<br>(266 - 494)          |
| Liver cancer due to alcohol use                                  | 154<br>(103 - 223)             | --                         | --                     | 7<br>(4 - 11)               | 49<br>(32 - 75)             | 97<br>(59 - 148)            |

Web Table 31- Morocco deaths with 95% UI by age, sex, and cause in 2013

| Cause                                         | Both Sexes, All Ages        | Both Sexes, 0-4 Years  | Both Sexes, 5-14 Years | Both Sexes, 15-49 Years  | Both Sexes, 50-69 Years     | Both Sexes, 70-80 Years     |
|-----------------------------------------------|-----------------------------|------------------------|------------------------|--------------------------|-----------------------------|-----------------------------|
| Liver cancer due to other causes              | 136<br>(74 - 205)           | --                     | 2<br>(1 - 3)           | 20<br>(12 - 30)          | 55<br>(29 - 90)             | 59<br>(29 - 100)            |
| Larynx cancer                                 | 334<br>(252 - 480)          | --                     | --                     | 54<br>(37 - 82)          | 162<br>(115 - 252)          | 118<br>(87 - 167)           |
| Tracheal, bronchus and lung cancer            | 4,642<br>(3,793 - 5,883)    | --                     | --                     | 638<br>(465 - 845)       | 2,453<br>(1,922 - 3,299)    | 1,552<br>(1,282 - 1,879)    |
| Breast cancer                                 | 2,427<br>(1,809 - 3,225)    | --                     | --                     | 812<br>(578 - 1,099)     | 1,122<br>(801 - 1,535)      | 493<br>(372 - 656)          |
| Cervical cancer                               | 1,226<br>(851 - 1,670)      | --                     | --                     | 333<br>(218 - 469)       | 540<br>(367 - 776)          | 353<br>(223 - 502)          |
| Uterine cancer                                | 251<br>(122 - 373)          | --                     | --                     | 29<br>(15 - 45)          | 128<br>(61 - 199)           | 95<br>(43 - 147)            |
| Prostate cancer                               | 1,330<br>(703 - 1,894)      | --                     | --                     | 38<br>(22 - 57)          | 277<br>(157 - 413)          | 1,015<br>(519 - 1,490)      |
| Colon and rectum cancer                       | 1,633<br>(1,369 - 1,995)    | --                     | --                     | 312<br>(245 - 389)       | 631<br>(502 - 790)          | 689<br>(559 - 852)          |
| Lip and oral cavity cancer                    | 243<br>(177 - 308)          | --                     | --                     | 55<br>(39 - 73)          | 105<br>(77 - 141)           | 84<br>(56 - 114)            |
| Nasopharynx cancer                            | 218<br>(165 - 296)          | --                     | 3<br>(1 - 5)           | 91<br>(66 - 132)         | 91<br>(62 - 137)            | 33<br>(23 - 47)             |
| Other pharynx cancer                          | 119<br>(89 - 159)           | --                     | --                     | 25<br>(18 - 34)          | 69<br>(49 - 96)             | 25<br>(16 - 34)             |
| Gallbladder and biliary tract cancer          | 588<br>(388 - 767)          | --                     | --                     | 82<br>(56 - 113)         | 254<br>(174 - 341)          | 251<br>(149 - 355)          |
| Pancreatic cancer                             | 1,034<br>(855 - 1,246)      | --                     | --                     | 123<br>(94 - 161)        | 455<br>(364 - 587)          | 456<br>(370 - 558)          |
| Malignant skin melanoma                       | 80<br>(60 - 102)            | --                     | --                     | 21<br>(15 - 27)          | 36<br>(26 - 49)             | 23<br>(16 - 31)             |
| Non-melanoma skin cancer                      | 159<br>(109 - 224)          | --                     | --                     | 22<br>(14 - 34)          | 58<br>(40 - 86)             | 78<br>(51 - 114)            |
| Ovarian cancer                                | 517<br>(390 - 701)          | --                     | --                     | 121<br>(83 - 166)        | 239<br>(167 - 341)          | 157<br>(111 - 217)          |
| Testicular cancer                             | 38<br>(22 - 55)             | --                     | --                     | 25<br>(14 - 37)          | 8<br>(4 - 12)               | 5<br>(2 - 9)                |
| Kidney cancer                                 | 315<br>(260 - 388)          | 9<br>(5 - 15)          | 5<br>(3 - 7)           | 49<br>(37 - 66)          | 139<br>(105 - 183)          | 113<br>(87 - 143)           |
| Bladder cancer                                | 732<br>(567 - 945)          | --                     | --                     | 58<br>(40 - 82)          | 317<br>(231 - 455)          | 356<br>(259 - 455)          |
| Brain and nervous system cancer               | 1,140<br>(822 - 1,436)      | 31<br>(17 - 52)        | 47<br>(33 - 63)        | 353<br>(255 - 460)       | 473<br>(335 - 634)          | 235<br>(130 - 317)          |
| Thyroid cancer                                | 157<br>(121 - 208)          | --                     | 0<br>(0 - 1)           | 26<br>(18 - 35)          | 74<br>(53 - 103)            | 57<br>(42 - 77)             |
| Mesothelioma                                  | 48<br>(36 - 63)             | --                     | --                     | 7<br>(5 - 11)            | 17<br>(12 - 25)             | 23<br>(15 - 34)             |
| Hodgkin lymphoma                              | 137<br>(106 - 169)          | 7<br>(4 - 11)          | 8<br>(5 - 15)          | 60<br>(42 - 81)          | 32<br>(23 - 46)             | 30<br>(20 - 42)             |
| Non-Hodgkin lymphoma                          | 767<br>(606 - 968)          | 31<br>(20 - 47)        | 19<br>(14 - 27)        | 190<br>(142 - 255)       | 280<br>(209 - 381)          | 246<br>(169 - 326)          |
| Multiple myeloma                              | 103<br>(69 - 140)           | --                     | --                     | 23<br>(16 - 31)          | 51<br>(33 - 74)             | 29<br>(19 - 42)             |
| Leukemia                                      | 900<br>(754 - 1,066)        | 49<br>(29 - 75)        | 73<br>(55 - 93)        | 278<br>(217 - 342)       | 257<br>(201 - 326)          | 242<br>(193 - 302)          |
| Other neoplasms                               | 2,009<br>(1,596 - 2,484)    | 153<br>(101 - 216)     | 96<br>(71 - 126)       | 425<br>(324 - 553)       | 671<br>(512 - 887)          | 664<br>(490 - 864)          |
| Cardiovascular diseases                       | 44,870<br>(38,202 - 53,685) | 1,006<br>(759 - 1,315) | 262<br>(210 - 323)     | 5,267<br>(4,175 - 6,493) | 14,608<br>(12,022 - 18,244) | 23,726<br>(20,639 - 28,508) |
| Rheumatic heart disease                       | 1,035<br>(648 - 1,347)      | 16<br>(9 - 27)         | 17<br>(10 - 24)        | 231<br>(143 - 303)       | 310<br>(170 - 428)          | 461<br>(276 - 626)          |
| Ischemic heart disease                        | 19,861<br>(16,591 - 24,323) | 217<br>(131 - 332)     | 84<br>(62 - 112)       | 2,370<br>(1,850 - 3,045) | 7,289<br>(5,948 - 9,141)    | 9,901<br>(8,270 - 12,331)   |
| Cerebrovascular disease                       | 13,563<br>(11,340 - 16,747) | 179<br>(122 - 252)     | 72<br>(54 - 95)        | 1,234<br>(953 - 1,573)   | 3,980<br>(3,145 - 5,057)    | 8,098<br>(6,712 - 10,046)   |
| Ischemic stroke                               | 7,951<br>(6,526 - 9,829)    | 17<br>(9 - 29)         | 6<br>(4 - 9)           | 250<br>(182 - 330)       | 1,834<br>(1,396 - 2,404)    | 5,843<br>(4,801 - 7,178)    |
| Hemorrhagic stroke                            | 5,612<br>(4,572 - 7,206)    | 162<br>(111 - 227)     | 66<br>(50 - 87)        | 984<br>(763 - 1,265)     | 2,146<br>(1,675 - 2,805)    | 2,254<br>(1,742 - 3,010)    |
| Hypertensive heart disease                    | 3,175<br>(2,409 - 4,765)    | 8<br>(4 - 16)          | 4<br>(3 - 6)           | 273<br>(198 - 383)       | 696<br>(502 - 1,035)        | 2,193<br>(1,604 - 3,404)    |
| Cardiomyopathy and myocarditis                | 2,480<br>(1,955 - 3,104)    | 280<br>(194 - 397)     | 37<br>(26 - 53)        | 365<br>(270 - 472)       | 645<br>(480 - 874)          | 1,153<br>(833 - 1,517)      |
| Atrial fibrillation and flutter               | 22<br>(17 - 30)             | --                     | --                     | 3<br>(2 - 4)             | 8<br>(6 - 11)               | 12<br>(8 - 17)              |
| Aortic aneurysm                               | 320<br>(247 - 411)          | --                     | --                     | 26<br>(19 - 37)          | 109<br>(81 - 151)           | 185<br>(134 - 245)          |
| Peripheral vascular disease                   | 43<br>(35 - 55)             | --                     | --                     | 4<br>(3 - 6)             | 11<br>(8 - 14)              | 28<br>(22 - 37)             |
| Endocarditis                                  | 518<br>(369 - 679)          | 66<br>(39 - 104)       | 10<br>(6 - 14)         | 154<br>(104 - 210)       | 159<br>(107 - 228)          | 128<br>(77 - 182)           |
| Other cardiovascular and circulatory diseases | 3,852<br>(3,067 - 4,929)    | 240<br>(168 - 345)     | 38<br>(26 - 52)        | 606<br>(453 - 804)       | 1,402<br>(1,044 - 1,857)    | 1,566<br>(1,205 - 2,056)    |

Web Table 31- Morocco deaths with 95% UI by age, sex, and cause in 2013

| Cause                                               | Both Sexes, All Ages      | Both Sexes, 0-4 Years | Both Sexes, 5-14 Years | Both Sexes, 15-49 Years  | Both Sexes, 50-69 Years  | Both Sexes, 70-80 Years  |
|-----------------------------------------------------|---------------------------|-----------------------|------------------------|--------------------------|--------------------------|--------------------------|
| Chronic respiratory diseases                        | 8,581<br>(7,253 - 10,262) | 171<br>(116 - 252)    | 24<br>(19 - 30)        | 735<br>(569 - 913)       | 2,391<br>(1,918 - 3,064) | 5,259<br>(4,450 - 6,306) |
| Chronic obstructive pulmonary disease               | 3,660<br>(2,988 - 4,696)  | 125<br>(81 - 193)     | 6<br>(4 - 8)           | 203<br>(152 - 272)       | 972<br>(753 - 1,292)     | 2,354<br>(1,893 - 3,019) |
| Pneumoconiosis                                      | 341<br>(234 - 489)        | 0<br>(0 - 1)          | 1<br>(1 - 1)           | 50<br>(31 - 76)          | 143<br>(92 - 216)        | 146<br>(100 - 218)       |
| Silicosis                                           | 223<br>(154 - 330)        | 0<br>(0 - 0)          | 0<br>(0 - 0)           | 9<br>(5 - 14)            | 95<br>(61 - 147)         | 119<br>(79 - 180)        |
| Asbestosis                                          | 13<br>(9 - 18)            | 0<br>(0 - 0)          | 0<br>(0 - 0)           | 5<br>(3 - 7)             | 4<br>(3 - 6)             | 4<br>(3 - 6)             |
| Coal workers pneumoconiosis                         | 5<br>(3 - 7)              | 0<br>(0 - 0)          | 0<br>(0 - 0)           | 1<br>(1 - 2)             | 2<br>(1 - 3)             | 1<br>(1 - 3)             |
| Other pneumoconiosis                                | 100<br>(68 - 145)         | 0<br>(0 - 0)          | 0<br>(0 - 0)           | 35<br>(22 - 54)          | 42<br>(27 - 64)          | 22<br>(14 - 33)          |
| Asthma                                              | 3,481<br>(2,744 - 4,301)  | 27<br>(14 - 47)       | 14<br>(10 - 17)        | 398<br>(302 - 503)       | 1,004<br>(770 - 1,298)   | 2,037<br>(1,549 - 2,579) |
| Interstitial lung disease and pulmonary sarcoidosis | 804<br>(592 - 1,135)      | 1<br>(0 - 1)          | 1<br>(1 - 2)           | 23<br>(16 - 34)          | 214<br>(150 - 314)       | 565<br>(403 - 814)       |
| Other chronic respiratory diseases                  | 296<br>(229 - 373)        | 18<br>(12 - 28)       | 3<br>(2 - 4)           | 60<br>(45 - 80)          | 58<br>(42 - 79)          | 157<br>(112 - 214)       |
| Cirrhosis                                           | 4,179<br>(3,469 - 5,142)  | 56<br>(32 - 90)       | 32<br>(25 - 41)        | 540<br>(419 - 669)       | 1,351<br>(1,081 - 1,706) | 2,199<br>(1,766 - 2,789) |
| Cirrhosis due to hepatitis B                        | 1,320<br>(707 - 2,073)    | 2<br>(1 - 5)          | 5<br>(2 - 9)           | 157<br>(89 - 248)        | 423<br>(229 - 670)       | 733<br>(339 - 1,211)     |
| Cirrhosis due to hepatitis C                        | 1,992<br>(1,280 - 2,913)  | 4<br>(1 - 10)         | 6<br>(2 - 13)          | 250<br>(134 - 390)       | 682<br>(408 - 1,040)     | 1,050<br>(650 - 1,553)   |
| Cirrhosis due to alcohol use                        | 453<br>(283 - 677)        | --                    | --                     | 38<br>(19 - 74)          | 132<br>(81 - 219)        | 283<br>(171 - 412)       |
| Cirrhosis due to other causes                       | 414<br>(284 - 636)        | 50<br>(28 - 81)       | 21<br>(14 - 29)        | 96<br>(58 - 153)         | 114<br>(65 - 199)        | 133<br>(75 - 222)        |
| Digestive diseases                                  | 2,781<br>(2,337 - 3,342)  | 48<br>(30 - 70)       | 37<br>(29 - 47)        | 537<br>(416 - 669)       | 903<br>(720 - 1,168)     | 1,256<br>(1,037 - 1,535) |
| Peptic ulcer disease                                | 560<br>(440 - 713)        | 5<br>(2 - 9)          | 5<br>(4 - 8)           | 107<br>(76 - 143)        | 204<br>(153 - 271)       | 238<br>(173 - 320)       |
| Gastritis and duodenitis                            | 149<br>(93 - 211)         | 3<br>(2 - 7)          | 2<br>(1 - 3)           | 20<br>(13 - 30)          | 55<br>(35 - 82)          | 69<br>(40 - 101)         |
| Appendicitis                                        | 104<br>(75 - 138)         | 2<br>(1 - 4)          | 4<br>(2 - 6)           | 36<br>(25 - 49)          | 34<br>(22 - 50)          | 29<br>(19 - 40)          |
| Paralytic ileus and intestinal obstruction          | 467<br>(321 - 663)        | 15<br>(8 - 25)        | 9<br>(5 - 13)          | 98<br>(66 - 139)         | 144<br>(93 - 214)        | 201<br>(132 - 300)       |
| Inguinal, femoral, and abdominal hernia             | 61<br>(41 - 91)           | 1<br>(1 - 3)          | 1<br>(0 - 1)           | 11<br>(7 - 19)           | 17<br>(11 - 26)          | 31<br>(19 - 46)          |
| Inflammatory bowel disease                          | 161<br>(123 - 219)        | 3<br>(2 - 6)          | 3<br>(2 - 4)           | 50<br>(36 - 69)          | 49<br>(34 - 70)          | 56<br>(38 - 81)          |
| Vascular intestinal disorders                       | 165<br>(99 - 268)         | 0<br>(0 - 1)          | 3<br>(1 - 6)           | 22<br>(11 - 39)          | 36<br>(19 - 66)          | 104<br>(61 - 169)        |
| Gallbladder and biliary diseases                    | 427<br>(321 - 561)        | 2<br>(1 - 3)          | 1<br>(1 - 2)           | 45<br>(32 - 59)          | 129<br>(92 - 177)        | 250<br>(170 - 348)       |
| Pancreatitis                                        | 298<br>(218 - 413)        | 1<br>(0 - 1)          | 3<br>(2 - 5)           | 67<br>(47 - 93)          | 117<br>(80 - 168)        | 111<br>(78 - 157)        |
| Other digestive diseases                            | 388<br>(296 - 494)        | 16<br>(8 - 26)        | 7<br>(3 - 9)           | 81<br>(56 - 107)         | 118<br>(85 - 159)        | 167<br>(121 - 231)       |
| Neurological disorders                              | 6,084<br>(5,079 - 7,385)  | 123<br>(84 - 187)     | 49<br>(34 - 69)        | 401<br>(307 - 512)       | 697<br>(542 - 893)       | 4,814<br>(3,942 - 5,917) |
| Alzheimer disease and other dementias               | 5,042<br>(4,136 - 6,183)  | --                    | --                     | 3<br>(1 - 6)             | 472<br>(349 - 623)       | 4,567<br>(3,719 - 5,655) |
| Parkinson disease                                   | 141<br>(101 - 194)        | --                    | --                     | 4<br>(3 - 8)             | 46<br>(31 - 67)          | 90<br>(60 - 131)         |
| Epilepsy                                            | 663<br>(510 - 844)        | 88<br>(54 - 145)      | 41<br>(27 - 60)        | 320<br>(239 - 421)       | 116<br>(81 - 163)        | 98<br>(62 - 151)         |
| Multiple sclerosis                                  | 43<br>(18 - 63)           | --                    | --                     | 18<br>(5 - 28)           | 17<br>(8 - 26)           | 8<br>(3 - 15)            |
| Other neurological disorders                        | 196<br>(163 - 248)        | 35<br>(26 - 46)       | 8<br>(6 - 12)          | 56<br>(44 - 74)          | 47<br>(35 - 67)          | 50<br>(40 - 64)          |
| Mental and substance use disorders                  | 4,298<br>(3,010 - 5,431)  | 54<br>(36 - 79)       | 0<br>(0 - 0)           | 3,029<br>(2,092 - 3,860) | 1,084<br>(732 - 1,471)   | 131<br>(103 - 166)       |
| Schizophrenia                                       | 64<br>(43 - 87)           | --                    | --                     | 27<br>(16 - 39)          | 24<br>(16 - 34)          | 14<br>(9 - 20)           |
| Alcohol use disorders                               | 262<br>(172 - 366)        | --                    | --                     | 85<br>(52 - 122)         | 126<br>(83 - 186)        | 51<br>(32 - 75)          |
| Drug use disorders                                  | 3,970<br>(2,688 - 5,036)  | 54<br>(36 - 79)       | --                     | 2,916<br>(1,993 - 3,724) | 934<br>(585 - 1,284)     | 66<br>(51 - 84)          |
| Opioid use disorders                                | 2,171<br>(1,477 - 2,773)  | 31<br>(21 - 48)       | --                     | 1,622<br>(1,101 - 2,076) | 481<br>(307 - 662)       | 36<br>(28 - 47)          |
| Cocaine use disorders                               | 51<br>(35 - 65)           | 1<br>(0 - 1)          | --                     | 41<br>(28 - 53)          | 9<br>(5 - 13)            | 1<br>(1 - 1)             |
| Amphetamine use disorders                           | 46<br>(32 - 59)           | 1<br>(1 - 2)          | --                     | 34<br>(23 - 45)          | 10<br>(6 - 15)           | 1<br>(1 - 1)             |
| Other drug use disorders                            | 1,703<br>(1,171 - 2,186)  | 21<br>(13 - 32)       | --                     | 1,219<br>(829 - 1,579)   | 435<br>(273 - 611)       | 28<br>(21 - 36)          |

Web Table 31- Morocco deaths with 95% UI by age, sex, and cause in 2013

| Cause                                               | Both Sexes, All Ages        | Both Sexes, 0-4 Years    | Both Sexes, 5-14 Years | Both Sexes, 15-49 Years  | Both Sexes, 50-69 Years  | Both Sexes, 70-80 Years     |
|-----------------------------------------------------|-----------------------------|--------------------------|------------------------|--------------------------|--------------------------|-----------------------------|
| Eating disorders                                    | 1<br>(1 - 2)                | --                       | 0<br>(0 - 0)           | 1<br>(1 - 2)             | --                       | --                          |
| Anorexia nervosa                                    | 1<br>(1 - 2)                | --                       | 0<br>(0 - 0)           | 1<br>(1 - 2)             | --                       | --                          |
| Diabetes, urogenital, blood, and endocrine diseases | 24,830<br>(21,253 - 29,646) | 459<br>(344 - 602)       | 145<br>(118 - 177)     | 2,237<br>(1,777 - 2,738) | 6,689<br>(5,429 - 8,355) | 15,301<br>(12,998 - 18,354) |
| Diabetes mellitus                                   | 17,020<br>(14,467 - 20,476) | 100<br>(68 - 143)        | 37<br>(26 - 52)        | 890<br>(704 - 1,098)     | 4,114<br>(3,329 - 5,206) | 11,879<br>(9,959 - 14,346)  |
| Acute glomerulonephritis                            | 29<br>(23 - 40)             | 2<br>(1 - 3)             | 2<br>(1 - 3)           | 7<br>(5 - 9)             | 9<br>(7 - 13)            | 10<br>(7 - 13)              |
| Chronic kidney disease                              | 5,240<br>(4,248 - 6,469)    | 60<br>(39 - 86)          | 34<br>(26 - 43)        | 871<br>(670 - 1,093)     | 1,942<br>(1,519 - 2,468) | 2,334<br>(1,859 - 2,916)    |
| Chronic kidney disease due to diabetes mellitus     | 961<br>(621 - 1,265)        | 7<br>(4 - 11)            | 4<br>(3 - 6)           | 101<br>(60 - 157)        | 376<br>(245 - 542)       | 473<br>(275 - 641)          |
| Chronic kidney disease due to hypertension          | 1,944<br>(1,443 - 2,597)    | 18<br>(11 - 28)          | 8<br>(6 - 11)          | 398<br>(288 - 543)       | 750<br>(538 - 1,017)     | 770<br>(537 - 1,103)        |
| Chronic kidney disease due to glomerulonephritis    | 144<br>(104 - 189)          | 6<br>(4 - 9)             | 4<br>(3 - 6)           | 33<br>(23 - 47)          | 51<br>(33 - 72)          | 49<br>(33 - 71)             |
| Chronic kidney disease due to other causes          | 2,191<br>(1,602 - 2,918)    | 29<br>(16 - 49)          | 16<br>(11 - 23)        | 339<br>(227 - 469)       | 765<br>(503 - 1,075)     | 1,041<br>(685 - 1,463)      |
| Urinary diseases and male infertility               | 1,163<br>(881 - 1,429)      | 47<br>(30 - 76)          | 12<br>(9 - 17)         | 172<br>(128 - 221)       | 335<br>(250 - 445)       | 597<br>(426 - 769)          |
| Interstitial nephritis and urinary tract infections | 413<br>(299 - 525)          | 39<br>(24 - 64)          | 8<br>(6 - 12)          | 86<br>(58 - 116)         | 115<br>(78 - 161)        | 164<br>(107 - 240)          |
| Urolithiasis                                        | 70<br>(49 - 101)            | --                       | 1<br>(1 - 2)           | 11<br>(7 - 16)           | 21<br>(13 - 31)          | 38<br>(22 - 61)             |
| Other urinary diseases                              | 680<br>(480 - 889)          | 9<br>(4 - 15)            | 3<br>(2 - 4)           | 75<br>(52 - 105)         | 199<br>(141 - 280)       | 394<br>(256 - 542)          |
| Gynecological diseases                              | 22<br>(13 - 33)             | --                       | --                     | 7<br>(5 - 11)            | 9<br>(5 - 15)            | 6<br>(3 - 10)               |
| Uterine fibroids                                    | 6<br>(3 - 9)                | --                       | --                     | 2<br>(1 - 3)             | 2<br>(1 - 4)             | 2<br>(1 - 3)                |
| Polycystic ovarian syndrome                         | 0<br>(0 - 1)                | --                       | --                     | 0<br>(0 - 1)             | 0<br>(0 - 0)             | --                          |
| Endometriosis                                       | 1<br>(1 - 2)                | --                       | --                     | 1<br>(1 - 2)             | 0<br>(0 - 0)             | --                          |
| Genital prolapse                                    | 4<br>(2 - 6)                | --                       | --                     | 1<br>(1 - 1)             | 2<br>(1 - 3)             | 1<br>(1 - 3)                |
| Other gynecological diseases                        | 10<br>(6 - 16)              | --                       | --                     | 3<br>(2 - 5)             | 5<br>(2 - 8)             | 2<br>(1 - 4)                |
| Hemoglobinopathies and hemolytic anemias            | 344<br>(249 - 499)          | 65<br>(40 - 101)         | 25<br>(18 - 36)        | 106<br>(76 - 160)        | 58<br>(40 - 87)          | 89<br>(53 - 133)            |
| Thalassemias                                        | 132<br>(96 - 193)           | 54<br>(33 - 85)          | 21<br>(15 - 31)        | 56<br>(40 - 83)          | 0<br>(0 - 0)             | 0<br>(0 - 0)                |
| Sickle cell disorders                               | 86<br>(62 - 130)            | 6<br>(3 - 9)             | 3<br>(2 - 4)           | 38<br>(26 - 58)          | 38<br>(25 - 57)          | 2<br>(1 - 3)                |
| G6PD deficiency                                     | 5<br>(4 - 7)                | 1<br>(0 - 1)             | 0<br>(0 - 0)           | 2<br>(1 - 2)             | 1<br>(1 - 2)             | 1<br>(1 - 1)                |
| Other hemoglobinopathies and hemolytic anemias      | 121<br>(77 - 177)           | 4<br>(3 - 7)             | 1<br>(1 - 1)           | 10<br>(7 - 15)           | 19<br>(13 - 28)          | 87<br>(51 - 129)            |
| Endocrine, metabolic, blood, and immune disorders   | 1,012<br>(707 - 1,254)      | 185<br>(123 - 266)       | 34<br>(22 - 48)        | 184<br>(137 - 240)       | 221<br>(153 - 305)       | 388<br>(210 - 541)          |
| Musculoskeletal disorders                           | 371<br>(291 - 466)          | --                       | 12<br>(9 - 16)         | 107<br>(82 - 138)        | 112<br>(85 - 151)        | 140<br>(103 - 187)          |
| Rheumatoid arthritis                                | 60<br>(43 - 80)             | --                       | 1<br>(1 - 2)           | 8<br>(5 - 11)            | 24<br>(16 - 34)          | 27<br>(17 - 41)             |
| Other musculoskeletal disorders                     | 311<br>(244 - 389)          | --                       | 11<br>(8 - 15)         | 99<br>(76 - 128)         | 88<br>(66 - 118)         | 112<br>(83 - 151)           |
| Other non-communicable diseases                     | 3,290<br>(2,700 - 4,140)    | 2,353<br>(1,796 - 3,113) | 113<br>(85 - 148)      | 299<br>(233 - 373)       | 204<br>(159 - 256)       | 321<br>(246 - 408)          |
| Congenital anomalies                                | 2,925<br>(2,346 - 3,758)    | 2,316<br>(1,760 - 3,068) | 108<br>(81 - 143)      | 239<br>(182 - 306)       | 120<br>(91 - 155)        | 142<br>(107 - 185)          |
| Neural tube defects                                 | 187<br>(102 - 321)          | 173<br>(90 - 308)        | 4<br>(2 - 6)           | 8<br>(5 - 13)            | 1<br>(1 - 3)             | 0<br>(0 - 1)                |
| Congenital heart anomalies                          | 1,303<br>(972 - 1,731)      | 1,129<br>(805 - 1,551)   | 55<br>(37 - 76)        | 59<br>(44 - 78)          | 27<br>(19 - 37)          | 33<br>(23 - 46)             |
| Cleft lip and cleft palate                          | 6<br>(3 - 11)               | 6<br>(3 - 11)            | --                     | --                       | --                       | --                          |
| Down syndrome                                       | 113<br>(74 - 170)           | 86<br>(50 - 138)         | 7<br>(4 - 10)          | 15<br>(10 - 24)          | 2<br>(1 - 4)             | 2<br>(1 - 4)                |
| Chromosomal unbalanced rearrangements               | 55<br>(35 - 85)             | 42<br>(25 - 66)          | 2<br>(1 - 3)           | 7<br>(4 - 12)            | 2<br>(1 - 3)             | 3<br>(1 - 6)                |
| Other congenital anomalies                          | 1,262<br>(1,000 - 1,636)    | 880<br>(629 - 1,216)     | 41<br>(28 - 57)        | 150<br>(110 - 193)       | 88<br>(66 - 113)         | 103<br>(77 - 137)           |
| Skin and subcutaneous diseases                      | 357<br>(278 - 451)          | 29<br>(16 - 49)          | 5<br>(3 - 6)           | 60<br>(44 - 80)          | 84<br>(63 - 114)         | 179<br>(122 - 245)          |
| Cellulitis                                          | 59<br>(36 - 81)             | 5<br>(2 - 9)             | 1<br>(1 - 1)           | 10<br>(7 - 15)           | 15<br>(10 - 22)          | 27<br>(14 - 44)             |
| Pyoderma                                            | 181<br>(140 - 238)          | 22<br>(12 - 38)          | 2<br>(1 - 3)           | 34<br>(24 - 46)          | 47<br>(33 - 65)          | 76<br>(51 - 111)            |

Web Table 31- Morocco deaths with 95% UI by age, sex, and cause in 2013

| Cause                                           | Both Sexes, All Ages        | Both Sexes, 0-4 Years    | Both Sexes, 5-14 Years | Both Sexes, 15-49 Years  | Both Sexes, 50-69 Years  | Both Sexes, 70-80 Years  |
|-------------------------------------------------|-----------------------------|--------------------------|------------------------|--------------------------|--------------------------|--------------------------|
| Decubitus ulcer                                 | 80<br>(54 - 114)            | 0<br>(0 - 1)             | 1<br>(0 - 1)           | 6<br>(4 - 9)             | 11<br>(8 - 18)           | 62<br>(39 - 93)          |
| Other skin and subcutaneous diseases            | 37<br>(17 - 51)             | 2<br>(1 - 5)             | 1<br>(1 - 1)           | 10<br>(5 - 13)           | 11<br>(5 - 17)           | 14<br>(4 - 22)           |
| Sudden infant death syndrome                    | 7<br>(3 - 17)               | 7<br>(3 - 17)            | --                     | --                       | --                       | --                       |
| Injuries                                        | 13,330<br>(11,180 - 15,644) | 1,324<br>(1,026 - 1,683) | 871<br>(752 - 987)     | 5,845<br>(4,597 - 7,101) | 2,826<br>(2,282 - 3,536) | 2,464<br>(2,078 - 2,964) |
| Transport injuries                              | 5,124<br>(4,253 - 6,105)    | 507<br>(372 - 682)       | 339<br>(274 - 411)     | 2,470<br>(1,927 - 3,039) | 1,136<br>(907 - 1,455)   | 671<br>(547 - 850)       |
| Road injuries                                   | 4,778<br>(3,977 - 5,665)    | 478<br>(348 - 647)       | 319<br>(257 - 388)     | 2,273<br>(1,773 - 2,800) | 1,071<br>(854 - 1,369)   | 637<br>(519 - 808)       |
| Pedestrian road injuries                        | 1,665<br>(1,329 - 2,063)    | 249<br>(166 - 348)       | 157<br>(118 - 200)     | 476<br>(333 - 644)       | 424<br>(307 - 553)       | 359<br>(281 - 466)       |
| Cyclist road injuries                           | 294<br>(227 - 372)          | 18<br>(10 - 30)          | 23<br>(16 - 32)        | 100<br>(72 - 136)        | 109<br>(79 - 147)        | 44<br>(31 - 61)          |
| Motorcyclist road injuries                      | 618<br>(438 - 826)          | 22<br>(13 - 35)          | 15<br>(10 - 23)        | 472<br>(323 - 643)       | 66<br>(43 - 92)          | 43<br>(27 - 66)          |
| Motor vehicle road injuries                     | 2,173<br>(1,751 - 2,685)    | 176<br>(119 - 244)       | 117<br>(87 - 151)      | 1,220<br>(939 - 1,560)   | 471<br>(355 - 630)       | 190<br>(140 - 261)       |
| Other road injuries                             | 27<br>(18 - 39)             | 13<br>(7 - 21)           | 7<br>(4 - 11)          | 3<br>(2 - 6)             | 2<br>(1 - 4)             | 2<br>(1 - 3)             |
| Other transport injuries                        | 345<br>(262 - 438)          | 28<br>(18 - 41)          | 20<br>(14 - 28)        | 198<br>(139 - 269)       | 65<br>(47 - 90)          | 34<br>(24 - 47)          |
| Unintentional injuries                          | 4,906<br>(4,112 - 5,752)    | 794<br>(595 - 1,067)     | 469<br>(391 - 555)     | 1,643<br>(1,240 - 2,076) | 869<br>(683 - 1,102)     | 1,131<br>(942 - 1,375)   |
| Falls                                           | 933<br>(744 - 1,158)        | 83<br>(51 - 128)         | 46<br>(31 - 63)        | 214<br>(149 - 292)       | 195<br>(136 - 276)       | 395<br>(289 - 532)       |
| Drowning                                        | 1,548<br>(1,145 - 1,927)    | 330<br>(202 - 528)       | 256<br>(192 - 333)     | 664<br>(456 - 908)       | 195<br>(134 - 267)       | 103<br>(75 - 139)        |
| Fire, heat, and hot substances                  | 370<br>(293 - 471)          | 80<br>(50 - 121)         | 32<br>(23 - 45)        | 91<br>(63 - 127)         | 69<br>(50 - 97)          | 98<br>(70 - 130)         |
| Poisonings                                      | 281<br>(208 - 353)          | 49<br>(29 - 77)          | 18<br>(12 - 26)        | 106<br>(72 - 144)        | 49<br>(33 - 71)          | 59<br>(41 - 83)          |
| Exposure to mechanical forces                   | 729<br>(570 - 923)          | 104<br>(65 - 160)        | 59<br>(41 - 81)        | 349<br>(239 - 473)       | 149<br>(110 - 203)       | 68<br>(51 - 91)          |
| Unintentional firearm injuries                  | 224<br>(152 - 302)          | 8<br>(4 - 15)            | 7<br>(4 - 11)          | 132<br>(78 - 196)        | 47<br>(29 - 74)          | 30<br>(18 - 47)          |
| Unintentional suffocation                       | 144<br>(105 - 205)          | 15<br>(7 - 30)           | 11<br>(6 - 17)         | 75<br>(51 - 113)         | 36<br>(23 - 56)          | 7<br>(4 - 11)            |
| Other exposure to mechanical forces             | 361<br>(278 - 466)          | 80<br>(47 - 131)         | 42<br>(26 - 63)        | 142<br>(92 - 200)        | 66<br>(45 - 97)          | 32<br>(22 - 44)          |
| Adverse effects of medical treatment            | 547<br>(417 - 710)          | 68<br>(41 - 108)         | 16<br>(11 - 23)        | 108<br>(79 - 149)        | 145<br>(97 - 210)        | 210<br>(141 - 316)       |
| Animal contact                                  | 77<br>(55 - 121)            | 14<br>(8 - 25)           | 9<br>(5 - 14)          | 11<br>(7 - 19)           | 13<br>(8 - 21)           | 30<br>(19 - 47)          |
| Venomous animal contact                         | 47<br>(34 - 74)             | 9<br>(5 - 16)            | 6<br>(4 - 10)          | 8<br>(5 - 14)            | 10<br>(6 - 16)           | 14<br>(8 - 22)           |
| Non-venomous animal contact                     | 30<br>(19 - 50)             | 5<br>(3 - 10)            | 3<br>(1 - 5)           | 3<br>(2 - 6)             | 3<br>(2 - 6)             | 16<br>(9 - 28)           |
| Foreign body                                    | 143<br>(106 - 208)          | 25<br>(15 - 37)          | 14<br>(9 - 23)         | 27<br>(19 - 41)          | 20<br>(14 - 30)          | 57<br>(40 - 87)          |
| Pulmonary aspiration and foreign body in airway | 134<br>(95 - 197)           | 24<br>(13 - 35)          | 13<br>(9 - 22)         | 25<br>(17 - 39)          | 17<br>(12 - 25)          | 55<br>(39 - 85)          |
| Foreign body in other body part                 | 9<br>(7 - 14)               | 2<br>(1 - 3)             | 1<br>(1 - 1)           | 2<br>(1 - 3)             | 3<br>(2 - 5)             | 2<br>(1 - 3)             |
| Other unintentional injuries                    | 279<br>(226 - 342)          | 41<br>(28 - 59)          | 19<br>(14 - 27)        | 75<br>(53 - 101)         | 33<br>(24 - 45)          | 111<br>(80 - 146)        |
| Self-harm and interpersonal violence            | 3,300<br>(2,464 - 4,170)    | 23<br>(7 - 41)           | 63<br>(40 - 93)        | 1,731<br>(1,249 - 2,209) | 821<br>(588 - 1,096)     | 662<br>(486 - 896)       |
| Self-harm                                       | 2,715<br>(2,072 - 3,489)    | --                       | 47<br>(28 - 79)        | 1,280<br>(956 - 1,635)   | 744<br>(535 - 998)       | 644<br>(468 - 880)       |
| Interpersonal violence                          | 585<br>(247 - 838)          | 23<br>(7 - 41)           | 15<br>(6 - 24)         | 452<br>(198 - 651)       | 77<br>(26 - 125)         | 18<br>(5 - 32)           |
| Assault by firearm                              | 288<br>(105 - 443)          | 6<br>(1 - 12)            | 4<br>(1 - 7)           | 232<br>(88 - 360)        | 38<br>(12 - 65)          | 8<br>(2 - 14)            |
| Assault by sharp object                         | 185<br>(72 - 283)           | 4<br>(1 - 8)             | 3<br>(1 - 5)           | 145<br>(58 - 222)        | 29<br>(8 - 52)           | 4<br>(1 - 8)             |
| Assault by other means                          | 112<br>(45 - 171)           | 13<br>(4 - 24)           | 8<br>(3 - 14)          | 74<br>(31 - 116)         | 10<br>(3 - 17)           | 6<br>(2 - 11)            |

Web Table 31- Morocco deaths with 95% UI by age, sex, and cause in 2013

| Cause                                                             | Males, All Ages              | Males, 0-4 Years           | Males, 5-14 Years        | Males, 15-49 Years          | Males, 50-69 Years          | Males, 70-80 Years          |
|-------------------------------------------------------------------|------------------------------|----------------------------|--------------------------|-----------------------------|-----------------------------|-----------------------------|
| All causes                                                        | 84,167<br>(69,956 - 103,974) | 10,855<br>(9,532 - 12,532) | 1,432<br>(1,313 - 1,578) | 16,974<br>(12,531 - 21,270) | 24,975<br>(19,901 - 34,532) | 29,931<br>(25,740 - 36,595) |
| Communicable, maternal, neonatal, and nutritional diseases        | 14,717<br>(12,943 - 16,584)  | 7,679<br>(6,771 - 8,802)   | 328<br>(258 - 420)       | 2,040<br>(1,584 - 2,573)    | 2,307<br>(1,784 - 3,016)    | 2,364<br>(1,944 - 2,929)    |
| HIV/AIDS and tuberculosis                                         | 2,052<br>(1,546 - 2,688)     | 30<br>(20 - 45)            | 10<br>(7 - 14)           | 734<br>(519 - 970)          | 687<br>(486 - 951)          | 590<br>(434 - 776)          |
| Tuberculosis                                                      | 1,945<br>(1,447 - 2,587)     | 28<br>(18 - 42)            | 9<br>(6 - 13)            | 652<br>(442 - 885)          | 667<br>(467 - 931)          | 588<br>(433 - 774)          |
| HIV/AIDS                                                          | 108<br>(72 - 161)            | 2<br>(1 - 6)               | 1<br>(0 - 3)             | 82<br>(59 - 115)            | 20<br>(11 - 36)             | 2<br>(1 - 4)                |
| HIV/AIDS resulting in mycobacterial infection                     | 7<br>(5 - 11)                | 0<br>(0 - 0)               | 0<br>(0 - 0)             | 5<br>(4 - 8)                | 1<br>(1 - 2)                | 0<br>(0 - 0)                |
| HIV/AIDS resulting in other diseases                              | 100<br>(68 - 151)            | 2<br>(1 - 6)               | 1<br>(0 - 3)             | 76<br>(55 - 108)            | 19<br>(10 - 34)             | 2<br>(1 - 4)                |
| Diarrhea, lower respiratory, and other common infectious diseases | 5,274<br>(4,259 - 6,667)     | 1,284<br>(908 - 1,809)     | 264<br>(196 - 356)       | 1,067<br>(734 - 1,464)      | 1,317<br>(867 - 1,881)      | 1,342<br>(1,010 - 1,782)    |
| Diarrheal diseases                                                | 389<br>(278 - 564)           | 173<br>(83 - 331)          | 12<br>(6 - 23)           | 66<br>(43 - 94)             | 52<br>(32 - 81)             | 86<br>(54 - 131)            |
| Intestinal infectious diseases                                    | 468<br>(246 - 801)           | 130<br>(66 - 224)          | 121<br>(61 - 205)        | 172<br>(73 - 344)           | 35<br>(15 - 70)             | 11<br>(4 - 22)              |
| Typhoid fever                                                     | 342<br>(169 - 609)           | 88<br>(43 - 162)           | 92<br>(45 - 160)         | 128<br>(52 - 265)           | 26<br>(11 - 55)             | 8<br>(3 - 17)               |
| Paratyphoid fever                                                 | 99<br>(47 - 184)             | 29<br>(13 - 57)            | 27<br>(12 - 52)          | 35<br>(14 - 74)             | 6<br>(2 - 13)               | 2<br>(1 - 4)                |
| Other intestinal infectious diseases                              | 26<br>(15 - 41)              | 12<br>(5 - 22)             | 2<br>(0 - 6)             | 8<br>(3 - 16)               | 3<br>(0 - 8)                | 2<br>(0 - 5)                |
| Lower respiratory infections                                      | 3,586<br>(2,705 - 4,638)     | 650<br>(420 - 947)         | 58<br>(36 - 85)          | 604<br>(392 - 853)          | 1,103<br>(674 - 1,604)      | 1,171<br>(862 - 1,575)      |
| Upper respiratory infections                                      | 5<br>(2 - 10)                | 1<br>(0 - 2)               | 0<br>(0 - 1)             | 1<br>(0 - 3)                | 1<br>(0 - 5)                | 1<br>(0 - 5)                |
| Otitis media                                                      | 6<br>(4 - 7)                 | 0<br>(0 - 1)               | 0<br>(0 - 0)             | 1<br>(1 - 1)                | 2<br>(1 - 3)                | 2<br>(1 - 3)                |
| Meningitis                                                        | 449<br>(333 - 604)           | 180<br>(103 - 310)         | 41<br>(25 - 63)          | 121<br>(79 - 172)           | 68<br>(43 - 104)            | 39<br>(24 - 59)             |
| Pneumococcal meningitis                                           | 137<br>(97 - 193)            | 50<br>(27 - 90)            | 15<br>(8 - 25)           | 40<br>(23 - 60)             | 20<br>(11 - 32)             | 13<br>(7 - 21)              |
| H influenzae type B meningitis                                    | 80<br>(52 - 123)             | 50<br>(26 - 95)            | 8<br>(4 - 14)            | 12<br>(6 - 21)              | 6<br>(3 - 11)               | 4<br>(1 - 7)                |
| Meningococcal meningitis                                          | 139<br>(96 - 197)            | 63<br>(34 - 118)           | 13<br>(7 - 23)           | 33<br>(19 - 52)             | 17<br>(8 - 31)              | 12<br>(6 - 20)              |
| Other meningitis                                                  | 93<br>(56 - 133)             | 17<br>(7 - 35)             | 5<br>(2 - 10)            | 36<br>(19 - 60)             | 24<br>(12 - 42)             | 10<br>(5 - 18)              |
| Encephalitis                                                      | 242<br>(173 - 320)           | 56<br>(29 - 99)            | 20<br>(11 - 31)          | 90<br>(55 - 126)            | 48<br>(30 - 73)             | 28<br>(17 - 40)             |
| Diphtheria                                                        | 1<br>(0 - 5)                 | 1<br>(0 - 4)               | 0<br>(0 - 2)             | 0<br>(0 - 1)                | 0<br>(0 - 1)                | --                          |
| Whooping cough                                                    | 6<br>(0 - 31)                | 5<br>(0 - 29)              | 0<br>(0 - 1)             | 0<br>(0 - 0)                | 0<br>(0 - 0)                | --                          |
| Tetanus                                                           | 20<br>(14 - 30)              | 4<br>(2 - 9)               | 1<br>(0 - 1)             | 8<br>(5 - 11)               | 7<br>(4 - 11)               | 1<br>(1 - 2)                |
| Measles                                                           | 94<br>(2 - 493)              | 81<br>(2 - 431)            | 11<br>(0 - 61)           | 2<br>(0 - 11)               | 0<br>(0 - 1)                | --                          |
| Varicella and herpes zoster                                       | 10<br>(3 - 26)               | 3<br>(0 - 11)              | 1<br>(0 - 3)             | 2<br>(0 - 7)                | 1<br>(0 - 4)                | 3<br>(0 - 14)               |
| Neglected tropical diseases and malaria                           | 105<br>(82 - 136)            | 18<br>(11 - 28)            | 7<br>(5 - 11)            | 37<br>(27 - 50)             | 27<br>(19 - 39)             | 16<br>(11 - 23)             |
| Malaria                                                           | 4<br>(2 - 5)                 | 0<br>(0 - 0)               | 1<br>(0 - 1)             | 2<br>(1 - 4)                | 1<br>(0 - 1)                | 0<br>(0 - 0)                |
| Leishmaniasis                                                     | 26<br>(19 - 34)              | 10<br>(6 - 16)             | 2<br>(1 - 3)             | 9<br>(5 - 13)               | 4<br>(3 - 6)                | 1<br>(0 - 1)                |
| Visceral leishmaniasis                                            | 26<br>(19 - 34)              | 10<br>(6 - 16)             | 2<br>(1 - 3)             | 9<br>(5 - 13)               | 4<br>(3 - 6)                | 1<br>(0 - 1)                |
| Schistosomiasis                                                   | 30<br>(21 - 42)              | 0<br>(0 - 0)               | 0<br>(0 - 1)             | 0<br>(6 - 15)               | 13<br>(7 - 21)              | 7<br>(4 - 11)               |
| Cysticercosis                                                     | 0<br>(0 - 0)                 | 0<br>(0 - 0)               | 0<br>(0 - 0)             | 0<br>(0 - 0)                | 0<br>(0 - 0)                | 0<br>(0 - 0)                |
| Cystic echinococcosis                                             | 11<br>(8 - 14)               | 0<br>(0 - 0)               | 1<br>(1 - 1)             | 5<br>(4 - 6)                | 3<br>(2 - 4)                | 1<br>(1 - 2)                |
| Dengue                                                            | 2<br>(1 - 2)                 | 0<br>(0 - 0)               | 0<br>(0 - 0)             | 1<br>(1 - 1)                | 0<br>(0 - 0)                | 0<br>(0 - 0)                |
| Rabies                                                            | 14<br>(9 - 28)               | 2<br>(1 - 6)               | 1<br>(1 - 2)             | 7<br>(4 - 11)               | 3<br>(1 - 8)                | 1<br>(1 - 3)                |
| Intestinal nematode infections                                    | 4<br>(1 - 12)                | 2<br>(0 - 7)               | 1<br>(0 - 4)             | 1<br>(0 - 5)                | 0<br>(0 - 3)                | 0<br>(0 - 3)                |
| Ascariasis                                                        | 4<br>(1 - 12)                | 2<br>(0 - 7)               | 1<br>(0 - 4)             | 1<br>(0 - 5)                | 0<br>(0 - 3)                | 0<br>(0 - 3)                |
| Other neglected tropical diseases                                 | 14<br>(11 - 20)              | 3<br>(2 - 5)               | 1<br>(0 - 1)             | 3<br>(2 - 4)                | 3<br>(2 - 4)                | 5<br>(3 - 9)                |
| Maternal disorders                                                | --                           | --                         | --                       | --                          | --                          | --                          |

Web Table 31- Morocco deaths with 95% UI by age, sex, and cause in 2013

| Cause                                                            | Males, All Ages             | Males, 0-4 Years         | Males, 5-14 Years  | Males, 15-49 Years         | Males, 50-69 Years          | Males, 70-80 Years          |
|------------------------------------------------------------------|-----------------------------|--------------------------|--------------------|----------------------------|-----------------------------|-----------------------------|
| Maternal hemorrhage                                              | --                          | --                       | --                 | --                         | --                          | --                          |
| Maternal sepsis and other maternal infections                    | --                          | --                       | --                 | --                         | --                          | --                          |
| Maternal hypertensive disorders                                  | --                          | --                       | --                 | --                         | --                          | --                          |
| Maternal obstructed labor                                        | --                          | --                       | --                 | --                         | --                          | --                          |
| Maternal abortive outcome                                        | --                          | --                       | --                 | --                         | --                          | --                          |
| Indirect maternal deaths                                         | --                          | --                       | --                 | --                         | --                          | --                          |
| Late maternal deaths                                             | --                          | --                       | --                 | --                         | --                          | --                          |
| Maternal deaths aggravated by HIV/AIDS                           | --                          | --                       | --                 | --                         | --                          | --                          |
| Other maternal disorders                                         | --                          | --                       | --                 | --                         | --                          | --                          |
| Neonatal disorders                                               | 5,944<br>(5,154 - 6,856)    | 5,944<br>(5,154 - 6,856) | --                 | --                         | --                          | --                          |
| Neonatal preterm birth complications                             | 3,041<br>(1,836 - 4,015)    | 3,041<br>(1,836 - 4,015) | --                 | --                         | --                          | --                          |
| Neonatal encephalopathy due to birth asphyxia and trauma         | 1,480<br>(881 - 2,361)      | 1,480<br>(881 - 2,361)   | --                 | --                         | --                          | --                          |
| Neonatal sepsis and other neonatal infections                    | 1,086<br>(473 - 2,157)      | 1,086<br>(473 - 2,157)   | --                 | --                         | --                          | --                          |
| Hemolytic disease and other neonatal jaundice                    | 42<br>(16 - 97)             | 42<br>(16 - 97)          | --                 | --                         | --                          | --                          |
| Other neonatal disorders                                         | 294<br>(155 - 517)          | 294<br>(155 - 517)       | --                 | --                         | --                          | --                          |
| Nutritional deficiencies                                         | 542<br>(289 - 732)          | 83<br>(37 - 144)         | 18<br>(10 - 28)    | 88<br>(49 - 130)           | 105<br>(60 - 159)           | 248<br>(124 - 358)          |
| Protein-energy malnutrition                                      | 81<br>(36 - 134)            | 42<br>(15 - 83)          | 4<br>(2 - 8)       | 10<br>(4 - 20)             | 8<br>(3 - 19)               | 17<br>(6 - 39)              |
| Iodine deficiency                                                | 4<br>(0 - 14)               | 1<br>(0 - 6)             | 0<br>(0 - 2)       | 1<br>(0 - 4)               | 1<br>(0 - 5)                | 1<br>(0 - 8)                |
| Iron-deficiency anemia                                           | 407<br>(205 - 580)          | 35<br>(10 - 68)          | 10<br>(4 - 16)     | 69<br>(35 - 106)           | 86<br>(45 - 133)            | 208<br>(102 - 307)          |
| Other nutritional deficiencies                                   | 50<br>(20 - 92)             | 5<br>(2 - 12)            | 4<br>(1 - 7)       | 8<br>(4 - 16)              | 10<br>(4 - 22)              | 22<br>(8 - 49)              |
| Other communicable, maternal, neonatal, and nutritional diseases | 800<br>(598 - 1,083)        | 320<br>(169 - 532)       | 29<br>(17 - 44)    | 114<br>(73 - 169)          | 170<br>(115 - 251)          | 167<br>(116 - 251)          |
| Sexually transmitted diseases excluding HIV                      | 342<br>(184 - 570)          | 289<br>(143 - 498)       | 20<br>(10 - 35)    | 9<br>(5 - 17)              | 11<br>(6 - 22)              | 12<br>(5 - 26)              |
| Syphilis                                                         | 333<br>(176 - 559)          | 289<br>(143 - 498)       | 20<br>(10 - 35)    | 5<br>(3 - 10)              | 8<br>(4 - 16)               | 10<br>(4 - 22)              |
| Chlamydial infection                                             | --                          | --                       | --                 | --                         | --                          | --                          |
| Gonococcal infection                                             | 6<br>(3 - 10)               | --                       | 0<br>(0 - 0)       | 2<br>(1 - 4)               | 2<br>(1 - 4)                | 1<br>(1 - 3)                |
| Other sexually transmitted diseases                              | 3<br>(2 - 6)                | --                       | 0<br>(0 - 0)       | 2<br>(1 - 3)               | 1<br>(1 - 2)                | 1<br>(0 - 1)                |
| Hepatitis                                                        | 234<br>(179 - 314)          | 5<br>(2 - 10)            | 3<br>(2 - 5)       | 32<br>(21 - 49)            | 92<br>(63 - 136)            | 102<br>(73 - 140)           |
| Acute hepatitis A                                                | 10<br>(3 - 21)              | 2<br>(1 - 5)             | 1<br>(0 - 2)       | 3<br>(1 - 6)               | 2<br>(1 - 6)                | 1<br>(0 - 3)                |
| Acute hepatitis B                                                | 172<br>(116 - 250)          | 3<br>(1 - 7)             | 1<br>(1 - 2)       | 16<br>(7 - 29)             | 68<br>(42 - 106)            | 84<br>(54 - 125)            |
| Acute hepatitis C                                                | 17<br>(2 - 50)              | --                       | 0<br>(0 - 1)       | 2<br>(0 - 7)               | 6<br>(1 - 19)               | 8<br>(1 - 28)               |
| Acute hepatitis E                                                | 36<br>(16 - 69)             | 0<br>(0 - 0)             | 1<br>(0 - 1)       | 11<br>(5 - 21)             | 15<br>(5 - 32)              | 9<br>(3 - 21)               |
| Other infectious diseases                                        | 224<br>(130 - 346)          | 26<br>(11 - 56)          | 5<br>(2 - 10)      | 73<br>(40 - 120)           | 67<br>(26 - 130)            | 54<br>(20 - 127)            |
| Non-communicable diseases                                        | 60,340<br>(49,325 - 77,159) | 2,402<br>(1,845 - 3,206) | 515<br>(442 - 592) | 10,403<br>(7,505 - 13,284) | 20,856<br>(16,551 - 28,955) | 26,164<br>(22,424 - 32,154) |
| Neoplasms                                                        | 12,952<br>(10,375 - 16,945) | 141<br>(94 - 204)        | 150<br>(118 - 182) | 2,228<br>(1,597 - 2,913)   | 5,769<br>(4,474 - 8,040)    | 4,664<br>(3,846 - 5,665)    |
| Esophageal cancer                                                | 199<br>(135 - 276)          | --                       | --                 | 48<br>(31 - 69)            | 89<br>(61 - 135)            | 62<br>(39 - 89)             |
| Stomach cancer                                                   | 1,361<br>(1,068 - 1,824)    | --                       | --                 | 214<br>(147 - 300)         | 676<br>(506 - 944)          | 471<br>(361 - 615)          |
| Liver cancer                                                     | 665<br>(518 - 889)          | --                       | 3<br>(2 - 5)       | 74<br>(48 - 104)           | 307<br>(227 - 429)          | 282<br>(211 - 378)          |
| Liver cancer due to hepatitis B                                  | 247<br>(173 - 352)          | --                       | 2<br>(1 - 3)       | 39<br>(24 - 55)            | 126<br>(82 - 189)           | 81<br>(53 - 122)            |
| Liver cancer due to hepatitis C                                  | 303<br>(212 - 429)          | --                       | 0<br>(0 - 1)       | 24<br>(14 - 38)            | 135<br>(88 - 205)           | 143<br>(92 - 212)           |
| Liver cancer due to alcohol use                                  | 83<br>(51 - 128)            | --                       | --                 | 5<br>(2 - 9)               | 32<br>(18 - 51)             | 46<br>(26 - 76)             |

Web Table 31- Morocco deaths with 95% UI by age, sex, and cause in 2013

| Cause                                         | Males, All Ages             | Males, 0-4 Years   | Males, 5-14 Years  | Males, 15-49 Years       | Males, 50-69 Years        | Males, 70-80 Years        |
|-----------------------------------------------|-----------------------------|--------------------|--------------------|--------------------------|---------------------------|---------------------------|
| Liver cancer due to other causes              | 33<br>(15 - 56)             | --                 | 1<br>(0 - 2)       | 6<br>(2 - 10)            | 14<br>(6 - 27)            | 12<br>(5 - 22)            |
| Larynx cancer                                 | 269<br>(195 - 413)          | --                 | --                 | 39<br>(25 - 64)          | 139<br>(95 - 227)         | 91<br>(63 - 135)          |
| Tracheal, bronchus and lung cancer            | 3,627<br>(2,823 - 4,903)    | --                 | --                 | 516<br>(355 - 723)       | 2,024<br>(1,542 - 2,858)  | 1,087<br>(883 - 1,373)    |
| Breast cancer                                 | 65<br>(37 - 96)             | --                 | --                 | 23<br>(12 - 38)          | 30<br>(16 - 51)           | 12<br>(5 - 22)            |
| Cervical cancer                               | --                          | --                 | --                 | --                       | --                        | --                        |
| Uterine cancer                                | --                          | --                 | --                 | --                       | --                        | --                        |
| Prostate cancer                               | 1,330<br>(703 - 1,894)      | --                 | --                 | 38<br>(22 - 57)          | 277<br>(157 - 413)        | 1,015<br>(519 - 1,490)    |
| Colon and rectum cancer                       | 738<br>(576 - 974)          | --                 | --                 | 170<br>(117 - 233)       | 307<br>(232 - 434)        | 261<br>(206 - 332)        |
| Lip and oral cavity cancer                    | 147<br>(90 - 205)           | --                 | --                 | 34<br>(21 - 50)          | 67<br>(40 - 98)           | 46<br>(27 - 66)           |
| Nasopharynx cancer                            | 142<br>(101 - 206)          | --                 | 2<br>(1 - 4)       | 62<br>(40 - 95)          | 55<br>(35 - 91)           | 23<br>(15 - 33)           |
| Other pharynx cancer                          | 97<br>(66 - 135)            | --                 | --                 | 19<br>(12 - 28)          | 58<br>(39 - 87)           | 20<br>(12 - 28)           |
| Gallbladder and biliary tract cancer          | 170<br>(105 - 235)          | --                 | --                 | 19<br>(12 - 29)          | 72<br>(45 - 109)          | 79<br>(43 - 112)          |
| Pancreatic cancer                             | 558<br>(438 - 750)          | --                 | --                 | 81<br>(56 - 114)         | 278<br>(206 - 391)        | 199<br>(153 - 259)        |
| Malignant skin melanoma                       | 30<br>(15 - 48)             | --                 | --                 | 8<br>(4 - 14)            | 16<br>(8 - 26)            | 6<br>(3 - 10)             |
| Non-melanoma skin cancer                      | 80<br>(50 - 119)            | --                 | --                 | 12<br>(7 - 20)           | 31<br>(19 - 50)           | 36<br>(22 - 53)           |
| Ovarian cancer                                | --                          | --                 | --                 | --                       | --                        | --                        |
| Testicular cancer                             | 38<br>(22 - 55)             | --                 | --                 | 25<br>(14 - 37)          | 8<br>(4 - 12)             | 5<br>(2 - 9)              |
| Kidney cancer                                 | 192<br>(149 - 252)          | 4<br>(2 - 8)       | 3<br>(2 - 4)       | 36<br>(24 - 52)          | 83<br>(60 - 118)          | 66<br>(48 - 89)           |
| Bladder cancer                                | 571<br>(427 - 766)          | --                 | --                 | 43<br>(28 - 65)          | 264<br>(183 - 398)        | 264<br>(190 - 359)        |
| Brain and nervous system cancer               | 640<br>(360 - 884)          | 15<br>(6 - 29)     | 27<br>(16 - 40)    | 197<br>(113 - 283)       | 283<br>(165 - 415)        | 117<br>(50 - 176)         |
| Thyroid cancer                                | 55<br>(39 - 75)             | --                 | 0<br>(0 - 0)       | 9<br>(5 - 14)            | 25<br>(16 - 37)           | 21<br>(14 - 30)           |
| Mesothelioma                                  | 24<br>(17 - 34)             | --                 | --                 | 5<br>(3 - 8)             | 11<br>(7 - 17)            | 8<br>(5 - 13)             |
| Hodgkin lymphoma                              | 88<br>(61 - 119)            | 4<br>(2 - 7)       | 5<br>(2 - 9)       | 42<br>(27 - 60)          | 21<br>(13 - 33)           | 16<br>(8 - 26)            |
| Non-Hodgkin lymphoma                          | 427<br>(313 - 602)          | 18<br>(10 - 28)    | 12<br>(8 - 18)     | 125<br>(81 - 182)        | 168<br>(115 - 259)        | 104<br>(74 - 147)         |
| Multiple myeloma                              | 58<br>(35 - 84)             | --                 | --                 | 14<br>(9 - 21)           | 29<br>(18 - 45)           | 15<br>(8 - 23)            |
| Leukemia                                      | 484<br>(381 - 613)          | 21<br>(11 - 37)    | 46<br>(33 - 62)    | 175<br>(123 - 234)       | 129<br>(95 - 182)         | 112<br>(86 - 147)         |
| Other neoplasms                               | 898<br>(719 - 1,145)        | 79<br>(48 - 123)   | 52<br>(35 - 73)    | 199<br>(138 - 273)       | 320<br>(231 - 455)        | 247<br>(184 - 329)        |
| Cardiovascular diseases                       | 20,447<br>(16,756 - 26,011) | 517<br>(363 - 718) | 144<br>(108 - 181) | 2,959<br>(2,126 - 3,894) | 7,595<br>(6,027 - 10,436) | 9,232<br>(7,828 - 11,300) |
| Rheumatic heart disease                       | 347<br>(168 - 480)          | 7<br>(3 - 14)      | 7<br>(3 - 11)      | 95<br>(49 - 138)         | 123<br>(55 - 186)         | 115<br>(53 - 164)         |
| Ischemic heart disease                        | 10,096<br>(8,138 - 13,180)  | 90<br>(46 - 157)   | 53<br>(36 - 74)    | 1,448<br>(1,041 - 1,966) | 4,271<br>(3,327 - 5,908)  | 4,234<br>(3,446 - 5,352)  |
| Cerebrovascular disease                       | 5,574<br>(4,359 - 7,429)    | 94<br>(59 - 146)   | 41<br>(28 - 57)    | 624<br>(424 - 880)       | 1,788<br>(1,335 - 2,550)  | 3,028<br>(2,370 - 3,914)  |
| Ischemic stroke                               | 3,207<br>(2,439 - 4,272)    | 9<br>(4 - 17)      | 4<br>(2 - 6)       | 142<br>(90 - 207)        | 873<br>(612 - 1,266)      | 2,178<br>(1,657 - 2,824)  |
| Hemorrhagic stroke                            | 2,368<br>(1,768 - 3,248)    | 84<br>(53 - 131)   | 38<br>(26 - 52)    | 481<br>(326 - 686)       | 915<br>(645 - 1,337)      | 849<br>(589 - 1,188)      |
| Hypertensive heart disease                    | 1,062<br>(725 - 1,660)      | 5<br>(2 - 10)      | 3<br>(2 - 4)       | 160<br>(100 - 249)       | 319<br>(201 - 499)        | 576<br>(378 - 938)        |
| Cardiomyopathy and myocarditis                | 1,216<br>(857 - 1,627)      | 144<br>(89 - 229)  | 15<br>(9 - 24)     | 210<br>(135 - 312)       | 311<br>(197 - 463)        | 536<br>(332 - 763)        |
| Atrial fibrillation and flutter               | 11<br>(8 - 17)              | --                 | --                 | 2<br>(1 - 3)             | 6<br>(4 - 9)              | 4<br>(2 - 5)              |
| Aortic aneurysm                               | 197<br>(149 - 269)          | --                 | --                 | 18<br>(12 - 27)          | 91<br>(66 - 132)          | 88<br>(62 - 121)          |
| Peripheral vascular disease                   | 22<br>(16 - 31)             | --                 | --                 | 3<br>(2 - 4)             | 7<br>(5 - 10)             | 12<br>(9 - 18)            |
| Endocarditis                                  | 243<br>(151 - 376)          | 24<br>(12 - 42)    | 4<br>(2 - 7)       | 73<br>(44 - 115)         | 91<br>(52 - 153)          | 51<br>(30 - 81)           |
| Other cardiovascular and circulatory diseases | 1,679<br>(1,270 - 2,314)    | 154<br>(99 - 232)  | 21<br>(14 - 30)    | 328<br>(221 - 460)       | 589<br>(419 - 857)        | 588<br>(427 - 824)        |



Web Table 31- Morocco deaths with 95% UI by age, sex, and cause in 2013

| Cause                                               | Males, All Ages          | Males, 0-4 Years | Males, 5-14 Years | Males, 15-49 Years       | Males, 50-69 Years       | Males, 70-80 Years       |
|-----------------------------------------------------|--------------------------|------------------|-------------------|--------------------------|--------------------------|--------------------------|
| Chronic respiratory diseases                        | 5,099<br>(4,157 - 6,696) | 96<br>(56 - 149) | 14<br>(10 - 19)   | 448<br>(312 - 606)       | 1,608<br>(1,221 - 2,335) | 2,932<br>(2,421 - 3,764) |
| Chronic obstructive pulmonary disease               | 2,319<br>(1,858 - 3,104) | 68<br>(37 - 116) | 3<br>(2 - 5)      | 115<br>(77 - 162)        | 640<br>(467 - 933)       | 1,493<br>(1,171 - 1,999) |
| Pneumoconiosis                                      | 311<br>(207 - 459)       | 0<br>(0 - 0)     | 0<br>(0 - 1)      | 48<br>(29 - 74)          | 133<br>(83 - 206)        | 129<br>(84 - 201)        |
| Silicosis                                           | 210<br>(140 - 315)       | 0<br>(0 - 0)     | 0<br>(0 - 0)      | 8<br>(4 - 14)            | 93<br>(58 - 145)         | 108<br>(69 - 171)        |
| Asbestosis                                          | 9<br>(6 - 14)            | 0<br>(0 - 0)     | 0<br>(0 - 0)      | 4<br>(2 - 7)             | 3<br>(2 - 4)             | 2<br>(1 - 3)             |
| Coal workers pneumoconiosis                         | 2<br>(1 - 2)             | 0<br>(0 - 0)     | 0<br>(0 - 0)      | 1<br>(1 - 1)             | 0<br>(0 - 0)             | 0<br>(0 - 0)             |
| Other pneumoconiosis                                | 91<br>(58 - 135)         | 0<br>(0 - 0)     | 0<br>(0 - 0)      | 35<br>(21 - 53)          | 37<br>(23 - 58)          | 18<br>(11 - 30)          |
| Asthma                                              | 1,867<br>(1,422 - 2,482) | 18<br>(8 - 35)   | 9<br>(6 - 12)     | 241<br>(164 - 333)       | 640<br>(464 - 913)       | 958<br>(704 - 1,315)     |
| Interstitial lung disease and pulmonary sarcoidosis | 451<br>(304 - 677)       | 0<br>(0 - 1)     | 0<br>(0 - 0)      | 11<br>(7 - 18)           | 158<br>(102 - 260)       | 281<br>(180 - 424)       |
| Other chronic respiratory diseases                  | 151<br>(110 - 203)       | 10<br>(6 - 17)   | 1<br>(1 - 2)      | 33<br>(21 - 48)          | 36<br>(25 - 54)          | 70<br>(46 - 104)         |
| Cirrhosis                                           | 1,798<br>(1,433 - 2,329) | 31<br>(14 - 59)  | 18<br>(13 - 25)   | 306<br>(208 - 410)       | 653<br>(496 - 921)       | 790<br>(610 - 1,021)     |
| Cirrhosis due to hepatitis B                        | 520<br>(259 - 826)       | 1<br>(0 - 4)     | 2<br>(0 - 6)      | 74<br>(27 - 141)         | 185<br>(80 - 311)        | 258<br>(128 - 410)       |
| Cirrhosis due to hepatitis C                        | 793<br>(441 - 1,249)     | 3<br>(0 - 8)     | 4<br>(1 - 10)     | 150<br>(74 - 245)        | 318<br>(165 - 536)       | 318<br>(174 - 530)       |
| Cirrhosis due to alcohol use                        | 299<br>(163 - 490)       | --               | --                | 31<br>(14 - 66)          | 97<br>(51 - 174)         | 170<br>(81 - 279)        |
| Cirrhosis due to other causes                       | 186<br>(110 - 303)       | 27<br>(13 - 52)  | 12<br>(6 - 19)    | 51<br>(23 - 87)          | 54<br>(22 - 104)         | 43<br>(19 - 77)          |
| Digestive diseases                                  | 1,466<br>(1,160 - 1,905) | 27<br>(14 - 43)  | 21<br>(15 - 28)   | 338<br>(236 - 451)       | 502<br>(376 - 713)       | 578<br>(455 - 730)       |
| Peptic ulcer disease                                | 327<br>(236 - 446)       | 2<br>(1 - 4)     | 3<br>(2 - 5)      | 76<br>(48 - 111)         | 128<br>(87 - 192)        | 118<br>(80 - 171)        |
| Gastritis and duodenitis                            | 76<br>(40 - 117)         | 0<br>(0 - 0)     | 1<br>(0 - 1)      | 11<br>(6 - 18)           | 26<br>(14 - 45)          | 38<br>(18 - 62)          |
| Appendicitis                                        | 62<br>(43 - 90)          | 1<br>(0 - 3)     | 3<br>(2 - 5)      | 24<br>(15 - 37)          | 19<br>(12 - 31)          | 15<br>(9 - 23)           |
| Paralytic ileus and intestinal obstruction          | 277<br>(160 - 440)       | 6<br>(2 - 11)    | 5<br>(2 - 8)      | 58<br>(33 - 96)          | 95<br>(53 - 161)         | 113<br>(62 - 175)        |
| Inguinal, femoral, and abdominal hernia             | 38<br>(22 - 59)          | 1<br>(0 - 3)     | 0<br>(0 - 1)      | 9<br>(5 - 16)            | 11<br>(6 - 18)           | 17<br>(9 - 27)           |
| Inflammatory bowel disease                          | 97<br>(67 - 139)         | 3<br>(1 - 6)     | 1<br>(1 - 2)      | 34<br>(21 - 52)          | 31<br>(20 - 48)          | 28<br>(17 - 44)          |
| Vascular intestinal disorders                       | 72<br>(29 - 152)         | 0<br>(0 - 0)     | 2<br>(1 - 4)      | 14<br>(5 - 30)           | 22<br>(9 - 50)           | 34<br>(13 - 70)          |
| Gallbladder and biliary diseases                    | 159<br>(107 - 223)       | 1<br>(1 - 2)     | 1<br>(0 - 1)      | 26<br>(17 - 38)          | 51<br>(32 - 79)          | 80<br>(47 - 124)         |
| Pancreatitis                                        | 143<br>(96 - 230)        | 0<br>(0 - 1)     | 2<br>(1 - 3)      | 33<br>(21 - 52)          | 50<br>(31 - 86)          | 58<br>(36 - 94)          |
| Other digestive diseases                            | 215<br>(142 - 293)       | 13<br>(6 - 23)   | 4<br>(1 - 6)      | 52<br>(30 - 75)          | 68<br>(43 - 104)         | 78<br>(49 - 115)         |
| Neurological disorders                              | 2,916<br>(2,352 - 3,783) | 56<br>(32 - 92)  | 27<br>(18 - 42)   | 223<br>(155 - 303)       | 371<br>(269 - 529)       | 2,238<br>(1,757 - 2,914) |
| Alzheimer disease and other dementias               | 2,366<br>(1,843 - 3,105) | --               | --                | 1<br>(0 - 4)             | 244<br>(165 - 359)       | 2,120<br>(1,644 - 2,778) |
| Parkinson disease                                   | 95<br>(61 - 143)         | --               | --                | 3<br>(2 - 6)             | 37<br>(22 - 57)          | 56<br>(31 - 93)          |
| Epilepsy                                            | 327<br>(243 - 436)       | 41<br>(21 - 74)  | 23<br>(13 - 38)   | 175<br>(118 - 245)       | 52<br>(33 - 81)          | 36<br>(23 - 55)          |
| Multiple sclerosis                                  | 21<br>(6 - 33)           | --               | --                | 10<br>(2 - 17)           | 9<br>(3 - 14)            | 3<br>(1 - 6)             |
| Other neurological disorders                        | 106<br>(81 - 159)        | 15<br>(10 - 22)  | 5<br>(3 - 8)      | 35<br>(24 - 52)          | 30<br>(21 - 49)          | 22<br>(17 - 31)          |
| Mental and substance use disorders                  | 3,719<br>(2,449 - 4,891) | 46<br>(29 - 71)  | 0<br>(0 - 0)      | 2,623<br>(1,696 - 3,457) | 981<br>(630 - 1,363)     | 70<br>(50 - 96)          |
| Schizophrenia                                       | 44<br>(25 - 65)          | --               | --                | 22<br>(11 - 34)          | 16<br>(9 - 25)           | 7<br>(4 - 11)            |
| Alcohol use disorders                               | 193<br>(110 - 283)       | --               | --                | 68<br>(38 - 101)         | 89<br>(50 - 139)         | 35<br>(20 - 54)          |
| Drug use disorders                                  | 3,482<br>(2,215 - 4,580) | 46<br>(29 - 71)  | --                | 2,532<br>(1,615 - 3,351) | 876<br>(530 - 1,229)     | 28<br>(18 - 39)          |
| Opioid use disorders                                | 1,907<br>(1,214 - 2,512) | 27<br>(17 - 43)  | --                | 1,413<br>(895 - 1,884)   | 451<br>(278 - 632)       | 15<br>(10 - 22)          |
| Cocaine use disorders                               | 41<br>(25 - 56)          | 1<br>(0 - 1)     | --                | 33<br>(20 - 45)          | 8<br>(5 - 12)            | 0<br>(0 - 0)             |
| Amphetamine use disorders                           | 37<br>(24 - 50)          | 1<br>(0 - 1)     | --                | 27<br>(17 - 37)          | 9<br>(5 - 14)            | 0<br>(0 - 0)             |
| Other drug use disorders                            | 1,497<br>(983 - 1,980)   | 18<br>(11 - 29)  | --                | 1,060<br>(677 - 1,425)   | 407<br>(246 - 586)       | 12<br>(8 - 17)           |

Web Table 31- Morocco deaths with 95% UI by age, sex, and cause in 2013

| Cause                                               | Males, All Ages            | Males, 0-4 Years       | Males, 5-14 Years | Males, 15-49 Years     | Males, 50-69 Years       | Males, 70-80 Years       |
|-----------------------------------------------------|----------------------------|------------------------|-------------------|------------------------|--------------------------|--------------------------|
| Eating disorders                                    | 0<br>(0 - 0)               | --                     | 0<br>(0 - 0)      | 0<br>(0 - 0)           | --                       | --                       |
| Anorexia nervosa                                    | 0<br>(0 - 0)               | --                     | 0<br>(0 - 0)      | 0<br>(0 - 0)           | --                       | --                       |
| Diabetes, urogenital, blood, and endocrine diseases | 10,185<br>(8,339 - 12,942) | 264<br>(185 - 365)     | 75<br>(59 - 95)   | 1,105<br>(781 - 1,450) | 3,233<br>(2,543 - 4,431) | 5,508<br>(4,617 - 6,632) |
| Diabetes mellitus                                   | 6,339<br>(5,106 - 7,984)   | 51<br>(33 - 75)        | 17<br>(11 - 24)   | 441<br>(309 - 605)     | 1,881<br>(1,441 - 2,653) | 3,950<br>(3,206 - 4,875) |
| Acute glomerulonephritis                            | 15<br>(11 - 23)            | 1<br>(1 - 2)           | 1<br>(1 - 2)      | 3<br>(2 - 5)           | 5<br>(3 - 8)             | 4<br>(3 - 7)             |
| Chronic kidney disease                              | 2,470<br>(1,914 - 3,266)   | 35<br>(22 - 58)        | 17<br>(12 - 24)   | 445<br>(311 - 615)     | 1,006<br>(753 - 1,389)   | 966<br>(738 - 1,276)     |
| Chronic kidney disease due to diabetes mellitus     | 424<br>(176 - 626)         | 2<br>(1 - 4)           | 2<br>(1 - 3)      | 82<br>(43 - 137)       | 120<br>(53 - 208)        | 219<br>(79 - 318)        |
| Chronic kidney disease due to hypertension          | 924<br>(661 - 1,352)       | 13<br>(7 - 22)         | 4<br>(3 - 7)      | 166<br>(104 - 257)     | 461<br>(307 - 687)       | 280<br>(177 - 450)       |
| Chronic kidney disease due to glomerulonephritis    | 70<br>(45 - 99)            | 4<br>(2 - 7)           | 3<br>(2 - 4)      | 19<br>(11 - 29)        | 27<br>(14 - 46)          | 18<br>(11 - 29)          |
| Chronic kidney disease due to other causes          | 1,051<br>(719 - 1,585)     | 17<br>(8 - 33)         | 9<br>(5 - 14)     | 178<br>(105 - 278)     | 398<br>(226 - 629)       | 449<br>(276 - 714)       |
| Urinary diseases and male infertility               | 750<br>(510 - 1,002)       | 27<br>(15 - 50)        | 7<br>(5 - 10)     | 84<br>(56 - 118)       | 217<br>(143 - 318)       | 415<br>(255 - 579)       |
| Interstitial nephritis and urinary tract infections | 144<br>(90 - 221)          | 22<br>(11 - 42)        | 5<br>(3 - 7)      | 21<br>(12 - 34)        | 40<br>(22 - 67)          | 56<br>(26 - 98)          |
| Urolithiasis                                        | 34<br>(21 - 55)            | --                     | 1<br>(0 - 1)      | 6<br>(3 - 11)          | 11<br>(6 - 20)           | 16<br>(8 - 30)           |
| Other urinary diseases                              | 572<br>(364 - 777)         | 5<br>(2 - 10)          | 2<br>(1 - 3)      | 56<br>(35 - 83)        | 165<br>(104 - 246)       | 344<br>(201 - 487)       |
| Gynecological diseases                              | --                         | --                     | --                | --                     | --                       | --                       |
| Uterine fibroids                                    | --                         | --                     | --                | --                     | --                       | --                       |
| Polycystic ovarian syndrome                         | --                         | --                     | --                | --                     | --                       | --                       |
| Endometriosis                                       | --                         | --                     | --                | --                     | --                       | --                       |
| Genital prolapse                                    | --                         | --                     | --                | --                     | --                       | --                       |
| Other gynecological diseases                        | --                         | --                     | --                | --                     | --                       | --                       |
| Hemoglobinopathies and hemolytic anemias            | 152<br>(94 - 249)          | 22<br>(12 - 40)        | 11<br>(6 - 17)    | 47<br>(27 - 79)        | 34<br>(20 - 57)          | 38<br>(22 - 64)          |
| Thalassemias                                        | 56<br>(35 - 92)            | 19<br>(10 - 34)        | 9<br>(5 - 15)     | 28<br>(16 - 48)        | 0<br>(0 - 0)             | 0<br>(0 - 0)             |
| Sickle cell disorders                               | 39<br>(23 - 64)            | 2<br>(1 - 3)           | 1<br>(1 - 2)      | 14<br>(8 - 23)         | 22<br>(12 - 37)          | 1<br>(0 - 1)             |
| G6PD deficiency                                     | 3<br>(2 - 5)               | 0<br>(0 - 1)           | 0<br>(0 - 0)      | 1<br>(0 - 1)           | 1<br>(1 - 2)             | 1<br>(0 - 1)             |
| Other hemoglobinopathies and hemolytic anemias      | 55<br>(33 - 89)            | 1<br>(1 - 2)           | 0<br>(0 - 1)      | 5<br>(3 - 8)           | 12<br>(7 - 19)           | 37<br>(21 - 62)          |
| Endocrine, metabolic, blood, and immune disorders   | 458<br>(292 - 594)         | 127<br>(70 - 201)      | 22<br>(13 - 35)   | 85<br>(52 - 124)       | 89<br>(53 - 133)         | 135<br>(71 - 199)        |
| Musculoskeletal disorders                           | 146<br>(103 - 198)         | --                     | 6<br>(4 - 9)      | 45<br>(30 - 65)        | 45<br>(30 - 68)          | 49<br>(34 - 69)          |
| Rheumatoid arthritis                                | 16<br>(11 - 26)            | --                     | 1<br>(0 - 1)      | 3<br>(2 - 6)           | 5<br>(3 - 8)             | 7<br>(4 - 12)            |
| Other musculoskeletal disorders                     | 129<br>(90 - 175)          | --                     | 6<br>(4 - 8)      | 42<br>(28 - 59)        | 40<br>(27 - 59)          | 42<br>(28 - 58)          |
| Other non-communicable diseases                     | 1,613<br>(1,246 - 2,092)   | 1,222<br>(888 - 1,671) | 59<br>(39 - 83)   | 127<br>(88 - 173)      | 101<br>(74 - 141)        | 103<br>(78 - 133)        |
| Congenital anomalies                                | 1,478<br>(1,118 - 1,935)   | 1,209<br>(877 - 1,655) | 57<br>(38 - 82)   | 96<br>(65 - 135)       | 59<br>(42 - 83)          | 56<br>(40 - 78)          |
| Neural tube defects                                 | 83<br>(36 - 168)           | 78<br>(31 - 159)       | 2<br>(1 - 3)      | 2<br>(1 - 3)           | 1<br>(1 - 3)             | 0<br>(0 - 0)             |
| Congenital heart anomalies                          | 670<br>(474 - 943)         | 585<br>(393 - 853)     | 27<br>(16 - 42)   | 29<br>(19 - 41)        | 14<br>(9 - 21)           | 14<br>(9 - 21)           |
| Cleft lip and cleft palate                          | 3<br>(1 - 7)               | 3<br>(1 - 7)           | --                | --                     | --                       | --                       |
| Down syndrome                                       | 64<br>(36 - 113)           | 49<br>(23 - 94)        | 2<br>(1 - 4)      | 11<br>(7 - 18)         | 1<br>(0 - 2)             | 1<br>(0 - 2)             |
| Chromosomal unbalanced rearrangements               | 28<br>(16 - 49)            | 23<br>(12 - 42)        | 2<br>(1 - 3)      | 2<br>(1 - 4)           | 1<br>(0 - 2)             | 0<br>(0 - 0)             |
| Other congenital anomalies                          | 631<br>(468 - 860)         | 471<br>(311 - 687)     | 24<br>(14 - 38)   | 53<br>(35 - 74)        | 42<br>(30 - 60)          | 41<br>(29 - 57)          |
| Skin and subcutaneous diseases                      | 132<br>(99 - 176)          | 11<br>(5 - 20)         | 2<br>(1 - 2)      | 31<br>(21 - 44)        | 42<br>(29 - 62)          | 47<br>(32 - 67)          |
| Cellulitis                                          | 25<br>(15 - 35)            | 2<br>(1 - 3)           | 0<br>(0 - 1)      | 5<br>(3 - 9)           | 9<br>(5 - 15)            | 8<br>(4 - 13)            |
| Pyoderma                                            | 75<br>(54 - 103)           | 9<br>(4 - 17)          | 1<br>(0 - 1)      | 19<br>(12 - 28)        | 24<br>(15 - 37)          | 23<br>(15 - 34)          |

Web Table 31- Morocco deaths with 95% UI by age, sex, and cause in 2013

| Cause                                           | Males, All Ages           | Males, 0-4 Years     | Males, 5-14 Years  | Males, 15-49 Years       | Males, 50-69 Years       | Males, 70-80 Years       |
|-------------------------------------------------|---------------------------|----------------------|--------------------|--------------------------|--------------------------|--------------------------|
| Decubitus ulcer                                 | 23<br>(15 - 33)           | 0<br>(0 - 0)         | 0<br>(0 - 0)       | 3<br>(2 - 4)             | 5<br>(3 - 9)             | 14<br>(8 - 23)           |
| Other skin and subcutaneous diseases            | 10<br>(6 - 15)            | 0<br>(0 - 0)         | 0<br>(0 - 0)       | 4<br>(2 - 6)             | 3<br>(2 - 6)             | 2<br>(1 - 4)             |
| Sudden infant death syndrome                    | 2<br>(1 - 5)              | 2<br>(1 - 5)         | --                 | --                       | --                       | --                       |
| Injuries                                        | 9,110<br>(7,185 - 11,398) | 775<br>(565 - 1,062) | 589<br>(505 - 675) | 4,531<br>(3,294 - 5,798) | 1,812<br>(1,390 - 2,501) | 1,403<br>(1,131 - 1,797) |
| Transport injuries                              | 3,402<br>(2,617 - 4,327)  | 282<br>(187 - 404)   | 216<br>(169 - 269) | 1,873<br>(1,357 - 2,450) | 660<br>(486 - 934)       | 371<br>(285 - 484)       |
| Road injuries                                   | 3,141<br>(2,423 - 3,992)  | 265<br>(176 - 379)   | 202<br>(157 - 252) | 1,702<br>(1,230 - 2,216) | 618<br>(458 - 872)       | 354<br>(272 - 463)       |
| Pedestrian road injuries                        | 1,016<br>(704 - 1,382)    | 149<br>(93 - 224)    | 107<br>(73 - 142)  | 336<br>(198 - 505)       | 236<br>(148 - 346)       | 188<br>(128 - 258)       |
| Cyclist road injuries                           | 200<br>(144 - 276)        | 11<br>(5 - 20)       | 17<br>(11 - 25)    | 80<br>(52 - 115)         | 58<br>(38 - 90)          | 34<br>(22 - 50)          |
| Motorcyclist road injuries                      | 525<br>(345 - 732)        | 18<br>(10 - 30)      | 13<br>(8 - 21)     | 409<br>(259 - 577)       | 46<br>(27 - 71)          | 39<br>(24 - 63)          |
| Motor vehicle road injuries                     | 1,381<br>(1,026 - 1,858)  | 78<br>(45 - 123)     | 59<br>(39 - 83)    | 875<br>(614 - 1,184)     | 276<br>(194 - 404)       | 93<br>(62 - 140)         |
| Other road injuries                             | 19<br>(11 - 29)           | 9<br>(4 - 17)        | 6<br>(3 - 10)      | 2<br>(1 - 5)             | 1<br>(1 - 3)             | 0<br>(0 - 1)             |
| Other transport injuries                        | 262<br>(182 - 350)        | 17<br>(9 - 27)       | 15<br>(9 - 22)     | 171<br>(112 - 242)       | 43<br>(27 - 66)          | 17<br>(11 - 26)          |
| Unintentional injuries                          | 3,301<br>(2,631 - 4,088)  | 483<br>(335 - 694)   | 332<br>(269 - 405) | 1,353<br>(965 - 1,780)   | 550<br>(408 - 764)       | 583<br>(465 - 750)       |
| Falls                                           | 603<br>(461 - 800)        | 54<br>(29 - 92)      | 33<br>(21 - 49)    | 177<br>(115 - 252)       | 151<br>(96 - 234)        | 188<br>(125 - 280)       |
| Drowning                                        | 1,173<br>(829 - 1,544)    | 207<br>(111 - 360)   | 190<br>(135 - 257) | 576<br>(374 - 813)       | 131<br>(81 - 193)        | 68<br>(46 - 99)          |
| Fire, heat, and hot substances                  | 205<br>(150 - 287)        | 38<br>(21 - 63)      | 16<br>(10 - 24)    | 68<br>(43 - 103)         | 36<br>(23 - 55)          | 48<br>(30 - 71)          |
| Poisonings                                      | 163<br>(100 - 218)        | 34<br>(16 - 59)      | 12<br>(7 - 19)     | 75<br>(45 - 113)         | 16<br>(10 - 26)          | 25<br>(15 - 39)          |
| Exposure to mechanical forces                   | 593<br>(445 - 780)        | 63<br>(38 - 102)     | 42<br>(29 - 59)    | 313<br>(207 - 434)       | 122<br>(86 - 176)        | 54<br>(38 - 75)          |
| Unintentional firearm injuries                  | 220<br>(148 - 298)        | 8<br>(4 - 14)        | 6<br>(3 - 11)      | 131<br>(76 - 194)        | 46<br>(27 - 73)          | 28<br>(17 - 46)          |
| Unintentional suffocation                       | 101<br>(68 - 155)         | 8<br>(3 - 23)        | 7<br>(3 - 12)      | 54<br>(33 - 85)          | 26<br>(15 - 44)          | 6<br>(3 - 10)            |
| Other exposure to mechanical forces             | 271<br>(200 - 355)        | 47<br>(27 - 79)      | 29<br>(18 - 44)    | 127<br>(81 - 182)        | 49<br>(32 - 77)          | 20<br>(13 - 28)          |
| Adverse effects of medical treatment            | 261<br>(183 - 389)        | 35<br>(18 - 65)      | 8<br>(5 - 13)      | 60<br>(37 - 94)          | 62<br>(34 - 100)         | 96<br>(53 - 168)         |
| Animal contact                                  | 42<br>(30 - 60)           | 8<br>(4 - 16)        | 6<br>(3 - 10)      | 5<br>(3 - 8)             | 7<br>(4 - 12)            | 16<br>(9 - 25)           |
| Venomous animal contact                         | 28<br>(20 - 42)           | 5<br>(2 - 9)         | 4<br>(2 - 7)       | 4<br>(2 - 6)             | 6<br>(4 - 11)            | 10<br>(6 - 16)           |
| Non-venomous animal contact                     | 14<br>(8 - 21)            | 3<br>(2 - 7)         | 2<br>(1 - 4)       | 1<br>(1 - 2)             | 1<br>(1 - 2)             | 6<br>(3 - 10)            |
| Foreign body                                    | 88<br>(52 - 139)          | 18<br>(8 - 29)       | 11<br>(7 - 20)     | 17<br>(10 - 30)          | 11<br>(7 - 19)           | 30<br>(17 - 52)          |
| Pulmonary aspiration and foreign body in airway | 82<br>(47 - 132)          | 17<br>(7 - 28)       | 11<br>(7 - 19)     | 16<br>(9 - 28)           | 9<br>(5 - 15)            | 30<br>(17 - 51)          |
| Foreign body in other body part                 | 5<br>(3 - 10)             | 1<br>(0 - 2)         | 0<br>(0 - 0)       | 1<br>(1 - 2)             | 3<br>(2 - 5)             | 0<br>(0 - 1)             |
| Other unintentional injuries                    | 173<br>(135 - 224)        | 24<br>(15 - 36)      | 14<br>(9 - 19)     | 62<br>(42 - 88)          | 15<br>(10 - 23)          | 59<br>(43 - 80)          |
| Self-harm and interpersonal violence            | 2,407<br>(1,634 - 3,193)  | 11<br>(3 - 21)       | 41<br>(24 - 70)    | 1,306<br>(835 - 1,744)   | 601<br>(381 - 862)       | 449<br>(285 - 682)       |
| Self-harm                                       | 1,922<br>(1,342 - 2,655)  | --                   | 32<br>(16 - 62)    | 915<br>(607 - 1,247)     | 538<br>(342 - 793)       | 437<br>(279 - 665)       |
| Interpersonal violence                          | 485<br>(186 - 718)        | 11<br>(3 - 21)       | 8<br>(3 - 15)      | 390<br>(153 - 581)       | 64<br>(18 - 108)         | 12<br>(3 - 23)           |
| Assault by firearm                              | 264<br>(95 - 415)         | 2<br>(0 - 5)         | 2<br>(0 - 4)       | 223<br>(84 - 351)        | 32<br>(9 - 57)           | 6<br>(1 - 12)            |
| Assault by sharp object                         | 144<br>(46 - 235)         | 2<br>(1 - 4)         | 1<br>(0 - 2)       | 112<br>(37 - 186)        | 26<br>(7 - 49)           | 3<br>(0 - 6)             |
| Assault by other means                          | 77<br>(25 - 126)          | 7<br>(2 - 13)        | 5<br>(2 - 10)      | 56<br>(19 - 95)          | 6<br>(1 - 11)            | 4<br>(1 - 7)             |

Web Table 31- Morocco deaths with 95% UI by age, sex, and cause in 2013

| Cause                                                             | Females, All Ages           | Females, 0-4 Years       | Females, 5-14 Years  | Females, 15-49 Years       | Females, 50-69 Years        | Females, 70-80 Years        |
|-------------------------------------------------------------------|-----------------------------|--------------------------|----------------------|----------------------------|-----------------------------|-----------------------------|
| All causes                                                        | 80,385<br>(68,031 - 98,212) | 8,585<br>(7,356 - 9,947) | 959<br>(835 - 1,130) | 10,624<br>(8,090 - 13,325) | 20,248<br>(15,209 - 27,173) | 39,969<br>(34,236 - 48,543) |
| Communicable, maternal, neonatal, and nutritional diseases        | 11,834<br>(10,393 - 13,410) | 5,886<br>(4,959 - 6,958) | 262<br>(201 - 349)   | 1,712<br>(1,418 - 2,043)   | 1,339<br>(1,024 - 1,740)    | 2,635<br>(2,092 - 3,309)    |
| HIV/AIDS and tuberculosis                                         | 1,252<br>(826 - 1,610)      | 29<br>(18 - 42)          | 15<br>(9 - 22)       | 356<br>(247 - 456)         | 341<br>(215 - 479)          | 512<br>(301 - 714)          |
| Tuberculosis                                                      | 1,191<br>(772 - 1,555)      | 26<br>(16 - 40)          | 14<br>(8 - 21)       | 305<br>(200 - 403)         | 333<br>(206 - 471)          | 512<br>(300 - 713)          |
| HIV/AIDS                                                          | 61<br>(42 - 96)             | 2<br>(1 - 6)             | 1<br>(0 - 2)         | 51<br>(36 - 75)            | 7<br>(4 - 14)               | 0<br>(0 - 1)                |
| HIV/AIDS resulting in mycobacterial infection                     | 3<br>(2 - 5)                | 0<br>(0 - 0)             | 0<br>(0 - 0)         | 2<br>(2 - 4)               | 0<br>(0 - 1)                | 0<br>(0 - 0)                |
| HIV/AIDS resulting in other diseases                              | 58<br>(40 - 91)             | 2<br>(1 - 5)             | 1<br>(0 - 2)         | 48<br>(35 - 71)            | 7<br>(3 - 14)               | 0<br>(0 - 1)                |
| Diarrhea, lower respiratory, and other common infectious diseases | 4,043<br>(3,288 - 5,047)    | 1,110<br>(787 - 1,544)   | 203<br>(145 - 286)   | 702<br>(509 - 949)         | 702<br>(482 - 988)          | 1,326<br>(961 - 1,808)      |
| Diarrheal diseases                                                | 386<br>(265 - 560)          | 152<br>(69 - 294)        | 14<br>(7 - 25)       | 51<br>(34 - 71)            | 44<br>(26 - 71)             | 125<br>(73 - 202)           |
| Intestinal infectious diseases                                    | 449<br>(240 - 758)          | 125<br>(66 - 219)        | 95<br>(49 - 167)     | 173<br>(80 - 322)          | 39<br>(15 - 78)             | 17<br>(7 - 33)              |
| Typhoid fever                                                     | 334<br>(173 - 575)          | 86<br>(41 - 158)         | 73<br>(37 - 130)     | 133<br>(58 - 250)          | 30<br>(10 - 60)             | 12<br>(4 - 24)              |
| Paratyphoid fever                                                 | 96<br>(48 - 170)            | 31<br>(13 - 62)          | 21<br>(8 - 39)       | 34<br>(15 - 69)            | 8<br>(2 - 17)               | 3<br>(1 - 8)                |
| Other intestinal infectious diseases                              | 19<br>(10 - 31)             | 8<br>(3 - 16)            | 1<br>(0 - 5)         | 6<br>(2 - 13)              | 2<br>(0 - 7)                | 2<br>(0 - 6)                |
| Lower respiratory infections                                      | 2,566<br>(1,980 - 3,303)    | 561<br>(344 - 822)       | 42<br>(26 - 65)      | 329<br>(223 - 459)         | 540<br>(360 - 787)          | 1,094<br>(766 - 1,524)      |
| Upper respiratory infections                                      | 5<br>(2 - 10)               | 1<br>(0 - 2)             | 0<br>(0 - 0)         | 1<br>(0 - 2)               | 1<br>(0 - 3)                | 2<br>(0 - 7)                |
| Otitis media                                                      | 6<br>(5 - 8)                | 0<br>(0 - 1)             | 0<br>(0 - 0)         | 1<br>(1 - 1)               | 2<br>(1 - 2)                | 3<br>(2 - 5)                |
| Meningitis                                                        | 368<br>(282 - 475)          | 145<br>(92 - 223)        | 30<br>(19 - 45)      | 91<br>(60 - 130)           | 47<br>(29 - 72)             | 55<br>(35 - 88)             |
| Pneumococcal meningitis                                           | 116<br>(84 - 162)           | 40<br>(24 - 65)          | 11<br>(6 - 17)       | 33<br>(18 - 56)            | 14<br>(8 - 25)              | 18<br>(10 - 31)             |
| H influenzae type B meningitis                                    | 59<br>(35 - 89)             | 36<br>(18 - 63)          | 5<br>(2 - 10)        | 10<br>(4 - 17)             | 4<br>(2 - 8)                | 4<br>(1 - 7)                |
| Meningococcal meningitis                                          | 119<br>(87 - 160)           | 54<br>(32 - 88)          | 10<br>(5 - 17)       | 25<br>(13 - 39)            | 13<br>(7 - 22)              | 17<br>(9 - 28)              |
| Other meningitis                                                  | 75<br>(47 - 107)            | 16<br>(8 - 29)           | 4<br>(1 - 7)         | 23<br>(10 - 43)            | 15<br>(7 - 26)              | 17<br>(9 - 30)              |
| Encephalitis                                                      | 144<br>(106 - 199)          | 33<br>(18 - 59)          | 10<br>(6 - 16)       | 50<br>(32 - 75)            | 26<br>(16 - 42)             | 25<br>(15 - 37)             |
| Diphtheria                                                        | 1<br>(0 - 5)                | 1<br>(0 - 5)             | 0<br>(0 - 1)         | 0<br>(0 - 1)               | 0<br>(0 - 0)                | --<br>(0 - 0)               |
| Whooping cough                                                    | 7<br>(0 - 36)               | 6<br>(0 - 34)            | 0<br>(0 - 2)         | 0<br>(0 - 0)               | 0<br>(0 - 0)                | --<br>(0 - 0)               |
| Tetanus                                                           | 8<br>(5 - 13)               | 5<br>(2 - 9)             | 0<br>(0 - 0)         | 2<br>(1 - 3)               | 1<br>(0 - 2)                | 0<br>(0 - 0)                |
| Measles                                                           | 93<br>(2 - 531)             | 79<br>(2 - 451)          | 11<br>(0 - 60)       | 3<br>(0 - 16)              | 0<br>(0 - 1)                | --<br>(0 - 1)               |
| Varicella and herpes zoster                                       | 12<br>(3 - 33)              | 2<br>(0 - 10)            | 1<br>(0 - 2)         | 3<br>(0 - 7)               | 1<br>(0 - 4)                | 5<br>(0 - 26)               |
| Neglected tropical diseases and malaria                           | 73<br>(57 - 95)             | 15<br>(10 - 23)          | 5<br>(3 - 8)         | 20<br>(15 - 27)            | 17<br>(11 - 25)             | 16<br>(11 - 24)             |
| Malaria                                                           | 4<br>(3 - 5)                | 0<br>(0 - 0)             | 1<br>(0 - 1)         | 2<br>(1 - 3)               | 1<br>(0 - 1)                | 0<br>(0 - 1)                |
| Leishmaniasis                                                     | 14<br>(10 - 19)             | 6<br>(4 - 9)             | 2<br>(1 - 2)         | 4<br>(3 - 6)               | 2<br>(1 - 3)                | 0<br>(0 - 1)                |
| Visceral leishmaniasis                                            | 14<br>(10 - 19)             | 6<br>(4 - 9)             | 2<br>(1 - 2)         | 4<br>(3 - 6)               | 2<br>(1 - 3)                | 0<br>(0 - 1)                |
| Schistosomiasis                                                   | 24<br>(16 - 34)             | 0<br>(0 - 0)             | 0<br>(0 - 0)         | 6<br>(3 - 9)               | 10<br>(5 - 16)              | 8<br>(4 - 14)               |
| Cysticercosis                                                     | 0<br>(0 - 0)                | 0<br>(0 - 0)             | 0<br>(0 - 0)         | 0<br>(0 - 0)               | 0<br>(0 - 0)                | 0<br>(0 - 0)                |
| Cystic echinococcosis                                             | 12<br>(10 - 15)             | 0<br>(0 - 1)             | 1<br>(1 - 1)         | 4<br>(3 - 6)               | 4<br>(3 - 5)                | 3<br>(2 - 3)                |
| Dengue                                                            | 2<br>(1 - 3)                | 0<br>(0 - 1)             | 0<br>(0 - 0)         | 1<br>(1 - 1)               | 0<br>(0 - 0)                | 0<br>(0 - 0)                |
| Rabies                                                            | 3<br>(2 - 6)                | 0<br>(0 - 0)             | 1<br>(0 - 1)         | 1<br>(1 - 2)               | 0<br>(0 - 1)                | 0<br>(0 - 2)                |
| Intestinal nematode infections                                    | 4<br>(1 - 12)               | 2<br>(0 - 8)             | 1<br>(0 - 3)         | 0<br>(0 - 4)               | 0<br>(0 - 3)                | 1<br>(0 - 4)                |
| Ascariasis                                                        | 4<br>(1 - 12)               | 2<br>(0 - 8)             | 1<br>(0 - 3)         | 0<br>(0 - 4)               | 0<br>(0 - 3)                | 1<br>(0 - 4)                |
| Other neglected tropical diseases                                 | 11<br>(7 - 17)              | 5<br>(3 - 11)            | 0<br>(0 - 1)         | 1<br>(1 - 2)               | 0<br>(0 - 1)                | 4<br>(2 - 6)                |
| Maternal disorders                                                | 472<br>(334 - 635)          | --                       | 1<br>(0 - 2)         | 472<br>(333 - 634)         | --                          | --                          |

Web Table 31- Morocco deaths with 95% UI by age, sex, and cause in 2013

| Cause                                                            | Females, All Ages           | Females, 0-4 Years       | Females, 5-14 Years | Females, 15-49 Years     | Females, 50-69 Years        | Females, 70-80 Years        |
|------------------------------------------------------------------|-----------------------------|--------------------------|---------------------|--------------------------|-----------------------------|-----------------------------|
| Maternal hemorrhage                                              | 78<br>(52 - 110)            | --                       | 0<br>(0 - 0)        | 78<br>(52 - 110)         | --                          | --                          |
| Maternal sepsis and other maternal infections                    | 30<br>(16 - 46)             | --                       | 0<br>(0 - 0)        | 30<br>(16 - 46)          | --                          | --                          |
| Maternal hypertensive disorders                                  | 84<br>(56 - 118)            | --                       | 0<br>(0 - 0)        | 83<br>(56 - 118)         | --                          | --                          |
| Maternal obstructed labor                                        | 49<br>(33 - 69)             | --                       | 0<br>(0 - 0)        | 48<br>(33 - 68)          | --                          | --                          |
| Maternal abortive outcome                                        | 76<br>(51 - 108)            | --                       | 0<br>(0 - 0)        | 76<br>(51 - 108)         | --                          | --                          |
| Indirect maternal deaths                                         | 42<br>(24 - 66)             | --                       | 0<br>(0 - 0)        | 42<br>(24 - 66)          | --                          | --                          |
| Late maternal deaths                                             | 43<br>(22 - 66)             | --                       | 0<br>(0 - 0)        | 43<br>(22 - 66)          | --                          | --                          |
| Maternal deaths aggravated by HIV/AIDS                           | 0<br>(0 - 0)                | --                       | --                  | 0<br>(0 - 0)             | --                          | --                          |
| Other maternal disorders                                         | 70<br>(46 - 102)            | --                       | 0<br>(0 - 0)        | 70<br>(46 - 102)         | --                          | --                          |
| Neonatal disorders                                               | 4,300<br>(3,545 - 5,181)    | 4,300<br>(3,545 - 5,181) | --                  | --                       | --                          | --                          |
| Neonatal preterm birth complications                             | 2,257<br>(1,405 - 3,005)    | 2,257<br>(1,405 - 3,005) | --                  | --                       | --                          | --                          |
| Neonatal encephalopathy due to birth asphyxia and trauma         | 1,110<br>(658 - 1,732)      | 1,110<br>(658 - 1,732)   | --                  | --                       | --                          | --                          |
| Neonatal sepsis and other neonatal infections                    | 703<br>(336 - 1,294)        | 703<br>(336 - 1,294)     | --                  | --                       | --                          | --                          |
| Hemolytic disease and other neonatal jaundice                    | 28<br>(10 - 64)             | 28<br>(10 - 64)          | --                  | --                       | --                          | --                          |
| Other neonatal disorders                                         | 202<br>(103 - 371)          | 202<br>(103 - 371)       | --                  | --                       | --                          | --                          |
| Nutritional deficiencies                                         | 723<br>(531 - 945)          | 105<br>(59 - 172)        | 12<br>(8 - 18)      | 110<br>(77 - 145)        | 127<br>(84 - 190)           | 368<br>(239 - 536)          |
| Protein-energy malnutrition                                      | 119<br>(61 - 204)           | 58<br>(24 - 109)         | 3<br>(1 - 5)        | 4<br>(1 - 9)             | 11<br>(4 - 25)              | 44<br>(16 - 95)             |
| Iodine deficiency                                                | 8<br>(1 - 32)               | 1<br>(0 - 9)             | 0<br>(0 - 2)        | 1<br>(0 - 5)             | 2<br>(0 - 10)               | 4<br>(0 - 24)               |
| Iron-deficiency anemia                                           | 504<br>(313 - 698)          | 37<br>(11 - 76)          | 7<br>(4 - 11)       | 95<br>(64 - 128)         | 98<br>(60 - 150)            | 267<br>(158 - 410)          |
| Other nutritional deficiencies                                   | 91<br>(38 - 165)            | 10<br>(3 - 23)           | 2<br>(1 - 4)        | 10<br>(4 - 19)           | 16<br>(5 - 30)              | 54<br>(19 - 110)            |
| Other communicable, maternal, neonatal, and nutritional diseases | 970<br>(727 - 1,284)        | 327<br>(170 - 556)       | 26<br>(14 - 43)     | 53<br>(34 - 79)          | 152<br>(101 - 226)          | 412<br>(293 - 601)          |
| Sexually transmitted diseases excluding HIV                      | 362<br>(199 - 613)          | 297<br>(145 - 523)       | 22<br>(11 - 38)     | 10<br>(6 - 18)           | 6<br>(2 - 15)               | 26<br>(9 - 65)              |
| Syphilis                                                         | 347<br>(183 - 597)          | 297<br>(145 - 523)       | 22<br>(11 - 38)     | 4<br>(2 - 7)             | 4<br>(1 - 8)                | 20<br>(7 - 49)              |
| Chlamydial infection                                             | 4<br>(3 - 8)                | --                       | 0<br>(0 - 0)        | 2<br>(1 - 3)             | 1<br>(0 - 2)                | 2<br>(1 - 4)                |
| Gonococcal infection                                             | 6<br>(4 - 12)               | --                       | 0<br>(0 - 0)        | 2<br>(1 - 4)             | 1<br>(0 - 3)                | 3<br>(1 - 8)                |
| Other sexually transmitted diseases                              | 4<br>(3 - 7)                | --                       | 0<br>(0 - 0)        | 2<br>(1 - 3)             | 1<br>(0 - 2)                | 1<br>(1 - 4)                |
| Hepatitis                                                        | 442<br>(334 - 599)          | 4<br>(2 - 6)             | 1<br>(0 - 1)        | 15<br>(10 - 22)          | 106<br>(70 - 153)           | 317<br>(230 - 446)          |
| Acute hepatitis A                                                | 11<br>(3 - 25)              | 2<br>(1 - 4)             | 0<br>(0 - 1)        | 1<br>(0 - 3)             | 3<br>(1 - 8)                | 4<br>(1 - 12)               |
| Acute hepatitis B                                                | 327<br>(205 - 473)          | 2<br>(1 - 3)             | 0<br>(0 - 0)        | 6<br>(3 - 10)            | 76<br>(45 - 119)            | 244<br>(141 - 362)          |
| Acute hepatitis C                                                | 40<br>(5 - 127)             | --                       | 0<br>(0 - 0)        | 1<br>(0 - 3)             | 7<br>(1 - 21)               | 32<br>(4 - 110)             |
| Acute hepatitis E                                                | 64<br>(22 - 141)            | 0<br>(0 - 0)             | 0<br>(0 - 0)        | 7<br>(4 - 12)            | 20<br>(6 - 45)              | 37<br>(9 - 96)              |
| Other infectious diseases                                        | 166<br>(95 - 286)           | 27<br>(11 - 64)          | 3<br>(1 - 7)        | 27<br>(15 - 46)          | 40<br>(17 - 81)             | 69<br>(22 - 182)            |
| Non-communicable diseases                                        | 64,332<br>(53,539 - 80,373) | 2,150<br>(1,652 - 2,776) | 416<br>(336 - 502)  | 7,598<br>(5,578 - 9,773) | 17,895<br>(13,405 - 24,056) | 36,273<br>(30,960 - 44,341) |
| Neoplasms                                                        | 12,438<br>(9,748 - 16,154)  | 140<br>(98 - 193)        | 107<br>(83 - 139)   | 2,622<br>(1,899 - 3,425) | 4,943<br>(3,666 - 6,668)    | 4,626<br>(3,579 - 5,956)    |
| Esophageal cancer                                                | 245<br>(171 - 332)          | --                       | --                  | 43<br>(29 - 61)          | 81<br>(53 - 121)            | 120<br>(76 - 169)           |
| Stomach cancer                                                   | 1,013<br>(741 - 1,363)      | --                       | --                  | 151<br>(102 - 213)       | 342<br>(236 - 472)          | 521<br>(340 - 739)          |
| Liver cancer                                                     | 760<br>(548 - 1,036)        | --                       | 2<br>(1 - 3)        | 70<br>(47 - 103)         | 276<br>(186 - 403)          | 412<br>(274 - 600)          |
| Liver cancer due to hepatitis B                                  | 209<br>(119 - 317)          | --                       | 1<br>(0 - 1)        | 30<br>(17 - 48)          | 92<br>(47 - 152)            | 87<br>(42 - 142)            |
| Liver cancer due to hepatitis C                                  | 377<br>(248 - 543)          | --                       | 0<br>(0 - 0)        | 23<br>(12 - 38)          | 127<br>(76 - 199)           | 227<br>(149 - 347)          |
| Liver cancer due to alcohol use                                  | 71<br>(35 - 128)            | --                       | --                  | 2<br>(1 - 5)             | 18<br>(8 - 34)              | 51<br>(23 - 94)             |

Web Table 31- Morocco deaths with 95% UI by age, sex, and cause in 2013

| Cause                                         | Females, All Ages           | Females, 0-4 Years | Females, 5-14 Years | Females, 15-49 Years     | Females, 50-69 Years     | Females, 70-80 Years        |
|-----------------------------------------------|-----------------------------|--------------------|---------------------|--------------------------|--------------------------|-----------------------------|
| Liver cancer due to other causes              | 103<br>(43 - 171)           | --                 | 1<br>(0 - 2)        | 15<br>(6 - 24)           | 40<br>(15 - 72)          | 47<br>(16 - 87)             |
| Larynx cancer                                 | 65<br>(35 - 125)            | --                 | --                  | 15<br>(8 - 29)           | 23<br>(11 - 42)          | 27<br>(14 - 56)             |
| Tracheal, bronchus and lung cancer            | 1,016<br>(746 - 1,362)      | --                 | --                  | 121<br>(84 - 171)        | 429<br>(294 - 606)       | 465<br>(304 - 646)          |
| Breast cancer                                 | 2,362<br>(1,753 - 3,163)    | --                 | --                  | 789<br>(556 - 1,075)     | 1,092<br>(768 - 1,507)   | 481<br>(360 - 645)          |
| Cervical cancer                               | 1,226<br>(851 - 1,670)      | --                 | --                  | 333<br>(218 - 469)       | 540<br>(367 - 776)       | 353<br>(223 - 502)          |
| Uterine cancer                                | 251<br>(122 - 373)          | --                 | --                  | 29<br>(15 - 45)          | 128<br>(61 - 199)        | 95<br>(43 - 147)            |
| Prostate cancer                               | --                          | --                 | --                  | --                       | --                       | --                          |
| Colon and rectum cancer                       | 895<br>(683 - 1,193)        | --                 | --                  | 142<br>(101 - 191)       | 324<br>(235 - 453)       | 428<br>(316 - 574)          |
| Lip and oral cavity cancer                    | 97<br>(63 - 137)            | --                 | --                  | 20<br>(13 - 30)          | 38<br>(24 - 58)          | 38<br>(22 - 61)             |
| Nasopharynx cancer                            | 76<br>(47 - 131)            | --                 | 1<br>(0 - 2)        | 29<br>(17 - 49)          | 35<br>(19 - 68)          | 10<br>(6 - 18)              |
| Other pharynx cancer                          | 22<br>(15 - 31)             | --                 | --                  | 6<br>(4 - 10)            | 11<br>(7 - 17)           | 5<br>(3 - 8)                |
| Gallbladder and biliary tract cancer          | 417<br>(246 - 582)          | --                 | --                  | 63<br>(37 - 93)          | 182<br>(110 - 266)       | 172<br>(89 - 267)           |
| Pancreatic cancer                             | 476<br>(360 - 642)          | --                 | --                  | 42<br>(29 - 60)          | 177<br>(126 - 250)       | 257<br>(186 - 350)          |
| Malignant skin melanoma                       | 50<br>(36 - 67)             | --                 | --                  | 12<br>(8 - 18)           | 21<br>(14 - 30)          | 17<br>(11 - 24)             |
| Non-melanoma skin cancer                      | 79<br>(46 - 128)            | --                 | --                  | 9<br>(5 - 18)            | 27<br>(15 - 46)          | 42<br>(22 - 72)             |
| Ovarian cancer                                | 517<br>(390 - 701)          | --                 | --                  | 121<br>(83 - 166)        | 239<br>(167 - 341)       | 157<br>(111 - 217)          |
| Testicular cancer                             | --                          | --                 | --                  | --                       | --                       | --                          |
| Kidney cancer                                 | 123<br>(89 - 172)           | 5<br>(2 - 9)       | 2<br>(1 - 4)        | 13<br>(9 - 20)           | 56<br>(36 - 83)          | 47<br>(29 - 72)             |
| Bladder cancer                                | 161<br>(88 - 243)           | --                 | --                  | 15<br>(9 - 25)           | 54<br>(31 - 87)          | 92<br>(45 - 148)            |
| Brain and nervous system cancer               | 500<br>(323 - 669)          | 16<br>(8 - 30)     | 20<br>(12 - 30)     | 156<br>(107 - 217)       | 189<br>(120 - 277)       | 118<br>(54 - 176)           |
| Thyroid cancer                                | 102<br>(70 - 152)           | --                 | 0<br>(0 - 0)        | 17<br>(11 - 26)          | 49<br>(31 - 78)          | 36<br>(23 - 54)             |
| Mesothelioma                                  | 25<br>(16 - 38)             | --                 | --                  | 3<br>(2 - 5)             | 7<br>(4 - 11)            | 15<br>(8 - 25)              |
| Hodgkin lymphoma                              | 49<br>(35 - 67)             | 3<br>(2 - 6)       | 4<br>(1 - 8)        | 18<br>(12 - 26)          | 11<br>(6 - 18)           | 14<br>(8 - 22)              |
| Non-Hodgkin lymphoma                          | 340<br>(228 - 466)          | 14<br>(7 - 24)     | 7<br>(4 - 11)       | 65<br>(44 - 92)          | 112<br>(73 - 169)        | 143<br>(78 - 211)           |
| Multiple myeloma                              | 45<br>(27 - 70)             | --                 | --                  | 9<br>(6 - 13)            | 22<br>(12 - 38)          | 14<br>(8 - 22)              |
| Leukemia                                      | 416<br>(319 - 540)          | 28<br>(14 - 48)    | 27<br>(18 - 37)     | 103<br>(73 - 138)        | 128<br>(88 - 179)        | 130<br>(92 - 181)           |
| Other neoplasms                               | 1,111<br>(735 - 1,485)      | 74<br>(43 - 111)   | 44<br>(28 - 65)     | 226<br>(146 - 318)       | 351<br>(219 - 516)       | 416<br>(256 - 606)          |
| Cardiovascular diseases                       | 24,423<br>(19,657 - 31,822) | 489<br>(337 - 695) | 118<br>(82 - 159)   | 2,308<br>(1,676 - 3,067) | 7,014<br>(5,143 - 9,577) | 14,495<br>(11,735 - 18,609) |
| Rheumatic heart disease                       | 688<br>(394 - 959)          | 9<br>(4 - 18)      | 10<br>(6 - 16)      | 136<br>(76 - 201)        | 187<br>(99 - 285)        | 346<br>(199 - 499)          |
| Ischemic heart disease                        | 9,765<br>(7,580 - 13,343)   | 126<br>(65 - 218)  | 31<br>(19 - 48)     | 922<br>(652 - 1,297)     | 3,018<br>(2,135 - 4,213) | 5,667<br>(4,344 - 7,835)    |
| Cerebrovascular disease                       | 7,989<br>(6,127 - 10,659)   | 85<br>(51 - 134)   | 31<br>(20 - 45)     | 610<br>(417 - 852)       | 2,192<br>(1,548 - 3,104) | 5,070<br>(3,837 - 6,872)    |
| Ischemic stroke                               | 4,744<br>(3,542 - 6,341)    | 8<br>(4 - 15)      | 2<br>(1 - 4)        | 108<br>(66 - 158)        | 961<br>(647 - 1,375)     | 3,665<br>(2,760 - 4,912)    |
| Hemorrhagic stroke                            | 3,245<br>(2,442 - 4,551)    | 78<br>(47 - 122)   | 29<br>(18 - 41)     | 502<br>(345 - 712)       | 1,232<br>(864 - 1,807)   | 1,405<br>(983 - 2,044)      |
| Hypertensive heart disease                    | 2,114<br>(1,440 - 3,522)    | 3<br>(1 - 8)       | 1<br>(1 - 2)        | 114<br>(72 - 177)        | 377<br>(240 - 626)       | 1,618<br>(1,067 - 2,692)    |
| Cardiomyopathy and myocarditis                | 1,264<br>(919 - 1,777)      | 136<br>(78 - 225)  | 22<br>(13 - 37)     | 155<br>(105 - 225)       | 333<br>(216 - 511)       | 617<br>(389 - 952)          |
| Atrial fibrillation and flutter               | 11<br>(7 - 17)              | --                 | --                  | 1<br>(0 - 1)             | 2<br>(1 - 4)             | 8<br>(5 - 13)               |
| Aortic aneurysm                               | 123<br>(69 - 186)           | --                 | --                  | 8<br>(4 - 13)            | 18<br>(10 - 30)          | 97<br>(53 - 151)            |
| Peripheral vascular disease                   | 21<br>(15 - 30)             | --                 | --                  | 2<br>(1 - 2)             | 4<br>(3 - 6)             | 16<br>(10 - 23)             |
| Endocarditis                                  | 275<br>(147 - 396)          | 42<br>(19 - 76)    | 5<br>(3 - 8)        | 81<br>(42 - 121)         | 68<br>(37 - 109)         | 78<br>(32 - 129)            |
| Other cardiovascular and circulatory diseases | 2,173<br>(1,554 - 2,938)    | 86<br>(52 - 134)   | 17<br>(10 - 26)     | 278<br>(182 - 398)       | 813<br>(534 - 1,175)     | 978<br>(686 - 1,411)        |

Web Table 31- Morocco deaths with 95% UI by age, sex, and cause in 2013

| Cause                                               | Females, All Ages        | Females, 0-4 Years | Females, 5-14 Years | Females, 15-49 Years | Females, 50-69 Years | Females, 70-80 Years     |
|-----------------------------------------------------|--------------------------|--------------------|---------------------|----------------------|----------------------|--------------------------|
| Chronic respiratory diseases                        | 3,482<br>(2,695 - 4,610) | 74<br>(44 - 121)   | 10<br>(7 - 13)      | 287<br>(211 - 381)   | 783<br>(557 - 1,104) | 2,328<br>(1,755 - 3,127) |
| Chronic obstructive pulmonary disease               | 1,341<br>(915 - 2,002)   | 57<br>(31 - 96)    | 2<br>(1 - 4)        | 88<br>(58 - 135)     | 332<br>(210 - 507)   | 861<br>(552 - 1,311)     |
| Pneumoconiosis                                      | 30<br>(18 - 46)          | 0<br>(0 - 0)       | 0<br>(0 - 0)        | 2<br>(1 - 3)         | 10<br>(6 - 16)       | 17<br>(9 - 31)           |
| Silicosis                                           | 14<br>(8 - 24)           | 0<br>(0 - 0)       | 0<br>(0 - 0)        | 1<br>(0 - 1)         | 2<br>(1 - 4)         | 11<br>(5 - 21)           |
| Asbestosis                                          | 4<br>(2 - 6)             | 0<br>(0 - 0)       | 0<br>(0 - 0)        | 1<br>(0 - 1)         | 1<br>(1 - 2)         | 2<br>(1 - 3)             |
| Coal workers pneumoconiosis                         | 3<br>(2 - 5)             | 0<br>(0 - 0)       | 0<br>(0 - 0)        | 0<br>(0 - 1)         | 1<br>(1 - 2)         | 1<br>(0 - 3)             |
| Other pneumoconiosis                                | 9<br>(5 - 14)            | 0<br>(0 - 0)       | 0<br>(0 - 0)        | 1<br>(0 - 1)         | 5<br>(3 - 8)         | 3<br>(2 - 6)             |
| Asthma                                              | 1,614<br>(1,058 - 2,257) | 9<br>(4 - 17)      | 5<br>(3 - 7)        | 157<br>(104 - 218)   | 364<br>(227 - 554)   | 1,079<br>(687 - 1,559)   |
| Interstitial lung disease and pulmonary sarcoidosis | 353<br>(207 - 598)       | 0<br>(0 - 1)       | 1<br>(0 - 2)        | 12<br>(7 - 21)       | 56<br>(30 - 97)      | 284<br>(157 - 492)       |
| Other chronic respiratory diseases                  | 145<br>(97 - 213)        | 8<br>(4 - 16)      | 1<br>(1 - 2)        | 27<br>(18 - 39)      | 22<br>(13 - 35)      | 86<br>(52 - 139)         |
| Cirrhosis                                           | 2,381<br>(1,831 - 3,176) | 25<br>(12 - 45)    | 14<br>(9 - 20)      | 234<br>(169 - 317)   | 698<br>(503 - 970)   | 1,409<br>(1,027 - 1,977) |
| Cirrhosis due to hepatitis B                        | 800<br>(277 - 1,453)     | 1<br>(0 - 3)       | 3<br>(1 - 5)        | 82<br>(28 - 159)     | 239<br>(75 - 480)    | 475<br>(149 - 920)       |
| Cirrhosis due to hepatitis C                        | 1,199<br>(557 - 1,960)   | 2<br>(0 - 5)       | 2<br>(1 - 5)        | 100<br>(23 - 187)    | 364<br>(110 - 631)   | 731<br>(375 - 1,188)     |
| Cirrhosis due to alcohol use                        | 154<br>(69 - 284)        | --                 | --                  | 7<br>(3 - 13)        | 35<br>(15 - 67)      | 113<br>(47 - 209)        |
| Cirrhosis due to other causes                       | 227<br>(127 - 387)       | 22<br>(11 - 41)    | 9<br>(5 - 15)       | 45<br>(22 - 88)      | 61<br>(28 - 126)     | 90<br>(36 - 170)         |
| Digestive diseases                                  | 1,315<br>(1,019 - 1,722) | 21<br>(13 - 33)    | 16<br>(12 - 22)     | 199<br>(145 - 267)   | 401<br>(276 - 565)   | 677<br>(510 - 903)       |
| Peptic ulcer disease                                | 233<br>(156 - 337)       | 3<br>(1 - 6)       | 2<br>(2 - 4)        | 31<br>(20 - 47)      | 76<br>(48 - 121)     | 120<br>(72 - 187)        |
| Gastritis and duodenitis                            | 73<br>(38 - 129)         | 3<br>(1 - 7)       | 1<br>(0 - 2)        | 9<br>(5 - 17)        | 29<br>(14 - 52)      | 31<br>(14 - 58)          |
| Appendicitis                                        | 42<br>(26 - 64)          | 1<br>(0 - 2)       | 1<br>(1 - 2)        | 12<br>(7 - 19)       | 15<br>(8 - 25)       | 14<br>(8 - 22)           |
| Paralytic ileus and intestinal obstruction          | 190<br>(102 - 310)       | 9<br>(4 - 17)      | 4<br>(2 - 7)        | 40<br>(22 - 63)      | 48<br>(25 - 85)      | 89<br>(46 - 158)         |
| Inguinal, femoral, and abdominal hernia             | 24<br>(12 - 40)          | 0<br>(0 - 0)       | 0<br>(0 - 1)        | 2<br>(1 - 4)         | 7<br>(3 - 12)        | 14<br>(7 - 25)           |
| Inflammatory bowel disease                          | 65<br>(39 - 97)          | 1<br>(0 - 2)       | 2<br>(1 - 3)        | 17<br>(10 - 25)      | 18<br>(9 - 30)       | 28<br>(15 - 47)          |
| Vascular intestinal disorders                       | 92<br>(46 - 174)         | 0<br>(0 - 0)       | 1<br>(0 - 3)        | 7<br>(4 - 17)        | 13<br>(6 - 26)       | 71<br>(33 - 129)         |
| Gallbladder and biliary diseases                    | 268<br>(179 - 387)       | 0<br>(0 - 1)       | 1<br>(0 - 1)        | 18<br>(11 - 27)      | 79<br>(48 - 123)     | 170<br>(106 - 261)       |
| Pancreatitis                                        | 155<br>(98 - 234)        | 0<br>(0 - 1)       | 1<br>(1 - 2)        | 34<br>(21 - 53)      | 67<br>(39 - 108)     | 52<br>(30 - 84)          |
| Other digestive diseases                            | 173<br>(121 - 250)       | 3<br>(1 - 5)       | 3<br>(2 - 4)        | 28<br>(19 - 42)      | 49<br>(31 - 76)      | 89<br>(55 - 143)         |
| Neurological disorders                              | 3,168<br>(2,360 - 4,205) | 67<br>(40 - 109)   | 21<br>(13 - 34)     | 178<br>(120 - 253)   | 326<br>(216 - 477)   | 2,576<br>(1,848 - 3,483) |
| Alzheimer disease and other dementias               | 2,676<br>(1,916 - 3,631) | --                 | --                  | 1<br>(0 - 4)         | 227<br>(135 - 345)   | 2,447<br>(1,736 - 3,335) |
| Parkinson disease                                   | 46<br>(28 - 71)          | --                 | --                  | 2<br>(1 - 3)         | 10<br>(6 - 17)       | 34<br>(19 - 57)          |
| Epilepsy                                            | 335<br>(216 - 473)       | 47<br>(23 - 86)    | 18<br>(10 - 31)     | 145<br>(93 - 212)    | 64<br>(37 - 100)     | 62<br>(31 - 109)         |
| Multiple sclerosis                                  | 22<br>(8 - 36)           | --                 | --                  | 8<br>(2 - 14)        | 8<br>(3 - 15)        | 5<br>(2 - 11)            |
| Other neurological disorders                        | 89<br>(72 - 112)         | 20<br>(14 - 27)    | 3<br>(2 - 4)        | 21<br>(16 - 28)      | 17<br>(12 - 24)      | 28<br>(20 - 39)          |
| Mental and substance use disorders                  | 578<br>(439 - 752)       | 8<br>(5 - 12)      | 0<br>(0 - 0)        | 406<br>(306 - 529)   | 103<br>(68 - 151)    | 61<br>(43 - 85)          |
| Schizophrenia                                       | 20<br>(13 - 31)          | --                 | --                  | 5<br>(3 - 7)         | 8<br>(5 - 13)        | 7<br>(4 - 12)            |
| Alcohol use disorders                               | 69<br>(29 - 134)         | --                 | --                  | 17<br>(7 - 31)       | 37<br>(15 - 74)      | 15<br>(6 - 30)           |
| Drug use disorders                                  | 488<br>(370 - 634)       | 8<br>(5 - 12)      | --                  | 384<br>(290 - 500)   | 58<br>(41 - 83)      | 38<br>(26 - 55)          |
| Opioid use disorders                                | 264<br>(200 - 345)       | 4<br>(3 - 7)       | --                  | 210<br>(156 - 276)   | 29<br>(20 - 41)      | 21<br>(14 - 31)          |
| Cocaine use disorders                               | 10<br>(7 - 13)           | 0<br>(0 - 0)       | --                  | 8<br>(6 - 11)        | 1<br>(1 - 1)         | 1<br>(0 - 1)             |
| Amphetamine use disorders                           | 9<br>(7 - 12)            | 0<br>(0 - 0)       | --                  | 7<br>(5 - 10)        | 1<br>(1 - 2)         | 1<br>(0 - 1)             |
| Other drug use disorders                            | 205<br>(156 - 268)       | 3<br>(2 - 5)       | --                  | 159<br>(120 - 208)   | 27<br>(19 - 39)      | 16<br>(11 - 24)          |

Web Table 31- Morocco deaths with 95% UI by age, sex, and cause in 2013

| Cause                                               | Females, All Ages           | Females, 0-4 Years     | Females, 5-14 Years | Females, 15-49 Years   | Females, 50-69 Years     | Females, 70-80 Years      |
|-----------------------------------------------------|-----------------------------|------------------------|---------------------|------------------------|--------------------------|---------------------------|
| Eating disorders                                    | 1<br>(1 - 2)                | --                     | 0<br>(0 - 0)        | 1<br>(0 - 1)           | --                       | --                        |
| Anorexia nervosa                                    | 1<br>(1 - 2)                | --                     | 0<br>(0 - 0)        | 1<br>(0 - 1)           | --                       | --                        |
| Diabetes, urogenital, blood, and endocrine diseases | 14,646<br>(11,692 - 18,693) | 195<br>(141 - 269)     | 69<br>(51 - 91)     | 1,131<br>(835 - 1,468) | 3,456<br>(2,547 - 4,746) | 9,794<br>(7,753 - 12,507) |
| Diabetes mellitus                                   | 10,681<br>(8,395 - 13,746)  | 49<br>(27 - 82)        | 21<br>(11 - 34)     | 449<br>(323 - 605)     | 2,233<br>(1,629 - 3,074) | 7,929<br>(6,144 - 10,266) |
| Acute glomerulonephritis                            | 14<br>(10 - 19)             | 1<br>(0 - 1)           | 1<br>(0 - 1)        | 4<br>(2 - 5)           | 4<br>(3 - 6)             | 5<br>(3 - 8)              |
| Chronic kidney disease                              | 2,770<br>(2,034 - 3,694)    | 24<br>(14 - 41)        | 16<br>(11 - 23)     | 426<br>(298 - 583)     | 936<br>(644 - 1,360)     | 1,368<br>(982 - 1,871)    |
| Chronic kidney disease due to diabetes mellitus     | 537<br>(315 - 776)          | 5<br>(3 - 9)           | 3<br>(2 - 4)        | 18<br>(11 - 28)        | 256<br>(148 - 393)       | 254<br>(135 - 383)        |
| Chronic kidney disease due to hypertension          | 1,020<br>(628 - 1,518)      | 5<br>(2 - 8)           | 4<br>(2 - 7)        | 233<br>(142 - 345)     | 289<br>(153 - 450)       | 490<br>(285 - 768)        |
| Chronic kidney disease due to glomerulonephritis    | 73<br>(45 - 111)            | 2<br>(1 - 4)           | 2<br>(1 - 3)        | 15<br>(9 - 23)         | 24<br>(13 - 38)          | 31<br>(17 - 51)           |
| Chronic kidney disease due to other causes          | 1,140<br>(698 - 1,688)      | 12<br>(5 - 24)         | 8<br>(4 - 13)       | 160<br>(83 - 260)      | 368<br>(214 - 591)       | 593<br>(316 - 946)        |
| Urinary diseases and male infertility               | 413<br>(296 - 558)          | 20<br>(11 - 38)        | 5<br>(3 - 8)        | 88<br>(58 - 125)       | 118<br>(76 - 176)        | 182<br>(115 - 273)        |
| Interstitial nephritis and urinary tract infections | 269<br>(175 - 371)          | 17<br>(9 - 33)         | 3<br>(2 - 6)        | 65<br>(40 - 93)        | 75<br>(45 - 118)         | 109<br>(60 - 173)         |
| Urolithiasis                                        | 36<br>(20 - 60)             | --                     | 0<br>(0 - 1)        | 5<br>(2 - 8)           | 10<br>(5 - 17)           | 22<br>(10 - 41)           |
| Other urinary diseases                              | 108<br>(71 - 168)           | 3<br>(1 - 7)           | 1<br>(1 - 2)        | 19<br>(10 - 33)        | 34<br>(19 - 56)          | 51<br>(29 - 85)           |
| Gynecological diseases                              | 22<br>(13 - 33)             | --                     | --                  | 7<br>(5 - 11)          | 6<br>(5 - 15)            | 6<br>(3 - 10)             |
| Uterine fibroids                                    | 6<br>(3 - 9)                | --                     | --                  | 2<br>(1 - 3)           | 2<br>(1 - 4)             | 2<br>(1 - 3)              |
| Polycystic ovarian syndrome                         | 0<br>(0 - 1)                | --                     | --                  | 0<br>(0 - 1)           | 0<br>(0 - 0)             | --                        |
| Endometriosis                                       | 1<br>(1 - 2)                | --                     | --                  | 1<br>(1 - 2)           | 0<br>(0 - 0)             | --                        |
| Genital prolapse                                    | 4<br>(2 - 6)                | --                     | --                  | 1<br>(1 - 1)           | 2<br>(1 - 3)             | 1<br>(1 - 3)              |
| Other gynecological diseases                        | 10<br>(6 - 16)              | --                     | --                  | 3<br>(2 - 5)           | 5<br>(2 - 8)             | 2<br>(1 - 4)              |
| Hemoglobinopathies and hemolytic anemias            | 191<br>(121 - 280)          | 43<br>(26 - 71)        | 15<br>(9 - 23)      | 59<br>(37 - 92)        | 24<br>(14 - 39)          | 51<br>(25 - 89)           |
| Thalassemias                                        | 76<br>(49 - 117)            | 35<br>(21 - 59)        | 12<br>(8 - 20)      | 28<br>(18 - 45)        | 0<br>(0 - 0)             | 0<br>(0 - 0)              |
| Sickle cell disorders                               | 47<br>(29 - 74)             | 4<br>(2 - 6)           | 2<br>(1 - 3)        | 24<br>(15 - 40)        | 16<br>(9 - 27)           | 1<br>(1 - 2)              |
| G6PD deficiency                                     | 2<br>(1 - 3)                | 0<br>(0 - 1)           | 0<br>(0 - 0)        | 1<br>(1 - 1)           | 0<br>(0 - 1)             | 0<br>(0 - 1)              |
| Other hemoglobinopathies and hemolytic anemias      | 66<br>(35 - 105)            | 3<br>(2 - 5)           | 1<br>(0 - 1)        | 5<br>(3 - 9)           | 7<br>(4 - 12)            | 50<br>(24 - 87)           |
| Endocrine, metabolic, blood, and immune disorders   | 554<br>(319 - 759)          | 58<br>(33 - 98)        | 12<br>(7 - 20)      | 99<br>(62 - 141)       | 133<br>(79 - 209)        | 253<br>(116 - 388)        |
| Musculoskeletal disorders                           | 225<br>(164 - 306)          | --                     | 6<br>(4 - 9)        | 61<br>(43 - 86)        | 68<br>(45 - 98)          | 90<br>(56 - 133)          |
| Rheumatoid arthritis                                | 44<br>(28 - 64)             | --                     | 1<br>(0 - 1)        | 4<br>(3 - 7)           | 19<br>(12 - 30)          | 20<br>(11 - 33)           |
| Other musculoskeletal disorders                     | 182<br>(132 - 247)          | --                     | 5<br>(4 - 8)        | 57<br>(40 - 80)        | 49<br>(31 - 72)          | 70<br>(45 - 106)          |
| Other non-communicable diseases                     | 1,677<br>(1,282 - 2,189)    | 1,131<br>(783 - 1,603) | 54<br>(35 - 80)     | 172<br>(120 - 236)     | 103<br>(71 - 147)        | 218<br>(146 - 302)        |
| Congenital anomalies                                | 1,447<br>(1,058 - 1,949)    | 1,107<br>(758 - 1,573) | 51<br>(32 - 77)     | 142<br>(98 - 200)      | 61<br>(41 - 92)          | 86<br>(58 - 126)          |
| Neural tube defects                                 | 104<br>(44 - 209)           | 95<br>(36 - 201)       | 2<br>(1 - 4)        | 6<br>(4 - 11)          | 0<br>(0 - 1)             | 0<br>(0 - 0)              |
| Congenital heart anomalies                          | 633<br>(428 - 910)          | 544<br>(347 - 815)     | 27<br>(16 - 43)     | 30<br>(20 - 45)        | 13<br>(8 - 20)           | 19<br>(11 - 31)           |
| Cleft lip and cleft palate                          | 2<br>(1 - 6)                | 2<br>(1 - 6)           | --                  | --                     | --                       | --                        |
| Down syndrome                                       | 49<br>(28 - 85)             | 37<br>(18 - 71)        | 4<br>(2 - 8)        | 4<br>(2 - 8)           | 1<br>(1 - 3)             | 1<br>(1 - 3)              |
| Chromosomal unbalanced rearrangements               | 27<br>(15 - 49)             | 18<br>(9 - 35)         | 0<br>(0 - 1)        | 5<br>(2 - 9)           | 1<br>(0 - 2)             | 3<br>(1 - 6)              |
| Other congenital anomalies                          | 631<br>(464 - 856)          | 409<br>(255 - 611)     | 17<br>(9 - 26)      | 97<br>(67 - 137)       | 46<br>(30 - 68)          | 63<br>(41 - 94)           |
| Skin and subcutaneous diseases                      | 225<br>(151 - 308)          | 19<br>(10 - 35)        | 3<br>(2 - 4)        | 29<br>(19 - 42)        | 42<br>(25 - 63)          | 132<br>(79 - 193)         |
| Cellulitis                                          | 34<br>(17 - 53)             | 3<br>(1 - 7)           | 1<br>(0 - 1)        | 5<br>(2 - 8)           | 6<br>(3 - 10)            | 20<br>(8 - 35)            |
| Pyoderma                                            | 107<br>(74 - 153)           | 13<br>(7 - 26)         | 1<br>(1 - 2)        | 16<br>(10 - 24)        | 23<br>(14 - 37)          | 53<br>(30 - 86)           |



Web Table 31- Morocco deaths with 95% UI by age, sex, and cause in 2013

| Cause                                           | Females, All Ages        | Females, 0-4 Years | Females, 5-14 Years | Females, 15-49 Years   | Females, 50-69 Years   | Females, 70-80 Years   |
|-------------------------------------------------|--------------------------|--------------------|---------------------|------------------------|------------------------|------------------------|
| Decubitus ulcer                                 | 57<br>(34 - 89)          | 0<br>(0 - 1)       | 0<br>(0 - 1)        | 3<br>(2 - 5)           | 6<br>(3 - 11)          | 48<br>(25 - 78)        |
| Other skin and subcutaneous diseases            | 27<br>(10 - 40)          | 2<br>(1 - 5)       | 1<br>(0 - 1)        | 5<br>(2 - 8)           | 7<br>(2 - 13)          | 11<br>(3 - 20)         |
| Sudden infant death syndrome                    | 5<br>(1 - 14)            | 5<br>(1 - 14)      | --                  | --                     | --                     | --                     |
| Injuries                                        | 4,219<br>(3,445 - 5,326) | 549<br>(411 - 698) | 282<br>(225 - 349)  | 1,314<br>(996 - 1,695) | 1,014<br>(728 - 1,412) | 1,061<br>(825 - 1,403) |
| Transport injuries                              | 1,721<br>(1,321 - 2,225) | 225<br>(152 - 314) | 123<br>(89 - 167)   | 597<br>(425 - 806)     | 475<br>(325 - 681)     | 300<br>(207 - 431)     |
| Road injuries                                   | 1,638<br>(1,257 - 2,116) | 213<br>(144 - 298) | 118<br>(85 - 159)   | 571<br>(404 - 769)     | 453<br>(309 - 653)     | 283<br>(196 - 408)     |
| Pedestrian road injuries                        | 649<br>(485 - 843)       | 100<br>(59 - 148)  | 50<br>(31 - 73)     | 140<br>(90 - 202)      | 188<br>(119 - 279)     | 171<br>(113 - 255)     |
| Cyclist road injuries                           | 94<br>(64 - 131)         | 7<br>(3 - 14)      | 6<br>(4 - 10)       | 21<br>(13 - 29)        | 50<br>(30 - 76)        | 10<br>(6 - 16)         |
| Motorcyclist road injuries                      | 93<br>(53 - 136)         | 4<br>(2 - 8)       | 2<br>(1 - 3)        | 63<br>(35 - 95)        | 20<br>(10 - 32)        | 4<br>(2 - 6)           |
| Motor vehicle road injuries                     | 793<br>(592 - 1,043)     | 98<br>(60 - 146)   | 58<br>(38 - 84)     | 345<br>(240 - 472)     | 195<br>(124 - 293)     | 97<br>(61 - 148)       |
| Other road injuries                             | 8<br>(5 - 14)            | 4<br>(2 - 7)       | 1<br>(0 - 2)        | 1<br>(1 - 2)           | 1<br>(0 - 2)           | 2<br>(1 - 3)           |
| Other transport injuries                        | 83<br>(58 - 111)         | 12<br>(7 - 19)     | 6<br>(3 - 9)        | 27<br>(17 - 38)        | 22<br>(13 - 34)        | 17<br>(10 - 27)        |
| Unintentional injuries                          | 1,605<br>(1,306 - 1,998) | 311<br>(223 - 417) | 137<br>(104 - 179)  | 290<br>(217 - 375)     | 319<br>(224 - 440)     | 548<br>(413 - 737)     |
| Falls                                           | 329<br>(229 - 463)       | 29<br>(16 - 48)    | 12<br>(8 - 18)      | 37<br>(24 - 53)        | 45<br>(28 - 69)        | 207<br>(132 - 316)     |
| Drowning                                        | 375<br>(256 - 508)       | 123<br>(71 - 203)  | 66<br>(41 - 98)     | 88<br>(56 - 124)       | 64<br>(37 - 104)       | 35<br>(20 - 54)        |
| Fire, heat, and hot substances                  | 165<br>(116 - 225)       | 42<br>(23 - 74)    | 16<br>(10 - 26)     | 22<br>(14 - 33)        | 34<br>(20 - 54)        | 50<br>(30 - 78)        |
| Poisonings                                      | 118<br>(71 - 167)        | 15<br>(8 - 27)     | 6<br>(3 - 10)       | 31<br>(16 - 47)        | 33<br>(19 - 52)        | 33<br>(20 - 54)        |
| Exposure to mechanical forces                   | 136<br>(106 - 183)       | 41<br>(23 - 65)    | 17<br>(11 - 25)     | 36<br>(25 - 55)        | 28<br>(18 - 41)        | 15<br>(10 - 21)        |
| Unintentional firearm injuries                  | 4<br>(3 - 6)             | 1<br>(0 - 1)       | 0<br>(0 - 0)        | 1<br>(1 - 2)           | 1<br>(1 - 2)           | 1<br>(1 - 2)           |
| Unintentional suffocation                       | 42<br>(26 - 71)          | 7<br>(2 - 17)      | 4<br>(2 - 7)        | 21<br>(13 - 37)        | 10<br>(5 - 17)         | 1<br>(1 - 2)           |
| Other exposure to mechanical forces             | 90<br>(67 - 121)         | 33<br>(18 - 57)    | 13<br>(7 - 21)      | 15<br>(10 - 22)        | 16<br>(10 - 26)        | 12<br>(7 - 19)         |
| Adverse effects of medical treatment            | 286<br>(185 - 417)       | 32<br>(16 - 64)    | 8<br>(5 - 12)       | 48<br>(30 - 72)        | 84<br>(46 - 136)       | 114<br>(61 - 202)      |
| Animal contact                                  | 35<br>(15 - 69)          | 6<br>(2 - 12)      | 3<br>(1 - 6)        | 6<br>(3 - 13)          | 5<br>(2 - 11)          | 15<br>(5 - 29)         |
| Venomous animal contact                         | 18<br>(8 - 37)           | 4<br>(2 - 9)       | 2<br>(1 - 5)        | 4<br>(2 - 9)           | 3<br>(1 - 7)           | 4<br>(1 - 9)           |
| Non-venomous animal contact                     | 16<br>(7 - 34)           | 2<br>(1 - 4)       | 1<br>(0 - 2)        | 2<br>(1 - 4)           | 2<br>(1 - 4)           | 11<br>(4 - 22)         |
| Foreign body                                    | 55<br>(37 - 92)          | 7<br>(4 - 12)      | 3<br>(2 - 5)        | 10<br>(6 - 16)         | 9<br>(5 - 15)          | 27<br>(16 - 48)        |
| Pulmonary aspiration and foreign body in airway | 51<br>(33 - 88)          | 7<br>(4 - 11)      | 2<br>(1 - 4)        | 9<br>(5 - 15)          | 8<br>(5 - 15)          | 26<br>(15 - 46)        |
| Foreign body in other body part                 | 4<br>(3 - 6)             | 1<br>(0 - 2)       | 1<br>(0 - 1)        | 1<br>(1 - 1)           | 0<br>(0 - 0)           | 1<br>(1 - 2)           |
| Other unintentional injuries                    | 105<br>(75 - 143)        | 16<br>(10 - 28)    | 6<br>(3 - 10)       | 13<br>(9 - 21)         | 18<br>(12 - 28)        | 52<br>(28 - 82)        |
| Self-harm and interpersonal violence            | 893<br>(661 - 1,190)     | 13<br>(3 - 25)     | 22<br>(11 - 36)     | 426<br>(305 - 556)     | 220<br>(141 - 330)     | 213<br>(138 - 331)     |
| Self-harm                                       | 793<br>(588 - 1,079)     | --                 | 15<br>(7 - 29)      | 365<br>(256 - 491)     | 207<br>(131 - 317)     | 207<br>(132 - 328)     |
| Interpersonal violence                          | 100<br>(40 - 147)        | 13<br>(3 - 25)     | 7<br>(2 - 12)       | 61<br>(25 - 92)        | 13<br>(5 - 24)         | 6<br>(2 - 13)          |
| Assault by firearm                              | 24<br>(8 - 39)           | 4<br>(1 - 8)       | 2<br>(1 - 5)        | 10<br>(3 - 17)         | 6<br>(2 - 12)          | 2<br>(0 - 5)           |
| Assault by sharp object                         | 41<br>(17 - 63)          | 2<br>(0 - 5)       | 1<br>(0 - 3)        | 33<br>(14 - 52)        | 3<br>(1 - 6)           | 2<br>(0 - 3)           |
| Assault by other means                          | 35<br>(13 - 55)          | 7<br>(2 - 14)      | 3<br>(1 - 6)        | 19<br>(7 - 31)         | 4<br>(1 - 8)           | 3<br>(1 - 5)           |

Web Table 31- Mozambique deaths with 95% UI by age, sex, and cause in 2013

| Cause                                                             | Both Sexes, All Ages           | Both Sexes, 0-4 Years        | Both Sexes, 5-14 Years      | Both Sexes, 15-49 Years      | Both Sexes, 50-69 Years     | Both Sexes, 70-80 Years     |
|-------------------------------------------------------------------|--------------------------------|------------------------------|-----------------------------|------------------------------|-----------------------------|-----------------------------|
| All causes                                                        | 280,527<br>(262,054 - 299,942) | 87,913<br>(76,259 - 101,095) | 12,684<br>(10,473 - 19,717) | 95,109<br>(85,217 - 103,467) | 43,947<br>(39,857 - 50,246) | 40,874<br>(37,526 - 45,208) |
| Communicable, maternal, neonatal, and nutritional diseases        | 205,294<br>(190,796 - 220,798) | 80,331<br>(69,562 - 91,355)  | 10,885<br>(9,049 - 16,046)  | 73,041<br>(65,247 - 80,851)  | 24,099<br>(21,515 - 26,759) | 16,937<br>(14,851 - 19,501) |
| HIV/AIDS and tuberculosis                                         | 89,927<br>(81,225 - 98,120)    | 12,643<br>(10,038 - 14,904)  | 5,940<br>(5,037 - 6,878)    | 51,240<br>(44,594 - 58,110)  | 15,057<br>(12,915 - 17,168) | 5,048<br>(4,041 - 5,917)    |
| Tuberculosis                                                      | 14,950<br>(12,303 - 17,475)    | 414<br>(251 - 620)           | 114<br>(66 - 237)           | 6,660<br>(5,122 - 8,379)     | 4,083<br>(3,112 - 5,216)    | 3,678<br>(2,681 - 4,492)    |
| HIV/AIDS                                                          | 74,978<br>(66,037 - 83,282)    | 12,229<br>(9,581 - 14,407)   | 5,826<br>(4,947 - 6,760)    | 44,579<br>(37,478 - 51,916)  | 10,974<br>(8,895 - 13,002)  | 1,370<br>(1,080 - 1,768)    |
| HIV/AIDS resulting in mycobacterial infection                     | 4,672<br>(3,636 - 5,876)       | 720<br>(543 - 933)           | 317<br>(247 - 401)          | 2,807<br>(2,129 - 3,586)     | 730<br>(543 - 952)          | 97<br>(70 - 132)            |
| HIV/AIDS resulting in other diseases                              | 70,306<br>(61,911 - 78,197)    | 11,509<br>(9,040 - 13,598)   | 5,509<br>(4,648 - 6,378)    | 41,772<br>(35,194 - 48,751)  | 10,244<br>(8,325 - 12,151)  | 1,273<br>(1,004 - 1,640)    |
| Diarrhea, lower respiratory, and other common infectious diseases | 38,499<br>(32,535 - 44,471)    | 18,021<br>(13,217 - 23,049)  | 1,493<br>(947 - 3,151)      | 7,258<br>(5,400 - 9,235)     | 4,777<br>(3,714 - 6,169)    | 6,950<br>(5,616 - 8,419)    |
| Diarrheal diseases                                                | 13,113<br>(10,005 - 16,464)    | 4,870<br>(2,762 - 7,928)     | 426<br>(222 - 934)          | 3,071<br>(2,136 - 4,157)     | 1,908<br>(1,274 - 2,758)    | 2,839<br>(1,984 - 3,913)    |
| Intestinal infectious diseases                                    | 1,048<br>(542 - 1,803)         | 401<br>(196 - 740)           | 240<br>(107 - 532)          | 349<br>(169 - 608)           | 40<br>(20 - 71)             | 18<br>(9 - 30)              |
| Typhoid fever                                                     | 760<br>(363 - 1,349)           | 268<br>(117 - 516)           | 185<br>(80 - 410)           | 267<br>(121 - 482)           | 28<br>(12 - 53)             | 11<br>(5 - 21)              |
| Paratyphoid fever                                                 | 192<br>(92 - 357)              | 76<br>(31 - 158)             | 46<br>(19 - 112)            | 61<br>(26 - 113)             | 6<br>(2 - 12)               | 2<br>(1 - 5)                |
| Other intestinal infectious diseases                              | 97<br>(64 - 139)               | 57<br>(32 - 93)              | 8<br>(3 - 18)               | 21<br>(11 - 35)              | 6<br>(2 - 12)               | 4<br>(1 - 11)               |
| Lower respiratory infections                                      | 17,950<br>(14,380 - 21,457)    | 9,010<br>(6,086 - 12,402)    | 435<br>(254 - 868)          | 2,358<br>(1,735 - 3,087)     | 2,332<br>(1,746 - 3,009)    | 3,816<br>(2,911 - 4,806)    |
| Upper respiratory infections                                      | 41<br>(21 - 71)                | 14<br>(2 - 42)               | 1<br>(0 - 5)                | 16<br>(5 - 32)               | 6<br>(1 - 14)               | 5<br>(1 - 12)               |
| Otitis media                                                      | 18<br>(15 - 22)                | 6<br>(3 - 9)                 | 1<br>(0 - 1)                | 3<br>(3 - 5)                 | 3<br>(2 - 3)                | 6<br>(4 - 8)                |
| Meningitis                                                        | 3,938<br>(3,049 - 5,073)       | 2,008<br>(1,239 - 3,048)     | 247<br>(129 - 537)          | 1,086<br>(746 - 1,521)       | 371<br>(261 - 508)          | 227<br>(160 - 329)          |
| Pneumococcal meningitis                                           | 950<br>(689 - 1,280)           | 385<br>(207 - 625)           | 76<br>(36 - 169)            | 322<br>(192 - 500)           | 105<br>(64 - 157)           | 63<br>(37 - 100)            |
| H influenzae type B meningitis                                    | 840<br>(563 - 1,231)           | 589<br>(341 - 971)           | 55<br>(25 - 126)            | 140<br>(83 - 228)            | 35<br>(19 - 57)             | 21<br>(12 - 33)             |
| Meningococcal meningitis                                          | 565<br>(400 - 754)             | 225<br>(128 - 368)           | 26<br>(10 - 65)             | 186<br>(103 - 291)           | 75<br>(40 - 122)            | 53<br>(30 - 84)             |
| Other meningitis                                                  | 1,583<br>(1,180 - 2,091)       | 809<br>(484 - 1,230)         | 90<br>(42 - 204)            | 438<br>(295 - 645)           | 156<br>(95 - 231)           | 90<br>(57 - 136)            |
| Encephalitis                                                      | 139<br>(108 - 181)             | 59<br>(38 - 93)              | 7<br>(4 - 15)               | 41<br>(27 - 62)              | 18<br>(13 - 26)             | 13<br>(9 - 18)              |
| Diphtheria                                                        | 31<br>(2 - 143)                | 23<br>(0 - 133)              | 4<br>(0 - 23)               | 3<br>(0 - 11)                | 0<br>(0 - 2)                | --                          |
| Whooping cough                                                    | 542<br>(1 - 2,880)             | 515<br>(1 - 2,719)           | 21<br>(0 - 119)             | 5<br>(0 - 28)                | 0<br>(0 - 2)                | --                          |
| Tetanus                                                           | 727<br>(511 - 1,004)           | 277<br>(155 - 488)           | 28<br>(14 - 63)             | 304<br>(187 - 415)           | 97<br>(53 - 156)            | 21<br>(12 - 31)             |
| Measles                                                           | 923<br>(220 - 2,670)           | 826<br>(198 - 2,422)         | 81<br>(17 - 233)            | 16<br>(4 - 45)               | 0<br>(0 - 1)                | --                          |
| Varicella and herpes zoster                                       | 28<br>(12 - 55)                | 11<br>(1 - 34)               | 2<br>(0 - 7)                | 6<br>(2 - 13)                | 2<br>(0 - 6)                | 7<br>(1 - 24)               |
| Neglected tropical diseases and malaria                           | 42,241<br>(33,711 - 52,346)    | 22,237<br>(14,884 - 30,806)  | 2,892<br>(1,729 - 5,669)    | 10,251<br>(6,817 - 15,369)   | 3,297<br>(2,092 - 5,132)    | 3,563<br>(2,116 - 6,036)    |
| Malaria                                                           | 39,669<br>(31,008 - 49,712)    | 21,497<br>(14,032 - 30,259)  | 2,369<br>(1,353 - 4,677)    | 9,236<br>(5,866 - 14,423)    | 3,100<br>(1,871 - 4,940)    | 3,466<br>(2,020 - 5,954)    |
| Leishmaniasis                                                     | 2,107<br>(1,087 - 3,396)       | 641<br>(201 - 1,345)         | 477<br>(179 - 1,133)        | 816<br>(433 - 1,282)         | 126<br>(60 - 223)           | 48<br>(24 - 91)             |
| Visceral leishmaniasis                                            | 2,107<br>(1,087 - 3,396)       | 641<br>(201 - 1,345)         | 477<br>(179 - 1,133)        | 816<br>(433 - 1,282)         | 126<br>(60 - 223)           | 48<br>(24 - 91)             |
| Schistosomiasis                                                   | 127<br>(89 - 170)              | 2<br>(1 - 3)                 | 3<br>(1 - 6)                | 73<br>(48 - 104)             | 33<br>(21 - 51)             | 16<br>(10 - 25)             |
| Cysticercosis                                                     | 9<br>(2 - 26)                  | 0<br>(0 - 1)                 | 0<br>(0 - 1)                | 7<br>(1 - 21)                | 1<br>(0 - 3)                | 0<br>(0 - 1)                |
| Cystic echinococcosis                                             | 16<br>(13 - 19)                | 2<br>(1 - 3)                 | 2<br>(1 - 4)                | 11<br>(8 - 13)               | 2<br>(1 - 2)                | 1<br>(1 - 1)                |
| Dengue                                                            | 5<br>(3 - 7)                   | 1<br>(0 - 1)                 | 1<br>(0 - 1)                | 3<br>(1 - 5)                 | 1<br>(0 - 1)                | 0<br>(0 - 0)                |
| Rabies                                                            | 149<br>(109 - 206)             | 24<br>(11 - 47)              | 32<br>(17 - 74)             | 77<br>(53 - 104)             | 13<br>(9 - 18)              | 3<br>(1 - 6)                |
| Intestinal nematode infections                                    | 58<br>(33 - 92)                | 43<br>(21 - 77)              | 7<br>(2 - 18)               | 6<br>(1 - 16)                | 1<br>(0 - 6)                | 1<br>(0 - 6)                |
| Ascariasis                                                        | 58<br>(33 - 92)                | 43<br>(21 - 77)              | 7<br>(2 - 18)               | 6<br>(1 - 16)                | 1<br>(0 - 6)                | 1<br>(0 - 6)                |
| Other neglected tropical diseases                                 | 100<br>(77 - 126)              | 28<br>(16 - 47)              | 2<br>(1 - 5)                | 22<br>(16 - 30)              | 20<br>(14 - 29)             | 27<br>(18 - 40)             |
| Maternal disorders                                                | 2,574<br>(1,567 - 3,783)       | --                           | 10<br>(3 - 24)              | 2,565<br>(1,554 - 3,776)     | --                          | --                          |

Web Table 31- Mozambique deaths with 95% UI by age, sex, and cause in 2013

| Cause                                                            | Both Sexes, All Ages        | Both Sexes, 0-4 Years       | Both Sexes, 5-14 Years | Both Sexes, 15-49 Years     | Both Sexes, 50-69 Years     | Both Sexes, 70-80 Years     |
|------------------------------------------------------------------|-----------------------------|-----------------------------|------------------------|-----------------------------|-----------------------------|-----------------------------|
| Maternal hemorrhage                                              | 286<br>(160 - 440)          | --                          | 1<br>(0 - 2)           | 285<br>(159 - 439)          | --                          | --                          |
| Maternal sepsis and other maternal infections                    | 300<br>(169 - 477)          | --                          | 2<br>(0 - 4)           | 298<br>(166 - 476)          | --                          | --                          |
| Maternal hypertensive disorders                                  | 276<br>(150 - 439)          | --                          | 1<br>(0 - 3)           | 275<br>(148 - 438)          | --                          | --                          |
| Maternal obstructed labor                                        | 120<br>(68 - 190)           | --                          | 0<br>(0 - 1)           | 120<br>(67 - 190)           | --                          | --                          |
| Maternal abortive outcome                                        | 410<br>(227 - 646)          | --                          | 1<br>(0 - 4)           | 409<br>(226 - 644)          | --                          | --                          |
| Indirect maternal deaths                                         | 280<br>(156 - 449)          | --                          | 1<br>(0 - 2)           | 279<br>(155 - 449)          | --                          | --                          |
| Late maternal deaths                                             | 219<br>(117 - 358)          | --                          | 2<br>(0 - 4)           | 217<br>(116 - 356)          | --                          | --                          |
| Maternal deaths aggravated by HIV/AIDS                           | 92<br>(49 - 146)            | --                          | --                     | 92<br>(49 - 146)            | --                          | --                          |
| Other maternal disorders                                         | 587<br>(340 - 876)          | --                          | 2<br>(1 - 5)           | 585<br>(338 - 874)          | --                          | --                          |
| Neonatal disorders                                               | 19,745<br>(16,665 - 22,919) | 19,745<br>(16,665 - 22,919) | --                     | --                          | --                          | --                          |
| Neonatal preterm birth complications                             | 4,704<br>(2,694 - 7,432)    | 4,704<br>(2,694 - 7,432)    | --                     | --                          | --                          | --                          |
| Neonatal encephalopathy due to birth asphyxia and trauma         | 5,458<br>(3,301 - 7,952)    | 5,458<br>(3,301 - 7,952)    | --                     | --                          | --                          | --                          |
| Neonatal sepsis and other neonatal infections                    | 5,937<br>(3,372 - 9,095)    | 5,937<br>(3,372 - 9,095)    | --                     | --                          | --                          | --                          |
| Hemolytic disease and other neonatal jaundice                    | 134<br>(43 - 349)           | 134<br>(43 - 349)           | --                     | --                          | --                          | --                          |
| Other neonatal disorders                                         | 3,513<br>(2,104 - 5,332)    | 3,513<br>(2,104 - 5,332)    | --                     | --                          | --                          | --                          |
| Nutritional deficiencies                                         | 6,204<br>(4,804 - 8,310)    | 2,779<br>(1,689 - 4,359)    | 249<br>(146 - 523)     | 1,296<br>(916 - 1,791)      | 728<br>(522 - 1,035)        | 1,151<br>(839 - 1,555)      |
| Protein-energy malnutrition                                      | 4,388<br>(3,104 - 6,326)    | 2,480<br>(1,485 - 3,959)    | 195<br>(107 - 415)     | 491<br>(289 - 847)          | 476<br>(306 - 733)          | 746<br>(479 - 1,090)        |
| Iodine deficiency                                                | 30<br>(5 - 86)              | 10<br>(0 - 58)              | 2<br>(0 - 11)          | 11<br>(1 - 39)              | 4<br>(0 - 16)               | 4<br>(0 - 17)               |
| Iron-deficiency anemia                                           | 1,721<br>(1,002 - 2,547)    | 283<br>(76 - 639)           | 51<br>(19 - 117)       | 779<br>(469 - 1,115)        | 237<br>(114 - 398)          | 371<br>(191 - 621)          |
| Other nutritional deficiencies                                   | 64<br>(36 - 109)            | 5<br>(1 - 14)               | 1<br>(0 - 2)           | 16<br>(8 - 35)              | 11<br>(6 - 20)              | 31<br>(14 - 60)             |
| Other communicable, maternal, neonatal, and nutritional diseases | 6,104<br>(3,248 - 9,732)    | 4,907<br>(2,313 - 8,330)    | 302<br>(122 - 662)     | 431<br>(304 - 585)          | 239<br>(162 - 350)          | 225<br>(129 - 380)          |
| Sexually transmitted diseases excluding HIV                      | 5,164<br>(2,430 - 8,832)    | 4,657<br>(2,085 - 8,072)    | 275<br>(100 - 613)     | 143<br>(88 - 211)           | 52<br>(30 - 89)             | 36<br>(20 - 66)             |
| Syphilis                                                         | 5,055<br>(2,322 - 8,742)    | 4,657<br>(2,085 - 8,072)    | 273<br>(99 - 610)      | 62<br>(39 - 91)             | 34<br>(20 - 60)             | 28<br>(16 - 52)             |
| Chlamydial infection                                             | 26<br>(15 - 38)             | --                          | 0<br>(0 - 1)           | 22<br>(11 - 34)             | 3<br>(1 - 6)                | 1<br>(1 - 3)                |
| Gonococcal infection                                             | 45<br>(32 - 63)             | --                          | 1<br>(0 - 2)           | 31<br>(20 - 46)             | 9<br>(5 - 16)               | 4<br>(2 - 8)                |
| Other sexually transmitted diseases                              | 37<br>(25 - 52)             | --                          | 1<br>(0 - 2)           | 28<br>(18 - 42)             | 6<br>(3 - 10)               | 2<br>(1 - 4)                |
| Hepatitis                                                        | 274<br>(220 - 334)          | 39<br>(22 - 64)             | 12<br>(7 - 24)         | 152<br>(106 - 206)          | 52<br>(37 - 73)             | 19<br>(14 - 26)             |
| Acute hepatitis A                                                | 30<br>(10 - 59)             | 15<br>(5 - 32)              | 4<br>(1 - 10)          | 10<br>(3 - 24)              | 1<br>(0 - 1)                | 0<br>(0 - 0)                |
| Acute hepatitis B                                                | 158<br>(108 - 213)          | 24<br>(10 - 44)             | 6<br>(2 - 12)          | 67<br>(36 - 107)            | 44<br>(30 - 63)             | 17<br>(12 - 24)             |
| Acute hepatitis C                                                | 3<br>(1 - 7)                | --                          | 0<br>(0 - 1)           | 2<br>(0 - 5)                | 1<br>(0 - 2)                | 0<br>(0 - 1)                |
| Acute hepatitis E                                                | 83<br>(42 - 132)            | 0<br>(0 - 1)                | 1<br>(0 - 3)           | 73<br>(38 - 116)            | 7<br>(2 - 15)               | 1<br>(0 - 3)                |
| Other infectious diseases                                        | 666<br>(460 - 940)          | 210<br>(114 - 349)          | 15<br>(7 - 35)         | 136<br>(80 - 219)           | 135<br>(73 - 228)           | 171<br>(81 - 325)           |
| Non-communicable diseases                                        | 58,701<br>(51,477 - 67,781) | 5,507<br>(3,747 - 7,934)    | 861<br>(573 - 1,773)   | 12,846<br>(10,286 - 15,081) | 17,463<br>(14,611 - 21,593) | 22,024<br>(19,133 - 25,351) |
| Neoplasms                                                        | 9,965<br>(8,660 - 11,562)   | 371<br>(251 - 532)          | 179<br>(111 - 376)     | 2,630<br>(2,098 - 3,111)    | 3,525<br>(2,939 - 4,363)    | 3,260<br>(2,787 - 3,832)    |
| Esophageal cancer                                                | 499<br>(394 - 665)          | --                          | --                     | 67<br>(50 - 99)             | 232<br>(168 - 319)          | 200<br>(154 - 268)          |
| Stomach cancer                                                   | 815<br>(682 - 990)          | --                          | --                     | 162<br>(126 - 203)          | 352<br>(280 - 455)          | 301<br>(230 - 387)          |
| Liver cancer                                                     | 790<br>(660 - 951)          | --                          | 7<br>(3 - 16)          | 257<br>(191 - 329)          | 284<br>(216 - 374)          | 242<br>(181 - 312)          |
| Liver cancer due to hepatitis B                                  | 198<br>(122 - 295)          | --                          | 2<br>(1 - 4)           | 88<br>(53 - 130)            | 69<br>(35 - 116)            | 39<br>(20 - 70)             |
| Liver cancer due to hepatitis C                                  | 348<br>(180 - 491)          | --                          | 1<br>(1 - 3)           | 94<br>(44 - 146)            | 131<br>(56 - 200)           | 122<br>(61 - 177)           |
| Liver cancer due to alcohol use                                  | 105<br>(65 - 164)           | --                          | --                     | 19<br>(10 - 32)             | 40<br>(22 - 67)             | 47<br>(28 - 75)             |

Web Table 31- Mozambique deaths with 95% UI by age, sex, and cause in 2013

| Cause                                         | Both Sexes, All Ages        | Both Sexes, 0-4 Years | Both Sexes, 5-14 Years | Both Sexes, 15-49 Years  | Both Sexes, 50-69 Years   | Both Sexes, 70-80 Years    |
|-----------------------------------------------|-----------------------------|-----------------------|------------------------|--------------------------|---------------------------|----------------------------|
| Liver cancer due to other causes              | 138<br>(94 - 209)           | --                    | 4<br>(2 - 8)           | 56<br>(35 - 83)          | 45<br>(25 - 79)           | 33<br>(19 - 57)            |
| Larynx cancer                                 | 72<br>(54 - 101)            | --                    | --                     | 13<br>(9 - 20)           | 30<br>(21 - 43)           | 29<br>(20 - 44)            |
| Tracheal, bronchus and lung cancer            | 602<br>(494 - 753)          | --                    | --                     | 70<br>(53 - 88)          | 314<br>(243 - 415)        | 218<br>(177 - 272)         |
| Breast cancer                                 | 746<br>(601 - 917)          | --                    | --                     | 368<br>(274 - 483)       | 242<br>(185 - 326)        | 136<br>(101 - 181)         |
| Cervical cancer                               | 868<br>(651 - 1,161)        | --                    | --                     | 321<br>(226 - 450)       | 338<br>(233 - 489)        | 209<br>(137 - 300)         |
| Uterine cancer                                | 68<br>(37 - 112)            | --                    | --                     | 10<br>(6 - 16)           | 34<br>(17 - 59)           | 24<br>(12 - 41)            |
| Prostate cancer                               | 634<br>(400 - 923)          | --                    | --                     | 11<br>(6 - 21)           | 188<br>(108 - 286)        | 435<br>(277 - 649)         |
| Colon and rectum cancer                       | 1,025<br>(870 - 1,215)      | --                    | --                     | 263<br>(206 - 321)       | 352<br>(282 - 442)        | 410<br>(331 - 501)         |
| Lip and oral cavity cancer                    | 169<br>(134 - 224)          | --                    | --                     | 45<br>(32 - 61)          | 72<br>(52 - 101)          | 52<br>(37 - 72)            |
| Nasopharynx cancer                            | 30<br>(22 - 43)             | --                    | 1<br>(0 - 1)           | 17<br>(11 - 27)          | 9<br>(6 - 13)             | 4<br>(3 - 6)               |
| Other pharynx cancer                          | 76<br>(59 - 99)             | --                    | --                     | 21<br>(15 - 29)          | 35<br>(24 - 51)           | 20<br>(14 - 29)            |
| Gallbladder and biliary tract cancer          | 179<br>(141 - 220)          | --                    | --                     | 73<br>(51 - 94)          | 72<br>(54 - 96)           | 34<br>(25 - 46)            |
| Pancreatic cancer                             | 222<br>(186 - 268)          | --                    | --                     | 64<br>(50 - 80)          | 108<br>(85 - 140)         | 50<br>(40 - 63)            |
| Malignant skin melanoma                       | 49<br>(36 - 65)             | --                    | --                     | 15<br>(10 - 22)          | 20<br>(14 - 27)           | 14<br>(10 - 19)            |
| Non-melanoma skin cancer                      | 58<br>(37 - 94)             | --                    | --                     | 13<br>(6 - 23)           | 17<br>(10 - 27)           | 29<br>(15 - 58)            |
| Ovarian cancer                                | 112<br>(87 - 142)           | --                    | --                     | 47<br>(30 - 66)          | 44<br>(31 - 62)           | 21<br>(14 - 30)            |
| Testicular cancer                             | 37<br>(23 - 54)             | --                    | --                     | 19<br>(11 - 28)          | 16<br>(8 - 26)            | 3<br>(2 - 5)               |
| Kidney cancer                                 | 240<br>(194 - 293)          | 29<br>(15 - 52)       | 6<br>(3 - 13)          | 43<br>(32 - 55)          | 93<br>(69 - 127)          | 69<br>(50 - 92)            |
| Bladder cancer                                | 170<br>(133 - 223)          | --                    | --                     | 28<br>(20 - 39)          | 50<br>(36 - 71)           | 92<br>(67 - 127)           |
| Brain and nervous system cancer               | 234<br>(179 - 306)          | 13<br>(5 - 28)        | 17<br>(9 - 37)         | 125<br>(89 - 163)        | 50<br>(35 - 76)           | 28<br>(19 - 39)            |
| Thyroid cancer                                | 23<br>(17 - 34)             | --                    | 0<br>(0 - 0)           | 2<br>(2 - 3)             | 11<br>(7 - 19)            | 9<br>(6 - 13)              |
| Mesothelioma                                  | 30<br>(21 - 43)             | --                    | --                     | 4<br>(3 - 6)             | 15<br>(9 - 26)            | 11<br>(6 - 18)             |
| Hodgkin lymphoma                              | 122<br>(90 - 154)           | 7<br>(3 - 14)         | 6<br>(2 - 16)          | 45<br>(32 - 60)          | 31<br>(21 - 45)           | 33<br>(21 - 46)            |
| Non-Hodgkin lymphoma                          | 531<br>(438 - 670)          | 74<br>(42 - 118)      | 30<br>(17 - 65)        | 159<br>(118 - 218)       | 126<br>(95 - 170)         | 141<br>(106 - 186)         |
| Multiple myeloma                              | 109<br>(86 - 137)           | --                    | --                     | 28<br>(20 - 37)          | 31<br>(23 - 41)           | 50<br>(37 - 66)            |
| Leukemia                                      | 208<br>(174 - 245)          | 18<br>(10 - 30)       | 16<br>(10 - 32)        | 88<br>(67 - 112)         | 37<br>(29 - 48)           | 48<br>(38 - 60)            |
| Other neoplasms                               | 1,249<br>(1,010 - 1,518)    | 230<br>(144 - 340)    | 95<br>(51 - 209)       | 252<br>(185 - 343)       | 326<br>(248 - 425)        | 346<br>(266 - 438)         |
| Cardiovascular diseases                       | 23,865<br>(20,496 - 28,153) | 326<br>(215 - 466)    | 100<br>(62 - 213)      | 3,485<br>(2,791 - 4,286) | 8,382<br>(6,927 - 10,414) | 11,571<br>(9,890 - 13,487) |
| Rheumatic heart disease                       | 996<br>(725 - 1,567)        | 10<br>(4 - 22)        | 22<br>(12 - 48)        | 476<br>(314 - 818)       | 276<br>(183 - 454)        | 212<br>(145 - 340)         |
| Ischemic heart disease                        | 5,502<br>(4,451 - 6,862)    | 2<br>(1 - 3)          | 6<br>(3 - 15)          | 521<br>(387 - 715)       | 2,000<br>(1,541 - 2,613)  | 2,973<br>(2,290 - 3,711)   |
| Cerebrovascular disease                       | 10,012<br>(8,100 - 12,100)  | 30<br>(17 - 49)       | 9<br>(5 - 19)          | 886<br>(666 - 1,144)     | 3,756<br>(2,969 - 4,794)  | 5,331<br>(4,213 - 6,456)   |
| Ischemic stroke                               | 4,599<br>(2,881 - 6,180)    | 3<br>(1 - 6)          | 1<br>(1 - 3)           | 148<br>(85 - 227)        | 1,324<br>(789 - 1,895)    | 3,123<br>(1,936 - 4,200)   |
| Hemorrhagic stroke                            | 5,413<br>(3,888 - 7,150)    | 28<br>(16 - 46)       | 8<br>(4 - 17)          | 738<br>(547 - 959)       | 2,432<br>(1,820 - 3,194)  | 2,208<br>(1,303 - 3,305)   |
| Hypertensive heart disease                    | 2,087<br>(1,386 - 3,371)    | 5<br>(2 - 10)         | 2<br>(1 - 5)           | 211<br>(117 - 308)       | 644<br>(408 - 995)        | 1,225<br>(753 - 2,150)     |
| Cardiomyopathy and myocarditis                | 1,373<br>(832 - 2,023)      | 143<br>(70 - 240)     | 28<br>(13 - 64)        | 449<br>(210 - 711)       | 394<br>(232 - 632)        | 358<br>(203 - 664)         |
| Atrial fibrillation and flutter               | 16<br>(9 - 26)              | --                    | --                     | 1<br>(0 - 1)             | 4<br>(2 - 6)              | 12<br>(5 - 21)             |
| Aortic aneurysm                               | 326<br>(199 - 484)          | --                    | --                     | 57<br>(27 - 88)          | 123<br>(72 - 196)         | 146<br>(92 - 218)          |
| Peripheral vascular disease                   | 22<br>(11 - 34)             | --                    | --                     | 1<br>(0 - 2)             | 7<br>(3 - 12)             | 14<br>(7 - 22)             |
| Endocarditis                                  | 320<br>(212 - 501)          | 19<br>(8 - 39)        | 4<br>(2 - 10)          | 69<br>(41 - 108)         | 98<br>(58 - 157)          | 129<br>(71 - 247)          |
| Other cardiovascular and circulatory diseases | 3,211<br>(1,943 - 5,048)    | 117<br>(53 - 218)     | 28<br>(12 - 61)        | 813<br>(445 - 1,239)     | 1,081<br>(605 - 1,777)    | 1,171<br>(672 - 2,075)     |

Web Table 31- Mozambique deaths with 95% UI by age, sex, and cause in 2013

| Cause                                               | Both Sexes, All Ages     | Both Sexes, 0-4 Years | Both Sexes, 5-14 Years | Both Sexes, 15-49 Years | Both Sexes, 50-69 Years | Both Sexes, 70-80 Years  |
|-----------------------------------------------------|--------------------------|-----------------------|------------------------|-------------------------|-------------------------|--------------------------|
| Chronic respiratory diseases                        | 3,504<br>(2,940 - 4,198) | 145<br>(86 - 224)     | 39<br>(23 - 79)        | 576<br>(435 - 719)      | 1,041<br>(813 - 1,348)  | 1,703<br>(1,383 - 2,126) |
| Chronic obstructive pulmonary disease               | 1,934<br>(1,550 - 2,460) | 31<br>(15 - 57)       | 16<br>(9 - 34)         | 209<br>(154 - 280)      | 596<br>(449 - 793)      | 1,081<br>(831 - 1,410)   |
| Pneumoconiosis                                      | 272<br>(175 - 403)       | 4<br>(1 - 8)          | 2<br>(1 - 5)           | 73<br>(45 - 106)        | 108<br>(64 - 171)       | 86<br>(52 - 131)         |
| Silicosis                                           | 71<br>(36 - 125)         | 1<br>(0 - 3)          | 1<br>(0 - 1)           | 16<br>(7 - 31)          | 28<br>(14 - 53)         | 25<br>(13 - 45)          |
| Asbestosis                                          | 29<br>(17 - 46)          | 1<br>(0 - 1)          | 0<br>(0 - 1)           | 8<br>(4 - 13)           | 14<br>(8 - 22)          | 7<br>(4 - 12)            |
| Coal workers pneumoconiosis                         | 35<br>(19 - 56)          | 0<br>(0 - 1)          | 0<br>(0 - 1)           | 7<br>(4 - 11)           | 16<br>(8 - 28)          | 12<br>(5 - 21)           |
| Other pneumoconiosis                                | 137<br>(90 - 199)        | 2<br>(1 - 4)          | 1<br>(0 - 2)           | 42<br>(26 - 64)         | 50<br>(30 - 80)         | 41<br>(24 - 65)          |
| Asthma                                              | 698<br>(538 - 906)       | 40<br>(17 - 80)       | 11<br>(6 - 21)         | 142<br>(98 - 196)       | 200<br>(146 - 281)      | 305<br>(213 - 427)       |
| Interstitial lung disease and pulmonary sarcoidosis | 345<br>(164 - 531)       | 5<br>(1 - 16)         | 2<br>(1 - 5)           | 49<br>(15 - 110)        | 105<br>(47 - 178)       | 183<br>(71 - 301)        |
| Other chronic respiratory diseases                  | 256<br>(183 - 344)       | 66<br>(38 - 103)      | 8<br>(4 - 18)          | 102<br>(64 - 149)       | 31<br>(19 - 49)         | 49<br>(30 - 75)          |
| Cirrhosis                                           | 2,428<br>(2,057 - 2,881) | 39<br>(18 - 74)       | 34<br>(21 - 74)        | 918<br>(709 - 1,134)    | 867<br>(683 - 1,110)    | 571<br>(454 - 714)       |
| Cirrhosis due to hepatitis B                        | 658<br>(423 - 924)       | 2<br>(1 - 4)          | 5<br>(2 - 11)          | 242<br>(146 - 359)      | 245<br>(149 - 362)      | 164<br>(100 - 242)       |
| Cirrhosis due to hepatitis C                        | 489<br>(287 - 702)       | 2<br>(0 - 5)          | 3<br>(1 - 7)           | 143<br>(65 - 228)       | 193<br>(102 - 295)      | 148<br>(86 - 216)        |
| Cirrhosis due to alcohol use                        | 877<br>(657 - 1,147)     | --                    | --                     | 308<br>(216 - 430)      | 346<br>(243 - 480)      | 223<br>(156 - 305)       |
| Cirrhosis due to other causes                       | 405<br>(304 - 531)       | 36<br>(16 - 68)       | 25<br>(15 - 54)        | 225<br>(151 - 323)      | 83<br>(49 - 121)        | 36<br>(21 - 55)          |
| Digestive diseases                                  | 3,603<br>(3,020 - 4,317) | 126<br>(67 - 214)     | 93<br>(57 - 198)       | 1,259<br>(964 - 1,617)  | 952<br>(743 - 1,232)    | 1,172<br>(938 - 1,442)   |
| Peptic ulcer disease                                | 1,081<br>(781 - 1,527)   | 12<br>(4 - 26)        | 11<br>(5 - 25)         | 364<br>(230 - 578)      | 314<br>(209 - 460)      | 381<br>(262 - 531)       |
| Gastritis and duodenitis                            | 157<br>(76 - 331)        | 8<br>(3 - 16)         | 6<br>(3 - 15)          | 53<br>(29 - 84)         | 35<br>(14 - 82)         | 55<br>(18 - 168)         |
| Appendicitis                                        | 342<br>(247 - 442)       | 9<br>(4 - 18)         | 15<br>(7 - 31)         | 153<br>(102 - 220)      | 75<br>(48 - 114)        | 90<br>(54 - 141)         |
| Paralytic ileus and intestinal obstruction          | 898<br>(628 - 1,240)     | 29<br>(12 - 56)       | 32<br>(18 - 67)        | 253<br>(162 - 368)      | 273<br>(177 - 404)      | 311<br>(203 - 477)       |
| Inguinal, femoral, and abdominal hernia             | 71<br>(47 - 105)         | 3<br>(1 - 9)          | 1<br>(1 - 4)           | 28<br>(18 - 41)         | 14<br>(8 - 24)          | 24<br>(15 - 38)          |
| Inflammatory bowel disease                          | 230<br>(127 - 310)       | 31<br>(12 - 60)       | 9<br>(4 - 20)          | 100<br>(55 - 147)       | 39<br>(17 - 62)         | 51<br>(23 - 85)          |
| Vascular intestinal disorders                       | 33<br>(16 - 68)          | 1<br>(0 - 2)          | 1<br>(0 - 2)           | 7<br>(3 - 14)           | 9<br>(4 - 18)           | 16<br>(7 - 43)           |
| Gallbladder and biliary diseases                    | 225<br>(170 - 292)       | 4<br>(2 - 7)          | 3<br>(2 - 7)           | 65<br>(44 - 93)         | 58<br>(39 - 83)         | 95<br>(63 - 139)         |
| Pancreatitis                                        | 184<br>(97 - 284)        | 2<br>(1 - 5)          | 2<br>(1 - 5)           | 100<br>(50 - 169)       | 44<br>(20 - 73)         | 36<br>(16 - 64)          |
| Other digestive diseases                            | 381<br>(290 - 496)       | 27<br>(12 - 51)       | 13<br>(7 - 28)         | 136<br>(91 - 188)       | 92<br>(62 - 136)        | 113<br>(75 - 184)        |
| Neurological disorders                              | 2,349<br>(1,967 - 2,755) | 216<br>(118 - 379)    | 97<br>(53 - 221)       | 582<br>(422 - 795)      | 215<br>(172 - 269)      | 1,239<br>(991 - 1,513)   |
| Alzheimer disease and other dementias               | 1,183<br>(938 - 1,456)   | --                    | --                     | 1<br>(0 - 1)            | 103<br>(78 - 135)       | 1,080<br>(850 - 1,331)   |
| Parkinson disease                                   | 16<br>(9 - 27)           | --                    | --                     | 1<br>(1 - 2)            | 2<br>(1 - 4)            | 13<br>(6 - 23)           |
| Epilepsy                                            | 964<br>(744 - 1,229)     | 179<br>(86 - 334)     | 87<br>(46 - 202)       | 519<br>(360 - 728)      | 64<br>(43 - 93)         | 116<br>(79 - 173)        |
| Multiple sclerosis                                  | 12<br>(6 - 22)           | --                    | --                     | 7<br>(3 - 17)           | 3<br>(2 - 5)            | 1<br>(1 - 2)             |
| Other neurological disorders                        | 174<br>(136 - 233)       | 37<br>(23 - 79)       | 10<br>(7 - 23)         | 55<br>(40 - 76)         | 43<br>(33 - 56)         | 29<br>(22 - 37)          |
| Mental and substance use disorders                  | 1,210<br>(846 - 1,702)   | 35<br>(8 - 78)        | 0<br>(0 - 0)           | 891<br>(575 - 1,278)    | 236<br>(152 - 368)      | 48<br>(32 - 76)          |
| Schizophrenia                                       | 35<br>(17 - 68)          | --                    | --                     | 24<br>(9 - 48)          | 7<br>(4 - 14)           | 4<br>(2 - 8)             |
| Alcohol use disorders                               | 850<br>(469 - 1,270)     | --                    | --                     | 618<br>(316 - 977)      | 200<br>(116 - 315)      | 32<br>(19 - 52)          |
| Drug use disorders                                  | 324<br>(223 - 459)       | 35<br>(8 - 78)        | --                     | 248<br>(176 - 360)      | 29<br>(13 - 49)         | 12<br>(4 - 24)           |
| Opioid use disorders                                | 34<br>(23 - 48)          | 4<br>(1 - 9)          | --                     | 26<br>(18 - 39)         | 3<br>(1 - 5)            | 1<br>(0 - 3)             |
| Cocaine use disorders                               | 1<br>(1 - 2)             | 0<br>(0 - 0)          | --                     | 1<br>(1 - 2)            | 0<br>(0 - 0)            | 0<br>(0 - 0)             |
| Amphetamine use disorders                           | 1<br>(1 - 2)             | 0<br>(0 - 0)          | --                     | 1<br>(1 - 1)            | 0<br>(0 - 0)            | 0<br>(0 - 0)             |
| Other drug use disorders                            | 287<br>(197 - 407)       | 31<br>(7 - 69)        | --                     | 219<br>(156 - 318)      | 26<br>(12 - 44)         | 11<br>(3 - 21)           |

Web Table 31- Mozambique deaths with 95% UI by age, sex, and cause in 2013

| Cause                                               | Both Sexes, All Ages     | Both Sexes, 0-4 Years    | Both Sexes, 5-14 Years | Both Sexes, 15-49 Years  | Both Sexes, 50-69 Years  | Both Sexes, 70-80 Years  |
|-----------------------------------------------------|--------------------------|--------------------------|------------------------|--------------------------|--------------------------|--------------------------|
| Eating disorders                                    | 1<br>(1 - 2)             | --                       | 0<br>(0 - 0)           | 1<br>(1 - 2)             | --                       | --                       |
| Anorexia nervosa                                    | 1<br>(1 - 2)             | --                       | 0<br>(0 - 0)           | 1<br>(1 - 2)             | --                       | --                       |
| Diabetes, urogenital, blood, and endocrine diseases | 6,820<br>(5,797 - 7,962) | 600<br>(379 - 886)       | 160<br>(100 - 340)     | 1,954<br>(1,535 - 2,368) | 2,001<br>(1,621 - 2,502) | 2,105<br>(1,769 - 2,510) |
| Diabetes mellitus                                   | 2,914<br>(2,439 - 3,500) | 26<br>(16 - 41)          | 11<br>(6 - 23)         | 531<br>(420 - 654)       | 1,188<br>(936 - 1,519)   | 1,159<br>(944 - 1,435)   |
| Acute glomerulonephritis                            | 126<br>(93 - 164)        | 9<br>(5 - 15)            | 3<br>(2 - 6)           | 43<br>(25 - 67)          | 43<br>(28 - 62)          | 29<br>(20 - 41)          |
| Chronic kidney disease                              | 1,230<br>(1,018 - 1,535) | 69<br>(43 - 106)         | 33<br>(20 - 67)        | 487<br>(366 - 648)       | 267<br>(205 - 352)       | 374<br>(293 - 482)       |
| Chronic kidney disease due to diabetes mellitus     | 6<br>(3 - 10)            | 0<br>(0 - 0)             | 0<br>(0 - 1)           | 2<br>(1 - 3)             | 2<br>(1 - 4)             | 2<br>(1 - 4)             |
| Chronic kidney disease due to hypertension          | 502<br>(361 - 721)       | 10<br>(4 - 21)           | 4<br>(2 - 8)           | 124<br>(77 - 198)        | 146<br>(95 - 221)        | 219<br>(142 - 328)       |
| Chronic kidney disease due to glomerulonephritis    | 442<br>(326 - 582)       | 46<br>(28 - 71)          | 21<br>(13 - 42)        | 230<br>(152 - 327)       | 70<br>(44 - 107)         | 75<br>(43 - 116)         |
| Chronic kidney disease due to other causes          | 280<br>(163 - 389)       | 13<br>(6 - 25)           | 8<br>(4 - 17)          | 130<br>(70 - 201)        | 50<br>(23 - 87)          | 79<br>(35 - 133)         |
| Urinary diseases and male infertility               | 1,013<br>(824 - 1,248)   | 70<br>(37 - 123)         | 18<br>(10 - 39)        | 351<br>(258 - 447)       | 288<br>(211 - 395)       | 287<br>(209 - 381)       |
| Interstitial nephritis and urinary tract infections | 709<br>(556 - 873)       | 49<br>(24 - 92)          | 10<br>(6 - 22)         | 214<br>(145 - 277)       | 211<br>(151 - 294)       | 225<br>(158 - 304)       |
| Urolithiasis                                        | 43<br>(24 - 76)          | --                       | 2<br>(1 - 4)           | 21<br>(9 - 43)           | 12<br>(6 - 24)           | 8<br>(3 - 17)            |
| Other urinary diseases                              | 262<br>(185 - 383)       | 21<br>(11 - 39)          | 6<br>(3 - 13)          | 115<br>(75 - 176)        | 66<br>(37 - 109)         | 54<br>(26 - 100)         |
| Gynecological diseases                              | 16<br>(11 - 24)          | --                       | --                     | 8<br>(5 - 14)            | 4<br>(2 - 7)             | 4<br>(2 - 7)             |
| Uterine fibroids                                    | 3<br>(2 - 5)             | --                       | --                     | 1<br>(1 - 2)             | 1<br>(1 - 2)             | 1<br>(1 - 2)             |
| Polycystic ovarian syndrome                         | 1<br>(0 - 1)             | --                       | --                     | 1<br>(0 - 1)             | 0<br>(0 - 0)             | --                       |
| Endometriosis                                       | 2<br>(1 - 2)             | --                       | --                     | 1<br>(1 - 2)             | 0<br>(0 - 0)             | --                       |
| Genital prolapse                                    | 3<br>(2 - 4)             | --                       | --                     | 1<br>(1 - 2)             | 1<br>(0 - 1)             | 1<br>(1 - 2)             |
| Other gynecological diseases                        | 8<br>(5 - 12)            | --                       | --                     | 4<br>(2 - 7)             | 2<br>(1 - 4)             | 2<br>(1 - 3)             |
| Hemoglobinopathies and hemolytic anemias            | 733<br>(364 - 1,149)     | 269<br>(97 - 487)        | 75<br>(32 - 157)       | 288<br>(119 - 490)       | 54<br>(29 - 113)         | 47<br>(23 - 116)         |
| Thalassemias                                        | 58<br>(24 - 97)          | 35<br>(12 - 64)          | 6<br>(3 - 12)          | 17<br>(7 - 30)           | 0<br>(0 - 0)             | 0<br>(0 - 0)             |
| Sickle cell disorders                               | 447<br>(199 - 722)       | 157<br>(53 - 290)        | 56<br>(24 - 118)       | 206<br>(83 - 352)        | 28<br>(15 - 59)          | 1<br>(1 - 3)             |
| G6PD deficiency                                     | 65<br>(30 - 103)         | 30<br>(11 - 54)          | 6<br>(2 - 12)          | 24<br>(9 - 41)           | 4<br>(2 - 8)             | 2<br>(1 - 4)             |
| Other hemoglobinopathies and hemolytic anemias      | 163<br>(96 - 252)        | 47<br>(21 - 82)          | 7<br>(3 - 16)          | 42<br>(19 - 66)          | 22<br>(12 - 48)          | 45<br>(22 - 110)         |
| Endocrine, metabolic, blood, and immune disorders   | 787<br>(616 - 977)       | 158<br>(101 - 235)       | 21<br>(11 - 44)        | 246<br>(171 - 343)       | 157<br>(112 - 212)       | 205<br>(136 - 282)       |
| Musculoskeletal disorders                           | 329<br>(217 - 460)       | --                       | 20<br>(9 - 44)         | 181<br>(88 - 294)        | 72<br>(50 - 101)         | 55<br>(36 - 96)          |
| Rheumatoid arthritis                                | 87<br>(54 - 130)         | --                       | 4<br>(2 - 10)          | 32<br>(12 - 62)          | 25<br>(14 - 45)          | 26<br>(14 - 55)          |
| Other musculoskeletal disorders                     | 242<br>(144 - 347)       | --                       | 16<br>(7 - 35)         | 150<br>(71 - 239)        | 47<br>(30 - 66)          | 30<br>(19 - 49)          |
| Other non-communicable diseases                     | 4,627<br>(3,026 - 7,199) | 3,648<br>(2,171 - 6,076) | 139<br>(70 - 310)      | 369<br>(237 - 589)       | 171<br>(131 - 226)       | 299<br>(224 - 395)       |
| Congenital anomalies                                | 3,824<br>(2,270 - 6,310) | 3,431<br>(1,972 - 5,800) | 129<br>(62 - 289)      | 199<br>(103 - 372)       | 31<br>(23 - 40)          | 34<br>(26 - 43)          |
| Neural tube defects                                 | 1,214<br>(346 - 2,960)   | 1,129<br>(306 - 2,767)   | 29<br>(6 - 87)         | 50<br>(10 - 157)         | 4<br>(1 - 9)             | 2<br>(1 - 6)             |
| Congenital heart anomalies                          | 1,499<br>(691 - 2,910)   | 1,319<br>(563 - 2,638)   | 64<br>(26 - 163)       | 89<br>(38 - 197)         | 12<br>(8 - 17)           | 14<br>(9 - 20)           |
| Cleft lip and cleft palate                          | 18<br>(3 - 45)           | 18<br>(3 - 45)           | --                     | --                       | --                       | --                       |
| Down syndrome                                       | 247<br>(69 - 529)        | 203<br>(49 - 464)        | 14<br>(4 - 32)         | 26<br>(8 - 53)           | 4<br>(3 - 7)             | 1<br>(1 - 1)             |
| Chromosomal unbalanced rearrangements               | 138<br>(40 - 342)        | 127<br>(35 - 324)        | 3<br>(1 - 8)           | 6<br>(2 - 16)            | 1<br>(0 - 1)             | 1<br>(0 - 1)             |
| Other congenital anomalies                          | 708<br>(291 - 1,773)     | 635<br>(238 - 1,611)     | 20<br>(8 - 54)         | 27<br>(12 - 74)          | 10<br>(7 - 16)           | 16<br>(10 - 22)          |
| Skin and subcutaneous diseases                      | 743<br>(604 - 922)       | 157<br>(90 - 269)        | 10<br>(6 - 21)         | 170<br>(121 - 227)       | 140<br>(104 - 192)       | 266<br>(194 - 360)       |
| Cellulitis                                          | 390<br>(212 - 611)       | 82<br>(29 - 180)         | 6<br>(2 - 13)          | 94<br>(51 - 150)         | 79<br>(41 - 130)         | 128<br>(62 - 219)        |
| Pyoderma                                            | 270<br>(133 - 433)       | 70<br>(23 - 137)         | 3<br>(1 - 8)           | 62<br>(25 - 110)         | 48<br>(22 - 87)          | 87<br>(42 - 157)         |

Web Table 31- Mozambique deaths with 95% UI by age, sex, and cause in 2013

| Cause                                           | Both Sexes, All Ages        | Both Sexes, 0-4 Years    | Both Sexes, 5-14 Years | Both Sexes, 15-49 Years   | Both Sexes, 50-69 Years  | Both Sexes, 70-80 Years  |
|-------------------------------------------------|-----------------------------|--------------------------|------------------------|---------------------------|--------------------------|--------------------------|
| Decubitus ulcer                                 | 67<br>(33 - 110)            | 2<br>(0 - 4)             | 1<br>(0 - 2)           | 9<br>(2 - 17)             | 10<br>(4 - 18)           | 46<br>(22 - 79)          |
| Other skin and subcutaneous diseases            | 15<br>(6 - 29)              | 3<br>(1 - 7)             | 0<br>(0 - 1)           | 5<br>(1 - 13)             | 3<br>(1 - 5)             | 4<br>(2 - 8)             |
| Sudden infant death syndrome                    | 60<br>(20 - 139)            | 60<br>(20 - 139)         | --                     | --                        | --                       | --                       |
| Injuries                                        | 16,532<br>(13,910 - 19,427) | 2,075<br>(1,417 - 3,087) | 937<br>(604 - 1,962)   | 9,222<br>(7,082 - 11,380) | 2,385<br>(1,904 - 3,026) | 1,913<br>(1,589 - 2,261) |
| Transport injuries                              | 6,689<br>(5,423 - 8,214)    | 514<br>(302 - 823)       | 415<br>(250 - 835)     | 3,964<br>(2,998 - 5,114)  | 1,095<br>(836 - 1,433)   | 701<br>(547 - 917)       |
| Road injuries                                   | 6,422<br>(5,202 - 7,873)    | 457<br>(272 - 744)       | 383<br>(228 - 763)     | 3,872<br>(2,926 - 4,987)  | 1,053<br>(806 - 1,376)   | 656<br>(512 - 858)       |
| Pedestrian road injuries                        | 3,633<br>(2,880 - 4,543)    | 273<br>(158 - 468)       | 242<br>(141 - 484)     | 2,081<br>(1,531 - 2,741)  | 622<br>(467 - 842)       | 414<br>(316 - 565)       |
| Cyclist road injuries                           | 309<br>(222 - 417)          | 17<br>(7 - 36)           | 26<br>(13 - 57)        | 151<br>(104 - 221)        | 74<br>(49 - 108)         | 41<br>(26 - 62)          |
| Motorcyclist road injuries                      | 409<br>(286 - 596)          | 15<br>(8 - 25)           | 7<br>(4 - 17)          | 324<br>(218 - 485)        | 35<br>(23 - 54)          | 26<br>(16 - 41)          |
| Motor vehicle road injuries                     | 2,012<br>(1,513 - 2,545)    | 133<br>(74 - 219)        | 100<br>(57 - 210)      | 1,308<br>(928 - 1,754)    | 308<br>(215 - 429)       | 163<br>(117 - 226)       |
| Other road injuries                             | 60<br>(39 - 88)             | 19<br>(9 - 37)           | 8<br>(4 - 19)          | 8<br>(5 - 13)             | 14<br>(8 - 23)           | 11<br>(5 - 19)           |
| Other transport injuries                        | 267<br>(206 - 368)          | 57<br>(31 - 93)          | 31<br>(17 - 68)        | 92<br>(63 - 150)          | 41<br>(28 - 61)          | 45<br>(31 - 66)          |
| Unintentional injuries                          | 5,748<br>(4,747 - 6,838)    | 1,411<br>(952 - 2,051)   | 447<br>(285 - 943)     | 2,121<br>(1,623 - 2,628)  | 820<br>(639 - 1,055)     | 949<br>(759 - 1,157)     |
| Falls                                           | 904<br>(619 - 1,153)        | 55<br>(28 - 97)          | 46<br>(23 - 99)        | 267<br>(166 - 374)        | 195<br>(118 - 284)       | 341<br>(226 - 480)       |
| Drowning                                        | 1,014<br>(660 - 1,387)      | 228<br>(110 - 452)       | 142<br>(71 - 323)      | 513<br>(304 - 715)        | 91<br>(61 - 129)         | 41<br>(25 - 60)          |
| Fire, heat, and hot substances                  | 1,005<br>(707 - 1,409)      | 417<br>(222 - 761)       | 85<br>(45 - 177)       | 276<br>(177 - 386)        | 117<br>(74 - 167)        | 109<br>(73 - 151)        |
| Poisonings                                      | 281<br>(21 - 368)           | 51<br>(27 - 91)          | 11<br>(6 - 24)         | 148<br>(102 - 210)        | 51<br>(34 - 72)          | 21<br>(14 - 30)          |
| Exposure to mechanical forces                   | 823<br>(657 - 1,076)        | 216<br>(123 - 373)       | 58<br>(32 - 128)       | 370<br>(274 - 491)        | 125<br>(89 - 180)        | 55<br>(41 - 72)          |
| Unintentional firearm injuries                  | 220<br>(158 - 303)          | 17<br>(9 - 29)           | 6<br>(3 - 13)          | 171<br>(113 - 251)        | 16<br>(10 - 24)          | 10<br>(7 - 15)           |
| Unintentional suffocation                       | 115<br>(63 - 267)           | 80<br>(31 - 210)         | 8<br>(3 - 19)          | 13<br>(8 - 22)            | 12<br>(7 - 23)           | 3<br>(2 - 5)             |
| Other exposure to mechanical forces             | 488<br>(374 - 647)          | 119<br>(62 - 213)        | 44<br>(22 - 100)       | 187<br>(133 - 267)        | 97<br>(64 - 148)         | 42<br>(29 - 58)          |
| Adverse effects of medical treatment            | 736<br>(571 - 947)          | 196<br>(111 - 345)       | 18<br>(10 - 38)        | 155<br>(105 - 217)        | 132<br>(92 - 186)        | 235<br>(159 - 341)       |
| Animal contact                                  | 382<br>(250 - 646)          | 55<br>(29 - 105)         | 39<br>(20 - 93)        | 175<br>(102 - 311)        | 60<br>(39 - 94)          | 52<br>(33 - 83)          |
| Venomous animal contact                         | 233<br>(139 - 418)          | 38<br>(17 - 83)          | 17<br>(8 - 42)         | 110<br>(58 - 226)         | 32<br>(19 - 52)          | 36<br>(21 - 58)          |
| Non-venomous animal contact                     | 149<br>(101 - 233)          | 17<br>(8 - 34)           | 22<br>(10 - 48)        | 66<br>(39 - 109)          | 28<br>(17 - 49)          | 16<br>(9 - 28)           |
| Foreign body                                    | 280<br>(193 - 409)          | 147<br>(85 - 231)        | 13<br>(7 - 29)         | 34<br>(22 - 54)           | 15<br>(10 - 21)          | 70<br>(47 - 103)         |
| Pulmonary aspiration and foreign body in airway | 267<br>(181 - 396)          | 144<br>(83 - 227)        | 12<br>(7 - 26)         | 32<br>(20 - 52)           | 11<br>(7 - 16)           | 67<br>(44 - 100)         |
| Foreign body in other body part                 | 13<br>(9 - 20)              | 3<br>(2 - 5)             | 1<br>(1 - 3)           | 2<br>(1 - 3)              | 4<br>(2 - 6)             | 3<br>(2 - 5)             |
| Other unintentional injuries                    | 324<br>(253 - 394)          | 47<br>(29 - 74)          | 36<br>(21 - 78)        | 183<br>(134 - 238)        | 33<br>(24 - 46)          | 24<br>(18 - 32)          |
| Self-harm and interpersonal violence            | 4,008<br>(2,998 - 5,085)    | 127<br>(68 - 231)        | 72<br>(38 - 158)       | 3,092<br>(2,207 - 4,123)  | 457<br>(317 - 629)       | 260<br>(179 - 358)       |
| Self-harm                                       | 1,744<br>(1,225 - 2,221)    | --                       | 20<br>(7 - 50)         | 1,168<br>(770 - 1,587)    | 321<br>(217 - 443)       | 234<br>(155 - 329)       |
| Interpersonal violence                          | 2,264<br>(1,550 - 3,146)    | 127<br>(68 - 231)        | 52<br>(26 - 115)       | 1,924<br>(1,274 - 2,772)  | 136<br>(78 - 209)        | 25<br>(15 - 40)          |
| Assault by firearm                              | 745<br>(409 - 1,197)        | 20<br>(7 - 42)           | 9<br>(3 - 21)          | 670<br>(363 - 1,085)      | 41<br>(18 - 75)          | 4<br>(2 - 9)             |
| Assault by sharp object                         | 434<br>(213 - 678)          | 20<br>(7 - 42)           | 8<br>(3 - 18)          | 372<br>(177 - 601)        | 31<br>(12 - 60)          | 4<br>(1 - 10)            |
| Assault by other means                          | 1,085<br>(719 - 1,556)      | 87<br>(44 - 168)         | 35<br>(17 - 82)        | 882<br>(543 - 1,313)      | 64<br>(37 - 103)         | 17<br>(10 - 28)          |
| Forces of nature, war, and legal intervention   | 87<br>(36 - 140)            | 23<br>(0 - 0)            | 3<br>(2 - 8)           | 44<br>(25 - 86)           | 14<br>(8 - 28)           | 3<br>(2 - 6)             |
| Exposure to forces of nature                    | 87<br>(36 - 140)            | 23<br>(0 - 0)            | 3<br>(2 - 8)           | 44<br>(25 - 86)           | 14<br>(8 - 28)           | 3<br>(2 - 6)             |

Web Table 31- Mozambique deaths with 95% UI by age, sex, and cause in 2013

| Cause                                                             | Males, All Ages                | Males, 0-4 Years            | Males, 5-14 Years         | Males, 15-49 Years          | Males, 50-69 Years          | Males, 70-80 Years          |
|-------------------------------------------------------------------|--------------------------------|-----------------------------|---------------------------|-----------------------------|-----------------------------|-----------------------------|
| All causes                                                        | 146,288<br>(134,300 - 159,635) | 47,418<br>(41,200 - 54,452) | 6,700<br>(5,544 - 10,580) | 46,358<br>(41,063 - 50,734) | 26,136<br>(22,456 - 30,930) | 19,677<br>(17,540 - 22,789) |
| Communicable, maternal, neonatal, and nutritional diseases        | 103,675<br>(95,260 - 113,374)  | 43,812<br>(38,014 - 49,950) | 5,640<br>(4,657 - 8,469)  | 32,584<br>(28,487 - 36,953) | 13,414<br>(11,466 - 15,517) | 8,226<br>(6,892 - 9,889)    |
| HIV/AIDS and tuberculosis                                         | 44,773<br>(39,666 - 50,016)    | 6,688<br>(5,309 - 7,871)    | 3,104<br>(2,635 - 3,596)  | 23,626<br>(19,850 - 27,772) | 8,282<br>(6,867 - 9,775)    | 3,072<br>(2,398 - 3,778)    |
| Tuberculosis                                                      | 9,214<br>(7,203 - 11,545)      | 233<br>(128 - 380)          | 56<br>(29 - 135)          | 3,702<br>(2,757 - 4,843)    | 2,869<br>(2,055 - 3,981)    | 2,354<br>(1,701 - 3,056)    |
| HIV/AIDS                                                          | 35,558<br>(30,206 - 40,857)    | 6,455<br>(5,033 - 7,607)    | 3,048<br>(2,574 - 3,548)  | 19,924<br>(15,657 - 24,131) | 5,413<br>(4,279 - 6,723)    | 718<br>(521 - 976)          |
| HIV/AIDS resulting in mycobacterial infection                     | 2,534<br>(1,960 - 3,201)       | 426<br>(321 - 553)          | 184<br>(144 - 234)        | 1,458<br>(1,064 - 1,930)    | 408<br>(289 - 550)          | 57<br>(39 - 82)             |
| HIV/AIDS resulting in other diseases                              | 33,025<br>(28,165 - 38,019)    | 6,030<br>(4,714 - 7,123)    | 2,864<br>(2,418 - 3,319)  | 18,466<br>(14,536 - 22,321) | 5,005<br>(3,948 - 6,199)    | 661<br>(476 - 895)          |
| Diarrhea, lower respiratory, and other common infectious diseases | 19,926<br>(16,170 - 23,880)    | 9,315<br>(6,539 - 12,307)   | 838<br>(506 - 1,791)      | 3,643<br>(2,694 - 4,702)    | 2,882<br>(2,030 - 3,992)    | 3,249<br>(2,459 - 4,206)    |
| Diarrheal diseases                                                | 6,431<br>(4,609 - 8,753)       | 2,436<br>(1,159 - 4,313)    | 238<br>(100 - 553)        | 1,477<br>(982 - 2,184)      | 1,117<br>(637 - 1,826)      | 1,164<br>(712 - 1,795)      |
| Intestinal infectious diseases                                    | 529<br>(274 - 932)             | 189<br>(83 - 360)           | 122<br>(52 - 284)         | 189<br>(88 - 341)           | 21<br>(9 - 40)              | 8<br>(3 - 15)               |
| Typhoid fever                                                     | 371<br>(176 - 666)             | 118<br>(48 - 249)           | 92<br>(38 - 221)          | 141<br>(61 - 258)           | 14<br>(6 - 28)              | 5<br>(2 - 9)                |
| Paratyphoid fever                                                 | 101<br>(45 - 197)              | 37<br>(13 - 81)             | 25<br>(8 - 63)            | 35<br>(14 - 71)             | 3<br>(1 - 8)                | 1<br>(0 - 2)                |
| Other intestinal infectious diseases                              | 57<br>(34 - 87)                | 33<br>(16 - 60)             | 5<br>(1 - 12)             | 13<br>(5 - 24)              | 3<br>(0 - 9)                | 2<br>(0 - 7)                |
| Lower respiratory infections                                      | 9,573<br>(7,299 - 11,935)      | 4,726<br>(2,874 - 6,701)    | 240<br>(126 - 513)        | 1,227<br>(826 - 1,710)      | 1,435<br>(970 - 2,115)      | 1,944<br>(1,382 - 2,689)    |
| Upper respiratory infections                                      | 22<br>(8 - 45)                 | 7<br>(0 - 28)               | 1<br>(0 - 3)              | 8<br>(2 - 21)               | 4<br>(0 - 11)               | 2<br>(0 - 8)                |
| Otitis media                                                      | 7<br>(6 - 10)                  | 2<br>(1 - 4)                | 0<br>(0 - 1)              | 2<br>(2 - 3)                | 1<br>(1 - 2)                | 2<br>(1 - 2)                |
| Meningitis                                                        | 2,084<br>(1,470 - 2,924)       | 1,072<br>(559 - 1,820)      | 161<br>(71 - 371)         | 517<br>(323 - 759)          | 223<br>(136 - 343)          | 109<br>(66 - 172)           |
| Pneumococcal meningitis                                           | 499<br>(324 - 729)             | 193<br>(81 - 362)           | 48<br>(18 - 120)          | 158<br>(78 - 277)           | 66<br>(34 - 112)            | 33<br>(17 - 58)             |
| H influenzae type B meningitis                                    | 453<br>(273 - 742)             | 314<br>(150 - 599)          | 37<br>(14 - 93)           | 69<br>(28 - 130)            | 21<br>(10 - 39)             | 10<br>(4 - 20)              |
| Meningococcal meningitis                                          | 264<br>(157 - 402)             | 109<br>(46 - 213)           | 17<br>(5 - 46)            | 78<br>(37 - 144)            | 39<br>(12 - 80)             | 21<br>(6 - 41)              |
| Other meningitis                                                  | 868<br>(586 - 1,258)           | 455<br>(231 - 812)          | 60<br>(23 - 147)          | 211<br>(122 - 334)          | 97<br>(50 - 164)            | 45<br>(24 - 76)             |
| Encephalitis                                                      | 81<br>(59 - 114)               | 38<br>(21 - 65)             | 4<br>(2 - 9)              | 24<br>(16 - 37)             | 10<br>(6 - 16)              | 6<br>(3 - 8)                |
| Diphtheria                                                        | 16<br>(0 - 87)                 | 12<br>(0 - 84)              | 2<br>(0 - 19)             | 2<br>(0 - 8)                | 0<br>(0 - 2)                | --                          |
| Whooping cough                                                    | 242<br>(0 - 1,282)             | 230<br>(0 - 1,197)          | 10<br>(0 - 56)            | 2<br>(0 - 13)               | 0<br>(0 - 1)                | --                          |
| Tetanus                                                           | 471<br>(309 - 735)             | 189<br>(90 - 394)           | 18<br>(9 - 45)            | 185<br>(105 - 278)          | 68<br>(34 - 123)            | 11<br>(5 - 20)              |
| Measles                                                           | 457<br>(107 - 1,355)           | 410<br>(94 - 1,229)         | 41<br>(8 - 113)           | 7<br>(2 - 19)               | 0<br>(0 - 1)                | --                          |
| Varicella and herpes zoster                                       | 13<br>(4 - 33)                 | 5<br>(0 - 23)               | 1<br>(0 - 4)              | 3<br>(0 - 9)                | 1<br>(0 - 4)                | 3<br>(0 - 13)               |
| Neglected tropical diseases and malaria                           | 20,909<br>(15,267 - 27,945)    | 12,057<br>(7,619 - 17,465)  | 1,418<br>(756 - 3,045)    | 4,514<br>(2,593 - 8,014)    | 1,669<br>(872 - 3,092)      | 1,251<br>(553 - 2,633)      |
| Malaria                                                           | 19,196<br>(13,650 - 25,948)    | 11,556<br>(7,152 - 16,877)  | 1,054<br>(480 - 2,360)    | 3,849<br>(2,047 - 7,269)    | 1,541<br>(727 - 2,947)      | 1,195<br>(491 - 2,582)      |
| Leishmaniasis                                                     | 1,472<br>(746 - 2,544)         | 450<br>(124 - 1,028)        | 338<br>(124 - 862)        | 569<br>(243 - 984)          | 82<br>(29 - 167)            | 33<br>(9 - 74)              |
| Visceral leishmaniasis                                            | 1,472<br>(746 - 2,544)         | 450<br>(124 - 1,028)        | 338<br>(124 - 862)        | 569<br>(243 - 984)          | 82<br>(29 - 167)            | 33<br>(9 - 74)              |
| Schistosomiasis                                                   | 74<br>(50 - 105)               | 1<br>(0 - 2)                | 2<br>(1 - 4)              | 40<br>(24 - 61)             | 23<br>(13 - 38)             | 9<br>(4 - 15)               |
| Cysticercosis                                                     | 4<br>(1 - 12)                  | 0<br>(0 - 0)                | 0<br>(0 - 0)              | 3<br>(1 - 9)                | 1<br>(0 - 2)                | 0<br>(0 - 0)                |
| Cystic echinococcosis                                             | 7<br>(6 - 9)                   | 1<br>(0 - 1)                | 1<br>(1 - 2)              | 4<br>(3 - 5)                | 1<br>(1 - 1)                | 0<br>(0 - 0)                |
| Dengue                                                            | 4<br>(2 - 6)                   | 0<br>(0 - 1)                | 0<br>(0 - 1)              | 3<br>(1 - 4)                | 1<br>(0 - 1)                | 0<br>(0 - 0)                |
| Rabies                                                            | 69<br>(41 - 105)               | 12<br>(4 - 29)              | 19<br>(8 - 46)            | 29<br>(18 - 42)             | 7<br>(4 - 11)               | 1<br>(0 - 3)                |
| Intestinal nematode infections                                    | 28<br>(13 - 51)                | 21<br>(8 - 41)              | 3<br>(0 - 11)             | 3<br>(0 - 12)               | 1<br>(0 - 5)                | 0<br>(0 - 4)                |
| Ascariasis                                                        | 28<br>(13 - 51)                | 21<br>(8 - 41)              | 3<br>(0 - 11)             | 3<br>(0 - 12)               | 1<br>(0 - 5)                | 0<br>(0 - 4)                |
| Other neglected tropical diseases                                 | 54<br>(40 - 74)                | 15<br>(8 - 30)              | 1<br>(1 - 3)              | 13<br>(9 - 19)              | 13<br>(8 - 21)              | 12<br>(7 - 19)              |
| Maternal disorders                                                | --                             | --                          | --                        | --                          | --                          | --                          |



Web Table 31- Mozambique deaths with 95% UI by age, sex, and cause in 2013

| Cause                                                            | Males, All Ages             | Males, 0-4 Years            | Males, 5-14 Years    | Males, 15-49 Years       | Males, 50-69 Years         | Males, 70-80 Years         |
|------------------------------------------------------------------|-----------------------------|-----------------------------|----------------------|--------------------------|----------------------------|----------------------------|
| Maternal hemorrhage                                              | --                          | --                          | --                   | --                       | --                         | --                         |
| Maternal sepsis and other maternal infections                    | --                          | --                          | --                   | --                       | --                         | --                         |
| Maternal hypertensive disorders                                  | --                          | --                          | --                   | --                       | --                         | --                         |
| Maternal obstructed labor                                        | --                          | --                          | --                   | --                       | --                         | --                         |
| Maternal abortive outcome                                        | --                          | --                          | --                   | --                       | --                         | --                         |
| Indirect maternal deaths                                         | --                          | --                          | --                   | --                       | --                         | --                         |
| Late maternal deaths                                             | --                          | --                          | --                   | --                       | --                         | --                         |
| Maternal deaths aggravated by HIV/AIDS                           | --                          | --                          | --                   | --                       | --                         | --                         |
| Other maternal disorders                                         | --                          | --                          | --                   | --                       | --                         | --                         |
| Neonatal disorders                                               | 11,882<br>(10,049 - 13,675) | 11,882<br>(10,049 - 13,675) | --                   | --                       | --                         | --                         |
| Neonatal preterm birth complications                             | 2,842<br>(1,289 - 4,997)    | 2,842<br>(1,289 - 4,997)    | --                   | --                       | --                         | --                         |
| Neonatal encephalopathy due to birth asphyxia and trauma         | 3,334<br>(1,675 - 5,363)    | 3,334<br>(1,675 - 5,363)    | --                   | --                       | --                         | --                         |
| Neonatal sepsis and other neonatal infections                    | 3,523<br>(1,522 - 6,387)    | 3,523<br>(1,522 - 6,387)    | --                   | --                       | --                         | --                         |
| Hemolytic disease and other neonatal jaundice                    | 102<br>(21 - 310)           | 102<br>(21 - 310)           | --                   | --                       | --                         | --                         |
| Other neonatal disorders                                         | 2,082<br>(926 - 3,686)      | 2,082<br>(926 - 3,686)      | --                   | --                       | --                         | --                         |
| Nutritional deficiencies                                         | 3,124<br>(2,097 - 5,050)    | 1,424<br>(683 - 2,661)      | 129<br>(62 - 296)    | 594<br>(390 - 963)       | 415<br>(249 - 702)         | 561<br>(348 - 916)         |
| Protein-energy malnutrition                                      | 2,301<br>(1,380 - 4,006)    | 1,236<br>(574 - 2,428)      | 98<br>(42 - 233)     | 308<br>(149 - 606)       | 283<br>(146 - 526)         | 376<br>(183 - 682)         |
| Iodine deficiency                                                | 12<br>(1 - 46)              | 4<br>(0 - 34)               | 1<br>(0 - 6)         | 4<br>(0 - 22)            | 2<br>(0 - 9)               | 1<br>(0 - 8)               |
| Iron-deficiency anemia                                           | 786<br>(280 - 1,466)        | 183<br>(28 - 521)           | 30<br>(7 - 80)       | 270<br>(107 - 473)       | 127<br>(40 - 272)          | 176<br>(57 - 379)          |
| Other nutritional deficiencies                                   | 25<br>(9 - 56)              | 1<br>(0 - 2)                | 1<br>(0 - 2)         | 12<br>(4 - 29)           | 4<br>(2 - 10)              | 8<br>(2 - 17)              |
| Other communicable, maternal, neonatal, and nutritional diseases | 3,060<br>(1,673 - 4,888)    | 2,446<br>(1,118 - 4,164)    | 149<br>(62 - 338)    | 206<br>(137 - 284)       | 166<br>(101 - 264)         | 93<br>(52 - 162)           |
| Sexually transmitted diseases excluding HIV                      | 2,538<br>(1,151 - 4,369)    | 2,321<br>(1,003 - 4,011)    | 134<br>(50 - 307)    | 35<br>(22 - 58)          | 33<br>(15 - 63)            | 15<br>(7 - 32)             |
| Syphilis                                                         | 2,509<br>(1,121 - 4,340)    | 2,321<br>(1,003 - 4,011)    | 132<br>(50 - 304)    | 19<br>(12 - 31)          | 23<br>(11 - 45)            | 13<br>(6 - 27)             |
| Chlamydial infection                                             | --                          | --                          | --                   | --                       | --                         | --                         |
| Gonococcal infection                                             | 17<br>(11 - 27)             | --                          | 1<br>(0 - 1)         | 9<br>(6 - 15)            | 6<br>(3 - 11)              | 2<br>(1 - 4)               |
| Other sexually transmitted diseases                              | 12<br>(8 - 20)              | --                          | 1<br>(0 - 1)         | 7<br>(5 - 12)            | 3<br>(2 - 7)               | 1<br>(0 - 2)               |
| Hepatitis                                                        | 169<br>(130 - 215)          | 22<br>(10 - 43)             | 8<br>(4 - 17)        | 84<br>(56 - 116)         | 43<br>(28 - 64)            | 13<br>(8 - 21)             |
| Acute hepatitis A                                                | 15<br>(4 - 34)              | 7<br>(2 - 19)               | 3<br>(1 - 6)         | 5<br>(1 - 12)            | 0<br>(0 - 1)               | 0<br>(0 - 0)               |
| Acute hepatitis B                                                | 114<br>(76 - 157)           | 14<br>(5 - 31)              | 4<br>(2 - 9)         | 47<br>(24 - 74)          | 37<br>(23 - 55)            | 12<br>(8 - 19)             |
| Acute hepatitis C                                                | 2<br>(0 - 5)                | --                          | 0<br>(0 - 0)         | 1<br>(0 - 4)             | 1<br>(0 - 2)               | 0<br>(0 - 1)               |
| Acute hepatitis E                                                | 38<br>(14 - 71)             | 0<br>(0 - 0)                | 1<br>(0 - 2)         | 31<br>(12 - 56)          | 5<br>(1 - 14)              | 1<br>(0 - 2)               |
| Other infectious diseases                                        | 353<br>(212 - 565)          | 103<br>(44 - 203)           | 8<br>(3 - 24)        | 87<br>(45 - 150)         | 90<br>(40 - 174)           | 65<br>(25 - 126)           |
| Non-communicable diseases                                        | 31,933<br>(26,733 - 38,972) | 2,521<br>(1,661 - 3,930)    | 470<br>(303 - 1,017) | 7,391<br>(5,827 - 8,898) | 11,058<br>(8,564 - 14,444) | 10,493<br>(8,776 - 12,827) |
| Neoplasms                                                        | 5,235<br>(4,352 - 6,474)    | 186<br>(115 - 293)          | 96<br>(56 - 213)     | 1,153<br>(902 - 1,397)   | 1,970<br>(1,518 - 2,587)   | 1,831<br>(1,487 - 2,289)   |
| Esophageal cancer                                                | 312<br>(224 - 451)          | --                          | --                   | 44<br>(30 - 63)          | 161<br>(107 - 238)         | 107<br>(73 - 157)          |
| Stomach cancer                                                   | 540<br>(422 - 700)          | --                          | --                   | 121<br>(89 - 160)        | 221<br>(161 - 310)         | 197<br>(142 - 269)         |
| Liver cancer                                                     | 478<br>(378 - 613)          | --                          | 4<br>(2 - 10)        | 177<br>(125 - 238)       | 174<br>(120 - 246)         | 124<br>(87 - 176)          |
| Liver cancer due to hepatitis B                                  | 143<br>(71 - 225)           | --                          | 1<br>(0 - 3)         | 67<br>(35 - 107)         | 50<br>(17 - 92)            | 25<br>(9 - 46)             |
| Liver cancer due to hepatitis C                                  | 214<br>(78 - 331)           | --                          | 1<br>(0 - 3)         | 70<br>(28 - 116)         | 80<br>(24 - 138)           | 62<br>(22 - 101)           |
| Liver cancer due to alcohol use                                  | 70<br>(36 - 119)            | --                          | --                   | 15<br>(7 - 27)           | 27<br>(12 - 53)            | 27<br>(13 - 50)            |

Web Table 31- Mozambique deaths with 95% UI by age, sex, and cause in 2013

| Cause                                         | Males, All Ages             | Males, 0-4 Years  | Males, 5-14 Years | Males, 15-49 Years       | Males, 50-69 Years       | Males, 70-80 Years       |
|-----------------------------------------------|-----------------------------|-------------------|-------------------|--------------------------|--------------------------|--------------------------|
| Liver cancer due to other causes              | 52<br>(28 - 84)             | --                | 2<br>(1 - 4)      | 25<br>(13 - 44)          | 16<br>(7 - 30)           | 9<br>(4 - 18)            |
| Larynx cancer                                 | 63<br>(45 - 89)             | --                | --                | 12<br>(8 - 19)           | 22<br>(15 - 33)          | 28<br>(19 - 43)          |
| Tracheal, bronchus and lung cancer            | 456<br>(355 - 597)          | --                | --                | 51<br>(37 - 68)          | 251<br>(182 - 351)       | 154<br>(119 - 204)       |
| Breast cancer                                 | 36<br>(23 - 57)             | --                | --                | 6<br>(4 - 12)            | 18<br>(9 - 32)           | 12<br>(5 - 21)           |
| Cervical cancer                               | --                          | --                | --                | --                       | --                       | --                       |
| Uterine cancer                                | --                          | --                | --                | --                       | --                       | --                       |
| Prostate cancer                               | 634<br>(400 - 923)          | --                | --                | 11<br>(6 - 21)           | 188<br>(108 - 286)       | 435<br>(277 - 649)       |
| Colon and rectum cancer                       | 607<br>(485 - 767)          | --                | --                | 173<br>(129 - 220)       | 221<br>(164 - 298)       | 213<br>(159 - 285)       |
| Lip and oral cavity cancer                    | 104<br>(71 - 146)           | --                | --                | 18<br>(12 - 26)          | 47<br>(30 - 70)          | 39<br>(25 - 57)          |
| Nasopharynx cancer                            | 15<br>(11 - 20)             | --                | 0<br>(0 - 1)      | 6<br>(4 - 9)             | 6<br>(4 - 10)            | 2<br>(1 - 3)             |
| Other pharynx cancer                          | 56<br>(40 - 77)             | --                | --                | 13<br>(9 - 20)           | 25<br>(15 - 40)          | 17<br>(12 - 25)          |
| Gallbladder and biliary tract cancer          | 81<br>(58 - 108)            | --                | --                | 42<br>(26 - 57)          | 25<br>(16 - 40)          | 14<br>(10 - 21)          |
| Pancreatic cancer                             | 134<br>(107 - 176)          | --                | --                | 41<br>(30 - 54)          | 69<br>(51 - 99)          | 24<br>(18 - 33)          |
| Malignant skin melanoma                       | 25<br>(13 - 40)             | --                | --                | 11<br>(6 - 17)           | 8<br>(4 - 14)            | 6<br>(3 - 10)            |
| Non-melanoma skin cancer                      | 27<br>(16 - 39)             | --                | --                | 3<br>(2 - 5)             | 11<br>(5 - 18)           | 13<br>(7 - 20)           |
| Ovarian cancer                                | --                          | --                | --                | --                       | --                       | --                       |
| Testicular cancer                             | 37<br>(23 - 54)             | --                | --                | 19<br>(11 - 28)          | 16<br>(8 - 26)           | 3<br>(2 - 5)             |
| Kidney cancer                                 | 157<br>(123 - 204)          | 14<br>(6 - 31)    | 3<br>(2 - 8)      | 24<br>(18 - 33)          | 75<br>(53 - 108)         | 40<br>(27 - 56)          |
| Bladder cancer                                | 146<br>(110 - 196)          | --                | --                | 19<br>(12 - 29)          | 45<br>(31 - 66)          | 82<br>(59 - 117)         |
| Brain and nervous system cancer               | 132<br>(87 - 195)           | 0<br>(0 - 1)      | 14<br>(7 - 32)    | 61<br>(37 - 89)          | 40<br>(26 - 65)          | 16<br>(9 - 25)           |
| Thyroid cancer                                | 7<br>(5 - 9)                | --                | 0<br>(0 - 0)      | 1<br>(1 - 1)             | 2<br>(1 - 3)             | 4<br>(2 - 5)             |
| Mesothelioma                                  | 24<br>(16 - 37)             | --                | --                | 1<br>(1 - 1)             | 14<br>(8 - 24)           | 10<br>(5 - 16)           |
| Hodgkin lymphoma                              | 72<br>(46 - 98)             | 5<br>(2 - 12)     | 4<br>(1 - 11)     | 28<br>(17 - 40)          | 20<br>(11 - 32)          | 15<br>(8 - 25)           |
| Non-Hodgkin lymphoma                          | 306<br>(234 - 398)          | 41<br>(19 - 71)   | 19<br>(9 - 42)    | 89<br>(65 - 122)         | 82<br>(55 - 119)         | 76<br>(51 - 110)         |
| Multiple myeloma                              | 54<br>(38 - 73)             | --                | --                | 13<br>(9 - 18)           | 17<br>(11 - 25)          | 23<br>(15 - 34)          |
| Leukemia                                      | 115<br>(91 - 145)           | 9<br>(4 - 17)     | 8<br>(4 - 19)     | 54<br>(40 - 73)          | 21<br>(15 - 30)          | 23<br>(17 - 32)          |
| Other neoplasms                               | 617<br>(480 - 774)          | 116<br>(65 - 186) | 43<br>(22 - 98)   | 114<br>(85 - 147)        | 188<br>(133 - 268)       | 156<br>(107 - 217)       |
| Cardiovascular diseases                       | 12,520<br>(10,269 - 15,571) | 147<br>(92 - 229) | 53<br>(29 - 126)  | 2,089<br>(1,602 - 2,628) | 5,345<br>(4,092 - 7,061) | 4,886<br>(4,019 - 6,060) |
| Rheumatic heart disease                       | 501<br>(339 - 847)          | 6<br>(2 - 14)     | 12<br>(5 - 30)    | 228<br>(143 - 397)       | 159<br>(94 - 284)        | 96<br>(61 - 170)         |
| Ischemic heart disease                        | 3,090<br>(2,363 - 4,045)    | 1<br>(0 - 3)      | 4<br>(2 - 10)     | 349<br>(247 - 482)       | 1,424<br>(1,015 - 1,984) | 1,313<br>(954 - 1,750)   |
| Cerebrovascular disease                       | 5,113<br>(3,884 - 6,615)    | 13<br>(6 - 23)    | 6<br>(3 - 13)     | 571<br>(398 - 803)       | 2,370<br>(1,743 - 3,242) | 2,154<br>(1,610 - 2,819) |
| Ischemic stroke                               | 2,248<br>(1,226 - 3,200)    | 1<br>(0 - 3)      | 1<br>(0 - 2)      | 99<br>(50 - 170)         | 879<br>(435 - 1,341)     | 1,269<br>(694 - 1,809)   |
| Hemorrhagic stroke                            | 2,865<br>(1,960 - 4,084)    | 12<br>(6 - 21)    | 5<br>(2 - 12)     | 472<br>(320 - 670)       | 1,491<br>(1,009 - 2,147) | 885<br>(468 - 1,463)     |
| Hypertensive heart disease                    | 944<br>(560 - 1,568)        | 2<br>(0 - 5)      | 1<br>(0 - 3)      | 120<br>(45 - 200)        | 369<br>(202 - 614)       | 452<br>(241 - 864)       |
| Cardiomyopathy and myocarditis                | 760<br>(293 - 1,236)        | 63<br>(11 - 122)  | 13<br>(3 - 35)    | 272<br>(64 - 465)        | 258<br>(118 - 449)       | 154<br>(79 - 266)        |
| Atrial fibrillation and flutter               | 7<br>(4 - 13)               | --                | --                | 0<br>(0 - 1)             | 2<br>(1 - 4)             | 5<br>(2 - 9)             |
| Aortic aneurysm                               | 236<br>(127 - 378)          | --                | --                | 41<br>(14 - 68)          | 98<br>(50 - 166)         | 97<br>(51 - 163)         |
| Peripheral vascular disease                   | 14<br>(5 - 24)              | --                | --                | 1<br>(0 - 2)             | 5<br>(2 - 10)            | 8<br>(3 - 14)            |
| Endocarditis                                  | 168<br>(90 - 283)           | 7<br>(2 - 17)     | 2<br>(1 - 5)      | 39<br>(20 - 67)          | 63<br>(32 - 112)         | 57<br>(28 - 101)         |
| Other cardiovascular and circulatory diseases | 1,686<br>(939 - 2,806)      | 55<br>(22 - 109)  | 15<br>(6 - 35)    | 468<br>(230 - 794)       | 597<br>(296 - 1,011)     | 550<br>(301 - 899)       |

Web Table 31- Mozambique deaths with 95% UI by age, sex, and cause in 2013

| Cause                                               | Males, All Ages          | Males, 0-4 Years | Males, 5-14 Years | Males, 15-49 Years   | Males, 50-69 Years   | Males, 70-80 Years   |
|-----------------------------------------------------|--------------------------|------------------|-------------------|----------------------|----------------------|----------------------|
| Chronic respiratory diseases                        | 2,109<br>(1,653 - 2,727) | 54<br>(29 - 95)  | 15<br>(9 - 33)    | 290<br>(215 - 378)   | 758<br>(547 - 1,041) | 993<br>(759 - 1,302) |
| Chronic obstructive pulmonary disease               | 1,189<br>(905 - 1,562)   | 13<br>(5 - 27)   | 7<br>(4 - 15)     | 118<br>(82 - 163)    | 425<br>(299 - 598)   | 625<br>(460 - 842)   |
| Pneumoconiosis                                      | 259<br>(161 - 388)       | 3<br>(1 - 6)     | 2<br>(1 - 4)      | 63<br>(36 - 96)      | 107<br>(63 - 170)    | 84<br>(50 - 129)     |
| Silicosis                                           | 70<br>(36 - 124)         | 1<br>(0 - 2)     | 0<br>(0 - 1)      | 15<br>(6 - 31)       | 28<br>(14 - 53)      | 25<br>(13 - 45)      |
| Asbestosis                                          | 29<br>(16 - 46)          | 0<br>(0 - 1)     | 0<br>(0 - 1)      | 7<br>(3 - 13)        | 13<br>(7 - 22)       | 7<br>(4 - 12)        |
| Coal workers pneumoconiosis                         | 35<br>(19 - 55)          | 0<br>(0 - 1)     | 0<br>(0 - 1)      | 6<br>(4 - 10)        | 16<br>(8 - 28)       | 12<br>(5 - 21)       |
| Other pneumoconiosis                                | 125<br>(77 - 188)        | 1<br>(0 - 3)     | 1<br>(0 - 1)      | 34<br>(20 - 55)      | 49<br>(29 - 79)      | 40<br>(22 - 63)      |
| Asthma                                              | 350<br>(254 - 494)       | 3<br>(1 - 7)     | 2<br>(1 - 4)      | 53<br>(37 - 75)      | 129<br>(82 - 192)    | 163<br>(104 - 252)   |
| Interstitial lung disease and pulmonary sarcoidosis | 190<br>(82 - 338)        | 2<br>(0 - 8)     | 1<br>(0 - 2)      | 17<br>(6 - 44)       | 74<br>(31 - 142)     | 96<br>(37 - 180)     |
| Other chronic respiratory diseases                  | 122<br>(78 - 181)        | 33<br>(17 - 60)  | 4<br>(2 - 10)     | 38<br>(22 - 62)      | 23<br>(12 - 39)      | 24<br>(13 - 41)      |
| Cirrhosis                                           | 1,486<br>(1,191 - 1,867) | 21<br>(7 - 48)   | 18<br>(10 - 42)   | 589<br>(431 - 762)   | 557<br>(405 - 754)   | 301<br>(223 - 409)   |
| Cirrhosis due to hepatitis B                        | 354<br>(157 - 559)       | 1<br>(0 - 2)     | 3<br>(0 - 7)      | 132<br>(53 - 222)    | 141<br>(55 - 233)    | 78<br>(33 - 127)     |
| Cirrhosis due to hepatitis C                        | 275<br>(143 - 424)       | 1<br>(0 - 4)     | 2<br>(0 - 5)      | 85<br>(35 - 164)     | 112<br>(48 - 189)    | 75<br>(34 - 124)     |
| Cirrhosis due to alcohol use                        | 640<br>(455 - 885)       | --               | --                | 250<br>(163 - 357)   | 258<br>(170 - 383)   | 133<br>(86 - 198)    |
| Cirrhosis due to other causes                       | 218<br>(145 - 314)       | 20<br>(6 - 45)   | 14<br>(7 - 32)    | 123<br>(73 - 187)    | 46<br>(24 - 82)      | 16<br>(8 - 26)       |
| Digestive diseases                                  | 2,145<br>(1,704 - 2,683) | 66<br>(27 - 132) | 60<br>(34 - 129)  | 825<br>(608 - 1,069) | 639<br>(463 - 880)   | 555<br>(414 - 740)   |
| Peptic ulcer disease                                | 734<br>(482 - 1,143)     | 7<br>(2 - 20)    | 8<br>(3 - 19)     | 272<br>(157 - 453)   | 236<br>(140 - 371)   | 211<br>(132 - 329)   |
| Gastritis and duodenitis                            | 83<br>(37 - 191)         | 4<br>(1 - 10)    | 4<br>(1 - 10)     | 31<br>(14 - 58)      | 21<br>(8 - 60)       | 22<br>(7 - 75)       |
| Appendicitis                                        | 184<br>(121 - 259)       | 3<br>(1 - 7)     | 9<br>(4 - 21)     | 92<br>(55 - 141)     | 46<br>(26 - 77)      | 33<br>(18 - 55)      |
| Paralytic ileus and intestinal obstruction          | 520<br>(302 - 785)       | 12<br>(4 - 29)   | 20<br>(9 - 43)    | 172<br>(94 - 268)    | 174<br>(93 - 288)    | 141<br>(72 - 234)    |
| Inguinal, femoral, and abdominal hernia             | 42<br>(23 - 67)          | 0<br>(0 - 0)     | 1<br>(0 - 3)      | 16<br>(8 - 26)       | 13<br>(6 - 23)       | 13<br>(6 - 22)       |
| Inflammatory bowel disease                          | 114<br>(40 - 173)        | 17<br>(4 - 41)   | 5<br>(2 - 13)     | 47<br>(17 - 76)      | 22<br>(7 - 43)       | 22<br>(6 - 53)       |
| Vascular intestinal disorders                       | 17<br>(6 - 37)           | 1<br>(0 - 2)     | 1<br>(0 - 2)      | 4<br>(1 - 11)        | 5<br>(2 - 11)        | 6<br>(2 - 15)        |
| Gallbladder and biliary diseases                    | 99<br>(65 - 144)         | 2<br>(0 - 4)     | 2<br>(1 - 4)      | 28<br>(14 - 43)      | 29<br>(16 - 50)      | 38<br>(20 - 65)      |
| Pancreatitis                                        | 123<br>(50 - 217)        | 1<br>(0 - 3)     | 1<br>(0 - 3)      | 74<br>(31 - 137)     | 30<br>(11 - 56)      | 16<br>(5 - 35)       |
| Other digestive diseases                            | 230<br>(152 - 320)       | 18<br>(5 - 38)   | 9<br>(4 - 20)     | 88<br>(51 - 134)     | 62<br>(35 - 101)     | 54<br>(30 - 92)      |
| Neurological disorders                              | 1,214<br>(949 - 1,523)   | 86<br>(39 - 173) | 62<br>(30 - 153)  | 351<br>(233 - 510)   | 117<br>(85 - 163)    | 597<br>(446 - 787)   |
| Alzheimer disease and other dementias               | 554<br>(402 - 729)       | --               | --                | 0<br>(0 - 1)         | 56<br>(38 - 81)      | 498<br>(356 - 664)   |
| Parkinson disease                                   | 11<br>(5 - 21)           | --               | --                | 1<br>(0 - 1)         | 0<br>(0 - 0)         | 10<br>(4 - 20)       |
| Epilepsy                                            | 543<br>(388 - 742)       | 66<br>(24 - 151) | 56<br>(25 - 139)  | 310<br>(195 - 467)   | 36<br>(20 - 60)      | 75<br>(45 - 126)     |
| Multiple sclerosis                                  | 3<br>(1 - 6)             | --               | --                | 2<br>(1 - 4)         | 1<br>(0 - 2)         | 0<br>(0 - 1)         |
| Other neurological disorders                        | 102<br>(65 - 159)        | 20<br>(9 - 61)   | 6<br>(3 - 15)     | 39<br>(24 - 58)      | 24<br>(15 - 35)      | 14<br>(8 - 19)       |
| Mental and substance use disorders                  | 968<br>(620 - 1,370)     | 27<br>(5 - 67)   | 0<br>(0 - 0)      | 702<br>(404 - 1,041) | 204<br>(119 - 323)   | 35<br>(22 - 56)      |
| Schizophrenia                                       | 14<br>(4 - 34)           | --               | --                | 9<br>(2 - 24)        | 4<br>(1 - 9)         | 2<br>(1 - 4)         |
| Alcohol use disorders                               | 739<br>(400 - 1,096)     | --               | --                | 530<br>(247 - 847)   | 182<br>(101 - 294)   | 28<br>(15 - 46)      |
| Drug use disorders                                  | 214<br>(149 - 298)       | 27<br>(5 - 67)   | --                | 163<br>(111 - 230)   | 19<br>(9 - 27)       | 6<br>(2 - 9)         |
| Opioid use disorders                                | 23<br>(15 - 32)          | 3<br>(1 - 8)     | --                | 18<br>(12 - 26)      | 2<br>(1 - 3)         | 1<br>(0 - 1)         |
| Cocaine use disorders                               | 1<br>(1 - 1)             | 0<br>(0 - 0)     | --                | 1<br>(0 - 1)         | 0<br>(0 - 0)         | 0<br>(0 - 0)         |
| Amphetamine use disorders                           | 1<br>(0 - 1)             | 0<br>(0 - 0)     | --                | 0<br>(0 - 1)         | 0<br>(0 - 0)         | 0<br>(0 - 0)         |
| Other drug use disorders                            | 190<br>(132 - 265)       | 23<br>(5 - 60)   | --                | 145<br>(98 - 206)    | 17<br>(8 - 24)       | 5<br>(2 - 8)         |

Web Table 31- Mozambique deaths with 95% UI by age, sex, and cause in 2013

| Cause                                               | Males, All Ages          | Males, 0-4 Years       | Males, 5-14 Years | Males, 15-49 Years     | Males, 50-69 Years     | Males, 70-80 Years     |
|-----------------------------------------------------|--------------------------|------------------------|-------------------|------------------------|------------------------|------------------------|
| Eating disorders                                    | 0<br>(0 - 0)             | --                     | 0<br>(0 - 0)      | 0<br>(0 - 0)           | --                     | --                     |
| Anorexia nervosa                                    | 0<br>(0 - 0)             | --                     | 0<br>(0 - 0)      | 0<br>(0 - 0)           | --                     | --                     |
| Diabetes, urogenital, blood, and endocrine diseases | 4,040<br>(3,293 - 4,991) | 340<br>(208 - 525)     | 92<br>(54 - 209)  | 1,143<br>(885 - 1,438) | 1,322<br>(992 - 1,768) | 1,143<br>(916 - 1,457) |
| Diabetes mellitus                                   | 1,807<br>(1,448 - 2,277) | 23<br>(14 - 37)        | 7<br>(4 - 16)     | 344<br>(258 - 448)     | 800<br>(577 - 1,081)   | 632<br>(476 - 838)     |
| Acute glomerulonephritis                            | 55<br>(35 - 80)          | 5<br>(3 - 11)          | 2<br>(1 - 3)      | 2<br>(1 - 4)           | 29<br>(17 - 48)        | 17<br>(10 - 27)        |
| Chronic kidney disease                              | 725<br>(564 - 938)       | 39<br>(21 - 67)        | 16<br>(9 - 34)    | 315<br>(228 - 435)     | 168<br>(118 - 236)     | 187<br>(133 - 258)     |
| Chronic kidney disease due to diabetes mellitus     | 4<br>(1 - 6)             | 0<br>(0 - 0)           | 0<br>(0 - 0)      | 1<br>(0 - 3)           | 1<br>(0 - 2)           | 1<br>(0 - 2)           |
| Chronic kidney disease due to hypertension          | 295<br>(191 - 482)       | 6<br>(2 - 16)          | 2<br>(1 - 5)      | 79<br>(42 - 156)       | 95<br>(56 - 156)       | 113<br>(66 - 184)      |
| Chronic kidney disease due to glomerulonephritis    | 234<br>(143 - 323)       | 25<br>(13 - 44)        | 10<br>(6 - 22)    | 125<br>(75 - 186)      | 39<br>(17 - 64)        | 34<br>(14 - 60)        |
| Chronic kidney disease due to other causes          | 193<br>(96 - 288)        | 8<br>(3 - 18)          | 4<br>(1 - 9)      | 110<br>(52 - 179)      | 32<br>(12 - 65)        | 39<br>(13 - 80)        |
| Urinary diseases and male infertility               | 692<br>(532 - 902)       | 43<br>(17 - 90)        | 11<br>(6 - 25)    | 232<br>(166 - 310)     | 205<br>(139 - 300)     | 202<br>(136 - 288)     |
| Interstitial nephritis and urinary tract infections | 471<br>(345 - 626)       | 32<br>(12 - 72)        | 7<br>(4 - 15)     | 143<br>(89 - 195)      | 141<br>(88 - 209)      | 149<br>(92 - 223)      |
| Urolithiasis                                        | 17<br>(9 - 38)           | --                     | 1<br>(0 - 1)      | 7<br>(3 - 14)          | 6<br>(2 - 15)          | 4<br>(1 - 11)          |
| Other urinary diseases                              | 204<br>(132 - 310)       | 11<br>(4 - 26)         | 4<br>(2 - 9)      | 82<br>(49 - 138)       | 58<br>(30 - 101)       | 48<br>(21 - 93)        |
| Gynecological diseases                              | --                       | --                     | --                | --                     | --                     | --                     |
| Uterine fibroids                                    | --                       | --                     | --                | --                     | --                     | --                     |
| Polycystic ovarian syndrome                         | --                       | --                     | --                | --                     | --                     | --                     |
| Endometriosis                                       | --                       | --                     | --                | --                     | --                     | --                     |
| Genital prolapse                                    | --                       | --                     | --                | --                     | --                     | --                     |
| Other gynecological diseases                        | --                       | --                     | --                | --                     | --                     | --                     |
| Hemoglobinopathies and hemolytic anemias            | 376<br>(191 - 651)       | 150<br>(50 - 292)      | 43<br>(18 - 102)  | 126<br>(61 - 224)      | 32<br>(13 - 89)        | 26<br>(9 - 87)         |
| Thalassemias                                        | 28<br>(12 - 51)          | 19<br>(6 - 37)         | 3<br>(1 - 7)      | 7<br>(3 - 13)          | 0<br>(0 - 0)           | 0<br>(0 - 0)           |
| Sickle cell disorders                               | 227<br>(106 - 390)       | 90<br>(29 - 181)       | 32<br>(14 - 77)   | 87<br>(42 - 155)       | 17<br>(7 - 46)         | 1<br>(0 - 2)           |
| G6PD deficiency                                     | 35<br>(17 - 61)          | 19<br>(6 - 36)         | 3<br>(1 - 8)      | 10<br>(5 - 18)         | 2<br>(1 - 6)           | 1<br>(0 - 3)           |
| Other hemoglobinopathies and hemolytic anemias      | 86<br>(42 - 191)         | 22<br>(9 - 41)         | 4<br>(2 - 10)     | 22<br>(11 - 39)        | 13<br>(5 - 38)         | 24<br>(8 - 81)         |
| Endocrine, metabolic, blood, and immune disorders   | 385<br>(262 - 506)       | 81<br>(45 - 132)       | 14<br>(7 - 30)    | 124<br>(79 - 177)      | 87<br>(53 - 130)       | 79<br>(41 - 126)       |
| Musculoskeletal disorders                           | 196<br>(107 - 262)       | --                     | 15<br>(6 - 34)    | 95<br>(46 - 133)       | 52<br>(25 - 78)        | 35<br>(17 - 61)        |
| Rheumatoid arthritis                                | 36<br>(16 - 66)          | --                     | 3<br>(1 - 7)      | 10<br>(4 - 25)         | 12<br>(5 - 23)         | 11<br>(4 - 23)         |
| Other musculoskeletal disorders                     | 160<br>(88 - 208)        | --                     | 13<br>(5 - 29)    | 85<br>(41 - 118)       | 39<br>(20 - 59)        | 24<br>(12 - 41)        |
| Other non-communicable diseases                     | 2,020<br>(1,347 - 3,312) | 1,596<br>(940 - 2,879) | 58<br>(29 - 133)  | 154<br>(114 - 207)     | 94<br>(64 - 136)       | 118<br>(81 - 175)      |
| Congenital anomalies                                | 1,643<br>(999 - 2,910)   | 1,491<br>(849 - 2,735) | 53<br>(25 - 121)  | 68<br>(47 - 98)        | 17<br>(12 - 25)        | 14<br>(10 - 20)        |
| Neural tube defects                                 | 534<br>(97 - 1,353)      | 502<br>(92 - 1,272)    | 12<br>(1 - 41)    | 17<br>(2 - 41)         | 2<br>(0 - 6)           | 1<br>(0 - 4)           |
| Congenital heart anomalies                          | 630<br>(269 - 1,466)     | 561<br>(205 - 1,357)   | 26<br>(10 - 67)   | 31<br>(19 - 48)        | 7<br>(4 - 11)          | 5<br>(3 - 8)           |
| Cleft lip and cleft palate                          | 8<br>(1 - 24)            | 8<br>(1 - 24)          | --                | --                     | --                     | --                     |
| Down syndrome                                       | 100<br>(21 - 260)        | 84<br>(12 - 240)       | 4<br>(1 - 12)     | 9<br>(3 - 18)          | 2<br>(1 - 4)           | 0<br>(0 - 1)           |
| Chromosomal unbalanced rearrangements               | 33<br>(8 - 115)          | 31<br>(7 - 110)        | 1<br>(0 - 3)      | 1<br>(0 - 3)           | 0<br>(0 - 1)           | 0<br>(0 - 0)           |
| Other congenital anomalies                          | 338<br>(106 - 993)       | 305<br>(83 - 937)      | 9<br>(3 - 26)     | 11<br>(5 - 21)         | 6<br>(3 - 11)          | 7<br>(4 - 11)          |
| Skin and subcutaneous diseases                      | 335<br>(260 - 436)       | 63<br>(33 - 106)       | 5<br>(3 - 12)     | 86<br>(61 - 118)       | 77<br>(50 - 114)       | 104<br>(68 - 158)      |
| Cellulitis                                          | 180<br>(72 - 306)        | 33<br>(9 - 72)         | 3<br>(1 - 8)      | 47<br>(20 - 87)        | 43<br>(18 - 79)        | 53<br>(19 - 103)       |
| Pyoderma                                            | 122<br>(48 - 220)        | 27<br>(7 - 58)         | 2<br>(0 - 5)      | 30<br>(11 - 57)        | 27<br>(9 - 55)         | 36<br>(12 - 75)        |

Web Table 31- Mozambique deaths with 95% UI by age, sex, and cause in 2013

| Cause                                           | Males, All Ages            | Males, 0-4 Years       | Males, 5-14 Years    | Males, 15-49 Years       | Males, 50-69 Years       | Males, 70-80 Years   |
|-------------------------------------------------|----------------------------|------------------------|----------------------|--------------------------|--------------------------|----------------------|
| Decubitus ulcer                                 | 28<br>(9 - 55)             | 1<br>(0 - 4)           | 0<br>(0 - 1)         | 6<br>(1 - 13)            | 5<br>(2 - 12)            | 15<br>(5 - 31)       |
| Other skin and subcutaneous diseases            | 5<br>(1 - 12)              | 1<br>(0 - 4)           | 0<br>(0 - 1)         | 2<br>(0 - 5)             | 1<br>(0 - 2)             | 1<br>(0 - 2)         |
| Sudden infant death syndrome                    | 42<br>(11 - 110)           | 42<br>(11 - 110)       | --                   | --                       | --                       | --                   |
| Injuries                                        | 10,679<br>(8,534 - 13,029) | 1,084<br>(646 - 1,789) | 590<br>(365 - 1,281) | 6,383<br>(4,866 - 8,026) | 1,665<br>(1,237 - 2,235) | 958<br>(750 - 1,223) |
| Transport injuries                              | 4,363<br>(3,407 - 5,527)   | 266<br>(134 - 497)     | 258<br>(143 - 552)   | 2,756<br>(2,036 - 3,583) | 733<br>(513 - 1,004)     | 350<br>(252 - 479)   |
| Road injuries                                   | 4,217<br>(3,295 - 5,327)   | 238<br>(118 - 454)     | 240<br>(132 - 505)   | 2,706<br>(1,993 - 3,530) | 705<br>(493 - 964)       | 329<br>(236 - 449)   |
| Pedestrian road injuries                        | 2,349<br>(1,731 - 3,136)   | 145<br>(67 - 301)      | 148<br>(76 - 313)    | 1,467<br>(1,011 - 2,051) | 399<br>(266 - 589)       | 189<br>(128 - 272)   |
| Cyclist road injuries                           | 251<br>(170 - 353)         | 12<br>(3 - 28)         | 19<br>(9 - 44)       | 133<br>(86 - 199)        | 55<br>(33 - 86)          | 34<br>(19 - 54)      |
| Motorcyclist road injuries                      | 290<br>(182 - 462)         | 10<br>(5 - 20)         | 6<br>(3 - 14)        | 229<br>(138 - 374)       | 26<br>(14 - 44)          | 18<br>(10 - 32)      |
| Motor vehicle road injuries                     | 1,288<br>(872 - 1,756)     | 57<br>(27 - 112)       | 61<br>(29 - 136)     | 871<br>(571 - 1,231)     | 217<br>(131 - 328)       | 81<br>(48 - 123)     |
| Other road injuries                             | 39<br>(20 - 63)            | 13<br>(4 - 30)         | 7<br>(2 - 17)        | 6<br>(3 - 10)            | 7<br>(3 - 14)            | 6<br>(3 - 12)        |
| Other transport injuries                        | 146<br>(104 - 208)         | 28<br>(13 - 53)        | 19<br>(9 - 43)       | 50<br>(32 - 79)          | 28<br>(16 - 45)          | 22<br>(13 - 34)      |
| Unintentional injuries                          | 3,432<br>(2,708 - 4,297)   | 738<br>(439 - 1,204)   | 284<br>(174 - 619)   | 1,406<br>(1,061 - 1,750) | 563<br>(402 - 767)       | 442<br>(337 - 580)   |
| Falls                                           | 582<br>(393 - 778)         | 29<br>(12 - 59)        | 35<br>(16 - 78)      | 203<br>(124 - 296)       | 156<br>(85 - 244)        | 160<br>(100 - 249)   |
| Drowning                                        | 722<br>(444 - 1,010)       | 109<br>(39 - 240)      | 100<br>(47 - 233)    | 416<br>(243 - 595)       | 66<br>(40 - 101)         | 31<br>(18 - 48)      |
| Fire, heat, and hot substances                  | 522<br>(333 - 810)         | 220<br>(96 - 464)      | 44<br>(22 - 96)      | 141<br>(90 - 198)        | 70<br>(39 - 115)         | 47<br>(28 - 72)      |
| Poisonings                                      | 189<br>(122 - 264)         | 30<br>(11 - 61)        | 7<br>(3 - 17)        | 110<br>(68 - 163)        | 32<br>(19 - 49)          | 11<br>(6 - 20)       |
| Exposure to mechanical forces                   | 546<br>(410 - 727)         | 118<br>(61 - 232)      | 40<br>(22 - 89)      | 261<br>(180 - 359)       | 100<br>(65 - 152)        | 26<br>(18 - 37)      |
| Unintentional firearm injuries                  | 137<br>(89 - 202)          | 8<br>(4 - 16)          | 3<br>(2 - 8)         | 109<br>(65 - 174)        | 10<br>(6 - 17)           | 6<br>(3 - 9)         |
| Unintentional suffocation                       | 80<br>(41 - 195)           | 50<br>(16 - 147)       | 5<br>(2 - 14)        | 11<br>(7 - 20)           | 11<br>(6 - 21)           | 2<br>(1 - 4)         |
| Other exposure to mechanical forces             | 329<br>(242 - 447)         | 60<br>(28 - 115)       | 32<br>(15 - 75)      | 140<br>(92 - 209)        | 79<br>(48 - 126)         | 19<br>(12 - 27)      |
| Adverse effects of medical treatment            | 372<br>(258 - 529)         | 120<br>(59 - 229)      | 9<br>(4 - 19)        | 66<br>(43 - 104)         | 72<br>(42 - 113)         | 106<br>(65 - 172)    |
| Animal contact                                  | 163<br>(109 - 228)         | 20<br>(8 - 42)         | 19<br>(9 - 45)       | 62<br>(38 - 100)         | 33<br>(18 - 55)          | 30<br>(16 - 48)      |
| Venomous animal contact                         | 78<br>(49 - 114)           | 5<br>(2 - 12)          | 4<br>(1 - 11)        | 28<br>(15 - 49)          | 19<br>(10 - 34)          | 22<br>(11 - 36)      |
| Non-venomous animal contact                     | 85<br>(55 - 126)           | 14<br>(6 - 31)         | 15<br>(7 - 35)       | 34<br>(20 - 57)          | 13<br>(7 - 23)           | 8<br>(4 - 14)        |
| Foreign body                                    | 122<br>(68 - 200)          | 69<br>(32 - 125)       | 7<br>(3 - 16)        | 18<br>(11 - 31)          | 10<br>(6 - 16)           | 18<br>(10 - 28)      |
| Pulmonary aspiration and foreign body in airway | 114<br>(60 - 192)          | 67<br>(30 - 122)       | 6<br>(3 - 14)        | 18<br>(9 - 30)           | 7<br>(3 - 11)            | 17<br>(9 - 28)       |
| Foreign body in other body part                 | 8<br>(5 - 14)              | 2<br>(1 - 4)           | 1<br>(0 - 2)         | 1<br>(1 - 2)             | 3<br>(2 - 6)             | 1<br>(1 - 2)         |
| Other unintentional injuries                    | 214<br>(167 - 269)         | 23<br>(13 - 41)        | 22<br>(12 - 52)      | 129<br>(92 - 174)        | 25<br>(17 - 37)          | 14<br>(10 - 19)      |
| Self-harm and interpersonal violence            | 2,835<br>(1,920 - 3,769)   | 69<br>(29 - 139)       | 46<br>(21 - 108)     | 2,195<br>(1,419 - 3,039) | 361<br>(222 - 532)       | 163<br>(94 - 248)    |
| Self-harm                                       | 1,177<br>(720 - 1,549)     | --                     | 17<br>(5 - 46)       | 765<br>(451 - 1,091)     | 247<br>(150 - 368)       | 148<br>(79 - 229)    |
| Interpersonal violence                          | 1,658<br>(1,003 - 2,483)   | 69<br>(29 - 139)       | 30<br>(12 - 69)      | 1,430<br>(847 - 2,190)   | 114<br>(59 - 183)        | 16<br>(7 - 28)       |
| Assault by firearm                              | 605<br>(278 - 1,023)       | 13<br>(3 - 30)         | 7<br>(2 - 17)        | 544<br>(248 - 939)       | 38<br>(15 - 72)          | 4<br>(1 - 9)         |
| Assault by sharp object                         | 306<br>(118 - 518)         | 11<br>(3 - 29)         | 5<br>(2 - 14)        | 260<br>(98 - 467)        | 28<br>(10 - 56)          | 2<br>(0 - 6)         |
| Assault by other means                          | 747<br>(407 - 1,187)       | 45<br>(19 - 92)        | 18<br>(8 - 41)       | 626<br>(312 - 1,035)     | 48<br>(24 - 88)          | 10<br>(5 - 19)       |
| Forces of nature, war, and legal intervention   | 49<br>(18 - 113)           | 11<br>(0 - 0)          | 2<br>(1 - 6)         | 26<br>(12 - 63)          | 9<br>(4 - 22)            | 2<br>(1 - 4)         |
| Exposure to forces of nature                    | 49<br>(18 - 113)           | 11<br>(0 - 0)          | 2<br>(1 - 6)         | 26<br>(12 - 63)          | 9<br>(4 - 22)            | 2<br>(1 - 4)         |

Web Table 31- Mozambique deaths with 95% UI by age, sex, and cause in 2013

| Cause                                                             | Females, All Ages              | Females, 0-4 Years          | Females, 5-14 Years      | Females, 15-49 Years        | Females, 50-69 Years        | Females, 70-80 Years        |
|-------------------------------------------------------------------|--------------------------------|-----------------------------|--------------------------|-----------------------------|-----------------------------|-----------------------------|
| All causes                                                        | 134,239<br>(123,212 - 144,791) | 40,495<br>(34,365 - 48,386) | 5,984<br>(4,828 - 9,050) | 48,751<br>(41,929 - 55,039) | 17,811<br>(15,826 - 21,092) | 21,198<br>(19,180 - 24,194) |
| Communicable, maternal, neonatal, and nutritional diseases        | 101,618<br>(92,752 - 110,298)  | 36,519<br>(30,775 - 43,396) | 5,245<br>(4,269 - 7,613) | 40,457<br>(34,969 - 45,677) | 10,685<br>(9,231 - 12,392)  | 8,712<br>(7,206 - 10,504)   |
| HIV/AIDS and tuberculosis                                         | 45,155<br>(39,988 - 49,981)    | 5,955<br>(4,739 - 7,002)    | 2,836<br>(2,403 - 3,287) | 27,613<br>(23,924 - 31,248) | 6,775<br>(5,587 - 8,019)    | 1,976<br>(1,413 - 2,530)    |
| Tuberculosis                                                      | 5,735<br>(4,380 - 7,257)       | 182<br>(96 - 306)           | 58<br>(30 - 120)         | 2,958<br>(1,954 - 4,084)    | 1,214<br>(850 - 1,689)      | 1,324<br>(786 - 1,843)      |
| HIV/AIDS                                                          | 39,419<br>(34,459 - 44,370)    | 5,773<br>(4,568 - 6,799)    | 2,778<br>(2,365 - 3,213) | 24,656<br>(20,885 - 28,517) | 5,561<br>(4,499 - 6,747)    | 652<br>(440 - 872)          |
| HIV/AIDS resulting in mycobacterial infection                     | 2,138<br>(1,654 - 2,690)       | 294<br>(219 - 382)          | 133<br>(102 - 168)       | 1,350<br>(1,026 - 1,722)    | 322<br>(238 - 430)          | 40<br>(26 - 56)             |
| HIV/AIDS resulting in other diseases                              | 37,281<br>(32,536 - 41,981)    | 5,479<br>(4,339 - 6,479)    | 2,645<br>(2,242 - 3,054) | 23,306<br>(19,729 - 26,941) | 5,239<br>(4,225 - 6,381)    | 612<br>(413 - 814)          |
| Diarrhea, lower respiratory, and other common infectious diseases | 18,573<br>(15,149 - 22,062)    | 8,706<br>(6,014 - 11,838)   | 654<br>(368 - 1,289)     | 3,615<br>(2,304 - 4,958)    | 1,896<br>(1,366 - 2,669)    | 3,702<br>(2,724 - 4,803)    |
| Diarrheal diseases                                                | 6,682<br>(4,731 - 9,141)       | 2,434<br>(1,044 - 4,481)    | 188<br>(78 - 432)        | 1,595<br>(919 - 2,491)      | 791<br>(466 - 1,272)        | 1,675<br>(1,005 - 2,541)    |
| Intestinal infectious diseases                                    | 519<br>(258 - 925)             | 212<br>(94 - 403)           | 118<br>(50 - 256)        | 161<br>(67 - 307)           | 19<br>(7 - 37)              | 10<br>(4 - 18)              |
| Typhoid fever                                                     | 389<br>(185 - 708)             | 150<br>(61 - 301)           | 93<br>(37 - 205)         | 126<br>(50 - 254)           | 14<br>(5 - 28)              | 6<br>(2 - 13)               |
| Paratyphoid fever                                                 | 90<br>(41 - 171)               | 39<br>(15 - 82)             | 21<br>(8 - 52)           | 26<br>(9 - 55)              | 3<br>(1 - 6)                | 1<br>(0 - 3)                |
| Other intestinal infectious diseases                              | 40<br>(23 - 62)                | 24<br>(11 - 43)             | 3<br>(1 - 9)             | 9<br>(3 - 18)               | 2<br>(0 - 7)                | 2<br>(0 - 7)                |
| Lower respiratory infections                                      | 8,378<br>(6,350 - 10,758)      | 4,284<br>(2,605 - 6,515)    | 194<br>(96 - 396)        | 1,131<br>(731 - 1,619)      | 897<br>(612 - 1,320)        | 1,871<br>(1,247 - 2,662)    |
| Upper respiratory infections                                      | 19<br>(6 - 43)                 | 7<br>(0 - 26)               | 1<br>(0 - 3)             | 7<br>(1 - 22)               | 2<br>(0 - 6)                | 2<br>(0 - 8)                |
| Otitis media                                                      | 11<br>(8 - 14)                 | 4<br>(2 - 6)                | 0<br>(0 - 1)             | 1<br>(1 - 2)                | 1<br>(1 - 2)                | 4<br>(3 - 6)                |
| Meningitis                                                        | 1,855<br>(1,320 - 2,545)       | 936<br>(533 - 1,535)        | 85<br>(42 - 184)         | 569<br>(312 - 901)          | 147<br>(90 - 235)           | 118<br>(71 - 188)           |
| Pneumococcal meningitis                                           | 451<br>(292 - 671)             | 192<br>(96 - 345)           | 28<br>(12 - 62)          | 163<br>(79 - 297)           | 38<br>(18 - 66)             | 30<br>(14 - 53)             |
| H influenzae type B meningitis                                    | 387<br>(231 - 635)             | 275<br>(141 - 494)          | 18<br>(7 - 43)           | 71<br>(32 - 131)            | 13<br>(6 - 25)              | 10<br>(5 - 19)              |
| Meningococcal meningitis                                          | 301<br>(192 - 435)             | 116<br>(47 - 222)           | 9<br>(3 - 24)            | 108<br>(51 - 192)           | 36<br>(17 - 68)             | 32<br>(15 - 56)             |
| Other meningitis                                                  | 715<br>(496 - 1,019)           | 354<br>(186 - 611)          | 30<br>(13 - 65)          | 227<br>(118 - 381)          | 59<br>(29 - 103)            | 45<br>(22 - 81)             |
| Encephalitis                                                      | 58<br>(42 - 80)                | 22<br>(12 - 39)             | 4<br>(2 - 7)             | 17<br>(9 - 30)              | 8<br>(5 - 13)               | 7<br>(4 - 11)               |
| Diphtheria                                                        | 15<br>(0 - 96)                 | 12<br>(0 - 90)              | 2<br>(0 - 14)            | 1<br>(0 - 7)                | 0<br>(0 - 1)                | --                          |
| Whooping cough                                                    | 300<br>(0 - 1,562)             | 285<br>(0 - 1,480)          | 12<br>(0 - 66)           | 3<br>(0 - 15)               | 0<br>(0 - 1)                | --                          |
| Tetanus                                                           | 256<br>(158 - 369)             | 88<br>(40 - 177)            | 10<br>(4 - 23)           | 119<br>(60 - 184)           | 29<br>(15 - 48)             | 10<br>(5 - 16)              |
| Measles                                                           | 467<br>(111 - 1,377)           | 417<br>(97 - 1,236)         | 41<br>(9 - 120)          | 9<br>(2 - 27)               | 0<br>(0 - 0)                | --                          |
| Varicella and herpes zoster                                       | 14<br>(4 - 36)                 | 6<br>(0 - 24)               | 1<br>(0 - 4)             | 3<br>(0 - 8)                | 1<br>(0 - 4)                | 4<br>(0 - 18)               |
| Neglected tropical diseases and malaria                           | 21,332<br>(15,688 - 27,337)    | 10,180<br>(6,423 - 14,644)  | 1,474<br>(750 - 2,925)   | 5,737<br>(2,858 - 9,257)    | 1,628<br>(666 - 2,723)      | 2,312<br>(946 - 4,221)      |
| Malaria                                                           | 20,473<br>(14,753 - 26,654)    | 9,941<br>(6,201 - 14,427)   | 1,315<br>(625 - 2,621)   | 5,387<br>(2,457 - 8,935)    | 1,559<br>(598 - 2,664)      | 2,271<br>(907 - 4,190)      |
| Leishmaniasis                                                     | 635<br>(222 - 1,221)           | 190<br>(23 - 533)           | 139<br>(23 - 404)        | 247<br>(76 - 495)           | 44<br>(11 - 98)             | 15<br>(6 - 29)              |
| Visceral leishmaniasis                                            | 635<br>(222 - 1,221)           | 190<br>(23 - 533)           | 139<br>(23 - 404)        | 247<br>(76 - 495)           | 44<br>(11 - 98)             | 15<br>(6 - 29)              |
| Schistosomiasis                                                   | 52<br>(33 - 76)                | 1<br>(0 - 1)                | 1<br>(0 - 2)             | 32<br>(17 - 52)             | 11<br>(6 - 18)              | 8<br>(4 - 13)               |
| Cysticercosis                                                     | 5<br>(1 - 15)                  | 0<br>(0 - 0)                | 0<br>(0 - 0)             | 4<br>(1 - 12)               | 0<br>(0 - 1)                | 0<br>(0 - 0)                |
| Cystic echinococcosis                                             | 9<br>(7 - 12)                  | 1<br>(1 - 1)                | 1<br>(1 - 2)             | 6<br>(4 - 9)                | 1<br>(1 - 1)                | 0<br>(0 - 1)                |
| Dengue                                                            | 1<br>(1 - 2)                   | 0<br>(0 - 0)                | 0<br>(0 - 0)             | 1<br>(0 - 1)                | 0<br>(0 - 0)                | 0<br>(0 - 0)                |
| Rabies                                                            | 81<br>(51 - 118)               | 12<br>(5 - 26)              | 13<br>(6 - 31)           | 47<br>(29 - 72)             | 6<br>(3 - 10)               | 2<br>(1 - 5)                |
| Intestinal nematode infections                                    | 30<br>(15 - 53)                | 22<br>(10 - 44)             | 3<br>(0 - 10)            | 3<br>(0 - 11)               | 0<br>(0 - 3)                | 1<br>(0 - 4)                |
| Ascariasis                                                        | 30<br>(15 - 53)                | 22<br>(10 - 44)             | 3<br>(0 - 10)            | 3<br>(0 - 11)               | 0<br>(0 - 3)                | 1<br>(0 - 4)                |
| Other neglected tropical diseases                                 | 45<br>(31 - 63)                | 12<br>(6 - 23)              | 1<br>(0 - 2)             | 9<br>(6 - 15)               | 7<br>(4 - 11)               | 15<br>(8 - 26)              |
| Maternal disorders                                                | 2,574<br>(1,567 - 3,783)       | --                          | 10<br>(3 - 24)           | 2,565<br>(1,554 - 3,776)    | --                          | --                          |

Web Table 31- Mozambique deaths with 95% UI by age, sex, and cause in 2013

| Cause                                                            | Females, All Ages           | Females, 0-4 Years       | Females, 5-14 Years | Females, 15-49 Years     | Females, 50-69 Years     | Females, 70-80 Years       |
|------------------------------------------------------------------|-----------------------------|--------------------------|---------------------|--------------------------|--------------------------|----------------------------|
| Maternal hemorrhage                                              | 286<br>(160 - 440)          | --                       | 1<br>(0 - 2)        | 285<br>(159 - 439)       | --                       | --                         |
| Maternal sepsis and other maternal infections                    | 300<br>(169 - 477)          | --                       | 2<br>(0 - 4)        | 298<br>(166 - 476)       | --                       | --                         |
| Maternal hypertensive disorders                                  | 276<br>(150 - 439)          | --                       | 1<br>(0 - 3)        | 275<br>(148 - 438)       | --                       | --                         |
| Maternal obstructed labor                                        | 120<br>(68 - 190)           | --                       | 0<br>(0 - 1)        | 120<br>(67 - 190)        | --                       | --                         |
| Maternal abortive outcome                                        | 410<br>(227 - 646)          | --                       | 1<br>(0 - 4)        | 409<br>(226 - 644)       | --                       | --                         |
| Indirect maternal deaths                                         | 280<br>(156 - 449)          | --                       | 1<br>(0 - 2)        | 279<br>(155 - 449)       | --                       | --                         |
| Late maternal deaths                                             | 219<br>(117 - 358)          | --                       | 2<br>(0 - 4)        | 217<br>(116 - 356)       | --                       | --                         |
| Maternal deaths aggravated by HIV/AIDS                           | 92<br>(49 - 146)            | --                       | --                  | 92<br>(49 - 146)         | --                       | --                         |
| Other maternal disorders                                         | 587<br>(340 - 876)          | --                       | 2<br>(1 - 5)        | 585<br>(338 - 874)       | --                       | --                         |
| Neonatal disorders                                               | 7,862<br>(6,358 - 9,551)    | 7,862<br>(6,358 - 9,551) | --                  | --                       | --                       | --                         |
| Neonatal preterm birth complications                             | 1,862<br>(855 - 3,299)      | 1,862<br>(855 - 3,299)   | --                  | --                       | --                       | --                         |
| Neonatal encephalopathy due to birth asphyxia and trauma         | 2,124<br>(1,026 - 3,540)    | 2,124<br>(1,026 - 3,540) | --                  | --                       | --                       | --                         |
| Neonatal sepsis and other neonatal infections                    | 2,414<br>(1,197 - 4,180)    | 2,414<br>(1,197 - 4,180) | --                  | --                       | --                       | --                         |
| Hemolytic disease and other neonatal jaundice                    | 32<br>(8 - 92)              | 32<br>(8 - 92)           | --                  | --                       | --                       | --                         |
| Other neonatal disorders                                         | 1,431<br>(701 - 2,505)      | 1,431<br>(701 - 2,505)   | --                  | --                       | --                       | --                         |
| Nutritional deficiencies                                         | 3,079<br>(2,307 - 4,048)    | 1,355<br>(762 - 2,237)   | 120<br>(63 - 250)   | 702<br>(448 - 1,012)     | 313<br>(214 - 449)       | 590<br>(405 - 842)         |
| Protein-energy malnutrition                                      | 2,087<br>(1,372 - 3,001)    | 1,244<br>(680 - 2,074)   | 97<br>(47 - 209)    | 183<br>(73 - 326)        | 193<br>(114 - 305)       | 369<br>(206 - 559)         |
| Iodine deficiency                                                | 18<br>(1 - 67)              | 6<br>(0 - 45)            | 1<br>(0 - 7)        | 6<br>(0 - 29)            | 2<br>(0 - 12)            | 2<br>(0 - 15)              |
| Iron-deficiency anemia                                           | 935<br>(551 - 1,475)        | 100<br>(21 - 263)        | 22<br>(7 - 55)      | 509<br>(279 - 776)       | 110<br>(43 - 204)        | 194<br>(90 - 377)          |
| Other nutritional deficiencies                                   | 40<br>(17 - 73)             | 5<br>(1 - 14)            | 0<br>(0 - 1)        | 4<br>(2 - 8)             | 7<br>(3 - 14)            | 24<br>(8 - 50)             |
| Other communicable, maternal, neonatal, and nutritional diseases | 3,043<br>(1,639 - 4,996)    | 2,461<br>(1,162 - 4,354) | 152<br>(57 - 329)   | 225<br>(132 - 333)       | 73<br>(40 - 129)         | 132<br>(58 - 285)          |
| Sexually transmitted diseases excluding HIV                      | 2,626<br>(1,249 - 4,561)    | 2,337<br>(1,054 - 4,187) | 142<br>(50 - 315)   | 108<br>(56 - 169)        | 19<br>(8 - 45)           | 21<br>(9 - 46)             |
| Syphilis                                                         | 2,547<br>(1,173 - 4,493)    | 2,337<br>(1,054 - 4,187) | 141<br>(49 - 314)   | 43<br>(22 - 68)          | 11<br>(4 - 24)           | 16<br>(7 - 35)             |
| Chlamydial infection                                             | 26<br>(15 - 38)             | --                       | 0<br>(0 - 1)        | 22<br>(11 - 34)          | 3<br>(1 - 6)             | 1<br>(1 - 3)               |
| Gonococcal infection                                             | 28<br>(17 - 41)             | --                       | 0<br>(0 - 1)        | 22<br>(12 - 35)          | 3<br>(1 - 8)             | 2<br>(1 - 6)               |
| Other sexually transmitted diseases                              | 25<br>(15 - 37)             | --                       | 0<br>(0 - 1)        | 21<br>(11 - 33)          | 3<br>(1 - 6)             | 1<br>(1 - 3)               |
| Hepatitis                                                        | 104<br>(71 - 147)           | 17<br>(9 - 31)           | 4<br>(2 - 8)        | 69<br>(38 - 108)         | 9<br>(6 - 14)            | 5<br>(4 - 8)               |
| Acute hepatitis A                                                | 15<br>(5 - 30)              | 8<br>(2 - 17)            | 2<br>(1 - 4)        | 5<br>(1 - 13)            | 0<br>(0 - 0)             | 0<br>(0 - 0)               |
| Acute hepatitis B                                                | 43<br>(27 - 66)             | 10<br>(4 - 19)           | 2<br>(1 - 4)        | 20<br>(8 - 40)           | 8<br>(5 - 12)            | 5<br>(3 - 7)               |
| Acute hepatitis C                                                | 1<br>(0 - 2)                | --                       | 0<br>(0 - 0)        | 1<br>(0 - 2)             | 0<br>(0 - 0)             | 0<br>(0 - 0)               |
| Acute hepatitis E                                                | 45<br>(22 - 76)             | 0<br>(0 - 0)             | 0<br>(0 - 1)        | 43<br>(20 - 74)          | 1<br>(0 - 3)             | 0<br>(0 - 1)               |
| Other infectious diseases                                        | 313<br>(190 - 533)          | 107<br>(46 - 218)        | 6<br>(2 - 17)       | 49<br>(22 - 90)          | 45<br>(19 - 95)          | 106<br>(36 - 248)          |
| Non-communicable diseases                                        | 26,768<br>(22,759 - 32,037) | 2,986<br>(1,832 - 4,858) | 391<br>(235 - 792)  | 5,455<br>(3,972 - 6,830) | 6,405<br>(5,049 - 8,589) | 11,531<br>(9,696 - 13,887) |
| Neoplasms                                                        | 4,730<br>(3,907 - 5,840)    | 185<br>(110 - 293)       | 83<br>(45 - 175)    | 1,477<br>(1,076 - 1,875) | 1,556<br>(1,217 - 2,104) | 1,429<br>(1,156 - 1,791)   |
| Esophageal cancer                                                | 187<br>(138 - 290)          | --                       | --                  | 23<br>(15 - 51)          | 70<br>(45 - 124)         | 94<br>(64 - 136)           |
| Stomach cancer                                                   | 275<br>(210 - 356)          | --                       | --                  | 40<br>(29 - 53)          | 131<br>(94 - 180)        | 104<br>(70 - 151)          |
| Liver cancer                                                     | 311<br>(237 - 404)          | --                       | 3<br>(1 - 6)        | 80<br>(52 - 112)         | 110<br>(72 - 160)        | 119<br>(79 - 169)          |
| Liver cancer due to hepatitis B                                  | 56<br>(26 - 103)            | --                       | 0<br>(0 - 1)        | 21<br>(7 - 40)           | 19<br>(5 - 42)           | 15<br>(5 - 32)             |
| Liver cancer due to hepatitis C                                  | 134<br>(70 - 209)           | --                       | 0<br>(0 - 1)        | 24<br>(8 - 45)           | 50<br>(23 - 87)          | 60<br>(29 - 97)            |
| Liver cancer due to alcohol use                                  | 36<br>(19 - 60)             | --                       | --                  | 4<br>(2 - 7)             | 12<br>(6 - 24)           | 20<br>(9 - 35)             |

Web Table 31- Mozambique deaths with 95% UI by age, sex, and cause in 2013

| Cause                                         | Females, All Ages          | Females, 0-4 Years | Females, 5-14 Years | Females, 15-49 Years   | Females, 50-69 Years     | Females, 70-80 Years     |
|-----------------------------------------------|----------------------------|--------------------|---------------------|------------------------|--------------------------|--------------------------|
| Liver cancer due to other causes              | 85<br>(50 - 139)           | --                 | 2<br>(1 - 4)        | 31<br>(16 - 50)        | 29<br>(12 - 58)          | 24<br>(11 - 44)          |
| Larynx cancer                                 | 10<br>(5 - 19)             | --                 | --                  | 1<br>(0 - 2)           | 8<br>(4 - 15)            | 1<br>(1 - 2)             |
| Tracheal, bronchus and lung cancer            | 146<br>(114 - 190)         | --                 | --                  | 19<br>(13 - 26)        | 62<br>(45 - 87)          | 64<br>(46 - 88)          |
| Breast cancer                                 | 709<br>(564 - 883)         | --                 | --                  | 361<br>(268 - 475)     | 223<br>(167 - 309)       | 125<br>(92 - 171)        |
| Cervical cancer                               | 868<br>(651 - 1,161)       | --                 | --                  | 321<br>(226 - 450)     | 338<br>(233 - 489)       | 209<br>(137 - 300)       |
| Uterine cancer                                | 68<br>(37 - 112)           | --                 | --                  | 10<br>(6 - 16)         | 34<br>(17 - 59)          | 24<br>(12 - 41)          |
| Prostate cancer                               | --                         | --                 | --                  | --                     | --                       | --                       |
| Colon and rectum cancer                       | 418<br>(335 - 526)         | --                 | --                  | 90<br>(65 - 120)       | 131<br>(98 - 177)        | 197<br>(143 - 262)       |
| Lip and oral cavity cancer                    | 66<br>(45 - 97)            | --                 | --                  | 28<br>(17 - 41)        | 25<br>(15 - 39)          | 13<br>(8 - 22)           |
| Nasopharynx cancer                            | 15<br>(9 - 27)             | --                 | 0<br>(0 - 0)        | 10<br>(6 - 19)         | 2<br>(1 - 5)             | 2<br>(1 - 4)             |
| Other pharynx cancer                          | 21<br>(15 - 29)            | --                 | --                  | 7<br>(4 - 13)          | 10<br>(6 - 16)           | 3<br>(2 - 5)             |
| Gallbladder and biliary tract cancer          | 97<br>(69 - 127)           | --                 | --                  | 31<br>(19 - 44)        | 46<br>(31 - 67)          | 20<br>(13 - 30)          |
| Pancreatic cancer                             | 87<br>(69 - 112)           | --                 | --                  | 23<br>(16 - 31)        | 38<br>(28 - 53)          | 26<br>(18 - 36)          |
| Malignant skin melanoma                       | 23<br>(18 - 31)            | --                 | --                  | 5<br>(3 - 6)           | 11<br>(8 - 17)           | 8<br>(5 - 11)            |
| Non-melanoma skin cancer                      | 32<br>(15 - 68)            | --                 | --                  | 9<br>(2 - 19)          | 6<br>(3 - 15)            | 16<br>(6 - 47)           |
| Ovarian cancer                                | 112<br>(87 - 142)          | --                 | --                  | 47<br>(30 - 66)        | 44<br>(31 - 62)          | 21<br>(14 - 30)          |
| Testicular cancer                             | --                         | --                 | --                  | --                     | --                       | --                       |
| Kidney cancer                                 | 82<br>(63 - 108)           | 14<br>(6 - 30)     | 3<br>(1 - 7)        | 19<br>(12 - 27)        | 17<br>(11 - 26)          | 29<br>(19 - 46)          |
| Bladder cancer                                | 24<br>(16 - 41)            | --                 | --                  | 9<br>(6 - 15)          | 5<br>(3 - 9)             | 10<br>(5 - 20)           |
| Brain and nervous system cancer               | 102<br>(74 - 133)          | 13<br>(5 - 28)     | 3<br>(2 - 6)        | 64<br>(41 - 91)        | 9<br>(6 - 14)            | 12<br>(8 - 18)           |
| Thyroid cancer                                | 16<br>(10 - 27)            | --                 | 0<br>(0 - 0)        | 1<br>(1 - 2)           | 9<br>(5 - 17)            | 5<br>(3 - 9)             |
| Mesothelioma                                  | 6<br>(4 - 8)               | --                 | --                  | 3<br>(2 - 5)           | 1<br>(1 - 2)             | 1<br>(1 - 2)             |
| Hodgkin lymphoma                              | 51<br>(35 - 68)            | 2<br>(1 - 4)       | 2<br>(1 - 6)        | 18<br>(11 - 27)        | 11<br>(7 - 19)           | 17<br>(10 - 28)          |
| Non-Hodgkin lymphoma                          | 225<br>(165 - 311)         | 34<br>(15 - 61)    | 12<br>(5 - 26)      | 70<br>(46 - 112)       | 44<br>(29 - 66)          | 66<br>(42 - 96)          |
| Multiple myeloma                              | 56<br>(41 - 74)            | --                 | --                  | 15<br>(10 - 22)        | 14<br>(9 - 20)           | 27<br>(18 - 39)          |
| Leukemia                                      | 93<br>(75 - 114)           | 9<br>(5 - 17)      | 8<br>(4 - 15)       | 34<br>(22 - 48)        | 16<br>(12 - 23)          | 25<br>(18 - 34)          |
| Other neoplasms                               | 632<br>(481 - 852)         | 113<br>(58 - 199)  | 52<br>(24 - 116)    | 138<br>(87 - 210)      | 138<br>(94 - 201)        | 190<br>(129 - 262)       |
| Cardiovascular diseases                       | 11,345<br>(9,220 - 14,325) | 179<br>(104 - 300) | 47<br>(26 - 93)     | 1,396<br>(980 - 2,005) | 3,038<br>(2,353 - 4,130) | 6,686<br>(5,369 - 8,329) |
| Rheumatic heart disease                       | 494<br>(315 - 894)         | 5<br>(1 - 12)      | 10<br>(4 - 21)      | 248<br>(136 - 505)     | 117<br>(69 - 217)        | 116<br>(69 - 206)        |
| Ischemic heart disease                        | 2,412<br>(1,678 - 3,239)   | 1<br>(0 - 1)       | 2<br>(1 - 5)        | 173<br>(109 - 294)     | 576<br>(375 - 846)       | 1,660<br>(1,124 - 2,279) |
| Cerebrovascular disease                       | 4,899<br>(3,574 - 6,276)   | 18<br>(8 - 34)     | 3<br>(1 - 7)        | 315<br>(214 - 449)     | 1,386<br>(949 - 1,916)   | 3,177<br>(2,269 - 4,066) |
| Ischemic stroke                               | 2,350<br>(1,254 - 3,504)   | 2<br>(0 - 5)       | 0<br>(0 - 1)        | 49<br>(23 - 95)        | 445<br>(206 - 760)       | 1,854<br>(999 - 2,729)   |
| Hemorrhagic stroke                            | 2,549<br>(1,653 - 3,680)   | 16<br>(7 - 31)     | 3<br>(1 - 6)        | 266<br>(170 - 387)     | 941<br>(613 - 1,382)     | 1,323<br>(773 - 2,170)   |
| Hypertensive heart disease                    | 1,143<br>(609 - 2,373)     | 3<br>(1 - 7)       | 1<br>(1 - 3)        | 91<br>(50 - 143)       | 274<br>(130 - 590)       | 773<br>(379 - 1,749)     |
| Cardiomyopathy and myocarditis                | 613<br>(344 - 1,148)       | 80<br>(38 - 151)   | 15<br>(6 - 34)      | 177<br>(69 - 396)      | 137<br>(60 - 299)        | 204<br>(75 - 491)        |
| Atrial fibrillation and flutter               | 9<br>(4 - 17)              | --                 | --                  | 0<br>(0 - 1)           | 2<br>(1 - 3)             | 7<br>(2 - 14)            |
| Aortic aneurysm                               | 90<br>(50 - 142)           | --                 | --                  | 17<br>(3 - 30)         | 25<br>(13 - 41)          | 49<br>(26 - 82)          |
| Peripheral vascular disease                   | 8<br>(5 - 15)              | --                 | --                  | 0<br>(0 - 1)           | 2<br>(1 - 3)             | 6<br>(3 - 12)            |
| Endocarditis                                  | 152<br>(74 - 360)          | 12<br>(3 - 31)     | 3<br>(1 - 6)        | 30<br>(14 - 60)        | 35<br>(11 - 90)          | 73<br>(20 - 198)         |
| Other cardiovascular and circulatory diseases | 1,525<br>(936 - 2,676)     | 62<br>(23 - 142)   | 14<br>(5 - 31)      | 344<br>(160 - 579)     | 484<br>(278 - 910)       | 621<br>(331 - 1,321)     |



Web Table 31- Mozambique deaths with 95% UI by age, sex, and cause in 2013

| Cause                                               | Females, All Ages        | Females, 0-4 Years | Females, 5-14 Years | Females, 15-49 Years | Females, 50-69 Years | Females, 70-80 Years |
|-----------------------------------------------------|--------------------------|--------------------|---------------------|----------------------|----------------------|----------------------|
| Chronic respiratory diseases                        | 1,395<br>(1,126 - 1,812) | 92<br>(48 - 154)   | 23<br>(13 - 47)     | 286<br>(194 - 389)   | 283<br>(207 - 399)   | 711<br>(534 - 965)   |
| Chronic obstructive pulmonary disease               | 745<br>(533 - 1,046)     | 18<br>(7 - 39)     | 9<br>(4 - 18)       | 92<br>(56 - 141)     | 171<br>(115 - 260)   | 455<br>(306 - 662)   |
| Pneumoconiosis                                      | 14<br>(9 - 21)           | 1<br>(0 - 3)       | 1<br>(0 - 1)        | 9<br>(5 - 15)        | 1<br>(1 - 2)         | 2<br>(1 - 3)         |
| Silicosis                                           | 1<br>(0 - 2)             | 0<br>(0 - 0)       | 0<br>(0 - 0)        | 0<br>(0 - 1)         | 0<br>(0 - 0)         | 0<br>(0 - 0)         |
| Asbestosis                                          | 1<br>(0 - 1)             | 0<br>(0 - 0)       | 0<br>(0 - 0)        | 0<br>(0 - 1)         | 0<br>(0 - 0)         | 0<br>(0 - 0)         |
| Coal workers pneumoconiosis                         | 1<br>(0 - 1)             | 0<br>(0 - 0)       | 0<br>(0 - 0)        | 0<br>(0 - 1)         | 0<br>(0 - 0)         | 0<br>(0 - 0)         |
| Other pneumoconiosis                                | 12<br>(7 - 18)           | 1<br>(0 - 2)       | 0<br>(0 - 1)        | 8<br>(4 - 13)        | 1<br>(1 - 2)         | 2<br>(1 - 3)         |
| Asthma                                              | 348<br>(228 - 501)       | 37<br>(15 - 77)    | 9<br>(4 - 18)       | 90<br>(54 - 139)     | 71<br>(42 - 115)     | 142<br>(78 - 244)    |
| Interstitial lung disease and pulmonary sarcoidosis | 154<br>(58 - 264)        | 3<br>(0 - 10)      | 1<br>(0 - 3)        | 32<br>(7 - 73)       | 31<br>(10 - 60)      | 87<br>(25 - 185)     |
| Other chronic respiratory diseases                  | 134<br>(86 - 206)        | 33<br>(16 - 59)    | 4<br>(2 - 9)        | 64<br>(36 - 105)     | 9<br>(5 - 16)        | 25<br>(13 - 49)      |
| Cirrhosis                                           | 942<br>(757 - 1,174)     | 18<br>(7 - 37)     | 15<br>(9 - 30)      | 329<br>(215 - 447)   | 310<br>(226 - 428)   | 270<br>(194 - 372)   |
| Cirrhosis due to hepatitis B                        | 304<br>(173 - 443)       | 1<br>(0 - 3)       | 3<br>(0 - 7)        | 110<br>(44 - 174)    | 104<br>(56 - 164)    | 86<br>(42 - 141)     |
| Cirrhosis due to hepatitis C                        | 215<br>(92 - 353)        | 1<br>(0 - 3)       | 1<br>(0 - 4)        | 59<br>(21 - 109)     | 81<br>(30 - 144)     | 73<br>(30 - 130)     |
| Cirrhosis due to alcohol use                        | 236<br>(141 - 350)       | --                 | --                  | 58<br>(30 - 96)      | 88<br>(47 - 143)     | 90<br>(50 - 149)     |
| Cirrhosis due to other causes                       | 187<br>(116 - 297)       | 16<br>(6 - 33)     | 12<br>(6 - 24)      | 102<br>(51 - 184)    | 37<br>(16 - 65)      | 21<br>(9 - 38)       |
| Digestive diseases                                  | 1,457<br>(1,154 - 1,859) | 61<br>(29 - 111)   | 33<br>(18 - 67)     | 434<br>(294 - 604)   | 312<br>(222 - 432)   | 617<br>(462 - 817)   |
| Peptic ulcer disease                                | 348<br>(218 - 527)       | 5<br>(2 - 10)      | 3<br>(1 - 7)        | 92<br>(49 - 156)     | 79<br>(45 - 127)     | 170<br>(102 - 277)   |
| Gastritis and duodenitis                            | 74<br>(25 - 210)         | 4<br>(1 - 9)       | 3<br>(1 - 6)        | 21<br>(8 - 40)       | 13<br>(3 - 45)       | 33<br>(7 - 130)      |
| Appendicitis                                        | 158<br>(105 - 223)       | 6<br>(2 - 14)      | 5<br>(2 - 12)       | 61<br>(32 - 108)     | 29<br>(15 - 50)      | 57<br>(27 - 99)      |
| Paralytic ileus and intestinal obstruction          | 379<br>(229 - 613)       | 16<br>(5 - 36)     | 12<br>(6 - 26)      | 82<br>(45 - 135)     | 98<br>(53 - 171)     | 170<br>(91 - 287)    |
| Inguinal, femoral, and abdominal hernia             | 29<br>(16 - 50)          | 3<br>(1 - 9)       | 0<br>(0 - 1)        | 12<br>(6 - 21)       | 2<br>(1 - 3)         | 12<br>(5 - 22)       |
| Inflammatory bowel disease                          | 115<br>(46 - 193)        | 14<br>(4 - 30)     | 3<br>(1 - 8)        | 52<br>(20 - 93)      | 16<br>(5 - 29)       | 30<br>(10 - 57)      |
| Vascular intestinal disorders                       | 16<br>(7 - 47)           | 0<br>(0 - 1)       | 0<br>(0 - 0)        | 2<br>(1 - 5)         | 4<br>(1 - 10)        | 10<br>(3 - 33)       |
| Gallbladder and biliary diseases                    | 125<br>(81 - 184)        | 2<br>(1 - 4)       | 1<br>(1 - 2)        | 37<br>(21 - 58)      | 28<br>(16 - 46)      | 57<br>(32 - 96)      |
| Pancreatitis                                        | 61<br>(32 - 101)         | 1<br>(0 - 2)       | 1<br>(0 - 2)        | 26<br>(8 - 48)       | 14<br>(6 - 26)       | 20<br>(8 - 43)       |
| Other digestive diseases                            | 151<br>(102 - 233)       | 10<br>(4 - 20)     | 4<br>(2 - 9)        | 48<br>(27 - 75)      | 30<br>(17 - 57)      | 59<br>(32 - 129)     |
| Neurological disorders                              | 1,136<br>(888 - 1,445)   | 130<br>(60 - 258)  | 35<br>(17 - 76)     | 231<br>(135 - 350)   | 98<br>(72 - 135)     | 642<br>(470 - 852)   |
| Alzheimer disease and other dementias               | 629<br>(461 - 827)       | --                 | --                  | 0<br>(0 - 1)         | 47<br>(32 - 66)      | 582<br>(419 - 776)   |
| Parkinson disease                                   | 5<br>(3 - 8)             | --                 | --                  | 1<br>(0 - 1)         | 2<br>(1 - 4)         | 3<br>(1 - 5)         |
| Epilepsy                                            | 421<br>(275 - 612)       | 113<br>(46 - 241)  | 31<br>(14 - 69)     | 209<br>(117 - 327)   | 28<br>(16 - 46)      | 41<br>(22 - 74)      |
| Multiple sclerosis                                  | 8<br>(4 - 17)            | --                 | --                  | 5<br>(2 - 14)        | 2<br>(1 - 4)         | 1<br>(0 - 2)         |
| Other neurological disorders                        | 72<br>(57 - 90)          | 17<br>(10 - 26)    | 4<br>(2 - 9)        | 16<br>(11 - 21)      | 19<br>(14 - 27)      | 16<br>(11 - 21)      |
| Mental and substance use disorders                  | 242<br>(160 - 373)       | 8<br>(2 - 15)      | 0<br>(0 - 0)        | 189<br>(113 - 300)   | 32<br>(17 - 60)      | 13<br>(6 - 28)       |
| Schizophrenia                                       | 21<br>(7 - 43)           | --                 | --                  | 15<br>(2 - 32)       | 3<br>(2 - 7)         | 2<br>(1 - 5)         |
| Alcohol use disorders                               | 111<br>(33 - 203)        | --                 | --                  | 89<br>(19 - 168)     | 18<br>(7 - 32)       | 4<br>(2 - 9)         |
| Drug use disorders                                  | 109<br>(51 - 201)        | 8<br>(2 - 15)      | --                  | 84<br>(42 - 167)     | 10<br>(3 - 30)       | 6<br>(1 - 18)        |
| Opioid use disorders                                | 11<br>(5 - 21)           | 1<br>(0 - 2)       | --                  | 9<br>(4 - 17)        | 1<br>(0 - 3)         | 1<br>(0 - 2)         |
| Cocaine use disorders                               | 1<br>(0 - 1)             | 0<br>(0 - 0)       | --                  | 1<br>(0 - 1)         | 0<br>(0 - 0)         | 0<br>(0 - 0)         |
| Amphetamine use disorders                           | 0<br>(0 - 1)             | 0<br>(0 - 0)       | --                  | 0<br>(0 - 1)         | 0<br>(0 - 0)         | 0<br>(0 - 0)         |
| Other drug use disorders                            | 97<br>(45 - 179)         | 7<br>(2 - 13)      | --                  | 74<br>(38 - 148)     | 9<br>(2 - 27)        | 6<br>(1 - 16)        |

Web Table 31- Mozambique deaths with 95% UI by age, sex, and cause in 2013

| Cause                                               | Females, All Ages        | Females, 0-4 Years       | Females, 5-14 Years | Females, 15-49 Years | Females, 50-69 Years | Females, 70-80 Years |
|-----------------------------------------------------|--------------------------|--------------------------|---------------------|----------------------|----------------------|----------------------|
| Eating disorders                                    | 1<br>(1 - 2)             | --                       | 0<br>(0 - 0)        | 1<br>(0 - 2)         | --                   | --                   |
| Anorexia nervosa                                    | 1<br>(1 - 2)             | --                       | 0<br>(0 - 0)        | 1<br>(0 - 2)         | --                   | --                   |
| Diabetes, urogenital, blood, and endocrine diseases | 2,780<br>(2,190 - 3,416) | 260<br>(135 - 445)       | 68<br>(35 - 136)    | 810<br>(541 - 1,106) | 680<br>(501 - 925)   | 962<br>(758 - 1,209) |
| Diabetes mellitus                                   | 1,108<br>(866 - 1,406)   | 3<br>(2 - 5)             | 4<br>(2 - 8)        | 186<br>(134 - 246)   | 388<br>(272 - 547)   | 527<br>(396 - 702)   |
| Acute glomerulonephritis                            | 71<br>(49 - 101)         | 3<br>(2 - 6)             | 1<br>(1 - 3)        | 41<br>(23 - 64)      | 13<br>(8 - 21)       | 13<br>(8 - 19)       |
| Chronic kidney disease                              | 505<br>(395 - 670)       | 30<br>(16 - 50)          | 17<br>(10 - 35)     | 172<br>(113 - 249)   | 100<br>(69 - 149)    | 187<br>(136 - 264)   |
| Chronic kidney disease due to diabetes mellitus     | 3<br>(1 - 5)             | 0<br>(0 - 0)             | 0<br>(0 - 0)        | 1<br>(0 - 1)         | 1<br>(0 - 2)         | 1<br>(0 - 3)         |
| Chronic kidney disease due to hypertension          | 207<br>(132 - 319)       | 4<br>(1 - 10)            | 2<br>(1 - 4)        | 45<br>(22 - 84)      | 50<br>(28 - 87)      | 106<br>(64 - 178)    |
| Chronic kidney disease due to glomerulonephritis    | 208<br>(133 - 303)       | 21<br>(11 - 35)          | 11<br>(6 - 22)      | 105<br>(56 - 168)    | 31<br>(14 - 54)      | 40<br>(16 - 70)      |
| Chronic kidney disease due to other causes          | 87<br>(42 - 140)         | 5<br>(2 - 12)            | 4<br>(1 - 9)        | 20<br>(9 - 39)       | 17<br>(6 - 33)       | 40<br>(12 - 77)      |
| Urinary diseases and male infertility               | 321<br>(245 - 415)       | 27<br>(13 - 50)          | 7<br>(3 - 16)       | 119<br>(79 - 174)    | 83<br>(56 - 124)     | 85<br>(55 - 128)     |
| Interstitial nephritis and urinary tract infections | 238<br>(176 - 318)       | 17<br>(7 - 35)           | 4<br>(1 - 9)        | 71<br>(43 - 107)     | 70<br>(46 - 104)     | 76<br>(49 - 114)     |
| Urolithiasis                                        | 25<br>(10 - 51)          | --                       | 1<br>(0 - 3)        | 15<br>(4 - 36)       | 6<br>(2 - 13)        | 4<br>(1 - 9)         |
| Other urinary diseases                              | 58<br>(36 - 96)          | 10<br>(4 - 19)           | 2<br>(1 - 6)        | 33<br>(16 - 59)      | 7<br>(4 - 15)        | 6<br>(3 - 12)        |
| Gynecological diseases                              | 16<br>(11 - 24)          | --                       | --                  | 8<br>(5 - 14)        | 4<br>(2 - 7)         | 4<br>(2 - 7)         |
| Uterine fibroids                                    | 3<br>(2 - 5)             | --                       | --                  | 1<br>(1 - 2)         | 1<br>(1 - 2)         | 1<br>(1 - 2)         |
| Polycystic ovarian syndrome                         | 1<br>(0 - 1)             | --                       | --                  | 1<br>(0 - 1)         | 0<br>(0 - 0)         | --                   |
| Endometriosis                                       | 2<br>(1 - 2)             | --                       | --                  | 1<br>(1 - 2)         | 0<br>(0 - 0)         | --                   |
| Genital prolapse                                    | 3<br>(2 - 4)             | --                       | --                  | 1<br>(1 - 2)         | 1<br>(0 - 1)         | 1<br>(1 - 2)         |
| Other gynecological diseases                        | 8<br>(5 - 12)            | --                       | --                  | 4<br>(2 - 7)         | 2<br>(1 - 4)         | 2<br>(1 - 3)         |
| Hemoglobinopathies and hemolytic anemias            | 356<br>(104 - 688)       | 119<br>(26 - 255)        | 32<br>(8 - 73)      | 163<br>(32 - 358)    | 22<br>(11 - 41)      | 22<br>(10 - 48)      |
| Thalassemias                                        | 29<br>(6 - 59)           | 16<br>(3 - 35)           | 3<br>(1 - 7)        | 10<br>(2 - 23)       | 0<br>(0 - 0)         | 0<br>(0 - 0)         |
| Sickle cell disorders                               | 220<br>(54 - 437)        | 66<br>(14 - 145)         | 23<br>(6 - 54)      | 118<br>(23 - 261)    | 11<br>(6 - 21)       | 0<br>(0 - 1)         |
| G6PD deficiency                                     | 30<br>(8 - 59)           | 11<br>(2 - 24)           | 2<br>(1 - 5)        | 14<br>(3 - 31)       | 1<br>(1 - 3)         | 1<br>(0 - 1)         |
| Other hemoglobinopathies and hemolytic anemias      | 78<br>(36 - 134)         | 25<br>(7 - 53)           | 3<br>(1 - 7)        | 20<br>(4 - 43)       | 9<br>(5 - 18)        | 20<br>(9 - 46)       |
| Endocrine, metabolic, blood, and immune disorders   | 402<br>(289 - 553)       | 78<br>(41 - 134)         | 7<br>(3 - 15)       | 122<br>(74 - 198)    | 70<br>(43 - 109)     | 126<br>(76 - 190)    |
| Musculoskeletal disorders                           | 133<br>(75 - 248)        | --                       | 5<br>(2 - 12)       | 86<br>(34 - 186)     | 21<br>(9 - 45)       | 21<br>(9 - 54)       |
| Rheumatoid arthritis                                | 51<br>(29 - 97)          | --                       | 2<br>(1 - 4)        | 21<br>(5 - 51)       | 13<br>(6 - 32)       | 15<br>(6 - 45)       |
| Other musculoskeletal disorders                     | 82<br>(41 - 171)         | --                       | 3<br>(1 - 7)        | 65<br>(23 - 146)     | 8<br>(3 - 20)        | 6<br>(2 - 21)        |
| Other non-communicable diseases                     | 2,607<br>(1,520 - 4,470) | 2,052<br>(1,070 - 3,720) | 82<br>(33 - 190)    | 216<br>(102 - 409)   | 77<br>(54 - 115)     | 181<br>(124 - 261)   |
| Congenital anomalies                                | 2,181<br>(1,130 - 3,991) | 1,939<br>(973 - 3,617)   | 77<br>(29 - 183)    | 131<br>(46 - 301)    | 14<br>(9 - 20)       | 19<br>(14 - 27)      |
| Neural tube defects                                 | 680<br>(166 - 1,876)     | 627<br>(150 - 1,708)     | 16<br>(4 - 50)      | 34<br>(7 - 133)      | 1<br>(0 - 3)         | 1<br>(0 - 3)         |
| Congenital heart anomalies                          | 869<br>(324 - 1,960)     | 758<br>(256 - 1,736)     | 38<br>(11 - 108)    | 59<br>(14 - 161)     | 5<br>(3 - 8)         | 9<br>(5 - 14)        |
| Cleft lip and cleft palate                          | 10<br>(1 - 31)           | 10<br>(1 - 31)           | --                  | --                   | --                   | --                   |
| Down syndrome                                       | 147<br>(36 - 344)        | 118<br>(26 - 308)        | 9<br>(2 - 23)       | 18<br>(3 - 42)       | 2<br>(1 - 4)         | 0<br>(0 - 1)         |
| Chromosomal unbalanced rearrangements               | 104<br>(22 - 290)        | 96<br>(19 - 277)         | 2<br>(0 - 6)        | 5<br>(1 - 14)        | 0<br>(0 - 1)         | 0<br>(0 - 1)         |
| Other congenital anomalies                          | 371<br>(130 - 962)       | 330<br>(107 - 863)       | 11<br>(3 - 32)      | 16<br>(4 - 57)       | 5<br>(3 - 8)         | 9<br>(5 - 15)        |
| Skin and subcutaneous diseases                      | 408<br>(311 - 553)       | 94<br>(43 - 196)         | 5<br>(2 - 10)       | 84<br>(49 - 131)     | 63<br>(41 - 98)      | 162<br>(105 - 240)   |
| Cellulitis                                          | 210<br>(110 - 360)       | 50<br>(13 - 129)         | 3<br>(1 - 7)        | 47<br>(14 - 79)      | 36<br>(18 - 65)      | 75<br>(35 - 145)     |
| Pyoderma                                            | 148<br>(64 - 249)        | 42<br>(12 - 108)         | 2<br>(1 - 4)        | 32<br>(10 - 66)      | 21<br>(9 - 38)       | 51<br>(22 - 96)      |

Web Table 31- Mozambique deaths with 95% UI by age, sex, and cause in 2013

| Cause                                           | Females, All Ages        | Females, 0-4 Years   | Females, 5-14 Years | Females, 15-49 Years     | Females, 50-69 Years | Females, 70-80 Years |
|-------------------------------------------------|--------------------------|----------------------|---------------------|--------------------------|----------------------|----------------------|
| Decubitus ulcer                                 | 40<br>(18 - 69)          | 0<br>(0 - 2)         | 0<br>(0 - 1)        | 3<br>(1 - 9)             | 5<br>(2 - 9)         | 32<br>(14 - 58)      |
| Other skin and subcutaneous diseases            | 10<br>(4 - 19)           | 2<br>(0 - 5)         | 0<br>(0 - 1)        | 3<br>(1 - 10)            | 2<br>(1 - 3)         | 3<br>(1 - 6)         |
| Sudden infant death syndrome                    | 19<br>(3 - 62)           | 19<br>(3 - 62)       | --                  | --                       | --                   | --                   |
| Injuries                                        | 5,853<br>(4,622 - 7,162) | 991<br>(629 - 1,547) | 347<br>(209 - 680)  | 2,839<br>(1,920 - 3,848) | 720<br>(561 - 987)   | 955<br>(736 - 1,216) |
| Transport injuries                              | 2,326<br>(1,738 - 3,178) | 249<br>(137 - 420)   | 156<br>(81 - 307)   | 1,208<br>(753 - 1,841)   | 362<br>(257 - 538)   | 350<br>(244 - 515)   |
| Road injuries                                   | 2,205<br>(1,630 - 3,007) | 220<br>(120 - 377)   | 144<br>(74 - 287)   | 1,166<br>(726 - 1,764)   | 349<br>(248 - 514)   | 327<br>(229 - 482)   |
| Pedestrian road injuries                        | 1,284<br>(937 - 1,816)   | 128<br>(66 - 226)    | 94<br>(47 - 194)    | 613<br>(372 - 967)       | 223<br>(156 - 334)   | 225<br>(155 - 338)   |
| Cyclist road injuries                           | 58<br>(39 - 85)          | 6<br>(2 - 14)        | 7<br>(3 - 16)       | 18<br>(10 - 30)          | 19<br>(11 - 31)      | 8<br>(4 - 13)        |
| Motorcyclist road injuries                      | 119<br>(67 - 220)        | 5<br>(2 - 9)         | 2<br>(1 - 4)        | 95<br>(49 - 184)         | 9<br>(5 - 16)        | 8<br>(4 - 16)        |
| Motor vehicle road injuries                     | 724<br>(512 - 1,015)     | 76<br>(36 - 140)     | 39<br>(17 - 82)     | 436<br>(267 - 653)       | 91<br>(57 - 143)     | 82<br>(49 - 130)     |
| Other road injuries                             | 21<br>(12 - 35)          | 5<br>(2 - 11)        | 2<br>(1 - 5)        | 2<br>(1 - 4)             | 7<br>(3 - 15)        | 4<br>(2 - 9)         |
| Other transport injuries                        | 121<br>(86 - 190)        | 29<br>(14 - 56)      | 13<br>(5 - 27)      | 42<br>(23 - 82)          | 14<br>(8 - 22)       | 24<br>(14 - 40)      |
| Unintentional injuries                          | 2,316<br>(1,781 - 2,821) | 673<br>(419 - 1,031) | 164<br>(94 - 329)   | 716<br>(450 - 1,008)     | 257<br>(189 - 351)   | 506<br>(364 - 663)   |
| Falls                                           | 322<br>(181 - 457)       | 26<br>(11 - 52)      | 11<br>(4 - 27)      | 64<br>(30 - 105)         | 39<br>(22 - 61)      | 181<br>(96 - 292)    |
| Drowning                                        | 292<br>(175 - 462)       | 119<br>(56 - 253)    | 41<br>(17 - 91)     | 97<br>(46 - 155)         | 25<br>(16 - 41)      | 10<br>(5 - 16)       |
| Fire, heat, and hot substances                  | 483<br>(308 - 714)       | 197<br>(88 - 400)    | 40<br>(18 - 89)     | 136<br>(69 - 220)        | 47<br>(28 - 71)      | 63<br>(36 - 96)      |
| Poisonings                                      | 92<br>(60 - 138)         | 21<br>(10 - 43)      | 4<br>(2 - 8)        | 38<br>(22 - 66)          | 20<br>(11 - 32)      | 9<br>(5 - 15)        |
| Exposure to mechanical forces                   | 278<br>(201 - 403)       | 97<br>(48 - 186)     | 17<br>(9 - 36)      | 109<br>(66 - 170)        | 25<br>(17 - 38)      | 29<br>(19 - 43)      |
| Unintentional firearm injuries                  | 83<br>(53 - 137)         | 9<br>(4 - 18)        | 3<br>(1 - 6)        | 61<br>(31 - 112)         | 6<br>(3 - 10)        | 5<br>(3 - 8)         |
| Unintentional suffocation                       | 36<br>(14 - 95)          | 30<br>(9 - 87)       | 3<br>(1 - 7)        | 1<br>(1 - 3)             | 1<br>(1 - 2)         | 1<br>(0 - 2)         |
| Other exposure to mechanical forces             | 159<br>(111 - 252)       | 59<br>(26 - 124)     | 12<br>(5 - 27)      | 46<br>(28 - 74)          | 18<br>(12 - 29)      | 23<br>(14 - 36)      |
| Adverse effects of medical treatment            | 364<br>(255 - 527)       | 76<br>(34 - 163)     | 10<br>(4 - 20)      | 88<br>(47 - 142)         | 60<br>(35 - 97)      | 129<br>(72 - 223)    |
| Animal contact                                  | 219<br>(111 - 454)       | 35<br>(14 - 84)      | 20<br>(8 - 52)      | 114<br>(51 - 250)        | 28<br>(12 - 55)      | 22<br>(10 - 48)      |
| Venomous animal contact                         | 155<br>(76 - 330)        | 33<br>(13 - 77)      | 13<br>(5 - 35)      | 82<br>(35 - 196)         | 12<br>(5 - 25)       | 14<br>(6 - 31)       |
| Non-venomous animal contact                     | 64<br>(28 - 138)         | 3<br>(1 - 7)         | 7<br>(2 - 19)       | 32<br>(12 - 70)          | 15<br>(6 - 32)       | 8<br>(3 - 19)        |
| Foreign body                                    | 158<br>(91 - 254)        | 78<br>(38 - 136)     | 6<br>(3 - 14)       | 16<br>(8 - 30)           | 5<br>(3 - 8)         | 52<br>(30 - 87)      |
| Pulmonary aspiration and foreign body in airway | 153<br>(86 - 249)        | 77<br>(38 - 135)     | 6<br>(3 - 13)       | 15<br>(7 - 29)           | 4<br>(2 - 7)         | 50<br>(28 - 84)      |
| Foreign body in other body part                 | 5<br>(3 - 7)             | 1<br>(0 - 2)         | 0<br>(0 - 1)        | 1<br>(0 - 1)             | 1<br>(0 - 1)         | 2<br>(1 - 4)         |
| Other unintentional injuries                    | 109<br>(62 - 154)        | 24<br>(11 - 45)      | 13<br>(6 - 29)      | 54<br>(26 - 86)          | 8<br>(5 - 13)        | 10<br>(6 - 16)       |
| Self-harm and interpersonal violence            | 1,173<br>(765 - 1,640)   | 58<br>(25 - 120)     | 26<br>(12 - 56)     | 897<br>(526 - 1,342)     | 96<br>(63 - 143)     | 96<br>(61 - 146)     |
| Self-harm                                       | 567<br>(369 - 818)       | --                   | 4<br>(1 - 10)       | 403<br>(229 - 647)       | 73<br>(47 - 110)     | 87<br>(53 - 137)     |
| Interpersonal violence                          | 606<br>(357 - 954)       | 58<br>(25 - 120)     | 22<br>(9 - 51)      | 494<br>(261 - 814)       | 23<br>(13 - 37)      | 10<br>(5 - 17)       |
| Assault by firearm                              | 140<br>(64 - 270)        | 7<br>(2 - 19)        | 2<br>(1 - 5)        | 126<br>(56 - 254)        | 3<br>(1 - 6)         | 0<br>(0 - 1)         |
| Assault by sharp object                         | 128<br>(56 - 233)        | 9<br>(3 - 21)        | 3<br>(1 - 7)        | 111<br>(45 - 210)        | 3<br>(1 - 6)         | 2<br>(1 - 5)         |
| Assault by other means                          | 338<br>(194 - 541)       | 42<br>(17 - 92)      | 17<br>(7 - 41)      | 256<br>(129 - 439)       | 16<br>(9 - 26)       | 7<br>(3 - 13)        |
| Forces of nature, war, and legal intervention   | 38<br>(13 - 68)          | 11<br>(0 - 0)        | 1<br>(0 - 3)        | 18<br>(8 - 46)           | 5<br>(3 - 13)        | 2<br>(1 - 5)         |
| Exposure to forces of nature                    | 38<br>(13 - 68)          | 11<br>(0 - 0)        | 1<br>(0 - 3)        | 18<br>(8 - 46)           | 5<br>(3 - 13)        | 2<br>(1 - 5)         |

Web Table 31- Myanmar deaths with 95% UI by age, sex, and cause in 2013

| Cause                                                              | Both Sexes, All Ages           | Both Sexes, 0-4 Years       | Both Sexes, 5-14 Years   | Both Sexes, 15-49 Years      | Both Sexes, 50-69 Years       | Both Sexes, 70-80 Years        |
|--------------------------------------------------------------------|--------------------------------|-----------------------------|--------------------------|------------------------------|-------------------------------|--------------------------------|
| All causes                                                         | 431,232<br>(287,683 - 621,089) | 34,098<br>(29,020 - 40,201) | 5,483<br>(4,463 - 7,040) | 98,549<br>(57,660 - 166,426) | 144,726<br>(84,157 - 226,332) | 148,374<br>(108,576 - 187,682) |
| Communicable, maternal, neonatal, and nutritional diseases         | 99,420<br>(71,198 - 142,120)   | 27,447<br>(23,179 - 32,546) | 2,597<br>(1,970 - 3,426) | 31,640<br>(17,977 - 55,587)  | 20,346<br>(11,933 - 33,802)   | 17,388<br>(12,589 - 22,632)    |
| HIV/AIDS and tuberculosis                                          | 30,507<br>(17,088 - 60,459)    | 56<br>(15 - 254)            | 125<br>(36 - 765)        | 14,268<br>(6,966 - 35,968)   | 9,839<br>(5,459 - 17,043)     | 6,219<br>(4,156 - 8,484)       |
| Tuberculosis                                                       | 23,756<br>(13,957 - 37,308)    | 20<br>(12 - 32)             | 52<br>(32 - 73)          | 9,205<br>(4,737 - 15,955)    | 8,400<br>(4,775 - 13,415)     | 6,080<br>(4,088 - 8,162)       |
| HIV/AIDS                                                           | 6,751<br>(743 - 38,390)        | 36<br>(1 - 237)             | 73<br>(0 - 720)          | 5,063<br>(557 - 28,853)      | 1,439<br>(136 - 8,089)        | 139<br>(10 - 722)              |
| HIV/AIDS resulting in mycobacterial infection                      | 462<br>(47 - 2,757)            | 2<br>(0 - 10)               | 3<br>(0 - 32)            | 344<br>(36 - 2,059)          | 103<br>(10 - 610)             | 11<br>(1 - 59)                 |
| HIV/AIDS resulting in other diseases                               | 6,289<br>(696 - 35,530)        | 34<br>(1 - 228)             | 70<br>(0 - 692)          | 4,720<br>(523 - 26,711)      | 1,336<br>(127 - 7,518)        | 128<br>(9 - 673)               |
| Diarrrhea, lower respiratory, and other common infectious diseases | 36,560<br>(27,103 - 48,997)    | 12,535<br>(9,684 - 15,927)  | 1,393<br>(967 - 1,912)   | 6,791<br>(3,690 - 11,277)    | 7,058<br>(4,023 - 11,594)     | 8,782<br>(6,042 - 11,914)      |
| Diarrheal diseases                                                 | 8,471<br>(5,635 - 12,141)      | 1,611<br>(809 - 2,774)      | 186<br>(98 - 325)        | 1,337<br>(683 - 2,390)       | 2,130<br>(1,124 - 3,688)      | 3,208<br>(1,923 - 4,905)       |
| Intestinal infectious diseases                                     | 1,736<br>(850 - 3,154)         | 453<br>(218 - 831)          | 436<br>(208 - 771)       | 666<br>(274 - 1,337)         | 139<br>(45 - 321)             | 42<br>(20 - 78)                |
| Typhoid fever                                                      | 1,247<br>(566 - 2,315)         | 304<br>(129 - 585)          | 325<br>(152 - 585)       | 490<br>(185 - 1,014)         | 102<br>(30 - 248)             | 27<br>(11 - 55)                |
| Paratyphoid fever                                                  | 359<br>(163 - 662)             | 110<br>(46 - 214)           | 100<br>(42 - 188)        | 124<br>(44 - 265)            | 20<br>(5 - 52)                | 5<br>(2 - 11)                  |
| Other intestinal infectious diseases                               | 130<br>(86 - 199)              | 39<br>(22 - 65)             | 11<br>(4 - 24)           | 52<br>(24 - 95)              | 17<br>(6 - 36)                | 10<br>(3 - 23)                 |
| Lower respiratory infections                                       | 21,495<br>(16,116 - 28,912)    | 8,691<br>(6,515 - 11,261)   | 353<br>(221 - 563)       | 3,040<br>(1,612 - 5,208)     | 4,202<br>(2,345 - 7,100)      | 5,209<br>(3,533 - 7,345)       |
| Upper respiratory infections                                       | 70<br>(30 - 135)               | 5<br>(1 - 13)               | 1<br>(0 - 4)             | 22<br>(6 - 51)               | 23<br>(5 - 60)                | 19<br>(3 - 53)                 |
| Otitis media                                                       | 52<br>(34 - 78)                | 3<br>(2 - 5)                | 3<br>(2 - 4)             | 15<br>(9 - 26)               | 17<br>(9 - 27)                | 14<br>(10 - 20)                |
| Meningitis                                                         | 2,473<br>(1,600 - 3,602)       | 560<br>(368 - 859)          | 154<br>(91 - 247)        | 1,241<br>(634 - 2,053)       | 354<br>(186 - 621)            | 163<br>(95 - 258)              |
| Pneumococcal meningitis                                            | 801<br>(479 - 1,225)           | 134<br>(77 - 214)           | 53<br>(28 - 91)          | 442<br>(189 - 764)           | 117<br>(56 - 219)             | 56<br>(30 - 94)                |
| H influenzae type B meningitis                                     | 477<br>(316 - 684)             | 213<br>(126 - 340)          | 42<br>(23 - 70)          | 160<br>(79 - 289)            | 42<br>(18 - 85)               | 20<br>(11 - 37)                |
| Meningococcal meningitis                                           | 314<br>(181 - 512)             | 39<br>(23 - 65)             | 15<br>(8 - 29)           | 173<br>(69 - 352)            | 59<br>(26 - 114)              | 28<br>(14 - 57)                |
| Other meningitis                                                   | 880<br>(536 - 1,397)           | 175<br>(104 - 286)          | 44<br>(23 - 77)          | 466<br>(219 - 870)           | 137<br>(64 - 246)             | 59<br>(32 - 96)                |
| Encephalitis                                                       | 777<br>(453 - 1,266)           | 131<br>(70 - 224)           | 78<br>(42 - 132)         | 338<br>(160 - 622)           | 146<br>(69 - 264)             | 84<br>(44 - 141)               |
| Diphtheria                                                         | 13<br>(2 - 41)                 | 5<br>(0 - 28)               | 3<br>(0 - 17)            | 4<br>(0 - 13)                | 1<br>(0 - 8)                  | --                             |
| Whooping cough                                                     | 338<br>(1 - 1,603)             | 303<br>(1 - 1,432)          | 24<br>(0 - 122)          | 10<br>(0 - 47)               | 1<br>(0 - 7)                  | --                             |
| Tetanus                                                            | 148<br>(87 - 253)              | 22<br>(13 - 37)             | 9<br>(5 - 15)            | 59<br>(29 - 111)             | 36<br>(16 - 73)               | 22<br>(11 - 39)                |
| Measles                                                            | 929<br>(316 - 2,075)           | 743<br>(251 - 1,657)        | 143<br>(48 - 331)        | 42<br>(12 - 105)             | 1<br>(0 - 4)                  | --                             |
| Varicella and herpes zoster                                        | 58<br>(23 - 121)               | 8<br>(1 - 28)               | 3<br>(0 - 9)             | 18<br>(4 - 44)               | 8<br>(1 - 21)                 | 21<br>(1 - 73)                 |
| Neglected tropical diseases and malaria                            | 10,355<br>(6,291 - 16,360)     | 803<br>(472 - 1,335)        | 909<br>(581 - 1,406)     | 5,820<br>(3,202 - 9,942)     | 2,256<br>(1,140 - 3,880)      | 566<br>(349 - 834)             |
| Malaria                                                            | 9,155<br>(5,590 - 14,544)      | 721<br>(401 - 1,258)        | 812<br>(500 - 1,304)     | 5,279<br>(2,875 - 9,037)     | 1,933<br>(959 - 3,385)        | 410<br>(234 - 650)             |
| Leishmaniasis                                                      | 1<br>(1 - 2)                   | 1<br>(0 - 1)                | 0<br>(0 - 0)             | 0<br>(0 - 0)                 | 0<br>(0 - 0)                  | 0<br>(0 - 0)                   |
| Visceral leishmaniasis                                             | 1<br>(1 - 2)                   | 1<br>(0 - 1)                | 0<br>(0 - 0)             | 0<br>(0 - 0)                 | 0<br>(0 - 0)                  | 0<br>(0 - 0)                   |
| Cysticercosis                                                      | 3<br>(2 - 5)                   | 0<br>(0 - 0)                | 0<br>(0 - 0)             | 2<br>(1 - 3)                 | 1<br>(1 - 2)                  | 0<br>(0 - 0)                   |
| Cystic echinococcosis                                              | 15<br>(9 - 24)                 | 0<br>(0 - 0)                | 1<br>(1 - 1)             | 7<br>(4 - 13)                | 4<br>(2 - 7)                  | 2<br>(1 - 2)                   |
| Dengue                                                             | 168<br>(83 - 258)              | 41<br>(19 - 71)             | 51<br>(19 - 79)          | 53<br>(25 - 93)              | 14<br>(7 - 26)                | 8<br>(5 - 14)                  |
| Rabies                                                             | 844<br>(431 - 1,348)           | 1<br>(0 - 1)                | 26<br>(12 - 59)          | 427<br>(197 - 756)           | 272<br>(133 - 465)            | 118<br>(60 - 192)              |
| Intestinal nematode infections                                     | 55<br>(30 - 90)                | 21<br>(8 - 41)              | 9<br>(2 - 22)            | 12<br>(2 - 31)               | 7<br>(1 - 22)                 | 6<br>(0 - 19)                  |
| Ascariasis                                                         | 55<br>(30 - 90)                | 21<br>(8 - 41)              | 9<br>(2 - 22)            | 12<br>(2 - 31)               | 7<br>(1 - 22)                 | 6<br>(0 - 19)                  |
| Other neglected tropical diseases                                  | 114<br>(60 - 187)              | 18<br>(7 - 37)              | 10<br>(5 - 18)           | 40<br>(18 - 74)              | 24<br>(11 - 44)               | 21<br>(11 - 37)                |
| Maternal disorders                                                 | 3,531<br>(1,773 - 6,609)       | --                          | 6<br>(2 - 15)            | 3,525<br>(1,768 - 6,595)     | --                            | --                             |
| Maternal hemorrhage                                                | 507<br>(235 - 991)             | --                          | 1<br>(0 - 2)             | 506<br>(234 - 990)           | --                            | --                             |

Web Table 31- Myanmar deaths with 95% UI by age, sex, and cause in 2013

| Cause                                                            | Both Sexes, All Ages           | Both Sexes, 0-4 Years       | Both Sexes, 5-14 Years   | Both Sexes, 15-49 Years     | Both Sexes, 50-69 Years       | Both Sexes, 70-80 Years       |
|------------------------------------------------------------------|--------------------------------|-----------------------------|--------------------------|-----------------------------|-------------------------------|-------------------------------|
| Maternal sepsis and other maternal infections                    | 342<br>(141 - 694)             | --                          | 1<br>(0 - 2)             | 341<br>(140 - 693)          | --                            | --                            |
| Maternal hypertensive disorders                                  | 368<br>(145 - 762)             | --                          | 0<br>(0 - 1)             | 367<br>(145 - 760)          | --                            | --                            |
| Maternal obstructed labor                                        | 276<br>(123 - 553)             | --                          | 0<br>(0 - 1)             | 275<br>(123 - 552)          | --                            | --                            |
| Maternal abortive outcome                                        | 567<br>(255 - 1,121)           | --                          | 1<br>(0 - 3)             | 566<br>(254 - 1,120)        | --                            | --                            |
| Indirect maternal deaths                                         | 401<br>(181 - 824)             | --                          | 1<br>(0 - 2)             | 400<br>(181 - 823)          | --                            | --                            |
| Late maternal deaths                                             | 442<br>(182 - 865)             | --                          | 1<br>(0 - 3)             | 441<br>(181 - 863)          | --                            | --                            |
| Maternal deaths aggravated by HIV/AIDS                           | 2<br>(1 - 4)                   | --                          | --                       | 2<br>(1 - 4)                | --                            | --                            |
| Other maternal disorders                                         | 619<br>(284 - 1,205)           | --                          | 1<br>(0 - 3)             | 618<br>(283 - 1,204)        | --                            | --                            |
| Neonatal disorders                                               | 12,922<br>(10,990 - 15,022)    | 12,922<br>(10,990 - 15,022) | --                       | --                          | --                            | --                            |
| Neonatal preterm birth complications                             | 5,175<br>(3,158 - 7,371)       | 5,175<br>(3,158 - 7,371)    | --                       | --                          | --                            | --                            |
| Neonatal encephalopathy due to birth asphyxia and trauma         | 4,685<br>(2,889 - 6,727)       | 4,685<br>(2,889 - 6,727)    | --                       | --                          | --                            | --                            |
| Neonatal sepsis and other neonatal infections                    | 1,980<br>(731 - 4,234)         | 1,980<br>(731 - 4,234)      | --                       | --                          | --                            | --                            |
| Hemolytic disease and other neonatal jaundice                    | 35<br>(14 - 89)                | 35<br>(14 - 89)             | --                       | --                          | --                            | --                            |
| Other neonatal disorders                                         | 1,047<br>(467 - 2,178)         | 1,047<br>(467 - 2,178)      | --                       | --                          | --                            | --                            |
| Nutritional deficiencies                                         | 1,841<br>(1,199 - 2,713)       | 249<br>(129 - 415)          | 25<br>(13 - 61)          | 186<br>(85 - 388)           | 257<br>(141 - 431)            | 1,124<br>(731 - 1,615)        |
| Protein-energy malnutrition                                      | 915<br>(521 - 1,391)           | 157<br>(66 - 289)           | 12<br>(5 - 30)           | 79<br>(32 - 175)            | 130<br>(64 - 220)             | 538<br>(292 - 834)            |
| Iodine deficiency                                                | 11<br>(1 - 43)                 | 2<br>(0 - 11)               | 0<br>(0 - 2)             | 1<br>(0 - 5)                | 2<br>(0 - 10)                 | 6<br>(0 - 34)                 |
| Iron-deficiency anemia                                           | 760<br>(436 - 1,326)           | 65<br>(21 - 150)            | 9<br>(3 - 26)            | 88<br>(34 - 212)            | 106<br>(48 - 222)             | 492<br>(285 - 813)            |
| Other nutritional deficiencies                                   | 154<br>(80 - 274)              | 26<br>(7 - 58)              | 4<br>(2 - 8)             | 18<br>(7 - 40)              | 19<br>(9 - 44)                | 88<br>(43 - 173)              |
| Other communicable, maternal, neonatal, and nutritional diseases | 3,704<br>(2,371 - 5,433)       | 882<br>(504 - 1,471)        | 139<br>(83 - 220)        | 1,050<br>(548 - 1,856)      | 937<br>(460 - 1,706)          | 697<br>(342 - 1,384)          |
| Sexually transmitted diseases excluding HIV                      | 1,015<br>(577 - 1,630)         | 728<br>(370 - 1,245)        | 82<br>(41 - 141)         | 93<br>(38 - 187)            | 61<br>(19 - 161)              | 50<br>(18 - 119)              |
| Syphilis                                                         | 922<br>(504 - 1,535)           | 728<br>(370 - 1,245)        | 80<br>(39 - 139)         | 40<br>(17 - 79)             | 35<br>(12 - 88)               | 39<br>(14 - 90)               |
| Chlamydial infection                                             | 26<br>(11 - 53)                | --                          | 0<br>(0 - 1)             | 15<br>(6 - 33)              | 7<br>(2 - 22)                 | 3<br>(1 - 7)                  |
| Gonococcal infection                                             | 37<br>(17 - 71)                | --                          | 1<br>(0 - 1)             | 20<br>(8 - 40)              | 11<br>(3 - 29)                | 6<br>(2 - 14)                 |
| Other sexually transmitted diseases                              | 29<br>(13 - 57)                | --                          | 1<br>(0 - 1)             | 18<br>(7 - 36)              | 8<br>(2 - 22)                 | 3<br>(1 - 7)                  |
| Hepatitis                                                        | 575<br>(345 - 914)             | 28<br>(15 - 50)             | 13<br>(9 - 19)           | 275<br>(143 - 483)          | 180<br>(100 - 299)            | 80<br>(51 - 114)              |
| Acute hepatitis A                                                | 46<br>(15 - 95)                | 15<br>(5 - 31)              | 5<br>(2 - 10)            | 20<br>(5 - 49)              | 5<br>(1 - 12)                 | 1<br>(0 - 2)                  |
| Acute hepatitis B                                                | 311<br>(175 - 512)             | 12<br>(4 - 27)              | 4<br>(2 - 7)             | 112<br>(50 - 212)           | 120<br>(63 - 205)             | 63<br>(39 - 94)               |
| Acute hepatitis C                                                | 13<br>(2 - 38)                 | --                          | 0<br>(0 - 1)             | 6<br>(1 - 21)               | 4<br>(1 - 13)                 | 2<br>(0 - 6)                  |
| Acute hepatitis E                                                | 205<br>(99 - 357)              | 0<br>(0 - 1)                | 3<br>(1 - 7)             | 136<br>(65 - 240)           | 51<br>(19 - 106)              | 14<br>(4 - 31)                |
| Other infectious diseases                                        | 2,115<br>(1,158 - 3,467)       | 126<br>(44 - 260)           | 44<br>(21 - 85)          | 682<br>(326 - 1,255)        | 696<br>(302 - 1,415)          | 567<br>(222 - 1,229)          |
| Non-communicable diseases                                        | 302,322<br>(194,280 - 441,926) | 5,364<br>(4,151 - 6,925)    | 1,591<br>(1,152 - 2,126) | 50,573<br>(28,122 - 88,017) | 117,772<br>(67,855 - 186,195) | 127,022<br>(93,679 - 160,571) |
| Neoplasms                                                        | 66,053<br>(39,256 - 102,437)   | 283<br>(174 - 465)          | 516<br>(318 - 711)       | 14,747<br>(7,940 - 25,702)  | 32,604<br>(18,492 - 52,202)   | 17,903<br>(12,206 - 23,502)   |
| Esophageal cancer                                                | 1,218<br>(696 - 1,860)         | --                          | --                       | 174<br>(85 - 316)           | 591<br>(319 - 953)            | 453<br>(273 - 656)            |
| Stomach cancer                                                   | 2,580<br>(1,592 - 3,900)       | --                          | --                       | 424<br>(221 - 757)          | 1,221<br>(707 - 1,955)        | 935<br>(651 - 1,278)          |
| Liver cancer                                                     | 8,759<br>(5,203 - 13,615)      | --                          | 18<br>(9 - 30)           | 2,157<br>(1,063 - 3,774)    | 4,688<br>(2,699 - 7,606)      | 1,896<br>(1,230 - 2,691)      |
| Liver cancer due to hepatitis B                                  | 3,441<br>(1,672 - 6,314)       | --                          | 7<br>(3 - 13)            | 1,022<br>(431 - 1,929)      | 1,859<br>(821 - 3,646)        | 554<br>(297 - 951)            |
| Liver cancer due to hepatitis C                                  | 4,104<br>(1,940 - 7,084)       | --                          | 3<br>(1 - 7)             | 832<br>(340 - 1,620)        | 2,234<br>(934 - 4,115)        | 1,035<br>(546 - 1,568)        |
| Liver cancer due to alcohol use                                  | 425<br>(214 - 747)             | --                          | --                       | 67<br>(26 - 131)            | 217<br>(99 - 409)             | 141<br>(73 - 245)             |
| Liver cancer due to other causes                                 | 788<br>(404 - 1,357)           | --                          | 7<br>(4 - 13)            | 236<br>(108 - 450)          | 379<br>(180 - 707)            | 166<br>(89 - 279)             |

Web Table 31- Myanmar deaths with 95% UI by age, sex, and cause in 2013

| Cause                                         | Both Sexes, All Ages          | Both Sexes, 0-4 Years | Both Sexes, 5-14 Years | Both Sexes, 15-49 Years    | Both Sexes, 50-69 Years     | Both Sexes, 70-80 Years     |
|-----------------------------------------------|-------------------------------|-----------------------|------------------------|----------------------------|-----------------------------|-----------------------------|
| Larynx cancer                                 | 501<br>(288 - 805)            | --                    | --                     | 77<br>(37 - 142)           | 261<br>(141 - 434)          | 163<br>(102 - 242)          |
| Tracheal, bronchus and lung cancer            | 15,743<br>(9,208 - 24,051)    | --                    | --                     | 2,103<br>(1,052 - 3,732)   | 8,917<br>(4,982 - 14,122)   | 4,723<br>(3,197 - 6,473)    |
| Breast cancer                                 | 4,704<br>(2,417 - 8,867)      | --                    | --                     | 1,697<br>(823 - 3,516)     | 2,240<br>(1,096 - 4,339)    | 767<br>(468 - 1,213)        |
| Cervical cancer                               | 6,005<br>(3,247 - 10,107)     | --                    | --                     | 1,818<br>(906 - 3,558)     | 3,158<br>(1,637 - 5,249)    | 1,030<br>(603 - 1,563)      |
| Uterine cancer                                | 747<br>(332 - 1,326)          | --                    | --                     | 105<br>(41 - 213)          | 442<br>(178 - 857)          | 199<br>(99 - 332)           |
| Prostate cancer                               | 527<br>(262 - 794)            | --                    | --                     | 8<br>(3 - 14)              | 115<br>(54 - 189)           | 404<br>(202 - 608)          |
| Colon and rectum cancer                       | 4,745<br>(2,951 - 7,129)      | --                    | --                     | 766<br>(421 - 1,330)       | 2,069<br>(1,173 - 3,301)    | 1,909<br>(1,287 - 2,667)    |
| Lip and oral cavity cancer                    | 1,690<br>(860 - 2,834)        | --                    | --                     | 315<br>(152 - 577)         | 806<br>(385 - 1,424)        | 569<br>(301 - 984)          |
| Nasopharynx cancer                            | 769<br>(396 - 1,294)          | --                    | 5<br>(2 - 10)          | 264<br>(131 - 478)         | 373<br>(177 - 668)          | 128<br>(71 - 200)           |
| Other pharynx cancer                          | 709<br>(379 - 1,182)          | --                    | --                     | 135<br>(63 - 259)          | 404<br>(200 - 713)          | 171<br>(102 - 257)          |
| Gallbladder and biliary tract cancer          | 1,241<br>(623 - 2,104)        | --                    | --                     | 151<br>(62 - 297)          | 606<br>(284 - 1,097)        | 484<br>(270 - 798)          |
| Pancreatic cancer                             | 1,567<br>(964 - 2,400)        | --                    | --                     | 218<br>(114 - 385)         | 809<br>(454 - 1,295)        | 540<br>(373 - 746)          |
| Malignant skin melanoma                       | 239<br>(131 - 416)            | --                    | --                     | 76<br>(38 - 141)           | 103<br>(50 - 191)           | 60<br>(36 - 95)             |
| Non-melanoma skin cancer                      | 305<br>(165 - 538)            | --                    | --                     | 53<br>(25 - 101)           | 99<br>(49 - 186)            | 152<br>(80 - 276)           |
| Ovarian cancer                                | 2,246<br>(1,072 - 3,907)      | --                    | --                     | 577<br>(261 - 1,129)       | 1,310<br>(595 - 2,357)      | 359<br>(198 - 578)          |
| Testicular cancer                             | 35<br>(17 - 59)               | --                    | --                     | 25<br>(11 - 44)            | 6<br>(3 - 11)               | 4<br>(2 - 8)                |
| Kidney cancer                                 | 756<br>(409 - 1,245)          | 9<br>(4 - 17)         | 4<br>(2 - 8)           | 125<br>(59 - 232)          | 407<br>(204 - 699)          | 211<br>(124 - 326)          |
| Bladder cancer                                | 951<br>(593 - 1,384)          | --                    | --                     | 83<br>(40 - 151)           | 405<br>(227 - 641)          | 463<br>(310 - 647)          |
| Brain and nervous system cancer               | 1,093<br>(580 - 1,785)        | 13<br>(6 - 27)        | 42<br>(21 - 65)        | 439<br>(211 - 779)         | 423<br>(218 - 700)          | 175<br>(99 - 258)           |
| Thyroid cancer                                | 433<br>(239 - 734)            | --                    | 1<br>(1 - 2)           | 60<br>(30 - 115)           | 185<br>(92 - 339)           | 186<br>(102 - 301)          |
| Mesothelioma                                  | 98<br>(53 - 164)              | --                    | --                     | 21<br>(10 - 39)            | 57<br>(27 - 104)            | 20<br>(12 - 32)             |
| Hodgkin lymphoma                              | 240<br>(118 - 449)            | 5<br>(2 - 10)         | 10<br>(4 - 19)         | 112<br>(50 - 224)          | 78<br>(33 - 152)            | 35<br>(19 - 64)             |
| Non-Hodgkin lymphoma                          | 1,698<br>(917 - 2,986)        | 18<br>(8 - 36)        | 48<br>(28 - 80)        | 506<br>(252 - 943)         | 698<br>(332 - 1,317)        | 428<br>(252 - 691)          |
| Multiple myeloma                              | 201<br>(110 - 332)            | --                    | --                     | 42<br>(20 - 77)            | 101<br>(52 - 169)           | 58<br>(36 - 89)             |
| Leukemia                                      | 2,734<br>(1,744 - 4,164)      | 154<br>(80 - 280)     | 291<br>(182 - 415)     | 1,196<br>(677 - 1,961)     | 719<br>(391 - 1,189)        | 373<br>(236 - 531)          |
| Other neoplasms                               | 3,520<br>(1,829 - 5,825)      | 83<br>(48 - 151)      | 98<br>(56 - 157)       | 1,018<br>(483 - 1,844)     | 1,314<br>(620 - 2,289)      | 1,007<br>(561 - 1,584)      |
| Cardiovascular diseases                       | 109,939<br>(72,477 - 159,092) | 532<br>(341 - 790)    | 222<br>(125 - 427)     | 11,601<br>(6,147 - 20,696) | 40,814<br>(23,811 - 65,912) | 56,770<br>(41,270 - 73,269) |
| Rheumatic heart disease                       | 1,621<br>(791 - 2,835)        | 16<br>(5 - 38)        | 42<br>(19 - 81)        | 570<br>(250 - 1,106)       | 484<br>(228 - 889)          | 509<br>(242 - 897)          |
| Ischemic heart disease                        | 32,106<br>(20,694 - 50,622)   | 8<br>(3 - 21)         | 17<br>(5 - 61)         | 3,461<br>(1,764 - 6,574)   | 13,398<br>(7,800 - 22,589)  | 15,223<br>(10,690 - 22,102) |
| Cerebrovascular disease                       | 56,467<br>(36,157 - 78,944)   | 70<br>(38 - 116)      | 42<br>(21 - 94)        | 4,373<br>(2,242 - 7,507)   | 19,906<br>(11,365 - 31,456) | 32,077<br>(22,907 - 41,251) |
| Ischemic stroke                               | 27,933<br>(12,648 - 41,425)   | 6<br>(1 - 15)         | 5<br>(2 - 11)          | 640<br>(182 - 1,330)       | 6,745<br>(2,533 - 12,011)   | 20,538<br>(9,610 - 28,781)  |
| Hemorrhagic stroke                            | 28,534<br>(15,667 - 48,075)   | 64<br>(35 - 109)      | 37<br>(18 - 87)        | 3,733<br>(1,859 - 6,596)   | 13,161<br>(6,818 - 21,885)  | 11,539<br>(6,310 - 22,015)  |
| Hypertensive heart disease                    | 7,046<br>(3,946 - 10,785)     | 13<br>(3 - 30)        | 5<br>(2 - 10)          | 680<br>(300 - 1,296)       | 2,340<br>(1,169 - 4,048)    | 4,009<br>(2,331 - 6,247)    |
| Cardiomyopathy and myocarditis                | 2,570<br>(1,512 - 4,217)      | 180<br>(56 - 322)     | 47<br>(22 - 90)        | 663<br>(307 - 1,264)       | 918<br>(386 - 1,375)        | 763<br>(525 - 1,571)        |
| Atrial fibrillation and flutter               | 42<br>(23 - 68)               | --                    | --                     | 6<br>(2 - 12)              | 14<br>(7 - 26)              | 21<br>(11 - 35)             |
| Aortic aneurysm                               | 683<br>(354 - 1,199)          | --                    | --                     | 84<br>(33 - 174)           | 173<br>(76 - 341)           | 425<br>(234 - 710)          |
| Peripheral vascular disease                   | 42<br>(22 - 73)               | --                    | --                     | 3<br>(1 - 7)               | 12<br>(6 - 23)              | 26<br>(15 - 45)             |
| Endocarditis                                  | 751<br>(416 - 1,260)          | 43<br>(19 - 86)       | 12<br>(5 - 28)         | 209<br>(96 - 403)          | 248<br>(124 - 446)          | 239<br>(141 - 382)          |
| Other cardiovascular and circulatory diseases | 8,612<br>(4,051 - 17,514)     | 204<br>(91 - 393)     | 57<br>(22 - 129)       | 1,553<br>(582 - 3,278)     | 3,475<br>(1,469 - 7,075)    | 3,323<br>(1,667 - 6,931)    |
| Chronic respiratory diseases                  | 35,860<br>(24,224 - 49,895)   | 577<br>(393 - 869)    | 125<br>(86 - 200)      | 2,260<br>(1,209 - 3,907)   | 12,145<br>(7,133 - 19,152)  | 20,753<br>(15,417 - 26,530) |

Web Table 31- Myanmar deaths with 95% UI by age, sex, and cause in 2013

| Cause                                               | Both Sexes, All Ages        | Both Sexes, 0-4 Years | Both Sexes, 5-14 Years | Both Sexes, 15-49 Years   | Both Sexes, 50-69 Years    | Both Sexes, 70-80 Years    |
|-----------------------------------------------------|-----------------------------|-----------------------|------------------------|---------------------------|----------------------------|----------------------------|
| Chronic obstructive pulmonary disease               | 20,083<br>(13,403 - 28,500) | 241<br>(140 - 399)    | 24<br>(12 - 39)        | 772<br>(371 - 1,371)      | 6,227<br>(3,483 - 9,845)   | 12,818<br>(9,126 - 17,020) |
| Pneumoconiosis                                      | 1,257<br>(712 - 2,016)      | 3<br>(1 - 6)          | 3<br>(1 - 5)           | 113<br>(49 - 210)         | 624<br>(319 - 1,072)       | 515<br>(295 - 817)         |
| Silicosis                                           | 628<br>(364 - 988)          | 1<br>(0 - 1)          | 1<br>(0 - 1)           | 6<br>(3 - 12)             | 185<br>(93 - 323)          | 436<br>(248 - 690)         |
| Asbestosis                                          | 122<br>(59 - 215)           | 0<br>(0 - 1)          | 1<br>(0 - 1)           | 18<br>(8 - 32)            | 102<br>(49 - 183)          | 1<br>(1 - 2)               |
| Coal workers pneumoconiosis                         | 303<br>(158 - 552)          | 0<br>(0 - 1)          | 1<br>(0 - 1)           | 57<br>(25 - 111)          | 232<br>(117 - 423)         | 13<br>(6 - 23)             |
| Other pneumoconiosis                                | 203<br>(108 - 343)          | 1<br>(0 - 2)          | 1<br>(0 - 2)           | 31<br>(14 - 60)           | 105<br>(51 - 194)          | 65<br>(35 - 110)           |
| Asthma                                              | 12,098<br>(6,668 - 19,300)  | 215<br>(112 - 388)    | 86<br>(53 - 143)       | 1,202<br>(605 - 2,067)    | 4,641<br>(2,333 - 7,793)   | 5,953<br>(3,285 - 9,175)   |
| Interstitial lung disease and pulmonary sarcoidosis | 1,238<br>(133 - 2,959)      | 1<br>(0 - 4)          | 1<br>(0 - 3)           | 20<br>(3 - 58)            | 426<br>(44 - 1,156)        | 791<br>(81 - 1,867)        |
| Other chronic respiratory diseases                  | 1,184<br>(724 - 1,957)      | 116<br>(78 - 170)     | 12<br>(5 - 25)         | 154<br>(67 - 302)         | 226<br>(109 - 430)         | 676<br>(403 - 1,125)       |
| Cirrhosis                                           | 24,584<br>(14,165 - 39,075) | 39<br>(16 - 82)       | 38<br>(25 - 54)        | 9,313<br>(4,640 - 16,004) | 11,181<br>(6,250 - 18,259) | 4,014<br>(2,810 - 5,386)   |
| Cirrhosis due to hepatitis B                        | 8,389<br>(3,724 - 14,692)   | 2<br>(1 - 6)          | 7<br>(3 - 12)          | 3,244<br>(1,205 - 5,966)  | 3,811<br>(1,639 - 7,090)   | 1,325<br>(703 - 2,137)     |
| Cirrhosis due to hepatitis C                        | 5,455<br>(2,429 - 11,138)   | 4<br>(1 - 11)         | 7<br>(3 - 11)          | 1,855<br>(657 - 4,423)    | 2,520<br>(947 - 5,183)     | 1,070<br>(514 - 1,785)     |
| Cirrhosis due to alcohol use                        | 7,986<br>(4,123 - 13,766)   | --                    | --                     | 2,718<br>(1,141 - 5,229)  | 3,863<br>(1,934 - 6,894)   | 1,405<br>(813 - 2,170)     |
| Cirrhosis due to other causes                       | 2,753<br>(1,280 - 4,985)    | 32<br>(13 - 69)       | 24<br>(15 - 35)        | 1,496<br>(607 - 2,805)    | 987<br>(437 - 1,853)       | 214<br>(115 - 376)         |
| Digestive diseases                                  | 12,397<br>(7,801 - 18,360)  | 125<br>(72 - 205)     | 90<br>(61 - 130)       | 2,729<br>(1,470 - 4,734)  | 4,152<br>(2,337 - 6,664)   | 5,301<br>(3,719 - 7,176)   |
| Peptic ulcer disease                                | 4,488<br>(2,703 - 7,164)    | 8<br>(4 - 16)         | 11<br>(6 - 18)         | 756<br>(362 - 1,417)      | 1,631<br>(871 - 2,754)     | 2,083<br>(1,333 - 3,083)   |
| Gastritis and duodenitis                            | 431<br>(217 - 889)          | 6<br>(2 - 14)         | 5<br>(3 - 10)          | 89<br>(39 - 204)          | 129<br>(58 - 280)          | 201<br>(104 - 404)         |
| Appendicitis                                        | 898<br>(495 - 1,516)        | 13<br>(6 - 25)        | 20<br>(11 - 33)        | 297<br>(148 - 558)        | 305<br>(149 - 547)         | 264<br>(147 - 431)         |
| Paralytic ileus and intestinal obstruction          | 1,506<br>(866 - 2,380)      | 37<br>(17 - 70)       | 16<br>(9 - 27)         | 226<br>(107 - 423)        | 430<br>(218 - 761)         | 797<br>(439 - 1,257)       |
| Inguinal, femoral, and abdominal hernia             | 233<br>(130 - 425)          | 5<br>(2 - 12)         | 3<br>(2 - 6)           | 44<br>(20 - 98)           | 72<br>(35 - 134)           | 109<br>(62 - 193)          |
| Inflammatory bowel disease                          | 417<br>(248 - 695)          | 10<br>(4 - 22)        | 6<br>(3 - 9)           | 116<br>(59 - 214)         | 124<br>(63 - 225)          | 161<br>(95 - 265)          |
| Vascular intestinal disorders                       | 111<br>(54 - 220)           | 2<br>(0 - 4)          | 2<br>(0 - 4)           | 31<br>(13 - 65)           | 28<br>(12 - 61)            | 48<br>(23 - 91)            |
| Gallbladder and biliary diseases                    | 1,564<br>(887 - 2,510)      | 10<br>(5 - 17)        | 6<br>(4 - 10)          | 304<br>(159 - 552)        | 521<br>(259 - 920)         | 723<br>(415 - 1,142)       |
| Pancreatitis                                        | 1,162<br>(543 - 1,944)      | 4<br>(2 - 9)          | 5<br>(2 - 10)          | 500<br>(201 - 933)        | 371<br>(162 - 665)         | 282<br>(141 - 487)         |
| Other digestive diseases                            | 1,586<br>(896 - 2,565)      | 29<br>(13 - 55)       | 16<br>(9 - 25)         | 367<br>(181 - 680)        | 540<br>(275 - 931)         | 635<br>(368 - 997)         |
| Neurological disorders                              | 11,554<br>(8,183 - 15,782)  | 24<br>(15 - 39)       | 69<br>(36 - 125)       | 988<br>(549 - 1,638)      | 1,558<br>(901 - 2,560)     | 8,915<br>(6,473 - 11,834)  |
| Alzheimer disease and other dementias               | 9,722<br>(6,919 - 13,067)   | --                    | --                     | 8<br>(3 - 18)             | 1,084<br>(599 - 1,834)     | 8,630<br>(6,249 - 11,478)  |
| Parkinson disease                                   | 142<br>(79 - 226)           | --                    | --                     | 11<br>(5 - 19)            | 44<br>(22 - 77)            | 87<br>(47 - 141)           |
| Epilepsy                                            | 1,254<br>(731 - 2,041)      | 2<br>(1 - 4)          | 47<br>(16 - 104)       | 811<br>(441 - 1,352)      | 303<br>(161 - 527)         | 91<br>(54 - 141)           |
| Multiple sclerosis                                  | 44<br>(12 - 89)             | --                    | --                     | 22<br>(5 - 48)            | 16<br>(4 - 33)             | 7<br>(2 - 14)              |
| Other neurological disorders                        | 392<br>(235 - 615)          | 22<br>(14 - 37)       | 22<br>(14 - 33)        | 137<br>(75 - 232)         | 111<br>(60 - 186)          | 100<br>(65 - 142)          |
| Mental and substance use disorders                  | 4,081<br>(1,708 - 7,082)    | 30<br>(7 - 67)        | 0<br>(0 - 0)           | 2,497<br>(1,034 - 4,561)  | 1,335<br>(490 - 2,355)     | 219<br>(120 - 333)         |
| Schizophrenia                                       | 81<br>(37 - 174)            | --                    | --                     | 36<br>(15 - 84)           | 29<br>(12 - 64)            | 16<br>(8 - 31)             |
| Alcohol use disorders                               | 3,031<br>(865 - 5,406)      | --                    | --                     | 1,696<br>(427 - 3,286)    | 1,160<br>(347 - 2,084)     | 175<br>(73 - 280)          |
| Drug use disorders                                  | 967<br>(454 - 1,737)        | 30<br>(7 - 67)        | --                     | 763<br>(346 - 1,382)      | 147<br>(60 - 269)          | 27<br>(7 - 51)             |
| Opioid use disorders                                | 617<br>(288 - 1,104)        | 20<br>(5 - 45)        | --                     | 491<br>(225 - 885)        | 89<br>(36 - 164)           | 17<br>(5 - 33)             |
| Cocaine use disorders                               | 17<br>(7 - 31)              | 1<br>(0 - 2)          | --                     | 14<br>(6 - 26)            | 2<br>(1 - 4)               | 0<br>(0 - 1)               |
| Amphetamine use disorders                           | 18<br>(8 - 33)              | 1<br>(0 - 2)          | --                     | 14<br>(6 - 26)            | 3<br>(1 - 6)               | 1<br>(0 - 1)               |
| Other drug use disorders                            | 315<br>(145 - 565)          | 9<br>(2 - 20)         | --                     | 244<br>(111 - 445)        | 53<br>(21 - 98)            | 9<br>(2 - 17)              |
| Eating disorders                                    | 2<br>(1 - 4)                | --                    | 0<br>(0 - 0)           | 2<br>(1 - 4)              | --                         | --                         |

Web Table 31- Myanmar deaths with 95% UI by age, sex, and cause in 2013

| Cause                                               | Both Sexes, All Ages        | Both Sexes, 0-4 Years    | Both Sexes, 5-14 Years | Both Sexes, 15-49 Years  | Both Sexes, 50-69 Years    | Both Sexes, 70-80 Years    |
|-----------------------------------------------------|-----------------------------|--------------------------|------------------------|--------------------------|----------------------------|----------------------------|
| Anorexia nervosa                                    | 2<br>(1 - 4)                | --                       | 0<br>(0 - 0)           | 2<br>(1 - 4)             | --                         | --                         |
| Diabetes, urogenital, blood, and endocrine diseases | 30,886<br>(19,587 - 45,460) | 235<br>(144 - 366)       | 182<br>(115 - 271)     | 5,139<br>(2,736 - 9,030) | 13,118<br>(7,346 - 20,741) | 12,211<br>(8,955 - 15,829) |
| Diabetes mellitus                                   | 13,536<br>(8,688 - 20,085)  | 4<br>(2 - 7)             | 10<br>(4 - 18)         | 1,473<br>(796 - 2,693)   | 6,291<br>(3,559 - 9,821)   | 5,758<br>(4,061 - 7,873)   |
| Acute glomerulonephritis                            | 83<br>(43 - 138)            | 4<br>(2 - 7)             | 6<br>(3 - 9)           | 37<br>(17 - 68)          | 19<br>(9 - 34)             | 16<br>(8 - 29)             |
| Chronic kidney disease                              | 11,736<br>(7,209 - 17,404)  | 3<br>(2 - 6)             | 28<br>(17 - 51)        | 2,052<br>(1,095 - 3,612) | 4,973<br>(2,761 - 7,949)   | 4,680<br>(3,214 - 6,341)   |
| Chronic kidney disease due to diabetes mellitus     | 756<br>(329 - 1,328)        | 0<br>(0 - 0)             | 1<br>(0 - 2)           | 108<br>(38 - 209)        | 324<br>(132 - 594)         | 323<br>(140 - 550)         |
| Chronic kidney disease due to hypertension          | 3,809<br>(2,118 - 6,379)    | 1<br>(0 - 2)             | 4<br>(2 - 8)           | 599<br>(280 - 1,133)     | 1,743<br>(860 - 2,978)     | 1,463<br>(817 - 2,466)     |
| Chronic kidney disease due to glomerulonephritis    | 1,248<br>(704 - 2,063)      | 2<br>(1 - 4)             | 15<br>(9 - 23)         | 363<br>(188 - 641)       | 449<br>(218 - 799)         | 419<br>(247 - 647)         |
| Chronic kidney disease due to other causes          | 5,923<br>(3,371 - 8,973)    | 0<br>(0 - 1)             | 9<br>(4 - 21)          | 982<br>(482 - 1,763)     | 2,457<br>(1,202 - 4,121)   | 2,475<br>(1,371 - 3,746)   |
| Urinary diseases and male infertility               | 2,845<br>(1,570 - 4,505)    | 29<br>(15 - 55)          | 14<br>(7 - 22)         | 623<br>(277 - 1,193)     | 1,060<br>(519 - 1,826)     | 1,120<br>(661 - 1,684)     |
| Interstitial nephritis and urinary tract infections | 1,392<br>(618 - 2,324)      | 15<br>(7 - 30)           | 5<br>(2 - 9)           | 300<br>(105 - 616)       | 461<br>(180 - 849)         | 611<br>(283 - 1,010)       |
| Urolithiasis                                        | 201<br>(100 - 336)          | --                       | 2<br>(1 - 3)           | 52<br>(22 - 108)         | 78<br>(34 - 146)           | 70<br>(32 - 128)           |
| Other urinary diseases                              | 1,252<br>(733 - 1,963)      | 14<br>(7 - 27)           | 6<br>(3 - 10)          | 271<br>(129 - 498)       | 522<br>(271 - 877)         | 439<br>(260 - 693)         |
| Gynecological diseases                              | 55<br>(26 - 117)            | --                       | --                     | 31<br>(14 - 71)          | 14<br>(6 - 31)             | 9<br>(4 - 19)              |
| Uterine fibroids                                    | 12<br>(5 - 26)              | --                       | --                     | 5<br>(2 - 13)            | 4<br>(1 - 8)               | 3<br>(1 - 6)               |
| Polycystic ovarian syndrome                         | 2<br>(1 - 5)                | --                       | --                     | 2<br>(1 - 4)             | 0<br>(0 - 0)               | --                         |
| Endometriosis                                       | 5<br>(2 - 12)               | --                       | --                     | 5<br>(2 - 11)            | 0<br>(0 - 1)               | --                         |
| Genital prolapse                                    | 9<br>(4 - 19)               | --                       | --                     | 4<br>(2 - 9)             | 3<br>(1 - 5)               | 2<br>(1 - 5)               |
| Other gynecological diseases                        | 26<br>(12 - 58)             | --                       | --                     | 15<br>(6 - 34)           | 7<br>(3 - 16)              | 4<br>(2 - 8)               |
| Hemoglobinopathies and hemolytic anemias            | 1,131<br>(513 - 2,009)      | 138<br>(66 - 228)        | 96<br>(46 - 161)       | 509<br>(207 - 988)       | 223<br>(94 - 411)          | 165<br>(80 - 291)          |
| Thalassemias                                        | 750<br>(334 - 1,310)        | 128<br>(60 - 212)        | 92<br>(44 - 155)       | 422<br>(172 - 813)       | 95<br>(39 - 175)           | 13<br>(6 - 24)             |
| Sickle cell disorders                               | 0<br>(0 - 0)                | 0<br>(0 - 0)             | 0<br>(0 - 0)           | 0<br>(0 - 0)             | 0<br>(0 - 0)               | 0<br>(0 - 0)               |
| G6PD deficiency                                     | 52<br>(22 - 97)             | 3<br>(1 - 5)             | 2<br>(1 - 3)           | 23<br>(8 - 46)           | 19<br>(8 - 36)             | 6<br>(3 - 10)              |
| Other hemoglobinopathies and hemolytic anemias      | 328<br>(151 - 574)          | 7<br>(3 - 12)            | 2<br>(1 - 4)           | 64<br>(23 - 127)         | 109<br>(47 - 199)          | 146<br>(71 - 258)          |
| Endocrine, metabolic, blood, and immune disorders   | 1,501<br>(821 - 2,382)      | 57<br>(30 - 109)         | 28<br>(15 - 46)        | 414<br>(204 - 751)       | 538<br>(259 - 926)         | 464<br>(247 - 711)         |
| Musculoskeletal disorders                           | 662<br>(347 - 1,242)        | --                       | 20<br>(12 - 34)        | 283<br>(139 - 544)       | 232<br>(113 - 439)         | 127<br>(69 - 251)          |
| Rheumatoid arthritis                                | 166<br>(81 - 346)           | --                       | 4<br>(2 - 8)           | 37<br>(16 - 76)          | 67<br>(30 - 139)           | 57<br>(28 - 125)           |
| Other musculoskeletal disorders                     | 496<br>(260 - 906)          | --                       | 16<br>(9 - 26)         | 246<br>(121 - 468)       | 165<br>(80 - 310)          | 70<br>(38 - 129)           |
| Other non-communicable diseases                     | 6,306<br>(4,867 - 8,301)    | 3,519<br>(2,539 - 4,770) | 329<br>(203 - 490)     | 1,016<br>(576 - 1,753)   | 634<br>(322 - 1,095)       | 809<br>(500 - 1,193)       |
| Congenital anomalies                                | 4,744<br>(3,478 - 6,279)    | 3,459<br>(2,497 - 4,703) | 313<br>(189 - 470)     | 674<br>(380 - 1,237)     | 161<br>(83 - 318)          | 136<br>(84 - 216)          |
| Neural tube defects                                 | 795<br>(159 - 1,641)        | 695<br>(129 - 1,473)     | 20<br>(4 - 47)         | 65<br>(15 - 180)         | 12<br>(2 - 46)             | 4<br>(1 - 12)              |
| Congenital heart anomalies                          | 2,362<br>(1,486 - 3,323)    | 1,677<br>(1,016 - 2,511) | 192<br>(106 - 292)     | 356<br>(182 - 660)       | 54<br>(23 - 107)           | 83<br>(41 - 136)           |
| Cleft lip and cleft palate                          | 10<br>(2 - 22)              | 10<br>(2 - 22)           | --                     | --                       | --                         | --                         |
| Down syndrome                                       | 165<br>(70 - 375)           | 87<br>(30 - 223)         | 21<br>(8 - 47)         | 43<br>(17 - 98)          | 13<br>(4 - 32)             | 1<br>(0 - 3)               |
| Chromosomal unbalanced rearrangements               | 129<br>(51 - 315)           | 86<br>(27 - 237)         | 5<br>(2 - 10)          | 31<br>(10 - 77)          | 5<br>(2 - 13)              | 2<br>(1 - 5)               |
| Other congenital anomalies                          | 1,283<br>(737 - 2,160)      | 905<br>(476 - 1,691)     | 75<br>(35 - 136)       | 179<br>(88 - 346)        | 77<br>(36 - 145)           | 46<br>(25 - 78)            |
| Skin and subcutaneous diseases                      | 1,540<br>(835 - 2,483)      | 37<br>(15 - 70)          | 17<br>(8 - 27)         | 341<br>(149 - 625)       | 472<br>(224 - 849)         | 673<br>(386 - 1,046)       |
| Cellulitis                                          | 523<br>(288 - 834)          | 16<br>(7 - 31)           | 6<br>(3 - 10)          | 127<br>(58 - 238)        | 189<br>(92 - 332)          | 186<br>(99 - 309)          |
| Pyoderma                                            | 632<br>(309 - 1,066)        | 20<br>(7 - 40)           | 7<br>(3 - 13)          | 157<br>(63 - 302)        | 213<br>(91 - 391)          | 234<br>(120 - 400)         |
| Decubitus ulcer                                     | 354<br>(170 - 607)          | 1<br>(0 - 2)             | 2<br>(1 - 4)           | 44<br>(15 - 90)          | 62<br>(24 - 123)           | 246<br>(119 - 422)         |



Web Table 31- Myanmar deaths with 95% UI by age, sex, and cause in 2013

| Cause                                           | Both Sexes, All Ages        | Both Sexes, 0-4 Years  | Both Sexes, 5-14 Years | Both Sexes, 15-49 Years    | Both Sexes, 50-69 Years   | Both Sexes, 70-80 Years  |
|-------------------------------------------------|-----------------------------|------------------------|------------------------|----------------------------|---------------------------|--------------------------|
| Other skin and subcutaneous diseases            | 31<br>(14 - 66)             | 1<br>(0 - 2)           | 1<br>(1 - 3)           | 13<br>(5 - 30)             | 9<br>(3 - 20)             | 7<br>(3 - 15)            |
| Sudden infant death syndrome                    | 22<br>(5 - 73)              | 22<br>(5 - 73)         | --                     | --                         | --                        | --                       |
| Injuries                                        | 29,490<br>(18,477 - 45,356) | 1,287<br>(848 - 1,969) | 1,295<br>(944 - 1,730) | 16,336<br>(9,457 - 26,708) | 6,608<br>(3,711 - 10,624) | 3,964<br>(2,577 - 5,462) |
| Transport injuries                              | 9,052<br>(5,384 - 14,611)   | 51<br>(27 - 89)        | 323<br>(199 - 566)     | 6,123<br>(3,501 - 10,008)  | 2,095<br>(1,153 - 3,448)  | 459<br>(310 - 682)       |
| Road injuries                                   | 8,414<br>(5,007 - 13,438)   | 44<br>(23 - 79)        | 302<br>(184 - 527)     | 5,718<br>(3,288 - 9,396)   | 1,932<br>(1,066 - 3,193)  | 418<br>(277 - 620)       |
| Pedestrian road injuries                        | 1,966<br>(1,101 - 3,305)    | 19<br>(9 - 36)         | 125<br>(73 - 228)      | 1,062<br>(566 - 1,852)     | 595<br>(309 - 1,070)      | 165<br>(100 - 274)       |
| Cyclist road injuries                           | 640<br>(344 - 1,094)        | 3<br>(1 - 8)           | 37<br>(18 - 76)        | 357<br>(190 - 632)         | 198<br>(100 - 362)        | 44<br>(26 - 72)          |
| Motorcyclist road injuries                      | 2,224<br>(1,134 - 3,756)    | 5<br>(2 - 11)          | 39<br>(20 - 76)        | 1,781<br>(890 - 3,058)     | 339<br>(161 - 633)        | 59<br>(33 - 98)          |
| Motor vehicle road injuries                     | 3,430<br>(1,869 - 5,583)    | 15<br>(7 - 29)         | 92<br>(51 - 157)       | 2,423<br>(1,288 - 3,929)   | 762<br>(391 - 1,271)      | 138<br>(81 - 208)        |
| Other road injuries                             | 155<br>(72 - 331)           | 1<br>(0 - 3)           | 9<br>(4 - 22)          | 95<br>(39 - 209)           | 38<br>(16 - 87)           | 12<br>(6 - 27)           |
| Other transport injuries                        | 637<br>(343 - 1,180)        | 7<br>(3 - 14)          | 21<br>(11 - 40)        | 406<br>(204 - 785)         | 163<br>(82 - 300)         | 41<br>(24 - 64)          |
| Unintentional injuries                          | 15,945<br>(9,833 - 23,901)  | 1,219<br>(788 - 1,877) | 924<br>(592 - 1,286)   | 6,773<br>(3,816 - 11,257)  | 3,720<br>(2,021 - 6,049)  | 3,209<br>(2,060 - 4,659) |
| Falls                                           | 6,861<br>(3,891 - 10,262)   | 158<br>(91 - 266)      | 120<br>(32 - 215)      | 2,510<br>(1,201 - 4,176)   | 1,840<br>(895 - 3,157)    | 2,234<br>(1,291 - 3,283) |
| Drowning                                        | 2,848<br>(1,846 - 4,345)    | 536<br>(271 - 998)     | 548<br>(314 - 830)     | 1,314<br>(717 - 2,249)     | 346<br>(182 - 636)        | 104<br>(64 - 165)        |
| Fire, heat, and hot substances                  | 1,063<br>(668 - 1,578)      | 197<br>(107 - 365)     | 67<br>(40 - 107)       | 474<br>(256 - 770)         | 287<br>(134 - 585)        | 39<br>(23 - 61)          |
| Poisonings                                      | 1,094<br>(542 - 1,866)      | 33<br>(16 - 60)        | 34<br>(16 - 57)        | 634<br>(301 - 1,176)       | 258<br>(121 - 442)        | 134<br>(58 - 221)        |
| Exposure to mechanical forces                   | 1,382<br>(819 - 2,354)      | 43<br>(23 - 75)        | 66<br>(37 - 105)       | 869<br>(463 - 1,603)       | 289<br>(153 - 507)        | 115<br>(72 - 171)        |
| Unintentional firearm injuries                  | 605<br>(312 - 1,166)        | 9<br>(4 - 18)          | 12<br>(6 - 24)         | 403<br>(189 - 811)         | 129<br>(61 - 252)         | 53<br>(29 - 93)          |
| Unintentional suffocation                       | 60<br>(9 - 114)             | 8<br>(1 - 24)          | 4<br>(1 - 9)           | 28<br>(4 - 57)             | 13<br>(2 - 26)            | 6<br>(1 - 12)            |
| Other exposure to mechanical forces             | 717<br>(409 - 1,205)        | 26<br>(12 - 49)        | 49<br>(25 - 84)        | 438<br>(219 - 800)         | 148<br>(71 - 262)         | 56<br>(27 - 89)          |
| Adverse effects of medical treatment            | 1,337<br>(637 - 2,308)      | 68<br>(33 - 136)       | 25<br>(12 - 42)        | 406<br>(168 - 791)         | 400<br>(172 - 720)        | 437<br>(205 - 758)       |
| Animal contact                                  | 220<br>(105 - 375)          | 17<br>(8 - 30)         | 20<br>(10 - 35)        | 87<br>(38 - 161)           | 64<br>(26 - 114)          | 31<br>(14 - 52)          |
| Venomous animal contact                         | 136<br>(65 - 236)           | 12<br>(5 - 23)         | 15<br>(7 - 26)         | 55<br>(25 - 104)           | 38<br>(16 - 71)           | 16<br>(7 - 30)           |
| Non-venomous animal contact                     | 83<br>(33 - 153)            | 5<br>(1 - 9)           | 5<br>(2 - 11)          | 32<br>(11 - 65)            | 26<br>(9 - 50)            | 15<br>(6 - 28)           |
| Foreign body                                    | 577<br>(265 - 1,053)        | 146<br>(66 - 281)      | 21<br>(8 - 41)         | 141<br>(57 - 271)          | 114<br>(44 - 226)         | 155<br>(66 - 299)        |
| Pulmonary aspiration and foreign body in airway | 555<br>(251 - 1,021)        | 144<br>(65 - 280)      | 20<br>(7 - 39)         | 132<br>(51 - 257)          | 109<br>(41 - 218)         | 151<br>(64 - 295)        |
| Foreign body in other body part                 | 22<br>(10 - 37)             | 2<br>(1 - 4)           | 2<br>(1 - 3)           | 9<br>(4 - 16)              | 6<br>(2 - 11)             | 3<br>(1 - 6)             |
| Other unintentional injuries                    | 563<br>(302 - 928)          | 20<br>(10 - 31)        | 23<br>(13 - 37)        | 337<br>(167 - 571)         | 123<br>(58 - 220)         | 60<br>(29 - 98)          |
| Self-harm and interpersonal violence            | 4,493<br>(2,646 - 7,545)    | 16<br>(9 - 29)         | 48<br>(26 - 93)        | 3,440<br>(1,983 - 5,866)   | 793<br>(437 - 1,407)      | 196<br>(119 - 301)       |
| Self-harm                                       | 2,784<br>(1,560 - 4,928)    | --                     | 21<br>(7 - 63)         | 1,942<br>(1,059 - 3,468)   | 647<br>(340 - 1,187)      | 175<br>(104 - 279)       |
| Interpersonal violence                          | 1,708<br>(926 - 2,831)      | 16<br>(9 - 29)         | 27<br>(15 - 44)        | 1,498<br>(784 - 2,538)     | 147<br>(74 - 261)         | 21<br>(12 - 35)          |
| Assault by firearm                              | 585<br>(244 - 1,028)        | 2<br>(1 - 5)           | 5<br>(2 - 9)           | 528<br>(218 - 942)         | 48<br>(19 - 93)           | 3<br>(1 - 6)             |
| Assault by sharp object                         | 573<br>(237 - 1,101)        | 2<br>(1 - 4)           | 4<br>(2 - 8)           | 522<br>(214 - 1,020)       | 40<br>(15 - 79)           | 5<br>(2 - 9)             |
| Assault by other means                          | 550<br>(277 - 953)          | 12<br>(6 - 22)         | 18<br>(10 - 31)        | 448<br>(209 - 804)         | 59<br>(29 - 110)          | 13<br>(7 - 22)           |
| Forces of nature, war, and legal intervention   | 1<br>(0 - 0)                | 1<br>(0 - 0)           | --                     | --                         | --                        | --                       |
| Exposure to forces of nature                    | 1<br>(0 - 0)                | 1<br>(0 - 0)           | --                     | --                         | --                        | --                       |

Web Table 31- Myanmar deaths with 95% UI by age, sex, and cause in 2013

| Cause                                                             | Males, All Ages                | Males, 0-4 Years            | Males, 5-14 Years        | Males, 15-49 Years           | Males, 50-69 Years           | Males, 70-80 Years          |
|-------------------------------------------------------------------|--------------------------------|-----------------------------|--------------------------|------------------------------|------------------------------|-----------------------------|
| All causes                                                        | 234,405<br>(158,145 - 335,409) | 18,869<br>(15,753 - 22,506) | 3,177<br>(2,592 - 4,024) | 64,003<br>(37,804 - 106,892) | 81,004<br>(48,417 - 125,192) | 67,353<br>(50,775 - 82,056) |
| Communicable, maternal, neonatal, and nutritional diseases        | 57,616<br>(40,812 - 84,493)    | 14,995<br>(12,480 - 18,015) | 1,348<br>(1,039 - 1,794) | 19,984<br>(10,906 - 36,231)  | 12,605<br>(7,401 - 20,822)   | 8,683<br>(6,275 - 11,505)   |
| HIV/AIDS and tuberculosis                                         | 23,064<br>(12,661 - 47,815)    | 33<br>(12 - 117)            | 67<br>(23 - 334)         | 11,312<br>(5,384 - 29,225)   | 7,430<br>(4,086 - 13,486)    | 4,222<br>(2,828 - 5,929)    |
| Tuberculosis                                                      | 17,233<br>(9,964 - 26,771)     | 17<br>(10 - 29)             | 36<br>(20 - 55)          | 6,953<br>(3,612 - 11,815)    | 6,132<br>(3,492 - 10,048)    | 4,095<br>(2,752 - 5,629)    |
| HIV/AIDS                                                          | 5,831<br>(635 - 31,666)        | 15<br>(0 - 102)             | 31<br>(0 - 305)          | 4,360<br>(464 - 24,059)      | 1,298<br>(122 - 7,238)       | 127<br>(10 - 660)           |
| HIV/AIDS resulting in mycobacterial infection                     | 416<br>(42 - 2,444)            | 1<br>(0 - 5)                | 2<br>(0 - 15)            | 308<br>(32 - 1,818)          | 96<br>(9 - 565)              | 10<br>(1 - 55)              |
| HIV/AIDS resulting in other diseases                              | 5,415<br>(594 - 29,176)        | 15<br>(0 - 97)              | 30<br>(0 - 293)          | 4,051<br>(435 - 22,189)      | 1,202<br>(112 - 6,725)       | 117<br>(9 - 612)            |
| Diarrhea, lower respiratory, and other common infectious diseases | 19,439<br>(14,419 - 25,809)    | 7,048<br>(5,248 - 9,261)    | 725<br>(498 - 1,019)     | 4,339<br>(2,310 - 7,051)     | 3,727<br>(2,135 - 5,990)     | 3,600<br>(2,454 - 5,066)    |
| Diarrheal diseases                                                | 4,540<br>(2,963 - 6,551)       | 1,337<br>(580 - 2,521)      | 116<br>(50 - 232)        | 925<br>(434 - 1,690)         | 1,150<br>(585 - 2,020)       | 1,011<br>(584 - 1,648)      |
| Intestinal infectious diseases                                    | 716<br>(326 - 1,310)           | 185<br>(75 - 367)           | 197<br>(87 - 376)        | 271<br>(80 - 574)            | 48<br>(13 - 114)             | 14<br>(5 - 31)              |
| Typhoid fever                                                     | 506<br>(215 - 934)             | 120<br>(45 - 251)           | 146<br>(61 - 286)        | 196<br>(49 - 434)            | 35<br>(6 - 92)               | 10<br>(2 - 23)              |
| Paratyphoid fever                                                 | 150<br>(59 - 287)              | 45<br>(16 - 97)             | 45<br>(17 - 93)          | 51<br>(12 - 119)             | 7<br>(1 - 18)                | 2<br>(0 - 4)                |
| Other intestinal infectious diseases                              | 59<br>(37 - 92)                | 20<br>(10 - 36)             | 6<br>(1 - 14)            | 24<br>(10 - 45)              | 7<br>(2 - 15)                | 3<br>(1 - 8)                |
| Lower respiratory infections                                      | 11,526<br>(8,494 - 15,551)     | 4,771<br>(3,326 - 6,455)    | 198<br>(111 - 327)       | 1,904<br>(954 - 3,248)       | 2,224<br>(1,242 - 3,915)     | 2,429<br>(1,513 - 3,687)    |
| Upper respiratory infections                                      | 29<br>(11 - 59)                | 2<br>(0 - 7)                | 1<br>(0 - 3)             | 12<br>(2 - 32)               | 9<br>(1 - 29)                | 5<br>(0 - 20)               |
| Otitis media                                                      | 17<br>(11 - 26)                | 1<br>(1 - 2)                | 1<br>(1 - 2)             | 6<br>(3 - 9)                 | 5<br>(3 - 9)                 | 4<br>(3 - 7)                |
| Meningitis                                                        | 1,640<br>(1,003 - 2,468)       | 246<br>(127 - 431)          | 96<br>(50 - 178)         | 992<br>(494 - 1,649)         | 210<br>(102 - 390)           | 95<br>(48 - 171)            |
| Pneumococcal meningitis                                           | 540<br>(276 - 870)             | 54<br>(26 - 102)            | 32<br>(14 - 66)          | 355<br>(140 - 629)           | 66<br>(27 - 135)             | 32<br>(13 - 63)             |
| H influenzae type B meningitis                                    | 293<br>(175 - 453)             | 100<br>(49 - 182)           | 28<br>(12 - 53)          | 128<br>(57 - 241)            | 26<br>(9 - 56)               | 12<br>(5 - 26)              |
| Meningococcal meningitis                                          | 219<br>(103 - 398)             | 18<br>(7 - 35)              | 10<br>(4 - 22)           | 138<br>(47 - 296)            | 36<br>(14 - 74)              | 17<br>(7 - 38)              |
| Other meningitis                                                  | 588<br>(320 - 986)             | 74<br>(34 - 142)            | 26<br>(11 - 53)          | 371<br>(164 - 715)           | 82<br>(30 - 160)             | 34<br>(16 - 65)             |
| Encephalitis                                                      | 364<br>(210 - 592)             | 64<br>(26 - 128)            | 40<br>(21 - 70)          | 171<br>(79 - 305)            | 61<br>(28 - 115)             | 28<br>(14 - 49)             |
| Diphtheria                                                        | 6<br>(0 - 24)                  | 2<br>(0 - 16)               | 1<br>(0 - 10)            | 2<br>(0 - 9)                 | 1<br>(0 - 4)                 | 5<br>--                     |
| Whooping cough                                                    | 126<br>(0 - 600)               | 114<br>(0 - 543)            | 9<br>(0 - 44)            | 3<br>(0 - 17)                | 0<br>(0 - 2)                 | --                          |
| Tetanus                                                           | 73<br>(41 - 127)               | 12<br>(6 - 23)              | 5<br>(3 - 9)             | 32<br>(14 - 63)              | 17<br>(7 - 33)               | 7<br>(4 - 14)               |
| Measles                                                           | 382<br>(123 - 861)             | 310<br>(97 - 712)           | 59<br>(19 - 137)         | 13<br>(4 - 32)               | 1<br>(0 - 1)                 | --                          |
| Varicella and herpes zoster                                       | 19<br>(5 - 43)                 | 3<br>(0 - 14)               | 1<br>(0 - 5)             | 7<br>(1 - 19)                | 2<br>(0 - 8)                 | 5<br>(0 - 22)               |
| Neglected tropical diseases and malaria                           | 5,522<br>(3,210 - 8,817)       | 257<br>(142 - 543)          | 474<br>(296 - 780)       | 3,603<br>(1,939 - 6,083)     | 996<br>(477 - 1,752)         | 193<br>(113 - 314)          |
| Malaria                                                           | 4,834<br>(2,817 - 7,915)       | 225<br>(113 - 512)          | 426<br>(252 - 732)       | 3,197<br>(1,667 - 5,498)     | 833<br>(391 - 1,538)         | 153<br>(81 - 264)           |
| Leishmaniasis                                                     | 0<br>(0 - 1)                   | 0<br>(0 - 1)                | 0<br>(0 - 0)             | 0<br>(0 - 0)                 | 0<br>(0 - 0)                 | 0<br>(0 - 0)                |
| Visceral leishmaniasis                                            | 0<br>(0 - 1)                   | 0<br>(0 - 1)                | 0<br>(0 - 0)             | 0<br>(0 - 0)                 | 0<br>(0 - 0)                 | 0<br>(0 - 0)                |
| Cysticercosis                                                     | 1<br>(1 - 2)                   | 0<br>(0 - 0)                | 0<br>(0 - 0)             | 1<br>(0 - 1)                 | 0<br>(0 - 0)                 | 0<br>(0 - 0)                |
| Cystic echinococcosis                                             | 5<br>(3 - 8)                   | 0<br>(0 - 0)                | 0<br>(0 - 1)             | 3<br>(2 - 5)                 | 1<br>(1 - 2)                 | 0<br>(0 - 1)                |
| Dengue                                                            | 70<br>(30 - 116)               | 17<br>(7 - 32)              | 20<br>(7 - 33)           | 25<br>(11 - 43)              | 5<br>(2 - 10)                | 3<br>(2 - 5)                |
| Rabies                                                            | 549<br>(238 - 947)             | 0<br>(0 - 1)                | 18<br>(8 - 45)           | 355<br>(150 - 646)           | 146<br>(57 - 280)            | 30<br>(12 - 52)             |
| Intestinal nematode infections                                    | 22<br>(9 - 44)                 | 9<br>(2 - 21)               | 4<br>(0 - 13)            | 6<br>(1 - 17)                | 3<br>(0 - 10)                | 1<br>(0 - 6)                |
| Ascariasis                                                        | 22<br>(9 - 44)                 | 9<br>(2 - 21)               | 4<br>(0 - 13)            | 6<br>(1 - 17)                | 3<br>(0 - 10)                | 1<br>(0 - 6)                |
| Other neglected tropical diseases                                 | 40<br>(20 - 70)                | 6<br>(2 - 16)               | 5<br>(2 - 9)             | 16<br>(6 - 30)               | 7<br>(3 - 15)                | 6<br>(3 - 11)               |
| Maternal disorders                                                | --                             | --                          | --                       | --                           | --                           | --                          |
| Maternal hemorrhage                                               | --                             | --                          | --                       | --                           | --                           | --                          |

Web Table 31- Myanmar deaths with 95% UI by age, sex, and cause in 2013

| Cause                                                            | Males, All Ages                | Males, 0-4 Years         | Males, 5-14 Years    | Males, 15-49 Years          | Males, 50-69 Years           | Males, 70-80 Years          |
|------------------------------------------------------------------|--------------------------------|--------------------------|----------------------|-----------------------------|------------------------------|-----------------------------|
| Maternal sepsis and other maternal infections                    | --                             | --                       | --                   | --                          | --                           | --                          |
| Maternal hypertensive disorders                                  | --                             | --                       | --                   | --                          | --                           | --                          |
| Maternal obstructed labor                                        | --                             | --                       | --                   | --                          | --                           | --                          |
| Maternal abortive outcome                                        | --                             | --                       | --                   | --                          | --                           | --                          |
| Indirect maternal deaths                                         | --                             | --                       | --                   | --                          | --                           | --                          |
| Late maternal deaths                                             | --                             | --                       | --                   | --                          | --                           | --                          |
| Maternal deaths aggravated by HIV/AIDS                           | --                             | --                       | --                   | --                          | --                           | --                          |
| Other maternal disorders                                         | --                             | --                       | --                   | --                          | --                           | --                          |
| Neonatal disorders                                               | 7,055<br>(5,870 - 8,336)       | 7,055<br>(5,870 - 8,336) | --                   | --                          | --                           | --                          |
| Neonatal preterm birth complications                             | 2,838<br>(1,338 - 4,507)       | 2,838<br>(1,338 - 4,507) | --                   | --                          | --                           | --                          |
| Neonatal encephalopathy due to birth asphyxia and trauma         | 2,452<br>(1,246 - 3,987)       | 2,452<br>(1,246 - 3,987) | --                   | --                          | --                           | --                          |
| Neonatal sepsis and other neonatal infections                    | 1,214<br>(325 - 2,816)         | 1,214<br>(325 - 2,816)   | --                   | --                          | --                           | --                          |
| Hemolytic disease and other neonatal jaundice                    | 22<br>(5 - 71)                 | 22<br>(5 - 71)           | --                   | --                          | --                           | --                          |
| Other neonatal disorders                                         | 528<br>(201 - 1,106)           | 528<br>(201 - 1,106)     | --                   | --                          | --                           | --                          |
| Nutritional deficiencies                                         | 1,037<br>(639 - 1,683)         | 212<br>(98 - 378)        | 19<br>(9 - 39)       | 150<br>(64 - 332)           | 154<br>(79 - 289)            | 502<br>(282 - 806)          |
| Protein-energy malnutrition                                      | 449<br>(216 - 811)             | 135<br>(52 - 263)        | 9<br>(3 - 23)        | 61<br>(24 - 148)            | 75<br>(32 - 145)             | 168<br>(59 - 329)           |
| Iodine deficiency                                                | 5<br>(0 - 18)                  | 1<br>(0 - 10)            | 0<br>(0 - 2)         | 1<br>(0 - 4)                | 1<br>(0 - 6)                 | 1<br>(0 - 8)                |
| Iron-deficiency anemia                                           | 514<br>(266 - 932)             | 55<br>(12 - 137)         | 6<br>(2 - 17)        | 75<br>(27 - 187)            | 68<br>(28 - 158)             | 310<br>(156 - 531)          |
| Other nutritional deficiencies                                   | 70<br>(27 - 141)               | 20<br>(3 - 51)           | 3<br>(1 - 7)         | 13<br>(4 - 34)              | 11<br>(4 - 28)               | 23<br>(8 - 49)              |
| Other communicable, maternal, neonatal, and nutritional diseases | 1,500<br>(902 - 2,285)         | 391<br>(211 - 656)       | 65<br>(39 - 103)     | 581<br>(277 - 1,007)        | 297<br>(127 - 616)           | 166<br>(72 - 379)           |
| Sexually transmitted diseases excluding HIV                      | 379<br>(200 - 644)             | 318<br>(161 - 557)       | 33<br>(16 - 59)      | 14<br>(5 - 36)              | 9<br>(3 - 23)                | 6<br>(2 - 17)               |
| Syphilis                                                         | 369<br>(193 - 632)             | 318<br>(161 - 557)       | 32<br>(16 - 59)      | 8<br>(3 - 20)               | 6<br>(2 - 17)                | 5<br>(2 - 14)               |
| Chlamydial infection                                             | --                             | --                       | --                   | --                          | --                           | --                          |
| Gonococcal infection                                             | 6<br>(3 - 16)                  | --                       | 0<br>(0 - 1)         | 4<br>(1 - 9)                | 1<br>(0 - 4)                 | 1<br>(0 - 2)                |
| Other sexually transmitted diseases                              | 4<br>(2 - 11)                  | --                       | 0<br>(0 - 1)         | 3<br>(1 - 7)                | 1<br>(0 - 2)                 | 0<br>(0 - 1)                |
| Hepatitis                                                        | 280<br>(164 - 453)             | 19<br>(8 - 41)           | 9<br>(6 - 14)        | 190<br>(96 - 327)           | 47<br>(26 - 79)              | 16<br>(10 - 24)             |
| Acute hepatitis A                                                | 28<br>(9 - 59)                 | 9<br>(3 - 23)            | 4<br>(1 - 7)         | 14<br>(3 - 35)              | 1<br>(0 - 3)                 | 0<br>(0 - 0)                |
| Acute hepatitis B                                                | 145<br>(76 - 249)              | 9<br>(3 - 22)            | 3<br>(1 - 6)         | 84<br>(35 - 168)            | 36<br>(19 - 61)              | 14<br>(8 - 21)              |
| Acute hepatitis C                                                | 7<br>(1 - 21)                  | --                       | 0<br>(0 - 1)         | 5<br>(1 - 16)               | 1<br>(0 - 5)                 | 1<br>(0 - 2)                |
| Acute hepatitis E                                                | 100<br>(43 - 181)              | 0<br>(0 - 1)             | 2<br>(1 - 5)         | 87<br>(37 - 161)            | 9<br>(2 - 21)                | 2<br>(0 - 5)                |
| Other infectious diseases                                        | 840<br>(423 - 1,466)           | 55<br>(14 - 142)         | 23<br>(8 - 48)       | 376<br>(145 - 704)          | 242<br>(89 - 555)            | 144<br>(50 - 356)           |
| Non-communicable diseases                                        | 155,373<br>(100,886 - 226,114) | 3,104<br>(2,270 - 4,208) | 922<br>(671 - 1,207) | 30,460<br>(15,988 - 51,712) | 63,920<br>(37,490 - 100,516) | 56,967<br>(43,567 - 69,415) |
| Neoplasms                                                        | 28,103<br>(17,615 - 41,714)    | 179<br>(98 - 304)        | 296<br>(189 - 434)   | 5,989<br>(3,221 - 10,271)   | 14,326<br>(8,464 - 22,227)   | 7,313<br>(5,317 - 9,445)    |
| Esophageal cancer                                                | 612<br>(350 - 965)             | --                       | --                   | 110<br>(51 - 194)           | 330<br>(173 - 558)           | 172<br>(103 - 249)          |
| Stomach cancer                                                   | 1,691<br>(1,093 - 2,488)       | --                       | --                   | 251<br>(122 - 441)          | 829<br>(501 - 1,328)         | 611<br>(421 - 841)          |
| Liver cancer                                                     | 6,763<br>(3,934 - 10,866)      | --                       | 14<br>(7 - 25)       | 1,806<br>(851 - 3,208)      | 3,688<br>(2,091 - 6,152)     | 1,255<br>(786 - 1,851)      |
| Liver cancer due to hepatitis B                                  | 2,861<br>(1,105 - 5,617)       | --                       | 6<br>(2 - 12)        | 895<br>(325 - 1,767)        | 1,554<br>(485 - 3,264)       | 407<br>(156 - 784)          |
| Liver cancer due to hepatitis C                                  | 3,104<br>(1,253 - 5,606)       | --                       | 3<br>(1 - 6)         | 693<br>(260 - 1,396)        | 1,738<br>(622 - 3,287)       | 670<br>(275 - 1,112)        |
| Liver cancer due to alcohol use                                  | 357<br>(155 - 669)             | --                       | --                   | 60<br>(21 - 123)            | 186<br>(78 - 361)            | 111<br>(43 - 214)           |
| Liver cancer due to other causes                                 | 441<br>(192 - 845)             | --                       | 5<br>(2 - 10)        | 158<br>(64 - 314)           | 210<br>(83 - 441)            | 68<br>(28 - 134)            |

Web Table 31- Myanmar deaths with 95% UI by age, sex, and cause in 2013

| Cause                                         | Males, All Ages             | Males, 0-4 Years   | Males, 5-14 Years  | Males, 15-49 Years        | Males, 50-69 Years          | Males, 70-80 Years          |
|-----------------------------------------------|-----------------------------|--------------------|--------------------|---------------------------|-----------------------------|-----------------------------|
| Larynx cancer                                 | 359<br>(210 - 571)          | --                 | --                 | 51<br>(24 - 98)           | 189<br>(104 - 317)          | 118<br>(74 - 176)           |
| Tracheal, bronchus and lung cancer            | 9,115<br>(5,705 - 13,724)   | --                 | --                 | 1,156<br>(576 - 1,963)    | 5,353<br>(3,056 - 8,523)    | 2,606<br>(1,855 - 3,539)    |
| Breast cancer                                 | 20<br>(10 - 36)             | --                 | --                 | 7<br>(3 - 14)             | 8<br>(3 - 16)               | 5<br>(2 - 8)                |
| Cervical cancer                               | --                          | --                 | --                 | --                        | --                          | --                          |
| Uterine cancer                                | --                          | --                 | --                 | --                        | --                          | --                          |
| Prostate cancer                               | 527<br>(262 - 794)          | --                 | --                 | 8<br>(3 - 14)             | 115<br>(54 - 189)           | 404<br>(202 - 608)          |
| Colon and rectum cancer                       | 1,560<br>(987 - 2,378)      | --                 | --                 | 314<br>(157 - 534)        | 708<br>(407 - 1,147)        | 538<br>(375 - 746)          |
| Lip and oral cavity cancer                    | 816<br>(441 - 1,402)        | --                 | --                 | 195<br>(85 - 374)         | 410<br>(206 - 745)          | 211<br>(121 - 337)          |
| Nasopharynx cancer                            | 335<br>(174 - 569)          | --                 | 2<br>(1 - 7)       | 132<br>(62 - 246)         | 155<br>(74 - 283)           | 45<br>(24 - 75)             |
| Other pharynx cancer                          | 414<br>(220 - 805)          | --                 | --                 | 89<br>(39 - 193)          | 238<br>(117 - 479)          | 88<br>(50 - 147)            |
| Gallbladder and biliary tract cancer          | 315<br>(167 - 527)          | --                 | --                 | 43<br>(18 - 82)           | 160<br>(75 - 290)           | 112<br>(64 - 187)           |
| Pancreatic cancer                             | 566<br>(347 - 856)          | --                 | --                 | 102<br>(51 - 177)         | 305<br>(179 - 499)          | 159<br>(110 - 219)          |
| Malignant skin melanoma                       | 60<br>(24 - 116)            | --                 | --                 | 23<br>(8 - 47)            | 23<br>(9 - 44)              | 14<br>(6 - 27)              |
| Non-melanoma skin cancer                      | 106<br>(54 - 196)           | --                 | --                 | 23<br>(10 - 46)           | 40<br>(17 - 81)             | 44<br>(22 - 78)             |
| Ovarian cancer                                | --                          | --                 | --                 | --                        | --                          | --                          |
| Testicular cancer                             | 35<br>(17 - 59)             | --                 | --                 | 25<br>(11 - 44)           | 6<br>(3 - 11)               | 4<br>(2 - 8)                |
| Kidney cancer                                 | 323<br>(180 - 517)          | 3<br>(1 - 7)       | 2<br>(1 - 3)       | 59<br>(27 - 108)          | 187<br>(98 - 314)           | 73<br>(46 - 109)            |
| Bladder cancer                                | 550<br>(350 - 823)          | --                 | --                 | 42<br>(19 - 82)           | 244<br>(135 - 399)          | 264<br>(176 - 378)          |
| Brain and nervous system cancer               | 470<br>(205 - 836)          | 6<br>(2 - 17)      | 20<br>(9 - 36)     | 203<br>(89 - 371)         | 183<br>(75 - 336)           | 58<br>(23 - 95)             |
| Thyroid cancer                                | 91<br>(49 - 151)            | --                 | 0<br>(0 - 1)       | 18<br>(8 - 32)            | 49<br>(24 - 88)             | 25<br>(15 - 39)             |
| Mesothelioma                                  | 27<br>(15 - 46)             | --                 | --                 | 6<br>(3 - 10)             | 14<br>(7 - 26)              | 7<br>(4 - 13)               |
| Hodgkin lymphoma                              | 94<br>(41 - 198)            | 2<br>(1 - 6)       | 4<br>(1 - 11)      | 49<br>(19 - 110)          | 27<br>(10 - 57)             | 11<br>(5 - 25)              |
| Non-Hodgkin lymphoma                          | 727<br>(395 - 1,286)        | 8<br>(3 - 18)      | 24<br>(13 - 44)    | 251<br>(124 - 458)        | 291<br>(144 - 558)          | 152<br>(89 - 248)           |
| Multiple myeloma                              | 76<br>(41 - 135)            | --                 | --                 | 18<br>(8 - 35)            | 39<br>(20 - 72)             | 19<br>(11 - 32)             |
| Leukemia                                      | 1,253<br>(823 - 1,856)      | 114<br>(48 - 224)  | 182<br>(103 - 279) | 612<br>(351 - 969)        | 280<br>(156 - 467)          | 64<br>(44 - 87)             |
| Other neoplasms                               | 1,197<br>(696 - 1,879)      | 46<br>(23 - 93)    | 47<br>(26 - 80)    | 395<br>(199 - 694)        | 455<br>(245 - 771)          | 254<br>(153 - 404)          |
| Cardiovascular diseases                       | 53,833<br>(35,138 - 77,304) | 518<br>(330 - 771) | 137<br>(85 - 206)  | 7,336<br>(3,739 - 12,645) | 22,406<br>(13,111 - 35,834) | 23,436<br>(17,807 - 29,104) |
| Rheumatic heart disease                       | 472<br>(225 - 923)          | 15<br>(4 - 38)     | 25<br>(8 - 48)     | 182<br>(77 - 375)         | 140<br>(64 - 294)           | 109<br>(53 - 216)           |
| Ischemic heart disease                        | 18,514<br>(11,865 - 28,129) | 7<br>(2 - 20)      | 8<br>(4 - 27)      | 2,598<br>(1,265 - 4,668)  | 8,348<br>(4,749 - 13,582)   | 7,553<br>(5,281 - 9,971)    |
| Cerebrovascular disease                       | 27,881<br>(17,852 - 39,638) | 68<br>(37 - 115)   | 28<br>(15 - 47)    | 2,938<br>(1,425 - 5,086)  | 11,467<br>(6,409 - 18,115)  | 13,380<br>(9,600 - 17,088)  |
| Ischemic stroke                               | 13,333<br>(5,691 - 21,193)  | 5<br>(1 - 15)      | 3<br>(1 - 8)       | 456<br>(109 - 1,031)      | 4,148<br>(1,445 - 7,826)    | 8,719<br>(4,070 - 12,287)   |
| Hemorrhagic stroke                            | 14,548<br>(7,656 - 25,745)  | 63<br>(34 - 108)   | 24<br>(12 - 42)    | 2,482<br>(1,151 - 4,428)  | 7,319<br>(3,669 - 12,942)   | 4,660<br>(2,319 - 9,602)    |
| Hypertensive heart disease                    | 2,028<br>(648 - 3,643)      | 12<br>(3 - 29)     | 4<br>(1 - 7)       | 317<br>(80 - 650)         | 817<br>(241 - 1,639)        | 879<br>(339 - 1,560)        |
| Cardiomyopathy and myocarditis                | 1,112<br>(538 - 1,982)      | 175<br>(49 - 315)  | 29<br>(11 - 55)    | 327<br>(126 - 651)        | 309<br>(136 - 623)          | 271<br>(139 - 467)          |
| Atrial fibrillation and flutter               | 8<br>(4 - 15)               | --                 | --                 | 2<br>(0 - 3)              | 3<br>(1 - 6)                | 3<br>(2 - 7)                |
| Aortic aneurysm                               | 325<br>(163 - 564)          | --                 | --                 | 45<br>(17 - 95)           | 69<br>(32 - 134)            | 211<br>(107 - 352)          |
| Peripheral vascular disease                   | 18<br>(8 - 32)              | --                 | --                 | 2<br>(1 - 4)              | 6<br>(2 - 12)               | 10<br>(4 - 18)              |
| Endocarditis                                  | 323<br>(149 - 575)          | 41<br>(17 - 85)    | 6<br>(3 - 12)      | 103<br>(39 - 204)         | 101<br>(42 - 201)           | 72<br>(34 - 122)            |
| Other cardiovascular and circulatory diseases | 3,152<br>(1,376 - 7,663)    | 199<br>(89 - 387)  | 37<br>(16 - 68)    | 822<br>(293 - 1,785)      | 1,146<br>(455 - 2,875)      | 948<br>(430 - 2,568)        |
| Chronic respiratory diseases                  | 24,237<br>(16,415 - 33,317) | 339<br>(198 - 568) | 99<br>(68 - 143)   | 1,693<br>(906 - 2,843)    | 8,636<br>(5,150 - 13,360)   | 13,469<br>(10,061 - 17,155) |

Web Table 31- Myanmar deaths with 95% UI by age, sex, and cause in 2013

| Cause                                               | Males, All Ages             | Males, 0-4 Years  | Males, 5-14 Years | Males, 15-49 Years        | Males, 50-69 Years        | Males, 70-80 Years        |
|-----------------------------------------------------|-----------------------------|-------------------|-------------------|---------------------------|---------------------------|---------------------------|
| Chronic obstructive pulmonary disease               | 13,665<br>(8,523 - 19,612)  | 150<br>(73 - 277) | 20<br>(10 - 36)   | 606<br>(258 - 1,091)      | 4,386<br>(2,280 - 7,115)  | 8,503<br>(5,690 - 11,471) |
| Pneumoconiosis                                      | 1,243<br>(699 - 2,004)      | 2<br>(0 - 5)      | 2<br>(1 - 4)      | 110<br>(48 - 206)         | 620<br>(316 - 1,065)      | 509<br>(290 - 811)        |
| Silicosis                                           | 628<br>(364 - 987)          | 0<br>(0 - 1)      | 1<br>(0 - 1)      | 6<br>(2 - 12)             | 185<br>(93 - 322)         | 436<br>(248 - 690)        |
| Asbestosis                                          | 122<br>(59 - 215)           | 0<br>(0 - 1)      | 0<br>(0 - 1)      | 18<br>(8 - 32)            | 102<br>(49 - 182)         | 1<br>(1 - 2)              |
| Coal workers pneumoconiosis                         | 302<br>(157 - 551)          | 0<br>(0 - 1)      | 0<br>(0 - 1)      | 57<br>(25 - 111)          | 232<br>(117 - 423)        | 13<br>(6 - 22)            |
| Other pneumoconiosis                                | 191<br>(99 - 325)           | 1<br>(0 - 2)      | 1<br>(0 - 1)      | 29<br>(12 - 58)           | 101<br>(48 - 189)         | 60<br>(30 - 106)          |
| Asthma                                              | 7,898<br>(4,003 - 13,033)   | 114<br>(43 - 240) | 66<br>(40 - 99)   | 841<br>(384 - 1,447)      | 3,167<br>(1,429 - 5,502)  | 3,711<br>(1,764 - 6,300)  |
| Interstitial lung disease and pulmonary sarcoidosis | 762<br>(77 - 1,889)         | 1<br>(0 - 4)      | 1<br>(0 - 2)      | 14<br>(2 - 40)            | 309<br>(28 - 855)         | 438<br>(45 - 1,097)       |
| Other chronic respiratory diseases                  | 670<br>(389 - 1,155)        | 73<br>(45 - 120)  | 10<br>(4 - 22)    | 122<br>(50 - 252)         | 156<br>(73 - 315)         | 308<br>(165 - 561)        |
| Cirrhosis                                           | 18,350<br>(10,386 - 29,133) | 36<br>(13 - 79)   | 25<br>(16 - 36)   | 7,692<br>(3,829 - 13,097) | 8,138<br>(4,560 - 13,253) | 2,459<br>(1,750 - 3,362)  |
| Cirrhosis due to hepatitis B                        | 5,826<br>(1,955 - 10,611)   | 2<br>(0 - 6)      | 5<br>(2 - 10)     | 2,637<br>(858 - 4,938)    | 2,543<br>(796 - 4,685)    | 640<br>(136 - 1,182)      |
| Cirrhosis due to hepatitis C                        | 3,307<br>(760 - 7,873)      | 4<br>(1 - 11)     | 4<br>(2 - 9)      | 1,288<br>(376 - 3,505)    | 1,456<br>(140 - 3,667)    | 555<br>(59 - 1,144)       |
| Cirrhosis due to alcohol use                        | 7,163<br>(3,616 - 12,673)   | --                | --                | 2,555<br>(1,041 - 4,982)  | 3,459<br>(1,703 - 6,370)  | 1,148<br>(626 - 1,810)    |
| Cirrhosis due to other causes                       | 2,054<br>(797 - 3,978)      | 30<br>(11 - 67)   | 15<br>(8 - 23)    | 1,212<br>(429 - 2,394)    | 680<br>(232 - 1,440)      | 116<br>(48 - 221)         |
| Digestive diseases                                  | 5,344<br>(3,334 - 8,076)    | 74<br>(37 - 134)  | 47<br>(30 - 71)   | 1,503<br>(784 - 2,514)    | 1,823<br>(1,025 - 2,971)  | 1,896<br>(1,315 - 2,503)  |
| Peptic ulcer disease                                | 2,115<br>(1,266 - 3,473)    | 5<br>(1 - 12)     | 6<br>(3 - 11)     | 480<br>(220 - 925)        | 808<br>(451 - 1,368)      | 816<br>(486 - 1,241)      |
| Gastritis and duodenitis                            | 153<br>(73 - 323)           | 3<br>(1 - 8)      | 2<br>(1 - 5)      | 38<br>(14 - 100)          | 49<br>(19 - 109)          | 60<br>(27 - 117)          |
| Appendicitis                                        | 295<br>(142 - 507)          | 6<br>(2 - 13)     | 8<br>(4 - 15)     | 125<br>(51 - 230)         | 90<br>(39 - 170)          | 66<br>(32 - 119)          |
| Paralytic ileus and intestinal obstruction          | 687<br>(326 - 1,202)        | 22<br>(8 - 49)    | 11<br>(5 - 21)    | 130<br>(49 - 263)         | 203<br>(84 - 399)         | 321<br>(143 - 546)        |
| Inguinal, femoral, and abdominal hernia             | 131<br>(59 - 269)           | 4<br>(1 - 11)     | 2<br>(1 - 5)      | 29<br>(11 - 74)           | 40<br>(14 - 86)           | 56<br>(25 - 109)          |
| Inflammatory bowel disease                          | 158<br>(88 - 247)           | 6<br>(2 - 14)     | 3<br>(1 - 5)      | 50<br>(24 - 89)           | 44<br>(20 - 79)           | 54<br>(28 - 89)           |
| Vascular intestinal disorders                       | 43<br>(14 - 106)            | 1<br>(0 - 4)      | 1<br>(0 - 3)      | 13<br>(4 - 33)            | 12<br>(3 - 32)            | 15<br>(5 - 38)            |
| Gallbladder and biliary diseases                    | 472<br>(250 - 761)          | 4<br>(2 - 8)      | 3<br>(2 - 5)      | 120<br>(55 - 213)         | 164<br>(73 - 299)         | 181<br>(92 - 303)         |
| Pancreatitis                                        | 595<br>(209 - 1,076)        | 2<br>(1 - 6)      | 3<br>(1 - 5)      | 321<br>(103 - 620)        | 175<br>(60 - 360)         | 94<br>(33 - 172)          |
| Other digestive diseases                            | 695<br>(368 - 1,178)        | 20<br>(8 - 42)    | 8<br>(4 - 14)     | 197<br>(85 - 374)         | 238<br>(109 - 437)        | 232<br>(117 - 410)        |
| Neurological disorders                              | 3,845<br>(2,713 - 5,267)    | 13<br>(7 - 29)    | 45<br>(21 - 91)   | 688<br>(376 - 1,108)      | 623<br>(354 - 995)        | 2,476<br>(1,796 - 3,287)  |
| Alzheimer disease and other dementias               | 2,749<br>(1,969 - 3,687)    | --                | --                | 2<br>(0 - 6)              | 384<br>(214 - 626)        | 2,363<br>(1,699 - 3,160)  |
| Parkinson disease                                   | 53<br>(24 - 89)             | --                | --                | 5<br>(2 - 9)              | 17<br>(7 - 31)            | 31<br>(13 - 59)           |
| Epilepsy                                            | 870<br>(505 - 1,396)        | 1<br>(0 - 2)      | 31<br>(9 - 77)    | 596<br>(314 - 985)        | 183<br>(94 - 324)         | 58<br>(32 - 96)           |
| Multiple sclerosis                                  | 13<br>(2 - 26)              | --                | --                | 7<br>(1 - 14)             | 4<br>(1 - 8)              | 2<br>(0 - 5)              |
| Other neurological disorders                        | 160<br>(93 - 276)           | 12<br>(6 - 28)    | 13<br>(7 - 23)    | 78<br>(40 - 142)          | 35<br>(18 - 63)           | 22<br>(14 - 34)           |
| Mental and substance use disorders                  | 3,329<br>(1,140 - 5,717)    | 9<br>(2 - 19)     | 0<br>(0 - 0)      | 2,061<br>(679 - 3,758)    | 1,102<br>(320 - 1,985)    | 158<br>(66 - 253)         |
| Schizophrenia                                       | 27<br>(11 - 68)             | --                | --                | 15<br>(5 - 37)            | 8<br>(3 - 23)             | 4<br>(2 - 9)              |
| Alcohol use disorders                               | 2,755<br>(652 - 4,911)      | --                | --                | 1,581<br>(358 - 3,083)    | 1,024<br>(247 - 1,870)    | 150<br>(55 - 244)         |
| Drug use disorders                                  | 547<br>(272 - 915)          | 9<br>(2 - 19)     | --                | 464<br>(225 - 786)        | 70<br>(33 - 126)          | 4<br>(2 - 7)              |
| Opioid use disorders                                | 352<br>(179 - 596)          | 6<br>(1 - 13)     | --                | 301<br>(145 - 510)        | 43<br>(20 - 78)           | 3<br>(1 - 5)              |
| Cocaine use disorders                               | 8<br>(4 - 14)               | 0<br>(0 - 0)      | --                | 7<br>(3 - 12)             | 1<br>(0 - 1)              | 0<br>(0 - 0)              |
| Amphetamine use disorders                           | 8<br>(4 - 13)               | 0<br>(0 - 0)      | --                | 7<br>(3 - 11)             | 1<br>(0 - 2)              | 0<br>(0 - 0)              |
| Other drug use disorders                            | 179<br>(88 - 307)           | 3<br>(0 - 6)      | --                | 150<br>(71 - 260)         | 25<br>(12 - 47)           | 1<br>(1 - 2)              |
| Eating disorders                                    | 0<br>(0 - 0)                | --                | 0<br>(0 - 0)      | 0<br>(0 - 0)              | --                        | --                        |

Web Table 31- Myanmar deaths with 95% UI by age, sex, and cause in 2013

| Cause                                               | Males, All Ages            | Males, 0-4 Years         | Males, 5-14 Years | Males, 15-49 Years       | Males, 50-69 Years        | Males, 70-80 Years       |
|-----------------------------------------------------|----------------------------|--------------------------|-------------------|--------------------------|---------------------------|--------------------------|
| Anorexia nervosa                                    | 0<br>(0 - 0)               | --                       | 0<br>(0 - 0)      | 0<br>(0 - 0)             | --                        | --                       |
| Diabetes, urogenital, blood, and endocrine diseases | 15,115<br>(9,458 - 22,058) | 113<br>(59 - 196)        | 92<br>(57 - 146)  | 2,909<br>(1,538 - 4,875) | 6,500<br>(3,680 - 10,108) | 5,501<br>(3,969 - 7,222) |
| Diabetes mellitus                                   | 6,807<br>(4,387 - 9,905)   | 0<br>(0 - 1)             | 3<br>(2 - 5)      | 910<br>(471 - 1,618)     | 3,260<br>(1,867 - 5,179)  | 2,634<br>(1,808 - 3,656) |
| Acute glomerulonephritis                            | 32<br>(15 - 58)            | 2<br>(1 - 4)             | 2<br>(1 - 4)      | 14<br>(6 - 27)           | 7<br>(3 - 16)             | 5<br>(3 - 11)            |
| Chronic kidney disease                              | 6,403<br>(3,826 - 9,562)   | 2<br>(1 - 5)             | 20<br>(11 - 33)   | 1,389<br>(712 - 2,261)   | 2,634<br>(1,446 - 4,210)  | 2,358<br>(1,483 - 3,333) |
| Chronic kidney disease due to diabetes mellitus     | 256<br>(59 - 528)          | 0<br>(0 - 0)             | 0<br>(0 - 1)      | 57<br>(12 - 130)         | 101<br>(24 - 234)         | 98<br>(20 - 203)         |
| Chronic kidney disease due to hypertension          | 1,678<br>(859 - 3,217)     | 0<br>(0 - 1)             | 2<br>(1 - 5)      | 362<br>(147 - 720)       | 783<br>(362 - 1,528)      | 531<br>(254 - 1,055)     |
| Chronic kidney disease due to glomerulonephritis    | 542<br>(305 - 879)         | 1<br>(1 - 3)             | 10<br>(6 - 16)    | 186<br>(96 - 324)        | 188<br>(90 - 336)         | 156<br>(86 - 248)        |
| Chronic kidney disease due to other causes          | 3,926<br>(2,056 - 6,057)   | 0<br>(0 - 1)             | 7<br>(3 - 15)     | 784<br>(362 - 1,430)     | 1,563<br>(709 - 2,682)    | 1,573<br>(797 - 2,442)   |
| Urinary diseases and male infertility               | 986<br>(560 - 1,506)       | 18<br>(7 - 38)           | 7<br>(4 - 11)     | 235<br>(105 - 403)       | 380<br>(196 - 623)        | 347<br>(208 - 527)       |
| Interstitial nephritis and urinary tract infections | 318<br>(139 - 532)         | 9<br>(3 - 23)            | 3<br>(1 - 5)      | 70<br>(25 - 138)         | 114<br>(43 - 214)         | 121<br>(51 - 210)        |
| Urolithiasis                                        | 68<br>(30 - 119)           | --                       | 1<br>(0 - 2)      | 18<br>(6 - 34)           | 27<br>(10 - 55)           | 22<br>(9 - 45)           |
| Other urinary diseases                              | 601<br>(342 - 958)         | 9<br>(3 - 19)            | 3<br>(2 - 6)      | 146<br>(66 - 258)        | 239<br>(119 - 404)        | 204<br>(113 - 325)       |
| Gynecological diseases                              | --                         | --                       | --                | --                       | --                        | --                       |
| Uterine fibroids                                    | --                         | --                       | --                | --                       | --                        | --                       |
| Polycystic ovarian syndrome                         | --                         | --                       | --                | --                       | --                        | --                       |
| Endometriosis                                       | --                         | --                       | --                | --                       | --                        | --                       |
| Genital prolapse                                    | --                         | --                       | --                | --                       | --                        | --                       |
| Other gynecological diseases                        | --                         | --                       | --                | --                       | --                        | --                       |
| Hemoglobinopathies and hemolytic anemias            | 440<br>(187 - 856)         | 65<br>(26 - 124)         | 45<br>(18 - 88)   | 204<br>(77 - 421)        | 75<br>(28 - 159)          | 51<br>(23 - 108)         |
| Thalassemias                                        | 308<br>(128 - 593)         | 60<br>(25 - 117)         | 43<br>(18 - 84)   | 168<br>(64 - 340)        | 32<br>(12 - 69)           | 4<br>(2 - 8)             |
| Sickle cell disorders                               | 0<br>(0 - 0)               | 0<br>(0 - 0)             | 0<br>(0 - 0)      | 0<br>(0 - 0)             | 0<br>(0 - 0)              | 0<br>(0 - 0)             |
| G6PD deficiency                                     | 20<br>(8 - 40)             | 1<br>(1 - 3)             | 1<br>(0 - 2)      | 9<br>(3 - 18)            | 7<br>(3 - 15)             | 2<br>(1 - 4)             |
| Other hemoglobinopathies and hemolytic anemias      | 113<br>(47 - 232)          | 3<br>(1 - 5)             | 1<br>(0 - 2)      | 28<br>(10 - 58)          | 35<br>(13 - 75)           | 46<br>(20 - 96)          |
| Endocrine, metabolic, blood, and immune disorders   | 447<br>(232 - 704)         | 26<br>(12 - 56)          | 15<br>(7 - 26)    | 157<br>(74 - 284)        | 144<br>(68 - 253)         | 105<br>(50 - 167)        |
| Musculoskeletal disorders                           | 258<br>(129 - 423)         | --                       | 10<br>(5 - 16)    | 123<br>(55 - 205)        | 84<br>(41 - 144)          | 41<br>(22 - 73)          |
| Rheumatoid arthritis                                | 38<br>(16 - 67)            | --                       | 2<br>(1 - 4)      | 13<br>(5 - 24)           | 15<br>(6 - 29)            | 9<br>(3 - 18)            |
| Other musculoskeletal disorders                     | 219<br>(110 - 359)         | --                       | 8<br>(4 - 13)     | 110<br>(50 - 185)        | 69<br>(33 - 119)          | 32<br>(17 - 57)          |
| Other non-communicable diseases                     | 2,960<br>(2,192 - 3,959)   | 1,823<br>(1,228 - 2,628) | 171<br>(95 - 260) | 467<br>(256 - 733)       | 280<br>(148 - 474)        | 219<br>(131 - 332)       |
| Congenital anomalies                                | 2,370<br>(1,689 - 3,235)   | 1,794<br>(1,200 - 2,587) | 163<br>(89 - 252) | 298<br>(164 - 479)       | 70<br>(37 - 119)          | 45<br>(24 - 70)          |
| Neural tube defects                                 | 481<br>(67 - 1,153)        | 436<br>(56 - 1,076)      | 11<br>(1 - 29)    | 28<br>(4 - 75)           | 4<br>(0 - 15)             | 1<br>(0 - 4)             |
| Congenital heart anomalies                          | 1,162<br>(649 - 1,765)     | 829<br>(418 - 1,368)     | 105<br>(51 - 172) | 174<br>(80 - 305)        | 29<br>(11 - 55)           | 25<br>(9 - 42)           |
| Cleft lip and cleft palate                          | 4<br>(1 - 10)              | 4<br>(1 - 10)            | --                | --                       | --                        | --                       |
| Down syndrome                                       | 56<br>(20 - 147)           | 34<br>(7 - 102)          | 7<br>(2 - 17)     | 14<br>(5 - 34)           | 2<br>(1 - 6)              | 0<br>(0 - 1)             |
| Chromosomal unbalanced rearrangements               | 41<br>(15 - 131)           | 28<br>(7 - 106)          | 2<br>(1 - 6)      | 8<br>(3 - 18)            | 2<br>(1 - 5)              | 1<br>(0 - 1)             |
| Other congenital anomalies                          | 625<br>(269 - 1,185)       | 463<br>(173 - 968)       | 37<br>(15 - 77)   | 75<br>(30 - 143)         | 32<br>(14 - 58)           | 18<br>(8 - 31)           |
| Skin and subcutaneous diseases                      | 580<br>(291 - 912)         | 19<br>(6 - 34)           | 8<br>(3 - 13)     | 169<br>(63 - 299)        | 210<br>(98 - 372)         | 175<br>(92 - 275)        |
| Cellulitis                                          | 215<br>(107 - 383)         | 8<br>(2 - 16)            | 3<br>(1 - 6)      | 61<br>(24 - 115)         | 84<br>(38 - 162)          | 60<br>(30 - 110)         |
| Pyoderma                                            | 251<br>(115 - 418)         | 10<br>(3 - 20)           | 4<br>(1 - 7)      | 81<br>(30 - 151)         | 94<br>(38 - 177)          | 62<br>(27 - 106)         |
| Decubitus ulcer                                     | 102<br>(41 - 175)          | 0<br>(0 - 1)             | 1<br>(0 - 2)      | 21<br>(6 - 41)           | 29<br>(9 - 57)            | 51<br>(22 - 92)          |

Web Table 31- Myanmar deaths with 95% UI by age, sex, and cause in 2013

| Cause                                           | Males, All Ages            | Males, 0-4 Years     | Males, 5-14 Years  | Males, 15-49 Years       | Males, 50-69 Years       | Males, 70-80 Years     |
|-------------------------------------------------|----------------------------|----------------------|--------------------|--------------------------|--------------------------|------------------------|
| Other skin and subcutaneous diseases            | 11<br>(5 - 18)             | 0<br>(0 - 1)         | 1<br>(0 - 1)       | 5<br>(2 - 9)             | 3<br>(1 - 6)             | 2<br>(1 - 3)           |
| Sudden infant death syndrome                    | 10<br>21,416               | 10<br>770            | --                 | --                       | --                       | --                     |
| Injuries                                        | (13,341 - 33,243)          | (442 - 1,304)        | (642 - 1,203)      | (7,757 - 21,708)         | (2,512 - 7,225)          | (1,096 - 2,348)        |
| Transport injuries                              | 7,525<br>(4,446 - 11,940)  | 44<br>(22 - 80)      | 246<br>(148 - 394) | 5,262<br>(3,021 - 8,538) | 1,631<br>(902 - 2,730)   | 343<br>(221 - 517)     |
| Road injuries                                   | 7,012<br>(4,109 - 11,105)  | 38<br>(19 - 70)      | 230<br>(140 - 374) | 4,915<br>(2,818 - 7,952) | 1,512<br>(843 - 2,530)   | 317<br>(204 - 478)     |
| Pedestrian road injuries                        | 1,585<br>(864 - 2,709)     | 16<br>(7 - 32)       | 96<br>(54 - 164)   | 887<br>(444 - 1,581)     | 462<br>(229 - 850)       | 124<br>(74 - 199)      |
| Cyclist road injuries                           | 531<br>(285 - 895)         | 3<br>(1 - 7)         | 31<br>(14 - 59)    | 298<br>(151 - 528)       | 162<br>(79 - 299)        | 37<br>(20 - 61)        |
| Motorcyclist road injuries                      | 1,945<br>(977 - 3,216)     | 5<br>(2 - 10)        | 29<br>(14 - 54)    | 1,586<br>(779 - 2,664)   | 278<br>(129 - 520)       | 48<br>(26 - 83)        |
| Motor vehicle road injuries                     | 2,821<br>(1,489 - 4,562)   | 13<br>(6 - 25)       | 67<br>(35 - 110)   | 2,063<br>(1,059 - 3,316) | 579<br>(282 - 990)       | 99<br>(53 - 160)       |
| Other road injuries                             | 129<br>(51 - 296)          | 1<br>(0 - 3)         | 7<br>(2 - 18)      | 81<br>(30 - 186)         | 31<br>(12 - 78)          | 10<br>(4 - 24)         |
| Other transport injuries                        | 513<br>(267 - 993)         | 6<br>(3 - 12)        | 16<br>(8 - 33)     | 347<br>(173 - 685)       | 119<br>(56 - 238)        | 25<br>(13 - 46)        |
| Unintentional injuries                          | 10,298<br>(6,383 - 15,461) | 718<br>(403 - 1,244) | 632<br>(378 - 876) | 5,465<br>(3,049 - 8,837) | 2,260<br>(1,234 - 3,789) | 1,222<br>(708 - 1,794) |
| Falls                                           | 4,590<br>(2,327 - 7,216)   | 68<br>(33 - 129)     | 95<br>(25 - 178)   | 2,304<br>(1,053 - 3,870) | 1,271<br>(536 - 2,259)   | 853<br>(404 - 1,352)   |
| Drowning                                        | 2,286<br>(1,439 - 3,526)   | 434<br>(189 - 887)   | 406<br>(229 - 619) | 1,144<br>(612 - 1,978)   | 249<br>(126 - 467)       | 53<br>(32 - 87)        |
| Fire, heat, and hot substances                  | 611<br>(360 - 933)         | 40<br>(20 - 75)      | 31<br>(15 - 57)    | 380<br>(189 - 647)       | 126<br>(62 - 245)        | 34<br>(19 - 54)        |
| Poisonings                                      | 486<br>(236 - 875)         | 13<br>(5 - 28)       | 11<br>(5 - 21)     | 322<br>(144 - 622)       | 111<br>(49 - 204)        | 28<br>(13 - 50)        |
| Exposure to mechanical forces                   | 1,007<br>(555 - 1,847)     | 22<br>(11 - 43)      | 38<br>(22 - 65)    | 718<br>(367 - 1,387)     | 175<br>(88 - 330)        | 53<br>(31 - 88)        |
| Unintentional firearm injuries                  | 468<br>(223 - 954)         | 5<br>(2 - 12)        | 8<br>(3 - 20)      | 342<br>(151 - 713)       | 81<br>(33 - 165)         | 32<br>(14 - 62)        |
| Unintentional suffocation                       | 37<br>(2 - 72)             | 6<br>(0 - 20)        | 2<br>(0 - 5)       | 19<br>(1 - 40)           | 7<br>(0 - 16)            | 3<br>(0 - 6)           |
| Other exposure to mechanical forces             | 502<br>(266 - 904)         | 11<br>(5 - 25)       | 27<br>(13 - 49)    | 358<br>(178 - 671)       | 88<br>(41 - 177)         | 18<br>(10 - 31)        |
| Adverse effects of medical treatment            | 557<br>(266 - 917)         | 34<br>(14 - 80)      | 13<br>(6 - 21)     | 204<br>(79 - 367)        | 176<br>(69 - 331)        | 130<br>(55 - 236)      |
| Animal contact                                  | 108<br>(54 - 183)          | 8<br>(3 - 16)        | 11<br>(5 - 21)     | 53<br>(23 - 95)          | 27<br>(13 - 51)          | 10<br>(5 - 17)         |
| Venomous animal contact                         | 63<br>(32 - 115)           | 5<br>(2 - 11)        | 8<br>(3 - 16)      | 31<br>(13 - 62)          | 15<br>(6 - 30)           | 5<br>(2 - 9)           |
| Non-venomous animal contact                     | 45<br>(17 - 82)            | 2<br>(1 - 6)         | 3<br>(1 - 8)       | 22<br>(7 - 43)           | 12<br>(4 - 25)           | 5<br>(2 - 10)          |
| Foreign body                                    | 289<br>(98 - 594)          | 89<br>(29 - 203)     | 13<br>(4 - 29)     | 82<br>(26 - 172)         | 61<br>(19 - 138)         | 43<br>(13 - 88)        |
| Pulmonary aspiration and foreign body in airway | 279<br>(88 - 579)          | 88<br>(29 - 202)     | 12<br>(3 - 28)     | 78<br>(23 - 165)         | 58<br>(16 - 134)         | 43<br>(12 - 88)        |
| Foreign body in other body part                 | 10<br>(4 - 18)             | 1<br>(0 - 2)         | 1<br>(0 - 2)       | 4<br>(2 - 8)             | 3<br>(1 - 7)             | 1<br>(0 - 1)           |
| Other unintentional injuries                    | 362<br>(198 - 609)         | 10<br>(5 - 17)       | 14<br>(8 - 24)     | 257<br>(129 - 433)       | 64<br>(30 - 119)         | 17<br>(10 - 28)        |
| Self-harm and interpersonal violence            | 3,593<br>(2,098 - 5,882)   | 8<br>(4 - 18)        | 29<br>(14 - 60)    | 2,832<br>(1,582 - 4,754) | 587<br>(316 - 1,077)     | 137<br>(76 - 233)      |
| Self-harm                                       | 2,225<br>(1,254 - 3,878)   | --                   | 13<br>(4 - 42)     | 1,598<br>(846 - 2,836)   | 486<br>(254 - 883)       | 127<br>(69 - 224)      |
| Interpersonal violence                          | 1,368<br>(679 - 2,364)     | 8<br>(4 - 18)        | 15<br>(7 - 28)     | 1,234<br>(600 - 2,130)   | 101<br>(46 - 189)        | 10<br>(5 - 19)         |
| Assault by firearm                              | 505<br>(183 - 915)         | 1<br>(0 - 3)         | 3<br>(1 - 7)       | 461<br>(165 - 845)       | 37<br>(11 - 78)          | 2<br>(1 - 5)           |
| Assault by sharp object                         | 477<br>(183 - 960)         | 1<br>(0 - 3)         | 2<br>(1 - 5)       | 443<br>(168 - 905)       | 29<br>(9 - 62)           | 2<br>(1 - 6)           |
| Assault by other means                          | 386<br>(150 - 704)         | 6<br>(3 - 12)        | 10<br>(5 - 19)     | 330<br>(123 - 619)       | 35<br>(13 - 68)          | 6<br>(2 - 11)          |
| Forces of nature, war, and legal intervention   | 1<br>(0 - 0)               | 1<br>(0 - 0)         | --                 | --                       | --                       | --                     |
| Exposure to forces of nature                    | 1<br>(0 - 0)               | 1<br>(0 - 0)         | --                 | --                       | --                       | --                     |

Web Table 31- Myanmar deaths with 95% UI by age, sex, and cause in 2013

| Cause                                                             | Females, All Ages              | Females, 0-4 Years          | Females, 5-14 Years      | Females, 15-49 Years        | Females, 50-69 Years         | Females, 70-80 Years         |
|-------------------------------------------------------------------|--------------------------------|-----------------------------|--------------------------|-----------------------------|------------------------------|------------------------------|
| All causes                                                        | 196,826<br>(130,235 - 286,881) | 15,229<br>(12,630 - 18,524) | 2,307<br>(1,783 - 3,023) | 34,547<br>(19,946 - 61,703) | 63,723<br>(35,970 - 101,089) | 81,021<br>(58,017 - 106,299) |
| Communicable, maternal, neonatal, and nutritional diseases        | 41,804<br>(30,620 - 59,803)    | 12,452<br>(10,392 - 15,213) | 1,249<br>(881 - 1,683)   | 11,656<br>(6,711 - 21,398)  | 7,741<br>(4,348 - 12,472)    | 8,705<br>(5,918 - 12,185)    |
| HIV/AIDS and tuberculosis                                         | 7,443<br>(4,043 - 12,644)      | 23<br>(2 - 139)             | 58<br>(10 - 429)         | 2,956<br>(1,473 - 6,219)    | 2,409<br>(1,268 - 4,149)     | 1,998<br>(1,196 - 2,991)     |
| Tuberculosis                                                      | 6,523<br>(3,695 - 10,706)      | 2<br>(1 - 6)                | 16<br>(7 - 28)           | 2,252<br>(1,131 - 4,233)    | 2,267<br>(1,192 - 3,605)     | 1,986<br>(1,185 - 2,980)     |
| HIV/AIDS                                                          | 920<br>(103 - 5,732)           | 20<br>(1 - 136)             | 42<br>(0 - 415)          | 704<br>(85 - 4,460)         | 142<br>(13 - 809)            | 12<br>(0 - 70)               |
| HIV/AIDS resulting in mycobacterial infection                     | 46<br>(5 - 259)                | 1<br>(0 - 5)                | 2<br>(0 - 17)            | 35<br>(4 - 203)             | 7<br>(1 - 42)                | 1<br>(0 - 4)                 |
| HIV/AIDS resulting in other diseases                              | 874<br>(98 - 5,486)            | 20<br>(1 - 131)             | 40<br>(0 - 399)          | 668<br>(81 - 4,234)         | 134<br>(13 - 769)            | 11<br>(0 - 66)               |
| Diarrhea, lower respiratory, and other common infectious diseases | 17,121<br>(12,507 - 23,335)    | 5,487<br>(4,164 - 7,161)    | 669<br>(427 - 943)       | 2,453<br>(1,320 - 4,397)    | 3,330<br>(1,817 - 5,585)     | 5,182<br>(3,204 - 7,614)     |
| Diarrheal diseases                                                | 3,931<br>(2,371 - 6,067)       | 274<br>(98 - 642)           | 70<br>(29 - 135)         | 412<br>(206 - 753)          | 979<br>(464 - 1,828)         | 2,196<br>(1,162 - 3,741)     |
| Intestinal infectious diseases                                    | 1,020<br>(482 - 1,890)         | 268<br>(117 - 519)          | 239<br>(96 - 458)        | 395<br>(151 - 894)          | 91<br>(29 - 237)             | 28<br>(11 - 56)              |
| Typhoid fever                                                     | 740<br>(327 - 1,407)           | 184<br>(72 - 375)           | 179<br>(71 - 351)        | 293<br>(105 - 694)          | 67<br>(18 - 190)             | 17<br>(6 - 39)               |
| Paratyphoid fever                                                 | 209<br>(87 - 403)              | 65<br>(24 - 135)            | 55<br>(19 - 113)         | 73<br>(25 - 168)            | 13<br>(3 - 40)               | 3<br>(1 - 9)                 |
| Other intestinal infectious diseases                              | 71<br>(41 - 117)               | 19<br>(9 - 35)              | 5<br>(1 - 15)            | 29<br>(11 - 61)             | 11<br>(3 - 26)               | 7<br>(1 - 18)                |
| Lower respiratory infections                                      | 9,969<br>(7,262 - 13,848)      | 3,920<br>(2,740 - 5,424)    | 155<br>(78 - 272)        | 1,136<br>(574 - 2,129)      | 1,978<br>(998 - 3,408)       | 2,781<br>(1,635 - 4,344)     |
| Upper respiratory infections                                      | 41<br>(13 - 92)                | 2<br>(0 - 9)                | 1<br>(0 - 3)             | 11<br>(2 - 32)              | 14<br>(1 - 46)               | 13<br>(1 - 45)               |
| Otitis media                                                      | 35<br>(21 - 55)                | 2<br>(1 - 3)                | 2<br>(1 - 2)             | 10<br>(5 - 18)              | 12<br>(6 - 20)               | 10<br>(6 - 15)               |
| Meningitis                                                        | 833<br>(543 - 1,263)           | 314<br>(179 - 524)          | 58<br>(28 - 101)         | 248<br>(118 - 489)          | 144<br>(67 - 264)            | 68<br>(35 - 121)             |
| Pneumococcal meningitis                                           | 262<br>(162 - 405)             | 79<br>(38 - 143)            | 21<br>(9 - 40)           | 87<br>(38 - 174)            | 50<br>(21 - 96)              | 24<br>(11 - 45)              |
| H influenzae type B meningitis                                    | 184<br>(115 - 284)             | 113<br>(59 - 199)           | 14<br>(6 - 27)           | 32<br>(14 - 64)             | 16<br>(6 - 34)               | 8<br>(4 - 16)                |
| Meningococcal meningitis                                          | 95<br>(51 - 167)               | 21<br>(9 - 41)              | 5<br>(2 - 12)            | 35<br>(13 - 78)             | 23<br>(7 - 50)               | 11<br>(2 - 24)               |
| Other meningitis                                                  | 292<br>(179 - 463)             | 101<br>(47 - 185)           | 18<br>(8 - 33)           | 95<br>(42 - 189)            | 54<br>(25 - 102)             | 25<br>(10 - 44)              |
| Encephalitis                                                      | 413<br>(226 - 707)             | 67<br>(30 - 128)            | 38<br>(17 - 67)          | 166<br>(74 - 336)           | 85<br>(39 - 160)             | 56<br>(27 - 100)             |
| Diphtheria                                                        | 7<br>(0 - 28)                  | 3<br>(0 - 22)               | 1<br>(0 - 10)            | 2<br>(0 - 8)                | 1<br>(0 - 6)                 | --                           |
| Whooping cough                                                    | 211<br>(0 - 989)               | 189<br>(0 - 879)            | 15<br>(0 - 77)           | 6<br>(0 - 31)               | 1<br>(0 - 5)                 | --                           |
| Tetanus                                                           | 75<br>(39 - 146)               | 10<br>(4 - 19)              | 4<br>(2 - 7)             | 27<br>(12 - 59)             | 20<br>(8 - 44)               | 15<br>(6 - 31)               |
| Measles                                                           | 547<br>(190 - 1,199)           | 433<br>(151 - 957)          | 85<br>(27 - 193)         | 29<br>(8 - 75)              | 1<br>(0 - 2)                 | --                           |
| Varicella and herpes zoster                                       | 39<br>(11 - 99)                | 5<br>(0 - 23)               | 2<br>(0 - 7)             | 12<br>(1 - 33)              | 5<br>(0 - 17)                | 16<br>(0 - 69)               |
| Neglected tropical diseases and malaria                           | 4,832<br>(2,927 - 7,832)       | 547<br>(283 - 969)          | 435<br>(251 - 670)       | 2,217<br>(1,193 - 4,157)    | 1,260<br>(629 - 2,128)       | 373<br>(220 - 548)           |
| Malaria                                                           | 4,322<br>(2,610 - 7,099)       | 496<br>(243 - 909)          | 386<br>(208 - 613)       | 2,081<br>(1,111 - 3,932)    | 1,100<br>(532 - 1,888)       | 258<br>(142 - 413)           |
| Leishmaniasis                                                     | 1<br>(0 - 1)                   | 0<br>(0 - 1)                | 0<br>(0 - 0)             | 0<br>(0 - 0)                | 0<br>(0 - 0)                 | 0<br>(0 - 0)                 |
| Visceral leishmaniasis                                            | 1<br>(0 - 1)                   | 0<br>(0 - 1)                | 0<br>(0 - 0)             | 0<br>(0 - 0)                | 0<br>(0 - 0)                 | 0<br>(0 - 0)                 |
| Cysticercosis                                                     | 2<br>(1 - 3)                   | 0<br>(0 - 0)                | 0<br>(0 - 0)             | 1<br>(1 - 2)                | 1<br>(0 - 1)                 | 0<br>(0 - 0)                 |
| Cystic echinococcosis                                             | 10<br>(6 - 15)                 | 0<br>(0 - 0)                | 1<br>(0 - 1)             | 4<br>(2 - 8)                | 3<br>(2 - 5)                 | 1<br>(1 - 2)                 |
| Dengue                                                            | 98<br>(41 - 158)               | 25<br>(8 - 44)              | 30<br>(9 - 52)           | 28<br>(11 - 57)             | 9<br>(4 - 17)                | 6<br>(3 - 10)                |
| Rabies                                                            | 294<br>(148 - 480)             | 0<br>(0 - 1)                | 8<br>(3 - 21)            | 71<br>(32 - 133)            | 127<br>(61 - 226)            | 88<br>(42 - 155)             |
| Intestinal nematode infections                                    | 32<br>(14 - 60)                | 12<br>(3 - 29)              | 5<br>(0 - 16)            | 6<br>(0 - 22)               | 5<br>(0 - 17)                | 4<br>(0 - 18)                |
| Ascariasis                                                        | 32<br>(14 - 60)                | 12<br>(3 - 29)              | 5<br>(0 - 16)            | 6<br>(0 - 22)               | 5<br>(0 - 17)                | 4<br>(0 - 18)                |
| Other neglected tropical diseases                                 | 74<br>(36 - 126)               | 12<br>(4 - 25)              | 6<br>(2 - 11)            | 25<br>(10 - 48)             | 16<br>(6 - 32)               | 15<br>(7 - 29)               |
| Maternal disorders                                                | 3,531<br>(1,773 - 6,609)       | --                          | 6<br>(2 - 15)            | 3,525<br>(1,768 - 6,595)    | --                           | --                           |
| Maternal hemorrhage                                               | 507<br>(235 - 991)             | --                          | 1<br>(0 - 2)             | 506<br>(234 - 990)          | --                           | --                           |



Web Table 31- Myanmar deaths with 95% UI by age, sex, and cause in 2013

| Cause                                                            | Females, All Ages             | Females, 0-4 Years       | Females, 5-14 Years | Females, 15-49 Years        | Females, 50-69 Years        | Females, 70-80 Years        |
|------------------------------------------------------------------|-------------------------------|--------------------------|---------------------|-----------------------------|-----------------------------|-----------------------------|
| Maternal sepsis and other maternal infections                    | 342<br>(141 - 694)            | --                       | 1<br>(0 - 2)        | 341<br>(140 - 693)          | --                          | --                          |
| Maternal hypertensive disorders                                  | 368<br>(145 - 762)            | --                       | 0<br>(0 - 1)        | 367<br>(145 - 760)          | --                          | --                          |
| Maternal obstructed labor                                        | 276<br>(123 - 553)            | --                       | 0<br>(0 - 1)        | 275<br>(123 - 552)          | --                          | --                          |
| Maternal abortive outcome                                        | 567<br>(255 - 1,121)          | --                       | 1<br>(0 - 3)        | 566<br>(254 - 1,120)        | --                          | --                          |
| Indirect maternal deaths                                         | 401<br>(181 - 824)            | --                       | 1<br>(0 - 2)        | 400<br>(181 - 823)          | --                          | --                          |
| Late maternal deaths                                             | 442<br>(182 - 865)            | --                       | 1<br>(0 - 3)        | 441<br>(181 - 863)          | --                          | --                          |
| Maternal deaths aggravated by HIV/AIDS                           | 2<br>(1 - 4)                  | --                       | --                  | 2<br>(1 - 4)                | --                          | --                          |
| Other maternal disorders                                         | 619<br>(284 - 1,205)          | --                       | 1<br>(0 - 3)        | 618<br>(283 - 1,204)        | --                          | --                          |
| Neonatal disorders                                               | 5,867<br>(4,753 - 7,126)      | 5,867<br>(4,753 - 7,126) | --                  | --                          | --                          | --                          |
| Neonatal preterm birth complications                             | 2,337<br>(1,322 - 3,585)      | 2,337<br>(1,322 - 3,585) | --                  | --                          | --                          | --                          |
| Neonatal encephalopathy due to birth asphyxia and trauma         | 2,233<br>(1,204 - 3,466)      | 2,233<br>(1,204 - 3,466) | --                  | --                          | --                          | --                          |
| Neonatal sepsis and other neonatal infections                    | 766<br>(213 - 1,780)          | 766<br>(213 - 1,780)     | --                  | --                          | --                          | --                          |
| Hemolytic disease and other neonatal jaundice                    | 13<br>(4 - 40)                | 13<br>(4 - 40)           | --                  | --                          | --                          | --                          |
| Other neonatal disorders                                         | 519<br>(204 - 1,226)          | 519<br>(204 - 1,226)     | --                  | --                          | --                          | --                          |
| Nutritional deficiencies                                         | 804<br>(498 - 1,253)          | 37<br>(18 - 74)          | 7<br>(3 - 28)       | 36<br>(18 - 81)             | 102<br>(50 - 185)           | 622<br>(376 - 988)          |
| Protein-energy malnutrition                                      | 466<br>(203 - 779)            | 21<br>(6 - 46)           | 3<br>(1 - 10)       | 18<br>(7 - 39)              | 55<br>(19 - 103)            | 369<br>(154 - 621)          |
| Iodine deficiency                                                | 7<br>(0 - 37)                 | 0<br>(0 - 4)             | 0<br>(0 - 1)        | 0<br>(0 - 2)                | 1<br>(0 - 7)                | 5<br>(0 - 32)               |
| Iron-deficiency anemia                                           | 246<br>(110 - 522)            | 10<br>(2 - 34)           | 2<br>(0 - 14)       | 13<br>(5 - 36)              | 38<br>(14 - 88)             | 183<br>(77 - 383)           |
| Other nutritional deficiencies                                   | 84<br>(37 - 181)              | 5<br>(1 - 14)            | 1<br>(0 - 3)        | 5<br>(2 - 11)               | 9<br>(3 - 21)               | 65<br>(26 - 145)            |
| Other communicable, maternal, neonatal, and nutritional diseases | 2,205<br>(1,343 - 3,441)      | 491<br>(275 - 816)       | 75<br>(40 - 125)    | 469<br>(234 - 889)          | 639<br>(285 - 1,327)        | 531<br>(224 - 1,166)        |
| Sexually transmitted diseases excluding HIV                      | 635<br>(360 - 998)            | 411<br>(206 - 707)       | 49<br>(23 - 88)     | 79<br>(31 - 170)            | 52<br>(13 - 151)            | 44<br>(13 - 112)            |
| Syphilis                                                         | 553<br>(303 - 890)            | 411<br>(206 - 707)       | 48<br>(23 - 87)     | 32<br>(13 - 70)             | 28<br>(7 - 80)              | 33<br>(10 - 85)             |
| Chlamydial infection                                             | 26<br>(11 - 53)               | --                       | 0<br>(0 - 1)        | 15<br>(6 - 33)              | 7<br>(2 - 22)               | 3<br>(1 - 7)                |
| Gonococcal infection                                             | 31<br>(13 - 63)               | --                       | 0<br>(0 - 1)        | 16<br>(6 - 35)              | 9<br>(2 - 27)               | 5<br>(2 - 13)               |
| Other sexually transmitted diseases                              | 25<br>(11 - 51)               | --                       | 0<br>(0 - 1)        | 15<br>(6 - 32)              | 7<br>(2 - 21)               | 3<br>(1 - 6)                |
| Hepatitis                                                        | 295<br>(174 - 472)            | 9<br>(5 - 17)            | 4<br>(2 - 6)        | 85<br>(44 - 152)            | 133<br>(71 - 236)           | 64<br>(38 - 96)             |
| Acute hepatitis A                                                | 18<br>(6 - 35)                | 6<br>(2 - 11)            | 2<br>(1 - 4)        | 6<br>(1 - 15)               | 4<br>(1 - 10)               | 1<br>(0 - 2)                |
| Acute hepatitis B                                                | 166<br>(91 - 271)             | 3<br>(1 - 8)             | 1<br>(0 - 2)        | 27<br>(11 - 59)             | 84<br>(41 - 153)            | 50<br>(28 - 78)             |
| Acute hepatitis C                                                | 6<br>(1 - 17)                 | --                       | 0<br>(0 - 0)        | 2<br>(0 - 6)                | 3<br>(0 - 9)                | 1<br>(0 - 5)                |
| Acute hepatitis E                                                | 105<br>(49 - 196)             | 0<br>(0 - 0)             | 1<br>(0 - 2)        | 50<br>(24 - 97)             | 42<br>(14 - 90)             | 12<br>(3 - 28)              |
| Other infectious diseases                                        | 1,275<br>(632 - 2,376)        | 71<br>(19 - 166)         | 21<br>(8 - 53)      | 306<br>(136 - 636)          | 454<br>(158 - 1,094)        | 423<br>(125 - 1,058)        |
| Non-communicable diseases                                        | 146,949<br>(94,106 - 216,122) | 2,260<br>(1,605 - 3,193) | 669<br>(447 - 946)  | 20,113<br>(11,016 - 36,305) | 53,852<br>(30,395 - 85,640) | 70,055<br>(50,151 - 92,179) |
| Neoplasms                                                        | 37,949<br>(21,377 - 60,830)   | 104<br>(59 - 180)        | 220<br>(118 - 320)  | 8,758<br>(4,536 - 15,842)   | 18,278<br>(9,683 - 30,087)  | 10,590<br>(6,728 - 14,417)  |
| Esophageal cancer                                                | 606<br>(304 - 969)            | --                       | --                  | 64<br>(26 - 129)            | 261<br>(119 - 449)          | 281<br>(137 - 451)          |
| Stomach cancer                                                   | 888<br>(528 - 1,460)          | --                       | --                  | 173<br>(86 - 325)           | 392<br>(208 - 668)          | 323<br>(198 - 503)          |
| Liver cancer                                                     | 1,996<br>(1,030 - 3,381)      | --                       | 4<br>(2 - 8)        | 351<br>(161 - 671)          | 1,000<br>(434 - 1,845)      | 641<br>(335 - 1,039)        |
| Liver cancer due to hepatitis B                                  | 580<br>(210 - 1,164)          | --                       | 1<br>(0 - 3)        | 127<br>(42 - 285)           | 305<br>(95 - 666)           | 147<br>(59 - 275)           |
| Liver cancer due to hepatitis C                                  | 1,000<br>(493 - 1,776)        | --                       | 1<br>(0 - 2)        | 139<br>(52 - 286)           | 495<br>(209 - 981)          | 365<br>(188 - 605)          |
| Liver cancer due to alcohol use                                  | 67<br>(30 - 121)              | --                       | --                  | 7<br>(2 - 15)               | 30<br>(11 - 62)             | 30<br>(14 - 57)             |
| Liver cancer due to other causes                                 | 348<br>(152 - 720)            | --                       | 2<br>(1 - 4)        | 78<br>(31 - 175)            | 169<br>(65 - 369)           | 98<br>(40 - 196)            |

Web Table 31- Myanmar deaths with 95% UI by age, sex, and cause in 2013

| Cause                                         | Females, All Ages           | Females, 0-4 Years | Females, 5-14 Years | Females, 15-49 Years     | Females, 50-69 Years        | Females, 70-80 Years        |
|-----------------------------------------------|-----------------------------|--------------------|---------------------|--------------------------|-----------------------------|-----------------------------|
| Larynx cancer                                 | 142<br>(54 - 289)           | --                 | --                  | 26<br>(9 - 58)           | 72<br>(26 - 146)            | 45<br>(16 - 88)             |
| Tracheal, bronchus and lung cancer            | 6,628<br>(3,139 - 11,105)   | --                 | --                  | 946<br>(384 - 1,833)     | 3,564<br>(1,514 - 6,258)    | 2,118<br>(1,151 - 3,264)    |
| Breast cancer                                 | 4,684<br>(2,403 - 8,836)    | --                 | --                  | 1,690<br>(819 - 3,507)   | 2,231<br>(1,091 - 4,322)    | 763<br>(464 - 1,208)        |
| Cervical cancer                               | 6,005<br>(3,247 - 10,107)   | --                 | --                  | 1,818<br>(906 - 3,558)   | 3,158<br>(1,637 - 5,249)    | 1,030<br>(603 - 1,563)      |
| Uterine cancer                                | 747<br>(332 - 1,326)        | --                 | --                  | 105<br>(41 - 213)        | 442<br>(178 - 857)          | 199<br>(99 - 332)           |
| Prostate cancer                               | --                          | --                 | --                  | --                       | --                          | --                          |
| Colon and rectum cancer                       | 3,185<br>(1,923 - 4,816)    | --                 | --                  | 452<br>(243 - 823)       | 1,361<br>(749 - 2,152)      | 1,371<br>(862 - 2,016)      |
| Lip and oral cavity cancer                    | 874<br>(345 - 1,742)        | --                 | --                  | 120<br>(48 - 255)        | 396<br>(153 - 816)          | 359<br>(140 - 703)          |
| Nasopharynx cancer                            | 434<br>(197 - 767)          | --                 | 2<br>(1 - 6)        | 132<br>(57 - 257)        | 217<br>(86 - 418)           | 83<br>(37 - 141)            |
| Other pharynx cancer                          | 295<br>(132 - 521)          | --                 | --                  | 46<br>(16 - 98)          | 166<br>(70 - 311)           | 83<br>(40 - 140)            |
| Gallbladder and biliary tract cancer          | 927<br>(410 - 1,606)        | --                 | --                  | 109<br>(36 - 232)        | 446<br>(177 - 828)          | 372<br>(184 - 651)          |
| Pancreatic cancer                             | 1,001<br>(595 - 1,567)      | --                 | --                  | 116<br>(57 - 217)        | 504<br>(263 - 842)          | 381<br>(240 - 556)          |
| Malignant skin melanoma                       | 179<br>(96 - 325)           | --                 | --                  | 53<br>(25 - 104)         | 80<br>(38 - 157)            | 46<br>(26 - 75)             |
| Non-melanoma skin cancer                      | 198<br>(90 - 390)           | --                 | --                  | 30<br>(11 - 67)          | 59<br>(23 - 125)            | 109<br>(48 - 220)           |
| Ovarian cancer                                | 2,246<br>(1,072 - 3,907)    | --                 | --                  | 577<br>(261 - 1,129)     | 1,310<br>(595 - 2,357)      | 359<br>(198 - 578)          |
| Testicular cancer                             | --                          | --                 | --                  | --                       | --                          | --                          |
| Kidney cancer                                 | 432<br>(206 - 748)          | 6<br>(2 - 12)      | 3<br>(1 - 5)        | 66<br>(27 - 132)         | 220<br>(92 - 399)           | 137<br>(70 - 229)           |
| Bladder cancer                                | 400<br>(205 - 651)          | --                 | --                  | 41<br>(17 - 80)          | 161<br>(77 - 278)           | 199<br>(102 - 325)          |
| Brain and nervous system cancer               | 623<br>(316 - 1,019)        | 7<br>(3 - 15)      | 22<br>(9 - 36)      | 237<br>(111 - 443)       | 241<br>(116 - 406)          | 117<br>(62 - 184)           |
| Thyroid cancer                                | 341<br>(178 - 610)          | --                 | 1<br>(0 - 2)        | 43<br>(19 - 89)          | 137<br>(65 - 270)           | 161<br>(83 - 269)           |
| Mesothelioma                                  | 71<br>(35 - 128)            | --                 | --                  | 16<br>(7 - 30)           | 43<br>(18 - 85)             | 13<br>(6 - 23)              |
| Hodgkin lymphoma                              | 146<br>(59 - 309)           | 3<br>(1 - 7)       | 6<br>(2 - 14)       | 63<br>(23 - 143)         | 51<br>(17 - 110)            | 24<br>(10 - 48)             |
| Non-Hodgkin lymphoma                          | 972<br>(468 - 1,868)        | 10<br>(4 - 24)     | 23<br>(10 - 43)     | 256<br>(113 - 548)       | 407<br>(168 - 834)          | 276<br>(141 - 494)          |
| Multiple myeloma                              | 125<br>(65 - 208)           | --                 | --                  | 24<br>(11 - 46)          | 61<br>(30 - 108)            | 39<br>(22 - 62)             |
| Leukemia                                      | 1,481<br>(857 - 2,389)      | 41<br>(17 - 81)    | 109<br>(58 - 169)   | 584<br>(313 - 1,070)     | 439<br>(219 - 747)          | 309<br>(182 - 464)          |
| Other neoplasms                               | 2,323<br>(1,086 - 4,225)    | 37<br>(16 - 80)    | 51<br>(23 - 95)     | 623<br>(264 - 1,253)     | 859<br>(361 - 1,701)        | 753<br>(386 - 1,277)        |
| Cardiovascular diseases                       | 56,106<br>(36,222 - 83,042) | 15<br>(8 - 25)     | 85<br>(29 - 267)    | 4,265<br>(2,261 - 8,163) | 18,407<br>(10,421 - 30,535) | 33,334<br>(23,321 - 45,179) |
| Rheumatic heart disease                       | 1,149<br>(497 - 2,221)      | 0                  | 18<br>(6 - 50)      | 388<br>(149 - 821)       | 344<br>(146 - 708)          | 399<br>(167 - 770)          |
| Ischemic heart disease                        | 13,592<br>(8,227 - 24,694)  | 1                  | 8<br>(1 - 42)       | 862<br>(389 - 1,948)     | 5,051<br>(2,622 - 9,992)    | 7,670<br>(4,868 - 13,159)   |
| Cerebrovascular disease                       | 28,586<br>(17,956 - 41,502) | 1                  | 14<br>(4 - 58)      | 1,435<br>(701 - 2,752)   | 8,439<br>(4,577 - 13,647)   | 18,697<br>(12,835 - 25,138) |
| Ischemic stroke                               | 14,601<br>(4,687 - 22,482)  | 0                  | 1<br>(0 - 6)        | 183<br>(40 - 428)        | 2,597<br>(692 - 4,950)      | 11,819<br>(3,913 - 17,438)  |
| Hemorrhagic stroke                            | 13,985<br>(7,070 - 25,704)  | 1<br>(1 - 3)       | 13<br>(3 - 54)      | 1,251<br>(594 - 2,373)   | 5,842<br>(2,823 - 9,938)    | 6,879<br>(3,271 - 14,271)   |
| Hypertensive heart disease                    | 5,018<br>(2,561 - 8,366)    | 0                  | 2<br>(0 - 6)        | 363<br>(151 - 762)       | 1,523<br>(679 - 2,724)      | 3,130<br>(1,637 - 5,207)    |
| Cardiomyopathy and myocarditis                | 1,458<br>(734 - 3,010)      | 5<br>(2 - 10)      | 18<br>(5 - 63)      | 335<br>(143 - 710)       | 453<br>(187 - 1,000)        | 647<br>(318 - 1,266)        |
| Atrial fibrillation and flutter               | 34<br>(18 - 57)             | --                 | --                  | 5<br>(2 - 9)             | 11<br>(5 - 21)              | 18<br>(9 - 31)              |
| Aortic aneurysm                               | 358<br>(138 - 772)          | --                 | --                  | 39<br>(11 - 98)          | 104<br>(33 - 244)           | 214<br>(88 - 443)           |
| Peripheral vascular disease                   | 24<br>(12 - 47)             | --                 | --                  | 2<br>(1 - 4)             | 6<br>(2 - 13)               | 17<br>(8 - 33)              |
| Endocarditis                                  | 427<br>(223 - 795)          | 2<br>(1 - 4)       | 6<br>(1 - 22)       | 106<br>(45 - 234)        | 146<br>(68 - 278)           | 167<br>(86 - 302)           |
| Other cardiovascular and circulatory diseases | 5,460<br>(2,421 - 11,173)   | 5<br>(2 - 12)      | 20<br>(5 - 77)      | 731<br>(262 - 1,573)     | 2,329<br>(908 - 4,743)      | 2,375<br>(1,126 - 4,624)    |
| Chronic respiratory diseases                  | 11,623<br>(7,512 - 16,750)  | 238<br>(144 - 378) | 26<br>(13 - 79)     | 568<br>(284 - 1,061)     | 3,508<br>(1,904 - 5,732)    | 7,284<br>(5,035 - 10,204)   |

Web Table 31- Myanmar deaths with 95% UI by age, sex, and cause in 2013

| Cause                                               | Females, All Ages         | Females, 0-4 Years | Females, 5-14 Years | Females, 15-49 Years   | Females, 50-69 Years     | Females, 70-80 Years     |
|-----------------------------------------------------|---------------------------|--------------------|---------------------|------------------------|--------------------------|--------------------------|
| Chronic obstructive pulmonary disease               | 6,418<br>(3,172 - 10,128) | 92<br>(40 - 181)   | 3<br>(1 - 9)        | 166<br>(54 - 359)      | 1,841<br>(752 - 3,229)   | 4,315<br>(2,207 - 6,581) |
| Pneumoconiosis                                      | 14<br>(7 - 25)            | 1<br>(0 - 3)       | 0<br>(0 - 1)        | 3<br>(1 - 7)           | 4<br>(2 - 9)             | 5<br>(2 - 10)            |
| Silicosis                                           | 1<br>(0 - 2)              | 0<br>(0 - 1)       | 0<br>(0 - 0)        | 0<br>(0 - 0)           | 0<br>(0 - 0)             | 0<br>(0 - 0)             |
| Asbestosis                                          | 1<br>(0 - 1)              | 0<br>(0 - 0)       | 0<br>(0 - 0)        | 0<br>(0 - 0)           | 0<br>(0 - 0)             | 0<br>(0 - 0)             |
| Coal workers pneumoconiosis                         | 1<br>(0 - 1)              | 0<br>(0 - 1)       | 0<br>(0 - 0)        | 0<br>(0 - 0)           | 0<br>(0 - 0)             | 0<br>(0 - 0)             |
| Other pneumoconiosis                                | 12<br>(5 - 22)            | 0<br>(0 - 1)       | 0<br>(0 - 0)        | 3<br>(1 - 6)           | 4<br>(2 - 8)             | 5<br>(2 - 9)             |
| Asthma                                              | 4,199<br>(1,969 - 8,417)  | 102<br>(47 - 187)  | 20<br>(9 - 67)      | 360<br>(160 - 741)     | 1,475<br>(593 - 3,069)   | 2,243<br>(973 - 4,752)   |
| Interstitial lung disease and pulmonary sarcoidosis | 477<br>(32 - 1,238)       | 0<br>(0 - 1)       | 0<br>(0 - 0)        | 6<br>(1 - 19)          | 117<br>(8 - 336)         | 353<br>(21 - 905)        |
| Other chronic respiratory diseases                  | 515<br>(248 - 967)        | 43<br>(25 - 76)    | 1<br>(0 - 4)        | 32<br>(12 - 70)        | 71<br>(26 - 138)         | 368<br>(159 - 743)       |
| Cirrhosis                                           | 6,234<br>(3,623 - 9,958)  | 2<br>(1 - 5)       | 13<br>(7 - 22)      | 1,620<br>(807 - 2,981) | 3,043<br>(1,630 - 5,131) | 1,555<br>(961 - 2,276)   |
| Cirrhosis due to hepatitis B                        | 2,563<br>(1,112 - 4,794)  | 0<br>(0 - 0)       | 2<br>(0 - 6)        | 607<br>(217 - 1,302)   | 1,268<br>(497 - 2,502)   | 685<br>(298 - 1,247)     |
| Cirrhosis due to hepatitis C                        | 2,148<br>(798 - 3,916)    | 0<br>(0 - 0)       | 2<br>(1 - 5)        | 567<br>(145 - 1,264)   | 1,064<br>(340 - 2,101)   | 515<br>(206 - 962)       |
| Cirrhosis due to alcohol use                        | 824<br>(323 - 1,610)      | --                 | --                  | 163<br>(48 - 353)      | 404<br>(145 - 843)       | 258<br>(98 - 494)        |
| Cirrhosis due to other causes                       | 699<br>(314 - 1,395)      | 2<br>(1 - 5)       | 9<br>(5 - 15)       | 284<br>(121 - 565)     | 307<br>(127 - 631)       | 97<br>(40 - 206)         |
| Digestive diseases                                  | 7,053<br>(4,544 - 10,558) | 51<br>(27 - 89)    | 43<br>(26 - 67)     | 1,226<br>(655 - 2,204) | 2,329<br>(1,220 - 3,797) | 3,405<br>(2,317 - 4,739) |
| Peptic ulcer disease                                | 2,373<br>(1,268 - 4,051)  | 4<br>(1 - 8)       | 5<br>(2 - 10)       | 275<br>(122 - 561)     | 823<br>(381 - 1,535)     | 1,266<br>(712 - 2,028)   |
| Gastritis and duodenitis                            | 278<br>(118 - 662)        | 3<br>(1 - 8)       | 3<br>(1 - 7)        | 51<br>(19 - 131)       | 80<br>(28 - 201)         | 141<br>(58 - 331)        |
| Appendicitis                                        | 603<br>(309 - 1,111)      | 7<br>(3 - 16)      | 11<br>(5 - 22)      | 172<br>(77 - 355)      | 214<br>(94 - 420)        | 198<br>(96 - 357)        |
| Paralytic ileus and intestinal obstruction          | 818<br>(399 - 1,406)      | 15<br>(5 - 32)     | 5<br>(2 - 10)       | 96<br>(40 - 192)       | 227<br>(94 - 443)        | 475<br>(207 - 833)       |
| Inguinal, femoral, and abdominal hernia             | 103<br>(48 - 195)         | 1<br>(0 - 3)       | 1<br>(1 - 2)        | 15<br>(6 - 31)         | 33<br>(12 - 68)          | 53<br>(24 - 107)         |
| Inflammatory bowel disease                          | 259<br>(131 - 495)        | 4<br>(1 - 9)       | 3<br>(1 - 5)        | 66<br>(29 - 136)       | 80<br>(35 - 154)         | 106<br>(52 - 198)        |
| Vascular intestinal disorders                       | 68<br>(29 - 145)          | 0<br>(0 - 2)       | 0<br>(0 - 2)        | 18<br>(6 - 42)         | 16<br>(6 - 36)           | 33<br>(14 - 67)          |
| Gallbladder and biliary diseases                    | 1,092<br>(576 - 1,798)    | 6<br>(2 - 12)      | 3<br>(2 - 6)        | 184<br>(88 - 360)      | 357<br>(159 - 642)       | 542<br>(265 - 918)       |
| Pancreatitis                                        | 567<br>(254 - 1,057)      | 2<br>(1 - 5)       | 3<br>(1 - 6)        | 179<br>(74 - 368)      | 196<br>(79 - 397)        | 188<br>(86 - 361)        |
| Other digestive diseases                            | 892<br>(476 - 1,477)      | 9<br>(4 - 19)      | 8<br>(4 - 14)       | 170<br>(80 - 332)      | 302<br>(143 - 547)       | 403<br>(206 - 668)       |
| Neurological disorders                              | 7,709<br>(5,213 - 10,568) | 11<br>(7 - 16)     | 24<br>(12 - 47)     | 301<br>(162 - 573)     | 935<br>(489 - 1,553)     | 6,438<br>(4,407 - 8,833) |
| Alzheimer disease and other dementias               | 6,973<br>(4,717 - 9,540)  | --                 | --                  | 6<br>(1 - 15)          | 700<br>(335 - 1,214)     | 6,267<br>(4,247 - 8,622) |
| Parkinson disease                                   | 90<br>(42 - 149)          | --                 | --                  | 6<br>(3 - 11)          | 28<br>(13 - 50)          | 56<br>(25 - 98)          |
| Epilepsy                                            | 384<br>(208 - 693)        | 1<br>(0 - 2)       | 16<br>(4 - 37)      | 215<br>(108 - 412)     | 120<br>(56 - 222)        | 32<br>(16 - 59)          |
| Multiple sclerosis                                  | 32<br>(9 - 70)            | --                 | --                  | 15<br>(4 - 37)         | 11<br>(3 - 26)           | 5<br>(1 - 11)            |
| Other neurological disorders                        | 231<br>(136 - 358)        | 10<br>(6 - 14)     | 9<br>(5 - 14)       | 59<br>(32 - 108)       | 76<br>(39 - 126)         | 78<br>(49 - 113)         |
| Mental and substance use disorders                  | 752<br>(279 - 1,428)      | 21<br>(2 - 57)     | 0<br>(0 - 0)        | 437<br>(139 - 894)     | 233<br>(94 - 442)        | 61<br>(27 - 111)         |
| Schizophrenia                                       | 54<br>(22 - 119)          | --                 | --                  | 21<br>(8 - 53)         | 20<br>(7 - 47)           | 13<br>(6 - 25)           |
| Alcohol use disorders                               | 276<br>(84 - 621)         | --                 | --                  | 115<br>(34 - 272)      | 136<br>(39 - 292)        | 25<br>(9 - 63)           |
| Drug use disorders                                  | 420<br>(102 - 887)        | 21<br>(2 - 57)     | --                  | 299<br>(66 - 667)      | 77<br>(15 - 162)         | 23<br>(4 - 47)           |
| Opioid use disorders                                | 265<br>(64 - 554)         | 14<br>(1 - 37)     | --                  | 190<br>(41 - 420)      | 46<br>(9 - 99)           | 15<br>(3 - 30)           |
| Cocaine use disorders                               | 9<br>(2 - 20)             | 1<br>(0 - 2)       | --                  | 7<br>(2 - 16)          | 1<br>(0 - 3)             | 0<br>(0 - 1)             |
| Amphetamine use disorders                           | 10<br>(2 - 22)            | 1<br>(0 - 2)       | --                  | 7<br>(1 - 16)          | 2<br>(0 - 4)             | 0<br>(0 - 1)             |
| Other drug use disorders                            | 136<br>(32 - 291)         | 6<br>(1 - 16)      | --                  | 95<br>(20 - 214)       | 27<br>(5 - 60)           | 8<br>(1 - 16)            |
| Eating disorders                                    | 2<br>(1 - 4)              | --                 | 0<br>(0 - 0)        | 2<br>(1 - 3)           | --                       | --                       |

Web Table 31- Myanmar deaths with 95% UI by age, sex, and cause in 2013

| Cause                                               | Females, All Ages           | Females, 0-4 Years       | Females, 5-14 Years | Females, 15-49 Years     | Females, 50-69 Years      | Females, 70-80 Years     |
|-----------------------------------------------------|-----------------------------|--------------------------|---------------------|--------------------------|---------------------------|--------------------------|
| Anorexia nervosa                                    | 2<br>(1 - 4)                | --                       | 0<br>(0 - 0)        | 2<br>(1 - 3)             | --                        | --                       |
| Diabetes, urogenital, blood, and endocrine diseases | 15,771<br>(10,039 - 24,487) | 123<br>(69 - 206)        | 90<br>(51 - 147)    | 2,230<br>(1,159 - 4,068) | 6,618<br>(3,810 - 10,930) | 6,711<br>(4,688 - 9,228) |
| Diabetes mellitus                                   | 6,730<br>(4,258 - 10,487)   | 4<br>(2 - 7)             | 7<br>(2 - 14)       | 564<br>(295 - 1,082)     | 3,031<br>(1,686 - 4,886)  | 3,124<br>(2,113 - 4,618) |
| Acute glomerulonephritis                            | 51<br>(24 - 88)             | 2<br>(1 - 4)             | 3<br>(1 - 6)        | 23<br>(10 - 44)          | 12<br>(4 - 21)            | 11<br>(4 - 20)           |
| Chronic kidney disease                              | 5,333<br>(3,225 - 8,512)    | 1<br>(0 - 2)             | 8<br>(4 - 23)       | 663<br>(352 - 1,264)     | 2,338<br>(1,249 - 4,025)  | 2,323<br>(1,493 - 3,365) |
| Chronic kidney disease due to diabetes mellitus     | 500<br>(194 - 932)          | 0<br>(0 - 0)             | 0<br>(0 - 1)        | 51<br>(16 - 107)         | 224<br>(73 - 451)         | 225<br>(86 - 424)        |
| Chronic kidney disease due to hypertension          | 2,131<br>(1,065 - 3,728)    | 0<br>(0 - 1)             | 2<br>(1 - 4)        | 237<br>(99 - 513)        | 959<br>(417 - 1,827)      | 932<br>(447 - 1,633)     |
| Chronic kidney disease due to glomerulonephritis    | 705<br>(367 - 1,279)        | 1<br>(0 - 1)             | 4<br>(2 - 10)       | 177<br>(84 - 344)        | 261<br>(111 - 519)        | 263<br>(132 - 455)       |
| Chronic kidney disease due to other causes          | 1,997<br>(968 - 3,407)      | 0<br>(0 - 0)             | 2<br>(0 - 9)        | 198<br>(85 - 412)        | 895<br>(372 - 1,777)      | 902<br>(396 - 1,615)     |
| Urinary diseases and male infertility               | 1,858<br>(937 - 3,084)      | 11<br>(4 - 22)           | 7<br>(3 - 12)       | 388<br>(154 - 809)       | 680<br>(297 - 1,226)      | 772<br>(401 - 1,283)     |
| Interstitial nephritis and urinary tract infections | 1,074<br>(433 - 1,861)      | 5<br>(2 - 12)            | 2<br>(1 - 5)        | 230<br>(74 - 491)        | 347<br>(124 - 681)        | 490<br>(204 - 848)       |
| Urolithiasis                                        | 133<br>(54 - 253)           | --                       | 1<br>(0 - 2)        | 34<br>(12 - 81)          | 51<br>(16 - 112)          | 47<br>(16 - 100)         |
| Other urinary diseases                              | 651<br>(322 - 1,125)        | 5<br>(2 - 12)            | 3<br>(1 - 6)        | 124<br>(51 - 264)        | 283<br>(124 - 508)        | 235<br>(116 - 447)       |
| Gynecological diseases                              | 55<br>(26 - 117)            | --                       | --                  | 31<br>(14 - 71)          | 14<br>(6 - 31)            | 9<br>(4 - 19)            |
| Uterine fibroids                                    | 12<br>(5 - 26)              | --                       | --                  | 5<br>(2 - 13)            | 4<br>(1 - 8)              | 3<br>(1 - 6)             |
| Polycystic ovarian syndrome                         | 2<br>(1 - 5)                | --                       | --                  | 2<br>(1 - 4)             | 0<br>(0 - 0)              | --                       |
| Endometriosis                                       | 5<br>(2 - 12)               | --                       | --                  | 5<br>(2 - 11)            | 0<br>(0 - 1)              | --                       |
| Genital prolapse                                    | 9<br>(4 - 19)               | --                       | --                  | 4<br>(2 - 9)             | 3<br>(1 - 5)              | 2<br>(1 - 5)             |
| Other gynecological diseases                        | 26<br>(12 - 58)             | --                       | --                  | 15<br>(6 - 34)           | 7<br>(3 - 16)             | 4<br>(2 - 8)             |
| Hemoglobinopathies and hemolytic anemias            | 691<br>(283 - 1,311)        | 73<br>(29 - 139)         | 51<br>(20 - 96)     | 305<br>(108 - 659)       | 148<br>(53 - 293)         | 113<br>(49 - 218)        |
| Thalassemias                                        | 443<br>(176 - 863)          | 68<br>(26 - 130)         | 49<br>(19 - 92)     | 255<br>(93 - 544)        | 62<br>(22 - 121)          | 9<br>(4 - 19)            |
| Sickle cell disorders                               | 0<br>(0 - 0)                | 0<br>(0 - 0)             | 0<br>(0 - 0)        | 0<br>(0 - 0)             | 0<br>(0 - 0)              | 0<br>(0 - 0)             |
| G6PD deficiency                                     | 32<br>(12 - 64)             | 1<br>(1 - 3)             | 1<br>(0 - 2)        | 14<br>(5 - 32)           | 12<br>(4 - 24)            | 4<br>(1 - 7)             |
| Other hemoglobinopathies and hemolytic anemias      | 216<br>(90 - 405)           | 4<br>(2 - 8)             | 1<br>(0 - 3)        | 36<br>(11 - 81)          | 74<br>(26 - 146)          | 101<br>(43 - 192)        |
| Endocrine, metabolic, blood, and immune disorders   | 1,054<br>(532 - 1,770)      | 32<br>(14 - 66)          | 13<br>(6 - 24)      | 256<br>(114 - 506)       | 394<br>(182 - 729)        | 358<br>(176 - 595)       |
| Musculoskeletal disorders                           | 405<br>(181 - 929)          | --                       | 10<br>(4 - 23)      | 160<br>(62 - 383)        | 148<br>(59 - 326)         | 87<br>(39 - 209)         |
| Rheumatoid arthritis                                | 128<br>(53 - 299)           | --                       | 2<br>(1 - 6)        | 25<br>(7 - 65)           | 52<br>(19 - 121)          | 48<br>(20 - 119)         |
| Other musculoskeletal disorders                     | 277<br>(125 - 626)          | --                       | 8<br>(3 - 18)       | 136<br>(53 - 322)        | 96<br>(38 - 211)          | 38<br>(16 - 92)          |
| Other non-communicable diseases                     | 3,346<br>(2,370 - 4,606)    | 1,696<br>(1,096 - 2,549) | 158<br>(86 - 263)   | 549<br>(282 - 1,076)     | 354<br>(166 - 640)        | 589<br>(335 - 915)       |
| Congenital anomalies                                | 2,374<br>(1,583 - 3,450)    | 1,665<br>(1,058 - 2,529) | 150<br>(80 - 255)   | 376<br>(196 - 770)       | 91<br>(43 - 219)          | 91<br>(53 - 156)         |
| Neural tube defects                                 | 314<br>(55 - 846)           | 259<br>(35 - 668)        | 9<br>(2 - 26)       | 37<br>(9 - 112)          | 8<br>(1 - 33)             | 2<br>(1 - 8)             |
| Congenital heart anomalies                          | 1,200<br>(680 - 1,838)      | 847<br>(431 - 1,371)     | 87<br>(40 - 151)    | 183<br>(80 - 393)        | 25<br>(9 - 59)            | 58<br>(28 - 100)         |
| Cleft lip and cleft palate                          | 6<br>(1 - 17)               | 6<br>(1 - 17)            | --                  | --                       | --                        | --                       |
| Down syndrome                                       | 109<br>(43 - 289)           | 53<br>(16 - 154)         | 15<br>(5 - 36)      | 30<br>(10 - 78)          | 11<br>(3 - 29)            | 1<br>(0 - 2)             |
| Chromosomal unbalanced rearrangements               | 88<br>(24 - 275)            | 58<br>(12 - 204)         | 2<br>(1 - 6)        | 23<br>(5 - 66)           | 3<br>(1 - 10)             | 2<br>(0 - 4)             |
| Other congenital anomalies                          | 658<br>(349 - 1,160)        | 442<br>(194 - 838)       | 38<br>(16 - 79)     | 105<br>(45 - 239)        | 45<br>(20 - 103)          | 28<br>(13 - 54)          |
| Skin and subcutaneous diseases                      | 960<br>(484 - 1,626)        | 19<br>(7 - 41)           | 8<br>(4 - 15)       | 172<br>(73 - 346)        | 263<br>(113 - 502)        | 498<br>(261 - 812)       |
| Cellulitis                                          | 308<br>(142 - 542)          | 8<br>(2 - 20)            | 3<br>(1 - 5)        | 66<br>(26 - 136)         | 104<br>(44 - 198)         | 126<br>(53 - 224)        |
| Pyoderma                                            | 380<br>(173 - 676)          | 10<br>(3 - 23)           | 4<br>(1 - 7)        | 76<br>(28 - 163)         | 119<br>(46 - 236)         | 172<br>(78 - 314)        |
| Decubitus ulcer                                     | 252<br>(117 - 453)          | 0<br>(0 - 1)             | 1<br>(0 - 2)        | 22<br>(7 - 53)           | 34<br>(12 - 74)           | 195<br>(88 - 354)        |

Web Table 31- Myanmar deaths with 95% UI by age, sex, and cause in 2013

| Cause                                           | Females, All Ages         | Females, 0-4 Years | Females, 5-14 Years | Females, 15-49 Years     | Females, 50-69 Years     | Females, 70-80 Years     |
|-------------------------------------------------|---------------------------|--------------------|---------------------|--------------------------|--------------------------|--------------------------|
| Other skin and subcutaneous diseases            | 20<br>(7 - 48)            | 0<br>(0 - 1)       | 1<br>(0 - 2)        | 8<br>(2 - 22)            | 6<br>(2 - 16)            | 6<br>(2 - 13)            |
| Sudden infant death syndrome                    | 12<br>(2 - 49)            | 12<br>(2 - 49)     | --                  | --                       | --                       | --                       |
| Injuries                                        | 8,074<br>(4,994 - 12,646) | 516<br>(335 - 780) | 389<br>(246 - 581)  | 2,777<br>(1,538 - 5,182) | 2,130<br>(1,161 - 3,512) | 2,261<br>(1,353 - 3,272) |
| Transport injuries                              | 1,526<br>(835 - 2,691)    | 7<br>(3 - 17)      | 77<br>(32 - 197)    | 862<br>(461 - 1,603)     | 464<br>(230 - 853)       | 117<br>(65 - 213)        |
| Road injuries                                   | 1,403<br>(760 - 2,510)    | 6<br>(3 - 15)      | 72<br>(30 - 187)    | 803<br>(427 - 1,510)     | 420<br>(206 - 783)       | 101<br>(56 - 192)        |
| Pedestrian road injuries                        | 380<br>(193 - 754)        | 3<br>(1 - 7)       | 29<br>(11 - 76)     | 175<br>(84 - 356)        | 133<br>(59 - 272)        | 41<br>(21 - 85)          |
| Cyclist road injuries                           | 109<br>(47 - 266)         | 0<br>(0 - 1)       | 6<br>(2 - 20)       | 59<br>(25 - 135)         | 36<br>(14 - 99)          | 7<br>(3 - 17)            |
| Motorcyclist road injuries                      | 278<br>(119 - 629)        | 1<br>(0 - 2)       | 10<br>(3 - 31)      | 195<br>(79 - 446)        | 61<br>(23 - 143)         | 11<br>(4 - 25)           |
| Motor vehicle road injuries                     | 609<br>(297 - 1,091)      | 2<br>(1 - 5)       | 25<br>(9 - 61)      | 360<br>(171 - 682)       | 183<br>(81 - 326)        | 39<br>(18 - 70)          |
| Other road injuries                             | 25<br>(11 - 52)           | 0<br>(0 - 1)       | 2<br>(1 - 6)        | 14<br>(6 - 30)           | 6<br>(3 - 14)            | 3<br>(1 - 6)             |
| Other transport injuries                        | 124<br>(60 - 226)         | 1<br>(0 - 2)       | 5<br>(2 - 12)       | 58<br>(26 - 119)         | 44<br>(20 - 85)          | 15<br>(7 - 27)           |
| Unintentional injuries                          | 5,647<br>(3,421 - 8,628)  | 501<br>(323 - 760) | 292<br>(175 - 464)  | 1,308<br>(691 - 2,396)   | 1,460<br>(756 - 2,404)   | 2,087<br>(1,206 - 3,062) |
| Falls                                           | 2,271<br>(1,309 - 3,430)  | 90<br>(45 - 173)   | 25<br>(5 - 51)      | 206<br>(111 - 374)       | 569<br>(276 - 981)       | 1,381<br>(762 - 2,189)   |
| Drowning                                        | 562<br>(318 - 1,022)      | 103<br>(45 - 200)  | 142<br>(55 - 290)   | 170<br>(85 - 358)        | 96<br>(45 - 187)         | 51<br>(28 - 93)          |
| Fire, heat, and hot substances                  | 452<br>(245 - 839)        | 157<br>(76 - 309)  | 36<br>(17 - 63)     | 94<br>(35 - 232)         | 161<br>(60 - 368)        | 5<br>(3 - 9)             |
| Poisonings                                      | 608<br>(212 - 1,145)      | 21<br>(7 - 44)     | 22<br>(7 - 45)      | 312<br>(101 - 637)       | 147<br>(48 - 277)        | 106<br>(34 - 192)        |
| Exposure to mechanical forces                   | 375<br>(200 - 615)        | 21<br>(9 - 38)     | 28<br>(10 - 49)     | 151<br>(75 - 284)        | 113<br>(54 - 196)        | 62<br>(31 - 97)          |
| Unintentional firearm injuries                  | 137<br>(73 - 245)         | 4<br>(2 - 8)       | 4<br>(2 - 8)        | 61<br>(27 - 119)         | 48<br>(20 - 93)          | 20<br>(10 - 36)          |
| Unintentional suffocation                       | 23<br>(1 - 49)            | 2<br>(0 - 8)       | 2<br>(0 - 5)        | 10<br>(0 - 22)           | 6<br>(0 - 13)            | 3<br>(0 - 7)             |
| Other exposure to mechanical forces             | 215<br>(76 - 361)         | 15<br>(6 - 30)     | 22<br>(6 - 40)      | 80<br>(29 - 149)         | 60<br>(19 - 109)         | 38<br>(10 - 63)          |
| Adverse effects of medical treatment            | 780<br>(330 - 1,446)      | 34<br>(14 - 75)    | 13<br>(5 - 25)      | 201<br>(76 - 440)        | 224<br>(83 - 441)        | 307<br>(121 - 590)       |
| Animal contact                                  | 111<br>(32 - 205)         | 9<br>(3 - 21)      | 9<br>(2 - 18)       | 35<br>(10 - 78)          | 37<br>(9 - 70)           | 21<br>(6 - 40)           |
| Venomous animal contact                         | 73<br>(23 - 139)          | 7<br>(2 - 17)      | 7<br>(2 - 14)       | 24<br>(7 - 53)           | 23<br>(6 - 48)           | 12<br>(3 - 24)           |
| Non-venomous animal contact                     | 38<br>(6 - 84)            | 2<br>(0 - 6)       | 2<br>(0 - 5)        | 11<br>(2 - 27)           | 14<br>(2 - 33)           | 9<br>(2 - 21)            |
| Foreign body                                    | 288<br>(115 - 595)        | 57<br>(24 - 125)   | 8<br>(3 - 17)       | 58<br>(22 - 123)         | 53<br>(19 - 113)         | 111<br>(39 - 243)        |
| Pulmonary aspiration and foreign body in airway | 276<br>(107 - 577)        | 56<br>(23 - 123)   | 7<br>(2 - 16)       | 54<br>(19 - 117)         | 51<br>(17 - 110)         | 109<br>(36 - 240)        |
| Foreign body in other body part                 | 11<br>(4 - 21)            | 1<br>(0 - 2)       | 1<br>(0 - 1)        | 5<br>(1 - 9)             | 2<br>(1 - 4)             | 3<br>(1 - 5)             |
| Other unintentional injuries                    | 201<br>(78 - 360)         | 10<br>(4 - 18)     | 9<br>(3 - 17)       | 79<br>(29 - 159)         | 59<br>(19 - 114)         | 43<br>(13 - 76)          |
| Self-harm and interpersonal violence            | 899<br>(497 - 1,699)      | 8<br>(3 - 17)      | 20<br>(9 - 39)      | 608<br>(332 - 1,195)     | 206<br>(105 - 401)       | 58<br>(34 - 98)          |
| Self-harm                                       | 560<br>(294 - 1,141)      | --                 | 8<br>(2 - 27)       | 345<br>(176 - 720)       | 160<br>(77 - 334)        | 47<br>(26 - 82)          |
| Interpersonal violence                          | 340<br>(180 - 627)        | 8<br>(3 - 17)      | 12<br>(5 - 23)      | 263<br>(134 - 509)       | 46<br>(22 - 87)          | 11<br>(5 - 21)           |
| Assault by firearm                              | 81<br>(34 - 163)          | 1<br>(0 - 3)       | 2<br>(0 - 4)        | 66<br>(27 - 141)         | 10<br>(4 - 22)           | 1<br>(0 - 2)             |
| Assault by sharp object                         | 96<br>(32 - 207)          | 1<br>(0 - 2)       | 2<br>(0 - 5)        | 79<br>(27 - 179)         | 12<br>(3 - 25)           | 2<br>(1 - 5)             |
| Assault by other means                          | 163<br>(82 - 325)         | 6<br>(2 - 13)      | 8<br>(4 - 16)       | 118<br>(53 - 250)        | 24<br>(11 - 48)          | 8<br>(3 - 15)            |
| Forces of nature, war, and legal intervention   | 0<br>(0 - 0)              | 0<br>(0 - 0)       | --                  | --                       | --                       | --                       |
| Exposure to forces of nature                    | 0<br>(0 - 0)              | 0<br>(0 - 0)       | --                  | --                       | --                       | --                       |

Web Table 31- Namibia deaths with 95% UI by age, sex, and cause in 2013

| Cause                                                             | Both Sexes, All Ages        | Both Sexes, 0-4 Years    | Both Sexes, 5-14 Years | Both Sexes, 15-49 Years  | Both Sexes, 50-69 Years  | Both Sexes, 70-80 Years  |
|-------------------------------------------------------------------|-----------------------------|--------------------------|------------------------|--------------------------|--------------------------|--------------------------|
| All causes                                                        | 20,643<br>(18,985 - 22,459) | 2,075<br>(1,447 - 2,929) | 391<br>(323 - 494)     | 8,987<br>(7,985 - 9,838) | 4,754<br>(4,253 - 5,388) | 4,435<br>(4,166 - 4,792) |
| Communicable, maternal, neonatal, and nutritional diseases        | 10,674<br>(9,667 - 11,833)  | 1,758<br>(1,256 - 2,477) | 241<br>(181 - 306)     | 5,940<br>(5,271 - 6,604) | 1,758<br>(1,534 - 2,012) | 977<br>(855 - 1,113)     |
| HIV/AIDS and tuberculosis                                         | 6,326<br>(5,561 - 7,167)    | 119<br>(80 - 164)        | 131<br>(76 - 198)      | 4,613<br>(4,004 - 5,287) | 1,159<br>(950 - 1,394)   | 305<br>(246 - 374)       |
| Tuberculosis                                                      | 2,189<br>(1,775 - 2,654)    | 30<br>(14 - 55)          | 20<br>(13 - 31)        | 1,296<br>(999 - 1,612)   | 596<br>(444 - 761)       | 248<br>(197 - 321)       |
| HIV/AIDS                                                          | 4,137<br>(3,356 - 5,038)    | 89<br>(56 - 130)         | 111<br>(55 - 181)      | 3,318<br>(2,672 - 4,086) | 563<br>(401 - 771)       | 56<br>(33 - 87)          |
| HIV/AIDS resulting in mycobacterial infection                     | 281<br>(208 - 379)          | 5<br>(3 - 8)             | 6<br>(3 - 11)          | 225<br>(163 - 299)       | 40<br>(27 - 58)          | 4<br>(2 - 7)             |
| HIV/AIDS resulting in other diseases                              | 3,856<br>(3,140 - 4,707)    | 83<br>(53 - 122)         | 105<br>(52 - 170)      | 3,093<br>(2,490 - 3,809) | 523<br>(372 - 713)       | 52<br>(31 - 81)          |
| Diarrhea, lower respiratory, and other common infectious diseases | 2,681<br>(2,256 - 3,159)    | 556<br>(323 - 911)       | 70<br>(48 - 102)       | 961<br>(753 - 1,206)     | 501<br>(397 - 636)       | 593<br>(481 - 720)       |
| Diarrheal diseases                                                | 956<br>(735 - 1,247)        | 290<br>(156 - 499)       | 23<br>(12 - 39)        | 294<br>(197 - 417)       | 154<br>(100 - 230)       | 194<br>(125 - 283)       |
| Intestinal infectious diseases                                    | 47<br>(22 - 94)             | 13<br>(5 - 30)           | 12<br>(5 - 25)         | 17<br>(8 - 38)           | 3<br>(1 - 5)             | 1<br>(0 - 2)             |
| Typhoid fever                                                     | 34<br>(16 - 70)             | 9<br>(4 - 22)            | 9<br>(4 - 19)          | 13<br>(5 - 28)           | 2<br>(1 - 4)             | 1<br>(0 - 1)             |
| Paratyphoid fever                                                 | 11<br>(5 - 22)              | 3<br>(1 - 8)             | 3<br>(1 - 7)           | 4<br>(2 - 9)             | 1<br>(0 - 1)             | 0<br>(0 - 0)             |
| Other intestinal infectious diseases                              | 1<br>(0 - 4)                | 1<br>(0 - 3)             | 0<br>(0 - 1)           | 0<br>(0 - 2)             | 0<br>(0 - 1)             | 0<br>(0 - 1)             |
| Lower respiratory infections                                      | 1,484<br>(1,235 - 1,774)    | 208<br>(110 - 374)       | 22<br>(14 - 34)        | 548<br>(416 - 710)       | 321<br>(240 - 408)       | 385<br>(306 - 485)       |
| Upper respiratory infections                                      | 1<br>(1 - 2)                | 0<br>(0 - 0)             | 0<br>(0 - 0)           | 1<br>(0 - 1)             | 0<br>(0 - 1)             | 0<br>(0 - 1)             |
| Otitis media                                                      | 1<br>(1 - 1)                | 0<br>(0 - 0)             | 0<br>(0 - 0)           | 0<br>(0 - 0)             | 0<br>(0 - 0)             | 0<br>(0 - 0)             |
| Meningitis                                                        | 158<br>(122 - 207)          | 27<br>(13 - 58)          | 10<br>(5 - 15)         | 90<br>(65 - 121)         | 20<br>(14 - 29)          | 11<br>(8 - 15)           |
| Pneumococcal meningitis                                           | 24<br>(17 - 31)             | 3<br>(1 - 6)             | 1<br>(1 - 2)           | 15<br>(9 - 21)           | 3<br>(2 - 5)             | 2<br>(1 - 3)             |
| H influenzae type B meningitis                                    | 27<br>(19 - 41)             | 10<br>(4 - 22)           | 2<br>(1 - 4)           | 12<br>(8 - 18)           | 2<br>(1 - 3)             | 1<br>(1 - 2)             |
| Meningococcal meningitis                                          | 56<br>(42 - 74)             | 8<br>(4 - 18)            | 4<br>(2 - 6)           | 33<br>(21 - 48)          | 7<br>(5 - 11)            | 4<br>(3 - 6)             |
| Other meningitis                                                  | 51<br>(37 - 68)             | 6<br>(3 - 13)            | 2<br>(1 - 4)           | 31<br>(19 - 46)          | 8<br>(5 - 12)            | 4<br>(2 - 6)             |
| Encephalitis                                                      | 18<br>(10 - 26)             | 3<br>(1 - 7)             | 2<br>(1 - 3)           | 9<br>(5 - 13)            | 2<br>(1 - 3)             | 2<br>(1 - 2)             |
| Diphtheria                                                        | 0<br>(0 - 2)                | 0<br>(0 - 1)             | 0<br>(0 - 0)           | 0<br>(0 - 0)             | 0<br>(0 - 0)             | --<br>(0 - 0)            |
| Whooping cough                                                    | 9<br>(0 - 46)               | 8<br>(0 - 43)            | 0<br>(0 - 2)           | 0<br>(0 - 1)             | 0<br>(0 - 0)             | --<br>(0 - 0)            |
| Tetanus                                                           | 2<br>(1 - 2)                | 0<br>(0 - 0)             | 0<br>(0 - 0)           | 1<br>(0 - 1)             | 0<br>(0 - 1)             | 0<br>(0 - 0)             |
| Measles                                                           | 5<br>(0 - 25)               | 4<br>(0 - 21)            | 1<br>(0 - 3)           | 0<br>(0 - 1)             | 0<br>(0 - 0)             | --<br>(0 - 0)            |
| Varicella and herpes zoster                                       | 1<br>(0 - 2)                | 0<br>(0 - 1)             | 0<br>(0 - 0)           | 0<br>(0 - 1)             | 0<br>(0 - 0)             | 0<br>(0 - 1)             |
| Neglected tropical diseases and malaria                           | 289<br>(187 - 466)          | 65<br>(18 - 173)         | 28<br>(13 - 54)        | 139<br>(81 - 249)        | 39<br>(18 - 75)          | 18<br>(8 - 45)           |
| Malaria                                                           | 241<br>(142 - 420)          | 59<br>(14 - 166)         | 27<br>(12 - 52)        | 110<br>(56 - 221)        | 31<br>(12 - 69)          | 14<br>(4 - 40)           |
| Leishmaniasis                                                     | 2<br>(1 - 3)                | 0<br>(0 - 1)             | 0<br>(0 - 0)           | 1<br>(0 - 1)             | 0<br>(0 - 1)             | 0<br>(0 - 0)             |
| Visceral leishmaniasis                                            | 2<br>(1 - 3)                | 0<br>(0 - 1)             | 0<br>(0 - 0)           | 1<br>(0 - 1)             | 0<br>(0 - 1)             | 0<br>(0 - 0)             |
| Schistosomiasis                                                   | 8<br>(6 - 10)               | 0<br>(0 - 0)             | 0<br>(0 - 0)           | 4<br>(3 - 6)             | 3<br>(2 - 4)             | 1<br>(1 - 2)             |
| Cysticercosis                                                     | 1<br>(0 - 1)                | 0<br>(0 - 0)             | 0<br>(0 - 0)           | 0<br>(0 - 1)             | 0<br>(0 - 0)             | 0<br>(0 - 0)             |
| Cystic echinococcosis                                             | 1<br>(1 - 1)                | 0<br>(0 - 0)             | 0<br>(0 - 0)           | 1<br>(1 - 1)             | 0<br>(0 - 0)             | 0<br>(0 - 0)             |
| Dengue                                                            | 0<br>(0 - 0)                | 0<br>(0 - 0)             | 0<br>(0 - 0)           | 0<br>(0 - 0)             | 0<br>(0 - 0)             | 0<br>(0 - 0)             |
| Rabies                                                            | 1<br>(0 - 1)                | 0<br>(0 - 0)             | 0<br>(0 - 0)           | 0<br>(0 - 0)             | 0<br>(0 - 0)             | 0<br>(0 - 0)             |
| Intestinal nematode infections                                    | 1<br>(0 - 6)                | 1<br>(0 - 4)             | 0<br>(0 - 1)           | 0<br>(0 - 3)             | 0<br>(0 - 1)             | 0<br>(0 - 1)             |
| Ascariasis                                                        | 1<br>(0 - 6)                | 1<br>(0 - 4)             | 0<br>(0 - 1)           | 0<br>(0 - 3)             | 0<br>(0 - 1)             | 0<br>(0 - 1)             |
| Other neglected tropical diseases                                 | 34<br>(24 - 49)             | 4<br>(2 - 11)            | 1<br>(0 - 2)           | 22<br>(15 - 33)          | 4<br>(3 - 6)             | 2<br>(2 - 4)             |
| Maternal disorders                                                | 89<br>(54 - 141)            | --                       | 0<br>(0 - 0)           | 89<br>(54 - 140)         | --                       | --                       |

Web Table 31- Namibia deaths with 95% UI by age, sex, and cause in 2013

| Cause                                                            | Both Sexes, All Ages     | Both Sexes, 0-4 Years | Both Sexes, 5-14 Years | Both Sexes, 15-49 Years  | Both Sexes, 50-69 Years  | Both Sexes, 70-80 Years  |
|------------------------------------------------------------------|--------------------------|-----------------------|------------------------|--------------------------|--------------------------|--------------------------|
| Maternal hemorrhage                                              | 10<br>(5 - 17)           | --                    | 0<br>(0 - 0)           | 10<br>(5 - 17)           | --                       | --                       |
| Maternal sepsis and other maternal infections                    | 10<br>(6 - 17)           | --                    | 0<br>(0 - 0)           | 10<br>(6 - 17)           | --                       | --                       |
| Maternal hypertensive disorders                                  | 12<br>(6 - 20)           | --                    | 0<br>(0 - 0)           | 12<br>(6 - 20)           | --                       | --                       |
| Maternal obstructed labor                                        | 5<br>(3 - 9)             | --                    | 0<br>(0 - 0)           | 5<br>(3 - 9)             | --                       | --                       |
| Maternal abortive outcome                                        | 16<br>(9 - 26)           | --                    | 0<br>(0 - 0)           | 16<br>(9 - 26)           | --                       | --                       |
| Indirect maternal deaths                                         | 10<br>(6 - 18)           | --                    | 0<br>(0 - 0)           | 10<br>(6 - 18)           | --                       | --                       |
| Late maternal deaths                                             | 11<br>(5 - 20)           | --                    | 0<br>(0 - 0)           | 11<br>(5 - 20)           | --                       | --                       |
| Maternal deaths aggravated by HIV/AIDS                           | 4<br>(2 - 7)             | --                    | --                     | 4<br>(2 - 7)             | --                       | --                       |
| Other maternal disorders                                         | 9<br>(5 - 16)            | --                    | 0<br>(0 - 0)           | 9<br>(5 - 16)            | --                       | --                       |
| Neonatal disorders                                               | 896<br>(657 - 1,215)     | 896<br>(657 - 1,215)  | --                     | --                       | --                       | --                       |
| Neonatal preterm birth complications                             | 285<br>(161 - 442)       | 285<br>(161 - 442)    | --                     | --                       | --                       | --                       |
| Neonatal encephalopathy due to birth asphyxia and trauma         | 220<br>(116 - 355)       | 220<br>(116 - 355)    | --                     | --                       | --                       | --                       |
| Neonatal sepsis and other neonatal infections                    | 85<br>(34 - 165)         | 85<br>(34 - 165)      | --                     | --                       | --                       | --                       |
| Hemolytic disease and other neonatal jaundice                    | 3<br>(1 - 7)             | 3<br>(1 - 7)          | --                     | --                       | --                       | --                       |
| Other neonatal disorders                                         | 303<br>(128 - 512)       | 303<br>(128 - 512)    | --                     | --                       | --                       | --                       |
| Nutritional deficiencies                                         | 218<br>(161 - 303)       | 72<br>(36 - 131)      | 5<br>(3 - 8)           | 57<br>(40 - 88)          | 37<br>(26 - 57)          | 47<br>(33 - 69)          |
| Protein-energy malnutrition                                      | 118<br>(71 - 189)        | 69<br>(34 - 126)      | 3<br>(2 - 6)           | 15<br>(8 - 28)           | 13<br>(7 - 23)           | 17<br>(9 - 29)           |
| Iodine deficiency                                                | 0<br>(0 - 1)             | 0<br>(0 - 0)          | 0<br>(0 - 0)           | 0<br>(0 - 1)             | 0<br>(0 - 0)             | 0<br>(0 - 0)             |
| Iron-deficiency anemia                                           | 88<br>(60 - 140)         | 2<br>(0 - 6)          | 2<br>(1 - 3)           | 38<br>(26 - 60)          | 20<br>(13 - 34)          | 25<br>(16 - 41)          |
| Other nutritional deficiencies                                   | 12<br>(7 - 20)           | 0<br>(0 - 1)          | 0<br>(0 - 0)           | 3<br>(2 - 7)             | 3<br>(2 - 6)             | 4<br>(2 - 8)             |
| Other communicable, maternal, neonatal, and nutritional diseases | 174<br>(120 - 251)       | 51<br>(16 - 99)       | 6<br>(3 - 11)          | 81<br>(54 - 124)         | 23<br>(14 - 39)          | 14<br>(8 - 24)           |
| Sexually transmitted diseases excluding HIV                      | 47<br>(11 - 92)          | 37<br>(3 - 81)        | 2<br>(0 - 5)           | 5<br>(2 - 8)             | 1<br>(1 - 3)             | 1<br>(0 - 2)             |
| Syphilis                                                         | 43<br>(7 - 88)           | 37<br>(3 - 81)        | 2<br>(0 - 5)           | 2<br>(1 - 4)             | 1<br>(0 - 2)             | 1<br>(0 - 2)             |
| Chlamydial infection                                             | 1<br>(0 - 2)             | --                    | 0<br>(0 - 0)           | 1<br>(0 - 2)             | 0<br>(0 - 0)             | 0<br>(0 - 0)             |
| Gonococcal infection                                             | 1<br>(1 - 2)             | --                    | 0<br>(0 - 0)           | 1<br>(0 - 2)             | 0<br>(0 - 1)             | 0<br>(0 - 0)             |
| Other sexually transmitted diseases                              | 1<br>(0 - 2)             | --                    | 0<br>(0 - 0)           | 1<br>(0 - 2)             | 0<br>(0 - 0)             | 0<br>(0 - 0)             |
| Hepatitis                                                        | 15<br>(11 - 21)          | 1<br>(1 - 3)          | 1<br>(0 - 1)           | 7<br>(5 - 10)            | 4<br>(3 - 6)             | 2<br>(2 - 3)             |
| Acute hepatitis A                                                | 2<br>(0 - 3)             | 0<br>(0 - 1)          | 0<br>(0 - 0)           | 1<br>(0 - 2)             | 0<br>(0 - 0)             | 0<br>(0 - 0)             |
| Acute hepatitis B                                                | 9<br>(6 - 13)            | 1<br>(0 - 2)          | 0<br>(0 - 0)           | 3<br>(1 - 5)             | 3<br>(2 - 5)             | 2<br>(1 - 3)             |
| Acute hepatitis C                                                | 0<br>(0 - 1)             | --                    | 0<br>(0 - 0)           | 0<br>(0 - 0)             | 0<br>(0 - 0)             | 0<br>(0 - 0)             |
| Acute hepatitis E                                                | 4<br>(2 - 7)             | 0<br>(0 - 0)          | 0<br>(0 - 0)           | 3<br>(2 - 5)             | 1<br>(0 - 1)             | 0<br>(0 - 0)             |
| Other infectious diseases                                        | 113<br>(76 - 174)        | 12<br>(5 - 34)        | 3<br>(1 - 7)           | 69<br>(43 - 112)         | 18<br>(9 - 34)           | 10<br>(5 - 21)           |
| Non-communicable diseases                                        | 7,767<br>(6,919 - 8,807) | 224<br>(124 - 370)    | 62<br>(43 - 91)        | 1,551<br>(1,259 - 1,841) | 2,666<br>(2,252 - 3,153) | 3,264<br>(3,022 - 3,577) |
| Neoplasms                                                        | 584<br>(492 - 697)       | 9<br>(4 - 17)         | 10<br>(6 - 15)         | 119<br>(94 - 147)        | 249<br>(204 - 307)       | 197<br>(171 - 232)       |
| Esophageal cancer                                                | 23<br>(16 - 34)          | --                    | --                     | 3<br>(2 - 5)             | 13<br>(9 - 19)           | 7<br>(5 - 11)            |
| Stomach cancer                                                   | 39<br>(31 - 48)          | --                    | --                     | 4<br>(3 - 5)             | 14<br>(11 - 19)          | 20<br>(15 - 27)          |
| Liver cancer                                                     | 21<br>(16 - 27)          | --                    | 0<br>(0 - 1)           | 6<br>(4 - 8)             | 11<br>(8 - 14)           | 5<br>(4 - 6)             |
| Liver cancer due to hepatitis B                                  | 7<br>(4 - 11)            | --                    | 0<br>(0 - 0)           | 2<br>(1 - 4)             | 3<br>(2 - 6)             | 1<br>(1 - 2)             |
| Liver cancer due to hepatitis C                                  | 9<br>(5 - 13)            | --                    | 0<br>(0 - 0)           | 2<br>(1 - 3)             | 5<br>(3 - 7)             | 2<br>(1 - 3)             |
| Liver cancer due to alcohol use                                  | 3<br>(2 - 5)             | --                    | --                     | 1<br>(0 - 1)             | 2<br>(1 - 3)             | 1<br>(1 - 1)             |

Web Table 31- Namibia deaths with 95% UI by age, sex, and cause in 2013

| Cause                                         | Both Sexes, All Ages     | Both Sexes, 0-4 Years | Both Sexes, 5-14 Years | Both Sexes, 15-49 Years | Both Sexes, 50-69 Years  | Both Sexes, 70-80 Years  |
|-----------------------------------------------|--------------------------|-----------------------|------------------------|-------------------------|--------------------------|--------------------------|
| Liver cancer due to other causes              | 3<br>(2 - 4)             | --                    | 0<br>(0 - 0)           | 1<br>(1 - 1)            | 1<br>(1 - 2)             | 0<br>(0 - 1)             |
| Larynx cancer                                 | 13<br>(10 - 19)          | --                    | --                     | 2<br>(1 - 3)            | 6<br>(4 - 9)             | 5<br>(4 - 7)             |
| Tracheal, bronchus and lung cancer            | 32<br>(26 - 42)          | --                    | --                     | 4<br>(3 - 7)            | 19<br>(14 - 25)          | 9<br>(8 - 11)            |
| Breast cancer                                 | 51<br>(35 - 67)          | --                    | --                     | 14<br>(8 - 19)          | 24<br>(16 - 34)          | 13<br>(10 - 18)          |
| Cervical cancer                               | 49<br>(36 - 71)          | --                    | --                     | 9<br>(6 - 14)           | 27<br>(18 - 41)          | 13<br>(9 - 19)           |
| Uterine cancer                                | 4<br>(3 - 10)            | --                    | --                     | 0<br>(0 - 1)            | 2<br>(1 - 4)             | 2<br>(1 - 5)             |
| Prostate cancer                               | 21<br>(13 - 41)          | --                    | --                     | 0<br>(0 - 1)            | 5<br>(3 - 10)            | 16<br>(9 - 31)           |
| Colon and rectum cancer                       | 29<br>(25 - 34)          | --                    | --                     | 5<br>(4 - 7)            | 12<br>(10 - 15)          | 12<br>(10 - 14)          |
| Lip and oral cavity cancer                    | 26<br>(20 - 34)          | --                    | --                     | 4<br>(3 - 6)            | 12<br>(9 - 17)           | 10<br>(7 - 13)           |
| Nasopharynx cancer                            | 4<br>(3 - 6)             | --                    | 0<br>(0 - 0)           | 2<br>(1 - 2)            | 2<br>(1 - 3)             | 1<br>(0 - 1)             |
| Other pharynx cancer                          | 16<br>(12 - 20)          | --                    | --                     | 2<br>(1 - 2)            | 11<br>(7 - 15)           | 3<br>(3 - 5)             |
| Gallbladder and biliary tract cancer          | 4<br>(2 - 6)             | --                    | --                     | 0<br>(0 - 1)            | 2<br>(1 - 2)             | 2<br>(1 - 3)             |
| Pancreatic cancer                             | 50<br>(43 - 59)          | --                    | --                     | 5<br>(4 - 6)            | 23<br>(18 - 28)          | 23<br>(19 - 28)          |
| Malignant skin melanoma                       | 7<br>(5 - 13)            | --                    | --                     | 2<br>(1 - 3)            | 3<br>(2 - 5)             | 3<br>(2 - 5)             |
| Non-melanoma skin cancer                      | 11<br>(7 - 14)           | --                    | --                     | 2<br>(2 - 3)            | 4<br>(3 - 6)             | 4<br>(3 - 6)             |
| Ovarian cancer                                | 13<br>(9 - 17)           | --                    | --                     | 2<br>(1 - 4)            | 6<br>(4 - 9)             | 4<br>(3 - 6)             |
| Testicular cancer                             | 1<br>(1 - 2)             | --                    | --                     | 1<br>(0 - 1)            | 0<br>(0 - 1)             | 0<br>(0 - 0)             |
| Kidney cancer                                 | 6<br>(5 - 8)             | 0<br>(0 - 0)          | 0<br>(0 - 1)           | 2<br>(1 - 2)            | 3<br>(2 - 3)             | 2<br>(1 - 2)             |
| Bladder cancer                                | 9<br>(7 - 12)            | --                    | --                     | 1<br>(1 - 2)            | 3<br>(2 - 4)             | 5<br>(3 - 6)             |
| Brain and nervous system cancer               | 12<br>(9 - 16)           | 1<br>(0 - 1)          | 1<br>(1 - 2)           | 4<br>(3 - 5)            | 4<br>(3 - 6)             | 2<br>(2 - 3)             |
| Thyroid cancer                                | 3<br>(2 - 4)             | --                    | 0<br>(0 - 0)           | 1<br>(0 - 1)            | 1<br>(1 - 2)             | 1<br>(1 - 2)             |
| Mesothelioma                                  | 1<br>(1 - 2)             | --                    | --                     | 0<br>(0 - 0)            | 1<br>(0 - 1)             | 0<br>(0 - 1)             |
| Hodgkin lymphoma                              | 3<br>(2 - 4)             | 0<br>(0 - 0)          | 0<br>(0 - 0)           | 1<br>(1 - 2)            | 1<br>(0 - 1)             | 0<br>(0 - 1)             |
| Non-Hodgkin lymphoma                          | 25<br>(19 - 38)          | 1<br>(0 - 2)          | 1<br>(0 - 2)           | 9<br>(6 - 13)           | 9<br>(6 - 13)            | 6<br>(4 - 10)            |
| Multiple myeloma                              | 6<br>(4 - 8)             | --                    | --                     | 1<br>(1 - 2)            | 3<br>(2 - 4)             | 2<br>(1 - 3)             |
| Leukemia                                      | 15<br>(12 - 18)          | 0<br>(0 - 1)          | 1<br>(0 - 1)           | 6<br>(5 - 8)            | 5<br>(4 - 6)             | 4<br>(3 - 4)             |
| Other neoplasms                               | 89<br>(73 - 108)         | 7<br>(3 - 14)         | 7<br>(3 - 11)          | 27<br>(20 - 34)         | 27<br>(21 - 36)          | 22<br>(17 - 28)          |
| Cardiovascular diseases                       | 3,452<br>(3,058 - 3,949) | 9<br>(5 - 17)         | 10<br>(6 - 16)         | 439<br>(346 - 547)      | 1,240<br>(1,041 - 1,484) | 1,754<br>(1,579 - 1,969) |
| Rheumatic heart disease                       | 56<br>(42 - 92)          | 0<br>(0 - 0)          | 1<br>(1 - 3)           | 18<br>(12 - 36)         | 10<br>(7 - 20)           | 26<br>(19 - 37)          |
| Ischemic heart disease                        | 1,112<br>(903 - 1,332)   | 1<br>(0 - 1)          | 1<br>(0 - 1)           | 114<br>(82 - 146)       | 393<br>(309 - 500)       | 604<br>(490 - 726)       |
| Cerebrovascular disease                       | 1,333<br>(1,128 - 1,589) | 2<br>(1 - 4)          | 3<br>(2 - 4)           | 149<br>(112 - 189)      | 479<br>(387 - 595)       | 700<br>(597 - 835)       |
| Ischemic stroke                               | 626<br>(455 - 754)       | 0<br>(0 - 0)          | 0<br>(0 - 1)           | 22<br>(14 - 31)         | 197<br>(130 - 253)       | 407<br>(301 - 493)       |
| Hemorrhagic stroke                            | 707<br>(573 - 928)       | 2<br>(1 - 3)          | 3<br>(2 - 4)           | 127<br>(95 - 165)       | 282<br>(215 - 381)       | 293<br>(232 - 408)       |
| Hypertensive heart disease                    | 414<br>(266 - 547)       | 0<br>(0 - 1)          | 0<br>(0 - 0)           | 41<br>(24 - 56)         | 142<br>(87 - 205)        | 231<br>(146 - 313)       |
| Cardiomyopathy and myocarditis                | 252<br>(196 - 320)       | 4<br>(2 - 9)          | 2<br>(1 - 5)           | 71<br>(51 - 109)        | 91<br>(65 - 121)         | 84<br>(55 - 116)         |
| Atrial fibrillation and flutter               | 7<br>(4 - 10)            | --                    | --                     | 0<br>(0 - 0)            | 2<br>(1 - 2)             | 5<br>(3 - 8)             |
| Aortic aneurysm                               | 39<br>(28 - 55)          | --                    | --                     | 4<br>(2 - 5)            | 14<br>(10 - 20)          | 21<br>(14 - 31)          |
| Peripheral vascular disease                   | 11<br>(7 - 15)           | --                    | --                     | 1<br>(0 - 1)            | 4<br>(3 - 6)             | 6<br>(4 - 9)             |
| Endocarditis                                  | 17<br>(12 - 23)          | 1<br>(0 - 3)          | 1<br>(0 - 1)           | 5<br>(4 - 8)            | 4<br>(3 - 7)             | 5<br>(3 - 8)             |
| Other cardiovascular and circulatory diseases | 211<br>(163 - 289)       | 1<br>(1 - 3)          | 1<br>(1 - 2)           | 36<br>(26 - 53)         | 100<br>(71 - 144)        | 73<br>(53 - 101)         |



Web Table 31- Namibia deaths with 95% UI by age, sex, and cause in 2013

| Cause                                               | Both Sexes, All Ages   | Both Sexes, 0-4 Years | Both Sexes, 5-14 Years | Both Sexes, 15-49 Years | Both Sexes, 50-69 Years | Both Sexes, 70-80 Years |
|-----------------------------------------------------|------------------------|-----------------------|------------------------|-------------------------|-------------------------|-------------------------|
| Chronic respiratory diseases                        | 1,076<br>(906 - 1,319) | 8<br>(4 - 16)         | 5<br>(3 - 7)           | 171<br>(132 - 227)      | 401<br>(318 - 517)      | 490<br>(418 - 593)      |
| Chronic obstructive pulmonary disease               | 647<br>(525 - 819)     | 2<br>(1 - 5)          | 1<br>(1 - 2)           | 69<br>(50 - 96)         | 242<br>(183 - 322)      | 332<br>(268 - 414)      |
| Pneumoconiosis                                      | 43<br>(28 - 64)        | 0<br>(0 - 0)          | 0<br>(0 - 0)           | 7<br>(4 - 12)           | 17<br>(10 - 27)         | 19<br>(12 - 29)         |
| Silicosis                                           | 9<br>(5 - 14)          | 0<br>(0 - 0)          | 0<br>(0 - 0)           | 1<br>(0 - 2)            | 3<br>(2 - 5)            | 5<br>(3 - 8)            |
| Asbestosis                                          | 10<br>(6 - 17)         | 0<br>(0 - 0)          | 0<br>(0 - 0)           | 2<br>(1 - 3)            | 4<br>(2 - 7)            | 5<br>(3 - 8)            |
| Coal workers pneumoconiosis                         | 8<br>(5 - 13)          | 0<br>(0 - 0)          | 0<br>(0 - 0)           | 1<br>(1 - 2)            | 4<br>(2 - 6)            | 3<br>(2 - 5)            |
| Other pneumoconiosis                                | 16<br>(10 - 24)        | 0<br>(0 - 0)          | 0<br>(0 - 0)           | 3<br>(2 - 5)            | 6<br>(4 - 10)           | 6<br>(4 - 10)           |
| Asthma                                              | 316<br>(249 - 410)     | 3<br>(1 - 7)          | 3<br>(2 - 4)           | 79<br>(57 - 110)        | 122<br>(92 - 165)       | 109<br>(78 - 154)       |
| Interstitial lung disease and pulmonary sarcoidosis | 47<br>(10 - 81)        | 1<br>(0 - 3)          | 0<br>(0 - 1)           | 11<br>(2 - 22)          | 15<br>(3 - 28)          | 20<br>(4 - 35)          |
| Other chronic respiratory diseases                  | 23<br>(17 - 32)        | 1<br>(1 - 3)          | 1<br>(0 - 1)           | 5<br>(4 - 8)            | 6<br>(4 - 8)            | 10<br>(7 - 16)          |
| Cirrhosis                                           | 181<br>(119 - 241)     | 1<br>(0 - 2)          | 1<br>(1 - 2)           | 61<br>(38 - 84)         | 80<br>(50 - 109)        | 38<br>(24 - 52)         |
| Cirrhosis due to hepatitis B                        | 28<br>(16 - 42)        | 0<br>(0 - 0)          | 0<br>(0 - 0)           | 10<br>(5 - 15)          | 13<br>(7 - 20)          | 6<br>(3 - 9)            |
| Cirrhosis due to hepatitis C                        | 26<br>(17 - 38)        | 0<br>(0 - 0)          | 0<br>(0 - 0)           | 7<br>(4 - 11)           | 12<br>(7 - 18)          | 8<br>(5 - 11)           |
| Cirrhosis due to alcohol use                        | 100<br>(61 - 141)      | --                    | --                     | 31<br>(18 - 46)         | 47<br>(27 - 70)         | 22<br>(13 - 33)         |
| Cirrhosis due to other causes                       | 26<br>(14 - 41)        | 1<br>(0 - 2)          | 1<br>(1 - 2)           | 13<br>(7 - 21)          | 9<br>(4 - 15)           | 3<br>(1 - 4)            |
| Digestive diseases                                  | 369<br>(309 - 448)     | 6<br>(3 - 11)         | 5<br>(3 - 7)           | 138<br>(105 - 174)      | 106<br>(83 - 135)       | 115<br>(94 - 141)       |
| Peptic ulcer disease                                | 82<br>(62 - 111)       | 0<br>(0 - 1)          | 0<br>(0 - 1)           | 25<br>(17 - 35)         | 27<br>(19 - 37)         | 31<br>(22 - 42)         |
| Gastritis and duodenitis                            | 22<br>(13 - 31)        | 0<br>(0 - 1)          | 0<br>(0 - 1)           | 7<br>(4 - 11)           | 6<br>(4 - 9)            | 8<br>(4 - 12)           |
| Appendicitis                                        | 11<br>(8 - 16)         | 0<br>(0 - 1)          | 1<br>(0 - 1)           | 5<br>(3 - 7)            | 3<br>(2 - 5)            | 2<br>(1 - 4)            |
| Paralytic ileus and intestinal obstruction          | 58<br>(41 - 85)        | 1<br>(1 - 3)          | 1<br>(1 - 2)           | 17<br>(10 - 25)         | 17<br>(11 - 26)         | 22<br>(14 - 34)         |
| Inguinal, femoral, and abdominal hernia             | 6<br>(4 - 10)          | 0<br>(0 - 0)          | 0<br>(0 - 0)           | 1<br>(1 - 2)            | 2<br>(1 - 3)            | 3<br>(2 - 4)            |
| Inflammatory bowel disease                          | 79<br>(58 - 101)       | 2<br>(1 - 5)          | 1<br>(0 - 2)           | 44<br>(31 - 59)         | 17<br>(11 - 24)         | 14<br>(10 - 21)         |
| Vascular intestinal disorders                       | 6<br>(3 - 11)          | 0<br>(0 - 0)          | 0<br>(0 - 0)           | 1<br>(1 - 3)            | 2<br>(1 - 3)            | 3<br>(1 - 5)            |
| Gallbladder and biliary diseases                    | 28<br>(20 - 36)        | 0<br>(0 - 0)          | 0<br>(0 - 0)           | 5<br>(4 - 7)            | 9<br>(6 - 13)           | 13<br>(8 - 18)          |
| Pancreatitis                                        | 31<br>(21 - 44)        | 0<br>(0 - 0)          | 0<br>(0 - 0)           | 16<br>(10 - 25)         | 9<br>(6 - 14)           | 5<br>(3 - 7)            |
| Other digestive diseases                            | 46<br>(36 - 60)        | 1<br>(0 - 2)          | 1<br>(0 - 1)           | 17<br>(12 - 24)         | 13<br>(9 - 19)          | 14<br>(10 - 20)         |
| Neurological disorders                              | 286<br>(236 - 342)     | 7<br>(3 - 15)         | 7<br>(4 - 14)          | 88<br>(63 - 116)        | 52<br>(39 - 71)         | 132<br>(111 - 155)      |
| Alzheimer disease and other dementias               | 111<br>(93 - 134)      | --                    | --                     | 0<br>(0 - 0)            | 10<br>(8 - 13)          | 101<br>(83 - 123)       |
| Parkinson disease                                   | 10<br>(7 - 14)         | --                    | --                     | 0<br>(0 - 0)            | 2<br>(1 - 3)            | 8<br>(5 - 12)           |
| Epilepsy                                            | 149<br>(111 - 188)     | 5<br>(2 - 13)         | 7<br>(4 - 13)          | 82<br>(58 - 109)        | 35<br>(23 - 52)         | 19<br>(13 - 28)         |
| Multiple sclerosis                                  | 1<br>(0 - 1)           | --                    | --                     | 0<br>(0 - 1)            | 0<br>(0 - 1)            | 0<br>(0 - 0)            |
| Other neurological disorders                        | 16<br>(13 - 19)        | 1<br>(1 - 2)          | 1<br>(0 - 1)           | 5<br>(4 - 6)            | 5<br>(4 - 6)            | 4<br>(3 - 5)            |
| Mental and substance use disorders                  | 238<br>(180 - 306)     | 4<br>(2 - 6)          | 0<br>(0 - 0)           | 185<br>(135 - 245)      | 35<br>(25 - 48)         | 14<br>(10 - 18)         |
| Schizophrenia                                       | 11<br>(8 - 16)         | --                    | --                     | 5<br>(3 - 7)            | 4<br>(2 - 6)            | 3<br>(1 - 5)            |
| Alcohol use disorders                               | 80<br>(46 - 114)       | --                    | --                     | 53<br>(30 - 80)         | 23<br>(13 - 34)         | 4<br>(2 - 6)            |
| Drug use disorders                                  | 146<br>(110 - 186)     | 4<br>(2 - 6)          | --                     | 126<br>(92 - 166)       | 8<br>(7 - 11)           | 7<br>(5 - 9)            |
| Opioid use disorders                                | 15<br>(11 - 21)        | 0<br>(0 - 1)          | --                     | 14<br>(9 - 18)          | 1<br>(1 - 1)            | 1<br>(1 - 1)            |
| Cocaine use disorders                               | 1<br>(0 - 1)           | 0<br>(0 - 0)          | --                     | 1<br>(0 - 1)            | 0<br>(0 - 0)            | 0<br>(0 - 0)            |
| Amphetamine use disorders                           | 0<br>(0 - 1)           | 0<br>(0 - 0)          | --                     | 0<br>(0 - 0)            | 0<br>(0 - 0)            | 0<br>(0 - 0)            |
| Other drug use disorders                            | 129<br>(98 - 165)      | 3<br>(2 - 6)          | --                     | 112<br>(82 - 147)       | 8<br>(6 - 10)           | 6<br>(5 - 8)            |

Web Table 31- Namibia deaths with 95% UI by age, sex, and cause in 2013

| Cause                                               | Both Sexes, All Ages     | Both Sexes, 0-4 Years | Both Sexes, 5-14 Years | Both Sexes, 15-49 Years | Both Sexes, 50-69 Years | Both Sexes, 70-80 Years |
|-----------------------------------------------------|--------------------------|-----------------------|------------------------|-------------------------|-------------------------|-------------------------|
| Eating disorders                                    | 1<br>(0 - 1)             | --                    | 0<br>(0 - 0)           | 1<br>(0 - 1)            | --                      | --                      |
| Anorexia nervosa                                    | 1<br>(0 - 1)             | --                    | 0<br>(0 - 0)           | 1<br>(0 - 1)            | --                      | --                      |
| Diabetes, urogenital, blood, and endocrine diseases | 1,294<br>(1,072 - 1,525) | 42<br>(17 - 83)       | 15<br>(9 - 23)         | 307<br>(226 - 388)      | 465<br>(375 - 572)      | 465<br>(390 - 546)      |
| Diabetes mellitus                                   | 685<br>(570 - 827)       | 1<br>(0 - 1)          | 1<br>(0 - 1)           | 72<br>(56 - 90)         | 307<br>(242 - 389)      | 304<br>(245 - 366)      |
| Acute glomerulonephritis                            | 1<br>(1 - 2)             | 0<br>(0 - 0)          | 0<br>(0 - 0)           | 1<br>(0 - 1)            | 0<br>(0 - 0)            | 0<br>(0 - 0)            |
| Chronic kidney disease                              | 215<br>(170 - 267)       | 2<br>(1 - 4)          | 2<br>(1 - 3)           | 54<br>(40 - 71)         | 71<br>(54 - 93)         | 86<br>(59 - 112)        |
| Chronic kidney disease due to diabetes mellitus     | 0<br>(0 - 1)             | 0<br>(0 - 0)          | 0<br>(0 - 0)           | 0<br>(0 - 0)            | 0<br>(0 - 0)            | 0<br>(0 - 0)            |
| Chronic kidney disease due to hypertension          | 124<br>(95 - 165)        | 0<br>(0 - 1)          | 0<br>(0 - 1)           | 26<br>(18 - 39)         | 45<br>(32 - 60)         | 52<br>(38 - 70)         |
| Chronic kidney disease due to glomerulonephritis    | 29<br>(19 - 37)          | 1<br>(0 - 2)          | 1<br>(1 - 1)           | 12<br>(8 - 18)          | 7<br>(4 - 10)           | 7<br>(4 - 11)           |
| Chronic kidney disease due to other causes          | 62<br>(35 - 90)          | 1<br>(0 - 2)          | 1<br>(0 - 1)           | 15<br>(9 - 23)          | 20<br>(10 - 31)         | 26<br>(11 - 43)         |
| Urinary diseases and male infertility               | 59<br>(46 - 71)          | 1<br>(1 - 3)          | 1<br>(0 - 1)           | 16<br>(12 - 20)         | 17<br>(13 - 22)         | 24<br>(18 - 32)         |
| Interstitial nephritis and urinary tract infections | 26<br>(19 - 34)          | 1<br>(0 - 2)          | 0<br>(0 - 1)           | 8<br>(5 - 11)           | 7<br>(5 - 10)           | 10<br>(7 - 14)          |
| Urolithiasis                                        | 1<br>(1 - 1)             | --                    | 0<br>(0 - 0)           | 0<br>(0 - 0)            | 0<br>(0 - 1)            | 0<br>(0 - 1)            |
| Other urinary diseases                              | 32<br>(24 - 39)          | 0<br>(0 - 1)          | 0<br>(0 - 0)           | 7<br>(5 - 10)           | 10<br>(6 - 14)          | 14<br>(9 - 19)          |
| Gynecological diseases                              | 1<br>(1 - 2)             | --                    | --                     | 1<br>(0 - 1)            | 0<br>(0 - 0)            | 0<br>(0 - 1)            |
| Uterine fibroids                                    | 0<br>(0 - 0)             | --                    | --                     | 0<br>(0 - 0)            | 0<br>(0 - 0)            | 0<br>(0 - 0)            |
| Polycystic ovarian syndrome                         | 0<br>(0 - 0)             | --                    | --                     | 0<br>(0 - 0)            | 0<br>(0 - 0)            | --                      |
| Endometriosis                                       | 0<br>(0 - 0)             | --                    | --                     | 0<br>(0 - 0)            | 0<br>(0 - 0)            | --                      |
| Genital prolapse                                    | 0<br>(0 - 0)             | --                    | --                     | 0<br>(0 - 0)            | 0<br>(0 - 0)            | 0<br>(0 - 0)            |
| Other gynecological diseases                        | 1<br>(0 - 1)             | --                    | --                     | 0<br>(0 - 1)            | 0<br>(0 - 0)            | 0<br>(0 - 0)            |
| Hemoglobinopathies and hemolytic anemias            | 53<br>(36 - 72)          | 5<br>(2 - 11)         | 3<br>(2 - 6)           | 25<br>(17 - 36)         | 9<br>(6 - 12)           | 11<br>(7 - 17)          |
| Thalassemias                                        | 3<br>(2 - 6)             | 2<br>(1 - 4)          | 1<br>(0 - 1)           | 1<br>(1 - 1)            | 0<br>(0 - 0)            | 0<br>(0 - 0)            |
| Sickle cell disorders                               | 13<br>(9 - 19)           | 1<br>(0 - 2)          | 1<br>(0 - 2)           | 9<br>(6 - 14)           | 2<br>(1 - 3)            | 0<br>(0 - 0)            |
| G6PD deficiency                                     | 2<br>(2 - 4)             | 0<br>(0 - 1)          | 0<br>(0 - 0)           | 2<br>(1 - 2)            | 0<br>(0 - 0)            | 0<br>(0 - 0)            |
| Other hemoglobinopathies and hemolytic anemias      | 34<br>(23 - 46)          | 2<br>(1 - 5)          | 1<br>(1 - 2)           | 13<br>(9 - 19)          | 7<br>(4 - 9)            | 11<br>(6 - 16)          |
| Endocrine, metabolic, blood, and immune disorders   | 280<br>(141 - 378)       | 33<br>(11 - 70)       | 8<br>(3 - 16)          | 139<br>(66 - 203)       | 60<br>(31 - 84)         | 40<br>(21 - 55)         |
| Musculoskeletal disorders                           | 35<br>(29 - 44)          | --                    | 1<br>(0 - 2)           | 11<br>(8 - 17)          | 11<br>(8 - 15)          | 12<br>(8 - 16)          |
| Rheumatoid arthritis                                | 12<br>(9 - 16)           | --                    | 0<br>(0 - 0)           | 2<br>(1 - 4)            | 4<br>(3 - 5)            | 6<br>(4 - 8)            |
| Other musculoskeletal disorders                     | 23<br>(19 - 29)          | --                    | 1<br>(0 - 1)           | 9<br>(6 - 13)           | 7<br>(5 - 10)           | 7<br>(4 - 9)            |
| Other non-communicable diseases                     | 252<br>(183 - 348)       | 138<br>(74 - 232)     | 9<br>(5 - 14)          | 33<br>(25 - 42)         | 26<br>(19 - 34)         | 46<br>(35 - 60)         |
| Congenital anomalies                                | 165<br>(101 - 255)       | 126<br>(64 - 215)     | 8<br>(4 - 12)          | 13<br>(9 - 19)          | 7<br>(5 - 11)           | 10<br>(7 - 16)          |
| Neural tube defects                                 | 12<br>(5 - 29)           | 11<br>(3 - 27)        | 0<br>(0 - 1)           | 1<br>(0 - 1)            | 0<br>(0 - 0)            | 0<br>(0 - 0)            |
| Congenital heart anomalies                          | 53<br>(26 - 86)          | 36<br>(12 - 68)       | 4<br>(1 - 6)           | 5<br>(3 - 7)            | 3<br>(2 - 4)            | 6<br>(4 - 9)            |
| Cleft lip and cleft palate                          | 0<br>(0 - 1)             | 0<br>(0 - 1)          | --                     | --                      | --                      | --                      |
| Down syndrome                                       | 13<br>(7 - 24)           | 9<br>(4 - 20)         | 1<br>(0 - 2)           | 2<br>(1 - 3)            | 1<br>(1 - 2)            | 0<br>(0 - 0)            |
| Chromosomal unbalanced rearrangements               | 8<br>(5 - 15)            | 7<br>(4 - 14)         | 0<br>(0 - 0)           | 1<br>(0 - 1)            | 0<br>(0 - 0)            | 0<br>(0 - 0)            |
| Other congenital anomalies                          | 77<br>(46 - 129)         | 62<br>(32 - 112)      | 3<br>(1 - 4)           | 5<br>(3 - 8)            | 3<br>(2 - 6)            | 4<br>(3 - 7)            |
| Skin and subcutaneous diseases                      | 79<br>(62 - 96)          | 3<br>(1 - 8)          | 1<br>(1 - 2)           | 19<br>(14 - 26)         | 36<br>(13 - 25)         | 36<br>(25 - 49)         |
| Cellulitis                                          | 17<br>(10 - 26)          | 1<br>(0 - 2)          | 0<br>(0 - 1)           | 4<br>(2 - 6)            | 5<br>(3 - 8)            | 8<br>(4 - 13)           |
| Pyoderma                                            | 29<br>(21 - 37)          | 2<br>(1 - 5)          | 0<br>(0 - 1)           | 10<br>(7 - 13)          | 8<br>(5 - 11)           | 9<br>(5 - 13)           |

Web Table 31- Namibia deaths with 95% UI by age, sex, and cause in 2013

| Cause                                           | Both Sexes, All Ages | Both Sexes, 0-4 Years | Both Sexes, 5-14 Years | Both Sexes, 15-49 Years | Both Sexes, 50-69 Years | Both Sexes, 70-80 Years |
|-------------------------------------------------|----------------------|-----------------------|------------------------|-------------------------|-------------------------|-------------------------|
| Decubitus ulcer                                 | 30<br>(22 - 39)      | 0<br>(0 - 1)          | 0<br>(0 - 0)           | 5<br>(3 - 6)            | 6<br>(4 - 8)            | 19<br>(13 - 28)         |
| Other skin and subcutaneous diseases            | 3<br>(2 - 4)         | 0<br>(0 - 1)          | 0<br>(0 - 0)           | 1<br>(1 - 2)            | 1<br>(0 - 1)            | 1<br>(0 - 1)            |
| Sudden infant death syndrome                    | 9<br>2,202           | 9<br>92               | --<br>89               | --<br>1,497             | --<br>330               | --<br>195               |
| Injuries                                        | (1,811 - 2,657)      | (48 - 167)            | (63 - 131)             | (1,155 - 1,898)         | (260 - 409)             | (161 - 230)             |
| Transport injuries                              | 499<br>(397 - 632)   | 20<br>(10 - 36)       | 30<br>(20 - 46)        | 353<br>(260 - 466)      | 73<br>(57 - 93)         | 22<br>(18 - 28)         |
| Road injuries                                   | 480<br>(382 - 606)   | 19<br>(9 - 33)        | 29<br>(18 - 42)        | 344<br>(254 - 454)      | 68<br>(53 - 87)         | 21<br>(16 - 26)         |
| Pedestrian road injuries                        | 81<br>(60 - 111)     | 8<br>(3 - 14)         | 12<br>(7 - 19)         | 34<br>(22 - 52)         | 18<br>(13 - 25)         | 10<br>(7 - 13)          |
| Cyclist road injuries                           | 49<br>(36 - 64)      | 2<br>(1 - 4)          | 4<br>(2 - 6)           | 26<br>(17 - 37)         | 13<br>(9 - 18)          | 4<br>(3 - 5)            |
| Motorcyclist road injuries                      | 85<br>(59 - 120)     | 1<br>(0 - 1)          | 1<br>(1 - 2)           | 76<br>(52 - 111)        | 6<br>(4 - 9)            | 1<br>(1 - 2)            |
| Motor vehicle road injuries                     | 258<br>(197 - 334)   | 8<br>(4 - 15)         | 11<br>(7 - 18)         | 204<br>(148 - 267)      | 28<br>(21 - 37)         | 6<br>(4 - 8)            |
| Other road injuries                             | 9<br>(6 - 13)        | 0<br>(0 - 1)          | 0<br>(0 - 1)           | 4<br>(3 - 8)            | 3<br>(1 - 4)            | 1<br>(0 - 1)            |
| Other transport injuries                        | 19<br>(14 - 28)      | 1<br>(1 - 3)          | 2<br>(1 - 3)           | 9<br>(6 - 16)           | 5<br>(4 - 7)            | 2<br>(1 - 2)            |
| Unintentional injuries                          | 727<br>(599 - 921)   | 66<br>(32 - 128)      | 49<br>(32 - 76)        | 332<br>(252 - 457)      | 145<br>(113 - 185)      | 135<br>(105 - 166)      |
| Falls                                           | 114<br>(90 - 145)    | 3<br>(1 - 7)          | 3<br>(1 - 5)           | 51<br>(35 - 73)         | 21<br>(14 - 31)         | 37<br>(26 - 50)         |
| Drowning                                        | 88<br>(64 - 126)     | 18<br>(7 - 44)        | 21<br>(11 - 38)        | 34<br>(22 - 54)         | 9<br>(6 - 13)           | 5<br>(4 - 7)            |
| Fire, heat, and hot substances                  | 99<br>(74 - 146)     | 12<br>(5 - 30)        | 5<br>(3 - 11)          | 42<br>(28 - 64)         | 17<br>(12 - 24)         | 23<br>(14 - 35)         |
| Poisonings                                      | 34<br>(24 - 59)      | 3<br>(1 - 6)          | 1<br>(1 - 2)           | 18<br>(11 - 36)         | 8<br>(5 - 12)           | 5<br>(3 - 7)            |
| Exposure to mechanical forces                   | 138<br>(97 - 210)    | 6<br>(3 - 15)         | 8<br>(5 - 15)          | 96<br>(62 - 158)        | 21<br>(14 - 32)         | 6<br>(5 - 9)            |
| Unintentional firearm injuries                  | 82<br>(48 - 125)     | 1<br>(0 - 3)          | 2<br>(1 - 3)           | 64<br>(36 - 106)        | 11<br>(7 - 17)          | 4<br>(2 - 6)            |
| Unintentional suffocation                       | 7<br>(1 - 12)        | 1<br>(0 - 3)          | 1<br>(0 - 1)           | 4<br>(1 - 7)            | 1<br>(0 - 1)            | 0<br>(0 - 1)            |
| Other exposure to mechanical forces             | 50<br>(33 - 102)     | 4<br>(1 - 11)         | 6<br>(3 - 11)          | 28<br>(17 - 60)         | 10<br>(6 - 16)          | 2<br>(1 - 4)            |
| Adverse effects of medical treatment            | 132<br>(93 - 167)    | 10<br>(4 - 24)        | 3<br>(2 - 7)           | 39<br>(27 - 54)         | 39<br>(23 - 59)         | 40<br>(22 - 60)         |
| Animal contact                                  | 19<br>(12 - 34)      | 2<br>(1 - 7)          | 2<br>(1 - 6)           | 8<br>(4 - 14)           | 4<br>(2 - 7)            | 2<br>(1 - 4)            |
| Venomous animal contact                         | 14<br>(9 - 28)       | 2<br>(1 - 5)          | 2<br>(1 - 4)           | 5<br>(3 - 11)           | 3<br>(2 - 6)            | 2<br>(1 - 3)            |
| Non-venomous animal contact                     | 5<br>(2 - 9)         | 1<br>(0 - 2)          | 1<br>(0 - 2)           | 2<br>(1 - 4)            | 1<br>(0 - 2)            | 1<br>(0 - 1)            |
| Foreign body                                    | 52<br>(33 - 80)      | 10<br>(4 - 24)        | 3<br>(1 - 5)           | 22<br>(13 - 34)         | 9<br>(6 - 14)           | 8<br>(5 - 12)           |
| Pulmonary aspiration and foreign body in airway | 51<br>(32 - 79)      | 10<br>(4 - 24)        | 2<br>(1 - 5)           | 21<br>(12 - 33)         | 9<br>(5 - 14)           | 8<br>(5 - 12)           |
| Foreign body in other body part                 | 2<br>(1 - 2)         | 0<br>(0 - 1)          | 0<br>(0 - 0)           | 1<br>(0 - 1)            | 0<br>(0 - 0)            | 0<br>(0 - 0)            |
| Other unintentional injuries                    | 51<br>(34 - 81)      | 2<br>(1 - 5)          | 2<br>(1 - 4)           | 22<br>(14 - 38)         | 16<br>(10 - 29)         | 9<br>(5 - 13)           |
| Self-harm and interpersonal violence            | 976<br>(641 - 1,298) | 6<br>(3 - 12)         | 9<br>(5 - 17)          | 812<br>(553 - 1,107)    | 112<br>(65 - 155)       | 37<br>(18 - 52)         |
| Self-harm                                       | 569<br>(230 - 776)   | --                    | 4<br>(1 - 9)           | 439<br>(183 - 620)      | 91<br>(36 - 130)        | 35<br>(14 - 50)         |
| Interpersonal violence                          | 407<br>(264 - 618)   | 6<br>(3 - 12)         | 5<br>(3 - 10)          | 372<br>(232 - 581)      | 20<br>(13 - 37)         | 3<br>(1 - 5)            |
| Assault by firearm                              | 104<br>(60 - 188)    | 1<br>(0 - 2)          | 1<br>(0 - 2)           | 96<br>(54 - 176)        | 6<br>(3 - 11)           | 0<br>(0 - 1)            |
| Assault by sharp object                         | 167<br>(101 - 259)   | 1<br>(0 - 2)          | 1<br>(0 - 2)           | 158<br>(93 - 246)       | 7<br>(3 - 12)           | 1<br>(0 - 1)            |
| Assault by other means                          | 135<br>(83 - 223)    | 4<br>(2 - 8)          | 3<br>(2 - 7)           | 119<br>(71 - 196)       | 8<br>(4 - 15)           | 1<br>(1 - 3)            |

Web Table 31- Namibia deaths with 95% UI by age, sex, and cause in 2013

| Cause                                                             | Males, All Ages             | Males, 0-4 Years       | Males, 5-14 Years  | Males, 15-49 Years       | Males, 50-69 Years       | Males, 70-80 Years       |
|-------------------------------------------------------------------|-----------------------------|------------------------|--------------------|--------------------------|--------------------------|--------------------------|
| All causes                                                        | 11,911<br>(10,717 - 13,251) | 1,162<br>(783 - 1,669) | 236<br>(193 - 298) | 5,476<br>(4,741 - 6,160) | 2,942<br>(2,497 - 3,441) | 2,096<br>(1,952 - 2,251) |
| Communicable, maternal, neonatal, and nutritional diseases        | 6,139<br>(5,385 - 6,877)    | 979<br>(685 - 1,373)   | 137<br>(103 - 174) | 3,328<br>(2,793 - 3,871) | 1,168<br>(981 - 1,379)   | 527<br>(445 - 623)       |
| HIV/AIDS and tuberculosis                                         | 3,811<br>(3,142 - 4,490)    | 63<br>(42 - 90)        | 69<br>(40 - 103)   | 2,664<br>(2,130 - 3,232) | 805<br>(623 - 1,003)     | 211<br>(164 - 269)       |
| Tuberculosis                                                      | 1,419<br>(1,050 - 1,840)    | 17<br>(7 - 34)         | 12<br>(7 - 19)     | 785<br>(536 - 1,053)     | 436<br>(298 - 586)       | 169<br>(124 - 225)       |
| HIV/AIDS                                                          | 2,393<br>(1,709 - 3,089)    | 46<br>(29 - 67)        | 57<br>(28 - 93)    | 1,879<br>(1,329 - 2,505) | 370<br>(243 - 528)       | 42<br>(23 - 66)          |
| HIV/AIDS resulting in mycobacterial infection                     | 181<br>(120 - 250)          | 3<br>(2 - 5)           | 4<br>(2 - 6)       | 142<br>(93 - 197)        | 29<br>(18 - 43)          | 3<br>(2 - 5)             |
| HIV/AIDS resulting in other diseases                              | 2,212<br>(1,590 - 2,869)    | 43<br>(27 - 62)        | 53<br>(26 - 86)    | 1,736<br>(1,224 - 2,308) | 341<br>(224 - 486)       | 38<br>(21 - 61)          |
| Diarrhea, lower respiratory, and other common infectious diseases | 1,426<br>(1,146 - 1,746)    | 297<br>(158 - 492)     | 42<br>(27 - 62)    | 507<br>(366 - 676)       | 303<br>(212 - 413)       | 278<br>(208 - 351)       |
| Diarrheal diseases                                                | 488<br>(336 - 660)          | 163<br>(74 - 289)      | 14<br>(6 - 27)     | 144<br>(86 - 225)        | 85<br>(45 - 142)         | 82<br>(47 - 132)         |
| Intestinal infectious diseases                                    | 24<br>(11 - 50)             | 6<br>(2 - 15)          | 7<br>(3 - 14)      | 10<br>(3 - 20)           | 1<br>(0 - 2)             | 0<br>(0 - 1)             |
| Typhoid fever                                                     | 17<br>(7 - 36)              | 4<br>(2 - 10)          | 5<br>(2 - 10)      | 7<br>(3 - 15)            | 1<br>(0 - 2)             | 0<br>(0 - 1)             |
| Paratyphoid fever                                                 | 6<br>(2 - 13)               | 2<br>(1 - 4)           | 2<br>(1 - 4)       | 2<br>(1 - 6)             | 0<br>(0 - 1)             | 0<br>(0 - 0)             |
| Other intestinal infectious diseases                              | 1<br>(0 - 3)                | 0<br>(0 - 2)           | 0<br>(0 - 1)       | 0<br>(0 - 1)             | 0<br>(0 - 0)             | 0<br>(0 - 0)             |
| Lower respiratory infections                                      | 807<br>(630 - 1,016)        | 105<br>(49 - 202)      | 13<br>(7 - 22)     | 298<br>(202 - 420)       | 202<br>(137 - 284)       | 188<br>(136 - 250)       |
| Upper respiratory infections                                      | 1<br>(0 - 1)                | 0<br>(0 - 0)           | 0<br>(0 - 0)       | 0<br>(0 - 1)             | 0<br>(0 - 0)             | 0<br>(0 - 0)             |
| Otitis media                                                      | 0<br>(0 - 1)                | 0<br>(0 - 0)           | 0<br>(0 - 0)       | 0<br>(0 - 0)             | 0<br>(0 - 0)             | 0<br>(0 - 0)             |
| Meningitis                                                        | 88<br>(65 - 119)            | 14<br>(6 - 31)         | 6<br>(3 - 11)      | 50<br>(33 - 75)          | 12<br>(7 - 20)           | 5<br>(3 - 9)             |
| Pneumococcal meningitis                                           | 13<br>(8 - 20)              | 1<br>(0 - 3)           | 1<br>(0 - 2)       | 8<br>(4 - 14)            | 2<br>(1 - 4)             | 1<br>(0 - 2)             |
| H influenzae type B meningitis                                    | 16<br>(10 - 24)             | 5<br>(2 - 12)          | 2<br>(1 - 3)       | 7<br>(4 - 12)            | 1<br>(1 - 2)             | 1<br>(0 - 1)             |
| Meningococcal meningitis                                          | 30<br>(21 - 44)             | 4<br>(2 - 9)           | 2<br>(1 - 4)       | 18<br>(10 - 29)          | 4<br>(2 - 7)             | 2<br>(1 - 3)             |
| Other meningitis                                                  | 30<br>(20 - 42)             | 4<br>(1 - 8)           | 1<br>(1 - 3)       | 18<br>(10 - 28)          | 5<br>(3 - 8)             | 2<br>(1 - 4)             |
| Encephalitis                                                      | 9<br>(6 - 14)               | 2<br>(0 - 4)           | 1<br>(0 - 2)       | 4<br>(3 - 7)             | 1<br>(1 - 2)             | 1<br>(0 - 1)             |
| Diphtheria                                                        | 0<br>(0 - 1)                | 0<br>(0 - 1)           | 0<br>(0 - 0)       | 0<br>(0 - 0)             | 0<br>(0 - 0)             | --<br>(0 - 0)            |
| Whooping cough                                                    | 4<br>(0 - 21)               | 4<br>(0 - 20)          | 0<br>(0 - 1)       | 0<br>(0 - 0)             | 0<br>(0 - 0)             | --<br>(0 - 0)            |
| Tetanus                                                           | 1<br>(1 - 2)                | 0<br>(0 - 0)           | 0<br>(0 - 0)       | 0<br>(0 - 1)             | 0<br>(0 - 1)             | 0<br>(0 - 0)             |
| Measles                                                           | 2<br>(0 - 13)               | 2<br>(0 - 11)          | 0<br>(0 - 1)       | 0<br>(0 - 0)             | 0<br>(0 - 0)             | --<br>(0 - 0)            |
| Varicella and herpes zoster                                       | 0<br>(0 - 1)                | 0<br>(0 - 1)           | 0<br>(0 - 0)       | 0<br>(0 - 0)             | 0<br>(0 - 0)             | 0<br>(0 - 1)             |
| Neglected tropical diseases and malaria                           | 184<br>(121 - 292)          | 38<br>(8 - 116)        | 20<br>(8 - 43)     | 91<br>(55 - 145)         | 25<br>(13 - 45)          | 10<br>(5 - 21)           |
| Malaria                                                           | 158<br>(97 - 267)           | 34<br>(6 - 110)        | 19<br>(7 - 41)     | 76<br>(42 - 132)         | 21<br>(9 - 40)           | 8<br>(3 - 19)            |
| Leishmaniasis                                                     | 1<br>(1 - 1)                | 0<br>(0 - 1)           | 0<br>(0 - 0)       | 0<br>(0 - 1)             | 0<br>(0 - 0)             | 0<br>(0 - 0)             |
| Visceral leishmaniasis                                            | 1<br>(1 - 1)                | 0<br>(0 - 1)           | 0<br>(0 - 0)       | 0<br>(0 - 1)             | 0<br>(0 - 0)             | 0<br>(0 - 0)             |
| Schistosomiasis                                                   | 5<br>(4 - 7)                | 0<br>(0 - 0)           | 0<br>(0 - 0)       | 3<br>(2 - 4)             | 2<br>(1 - 3)             | 1<br>(0 - 1)             |
| Cysticercosis                                                     | 0<br>(0 - 0)                | 0<br>(0 - 0)           | 0<br>(0 - 0)       | 0<br>(0 - 0)             | 0<br>(0 - 0)             | 0<br>(0 - 0)             |
| Cystic echinococcosis                                             | 1<br>(0 - 1)                | 0<br>(0 - 0)           | 0<br>(0 - 0)       | 0<br>(0 - 0)             | 0<br>(0 - 0)             | 0<br>(0 - 0)             |
| Dengue                                                            | 0<br>(0 - 0)                | 0<br>(0 - 0)           | 0<br>(0 - 0)       | 0<br>(0 - 0)             | 0<br>(0 - 0)             | 0<br>(0 - 0)             |
| Rabies                                                            | 0<br>(0 - 1)                | 0<br>(0 - 0)           | 0<br>(0 - 0)       | 0<br>(0 - 0)             | 0<br>(0 - 0)             | 0<br>(0 - 0)             |
| Intestinal nematode infections                                    | 1<br>(0 - 4)                | 0<br>(0 - 2)           | 0<br>(0 - 1)       | 0<br>(0 - 2)             | 0<br>(0 - 1)             | 0<br>(0 - 0)             |
| Ascariasis                                                        | 1<br>(0 - 4)                | 0<br>(0 - 2)           | 0<br>(0 - 1)       | 0<br>(0 - 2)             | 0<br>(0 - 1)             | 0<br>(0 - 0)             |
| Other neglected tropical diseases                                 | 18<br>(11 - 28)             | 3<br>(1 - 7)           | 1<br>(0 - 1)       | 11<br>(6 - 18)           | 2<br>(1 - 4)             | 1<br>(1 - 2)             |
| Maternal disorders                                                | --                          | --                     | --                 | --                       | --                       | --                       |

Web Table 31- Namibia deaths with 95% UI by age, sex, and cause in 2013

| Cause                                                            | Males, All Ages          | Males, 0-4 Years   | Males, 5-14 Years | Males, 15-49 Years   | Males, 50-69 Years       | Males, 70-80 Years       |
|------------------------------------------------------------------|--------------------------|--------------------|-------------------|----------------------|--------------------------|--------------------------|
| Maternal hemorrhage                                              | --                       | --                 | --                | --                   | --                       | --                       |
| Maternal sepsis and other maternal infections                    | --                       | --                 | --                | --                   | --                       | --                       |
| Maternal hypertensive disorders                                  | --                       | --                 | --                | --                   | --                       | --                       |
| Maternal obstructed labor                                        | --                       | --                 | --                | --                   | --                       | --                       |
| Maternal abortive outcome                                        | --                       | --                 | --                | --                   | --                       | --                       |
| Indirect maternal deaths                                         | --                       | --                 | --                | --                   | --                       | --                       |
| Late maternal deaths                                             | --                       | --                 | --                | --                   | --                       | --                       |
| Maternal deaths aggravated by HIV/AIDS                           | --                       | --                 | --                | --                   | --                       | --                       |
| Other maternal disorders                                         | --                       | --                 | --                | --                   | --                       | --                       |
| Neonatal disorders                                               | 516<br>(383 - 679)       | 516<br>(383 - 679) | --                | --                   | --                       | --                       |
| Neonatal preterm birth complications                             | 171<br>(78 - 291)        | 171<br>(78 - 291)  | --                | --                   | --                       | --                       |
| Neonatal encephalopathy due to birth asphyxia and trauma         | 124<br>(55 - 225)        | 124<br>(55 - 225)  | --                | --                   | --                       | --                       |
| Neonatal sepsis and other neonatal infections                    | 47<br>(14 - 104)         | 47<br>(14 - 104)   | --                | --                   | --                       | --                       |
| Hemolytic disease and other neonatal jaundice                    | 2<br>(1 - 4)             | 2<br>(1 - 4)       | --                | --                   | --                       | --                       |
| Other neonatal disorders                                         | 173<br>(62 - 320)        | 173<br>(62 - 320)  | --                | --                   | --                       | --                       |
| Nutritional deficiencies                                         | 114<br>(72 - 190)        | 40<br>(16 - 81)    | 3<br>(2 - 6)      | 27<br>(16 - 53)      | 21<br>(13 - 39)          | 22<br>(13 - 40)          |
| Protein-energy malnutrition                                      | 68<br>(33 - 122)         | 39<br>(16 - 78)    | 2<br>(1 - 4)      | 9<br>(4 - 19)        | 9<br>(3 - 17)            | 9<br>(4 - 18)            |
| Iodine deficiency                                                | 0<br>(0 - 1)             | 0<br>(0 - 0)       | 0<br>(0 - 0)      | 0<br>(0 - 0)         | 0<br>(0 - 0)             | 0<br>(0 - 0)             |
| Iron-deficiency anemia                                           | 40<br>(21 - 82)          | 1<br>(0 - 4)       | 1<br>(0 - 2)      | 16<br>(8 - 34)       | 11<br>(5 - 23)           | 11<br>(5 - 23)           |
| Other nutritional deficiencies                                   | 6<br>(3 - 13)            | 0<br>(0 - 1)       | 0<br>(0 - 0)      | 2<br>(1 - 5)         | 2<br>(1 - 4)             | 2<br>(1 - 4)             |
| Other communicable, maternal, neonatal, and nutritional diseases | 89<br>(55 - 136)         | 26<br>(8 - 54)     | 3<br>(2 - 6)      | 40<br>(22 - 69)      | 13<br>(7 - 24)           | 6<br>(3 - 13)            |
| Sexually transmitted diseases excluding HIV                      | 21<br>(3 - 45)           | 19<br>(2 - 41)     | 1<br>(0 - 3)      | 1<br>(0 - 1)         | 0<br>(0 - 1)             | 0<br>(0 - 1)             |
| Syphilis                                                         | 21<br>(3 - 44)           | 19<br>(2 - 41)     | 1<br>(0 - 3)      | 0<br>(0 - 1)         | 0<br>(0 - 1)             | 0<br>(0 - 0)             |
| Chlamydial infection                                             | --                       | --                 | --                | --                   | --                       | --                       |
| Gonococcal infection                                             | 0<br>(0 - 0)             | --                 | 0<br>(0 - 0)      | 0<br>(0 - 0)         | 0<br>(0 - 0)             | 0<br>(0 - 0)             |
| Other sexually transmitted diseases                              | 0<br>(0 - 0)             | --                 | 0<br>(0 - 0)      | 0<br>(0 - 0)         | 0<br>(0 - 0)             | 0<br>(0 - 0)             |
| Hepatitis                                                        | 9<br>(7 - 14)            | 1<br>(0 - 2)       | 0<br>(0 - 1)      | 4<br>(3 - 7)         | 3<br>(2 - 4)             | 1<br>(1 - 2)             |
| Acute hepatitis A                                                | 1<br>(0 - 2)             | 0<br>(0 - 1)       | 0<br>(0 - 0)      | 0<br>(0 - 1)         | 0<br>(0 - 0)             | 0<br>(0 - 0)             |
| Acute hepatitis B                                                | 6<br>(4 - 9)             | 0<br>(0 - 1)       | 0<br>(0 - 0)      | 2<br>(1 - 4)         | 2<br>(1 - 3)             | 1<br>(1 - 2)             |
| Acute hepatitis C                                                | 0<br>(0 - 0)             | --                 | 0<br>(0 - 0)      | 0<br>(0 - 0)         | 0<br>(0 - 0)             | 0<br>(0 - 0)             |
| Acute hepatitis E                                                | 2<br>(1 - 4)             | 0<br>(0 - 0)       | 0<br>(0 - 0)      | 2<br>(1 - 3)         | 0<br>(0 - 1)             | 0<br>(0 - 0)             |
| Other infectious diseases                                        | 58<br>(35 - 96)          | 6<br>(2 - 19)      | 2<br>(1 - 4)      | 35<br>(18 - 63)      | 10<br>(4 - 21)           | 5<br>(2 - 11)            |
| Non-communicable diseases                                        | 4,125<br>(3,516 - 4,810) | 129<br>(68 - 213)  | 37<br>(26 - 52)   | 960<br>(725 - 1,201) | 1,533<br>(1,211 - 1,910) | 1,466<br>(1,337 - 1,601) |
| Neoplasms                                                        | 269<br>(215 - 336)       | 5<br>(2 - 11)      | 6<br>(3 - 9)      | 54<br>(40 - 72)      | 114<br>(86 - 150)        | 89<br>(74 - 110)         |
| Esophageal cancer                                                | 18<br>(12 - 29)          | --                 | --                | 2<br>(1 - 4)         | 10<br>(6 - 16)           | 6<br>(4 - 9)             |
| Stomach cancer                                                   | 7<br>(6 - 9)             | --                 | --                | 1<br>(1 - 1)         | 3<br>(2 - 4)             | 3<br>(2 - 4)             |
| Liver cancer                                                     | 15<br>(11 - 20)          | --                 | 0<br>(0 - 0)      | 5<br>(3 - 6)         | 7<br>(5 - 11)            | 3<br>(2 - 4)             |
| Liver cancer due to hepatitis B                                  | 5<br>(3 - 9)             | --                 | 0<br>(0 - 0)      | 2<br>(1 - 4)         | 3<br>(1 - 5)             | 1<br>(0 - 1)             |
| Liver cancer due to hepatitis C                                  | 6<br>(3 - 9)             | --                 | 0<br>(0 - 0)      | 1<br>(1 - 3)         | 3<br>(1 - 5)             | 1<br>(1 - 2)             |
| Liver cancer due to alcohol use                                  | 2<br>(1 - 4)             | --                 | --                | 0<br>(0 - 1)         | 1<br>(1 - 2)             | 1<br>(0 - 1)             |

Web Table 31- Namibia deaths with 95% UI by age, sex, and cause in 2013

| Cause                                         | Males, All Ages          | Males, 0-4 Years | Males, 5-14 Years | Males, 15-49 Years | Males, 50-69 Years | Males, 70-80 Years |
|-----------------------------------------------|--------------------------|------------------|-------------------|--------------------|--------------------|--------------------|
| Liver cancer due to other causes              | 1<br>(1 - 2)             | --               | 0<br>(0 - 0)      | 1<br>(0 - 1)       | 1<br>(0 - 1)       | 0<br>(0 - 0)       |
| Larynx cancer                                 | 11<br>(8 - 17)           | --               | --                | 1<br>(1 - 2)       | 5<br>(3 - 8)       | 5<br>(3 - 7)       |
| Tracheal, bronchus and lung cancer            | 21<br>(16 - 26)          | --               | --                | 3<br>(2 - 4)       | 12<br>(9 - 16)     | 6<br>(5 - 7)       |
| Breast cancer                                 | 3<br>(2 - 4)             | --               | --                | 1<br>(0 - 1)       | 1<br>(1 - 2)       | 1<br>(0 - 1)       |
| Cervical cancer                               | --                       | --               | --                | --                 | --                 | --                 |
| Uterine cancer                                | --                       | --               | --                | --                 | --                 | --                 |
| Prostate cancer                               | 21<br>(13 - 41)          | --               | --                | 0<br>(0 - 1)       | 5<br>(3 - 10)      | 16<br>(9 - 31)     |
| Colon and rectum cancer                       | 16<br>(13 - 19)          | --               | --                | 3<br>(2 - 4)       | 6<br>(5 - 8)       | 7<br>(5 - 8)       |
| Lip and oral cavity cancer                    | 15<br>(11 - 21)          | --               | --                | 3<br>(2 - 4)       | 7<br>(5 - 11)      | 5<br>(3 - 7)       |
| Nasopharynx cancer                            | 2<br>(2 - 3)             | --               | 0<br>(0 - 0)      | 1<br>(1 - 2)       | 1<br>(1 - 1)       | 0<br>(0 - 0)       |
| Other pharynx cancer                          | 13<br>(9 - 17)           | --               | --                | 1<br>(1 - 2)       | 9<br>(6 - 13)      | 2<br>(2 - 4)       |
| Gallbladder and biliary tract cancer          | 1<br>(1 - 2)             | --               | --                | 0<br>(0 - 0)       | 0<br>(0 - 1)       | 1<br>(0 - 1)       |
| Pancreatic cancer                             | 26<br>(21 - 32)          | --               | --                | 3<br>(2 - 4)       | 13<br>(10 - 17)    | 10<br>(8 - 13)     |
| Malignant skin melanoma                       | 2<br>(0 - 8)             | --               | --                | 1<br>(0 - 2)       | 1<br>(0 - 3)       | 1<br>(0 - 2)       |
| Non-melanoma skin cancer                      | 7<br>(4 - 10)            | --               | --                | 3<br>(1 - 2)       | 3<br>(2 - 4)       | 3<br>(1 - 4)       |
| Ovarian cancer                                | --                       | --               | --                | --                 | --                 | --                 |
| Testicular cancer                             | 1<br>(1 - 2)             | --               | --                | 1<br>(0 - 1)       | 0<br>(0 - 1)       | 0<br>(0 - 0)       |
| Kidney cancer                                 | 3<br>(3 - 4)             | 0<br>(0 - 0)     | 0<br>(0 - 0)      | 1<br>(1 - 1)       | 2<br>(1 - 2)       | 1<br>(0 - 1)       |
| Bladder cancer                                | 5<br>(4 - 8)             | --               | --                | 1<br>(0 - 1)       | 3<br>(1 - 3)       | 2<br>(2 - 5)       |
| Brain and nervous system cancer               | 5<br>(3 - 9)             | 0<br>(0 - 1)     | 0<br>(0 - 1)      | 1<br>(1 - 3)       | 2<br>(1 - 4)       | 1<br>(0 - 1)       |
| Thyroid cancer                                | 1<br>(1 - 2)             | --               | 0<br>(0 - 0)      | 0<br>(0 - 1)       | 0<br>(0 - 1)       | 0<br>(0 - 1)       |
| Mesothelioma                                  | 1<br>(0 - 1)             | --               | --                | 0<br>(0 - 0)       | 0<br>(0 - 1)       | 0<br>(0 - 0)       |
| Hodgkin lymphoma                              | 1<br>(1 - 3)             | 0<br>(0 - 0)     | 0<br>(0 - 0)      | 1<br>(0 - 1)       | 0<br>(0 - 1)       | 0<br>(0 - 0)       |
| Non-Hodgkin lymphoma                          | 17<br>(13 - 26)          | 1<br>(0 - 1)     | 1<br>(0 - 2)      | 6<br>(4 - 9)       | 6<br>(3 - 9)       | 4<br>(2 - 7)       |
| Multiple myeloma                              | 3<br>(2 - 5)             | --               | --                | 1<br>(0 - 1)       | 1<br>(1 - 2)       | 1<br>(1 - 2)       |
| Leukemia                                      | 8<br>(6 - 10)            | 0<br>(0 - 1)     | 0<br>(0 - 1)      | 3<br>(2 - 4)       | 2<br>(2 - 3)       | 2<br>(2 - 3)       |
| Other neoplasms                               | 46<br>(36 - 58)          | 4<br>(2 - 9)     | 4<br>(2 - 6)      | 13<br>(9 - 19)     | 15<br>(10 - 21)    | 10<br>(7 - 14)     |
| Cardiovascular diseases                       | 1,669<br>(1,417 - 1,955) | 4<br>(2 - 8)     | 5<br>(3 - 8)      | 264<br>(195 - 339) | 693<br>(547 - 878) | 702<br>(615 - 786) |
| Rheumatic heart disease                       | 23<br>(16 - 44)          | 0<br>(0 - 0)     | 1<br>(0 - 2)      | 9<br>(5 - 20)      | 6<br>(4 - 12)      | 7<br>(5 - 11)      |
| Ischemic heart disease                        | 641<br>(488 - 789)       | 0<br>(0 - 1)     | 0<br>(0 - 1)      | 88<br>(60 - 119)   | 277<br>(205 - 365) | 275<br>(202 - 335) |
| Cerebrovascular disease                       | 598<br>(478 - 743)       | 1<br>(0 - 2)     | 2<br>(1 - 3)      | 91<br>(63 - 125)   | 242<br>(174 - 324) | 262<br>(209 - 322) |
| Ischemic stroke                               | 276<br>(195 - 349)       | 0<br>(0 - 0)     | 0<br>(0 - 0)      | 16<br>(9 - 24)     | 106<br>(70 - 149)  | 154<br>(110 - 196) |
| Hemorrhagic stroke                            | 322<br>(240 - 439)       | 1<br>(0 - 2)     | 2<br>(1 - 3)      | 76<br>(52 - 104)   | 136<br>(91 - 197)  | 109<br>(78 - 155)  |
| Hypertensive heart disease                    | 158<br>(93 - 232)        | 0<br>(0 - 0)     | 0<br>(0 - 0)      | 22<br>(11 - 36)    | 66<br>(36 - 104)   | 70<br>(39 - 103)   |
| Cardiomyopathy and myocarditis                | 123<br>(78 - 169)        | 2<br>(1 - 3)     | 1<br>(1 - 2)      | 28<br>(17 - 44)    | 55<br>(31 - 82)    | 36<br>(20 - 55)    |
| Atrial fibrillation and flutter               | 2<br>(1 - 4)             | --               | --                | 0<br>(0 - 0)       | 1<br>(0 - 1)       | 1<br>(1 - 3)       |
| Aortic aneurysm                               | 27<br>(16 - 39)          | --               | --                | 2<br>(1 - 3)       | 11<br>(6 - 17)     | 14<br>(8 - 21)     |
| Peripheral vascular disease                   | 7<br>(4 - 11)            | --               | --                | 1<br>(0 - 1)       | 3<br>(2 - 5)       | 4<br>(2 - 6)       |
| Endocarditis                                  | 10<br>(6 - 15)           | 1<br>(0 - 2)     | 0<br>(0 - 1)      | 3<br>(2 - 5)       | 3<br>(2 - 5)       | 3<br>(1 - 4)       |
| Other cardiovascular and circulatory diseases | 80<br>(58 - 107)         | 1<br>(0 - 1)     | 1<br>(0 - 1)      | 19<br>(13 - 28)    | 29<br>(19 - 45)    | 30<br>(20 - 42)    |

Web Table 31- Namibia deaths with 95% UI by age, sex, and cause in 2013

| Cause                                               | Males, All Ages    | Males, 0-4 Years | Males, 5-14 Years | Males, 15-49 Years | Males, 50-69 Years | Males, 70-80 Years |
|-----------------------------------------------------|--------------------|------------------|-------------------|--------------------|--------------------|--------------------|
| Chronic respiratory diseases                        | 706<br>(564 - 923) | 5<br>(2 - 11)    | 3<br>(2 - 5)      | 104<br>(73 - 152)  | 284<br>(210 - 391) | 310<br>(248 - 401) |
| Chronic obstructive pulmonary disease               | 452<br>(354 - 605) | 2<br>(0 - 4)     | 1<br>(0 - 1)      | 48<br>(31 - 73)    | 181<br>(130 - 253) | 222<br>(173 - 299) |
| Pneumoconiosis                                      | 40<br>(26 - 61)    | 0<br>(0 - 0)     | 0<br>(0 - 0)      | 7<br>(3 - 12)      | 16<br>(10 - 26)    | 18<br>(11 - 27)    |
| Silicosis                                           | 8<br>(5 - 13)      | 0<br>(0 - 0)     | 0<br>(0 - 0)      | 1<br>(0 - 2)       | 3<br>(2 - 5)       | 5<br>(3 - 7)       |
| Asbestosis                                          | 10<br>(6 - 17)     | 0<br>(0 - 0)     | 0<br>(0 - 0)      | 1<br>(1 - 3)       | 4<br>(2 - 7)       | 5<br>(3 - 8)       |
| Coal workers pneumoconiosis                         | 8<br>(5 - 13)      | 0<br>(0 - 0)     | 0<br>(0 - 0)      | 1<br>(1 - 2)       | 4<br>(2 - 6)       | 3<br>(2 - 5)       |
| Other pneumoconiosis                                | 13<br>(8 - 22)     | 0<br>(0 - 0)     | 0<br>(0 - 0)      | 3<br>(1 - 5)       | 6<br>(3 - 10)      | 5<br>(3 - 9)       |
| Asthma                                              | 177<br>(127 - 248) | 2<br>(1 - 5)     | 2<br>(1 - 3)      | 43<br>(27 - 68)    | 75<br>(50 - 111)   | 55<br>(36 - 80)    |
| Interstitial lung disease and pulmonary sarcoidosis | 26<br>(6 - 48)     | 1<br>(0 - 2)     | 0<br>(0 - 1)      | 5<br>(1 - 11)      | 10<br>(2 - 20)     | 10<br>(2 - 21)     |
| Other chronic respiratory diseases                  | 11<br>(7 - 18)     | 1<br>(0 - 2)     | 0<br>(0 - 1)      | 2<br>(1 - 4)       | 3<br>(2 - 5)       | 5<br>(3 - 8)       |
| Cirrhosis                                           | 132<br>(80 - 186)  | 1<br>(0 - 2)     | 1<br>(0 - 1)      | 46<br>(26 - 69)    | 59<br>(34 - 90)    | 25<br>(15 - 36)    |
| Cirrhosis due to hepatitis B                        | 18<br>(9 - 30)     | 0<br>(0 - 0)     | 0<br>(0 - 0)      | 6<br>(3 - 11)      | 8<br>(4 - 15)      | 3<br>(1 - 6)       |
| Cirrhosis due to hepatitis C                        | 12<br>(6 - 20)     | 0<br>(0 - 0)     | 0<br>(0 - 0)      | 3<br>(1 - 7)       | 5<br>(2 - 10)      | 3<br>(1 - 5)       |
| Cirrhosis due to alcohol use                        | 84<br>(49 - 124)   | --               | --                | 27<br>(15 - 42)    | 40<br>(22 - 62)    | 17<br>(10 - 26)    |
| Cirrhosis due to other causes                       | 18<br>(8 - 32)     | 1<br>(0 - 2)     | 1<br>(0 - 1)      | 9<br>(4 - 17)      | 6<br>(2 - 12)      | 2<br>(1 - 3)       |
| Digestive diseases                                  | 210<br>(162 - 270) | 3<br>(1 - 7)     | 3<br>(2 - 5)      | 87<br>(61 - 118)   | 66<br>(46 - 91)    | 51<br>(39 - 66)    |
| Peptic ulcer disease                                | 47<br>(32 - 70)    | 0<br>(0 - 1)     | 0<br>(0 - 0)      | 17<br>(10 - 27)    | 17<br>(10 - 26)    | 13<br>(8 - 21)     |
| Gastritis and duodenitis                            | 12<br>(6 - 19)     | 0<br>(0 - 0)     | 0<br>(0 - 0)      | 4<br>(2 - 7)       | 4<br>(2 - 7)       | 4<br>(2 - 6)       |
| Appendicitis                                        | 7<br>(4 - 10)      | 0<br>(0 - 0)     | 1<br>(0 - 1)      | 3<br>(2 - 5)       | 2<br>(1 - 3)       | 1<br>(1 - 2)       |
| Paralytic ileus and intestinal obstruction          | 33<br>(19 - 50)    | 1<br>(0 - 2)     | 1<br>(0 - 2)      | 11<br>(5 - 18)     | 10<br>(5 - 17)     | 10<br>(6 - 16)     |
| Inguinal, femoral, and abdominal hernia             | 3<br>(2 - 6)       | 0<br>(0 - 0)     | 0<br>(0 - 0)      | 1<br>(0 - 2)       | 1<br>(1 - 2)       | 1<br>(1 - 2)       |
| Inflammatory bowel disease                          | 39<br>(26 - 53)    | 1<br>(0 - 3)     | 1<br>(0 - 1)      | 22<br>(14 - 31)    | 10<br>(5 - 15)     | 6<br>(4 - 9)       |
| Vascular intestinal disorders                       | 3<br>(1 - 8)       | 0<br>(0 - 0)     | 0<br>(0 - 0)      | 1<br>(0 - 2)       | 1<br>(0 - 3)       | 1<br>(0 - 3)       |
| Gallbladder and biliary diseases                    | 14<br>(8 - 19)     | 0<br>(0 - 0)     | 0<br>(0 - 0)      | 3<br>(2 - 5)       | 5<br>(3 - 8)       | 6<br>(3 - 9)       |
| Pancreatitis                                        | 24<br>(15 - 36)    | 0<br>(0 - 0)     | 0<br>(0 - 0)      | 14<br>(8 - 22)     | 7<br>(4 - 12)      | 3<br>(2 - 5)       |
| Other digestive diseases                            | 27<br>(19 - 39)    | 0<br>(0 - 1)     | 0<br>(0 - 1)      | 11<br>(7 - 17)     | 9<br>(5 - 13)      | 6<br>(4 - 9)       |
| Neurological disorders                              | 165<br>(128 - 205) | 4<br>(1 - 10)    | 5<br>(2 - 10)     | 58<br>(36 - 83)    | 35<br>(23 - 50)    | 63<br>(51 - 76)    |
| Alzheimer disease and other dementias               | 49<br>(39 - 61)    | --               | --                | 0<br>(0 - 0)       | 5<br>(3 - 6)       | 44<br>(35 - 56)    |
| Parkinson disease                                   | 6<br>(4 - 10)      | --               | --                | 0<br>(0 - 0)       | 1<br>(1 - 2)       | 5<br>(3 - 8)       |
| Epilepsy                                            | 100<br>(68 - 135)  | 3<br>(1 - 9)     | 4<br>(2 - 9)      | 55<br>(34 - 80)    | 26<br>(16 - 40)    | 12<br>(7 - 18)     |
| Multiple sclerosis                                  | 0<br>(0 - 1)       | --               | --                | 0<br>(0 - 0)       | 0<br>(0 - 0)       | 0<br>(0 - 0)       |
| Other neurological disorders                        | 9<br>(6 - 11)      | 1<br>(0 - 1)     | 0<br>(0 - 1)      | 3<br>(2 - 4)       | 3<br>(2 - 4)       | 2<br>(1 - 3)       |
| Mental and substance use disorders                  | 198<br>(143 - 261) | 3<br>(1 - 5)     | 0<br>(0 - 0)      | 161<br>(113 - 218) | 24<br>(15 - 35)    | 10<br>(7 - 14)     |
| Schizophrenia                                       | 7<br>(4 - 10)      | --               | --                | 3<br>(2 - 5)       | 2<br>(1 - 4)       | 1<br>(1 - 2)       |
| Alcohol use disorders                               | 66<br>(36 - 97)    | --               | --                | 45<br>(25 - 72)    | 17<br>(9 - 28)     | 3<br>(2 - 5)       |
| Drug use disorders                                  | 125<br>(89 - 165)  | 3<br>(1 - 5)     | --                | 113<br>(78 - 152)  | 4<br>(3 - 5)       | 6<br>(4 - 8)       |
| Opioid use disorders                                | 13<br>(9 - 18)     | 0<br>(0 - 1)     | --                | 12<br>(8 - 17)     | 0<br>(0 - 1)       | 1<br>(0 - 1)       |
| Cocaine use disorders                               | 0<br>(0 - 1)       | 0<br>(0 - 0)     | --                | 0<br>(0 - 1)       | 0<br>(0 - 0)       | 0<br>(0 - 0)       |
| Amphetamine use disorders                           | 0<br>(0 - 0)       | 0<br>(0 - 0)     | --                | 0<br>(0 - 0)       | 0<br>(0 - 0)       | 0<br>(0 - 0)       |
| Other drug use disorders                            | 111<br>(79 - 147)  | 2<br>(1 - 4)     | --                | 100<br>(69 - 134)  | 4<br>(2 - 5)       | 5<br>(3 - 7)       |

Web Table 31- Namibia deaths with 95% UI by age, sex, and cause in 2013

| Cause                                               | Males, All Ages    | Males, 0-4 Years | Males, 5-14 Years | Males, 15-49 Years | Males, 50-69 Years | Males, 70-80 Years |
|-----------------------------------------------------|--------------------|------------------|-------------------|--------------------|--------------------|--------------------|
| Eating disorders                                    | 0<br>(0 - 0)       | --               | 0<br>(0 - 0)      | 0<br>(0 - 0)       | --                 | --                 |
| Anorexia nervosa                                    | 0<br>(0 - 0)       | --               | 0<br>(0 - 0)      | 0<br>(0 - 0)       | --                 | --                 |
| Diabetes, urogenital, blood, and endocrine diseases | 627<br>(491 - 751) | 22<br>(8 - 44)   | 9<br>(5 - 14)     | 164<br>(112 - 217) | 237<br>(177 - 305) | 195<br>(156 - 235) |
| Diabetes mellitus                                   | 304<br>(246 - 369) | 0<br>(0 - 1)     | 0<br>(0 - 1)      | 43<br>(30 - 58)    | 145<br>(105 - 190) | 116<br>(89 - 149)  |
| Acute glomerulonephritis                            | 1<br>(0 - 1)       | 0<br>(0 - 0)     | 0<br>(0 - 0)      | 0<br>(0 - 0)       | 0<br>(0 - 0)       | 0<br>(0 - 0)       |
| Chronic kidney disease                              | 125<br>(94 - 164)  | 1<br>(0 - 3)     | 1<br>(1 - 2)      | 34<br>(24 - 49)    | 44<br>(31 - 61)    | 45<br>(30 - 61)    |
| Chronic kidney disease due to diabetes mellitus     | 0<br>(0 - 0)       | 0<br>(0 - 0)     | 0<br>(0 - 0)      | 0<br>(0 - 0)       | 0<br>(0 - 0)       | 0<br>(0 - 0)       |
| Chronic kidney disease due to hypertension          | 72<br>(51 - 102)   | 0<br>(0 - 0)     | 0<br>(0 - 0)      | 17<br>(11 - 28)    | 27<br>(18 - 40)    | 27<br>(18 - 40)    |
| Chronic kidney disease due to glomerulonephritis    | 18<br>(10 - 25)    | 0<br>(0 - 1)     | 1<br>(0 - 1)      | 8<br>(4 - 11)      | 4<br>(2 - 7)       | 5<br>(2 - 8)       |
| Chronic kidney disease due to other causes          | 35<br>(16 - 55)    | 0<br>(0 - 2)     | 0<br>(0 - 1)      | 9<br>(4 - 16)      | 12<br>(5 - 20)     | 13<br>(4 - 23)     |
| Urinary diseases and male infertility               | 35<br>(26 - 45)    | 1<br>(0 - 2)     | 0<br>(0 - 1)      | 10<br>(7 - 13)     | 11<br>(8 - 16)     | 13<br>(9 - 18)     |
| Interstitial nephritis and urinary tract infections | 12<br>(8 - 17)     | 1<br>(0 - 1)     | 0<br>(0 - 0)      | 4<br>(2 - 5)       | 4<br>(2 - 6)       | 4<br>(2 - 7)       |
| Urolithiasis                                        | 1<br>(0 - 1)       | --               | 0<br>(0 - 0)      | 0<br>(0 - 0)       | 0<br>(0 - 1)       | 0<br>(0 - 0)       |
| Other urinary diseases                              | 23<br>(16 - 30)    | 0<br>(0 - 1)     | 0<br>(0 - 0)      | 6<br>(4 - 8)       | 8<br>(5 - 11)      | 9<br>(5 - 13)      |
| Gynecological diseases                              | --                 | --               | --                | --                 | --                 | --                 |
| Uterine fibroids                                    | --                 | --               | --                | --                 | --                 | --                 |
| Polycystic ovarian syndrome                         | --                 | --               | --                | --                 | --                 | --                 |
| Endometriosis                                       | --                 | --               | --                | --                 | --                 | --                 |
| Genital prolapse                                    | --                 | --               | --                | --                 | --                 | --                 |
| Other gynecological diseases                        | --                 | --               | --                | --                 | --                 | --                 |
| Hemoglobinopathies and hemolytic anemias            | 22<br>(12 - 32)    | 2<br>(1 - 6)     | 2<br>(1 - 3)      | 10<br>(5 - 15)     | 4<br>(2 - 6)       | 4<br>(2 - 6)       |
| Thalassemias                                        | 1<br>(1 - 2)       | 1<br>(0 - 2)     | 0<br>(0 - 0)      | 0<br>(0 - 0)       | 0<br>(0 - 0)       | 0<br>(0 - 0)       |
| Sickle cell disorders                               | 5<br>(3 - 8)       | 1<br>(0 - 2)     | 1<br>(0 - 1)      | 3<br>(2 - 5)       | 1<br>(0 - 1)       | 0<br>(0 - 0)       |
| G6PD deficiency                                     | 1<br>(1 - 2)       | 0<br>(0 - 1)     | 0<br>(0 - 0)      | 1<br>(0 - 1)       | 0<br>(0 - 0)       | 0<br>(0 - 0)       |
| Other hemoglobinopathies and hemolytic anemias      | 14<br>(8 - 21)     | 1<br>(0 - 2)     | 1<br>(0 - 1)      | 6<br>(3 - 9)       | 3<br>(2 - 5)       | 4<br>(2 - 6)       |
| Endocrine, metabolic, blood, and immune disorders   | 139<br>(64 - 190)  | 17<br>(5 - 38)   | 5<br>(2 - 10)     | 67<br>(28 - 101)   | 34<br>(15 - 51)    | 16<br>(8 - 24)     |
| Musculoskeletal disorders                           | 16<br>(10 - 21)    | --               | 0<br>(0 - 1)      | 5<br>(4 - 8)       | 5<br>(3 - 8)       | 5<br>(2 - 7)       |
| Rheumatoid arthritis                                | 5<br>(3 - 7)       | --               | 0<br>(0 - 0)      | 1<br>(1 - 2)       | 2<br>(1 - 3)       | 2<br>(1 - 3)       |
| Other musculoskeletal disorders                     | 11<br>(7 - 14)     | --               | 0<br>(0 - 1)      | 4<br>(3 - 6)       | 4<br>(2 - 5)       | 3<br>(1 - 4)       |
| Other non-communicable diseases                     | 134<br>(88 - 188)  | 81<br>(40 - 138) | 5<br>(3 - 8)      | 17<br>(12 - 23)    | 14<br>(9 - 20)     | 17<br>(11 - 23)    |
| Congenital anomalies                                | 94<br>(52 - 148)   | 74<br>(36 - 128) | 4<br>(2 - 8)      | 7<br>(4 - 12)      | 4<br>(3 - 7)       | 4<br>(3 - 7)       |
| Neural tube defects                                 | 7<br>(2 - 20)      | 6<br>(1 - 19)    | 0<br>(0 - 0)      | 0<br>(0 - 1)       | 0<br>(0 - 0)       | 0<br>(0 - 0)       |
| Congenital heart anomalies                          | 30<br>(14 - 51)    | 21<br>(7 - 43)   | 2<br>(1 - 4)      | 3<br>(2 - 4)       | 1<br>(1 - 2)       | 2<br>(1 - 3)       |
| Cleft lip and cleft palate                          | 0<br>(0 - 0)       | 0<br>(0 - 0)     | --                | --                 | --                 | --                 |
| Down syndrome                                       | 8<br>(4 - 17)      | 6<br>(2 - 15)    | 0<br>(0 - 1)      | 1<br>(1 - 2)       | 1<br>(0 - 1)       | 0<br>(0 - 0)       |
| Chromosomal unbalanced rearrangements               | 4<br>(2 - 9)       | 4<br>(1 - 9)     | 0<br>(0 - 0)      | 0<br>(0 - 0)       | 0<br>(0 - 0)       | 0<br>(0 - 0)       |
| Other congenital anomalies                          | 44<br>(24 - 82)    | 37<br>(17 - 73)  | 1<br>(1 - 3)      | 2<br>(1 - 5)       | 2<br>(1 - 3)       | 2<br>(1 - 4)       |
| Skin and subcutaneous diseases                      | 35<br>(24 - 45)    | 1<br>(0 - 4)     | 1<br>(0 - 1)      | 10<br>(6 - 14)     | 10<br>(6 - 15)     | 13<br>(8 - 19)     |
| Cellulitis                                          | 7<br>(4 - 12)      | 0<br>(0 - 1)     | 0<br>(0 - 0)      | 2<br>(1 - 3)       | 3<br>(1 - 5)       | 3<br>(1 - 5)       |
| Pyoderma                                            | 15<br>(10 - 20)    | 1<br>(0 - 3)     | 0<br>(0 - 0)      | 6<br>(3 - 8)       | 4<br>(2 - 7)       | 4<br>(2 - 6)       |



Web Table 31- Namibia deaths with 95% UI by age, sex, and cause in 2013

| Cause                                           | Males, All Ages          | Males, 0-4 Years | Males, 5-14 Years | Males, 15-49 Years     | Males, 50-69 Years | Males, 70-80 Years |
|-------------------------------------------------|--------------------------|------------------|-------------------|------------------------|--------------------|--------------------|
| Decubitus ulcer                                 | 12<br>(7 - 16)           | 0<br>(0 - 0)     | 0<br>(0 - 0)      | 2<br>(1 - 3)           | 3<br>(2 - 5)       | 6<br>(3 - 10)      |
| Other skin and subcutaneous diseases            | 1<br>(1 - 2)             | 0<br>(0 - 0)     | 0<br>(0 - 0)      | 0<br>(0 - 1)           | 0<br>(0 - 1)       | 0<br>(0 - 0)       |
| Sudden infant death syndrome                    | 5<br>(1 - 18)            | 5<br>(1 - 18)    | --                | --                     | --                 | --                 |
| Injuries                                        | 1,646<br>(1,299 - 2,060) | 54<br>(27 - 102) | 61<br>(43 - 90)   | 1,187<br>(872 - 1,543) | 241<br>(173 - 314) | 103<br>(82 - 125)  |
| Transport injuries                              | 364<br>(273 - 480)       | 12<br>(5 - 24)   | 21<br>(13 - 32)   | 266<br>(188 - 367)     | 49<br>(35 - 67)    | 15<br>(12 - 20)    |
| Road injuries                                   | 351<br>(264 - 463)       | 11<br>(5 - 22)   | 20<br>(12 - 30)   | 260<br>(183 - 357)     | 46<br>(33 - 64)    | 14<br>(11 - 19)    |
| Pedestrian road injuries                        | 55<br>(37 - 80)          | 5<br>(2 - 10)    | 8<br>(5 - 14)     | 24<br>(14 - 40)        | 12<br>(7 - 19)     | 6<br>(4 - 9)       |
| Cyclist road injuries                           | 40<br>(28 - 53)          | 1<br>(0 - 4)     | 3<br>(2 - 6)      | 22<br>(14 - 33)        | 10<br>(6 - 15)     | 3<br>(2 - 4)       |
| Motorcyclist road injuries                      | 78<br>(52 - 113)         | 1<br>(0 - 1)     | 1<br>(0 - 2)      | 70<br>(46 - 104)       | 5<br>(3 - 8)       | 1<br>(1 - 1)       |
| Motor vehicle road injuries                     | 171<br>(122 - 237)       | 4<br>(2 - 9)     | 7<br>(4 - 11)     | 140<br>(95 - 198)      | 17<br>(11 - 25)    | 4<br>(2 - 6)       |
| Other road injuries                             | 8<br>(5 - 13)            | 0<br>(0 - 1)     | 0<br>(0 - 1)      | 4<br>(2 - 8)           | 3<br>(1 - 4)       | 1<br>(0 - 1)       |
| Other transport injuries                        | 13<br>(9 - 21)           | 1<br>(0 - 2)     | 1<br>(1 - 2)      | 7<br>(4 - 13)          | 2<br>(1 - 4)       | 1<br>(1 - 2)       |
| Unintentional injuries                          | 489<br>(388 - 620)       | 39<br>(18 - 78)  | 34<br>(23 - 52)   | 255<br>(183 - 351)     | 98<br>(71 - 134)   | 63<br>(48 - 81)    |
| Falls                                           | 80<br>(59 - 109)         | 2<br>(1 - 5)     | 2<br>(1 - 4)      | 44<br>(29 - 67)        | 17<br>(11 - 27)    | 14<br>(9 - 22)     |
| Drowning                                        | 67<br>(47 - 96)          | 12<br>(4 - 31)   | 16<br>(8 - 30)    | 30<br>(19 - 48)        | 6<br>(4 - 10)      | 3<br>(2 - 4)       |
| Fire, heat, and hot substances                  | 52<br>(37 - 73)          | 6<br>(2 - 18)    | 3<br>(2 - 6)      | 24<br>(15 - 38)        | 9<br>(6 - 14)      | 9<br>(5 - 14)      |
| Poisonings                                      | 20<br>(13 - 38)          | 2<br>(1 - 4)     | 1<br>(0 - 1)      | 10<br>(6 - 24)         | 5<br>(3 - 8)       | 3<br>(1 - 4)       |
| Exposure to mechanical forces                   | 115<br>(76 - 177)        | 4<br>(1 - 9)     | 6<br>(3 - 11)     | 85<br>(52 - 142)       | 16<br>(10 - 26)    | 5<br>(3 - 7)       |
| Unintentional firearm injuries                  | 68<br>(36 - 110)         | 1<br>(0 - 2)     | 1<br>(0 - 3)      | 56<br>(28 - 97)        | 7<br>(4 - 13)      | 3<br>(1 - 5)       |
| Unintentional suffocation                       | 4<br>(0 - 9)             | 0<br>(0 - 2)     | 0<br>(0 - 1)      | 3<br>(0 - 6)           | 1<br>(0 - 1)       | 0<br>(0 - 0)       |
| Other exposure to mechanical forces             | 43<br>(27 - 73)          | 3<br>(1 - 6)     | 4<br>(2 - 9)      | 26<br>(15 - 51)        | 8<br>(5 - 14)      | 2<br>(1 - 3)       |
| Adverse effects of medical treatment            | 70<br>(44 - 96)          | 5<br>(2 - 14)    | 2<br>(1 - 3)      | 22<br>(13 - 33)        | 23<br>(11 - 38)    | 19<br>(9 - 32)     |
| Animal contact                                  | 12<br>(7 - 19)           | 1<br>(0 - 5)     | 2<br>(1 - 4)      | 5<br>(3 - 9)           | 2<br>(1 - 4)       | 2<br>(1 - 3)       |
| Venomous animal contact                         | 8<br>(4 - 13)            | 1<br>(0 - 3)     | 1<br>(0 - 3)      | 3<br>(2 - 6)           | 2<br>(1 - 3)       | 1<br>(0 - 2)       |
| Non-venomous animal contact                     | 4<br>(1 - 7)             | 0<br>(0 - 2)     | 0<br>(0 - 2)      | 2<br>(1 - 4)           | 1<br>(0 - 1)       | 1<br>(0 - 1)       |
| Foreign body                                    | 39<br>(22 - 62)          | 6<br>(2 - 15)    | 2<br>(1 - 3)      | 19<br>(10 - 30)        | 7<br>(4 - 11)      | 5<br>(3 - 8)       |
| Pulmonary aspiration and foreign body in airway | 37<br>(21 - 61)          | 6<br>(2 - 14)    | 2<br>(1 - 3)      | 18<br>(9 - 29)         | 7<br>(4 - 11)      | 5<br>(3 - 8)       |
| Foreign body in other body part                 | 1<br>(0 - 2)             | 0<br>(0 - 0)     | 0<br>(0 - 0)      | 1<br>(0 - 1)           | 0<br>(0 - 0)       | 0<br>(0 - 0)       |
| Other unintentional injuries                    | 35<br>(21 - 64)          | 1<br>(0 - 2)     | 1<br>(0 - 2)      | 16<br>(9 - 30)         | 13<br>(7 - 25)     | 5<br>(3 - 9)       |
| Self-harm and interpersonal violence            | 793<br>(493 - 1,059)     | 3<br>(1 - 7)     | 7<br>(3 - 13)     | 666<br>(418 - 918)     | 94<br>(49 - 136)   | 24<br>(10 - 37)    |
| Self-harm                                       | 480<br>(187 - 674)       | --               | 3<br>(1 - 8)      | 378<br>(146 - 549)     | 77<br>(29 - 115)   | 22<br>(8 - 35)     |
| Interpersonal violence                          | 313<br>(193 - 475)       | 3<br>(1 - 7)     | 4<br>(2 - 7)      | 288<br>(172 - 439)     | 17<br>(9 - 32)     | 2<br>(1 - 4)       |
| Assault by firearm                              | 75<br>(36 - 145)         | 0<br>(0 - 1)     | 1<br>(0 - 1)      | 69<br>(32 - 132)       | 4<br>(2 - 10)      | 0<br>(0 - 1)       |
| Assault by sharp object                         | 135<br>(73 - 209)        | 1<br>(0 - 2)     | 1<br>(0 - 2)      | 127<br>(67 - 200)      | 6<br>(3 - 11)      | 0<br>(0 - 1)       |
| Assault by other means                          | 104<br>(58 - 175)        | 2<br>(1 - 5)     | 2<br>(1 - 5)      | 92<br>(49 - 158)       | 7<br>(3 - 13)      | 1<br>(0 - 2)       |

Web Table 31- Namibia deaths with 95% UI by age, sex, and cause in 2013

| Cause                                                              | Females, All Ages        | Females, 0-4 Years   | Females, 5-14 Years | Females, 15-49 Years     | Females, 50-69 Years     | Females, 70-80 Years     |
|--------------------------------------------------------------------|--------------------------|----------------------|---------------------|--------------------------|--------------------------|--------------------------|
| All causes                                                         | 8,731<br>(7,869 - 9,877) | 913<br>(653 - 1,328) | 155<br>(126 - 198)  | 3,512<br>(3,045 - 3,958) | 1,813<br>(1,509 - 2,221) | 2,339<br>(2,126 - 2,676) |
| Communicable, maternal, neonatal, and nutritional diseases         | 4,534<br>(4,031 - 5,151) | 779<br>(555 - 1,123) | 103<br>(75 - 136)   | 2,612<br>(2,242 - 2,987) | 590<br>(491 - 707)       | 450<br>(355 - 558)       |
| HIV/AIDS and tuberculosis                                          | 2,515<br>(2,144 - 2,952) | 56<br>(37 - 77)      | 62<br>(35 - 95)     | 1,950<br>(1,651 - 2,287) | 353<br>(270 - 454)       | 94<br>(69 - 132)         |
| Tuberculosis                                                       | 771<br>(580 - 976)       | 13<br>(6 - 24)       | 8<br>(4 - 14)       | 511<br>(350 - 670)       | 160<br>(113 - 225)       | 80<br>(56 - 115)         |
| HIV/AIDS                                                           | 1,744<br>(1,354 - 2,172) | 43<br>(27 - 63)      | 54<br>(27 - 89)     | 1,439<br>(1,146 - 1,774) | 193<br>(117 - 291)       | 15<br>(6 - 27)           |
| HIV/AIDS resulting in mycobacterial infection                      | 100<br>(73 - 137)        | 2<br>(1 - 3)         | 3<br>(1 - 5)        | 83<br>(61 - 113)         | 11<br>(6 - 18)           | 1<br>(0 - 2)             |
| HIV/AIDS resulting in other diseases                               | 1,644<br>(1,278 - 2,044) | 41<br>(26 - 60)      | 52<br>(26 - 84)     | 1,356<br>(1,079 - 1,657) | 182<br>(110 - 273)       | 14<br>(5 - 25)           |
| Diarrrhea, lower respiratory, and other common infectious diseases | 1,255<br>(1,005 - 1,576) | 259<br>(147 - 441)   | 28<br>(17 - 44)     | 454<br>(318 - 619)       | 198<br>(143 - 276)       | 316<br>(225 - 418)       |
| Diarrrheal diseases                                                | 468<br>(334 - 651)       | 128<br>(58 - 239)    | 9<br>(4 - 17)       | 150<br>(84 - 243)        | 69<br>(38 - 120)         | 112<br>(61 - 185)        |
| Intestinal infectious diseases                                     | 22<br>(10 - 44)          | 7<br>(2 - 15)        | 6<br>(2 - 12)       | 8<br>(3 - 17)            | 1<br>(1 - 3)             | 1<br>(0 - 1)             |
| Typhoid fever                                                      | 17<br>(7 - 35)           | 5<br>(2 - 12)        | 4<br>(2 - 9)        | 6<br>(2 - 14)            | 1<br>(0 - 2)             | 0<br>(0 - 1)             |
| Paratyphoid fever                                                  | 5<br>(2 - 9)             | 2<br>(0 - 4)         | 1<br>(0 - 3)        | 2<br>(1 - 4)             | 0<br>(0 - 1)             | 0<br>(0 - 0)             |
| Other intestinal infectious diseases                               | 0<br>(0 - 2)             | 0<br>(0 - 1)         | 0<br>(0 - 0)        | 0<br>(0 - 1)             | 0<br>(0 - 0)             | 0<br>(0 - 0)             |
| Lower respiratory infections                                       | 678<br>(520 - 875)       | 104<br>(50 - 201)    | 9<br>(5 - 14)       | 250<br>(169 - 361)       | 118<br>(81 - 168)        | 196<br>(132 - 277)       |
| Upper respiratory infections                                       | 0<br>(0 - 1)             | 0<br>(0 - 0)         | 0<br>(0 - 0)        | 0<br>(0 - 1)             | 0<br>(0 - 0)             | 0<br>(0 - 0)             |
| Otitis media                                                       | 0<br>(0 - 1)             | 0<br>(0 - 0)         | 0<br>(0 - 0)        | 0<br>(0 - 0)             | 0<br>(0 - 0)             | 0<br>(0 - 0)             |
| Meningitis                                                         | 70<br>(48 - 105)         | 13<br>(5 - 36)       | 4<br>(2 - 6)        | 40<br>(25 - 62)          | 8<br>(5 - 12)            | 6<br>(3 - 9)             |
| Pneumococcal meningitis                                            | 11<br>(6 - 17)           | 1<br>(0 - 4)         | 1<br>(0 - 1)        | 7<br>(3 - 11)            | 1<br>(1 - 3)             | 1<br>(0 - 2)             |
| H influenzae type B meningitis                                     | 12<br>(7 - 23)           | 4<br>(2 - 14)        | 1<br>(0 - 2)        | 5<br>(3 - 9)             | 1<br>(0 - 1)             | 1<br>(0 - 1)             |
| Meningococcal meningitis                                           | 26<br>(17 - 39)          | 4<br>(2 - 11)        | 1<br>(1 - 3)        | 15<br>(8 - 25)           | 3<br>(2 - 5)             | 2<br>(1 - 4)             |
| Other meningitis                                                   | 21<br>(12 - 33)          | 3<br>(1 - 7)         | 1<br>(0 - 1)        | 13<br>(6 - 23)           | 3<br>(1 - 5)             | 2<br>(1 - 3)             |
| Encephalitis                                                       | 9<br>(4 - 14)            | 2<br>(0 - 4)         | 1<br>(0 - 1)        | 4<br>(2 - 8)             | 1<br>(0 - 2)             | 1<br>(0 - 1)             |
| Diphtheria                                                         | 0<br>(0 - 1)             | 0<br>(0 - 1)         | 0<br>(0 - 0)        | 0<br>(0 - 0)             | 0<br>(0 - 0)             | --                       |
| Whooping cough                                                     | 5<br>(0 - 25)            | 4<br>(0 - 23)        | 0<br>(0 - 1)        | 0<br>(0 - 0)             | 0<br>(0 - 0)             | --                       |
| Tetanus                                                            | 1<br>(0 - 1)             | 0<br>(0 - 0)         | 0<br>(0 - 0)        | 0<br>(0 - 0)             | 0<br>(0 - 0)             | 0<br>(0 - 0)             |
| Measles                                                            | 2<br>(0 - 11)            | 2<br>(0 - 10)        | 0<br>(0 - 1)        | 0<br>(0 - 0)             | 0<br>(0 - 0)             | --                       |
| Varicella and herpes zoster                                        | 1<br>(0 - 1)             | 0<br>(0 - 1)         | 0<br>(0 - 0)        | 0<br>(0 - 0)             | 0<br>(0 - 0)             | 0<br>(0 - 1)             |
| Neglected tropical diseases and malaria                            | 105<br>(44 - 234)        | 27<br>(6 - 78)       | 8<br>(1 - 27)       | 48<br>(15 - 134)         | 14<br>(3 - 44)           | 8<br>(2 - 33)            |
| Malaria                                                            | 83<br>(24 - 211)         | 25<br>(4 - 72)       | 7<br>(0 - 26)       | 35<br>(1 - 119)          | 11<br>(0 - 41)           | 6<br>(0 - 31)            |
| Leishmaniasis                                                      | 1<br>(1 - 2)             | 0<br>(0 - 1)         | 0<br>(0 - 0)        | 0<br>(0 - 1)             | 0<br>(0 - 0)             | 0<br>(0 - 0)             |
| Visceral leishmaniasis                                             | 1<br>(1 - 2)             | 0<br>(0 - 1)         | 0<br>(0 - 0)        | 0<br>(0 - 1)             | 0<br>(0 - 0)             | 0<br>(0 - 0)             |
| Schistosomiasis                                                    | 3<br>(2 - 4)             | 0<br>(0 - 0)         | 0<br>(0 - 0)        | 2<br>(1 - 2)             | 1<br>(1 - 1)             | 1<br>(0 - 1)             |
| Cysticercosis                                                      | 0<br>(0 - 0)             | 0<br>(0 - 0)         | 0<br>(0 - 0)        | 0<br>(0 - 0)             | 0<br>(0 - 0)             | 0<br>(0 - 0)             |
| Cystic echinococcosis                                              | 1<br>(0 - 1)             | 0<br>(0 - 0)         | 0<br>(0 - 0)        | 0<br>(0 - 0)             | 0<br>(0 - 0)             | 0<br>(0 - 0)             |
| Dengue                                                             | 0<br>(0 - 0)             | 0<br>(0 - 0)         | 0<br>(0 - 0)        | 0<br>(0 - 0)             | 0<br>(0 - 0)             | 0<br>(0 - 0)             |
| Rabies                                                             | 0<br>(0 - 0)             | 0<br>(0 - 0)         | 0<br>(0 - 0)        | 0<br>(0 - 0)             | 0<br>(0 - 0)             | 0<br>(0 - 0)             |
| Intestinal nematode infections                                     | 1<br>(0 - 4)             | 0<br>(0 - 2)         | 0<br>(0 - 1)        | 0<br>(0 - 2)             | 0<br>(0 - 1)             | 0<br>(0 - 0)             |
| Ascariasis                                                         | 1<br>(0 - 4)             | 0<br>(0 - 2)         | 0<br>(0 - 1)        | 0<br>(0 - 2)             | 0<br>(0 - 1)             | 0<br>(0 - 0)             |
| Other neglected tropical diseases                                  | 16<br>(10 - 26)          | 2<br>(1 - 5)         | 0<br>(0 - 1)        | 11<br>(6 - 19)           | 2<br>(1 - 3)             | 1<br>(1 - 2)             |
| Maternal disorders                                                 | 89<br>(54 - 141)         | --                   | 0<br>(0 - 0)        | 89<br>(54 - 140)         | --                       | --                       |

Web Table 31- Namibia deaths with 95% UI by age, sex, and cause in 2013

| Cause                                                            | Females, All Ages        | Females, 0-4 Years | Females, 5-14 Years | Females, 15-49 Years | Females, 50-69 Years   | Females, 70-80 Years     |
|------------------------------------------------------------------|--------------------------|--------------------|---------------------|----------------------|------------------------|--------------------------|
| Maternal hemorrhage                                              | 10<br>(5 - 17)           | --                 | 0<br>(0 - 0)        | 10<br>(5 - 17)       | --                     | --                       |
| Maternal sepsis and other maternal infections                    | 10<br>(6 - 17)           | --                 | 0<br>(0 - 0)        | 10<br>(6 - 17)       | --                     | --                       |
| Maternal hypertensive disorders                                  | 12<br>(6 - 20)           | --                 | 0<br>(0 - 0)        | 12<br>(6 - 20)       | --                     | --                       |
| Maternal obstructed labor                                        | 5<br>(3 - 9)             | --                 | 0<br>(0 - 0)        | 5<br>(3 - 9)         | --                     | --                       |
| Maternal abortive outcome                                        | 16<br>(9 - 26)           | --                 | 0<br>(0 - 0)        | 16<br>(9 - 26)       | --                     | --                       |
| Indirect maternal deaths                                         | 10<br>(6 - 18)           | --                 | 0<br>(0 - 0)        | 10<br>(6 - 18)       | --                     | --                       |
| Late maternal deaths                                             | 11<br>(5 - 20)           | --                 | 0<br>(0 - 0)        | 11<br>(5 - 20)       | --                     | --                       |
| Maternal deaths aggravated by HIV/AIDS                           | 4<br>(2 - 7)             | --                 | --                  | 4<br>(2 - 7)         | --                     | --                       |
| Other maternal disorders                                         | 9<br>(5 - 16)            | --                 | 0<br>(0 - 0)        | 9<br>(5 - 16)        | --                     | --                       |
| Neonatal disorders                                               | 380<br>(275 - 540)       | 380<br>(275 - 540) | --                  | --                   | --                     | --                       |
| Neonatal preterm birth complications                             | 115<br>(51 - 205)        | 115<br>(51 - 205)  | --                  | --                   | --                     | --                       |
| Neonatal encephalopathy due to birth asphyxia and trauma         | 96<br>(39 - 176)         | 96<br>(39 - 176)   | --                  | --                   | --                     | --                       |
| Neonatal sepsis and other neonatal infections                    | 38<br>(12 - 82)          | 38<br>(12 - 82)    | --                  | --                   | --                     | --                       |
| Hemolytic disease and other neonatal jaundice                    | 1<br>(0 - 4)             | 1<br>(0 - 4)       | --                  | --                   | --                     | --                       |
| Other neonatal disorders                                         | 130<br>(48 - 254)        | 130<br>(48 - 254)  | --                  | --                   | --                     | --                       |
| Nutritional deficiencies                                         | 104<br>(73 - 145)        | 32<br>(15 - 62)    | 2<br>(1 - 3)        | 30<br>(19 - 44)      | 16<br>(10 - 23)        | 25<br>(16 - 37)          |
| Protein-energy malnutrition                                      | 50<br>(28 - 82)          | 31<br>(14 - 60)    | 1<br>(0 - 2)        | 6<br>(2 - 13)        | 4<br>(2 - 9)           | 8<br>(3 - 16)            |
| Iodine deficiency                                                | 0<br>(0 - 1)             | 0<br>(0 - 0)       | 0<br>(0 - 0)        | 0<br>(0 - 1)         | 0<br>(0 - 0)           | 0<br>(0 - 0)             |
| Iron-deficiency anemia                                           | 48<br>(30 - 73)          | 1<br>(0 - 4)       | 1<br>(0 - 1)        | 22<br>(13 - 34)      | 10<br>(5 - 15)         | 14<br>(8 - 25)           |
| Other nutritional deficiencies                                   | 6<br>(2 - 11)            | 0<br>(0 - 1)       | 0<br>(0 - 0)        | 1<br>(0 - 3)         | 2<br>(1 - 3)           | 3<br>(1 - 5)             |
| Other communicable, maternal, neonatal, and nutritional diseases | 86<br>(53 - 132)         | 25<br>(7 - 51)     | 3<br>(1 - 6)        | 41<br>(23 - 74)      | 9<br>(5 - 18)          | 7<br>(3 - 15)            |
| Sexually transmitted diseases excluding HIV                      | 26<br>(8 - 50)           | 19<br>(2 - 42)     | 1<br>(0 - 3)        | 4<br>(1 - 8)         | 1<br>(0 - 2)           | 1<br>(0 - 2)             |
| Syphilis                                                         | 23<br>(5 - 47)           | 19<br>(2 - 42)     | 1<br>(0 - 3)        | 2<br>(1 - 3)         | 0<br>(0 - 1)           | 1<br>(0 - 1)             |
| Chlamydial infection                                             | 1<br>(0 - 2)             | --                 | 0<br>(0 - 0)        | 1<br>(0 - 2)         | 0<br>(0 - 0)           | 0<br>(0 - 0)             |
| Gonococcal infection                                             | 1<br>(0 - 2)             | --                 | 0<br>(0 - 0)        | 1<br>(0 - 2)         | 0<br>(0 - 0)           | 0<br>(0 - 0)             |
| Other sexually transmitted diseases                              | 1<br>(0 - 2)             | --                 | 0<br>(0 - 0)        | 1<br>(0 - 1)         | 0<br>(0 - 0)           | 0<br>(0 - 0)             |
| Hepatitis                                                        | 5<br>(4 - 9)             | 0<br>(0 - 1)       | 0<br>(0 - 0)        | 2<br>(1 - 4)         | 1<br>(1 - 2)           | 1<br>(1 - 2)             |
| Acute hepatitis A                                                | 1<br>(0 - 1)             | 0<br>(0 - 1)       | 0<br>(0 - 0)        | 0<br>(0 - 1)         | 0<br>(0 - 0)           | 0<br>(0 - 0)             |
| Acute hepatitis B                                                | 3<br>(2 - 5)             | 0<br>(0 - 1)       | 0<br>(0 - 0)        | 1<br>(0 - 1)         | 1<br>(1 - 2)           | 1<br>(0 - 1)             |
| Acute hepatitis C                                                | 0<br>(0 - 0)             | --                 | 0<br>(0 - 0)        | 0<br>(0 - 0)         | 0<br>(0 - 0)           | 0<br>(0 - 0)             |
| Acute hepatitis E                                                | 2<br>(1 - 3)             | 0<br>(0 - 0)       | 0<br>(0 - 0)        | 1<br>(1 - 3)         | 0<br>(0 - 1)           | 0<br>(0 - 0)             |
| Other infectious diseases                                        | 55<br>(31 - 97)          | 6<br>(2 - 20)      | 1<br>(0 - 4)        | 35<br>(17 - 66)      | 7<br>(3 - 15)          | 5<br>(2 - 13)            |
| Non-communicable diseases                                        | 3,641<br>(3,131 - 4,411) | 96<br>(50 - 169)   | 25<br>(16 - 40)     | 590<br>(451 - 759)   | 1,133<br>(892 - 1,471) | 1,797<br>(1,595 - 2,086) |
| Neoplasms                                                        | 315<br>(254 - 403)       | 4<br>(1 - 8)       | 4<br>(2 - 8)        | 64<br>(47 - 83)      | 135<br>(102 - 185)     | 108<br>(90 - 130)        |
| Esophageal cancer                                                | 5<br>(4 - 7)             | --                 | --                  | 1<br>(0 - 1)         | 3<br>(2 - 4)           | 2<br>(1 - 2)             |
| Stomach cancer                                                   | 32<br>(24 - 41)          | --                 | --                  | 3<br>(2 - 4)         | 12<br>(8 - 16)         | 17<br>(12 - 24)          |
| Liver cancer                                                     | 6<br>(4 - 9)             | --                 | 0<br>(0 - 0)        | 1<br>(1 - 2)         | 3<br>(2 - 5)           | 2<br>(1 - 3)             |
| Liver cancer due to hepatitis B                                  | 2<br>(1 - 3)             | --                 | 0<br>(0 - 0)        | 0<br>(0 - 1)         | 1<br>(0 - 2)           | 0<br>(0 - 1)             |
| Liver cancer due to hepatitis C                                  | 3<br>(1 - 4)             | --                 | 0<br>(0 - 0)        | 0<br>(0 - 1)         | 1<br>(0 - 2)           | 1<br>(0 - 2)             |
| Liver cancer due to alcohol use                                  | 1<br>(0 - 1)             | --                 | --                  | 0<br>(0 - 0)         | 0<br>(0 - 1)           | 0<br>(0 - 1)             |

Web Table 31- Namibia deaths with 95% UI by age, sex, and cause in 2013

| Cause                                         | Females, All Ages        | Females, 0-4 Years | Females, 5-14 Years | Females, 15-49 Years | Females, 50-69 Years | Females, 70-80 Years   |
|-----------------------------------------------|--------------------------|--------------------|---------------------|----------------------|----------------------|------------------------|
| Liver cancer due to other causes              | 1<br>(1 - 2)             | --                 | 0<br>(0 - 0)        | 0<br>(0 - 1)         | 1<br>(0 - 1)         | 0<br>(0 - 1)           |
| Larynx cancer                                 | 2<br>(1 - 4)             | --                 | --                  | 1<br>(0 - 2)         | 1<br>(0 - 2)         | 0<br>(0 - 0)           |
| Tracheal, bronchus and lung cancer            | 11<br>(8 - 19)           | --                 | --                  | 2<br>(1 - 3)         | 6<br>(4 - 11)        | 3<br>(2 - 5)           |
| Breast cancer                                 | 49<br>(34 - 65)          | --                 | --                  | 13<br>(7 - 18)       | 23<br>(15 - 32)      | 13<br>(10 - 17)        |
| Cervical cancer                               | 49<br>(36 - 71)          | --                 | --                  | 9<br>(6 - 14)        | 27<br>(18 - 41)      | 13<br>(9 - 19)         |
| Uterine cancer                                | 4<br>(3 - 10)            | --                 | --                  | 0<br>(0 - 1)         | 2<br>(1 - 4)         | 2<br>(1 - 5)           |
| Prostate cancer                               | --                       | --                 | --                  | --                   | --                   | --                     |
| Colon and rectum cancer                       | 14<br>(11 - 18)          | --                 | --                  | 2<br>(2 - 3)         | 6<br>(4 - 8)         | 6<br>(4 - 7)           |
| Lip and oral cavity cancer                    | 11<br>(7 - 16)           | --                 | --                  | 1<br>(1 - 2)         | 5<br>(3 - 8)         | 5<br>(3 - 7)           |
| Nasopharynx cancer                            | 2<br>(1 - 3)             | --                 | 0<br>(0 - 0)        | 1<br>(0 - 1)         | 1<br>(0 - 2)         | 1<br>(0 - 1)           |
| Other pharynx cancer                          | 3<br>(2 - 4)             | --                 | --                  | 0<br>(0 - 1)         | 2<br>(1 - 3)         | 1<br>(1 - 1)           |
| Gallbladder and biliary tract cancer          | 2<br>(1 - 4)             | --                 | --                  | 0<br>(0 - 0)         | 1<br>(1 - 2)         | 1<br>(1 - 2)           |
| Pancreatic cancer                             | 24<br>(19 - 31)          | --                 | --                  | 2<br>(1 - 2)         | 10<br>(7 - 14)       | 13<br>(9 - 17)         |
| Malignant skin melanoma                       | 5<br>(4 - 7)             | --                 | --                  | 1<br>(1 - 1)         | 2<br>(1 - 3)         | 2<br>(2 - 3)           |
| Non-melanoma skin cancer                      | 4<br>(2 - 6)             | --                 | --                  | 1<br>(0 - 2)         | 1<br>(1 - 2)         | 2<br>(1 - 3)           |
| Ovarian cancer                                | 13<br>(9 - 17)           | --                 | --                  | 2<br>(1 - 4)         | 6<br>(4 - 9)         | 4<br>(3 - 6)           |
| Testicular cancer                             | --                       | --                 | --                  | --                   | --                   | --                     |
| Kidney cancer                                 | 3<br>(2 - 5)             | 0<br>(0 - 0)       | 0<br>(0 - 0)        | 1<br>(0 - 1)         | 1<br>(1 - 2)         | 1<br>(1 - 2)           |
| Bladder cancer                                | 3<br>(2 - 6)             | --                 | --                  | 1<br>(0 - 1)         | 1<br>(1 - 2)         | 2<br>(1 - 2)           |
| Brain and nervous system cancer               | 7<br>(5 - 9)             | 0<br>(0 - 1)       | 1<br>(0 - 1)        | 2<br>(1 - 3)         | 2<br>(2 - 3)         | 2<br>(1 - 2)           |
| Thyroid cancer                                | 2<br>(1 - 3)             | --                 | 0<br>(0 - 0)        | 0<br>(0 - 0)         | 1<br>(0 - 1)         | 1<br>(1 - 1)           |
| Mesothelioma                                  | 1<br>(0 - 1)             | --                 | --                  | 0<br>(0 - 0)         | 0<br>(0 - 1)         | 0<br>(0 - 0)           |
| Hodgkin lymphoma                              | 1<br>(1 - 2)             | 0<br>(0 - 0)       | 0<br>(0 - 0)        | 0<br>(0 - 1)         | 0<br>(0 - 1)         | 0<br>(0 - 0)           |
| Non-Hodgkin lymphoma                          | 8<br>(5 - 14)            | 0<br>(0 - 1)       | 0<br>(0 - 0)        | 2<br>(1 - 4)         | 3<br>(2 - 6)         | 2<br>(1 - 4)           |
| Multiple myeloma                              | 3<br>(2 - 4)             | --                 | --                  | 0<br>(0 - 1)         | 1<br>(1 - 2)         | 1<br>(0 - 1)           |
| Leukemia                                      | 7<br>(5 - 9)             | 0<br>(0 - 0)       | 0<br>(0 - 0)        | 3<br>(2 - 4)         | 2<br>(1 - 3)         | 2<br>(1 - 2)           |
| Other neoplasms                               | 44<br>(31 - 58)          | 3<br>(1 - 7)       | 3<br>(1 - 6)        | 14<br>(9 - 20)       | 12<br>(8 - 18)       | 11<br>(8 - 16)         |
| Cardiovascular diseases                       | 1,783<br>(1,495 - 2,214) | 5<br>(2 - 11)      | 4<br>(2 - 9)        | 175<br>(123 - 256)   | 547<br>(419 - 721)   | 1,052<br>(909 - 1,254) |
| Rheumatic heart disease                       | 33<br>(23 - 56)          | 0<br>(0 - 0)       | 1<br>(0 - 1)        | 9<br>(5 - 19)        | 4<br>(2 - 10)        | 19<br>(13 - 28)        |
| Ischemic heart disease                        | 471<br>(358 - 623)       | 0<br>(0 - 1)       | 0<br>(0 - 1)        | 26<br>(17 - 40)      | 115<br>(78 - 169)    | 329<br>(256 - 426)     |
| Cerebrovascular disease                       | 735<br>(590 - 955)       | 1<br>(0 - 2)       | 1<br>(1 - 2)        | 58<br>(38 - 86)      | 238<br>(175 - 327)   | 438<br>(354 - 566)     |
| Ischemic stroke                               | 350<br>(221 - 460)       | 0<br>(0 - 0)       | 0<br>(0 - 0)        | 7<br>(3 - 10)        | 91<br>(49 - 129)     | 253<br>(168 - 331)     |
| Hemorrhagic stroke                            | 385<br>(292 - 559)       | 1<br>(0 - 2)       | 1<br>(0 - 2)        | 51<br>(34 - 78)      | 147<br>(105 - 218)   | 185<br>(136 - 283)     |
| Hypertensive heart disease                    | 256<br>(152 - 360)       | 0<br>(0 - 0)       | 0<br>(0 - 0)        | 19<br>(10 - 28)      | 76<br>(42 - 117)     | 161<br>(92 - 231)      |
| Cardiomyopathy and myocarditis                | 129<br>(90 - 198)        | 2<br>(1 - 7)       | 1<br>(0 - 4)        | 43<br>(27 - 76)      | 36<br>(23 - 57)      | 47<br>(28 - 78)        |
| Atrial fibrillation and flutter               | 5<br>(2 - 8)             | --                 | --                  | 0<br>(0 - 0)         | 1<br>(0 - 2)         | 4<br>(2 - 6)           |
| Aortic aneurysm                               | 13<br>(7 - 19)           | --                 | --                  | 1<br>(1 - 2)         | 4<br>(2 - 6)         | 8<br>(4 - 12)          |
| Peripheral vascular disease                   | 4<br>(2 - 6)             | --                 | --                  | 0<br>(0 - 0)         | 1<br>(1 - 2)         | 2<br>(2 - 4)           |
| Endocarditis                                  | 7<br>(4 - 10)            | 1<br>(0 - 1)       | 0<br>(0 - 1)        | 2<br>(1 - 4)         | 1<br>(1 - 2)         | 2<br>(1 - 4)           |
| Other cardiovascular and circulatory diseases | 131<br>(91 - 195)        | 1<br>(0 - 2)       | 1<br>(0 - 1)        | 16<br>(10 - 29)      | 71<br>(45 - 108)     | 43<br>(29 - 64)        |

Web Table 31- Namibia deaths with 95% UI by age, sex, and cause in 2013

| Cause                                               | Females, All Ages  | Females, 0-4 Years | Females, 5-14 Years | Females, 15-49 Years | Females, 50-69 Years | Females, 70-80 Years |
|-----------------------------------------------------|--------------------|--------------------|---------------------|----------------------|----------------------|----------------------|
| Chronic respiratory diseases                        | 369<br>(289 - 471) | 3<br>(1 - 7)       | 2<br>(1 - 3)        | 67<br>(48 - 93)      | 117<br>(85 - 163)    | 180<br>(138 - 234)   |
| Chronic obstructive pulmonary disease               | 194<br>(134 - 268) | 1<br>(0 - 2)       | 0<br>(0 - 1)        | 21<br>(12 - 34)      | 61<br>(39 - 91)      | 110<br>(74 - 151)    |
| Pneumoconiosis                                      | 3<br>(2 - 4)       | 0<br>(0 - 0)       | 0<br>(0 - 0)        | 0<br>(0 - 1)         | 1<br>(0 - 2)         | 1<br>(1 - 2)         |
| Silicosis                                           | 0<br>(0 - 0)       | 0<br>(0 - 0)       | 0<br>(0 - 0)        | 0<br>(0 - 0)         | 0<br>(0 - 0)         | 0<br>(0 - 0)         |
| Asbestosis                                          | 0<br>(0 - 1)       | 0<br>(0 - 0)       | 0<br>(0 - 0)        | 0<br>(0 - 0)         | 0<br>(0 - 0)         | 0<br>(0 - 0)         |
| Coal workers pneumoconiosis                         | 0<br>(0 - 0)       | 0<br>(0 - 0)       | 0<br>(0 - 0)        | 0<br>(0 - 0)         | 0<br>(0 - 0)         | 0<br>(0 - 0)         |
| Other pneumoconiosis                                | 2<br>(1 - 3)       | 0<br>(0 - 0)       | 0<br>(0 - 0)        | 0<br>(0 - 0)         | 1<br>(0 - 1)         | 1<br>(1 - 2)         |
| Asthma                                              | 139<br>(92 - 212)  | 1<br>(1 - 3)       | 1<br>(1 - 2)        | 36<br>(23 - 55)      | 47<br>(27 - 74)      | 53<br>(32 - 89)      |
| Interstitial lung disease and pulmonary sarcoidosis | 21<br>(3 - 41)     | 0<br>(0 - 1)       | 0<br>(0 - 1)        | 6<br>(1 - 14)        | 5<br>(1 - 11)        | 9<br>(1 - 20)        |
| Other chronic respiratory diseases                  | 12<br>(7 - 19)     | 0<br>(0 - 1)       | 0<br>(0 - 0)        | 3<br>(2 - 5)         | 2<br>(1 - 4)         | 6<br>(3 - 10)        |
| Cirrhosis                                           | 49<br>(32 - 79)    | 0<br>(0 - 1)       | 0<br>(0 - 1)        | 15<br>(9 - 25)       | 21<br>(12 - 35)      | 13<br>(8 - 22)       |
| Cirrhosis due to hepatitis B                        | 10<br>(5 - 20)     | 0<br>(0 - 0)       | 0<br>(0 - 0)        | 3<br>(1 - 6)         | 4<br>(2 - 9)         | 2<br>(1 - 5)         |
| Cirrhosis due to hepatitis C                        | 15<br>(7 - 24)     | 0<br>(0 - 0)       | 0<br>(0 - 0)        | 4<br>(2 - 6)         | 6<br>(2 - 11)        | 5<br>(2 - 8)         |
| Cirrhosis due to alcohol use                        | 16<br>(10 - 28)    | --                 | --                  | 4<br>(2 - 7)         | 7<br>(4 - 14)        | 5<br>(3 - 9)         |
| Cirrhosis due to other causes                       | 8<br>(4 - 15)      | 0<br>(0 - 1)       | 0<br>(0 - 1)        | 4<br>(2 - 8)         | 3<br>(1 - 5)         | 1<br>(0 - 2)         |
| Digestive diseases                                  | 158<br>(125 - 200) | 2<br>(1 - 5)       | 2<br>(1 - 3)        | 51<br>(35 - 68)      | 40<br>(29 - 55)      | 63<br>(48 - 83)      |
| Peptic ulcer disease                                | 35<br>(22 - 52)    | 0<br>(0 - 0)       | 0<br>(0 - 0)        | 8<br>(5 - 13)        | 10<br>(6 - 15)       | 17<br>(10 - 26)      |
| Gastritis and duodenitis                            | 9<br>(4 - 16)      | 0<br>(0 - 0)       | 0<br>(0 - 0)        | 2<br>(1 - 4)         | 2<br>(1 - 4)         | 4<br>(2 - 8)         |
| Appendicitis                                        | 4<br>(2 - 7)       | 0<br>(0 - 0)       | 0<br>(0 - 0)        | 2<br>(1 - 3)         | 1<br>(1 - 2)         | 1<br>(1 - 2)         |
| Paralytic ileus and intestinal obstruction          | 26<br>(15 - 43)    | 1<br>(0 - 1)       | 1<br>(0 - 1)        | 6<br>(3 - 10)        | 6<br>(3 - 12)        | 12<br>(7 - 22)       |
| Inguinal, femoral, and abdominal hernia             | 3<br>(1 - 5)       | 0<br>(0 - 0)       | 0<br>(0 - 0)        | 0<br>(0 - 1)         | 1<br>(0 - 1)         | 1<br>(1 - 3)         |
| Inflammatory bowel disease                          | 40<br>(26 - 57)    | 1<br>(0 - 2)       | 0<br>(0 - 1)        | 22<br>(14 - 32)      | 8<br>(5 - 12)        | 8<br>(5 - 14)        |
| Vascular intestinal disorders                       | 3<br>(1 - 5)       | 0<br>(0 - 0)       | 0<br>(0 - 0)        | 0<br>(0 - 1)         | 1<br>(0 - 2)         | 1<br>(1 - 3)         |
| Gallbladder and biliary diseases                    | 14<br>(9 - 21)     | 0<br>(0 - 0)       | 0<br>(0 - 0)        | 2<br>(1 - 3)         | 4<br>(3 - 7)         | 7<br>(4 - 12)        |
| Pancreatitis                                        | 6<br>(4 - 10)      | 0<br>(0 - 0)       | 0<br>(0 - 0)        | 2<br>(1 - 4)         | 2<br>(1 - 4)         | 2<br>(1 - 3)         |
| Other digestive diseases                            | 19<br>(13 - 26)    | 0<br>(0 - 1)       | 0<br>(0 - 0)        | 6<br>(4 - 9)         | 4<br>(3 - 7)         | 8<br>(5 - 13)        |
| Neurological disorders                              | 121<br>(96 - 149)  | 3<br>(1 - 6)       | 3<br>(1 - 5)        | 30<br>(18 - 45)      | 17<br>(12 - 25)      | 69<br>(54 - 86)      |
| Alzheimer disease and other dementias               | 61<br>(47 - 79)    | --                 | --                  | 0<br>(0 - 0)         | 5<br>(4 - 7)         | 56<br>(43 - 73)      |
| Parkinson disease                                   | 4<br>(2 - 6)       | --                 | --                  | 0<br>(0 - 0)         | 1<br>(0 - 1)         | 3<br>(2 - 5)         |
| Epilepsy                                            | 49<br>(32 - 68)    | 2<br>(1 - 5)       | 2<br>(1 - 5)        | 27<br>(15 - 43)      | 9<br>(5 - 15)        | 8<br>(4 - 14)        |
| Multiple sclerosis                                  | 0<br>(0 - 1)       | --                 | --                  | 0<br>(0 - 0)         | 0<br>(0 - 0)         | 0<br>(0 - 0)         |
| Other neurological disorders                        | 7<br>(6 - 9)       | 1<br>(0 - 1)       | 0<br>(0 - 0)        | 2<br>(2 - 3)         | 2<br>(1 - 3)         | 2<br>(1 - 3)         |
| Mental and substance use disorders                  | 40<br>(29 - 56)    | 1<br>(0 - 2)       | 0<br>(0 - 0)        | 24<br>(17 - 36)      | 12<br>(7 - 17)       | 4<br>(2 - 5)         |
| Schizophrenia                                       | 5<br>(3 - 7)       | --                 | --                  | 2<br>(1 - 3)         | 2<br>(1 - 3)         | 1<br>(1 - 3)         |
| Alcohol use disorders                               | 14<br>(5 - 25)     | --                 | --                  | 8<br>(3 - 15)        | 5<br>(2 - 10)        | 1<br>(0 - 2)         |
| Drug use disorders                                  | 21<br>(15 - 29)    | 1<br>(0 - 2)       | --                  | 14<br>(9 - 21)       | 5<br>(3 - 6)         | 2<br>(1 - 2)         |
| Opioid use disorders                                | 2<br>(1 - 3)       | 0<br>(0 - 0)       | --                  | 1<br>(1 - 2)         | 0<br>(0 - 1)         | 0<br>(0 - 0)         |
| Cocaine use disorders                               | 0<br>(0 - 0)       | 0<br>(0 - 0)       | --                  | 0<br>(0 - 0)         | 0<br>(0 - 0)         | 0<br>(0 - 0)         |
| Amphetamine use disorders                           | 0<br>(0 - 0)       | 0<br>(0 - 0)       | --                  | 0<br>(0 - 0)         | 0<br>(0 - 0)         | 0<br>(0 - 0)         |
| Other drug use disorders                            | 19<br>(13 - 26)    | 1<br>(0 - 1)       | --                  | 12<br>(8 - 19)       | 4<br>(3 - 6)         | 1<br>(1 - 2)         |

Web Table 31- Namibia deaths with 95% UI by age, sex, and cause in 2013

| Cause                                               | Females, All Ages  | Females, 0-4 Years | Females, 5-14 Years | Females, 15-49 Years | Females, 50-69 Years | Females, 70-80 Years |
|-----------------------------------------------------|--------------------|--------------------|---------------------|----------------------|----------------------|----------------------|
| Eating disorders                                    | 0<br>(0 - 1)       | --                 | 0<br>(0 - 0)        | 0<br>(0 - 1)         | --                   | --                   |
| Anorexia nervosa                                    | 0<br>(0 - 1)       | --                 | 0<br>(0 - 0)        | 0<br>(0 - 1)         | --                   | --                   |
| Diabetes, urogenital, blood, and endocrine diseases | 667<br>(526 - 864) | 20<br>(7 - 46)     | 6<br>(3 - 11)       | 143<br>(95 - 204)    | 227<br>(166 - 306)   | 271<br>(214 - 345)   |
| Diabetes mellitus                                   | 381<br>(295 - 496) | 0<br>(0 - 1)       | 0<br>(0 - 1)        | 30<br>(22 - 41)      | 163<br>(117 - 223)   | 188<br>(142 - 247)   |
| Acute glomerulonephritis                            | 1<br>(0 - 1)       | 0<br>(0 - 0)       | 0<br>(0 - 0)        | 0<br>(0 - 0)         | 0<br>(0 - 0)         | 0<br>(0 - 0)         |
| Chronic kidney disease                              | 90<br>(61 - 125)   | 1<br>(0 - 2)       | 1<br>(0 - 2)        | 20<br>(13 - 30)      | 28<br>(17 - 41)      | 41<br>(24 - 61)      |
| Chronic kidney disease due to diabetes mellitus     | 0<br>(0 - 0)       | 0<br>(0 - 0)       | 0<br>(0 - 0)        | 0<br>(0 - 0)         | 0<br>(0 - 0)         | 0<br>(0 - 0)         |
| Chronic kidney disease due to hypertension          | 51<br>(34 - 74)    | 0<br>(0 - 0)       | 0<br>(0 - 0)        | 9<br>(5 - 14)        | 17<br>(11 - 26)      | 25<br>(15 - 38)      |
| Chronic kidney disease due to glomerulonephritis    | 11<br>(6 - 17)     | 0<br>(0 - 1)       | 0<br>(0 - 1)        | 5<br>(3 - 8)         | 2<br>(1 - 4)         | 3<br>(1 - 5)         |
| Chronic kidney disease due to other causes          | 27<br>(12 - 49)    | 0<br>(0 - 1)       | 0<br>(0 - 1)        | 6<br>(2 - 11)        | 8<br>(3 - 16)        | 13<br>(4 - 26)       |
| Urinary diseases and male infertility               | 23<br>(16 - 32)    | 1<br>(0 - 2)       | 0<br>(0 - 1)        | 6<br>(4 - 10)        | 6<br>(4 - 8)         | 11<br>(7 - 17)       |
| Interstitial nephritis and urinary tract infections | 14<br>(9 - 20)     | 0<br>(0 - 1)       | 0<br>(0 - 0)        | 4<br>(2 - 7)         | 3<br>(2 - 5)         | 6<br>(3 - 10)        |
| Urolithiasis                                        | 0<br>(0 - 1)       | --                 | 0<br>(0 - 0)        | 0<br>(0 - 0)         | 0<br>(0 - 0)         | 0<br>(0 - 0)         |
| Other urinary diseases                              | 9<br>(5 - 14)      | 0<br>(0 - 0)       | 0<br>(0 - 0)        | 2<br>(1 - 3)         | 2<br>(1 - 3)         | 5<br>(2 - 9)         |
| Gynecological diseases                              | 1<br>(1 - 2)       | --                 | --                  | 1<br>(0 - 1)         | 0<br>(0 - 0)         | 0<br>(0 - 1)         |
| Uterine fibroids                                    | 0<br>(0 - 0)       | --                 | --                  | 0<br>(0 - 0)         | 0<br>(0 - 0)         | 0<br>(0 - 0)         |
| Polycystic ovarian syndrome                         | 0<br>(0 - 0)       | --                 | --                  | 0<br>(0 - 0)         | 0<br>(0 - 0)         | --                   |
| Endometriosis                                       | 0<br>(0 - 0)       | --                 | --                  | 0<br>(0 - 0)         | 0<br>(0 - 0)         | --                   |
| Genital prolapse                                    | 0<br>(0 - 0)       | --                 | --                  | 0<br>(0 - 0)         | 0<br>(0 - 0)         | 0<br>(0 - 0)         |
| Other gynecological diseases                        | 1<br>(0 - 1)       | --                 | --                  | 0<br>(0 - 1)         | 0<br>(0 - 0)         | 0<br>(0 - 0)         |
| Hemoglobinopathies and hemolytic anemias            | 31<br>(20 - 49)    | 2<br>(1 - 7)       | 1<br>(1 - 3)        | 15<br>(9 - 25)       | 5<br>(3 - 7)         | 7<br>(4 - 12)        |
| Thalassemias                                        | 2<br>(1 - 4)       | 1<br>(0 - 2)       | 0<br>(0 - 1)        | 1<br>(0 - 1)         | 0<br>(0 - 0)         | 0<br>(0 - 0)         |
| Sickle cell disorders                               | 8<br>(5 - 14)      | 0<br>(0 - 1)       | 0<br>(0 - 1)        | 6<br>(4 - 10)        | 1<br>(1 - 2)         | 0<br>(0 - 0)         |
| G6PD deficiency                                     | 1<br>(1 - 2)       | 0<br>(0 - 0)       | 0<br>(0 - 0)        | 1<br>(0 - 1)         | 0<br>(0 - 0)         | 0<br>(0 - 0)         |
| Other hemoglobinopathies and hemolytic anemias      | 20<br>(12 - 30)    | 1<br>(0 - 3)       | 1<br>(0 - 1)        | 8<br>(5 - 12)        | 4<br>(2 - 6)         | 7<br>(3 - 12)        |
| Endocrine, metabolic, blood, and immune disorders   | 141<br>(64 - 219)  | 16<br>(4 - 40)     | 3<br>(1 - 8)        | 71<br>(30 - 122)     | 27<br>(13 - 42)      | 23<br>(11 - 37)      |
| Musculoskeletal disorders                           | 20<br>(14 - 27)    | --                 | 0<br>(0 - 1)        | 6<br>(4 - 10)        | 6<br>(4 - 9)         | 8<br>(4 - 11)        |
| Rheumatoid arthritis                                | 7<br>(5 - 10)      | --                 | 0<br>(0 - 0)        | 1<br>(1 - 2)         | 2<br>(1 - 3)         | 4<br>(2 - 6)         |
| Other musculoskeletal disorders                     | 12<br>(9 - 17)     | --                 | 0<br>(0 - 1)        | 5<br>(3 - 8)         | 4<br>(2 - 6)         | 4<br>(2 - 6)         |
| Other non-communicable diseases                     | 118<br>(81 - 170)  | 57<br>(27 - 103)   | 4<br>(2 - 7)        | 16<br>(10 - 22)      | 12<br>(8 - 17)       | 30<br>(20 - 41)      |
| Congenital anomalies                                | 71<br>(37 - 119)   | 52<br>(22 - 97)    | 3<br>(1 - 6)        | 6<br>(4 - 10)        | 3<br>(2 - 6)         | 6<br>(4 - 10)        |
| Neural tube defects                                 | 5<br>(1 - 14)      | 4<br>(1 - 13)      | 0<br>(0 - 0)        | 0<br>(0 - 1)         | 0<br>(0 - 0)         | 0<br>(0 - 0)         |
| Congenital heart anomalies                          | 24<br>(10 - 41)    | 15<br>(4 - 33)     | 1<br>(0 - 3)        | 2<br>(1 - 4)         | 1<br>(1 - 2)         | 4<br>(2 - 6)         |
| Cleft lip and cleft palate                          | 0<br>(0 - 1)       | 0<br>(0 - 1)       | --                  | --                   | --                   | --                   |
| Down syndrome                                       | 5<br>(2 - 10)      | 3<br>(1 - 8)       | 1<br>(0 - 1)        | 0<br>(0 - 1)         | 0<br>(0 - 1)         | 0<br>(0 - 0)         |
| Chromosomal unbalanced rearrangements               | 4<br>(2 - 9)       | 4<br>(1 - 9)       | 0<br>(0 - 0)        | 1<br>(0 - 1)         | 0<br>(0 - 0)         | 0<br>(0 - 0)         |
| Other congenital anomalies                          | 33<br>(17 - 56)    | 25<br>(10 - 48)    | 1<br>(0 - 2)        | 3<br>(2 - 4)         | 2<br>(1 - 3)         | 2<br>(1 - 4)         |
| Skin and subcutaneous diseases                      | 44<br>(31 - 59)    | 2<br>(1 - 5)       | 1<br>(0 - 1)        | 9<br>(6 - 15)        | 9<br>(5 - 13)        | 23<br>(15 - 35)      |
| Cellulitis                                          | 10<br>(5 - 16)     | 0<br>(0 - 1)       | 0<br>(0 - 0)        | 2<br>(1 - 4)         | 2<br>(1 - 4)         | 5<br>(2 - 9)         |
| Pyoderma                                            | 14<br>(9 - 21)     | 1<br>(0 - 3)       | 0<br>(0 - 0)        | 4<br>(2 - 7)         | 3<br>(2 - 5)         | 5<br>(3 - 9)         |

Web Table 31- Namibia deaths with 95% UI by age, sex, and cause in 2013

| Cause                                           | Females, All Ages  | Females, 0-4 Years | Females, 5-14 Years | Females, 15-49 Years | Females, 50-69 Years | Females, 70-80 Years |
|-------------------------------------------------|--------------------|--------------------|---------------------|----------------------|----------------------|----------------------|
| Decubitus ulcer                                 | 18<br>(12 - 27)    | 0<br>(0 - 0)       | 0<br>(0 - 0)        | 2<br>(1 - 4)         | 3<br>(2 - 4)         | 13<br>(8 - 20)       |
| Other skin and subcutaneous diseases            | 2<br>(1 - 3)       | 0<br>(0 - 1)       | 0<br>(0 - 0)        | 1<br>(0 - 1)         | 0<br>(0 - 1)         | 1<br>(0 - 1)         |
| Sudden infant death syndrome                    | 4<br>(0 - 17)      | 4<br>(0 - 17)      | --                  | --                   | --                   | --                   |
| Injuries                                        | 556<br>(428 - 718) | 38<br>(19 - 72)    | 27<br>(17 - 43)     | 310<br>(207 - 437)   | 89<br>(67 - 120)     | 92<br>(69 - 119)     |
| Transport injuries                              | 135<br>(99 - 185)  | 8<br>(4 - 16)      | 9<br>(5 - 16)       | 87<br>(58 - 128)     | 24<br>(17 - 35)      | 7<br>(5 - 10)        |
| Road injuries                                   | 129<br>(94 - 175)  | 7<br>(3 - 15)      | 9<br>(5 - 15)       | 85<br>(56 - 124)     | 22<br>(15 - 32)      | 7<br>(5 - 10)        |
| Pedestrian road injuries                        | 26<br>(18 - 40)    | 3<br>(1 - 6)       | 3<br>(2 - 7)        | 9<br>(5 - 18)        | 6<br>(4 - 10)        | 4<br>(2 - 5)         |
| Cyclist road injuries                           | 9<br>(6 - 13)      | 0<br>(0 - 1)       | 1<br>(0 - 1)        | 4<br>(2 - 7)         | 3<br>(2 - 5)         | 1<br>(0 - 1)         |
| Motorcyclist road injuries                      | 7<br>(4 - 12)      | 0<br>(0 - 0)       | 0<br>(0 - 0)        | 6<br>(3 - 11)        | 0<br>(0 - 1)         | 0<br>(0 - 0)         |
| Motor vehicle road injuries                     | 87<br>(62 - 121)   | 4<br>(2 - 8)       | 5<br>(2 - 8)        | 64<br>(42 - 95)      | 11<br>(8 - 17)       | 2<br>(1 - 3)         |
| Other road injuries                             | 1<br>(0 - 1)       | 0<br>(0 - 1)       | 0<br>(0 - 1)        | 0<br>(0 - 0)         | 0<br>(0 - 0)         | 0<br>(0 - 0)         |
| Other transport injuries                        | 6<br>(4 - 9)       | 1<br>(0 - 1)       | 1<br>(0 - 1)        | 2<br>(1 - 4)         | 3<br>(2 - 4)         | 0<br>(0 - 1)         |
| Unintentional injuries                          | 238<br>(187 - 325) | 28<br>(12 - 57)    | 15<br>(8 - 27)      | 77<br>(53 - 114)     | 47<br>(34 - 65)      | 71<br>(51 - 94)      |
| Falls                                           | 34<br>(24 - 46)    | 1<br>(0 - 3)       | 1<br>(0 - 2)        | 6<br>(4 - 10)        | 4<br>(2 - 5)         | 22<br>(14 - 34)      |
| Drowning                                        | 21<br>(13 - 37)    | 6<br>(2 - 16)      | 5<br>(2 - 11)       | 5<br>(3 - 8)         | 3<br>(2 - 4)         | 2<br>(1 - 3)         |
| Fire, heat, and hot substances                  | 47<br>(31 - 79)    | 5<br>(2 - 14)      | 2<br>(1 - 5)        | 18<br>(10 - 33)      | 8<br>(5 - 13)        | 14<br>(8 - 26)       |
| Poisonings                                      | 15<br>(9 - 31)     | 1<br>(0 - 2)       | 0<br>(0 - 1)        | 8<br>(4 - 18)        | 4<br>(2 - 6)         | 2<br>(1 - 4)         |
| Exposure to mechanical forces                   | 23<br>(15 - 35)    | 3<br>(1 - 6)       | 2<br>(1 - 5)        | 11<br>(7 - 19)       | 5<br>(3 - 8)         | 2<br>(1 - 3)         |
| Unintentional firearm injuries                  | 14<br>(9 - 22)     | 0<br>(0 - 1)       | 0<br>(0 - 1)        | 8<br>(4 - 14)        | 4<br>(2 - 6)         | 1<br>(1 - 2)         |
| Unintentional suffocation                       | 2<br>(0 - 5)       | 1<br>(0 - 2)       | 0<br>(0 - 1)        | 1<br>(0 - 3)         | 0<br>(0 - 0)         | 0<br>(0 - 0)         |
| Other exposure to mechanical forces             | 7<br>(4 - 14)      | 2<br>(0 - 5)       | 2<br>(0 - 4)        | 2<br>(1 - 4)         | 1<br>(1 - 2)         | 1<br>(0 - 1)         |
| Adverse effects of medical treatment            | 61<br>(39 - 90)    | 5<br>(1 - 12)      | 2<br>(1 - 4)        | 17<br>(10 - 27)      | 16<br>(9 - 27)       | 21<br>(10 - 36)      |
| Animal contact                                  | 7<br>(3 - 19)      | 1<br>(0 - 3)       | 1<br>(0 - 2)        | 3<br>(1 - 8)         | 2<br>(1 - 4)         | 1<br>(0 - 2)         |
| Venomous animal contact                         | 6<br>(3 - 16)      | 1<br>(0 - 3)       | 1<br>(0 - 2)        | 2<br>(1 - 7)         | 2<br>(1 - 4)         | 1<br>(0 - 2)         |
| Non-venomous animal contact                     | 1<br>(0 - 3)       | 0<br>(0 - 0)       | 0<br>(0 - 0)        | 0<br>(0 - 1)         | 0<br>(0 - 1)         | 0<br>(0 - 0)         |
| Foreign body                                    | 14<br>(6 - 26)     | 4<br>(1 - 12)      | 1<br>(0 - 2)        | 3<br>(2 - 6)         | 2<br>(1 - 4)         | 3<br>(1 - 4)         |
| Pulmonary aspiration and foreign body in airway | 13<br>(6 - 25)     | 4<br>(1 - 12)      | 1<br>(0 - 2)        | 3<br>(2 - 6)         | 2<br>(1 - 4)         | 3<br>(1 - 4)         |
| Foreign body in other body part                 | 0<br>(0 - 1)       | 0<br>(0 - 0)       | 0<br>(0 - 0)        | 0<br>(0 - 0)         | 0<br>(0 - 0)         | 0<br>(0 - 0)         |
| Other unintentional injuries                    | 16<br>(9 - 31)     | 1<br>(0 - 4)       | 1<br>(0 - 2)        | 7<br>(3 - 14)        | 3<br>(2 - 6)         | 4<br>(2 - 7)         |
| Self-harm and interpersonal violence            | 182<br>(116 - 286) | 3<br>(1 - 6)       | 3<br>(1 - 6)        | 146<br>(86 - 242)    | 18<br>(8 - 28)       | 13<br>(4 - 20)       |
| Self-harm                                       | 89<br>(28 - 131)   | --                 | 1<br>(0 - 3)        | 61<br>(21 - 101)     | 15<br>(4 - 23)       | 12<br>(2 - 19)       |
| Interpersonal violence                          | 93<br>(46 - 192)   | 3<br>(1 - 6)       | 2<br>(1 - 4)        | 84<br>(40 - 180)     | 4<br>(2 - 7)         | 1<br>(0 - 2)         |
| Assault by firearm                              | 29<br>(13 - 64)    | 0<br>(0 - 1)       | 0<br>(0 - 1)        | 26<br>(11 - 61)      | 1<br>(1 - 3)         | 0<br>(0 - 1)         |
| Assault by sharp object                         | 33<br>(15 - 72)    | 0<br>(0 - 1)       | 0<br>(0 - 1)        | 31<br>(14 - 69)      | 1<br>(0 - 2)         | 0<br>(0 - 1)         |
| Assault by other means                          | 32<br>(15 - 68)    | 2<br>(1 - 4)       | 1<br>(0 - 3)        | 27<br>(12 - 61)      | 1<br>(1 - 3)         | 0<br>(0 - 1)         |

Web Table 31- Nepal deaths with 95% UI by age, sex, and cause in 2013

| Cause                                                             | Both Sexes, All Ages           | Both Sexes, 0-4 Years       | Both Sexes, 5-14 Years   | Both Sexes, 15-49 Years     | Both Sexes, 50-69 Years     | Both Sexes, 70-80 Years     |
|-------------------------------------------------------------------|--------------------------------|-----------------------------|--------------------------|-----------------------------|-----------------------------|-----------------------------|
| All causes                                                        | 158,150<br>(139,583 - 178,358) | 22,241<br>(19,971 - 24,852) | 3,720<br>(3,370 - 4,151) | 28,032<br>(24,121 - 32,679) | 45,493<br>(37,327 - 53,869) | 58,664<br>(51,489 - 65,260) |
| Communicable, maternal, neonatal, and nutritional diseases        | 46,389<br>(41,619 - 53,075)    | 19,533<br>(17,479 - 21,940) | 1,777<br>(1,472 - 2,140) | 8,367<br>(6,869 - 12,043)   | 7,419<br>(5,917 - 9,332)    | 9,294<br>(7,606 - 11,117)   |
| HIV/AIDS and tuberculosis                                         | 9,689<br>(6,889 - 15,816)      | 113<br>(68 - 215)           | 117<br>(66 - 278)        | 3,520<br>(2,302 - 7,908)    | 3,619<br>(2,515 - 5,241)    | 2,320<br>(1,677 - 3,150)    |
| Tuberculosis                                                      | 8,162<br>(6,007 - 10,639)      | 97<br>(64 - 143)            | 94<br>(61 - 135)         | 2,384<br>(1,691 - 3,176)    | 3,310<br>(2,350 - 4,532)    | 2,276<br>(1,649 - 3,063)    |
| HIV/AIDS                                                          | 1,527<br>(130 - 8,087)         | 16<br>(1 - 102)             | 23<br>(0 - 196)          | 1,136<br>(100 - 5,993)      | 309<br>(24 - 1,774)         | 44<br>(3 - 256)             |
| HIV/AIDS resulting in mycobacterial infection                     | 101<br>(8 - 574)               | 1<br>(0 - 6)                | 1<br>(0 - 10)            | 74<br>(6 - 409)             | 22<br>(2 - 124)             | 3<br>(0 - 18)               |
| HIV/AIDS resulting in other diseases                              | 1,426<br>(122 - 7,520)         | 15<br>(1 - 97)              | 21<br>(0 - 185)          | 1,062<br>(94 - 5,576)       | 287<br>(23 - 1,646)         | 41<br>(2 - 239)             |
| Diarrhea, lower respiratory, and other common infectious diseases | 18,148<br>(15,435 - 21,159)    | 7,186<br>(5,815 - 8,638)    | 964<br>(692 - 1,296)     | 1,815<br>(1,306 - 2,394)    | 2,770<br>(1,969 - 3,776)    | 5,411<br>(4,047 - 7,016)    |
| Diarrheal diseases                                                | 7,448<br>(5,696 - 9,597)       | 1,897<br>(1,178 - 2,779)    | 289<br>(171 - 446)       | 680<br>(460 - 960)          | 1,532<br>(951 - 2,348)      | 3,051<br>(1,963 - 4,468)    |
| Intestinal infectious diseases                                    | 1,167<br>(567 - 2,104)         | 246<br>(100 - 483)          | 366<br>(144 - 659)       | 439<br>(192 - 850)          | 85<br>(35 - 178)            | 32<br>(13 - 64)             |
| Typhoid fever                                                     | 881<br>(416 - 1,583)           | 180<br>(69 - 360)           | 279<br>(108 - 516)       | 333<br>(142 - 638)          | 65<br>(27 - 136)            | 25<br>(10 - 49)             |
| Paratyphoid fever                                                 | 268<br>(124 - 499)             | 59<br>(22 - 126)            | 85<br>(33 - 178)         | 101<br>(40 - 213)           | 17<br>(6 - 38)              | 6<br>(2 - 16)               |
| Other intestinal infectious diseases                              | 19<br>(9 - 30)                 | 8<br>(3 - 16)               | 2<br>(0 - 7)             | 5<br>(1 - 12)               | 2<br>(0 - 6)                | 1<br>(0 - 6)                |
| Lower respiratory infections                                      | 8,128<br>(6,739 - 9,640)       | 4,384<br>(3,347 - 5,579)    | 162<br>(108 - 237)       | 438<br>(312 - 578)          | 980<br>(693 - 1,334)        | 2,163<br>(1,575 - 2,812)    |
| Upper respiratory infections                                      | 18<br>(9 - 30)                 | 2<br>(0 - 6)                | 1<br>(0 - 2)             | 4<br>(2 - 9)                | 5<br>(1 - 12)               | 6<br>(1 - 15)               |
| Otitis media                                                      | 5<br>(4 - 7)                   | 1<br>(0 - 1)                | 1<br>(1 - 1)             | 2<br>(1 - 2)                | 1<br>(1 - 2)                | 1<br>(0 - 1)                |
| Meningitis                                                        | 602<br>(477 - 773)             | 206<br>(126 - 350)          | 61<br>(38 - 94)          | 138<br>(99 - 189)           | 89<br>(60 - 126)            | 109<br>(68 - 160)           |
| Pneumococcal meningitis                                           | 185<br>(141 - 243)             | 49<br>(28 - 83)             | 23<br>(14 - 36)          | 47<br>(31 - 67)             | 29<br>(17 - 46)             | 37<br>(20 - 59)             |
| H influenzae type B meningitis                                    | 135<br>(96 - 201)              | 81<br>(47 - 143)            | 15<br>(9 - 27)           | 18<br>(11 - 26)             | 9<br>(5 - 14)               | 11<br>(6 - 19)              |
| Meningococcal meningitis                                          | 72<br>(54 - 94)                | 15<br>(9 - 27)              | 6<br>(4 - 11)            | 21<br>(14 - 30)             | 13<br>(7 - 20)              | 17<br>(9 - 28)              |
| Other meningitis                                                  | 210<br>(161 - 267)             | 61<br>(34 - 113)            | 16<br>(9 - 26)           | 52<br>(33 - 76)             | 38<br>(23 - 57)             | 44<br>(25 - 68)             |
| Encephalitis                                                      | 246<br>(134 - 398)             | 85<br>(39 - 153)            | 47<br>(18 - 79)          | 72<br>(28 - 124)            | 28<br>(14 - 58)             | 14<br>(7 - 33)              |
| Diphtheria                                                        | 3<br>(0 - 12)                  | 2<br>(0 - 9)                | 1<br>(0 - 5)             | 1<br>(0 - 2)                | 0<br>(0 - 1)                | --                          |
| Whooping cough                                                    | 147<br>(0 - 741)               | 134<br>(0 - 672)            | 11<br>(0 - 53)           | 2<br>(0 - 12)               | 0<br>(0 - 1)                | --                          |
| Tetanus                                                           | 277<br>(145 - 402)             | 169<br>(85 - 278)           | 14<br>(5 - 22)           | 28<br>(13 - 41)             | 45<br>(13 - 73)             | 21<br>(7 - 39)              |
| Measles                                                           | 65<br>(17 - 179)               | 53<br>(14 - 146)            | 10<br>(3 - 29)           | 2<br>(0 - 5)                | 0<br>(0 - 0)                | --                          |
| Varicella and herpes zoster                                       | 40<br>(18 - 77)                | 9<br>(1 - 29)               | 3<br>(0 - 11)            | 9<br>(3 - 20)               | 5<br>(1 - 11)               | 14<br>(1 - 48)              |
| Neglected tropical diseases and malaria                           | 1,913<br>(1,432 - 2,563)       | 454<br>(274 - 718)          | 422<br>(302 - 565)       | 632<br>(421 - 926)          | 258<br>(163 - 390)          | 148<br>(95 - 234)           |
| Malaria                                                           | 471<br>(207 - 983)             | 63<br>(1 - 238)             | 58<br>(17 - 144)         | 175<br>(57 - 370)           | 106<br>(36 - 231)           | 70<br>(23 - 153)            |
| Leishmaniasis                                                     | 1,079<br>(837 - 1,386)         | 340<br>(213 - 493)          | 279<br>(183 - 396)       | 347<br>(242 - 461)          | 85<br>(57 - 121)            | 28<br>(19 - 38)             |
| Visceral leishmaniasis                                            | 1,079<br>(837 - 1,386)         | 340<br>(213 - 493)          | 279<br>(183 - 396)       | 347<br>(242 - 461)          | 85<br>(57 - 121)            | 28<br>(19 - 38)             |
| Cysticercosis                                                     | 1<br>(1 - 2)                   | 0<br>(0 - 0)                | 0<br>(0 - 0)             | 1<br>(0 - 1)                | 0<br>(0 - 1)                | 0<br>(0 - 0)                |
| Cystic echinococcosis                                             | 32<br>(27 - 39)                | 1<br>(1 - 2)                | 5<br>(4 - 6)             | 14<br>(11 - 17)             | 8<br>(6 - 10)               | 5<br>(4 - 6)                |
| Dengue                                                            | 20<br>(14 - 35)                | 3<br>(1 - 6)                | 2<br>(1 - 4)             | 7<br>(5 - 13)               | 5<br>(2 - 8)                | 4<br>(2 - 7)                |
| Rabies                                                            | 212<br>(109 - 430)             | 17<br>(5 - 43)              | 70<br>(33 - 136)         | 73<br>(33 - 185)            | 40<br>(22 - 70)             | 13<br>(7 - 23)              |
| Intestinal nematode infections                                    | 19<br>(8 - 36)                 | 9<br>(2 - 21)               | 4<br>(0 - 12)            | 2<br>(0 - 10)               | 2<br>(0 - 7)                | 2<br>(0 - 7)                |
| Ascariasis                                                        | 19<br>(8 - 36)                 | 9<br>(2 - 21)               | 4<br>(0 - 12)            | 2<br>(0 - 10)               | 2<br>(0 - 7)                | 2<br>(0 - 7)                |
| Other neglected tropical diseases                                 | 78<br>(52 - 118)               | 22<br>(10 - 45)             | 5<br>(3 - 9)             | 14<br>(8 - 21)              | 12<br>(7 - 20)              | 26<br>(14 - 40)             |
| Maternal disorders                                                | 1,588<br>(1,113 - 2,119)       | --                          | 1<br>(0 - 3)             | 1,586<br>(1,112 - 2,118)    | --                          | --                          |
| Maternal hemorrhage                                               | 222<br>(140 - 333)             | --                          | 0<br>(0 - 0)             | 222<br>(140 - 333)          | --                          | --                          |



Web Table 31- Nepal deaths with 95% UI by age, sex, and cause in 2013

| Cause                                                            | Both Sexes, All Ages         | Both Sexes, 0-4 Years      | Both Sexes, 5-14 Years | Both Sexes, 15-49 Years    | Both Sexes, 50-69 Years     | Both Sexes, 70-80 Years     |
|------------------------------------------------------------------|------------------------------|----------------------------|------------------------|----------------------------|-----------------------------|-----------------------------|
| Maternal sepsis and other maternal infections                    | 83<br>(47 - 131)             | --                         | 0<br>(0 - 0)           | 83<br>(47 - 131)           | --                          | --                          |
| Maternal hypertensive disorders                                  | 182<br>(113 - 267)           | --                         | 0<br>(0 - 1)           | 182<br>(113 - 266)         | --                          | --                          |
| Maternal obstructed labor                                        | 77<br>(49 - 113)             | --                         | 0<br>(0 - 0)           | 77<br>(49 - 113)           | --                          | --                          |
| Maternal abortive outcome                                        | 197<br>(115 - 291)           | --                         | 0<br>(0 - 0)           | 197<br>(115 - 291)         | --                          | --                          |
| Indirect maternal deaths                                         | 196<br>(121 - 286)           | --                         | 0<br>(0 - 0)           | 196<br>(120 - 286)         | --                          | --                          |
| Late maternal deaths                                             | 263<br>(153 - 395)           | --                         | 0<br>(0 - 1)           | 262<br>(153 - 395)         | --                          | --                          |
| Maternal deaths aggravated by HIV/AIDS                           | 0<br>(0 - 1)                 | --                         | --                     | 0<br>(0 - 1)               | --                          | --                          |
| Other maternal disorders                                         | 364<br>(241 - 512)           | --                         | 0<br>(0 - 1)           | 364<br>(241 - 512)         | --                          | --                          |
| Neonatal disorders                                               | 10,418<br>(9,293 - 11,586)   | 10,418<br>(9,293 - 11,586) | --                     | --                         | --                          | --                          |
| Neonatal preterm birth complications                             | 2,536<br>(1,508 - 3,851)     | 2,536<br>(1,508 - 3,851)   | --                     | --                         | --                          | --                          |
| Neonatal encephalopathy due to birth asphyxia and trauma         | 4,123<br>(2,729 - 5,660)     | 4,123<br>(2,729 - 5,660)   | --                     | --                         | --                          | --                          |
| Neonatal sepsis and other neonatal infections                    | 2,349<br>(1,307 - 3,857)     | 2,349<br>(1,307 - 3,857)   | --                     | --                         | --                          | --                          |
| Hemolytic disease and other neonatal jaundice                    | 55<br>(24 - 119)             | 55<br>(24 - 119)           | --                     | --                         | --                          | --                          |
| Other neonatal disorders                                         | 1,354<br>(772 - 2,189)       | 1,354<br>(772 - 2,189)     | --                     | --                         | --                          | --                          |
| Nutritional deficiencies                                         | 2,208<br>(1,638 - 2,731)     | 359<br>(228 - 552)         | 92<br>(62 - 131)       | 283<br>(201 - 380)         | 378<br>(252 - 514)          | 1,096<br>(738 - 1,512)      |
| Protein-energy malnutrition                                      | 1,717<br>(1,080 - 2,224)     | 323<br>(199 - 504)         | 69<br>(40 - 103)       | 178<br>(99 - 260)          | 875<br>(154 - 395)          | 2,768<br>(408 - 1,268)      |
| Iodine deficiency                                                | 7<br>(1 - 22)                | 0<br>(0 - 3)               | 0<br>(0 - 2)           | 2<br>(0 - 7)               | 2<br>(0 - 8)                | 3<br>(0 - 15)               |
| Iron-deficiency anemia                                           | 371<br>(190 - 710)           | 31<br>(4 - 84)             | 21<br>(5 - 46)         | 91<br>(47 - 152)           | 79<br>(35 - 152)            | 150<br>(51 - 365)           |
| Other nutritional deficiencies                                   | 112<br>(53 - 249)            | 4<br>(1 - 12)              | 2<br>(1 - 7)           | 14<br>(5 - 33)             | 24<br>(11 - 56)             | 69<br>(27 - 152)            |
| Other communicable, maternal, neonatal, and nutritional diseases | 2,426<br>(1,841 - 3,163)     | 1,003<br>(590 - 1,507)     | 179<br>(125 - 259)     | 531<br>(383 - 839)         | 394<br>(278 - 561)          | 318<br>(206 - 479)          |
| Sexually transmitted diseases excluding HIV                      | 943<br>(535 - 1,440)         | 776<br>(408 - 1,232)       | 66<br>(34 - 110)       | 26<br>(15 - 46)            | 32<br>(14 - 76)             | 43<br>(15 - 111)            |
| Syphilis                                                         | 906<br>(503 - 1,389)         | 776<br>(408 - 1,232)       | 65<br>(33 - 109)       | 12<br>(7 - 20)             | 19<br>(9 - 44)              | 33<br>(12 - 85)             |
| Chlamydial infection                                             | 9<br>(5 - 19)                | --                         | 0<br>(0 - 0)           | 4<br>(2 - 7)               | 3<br>(1 - 9)                | 2<br>(1 - 7)                |
| Gonococcal infection                                             | 17<br>(9 - 32)               | --                         | 0<br>(0 - 1)           | 6<br>(3 - 10)              | 6<br>(2 - 13)               | 5<br>(2 - 13)               |
| Other sexually transmitted diseases                              | 12<br>(7 - 22)               | --                         | 0<br>(0 - 1)           | 5<br>(3 - 9)               | 4<br>(2 - 10)               | 2<br>(1 - 7)                |
| Hepatitis                                                        | 970<br>(729 - 1,661)         | 94<br>(52 - 243)           | 80<br>(51 - 159)       | 421<br>(291 - 723)         | 240<br>(166 - 374)          | 136<br>(99 - 192)           |
| Acute hepatitis A                                                | 118<br>(40 - 281)            | 52<br>(18 - 142)           | 31<br>(12 - 68)        | 27<br>(7 - 64)             | 6<br>(1 - 16)               | 1<br>(0 - 3)                |
| Acute hepatitis B                                                | 371<br>(231 - 675)           | 40<br>(14 - 114)           | 17<br>(7 - 37)         | 76<br>(33 - 153)           | 137<br>(77 - 245)           | 101<br>(63 - 153)           |
| Acute hepatitis C                                                | 11<br>(2 - 30)               | --                         | 2<br>(0 - 7)           | 4<br>(1 - 12)              | 3<br>(0 - 8)                | 2<br>(0 - 5)                |
| Acute hepatitis E                                                | 470<br>(303 - 765)           | 2<br>(0 - 6)               | 30<br>(14 - 61)        | 314<br>(205 - 541)         | 94<br>(50 - 158)            | 31<br>(13 - 59)             |
| Other infectious diseases                                        | 512<br>(264 - 962)           | 133<br>(49 - 364)          | 33<br>(14 - 85)        | 84<br>(47 - 148)           | 122<br>(55 - 237)           | 140<br>(56 - 272)           |
| Non-communicable diseases                                        | 94,506<br>(80,263 - 109,132) | 1,760<br>(1,210 - 2,336)   | 963<br>(803 - 1,141)   | 11,945<br>(9,101 - 14,444) | 33,924<br>(27,473 - 40,811) | 45,915<br>(39,868 - 51,886) |
| Neoplasms                                                        | 13,210<br>(10,524 - 15,939)  | 134<br>(77 - 188)          | 247<br>(169 - 318)     | 2,672<br>(2,024 - 3,262)   | 6,396<br>(4,957 - 8,029)    | 3,762<br>(3,151 - 4,416)    |
| Esophageal cancer                                                | 1,348<br>(928 - 2,061)       | --                         | --                     | 188<br>(118 - 306)         | 716<br>(464 - 1,161)        | 444<br>(313 - 647)          |
| Stomach cancer                                                   | 1,043<br>(831 - 1,277)       | --                         | --                     | 176<br>(126 - 225)         | 537<br>(405 - 680)          | 330<br>(255 - 415)          |
| Liver cancer                                                     | 771<br>(506 - 1,025)         | --                         | 4<br>(2 - 7)           | 122<br>(72 - 175)          | 395<br>(241 - 555)          | 249<br>(169 - 339)          |
| Liver cancer due to hepatitis B                                  | 219<br>(104 - 354)           | --                         | 2<br>(1 - 3)           | 46<br>(22 - 74)            | 116<br>(53 - 200)           | 56<br>(25 - 96)             |
| Liver cancer due to hepatitis C                                  | 353<br>(241 - 487)           | --                         | 0<br>(0 - 1)           | 45<br>(26 - 71)            | 187<br>(119 - 272)          | 120<br>(76 - 168)           |
| Liver cancer due to alcohol use                                  | 91<br>(47 - 147)             | --                         | --                     | 8<br>(3 - 13)              | 43<br>(20 - 73)             | 40<br>(21 - 67)             |
| Liver cancer due to other causes                                 | 108<br>(55 - 179)            | --                         | 2<br>(1 - 4)           | 23<br>(13 - 36)            | 50<br>(24 - 86)             | 33<br>(15 - 61)             |

Web Table 31- Nepal deaths with 95% UI by age, sex, and cause in 2013

| Cause                                         | Both Sexes, All Ages        | Both Sexes, 0-4 Years | Both Sexes, 5-14 Years | Both Sexes, 15-49 Years  | Both Sexes, 50-69 Years     | Both Sexes, 70-80 Years     |
|-----------------------------------------------|-----------------------------|-----------------------|------------------------|--------------------------|-----------------------------|-----------------------------|
| Larynx cancer                                 | 352<br>(250 - 489)          | --                    | --                     | 41<br>(27 - 59)          | 178<br>(121 - 262)          | 134<br>(91 - 186)           |
| Tracheal, bronchus and lung cancer            | 1,328<br>(998 - 1,970)      | --                    | --                     | 157<br>(104 - 252)       | 756<br>(533 - 1,221)        | 415<br>(322 - 556)          |
| Breast cancer                                 | 1,030<br>(723 - 1,369)      | --                    | --                     | 291<br>(188 - 399)       | 504<br>(327 - 714)          | 234<br>(163 - 315)          |
| Cervical cancer                               | 744<br>(444 - 1,041)        | --                    | --                     | 164<br>(101 - 243)       | 400<br>(216 - 611)          | 180<br>(98 - 264)           |
| Uterine cancer                                | 67<br>(37 - 107)            | --                    | --                     | 8<br>(4 - 14)            | 35<br>(18 - 61)             | 24<br>(13 - 39)             |
| Prostate cancer                               | 110<br>(61 - 186)           | --                    | --                     | 1<br>(1 - 2)             | 21<br>(10 - 41)             | 87<br>(49 - 148)            |
| Colon and rectum cancer                       | 863<br>(701 - 1,037)        | --                    | --                     | 174<br>(132 - 217)       | 408<br>(317 - 508)          | 281<br>(229 - 343)          |
| Lip and oral cavity cancer                    | 589<br>(415 - 840)          | --                    | --                     | 117<br>(74 - 172)        | 289<br>(194 - 429)          | 184<br>(127 - 261)          |
| Nasopharynx cancer                            | 194<br>(137 - 266)          | --                    | 3<br>(1 - 10)          | 55<br>(35 - 83)          | 101<br>(66 - 150)           | 35<br>(22 - 55)             |
| Other pharynx cancer                          | 454<br>(281 - 634)          | --                    | --                     | 70<br>(40 - 104)         | 269<br>(156 - 395)          | 115<br>(70 - 167)           |
| Gallbladder and biliary tract cancer          | 332<br>(245 - 442)          | --                    | --                     | 69<br>(45 - 99)          | 174<br>(122 - 244)          | 89<br>(60 - 126)            |
| Pancreatic cancer                             | 324<br>(258 - 391)          | --                    | --                     | 54<br>(40 - 69)          | 169<br>(128 - 216)          | 101<br>(80 - 126)           |
| Malignant skin melanoma                       | 24<br>(17 - 39)             | --                    | --                     | 6<br>(4 - 10)            | 11<br>(7 - 17)              | 8<br>(5 - 13)               |
| Non-melanoma skin cancer                      | 32<br>(21 - 46)             | --                    | --                     | 5<br>(3 - 9)             | 10<br>(6 - 16)              | 16<br>(10 - 26)             |
| Ovarian cancer                                | 551<br>(320 - 848)          | --                    | --                     | 129<br>(65 - 213)        | 311<br>(168 - 501)          | 112<br>(67 - 174)           |
| Testicular cancer                             | 23<br>(15 - 33)             | --                    | --                     | 14<br>(8 - 22)           | 6<br>(3 - 11)               | 3<br>(2 - 5)                |
| Kidney cancer                                 | 144<br>(103 - 197)          | 2<br>(1 - 4)          | 3<br>(1 - 5)           | 19<br>(13 - 28)          | 79<br>(52 - 116)            | 42<br>(30 - 57)             |
| Bladder cancer                                | 240<br>(181 - 319)          | --                    | --                     | 19<br>(12 - 28)          | 107<br>(74 - 153)           | 114<br>(83 - 154)           |
| Brain and nervous system cancer               | 331<br>(192 - 438)          | 4<br>(2 - 8)          | 20<br>(12 - 28)        | 115<br>(70 - 153)        | 144<br>(74 - 204)           | 48<br>(25 - 69)             |
| Thyroid cancer                                | 82<br>(48 - 120)            | --                    | 1<br>(0 - 1)           | 11<br>(7 - 17)           | 37<br>(21 - 57)             | 33<br>(19 - 51)             |
| Mesothelioma                                  | 13<br>(9 - 19)              | --                    | --                     | 4<br>(3 - 7)             | 7<br>(4 - 11)               | 2<br>(1 - 4)                |
| Hodgkin lymphoma                              | 53<br>(39 - 77)             | 4<br>(2 - 8)          | 4<br>(2 - 9)           | 16<br>(10 - 24)          | 17<br>(10 - 26)             | 13<br>(8 - 19)              |
| Non-Hodgkin lymphoma                          | 513<br>(348 - 743)          | 9<br>(4 - 17)         | 27<br>(15 - 41)        | 134<br>(84 - 209)        | 208<br>(136 - 301)          | 135<br>(95 - 196)           |
| Multiple myeloma                              | 103<br>(68 - 143)           | --                    | --                     | 14<br>(9 - 20)           | 54<br>(33 - 80)             | 35<br>(23 - 49)             |
| Leukemia                                      | 741<br>(514 - 903)          | 25<br>(12 - 43)       | 103<br>(63 - 142)      | 300<br>(197 - 378)       | 205<br>(140 - 268)          | 108<br>(78 - 137)           |
| Other neoplasms                               | 811<br>(500 - 1,061)        | 91<br>(44 - 137)      | 81<br>(42 - 124)       | 201<br>(114 - 268)       | 248<br>(140 - 342)          | 190<br>(131 - 272)          |
| Cardiovascular diseases                       | 43,925<br>(36,826 - 51,836) | 80<br>(55 - 125)      | 124<br>(87 - 177)      | 4,058<br>(2,996 - 5,110) | 15,679<br>(12,618 - 19,160) | 23,983<br>(20,584 - 27,953) |
| Rheumatic heart disease                       | 1,492<br>(1,027 - 2,428)    | 8<br>(4 - 16)         | 41<br>(25 - 63)        | 407<br>(270 - 612)       | 541<br>(343 - 988)          | 495<br>(321 - 895)          |
| Ischemic heart disease                        | 20,347<br>(16,445 - 24,865) | 11<br>(4 - 26)        | 27<br>(15 - 47)        | 2,030<br>(1,372 - 2,640) | 7,884<br>(6,041 - 10,150)   | 10,396<br>(8,479 - 12,928)  |
| Cerebrovascular disease                       | 16,097<br>(12,250 - 19,583) | 17<br>(11 - 27)       | 29<br>(18 - 43)        | 1,002<br>(668 - 1,329)   | 5,170<br>(3,824 - 6,626)    | 9,879<br>(7,508 - 12,028)   |
| Ischemic stroke                               | 8,053<br>(5,140 - 10,650)   | 2<br>(1 - 5)          | 4<br>(2 - 7)           | 165<br>(79 - 286)        | 1,860<br>(1,008 - 2,882)    | 6,022<br>(4,009 - 7,727)    |
| Hemorrhagic stroke                            | 8,044<br>(5,068 - 11,048)   | 15<br>(9 - 23)        | 25<br>(16 - 37)        | 836<br>(536 - 1,128)     | 3,311<br>(2,103 - 4,545)    | 3,858<br>(2,237 - 5,644)    |
| Hypertensive heart disease                    | 4,226<br>(2,899 - 6,950)    | 7<br>(3 - 15)         | 6<br>(3 - 11)          | 324<br>(188 - 554)       | 1,476<br>(938 - 2,485)      | 2,412<br>(1,617 - 4,149)    |
| Cardiomyopathy and myocarditis                | 820<br>(579 - 1,111)        | 30<br>(18 - 48)       | 17<br>(10 - 28)        | 180<br>(115 - 259)       | 292<br>(194 - 423)          | 301<br>(197 - 453)          |
| Atrial fibrillation and flutter               | 23<br>(12 - 35)             | --                    | --                     | 1<br>(1 - 1)             | 6<br>(3 - 9)                | 16<br>(8 - 26)              |
| Aortic aneurysm                               | 294<br>(202 - 410)          | --                    | --                     | 25<br>(16 - 35)          | 105<br>(68 - 151)           | 164<br>(111 - 231)          |
| Peripheral vascular disease                   | 25<br>(14 - 38)             | --                    | --                     | 1<br>(0 - 1)             | 7<br>(4 - 13)               | 17<br>(9 - 26)              |
| Endocarditis                                  | 197<br>(126 - 289)          | 5<br>(3 - 9)          | 3<br>(2 - 5)           | 44<br>(26 - 66)          | 64<br>(39 - 103)            | 80<br>(49 - 127)            |
| Other cardiovascular and circulatory diseases | 404<br>(279 - 707)          | 2<br>(1 - 5)          | 2<br>(1 - 5)           | 44<br>(28 - 79)          | 133<br>(83 - 263)           | 223<br>(149 - 355)          |
| Chronic respiratory diseases                  | 15,830<br>(12,812 - 19,335) | 208<br>(143 - 305)    | 97<br>(73 - 130)       | 1,270<br>(951 - 1,643)   | 5,140<br>(3,880 - 6,627)    | 9,115<br>(7,378 - 11,057)   |

Web Table 31- Nepal deaths with 95% UI by age, sex, and cause in 2013

| Cause                                               | Both Sexes, All Ages      | Both Sexes, 0-4 Years | Both Sexes, 5-14 Years | Both Sexes, 15-49 Years | Both Sexes, 50-69 Years  | Both Sexes, 70-80 Years  |
|-----------------------------------------------------|---------------------------|-----------------------|------------------------|-------------------------|--------------------------|--------------------------|
| Chronic obstructive pulmonary disease               | 8,604<br>(6,479 - 11,007) | 58<br>(29 - 104)      | 21<br>(12 - 32)        | 426<br>(265 - 604)      | 2,524<br>(1,777 - 3,451) | 5,575<br>(4,259 - 7,118) |
| Pneumoconiosis                                      | 2,114<br>(1,455 - 2,932)  | 1<br>(0 - 2)          | 2<br>(1 - 4)           | 175<br>(114 - 246)      | 815<br>(529 - 1,172)     | 1,121<br>(731 - 1,616)   |
| Silicosis                                           | 444<br>(229 - 722)        | 0<br>(0 - 1)          | 1<br>(0 - 1)           | 35<br>(20 - 57)         | 179<br>(88 - 313)        | 230<br>(114 - 378)       |
| Asbestosis                                          | 148<br>(89 - 239)         | 0<br>(0 - 0)          | 0<br>(0 - 1)           | 20<br>(11 - 31)         | 71<br>(40 - 121)         | 57<br>(32 - 95)          |
| Coal workers pneumoconiosis                         | 225<br>(111 - 373)        | 0<br>(0 - 0)          | 1<br>(0 - 1)           | 29<br>(16 - 48)         | 102<br>(48 - 179)        | 93<br>(42 - 164)         |
| Other pneumoconiosis                                | 1,297<br>(845 - 1,857)    | 0<br>(0 - 0)          | 1<br>(0 - 1)           | 91<br>(55 - 133)        | 463<br>(277 - 705)       | 741<br>(454 - 1,126)     |
| Asthma                                              | 3,295<br>(2,355 - 5,178)  | 54<br>(29 - 94)       | 56<br>(40 - 78)        | 499<br>(343 - 724)      | 1,160<br>(766 - 1,822)   | 1,525<br>(1,023 - 2,525) |
| Interstitial lung disease and pulmonary sarcoidosis | 1,434<br>(355 - 2,504)    | 1<br>(0 - 3)          | 2<br>(1 - 4)           | 118<br>(23 - 237)       | 537<br>(116 - 1,066)     | 777<br>(208 - 1,327)     |
| Other chronic respiratory diseases                  | 382<br>(277 - 504)        | 95<br>(63 - 147)      | 15<br>(9 - 22)         | 52<br>(34 - 75)         | 104<br>(61 - 168)        | 116<br>(73 - 169)        |
| Cirrhosis                                           | 3,615<br>(2,882 - 4,443)  | 42<br>(23 - 75)       | 79<br>(56 - 112)       | 1,135<br>(826 - 1,449)  | 1,460<br>(1,121 - 1,845) | 899<br>(702 - 1,143)     |
| Cirrhosis due to hepatitis B                        | 787<br>(525 - 1,128)      | 1<br>(0 - 3)          | 10<br>(5 - 19)         | 228<br>(133 - 372)      | 332<br>(211 - 487)       | 216<br>(141 - 316)       |
| Cirrhosis due to hepatitis C                        | 426<br>(246 - 726)        | 2<br>(0 - 4)          | 6<br>(2 - 13)          | 109<br>(56 - 182)       | 173<br>(79 - 341)        | 136<br>(74 - 221)        |
| Cirrhosis due to alcohol use                        | 1,665<br>(1,213 - 2,196)  | --                    | --                     | 481<br>(291 - 680)      | 734<br>(508 - 1,020)     | 450<br>(330 - 585)       |
| Cirrhosis due to other causes                       | 736<br>(467 - 1,005)      | 39<br>(21 - 69)       | 62<br>(44 - 89)        | 316<br>(178 - 443)      | 221<br>(116 - 327)       | 98<br>(53 - 147)         |
| Digestive diseases                                  | 4,708<br>(3,647 - 5,938)  | 25<br>(14 - 49)       | 87<br>(62 - 116)       | 981<br>(703 - 1,262)    | 1,759<br>(1,302 - 2,283) | 1,857<br>(1,398 - 2,563) |
| Peptic ulcer disease                                | 1,558<br>(1,019 - 2,112)  | 2<br>(1 - 3)          | 7<br>(4 - 11)          | 226<br>(138 - 320)      | 635<br>(389 - 916)       | 688<br>(455 - 968)       |
| Gastritis and duodenitis                            | 279<br>(151 - 540)        | 2<br>(1 - 4)          | 5<br>(2 - 12)          | 52<br>(27 - 107)        | 100<br>(50 - 206)        | 120<br>(59 - 253)        |
| Appendicitis                                        | 201<br>(126 - 283)        | 1<br>(0 - 2)          | 6<br>(2 - 10)          | 82<br>(43 - 130)        | 58<br>(33 - 92)          | 55<br>(33 - 84)          |
| Paralytic ileus and intestinal obstruction          | 1,497<br>(973 - 2,496)    | 15<br>(8 - 31)        | 53<br>(34 - 77)        | 351<br>(224 - 535)      | 537<br>(318 - 903)       | 541<br>(279 - 1,063)     |
| Inguinal, femoral, and abdominal hernia             | 94<br>(49 - 204)          | 1<br>(0 - 2)          | 3<br>(1 - 5)           | 15<br>(8 - 29)          | 22<br>(9 - 53)           | 54<br>(28 - 114)         |
| Inflammatory bowel disease                          | 151<br>(96 - 230)         | 3<br>(1 - 6)          | 4<br>(2 - 7)           | 39<br>(23 - 64)         | 48<br>(27 - 77)          | 57<br>(34 - 89)          |
| Vascular intestinal disorders                       | 106<br>(55 - 192)         | 0<br>(0 - 1)          | 1<br>(0 - 3)           | 14<br>(7 - 27)          | 35<br>(18 - 67)          | 55<br>(28 - 101)         |
| Gallbladder and biliary diseases                    | 169<br>(112 - 256)        | 0<br>(0 - 1)          | 2<br>(1 - 3)           | 24<br>(14 - 38)         | 68<br>(39 - 113)         | 76<br>(44 - 129)         |
| Pancreatitis                                        | 491<br>(197 - 835)        | 0<br>(0 - 1)          | 4<br>(1 - 7)           | 140<br>(66 - 250)       | 193<br>(73 - 353)        | 154<br>(48 - 288)        |
| Other digestive diseases                            | 162<br>(99 - 255)         | 1<br>(0 - 3)          | 3<br>(2 - 6)           | 37<br>(20 - 60)         | 63<br>(34 - 106)         | 58<br>(34 - 93)          |
| Neurological disorders                              | 2,836<br>(2,293 - 3,406)  | 49<br>(29 - 87)       | 64<br>(31 - 121)       | 246<br>(158 - 367)      | 332<br>(251 - 422)       | 2,145<br>(1,720 - 2,640) |
| Alzheimer disease and other dementias               | 2,261<br>(1,825 - 2,774)  | --                    | --                     | 1<br>(1 - 2)            | 217<br>(156 - 283)       | 2,043<br>(1,633 - 2,531) |
| Parkinson disease                                   | 5<br>(3 - 9)              | --                    | --                     | 1<br>(1 - 2)            | 1<br>(0 - 1)             | 3<br>(2 - 7)             |
| Epilepsy                                            | 361<br>(209 - 585)        | 31<br>(13 - 68)       | 53<br>(21 - 110)       | 182<br>(103 - 302)      | 46<br>(28 - 78)          | 49<br>(30 - 78)          |
| Multiple sclerosis                                  | 38<br>(11 - 65)           | --                    | --                     | 11<br>(4 - 20)          | 14<br>(4 - 28)           | 12<br>(2 - 23)           |
| Other neurological disorders                        | 171<br>(132 - 221)        | 18<br>(13 - 25)       | 12<br>(8 - 16)         | 50<br>(37 - 67)         | 54<br>(38 - 75)          | 38<br>(28 - 52)          |
| Mental and substance use disorders                  | 117<br>(71 - 183)         | 2<br>(1 - 5)          | 0<br>(0 - 0)           | 44<br>(25 - 80)         | 49<br>(29 - 78)          | 21<br>(15 - 30)          |
| Schizophrenia                                       | 17<br>(5 - 43)            | --                    | --                     | 5<br>(1 - 16)           | 7<br>(2 - 17)            | 5<br>(2 - 12)            |
| Alcohol use disorders                               | 34<br>(21 - 70)           | --                    | --                     | 16<br>(8 - 33)          | 11<br>(6 - 27)           | 7<br>(4 - 11)            |
| Drug use disorders                                  | 65<br>(36 - 94)           | 2<br>(1 - 5)          | --                     | 23<br>(12 - 37)         | 31<br>(14 - 47)          | 8<br>(4 - 12)            |
| Opioid use disorders                                | 35<br>(19 - 49)           | 1<br>(1 - 3)          | --                     | 13<br>(7 - 20)          | 16<br>(7 - 24)           | 5<br>(2 - 7)             |
| Cocaine use disorders                               | 1<br>(0 - 1)              | 0<br>(0 - 0)          | --                     | 0<br>(0 - 1)            | 0<br>(0 - 0)             | 0<br>(0 - 0)             |
| Amphetamine use disorders                           | 1<br>(0 - 1)              | 0<br>(0 - 0)          | --                     | 0<br>(0 - 0)            | 0<br>(0 - 1)             | 0<br>(0 - 0)             |
| Other drug use disorders                            | 29<br>(16 - 42)           | 1<br>(0 - 2)          | --                     | 10<br>(5 - 16)          | 14<br>(7 - 22)           | 4<br>(2 - 5)             |
| Eating disorders                                    | 0<br>(0 - 1)              | --                    | 0<br>(0 - 0)           | 0<br>(0 - 1)            | --                       | --                       |

Web Table 31- Nepal deaths with 95% UI by age, sex, and cause in 2013

| Cause                                               | Both Sexes, All Ages     | Both Sexes, 0-4 Years  | Both Sexes, 5-14 Years | Both Sexes, 15-49 Years | Both Sexes, 50-69 Years  | Both Sexes, 70-80 Years  |
|-----------------------------------------------------|--------------------------|------------------------|------------------------|-------------------------|--------------------------|--------------------------|
| Anorexia nervosa                                    | 0<br>(0 - 1)             | --                     | 0<br>(0 - 0)           | 0<br>(0 - 1)            | --                       | --                       |
| Diabetes, urogenital, blood, and endocrine diseases | 8,234<br>(6,347 - 9,892) | 179<br>(122 - 264)     | 117<br>(86 - 167)      | 1,288<br>(927 - 1,609)  | 2,839<br>(2,138 - 3,553) | 3,810<br>(2,930 - 4,635) |
| Diabetes mellitus                                   | 4,400<br>(3,500 - 5,407) | 12<br>(8 - 17)         | 11<br>(7 - 16)         | 432<br>(316 - 547)      | 1,597<br>(1,212 - 2,034) | 2,349<br>(1,817 - 2,966) |
| Acute glomerulonephritis                            | 135<br>(53 - 282)        | 20<br>(4 - 52)         | 17<br>(7 - 39)         | 40<br>(17 - 83)         | 29<br>(12 - 58)          | 28<br>(12 - 58)          |
| Chronic kidney disease                              | 2,157<br>(1,009 - 2,791) | 14<br>(8 - 24)         | 14<br>(9 - 22)         | 468<br>(194 - 647)      | 805<br>(351 - 1,105)     | 856<br>(433 - 1,137)     |
| Chronic kidney disease due to diabetes mellitus     | 105<br>(19 - 178)        | 0<br>(0 - 1)           | 0<br>(0 - 1)           | 18<br>(3 - 32)          | 50<br>(8 - 85)           | 37<br>(7 - 64)           |
| Chronic kidney disease due to hypertension          | 664<br>(327 - 939)       | 2<br>(1 - 3)           | 1<br>(1 - 3)           | 95<br>(40 - 148)        | 240<br>(112 - 366)       | 327<br>(168 - 473)       |
| Chronic kidney disease due to glomerulonephritis    | 551<br>(290 - 813)       | 8<br>(5 - 14)          | 10<br>(6 - 15)         | 158<br>(76 - 237)       | 189<br>(92 - 297)        | 186<br>(91 - 278)        |
| Chronic kidney disease due to other causes          | 836<br>(187 - 1,272)     | 3<br>(1 - 7)           | 3<br>(1 - 6)           | 197<br>(36 - 317)       | 327<br>(67 - 544)        | 306<br>(75 - 495)        |
| Urinary diseases and male infertility               | 660<br>(506 - 887)       | 15<br>(8 - 28)         | 11<br>(7 - 19)         | 125<br>(83 - 185)       | 210<br>(147 - 297)       | 299<br>(215 - 422)       |
| Interstitial nephritis and urinary tract infections | 478<br>(350 - 670)       | 13<br>(7 - 24)         | 8<br>(5 - 13)          | 93<br>(61 - 141)        | 150<br>(101 - 220)       | 215<br>(138 - 330)       |
| Urolithiasis                                        | 53<br>(29 - 107)         | --                     | 1<br>(0 - 3)           | 11<br>(5 - 24)          | 20<br>(9 - 44)           | 21<br>(10 - 43)          |
| Other urinary diseases                              | 128<br>(66 - 201)        | 2<br>(1 - 4)           | 2<br>(1 - 3)           | 21<br>(11 - 37)         | 40<br>(19 - 68)          | 63<br>(30 - 107)         |
| Gynecological diseases                              | 25<br>(3 - 62)           | --                     | --                     | 8<br>(2 - 22)           | 2<br>(1 - 4)             | 15<br>(1 - 41)           |
| Uterine fibroids                                    | 7<br>(1 - 18)            | --                     | --                     | 2<br>(0 - 6)            | 1<br>(0 - 1)             | 5<br>(0 - 13)            |
| Polycystic ovarian syndrome                         | 0<br>(0 - 1)             | --                     | --                     | 0<br>(0 - 1)            | 0<br>(0 - 0)             | --                       |
| Endometriosis                                       | 1<br>(0 - 3)             | --                     | --                     | 1<br>(0 - 3)            | 0<br>(0 - 0)             | --                       |
| Genital prolapse                                    | 5<br>(1 - 13)            | --                     | --                     | 1<br>(0 - 2)            | 0<br>(0 - 1)             | 4<br>(0 - 10)            |
| Other gynecological diseases                        | 11<br>(2 - 27)           | --                     | --                     | 4<br>(1 - 9)            | 1<br>(0 - 2)             | 6<br>(0 - 18)            |
| Hemoglobinopathies and hemolytic anemias            | 302<br>(153 - 595)       | 65<br>(33 - 146)       | 40<br>(21 - 89)        | 96<br>(45 - 198)        | 42<br>(22 - 78)          | 59<br>(26 - 108)         |
| Thalassemias                                        | 138<br>(69 - 296)        | 47<br>(23 - 111)       | 32<br>(17 - 72)        | 53<br>(24 - 117)        | 5<br>(3 - 9)             | 1<br>(0 - 2)             |
| Sickle cell disorders                               | 3<br>(2 - 7)             | 1<br>(1 - 2)           | 1<br>(0 - 1)           | 1<br>(1 - 3)            | 0<br>(0 - 1)             | 0<br>(0 - 0)             |
| G6PD deficiency                                     | 10<br>(5 - 18)           | 3<br>(1 - 6)           | 1<br>(1 - 2)           | 4<br>(2 - 7)            | 2<br>(1 - 3)             | 1<br>(0 - 1)             |
| Other hemoglobinopathies and hemolytic anemias      | 151<br>(76 - 273)        | 14<br>(8 - 29)         | 7<br>(3 - 14)          | 38<br>(19 - 72)         | 35<br>(18 - 65)          | 57<br>(26 - 105)         |
| Endocrine, metabolic, blood, and immune disorders   | 555<br>(324 - 737)       | 54<br>(27 - 87)        | 24<br>(14 - 38)        | 120<br>(72 - 170)       | 153<br>(89 - 216)        | 205<br>(99 - 305)        |
| Musculoskeletal disorders                           | 257<br>(148 - 337)       | --                     | 13<br>(7 - 20)         | 61<br>(39 - 84)         | 106<br>(49 - 149)        | 77<br>(45 - 109)         |
| Rheumatoid arthritis                                | 130<br>(66 - 184)        | --                     | 3<br>(1 - 7)           | 15<br>(8 - 26)          | 58<br>(25 - 88)          | 54<br>(28 - 81)          |
| Other musculoskeletal disorders                     | 127<br>(72 - 177)        | --                     | 10<br>(4 - 15)         | 47<br>(27 - 63)         | 48<br>(20 - 73)          | 23<br>(13 - 41)          |
| Other non-communicable diseases                     | 1,775<br>(1,193 - 2,324) | 1,039<br>(594 - 1,538) | 136<br>(75 - 208)      | 189<br>(131 - 259)      | 165<br>(116 - 221)       | 246<br>(179 - 325)       |
| Congenital anomalies                                | 1,347<br>(832 - 1,897)   | 972<br>(543 - 1,456)   | 128<br>(68 - 199)      | 132<br>(87 - 187)       | 56<br>(37 - 78)          | 59<br>(39 - 78)          |
| Neural tube defects                                 | 98<br>(36 - 263)         | 81<br>(24 - 226)       | 6<br>(2 - 16)          | 8<br>(4 - 17)           | 2<br>(1 - 4)             | 1<br>(1 - 2)             |
| Congenital heart anomalies                          | 783<br>(353 - 1,215)     | 562<br>(213 - 951)     | 80<br>(31 - 136)       | 59<br>(31 - 92)         | 37<br>(22 - 55)          | 45<br>(29 - 60)          |
| Cleft lip and cleft palate                          | 9<br>(3 - 23)            | 9<br>(3 - 23)          | --                     | --                      | --                       | --                       |
| Down syndrome                                       | 65<br>(36 - 113)         | 34<br>(13 - 68)        | 10<br>(4 - 18)         | 18<br>(10 - 28)         | 4<br>(2 - 6)             | 0<br>(0 - 1)             |
| Chromosomal unbalanced rearrangements               | 39<br>(17 - 68)          | 29<br>(11 - 56)        | 3<br>(1 - 5)           | 6<br>(3 - 9)            | 1<br>(0 - 1)             | 0<br>(0 - 1)             |
| Other congenital anomalies                          | 353<br>(229 - 522)       | 257<br>(148 - 409)     | 30<br>(16 - 48)        | 42<br>(23 - 63)         | 12<br>(7 - 19)           | 12<br>(6 - 19)           |
| Skin and subcutaneous diseases                      | 381<br>(291 - 485)       | 20<br>(11 - 36)        | 8<br>(6 - 12)          | 57<br>(40 - 81)         | 109<br>(74 - 153)        | 187<br>(129 - 262)       |
| Cellulitis                                          | 210<br>(99 - 352)        | 15<br>(6 - 27)         | 6<br>(3 - 9)           | 32<br>(15 - 56)         | 61<br>(27 - 107)         | 96<br>(38 - 173)         |
| Pyoderma                                            | 114<br>(31 - 200)        | 4<br>(1 - 9)           | 1<br>(0 - 3)           | 18<br>(5 - 32)          | 36<br>(9 - 64)           | 54<br>(15 - 105)         |
| Decubitus ulcer                                     | 54<br>(12 - 138)         | 1<br>(0 - 4)           | 1<br>(0 - 3)           | 6<br>(1 - 15)           | 10<br>(2 - 29)           | 36<br>(8 - 90)           |

Web Table 31- Nepal deaths with 95% UI by age, sex, and cause in 2013

| Cause                                           | Both Sexes, All Ages        | Both Sexes, 0-4 Years | Both Sexes, 5-14 Years | Both Sexes, 15-49 Years  | Both Sexes, 50-69 Years  | Both Sexes, 70-80 Years  |
|-------------------------------------------------|-----------------------------|-----------------------|------------------------|--------------------------|--------------------------|--------------------------|
| Other skin and subcutaneous diseases            | 4<br>(1 - 7)                | 0<br>(0 - 1)          | 0<br>(0 - 1)           | 1<br>(0 - 2)             | 1<br>(0 - 2)             | 1<br>(0 - 2)             |
| Sudden infant death syndrome                    | 47<br>(9 - 127)             | 47<br>(9 - 127)       | --                     | --                       | --                       | --                       |
| Injuries                                        | 17,255<br>(13,465 - 20,495) | 949<br>(638 - 1,477)  | 981<br>(767 - 1,227)   | 7,721<br>(5,916 - 9,322) | 4,150<br>(2,970 - 5,303) | 3,455<br>(2,442 - 4,233) |
| Transport injuries                              | 2,945<br>(2,169 - 3,781)    | 83<br>(56 - 126)      | 173<br>(122 - 233)     | 1,516<br>(1,080 - 2,010) | 689<br>(448 - 927)       | 484<br>(259 - 649)       |
| Road injuries                                   | 2,628<br>(1,909 - 3,397)    | 68<br>(46 - 101)      | 153<br>(108 - 206)     | 1,365<br>(975 - 1,836)   | 608<br>(403 - 823)       | 434<br>(235 - 583)       |
| Pedestrian road injuries                        | 1,162<br>(753 - 1,539)      | 37<br>(23 - 57)       | 96<br>(61 - 141)       | 453<br>(285 - 653)       | 318<br>(186 - 449)       | 258<br>(138 - 357)       |
| Cyclist road injuries                           | 183<br>(124 - 267)          | 3<br>(1 - 6)          | 11<br>(5 - 20)         | 96<br>(63 - 140)         | 41<br>(23 - 66)          | 32<br>(18 - 53)          |
| Motorcyclist road injuries                      | 403<br>(245 - 618)          | 5<br>(3 - 9)          | 8<br>(4 - 14)          | 304<br>(176 - 469)       | 56<br>(31 - 96)          | 31<br>(16 - 50)          |
| Motor vehicle road injuries                     | 821<br>(575 - 1,087)        | 19<br>(12 - 30)       | 32<br>(20 - 52)        | 491<br>(332 - 675)       | 174<br>(108 - 248)       | 104<br>(50 - 152)        |
| Other road injuries                             | 59<br>(31 - 134)            | 4<br>(2 - 8)          | 5<br>(2 - 14)          | 20<br>(8 - 62)           | 20<br>(10 - 41)          | 10<br>(5 - 21)           |
| Other transport injuries                        | 316<br>(212 - 430)          | 15<br>(9 - 25)        | 20<br>(12 - 31)        | 151<br>(101 - 220)       | 81<br>(40 - 121)         | 50<br>(18 - 77)          |
| Unintentional injuries                          | 7,033<br>(5,531 - 9,023)    | 844<br>(544 - 1,375)  | 631<br>(461 - 871)     | 2,102<br>(1,570 - 2,868) | 1,456<br>(1,076 - 1,979) | 2,000<br>(1,438 - 2,584) |
| Falls                                           | 1,709<br>(1,102 - 2,525)    | 89<br>(42 - 193)      | 74<br>(37 - 143)       | 300<br>(191 - 458)       | 388<br>(219 - 602)       | 858<br>(496 - 1,293)     |
| Drowning                                        | 1,337<br>(612 - 2,381)      | 321<br>(100 - 764)    | 244<br>(115 - 478)     | 436<br>(230 - 704)       | 200<br>(81 - 381)        | 136<br>(50 - 254)        |
| Fire, heat, and hot substances                  | 1,237<br>(818 - 2,336)      | 133<br>(47 - 374)     | 77<br>(31 - 182)       | 431<br>(262 - 843)       | 248<br>(150 - 454)       | 347<br>(212 - 544)       |
| Poisonings                                      | 168<br>(89 - 223)           | 14<br>(7 - 25)        | 9<br>(5 - 14)          | 76<br>(41 - 109)         | 38<br>(19 - 56)          | 31<br>(11 - 49)          |
| Exposure to mechanical forces                   | 385<br>(276 - 538)          | 62<br>(31 - 112)      | 36<br>(21 - 62)        | 142<br>(93 - 211)        | 88<br>(55 - 134)         | 57<br>(25 - 84)          |
| Unintentional firearm injuries                  | 86<br>(57 - 127)            | 6<br>(3 - 12)         | 4<br>(2 - 7)           | 43<br>(25 - 72)          | 19<br>(11 - 29)          | 14<br>(7 - 23)           |
| Unintentional suffocation                       | 29<br>(13 - 57)             | 15<br>(4 - 38)        | 5<br>(2 - 8)           | 5<br>(3 - 10)            | 3<br>(1 - 5)             | 2<br>(1 - 3)             |
| Other exposure to mechanical forces             | 270<br>(185 - 395)          | 42<br>(16 - 82)       | 27<br>(14 - 52)        | 93<br>(59 - 145)         | 67<br>(38 - 108)         | 41<br>(14 - 64)          |
| Adverse effects of medical treatment            | 466<br>(255 - 717)          | 42<br>(19 - 85)       | 17<br>(8 - 35)         | 155<br>(62 - 280)        | 131<br>(68 - 214)        | 119<br>(73 - 198)        |
| Animal contact                                  | 576<br>(354 - 956)          | 54<br>(23 - 129)      | 104<br>(54 - 195)      | 229<br>(133 - 383)       | 113<br>(65 - 202)        | 75<br>(44 - 128)         |
| Venomous animal contact                         | 442<br>(274 - 733)          | 33<br>(12 - 84)       | 90<br>(47 - 167)       | 195<br>(111 - 321)       | 85<br>(48 - 154)         | 38<br>(20 - 79)          |
| Non-venomous animal contact                     | 134<br>(72 - 250)           | 21<br>(8 - 54)        | 14<br>(5 - 35)         | 34<br>(15 - 74)          | 28<br>(13 - 56)          | 37<br>(18 - 65)          |
| Foreign body                                    | 206<br>(122 - 318)          | 85<br>(45 - 156)      | 4<br>(2 - 7)           | 21<br>(13 - 37)          | 14<br>(8 - 26)           | 81<br>(41 - 125)         |
| Pulmonary aspiration and foreign body in airway | 193<br>(109 - 304)          | 84<br>(44 - 154)      | 3<br>(1 - 6)           | 17<br>(10 - 33)          | 11<br>(6 - 23)           | 78<br>(37 - 120)         |
| Foreign body in other body part                 | 13<br>(9 - 19)              | 1<br>(1 - 3)          | 1<br>(1 - 2)           | 4<br>(2 - 6)             | 3<br>(2 - 5)             | 4<br>(2 - 6)             |
| Other unintentional injuries                    | 949<br>(568 - 1,513)        | 43<br>(21 - 96)       | 64<br>(32 - 114)       | 312<br>(163 - 516)       | 234<br>(127 - 395)       | 295<br>(143 - 493)       |
| Self-harm and interpersonal violence            | 7,185<br>(4,594 - 8,927)    | 21<br>(9 - 44)        | 174<br>(92 - 291)      | 4,063<br>(2,671 - 5,138) | 1,970<br>(1,182 - 2,644) | 957<br>(564 - 1,329)     |
| Self-harm                                       | 6,512<br>(4,117 - 8,239)    | --                    | 147<br>(71 - 262)      | 3,507<br>(2,192 - 4,620) | 1,913<br>(1,153 - 2,582) | 945<br>(552 - 1,320)     |
| Interpersonal violence                          | 673<br>(353 - 930)          | 21<br>(9 - 44)        | 27<br>(12 - 45)        | 556<br>(284 - 791)       | 57<br>(27 - 89)          | 12<br>(5 - 19)           |
| Assault by firearm                              | 213<br>(94 - 367)           | 2<br>(1 - 6)          | 5<br>(2 - 10)          | 181<br>(80 - 318)        | 22<br>(8 - 39)           | 3<br>(1 - 5)             |
| Assault by sharp object                         | 240<br>(118 - 371)          | 3<br>(1 - 7)          | 6<br>(3 - 12)          | 212<br>(101 - 324)       | 18<br>(8 - 31)           | 2<br>(1 - 3)             |
| Assault by other means                          | 221<br>(93 - 329)           | 16<br>(7 - 32)        | 17<br>(7 - 29)         | 164<br>(65 - 260)        | 17<br>(8 - 27)           | 7<br>(3 - 12)            |
| Forces of nature, war, and legal intervention   | 93<br>(52 - 191)            | 0<br>(0 - 0)          | 3<br>(2 - 7)           | 40<br>(22 - 81)          | 35<br>(20 - 72)          | 14<br>(7 - 27)           |
| Exposure to forces of nature                    | 93<br>(52 - 191)            | 0<br>(0 - 0)          | 3<br>(2 - 7)           | 40<br>(22 - 81)          | 35<br>(20 - 72)          | 14<br>(7 - 27)           |

Web Table 31- Nepal deaths with 95% UI by age, sex, and cause in 2013

| Cause                                                             | Males, All Ages             | Males, 0-4 Years            | Males, 5-14 Years        | Males, 15-49 Years          | Males, 50-69 Years          | Males, 70-80 Years          |
|-------------------------------------------------------------------|-----------------------------|-----------------------------|--------------------------|-----------------------------|-----------------------------|-----------------------------|
| All causes                                                        | 84,205<br>(72,021 - 96,806) | 11,876<br>(10,303 - 13,470) | 2,091<br>(1,886 - 2,343) | 16,076<br>(12,999 - 20,264) | 25,482<br>(20,332 - 30,846) | 28,680<br>(24,677 - 32,555) |
| Communicable, maternal, neonatal, and nutritional diseases        | 24,372<br>(21,138 - 28,703) | 10,468<br>(9,164 - 11,878)  | 954<br>(768 - 1,168)     | 4,073<br>(3,016 - 7,059)    | 4,379<br>(3,356 - 5,672)    | 4,497<br>(3,551 - 5,530)    |
| HIV/AIDS and tuberculosis                                         | 6,662<br>(4,471 - 11,227)   | 75<br>(41 - 139)            | 60<br>(32 - 143)         | 2,326<br>(1,417 - 5,617)    | 2,553<br>(1,715 - 3,736)    | 1,648<br>(1,112 - 2,405)    |
| Tuberculosis                                                      | 5,460<br>(3,794 - 7,301)    | 67<br>(38 - 109)            | 49<br>(29 - 74)          | 1,444<br>(907 - 2,031)      | 2,291<br>(1,541 - 3,196)    | 1,609<br>(1,083 - 2,269)    |
| HIV/AIDS                                                          | 1,202<br>(103 - 6,065)      | 8<br>(0 - 3)                | 11<br>(0 - 6)            | 882<br>(78 - 4,466)         | 262<br>(22 - 1,441)         | 39<br>(2 - 212)             |
| HIV/AIDS resulting in mycobacterial infection                     | 84<br>(7 - 456)             | 0<br>(0 - 3)                | 1<br>(0 - 6)             | 61<br>(5 - 321)             | 19<br>(2 - 106)             | 3<br>(0 - 15)               |
| HIV/AIDS resulting in other diseases                              | 1,118<br>(96 - 5,600)       | 7<br>(0 - 48)               | 10<br>(0 - 90)           | 821<br>(72 - 4,126)         | 243<br>(21 - 1,331)         | 36<br>(2 - 197)             |
| Diarrhea, lower respiratory, and other common infectious diseases | 8,526<br>(7,068 - 10,179)   | 3,633<br>(2,774 - 4,577)    | 512<br>(337 - 728)       | 928<br>(624 - 1,309)        | 1,280<br>(852 - 1,838)      | 2,173<br>(1,566 - 2,933)    |
| Diarrheal diseases                                                | 3,175<br>(2,218 - 4,278)    | 941<br>(493 - 1,530)        | 146<br>(71 - 255)        | 325<br>(183 - 499)          | 645<br>(344 - 1,092)        | 1,119<br>(627 - 1,794)      |
| Intestinal infectious diseases                                    | 652<br>(265 - 1,315)        | 153<br>(53 - 339)           | 215<br>(67 - 449)        | 225<br>(79 - 498)           | 45<br>(11 - 105)            | 14<br>(3 - 36)              |
| Typhoid fever                                                     | 493<br>(197 - 978)          | 112<br>(36 - 261)           | 164<br>(51 - 341)        | 172<br>(59 - 392)           | 34<br>(8 - 86)              | 11<br>(2 - 27)              |
| Paratyphoid fever                                                 | 149<br>(58 - 329)           | 37<br>(11 - 91)             | 50<br>(13 - 117)         | 50<br>(16 - 125)            | 9<br>(2 - 25)               | 3<br>(1 - 11)               |
| Other intestinal infectious diseases                              | 10<br>(4 - 20)              | 5<br>(1 - 11)               | 1<br>(0 - 5)             | 3<br>(0 - 8)                | 1<br>(0 - 5)                | 1<br>(0 - 3)                |
| Lower respiratory infections                                      | 3,994<br>(3,083 - 4,970)    | 2,220<br>(1,540 - 2,959)    | 76<br>(44 - 126)         | 231<br>(148 - 333)          | 506<br>(312 - 733)          | 961<br>(636 - 1,375)        |
| Upper respiratory infections                                      | 9<br>(3 - 19)               | 1<br>(0 - 4)                | 0<br>(0 - 1)             | 2<br>(0 - 6)                | 3<br>(0 - 8)                | 2<br>(0 - 9)                |
| Otitis media                                                      | 2<br>(2 - 3)                | 0<br>(0 - 0)                | 0<br>(0 - 1)             | 1<br>(1 - 1)                | 1<br>(0 - 1)                | 0<br>(0 - 0)                |
| Meningitis                                                        | 281<br>(205 - 381)          | 89<br>(46 - 157)            | 24<br>(12 - 45)          | 78<br>(48 - 115)            | 37<br>(22 - 58)             | 53<br>(29 - 87)             |
| Pneumococcal meningitis                                           | 88<br>(61 - 123)            | 21<br>(10 - 40)             | 9<br>(4 - 17)            | 27<br>(16 - 43)             | 12<br>(6 - 21)              | 18<br>(9 - 33)              |
| H influenzae type B meningitis                                    | 61<br>(40 - 92)             | 36<br>(18 - 68)             | 6<br>(3 - 13)            | 10<br>(5 - 17)              | 4<br>(2 - 7)                | 5<br>(2 - 11)               |
| Meningococcal meningitis                                          | 34<br>(22 - 48)             | 7<br>(3 - 12)               | 2<br>(1 - 5)             | 11<br>(5 - 18)              | 5<br>(2 - 10)               | 8<br>(4 - 15)               |
| Other meningitis                                                  | 98<br>(68 - 134)            | 25<br>(11 - 47)             | 6<br>(3 - 12)            | 30<br>(16 - 48)             | 16<br>(8 - 26)              | 21<br>(10 - 37)             |
| Encephalitis                                                      | 146<br>(63 - 237)           | 42<br>(14 - 94)             | 33<br>(10 - 62)          | 47<br>(17 - 77)             | 16<br>(8 - 35)              | 8<br>(4 - 20)               |
| Diphtheria                                                        | 2<br>(0 - 7)                | 1<br>(0 - 5)                | 0<br>(0 - 3)             | 0<br>(0 - 1)                | 0<br>(0 - 1)                | --                          |
| Whooping cough                                                    | 66<br>(0 - 330)             | 61<br>(0 - 303)             | 4<br>(0 - 22)            | 1<br>(0 - 5)                | 0<br>(0 - 1)                | --                          |
| Tetanus                                                           | 149<br>(71 - 237)           | 93<br>(39 - 174)            | 7<br>(2 - 11)            | 14<br>(5 - 24)              | 25<br>(6 - 43)              | 9<br>(2 - 21)               |
| Measles                                                           | 32<br>(8 - 88)              | 26<br>(7 - 74)              | 5<br>(1 - 13)            | 1<br>(0 - 2)                | 0<br>(0 - 0)                | --                          |
| Varicella and herpes zoster                                       | 18<br>(6 - 41)              | 5<br>(0 - 19)               | 2<br>(0 - 7)             | 4<br>(1 - 11)               | 2<br>(0 - 8)                | 6<br>(0 - 24)               |
| Neglected tropical diseases and malaria                           | 1,098<br>(756 - 1,655)      | 257<br>(133 - 426)          | 248<br>(162 - 363)       | 381<br>(221 - 630)          | 141<br>(72 - 253)           | 71<br>(36 - 141)            |
| Malaria                                                           | 228<br>(47 - 605)           | 24<br>(0 - 81)              | 26<br>(3 - 79)           | 98<br>(14 - 286)            | 50<br>(6 - 160)             | 30<br>(4 - 100)             |
| Leishmaniasis                                                     | 664<br>(472 - 901)          | 207<br>(105 - 343)          | 168<br>(102 - 258)       | 218<br>(131 - 310)          | 55<br>(33 - 82)             | 16<br>(8 - 25)              |
| Visceral leishmaniasis                                            | 664<br>(472 - 901)          | 207<br>(105 - 343)          | 168<br>(102 - 258)       | 218<br>(131 - 310)          | 55<br>(33 - 82)             | 16<br>(8 - 25)              |
| Cysticercosis                                                     | 1<br>(0 - 1)                | 0<br>(0 - 0)                | 0<br>(0 - 0)             | 0<br>(0 - 0)                | 0<br>(0 - 0)                | 0<br>(0 - 0)                |
| Cystic echinococcosis                                             | 14<br>(11 - 17)             | 0<br>(0 - 1)                | 2<br>(2 - 3)             | 6<br>(5 - 8)                | 4<br>(3 - 5)                | 2<br>(1 - 2)                |
| Dengue                                                            | 8<br>(5 - 15)               | 1<br>(1 - 3)                | 1<br>(0 - 2)             | 2<br>(1 - 4)                | 2<br>(1 - 5)                | 1<br>(1 - 3)                |
| Rabies                                                            | 135<br>(62 - 339)           | 10<br>(2 - 32)              | 46<br>(19 - 106)         | 47<br>(20 - 138)            | 24<br>(10 - 53)             | 8<br>(3 - 17)               |
| Intestinal nematode infections                                    | 9<br>(3 - 20)               | 4<br>(0 - 12)               | 2<br>(0 - 7)             | 1<br>(0 - 7)                | 1<br>(0 - 5)                | 1<br>(0 - 4)                |
| Ascariasis                                                        | 9<br>(3 - 20)               | 4<br>(0 - 12)               | 2<br>(0 - 7)             | 1<br>(0 - 7)                | 1<br>(0 - 5)                | 1<br>(0 - 4)                |
| Other neglected tropical diseases                                 | 39<br>(24 - 64)             | 11<br>(4 - 27)              | 3<br>(2 - 6)             | 8<br>(5 - 13)               | 5<br>(3 - 10)               | 12<br>(6 - 21)              |
| Maternal disorders                                                | --                          | --                          | --                       | --                          | --                          | --                          |
| Maternal hemorrhage                                               | --                          | --                          | --                       | --                          | --                          | --                          |

Web Table 31- Nepal deaths with 95% UI by age, sex, and cause in 2013

| Cause                                                            | Males, All Ages             | Males, 0-4 Years         | Males, 5-14 Years  | Males, 15-49 Years       | Males, 50-69 Years          | Males, 70-80 Years          |
|------------------------------------------------------------------|-----------------------------|--------------------------|--------------------|--------------------------|-----------------------------|-----------------------------|
| Maternal sepsis and other maternal infections                    | --                          | --                       | --                 | --                       | --                          | --                          |
| Maternal hypertensive disorders                                  | --                          | --                       | --                 | --                       | --                          | --                          |
| Maternal obstructed labor                                        | --                          | --                       | --                 | --                       | --                          | --                          |
| Maternal abortive outcome                                        | --                          | --                       | --                 | --                       | --                          | --                          |
| Indirect maternal deaths                                         | --                          | --                       | --                 | --                       | --                          | --                          |
| Late maternal deaths                                             | --                          | --                       | --                 | --                       | --                          | --                          |
| Maternal deaths aggravated by HIV/AIDS                           | --                          | --                       | --                 | --                       | --                          | --                          |
| Other maternal disorders                                         | --                          | --                       | --                 | --                       | --                          | --                          |
| Neonatal disorders                                               | 5,844<br>(5,101 - 6,545)    | 5,844<br>(5,101 - 6,545) | --                 | --                       | --                          | --                          |
| Neonatal preterm birth complications                             | 1,409<br>(663 - 2,518)      | 1,409<br>(663 - 2,518)   | --                 | --                       | --                          | --                          |
| Neonatal encephalopathy due to birth asphyxia and trauma         | 2,248<br>(1,134 - 3,472)    | 2,248<br>(1,134 - 3,472) | --                 | --                       | --                          | --                          |
| Neonatal sepsis and other neonatal infections                    | 1,423<br>(588 - 2,740)      | 1,423<br>(588 - 2,740)   | --                 | --                       | --                          | --                          |
| Hemolytic disease and other neonatal jaundice                    | 34<br>(10 - 92)             | 34<br>(10 - 92)          | --                 | --                       | --                          | --                          |
| Other neonatal disorders                                         | 730<br>(307 - 1,388)        | 730<br>(307 - 1,388)     | --                 | --                       | --                          | --                          |
| Nutritional deficiencies                                         | 1,029<br>(597 - 1,437)      | 166<br>(82 - 297)        | 46<br>(26 - 73)    | 157<br>(91 - 243)        | 202<br>(110 - 305)          | 459<br>(239 - 705)          |
| Protein-energy malnutrition                                      | 820<br>(384 - 1,181)        | 149<br>(70 - 277)        | 34<br>(17 - 57)    | 108<br>(46 - 172)        | 159<br>(69 - 263)           | 370<br>(145 - 613)          |
| Iodine deficiency                                                | 3<br>(0 - 11)               | 0<br>(0 - 1)             | 0<br>(0 - 1)       | 1<br>(0 - 5)             | 1<br>(0 - 6)                | 1<br>(0 - 6)                |
| Iron-deficiency anemia                                           | 151<br>(50 - 399)           | 15<br>(2 - 39)           | 11<br>(2 - 27)     | 40<br>(16 - 91)          | 32<br>(2 - 102)             | 53<br>(2 - 182)             |
| Other nutritional deficiencies                                   | 56<br>(17 - 108)            | 2<br>(0 - 7)             | 1<br>(0 - 3)       | 9<br>(3 - 18)            | 9<br>(3 - 19)               | 35<br>(9 - 81)              |
| Other communicable, maternal, neonatal, and nutritional diseases | 1,214<br>(891 - 1,669)      | 494<br>(281 - 778)       | 88<br>(58 - 134)   | 282<br>(181 - 446)       | 203<br>(126 - 339)          | 146<br>(89 - 247)           |
| Sexually transmitted diseases excluding HIV                      | 439<br>(235 - 703)          | 383<br>(196 - 629)       | 29<br>(15 - 49)    | 8<br>(4 - 14)            | 9<br>(4 - 20)               | 10<br>(4 - 24)              |
| Syphilis                                                         | 431<br>(229 - 696)          | 383<br>(196 - 629)       | 29<br>(15 - 48)    | 4<br>(2 - 8)             | 7<br>(3 - 15)               | 8<br>(3 - 20)               |
| Chlamydial infection                                             | --                          | --                       | --                 | --                       | --                          | --                          |
| Gonococcal infection                                             | 5<br>(3 - 9)                | --                       | 0<br>(0 - 0)       | 2<br>(1 - 3)             | 2<br>(1 - 3)                | 1<br>(0 - 3)                |
| Other sexually transmitted diseases                              | 3<br>(2 - 5)                | --                       | 0<br>(0 - 0)       | 2<br>(1 - 3)             | 1<br>(0 - 2)                | 0<br>(0 - 1)                |
| Hepatitis                                                        | 520<br>(347 - 921)          | 50<br>(20 - 140)         | 42<br>(23 - 87)    | 225<br>(140 - 382)       | 133<br>(79 - 235)           | 70<br>(44 - 112)            |
| Acute hepatitis A                                                | 58<br>(16 - 149)            | 25<br>(7 - 77)           | 15<br>(5 - 36)     | 15<br>(3 - 36)           | 3<br>(1 - 8)                | 1<br>(0 - 2)                |
| Acute hepatitis B                                                | 212<br>(115 - 418)          | 24<br>(7 - 74)           | 10<br>(4 - 22)     | 45<br>(16 - 95)          | 80<br>(38 - 160)            | 54<br>(30 - 95)             |
| Acute hepatitis C                                                | 7<br>(1 - 18)               | --                       | 1<br>(0 - 4)       | 2<br>(0 - 7)             | 2<br>(0 - 5)                | 1<br>(0 - 4)                |
| Acute hepatitis E                                                | 243<br>(139 - 408)          | 1<br>(0 - 3)             | 16<br>(6 - 36)     | 163<br>(95 - 286)        | 49<br>(22 - 95)             | 14<br>(5 - 31)              |
| Other infectious diseases                                        | 255<br>(126 - 507)          | 62<br>(20 - 201)         | 17<br>(6 - 42)     | 49<br>(24 - 92)          | 61<br>(23 - 140)            | 67<br>(21 - 155)            |
| Non-communicable diseases                                        | 49,502<br>(40,536 - 59,280) | 932<br>(586 - 1,302)     | 530<br>(427 - 648) | 6,795<br>(4,896 - 8,647) | 18,672<br>(14,564 - 23,337) | 22,574<br>(18,984 - 26,105) |
| Neoplasms                                                        | 6,294<br>(4,823 - 7,949)    | 68<br>(38 - 103)         | 146<br>(106 - 189) | 1,132<br>(798 - 1,488)   | 3,064<br>(2,278 - 3,962)    | 1,884<br>(1,498 - 2,299)    |
| Esophageal cancer                                                | 544<br>(376 - 749)          | --                       | --                 | 65<br>(40 - 96)          | 297<br>(198 - 426)          | 182<br>(123 - 262)          |
| Stomach cancer                                                   | 632<br>(460 - 799)          | --                       | --                 | 90<br>(56 - 126)         | 337<br>(240 - 445)          | 205<br>(143 - 276)          |
| Liver cancer                                                     | 492<br>(295 - 684)          | --                       | 3<br>(1 - 5)       | 71<br>(38 - 110)         | 266<br>(150 - 403)          | 152<br>(91 - 219)           |
| Liver cancer due to hepatitis B                                  | 160<br>(79 - 285)           | --                       | 1<br>(0 - 3)       | 32<br>(16 - 57)          | 89<br>(39 - 169)            | 38<br>(17 - 70)             |
| Liver cancer due to hepatitis C                                  | 228<br>(138 - 339)          | --                       | 0<br>(0 - 1)       | 26<br>(12 - 45)          | 125<br>(70 - 202)           | 77<br>(43 - 116)            |
| Liver cancer due to alcohol use                                  | 68<br>(31 - 117)            | --                       | --                 | 6<br>(2 - 11)            | 34<br>(14 - 61)             | 28<br>(13 - 51)             |
| Liver cancer due to other causes                                 | 37<br>(15 - 67)             | --                       | 1<br>(0 - 3)       | 8<br>(3 - 14)            | 19<br>(7 - 37)              | 9<br>(3 - 18)               |

Web Table 31- Nepal deaths with 95% UI by age, sex, and cause in 2013

| Cause                                         | Males, All Ages             | Males, 0-4 Years  | Males, 5-14 Years | Males, 15-49 Years       | Males, 50-69 Years        | Males, 70-80 Years         |
|-----------------------------------------------|-----------------------------|-------------------|-------------------|--------------------------|---------------------------|----------------------------|
| Larynx cancer                                 | 279<br>(188 - 395)          | --                | --                | 30<br>(18 - 46)          | 140<br>(89 - 216)         | 109<br>(69 - 157)          |
| Tracheal, bronchus and lung cancer            | 872<br>(644 - 1,384)        | --                | --                | 90<br>(56 - 149)         | 491<br>(343 - 819)        | 291<br>(217 - 409)         |
| Breast cancer                                 | 15<br>(8 - 23)              | --                | --                | 3<br>(2 - 5)             | 7<br>(3 - 13)             | 5<br>(2 - 9)               |
| Cervical cancer                               | --                          | --                | --                | --                       | --                        | --                         |
| Uterine cancer                                | --                          | --                | --                | --                       | --                        | --                         |
| Prostate cancer                               | 110<br>(61 - 186)           | --                | --                | 1<br>(1 - 2)             | 21<br>(10 - 41)           | 87<br>(49 - 148)           |
| Colon and rectum cancer                       | 452<br>(349 - 567)          | --                | --                | 93<br>(63 - 125)         | 218<br>(157 - 285)        | 142<br>(107 - 178)         |
| Lip and oral cavity cancer                    | 297<br>(185 - 451)          | --                | --                | 58<br>(32 - 98)          | 151<br>(88 - 247)         | 87<br>(54 - 137)           |
| Nasopharynx cancer                            | 136<br>(91 - 193)           | --                | 3<br>(1 - 9)      | 37<br>(21 - 60)          | 72<br>(43 - 110)          | 25<br>(14 - 42)            |
| Other pharynx cancer                          | 338<br>(183 - 506)          | --                | --                | 45<br>(21 - 73)          | 203<br>(104 - 325)        | 90<br>(50 - 140)           |
| Gallbladder and biliary tract cancer          | 108<br>(74 - 153)           | --                | --                | 18<br>(11 - 28)          | 59<br>(38 - 90)           | 30<br>(19 - 47)            |
| Pancreatic cancer                             | 188<br>(136 - 241)          | --                | --                | 32<br>(21 - 45)          | 103<br>(73 - 139)         | 52<br>(37 - 70)            |
| Malignant skin melanoma                       | 13<br>(7 - 26)              | --                | --                | 3<br>(2 - 7)             | 5<br>(2 - 11)             | 4<br>(2 - 9)               |
| Non-melanoma skin cancer                      | 15<br>(10 - 23)             | --                | --                | 2<br>(1 - 4)             | 5<br>(3 - 8)              | 7<br>(4 - 12)              |
| Ovarian cancer                                | --                          | --                | --                | --                       | --                        | --                         |
| Testicular cancer                             | 23<br>(15 - 33)             | --                | --                | 14<br>(8 - 22)           | 6<br>(3 - 11)             | 3<br>(2 - 5)               |
| Kidney cancer                                 | 99<br>(65 - 146)            | 1<br>(0 - 3)      | 2<br>(1 - 3)      | 12<br>(7 - 19)           | 57<br>(34 - 92)           | 27<br>(18 - 42)            |
| Bladder cancer                                | 183<br>(132 - 251)          | --                | --                | 12<br>(7 - 18)           | 84<br>(54 - 122)          | 88<br>(61 - 124)           |
| Brain and nervous system cancer               | 188<br>(68 - 280)           | 2<br>(1 - 5)      | 12<br>(6 - 19)    | 62<br>(24 - 94)          | 84<br>(26 - 137)          | 28<br>(8 - 46)             |
| Thyroid cancer                                | 30<br>(16 - 45)             | --                | 0<br>(0 - 0)      | 5<br>(2 - 8)             | 14<br>(7 - 24)            | 10<br>(5 - 17)             |
| Mesothelioma                                  | 8<br>(5 - 13)               | --                | --                | 3<br>(2 - 5)             | 4<br>(2 - 8)              | 1<br>(0 - 2)               |
| Hodgkin lymphoma                              | 29<br>(20 - 46)             | 2<br>(1 - 3)      | 3<br>(1 - 8)      | 9<br>(5 - 16)            | 9<br>(5 - 15)             | 6<br>(4 - 11)              |
| Non-Hodgkin lymphoma                          | 346<br>(218 - 548)          | 6<br>(2 - 12)     | 19<br>(11 - 31)   | 96<br>(58 - 160)         | 141<br>(80 - 228)         | 84<br>(52 - 140)           |
| Multiple myeloma                              | 56<br>(30 - 83)             | --                | --                | 8<br>(4 - 13)            | 30<br>(15 - 48)           | 18<br>(10 - 28)            |
| Leukemia                                      | 391<br>(265 - 501)          | 13<br>(5 - 24)    | 59<br>(37 - 87)   | 156<br>(100 - 214)       | 104<br>(62 - 146)         | 59<br>(39 - 82)            |
| Other neoplasms                               | 450<br>(232 - 595)          | 44<br>(22 - 70)   | 45<br>(23 - 72)   | 116<br>(58 - 165)        | 152<br>(66 - 223)         | 92<br>(54 - 132)           |
| Cardiovascular diseases                       | 23,511<br>(18,963 - 28,556) | 46<br>(28 - 74)   | 67<br>(43 - 97)   | 2,643<br>(1,859 - 3,435) | 9,135<br>(7,060 - 11,590) | 11,620<br>(9,583 - 13,578) |
| Rheumatic heart disease                       | 781<br>(464 - 1,478)        | 5<br>(2 - 10)     | 23<br>(12 - 37)   | 230<br>(131 - 409)       | 275<br>(153 - 567)        | 249<br>(134 - 505)         |
| Ischemic heart disease                        | 11,384<br>(8,344 - 14,559)  | 6<br>(2 - 15)     | 15<br>(8 - 26)    | 1,406<br>(895 - 1,931)   | 4,881<br>(3,414 - 6,473)  | 5,076<br>(3,835 - 6,375)   |
| Cerebrovascular disease                       | 7,775<br>(5,745 - 10,026)   | 11<br>(6 - 19)    | 16<br>(9 - 27)    | 585<br>(375 - 848)       | 2,635<br>(1,829 - 3,592)  | 4,528<br>(3,339 - 5,776)   |
| Ischemic stroke                               | 3,874<br>(1,931 - 6,012)    | 2<br>(1 - 3)      | 2<br>(1 - 4)      | 98<br>(33 - 202)         | 1,010<br>(393 - 1,774)    | 2,763<br>(1,458 - 4,075)   |
| Hemorrhagic stroke                            | 3,901<br>(2,261 - 6,026)    | 10<br>(5 - 16)    | 14<br>(8 - 24)    | 488<br>(304 - 716)       | 1,625<br>(941 - 2,489)    | 1,765<br>(928 - 3,064)     |
| Hypertensive heart disease                    | 2,468<br>(1,454 - 4,893)    | 4<br>(1 - 11)     | 3<br>(2 - 8)      | 225<br>(115 - 456)       | 933<br>(504 - 1,942)      | 1,302<br>(735 - 2,598)     |
| Cardiomyopathy and myocarditis                | 505<br>(310 - 767)          | 16<br>(8 - 29)    | 8<br>(4 - 14)     | 122<br>(68 - 195)        | 196<br>(112 - 301)        | 163<br>(94 - 272)          |
| Atrial fibrillation and flutter               | 12<br>(6 - 20)              | --                | --                | 1<br>(0 - 1)             | 3<br>(2 - 6)              | 8<br>(4 - 14)              |
| Aortic aneurysm                               | 213<br>(123 - 318)          | --                | --                | 18<br>(10 - 28)          | 81<br>(46 - 123)          | 114<br>(64 - 179)          |
| Peripheral vascular disease                   | 15<br>(6 - 27)              | --                | --                | 1<br>(0 - 1)             | 4<br>(2 - 9)              | 10<br>(4 - 18)             |
| Endocarditis                                  | 125<br>(67 - 208)           | 3<br>(1 - 6)      | 1<br>(1 - 3)      | 30<br>(15 - 51)          | 46<br>(22 - 81)           | 45<br>(23 - 79)            |
| Other cardiovascular and circulatory diseases | 234<br>(153 - 435)          | 1<br>(0 - 3)      | 1<br>(0 - 2)      | 25<br>(15 - 56)          | 81<br>(47 - 166)          | 126<br>(79 - 212)          |
| Chronic respiratory diseases                  | 8,244<br>(6,186 - 11,155)   | 105<br>(61 - 174) | 49<br>(33 - 70)   | 669<br>(439 - 962)       | 2,762<br>(1,906 - 3,914)  | 4,659<br>(3,487 - 6,449)   |



Web Table 31- Nepal deaths with 95% UI by age, sex, and cause in 2013

| Cause                                               | Males, All Ages          | Males, 0-4 Years | Males, 5-14 Years | Males, 15-49 Years   | Males, 50-69 Years     | Males, 70-80 Years       |
|-----------------------------------------------------|--------------------------|------------------|-------------------|----------------------|------------------------|--------------------------|
| Chronic obstructive pulmonary disease               | 4,736<br>(3,392 - 6,651) | 16<br>(4 - 42)   | 11<br>(6 - 17)    | 245<br>(147 - 364)   | 1,446<br>(955 - 2,218) | 3,019<br>(2,162 - 4,253) |
| Pneumoconiosis                                      | 1,055<br>(601 - 1,652)   | 1<br>(0 - 1)     | 2<br>(0 - 3)      | 102<br>(55 - 159)    | 434<br>(233 - 705)     | 517<br>(287 - 837)       |
| Silicosis                                           | 390<br>(182 - 682)       | 0<br>(0 - 1)     | 0<br>(0 - 1)      | 27<br>(14 - 48)      | 155<br>(66 - 291)      | 208<br>(97 - 360)        |
| Asbestosis                                          | 105<br>(51 - 194)        | 0<br>(0 - 0)     | 0<br>(0 - 1)      | 13<br>(6 - 24)       | 51<br>(24 - 102)       | 40<br>(18 - 78)          |
| Coal workers pneumoconiosis                         | 181<br>(78 - 327)        | 0<br>(0 - 0)     | 0<br>(0 - 1)      | 22<br>(10 - 40)      | 82<br>(34 - 155)       | 77<br>(30 - 150)         |
| Other pneumoconiosis                                | 379<br>(199 - 621)       | 0<br>(0 - 0)     | 0<br>(0 - 1)      | 39<br>(18 - 65)      | 146<br>(72 - 266)      | 193<br>(95 - 331)        |
| Asthma                                              | 1,596<br>(1,025 - 2,465) | 28<br>(11 - 60)  | 27<br>(16 - 42)   | 233<br>(136 - 378)   | 571<br>(323 - 937)     | 736<br>(433 - 1,172)     |
| Interstitial lung disease and pulmonary sarcoidosis | 656<br>(172 - 1,210)     | 0<br>(0 - 1)     | 1<br>(0 - 3)      | 60<br>(9 - 139)      | 264<br>(59 - 548)      | 330<br>(96 - 618)        |
| Other chronic respiratory diseases                  | 200<br>(132 - 294)       | 60<br>(35 - 105) | 8<br>(5 - 14)     | 29<br>(16 - 48)      | 47<br>(26 - 80)        | 57<br>(29 - 94)          |
| Cirrhosis                                           | 2,250<br>(1,703 - 2,915) | 24<br>(10 - 50)  | 45<br>(30 - 68)   | 790<br>(529 - 1,068) | 919<br>(653 - 1,245)   | 472<br>(347 - 635)       |
| Cirrhosis due to hepatitis B                        | 441<br>(247 - 707)       | 1<br>(0 - 3)     | 7<br>(2 - 14)     | 147<br>(70 - 249)    | 186<br>(101 - 309)     | 100<br>(52 - 162)        |
| Cirrhosis due to hepatitis C                        | 183<br>(83 - 312)        | 1<br>(0 - 2)     | 4<br>(1 - 9)      | 55<br>(18 - 103)     | 72<br>(18 - 137)       | 51<br>(18 - 97)          |
| Cirrhosis due to alcohol use                        | 1,245<br>(845 - 1,735)   | --               | --                | 409<br>(239 - 612)   | 555<br>(354 - 809)     | 281<br>(194 - 384)       |
| Cirrhosis due to other causes                       | 381<br>(191 - 580)       | 22<br>(9 - 46)   | 35<br>(23 - 53)   | 178<br>(74 - 271)    | 107<br>(38 - 198)      | 39<br>(13 - 74)          |
| Digestive diseases                                  | 2,533<br>(1,795 - 3,447) | 15<br>(6 - 36)   | 44<br>(28 - 64)   | 563<br>(360 - 786)   | 994<br>(640 - 1,399)   | 917<br>(627 - 1,348)     |
| Peptic ulcer disease                                | 896<br>(553 - 1,284)     | 1<br>(0 - 2)     | 4<br>(2 - 7)      | 146<br>(80 - 221)    | 383<br>(212 - 576)     | 362<br>(222 - 552)       |
| Gastritis and duodenitis                            | 116<br>(59 - 256)        | 1<br>(0 - 3)     | 2<br>(1 - 5)      | 25<br>(12 - 60)      | 45<br>(21 - 105)       | 43<br>(20 - 99)          |
| Appendicitis                                        | 108<br>(53 - 177)        | 1<br>(0 - 1)     | 3<br>(1 - 6)      | 49<br>(21 - 87)      | 31<br>(15 - 56)        | 25<br>(12 - 49)          |
| Paralytic ileus and intestinal obstruction          | 831<br>(510 - 1,460)     | 9<br>(4 - 24)    | 29<br>(18 - 43)   | 183<br>(101 - 313)   | 322<br>(172 - 582)     | 288<br>(154 - 564)       |
| Inguinal, femoral, and abdominal hernia             | 63<br>(32 - 142)         | 0<br>(0 - 2)     | 1<br>(0 - 3)      | 9<br>(4 - 21)        | 14<br>(5 - 37)         | 39<br>(19 - 86)          |
| Inflammatory bowel disease                          | 69<br>(35 - 132)         | 2<br>(0 - 4)     | 2<br>(1 - 3)      | 19<br>(9 - 37)       | 23<br>(11 - 46)        | 24<br>(12 - 46)          |
| Vascular intestinal disorders                       | 51<br>(17 - 116)         | 0<br>(0 - 1)     | 1<br>(0 - 2)      | 8<br>(3 - 19)        | 19<br>(6 - 46)         | 23<br>(7 - 54)           |
| Gallbladder and biliary diseases                    | 58<br>(32 - 126)         | 0<br>(0 - 0)     | 1<br>(0 - 1)      | 10<br>(5 - 20)       | 23<br>(11 - 52)        | 25<br>(11 - 60)          |
| Pancreatitis                                        | 266<br>(78 - 520)        | 0<br>(0 - 1)     | 2<br>(0 - 3)      | 93<br>(31 - 181)     | 105<br>(27 - 219)      | 66<br>(14 - 145)         |
| Other digestive diseases                            | 75<br>(24 - 138)         | 0<br>(0 - 2)     | 1<br>(0 - 3)      | 21<br>(5 - 40)       | 30<br>(9 - 60)         | 22<br>(8 - 45)           |
| Neurological disorders                              | 1,404<br>(1,070 - 1,771) | 24<br>(12 - 50)  | 34<br>(16 - 70)   | 141<br>(88 - 220)    | 175<br>(125 - 237)     | 1,031<br>(769 - 1,303)   |
| Alzheimer disease and other dementias               | 1,090<br>(828 - 1,372)   | --               | --                | 0<br>(0 - 1)         | 115<br>(78 - 160)      | 975<br>(721 - 1,233)     |
| Parkinson disease                                   | 1<br>(1 - 2)             | --               | --                | 1<br>(0 - 1)         | 0<br>(0 - 0)           | 0<br>(0 - 1)             |
| Epilepsy                                            | 212<br>(121 - 350)       | 16<br>(5 - 39)   | 28<br>(11 - 64)   | 105<br>(58 - 178)    | 29<br>(16 - 54)        | 35<br>(18 - 63)          |
| Multiple sclerosis                                  | 16<br>(3 - 30)           | --               | --                | 5<br>(1 - 10)        | 6<br>(1 - 12)          | 5<br>(1 - 11)            |
| Other neurological disorders                        | 85<br>(56 - 120)         | 8<br>(5 - 12)    | 6<br>(4 - 9)      | 30<br>(19 - 43)      | 25<br>(14 - 37)        | 16<br>(10 - 23)          |
| Mental and substance use disorders                  | 85<br>(47 - 131)         | 1<br>(0 - 3)     | 0<br>(0 - 0)      | 34<br>(18 - 63)      | 36<br>(18 - 58)        | 13<br>(8 - 19)           |
| Schizophrenia                                       | 9<br>(3 - 29)            | --               | --                | 3<br>(1 - 11)        | 4<br>(1 - 12)          | 2<br>(1 - 6)             |
| Alcohol use disorders                               | 24<br>(13 - 53)          | --               | --                | 11<br>(6 - 26)       | 7<br>(4 - 21)          | 5<br>(2 - 8)             |
| Drug use disorders                                  | 53<br>(26 - 84)          | 1<br>(0 - 3)     | --                | 20<br>(10 - 33)      | 25<br>(7 - 41)         | 6<br>(2 - 10)            |
| Opioid use disorders                                | 28<br>(14 - 45)          | 1<br>(0 - 2)     | --                | 11<br>(5 - 18)       | 13<br>(4 - 22)         | 3<br>(1 - 6)             |
| Cocaine use disorders                               | 1<br>(0 - 1)             | 0<br>(0 - 0)     | --                | 0<br>(0 - 0)         | 0<br>(0 - 0)           | 0<br>(0 - 0)             |
| Amphetamine use disorders                           | 1<br>(0 - 1)             | 0<br>(0 - 0)     | --                | 0<br>(0 - 0)         | 0<br>(0 - 0)           | 0<br>(0 - 0)             |
| Other drug use disorders                            | 23<br>(11 - 37)          | 0<br>(0 - 1)     | --                | 8<br>(4 - 15)        | 12<br>(4 - 19)         | 3<br>(1 - 4)             |
| Eating disorders                                    | 0<br>(0 - 0)             | --               | 0<br>(0 - 0)      | 0<br>(0 - 0)         | --                     | --                       |

Web Table 31- Nepal deaths with 95% UI by age, sex, and cause in 2013

| Cause                                               | Males, All Ages          | Males, 0-4 Years   | Males, 5-14 Years | Males, 15-49 Years | Males, 50-69 Years       | Males, 70-80 Years       |
|-----------------------------------------------------|--------------------------|--------------------|-------------------|--------------------|--------------------------|--------------------------|
| Anorexia nervosa                                    | 0<br>(0 - 0)             | --                 | 0<br>(0 - 0)      | 0<br>(0 - 0)       | --                       | --                       |
| Diabetes, urogenital, blood, and endocrine diseases | 4,162<br>(3,238 - 5,150) | 93<br>(57 - 151)   | 66<br>(46 - 96)   | 692<br>(469 - 927) | 1,455<br>(1,042 - 1,928) | 1,855<br>(1,410 - 2,315) |
| Diabetes mellitus                                   | 2,153<br>(1,609 - 2,773) | 6<br>(4 - 10)      | 5<br>(3 - 8)      | 216<br>(148 - 300) | 792<br>(552 - 1,080)     | 1,133<br>(828 - 1,506)   |
| Acute glomerulonephritis                            | 75<br>(26 - 155)         | 13<br>(2 - 35)     | 9<br>(3 - 21)     | 21<br>(8 - 44)     | 16<br>(6 - 36)           | 15<br>(6 - 32)           |
| Chronic kidney disease                              | 1,213<br>(638 - 1,687)   | 8<br>(4 - 14)      | 8<br>(5 - 14)     | 289<br>(124 - 426) | 447<br>(216 - 665)       | 462<br>(256 - 641)       |
| Chronic kidney disease due to diabetes mellitus     | 56<br>(4 - 110)          | 0<br>(0 - 0)       | 0<br>(0 - 0)      | 11<br>(1 - 22)     | 27<br>(2 - 53)           | 19<br>(1 - 37)           |
| Chronic kidney disease due to hypertension          | 407<br>(184 - 640)       | 1<br>(0 - 2)       | 1<br>(0 - 2)      | 64<br>(25 - 115)   | 153<br>(68 - 256)        | 188<br>(87 - 302)        |
| Chronic kidney disease due to glomerulonephritis    | 257<br>(133 - 401)       | 4<br>(3 - 8)       | 5<br>(3 - 8)      | 78<br>(35 - 125)   | 85<br>(40 - 142)         | 84<br>(40 - 147)         |
| Chronic kidney disease due to other causes          | 493<br>(125 - 925)       | 2<br>(1 - 5)       | 2<br>(1 - 4)      | 136<br>(28 - 248)  | 183<br>(43 - 378)        | 171<br>(46 - 327)        |
| Urinary diseases and male infertility               | 315<br>(231 - 465)       | 6<br>(3 - 13)      | 5<br>(3 - 9)      | 57<br>(34 - 90)    | 103<br>(68 - 164)        | 144<br>(95 - 223)        |
| Interstitial nephritis and urinary tract infections | 206<br>(137 - 327)       | 5<br>(2 - 11)      | 3<br>(2 - 6)      | 38<br>(21 - 64)    | 67<br>(39 - 115)         | 93<br>(52 - 157)         |
| Urolithiasis                                        | 33<br>(13 - 76)          | --                 | 1<br>(0 - 2)      | 6<br>(2 - 17)      | 13<br>(4 - 33)           | 13<br>(5 - 32)           |
| Other urinary diseases                              | 75<br>(37 - 126)         | 1<br>(0 - 2)       | 1<br>(0 - 3)      | 12<br>(5 - 22)     | 24<br>(10 - 43)          | 37<br>(17 - 69)          |
| Gynecological diseases                              | --                       | --                 | --                | --                 | --                       | --                       |
| Uterine fibroids                                    | --                       | --                 | --                | --                 | --                       | --                       |
| Polycystic ovarian syndrome                         | --                       | --                 | --                | --                 | --                       | --                       |
| Endometriosis                                       | --                       | --                 | --                | --                 | --                       | --                       |
| Genital prolapse                                    | --                       | --                 | --                | --                 | --                       | --                       |
| Other gynecological diseases                        | --                       | --                 | --                | --                 | --                       | --                       |
| Hemoglobinopathies and hemolytic anemias            | 175<br>(91 - 324)        | 38<br>(19 - 85)    | 26<br>(13 - 51)   | 53<br>(25 - 101)   | 26<br>(14 - 54)          | 31<br>(14 - 61)          |
| Thalassemias                                        | 80<br>(41 - 158)         | 27<br>(13 - 65)    | 21<br>(10 - 40)   | 28<br>(13 - 57)    | 3<br>(2 - 6)             | 0<br>(0 - 1)             |
| Sickle cell disorders                               | 2<br>(1 - 4)             | 1<br>(0 - 1)       | 0<br>(0 - 1)      | 1<br>(0 - 1)       | 0<br>(0 - 0)             | 0<br>(0 - 0)             |
| G6PD deficiency                                     | 8<br>(4 - 14)            | 2<br>(1 - 5)       | 1<br>(0 - 2)      | 3<br>(1 - 5)       | 1<br>(1 - 3)             | 0<br>(0 - 1)             |
| Other hemoglobinopathies and hemolytic anemias      | 86<br>(44 - 160)         | 8<br>(4 - 15)      | 4<br>(2 - 8)      | 22<br>(11 - 42)    | 21<br>(11 - 44)          | 30<br>(14 - 59)          |
| Endocrine, metabolic, blood, and immune disorders   | 231<br>(125 - 319)       | 22<br>(10 - 37)    | 12<br>(7 - 20)    | 56<br>(32 - 85)    | 70<br>(36 - 108)         | 71<br>(32 - 110)         |
| Musculoskeletal disorders                           | 122<br>(56 - 179)        | --                 | 6<br>(3 - 10)     | 38<br>(16 - 58)    | 54<br>(19 - 84)          | 23<br>(14 - 38)          |
| Rheumatoid arthritis                                | 45<br>(21 - 78)          | --                 | 2<br>(0 - 3)      | 8<br>(3 - 17)      | 23<br>(8 - 43)           | 12<br>(5 - 22)           |
| Other musculoskeletal disorders                     | 77<br>(30 - 116)         | --                 | 4<br>(2 - 8)      | 30<br>(10 - 45)    | 31<br>(9 - 53)           | 11<br>(6 - 20)           |
| Other non-communicable diseases                     | 898<br>(558 - 1,245)     | 557<br>(282 - 876) | 72<br>(38 - 111)  | 93<br>(62 - 133)   | 78<br>(50 - 111)         | 99<br>(68 - 140)         |
| Congenital anomalies                                | 708<br>(399 - 1,040)     | 523<br>(255 - 828) | 68<br>(34 - 108)  | 62<br>(37 - 94)    | 27<br>(15 - 41)          | 28<br>(18 - 40)          |
| Neural tube defects                                 | 51<br>(15 - 164)         | 43<br>(10 - 150)   | 3<br>(1 - 11)     | 4<br>(1 - 9)       | 1<br>(0 - 2)             | 1<br>(0 - 2)             |
| Congenital heart anomalies                          | 397<br>(155 - 644)       | 287<br>(86 - 506)  | 42<br>(16 - 72)   | 28<br>(13 - 44)    | 19<br>(9 - 29)           | 22<br>(12 - 31)          |
| Cleft lip and cleft palate                          | 5<br>(1 - 13)            | 5<br>(1 - 13)      | --                | --                 | --                       | --                       |
| Down syndrome                                       | 31<br>(15 - 63)          | 17<br>(6 - 43)     | 4<br>(2 - 9)      | 8<br>(4 - 13)      | 1<br>(1 - 3)             | 0<br>(0 - 0)             |
| Chromosomal unbalanced rearrangements               | 18<br>(8 - 37)           | 14<br>(5 - 33)     | 2<br>(1 - 3)      | 2<br>(1 - 3)       | 0<br>(0 - 1)             | 0<br>(0 - 0)             |
| Other congenital anomalies                          | 206<br>(115 - 338)       | 157<br>(77 - 281)  | 17<br>(8 - 32)    | 21<br>(11 - 34)    | 6<br>(3 - 12)            | 6<br>(2 - 10)            |
| Skin and subcutaneous diseases                      | 163<br>(114 - 228)       | 7<br>(3 - 15)      | 4<br>(2 - 7)      | 31<br>(20 - 48)    | 50<br>(31 - 77)          | 71<br>(45 - 107)         |
| Cellulitis                                          | 71<br>(19 - 160)         | 4<br>(1 - 12)      | 2<br>(1 - 5)      | 14<br>(4 - 32)     | 23<br>(5 - 54)           | 28<br>(7 - 72)           |
| Pyoderma                                            | 70<br>(8 - 130)          | 2<br>(0 - 5)       | 1<br>(0 - 2)      | 13<br>(1 - 26)     | 23<br>(2 - 45)           | 31<br>(5 - 64)           |
| Decubitus ulcer                                     | 20<br>(3 - 46)           | 0<br>(0 - 1)       | 1<br>(0 - 1)      | 3<br>(0 - 7)       | 4<br>(0 - 12)            | 11<br>(2 - 28)           |

Web Table 31- Nepal deaths with 95% UI by age, sex, and cause in 2013

| Cause                                           | Males, All Ages            | Males, 0-4 Years   | Males, 5-14 Years  | Males, 15-49 Years       | Males, 50-69 Years       | Males, 70-80 Years       |
|-------------------------------------------------|----------------------------|--------------------|--------------------|--------------------------|--------------------------|--------------------------|
| Other skin and subcutaneous diseases            | 2<br>(0 - 4)               | 0<br>(0 - 1)       | 0<br>(0 - 0)       | 1<br>(0 - 1)             | 0<br>(0 - 1)             | 0<br>(0 - 1)             |
| Sudden infant death syndrome                    | 27<br>(3 - 86)             | 27<br>(3 - 86)     | --                 | --                       | --                       | --                       |
| Injuries                                        | 10,331<br>(7,960 - 12,792) | 476<br>(296 - 810) | 607<br>(468 - 770) | 5,207<br>(3,822 - 6,564) | 2,431<br>(1,672 - 3,310) | 1,609<br>(1,128 - 2,095) |
| Transport injuries                              | 2,238<br>(1,613 - 2,966)   | 50<br>(29 - 83)    | 118<br>(76 - 169)  | 1,293<br>(886 - 1,748)   | 467<br>(308 - 664)       | 311<br>(169 - 440)       |
| Road injuries                                   | 2,022<br>(1,450 - 2,677)   | 42<br>(25 - 71)    | 107<br>(69 - 153)  | 1,173<br>(797 - 1,590)   | 414<br>(273 - 592)       | 286<br>(156 - 401)       |
| Pedestrian road injuries                        | 858<br>(532 - 1,201)       | 23<br>(12 - 40)    | 67<br>(40 - 104)   | 393<br>(234 - 590)       | 209<br>(121 - 316)       | 166<br>(84 - 244)        |
| Cyclist road injuries                           | 150<br>(94 - 232)          | 2<br>(1 - 5)       | 9<br>(3 - 17)      | 81<br>(50 - 122)         | 35<br>(18 - 60)          | 23<br>(11 - 42)          |
| Motorcyclist road injuries                      | 342<br>(190 - 551)         | 4<br>(2 - 7)       | 6<br>(2 - 12)      | 274<br>(149 - 439)       | 37<br>(16 - 72)          | 21<br>(10 - 39)          |
| Motor vehicle road injuries                     | 628<br>(412 - 878)         | 11<br>(6 - 20)     | 21<br>(11 - 37)    | 409<br>(256 - 594)       | 116<br>(69 - 180)        | 71<br>(34 - 116)         |
| Other road injuries                             | 45<br>(21 - 121)           | 3<br>(1 - 7)       | 4<br>(1 - 11)      | 17<br>(6 - 56)           | 17<br>(7 - 38)           | 6<br>(2 - 17)            |
| Other transport injuries                        | 216<br>(148 - 313)         | 7<br>(4 - 15)      | 11<br>(6 - 21)     | 120<br>(75 - 186)        | 52<br>(27 - 83)          | 26<br>(11 - 42)          |
| Unintentional injuries                          | 3,705<br>(2,829 - 4,778)   | 415<br>(249 - 750) | 384<br>(274 - 534) | 1,356<br>(979 - 1,870)   | 785<br>(545 - 1,091)     | 764<br>(533 - 995)       |
| Falls                                           | 912<br>(561 - 1,350)       | 49<br>(18 - 113)   | 49<br>(22 - 95)    | 229<br>(134 - 367)       | 243<br>(131 - 414)       | 342<br>(171 - 548)       |
| Drowning                                        | 811<br>(376 - 1,463)       | 167<br>(45 - 474)  | 153<br>(68 - 314)  | 312<br>(162 - 516)       | 123<br>(46 - 248)        | 57<br>(22 - 119)         |
| Fire, heat, and hot substances                  | 390<br>(247 - 729)         | 48<br>(16 - 121)   | 24<br>(10 - 55)    | 154<br>(91 - 278)        | 77<br>(41 - 155)         | 88<br>(54 - 146)         |
| Poisonings                                      | 102<br>(53 - 144)          | 9<br>(4 - 19)      | 5<br>(3 - 9)       | 49<br>(26 - 74)          | 22<br>(11 - 35)          | 17<br>(6 - 31)           |
| Exposure to mechanical forces                   | 260<br>(181 - 373)         | 32<br>(14 - 62)    | 21<br>(12 - 38)    | 117<br>(76 - 175)        | 60<br>(36 - 97)          | 30<br>(15 - 44)          |
| Unintentional firearm injuries                  | 59<br>(34 - 93)            | 3<br>(1 - 6)       | 2<br>(1 - 4)       | 34<br>(17 - 61)          | 10<br>(5 - 18)           | 10<br>(4 - 18)           |
| Unintentional suffocation                       | 19<br>(3 - 44)             | 11<br>(1 - 32)     | 2<br>(0 - 6)       | 3<br>(1 - 6)             | 2<br>(0 - 3)             | 1<br>(0 - 2)             |
| Other exposure to mechanical forces             | 182<br>(128 - 286)         | 19<br>(8 - 40)     | 16<br>(8 - 32)     | 80<br>(50 - 130)         | 48<br>(27 - 83)          | 19<br>(9 - 30)           |
| Adverse effects of medical treatment            | 237<br>(119 - 392)         | 22<br>(9 - 54)     | 11<br>(4 - 24)     | 75<br>(27 - 142)         | 68<br>(30 - 124)         | 60<br>(30 - 114)         |
| Animal contact                                  | 355<br>(197 - 589)         | 27<br>(10 - 74)    | 70<br>(32 - 140)   | 152<br>(71 - 262)        | 67<br>(32 - 128)         | 39<br>(20 - 71)          |
| Venomous animal contact                         | 277<br>(154 - 464)         | 13<br>(4 - 39)     | 62<br>(28 - 123)   | 127<br>(60 - 218)        | 52<br>(25 - 99)          | 23<br>(11 - 46)          |
| Non-venomous animal contact                     | 77<br>(26 - 172)           | 14<br>(3 - 43)     | 8<br>(2 - 24)      | 24<br>(7 - 58)           | 15<br>(4 - 38)           | 16<br>(5 - 33)           |
| Foreign body                                    | 86<br>(42 - 143)           | 43<br>(15 - 91)    | 3<br>(1 - 5)       | 8<br>(5 - 17)            | 7<br>(4 - 15)            | 25<br>(10 - 38)          |
| Pulmonary aspiration and foreign body in airway | 79<br>(33 - 137)           | 42<br>(14 - 90)    | 2<br>(1 - 4)       | 5<br>(3 - 13)            | 4<br>(2 - 11)            | 24<br>(10 - 38)          |
| Foreign body in other body part                 | 7<br>(4 - 13)              | 1<br>(0 - 1)       | 1<br>(0 - 1)       | 3<br>(1 - 4)             | 3<br>(1 - 5)             | 1<br>(0 - 1)             |
| Other unintentional injuries                    | 552<br>(290 - 919)         | 19<br>(8 - 39)     | 48<br>(22 - 91)    | 261<br>(127 - 459)       | 119<br>(54 - 226)        | 106<br>(51 - 191)        |
| Self-harm and interpersonal violence            | 4,331<br>(2,433 - 5,746)   | 11<br>(4 - 23)     | 103<br>(43 - 207)  | 2,533<br>(1,531 - 3,389) | 1,158<br>(566 - 1,755)   | 527<br>(258 - 827)       |
| Self-harm                                       | 3,811<br>(2,099 - 5,152)   | --                 | 87<br>(32 - 194)   | 2,090<br>(1,191 - 2,885) | 1,114<br>(533 - 1,706)   | 520<br>(251 - 819)       |
| Interpersonal violence                          | 520<br>(238 - 748)         | 11<br>(4 - 23)     | 16<br>(6 - 29)     | 443<br>(201 - 655)       | 44<br>(18 - 73)          | 7<br>(3 - 13)            |
| Assault by firearm                              | 192<br>(81 - 331)          | 2<br>(0 - 5)       | 4<br>(1 - 9)       | 164<br>(70 - 292)        | 20<br>(6 - 37)           | 2<br>(1 - 4)             |
| Assault by sharp object                         | 196<br>(81 - 312)          | 1<br>(0 - 3)       | 4<br>(1 - 9)       | 174<br>(71 - 279)        | 16<br>(6 - 29)           | 1<br>(0 - 2)             |
| Assault by other means                          | 133<br>(47 - 220)          | 8<br>(3 - 16)      | 8<br>(3 - 16)      | 105<br>(33 - 183)        | 8<br>(3 - 15)            | 4<br>(1 - 9)             |
| Forces of nature, war, and legal intervention   | 57<br>(27 - 140)           | 0<br>(0 - 0)       | 2<br>(1 - 5)       | 25<br>(12 - 61)          | 22<br>(11 - 52)          | 7<br>(3 - 19)            |
| Exposure to forces of nature                    | 57<br>(27 - 140)           | 0<br>(0 - 0)       | 2<br>(1 - 5)       | 25<br>(12 - 61)          | 22<br>(11 - 52)          | 7<br>(3 - 19)            |

Web Table 31- Nepal deaths with 95% UI by age, sex, and cause in 2013

| Cause                                                              | Females, All Ages           | Females, 0-4 Years         | Females, 5-14 Years      | Females, 15-49 Years       | Females, 50-69 Years        | Females, 70-80 Years        |
|--------------------------------------------------------------------|-----------------------------|----------------------------|--------------------------|----------------------------|-----------------------------|-----------------------------|
| All causes                                                         | 73,945<br>(61,462 - 86,946) | 10,365<br>(9,000 - 12,086) | 1,629<br>(1,370 - 1,940) | 11,957<br>(9,721 - 14,342) | 20,012<br>(14,991 - 26,035) | 29,983<br>(24,611 - 34,872) |
| Communicable, maternal, neonatal, and nutritional diseases         | 22,017<br>(18,953 - 25,904) | 9,065<br>(7,828 - 10,685)  | 823<br>(622 - 1,079)     | 4,293<br>(3,549 - 5,339)   | 3,040<br>(2,113 - 4,212)    | 4,797<br>(3,550 - 6,289)    |
| HIV/AIDS and tuberculosis                                          | 3,028<br>(1,855 - 4,946)    | 38<br>(19 - 89)            | 57<br>(27 - 143)         | 1,194<br>(681 - 2,541)     | 1,066<br>(602 - 1,839)      | 672<br>(408 - 1,008)        |
| Tuberculosis                                                       | 2,702<br>(1,700 - 4,062)    | 30<br>(17 - 49)            | 46<br>(24 - 78)          | 940<br>(578 - 1,412)       | 1,019<br>(570 - 1,714)      | 667<br>(403 - 996)          |
| HIV/AIDS                                                           | 326<br>(23 - 2,170)         | 8<br>(0 - 51)              | 11<br>(0 - 100)          | 254<br>(19 - 1,597)        | 46<br>(2 - 334)             | 5<br>(0 - 48)               |
| HIV/AIDS resulting in mycobacterial infection                      | 17<br>(1 - 118)             | 0<br>(0 - 3)               | 1<br>(0 - 5)             | 13<br>(1 - 88)             | 3<br>(0 - 19)               | 0<br>(0 - 3)                |
| HIV/AIDS resulting in other diseases                               | 309<br>(22 - 2,051)         | 8<br>(0 - 49)              | 11<br>(0 - 95)           | 241<br>(18 - 1,519)        | 44<br>(2 - 315)             | 5<br>(0 - 46)               |
| Diarrrhea, lower respiratory, and other common infectious diseases | 9,622<br>(7,680 - 11,886)   | 3,554<br>(2,795 - 4,414)   | 452<br>(294 - 655)       | 887<br>(580 - 1,261)       | 1,490<br>(925 - 2,261)      | 3,238<br>(2,195 - 4,588)    |
| Diarrheal diseases                                                 | 4,273<br>(3,045 - 6,047)    | 956<br>(486 - 1,578)       | 143<br>(73 - 257)        | 355<br>(211 - 560)         | 886<br>(465 - 1,529)        | 1,932<br>(1,075 - 3,204)    |
| Intestinal infectious diseases                                     | 515<br>(222 - 1,006)        | 93<br>(29 - 193)           | 150<br>(52 - 313)        | 214<br>(69 - 482)          | 40<br>(13 - 94)             | 18<br>(6 - 37)              |
| Typhoid fever                                                      | 389<br>(164 - 768)          | 68<br>(19 - 152)           | 115<br>(38 - 236)        | 161<br>(53 - 352)          | 31<br>(10 - 76)             | 14<br>(5 - 30)              |
| Paratyphoid fever                                                  | 118<br>(47 - 260)           | 22<br>(6 - 53)             | 35<br>(11 - 81)          | 50<br>(13 - 133)           | 8<br>(2 - 22)               | 3<br>(1 - 8)                |
| Other intestinal infectious diseases                               | 8<br>(3 - 16)               | 3<br>(0 - 9)               | 1<br>(0 - 4)             | 2<br>(0 - 8)               | 1<br>(0 - 4)                | 1<br>(0 - 4)                |
| Lower respiratory infections                                       | 4,134<br>(3,170 - 5,118)    | 2,164<br>(1,515 - 2,914)   | 87<br>(49 - 140)         | 207<br>(132 - 304)         | 474<br>(283 - 728)          | 1,202<br>(766 - 1,738)      |
| Upper respiratory infections                                       | 9<br>(3 - 18)               | 1<br>(0 - 4)               | 0<br>(0 - 1)             | 2<br>(0 - 5)               | 2<br>(0 - 7)                | 3<br>(0 - 10)               |
| Otitis media                                                       | 3<br>(2 - 4)                | 0<br>(0 - 1)               | 0<br>(0 - 1)             | 1<br>(1 - 1)               | 1<br>(1 - 1)                | 0<br>(0 - 1)                |
| Meningitis                                                         | 321<br>(233 - 485)          | 116<br>(61 - 254)          | 37<br>(21 - 64)          | 60<br>(38 - 93)            | 52<br>(29 - 84)             | 56<br>(30 - 92)             |
| Pneumococcal meningitis                                            | 97<br>(66 - 145)            | 28<br>(14 - 60)            | 14<br>(7 - 25)           | 20<br>(11 - 33)            | 17<br>(8 - 31)              | 19<br>(9 - 33)              |
| H influenzae type B meningitis                                     | 73<br>(45 - 133)            | 45<br>(22 - 105)           | 9<br>(4 - 17)            | 8<br>(4 - 14)              | 5<br>(2 - 10)               | 6<br>(3 - 11)               |
| Meningococcal meningitis                                           | 39<br>(25 - 57)             | 8<br>(4 - 20)              | 4<br>(2 - 8)             | 10<br>(5 - 17)             | 7<br>(3 - 14)               | 9<br>(3 - 19)               |
| Other meningitis                                                   | 112<br>(78 - 162)           | 35<br>(16 - 81)            | 10<br>(4 - 19)           | 23<br>(12 - 37)            | 22<br>(11 - 38)             | 23<br>(11 - 39)             |
| Encephalitis                                                       | 100<br>(46 - 180)           | 42<br>(15 - 81)            | 14<br>(5 - 33)           | 26<br>(9 - 57)             | 12<br>(5 - 27)              | 6<br>(3 - 16)               |
| Diphtheria                                                         | 2<br>(0 - 8)                | 1<br>(0 - 6)               | 0<br>(0 - 3)             | 0<br>(0 - 1)               | 0<br>(0 - 0)                | --<br>(0 - 39)              |
| Whooping cough                                                     | 81<br>(0 - 416)             | 74<br>(0 - 374)            | 6<br>(0 - 30)            | 1<br>(0 - 7)               | 0<br>(0 - 1)                | --<br>(0 - 1)               |
| Tetanus                                                            | 128<br>(55 - 209)           | 75<br>(28 - 146)           | 7<br>(2 - 13)            | 14<br>(6 - 23)             | 20<br>(5 - 40)              | 12<br>(4 - 25)              |
| Measles                                                            | 33<br>(9 - 90)              | 27<br>(7 - 72)             | 5<br>(1 - 16)            | 1<br>(0 - 3)               | 0<br>(0 - 0)                | --<br>(0 - 0)               |
| Varicella and herpes zoster                                        | 22<br>(7 - 56)              | 4<br>(0 - 18)              | 2<br>(0 - 8)             | 5<br>(1 - 14)              | 2<br>(0 - 7)                | 9<br>(0 - 39)               |
| Neglected tropical diseases and malaria                            | 815<br>(545 - 1,338)        | 197<br>(96 - 360)          | 174<br>(107 - 270)       | 251<br>(153 - 421)         | 117<br>(62 - 234)           | 77<br>(42 - 160)            |
| Malaria                                                            | 243<br>(48 - 725)           | 39<br>(1 - 177)            | 31<br>(5 - 115)          | 77<br>(16 - 240)           | 56<br>(11 - 172)            | 40<br>(8 - 123)             |
| Leishmaniasis                                                      | 415<br>(284 - 569)          | 133<br>(72 - 216)          | 111<br>(63 - 172)        | 129<br>(73 - 188)          | 30<br>(16 - 48)             | 11<br>(7 - 17)              |
| Visceral leishmaniasis                                             | 415<br>(284 - 569)          | 133<br>(72 - 216)          | 111<br>(63 - 172)        | 129<br>(73 - 188)          | 30<br>(16 - 48)             | 11<br>(7 - 17)              |
| Cysticercosis                                                      | 1<br>(0 - 1)                | 0<br>(0 - 0)               | 0<br>(0 - 0)             | 0<br>(0 - 0)               | 0<br>(0 - 0)                | 0<br>(0 - 0)                |
| Cystic echinococcosis                                              | 18<br>(14 - 23)             | 1<br>(0 - 1)               | 3<br>(2 - 3)             | 7<br>(5 - 9)               | 5<br>(3 - 6)                | 3<br>(2 - 4)                |
| Dengue                                                             | 12<br>(6 - 24)              | 1<br>(1 - 3)               | 1<br>(0 - 3)             | 5<br>(3 - 10)              | 2<br>(1 - 5)                | 3<br>(1 - 5)                |
| Rabies                                                             | 77<br>(35 - 164)            | 7<br>(2 - 18)              | 24<br>(8 - 54)           | 26<br>(11 - 67)            | 16<br>(7 - 32)              | 5<br>(2 - 9)                |
| Intestinal nematode infections                                     | 10<br>(3 - 22)              | 5<br>(1 - 14)              | 2<br>(0 - 8)             | 1<br>(0 - 6)               | 1<br>(0 - 5)                | 1<br>(0 - 5)                |
| Ascariasis                                                         | 10<br>(3 - 22)              | 5<br>(1 - 14)              | 2<br>(0 - 8)             | 1<br>(0 - 6)               | 1<br>(0 - 5)                | 1<br>(0 - 5)                |
| Other neglected tropical diseases                                  | 39<br>(18 - 65)             | 11<br>(4 - 27)             | 2<br>(1 - 4)             | 5<br>(3 - 10)              | 7<br>(3 - 13)               | 14<br>(5 - 25)              |
| Maternal disorders                                                 | 1,588<br>(1,113 - 2,119)    | --                         | 1<br>(0 - 3)             | 1,586<br>(1,112 - 2,118)   | --                          | --                          |
| Maternal hemorrhage                                                | 222<br>(140 - 333)          | --                         | 0<br>(0 - 0)             | 222<br>(140 - 333)         | --                          | --                          |

Web Table 31- Nepal deaths with 95% UI by age, sex, and cause in 2013

| Cause                                                            | Females, All Ages           | Females, 0-4 Years       | Females, 5-14 Years | Females, 15-49 Years     | Females, 50-69 Years        | Females, 70-80 Years        |
|------------------------------------------------------------------|-----------------------------|--------------------------|---------------------|--------------------------|-----------------------------|-----------------------------|
| Maternal sepsis and other maternal infections                    | 83<br>(47 - 131)            | --                       | 0<br>(0 - 0)        | 83<br>(47 - 131)         | --                          | --                          |
| Maternal hypertensive disorders                                  | 182<br>(113 - 267)          | --                       | 0<br>(0 - 1)        | 182<br>(113 - 266)       | --                          | --                          |
| Maternal obstructed labor                                        | 77<br>(49 - 113)            | --                       | 0<br>(0 - 0)        | 77<br>(49 - 113)         | --                          | --                          |
| Maternal abortive outcome                                        | 197<br>(115 - 291)          | --                       | 0<br>(0 - 0)        | 197<br>(115 - 291)       | --                          | --                          |
| Indirect maternal deaths                                         | 196<br>(121 - 286)          | --                       | 0<br>(0 - 0)        | 196<br>(120 - 286)       | --                          | --                          |
| Late maternal deaths                                             | 263<br>(153 - 395)          | --                       | 0<br>(0 - 1)        | 263<br>(153 - 395)       | --                          | --                          |
| Maternal deaths aggravated by HIV/AIDS                           | 0<br>(0 - 1)                | --                       | --                  | 0<br>(0 - 1)             | --                          | --                          |
| Other maternal disorders                                         | 364<br>(241 - 512)          | --                       | 0<br>(0 - 1)        | 364<br>(241 - 512)       | --                          | --                          |
| Neonatal disorders                                               | 4,574<br>(3,910 - 5,411)    | 4,574<br>(3,910 - 5,411) | --                  | --                       | --                          | --                          |
| Neonatal preterm birth complications                             | 1,126<br>(536 - 1,911)      | 1,126<br>(536 - 1,911)   | --                  | --                       | --                          | --                          |
| Neonatal encephalopathy due to birth asphyxia and trauma         | 1,875<br>(1,118 - 2,736)    | 1,875<br>(1,118 - 2,736) | --                  | --                       | --                          | --                          |
| Neonatal sepsis and other neonatal infections                    | 927<br>(412 - 1,613)        | 927<br>(412 - 1,613)     | --                  | --                       | --                          | --                          |
| Hemolytic disease and other neonatal jaundice                    | 22<br>(8 - 53)              | 22<br>(8 - 53)           | --                  | --                       | --                          | --                          |
| Other neonatal disorders                                         | 624<br>(303 - 1,094)        | 624<br>(303 - 1,094)     | --                  | --                       | --                          | --                          |
| Nutritional deficiencies                                         | 1,179<br>(820 - 1,564)      | 193<br>(97 - 330)        | 46<br>(26 - 71)     | 126<br>(83 - 178)        | 176<br>(104 - 268)          | 638<br>(378 - 951)          |
| Protein-energy malnutrition                                      | 897<br>(412 - 1,257)        | 174<br>(89 - 308)        | 35<br>(14 - 59)     | 70<br>(20 - 114)         | 113<br>(38 - 188)           | 506<br>(158 - 803)          |
| Iodine deficiency                                                | 4<br>(0 - 16)               | 0<br>(0 - 2)             | 0<br>(0 - 2)        | 1<br>(0 - 4)             | 1<br>(0 - 6)                | 2<br>(0 - 13)               |
| Iron-deficiency anemia                                           | 221<br>(58 - 477)           | 16<br>(1 - 64)           | 10<br>(1 - 28)      | 51<br>(16 - 94)          | 47<br>(11 - 102)            | 97<br>(23 - 262)            |
| Other nutritional deficiencies                                   | 57<br>(19 - 185)            | 2<br>(0 - 8)             | 1<br>(0 - 5)        | 5<br>(1 - 21)            | 15<br>(5 - 43)              | 34<br>(10 - 115)            |
| Other communicable, maternal, neonatal, and nutritional diseases | 1,212<br>(863 - 1,648)      | 509<br>(288 - 817)       | 91<br>(58 - 144)    | 248<br>(164 - 426)       | 191<br>(116 - 302)          | 172<br>(93 - 315)           |
| Sexually transmitted diseases excluding HIV                      | 504<br>(292 - 793)          | 393<br>(202 - 641)       | 37<br>(19 - 63)     | 18<br>(9 - 37)           | 23<br>(8 - 67)              | 33<br>(9 - 102)             |
| Syphilis                                                         | 475<br>(267 - 755)          | 393<br>(202 - 641)       | 36<br>(18 - 63)     | 7<br>(4 - 15)            | 13<br>(4 - 37)              | 25<br>(7 - 77)              |
| Chlamydial infection                                             | 9<br>(5 - 19)               | --                       | 0<br>(0 - 0)        | 4<br>(2 - 7)             | 3<br>(1 - 9)                | 2<br>(1 - 7)                |
| Gonococcal infection                                             | 12<br>(6 - 27)              | --                       | 0<br>(0 - 0)        | 4<br>(2 - 8)             | 4<br>(1 - 12)               | 4<br>(1 - 12)               |
| Other sexually transmitted diseases                              | 9<br>(5 - 19)               | --                       | 0<br>(0 - 0)        | 3<br>(2 - 7)             | 3<br>(1 - 9)                | 2<br>(1 - 7)                |
| Hepatitis                                                        | 450<br>(314 - 799)          | 44<br>(22 - 117)         | 38<br>(22 - 88)     | 195<br>(125 - 376)       | 107<br>(66 - 173)           | 66<br>(42 - 97)             |
| Acute hepatitis A                                                | 60<br>(21 - 144)            | 27<br>(9 - 73)           | 16<br>(5 - 39)      | 13<br>(3 - 31)           | 3<br>(1 - 9)                | 1<br>(0 - 2)                |
| Acute hepatitis B                                                | 159<br>(90 - 292)           | 16<br>(5 - 49)           | 7<br>(2 - 18)       | 30<br>(11 - 73)          | 58<br>(28 - 104)            | 48<br>(26 - 76)             |
| Acute hepatitis C                                                | 4<br>(1 - 12)               | --                       | 1<br>(0 - 3)        | 2<br>(0 - 6)             | 1<br>(0 - 4)                | 1<br>(0 - 2)                |
| Acute hepatitis E                                                | 228<br>(140 - 409)          | 1<br>(0 - 3)             | 14<br>(6 - 34)      | 151<br>(94 - 276)        | 45<br>(20 - 83)             | 17<br>(5 - 36)              |
| Other infectious diseases                                        | 258<br>(108 - 567)          | 72<br>(20 - 250)         | 17<br>(5 - 49)      | 35<br>(15 - 78)          | 61<br>(21 - 137)            | 73<br>(19 - 177)            |
| Non-communicable diseases                                        | 45,004<br>(35,127 - 55,013) | 827<br>(560 - 1,204)     | 433<br>(323 - 560)  | 5,150<br>(3,746 - 6,598) | 15,253<br>(11,118 - 20,100) | 23,341<br>(18,766 - 27,427) |
| Neoplasms                                                        | 6,917<br>(5,077 - 8,979)    | 67<br>(33 - 107)         | 100<br>(54 - 145)   | 1,540<br>(1,096 - 2,006) | 3,332<br>(2,322 - 4,580)    | 1,878<br>(1,407 - 2,352)    |
| Esophageal cancer                                                | 804<br>(455 - 1,516)        | --                       | --                  | 123<br>(65 - 235)        | 419<br>(205 - 866)          | 262<br>(150 - 470)          |
| Stomach cancer                                                   | 411<br>(288 - 563)          | --                       | --                  | 86<br>(56 - 123)         | 200<br>(128 - 286)          | 125<br>(81 - 181)           |
| Liver cancer                                                     | 278<br>(176 - 404)          | --                       | 1<br>(1 - 3)        | 50<br>(28 - 78)          | 130<br>(75 - 201)           | 97<br>(58 - 151)            |
| Liver cancer due to hepatitis B                                  | 59<br>(12 - 118)            | --                       | 0<br>(0 - 1)        | 14<br>(3 - 26)           | 27<br>(5 - 56)              | 18<br>(4 - 41)              |
| Liver cancer due to hepatitis C                                  | 125<br>(58 - 202)           | --                       | 0<br>(0 - 0)        | 19<br>(7 - 36)           | 62<br>(27 - 107)            | 43<br>(16 - 75)             |
| Liver cancer due to alcohol use                                  | 23<br>(10 - 46)             | --                       | --                  | 2<br>(1 - 4)             | 9<br>(4 - 19)               | 12<br>(5 - 26)              |
| Liver cancer due to other causes                                 | 71<br>(34 - 129)            | --                       | 1<br>(0 - 2)        | 15<br>(7 - 27)           | 31<br>(13 - 60)             | 24<br>(10 - 49)             |

Web Table 31- Nepal deaths with 95% UI by age, sex, and cause in 2013

| Cause                                         | Females, All Ages           | Females, 0-4 Years | Females, 5-14 Years | Females, 15-49 Years   | Females, 50-69 Years     | Females, 70-80 Years       |
|-----------------------------------------------|-----------------------------|--------------------|---------------------|------------------------|--------------------------|----------------------------|
| Larynx cancer                                 | 73<br>(33 - 137)            | --                 | --                  | 11<br>(5 - 21)         | 37<br>(16 - 73)          | 25<br>(12 - 48)            |
| Tracheal, bronchus and lung cancer            | 456<br>(280 - 864)          | --                 | --                  | 67<br>(38 - 129)       | 264<br>(147 - 547)       | 125<br>(83 - 190)          |
| Breast cancer                                 | 1,015<br>(708 - 1,354)      | --                 | --                  | 288<br>(185 - 395)     | 497<br>(322 - 706)       | 230<br>(159 - 311)         |
| Cervical cancer                               | 744<br>(444 - 1,041)        | --                 | --                  | 164<br>(101 - 243)     | 400<br>(216 - 611)       | 180<br>(98 - 264)          |
| Uterine cancer                                | 67<br>(37 - 107)            | --                 | --                  | 8<br>(4 - 14)          | 35<br>(18 - 61)          | 24<br>(13 - 39)            |
| Prostate cancer                               | --                          | --                 | --                  | --                     | --                       | --                         |
| Colon and rectum cancer                       | 411<br>(296 - 536)          | --                 | --                  | 81<br>(57 - 109)       | 190<br>(129 - 266)       | 139<br>(96 - 191)          |
| Lip and oral cavity cancer                    | 293<br>(168 - 477)          | --                 | --                  | 58<br>(28 - 98)        | 138<br>(69 - 244)        | 96<br>(54 - 154)           |
| Nasopharynx cancer                            | 57<br>(30 - 101)            | --                 | 1<br>(0 - 2)        | 18<br>(9 - 34)         | 29<br>(13 - 52)          | 10<br>(5 - 18)             |
| Other pharynx cancer                          | 116<br>(67 - 183)           | --                 | --                  | 25<br>(12 - 48)        | 66<br>(33 - 109)         | 25<br>(15 - 39)            |
| Gallbladder and biliary tract cancer          | 224<br>(146 - 317)          | --                 | --                  | 51<br>(30 - 78)        | 115<br>(71 - 178)        | 59<br>(35 - 90)            |
| Pancreatic cancer                             | 136<br>(95 - 187)           | --                 | --                  | 22<br>(14 - 30)        | 66<br>(41 - 98)          | 49<br>(34 - 68)            |
| Malignant skin melanoma                       | 12<br>(8 - 17)              | --                 | --                  | 2<br>(2 - 4)           | 6<br>(3 - 9)             | 4<br>(3 - 6)               |
| Non-melanoma skin cancer                      | 17<br>(9 - 29)              | --                 | --                  | 3<br>(1 - 6)           | 5<br>(2 - 10)            | 9<br>(4 - 17)              |
| Ovarian cancer                                | 551<br>(320 - 848)          | --                 | --                  | 129<br>(65 - 213)      | 311<br>(168 - 501)       | 112<br>(67 - 174)          |
| Testicular cancer                             | --                          | --                 | --                  | --                     | --                       | --                         |
| Kidney cancer                                 | 45<br>(30 - 67)             | 1<br>(0 - 3)       | 1<br>(0 - 2)        | 7<br>(4 - 12)          | 22<br>(12 - 35)          | 14<br>(8 - 23)             |
| Bladder cancer                                | 57<br>(34 - 96)             | --                 | --                  | 7<br>(4 - 14)          | 24<br>(12 - 46)          | 27<br>(16 - 44)            |
| Brain and nervous system cancer               | 142<br>(90 - 192)           | 2<br>(1 - 4)       | 8<br>(4 - 13)       | 53<br>(34 - 73)        | 59<br>(31 - 89)          | 20<br>(11 - 30)            |
| Thyroid cancer                                | 52<br>(23 - 83)             | --                 | 0<br>(0 - 1)        | 6<br>(3 - 11)          | 23<br>(9 - 39)           | 22<br>(10 - 38)            |
| Mesothelioma                                  | 5<br>(3 - 8)                | --                 | --                  | 1<br>(1 - 2)           | 2<br>(1 - 4)             | 2<br>(1 - 3)               |
| Hodgkin lymphoma                              | 24<br>(15 - 37)             | 2<br>(1 - 5)       | 1<br>(0 - 3)        | 6<br>(4 - 11)          | 8<br>(4 - 14)            | 6<br>(3 - 10)              |
| Non-Hodgkin lymphoma                          | 166<br>(100 - 249)          | 3<br>(1 - 7)       | 8<br>(3 - 15)       | 38<br>(20 - 64)        | 67<br>(38 - 108)         | 50<br>(31 - 78)            |
| Multiple myeloma                              | 47<br>(28 - 72)             | --                 | --                  | 6<br>(4 - 9)           | 24<br>(13 - 39)          | 17<br>(10 - 27)            |
| Leukemia                                      | 350<br>(197 - 464)          | 12<br>(4 - 24)     | 44<br>(18 - 68)     | 144<br>(75 - 196)      | 101<br>(61 - 149)        | 49<br>(32 - 68)            |
| Other neoplasms                               | 361<br>(217 - 535)          | 46<br>(19 - 84)    | 36<br>(15 - 64)     | 85<br>(44 - 133)       | 96<br>(52 - 153)         | 98<br>(62 - 162)           |
| Cardiovascular diseases                       | 20,414<br>(15,488 - 26,036) | 34<br>(20 - 72)    | 57<br>(34 - 111)    | 1,414<br>(869 - 1,937) | 6,544<br>(4,614 - 9,137) | 12,363<br>(9,620 - 15,476) |
| Rheumatic heart disease                       | 711<br>(407 - 1,355)        | 4<br>(1 - 10)      | 18<br>(9 - 37)      | 177<br>(88 - 286)      | 266<br>(135 - 578)       | 246<br>(130 - 525)         |
| Ischemic heart disease                        | 8,963<br>(6,301 - 13,016)   | 5<br>(1 - 18)      | 12<br>(5 - 32)      | 623<br>(340 - 1,000)   | 3,003<br>(1,900 - 4,824) | 5,320<br>(3,806 - 7,828)   |
| Cerebrovascular disease                       | 8,322<br>(5,495 - 11,026)   | 6<br>(3 - 12)      | 13<br>(7 - 24)      | 416<br>(205 - 634)     | 2,536<br>(1,549 - 3,674) | 5,352<br>(3,573 - 6,994)   |
| Ischemic stroke                               | 4,179<br>(2,129 - 6,045)    | 1<br>(0 - 2)       | 2<br>(1 - 5)        | 67<br>(21 - 135)       | 850<br>(332 - 1,560)     | 3,259<br>(1,679 - 4,572)   |
| Hemorrhagic stroke                            | 4,143<br>(2,131 - 6,278)    | 5<br>(2 - 11)      | 11<br>(6 - 21)      | 349<br>(169 - 538)     | 1,686<br>(906 - 2,582)   | 2,093<br>(970 - 3,362)     |
| Hypertensive heart disease                    | 1,758<br>(1,083 - 3,101)    | 3<br>(1 - 8)       | 3<br>(1 - 6)        | 99<br>(42 - 187)       | 544<br>(270 - 1,008)     | 1,110<br>(675 - 1,982)     |
| Cardiomyopathy and myocarditis                | 315<br>(184 - 577)          | 14<br>(6 - 28)     | 9<br>(4 - 19)       | 58<br>(30 - 98)        | 96<br>(50 - 187)         | 138<br>(70 - 274)          |
| Atrial fibrillation and flutter               | 11<br>(5 - 20)              | --                 | --                  | 0<br>(0 - 1)           | 2<br>(1 - 4)             | 8<br>(3 - 16)              |
| Aortic aneurysm                               | 81<br>(41 - 135)            | --                 | --                  | 7<br>(3 - 12)          | 25<br>(12 - 44)          | 50<br>(25 - 85)            |
| Peripheral vascular disease                   | 10<br>(5 - 19)              | --                 | --                  | 0<br>(0 - 1)           | 3<br>(1 - 6)             | 7<br>(3 - 13)              |
| Endocarditis                                  | 72<br>(37 - 143)            | 2<br>(1 - 5)       | 2<br>(1 - 3)        | 14<br>(6 - 27)         | 19<br>(8 - 39)           | 36<br>(16 - 75)            |
| Other cardiovascular and circulatory diseases | 171<br>(105 - 322)          | 1<br>(0 - 3)       | 1<br>(0 - 4)        | 19<br>(11 - 34)        | 52<br>(28 - 114)         | 97<br>(56 - 181)           |
| Chronic respiratory diseases                  | 7,586<br>(5,376 - 9,830)    | 103<br>(61 - 164)  | 48<br>(31 - 73)     | 601<br>(396 - 843)     | 2,378<br>(1,499 - 3,488) | 4,456<br>(3,177 - 5,760)   |

Web Table 31- Nepal deaths with 95% UI by age, sex, and cause in 2013

| Cause                                               | Females, All Ages        | Females, 0-4 Years | Females, 5-14 Years | Females, 15-49 Years | Females, 50-69 Years   | Females, 70-80 Years     |
|-----------------------------------------------------|--------------------------|--------------------|---------------------|----------------------|------------------------|--------------------------|
| Chronic obstructive pulmonary disease               | 3,868<br>(2,307 - 5,548) | 42<br>(19 - 84)    | 10<br>(3 - 19)      | 181<br>(85 - 295)    | 1,078<br>(572 - 1,683) | 2,556<br>(1,571 - 3,667) |
| Pneumoconiosis                                      | 1,059<br>(623 - 1,686)   | 0<br>(0 - 0)       | 1<br>(0 - 1)        | 73<br>(39 - 117)     | 381<br>(200 - 682)     | 604<br>(316 - 1,016)     |
| Silicosis                                           | 54<br>(23 - 113)         | 0<br>(0 - 0)       | 0<br>(0 - 0)        | 8<br>(3 - 15)        | 24<br>(9 - 55)         | 22<br>(8 - 51)           |
| Asbestosis                                          | 44<br>(19 - 87)          | 0<br>(0 - 0)       | 0<br>(0 - 0)        | 6<br>(3 - 12)        | 20<br>(7 - 45)         | 18<br>(6 - 38)           |
| Coal workers pneumoconiosis                         | 44<br>(17 - 90)          | 0<br>(0 - 0)       | 0<br>(0 - 0)        | 7<br>(3 - 13)        | 21<br>(7 - 50)         | 16<br>(5 - 39)           |
| Other pneumoconiosis                                | 918<br>(530 - 1,467)     | 0<br>(0 - 0)       | 0<br>(0 - 0)        | 52<br>(28 - 84)      | 317<br>(166 - 557)     | 549<br>(290 - 932)       |
| Asthma                                              | 1,699<br>(1,020 - 3,135) | 25<br>(11 - 46)    | 29<br>(18 - 46)     | 266<br>(162 - 442)   | 589<br>(305 - 1,123)   | 789<br>(441 - 1,589)     |
| Interstitial lung disease and pulmonary sarcoidosis | 778<br>(113 - 1,605)     | 0<br>(0 - 2)       | 1<br>(0 - 2)        | 57<br>(9 - 124)      | 273<br>(31 - 654)      | 447<br>(70 - 942)        |
| Other chronic respiratory diseases                  | 182<br>(106 - 283)       | 35<br>(20 - 61)    | 7<br>(2 - 12)       | 24<br>(12 - 40)      | 57<br>(24 - 116)       | 59<br>(29 - 100)         |
| Cirrhosis                                           | 1,364<br>(1,006 - 1,817) | 18<br>(8 - 35)     | 33<br>(20 - 55)     | 345<br>(229 - 473)   | 541<br>(359 - 790)     | 428<br>(297 - 598)       |
| Cirrhosis due to hepatitis B                        | 346<br>(153 - 567)       | 0<br>(0 - 1)       | 3<br>(1 - 8)        | 81<br>(25 - 148)     | 146<br>(59 - 253)      | 116<br>(54 - 192)        |
| Cirrhosis due to hepatitis C                        | 243<br>(80 - 501)        | 1<br>(0 - 3)       | 3<br>(1 - 6)        | 54<br>(12 - 119)     | 102<br>(23 - 242)      | 84<br>(31 - 159)         |
| Cirrhosis due to alcohol use                        | 420<br>(260 - 627)       | --                 | --                  | 72<br>(32 - 123)     | 179<br>(102 - 295)     | 169<br>(100 - 256)       |
| Cirrhosis due to other causes                       | 355<br>(201 - 550)       | 17<br>(7 - 32)     | 27<br>(16 - 46)     | 138<br>(75 - 226)    | 114<br>(51 - 197)      | 59<br>(29 - 101)         |
| Digestive diseases                                  | 2,175<br>(1,509 - 3,036) | 10<br>(6 - 18)     | 42<br>(28 - 62)     | 418<br>(282 - 582)   | 765<br>(476 - 1,128)   | 940<br>(641 - 1,470)     |
| Peptic ulcer disease                                | 663<br>(343 - 1,015)     | 1<br>(0 - 2)       | 3<br>(1 - 6)        | 80<br>(38 - 138)     | 253<br>(114 - 436)     | 326<br>(164 - 522)       |
| Gastritis and duodenitis                            | 162<br>(59 - 381)        | 1<br>(0 - 3)       | 3<br>(1 - 8)        | 27<br>(11 - 66)      | 55<br>(18 - 144)       | 77<br>(24 - 186)         |
| Appendicitis                                        | 93<br>(48 - 151)         | 1<br>(0 - 1)       | 3<br>(1 - 6)        | 33<br>(14 - 60)      | 27<br>(12 - 51)        | 30<br>(15 - 54)          |
| Paralytic ileus and intestinal obstruction          | 666<br>(342 - 1,296)     | 6<br>(3 - 11)      | 24<br>(12 - 40)     | 168<br>(93 - 273)    | 215<br>(93 - 443)      | 253<br>(82 - 630)        |
| Inguinal, femoral, and abdominal hernia             | 30<br>(12 - 77)          | 0<br>(0 - 1)       | 1<br>(0 - 3)        | 6<br>(2 - 14)        | 8<br>(3 - 24)          | 15<br>(6 - 39)           |
| Inflammatory bowel disease                          | 82<br>(42 - 129)         | 1<br>(0 - 3)       | 2<br>(1 - 4)        | 20<br>(10 - 34)      | 25<br>(11 - 45)        | 33<br>(15 - 59)          |
| Vascular intestinal disorders                       | 54<br>(24 - 121)         | 0<br>(0 - 0)       | 0<br>(0 - 1)        | 6<br>(2 - 15)        | 16<br>(7 - 35)         | 32<br>(13 - 69)          |
| Gallbladder and biliary diseases                    | 111<br>(56 - 186)        | 0<br>(0 - 0)       | 1<br>(0 - 2)        | 13<br>(7 - 23)       | 45<br>(18 - 86)        | 51<br>(25 - 96)          |
| Pancreatitis                                        | 226<br>(76 - 480)        | 0<br>(0 - 0)       | 2<br>(1 - 5)        | 47<br>(19 - 98)      | 88<br>(28 - 196)       | 88<br>(24 - 206)         |
| Other digestive diseases                            | 87<br>(49 - 152)         | 0<br>(0 - 1)       | 2<br>(1 - 4)        | 16<br>(8 - 30)       | 33<br>(16 - 63)        | 35<br>(17 - 64)          |
| Neurological disorders                              | 1,432<br>(1,032 - 1,880) | 25<br>(13 - 49)    | 30<br>(13 - 68)     | 106<br>(58 - 193)    | 158<br>(101 - 226)     | 1,114<br>(786 - 1,506)   |
| Alzheimer disease and other dementias               | 1,171<br>(824 - 1,582)   | --                 | --                  | 1<br>(0 - 1)         | 102<br>(61 - 150)      | 1,068<br>(748 - 1,453)   |
| Parkinson disease                                   | 4<br>(2 - 8)             | --                 | --                  | 1<br>(0 - 1)         | 0<br>(0 - 1)           | 3<br>(2 - 7)             |
| Epilepsy                                            | 149<br>(71 - 288)        | 15<br>(5 - 40)     | 25<br>(8 - 63)      | 78<br>(35 - 165)     | 18<br>(8 - 33)         | 14<br>(7 - 26)           |
| Multiple sclerosis                                  | 21<br>(4 - 42)           | --                 | --                  | 6<br>(2 - 13)        | 8<br>(1 - 19)          | 7<br>(1 - 15)            |
| Other neurological disorders                        | 86<br>(61 - 131)         | 10<br>(6 - 15)     | 6<br>(4 - 9)        | 20<br>(13 - 31)      | 29<br>(18 - 47)        | 22<br>(14 - 34)          |
| Mental and substance use disorders                  | 32<br>(16 - 65)          | 1<br>(0 - 3)       | 0<br>(0 - 0)        | 10<br>(5 - 23)       | 13<br>(6 - 26)         | 7<br>(4 - 14)            |
| Schizophrenia                                       | 8<br>(2 - 24)            | --                 | --                  | 2<br>(0 - 8)         | 3<br>(1 - 9)           | 3<br>(1 - 8)             |
| Alcohol use disorders                               | 11<br>(4 - 27)           | --                 | --                  | 4<br>(2 - 12)        | 4<br>(2 - 11)          | 2<br>(1 - 5)             |
| Drug use disorders                                  | 12<br>(6 - 23)           | 1<br>(0 - 3)       | --                  | 3<br>(1 - 6)         | 6<br>(2 - 12)          | 2<br>(1 - 4)             |
| Opioid use disorders                                | 7<br>(3 - 12)            | 1<br>(0 - 2)       | --                  | 2<br>(1 - 4)         | 3<br>(1 - 6)           | 1<br>(0 - 2)             |
| Cocaine use disorders                               | 0<br>(0 - 0)             | 0<br>(0 - 0)       | --                  | 0<br>(0 - 0)         | 0<br>(0 - 0)           | 0<br>(0 - 0)             |
| Amphetamine use disorders                           | 0<br>(0 - 0)             | 0<br>(0 - 0)       | --                  | 0<br>(0 - 0)         | 0<br>(0 - 0)           | 0<br>(0 - 0)             |
| Other drug use disorders                            | 5<br>(2 - 10)            | 1<br>(0 - 1)       | --                  | 1<br>(1 - 3)         | 3<br>(1 - 5)           | 1<br>(0 - 2)             |
| Eating disorders                                    | 0<br>(0 - 1)             | --                 | 0<br>(0 - 0)        | 0<br>(0 - 0)         | --                     | --                       |

Web Table 31- Nepal deaths with 95% UI by age, sex, and cause in 2013

| Cause                                               | Females, All Ages        | Females, 0-4 Years | Females, 5-14 Years | Females, 15-49 Years | Females, 50-69 Years   | Females, 70-80 Years     |
|-----------------------------------------------------|--------------------------|--------------------|---------------------|----------------------|------------------------|--------------------------|
| Anorexia nervosa                                    | 0<br>(0 - 1)             | --                 | 0<br>(0 - 0)        | 0<br>(0 - 0)         | --                     | --                       |
| Diabetes, urogenital, blood, and endocrine diseases | 4,072<br>(2,703 - 5,401) | 86<br>(55 - 137)   | 51<br>(33 - 82)     | 596<br>(379 - 801)   | 1,384<br>(862 - 1,943) | 1,955<br>(1,285 - 2,609) |
| Diabetes mellitus                                   | 2,247<br>(1,575 - 3,042) | 5<br>(3 - 10)      | 6<br>(3 - 10)       | 215<br>(137 - 294)   | 805<br>(510 - 1,161)   | 1,216<br>(840 - 1,668)   |
| Acute glomerulonephritis                            | 60<br>(17 - 137)         | 8<br>(1 - 22)      | 8<br>(2 - 21)       | 19<br>(6 - 43)       | 13<br>(4 - 28)         | 13<br>(3 - 31)           |
| Chronic kidney disease                              | 944<br>(326 - 1,464)     | 6<br>(2 - 14)      | 6<br>(3 - 13)       | 179<br>(53 - 316)    | 358<br>(106 - 587)     | 394<br>(145 - 592)       |
| Chronic kidney disease due to diabetes mellitus     | 49<br>(8 - 96)           | 0<br>(0 - 0)       | 0<br>(0 - 0)        | 8<br>(1 - 15)        | 23<br>(4 - 48)         | 18<br>(3 - 37)           |
| Chronic kidney disease due to hypertension          | 257<br>(83 - 494)        | 1<br>(0 - 1)       | 1<br>(0 - 1)        | 31<br>(8 - 70)       | 87<br>(26 - 183)       | 139<br>(50 - 262)        |
| Chronic kidney disease due to glomerulonephritis    | 294<br>(113 - 504)       | 4<br>(2 - 9)       | 4<br>(2 - 9)        | 80<br>(31 - 150)     | 104<br>(38 - 188)      | 102<br>(31 - 177)        |
| Chronic kidney disease due to other causes          | 343<br>(50 - 662)        | 1<br>(0 - 4)       | 1<br>(0 - 3)        | 61<br>(6 - 132)      | 144<br>(18 - 297)      | 135<br>(20 - 274)        |
| Urinary diseases and male infertility               | 345<br>(228 - 528)       | 9<br>(4 - 20)      | 6<br>(3 - 14)       | 69<br>(40 - 127)     | 107<br>(63 - 176)      | 155<br>(93 - 253)        |
| Interstitial nephritis and urinary tract infections | 272<br>(173 - 445)       | 8<br>(4 - 18)      | 5<br>(2 - 10)       | 54<br>(31 - 106)     | 83<br>(47 - 143)       | 122<br>(68 - 214)        |
| Urolithiasis                                        | 20<br>(7 - 46)           | --                 | 1<br>(0 - 2)        | 5<br>(2 - 12)        | 7<br>(2 - 18)          | 8<br>(2 - 20)            |
| Other urinary diseases                              | 53<br>(19 - 106)         | 1<br>(0 - 3)       | 1<br>(0 - 2)        | 10<br>(3 - 20)       | 17<br>(5 - 34)         | 25<br>(7 - 55)           |
| Gynecological diseases                              | 25<br>(3 - 62)           | --                 | --                  | 8<br>(2 - 22)        | 2<br>(1 - 4)           | 15<br>(1 - 41)           |
| Uterine fibroids                                    | 7<br>(1 - 18)            | --                 | --                  | 2<br>(0 - 6)         | 1<br>(0 - 1)           | 5<br>(0 - 13)            |
| Polycystic ovarian syndrome                         | 0<br>(0 - 1)             | --                 | --                  | 0<br>(0 - 1)         | 0<br>(0 - 0)           | --                       |
| Endometriosis                                       | 1<br>(0 - 3)             | --                 | --                  | 1<br>(0 - 3)         | 0<br>(0 - 0)           | --                       |
| Genital prolapse                                    | 5<br>(1 - 13)            | --                 | --                  | 1<br>(0 - 2)         | 0<br>(0 - 1)           | 4<br>(0 - 10)            |
| Other gynecological diseases                        | 11<br>(2 - 27)           | --                 | --                  | 4<br>(1 - 9)         | 1<br>(0 - 2)           | 6<br>(0 - 18)            |
| Hemoglobinopathies and hemolytic anemias            | 127<br>(38 - 330)        | 27<br>(8 - 77)     | 14<br>(4 - 45)      | 42<br>(12 - 114)     | 16<br>(5 - 44)         | 27<br>(8 - 66)           |
| Thalassemias                                        | 58<br>(17 - 167)         | 20<br>(6 - 58)     | 12<br>(3 - 37)      | 24<br>(7 - 70)       | 2<br>(1 - 5)           | 0<br>(0 - 1)             |
| Sickle cell disorders                               | 1<br>(0 - 4)             | 0<br>(0 - 1)       | 0<br>(0 - 1)        | 1<br>(0 - 2)         | 0<br>(0 - 0)           | 0<br>(0 - 0)             |
| G6PD deficiency                                     | 2<br>(1 - 5)             | 0<br>(0 - 1)       | 0<br>(0 - 1)        | 1<br>(0 - 3)         | 0<br>(0 - 1)           | 0<br>(0 - 0)             |
| Other hemoglobinopathies and hemolytic anemias      | 65<br>(20 - 160)         | 6<br>(2 - 17)      | 2<br>(1 - 7)        | 16<br>(5 - 40)       | 14<br>(4 - 38)         | 27<br>(7 - 65)           |
| Endocrine, metabolic, blood, and immune disorders   | 324<br>(151 - 478)       | 32<br>(14 - 62)    | 12<br>(5 - 24)      | 63<br>(29 - 105)     | 83<br>(38 - 135)       | 134<br>(53 - 221)        |
| Musculoskeletal disorders                           | 135<br>(63 - 198)        | --                 | 7<br>(3 - 13)       | 23<br>(14 - 39)      | 51<br>(19 - 81)        | 54<br>(21 - 84)          |
| Rheumatoid arthritis                                | 85<br>(31 - 130)         | --                 | 2<br>(1 - 4)        | 6<br>(3 - 13)        | 35<br>(11 - 58)        | 42<br>(15 - 68)          |
| Other musculoskeletal disorders                     | 50<br>(28 - 88)          | --                 | 5<br>(2 - 10)       | 17<br>(10 - 29)      | 17<br>(6 - 32)         | 12<br>(5 - 25)           |
| Other non-communicable diseases                     | 877<br>(577 - 1,267)     | 482<br>(261 - 817) | 65<br>(28 - 122)    | 96<br>(57 - 143)     | 87<br>(55 - 130)       | 147<br>(95 - 218)        |
| Congenital anomalies                                | 638<br>(372 - 1,007)     | 449<br>(239 - 770) | 60<br>(24 - 116)    | 70<br>(39 - 109)     | 29<br>(16 - 44)        | 31<br>(14 - 44)          |
| Neural tube defects                                 | 47<br>(14 - 148)         | 39<br>(7 - 128)    | 2<br>(1 - 9)        | 4<br>(2 - 11)        | 1<br>(0 - 3)           | 1<br>(0 - 1)             |
| Congenital heart anomalies                          | 385<br>(174 - 666)       | 274<br>(101 - 520) | 38<br>(12 - 81)     | 31<br>(14 - 55)      | 19<br>(10 - 29)        | 23<br>(11 - 34)          |
| Cleft lip and cleft palate                          | 5<br>(1 - 14)            | 5<br>(1 - 14)      | --                  | --                   | --                     | --                       |
| Down syndrome                                       | 34<br>(14 - 67)          | 16<br>(5 - 38)     | 5<br>(1 - 12)       | 10<br>(5 - 19)       | 2<br>(1 - 4)           | 0<br>(0 - 1)             |
| Chromosomal unbalanced rearrangements               | 21<br>(5 - 46)           | 15<br>(3 - 37)     | 1<br>(0 - 3)        | 4<br>(1 - 7)         | 0<br>(0 - 1)           | 0<br>(0 - 1)             |
| Other congenital anomalies                          | 147<br>(77 - 261)        | 101<br>(45 - 196)  | 13<br>(5 - 26)      | 21<br>(10 - 35)      | 6<br>(3 - 11)          | 7<br>(3 - 11)            |
| Skin and subcutaneous diseases                      | 219<br>(148 - 306)       | 13<br>(6 - 24)     | 4<br>(2 - 7)        | 26<br>(15 - 40)      | 58<br>(35 - 93)        | 117<br>(72 - 180)        |
| Cellulitis                                          | 139<br>(42 - 246)        | 10<br>(4 - 21)     | 3<br>(1 - 7)        | 18<br>(6 - 35)       | 38<br>(11 - 75)        | 68<br>(15 - 135)         |
| Pyoderma                                            | 43<br>(4 - 98)           | 2<br>(0 - 6)       | 0<br>(0 - 1)        | 5<br>(0 - 11)        | 14<br>(1 - 35)         | 23<br>(2 - 58)           |
| Decubitus ulcer                                     | 35<br>(5 - 103)          | 1<br>(0 - 3)       | 1<br>(0 - 2)        | 3<br>(0 - 10)        | 6<br>(1 - 22)          | 25<br>(3 - 72)           |



Web Table 31- Nepal deaths with 95% UI by age, sex, and cause in 2013

| Cause                                           | Females, All Ages        | Females, 0-4 Years | Females, 5-14 Years | Females, 15-49 Years     | Females, 50-69 Years     | Females, 70-80 Years     |
|-------------------------------------------------|--------------------------|--------------------|---------------------|--------------------------|--------------------------|--------------------------|
| Other skin and subcutaneous diseases            | 2<br>(0 - 5)             | 0<br>(0 - 1)       | 0<br>(0 - 0)        | 1<br>(0 - 1)             | 0<br>(0 - 1)             | 1<br>(0 - 1)             |
| Sudden infant death syndrome                    | 20<br>(2 - 71)           | 20<br>(2 - 71)     | --                  | --                       | --                       | --                       |
| Injuries                                        | 6,924<br>(4,982 - 8,959) | 473<br>(279 - 808) | 373<br>(254 - 546)  | 2,514<br>(1,766 - 3,419) | 1,719<br>(1,012 - 2,467) | 1,845<br>(1,131 - 2,441) |
| Transport injuries                              | 706<br>(401 - 1,001)     | 33<br>(20 - 53)    | 55<br>(33 - 86)     | 223<br>(143 - 315)       | 223<br>(102 - 353)       | 172<br>(69 - 272)        |
| Road injuries                                   | 606<br>(350 - 856)       | 26<br>(16 - 41)    | 46<br>(28 - 74)     | 192<br>(123 - 271)       | 194<br>(92 - 303)        | 148<br>(63 - 231)        |
| Pedestrian road injuries                        | 304<br>(148 - 448)       | 14<br>(8 - 24)     | 29<br>(15 - 49)     | 60<br>(32 - 92)          | 108<br>(44 - 181)        | 92<br>(38 - 149)         |
| Cyclist road injuries                           | 34<br>(18 - 52)          | 1<br>(0 - 2)       | 3<br>(1 - 5)        | 15<br>(7 - 28)           | 5<br>(3 - 10)            | 9<br>(3 - 17)            |
| Motorcyclist road injuries                      | 62<br>(36 - 110)         | 2<br>(1 - 4)       | 2<br>(1 - 5)        | 30<br>(16 - 56)          | 19<br>(9 - 34)           | 9<br>(3 - 18)            |
| Motor vehicle road injuries                     | 193<br>(104 - 282)       | 8<br>(4 - 14)      | 11<br>(6 - 20)      | 83<br>(45 - 124)         | 58<br>(26 - 94)          | 33<br>(13 - 55)          |
| Other road injuries                             | 14<br>(7 - 27)           | 1<br>(0 - 3)       | 2<br>(0 - 4)        | 4<br>(2 - 9)             | 3<br>(1 - 7)             | 4<br>(2 - 8)             |
| Other transport injuries                        | 100<br>(45 - 152)        | 7<br>(3 - 13)      | 9<br>(4 - 16)       | 31<br>(18 - 47)          | 29<br>(9 - 53)           | 24<br>(5 - 44)           |
| Unintentional injuries                          | 3,328<br>(2,398 - 4,696) | 429<br>(241 - 760) | 246<br>(147 - 416)  | 746<br>(481 - 1,164)     | 670<br>(431 - 1,010)     | 1,237<br>(767 - 1,707)   |
| Falls                                           | 798<br>(400 - 1,327)     | 40<br>(16 - 107)   | 26<br>(10 - 65)     | 70<br>(37 - 131)         | 145<br>(64 - 256)        | 516<br>(242 - 860)       |
| Drowning                                        | 525<br>(200 - 1,086)     | 154<br>(44 - 408)  | 91<br>(35 - 207)    | 124<br>(51 - 244)        | 77<br>(24 - 160)         | 79<br>(24 - 165)         |
| Fire, heat, and hot substances                  | 847<br>(512 - 1,641)     | 86<br>(24 - 270)   | 53<br>(19 - 139)    | 278<br>(150 - 542)       | 171<br>(92 - 317)        | 259<br>(140 - 448)       |
| Poisonings                                      | 66<br>(25 - 102)         | 5<br>(2 - 10)      | 4<br>(2 - 7)        | 27<br>(11 - 44)          | 16<br>(5 - 29)           | 14<br>(4 - 25)           |
| Exposure to mechanical forces                   | 125<br>(72 - 193)        | 30<br>(13 - 62)    | 15<br>(7 - 30)      | 25<br>(15 - 43)          | 28<br>(13 - 46)          | 27<br>(8 - 45)           |
| Unintentional firearm injuries                  | 28<br>(16 - 49)          | 3<br>(1 - 8)       | 2<br>(1 - 5)        | 9<br>(5 - 18)            | 8<br>(4 - 15)            | 5<br>(2 - 8)             |
| Unintentional suffocation                       | 10<br>(1 - 20)           | 4<br>(0 - 12)      | 2<br>(0 - 5)        | 2<br>(0 - 5)             | 1<br>(0 - 3)             | 1<br>(0 - 1)             |
| Other exposure to mechanical forces             | 88<br>(26 - 148)         | 23<br>(5 - 52)     | 11<br>(4 - 24)      | 14<br>(6 - 27)           | 18<br>(4 - 34)           | 22<br>(4 - 39)           |
| Adverse effects of medical treatment            | 229<br>(115 - 364)       | 20<br>(7 - 47)     | 6<br>(3 - 13)       | 80<br>(29 - 156)         | 64<br>(29 - 113)         | 59<br>(31 - 113)         |
| Animal contact                                  | 221<br>(89 - 447)        | 27<br>(9 - 77)     | 34<br>(12 - 86)     | 77<br>(25 - 169)         | 46<br>(17 - 99)          | 37<br>(13 - 74)          |
| Venomous animal contact                         | 165<br>(66 - 359)        | 19<br>(5 - 56)     | 28<br>(9 - 73)      | 68<br>(22 - 146)         | 33<br>(11 - 79)          | 15<br>(5 - 38)           |
| Non-venomous animal contact                     | 57<br>(17 - 135)         | 7<br>(2 - 20)      | 6<br>(1 - 18)       | 9<br>(2 - 30)            | 13<br>(3 - 31)           | 21<br>(5 - 42)           |
| Foreign body                                    | 120<br>(65 - 204)        | 42<br>(20 - 91)    | 1<br>(1 - 3)        | 13<br>(7 - 25)           | 7<br>(4 - 16)            | 57<br>(25 - 95)          |
| Pulmonary aspiration and foreign body in airway | 114<br>(59 - 198)        | 41<br>(19 - 90)    | 1<br>(0 - 2)        | 12<br>(6 - 24)           | 7<br>(3 - 15)            | 54<br>(22 - 92)          |
| Foreign body in other body part                 | 6<br>(3 - 10)            | 1<br>(0 - 2)       | 1<br>(0 - 1)        | 1<br>(1 - 2)             | 1<br>(0 - 1)             | 3<br>(1 - 5)             |
| Other unintentional injuries                    | 397<br>(130 - 793)       | 25<br>(10 - 74)    | 16<br>(7 - 47)      | 51<br>(24 - 118)         | 116<br>(27 - 246)        | 189<br>(38 - 368)        |
| Self-harm and interpersonal violence            | 2,854<br>(1,575 - 4,066) | 11<br>(4 - 25)     | 71<br>(30 - 141)    | 1,530<br>(894 - 2,379)   | 813<br>(402 - 1,275)     | 430<br>(214 - 679)       |
| Self-harm                                       | 2,701<br>(1,443 - 3,939) | --                 | 60<br>(22 - 130)    | 1,417<br>(782 - 2,251)   | 799<br>(395 - 1,262)     | 426<br>(211 - 673)       |
| Interpersonal violence                          | 153<br>(69 - 240)        | 11<br>(4 - 25)     | 11<br>(4 - 22)      | 113<br>(50 - 185)        | 13<br>(6 - 23)           | 4<br>(2 - 8)             |
| Assault by firearm                              | 21<br>(7 - 47)           | 1<br>(0 - 2)       | 1<br>(0 - 2)        | 17<br>(5 - 38)           | 2<br>(1 - 5)             | 1<br>(0 - 2)             |
| Assault by sharp object                         | 44<br>(21 - 78)          | 2<br>(1 - 5)       | 2<br>(1 - 4)        | 38<br>(18 - 67)          | 2<br>(1 - 4)             | 1<br>(0 - 1)             |
| Assault by other means                          | 88<br>(32 - 140)         | 8<br>(3 - 19)      | 9<br>(3 - 17)       | 59<br>(19 - 101)         | 9<br>(3 - 16)            | 3<br>(1 - 5)             |
| Forces of nature, war, and legal intervention   | 36<br>(18 - 86)          | 0<br>(0 - 0)       | 1<br>(1 - 3)        | 15<br>(7 - 35)           | 13<br>(7 - 31)           | 6<br>(3 - 15)            |
| Exposure to forces of nature                    | 36<br>(18 - 86)          | 0<br>(0 - 0)       | 1<br>(1 - 3)        | 15<br>(7 - 35)           | 13<br>(7 - 31)           | 6<br>(3 - 15)            |

Web Table 31- Netherlands deaths with 95% UI by age, sex, and cause in 2013

| Cause                                                             | Both Sexes, All Ages           | Both Sexes, 0-4 Years | Both Sexes, 5-14 Years | Both Sexes, 15-49 Years  | Both Sexes, 50-69 Years     | Both Sexes, 70-80 Years        |
|-------------------------------------------------------------------|--------------------------------|-----------------------|------------------------|--------------------------|-----------------------------|--------------------------------|
| All causes                                                        | 151,833<br>(145,691 - 158,040) | 734<br>(592 - 915)    | 180<br>(159 - 205)     | 6,084<br>(5,722 - 6,475) | 30,623<br>(28,943 - 32,320) | 114,211<br>(109,919 - 118,505) |
| Communicable, maternal, neonatal, and nutritional diseases        | 9,616<br>(7,846 - 11,273)      | 333<br>(260 - 424)    | 16<br>(12 - 19)        | 219<br>(173 - 258)       | 741<br>(517 - 878)          | 8,307<br>(6,686 - 9,865)       |
| HIV/AIDS and tuberculosis                                         | 213<br>(171 - 270)             | 0<br>(0 - 0)          | 0<br>(0 - 0)           | 63<br>(40 - 96)          | 48<br>(33 - 72)             | 101<br>(83 - 129)              |
| Tuberculosis                                                      | 123<br>(103 - 154)             | 0<br>(0 - 0)          | 0<br>(0 - 0)           | 4<br>(3 - 5)             | 21<br>(17 - 26)             | 98<br>(79 - 124)               |
| HIV/AIDS                                                          | 91<br>(52 - 147)               | 0<br>(0 - 0)          | 0<br>(0 - 0)           | 59<br>(36 - 92)          | 28<br>(13 - 52)             | 4<br>(1 - 9)                   |
| HIV/AIDS resulting in mycobacterial infection                     | 5<br>(3 - 8)                   | 0<br>(0 - 0)          | 0<br>(0 - 0)           | 3<br>(2 - 5)             | 1<br>(1 - 3)                | 0<br>(0 - 1)                   |
| HIV/AIDS resulting in other diseases                              | 86<br>(49 - 138)               | 0<br>(0 - 0)          | 0<br>(0 - 0)           | 56<br>(34 - 88)          | 26<br>(12 - 49)             | 4<br>(1 - 8)                   |
| Diarrhea, lower respiratory, and other common infectious diseases | 8,273<br>(6,612 - 9,924)       | 43<br>(31 - 56)       | 112<br>(9 - 15)        | 600<br>(82 - 131)        | 7,506<br>(395 - 727)        | 7,506<br>(5,990 - 9,108)       |
| Diarrheal diseases                                                | 334<br>(244 - 456)             | 5<br>(3 - 7)          | 1<br>(0 - 1)           | 6<br>(4 - 7)             | 22<br>(17 - 27)             | 301<br>(211 - 424)             |
| Intestinal infectious diseases                                    | 10<br>(4 - 20)                 | 2<br>(0 - 4)          | 2<br>(0 - 4)           | 4<br>(1 - 8)             | 1<br>(0 - 4)                | 1<br>(0 - 3)                   |
| Typhoid fever                                                     | 6<br>(2 - 14)                  | 1<br>(0 - 2)          | 1<br>(0 - 3)           | 3<br>(1 - 6)             | 1<br>(0 - 2)                | 1<br>(0 - 2)                   |
| Paratyphoid fever                                                 | 2<br>(1 - 4)                   | 0<br>(0 - 1)          | 0<br>(0 - 1)           | 1<br>(0 - 1)             | 0<br>(0 - 0)                | 0<br>(0 - 0)                   |
| Other intestinal infectious diseases                              | 2<br>(0 - 5)                   | 0<br>(0 - 2)          | 0<br>(0 - 1)           | 0<br>(0 - 2)             | 0<br>(0 - 2)                | 0<br>(0 - 2)                   |
| Lower respiratory infections                                      | 7,740<br>(6,103 - 9,372)       | 17<br>(12 - 25)       | 5<br>(3 - 7)           | 80<br>(52 - 98)          | 536<br>(331 - 660)          | 7,102<br>(5,580 - 8,696)       |
| Upper respiratory infections                                      | 3<br>(1 - 8)                   | 0<br>(0 - 0)          | 0<br>(0 - 0)           | 0<br>(0 - 0)             | 1<br>(0 - 2)                | 2<br>(0 - 7)                   |
| Otitis media                                                      | 5<br>(4 - 5)                   | 0<br>(0 - 0)          | 0<br>(0 - 0)           | 1<br>(1 - 1)             | 1<br>(1 - 1)                | 2<br>(2 - 3)                   |
| Meningitis                                                        | 117<br>(92 - 132)              | 14<br>(9 - 19)        | 3<br>(2 - 3)           | 12<br>(10 - 14)          | 26<br>(20 - 31)             | 62<br>(49 - 75)                |
| Pneumococcal meningitis                                           | 20<br>(16 - 25)                | 2<br>(1 - 3)          | 0<br>(0 - 1)           | 2<br>(2 - 3)             | 5<br>(3 - 7)                | 11<br>(8 - 15)                 |
| H influenzae type B meningitis                                    | 14<br>(10 - 18)                | 4<br>(2 - 6)          | 0<br>(0 - 1)           | 1<br>(1 - 2)             | 3<br>(1 - 4)                | 6<br>(4 - 9)                   |
| Meningococcal meningitis                                          | 38<br>(29 - 46)                | 4<br>(2 - 6)          | 1<br>(1 - 1)           | 4<br>(3 - 5)             | 8<br>(4 - 12)               | 21<br>(15 - 28)                |
| Other meningitis                                                  | 44<br>(33 - 54)                | 4<br>(2 - 7)          | 1<br>(0 - 1)           | 5<br>(4 - 6)             | 11<br>(7 - 14)              | 24<br>(17 - 31)                |
| Encephalitis                                                      | 45<br>(35 - 62)                | 2<br>(2 - 4)          | 1<br>(1 - 2)           | 6<br>(5 - 10)            | 11<br>(7 - 16)              | 24<br>(16 - 35)                |
| Diphtheria                                                        | 0<br>(0 - 1)                   | 0<br>(0 - 0)          | 0<br>(0 - 0)           | 0<br>(0 - 0)             | 0<br>(0 - 0)                | --                             |
| Whooping cough                                                    | 1<br>(1 - 2)                   | 0<br>(0 - 0)          | 0<br>(0 - 0)           | 1<br>(1 - 1)             | 0<br>(0 - 0)                | --                             |
| Tetanus                                                           | 2<br>(1 - 2)                   | 0<br>(0 - 0)          | 0<br>(0 - 0)           | 1<br>(0 - 1)             | 0<br>(0 - 1)                | 0<br>(0 - 1)                   |
| Measles                                                           | 2<br>(0 - 4)                   | 1<br>(0 - 3)          | 0<br>(0 - 1)           | 0<br>(0 - 0)             | 0<br>(0 - 0)                | --                             |
| Varicella and herpes zoster                                       | 14<br>(4 - 47)                 | 1<br>(0 - 2)          | 0<br>(0 - 1)           | 1<br>(0 - 3)             | 1<br>(0 - 4)                | 11<br>(1 - 43)                 |
| Neglected tropical diseases and malaria                           | 13<br>(10 - 16)                | 1<br>(0 - 1)          | 1<br>(0 - 1)           | 3<br>(2 - 4)             | 4<br>(3 - 5)                | 5<br>(3 - 7)                   |
| Cysticercosis                                                     | 0<br>(0 - 0)                   | 0<br>(0 - 0)          | 0<br>(0 - 0)           | 0<br>(0 - 0)             | 0<br>(0 - 0)                | 0<br>(0 - 0)                   |
| Cystic echinococcosis                                             | 1<br>(1 - 1)                   | 0<br>(0 - 0)          | 0<br>(0 - 0)           | 0<br>(0 - 0)             | 0<br>(0 - 0)                | 1<br>(1 - 1)                   |
| Dengue                                                            | 2<br>(1 - 2)                   | 0<br>(0 - 0)          | 0<br>(0 - 0)           | 1<br>(1 - 1)             | 0<br>(0 - 1)                | 0<br>(0 - 0)                   |
| Rabies                                                            | 2<br>(1 - 2)                   | 0<br>(0 - 0)          | 0<br>(0 - 0)           | 1<br>(0 - 1)             | 0<br>(0 - 0)                | 0<br>(0 - 0)                   |
| Other neglected tropical diseases                                 | 9<br>(5 - 11)                  | 0<br>(0 - 1)          | 0<br>(0 - 0)           | 1<br>(1 - 2)             | 3<br>(2 - 4)                | 4<br>(2 - 5)                   |
| Maternal disorders                                                | 12<br>(9 - 15)                 | --                    | 0<br>(0 - 0)           | 12<br>(9 - 15)           | --                          | --                             |
| Maternal hemorrhage                                               | 1<br>(1 - 2)                   | --                    | 0<br>(0 - 0)           | 1<br>(1 - 2)             | --                          | --                             |
| Maternal sepsis and other maternal infections                     | 1<br>(1 - 2)                   | --                    | 0<br>(0 - 0)           | 1<br>(1 - 2)             | --                          | --                             |
| Maternal hypertensive disorders                                   | 3<br>(2 - 3)                   | --                    | 0<br>(0 - 0)           | 3<br>(2 - 3)             | --                          | --                             |
| Maternal obstructed labor                                         | 1<br>(1 - 1)                   | --                    | 0<br>(0 - 0)           | 1<br>(1 - 1)             | --                          | --                             |
| Maternal abortive outcome                                         | 2<br>(1 - 3)                   | --                    | 0<br>(0 - 0)           | 2<br>(1 - 3)             | --                          | --                             |
| Indirect maternal deaths                                          | 1<br>(1 - 2)                   | --                    | 0<br>(0 - 0)           | 1<br>(1 - 2)             | --                          | --                             |

Web Table 31- Netherlands deaths with 95% UI by age, sex, and cause in 2013

| Cause                                                            | Both Sexes, All Ages           | Both Sexes, 0-4 Years | Both Sexes, 5-14 Years | Both Sexes, 15-49 Years  | Both Sexes, 50-69 Years     | Both Sexes, 70-80 Years       |
|------------------------------------------------------------------|--------------------------------|-----------------------|------------------------|--------------------------|-----------------------------|-------------------------------|
| Late maternal deaths                                             | 1<br>(0 - 1)                   | --                    | 0<br>(0 - 0)           | 1<br>(0 - 1)             | --                          | --                            |
| Maternal deaths aggravated by HIV/AIDS                           | 0<br>(0 - 0)                   | --                    | --                     | 0<br>(0 - 0)             | --                          | --                            |
| Other maternal disorders                                         | 2<br>(2 - 3)                   | --                    | 0<br>(0 - 0)           | 2<br>(2 - 3)             | --                          | --                            |
| Neonatal disorders                                               | 282<br>(219 - 363)             | 282<br>(219 - 363)    | --                     | --                       | --                          | --                            |
| Neonatal preterm birth complications                             | 113<br>(82 - 156)              | 113<br>(82 - 156)     | --                     | --                       | --                          | --                            |
| Neonatal encephalopathy due to birth asphyxia and trauma         | 68<br>(47 - 91)                | 68<br>(47 - 91)       | --                     | --                       | --                          | --                            |
| Neonatal sepsis and other neonatal infections                    | 34<br>(19 - 60)                | 34<br>(19 - 60)       | --                     | --                       | --                          | --                            |
| Hemolytic disease and other neonatal jaundice                    | 0<br>(0 - 1)                   | 0<br>(0 - 1)          | --                     | --                       | --                          | --                            |
| Other neonatal disorders                                         | 66<br>(35 - 94)                | 66<br>(35 - 94)       | --                     | --                       | --                          | --                            |
| Nutritional deficiencies                                         | 592<br>(402 - 759)             | 1<br>(1 - 2)          | 0<br>(0 - 1)           | 13<br>(10 - 16)          | 33<br>(24 - 41)             | 544<br>(363 - 703)            |
| Protein-energy malnutrition                                      | 149<br>(75 - 251)              | 0<br>(0 - 1)          | 0<br>(0 - 0)           | 2<br>(1 - 4)             | 9<br>(5 - 13)               | 137<br>(65 - 236)             |
| Iodine deficiency                                                | 1<br>(0 - 5)                   | 0<br>(0 - 0)          | 0<br>(0 - 0)           | 0<br>(0 - 0)             | 0<br>(0 - 1)                | 1<br>(0 - 5)                  |
| Iron-deficiency anemia                                           | 386<br>(236 - 518)             | 0<br>(0 - 1)          | 0<br>(0 - 0)           | 9<br>(6 - 12)            | 19<br>(13 - 26)             | 357<br>(215 - 483)            |
| Other nutritional deficiencies                                   | 56<br>(23 - 98)                | 0<br>(0 - 1)          | 0<br>(0 - 0)           | 2<br>(1 - 3)             | 5<br>(3 - 8)                | 48<br>(19 - 89)               |
| Other communicable, maternal, neonatal, and nutritional diseases | 230<br>(153 - 276)             | 6<br>(4 - 9)          | 2<br>(1 - 3)           | 16<br>(11 - 19)          | 56<br>(35 - 70)             | 150<br>(97 - 187)             |
| Sexually transmitted diseases excluding HIV                      | 11<br>(7 - 17)                 | 1<br>(0 - 2)          | 0<br>(0 - 0)           | 1<br>(1 - 1)             | 2<br>(1 - 3)                | 7<br>(4 - 12)                 |
| Syphilis                                                         | 8<br>(5 - 13)                  | 1<br>(0 - 2)          | 0<br>(0 - 0)           | 0<br>(0 - 1)             | 1<br>(1 - 2)                | 6<br>(3 - 10)                 |
| Chlamydial infection                                             | 1<br>(0 - 1)                   | --                    | 0<br>(0 - 0)           | 0<br>(0 - 0)             | 0<br>(0 - 0)                | 0<br>(0 - 1)                  |
| Gonococcal infection                                             | 1<br>(1 - 2)                   | --                    | 0<br>(0 - 0)           | 0<br>(0 - 0)             | 0<br>(0 - 1)                | 1<br>(0 - 1)                  |
| Other sexually transmitted diseases                              | 1<br>(1 - 1)                   | --                    | 0<br>(0 - 0)           | 0<br>(0 - 0)             | 0<br>(0 - 0)                | 0<br>(0 - 1)                  |
| Hepatitis                                                        | 9<br>(7 - 11)                  | 0<br>(0 - 0)          | 0<br>(0 - 0)           | 2<br>(1 - 2)             | 3<br>(2 - 3)                | 4<br>(3 - 6)                  |
| Acute hepatitis A                                                | 2<br>(1 - 4)                   | 0<br>(0 - 0)          | 0<br>(0 - 0)           | 1<br>(0 - 1)             | 1<br>(0 - 1)                | 1<br>(0 - 2)                  |
| Acute hepatitis B                                                | 7<br>(4 - 9)                   | 0<br>(0 - 0)          | 0<br>(0 - 0)           | 1<br>(1 - 2)             | 2<br>(1 - 3)                | 3<br>(2 - 5)                  |
| Acute hepatitis C                                                | 0<br>(0 - 0)                   | --                    | 0<br>(0 - 0)           | 0<br>(0 - 0)             | 0<br>(0 - 0)                | 0<br>(0 - 0)                  |
| Other infectious diseases                                        | 210<br>(131 - 258)             | 5<br>(3 - 7)          | 2<br>(1 - 3)           | 13<br>(8 - 16)           | 51<br>(31 - 66)             | 139<br>(83 - 176)             |
| Non-communicable diseases                                        | 135,305<br>(129,672 - 141,218) | 340<br>(270 - 432)    | 111<br>(97 - 128)      | 4,364<br>(4,081 - 4,676) | 28,551<br>(27,011 - 30,168) | 101,939<br>(97,931 - 106,343) |
| Neoplasms                                                        | 50,054<br>(46,218 - 53,185)    | 31<br>(23 - 43)       | 57<br>(48 - 66)        | 2,474<br>(2,298 - 2,667) | 17,043<br>(15,928 - 18,122) | 30,449<br>(27,653 - 32,623)   |
| Esophageal cancer                                                | 1,741<br>(1,222 - 1,976)       | --                    | --                     | 70<br>(54 - 86)          | 756<br>(509 - 888)          | 916<br>(649 - 1,070)          |
| Stomach cancer                                                   | 2,565<br>(2,203 - 3,036)       | --                    | --                     | 82<br>(68 - 100)         | 646<br>(566 - 740)          | 1,838<br>(1,522 - 2,257)      |
| Liver cancer                                                     | 718<br>(467 - 889)             | --                    | 1<br>(0 - 1)           | 39<br>(28 - 49)          | 267<br>(183 - 332)          | 411<br>(251 - 542)            |
| Liver cancer due to hepatitis B                                  | 118<br>(45 - 219)              | --                    | 0<br>(0 - 1)           | 13<br>(7 - 20)           | 55<br>(17 - 105)            | 50<br>(18 - 110)              |
| Liver cancer due to hepatitis C                                  | 423<br>(248 - 564)             | --                    | 0<br>(0 - 0)           | 19<br>(11 - 28)          | 153<br>(89 - 210)           | 251<br>(146 - 350)            |
| Liver cancer due to alcohol use                                  | 139<br>(80 - 214)              | --                    | --                     | 4<br>(2 - 7)             | 45<br>(25 - 71)             | 90<br>(48 - 145)              |
| Liver cancer due to other causes                                 | 38<br>(16 - 66)                | --                    | 0<br>(0 - 0)           | 3<br>(2 - 6)             | 14<br>(6 - 25)              | 20<br>(7 - 39)                |
| Larynx cancer                                                    | 233<br>(177 - 286)             | --                    | --                     | 11<br>(8 - 15)           | 102<br>(81 - 131)           | 119<br>(84 - 150)             |
| Tracheal, bronchus and lung cancer                               | 11,896<br>(9,886 - 13,087)     | --                    | --                     | 427<br>(359 - 489)       | 4,923<br>(4,067 - 5,455)    | 6,546<br>(5,337 - 7,346)      |
| Breast cancer                                                    | 3,997<br>(3,330 - 4,915)       | --                    | --                     | 452<br>(386 - 561)       | 1,583<br>(1,338 - 1,999)    | 1,961<br>(1,464 - 2,447)      |
| Cervical cancer                                                  | 323<br>(267 - 413)             | --                    | --                     | 50<br>(40 - 63)          | 107<br>(86 - 138)           | 166<br>(123 - 224)            |
| Uterine cancer                                                   | 488<br>(364 - 595)             | --                    | --                     | 12<br>(8 - 16)           | 154<br>(116 - 192)          | 323<br>(223 - 415)            |
| Prostate cancer                                                  | 3,557<br>(2,771 - 5,071)       | --                    | --                     | 6<br>(3 - 9)             | 565<br>(382 - 773)          | 2,986<br>(2,297 - 4,364)      |

Web Table 31- Netherlands deaths with 95% UI by age, sex, and cause in 2013

| Cause                                         | Both Sexes, All Ages        | Both Sexes, 0-4 Years | Both Sexes, 5-14 Years | Both Sexes, 15-49 Years | Both Sexes, 50-69 Years  | Both Sexes, 70-80 Years     |
|-----------------------------------------------|-----------------------------|-----------------------|------------------------|-------------------------|--------------------------|-----------------------------|
| Colon and rectum cancer                       | 7,213<br>(6,516 - 7,940)    | --                    | --                     | 218<br>(193 - 244)      | 2,059<br>(1,891 - 2,235) | 4,937<br>(4,341 - 5,601)    |
| Lip and oral cavity cancer                    | 414<br>(334 - 475)          | --                    | --                     | 32<br>(26 - 40)         | 189<br>(135 - 221)       | 193<br>(157 - 235)          |
| Nasopharynx cancer                            | 55<br>(44 - 79)             | --                    | 0<br>(0 - 0)           | 8<br>(6 - 13)           | 28<br>(20 - 41)          | 18<br>(13 - 27)             |
| Other pharynx cancer                          | 234<br>(167 - 279)          | --                    | --                     | 18<br>(14 - 24)         | 139<br>(92 - 174)        | 76<br>(56 - 96)             |
| Gallbladder and biliary tract cancer          | 576<br>(449 - 783)          | --                    | --                     | 12<br>(9 - 16)          | 147<br>(118 - 208)       | 417<br>(307 - 562)          |
| Pancreatic cancer                             | 3,079<br>(2,796 - 3,368)    | --                    | --                     | 100<br>(86 - 117)       | 1,105<br>(1,009 - 1,223) | 1,873<br>(1,659 - 2,102)    |
| Malignant skin melanoma                       | 802<br>(488 - 1,019)        | --                    | --                     | 146<br>(98 - 203)       | 337<br>(199 - 443)       | 318<br>(180 - 421)          |
| Non-melanoma skin cancer                      | 151<br>(114 - 209)          | --                    | --                     | 3<br>(3 - 5)            | 20<br>(15 - 29)          | 128<br>(94 - 179)           |
| Ovarian cancer                                | 1,321<br>(1,110 - 1,567)    | --                    | --                     | 79<br>(63 - 102)        | 515<br>(434 - 632)       | 728<br>(550 - 942)          |
| Testicular cancer                             | 25<br>(16 - 34)             | --                    | --                     | 14<br>(9 - 20)          | 7<br>(4 - 9)             | 5<br>(3 - 7)                |
| Kidney cancer                                 | 1,473<br>(1,238 - 1,731)    | 1<br>(1 - 2)          | 1<br>(1 - 2)           | 53<br>(42 - 65)         | 561<br>(472 - 659)       | 856<br>(656 - 1,107)        |
| Bladder cancer                                | 1,580<br>(1,271 - 1,858)    | --                    | --                     | 23<br>(18 - 28)         | 346<br>(289 - 406)       | 1,212<br>(942 - 1,456)      |
| Brain and nervous system cancer               | 1,061<br>(873 - 1,226)      | 8<br>(5 - 12)         | 19<br>(14 - 24)        | 188<br>(155 - 221)      | 515<br>(426 - 623)       | 332<br>(249 - 403)          |
| Thyroid cancer                                | 127<br>(105 - 154)          | --                    | 0<br>(0 - 0)           | 5<br>(4 - 7)            | 37<br>(31 - 47)          | 85<br>(67 - 106)            |
| Mesothelioma                                  | 630<br>(433 - 861)          | --                    | --                     | 15<br>(10 - 27)         | 254<br>(174 - 420)       | 361<br>(197 - 501)          |
| Hodgkin lymphoma                              | 98<br>(79 - 139)            | 0<br>(0 - 0)          | 0<br>(0 - 1)           | 22<br>(17 - 36)         | 31<br>(24 - 47)          | 45<br>(33 - 59)             |
| Non-Hodgkin lymphoma                          | 1,373<br>(901 - 1,785)      | 2<br>(1 - 3)          | 4<br>(2 - 7)           | 90<br>(56 - 133)        | 430<br>(274 - 619)       | 846<br>(543 - 1,068)        |
| Multiple myeloma                              | 935<br>(678 - 1,405)        | --                    | --                     | 26<br>(18 - 43)         | 306<br>(219 - 472)       | 602<br>(417 - 905)          |
| Leukemia                                      | 1,446<br>(1,304 - 1,599)    | 8<br>(5 - 13)         | 16<br>(12 - 20)        | 107<br>(94 - 122)       | 381<br>(338 - 429)       | 934<br>(811 - 1,064)        |
| Other neoplasms                               | 1,943<br>(1,613 - 2,361)    | 12<br>(8 - 17)        | 15<br>(12 - 19)        | 165<br>(137 - 201)      | 533<br>(457 - 678)       | 1,218<br>(908 - 1,531)      |
| Cardiovascular diseases                       | 45,351<br>(41,745 - 51,792) | 6<br>(4 - 7)          | 5<br>(4 - 6)           | 898<br>(810 - 1,007)    | 6,491<br>(5,887 - 7,581) | 37,951<br>(34,696 - 43,451) |
| Rheumatic heart disease                       | 78<br>(60 - 117)            | 0<br>(0 - 0)          | 0<br>(0 - 0)           | 4<br>(3 - 7)            | 20<br>(15 - 36)          | 53<br>(39 - 76)             |
| Ischemic heart disease                        | 22,850<br>(20,179 - 28,570) | 0<br>(0 - 0)          | 1<br>(0 - 1)           | 505<br>(439 - 596)      | 3,830<br>(3,351 - 4,847) | 18,515<br>(16,163 - 23,344) |
| Cerebrovascular disease                       | 11,884<br>(9,823 - 14,488)  | 1<br>(1 - 2)          | 2<br>(1 - 2)           | 207<br>(155 - 246)      | 1,289<br>(1,008 - 1,558) | 10,386<br>(8,496 - 12,743)  |
| Ischemic stroke                               | 6,736<br>(5,366 - 8,384)    | 0<br>(0 - 0)          | 0<br>(0 - 0)           | 30<br>(19 - 40)         | 428<br>(298 - 541)       | 6,277<br>(5,006 - 7,967)    |
| Hemorrhagic stroke                            | 5,148<br>(3,832 - 6,678)    | 1<br>(1 - 2)          | 2<br>(1 - 2)           | 176<br>(133 - 210)      | 861<br>(676 - 1,071)     | 4,108<br>(2,941 - 5,501)    |
| Hypertensive heart disease                    | 540<br>(354 - 735)          | 0<br>(0 - 0)          | 0<br>(0 - 0)           | 7<br>(5 - 9)            | 56<br>(41 - 81)          | 478<br>(301 - 656)          |
| Cardiomyopathy and myocarditis                | 1,412<br>(1,108 - 2,323)    | 3<br>(2 - 4)          | 1<br>(1 - 2)           | 54<br>(44 - 74)         | 243<br>(199 - 330)       | 1,111<br>(835 - 1,913)      |
| Atrial fibrillation and flutter               | 1,817<br>(1,366 - 2,323)    | --                    | --                     | 4<br>(3 - 5)            | 95<br>(70 - 117)         | 1,719<br>(1,280 - 2,222)    |
| Aortic aneurysm                               | 1,699<br>(1,342 - 2,060)    | --                    | --                     | 22<br>(17 - 28)         | 326<br>(261 - 396)       | 1,351<br>(1,055 - 1,678)    |
| Peripheral vascular disease                   | 738<br>(572 - 907)          | --                    | --                     | 4<br>(3 - 5)            | 74<br>(56 - 91)          | 661<br>(504 - 828)          |
| Endocarditis                                  | 183<br>(131 - 251)          | 0<br>(0 - 0)          | 0<br>(0 - 0)           | 9<br>(7 - 14)           | 42<br>(29 - 64)          | 131<br>(90 - 183)           |
| Other cardiovascular and circulatory diseases | 4,148<br>(2,738 - 5,127)    | 1<br>(1 - 2)          | 1<br>(0 - 1)           | 83<br>(51 - 104)        | 517<br>(370 - 635)       | 3,546<br>(2,278 - 4,486)    |
| Chronic respiratory diseases                  | 9,835<br>(8,040 - 10,927)   | 3<br>(2 - 4)          | 2<br>(1 - 3)           | 93<br>(72 - 108)        | 1,359<br>(1,052 - 1,520) | 8,378<br>(6,750 - 9,331)    |
| Chronic obstructive pulmonary disease         | 8,838<br>(7,207 - 9,858)    | 1<br>(1 - 1)          | 1<br>(0 - 1)           | 61<br>(47 - 75)         | 1,188<br>(932 - 1,344)   | 7,586<br>(6,180 - 8,492)    |
| Pneumoconiosis                                | 179<br>(120 - 278)          | 0<br>(0 - 0)          | 0<br>(0 - 0)           | 3<br>(2 - 5)            | 26<br>(16 - 42)          | 150<br>(97 - 240)           |
| Silicosis                                     | 16<br>(10 - 26)             | 0<br>(0 - 0)          | 0<br>(0 - 0)           | 1<br>(0 - 1)            | 2<br>(1 - 4)             | 13<br>(8 - 22)              |
| Asbestosis                                    | 61<br>(39 - 96)             | 0<br>(0 - 0)          | 0<br>(0 - 0)           | 1<br>(1 - 1)            | 9<br>(5 - 15)            | 51<br>(32 - 82)             |
| Coal workers pneumoconiosis                   | 15<br>(10 - 24)             | 0<br>(0 - 0)          | 0<br>(0 - 0)           | 0<br>(0 - 1)            | 2<br>(1 - 3)             | 13<br>(8 - 21)              |
| Other pneumoconiosis                          | 87<br>(57 - 136)            | 0<br>(0 - 0)          | 0<br>(0 - 0)           | 1<br>(1 - 2)            | 13<br>(8 - 21)           | 73<br>(46 - 116)            |

Web Table 31- Netherlands deaths with 95% UI by age, sex, and cause in 2013

| Cause                                               | Both Sexes, All Ages        | Both Sexes, 0-4 Years | Both Sexes, 5-14 Years | Both Sexes, 15-49 Years | Both Sexes, 50-69 Years  | Both Sexes, 70-80 Years    |
|-----------------------------------------------------|-----------------------------|-----------------------|------------------------|-------------------------|--------------------------|----------------------------|
| Asthma                                              | 103<br>(67 - 147)           | 0<br>(0 - 0)          | 0<br>(0 - 1)           | 10<br>(7 - 13)          | 26<br>(17 - 37)          | 66<br>(40 - 102)           |
| Interstitial lung disease and pulmonary sarcoidosis | 660<br>(335 - 944)          | 1<br>(0 - 1)          | 0<br>(0 - 1)           | 13<br>(8 - 18)          | 108<br>(50 - 162)        | 538<br>(271 - 778)         |
| Other chronic respiratory diseases                  | 56<br>(40 - 74)             | 1<br>(1 - 2)          | 0<br>(0 - 1)           | 5<br>(4 - 7)            | 12<br>(8 - 16)           | 37<br>(25 - 52)            |
| Cirrhosis                                           | 1,725<br>(1,583 - 1,888)    | 1<br>(1 - 1)          | 1<br>(1 - 1)           | 158<br>(138 - 180)      | 671<br>(606 - 745)       | 895<br>(789 - 1,014)       |
| Cirrhosis due to hepatitis B                        | 189<br>(117 - 256)          | 0<br>(0 - 0)          | 0<br>(0 - 0)           | 16<br>(10 - 26)         | 71<br>(45 - 101)         | 101<br>(61 - 145)          |
| Cirrhosis due to hepatitis C                        | 849<br>(649 - 1,041)        | 0<br>(0 - 0)          | 0<br>(0 - 0)           | 75<br>(51 - 99)         | 322<br>(237 - 407)       | 452<br>(326 - 563)         |
| Cirrhosis due to alcohol use                        | 523<br>(373 - 685)          | --                    | --                     | 38<br>(22 - 55)         | 206<br>(136 - 277)       | 279<br>(199 - 377)         |
| Cirrhosis due to other causes                       | 164<br>(99 - 252)           | 1<br>(0 - 1)          | 1<br>(0 - 1)           | 28<br>(19 - 41)         | 72<br>(41 - 121)         | 63<br>(32 - 98)            |
| Digestive diseases                                  | 4,139<br>(3,624 - 4,759)    | 3<br>(2 - 4)          | 2<br>(2 - 3)           | 90<br>(76 - 102)        | 512<br>(447 - 574)       | 3,532<br>(3,055 - 4,113)   |
| Peptic ulcer disease                                | 455<br>(352 - 624)          | 0<br>(0 - 0)          | 0<br>(0 - 0)           | 10<br>(8 - 13)          | 61<br>(46 - 78)          | 384<br>(284 - 546)         |
| Gastritis and duodenitis                            | 28<br>(17 - 55)             | 0<br>(0 - 0)          | 0<br>(0 - 0)           | 2<br>(1 - 3)            | 4<br>(3 - 7)             | 22<br>(12 - 45)            |
| Appendicitis                                        | 55<br>(39 - 81)             | 0<br>(0 - 0)          | 0<br>(0 - 0)           | 3<br>(2 - 4)            | 10<br>(7 - 14)           | 41<br>(27 - 64)            |
| Paralytic ileus and intestinal obstruction          | 903<br>(609 - 1,346)        | 1<br>(0 - 1)          | 1<br>(0 - 1)           | 13<br>(9 - 18)          | 73<br>(48 - 105)         | 815<br>(537 - 1,222)       |
| Inguinal, femoral, and abdominal hernia             | 112<br>(61 - 171)           | 0<br>(0 - 0)          | 0<br>(0 - 0)           | 1<br>(1 - 2)            | 10<br>(6 - 14)           | 101<br>(53 - 156)          |
| Inflammatory bowel disease                          | 542<br>(332 - 716)          | 2<br>(1 - 2)          | 1<br>(0 - 1)           | 12<br>(8 - 15)          | 51<br>(32 - 65)          | 477<br>(283 - 643)         |
| Vascular intestinal disorders                       | 633<br>(396 - 945)          | 0<br>(0 - 0)          | 0<br>(0 - 0)           | 11<br>(7 - 17)          | 106<br>(64 - 158)        | 516<br>(309 - 796)         |
| Gallbladder and biliary diseases                    | 474<br>(357 - 610)          | 0<br>(0 - 0)          | 0<br>(0 - 0)           | 6<br>(4 - 7)            | 48<br>(36 - 60)          | 421<br>(314 - 544)         |
| Pancreatitis                                        | 244<br>(181 - 332)          | 0<br>(0 - 0)          | 0<br>(0 - 0)           | 20<br>(15 - 26)         | 65<br>(46 - 86)          | 159<br>(114 - 225)         |
| Other digestive diseases                            | 693<br>(531 - 870)          | 0<br>(0 - 0)          | 0<br>(0 - 0)           | 11<br>(8 - 14)          | 84<br>(62 - 104)         | 597<br>(449 - 764)         |
| Neurological disorders                              | 13,718<br>(10,685 - 16,526) | 24<br>(17 - 33)       | 12<br>(9 - 14)         | 189<br>(159 - 220)      | 894<br>(779 - 1,030)     | 12,600<br>(9,554 - 15,369) |
| Alzheimer disease and other dementias               | 10,910<br>(7,889 - 13,662)  | --                    | --                     | 1<br>(1 - 2)            | 269<br>(201 - 344)       | 10,639<br>(7,609 - 13,364) |
| Parkinson disease                                   | 1,416<br>(1,159 - 1,838)    | --                    | --                     | 2<br>(1 - 2)            | 89<br>(72 - 117)         | 1,326<br>(1,075 - 1,738)   |
| Epilepsy                                            | 233<br>(165 - 281)          | 5<br>(3 - 7)          | 4<br>(3 - 6)           | 59<br>(42 - 73)         | 56<br>(39 - 70)          | 109<br>(73 - 142)          |
| Multiple sclerosis                                  | 228<br>(159 - 346)          | --                    | --                     | 42<br>(29 - 66)         | 118<br>(81 - 183)        | 67<br>(43 - 107)           |
| Other neurological disorders                        | 931<br>(800 - 1,043)        | 20<br>(14 - 27)       | 7<br>(6 - 9)           | 84<br>(70 - 97)         | 362<br>(305 - 422)       | 458<br>(380 - 531)         |
| Mental and substance use disorders                  | 434<br>(299 - 508)          | 0<br>(0 - 0)          | 0<br>(0 - 0)           | 154<br>(124 - 181)      | 181<br>(109 - 229)       | 98<br>(57 - 124)           |
| Schizophrenia                                       | 32<br>(9 - 51)              | --                    | --                     | 4<br>(1 - 6)            | 9<br>(3 - 14)            | 19<br>(5 - 34)             |
| Alcohol use disorders                               | 268<br>(153 - 352)          | --                    | --                     | 54<br>(34 - 75)         | 151<br>(85 - 203)        | 63<br>(34 - 84)            |
| Drug use disorders                                  | 131<br>(106 - 152)          | 0<br>(0 - 0)          | --                     | 93<br>(74 - 111)        | 21<br>(16 - 26)          | 16<br>(12 - 20)            |
| Opioid use disorders                                | 48<br>(38 - 56)             | 0<br>(0 - 0)          | --                     | 35<br>(27 - 42)         | 7<br>(5 - 9)             | 6<br>(4 - 7)               |
| Cocaine use disorders                               | 4<br>(3 - 4)                | 0<br>(0 - 0)          | --                     | 3<br>(2 - 3)            | 0<br>(0 - 1)             | 0<br>(0 - 1)               |
| Amphetamine use disorders                           | 4<br>(3 - 4)                | 0<br>(0 - 0)          | --                     | 3<br>(2 - 3)            | 1<br>(0 - 1)             | 0<br>(0 - 1)               |
| Other drug use disorders                            | 76<br>(62 - 88)             | 0<br>(0 - 0)          | --                     | 53<br>(42 - 64)         | 13<br>(10 - 16)          | 9<br>(7 - 12)              |
| Eating disorders                                    | 3<br>(2 - 4)                | --                    | 0<br>(0 - 0)           | 3<br>(2 - 4)            | --                       | --                         |
| Anorexia nervosa                                    | 3<br>(2 - 4)                | --                    | 0<br>(0 - 0)           | 3<br>(2 - 4)            | --                       | --                         |
| Diabetes, urogenital, blood, and endocrine diseases | 8,324<br>(7,316 - 9,440)    | 21<br>(15 - 28)       | 12<br>(10 - 17)        | 192<br>(171 - 221)      | 1,127<br>(1,013 - 1,291) | 6,972<br>(6,027 - 7,942)   |
| Diabetes mellitus                                   | 3,343<br>(2,940 - 4,094)    | 1<br>(1 - 1)          | 1<br>(1 - 1)           | 84<br>(72 - 100)        | 652<br>(574 - 780)       | 2,606<br>(2,231 - 3,231)   |
| Acute glomerulonephritis                            | 3<br>(2 - 5)                | 0<br>(0 - 0)          | 0<br>(0 - 0)           | 1<br>(1 - 1)            | 1<br>(0 - 2)             | 1<br>(1 - 3)               |
| Chronic kidney disease                              | 2,381<br>(2,000 - 2,774)    | 1<br>(0 - 1)          | 1<br>(1 - 1)           | 30<br>(25 - 36)         | 217<br>(181 - 253)       | 2,133<br>(1,763 - 2,506)   |
| Chronic kidney disease due to diabetes mellitus     | 632<br>(461 - 869)          | 0<br>(0 - 0)          | 0<br>(0 - 0)           | 7<br>(5 - 10)           | 64<br>(41 - 83)          | 560<br>(408 - 774)         |

Web Table 31- Netherlands deaths with 95% UI by age, sex, and cause in 2013

| Cause                                               | Both Sexes, All Ages     | Both Sexes, 0-4 Years | Both Sexes, 5-14 Years | Both Sexes, 15-49 Years  | Both Sexes, 50-69 Years  | Both Sexes, 70-80 Years  |
|-----------------------------------------------------|--------------------------|-----------------------|------------------------|--------------------------|--------------------------|--------------------------|
| Chronic kidney disease due to hypertension          | 339<br>(229 - 506)       | 0<br>(0 - 0)          | 0<br>(0 - 0)           | 3<br>(2 - 5)             | 28<br>(20 - 45)          | 308<br>(205 - 461)       |
| Chronic kidney disease due to glomerulonephritis    | 35<br>(22 - 59)          | 0<br>(0 - 0)          | 0<br>(0 - 0)           | 2<br>(1 - 3)             | 7<br>(5 - 12)            | 25<br>(14 - 45)          |
| Chronic kidney disease due to other causes          | 1,376<br>(997 - 1,713)   | 0<br>(0 - 1)          | 0<br>(0 - 0)           | 18<br>(13 - 23)          | 117<br>(87 - 148)        | 1,240<br>(883 - 1,576)   |
| Urinary diseases and male infertility               | 2,016<br>(1,413 - 2,620) | 1<br>(0 - 1)          | 0<br>(0 - 0)           | 19<br>(14 - 22)          | 132<br>(96 - 156)        | 1,864<br>(1,284 - 2,454) |
| Interstitial nephritis and urinary tract infections | 1,790<br>(1,242 - 2,323) | 0<br>(0 - 1)          | 0<br>(0 - 0)           | 11<br>(8 - 14)           | 87<br>(61 - 106)         | 1,692<br>(1,160 - 2,227) |
| Urolithiasis                                        | 49<br>(34 - 80)          | --                    | 0<br>(0 - 0)           | 1<br>(1 - 2)             | 9<br>(6 - 14)            | 39<br>(25 - 68)          |
| Other urinary diseases                              | 176<br>(99 - 251)        | 0<br>(0 - 0)          | 0<br>(0 - 0)           | 6<br>(4 - 8)             | 36<br>(20 - 47)          | 134<br>(68 - 206)        |
| Gynecological diseases                              | 8<br>(5 - 13)            | --                    | --                     | 1<br>(1 - 1)             | 1<br>(1 - 1)             | 6<br>(4 - 11)            |
| Uterine fibroids                                    | 2<br>(2 - 4)             | --                    | --                     | 0<br>(0 - 0)             | 0<br>(0 - 0)             | 2<br>(1 - 3)             |
| Polycystic ovarian syndrome                         | 0<br>(0 - 0)             | --                    | --                     | 0<br>(0 - 0)             | 0<br>(0 - 0)             | --                       |
| Endometriosis                                       | 0<br>(0 - 0)             | --                    | --                     | 0<br>(0 - 0)             | 0<br>(0 - 0)             | --                       |
| Genital prolapse                                    | 2<br>(1 - 3)             | --                    | --                     | 0<br>(0 - 0)             | 0<br>(0 - 0)             | 2<br>(1 - 3)             |
| Other gynecological diseases                        | 4<br>(2 - 6)             | --                    | --                     | 0<br>(0 - 0)             | 0<br>(0 - 1)             | 3<br>(2 - 5)             |
| Hemoglobinopathies and hemolytic anemias            | 96<br>(70 - 146)         | 2<br>(1 - 3)          | 1<br>(1 - 2)           | 7<br>(6 - 11)            | 14<br>(11 - 21)          | 71<br>(49 - 112)         |
| Thalassemias                                        | 1<br>(1 - 2)             | 0<br>(0 - 0)          | 0<br>(0 - 0)           | 1<br>(0 - 1)             | 0<br>(0 - 0)             | 0<br>(0 - 0)             |
| Sickle cell disorders                               | 16<br>(12 - 22)          | 1<br>(1 - 1)          | 1<br>(1 - 1)           | 4<br>(3 - 5)             | 7<br>(5 - 10)            | 3<br>(2 - 5)             |
| G6PD deficiency                                     | 0<br>(0 - 1)             | 0<br>(0 - 0)          | 0<br>(0 - 0)           | 0<br>(0 - 0)             | 0<br>(0 - 0)             | 0<br>(0 - 0)             |
| Other hemoglobinopathies and hemolytic anemias      | 79<br>(56 - 124)         | 0<br>(0 - 1)          | 0<br>(0 - 1)           | 3<br>(2 - 4)             | 7<br>(5 - 11)            | 67<br>(47 - 107)         |
| Endocrine, metabolic, blood, and immune disorders   | 477<br>(395 - 784)       | 17<br>(12 - 24)       | 9<br>(6 - 13)          | 51<br>(41 - 72)          | 111<br>(90 - 167)        | 290<br>(218 - 558)       |
| Musculoskeletal disorders                           | 533<br>(435 - 926)       | --                    | 1<br>(1 - 2)           | 26<br>(21 - 41)          | 106<br>(86 - 190)        | 401<br>(313 - 687)       |
| Rheumatoid arthritis                                | 162<br>(117 - 290)       | --                    | 0<br>(0 - 0)           | 2<br>(1 - 4)             | 27<br>(18 - 52)          | 133<br>(93 - 238)        |
| Other musculoskeletal disorders                     | 371<br>(294 - 588)       | --                    | 1<br>(1 - 1)           | 24<br>(20 - 38)          | 79<br>(62 - 136)         | 268<br>(202 - 421)       |
| Other non-communicable diseases                     | 1,191<br>(1,012 - 1,484) | 252<br>(195 - 334)    | 19<br>(15 - 24)        | 91<br>(79 - 109)         | 166<br>(145 - 192)       | 663<br>(508 - 928)       |
| Congenital anomalies                                | 504<br>(436 - 598)       | 225<br>(173 - 293)    | 19<br>(15 - 24)        | 85<br>(74 - 103)         | 124<br>(106 - 148)       | 51<br>(41 - 63)          |
| Neural tube defects                                 | 15<br>(11 - 23)          | 11<br>(7 - 18)        | 1<br>(0 - 1)           | 2<br>(2 - 3)             | 1<br>(1 - 2)             | 0<br>(0 - 1)             |
| Congenital heart anomalies                          | 139<br>(117 - 169)       | 69<br>(53 - 91)       | 6<br>(4 - 9)           | 31<br>(25 - 38)          | 22<br>(16 - 32)          | 10<br>(8 - 14)           |
| Cleft lip and cleft palate                          | 0<br>(0 - 0)             | 0<br>(0 - 0)          | --                     | --                       | --                       | --                       |
| Down syndrome                                       | 109<br>(74 - 138)        | 11<br>(6 - 16)        | 2<br>(1 - 3)           | 20<br>(13 - 27)          | 72<br>(47 - 95)          | 5<br>(3 - 7)             |
| Chromosomal unbalanced rearrangements               | 46<br>(32 - 70)          | 29<br>(19 - 46)       | 2<br>(1 - 2)           | 5<br>(4 - 8)             | 8<br>(5 - 15)            | 1<br>(1 - 2)             |
| Other congenital anomalies                          | 195<br>(162 - 242)       | 105<br>(79 - 140)     | 8<br>(6 - 12)          | 27<br>(21 - 35)          | 22<br>(15 - 31)          | 34<br>(26 - 43)          |
| Skin and subcutaneous diseases                      | 661<br>(508 - 929)       | 0<br>(0 - 1)          | 0<br>(0 - 0)           | 6<br>(5 - 7)             | 42<br>(34 - 51)          | 612<br>(460 - 875)       |
| Cellulitis                                          | 35<br>(21 - 63)          | 0<br>(0 - 0)          | 0<br>(0 - 0)           | 1<br>(1 - 1)             | 5<br>(3 - 8)             | 29<br>(16 - 55)          |
| Pyoderma                                            | 303<br>(214 - 419)       | 0<br>(0 - 0)          | 0<br>(0 - 0)           | 4<br>(3 - 5)             | 28<br>(21 - 35)          | 271<br>(182 - 388)       |
| Decubitus ulcer                                     | 299<br>(205 - 499)       | 0<br>(0 - 0)          | 0<br>(0 - 0)           | 1<br>(0 - 1)             | 7<br>(5 - 11)            | 291<br>(198 - 487)       |
| Other skin and subcutaneous diseases                | 24<br>(12 - 51)          | 0<br>(0 - 0)          | 0<br>(0 - 0)           | 1<br>(0 - 1)             | 2<br>(1 - 3)             | 21<br>(10 - 48)          |
| Sudden infant death syndrome                        | 26<br>(13 - 61)          | 26<br>(13 - 61)       | --                     | --                       | --                       | --                       |
| Injuries                                            | 6,912<br>(6,176 - 7,723) | 61<br>(45 - 81)       | 53<br>(45 - 62)        | 1,501<br>(1,344 - 1,636) | 1,331<br>(1,181 - 1,459) | 3,966<br>(3,348 - 4,723) |
| Transport injuries                                  | 995<br>(901 - 1,121)     | 11<br>(7 - 16)        | 28<br>(23 - 34)        | 379<br>(338 - 428)       | 234<br>(205 - 282)       | 343<br>(295 - 400)       |
| Road injuries                                       | 960<br>(868 - 1,086)     | 10<br>(7 - 15)        | 26<br>(21 - 32)        | 364<br>(325 - 410)       | 223<br>(195 - 272)       | 336<br>(290 - 394)       |
| Pedestrian road injuries                            | 149<br>(108 - 211)       | 5<br>(3 - 7)          | 6<br>(4 - 9)           | 23<br>(14 - 34)          | 33<br>(22 - 50)          | 83<br>(59 - 119)         |

Web Table 31- Netherlands deaths with 95% UI by age, sex, and cause in 2013

| Cause                                           | Both Sexes, All Ages     | Both Sexes, 0-4 Years | Both Sexes, 5-14 Years | Both Sexes, 15-49 Years | Both Sexes, 50-69 Years | Both Sexes, 70-80 Years  |
|-------------------------------------------------|--------------------------|-----------------------|------------------------|-------------------------|-------------------------|--------------------------|
| Cyclist road injuries                           | 235<br>(179 - 283)       | 1<br>(1 - 2)          | 12<br>(9 - 15)         | 40<br>(28 - 51)         | 62<br>(45 - 79)         | 119<br>(89 - 152)        |
| Motorcyclist road injuries                      | 137<br>(100 - 198)       | 0<br>(0 - 0)          | 1<br>(1 - 2)           | 87<br>(62 - 124)        | 26<br>(17 - 38)         | 22<br>(15 - 38)          |
| Motor vehicle road injuries                     | 432<br>(354 - 523)       | 4<br>(3 - 6)          | 6<br>(4 - 9)           | 211<br>(172 - 246)      | 100<br>(78 - 130)       | 110<br>(82 - 143)        |
| Other road injuries                             | 8<br>(5 - 17)            | 0<br>(0 - 0)          | 0<br>(0 - 1)           | 2<br>(2 - 5)            | 2<br>(1 - 5)            | 2<br>(1 - 6)             |
| Other transport injuries                        | 35<br>(25 - 44)          | 1<br>(0 - 1)          | 2<br>(1 - 2)           | 15<br>(11 - 19)         | 11<br>(7 - 16)          | 7<br>(4 - 10)            |
| Unintentional injuries                          | 3,874<br>(3,232 - 4,563) | 43<br>(32 - 60)       | 17<br>(14 - 22)        | 182<br>(162 - 207)      | 401<br>(324 - 451)      | 3,231<br>(2,633 - 3,922) |
| Falls                                           | 2,981<br>(2,298 - 3,666) | 4<br>(3 - 5)          | 2<br>(2 - 3)           | 61<br>(47 - 73)         | 228<br>(147 - 271)      | 2,686<br>(2,058 - 3,379) |
| Drowning                                        | 100<br>(76 - 152)        | 14<br>(7 - 27)        | 6<br>(4 - 10)          | 28<br>(20 - 42)         | 29<br>(20 - 41)         | 24<br>(17 - 31)          |
| Fire, heat, and hot substances                  | 120<br>(91 - 179)        | 3<br>(2 - 6)          | 2<br>(1 - 3)           | 14<br>(11 - 20)         | 16<br>(13 - 21)         | 85<br>(59 - 133)         |
| Poisonings                                      | 29<br>(18 - 36)          | 1<br>(0 - 1)          | 0<br>(0 - 0)           | 8<br>(5 - 10)           | 7<br>(4 - 9)            | 13<br>(7 - 19)           |
| Exposure to mechanical forces                   | 96<br>(82 - 114)         | 9<br>(6 - 13)         | 3<br>(2 - 5)           | 34<br>(27 - 41)         | 25<br>(20 - 30)         | 25<br>(19 - 36)          |
| Unintentional firearm injuries                  | 2<br>(2 - 2)             | 0<br>(0 - 0)          | 0<br>(0 - 0)           | 1<br>(1 - 1)            | 0<br>(0 - 1)            | 0<br>(0 - 0)             |
| Unintentional suffocation                       | 31<br>(24 - 46)          | 6<br>(4 - 10)         | 1<br>(0 - 1)           | 6<br>(4 - 9)            | 7<br>(4 - 10)           | 12<br>(7 - 21)           |
| Other exposure to mechanical forces             | 62<br>(51 - 72)          | 2<br>(1 - 3)          | 3<br>(2 - 3)           | 27<br>(21 - 33)         | 17<br>(13 - 22)         | 13<br>(10 - 17)          |
| Adverse effects of medical treatment            | 247<br>(180 - 409)       | 2<br>(1 - 3)          | 0<br>(0 - 1)           | 11<br>(8 - 18)          | 43<br>(32 - 68)         | 191<br>(132 - 328)       |
| Animal contact                                  | 12<br>(9 - 19)           | 0<br>(0 - 1)          | 0<br>(0 - 1)           | 3<br>(2 - 4)            | 4<br>(3 - 7)            | 5<br>(3 - 8)             |
| Venomous animal contact                         | 2<br>(1 - 4)             | 0<br>(0 - 0)          | 0<br>(0 - 0)           | 1<br>(0 - 1)            | 1<br>(1 - 2)            | 0<br>(0 - 1)             |
| Non-venomous animal contact                     | 10<br>(8 - 15)           | 0<br>(0 - 0)          | 0<br>(0 - 0)           | 2<br>(1 - 3)            | 3<br>(2 - 5)            | 4<br>(3 - 7)             |
| Foreign body                                    | 256<br>(127 - 352)       | 9<br>(5 - 13)         | 2<br>(1 - 2)           | 19<br>(10 - 24)         | 43<br>(23 - 57)         | 184<br>(88 - 266)        |
| Pulmonary aspiration and foreign body in airway | 252<br>(123 - 348)       | 9<br>(5 - 13)         | 2<br>(1 - 2)           | 18<br>(9 - 23)          | 42<br>(22 - 57)         | 182<br>(85 - 264)        |
| Foreign body in other body part                 | 4<br>(3 - 6)             | 0<br>(0 - 0)          | 0<br>(0 - 0)           | 1<br>(1 - 1)            | 1<br>(1 - 1)            | 2<br>(1 - 4)             |
| Other unintentional injuries                    | 34<br>(25 - 43)          | 2<br>(1 - 4)          | 1<br>(0 - 1)           | 6<br>(4 - 8)            | 7<br>(4 - 9)            | 18<br>(11 - 27)          |
| Self-harm and interpersonal violence            | 2,043<br>(1,705 - 2,277) | 7<br>(4 - 9)          | 8<br>(6 - 11)          | 940<br>(745 - 1,055)    | 696<br>(572 - 801)      | 393<br>(330 - 493)       |
| Self-harm                                       | 1,883<br>(1,557 - 2,109) | --                    | 4<br>(3 - 6)           | 846<br>(663 - 948)      | 660<br>(542 - 766)      | 373<br>(312 - 475)       |
| Interpersonal violence                          | 160<br>(110 - 193)       | 7<br>(4 - 9)          | 4<br>(2 - 5)           | 94<br>(67 - 119)        | 36<br>(22 - 46)         | 20<br>(13 - 24)          |
| Assault by firearm                              | 44<br>(25 - 66)          | 0<br>(0 - 1)          | 0<br>(0 - 1)           | 34<br>(19 - 51)         | 8<br>(4 - 14)           | 2<br>(1 - 3)             |
| Assault by sharp object                         | 58<br>(38 - 85)          | 1<br>(0 - 1)          | 1<br>(1 - 2)           | 38<br>(25 - 55)         | 13<br>(8 - 19)          | 5<br>(3 - 8)             |
| Assault by other means                          | 58<br>(35 - 75)          | 6<br>(3 - 8)          | 2<br>(1 - 3)           | 23<br>(13 - 31)         | 15<br>(8 - 20)          | 13<br>(8 - 16)           |

Web Table 31- Netherlands deaths with 95% UI by age, sex, and cause in 2013

| Cause                                                             | Males, All Ages             | Males, 0-4 Years   | Males, 5-14 Years | Males, 15-49 Years       | Males, 50-69 Years          | Males, 70-80 Years          |
|-------------------------------------------------------------------|-----------------------------|--------------------|-------------------|--------------------------|-----------------------------|-----------------------------|
| All causes                                                        | 74,009<br>(69,750 - 78,394) | 414<br>(326 - 518) | 102<br>(88 - 119) | 3,452<br>(3,170 - 3,750) | 18,246<br>(16,895 - 19,639) | 51,794<br>(49,134 - 54,461) |
| Communicable, maternal, neonatal, and nutritional diseases        | 4,262<br>(3,278 - 5,219)    | 192<br>(147 - 246) | 8<br>(6 - 10)     | 128<br>(95 - 163)        | 447<br>(293 - 565)          | 3,487<br>(2,634 - 4,387)    |
| HIV/AIDS and tuberculosis                                         | 139<br>(104 - 192)          | 0<br>(0 - 0)       | 0<br>(0 - 0)      | 50<br>(30 - 80)          | 35<br>(22 - 58)             | 54<br>(42 - 71)             |
| Tuberculosis                                                      | 65<br>(53 - 84)             | 0<br>(0 - 0)       | 0<br>(0 - 0)      | 2<br>(2 - 3)             | 12<br>(10 - 16)             | 51<br>(40 - 66)             |
| HIV/AIDS                                                          | 73<br>(40 - 125)            | 0<br>(0 - 0)       | 0<br>(0 - 0)      | 47<br>(28 - 78)          | 23<br>(10 - 45)             | 3<br>(1 - 8)                |
| HIV/AIDS resulting in mycobacterial infection                     | 4<br>(2 - 7)                | 0<br>(0 - 0)       | 0<br>(0 - 0)      | 2<br>(1 - 4)             | 1<br>(1 - 3)                | 0<br>(0 - 1)                |
| HIV/AIDS resulting in other diseases                              | 70<br>(38 - 118)            | 0<br>(0 - 0)       | 0<br>(0 - 0)      | 45<br>(27 - 74)          | 21<br>(10 - 43)             | 3<br>(1 - 7)                |
| Diarrhea, lower respiratory, and other common infectious diseases | 3,661<br>(2,720 - 4,591)    | 24<br>(16 - 33)    | 6<br>(4 - 8)      | 61<br>(42 - 77)          | 363<br>(220 - 472)          | 3,207<br>(2,366 - 4,086)    |
| Diarrheal diseases                                                | 118<br>(82 - 173)           | 3<br>(2 - 5)       | 0<br>(0 - 0)      | 2<br>(2 - 3)             | 12<br>(8 - 16)              | 101<br>(65 - 157)           |
| Intestinal infectious diseases                                    | 5<br>(2 - 11)               | 1<br>(0 - 3)       | 1<br>(0 - 2)      | 2<br>(1 - 4)             | 1<br>(0 - 2)                | 1<br>(0 - 2)                |
| Typhoid fever                                                     | 3<br>(1 - 7)                | 0<br>(0 - 1)       | 1<br>(0 - 1)      | 1<br>(0 - 3)             | 0<br>(0 - 1)                | 0<br>(0 - 1)                |
| Paratyphoid fever                                                 | 1<br>(0 - 2)                | 0<br>(0 - 0)       | 0<br>(0 - 0)      | 0<br>(0 - 1)             | 0<br>(0 - 0)                | 0<br>(0 - 0)                |
| Other intestinal infectious diseases                              | 1<br>(0 - 4)                | 0<br>(0 - 2)       | 0<br>(0 - 0)      | 0<br>(0 - 2)             | 0<br>(0 - 2)                | 0<br>(0 - 2)                |
| Lower respiratory infections                                      | 3,450<br>(2,486 - 4,368)    | 10<br>(6 - 16)     | 2<br>(1 - 4)      | 45<br>(27 - 60)          | 329<br>(188 - 437)          | 3,063<br>(2,220 - 3,949)    |
| Upper respiratory infections                                      | 1<br>(0 - 4)                | 0<br>(0 - 0)       | 0<br>(0 - 0)      | 0<br>(0 - 0)             | 0<br>(0 - 1)                | 1<br>(0 - 4)                |
| Otitis media                                                      | 2<br>(2 - 3)                | 0<br>(0 - 0)       | 0<br>(0 - 0)      | 0<br>(0 - 1)             | 1<br>(0 - 1)                | 1<br>(1 - 1)                |
| Meningitis                                                        | 54<br>(40 - 63)             | 7<br>(4 - 12)      | 1<br>(1 - 2)      | 6<br>(5 - 8)             | 13<br>(10 - 17)             | 26<br>(19 - 32)             |
| Pneumococcal meningitis                                           | 10<br>(6 - 13)              | 1<br>(0 - 2)       | 0<br>(0 - 0)      | 1<br>(1 - 2)             | 3<br>(1 - 4)                | 5<br>(3 - 8)                |
| H influenzae type B meningitis                                    | 7<br>(4 - 10)               | 2<br>(1 - 4)       | 0<br>(0 - 0)      | 1<br>(0 - 1)             | 1<br>(1 - 3)                | 3<br>(1 - 4)                |
| Meningococcal meningitis                                          | 17<br>(12 - 22)             | 2<br>(1 - 3)       | 0<br>(0 - 1)      | 2<br>(1 - 3)             | 4<br>(2 - 7)                | 8<br>(5 - 12)               |
| Other meningitis                                                  | 20<br>(14 - 26)             | 2<br>(1 - 4)       | 0<br>(0 - 1)      | 2<br>(2 - 3)             | 5<br>(3 - 8)                | 10<br>(6 - 14)              |
| Encephalitis                                                      | 22<br>(14 - 31)             | 1<br>(1 - 2)       | 1<br>(0 - 1)      | 3<br>(2 - 5)             | 6<br>(3 - 9)                | 11<br>(6 - 16)              |
| Diphtheria                                                        | 0<br>(0 - 0)                | 0<br>(0 - 0)       | 0<br>(0 - 0)      | 0<br>(0 - 0)             | 0<br>(0 - 0)                | --<br>(0 - 0)               |
| Whooping cough                                                    | 1<br>(0 - 1)                | 0<br>(0 - 0)       | 0<br>(0 - 0)      | 0<br>(0 - 0)             | 0<br>(0 - 0)                | 0<br>(0 - 0)                |
| Tetanus                                                           | 1<br>(0 - 1)                | 0<br>(0 - 0)       | 0<br>(0 - 0)      | 0<br>(0 - 0)             | 0<br>(0 - 0)                | 0<br>(0 - 0)                |
| Measles                                                           | 1<br>(0 - 2)                | 1<br>(0 - 2)       | 0<br>(0 - 0)      | 0<br>(0 - 0)             | 0<br>(0 - 0)                | --<br>(0 - 0)               |
| Varicella and herpes zoster                                       | 6<br>(1 - 22)               | 0<br>(0 - 2)       | 0<br>(0 - 1)      | 1<br>(0 - 2)             | 1<br>(0 - 2)                | 4<br>(0 - 20)               |
| Neglected tropical diseases and malaria                           | 7<br>(4 - 8)                | 0<br>(0 - 1)       | 0<br>(0 - 0)      | 2<br>(1 - 2)             | 2<br>(1 - 3)                | 2<br>(1 - 3)                |
| Cysticercosis                                                     | 0<br>(0 - 0)                | 0<br>(0 - 0)       | 0<br>(0 - 0)      | 0<br>(0 - 0)             | 0<br>(0 - 0)                | 0<br>(0 - 0)                |
| Cystic echinococcosis                                             | 1<br>(0 - 1)                | 0<br>(0 - 0)       | 0<br>(0 - 0)      | 0<br>(0 - 0)             | 0<br>(0 - 0)                | 0<br>(0 - 0)                |
| Dengue                                                            | 1<br>(1 - 1)                | 0<br>(0 - 0)       | 0<br>(0 - 0)      | 0<br>(0 - 0)             | 0<br>(0 - 0)                | 0<br>(0 - 0)                |
| Rabies                                                            | 1<br>(0 - 1)                | 0<br>(0 - 0)       | 0<br>(0 - 0)      | 0<br>(0 - 0)             | 0<br>(0 - 0)                | 0<br>(0 - 0)                |
| Other neglected tropical diseases                                 | 5<br>(2 - 6)                | 0<br>(0 - 1)       | 0<br>(0 - 0)      | 1<br>(1 - 1)             | 2<br>(1 - 2)                | 2<br>(1 - 2)                |
| Maternal disorders                                                | --                          | --                 | --                | --                       | --                          | --                          |
| Maternal hemorrhage                                               | --                          | --                 | --                | --                       | --                          | --                          |
| Maternal sepsis and other maternal infections                     | --                          | --                 | --                | --                       | --                          | --                          |
| Maternal hypertensive disorders                                   | --                          | --                 | --                | --                       | --                          | --                          |
| Maternal obstructed labor                                         | --                          | --                 | --                | --                       | --                          | --                          |
| Maternal abortive outcome                                         | --                          | --                 | --                | --                       | --                          | --                          |
| Indirect maternal deaths                                          | --                          | --                 | --                | --                       | --                          | --                          |



Web Table 31- Netherlands deaths with 95% UI by age, sex, and cause in 2013

| Cause                                                            | Males, All Ages             | Males, 0-4 Years   | Males, 5-14 Years | Males, 15-49 Years       | Males, 50-69 Years          | Males, 70-80 Years          |
|------------------------------------------------------------------|-----------------------------|--------------------|-------------------|--------------------------|-----------------------------|-----------------------------|
| Late maternal deaths                                             | --                          | --                 | --                | --                       | --                          | --                          |
| Maternal deaths aggravated by HIV/AIDS                           | --                          | --                 | --                | --                       | --                          | --                          |
| Other maternal disorders                                         | --                          | --                 | --                | --                       | --                          | --                          |
| Neonatal disorders                                               | 163<br>(125 - 208)          | 163<br>(125 - 208) | --                | --                       | --                          | --                          |
| Neonatal preterm birth complications                             | 68<br>(45 - 98)             | 68<br>(45 - 98)    | --                | --                       | --                          | --                          |
| Neonatal encephalopathy due to birth asphyxia and trauma         | 37<br>(23 - 53)             | 37<br>(23 - 53)    | --                | --                       | --                          | --                          |
| Neonatal sepsis and other neonatal infections                    | 20<br>(8 - 40)              | 20<br>(8 - 40)     | --                | --                       | --                          | --                          |
| Hemolytic disease and other neonatal jaundice                    | 0<br>(0 - 1)                | 0<br>(0 - 1)       | --                | --                       | --                          | --                          |
| Other neonatal disorders                                         | 39<br>(18 - 58)             | 39<br>(18 - 58)    | --                | --                       | --                          | --                          |
| Nutritional deficiencies                                         | 181<br>(97 - 251)           | 1<br>(0 - 1)       | 0<br>(0 - 0)      | 7<br>(4 - 10)            | 17<br>(10 - 24)             | 157<br>(82 - 223)           |
| Protein-energy malnutrition                                      | 42<br>(16 - 80)             | 0<br>(0 - 0)       | 0<br>(0 - 0)      | 2<br>(1 - 3)             | 4<br>(2 - 7)                | 36<br>(12 - 70)             |
| Iodine deficiency                                                | 0<br>(0 - 2)                | 0<br>(0 - 0)       | 0<br>(0 - 0)      | 0<br>(0 - 0)             | 0<br>(0 - 1)                | 0<br>(0 - 2)                |
| Iron-deficiency anemia                                           | 121<br>(54 - 180)           | 0<br>(0 - 0)       | 0<br>(0 - 0)      | 4<br>(2 - 7)             | 10<br>(5 - 15)              | 106<br>(45 - 164)           |
| Other nutritional deficiencies                                   | 18<br>(6 - 37)              | 0<br>(0 - 0)       | 0<br>(0 - 0)      | 1<br>(0 - 2)             | 3<br>(1 - 6)                | 14<br>(4 - 31)              |
| Other communicable, maternal, neonatal, and nutritional diseases | 111<br>(60 - 139)           | 3<br>(2 - 5)       | 1<br>(1 - 2)      | 9<br>(6 - 12)            | 30<br>(16 - 40)             | 67<br>(34 - 89)             |
| Sexually transmitted diseases excluding HIV                      | 3<br>(2 - 6)                | 0<br>(0 - 1)       | 0<br>(0 - 0)      | 0<br>(0 - 1)             | 1<br>(0 - 2)                | 1<br>(1 - 4)                |
| Syphilis                                                         | 2<br>(1 - 5)                | 0<br>(0 - 1)       | 0<br>(0 - 0)      | 0<br>(0 - 0)             | 1<br>(0 - 1)                | 1<br>(1 - 3)                |
| Chlamydial infection                                             | --                          | --                 | --                | --                       | --                          | --                          |
| Gonococcal infection                                             | 0<br>(0 - 1)                | --                 | 0<br>(0 - 0)      | 0<br>(0 - 0)             | 0<br>(0 - 0)                | 0<br>(0 - 0)                |
| Other sexually transmitted diseases                              | 0<br>(0 - 0)                | --                 | 0<br>(0 - 0)      | 0<br>(0 - 0)             | 0<br>(0 - 0)                | 0<br>(0 - 0)                |
| Hepatitis                                                        | 5<br>(4 - 6)                | 0<br>(0 - 0)       | 0<br>(0 - 0)      | 1<br>(1 - 1)             | 2<br>(1 - 2)                | 2<br>(1 - 3)                |
| Acute hepatitis A                                                | 1<br>(0 - 2)                | 0<br>(0 - 0)       | 0<br>(0 - 0)      | 0<br>(0 - 1)             | 0<br>(0 - 1)                | 0<br>(0 - 1)                |
| Acute hepatitis B                                                | 4<br>(2 - 5)                | 0<br>(0 - 0)       | 0<br>(0 - 0)      | 1<br>(0 - 1)             | 1<br>(1 - 2)                | 2<br>(1 - 3)                |
| Acute hepatitis C                                                | 0<br>(0 - 0)                | --                 | 0<br>(0 - 0)      | 0<br>(0 - 0)             | 0<br>(0 - 0)                | 0<br>(0 - 0)                |
| Other infectious diseases                                        | 103<br>(51 - 131)           | 3<br>(1 - 4)       | 1<br>(1 - 2)      | 8<br>(4 - 10)            | 28<br>(14 - 37)             | 63<br>(30 - 86)             |
| Non-communicable diseases                                        | 66,045<br>(62,125 - 69,820) | 185<br>(143 - 239) | 62<br>(52 - 73)   | 2,240<br>(2,032 - 2,469) | 16,910<br>(15,637 - 18,177) | 46,648<br>(44,189 - 49,056) |
| Neoplasms                                                        | 27,884<br>(25,815 - 29,972) | 17<br>(11 - 26)    | 33<br>(26 - 40)   | 1,070<br>(954 - 1,205)   | 9,633<br>(8,859 - 10,401)   | 17,131<br>(15,731 - 18,635) |
| Esophageal cancer                                                | 1,247<br>(750 - 1,471)      | --                 | --                | 57<br>(40 - 72)          | 591<br>(348 - 721)          | 600<br>(350 - 739)          |
| Stomach cancer                                                   | 1,551<br>(1,342 - 1,794)    | --                 | --                | 49<br>(40 - 60)          | 454<br>(393 - 522)          | 1,048<br>(869 - 1,266)      |
| Liver cancer                                                     | 421<br>(234 - 550)          | --                 | 1<br>(0 - 1)      | 24<br>(14 - 33)          | 181<br>(101 - 241)          | 215<br>(105 - 308)          |
| Liver cancer due to hepatitis B                                  | 88<br>(31 - 170)            | --                 | 0<br>(0 - 1)      | 9<br>(4 - 15)            | 45<br>(14 - 87)             | 34<br>(11 - 74)             |
| Liver cancer due to hepatitis C                                  | 232<br>(108 - 361)          | --                 | 0<br>(0 - 0)      | 11<br>(5 - 19)           | 99<br>(49 - 157)            | 122<br>(47 - 201)           |
| Liver cancer due to alcohol use                                  | 92<br>(39 - 156)            | --                 | --                | 3<br>(1 - 6)             | 33<br>(14 - 58)             | 55<br>(21 - 99)             |
| Liver cancer due to other causes                                 | 9<br>(3 - 19)               | --                 | 0<br>(0 - 0)      | 1<br>(0 - 2)             | 4<br>(1 - 9)                | 4<br>(1 - 9)                |
| Larynx cancer                                                    | 195<br>(144 - 253)          | --                 | --                | 9<br>(6 - 12)            | 84<br>(63 - 114)            | 103<br>(70 - 134)           |
| Tracheal, bronchus and lung cancer                               | 8,148<br>(7,438 - 8,902)    | --                 | --                | 193<br>(160 - 230)       | 3,161<br>(2,843 - 3,501)    | 4,795<br>(4,323 - 5,308)    |
| Breast cancer                                                    | 32<br>(12 - 59)             | --                 | --                | 2<br>(1 - 3)             | 10<br>(4 - 22)              | 20<br>(7 - 36)              |
| Cervical cancer                                                  | --                          | --                 | --                | --                       | --                          | --                          |
| Uterine cancer                                                   | --                          | --                 | --                | --                       | --                          | --                          |
| Prostate cancer                                                  | 3,557<br>(2,771 - 5,071)    | --                 | --                | 6<br>(3 - 9)             | 565<br>(382 - 773)          | 2,986<br>(2,297 - 4,364)    |

Web Table 31- Netherlands deaths with 95% UI by age, sex, and cause in 2013

| Cause                                         | Males, All Ages             | Males, 0-4 Years | Males, 5-14 Years | Males, 15-49 Years | Males, 50-69 Years       | Males, 70-80 Years          |
|-----------------------------------------------|-----------------------------|------------------|-------------------|--------------------|--------------------------|-----------------------------|
| Colon and rectum cancer                       | 3,653<br>(3,259 - 4,051)    | --               | --                | 113<br>(95 - 132)  | 1,210<br>(1,080 - 1,356) | 2,331<br>(2,018 - 2,670)    |
| Lip and oral cavity cancer                    | 283<br>(198 - 329)          | --               | --                | 22<br>(17 - 30)    | 142<br>(88 - 172)        | 119<br>(88 - 149)           |
| Nasopharynx cancer                            | 37<br>(29 - 52)             | --               | 0<br>(0 - 0)      | 6<br>(4 - 10)      | 19<br>(14 - 28)          | 11<br>(8 - 16)              |
| Other pharynx cancer                          | 185<br>(123 - 229)          | --               | --                | 14<br>(10 - 19)    | 113<br>(67 - 148)        | 59<br>(41 - 76)             |
| Gallbladder and biliary tract cancer          | 178<br>(134 - 275)          | --               | --                | 6<br>(4 - 9)       | 59<br>(41 - 92)          | 113<br>(84 - 178)           |
| Pancreatic cancer                             | 1,496<br>(1,334 - 1,678)    | --               | --                | 58<br>(47 - 71)    | 632<br>(555 - 724)       | 806<br>(698 - 930)          |
| Malignant skin melanoma                       | 433<br>(189 - 663)          | --               | --                | 82<br>(39 - 141)   | 196<br>(81 - 300)        | 155<br>(61 - 235)           |
| Non-melanoma skin cancer                      | 82<br>(52 - 132)            | --               | --                | 2<br>(1 - 3)       | 13<br>(8 - 21)           | 67<br>(42 - 110)            |
| Ovarian cancer                                | --                          | --               | --                | --                 | --                       | --                          |
| Testicular cancer                             | 25<br>(16 - 34)             | --               | --                | 14<br>(9 - 20)     | 7<br>(4 - 9)             | 5<br>(3 - 7)                |
| Kidney cancer                                 | 974<br>(816 - 1,138)        | 1<br>(0 - 1)     | 1<br>(0 - 1)      | 37<br>(27 - 47)    | 403<br>(327 - 487)       | 532<br>(409 - 665)          |
| Bladder cancer                                | 1,136<br>(901 - 1,357)      | --               | --                | 13<br>(10 - 17)    | 256<br>(208 - 309)       | 868<br>(663 - 1,071)        |
| Brain and nervous system cancer               | 624<br>(466 - 751)          | 4<br>(2 - 7)     | 11<br>(8 - 15)    | 116<br>(90 - 144)  | 316<br>(238 - 403)       | 177<br>(117 - 228)          |
| Thyroid cancer                                | 45<br>(36 - 54)             | --               | 0<br>(0 - 0)      | 3<br>(2 - 4)       | 16<br>(12 - 20)          | 26<br>(20 - 34)             |
| Mesothelioma                                  | 551<br>(352 - 789)          | --               | --                | 11<br>(6 - 23)     | 224<br>(143 - 393)       | 316<br>(160 - 459)          |
| Hodgkin lymphoma                              | 55<br>(39 - 78)             | 0<br>(0 - 0)     | 0<br>(0 - 0)      | 13<br>(9 - 22)     | 20<br>(13 - 30)          | 22<br>(13 - 31)             |
| Non-Hodgkin lymphoma                          | 759<br>(332 - 973)          | 1<br>(1 - 2)     | 3<br>(1 - 5)      | 58<br>(27 - 87)    | 263<br>(120 - 377)       | 433<br>(185 - 561)          |
| Multiple myeloma                              | 487<br>(297 - 819)          | --               | --                | 16<br>(9 - 29)     | 176<br>(107 - 315)       | 295<br>(169 - 508)          |
| Leukemia                                      | 808<br>(710 - 908)          | 5<br>(3 - 9)     | 10<br>(7 - 13)    | 58<br>(49 - 69)    | 238<br>(203 - 278)       | 498<br>(423 - 585)          |
| Other neoplasms                               | 921<br>(760 - 1,268)        | 6<br>(4 - 10)    | 8<br>(5 - 11)     | 90<br>(65 - 116)   | 285<br>(224 - 401)       | 532<br>(382 - 776)          |
| Cardiovascular diseases                       | 20,443<br>(18,884 - 22,097) | 3<br>(2 - 4)     | 3<br>(2 - 3)      | 571<br>(504 - 639) | 4,354<br>(3,937 - 4,762) | 15,512<br>(14,243 - 16,818) |
| Rheumatic heart disease                       | 18<br>(12 - 31)             | 0<br>(0 - 0)     | 0<br>(0 - 0)      | 2<br>(1 - 3)       | 6<br>(3 - 11)            | 11<br>(7 - 18)              |
| Ischemic heart disease                        | 11,006<br>(9,788 - 13,605)  | 0<br>(0 - 0)     | 0<br>(0 - 0)      | 375<br>(320 - 449) | 2,740<br>(2,423 - 3,276) | 7,890<br>(6,845 - 9,891)    |
| Cerebrovascular disease                       | 4,547<br>(3,522 - 5,582)    | 1<br>(0 - 1)     | 1<br>(0 - 1)      | 86<br>(61 - 111)   | 703<br>(495 - 875)       | 3,757<br>(2,878 - 4,645)    |
| Ischemic stroke                               | 2,463<br>(1,765 - 3,151)    | 0<br>(0 - 0)     | 0<br>(0 - 0)      | 15<br>(8 - 22)     | 262<br>(154 - 346)       | 2,186<br>(1,583 - 2,835)    |
| Hemorrhagic stroke                            | 2,084<br>(1,408 - 2,707)    | 1<br>(0 - 1)     | 1<br>(0 - 1)      | 71<br>(50 - 91)    | 441<br>(302 - 565)       | 1,571<br>(1,012 - 2,109)    |
| Hypertensive heart disease                    | 164<br>(96 - 228)           | 0<br>(0 - 0)     | 0<br>(0 - 0)      | 4<br>(2 - 5)       | 35<br>(22 - 52)          | 125<br>(68 - 181)           |
| Cardiomyopathy and myocarditis                | 757<br>(558 - 1,236)        | 2<br>(1 - 2)     | 1<br>(1 - 1)      | 40<br>(31 - 59)    | 177<br>(135 - 250)       | 537<br>(365 - 962)          |
| Atrial fibrillation and flutter               | 663<br>(466 - 909)          | --               | --                | 3<br>(2 - 4)       | 63<br>(42 - 83)          | 597<br>(410 - 825)          |
| Aortic aneurysm                               | 1,135<br>(929 - 1,369)      | --               | --                | 15<br>(10 - 19)    | 250<br>(197 - 309)       | 869<br>(697 - 1,072)        |
| Peripheral vascular disease                   | 328<br>(240 - 425)          | --               | --                | 2<br>(1 - 3)       | 52<br>(35 - 66)          | 275<br>(198 - 367)          |
| Endocarditis                                  | 98<br>(57 - 155)            | 0<br>(0 - 0)     | 0<br>(0 - 0)      | 6<br>(4 - 10)      | 27<br>(14 - 46)          | 65<br>(36 - 104)            |
| Other cardiovascular and circulatory diseases | 1,727<br>(1,024 - 2,121)    | 1<br>(0 - 1)     | 0<br>(0 - 0)      | 38<br>(20 - 48)    | 302<br>(179 - 374)       | 1,386<br>(835 - 1,748)      |
| Chronic respiratory diseases                  | 5,765<br>(4,884 - 6,609)    | 2<br>(1 - 2)     | 1<br>(1 - 1)      | 44<br>(33 - 54)    | 761<br>(618 - 887)       | 4,958<br>(4,189 - 5,728)    |
| Chronic obstructive pulmonary disease         | 5,096<br>(4,298 - 5,872)    | 1<br>(0 - 1)     | 0<br>(0 - 0)      | 28<br>(20 - 34)    | 656<br>(535 - 784)       | 4,411<br>(3,713 - 5,122)    |
| Pneumoconiosis                                | 174<br>(114 - 273)          | 0<br>(0 - 0)     | 0<br>(0 - 0)      | 3<br>(2 - 4)       | 25<br>(16 - 41)          | 146<br>(93 - 236)           |
| Silicosis                                     | 16<br>(10 - 26)             | 0<br>(0 - 0)     | 0<br>(0 - 0)      | 0<br>(0 - 1)       | 2<br>(1 - 4)             | 13<br>(8 - 22)              |
| Asbestosis                                    | 61<br>(39 - 96)             | 0<br>(0 - 0)     | 0<br>(0 - 0)      | 1<br>(1 - 1)       | 9<br>(5 - 15)            | 51<br>(32 - 82)             |
| Coal workers pneumoconiosis                   | 15<br>(9 - 23)              | 0<br>(0 - 0)     | 0<br>(0 - 0)      | 0<br>(0 - 1)       | 1<br>(1 - 3)             | 13<br>(8 - 21)              |
| Other pneumoconiosis                          | 83<br>(53 - 130)            | 0<br>(0 - 0)     | 0<br>(0 - 0)      | 1<br>(1 - 2)       | 13<br>(8 - 20)           | 69<br>(42 - 114)            |

Web Table 31- Netherlands deaths with 95% UI by age, sex, and cause in 2013

| Cause                                               | Males, All Ages          | Males, 0-4 Years | Males, 5-14 Years | Males, 15-49 Years | Males, 50-69 Years | Males, 70-80 Years       |
|-----------------------------------------------------|--------------------------|------------------|-------------------|--------------------|--------------------|--------------------------|
| Asthma                                              | 28<br>(22 - 35)          | 0<br>(0 - 0)     | 0<br>(0 - 0)      | 4<br>(3 - 5)       | 8<br>(6 - 10)      | 16<br>(12 - 22)          |
| Interstitial lung disease and pulmonary sarcoidosis | 438<br>(221 - 603)       | 0<br>(0 - 0)     | 0<br>(0 - 0)      | 7<br>(4 - 10)      | 65<br>(26 - 103)   | 367<br>(186 - 520)       |
| Other chronic respiratory diseases                  | 29<br>(22 - 39)          | 1<br>(0 - 1)     | 0<br>(0 - 0)      | 3<br>(2 - 5)       | 7<br>(5 - 10)      | 18<br>(12 - 26)          |
| Cirrhosis                                           | 984<br>(878 - 1,088)     | 0<br>(0 - 1)     | 0<br>(0 - 1)      | 107<br>(90 - 126)  | 459<br>(401 - 522) | 417<br>(360 - 481)       |
| Cirrhosis due to hepatitis B                        | 92<br>(44 - 150)         | 0<br>(0 - 0)     | 0<br>(0 - 0)      | 10<br>(4 - 18)     | 42<br>(21 - 71)    | 39<br>(17 - 69)          |
| Cirrhosis due to hepatitis C                        | 413<br>(228 - 552)       | 0<br>(0 - 0)     | 0<br>(0 - 0)      | 47<br>(28 - 68)    | 197<br>(109 - 271) | 168<br>(81 - 242)        |
| Cirrhosis due to alcohol use                        | 394<br>(276 - 536)       | --               | --                | 33<br>(19 - 49)    | 176<br>(114 - 247) | 185<br>(118 - 263)       |
| Cirrhosis due to other causes                       | 86<br>(36 - 172)         | 0<br>(0 - 1)     | 0<br>(0 - 0)      | 17<br>(8 - 31)     | 43<br>(17 - 91)    | 25<br>(9 - 55)           |
| Digestive diseases                                  | 1,602<br>(1,349 - 1,846) | 2<br>(1 - 3)     | 1<br>(1 - 2)      | 49<br>(40 - 59)    | 289<br>(232 - 339) | 1,261<br>(1,053 - 1,481) |
| Peptic ulcer disease                                | 185<br>(137 - 248)       | 0<br>(0 - 0)     | 0<br>(0 - 0)      | 6<br>(4 - 9)       | 37<br>(24 - 51)    | 142<br>(100 - 199)       |
| Gastritis and duodenitis                            | 10<br>(5 - 22)           | 0<br>(0 - 0)     | 0<br>(0 - 0)      | 1<br>(1 - 2)       | 2<br>(1 - 5)       | 6<br>(3 - 16)            |
| Appendicitis                                        | 25<br>(15 - 37)          | 0<br>(0 - 0)     | 0<br>(0 - 0)      | 2<br>(1 - 3)       | 6<br>(3 - 8)       | 18<br>(10 - 27)          |
| Paralytic ileus and intestinal obstruction          | 335<br>(186 - 525)       | 0<br>(0 - 1)     | 0<br>(0 - 1)      | 7<br>(4 - 11)      | 44<br>(24 - 68)    | 282<br>(157 - 453)       |
| Inguinal, femoral, and abdominal hernia             | 51<br>(24 - 80)          | 0<br>(0 - 0)     | 0<br>(0 - 0)      | 1<br>(0 - 1)       | 6<br>(3 - 9)       | 44<br>(20 - 71)          |
| Inflammatory bowel disease                          | 179<br>(101 - 244)       | 1<br>(0 - 1)     | 0<br>(0 - 0)      | 6<br>(3 - 8)       | 25<br>(13 - 34)    | 148<br>(82 - 208)        |
| Vascular intestinal disorders                       | 250<br>(107 - 469)       | 0<br>(0 - 0)     | 0<br>(0 - 0)      | 4<br>(2 - 9)       | 55<br>(23 - 101)   | 191<br>(79 - 364)        |
| Gallbladder and biliary diseases                    | 196<br>(133 - 260)       | 0<br>(0 - 0)     | 0<br>(0 - 0)      | 3<br>(2 - 4)       | 26<br>(16 - 35)    | 167<br>(113 - 226)       |
| Pancreatitis                                        | 124<br>(80 - 180)        | 0<br>(0 - 0)     | 0<br>(0 - 0)      | 13<br>(9 - 19)     | 43<br>(27 - 63)    | 67<br>(41 - 100)         |
| Other digestive diseases                            | 248<br>(171 - 330)       | 0<br>(0 - 0)     | 0<br>(0 - 0)      | 7<br>(4 - 9)       | 46<br>(28 - 61)    | 195<br>(137 - 270)       |
| Neurological disorders                              | 4,860<br>(3,935 - 6,006) | 14<br>(9 - 19)   | 7<br>(5 - 9)      | 110<br>(86 - 134)  | 472<br>(394 - 573) | 4,257<br>(3,344 - 5,350) |
| Alzheimer disease and other dementias               | 3,360<br>(2,435 - 4,412) | --               | --                | 0<br>(0 - 1)       | 127<br>(83 - 186)  | 3,232<br>(2,340 - 4,305) |
| Parkinson disease                                   | 783<br>(602 - 991)       | --               | --                | 1<br>(1 - 1)       | 60<br>(46 - 77)    | 722<br>(545 - 925)       |
| Epilepsy                                            | 121<br>(81 - 149)        | 3<br>(1 - 4)     | 3<br>(2 - 4)      | 38<br>(24 - 49)    | 33<br>(21 - 44)    | 45<br>(30 - 61)          |
| Multiple sclerosis                                  | 91<br>(43 - 160)         | --               | --                | 16<br>(7 - 32)     | 48<br>(22 - 86)    | 26<br>(12 - 50)          |
| Other neurological disorders                        | 505<br>(373 - 595)       | 11<br>(7 - 16)   | 4<br>(3 - 6)      | 55<br>(41 - 67)    | 203<br>(159 - 256) | 231<br>(162 - 281)       |
| Mental and substance use disorders                  | 310<br>(199 - 365)       | 0<br>(0 - 0)     | 0<br>(0 - 0)      | 116<br>(89 - 139)  | 133<br>(70 - 167)  | 62<br>(32 - 79)          |
| Schizophrenia                                       | 13<br>(3 - 22)           | --               | --                | 3<br>(1 - 5)       | 5<br>(1 - 9)       | 5<br>(1 - 10)            |
| Alcohol use disorders                               | 200<br>(102 - 248)       | --               | --                | 37<br>(21 - 53)    | 113<br>(54 - 148)  | 49<br>(24 - 67)          |
| Drug use disorders                                  | 97<br>(75 - 117)         | 0<br>(0 - 0)     | --                | 75<br>(58 - 93)    | 15<br>(10 - 20)    | 7<br>(5 - 10)            |
| Opioid use disorders                                | 36<br>(28 - 43)          | 0<br>(0 - 0)     | --                | 28<br>(21 - 35)    | 5<br>(3 - 7)       | 3<br>(2 - 4)             |
| Cocaine use disorders                               | 2<br>(2 - 3)             | 0<br>(0 - 0)     | --                | 2<br>(1 - 3)       | 0<br>(0 - 0)       | 0<br>(0 - 0)             |
| Amphetamine use disorders                           | 2<br>(2 - 3)             | 0<br>(0 - 0)     | --                | 2<br>(1 - 2)       | 0<br>(0 - 1)       | 0<br>(0 - 0)             |
| Other drug use disorders                            | 56<br>(43 - 69)          | 0<br>(0 - 0)     | --                | 43<br>(33 - 54)    | 9<br>(6 - 12)      | 4<br>(3 - 6)             |
| Eating disorders                                    | 0<br>(0 - 1)             | --               | 0<br>(0 - 0)      | 0<br>(0 - 1)       | --                 | --                       |
| Anorexia nervosa                                    | 0<br>(0 - 1)             | --               | 0<br>(0 - 0)      | 0<br>(0 - 1)       | --                 | --                       |
| Diabetes, urogenital, blood, and endocrine diseases | 3,543<br>(3,150 - 4,019) | 12<br>(8 - 18)   | 7<br>(5 - 10)     | 116<br>(99 - 140)  | 683<br>(602 - 782) | 2,726<br>(2,365 - 3,120) |
| Diabetes mellitus                                   | 1,466<br>(1,287 - 1,671) | 1<br>(0 - 1)     | 0<br>(0 - 0)      | 57<br>(47 - 70)    | 424<br>(366 - 499) | 984<br>(835 - 1,154)     |
| Acute glomerulonephritis                            | 1<br>(1 - 3)             | 0<br>(0 - 0)     | 0<br>(0 - 0)      | 0<br>(0 - 1)       | 0<br>(0 - 1)       | 0<br>(0 - 1)             |
| Chronic kidney disease                              | 1,083<br>(890 - 1,314)   | 0<br>(0 - 1)     | 0<br>(0 - 0)      | 16<br>(12 - 20)    | 125<br>(99 - 154)  | 942<br>(765 - 1,152)     |
| Chronic kidney disease due to diabetes mellitus     | 284<br>(180 - 499)       | 0<br>(0 - 0)     | 0<br>(0 - 0)      | 4<br>(2 - 6)       | 38<br>(17 - 55)    | 243<br>(155 - 438)       |

Web Table 31- Netherlands deaths with 95% UI by age, sex, and cause in 2013

| Cause                                               | Males, All Ages          | Males, 0-4 Years   | Males, 5-14 Years | Males, 15-49 Years     | Males, 50-69 Years   | Males, 70-80 Years       |
|-----------------------------------------------------|--------------------------|--------------------|-------------------|------------------------|----------------------|--------------------------|
| Chronic kidney disease due to hypertension          | 155<br>(91 - 270)        | 0<br>(0 - 0)       | 0<br>(0 - 0)      | 1<br>(1 - 3)           | 16<br>(10 - 30)      | 138<br>(78 - 238)        |
| Chronic kidney disease due to glomerulonephritis    | 15<br>(9 - 29)           | 0<br>(0 - 0)       | 0<br>(0 - 0)      | 1<br>(1 - 2)           | 4<br>(2 - 7)         | 10<br>(6 - 20)           |
| Chronic kidney disease due to other causes          | 629<br>(404 - 846)       | 0<br>(0 - 0)       | 0<br>(0 - 0)      | 10<br>(6 - 14)         | 67<br>(42 - 94)      | 552<br>(340 - 754)       |
| Urinary diseases and male infertility               | 744<br>(495 - 961)       | 0<br>(0 - 0)       | 0<br>(0 - 0)      | 8<br>(5 - 10)          | 65<br>(40 - 81)      | 670<br>(441 - 884)       |
| Interstitial nephritis and urinary tract infections | 615<br>(391 - 807)       | 0<br>(0 - 0)       | 0<br>(0 - 0)      | 4<br>(2 - 6)           | 38<br>(22 - 51)      | 572<br>(363 - 764)       |
| Urolithiasis                                        | 21<br>(12 - 36)          | --                 | 0<br>(0 - 0)      | 1<br>(0 - 1)           | 4<br>(2 - 7)         | 16<br>(8 - 29)           |
| Other urinary diseases                              | 109<br>(53 - 166)        | 0<br>(0 - 0)       | 0<br>(0 - 0)      | 3<br>(2 - 5)           | 22<br>(11 - 32)      | 83<br>(38 - 138)         |
| Gynecological diseases                              | --                       | --                 | --                | --                     | --                   | --                       |
| Uterine fibroids                                    | --                       | --                 | --                | --                     | --                   | --                       |
| Polycystic ovarian syndrome                         | --                       | --                 | --                | --                     | --                   | --                       |
| Endometriosis                                       | --                       | --                 | --                | --                     | --                   | --                       |
| Genital prolapse                                    | --                       | --                 | --                | --                     | --                   | --                       |
| Other gynecological diseases                        | --                       | --                 | --                | --                     | --                   | --                       |
| Hemoglobinopathies and hemolytic anemias            | 45<br>(29 - 76)          | 1<br>(0 - 1)       | 1<br>(0 - 1)      | 5<br>(3 - 7)           | 7<br>(4 - 11)        | 32<br>(20 - 54)          |
| Thalassemias                                        | 1<br>(0 - 1)             | 0<br>(0 - 0)       | 0<br>(0 - 0)      | 0<br>(0 - 1)           | 0<br>(0 - 0)         | 0<br>(0 - 0)             |
| Sickle cell disorders                               | 8<br>(5 - 13)            | 0<br>(0 - 1)       | 0<br>(0 - 1)      | 2<br>(1 - 4)           | 3<br>(2 - 5)         | 1<br>(1 - 2)             |
| G6PD deficiency                                     | 0<br>(0 - 0)             | 0<br>(0 - 0)       | 0<br>(0 - 0)      | 0<br>(0 - 0)           | 0<br>(0 - 0)         | 0<br>(0 - 0)             |
| Other hemoglobinopathies and hemolytic anemias      | 36<br>(23 - 61)          | 0<br>(0 - 0)       | 0<br>(0 - 0)      | 2<br>(1 - 3)           | 4<br>(2 - 6)         | 30<br>(19 - 52)          |
| Endocrine, metabolic, blood, and immune disorders   | 204<br>(160 - 362)       | 10<br>(6 - 16)     | 5<br>(3 - 8)      | 29<br>(21 - 49)        | 62<br>(44 - 106)     | 98<br>(68 - 206)         |
| Musculoskeletal disorders                           | 184<br>(143 - 301)       | --                 | 0<br>(0 - 1)      | 9<br>(7 - 15)          | 46<br>(35 - 84)      | 128<br>(93 - 212)        |
| Rheumatoid arthritis                                | 48<br>(27 - 96)          | --                 | 0<br>(0 - 0)      | 1<br>(0 - 2)           | 11<br>(5 - 26)       | 35<br>(19 - 71)          |
| Other musculoskeletal disorders                     | 136<br>(95 - 217)        | --                 | 0<br>(0 - 1)      | 9<br>(6 - 14)          | 35<br>(24 - 62)      | 93<br>(61 - 150)         |
| Other non-communicable diseases                     | 468<br>(400 - 559)       | 135<br>(102 - 180) | 10<br>(7 - 13)    | 48<br>(40 - 58)        | 80<br>(66 - 94)      | 196<br>(148 - 266)       |
| Congenital anomalies                                | 255<br>(217 - 305)       | 121<br>(91 - 159)  | 10<br>(7 - 13)    | 45<br>(37 - 55)        | 58<br>(48 - 71)      | 21<br>(17 - 27)          |
| Neural tube defects                                 | 7<br>(5 - 11)            | 5<br>(3 - 9)       | 0<br>(0 - 1)      | 1<br>(1 - 2)           | 0<br>(0 - 1)         | 0<br>(0 - 0)             |
| Congenital heart anomalies                          | 76<br>(60 - 97)          | 39<br>(28 - 55)    | 3<br>(2 - 5)      | 18<br>(14 - 24)        | 11<br>(7 - 19)       | 4<br>(3 - 6)             |
| Cleft lip and cleft palate                          | 0<br>(0 - 0)             | 0<br>(0 - 0)       | --                | --                     | --                   | --                       |
| Down syndrome                                       | 53<br>(26 - 69)          | 6<br>(2 - 10)      | 1<br>(0 - 2)      | 10<br>(4 - 14)         | 34<br>(16 - 46)      | 3<br>(1 - 4)             |
| Chromosomal unbalanced rearrangements               | 18<br>(12 - 29)          | 12<br>(7 - 20)     | 0<br>(0 - 1)      | 2<br>(1 - 3)           | 3<br>(2 - 7)         | 0<br>(0 - 1)             |
| Other congenital anomalies                          | 101<br>(80 - 131)        | 59<br>(42 - 83)    | 5<br>(3 - 7)      | 14<br>(10 - 19)        | 10<br>(6 - 18)       | 14<br>(10 - 18)          |
| Skin and subcutaneous diseases                      | 199<br>(151 - 268)       | 0<br>(0 - 0)       | 0<br>(0 - 0)      | 3<br>(2 - 4)           | 21<br>(15 - 27)      | 174<br>(127 - 244)       |
| Cellulitis                                          | 14<br>(7 - 26)           | 0<br>(0 - 0)       | 0<br>(0 - 0)      | 0<br>(0 - 1)           | 3<br>(1 - 5)         | 11<br>(5 - 21)           |
| Pyoderma                                            | 100<br>(66 - 136)        | 0<br>(0 - 0)       | 0<br>(0 - 0)      | 2<br>(1 - 3)           | 15<br>(10 - 20)      | 83<br>(53 - 117)         |
| Decubitus ulcer                                     | 79<br>(52 - 123)         | 0<br>(0 - 0)       | 0<br>(0 - 0)      | 0<br>(0 - 1)           | 3<br>(2 - 5)         | 75<br>(48 - 120)         |
| Other skin and subcutaneous diseases                | 7<br>(3 - 14)            | 0<br>(0 - 0)       | 0<br>(0 - 0)      | 0<br>(0 - 0)           | 1<br>(0 - 1)         | 6<br>(2 - 13)            |
| Sudden infant death syndrome                        | 14<br>(6 - 35)           | 0<br>(6 - 35)      | --                | --                     | --                   | --                       |
| Injuries                                            | 3,702<br>(3,172 - 4,090) | 37<br>(26 - 52)    | 33<br>(27 - 40)   | 1,084<br>(928 - 1,208) | 889<br>(698 - 1,005) | 1,659<br>(1,365 - 1,937) |
| Transport injuries                                  | 674<br>(601 - 742)       | 6<br>(4 - 10)      | 16<br>(12 - 20)   | 283<br>(248 - 321)     | 158<br>(136 - 181)   | 211<br>(175 - 253)       |
| Road injuries                                       | 648<br>(580 - 715)       | 6<br>(4 - 10)      | 15<br>(11 - 19)   | 271<br>(238 - 308)     | 149<br>(128 - 171)   | 207<br>(172 - 249)       |
| Pedestrian road injuries                            | 81<br>(46 - 135)         | 3<br>(1 - 5)       | 4<br>(2 - 6)      | 14<br>(7 - 25)         | 20<br>(10 - 35)      | 40<br>(22 - 71)          |

Web Table 31- Netherlands deaths with 95% UI by age, sex, and cause in 2013

| Cause                                           | Males, All Ages          | Males, 0-4 Years | Males, 5-14 Years | Males, 15-49 Years | Males, 50-69 Years | Males, 70-80 Years     |
|-------------------------------------------------|--------------------------|------------------|-------------------|--------------------|--------------------|------------------------|
| Cyclist road injuries                           | 154<br>(106 - 198)       | 1<br>(0 - 1)     | 7<br>(4 - 9)      | 23<br>(14 - 32)    | 40<br>(25 - 54)    | 84<br>(59 - 115)       |
| Motorcyclist road injuries                      | 118<br>(80 - 174)        | 0<br>(0 - 0)     | 1<br>(0 - 2)      | 76<br>(49 - 110)   | 22<br>(13 - 32)    | 19<br>(12 - 34)        |
| Motor vehicle road injuries                     | 292<br>(218 - 362)       | 2<br>(1 - 4)     | 3<br>(2 - 5)      | 157<br>(120 - 191) | 67<br>(48 - 91)    | 63<br>(39 - 90)        |
| Other road injuries                             | 4<br>(2 - 8)             | 0<br>(0 - 0)     | 0<br>(0 - 0)      | 1<br>(0 - 2)       | 1<br>(1 - 3)       | 1<br>(1 - 4)           |
| Other transport injuries                        | 25<br>(17 - 32)          | 0<br>(0 - 1)     | 1<br>(0 - 1)      | 12<br>(8 - 15)     | 9<br>(5 - 13)      | 4<br>(2 - 5)           |
| Unintentional injuries                          | 1,651<br>(1,314 - 1,930) | 27<br>(18 - 39)  | 12<br>(9 - 15)    | 139<br>(120 - 160) | 262<br>(195 - 304) | 1,211<br>(912 - 1,468) |
| Falls                                           | 1,170<br>(797 - 1,431)   | 3<br>(2 - 4)     | 2<br>(1 - 3)      | 46<br>(33 - 57)    | 148<br>(80 - 185)  | 971<br>(671 - 1,228)   |
| Drowning                                        | 76<br>(56 - 115)         | 9<br>(5 - 20)    | 5<br>(3 - 8)      | 24<br>(17 - 36)    | 23<br>(15 - 33)    | 16<br>(10 - 22)        |
| Fire, heat, and hot substances                  | 51<br>(38 - 79)          | 2<br>(1 - 4)     | 1<br>(1 - 2)      | 9<br>(7 - 14)      | 8<br>(6 - 12)      | 30<br>(20 - 49)        |
| Poisonings                                      | 14<br>(8 - 17)           | 0<br>(0 - 0)     | 0<br>(0 - 0)      | 5<br>(3 - 6)       | 4<br>(2 - 5)       | 5<br>(3 - 7)           |
| Exposure to mechanical forces                   | 70<br>(58 - 82)          | 5<br>(3 - 8)     | 3<br>(2 - 3)      | 31<br>(24 - 38)    | 20<br>(16 - 25)    | 11<br>(8 - 15)         |
| Unintentional firearm injuries                  | 1<br>(1 - 1)             | 0<br>(0 - 0)     | 0<br>(0 - 0)      | 1<br>(0 - 1)       | 0<br>(0 - 0)       | 0<br>(0 - 0)           |
| Unintentional suffocation                       | 19<br>(12 - 26)          | 4<br>(2 - 7)     | 1<br>(0 - 1)      | 5<br>(3 - 8)       | 5<br>(3 - 8)       | 4<br>(2 - 7)           |
| Other exposure to mechanical forces             | 50<br>(40 - 58)          | 1<br>(1 - 2)     | 2<br>(1 - 2)      | 25<br>(19 - 31)    | 15<br>(11 - 18)    | 7<br>(5 - 9)           |
| Adverse effects of medical treatment            | 116<br>(85 - 202)        | 1<br>(1 - 2)     | 0<br>(0 - 0)      | 6<br>(4 - 11)      | 26<br>(18 - 45)    | 82<br>(57 - 147)       |
| Animal contact                                  | 9<br>(6 - 12)            | 0<br>(0 - 0)     | 0<br>(0 - 0)      | 2<br>(1 - 2)       | 3<br>(2 - 5)       | 3<br>(2 - 4)           |
| Venomous animal contact                         | 1<br>(1 - 2)             | 0<br>(0 - 0)     | 0<br>(0 - 0)      | 0<br>(0 - 1)       | 0<br>(0 - 1)       | 0<br>(0 - 0)           |
| Non-venomous animal contact                     | 7<br>(5 - 10)            | 0<br>(0 - 0)     | 0<br>(0 - 0)      | 1<br>(1 - 2)       | 3<br>(2 - 4)       | 3<br>(2 - 4)           |
| Foreign body                                    | 131<br>(51 - 184)        | 5<br>(2 - 8)     | 1<br>(1 - 2)      | 12<br>(6 - 16)     | 26<br>(10 - 37)    | 87<br>(31 - 131)       |
| Pulmonary aspiration and foreign body in airway | 130<br>(50 - 183)        | 5<br>(2 - 8)     | 1<br>(0 - 2)      | 12<br>(5 - 16)     | 25<br>(9 - 36)     | 87<br>(30 - 131)       |
| Foreign body in other body part                 | 1<br>(1 - 3)             | 0<br>(0 - 0)     | 0<br>(0 - 0)      | 1<br>(0 - 1)       | 0<br>(0 - 1)       | 0<br>(0 - 1)           |
| Other unintentional injuries                    | 16<br>(12 - 20)          | 1<br>(1 - 2)     | 0<br>(0 - 1)      | 5<br>(3 - 7)       | 4<br>(2 - 6)       | 5<br>(3 - 8)           |
| Self-harm and interpersonal violence            | 1,378<br>(1,044 - 1,583) | 3<br>(2 - 5)     | 5<br>(4 - 7)      | 662<br>(482 - 774) | 469<br>(316 - 561) | 238<br>(184 - 318)     |
| Self-harm                                       | 1,272<br>(931 - 1,471)   | --               | 3<br>(2 - 5)      | 598<br>(414 - 705) | 443<br>(291 - 538) | 228<br>(175 - 310)     |
| Interpersonal violence                          | 105<br>(62 - 143)        | 3<br>(2 - 5)     | 2<br>(1 - 3)      | 65<br>(41 - 91)    | 25<br>(13 - 35)    | 10<br>(5 - 14)         |
| Assault by firearm                              | 35<br>(17 - 57)          | 0<br>(0 - 0)     | 0<br>(0 - 0)      | 28<br>(14 - 45)    | 6<br>(3 - 12)      | 1<br>(0 - 2)           |
| Assault by sharp object                         | 39<br>(22 - 65)          | 0<br>(0 - 1)     | 1<br>(0 - 1)      | 25<br>(14 - 43)    | 10<br>(5 - 16)     | 3<br>(2 - 5)           |
| Assault by other means                          | 31<br>(15 - 45)          | 3<br>(1 - 5)     | 1<br>(0 - 2)      | 12<br>(6 - 19)     | 9<br>(4 - 14)      | 6<br>(3 - 9)           |

Web Table 31- Netherlands deaths with 95% UI by age, sex, and cause in 2013

| Cause                                                             | Females, All Ages           | Females, 0-4 Years | Females, 5-14 Years | Females, 15-49 Years     | Females, 50-69 Years        | Females, 70-80 Years        |
|-------------------------------------------------------------------|-----------------------------|--------------------|---------------------|--------------------------|-----------------------------|-----------------------------|
| All causes                                                        | 77,823<br>(73,578 - 82,407) | 320<br>(256 - 402) | 78<br>(69 - 88)     | 2,631<br>(2,405 - 2,891) | 12,377<br>(11,492 - 13,353) | 62,417<br>(59,217 - 65,737) |
| Communicable, maternal, neonatal, and nutritional diseases        | 5,354<br>(4,145 - 6,795)    | 141<br>(106 - 185) | 8<br>(6 - 10)       | 91<br>(69 - 106)         | 294<br>(201 - 353)          | 4,820<br>(3,655 - 6,269)    |
| HIV/AIDS and tuberculosis                                         | 74<br>(58 - 96)             | 0<br>(0 - 0)       | 0<br>(0 - 0)        | 13<br>(8 - 22)           | 13<br>(10 - 18)             | 48<br>(34 - 67)             |
| Tuberculosis                                                      | 57<br>(43 - 78)             | 0<br>(0 - 0)       | 0<br>(0 - 0)        | 2<br>(1 - 3)             | 8<br>(6 - 12)               | 47<br>(33 - 66)             |
| HIV/AIDS                                                          | 17<br>(9 - 30)              | 0<br>(0 - 0)       | 0<br>(0 - 0)        | 12<br>(7 - 20)           | 5<br>(2 - 9)                | 1<br>(0 - 2)                |
| HIV/AIDS resulting in mycobacterial infection                     | 1<br>(0 - 1)                | 0<br>(0 - 0)       | 0<br>(0 - 0)        | 0<br>(0 - 1)             | 0<br>(0 - 0)                | 0<br>(0 - 0)                |
| HIV/AIDS resulting in other diseases                              | 16<br>(9 - 29)              | 0<br>(0 - 0)       | 0<br>(0 - 0)        | 11<br>(6 - 19)           | 5<br>(2 - 9)                | 1<br>(0 - 1)                |
| Diarrhea, lower respiratory, and other common infectious diseases | 4,612<br>(3,462 - 6,052)    | 19<br>(13 - 25)    | 6<br>(5 - 8)        | 51<br>(36 - 61)          | 237<br>(152 - 295)          | 4,299<br>(3,184 - 5,728)    |
| Diarrheal diseases                                                | 216<br>(133 - 331)          | 2<br>(1 - 4)       | 0<br>(0 - 0)        | 3<br>(2 - 4)             | 10<br>(7 - 14)              | 201<br>(119 - 315)          |
| Intestinal infectious diseases                                    | 5<br>(2 - 10)               | 1<br>(0 - 2)       | 1<br>(0 - 2)        | 2<br>(1 - 4)             | 1<br>(0 - 2)                | 1<br>(0 - 2)                |
| Typhoid fever                                                     | 3<br>(1 - 7)                | 0<br>(0 - 1)       | 1<br>(0 - 1)        | 1<br>(0 - 3)             | 0<br>(0 - 1)                | 0<br>(0 - 1)                |
| Paratyphoid fever                                                 | 1<br>(0 - 2)                | 0<br>(0 - 0)       | 0<br>(0 - 0)        | 0<br>(0 - 1)             | 0<br>(0 - 0)                | 0<br>(0 - 0)                |
| Other intestinal infectious diseases                              | 1<br>(0 - 3)                | 0<br>(0 - 1)       | 0<br>(0 - 1)        | 0<br>(0 - 2)             | 0<br>(0 - 1)                | 0<br>(0 - 2)                |
| Lower respiratory infections                                      | 4,290<br>(3,162 - 5,755)    | 7<br>(4 - 10)      | 3<br>(2 - 4)        | 35<br>(21 - 44)          | 207<br>(121 - 263)          | 4,038<br>(2,944 - 5,491)    |
| Upper respiratory infections                                      | 2<br>(0 - 6)                | 0<br>(0 - 0)       | 0<br>(0 - 0)        | 0<br>(0 - 0)             | 0<br>(0 - 1)                | 1<br>(0 - 5)                |
| Otitis media                                                      | 2<br>(2 - 3)                | 0<br>(0 - 0)       | 0<br>(0 - 0)        | 0<br>(0 - 0)             | 1<br>(0 - 1)                | 1<br>(1 - 2)                |
| Meningitis                                                        | 63<br>(48 - 74)             | 6<br>(4 - 9)       | 1<br>(1 - 2)        | 6<br>(4 - 7)             | 12<br>(9 - 16)              | 36<br>(26 - 47)             |
| Pneumococcal meningitis                                           | 10<br>(7 - 15)              | 1<br>(0 - 1)       | 0<br>(0 - 0)        | 1<br>(0 - 2)             | 2<br>(1 - 4)                | 6<br>(4 - 10)               |
| H influenzae type B meningitis                                    | 7<br>(5 - 9)                | 2<br>(1 - 3)       | 0<br>(0 - 0)        | 1<br>(0 - 1)             | 1<br>(0 - 2)                | 3<br>(2 - 5)                |
| Meningococcal meningitis                                          | 21<br>(15 - 28)             | 2<br>(1 - 3)       | 0<br>(0 - 1)        | 2<br>(1 - 3)             | 4<br>(2 - 7)                | 13<br>(8 - 19)              |
| Other meningitis                                                  | 24<br>(16 - 32)             | 2<br>(1 - 3)       | 0<br>(0 - 1)        | 2<br>(1 - 3)             | 5<br>(2 - 8)                | 14<br>(9 - 20)              |
| Encephalitis                                                      | 24<br>(17 - 37)             | 1<br>(1 - 2)       | 1<br>(0 - 1)        | 3<br>(2 - 6)             | 5<br>(3 - 8)                | 14<br>(8 - 22)              |
| Diphtheria                                                        | 0<br>(0 - 0)                | 0<br>(0 - 0)       | 0<br>(0 - 0)        | 0<br>(0 - 0)             | 0<br>(0 - 0)                | --                          |
| Whooping cough                                                    | 1<br>(1 - 1)                | 0<br>(0 - 0)       | 0<br>(0 - 0)        | 0<br>(0 - 0)             | 0<br>(0 - 0)                | --                          |
| Tetanus                                                           | 1<br>(1 - 1)                | 0<br>(0 - 0)       | 0<br>(0 - 0)        | 0<br>(0 - 0)             | 0<br>(0 - 0)                | 0<br>(0 - 0)                |
| Measles                                                           | 1<br>(0 - 2)                | 1<br>(0 - 2)       | 0<br>(0 - 0)        | 0<br>(0 - 0)             | 0<br>(0 - 0)                | --                          |
| Varicella and herpes zoster                                       | 8<br>(1 - 40)               | 0<br>(0 - 2)       | 0<br>(0 - 0)        | 1<br>(0 - 2)             | 1<br>(0 - 3)                | 7<br>(0 - 38)               |
| Neglected tropical diseases and malaria                           | 7<br>(4 - 8)                | 0<br>(0 - 0)       | 0<br>(0 - 0)        | 1<br>(1 - 2)             | 2<br>(1 - 2)                | 3<br>(1 - 4)                |
| Cysticercosis                                                     | 0<br>(0 - 0)                | 0<br>(0 - 0)       | 0<br>(0 - 0)        | 0<br>(0 - 0)             | 0<br>(0 - 0)                | 0<br>(0 - 0)                |
| Cystic echinococcosis                                             | 1<br>(1 - 1)                | 0<br>(0 - 0)       | 0<br>(0 - 0)        | 0<br>(0 - 0)             | 0<br>(0 - 0)                | 0<br>(0 - 0)                |
| Dengue                                                            | 1<br>(1 - 1)                | 0<br>(0 - 0)       | 0<br>(0 - 0)        | 0<br>(0 - 0)             | 0<br>(0 - 0)                | 0<br>(0 - 0)                |
| Rabies                                                            | 1<br>(0 - 1)                | 0<br>(0 - 0)       | 0<br>(0 - 0)        | 0<br>(0 - 0)             | 0<br>(0 - 0)                | 0<br>(0 - 0)                |
| Other neglected tropical diseases                                 | 4<br>(1 - 6)                | 0<br>(0 - 0)       | 0<br>(0 - 0)        | 1<br>(0 - 1)             | 1<br>(0 - 2)                | 2<br>(1 - 4)                |
| Maternal disorders                                                | 12<br>(9 - 15)              | --                 | 0<br>(0 - 0)        | 12<br>(9 - 15)           | --                          | --                          |
| Maternal hemorrhage                                               | 1<br>(1 - 2)                | --                 | 0<br>(0 - 0)        | 1<br>(1 - 2)             | --                          | --                          |
| Maternal sepsis and other maternal infections                     | 1<br>(1 - 2)                | --                 | 0<br>(0 - 0)        | 1<br>(1 - 2)             | --                          | --                          |
| Maternal hypertensive disorders                                   | 3<br>(2 - 3)                | --                 | 0<br>(0 - 0)        | 3<br>(2 - 3)             | --                          | --                          |
| Maternal obstructed labor                                         | 1<br>(1 - 1)                | --                 | 0<br>(0 - 0)        | 1<br>(1 - 1)             | --                          | --                          |
| Maternal abortive outcome                                         | 2<br>(1 - 3)                | --                 | 0<br>(0 - 0)        | 2<br>(1 - 3)             | --                          | --                          |
| Indirect maternal deaths                                          | 1<br>(1 - 2)                | --                 | 0<br>(0 - 0)        | 1<br>(1 - 2)             | --                          | --                          |

Web Table 31- Netherlands deaths with 95% UI by age, sex, and cause in 2013

| Cause                                                            | Females, All Ages           | Females, 0-4 Years | Females, 5-14 Years | Females, 15-49 Years     | Females, 50-69 Years        | Females, 70-80 Years        |
|------------------------------------------------------------------|-----------------------------|--------------------|---------------------|--------------------------|-----------------------------|-----------------------------|
| Late maternal deaths                                             | 1<br>(0 - 1)                | --                 | 0<br>(0 - 0)        | 1<br>(0 - 1)             | --                          | --                          |
| Maternal deaths aggravated by HIV/AIDS                           | 0<br>(0 - 0)                | --                 | --                  | 0<br>(0 - 0)             | --                          | --                          |
| Other maternal disorders                                         | 2<br>(2 - 3)                | --                 | 0<br>(0 - 0)        | 2<br>(2 - 3)             | --                          | --                          |
| Neonatal disorders                                               | 119<br>(88 - 157)           | 119<br>(88 - 157)  | --                  | --                       | --                          | --                          |
| Neonatal preterm birth complications                             | 46<br>(30 - 67)             | 46<br>(30 - 67)    | --                  | --                       | --                          | --                          |
| Neonatal encephalopathy due to birth asphyxia and trauma         | 31<br>(19 - 45)             | 31<br>(19 - 45)    | --                  | --                       | --                          | --                          |
| Neonatal sepsis and other neonatal infections                    | 14<br>(7 - 28)              | 14<br>(7 - 28)     | --                  | --                       | --                          | --                          |
| Hemolytic disease and other neonatal jaundice                    | 0<br>(0 - 0)                | 0<br>(0 - 0)       | --                  | --                       | --                          | --                          |
| Other neonatal disorders                                         | 27<br>(12 - 41)             | 27<br>(12 - 41)    | --                  | --                       | --                          | --                          |
| Nutritional deficiencies                                         | 411<br>(262 - 555)          | 1<br>(0 - 1)       | 0<br>(0 - 0)        | 6<br>(4 - 8)             | 16<br>(11 - 20)             | 387<br>(245 - 530)          |
| Protein-energy malnutrition                                      | 107<br>(42 - 197)           | 0<br>(0 - 0)       | 0<br>(0 - 0)        | 1<br>(0 - 2)             | 4<br>(2 - 7)                | 102<br>(39 - 189)           |
| Iodine deficiency                                                | 1<br>(0 - 5)                | 0<br>(0 - 0)       | 0<br>(0 - 0)        | 0<br>(0 - 0)             | 0<br>(0 - 1)                | 1<br>(0 - 4)                |
| Iron-deficiency anemia                                           | 265<br>(144 - 381)          | 0<br>(0 - 0)       | 0<br>(0 - 0)        | 4<br>(3 - 6)             | 10<br>(5 - 14)              | 251<br>(133 - 364)          |
| Other nutritional deficiencies                                   | 37<br>(10 - 77)             | 0<br>(0 - 0)       | 0<br>(0 - 0)        | 1<br>(0 - 2)             | 2<br>(1 - 3)                | 34<br>(9 - 72)              |
| Other communicable, maternal, neonatal, and nutritional diseases | 119<br>(75 - 153)           | 3<br>(2 - 4)       | 1<br>(1 - 1)        | 7<br>(5 - 9)             | 26<br>(16 - 34)             | 83<br>(50 - 113)            |
| Sexually transmitted diseases excluding HIV                      | 8<br>(5 - 13)               | 0<br>(0 - 1)       | 0<br>(0 - 0)        | 1<br>(0 - 1)             | 1<br>(1 - 2)                | 6<br>(3 - 10)               |
| Syphilis                                                         | 6<br>(4 - 10)               | 0<br>(0 - 1)       | 0<br>(0 - 0)        | 0<br>(0 - 0)             | 1<br>(0 - 1)                | 5<br>(3 - 8)                |
| Chlamydial infection                                             | 1<br>(0 - 1)                | --                 | 0<br>(0 - 0)        | 0<br>(0 - 0)             | 0<br>(0 - 0)                | 0<br>(0 - 1)                |
| Gonococcal infection                                             | 1<br>(1 - 2)                | --                 | 0<br>(0 - 0)        | 0<br>(0 - 0)             | 0<br>(0 - 0)                | 1<br>(0 - 1)                |
| Other sexually transmitted diseases                              | 1<br>(0 - 1)                | --                 | 0<br>(0 - 0)        | 0<br>(0 - 0)             | 0<br>(0 - 0)                | 0<br>(0 - 0)                |
| Hepatitis                                                        | 4<br>(3 - 6)                | 0<br>(0 - 0)       | 0<br>(0 - 0)        | 1<br>(1 - 1)             | 1<br>(1 - 2)                | 2<br>(1 - 3)                |
| Acute hepatitis A                                                | 1<br>(0 - 2)                | 0<br>(0 - 0)       | 0<br>(0 - 0)        | 0<br>(0 - 1)             | 0<br>(0 - 1)                | 0<br>(0 - 1)                |
| Acute hepatitis B                                                | 3<br>(2 - 4)                | 0<br>(0 - 0)       | 0<br>(0 - 0)        | 0<br>(0 - 1)             | 1<br>(0 - 1)                | 2<br>(1 - 3)                |
| Acute hepatitis C                                                | 0<br>(0 - 0)                | --                 | 0<br>(0 - 0)        | 0<br>(0 - 0)             | 0<br>(0 - 0)                | 0<br>(0 - 0)                |
| Other infectious diseases                                        | 107<br>(63 - 140)           | 2<br>(1 - 3)       | 1<br>(0 - 1)        | 5<br>(3 - 7)             | 24<br>(13 - 32)             | 75<br>(41 - 105)            |
| Non-communicable diseases                                        | 69,260<br>(65,147 - 73,534) | 155<br>(120 - 198) | 50<br>(43 - 57)     | 2,124<br>(1,937 - 2,343) | 11,641<br>(10,801 - 12,568) | 55,291<br>(52,169 - 58,611) |
| Neoplasms                                                        | 22,170<br>(18,746 - 24,585) | 14<br>(10 - 19)    | 24<br>(20 - 29)     | 1,404<br>(1,269 - 1,558) | 7,410<br>(6,451 - 8,155)    | 13,318<br>(10,860 - 15,066) |
| Esophageal cancer                                                | 494<br>(414 - 579)          | --                 | --                  | 13<br>(10 - 17)          | 165<br>(136 - 197)          | 316<br>(255 - 388)          |
| Stomach cancer                                                   | 1,014<br>(704 - 1,456)      | --                 | --                  | 33<br>(23 - 47)          | 193<br>(142 - 258)          | 789<br>(523 - 1,185)        |
| Liver cancer                                                     | 297<br>(157 - 384)          | --                 | 0<br>(0 - 0)        | 15<br>(10 - 20)          | 85<br>(51 - 108)            | 197<br>(94 - 277)           |
| Liver cancer due to hepatitis B                                  | 29<br>(5 - 91)              | --                 | 0<br>(0 - 0)        | 3<br>(1 - 7)             | 10<br>(1 - 33)              | 16<br>(2 - 53)              |
| Liver cancer due to hepatitis C                                  | 191<br>(108 - 263)          | --                 | 0<br>(0 - 0)        | 8<br>(4 - 12)            | 54<br>(33 - 77)             | 129<br>(64 - 190)           |
| Liver cancer due to alcohol use                                  | 48<br>(25 - 80)             | --                 | --                  | 1<br>(0 - 3)             | 11<br>(5 - 21)              | 35<br>(15 - 59)             |
| Liver cancer due to other causes                                 | 29<br>(9 - 52)              | --                 | 0<br>(0 - 0)        | 3<br>(1 - 5)             | 10<br>(3 - 20)              | 16<br>(4 - 33)              |
| Larynx cancer                                                    | 37<br>(25 - 53)             | --                 | --                  | 2<br>(1 - 3)             | 19<br>(13 - 27)             | 16<br>(10 - 25)             |
| Tracheal, bronchus and lung cancer                               | 3,748<br>(1,902 - 4,634)    | --                 | --                  | 234<br>(164 - 288)       | 1,763<br>(970 - 2,151)      | 1,751<br>(692 - 2,342)      |
| Breast cancer                                                    | 3,965<br>(3,284 - 4,887)    | --                 | --                  | 451<br>(385 - 560)       | 1,573<br>(1,329 - 1,989)    | 1,941<br>(1,443 - 2,429)    |
| Cervical cancer                                                  | 323<br>(267 - 413)          | --                 | --                  | 50<br>(40 - 63)          | 107<br>(86 - 138)           | 166<br>(123 - 224)          |
| Uterine cancer                                                   | 488<br>(364 - 595)          | --                 | --                  | 12<br>(8 - 16)           | 154<br>(116 - 192)          | 323<br>(223 - 415)          |
| Prostate cancer                                                  | --                          | --                 | --                  | --                       | --                          | --                          |

Web Table 31- Netherlands deaths with 95% UI by age, sex, and cause in 2013

| Cause                                         | Females, All Ages           | Females, 0-4 Years | Females, 5-14 Years | Females, 15-49 Years | Females, 50-69 Years     | Females, 70-80 Years        |
|-----------------------------------------------|-----------------------------|--------------------|---------------------|----------------------|--------------------------|-----------------------------|
| Colon and rectum cancer                       | 3,560<br>(2,980 - 4,216)    | --                 | --                  | 105<br>(88 - 125)    | 849<br>(746 - 955)       | 2,606<br>(2,095 - 3,202)    |
| Lip and oral cavity cancer                    | 131<br>(106 - 169)          | --                 | --                  | 10<br>(7 - 12)       | 47<br>(38 - 58)          | 74<br>(55 - 103)            |
| Nasopharynx cancer                            | 18<br>(10 - 37)             | --                 | 0<br>(0 - 0)        | 3<br>(1 - 6)         | 9<br>(5 - 13)            | 7<br>(3 - 13)               |
| Other pharynx cancer                          | 48<br>(36 - 67)             | --                 | --                  | 4<br>(3 - 6)         | 27<br>(19 - 38)          | 17<br>(12 - 26)             |
| Gallbladder and biliary tract cancer          | 398<br>(269 - 552)          | --                 | --                  | 6<br>(4 - 9)         | 88<br>(66 - 139)         | 304<br>(192 - 438)          |
| Pancreatic cancer                             | 1,582<br>(1,373 - 1,816)    | --                 | --                  | 42<br>(34 - 53)      | 473<br>(407 - 543)       | 1,067<br>(894 - 1,268)      |
| Malignant skin melanoma                       | 369<br>(194 - 451)          | --                 | --                  | 64<br>(40 - 82)      | 141<br>(73 - 179)        | 164<br>(76 - 221)           |
| Non-melanoma skin cancer                      | 70<br>(47 - 95)             | --                 | --                  | 2<br>(1 - 2)         | 7<br>(5 - 9)             | 61<br>(40 - 85)             |
| Ovarian cancer                                | 1,321<br>(1,110 - 1,567)    | --                 | --                  | 79<br>(63 - 102)     | 515<br>(434 - 632)       | 728<br>(550 - 942)          |
| Testicular cancer                             | --                          | --                 | --                  | --                   | --                       | --                          |
| Kidney cancer                                 | 499<br>(333 - 711)          | 1<br>(0 - 1)       | 1<br>(0 - 1)        | 16<br>(12 - 22)      | 158<br>(119 - 203)       | 324<br>(188 - 526)          |
| Bladder cancer                                | 444<br>(287 - 624)          | --                 | --                  | 10<br>(6 - 14)       | 90<br>(61 - 126)         | 344<br>(216 - 494)          |
| Brain and nervous system cancer               | 437<br>(323 - 527)          | 3<br>(2 - 6)       | 8<br>(6 - 11)       | 72<br>(56 - 90)      | 200<br>(159 - 254)       | 154<br>(99 - 200)           |
| Thyroid cancer                                | 83<br>(63 - 107)            | --                 | 0<br>(0 - 0)        | 2<br>(2 - 4)         | 21<br>(16 - 30)          | 59<br>(43 - 79)             |
| Mesothelioma                                  | 79<br>(50 - 108)            | --                 | --                  | 4<br>(2 - 5)         | 30<br>(20 - 44)          | 46<br>(26 - 66)             |
| Hodgkin lymphoma                              | 43<br>(33 - 67)             | 0<br>(0 - 0)       | 0<br>(0 - 0)        | 9<br>(6 - 15)        | 12<br>(8 - 19)           | 22<br>(15 - 33)             |
| Non-Hodgkin lymphoma                          | 614<br>(323 - 937)          | 1<br>(0 - 1)       | 1<br>(1 - 3)        | 33<br>(19 - 57)      | 166<br>(93 - 275)        | 413<br>(196 - 630)          |
| Multiple myeloma                              | 448<br>(292 - 727)          | --                 | --                  | 11<br>(7 - 19)       | 130<br>(81 - 221)        | 307<br>(189 - 510)          |
| Leukemia                                      | 638<br>(518 - 755)          | 3<br>(2 - 6)       | 6<br>(4 - 9)        | 49<br>(41 - 59)      | 143<br>(118 - 168)       | 436<br>(329 - 535)          |
| Other neoplasms                               | 1,022<br>(747 - 1,284)      | 6<br>(4 - 8)       | 7<br>(6 - 10)       | 75<br>(62 - 93)      | 247<br>(199 - 311)       | 686<br>(449 - 923)          |
| Cardiovascular diseases                       | 24,908<br>(21,757 - 31,170) | 3<br>(2 - 4)       | 2<br>(2 - 3)        | 327<br>(263 - 411)   | 2,137<br>(1,779 - 3,166) | 22,439<br>(19,504 - 27,563) |
| Rheumatic heart disease                       | 60<br>(43 - 95)             | 0<br>(0 - 0)       | 0<br>(0 - 0)        | 3<br>(2 - 4)         | 15<br>(10 - 28)          | 43<br>(29 - 64)             |
| Ischemic heart disease                        | 11,845<br>(9,555 - 16,851)  | 0<br>(0 - 0)       | 0<br>(0 - 0)        | 130<br>(97 - 189)    | 1,089<br>(831 - 1,858)   | 10,625<br>(8,466 - 14,830)  |
| Cerebrovascular disease                       | 7,338<br>(5,899 - 10,207)   | 1<br>(0 - 1)       | 1<br>(1 - 1)        | 121<br>(83 - 151)    | 586<br>(457 - 860)       | 6,629<br>(5,269 - 9,158)    |
| Ischemic stroke                               | 4,273<br>(3,204 - 6,079)    | 0<br>(0 - 0)       | 0<br>(0 - 0)        | 15<br>(9 - 21)       | 166<br>(107 - 270)       | 4,092<br>(3,086 - 5,791)    |
| Hemorrhagic stroke                            | 3,064<br>(2,118 - 4,471)    | 1<br>(0 - 1)       | 1<br>(1 - 1)        | 105<br>(73 - 133)    | 420<br>(320 - 624)       | 2,537<br>(1,692 - 3,830)    |
| Hypertensive heart disease                    | 376<br>(226 - 566)          | 0<br>(0 - 0)       | 0<br>(0 - 0)        | 3<br>(2 - 5)         | 20<br>(14 - 35)          | 353<br>(205 - 532)          |
| Cardiomyopathy and myocarditis                | 655<br>(457 - 1,334)        | 1<br>(1 - 2)       | 1<br>(0 - 1)        | 14<br>(10 - 21)      | 67<br>(49 - 117)         | 573<br>(384 - 1,205)        |
| Atrial fibrillation and flutter               | 1,154<br>(778 - 1,616)      | --                 | --                  | 1<br>(1 - 1)         | 31<br>(22 - 43)          | 1,122<br>(747 - 1,573)      |
| Aortic aneurysm                               | 565<br>(321 - 850)          | --                 | --                  | 7<br>(4 - 11)        | 75<br>(43 - 114)         | 482<br>(268 - 744)          |
| Peripheral vascular disease                   | 409<br>(286 - 563)          | --                 | --                  | 2<br>(1 - 2)         | 22<br>(16 - 31)          | 386<br>(264 - 538)          |
| Endocarditis                                  | 85<br>(55 - 142)            | 0<br>(0 - 0)       | 0<br>(0 - 0)        | 3<br>(2 - 5)         | 16<br>(10 - 29)          | 66<br>(40 - 114)            |
| Other cardiovascular and circulatory diseases | 2,421<br>(1,416 - 3,218)    | 1<br>(0 - 1)       | 0<br>(0 - 1)        | 45<br>(27 - 60)      | 215<br>(149 - 301)       | 2,160<br>(1,216 - 2,915)    |
| Chronic respiratory diseases                  | 4,070<br>(2,643 - 4,784)    | 1<br>(1 - 2)       | 1<br>(1 - 2)        | 49<br>(33 - 60)      | 599<br>(348 - 702)       | 3,420<br>(2,229 - 4,085)    |
| Chronic obstructive pulmonary disease         | 3,742<br>(2,450 - 4,446)    | 0<br>(0 - 1)       | 0<br>(0 - 1)        | 34<br>(23 - 43)      | 532<br>(314 - 633)       | 3,175<br>(2,117 - 3,850)    |
| Pneumoconiosis                                | 5<br>(3 - 9)                | 0<br>(0 - 0)       | 0<br>(0 - 0)        | 1<br>(0 - 1)         | 1<br>(0 - 1)             | 4<br>(2 - 8)                |
| Silicosis                                     | 0<br>(0 - 0)                | 0<br>(0 - 0)       | 0<br>(0 - 0)        | 0<br>(0 - 0)         | 0<br>(0 - 0)             | 0<br>(0 - 0)                |
| Asbestosis                                    | 0<br>(0 - 0)                | 0<br>(0 - 0)       | 0<br>(0 - 0)        | 0<br>(0 - 0)         | 0<br>(0 - 0)             | 0<br>(0 - 0)                |
| Coal workers pneumoconiosis                   | 0<br>(0 - 0)                | 0<br>(0 - 0)       | 0<br>(0 - 0)        | 0<br>(0 - 0)         | 0<br>(0 - 0)             | 0<br>(0 - 0)                |
| Other pneumoconiosis                          | 5<br>(2 - 8)                | 0<br>(0 - 0)       | 0<br>(0 - 0)        | 0<br>(0 - 0)         | 1<br>(0 - 1)             | 4<br>(2 - 7)                |



Web Table 31- Netherlands deaths with 95% UI by age, sex, and cause in 2013

| Cause                                               | Females, All Ages         | Females, 0-4 Years | Females, 5-14 Years | Females, 15-49 Years | Females, 50-69 Years | Females, 70-80 Years      |
|-----------------------------------------------------|---------------------------|--------------------|---------------------|----------------------|----------------------|---------------------------|
| Asthma                                              | 74<br>(39 - 120)          | 0<br>(0 - 0)       | 0<br>(0 - 0)        | 6<br>(4 - 9)         | 18<br>(10 - 29)      | 50<br>(23 - 85)           |
| Interstitial lung disease and pulmonary sarcoidosis | 222<br>(68 - 414)         | 0<br>(0 - 1)       | 0<br>(0 - 0)        | 6<br>(3 - 10)        | 43<br>(15 - 78)      | 172<br>(45 - 334)         |
| Other chronic respiratory diseases                  | 26<br>(15 - 42)           | 0<br>(0 - 1)       | 0<br>(0 - 0)        | 2<br>(1 - 3)         | 5<br>(3 - 9)         | 19<br>(10 - 31)           |
| Cirrhosis                                           | 741<br>(640 - 860)        | 0<br>(0 - 0)       | 0<br>(0 - 0)        | 51<br>(42 - 62)      | 212<br>(183 - 244)   | 478<br>(387 - 583)        |
| Cirrhosis due to hepatitis B                        | 97<br>(47 - 159)          | 0<br>(0 - 0)       | 0<br>(0 - 0)        | 7<br>(3 - 14)        | 28<br>(13 - 53)      | 62<br>(30 - 107)          |
| Cirrhosis due to hepatitis C                        | 436<br>(323 - 549)        | 0<br>(0 - 0)       | 0<br>(0 - 0)        | 28<br>(17 - 40)      | 124<br>(78 - 164)    | 283<br>(201 - 374)        |
| Cirrhosis due to alcohol use                        | 130<br>(70 - 200)         | --                 | --                  | 5<br>(1 - 11)        | 30<br>(12 - 55)      | 94<br>(52 - 154)          |
| Cirrhosis due to other causes                       | 78<br>(37 - 130)          | 0<br>(0 - 0)       | 0<br>(0 - 0)        | 11<br>(6 - 17)       | 29<br>(14 - 47)      | 38<br>(12 - 73)           |
| Digestive diseases                                  | 2,537<br>(2,096 - 3,084)  | 1<br>(1 - 2)       | 1<br>(1 - 1)        | 40<br>(32 - 48)      | 223<br>(185 - 265)   | 2,271<br>(1,854 - 2,803)  |
| Peptic ulcer disease                                | 270<br>(183 - 422)        | 0<br>(0 - 0)       | 0<br>(0 - 0)        | 4<br>(3 - 5)         | 24<br>(16 - 33)      | 242<br>(156 - 388)        |
| Gastritis and duodenitis                            | 19<br>(9 - 41)            | 0<br>(0 - 0)       | 0<br>(0 - 0)        | 1<br>(0 - 2)         | 2<br>(1 - 3)         | 16<br>(7 - 36)            |
| Appendicitis                                        | 29<br>(17 - 53)           | 0<br>(0 - 0)       | 0<br>(0 - 0)        | 2<br>(1 - 2)         | 5<br>(3 - 8)         | 23<br>(12 - 44)           |
| Paralytic ileus and intestinal obstruction          | 568<br>(311 - 947)        | 0<br>(0 - 1)       | 0<br>(0 - 0)        | 6<br>(3 - 9)         | 29<br>(15 - 48)      | 532<br>(292 - 892)        |
| Inguinal, femoral, and abdominal hernia             | 62<br>(25 - 106)          | 0<br>(0 - 0)       | 0<br>(0 - 0)        | 1<br>(0 - 1)         | 4<br>(2 - 7)         | 57<br>(22 - 100)          |
| Inflammatory bowel disease                          | 363<br>(187 - 537)        | 1<br>(0 - 1)       | 0<br>(0 - 0)        | 7<br>(4 - 9)         | 27<br>(15 - 37)      | 328<br>(165 - 500)        |
| Vascular intestinal disorders                       | 383<br>(181 - 647)        | 0<br>(0 - 0)       | 0<br>(0 - 0)        | 6<br>(3 - 11)        | 51<br>(27 - 79)      | 326<br>(147 - 571)        |
| Gallbladder and biliary diseases                    | 278<br>(186 - 396)        | 0<br>(0 - 0)       | 0<br>(0 - 0)        | 3<br>(2 - 4)         | 22<br>(15 - 31)      | 254<br>(167 - 367)        |
| Pancreatitis                                        | 120<br>(77 - 181)         | 0<br>(0 - 0)       | 0<br>(0 - 0)        | 7<br>(4 - 10)        | 21<br>(14 - 31)      | 91<br>(56 - 144)          |
| Other digestive diseases                            | 445<br>(311 - 598)        | 0<br>(0 - 0)       | 0<br>(0 - 0)        | 5<br>(3 - 6)         | 38<br>(28 - 50)      | 402<br>(275 - 545)        |
| Neurological disorders                              | 8,858<br>(6,193 - 11,329) | 10<br>(7 - 14)     | 5<br>(4 - 6)        | 78<br>(64 - 97)      | 422<br>(351 - 505)   | 8,342<br>(5,704 - 10,807) |
| Alzheimer disease and other dementias               | 7,550<br>(4,886 - 10,017) | --                 | --                  | 1<br>(0 - 2)         | 142<br>(93 - 197)    | 7,407<br>(4,764 - 9,871)  |
| Parkinson disease                                   | 633<br>(434 - 966)        | --                 | --                  | 1<br>(1 - 1)         | 28<br>(20 - 46)      | 604<br>(406 - 919)        |
| Epilepsy                                            | 112<br>(67 - 147)         | 2<br>(1 - 3)       | 2<br>(1 - 3)        | 21<br>(13 - 28)      | 23<br>(14 - 30)      | 64<br>(35 - 91)           |
| Multiple sclerosis                                  | 137<br>(86 - 224)         | --                 | --                  | 26<br>(16 - 46)      | 70<br>(44 - 113)     | 41<br>(24 - 67)           |
| Other neurological disorders                        | 426<br>(372 - 485)        | 8<br>(6 - 12)      | 3<br>(2 - 4)        | 29<br>(24 - 35)      | 159<br>(132 - 185)   | 227<br>(187 - 274)        |
| Mental and substance use disorders                  | 123<br>(74 - 164)         | 0<br>(0 - 0)       | 0<br>(0 - 0)        | 38<br>(27 - 52)      | 48<br>(24 - 77)      | 36<br>(18 - 52)           |
| Schizophrenia                                       | 19<br>(5 - 32)            | --                 | --                  | 1<br>(0 - 2)         | 4<br>(1 - 6)         | 14<br>(3 - 26)            |
| Alcohol use disorders                               | 69<br>(29 - 120)          | --                 | --                  | 17<br>(7 - 30)       | 38<br>(16 - 69)      | 14<br>(5 - 23)            |
| Drug use disorders                                  | 34<br>(28 - 40)           | 0<br>(0 - 0)       | --                  | 18<br>(14 - 23)      | 7<br>(5 - 9)         | 9<br>(6 - 12)             |
| Opioid use disorders                                | 12<br>(10 - 14)           | 0<br>(0 - 0)       | --                  | 6<br>(5 - 8)         | 2<br>(2 - 3)         | 3<br>(2 - 4)              |
| Cocaine use disorders                               | 1<br>(1 - 2)              | 0<br>(0 - 0)       | --                  | 1<br>(1 - 1)         | 0<br>(0 - 0)         | 0<br>(0 - 0)              |
| Amphetamine use disorders                           | 1<br>(1 - 2)              | 0<br>(0 - 0)       | --                  | 1<br>(1 - 1)         | 0<br>(0 - 0)         | 0<br>(0 - 0)              |
| Other drug use disorders                            | 19<br>(16 - 23)           | 0<br>(0 - 0)       | --                  | 10<br>(8 - 13)       | 4<br>(3 - 5)         | 5<br>(3 - 7)              |
| Eating disorders                                    | 2<br>(1 - 4)              | --                 | 0<br>(0 - 0)        | 2<br>(1 - 4)         | --                   | --                        |
| Anorexia nervosa                                    | 2<br>(1 - 4)              | --                 | 0<br>(0 - 0)        | 2<br>(1 - 4)         | --                   | --                        |
| Diabetes, urogenital, blood, and endocrine diseases | 4,781<br>(3,904 - 5,911)  | 8<br>(6 - 12)      | 5<br>(4 - 7)        | 76<br>(65 - 91)      | 444<br>(380 - 556)   | 4,246<br>(3,419 - 5,178)  |
| Diabetes mellitus                                   | 1,877<br>(1,513 - 2,569)  | 0<br>(0 - 1)       | 0<br>(0 - 1)        | 27<br>(22 - 34)      | 228<br>(185 - 340)   | 1,622<br>(1,285 - 2,226)  |
| Acute glomerulonephritis                            | 2<br>(1 - 3)              | 0<br>(0 - 0)       | 0<br>(0 - 0)        | 0<br>(0 - 1)         | 0<br>(0 - 1)         | 1<br>(1 - 2)              |
| Chronic kidney disease                              | 1,298<br>(967 - 1,618)    | 0<br>(0 - 0)       | 0<br>(0 - 0)        | 14<br>(11 - 17)      | 92<br>(72 - 115)     | 1,191<br>(869 - 1,502)    |
| Chronic kidney disease due to diabetes mellitus     | 347<br>(244 - 461)        | 0<br>(0 - 0)       | 0<br>(0 - 0)        | 3<br>(2 - 4)         | 27<br>(19 - 36)      | 317<br>(219 - 429)        |

Web Table 31- Netherlands deaths with 95% UI by age, sex, and cause in 2013

| Cause                                               | Females, All Ages        | Females, 0-4 Years | Females, 5-14 Years | Females, 15-49 Years | Females, 50-69 Years | Females, 70-80 Years     |
|-----------------------------------------------------|--------------------------|--------------------|---------------------|----------------------|----------------------|--------------------------|
| Chronic kidney disease due to hypertension          | 184<br>(94 - 323)        | 0<br>(0 - 0)       | 0<br>(0 - 0)        | 2<br>(1 - 3)         | 12<br>(6 - 22)       | 170<br>(86 - 300)        |
| Chronic kidney disease due to glomerulonephritis    | 20<br>(11 - 37)          | 0<br>(0 - 0)       | 0<br>(0 - 0)        | 1<br>(1 - 2)         | 4<br>(2 - 7)         | 15<br>(7 - 29)           |
| Chronic kidney disease due to other causes          | 747<br>(489 - 1,014)     | 0<br>(0 - 0)       | 0<br>(0 - 0)        | 8<br>(5 - 11)        | 50<br>(31 - 70)      | 689<br>(438 - 944)       |
| Urinary diseases and male infertility               | 1,272<br>(770 - 1,790)   | 0<br>(0 - 0)       | 0<br>(0 - 0)        | 11<br>(7 - 14)       | 67<br>(43 - 84)      | 1,194<br>(696 - 1,716)   |
| Interstitial nephritis and urinary tract infections | 1,176<br>(692 - 1,670)   | 0<br>(0 - 0)       | 0<br>(0 - 0)        | 7<br>(5 - 10)        | 49<br>(30 - 63)      | 1,120<br>(650 - 1,610)   |
| Urolithiasis                                        | 28<br>(16 - 57)          | --                 | 0<br>(0 - 0)        | 1<br>(0 - 1)         | 5<br>(3 - 9)         | 23<br>(12 - 48)          |
| Other urinary diseases                              | 67<br>(31 - 116)         | 0<br>(0 - 0)       | 0<br>(0 - 0)        | 3<br>(1 - 4)         | 13<br>(7 - 20)       | 51<br>(19 - 99)          |
| Gynecological diseases                              | 8<br>(5 - 13)            | --                 | --                  | 1<br>(1 - 1)         | 1<br>(1 - 1)         | 6<br>(4 - 11)            |
| Uterine fibroids                                    | 2<br>(2 - 4)             | --                 | --                  | 0<br>(0 - 0)         | 0<br>(0 - 0)         | 2<br>(1 - 3)             |
| Polycystic ovarian syndrome                         | 0<br>(0 - 0)             | --                 | --                  | 0<br>(0 - 0)         | 0<br>(0 - 0)         | --                       |
| Endometriosis                                       | 0<br>(0 - 0)             | --                 | --                  | 0<br>(0 - 0)         | 0<br>(0 - 0)         | --                       |
| Genital prolapse                                    | 2<br>(1 - 3)             | --                 | --                  | 0<br>(0 - 0)         | 0<br>(0 - 0)         | 2<br>(1 - 3)             |
| Other gynecological diseases                        | 4<br>(2 - 6)             | --                 | --                  | 0<br>(0 - 0)         | 0<br>(0 - 1)         | 3<br>(2 - 5)             |
| Hemoglobinopathies and hemolytic anemias            | 51<br>(33 - 90)          | 1<br>(0 - 1)       | 1<br>(0 - 1)        | 3<br>(2 - 5)         | 7<br>(5 - 12)        | 39<br>(24 - 72)          |
| Thalassemias                                        | 0<br>(0 - 1)             | 0<br>(0 - 0)       | 0<br>(0 - 0)        | 0<br>(0 - 0)         | 0<br>(0 - 0)         | 0<br>(0 - 0)             |
| Sickle cell disorders                               | 7<br>(5 - 12)            | 0<br>(0 - 1)       | 0<br>(0 - 1)        | 1<br>(1 - 2)         | 3<br>(2 - 6)         | 2<br>(1 - 3)             |
| G6PD deficiency                                     | 0<br>(0 - 0)             | 0<br>(0 - 0)       | 0<br>(0 - 0)        | 0<br>(0 - 0)         | 0<br>(0 - 0)         | 0<br>(0 - 0)             |
| Other hemoglobinopathies and hemolytic anemias      | 42<br>(27 - 76)          | 0<br>(0 - 1)       | 0<br>(0 - 0)        | 1<br>(1 - 2)         | 4<br>(3 - 6)         | 37<br>(22 - 68)          |
| Endocrine, metabolic, blood, and immune disorders   | 273<br>(206 - 474)       | 7<br>(5 - 10)      | 4<br>(3 - 6)        | 21<br>(16 - 29)      | 49<br>(37 - 72)      | 192<br>(131 - 364)       |
| Musculoskeletal disorders                           | 349<br>(264 - 639)       | --                 | 1<br>(0 - 1)        | 16<br>(13 - 27)      | 59<br>(47 - 110)     | 272<br>(196 - 491)       |
| Rheumatoid arthritis                                | 114<br>(79 - 219)        | --                 | 0<br>(0 - 0)        | 1<br>(1 - 2)         | 16<br>(11 - 31)      | 98<br>(63 - 185)         |
| Other musculoskeletal disorders                     | 235<br>(175 - 387)       | --                 | 1<br>(0 - 1)        | 15<br>(12 - 24)      | 44<br>(34 - 79)      | 175<br>(121 - 281)       |
| Other non-communicable diseases                     | 723<br>(571 - 972)       | 117<br>(86 - 160)  | 9<br>(7 - 12)       | 43<br>(35 - 54)      | 86<br>(70 - 105)     | 467<br>(328 - 704)       |
| Congenital anomalies                                | 249<br>(205 - 302)       | 105<br>(78 - 139)  | 9<br>(7 - 12)       | 41<br>(33 - 51)      | 66<br>(51 - 83)      | 29<br>(21 - 40)          |
| Neural tube defects                                 | 8<br>(5 - 14)            | 6<br>(3 - 10)      | 0<br>(0 - 1)        | 1<br>(1 - 2)         | 0<br>(0 - 1)         | 0<br>(0 - 0)             |
| Congenital heart anomalies                          | 63<br>(50 - 79)          | 30<br>(22 - 42)    | 3<br>(2 - 4)        | 13<br>(9 - 17)       | 11<br>(7 - 17)       | 6<br>(4 - 9)             |
| Cleft lip and cleft palate                          | 0<br>(0 - 0)             | 0<br>(0 - 0)       | --                  | --                   | --                   | --                       |
| Down syndrome                                       | 57<br>(27 - 78)          | 5<br>(2 - 8)       | 1<br>(0 - 1)        | 11<br>(5 - 15)       | 38<br>(18 - 54)      | 2<br>(1 - 4)             |
| Chromosomal unbalanced rearrangements               | 28<br>(17 - 47)          | 18<br>(10 - 31)    | 1<br>(1 - 2)        | 4<br>(2 - 6)         | 5<br>(2 - 10)        | 1<br>(0 - 1)             |
| Other congenital anomalies                          | 94<br>(74 - 119)         | 46<br>(32 - 65)    | 4<br>(3 - 5)        | 12<br>(9 - 16)       | 12<br>(7 - 19)       | 20<br>(14 - 28)          |
| Skin and subcutaneous diseases                      | 461<br>(325 - 697)       | 0<br>(0 - 0)       | 0<br>(0 - 0)        | 3<br>(2 - 3)         | 21<br>(16 - 26)      | 438<br>(302 - 673)       |
| Cellulitis                                          | 21<br>(10 - 47)          | 0<br>(0 - 0)       | 0<br>(0 - 0)        | 0<br>(0 - 1)         | 2<br>(1 - 5)         | 18<br>(8 - 43)           |
| Pyoderma                                            | 203<br>(127 - 313)       | 0<br>(0 - 0)       | 0<br>(0 - 0)        | 2<br>(1 - 2)         | 13<br>(9 - 17)       | 188<br>(114 - 300)       |
| Decubitus ulcer                                     | 221<br>(136 - 385)       | 0<br>(0 - 0)       | 0<br>(0 - 0)        | 0<br>(0 - 0)         | 4<br>(3 - 7)         | 216<br>(132 - 381)       |
| Other skin and subcutaneous diseases                | 17<br>(7 - 44)           | 0<br>(0 - 0)       | 0<br>(0 - 0)        | 0<br>(0 - 0)         | 1<br>(1 - 3)         | 15<br>(6 - 43)           |
| Sudden infant death syndrome                        | 12<br>(4 - 35)           | 12<br>(4 - 35)     | --                  | --                   | --                   | --                       |
| Injuries                                            | 3,210<br>(2,606 - 3,851) | 24<br>(18 - 31)    | 20<br>(17 - 25)     | 417<br>(364 - 483)   | 442<br>(378 - 544)   | 2,306<br>(1,733 - 2,943) |
| Transport injuries                                  | 322<br>(267 - 425)       | 5<br>(3 - 7)       | 12<br>(9 - 17)      | 96<br>(80 - 122)     | 77<br>(59 - 119)     | 132<br>(98 - 170)        |
| Road injuries                                       | 312<br>(259 - 410)       | 4<br>(3 - 7)       | 12<br>(9 - 17)      | 93<br>(77 - 118)     | 74<br>(58 - 115)     | 129<br>(96 - 167)        |
| Pedestrian road injuries                            | 68<br>(45 - 96)          | 2<br>(1 - 3)       | 3<br>(2 - 4)        | 8<br>(5 - 13)        | 13<br>(8 - 21)       | 42<br>(26 - 62)          |

Web Table 31- Netherlands deaths with 95% UI by age, sex, and cause in 2013

| Cause                                           | Females, All Ages        | Females, 0-4 Years | Females, 5-14 Years | Females, 15-49 Years | Females, 50-69 Years | Females, 70-80 Years     |
|-------------------------------------------------|--------------------------|--------------------|---------------------|----------------------|----------------------|--------------------------|
| Cyclist road injuries                           | 81<br>(54 - 108)         | 1<br>(0 - 1)       | 5<br>(3 - 8)        | 17<br>(11 - 23)      | 23<br>(14 - 36)      | 35<br>(21 - 50)          |
| Motorcyclist road injuries                      | 19<br>(9 - 37)           | 0<br>(0 - 0)       | 0<br>(0 - 1)        | 11<br>(6 - 21)       | 4<br>(2 - 9)         | 3<br>(1 - 7)             |
| Motor vehicle road injuries                     | 140<br>(106 - 191)       | 2<br>(1 - 3)       | 3<br>(2 - 5)        | 55<br>(41 - 72)      | 33<br>(23 - 53)      | 48<br>(32 - 70)          |
| Other road injuries                             | 4<br>(2 - 9)             | 0<br>(0 - 0)       | 0<br>(0 - 1)        | 2<br>(1 - 3)         | 1<br>(1 - 3)         | 1<br>(0 - 3)             |
| Other transport injuries                        | 10<br>(6 - 16)           | 0<br>(0 - 0)       | 1<br>(0 - 1)        | 3<br>(2 - 5)         | 3<br>(1 - 5)         | 3<br>(2 - 6)             |
| Unintentional injuries                          | 2,223<br>(1,645 - 2,842) | 16<br>(12 - 22)    | 5<br>(4 - 7)        | 43<br>(37 - 51)      | 138<br>(105 - 163)   | 2,020<br>(1,454 - 2,637) |
| Falls                                           | 1,811<br>(1,245 - 2,424) | 1<br>(1 - 2)       | 1<br>(0 - 1)        | 15<br>(11 - 19)      | 80<br>(50 - 100)     | 1,715<br>(1,173 - 2,326) |
| Drowning                                        | 24<br>(18 - 35)          | 4<br>(2 - 8)       | 2<br>(1 - 3)        | 4<br>(3 - 5)         | 6<br>(4 - 8)         | 8<br>(5 - 11)            |
| Fire, heat, and hot substances                  | 69<br>(47 - 114)         | 1<br>(1 - 2)       | 1<br>(1 - 1)        | 5<br>(4 - 7)         | 8<br>(6 - 11)        | 54<br>(34 - 95)          |
| Poisonings                                      | 15<br>(7 - 21)           | 0<br>(0 - 0)       | 0<br>(0 - 0)        | 3<br>(1 - 4)         | 3<br>(1 - 4)         | 9<br>(3 - 13)            |
| Exposure to mechanical forces                   | 26<br>(20 - 38)          | 3<br>(2 - 5)       | 1<br>(1 - 1)        | 3<br>(3 - 4)         | 4<br>(3 - 6)         | 14<br>(9 - 23)           |
| Unintentional firearm injuries                  | 1<br>(1 - 1)             | 0<br>(0 - 0)       | 0<br>(0 - 0)        | 0<br>(0 - 1)         | 0<br>(0 - 0)         | 0<br>(0 - 0)             |
| Unintentional suffocation                       | 12<br>(7 - 24)           | 2<br>(1 - 4)       | 0<br>(0 - 0)        | 1<br>(1 - 2)         | 1<br>(1 - 3)         | 7<br>(3 - 16)            |
| Other exposure to mechanical forces             | 13<br>(10 - 16)          | 1<br>(1 - 2)       | 1<br>(0 - 1)        | 2<br>(2 - 3)         | 3<br>(2 - 4)         | 6<br>(4 - 9)             |
| Adverse effects of medical treatment            | 132<br>(88 - 246)        | 1<br>(0 - 2)       | 0<br>(0 - 0)        | 5<br>(3 - 9)         | 17<br>(12 - 28)      | 109<br>(68 - 210)        |
| Animal contact                                  | 4<br>(2 - 10)            | 0<br>(0 - 0)       | 0<br>(0 - 0)        | 1<br>(1 - 2)         | 1<br>(0 - 2)         | 2<br>(1 - 5)             |
| Venomous animal contact                         | 1<br>(0 - 2)             | 0<br>(0 - 0)       | 0<br>(0 - 0)        | 0<br>(0 - 1)         | 0<br>(0 - 1)         | 0<br>(0 - 0)             |
| Non-venomous animal contact                     | 3<br>(1 - 7)             | 0<br>(0 - 0)       | 0<br>(0 - 0)        | 1<br>(0 - 1)         | 1<br>(0 - 1)         | 2<br>(1 - 4)             |
| Foreign body                                    | 125<br>(57 - 188)        | 4<br>(2 - 6)       | 1<br>(0 - 1)        | 7<br>(3 - 9)         | 17<br>(9 - 24)       | 97<br>(42 - 154)         |
| Pulmonary aspiration and foreign body in airway | 122<br>(55 - 186)        | 4<br>(2 - 6)       | 1<br>(0 - 1)        | 6<br>(3 - 9)         | 17<br>(8 - 24)       | 95<br>(41 - 152)         |
| Foreign body in other body part                 | 2<br>(1 - 4)             | 0<br>(0 - 0)       | 0<br>(0 - 0)        | 0<br>(0 - 1)         | 0<br>(0 - 0)         | 2<br>(1 - 3)             |
| Other unintentional injuries                    | 18<br>(9 - 27)           | 1<br>(0 - 2)       | 0<br>(0 - 0)        | 2<br>(1 - 2)         | 2<br>(1 - 4)         | 13<br>(5 - 22)           |
| Self-harm and interpersonal violence            | 665<br>(573 - 820)       | 3<br>(2 - 5)       | 3<br>(2 - 4)        | 277<br>(233 - 326)   | 227<br>(191 - 312)   | 155<br>(118 - 207)       |
| Self-harm                                       | 610<br>(524 - 766)       | --                 | 1<br>(1 - 1)        | 248<br>(208 - 298)   | 217<br>(181 - 303)   | 145<br>(110 - 196)       |
| Interpersonal violence                          | 55<br>(34 - 68)          | 3<br>(2 - 5)       | 2<br>(1 - 3)        | 29<br>(18 - 37)      | 11<br>(7 - 14)       | 10<br>(6 - 13)           |
| Assault by firearm                              | 9<br>(5 - 14)            | 0<br>(0 - 0)       | 0<br>(0 - 0)        | 6<br>(3 - 9)         | 2<br>(1 - 3)         | 1<br>(0 - 2)             |
| Assault by sharp object                         | 19<br>(11 - 27)          | 0<br>(0 - 1)       | 0<br>(0 - 1)        | 12<br>(7 - 18)       | 3<br>(2 - 5)         | 2<br>(1 - 4)             |
| Assault by other means                          | 27<br>(15 - 35)          | 3<br>(1 - 4)       | 1<br>(1 - 2)        | 11<br>(6 - 15)       | 6<br>(3 - 8)         | 7<br>(4 - 9)             |

Web Table 31- New Zealand deaths with 95% UI by age, sex, and cause in 2013

| Cause                                                             | Both Sexes, All Ages        | Both Sexes, 0-4 Years | Both Sexes, 5-14 Years | Both Sexes, 15-49 Years  | Both Sexes, 50-69 Years  | Both Sexes, 70-80 Years     |
|-------------------------------------------------------------------|-----------------------------|-----------------------|------------------------|--------------------------|--------------------------|-----------------------------|
| All causes                                                        | 33,248<br>(31,801 - 34,740) | 348<br>(292 - 416)    | 71<br>(64 - 79)        | 2,097<br>(1,951 - 2,246) | 6,769<br>(6,371 - 7,193) | 23,963<br>(23,023 - 24,895) |
| Communicable, maternal, neonatal, and nutritional diseases        | 1,001<br>(791 - 1,510)      | 120<br>(96 - 148)     | 4<br>(3 - 6)           | 41<br>(36 - 47)          | 63<br>(54 - 75)          | 772<br>(564 - 1,285)        |
| HIV/AIDS and tuberculosis                                         | 32<br>(27 - 38)             | 0<br>(0 - 0)          | 0<br>(0 - 0)           | 11<br>(8 - 15)           | 9<br>(7 - 11)            | 12<br>(10 - 15)             |
| Tuberculosis                                                      | 19<br>(17 - 23)             | 0<br>(0 - 0)          | 0<br>(0 - 0)           | 2<br>(2 - 2)             | 6<br>(5 - 7)             | 12<br>(9 - 15)              |
| HIV/AIDS                                                          | 13<br>(8 - 18)              | 0<br>(0 - 0)          | 0<br>(0 - 0)           | 9<br>(6 - 13)            | 3<br>(2 - 5)             | 0<br>(0 - 1)                |
| HIV/AIDS resulting in mycobacterial infection                     | 1<br>(0 - 1)                | 0<br>(0 - 0)          | 0<br>(0 - 0)           | 0<br>(0 - 1)             | 0<br>(0 - 0)             | 0<br>(0 - 0)                |
| HIV/AIDS resulting in other diseases                              | 12<br>(8 - 17)              | 0<br>(0 - 0)          | 0<br>(0 - 0)           | 9<br>(6 - 12)            | 3<br>(2 - 5)             | 0<br>(0 - 1)                |
| Diarrhea, lower respiratory, and other common infectious diseases | 802<br>(594 - 1,314)        | 22<br>(15 - 30)       | 3<br>(2 - 6)           | 19<br>(15 - 24)          | 44<br>(36 - 56)          | 714<br>(507 - 1,224)        |
| Diarrheal diseases                                                | 39<br>(27 - 55)             | 2<br>(2 - 4)          | 0<br>(0 - 0)           | 1<br>(1 - 1)             | 2<br>(2 - 3)             | 34<br>(22 - 49)             |
| Intestinal infectious diseases                                    | 9<br>(3 - 19)               | 2<br>(1 - 4)          | 2<br>(1 - 4)           | 3<br>(1 - 8)             | 1<br>(0 - 3)             | 1<br>(0 - 2)                |
| Typhoid fever                                                     | 6<br>(2 - 15)               | 1<br>(0 - 3)          | 1<br>(0 - 3)           | 3<br>(1 - 6)             | 1<br>(0 - 2)             | 1<br>(0 - 1)                |
| Paratyphoid fever                                                 | 2<br>(1 - 5)                | 0<br>(0 - 1)          | 0<br>(0 - 1)           | 1<br>(0 - 2)             | 0<br>(0 - 1)             | 0<br>(0 - 0)                |
| Other intestinal infectious diseases                              | 0<br>(0 - 2)                | 0<br>(0 - 1)          | 0<br>(0 - 0)           | 0<br>(0 - 1)             | 0<br>(0 - 1)             | 0<br>(0 - 1)                |
| Lower respiratory infections                                      | 723<br>(516 - 1,245)        | 11<br>(7 - 16)        | 1<br>(0 - 1)           | 9<br>(7 - 11)            | 35<br>(27 - 48)          | 667<br>(462 - 1,178)        |
| Upper respiratory infections                                      | 1<br>(0 - 2)                | 0<br>(0 - 0)          | 0<br>(0 - 0)           | 0<br>(0 - 0)             | 0<br>(0 - 0)             | 0<br>(0 - 2)                |
| Otitis media                                                      | 1<br>(0 - 1)                | 0<br>(0 - 0)          | 0<br>(0 - 0)           | 0<br>(0 - 0)             | 0<br>(0 - 0)             | 0<br>(0 - 0)                |
| Meningitis                                                        | 20<br>(16 - 23)             | 5<br>(3 - 7)          | 1<br>(0 - 1)           | 3<br>(3 - 4)             | 4<br>(3 - 5)             | 7<br>(5 - 8)                |
| Pneumococcal meningitis                                           | 5<br>(4 - 6)                | 1<br>(1 - 2)          | 0<br>(0 - 0)           | 1<br>(1 - 1)             | 1<br>(1 - 2)             | 2<br>(1 - 3)                |
| H influenzae type B meningitis                                    | 3<br>(2 - 4)                | 1<br>(1 - 2)          | 0<br>(0 - 0)           | 0<br>(0 - 0)             | 0<br>(0 - 0)             | 1<br>(0 - 1)                |
| Meningococcal meningitis                                          | 5<br>(4 - 6)                | 1<br>(1 - 1)          | 0<br>(0 - 0)           | 1<br>(1 - 1)             | 1<br>(1 - 1)             | 2<br>(1 - 2)                |
| Other meningitis                                                  | 7<br>(5 - 9)                | 2<br>(1 - 2)          | 0<br>(0 - 0)           | 1<br>(1 - 2)             | 2<br>(1 - 2)             | 3<br>(2 - 3)                |
| Encephalitis                                                      | 5<br>(3 - 7)                | 1<br>(0 - 1)          | 0<br>(0 - 0)           | 1<br>(1 - 2)             | 1<br>(0 - 1)             | 2<br>(1 - 3)                |
| Diphtheria                                                        | 0<br>(0 - 0)                | 0<br>(0 - 0)          | 0<br>(0 - 0)           | 0<br>(0 - 0)             | 0<br>(0 - 0)             | --<br>(0 - 0)               |
| Whooping cough                                                    | 0<br>(0 - 0)                | 0<br>(0 - 0)          | 0<br>(0 - 0)           | 0<br>(0 - 0)             | 0<br>(0 - 0)             | --<br>(0 - 0)               |
| Tetanus                                                           | 0<br>(0 - 1)                | 0<br>(0 - 0)          | 0<br>(0 - 0)           | 0<br>(0 - 0)             | 0<br>(0 - 0)             | 0<br>(0 - 0)                |
| Measles                                                           | 0<br>(0 - 0)                | 0<br>(0 - 0)          | 0<br>(0 - 0)           | 0<br>(0 - 0)             | 0<br>(0 - 0)             | --<br>(0 - 0)               |
| Varicella and herpes zoster                                       | 4<br>(1 - 11)               | 0<br>(0 - 1)          | 0<br>(0 - 0)           | 0<br>(0 - 1)             | 0<br>(0 - 1)             | 3<br>(0 - 10)               |
| Neglected tropical diseases and malaria                           | 2<br>(2 - 3)                | 0<br>(0 - 0)          | 0<br>(0 - 0)           | 1<br>(1 - 1)             | 1<br>(1 - 1)             | 1<br>(1 - 1)                |
| Cysticercosis                                                     | 0<br>(0 - 0)                | 0<br>(0 - 0)          | 0<br>(0 - 0)           | 0<br>(0 - 0)             | 0<br>(0 - 0)             | 0<br>(0 - 0)                |
| Cystic echinococcosis                                             | 1<br>(1 - 1)                | 0<br>(0 - 0)          | 0<br>(0 - 0)           | 0<br>(0 - 0)             | 0<br>(0 - 0)             | 0<br>(0 - 0)                |
| Dengue                                                            | 0<br>(0 - 0)                | 0<br>(0 - 0)          | 0<br>(0 - 0)           | 0<br>(0 - 0)             | 0<br>(0 - 0)             | 0<br>(0 - 0)                |
| Rabies                                                            | 0<br>(0 - 0)                | 0<br>(0 - 0)          | 0<br>(0 - 0)           | 0<br>(0 - 0)             | 0<br>(0 - 0)             | 0<br>(0 - 0)                |
| Other neglected tropical diseases                                 | 1<br>(0 - 1)                | 0<br>(0 - 0)          | 0<br>(0 - 0)           | 0<br>(0 - 0)             | 0<br>(0 - 0)             | 0<br>(0 - 0)                |
| Maternal disorders                                                | 6<br>(4 - 7)                | --                    | 0<br>(0 - 0)           | 6<br>(4 - 7)             | --                       | --                          |
| Maternal hemorrhage                                               | 1<br>(0 - 1)                | --                    | 0<br>(0 - 0)           | 1<br>(0 - 1)             | --                       | --                          |
| Maternal sepsis and other maternal infections                     | 0<br>(0 - 1)                | --                    | 0<br>(0 - 0)           | 0<br>(0 - 1)             | --                       | --                          |
| Maternal hypertensive disorders                                   | 1<br>(1 - 1)                | --                    | 0<br>(0 - 0)           | 1<br>(1 - 1)             | --                       | --                          |
| Maternal obstructed labor                                         | 1<br>(0 - 1)                | --                    | 0<br>(0 - 0)           | 1<br>(0 - 1)             | --                       | --                          |
| Maternal abortive outcome                                         | 1<br>(0 - 1)                | --                    | 0<br>(0 - 0)           | 1<br>(0 - 1)             | --                       | --                          |
| Indirect maternal deaths                                          | 1<br>(1 - 1)                | --                    | 0<br>(0 - 0)           | 1<br>(1 - 1)             | --                       | --                          |

Web Table 31- New Zealand deaths with 95% UI by age, sex, and cause in 2013

| Cause                                                            | Both Sexes, All Ages        | Both Sexes, 0-4 Years | Both Sexes, 5-14 Years | Both Sexes, 15-49 Years  | Both Sexes, 50-69 Years  | Both Sexes, 70-80 Years     |
|------------------------------------------------------------------|-----------------------------|-----------------------|------------------------|--------------------------|--------------------------|-----------------------------|
| Late maternal deaths                                             | 0<br>(0 - 1)                | --                    | 0<br>(0 - 0)           | 0<br>(0 - 1)             | --                       | --                          |
| Maternal deaths aggravated by HIV/AIDS                           | 0<br>(0 - 0)                | --                    | --                     | 0<br>(0 - 0)             | --                       | --                          |
| Other maternal disorders                                         | 1<br>(1 - 2)                | --                    | 0<br>(0 - 0)           | 1<br>(1 - 2)             | --                       | --                          |
| Neonatal disorders                                               | 94<br>(75 - 116)            | 94<br>(75 - 116)      | --                     | --                       | --                       | --                          |
| Neonatal preterm birth complications                             | 54<br>(40 - 68)             | 54<br>(40 - 68)       | --                     | --                       | --                       | --                          |
| Neonatal encephalopathy due to birth asphyxia and trauma         | 19<br>(14 - 26)             | 19<br>(14 - 26)       | --                     | --                       | --                       | --                          |
| Neonatal sepsis and other neonatal infections                    | 5<br>(2 - 8)                | 5<br>(2 - 8)          | --                     | --                       | --                       | --                          |
| Hemolytic disease and other neonatal jaundice                    | 0<br>(0 - 0)                | 0<br>(0 - 0)          | --                     | --                       | --                       | --                          |
| Other neonatal disorders                                         | 16<br>(8 - 24)              | 16<br>(8 - 24)        | --                     | --                       | --                       | --                          |
| Nutritional deficiencies                                         | 35<br>(26 - 48)             | 0<br>(0 - 0)          | 0<br>(0 - 0)           | 1<br>(0 - 1)             | 2<br>(1 - 2)             | 32<br>(24 - 45)             |
| Protein-energy malnutrition                                      | 9<br>(4 - 14)               | 0<br>(0 - 0)          | 0<br>(0 - 0)           | 0<br>(0 - 0)             | 1<br>(0 - 1)             | 8<br>(4 - 13)               |
| Iodine deficiency                                                | 0<br>(0 - 1)                | 0<br>(0 - 0)          | 0<br>(0 - 0)           | 0<br>(0 - 0)             | 0<br>(0 - 0)             | 0<br>(0 - 1)                |
| Iron-deficiency anemia                                           | 23<br>(16 - 33)             | 0<br>(0 - 0)          | 0<br>(0 - 0)           | 0<br>(0 - 0)             | 1<br>(1 - 1)             | 22<br>(15 - 32)             |
| Other nutritional deficiencies                                   | 3<br>(1 - 6)                | 0<br>(0 - 0)          | 0<br>(0 - 0)           | 0<br>(0 - 0)             | 0<br>(0 - 1)             | 2<br>(1 - 5)                |
| Other communicable, maternal, neonatal, and nutritional diseases | 30<br>(22 - 35)             | 5<br>(2 - 7)          | 0<br>(0 - 1)           | 4<br>(3 - 5)             | 7<br>(5 - 9)             | 14<br>(10 - 18)             |
| Sexually transmitted diseases excluding HIV                      | 3<br>(1 - 6)                | 2<br>(0 - 4)          | 0<br>(0 - 0)           | 0<br>(0 - 0)             | 0<br>(0 - 1)             | 1<br>(0 - 1)                |
| Syphilis                                                         | 3<br>(1 - 5)                | 2<br>(0 - 4)          | 0<br>(0 - 0)           | 0<br>(0 - 0)             | 0<br>(0 - 0)             | 1<br>(0 - 1)                |
| Chlamydial infection                                             | 0<br>(0 - 0)                | --                    | 0<br>(0 - 0)           | 0<br>(0 - 0)             | 0<br>(0 - 0)             | 0<br>(0 - 0)                |
| Gonococcal infection                                             | 0<br>(0 - 0)                | --                    | 0<br>(0 - 0)           | 0<br>(0 - 0)             | 0<br>(0 - 0)             | 0<br>(0 - 0)                |
| Other sexually transmitted diseases                              | 0<br>(0 - 0)                | --                    | 0<br>(0 - 0)           | 0<br>(0 - 0)             | 0<br>(0 - 0)             | 0<br>(0 - 0)                |
| Hepatitis                                                        | 2<br>(2 - 2)                | 0<br>(0 - 0)          | 0<br>(0 - 0)           | 1<br>(1 - 1)             | 1<br>(1 - 1)             | 0<br>(0 - 1)                |
| Acute hepatitis A                                                | 0<br>(0 - 0)                | 0<br>(0 - 0)          | 0<br>(0 - 0)           | 0<br>(0 - 0)             | 0<br>(0 - 0)             | 0<br>(0 - 0)                |
| Acute hepatitis B                                                | 2<br>(1 - 2)                | 0<br>(0 - 0)          | 0<br>(0 - 0)           | 1<br>(0 - 1)             | 1<br>(1 - 1)             | 0<br>(0 - 1)                |
| Acute hepatitis C                                                | 0<br>(0 - 0)                | --                    | 0<br>(0 - 0)           | 0<br>(0 - 0)             | 0<br>(0 - 0)             | 0<br>(0 - 0)                |
| Other infectious diseases                                        | 24<br>(17 - 30)             | 3<br>(2 - 4)          | 0<br>(0 - 0)           | 3<br>(2 - 4)             | 6<br>(4 - 8)             | 12<br>(8 - 16)              |
| Non-communicable diseases                                        | 30,455<br>(29,080 - 31,907) | 174<br>(140 - 217)    | 37<br>(32 - 42)        | 1,292<br>(1,197 - 1,395) | 6,389<br>(6,014 - 6,788) | 22,563<br>(21,605 - 23,596) |
| Neoplasms                                                        | 9,638<br>(8,952 - 10,335)   | 12<br>(8 - 16)        | 17<br>(14 - 19)        | 618<br>(564 - 673)       | 3,280<br>(3,056 - 3,513) | 5,712<br>(5,242 - 6,171)    |
| Esophageal cancer                                                | 288<br>(238 - 329)          | --                    | --                     | 9<br>(7 - 12)            | 101<br>(83 - 120)        | 178<br>(141 - 210)          |
| Stomach cancer                                                   | 411<br>(347 - 485)          | --                    | --                     | 24<br>(20 - 29)          | 114<br>(98 - 131)        | 273<br>(220 - 337)          |
| Liver cancer                                                     | 251<br>(185 - 316)          | --                    | 0<br>(0 - 0)           | 21<br>(15 - 28)          | 96<br>(71 - 124)         | 133<br>(92 - 176)           |
| Liver cancer due to hepatitis B                                  | 60<br>(34 - 91)             | --                    | 0<br>(0 - 0)           | 9<br>(6 - 13)            | 29<br>(15 - 45)          | 21<br>(12 - 36)             |
| Liver cancer due to hepatitis C                                  | 134<br>(92 - 179)           | --                    | 0<br>(0 - 0)           | 8<br>(5 - 13)            | 47<br>(31 - 64)          | 79<br>(54 - 109)            |
| Liver cancer due to alcohol use                                  | 37<br>(23 - 61)             | --                    | --                     | 2<br>(1 - 4)             | 13<br>(8 - 22)           | 22<br>(13 - 37)             |
| Liver cancer due to other causes                                 | 21<br>(13 - 31)             | --                    | 0<br>(0 - 0)           | 2<br>(2 - 4)             | 8<br>(5 - 12)            | 10<br>(6 - 16)              |
| Larynx cancer                                                    | 41<br>(30 - 51)             | --                    | --                     | 1<br>(1 - 2)             | 15<br>(11 - 19)          | 24<br>(17 - 32)             |
| Tracheal, bronchus and lung cancer                               | 1,837<br>(1,649 - 2,020)    | --                    | --                     | 65<br>(54 - 77)          | 762<br>(681 - 848)       | 1,010<br>(879 - 1,145)      |
| Breast cancer                                                    | 717<br>(557 - 852)          | --                    | --                     | 111<br>(89 - 135)        | 310<br>(236 - 368)       | 296<br>(221 - 378)          |
| Cervical cancer                                                  | 90<br>(72 - 113)            | --                    | --                     | 20<br>(15 - 26)          | 34<br>(27 - 43)          | 36<br>(26 - 49)             |
| Uterine cancer                                                   | 102<br>(80 - 126)           | --                    | --                     | 5<br>(4 - 7)             | 39<br>(29 - 52)          | 57<br>(42 - 78)             |
| Prostate cancer                                                  | 789<br>(613 - 1,120)        | --                    | --                     | 2<br>(1 - 3)             | 125<br>(87 - 173)        | 662<br>(501 - 974)          |

Web Table 31- New Zealand deaths with 95% UI by age, sex, and cause in 2013

| Cause                                         | Both Sexes, All Ages        | Both Sexes, 0-4 Years | Both Sexes, 5-14 Years | Both Sexes, 15-49 Years | Both Sexes, 50-69 Years  | Both Sexes, 70-80 Years   |
|-----------------------------------------------|-----------------------------|-----------------------|------------------------|-------------------------|--------------------------|---------------------------|
| Colon and rectum cancer                       | 1,557<br>(1,388 - 1,737)    | --                    | --                     | 62<br>(54 - 71)         | 487<br>(438 - 536)       | 1,008<br>(864 - 1,166)    |
| Lip and oral cavity cancer                    | 92<br>(79 - 105)            | --                    | --                     | 8<br>(6 - 10)           | 36<br>(29 - 44)          | 48<br>(39 - 58)           |
| Nasopharynx cancer                            | 21<br>(15 - 26)             | --                    | 0<br>(0 - 0)           | 5<br>(4 - 7)            | 9<br>(6 - 12)            | 6<br>(4 - 9)              |
| Other pharynx cancer                          | 53<br>(43 - 67)             | --                    | --                     | 3<br>(2 - 4)            | 30<br>(23 - 40)          | 19<br>(15 - 25)           |
| Gallbladder and biliary tract cancer          | 122<br>(92 - 157)           | --                    | --                     | 5<br>(4 - 7)            | 36<br>(27 - 47)          | 81<br>(58 - 109)          |
| Pancreatic cancer                             | 509<br>(457 - 565)          | --                    | --                     | 20<br>(16 - 24)         | 177<br>(157 - 200)       | 312<br>(269 - 358)        |
| Malignant skin melanoma                       | 335<br>(213 - 490)          | --                    | --                     | 51<br>(34 - 79)         | 127<br>(83 - 191)        | 158<br>(94 - 227)         |
| Non-melanoma skin cancer                      | 107<br>(66 - 149)           | --                    | --                     | 2<br>(1 - 3)            | 19<br>(11 - 26)          | 86<br>(52 - 123)          |
| Ovarian cancer                                | 231<br>(189 - 277)          | --                    | --                     | 18<br>(14 - 23)         | 100<br>(80 - 122)        | 113<br>(83 - 149)         |
| Testicular cancer                             | 8<br>(6 - 11)               | --                    | --                     | 5<br>(4 - 7)            | 2<br>(1 - 2)             | 1<br>(1 - 1)              |
| Kidney cancer                                 | 213<br>(179 - 258)          | 0<br>(0 - 1)          | 0<br>(0 - 0)           | 13<br>(10 - 17)         | 85<br>(69 - 103)         | 115<br>(89 - 149)         |
| Bladder cancer                                | 223<br>(181 - 266)          | --                    | --                     | 4<br>(3 - 5)            | 44<br>(36 - 54)          | 175<br>(139 - 216)        |
| Brain and nervous system cancer               | 256<br>(219 - 311)          | 2<br>(1 - 4)          | 5<br>(4 - 7)           | 47<br>(39 - 57)         | 120<br>(102 - 149)       | 81<br>(64 - 100)          |
| Thyroid cancer                                | 29<br>(24 - 36)             | --                    | 0<br>(0 - 0)           | 2<br>(1 - 2)            | 9<br>(7 - 11)            | 19<br>(14 - 25)           |
| Mesothelioma                                  | 84<br>(44 - 116)            | --                    | --                     | 3<br>(2 - 4)            | 32<br>(16 - 45)          | 50<br>(23 - 75)           |
| Hodgkin lymphoma                              | 22<br>(15 - 29)             | 0<br>(0 - 0)          | 0<br>(0 - 0)           | 6<br>(4 - 8)            | 7<br>(5 - 9)             | 9<br>(6 - 12)             |
| Non-Hodgkin lymphoma                          | 351<br>(227 - 439)          | 1<br>(0 - 1)          | 1<br>(1 - 1)           | 28<br>(17 - 36)         | 115<br>(73 - 147)        | 207<br>(133 - 265)        |
| Multiple myeloma                              | 205<br>(142 - 305)          | --                    | --                     | 8<br>(5 - 12)           | 66<br>(45 - 98)          | 132<br>(88 - 200)         |
| Leukemia                                      | 314<br>(275 - 353)          | 3<br>(2 - 5)          | 5<br>(4 - 7)           | 31<br>(27 - 35)         | 82<br>(70 - 95)          | 193<br>(162 - 227)        |
| Other neoplasms                               | 382<br>(301 - 450)          | 5<br>(4 - 7)          | 4<br>(3 - 6)           | 41<br>(34 - 48)         | 103<br>(85 - 121)        | 228<br>(160 - 284)        |
| Cardiovascular diseases                       | 11,870<br>(10,993 - 12,814) | 3<br>(2 - 4)          | 2<br>(2 - 2)           | 320<br>(287 - 355)      | 1,801<br>(1,646 - 1,993) | 9,745<br>(8,957 - 10,535) |
| Rheumatic heart disease                       | 184<br>(101 - 238)          | 0<br>(0 - 0)          | 0<br>(0 - 1)           | 17<br>(10 - 22)         | 38<br>(20 - 49)          | 129<br>(69 - 176)         |
| Ischemic heart disease                        | 6,739<br>(6,067 - 7,491)    | 0<br>(0 - 0)          | 0<br>(0 - 0)           | 181<br>(158 - 207)      | 1,170<br>(1,045 - 1,345) | 5,389<br>(4,753 - 6,005)  |
| Cerebrovascular disease                       | 2,900<br>(2,337 - 3,349)    | 0<br>(0 - 1)          | 0<br>(0 - 0)           | 55<br>(42 - 66)         | 291<br>(231 - 348)       | 2,554<br>(2,046 - 2,968)  |
| Ischemic stroke                               | 1,966<br>(1,545 - 2,322)    | 0<br>(0 - 0)          | 0<br>(0 - 0)           | 6<br>(4 - 8)            | 64<br>(37 - 84)          | 1,896<br>(1,497 - 2,245)  |
| Hemorrhagic stroke                            | 934<br>(714 - 1,128)        | 0<br>(0 - 0)          | 0<br>(0 - 0)           | 49<br>(38 - 59)         | 227<br>(184 - 271)       | 657<br>(467 - 824)        |
| Hypertensive heart disease                    | 320<br>(236 - 503)          | 0<br>(0 - 0)          | 0<br>(0 - 0)           | 4<br>(3 - 6)            | 30<br>(23 - 43)          | 286<br>(205 - 456)        |
| Cardiomyopathy and myocarditis                | 245<br>(201 - 337)          | 2<br>(1 - 2)          | 1<br>(1 - 1)           | 38<br>(31 - 51)         | 91<br>(71 - 126)         | 113<br>(87 - 162)         |
| Atrial fibrillation and flutter               | 335<br>(243 - 449)          | --                    | --                     | 1<br>(1 - 2)            | 17<br>(13 - 22)          | 316<br>(227 - 431)        |
| Aortic aneurysm                               | 468<br>(378 - 617)          | --                    | --                     | 8<br>(6 - 10)           | 85<br>(68 - 108)         | 376<br>(299 - 499)        |
| Peripheral vascular disease                   | 121<br>(89 - 163)           | --                    | --                     | 0<br>(0 - 0)            | 8<br>(6 - 10)            | 113<br>(82 - 154)         |
| Endocarditis                                  | 33<br>(22 - 52)             | 0<br>(0 - 0)          | 0<br>(0 - 0)           | 3<br>(2 - 4)            | 6<br>(4 - 10)            | 24<br>(15 - 39)           |
| Other cardiovascular and circulatory diseases | 525<br>(384 - 671)          | 0<br>(0 - 1)          | 0<br>(0 - 0)           | 13<br>(10 - 17)         | 65<br>(48 - 83)          | 446<br>(310 - 585)        |
| Chronic respiratory diseases                  | 2,271<br>(1,785 - 2,544)    | 3<br>(2 - 4)          | 2<br>(2 - 3)           | 47<br>(39 - 54)         | 381<br>(303 - 431)       | 1,838<br>(1,447 - 2,091)  |
| Chronic obstructive pulmonary disease         | 1,841<br>(1,430 - 2,092)    | 2<br>(1 - 3)          | 0<br>(0 - 0)           | 23<br>(17 - 28)         | 327<br>(249 - 374)       | 1,489<br>(1,141 - 1,720)  |
| Pneumoconiosis                                | 40<br>(23 - 65)             | 0<br>(0 - 0)          | 0<br>(0 - 0)           | 1<br>(1 - 1)            | 3<br>(2 - 4)             | 36<br>(21 - 60)           |
| Silicosis                                     | 22<br>(12 - 38)             | 0<br>(0 - 0)          | 0<br>(0 - 0)           | 0<br>(0 - 0)            | 1<br>(0 - 1)             | 21<br>(12 - 37)           |
| Asbestosis                                    | 12<br>(7 - 19)              | 0<br>(0 - 0)          | 0<br>(0 - 0)           | 0<br>(0 - 0)            | 1<br>(1 - 2)             | 10<br>(5 - 17)            |
| Coal workers pneumoconiosis                   | 2<br>(1 - 3)                | 0<br>(0 - 0)          | 0<br>(0 - 0)           | 0<br>(0 - 0)            | 0<br>(0 - 0)             | 2<br>(1 - 3)              |
| Other pneumoconiosis                          | 4<br>(2 - 6)                | 0<br>(0 - 0)          | 0<br>(0 - 0)           | 0<br>(0 - 1)            | 1<br>(0 - 1)             | 3<br>(1 - 5)              |

Web Table 31- New Zealand deaths with 95% UI by age, sex, and cause in 2013

| Cause                                               | Both Sexes, All Ages     | Both Sexes, 0-4 Years | Both Sexes, 5-14 Years | Both Sexes, 15-49 Years | Both Sexes, 50-69 Years | Both Sexes, 70-80 Years  |
|-----------------------------------------------------|--------------------------|-----------------------|------------------------|-------------------------|-------------------------|--------------------------|
| Asthma                                              | 88<br>(61 - 116)         | 0<br>(0 - 0)          | 2<br>(1 - 2)           | 18<br>(15 - 22)         | 23<br>(16 - 33)         | 44<br>(27 - 65)          |
| Interstitial lung disease and pulmonary sarcoidosis | 283<br>(191 - 450)       | 0<br>(0 - 0)          | 0<br>(0 - 0)           | 4<br>(3 - 7)            | 27<br>(19 - 39)         | 252<br>(165 - 409)       |
| Other chronic respiratory diseases                  | 19<br>(13 - 28)          | 1<br>(0 - 1)          | 0<br>(0 - 0)           | 1<br>(0 - 1)            | 1<br>(1 - 2)            | 17<br>(10 - 25)          |
| Cirrhosis                                           | 225<br>(202 - 250)       | 0<br>(0 - 0)          | 0<br>(0 - 0)           | 26<br>(22 - 31)         | 89<br>(79 - 101)        | 109<br>(93 - 128)        |
| Cirrhosis due to hepatitis B                        | 44<br>(28 - 65)          | 0<br>(0 - 0)          | 0<br>(0 - 0)           | 6<br>(4 - 8)            | 17<br>(11 - 26)         | 21<br>(11 - 33)          |
| Cirrhosis due to hepatitis C                        | 99<br>(75 - 121)         | 0<br>(0 - 0)          | 0<br>(0 - 0)           | 11<br>(7 - 15)          | 38<br>(26 - 49)         | 49<br>(36 - 63)          |
| Cirrhosis due to alcohol use                        | 67<br>(51 - 85)          | --<br>(0 - 0)         | --<br>(0 - 0)          | 6<br>(4 - 9)            | 26<br>(19 - 36)         | 34<br>(25 - 45)          |
| Cirrhosis due to other causes                       | 15<br>(10 - 21)          | 0<br>(0 - 0)          | 0<br>(0 - 0)           | 3<br>(2 - 5)            | 6<br>(4 - 10)           | 5<br>(3 - 8)             |
| Digestive diseases                                  | 661<br>(568 - 750)       | 0<br>(0 - 1)          | 0<br>(0 - 0)           | 15<br>(13 - 17)         | 88<br>(72 - 101)        | 557<br>(475 - 638)       |
| Peptic ulcer disease                                | 114<br>(84 - 154)        | 0<br>(0 - 0)          | 0<br>(0 - 0)           | 2<br>(1 - 2)            | 14<br>(11 - 19)         | 98<br>(70 - 135)         |
| Gastritis and duodenitis                            | 11<br>(6 - 16)           | 0<br>(0 - 0)          | 0<br>(0 - 0)           | 0<br>(0 - 1)            | 2<br>(1 - 3)            | 9<br>(5 - 13)            |
| Appendicitis                                        | 6<br>(4 - 8)             | 0<br>(0 - 0)          | 0<br>(0 - 0)           | 1<br>(0 - 1)            | 1<br>(1 - 2)            | 4<br>(3 - 6)             |
| Paralytic ileus and intestinal obstruction          | 123<br>(79 - 168)        | 0<br>(0 - 0)          | 0<br>(0 - 0)           | 2<br>(2 - 3)            | 11<br>(7 - 17)          | 109<br>(69 - 151)        |
| Inguinal, femoral, and abdominal hernia             | 20<br>(10 - 30)          | 0<br>(0 - 0)          | 0<br>(0 - 0)           | 0<br>(0 - 1)            | 2<br>(1 - 3)            | 17<br>(8 - 26)           |
| Inflammatory bowel disease                          | 29<br>(20 - 41)          | 0<br>(0 - 0)          | 0<br>(0 - 0)           | 1<br>(1 - 1)            | 5<br>(3 - 6)            | 24<br>(15 - 35)          |
| Vascular intestinal disorders                       | 105<br>(64 - 160)        | 0<br>(0 - 0)          | 0<br>(0 - 0)           | 2<br>(1 - 3)            | 15<br>(9 - 23)          | 87<br>(52 - 136)         |
| Gallbladder and biliary diseases                    | 68<br>(45 - 87)          | 0<br>(0 - 0)          | 0<br>(0 - 0)           | 1<br>(1 - 2)            | 10<br>(6 - 12)          | 57<br>(38 - 75)          |
| Pancreatitis                                        | 43<br>(31 - 56)          | 0<br>(0 - 0)          | 0<br>(0 - 0)           | 3<br>(2 - 4)            | 11<br>(8 - 15)          | 29<br>(20 - 39)          |
| Other digestive diseases                            | 142<br>(105 - 176)       | 0<br>(0 - 0)          | 0<br>(0 - 0)           | 2<br>(2 - 3)            | 16<br>(12 - 20)         | 124<br>(90 - 158)        |
| Neurological disorders                              | 3,201<br>(2,517 - 3,798) | 6<br>(5 - 9)          | 4<br>(3 - 5)           | 57<br>(48 - 66)         | 206<br>(174 - 238)      | 2,927<br>(2,242 - 3,531) |
| Alzheimer disease and other dementias               | 2,659<br>(1,957 - 3,249) | --<br>(0 - 0)         | --<br>(0 - 0)          | 0<br>(0 - 0)            | 79<br>(58 - 104)        | 2,580<br>(1,883 - 3,176) |
| Parkinson disease                                   | 234<br>(171 - 291)       | --<br>(0 - 0)         | --<br>(0 - 0)          | 1<br>(0 - 1)            | 14<br>(10 - 17)         | 220<br>(158 - 277)       |
| Epilepsy                                            | 50<br>(39 - 60)          | 1<br>(1 - 2)          | 2<br>(1 - 2)           | 26<br>(20 - 32)         | 10<br>(7 - 12)          | 12<br>(8 - 16)           |
| Multiple sclerosis                                  | 41<br>(26 - 58)          | --<br>(0 - 0)         | --<br>(0 - 0)          | 8<br>(5 - 11)           | 21<br>(13 - 31)         | 12<br>(7 - 18)           |
| Other neurological disorders                        | 217<br>(181 - 249)       | 5<br>(4 - 7)          | 2<br>(2 - 3)           | 22<br>(18 - 27)         | 83<br>(68 - 97)         | 104<br>(85 - 124)        |
| Mental and substance use disorders                  | 95<br>(76 - 111)         | 0<br>(0 - 0)          | 0<br>(0 - 0)           | 56<br>(45 - 67)         | 23<br>(17 - 29)         | 16<br>(11 - 21)          |
| Schizophrenia                                       | 4<br>(1 - 6)             | --<br>(0 - 0)         | --<br>(0 - 0)          | 1<br>(0 - 1)            | 1<br>(0 - 2)            | 2<br>(1 - 4)             |
| Alcohol use disorders                               | 35<br>(21 - 47)          | --<br>(0 - 0)         | --<br>(0 - 0)          | 11<br>(6 - 14)          | 13<br>(8 - 19)          | 11<br>(7 - 15)           |
| Drug use disorders                                  | 56<br>(45 - 67)          | 0<br>(0 - 0)          | --<br>(0 - 0)          | 44<br>(35 - 54)         | 9<br>(7 - 11)           | 3<br>(2 - 4)             |
| Opioid use disorders                                | 33<br>(26 - 39)          | 0<br>(0 - 0)          | --<br>(0 - 0)          | 26<br>(20 - 32)         | 5<br>(4 - 6)            | 2<br>(1 - 2)             |
| Cocaine use disorders                               | 2<br>(1 - 2)             | 0<br>(0 - 0)          | --<br>(0 - 0)          | 1<br>(1 - 2)            | 0<br>(0 - 0)            | 0<br>(0 - 0)             |
| Amphetamine use disorders                           | 2<br>(2 - 2)             | 0<br>(0 - 0)          | --<br>(0 - 0)          | 1<br>(1 - 2)            | 0<br>(0 - 0)            | 0<br>(0 - 0)             |
| Other drug use disorders                            | 20<br>(16 - 24)          | 0<br>(0 - 0)          | --<br>(0 - 0)          | 16<br>(12 - 19)         | 3<br>(3 - 4)            | 1<br>(1 - 1)             |
| Eating disorders                                    | 1<br>(0 - 1)             | --<br>(0 - 0)         | 0<br>(0 - 0)           | 1<br>(0 - 1)            | --<br>(0 - 0)           | --<br>(0 - 0)            |
| Anorexia nervosa                                    | 1<br>(0 - 1)             | --<br>(0 - 0)         | 0<br>(0 - 0)           | 1<br>(0 - 1)            | --<br>(0 - 0)           | --<br>(0 - 0)            |
| Diabetes, urogenital, blood, and endocrine diseases | 2,013<br>(1,795 - 2,287) | 8<br>(6 - 11)         | 4<br>(3 - 5)           | 105<br>(91 - 122)       | 446<br>(393 - 509)      | 1,450<br>(1,273 - 1,690) |
| Diabetes mellitus                                   | 731<br>(636 - 829)       | 0<br>(0 - 1)          | 0<br>(0 - 0)           | 26<br>(22 - 31)         | 177<br>(151 - 204)      | 527<br>(446 - 618)       |
| Acute glomerulonephritis                            | 1<br>(1 - 1)             | 0<br>(0 - 0)          | 0<br>(0 - 0)           | 0<br>(0 - 0)            | 0<br>(0 - 0)            | 0<br>(0 - 0)             |
| Chronic kidney disease                              | 809<br>(656 - 1,065)     | 0<br>(0 - 1)          | 0<br>(0 - 0)           | 29<br>(23 - 40)         | 157<br>(125 - 205)      | 623<br>(491 - 837)       |
| Chronic kidney disease due to diabetes mellitus     | 299<br>(222 - 431)       | 0<br>(0 - 0)          | 0<br>(0 - 0)           | 13<br>(10 - 19)         | 88<br>(67 - 116)        | 198<br>(139 - 304)       |

Web Table 31- New Zealand deaths with 95% UI by age, sex, and cause in 2013

| Cause                                               | Both Sexes, All Ages     | Both Sexes, 0-4 Years | Both Sexes, 5-14 Years | Both Sexes, 15-49 Years | Both Sexes, 50-69 Years | Both Sexes, 70-80 Years |
|-----------------------------------------------------|--------------------------|-----------------------|------------------------|-------------------------|-------------------------|-------------------------|
| Chronic kidney disease due to hypertension          | 139<br>(95 - 200)        | 0<br>(0 - 0)          | 0<br>(0 - 0)           | 3<br>(2 - 5)            | 18<br>(12 - 30)         | 119<br>(76 - 171)       |
| Chronic kidney disease due to glomerulonephritis    | 21<br>(13 - 29)          | 0<br>(0 - 0)          | 0<br>(0 - 0)           | 3<br>(2 - 5)            | 6<br>(3 - 9)            | 11<br>(7 - 17)          |
| Chronic kidney disease due to other causes          | 350<br>(219 - 532)       | 0<br>(0 - 0)          | 0<br>(0 - 0)           | 10<br>(6 - 16)          | 45<br>(25 - 70)         | 294<br>(182 - 456)      |
| Urinary diseases and male infertility               | 163<br>(124 - 232)       | 0<br>(0 - 1)          | 0<br>(0 - 0)           | 4<br>(3 - 5)            | 16<br>(13 - 21)         | 143<br>(105 - 207)      |
| Interstitial nephritis and urinary tract infections | 138<br>(104 - 197)       | 0<br>(0 - 1)          | 0<br>(0 - 0)           | 2<br>(2 - 3)            | 11<br>(9 - 16)          | 124<br>(90 - 180)       |
| Urolithiasis                                        | 10<br>(6 - 14)           | --                    | 0<br>(0 - 0)           | 1<br>(0 - 1)            | 2<br>(2 - 3)            | 6<br>(4 - 10)           |
| Other urinary diseases                              | 16<br>(10 - 28)          | 0<br>(0 - 0)          | 0<br>(0 - 0)           | 1<br>(1 - 1)            | 2<br>(1 - 3)            | 13<br>(8 - 24)          |
| Gynecological diseases                              | 1<br>(0 - 1)             | --                    | --                     | 0<br>(0 - 0)            | 0<br>(0 - 0)            | 0<br>(0 - 0)            |
| Uterine fibroids                                    | 0<br>(0 - 0)             | --                    | --                     | 0<br>(0 - 0)            | 0<br>(0 - 0)            | 0<br>(0 - 0)            |
| Polycystic ovarian syndrome                         | 0<br>(0 - 0)             | --                    | --                     | 0<br>(0 - 0)            | 0<br>(0 - 0)            | --                      |
| Endometriosis                                       | 0<br>(0 - 0)             | --                    | --                     | 0<br>(0 - 0)            | 0<br>(0 - 0)            | --                      |
| Genital prolapse                                    | 0<br>(0 - 0)             | --                    | --                     | 0<br>(0 - 0)            | 0<br>(0 - 0)            | 0<br>(0 - 0)            |
| Other gynecological diseases                        | 0<br>(0 - 0)             | --                    | --                     | 0<br>(0 - 0)            | 0<br>(0 - 0)            | 0<br>(0 - 0)            |
| Hemoglobinopathies and hemolytic anemias            | 16<br>(12 - 24)          | 0<br>(0 - 1)          | 0<br>(0 - 0)           | 1<br>(1 - 2)            | 2<br>(1 - 3)            | 13<br>(9 - 19)          |
| Thalassemias                                        | 2<br>(1 - 3)             | 0<br>(0 - 1)          | 0<br>(0 - 0)           | 1<br>(0 - 1)            | 0<br>(0 - 1)            | 0<br>(0 - 0)            |
| Sickle cell disorders                               | 1<br>(0 - 1)             | 0<br>(0 - 0)          | 0<br>(0 - 0)           | 0<br>(0 - 0)            | 0<br>(0 - 0)            | 0<br>(0 - 0)            |
| G6PD deficiency                                     | 0<br>(0 - 0)             | 0<br>(0 - 0)          | 0<br>(0 - 0)           | 0<br>(0 - 0)            | 0<br>(0 - 0)            | 0<br>(0 - 0)            |
| Other hemoglobinopathies and hemolytic anemias      | 14<br>(10 - 21)          | 0<br>(0 - 0)          | 0<br>(0 - 0)           | 0<br>(0 - 0)            | 1<br>(1 - 2)            | 12<br>(8 - 18)          |
| Endocrine, metabolic, blood, and immune disorders   | 293<br>(199 - 347)       | 6<br>(4 - 8)          | 3<br>(2 - 4)           | 45<br>(31 - 54)         | 94<br>(63 - 116)        | 145<br>(89 - 187)       |
| Musculoskeletal disorders                           | 162<br>(130 - 204)       | --                    | 0<br>(0 - 1)           | 13<br>(10 - 16)         | 40<br>(33 - 51)         | 109<br>(83 - 142)       |
| Rheumatoid arthritis                                | 57<br>(42 - 76)          | --                    | 0<br>(0 - 0)           | 1<br>(1 - 1)            | 13<br>(9 - 17)          | 43<br>(30 - 61)         |
| Other musculoskeletal disorders                     | 105<br>(82 - 132)        | --                    | 0<br>(0 - 1)           | 12<br>(10 - 15)         | 28<br>(21 - 36)         | 65<br>(48 - 89)         |
| Other non-communicable diseases                     | 318<br>(278 - 377)       | 142<br>(112 - 185)    | 7<br>(6 - 9)           | 34<br>(29 - 42)         | 35<br>(30 - 42)         | 100<br>(76 - 131)       |
| Congenital anomalies                                | 188<br>(160 - 222)       | 90<br>(71 - 114)      | 7<br>(6 - 9)           | 32<br>(27 - 40)         | 28<br>(23 - 34)         | 31<br>(24 - 42)         |
| Neural tube defects                                 | 6<br>(4 - 8)             | 4<br>(3 - 7)          | 0<br>(0 - 0)           | 1<br>(1 - 1)            | 0<br>(0 - 0)            | 0<br>(0 - 0)            |
| Congenital heart anomalies                          | 68<br>(54 - 85)          | 29<br>(20 - 39)       | 3<br>(2 - 4)           | 13<br>(10 - 17)         | 7<br>(5 - 9)            | 17<br>(12 - 25)         |
| Cleft lip and cleft palate                          | 0<br>(0 - 0)             | 0<br>(0 - 0)          | --                     | --                      | --                      | --                      |
| Down syndrome                                       | 20<br>(13 - 26)          | 4<br>(2 - 6)          | 0<br>(0 - 1)           | 4<br>(3 - 6)            | 10<br>(6 - 14)          | 1<br>(1 - 2)            |
| Chromosomal unbalanced rearrangements               | 12<br>(8 - 17)           | 11<br>(7 - 16)        | 0<br>(0 - 0)           | 1<br>(0 - 1)            | 0<br>(0 - 0)            | 0<br>(0 - 0)            |
| Other congenital anomalies                          | 83<br>(67 - 105)         | 42<br>(32 - 57)       | 4<br>(3 - 5)           | 14<br>(11 - 19)         | 10<br>(7 - 14)          | 12<br>(9 - 18)          |
| Skin and subcutaneous diseases                      | 79<br>(54 - 108)         | 0<br>(0 - 0)          | 0<br>(0 - 0)           | 2<br>(1 - 2)            | 8<br>(6 - 9)            | 69<br>(45 - 97)         |
| Cellulitis                                          | 40<br>(23 - 59)          | 0<br>(0 - 0)          | 0<br>(0 - 0)           | 1<br>(1 - 1)            | 5<br>(4 - 7)            | 34<br>(18 - 53)         |
| Pyoderma                                            | 24<br>(13 - 40)          | 0<br>(0 - 0)          | 0<br>(0 - 0)           | 0<br>(0 - 0)            | 2<br>(1 - 2)            | 22<br>(12 - 37)         |
| Decubitus ulcer                                     | 10<br>(5 - 19)           | 0<br>(0 - 0)          | 0<br>(0 - 0)           | 0<br>(0 - 0)            | 0<br>(0 - 1)            | 9<br>(5 - 18)           |
| Other skin and subcutaneous diseases                | 4<br>(2 - 9)             | 0<br>(0 - 0)          | 0<br>(0 - 0)           | 0<br>(0 - 0)            | 1<br>(0 - 1)            | 3<br>(1 - 8)            |
| Sudden infant death syndrome                        | 51<br>(32 - 87)          | 51<br>(32 - 87)       | --                     | --                      | --                      | --                      |
| Injuries                                            | 1,792<br>(1,635 - 1,985) | 54<br>(38 - 70)       | 30<br>(26 - 34)        | 764<br>(701 - 832)      | 317<br>(283 - 353)      | 628<br>(523 - 759)      |
| Transport injuries                                  | 474<br>(426 - 523)       | 11<br>(8 - 16)        | 15<br>(12 - 18)        | 281<br>(250 - 316)      | 92<br>(78 - 107)        | 74<br>(60 - 89)         |
| Road injuries                                       | 435<br>(391 - 481)       | 11<br>(8 - 15)        | 14<br>(12 - 17)        | 258<br>(229 - 289)      | 81<br>(69 - 95)         | 71<br>(57 - 85)         |
| Pedestrian road injuries                            | 65<br>(44 - 95)          | 5<br>(3 - 7)          | 4<br>(3 - 6)           | 20<br>(12 - 33)         | 14<br>(9 - 22)          | 22<br>(15 - 33)         |



Web Table 31- New Zealand deaths with 95% UI by age, sex, and cause in 2013

| Cause                                           | Both Sexes, All Ages | Both Sexes, 0-4 Years | Both Sexes, 5-14 Years | Both Sexes, 15-49 Years | Both Sexes, 50-69 Years | Both Sexes, 70-80 Years |
|-------------------------------------------------|----------------------|-----------------------|------------------------|-------------------------|-------------------------|-------------------------|
| Cyclist road injuries                           | 12<br>(8 - 17)       | 0<br>(0 - 0)          | 2<br>(2 - 3)           | 6<br>(4 - 8)            | 3<br>(2 - 4)            | 2<br>(1 - 3)            |
| Motorcyclist road injuries                      | 39<br>(26 - 59)      | 0<br>(0 - 0)          | 1<br>(0 - 1)           | 35<br>(23 - 52)         | 3<br>(2 - 5)            | 1<br>(0 - 1)            |
| Motor vehicle road injuries                     | 316<br>(264 - 359)   | 6<br>(4 - 9)          | 7<br>(5 - 9)           | 197<br>(165 - 225)      | 61<br>(49 - 74)         | 45<br>(34 - 57)         |
| Other road injuries                             | 2<br>(1 - 3)         | 0<br>(0 - 0)          | 0<br>(0 - 0)           | 1<br>(0 - 1)            | 1<br>(0 - 1)            | 0<br>(0 - 1)            |
| Other transport injuries                        | 39<br>(30 - 50)      | 0<br>(0 - 1)          | 1<br>(1 - 1)           | 24<br>(17 - 31)         | 11<br>(8 - 15)          | 3<br>(2 - 5)            |
| Unintentional injuries                          | 736<br>(619 - 879)   | 37<br>(24 - 50)       | 10<br>(8 - 13)         | 113<br>(98 - 141)       | 84<br>(73 - 97)         | 492<br>(387 - 622)      |
| Falls                                           | 473<br>(366 - 603)   | 2<br>(1 - 3)          | 1<br>(1 - 1)           | 23<br>(19 - 29)         | 33<br>(24 - 40)         | 414<br>(310 - 538)      |
| Drowning                                        | 76<br>(58 - 121)     | 9<br>(6 - 15)         | 4<br>(3 - 6)           | 40<br>(30 - 65)         | 17<br>(11 - 27)         | 7<br>(5 - 10)           |
| Fire, heat, and hot substances                  | 28<br>(23 - 36)      | 2<br>(1 - 3)          | 1<br>(1 - 1)           | 7<br>(5 - 9)            | 5<br>(4 - 7)            | 13<br>(10 - 17)         |
| Poisonings                                      | 11<br>(7 - 13)       | 0<br>(0 - 1)          | 0<br>(0 - 0)           | 5<br>(3 - 7)            | 2<br>(1 - 3)            | 3<br>(2 - 3)            |
| Exposure to mechanical forces                   | 58<br>(42 - 70)      | 18<br>(5 - 29)        | 2<br>(2 - 3)           | 22<br>(18 - 27)         | 9<br>(7 - 11)           | 6<br>(5 - 8)            |
| Unintentional firearm injuries                  | 3<br>(2 - 3)         | 0<br>(0 - 0)          | 0<br>(0 - 0)           | 2<br>(1 - 2)            | 0<br>(0 - 1)            | 0<br>(0 - 0)            |
| Unintentional suffocation                       | 23<br>(7 - 34)       | 17<br>(4 - 27)        | 1<br>(1 - 2)           | 3<br>(1 - 4)            | 1<br>(0 - 1)            | 1<br>(0 - 1)            |
| Other exposure to mechanical forces             | 32<br>(27 - 38)      | 1<br>(1 - 2)          | 1<br>(1 - 1)           | 17<br>(13 - 21)         | 8<br>(6 - 10)           | 5<br>(4 - 7)            |
| Adverse effects of medical treatment            | 34<br>(25 - 54)      | 1<br>(0 - 1)          | 0<br>(0 - 0)           | 3<br>(2 - 4)            | 7<br>(5 - 12)           | 24<br>(17 - 39)         |
| Animal contact                                  | 4<br>(2 - 6)         | 0<br>(0 - 0)          | 0<br>(0 - 0)           | 1<br>(1 - 1)            | 2<br>(1 - 3)            | 1<br>(0 - 1)            |
| Venomous animal contact                         | 1<br>(1 - 2)         | 0<br>(0 - 0)          | 0<br>(0 - 0)           | 0<br>(0 - 0)            | 1<br>(0 - 2)            | 0<br>(0 - 0)            |
| Non-venomous animal contact                     | 2<br>(2 - 4)         | 0<br>(0 - 0)          | 0<br>(0 - 0)           | 1<br>(0 - 1)            | 1<br>(1 - 2)            | 1<br>(0 - 1)            |
| Foreign body                                    | 42<br>(28 - 56)      | 4<br>(2 - 6)          | 1<br>(1 - 1)           | 7<br>(5 - 10)           | 8<br>(5 - 11)           | 22<br>(14 - 31)         |
| Pulmonary aspiration and foreign body in airway | 40<br>(27 - 54)      | 4<br>(2 - 6)          | 1<br>(0 - 1)           | 7<br>(5 - 10)           | 7<br>(5 - 11)           | 21<br>(13 - 30)         |
| Foreign body in other body part                 | 1<br>(1 - 2)         | 0<br>(0 - 0)          | 0<br>(0 - 0)           | 0<br>(0 - 0)            | 0<br>(0 - 0)            | 1<br>(0 - 1)            |
| Other unintentional injuries                    | 11<br>(8 - 14)       | 1<br>(0 - 1)          | 0<br>(0 - 1)           | 5<br>(3 - 7)            | 2<br>(1 - 4)            | 2<br>(2 - 4)            |
| Self-harm and interpersonal violence            | 582<br>(468 - 654)   | 5<br>(3 - 7)          | 5<br>(4 - 6)           | 370<br>(302 - 417)      | 140<br>(108 - 166)      | 62<br>(51 - 80)         |
| Self-harm                                       | 519<br>(417 - 586)   | -                     | 3<br>(2 - 4)           | 329<br>(263 - 375)      | 129<br>(98 - 155)       | 57<br>(46 - 75)         |
| Interpersonal violence                          | 63<br>(44 - 79)      | 5<br>(3 - 7)          | 2<br>(1 - 3)           | 41<br>(28 - 52)         | 11<br>(7 - 15)          | 5<br>(3 - 6)            |
| Assault by firearm                              | 11<br>(7 - 19)       | 0<br>(0 - 0)          | 0<br>(0 - 0)           | 8<br>(5 - 13)           | 2<br>(1 - 4)            | 1<br>(0 - 1)            |
| Assault by sharp object                         | 20<br>(14 - 30)      | 1<br>(0 - 1)          | 1<br>(0 - 1)           | 14<br>(10 - 21)         | 3<br>(2 - 5)            | 1<br>(1 - 2)            |
| Assault by other means                          | 32<br>(19 - 41)      | 4<br>(2 - 6)          | 1<br>(1 - 2)           | 18<br>(10 - 24)         | 6<br>(3 - 8)            | 3<br>(2 - 4)            |

Web Table 31- New Zealand deaths with 95% UI by age, sex, and cause in 2013

| Cause                                                             | Males, All Ages             | Males, 0-4 Years   | Males, 5-14 Years | Males, 15-49 Years       | Males, 50-69 Years       | Males, 70-80 Years          |
|-------------------------------------------------------------------|-----------------------------|--------------------|-------------------|--------------------------|--------------------------|-----------------------------|
| All causes                                                        | 17,138<br>(16,073 - 18,350) | 196<br>(163 - 238) | 41<br>(36 - 46)   | 1,299<br>(1,184 - 1,429) | 3,970<br>(3,649 - 4,341) | 11,633<br>(11,002 - 12,349) |
| Communicable, maternal, neonatal, and nutritional diseases        | 449<br>(333 - 683)          | 69<br>(53 - 86)    | 2<br>(2 - 4)      | 21<br>(18 - 26)          | 35<br>(28 - 46)          | 322<br>(210 - 552)          |
| HIV/AIDS and tuberculosis                                         | 21<br>(16 - 26)             | 0<br>(0 - 0)       | 0<br>(0 - 0)      | 8<br>(6 - 12)            | 5<br>(4 - 7)             | 7<br>(5 - 9)                |
| Tuberculosis                                                      | 10<br>(8 - 13)              | 0<br>(0 - 0)       | 0<br>(0 - 0)      | 1<br>(1 - 1)             | 3<br>(2 - 4)             | 6<br>(5 - 9)                |
| HIV/AIDS                                                          | 10<br>(7 - 15)              | 0<br>(0 - 0)       | 0<br>(0 - 0)      | 7<br>(5 - 11)            | 3<br>(1 - 4)             | 0<br>(0 - 1)                |
| HIV/AIDS resulting in mycobacterial infection                     | 1<br>(0 - 1)                | 0<br>(0 - 0)       | 0<br>(0 - 0)      | 0<br>(0 - 1)             | 0<br>(0 - 0)             | 0<br>(0 - 0)                |
| HIV/AIDS resulting in other diseases                              | 10<br>(6 - 15)              | 0<br>(0 - 0)       | 0<br>(0 - 0)      | 7<br>(4 - 10)            | 3<br>(1 - 4)             | 0<br>(0 - 1)                |
| Diarrhea, lower respiratory, and other common infectious diseases | 347<br>(232 - 586)          | 12<br>(8 - 18)     | 2<br>(1 - 3)      | 10<br>(8 - 14)           | 24<br>(18 - 35)          | 298<br>(186 - 527)          |
| Diarrheal diseases                                                | 14<br>(9 - 23)              | 1<br>(1 - 2)       | 0<br>(0 - 0)      | 0<br>(0 - 0)             | 1<br>(1 - 1)             | 12<br>(7 - 20)              |
| Intestinal infectious diseases                                    | 5<br>(2 - 12)               | 1<br>(0 - 2)       | 1<br>(0 - 2)      | 2<br>(1 - 5)             | 1<br>(0 - 2)             | 0<br>(0 - 1)                |
| Typhoid fever                                                     | 4<br>(1 - 8)                | 1<br>(0 - 2)       | 1<br>(0 - 2)      | 1<br>(0 - 4)             | 0<br>(0 - 1)             | 0<br>(0 - 1)                |
| Paratyphoid fever                                                 | 1<br>(0 - 3)                | 0<br>(0 - 1)       | 0<br>(0 - 1)      | 1<br>(0 - 1)             | 0<br>(0 - 0)             | 0<br>(0 - 0)                |
| Other intestinal infectious diseases                              | 0<br>(0 - 2)                | 0<br>(0 - 1)       | 0<br>(0 - 0)      | 0<br>(0 - 1)             | 0<br>(0 - 1)             | 0<br>(0 - 0)                |
| Lower respiratory infections                                      | 311<br>(198 - 553)          | 6<br>(4 - 10)      | 0<br>(0 - 0)      | 5<br>(3 - 7)             | 20<br>(14 - 30)          | 280<br>(169 - 508)          |
| Upper respiratory infections                                      | 0<br>(0 - 1)                | 0<br>(0 - 0)       | 0<br>(0 - 0)      | 0<br>(0 - 0)             | 0<br>(0 - 0)             | 0<br>(0 - 1)                |
| Otitis media                                                      | 0<br>(0 - 0)                | 0<br>(0 - 0)       | 0<br>(0 - 0)      | 0<br>(0 - 0)             | 0<br>(0 - 0)             | 0<br>(0 - 0)                |
| Meningitis                                                        | 11<br>(8 - 13)              | 3<br>(2 - 5)       | 0<br>(0 - 0)      | 2<br>(1 - 2)             | 2<br>(2 - 3)             | 3<br>(2 - 4)                |
| Pneumococcal meningitis                                           | 3<br>(2 - 4)                | 1<br>(0 - 1)       | 0<br>(0 - 0)      | 0<br>(0 - 1)             | 1<br>(0 - 1)             | 1<br>(0 - 2)                |
| H influenzae type B meningitis                                    | 2<br>(1 - 2)                | 1<br>(0 - 2)       | 0<br>(0 - 0)      | 0<br>(0 - 0)             | 0<br>(0 - 0)             | 0<br>(0 - 1)                |
| Meningococcal meningitis                                          | 2<br>(2 - 3)                | 1<br>(0 - 1)       | 0<br>(0 - 0)      | 0<br>(0 - 1)             | 1<br>(0 - 1)             | 1<br>(1 - 1)                |
| Other meningitis                                                  | 4<br>(3 - 5)                | 1<br>(0 - 2)       | 0<br>(0 - 0)      | 1<br>(0 - 1)             | 1<br>(1 - 1)             | 1<br>(1 - 2)                |
| Encephalitis                                                      | 3<br>(1 - 4)                | 0<br>(0 - 1)       | 0<br>(0 - 0)      | 1<br>(0 - 1)             | 1<br>(0 - 1)             | 1<br>(0 - 2)                |
| Diphtheria                                                        | 0<br>(0 - 0)                | 0<br>(0 - 0)       | 0<br>(0 - 0)      | 0<br>(0 - 0)             | 0<br>(0 - 0)             | --<br>(0 - 0)               |
| Whooping cough                                                    | 0<br>(0 - 0)                | 0<br>(0 - 0)       | 0<br>(0 - 0)      | 0<br>(0 - 0)             | 0<br>(0 - 0)             | --<br>(0 - 0)               |
| Tetanus                                                           | 0<br>(0 - 0)                | 0<br>(0 - 0)       | 0<br>(0 - 0)      | 0<br>(0 - 0)             | 0<br>(0 - 0)             | 0<br>(0 - 0)                |
| Measles                                                           | 0<br>(0 - 0)                | 0<br>(0 - 0)       | 0<br>(0 - 0)      | 0<br>(0 - 0)             | 0<br>(0 - 0)             | --<br>(0 - 0)               |
| Varicella and herpes zoster                                       | 2<br>(0 - 7)                | 0<br>(0 - 1)       | 0<br>(0 - 0)      | 0<br>(0 - 1)             | 0<br>(0 - 1)             | 1<br>(0 - 6)                |
| Neglected tropical diseases and malaria                           | 1<br>(1 - 1)                | 0<br>(0 - 0)       | 0<br>(0 - 0)      | 0<br>(0 - 1)             | 0<br>(0 - 0)             | 0<br>(0 - 0)                |
| Cysticercosis                                                     | 0<br>(0 - 0)                | 0<br>(0 - 0)       | 0<br>(0 - 0)      | 0<br>(0 - 0)             | 0<br>(0 - 0)             | 0<br>(0 - 0)                |
| Cystic echinococcosis                                             | 0<br>(0 - 1)                | 0<br>(0 - 0)       | 0<br>(0 - 0)      | 0<br>(0 - 0)             | 0<br>(0 - 0)             | 0<br>(0 - 0)                |
| Dengue                                                            | 0<br>(0 - 0)                | 0<br>(0 - 0)       | 0<br>(0 - 0)      | 0<br>(0 - 0)             | 0<br>(0 - 0)             | 0<br>(0 - 0)                |
| Rabies                                                            | 0<br>(0 - 0)                | 0<br>(0 - 0)       | 0<br>(0 - 0)      | 0<br>(0 - 0)             | 0<br>(0 - 0)             | 0<br>(0 - 0)                |
| Other neglected tropical diseases                                 | 0<br>(0 - 0)                | 0<br>(0 - 0)       | 0<br>(0 - 0)      | 0<br>(0 - 0)             | 0<br>(0 - 0)             | 0<br>(0 - 0)                |
| Maternal disorders                                                | --                          | --                 | --                | --                       | --                       | --                          |
| Maternal hemorrhage                                               | --                          | --                 | --                | --                       | --                       | --                          |
| Maternal sepsis and other maternal infections                     | --                          | --                 | --                | --                       | --                       | --                          |
| Maternal hypertensive disorders                                   | --                          | --                 | --                | --                       | --                       | --                          |
| Maternal obstructed labor                                         | --                          | --                 | --                | --                       | --                       | --                          |
| Maternal abortive outcome                                         | --                          | --                 | --                | --                       | --                       | --                          |
| Indirect maternal deaths                                          | --                          | --                 | --                | --                       | --                       | --                          |

Web Table 31- New Zealand deaths with 95% UI by age, sex, and cause in 2013

| Cause                                                            | Males, All Ages             | Males, 0-4 Years | Males, 5-14 Years | Males, 15-49 Years | Males, 50-69 Years       | Males, 70-80 Years          |
|------------------------------------------------------------------|-----------------------------|------------------|-------------------|--------------------|--------------------------|-----------------------------|
| Late maternal deaths                                             | --                          | --               | --                | --                 | --                       | --                          |
| Maternal deaths aggravated by HIV/AIDS                           | --                          | --               | --                | --                 | --                       | --                          |
| Other maternal disorders                                         | --                          | --               | --                | --                 | --                       | --                          |
| Neonatal disorders                                               | 53<br>(41 - 67)             | 53<br>(41 - 67)  | --                | --                 | --                       | --                          |
| Neonatal preterm birth complications                             | 31<br>(22 - 41)             | 31<br>(22 - 41)  | --                | --                 | --                       | --                          |
| Neonatal encephalopathy due to birth asphyxia and trauma         | 11<br>(7 - 17)              | 11<br>(7 - 17)   | --                | --                 | --                       | --                          |
| Neonatal sepsis and other neonatal infections                    | 2<br>(1 - 5)                | 2<br>(1 - 5)     | --                | --                 | --                       | --                          |
| Hemolytic disease and other neonatal jaundice                    | 0<br>(0 - 0)                | 0<br>(0 - 0)     | --                | --                 | --                       | --                          |
| Other neonatal disorders                                         | 9<br>(4 - 14)               | 9<br>(4 - 14)    | --                | --                 | --                       | --                          |
| Nutritional deficiencies                                         | 12<br>(8 - 22)              | 0<br>(0 - 0)     | 0<br>(0 - 0)      | 0<br>(0 - 0)       | 1<br>(1 - 1)             | 11<br>(7 - 20)              |
| Protein-energy malnutrition                                      | 4<br>(1 - 7)                | 0<br>(0 - 0)     | 0<br>(0 - 0)      | 0<br>(0 - 0)       | 0<br>(0 - 0)             | 3<br>(1 - 6)                |
| Iodine deficiency                                                | 0<br>(0 - 0)                | 0<br>(0 - 0)     | 0<br>(0 - 0)      | 0<br>(0 - 0)       | 0<br>(0 - 0)             | 0<br>(0 - 0)                |
| Iron-deficiency anemia                                           | 8<br>(4 - 14)               | 0<br>(0 - 0)     | 0<br>(0 - 0)      | 0<br>(0 - 0)       | 0<br>(0 - 1)             | 7<br>(4 - 14)               |
| Other nutritional deficiencies                                   | 1<br>(0 - 3)                | 0<br>(0 - 0)     | 0<br>(0 - 0)      | 0<br>(0 - 0)       | 0<br>(0 - 0)             | 1<br>(0 - 3)                |
| Other communicable, maternal, neonatal, and nutritional diseases | 15<br>(10 - 19)             | 3<br>(1 - 4)     | 0<br>(0 - 0)      | 2<br>(2 - 3)       | 4<br>(3 - 5)             | 6<br>(3 - 9)                |
| Sexually transmitted diseases excluding HIV                      | 1<br>(0 - 2)                | 1<br>(0 - 2)     | 0<br>(0 - 0)      | 0<br>(0 - 0)       | 0<br>(0 - 0)             | 0<br>(0 - 0)                |
| Syphilis                                                         | 1<br>(0 - 2)                | 1<br>(0 - 2)     | 0<br>(0 - 0)      | 0<br>(0 - 0)       | 0<br>(0 - 0)             | 0<br>(0 - 0)                |
| Chlamydial infection                                             | --                          | --               | --                | --                 | --                       | --                          |
| Gonococcal infection                                             | 0<br>(0 - 0)                | --               | 0<br>(0 - 0)      | 0<br>(0 - 0)       | 0<br>(0 - 0)             | 0<br>(0 - 0)                |
| Other sexually transmitted diseases                              | 0<br>(0 - 0)                | --               | 0<br>(0 - 0)      | 0<br>(0 - 0)       | 0<br>(0 - 0)             | 0<br>(0 - 0)                |
| Hepatitis                                                        | 1<br>(1 - 2)                | 0<br>(0 - 0)     | 0<br>(0 - 0)      | 0<br>(0 - 1)       | 1<br>(0 - 1)             | 0<br>(0 - 0)                |
| Acute hepatitis A                                                | 0<br>(0 - 0)                | 0<br>(0 - 0)     | 0<br>(0 - 0)      | 0<br>(0 - 0)       | 0<br>(0 - 0)             | 0<br>(0 - 0)                |
| Acute hepatitis B                                                | 1<br>(1 - 1)                | 0<br>(0 - 0)     | 0<br>(0 - 0)      | 0<br>(0 - 1)       | 0<br>(0 - 1)             | 0<br>(0 - 0)                |
| Acute hepatitis C                                                | 0<br>(0 - 0)                | --               | 0<br>(0 - 0)      | 0<br>(0 - 0)       | 0<br>(0 - 0)             | 0<br>(0 - 0)                |
| Other infectious diseases                                        | 13<br>(8 - 17)              | 2<br>(1 - 2)     | 0<br>(0 - 0)      | 2<br>(1 - 2)       | 3<br>(2 - 5)             | 6<br>(3 - 9)                |
| Non-communicable diseases                                        | 15,529<br>(14,559 - 16,632) | 95<br>(75 - 122) | 19<br>(17 - 23)   | 694<br>(624 - 771) | 3,708<br>(3,408 - 4,061) | 11,013<br>(10,392 - 11,707) |
| Neoplasms                                                        | 5,227<br>(4,797 - 5,698)    | 6<br>(4 - 10)    | 9<br>(7 - 11)     | 266<br>(234 - 302) | 1,739<br>(1,575 - 1,914) | 3,206<br>(2,920 - 3,524)    |
| Esophageal cancer                                                | 190<br>(146 - 225)          | --               | --                | 8<br>(5 - 10)      | 77<br>(60 - 97)          | 106<br>(74 - 132)           |
| Stomach cancer                                                   | 252<br>(213 - 295)          | --               | --                | 14<br>(11 - 18)    | 79<br>(66 - 92)          | 159<br>(126 - 199)          |
| Liver cancer                                                     | 158<br>(107 - 213)          | --               | 0<br>(0 - 0)      | 15<br>(10 - 23)    | 71<br>(48 - 96)          | 71<br>(42 - 105)            |
| Liver cancer due to hepatitis B                                  | 47<br>(21 - 76)             | --               | 0<br>(0 - 0)      | 7<br>(4 - 11)      | 25<br>(10 - 40)          | 15<br>(6 - 27)              |
| Liver cancer due to hepatitis C                                  | 75<br>(44 - 115)            | --               | 0<br>(0 - 0)      | 5<br>(2 - 10)      | 32<br>(18 - 49)          | 38<br>(21 - 59)             |
| Liver cancer due to alcohol use                                  | 28<br>(15 - 51)             | --               | --                | 2<br>(1 - 3)       | 11<br>(6 - 20)           | 15<br>(7 - 29)              |
| Liver cancer due to other causes                                 | 8<br>(3 - 14)               | --               | 0<br>(0 - 0)      | 1<br>(0 - 2)       | 4<br>(2 - 7)             | 3<br>(1 - 6)                |
| Larynx cancer                                                    | 35<br>(23 - 45)             | --               | --                | 1<br>(1 - 2)       | 12<br>(8 - 16)           | 21<br>(14 - 28)             |
| Tracheal, bronchus and lung cancer                               | 1,063<br>(943 - 1,190)      | --               | --                | 27<br>(21 - 34)    | 411<br>(359 - 476)       | 624<br>(541 - 713)          |
| Breast cancer                                                    | 4<br>(2 - 8)                | --               | --                | 0<br>(0 - 1)       | 1<br>(0 - 3)             | 3<br>(1 - 5)                |
| Cervical cancer                                                  | --                          | --               | --                | --                 | --                       | --                          |
| Uterine cancer                                                   | --                          | --               | --                | --                 | --                       | --                          |
| Prostate cancer                                                  | 789<br>(613 - 1,120)        | --               | --                | 2<br>(1 - 3)       | 125<br>(87 - 173)        | 662<br>(501 - 974)          |

Web Table 31- New Zealand deaths with 95% UI by age, sex, and cause in 2013

| Cause                                         | Males, All Ages          | Males, 0-4 Years | Males, 5-14 Years | Males, 15-49 Years | Males, 50-69 Years       | Males, 70-80 Years       |
|-----------------------------------------------|--------------------------|------------------|-------------------|--------------------|--------------------------|--------------------------|
| Colon and rectum cancer                       | 799<br>(690 - 906)       | --               | --                | 31<br>(25 - 38)    | 276<br>(239 - 315)       | 492<br>(412 - 578)       |
| Lip and oral cavity cancer                    | 57<br>(45 - 69)          | --               | --                | 5<br>(4 - 7)       | 26<br>(19 - 33)          | 26<br>(19 - 35)          |
| Nasopharynx cancer                            | 14<br>(10 - 19)          | --               | 0<br>(0 - 0)      | 4<br>(2 - 6)       | 7<br>(5 - 10)            | 4<br>(2 - 5)             |
| Other pharynx cancer                          | 42<br>(32 - 55)          | --               | --                | 3<br>(2 - 4)       | 25<br>(18 - 36)          | 14<br>(10 - 20)          |
| Gallbladder and biliary tract cancer          | 46<br>(31 - 63)          | --               | --                | 2<br>(1 - 2)       | 13<br>(9 - 19)           | 31<br>(20 - 44)          |
| Pancreatic cancer                             | 250<br>(218 - 286)       | --               | --                | 11<br>(9 - 14)     | 100<br>(84 - 117)        | 139<br>(117 - 164)       |
| Malignant skin melanoma                       | 215<br>(106 - 363)       | --               | --                | 31<br>(17 - 57)    | 85<br>(43 - 149)         | 99<br>(46 - 156)         |
| Non-melanoma skin cancer                      | 74<br>(39 - 108)         | --               | --                | 1<br>(1 - 2)       | 15<br>(7 - 22)           | 58<br>(30 - 88)          |
| Ovarian cancer                                | --                       | --               | --                | --                 | --                       | --                       |
| Testicular cancer                             | 8<br>(6 - 11)            | --               | --                | 5<br>(4 - 7)       | 2<br>(1 - 2)             | 1<br>(1 - 1)             |
| Kidney cancer                                 | 143<br>(115 - 175)       | 0<br>(0 - 0)     | 0<br>(0 - 0)      | 9<br>(7 - 12)      | 60<br>(47 - 77)          | 73<br>(54 - 98)          |
| Bladder cancer                                | 159<br>(123 - 194)       | --               | --                | 2<br>(2 - 3)       | 34<br>(26 - 42)          | 123<br>(94 - 157)        |
| Brain and nervous system cancer               | 151<br>(122 - 198)       | 1<br>(1 - 3)     | 3<br>(2 - 4)      | 28<br>(21 - 37)    | 74<br>(59 - 102)         | 45<br>(31 - 61)          |
| Thyroid cancer                                | 10<br>(8 - 13)           | --               | 0<br>(0 - 0)      | 1<br>(1 - 1)       | 4<br>(3 - 5)             | 6<br>(4 - 8)             |
| Mesothelioma                                  | 73<br>(33 - 105)         | --               | --                | 2<br>(1 - 3)       | 28<br>(12 - 42)          | 43<br>(16 - 68)          |
| Hodgkin lymphoma                              | 14<br>(8 - 18)           | 0<br>(0 - 0)     | 0<br>(0 - 0)      | 4<br>(2 - 5)       | 4<br>(3 - 6)             | 5<br>(3 - 8)             |
| Non-Hodgkin lymphoma                          | 195<br>(94 - 255)        | 0<br>(0 - 1)     | 1<br>(0 - 1)      | 17<br>(8 - 23)     | 68<br>(28 - 89)          | 109<br>(53 - 152)        |
| Multiple myeloma                              | 116<br>(65 - 189)        | --               | --                | 5<br>(3 - 8)       | 38<br>(21 - 64)          | 73<br>(39 - 123)         |
| Leukemia                                      | 178<br>(153 - 207)       | 2<br>(1 - 3)     | 3<br>(2 - 4)      | 17<br>(14 - 20)    | 50<br>(41 - 60)          | 107<br>(87 - 130)        |
| Other neoplasms                               | 193<br>(137 - 239)       | 3<br>(1 - 4)     | 2<br>(1 - 3)      | 22<br>(16 - 26)    | 55<br>(41 - 69)          | 112<br>(66 - 153)        |
| Cardiovascular diseases                       | 5,928<br>(5,441 - 6,448) | 1<br>(1 - 2)     | 1<br>(1 - 1)      | 223<br>(197 - 253) | 1,247<br>(1,124 - 1,383) | 4,455<br>(4,074 - 4,851) |
| Rheumatic heart disease                       | 70<br>(32 - 99)          | 0<br>(0 - 0)     | 0<br>(0 - 0)      | 9<br>(4 - 12)      | 17<br>(7 - 25)           | 45<br>(19 - 69)          |
| Ischemic heart disease                        | 3,721<br>(3,329 - 4,154) | 0<br>(0 - 0)     | 0<br>(0 - 0)      | 144<br>(124 - 167) | 877<br>(779 - 991)       | 2,701<br>(2,391 - 3,046) |
| Cerebrovascular disease                       | 1,132<br>(868 - 1,416)   | 0<br>(0 - 0)     | 0<br>(0 - 0)      | 24<br>(17 - 32)    | 154<br>(107 - 197)       | 954<br>(731 - 1,203)     |
| Ischemic stroke                               | 748<br>(545 - 957)       | 0<br>(0 - 0)     | 0<br>(0 - 0)      | 3<br>(2 - 5)       | 44<br>(23 - 60)          | 701<br>(506 - 901)       |
| Hemorrhagic stroke                            | 384<br>(262 - 499)       | 0<br>(0 - 0)     | 0<br>(0 - 0)      | 21<br>(15 - 28)    | 110<br>(78 - 141)        | 252<br>(158 - 342)       |
| Hypertensive heart disease                    | 109<br>(71 - 176)        | 0<br>(0 - 0)     | 0<br>(0 - 0)      | 3<br>(2 - 4)       | 16<br>(11 - 26)          | 91<br>(55 - 151)         |
| Cardiomyopathy and myocarditis                | 175<br>(134 - 248)       | 1<br>(1 - 1)     | 0<br>(0 - 1)      | 29<br>(22 - 40)    | 74<br>(53 - 105)         | 71<br>(49 - 108)         |
| Atrial fibrillation and flutter               | 143<br>(91 - 212)        | --               | --                | 1<br>(0 - 1)       | 10<br>(6 - 15)           | 131<br>(83 - 200)        |
| Aortic aneurysm                               | 264<br>(217 - 334)       | --               | --                | 5<br>(4 - 7)       | 54<br>(42 - 67)          | 205<br>(163 - 269)       |
| Peripheral vascular disease                   | 49<br>(34 - 70)          | --               | --                | 0<br>(0 - 0)       | 5<br>(3 - 6)             | 44<br>(30 - 65)          |
| Endocarditis                                  | 18<br>(11 - 33)          | 0<br>(0 - 0)     | 0<br>(0 - 0)      | 1<br>(1 - 3)       | 5<br>(3 - 9)             | 12<br>(7 - 22)           |
| Other cardiovascular and circulatory diseases | 246<br>(157 - 314)       | 0<br>(0 - 0)     | 0<br>(0 - 0)      | 7<br>(5 - 10)      | 37<br>(23 - 48)          | 201<br>(127 - 266)       |
| Chronic respiratory diseases                  | 1,231<br>(976 - 1,408)   | 2<br>(1 - 2)     | 1<br>(1 - 1)      | 22<br>(18 - 27)    | 191<br>(148 - 227)       | 1,016<br>(803 - 1,179)   |
| Chronic obstructive pulmonary disease         | 1,026<br>(807 - 1,194)   | 1<br>(0 - 2)     | 0<br>(0 - 0)      | 11<br>(8 - 14)     | 162<br>(124 - 193)       | 851<br>(672 - 1,010)     |
| Pneumoconiosis                                | 39<br>(23 - 64)          | 0<br>(0 - 0)     | 0<br>(0 - 0)      | 1<br>(0 - 1)       | 3<br>(2 - 4)             | 36<br>(20 - 60)          |
| Silicosis                                     | 22<br>(12 - 38)          | 0<br>(0 - 0)     | 0<br>(0 - 0)      | 0<br>(0 - 0)       | 1<br>(0 - 1)             | 21<br>(12 - 37)          |
| Asbestosis                                    | 12<br>(6 - 19)           | 0<br>(0 - 0)     | 0<br>(0 - 0)      | 0<br>(0 - 0)       | 1<br>(1 - 2)             | 10<br>(5 - 17)           |
| Coal workers pneumoconiosis                   | 2<br>(1 - 3)             | 0<br>(0 - 0)     | 0<br>(0 - 0)      | 0<br>(0 - 0)       | 0<br>(0 - 0)             | 2<br>(1 - 3)             |
| Other pneumoconiosis                          | 3<br>(2 - 6)             | 0<br>(0 - 0)     | 0<br>(0 - 0)      | 0<br>(0 - 1)       | 0<br>(0 - 1)             | 2<br>(1 - 5)             |

Web Table 31- New Zealand deaths with 95% UI by age, sex, and cause in 2013

| Cause                                               | Males, All Ages          | Males, 0-4 Years | Males, 5-14 Years | Males, 15-49 Years | Males, 50-69 Years | Males, 70-80 Years     |
|-----------------------------------------------------|--------------------------|------------------|-------------------|--------------------|--------------------|------------------------|
| Asthma                                              | 29<br>(21 - 36)          | 0<br>(0 - 0)     | 1<br>(1 - 1)      | 7<br>(6 - 9)       | 8<br>(6 - 11)      | 12<br>(8 - 17)         |
| Interstitial lung disease and pulmonary sarcoidosis | 129<br>(83 - 198)        | 0<br>(0 - 0)     | 0<br>(0 - 0)      | 3<br>(2 - 4)       | 17<br>(11 - 26)    | 110<br>(68 - 173)      |
| Other chronic respiratory diseases                  | 8<br>(5 - 12)            | 0<br>(0 - 1)     | 0<br>(0 - 0)      | 0<br>(0 - 0)       | 1<br>(1 - 1)       | 7<br>(4 - 11)          |
| Cirrhosis                                           | 135<br>(119 - 154)       | 0<br>(0 - 0)     | 0<br>(0 - 0)      | 17<br>(14 - 22)    | 62<br>(53 - 73)    | 56<br>(46 - 67)        |
| Cirrhosis due to hepatitis B                        | 23<br>(10 - 41)          | 0<br>(0 - 0)     | 0<br>(0 - 0)      | 3<br>(2 - 5)       | 11<br>(5 - 19)     | 9<br>(3 - 18)          |
| Cirrhosis due to hepatitis C                        | 55<br>(36 - 73)          | 0<br>(0 - 0)     | 0<br>(0 - 0)      | 7<br>(4 - 11)      | 25<br>(14 - 35)    | 23<br>(15 - 31)        |
| Cirrhosis due to alcohol use                        | 50<br>(35 - 67)          | --<br>(0 - 0)    | --<br>(0 - 0)     | 5<br>(3 - 8)       | 22<br>(14 - 31)    | 23<br>(16 - 32)        |
| Cirrhosis due to other causes                       | 7<br>(3 - 12)            | 0<br>(0 - 0)     | 0<br>(0 - 0)      | 2<br>(1 - 3)       | 4<br>(1 - 6)       | 2<br>(1 - 3)           |
| Digestive diseases                                  | 291<br>(224 - 344)       | 0<br>(0 - 0)     | 0<br>(0 - 0)      | 8<br>(6 - 10)      | 49<br>(38 - 59)    | 234<br>(178 - 283)     |
| Peptic ulcer disease                                | 53<br>(36 - 72)          | 0<br>(0 - 0)     | 0<br>(0 - 0)      | 1<br>(1 - 1)       | 9<br>(6 - 12)      | 43<br>(28 - 61)        |
| Gastritis and duodenitis                            | 6<br>(2 - 9)             | 0<br>(0 - 0)     | 0<br>(0 - 0)      | 0<br>(0 - 0)       | 1<br>(1 - 2)       | 4<br>(2 - 7)           |
| Appendicitis                                        | 3<br>(2 - 5)             | 0<br>(0 - 0)     | 0<br>(0 - 0)      | 0<br>(0 - 1)       | 1<br>(0 - 1)       | 2<br>(1 - 3)           |
| Paralytic ileus and intestinal obstruction          | 52<br>(30 - 80)          | 0<br>(0 - 0)     | 0<br>(0 - 0)      | 1<br>(1 - 2)       | 6<br>(3 - 10)      | 45<br>(25 - 70)        |
| Inguinal, femoral, and abdominal hernia             | 11<br>(4 - 18)           | 0<br>(0 - 0)     | 0<br>(0 - 0)      | 0<br>(0 - 0)       | 1<br>(1 - 2)       | 9<br>(3 - 16)          |
| Inflammatory bowel disease                          | 10<br>(7 - 15)           | 0<br>(0 - 0)     | 0<br>(0 - 0)      | 0<br>(0 - 1)       | 2<br>(1 - 3)       | 8<br>(5 - 12)          |
| Vascular intestinal disorders                       | 41<br>(17 - 79)          | 0<br>(0 - 0)     | 0<br>(0 - 0)      | 1<br>(0 - 2)       | 8<br>(3 - 16)      | 32<br>(12 - 63)        |
| Gallbladder and biliary diseases                    | 33<br>(18 - 47)          | 0<br>(0 - 0)     | 0<br>(0 - 0)      | 1<br>(0 - 1)       | 4<br>(2 - 6)       | 28<br>(15 - 41)        |
| Pancreatitis                                        | 22<br>(13 - 31)          | 0<br>(0 - 0)     | 0<br>(0 - 0)      | 2<br>(1 - 3)       | 7<br>(4 - 10)      | 13<br>(7 - 20)         |
| Other digestive diseases                            | 60<br>(35 - 84)          | 0<br>(0 - 0)     | 0<br>(0 - 0)      | 1<br>(1 - 2)       | 9<br>(5 - 12)      | 49<br>(29 - 72)        |
| Neurological disorders                              | 1,386<br>(1,096 - 1,702) | 4<br>(2 - 6)     | 2<br>(2 - 3)      | 34<br>(28 - 42)    | 106<br>(88 - 129)  | 1,239<br>(961 - 1,551) |
| Alzheimer disease and other dementias               | 1,078<br>(799 - 1,400)   | --<br>(0 - 0)    | --<br>(0 - 0)     | 0<br>(0 - 0)       | 37<br>(25 - 54)    | 1,040<br>(759 - 1,363) |
| Parkinson disease                                   | 140<br>(97 - 187)        | --<br>(0 - 0)    | --<br>(0 - 0)     | 0<br>(0 - 0)       | 8<br>(6 - 11)      | 132<br>(90 - 178)      |
| Epilepsy                                            | 31<br>(23 - 39)          | 1<br>(0 - 1)     | 1<br>(1 - 1)      | 17<br>(13 - 22)    | 6<br>(4 - 8)       | 6<br>(4 - 9)           |
| Multiple sclerosis                                  | 12<br>(5 - 21)           | --<br>(0 - 0)    | --<br>(0 - 0)     | 2<br>(1 - 4)       | 6<br>(3 - 11)      | 3<br>(1 - 6)           |
| Other neurological disorders                        | 126<br>(99 - 156)        | 3<br>(2 - 5)     | 1<br>(1 - 2)      | 15<br>(12 - 19)    | 49<br>(37 - 62)    | 57<br>(43 - 74)        |
| Mental and substance use disorders                  | 64<br>(48 - 78)          | 0<br>(0 - 0)     | 0<br>(0 - 0)      | 39<br>(29 - 48)    | 14<br>(9 - 20)     | 10<br>(6 - 14)         |
| Schizophrenia                                       | 2<br>(1 - 3)             | --<br>(0 - 0)    | --<br>(0 - 0)     | 0<br>(0 - 1)       | 1<br>(0 - 1)       | 1<br>(0 - 2)           |
| Alcohol use disorders                               | 26<br>(14 - 34)          | --<br>(0 - 0)    | --<br>(0 - 0)     | 8<br>(4 - 11)      | 10<br>(5 - 15)     | 8<br>(5 - 12)          |
| Drug use disorders                                  | 36<br>(26 - 45)          | 0<br>(0 - 0)     | --<br>(0 - 0)     | 31<br>(21 - 39)    | 4<br>(3 - 5)       | 1<br>(1 - 2)           |
| Opioid use disorders                                | 21<br>(15 - 27)          | 0<br>(0 - 0)     | --<br>(0 - 0)     | 18<br>(13 - 23)    | 2<br>(1 - 3)       | 1<br>(1 - 1)           |
| Cocaine use disorders                               | 1<br>(1 - 1)             | 0<br>(0 - 0)     | --<br>(0 - 0)     | 1<br>(1 - 1)       | 0<br>(0 - 0)       | 0<br>(0 - 0)           |
| Amphetamine use disorders                           | 1<br>(1 - 1)             | 0<br>(0 - 0)     | --<br>(0 - 0)     | 1<br>(1 - 1)       | 0<br>(0 - 0)       | 0<br>(0 - 0)           |
| Other drug use disorders                            | 13<br>(9 - 16)           | 0<br>(0 - 0)     | --<br>(0 - 0)     | 11<br>(7 - 14)     | 2<br>(1 - 2)       | 0<br>(0 - 1)           |
| Eating disorders                                    | 0<br>(0 - 0)             | --<br>(0 - 0)    | 0<br>(0 - 0)      | 0<br>(0 - 0)       | --<br>(0 - 0)      | --<br>(0 - 0)          |
| Anorexia nervosa                                    | 0<br>(0 - 0)             | --<br>(0 - 0)    | 0<br>(0 - 0)      | 0<br>(0 - 0)       | --<br>(0 - 0)      | --<br>(0 - 0)          |
| Diabetes, urogenital, blood, and endocrine diseases | 1,066<br>(926 - 1,246)   | 4<br>(3 - 6)     | 2<br>(1 - 3)      | 62<br>(51 - 76)    | 268<br>(225 - 319) | 729<br>(621 - 868)     |
| Diabetes mellitus                                   | 397<br>(338 - 471)       | 0<br>(0 - 0)     | 0<br>(0 - 0)      | 16<br>(13 - 20)    | 111<br>(92 - 133)  | 269<br>(219 - 328)     |
| Acute glomerulonephritis                            | 0<br>(0 - 1)             | 0<br>(0 - 0)     | 0<br>(0 - 0)      | 0<br>(0 - 0)       | 0<br>(0 - 0)       | 0<br>(0 - 0)           |
| Chronic kidney disease                              | 439<br>(328 - 593)       | 0<br>(0 - 0)     | 0<br>(0 - 0)      | 16<br>(11 - 24)    | 91<br>(68 - 122)   | 331<br>(243 - 454)     |
| Chronic kidney disease due to diabetes mellitus     | 176<br>(117 - 305)       | 0<br>(0 - 0)     | 0<br>(0 - 0)      | 8<br>(5 - 13)      | 52<br>(36 - 77)    | 116<br>(71 - 215)      |

Web Table 31- New Zealand deaths with 95% UI by age, sex, and cause in 2013

| Cause                                               | Males, All Ages          | Males, 0-4 Years | Males, 5-14 Years | Males, 15-49 Years | Males, 50-69 Years | Males, 70-80 Years |
|-----------------------------------------------------|--------------------------|------------------|-------------------|--------------------|--------------------|--------------------|
| Chronic kidney disease due to hypertension          | 64<br>(27 - 101)         | 0<br>(0 - 0)     | 0<br>(0 - 0)      | 2<br>(1 - 3)       | 9<br>(4 - 19)      | 53<br>(21 - 82)    |
| Chronic kidney disease due to glomerulonephritis    | 12<br>(5 - 17)           | 0<br>(0 - 0)     | 0<br>(0 - 0)      | 2<br>(1 - 3)       | 3<br>(1 - 6)       | 6<br>(2 - 10)      |
| Chronic kidney disease due to other causes          | 188<br>(94 - 295)        | 0<br>(0 - 0)     | 0<br>(0 - 0)      | 5<br>(2 - 9)       | 26<br>(10 - 46)    | 156<br>(80 - 250)  |
| Urinary diseases and male infertility               | 63<br>(47 - 88)          | 0<br>(0 - 0)     | 0<br>(0 - 0)      | 1<br>(1 - 2)       | 6<br>(5 - 8)       | 56<br>(40 - 80)    |
| Interstitial nephritis and urinary tract infections | 50<br>(36 - 70)          | 0<br>(0 - 0)     | 0<br>(0 - 0)      | 1<br>(1 - 1)       | 4<br>(3 - 6)       | 45<br>(31 - 64)    |
| Urolithiasis                                        | 4<br>(2 - 6)             | --               | 0<br>(0 - 0)      | 0<br>(0 - 0)       | 1<br>(0 - 1)       | 3<br>(1 - 5)       |
| Other urinary diseases                              | 10<br>(5 - 18)           | 0<br>(0 - 0)     | 0<br>(0 - 0)      | 0<br>(0 - 1)       | 1<br>(1 - 2)       | 8<br>(4 - 16)      |
| Gynecological diseases                              | --                       | --               | --                | --                 | --                 | --                 |
| Uterine fibroids                                    | --                       | --               | --                | --                 | --                 | --                 |
| Polycystic ovarian syndrome                         | --                       | --               | --                | --                 | --                 | --                 |
| Endometriosis                                       | --                       | --               | --                | --                 | --                 | --                 |
| Genital prolapse                                    | --                       | --               | --                | --                 | --                 | --                 |
| Other gynecological diseases                        | --                       | --               | --                | --                 | --                 | --                 |
| Hemoglobinopathies and hemolytic anemias            | 6<br>(4 - 10)            | 0<br>(0 - 0)     | 0<br>(0 - 0)      | 0<br>(0 - 1)       | 1<br>(1 - 1)       | 5<br>(3 - 8)       |
| Thalassemias                                        | 1<br>(1 - 1)             | 0<br>(0 - 0)     | 0<br>(0 - 0)      | 0<br>(0 - 0)       | 0<br>(0 - 0)       | 0<br>(0 - 0)       |
| Sickle cell disorders                               | 0<br>(0 - 0)             | 0<br>(0 - 0)     | 0<br>(0 - 0)      | 0<br>(0 - 0)       | 0<br>(0 - 0)       | 0<br>(0 - 0)       |
| G6PD deficiency                                     | 0<br>(0 - 0)             | 0<br>(0 - 0)     | 0<br>(0 - 0)      | 0<br>(0 - 0)       | 0<br>(0 - 0)       | 0<br>(0 - 0)       |
| Other hemoglobinopathies and hemolytic anemias      | 5<br>(3 - 8)             | 0<br>(0 - 0)     | 0<br>(0 - 0)      | 0<br>(0 - 0)       | 1<br>(0 - 1)       | 4<br>(3 - 7)       |
| Endocrine, metabolic, blood, and immune disorders   | 161<br>(105 - 200)       | 3<br>(2 - 5)     | 2<br>(1 - 3)      | 28<br>(19 - 36)    | 59<br>(35 - 79)    | 69<br>(40 - 98)    |
| Musculoskeletal disorders                           | 49<br>(35 - 70)          | --               | 0<br>(0 - 0)      | 3<br>(3 - 5)       | 14<br>(10 - 20)    | 32<br>(22 - 47)    |
| Rheumatoid arthritis                                | 15<br>(9 - 23)           | --               | 0<br>(0 - 0)      | 0<br>(0 - 0)       | 4<br>(2 - 8)       | 10<br>(6 - 16)     |
| Other musculoskeletal disorders                     | 34<br>(24 - 50)          | --               | 0<br>(0 - 0)      | 3<br>(2 - 4)       | 9<br>(6 - 14)      | 22<br>(14 - 32)    |
| Other non-communicable diseases                     | 152<br>(129 - 182)       | 77<br>(59 - 103) | 4<br>(3 - 5)      | 18<br>(15 - 23)    | 18<br>(14 - 22)    | 36<br>(26 - 48)    |
| Congenital anomalies                                | 95<br>(80 - 114)         | 48<br>(36 - 62)  | 4<br>(3 - 5)      | 17<br>(14 - 22)    | 14<br>(11 - 18)    | 13<br>(9 - 18)     |
| Neural tube defects                                 | 2<br>(1 - 4)             | 2<br>(1 - 3)     | 0<br>(0 - 0)      | 0<br>(0 - 1)       | 0<br>(0 - 0)       | 0<br>(0 - 0)       |
| Congenital heart anomalies                          | 35<br>(26 - 46)          | 16<br>(11 - 24)  | 1<br>(1 - 2)      | 7<br>(5 - 10)      | 4<br>(3 - 6)       | 6<br>(4 - 9)       |
| Cleft lip and cleft palate                          | 0<br>(0 - 0)             | 0<br>(0 - 0)     | --                | --                 | --                 | --                 |
| Down syndrome                                       | 9<br>(3 - 13)            | 2<br>(0 - 3)     | 0<br>(0 - 0)      | 2<br>(1 - 3)       | 5<br>(2 - 7)       | 1<br>(0 - 1)       |
| Chromosomal unbalanced rearrangements               | 5<br>(3 - 7)             | 4<br>(2 - 6)     | 0<br>(0 - 0)      | 0<br>(0 - 0)       | 0<br>(0 - 0)       | 0<br>(0 - 0)       |
| Other congenital anomalies                          | 45<br>(34 - 59)          | 24<br>(17 - 35)  | 2<br>(1 - 3)      | 8<br>(5 - 11)      | 5<br>(3 - 8)       | 6<br>(4 - 9)       |
| Skin and subcutaneous diseases                      | 28<br>(19 - 39)          | 0<br>(0 - 0)     | 0<br>(0 - 0)      | 1<br>(1 - 1)       | 4<br>(3 - 5)       | 24<br>(15 - 34)    |
| Cellulitis                                          | 16<br>(8 - 24)           | 0<br>(0 - 0)     | 0<br>(0 - 0)      | 1<br>(0 - 1)       | 3<br>(2 - 4)       | 13<br>(6 - 21)     |
| Pyoderma                                            | 7<br>(4 - 14)            | 0<br>(0 - 0)     | 0<br>(0 - 0)      | 0<br>(0 - 0)       | 1<br>(0 - 1)       | 6<br>(3 - 13)      |
| Decubitus ulcer                                     | 3<br>(1 - 7)             | 0<br>(0 - 0)     | 0<br>(0 - 0)      | 0<br>(0 - 0)       | 0<br>(0 - 0)       | 3<br>(1 - 7)       |
| Other skin and subcutaneous diseases                | 1<br>(1 - 3)             | 0<br>(0 - 0)     | 0<br>(0 - 0)      | 0<br>(0 - 0)       | 0<br>(0 - 0)       | 1<br>(0 - 2)       |
| Sudden infant death syndrome                        | 28<br>(15 - 51)          | 28<br>(15 - 51)  | --                | --                 | --                 | --                 |
| Injuries                                            | 1,159<br>(1,042 - 1,290) | 32<br>(21 - 45)  | 19<br>(16 - 22)   | 584<br>(528 - 651) | 227<br>(194 - 262) | 297<br>(238 - 364) |
| Transport injuries                                  | 323<br>(285 - 364)       | 6<br>(4 - 9)     | 9<br>(7 - 11)     | 207<br>(180 - 239) | 59<br>(49 - 71)    | 41<br>(32 - 51)    |
| Road injuries                                       | 291<br>(257 - 329)       | 6<br>(4 - 9)     | 8<br>(6 - 10)     | 187<br>(163 - 217) | 51<br>(41 - 61)    | 39<br>(30 - 48)    |
| Pedestrian road injuries                            | 42<br>(23 - 69)          | 3<br>(1 - 5)     | 2<br>(1 - 4)      | 15<br>(8 - 28)     | 9<br>(5 - 17)      | 12<br>(6 - 20)     |

Web Table 31- New Zealand deaths with 95% UI by age, sex, and cause in 2013

| Cause                                           | Males, All Ages    | Males, 0-4 Years | Males, 5-14 Years | Males, 15-49 Years | Males, 50-69 Years | Males, 70-80 Years |
|-------------------------------------------------|--------------------|------------------|-------------------|--------------------|--------------------|--------------------|
| Cyclist road injuries                           | 10<br>(6 - 15)     | 0<br>(0 - 0)     | 2<br>(1 - 3)      | 4<br>(3 - 7)       | 2<br>(1 - 4)       | 2<br>(1 - 3)       |
| Motorcyclist road injuries                      | 36<br>(23 - 56)    | 0<br>(0 - 0)     | 0<br>(0 - 1)      | 32<br>(20 - 50)    | 3<br>(2 - 5)       | 1<br>(0 - 1)       |
| Motor vehicle road injuries                     | 202<br>(158 - 239) | 3<br>(2 - 5)     | 3<br>(2 - 5)      | 136<br>(107 - 162) | 36<br>(27 - 45)    | 24<br>(16 - 33)    |
| Other road injuries                             | 1<br>(0 - 2)       | 0<br>(0 - 0)     | 0<br>(0 - 0)      | 0<br>(0 - 1)       | 1<br>(0 - 1)       | 0<br>(0 - 1)       |
| Other transport injuries                        | 32<br>(23 - 41)    | 0<br>(0 - 0)     | 1<br>(0 - 1)      | 20<br>(14 - 27)    | 9<br>(6 - 12)      | 2<br>(1 - 4)       |
| Unintentional injuries                          | 400<br>(327 - 479) | 24<br>(14 - 34)  | 7<br>(6 - 9)      | 96<br>(81 - 122)   | 62<br>(52 - 73)    | 211<br>(152 - 272) |
| Falls                                           | 220<br>(154 - 285) | 2<br>(1 - 2)     | 1<br>(1 - 1)      | 21<br>(16 - 26)    | 25<br>(17 - 31)    | 173<br>(117 - 234) |
| Drowning                                        | 63<br>(45 - 100)   | 6<br>(3 - 10)    | 3<br>(2 - 4)      | 36<br>(26 - 59)    | 14<br>(9 - 23)     | 5<br>(3 - 7)       |
| Fire, heat, and hot substances                  | 16<br>(12 - 22)    | 1<br>(1 - 2)     | 1<br>(0 - 1)      | 5<br>(4 - 6)       | 3<br>(2 - 5)       | 6<br>(4 - 8)       |
| Poisonings                                      | 7<br>(4 - 9)       | 0<br>(0 - 0)     | 0<br>(0 - 0)      | 4<br>(2 - 5)       | 1<br>(1 - 2)       | 1<br>(1 - 2)       |
| Exposure to mechanical forces                   | 45<br>(33 - 55)    | 12<br>(3 - 20)   | 2<br>(1 - 3)      | 20<br>(16 - 24)    | 8<br>(6 - 10)      | 4<br>(3 - 5)       |
| Unintentional firearm injuries                  | 2<br>(2 - 3)       | 0<br>(0 - 0)     | 0<br>(0 - 0)      | 2<br>(1 - 2)       | 0<br>(0 - 0)       | 0<br>(0 - 0)       |
| Unintentional suffocation                       | 15<br>(4 - 23)     | 11<br>(2 - 19)   | 1<br>(0 - 2)      | 2<br>(1 - 3)       | 1<br>(0 - 1)       | 0<br>(0 - 1)       |
| Other exposure to mechanical forces             | 28<br>(23 - 33)    | 1<br>(0 - 1)     | 1<br>(0 - 1)      | 16<br>(12 - 20)    | 7<br>(6 - 9)       | 3<br>(2 - 4)       |
| Adverse effects of medical treatment            | 14<br>(10 - 24)    | 0<br>(0 - 1)     | 0<br>(0 - 0)      | 1<br>(1 - 2)       | 3<br>(2 - 6)       | 9<br>(6 - 16)      |
| Animal contact                                  | 2<br>(1 - 4)       | 0<br>(0 - 0)     | 0<br>(0 - 0)      | 1<br>(0 - 1)       | 1<br>(0 - 1)       | 0<br>(0 - 1)       |
| Venomous animal contact                         | 0<br>(0 - 1)       | 0<br>(0 - 0)     | 0<br>(0 - 0)      | 0<br>(0 - 0)       | 0<br>(0 - 0)       | 0<br>(0 - 0)       |
| Non-venomous animal contact                     | 1<br>(1 - 3)       | 0<br>(0 - 0)     | 0<br>(0 - 0)      | 0<br>(0 - 1)       | 1<br>(0 - 1)       | 0<br>(0 - 1)       |
| Foreign body                                    | 24<br>(12 - 35)    | 2<br>(1 - 4)     | 1<br>(0 - 1)      | 5<br>(3 - 8)       | 5<br>(3 - 7)       | 12<br>(5 - 18)     |
| Pulmonary aspiration and foreign body in airway | 24<br>(12 - 34)    | 2<br>(1 - 4)     | 1<br>(0 - 1)      | 5<br>(3 - 7)       | 5<br>(2 - 7)       | 11<br>(5 - 18)     |
| Foreign body in other body part                 | 0<br>(0 - 1)       | 0<br>(0 - 0)     | 0<br>(0 - 0)      | 0<br>(0 - 0)       | 0<br>(0 - 0)       | 0<br>(0 - 0)       |
| Other unintentional injuries                    | 9<br>(7 - 12)      | 1<br>(0 - 1)     | 0<br>(0 - 1)      | 5<br>(3 - 7)       | 2<br>(1 - 3)       | 1<br>(1 - 2)       |
| Self-harm and interpersonal violence            | 436<br>(338 - 507) | 3<br>(1 - 4)     | 3<br>(2 - 4)      | 280<br>(216 - 327) | 105<br>(75 - 131)  | 45<br>(34 - 60)    |
| Self-harm                                       | 396<br>(302 - 467) | -                | 2<br>(1 - 3)      | 253<br>(196 - 300) | 97<br>(68 - 123)   | 43<br>(32 - 58)    |
| Interpersonal violence                          | 40<br>(25 - 54)    | 3<br>(1 - 4)     | 1<br>(1 - 2)      | 27<br>(16 - 37)    | 8<br>(5 - 12)      | 2<br>(1 - 3)       |
| Assault by firearm                              | 8<br>(4 - 15)      | 0<br>(0 - 0)     | 0<br>(0 - 0)      | 5<br>(3 - 10)      | 2<br>(1 - 3)       | 0<br>(0 - 1)       |
| Assault by sharp object                         | 13<br>(8 - 23)     | 0<br>(0 - 1)     | 0<br>(0 - 1)      | 10<br>(6 - 16)     | 2<br>(1 - 4)       | 1<br>(0 - 1)       |
| Assault by other means                          | 19<br>(9 - 27)     | 2<br>(1 - 3)     | 1<br>(0 - 1)      | 12<br>(5 - 17)     | 4<br>(2 - 6)       | 1<br>(1 - 2)       |

Web Table 31- New Zealand deaths with 95% UI by age, sex, and cause in 2013

| Cause                                                             | Females, All Ages           | Females, 0-4 Years | Females, 5-14 Years | Females, 15-49 Years | Females, 50-69 Years     | Females, 70-80 Years        |
|-------------------------------------------------------------------|-----------------------------|--------------------|---------------------|----------------------|--------------------------|-----------------------------|
| All causes                                                        | 16,110<br>(15,173 - 17,138) | 152<br>(125 - 184) | 30<br>(27 - 33)     | 798<br>(725 - 877)   | 2,799<br>(2,584 - 3,036) | 12,330<br>(11,657 - 13,058) |
| Communicable, maternal, neonatal, and nutritional diseases        | 552<br>(399 - 922)          | 52<br>(40 - 65)    | 2<br>(1 - 3)        | 19<br>(17 - 23)      | 28<br>(23 - 34)          | 450<br>(294 - 819)          |
| HIV/AIDS and tuberculosis                                         | 12<br>(9 - 14)              | 0<br>(0 - 0)       | 0<br>(0 - 0)        | 3<br>(2 - 4)         | 3<br>(3 - 5)             | 5<br>(4 - 8)                |
| Tuberculosis                                                      | 9<br>(7 - 12)               | 0<br>(0 - 0)       | 0<br>(0 - 0)        | 1<br>(1 - 1)         | 3<br>(2 - 4)             | 5<br>(4 - 7)                |
| HIV/AIDS                                                          | 2<br>(1 - 4)                | 0<br>(0 - 0)       | 0<br>(0 - 0)        | 2<br>(1 - 3)         | 1<br>(0 - 1)             | 0<br>(0 - 0)                |
| HIV/AIDS resulting in mycobacterial infection                     | 0<br>(0 - 0)                | 0<br>(0 - 0)       | 0<br>(0 - 0)        | 0<br>(0 - 0)         | 0<br>(0 - 0)             | 0<br>(0 - 0)                |
| HIV/AIDS resulting in other diseases                              | 2<br>(1 - 3)                | 0<br>(0 - 0)       | 0<br>(0 - 0)        | 2<br>(1 - 3)         | 0<br>(0 - 1)             | 0<br>(0 - 0)                |
| Diarrhea, lower respiratory, and other common infectious diseases | 455<br>(302 - 824)          | 9<br>(6 - 13)      | 2<br>(1 - 2)        | 9<br>(7 - 11)        | 20<br>(15 - 26)          | 416<br>(263 - 779)          |
| Diarrheal diseases                                                | 25<br>(15 - 40)             | 1<br>(1 - 2)       | 0<br>(0 - 0)        | 0<br>(0 - 1)         | 1<br>(1 - 2)             | 22<br>(12 - 37)             |
| Intestinal infectious diseases                                    | 4<br>(1 - 9)                | 1<br>(0 - 2)       | 1<br>(0 - 2)        | 1<br>(0 - 3)         | 0<br>(0 - 1)             | 0<br>(0 - 1)                |
| Typhoid fever                                                     | 3<br>(1 - 6)                | 1<br>(0 - 1)       | 1<br>(0 - 1)        | 1<br>(0 - 3)         | 0<br>(0 - 1)             | 0<br>(0 - 1)                |
| Paratyphoid fever                                                 | 1<br>(0 - 2)                | 0<br>(0 - 1)       | 0<br>(0 - 0)        | 0<br>(0 - 1)         | 0<br>(0 - 0)             | 0<br>(0 - 0)                |
| Other intestinal infectious diseases                              | 0<br>(0 - 2)                | 0<br>(0 - 1)       | 0<br>(0 - 0)        | 0<br>(0 - 0)         | 0<br>(0 - 0)             | 0<br>(0 - 0)                |
| Lower respiratory infections                                      | 412<br>(259 - 783)          | 5<br>(3 - 8)       | 0<br>(0 - 1)        | 4<br>(3 - 5)         | 15<br>(11 - 22)          | 387<br>(235 - 753)          |
| Upper respiratory infections                                      | 0<br>(0 - 1)                | 0<br>(0 - 0)       | 0<br>(0 - 0)        | 0<br>(0 - 0)         | 0<br>(0 - 0)             | 0<br>(0 - 1)                |
| Otitis media                                                      | 0<br>(0 - 0)                | 0<br>(0 - 0)       | 0<br>(0 - 0)        | 0<br>(0 - 0)         | 0<br>(0 - 0)             | 0<br>(0 - 0)                |
| Meningitis                                                        | 9<br>(7 - 11)               | 2<br>(1 - 3)       | 0<br>(0 - 0)        | 2<br>(1 - 2)         | 2<br>(1 - 2)             | 3<br>(2 - 4)                |
| Pneumococcal meningitis                                           | 2<br>(2 - 3)                | 0<br>(0 - 1)       | 0<br>(0 - 0)        | 0<br>(0 - 1)         | 0<br>(0 - 1)             | 1<br>(1 - 1)                |
| H influenzae type B meningitis                                    | 1<br>(1 - 2)                | 1<br>(0 - 1)       | 0<br>(0 - 0)        | 0<br>(0 - 0)         | 0<br>(0 - 0)             | 0<br>(0 - 0)                |
| Meningococcal meningitis                                          | 2<br>(2 - 3)                | 0<br>(0 - 1)       | 0<br>(0 - 0)        | 0<br>(0 - 1)         | 0<br>(0 - 1)             | 1<br>(0 - 1)                |
| Other meningitis                                                  | 3<br>(2 - 4)                | 1<br>(0 - 1)       | 0<br>(0 - 0)        | 1<br>(0 - 1)         | 1<br>(0 - 1)             | 1<br>(1 - 2)                |
| Encephalitis                                                      | 2<br>(1 - 3)                | 0<br>(0 - 0)       | 0<br>(0 - 0)        | 1<br>(0 - 1)         | 0<br>(0 - 0)             | 1<br>(0 - 2)                |
| Diphtheria                                                        | 0<br>(0 - 0)                | 0<br>(0 - 0)       | 0<br>(0 - 0)        | 0<br>(0 - 0)         | 0<br>(0 - 0)             | --                          |
| Whooping cough                                                    | 0<br>(0 - 0)                | 0<br>(0 - 0)       | 0<br>(0 - 0)        | 0<br>(0 - 0)         | 0<br>(0 - 0)             | --                          |
| Tetanus                                                           | 0<br>(0 - 0)                | 0<br>(0 - 0)       | 0<br>(0 - 0)        | 0<br>(0 - 0)         | 0<br>(0 - 0)             | 0<br>(0 - 0)                |
| Measles                                                           | 0<br>(0 - 0)                | 0<br>(0 - 0)       | 0<br>(0 - 0)        | 0<br>(0 - 0)         | 0<br>(0 - 0)             | --                          |
| Varicella and herpes zoster                                       | 2<br>(0 - 9)                | 0<br>(0 - 1)       | 0<br>(0 - 0)        | 0<br>(0 - 1)         | 0<br>(0 - 1)             | 2<br>(0 - 8)                |
| Neglected tropical diseases and malaria                           | 1<br>(1 - 1)                | 0<br>(0 - 0)       | 0<br>(0 - 0)        | 0<br>(0 - 1)         | 0<br>(0 - 0)             | 0<br>(0 - 0)                |
| Cysticercosis                                                     | 0<br>(0 - 0)                | 0<br>(0 - 0)       | 0<br>(0 - 0)        | 0<br>(0 - 0)         | 0<br>(0 - 0)             | 0<br>(0 - 0)                |
| Cystic echinococcosis                                             | 1<br>(0 - 1)                | 0<br>(0 - 0)       | 0<br>(0 - 0)        | 0<br>(0 - 0)         | 0<br>(0 - 0)             | 0<br>(0 - 0)                |
| Dengue                                                            | 0<br>(0 - 0)                | 0<br>(0 - 0)       | 0<br>(0 - 0)        | 0<br>(0 - 0)         | 0<br>(0 - 0)             | 0<br>(0 - 0)                |
| Rabies                                                            | 0<br>(0 - 0)                | 0<br>(0 - 0)       | 0<br>(0 - 0)        | 0<br>(0 - 0)         | 0<br>(0 - 0)             | 0<br>(0 - 0)                |
| Other neglected tropical diseases                                 | 0<br>(0 - 0)                | 0<br>(0 - 0)       | 0<br>(0 - 0)        | 0<br>(0 - 0)         | 0<br>(0 - 0)             | 0<br>(0 - 0)                |
| Maternal disorders                                                | 6<br>(4 - 7)                | --                 | 0<br>(0 - 0)        | 6<br>(4 - 7)         | --                       | --                          |
| Maternal hemorrhage                                               | 1<br>(0 - 1)                | --                 | 0<br>(0 - 0)        | 1<br>(0 - 1)         | --                       | --                          |
| Maternal sepsis and other maternal infections                     | 0<br>(0 - 1)                | --                 | 0<br>(0 - 0)        | 0<br>(0 - 1)         | --                       | --                          |
| Maternal hypertensive disorders                                   | 1<br>(1 - 1)                | --                 | 0<br>(0 - 0)        | 1<br>(1 - 1)         | --                       | --                          |
| Maternal obstructed labor                                         | 1<br>(0 - 1)                | --                 | 0<br>(0 - 0)        | 1<br>(0 - 1)         | --                       | --                          |
| Maternal abortive outcome                                         | 1<br>(0 - 1)                | --                 | 0<br>(0 - 0)        | 1<br>(0 - 1)         | --                       | --                          |
| Indirect maternal deaths                                          | 1<br>(1 - 1)                | --                 | 0<br>(0 - 0)        | 1<br>(1 - 1)         | --                       | --                          |



Web Table 31- New Zealand deaths with 95% UI by age, sex, and cause in 2013

| Cause                                                            | Females, All Ages           | Females, 0-4 Years | Females, 5-14 Years | Females, 15-49 Years | Females, 50-69 Years     | Females, 70-80 Years        |
|------------------------------------------------------------------|-----------------------------|--------------------|---------------------|----------------------|--------------------------|-----------------------------|
| Late maternal deaths                                             | 0<br>(0 - 1)                | --                 | 0<br>(0 - 0)        | 0<br>(0 - 1)         | --                       | --                          |
| Maternal deaths aggravated by HIV/AIDS                           | 0<br>(0 - 0)                | --                 | --                  | 0<br>(0 - 0)         | --                       | --                          |
| Other maternal disorders                                         | 1<br>(1 - 2)                | --                 | 0<br>(0 - 0)        | 1<br>(1 - 2)         | --                       | --                          |
| Neonatal disorders                                               | 41<br>(31 - 52)             | 41<br>(31 - 52)    | --                  | --                   | --                       | --                          |
| Neonatal preterm birth complications                             | 23<br>(16 - 30)             | 23<br>(16 - 30)    | --                  | --                   | --                       | --                          |
| Neonatal encephalopathy due to birth asphyxia and trauma         | 8<br>(5 - 12)               | 8<br>(5 - 12)      | --                  | --                   | --                       | --                          |
| Neonatal sepsis and other neonatal infections                    | 3<br>(1 - 5)                | 3<br>(1 - 5)       | --                  | --                   | --                       | --                          |
| Hemolytic disease and other neonatal jaundice                    | 0<br>(0 - 0)                | 0<br>(0 - 0)       | --                  | --                   | --                       | --                          |
| Other neonatal disorders                                         | 8<br>(3 - 12)               | 8<br>(3 - 12)      | --                  | --                   | --                       | --                          |
| Nutritional deficiencies                                         | 23<br>(16 - 33)             | 0<br>(0 - 0)       | 0<br>(0 - 0)        | 0<br>(0 - 0)         | 1<br>(1 - 1)             | 21<br>(15 - 31)             |
| Protein-energy malnutrition                                      | 5<br>(2 - 10)               | 0<br>(0 - 0)       | 0<br>(0 - 0)        | 0<br>(0 - 0)         | 0<br>(0 - 1)             | 5<br>(2 - 10)               |
| Iodine deficiency                                                | 0<br>(0 - 1)                | 0<br>(0 - 0)       | 0<br>(0 - 0)        | 0<br>(0 - 0)         | 0<br>(0 - 0)             | 0<br>(0 - 1)                |
| Iron-deficiency anemia                                           | 16<br>(9 - 24)              | 0<br>(0 - 0)       | 0<br>(0 - 0)        | 0<br>(0 - 0)         | 1<br>(0 - 1)             | 15<br>(9 - 23)              |
| Other nutritional deficiencies                                   | 2<br>(1 - 4)                | 0<br>(0 - 0)       | 0<br>(0 - 0)        | 0<br>(0 - 0)         | 0<br>(0 - 0)             | 2<br>(0 - 4)                |
| Other communicable, maternal, neonatal, and nutritional diseases | 15<br>(11 - 18)             | 2<br>(1 - 3)       | 0<br>(0 - 0)        | 2<br>(1 - 2)         | 3<br>(2 - 4)             | 7<br>(5 - 10)               |
| Sexually transmitted diseases excluding HIV                      | 2<br>(1 - 3)                | 1<br>(0 - 2)       | 0<br>(0 - 0)        | 0<br>(0 - 0)         | 0<br>(0 - 0)             | 1<br>(0 - 1)                |
| Syphilis                                                         | 2<br>(1 - 3)                | 1<br>(0 - 2)       | 0<br>(0 - 0)        | 0<br>(0 - 0)         | 0<br>(0 - 0)             | 1<br>(0 - 1)                |
| Chlamydial infection                                             | 0<br>(0 - 0)                | --                 | 0<br>(0 - 0)        | 0<br>(0 - 0)         | 0<br>(0 - 0)             | 0<br>(0 - 0)                |
| Gonococcal infection                                             | 0<br>(0 - 0)                | --                 | 0<br>(0 - 0)        | 0<br>(0 - 0)         | 0<br>(0 - 0)             | 0<br>(0 - 0)                |
| Other sexually transmitted diseases                              | 0<br>(0 - 0)                | --                 | 0<br>(0 - 0)        | 0<br>(0 - 0)         | 0<br>(0 - 0)             | 0<br>(0 - 0)                |
| Hepatitis                                                        | 1<br>(1 - 1)                | 0<br>(0 - 0)       | 0<br>(0 - 0)        | 0<br>(0 - 0)         | 0<br>(0 - 0)             | 0<br>(0 - 0)                |
| Acute hepatitis A                                                | 0<br>(0 - 0)                | 0<br>(0 - 0)       | 0<br>(0 - 0)        | 0<br>(0 - 0)         | 0<br>(0 - 0)             | 0<br>(0 - 0)                |
| Acute hepatitis B                                                | 1<br>(0 - 1)                | 0<br>(0 - 0)       | 0<br>(0 - 0)        | 0<br>(0 - 0)         | 0<br>(0 - 0)             | 0<br>(0 - 0)                |
| Acute hepatitis C                                                | 0<br>(0 - 0)                | --                 | 0<br>(0 - 0)        | 0<br>(0 - 0)         | 0<br>(0 - 0)             | 0<br>(0 - 0)                |
| Other infectious diseases                                        | 12<br>(8 - 15)              | 1<br>(1 - 1)       | 0<br>(0 - 0)        | 1<br>(1 - 2)         | 3<br>(2 - 4)             | 7<br>(4 - 9)                |
| Non-communicable diseases                                        | 14,925<br>(13,999 - 15,913) | 79<br>(62 - 103)   | 17<br>(15 - 20)     | 599<br>(542 - 664)   | 2,681<br>(2,473 - 2,914) | 11,549<br>(10,862 - 12,261) |
| Neoplasms                                                        | 4,411<br>(3,874 - 4,893)    | 5<br>(4 - 7)       | 8<br>(6 - 9)        | 352<br>(313 - 395)   | 1,541<br>(1,378 - 1,702) | 2,506<br>(2,135 - 2,825)    |
| Esophageal cancer                                                | 98<br>(79 - 120)            | --                 | --                  | 2<br>(1 - 2)         | 24<br>(19 - 31)          | 72<br>(55 - 92)             |
| Stomach cancer                                                   | 159<br>(114 - 221)          | --                 | --                  | 10<br>(7 - 13)       | 35<br>(25 - 47)          | 114<br>(78 - 166)           |
| Liver cancer                                                     | 93<br>(66 - 121)            | --                 | 0<br>(0 - 0)        | 6<br>(4 - 8)         | 26<br>(18 - 33)          | 61<br>(39 - 85)             |
| Liver cancer due to hepatitis B                                  | 13<br>(6 - 20)              | --                 | 0<br>(0 - 0)        | 2<br>(1 - 2)         | 5<br>(2 - 8)             | 6<br>(3 - 10)               |
| Liver cancer due to hepatitis C                                  | 58<br>(39 - 80)             | --                 | 0<br>(0 - 0)        | 3<br>(2 - 4)         | 15<br>(10 - 21)          | 41<br>(26 - 58)             |
| Liver cancer due to alcohol use                                  | 9<br>(5 - 15)               | --                 | --                  | 0<br>(0 - 1)         | 2<br>(1 - 3)             | 7<br>(3 - 11)               |
| Liver cancer due to other causes                                 | 13<br>(7 - 20)              | --                 | 0<br>(0 - 0)        | 1<br>(1 - 2)         | 4<br>(2 - 7)             | 7<br>(4 - 12)               |
| Larynx cancer                                                    | 6<br>(4 - 9)                | --                 | --                  | 0<br>(0 - 0)         | 3<br>(2 - 4)             | 3<br>(2 - 5)                |
| Tracheal, bronchus and lung cancer                               | 775<br>(600 - 911)          | --                 | --                  | 37<br>(28 - 48)      | 351<br>(286 - 417)       | 386<br>(267 - 492)          |
| Breast cancer                                                    | 713<br>(554 - 847)          | --                 | --                  | 111<br>(89 - 135)    | 309<br>(233 - 366)       | 294<br>(216 - 374)          |
| Cervical cancer                                                  | 90<br>(72 - 113)            | --                 | --                  | 20<br>(15 - 26)      | 34<br>(27 - 43)          | 36<br>(26 - 49)             |
| Uterine cancer                                                   | 102<br>(80 - 126)           | --                 | --                  | 5<br>(4 - 7)         | 39<br>(29 - 52)          | 57<br>(42 - 78)             |
| Prostate cancer                                                  | --                          | --                 | --                  | --                   | --                       | --                          |

Web Table 31- New Zealand deaths with 95% UI by age, sex, and cause in 2013

| Cause                                         | Females, All Ages        | Females, 0-4 Years | Females, 5-14 Years | Females, 15-49 Years | Females, 50-69 Years | Females, 70-80 Years     |
|-----------------------------------------------|--------------------------|--------------------|---------------------|----------------------|----------------------|--------------------------|
| Colon and rectum cancer                       | 758<br>(624 - 898)       | --                 | --                  | 31<br>(25 - 37)      | 211<br>(181 - 242)   | 517<br>(400 - 646)       |
| Lip and oral cavity cancer                    | 35<br>(27 - 42)          | --                 | --                  | 2<br>(2 - 3)         | 11<br>(8 - 13)       | 22<br>(16 - 28)          |
| Nasopharynx cancer                            | 7<br>(3 - 11)            | --                 | 0<br>(0 - 0)        | 2<br>(1 - 3)         | 2<br>(1 - 4)         | 3<br>(1 - 5)             |
| Other pharynx cancer                          | 11<br>(8 - 14)           | --                 | --                  | 1<br>(0 - 1)         | 5<br>(3 - 6)         | 5<br>(4 - 7)             |
| Gallbladder and biliary tract cancer          | 76<br>(52 - 104)         | --                 | --                  | 3<br>(2 - 5)         | 23<br>(16 - 31)      | 50<br>(31 - 73)          |
| Pancreatic cancer                             | 259<br>(216 - 301)       | --                 | --                  | 9<br>(7 - 11)        | 77<br>(64 - 91)      | 173<br>(137 - 211)       |
| Malignant skin melanoma                       | 121<br>(77 - 162)        | --                 | --                  | 20<br>(14 - 29)      | 42<br>(28 - 56)      | 59<br>(33 - 86)          |
| Non-melanoma skin cancer                      | 33<br>(19 - 50)          | --                 | --                  | 1<br>(0 - 1)         | 4<br>(2 - 5)         | 29<br>(16 - 45)          |
| Ovarian cancer                                | 231<br>(189 - 277)       | --                 | --                  | 18<br>(14 - 23)      | 100<br>(80 - 122)    | 113<br>(83 - 149)        |
| Testicular cancer                             | --                       | --                 | --                  | --                   | --                   | --                       |
| Kidney cancer                                 | 71<br>(50 - 96)          | 0<br>(0 - 0)       | 0<br>(0 - 0)        | 4<br>(3 - 5)         | 24<br>(17 - 32)      | 42<br>(27 - 64)          |
| Bladder cancer                                | 64<br>(43 - 90)          | --                 | --                  | 2<br>(1 - 2)         | 10<br>(7 - 15)       | 52<br>(35 - 76)          |
| Brain and nervous system cancer               | 104<br>(81 - 127)        | 1<br>(1 - 2)       | 2<br>(2 - 4)        | 19<br>(14 - 24)      | 46<br>(35 - 59)      | 36<br>(25 - 48)          |
| Thyroid cancer                                | 19<br>(14 - 25)          | --                 | 0<br>(0 - 0)        | 1<br>(1 - 1)         | 5<br>(4 - 7)         | 13<br>(9 - 19)           |
| Mesothelioma                                  | 11<br>(7 - 15)           | --                 | --                  | 1<br>(1 - 1)         | 3<br>(2 - 5)         | 7<br>(4 - 11)            |
| Hodgkin lymphoma                              | 8<br>(6 - 11)            | 0<br>(0 - 0)       | 0<br>(0 - 0)        | 2<br>(2 - 3)         | 2<br>(1 - 3)         | 3<br>(2 - 5)             |
| Non-Hodgkin lymphoma                          | 156<br>(73 - 218)        | 0<br>(0 - 0)       | 0<br>(0 - 1)        | 10<br>(5 - 15)       | 47<br>(21 - 67)      | 98<br>(45 - 142)         |
| Multiple myeloma                              | 89<br>(57 - 147)         | --                 | --                  | 3<br>(2 - 5)         | 28<br>(17 - 45)      | 59<br>(36 - 98)          |
| Leukemia                                      | 136<br>(108 - 162)       | 1<br>(1 - 3)       | 2<br>(1 - 3)        | 14<br>(11 - 17)      | 32<br>(25 - 39)      | 86<br>(64 - 108)         |
| Other neoplasms                               | 189<br>(141 - 235)       | 2<br>(2 - 3)       | 2<br>(2 - 3)        | 20<br>(16 - 24)      | 49<br>(38 - 59)      | 116<br>(76 - 155)        |
| Cardiovascular diseases                       | 5,942<br>(5,254 - 6,790) | 1<br>(1 - 2)       | 1<br>(1 - 1)        | 97<br>(78 - 118)     | 553<br>(470 - 724)   | 5,290<br>(4,678 - 5,997) |
| Rheumatic heart disease                       | 114<br>(57 - 151)        | 0<br>(0 - 0)       | 0<br>(0 - 0)        | 9<br>(5 - 12)        | 21<br>(11 - 28)      | 84<br>(41 - 118)         |
| Ischemic heart disease                        | 3,018<br>(2,506 - 3,745) | 0<br>(0 - 0)       | 0<br>(0 - 0)        | 37<br>(29 - 49)      | 293<br>(237 - 437)   | 2,688<br>(2,192 - 3,279) |
| Cerebrovascular disease                       | 1,768<br>(1,307 - 2,133) | 0<br>(0 - 0)       | 0<br>(0 - 0)        | 31<br>(22 - 38)      | 137<br>(101 - 176)   | 1,600<br>(1,182 - 1,934) |
| Ischemic stroke                               | 1,218<br>(881 - 1,496)   | 0<br>(0 - 0)       | 0<br>(0 - 0)        | 3<br>(1 - 4)         | 21<br>(11 - 28)      | 1,195<br>(869 - 1,470)   |
| Hemorrhagic stroke                            | 550<br>(373 - 731)       | 0<br>(0 - 0)       | 0<br>(0 - 0)        | 28<br>(20 - 35)      | 117<br>(88 - 152)    | 405<br>(252 - 562)       |
| Hypertensive heart disease                    | 211<br>(141 - 358)       | 0<br>(0 - 0)       | 0<br>(0 - 0)        | 2<br>(1 - 3)         | 14<br>(9 - 23)       | 195<br>(126 - 336)       |
| Cardiomyopathy and myocarditis                | 69<br>(51 - 117)         | 1<br>(0 - 1)       | 0<br>(0 - 0)        | 9<br>(7 - 14)        | 18<br>(13 - 28)      | 41<br>(27 - 75)          |
| Atrial fibrillation and flutter               | 192<br>(123 - 290)       | --                 | --                  | 1<br>(0 - 1)         | 7<br>(5 - 10)        | 185<br>(117 - 281)       |
| Aortic aneurysm                               | 204<br>(131 - 330)       | --                 | --                  | 3<br>(2 - 4)         | 31<br>(19 - 50)      | 171<br>(108 - 280)       |
| Peripheral vascular disease                   | 72<br>(46 - 109)         | --                 | --                  | 0<br>(0 - 0)         | 3<br>(2 - 4)         | 69<br>(43 - 106)         |
| Endocarditis                                  | 14<br>(8 - 28)           | 0<br>(0 - 0)       | 0<br>(0 - 0)        | 1<br>(1 - 2)         | 2<br>(1 - 3)         | 12<br>(7 - 23)           |
| Other cardiovascular and circulatory diseases | 279<br>(188 - 387)       | 0<br>(0 - 0)       | 0<br>(0 - 0)        | 6<br>(4 - 8)         | 28<br>(18 - 38)      | 245<br>(157 - 352)       |
| Chronic respiratory diseases                  | 1,040<br>(705 - 1,245)   | 1<br>(1 - 2)       | 1<br>(1 - 2)        | 25<br>(19 - 31)      | 190<br>(136 - 226)   | 822<br>(552 - 1,012)     |
| Chronic obstructive pulmonary disease         | 815<br>(525 - 1,009)     | 1<br>(0 - 1)       | 0<br>(0 - 0)        | 12<br>(8 - 16)       | 164<br>(112 - 198)   | 638<br>(393 - 811)       |
| Pneumoconiosis                                | 1<br>(0 - 1)             | 0<br>(0 - 0)       | 0<br>(0 - 0)        | 0<br>(0 - 0)         | 0<br>(0 - 0)         | 0<br>(0 - 0)             |
| Silicosis                                     | 0<br>(0 - 0)             | 0<br>(0 - 0)       | 0<br>(0 - 0)        | 0<br>(0 - 0)         | 0<br>(0 - 0)         | 0<br>(0 - 0)             |
| Asbestosis                                    | 0<br>(0 - 0)             | 0<br>(0 - 0)       | 0<br>(0 - 0)        | 0<br>(0 - 0)         | 0<br>(0 - 0)         | 0<br>(0 - 0)             |
| Coal workers pneumoconiosis                   | 0<br>(0 - 0)             | 0<br>(0 - 0)       | 0<br>(0 - 0)        | 0<br>(0 - 0)         | 0<br>(0 - 0)         | 0<br>(0 - 0)             |
| Other pneumoconiosis                          | 0<br>(0 - 0)             | 0<br>(0 - 0)       | 0<br>(0 - 0)        | 0<br>(0 - 0)         | 0<br>(0 - 0)         | 0<br>(0 - 0)             |

Web Table 31- New Zealand deaths with 95% UI by age, sex, and cause in 2013

| Cause                                               | Females, All Ages        | Females, 0-4 Years | Females, 5-14 Years | Females, 15-49 Years | Females, 50-69 Years | Females, 70-80 Years     |
|-----------------------------------------------------|--------------------------|--------------------|---------------------|----------------------|----------------------|--------------------------|
| Asthma                                              | 59<br>(35 - 89)          | 0<br>(0 - 0)       | 1<br>(1 - 1)        | 11<br>(8 - 15)       | 15<br>(8 - 24)       | 32<br>(16 - 53)          |
| Interstitial lung disease and pulmonary sarcoidosis | 154<br>(78 - 302)        | 0<br>(0 - 0)       | 0<br>(0 - 0)        | 2<br>(1 - 4)         | 10<br>(5 - 19)       | 142<br>(69 - 284)        |
| Other chronic respiratory diseases                  | 11<br>(5 - 20)           | 0<br>(0 - 0)       | 0<br>(0 - 0)        | 0<br>(0 - 0)         | 1<br>(0 - 1)         | 10<br>(5 - 19)           |
| Cirrhosis                                           | 89<br>(75 - 106)         | 0<br>(0 - 0)       | 0<br>(0 - 0)        | 9<br>(7 - 11)        | 27<br>(22 - 32)      | 53<br>(42 - 68)          |
| Cirrhosis due to hepatitis B                        | 21<br>(12 - 33)          | 0<br>(0 - 0)       | 0<br>(0 - 0)        | 2<br>(1 - 3)         | 7<br>(4 - 10)        | 12<br>(5 - 21)           |
| Cirrhosis due to hepatitis C                        | 43<br>(30 - 57)          | 0<br>(0 - 0)       | 0<br>(0 - 0)        | 4<br>(2 - 6)         | 13<br>(9 - 18)       | 26<br>(17 - 38)          |
| Cirrhosis due to alcohol use                        | 17<br>(8 - 25)           | --<br>(0 - 0)      | --<br>(0 - 0)       | 1<br>(1 - 2)         | 4<br>(2 - 7)         | 11<br>(5 - 19)           |
| Cirrhosis due to other causes                       | 8<br>(4 - 12)            | 0<br>(0 - 0)       | 0<br>(0 - 0)        | 2<br>(1 - 2)         | 3<br>(1 - 5)         | 3<br>(1 - 6)             |
| Digestive diseases                                  | 370<br>(291 - 452)       | 0<br>(0 - 0)       | 0<br>(0 - 0)        | 7<br>(5 - 8)         | 40<br>(31 - 48)      | 323<br>(250 - 403)       |
| Peptic ulcer disease                                | 61<br>(41 - 97)          | 0<br>(0 - 0)       | 0<br>(0 - 0)        | 1<br>(0 - 1)         | 6<br>(4 - 8)         | 55<br>(35 - 90)          |
| Gastritis and duodenitis                            | 5<br>(2 - 10)            | 0<br>(0 - 0)       | 0<br>(0 - 0)        | 0<br>(0 - 0)         | 1<br>(0 - 1)         | 4<br>(2 - 8)             |
| Appendicitis                                        | 3<br>(2 - 5)             | 0<br>(0 - 0)       | 0<br>(0 - 0)        | 0<br>(0 - 0)         | 1<br>(0 - 1)         | 2<br>(1 - 4)             |
| Paralytic ileus and intestinal obstruction          | 70<br>(36 - 110)         | 0<br>(0 - 0)       | 0<br>(0 - 0)        | 1<br>(1 - 2)         | 5<br>(3 - 8)         | 64<br>(31 - 101)         |
| Inguinal, femoral, and abdominal hernia             | 9<br>(3 - 15)            | 0<br>(0 - 0)       | 0<br>(0 - 0)        | 0<br>(0 - 0)         | 1<br>(0 - 1)         | 8<br>(3 - 14)            |
| Inflammatory bowel disease                          | 19<br>(11 - 30)          | 0<br>(0 - 0)       | 0<br>(0 - 0)        | 1<br>(0 - 1)         | 3<br>(2 - 4)         | 16<br>(8 - 26)           |
| Vascular intestinal disorders                       | 63<br>(33 - 107)         | 0<br>(0 - 0)       | 0<br>(0 - 0)        | 1<br>(0 - 1)         | 7<br>(4 - 12)        | 56<br>(28 - 96)          |
| Gallbladder and biliary diseases                    | 35<br>(21 - 47)          | 0<br>(0 - 0)       | 0<br>(0 - 0)        | 1<br>(1 - 1)         | 5<br>(3 - 7)         | 29<br>(17 - 41)          |
| Pancreatitis                                        | 21<br>(13 - 31)          | 0<br>(0 - 0)       | 0<br>(0 - 0)        | 1<br>(1 - 2)         | 4<br>(3 - 6)         | 16<br>(9 - 24)           |
| Other digestive diseases                            | 83<br>(56 - 113)         | 0<br>(0 - 0)       | 0<br>(0 - 0)        | 1<br>(1 - 1)         | 7<br>(5 - 10)        | 75<br>(50 - 104)         |
| Neurological disorders                              | 1,815<br>(1,206 - 2,343) | 3<br>(2 - 4)       | 2<br>(1 - 2)        | 23<br>(18 - 27)      | 100<br>(77 - 121)    | 1,688<br>(1,077 - 2,204) |
| Alzheimer disease and other dementias               | 1,581<br>(969 - 2,100)   | --<br>(0 - 0)      | --<br>(0 - 0)       | 0<br>(0 - 0)         | 42<br>(27 - 59)      | 1,539<br>(932 - 2,051)   |
| Parkinson disease                                   | 93<br>(48 - 134)         | --<br>(0 - 0)      | --<br>(0 - 0)       | 0<br>(0 - 0)         | 5<br>(3 - 7)         | 88<br>(44 - 128)         |
| Epilepsy                                            | 19<br>(13 - 24)          | 1<br>(0 - 1)       | 1<br>(0 - 1)        | 9<br>(6 - 12)        | 4<br>(3 - 5)         | 5<br>(3 - 8)             |
| Multiple sclerosis                                  | 30<br>(16 - 42)          | --<br>(0 - 0)      | --<br>(0 - 0)       | 6<br>(3 - 9)         | 15<br>(8 - 23)       | 9<br>(4 - 14)            |
| Other neurological disorders                        | 91<br>(76 - 108)         | 2<br>(1 - 3)       | 1<br>(1 - 1)        | 8<br>(6 - 9)         | 34<br>(28 - 42)      | 47<br>(36 - 59)          |
| Mental and substance use disorders                  | 32<br>(24 - 38)          | 0<br>(0 - 0)       | 0<br>(0 - 0)        | 17<br>(14 - 21)      | 8<br>(6 - 11)        | 6<br>(3 - 8)             |
| Schizophrenia                                       | 2<br>(1 - 4)             | --<br>(0 - 0)      | --<br>(0 - 0)       | 0<br>(0 - 0)         | 0<br>(0 - 1)         | 1<br>(0 - 3)             |
| Alcohol use disorders                               | 9<br>(4 - 15)            | --<br>(0 - 0)      | --<br>(0 - 0)       | 3<br>(1 - 5)         | 3<br>(1 - 6)         | 3<br>(1 - 5)             |
| Drug use disorders                                  | 20<br>(16 - 25)          | 0<br>(0 - 0)       | --<br>(0 - 0)       | 14<br>(11 - 17)      | 5<br>(3 - 6)         | 2<br>(1 - 2)             |
| Opioid use disorders                                | 11<br>(9 - 14)           | 0<br>(0 - 0)       | --<br>(0 - 0)       | 8<br>(6 - 10)        | 3<br>(2 - 3)         | 1<br>(1 - 1)             |
| Cocaine use disorders                               | 1<br>(1 - 1)             | 0<br>(0 - 0)       | --<br>(0 - 0)       | 1<br>(0 - 1)         | 0<br>(0 - 0)         | 0<br>(0 - 0)             |
| Amphetamine use disorders                           | 1<br>(1 - 1)             | 0<br>(0 - 0)       | --<br>(0 - 0)       | 1<br>(0 - 1)         | 0<br>(0 - 0)         | 0<br>(0 - 0)             |
| Other drug use disorders                            | 7<br>(6 - 9)             | 0<br>(0 - 0)       | --<br>(0 - 0)       | 5<br>(4 - 6)         | 2<br>(1 - 2)         | 1<br>(0 - 1)             |
| Eating disorders                                    | 1<br>(0 - 1)             | --<br>(0 - 0)      | 0<br>(0 - 0)        | 0<br>(0 - 1)         | --<br>(0 - 0)        | --<br>(0 - 0)            |
| Anorexia nervosa                                    | 1<br>(0 - 1)             | --<br>(0 - 0)      | 0<br>(0 - 0)        | 0<br>(0 - 1)         | --<br>(0 - 0)        | --<br>(0 - 0)            |
| Diabetes, urogenital, blood, and endocrine diseases | 947<br>(804 - 1,119)     | 3<br>(2 - 5)       | 2<br>(1 - 2)        | 43<br>(36 - 51)      | 178<br>(149 - 208)   | 721<br>(599 - 882)       |
| Diabetes mellitus                                   | 334<br>(265 - 408)       | 0<br>(0 - 0)       | 0<br>(0 - 0)        | 9<br>(7 - 12)        | 66<br>(52 - 80)      | 258<br>(196 - 328)       |
| Acute glomerulonephritis                            | 0<br>(0 - 0)             | 0<br>(0 - 0)       | 0<br>(0 - 0)        | 0<br>(0 - 0)         | 0<br>(0 - 0)         | 0<br>(0 - 0)             |
| Chronic kidney disease                              | 370<br>(289 - 503)       | 0<br>(0 - 0)       | 0<br>(0 - 0)        | 13<br>(10 - 18)      | 65<br>(50 - 90)      | 291<br>(216 - 411)       |
| Chronic kidney disease due to diabetes mellitus     | 124<br>(85 - 172)        | 0<br>(0 - 0)       | 0<br>(0 - 0)        | 6<br>(4 - 8)         | 36<br>(24 - 49)      | 82<br>(52 - 122)         |

Web Table 31- New Zealand deaths with 95% UI by age, sex, and cause in 2013

| Cause                                               | Females, All Ages  | Females, 0-4 Years | Females, 5-14 Years | Females, 15-49 Years | Females, 50-69 Years | Females, 70-80 Years |
|-----------------------------------------------------|--------------------|--------------------|---------------------|----------------------|----------------------|----------------------|
| Chronic kidney disease due to hypertension          | 75<br>(39 - 124)   | 0<br>(0 - 0)       | 0<br>(0 - 0)        | 1<br>(1 - 2)         | 8<br>(4 - 16)        | 66<br>(34 - 107)     |
| Chronic kidney disease due to glomerulonephritis    | 9<br>(6 - 14)      | 0<br>(0 - 0)       | 0<br>(0 - 0)        | 2<br>(1 - 2)         | 3<br>(1 - 4)         | 5<br>(3 - 8)         |
| Chronic kidney disease due to other causes          | 162<br>(98 - 275)  | 0<br>(0 - 0)       | 0<br>(0 - 0)        | 5<br>(3 - 8)         | 19<br>(9 - 33)       | 138<br>(77 - 240)    |
| Urinary diseases and male infertility               | 99<br>(67 - 154)   | 0<br>(0 - 0)       | 0<br>(0 - 0)        | 2<br>(2 - 4)         | 10<br>(7 - 14)       | 87<br>(56 - 141)     |
| Interstitial nephritis and urinary tract infections | 88<br>(58 - 140)   | 0<br>(0 - 0)       | 0<br>(0 - 0)        | 2<br>(1 - 2)         | 7<br>(5 - 11)        | 79<br>(50 - 129)     |
| Urolithiasis                                        | 6<br>(3 - 9)       | --                 | 0<br>(0 - 0)        | 0<br>(0 - 1)         | 2<br>(1 - 3)         | 4<br>(2 - 7)         |
| Other urinary diseases                              | 6<br>(3 - 11)      | 0<br>(0 - 0)       | 0<br>(0 - 0)        | 0<br>(0 - 1)         | 1<br>(0 - 1)         | 5<br>(2 - 10)        |
| Gynecological diseases                              | 1<br>(0 - 1)       | --                 | --                  | 0<br>(0 - 0)         | 0<br>(0 - 0)         | 0<br>(0 - 0)         |
| Uterine fibroids                                    | 0<br>(0 - 0)       | --                 | --                  | 0<br>(0 - 0)         | 0<br>(0 - 0)         | 0<br>(0 - 0)         |
| Polycystic ovarian syndrome                         | 0<br>(0 - 0)       | --                 | --                  | 0<br>(0 - 0)         | 0<br>(0 - 0)         | --                   |
| Endometriosis                                       | 0<br>(0 - 0)       | --                 | --                  | 0<br>(0 - 0)         | 0<br>(0 - 0)         | --                   |
| Genital prolapse                                    | 0<br>(0 - 0)       | --                 | --                  | 0<br>(0 - 0)         | 0<br>(0 - 0)         | 0<br>(0 - 0)         |
| Other gynecological diseases                        | 0<br>(0 - 0)       | --                 | --                  | 0<br>(0 - 0)         | 0<br>(0 - 0)         | 0<br>(0 - 0)         |
| Hemoglobinopathies and hemolytic anemias            | 10<br>(6 - 17)     | 0<br>(0 - 0)       | 0<br>(0 - 0)        | 1<br>(0 - 1)         | 1<br>(1 - 2)         | 8<br>(5 - 14)        |
| Thalassemias                                        | 1<br>(1 - 2)       | 0<br>(0 - 0)       | 0<br>(0 - 0)        | 0<br>(0 - 1)         | 0<br>(0 - 0)         | 0<br>(0 - 0)         |
| Sickle cell disorders                               | 0<br>(0 - 1)       | 0<br>(0 - 0)       | 0<br>(0 - 0)        | 0<br>(0 - 0)         | 0<br>(0 - 0)         | 0<br>(0 - 0)         |
| G6PD deficiency                                     | 0<br>(0 - 0)       | 0<br>(0 - 0)       | 0<br>(0 - 0)        | 0<br>(0 - 0)         | 0<br>(0 - 0)         | 0<br>(0 - 0)         |
| Other hemoglobinopathies and hemolytic anemias      | 9<br>(5 - 15)      | 0<br>(0 - 0)       | 0<br>(0 - 0)        | 0<br>(0 - 0)         | 1<br>(0 - 1)         | 8<br>(4 - 14)        |
| Endocrine, metabolic, blood, and immune disorders   | 133<br>(77 - 171)  | 3<br>(1 - 4)       | 1<br>(1 - 2)        | 17<br>(10 - 22)      | 35<br>(22 - 46)      | 76<br>(39 - 107)     |
| Musculoskeletal disorders                           | 113<br>(86 - 150)  | --                 | 0<br>(0 - 0)        | 9<br>(7 - 12)        | 27<br>(20 - 35)      | 77<br>(54 - 109)     |
| Rheumatoid arthritis                                | 43<br>(29 - 60)    | --                 | 0<br>(0 - 0)        | 1<br>(0 - 1)         | 8<br>(5 - 12)        | 34<br>(21 - 51)      |
| Other musculoskeletal disorders                     | 71<br>(53 - 93)    | --                 | 0<br>(0 - 0)        | 9<br>(7 - 11)        | 18<br>(14 - 24)      | 44<br>(29 - 64)      |
| Other non-communicable diseases                     | 166<br>(137 - 205) | 65<br>(49 - 89)    | 4<br>(3 - 5)        | 16<br>(12 - 21)      | 18<br>(14 - 23)      | 64<br>(44 - 91)      |
| Congenital anomalies                                | 93<br>(73 - 116)   | 42<br>(31 - 56)    | 4<br>(3 - 5)        | 15<br>(12 - 21)      | 14<br>(10 - 18)      | 19<br>(12 - 27)      |
| Neural tube defects                                 | 3<br>(2 - 5)       | 2<br>(1 - 4)       | 0<br>(0 - 0)        | 0<br>(0 - 1)         | 0<br>(0 - 0)         | 0<br>(0 - 0)         |
| Congenital heart anomalies                          | 33<br>(24 - 46)    | 12<br>(8 - 18)     | 1<br>(1 - 2)        | 6<br>(4 - 9)         | 3<br>(2 - 4)         | 11<br>(7 - 18)       |
| Cleft lip and cleft palate                          | 0<br>(0 - 0)       | 0<br>(0 - 0)       | --                  | --                   | --                   | --                   |
| Down syndrome                                       | 11<br>(5 - 16)     | 2<br>(1 - 4)       | 0<br>(0 - 1)        | 3<br>(1 - 4)         | 5<br>(2 - 8)         | 1<br>(0 - 1)         |
| Chromosomal unbalanced rearrangements               | 7<br>(5 - 12)      | 7<br>(4 - 11)      | 0<br>(0 - 0)        | 0<br>(0 - 1)         | 0<br>(0 - 0)         | 0<br>(0 - 0)         |
| Other congenital anomalies                          | 38<br>(28 - 52)    | 18<br>(12 - 26)    | 2<br>(1 - 3)        | 6<br>(4 - 9)         | 5<br>(3 - 8)         | 7<br>(4 - 11)        |
| Skin and subcutaneous diseases                      | 50<br>(32 - 74)    | 0<br>(0 - 0)       | 0<br>(0 - 0)        | 1<br>(0 - 1)         | 4<br>(3 - 5)         | 45<br>(28 - 69)      |
| Cellulitis                                          | 24<br>(10 - 38)    | 0<br>(0 - 0)       | 0<br>(0 - 0)        | 0<br>(0 - 0)         | 3<br>(2 - 4)         | 21<br>(8 - 35)       |
| Pyoderma                                            | 17<br>(8 - 31)     | 0<br>(0 - 0)       | 0<br>(0 - 0)        | 0<br>(0 - 0)         | 1<br>(0 - 1)         | 16<br>(7 - 29)       |
| Decubitus ulcer                                     | 6<br>(3 - 13)      | 0<br>(0 - 0)       | 0<br>(0 - 0)        | 0<br>(0 - 0)         | 0<br>(0 - 0)         | 6<br>(3 - 13)        |
| Other skin and subcutaneous diseases                | 3<br>(1 - 7)       | 0<br>(0 - 0)       | 0<br>(0 - 0)        | 0<br>(0 - 0)         | 0<br>(0 - 1)         | 3<br>(1 - 7)         |
| Sudden infant death syndrome                        | 23<br>(12 - 41)    | 23<br>(12 - 41)    | --                  | --                   | --                   | --                   |
| Injuries                                            | 633<br>(532 - 756) | 21<br>(15 - 28)    | 11<br>(9 - 13)      | 180<br>(159 - 203)   | 90<br>(76 - 106)     | 330<br>(242 - 447)   |
| Transport injuries                                  | 151<br>(124 - 182) | 5<br>(3 - 7)       | 6<br>(5 - 8)        | 74<br>(62 - 89)      | 33<br>(24 - 43)      | 33<br>(23 - 45)      |
| Road injuries                                       | 144<br>(118 - 174) | 5<br>(3 - 7)       | 6<br>(4 - 8)        | 70<br>(59 - 85)      | 31<br>(22 - 40)      | 32<br>(22 - 43)      |
| Pedestrian road injuries                            | 23<br>(15 - 37)    | 2<br>(1 - 3)       | 2<br>(1 - 2)        | 5<br>(3 - 8)         | 4<br>(2 - 7)         | 10<br>(6 - 17)       |

Web Table 31- New Zealand deaths with 95% UI by age, sex, and cause in 2013

| Cause                                           | Females, All Ages  | Females, 0-4 Years | Females, 5-14 Years | Females, 15-49 Years | Females, 50-69 Years | Females, 70-80 Years |
|-------------------------------------------------|--------------------|--------------------|---------------------|----------------------|----------------------|----------------------|
| Cyclist road injuries                           | 2<br>(2 - 3)       | 0<br>(0 - 0)       | 1<br>(0 - 1)        | 1<br>(1 - 2)         | 0<br>(0 - 1)         | 0<br>(0 - 1)         |
| Motorcyclist road injuries                      | 3<br>(1 - 7)       | 0<br>(0 - 0)       | 0<br>(0 - 0)        | 3<br>(1 - 6)         | 0<br>(0 - 1)         | 0<br>(0 - 0)         |
| Motor vehicle road injuries                     | 115<br>(90 - 139)  | 3<br>(2 - 5)       | 4<br>(2 - 5)        | 61<br>(50 - 75)      | 26<br>(18 - 34)      | 21<br>(13 - 30)      |
| Other road injuries                             | 1<br>(0 - 1)       | 0<br>(0 - 0)       | 0<br>(0 - 0)        | 0<br>(0 - 0)         | 0<br>(0 - 0)         | 0<br>(0 - 0)         |
| Other transport injuries                        | 7<br>(5 - 11)      | 0<br>(0 - 0)       | 0<br>(0 - 1)        | 4<br>(2 - 6)         | 2<br>(1 - 4)         | 1<br>(0 - 2)         |
| Unintentional injuries                          | 336<br>(250 - 454) | 14<br>(8 - 19)     | 3<br>(2 - 4)        | 17<br>(14 - 21)      | 22<br>(19 - 28)      | 281<br>(194 - 395)   |
| Falls                                           | 253<br>(167 - 367) | 1<br>(0 - 1)       | 0<br>(0 - 0)        | 3<br>(2 - 4)         | 8<br>(6 - 11)        | 241<br>(156 - 355)   |
| Drowning                                        | 13<br>(10 - 21)    | 3<br>(2 - 5)       | 1<br>(1 - 2)        | 4<br>(3 - 6)         | 2<br>(2 - 4)         | 2<br>(2 - 3)         |
| Fire, heat, and hot substances                  | 12<br>(9 - 17)     | 1<br>(0 - 1)       | 0<br>(0 - 1)        | 2<br>(1 - 3)         | 2<br>(1 - 3)         | 7<br>(5 - 11)        |
| Poisonings                                      | 4<br>(2 - 5)       | 0<br>(0 - 0)       | 0<br>(0 - 0)        | 1<br>(1 - 2)         | 1<br>(0 - 1)         | 1<br>(1 - 2)         |
| Exposure to mechanical forces                   | 13<br>(7 - 18)     | 7<br>(2 - 12)      | 1<br>(0 - 1)        | 2<br>(1 - 3)         | 1<br>(1 - 1)         | 3<br>(2 - 4)         |
| Unintentional firearm injuries                  | 0<br>(0 - 0)       | 0<br>(0 - 0)       | 0<br>(0 - 0)        | 0<br>(0 - 0)         | 0<br>(0 - 0)         | 0<br>(0 - 0)         |
| Unintentional suffocation                       | 8<br>(2 - 13)      | 6<br>(1 - 12)      | 0<br>(0 - 0)        | 1<br>(0 - 1)         | 0<br>(0 - 0)         | 0<br>(0 - 1)         |
| Other exposure to mechanical forces             | 5<br>(4 - 6)       | 1<br>(0 - 1)       | 0<br>(0 - 0)        | 1<br>(1 - 1)         | 1<br>(0 - 1)         | 2<br>(2 - 3)         |
| Adverse effects of medical treatment            | 20<br>(14 - 35)    | 0<br>(0 - 1)       | 0<br>(0 - 0)        | 2<br>(1 - 3)         | 4<br>(3 - 6)         | 15<br>(9 - 27)       |
| Animal contact                                  | 2<br>(1 - 4)       | 0<br>(0 - 0)       | 0<br>(0 - 0)        | 0<br>(0 - 1)         | 1<br>(0 - 2)         | 0<br>(0 - 1)         |
| Venomous animal contact                         | 1<br>(0 - 2)       | 0<br>(0 - 0)       | 0<br>(0 - 0)        | 0<br>(0 - 0)         | 1<br>(0 - 1)         | 0<br>(0 - 0)         |
| Non-venomous animal contact                     | 1<br>(0 - 2)       | 0<br>(0 - 0)       | 0<br>(0 - 0)        | 0<br>(0 - 1)         | 0<br>(0 - 1)         | 0<br>(0 - 1)         |
| Foreign body                                    | 17<br>(11 - 29)    | 2<br>(1 - 3)       | 0<br>(0 - 0)        | 2<br>(1 - 4)         | 3<br>(2 - 5)         | 10<br>(6 - 18)       |
| Pulmonary aspiration and foreign body in airway | 17<br>(10 - 28)    | 2<br>(1 - 3)       | 0<br>(0 - 0)        | 2<br>(1 - 4)         | 3<br>(2 - 5)         | 10<br>(6 - 18)       |
| Foreign body in other body part                 | 1<br>(0 - 2)       | 0<br>(0 - 0)       | 0<br>(0 - 0)        | 0<br>(0 - 0)         | 0<br>(0 - 0)         | 1<br>(0 - 1)         |
| Other unintentional injuries                    | 2<br>(1 - 3)       | 0<br>(0 - 0)       | 0<br>(0 - 0)        | 0<br>(0 - 1)         | 0<br>(0 - 1)         | 1<br>(0 - 2)         |
| Self-harm and interpersonal violence            | 145<br>(118 - 167) | 3<br>(1 - 4)       | 2<br>(1 - 2)        | 89<br>(69 - 104)     | 35<br>(27 - 43)      | 17<br>(13 - 21)      |
| Self-harm                                       | 123<br>(98 - 142)  | -                  | 1<br>(1 - 1)        | 75<br>(56 - 89)      | 32<br>(24 - 41)      | 14<br>(11 - 19)      |
| Interpersonal violence                          | 23<br>(14 - 28)    | 3<br>(1 - 4)       | 1<br>(1 - 1)        | 14<br>(9 - 18)       | 3<br>(2 - 4)         | 2<br>(2 - 3)         |
| Assault by firearm                              | 3<br>(2 - 5)       | 0<br>(0 - 0)       | 0<br>(0 - 0)        | 2<br>(1 - 4)         | 0<br>(0 - 1)         | 0<br>(0 - 0)         |
| Assault by sharp object                         | 7<br>(4 - 10)      | 0<br>(0 - 1)       | 0<br>(0 - 0)        | 5<br>(3 - 7)         | 1<br>(1 - 1)         | 1<br>(0 - 1)         |
| Assault by other means                          | 13<br>(7 - 16)     | 2<br>(1 - 3)       | 1<br>(0 - 1)        | 7<br>(3 - 9)         | 2<br>(1 - 2)         | 2<br>(1 - 2)         |

Web Table 31- Nicaragua deaths with 95% UI by age, sex, and cause in 2013

| Cause                                                             | Both Sexes, All Ages        | Both Sexes, 0-4 Years    | Both Sexes, 5-14 Years | Both Sexes, 15-49 Years  | Both Sexes, 50-69 Years  | Both Sexes, 70-80 Years     |
|-------------------------------------------------------------------|-----------------------------|--------------------------|------------------------|--------------------------|--------------------------|-----------------------------|
| All causes                                                        | 25,206<br>(23,962 - 26,696) | 3,344<br>(3,042 - 3,692) | 514<br>(477 - 551)     | 4,325<br>(3,891 - 4,820) | 5,157<br>(4,718 - 5,735) | 11,867<br>(11,513 - 12,319) |
| Communicable, maternal, neonatal, and nutritional diseases        | 3,880<br>(3,569 - 4,177)    | 2,211<br>(1,985 - 2,464) | 115<br>(98 - 134)      | 551<br>(471 - 639)       | 270<br>(234 - 310)       | 733<br>(642 - 848)          |
| HIV/AIDS and tuberculosis                                         | 447<br>(353 - 564)          | 5<br>(3 - 14)            | 4<br>(3 - 5)           | 269<br>(198 - 352)       | 95<br>(73 - 129)         | 74<br>(62 - 99)             |
| Tuberculosis                                                      | 195<br>(170 - 252)          | 3<br>(2 - 4)             | 4<br>(3 - 5)           | 61<br>(51 - 75)          | 59<br>(49 - 84)          | 68<br>(56 - 92)             |
| HIV/AIDS                                                          | 252<br>(165 - 364)          | 2<br>(0 - 11)            | 0<br>(0 - 1)           | 208<br>(137 - 293)       | 36<br>(17 - 61)          | 6<br>(3 - 12)               |
| HIV/AIDS resulting in mycobacterial infection                     | 15<br>(9 - 23)              | 0<br>(0 - 1)             | 0<br>(0 - 0)           | 12<br>(8 - 18)           | 2<br>(1 - 4)             | 0<br>(0 - 1)                |
| HIV/AIDS resulting in other diseases                              | 237<br>(157 - 344)          | 2<br>(0 - 10)            | 0<br>(0 - 1)           | 196<br>(129 - 276)       | 33<br>(16 - 57)          | 6<br>(2 - 11)               |
| Diarrhea, lower respiratory, and other common infectious diseases | 1,750<br>(1,565 - 1,949)    | 823<br>(697 - 976)       | 82<br>(66 - 101)       | 151<br>(122 - 181)       | 143<br>(120 - 168)       | 552<br>(466 - 654)          |
| Diarrheal diseases                                                | 310<br>(251 - 383)          | 210<br>(154 - 277)       | 10<br>(7 - 14)         | 15<br>(12 - 19)          | 20<br>(16 - 26)          | 55<br>(40 - 74)             |
| Intestinal infectious diseases                                    | 92<br>(49 - 159)            | 32<br>(17 - 57)          | 28<br>(15 - 47)        | 27<br>(13 - 51)          | 3<br>(1 - 6)             | 1<br>(1 - 3)                |
| Typhoid fever                                                     | 69<br>(36 - 119)            | 23<br>(11 - 42)          | 22<br>(11 - 37)        | 21<br>(10 - 39)          | 2<br>(1 - 5)             | 1<br>(0 - 2)                |
| Paratyphoid fever                                                 | 19<br>(9 - 34)              | 7<br>(3 - 13)            | 6<br>(3 - 11)          | 6<br>(2 - 11)            | 1<br>(0 - 1)             | 0<br>(0 - 0)                |
| Other intestinal infectious diseases                              | 4<br>(1 - 10)               | 2<br>(0 - 7)             | 0<br>(0 - 3)           | 1<br>(0 - 4)             | 0<br>(0 - 2)             | 0<br>(0 - 2)                |
| Lower respiratory infections                                      | 1,204<br>(1,050 - 1,373)    | 515<br>(407 - 639)       | 23<br>(18 - 30)        | 77<br>(59 - 95)          | 106<br>(85 - 129)        | 483<br>(401 - 587)          |
| Upper respiratory infections                                      | 2<br>(1 - 3)                | 0<br>(0 - 1)             | 0<br>(0 - 0)           | 0<br>(0 - 1)             | 0<br>(0 - 1)             | 1<br>(0 - 2)                |
| Otitis media                                                      | 1<br>(1 - 1)                | 0<br>(0 - 0)             | 0<br>(0 - 0)           | 0<br>(0 - 0)             | 0<br>(0 - 0)             | 0<br>(0 - 0)                |
| Meningitis                                                        | 93<br>(79 - 113)            | 48<br>(35 - 66)          | 12<br>(9 - 14)         | 17<br>(15 - 21)          | 8<br>(7 - 10)            | 8<br>(7 - 10)               |
| Pneumococcal meningitis                                           | 30<br>(25 - 37)             | 13<br>(10 - 19)          | 4<br>(3 - 6)           | 6<br>(5 - 9)             | 3<br>(2 - 4)             | 3<br>(2 - 4)                |
| H influenzae type B meningitis                                    | 23<br>(18 - 31)             | 17<br>(12 - 25)          | 3<br>(2 - 4)           | 2<br>(1 - 3)             | 1<br>(0 - 1)             | 1<br>(1 - 1)                |
| Meningococcal meningitis                                          | 10<br>(8 - 13)              | 4<br>(3 - 7)             | 1<br>(1 - 2)           | 2<br>(2 - 3)             | 1<br>(1 - 1)             | 1<br>(1 - 2)                |
| Other meningitis                                                  | 30<br>(23 - 38)             | 13<br>(7 - 19)           | 3<br>(2 - 5)           | 7<br>(5 - 9)             | 4<br>(2 - 5)             | 4<br>(3 - 5)                |
| Encephalitis                                                      | 42<br>(33 - 51)             | 16<br>(11 - 22)          | 9<br>(6 - 13)          | 11<br>(8 - 15)           | 4<br>(3 - 6)             | 2<br>(1 - 3)                |
| Diphtheria                                                        | 0<br>(0 - 2)                | 0<br>(0 - 2)             | 0<br>(0 - 1)           | 0<br>(0 - 0)             | 0<br>(0 - 0)             | --<br>(0 - 0)               |
| Whooping cough                                                    | 2<br>(1 - 3)                | 1<br>(0 - 3)             | 0<br>(0 - 0)           | 0<br>(0 - 0)             | 0<br>(0 - 0)             | --<br>(0 - 0)               |
| Tetanus                                                           | 1<br>(1 - 2)                | 0<br>(0 - 0)             | 0<br>(0 - 0)           | 0<br>(0 - 0)             | 0<br>(0 - 0)             | 0<br>(0 - 0)                |
| Measles                                                           | 0<br>(0 - 0)                | 0<br>(0 - 0)             | 0<br>(0 - 0)           | 0<br>(0 - 0)             | 0<br>(0 - 0)             | --<br>(0 - 0)               |
| Varicella and herpes zoster                                       | 3<br>(1 - 6)                | 1<br>(0 - 3)             | 0<br>(0 - 1)           | 1<br>(0 - 1)             | 0<br>(0 - 1)             | 1<br>(0 - 4)                |
| Neglected tropical diseases and malaria                           | 28<br>(22 - 41)             | 7<br>(5 - 12)            | 5<br>(4 - 7)           | 8<br>(6 - 11)            | 4<br>(3 - 7)             | 4<br>(3 - 10)               |
| Malaria                                                           | 2<br>(1 - 2)                | 0<br>(0 - 1)             | 0<br>(0 - 0)           | 1<br>(0 - 1)             | 0<br>(0 - 0)             | 0<br>(0 - 0)                |
| Chagas disease                                                    | 4<br>(1 - 15)               | 0<br>(0 - 0)             | 0<br>(0 - 0)           | 1<br>(0 - 3)             | 1<br>(0 - 5)             | 2<br>(1 - 7)                |
| Leishmaniasis                                                     | 3<br>(2 - 4)                | 1<br>(1 - 2)             | 0<br>(0 - 1)           | 1<br>(1 - 1)             | 0<br>(0 - 0)             | 0<br>(0 - 0)                |
| Visceral leishmaniasis                                            | 3<br>(2 - 4)                | 1<br>(1 - 2)             | 0<br>(0 - 1)           | 1<br>(1 - 1)             | 0<br>(0 - 0)             | 0<br>(0 - 0)                |
| Cysticercosis                                                     | 1<br>(1 - 1)                | 0<br>(0 - 0)             | 0<br>(0 - 0)           | 1<br>(1 - 1)             | 0<br>(0 - 0)             | 0<br>(0 - 0)                |
| Cystic echinococcosis                                             | 0<br>(0 - 0)                | 0<br>(0 - 0)             | 0<br>(0 - 0)           | 0<br>(0 - 0)             | 0<br>(0 - 0)             | 0<br>(0 - 0)                |
| Dengue                                                            | 12<br>(9 - 14)              | 3<br>(2 - 4)             | 3<br>(2 - 4)           | 3<br>(2 - 4)             | 1<br>(1 - 1)             | 2<br>(1 - 2)                |
| Rabies                                                            | 1<br>(0 - 1)                | 0<br>(0 - 0)             | 0<br>(0 - 0)           | 0<br>(0 - 0)             | 0<br>(0 - 0)             | 0<br>(0 - 0)                |
| Intestinal nematode infections                                    | 2<br>(0 - 8)                | 1<br>(0 - 6)             | 0<br>(0 - 3)           | 0<br>(0 - 2)             | 0<br>(0 - 1)             | 0<br>(0 - 2)                |
| Ascariasis                                                        | 2<br>(0 - 8)                | 1<br>(0 - 6)             | 0<br>(0 - 3)           | 0<br>(0 - 2)             | 0<br>(0 - 1)             | 0<br>(0 - 2)                |
| Other neglected tropical diseases                                 | 3<br>(3 - 6)                | 1<br>(1 - 3)             | 1<br>(0 - 1)           | 1<br>(1 - 1)             | 0<br>(0 - 1)             | 0<br>(0 - 1)                |
| Maternal disorders                                                | 90<br>(69 - 113)            | --                       | 1<br>(1 - 2)           | 89<br>(68 - 112)         | --                       | --                          |

Web Table 31- Nicaragua deaths with 95% UI by age, sex, and cause in 2013

| Cause                                                            | Both Sexes, All Ages        | Both Sexes, 0-4 Years    | Both Sexes, 5-14 Years | Both Sexes, 15-49 Years  | Both Sexes, 50-69 Years  | Both Sexes, 70-80 Years     |
|------------------------------------------------------------------|-----------------------------|--------------------------|------------------------|--------------------------|--------------------------|-----------------------------|
| Maternal hemorrhage                                              | 21<br>(16 - 28)             | --                       | 0<br>(0 - 0)           | 21<br>(15 - 27)          | --                       | --                          |
| Maternal sepsis and other maternal infections                    | 9<br>(6 - 12)               | --                       | 0<br>(0 - 0)           | 8<br>(6 - 12)            | --                       | --                          |
| Maternal hypertensive disorders                                  | 14<br>(10 - 19)             | --                       | 0<br>(0 - 0)           | 14<br>(10 - 19)          | --                       | --                          |
| Maternal obstructed labor                                        | 6<br>(4 - 9)                | --                       | 0<br>(0 - 0)           | 6<br>(4 - 9)             | --                       | --                          |
| Maternal abortive outcome                                        | 9<br>(5 - 13)               | --                       | 0<br>(0 - 0)           | 9<br>(5 - 13)            | --                       | --                          |
| Indirect maternal deaths                                         | 15<br>(11 - 21)             | --                       | 0<br>(0 - 0)           | 15<br>(11 - 20)          | --                       | --                          |
| Late maternal deaths                                             | 6<br>(3 - 10)               | --                       | 0<br>(0 - 0)           | 6<br>(3 - 10)            | --                       | --                          |
| Maternal deaths aggravated by HIV/AIDS                           | 0<br>(0 - 0)                | --                       | --                     | 0<br>(0 - 0)             | --                       | --                          |
| Other maternal disorders                                         | 9<br>(6 - 12)               | --                       | 0<br>(0 - 0)           | 9<br>(6 - 12)            | --                       | --                          |
| Neonatal disorders                                               | 1,157<br>(1,028 - 1,275)    | 1,157<br>(1,028 - 1,275) | --                     | --                       | --                       | --                          |
| Neonatal preterm birth complications                             | 540<br>(401 - 657)          | 540<br>(401 - 657)       | --                     | --                       | --                       | --                          |
| Neonatal encephalopathy due to birth asphyxia and trauma         | 285<br>(211 - 370)          | 285<br>(211 - 370)       | --                     | --                       | --                       | --                          |
| Neonatal sepsis and other neonatal infections                    | 282<br>(192 - 442)          | 282<br>(192 - 442)       | --                     | --                       | --                       | --                          |
| Hemolytic disease and other neonatal jaundice                    | 7<br>(3 - 14)               | 7<br>(3 - 14)            | --                     | --                       | --                       | --                          |
| Other neonatal disorders                                         | 43<br>(26 - 58)             | 43<br>(26 - 58)          | --                     | --                       | --                       | --                          |
| Nutritional deficiencies                                         | 316<br>(251 - 381)          | 157<br>(115 - 198)       | 15<br>(11 - 19)        | 26<br>(21 - 33)          | 23<br>(18 - 32)          | 95<br>(74 - 122)            |
| Protein-energy malnutrition                                      | 257<br>(193 - 314)          | 146<br>(105 - 187)       | 12<br>(8 - 15)         | 15<br>(9 - 20)           | 14<br>(9 - 20)           | 70<br>(49 - 93)             |
| Iodine deficiency                                                | 0<br>(0 - 1)                | 0<br>(0 - 0)             | 0<br>(0 - 0)           | 0<br>(0 - 0)             | 0<br>(0 - 0)             | 0<br>(0 - 0)                |
| Iron-deficiency anemia                                           | 56<br>(35 - 94)             | 10<br>(4 - 27)           | 3<br>(1 - 5)           | 11<br>(7 - 16)           | 9<br>(5 - 14)            | 23<br>(13 - 41)             |
| Other nutritional deficiencies                                   | 3<br>(1 - 4)                | 1<br>(0 - 1)             | 0<br>(0 - 1)           | 1<br>(0 - 1)             | 0<br>(0 - 0)             | 1<br>(0 - 1)                |
| Other communicable, maternal, neonatal, and nutritional diseases | 92<br>(49 - 147)            | 62<br>(23 - 113)         | 8<br>(4 - 12)          | 9<br>(7 - 11)            | 6<br>(5 - 7)             | 8<br>(6 - 12)               |
| Sexually transmitted diseases excluding HIV                      | 60<br>(18 - 115)            | 54<br>(15 - 104)         | 5<br>(1 - 9)           | 1<br>(0 - 1)             | 0<br>(0 - 0)             | 1<br>(0 - 1)                |
| Syphilis                                                         | 60<br>(17 - 115)            | 54<br>(15 - 104)         | 5<br>(1 - 9)           | 0<br>(0 - 0)             | 0<br>(0 - 0)             | 0<br>(0 - 1)                |
| Chlamydial infection                                             | 0<br>(0 - 0)                | --                       | 0<br>(0 - 0)           | 0<br>(0 - 0)             | 0<br>(0 - 0)             | 0<br>(0 - 0)                |
| Gonococcal infection                                             | 0<br>(0 - 0)                | --                       | 0<br>(0 - 0)           | 0<br>(0 - 0)             | 0<br>(0 - 0)             | 0<br>(0 - 0)                |
| Other sexually transmitted diseases                              | 0<br>(0 - 0)                | --                       | 0<br>(0 - 0)           | 0<br>(0 - 0)             | 0<br>(0 - 0)             | 0<br>(0 - 0)                |
| Hepatitis                                                        | 9<br>(8 - 11)               | 2<br>(1 - 3)             | 1<br>(0 - 1)           | 3<br>(2 - 3)             | 2<br>(2 - 3)             | 2<br>(1 - 3)                |
| Acute hepatitis A                                                | 4<br>(2 - 5)                | 2<br>(1 - 3)             | 1<br>(0 - 1)           | 1<br>(1 - 2)             | 0<br>(0 - 1)             | 0<br>(0 - 0)                |
| Acute hepatitis B                                                | 5<br>(3 - 7)                | 1<br>(0 - 1)             | 0<br>(0 - 0)           | 1<br>(0 - 2)             | 1<br>(1 - 2)             | 1<br>(1 - 2)                |
| Acute hepatitis C                                                | 1<br>(0 - 2)                | --                       | 0<br>(0 - 0)           | 0<br>(0 - 1)             | 0<br>(0 - 1)             | 0<br>(0 - 1)                |
| Other infectious diseases                                        | 23<br>(19 - 32)             | 6<br>(4 - 8)             | 2<br>(2 - 4)           | 5<br>(4 - 7)             | 3<br>(3 - 5)             | 6<br>(4 - 9)                |
| Non-communicable diseases                                        | 18,669<br>(17,676 - 19,864) | 950<br>(812 - 1,099)     | 217<br>(195 - 240)     | 2,235<br>(1,972 - 2,514) | 4,532<br>(4,135 - 5,032) | 10,734<br>(10,384 - 11,182) |
| Neoplasms                                                        | 3,099<br>(2,865 - 3,382)    | 49<br>(37 - 62)          | 85<br>(73 - 96)        | 557<br>(487 - 629)       | 987<br>(882 - 1,119)     | 1,421<br>(1,324 - 1,570)    |
| Esophageal cancer                                                | 35<br>(28 - 43)             | --                       | --                     | 3<br>(2 - 4)             | 13<br>(10 - 17)          | 19<br>(15 - 23)             |
| Stomach cancer                                                   | 403<br>(367 - 446)          | --                       | --                     | 50<br>(43 - 58)          | 144<br>(127 - 165)       | 209<br>(187 - 234)          |
| Liver cancer                                                     | 305<br>(271 - 342)          | --                       | 3<br>(2 - 3)           | 37<br>(31 - 43)          | 105<br>(90 - 123)        | 160<br>(138 - 184)          |
| Liver cancer due to hepatitis B                                  | 75<br>(46 - 104)            | --                       | 1<br>(0 - 1)           | 13<br>(7 - 19)           | 30<br>(17 - 45)          | 31<br>(18 - 43)             |
| Liver cancer due to hepatitis C                                  | 149<br>(116 - 195)          | --                       | 1<br>(0 - 1)           | 15<br>(10 - 21)          | 50<br>(35 - 69)          | 83<br>(64 - 108)            |
| Liver cancer due to alcohol use                                  | 53<br>(37 - 77)             | --                       | --                     | 3<br>(2 - 5)             | 15<br>(10 - 24)          | 34<br>(23 - 51)             |
| Liver cancer due to other causes                                 | 28<br>(20 - 41)             | --                       | 1<br>(1 - 2)           | 6<br>(4 - 9)             | 10<br>(6 - 15)           | 12<br>(7 - 17)              |

Web Table 31- Nicaragua deaths with 95% UI by age, sex, and cause in 2013

| Cause                                         | Both Sexes, All Ages     | Both Sexes, 0-4 Years | Both Sexes, 5-14 Years | Both Sexes, 15-49 Years | Both Sexes, 50-69 Years  | Both Sexes, 70-80 Years  |
|-----------------------------------------------|--------------------------|-----------------------|------------------------|-------------------------|--------------------------|--------------------------|
| Larynx cancer                                 | 36<br>(29 - 50)          | --                    | --                     | 3<br>(2 - 4)            | 13<br>(10 - 17)          | 21<br>(17 - 29)          |
| Tracheal, bronchus and lung cancer            | 232<br>(208 - 263)       | --                    | --                     | 23<br>(20 - 28)         | 85<br>(73 - 101)         | 124<br>(109 - 142)       |
| Breast cancer                                 | 175<br>(147 - 206)       | --                    | --                     | 52<br>(41 - 65)         | 70<br>(56 - 87)          | 52<br>(43 - 63)          |
| Cervical cancer                               | 320<br>(265 - 407)       | --                    | --                     | 103<br>(80 - 129)       | 123<br>(97 - 162)        | 94<br>(75 - 129)         |
| Uterine cancer                                | 18<br>(14 - 29)          | --                    | --                     | 2<br>(2 - 4)            | 9<br>(6 - 14)            | 7<br>(5 - 11)            |
| Prostate cancer                               | 279<br>(183 - 407)       | --                    | --                     | 2<br>(1 - 3)            | 44<br>(28 - 64)          | 233<br>(150 - 339)       |
| Colon and rectum cancer                       | 234<br>(212 - 258)       | --                    | --                     | 34<br>(30 - 39)         | 73<br>(64 - 83)          | 126<br>(112 - 144)       |
| Lip and oral cavity cancer                    | 25<br>(21 - 31)          | --                    | --                     | 3<br>(2 - 4)            | 9<br>(7 - 11)            | 13<br>(11 - 17)          |
| Nasopharynx cancer                            | 8<br>(7 - 10)            | --                    | 0<br>(0 - 0)           | 3<br>(2 - 3)            | 3<br>(2 - 3)             | 2<br>(2 - 3)             |
| Other pharynx cancer                          | 14<br>(12 - 17)          | --                    | --                     | 2<br>(1 - 2)            | 6<br>(5 - 7)             | 6<br>(5 - 8)             |
| Gallbladder and biliary tract cancer          | 89<br>(70 - 140)         | --                    | --                     | 6<br>(5 - 10)           | 34<br>(25 - 51)          | 49<br>(37 - 78)          |
| Pancreatic cancer                             | 126<br>(113 - 142)       | --                    | --                     | 11<br>(10 - 13)         | 45<br>(39 - 53)          | 70<br>(60 - 81)          |
| Malignant skin melanoma                       | 13<br>(10 - 19)          | --                    | --                     | 3<br>(2 - 4)            | 4<br>(3 - 7)             | 5<br>(4 - 8)             |
| Non-melanoma skin cancer                      | 39<br>(29 - 52)          | --                    | --                     | 4<br>(3 - 6)            | 9<br>(7 - 13)            | 25<br>(19 - 34)          |
| Ovarian cancer                                | 50<br>(42 - 60)          | --                    | --                     | 14<br>(11 - 18)         | 20<br>(16 - 26)          | 15<br>(13 - 19)          |
| Testicular cancer                             | 5<br>(2 - 8)             | --                    | --                     | 4<br>(1 - 6)            | 1<br>(0 - 1)             | 1<br>(0 - 1)             |
| Kidney cancer                                 | 46<br>(41 - 52)          | 2<br>(1 - 2)          | 1<br>(1 - 1)           | 6<br>(5 - 7)            | 17<br>(15 - 20)          | 19<br>(17 - 23)          |
| Bladder cancer                                | 22<br>(17 - 26)          | --                    | --                     | 2<br>(1 - 2)            | 6<br>(5 - 7)             | 15<br>(11 - 18)          |
| Brain and nervous system cancer               | 95<br>(53 - 113)         | 7<br>(4 - 10)         | 14<br>(8 - 18)         | 33<br>(18 - 41)         | 26<br>(14 - 32)          | 16<br>(8 - 20)           |
| Thyroid cancer                                | 19<br>(14 - 23)          | --                    | 0<br>(0 - 0)           | 2<br>(2 - 3)            | 6<br>(4 - 8)             | 11<br>(7 - 13)           |
| Mesothelioma                                  | 2<br>(1 - 2)             | --                    | --                     | 0<br>(0 - 1)            | 1<br>(1 - 1)             | 0<br>(0 - 1)             |
| Hodgkin lymphoma                              | 12<br>(6 - 16)           | 0<br>(0 - 1)          | 1<br>(1 - 2)           | 4<br>(2 - 6)            | 3<br>(1 - 4)             | 3<br>(1 - 4)             |
| Non-Hodgkin lymphoma                          | 80<br>(65 - 99)          | 4<br>(3 - 5)          | 6<br>(5 - 10)          | 21<br>(16 - 26)         | 25<br>(18 - 32)          | 24<br>(17 - 31)          |
| Multiple myeloma                              | 17<br>(14 - 21)          | --                    | --                     | 2<br>(2 - 3)            | 8<br>(6 - 11)            | 6<br>(5 - 8)             |
| Leukemia                                      | 204<br>(182 - 225)       | 19<br>(14 - 26)       | 41<br>(33 - 49)        | 77<br>(66 - 91)         | 33<br>(28 - 39)          | 33<br>(28 - 38)          |
| Other neoplasms                               | 196<br>(166 - 231)       | 16<br>(10 - 23)       | 17<br>(13 - 22)        | 47<br>(38 - 56)         | 54<br>(45 - 68)          | 61<br>(49 - 76)          |
| Cardiovascular diseases                       | 6,560<br>(6,109 - 7,154) | 29<br>(24 - 38)       | 20<br>(16 - 23)        | 415<br>(357 - 483)      | 1,270<br>(1,134 - 1,457) | 4,826<br>(4,521 - 5,217) |
| Rheumatic heart disease                       | 38<br>(30 - 49)          | 0<br>(0 - 1)          | 2<br>(1 - 3)           | 13<br>(10 - 17)         | 9<br>(7 - 12)            | 13<br>(10 - 18)          |
| Ischemic heart disease                        | 3,657<br>(3,297 - 4,149) | 3<br>(2 - 4)          | 4<br>(3 - 5)           | 202<br>(168 - 243)      | 667<br>(577 - 800)       | 2,780<br>(2,503 - 3,141) |
| Cerebrovascular disease                       | 2,050<br>(1,811 - 2,402) | 7<br>(5 - 9)          | 6<br>(5 - 7)           | 126<br>(105 - 153)      | 429<br>(368 - 516)       | 1,482<br>(1,296 - 1,741) |
| Ischemic stroke                               | 499<br>(384 - 813)       | 1<br>(0 - 1)          | 1<br>(0 - 1)           | 18<br>(13 - 29)         | 89<br>(67 - 143)         | 391<br>(294 - 644)       |
| Hemorrhagic stroke                            | 1,551<br>(1,260 - 1,772) | 6<br>(4 - 8)          | 5<br>(4 - 7)           | 108<br>(90 - 131)       | 340<br>(287 - 401)       | 1,091<br>(855 - 1,260)   |
| Hypertensive heart disease                    | 474<br>(327 - 600)       | 0<br>(0 - 1)          | 0<br>(0 - 0)           | 14<br>(10 - 19)         | 77<br>(54 - 98)          | 382<br>(251 - 492)       |
| Cardiomyopathy and myocarditis                | 86<br>(73 - 108)         | 8<br>(5 - 11)         | 4<br>(3 - 5)           | 23<br>(18 - 29)         | 23<br>(19 - 31)          | 29<br>(23 - 38)          |
| Atrial fibrillation and flutter               | 7<br>(6 - 10)            | --                    | --                     | 1<br>(0 - 1)            | 1<br>(1 - 1)             | 6<br>(4 - 8)             |
| Aortic aneurysm                               | 16<br>(13 - 20)          | --                    | --                     | 2<br>(1 - 2)            | 3<br>(2 - 4)             | 11<br>(9 - 14)           |
| Peripheral vascular disease                   | 2<br>(1 - 2)             | --                    | --                     | 0<br>(0 - 0)            | 0<br>(0 - 0)             | 1<br>(1 - 2)             |
| Endocarditis                                  | 20<br>(16 - 27)          | 5<br>(3 - 7)          | 1<br>(1 - 2)           | 4<br>(3 - 6)            | 3<br>(2 - 4)             | 7<br>(5 - 9)             |
| Other cardiovascular and circulatory diseases | 210<br>(169 - 273)       | 7<br>(5 - 9)          | 3<br>(2 - 3)           | 30<br>(23 - 40)         | 57<br>(43 - 75)          | 115<br>(85 - 160)        |
| Chronic respiratory diseases                  | 1,363<br>(1,121 - 1,506) | 33<br>(26 - 42)       | 7<br>(6 - 9)           | 55<br>(46 - 64)         | 190<br>(163 - 219)       | 1,078<br>(859 - 1,196)   |



Web Table 31- Nicaragua deaths with 95% UI by age, sex, and cause in 2013

| Cause                                               | Both Sexes, All Ages   | Both Sexes, 0-4 Years | Both Sexes, 5-14 Years | Both Sexes, 15-49 Years | Both Sexes, 50-69 Years | Both Sexes, 70-80 Years |
|-----------------------------------------------------|------------------------|-----------------------|------------------------|-------------------------|-------------------------|-------------------------|
| Chronic obstructive pulmonary disease               | 1,149<br>(923 - 1,276) | 13<br>(9 - 19)        | 1<br>(1 - 2)           | 30<br>(24 - 37)         | 148<br>(125 - 171)      | 957<br>(748 - 1,067)    |
| Pneumoconiosis                                      | 13<br>(10 - 20)        | 0<br>(0 - 0)          | 0<br>(0 - 0)           | 1<br>(1 - 1)            | 3<br>(2 - 5)            | 9<br>(6 - 14)           |
| Silicosis                                           | 1<br>(1 - 1)           | 0<br>(0 - 0)          | 0<br>(0 - 0)           | 0<br>(0 - 0)            | 0<br>(0 - 0)            | 0<br>(0 - 1)            |
| Asbestosis                                          | 2<br>(1 - 3)           | 0<br>(0 - 0)          | 0<br>(0 - 0)           | 0<br>(0 - 0)            | 1<br>(0 - 1)            | 1<br>(1 - 2)            |
| Coal workers pneumoconiosis                         | 2<br>(1 - 2)           | 0<br>(0 - 0)          | 0<br>(0 - 0)           | 0<br>(0 - 0)            | 0<br>(0 - 1)            | 1<br>(1 - 2)            |
| Other pneumoconiosis                                | 9<br>(6 - 13)          | 0<br>(0 - 0)          | 0<br>(0 - 0)           | 0<br>(0 - 1)            | 2<br>(1 - 3)            | 6<br>(4 - 10)           |
| Asthma                                              | 133<br>(102 - 165)     | 12<br>(8 - 18)        | 4<br>(3 - 5)           | 17<br>(13 - 21)         | 26<br>(19 - 35)         | 74<br>(51 - 100)        |
| Interstitial lung disease and pulmonary sarcoidosis | 40<br>(28 - 56)        | 0<br>(0 - 1)          | 1<br>(0 - 1)           | 4<br>(3 - 6)            | 10<br>(7 - 15)          | 24<br>(15 - 37)         |
| Other chronic respiratory diseases                  | 28<br>(21 - 36)        | 7<br>(6 - 10)         | 1<br>(0 - 1)           | 3<br>(2 - 3)            | 3<br>(2 - 4)            | 15<br>(10 - 21)         |
| Cirrhosis                                           | 1,069<br>(970 - 1,190) | 4<br>(3 - 5)          | 6<br>(5 - 7)           | 299<br>(257 - 349)      | 422<br>(373 - 480)      | 338<br>(306 - 376)      |
| Cirrhosis due to hepatitis B                        | 34<br>(19 - 50)        | 0<br>(0 - 0)          | 0<br>(0 - 0)           | 10<br>(6 - 14)          | 14<br>(8 - 21)          | 11<br>(5 - 18)          |
| Cirrhosis due to hepatitis C                        | 398<br>(320 - 479)     | 0<br>(0 - 1)          | 1<br>(1 - 2)           | 89<br>(61 - 117)        | 156<br>(119 - 194)      | 152<br>(120 - 185)      |
| Cirrhosis due to alcohol use                        | 487<br>(408 - 575)     | --                    | --                     | 135<br>(105 - 171)      | 202<br>(163 - 243)      | 150<br>(123 - 183)      |
| Cirrhosis due to other causes                       | 149<br>(104 - 201)     | 4<br>(3 - 5)          | 5<br>(4 - 5)           | 65<br>(43 - 89)         | 50<br>(31 - 76)         | 25<br>(17 - 35)         |
| Digestive diseases                                  | 518<br>(464 - 646)     | 7<br>(5 - 10)         | 9<br>(8 - 11)          | 75<br>(65 - 92)         | 122<br>(104 - 161)      | 304<br>(268 - 383)      |
| Peptic ulcer disease                                | 134<br>(106 - 190)     | 0<br>(0 - 0)          | 0<br>(0 - 0)           | 14<br>(11 - 20)         | 32<br>(25 - 46)         | 87<br>(66 - 126)        |
| Gastritis and duodenitis                            | 33<br>(24 - 55)        | 0<br>(0 - 0)          | 0<br>(0 - 0)           | 4<br>(3 - 6)            | 9<br>(6 - 15)           | 20<br>(13 - 34)         |
| Appendicitis                                        | 32<br>(25 - 46)        | 0<br>(0 - 1)          | 2<br>(1 - 3)           | 9<br>(7 - 12)           | 9<br>(6 - 13)           | 11<br>(8 - 18)          |
| Paralytic ileus and intestinal obstruction          | 70<br>(28 - 102)       | 4<br>(2 - 6)          | 3<br>(2 - 5)           | 8<br>(3 - 12)           | 12<br>(4 - 18)          | 43<br>(15 - 66)         |
| Inguinal, femoral, and abdominal hernia             | 38<br>(24 - 73)        | 1<br>(0 - 1)          | 1<br>(0 - 2)           | 4<br>(2 - 7)            | 8<br>(5 - 14)           | 25<br>(15 - 51)         |
| Inflammatory bowel disease                          | 6<br>(4 - 8)           | 0<br>(0 - 0)          | 0<br>(0 - 1)           | 2<br>(1 - 2)            | 2<br>(1 - 2)            | 2<br>(1 - 3)            |
| Vascular intestinal disorders                       | 30<br>(17 - 48)        | 0<br>(0 - 0)          | 0<br>(0 - 0)           | 2<br>(1 - 4)            | 7<br>(4 - 12)           | 21<br>(12 - 34)         |
| Gallbladder and biliary diseases                    | 66<br>(53 - 96)        | 0<br>(0 - 0)          | 0<br>(0 - 0)           | 7<br>(6 - 10)           | 15<br>(11 - 24)         | 43<br>(33 - 64)         |
| Pancreatitis                                        | 56<br>(44 - 79)        | 0<br>(0 - 0)          | 1<br>(0 - 1)           | 18<br>(14 - 25)         | 16<br>(12 - 24)         | 21<br>(16 - 32)         |
| Other digestive diseases                            | 53<br>(43 - 67)        | 1<br>(1 - 2)          | 1<br>(1 - 2)           | 7<br>(5 - 9)            | 13<br>(10 - 17)         | 30<br>(23 - 40)         |
| Neurological disorders                              | 1,123<br>(928 - 1,327) | 12<br>(9 - 19)        | 12<br>(10 - 15)        | 60<br>(50 - 74)         | 71<br>(58 - 87)         | 968<br>(774 - 1,171)    |
| Alzheimer disease and other dementias               | 955<br>(757 - 1,162)   | --                    | --                     | 0<br>(0 - 1)            | 43<br>(29 - 58)         | 912<br>(719 - 1,113)    |
| Parkinson disease                                   | 43<br>(34 - 53)        | --                    | --                     | 1<br>(0 - 1)            | 7<br>(5 - 8)            | 36<br>(27 - 45)         |
| Epilepsy                                            | 86<br>(73 - 111)       | 9<br>(6 - 15)         | 9<br>(7 - 12)          | 43<br>(34 - 56)         | 12<br>(10 - 15)         | 14<br>(11 - 19)         |
| Multiple sclerosis                                  | 6<br>(4 - 9)           | --                    | --                     | 2<br>(2 - 4)            | 2<br>(1 - 3)            | 1<br>(1 - 2)            |
| Other neurological disorders                        | 33<br>(28 - 38)        | 4<br>(3 - 5)          | 3<br>(2 - 4)           | 13<br>(11 - 16)         | 8<br>(7 - 10)           | 5<br>(4 - 6)            |
| Mental and substance use disorders                  | 328<br>(209 - 420)     | 2<br>(1 - 3)          | 0<br>(0 - 0)           | 152<br>(91 - 198)       | 122<br>(76 - 161)       | 52<br>(35 - 71)         |
| Schizophrenia                                       | 2<br>(2 - 3)           | --                    | --                     | 1<br>(1 - 1)            | 1<br>(0 - 1)            | 0<br>(0 - 1)            |
| Alcohol use disorders                               | 299<br>(179 - 392)     | --                    | --                     | 136<br>(73 - 183)       | 116<br>(70 - 156)       | 46<br>(28 - 65)         |
| Drug use disorders                                  | 26<br>(22 - 34)        | 2<br>(1 - 3)          | --                     | 14<br>(11 - 19)         | 5<br>(4 - 7)            | 6<br>(4 - 8)            |
| Opioid use disorders                                | 6<br>(5 - 7)           | 0<br>(0 - 1)          | --                     | 3<br>(2 - 4)            | 1<br>(1 - 1)            | 1<br>(1 - 2)            |
| Cocaine use disorders                               | 1<br>(1 - 1)           | 0<br>(0 - 0)          | --                     | 0<br>(0 - 1)            | 0<br>(0 - 0)            | 0<br>(0 - 0)            |
| Amphetamine use disorders                           | 1<br>(0 - 1)           | 0<br>(0 - 0)          | --                     | 0<br>(0 - 0)            | 0<br>(0 - 0)            | 0<br>(0 - 0)            |
| Other drug use disorders                            | 19<br>(16 - 25)        | 1<br>(1 - 2)          | --                     | 10<br>(8 - 14)          | 4<br>(3 - 5)            | 4<br>(3 - 6)            |
| Eating disorders                                    | 0<br>(0 - 0)           | --                    | 0<br>(0 - 0)           | 0<br>(0 - 0)            | --                      | --                      |

Web Table 31- Nicaragua deaths with 95% UI by age, sex, and cause in 2013

| Cause                                               | Both Sexes, All Ages     | Both Sexes, 0-4 Years | Both Sexes, 5-14 Years | Both Sexes, 15-49 Years | Both Sexes, 50-69 Years  | Both Sexes, 70-80 Years  |
|-----------------------------------------------------|--------------------------|-----------------------|------------------------|-------------------------|--------------------------|--------------------------|
| Anorexia nervosa                                    | 0<br>(0 - 0)             | --                    | 0<br>(0 - 0)           | 0<br>(0 - 0)            | --                       | --                       |
| Diabetes, urogenital, blood, and endocrine diseases | 3,642<br>(3,057 - 3,979) | 49<br>(39 - 65)       | 40<br>(34 - 47)        | 548<br>(418 - 635)      | 1,320<br>(1,053 - 1,489) | 1,686<br>(1,478 - 1,835) |
| Diabetes mellitus                                   | 1,322<br>(1,191 - 1,464) | 2<br>(1 - 3)          | 4<br>(3 - 5)           | 110<br>(93 - 129)       | 466<br>(410 - 536)       | 741<br>(655 - 834)       |
| Acute glomerulonephritis                            | 2<br>(2 - 3)             | 0<br>(0 - 1)          | 0<br>(0 - 0)           | 0<br>(0 - 1)            | 0<br>(0 - 1)             | 1<br>(0 - 1)             |
| Chronic kidney disease                              | 2,109<br>(1,530 - 2,358) | 21<br>(16 - 28)       | 20<br>(16 - 24)        | 388<br>(260 - 461)      | 811<br>(543 - 936)       | 869<br>(665 - 977)       |
| Chronic kidney disease due to diabetes mellitus     | 888<br>(577 - 1,078)     | 1<br>(1 - 3)          | 1<br>(0 - 1)           | 95<br>(58 - 130)        | 417<br>(264 - 520)       | 374<br>(259 - 458)       |
| Chronic kidney disease due to hypertension          | 359<br>(240 - 492)       | 3<br>(2 - 5)          | 2<br>(2 - 3)           | 94<br>(65 - 128)        | 107<br>(64 - 160)        | 153<br>(101 - 213)       |
| Chronic kidney disease due to glomerulonephritis    | 27<br>(22 - 34)          | 6<br>(4 - 8)          | 6<br>(5 - 8)           | 8<br>(6 - 10)           | 3<br>(2 - 4)             | 5<br>(3 - 6)             |
| Chronic kidney disease due to other causes          | 835<br>(454 - 1,004)     | 11<br>(7 - 16)        | 11<br>(8 - 14)         | 191<br>(86 - 246)       | 285<br>(126 - 368)       | 337<br>(210 - 439)       |
| Urinary diseases and male infertility               | 69<br>(59 - 85)          | 3<br>(2 - 4)          | 1<br>(1 - 1)           | 8<br>(7 - 10)           | 15<br>(12 - 19)          | 41<br>(33 - 54)          |
| Interstitial nephritis and urinary tract infections | 45<br>(38 - 59)          | 2<br>(2 - 3)          | 1<br>(0 - 1)           | 5<br>(4 - 6)            | 9<br>(7 - 12)            | 28<br>(21 - 39)          |
| Urolithiasis                                        | 4<br>(3 - 5)             | --                    | 0<br>(0 - 0)           | 1<br>(1 - 1)            | 1<br>(1 - 2)             | 2<br>(1 - 3)             |
| Other urinary diseases                              | 20<br>(14 - 26)          | 1<br>(0 - 1)          | 0<br>(0 - 0)           | 3<br>(2 - 3)            | 5<br>(3 - 6)             | 12<br>(7 - 16)           |
| Gynecological diseases                              | 1<br>(1 - 2)             | --                    | --                     | 1<br>(0 - 1)            | 0<br>(0 - 0)             | 0<br>(0 - 1)             |
| Uterine fibroids                                    | 0<br>(0 - 0)             | --                    | --                     | 0<br>(0 - 0)            | 0<br>(0 - 0)             | 0<br>(0 - 0)             |
| Polycystic ovarian syndrome                         | 0<br>(0 - 0)             | --                    | --                     | 0<br>(0 - 0)            | 0<br>(0 - 0)             | --                       |
| Endometriosis                                       | 0<br>(0 - 0)             | --                    | --                     | 0<br>(0 - 0)            | 0<br>(0 - 0)             | --                       |
| Genital prolapse                                    | 0<br>(0 - 0)             | --                    | --                     | 0<br>(0 - 0)            | 0<br>(0 - 0)             | 0<br>(0 - 0)             |
| Other gynecological diseases                        | 1<br>(0 - 1)             | --                    | --                     | 0<br>(0 - 0)            | 0<br>(0 - 0)             | 0<br>(0 - 0)             |
| Hemoglobinopathies and hemolytic anemias            | 53<br>(37 - 70)          | 9<br>(5 - 15)         | 10<br>(6 - 14)         | 20<br>(14 - 27)         | 7<br>(5 - 10)            | 7<br>(5 - 9)             |
| Thalassemias                                        | 1<br>(1 - 2)             | 0<br>(0 - 1)          | 0<br>(0 - 0)           | 0<br>(0 - 1)            | 0<br>(0 - 0)             | 0<br>(0 - 0)             |
| Sickle cell disorders                               | 26<br>(18 - 35)          | 5<br>(3 - 8)          | 7<br>(4 - 9)           | 12<br>(8 - 16)          | 3<br>(2 - 3)             | 0<br>(0 - 0)             |
| G6PD deficiency                                     | 3<br>(2 - 4)             | 1<br>(0 - 1)          | 1<br>(0 - 1)           | 1<br>(1 - 2)            | 0<br>(0 - 0)             | 0<br>(0 - 0)             |
| Other hemoglobinopathies and hemolytic anemias      | 23<br>(16 - 30)          | 3<br>(2 - 5)          | 2<br>(2 - 3)           | 6<br>(4 - 8)            | 4<br>(3 - 6)             | 6<br>(4 - 9)             |
| Endocrine, metabolic, blood, and immune disorders   | 86<br>(70 - 138)         | 13<br>(9 - 24)        | 5<br>(3 - 7)           | 22<br>(17 - 33)         | 19<br>(15 - 32)          | 26<br>(20 - 47)          |
| Musculoskeletal disorders                           | 87<br>(47 - 102)         | --                    | 6<br>(3 - 7)           | 43<br>(20 - 53)         | 14<br>(8 - 18)           | 24<br>(16 - 31)          |
| Rheumatoid arthritis                                | 17<br>(13 - 22)          | --                    | 0<br>(0 - 1)           | 3<br>(2 - 4)            | 4<br>(3 - 6)             | 10<br>(7 - 14)           |
| Other musculoskeletal disorders                     | 70<br>(35 - 83)          | --                    | 5<br>(3 - 7)           | 41<br>(18 - 50)         | 10<br>(5 - 13)           | 14<br>(8 - 19)           |
| Other non-communicable diseases                     | 880<br>(740 - 1,021)     | 766<br>(634 - 901)    | 34<br>(26 - 41)        | 31<br>(23 - 36)         | 14<br>(10 - 16)          | 36<br>(19 - 46)          |
| Congenital anomalies                                | 800<br>(658 - 931)       | 729<br>(597 - 858)    | 32<br>(25 - 40)        | 25<br>(19 - 31)         | 6<br>(5 - 8)             | 7<br>(5 - 9)             |
| Neural tube defects                                 | 48<br>(31 - 69)          | 47<br>(30 - 68)       | 0<br>(0 - 0)           | 0<br>(0 - 0)            | 0<br>(0 - 0)             | 0<br>(0 - 0)             |
| Congenital heart anomalies                          | 348<br>(270 - 431)       | 306<br>(231 - 390)    | 20<br>(15 - 26)        | 17<br>(13 - 21)         | 3<br>(2 - 3)             | 2<br>(1 - 3)             |
| Cleft lip and cleft palate                          | 4<br>(1 - 13)            | 4<br>(1 - 13)         | --                     | --                      | --                       | --                       |
| Down syndrome                                       | 17<br>(11 - 26)          | 12<br>(7 - 20)        | 3<br>(2 - 4)           | 2<br>(1 - 3)            | 1<br>(0 - 1)             | 0<br>(0 - 0)             |
| Chromosomal unbalanced rearrangements               | 11<br>(6 - 17)           | 9<br>(5 - 15)         | 0<br>(0 - 1)           | 1<br>(0 - 1)            | 0<br>(0 - 0)             | 0<br>(0 - 1)             |
| Other congenital anomalies                          | 372<br>(292 - 447)       | 351<br>(273 - 427)    | 9<br>(6 - 13)          | 5<br>(4 - 7)            | 3<br>(2 - 4)             | 4<br>(3 - 5)             |
| Skin and subcutaneous diseases                      | 50<br>(25 - 60)          | 6<br>(4 - 9)          | 1<br>(1 - 2)           | 6<br>(3 - 7)            | 7<br>(4 - 9)             | 30<br>(13 - 39)          |
| Cellulitis                                          | 5<br>(2 - 7)             | 1<br>(0 - 1)          | 0<br>(0 - 0)           | 1<br>(0 - 1)            | 1<br>(0 - 1)             | 2<br>(1 - 4)             |
| Pyoderma                                            | 28<br>(16 - 35)          | 5<br>(3 - 7)          | 1<br>(0 - 1)           | 3<br>(2 - 4)            | 4<br>(2 - 5)             | 15<br>(9 - 21)           |
| Decubitus ulcer                                     | 16<br>(5 - 21)           | 0<br>(0 - 0)          | 0<br>(0 - 0)           | 2<br>(1 - 2)            | 2<br>(1 - 3)             | 12<br>(3 - 17)           |

Web Table 31- Nicaragua deaths with 95% UI by age, sex, and cause in 2013

| Cause                                           | Both Sexes, All Ages     | Both Sexes, 0-4 Years | Both Sexes, 5-14 Years | Both Sexes, 15-49 Years  | Both Sexes, 50-69 Years | Both Sexes, 70-80 Years |
|-------------------------------------------------|--------------------------|-----------------------|------------------------|--------------------------|-------------------------|-------------------------|
| Other skin and subcutaneous diseases            | 2<br>(1 - 3)             | 0<br>(0 - 1)          | 0<br>(0 - 0)           | 1<br>(0 - 1)             | 0<br>(0 - 0)            | 1<br>(0 - 1)            |
| Sudden infant death syndrome                    | 31<br>(17 - 60)          | 31<br>(17 - 60)       | --                     | --                       | --                      | --                      |
| Injuries                                        | 2,658<br>(2,386 - 3,006) | 183<br>(144 - 244)    | 181<br>(161 - 203)     | 1,539<br>(1,335 - 1,810) | 355<br>(307 - 418)      | 399<br>(324 - 455)      |
| Transport injuries                              | 734<br>(643 - 850)       | 28<br>(19 - 39)       | 68<br>(56 - 80)        | 414<br>(344 - 502)       | 123<br>(101 - 152)      | 102<br>(85 - 127)       |
| Road injuries                                   | 713<br>(625 - 827)       | 26<br>(19 - 38)       | 65<br>(54 - 77)        | 404<br>(336 - 489)       | 119<br>(98 - 147)       | 99<br>(82 - 124)        |
| Pedestrian road injuries                        | 221<br>(176 - 273)       | 14<br>(9 - 20)        | 31<br>(24 - 40)        | 82<br>(60 - 110)         | 41<br>(30 - 54)         | 53<br>(40 - 69)         |
| Cyclist road injuries                           | 68<br>(53 - 86)          | 2<br>(1 - 4)          | 8<br>(5 - 10)          | 30<br>(22 - 40)          | 20<br>(15 - 27)         | 8<br>(6 - 11)           |
| Motorcyclist road injuries                      | 95<br>(65 - 126)         | 1<br>(1 - 2)          | 3<br>(2 - 4)           | 79<br>(54 - 106)         | 9<br>(5 - 12)           | 4<br>(2 - 6)            |
| Motor vehicle road injuries                     | 316<br>(264 - 388)       | 9<br>(6 - 13)         | 22<br>(16 - 29)        | 208<br>(166 - 261)       | 45<br>(36 - 61)         | 32<br>(24 - 44)         |
| Other road injuries                             | 13<br>(7 - 18)           | 1<br>(1 - 2)          | 2<br>(1 - 3)           | 4<br>(2 - 7)             | 3<br>(2 - 5)            | 3<br>(1 - 4)            |
| Other transport injuries                        | 21<br>(16 - 26)          | 1<br>(1 - 2)          | 2<br>(2 - 3)           | 10<br>(7 - 13)           | 4<br>(3 - 6)            | 3<br>(2 - 4)            |
| Unintentional injuries                          | 869<br>(743 - 973)       | 140<br>(103 - 199)    | 74<br>(63 - 91)        | 299<br>(250 - 361)       | 109<br>(89 - 126)       | 247<br>(170 - 302)      |
| Falls                                           | 245<br>(132 - 309)       | 7<br>(4 - 10)         | 7<br>(4 - 10)          | 40<br>(20 - 51)          | 35<br>(19 - 45)         | 156<br>(79 - 208)       |
| Drowning                                        | 225<br>(179 - 319)       | 22<br>(13 - 40)       | 37<br>(28 - 55)        | 129<br>(100 - 180)       | 23<br>(18 - 31)         | 13<br>(11 - 18)         |
| Fire, heat, and hot substances                  | 33<br>(28 - 41)          | 6<br>(4 - 10)         | 2<br>(2 - 3)           | 9<br>(7 - 11)            | 5<br>(4 - 6)            | 11<br>(8 - 14)          |
| Poisonings                                      | 19<br>(16 - 26)          | 2<br>(1 - 3)          | 1<br>(1 - 1)           | 10<br>(7 - 13)           | 3<br>(2 - 4)            | 4<br>(3 - 6)            |
| Exposure to mechanical forces                   | 62<br>(51 - 100)         | 3<br>(2 - 6)          | 7<br>(5 - 13)          | 39<br>(30 - 61)          | 9<br>(7 - 15)           | 4<br>(3 - 8)            |
| Unintentional firearm injuries                  | 28<br>(21 - 36)          | 1<br>(0 - 1)          | 3<br>(2 - 4)           | 21<br>(15 - 27)          | 3<br>(2 - 5)            | 1<br>(1 - 1)            |
| Unintentional suffocation                       | 5<br>(4 - 12)            | 1<br>(1 - 2)          | 1<br>(1 - 3)           | 2<br>(1 - 4)             | 1<br>(0 - 1)            | 1<br>(0 - 2)            |
| Other exposure to mechanical forces             | 28<br>(22 - 55)          | 1<br>(1 - 3)          | 4<br>(2 - 7)           | 16<br>(12 - 33)          | 5<br>(3 - 9)            | 2<br>(2 - 4)            |
| Adverse effects of medical treatment            | 70<br>(56 - 98)          | 8<br>(5 - 18)         | 2<br>(2 - 4)           | 16<br>(12 - 23)          | 12<br>(9 - 17)          | 32<br>(24 - 47)         |
| Animal contact                                  | 21<br>(8 - 26)           | 2<br>(1 - 3)          | 3<br>(2 - 5)           | 8<br>(3 - 11)            | 4<br>(2 - 6)            | 4<br>(1 - 5)            |
| Venomous animal contact                         | 16<br>(6 - 19)           | 1<br>(0 - 2)          | 3<br>(1 - 4)           | 6<br>(3 - 8)             | 3<br>(1 - 5)            | 2<br>(1 - 4)            |
| Non-venomous animal contact                     | 6<br>(2 - 7)             | 0<br>(0 - 1)          | 1<br>(0 - 1)           | 2<br>(1 - 3)             | 1<br>(0 - 2)            | 1<br>(0 - 2)            |
| Foreign body                                    | 144<br>(97 - 198)        | 89<br>(58 - 130)      | 9<br>(6 - 12)          | 18<br>(12 - 26)          | 10<br>(6 - 15)          | 18<br>(11 - 24)         |
| Pulmonary aspiration and foreign body in airway | 141<br>(95 - 195)        | 87<br>(57 - 129)      | 9<br>(5 - 12)          | 18<br>(12 - 25)          | 10<br>(6 - 14)          | 17<br>(11 - 24)         |
| Foreign body in other body part                 | 3<br>(2 - 4)             | 1<br>(1 - 2)          | 1<br>(0 - 1)           | 0<br>(0 - 1)             | 0<br>(0 - 0)            | 0<br>(0 - 1)            |
| Other unintentional injuries                    | 49<br>(39 - 63)          | 2<br>(1 - 3)          | 4<br>(2 - 6)           | 30<br>(22 - 42)          | 8<br>(5 - 11)           | 6<br>(4 - 9)            |
| Self-harm and interpersonal violence            | 1,031<br>(876 - 1,333)   | 16<br>(9 - 27)        | 39<br>(30 - 51)        | 817<br>(686 - 1,044)     | 116<br>(91 - 167)       | 44<br>(35 - 60)         |
| Self-harm                                       | 460<br>(390 - 613)       | --                    | 19<br>(14 - 24)        | 359<br>(300 - 468)       | 56<br>(45 - 86)         | 26<br>(21 - 39)         |
| Interpersonal violence                          | 571<br>(443 - 796)       | 16<br>(9 - 27)        | 20<br>(13 - 31)        | 457<br>(355 - 645)       | 60<br>(39 - 93)         | 18<br>(11 - 28)         |
| Assault by firearm                              | 295<br>(194 - 469)       | 4<br>(2 - 7)          | 9<br>(5 - 16)          | 248<br>(162 - 382)       | 30<br>(17 - 49)         | 5<br>(2 - 8)            |
| Assault by sharp object                         | 202<br>(127 - 317)       | 2<br>(1 - 4)          | 5<br>(3 - 9)           | 167<br>(103 - 262)       | 21<br>(12 - 36)         | 7<br>(4 - 11)           |
| Assault by other means                          | 74<br>(51 - 104)         | 10<br>(6 - 17)        | 6<br>(4 - 9)           | 43<br>(26 - 62)          | 9<br>(5 - 15)           | 6<br>(4 - 10)           |
| Forces of nature, war, and legal intervention   | 23<br>(12 - 48)          | 0<br>(0 - 0)          | 1<br>(0 - 2)           | 10<br>(5 - 20)           | 7<br>(4 - 14)           | 5<br>(3 - 11)           |
| Exposure to forces of nature                    | 23<br>(12 - 48)          | 0<br>(0 - 0)          | 1<br>(0 - 2)           | 10<br>(5 - 20)           | 7<br>(4 - 14)           | 5<br>(3 - 11)           |

Web Table 31- Nicaragua deaths with 95% UI by age, sex, and cause in 2013

| Cause                                                             | Males, All Ages             | Males, 0-4 Years         | Males, 5-14 Years  | Males, 15-49 Years       | Males, 50-69 Years       | Males, 70-80 Years       |
|-------------------------------------------------------------------|-----------------------------|--------------------------|--------------------|--------------------------|--------------------------|--------------------------|
| All causes                                                        | 14,079<br>(13,102 - 15,252) | 1,908<br>(1,717 - 2,130) | 304<br>(279 - 327) | 2,945<br>(2,564 - 3,360) | 3,079<br>(2,763 - 3,461) | 5,844<br>(5,592 - 6,190) |
| Communicable, maternal, neonatal, and nutritional diseases        | 2,214<br>(2,001 - 2,418)    | 1,288<br>(1,143 - 1,453) | 61<br>(51 - 74)    | 309<br>(250 - 378)       | 175<br>(147 - 210)       | 379<br>(314 - 454)       |
| HIV/AIDS and tuberculosis                                         | 330<br>(253 - 427)          | 3<br>(2 - 7)             | 2<br>(2 - 3)       | 200<br>(143 - 265)       | 72<br>(52 - 103)         | 53<br>(42 - 75)          |
| Tuberculosis                                                      | 131<br>(110 - 186)          | 2<br>(1 - 3)             | 2<br>(2 - 3)       | 38<br>(30 - 50)          | 42<br>(33 - 64)          | 47<br>(38 - 69)          |
| HIV/AIDS                                                          | 199<br>(130 - 284)          | 1<br>(0 - 6)             | 0<br>(0 - 1)       | 162<br>(106 - 227)       | 30<br>(14 - 51)          | 6<br>(2 - 11)            |
| HIV/AIDS resulting in mycobacterial infection                     | 12<br>(8 - 19)              | 0<br>(0 - 0)             | 0<br>(0 - 0)       | 10<br>(6 - 15)           | 2<br>(1 - 3)             | 0<br>(0 - 1)             |
| HIV/AIDS resulting in other diseases                              | 186<br>(121 - 266)          | 1<br>(0 - 5)             | 0<br>(0 - 1)       | 152<br>(100 - 214)       | 28<br>(13 - 48)          | 5<br>(2 - 10)            |
| Diarrhea, lower respiratory, and other common infectious diseases | 989<br>(853 - 1,130)        | 493<br>(401 - 605)       | 45<br>(35 - 57)    | 87<br>(68 - 109)         | 86<br>(68 - 105)         | 277<br>(217 - 348)       |
| Diarrheal diseases                                                | 176<br>(132 - 232)          | 122<br>(80 - 178)        | 5<br>(3 - 8)       | 9<br>(6 - 11)            | 12<br>(8 - 16)           | 29<br>(19 - 43)          |
| Intestinal infectious diseases                                    | 46<br>(23 - 81)             | 16<br>(7 - 29)           | 15<br>(7 - 27)     | 14<br>(6 - 26)           | 1<br>(0 - 3)             | 1<br>(0 - 2)             |
| Typhoid fever                                                     | 35<br>(17 - 61)             | 11<br>(5 - 22)           | 12<br>(5 - 21)     | 10<br>(4 - 20)           | 1<br>(0 - 2)             | 0<br>(0 - 1)             |
| Paratyphoid fever                                                 | 10<br>(4 - 18)              | 3<br>(1 - 7)             | 3<br>(1 - 7)       | 3<br>(1 - 6)             | 0<br>(0 - 1)             | 0<br>(0 - 0)             |
| Other intestinal infectious diseases                              | 2<br>(0 - 7)                | 1<br>(0 - 5)             | 0<br>(0 - 2)       | 1<br>(0 - 3)             | 0<br>(0 - 2)             | 0<br>(0 - 1)             |
| Lower respiratory infections                                      | 684<br>(572 - 815)          | 320<br>(236 - 418)       | 13<br>(9 - 19)     | 47<br>(33 - 62)          | 64<br>(48 - 82)          | 241<br>(180 - 312)       |
| Upper respiratory infections                                      | 1<br>(0 - 2)                | 0<br>(0 - 1)             | 0<br>(0 - 0)       | 0<br>(0 - 1)             | 0<br>(0 - 1)             | 0<br>(0 - 1)             |
| Otitis media                                                      | 0<br>(0 - 1)                | 0<br>(0 - 0)             | 0<br>(0 - 0)       | 0<br>(0 - 0)             | 0<br>(0 - 0)             | 0<br>(0 - 0)             |
| Meningitis                                                        | 56<br>(44 - 72)             | 27<br>(17 - 42)          | 7<br>(5 - 9)       | 11<br>(9 - 14)           | 5<br>(4 - 7)             | 5<br>(4 - 6)             |
| Pneumococcal meningitis                                           | 18<br>(14 - 23)             | 8<br>(4 - 12)            | 3<br>(2 - 4)       | 4<br>(3 - 6)             | 2<br>(1 - 3)             | 2<br>(1 - 2)             |
| H influenzae type B meningitis                                    | 13<br>(9 - 19)              | 10<br>(6 - 15)           | 2<br>(1 - 3)       | 1<br>(1 - 2)             | 0<br>(0 - 1)             | 0<br>(0 - 1)             |
| Meningococcal meningitis                                          | 6<br>(4 - 8)                | 3<br>(1 - 4)             | 1<br>(0 - 1)       | 1<br>(1 - 2)             | 1<br>(0 - 1)             | 1<br>(0 - 1)             |
| Other meningitis                                                  | 18<br>(13 - 24)             | 7<br>(4 - 12)            | 2<br>(1 - 3)       | 4<br>(2 - 6)             | 2<br>(1 - 3)             | 2<br>(1 - 3)             |
| Encephalitis                                                      | 21<br>(15 - 29)             | 7<br>(4 - 13)            | 4<br>(3 - 7)       | 6<br>(4 - 9)             | 2<br>(1 - 4)             | 1<br>(1 - 1)             |
| Diphtheria                                                        | 0<br>(0 - 1)                | 0<br>(0 - 1)             | 0<br>(0 - 0)       | 0<br>(0 - 0)             | 0<br>(0 - 0)             | --                       |
| Whooping cough                                                    | 1<br>(0 - 2)                | 0<br>(0 - 1)             | 0<br>(0 - 0)       | 0<br>(0 - 0)             | 0<br>(0 - 0)             | --                       |
| Tetanus                                                           | 1<br>(0 - 1)                | 0<br>(0 - 0)             | 0<br>(0 - 0)       | 0<br>(0 - 0)             | 0<br>(0 - 0)             | 0<br>(0 - 0)             |
| Measles                                                           | 0<br>(0 - 0)                | 0<br>(0 - 0)             | 0<br>(0 - 0)       | 0<br>(0 - 0)             | 0<br>(0 - 0)             | --                       |
| Varicella and herpes zoster                                       | 1<br>(0 - 4)                | 0<br>(0 - 2)             | 0<br>(0 - 0)       | 0<br>(0 - 1)             | 0<br>(0 - 0)             | 0<br>(0 - 2)             |
| Neglected tropical diseases and malaria                           | 15<br>(11 - 22)             | 4<br>(2 - 8)             | 3<br>(2 - 5)       | 5<br>(3 - 7)             | 2<br>(1 - 5)             | 2<br>(1 - 5)             |
| Malaria                                                           | 1<br>(1 - 1)                | 0<br>(0 - 0)             | 0<br>(0 - 0)       | 0<br>(0 - 1)             | 0<br>(0 - 0)             | 0<br>(0 - 0)             |
| Chagas disease                                                    | 2<br>(0 - 8)                | 0<br>(0 - 0)             | 0<br>(0 - 0)       | 0<br>(0 - 2)             | 1<br>(0 - 3)             | 1<br>(0 - 3)             |
| Leishmaniasis                                                     | 2<br>(1 - 3)                | 1<br>(0 - 1)             | 0<br>(0 - 0)       | 1<br>(0 - 1)             | 0<br>(0 - 0)             | 0<br>(0 - 0)             |
| Visceral leishmaniasis                                            | 2<br>(1 - 3)                | 1<br>(0 - 1)             | 0<br>(0 - 0)       | 1<br>(0 - 1)             | 0<br>(0 - 0)             | 0<br>(0 - 0)             |
| Cysticercosis                                                     | 1<br>(1 - 1)                | 0<br>(0 - 0)             | 0<br>(0 - 0)       | 0<br>(0 - 1)             | 0<br>(0 - 0)             | 0<br>(0 - 0)             |
| Cystic echinococcosis                                             | 0<br>(0 - 0)                | 0<br>(0 - 0)             | 0<br>(0 - 0)       | 0<br>(0 - 0)             | 0<br>(0 - 0)             | 0<br>(0 - 0)             |
| Dengue                                                            | 6<br>(4 - 8)                | 2<br>(1 - 3)             | 1<br>(1 - 2)       | 2<br>(1 - 2)             | 1<br>(0 - 1)             | 1<br>(0 - 1)             |
| Rabies                                                            | 0<br>(0 - 0)                | 0<br>(0 - 0)             | 0<br>(0 - 0)       | 0<br>(0 - 0)             | 0<br>(0 - 0)             | 0<br>(0 - 0)             |
| Intestinal nematode infections                                    | 1<br>(0 - 6)                | 0<br>(0 - 4)             | 0<br>(0 - 2)       | 0<br>(0 - 1)             | 0<br>(0 - 1)             | 0<br>(0 - 1)             |
| Ascariasis                                                        | 1<br>(0 - 6)                | 0<br>(0 - 4)             | 0<br>(0 - 2)       | 0<br>(0 - 1)             | 0<br>(0 - 1)             | 0<br>(0 - 1)             |
| Other neglected tropical diseases                                 | 2<br>(1 - 3)                | 1<br>(0 - 2)             | 0<br>(0 - 1)       | 0<br>(0 - 1)             | 0<br>(0 - 0)             | 0<br>(0 - 0)             |
| Maternal disorders                                                | --                          | --                       | --                 | --                       | --                       | --                       |

Web Table 31- Nicaragua deaths with 95% UI by age, sex, and cause in 2013

| Cause                                                            | Males, All Ages                            | Males, 0-4 Years              | Males, 5-14 Years             | Males, 15-49 Years                    | Males, 50-69 Years                    | Males, 70-80 Years                    |
|------------------------------------------------------------------|--------------------------------------------|-------------------------------|-------------------------------|---------------------------------------|---------------------------------------|---------------------------------------|
| Maternal hemorrhage                                              | --                                         | --                            | --                            | --                                    | --                                    | --                                    |
| Maternal sepsis and other maternal infections                    | --                                         | --                            | --                            | --                                    | --                                    | --                                    |
| Maternal hypertensive disorders                                  | --                                         | --                            | --                            | --                                    | --                                    | --                                    |
| Maternal obstructed labor                                        | --                                         | --                            | --                            | --                                    | --                                    | --                                    |
| Maternal abortive outcome                                        | --                                         | --                            | --                            | --                                    | --                                    | --                                    |
| Indirect maternal deaths                                         | --                                         | --                            | --                            | --                                    | --                                    | --                                    |
| Late maternal deaths                                             | --                                         | --                            | --                            | --                                    | --                                    | --                                    |
| Maternal deaths aggravated by HIV/AIDS                           | --                                         | --                            | --                            | --                                    | --                                    | --                                    |
| Other maternal disorders                                         | --                                         | --                            | --                            | --                                    | --                                    | --                                    |
| Neonatal disorders                                               | 676<br>(604 - 752)                         | 676<br>(604 - 752)            | --                            | --                                    | --                                    | --                                    |
| Neonatal preterm birth complications                             | 312<br>(204 - 405)                         | 312<br>(204 - 405)            | --                            | --                                    | --                                    | --                                    |
| Neonatal encephalopathy due to birth asphyxia and trauma         | 168<br>(106 - 229)                         | 168<br>(106 - 229)            | --                            | --                                    | --                                    | --                                    |
| Neonatal sepsis and other neonatal infections                    | 165<br>(88 - 293)                          | 165<br>(88 - 293)             | --                            | --                                    | --                                    | --                                    |
| Hemolytic disease and other neonatal jaundice                    | 6<br>(2 - 13)                              | 6<br>(2 - 13)                 | --                            | --                                    | --                                    | --                                    |
| Other neonatal disorders                                         | 25<br>(14 - 37)                            | 25<br>(14 - 37)               | --                            | --                                    | --                                    | --                                    |
| Nutritional deficiencies                                         | 157<br>(102 - 218)                         | 82<br>(48 - 115)              | 7<br>(4 - 10)                 | 12<br>(7 - 18)                        | 13<br>(8 - 22)                        | 43<br>(27 - 66)                       |
| Protein-energy malnutrition                                      | 130<br>(81 - 175)                          | 76<br>(42 - 108)              | 6<br>(3 - 8)                  | 8<br>(4 - 11)                         | 8<br>(5 - 15)                         | 33<br>(19 - 50)                       |
| Iodine deficiency                                                | 0<br>(0 - 1)                               | 0<br>(0 - 0)                  | 0<br>(0 - 0)                  | 0<br>(0 - 0)                          | 0<br>(0 - 0)                          | 0<br>(0 - 0)                          |
| Iron-deficiency anemia                                           | 26<br>(11 - 53)                            | 6<br>(2 - 18)                 | 1<br>(1 - 3)                  | 4<br>(2 - 8)                          | 4<br>(2 - 9)                          | 10<br>(4 - 22)                        |
| Other nutritional deficiencies                                   | 1<br>(1 - 2)                               | 0<br>(0 - 1)                  | 0<br>(0 - 0)                  | 0<br>(0 - 1)                          | 0<br>(0 - 0)                          | 0<br>(0 - 1)                          |
| Other communicable, maternal, neonatal, and nutritional diseases | 48<br>(26 - 76)                            | 31<br>(12 - 56)               | 4<br>(2 - 6)                  | 6<br>(4 - 8)                          | 3<br>(2 - 4)                          | 4<br>(3 - 7)                          |
| Sexually transmitted diseases excluding HIV                      | 29<br>(8 - 57)                             | 27<br>(7 - 52)                | 2<br>(1 - 4)                  | 0<br>(0 - 0)                          | 0<br>(0 - 0)                          | 0<br>(0 - 0)                          |
| Syphilis                                                         | 29<br>(8 - 57)                             | 27<br>(7 - 52)                | 2<br>(1 - 4)                  | 0<br>(0 - 0)                          | 0<br>(0 - 0)                          | 0<br>(0 - 0)                          |
| Chlamydial infection                                             | --                                         | --                            | --                            | --                                    | --                                    | --                                    |
| Gonococcal infection                                             | 0<br>(0 - 0)                               | --                            | 0<br>(0 - 0)                  | 0<br>(0 - 0)                          | 0<br>(0 - 0)                          | 0<br>(0 - 0)                          |
| Other sexually transmitted diseases                              | 0<br>(0 - 0)                               | --                            | 0<br>(0 - 0)                  | 0<br>(0 - 0)                          | 0<br>(0 - 0)                          | 0<br>(0 - 0)                          |
| Hepatitis                                                        | 6<br>(5 - 7)                               | 1<br>(1 - 2)                  | 0<br>(0 - 1)                  | 2<br>(1 - 2)                          | 1<br>(1 - 1)                          | 1<br>(1 - 1)                          |
| Acute hepatitis A                                                | 2<br>(1 - 4)                               | 1<br>(0 - 2)                  | 0<br>(0 - 1)                  | 1<br>(0 - 1)                          | 0<br>(0 - 0)                          | 0<br>(0 - 0)                          |
| Acute hepatitis B                                                | 3<br>(2 - 4)                               | 0<br>(0 - 1)                  | 0<br>(0 - 0)                  | 1<br>(0 - 1)                          | 1<br>(0 - 1)                          | 1<br>(0 - 1)                          |
| Acute hepatitis C                                                | 0<br>(0 - 1)                               | --                            | 0<br>(0 - 0)                  | 0<br>(0 - 1)                          | 0<br>(0 - 0)                          | 0<br>(0 - 0)                          |
| Other infectious diseases                                        | 13<br>(10 - 20)                            | 3<br>(2 - 5)                  | 1<br>(1 - 2)                  | 4<br>(3 - 6)                          | 2<br>(1 - 3)                          | 3<br>(2 - 6)                          |
| Non-communicable diseases                                        | 9,127 - 10,667<br>9,127<br>(1,348 - 1,679) | 422 - 620<br>516<br>(18 - 35) | 106 - 135<br>120<br>(42 - 58) | 1,109 - 1,557<br>1,335<br>(173 - 246) | 2,344 - 2,938<br>2,614<br>(394 - 519) | 5,013 - 5,579<br>5,243<br>(676 - 871) |
| Neoplasms                                                        | 1,497<br>(1,348 - 1,679)                   | 26<br>(18 - 35)               | 50<br>(42 - 58)               | 209<br>(173 - 246)                    | 450<br>(394 - 519)                    | 763<br>(676 - 871)                    |
| Esophageal cancer                                                | 25<br>(19 - 33)                            | --                            | --                            | 2<br>(2 - 3)                          | 10<br>(8 - 14)                        | 12<br>(9 - 16)                        |
| Stomach cancer                                                   | 237<br>(211 - 269)                         | --                            | --                            | 27<br>(22 - 32)                       | 91<br>(77 - 107)                      | 119<br>(101 - 138)                    |
| Liver cancer                                                     | 154<br>(133 - 179)                         | --                            | 2<br>(2 - 3)                  | 20<br>(16 - 24)                       | 54<br>(45 - 65)                       | 77<br>(63 - 94)                       |
| Liver cancer due to hepatitis B                                  | 49<br>(21 - 76)                            | --                            | 1<br>(0 - 1)                  | 8<br>(3 - 13)                         | 20<br>(7 - 32)                        | 20<br>(9 - 32)                        |
| Liver cancer due to hepatitis C                                  | 69<br>(43 - 103)                           | --                            | 1<br>(0 - 1)                  | 8<br>(4 - 13)                         | 24<br>(13 - 39)                       | 37<br>(22 - 54)                       |
| Liver cancer due to alcohol use                                  | 27<br>(16 - 41)                            | --                            | --                            | 2<br>(1 - 3)                          | 8<br>(4 - 12)                         | 17<br>(10 - 28)                       |
| Liver cancer due to other causes                                 | 9<br>(5 - 14)                              | --                            | 1<br>(0 - 1)                  | 2<br>(1 - 4)                          | 3<br>(1 - 5)                          | 3<br>(2 - 6)                          |

Web Table 31- Nicaragua deaths with 95% UI by age, sex, and cause in 2013

| Cause                                         | Males, All Ages          | Males, 0-4 Years | Males, 5-14 Years | Males, 15-49 Years | Males, 50-69 Years | Males, 70-80 Years       |
|-----------------------------------------------|--------------------------|------------------|-------------------|--------------------|--------------------|--------------------------|
| Larynx cancer                                 | 30<br>(24 - 43)          | --               | --                | 2<br>(1 - 3)       | 10<br>(8 - 15)     | 17<br>(13 - 24)          |
| Tracheal, bronchus and lung cancer            | 147<br>(129 - 171)       | --               | --                | 14<br>(11 - 17)    | 54<br>(45 - 67)    | 79<br>(67 - 93)          |
| Breast cancer                                 | 2<br>(2 - 4)             | --               | --                | 0<br>(0 - 1)       | 1<br>(1 - 2)       | 1<br>(0 - 2)             |
| Cervical cancer                               | --                       | --               | --                | --                 | --                 | --                       |
| Uterine cancer                                | --                       | --               | --                | --                 | --                 | --                       |
| Prostate cancer                               | 279<br>(183 - 407)       | --               | --                | 2<br>(1 - 3)       | 44<br>(28 - 64)    | 233<br>(150 - 339)       |
| Colon and rectum cancer                       | 110<br>(96 - 125)        | --               | --                | 19<br>(15 - 23)    | 36<br>(30 - 43)    | 55<br>(46 - 64)          |
| Lip and oral cavity cancer                    | 17<br>(13 - 23)          | --               | --                | 2<br>(1 - 2)       | 7<br>(5 - 9)       | 8<br>(6 - 11)            |
| Nasopharynx cancer                            | 6<br>(5 - 6)             | --               | 0<br>(0 - 0)      | 2<br>(2 - 2)       | 2<br>(2 - 2)       | 1<br>(1 - 2)             |
| Other pharynx cancer                          | 12<br>(10 - 15)          | --               | --                | 1<br>(1 - 2)       | 5<br>(4 - 7)       | 6<br>(5 - 7)             |
| Gallbladder and biliary tract cancer          | 23<br>(17 - 39)          | --               | --                | 2<br>(1 - 3)       | 9<br>(6 - 14)      | 13<br>(9 - 22)           |
| Pancreatic cancer                             | 58<br>(50 - 67)          | --               | --                | 6<br>(5 - 7)       | 22<br>(18 - 26)    | 30<br>(25 - 37)          |
| Malignant skin melanoma                       | 7<br>(4 - 13)            | --               | --                | 2<br>(1 - 3)       | 3<br>(2 - 5)       | 3<br>(2 - 5)             |
| Non-melanoma skin cancer                      | 20<br>(15 - 31)          | --               | --                | 2<br>(1 - 2)       | 6<br>(4 - 9)       | 13<br>(9 - 20)           |
| Ovarian cancer                                | --                       | --               | --                | --                 | --                 | --                       |
| Testicular cancer                             | 5<br>(2 - 8)             | --               | --                | 4<br>(1 - 6)       | 1<br>(0 - 1)       | 1<br>(0 - 1)             |
| Kidney cancer                                 | 28<br>(24 - 32)          | 1<br>(1 - 2)     | 1<br>(1 - 1)      | 4<br>(3 - 5)       | 11<br>(9 - 14)     | 11<br>(9 - 13)           |
| Bladder cancer                                | 13<br>(11 - 16)          | --               | --                | 1<br>(1 - 1)       | 4<br>(3 - 5)       | 9<br>(7 - 11)            |
| Brain and nervous system cancer               | 47<br>(18 - 61)          | 3<br>(1 - 5)     | 7<br>(2 - 10)     | 16<br>(6 - 22)     | 14<br>(5 - 20)     | 7<br>(2 - 10)            |
| Thyroid cancer                                | 6<br>(4 - 7)             | --               | 0<br>(0 - 0)      | 1<br>(1 - 1)       | 2<br>(1 - 2)       | 3<br>(2 - 4)             |
| Mesothelioma                                  | 1<br>(1 - 1)             | --               | --                | 0<br>(0 - 0)       | 0<br>(0 - 0)       | 0<br>(0 - 0)             |
| Hodgkin lymphoma                              | 7<br>(3 - 10)            | 0<br>(0 - 1)     | 1<br>(0 - 1)      | 2<br>(1 - 4)       | 2<br>(1 - 3)       | 2<br>(1 - 3)             |
| Non-Hodgkin lymphoma                          | 47<br>(36 - 61)          | 2<br>(1 - 4)     | 5<br>(3 - 8)      | 13<br>(9 - 17)     | 15<br>(11 - 21)    | 12<br>(8 - 16)           |
| Multiple myeloma                              | 9<br>(7 - 12)            | --               | --                | 1<br>(1 - 2)       | 4<br>(3 - 6)       | 3<br>(2 - 5)             |
| Leukemia                                      | 111<br>(97 - 127)        | 10<br>(6 - 15)   | 24<br>(18 - 30)   | 41<br>(33 - 52)    | 17<br>(14 - 21)    | 19<br>(15 - 23)          |
| Other neoplasms                               | 97<br>(81 - 113)         | 9<br>(5 - 13)    | 10<br>(7 - 13)    | 24<br>(18 - 29)    | 26<br>(21 - 33)    | 29<br>(22 - 37)          |
| Cardiovascular diseases                       | 3,184<br>(2,925 - 3,492) | 15<br>(12 - 20)  | 11<br>(9 - 13)    | 229<br>(187 - 272) | 712<br>(630 - 813) | 2,217<br>(2,046 - 2,406) |
| Rheumatic heart disease                       | 13<br>(9 - 20)           | 0<br>(0 - 0)     | 1<br>(0 - 1)      | 4<br>(3 - 6)       | 3<br>(2 - 5)       | 5<br>(3 - 8)             |
| Ischemic heart disease                        | 1,811<br>(1,586 - 2,072) | 1<br>(1 - 2)     | 2<br>(1 - 3)      | 123<br>(98 - 150)  | 390<br>(331 - 466) | 1,296<br>(1,125 - 1,478) |
| Cerebrovascular disease                       | 1,011<br>(822 - 1,234)   | 4<br>(3 - 5)     | 4<br>(3 - 5)      | 66<br>(49 - 85)    | 244<br>(196 - 296) | 694<br>(560 - 858)       |
| Ischemic stroke                               | 249<br>(174 - 436)       | 0<br>(0 - 1)     | 0<br>(0 - 1)      | 10<br>(7 - 17)     | 54<br>(37 - 94)    | 184<br>(123 - 324)       |
| Hemorrhagic stroke                            | 762<br>(551 - 942)       | 3<br>(2 - 5)     | 3<br>(2 - 4)      | 56<br>(41 - 73)    | 190<br>(141 - 235) | 510<br>(355 - 641)       |
| Hypertensive heart disease                    | 196<br>(113 - 272)       | 0<br>(0 - 0)     | 0<br>(0 - 0)      | 7<br>(4 - 10)      | 38<br>(22 - 52)    | 150<br>(82 - 217)        |
| Cardiomyopathy and myocarditis                | 49<br>(39 - 66)          | 4<br>(3 - 7)     | 2<br>(2 - 3)      | 13<br>(9 - 17)     | 14<br>(10 - 20)    | 16<br>(11 - 23)          |
| Atrial fibrillation and flutter               | 3<br>(2 - 4)             | --               | --                | 0<br>(0 - 0)       | 0<br>(0 - 0)       | 2<br>(1 - 3)             |
| Aortic aneurysm                               | 10<br>(8 - 13)           | --               | --                | 1<br>(1 - 1)       | 2<br>(2 - 3)       | 7<br>(5 - 9)             |
| Peripheral vascular disease                   | 1<br>(0 - 1)             | --               | --                | 0<br>(0 - 0)       | 0<br>(0 - 0)       | 0<br>(0 - 1)             |
| Endocarditis                                  | 11<br>(8 - 17)           | 3<br>(1 - 5)     | 1<br>(0 - 1)      | 3<br>(2 - 5)       | 2<br>(1 - 3)       | 3<br>(2 - 6)             |
| Other cardiovascular and circulatory diseases | 79<br>(63 - 107)         | 3<br>(2 - 4)     | 1<br>(1 - 2)      | 13<br>(9 - 17)     | 19<br>(14 - 27)    | 44<br>(31 - 61)          |
| Chronic respiratory diseases                  | 730<br>(575 - 823)       | 17<br>(12 - 24)  | 4<br>(3 - 5)      | 27<br>(21 - 33)    | 109<br>(90 - 133)  | 573<br>(433 - 654)       |

Web Table 31- Nicaragua deaths with 95% UI by age, sex, and cause in 2013

| Cause                                               | Males, All Ages    | Males, 0-4 Years | Males, 5-14 Years | Males, 15-49 Years | Males, 50-69 Years | Males, 70-80 Years |
|-----------------------------------------------------|--------------------|------------------|-------------------|--------------------|--------------------|--------------------|
| Chronic obstructive pulmonary disease               | 625<br>(481 - 712) | 7<br>(4 - 11)    | 1<br>(1 - 1)      | 16<br>(12 - 20)    | 87<br>(71 - 107)   | 514<br>(382 - 587) |
| Pneumoconiosis                                      | 12<br>(8 - 19)     | 0<br>(0 - 0)     | 0<br>(0 - 0)      | 1<br>(0 - 1)       | 3<br>(2 - 5)       | 8<br>(5 - 13)      |
| Silicosis                                           | 1<br>(1 - 1)       | 0<br>(0 - 0)     | 0<br>(0 - 0)      | 0<br>(0 - 0)       | 0<br>(0 - 0)       | 0<br>(0 - 1)       |
| Asbestosis                                          | 2<br>(1 - 3)       | 0<br>(0 - 0)     | 0<br>(0 - 0)      | 0<br>(0 - 0)       | 1<br>(0 - 1)       | 1<br>(1 - 2)       |
| Coal workers pneumoconiosis                         | 2<br>(1 - 2)       | 0<br>(0 - 0)     | 0<br>(0 - 0)      | 0<br>(0 - 0)       | 0<br>(0 - 1)       | 1<br>(1 - 2)       |
| Other pneumoconiosis                                | 8<br>(5 - 12)      | 0<br>(0 - 0)     | 0<br>(0 - 0)      | 0<br>(0 - 1)       | 2<br>(1 - 3)       | 5<br>(3 - 9)       |
| Asthma                                              | 58<br>(45 - 72)    | 5<br>(3 - 9)     | 2<br>(1 - 3)      | 6<br>(5 - 8)       | 11<br>(8 - 14)     | 34<br>(23 - 45)    |
| Interstitial lung disease and pulmonary sarcoidosis | 21<br>(15 - 32)    | 0<br>(0 - 0)     | 0<br>(0 - 1)      | 2<br>(2 - 3)       | 7<br>(5 - 11)      | 11<br>(7 - 18)     |
| Other chronic respiratory diseases                  | 13<br>(10 - 18)    | 4<br>(3 - 6)     | 0<br>(0 - 0)      | 1<br>(1 - 2)       | 1<br>(1 - 2)       | 7<br>(4 - 10)      |
| Cirrhosis                                           | 765<br>(676 - 874) | 2<br>(1 - 3)     | 3<br>(3 - 4)      | 252<br>(211 - 300) | 313<br>(270 - 370) | 194<br>(171 - 221) |
| Cirrhosis due to hepatitis B                        | 23<br>(12 - 35)    | 0<br>(0 - 0)     | 0<br>(0 - 0)      | 8<br>(4 - 12)      | 9<br>(5 - 15)      | 6<br>(2 - 9)       |
| Cirrhosis due to hepatitis C                        | 227<br>(158 - 298) | 0<br>(0 - 0)     | 1<br>(0 - 1)      | 65<br>(39 - 92)    | 94<br>(61 - 128)   | 67<br>(46 - 90)    |
| Cirrhosis due to alcohol use                        | 413<br>(339 - 495) | --               | --                | 128<br>(99 - 163)  | 176<br>(141 - 217) | 110<br>(87 - 136)  |
| Cirrhosis due to other causes                       | 102<br>(61 - 144)  | 2<br>(1 - 3)     | 3<br>(2 - 3)      | 52<br>(29 - 74)    | 34<br>(17 - 53)    | 12<br>(6 - 19)     |
| Digestive diseases                                  | 259<br>(224 - 342) | 4<br>(2 - 5)     | 5<br>(4 - 7)      | 44<br>(35 - 58)    | 69<br>(56 - 99)    | 137<br>(116 - 181) |
| Peptic ulcer disease                                | 74<br>(57 - 111)   | 0<br>(0 - 0)     | 0<br>(0 - 0)      | 10<br>(7 - 15)     | 20<br>(15 - 31)    | 44<br>(32 - 68)    |
| Gastritis and duodenitis                            | 16<br>(10 - 28)    | 0<br>(0 - 0)     | 0<br>(0 - 0)      | 2<br>(1 - 4)       | 5<br>(3 - 10)      | 9<br>(5 - 16)      |
| Appendicitis                                        | 17<br>(12 - 26)    | 0<br>(0 - 0)     | 1<br>(1 - 2)      | 5<br>(4 - 8)       | 5<br>(3 - 7)       | 5<br>(3 - 9)       |
| Paralytic ileus and intestinal obstruction          | 36<br>(12 - 52)    | 2<br>(1 - 3)     | 2<br>(1 - 3)      | 5<br>(2 - 8)       | 7<br>(2 - 10)      | 20<br>(6 - 32)     |
| Inguinal, femoral, and abdominal hernia             | 20<br>(12 - 44)    | 0<br>(0 - 1)     | 1<br>(0 - 1)      | 2<br>(1 - 5)       | 4<br>(3 - 9)       | 13<br>(7 - 30)     |
| Inflammatory bowel disease                          | 4<br>(3 - 5)       | 0<br>(0 - 0)     | 0<br>(0 - 0)      | 1<br>(1 - 1)       | 1<br>(1 - 2)       | 1<br>(1 - 2)       |
| Vascular intestinal disorders                       | 13<br>(5 - 27)     | 0<br>(0 - 0)     | 0<br>(0 - 0)      | 1<br>(0 - 2)       | 4<br>(2 - 8)       | 8<br>(3 - 16)      |
| Gallbladder and biliary diseases                    | 22<br>(17 - 35)    | 0<br>(0 - 0)     | 0<br>(0 - 0)      | 2<br>(2 - 4)       | 6<br>(4 - 10)      | 14<br>(10 - 22)    |
| Pancreatitis                                        | 32<br>(22 - 51)    | 0<br>(0 - 0)     | 0<br>(0 - 0)      | 11<br>(8 - 16)     | 10<br>(7 - 16)     | 11<br>(7 - 18)     |
| Other digestive diseases                            | 25<br>(17 - 33)    | 1<br>(0 - 1)     | 1<br>(0 - 1)      | 4<br>(3 - 6)       | 8<br>(5 - 10)      | 12<br>(8 - 16)     |
| Neurological disorders                              | 576<br>(438 - 726) | 7<br>(4 - 12)    | 7<br>(5 - 9)      | 36<br>(28 - 47)    | 43<br>(32 - 57)    | 485<br>(349 - 627) |
| Alzheimer disease and other dementias               | 478<br>(342 - 622) | --               | --                | 0<br>(0 - 0)       | 25<br>(15 - 38)    | 453<br>(317 - 594) |
| Parkinson disease                                   | 24<br>(19 - 31)    | --               | --                | 0<br>(0 - 0)       | 5<br>(3 - 6)       | 20<br>(14 - 26)    |
| Epilepsy                                            | 54<br>(43 - 74)    | 5<br>(3 - 9)     | 5<br>(4 - 8)      | 28<br>(21 - 38)    | 8<br>(6 - 10)      | 9<br>(6 - 12)      |
| Multiple sclerosis                                  | 2<br>(1 - 4)       | --               | --                | 1<br>(0 - 2)       | 1<br>(0 - 2)       | 0<br>(0 - 1)       |
| Other neurological disorders                        | 18<br>(13 - 22)    | 2<br>(1 - 3)     | 1<br>(1 - 2)      | 7<br>(5 - 9)       | 5<br>(4 - 7)       | 3<br>(2 - 4)       |
| Mental and substance use disorders                  | 307<br>(188 - 398) | 1<br>(0 - 1)     | 0<br>(0 - 0)      | 144<br>(84 - 189)  | 116<br>(71 - 155)  | 45<br>(27 - 64)    |
| Schizophrenia                                       | 1<br>(1 - 2)       | --               | --                | 1<br>(0 - 1)       | 0<br>(0 - 1)       | 0<br>(0 - 0)       |
| Alcohol use disorders                               | 289<br>(171 - 380) | --               | --                | 133<br>(70 - 178)  | 113<br>(67 - 151)  | 44<br>(26 - 63)    |
| Drug use disorders                                  | 17<br>(13 - 24)    | 1<br>(0 - 1)     | --                | 11<br>(8 - 16)     | 3<br>(2 - 5)       | 2<br>(1 - 2)       |
| Opioid use disorders                                | 4<br>(3 - 5)       | 0<br>(0 - 0)     | --                | 2<br>(2 - 4)       | 1<br>(0 - 1)       | 0<br>(0 - 1)       |
| Cocaine use disorders                               | 0<br>(0 - 1)       | 0<br>(0 - 0)     | --                | 0<br>(0 - 0)       | 0<br>(0 - 0)       | 0<br>(0 - 0)       |
| Amphetamine use disorders                           | 0<br>(0 - 0)       | 0<br>(0 - 0)     | --                | 0<br>(0 - 0)       | 0<br>(0 - 0)       | 0<br>(0 - 0)       |
| Other drug use disorders                            | 12<br>(9 - 18)     | 1<br>(0 - 1)     | --                | 8<br>(6 - 12)      | 2<br>(2 - 4)       | 1<br>(1 - 2)       |
| Eating disorders                                    | 0<br>(0 - 0)       | --               | 0<br>(0 - 0)      | 0<br>(0 - 0)       | --                 | --                 |

Web Table 31- Nicaragua deaths with 95% UI by age, sex, and cause in 2013

| Cause                                               | Males, All Ages          | Males, 0-4 Years   | Males, 5-14 Years | Males, 15-49 Years | Males, 50-69 Years | Males, 70-80 Years |
|-----------------------------------------------------|--------------------------|--------------------|-------------------|--------------------|--------------------|--------------------|
| Anorexia nervosa                                    | 0<br>(0 - 0)             | --                 | 0<br>(0 - 0)      | 0<br>(0 - 0)       | --                 | --                 |
| Diabetes, urogenital, blood, and endocrine diseases | 2,018<br>(1,635 - 2,280) | 27<br>(20 - 37)    | 21<br>(17 - 26)   | 373<br>(267 - 449) | 790<br>(609 - 916) | 808<br>(677 - 902) |
| Diabetes mellitus                                   | 560<br>(499 - 636)       | 1<br>(1 - 1)       | 1<br>(1 - 2)      | 55<br>(44 - 68)    | 221<br>(190 - 259) | 282<br>(246 - 328) |
| Acute glomerulonephritis                            | 1<br>(1 - 2)             | 0<br>(0 - 0)       | 0<br>(0 - 0)      | 0<br>(0 - 0)       | 0<br>(0 - 1)       | 0<br>(0 - 1)       |
| Chronic kidney disease                              | 1,356<br>(933 - 1,553)   | 12<br>(8 - 17)     | 11<br>(8 - 15)    | 295<br>(190 - 360) | 549<br>(370 - 650) | 490<br>(359 - 567) |
| Chronic kidney disease due to diabetes mellitus     | 499<br>(277 - 654)       | 1<br>(0 - 2)       | 1<br>(0 - 1)      | 60<br>(27 - 93)    | 253<br>(147 - 333) | 184<br>(93 - 250)  |
| Chronic kidney disease due to hypertension          | 256<br>(145 - 387)       | 2<br>(1 - 3)       | 1<br>(1 - 2)      | 74<br>(46 - 107)   | 83<br>(41 - 132)   | 96<br>(48 - 147)   |
| Chronic kidney disease due to glomerulonephritis    | 16<br>(11 - 21)          | 3<br>(2 - 5)       | 3<br>(2 - 5)      | 5<br>(3 - 7)       | 2<br>(1 - 3)       | 2<br>(1 - 3)       |
| Chronic kidney disease due to other causes          | 585<br>(274 - 744)       | 6<br>(3 - 10)      | 6<br>(3 - 9)      | 155<br>(62 - 207)  | 210<br>(83 - 289)  | 207<br>(106 - 289) |
| Urinary diseases and male infertility               | 38<br>(32 - 51)          | 2<br>(1 - 3)       | 1<br>(0 - 1)      | 4<br>(3 - 6)       | 9<br>(7 - 13)      | 23<br>(17 - 32)    |
| Interstitial nephritis and urinary tract infections | 20<br>(15 - 29)          | 2<br>(1 - 2)       | 0<br>(0 - 1)      | 2<br>(2 - 3)       | 4<br>(3 - 6)       | 12<br>(8 - 18)     |
| Urolithiasis                                        | 2<br>(1 - 3)             | --                 | 0<br>(0 - 0)      | 0<br>(0 - 1)       | 1<br>(0 - 1)       | 1<br>(1 - 2)       |
| Other urinary diseases                              | 16<br>(11 - 22)          | 0<br>(0 - 1)       | 0<br>(0 - 0)      | 2<br>(1 - 3)       | 4<br>(2 - 5)       | 10<br>(6 - 14)     |
| Gynecological diseases                              | --                       | --                 | --                | --                 | --                 | --                 |
| Uterine fibroids                                    | --                       | --                 | --                | --                 | --                 | --                 |
| Polycystic ovarian syndrome                         | --                       | --                 | --                | --                 | --                 | --                 |
| Endometriosis                                       | --                       | --                 | --                | --                 | --                 | --                 |
| Genital prolapse                                    | --                       | --                 | --                | --                 | --                 | --                 |
| Other gynecological diseases                        | --                       | --                 | --                | --                 | --                 | --                 |
| Hemoglobinopathies and hemolytic anemias            | 25<br>(15 - 37)          | 4<br>(2 - 8)       | 5<br>(3 - 7)      | 10<br>(6 - 15)     | 3<br>(2 - 5)       | 3<br>(2 - 4)       |
| Thalassemias                                        | 1<br>(0 - 1)             | 0<br>(0 - 0)       | 0<br>(0 - 0)      | 0<br>(0 - 0)       | 0<br>(0 - 0)       | 0<br>(0 - 0)       |
| Sickle cell disorders                               | 13<br>(8 - 19)           | 3<br>(1 - 5)       | 3<br>(2 - 5)      | 6<br>(3 - 9)       | 1<br>(1 - 2)       | 0<br>(0 - 0)       |
| G6PD deficiency                                     | 2<br>(1 - 3)             | 0<br>(0 - 1)       | 0<br>(0 - 1)      | 1<br>(0 - 1)       | 0<br>(0 - 0)       | 0<br>(0 - 0)       |
| Other hemoglobinopathies and hemolytic anemias      | 10<br>(6 - 15)           | 1<br>(1 - 2)       | 1<br>(1 - 2)      | 3<br>(2 - 4)       | 2<br>(1 - 3)       | 3<br>(2 - 4)       |
| Endocrine, metabolic, blood, and immune disorders   | 37<br>(29 - 60)          | 7<br>(4 - 14)      | 3<br>(2 - 5)      | 9<br>(6 - 14)      | 8<br>(6 - 14)      | 10<br>(7 - 18)     |
| Musculoskeletal disorders                           | 18<br>(12 - 23)          | --                 | 2<br>(1 - 2)      | 5<br>(3 - 6)       | 4<br>(2 - 5)       | 8<br>(5 - 12)      |
| Rheumatoid arthritis                                | 5<br>(3 - 7)             | --                 | 0<br>(0 - 0)      | 0<br>(0 - 1)       | 1<br>(1 - 2)       | 3<br>(2 - 5)       |
| Other musculoskeletal disorders                     | 14<br>(9 - 17)           | --                 | 1<br>(1 - 2)      | 4<br>(2 - 5)       | 3<br>(1 - 4)       | 5<br>(3 - 8)       |
| Other non-communicable diseases                     | 474<br>(379 - 563)       | 419<br>(330 - 509) | 18<br>(14 - 24)   | 16<br>(12 - 20)    | 8<br>(6 - 9)       | 13<br>(8 - 17)     |
| Congenital anomalies                                | 436<br>(343 - 524)       | 399<br>(312 - 486) | 18<br>(13 - 23)   | 13<br>(10 - 17)    | 4<br>(3 - 5)       | 3<br>(2 - 4)       |
| Neural tube defects                                 | 19<br>(11 - 30)          | 19<br>(11 - 29)    | 0<br>(0 - 0)      | 0<br>(0 - 0)       | 0<br>(0 - 0)       | 0<br>(0 - 0)       |
| Congenital heart anomalies                          | 194<br>(140 - 249)       | 173<br>(121 - 228) | 11<br>(7 - 15)    | 9<br>(6 - 11)      | 1<br>(1 - 2)       | 0<br>(0 - 1)       |
| Cleft lip and cleft palate                          | 3<br>(0 - 12)            | 3<br>(0 - 12)      | --                | --                 | --                 | --                 |
| Down syndrome                                       | 9<br>(5 - 17)            | 6<br>(3 - 13)      | 1<br>(1 - 2)      | 1<br>(1 - 2)       | 0<br>(0 - 1)       | 0<br>(0 - 0)       |
| Chromosomal unbalanced rearrangements               | 4<br>(2 - 7)             | 3<br>(2 - 6)       | 0<br>(0 - 0)      | 0<br>(0 - 0)       | 0<br>(0 - 0)       | 0<br>(0 - 1)       |
| Other congenital anomalies                          | 206<br>(149 - 263)       | 195<br>(139 - 251) | 5<br>(3 - 9)      | 3<br>(2 - 4)       | 2<br>(1 - 2)       | 2<br>(1 - 3)       |
| Skin and subcutaneous diseases                      | 21<br>(11 - 27)          | 3<br>(2 - 5)       | 1<br>(0 - 1)      | 3<br>(2 - 4)       | 4<br>(2 - 5)       | 10<br>(5 - 14)     |
| Cellulitis                                          | 2<br>(1 - 3)             | 0<br>(0 - 1)       | 0<br>(0 - 0)      | 0<br>(0 - 0)       | 1<br>(0 - 1)       | 1<br>(0 - 1)       |
| Pyoderma                                            | 13<br>(7 - 17)           | 3<br>(1 - 5)       | 1<br>(0 - 1)      | 2<br>(1 - 2)       | 2<br>(1 - 3)       | 6<br>(3 - 9)       |
| Decubitus ulcer                                     | 6<br>(2 - 8)             | 0<br>(0 - 0)       | 0<br>(0 - 0)      | 1<br>(0 - 1)       | 1<br>(1 - 2)       | 3<br>(1 - 6)       |



Web Table 31- Nicaragua deaths with 95% UI by age, sex, and cause in 2013

| Cause                                           | Males, All Ages          | Males, 0-4 Years  | Males, 5-14 Years  | Males, 15-49 Years       | Males, 50-69 Years | Males, 70-80 Years |
|-------------------------------------------------|--------------------------|-------------------|--------------------|--------------------------|--------------------|--------------------|
| Other skin and subcutaneous diseases            | 1<br>(0 - 1)             | 0<br>(0 - 0)      | 0<br>(0 - 0)       | 0<br>(0 - 0)             | 0<br>(0 - 0)       | 0<br>(0 - 0)       |
| Sudden infant death syndrome                    | 17<br>(7 - 38)           | 17<br>(7 - 38)    | --                 | --                       | --                 | --                 |
| Injuries                                        | 2,038<br>(1,781 - 2,351) | 103<br>(73 - 141) | 122<br>(107 - 139) | 1,301<br>(1,111 - 1,549) | 291<br>(245 - 349) | 221<br>(187 - 251) |
| Transport injuries                              | 595<br>(501 - 702)       | 18<br>(11 - 27)   | 48<br>(38 - 59)    | 358<br>(285 - 439)       | 102<br>(81 - 126)  | 71<br>(56 - 89)    |
| Road injuries                                   | 579<br>(487 - 686)       | 17<br>(11 - 26)   | 46<br>(36 - 56)    | 350<br>(280 - 428)       | 99<br>(78 - 122)   | 69<br>(54 - 87)    |
| Pedestrian road injuries                        | 165<br>(118 - 216)       | 9<br>(5 - 15)     | 21<br>(15 - 29)    | 65<br>(44 - 92)          | 33<br>(22 - 45)    | 37<br>(25 - 50)    |
| Cyclist road injuries                           | 60<br>(46 - 78)          | 2<br>(1 - 3)      | 6<br>(4 - 9)       | 27<br>(19 - 37)          | 18<br>(13 - 25)    | 7<br>(4 - 10)      |
| Motorcyclist road injuries                      | 87<br>(58 - 118)         | 1<br>(0 - 1)      | 2<br>(1 - 4)       | 73<br>(48 - 101)         | 8<br>(5 - 11)      | 3<br>(2 - 5)       |
| Motor vehicle road injuries                     | 255<br>(204 - 322)       | 5<br>(3 - 8)      | 15<br>(10 - 21)    | 180<br>(140 - 230)       | 36<br>(27 - 51)    | 19<br>(13 - 29)    |
| Other road injuries                             | 11<br>(6 - 17)           | 1<br>(0 - 2)      | 1<br>(1 - 2)       | 4<br>(2 - 6)             | 3<br>(1 - 5)       | 2<br>(1 - 4)       |
| Other transport injuries                        | 16<br>(11 - 20)          | 1<br>(0 - 1)      | 2<br>(1 - 3)       | 8<br>(5 - 11)            | 3<br>(2 - 5)       | 2<br>(1 - 3)       |
| Unintentional injuries                          | 585<br>(503 - 679)       | 77<br>(51 - 112)  | 52<br>(43 - 66)    | 258<br>(211 - 315)       | 84<br>(67 - 100)   | 114<br>(82 - 136)  |
| Falls                                           | 135<br>(71 - 167)        | 5<br>(2 - 8)      | 6<br>(3 - 8)       | 36<br>(17 - 48)          | 28<br>(14 - 36)    | 61<br>(31 - 79)    |
| Drowning                                        | 191<br>(147 - 266)       | 13<br>(7 - 26)    | 27<br>(20 - 42)    | 118<br>(89 - 162)        | 21<br>(16 - 29)    | 11<br>(9 - 16)     |
| Fire, heat, and hot substances                  | 19<br>(15 - 26)          | 3<br>(1 - 5)      | 1<br>(1 - 2)       | 6<br>(4 - 9)             | 3<br>(2 - 4)       | 6<br>(4 - 9)       |
| Poisonings                                      | 14<br>(10 - 19)          | 1<br>(1 - 2)      | 1<br>(0 - 1)       | 8<br>(5 - 10)            | 3<br>(2 - 4)       | 2<br>(2 - 3)       |
| Exposure to mechanical forces                   | 51<br>(41 - 85)          | 1<br>(1 - 3)      | 5<br>(4 - 9)       | 35<br>(26 - 55)          | 8<br>(6 - 13)      | 3<br>(2 - 5)       |
| Unintentional firearm injuries                  | 25<br>(18 - 32)          | 0<br>(0 - 1)      | 2<br>(1 - 3)       | 19<br>(13 - 25)          | 3<br>(2 - 4)       | 1<br>(0 - 1)       |
| Unintentional suffocation                       | 4<br>(3 - 10)            | 1<br>(0 - 1)      | 1<br>(0 - 2)       | 1<br>(1 - 3)             | 0<br>(0 - 1)       | 1<br>(0 - 2)       |
| Other exposure to mechanical forces             | 23<br>(18 - 47)          | 0<br>(0 - 1)      | 2<br>(2 - 5)       | 15<br>(11 - 31)          | 4<br>(3 - 8)       | 1<br>(1 - 3)       |
| Adverse effects of medical treatment            | 32<br>(24 - 51)          | 4<br>(2 - 10)     | 2<br>(1 - 3)       | 8<br>(6 - 14)            | 6<br>(4 - 10)      | 13<br>(9 - 21)     |
| Animal contact                                  | 16<br>(5 - 20)           | 1<br>(0 - 2)      | 2<br>(1 - 3)       | 6<br>(2 - 8)             | 3<br>(1 - 5)       | 3<br>(1 - 4)       |
| Venomous animal contact                         | 11<br>(3 - 14)           | 1<br>(0 - 2)      | 1<br>(1 - 2)       | 4<br>(1 - 5)             | 2<br>(1 - 3)       | 2<br>(0 - 3)       |
| Non-venomous animal contact                     | 5<br>(1 - 7)             | 0<br>(0 - 1)      | 1<br>(0 - 1)       | 2<br>(0 - 3)             | 1<br>(0 - 1)       | 1<br>(0 - 2)       |
| Foreign body                                    | 85<br>(48 - 127)         | 47<br>(25 - 77)   | 5<br>(3 - 8)       | 14<br>(8 - 21)           | 8<br>(4 - 12)      | 11<br>(6 - 17)     |
| Pulmonary aspiration and foreign body in airway | 83<br>(47 - 125)         | 46<br>(24 - 76)   | 5<br>(3 - 8)       | 14<br>(7 - 21)           | 7<br>(4 - 12)      | 11<br>(5 - 17)     |
| Foreign body in other body part                 | 1<br>(1 - 2)             | 1<br>(0 - 1)      | 0<br>(0 - 0)       | 0<br>(0 - 0)             | 0<br>(0 - 0)       | 0<br>(0 - 0)       |
| Other unintentional injuries                    | 43<br>(32 - 56)          | 1<br>(1 - 2)      | 3<br>(1 - 5)       | 28<br>(19 - 39)          | 6<br>(4 - 10)      | 5<br>(3 - 7)       |
| Self-harm and interpersonal violence            | 843<br>(696 - 1,117)     | 9<br>(4 - 17)     | 22<br>(15 - 33)    | 678<br>(558 - 892)       | 101<br>(75 - 148)  | 34<br>(25 - 48)    |
| Self-harm                                       | 353<br>(284 - 485)       | --                | 9<br>(5 - 13)      | 275<br>(218 - 368)       | 48<br>(37 - 77)    | 21<br>(16 - 32)    |
| Interpersonal violence                          | 491<br>(367 - 712)       | 9<br>(4 - 17)     | 13<br>(7 - 23)     | 404<br>(302 - 588)       | 52<br>(31 - 85)    | 13<br>(6 - 23)     |
| Assault by firearm                              | 271<br>(168 - 443)       | 3<br>(1 - 6)      | 7<br>(4 - 14)      | 229<br>(140 - 365)       | 28<br>(15 - 47)    | 4<br>(2 - 8)       |
| Assault by sharp object                         | 172<br>(96 - 285)        | 1<br>(0 - 3)      | 3<br>(1 - 6)       | 145<br>(79 - 242)        | 18<br>(8 - 32)     | 5<br>(2 - 9)       |
| Assault by other means                          | 48<br>(27 - 74)          | 5<br>(2 - 9)      | 3<br>(1 - 6)       | 30<br>(16 - 46)          | 7<br>(3 - 12)      | 4<br>(2 - 7)       |
| Forces of nature, war, and legal intervention   | 14<br>(6 - 33)           | 0<br>(0 - 0)      | 0<br>(0 - 1)       | 6<br>(3 - 15)            | 4<br>(2 - 10)      | 2<br>(1 - 6)       |
| Exposure to forces of nature                    | 14<br>(6 - 33)           | 0<br>(0 - 0)      | 0<br>(0 - 1)       | 6<br>(3 - 15)            | 4<br>(2 - 10)      | 2<br>(1 - 6)       |

Web Table 31- Nicaragua deaths with 95% UI by age, sex, and cause in 2013

| Cause                                                             | Females, All Ages           | Females, 0-4 Years       | Females, 5-14 Years | Females, 15-49 Years     | Females, 50-69 Years     | Females, 70-80 Years     |
|-------------------------------------------------------------------|-----------------------------|--------------------------|---------------------|--------------------------|--------------------------|--------------------------|
| All causes                                                        | 11,127<br>(10,354 - 11,973) | 1,436<br>(1,265 - 1,656) | 210<br>(192 - 232)  | 1,380<br>(1,183 - 1,553) | 2,078<br>(1,775 - 2,481) | 6,023<br>(5,751 - 6,318) |
| Communicable, maternal, neonatal, and nutritional diseases        | 1,666<br>(1,508 - 1,838)    | 922<br>(791 - 1,072)     | 54<br>(45 - 64)     | 242<br>(209 - 276)       | 95<br>(79 - 114)         | 354<br>(292 - 448)       |
| HIV/AIDS and tuberculosis                                         | 117<br>(90 - 159)           | 2<br>(1 - 6)             | 2<br>(1 - 2)        | 70<br>(49 - 99)          | 23<br>(17 - 32)          | 21<br>(16 - 29)          |
| Tuberculosis                                                      | 64<br>(53 - 79)             | 1<br>(1 - 2)             | 2<br>(1 - 2)        | 23<br>(18 - 30)          | 18<br>(13 - 23)          | 21<br>(15 - 28)          |
| HIV/AIDS                                                          | 53<br>(29 - 94)             | 1<br>(0 - 5)             | 0<br>(0 - 1)        | 46<br>(26 - 77)          | 5<br>(2 - 12)            | 1<br>(0 - 2)             |
| HIV/AIDS resulting in mycobacterial infection                     | 3<br>(1 - 5)                | 0<br>(0 - 0)             | 0<br>(0 - 0)        | 2<br>(1 - 4)             | 0<br>(0 - 1)             | 0<br>(0 - 0)             |
| HIV/AIDS resulting in other diseases                              | 51<br>(28 - 89)             | 1<br>(0 - 5)             | 0<br>(0 - 1)        | 44<br>(24 - 74)          | 5<br>(2 - 12)            | 1<br>(0 - 1)             |
| Diarrhea, lower respiratory, and other common infectious diseases | 761<br>(659 - 879)          | 329<br>(264 - 405)       | 37<br>(28 - 47)     | 63<br>(48 - 79)          | 57<br>(45 - 72)          | 275<br>(214 - 363)       |
| Diarrheal diseases                                                | 134<br>(99 - 175)           | 88<br>(56 - 127)         | 4<br>(3 - 7)        | 7<br>(5 - 9)             | 8<br>(6 - 12)            | 26<br>(17 - 40)          |
| Intestinal infectious diseases                                    | 45<br>(23 - 79)             | 16<br>(8 - 29)           | 13<br>(6 - 22)      | 14<br>(6 - 26)           | 2<br>(1 - 4)             | 1<br>(0 - 2)             |
| Typhoid fever                                                     | 34<br>(17 - 60)             | 12<br>(5 - 22)           | 10<br>(5 - 17)      | 11<br>(4 - 20)           | 1<br>(0 - 3)             | 1<br>(0 - 1)             |
| Paratyphoid fever                                                 | 10<br>(4 - 17)              | 4<br>(1 - 7)             | 3<br>(1 - 5)        | 3<br>(1 - 6)             | 0<br>(0 - 1)             | 0<br>(0 - 0)             |
| Other intestinal infectious diseases                              | 2<br>(0 - 6)                | 1<br>(0 - 4)             | 0<br>(0 - 1)        | 0<br>(0 - 3)             | 0<br>(0 - 1)             | 0<br>(0 - 1)             |
| Lower respiratory infections                                      | 520<br>(434 - 621)          | 196<br>(144 - 256)       | 10<br>(7 - 13)      | 30<br>(22 - 38)          | 42<br>(31 - 55)          | 242<br>(182 - 323)       |
| Upper respiratory infections                                      | 1<br>(0 - 2)                | 0<br>(0 - 0)             | 0<br>(0 - 0)        | 0<br>(0 - 0)             | 0<br>(0 - 0)             | 0<br>(0 - 1)             |
| Otitis media                                                      | 0<br>(0 - 0)                | 0<br>(0 - 0)             | 0<br>(0 - 0)        | 0<br>(0 - 0)             | 0<br>(0 - 0)             | 0<br>(0 - 0)             |
| Meningitis                                                        | 38<br>(31 - 49)             | 20<br>(15 - 29)          | 5<br>(3 - 6)        | 6<br>(5 - 8)             | 3<br>(2 - 4)             | 4<br>(3 - 5)             |
| Pneumococcal meningitis                                           | 12<br>(9 - 15)              | 6<br>(4 - 9)             | 2<br>(1 - 3)        | 2<br>(2 - 3)             | 1<br>(1 - 1)             | 1<br>(1 - 2)             |
| H influenzae type B meningitis                                    | 10<br>(7 - 14)              | 8<br>(5 - 11)            | 1<br>(1 - 2)        | 1<br>(0 - 1)             | 0<br>(0 - 0)             | 0<br>(0 - 1)             |
| Meningococcal meningitis                                          | 4<br>(3 - 6)                | 2<br>(1 - 3)             | 1<br>(0 - 1)        | 1<br>(0 - 1)             | 0<br>(0 - 1)             | 0<br>(0 - 1)             |
| Other meningitis                                                  | 12<br>(8 - 17)              | 5<br>(3 - 9)             | 1<br>(1 - 2)        | 3<br>(2 - 4)             | 1<br>(1 - 2)             | 2<br>(1 - 2)             |
| Encephalitis                                                      | 20<br>(15 - 27)             | 8<br>(5 - 13)            | 4<br>(3 - 7)        | 5<br>(3 - 7)             | 2<br>(1 - 3)             | 1<br>(1 - 2)             |
| Diphtheria                                                        | 0<br>(0 - 1)                | 0<br>(0 - 1)             | 0<br>(0 - 0)        | 0<br>(0 - 0)             | 0<br>(0 - 0)             | --<br>(0 - 0)            |
| Whooping cough                                                    | 1<br>(0 - 3)                | 1<br>(0 - 2)             | 0<br>(0 - 0)        | 0<br>(0 - 0)             | 0<br>(0 - 0)             | --<br>(0 - 0)            |
| Tetanus                                                           | 0<br>(0 - 0)                | 0<br>(0 - 0)             | 0<br>(0 - 0)        | 0<br>(0 - 0)             | 0<br>(0 - 0)             | 0<br>(0 - 0)             |
| Measles                                                           | 0<br>(0 - 0)                | 0<br>(0 - 0)             | 0<br>(0 - 0)        | 0<br>(0 - 0)             | 0<br>(0 - 0)             | --<br>(0 - 0)            |
| Varicella and herpes zoster                                       | 2<br>(0 - 4)                | 0<br>(0 - 2)             | 0<br>(0 - 0)        | 0<br>(0 - 1)             | 0<br>(0 - 0)             | 1<br>(0 - 3)             |
| Neglected tropical diseases and malaria                           | 13<br>(10 - 21)             | 3<br>(2 - 7)             | 2<br>(2 - 4)        | 2<br>(2 - 5)             | 2<br>(1 - 4)             | 2<br>(1 - 7)             |
| Malaria                                                           | 1<br>(1 - 1)                | 0<br>(0 - 1)             | 0<br>(0 - 0)        | 0<br>(0 - 0)             | 0<br>(0 - 0)             | 0<br>(0 - 0)             |
| Chagas disease                                                    | 2<br>(0 - 8)                | 0<br>(0 - 0)             | 0<br>(0 - 0)        | 0<br>(0 - 2)             | 0<br>(0 - 2)             | 1<br>(0 - 5)             |
| Leishmaniasis                                                     | 1<br>(0 - 2)                | 1<br>(0 - 1)             | 0<br>(0 - 0)        | 0<br>(0 - 0)             | 0<br>(0 - 0)             | 0<br>(0 - 0)             |
| Visceral leishmaniasis                                            | 1<br>(0 - 2)                | 1<br>(0 - 1)             | 0<br>(0 - 0)        | 0<br>(0 - 0)             | 0<br>(0 - 0)             | 0<br>(0 - 0)             |
| Cysticercosis                                                     | 1<br>(1 - 1)                | 0<br>(0 - 0)             | 0<br>(0 - 0)        | 0<br>(0 - 0)             | 0<br>(0 - 0)             | 0<br>(0 - 0)             |
| Cystic echinococcosis                                             | 0<br>(0 - 0)                | 0<br>(0 - 0)             | 0<br>(0 - 0)        | 0<br>(0 - 0)             | 0<br>(0 - 0)             | 0<br>(0 - 0)             |
| Dengue                                                            | 6<br>(4 - 7)                | 1<br>(1 - 2)             | 2<br>(1 - 2)        | 1<br>(1 - 2)             | 1<br>(0 - 1)             | 1<br>(1 - 2)             |
| Rabies                                                            | 0<br>(0 - 0)                | 0<br>(0 - 0)             | 0<br>(0 - 0)        | 0<br>(0 - 0)             | 0<br>(0 - 0)             | 0<br>(0 - 0)             |
| Intestinal nematode infections                                    | 1<br>(0 - 5)                | 0<br>(0 - 4)             | 0<br>(0 - 1)        | 0<br>(0 - 1)             | 0<br>(0 - 0)             | 0<br>(0 - 1)             |
| Ascariasis                                                        | 1<br>(0 - 5)                | 0<br>(0 - 4)             | 0<br>(0 - 1)        | 0<br>(0 - 1)             | 0<br>(0 - 0)             | 0<br>(0 - 1)             |
| Other neglected tropical diseases                                 | 1<br>(1 - 2)                | 1<br>(0 - 1)             | 0<br>(0 - 0)        | 0<br>(0 - 0)             | 0<br>(0 - 0)             | 0<br>(0 - 0)             |
| Maternal disorders                                                | 90<br>(69 - 113)            | --                       | 1<br>(1 - 2)        | 89<br>(68 - 112)         | --                       | --                       |

Web Table 31- Nicaragua deaths with 95% UI by age, sex, and cause in 2013

| Cause                                                            | Females, All Ages        | Females, 0-4 Years | Females, 5-14 Years | Females, 15-49 Years | Females, 50-69 Years     | Females, 70-80 Years     |
|------------------------------------------------------------------|--------------------------|--------------------|---------------------|----------------------|--------------------------|--------------------------|
| Maternal hemorrhage                                              | 21<br>(16 - 28)          | --                 | 0<br>(0 - 0)        | 21<br>(15 - 27)      | --                       | --                       |
| Maternal sepsis and other maternal infections                    | 9<br>(6 - 12)            | --                 | 0<br>(0 - 0)        | 8<br>(6 - 12)        | --                       | --                       |
| Maternal hypertensive disorders                                  | 14<br>(10 - 19)          | --                 | 0<br>(0 - 0)        | 14<br>(10 - 19)      | --                       | --                       |
| Maternal obstructed labor                                        | 6<br>(4 - 9)             | --                 | 0<br>(0 - 0)        | 6<br>(4 - 9)         | --                       | --                       |
| Maternal abortive outcome                                        | 9<br>(5 - 13)            | --                 | 0<br>(0 - 0)        | 9<br>(5 - 13)        | --                       | --                       |
| Indirect maternal deaths                                         | 15<br>(11 - 21)          | --                 | 0<br>(0 - 0)        | 15<br>(11 - 20)      | --                       | --                       |
| Late maternal deaths                                             | 6<br>(3 - 10)            | --                 | 0<br>(0 - 0)        | 6<br>(3 - 10)        | --                       | --                       |
| Maternal deaths aggravated by HIV/AIDS                           | 0<br>(0 - 0)             | --                 | --                  | 0<br>(0 - 0)         | --                       | --                       |
| Other maternal disorders                                         | 9<br>(6 - 12)            | --                 | 0<br>(0 - 0)        | 9<br>(6 - 12)        | --                       | --                       |
| Neonatal disorders                                               | 482<br>(410 - 556)       | 482<br>(410 - 556) | --                  | --                   | --                       | --                       |
| Neonatal preterm birth complications                             | 228<br>(150 - 292)       | 228<br>(150 - 292) | --                  | --                   | --                       | --                       |
| Neonatal encephalopathy due to birth asphyxia and trauma         | 117<br>(80 - 165)        | 117<br>(80 - 165)  | --                  | --                   | --                       | --                       |
| Neonatal sepsis and other neonatal infections                    | 117<br>(67 - 199)        | 117<br>(67 - 199)  | --                  | --                   | --                       | --                       |
| Hemolytic disease and other neonatal jaundice                    | 2<br>(0 - 5)             | 2<br>(0 - 5)       | --                  | --                   | --                       | --                       |
| Other neonatal disorders                                         | 18<br>(10 - 27)          | 18<br>(10 - 27)    | --                  | --                   | --                       | --                       |
| Nutritional deficiencies                                         | 159<br>(130 - 191)       | 75<br>(53 - 101)   | 8<br>(5 - 10)       | 14<br>(11 - 17)      | 10<br>(8 - 13)           | 52<br>(38 - 68)          |
| Protein-energy malnutrition                                      | 127<br>(94 - 159)        | 70<br>(49 - 96)    | 6<br>(4 - 8)        | 7<br>(4 - 10)        | 6<br>(3 - 8)             | 38<br>(23 - 53)          |
| Iodine deficiency                                                | 0<br>(0 - 1)             | 0<br>(0 - 0)       | 0<br>(0 - 0)        | 0<br>(0 - 0)         | 0<br>(0 - 0)             | 0<br>(0 - 0)             |
| Iron-deficiency anemia                                           | 30<br>(14 - 53)          | 4<br>(1 - 14)      | 1<br>(0 - 2)        | 7<br>(4 - 10)        | 4<br>(2 - 7)             | 14<br>(6 - 25)           |
| Other nutritional deficiencies                                   | 1<br>(1 - 2)             | 0<br>(0 - 1)       | 0<br>(0 - 0)        | 0<br>(0 - 1)         | 0<br>(0 - 0)             | 0<br>(0 - 1)             |
| Other communicable, maternal, neonatal, and nutritional diseases | 45<br>(23 - 73)          | 31<br>(11 - 56)    | 4<br>(2 - 6)        | 3<br>(2 - 4)         | 3<br>(2 - 4)             | 4<br>(3 - 6)             |
| Sexually transmitted diseases excluding HIV                      | 31<br>(10 - 59)          | 28<br>(8 - 53)     | 3<br>(1 - 5)        | 0<br>(0 - 1)         | 0<br>(0 - 0)             | 0<br>(0 - 1)             |
| Syphilis                                                         | 31<br>(9 - 58)           | 28<br>(8 - 53)     | 3<br>(1 - 5)        | 0<br>(0 - 0)         | 0<br>(0 - 0)             | 0<br>(0 - 0)             |
| Chlamydial infection                                             | 0<br>(0 - 0)             | --                 | 0<br>(0 - 0)        | 0<br>(0 - 0)         | 0<br>(0 - 0)             | 0<br>(0 - 0)             |
| Gonococcal infection                                             | 0<br>(0 - 0)             | --                 | 0<br>(0 - 0)        | 0<br>(0 - 0)         | 0<br>(0 - 0)             | 0<br>(0 - 0)             |
| Other sexually transmitted diseases                              | 0<br>(0 - 0)             | --                 | 0<br>(0 - 0)        | 0<br>(0 - 0)         | 0<br>(0 - 0)             | 0<br>(0 - 0)             |
| Hepatitis                                                        | 4<br>(3 - 5)             | 1<br>(0 - 1)       | 0<br>(0 - 0)        | 1<br>(1 - 1)         | 1<br>(1 - 1)             | 1<br>(1 - 1)             |
| Acute hepatitis A                                                | 1<br>(1 - 2)             | 0<br>(0 - 1)       | 0<br>(0 - 0)        | 1<br>(0 - 1)         | 0<br>(0 - 0)             | 0<br>(0 - 0)             |
| Acute hepatitis B                                                | 2<br>(1 - 3)             | 0<br>(0 - 0)       | 0<br>(0 - 0)        | 0<br>(0 - 1)         | 1<br>(0 - 1)             | 1<br>(0 - 1)             |
| Acute hepatitis C                                                | 0<br>(0 - 1)             | --                 | 0<br>(0 - 0)        | 0<br>(0 - 0)         | 0<br>(0 - 0)             | 0<br>(0 - 0)             |
| Other infectious diseases                                        | 10<br>(8 - 15)           | 3<br>(2 - 4)       | 1<br>(1 - 2)        | 2<br>(1 - 3)         | 2<br>(1 - 3)             | 3<br>(2 - 5)             |
| Non-communicable diseases                                        | 8,841<br>(8,128 - 9,619) | 434<br>(352 - 522) | 97<br>(85 - 110)    | 900<br>(752 - 1,045) | 1,918<br>(1,632 - 2,298) | 5,491<br>(5,223 - 5,772) |
| Neoplasms                                                        | 1,602<br>(1,416 - 1,823) | 23<br>(17 - 29)    | 35<br>(29 - 42)     | 348<br>(289 - 408)   | 537<br>(454 - 647)       | 658<br>(600 - 752)       |
| Esophageal cancer                                                | 10<br>(7 - 12)           | --                 | --                  | 1<br>(1 - 1)         | 3<br>(2 - 3)             | 7<br>(4 - 8)             |
| Stomach cancer                                                   | 167<br>(144 - 194)       | --                 | --                  | 24<br>(19 - 28)      | 53<br>(43 - 65)          | 90<br>(76 - 109)         |
| Liver cancer                                                     | 151<br>(126 - 181)       | --                 | 1<br>(0 - 1)        | 17<br>(13 - 22)      | 51<br>(40 - 63)          | 83<br>(66 - 104)         |
| Liver cancer due to hepatitis B                                  | 26<br>(11 - 46)          | --                 | 0<br>(0 - 0)        | 5<br>(2 - 8)         | 10<br>(3 - 20)           | 11<br>(4 - 20)           |
| Liver cancer due to hepatitis C                                  | 80<br>(53 - 108)         | --                 | 0<br>(0 - 0)        | 7<br>(4 - 10)        | 27<br>(15 - 38)          | 46<br>(28 - 64)          |
| Liver cancer due to alcohol use                                  | 26<br>(14 - 46)          | --                 | --                  | 1<br>(1 - 3)         | 8<br>(4 - 14)            | 17<br>(9 - 31)           |
| Liver cancer due to other causes                                 | 20<br>(12 - 29)          | --                 | 0<br>(0 - 1)        | 4<br>(2 - 6)         | 7<br>(4 - 12)            | 8<br>(5 - 13)            |

Web Table 31- Nicaragua deaths with 95% UI by age, sex, and cause in 2013

| Cause                                         | Females, All Ages        | Females, 0-4 Years | Females, 5-14 Years | Females, 15-49 Years | Females, 50-69 Years | Females, 70-80 Years     |
|-----------------------------------------------|--------------------------|--------------------|---------------------|----------------------|----------------------|--------------------------|
| Larynx cancer                                 | 6<br>(3 - 12)            | --                 | --                  | 1<br>(0 - 1)         | 2<br>(1 - 4)         | 3<br>(2 - 7)             |
| Tracheal, bronchus and lung cancer            | 85<br>(72 - 102)         | --                 | --                  | 10<br>(8 - 13)       | 30<br>(24 - 39)      | 45<br>(37 - 55)          |
| Breast cancer                                 | 173<br>(145 - 204)       | --                 | --                  | 52<br>(41 - 64)      | 69<br>(55 - 86)      | 51<br>(43 - 62)          |
| Cervical cancer                               | 320<br>(265 - 407)       | --                 | --                  | 103<br>(80 - 129)    | 123<br>(97 - 162)    | 94<br>(75 - 129)         |
| Uterine cancer                                | 18<br>(14 - 29)          | --                 | --                  | 2<br>(2 - 4)         | 9<br>(6 - 14)        | 7<br>(5 - 11)            |
| Prostate cancer                               | --                       | --                 | --                  | --                   | --                   | --                       |
| Colon and rectum cancer                       | 124<br>(107 - 145)       | --                 | --                  | 16<br>(13 - 19)      | 37<br>(30 - 45)      | 72<br>(60 - 88)          |
| Lip and oral cavity cancer                    | 8<br>(6 - 11)            | --                 | --                  | 1<br>(1 - 2)         | 2<br>(1 - 3)         | 5<br>(3 - 7)             |
| Nasopharynx cancer                            | 2<br>(2 - 4)             | --                 | 0<br>(0 - 0)        | 1<br>(0 - 1)         | 1<br>(0 - 1)         | 1<br>(1 - 1)             |
| Other pharynx cancer                          | 2<br>(1 - 2)             | --                 | --                  | 0<br>(0 - 0)         | 1<br>(0 - 1)         | 1<br>(1 - 1)             |
| Gallbladder and biliary tract cancer          | 66<br>(49 - 103)         | --                 | --                  | 4<br>(3 - 6)         | 25<br>(18 - 38)      | 37<br>(27 - 60)          |
| Pancreatic cancer                             | 69<br>(58 - 81)          | --                 | --                  | 5<br>(4 - 7)         | 24<br>(19 - 30)      | 39<br>(32 - 48)          |
| Malignant skin melanoma                       | 5<br>(5 - 6)             | --                 | --                  | 2<br>(1 - 2)         | 2<br>(1 - 2)         | 2<br>(2 - 3)             |
| Non-melanoma skin cancer                      | 18<br>(11 - 26)          | --                 | --                  | 2<br>(2 - 3)         | 4<br>(2 - 5)         | 12<br>(8 - 18)           |
| Ovarian cancer                                | 50<br>(42 - 60)          | --                 | --                  | 14<br>(11 - 18)      | 20<br>(16 - 26)      | 15<br>(13 - 19)          |
| Testicular cancer                             | --                       | --                 | --                  | --                   | --                   | --                       |
| Kidney cancer                                 | 18<br>(15 - 21)          | 1<br>(1 - 1)       | 0<br>(0 - 1)        | 2<br>(2 - 3)         | 6<br>(5 - 8)         | 8<br>(7 - 11)            |
| Bladder cancer                                | 9<br>(5 - 12)            | --                 | --                  | 1<br>(1 - 1)         | 2<br>(1 - 3)         | 6<br>(3 - 8)             |
| Brain and nervous system cancer               | 48<br>(22 - 56)          | 4<br>(2 - 6)       | 7<br>(3 - 10)       | 17<br>(8 - 21)       | 11<br>(5 - 14)       | 9<br>(4 - 11)            |
| Thyroid cancer                                | 14<br>(8 - 17)           | --                 | 0<br>(0 - 0)        | 2<br>(1 - 2)         | 4<br>(2 - 6)         | 8<br>(5 - 10)            |
| Mesothelioma                                  | 1<br>(0 - 1)             | --                 | --                  | 0<br>(0 - 0)         | 0<br>(0 - 0)         | 0<br>(0 - 0)             |
| Hodgkin lymphoma                              | 5<br>(2 - 6)             | 0<br>(0 - 0)       | 0<br>(0 - 1)        | 2<br>(1 - 3)         | 1<br>(0 - 2)         | 1<br>(0 - 2)             |
| Non-Hodgkin lymphoma                          | 33<br>(21 - 42)          | 1<br>(1 - 2)       | 2<br>(1 - 2)        | 8<br>(5 - 10)        | 10<br>(5 - 13)       | 12<br>(7 - 17)           |
| Multiple myeloma                              | 8<br>(6 - 10)            | --                 | --                  | 1<br>(1 - 1)         | 4<br>(3 - 5)         | 3<br>(2 - 4)             |
| Leukemia                                      | 92<br>(80 - 105)         | 9<br>(6 - 13)      | 17<br>(13 - 21)     | 36<br>(29 - 43)      | 16<br>(12 - 20)      | 14<br>(12 - 17)          |
| Other neoplasms                               | 99<br>(77 - 128)         | 7<br>(4 - 11)      | 8<br>(5 - 10)       | 23<br>(17 - 30)      | 29<br>(21 - 41)      | 32<br>(24 - 46)          |
| Cardiovascular diseases                       | 3,376<br>(3,020 - 3,892) | 14<br>(10 - 21)    | 9<br>(6 - 11)       | 186<br>(147 - 234)   | 558<br>(457 - 705)   | 2,609<br>(2,374 - 2,961) |
| Rheumatic heart disease                       | 25<br>(17 - 33)          | 0<br>(0 - 0)       | 1<br>(1 - 2)        | 10<br>(6 - 13)       | 6<br>(4 - 8)         | 8<br>(5 - 11)            |
| Ischemic heart disease                        | 1,845<br>(1,560 - 2,214) | 2<br>(1 - 3)       | 2<br>(1 - 2)        | 79<br>(58 - 103)     | 278<br>(219 - 365)   | 1,485<br>(1,265 - 1,775) |
| Cerebrovascular disease                       | 1,039<br>(881 - 1,328)   | 3<br>(2 - 4)       | 2<br>(2 - 3)        | 60<br>(45 - 82)      | 185<br>(144 - 255)   | 788<br>(657 - 997)       |
| Ischemic stroke                               | 250<br>(180 - 431)       | 0<br>(0 - 1)       | 0<br>(0 - 0)        | 8<br>(5 - 14)        | 35<br>(24 - 62)      | 207<br>(147 - 367)       |
| Hemorrhagic stroke                            | 789<br>(607 - 989)       | 3<br>(2 - 4)       | 2<br>(1 - 3)        | 52<br>(39 - 71)      | 150<br>(117 - 206)   | 581<br>(428 - 735)       |
| Hypertensive heart disease                    | 279<br>(167 - 369)       | 0<br>(0 - 0)       | 0<br>(0 - 0)        | 8<br>(5 - 11)        | 39<br>(25 - 54)      | 231<br>(135 - 313)       |
| Cardiomyopathy and myocarditis                | 37<br>(29 - 51)          | 3<br>(2 - 6)       | 1<br>(1 - 2)        | 10<br>(7 - 14)       | 9<br>(7 - 13)        | 14<br>(10 - 19)          |
| Atrial fibrillation and flutter               | 5<br>(3 - 7)             | --                 | --                  | 0<br>(0 - 0)         | 1<br>(0 - 1)         | 4<br>(2 - 6)             |
| Aortic aneurysm                               | 6<br>(3 - 9)             | --                 | --                  | 1<br>(1 - 1)         | 1<br>(1 - 2)         | 4<br>(2 - 6)             |
| Peripheral vascular disease                   | 1<br>(1 - 2)             | --                 | --                  | 0<br>(0 - 0)         | 0<br>(0 - 0)         | 1<br>(1 - 1)             |
| Endocarditis                                  | 9<br>(6 - 13)            | 2<br>(1 - 4)       | 1<br>(0 - 1)        | 1<br>(1 - 2)         | 1<br>(1 - 2)         | 3<br>(2 - 5)             |
| Other cardiovascular and circulatory diseases | 131<br>(99 - 170)        | 4<br>(2 - 6)       | 1<br>(1 - 2)        | 17<br>(12 - 25)      | 38<br>(26 - 53)      | 71<br>(50 - 99)          |
| Chronic respiratory diseases                  | 633<br>(478 - 736)       | 16<br>(12 - 22)    | 3<br>(2 - 4)        | 28<br>(22 - 35)      | 81<br>(62 - 101)     | 505<br>(365 - 597)       |

Web Table 31- Nicaragua deaths with 95% UI by age, sex, and cause in 2013

| Cause                                               | Females, All Ages  | Females, 0-4 Years | Females, 5-14 Years | Females, 15-49 Years | Females, 50-69 Years | Females, 70-80 Years |
|-----------------------------------------------------|--------------------|--------------------|---------------------|----------------------|----------------------|----------------------|
| Chronic obstructive pulmonary disease               | 524<br>(384 - 623) | 6<br>(3 - 10)      | 0<br>(0 - 1)        | 14<br>(10 - 19)      | 60<br>(45 - 77)      | 443<br>(322 - 531)   |
| Pneumoconiosis                                      | 1<br>(1 - 2)       | 0<br>(0 - 0)       | 0<br>(0 - 0)        | 0<br>(0 - 0)         | 0<br>(0 - 0)         | 1<br>(0 - 1)         |
| Silicosis                                           | 0<br>(0 - 0)       | 0<br>(0 - 0)       | 0<br>(0 - 0)        | 0<br>(0 - 0)         | 0<br>(0 - 0)         | 0<br>(0 - 0)         |
| Asbestosis                                          | 0<br>(0 - 0)       | 0<br>(0 - 0)       | 0<br>(0 - 0)        | 0<br>(0 - 0)         | 0<br>(0 - 0)         | 0<br>(0 - 0)         |
| Coal workers pneumoconiosis                         | 0<br>(0 - 0)       | 0<br>(0 - 0)       | 0<br>(0 - 0)        | 0<br>(0 - 0)         | 0<br>(0 - 0)         | 0<br>(0 - 0)         |
| Other pneumoconiosis                                | 1<br>(1 - 2)       | 0<br>(0 - 0)       | 0<br>(0 - 0)        | 0<br>(0 - 0)         | 0<br>(0 - 0)         | 1<br>(0 - 1)         |
| Asthma                                              | 74<br>(49 - 109)   | 7<br>(4 - 11)      | 2<br>(1 - 3)        | 10<br>(7 - 14)       | 15<br>(9 - 23)       | 40<br>(22 - 65)      |
| Interstitial lung disease and pulmonary sarcoidosis | 19<br>(10 - 32)    | 0<br>(0 - 0)       | 0<br>(0 - 1)        | 2<br>(1 - 3)         | 4<br>(2 - 6)         | 13<br>(6 - 23)       |
| Other chronic respiratory diseases                  | 15<br>(10 - 22)    | 3<br>(2 - 5)       | 0<br>(0 - 1)        | 1<br>(1 - 2)         | 1<br>(1 - 2)         | 8<br>(4 - 14)        |
| Cirrhosis                                           | 304<br>(264 - 348) | 2<br>(1 - 3)       | 2<br>(2 - 3)        | 47<br>(38 - 57)      | 108<br>(89 - 133)    | 144<br>(123 - 170)   |
| Cirrhosis due to hepatitis B                        | 11<br>(5 - 21)     | 0<br>(0 - 0)       | 0<br>(0 - 0)        | 2<br>(0 - 4)         | 4<br>(2 - 8)         | 5<br>(2 - 10)        |
| Cirrhosis due to hepatitis C                        | 172<br>(123 - 218) | 0<br>(0 - 0)       | 1<br>(0 - 1)        | 24<br>(12 - 33)      | 62<br>(37 - 82)      | 86<br>(62 - 112)     |
| Cirrhosis due to alcohol use                        | 73<br>(40 - 106)   | --                 | --                  | 8<br>(4 - 13)        | 26<br>(13 - 42)      | 40<br>(22 - 58)      |
| Cirrhosis due to other causes                       | 47<br>(28 - 71)    | 2<br>(1 - 2)       | 2<br>(1 - 3)        | 14<br>(8 - 22)       | 17<br>(8 - 29)       | 13<br>(7 - 21)       |
| Digestive diseases                                  | 259<br>(223 - 326) | 4<br>(3 - 5)       | 4<br>(3 - 5)        | 31<br>(25 - 38)      | 53<br>(42 - 70)      | 167<br>(141 - 218)   |
| Peptic ulcer disease                                | 60<br>(44 - 88)    | 0<br>(0 - 0)       | 0<br>(0 - 0)        | 5<br>(3 - 6)         | 12<br>(8 - 17)       | 43<br>(30 - 66)      |
| Gastritis and duodenitis                            | 17<br>(10 - 34)    | 0<br>(0 - 0)       | 0<br>(0 - 0)        | 1<br>(1 - 3)         | 4<br>(2 - 8)         | 11<br>(6 - 24)       |
| Appendicitis                                        | 15<br>(10 - 23)    | 0<br>(0 - 1)       | 1<br>(1 - 1)        | 4<br>(2 - 5)         | 4<br>(3 - 7)         | 6<br>(3 - 10)        |
| Paralytic ileus and intestinal obstruction          | 34<br>(11 - 53)    | 2<br>(1 - 3)       | 1<br>(1 - 2)        | 3<br>(1 - 5)         | 5<br>(1 - 9)         | 23<br>(7 - 38)       |
| Inguinal, femoral, and abdominal hernia             | 18<br>(10 - 39)    | 0<br>(0 - 1)       | 0<br>(0 - 1)        | 1<br>(1 - 3)         | 3<br>(2 - 7)         | 12<br>(6 - 29)       |
| Inflammatory bowel disease                          | 2<br>(1 - 3)       | 0<br>(0 - 0)       | 0<br>(0 - 0)        | 1<br>(0 - 1)         | 0<br>(0 - 1)         | 1<br>(0 - 1)         |
| Vascular intestinal disorders                       | 17<br>(8 - 32)     | 0<br>(0 - 0)       | 0<br>(0 - 0)        | 1<br>(1 - 2)         | 3<br>(2 - 6)         | 13<br>(6 - 24)       |
| Gallbladder and biliary diseases                    | 44<br>(34 - 65)    | 0<br>(0 - 0)       | 0<br>(0 - 0)        | 5<br>(4 - 7)         | 9<br>(7 - 15)        | 29<br>(21 - 45)      |
| Pancreatitis                                        | 25<br>(17 - 36)    | 0<br>(0 - 0)       | 0<br>(0 - 1)        | 7<br>(5 - 10)        | 6<br>(4 - 9)         | 11<br>(7 - 17)       |
| Other digestive diseases                            | 28<br>(21 - 38)    | 1<br>(0 - 1)       | 1<br>(0 - 1)        | 3<br>(2 - 4)         | 5<br>(4 - 7)         | 18<br>(13 - 27)      |
| Neurological disorders                              | 547<br>(417 - 693) | 6<br>(4 - 9)       | 5<br>(4 - 7)        | 24<br>(19 - 30)      | 29<br>(22 - 38)      | 483<br>(358 - 627)   |
| Alzheimer disease and other dementias               | 476<br>(348 - 619) | --                 | --                  | 0<br>(0 - 0)         | 18<br>(12 - 26)      | 459<br>(334 - 600)   |
| Parkinson disease                                   | 19<br>(11 - 25)    | --                 | --                  | 0<br>(0 - 1)         | 2<br>(1 - 3)         | 16<br>(9 - 23)       |
| Epilepsy                                            | 33<br>(25 - 44)    | 4<br>(2 - 7)       | 4<br>(2 - 6)        | 15<br>(11 - 21)      | 4<br>(3 - 6)         | 5<br>(4 - 8)         |
| Multiple sclerosis                                  | 4<br>(2 - 6)       | --                 | --                  | 2<br>(1 - 3)         | 1<br>(1 - 2)         | 1<br>(1 - 2)         |
| Other neurological disorders                        | 15<br>(13 - 17)    | 2<br>(1 - 3)       | 1<br>(1 - 2)        | 6<br>(5 - 8)         | 3<br>(3 - 4)         | 2<br>(2 - 3)         |
| Mental and substance use disorders                  | 21<br>(15 - 30)    | 1<br>(0 - 1)       | 0<br>(0 - 0)        | 8<br>(5 - 11)        | 6<br>(3 - 9)         | 7<br>(5 - 10)        |
| Schizophrenia                                       | 1<br>(1 - 1)       | --                 | --                  | 0<br>(0 - 1)         | 0<br>(0 - 0)         | 0<br>(0 - 0)         |
| Alcohol use disorders                               | 10<br>(4 - 18)     | --                 | --                  | 4<br>(2 - 7)         | 4<br>(1 - 7)         | 3<br>(1 - 5)         |
| Drug use disorders                                  | 10<br>(8 - 12)     | 1<br>(0 - 1)       | --                  | 3<br>(2 - 4)         | 2<br>(1 - 2)         | 4<br>(3 - 6)         |
| Opioid use disorders                                | 2<br>(2 - 3)       | 0<br>(0 - 0)       | --                  | 1<br>(0 - 1)         | 0<br>(0 - 0)         | 1<br>(1 - 1)         |
| Cocaine use disorders                               | 0<br>(0 - 0)       | 0<br>(0 - 0)       | --                  | 0<br>(0 - 0)         | 0<br>(0 - 0)         | 0<br>(0 - 0)         |
| Amphetamine use disorders                           | 0<br>(0 - 0)       | 0<br>(0 - 0)       | --                  | 0<br>(0 - 0)         | 0<br>(0 - 0)         | 0<br>(0 - 0)         |
| Other drug use disorders                            | 7<br>(6 - 9)       | 1<br>(0 - 1)       | --                  | 2<br>(2 - 3)         | 1<br>(1 - 2)         | 3<br>(2 - 4)         |
| Eating disorders                                    | 0<br>(0 - 0)       | --                 | 0<br>(0 - 0)        | 0<br>(0 - 0)         | --                   | --                   |

Web Table 31- Nicaragua deaths with 95% UI by age, sex, and cause in 2013

| Cause                                               | Females, All Ages        | Females, 0-4 Years | Females, 5-14 Years | Females, 15-49 Years | Females, 50-69 Years | Females, 70-80 Years |
|-----------------------------------------------------|--------------------------|--------------------|---------------------|----------------------|----------------------|----------------------|
| Anorexia nervosa                                    | 0<br>(0 - 0)             | --                 | 0<br>(0 - 0)        | 0<br>(0 - 0)         | --                   | --                   |
| Diabetes, urogenital, blood, and endocrine diseases | 1,624<br>(1,370 - 1,843) | 22<br>(17 - 31)    | 19<br>(15 - 23)     | 175<br>(139 - 210)   | 530<br>(413 - 645)   | 878<br>(747 - 995)   |
| Diabetes mellitus                                   | 762<br>(655 - 885)       | 1<br>(1 - 2)       | 2<br>(1 - 4)        | 54<br>(42 - 67)      | 246<br>(197 - 303)   | 459<br>(388 - 539)   |
| Acute glomerulonephritis                            | 1<br>(1 - 1)             | 0<br>(0 - 0)       | 0<br>(0 - 0)        | 0<br>(0 - 0)         | 0<br>(0 - 0)         | 0<br>(0 - 1)         |
| Chronic kidney disease                              | 753<br>(546 - 885)       | 10<br>(7 - 14)     | 9<br>(7 - 11)       | 93<br>(65 - 114)     | 262<br>(171 - 329)   | 380<br>(281 - 457)   |
| Chronic kidney disease due to diabetes mellitus     | 389<br>(277 - 468)       | 1<br>(0 - 1)       | 0<br>(0 - 0)        | 35<br>(23 - 46)      | 163<br>(110 - 210)   | 190<br>(136 - 235)   |
| Chronic kidney disease due to hypertension          | 103<br>(58 - 166)        | 1<br>(1 - 2)       | 1<br>(1 - 2)        | 20<br>(11 - 31)      | 24<br>(12 - 40)      | 57<br>(29 - 99)      |
| Chronic kidney disease due to glomerulonephritis    | 11<br>(8 - 15)           | 3<br>(2 - 4)       | 3<br>(2 - 3)        | 3<br>(2 - 4)         | 1<br>(0 - 1)         | 2<br>(1 - 4)         |
| Chronic kidney disease due to other causes          | 250<br>(138 - 324)       | 5<br>(3 - 8)       | 5<br>(3 - 7)        | 35<br>(18 - 48)      | 75<br>(30 - 106)     | 130<br>(73 - 191)    |
| Urinary diseases and male infertility               | 30<br>(23 - 41)          | 1<br>(1 - 2)       | 0<br>(0 - 1)        | 4<br>(3 - 5)         | 6<br>(5 - 9)         | 18<br>(12 - 28)      |
| Interstitial nephritis and urinary tract infections | 25<br>(19 - 36)          | 1<br>(1 - 1)       | 0<br>(0 - 0)        | 3<br>(2 - 4)         | 5<br>(3 - 7)         | 16<br>(11 - 25)      |
| Urolithiasis                                        | 1<br>(1 - 2)             | --                 | 0<br>(0 - 0)        | 0<br>(0 - 0)         | 1<br>(0 - 1)         | 0<br>(0 - 1)         |
| Other urinary diseases                              | 4<br>(2 - 5)             | 0<br>(0 - 1)       | 0<br>(0 - 0)        | 1<br>(0 - 1)         | 1<br>(0 - 1)         | 2<br>(1 - 3)         |
| Gynecological diseases                              | 1<br>(1 - 2)             | --                 | --                  | 1<br>(0 - 1)         | 0<br>(0 - 0)         | 0<br>(0 - 1)         |
| Uterine fibroids                                    | 0<br>(0 - 0)             | --                 | --                  | 0<br>(0 - 0)         | 0<br>(0 - 0)         | 0<br>(0 - 0)         |
| Polycystic ovarian syndrome                         | 0<br>(0 - 0)             | --                 | --                  | 0<br>(0 - 0)         | 0<br>(0 - 0)         | --                   |
| Endometriosis                                       | 0<br>(0 - 0)             | --                 | --                  | 0<br>(0 - 0)         | 0<br>(0 - 0)         | --                   |
| Genital prolapse                                    | 0<br>(0 - 0)             | --                 | --                  | 0<br>(0 - 0)         | 0<br>(0 - 0)         | 0<br>(0 - 0)         |
| Other gynecological diseases                        | 1<br>(0 - 1)             | --                 | --                  | 0<br>(0 - 0)         | 0<br>(0 - 0)         | 0<br>(0 - 0)         |
| Hemoglobinopathies and hemolytic anemias            | 28<br>(16 - 38)          | 4<br>(2 - 8)       | 5<br>(3 - 8)        | 10<br>(6 - 15)       | 4<br>(2 - 6)         | 4<br>(2 - 6)         |
| Thalassemias                                        | 1<br>(0 - 1)             | 0<br>(0 - 0)       | 0<br>(0 - 0)        | 0<br>(0 - 0)         | 0<br>(0 - 0)         | 0<br>(0 - 0)         |
| Sickle cell disorders                               | 13<br>(8 - 18)           | 2<br>(1 - 4)       | 3<br>(2 - 5)        | 6<br>(4 - 9)         | 1<br>(1 - 2)         | 0<br>(0 - 0)         |
| G6PD deficiency                                     | 1<br>(1 - 1)             | 0<br>(0 - 0)       | 0<br>(0 - 0)        | 0<br>(0 - 1)         | 0<br>(0 - 0)         | 0<br>(0 - 0)         |
| Other hemoglobinopathies and hemolytic anemias      | 13<br>(8 - 18)           | 2<br>(1 - 3)       | 1<br>(1 - 2)        | 3<br>(2 - 5)         | 2<br>(1 - 4)         | 4<br>(2 - 6)         |
| Endocrine, metabolic, blood, and immune disorders   | 49<br>(38 - 86)          | 6<br>(4 - 12)      | 2<br>(1 - 3)        | 13<br>(9 - 21)       | 12<br>(8 - 21)       | 17<br>(11 - 33)      |
| Musculoskeletal disorders                           | 69<br>(31 - 83)          | --                 | 4<br>(2 - 6)        | 38<br>(17 - 49)      | 10<br>(4 - 14)       | 16<br>(8 - 22)       |
| Rheumatoid arthritis                                | 12<br>(8 - 17)           | --                 | 0<br>(0 - 0)        | 2<br>(1 - 3)         | 3<br>(2 - 4)         | 7<br>(4 - 11)        |
| Other musculoskeletal disorders                     | 57<br>(23 - 69)          | --                 | 4<br>(2 - 5)        | 36<br>(15 - 46)      | 7<br>(3 - 10)        | 9<br>(3 - 13)        |
| Other non-communicable diseases                     | 406<br>(322 - 485)       | 347<br>(270 - 425) | 15<br>(11 - 20)     | 15<br>(10 - 18)      | 6<br>(4 - 8)         | 24<br>(10 - 32)      |
| Congenital anomalies                                | 364<br>(284 - 439)       | 330<br>(256 - 405) | 15<br>(10 - 20)     | 12<br>(8 - 15)       | 3<br>(2 - 4)         | 4<br>(3 - 6)         |
| Neural tube defects                                 | 29<br>(15 - 44)          | 28<br>(15 - 44)    | 0<br>(0 - 0)        | 0<br>(0 - 0)         | 0<br>(0 - 0)         | 0<br>(0 - 0)         |
| Congenital heart anomalies                          | 154<br>(113 - 201)       | 133<br>(93 - 180)  | 9<br>(6 - 13)       | 9<br>(6 - 11)        | 1<br>(1 - 2)         | 2<br>(1 - 3)         |
| Cleft lip and cleft palate                          | 2<br>(0 - 4)             | 2<br>(0 - 4)       | --                  | --                   | --                   | --                   |
| Down syndrome                                       | 8<br>(4 - 12)            | 5<br>(3 - 10)      | 1<br>(1 - 2)        | 1<br>(0 - 1)         | 0<br>(0 - 0)         | 0<br>(0 - 0)         |
| Chromosomal unbalanced rearrangements               | 7<br>(3 - 12)            | 6<br>(2 - 11)      | 0<br>(0 - 0)        | 0<br>(0 - 1)         | 0<br>(0 - 0)         | 0<br>(0 - 0)         |
| Other congenital anomalies                          | 165<br>(121 - 210)       | 156<br>(113 - 201) | 4<br>(2 - 6)        | 2<br>(1 - 3)         | 1<br>(1 - 2)         | 2<br>(1 - 3)         |
| Skin and subcutaneous diseases                      | 29<br>(13 - 38)          | 3<br>(1 - 5)       | 1<br>(0 - 1)        | 3<br>(1 - 3)         | 3<br>(2 - 4)         | 20<br>(8 - 28)       |
| Cellulitis                                          | 3<br>(1 - 4)             | 0<br>(0 - 1)       | 0<br>(0 - 0)        | 0<br>(0 - 1)         | 0<br>(0 - 1)         | 1<br>(0 - 3)         |
| Pyoderma                                            | 15<br>(8 - 21)           | 2<br>(1 - 4)       | 0<br>(0 - 0)        | 1<br>(1 - 1)         | 2<br>(1 - 3)         | 10<br>(5 - 15)       |
| Decubitus ulcer                                     | 10<br>(3 - 15)           | 0<br>(0 - 0)       | 0<br>(0 - 0)        | 1<br>(0 - 1)         | 1<br>(0 - 1)         | 8<br>(2 - 13)        |

Web Table 31- Nicaragua deaths with 95% UI by age, sex, and cause in 2013

| Cause                                           | Females, All Ages  | Females, 0-4 Years | Females, 5-14 Years | Females, 15-49 Years | Females, 50-69 Years | Females, 70-80 Years |
|-------------------------------------------------|--------------------|--------------------|---------------------|----------------------|----------------------|----------------------|
| Other skin and subcutaneous diseases            | 1<br>(1 - 2)       | 0<br>(0 - 0)       | 0<br>(0 - 0)        | 0<br>(0 - 1)         | 0<br>(0 - 0)         | 0<br>(0 - 1)         |
| Sudden infant death syndrome                    | 14<br>(4 - 34)     | 14<br>(4 - 34)     | --                  | --                   | --                   | --                   |
| Injuries                                        | 620<br>(537 - 702) | 80<br>(59 - 117)   | 59<br>(50 - 71)     | 238<br>(196 - 293)   | 65<br>(53 - 82)      | 178<br>(121 - 221)   |
| Transport injuries                              | 139<br>(118 - 175) | 10<br>(6 - 15)     | 20<br>(14 - 26)     | 56<br>(44 - 73)      | 21<br>(16 - 30)      | 31<br>(23 - 45)      |
| Road injuries                                   | 133<br>(113 - 169) | 10<br>(6 - 15)     | 19<br>(14 - 26)     | 54<br>(42 - 70)      | 20<br>(15 - 29)      | 30<br>(22 - 43)      |
| Pedestrian road injuries                        | 56<br>(45 - 75)    | 5<br>(3 - 8)       | 10<br>(7 - 14)      | 17<br>(12 - 25)      | 8<br>(6 - 13)        | 16<br>(11 - 25)      |
| Cyclist road injuries                           | 7<br>(5 - 9)       | 0<br>(0 - 1)       | 1<br>(1 - 2)        | 3<br>(2 - 4)         | 1<br>(1 - 2)         | 1<br>(1 - 2)         |
| Motorcyclist road injuries                      | 8<br>(5 - 11)      | 0<br>(0 - 1)       | 0<br>(0 - 1)        | 6<br>(4 - 9)         | 1<br>(0 - 1)         | 0<br>(0 - 1)         |
| Motor vehicle road injuries                     | 61<br>(48 - 80)    | 4<br>(2 - 7)       | 7<br>(4 - 10)       | 28<br>(20 - 37)      | 9<br>(7 - 13)        | 13<br>(8 - 19)       |
| Other road injuries                             | 1<br>(1 - 3)       | 0<br>(0 - 0)       | 0<br>(0 - 1)        | 1<br>(0 - 1)         | 0<br>(0 - 0)         | 0<br>(0 - 0)         |
| Other transport injuries                        | 5<br>(4 - 7)       | 0<br>(0 - 1)       | 1<br>(0 - 1)        | 2<br>(1 - 3)         | 1<br>(1 - 2)         | 1<br>(1 - 2)         |
| Unintentional injuries                          | 283<br>(214 - 338) | 63<br>(43 - 100)   | 22<br>(18 - 28)     | 40<br>(33 - 49)      | 25<br>(18 - 31)      | 133<br>(77 - 179)    |
| Falls                                           | 110<br>(50 - 156)  | 2<br>(1 - 3)       | 2<br>(1 - 2)        | 3<br>(2 - 4)         | 8<br>(4 - 11)        | 95<br>(40 - 140)     |
| Drowning                                        | 34<br>(25 - 53)    | 9<br>(5 - 17)      | 10<br>(7 - 16)      | 11<br>(8 - 17)       | 2<br>(1 - 3)         | 2<br>(1 - 3)         |
| Fire, heat, and hot substances                  | 14<br>(11 - 18)    | 3<br>(2 - 6)       | 1<br>(1 - 2)        | 3<br>(2 - 4)         | 3<br>(2 - 3)         | 5<br>(3 - 6)         |
| Poisonings                                      | 5<br>(4 - 9)       | 1<br>(0 - 1)       | 0<br>(0 - 1)        | 2<br>(1 - 3)         | 0<br>(0 - 1)         | 2<br>(1 - 3)         |
| Exposure to mechanical forces                   | 10<br>(8 - 16)     | 2<br>(1 - 3)       | 2<br>(2 - 4)        | 4<br>(3 - 6)         | 1<br>(1 - 2)         | 1<br>(1 - 2)         |
| Unintentional firearm injuries                  | 4<br>(3 - 5)       | 0<br>(0 - 1)       | 1<br>(0 - 1)        | 2<br>(1 - 2)         | 0<br>(0 - 1)         | 0<br>(0 - 1)         |
| Unintentional suffocation                       | 1<br>(1 - 5)       | 0<br>(0 - 1)       | 0<br>(0 - 1)        | 0<br>(0 - 1)         | 0<br>(0 - 0)         | 0<br>(0 - 1)         |
| Other exposure to mechanical forces             | 5<br>(4 - 10)      | 1<br>(1 - 2)       | 1<br>(1 - 2)        | 2<br>(1 - 3)         | 1<br>(0 - 1)         | 1<br>(0 - 2)         |
| Adverse effects of medical treatment            | 38<br>(28 - 55)    | 4<br>(2 - 9)       | 1<br>(1 - 1)        | 8<br>(6 - 11)        | 6<br>(4 - 10)        | 19<br>(12 - 31)      |
| Animal contact                                  | 5<br>(2 - 8)       | 0<br>(0 - 1)       | 1<br>(0 - 2)        | 2<br>(1 - 3)         | 1<br>(0 - 2)         | 1<br>(0 - 1)         |
| Venomous animal contact                         | 5<br>(2 - 7)       | 0<br>(0 - 1)       | 1<br>(0 - 2)        | 2<br>(1 - 3)         | 1<br>(0 - 2)         | 0<br>(0 - 1)         |
| Non-venomous animal contact                     | 1<br>(0 - 1)       | 0<br>(0 - 0)       | 0<br>(0 - 0)        | 0<br>(0 - 0)         | 0<br>(0 - 0)         | 0<br>(0 - 0)         |
| Foreign body                                    | 59<br>(36 - 93)    | 42<br>(24 - 71)    | 4<br>(2 - 5)        | 5<br>(3 - 7)         | 2<br>(1 - 4)         | 7<br>(4 - 12)        |
| Pulmonary aspiration and foreign body in airway | 57<br>(34 - 91)    | 41<br>(23 - 70)    | 3<br>(2 - 5)        | 4<br>(3 - 7)         | 2<br>(1 - 4)         | 7<br>(4 - 11)        |
| Foreign body in other body part                 | 2<br>(1 - 2)       | 1<br>(0 - 1)       | 0<br>(0 - 1)        | 0<br>(0 - 0)         | 0<br>(0 - 0)         | 0<br>(0 - 1)         |
| Other unintentional injuries                    | 7<br>(3 - 9)       | 0<br>(0 - 1)       | 1<br>(0 - 2)        | 2<br>(1 - 4)         | 1<br>(0 - 2)         | 2<br>(0 - 3)         |
| Self-harm and interpersonal violence            | 188<br>(153 - 246) | 7<br>(3 - 14)      | 17<br>(12 - 23)     | 138<br>(109 - 181)   | 16<br>(12 - 23)      | 10<br>(7 - 16)       |
| Self-harm                                       | 108<br>(88 - 140)  | --                 | 10<br>(7 - 14)      | 85<br>(67 - 111)     | 8<br>(6 - 11)        | 5<br>(4 - 8)         |
| Interpersonal violence                          | 80<br>(58 - 120)   | 7<br>(3 - 14)      | 7<br>(4 - 12)       | 54<br>(36 - 83)      | 8<br>(5 - 13)        | 5<br>(3 - 9)         |
| Assault by firearm                              | 25<br>(15 - 42)    | 1<br>(0 - 2)       | 2<br>(1 - 3)        | 20<br>(11 - 33)      | 2<br>(1 - 4)         | 1<br>(0 - 1)         |
| Assault by sharp object                         | 30<br>(20 - 49)    | 1<br>(0 - 2)       | 2<br>(1 - 4)        | 21<br>(13 - 36)      | 4<br>(2 - 6)         | 2<br>(1 - 3)         |
| Assault by other means                          | 26<br>(17 - 39)    | 5<br>(2 - 10)      | 3<br>(2 - 5)        | 12<br>(7 - 21)       | 3<br>(1 - 4)         | 3<br>(1 - 6)         |
| Forces of nature, war, and legal intervention   | 10<br>(5 - 22)     | 0<br>(0 - 0)       | 0<br>(0 - 1)        | 3<br>(2 - 8)         | 3<br>(1 - 7)         | 3<br>(1 - 7)         |
| Exposure to forces of nature                    | 10<br>(5 - 22)     | 0<br>(0 - 0)       | 0<br>(0 - 1)        | 3<br>(2 - 8)         | 3<br>(1 - 7)         | 3<br>(1 - 7)         |

Web Table 31- Niger deaths with 95% UI by age, sex, and cause in 2013

| Cause                                                             | Both Sexes, All Ages           | Both Sexes, 0-4 Years        | Both Sexes, 5-14 Years   | Both Sexes, 15-49 Years     | Both Sexes, 50-69 Years     | Both Sexes, 70-80 Years     |
|-------------------------------------------------------------------|--------------------------------|------------------------------|--------------------------|-----------------------------|-----------------------------|-----------------------------|
| All causes                                                        | 170,669<br>(159,806 - 182,272) | 97,824<br>(88,736 - 108,136) | 8,648<br>(7,829 - 9,579) | 23,339<br>(21,402 - 25,437) | 23,599<br>(21,110 - 26,152) | 17,260<br>(15,985 - 18,519) |
| Communicable, maternal, neonatal, and nutritional diseases        | 121,541<br>(111,131 - 132,315) | 87,791<br>(78,063 - 98,236)  | 5,793<br>(5,071 - 6,621) | 13,757<br>(12,598 - 14,989) | 8,231<br>(7,138 - 9,318)    | 5,970<br>(4,996 - 6,745)    |
| HIV/AIDS and tuberculosis                                         | 8,746<br>(7,345 - 10,626)      | 691<br>(469 - 1,106)         | 437<br>(333 - 578)       | 4,309<br>(3,516 - 5,370)    | 2,445<br>(1,968 - 3,004)    | 864<br>(665 - 1,107)        |
| Tuberculosis                                                      | 5,369<br>(4,389 - 6,650)       | 519<br>(296 - 898)           | 215<br>(145 - 325)       | 1,952<br>(1,494 - 2,499)    | 1,865<br>(1,445 - 2,347)    | 818<br>(617 - 1,058)        |
| HIV/AIDS                                                          | 3,377<br>(2,382 - 4,617)       | 173<br>(113 - 253)           | 222<br>(163 - 280)       | 2,357<br>(1,605 - 3,304)    | 579<br>(363 - 865)          | 46<br>(27 - 73)             |
| HIV/AIDS resulting in mycobacterial infection                     | 216<br>(146 - 310)             | 10<br>(6 - 16)               | 12<br>(9 - 17)           | 150<br>(98 - 222)           | 40<br>(24 - 63)             | 3<br>(2 - 5)                |
| HIV/AIDS resulting in other diseases                              | 3,160<br>(2,234 - 4,314)       | 162<br>(106 - 239)           | 210<br>(154 - 264)       | 2,207<br>(1,504 - 3,092)    | 539<br>(340 - 806)          | 43<br>(24 - 68)             |
| Diarrhea, lower respiratory, and other common infectious diseases | 53,846<br>(44,071 - 65,198)    | 38,664<br>(29,084 - 49,133)  | 3,205<br>(2,305 - 4,176) | 3,905<br>(3,237 - 4,670)    | 4,169<br>(3,339 - 5,110)    | 3,903<br>(3,056 - 4,689)    |
| Diarrheal diseases                                                | 23,709<br>(16,703 - 31,845)    | 17,426<br>(10,719 - 25,410)  | 1,207<br>(707 - 1,844)   | 1,768<br>(1,335 - 2,289)    | 1,800<br>(1,247 - 2,447)    | 1,508<br>(1,097 - 2,011)    |
| Intestinal infectious diseases                                    | 877<br>(475 - 1,520)           | 314<br>(158 - 587)           | 298<br>(156 - 522)       | 217<br>(110 - 388)          | 37<br>(19 - 67)             | 10<br>(5 - 18)              |
| Typhoid fever                                                     | 555<br>(281 - 986)             | 185<br>(81 - 367)            | 194<br>(98 - 355)        | 144<br>(68 - 260)           | 25<br>(11 - 48)             | 6<br>(3 - 11)               |
| Paratyphoid fever                                                 | 259<br>(125 - 482)             | 91<br>(40 - 185)             | 95<br>(41 - 184)         | 63<br>(27 - 123)            | 8<br>(3 - 16)               | 2<br>(1 - 5)                |
| Other intestinal infectious diseases                              | 64<br>(41 - 90)                | 39<br>(22 - 63)              | 8<br>(3 - 17)            | 11<br>(4 - 22)              | 4<br>(1 - 12)               | 2<br>(0 - 6)                |
| Lower respiratory infections                                      | 20,491<br>(15,583 - 26,568)    | 14,845<br>(10,174 - 20,496)  | 759<br>(496 - 1,111)     | 907<br>(701 - 1,153)        | 1,806<br>(1,244 - 2,338)    | 2,174<br>(1,495 - 2,756)    |
| Upper respiratory infections                                      | 31<br>(13 - 71)                | 18<br>(2 - 60)               | 2<br>(0 - 7)             | 5<br>(2 - 9)                | 4<br>(1 - 10)               | 2<br>(0 - 6)                |
| Otitis media                                                      | 13<br>(10 - 18)                | 6<br>(3 - 10)                | 1<br>(1 - 2)             | 1<br>(1 - 2)                | 2<br>(2 - 3)                | 2<br>(2 - 3)                |
| Meningitis                                                        | 5,558<br>(3,976 - 8,018)       | 3,560<br>(2,074 - 5,952)     | 680<br>(427 - 985)       | 753<br>(546 - 963)          | 397<br>(264 - 547)          | 169<br>(99 - 245)           |
| Pneumococcal meningitis                                           | 927<br>(646 - 1,360)           | 525<br>(292 - 973)           | 134<br>(75 - 228)        | 159<br>(95 - 240)           | 76<br>(45 - 120)            | 33<br>(16 - 58)             |
| H influenzae type B meningitis                                    | 1,166<br>(761 - 1,779)         | 887<br>(489 - 1,499)         | 133<br>(70 - 215)        | 94<br>(59 - 135)            | 37<br>(20 - 67)             | 14<br>(8 - 25)              |
| Meningococcal meningitis                                          | 3,007<br>(2,091 - 4,377)       | 1,922<br>(1,051 - 3,262)     | 363<br>(219 - 553)       | 409<br>(290 - 549)          | 220<br>(134 - 322)          | 93<br>(52 - 139)            |
| Other meningitis                                                  | 459<br>(312 - 675)             | 227<br>(117 - 423)           | 49<br>(22 - 86)          | 91<br>(52 - 137)            | 64<br>(33 - 113)            | 28<br>(14 - 48)             |
| Encephalitis                                                      | 202<br>(135 - 283)             | 104<br>(53 - 180)            | 28<br>(19 - 47)          | 36<br>(23 - 52)             | 22<br>(10 - 33)             | 11<br>(4 - 18)              |
| Diphtheria                                                        | 31<br>(1 - 181)                | 26<br>(0 - 179)              | 4<br>(0 - 29)            | 1<br>(0 - 2)                | 0<br>(0 - 1)                | --                          |
| Whooping cough                                                    | 609<br>(1 - 2,928)             | 568<br>(1 - 2,716)           | 37<br>(0 - 176)          | 4<br>(0 - 21)               | 1<br>(0 - 3)                | --                          |
| Tetanus                                                           | 1,715<br>(1,012 - 3,112)       | 1,288<br>(655 - 2,634)       | 110<br>(52 - 195)        | 200<br>(116 - 334)          | 97<br>(56 - 177)            | 20<br>(10 - 45)             |
| Measles                                                           | 576<br>(194 - 1,305)           | 494<br>(161 - 1,120)         | 75<br>(26 - 160)         | 7<br>(3 - 15)               | 0<br>(0 - 0)                | --                          |
| Varicella and herpes zoster                                       | 32<br>(15 - 64)                | 14<br>(2 - 45)               | 4<br>(0 - 12)            | 6<br>(2 - 14)               | 3<br>(1 - 8)                | 5<br>(0 - 15)               |
| Neglected tropical diseases and malaria                           | 25,937<br>(14,063 - 41,019)    | 23,021<br>(11,783 - 38,151)  | 1,198<br>(576 - 2,232)   | 766<br>(367 - 1,369)        | 589<br>(270 - 1,216)        | 364<br>(141 - 823)          |
| Malaria                                                           | 25,433<br>(13,395 - 40,453)    | 22,819<br>(11,523 - 37,962)  | 1,073<br>(444 - 2,146)   | 663<br>(249 - 1,289)        | 534<br>(209 - 1,168)        | 345<br>(120 - 806)          |
| Leishmaniasis                                                     | 1<br>(1 - 1)                   | 0<br>(0 - 0)                 | 0<br>(0 - 0)             | 0<br>(0 - 0)                | 0<br>(0 - 0)                | 0<br>(0 - 0)                |
| Visceral leishmaniasis                                            | 1<br>(1 - 1)                   | 0<br>(0 - 0)                 | 0<br>(0 - 0)             | 0<br>(0 - 0)                | 0<br>(0 - 0)                | 0<br>(0 - 0)                |
| Schistosomiasis                                                   | 53<br>(40 - 69)                | 2<br>(1 - 5)                 | 4<br>(2 - 6)             | 19<br>(13 - 25)             | 21<br>(14 - 30)             | 8<br>(5 - 12)               |
| Cysticercosis                                                     | 5<br>(1 - 15)                  | 1<br>(0 - 2)                 | 1<br>(0 - 2)             | 2<br>(0 - 7)                | 1<br>(0 - 3)                | 0<br>(0 - 1)                |
| Cystic echinococcosis                                             | 12<br>(10 - 15)                | 4<br>(2 - 6)                 | 3<br>(3 - 4)             | 3<br>(3 - 4)                | 2<br>(1 - 2)                | 1<br>(0 - 1)                |
| Dengue                                                            | 8<br>(5 - 13)                  | 4<br>(1 - 8)                 | 2<br>(1 - 3)             | 1<br>(1 - 3)                | 0<br>(0 - 1)                | 0<br>(0 - 0)                |
| Yellow fever                                                      | 1<br>(0 - 1)                   | 0<br>(0 - 0)                 | 0<br>(0 - 0)             | 0<br>(0 - 1)                | 0<br>(0 - 0)                | 0<br>(0 - 0)                |
| Rabies                                                            | 265<br>(164 - 404)             | 75<br>(32 - 161)             | 96<br>(53 - 164)         | 65<br>(39 - 107)            | 24<br>(11 - 40)             | 6<br>(2 - 11)               |
| Intestinal nematode infections                                    | 110<br>(64 - 175)              | 93<br>(50 - 156)             | 13<br>(4 - 29)           | 2<br>(0 - 8)                | 1<br>(0 - 6)                | 1<br>(0 - 5)                |
| Ascariasis                                                        | 110<br>(64 - 175)              | 93<br>(50 - 156)             | 13<br>(4 - 29)           | 2<br>(0 - 8)                | 1<br>(0 - 6)                | 1<br>(0 - 5)                |
| Other neglected tropical diseases                                 | 49<br>(30 - 119)               | 22<br>(11 - 65)              | 6<br>(3 - 14)            | 10<br>(6 - 19)              | 7<br>(4 - 11)               | 5<br>(3 - 8)                |



Web Table 31- Niger deaths with 95% UI by age, sex, and cause in 2013

| Cause                                                            | Both Sexes, All Ages        | Both Sexes, 0-4 Years       | Both Sexes, 5-14 Years   | Both Sexes, 15-49 Years  | Both Sexes, 50-69 Years     | Both Sexes, 70-80 Years    |
|------------------------------------------------------------------|-----------------------------|-----------------------------|--------------------------|--------------------------|-----------------------------|----------------------------|
| Maternal disorders                                               | 3,873<br>(2,936 - 4,811)    | --                          | 58<br>(21 - 124)         | 3,814<br>(2,885 - 4,720) | --                          | --                         |
| Maternal hemorrhage                                              | 699<br>(482 - 935)          | --                          | 6<br>(2 - 13)            | 694<br>(479 - 930)       | --                          | --                         |
| Maternal sepsis and other maternal infections                    | 219<br>(134 - 312)          | --                          | 4<br>(1 - 9)             | 215<br>(132 - 308)       | --                          | --                         |
| Maternal hypertensive disorders                                  | 310<br>(200 - 440)          | --                          | 4<br>(1 - 11)            | 305<br>(198 - 435)       | --                          | --                         |
| Maternal obstructed labor                                        | 190<br>(113 - 274)          | --                          | 2<br>(1 - 5)             | 188<br>(111 - 271)       | --                          | --                         |
| Maternal abortive outcome                                        | 688<br>(480 - 943)          | --                          | 10<br>(3 - 22)           | 678<br>(475 - 935)       | --                          | --                         |
| Indirect maternal deaths                                         | 399<br>(267 - 572)          | --                          | 5<br>(2 - 12)            | 394<br>(262 - 567)       | --                          | --                         |
| Late maternal deaths                                             | 597<br>(337 - 911)          | --                          | 16<br>(5 - 40)           | 581<br>(324 - 887)       | --                          | --                         |
| Maternal deaths aggravated by HIV/AIDS                           | 4<br>(2 - 6)                | --                          | --                       | 4<br>(2 - 6)             | --                          | --                         |
| Other maternal disorders                                         | 760<br>(533 - 998)          | --                          | 11<br>(4 - 24)           | 748<br>(526 - 986)       | --                          | --                         |
| Neonatal disorders                                               | 15,634<br>(11,902 - 20,175) | 15,634<br>(11,902 - 20,175) | --                       | --                       | --                          | --                         |
| Neonatal preterm birth complications                             | 5,545<br>(2,632 - 9,187)    | 5,545<br>(2,632 - 9,187)    | --                       | --                       | --                          | --                         |
| Neonatal encephalopathy due to birth asphyxia and trauma         | 4,375<br>(1,227 - 8,433)    | 4,375<br>(1,227 - 8,433)    | --                       | --                       | --                          | --                         |
| Neonatal sepsis and other neonatal infections                    | 3,507<br>(1,376 - 6,081)    | 3,507<br>(1,376 - 6,081)    | --                       | --                       | --                          | --                         |
| Hemolytic disease and other neonatal jaundice                    | 125<br>(39 - 322)           | 125<br>(39 - 322)           | --                       | --                       | --                          | --                         |
| Other neonatal disorders                                         | 2,081<br>(810 - 3,733)      | 2,081<br>(810 - 3,733)      | --                       | --                       | --                          | --                         |
| Nutritional deficiencies                                         | 10,568<br>(7,220 - 14,968)  | 7,674<br>(4,523 - 11,604)   | 632<br>(422 - 912)       | 754<br>(557 - 1,014)     | 808<br>(589 - 1,083)        | 699<br>(522 - 957)         |
| Protein-energy malnutrition                                      | 8,074<br>(4,946 - 12,015)   | 6,799<br>(3,921 - 10,569)   | 403<br>(244 - 614)       | 240<br>(113 - 446)       | 345<br>(188 - 586)          | 288<br>(156 - 490)         |
| Iodine deficiency                                                | 19<br>(3 - 68)              | 10<br>(0 - 58)              | 3<br>(0 - 19)            | 2<br>(0 - 8)             | 2<br>(0 - 9)                | 1<br>(0 - 7)               |
| Iron-deficiency anemia                                           | 2,445<br>(1,405 - 3,732)    | 855<br>(221 - 1,999)        | 224<br>(107 - 395)       | 506<br>(326 - 691)       | 453<br>(258 - 646)          | 406<br>(258 - 590)         |
| Other nutritional deficiencies                                   | 30<br>(14 - 51)             | 11<br>(3 - 28)              | 2<br>(1 - 5)             | 6<br>(2 - 14)            | 8<br>(2 - 15)               | 4<br>(2 - 7)               |
| Other communicable, maternal, neonatal, and nutritional diseases | 2,938<br>(1,992 - 4,332)    | 2,106<br>(1,239 - 3,316)    | 263<br>(160 - 410)       | 209<br>(153 - 318)       | 221<br>(153 - 343)          | 139<br>(87 - 235)          |
| Sexually transmitted diseases excluding HIV                      | 2,121<br>(1,218 - 3,402)    | 1,783<br>(962 - 2,969)      | 208<br>(113 - 343)       | 61<br>(36 - 125)         | 45<br>(21 - 101)            | 25<br>(10 - 58)            |
| Syphilis                                                         | 2,065<br>(1,174 - 3,355)    | 1,783<br>(962 - 2,969)      | 201<br>(108 - 335)       | 30<br>(17 - 65)          | 31<br>(14 - 71)             | 20<br>(8 - 46)             |
| Chlamydial infection                                             | 6<br>(3 - 11)               | --                          | 1<br>(0 - 1)             | 3<br>(2 - 6)             | 2<br>(0 - 4)                | 1<br>(0 - 2)               |
| Gonococcal infection                                             | 29<br>(17 - 57)             | --                          | 3<br>(1 - 6)             | 15<br>(9 - 31)           | 8<br>(4 - 17)               | 3<br>(1 - 7)               |
| Other sexually transmitted diseases                              | 22<br>(14 - 43)             | --                          | 3<br>(1 - 6)             | 13<br>(8 - 26)           | 5<br>(2 - 11)               | 1<br>(1 - 3)               |
| Hepatitis                                                        | 349<br>(212 - 489)          | 85<br>(35 - 152)            | 25<br>(13 - 38)          | 88<br>(53 - 132)         | 94<br>(54 - 142)            | 58<br>(32 - 91)            |
| Acute hepatitis A                                                | 37<br>(9 - 81)              | 27<br>(6 - 64)              | 7<br>(2 - 14)            | 3<br>(1 - 6)             | 1<br>(0 - 2)                | 0<br>(0 - 0)               |
| Acute hepatitis B                                                | 224<br>(132 - 326)          | 57<br>(21 - 110)            | 12<br>(5 - 21)           | 32<br>(16 - 54)          | 74<br>(43 - 111)            | 50<br>(27 - 79)            |
| Acute hepatitis C                                                | 9<br>(2 - 22)               | --                          | 1<br>(0 - 4)             | 2<br>(0 - 6)             | 3<br>(0 - 9)                | 2<br>(0 - 6)               |
| Acute hepatitis E                                                | 80<br>(35 - 139)            | 1<br>(0 - 3)                | 5<br>(2 - 9)             | 51<br>(24 - 86)          | 17<br>(5 - 40)              | 5<br>(1 - 14)              |
| Other infectious diseases                                        | 468<br>(254 - 967)          | 239<br>(98 - 502)           | 31<br>(10 - 70)          | 60<br>(27 - 140)         | 81<br>(35 - 203)            | 57<br>(21 - 158)           |
| Non-communicable diseases                                        | 40,637<br>(34,906 - 47,576) | 7,525<br>(4,215 - 12,385)   | 1,621<br>(1,205 - 2,243) | 6,629<br>(5,706 - 7,654) | 14,186<br>(12,270 - 16,229) | 10,676<br>(9,512 - 12,077) |
| Neoplasms                                                        | 5,981<br>(5,213 - 6,796)    | 193<br>(123 - 295)          | 182<br>(133 - 250)       | 1,575<br>(1,296 - 1,886) | 2,850<br>(2,422 - 3,347)    | 1,180<br>(1,022 - 1,364)   |
| Esophageal cancer                                                | 171<br>(120 - 256)          | --                          | --                       | 27<br>(19 - 38)          | 104<br>(71 - 157)           | 40<br>(26 - 64)            |
| Stomach cancer                                                   | 596<br>(493 - 706)          | --                          | --                       | 123<br>(95 - 156)        | 353<br>(278 - 428)          | 121<br>(96 - 153)          |
| Liver cancer                                                     | 1,748<br>(1,396 - 2,186)    | --                          | 9<br>(5 - 16)            | 588<br>(427 - 801)       | 865<br>(667 - 1,114)        | 285<br>(212 - 374)         |
| Liver cancer due to hepatitis B                                  | 715<br>(317 - 1,115)        | --                          | 4<br>(2 - 9)             | 304<br>(143 - 487)       | 325<br>(108 - 560)          | 82<br>(42 - 140)           |
| Liver cancer due to hepatitis C                                  | 583<br>(283 - 974)          | --                          | 1<br>(0 - 1)             | 134<br>(56 - 273)        | 325<br>(148 - 576)          | 123<br>(54 - 194)          |

Web Table 31- Niger deaths with 95% UI by age, sex, and cause in 2013

| Cause                                | Both Sexes, All Ages        | Both Sexes, 0-4 Years | Both Sexes, 5-14 Years | Both Sexes, 15-49 Years  | Both Sexes, 50-69 Years  | Both Sexes, 70-80 Years  |
|--------------------------------------|-----------------------------|-----------------------|------------------------|--------------------------|--------------------------|--------------------------|
| Liver cancer due to alcohol use      | 198<br>(108 - 319)          | --                    | --                     | 44<br>(19 - 88)          | 105<br>(52 - 181)        | 49<br>(27 - 82)          |
| Liver cancer due to other causes     | 252<br>(152 - 386)          | --                    | 4<br>(2 - 9)           | 106<br>(62 - 190)        | 111<br>(62 - 177)        | 30<br>(17 - 53)          |
| Larynx cancer                        | 21<br>(13 - 51)             | --                    | --                     | 4<br>(2 - 7)             | 12<br>(7 - 31)           | 5<br>(3 - 13)            |
| Tracheal, bronchus and lung cancer   | 243<br>(203 - 291)          | --                    | --                     | 25<br>(20 - 33)          | 150<br>(122 - 186)       | 67<br>(56 - 79)          |
| Breast cancer                        | 306<br>(210 - 385)          | --                    | --                     | 115<br>(72 - 150)        | 147<br>(100 - 193)       | 44<br>(31 - 57)          |
| Cervical cancer                      | 759<br>(565 - 983)          | --                    | --                     | 202<br>(139 - 278)       | 436<br>(302 - 599)       | 121<br>(83 - 172)        |
| Uterine cancer                       | 63<br>(36 - 100)            | --                    | --                     | 11<br>(5 - 19)           | 34<br>(18 - 57)          | 18<br>(10 - 29)          |
| Prostate cancer                      | 176<br>(112 - 272)          | --                    | --                     | 4<br>(2 - 6)             | 61<br>(36 - 98)          | 110<br>(71 - 174)        |
| Colon and rectum cancer              | 286<br>(243 - 337)          | --                    | --                     | 80<br>(64 - 99)          | 122<br>(101 - 148)       | 84<br>(69 - 103)         |
| Lip and oral cavity cancer           | 37<br>(28 - 48)             | --                    | --                     | 10<br>(7 - 14)           | 18<br>(13 - 23)          | 9<br>(6 - 13)            |
| Nasopharynx cancer                   | 13<br>(10 - 17)             | --                    | 1<br>(0 - 2)           | 6<br>(4 - 8)             | 5<br>(4 - 8)             | 1<br>(1 - 2)             |
| Other pharynx cancer                 | 14<br>(10 - 20)             | --                    | --                     | 4<br>(3 - 5)             | 7<br>(4 - 12)            | 3<br>(2 - 4)             |
| Gallbladder and biliary tract cancer | 76<br>(56 - 102)            | --                    | --                     | 14<br>(9 - 20)           | 43<br>(30 - 61)          | 19<br>(13 - 28)          |
| Pancreatic cancer                    | 133<br>(113 - 155)          | --                    | --                     | 26<br>(21 - 33)          | 79<br>(65 - 95)          | 27<br>(22 - 34)          |
| Malignant skin melanoma              | 17<br>(13 - 24)             | --                    | --                     | 5<br>(3 - 7)             | 9<br>(6 - 12)            | 3<br>(2 - 5)             |
| Non-melanoma skin cancer             | 13<br>(9 - 19)              | --                    | --                     | 3<br>(2 - 4)             | 4<br>(3 - 7)             | 6<br>(4 - 10)            |
| Ovarian cancer                       | 70<br>(43 - 107)            | --                    | --                     | 18<br>(10 - 29)          | 43<br>(25 - 68)          | 9<br>(5 - 15)            |
| Testicular cancer                    | 6<br>(4 - 9)                | --                    | --                     | 5<br>(3 - 7)             | 1<br>(1 - 2)             | 0<br>(0 - 1)             |
| Kidney cancer                        | 56<br>(43 - 75)             | 12<br>(5 - 24)        | 5<br>(3 - 9)           | 8<br>(6 - 12)            | 23<br>(17 - 31)          | 8<br>(5 - 10)            |
| Bladder cancer                       | 107<br>(86 - 145)           | --                    | --                     | 20<br>(13 - 28)          | 46<br>(34 - 70)          | 41<br>(30 - 61)          |
| Brain and nervous system cancer      | 68<br>(42 - 83)             | 5<br>(2 - 9)          | 10<br>(5 - 15)         | 28<br>(15 - 36)          | 18<br>(12 - 24)          | 7<br>(5 - 9)             |
| Thyroid cancer                       | 16<br>(11 - 24)             | --                    | 0<br>(0 - 1)           | 2<br>(1 - 3)             | 9<br>(5 - 13)            | 5<br>(3 - 8)             |
| Mesothelioma                         | 8<br>(6 - 10)               | --                    | --                     | 2<br>(1 - 2)             | 4<br>(3 - 5)             | 2<br>(1 - 3)             |
| Hodgkin lymphoma                     | 35<br>(24 - 48)             | 6<br>(3 - 10)         | 6<br>(3 - 12)          | 11<br>(8 - 16)           | 7<br>(4 - 10)            | 6<br>(3 - 11)            |
| Non-Hodgkin lymphoma                 | 247<br>(157 - 339)          | 42<br>(21 - 74)       | 50<br>(26 - 84)        | 73<br>(44 - 105)         | 59<br>(35 - 96)          | 24<br>(14 - 41)          |
| Multiple myeloma                     | 30<br>(24 - 38)             | --                    | --                     | 5<br>(4 - 7)             | 17<br>(13 - 22)          | 8<br>(5 - 11)            |
| Leukemia                             | 119<br>(83 - 141)           | 12<br>(7 - 23)        | 25<br>(16 - 34)        | 45<br>(29 - 56)          | 22<br>(16 - 28)          | 15<br>(11 - 18)          |
| Other neoplasms                      | 547<br>(420 - 739)          | 116<br>(71 - 194)     | 76<br>(50 - 116)       | 113<br>(77 - 159)        | 152<br>(100 - 241)       | 91<br>(63 - 133)         |
| Cardiovascular diseases              | 14,488<br>(12,596 - 16,952) | 627<br>(400 - 986)    | 223<br>(152 - 315)     | 1,727<br>(1,399 - 2,113) | 6,233<br>(5,268 - 7,250) | 5,678<br>(4,983 - 6,683) |
| Rheumatic heart disease              | 294<br>(167 - 739)          | 31<br>(11 - 79)       | 23<br>(11 - 53)        | 65<br>(30 - 189)         | 95<br>(44 - 273)         | 80<br>(49 - 180)         |
| Ischemic heart disease               | 5,151<br>(4,066 - 6,745)    | 37<br>(12 - 84)       | 33<br>(19 - 51)        | 564<br>(426 - 738)       | 2,366<br>(1,839 - 3,058) | 2,152<br>(1,642 - 2,983) |
| Cerebrovascular disease              | 4,430<br>(2,874 - 5,793)    | 106<br>(59 - 179)     | 39<br>(22 - 64)        | 405<br>(222 - 572)       | 1,878<br>(1,197 - 2,510) | 2,003<br>(1,305 - 2,600) |
| Ischemic stroke                      | 2,362<br>(470 - 3,620)      | 14<br>(2 - 36)        | 4<br>(1 - 12)          | 74<br>(10 - 149)         | 928<br>(144 - 1,531)     | 1,342<br>(290 - 1,986)   |
| Hemorrhagic stroke                   | 2,069<br>(1,177 - 3,874)    | 93<br>(48 - 163)      | 35<br>(17 - 59)        | 331<br>(177 - 479)       | 950<br>(523 - 1,731)     | 660<br>(284 - 1,577)     |
| Hypertensive heart disease           | 1,101<br>(525 - 1,694)      | 10<br>(3 - 20)        | 3<br>(1 - 6)           | 115<br>(39 - 202)        | 461<br>(203 - 763)       | 512<br>(256 - 793)       |
| Cardiomyopathy and myocarditis       | 1,048<br>(722 - 1,543)      | 145<br>(58 - 326)     | 47<br>(27 - 76)        | 194<br>(126 - 318)       | 382<br>(234 - 562)       | 280<br>(149 - 480)       |
| Atrial fibrillation and flutter      | 1<br>(0 - 1)                | --                    | --                     | 0<br>(0 - 0)             | 0<br>(0 - 0)             | 0<br>(0 - 1)             |
| Aortic aneurysm                      | 187<br>(92 - 415)           | --                    | --                     | 22<br>(10 - 52)          | 92<br>(45 - 196)         | 73<br>(33 - 179)         |
| Peripheral vascular disease          | 4<br>(1 - 8)                | --                    | --                     | 0<br>(0 - 0)             | 2<br>(1 - 3)             | 2<br>(1 - 5)             |
| Endocarditis                         | 445<br>(316 - 641)          | 83<br>(39 - 146)      | 16<br>(10 - 24)        | 88<br>(59 - 130)         | 144<br>(89 - 232)        | 114<br>(73 - 194)        |

Web Table 31- Niger deaths with 95% UI by age, sex, and cause in 2013

| Cause                                               | Both Sexes, All Ages     | Both Sexes, 0-4 Years | Both Sexes, 5-14 Years | Both Sexes, 15-49 Years | Both Sexes, 50-69 Years | Both Sexes, 70-80 Years |
|-----------------------------------------------------|--------------------------|-----------------------|------------------------|-------------------------|-------------------------|-------------------------|
| Other cardiovascular and circulatory diseases       | 1,828<br>(1,328 - 3,384) | 214<br>(111 - 414)    | 62<br>(38 - 99)        | 275<br>(192 - 497)      | 815<br>(558 - 1,505)    | 462<br>(294 - 995)      |
| Chronic respiratory diseases                        | 2,818<br>(2,236 - 4,665) | 282<br>(145 - 618)    | 65<br>(44 - 111)       | 306<br>(236 - 492)      | 1,088<br>(823 - 1,777)  | 1,077<br>(842 - 1,720)  |
| Chronic obstructive pulmonary disease               | 1,648<br>(1,276 - 2,734) | 109<br>(57 - 221)     | 26<br>(17 - 40)        | 98<br>(71 - 148)        | 656<br>(482 - 1,085)    | 760<br>(570 - 1,264)    |
| Pneumoconiosis                                      | 165<br>(95 - 329)        | 4<br>(1 - 10)         | 3<br>(1 - 6)           | 30<br>(17 - 54)         | 96<br>(53 - 192)        | 33<br>(14 - 75)         |
| Silicosis                                           | 31<br>(13 - 95)          | 1<br>(0 - 4)          | 1<br>(0 - 2)           | 6<br>(3 - 17)           | 9<br>(3 - 31)           | 13<br>(4 - 41)          |
| Asbestosis                                          | 12<br>(6 - 29)           | 1<br>(0 - 2)          | 1<br>(0 - 1)           | 2<br>(1 - 6)            | 7<br>(3 - 18)           | 1<br>(0 - 3)            |
| Coal workers pneumoconiosis                         | 56<br>(27 - 111)         | 1<br>(0 - 2)          | 1<br>(0 - 1)           | 3<br>(1 - 5)            | 47<br>(23 - 93)         | 5<br>(1 - 10)           |
| Other pneumoconiosis                                | 67<br>(37 - 107)         | 1<br>(0 - 3)          | 1<br>(0 - 1)           | 18<br>(10 - 30)         | 33<br>(15 - 57)         | 14<br>(7 - 25)          |
| Asthma                                              | 629<br>(424 - 1,205)     | 116<br>(49 - 297)     | 21<br>(12 - 46)        | 112<br>(78 - 210)       | 221<br>(140 - 412)      | 158<br>(99 - 290)       |
| Interstitial lung disease and pulmonary sarcoidosis | 152<br>(22 - 269)        | 1<br>(0 - 3)          | 1<br>(0 - 1)           | 7<br>(2 - 12)           | 64<br>(8 - 124)         | 79<br>(9 - 150)         |
| Other chronic respiratory diseases                  | 224<br>(139 - 393)       | 53<br>(24 - 119)      | 14<br>(8 - 25)         | 59<br>(40 - 96)         | 51<br>(26 - 96)         | 47<br>(27 - 88)         |
| Cirrhosis                                           | 2,026<br>(1,660 - 2,450) | 120<br>(53 - 233)     | 47<br>(33 - 64)        | 535<br>(411 - 698)      | 987<br>(780 - 1,241)    | 337<br>(264 - 425)      |
| Cirrhosis due to hepatitis B                        | 571<br>(332 - 910)       | 7<br>(2 - 16)         | 8<br>(3 - 14)          | 156<br>(80 - 275)       | 300<br>(170 - 484)      | 101<br>(57 - 153)       |
| Cirrhosis due to hepatitis C                        | 504<br>(290 - 795)       | 8<br>(2 - 18)         | 9<br>(4 - 18)          | 132<br>(83 - 214)       | 255<br>(115 - 438)      | 100<br>(51 - 155)       |
| Cirrhosis due to alcohol use                        | 593<br>(381 - 853)       | --                    | --                     | 146<br>(89 - 225)       | 334<br>(204 - 492)      | 113<br>(67 - 173)       |
| Cirrhosis due to other causes                       | 358<br>(258 - 521)       | 106<br>(47 - 206)     | 30<br>(20 - 43)        | 101<br>(62 - 153)       | 98<br>(54 - 160)        | 23<br>(13 - 38)         |
| Digestive diseases                                  | 2,955<br>(2,375 - 3,593) | 399<br>(197 - 798)    | 191<br>(136 - 269)     | 689<br>(515 - 889)      | 1,008<br>(771 - 1,291)  | 669<br>(524 - 833)      |
| Peptic ulcer disease                                | 749<br>(540 - 1,002)     | 56<br>(19 - 146)      | 30<br>(16 - 51)        | 173<br>(114 - 254)      | 296<br>(201 - 428)      | 194<br>(133 - 273)      |
| Gastritis and duodenitis                            | 134<br>(71 - 282)        | 26<br>(8 - 67)        | 12<br>(6 - 24)         | 27<br>(14 - 60)         | 38<br>(17 - 97)         | 31<br>(12 - 78)         |
| Appendicitis                                        | 272<br>(183 - 368)       | 70<br>(26 - 165)      | 40<br>(21 - 68)        | 60<br>(37 - 87)         | 61<br>(29 - 100)        | 42<br>(14 - 78)         |
| Paralytic ileus and intestinal obstruction          | 827<br>(469 - 1,141)     | 64<br>(23 - 136)      | 47<br>(25 - 76)        | 184<br>(85 - 280)       | 320<br>(161 - 476)      | 212<br>(129 - 305)      |
| Inguinal, femoral, and abdominal hernia             | 92<br>(54 - 161)         | 6<br>(2 - 15)         | 3<br>(2 - 8)           | 20<br>(11 - 39)         | 36<br>(19 - 64)         | 27<br>(14 - 44)         |
| Inflammatory bowel disease                          | 177<br>(77 - 271)        | 72<br>(25 - 165)      | 10<br>(4 - 16)         | 33<br>(9 - 63)          | 38<br>(8 - 69)          | 25<br>(5 - 41)          |
| Vascular intestinal disorders                       | 12<br>(5 - 25)           | 2<br>(0 - 7)          | 1<br>(0 - 2)           | 2<br>(1 - 5)            | 3<br>(1 - 7)            | 3<br>(1 - 7)            |
| Gallbladder and biliary diseases                    | 175<br>(117 - 232)       | 14<br>(6 - 28)        | 13<br>(5 - 21)         | 35<br>(20 - 52)         | 59<br>(38 - 87)         | 53<br>(32 - 78)         |
| Pancreatitis                                        | 148<br>(70 - 222)        | 5<br>(2 - 11)         | 4<br>(2 - 7)           | 64<br>(27 - 109)        | 52<br>(25 - 83)         | 24<br>(10 - 41)         |
| Other digestive diseases                            | 369<br>(257 - 580)       | 84<br>(32 - 204)      | 30<br>(18 - 47)        | 90<br>(57 - 139)        | 106<br>(67 - 174)       | 58<br>(35 - 89)         |
| Neurological disorders                              | 1,081<br>(900 - 1,306)   | 206<br>(112 - 363)    | 87<br>(48 - 138)       | 211<br>(144 - 340)      | 129<br>(104 - 162)      | 448<br>(374 - 539)      |
| Alzheimer disease and other dementias               | 470<br>(391 - 562)       | --                    | --                     | 0<br>(0 - 1)            | 63<br>(49 - 79)         | 407<br>(335 - 496)      |
| Parkinson disease                                   | 5<br>(3 - 9)             | --                    | --                     | 1<br>(0 - 1)            | 1<br>(0 - 2)            | 3<br>(2 - 6)            |
| Epilepsy                                            | 474<br>(323 - 701)       | 175<br>(89 - 325)     | 74<br>(35 - 125)       | 172<br>(107 - 295)      | 30<br>(19 - 55)         | 23<br>(13 - 38)         |
| Multiple sclerosis                                  | 1<br>(1 - 4)             | --                    | --                     | 1<br>(0 - 2)            | 0<br>(0 - 2)            | 0<br>(0 - 1)            |
| Other neurological disorders                        | 131<br>(103 - 186)       | 31<br>(18 - 85)       | 13<br>(9 - 21)         | 37<br>(28 - 48)         | 35<br>(26 - 46)         | 15<br>(11 - 20)         |
| Mental and substance use disorders                  | 453<br>(249 - 665)       | 24<br>(4 - 61)        | 0<br>(0 - 0)           | 293<br>(148 - 474)      | 110<br>(58 - 184)       | 26<br>(14 - 46)         |
| Schizophrenia                                       | 2<br>(1 - 4)             | --                    | --                     | 1<br>(0 - 2)            | 1<br>(0 - 1)            | 0<br>(0 - 1)            |
| Alcohol use disorders                               | 176<br>(68 - 351)        | --                    | --                     | 83<br>(33 - 169)        | 77<br>(29 - 155)        | 16<br>(4 - 34)          |
| Drug use disorders                                  | 275<br>(142 - 436)       | 24<br>(4 - 61)        | --                     | 209<br>(97 - 362)       | 32<br>(21 - 49)         | 10<br>(7 - 14)          |
| Opioid use disorders                                | 29<br>(15 - 47)          | 3<br>(0 - 7)          | --                     | 22<br>(10 - 39)         | 3<br>(2 - 5)            | 1<br>(1 - 2)            |
| Cocaine use disorders                               | 1<br>(1 - 2)             | 0<br>(0 - 0)          | --                     | 1<br>(0 - 1)            | 0<br>(0 - 0)            | 0<br>(0 - 0)            |
| Amphetamine use disorders                           | 1<br>(0 - 1)             | 0<br>(0 - 0)          | --                     | 1<br>(0 - 1)            | 0<br>(0 - 0)            | 0<br>(0 - 0)            |

Web Table 31- Niger deaths with 95% UI by age, sex, and cause in 2013

| Cause                                               | Both Sexes, All Ages     | Both Sexes, 0-4 Years    | Both Sexes, 5-14 Years | Both Sexes, 15-49 Years | Both Sexes, 50-69 Years  | Both Sexes, 70-80 Years |
|-----------------------------------------------------|--------------------------|--------------------------|------------------------|-------------------------|--------------------------|-------------------------|
| Other drug use disorders                            | 244<br>(126 - 387)       | 21<br>(4 - 54)           | --                     | 185<br>(86 - 322)       | 29<br>(19 - 45)          | 9<br>(6 - 13)           |
| Eating disorders                                    | 0<br>(0 - 0)             | --                       | 0<br>(0 - 0)           | 0<br>(0 - 0)            | --                       | --                      |
| Anorexia nervosa                                    | 0<br>(0 - 0)             | --                       | 0<br>(0 - 0)           | 0<br>(0 - 0)            | --                       | --                      |
| Diabetes, urogenital, blood, and endocrine diseases | 6,299<br>(4,641 - 8,804) | 1,920<br>(882 - 3,997)   | 586<br>(300 - 1,068)   | 1,072<br>(809 - 1,580)  | 1,607<br>(1,329 - 1,892) | 1,114<br>(907 - 1,304)  |
| Diabetes mellitus                                   | 1,665<br>(1,348 - 1,973) | 33<br>(21 - 50)          | 16<br>(10 - 24)        | 198<br>(152 - 249)      | 838<br>(666 - 1,029)     | 581<br>(453 - 726)      |
| Acute glomerulonephritis                            | 35<br>(19 - 56)          | 7<br>(3 - 20)            | 5<br>(2 - 10)          | 10<br>(5 - 19)          | 10<br>(5 - 19)           | 2<br>(1 - 6)            |
| Chronic kidney disease                              | 940<br>(639 - 1,259)     | 149<br>(85 - 235)        | 70<br>(34 - 103)       | 259<br>(138 - 395)      | 267<br>(193 - 370)       | 196<br>(143 - 270)      |
| Chronic kidney disease due to diabetes mellitus     | 7<br>(2 - 15)            | 0<br>(0 - 1)             | 0<br>(0 - 1)           | 1<br>(0 - 1)            | 6<br>(2 - 12)            | 0<br>(0 - 1)            |
| Chronic kidney disease due to hypertension          | 294<br>(191 - 548)       | 14<br>(3 - 37)           | 5<br>(2 - 14)          | 62<br>(32 - 134)        | 117<br>(74 - 203)        | 95<br>(63 - 162)        |
| Chronic kidney disease due to glomerulonephritis    | 467<br>(315 - 636)       | 104<br>(60 - 171)        | 49<br>(27 - 71)        | 150<br>(86 - 220)       | 99<br>(56 - 150)         | 63<br>(33 - 99)         |
| Chronic kidney disease due to other causes          | 172<br>(62 - 310)        | 30<br>(9 - 67)           | 14<br>(3 - 28)         | 46<br>(13 - 89)         | 45<br>(14 - 92)          | 37<br>(15 - 76)         |
| Urinary diseases and male infertility               | 772<br>(502 - 1,015)     | 137<br>(70 - 244)        | 26<br>(16 - 42)        | 160<br>(86 - 239)       | 248<br>(153 - 340)       | 200<br>(134 - 275)      |
| Interstitial nephritis and urinary tract infections | 685<br>(435 - 904)       | 121<br>(57 - 221)        | 21<br>(11 - 35)        | 140<br>(74 - 211)       | 221<br>(136 - 304)       | 182<br>(124 - 251)      |
| Urolithiasis                                        | 10<br>(4 - 26)           | --                       | 2<br>(1 - 4)           | 3<br>(1 - 8)            | 4<br>(1 - 11)            | 1<br>(0 - 6)            |
| Other urinary diseases                              | 77<br>(44 - 116)         | 16<br>(5 - 35)           | 3<br>(1 - 7)           | 17<br>(7 - 31)          | 24<br>(9 - 41)           | 17<br>(6 - 32)          |
| Gynecological diseases                              | 16<br>(7 - 26)           | --                       | --                     | 8<br>(4 - 16)           | 5<br>(2 - 10)            | 2<br>(1 - 4)            |
| Uterine fibroids                                    | 3<br>(2 - 6)             | --                       | --                     | 1<br>(1 - 3)            | 1<br>(1 - 3)             | 1<br>(0 - 1)            |
| Polycystic ovarian syndrome                         | 1<br>(0 - 1)             | --                       | --                     | 1<br>(0 - 1)            | 0<br>(0 - 0)             | --                      |
| Endometriosis                                       | 1<br>(1 - 3)             | --                       | --                     | 1<br>(1 - 3)            | 0<br>(0 - 0)             | --                      |
| Genital prolapse                                    | 3<br>(1 - 4)             | --                       | --                     | 1<br>(0 - 2)            | 1<br>(0 - 2)             | 1<br>(0 - 1)            |
| Other gynecological diseases                        | 8<br>(4 - 13)            | --                       | --                     | 4<br>(2 - 8)            | 3<br>(1 - 5)             | 1<br>(0 - 2)            |
| Hemoglobinopathies and hemolytic anemias            | 2,253<br>(722 - 4,915)   | 1,395<br>(421 - 3,412)   | 428<br>(141 - 932)     | 308<br>(97 - 899)       | 89<br>(31 - 267)         | 33<br>(13 - 85)         |
| Thalassemias                                        | 50<br>(16 - 108)         | 39<br>(12 - 90)          | 7<br>(3 - 15)          | 4<br>(1 - 11)           | 0<br>(0 - 0)             | 0<br>(0 - 0)            |
| Sickle cell disorders                               | 2,144<br>(684 - 4,713)   | 1,332<br>(400 - 3,278)   | 417<br>(138 - 909)     | 299<br>(94 - 873)       | 84<br>(29 - 252)         | 12<br>(5 - 30)          |
| G6PD deficiency                                     | 13<br>(4 - 29)           | 8<br>(2 - 20)            | 2<br>(1 - 4)           | 2<br>(0 - 5)            | 1<br>(0 - 2)             | 1<br>(0 - 2)            |
| Other hemoglobinopathies and hemolytic anemias      | 46<br>(17 - 107)         | 16<br>(5 - 37)           | 2<br>(1 - 4)           | 3<br>(1 - 10)           | 5<br>(2 - 13)            | 20<br>(8 - 52)          |
| Endocrine, metabolic, blood, and immune disorders   | 619<br>(444 - 840)       | 199<br>(111 - 401)       | 42<br>(24 - 75)        | 129<br>(87 - 173)       | 150<br>(92 - 198)        | 100<br>(53 - 139)       |
| Musculoskeletal disorders                           | 125<br>(74 - 181)        | --                       | 21<br>(10 - 33)        | 39<br>(21 - 60)         | 41<br>(23 - 61)          | 23<br>(14 - 37)         |
| Rheumatoid arthritis                                | 19<br>(9 - 31)           | --                       | 3<br>(1 - 5)           | 4<br>(1 - 6)            | 6<br>(3 - 11)            | 6<br>(3 - 12)           |
| Other musculoskeletal disorders                     | 106<br>(63 - 155)        | --                       | 18<br>(9 - 30)         | 35<br>(19 - 55)         | 35<br>(20 - 51)          | 17<br>(10 - 26)         |
| Other non-communicable diseases                     | 4,412<br>(2,399 - 8,023) | 3,754<br>(1,776 - 7,352) | 219<br>(117 - 385)     | 182<br>(128 - 246)      | 133<br>(86 - 183)        | 124<br>(76 - 176)       |
| Congenital anomalies                                | 3,912<br>(1,867 - 7,575) | 3,579<br>(1,615 - 7,157) | 199<br>(100 - 370)     | 95<br>(66 - 136)        | 24<br>(16 - 35)          | 14<br>(10 - 20)         |
| Neural tube defects                                 | 1,096<br>(326 - 3,111)   | 1,033<br>(300 - 2,957)   | 43<br>(13 - 113)       | 18<br>(5 - 45)          | 2<br>(0 - 7)             | 1<br>(0 - 3)            |
| Congenital heart anomalies                          | 1,414<br>(704 - 2,570)   | 1,272<br>(600 - 2,370)   | 84<br>(41 - 159)       | 40<br>(27 - 56)         | 12<br>(8 - 17)           | 6<br>(4 - 9)            |
| Cleft lip and cleft palate                          | 21<br>(4 - 65)           | 21<br>(4 - 65)           | --                     | --                      | --                       | --                      |
| Down syndrome                                       | 506<br>(158 - 1,199)     | 452<br>(119 - 1,141)     | 34<br>(14 - 68)        | 16<br>(9 - 25)          | 4<br>(2 - 7)             | 1<br>(0 - 1)            |
| Chromosomal unbalanced rearrangements               | 138<br>(39 - 383)        | 127<br>(33 - 366)        | 6<br>(1 - 15)          | 4<br>(2 - 6)            | 1<br>(0 - 1)             | 0<br>(0 - 1)            |
| Other congenital anomalies                          | 737<br>(180 - 2,825)     | 674<br>(143 - 2,671)     | 33<br>(10 - 118)       | 18<br>(10 - 34)         | 6<br>(3 - 10)            | 6<br>(3 - 9)            |
| Skin and subcutaneous diseases                      | 463<br>(316 - 597)       | 139<br>(74 - 223)        | 19<br>(12 - 29)        | 87<br>(47 - 129)        | 108<br>(66 - 155)        | 110<br>(65 - 160)       |
| Cellulitis                                          | 277<br>(146 - 418)       | 74<br>(30 - 145)         | 14<br>(8 - 23)         | 50<br>(22 - 83)         | 67<br>(34 - 105)         | 72<br>(39 - 112)        |

Web Table 31- Niger deaths with 95% UI by age, sex, and cause in 2013

| Cause                                           | Both Sexes, All Ages      | Both Sexes, 0-4 Years    | Both Sexes, 5-14 Years | Both Sexes, 15-49 Years  | Both Sexes, 50-69 Years | Both Sexes, 70-80 Years |
|-------------------------------------------------|---------------------------|--------------------------|------------------------|--------------------------|-------------------------|-------------------------|
| Pyoderma                                        | 175<br>(85 - 296)         | 61<br>(19 - 130)         | 5<br>(2 - 11)          | 33<br>(15 - 64)          | 40<br>(18 - 74)         | 35<br>(14 - 67)         |
| Decubitus ulcer                                 | 5<br>(2 - 10)             | 0<br>(0 - 1)             | 0<br>(0 - 1)           | 1<br>(0 - 3)             | 1<br>(0 - 2)            | 3<br>(1 - 6)            |
| Other skin and subcutaneous diseases            | 6<br>(2 - 14)             | 3<br>(0 - 10)            | 0<br>(0 - 1)           | 2<br>(1 - 4)             | 1<br>(0 - 1)            | 1<br>(0 - 2)            |
| Sudden infant death syndrome                    | 37<br>(10 - 100)          | 37<br>(10 - 100)         | --                     | --                       | --                      | --                      |
| Injuries                                        | 8,491<br>(6,986 - 10,188) | 2,508<br>(1,579 - 3,731) | 1,234<br>(908 - 1,607) | 2,953<br>(2,404 - 3,580) | 1,181<br>(946 - 1,431)  | 614<br>(435 - 769)      |
| Transport injuries                              | 3,200<br>(2,600 - 3,843)  | 538<br>(278 - 970)       | 486<br>(339 - 655)     | 1,495<br>(1,148 - 1,871) | 505<br>(390 - 621)      | 176<br>(131 - 218)      |
| Road injuries                                   | 3,035<br>(2,485 - 3,641)  | 474<br>(240 - 866)       | 454<br>(316 - 615)     | 1,462<br>(1,124 - 1,835) | 481<br>(378 - 591)      | 163<br>(125 - 202)      |
| Pedestrian road injuries                        | 777<br>(579 - 1,007)      | 121<br>(56 - 237)        | 124<br>(79 - 185)      | 359<br>(245 - 504)       | 127<br>(89 - 167)       | 47<br>(33 - 64)         |
| Cyclist road injuries                           | 189<br>(138 - 253)        | 50<br>(21 - 98)          | 45<br>(27 - 68)        | 51<br>(36 - 73)          | 34<br>(20 - 49)         | 9<br>(5 - 15)           |
| Motorcyclist road injuries                      | 374<br>(259 - 529)        | 49<br>(22 - 91)          | 35<br>(19 - 56)        | 231<br>(151 - 342)       | 48<br>(32 - 69)         | 11<br>(7 - 17)          |
| Motor vehicle road injuries                     | 1,556<br>(1,238 - 1,919)  | 213<br>(102 - 389)       | 217<br>(150 - 303)     | 788<br>(576 - 1,014)     | 251<br>(188 - 319)      | 87<br>(63 - 110)        |
| Other road injuries                             | 138<br>(74 - 231)         | 42<br>(15 - 96)          | 34<br>(16 - 63)        | 32<br>(16 - 73)          | 20<br>(10 - 36)         | 9<br>(4 - 16)           |
| Other transport injuries                        | 166<br>(96 - 237)         | 64<br>(28 - 122)         | 32<br>(16 - 52)        | 33<br>(23 - 53)          | 24<br>(11 - 35)         | 13<br>(3 - 21)          |
| Unintentional injuries                          | 4,482<br>(3,539 - 5,809)  | 1,921<br>(1,163 - 2,919) | 707<br>(502 - 974)     | 952<br>(716 - 1,290)     | 521<br>(405 - 688)      | 381<br>(247 - 514)      |
| Falls                                           | 794<br>(561 - 1,092)      | 190<br>(91 - 356)        | 81<br>(48 - 132)       | 198<br>(119 - 312)       | 152<br>(93 - 240)       | 173<br>(93 - 270)       |
| Drowning                                        | 1,175<br>(656 - 1,961)    | 610<br>(208 - 1,197)     | 269<br>(137 - 442)     | 217<br>(128 - 336)       | 60<br>(42 - 90)         | 19<br>(13 - 30)         |
| Fire, heat, and hot substances                  | 606<br>(400 - 908)        | 332<br>(154 - 617)       | 75<br>(44 - 121)       | 97<br>(66 - 168)         | 61<br>(37 - 101)        | 42<br>(24 - 70)         |
| Poisonings                                      | 262<br>(162 - 460)        | 128<br>(55 - 271)        | 30<br>(17 - 51)        | 65<br>(41 - 127)         | 31<br>(20 - 48)         | 8<br>(5 - 12)           |
| Exposure to mechanical forces                   | 673<br>(493 - 915)        | 240<br>(136 - 396)       | 113<br>(69 - 178)      | 208<br>(140 - 315)       | 85<br>(55 - 128)        | 26<br>(13 - 36)         |
| Unintentional firearm injuries                  | 280<br>(190 - 440)        | 78<br>(38 - 153)         | 35<br>(18 - 65)        | 124<br>(74 - 200)        | 34<br>(21 - 55)         | 10<br>(6 - 15)          |
| Unintentional suffocation                       | 55<br>(29 - 110)          | 34<br>(12 - 88)          | 9<br>(4 - 16)          | 8<br>(4 - 14)            | 4<br>(2 - 6)            | 1<br>(1 - 2)            |
| Other exposure to mechanical forces             | 337<br>(184 - 532)        | 128<br>(53 - 244)        | 70<br>(34 - 124)       | 77<br>(47 - 150)         | 48<br>(19 - 83)         | 15<br>(3 - 24)          |
| Adverse effects of medical treatment            | 283<br>(124 - 515)        | 100<br>(31 - 210)        | 21<br>(8 - 39)         | 50<br>(23 - 96)          | 60<br>(20 - 122)        | 52<br>(14 - 109)        |
| Animal contact                                  | 145<br>(79 - 211)         | 46<br>(20 - 85)          | 33<br>(16 - 56)        | 29<br>(13 - 52)          | 22<br>(9 - 37)          | 15<br>(4 - 25)          |
| Venomous animal contact                         | 81<br>(41 - 131)          | 29<br>(11 - 64)          | 18<br>(8 - 35)         | 16<br>(6 - 33)           | 10<br>(4 - 21)          | 7<br>(1 - 13)           |
| Non-venomous animal contact                     | 64<br>(29 - 93)           | 17<br>(6 - 35)           | 15<br>(6 - 26)         | 12<br>(5 - 22)           | 12<br>(4 - 20)          | 8<br>(2 - 13)           |
| Foreign body                                    | 276<br>(175 - 492)        | 188<br>(101 - 378)       | 26<br>(15 - 41)        | 20<br>(13 - 33)          | 18<br>(10 - 25)         | 23<br>(12 - 36)         |
| Pulmonary aspiration and foreign body in airway | 264<br>(164 - 480)        | 184<br>(99 - 373)        | 24<br>(14 - 39)        | 19<br>(11 - 32)          | 15<br>(8 - 22)          | 22<br>(11 - 34)         |
| Foreign body in other body part                 | 12<br>(8 - 19)            | 4<br>(2 - 9)             | 2<br>(1 - 3)           | 2<br>(1 - 3)             | 3<br>(1 - 4)            | 1<br>(1 - 2)            |
| Other unintentional injuries                    | 268<br>(201 - 350)        | 88<br>(48 - 149)         | 58<br>(35 - 82)        | 69<br>(50 - 92)          | 31<br>(21 - 42)         | 22<br>(13 - 30)         |
| Self-harm and interpersonal violence            | 789<br>(593 - 1,016)      | 48<br>(24 - 93)          | 40<br>(24 - 62)        | 496<br>(362 - 692)       | 150<br>(99 - 212)       | 56<br>(26 - 83)         |
| Self-harm                                       | 485<br>(336 - 683)        | --                       | 17<br>(7 - 38)         | 283<br>(191 - 455)       | 131<br>(78 - 192)       | 54<br>(23 - 81)         |
| Interpersonal violence                          | 305<br>(198 - 438)        | 48<br>(24 - 93)          | 23<br>(13 - 37)        | 213<br>(130 - 327)       | 19<br>(12 - 30)         | 2<br>(1 - 4)            |
| Assault by firearm                              | 143<br>(70 - 222)         | 12<br>(5 - 24)           | 6<br>(3 - 11)          | 117<br>(53 - 186)        | 8<br>(4 - 15)           | 1<br>(0 - 1)            |
| Assault by sharp object                         | 64<br>(35 - 123)          | 8<br>(2 - 19)            | 4<br>(2 - 8)           | 46<br>(22 - 101)         | 6<br>(3 - 10)           | 1<br>(0 - 1)            |
| Assault by other means                          | 97<br>(61 - 160)          | 28<br>(13 - 60)          | 13<br>(7 - 22)         | 50<br>(27 - 93)          | 5<br>(3 - 9)            | 1<br>(1 - 2)            |
| Forces of nature, war, and legal intervention   | 19<br>(11 - 38)           | 1<br>(0 - 0)             | 2<br>(1 - 3)           | 10<br>(6 - 19)           | 5<br>(3 - 11)           | 1<br>(1 - 2)            |
| Exposure to forces of nature                    | 19<br>(11 - 38)           | 1<br>(0 - 0)             | 2<br>(1 - 3)           | 10<br>(6 - 19)           | 5<br>(3 - 11)           | 1<br>(1 - 2)            |

Web Table 31- Niger deaths with 95% UI by age, sex, and cause in 2013

| Cause                                                             | Males, All Ages             | Males, 0-4 Years            | Males, 5-14 Years        | Males, 15-49 Years          | Males, 50-69 Years          | Males, 70-80 Years       |
|-------------------------------------------------------------------|-----------------------------|-----------------------------|--------------------------|-----------------------------|-----------------------------|--------------------------|
| All causes                                                        | 90,591<br>(82,446 - 98,194) | 51,683<br>(45,467 - 58,562) | 4,526<br>(3,991 - 5,104) | 12,273<br>(10,712 - 14,154) | 13,795<br>(11,819 - 15,742) | 8,315<br>(7,407 - 8,900) |
| Communicable, maternal, neonatal, and nutritional diseases        | 62,597<br>(55,279 - 69,874) | 46,018<br>(39,862 - 52,698) | 2,878<br>(2,376 - 3,389) | 5,783<br>(4,987 - 6,663)    | 4,937<br>(4,058 - 5,879)    | 2,980<br>(2,433 - 3,517) |
| HIV/AIDS and tuberculosis                                         | 5,281<br>(4,236 - 6,832)    | 371<br>(240 - 620)          | 225<br>(165 - 309)       | 2,550<br>(1,998 - 3,303)    | 1,633<br>(1,207 - 2,131)    | 502<br>(349 - 702)       |
| Tuberculosis                                                      | 3,151<br>(2,391 - 4,336)    | 277<br>(149 - 523)          | 105<br>(61 - 183)        | 1,095<br>(786 - 1,543)      | 1,204<br>(850 - 1,640)      | 469<br>(322 - 668)       |
| HIV/AIDS                                                          | 2,131<br>(1,530 - 2,889)    | 94<br>(61 - 138)            | 120<br>(88 - 152)        | 1,455<br>(998 - 2,073)      | 429<br>(267 - 650)          | 33<br>(18 - 53)          |
| HIV/AIDS resulting in mycobacterial infection                     | 149<br>(101 - 213)          | 6<br>(4 - 9)                | 7<br>(5 - 10)            | 101<br>(67 - 149)           | 32<br>(19 - 50)             | 3<br>(1 - 4)             |
| HIV/AIDS resulting in other diseases                              | 1,981<br>(1,420 - 2,694)    | 87<br>(57 - 128)            | 113<br>(83 - 142)        | 1,354<br>(927 - 1,922)      | 398<br>(247 - 602)          | 30<br>(16 - 49)          |
| Diarrhea, lower respiratory, and other common infectious diseases | 29,050<br>(22,507 - 37,310) | 20,803<br>(14,621 - 28,564) | 1,658<br>(1,121 - 2,215) | 2,228<br>(1,706 - 2,873)    | 2,417<br>(1,765 - 3,133)    | 1,943<br>(1,451 - 2,455) |
| Diarrheal diseases                                                | 12,606<br>(7,679 - 18,762)  | 9,209<br>(4,550 - 15,159)   | 635<br>(312 - 1,101)     | 980<br>(665 - 1,414)        | 1,043<br>(624 - 1,547)      | 739<br>(472 - 1,107)     |
| Intestinal infectious diseases                                    | 473<br>(247 - 834)          | 165<br>(75 - 332)           | 152<br>(74 - 271)        | 131<br>(60 - 249)           | 20<br>(10 - 39)             | 4<br>(2 - 9)             |
| Typhoid fever                                                     | 284<br>(129 - 523)          | 92<br>(34 - 201)            | 94<br>(40 - 186)         | 82<br>(34 - 160)            | 13<br>(5 - 28)              | 3<br>(1 - 5)             |
| Paratyphoid fever                                                 | 150<br>(63 - 296)           | 50<br>(16 - 117)            | 53<br>(19 - 108)         | 42<br>(15 - 93)             | 5<br>(2 - 10)               | 1<br>(0 - 2)             |
| Other intestinal infectious diseases                              | 39<br>(23 - 61)             | 24<br>(11 - 43)             | 5<br>(1 - 12)            | 7<br>(2 - 16)               | 2<br>(0 - 8)                | 1<br>(0 - 4)             |
| Lower respiratory infections                                      | 11,110<br>(8,015 - 15,490)  | 8,034<br>(5,137 - 12,207)   | 383<br>(226 - 619)       | 533<br>(359 - 756)          | 1,049<br>(676 - 1,476)      | 1,112<br>(729 - 1,516)   |
| Upper respiratory infections                                      | 17<br>(5 - 48)              | 9<br>(0 - 41)               | 1<br>(0 - 5)             | 3<br>(1 - 7)                | 2<br>(0 - 7)                | 1<br>(0 - 4)             |
| Otitis media                                                      | 6<br>(4 - 10)               | 3<br>(1 - 6)                | 1<br>(0 - 1)             | 1<br>(1 - 1)                | 1<br>(1 - 1)                | 1<br>(1 - 1)             |
| Meningitis                                                        | 3,080<br>(1,995 - 4,929)    | 1,989<br>(965 - 3,890)      | 362<br>(201 - 588)       | 429<br>(285 - 608)          | 229<br>(141 - 352)          | 72<br>(43 - 114)         |
| Pneumococcal meningitis                                           | 498<br>(281 - 839)          | 282<br>(112 - 603)          | 68<br>(27 - 138)         | 91<br>(42 - 153)            | 44<br>(18 - 78)             | 13<br>(5 - 25)           |
| H influenzae type B meningitis                                    | 647<br>(352 - 1,133)        | 487<br>(211 - 958)          | 74<br>(32 - 146)         | 57<br>(28 - 94)             | 22<br>(9 - 48)              | 6<br>(3 - 12)            |
| Meningococcal meningitis                                          | 1,676<br>(1,067 - 2,764)    | 1,092<br>(515 - 2,135)      | 194<br>(99 - 328)        | 225<br>(144 - 334)          | 124<br>(70 - 199)           | 41<br>(21 - 68)          |
| Other meningitis                                                  | 259<br>(150 - 453)          | 127<br>(45 - 310)           | 26<br>(9 - 52)           | 56<br>(27 - 100)            | 39<br>(16 - 76)             | 12<br>(4 - 23)           |
| Encephalitis                                                      | 120<br>(77 - 186)           | 63<br>(28 - 120)            | 17<br>(10 - 33)          | 24<br>(15 - 36)             | 12<br>(6 - 18)              | 5<br>(2 - 8)             |
| Diphtheria                                                        | 16<br>(0 - 110)             | 14<br>(0 - 109)             | 2<br>(0 - 20)            | 0<br>(0 - 2)                | 0<br>(0 - 1)                | --                       |
| Whooping cough                                                    | 293<br>(1 - 1,417)          | 275<br>(1 - 1,322)          | 16<br>(0 - 79)           | 2<br>(0 - 12)               | 0<br>(0 - 2)                | --                       |
| Tetanus                                                           | 1,008<br>(546 - 2,215)      | 772<br>(294 - 1,988)        | 52<br>(18 - 121)         | 118<br>(46 - 215)           | 58<br>(21 - 120)            | 7<br>(3 - 20)            |
| Measles                                                           | 302<br>(101 - 703)          | 263<br>(83 - 616)           | 36<br>(13 - 79)          | 4<br>(1 - 8)                | 0<br>(0 - 0)                | --                       |
| Varicella and herpes zoster                                       | 17<br>(5 - 42)              | 8<br>(0 - 32)               | 2<br>(0 - 8)             | 3<br>(1 - 10)               | 2<br>(0 - 5)                | 2<br>(0 - 8)             |
| Neglected tropical diseases and malaria                           | 11,845<br>(4,924 - 20,726)  | 10,402<br>(3,810 - 18,890)  | 539<br>(242 - 1,027)     | 437<br>(212 - 972)          | 322<br>(130 - 713)          | 145<br>(49 - 344)        |
| Malaria                                                           | 11,564<br>(4,559 - 20,485)  | 10,291<br>(3,643 - 18,818)  | 463<br>(177 - 974)       | 380<br>(156 - 929)          | 293<br>(101 - 686)          | 137<br>(40 - 338)        |
| Leishmaniasis                                                     | 0<br>(0 - 1)                | 0<br>(0 - 0)                | 0<br>(0 - 0)             | 0<br>(0 - 0)                | 0<br>(0 - 0)                | 0<br>(0 - 0)             |
| Visceral leishmaniasis                                            | 0<br>(0 - 1)                | 0<br>(0 - 0)                | 0<br>(0 - 0)             | 0<br>(0 - 0)                | 0<br>(0 - 0)                | 0<br>(0 - 0)             |
| Schistosomiasis                                                   | 31<br>(22 - 42)             | 1<br>(0 - 3)                | 2<br>(1 - 4)             | 12<br>(7 - 17)              | 12<br>(7 - 19)              | 4<br>(2 - 6)             |
| Cysticercosis                                                     | 2<br>(1 - 7)                | 0<br>(0 - 1)                | 0<br>(0 - 1)             | 1<br>(0 - 4)                | 1<br>(0 - 1)                | 0<br>(0 - 0)             |
| Cystic echinococcosis                                             | 6<br>(4 - 7)                | 2<br>(1 - 3)                | 1<br>(1 - 2)             | 2<br>(1 - 2)                | 1<br>(1 - 1)                | 0<br>(0 - 0)             |
| Dengue                                                            | 6<br>(2 - 10)               | 3<br>(1 - 7)                | 1<br>(1 - 2)             | 1<br>(0 - 2)                | 0<br>(0 - 1)                | 0<br>(0 - 0)             |
| Yellow fever                                                      | 1<br>(0 - 1)                | 0<br>(0 - 0)                | 0<br>(0 - 0)             | 0<br>(0 - 1)                | 0<br>(0 - 0)                | 0<br>(0 - 0)             |
| Rabies                                                            | 156<br>(76 - 266)           | 48<br>(12 - 127)            | 62<br>(26 - 119)         | 34<br>(16 - 62)             | 11<br>(4 - 21)              | 1<br>(0 - 3)             |
| Intestinal nematode infections                                    | 55<br>(25 - 99)             | 47<br>(20 - 88)             | 6<br>(1 - 17)            | 1<br>(0 - 6)                | 1<br>(0 - 4)                | 0<br>(0 - 2)             |
| Ascariasis                                                        | 55<br>(25 - 99)             | 47<br>(20 - 88)             | 6<br>(1 - 17)            | 1<br>(0 - 6)                | 1<br>(0 - 4)                | 0<br>(0 - 2)             |
| Other neglected tropical diseases                                 | 25<br>(13 - 47)             | 10<br>(4 - 25)              | 3<br>(1 - 6)             | 6<br>(3 - 12)               | 4<br>(2 - 7)                | 2<br>(1 - 4)             |

Web Table 31- Niger deaths with 95% UI by age, sex, and cause in 2013

| Cause                                                            | Males, All Ages             | Males, 0-4 Years          | Males, 5-14 Years    | Males, 15-49 Years       | Males, 50-69 Years       | Males, 70-80 Years       |
|------------------------------------------------------------------|-----------------------------|---------------------------|----------------------|--------------------------|--------------------------|--------------------------|
| Maternal disorders                                               | --                          | --                        | --                   | --                       | --                       | --                       |
| Maternal hemorrhage                                              | --                          | --                        | --                   | --                       | --                       | --                       |
| Maternal sepsis and other maternal infections                    | --                          | --                        | --                   | --                       | --                       | --                       |
| Maternal hypertensive disorders                                  | --                          | --                        | --                   | --                       | --                       | --                       |
| Maternal obstructed labor                                        | --                          | --                        | --                   | --                       | --                       | --                       |
| Maternal abortive outcome                                        | --                          | --                        | --                   | --                       | --                       | --                       |
| Indirect maternal deaths                                         | --                          | --                        | --                   | --                       | --                       | --                       |
| Late maternal deaths                                             | --                          | --                        | --                   | --                       | --                       | --                       |
| Maternal deaths aggravated by HIV/AIDS                           | --                          | --                        | --                   | --                       | --                       | --                       |
| Other maternal disorders                                         | --                          | --                        | --                   | --                       | --                       | --                       |
| Neonatal disorders                                               | 9,195<br>(6,923 - 11,791)   | 9,195<br>(6,923 - 11,791) | --                   | --                       | --                       | --                       |
| Neonatal preterm birth complications                             | 3,138<br>(1,366 - 5,210)    | 3,138<br>(1,366 - 5,210)  | --                   | --                       | --                       | --                       |
| Neonatal encephalopathy due to birth asphyxia and trauma         | 2,356<br>(601 - 4,929)      | 2,356<br>(601 - 4,929)    | --                   | --                       | --                       | --                       |
| Neonatal sepsis and other neonatal infections                    | 2,284<br>(672 - 4,173)      | 2,284<br>(672 - 4,173)    | --                   | --                       | --                       | --                       |
| Hemolytic disease and other neonatal jaundice                    | 80<br>(19 - 233)            | 80<br>(19 - 233)          | --                   | --                       | --                       | --                       |
| Other neonatal disorders                                         | 1,336<br>(453 - 3,086)      | 1,336<br>(453 - 3,086)    | --                   | --                       | --                       | --                       |
| Nutritional deficiencies                                         | 5,698<br>(3,306 - 9,347)    | 4,169<br>(2,066 - 7,285)  | 327<br>(178 - 533)   | 428<br>(260 - 652)       | 444<br>(263 - 692)       | 331<br>(206 - 539)       |
| Protein-energy malnutrition                                      | 4,566<br>(2,385 - 7,852)    | 3,762<br>(1,770 - 6,797)  | 223<br>(105 - 395)   | 192<br>(83 - 371)        | 231<br>(92 - 422)        | 158<br>(63 - 312)        |
| Iodine deficiency                                                | 8<br>(1 - 36)               | 3<br>(0 - 30)             | 1<br>(0 - 10)        | 2<br>(0 - 6)             | 1<br>(0 - 6)             | 1<br>(0 - 4)             |
| Iron-deficiency anemia                                           | 1,111<br>(373 - 2,178)      | 402<br>(38 - 1,267)       | 102<br>(30 - 206)    | 228<br>(88 - 386)        | 209<br>(77 - 370)        | 170<br>(72 - 304)        |
| Other nutritional deficiencies                                   | 14<br>(4 - 29)              | 2<br>(0 - 7)              | 1<br>(0 - 3)         | 5<br>(1 - 13)            | 3<br>(1 - 8)             | 2<br>(1 - 5)             |
| Other communicable, maternal, neonatal, and nutritional diseases | 1,528<br>(998 - 2,332)      | 1,079<br>(624 - 1,753)    | 129<br>(77 - 208)    | 140<br>(85 - 244)        | 122<br>(68 - 239)        | 59<br>(30 - 119)         |
| Sexually transmitted diseases excluding HIV                      | 1,097<br>(633 - 1,800)      | 906<br>(490 - 1,560)      | 97<br>(53 - 162)     | 44<br>(22 - 111)         | 34<br>(13 - 84)          | 17<br>(6 - 44)           |
| Syphilis                                                         | 1,060<br>(597 - 1,758)      | 906<br>(490 - 1,560)      | 92<br>(49 - 158)     | 23<br>(12 - 59)          | 24<br>(10 - 61)          | 14<br>(5 - 37)           |
| Chlamydial infection                                             | --                          | --                        | --                   | --                       | --                       | --                       |
| Gonococcal infection                                             | 22<br>(12 - 51)             | --                        | 2<br>(1 - 5)         | 12<br>(6 - 28)           | 6<br>(2 - 15)            | 2<br>(1 - 5)             |
| Other sexually transmitted diseases                              | 16<br>(9 - 37)              | --                        | 2<br>(1 - 5)         | 10<br>(5 - 23)           | 3<br>(1 - 9)             | 1<br>(0 - 2)             |
| Hepatitis                                                        | 167<br>(94 - 267)           | 46<br>(16 - 94)           | 15<br>(7 - 26)       | 54<br>(28 - 101)         | 39<br>(20 - 71)          | 14<br>(7 - 25)           |
| Acute hepatitis A                                                | 18<br>(4 - 44)              | 13<br>(2 - 33)            | 4<br>(1 - 8)         | 2<br>(0 - 5)             | 0<br>(0 - 1)             | 0<br>(0 - 0)             |
| Acute hepatitis B                                                | 105<br>(58 - 170)           | 32<br>(10 - 69)           | 7<br>(3 - 14)        | 22<br>(11 - 41)          | 31<br>(16 - 54)          | 13<br>(7 - 22)           |
| Acute hepatitis C                                                | 4<br>(1 - 11)               | --                        | 1<br>(0 - 3)         | 2<br>(0 - 4)             | 1<br>(0 - 4)             | 0<br>(0 - 2)             |
| Acute hepatitis E                                                | 39<br>(14 - 88)             | 1<br>(0 - 2)              | 3<br>(1 - 7)         | 28<br>(10 - 61)          | 7<br>(1 - 20)            | 1<br>(0 - 3)             |
| Other infectious diseases                                        | 263<br>(115 - 563)          | 127<br>(37 - 307)         | 17<br>(4 - 42)       | 41<br>(15 - 115)         | 49<br>(16 - 138)         | 29<br>(8 - 80)           |
| Non-communicable diseases                                        | 22,244<br>(17,992 - 27,574) | 4,097<br>(2,076 - 7,969)  | 879<br>(563 - 1,386) | 4,163<br>(3,352 - 5,138) | 8,064<br>(6,597 - 9,479) | 5,041<br>(4,328 - 5,680) |
| Neoplasms                                                        | 3,127<br>(2,581 - 3,705)    | 123<br>(73 - 209)         | 97<br>(67 - 135)     | 885<br>(678 - 1,140)     | 1,409<br>(1,105 - 1,754) | 613<br>(501 - 752)       |
| Esophageal cancer                                                | 122<br>(75 - 201)           | --                        | --                   | 21<br>(14 - 32)          | 74<br>(43 - 125)         | 26<br>(14 - 47)          |
| Stomach cancer                                                   | 356<br>(272 - 448)          | --                        | --                   | 82<br>(58 - 114)         | 203<br>(146 - 265)       | 70<br>(52 - 92)          |
| Liver cancer                                                     | 1,294<br>(971 - 1,666)      | --                        | 7<br>(3 - 14)        | 486<br>(340 - 687)       | 615<br>(432 - 846)       | 186<br>(126 - 265)       |
| Liver cancer due to hepatitis B                                  | 553<br>(195 - 957)          | --                        | 4<br>(1 - 8)         | 259<br>(113 - 445)       | 233<br>(40 - 464)        | 57<br>(18 - 105)         |
| Liver cancer due to hepatitis C                                  | 428<br>(147 - 815)          | --                        | 0<br>(0 - 1)         | 111<br>(31 - 247)        | 239<br>(78 - 480)        | 77<br>(24 - 138)         |

Web Table 31- Niger deaths with 95% UI by age, sex, and cause in 2013

| Cause                                | Males, All Ages          | Males, 0-4 Years   | Males, 5-14 Years | Males, 15-49 Years   | Males, 50-69 Years       | Males, 70-80 Years       |
|--------------------------------------|--------------------------|--------------------|-------------------|----------------------|--------------------------|--------------------------|
| Liver cancer due to alcohol use      | 166<br>(87 - 278)        | --                 | --                | 40<br>(15 - 84)      | 87<br>(40 - 156)         | 39<br>(18 - 68)          |
| Liver cancer due to other causes     | 147<br>(75 - 271)        | --                 | 3<br>(1 - 7)      | 75<br>(37 - 160)     | 56<br>(22 - 106)         | 13<br>(6 - 24)           |
| Larynx cancer                        | 18<br>(11 - 48)          | --                 | --                | 3<br>(2 - 7)         | 10<br>(6 - 29)           | 5<br>(3 - 12)            |
| Tracheal, bronchus and lung cancer   | 166<br>(130 - 203)       | --                 | --                | 16<br>(12 - 22)      | 106<br>(79 - 135)        | 44<br>(35 - 55)          |
| Breast cancer                        | 6<br>(3 - 10)            | --                 | --                | 2<br>(1 - 3)         | 3<br>(1 - 6)             | 1<br>(1 - 2)             |
| Cervical cancer                      | --                       | --                 | --                | --                   | --                       | --                       |
| Uterine cancer                       | --                       | --                 | --                | --                   | --                       | --                       |
| Prostate cancer                      | 176<br>(112 - 272)       | --                 | --                | 4<br>(2 - 6)         | 61<br>(36 - 98)          | 110<br>(71 - 174)        |
| Colon and rectum cancer              | 144<br>(116 - 179)       | --                 | --                | 44<br>(33 - 58)      | 64<br>(48 - 82)          | 37<br>(29 - 48)          |
| Lip and oral cavity cancer           | 19<br>(13 - 27)          | --                 | --                | 5<br>(3 - 7)         | 10<br>(6 - 15)           | 4<br>(3 - 6)             |
| Nasopharynx cancer                   | 9<br>(6 - 12)            | --                 | 1<br>(0 - 1)      | 4<br>(2 - 6)         | 3<br>(2 - 6)             | 1<br>(0 - 1)             |
| Other pharynx cancer                 | 8<br>(5 - 15)            | --                 | --                | 3<br>(2 - 4)         | 4<br>(2 - 8)             | 2<br>(1 - 3)             |
| Gallbladder and biliary tract cancer | 16<br>(11 - 23)          | --                 | --                | 4<br>(3 - 6)         | 7<br>(4 - 12)            | 4<br>(3 - 7)             |
| Pancreatic cancer                    | 73<br>(57 - 93)          | --                 | --                | 18<br>(13 - 25)      | 44<br>(32 - 58)          | 11<br>(8 - 15)           |
| Malignant skin melanoma              | 9<br>(5 - 16)            | --                 | --                | 3<br>(2 - 5)         | 4<br>(2 - 7)             | 2<br>(1 - 4)             |
| Non-melanoma skin cancer             | 6<br>(4 - 11)            | --                 | --                | 1<br>(1 - 2)         | 3<br>(2 - 5)             | 3<br>(2 - 4)             |
| Ovarian cancer                       | --                       | --                 | --                | --                   | --                       | --                       |
| Testicular cancer                    | 6<br>(4 - 9)             | --                 | --                | 5<br>(3 - 7)         | 1<br>(1 - 2)             | 0<br>(0 - 1)             |
| Kidney cancer                        | 33<br>(22 - 45)          | 7<br>(2 - 16)      | 3<br>(1 - 5)      | 5<br>(3 - 7)         | 14<br>(9 - 20)           | 5<br>(3 - 7)             |
| Bladder cancer                       | 68<br>(51 - 105)         | --                 | --                | 13<br>(8 - 19)       | 28<br>(19 - 49)          | 27<br>(19 - 46)          |
| Brain and nervous system cancer      | 33<br>(16 - 44)          | 1<br>(0 - 3)       | 6<br>(3 - 11)     | 13<br>(6 - 18)       | 10<br>(5 - 14)           | 3<br>(1 - 5)             |
| Thyroid cancer                       | 3<br>(2 - 4)             | --                 | 0<br>(0 - 0)      | 1<br>(1 - 1)         | 1<br>(1 - 2)             | 1<br>(0 - 1)             |
| Mesothelioma                         | 5<br>(3 - 6)             | --                 | --                | 1<br>(0 - 1)         | 2<br>(1 - 3)             | 2<br>(1 - 3)             |
| Hodgkin lymphoma                     | 19<br>(12 - 29)          | 3<br>(1 - 7)       | 3<br>(1 - 8)      | 7<br>(5 - 12)        | 4<br>(2 - 7)             | 1<br>(1 - 2)             |
| Non-Hodgkin lymphoma                 | 161<br>(95 - 231)        | 25<br>(11 - 51)    | 30<br>(14 - 54)   | 50<br>(27 - 77)      | 40<br>(22 - 66)          | 16<br>(9 - 28)           |
| Multiple myeloma                     | 11<br>(8 - 16)           | --                 | --                | 3<br>(2 - 4)         | 6<br>(4 - 9)             | 2<br>(1 - 3)             |
| Leukemia                             | 65<br>(43 - 82)          | 9<br>(4 - 18)      | 13<br>(7 - 20)    | 28<br>(17 - 37)      | 9<br>(6 - 12)            | 6<br>(4 - 8)             |
| Other neoplasms                      | 302<br>(206 - 456)       | 78<br>(43 - 146)   | 34<br>(20 - 54)   | 65<br>(39 - 106)     | 82<br>(44 - 157)         | 43<br>(24 - 77)          |
| Cardiovascular diseases              | 7,089<br>(5,935 - 8,248) | 310<br>(176 - 511) | 115<br>(73 - 174) | 987<br>(777 - 1,260) | 3,339<br>(2,689 - 4,049) | 2,338<br>(1,978 - 2,692) |
| Rheumatic heart disease              | 138<br>(70 - 351)        | 20<br>(6 - 51)     | 9<br>(3 - 25)     | 31<br>(13 - 92)      | 48<br>(20 - 142)         | 30<br>(16 - 70)          |
| Ischemic heart disease               | 2,912<br>(2,240 - 3,622) | 26<br>(8 - 64)     | 22<br>(11 - 37)   | 373<br>(254 - 494)   | 1,505<br>(1,124 - 1,946) | 986<br>(748 - 1,228)     |
| Cerebrovascular disease              | 1,846<br>(1,282 - 2,530) | 50<br>(24 - 98)    | 18<br>(10 - 32)   | 188<br>(117 - 285)   | 845<br>(556 - 1,175)     | 745<br>(524 - 1,002)     |
| Ischemic stroke                      | 944<br>(115 - 1,604)     | 4<br>(0 - 12)      | 2<br>(0 - 4)      | 39<br>(2 - 88)       | 419<br>(40 - 756)        | 480<br>(72 - 789)        |
| Hemorrhagic stroke                   | 902<br>(461 - 1,761)     | 46<br>(22 - 91)    | 16<br>(8 - 29)    | 149<br>(94 - 236)    | 426<br>(201 - 847)       | 264<br>(95 - 663)        |
| Hypertensive heart disease           | 378<br>(87 - 831)        | 5<br>(0 - 13)      | 2<br>(0 - 3)      | 57<br>(8 - 140)      | 175<br>(39 - 376)        | 140<br>(37 - 280)        |
| Cardiomyopathy and myocarditis       | 586<br>(330 - 831)       | 63<br>(15 - 156)   | 24<br>(9 - 46)    | 111<br>(61 - 172)    | 263<br>(122 - 417)       | 126<br>(53 - 208)        |
| Atrial fibrillation and flutter      | 0<br>(0 - 0)             | --                 | --                | 0<br>(0 - 0)         | 0<br>(0 - 0)             | 0<br>(0 - 0)             |
| Aortic aneurysm                      | 103<br>(46 - 201)        | --                 | --                | 11<br>(5 - 21)       | 59<br>(26 - 108)         | 33<br>(14 - 73)          |
| Peripheral vascular disease          | 3<br>(1 - 7)             | --                 | --                | 0<br>(0 - 0)         | 1<br>(0 - 2)             | 2<br>(0 - 4)             |
| Endocarditis                         | 291<br>(172 - 441)       | 41<br>(13 - 91)    | 8<br>(4 - 15)     | 59<br>(34 - 95)      | 113<br>(61 - 188)        | 70<br>(39 - 115)         |



Web Table 31- Niger deaths with 95% UI by age, sex, and cause in 2013

| Cause                                               | Males, All Ages          | Males, 0-4 Years  | Males, 5-14 Years | Males, 15-49 Years | Males, 50-69 Years   | Males, 70-80 Years   |
|-----------------------------------------------------|--------------------------|-------------------|-------------------|--------------------|----------------------|----------------------|
| Other cardiovascular and circulatory diseases       | 831<br>(590 - 1,410)     | 105<br>(50 - 209) | 32<br>(18 - 56)   | 156<br>(104 - 251) | 331<br>(211 - 592)   | 207<br>(132 - 439)   |
| Chronic respiratory diseases                        | 1,755<br>(1,289 - 3,181) | 157<br>(64 - 393) | 32<br>(20 - 65)   | 195<br>(139 - 332) | 710<br>(487 - 1,294) | 663<br>(473 - 1,166) |
| Chronic obstructive pulmonary disease               | 1,063<br>(755 - 1,892)   | 63<br>(25 - 154)  | 12<br>(7 - 24)    | 62<br>(41 - 107)   | 427<br>(284 - 780)   | 498<br>(344 - 887)   |
| Pneumoconiosis                                      | 162<br>(91 - 324)        | 3<br>(0 - 9)      | 2<br>(0 - 5)      | 29<br>(16 - 53)    | 95<br>(52 - 190)     | 32<br>(14 - 74)      |
| Silicosis                                           | 30<br>(12 - 95)          | 1<br>(0 - 4)      | 1<br>(0 - 2)      | 6<br>(2 - 17)      | 9<br>(3 - 31)        | 13<br>(4 - 41)       |
| Asbestosis                                          | 12<br>(6 - 28)           | 1<br>(0 - 2)      | 0<br>(0 - 1)      | 2<br>(1 - 6)       | 7<br>(3 - 18)        | 1<br>(0 - 3)         |
| Coal workers pneumoconiosis                         | 55<br>(27 - 111)         | 1<br>(0 - 2)      | 0<br>(0 - 1)      | 3<br>(1 - 5)       | 46<br>(23 - 93)      | 5<br>(1 - 10)        |
| Other pneumoconiosis                                | 65<br>(35 - 104)         | 1<br>(0 - 3)      | 0<br>(0 - 1)      | 18<br>(10 - 30)    | 32<br>(15 - 57)      | 13<br>(7 - 25)       |
| Asthma                                              | 295<br>(170 - 647)       | 55<br>(18 - 151)  | 8<br>(4 - 17)     | 62<br>(38 - 118)   | 105<br>(51 - 246)    | 65<br>(30 - 158)     |
| Interstitial lung disease and pulmonary sarcoidosis | 97<br>(11 - 194)         | 1<br>(0 - 2)      | 0<br>(0 - 1)      | 3<br>(1 - 6)       | 47<br>(5 - 102)      | 46<br>(4 - 102)      |
| Other chronic respiratory diseases                  | 139<br>(67 - 279)        | 35<br>(11 - 90)   | 10<br>(5 - 21)    | 38<br>(20 - 66)    | 35<br>(13 - 73)      | 21<br>(8 - 45)       |
| Cirrhosis                                           | 1,405<br>(1,109 - 1,777) | 71<br>(26 - 158)  | 26<br>(16 - 38)   | 406<br>(294 - 549) | 713<br>(537 - 956)   | 189<br>(141 - 245)   |
| Cirrhosis due to hepatitis B                        | 401<br>(144 - 738)       | 4<br>(1 - 11)     | 4<br>(1 - 10)     | 120<br>(45 - 236)  | 217<br>(69 - 395)    | 56<br>(17 - 109)     |
| Cirrhosis due to hepatitis C                        | 266<br>(79 - 530)        | 3<br>(0 - 9)      | 3<br>(0 - 7)      | 74<br>(25 - 153)   | 142<br>(22 - 305)    | 44<br>(10 - 82)      |
| Cirrhosis due to alcohol use                        | 489<br>(300 - 726)       | --                | --                | 132<br>(77 - 209)  | 282<br>(165 - 430)   | 76<br>(44 - 119)     |
| Cirrhosis due to other causes                       | 248<br>(160 - 377)       | 65<br>(23 - 144)  | 19<br>(11 - 29)   | 79<br>(43 - 131)   | 72<br>(33 - 132)     | 13<br>(6 - 25)       |
| Digestive diseases                                  | 1,879<br>(1,412 - 2,435) | 234<br>(93 - 533) | 109<br>(71 - 163) | 499<br>(352 - 680) | 685<br>(484 - 928)   | 352<br>(259 - 470)   |
| Peptic ulcer disease                                | 528<br>(359 - 770)       | 40<br>(11 - 120)  | 21<br>(9 - 38)    | 136<br>(83 - 207)  | 218<br>(133 - 342)   | 114<br>(68 - 173)    |
| Gastritis and duodenitis                            | 68<br>(30 - 170)         | 14<br>(3 - 39)    | 5<br>(2 - 12)     | 15<br>(6 - 42)     | 22<br>(8 - 72)       | 13<br>(4 - 44)       |
| Appendicitis                                        | 116<br>(61 - 179)        | 26<br>(7 - 74)    | 16<br>(7 - 30)    | 27<br>(14 - 46)    | 30<br>(13 - 55)      | 16<br>(5 - 32)       |
| Paralytic ileus and intestinal obstruction          | 539<br>(260 - 801)       | 39<br>(11 - 102)  | 31<br>(15 - 57)   | 141<br>(54 - 227)  | 219<br>(92 - 354)    | 108<br>(57 - 164)    |
| Inguinal, femoral, and abdominal hernia             | 75<br>(42 - 150)         | 3<br>(0 - 12)     | 2<br>(1 - 7)      | 17<br>(9 - 36)     | 32<br>(15 - 61)      | 21<br>(11 - 40)      |
| Inflammatory bowel disease                          | 100<br>(26 - 178)        | 42<br>(11 - 112)  | 4<br>(1 - 9)      | 18<br>(3 - 47)     | 24<br>(3 - 51)       | 12<br>(2 - 24)       |
| Vascular intestinal disorders                       | 8<br>(3 - 18)            | 2<br>(0 - 7)      | 1<br>(0 - 2)      | 1<br>(0 - 3)       | 2<br>(1 - 5)         | 2<br>(1 - 4)         |
| Gallbladder and biliary diseases                    | 85<br>(46 - 126)         | 5<br>(1 - 16)     | 6<br>(2 - 11)     | 21<br>(8 - 38)     | 28<br>(14 - 46)      | 24<br>(11 - 44)      |
| Pancreatitis                                        | 105<br>(41 - 176)        | 2<br>(0 - 8)      | 2<br>(1 - 4)      | 56<br>(18 - 101)   | 33<br>(14 - 58)      | 13<br>(4 - 23)       |
| Other digestive diseases                            | 255<br>(153 - 447)       | 61<br>(17 - 173)  | 20<br>(10 - 37)   | 67<br>(34 - 118)   | 78<br>(42 - 145)     | 29<br>(14 - 57)      |
| Neurological disorders                              | 587<br>(468 - 761)       | 110<br>(46 - 222) | 44<br>(21 - 76)   | 126<br>(82 - 215)  | 73<br>(53 - 95)      | 234<br>(183 - 291)   |
| Alzheimer disease and other dementias               | 252<br>(196 - 313)       | --                | --                | 0<br>(0 - 1)       | 37<br>(26 - 49)      | 215<br>(166 - 270)   |
| Parkinson disease                                   | 3<br>(2 - 6)             | --                | --                | 0<br>(0 - 1)       | 0<br>(0 - 1)         | 3<br>(1 - 5)         |
| Epilepsy                                            | 252<br>(152 - 402)       | 92<br>(33 - 200)  | 36<br>(15 - 68)   | 98<br>(57 - 181)   | 16<br>(9 - 31)       | 10<br>(6 - 17)       |
| Multiple sclerosis                                  | 0<br>(0 - 1)             | --                | --                | 0<br>(0 - 0)       | 0<br>(0 - 0)         | 0<br>(0 - 0)         |
| Other neurological disorders                        | 80<br>(54 - 135)         | 19<br>(8 - 73)    | 8<br>(5 - 15)     | 27<br>(19 - 38)    | 19<br>(12 - 28)      | 7<br>(4 - 10)        |
| Mental and substance use disorders                  | 389<br>(189 - 588)       | 18<br>(3 - 55)    | 0<br>(0 - 0)      | 266<br>(125 - 437) | 86<br>(42 - 154)     | 19<br>(7 - 37)       |
| Schizophrenia                                       | 0<br>(0 - 1)             | --                | --                | 0<br>(0 - 0)       | 0<br>(0 - 0)         | 0<br>(0 - 0)         |
| Alcohol use disorders                               | 145<br>(55 - 305)        | --                | --                | 67<br>(26 - 147)   | 64<br>(24 - 137)     | 14<br>(3 - 32)       |
| Drug use disorders                                  | 243<br>(112 - 411)       | 18<br>(3 - 55)    | --                | 198<br>(83 - 353)  | 22<br>(11 - 40)      | 5<br>(2 - 8)         |
| Opioid use disorders                                | 26<br>(11 - 44)          | 2<br>(0 - 6)      | --                | 21<br>(8 - 38)     | 2<br>(1 - 4)         | 1<br>(0 - 1)         |
| Cocaine use disorders                               | 1<br>(0 - 2)             | 0<br>(0 - 0)      | --                | 1<br>(0 - 1)       | 0<br>(0 - 0)         | 0<br>(0 - 0)         |
| Amphetamine use disorders                           | 1<br>(0 - 1)             | 0<br>(0 - 0)      | --                | 0<br>(0 - 1)       | 0<br>(0 - 0)         | 0<br>(0 - 0)         |

Web Table 31- Niger deaths with 95% UI by age, sex, and cause in 2013

| Cause                                               | Males, All Ages          | Males, 0-4 Years       | Males, 5-14 Years  | Males, 15-49 Years   | Males, 50-69 Years   | Males, 70-80 Years |
|-----------------------------------------------------|--------------------------|------------------------|--------------------|----------------------|----------------------|--------------------|
| Other drug use disorders                            | 216<br>(100 - 366)       | 16<br>(2 - 48)         | --                 | 176<br>(74 - 315)    | 20<br>(10 - 36)      | 4<br>(2 - 7)       |
| Eating disorders                                    | 0<br>(0 - 0)             | --                     | 0<br>(0 - 0)       | 0<br>(0 - 0)         | --                   | --                 |
| Anorexia nervosa                                    | 0<br>(0 - 0)             | --                     | 0<br>(0 - 0)       | 0<br>(0 - 0)         | --                   | --                 |
| Diabetes, urogenital, blood, and endocrine diseases | 3,808<br>(2,438 - 6,473) | 1,209<br>(376 - 3,317) | 344<br>(117 - 817) | 696<br>(447 - 1,218) | 977<br>(745 - 1,231) | 582<br>(466 - 707) |
| Diabetes mellitus                                   | 922<br>(706 - 1,157)     | 26<br>(15 - 42)        | 9<br>(6 - 15)      | 117<br>(83 - 158)    | 495<br>(351 - 646)   | 274<br>(200 - 365) |
| Acute glomerulonephritis                            | 17<br>(8 - 35)           | 4<br>(1 - 14)          | 3<br>(1 - 6)       | 4<br>(2 - 9)         | 5<br>(2 - 9)         | 1<br>(0 - 4)       |
| Chronic kidney disease                              | 607<br>(395 - 929)       | 93<br>(45 - 176)       | 43<br>(19 - 74)    | 185<br>(92 - 322)    | 170<br>(110 - 267)   | 116<br>(74 - 188)  |
| Chronic kidney disease due to diabetes mellitus     | 4<br>(1 - 11)            | 0<br>(0 - 0)           | 0<br>(0 - 0)       | 0<br>(0 - 1)         | 4<br>(0 - 9)         | 0<br>(0 - 0)       |
| Chronic kidney disease due to hypertension          | 159<br>(82 - 395)        | 9<br>(1 - 28)          | 2<br>(0 - 10)      | 40<br>(15 - 107)     | 63<br>(30 - 143)     | 45<br>(22 - 103)   |
| Chronic kidney disease due to glomerulonephritis    | 335<br>(200 - 494)       | 64<br>(28 - 124)       | 33<br>(17 - 54)    | 111<br>(59 - 176)    | 76<br>(38 - 125)     | 51<br>(21 - 86)    |
| Chronic kidney disease due to other causes          | 109<br>(36 - 231)        | 20<br>(4 - 53)         | 7<br>(1 - 18)      | 34<br>(9 - 77)       | 27<br>(8 - 66)       | 21<br>(7 - 51)     |
| Urinary diseases and male infertility               | 513<br>(309 - 744)       | 95<br>(45 - 192)       | 13<br>(8 - 21)     | 111<br>(52 - 185)    | 162<br>(87 - 254)    | 131<br>(81 - 197)  |
| Interstitial nephritis and urinary tract infections | 449<br>(273 - 672)       | 84<br>(37 - 177)       | 11<br>(7 - 18)     | 95<br>(46 - 164)     | 142<br>(79 - 224)    | 117<br>(74 - 177)  |
| Urolithiasis                                        | 3<br>(1 - 7)             | --                     | 0<br>(0 - 1)       | 1<br>(0 - 3)         | 1<br>(0 - 3)         | 0<br>(0 - 1)       |
| Other urinary diseases                              | 61<br>(29 - 96)          | 11<br>(3 - 27)         | 2<br>(1 - 4)       | 15<br>(4 - 27)       | 19<br>(6 - 36)       | 14<br>(4 - 28)     |
| Gynecological diseases                              | --                       | --                     | --                 | --                   | --                   | --                 |
| Uterine fibroids                                    | --                       | --                     | --                 | --                   | --                   | --                 |
| Polycystic ovarian syndrome                         | --                       | --                     | --                 | --                   | --                   | --                 |
| Endometriosis                                       | --                       | --                     | --                 | --                   | --                   | --                 |
| Genital prolapse                                    | --                       | --                     | --                 | --                   | --                   | --                 |
| Other gynecological diseases                        | --                       | --                     | --                 | --                   | --                   | --                 |
| Hemoglobinopathies and hemolytic anemias            | 1,407<br>(179 - 4,136)   | 893<br>(108 - 2,995)   | 253<br>(31 - 732)  | 194<br>(21 - 781)    | 52<br>(8 - 230)      | 15<br>(4 - 60)     |
| Thalassemias                                        | 30<br>(4 - 90)           | 24<br>(3 - 78)         | 4<br>(0 - 11)      | 2<br>(0 - 10)        | 0<br>(0 - 0)         | 0<br>(0 - 0)       |
| Sickle cell disorders                               | 1,345<br>(170 - 3,931)   | 856<br>(104 - 2,865)   | 246<br>(30 - 714)  | 189<br>(20 - 758)    | 49<br>(7 - 218)      | 5<br>(1 - 20)      |
| G6PD deficiency                                     | 9<br>(1 - 25)            | 6<br>(1 - 18)          | 1<br>(0 - 3)       | 1<br>(0 - 4)         | 0<br>(0 - 2)         | 0<br>(0 - 2)       |
| Other hemoglobinopathies and hemolytic anemias      | 23<br>(5 - 83)           | 8<br>(1 - 25)          | 1<br>(0 - 3)       | 2<br>(0 - 9)         | 2<br>(0 - 10)        | 10<br>(3 - 38)     |
| Endocrine, metabolic, blood, and immune disorders   | 343<br>(223 - 536)       | 98<br>(51 - 244)       | 24<br>(13 - 47)    | 84<br>(46 - 122)     | 93<br>(50 - 139)     | 44<br>(23 - 69)    |
| Musculoskeletal disorders                           | 77<br>(40 - 103)         | --                     | 14<br>(5 - 24)     | 25<br>(12 - 36)      | 26<br>(12 - 37)      | 12<br>(7 - 18)     |
| Rheumatoid arthritis                                | 7<br>(2 - 11)            | --                     | 1<br>(0 - 3)       | 2<br>(0 - 3)         | 2<br>(1 - 4)         | 2<br>(0 - 3)       |
| Other musculoskeletal disorders                     | 70<br>(37 - 96)          | --                     | 12<br>(5 - 23)     | 23<br>(11 - 34)      | 23<br>(11 - 34)      | 11<br>(6 - 16)     |
| Other non-communicable diseases                     | 2,128<br>(1,118 - 4,450) | 1,863<br>(882 - 4,155) | 98<br>(49 - 194)   | 80<br>(52 - 116)     | 48<br>(26 - 67)      | 38<br>(16 - 56)    |
| Congenital anomalies                                | 1,955<br>(955 - 4,287)   | 1,789<br>(818 - 4,078) | 91<br>(43 - 188)   | 55<br>(32 - 87)      | 13<br>(7 - 21)       | 7<br>(4 - 10)      |
| Neural tube defects                                 | 539<br>(119 - 1,350)     | 506<br>(108 - 1,307)   | 19<br>(4 - 51)     | 11<br>(2 - 30)       | 1<br>(0 - 5)         | 1<br>(0 - 2)       |
| Congenital heart anomalies                          | 723<br>(343 - 1,577)     | 643<br>(284 - 1,452)   | 45<br>(20 - 97)    | 25<br>(14 - 41)      | 6<br>(4 - 11)        | 3<br>(1 - 5)       |
| Cleft lip and cleft palate                          | 11<br>(1 - 44)           | 11<br>(1 - 44)         | --                 | --                   | --                   | --                 |
| Down syndrome                                       | 168<br>(38 - 528)        | 155<br>(28 - 510)      | 6<br>(2 - 16)      | 5<br>(2 - 9)         | 1<br>(1 - 3)         | 0<br>(0 - 0)       |
| Chromosomal unbalanced rearrangements               | 61<br>(13 - 182)         | 56<br>(11 - 173)       | 3<br>(1 - 8)       | 2<br>(1 - 3)         | 0<br>(0 - 1)         | 0<br>(0 - 0)       |
| Other congenital anomalies                          | 453<br>(84 - 1,981)      | 417<br>(62 - 1,890)    | 18<br>(4 - 71)     | 11<br>(4 - 21)       | 3<br>(1 - 6)         | 3<br>(2 - 5)       |
| Skin and subcutaneous diseases                      | 148<br>(56 - 203)        | 50<br>(19 - 91)        | 7<br>(4 - 10)      | 25<br>(9 - 39)       | 35<br>(12 - 50)      | 32<br>(10 - 48)    |
| Cellulitis                                          | 97<br>(36 - 156)         | 32<br>(13 - 70)        | 5<br>(3 - 9)       | 15<br>(5 - 27)       | 26<br>(8 - 41)       | 19<br>(6 - 33)     |

Web Table 31- Niger deaths with 95% UI by age, sex, and cause in 2013

| Cause                                           | Males, All Ages          | Males, 0-4 Years       | Males, 5-14 Years    | Males, 15-49 Years       | Males, 50-69 Years   | Males, 70-80 Years |
|-------------------------------------------------|--------------------------|------------------------|----------------------|--------------------------|----------------------|--------------------|
| Pyoderma                                        | 49<br>(14 - 93)          | 17<br>(3 - 44)         | 1<br>(0 - 3)         | 10<br>(3 - 18)           | 9<br>(3 - 17)        | 11<br>(3 - 21)     |
| Decubitus ulcer                                 | 2<br>(0 - 5)             | 0<br>(0 - 0)           | 0<br>(0 - 0)         | 0<br>(0 - 1)             | 0<br>(0 - 0)         | 2<br>(0 - 4)       |
| Other skin and subcutaneous diseases            | 0<br>(0 - 1)             | 0<br>(0 - 0)           | 0<br>(0 - 0)         | 0<br>(0 - 0)             | 0<br>(0 - 0)         | 0<br>(0 - 0)       |
| Sudden infant death syndrome                    | 24<br>(4 - 80)           | 24<br>(4 - 80)         | --                   | --                       | --                   | --                 |
| Injuries                                        | 5,751<br>(4,614 - 7,113) | 1,568<br>(873 - 2,663) | 769<br>(538 - 1,042) | 2,327<br>(1,812 - 2,914) | 793<br>(611 - 1,013) | 294<br>(222 - 369) |
| Transport injuries                              | 2,232<br>(1,728 - 2,793) | 331<br>(145 - 665)     | 294<br>(190 - 417)   | 1,173<br>(879 - 1,532)   | 335<br>(244 - 433)   | 98<br>(70 - 130)   |
| Road injuries                                   | 2,125<br>(1,648 - 2,657) | 290<br>(125 - 596)     | 273<br>(178 - 389)   | 1,150<br>(858 - 1,503)   | 321<br>(233 - 415)   | 91<br>(67 - 121)   |
| Pedestrian road injuries                        | 541<br>(362 - 763)       | 78<br>(29 - 179)       | 73<br>(42 - 119)     | 282<br>(177 - 421)       | 83<br>(50 - 123)     | 25<br>(15 - 38)    |
| Cyclist road injuries                           | 128<br>(85 - 183)        | 31<br>(10 - 72)        | 29<br>(14 - 50)      | 42<br>(27 - 63)          | 20<br>(11 - 32)      | 6<br>(3 - 11)      |
| Motorcyclist road injuries                      | 281<br>(174 - 429)       | 31<br>(11 - 70)        | 23<br>(12 - 42)      | 183<br>(105 - 291)       | 36<br>(22 - 56)      | 7<br>(4 - 11)      |
| Motor vehicle road injuries                     | 1,085<br>(807 - 1,408)   | 122<br>(50 - 266)      | 124<br>(74 - 181)    | 621<br>(426 - 836)       | 169<br>(118 - 227)   | 48<br>(32 - 67)    |
| Other road injuries                             | 90<br>(33 - 187)         | 28<br>(6 - 80)         | 23<br>(6 - 48)       | 22<br>(7 - 60)           | 12<br>(4 - 29)       | 5<br>(1 - 10)      |
| Other transport injuries                        | 108<br>(68 - 161)        | 41<br>(16 - 90)        | 21<br>(11 - 37)      | 23<br>(13 - 45)          | 15<br>(8 - 22)       | 7<br>(2 - 13)      |
| Unintentional injuries                          | 2,915<br>(2,156 - 3,962) | 1,209<br>(637 - 2,042) | 449<br>(297 - 650)   | 748<br>(532 - 1,056)     | 347<br>(254 - 482)   | 162<br>(115 - 224) |
| Falls                                           | 526<br>(345 - 850)       | 127<br>(52 - 263)      | 53<br>(27 - 97)      | 166<br>(93 - 276)        | 114<br>(63 - 199)    | 67<br>(37 - 119)   |
| Drowning                                        | 856<br>(426 - 1,566)     | 427<br>(115 - 974)     | 189<br>(87 - 337)    | 184<br>(99 - 301)        | 44<br>(28 - 69)      | 12<br>(7 - 20)     |
| Fire, heat, and hot substances                  | 315<br>(183 - 520)       | 171<br>(62 - 366)      | 34<br>(18 - 61)      | 58<br>(35 - 110)         | 33<br>(18 - 62)      | 18<br>(9 - 31)     |
| Poisonings                                      | 193<br>(102 - 406)       | 88<br>(27 - 234)       | 21<br>(10 - 41)      | 55<br>(31 - 120)         | 24<br>(13 - 42)      | 5<br>(3 - 9)       |
| Exposure to mechanical forces                   | 498<br>(347 - 721)       | 162<br>(79 - 290)      | 80<br>(47 - 133)     | 179<br>(112 - 275)       | 63<br>(39 - 100)     | 14<br>(8 - 20)     |
| Unintentional firearm injuries                  | 227<br>(132 - 385)       | 60<br>(24 - 127)       | 26<br>(11 - 53)      | 109<br>(59 - 183)        | 27<br>(14 - 48)      | 7<br>(3 - 11)      |
| Unintentional suffocation                       | 40<br>(18 - 88)          | 23<br>(6 - 69)         | 6<br>(2 - 13)        | 7<br>(3 - 13)            | 3<br>(1 - 6)         | 1<br>(0 - 1)       |
| Other exposure to mechanical forces             | 230<br>(141 - 394)       | 79<br>(31 - 159)       | 48<br>(23 - 92)      | 63<br>(38 - 130)         | 33<br>(16 - 64)      | 7<br>(2 - 12)      |
| Adverse effects of medical treatment            | 144<br>(55 - 287)        | 59<br>(14 - 147)       | 10<br>(3 - 21)       | 26<br>(10 - 57)          | 28<br>(8 - 62)       | 21<br>(5 - 49)     |
| Animal contact                                  | 67<br>(30 - 99)          | 21<br>(8 - 48)         | 15<br>(6 - 26)       | 12<br>(5 - 23)           | 11<br>(3 - 20)       | 7<br>(1 - 13)      |
| Venomous animal contact                         | 26<br>(12 - 44)          | 8<br>(2 - 23)          | 5<br>(2 - 10)        | 6<br>(2 - 11)            | 4<br>(1 - 8)         | 3<br>(0 - 6)       |
| Non-venomous animal contact                     | 40<br>(15 - 64)          | 13<br>(4 - 30)         | 10<br>(3 - 18)       | 7<br>(2 - 14)            | 7<br>(2 - 13)        | 4<br>(1 - 7)       |
| Foreign body                                    | 144<br>(77 - 290)        | 100<br>(46 - 230)      | 13<br>(7 - 23)       | 14<br>(7 - 25)           | 10<br>(5 - 16)       | 8<br>(3 - 13)      |
| Pulmonary aspiration and foreign body in airway | 136<br>(70 - 283)        | 97<br>(44 - 225)       | 11<br>(5 - 22)       | 13<br>(5 - 24)           | 8<br>(3 - 14)        | 7<br>(3 - 12)      |
| Foreign body in other body part                 | 8<br>(5 - 15)            | 3<br>(1 - 8)           | 1<br>(1 - 3)         | 1<br>(1 - 2)             | 2<br>(1 - 3)         | 0<br>(0 - 1)       |
| Other unintentional injuries                    | 171<br>(120 - 237)       | 53<br>(24 - 100)       | 34<br>(20 - 53)      | 53<br>(36 - 76)          | 19<br>(12 - 29)      | 10<br>(7 - 15)     |
| Self-harm and interpersonal violence            | 592<br>(414 - 824)       | 27<br>(10 - 62)        | 25<br>(13 - 44)      | 400<br>(272 - 593)       | 107<br>(64 - 164)    | 33<br>(16 - 56)    |
| Self-harm                                       | 361<br>(229 - 568)       | --                     | 12<br>(4 - 29)       | 226<br>(140 - 395)       | 92<br>(49 - 148)     | 31<br>(14 - 54)    |
| Interpersonal violence                          | 231<br>(139 - 353)       | 27<br>(10 - 62)        | 13<br>(6 - 24)       | 174<br>(97 - 278)        | 15<br>(8 - 26)       | 1<br>(1 - 3)       |
| Assault by firearm                              | 121<br>(51 - 198)        | 6<br>(2 - 16)          | 3<br>(1 - 7)         | 105<br>(44 - 171)        | 7<br>(3 - 13)        | 1<br>(0 - 1)       |
| Assault by sharp object                         | 46<br>(21 - 109)         | 4<br>(1 - 13)          | 3<br>(1 - 5)         | 33<br>(12 - 91)          | 5<br>(2 - 10)        | 0<br>(0 - 1)       |
| Assault by other means                          | 64<br>(33 - 124)         | 17<br>(6 - 46)         | 7<br>(3 - 15)        | 36<br>(15 - 78)          | 4<br>(2 - 7)         | 1<br>(0 - 1)       |
| Forces of nature, war, and legal intervention   | 12<br>(6 - 28)           | 1<br>(0 - 0)           | 1<br>(1 - 2)         | 6<br>(3 - 15)            | 4<br>(2 - 9)         | 1<br>(0 - 1)       |
| Exposure to forces of nature                    | 12<br>(6 - 28)           | 1<br>(0 - 0)           | 1<br>(1 - 2)         | 6<br>(3 - 15)            | 4<br>(2 - 9)         | 1<br>(0 - 1)       |

Web Table 31- Niger deaths with 95% UI by age, sex, and cause in 2013

| Cause                                                             | Females, All Ages           | Females, 0-4 Years          | Females, 5-14 Years      | Females, 15-49 Years       | Females, 50-69 Years      | Females, 70-80 Years      |
|-------------------------------------------------------------------|-----------------------------|-----------------------------|--------------------------|----------------------------|---------------------------|---------------------------|
| All causes                                                        | 80,078<br>(72,876 - 87,676) | 46,141<br>(39,957 - 52,602) | 4,122<br>(3,519 - 4,776) | 11,066<br>(9,918 - 12,154) | 9,804<br>(8,606 - 11,319) | 8,945<br>(8,201 - 10,066) |
| Communicable, maternal, neonatal, and nutritional diseases        | 58,945<br>(52,532 - 65,539) | 41,773<br>(36,052 - 48,339) | 2,915<br>(2,408 - 3,481) | 7,974<br>(7,046 - 8,874)   | 3,294<br>(2,703 - 3,971)  | 2,990<br>(2,335 - 3,593)  |
| HIV/AIDS and tuberculosis                                         | 3,464<br>(2,799 - 4,266)    | 321<br>(196 - 575)          | 212<br>(154 - 295)       | 1,759<br>(1,298 - 2,230)   | 811<br>(620 - 1,037)      | 362<br>(249 - 509)        |
| Tuberculosis                                                      | 2,218<br>(1,695 - 2,844)    | 242<br>(119 - 480)          | 110<br>(63 - 185)        | 857<br>(558 - 1,192)       | 661<br>(470 - 891)        | 348<br>(234 - 494)        |
| HIV/AIDS                                                          | 1,246<br>(787 - 1,776)      | 79<br>(51 - 116)            | 102<br>(75 - 129)        | 902<br>(553 - 1,321)       | 150<br>(79 - 244)         | 14<br>(6 - 26)            |
| HIV/AIDS resulting in mycobacterial infection                     | 67<br>(41 - 101)            | 4<br>(3 - 6)                | 5<br>(3 - 7)             | 49<br>(28 - 74)            | 8<br>(4 - 14)             | 1<br>(0 - 2)              |
| HIV/AIDS resulting in other diseases                              | 1,179<br>(747 - 1,682)      | 75<br>(49 - 110)            | 97<br>(71 - 122)         | 853<br>(525 - 1,250)       | 142<br>(74 - 230)         | 13<br>(5 - 24)            |
| Diarrhea, lower respiratory, and other common infectious diseases | 24,797<br>(19,177 - 30,609) | 17,861<br>(12,345 - 23,787) | 1,547<br>(1,032 - 2,153) | 1,677<br>(1,277 - 2,105)   | 1,752<br>(1,285 - 2,295)  | 1,960<br>(1,408 - 2,537)  |
| Diarrheal diseases                                                | 11,103<br>(7,199 - 15,608)  | 8,218<br>(4,286 - 12,776)   | 571<br>(292 - 967)       | 787<br>(534 - 1,061)       | 757<br>(470 - 1,127)      | 769<br>(471 - 1,160)      |
| Intestinal infectious diseases                                    | 404<br>(206 - 723)          | 149<br>(66 - 294)           | 146<br>(68 - 269)        | 86<br>(41 - 158)           | 17<br>(7 - 33)            | 6<br>(2 - 11)             |
| Typhoid fever                                                     | 271<br>(132 - 496)          | 93<br>(38 - 196)            | 100<br>(42 - 192)        | 62<br>(27 - 116)           | 12<br>(5 - 24)            | 4<br>(2 - 7)              |
| Paratyphoid fever                                                 | 109<br>(47 - 214)           | 41<br>(15 - 91)             | 43<br>(16 - 95)          | 21<br>(8 - 47)             | 3<br>(1 - 8)              | 1<br>(0 - 3)              |
| Other intestinal infectious diseases                              | 25<br>(13 - 41)             | 15<br>(7 - 29)              | 3<br>(0 - 10)            | 4<br>(1 - 9)               | 2<br>(0 - 7)              | 1<br>(0 - 4)              |
| Lower respiratory infections                                      | 9,382<br>(6,502 - 13,178)   | 6,812<br>(4,082 - 10,528)   | 376<br>(228 - 552)       | 374<br>(264 - 516)         | 757<br>(481 - 1,054)      | 1,063<br>(675 - 1,464)    |
| Upper respiratory infections                                      | 14<br>(4 - 42)              | 8<br>(0 - 36)               | 1<br>(0 - 4)             | 2<br>(0 - 5)               | 2<br>(0 - 6)              | 1<br>(0 - 4)              |
| Otitis media                                                      | 7<br>(5 - 10)               | 3<br>(1 - 6)                | 1<br>(0 - 1)             | 0<br>(0 - 1)               | 1<br>(1 - 2)              | 1<br>(1 - 2)              |
| Meningitis                                                        | 2,478<br>(1,639 - 4,016)    | 1,572<br>(766 - 3,127)      | 318<br>(192 - 488)       | 324<br>(208 - 470)         | 167<br>(98 - 253)         | 97<br>(45 - 159)          |
| Pneumococcal meningitis                                           | 429<br>(277 - 691)          | 242<br>(115 - 487)          | 67<br>(31 - 117)         | 68<br>(34 - 117)           | 31<br>(11 - 62)           | 20<br>(6 - 43)            |
| H influenzae type B meningitis                                    | 519<br>(291 - 928)          | 400<br>(174 - 806)          | 59<br>(30 - 108)         | 37<br>(16 - 68)            | 15<br>(7 - 30)            | 8<br>(3 - 18)             |
| Meningococcal meningitis                                          | 1,330<br>(851 - 2,289)      | 829<br>(385 - 1,794)        | 169<br>(87 - 276)        | 184<br>(105 - 283)         | 95<br>(50 - 153)          | 52<br>(25 - 88)           |
| Other meningitis                                                  | 200<br>(118 - 328)          | 100<br>(35 - 214)           | 23<br>(8 - 48)           | 35<br>(17 - 64)            | 25<br>(12 - 49)           | 17<br>(6 - 33)            |
| Encephalitis                                                      | 82<br>(50 - 128)            | 41<br>(18 - 86)             | 11<br>(7 - 19)           | 13<br>(7 - 21)             | 10<br>(3 - 18)            | 6<br>(1 - 11)             |
| Diphtheria                                                        | 15<br>(0 - 113)             | 12<br>(0 - 110)             | 2<br>(0 - 17)            | 0<br>(0 - 1)               | 0<br>(0 - 1)              | --                        |
| Whooping cough                                                    | 316<br>(1 - 1,494)          | 293<br>(1 - 1,389)          | 21<br>(0 - 102)          | 2<br>(0 - 10)              | 0<br>(0 - 1)              | --                        |
| Tetanus                                                           | 707<br>(312 - 1,605)        | 516<br>(168 - 1,387)        | 57<br>(20 - 112)         | 82<br>(31 - 149)           | 38<br>(15 - 77)           | 13<br>(4 - 31)            |
| Measles                                                           | 274<br>(88 - 623)           | 231<br>(72 - 542)           | 39<br>(13 - 84)          | 4<br>(1 - 8)               | 0<br>(0 - 0)              | --                        |
| Varicella and herpes zoster                                       | 16<br>(5 - 37)              | 7<br>(0 - 25)               | 2<br>(0 - 8)             | 3<br>(0 - 7)               | 2<br>(0 - 5)              | 3<br>(0 - 11)             |
| Neglected tropical diseases and malaria                           | 14,092<br>(6,953 - 21,762)  | 12,619<br>(5,699 - 20,650)  | 659<br>(188 - 1,405)     | 329<br>(108 - 737)         | 267<br>(75 - 686)         | 219<br>(49 - 613)         |
| Malaria                                                           | 13,869<br>(6,688 - 21,584)  | 12,529<br>(5,545 - 20,584)  | 610<br>(141 - 1,368)     | 282<br>(56 - 699)          | 241<br>(45 - 664)         | 207<br>(36 - 603)         |
| Leishmaniasis                                                     | 0<br>(0 - 0)                | 0<br>(0 - 0)                | 0<br>(0 - 0)             | 0<br>(0 - 0)               | 0<br>(0 - 0)              | 0<br>(0 - 0)              |
| Visceral leishmaniasis                                            | 0<br>(0 - 0)                | 0<br>(0 - 0)                | 0<br>(0 - 0)             | 0<br>(0 - 0)               | 0<br>(0 - 0)              | 0<br>(0 - 0)              |
| Schistosomiasis                                                   | 22<br>(16 - 30)             | 1<br>(0 - 2)                | 2<br>(1 - 3)             | 7<br>(4 - 10)              | 9<br>(5 - 13)             | 4<br>(2 - 7)              |
| Cysticercosis                                                     | 3<br>(1 - 8)                | 0<br>(0 - 1)                | 0<br>(0 - 1)             | 1<br>(0 - 4)               | 1<br>(0 - 2)              | 0<br>(0 - 0)              |
| Cystic echinococcosis                                             | 7<br>(5 - 9)                | 2<br>(1 - 3)                | 2<br>(1 - 3)             | 2<br>(1 - 2)               | 1<br>(1 - 1)              | 0<br>(0 - 0)              |
| Dengue                                                            | 3<br>(1 - 5)                | 1<br>(0 - 2)                | 1<br>(0 - 2)             | 0<br>(0 - 2)               | 0<br>(0 - 1)              | 0<br>(0 - 0)              |
| Yellow fever                                                      | 0<br>(0 - 0)                | 0<br>(0 - 0)                | 0<br>(0 - 0)             | 0<br>(0 - 0)               | 0<br>(0 - 0)              | 0<br>(0 - 0)              |
| Rabies                                                            | 109<br>(62 - 179)           | 27<br>(10 - 58)             | 34<br>(15 - 68)          | 31<br>(15 - 52)            | 13<br>(5 - 23)            | 5<br>(1 - 10)             |
| Intestinal nematode infections                                    | 55<br>(28 - 96)             | 46<br>(22 - 87)             | 7<br>(1 - 18)            | 1<br>(0 - 5)               | 0<br>(0 - 4)              | 0<br>(0 - 4)              |
| Ascariasis                                                        | 55<br>(28 - 96)             | 46<br>(22 - 87)             | 7<br>(1 - 18)            | 1<br>(0 - 5)               | 0<br>(0 - 4)              | 0<br>(0 - 4)              |
| Other neglected tropical diseases                                 | 24<br>(14 - 71)             | 12<br>(5 - 42)              | 3<br>(1 - 9)             | 4<br>(2 - 10)              | 3<br>(1 - 5)              | 2<br>(1 - 4)              |

Web Table 31- Niger deaths with 95% UI by age, sex, and cause in 2013

| Cause                                                            | Females, All Ages           | Females, 0-4 Years       | Females, 5-14 Years  | Females, 15-49 Years     | Females, 50-69 Years     | Females, 70-80 Years     |
|------------------------------------------------------------------|-----------------------------|--------------------------|----------------------|--------------------------|--------------------------|--------------------------|
| Maternal disorders                                               | 3,873<br>(2,936 - 4,811)    | --                       | 58<br>(21 - 124)     | 3,814<br>(2,885 - 4,720) | --                       | --                       |
| Maternal hemorrhage                                              | 699<br>(482 - 935)          | --                       | 6<br>(2 - 13)        | 694<br>(479 - 930)       | --                       | --                       |
| Maternal sepsis and other maternal infections                    | 219<br>(134 - 312)          | --                       | 4<br>(1 - 9)         | 215<br>(132 - 308)       | --                       | --                       |
| Maternal hypertensive disorders                                  | 310<br>(200 - 440)          | --                       | 4<br>(1 - 11)        | 305<br>(198 - 435)       | --                       | --                       |
| Maternal obstructed labor                                        | 190<br>(113 - 274)          | --                       | 2<br>(1 - 5)         | 188<br>(111 - 271)       | --                       | --                       |
| Maternal abortive outcome                                        | 688<br>(480 - 943)          | --                       | 10<br>(3 - 22)       | 678<br>(475 - 935)       | --                       | --                       |
| Indirect maternal deaths                                         | 399<br>(267 - 572)          | --                       | 5<br>(2 - 12)        | 394<br>(262 - 567)       | --                       | --                       |
| Late maternal deaths                                             | 597<br>(337 - 911)          | --                       | 16<br>(5 - 40)       | 581<br>(324 - 887)       | --                       | --                       |
| Maternal deaths aggravated by HIV/AIDS                           | 4<br>(2 - 6)                | --                       | --                   | 4<br>(2 - 6)             | --                       | --                       |
| Other maternal disorders                                         | 760<br>(533 - 998)          | --                       | 11<br>(4 - 24)       | 748<br>(526 - 986)       | --                       | --                       |
| Neonatal disorders                                               | 6,439<br>(4,651 - 9,034)    | 6,439<br>(4,651 - 9,034) | --                   | --                       | --                       | --                       |
| Neonatal preterm birth complications                             | 2,407<br>(792 - 4,437)      | 2,407<br>(792 - 4,437)   | --                   | --                       | --                       | --                       |
| Neonatal encephalopathy due to birth asphyxia and trauma         | 2,019<br>(435 - 4,057)      | 2,019<br>(435 - 4,057)   | --                   | --                       | --                       | --                       |
| Neonatal sepsis and other neonatal infections                    | 1,223<br>(313 - 2,588)      | 1,223<br>(313 - 2,588)   | --                   | --                       | --                       | --                       |
| Hemolytic disease and other neonatal jaundice                    | 45<br>(9 - 150)             | 45<br>(9 - 150)          | --                   | --                       | --                       | --                       |
| Other neonatal disorders                                         | 745<br>(246 - 1,502)        | 745<br>(246 - 1,502)     | --                   | --                       | --                       | --                       |
| Nutritional deficiencies                                         | 4,870<br>(3,214 - 7,320)    | 3,506<br>(1,884 - 5,765) | 305<br>(174 - 493)   | 326<br>(237 - 463)       | 365<br>(251 - 502)       | 368<br>(262 - 516)       |
| Protein-energy malnutrition                                      | 3,509<br>(1,871 - 5,727)    | 3,036<br>(1,470 - 5,150) | 180<br>(88 - 311)    | 47<br>(19 - 120)         | 115<br>(51 - 228)        | 130<br>(57 - 253)        |
| Iodine deficiency                                                | 11<br>(0 - 51)              | 7<br>(0 - 47)            | 2<br>(0 - 15)        | 1<br>(0 - 4)             | 1<br>(0 - 7)             | 1<br>(0 - 5)             |
| Iron-deficiency anemia                                           | 1,334<br>(706 - 2,452)      | 454<br>(97 - 1,423)      | 122<br>(48 - 244)    | 278<br>(177 - 405)       | 244<br>(126 - 380)       | 236<br>(125 - 364)       |
| Other nutritional deficiencies                                   | 16<br>(5 - 34)              | 9<br>(2 - 25)            | 1<br>(0 - 2)         | 1<br>(0 - 2)             | 4<br>(1 - 9)             | 1<br>(0 - 3)             |
| Other communicable, maternal, neonatal, and nutritional diseases | 1,410<br>(862 - 2,102)      | 1,028<br>(565 - 1,670)   | 134<br>(74 - 220)    | 69<br>(45 - 104)         | 99<br>(54 - 164)         | 80<br>(37 - 148)         |
| Sexually transmitted diseases excluding HIV                      | 1,023<br>(553 - 1,689)      | 877<br>(444 - 1,472)     | 111<br>(55 - 189)    | 16<br>(8 - 29)           | 12<br>(4 - 31)           | 8<br>(2 - 24)            |
| Syphilis                                                         | 1,005<br>(534 - 1,672)      | 877<br>(444 - 1,472)     | 109<br>(54 - 187)    | 7<br>(3 - 12)            | 6<br>(2 - 17)            | 6<br>(2 - 18)            |
| Chlamydial infection                                             | 6<br>(3 - 11)               | --                       | 1<br>(0 - 1)         | 3<br>(2 - 6)             | 2<br>(0 - 4)             | 1<br>(0 - 2)             |
| Gonococcal infection                                             | 7<br>(4 - 13)               | --                       | 0<br>(0 - 1)         | 3<br>(2 - 6)             | 2<br>(1 - 6)             | 1<br>(0 - 3)             |
| Other sexually transmitted diseases                              | 6<br>(3 - 10)               | --                       | 0<br>(0 - 1)         | 3<br>(2 - 5)             | 2<br>(0 - 4)             | 1<br>(0 - 2)             |
| Hepatitis                                                        | 182<br>(96 - 280)           | 39<br>(13 - 82)          | 10<br>(4 - 18)       | 34<br>(18 - 55)          | 56<br>(27 - 92)          | 44<br>(20 - 75)          |
| Acute hepatitis A                                                | 19<br>(4 - 45)              | 14<br>(3 - 36)           | 3<br>(1 - 7)         | 1<br>(0 - 2)             | 0<br>(0 - 1)             | 0<br>(0 - 0)             |
| Acute hepatitis B                                                | 119<br>(57 - 196)           | 24<br>(7 - 53)           | 4<br>(1 - 9)         | 9<br>(3 - 19)            | 43<br>(20 - 75)          | 38<br>(17 - 66)          |
| Acute hepatitis C                                                | 5<br>(1 - 14)               | --                       | 1<br>(0 - 2)         | 1<br>(0 - 2)             | 2<br>(0 - 6)             | 2<br>(0 - 6)             |
| Acute hepatitis E                                                | 41<br>(17 - 77)             | 1<br>(0 - 2)             | 2<br>(1 - 4)         | 23<br>(11 - 39)          | 11<br>(3 - 26)           | 4<br>(1 - 13)            |
| Other infectious diseases                                        | 205<br>(90 - 504)           | 112<br>(35 - 310)        | 14<br>(4 - 39)       | 19<br>(7 - 56)           | 32<br>(10 - 98)          | 29<br>(7 - 106)          |
| Non-communicable diseases                                        | 18,394<br>(15,413 - 22,469) | 3,428<br>(1,757 - 6,061) | 742<br>(523 - 1,023) | 2,467<br>(1,957 - 3,033) | 6,121<br>(5,185 - 7,444) | 5,635<br>(4,889 - 6,765) |
| Neoplasms                                                        | 2,853<br>(2,374 - 3,425)    | 69<br>(38 - 119)         | 85<br>(53 - 135)     | 691<br>(549 - 846)       | 1,441<br>(1,176 - 1,766) | 568<br>(469 - 692)       |
| Esophageal cancer                                                | 50<br>(34 - 69)             | --                       | --                   | 6<br>(4 - 9)             | 30<br>(19 - 44)          | 14<br>(8 - 22)           |
| Stomach cancer                                                   | 240<br>(185 - 309)          | --                       | --                   | 41<br>(29 - 56)          | 149<br>(110 - 201)       | 51<br>(34 - 72)          |
| Liver cancer                                                     | 454<br>(316 - 614)          | --                       | 2<br>(1 - 4)         | 102<br>(65 - 152)        | 250<br>(165 - 366)       | 99<br>(63 - 149)         |
| Liver cancer due to hepatitis B                                  | 162<br>(91 - 273)           | --                       | 1<br>(0 - 1)         | 45<br>(25 - 73)          | 91<br>(45 - 164)         | 25<br>(12 - 50)          |
| Liver cancer due to hepatitis C                                  | 155<br>(69 - 254)           | --                       | 0<br>(0 - 1)         | 23<br>(3 - 44)           | 86<br>(34 - 151)         | 46<br>(24 - 77)          |

Web Table 31- Niger deaths with 95% UI by age, sex, and cause in 2013

| Cause                                | Females, All Ages        | Females, 0-4 Years | Females, 5-14 Years | Females, 15-49 Years | Females, 50-69 Years     | Females, 70-80 Years     |
|--------------------------------------|--------------------------|--------------------|---------------------|----------------------|--------------------------|--------------------------|
| Liver cancer due to alcohol use      | 32<br>(11 - 63)          | --                 | --                  | 4<br>(1 - 8)         | 18<br>(6 - 36)           | 10<br>(3 - 22)           |
| Liver cancer due to other causes     | 104<br>(54 - 189)        | --                 | 1<br>(1 - 3)        | 31<br>(16 - 54)      | 55<br>(24 - 107)         | 17<br>(8 - 36)           |
| Larynx cancer                        | 2<br>(1 - 4)             | --                 | --                  | 1<br>(0 - 1)         | 1<br>(1 - 2)             | 1<br>(0 - 1)             |
| Tracheal, bronchus and lung cancer   | 77<br>(61 - 100)         | --                 | --                  | 9<br>(7 - 13)        | 45<br>(34 - 61)          | 23<br>(17 - 32)          |
| Breast cancer                        | 300<br>(204 - 377)       | --                 | --                  | 113<br>(70 - 148)    | 144<br>(97 - 189)        | 43<br>(30 - 57)          |
| Cervical cancer                      | 759<br>(565 - 983)       | --                 | --                  | 202<br>(139 - 278)   | 436<br>(302 - 599)       | 121<br>(83 - 172)        |
| Uterine cancer                       | 63<br>(36 - 100)         | --                 | --                  | 11<br>(5 - 19)       | 34<br>(18 - 57)          | 18<br>(10 - 29)          |
| Prostate cancer                      | --                       | --                 | --                  | --                   | --                       | --                       |
| Colon and rectum cancer              | 141<br>(113 - 177)       | --                 | --                  | 36<br>(27 - 48)      | 59<br>(45 - 77)          | 47<br>(34 - 64)          |
| Lip and oral cavity cancer           | 18<br>(12 - 25)          | --                 | --                  | 6<br>(3 - 10)        | 8<br>(5 - 11)            | 5<br>(3 - 8)             |
| Nasopharynx cancer                   | 5<br>(3 - 8)             | --                 | 0<br>(0 - 1)        | 2<br>(1 - 3)         | 2<br>(1 - 3)             | 1<br>(0 - 1)             |
| Other pharynx cancer                 | 5<br>(3 - 8)             | --                 | --                  | 1<br>(1 - 2)         | 3<br>(2 - 5)             | 1<br>(1 - 1)             |
| Gallbladder and biliary tract cancer | 61<br>(41 - 84)          | --                 | --                  | 10<br>(6 - 14)       | 36<br>(23 - 54)          | 15<br>(9 - 23)           |
| Pancreatic cancer                    | 60<br>(48 - 72)          | --                 | --                  | 8<br>(6 - 10)        | 36<br>(27 - 45)          | 16<br>(12 - 22)          |
| Malignant skin melanoma              | 8<br>(6 - 10)            | --                 | --                  | 2<br>(1 - 2)         | 5<br>(3 - 7)             | 1<br>(1 - 2)             |
| Non-melanoma skin cancer             | 6<br>(3 - 12)            | --                 | --                  | 1<br>(1 - 3)         | 2<br>(1 - 3)             | 3<br>(1 - 7)             |
| Ovarian cancer                       | 70<br>(43 - 107)         | --                 | --                  | 18<br>(10 - 29)      | 43<br>(25 - 68)          | 9<br>(5 - 15)            |
| Testicular cancer                    | --                       | --                 | --                  | --                   | --                       | --                       |
| Kidney cancer                        | 24<br>(15 - 35)          | 5<br>(2 - 13)      | 3<br>(1 - 6)        | 4<br>(2 - 6)         | 9<br>(6 - 14)            | 3<br>(2 - 5)             |
| Bladder cancer                       | 39<br>(28 - 60)          | --                 | --                  | 8<br>(4 - 12)        | 18<br>(11 - 28)          | 14<br>(8 - 25)           |
| Brain and nervous system cancer      | 35<br>(22 - 44)          | 3<br>(1 - 7)       | 3<br>(2 - 6)        | 16<br>(7 - 21)       | 9<br>(6 - 12)            | 4<br>(3 - 6)             |
| Thyroid cancer                       | 13<br>(8 - 20)           | --                 | 0<br>(0 - 0)        | 1<br>(1 - 2)         | 7<br>(4 - 11)            | 4<br>(3 - 8)             |
| Mesothelioma                         | 3<br>(2 - 4)             | --                 | --                  | 1<br>(1 - 1)         | 2<br>(1 - 3)             | 0<br>(0 - 1)             |
| Hodgkin lymphoma                     | 16<br>(9 - 23)           | 3<br>(1 - 5)       | 2<br>(1 - 5)        | 4<br>(2 - 6)         | 3<br>(1 - 4)             | 5<br>(2 - 9)             |
| Non-Hodgkin lymphoma                 | 86<br>(49 - 135)         | 17<br>(6 - 37)     | 20<br>(9 - 39)      | 23<br>(12 - 38)      | 19<br>(10 - 34)          | 7<br>(4 - 16)            |
| Multiple myeloma                     | 19<br>(14 - 25)          | --                 | --                  | 3<br>(2 - 4)         | 10<br>(7 - 15)           | 6<br>(4 - 9)             |
| Leukemia                             | 54<br>(33 - 69)          | 3<br>(1 - 7)       | 12<br>(7 - 19)      | 17<br>(9 - 22)       | 13<br>(8 - 17)           | 8<br>(5 - 11)            |
| Other neoplasms                      | 246<br>(181 - 333)       | 38<br>(18 - 81)    | 41<br>(21 - 77)     | 48<br>(30 - 68)      | 70<br>(46 - 106)         | 48<br>(31 - 73)          |
| Cardiovascular diseases              | 7,399<br>(6,083 - 9,863) | 317<br>(169 - 619) | 107<br>(61 - 187)   | 740<br>(530 - 1,112) | 2,894<br>(2,294 - 3,891) | 3,340<br>(2,750 - 4,419) |
| Rheumatic heart disease              | 156<br>(78 - 440)        | 12<br>(3 - 38)     | 14<br>(6 - 33)      | 33<br>(13 - 115)     | 47<br>(18 - 160)         | 50<br>(27 - 128)         |
| Ischemic heart disease               | 2,239<br>(1,564 - 3,701) | 11<br>(2 - 42)     | 11<br>(4 - 22)      | 190<br>(118 - 340)   | 861<br>(585 - 1,427)     | 1,166<br>(786 - 1,955)   |
| Cerebrovascular disease              | 2,584<br>(1,216 - 3,743) | 56<br>(26 - 118)   | 21<br>(9 - 42)      | 217<br>(76 - 348)    | 1,032<br>(468 - 1,558)   | 1,258<br>(636 - 1,805)   |
| Ischemic stroke                      | 1,417<br>(99 - 2,320)    | 9<br>(1 - 31)      | 2<br>(0 - 8)        | 35<br>(1 - 100)      | 508<br>(22 - 903)        | 862<br>(72 - 1,349)      |
| Hemorrhagic stroke                   | 1,167<br>(372 - 2,259)   | 47<br>(18 - 104)   | 19<br>(6 - 38)      | 182<br>(49 - 296)    | 524<br>(168 - 968)       | 396<br>(114 - 975)       |
| Hypertensive heart disease           | 723<br>(306 - 1,322)     | 5<br>(1 - 14)      | 2<br>(1 - 3)        | 58<br>(20 - 141)     | 286<br>(106 - 567)       | 373<br>(156 - 654)       |
| Cardiomyopathy and myocarditis       | 462<br>(230 - 1,038)     | 82<br>(30 - 244)   | 22<br>(10 - 52)     | 83<br>(36 - 197)     | 119<br>(51 - 302)        | 155<br>(59 - 387)        |
| Atrial fibrillation and flutter      | 0<br>(0 - 1)             | --                 | --                  | 0<br>(0 - 0)         | 0<br>(0 - 0)             | 0<br>(0 - 0)             |
| Aortic aneurysm                      | 83<br>(24 - 300)         | --                 | --                  | 10<br>(3 - 39)       | 34<br>(9 - 124)          | 39<br>(11 - 146)         |
| Peripheral vascular disease          | 1<br>(1 - 3)             | --                 | --                  | 0<br>(0 - 0)         | 1<br>(0 - 2)             | 0<br>(0 - 1)             |
| Endocarditis                         | 153<br>(84 - 325)        | 42<br>(16 - 81)    | 8<br>(4 - 15)       | 29<br>(15 - 59)      | 31<br>(14 - 84)          | 44<br>(18 - 116)         |

Web Table 31- Niger deaths with 95% UI by age, sex, and cause in 2013

| Cause                                               | Females, All Ages      | Females, 0-4 Years | Females, 5-14 Years | Females, 15-49 Years | Females, 50-69 Years | Females, 70-80 Years |
|-----------------------------------------------------|------------------------|--------------------|---------------------|----------------------|----------------------|----------------------|
| Other cardiovascular and circulatory diseases       | 996<br>(636 - 2,162)   | 109<br>(46 - 251)  | 30<br>(15 - 59)     | 119<br>(68 - 281)    | 484<br>(293 - 1,025) | 254<br>(138 - 618)   |
| Chronic respiratory diseases                        | 1,063<br>(836 - 1,750) | 126<br>(58 - 297)  | 33<br>(20 - 56)     | 112<br>(82 - 188)    | 379<br>(277 - 585)   | 414<br>(312 - 659)   |
| Chronic obstructive pulmonary disease               | 585<br>(413 - 1,006)   | 46<br>(20 - 99)    | 14<br>(7 - 23)      | 35<br>(20 - 61)      | 228<br>(148 - 387)   | 262<br>(177 - 445)   |
| Pneumoconiosis                                      | 3<br>(2 - 5)           | 1<br>(0 - 2)       | 1<br>(0 - 1)        | 1<br>(0 - 1)         | 1<br>(0 - 2)         | 0<br>(0 - 0)         |
| Silicosis                                           | 0<br>(0 - 1)           | 0<br>(0 - 0)       | 0<br>(0 - 0)        | 0<br>(0 - 0)         | 0<br>(0 - 0)         | 0<br>(0 - 0)         |
| Asbestosis                                          | 0<br>(0 - 1)           | 0<br>(0 - 0)       | 0<br>(0 - 0)        | 0<br>(0 - 0)         | 0<br>(0 - 0)         | 0<br>(0 - 0)         |
| Coal workers pneumoconiosis                         | 0<br>(0 - 1)           | 0<br>(0 - 0)       | 0<br>(0 - 0)        | 0<br>(0 - 0)         | 0<br>(0 - 0)         | 0<br>(0 - 0)         |
| Other pneumoconiosis                                | 2<br>(1 - 4)           | 0<br>(0 - 1)       | 0<br>(0 - 1)        | 1<br>(0 - 1)         | 1<br>(0 - 2)         | 0<br>(0 - 0)         |
| Asthma                                              | 334<br>(217 - 595)     | 61<br>(22 - 165)   | 13<br>(7 - 33)      | 51<br>(33 - 101)     | 116<br>(68 - 196)    | 94<br>(53 - 170)     |
| Interstitial lung disease and pulmonary sarcoidosis | 55<br>(7 - 104)        | 1<br>(0 - 2)       | 1<br>(0 - 1)        | 4<br>(1 - 8)         | 17<br>(2 - 34)       | 33<br>(3 - 68)       |
| Other chronic respiratory diseases                  | 85<br>(54 - 148)       | 18<br>(7 - 41)     | 5<br>(2 - 8)        | 21<br>(12 - 35)      | 17<br>(9 - 30)       | 26<br>(13 - 49)      |
| Cirrhosis                                           | 621<br>(471 - 815)     | 49<br>(19 - 108)   | 21<br>(12 - 32)     | 130<br>(93 - 178)    | 274<br>(194 - 380)   | 148<br>(101 - 213)   |
| Cirrhosis due to hepatitis B                        | 170<br>(28 - 317)      | 3<br>(0 - 9)       | 3<br>(0 - 8)        | 36<br>(4 - 72)       | 83<br>(14 - 164)     | 44<br>(8 - 86)       |
| Cirrhosis due to hepatitis C                        | 237<br>(112 - 351)     | 5<br>(1 - 14)      | 6<br>(1 - 13)       | 58<br>(31 - 91)      | 112<br>(37 - 181)    | 56<br>(23 - 91)      |
| Cirrhosis due to alcohol use                        | 104<br>(51 - 204)      | --                 | --                  | 14<br>(7 - 25)       | 52<br>(24 - 107)     | 38<br>(16 - 79)      |
| Cirrhosis due to other causes                       | 110<br>(67 - 173)      | 41<br>(16 - 90)    | 11<br>(5 - 19)      | 22<br>(11 - 36)      | 26<br>(10 - 52)      | 10<br>(4 - 20)       |
| Digestive diseases                                  | 1,076<br>(830 - 1,343) | 164<br>(73 - 314)  | 82<br>(52 - 123)    | 190<br>(136 - 255)   | 324<br>(230 - 436)   | 316<br>(219 - 430)   |
| Peptic ulcer disease                                | 221<br>(135 - 319)     | 16<br>(5 - 40)     | 9<br>(4 - 20)       | 38<br>(21 - 58)      | 78<br>(44 - 127)     | 80<br>(44 - 129)     |
| Gastritis and duodenitis                            | 66<br>(24 - 169)       | 12<br>(2 - 33)     | 7<br>(3 - 16)       | 12<br>(5 - 32)       | 16<br>(5 - 50)       | 18<br>(5 - 59)       |
| Appendicitis                                        | 157<br>(100 - 231)     | 44<br>(15 - 110)   | 24<br>(11 - 45)     | 32<br>(19 - 53)      | 31<br>(13 - 53)      | 26<br>(8 - 54)       |
| Paralytic ileus and intestinal obstruction          | 288<br>(158 - 432)     | 25<br>(7 - 57)     | 16<br>(6 - 30)      | 43<br>(19 - 69)      | 100<br>(48 - 165)    | 103<br>(54 - 174)    |
| Inguinal, femoral, and abdominal hernia             | 17<br>(6 - 28)         | 3<br>(1 - 7)       | 1<br>(0 - 2)        | 3<br>(1 - 7)         | 4<br>(1 - 8)         | 6<br>(1 - 12)        |
| Inflammatory bowel disease                          | 77<br>(17 - 131)       | 30<br>(6 - 78)     | 5<br>(1 - 10)       | 15<br>(2 - 24)       | 14<br>(2 - 24)       | 13<br>(2 - 24)       |
| Vascular intestinal disorders                       | 4<br>(1 - 14)          | 0<br>(0 - 1)       | 0<br>(0 - 1)        | 1<br>(0 - 3)         | 1<br>(0 - 5)         | 1<br>(0 - 5)         |
| Gallbladder and biliary diseases                    | 90<br>(54 - 126)       | 9<br>(3 - 18)      | 7<br>(2 - 13)       | 14<br>(8 - 21)       | 32<br>(18 - 50)      | 29<br>(15 - 46)      |
| Pancreatitis                                        | 43<br>(18 - 79)        | 3<br>(1 - 6)       | 2<br>(1 - 4)        | 8<br>(4 - 15)        | 19<br>(6 - 41)       | 11<br>(4 - 23)       |
| Other digestive diseases                            | 114<br>(71 - 169)      | 24<br>(7 - 54)     | 10<br>(5 - 17)      | 23<br>(14 - 39)      | 28<br>(16 - 47)      | 29<br>(15 - 50)      |
| Neurological disorders                              | 494<br>(388 - 640)     | 96<br>(44 - 185)   | 43<br>(20 - 76)     | 85<br>(50 - 153)     | 56<br>(42 - 76)      | 214<br>(161 - 278)   |
| Alzheimer disease and other dementias               | 219<br>(165 - 284)     | --                 | --                  | 0<br>(0 - 0)         | 26<br>(19 - 37)      | 192<br>(143 - 251)   |
| Parkinson disease                                   | 2<br>(1 - 4)           | --                 | --                  | 0<br>(0 - 0)         | 1<br>(0 - 1)         | 1<br>(0 - 2)         |
| Epilepsy                                            | 222<br>(137 - 363)     | 83<br>(35 - 172)   | 38<br>(16 - 69)     | 74<br>(40 - 141)     | 14<br>(7 - 29)       | 13<br>(6 - 26)       |
| Multiple sclerosis                                  | 1<br>(0 - 4)           | --                 | --                  | 0<br>(0 - 2)         | 0<br>(0 - 2)         | 0<br>(0 - 1)         |
| Other neurological disorders                        | 51<br>(38 - 69)        | 12<br>(7 - 20)     | 5<br>(3 - 9)        | 10<br>(7 - 14)       | 16<br>(11 - 23)      | 8<br>(6 - 12)        |
| Mental and substance use disorders                  | 64<br>(41 - 104)       | 6<br>(1 - 12)      | 0<br>(0 - 0)        | 27<br>(15 - 50)      | 24<br>(14 - 40)      | 7<br>(5 - 11)        |
| Schizophrenia                                       | 2<br>(1 - 3)           | --                 | --                  | 1<br>(0 - 2)         | 1<br>(0 - 1)         | 0<br>(0 - 0)         |
| Alcohol use disorders                               | 31<br>(6 - 69)         | --                 | --                  | 16<br>(3 - 38)       | 13<br>(2 - 30)       | 2<br>(0 - 4)         |
| Drug use disorders                                  | 32<br>(20 - 48)        | 6<br>(1 - 12)      | --                  | 11<br>(6 - 19)       | 10<br>(6 - 16)       | 5<br>(3 - 8)         |
| Opioid use disorders                                | 3<br>(2 - 5)           | 1<br>(0 - 1)       | --                  | 1<br>(1 - 2)         | 1<br>(1 - 1)         | 1<br>(0 - 1)         |
| Cocaine use disorders                               | 0<br>(0 - 0)           | 0<br>(0 - 0)       | --                  | 0<br>(0 - 0)         | 0<br>(0 - 0)         | 0<br>(0 - 0)         |
| Amphetamine use disorders                           | 0<br>(0 - 0)           | 0<br>(0 - 0)       | --                  | 0<br>(0 - 0)         | 0<br>(0 - 0)         | 0<br>(0 - 0)         |

Web Table 31- Niger deaths with 95% UI by age, sex, and cause in 2013

| Cause                                               | Females, All Ages        | Females, 0-4 Years     | Females, 5-14 Years | Females, 15-49 Years | Females, 50-69 Years | Females, 70-80 Years |
|-----------------------------------------------------|--------------------------|------------------------|---------------------|----------------------|----------------------|----------------------|
| Other drug use disorders                            | 28<br>(17 - 43)          | 5<br>(1 - 10)          | --                  | 9<br>(5 - 17)        | 9<br>(5 - 14)        | 5<br>(3 - 7)         |
| Eating disorders                                    | 0<br>(0 - 0)             | --                     | 0<br>(0 - 0)        | 0<br>(0 - 0)         | --                   | --                   |
| Anorexia nervosa                                    | 0<br>(0 - 0)             | --                     | 0<br>(0 - 0)        | 0<br>(0 - 0)         | --                   | --                   |
| Diabetes, urogenital, blood, and endocrine diseases | 2,491<br>(1,838 - 3,397) | 711<br>(360 - 1,315)   | 242<br>(139 - 410)  | 377<br>(277 - 514)   | 630<br>(467 - 785)   | 532<br>(375 - 660)   |
| Diabetes mellitus                                   | 743<br>(555 - 925)       | 7<br>(3 - 13)          | 6<br>(3 - 13)       | 81<br>(55 - 107)     | 343<br>(246 - 458)   | 306<br>(214 - 399)   |
| Acute glomerulonephritis                            | 18<br>(10 - 32)          | 3<br>(1 - 8)           | 3<br>(1 - 5)        | 6<br>(3 - 13)        | 5<br>(1 - 11)        | 1<br>(0 - 3)         |
| Chronic kidney disease                              | 333<br>(201 - 510)       | 56<br>(28 - 100)       | 27<br>(13 - 46)     | 73<br>(39 - 139)     | 97<br>(60 - 150)     | 79<br>(50 - 118)     |
| Chronic kidney disease due to diabetes mellitus     | 3<br>(1 - 6)             | 0<br>(0 - 0)           | 0<br>(0 - 1)        | 0<br>(0 - 0)         | 2<br>(1 - 5)         | 0<br>(0 - 0)         |
| Chronic kidney disease due to hypertension          | 135<br>(77 - 212)        | 5<br>(1 - 14)          | 3<br>(1 - 6)        | 22<br>(9 - 42)       | 54<br>(29 - 87)      | 50<br>(30 - 77)      |
| Chronic kidney disease due to glomerulonephritis    | 132<br>(74 - 202)        | 41<br>(20 - 72)        | 16<br>(8 - 28)      | 39<br>(20 - 74)      | 23<br>(9 - 42)       | 13<br>(4 - 23)       |
| Chronic kidney disease due to other causes          | 63<br>(19 - 118)         | 10<br>(3 - 24)         | 7<br>(2 - 17)       | 11<br>(3 - 31)       | 18<br>(4 - 37)       | 16<br>(3 - 37)       |
| Urinary diseases and male infertility               | 259<br>(162 - 373)       | 41<br>(16 - 89)        | 13<br>(6 - 25)      | 49<br>(28 - 88)      | 86<br>(50 - 139)     | 69<br>(43 - 108)     |
| Interstitial nephritis and urinary tract infections | 236<br>(137 - 339)       | 37<br>(12 - 83)        | 10<br>(3 - 22)      | 45<br>(23 - 79)      | 79<br>(43 - 124)     | 65<br>(40 - 104)     |
| Urolithiasis                                        | 7<br>(2 - 23)            | --                     | 1<br>(0 - 4)        | 2<br>(0 - 6)         | 3<br>(1 - 9)         | 1<br>(0 - 5)         |
| Other urinary diseases                              | 16<br>(9 - 30)           | 5<br>(1 - 13)          | 1<br>(0 - 5)        | 3<br>(1 - 7)         | 5<br>(2 - 10)        | 3<br>(1 - 6)         |
| Gynecological diseases                              | 16<br>(7 - 26)           | --                     | --                  | 8<br>(4 - 16)        | 5<br>(2 - 10)        | 2<br>(1 - 4)         |
| Uterine fibroids                                    | 3<br>(2 - 6)             | --                     | --                  | 1<br>(1 - 3)         | 1<br>(1 - 3)         | 1<br>(0 - 1)         |
| Polycystic ovarian syndrome                         | 1<br>(0 - 1)             | --                     | --                  | 1<br>(0 - 1)         | 0<br>(0 - 0)         | --                   |
| Endometriosis                                       | 1<br>(1 - 3)             | --                     | --                  | 1<br>(1 - 3)         | 0<br>(0 - 0)         | --                   |
| Genital prolapse                                    | 3<br>(1 - 4)             | --                     | --                  | 1<br>(0 - 2)         | 1<br>(0 - 2)         | 1<br>(0 - 1)         |
| Other gynecological diseases                        | 8<br>(4 - 13)            | --                     | --                  | 4<br>(2 - 8)         | 3<br>(1 - 5)         | 1<br>(0 - 2)         |
| Hemoglobinopathies and hemolytic anemias            | 846<br>(424 - 1,624)     | 502<br>(202 - 1,087)   | 175<br>(87 - 339)   | 114<br>(63 - 210)    | 37<br>(19 - 60)      | 18<br>(6 - 43)       |
| Thalassemias                                        | 20<br>(9 - 40)           | 15<br>(6 - 33)         | 3<br>(2 - 6)        | 1<br>(1 - 3)         | 0<br>(0 - 0)         | 0<br>(0 - 0)         |
| Sickle cell disorders                               | 799<br>(400 - 1,548)     | 476<br>(190 - 1,039)   | 171<br>(85 - 330)   | 111<br>(61 - 204)    | 34<br>(17 - 56)      | 7<br>(2 - 17)        |
| G6PD deficiency                                     | 4<br>(2 - 7)             | 2<br>(1 - 4)           | 1<br>(0 - 1)        | 1<br>(0 - 1)         | 0<br>(0 - 1)         | 1<br>(0 - 1)         |
| Other hemoglobinopathies and hemolytic anemias      | 23<br>(10 - 42)          | 8<br>(3 - 19)          | 1<br>(0 - 2)        | 1<br>(0 - 2)         | 2<br>(1 - 4)         | 10<br>(4 - 25)       |
| Endocrine, metabolic, blood, and immune disorders   | 276<br>(171 - 399)       | 101<br>(45 - 214)      | 18<br>(8 - 38)      | 45<br>(27 - 69)      | 56<br>(31 - 88)      | 56<br>(22 - 91)      |
| Musculoskeletal disorders                           | 48<br>(28 - 89)          | --                     | 8<br>(4 - 14)       | 14<br>(7 - 28)       | 16<br>(9 - 30)       | 11<br>(6 - 22)       |
| Rheumatoid arthritis                                | 12<br>(6 - 24)           | --                     | 2<br>(1 - 3)        | 2<br>(1 - 4)         | 4<br>(2 - 8)         | 5<br>(2 - 11)        |
| Other musculoskeletal disorders                     | 36<br>(21 - 69)          | --                     | 6<br>(3 - 10)       | 12<br>(6 - 25)       | 12<br>(6 - 24)       | 6<br>(3 - 13)        |
| Other non-communicable diseases                     | 2,284<br>(1,086 - 4,640) | 1,891<br>(714 - 4,152) | 121<br>(54 - 255)   | 102<br>(64 - 150)    | 85<br>(51 - 134)     | 86<br>(50 - 136)     |
| Congenital anomalies                                | 1,957<br>(765 - 4,356)   | 1,790<br>(649 - 4,044) | 109<br>(41 - 241)   | 40<br>(24 - 71)      | 12<br>(7 - 20)       | 7<br>(4 - 12)        |
| Neural tube defects                                 | 558<br>(120 - 1,885)     | 527<br>(107 - 1,793)   | 23<br>(6 - 79)      | 7<br>(2 - 21)        | 1<br>(0 - 2)         | 0<br>(0 - 1)         |
| Congenital heart anomalies                          | 691<br>(285 - 1,465)     | 629<br>(240 - 1,373)   | 39<br>(13 - 93)     | 14<br>(8 - 25)       | 5<br>(3 - 9)         | 3<br>(2 - 6)         |
| Cleft lip and cleft palate                          | 10<br>(1 - 32)           | 10<br>(1 - 32)         | --                  | --                   | --                   | --                   |
| Down syndrome                                       | 338<br>(92 - 862)        | 296<br>(67 - 816)      | 28<br>(9 - 60)      | 11<br>(5 - 19)       | 3<br>(1 - 6)         | 0<br>(0 - 1)         |
| Chromosomal unbalanced rearrangements               | 76<br>(15 - 220)         | 71<br>(12 - 211)       | 3<br>(1 - 8)        | 2<br>(1 - 3)         | 0<br>(0 - 1)         | 0<br>(0 - 0)         |
| Other congenital anomalies                          | 284<br>(68 - 1,130)      | 256<br>(55 - 1,039)    | 16<br>(4 - 56)      | 7<br>(3 - 17)        | 3<br>(1 - 5)         | 3<br>(1 - 5)         |
| Skin and subcutaneous diseases                      | 315<br>(208 - 445)       | 89<br>(43 - 163)       | 13<br>(7 - 21)      | 61<br>(31 - 101)     | 73<br>(42 - 119)     | 79<br>(45 - 128)     |
| Cellulitis                                          | 180<br>(82 - 299)        | 42<br>(12 - 92)        | 8<br>(4 - 16)       | 35<br>(14 - 65)      | 41<br>(18 - 74)      | 53<br>(27 - 90)      |



Web Table 31- Niger deaths with 95% UI by age, sex, and cause in 2013

| Cause                                           | Females, All Ages        | Females, 0-4 Years   | Females, 5-14 Years | Females, 15-49 Years | Females, 50-69 Years | Females, 70-80 Years |
|-------------------------------------------------|--------------------------|----------------------|---------------------|----------------------|----------------------|----------------------|
| Pyoderma                                        | 126<br>(58 - 238)        | 44<br>(11 - 98)      | 4<br>(1 - 9)        | 23<br>(10 - 52)      | 31<br>(13 - 63)      | 24<br>(8 - 56)       |
| Decubitus ulcer                                 | 3<br>(1 - 7)             | 0<br>(0 - 1)         | 0<br>(0 - 1)        | 1<br>(0 - 2)         | 1<br>(0 - 1)         | 1<br>(0 - 3)         |
| Other skin and subcutaneous diseases            | 6<br>(2 - 13)            | 3<br>(0 - 10)        | 0<br>(0 - 1)        | 2<br>(1 - 4)         | 1<br>(0 - 1)         | 1<br>(0 - 2)         |
| Sudden infant death syndrome                    | 13<br>(1 - 50)           | 13<br>(1 - 50)       | --                  | --                   | --                   | --                   |
| Injuries                                        | 2,739<br>(2,080 - 3,454) | 940<br>(563 - 1,504) | 466<br>(317 - 666)  | 625<br>(475 - 790)   | 388<br>(276 - 497)   | 320<br>(189 - 437)   |
| Transport injuries                              | 968<br>(736 - 1,254)     | 207<br>(94 - 413)    | 193<br>(113 - 299)  | 321<br>(221 - 433)   | 169<br>(119 - 227)   | 78<br>(51 - 106)     |
| Road injuries                                   | 910<br>(697 - 1,184)     | 184<br>(80 - 369)    | 182<br>(106 - 283)  | 312<br>(216 - 419)   | 160<br>(114 - 213)   | 72<br>(49 - 98)      |
| Pedestrian road injuries                        | 236<br>(162 - 326)       | 43<br>(15 - 90)      | 51<br>(26 - 91)     | 77<br>(47 - 115)     | 44<br>(28 - 63)      | 22<br>(14 - 33)      |
| Cyclist road injuries                           | 62<br>(39 - 95)          | 19<br>(6 - 47)       | 16<br>(8 - 30)      | 9<br>(5 - 16)        | 14<br>(6 - 23)       | 3<br>(1 - 5)         |
| Motorcyclist road injuries                      | 94<br>(58 - 142)         | 18<br>(6 - 43)       | 12<br>(5 - 23)      | 48<br>(28 - 80)      | 12<br>(5 - 20)       | 4<br>(2 - 8)         |
| Motor vehicle road injuries                     | 471<br>(346 - 624)       | 91<br>(37 - 194)     | 93<br>(53 - 151)    | 167<br>(107 - 229)   | 82<br>(58 - 114)     | 39<br>(25 - 55)      |
| Other road injuries                             | 48<br>(12 - 82)          | 14<br>(2 - 35)       | 11<br>(2 - 23)      | 10<br>(3 - 22)       | 8<br>(2 - 17)        | 4<br>(1 - 9)         |
| Other transport injuries                        | 58<br>(15 - 99)          | 23<br>(6 - 54)       | 11<br>(2 - 21)      | 9<br>(3 - 15)        | 9<br>(2 - 16)        | 6<br>(1 - 11)        |
| Unintentional injuries                          | 1,567<br>(1,071 - 2,101) | 712<br>(407 - 1,147) | 258<br>(159 - 378)  | 204<br>(150 - 292)   | 175<br>(113 - 245)   | 218<br>(118 - 321)   |
| Falls                                           | 268<br>(143 - 393)       | 62<br>(25 - 135)     | 28<br>(12 - 52)     | 33<br>(17 - 57)      | 39<br>(20 - 61)      | 106<br>(41 - 188)    |
| Drowning                                        | 319<br>(162 - 519)       | 183<br>(67 - 372)    | 80<br>(37 - 138)    | 33<br>(20 - 58)      | 16<br>(8 - 25)       | 8<br>(4 - 13)        |
| Fire, heat, and hot substances                  | 291<br>(169 - 484)       | 161<br>(62 - 334)    | 41<br>(20 - 76)     | 38<br>(23 - 71)      | 27<br>(16 - 47)      | 24<br>(13 - 44)      |
| Poisonings                                      | 69<br>(24 - 136)         | 40<br>(11 - 102)     | 9<br>(3 - 19)       | 9<br>(4 - 16)        | 7<br>(2 - 13)        | 3<br>(1 - 5)         |
| Exposure to mechanical forces                   | 175<br>(115 - 247)       | 78<br>(41 - 141)     | 33<br>(17 - 58)     | 29<br>(17 - 50)      | 22<br>(11 - 35)      | 12<br>(4 - 18)       |
| Unintentional firearm injuries                  | 53<br>(34 - 89)          | 18<br>(8 - 39)       | 9<br>(4 - 20)       | 15<br>(8 - 30)       | 7<br>(4 - 12)        | 3<br>(2 - 6)         |
| Unintentional suffocation                       | 15<br>(5 - 35)           | 11<br>(2 - 29)       | 3<br>(1 - 6)        | 1<br>(0 - 2)         | 1<br>(0 - 1)         | 0<br>(0 - 1)         |
| Other exposure to mechanical forces             | 107<br>(42 - 165)        | 49<br>(20 - 97)      | 21<br>(8 - 43)      | 14<br>(5 - 27)       | 14<br>(2 - 25)       | 8<br>(1 - 14)        |
| Adverse effects of medical treatment            | 139<br>(55 - 255)        | 41<br>(13 - 98)      | 11<br>(4 - 22)      | 24<br>(10 - 47)      | 32<br>(10 - 70)      | 31<br>(7 - 71)       |
| Animal contact                                  | 78<br>(25 - 129)         | 25<br>(8 - 59)       | 18<br>(5 - 36)      | 16<br>(4 - 34)       | 11<br>(2 - 23)       | 7<br>(1 - 15)        |
| Venomous animal contact                         | 55<br>(20 - 96)          | 21<br>(6 - 50)       | 13<br>(4 - 28)      | 11<br>(2 - 26)       | 6<br>(1 - 15)        | 3<br>(0 - 9)         |
| Non-venomous animal contact                     | 24<br>(5 - 45)           | 4<br>(1 - 11)        | 5<br>(1 - 12)       | 5<br>(1 - 12)        | 5<br>(1 - 11)        | 4<br>(1 - 8)         |
| Foreign body                                    | 131<br>(73 - 263)        | 88<br>(37 - 210)     | 13<br>(6 - 24)      | 6<br>(3 - 12)        | 8<br>(4 - 13)        | 16<br>(6 - 27)       |
| Pulmonary aspiration and foreign body in airway | 127<br>(69 - 259)        | 87<br>(36 - 209)     | 13<br>(6 - 24)      | 6<br>(3 - 11)        | 7<br>(3 - 12)        | 15<br>(6 - 26)       |
| Foreign body in other body part                 | 4<br>(2 - 5)             | 1<br>(0 - 2)         | 1<br>(0 - 1)        | 1<br>(0 - 1)         | 1<br>(0 - 1)         | 1<br>(0 - 2)         |
| Other unintentional injuries                    | 97<br>(61 - 136)         | 34<br>(15 - 64)      | 24<br>(11 - 39)     | 16<br>(10 - 26)      | 12<br>(6 - 18)       | 12<br>(4 - 18)       |
| Self-harm and interpersonal violence            | 197<br>(134 - 262)       | 20<br>(9 - 45)       | 15<br>(8 - 25)      | 96<br>(65 - 137)     | 43<br>(20 - 65)      | 23<br>(7 - 37)       |
| Self-harm                                       | 123<br>(71 - 182)        | --                   | 5<br>(2 - 11)       | 57<br>(35 - 96)      | 39<br>(16 - 60)      | 22<br>(6 - 36)       |
| Interpersonal violence                          | 74<br>(41 - 116)         | 20<br>(9 - 45)       | 10<br>(4 - 18)      | 39<br>(20 - 68)      | 4<br>(2 - 6)         | 1<br>(0 - 2)         |
| Assault by firearm                              | 22<br>(9 - 37)           | 6<br>(2 - 14)        | 3<br>(1 - 6)        | 12<br>(4 - 22)       | 2<br>(0 - 3)         | 0<br>(0 - 0)         |
| Assault by sharp object                         | 19<br>(8 - 32)           | 4<br>(1 - 10)        | 2<br>(1 - 4)        | 12<br>(5 - 23)       | 1<br>(0 - 1)         | 0<br>(0 - 0)         |
| Assault by other means                          | 33<br>(18 - 55)          | 11<br>(4 - 25)       | 5<br>(2 - 10)       | 14<br>(7 - 28)       | 2<br>(1 - 3)         | 0<br>(0 - 1)         |
| Forces of nature, war, and legal intervention   | 7<br>(3 - 16)            | 1<br>(0 - 0)         | 1<br>(0 - 1)        | 4<br>(2 - 8)         | 2<br>(1 - 4)         | 1<br>(0 - 1)         |
| Exposure to forces of nature                    | 7<br>(3 - 16)            | 1<br>(0 - 0)         | 1<br>(0 - 1)        | 4<br>(2 - 8)         | 2<br>(1 - 4)         | 1<br>(0 - 1)         |

Web Table 31- Nigeria deaths with 95% UI by age, sex, and cause in 2013

| Cause                                                             | Both Sexes, All Ages                 | Both Sexes, 0-4 Years          | Both Sexes, 5-14 Years      | Both Sexes, 15-49 Years        | Both Sexes, 50-69 Years        | Both Sexes, 70-80 Years        |
|-------------------------------------------------------------------|--------------------------------------|--------------------------------|-----------------------------|--------------------------------|--------------------------------|--------------------------------|
| All causes                                                        | 1,691,918<br>(1,545,911 - 1,823,935) | 892,597<br>(796,144 - 991,568) | 79,219<br>(66,591 - 95,596) | 364,220<br>(321,974 - 402,074) | 205,000<br>(181,493 - 239,702) | 150,881<br>(140,998 - 167,167) |
| Communicable, maternal, neonatal, and nutritional diseases        | 1,066,842<br>(916,856 - 1,201,063)   | 701,945<br>(569,434 - 831,425) | 36,917<br>(26,891 - 46,425) | 216,820<br>(190,507 - 246,724) | 71,554<br>(61,749 - 81,654)    | 39,605<br>(31,937 - 46,485)    |
| HIV/AIDS and tuberculosis                                         | 213,250<br>(186,970 - 244,515)       | 18,514<br>(15,119 - 22,809)    | 9,399<br>(7,731 - 11,147)   | 136,503<br>(114,171 - 163,578) | 40,498<br>(34,080 - 47,133)    | 8,336<br>(6,384 - 10,431)      |
| Tuberculosis                                                      | 37,449<br>(28,903 - 48,392)          | 4,329<br>(2,570 - 6,992)       | 1,051<br>(660 - 1,609)      | 16,159<br>(11,634 - 22,299)    | 10,223<br>(7,208 - 13,970)     | 5,687<br>(3,979 - 7,639)       |
| HIV/AIDS                                                          | 175,801<br>(152,011 - 208,115)       | 14,185<br>(11,525 - 17,649)    | 8,348<br>(6,731 - 10,012)   | 120,344<br>(97,506 - 147,508)  | 30,274<br>(24,303 - 36,612)    | 2,649<br>(1,846 - 3,545)       |
| HIV/AIDS resulting in mycobacterial infection                     | 10,791<br>(8,247 - 13,758)           | 851<br>(633 - 1,129)           | 459<br>(340 - 605)          | 7,368<br>(5,420 - 9,840)       | 1,932<br>(1,433 - 2,526)       | 180<br>(117 - 252)             |
| HIV/AIDS resulting in other diseases                              | 165,011<br>(142,489 - 194,895)       | 13,334<br>(10,797 - 16,560)    | 7,889<br>(6,354 - 9,472)    | 112,976<br>(92,018 - 139,083)  | 28,343<br>(22,881 - 34,110)    | 2,469<br>(1,721 - 3,295)       |
| Diarrhea, lower respiratory, and other common infectious diseases | 277,133<br>(204,561 - 355,093)       | 194,641<br>(131,225 - 263,244) | 12,932<br>(7,360 - 19,372)  | 25,719<br>(19,238 - 32,563)    | 20,565<br>(14,689 - 26,920)    | 23,276<br>(17,043 - 29,215)    |
| Diarrheal diseases                                                | 61,394<br>(36,076 - 94,185)          | 44,743<br>(20,467 - 79,199)    | 2,190<br>(984 - 4,275)      | 6,425<br>(4,292 - 9,774)       | 4,134<br>(2,624 - 6,633)       | 3,902<br>(2,585 - 5,870)       |
| Intestinal infectious diseases                                    | 7,105<br>(3,642 - 12,918)            | 2,701<br>(1,322 - 5,110)       | 1,971<br>(859 - 3,883)      | 2,033<br>(969 - 3,795)         | 305<br>(149 - 547)             | 96<br>(53 - 164)               |
| Typhoid fever                                                     | 4,282<br>(2,096 - 7,880)             | 1,552<br>(693 - 3,103)         | 1,233<br>(513 - 2,525)      | 1,259<br>(566 - 2,412)         | 183<br>(78 - 351)              | 55<br>(26 - 103)               |
| Paratyphoid fever                                                 | 2,384<br>(1,123 - 4,537)             | 883<br>(373 - 1,759)           | 694<br>(283 - 1,459)        | 688<br>(289 - 1,456)           | 93<br>(35 - 197)               | 26<br>(10 - 54)                |
| Other intestinal infectious diseases                              | 439<br>(311 - 608)                   | 265<br>(167 - 406)             | 44<br>(23 - 74)             | 87<br>(60 - 123)               | 29<br>(17 - 47)                | 14<br>(6 - 26)                 |
| Lower respiratory infections                                      | 160,184<br>(116,511 - 212,091)       | 113,255<br>(73,210 - 161,024)  | 4,561<br>(2,443 - 7,432)    | 10,449<br>(7,595 - 13,695)     | 13,795<br>(8,714 - 18,705)     | 18,124<br>(12,205 - 23,268)    |
| Upper respiratory infections                                      | 184<br>(79 - 418)                    | 104<br>(14 - 338)              | 9<br>(1 - 30)               | 37<br>(12 - 76)                | 21<br>(5 - 52)                 | 13<br>(2 - 33)                 |
| Otitis media                                                      | 93<br>(71 - 121)                     | 43<br>(24 - 68)                | 7<br>(4 - 10)               | 12<br>(9 - 16)                 | 15<br>(11 - 20)                | 17<br>(13 - 22)                |
| Meningitis                                                        | 30,484<br>(19,273 - 45,305)          | 18,872<br>(9,392 - 31,082)     | 2,635<br>(1,259 - 4,496)    | 6,005<br>(3,790 - 8,627)       | 2,003<br>(1,275 - 2,923)       | 969<br>(609 - 1,429)           |
| Pneumococcal meningitis                                           | 8,690<br>(5,103 - 13,440)            | 4,785<br>(2,444 - 8,090)       | 935<br>(370 - 1,753)        | 2,041<br>(1,009 - 3,204)       | 633<br>(337 - 1,000)           | 296<br>(169 - 481)             |
| H influenzae type B meningitis                                    | 5,836<br>(3,406 - 9,752)             | 4,546<br>(2,299 - 7,960)       | 430<br>(181 - 793)          | 626<br>(337 - 1,006)           | 164<br>(89 - 287)              | 70<br>(36 - 115)               |
| Meningococcal meningitis                                          | 10,514<br>(6,428 - 15,937)           | 6,578<br>(3,113 - 11,222)      | 894<br>(413 - 1,609)        | 1,980<br>(1,166 - 3,078)       | 697<br>(395 - 1,085)           | 365<br>(209 - 578)             |
| Other meningitis                                                  | 5,444<br>(3,283 - 7,930)             | 2,962<br>(1,421 - 5,004)       | 377<br>(170 - 677)          | 1,358<br>(713 - 2,146)         | 509<br>(318 - 772)             | 238<br>(132 - 401)             |
| Encephalitis                                                      | 1,507<br>(917 - 2,417)               | 663<br>(345 - 1,333)           | 197<br>(83 - 542)           | 361<br>(224 - 616)             | 188<br>(113 - 279)             | 98<br>(48 - 150)               |
| Diphtheria                                                        | 256<br>(9 - 1,248)                   | 216<br>(0 - 1,226)             | 30<br>(0 - 186)             | 9<br>(1 - 28)                  | 2<br>(0 - 8)                   | --                             |
| Whooping cough                                                    | 3,632<br>(7 - 18,755)                | 3,447<br>(7 - 17,861)          | 154<br>(0 - 810)            | 27<br>(0 - 148)                | 3<br>(0 - 17)                  | --                             |
| Tetanus                                                           | 791<br>(493 - 1,350)                 | 492<br>(225 - 843)             | 30<br>(14 - 65)             | 169<br>(72 - 568)              | 77<br>(33 - 236)               | 23<br>(9 - 83)                 |
| Measles                                                           | 11,307<br>(4,508 - 23,823)           | 10,016<br>(3,944 - 21,266)     | 1,132<br>(442 - 2,493)      | 155<br>(65 - 308)              | 4<br>(2 - 8)                   | --                             |
| Varicella and herpes zoster                                       | 196<br>(83 - 410)                    | 90<br>(10 - 272)               | 16<br>(1 - 55)              | 39<br>(11 - 85)                | 18<br>(3 - 47)                 | 34<br>(4 - 100)                |
| Neglected tropical diseases and malaria                           | 263,300<br>(174,880 - 364,172)       | 236,587<br>(150,641 - 338,860) | 10,212<br>(5,295 - 17,524)  | 9,626<br>(5,582 - 16,439)      | 4,397<br>(2,323 - 8,027)       | 2,479<br>(1,202 - 5,090)       |
| Malaria                                                           | 260,405<br>(171,907 - 361,607)       | 235,483<br>(149,163 - 338,037) | 9,718<br>(4,813 - 16,979)   | 8,798<br>(4,809 - 15,626)      | 4,057<br>(2,004 - 7,675)       | 2,349<br>(1,050 - 4,957)       |
| Leishmaniasis                                                     | 3<br>(2 - 5)                         | 1<br>(1 - 2)                   | 0<br>(0 - 1)                | 1<br>(1 - 2)                   | 0<br>(0 - 0)                   | 0<br>(0 - 0)                   |
| Visceral leishmaniasis                                            | 3<br>(2 - 5)                         | 1<br>(1 - 2)                   | 0<br>(0 - 1)                | 1<br>(1 - 2)                   | 0<br>(0 - 0)                   | 0<br>(0 - 0)                   |
| African trypanosomiasis                                           | 12<br>(5 - 26)                       | 1<br>(0 - 2)                   | 1<br>(0 - 3)                | 8<br>(3 - 17)                  | 2<br>(1 - 4)                   | 0<br>(0 - 1)                   |
| Schistosomiasis                                                   | 530<br>(390 - 711)                   | 20<br>(8 - 38)                 | 24<br>(11 - 43)             | 244<br>(166 - 351)             | 171<br>(107 - 252)             | 72<br>(42 - 109)               |
| Cysticercosis                                                     | 45<br>(10 - 125)                     | 5<br>(1 - 16)                  | 3<br>(1 - 10)               | 28<br>(6 - 81)                 | 7<br>(2 - 20)                  | 2<br>(0 - 5)                   |
| Cystic echinococcosis                                             | 72<br>(57 - 92)                      | 19<br>(12 - 30)                | 13<br>(8 - 19)              | 29<br>(22 - 36)                | 8<br>(7 - 10)                  | 3<br>(3 - 3)                   |
| Dengue                                                            | 168<br>(100 - 262)                   | 90<br>(26 - 170)               | 36<br>(17 - 58)             | 34<br>(21 - 61)                | 6<br>(3 - 16)                  | 2<br>(1 - 5)                   |
| Yellow fever                                                      | 157<br>(105 - 231)                   | 15<br>(5 - 34)                 | 31<br>(11 - 66)             | 86<br>(49 - 144)               | 18<br>(7 - 38)                 | 7<br>(2 - 20)                  |
| Rabies                                                            | 1,078<br>(617 - 1,796)               | 321<br>(140 - 637)             | 312<br>(135 - 645)          | 332<br>(205 - 509)             | 96<br>(36 - 171)               | 18<br>(6 - 34)                 |
| Intestinal nematode infections                                    | 624<br>(389 - 958)                   | 538<br>(320 - 845)             | 58<br>(30 - 97)             | 18<br>(8 - 33)                 | 6<br>(1 - 15)                  | 4<br>(0 - 13)                  |
| Ascariasis                                                        | 624<br>(389 - 958)                   | 538<br>(320 - 845)             | 58<br>(30 - 97)             | 18<br>(8 - 33)                 | 6<br>(1 - 15)                  | 4<br>(0 - 13)                  |

Web Table 31- Nigeria deaths with 95% UI by age, sex, and cause in 2013

| Cause                                                            | Both Sexes, All Ages           | Both Sexes, 0-4 Years          | Both Sexes, 5-14 Years      | Both Sexes, 15-49 Years      | Both Sexes, 50-69 Years       | Both Sexes, 70-80 Years       |
|------------------------------------------------------------------|--------------------------------|--------------------------------|-----------------------------|------------------------------|-------------------------------|-------------------------------|
| Other neglected tropical diseases                                | 206<br>(131 - 358)             | 94<br>(42 - 184)               | 15<br>(7 - 25)              | 48<br>(30 - 88)              | 27<br>(17 - 45)               | 22<br>(14 - 34)               |
| Maternal disorders                                               | 36,698<br>(24,829 - 49,252)    | --                             | 208<br>(68 - 512)           | 36,489<br>(24,645 - 49,064)  | --                            | --                            |
| Maternal hemorrhage                                              | 5,661<br>(3,289 - 8,567)       | --                             | 17<br>(5 - 45)              | 5,644<br>(3,272 - 8,533)     | --                            | --                            |
| Maternal sepsis and other maternal infections                    | 1,821<br>(921 - 2,987)         | --                             | 11<br>(2 - 30)              | 1,810<br>(909 - 2,966)       | --                            | --                            |
| Maternal hypertensive disorders                                  | 2,691<br>(1,591 - 4,202)       | --                             | 15<br>(4 - 39)              | 2,676<br>(1,584 - 4,177)     | --                            | --                            |
| Maternal obstructed labor                                        | 2,807<br>(1,649 - 4,089)       | --                             | 11<br>(3 - 29)              | 2,796<br>(1,646 - 4,079)     | --                            | --                            |
| Maternal abortive outcome                                        | 6,406<br>(4,048 - 9,225)       | --                             | 37<br>(11 - 96)             | 6,369<br>(4,022 - 9,163)     | --                            | --                            |
| Indirect maternal deaths                                         | 4,067<br>(2,326 - 6,420)       | --                             | 18<br>(5 - 46)              | 4,049<br>(2,311 - 6,392)     | --                            | --                            |
| Late maternal deaths                                             | 5,876<br>(2,944 - 9,191)       | --                             | 59<br>(16 - 157)            | 5,817<br>(2,909 - 9,118)     | --                            | --                            |
| Maternal deaths aggravated by HIV/AIDS                           | 450<br>(223 - 736)             | --                             | --                          | 450<br>(223 - 736)           | --                            | --                            |
| Other maternal disorders                                         | 6,844<br>(4,284 - 9,879)       | --                             | 40<br>(11 - 101)            | 6,804<br>(4,232 - 9,811)     | --                            | --                            |
| Neonatal disorders                                               | 187,464<br>(144,634 - 222,644) | 187,464<br>(144,634 - 222,644) | --                          | --                           | --                            | --                            |
| Neonatal preterm birth complications                             | 61,669<br>(33,258 - 95,179)    | 61,669<br>(33,258 - 95,179)    | --                          | --                           | --                            | --                            |
| Neonatal encephalopathy due to birth asphyxia and trauma         | 60,479<br>(35,075 - 92,294)    | 60,479<br>(35,075 - 92,294)    | --                          | --                           | --                            | --                            |
| Neonatal sepsis and other neonatal infections                    | 45,349<br>(25,445 - 73,814)    | 45,349<br>(25,445 - 73,814)    | --                          | --                           | --                            | --                            |
| Hemolytic disease and other neonatal jaundice                    | 1,041<br>(414 - 2,427)         | 1,041<br>(414 - 2,427)         | --                          | --                           | --                            | --                            |
| Other neonatal disorders                                         | 18,926<br>(10,104 - 31,688)    | 18,926<br>(10,104 - 31,688)    | --                          | --                           | --                            | --                            |
| Nutritional deficiencies                                         | 66,355<br>(39,404 - 99,408)    | 47,518<br>(24,566 - 77,925)    | 2,872<br>(1,441 - 4,792)    | 6,741<br>(4,281 - 9,610)     | 4,700<br>(3,288 - 6,452)      | 4,523<br>(3,170 - 6,303)      |
| Protein-energy malnutrition                                      | 52,783<br>(30,490 - 82,146)    | 43,299<br>(22,732 - 71,453)    | 2,243<br>(1,130 - 3,730)    | 2,303<br>(1,282 - 3,841)     | 2,502<br>(1,509 - 3,846)      | 2,436<br>(1,480 - 3,756)      |
| Iodine deficiency                                                | 52<br>(7 - 202)                | 29<br>(0 - 162)                | 4<br>(0 - 22)               | 10<br>(0 - 40)               | 6<br>(0 - 32)                 | 3<br>(0 - 18)                 |
| Iron-deficiency anemia                                           | 13,297<br>(7,786 - 23,028)     | 4,112<br>(1,055 - 11,382)      | 615<br>(241 - 1,399)        | 4,377<br>(2,601 - 6,726)     | 2,136<br>(1,158 - 3,440)      | 2,057<br>(1,178 - 3,362)      |
| Other nutritional deficiencies                                   | 223<br>(106 - 403)             | 78<br>(21 - 219)               | 10<br>(4 - 28)              | 51<br>(24 - 99)              | 56<br>(19 - 102)              | 27<br>(12 - 55)               |
| Other communicable, maternal, neonatal, and nutritional diseases | 22,641<br>(11,341 - 36,942)    | 17,220<br>(6,646 - 30,359)     | 1,294<br>(517 - 2,423)      | 1,741<br>(1,050 - 2,432)     | 1,394<br>(852 - 2,009)        | 992<br>(555 - 1,530)          |
| Sexually transmitted diseases excluding HIV                      | 16,210<br>(5,219 - 30,336)     | 14,559<br>(4,184 - 27,785)     | 991<br>(280 - 2,013)        | 346<br>(201 - 610)           | 188<br>(87 - 382)             | 125<br>(54 - 287)             |
| Syphilis                                                         | 15,921<br>(4,905 - 30,028)     | 14,559<br>(4,184 - 27,785)     | 972<br>(265 - 1,991)        | 164<br>(96 - 303)            | 125<br>(56 - 254)             | 100<br>(43 - 228)             |
| Chlamydial infection                                             | 45<br>(23 - 77)                | --                             | 2<br>(1 - 3)                | 31<br>(14 - 53)              | 9<br>(3 - 25)                 | 3<br>(1 - 9)                  |
| Gonococcal infection                                             | 138<br>(85 - 251)              | --                             | 9<br>(4 - 20)               | 81<br>(47 - 149)             | 33<br>(15 - 67)               | 15<br>(6 - 35)                |
| Other sexually transmitted diseases                              | 107<br>(67 - 190)              | --                             | 9<br>(4 - 20)               | 71<br>(41 - 128)             | 21<br>(9 - 44)                | 7<br>(3 - 16)                 |
| Hepatitis                                                        | 2,672<br>(731 - 4,101)         | 599<br>(88 - 1,148)            | 130<br>(20 - 247)           | 858<br>(215 - 1,407)         | 652<br>(246 - 1,081)          | 433<br>(162 - 742)            |
| Acute hepatitis A                                                | 245<br>(36 - 601)              | 166<br>(19 - 432)              | 34<br>(5 - 82)              | 36<br>(6 - 97)               | 7<br>(1 - 18)                 | 2<br>(0 - 5)                  |
| Acute hepatitis B                                                | 1,779<br>(539 - 2,872)         | 427<br>(63 - 874)              | 73<br>(11 - 148)            | 356<br>(97 - 655)            | 535<br>(203 - 889)            | 388<br>(146 - 675)            |
| Acute hepatitis C                                                | 47<br>(7 - 135)                | --                             | 4<br>(1 - 15)               | 14<br>(2 - 42)               | 17<br>(2 - 55)                | 12<br>(1 - 40)                |
| Acute hepatitis E                                                | 601<br>(150 - 1,114)           | 6<br>(0 - 19)                  | 18<br>(3 - 46)              | 451<br>(104 - 826)           | 93<br>(24 - 212)              | 32<br>(6 - 87)                |
| Other infectious diseases                                        | 3,759<br>(2,297 - 5,967)       | 2,062<br>(915 - 4,084)         | 173<br>(66 - 362)           | 537<br>(276 - 984)           | 554<br>(276 - 1,064)          | 433<br>(177 - 866)            |
| Non-communicable diseases                                        | 468,646<br>(352,499 - 644,141) | 142,346<br>(65,114 - 261,999)  | 25,580<br>(11,662 - 47,878) | 83,469<br>(63,040 - 111,791) | 115,372<br>(98,119 - 143,100) | 101,879<br>(92,898 - 117,949) |
| Neoplasms                                                        | 56,159<br>(47,233 - 69,337)    | 2,190<br>(1,209 - 3,496)       | 1,143<br>(627 - 1,795)      | 16,256<br>(12,825 - 20,017)  | 24,972<br>(19,915 - 32,812)   | 11,599<br>(9,659 - 14,704)    |
| Esophageal cancer                                                | 1,146<br>(783 - 1,654)         | --                             | --                          | 213<br>(122 - 354)           | 643<br>(423 - 954)            | 289<br>(194 - 416)            |
| Stomach cancer                                                   | 4,496<br>(3,688 - 5,771)       | --                             | --                          | 1,108<br>(818 - 1,486)       | 2,438<br>(1,905 - 3,237)      | 950<br>(742 - 1,249)          |
| Liver cancer                                                     | 14,890<br>(10,235 - 22,239)    | --                             | 55<br>(27 - 105)            | 5,153<br>(3,088 - 7,644)     | 7,005<br>(4,611 - 11,304)     | 2,677<br>(1,720 - 4,313)      |
| Liver cancer due to hepatitis B                                  | 6,091<br>(4,047 - 9,151)       | --                             | 29<br>(13 - 60)             | 2,765<br>(1,627 - 4,206)     | 2,608<br>(1,637 - 4,279)      | 689<br>(419 - 1,139)          |

Web Table 31- Nigeria deaths with 95% UI by age, sex, and cause in 2013

| Cause                                | Both Sexes, All Ages           | Both Sexes, 0-4 Years    | Both Sexes, 5-14 Years | Both Sexes, 15-49 Years     | Both Sexes, 50-69 Years     | Both Sexes, 70-80 Years     |
|--------------------------------------|--------------------------------|--------------------------|------------------------|-----------------------------|-----------------------------|-----------------------------|
| Liver cancer due to hepatitis C      | 3,886<br>(2,140 - 6,503)       | --                       | 3<br>(1 - 8)           | 868<br>(438 - 1,529)        | 2,046<br>(1,094 - 3,605)    | 969<br>(511 - 1,644)        |
| Liver cancer due to alcohol use      | 2,926<br>(1,757 - 5,074)       | --                       | --                     | 657<br>(352 - 1,216)        | 1,510<br>(838 - 2,735)      | 759<br>(423 - 1,329)        |
| Liver cancer due to other causes     | 1,986<br>(1,275 - 3,088)       | --                       | 23<br>(11 - 43)        | 863<br>(505 - 1,309)        | 841<br>(461 - 1,461)        | 260<br>(137 - 463)          |
| Larynx cancer                        | 171<br>(116 - 354)             | --                       | --                     | 35<br>(23 - 59)             | 85<br>(51 - 200)            | 51<br>(33 - 101)            |
| Tracheal, bronchus and lung cancer   | 2,184<br>(1,798 - 2,812)       | --                       | --                     | 307<br>(233 - 394)          | 1,243<br>(956 - 1,701)      | 634<br>(516 - 833)          |
| Breast cancer                        | 4,063<br>(2,904 - 5,450)       | --                       | --                     | 1,594<br>(1,100 - 2,138)    | 1,911<br>(1,262 - 2,838)    | 559<br>(379 - 755)          |
| Cervical cancer                      | 7,593<br>(5,554 - 10,192)      | --                       | --                     | 2,706<br>(1,837 - 3,866)    | 3,850<br>(2,653 - 5,520)    | 1,037<br>(712 - 1,492)      |
| Uterine cancer                       | 636<br>(434 - 930)             | --                       | --                     | 146<br>(76 - 225)           | 328<br>(200 - 512)          | 161<br>(99 - 264)           |
| Prostate cancer                      | 2,176<br>(1,493 - 3,683)       | --                       | --                     | 47<br>(23 - 89)             | 720<br>(440 - 1,232)        | 1,409<br>(942 - 2,437)      |
| Colon and rectum cancer              | 3,265<br>(2,555 - 4,038)       | --                       | --                     | 899<br>(666 - 1,162)        | 1,361<br>(1,042 - 1,762)    | 1,005<br>(773 - 1,282)      |
| Lip and oral cavity cancer           | 353<br>(258 - 476)             | --                       | --                     | 110<br>(69 - 162)           | 155<br>(107 - 222)          | 88<br>(59 - 138)            |
| Nasopharynx cancer                   | 124<br>(85 - 178)              | --                       | 6<br>(2 - 14)          | 58<br>(37 - 86)             | 47<br>(31 - 72)             | 13<br>(8 - 20)              |
| Other pharynx cancer                 | 151<br>(108 - 208)             | --                       | --                     | 48<br>(31 - 68)             | 68<br>(44 - 102)            | 35<br>(21 - 53)             |
| Gallbladder and biliary tract cancer | 767<br>(511 - 1,060)           | --                       | --                     | 125<br>(66 - 180)           | 439<br>(278 - 636)          | 203<br>(129 - 304)          |
| Pancreatic cancer                    | 1,384<br>(1,142 - 1,691)       | --                       | --                     | 247<br>(187 - 323)          | 829<br>(645 - 1,072)        | 308<br>(246 - 390)          |
| Malignant skin melanoma              | 155<br>(114 - 211)             | --                       | --                     | 44<br>(30 - 62)             | 79<br>(54 - 114)            | 32<br>(22 - 47)             |
| Non-melanoma skin cancer             | 101<br>(73 - 147)              | --                       | --                     | 26<br>(16 - 40)             | 31<br>(19 - 51)             | 44<br>(29 - 67)             |
| Ovarian cancer                       | 1,037<br>(758 - 1,414)         | --                       | --                     | 306<br>(213 - 428)          | 601<br>(402 - 886)          | 130<br>(83 - 201)           |
| Testicular cancer                    | 52<br>(31 - 76)                | --                       | --                     | 38<br>(21 - 60)             | 9<br>(5 - 15)               | 5<br>(3 - 8)                |
| Kidney cancer                        | 519<br>(372 - 690)             | 106<br>(46 - 217)        | 37<br>(19 - 65)        | 96<br>(70 - 131)            | 206<br>(138 - 299)          | 74<br>(49 - 105)            |
| Bladder cancer                       | 1,063<br>(809 - 1,432)         | --                       | --                     | 252<br>(145 - 367)          | 405<br>(289 - 589)          | 405<br>(284 - 608)          |
| Brain and nervous system cancer      | 638<br>(423 - 810)             | 41<br>(17 - 76)          | 67<br>(29 - 113)       | 288<br>(169 - 387)          | 173<br>(113 - 233)          | 69<br>(47 - 96)             |
| Thyroid cancer                       | 141<br>(100 - 209)             | --                       | 2<br>(1 - 4)           | 20<br>(14 - 34)             | 77<br>(49 - 120)            | 42<br>(26 - 70)             |
| Mesothelioma                         | 78<br>(58 - 100)               | --                       | --                     | 19<br>(12 - 26)             | 35<br>(23 - 52)             | 24<br>(14 - 39)             |
| Hodgkin lymphoma                     | 314<br>(204 - 434)             | 52<br>(20 - 99)          | 36<br>(13 - 86)        | 120<br>(77 - 167)           | 54<br>(36 - 84)             | 52<br>(24 - 93)             |
| Non-Hodgkin lymphoma                 | 2,734<br>(1,872 - 3,844)       | 913<br>(413 - 1,804)     | 325<br>(146 - 624)     | 747<br>(524 - 1,012)        | 506<br>(332 - 737)          | 243<br>(158 - 376)          |
| Multiple myeloma                     | 273<br>(201 - 366)             | --                       | --                     | 47<br>(30 - 69)             | 155<br>(107 - 219)          | 70<br>(48 - 103)            |
| Leukemia                             | 994<br>(785 - 1,242)           | 96<br>(51 - 179)         | 152<br>(85 - 235)      | 402<br>(297 - 518)          | 197<br>(148 - 268)          | 146<br>(112 - 185)          |
| Other neoplasms                      | 4,663<br>(3,463 - 6,748)       | 983<br>(546 - 1,811)     | 463<br>(238 - 790)     | 1,055<br>(729 - 1,688)      | 1,318<br>(839 - 2,174)      | 844<br>(564 - 1,285)        |
| Cardiovascular diseases              | 130,489<br>(114,309 - 157,483) | 5,410<br>(3,305 - 9,568) | 1,197<br>(685 - 2,080) | 15,204<br>(11,739 - 19,358) | 50,769<br>(42,867 - 63,582) | 57,908<br>(51,890 - 67,735) |
| Rheumatic heart disease              | 1,503<br>(935 - 3,510)         | 128<br>(46 - 358)        | 72<br>(32 - 174)       | 367<br>(179 - 1,045)        | 448<br>(229 - 1,211)        | 488<br>(334 - 923)          |
| Ischemic heart disease               | 36,987<br>(30,062 - 48,311)    | 246<br>(78 - 637)        | 160<br>(77 - 285)      | 4,153<br>(2,971 - 5,739)    | 15,185<br>(11,934 - 20,263) | 17,242<br>(14,015 - 22,925) |
| Cerebrovascular disease              | 55,415<br>(46,776 - 66,946)    | 1,445<br>(772 - 2,810)   | 321<br>(169 - 578)     | 5,129<br>(3,745 - 6,623)    | 21,350<br>(17,040 - 26,744) | 27,170<br>(23,208 - 32,310) |
| Ischemic stroke                      | 34,934<br>(23,102 - 43,287)    | 218<br>(71 - 539)        | 46<br>(18 - 100)       | 1,241<br>(682 - 1,798)      | 12,678<br>(7,398 - 17,052)  | 20,751<br>(14,524 - 25,271) |
| Hemorrhagic stroke                   | 20,481<br>(14,789 - 34,537)    | 1,227<br>(649 - 2,375)   | 275<br>(138 - 491)     | 3,888<br>(2,632 - 5,267)    | 8,672<br>(5,915 - 12,240)   | 6,419<br>(4,091 - 12,240)   |
| Hypertensive heart disease           | 10,132<br>(5,053 - 16,088)     | 77<br>(20 - 166)         | 18<br>(7 - 32)         | 997<br>(345 - 1,851)        | 3,890<br>(1,676 - 6,601)    | 5,148<br>(2,635 - 7,933)    |
| Cardiomyopathy and myocarditis       | 9,967<br>(6,500 - 15,238)      | 1,491<br>(637 - 3,407)   | 293<br>(138 - 539)     | 1,942<br>(1,174 - 2,940)    | 3,195<br>(1,827 - 5,672)    | 3,045<br>(1,682 - 5,155)    |
| Atrial fibrillation and flutter      | 15<br>(6 - 27)                 | --                       | --                     | 2<br>(1 - 4)                | 4<br>(2 - 8)                | 8<br>(3 - 17)               |
| Aortic aneurysm                      | 1,194<br>(857 - 1,648)         | --                       | --                     | 143<br>(83 - 206)           | 549<br>(369 - 773)          | 502<br>(351 - 727)          |
| Peripheral vascular disease          | 78<br>(45 - 151)               | --                       | --                     | 3<br>(2 - 6)                | 33<br>(20 - 60)             | 42<br>(21 - 91)             |

Web Table 31- Nigeria deaths with 95% UI by age, sex, and cause in 2013

| Cause                                               | Both Sexes, All Ages        | Both Sexes, 0-4 Years    | Both Sexes, 5-14 Years | Both Sexes, 15-49 Years  | Both Sexes, 50-69 Years   | Both Sexes, 70-80 Years   |
|-----------------------------------------------------|-----------------------------|--------------------------|------------------------|--------------------------|---------------------------|---------------------------|
| Endocarditis                                        | 2,640<br>(1,842 - 3,855)    | 516<br>(182 - 950)       | 61<br>(31 - 107)       | 457<br>(275 - 699)       | 799<br>(520 - 1,364)      | 808<br>(564 - 1,261)      |
| Other cardiovascular and circulatory diseases       | 12,557<br>(9,447 - 19,406)  | 1,507<br>(841 - 2,812)   | 272<br>(144 - 484)     | 2,010<br>(1,431 - 2,945) | 5,314<br>(3,635 - 8,664)  | 3,455<br>(2,398 - 6,246)  |
| Chronic respiratory diseases                        | 21,885<br>(17,892 - 31,594) | 2,078<br>(1,218 - 3,524) | 346<br>(224 - 509)     | 3,116<br>(2,380 - 4,385) | 7,731<br>(5,979 - 11,305) | 8,614<br>(6,928 - 12,611) |
| Chronic obstructive pulmonary disease               | 12,578<br>(9,679 - 18,306)  | 866<br>(488 - 1,471)     | 145<br>(88 - 225)      | 1,043<br>(733 - 1,504)   | 4,668<br>(3,410 - 7,112)  | 5,856<br>(4,439 - 8,832)  |
| Pneumoconiosis                                      | 944<br>(616 - 1,479)        | 24<br>(5 - 68)           | 14<br>(6 - 25)         | 215<br>(135 - 330)       | 490<br>(283 - 805)        | 201<br>(112 - 373)        |
| Silicosis                                           | 139<br>(73 - 287)           | 6<br>(1 - 20)            | 3<br>(1 - 7)           | 29<br>(15 - 53)          | 34<br>(15 - 76)           | 65<br>(30 - 150)          |
| Asbestosis                                          | 74<br>(46 - 127)            | 6<br>(1 - 15)            | 3<br>(1 - 6)           | 18<br>(11 - 30)          | 39<br>(20 - 73)           | 8<br>(4 - 17)             |
| Coal workers pneumoconiosis                         | 290<br>(181 - 471)          | 4<br>(1 - 11)            | 3<br>(1 - 6)           | 16<br>(10 - 27)          | 235<br>(138 - 390)        | 31<br>(14 - 58)           |
| Other pneumoconiosis                                | 442<br>(285 - 652)          | 8<br>(2 - 22)            | 4<br>(2 - 7)           | 152<br>(96 - 227)        | 181<br>(98 - 300)         | 97<br>(56 - 167)          |
| Asthma                                              | 4,056<br>(2,879 - 6,041)    | 670<br>(334 - 1,347)     | 85<br>(51 - 128)       | 978<br>(689 - 1,438)     | 1,332<br>(852 - 2,036)    | 991<br>(622 - 1,554)      |
| Interstitial lung disease and pulmonary sarcoidosis | 2,154<br>(1,030 - 3,522)    | 35<br>(4 - 161)          | 13<br>(5 - 35)         | 141<br>(91 - 228)        | 840<br>(368 - 1,439)      | 1,125<br>(399 - 1,934)    |
| Other chronic respiratory diseases                  | 2,153<br>(1,510 - 3,215)    | 482<br>(247 - 856)       | 90<br>(49 - 142)       | 738<br>(495 - 1,095)     | 402<br>(251 - 648)        | 441<br>(269 - 725)        |
| Cirrhosis                                           | 17,077<br>(13,883 - 21,334) | 886<br>(396 - 1,671)     | 284<br>(178 - 434)     | 5,783<br>(4,433 - 7,500) | 7,232<br>(5,534 - 9,512)  | 2,891<br>(2,253 - 3,842)  |
| Cirrhosis due to hepatitis B                        | 4,169<br>(2,215 - 6,472)    | 39<br>(7 - 104)          | 39<br>(7 - 79)         | 1,368<br>(594 - 2,258)   | 1,939<br>(1,025 - 3,051)  | 784<br>(465 - 1,180)      |
| Cirrhosis due to hepatitis C                        | 3,180<br>(1,603 - 4,867)    | 55<br>(11 - 135)         | 44<br>(14 - 83)        | 1,050<br>(506 - 1,617)   | 1,372<br>(637 - 2,273)    | 659<br>(340 - 1,125)      |
| Cirrhosis due to alcohol use                        | 6,965<br>(4,973 - 9,245)    | --                       | --                     | 2,359<br>(1,461 - 3,448) | 3,319<br>(2,352 - 4,584)  | 1,286<br>(939 - 1,737)    |
| Cirrhosis due to other causes                       | 2,763<br>(1,951 - 3,863)    | 792<br>(345 - 1,502)     | 202<br>(111 - 337)     | 1,006<br>(663 - 1,424)   | 602<br>(356 - 949)        | 162<br>(102 - 252)        |
| Digestive diseases                                  | 21,485<br>(14,600 - 28,087) | 2,438<br>(1,230 - 4,241) | 986<br>(470 - 1,657)   | 6,511<br>(3,869 - 9,035) | 6,503<br>(4,137 - 8,805)  | 5,048<br>(3,566 - 6,580)  |
| Peptic ulcer disease                                | 4,512<br>(2,948 - 6,439)    | 264<br>(107 - 570)       | 134<br>(57 - 289)      | 1,405<br>(827 - 2,146)   | 1,493<br>(900 - 2,242)    | 1,217<br>(753 - 1,755)    |
| Gastritis and duodenitis                            | 789<br>(339 - 1,383)        | 141<br>(27 - 352)        | 50<br>(19 - 102)       | 223<br>(99 - 353)        | 195<br>(65 - 440)         | 181<br>(49 - 425)         |
| Appendicitis                                        | 1,479<br>(835 - 2,151)      | 306<br>(101 - 656)       | 137<br>(61 - 273)      | 514<br>(282 - 811)       | 290<br>(119 - 493)        | 232<br>(82 - 445)         |
| Paralytic ileus and intestinal obstruction          | 6,513<br>(3,450 - 9,359)    | 452<br>(176 - 922)       | 288<br>(123 - 520)     | 1,474<br>(712 - 2,330)   | 2,442<br>(1,139 - 3,547)  | 1,857<br>(1,071 - 2,804)  |
| Inguinal, femoral, and abdominal hernia             | 475<br>(208 - 809)          | 29<br>(9 - 78)           | 13<br>(4 - 35)         | 123<br>(37 - 232)        | 157<br>(70 - 287)         | 153<br>(76 - 263)         |
| Inflammatory bowel disease                          | 1,370<br>(695 - 2,107)      | 480<br>(175 - 999)       | 55<br>(23 - 115)       | 412<br>(160 - 650)       | 243<br>(73 - 411)         | 180<br>(61 - 296)         |
| Vascular intestinal disorders                       | 93<br>(33 - 207)            | 15<br>(2 - 50)           | 6<br>(1 - 17)          | 26<br>(12 - 52)          | 23<br>(8 - 59)            | 24<br>(6 - 64)            |
| Gallbladder and biliary diseases                    | 1,367<br>(750 - 2,099)      | 92<br>(40 - 178)         | 70<br>(13 - 139)       | 394<br>(199 - 652)       | 414<br>(230 - 712)        | 397<br>(217 - 625)        |
| Pancreatitis                                        | 1,403<br>(782 - 2,095)      | 41<br>(9 - 100)          | 27<br>(9 - 47)         | 696<br>(329 - 1,217)     | 417<br>(211 - 676)        | 221<br>(98 - 386)         |
| Other digestive diseases                            | 3,484<br>(2,160 - 4,909)    | 618<br>(260 - 1,185)     | 206<br>(90 - 378)      | 1,245<br>(698 - 1,898)   | 829<br>(495 - 1,245)      | 585<br>(353 - 881)        |
| Neurological disorders                              | 11,984<br>(8,704 - 16,439)  | 2,355<br>(1,140 - 4,532) | 899<br>(444 - 1,592)   | 3,167<br>(1,477 - 5,369) | 1,246<br>(944 - 1,714)    | 4,317<br>(3,622 - 5,114)  |
| Alzheimer disease and other dementias               | 4,416<br>(3,711 - 5,285)    | --                       | --                     | 3<br>(1 - 6)             | 575<br>(439 - 744)        | 3,838<br>(3,195 - 4,568)  |
| Parkinson disease                                   | 59<br>(34 - 110)            | --                       | --                     | 8<br>(5 - 10)            | 9<br>(5 - 22)             | 42<br>(20 - 86)           |
| Epilepsy                                            | 6,464<br>(3,359 - 10,999)   | 2,114<br>(969 - 4,300)   | 825<br>(382 - 1,509)   | 2,862<br>(1,248 - 5,004) | 366<br>(165 - 767)        | 297<br>(113 - 640)        |
| Multiple sclerosis                                  | 14<br>(6 - 56)              | --                       | --                     | 8<br>(3 - 32)            | 5<br>(2 - 19)             | 2<br>(1 - 6)              |
| Other neurological disorders                        | 1,031<br>(741 - 1,271)      | 241<br>(133 - 466)       | 74<br>(38 - 108)       | 286<br>(185 - 383)       | 291<br>(198 - 386)        | 139<br>(94 - 179)         |
| Mental and substance use disorders                  | 5,809<br>(3,278 - 7,711)    | 323<br>(87 - 668)        | 2<br>(1 - 4)           | 4,152<br>(2,147 - 5,733) | 1,030<br>(635 - 1,529)    | 302<br>(184 - 436)        |
| Schizophrenia                                       | 22<br>(12 - 34)             | --                       | --                     | 13<br>(6 - 21)           | 6<br>(3 - 11)             | 2<br>(1 - 4)              |
| Alcohol use disorders                               | 1,689<br>(604 - 3,002)      | --                       | --                     | 955<br>(358 - 1,721)     | 582<br>(200 - 1,099)      | 152<br>(40 - 298)         |
| Drug use disorders                                  | 4,086<br>(2,297 - 5,439)    | 323<br>(87 - 668)        | --                     | 3,173<br>(1,632 - 4,436) | 442<br>(324 - 586)        | 148<br>(113 - 194)        |
| Opioid use disorders                                | 434<br>(238 - 599)          | 36<br>(9 - 75)           | --                     | 342<br>(174 - 490)       | 40<br>(28 - 54)           | 16<br>(11 - 21)           |
| Cocaine use disorders                               | 16<br>(9 - 22)              | 2<br>(0 - 3)             | --                     | 13<br>(7 - 18)           | 1<br>(1 - 2)              | 1<br>(0 - 1)              |

Web Table 31- Nigeria deaths with 95% UI by age, sex, and cause in 2013

| Cause                                               | Both Sexes, All Ages          | Both Sexes, 0-4 Years        | Both Sexes, 5-14 Years     | Both Sexes, 15-49 Years     | Both Sexes, 50-69 Years     | Both Sexes, 70-80 Years   |
|-----------------------------------------------------|-------------------------------|------------------------------|----------------------------|-----------------------------|-----------------------------|---------------------------|
| Amphetamine use disorders                           | 12<br>(7 - 15)                | 1<br>(0 - 3)                 | --                         | 8<br>(5 - 12)               | 1<br>(1 - 2)                | 0<br>(0 - 1)              |
| Other drug use disorders                            | 3,624<br>(2,038 - 4,826)      | 284<br>(77 - 587)            | --                         | 2,810<br>(1,448 - 3,931)    | 399<br>(292 - 532)          | 132<br>(100 - 173)        |
| Eating disorders                                    | 12<br>(7 - 20)                | --                           | 2<br>(1 - 4)               | 10<br>(6 - 18)              | --                          | --                        |
| Anorexia nervosa                                    | 12<br>(7 - 20)                | --                           | 2<br>(1 - 4)               | 10<br>(6 - 18)              | --                          | --                        |
| Diabetes, urogenital, blood, and endocrine diseases | 155,431<br>(63,861 - 321,784) | 85,476<br>(22,236 - 197,038) | 19,118<br>(4,714 - 43,214) | 26,657<br>(13,016 - 60,968) | 14,339<br>(11,211 - 19,152) | 9,840<br>(8,353 - 11,716) |
| Diabetes mellitus                                   | 13,420<br>(11,034 - 16,611)   | 271<br>(169 - 431)           | 83<br>(48 - 129)           | 2,138<br>(1,626 - 2,759)    | 6,179<br>(4,769 - 8,171)    | 4,749<br>(3,752 - 5,992)  |
| Acute glomerulonephritis                            | 206<br>(127 - 440)            | 43<br>(13 - 182)             | 21<br>(9 - 67)             | 75<br>(47 - 134)            | 52<br>(33 - 80)             | 15<br>(6 - 40)            |
| Chronic kidney disease                              | 10,107<br>(6,994 - 13,257)    | 1,421<br>(820 - 2,330)       | 483<br>(271 - 767)         | 3,244<br>(1,953 - 4,370)    | 2,738<br>(1,893 - 3,969)    | 2,221<br>(1,531 - 3,139)  |
| Chronic kidney disease due to diabetes mellitus     | 120<br>(40 - 192)             | 5<br>(2 - 9)                 | 5<br>(2 - 8)               | 11<br>(5 - 16)              | 95<br>(25 - 161)            | 4<br>(2 - 8)              |
| Chronic kidney disease due to hypertension          | 3,268<br>(2,272 - 4,613)      | 154<br>(37 - 303)            | 41<br>(16 - 85)            | 860<br>(455 - 1,371)        | 1,196<br>(787 - 1,749)      | 1,018<br>(661 - 1,527)    |
| Chronic kidney disease due to glomerulonephritis    | 3,797<br>(2,443 - 5,052)      | 816<br>(474 - 1,322)         | 270<br>(155 - 425)         | 1,551<br>(924 - 2,180)      | 654<br>(392 - 1,006)        | 505<br>(276 - 776)        |
| Chronic kidney disease due to other causes          | 2,922<br>(1,535 - 4,537)      | 447<br>(196 - 889)           | 168<br>(77 - 294)          | 821<br>(446 - 1,378)        | 792<br>(282 - 1,540)        | 694<br>(272 - 1,188)      |
| Urinary diseases and male infertility               | 6,313<br>(4,143 - 8,074)      | 1,113<br>(478 - 1,971)       | 154<br>(67 - 251)          | 1,609<br>(891 - 2,162)      | 1,818<br>(1,201 - 2,469)    | 1,619<br>(1,189 - 2,149)  |
| Interstitial nephritis and urinary tract infections | 5,512<br>(3,432 - 7,151)      | 971<br>(341 - 1,817)         | 121<br>(42 - 206)          | 1,340<br>(679 - 1,830)      | 1,614<br>(1,037 - 2,188)    | 1,465<br>(1,037 - 1,934)  |
| Urolithiasis                                        | 79<br>(31 - 232)              | --                           | 9<br>(3 - 23)              | 34<br>(10 - 124)            | 25<br>(8 - 67)              | 11<br>(3 - 39)            |
| Other urinary diseases                              | 722<br>(478 - 1,026)          | 141<br>(43 - 333)            | 24<br>(10 - 51)            | 234<br>(133 - 358)          | 179<br>(78 - 303)           | 142<br>(64 - 255)         |
| Gynecological diseases                              | 91<br>(52 - 164)              | --                           | --                         | 62<br>(32 - 128)            | 21<br>(10 - 38)             | 8<br>(4 - 15)             |
| Uterine fibroids                                    | 17<br>(10 - 30)               | --                           | --                         | 9<br>(5 - 17)               | 5<br>(3 - 10)               | 3<br>(1 - 5)              |
| Polycystic ovarian syndrome                         | 4<br>(2 - 10)                 | --                           | --                         | 4<br>(2 - 10)               | 0<br>(0 - 0)                | --                        |
| Endometriosis                                       | 11<br>(5 - 22)                | --                           | --                         | 10<br>(5 - 22)              | 0<br>(0 - 1)                | --                        |
| Genital prolapse                                    | 14<br>(8 - 25)                | --                           | --                         | 8<br>(4 - 18)               | 4<br>(2 - 7)                | 2<br>(1 - 4)              |
| Other gynecological diseases                        | 45<br>(25 - 81)               | --                           | --                         | 30<br>(15 - 63)             | 11<br>(5 - 21)              | 4<br>(2 - 7)              |
| Hemoglobinopathies and hemolytic anemias            | 119,671<br>(26,946 - 292,306) | 80,766<br>(16,901 - 194,241) | 18,126<br>(3,533 - 42,603) | 18,203<br>(4,476 - 54,656)  | 2,284<br>(570 - 7,848)      | 292<br>(139 - 586)        |
| Thalassemias                                        | 276<br>(59 - 674)             | 228<br>(47 - 549)            | 27<br>(5 - 64)             | 20<br>(5 - 59)              | 0<br>(0 - 0)                | 0<br>(0 - 0)              |
| Sickle cell disorders                               | 117,736<br>(26,465 - 286,939) | 79,341<br>(16,593 - 189,521) | 18,003<br>(3,509 - 42,314) | 18,030<br>(4,437 - 54,099)  | 2,228<br>(550 - 7,682)      | 135<br>(62 - 270)         |
| G6PD deficiency                                     | 582<br>(131 - 1,481)          | 417<br>(84 - 1,030)          | 61<br>(12 - 143)           | 76<br>(19 - 228)            | 15<br>(5 - 47)              | 12<br>(6 - 25)            |
| Other hemoglobinopathies and hemolytic anemias      | 1,077<br>(286 - 3,232)        | 779<br>(153 - 2,560)         | 35<br>(7 - 82)             | 76<br>(15 - 250)            | 42<br>(15 - 111)            | 145<br>(70 - 304)         |
| Endocrine, metabolic, blood, and immune disorders   | 5,623<br>(3,203 - 7,539)      | 1,863<br>(965 - 2,999)       | 250<br>(116 - 419)         | 1,327<br>(739 - 1,828)      | 1,247<br>(568 - 1,928)      | 936<br>(377 - 1,461)      |
| Musculoskeletal disorders                           | 1,376<br>(997 - 1,832)        | --                           | 165<br>(69 - 274)          | 579<br>(372 - 814)          | 389<br>(261 - 588)          | 243<br>(157 - 405)        |
| Rheumatoid arthritis                                | 166<br>(108 - 264)            | --                           | 17<br>(5 - 31)             | 38<br>(21 - 62)             | 49<br>(27 - 91)             | 63<br>(34 - 116)          |
| Other musculoskeletal disorders                     | 1,210<br>(864 - 1,610)        | --                           | 148<br>(62 - 245)          | 542<br>(347 - 755)          | 340<br>(230 - 509)          | 180<br>(116 - 297)        |
| Other non-communicable diseases                     | 46,952<br>(26,724 - 76,991)   | 41,190<br>(21,416 - 70,669)  | 1,440<br>(800 - 2,348)     | 2,043<br>(1,399 - 2,883)    | 1,163<br>(732 - 1,676)      | 1,116<br>(673 - 1,702)    |
| Congenital anomalies                                | 42,189<br>(22,252 - 71,953)   | 39,396<br>(20,080 - 68,740)  | 1,321<br>(698 - 2,232)     | 1,105<br>(682 - 1,745)      | 227<br>(143 - 355)          | 140<br>(94 - 205)         |
| Neural tube defects                                 | 8,007<br>(2,490 - 18,470)     | 7,710<br>(2,305 - 17,998)    | 159<br>(51 - 360)          | 125<br>(38 - 282)           | 8<br>(2 - 24)               | 4<br>(1 - 13)             |
| Congenital heart anomalies                          | 19,698<br>(9,930 - 36,008)    | 18,255<br>(8,759 - 34,134)   | 703<br>(367 - 1,262)       | 549<br>(312 - 927)          | 124<br>(78 - 193)           | 66<br>(42 - 99)           |
| Cleft lip and cleft palate                          | 266<br>(60 - 766)             | 266<br>(60 - 766)            | --                         | --                          | --                          | --                        |
| Down syndrome                                       | 4,556<br>(1,398 - 10,236)     | 4,156<br>(1,103 - 9,603)     | 186<br>(67 - 407)          | 180<br>(89 - 372)           | 30<br>(11 - 63)             | 4<br>(1 - 8)              |
| Chromosomal unbalanced rearrangements               | 1,307<br>(438 - 2,913)        | 1,228<br>(382 - 2,837)       | 31<br>(11 - 63)            | 40<br>(21 - 85)             | 5<br>(2 - 8)                | 3<br>(2 - 5)              |
| Other congenital anomalies                          | 8,355<br>(2,634 - 28,453)     | 7,780<br>(2,245 - 27,474)    | 241<br>(89 - 683)          | 211<br>(118 - 409)          | 60<br>(30 - 99)             | 62<br>(33 - 97)           |
| Skin and subcutaneous diseases                      | 4,282<br>(2,253 - 5,641)      | 1,313<br>(556 - 2,138)       | 119<br>(56 - 181)          | 939<br>(423 - 1,344)        | 936<br>(547 - 1,416)        | 976<br>(571 - 1,512)      |

Web Table 31- Nigeria deaths with 95% UI by age, sex, and cause in 2013

| Cause                                           | Both Sexes, All Ages           | Both Sexes, 0-4 Years       | Both Sexes, 5-14 Years     | Both Sexes, 15-49 Years     | Both Sexes, 50-69 Years     | Both Sexes, 70-80 Years   |
|-------------------------------------------------|--------------------------------|-----------------------------|----------------------------|-----------------------------|-----------------------------|---------------------------|
| Cellulitis                                      | 1,393<br>(527 - 2,033)         | 371<br>(75 - 704)           | 55<br>(18 - 92)            | 287<br>(79 - 459)           | 318<br>(111 - 514)          | 363<br>(127 - 623)        |
| Pyoderma                                        | 2,668<br>(1,589 - 3,941)       | 885<br>(413 - 1,442)        | 55<br>(27 - 91)            | 586<br>(299 - 905)          | 592<br>(288 - 1,048)        | 550<br>(259 - 1,053)      |
| Decubitus ulcer                                 | 84<br>(42 - 166)               | 4<br>(1 - 9)                | 4<br>(2 - 7)               | 19<br>(8 - 34)              | 11<br>(4 - 25)              | 47<br>(18 - 106)          |
| Other skin and subcutaneous diseases            | 138<br>(54 - 265)              | 53<br>(7 - 154)             | 5<br>(3 - 10)              | 48<br>(18 - 85)             | 15<br>(6 - 37)              | 16<br>(4 - 47)            |
| Sudden infant death syndrome                    | 482<br>(152 - 1,206)           | 482<br>(152 - 1,206)        | --                         | --                          | --                          | --                        |
| Injuries                                        | 156,430<br>(115,739 - 196,434) | 48,307<br>(28,128 - 76,949) | 16,721<br>(9,133 - 24,262) | 63,931<br>(48,004 - 79,972) | 18,074<br>(14,316 - 23,282) | 9,397<br>(7,488 - 11,594) |
| Transport injuries                              | 95,582<br>(73,765 - 117,903)   | 20,704<br>(11,542 - 33,945) | 9,787<br>(5,762 - 14,684)  | 48,056<br>(35,749 - 60,960) | 12,005<br>(9,386 - 15,642)  | 5,030<br>(4,022 - 6,327)  |
| Road injuries                                   | 93,669<br>(72,446 - 114,914)   | 19,879<br>(11,036 - 32,767) | 9,510<br>(5,607 - 14,251)  | 47,598<br>(35,393 - 60,386) | 11,793<br>(9,236 - 15,405)  | 4,889<br>(3,919 - 6,186)  |
| Pedestrian road injuries                        | 31,562<br>(23,208 - 41,970)    | 10,068<br>(4,975 - 17,882)  | 4,605<br>(2,587 - 7,200)   | 9,467<br>(6,296 - 13,436)   | 4,586<br>(3,266 - 6,233)    | 2,836<br>(2,120 - 3,642)  |
| Cyclist road injuries                           | 3,030<br>(1,966 - 4,261)       | 797<br>(343 - 1,556)        | 668<br>(317 - 1,187)       | 922<br>(594 - 1,332)        | 467<br>(269 - 673)          | 177<br>(106 - 285)        |
| Motorcyclist road injuries                      | 18,154<br>(12,208 - 24,137)    | 1,136<br>(552 - 2,175)      | 811<br>(420 - 1,392)       | 13,348<br>(8,617 - 18,206)  | 2,369<br>(1,511 - 3,544)    | 490<br>(315 - 740)        |
| Motor vehicle road injuries                     | 36,555<br>(27,267 - 47,422)    | 7,457<br>(4,173 - 12,599)   | 2,897<br>(1,632 - 4,620)   | 21,048<br>(14,805 - 28,033) | 4,037<br>(2,928 - 5,582)    | 1,118<br>(794 - 1,584)    |
| Other road injuries                             | 4,367<br>(2,220 - 6,330)       | 421<br>(152 - 856)          | 530<br>(206 - 1,041)       | 2,814<br>(1,205 - 4,617)    | 335<br>(185 - 539)          | 267<br>(131 - 557)        |
| Other transport injuries                        | 1,914<br>(1,193 - 2,713)       | 826<br>(350 - 1,567)        | 276<br>(142 - 469)         | 458<br>(308 - 746)          | 212<br>(108 - 307)          | 141<br>(45 - 222)         |
| Unintentional injuries                          | 56,406<br>(33,305 - 77,882)    | 26,977<br>(13,969 - 43,545) | 6,791<br>(3,004 - 10,232)  | 12,675<br>(8,367 - 16,758)  | 5,704<br>(3,796 - 8,279)    | 4,259<br>(2,898 - 6,194)  |
| Falls                                           | 11,521<br>(8,054 - 16,169)     | 3,925<br>(1,855 - 7,234)    | 1,150<br>(504 - 2,137)     | 3,436<br>(2,311 - 4,879)    | 1,555<br>(1,082 - 2,347)    | 1,456<br>(1,046 - 2,012)  |
| Drowning                                        | 8,943<br>(5,266 - 16,232)      | 5,220<br>(2,372 - 10,629)   | 1,721<br>(826 - 3,305)     | 1,482<br>(905 - 2,430)      | 349<br>(233 - 571)          | 171<br>(123 - 277)        |
| Fire, heat, and hot substances                  | 7,088<br>(3,038 - 11,542)      | 4,713<br>(1,868 - 8,590)    | 593<br>(219 - 1,005)       | 967<br>(490 - 1,391)        | 472<br>(283 - 724)          | 343<br>(210 - 514)        |
| Poisonings                                      | 4,196<br>(893 - 7,442)         | 1,862<br>(282 - 4,418)      | 362<br>(50 - 731)          | 1,394<br>(400 - 2,137)      | 428<br>(75 - 692)           | 150<br>(26 - 256)         |
| Exposure to mechanical forces                   | 6,376<br>(3,312 - 20,295)      | 3,376<br>(1,216 - 13,806)   | 796<br>(336 - 1,776)       | 1,484<br>(838 - 4,029)      | 528<br>(305 - 1,174)        | 192<br>(90 - 383)         |
| Unintentional firearm injuries                  | 1,442<br>(913 - 2,174)         | 677<br>(323 - 1,227)        | 168<br>(77 - 312)          | 465<br>(280 - 695)          | 103<br>(62 - 168)           | 29<br>(19 - 43)           |
| Unintentional suffocation                       | 2,491<br>(311 - 15,594)        | 1,704<br>(149 - 11,919)     | 233<br>(30 - 1,045)        | 400<br>(53 - 2,693)         | 116<br>(22 - 903)           | 38<br>(8 - 263)           |
| Other exposure to mechanical forces             | 2,442<br>(1,368 - 3,592)       | 995<br>(391 - 1,907)        | 395<br>(143 - 782)         | 619<br>(378 - 1,007)        | 308<br>(119 - 480)          | 125<br>(27 - 189)         |
| Adverse effects of medical treatment            | 5,797<br>(1,334 - 13,755)      | 2,528<br>(466 - 6,099)      | 290<br>(36 - 831)          | 1,133<br>(236 - 2,994)      | 995<br>(184 - 2,893)        | 852<br>(136 - 2,538)      |
| Animal contact                                  | 3,563<br>(676 - 5,694)         | 1,140<br>(161 - 2,350)      | 647<br>(80 - 1,268)        | 956<br>(209 - 1,467)        | 511<br>(94 - 903)           | 309<br>(41 - 549)         |
| Venomous animal contact                         | 1,767<br>(281 - 2,935)         | 636<br>(82 - 1,329)         | 285<br>(36 - 600)          | 506<br>(90 - 841)           | 211<br>(34 - 444)           | 129<br>(11 - 255)         |
| Non-venomous animal contact                     | 1,796<br>(322 - 3,042)         | 504<br>(77 - 1,264)         | 362<br>(42 - 747)          | 450<br>(99 - 765)           | 300<br>(54 - 527)           | 180<br>(28 - 338)         |
| Foreign body                                    | 3,225<br>(1,489 - 5,328)       | 2,255<br>(809 - 4,160)      | 216<br>(80 - 382)          | 277<br>(146 - 445)          | 193<br>(92 - 314)           | 284<br>(104 - 480)        |
| Pulmonary aspiration and foreign body in airway | 3,064<br>(1,363 - 5,052)       | 2,191<br>(773 - 4,035)      | 194<br>(68 - 347)          | 251<br>(122 - 405)          | 162<br>(66 - 276)           | 267<br>(88 - 461)         |
| Foreign body in other body part                 | 161<br>(86 - 539)              | 64<br>(23 - 262)            | 22<br>(9 - 83)             | 26<br>(12 - 113)            | 32<br>(17 - 53)             | 17<br>(9 - 32)            |
| Other unintentional injuries                    | 5,696<br>(3,503 - 7,572)       | 1,959<br>(929 - 3,257)      | 1,017<br>(432 - 1,683)     | 1,545<br>(1,071 - 2,076)    | 673<br>(463 - 916)          | 502<br>(299 - 677)        |
| Self-harm and interpersonal violence            | 4,223<br>(3,114 - 5,791)       | 406<br>(204 - 765)          | 143<br>(77 - 246)          | 3,200<br>(2,244 - 4,587)    | 365<br>(273 - 552)          | 108<br>(78 - 176)         |
| Self-harm                                       | 1,229<br>(933 - 1,768)         | --                          | 16<br>(7 - 33)             | 889<br>(633 - 1,284)        | 235<br>(164 - 394)          | 89<br>(60 - 156)          |
| Interpersonal violence                          | 2,994<br>(1,983 - 4,325)       | 406<br>(204 - 765)          | 127<br>(65 - 226)          | 2,312<br>(1,471 - 3,465)    | 130<br>(82 - 205)           | 19<br>(11 - 32)           |
| Assault by firearm                              | 920<br>(555 - 1,659)           | 97<br>(40 - 201)            | 26<br>(9 - 60)             | 756<br>(439 - 1,391)        | 33<br>(18 - 63)             | 7<br>(3 - 14)             |
| Assault by sharp object                         | 403<br>(243 - 590)             | 53<br>(23 - 117)            | 15<br>(8 - 30)             | 312<br>(176 - 473)          | 20<br>(10 - 33)             | 3<br>(1 - 5)              |
| Assault by other means                          | 1,671<br>(1,051 - 2,450)       | 257<br>(124 - 503)          | 86<br>(41 - 160)           | 1,243<br>(734 - 1,862)      | 77<br>(44 - 127)            | 9<br>(5 - 15)             |
| Forces of nature, war, and legal intervention   | 218<br>(0 - 10)                | 218<br>(0 - 10)             | --                         | --                          | --                          | --                        |
| Exposure to forces of nature                    | 218<br>(0 - 10)                | 218<br>(0 - 10)             | --                         | --                          | --                          | --                        |

Web Table 31- Nigeria deaths with 95% UI by age, sex, and cause in 2013

| Cause                                                             | Males, All Ages                | Males, 0-4 Years               | Males, 5-14 Years           | Males, 15-49 Years             | Males, 50-69 Years            | Males, 70-80 Years          |
|-------------------------------------------------------------------|--------------------------------|--------------------------------|-----------------------------|--------------------------------|-------------------------------|-----------------------------|
| All causes                                                        | 871,818<br>(781,111 - 959,548) | 480,656<br>(416,865 - 552,071) | 43,160<br>(35,869 - 52,747) | 171,181<br>(144,355 - 198,033) | 105,509<br>(88,992 - 132,914) | 71,311<br>(64,826 - 85,163) |
| Communicable, maternal, neonatal, and nutritional diseases        | 550,980<br>(454,016 - 639,993) | 388,748<br>(300,216 - 473,273) | 19,325<br>(13,216 - 26,036) | 84,250<br>(71,115 - 100,664)   | 37,966<br>(31,268 - 44,930)   | 20,691<br>(16,180 - 25,656) |
| HIV/AIDS and tuberculosis                                         | 106,260<br>(91,131 - 126,799)  | 9,770<br>(7,709 - 12,522)      | 4,897<br>(3,962 - 5,877)    | 63,874<br>(51,531 - 81,195)    | 22,413<br>(18,026 - 27,509)   | 5,307<br>(3,727 - 7,151)    |
| Tuberculosis                                                      | 22,730<br>(15,211 - 31,509)    | 2,581<br>(1,230 - 4,840)       | 682<br>(381 - 1,208)        | 8,736<br>(5,470 - 13,442)      | 6,898<br>(4,386 - 10,205)     | 3,833<br>(2,438 - 5,577)    |
| HIV/AIDS                                                          | 83,530<br>(70,612 - 104,376)   | 7,189<br>(5,770 - 9,033)       | 4,214<br>(3,405 - 5,057)    | 55,138<br>(42,358 - 73,145)    | 15,516<br>(11,635 - 20,090)   | 1,474<br>(929 - 2,188)      |
| HIV/AIDS resulting in mycobacterial infection                     | 5,840<br>(4,399 - 7,631)       | 485<br>(356 - 641)             | 261<br>(194 - 343)          | 3,857<br>(2,766 - 5,386)       | 1,125<br>(805 - 1,522)        | 112<br>(68 - 170)           |
| HIV/AIDS resulting in other diseases                              | 77,690<br>(65,636 - 96,825)    | 6,704<br>(5,375 - 8,407)       | 3,953<br>(3,188 - 4,753)    | 51,281<br>(39,623 - 67,967)    | 14,391<br>(10,832 - 18,626)   | 1,361<br>(852 - 2,022)      |
| Diarrhea, lower respiratory, and other common infectious diseases | 139,485<br>(91,676 - 191,714)  | 97,950<br>(55,767 - 146,541)   | 7,376<br>(3,646 - 11,917)   | 11,732<br>(7,861 - 16,177)     | 10,583<br>(7,107 - 15,199)    | 11,844<br>(8,248 - 16,003)  |
| Diarrheal diseases                                                | 29,991<br>(14,524 - 55,555)    | 22,941<br>(7,533 - 48,885)     | 1,262<br>(412 - 2,813)      | 2,414<br>(1,425 - 4,191)       | 1,771<br>(908 - 3,411)        | 1,602<br>(864 - 2,835)      |
| Intestinal infectious diseases                                    | 3,644<br>(1,731 - 6,830)       | 1,226<br>(489 - 2,619)         | 1,061<br>(407 - 2,226)      | 1,162<br>(501 - 2,302)         | 153<br>(69 - 284)             | 42<br>(20 - 76)             |
| Typhoid fever                                                     | 2,152<br>(959 - 4,239)         | 687<br>(240 - 1,504)           | 661<br>(233 - 1,448)        | 699<br>(279 - 1,449)           | 83<br>(29 - 170)              | 21<br>(6 - 46)              |
| Paratyphoid fever                                                 | 1,240<br>(520 - 2,642)         | 390<br>(120 - 976)             | 372<br>(120 - 878)          | 411<br>(132 - 965)             | 53<br>(15 - 124)              | 14<br>(4 - 32)              |
| Other intestinal infectious diseases                              | 253<br>(154 - 379)             | 149<br>(73 - 258)              | 27<br>(12 - 50)             | 52<br>(32 - 80)                | 17<br>(7 - 30)                | 7<br>(2 - 17)               |
| Lower respiratory infections                                      | 82,415<br>(54,074 - 117,428)   | 57,358<br>(31,856 - 90,804)    | 2,682<br>(1,210 - 4,948)    | 5,131<br>(3,297 - 7,665)       | 7,518<br>(4,679 - 11,156)     | 9,725<br>(6,170 - 13,356)   |
| Upper respiratory infections                                      | 93<br>(27 - 272)               | 54<br>(3 - 227)                | 5<br>(0 - 24)               | 17<br>(3 - 44)                 | 11<br>(1 - 31)                | 6<br>(0 - 19)               |
| Otitis media                                                      | 40<br>(26 - 59)                | 18<br>(8 - 35)                 | 4<br>(2 - 6)                | 6<br>(4 - 9)                   | 6<br>(4 - 8)                  | 6<br>(4 - 8)                |
| Meningitis                                                        | 14,831<br>(8,357 - 25,314)     | 9,314<br>(4,169 - 19,005)      | 1,534<br>(564 - 3,177)      | 2,605<br>(1,384 - 4,313)       | 983<br>(518 - 1,718)          | 396<br>(214 - 670)          |
| Pneumococcal meningitis                                           | 4,326<br>(2,209 - 7,553)       | 2,361<br>(879 - 5,117)         | 575<br>(173 - 1,290)        | 962<br>(455 - 1,741)           | 315<br>(126 - 583)            | 113<br>(51 - 211)           |
| H influenzae type B meningitis                                    | 2,955<br>(1,450 - 5,732)       | 2,307<br>(930 - 4,973)         | 248<br>(78 - 560)           | 275<br>(104 - 517)             | 92<br>(35 - 188)              | 33<br>(15 - 61)             |
| Meningococcal meningitis                                          | 4,891<br>(2,238 - 9,075)       | 3,227<br>(1,132 - 7,121)       | 503<br>(159 - 1,101)        | 721<br>(284 - 1,375)           | 300<br>(116 - 581)            | 140<br>(67 - 251)           |
| Other meningitis                                                  | 2,659<br>(1,439 - 4,452)       | 1,419<br>(559 - 3,054)         | 207<br>(76 - 453)           | 647<br>(303 - 1,216)           | 276<br>(135 - 493)            | 110<br>(51 - 213)           |
| Encephalitis                                                      | 877<br>(423 - 1,619)           | 409<br>(146 - 999)             | 128<br>(40 - 396)           | 205<br>(111 - 373)             | 90<br>(53 - 145)              | 44<br>(23 - 68)             |
| Diphtheria                                                        | 124<br>(1 - 825)               | 102<br>(0 - 796)               | 17<br>(0 - 131)             | 4<br>(0 - 17)                  | 1<br>(0 - 6)                  | --                          |
| Whooping cough                                                    | 1,547<br>(3 - 7,930)           | 1,460<br>(3 - 7,466)           | 72<br>(0 - 370)             | 13<br>(0 - 74)                 | 2<br>(0 - 9)                  | --                          |
| Tetanus                                                           | 456<br>(237 - 952)             | 302<br>(121 - 593)             | 19<br>(7 - 52)              | 87<br>(32 - 303)               | 38<br>(15 - 125)              | 9<br>(3 - 31)               |
| Measles                                                           | 5,372<br>(1,918 - 11,982)      | 4,720<br>(1,667 - 10,699)      | 583<br>(198 - 1,291)        | 67<br>(26 - 131)               | 2<br>(1 - 5)                  | --                          |
| Varicella and herpes zoster                                       | 97<br>(29 - 249)               | 44<br>(1 - 178)                | 9<br>(0 - 43)               | 20<br>(2 - 57)                 | 9<br>(1 - 31)                 | 15<br>(0 - 57)              |
| Neglected tropical diseases and malaria                           | 153,248<br>(97,938 - 225,186)  | 140,489<br>(85,904 - 208,280)  | 4,710<br>(1,994 - 10,033)   | 4,830<br>(2,089 - 11,523)      | 2,131<br>(823 - 5,187)        | 1,087<br>(367 - 2,883)      |
| Malaria                                                           | 151,794<br>(95,928 - 223,806)  | 139,966<br>(85,556 - 207,866)  | 4,407<br>(1,599 - 9,747)    | 4,428<br>(1,662 - 11,120)      | 1,965<br>(646 - 5,035)        | 1,028<br>(309 - 2,825)      |
| Leishmaniasis                                                     | 2<br>(1 - 3)                   | 1<br>(0 - 2)                   | 0<br>(0 - 1)                | 1<br>(0 - 1)                   | 0<br>(0 - 0)                  | 0<br>(0 - 0)                |
| Visceral leishmaniasis                                            | 2<br>(1 - 3)                   | 1<br>(0 - 2)                   | 0<br>(0 - 1)                | 1<br>(0 - 1)                   | 0<br>(0 - 0)                  | 0<br>(0 - 0)                |
| African trypanosomiasis                                           | 6<br>(2 - 14)                  | 0<br>(0 - 1)                   | 1<br>(0 - 2)                | 4<br>(2 - 9)                   | 1<br>(0 - 2)                  | 0<br>(0 - 0)                |
| Schistosomiasis                                                   | 273<br>(186 - 398)             | 10<br>(3 - 24)                 | 14<br>(5 - 29)              | 124<br>(73 - 197)              | 90<br>(49 - 150)              | 35<br>(18 - 61)             |
| Cysticercosis                                                     | 18<br>(4 - 51)                 | 2<br>(0 - 7)                   | 2<br>(0 - 5)                | 11<br>(2 - 31)                 | 3<br>(1 - 8)                  | 1<br>(0 - 2)                |
| Cystic echinococcosis                                             | 29<br>(20 - 40)                | 8<br>(3 - 14)                  | 6<br>(4 - 10)               | 11<br>(8 - 14)                 | 3<br>(2 - 4)                  | 1<br>(1 - 1)                |
| Dengue                                                            | 106<br>(46 - 192)              | 59<br>(10 - 133)               | 24<br>(10 - 43)             | 18<br>(10 - 42)                | 3<br>(2 - 10)                 | 1<br>(1 - 3)                |
| Yellow fever                                                      | 108<br>(61 - 179)              | 10<br>(2 - 27)                 | 22<br>(5 - 54)              | 59<br>(30 - 116)               | 12<br>(4 - 30)                | 5<br>(1 - 15)               |
| Rabies                                                            | 533<br>(225 - 1,081)           | 152<br>(42 - 392)              | 194<br>(64 - 457)           | 144<br>(51 - 285)              | 38<br>(9 - 86)                | 4<br>(1 - 11)               |
| Intestinal nematode infections                                    | 288<br>(135 - 512)             | 245<br>(105 - 456)             | 32<br>(13 - 63)             | 8<br>(2 - 18)                  | 3<br>(0 - 10)                 | 1<br>(0 - 6)                |
| Ascariasis                                                        | 288<br>(135 - 512)             | 245<br>(105 - 456)             | 32<br>(13 - 63)             | 8<br>(2 - 18)                  | 3<br>(0 - 10)                 | 1<br>(0 - 6)                |



Web Table 31- Nigeria deaths with 95% UI by age, sex, and cause in 2013

| Cause                                                            | Males, All Ages                | Males, 0-4 Years              | Males, 5-14 Years          | Males, 15-49 Years          | Males, 50-69 Years          | Males, 70-80 Years          |
|------------------------------------------------------------------|--------------------------------|-------------------------------|----------------------------|-----------------------------|-----------------------------|-----------------------------|
| Other neglected tropical diseases                                | 89<br>(51 - 146)               | 35<br>(12 - 80)               | 7<br>(3 - 15)              | 23<br>(12 - 42)             | 13<br>(7 - 24)              | 10<br>(6 - 18)              |
| Maternal disorders                                               | --                             | --                            | --                         | --                          | --                          | --                          |
| Maternal hemorrhage                                              | --                             | --                            | --                         | --                          | --                          | --                          |
| Maternal sepsis and other maternal infections                    | --                             | --                            | --                         | --                          | --                          | --                          |
| Maternal hypertensive disorders                                  | --                             | --                            | --                         | --                          | --                          | --                          |
| Maternal obstructed labor                                        | --                             | --                            | --                         | --                          | --                          | --                          |
| Maternal abortive outcome                                        | --                             | --                            | --                         | --                          | --                          | --                          |
| Indirect maternal deaths                                         | --                             | --                            | --                         | --                          | --                          | --                          |
| Late maternal deaths                                             | --                             | --                            | --                         | --                          | --                          | --                          |
| Maternal deaths aggravated by HIV/AIDS                           | --                             | --                            | --                         | --                          | --                          | --                          |
| Other maternal disorders                                         | --                             | --                            | --                         | --                          | --                          | --                          |
| Neonatal disorders                                               | 109,203<br>(84,287 - 130,954)  | 109,203<br>(84,287 - 130,954) | --                         | --                          | --                          | --                          |
| Neonatal preterm birth complications                             | 35,139<br>(15,823 - 59,416)    | 35,139<br>(15,823 - 59,416)   | --                         | --                          | --                          | --                          |
| Neonatal encephalopathy due to birth asphyxia and trauma         | 32,994<br>(15,612 - 55,507)    | 32,994<br>(15,612 - 55,507)   | --                         | --                          | --                          | --                          |
| Neonatal sepsis and other neonatal infections                    | 29,410<br>(12,334 - 54,548)    | 29,410<br>(12,334 - 54,548)   | --                         | --                          | --                          | --                          |
| Hemolytic disease and other neonatal jaundice                    | 725<br>(196 - 1,806)           | 725<br>(196 - 1,806)          | --                         | --                          | --                          | --                          |
| Other neonatal disorders                                         | 10,936<br>(4,470 - 21,433)     | 10,936<br>(4,470 - 21,433)    | --                         | --                          | --                          | --                          |
| Nutritional deficiencies                                         | 31,976<br>(14,405 - 57,885)    | 23,221<br>(8,662 - 46,930)    | 1,654<br>(626 - 3,214)     | 2,874<br>(1,526 - 4,676)    | 2,180<br>(1,125 - 3,581)    | 2,047<br>(1,104 - 3,466)    |
| Protein-energy malnutrition                                      | 26,758<br>(11,599 - 49,785)    | 21,126<br>(8,048 - 42,658)    | 1,338<br>(502 - 2,679)     | 1,625<br>(745 - 2,819)      | 1,411<br>(605 - 2,387)      | 1,257<br>(596 - 2,309)      |
| Iodine deficiency                                                | 18<br>(1 - 91)                 | 10<br>(0 - 80)                | 2<br>(0 - 12)              | 4<br>(0 - 19)               | 2<br>(0 - 11)               | 1<br>(0 - 9)                |
| Iron-deficiency anemia                                           | 5,116<br>(1,901 - 12,023)      | 2,069<br>(218 - 7,646)        | 308<br>(63 - 860)          | 1,211<br>(461 - 2,335)      | 752<br>(254 - 1,549)        | 776<br>(279 - 1,646)        |
| Other nutritional deficiencies                                   | 85<br>(35 - 190)               | 16<br>(2 - 71)                | 6<br>(1 - 21)              | 34<br>(11 - 74)             | 15<br>(4 - 34)              | 13<br>(4 - 32)              |
| Other communicable, maternal, neonatal, and nutritional diseases | 10,808<br>(5,306 - 18,632)     | 8,115<br>(3,036 - 15,028)     | 689<br>(250 - 1,363)       | 940<br>(472 - 1,596)        | 658<br>(345 - 1,215)        | 406<br>(211 - 755)          |
| Sexually transmitted diseases excluding HIV                      | 7,686<br>(2,333 - 14,829)      | 6,796<br>(1,895 - 13,354)     | 499<br>(135 - 1,072)       | 191<br>(96 - 438)           | 121<br>(44 - 289)           | 79<br>(28 - 209)            |
| Syphilis                                                         | 7,536<br>(2,225 - 14,685)      | 6,796<br>(1,895 - 13,354)     | 485<br>(122 - 1,058)       | 101<br>(51 - 237)           | 89<br>(32 - 212)            | 65<br>(23 - 174)            |
| Chlamydial infection                                             | --                             | --                            | --                         | --                          | --                          | --                          |
| Gonococcal infection                                             | 87<br>(47 - 200)               | --                            | 7<br>(3 - 19)              | 49<br>(25 - 111)            | 21<br>(8 - 50)              | 9<br>(3 - 26)               |
| Other sexually transmitted diseases                              | 63<br>(35 - 143)               | --                            | 7<br>(3 - 18)              | 41<br>(21 - 91)             | 12<br>(4 - 29)              | 4<br>(1 - 10)               |
| Hepatitis                                                        | 1,129<br>(341 - 2,023)         | 291<br>(43 - 697)             | 84<br>(13 - 182)           | 423<br>(122 - 796)          | 226<br>(85 - 457)           | 106<br>(40 - 221)           |
| Acute hepatitis A                                                | 109<br>(16 - 306)              | 68<br>(7 - 201)               | 20<br>(3 - 52)             | 19<br>(3 - 56)              | 2<br>(0 - 6)                | 0<br>(0 - 1)                |
| Acute hepatitis B                                                | 759<br>(240 - 1,384)           | 221<br>(33 - 542)             | 50<br>(8 - 108)            | 209<br>(62 - 435)           | 184<br>(67 - 372)           | 95<br>(36 - 198)            |
| Acute hepatitis C                                                | 19<br>(3 - 57)                 | --                            | 3<br>(0 - 10)              | 8<br>(1 - 26)               | 6<br>(1 - 21)               | 3<br>(0 - 9)                |
| Acute hepatitis E                                                | 242<br>(63 - 536)              | 2<br>(0 - 10)                 | 11<br>(1 - 34)             | 186<br>(46 - 413)           | 34<br>(7 - 95)              | 8<br>(1 - 24)               |
| Other infectious diseases                                        | 1,993<br>(972 - 3,916)         | 1,028<br>(309 - 2,468)        | 107<br>(26 - 277)          | 326<br>(133 - 699)          | 310<br>(115 - 775)          | 222<br>(74 - 535)           |
| Non-communicable diseases                                        | 221,713<br>(151,588 - 340,901) | 64,931<br>(22,208 - 154,906)  | 12,512<br>(4,418 - 26,121) | 41,794<br>(27,817 - 63,302) | 56,502<br>(45,163 - 74,906) | 45,975<br>(40,460 - 55,623) |
| Neoplasms                                                        | 25,963<br>(20,070 - 34,077)    | 1,287<br>(625 - 2,360)        | 645<br>(331 - 1,035)       | 7,359<br>(4,997 - 10,336)   | 10,565<br>(7,725 - 15,054)  | 6,108<br>(4,895 - 8,060)    |
| Esophageal cancer                                                | 766<br>(471 - 1,206)           | --                            | --                         | 170<br>(87 - 300)           | 413<br>(241 - 686)          | 183<br>(114 - 279)          |
| Stomach cancer                                                   | 2,353<br>(1,769 - 3,271)       | --                            | --                         | 643<br>(418 - 962)          | 1,181<br>(838 - 1,678)      | 530<br>(378 - 737)          |
| Liver cancer                                                     | 9,902<br>(5,912 - 15,557)      | --                            | 40<br>(15 - 87)            | 3,831<br>(2,107 - 6,139)    | 4,366<br>(2,438 - 7,404)    | 1,666<br>(907 - 2,876)      |
| Liver cancer due to hepatitis B                                  | 4,365<br>(2,393 - 6,980)       | --                            | 24<br>(9 - 54)             | 2,203<br>(1,193 - 3,480)    | 1,699<br>(875 - 2,987)      | 439<br>(196 - 839)          |

Web Table 31- Nigeria deaths with 95% UI by age, sex, and cause in 2013

| Cause                                | Males, All Ages             | Males, 0-4 Years         | Males, 5-14 Years    | Males, 15-49 Years        | Males, 50-69 Years          | Males, 70-80 Years          |
|--------------------------------------|-----------------------------|--------------------------|----------------------|---------------------------|-----------------------------|-----------------------------|
| Liver cancer due to hepatitis C      | 2,523<br>(1,156 - 4,701)    | --                       | 2<br>(0 - 6)         | 603<br>(229 - 1,232)      | 1,308<br>(559 - 2,631)      | 610<br>(292 - 1,157)        |
| Liver cancer due to alcohol use      | 2,110<br>(1,075 - 3,978)    | --                       | --                   | 542<br>(249 - 1,066)      | 1,044<br>(486 - 2,000)      | 524<br>(254 - 1,010)        |
| Liver cancer due to other causes     | 904<br>(454 - 1,587)        | --                       | 15<br>(5 - 32)       | 483<br>(230 - 893)        | 314<br>(132 - 648)          | 93<br>(37 - 189)            |
| Larynx cancer                        | 153<br>(100 - 340)          | --                       | --                   | 30<br>(19 - 56)           | 76<br>(43 - 190)            | 47<br>(30 - 98)             |
| Tracheal, bronchus and lung cancer   | 1,400<br>(1,084 - 1,896)    | --                       | --                   | 171<br>(115 - 240)        | 811<br>(587 - 1,157)        | 418<br>(325 - 567)          |
| Breast cancer                        | 59<br>(33 - 97)             | --                       | --                   | 18<br>(10 - 30)           | 30<br>(13 - 57)             | 11<br>(5 - 22)              |
| Cervical cancer                      | --                          | --                       | --                   | --                        | --                          | --                          |
| Uterine cancer                       | --                          | --                       | --                   | --                        | --                          | --                          |
| Prostate cancer                      | 2,176<br>(1,493 - 3,683)    | --                       | --                   | 47<br>(23 - 89)           | 720<br>(440 - 1,232)        | 1,409<br>(942 - 2,437)      |
| Colon and rectum cancer              | 1,734<br>(1,262 - 2,301)    | --                       | --                   | 496<br>(321 - 691)        | 726<br>(511 - 1,029)        | 513<br>(373 - 688)          |
| Lip and oral cavity cancer           | 164<br>(98 - 246)           | --                       | --                   | 44<br>(26 - 70)           | 77<br>(44 - 127)            | 43<br>(23 - 68)             |
| Nasopharynx cancer                   | 70<br>(42 - 108)            | --                       | 4<br>(1 - 11)        | 32<br>(17 - 52)           | 29<br>(16 - 49)             | 6<br>(3 - 11)               |
| Other pharynx cancer                 | 92<br>(52 - 140)            | --                       | --                   | 29<br>(14 - 48)           | 36<br>(20 - 61)             | 26<br>(11 - 42)             |
| Gallbladder and biliary tract cancer | 132<br>(85 - 190)           | --                       | --                   | 33<br>(16 - 52)           | 58<br>(34 - 92)             | 42<br>(26 - 66)             |
| Pancreatic cancer                    | 677<br>(522 - 893)          | --                       | --                   | 155<br>(104 - 220)        | 401<br>(292 - 556)          | 121<br>(90 - 160)           |
| Malignant skin melanoma              | 71<br>(33 - 116)            | --                       | --                   | 24<br>(11 - 40)           | 30<br>(13 - 51)             | 17<br>(8 - 30)              |
| Non-melanoma skin cancer             | 52<br>(34 - 86)             | --                       | --                   | 11<br>(6 - 19)            | 19<br>(10 - 36)             | 21<br>(13 - 34)             |
| Ovarian cancer                       | --                          | --                       | --                   | --                        | --                          | --                          |
| Testicular cancer                    | 52<br>(31 - 76)             | --                       | --                   | 38<br>(21 - 60)           | 9<br>(5 - 15)               | 5<br>(3 - 8)                |
| Kidney cancer                        | 238<br>(150 - 362)          | 46<br>(14 - 118)         | 16<br>(6 - 33)       | 38<br>(23 - 60)           | 98<br>(58 - 157)            | 41<br>(26 - 63)             |
| Bladder cancer                       | 647<br>(457 - 945)          | --                       | --                   | 137<br>(72 - 227)         | 235<br>(150 - 379)          | 275<br>(182 - 427)          |
| Brain and nervous system cancer      | 286<br>(144 - 408)          | 10<br>(3 - 24)           | 46<br>(16 - 86)      | 115<br>(56 - 175)         | 84<br>(39 - 132)            | 31<br>(13 - 49)             |
| Thyroid cancer                       | 25<br>(16 - 42)             | --                       | 1<br>(0 - 3)         | 8<br>(5 - 13)             | 9<br>(5 - 22)               | 6<br>(3 - 11)               |
| Mesothelioma                         | 47<br>(31 - 69)             | --                       | --                   | 6<br>(4 - 10)             | 21<br>(12 - 34)             | 20<br>(10 - 35)             |
| Hodgkin lymphoma                     | 164<br>(97 - 255)           | 27<br>(8 - 59)           | 23<br>(6 - 64)       | 71<br>(40 - 116)          | 32<br>(16 - 56)             | 12<br>(6 - 20)              |
| Non-Hodgkin lymphoma                 | 1,630<br>(986 - 2,511)      | 514<br>(185 - 1,199)     | 201<br>(78 - 411)    | 436<br>(275 - 664)        | 315<br>(182 - 521)          | 164<br>(99 - 273)           |
| Multiple myeloma                     | 86<br>(34 - 138)            | --                       | --                   | 21<br>(9 - 35)            | 49<br>(17 - 85)             | 15<br>(7 - 24)              |
| Leukemia                             | 515<br>(360 - 699)          | 67<br>(28 - 139)         | 83<br>(39 - 144)     | 225<br>(143 - 320)        | 74<br>(51 - 105)            | 66<br>(47 - 91)             |
| Other neoplasms                      | 2,471<br>(1,624 - 3,968)    | 623<br>(316 - 1,224)     | 231<br>(104 - 435)   | 530<br>(302 - 945)        | 667<br>(354 - 1,308)        | 420<br>(245 - 779)          |
| Cardiovascular diseases              | 58,578<br>(48,914 - 73,336) | 2,326<br>(1,176 - 4,176) | 663<br>(304 - 1,207) | 7,541<br>(5,223 - 10,098) | 24,490<br>(19,456 - 32,389) | 23,558<br>(20,185 - 28,663) |
| Rheumatic heart disease              | 569<br>(315 - 1,398)        | 71<br>(20 - 180)         | 30<br>(10 - 82)      | 136<br>(58 - 392)         | 176<br>(81 - 473)           | 157<br>(92 - 347)           |
| Ischemic heart disease               | 18,562<br>(13,851 - 24,923) | 160<br>(43 - 435)        | 110<br>(45 - 220)    | 2,391<br>(1,558 - 3,478)  | 8,558<br>(6,129 - 12,063)   | 7,343<br>(5,507 - 9,926)    |
| Cerebrovascular disease              | 25,266<br>(19,538 - 32,559) | 756<br>(369 - 1,451)     | 199<br>(87 - 377)    | 2,586<br>(1,675 - 3,667)  | 10,145<br>(7,374 - 13,776)  | 11,580<br>(9,152 - 14,791)  |
| Ischemic stroke                      | 15,729<br>(9,609 - 21,473)  | 82<br>(19 - 248)         | 29<br>(10 - 64)      | 707<br>(312 - 1,193)      | 6,160<br>(3,162 - 9,156)    | 8,751<br>(5,847 - 11,418)   |
| Hemorrhagic stroke                   | 9,537<br>(5,937 - 16,627)   | 674<br>(273 - 1,310)     | 170<br>(65 - 329)    | 1,879<br>(1,137 - 2,773)  | 3,985<br>(2,172 - 7,451)    | 2,829<br>(1,484 - 5,821)    |
| Hypertensive heart disease           | 2,827<br>(1,162 - 5,929)    | 30<br>(2 - 80)           | 8<br>(1 - 17)        | 388<br>(89 - 929)         | 1,181<br>(436 - 2,676)      | 1,220<br>(484 - 2,546)      |
| Cardiomyopathy and myocarditis       | 4,499<br>(2,577 - 7,506)    | 493<br>(134 - 1,294)     | 148<br>(47 - 298)    | 830<br>(439 - 1,346)      | 1,881<br>(802 - 3,699)      | 1,148<br>(496 - 2,233)      |
| Atrial fibrillation and flutter      | 2<br>(2 - 4)                | --                       | --                   | 1<br>(0 - 1)              | 1<br>(1 - 2)                | 1<br>(0 - 1)                |
| Aortic aneurysm                      | 685<br>(483 - 1,073)        | --                       | --                   | 74<br>(45 - 117)          | 354<br>(223 - 559)          | 257<br>(171 - 442)          |
| Peripheral vascular disease          | 44<br>(16 - 111)            | --                       | --                   | 2<br>(1 - 4)              | 12<br>(4 - 31)              | 31<br>(11 - 80)             |

Web Table 31- Nigeria deaths with 95% UI by age, sex, and cause in 2013

| Cause                                               | Males, All Ages            | Males, 0-4 Years       | Males, 5-14 Years    | Males, 15-49 Years       | Males, 50-69 Years       | Males, 70-80 Years       |
|-----------------------------------------------------|----------------------------|------------------------|----------------------|--------------------------|--------------------------|--------------------------|
| Endocarditis                                        | 1,568<br>(963 - 2,540)     | 206<br>(65 - 431)      | 30<br>(12 - 60)      | 252<br>(143 - 457)       | 594<br>(346 - 1,079)     | 486<br>(297 - 805)       |
| Other cardiovascular and circulatory diseases       | 4,554<br>(3,142 - 7,273)   | 612<br>(274 - 1,232)   | 138<br>(59 - 265)    | 880<br>(552 - 1,369)     | 1,587<br>(969 - 2,763)   | 1,336<br>(841 - 2,487)   |
| Chronic respiratory diseases                        | 12,068<br>(9,308 - 18,372) | 988<br>(411 - 2,107)   | 177<br>(92 - 318)    | 1,520<br>(1,022 - 2,253) | 4,348<br>(3,091 - 6,847) | 5,035<br>(3,843 - 7,402) |
| Chronic obstructive pulmonary disease               | 7,451<br>(5,484 - 11,682)  | 441<br>(174 - 954)     | 73<br>(35 - 138)     | 556<br>(349 - 897)       | 2,657<br>(1,758 - 4,318) | 3,724<br>(2,699 - 5,661) |
| Pneumoconiosis                                      | 908<br>(577 - 1,437)       | 17<br>(1 - 57)         | 9<br>(2 - 20)        | 203<br>(123 - 319)       | 481<br>(276 - 793)       | 199<br>(109 - 368)       |
| Silicosis                                           | 135<br>(70 - 285)          | 5<br>(0 - 18)          | 2<br>(1 - 6)         | 29<br>(15 - 52)          | 34<br>(14 - 75)          | 65<br>(30 - 150)         |
| Asbestosis                                          | 70<br>(42 - 122)           | 3<br>(0 - 12)          | 2<br>(0 - 4)         | 17<br>(10 - 29)          | 39<br>(20 - 72)          | 8<br>(4 - 17)            |
| Coal workers pneumoconiosis                         | 286<br>(178 - 468)         | 3<br>(0 - 9)           | 2<br>(0 - 5)         | 16<br>(9 - 26)           | 235<br>(137 - 390)       | 31<br>(14 - 58)          |
| Other pneumoconiosis                                | 417<br>(264 - 624)         | 5<br>(0 - 18)          | 3<br>(1 - 6)         | 141<br>(83 - 218)        | 173<br>(89 - 294)        | 95<br>(54 - 163)         |
| Asthma                                              | 1,488<br>(946 - 2,775)     | 259<br>(81 - 664)      | 33<br>(15 - 59)      | 394<br>(244 - 678)       | 462<br>(242 - 921)       | 340<br>(179 - 723)       |
| Interstitial lung disease and pulmonary sarcoidosis | 1,240<br>(445 - 2,194)     | 16<br>(1 - 101)        | 5<br>(1 - 15)        | 49<br>(26 - 86)          | 547<br>(173 - 1,019)     | 623<br>(173 - 1,156)     |
| Other chronic respiratory diseases                  | 982<br>(601 - 1,524)       | 256<br>(98 - 554)      | 58<br>(25 - 106)     | 319<br>(182 - 495)       | 201<br>(109 - 343)       | 149<br>(83 - 258)        |
| Cirrhosis                                           | 11,033<br>(8,386 - 14,957) | 489<br>(149 - 1,152)   | 177<br>(91 - 304)    | 3,907<br>(2,650 - 5,454) | 4,826<br>(3,457 - 6,826) | 1,634<br>(1,181 - 2,246) |
| Cirrhosis due to hepatitis B                        | 2,824<br>(1,227 - 4,805)   | 20<br>(4 - 61)         | 25<br>(4 - 63)       | 962<br>(338 - 1,806)     | 1,346<br>(580 - 2,328)   | 471<br>(209 - 822)       |
| Cirrhosis due to hepatitis C                        | 930<br>(426 - 1,651)       | 16<br>(4 - 48)         | 11<br>(4 - 24)       | 251<br>(95 - 512)        | 438<br>(179 - 862)       | 214<br>(93 - 426)        |
| Cirrhosis due to alcohol use                        | 5,452<br>(3,504 - 7,755)   | -                      | -                    | 1,985<br>(1,098 - 3,055) | 2,614<br>(1,672 - 3,811) | 853<br>(566 - 1,263)     |
| Cirrhosis due to other causes                       | 1,828<br>(1,105 - 2,773)   | 453<br>(135 - 1,087)   | 141<br>(62 - 260)    | 710<br>(394 - 1,089)     | 429<br>(211 - 739)       | 96<br>(52 - 157)         |
| Digestive diseases                                  | 11,813<br>(7,035 - 16,296) | 1,217<br>(444 - 2,539) | 586<br>(242 - 1,071) | 3,779<br>(1,892 - 5,702) | 3,758<br>(2,115 - 5,600) | 2,474<br>(1,624 - 3,444) |
| Peptic ulcer disease                                | 2,721<br>(1,559 - 4,230)   | 165<br>(36 - 459)      | 93<br>(32 - 235)     | 897<br>(451 - 1,537)     | 925<br>(480 - 1,566)     | 641<br>(348 - 1,019)     |
| Gastritis and duodenitis                            | 360<br>(120 - 870)         | 68<br>(7 - 224)        | 24<br>(6 - 61)       | 95<br>(32 - 245)         | 98<br>(26 - 305)         | 75<br>(16 - 258)         |
| Appendicitis                                        | 447<br>(222 - 763)         | 86<br>(16 - 241)       | 53<br>(17 - 115)     | 136<br>(62 - 263)        | 101<br>(37 - 198)        | 70<br>(24 - 145)         |
| Paralytic ileus and intestinal obstruction          | 4,066<br>(1,769 - 6,273)   | 252<br>(66 - 645)      | 201<br>(77 - 423)    | 1,044<br>(407 - 1,815)   | 1,566<br>(597 - 2,514)   | 1,003<br>(469 - 1,609)   |
| Inguinal, femoral, and abdominal hernia             | 362<br>(150 - 708)         | 12<br>(2 - 52)         | 9<br>(3 - 31)        | 94<br>(28 - 207)         | 130<br>(51 - 262)        | 116<br>(55 - 232)        |
| Inflammatory bowel disease                          | 657<br>(303 - 1,150)       | 255<br>(63 - 658)      | 29<br>(11 - 72)      | 162<br>(43 - 311)        | 130<br>(26 - 282)        | 81<br>(20 - 158)         |
| Vascular intestinal disorders                       | 54<br>(13 - 137)           | 13<br>(1 - 49)         | 5<br>(1 - 15)        | 11<br>(2 - 29)           | 11<br>(2 - 33)           | 13<br>(3 - 35)           |
| Gallbladder and biliary diseases                    | 540<br>(217 - 967)         | 27<br>(6 - 73)         | 34<br>(5 - 77)       | 172<br>(47 - 347)        | 144<br>(60 - 285)        | 163<br>(65 - 302)        |
| Pancreatitis                                        | 928<br>(422 - 1,697)       | 16<br>(2 - 63)         | 15<br>(4 - 33)       | 564<br>(224 - 1,078)     | 221<br>(95 - 445)        | 111<br>(42 - 240)        |
| Other digestive diseases                            | 1,679<br>(888 - 2,816)     | 321<br>(104 - 738)     | 124<br>(42 - 262)    | 602<br>(228 - 1,109)     | 432<br>(201 - 758)       | 200<br>(107 - 325)       |
| Neurological disorders                              | 5,963<br>(4,117 - 9,230)   | 987<br>(356 - 2,557)   | 532<br>(208 - 1,100) | 1,600<br>(658 - 3,463)   | 645<br>(432 - 987)       | 2,199<br>(1,712 - 2,791) |
| Alzheimer disease and other dementias               | 2,276<br>(1,776 - 2,898)   | -                      | -                    | 1<br>(0 - 4)             | 313<br>(209 - 455)       | 1,962<br>(1,482 - 2,506) |
| Parkinson disease                                   | 41<br>(20 - 83)            | -                      | -                    | 4<br>(2 - 6)             | 3<br>(1 - 8)             | 34<br>(14 - 74)          |
| Epilepsy                                            | 3,105<br>(1,527 - 6,260)   | 873<br>(284 - 2,410)   | 491<br>(173 - 1,050) | 1,407<br>(536 - 3,183)   | 195<br>(67 - 482)        | 140<br>(49 - 316)        |
| Multiple sclerosis                                  | 3<br>(2 - 8)               | -                      | -                    | 2<br>(1 - 5)             | 1<br>(0 - 3)             | 0<br>(0 - 1)             |
| Other neurological disorders                        | 538<br>(272 - 726)         | 114<br>(38 - 345)      | 41<br>(15 - 64)      | 186<br>(94 - 270)        | 134<br>(56 - 206)        | 63<br>(24 - 94)          |
| Mental and substance use disorders                  | 4,705<br>(2,472 - 6,553)   | 239<br>(35 - 564)      | 0<br>(0 - 1)         | 3,540<br>(1,843 - 5,022) | 720<br>(408 - 1,124)     | 206<br>(93 - 330)        |
| Schizophrenia                                       | 4<br>(2 - 7)               | -                      | -                    | 2<br>(1 - 4)             | 1<br>(1 - 3)             | 1<br>(0 - 1)             |
| Alcohol use disorders                               | 1,288<br>(526 - 2,268)     | -                      | -                    | 701<br>(306 - 1,223)     | 454<br>(170 - 872)       | 133<br>(33 - 266)        |
| Drug use disorders                                  | 3,412<br>(1,657 - 4,788)   | 239<br>(35 - 564)      | -                    | 2,836<br>(1,302 - 4,088) | 265<br>(155 - 387)       | 72<br>(42 - 105)         |
| Opioid use disorders                                | 367<br>(176 - 528)         | 27<br>(4 - 64)         | -                    | 308<br>(141 - 458)       | 25<br>(14 - 37)          | 8<br>(4 - 12)            |
| Cocaine use disorders                               | 13<br>(6 - 19)             | 1<br>(0 - 2)           | -                    | 11<br>(5 - 17)           | 1<br>(0 - 1)             | 0<br>(0 - 0)             |

Web Table 31- Nigeria deaths with 95% UI by age, sex, and cause in 2013

| Cause                                               | Males, All Ages              | Males, 0-4 Years            | Males, 5-14 Years       | Males, 15-49 Years         | Males, 50-69 Years        | Males, 70-80 Years       |
|-----------------------------------------------------|------------------------------|-----------------------------|-------------------------|----------------------------|---------------------------|--------------------------|
| Amphetamine use disorders                           | 9<br>(4 - 12)                | 1<br>(0 - 2)                | --                      | 7<br>(3 - 10)              | 1<br>(0 - 1)              | 0<br>(0 - 0)             |
| Other drug use disorders                            | 3,024<br>(1,475 - 4,240)     | 211<br>(30 - 511)           | --                      | 2,510<br>(1,156 - 3,619)   | 239<br>(139 - 352)        | 64<br>(37 - 95)          |
| Eating disorders                                    | 1<br>(1 - 2)                 | --                          | 0<br>(0 - 1)            | 1<br>(0 - 2)               | --                        | --                       |
| Anorexia nervosa                                    | 1<br>(1 - 2)                 | --                          | 0<br>(0 - 1)            | 1<br>(0 - 2)               | --                        | --                       |
| Diabetes, urogenital, blood, and endocrine diseases | 70,648<br>(17,100 - 176,588) | 39,189<br>(3,326 - 121,290) | 8,954<br>(808 - 23,906) | 11,615<br>(3,348 - 35,528) | 6,600<br>(4,388 - 10,435) | 4,289<br>(3,379 - 5,484) |
| Diabetes mellitus                                   | 5,580<br>(4,073 - 8,141)     | 182<br>(97 - 318)           | 39<br>(18 - 71)         | 820<br>(505 - 1,273)       | 2,712<br>(1,814 - 4,242)  | 1,827<br>(1,286 - 2,743) |
| Acute glomerulonephritis                            | 90<br>(41 - 272)             | 23<br>(5 - 125)             | 12<br>(4 - 48)          | 23<br>(10 - 66)            | 24<br>(12 - 50)           | 8<br>(3 - 26)            |
| Chronic kidney disease                              | 4,303<br>(2,736 - 7,000)     | 692<br>(299 - 1,333)        | 220<br>(102 - 404)      | 1,370<br>(648 - 2,158)     | 1,101<br>(692 - 1,931)    | 920<br>(607 - 1,544)     |
| Chronic kidney disease due to diabetes mellitus     | 40<br>(5 - 75)               | 2<br>(0 - 4)                | 1<br>(0 - 2)            | 4<br>(1 - 8)               | 32<br>(2 - 65)            | 2<br>(0 - 5)             |
| Chronic kidney disease due to hypertension          | 1,105<br>(661 - 1,701)       | 61<br>(11 - 144)            | 10<br>(3 - 27)          | 302<br>(132 - 493)         | 403<br>(204 - 692)        | 328<br>(179 - 574)       |
| Chronic kidney disease due to glomerulonephritis    | 2,148<br>(1,255 - 3,223)     | 412<br>(150 - 847)          | 169<br>(81 - 294)       | 775<br>(378 - 1,183)       | 427<br>(217 - 733)        | 365<br>(177 - 600)       |
| Chronic kidney disease due to other causes          | 1,010<br>(470 - 2,472)       | 217<br>(68 - 539)           | 39<br>(11 - 113)        | 289<br>(112 - 777)         | 239<br>(89 - 730)         | 225<br>(82 - 590)        |
| Urinary diseases and male infertility               | 3,771<br>(2,169 - 5,275)     | 696<br>(271 - 1,451)        | 83<br>(36 - 141)        | 932<br>(425 - 1,382)       | 1,035<br>(572 - 1,604)    | 1,024<br>(666 - 1,503)   |
| Interstitial nephritis and urinary tract infections | 3,247<br>(1,773 - 4,670)     | 607<br>(188 - 1,310)        | 66<br>(24 - 113)        | 757<br>(308 - 1,138)       | 908<br>(494 - 1,439)      | 909<br>(573 - 1,350)     |
| Urolithiasis                                        | 17<br>(8 - 34)               | --                          | 3<br>(1 - 7)            | 8<br>(2 - 19)              | 3<br>(1 - 9)              | 2<br>(1 - 6)             |
| Other urinary diseases                              | 506<br>(279 - 786)           | 88<br>(17 - 252)            | 14<br>(4 - 37)          | 167<br>(76 - 291)          | 124<br>(48 - 224)         | 113<br>(45 - 217)        |
| Gynecological diseases                              | --                           | --                          | --                      | --                         | --                        | --                       |
| Uterine fibroids                                    | --                           | --                          | --                      | --                         | --                        | --                       |
| Polycystic ovarian syndrome                         | --                           | --                          | --                      | --                         | --                        | --                       |
| Endometriosis                                       | --                           | --                          | --                      | --                         | --                        | --                       |
| Genital prolapse                                    | --                           | --                          | --                      | --                         | --                        | --                       |
| Other gynecological diseases                        | --                           | --                          | --                      | --                         | --                        | --                       |
| Hemoglobinopathies and hemolytic anemias            | 54,401<br>(1,397 - 162,313)  | 36,907<br>(909 - 119,524)   | 8,464<br>(208 - 23,632) | 7,826<br>(180 - 33,251)    | 1,076<br>(61 - 5,542)     | 128<br>(46 - 418)        |
| Thalassemias                                        | 129<br>(3 - 390)             | 107<br>(2 - 340)            | 12<br>(0 - 35)          | 9<br>(0 - 39)              | 0<br>(0 - 0)              | 0<br>(0 - 0)             |
| Sickle cell disorders                               | 53,602<br>(1,341 - 160,347)  | 36,346<br>(899 - 117,962)   | 8,407<br>(207 - 23,473) | 7,741<br>(178 - 32,890)    | 1,052<br>(58 - 5,442)     | 55<br>(19 - 186)         |
| G6PD deficiency                                     | 273<br>(9 - 829)             | 199<br>(4 - 621)            | 28<br>(1 - 79)          | 33<br>(1 - 142)            | 7<br>(1 - 32)             | 5<br>(2 - 18)            |
| Other hemoglobinopathies and hemolytic anemias      | 398<br>(35 - 1,429)          | 255<br>(4 - 883)            | 16<br>(0 - 45)          | 42<br>(1 - 177)            | 17<br>(2 - 75)            | 68<br>(26 - 217)         |
| Endocrine, metabolic, blood, and immune disorders   | 2,503<br>(768 - 4,061)       | 690<br>(231 - 1,296)        | 136<br>(42 - 289)       | 644<br>(156 - 1,146)       | 652<br>(112 - 1,179)      | 381<br>(65 - 672)        |
| Musculoskeletal disorders                           | 565<br>(366 - 981)           | --                          | 86<br>(36 - 191)        | 213<br>(131 - 362)         | 165<br>(92 - 319)         | 101<br>(59 - 209)        |
| Rheumatoid arthritis                                | 51<br>(27 - 102)             | --                          | 7<br>(2 - 16)           | 12<br>(6 - 21)             | 17<br>(8 - 38)            | 15<br>(6 - 38)           |
| Other musculoskeletal disorders                     | 514<br>(330 - 881)           | --                          | 79<br>(32 - 176)        | 201<br>(123 - 345)         | 148<br>(83 - 280)         | 86<br>(48 - 170)         |
| Other non-communicable diseases                     | 20,376<br>(10,397 - 38,426)  | 18,208<br>(8,659 - 36,483)  | 691<br>(278 - 1,289)    | 721<br>(430 - 1,105)       | 385<br>(179 - 617)        | 370<br>(132 - 572)       |
| Congenital anomalies                                | 18,789<br>(9,032 - 36,992)   | 17,486<br>(8,151 - 35,691)  | 641<br>(248 - 1,247)    | 483<br>(281 - 816)         | 109<br>(56 - 183)         | 71<br>(41 - 113)         |
| Neural tube defects                                 | 3,331<br>(701 - 8,235)       | 3,209<br>(637 - 8,058)      | 69<br>(16 - 163)        | 47<br>(11 - 117)           | 4<br>(1 - 15)             | 2<br>(0 - 8)             |
| Congenital heart anomalies                          | 9,078<br>(4,387 - 17,180)    | 8,309<br>(3,864 - 16,405)   | 394<br>(158 - 772)      | 278<br>(157 - 474)         | 64<br>(32 - 114)          | 32<br>(16 - 55)          |
| Cleft lip and cleft palate                          | 139<br>(26 - 369)            | 139<br>(26 - 369)           | --                      | --                         | --                        | --                       |
| Down syndrome                                       | 1,340<br>(299 - 3,680)       | 1,253<br>(242 - 3,613)      | 38<br>(11 - 93)         | 39<br>(17 - 80)            | 8<br>(4 - 19)             | 1<br>(0 - 3)             |
| Chromosomal unbalanced rearrangements               | 489<br>(146 - 1,371)         | 456<br>(124 - 1,334)        | 15<br>(3 - 41)          | 14<br>(7 - 26)             | 2<br>(1 - 4)              | 2<br>(1 - 3)             |
| Other congenital anomalies                          | 4,413<br>(1,052 - 16,662)    | 4,119<br>(859 - 16,127)     | 126<br>(26 - 422)       | 105<br>(54 - 176)          | 30<br>(13 - 51)           | 33<br>(17 - 56)          |
| Skin and subcutaneous diseases                      | 1,293<br>(306 - 1,913)       | 429<br>(94 - 918)           | 50<br>(12 - 88)         | 238<br>(64 - 372)          | 276<br>(63 - 465)         | 300<br>(71 - 480)        |

Web Table 31- Nigeria deaths with 95% UI by age, sex, and cause in 2013

| Cause                                           | Males, All Ages              | Males, 0-4 Years            | Males, 5-14 Years          | Males, 15-49 Years          | Males, 50-69 Years         | Males, 70-80 Years       |
|-------------------------------------------------|------------------------------|-----------------------------|----------------------------|-----------------------------|----------------------------|--------------------------|
| Cellulitis                                      | 521<br>(97 - 895)            | 179<br>(32 - 444)           | 29<br>(5 - 56)             | 77<br>(14 - 137)            | 136<br>(22 - 247)          | 100<br>(16 - 183)        |
| Pyoderma                                        | 724<br>(201 - 1,202)         | 247<br>(62 - 521)           | 19<br>(6 - 40)             | 153<br>(45 - 261)           | 137<br>(39 - 289)          | 170<br>(47 - 306)        |
| Decubitus ulcer                                 | 38<br>(8 - 81)               | 2<br>(0 - 4)                | 1<br>(0 - 3)               | 5<br>(1 - 10)               | 2<br>(1 - 6)               | 29<br>(4 - 66)           |
| Other skin and subcutaneous diseases            | 9<br>(3 - 19)                | 2<br>(0 - 6)                | 1<br>(0 - 3)               | 3<br>(1 - 6)                | 2<br>(0 - 5)               | 1<br>(0 - 3)             |
| Sudden infant death syndrome                    | 294<br>(67 - 899)            | 294<br>(67 - 899)           | --                         | --                          | --                         | --                       |
| Injuries                                        | 99,125<br>(69,831 - 133,541) | 26,978<br>(13,248 - 49,481) | 11,323<br>(6,345 - 17,668) | 45,137<br>(30,852 - 59,232) | 11,042<br>(8,203 - 15,375) | 4,645<br>(3,493 - 6,309) |
| Transport injuries                              | 60,196<br>(42,518 - 78,264)  | 10,200<br>(4,528 - 19,912)  | 6,670<br>(3,668 - 10,641)  | 33,810<br>(22,571 - 45,026) | 7,092<br>(5,203 - 10,183)  | 2,424<br>(1,831 - 3,311) |
| Road injuries                                   | 59,043<br>(41,490 - 76,514)  | 9,731<br>(4,270 - 19,011)   | 6,458<br>(3,532 - 10,234)  | 33,531<br>(22,315 - 44,502) | 6,976<br>(5,107 - 10,009)  | 2,347<br>(1,764 - 3,225) |
| Pedestrian road injuries                        | 18,063<br>(10,876 - 27,871)  | 5,622<br>(1,740 - 12,297)   | 3,032<br>(1,542 - 5,104)   | 6,334<br>(3,517 - 9,910)    | 1,944<br>(1,162 - 3,034)   | 1,130<br>(738 - 1,634)   |
| Cyclist road injuries                           | 1,880<br>(1,089 - 3,020)     | 462<br>(143 - 1,138)        | 453<br>(154 - 927)         | 627<br>(355 - 989)          | 234<br>(144 - 413)         | 104<br>(56 - 204)        |
| Motorcyclist road injuries                      | 15,502<br>(9,705 - 21,323)   | 783<br>(298 - 1,740)        | 656<br>(314 - 1,193)       | 11,588<br>(6,845 - 16,499)  | 2,121<br>(1,254 - 3,264)   | 354<br>(203 - 593)       |
| Motor vehicle road injuries                     | 21,175<br>(13,708 - 29,250)  | 2,586<br>(1,157 - 5,070)    | 1,884<br>(891 - 3,347)     | 13,626<br>(8,514 - 19,382)  | 2,446<br>(1,626 - 3,724)   | 633<br>(411 - 970)       |
| Other road injuries                             | 2,422<br>(1,116 - 3,745)     | 278<br>(71 - 683)           | 433<br>(147 - 966)         | 1,355<br>(508 - 2,258)      | 231<br>(105 - 421)         | 126<br>(54 - 242)        |
| Other transport injuries                        | 1,153<br>(743 - 1,776)       | 469<br>(184 - 1,038)        | 212<br>(99 - 388)          | 279<br>(157 - 590)          | 117<br>(67 - 183)          | 77<br>(25 - 133)         |
| Unintentional injuries                          | 36,040<br>(21,162 - 56,275)  | 16,437<br>(7,289 - 30,543)  | 4,563<br>(2,056 - 7,463)   | 9,162<br>(5,970 - 13,051)   | 3,721<br>(2,388 - 6,053)   | 2,157<br>(1,339 - 3,749) |
| Falls                                           | 9,008<br>(5,814 - 13,343)    | 3,292<br>(1,443 - 6,452)    | 996<br>(397 - 1,932)       | 2,842<br>(1,763 - 4,273)    | 1,192<br>(756 - 1,916)     | 687<br>(426 - 1,123)     |
| Drowning                                        | 5,905<br>(3,046 - 11,719)    | 3,198<br>(1,131 - 7,432)    | 1,234<br>(526 - 2,565)     | 1,159<br>(672 - 2,016)      | 231<br>(137 - 402)         | 83<br>(52 - 143)         |
| Fire, heat, and hot substances                  | 3,432<br>(1,249 - 6,453)     | 2,257<br>(575 - 4,955)      | 306<br>(93 - 593)          | 487<br>(256 - 746)          | 232<br>(128 - 388)         | 150<br>(85 - 243)        |
| Poisonings                                      | 2,612<br>(598 - 4,758)       | 1,029<br>(187 - 2,693)      | 238<br>(38 - 517)          | 996<br>(259 - 1,573)        | 266<br>(56 - 455)          | 83<br>(17 - 149)         |
| Exposure to mechanical forces                   | 4,317<br>(1,871 - 11,514)    | 2,112<br>(518 - 6,030)      | 575<br>(211 - 1,209)       | 1,178<br>(610 - 3,768)      | 353<br>(188 - 1,056)       | 100<br>(47 - 306)        |
| Unintentional firearm injuries                  | 956<br>(533 - 1,604)         | 362<br>(123 - 854)          | 112<br>(42 - 232)          | 382<br>(211 - 605)          | 81<br>(41 - 141)           | 19<br>(10 - 31)          |
| Unintentional suffocation                       | 1,888<br>(199 - 9,547)       | 1,234<br>(70 - 5,310)       | 186<br>(18 - 762)          | 341<br>(44 - 2,508)         | 97<br>(14 - 899)           | 29<br>(4 - 259)          |
| Other exposure to mechanical forces             | 1,472<br>(756 - 2,418)       | 516<br>(133 - 1,134)        | 276<br>(86 - 569)          | 454<br>(251 - 812)          | 174<br>(71 - 299)          | 52<br>(14 - 84)          |
| Adverse effects of medical treatment            | 4,393<br>(733 - 12,063)      | 2,076<br>(333 - 5,644)      | 227<br>(15 - 766)          | 821<br>(102 - 2,628)        | 692<br>(65 - 2,450)        | 576<br>(47 - 2,061)      |
| Animal contact                                  | 1,663<br>(216 - 2,959)       | 541<br>(69 - 1,404)         | 365<br>(35 - 798)          | 340<br>(44 - 545)           | 256<br>(38 - 434)          | 161<br>(13 - 272)        |
| Venomous animal contact                         | 655<br>(86 - 1,230)          | 194<br>(24 - 568)           | 124<br>(13 - 301)          | 163<br>(18 - 281)           | 100<br>(12 - 180)          | 74<br>(3 - 137)          |
| Non-venomous animal contact                     | 1,009<br>(126 - 1,807)       | 347<br>(36 - 956)           | 241<br>(19 - 517)          | 177<br>(24 - 293)           | 157<br>(21 - 282)          | 87<br>(8 - 165)          |
| Foreign body                                    | 1,402<br>(568 - 2,718)       | 972<br>(327 - 2,071)        | 107<br>(39 - 218)          | 150<br>(58 - 290)           | 89<br>(35 - 160)           | 85<br>(24 - 166)         |
| Pulmonary aspiration and foreign body in airway | 1,301<br>(489 - 2,588)       | 929<br>(308 - 2,023)        | 91<br>(29 - 194)           | 135<br>(42 - 280)           | 67<br>(17 - 136)           | 78<br>(18 - 160)         |
| Foreign body in other body part                 | 102<br>(48 - 305)            | 43<br>(14 - 172)            | 16<br>(6 - 60)             | 14<br>(6 - 42)              | 22<br>(9 - 38)             | 7<br>(3 - 11)            |
| Other unintentional injuries                    | 3,309<br>(2,264 - 4,588)     | 960<br>(421 - 1,857)        | 516<br>(265 - 875)         | 1,191<br>(774 - 1,684)      | 409<br>(271 - 602)         | 233<br>(164 - 326)       |
| Self-harm and interpersonal violence            | 2,769<br>(1,769 - 4,179)     | 223<br>(85 - 487)           | 90<br>(41 - 185)           | 2,164<br>(1,288 - 3,249)    | 228<br>(152 - 376)         | 63<br>(41 - 108)         |
| Self-harm                                       | 635<br>(426 - 1,066)         | --                          | 11<br>(3 - 26)             | 444<br>(278 - 735)          | 130<br>(82 - 239)          | 49<br>(29 - 100)         |
| Interpersonal violence                          | 2,134<br>(1,210 - 3,333)     | 223<br>(85 - 487)           | 80<br>(33 - 166)           | 1,720<br>(935 - 2,745)      | 98<br>(50 - 170)           | 14<br>(6 - 27)           |
| Assault by firearm                              | 686<br>(347 - 1,375)         | 51<br>(14 - 133)            | 15<br>(3 - 42)             | 590<br>(288 - 1,204)        | 23<br>(11 - 52)            | 6<br>(2 - 13)            |
| Assault by sharp object                         | 191<br>(80 - 334)            | 14<br>(4 - 34)              | 5<br>(2 - 11)              | 158<br>(63 - 282)           | 13<br>(4 - 26)             | 2<br>(0 - 4)             |
| Assault by other means                          | 1,257<br>(655 - 2,015)       | 158<br>(57 - 364)           | 60<br>(25 - 128)           | 972<br>(465 - 1,560)        | 62<br>(30 - 112)           | 6<br>(2 - 11)            |
| Forces of nature, war, and legal intervention   | 119<br>(0 - 10)              | 119<br>(0 - 10)             | --                         | --                          | --                         | --                       |
| Exposure to forces of nature                    | 119<br>(0 - 10)              | 119<br>(0 - 10)             | --                         | --                          | --                         | --                       |

Web Table 31- Nigeria deaths with 95% UI by age, sex, and cause in 2013

| Cause                                                             | Females, All Ages              | Females, 0-4 Years             | Females, 5-14 Years         | Females, 15-49 Years           | Females, 50-69 Years         | Females, 70-80 Years        |
|-------------------------------------------------------------------|--------------------------------|--------------------------------|-----------------------------|--------------------------------|------------------------------|-----------------------------|
| All causes                                                        | 820,100<br>(746,189 - 918,906) | 411,941<br>(352,420 - 465,030) | 36,059<br>(29,122 - 46,191) | 193,039<br>(166,363 - 221,290) | 99,491<br>(85,730 - 125,777) | 79,571<br>(74,212 - 96,697) |
| Communicable, maternal, neonatal, and nutritional diseases        | 515,862<br>(434,142 - 582,977) | 313,197<br>(242,693 - 376,930) | 17,592<br>(11,962 - 23,632) | 132,570<br>(114,630 - 151,562) | 33,589<br>(28,161 - 39,626)  | 18,914<br>(15,046 - 23,266) |
| HIV/AIDS and tuberculosis                                         | 106,990<br>(89,074 - 126,639)  | 8,745<br>(7,205 - 10,707)      | 4,502<br>(3,671 - 5,374)    | 72,629<br>(58,551 - 88,425)    | 18,084<br>(13,886 - 21,899)  | 3,029<br>(2,140 - 4,165)    |
| Tuberculosis                                                      | 14,719<br>(10,135 - 20,468)    | 1,748<br>(947 - 2,999)         | 369<br>(198 - 647)          | 7,423<br>(4,503 - 11,286)      | 3,326<br>(2,216 - 4,996)     | 1,853<br>(1,189 - 2,850)    |
| HIV/AIDS                                                          | 92,271<br>(74,817 - 111,822)   | 6,997<br>(5,705 - 8,617)       | 4,134<br>(3,326 - 4,955)    | 65,206<br>(51,975 - 81,717)    | 14,759<br>(10,830 - 18,750)  | 1,176<br>(670 - 1,860)      |
| HIV/AIDS resulting in mycobacterial infection                     | 4,951<br>(3,591 - 6,452)       | 366<br>(270 - 488)             | 199<br>(147 - 262)          | 3,512<br>(2,479 - 4,662)       | 807<br>(546 - 1,090)         | 68<br>(36 - 114)            |
| HIV/AIDS resulting in other diseases                              | 87,320<br>(71,267 - 105,798)   | 6,630<br>(5,412 - 8,156)       | 3,935<br>(3,164 - 4,722)    | 61,695<br>(49,169 - 77,259)    | 13,952<br>(10,245 - 17,688)  | 1,108<br>(630 - 1,763)      |
| Diarrhea, lower respiratory, and other common infectious diseases | 137,648<br>(98,728 - 176,594)  | 96,691<br>(62,924 - 133,417)   | 5,556<br>(3,049 - 9,014)    | 13,988<br>(9,439 - 19,136)     | 9,981<br>(6,737 - 14,539)    | 11,432<br>(7,954 - 15,182)  |
| Diarrheal diseases                                                | 31,404<br>(16,652 - 55,751)    | 21,802<br>(8,022 - 46,860)     | 928<br>(351 - 2,042)        | 4,011<br>(2,329 - 6,507)       | 2,362<br>(1,324 - 4,157)     | 2,300<br>(1,312 - 3,826)    |
| Intestinal infectious diseases                                    | 3,461<br>(1,726 - 6,402)       | 1,474<br>(699 - 2,772)         | 910<br>(378 - 1,875)        | 872<br>(348 - 1,767)           | 152<br>(62 - 302)            | 53<br>(20 - 101)            |
| Typhoid fever                                                     | 2,130<br>(986 - 4,019)         | 865<br>(376 - 1,755)           | 572<br>(226 - 1,270)        | 560<br>(203 - 1,192)           | 100<br>(32 - 213)            | 34<br>(9 - 70)              |
| Paratyphoid fever                                                 | 1,144<br>(493 - 2,222)         | 493<br>(192 - 1,013)           | 322<br>(97 - 726)           | 277<br>(93 - 617)              | 40<br>(12 - 93)              | 13<br>(4 - 29)              |
| Other intestinal infectious diseases                              | 186<br>(128 - 258)             | 116<br>(68 - 176)              | 16<br>(7 - 30)              | 35<br>(20 - 54)                | 13<br>(5 - 24)               | 6<br>(1 - 15)               |
| Lower respiratory infections                                      | 77,769<br>(53,876 - 106,447)   | 55,897<br>(34,930 - 82,739)    | 1,879<br>(881 - 3,459)      | 5,318<br>(3,454 - 7,560)       | 6,277<br>(3,796 - 9,605)     | 8,399<br>(5,371 - 11,699)   |
| Upper respiratory infections                                      | 91<br>(28 - 249)               | 50<br>(2 - 209)                | 4<br>(0 - 16)               | 19<br>(4 - 50)                 | 11<br>(1 - 35)               | 7<br>(0 - 23)               |
| Otitis media                                                      | 53<br>(39 - 73)                | 24<br>(13 - 42)                | 3<br>(2 - 5)                | 6<br>(4 - 8)                   | 9<br>(7 - 14)                | 10<br>(7 - 15)              |
| Meningitis                                                        | 15,653<br>(8,517 - 24,214)     | 9,558<br>(3,363 - 17,445)      | 1,101<br>(475 - 2,119)      | 3,400<br>(1,849 - 5,342)       | 1,020<br>(594 - 1,607)       | 574<br>(310 - 978)          |
| Pneumococcal meningitis                                           | 4,363<br>(2,208 - 6,991)       | 2,424<br>(752 - 4,753)         | 359<br>(129 - 806)          | 1,079<br>(431 - 2,004)         | 318<br>(148 - 602)           | 183<br>(87 - 352)           |
| H influenzae type B meningitis                                    | 2,881<br>(1,320 - 4,961)       | 2,239<br>(785 - 4,222)         | 182<br>(64 - 380)           | 352<br>(160 - 635)             | 72<br>(28 - 149)             | 37<br>(13 - 77)             |
| Meningococcal meningitis                                          | 5,623<br>(3,063 - 8,730)       | 3,351<br>(980 - 6,170)         | 390<br>(170 - 801)          | 1,259<br>(627 - 2,139)         | 397<br>(194 - 680)           | 225<br>(107 - 411)          |
| Other meningitis                                                  | 2,785<br>(1,405 - 4,344)       | 1,544<br>(590 - 2,973)         | 170<br>(56 - 363)           | 711<br>(307 - 1,301)           | 233<br>(98 - 420)            | 128<br>(52 - 251)           |
| Encephalitis                                                      | 630<br>(405 - 934)             | 254<br>(126 - 524)             | 69<br>(33 - 176)            | 155<br>(87 - 290)              | 98<br>(46 - 164)             | 54<br>(21 - 95)             |
| Diphtheria                                                        | 132<br>(2 - 918)               | 114<br>(0 - 894)               | 13<br>(0 - 108)             | 5<br>(0 - 19)                  | 1<br>(0 - 5)                 | --                          |
| Whooping cough                                                    | 2,085<br>(4 - 11,104)          | 1,987<br>(4 - 10,573)          | 82<br>(0 - 440)             | 14<br>(0 - 73)                 | 2<br>(0 - 8)                 | --                          |
| Tetanus                                                           | 335<br>(178 - 695)             | 190<br>(67 - 413)              | 11<br>(5 - 23)              | 81<br>(29 - 319)               | 38<br>(14 - 131)             | 15<br>(5 - 52)              |
| Measles                                                           | 5,934<br>(2,251 - 12,229)      | 5,296<br>(1,970 - 11,101)      | 549<br>(207 - 1,198)        | 88<br>(36 - 182)               | 2<br>(1 - 4)                 | --                          |
| Varicella and herpes zoster                                       | 100<br>(29 - 247)              | 46<br>(2 - 183)                | 8<br>(0 - 34)               | 18<br>(3 - 52)                 | 9<br>(1 - 32)                | 19<br>(1 - 74)              |
| Neglected tropical diseases and malaria                           | 110,053<br>(62,960 - 159,510)  | 96,098<br>(50,434 - 146,338)   | 5,502<br>(1,655 - 11,263)   | 4,795<br>(1,603 - 9,640)       | 2,266<br>(675 - 4,795)       | 1,392<br>(369 - 3,349)      |
| Malaria                                                           | 108,611<br>(61,160 - 158,184)  | 95,517<br>(49,866 - 145,854)   | 5,311<br>(1,404 - 11,097)   | 4,370<br>(1,104 - 9,282)       | 2,092<br>(466 - 4,641)       | 1,321<br>(282 - 3,296)      |
| Leishmaniasis                                                     | 1<br>(1 - 2)                   | 0<br>(0 - 1)                   | 0<br>(0 - 0)                | 0<br>(0 - 1)                   | 0<br>(0 - 0)                 | 0<br>(0 - 0)                |
| Visceral leishmaniasis                                            | 1<br>(1 - 2)                   | 0<br>(0 - 1)                   | 0<br>(0 - 0)                | 0<br>(0 - 1)                   | 0<br>(0 - 0)                 | 0<br>(0 - 0)                |
| African trypanosomiasis                                           | 6<br>(2 - 13)                  | 0<br>(0 - 1)                   | 1<br>(0 - 1)                | 4<br>(1 - 8)                   | 1<br>(0 - 2)                 | 0<br>(0 - 0)                |
| Schistosomiasis                                                   | 257<br>(174 - 359)             | 10<br>(3 - 20)                 | 10<br>(4 - 19)              | 120<br>(70 - 187)              | 81<br>(44 - 135)             | 36<br>(18 - 63)             |
| Cysticercosis                                                     | 27<br>(6 - 76)                 | 3<br>(1 - 9)                   | 2<br>(0 - 5)                | 17<br>(4 - 50)                 | 4<br>(1 - 12)                | 1<br>(0 - 3)                |
| Cystic echinococcosis                                             | 44<br>(34 - 55)                | 12<br>(7 - 18)                 | 7<br>(4 - 11)               | 18<br>(13 - 24)                | 5<br>(4 - 6)                 | 2<br>(2 - 2)                |
| Dengue                                                            | 62<br>(35 - 98)                | 30<br>(10 - 56)                | 11<br>(4 - 23)              | 16<br>(9 - 33)                 | 3<br>(1 - 9)                 | 1<br>(0 - 3)                |
| Yellow fever                                                      | 48<br>(28 - 80)                | 5<br>(1 - 15)                  | 9<br>(2 - 25)               | 26<br>(11 - 52)                | 6<br>(1 - 17)                | 2<br>(0 - 9)                |
| Rabies                                                            | 545<br>(296 - 896)             | 169<br>(63 - 361)              | 117<br>(47 - 253)           | 188<br>(109 - 291)             | 58<br>(22 - 109)             | 13<br>(4 - 28)              |
| Intestinal nematode infections                                    | 335<br>(197 - 506)             | 293<br>(163 - 451)             | 27<br>(12 - 49)             | 10<br>(3 - 22)                 | 3<br>(0 - 11)                | 2<br>(0 - 10)               |
| Ascariasis                                                        | 335<br>(197 - 506)             | 293<br>(163 - 451)             | 27<br>(12 - 49)             | 10<br>(3 - 22)                 | 3<br>(0 - 11)                | 2<br>(0 - 10)               |

Web Table 31- Nigeria deaths with 95% UI by age, sex, and cause in 2013

| Cause                                                            | Females, All Ages              | Females, 0-4 Years           | Females, 5-14 Years        | Females, 15-49 Years        | Females, 50-69 Years        | Females, 70-80 Years        |
|------------------------------------------------------------------|--------------------------------|------------------------------|----------------------------|-----------------------------|-----------------------------|-----------------------------|
| Other neglected tropical diseases                                | 117<br>(67 - 256)              | 58<br>(21 - 141)             | 7<br>(3 - 16)              | 25<br>(14 - 60)             | 14<br>(7 - 27)              | 12<br>(6 - 20)              |
| Maternal disorders                                               | 36,698<br>(24,829 - 49,252)    | --                           | 208<br>(68 - 512)          | 36,489<br>(24,645 - 49,064) | --                          | --                          |
| Maternal hemorrhage                                              | 5,661<br>(3,289 - 8,567)       | --                           | 17<br>(5 - 45)             | 5,644<br>(3,272 - 8,533)    | --                          | --                          |
| Maternal sepsis and other maternal infections                    | 1,821<br>(921 - 2,987)         | --                           | 11<br>(2 - 30)             | 1,810<br>(909 - 2,966)      | --                          | --                          |
| Maternal hypertensive disorders                                  | 2,691<br>(1,591 - 4,202)       | --                           | 15<br>(4 - 39)             | 2,676<br>(1,584 - 4,177)    | --                          | --                          |
| Maternal obstructed labor                                        | 2,807<br>(1,649 - 4,089)       | --                           | 11<br>(3 - 29)             | 2,796<br>(1,646 - 4,079)    | --                          | --                          |
| Maternal abortive outcome                                        | 6,406<br>(4,048 - 9,225)       | --                           | 37<br>(11 - 96)            | 6,369<br>(4,022 - 9,163)    | --                          | --                          |
| Indirect maternal deaths                                         | 4,067<br>(2,326 - 6,420)       | --                           | 18<br>(5 - 46)             | 4,049<br>(2,311 - 6,392)    | --                          | --                          |
| Late maternal deaths                                             | 5,876<br>(2,944 - 9,191)       | --                           | 59<br>(16 - 157)           | 5,817<br>(2,909 - 9,118)    | --                          | --                          |
| Maternal deaths aggravated by HIV/AIDS                           | 450<br>(223 - 736)             | --                           | --                         | 450<br>(223 - 736)          | --                          | --                          |
| Other maternal disorders                                         | 6,844<br>(4,284 - 9,879)       | --                           | 40<br>(11 - 101)           | 6,804<br>(4,232 - 9,811)    | --                          | --                          |
| Neonatal disorders                                               | 78,261<br>(56,410 - 100,712)   | 78,261<br>(56,410 - 100,712) | --                         | --                          | --                          | --                          |
| Neonatal preterm birth complications                             | 26,530<br>(10,727 - 47,352)    | 26,530<br>(10,727 - 47,352)  | --                         | --                          | --                          | --                          |
| Neonatal encephalopathy due to birth asphyxia and trauma         | 27,485<br>(13,369 - 44,699)    | 27,485<br>(13,369 - 44,699)  | --                         | --                          | --                          | --                          |
| Neonatal sepsis and other neonatal infections                    | 15,939<br>(6,837 - 30,751)     | 15,939<br>(6,837 - 30,751)   | --                         | --                          | --                          | --                          |
| Hemolytic disease and other neonatal jaundice                    | 317<br>(81 - 763)              | 317<br>(81 - 763)            | --                         | --                          | --                          | --                          |
| Other neonatal disorders                                         | 7,990<br>(3,807 - 15,498)      | 7,990<br>(3,807 - 15,498)    | --                         | --                          | --                          | --                          |
| Nutritional deficiencies                                         | 34,379<br>(20,975 - 50,675)    | 24,297<br>(12,580 - 39,814)  | 1,218<br>(602 - 2,128)     | 3,867<br>(2,229 - 5,933)    | 2,521<br>(1,641 - 3,716)    | 2,476<br>(1,663 - 3,708)    |
| Protein-energy malnutrition                                      | 26,026<br>(14,411 - 40,298)    | 22,173<br>(11,325 - 36,400)  | 905<br>(418 - 1,649)       | 678<br>(261 - 1,639)        | 1,091<br>(517 - 1,976)      | 1,179<br>(544 - 2,163)      |
| Iodine deficiency                                                | 34<br>(2 - 159)                | 19<br>(0 - 145)              | 2<br>(0 - 16)              | 6<br>(0 - 29)               | 4<br>(0 - 29)               | 2<br>(0 - 14)               |
| Iron-deficiency anemia                                           | 8,181<br>(4,596 - 15,117)      | 2,043<br>(430 - 7,150)       | 307<br>(102 - 765)         | 3,166<br>(1,791 - 4,923)    | 1,384<br>(687 - 2,294)      | 1,281<br>(663 - 2,218)      |
| Other nutritional deficiencies                                   | 138<br>(51 - 300)              | 62<br>(11 - 193)             | 4<br>(1 - 11)              | 17<br>(6 - 51)              | 41<br>(10 - 82)             | 14<br>(5 - 33)              |
| Other communicable, maternal, neonatal, and nutritional diseases | 11,833<br>(5,679 - 19,738)     | 9,105<br>(3,371 - 16,641)    | 605<br>(227 - 1,196)       | 801<br>(396 - 1,228)        | 736<br>(350 - 1,217)        | 586<br>(251 - 1,011)        |
| Sexually transmitted diseases excluding HIV                      | 8,524<br>(2,855 - 16,229)      | 7,763<br>(2,301 - 14,971)    | 493<br>(141 - 1,034)       | 155<br>(68 - 268)           | 67<br>(23 - 172)            | 47<br>(13 - 129)            |
| Syphilis                                                         | 8,385<br>(2,664 - 16,076)      | 7,763<br>(2,301 - 14,971)    | 488<br>(138 - 1,028)       | 63<br>(28 - 108)            | 37<br>(12 - 92)             | 35<br>(9 - 96)              |
| Chlamydial infection                                             | 45<br>(23 - 77)                | --                           | 2<br>(1 - 3)               | 31<br>(14 - 53)             | 9<br>(3 - 25)               | 3<br>(1 - 9)                |
| Gonococcal infection                                             | 51<br>(28 - 86)                | --                           | 2<br>(1 - 3)               | 32<br>(14 - 55)             | 12<br>(4 - 31)              | 6<br>(2 - 16)               |
| Other sexually transmitted diseases                              | 44<br>(23 - 75)                | --                           | 2<br>(1 - 3)               | 30<br>(13 - 52)             | 9<br>(3 - 24)               | 3<br>(1 - 9)                |
| Hepatitis                                                        | 1,542<br>(387 - 2,537)         | 308<br>(35 - 635)            | 46<br>(6 - 101)            | 435<br>(85 - 770)           | 426<br>(139 - 784)          | 328<br>(106 - 590)          |
| Acute hepatitis A                                                | 136<br>(14 - 348)              | 98<br>(8 - 262)              | 14<br>(2 - 39)             | 18<br>(2 - 50)              | 5<br>(1 - 14)               | 1<br>(0 - 4)                |
| Acute hepatitis B                                                | 1,020<br>(276 - 1,761)         | 205<br>(22 - 457)            | 23<br>(3 - 57)             | 147<br>(25 - 311)           | 351<br>(114 - 658)          | 294<br>(98 - 540)           |
| Acute hepatitis C                                                | 27<br>(3 - 90)                 | --                           | 2<br>(0 - 6)               | 6<br>(1 - 19)               | 11<br>(1 - 40)              | 9<br>(0 - 35)               |
| Acute hepatitis E                                                | 358<br>(72 - 698)              | 4<br>(0 - 16)                | 7<br>(1 - 18)              | 265<br>(50 - 517)           | 59<br>(11 - 153)            | 24<br>(3 - 75)              |
| Other infectious diseases                                        | 1,766<br>(946 - 3,529)         | 1,034<br>(391 - 2,586)       | 66<br>(20 - 175)           | 211<br>(102 - 365)          | 244<br>(93 - 555)           | 211<br>(56 - 546)           |
| Non-communicable diseases                                        | 246,933<br>(185,892 - 355,705) | 77,416<br>(37,424 - 147,956) | 13,069<br>(6,265 - 25,465) | 41,674<br>(30,373 - 58,597) | 58,870<br>(48,426 - 79,791) | 55,904<br>(50,105 - 69,058) |
| Neoplasms                                                        | 30,197<br>(24,584 - 39,143)    | 903<br>(438 - 1,593)         | 498<br>(230 - 909)         | 8,897<br>(6,816 - 11,377)   | 14,407<br>(11,290 - 20,073) | 5,491<br>(4,467 - 7,271)    |
| Esophageal cancer                                                | 380<br>(242 - 636)             | --                           | --                         | 44<br>(25 - 72)             | 231<br>(139 - 387)          | 106<br>(60 - 214)           |
| Stomach cancer                                                   | 2,142<br>(1,626 - 3,005)       | --                           | --                         | 465<br>(314 - 683)          | 1,257<br>(902 - 1,810)      | 420<br>(281 - 646)          |
| Liver cancer                                                     | 4,988<br>(3,540 - 7,645)       | --                           | 15<br>(7 - 27)             | 1,322<br>(790 - 2,238)      | 2,639<br>(1,686 - 4,397)    | 1,011<br>(625 - 1,683)      |
| Liver cancer due to hepatitis B                                  | 1,726<br>(1,047 - 2,782)       | --                           | 5<br>(2 - 11)              | 562<br>(316 - 995)          | 909<br>(478 - 1,621)        | 250<br>(129 - 457)          |

Web Table 31- Nigeria deaths with 95% UI by age, sex, and cause in 2013

| Cause                                | Females, All Ages           | Females, 0-4 Years       | Females, 5-14 Years  | Females, 15-49 Years      | Females, 50-69 Years        | Females, 70-80 Years        |
|--------------------------------------|-----------------------------|--------------------------|----------------------|---------------------------|-----------------------------|-----------------------------|
| Liver cancer due to hepatitis C      | 1,363<br>(560 - 2,766)      | --                       | 2<br>(1 - 3)         | 265<br>(108 - 616)        | 738<br>(271 - 1,534)        | 359<br>(131 - 714)          |
| Liver cancer due to alcohol use      | 816<br>(344 - 1,647)        | --                       | --                   | 115<br>(47 - 235)         | 466<br>(185 - 990)          | 235<br>(90 - 455)           |
| Liver cancer due to other causes     | 1,082<br>(616 - 1,781)      | --                       | 8<br>(4 - 15)        | 380<br>(206 - 667)        | 527<br>(253 - 970)          | 167<br>(75 - 322)           |
| Larynx cancer                        | 18<br>(7 - 34)              | --                       | --                   | 5<br>(2 - 9)              | 10<br>(3 - 20)              | 3<br>(1 - 7)                |
| Tracheal, bronchus and lung cancer   | 783<br>(614 - 1,108)        | --                       | --                   | 136<br>(94 - 186)         | 432<br>(308 - 667)          | 215<br>(156 - 320)          |
| Breast cancer                        | 4,005<br>(2,852 - 5,393)    | --                       | --                   | 1,576<br>(1,086 - 2,118)  | 1,881<br>(1,236 - 2,808)    | 548<br>(372 - 742)          |
| Cervical cancer                      | 7,593<br>(5,554 - 10,192)   | --                       | --                   | 2,706<br>(1,837 - 3,866)  | 3,850<br>(2,653 - 5,520)    | 1,037<br>(712 - 1,492)      |
| Uterine cancer                       | 636<br>(434 - 930)          | --                       | --                   | 146<br>(76 - 225)         | 328<br>(200 - 512)          | 161<br>(99 - 264)           |
| Prostate cancer                      | --                          | --                       | --                   | --                        | --                          | --                          |
| Colon and rectum cancer              | 1,531<br>(1,156 - 2,001)    | --                       | --                   | 403<br>(280 - 553)        | 636<br>(460 - 894)          | 492<br>(355 - 671)          |
| Lip and oral cavity cancer           | 189<br>(117 - 273)          | --                       | --                   | 66<br>(33 - 114)          | 77<br>(42 - 124)            | 46<br>(23 - 83)             |
| Nasopharynx cancer                   | 54<br>(34 - 89)             | --                       | 2<br>(1 - 5)         | 26<br>(14 - 46)           | 19<br>(10 - 32)             | 7<br>(4 - 12)               |
| Other pharynx cancer                 | 59<br>(38 - 90)             | --                       | --                   | 18<br>(10 - 31)           | 32<br>(19 - 55)             | 9<br>(5 - 14)               |
| Gallbladder and biliary tract cancer | 634<br>(391 - 924)          | --                       | --                   | 92<br>(42 - 141)          | 381<br>(226 - 576)          | 161<br>(93 - 256)           |
| Pancreatic cancer                    | 707<br>(535 - 959)          | --                       | --                   | 92<br>(65 - 127)          | 428<br>(305 - 611)          | 187<br>(133 - 262)          |
| Malignant skin melanoma              | 84<br>(61 - 116)            | --                       | --                   | 20<br>(14 - 28)           | 49<br>(32 - 74)             | 14<br>(10 - 20)             |
| Non-melanoma skin cancer             | 49<br>(29 - 77)             | --                       | --                   | 15<br>(7 - 25)            | 12<br>(6 - 23)              | 23<br>(11 - 40)             |
| Ovarian cancer                       | 1,037<br>(758 - 1,414)      | --                       | --                   | 306<br>(213 - 428)        | 601<br>(402 - 886)          | 130<br>(83 - 201)           |
| Testicular cancer                    | --                          | --                       | --                   | --                        | --                          | --                          |
| Kidney cancer                        | 281<br>(193 - 410)          | 60<br>(21 - 140)         | 21<br>(9 - 43)       | 59<br>(38 - 86)           | 109<br>(64 - 181)           | 33<br>(19 - 53)             |
| Bladder cancer                       | 416<br>(281 - 626)          | --                       | --                   | 115<br>(55 - 190)         | 171<br>(108 - 284)          | 130<br>(76 - 240)           |
| Brain and nervous system cancer      | 352<br>(228 - 468)          | 31<br>(12 - 66)          | 21<br>(10 - 36)      | 173<br>(85 - 242)         | 89<br>(61 - 135)            | 39<br>(25 - 59)             |
| Thyroid cancer                       | 116<br>(78 - 180)           | --                       | 1<br>(0 - 2)         | 12<br>(7 - 24)            | 68<br>(40 - 110)            | 35<br>(21 - 62)             |
| Mesothelioma                         | 31<br>(21 - 43)             | --                       | --                   | 12<br>(7 - 19)            | 15<br>(8 - 25)              | 4<br>(2 - 7)                |
| Hodgkin lymphoma                     | 150<br>(86 - 218)           | 25<br>(9 - 50)           | 14<br>(4 - 35)       | 48<br>(28 - 73)           | 23<br>(13 - 39)             | 40<br>(14 - 81)             |
| Non-Hodgkin lymphoma                 | 1,104<br>(516 - 1,732)      | 398<br>(137 - 829)       | 124<br>(44 - 276)    | 311<br>(161 - 468)        | 191<br>(97 - 322)           | 80<br>(39 - 145)            |
| Multiple myeloma                     | 187<br>(132 - 266)          | --                       | --                   | 26<br>(16 - 39)           | 106<br>(69 - 161)           | 55<br>(33 - 87)             |
| Leukemia                             | 479<br>(348 - 655)          | 29<br>(12 - 59)          | 69<br>(36 - 121)     | 177<br>(115 - 253)        | 124<br>(86 - 183)           | 80<br>(56 - 114)            |
| Other neoplasms                      | 2,192<br>(1,601 - 3,348)    | 360<br>(164 - 844)       | 232<br>(88 - 450)    | 525<br>(328 - 924)        | 652<br>(411 - 1,018)        | 424<br>(275 - 640)          |
| Cardiovascular diseases              | 71,911<br>(59,218 - 93,077) | 3,084<br>(1,540 - 6,674) | 534<br>(279 - 1,111) | 7,664<br>(4,864 - 10,818) | 26,279<br>(20,736 - 35,900) | 34,351<br>(29,214 - 42,832) |
| Rheumatic heart disease              | 934<br>(547 - 2,516)        | 58<br>(15 - 246)         | 42<br>(18 - 108)     | 231<br>(99 - 744)         | 272<br>(124 - 869)          | 331<br>(207 - 647)          |
| Ischemic heart disease               | 18,425<br>(14,142 - 27,933) | 87<br>(17 - 386)         | 50<br>(17 - 129)     | 1,762<br>(945 - 2,937)    | 6,627<br>(4,720 - 10,385)   | 9,899<br>(7,462 - 14,567)   |
| Cerebrovascular disease              | 30,149<br>(23,758 - 39,336) | 689<br>(265 - 1,984)     | 122<br>(53 - 314)    | 2,543<br>(1,677 - 3,656)  | 11,205<br>(8,226 - 15,561)  | 15,590<br>(12,295 - 19,936) |
| Ischemic stroke                      | 19,205<br>(12,150 - 25,483) | 136<br>(35 - 395)        | 17<br>(5 - 56)       | 533<br>(258 - 899)        | 6,518<br>(3,496 - 9,427)    | 12,000<br>(7,824 - 15,653)  |
| Hemorrhagic stroke                   | 10,944<br>(7,132 - 19,738)  | 553<br>(211 - 1,635)     | 105<br>(46 - 261)    | 2,009<br>(1,284 - 2,971)  | 4,687<br>(2,837 - 8,527)    | 3,590<br>(2,071 - 7,364)    |
| Hypertensive heart disease           | 7,305<br>(3,438 - 12,297)   | 47<br>(9 - 143)          | 10<br>(4 - 23)       | 610<br>(211 - 1,096)      | 2,709<br>(1,066 - 5,070)    | 3,928<br>(1,844 - 6,616)    |
| Cardiomyopathy and myocarditis       | 5,468<br>(3,153 - 10,169)   | 999<br>(308 - 2,808)     | 145<br>(55 - 340)    | 1,112<br>(491 - 2,042)    | 1,315<br>(646 - 2,744)      | 1,897<br>(791 - 3,760)      |
| Atrial fibrillation and flutter      | 12<br>(4 - 24)              | --                       | --                   | 1<br>(1 - 3)              | 3<br>(1 - 7)                | 7<br>(2 - 16)               |
| Aortic aneurysm                      | 509<br>(269 - 788)          | --                       | --                   | 69<br>(30 - 116)          | 195<br>(94 - 328)           | 245<br>(126 - 393)          |
| Peripheral vascular disease          | 34<br>(22 - 53)             | --                       | --                   | 2<br>(1 - 3)              | 21<br>(13 - 36)             | 11<br>(7 - 17)              |



Web Table 31- Nigeria deaths with 95% UI by age, sex, and cause in 2013

| Cause                                               | Females, All Ages         | Females, 0-4 Years     | Females, 5-14 Years | Females, 15-49 Years     | Females, 50-69 Years     | Females, 70-80 Years     |
|-----------------------------------------------------|---------------------------|------------------------|---------------------|--------------------------|--------------------------|--------------------------|
| Endocarditis                                        | 1,072<br>(649 - 1,708)    | 310<br>(85 - 654)      | 31<br>(13 - 64)     | 204<br>(93 - 346)        | 204<br>(117 - 402)       | 322<br>(170 - 613)       |
| Other cardiovascular and circulatory diseases       | 8,003<br>(5,671 - 13,267) | 894<br>(403 - 2,055)   | 133<br>(63 - 279)   | 1,129<br>(683 - 1,845)   | 3,727<br>(2,443 - 6,428) | 2,119<br>(1,365 - 3,974) |
| Chronic respiratory diseases                        | 9,816<br>(7,671 - 15,496) | 1,090<br>(573 - 2,003) | 169<br>(96 - 273)   | 1,596<br>(1,129 - 2,392) | 3,383<br>(2,477 - 5,335) | 3,579<br>(2,695 - 5,923) |
| Chronic obstructive pulmonary disease               | 5,127<br>(3,501 - 8,712)  | 425<br>(203 - 818)     | 72<br>(36 - 122)    | 487<br>(291 - 852)       | 2,010<br>(1,314 - 3,515) | 2,132<br>(1,391 - 3,645) |
| Pneumoconiosis                                      | 37<br>(23 - 65)           | 8<br>(2 - 19)          | 5<br>(2 - 9)        | 13<br>(8 - 23)           | 9<br>(5 - 18)            | 2<br>(1 - 4)             |
| Silicosis                                           | 3<br>(2 - 6)              | 1<br>(0 - 3)           | 1<br>(1 - 2)        | 0<br>(0 - 1)             | 1<br>(0 - 1)             | 0<br>(0 - 0)             |
| Asbestosis                                          | 4<br>(2 - 9)              | 2<br>(1 - 6)           | 1<br>(1 - 2)        | 0<br>(0 - 1)             | 1<br>(0 - 1)             | 0<br>(0 - 0)             |
| Coal workers pneumoconiosis                         | 4<br>(2 - 7)              | 1<br>(0 - 4)           | 1<br>(1 - 2)        | 0<br>(0 - 1)             | 1<br>(0 - 1)             | 0<br>(0 - 0)             |
| Other pneumoconiosis                                | 25<br>(16 - 45)           | 3<br>(1 - 7)           | 2<br>(1 - 3)        | 11<br>(7 - 20)           | 8<br>(4 - 15)            | 2<br>(1 - 4)             |
| Asthma                                              | 2,568<br>(1,179 - 4,004)  | 411<br>(156 - 864)     | 53<br>(25 - 94)     | 584<br>(297 - 916)       | 869<br>(347 - 1,481)     | 651<br>(242 - 1,158)     |
| Interstitial lung disease and pulmonary sarcoidosis | 914<br>(424 - 1,960)      | 19<br>(2 - 93)         | 7<br>(2 - 24)       | 92<br>(50 - 173)         | 293<br>(130 - 693)       | 501<br>(162 - 1,056)     |
| Other chronic respiratory diseases                  | 1,171<br>(762 - 2,068)    | 227<br>(109 - 456)     | 32<br>(14 - 61)     | 420<br>(265 - 758)       | 200<br>(110 - 401)       | 292<br>(159 - 549)       |
| Cirrhosis                                           | 6,044<br>(4,607 - 8,579)  | 397<br>(154 - 810)     | 107<br>(55 - 173)   | 1,876<br>(1,311 - 2,715) | 2,406<br>(1,712 - 3,583) | 1,257<br>(857 - 1,886)   |
| Cirrhosis due to hepatitis B                        | 1,345<br>(620 - 2,335)    | 19<br>(2 - 77)         | 14<br>(2 - 40)      | 406<br>(162 - 843)       | 593<br>(248 - 1,047)     | 312<br>(142 - 544)       |
| Cirrhosis due to hepatitis C                        | 2,251<br>(1,002 - 3,803)  | 39<br>(5 - 120)        | 32<br>(6 - 72)      | 799<br>(316 - 1,348)     | 935<br>(350 - 1,715)     | 446<br>(199 - 784)       |
| Cirrhosis due to alcohol use                        | 1,513<br>(924 - 2,325)    | --                     | --                  | 374<br>(165 - 656)       | 705<br>(395 - 1,119)     | 433<br>(258 - 716)       |
| Cirrhosis due to other causes                       | 935<br>(549 - 1,422)      | 339<br>(126 - 717)     | 61<br>(26 - 113)    | 296<br>(148 - 489)       | 173<br>(77 - 302)        | 66<br>(29 - 115)         |
| Digestive diseases                                  | 9,671<br>(6,434 - 13,125) | 1,221<br>(590 - 2,289) | 399<br>(167 - 714)  | 2,732<br>(1,632 - 4,030) | 2,745<br>(1,722 - 4,010) | 2,574<br>(1,728 - 3,588) |
| Peptic ulcer disease                                | 1,791<br>(1,054 - 2,854)  | 99<br>(33 - 235)       | 41<br>(14 - 96)     | 507<br>(272 - 879)       | 568<br>(298 - 1,008)     | 576<br>(314 - 987)       |
| Gastritis and duodenitis                            | 429<br>(148 - 864)        | 72<br>(11 - 190)       | 26<br>(7 - 55)      | 127<br>(43 - 225)        | 97<br>(24 - 275)         | 107<br>(23 - 335)        |
| Appendicitis                                        | 1,032<br>(528 - 1,600)    | 220<br>(65 - 500)      | 84<br>(32 - 192)    | 378<br>(188 - 658)       | 189<br>(71 - 359)        | 162<br>(48 - 350)        |
| Paralytic ileus and intestinal obstruction          | 2,446<br>(1,312 - 3,898)  | 200<br>(59 - 465)      | 88<br>(29 - 186)    | 430<br>(190 - 733)       | 875<br>(425 - 1,449)     | 854<br>(455 - 1,520)     |
| Inguinal, femoral, and abdominal hernia             | 114<br>(29 - 192)         | 18<br>(3 - 45)         | 3<br>(1 - 7)        | 29<br>(5 - 50)           | 27<br>(7 - 54)           | 37<br>(9 - 78)           |
| Inflammatory bowel disease                          | 713<br>(264 - 1,187)      | 225<br>(68 - 493)      | 26<br>(8 - 57)      | 250<br>(80 - 432)        | 113<br>(27 - 211)        | 99<br>(25 - 190)         |
| Vascular intestinal disorders                       | 39<br>(15 - 115)          | 1<br>(0 - 8)           | 1<br>(0 - 4)        | 15<br>(5 - 33)           | 12<br>(4 - 40)           | 10<br>(2 - 41)           |
| Gallbladder and biliary diseases                    | 827<br>(464 - 1,315)      | 65<br>(21 - 138)       | 37<br>(6 - 75)      | 221<br>(126 - 360)       | 270<br>(132 - 502)       | 234<br>(121 - 416)       |
| Pancreatitis                                        | 475<br>(21 - 886)         | 25<br>(4 - 62)         | 12<br>(3 - 24)      | 132<br>(68 - 235)        | 196<br>(68 - 470)        | 110<br>(38 - 257)        |
| Other digestive diseases                            | 1,805<br>(1,011 - 2,763)  | 297<br>(105 - 611)     | 83<br>(32 - 171)    | 643<br>(323 - 1,054)     | 397<br>(198 - 688)       | 385<br>(188 - 676)       |
| Neurological disorders                              | 6,021<br>(4,145 - 8,467)  | 1,369<br>(603 - 2,827) | 367<br>(165 - 733)  | 1,566<br>(709 - 2,814)   | 601<br>(432 - 903)       | 2,119<br>(1,638 - 2,672) |
| Alzheimer disease and other dementias               | 2,139<br>(1,662 - 2,746)  | --                     | --                  | 2<br>(0 - 3)             | 262<br>(181 - 375)       | 1,875<br>(1,436 - 2,415) |
| Parkinson disease                                   | 18<br>(11 - 45)           | --                     | --                  | 4<br>(2 - 5)             | 7<br>(3 - 17)            | 8<br>(4 - 27)            |
| Epilepsy                                            | 3,359<br>(1,681 - 5,622)  | 1,241<br>(491 - 2,664) | 334<br>(139 - 691)  | 1,455<br>(587 - 2,695)   | 171<br>(78 - 391)        | 157<br>(51 - 380)        |
| Multiple sclerosis                                  | 11<br>(3 - 50)            | --                     | --                  | 6<br>(1 - 30)            | 4<br>(1 - 17)            | 1<br>(0 - 6)             |
| Other neurological disorders                        | 493<br>(382 - 641)        | 127<br>(74 - 197)      | 33<br>(18 - 54)     | 100<br>(71 - 135)        | 157<br>(113 - 222)       | 76<br>(56 - 105)         |
| Mental and substance use disorders                  | 1,104<br>(609 - 1,777)    | 83<br>(26 - 137)       | 1<br>(0 - 3)        | 612<br>(268 - 1,064)     | 310<br>(169 - 541)       | 97<br>(66 - 138)         |
| Schizophrenia                                       | 17<br>(8 - 29)            | --                     | --                  | 11<br>(4 - 18)           | 5<br>(2 - 10)            | 2<br>(1 - 3)             |
| Alcohol use disorders                               | 401<br>(41 - 910)         | --                     | --                  | 254<br>(24 - 569)        | 128<br>(11 - 332)        | 19<br>(2 - 47)           |
| Drug use disorders                                  | 674<br>(516 - 868)        | 83<br>(26 - 137)       | --                  | 337<br>(214 - 495)       | 177<br>(120 - 262)       | 76<br>(53 - 112)         |
| Opioid use disorders                                | 67<br>(50 - 89)           | 9<br>(3 - 16)          | --                  | 35<br>(21 - 52)          | 16<br>(10 - 23)          | 8<br>(5 - 13)            |
| Cocaine use disorders                               | 4<br>(3 - 5)              | 1<br>(0 - 1)           | --                  | 2<br>(1 - 3)             | 1<br>(0 - 1)             | 0<br>(0 - 1)             |

Web Table 31- Nigeria deaths with 95% UI by age, sex, and cause in 2013

| Cause                                               | Females, All Ages            | Females, 0-4 Years           | Females, 5-14 Years        | Females, 15-49 Years       | Females, 50-69 Years      | Females, 70-80 Years     |
|-----------------------------------------------------|------------------------------|------------------------------|----------------------------|----------------------------|---------------------------|--------------------------|
| Amphetamine use disorders                           | 3<br>(2 - 4)                 | 1<br>(0 - 1)                 | --                         | 1<br>(1 - 2)               | 1<br>(0 - 1)              | 0<br>(0 - 0)             |
| Other drug use disorders                            | 600<br>(459 - 771)           | 73<br>(23 - 122)             | --                         | 299<br>(190 - 438)         | 160<br>(108 - 237)        | 68<br>(47 - 99)          |
| Eating disorders                                    | 11<br>(6 - 19)               | --                           | 1<br>(0 - 3)               | 9<br>(5 - 17)              | --                        | --                       |
| Anorexia nervosa                                    | 11<br>(6 - 19)               | --                           | 1<br>(0 - 3)               | 9<br>(5 - 17)              | --                        | --                       |
| Diabetes, urogenital, blood, and endocrine diseases | 84,783<br>(42,620 - 182,788) | 46,287<br>(16,637 - 118,794) | 10,165<br>(3,411 - 23,044) | 15,042<br>(8,304 - 29,853) | 7,739<br>(5,928 - 11,117) | 5,551<br>(4,377 - 7,217) |
| Diabetes mellitus                                   | 7,839<br>(6,216 - 10,332)    | 89<br>(44 - 153)             | 44<br>(20 - 79)            | 1,318<br>(973 - 1,775)     | 3,467<br>(2,575 - 4,813)  | 2,921<br>(2,145 - 4,022) |
| Acute glomerulonephritis                            | 116<br>(77 - 196)            | 20<br>(6 - 70)               | 9<br>(4 - 25)              | 52<br>(31 - 83)            | 28<br>(14 - 51)           | 7<br>(3 - 20)            |
| Chronic kidney disease                              | 5,804<br>(3,513 - 7,938)     | 729<br>(370 - 1,244)         | 264<br>(132 - 438)         | 1,873<br>(1,002 - 2,747)   | 1,637<br>(876 - 2,646)    | 1,301<br>(732 - 2,091)   |
| Chronic kidney disease due to diabetes mellitus     | 79<br>(30 - 141)             | 3<br>(1 - 7)                 | 4<br>(1 - 7)               | 7<br>(3 - 11)              | 63<br>(17 - 118)          | 3<br>(1 - 5)             |
| Chronic kidney disease due to hypertension          | 2,164<br>(1,238 - 3,337)     | 93<br>(20 - 233)             | 31<br>(11 - 70)            | 558<br>(260 - 981)         | 793<br>(436 - 1,255)      | 690<br>(404 - 1,095)     |
| Chronic kidney disease due to glomerulonephritis    | 1,649<br>(1,018 - 2,345)     | 404<br>(202 - 698)           | 101<br>(53 - 176)          | 777<br>(412 - 1,241)       | 228<br>(104 - 410)        | 140<br>(57 - 266)        |
| Chronic kidney disease due to other causes          | 1,912<br>(836 - 3,209)       | 230<br>(77 - 519)            | 128<br>(52 - 233)          | 532<br>(184 - 970)         | 554<br>(148 - 1,187)      | 468<br>(116 - 921)       |
| Urinary diseases and male infertility               | 2,542<br>(1,675 - 3,445)     | 417<br>(130 - 834)           | 71<br>(25 - 147)           | 676<br>(418 - 985)         | 783<br>(469 - 1,245)      | 594<br>(371 - 945)       |
| Interstitial nephritis and urinary tract infections | 2,265<br>(1,369 - 3,136)     | 364<br>(96 - 770)            | 55<br>(15 - 121)           | 583<br>(310 - 889)         | 706<br>(414 - 1,133)      | 556<br>(345 - 873)       |
| Urolithiasis                                        | 61<br>(18 - 210)             | --                           | 6<br>(1 - 18)              | 26<br>(5 - 113)            | 21<br>(5 - 64)            | 9<br>(2 - 37)            |
| Other urinary diseases                              | 216<br>(130 - 383)           | 53<br>(13 - 142)             | 10<br>(3 - 29)             | 68<br>(29 - 136)           | 55<br>(17 - 118)          | 29<br>(10 - 67)          |
| Gynecological diseases                              | 91<br>(52 - 164)             | --                           | --                         | 62<br>(32 - 128)           | 21<br>(10 - 38)           | 8<br>(4 - 15)            |
| Uterine fibroids                                    | 17<br>(10 - 30)              | --                           | --                         | 9<br>(5 - 17)              | 5<br>(3 - 10)             | 3<br>(1 - 5)             |
| Polycystic ovarian syndrome                         | 4<br>(2 - 10)                | --                           | --                         | 4<br>(2 - 10)              | 0<br>(0 - 0)              | --                       |
| Endometriosis                                       | 11<br>(5 - 22)               | --                           | --                         | 10<br>(5 - 22)             | 0<br>(0 - 1)              | --                       |
| Genital prolapse                                    | 14<br>(8 - 25)               | --                           | --                         | 8<br>(4 - 18)              | 4<br>(2 - 7)              | 2<br>(1 - 4)             |
| Other gynecological diseases                        | 45<br>(25 - 81)              | --                           | --                         | 30<br>(15 - 63)            | 11<br>(5 - 21)            | 4<br>(2 - 7)             |
| Hemoglobinopathies and hemolytic anemias            | 65,270<br>(22,612 - 165,246) | 43,858<br>(14,579 - 116,912) | 9,662<br>(2,818 - 22,611)  | 10,377<br>(3,921 - 24,934) | 1,208<br>(465 - 3,070)    | 164<br>(64 - 317)        |
| Thalassemias                                        | 147<br>(50 - 390)            | 121<br>(40 - 332)            | 15<br>(4 - 35)             | 11<br>(4 - 27)             | 0<br>(0 - 0)              | 0<br>(0 - 0)             |
| Sickle cell disorders                               | 64,134<br>(22,218 - 161,760) | 42,994<br>(14,325 - 114,220) | 9,596<br>(2,799 - 22,455)  | 10,289<br>(3,888 - 24,724) | 1,175<br>(448 - 3,014)    | 80<br>(30 - 167)         |
| G6PD deficiency                                     | 309<br>(110 - 801)           | 219<br>(71 - 615)            | 33<br>(9 - 76)             | 43<br>(16 - 102)           | 8<br>(4 - 18)             | 7<br>(3 - 13)            |
| Other hemoglobinopathies and hemolytic anemias      | 680<br>(226 - 2,128)         | 525<br>(136 - 1,909)         | 19<br>(6 - 44)             | 34<br>(12 - 87)            | 25<br>(11 - 47)           | 77<br>(31 - 146)         |
| Endocrine, metabolic, blood, and immune disorders   | 3,120<br>(1,848 - 4,858)     | 1,173<br>(519 - 2,363)       | 114<br>(47 - 230)          | 683<br>(370 - 1,247)       | 594<br>(319 - 987)        | 556<br>(235 - 935)       |
| Musculoskeletal disorders                           | 811<br>(532 - 1,170)         | --                           | 79<br>(27 - 146)           | 367<br>(206 - 566)         | 224<br>(116 - 364)        | 142<br>(71 - 262)        |
| Rheumatoid arthritis                                | 115<br>(66 - 203)            | --                           | 9<br>(2 - 20)              | 26<br>(10 - 50)            | 32<br>(15 - 69)           | 48<br>(23 - 90)          |
| Other musculoskeletal disorders                     | 696<br>(452 - 992)           | --                           | 70<br>(23 - 128)           | 341<br>(190 - 529)         | 192<br>(91 - 314)         | 94<br>(41 - 179)         |
| Other non-communicable diseases                     | 26,577<br>(12,007 - 49,905)  | 22,982<br>(8,806 - 45,406)   | 749<br>(311 - 1,566)       | 1,323<br>(750 - 2,163)     | 778<br>(465 - 1,219)      | 746<br>(443 - 1,232)     |
| Congenital anomalies                                | 23,399<br>(9,001 - 46,339)   | 21,910<br>(8,118 - 44,021)   | 680<br>(248 - 1,478)       | 622<br>(263 - 1,267)       | 118<br>(68 - 197)         | 70<br>(44 - 110)         |
| Neural tube defects                                 | 4,676<br>(962 - 13,531)      | 4,501<br>(893 - 13,255)      | 91<br>(20 - 271)           | 78<br>(21 - 219)           | 4<br>(1 - 11)             | 2<br>(1 - 6)             |
| Congenital heart anomalies                          | 10,621<br>(3,429 - 23,326)   | 9,946<br>(3,103 - 22,240)    | 309<br>(97 - 763)          | 271<br>(83 - 657)          | 60<br>(29 - 98)           | 34<br>(18 - 55)          |
| Cleft lip and cleft palate                          | 127<br>(9 - 578)             | 127<br>(9 - 578)             | --                         | --                         | --                        | --                       |
| Down syndrome                                       | 3,216<br>(755 - 8,562)       | 2,903<br>(585 - 7,964)       | 148<br>(46 - 373)          | 141<br>(59 - 334)          | 21<br>(6 - 50)            | 3<br>(1 - 6)             |
| Chromosomal unbalanced rearrangements               | 818<br>(195 - 2,147)         | 772<br>(171 - 2,075)         | 16<br>(5 - 42)             | 26<br>(9 - 70)             | 2<br>(1 - 5)              | 1<br>(1 - 3)             |
| Other congenital anomalies                          | 3,942<br>(1,021 - 14,000)    | 3,661<br>(850 - 13,490)      | 116<br>(31 - 356)          | 106<br>(35 - 278)          | 30<br>(12 - 61)           | 29<br>(13 - 53)          |
| Skin and subcutaneous diseases                      | 2,989<br>(1,889 - 4,309)     | 884<br>(365 - 1,562)         | 69<br>(35 - 114)           | 701<br>(350 - 1,080)       | 660<br>(380 - 1,080)      | 676<br>(385 - 1,143)     |

Web Table 31- Nigeria deaths with 95% UI by age, sex, and cause in 2013

| Cause                                           | Females, All Ages           | Females, 0-4 Years          | Females, 5-14 Years      | Females, 15-49 Years        | Females, 50-69 Years     | Females, 70-80 Years     |
|-------------------------------------------------|-----------------------------|-----------------------------|--------------------------|-----------------------------|--------------------------|--------------------------|
| Cellulitis                                      | 871<br>(254 - 1,429)        | 192<br>(31 - 454)           | 26<br>(9 - 48)           | 209<br>(55 - 378)           | 182<br>(44 - 342)        | 263<br>(75 - 482)        |
| Pyoderma                                        | 1,943<br>(1,187 - 3,088)    | 638<br>(270 - 1,157)        | 36<br>(17 - 63)          | 433<br>(226 - 722)          | 456<br>(223 - 844)       | 380<br>(161 - 805)       |
| Decubitus ulcer                                 | 46<br>(23 - 98)             | 2<br>(1 - 7)                | 3<br>(1 - 5)             | 14<br>(6 - 28)              | 9<br>(3 - 20)            | 18<br>(5 - 53)           |
| Other skin and subcutaneous diseases            | 129<br>(50 - 255)           | 51<br>(6 - 151)             | 4<br>(2 - 8)             | 45<br>(17 - 83)             | 13<br>(5 - 34)           | 15<br>(4 - 44)           |
| Sudden infant death syndrome                    | 188<br>(28 - 605)           | 188<br>(28 - 605)           | --                       | --                          | --                       | --                       |
| Injuries                                        | 57,305<br>(41,671 - 73,715) | 21,328<br>(11,756 - 32,553) | 5,398<br>(2,480 - 8,969) | 18,794<br>(12,767 - 25,689) | 7,032<br>(4,902 - 9,676) | 4,752<br>(3,497 - 6,091) |
| Transport injuries                              | 35,386<br>(24,864 - 47,231) | 10,505<br>(5,174 - 18,270)  | 3,117<br>(1,327 - 5,587) | 14,246<br>(9,543 - 20,378)  | 4,913<br>(3,355 - 6,929) | 2,606<br>(1,846 - 3,596) |
| Road injuries                                   | 34,626<br>(24,439 - 46,174) | 10,148<br>(4,984 - 17,727)  | 3,052<br>(1,314 - 5,465) | 14,067<br>(9,426 - 20,077)  | 4,818<br>(3,292 - 6,809) | 2,542<br>(1,809 - 3,540) |
| Pedestrian road injuries                        | 13,499<br>(8,735 - 18,463)  | 4,446<br>(1,839 - 8,651)    | 1,573<br>(609 - 2,954)   | 3,133<br>(1,999 - 4,737)    | 2,642<br>(1,687 - 3,888) | 1,706<br>(1,139 - 2,451) |
| Cyclist road injuries                           | 1,150<br>(570 - 1,784)      | 335<br>(105 - 794)          | 215<br>(70 - 441)        | 294<br>(172 - 477)          | 233<br>(72 - 397)        | 72<br>(26 - 126)         |
| Motorcyclist road injuries                      | 2,652<br>(1,609 - 4,399)    | 354<br>(139 - 774)          | 154<br>(65 - 352)        | 1,760<br>(957 - 3,101)      | 248<br>(120 - 479)       | 136<br>(56 - 265)        |
| Motor vehicle road injuries                     | 15,380<br>(10,747 - 21,512) | 4,870<br>(2,383 - 8,758)    | 1,013<br>(445 - 1,895)   | 7,421<br>(4,821 - 11,288)   | 1,590<br>(994 - 2,416)   | 485<br>(273 - 848)       |
| Other road injuries                             | 1,944<br>(854 - 3,380)      | 143<br>(46 - 360)           | 97<br>(22 - 222)         | 1,459<br>(488 - 2,731)      | 104<br>(46 - 202)        | 142<br>(40 - 410)        |
| Other transport injuries                        | 761<br>(260 - 1,222)        | 357<br>(90 - 736)           | 65<br>(13 - 149)         | 179<br>(91 - 287)           | 96<br>(24 - 166)         | 64<br>(13 - 114)         |
| Unintentional injuries                          | 20,366<br>(11,309 - 28,823) | 10,541<br>(5,144 - 17,759)  | 2,228<br>(880 - 3,615)   | 3,513<br>(1,856 - 4,888)    | 1,982<br>(1,170 - 2,834) | 2,102<br>(1,356 - 2,857) |
| Falls                                           | 2,513<br>(1,785 - 3,585)    | 633<br>(256 - 1,246)        | 154<br>(63 - 297)        | 594<br>(337 - 914)          | 363<br>(234 - 610)       | 769<br>(498 - 1,153)     |
| Drowning                                        | 3,039<br>(1,683 - 5,838)    | 2,022<br>(874 - 4,529)      | 487<br>(224 - 934)       | 323<br>(177 - 550)          | 118<br>(71 - 205)        | 88<br>(54 - 142)         |
| Fire, heat, and hot substances                  | 3,657<br>(1,745 - 6,195)    | 2,456<br>(990 - 4,842)      | 287<br>(109 - 557)       | 481<br>(199 - 809)          | 240<br>(122 - 386)       | 193<br>(103 - 314)       |
| Poisonings                                      | 1,584<br>(166 - 3,608)      | 833<br>(49 - 2,567)         | 124<br>(8 - 322)         | 399<br>(71 - 769)           | 162<br>(9 - 330)         | 67<br>(5 - 134)          |
| Exposure to mechanical forces                   | 2,059<br>(839 - 8,140)      | 1,264<br>(423 - 5,572)      | 221<br>(87 - 689)        | 306<br>(161 - 1,040)        | 175<br>(50 - 352)        | 92<br>(23 - 159)         |
| Unintentional firearm injuries                  | 486<br>(283 - 823)          | 315<br>(132 - 611)          | 56<br>(24 - 124)         | 83<br>(45 - 140)            | 22<br>(13 - 39)          | 10<br>(6 - 17)           |
| Unintentional suffocation                       | 603<br>(41 - 6,954)         | 469<br>(26 - 4,987)         | 47<br>(4 - 495)          | 59<br>(4 - 815)             | 19<br>(3 - 147)          | 9<br>(2 - 62)            |
| Other exposure to mechanical forces             | 970<br>(360 - 1,503)        | 479<br>(161 - 921)          | 119<br>(38 - 237)        | 165<br>(84 - 270)           | 134<br>(22 - 221)        | 73<br>(10 - 117)         |
| Adverse effects of medical treatment            | 1,405<br>(442 - 2,401)      | 452<br>(88 - 1,032)         | 62<br>(15 - 122)         | 313<br>(102 - 538)          | 302<br>(90 - 618)        | 276<br>(69 - 593)        |
| Animal contact                                  | 1,900<br>(291 - 3,196)      | 599<br>(67 - 1,306)         | 282<br>(28 - 687)        | 616<br>(109 - 1,073)        | 255<br>(23 - 567)        | 148<br>(11 - 336)        |
| Venomous animal contact                         | 1,113<br>(138 - 2,127)      | 442<br>(35 - 1,041)         | 161<br>(12 - 428)        | 342<br>(45 - 668)           | 112<br>(7 - 319)         | 56<br>(2 - 164)          |
| Non-venomous animal contact                     | 787<br>(97 - 1,641)         | 157<br>(17 - 434)           | 121<br>(11 - 338)        | 273<br>(40 - 535)           | 144<br>(12 - 325)        | 92<br>(7 - 229)          |
| Foreign body                                    | 1,823<br>(703 - 3,618)      | 1,283<br>(407 - 2,924)      | 109<br>(33 - 224)        | 127<br>(59 - 250)           | 104<br>(40 - 185)        | 199<br>(60 - 367)        |
| Pulmonary aspiration and foreign body in airway | 1,764<br>(656 - 3,507)      | 1,262<br>(394 - 2,835)      | 104<br>(29 - 212)        | 115<br>(50 - 217)           | 94<br>(29 - 177)         | 189<br>(50 - 355)        |
| Foreign body in other body part                 | 59<br>(25 - 393)            | 21<br>(5 - 165)             | 6<br>(2 - 44)            | 12<br>(5 - 84)              | 9<br>(4 - 27)            | 11<br>(5 - 24)           |
| Other unintentional injuries                    | 2,387<br>(835 - 3,592)      | 999<br>(279 - 1,848)        | 501<br>(102 - 1,012)     | 354<br>(206 - 517)          | 263<br>(96 - 423)        | 270<br>(88 - 410)        |
| Self-harm and interpersonal violence            | 1,453<br>(1,026 - 2,023)    | 183<br>(78 - 416)           | 53<br>(25 - 101)         | 1,036<br>(679 - 1,488)      | 137<br>(92 - 225)        | 44<br>(28 - 75)          |
| Self-harm                                       | 594<br>(409 - 891)          | --                          | 5<br>(2 - 14)            | 444<br>(278 - 678)          | 105<br>(66 - 187)        | 39<br>(24 - 69)          |
| Interpersonal violence                          | 860<br>(552 - 1,336)        | 183<br>(78 - 416)           | 48<br>(21 - 94)          | 592<br>(343 - 934)          | 32<br>(18 - 55)          | 5<br>(3 - 10)            |
| Assault by firearm                              | 234<br>(122 - 425)          | 45<br>(17 - 106)            | 12<br>(4 - 26)           | 166<br>(79 - 313)           | 10<br>(5 - 19)           | 1<br>(0 - 3)             |
| Assault by sharp object                         | 212<br>(108 - 352)          | 40<br>(14 - 99)             | 11<br>(4 - 24)           | 154<br>(74 - 266)           | 7<br>(3 - 13)            | 1<br>(0 - 2)             |
| Assault by other means                          | 413<br>(246 - 688)          | 98<br>(39 - 231)            | 25<br>(10 - 53)          | 272<br>(146 - 471)          | 15<br>(8 - 26)           | 3<br>(1 - 6)             |
| Forces of nature, war, and legal intervention   | 99<br>(0 - 8)               | 99<br>(0 - 8)               | --                       | --                          | --                       | --                       |
| Exposure to forces of nature                    | 99<br>(0 - 8)               | 99<br>(0 - 8)               | --                       | --                          | --                       | --                       |

Web Table 31- North Korea deaths with 95% UI by age, sex, and cause in 2013

| Cause                                                             | Both Sexes, All Ages           | Both Sexes, 0-4 Years    | Both Sexes, 5-14 Years   | Both Sexes, 15-49 Years     | Both Sexes, 50-69 Years     | Both Sexes, 70-80 Years      |
|-------------------------------------------------------------------|--------------------------------|--------------------------|--------------------------|-----------------------------|-----------------------------|------------------------------|
| All causes                                                        | 212,574<br>(186,350 - 237,884) | 7,566<br>(6,127 - 9,405) | 1,492<br>(1,325 - 1,710) | 33,264<br>(27,930 - 41,358) | 70,585<br>(59,370 - 81,290) | 99,667<br>(87,788 - 106,896) |
| Communicable, maternal, neonatal, and nutritional diseases        | 14,572<br>(12,074 - 17,803)    | 4,522<br>(3,420 - 5,871) | 218<br>(143 - 445)       | 2,127<br>(1,665 - 2,784)    | 2,696<br>(2,051 - 3,840)    | 5,009<br>(3,909 - 6,478)     |
| HIV/AIDS and tuberculosis                                         | 2,786<br>(1,792 - 5,265)       | 17<br>(10 - 29)          | 15<br>(9 - 27)           | 788<br>(517 - 1,440)        | 1,070<br>(633 - 2,097)      | 897<br>(575 - 1,639)         |
| Tuberculosis                                                      | 2,559<br>(1,576 - 5,051)       | 11<br>(5 - 23)           | 11<br>(6 - 23)           | 630<br>(364 - 1,283)        | 1,017<br>(585 - 2,053)      | 889<br>(568 - 1,633)         |
| HIV/AIDS                                                          | 227<br>(179 - 287)             | 5<br>(3 - 9)             | 3<br>(2 - 5)             | 158<br>(126 - 193)          | 53<br>(36 - 74)             | 8<br>(5 - 11)                |
| HIV/AIDS resulting in mycobacterial infection                     | 14<br>(10 - 18)                | 0<br>(0 - 0)             | 0<br>(0 - 0)             | 9<br>(7 - 12)               | 3<br>(2 - 5)                | 1<br>(0 - 1)                 |
| HIV/AIDS resulting in other diseases                              | 214<br>(168 - 269)             | 5<br>(3 - 9)             | 3<br>(2 - 5)             | 149<br>(118 - 181)          | 49<br>(33 - 69)             | 7<br>(5 - 10)                |
| Diarrhea, lower respiratory, and other common infectious diseases | 6,977<br>(5,518 - 8,802)       | 1,534<br>(966 - 2,488)   | 173<br>(102 - 405)       | 629<br>(474 - 848)          | 1,123<br>(848 - 1,467)      | 3,518<br>(2,521 - 4,858)     |
| Diarrheal diseases                                                | 351<br>(233 - 510)             | 112<br>(35 - 249)        | 9<br>(4 - 17)            | 51<br>(31 - 79)             | 71<br>(42 - 111)            | 108<br>(62 - 175)            |
| Intestinal infectious diseases                                    | 34<br>(17 - 64)                | 10<br>(4 - 20)           | 8<br>(4 - 16)            | 11<br>(5 - 24)              | 3<br>(1 - 7)                | 2<br>(1 - 4)                 |
| Typhoid fever                                                     | 24<br>(11 - 44)                | 6<br>(2 - 13)            | 6<br>(3 - 12)            | 8<br>(3 - 17)               | 2<br>(1 - 5)                | 1<br>(0 - 2)                 |
| Paratyphoid fever                                                 | 7<br>(3 - 14)                  | 2<br>(1 - 6)             | 2<br>(1 - 5)             | 2<br>(1 - 5)                | 0<br>(0 - 1)                | 0<br>(0 - 0)                 |
| Other intestinal infectious diseases                              | 3<br>(0 - 9)                   | 1<br>(0 - 4)             | 0<br>(0 - 2)             | 1<br>(0 - 5)                | 1<br>(0 - 3)                | 0<br>(0 - 2)                 |
| Lower respiratory infections                                      | 5,583<br>(4,339 - 7,204)       | 856<br>(497 - 1,256)     | 50<br>(31 - 74)          | 399<br>(287 - 557)          | 948<br>(693 - 1,275)        | 3,330<br>(2,349 - 4,661)     |
| Upper respiratory infections                                      | 22<br>(11 - 40)                | 1<br>(0 - 2)             | 0<br>(0 - 1)             | 5<br>(1 - 12)               | 8<br>(2 - 19)               | 8<br>(1 - 23)                |
| Otitis media                                                      | 6<br>(5 - 8)                   | 0<br>(0 - 0)             | 1<br>(0 - 1)             | 2<br>(2 - 3)                | 1<br>(1 - 2)                | 1<br>(1 - 2)                 |
| Meningitis                                                        | 273<br>(201 - 365)             | 85<br>(42 - 149)         | 19<br>(10 - 31)          | 76<br>(51 - 109)            | 50<br>(32 - 74)             | 42<br>(27 - 61)              |
| Pneumococcal meningitis                                           | 67<br>(46 - 93)                | 13<br>(6 - 25)           | 4<br>(2 - 7)             | 22<br>(14 - 35)             | 15<br>(8 - 24)              | 14<br>(8 - 23)               |
| H influenzae type B meningitis                                    | 31<br>(22 - 45)                | 15<br>(7 - 26)           | 3<br>(1 - 5)             | 7<br>(4 - 11)               | 4<br>(2 - 7)                | 3<br>(2 - 6)                 |
| Meningococcal meningitis                                          | 42<br>(29 - 59)                | 12<br>(5 - 23)           | 3<br>(2 - 5)             | 12<br>(7 - 20)              | 8<br>(4 - 13)               | 7<br>(4 - 11)                |
| Other meningitis                                                  | 132<br>(92 - 186)              | 46<br>(23 - 83)          | 10<br>(5 - 16)           | 35<br>(23 - 53)             | 24<br>(15 - 36)             | 18<br>(10 - 29)              |
| Encephalitis                                                      | 168<br>(117 - 236)             | 68<br>(31 - 134)         | 18<br>(11 - 26)          | 44<br>(27 - 60)             | 25<br>(16 - 36)             | 14<br>(9 - 19)               |
| Diphtheria                                                        | 7<br>(1 - 22)                  | 3<br>(0 - 13)            | 1<br>(0 - 7)             | 2<br>(0 - 9)                | 1<br>(0 - 6)                | --                           |
| Whooping cough                                                    | 175<br>(0 - 797)               | 156<br>(0 - 705)         | 13<br>(0 - 67)           | 5<br>(0 - 24)               | 1<br>(0 - 5)                | --                           |
| Tetanus                                                           | 40<br>(18 - 103)               | 7<br>(2 - 24)            | 1<br>(0 - 4)             | 15<br>(6 - 48)              | 11<br>(4 - 36)              | 6<br>(3 - 14)                |
| Measles                                                           | 302<br>(7 - 1,539)             | 235<br>(6 - 1,192)       | 52<br>(1 - 279)          | 14<br>(0 - 81)              | 1<br>(0 - 5)                | --                           |
| Varicella and herpes zoster                                       | 15<br>(7 - 33)                 | 2<br>(0 - 6)             | 1<br>(0 - 2)             | 4<br>(1 - 8)                | 2<br>(0 - 6)                | 7<br>(1 - 26)                |
| Neglected tropical diseases and malaria                           | 72<br>(54 - 96)                | 11<br>(5 - 23)           | 6<br>(3 - 12)            | 26<br>(17 - 37)             | 18<br>(11 - 26)             | 11<br>(6 - 18)               |
| Malaria                                                           | 0<br>(0 - 1)                   | 0<br>(0 - 0)             | 0<br>(0 - 0)             | 0<br>(0 - 0)                | 0<br>(0 - 0)                | 0<br>(0 - 0)                 |
| Leishmaniasis                                                     | 20<br>(12 - 30)                | 6<br>(2 - 15)            | 2<br>(0 - 4)             | 7<br>(3 - 13)               | 3<br>(1 - 5)                | 3<br>(1 - 6)                 |
| Visceral leishmaniasis                                            | 20<br>(12 - 30)                | 6<br>(2 - 15)            | 2<br>(0 - 4)             | 7<br>(3 - 13)               | 3<br>(1 - 5)                | 3<br>(1 - 6)                 |
| Cysticercosis                                                     | 1<br>(0 - 1)                   | 0<br>(0 - 0)             | 0<br>(0 - 0)             | 0<br>(0 - 0)                | 0<br>(0 - 0)                | 0<br>(0 - 0)                 |
| Cystic echinococcosis                                             | 5<br>(4 - 6)                   | 0<br>(0 - 0)             | 0<br>(0 - 0)             | 2<br>(2 - 2)                | 2<br>(1 - 2)                | 1<br>(1 - 1)                 |
| Dengue                                                            | 4<br>(3 - 6)                   | 0<br>(0 - 0)             | 1<br>(0 - 1)             | 2<br>(2 - 3)                | 1<br>(1 - 1)                | 0<br>(0 - 0)                 |
| Rabies                                                            | 12<br>(5 - 21)                 | 1<br>(0 - 2)             | 2<br>(1 - 3)             | 5<br>(2 - 10)               | 4<br>(1 - 7)                | 1<br>(0 - 2)                 |
| Intestinal nematode infections                                    | 9<br>(2 - 20)                  | 2<br>(0 - 9)             | 1<br>(0 - 7)             | 2<br>(0 - 7)                | 2<br>(0 - 8)                | 2<br>(0 - 8)                 |
| Ascariasis                                                        | 9<br>(2 - 20)                  | 2<br>(0 - 9)             | 1<br>(0 - 7)             | 2<br>(0 - 7)                | 2<br>(0 - 8)                | 2<br>(0 - 8)                 |
| Other neglected tropical diseases                                 | 21<br>(13 - 31)                | 1<br>(1 - 2)             | 1<br>(0 - 1)             | 7<br>(4 - 12)               | 7<br>(4 - 11)               | 4<br>(2 - 7)                 |
| Maternal disorders                                                | 275<br>(172 - 398)             | --                       | 1<br>(1 - 3)             | 274<br>(171 - 397)          | --                          | --                           |
| Maternal hemorrhage                                               | 51<br>(25 - 85)                | --                       | 0<br>(0 - 0)             | 51<br>(25 - 84)             | --                          | --                           |

Web Table 31- North Korea deaths with 95% UI by age, sex, and cause in 2013

| Cause                                                            | Both Sexes, All Ages           | Both Sexes, 0-4 Years    | Both Sexes, 5-14 Years | Both Sexes, 15-49 Years     | Both Sexes, 50-69 Years     | Both Sexes, 70-80 Years     |
|------------------------------------------------------------------|--------------------------------|--------------------------|------------------------|-----------------------------|-----------------------------|-----------------------------|
| Maternal sepsis and other maternal infections                    | 26<br>(13 - 43)                | --                       | 0<br>(0 - 0)           | 26<br>(13 - 43)             | --                          | --                          |
| Maternal hypertensive disorders                                  | 25<br>(12 - 45)                | --                       | 0<br>(0 - 0)           | 25<br>(12 - 45)             | --                          | --                          |
| Maternal obstructed labor                                        | 32<br>(15 - 53)                | --                       | 0<br>(0 - 0)           | 32<br>(15 - 53)             | --                          | --                          |
| Maternal abortive outcome                                        | 31<br>(16 - 52)                | --                       | 0<br>(0 - 0)           | 31<br>(16 - 52)             | --                          | --                          |
| Indirect maternal deaths                                         | 35<br>(17 - 59)                | --                       | 0<br>(0 - 0)           | 35<br>(17 - 59)             | --                          | --                          |
| Late maternal deaths                                             | 32<br>(17 - 59)                | --                       | 0<br>(0 - 1)           | 32<br>(17 - 59)             | --                          | --                          |
| Maternal deaths aggravated by HIV/AIDS                           | 0<br>(0 - 0)                   | --                       | --                     | 0<br>(0 - 0)                | --                          | --                          |
| Other maternal disorders                                         | 43<br>(23 - 68)                | --                       | 0<br>(0 - 1)           | 43<br>(23 - 68)             | --                          | --                          |
| Neonatal disorders                                               | 2,824<br>(2,113 - 3,665)       | 2,824<br>(2,113 - 3,665) | --                     | --                          | --                          | --                          |
| Neonatal preterm birth complications                             | 1,455<br>(901 - 2,087)         | 1,455<br>(901 - 2,087)   | --                     | --                          | --                          | --                          |
| Neonatal encephalopathy due to birth asphyxia and trauma         | 852<br>(478 - 1,296)           | 852<br>(478 - 1,296)     | --                     | --                          | --                          | --                          |
| Neonatal sepsis and other neonatal infections                    | 89<br>(34 - 183)               | 89<br>(34 - 183)         | --                     | --                          | --                          | --                          |
| Hemolytic disease and other neonatal jaundice                    | 46<br>(17 - 121)               | 46<br>(17 - 121)         | --                     | --                          | --                          | --                          |
| Other neonatal disorders                                         | 381<br>(160 - 762)             | 381<br>(160 - 762)       | --                     | --                          | --                          | --                          |
| Nutritional deficiencies                                         | 741<br>(380 - 1,191)           | 80<br>(33 - 144)         | 11<br>(5 - 20)         | 117<br>(52 - 207)           | 136<br>(62 - 245)           | 396<br>(209 - 654)          |
| Protein-energy malnutrition                                      | 256<br>(107 - 464)             | 49<br>(16 - 105)         | 3<br>(1 - 6)           | 24<br>(9 - 53)              | 33<br>(11 - 71)             | 146<br>(51 - 302)           |
| Iodine deficiency                                                | 9<br>(2 - 28)                  | 1<br>(0 - 3)             | 0<br>(0 - 1)           | 2<br>(0 - 5)                | 3<br>(0 - 11)               | 4<br>(0 - 21)               |
| Iron-deficiency anemia                                           | 382<br>(191 - 652)             | 16<br>(5 - 37)           | 6<br>(2 - 11)          | 74<br>(33 - 131)            | 85<br>(38 - 163)            | 202<br>(94 - 354)           |
| Other nutritional deficiencies                                   | 94<br>(41 - 198)               | 14<br>(5 - 31)           | 2<br>(1 - 5)           | 17<br>(7 - 37)              | 16<br>(6 - 37)              | 45<br>(17 - 105)            |
| Other communicable, maternal, neonatal, and nutritional diseases | 897<br>(669 - 1,155)           | 57<br>(22 - 107)         | 10<br>(6 - 15)         | 294<br>(190 - 437)          | 349<br>(240 - 478)          | 187<br>(132 - 251)          |
| Sexually transmitted diseases excluding HIV                      | 45<br>(12 - 94)                | 30<br>(0 - 75)           | 3<br>(0 - 7)           | 4<br>(2 - 8)                | 5<br>(2 - 11)               | 4<br>(1 - 8)                |
| Syphilis                                                         | 40<br>(7 - 89)                 | 30<br>(0 - 75)           | 3<br>(0 - 7)           | 2<br>(1 - 4)                | 3<br>(1 - 6)                | 3<br>(1 - 6)                |
| Chlamydial infection                                             | 1<br>(0 - 3)                   | --                       | 0<br>(0 - 0)           | 1<br>(0 - 1)                | 0<br>(0 - 1)                | 0<br>(0 - 1)                |
| Gonococcal infection                                             | 2<br>(1 - 4)                   | --                       | 0<br>(0 - 0)           | 1<br>(0 - 2)                | 1<br>(0 - 2)                | 0<br>(0 - 1)                |
| Other sexually transmitted diseases                              | 2<br>(1 - 3)                   | --                       | 0<br>(0 - 0)           | 1<br>(0 - 2)                | 1<br>(0 - 1)                | 0<br>(0 - 1)                |
| Hepatitis                                                        | 790<br>(561 - 1,038)           | 15<br>(7 - 28)           | 5<br>(3 - 7)           | 274<br>(175 - 415)          | 328<br>(220 - 451)          | 168<br>(114 - 230)          |
| Acute hepatitis A                                                | 29<br>(8 - 65)                 | 5<br>(2 - 12)            | 2<br>(0 - 3)           | 14<br>(3 - 35)              | 7<br>(1 - 18)               | 2<br>(0 - 4)                |
| Acute hepatitis B                                                | 512<br>(333 - 717)             | 9<br>(4 - 20)            | 2<br>(1 - 3)           | 122<br>(58 - 216)           | 240<br>(149 - 349)          | 138<br>(89 - 194)           |
| Acute hepatitis C                                                | 18<br>(3 - 47)                 | --                       | 0<br>(0 - 1)           | 6<br>(1 - 18)               | 7<br>(1 - 21)               | 4<br>(1 - 13)               |
| Acute hepatitis E                                                | 231<br>(121 - 382)             | 0<br>(0 - 0)             | 1<br>(1 - 3)           | 132<br>(74 - 214)           | 74<br>(30 - 142)            | 23<br>(8 - 52)              |
| Other infectious diseases                                        | 61<br>(38 - 98)                | 12<br>(5 - 27)           | 2<br>(1 - 5)           | 15<br>(9 - 25)              | 16<br>(7 - 31)              | 16<br>(6 - 34)              |
| Non-communicable diseases                                        | 179,681<br>(157,247 - 200,712) | 2,090<br>(1,464 - 2,812) | 566<br>(453 - 687)     | 21,364<br>(17,444 - 26,917) | 63,574<br>(53,065 - 73,475) | 92,087<br>(81,323 - 98,648) |
| Neoplasms                                                        | 47,483<br>(39,293 - 55,194)    | 183<br>(108 - 275)       | 241<br>(187 - 302)     | 8,488<br>(6,762 - 10,786)   | 22,511<br>(18,169 - 26,624) | 16,060<br>(13,469 - 18,251) |
| Esophageal cancer                                                | 2,428<br>(1,470 - 3,553)       | --                       | --                     | 242<br>(139 - 408)          | 1,310<br>(805 - 1,924)      | 876<br>(484 - 1,393)        |
| Stomach cancer                                                   | 8,038<br>(6,318 - 9,826)       | --                       | --                     | 1,110<br>(796 - 1,520)      | 3,899<br>(2,948 - 4,891)    | 3,029<br>(2,329 - 3,816)    |
| Liver cancer                                                     | 9,098<br>(6,882 - 12,157)      | --                       | 11<br>(6 - 17)         | 2,137<br>(1,438 - 3,165)    | 4,514<br>(3,218 - 6,342)    | 2,437<br>(1,761 - 3,378)    |
| Liver cancer due to hepatitis B                                  | 4,031<br>(2,474 - 6,365)       | --                       | 5<br>(3 - 9)           | 1,096<br>(639 - 1,834)      | 2,008<br>(1,113 - 3,251)    | 922<br>(559 - 1,440)        |
| Liver cancer due to hepatitis C                                  | 3,470<br>(1,934 - 6,073)       | --                       | 1<br>(0 - 2)           | 693<br>(287 - 1,413)        | 1,763<br>(928 - 3,329)      | 1,014<br>(581 - 1,585)      |
| Liver cancer due to alcohol use                                  | 571<br>(339 - 1,034)           | --                       | --                     | 90<br>(39 - 199)            | 279<br>(147 - 578)          | 202<br>(123 - 327)          |
| Liver cancer due to other causes                                 | 1,025<br>(599 - 1,735)         | --                       | 5<br>(2 - 8)           | 257<br>(132 - 502)          | 464<br>(253 - 853)          | 299<br>(175 - 476)          |

Web Table 31- North Korea deaths with 95% UI by age, sex, and cause in 2013

| Cause                                         | Both Sexes, All Ages         | Both Sexes, 0-4 Years | Both Sexes, 5-14 Years | Both Sexes, 15-49 Years  | Both Sexes, 50-69 Years     | Both Sexes, 70-80 Years     |
|-----------------------------------------------|------------------------------|-----------------------|------------------------|--------------------------|-----------------------------|-----------------------------|
| Larynx cancer                                 | 362<br>(240 - 526)           | --                    | --                     | 52<br>(31 - 82)          | 189<br>(118 - 279)          | 122<br>(84 - 184)           |
| Tracheal, bronchus and lung cancer            | 13,242<br>(9,287 - 16,173)   | --                    | --                     | 1,602<br>(1,023 - 2,239) | 6,618<br>(4,462 - 8,209)    | 5,022<br>(3,562 - 6,214)    |
| Breast cancer                                 | 1,231<br>(877 - 1,657)       | --                    | --                     | 391<br>(263 - 565)       | 564<br>(395 - 783)          | 276<br>(201 - 366)          |
| Cervical cancer                               | 980<br>(688 - 1,322)         | --                    | --                     | 314<br>(201 - 463)       | 428<br>(289 - 612)          | 237<br>(161 - 328)          |
| Uterine cancer                                | 402<br>(223 - 634)           | --                    | --                     | 82<br>(41 - 145)         | 205<br>(108 - 343)          | 115<br>(65 - 189)           |
| Prostate cancer                               | 187<br>(119 - 296)           | --                    | --                     | 5<br>(3 - 9)             | 60<br>(35 - 102)            | 121<br>(77 - 191)           |
| Colon and rectum cancer                       | 2,801<br>(2,313 - 3,359)     | --                    | --                     | 398<br>(304 - 519)       | 1,208<br>(962 - 1,494)      | 1,194<br>(975 - 1,462)      |
| Lip and oral cavity cancer                    | 276<br>(193 - 375)           | --                    | --                     | 70<br>(45 - 104)         | 126<br>(84 - 178)           | 80<br>(55 - 110)            |
| Nasopharynx cancer                            | 543<br>(370 - 736)           | --                    | 2<br>(1 - 4)           | 186<br>(121 - 281)       | 264<br>(170 - 374)          | 91<br>(57 - 133)            |
| Other pharynx cancer                          | 119<br>(81 - 175)            | --                    | --                     | 30<br>(18 - 49)          | 60<br>(38 - 93)             | 30<br>(20 - 43)             |
| Gallbladder and biliary tract cancer          | 449<br>(305 - 711)           | --                    | --                     | 39<br>(23 - 67)          | 184<br>(117 - 304)          | 227<br>(142 - 363)          |
| Pancreatic cancer                             | 882<br>(734 - 1,041)         | --                    | --                     | 102<br>(77 - 138)        | 410<br>(332 - 504)          | 370<br>(295 - 460)          |
| Malignant skin melanoma                       | 77<br>(57 - 108)             | --                    | --                     | 20<br>(14 - 31)          | 33<br>(23 - 49)             | 24<br>(17 - 34)             |
| Non-melanoma skin cancer                      | 241<br>(158 - 396)           | --                    | --                     | 39<br>(24 - 64)          | 77<br>(48 - 129)            | 125<br>(77 - 219)           |
| Ovarian cancer                                | 382<br>(242 - 561)           | --                    | --                     | 97<br>(53 - 157)         | 192<br>(116 - 300)          | 93<br>(59 - 139)            |
| Testicular cancer                             | 18<br>(12 - 27)              | --                    | --                     | 12<br>(7 - 19)           | 4<br>(2 - 6)                | 2<br>(1 - 4)                |
| Kidney cancer                                 | 305<br>(232 - 392)           | 4<br>(2 - 6)          | 2<br>(1 - 3)           | 53<br>(35 - 74)          | 141<br>(102 - 187)          | 106<br>(72 - 148)           |
| Bladder cancer                                | 663<br>(507 - 838)           | --                    | --                     | 52<br>(35 - 74)          | 277<br>(203 - 363)          | 335<br>(245 - 441)          |
| Brain and nervous system cancer               | 1,008<br>(754 - 1,331)       | 20<br>(8 - 37)        | 46<br>(31 - 65)        | 312<br>(226 - 447)       | 403<br>(286 - 553)          | 227<br>(158 - 310)          |
| Thyroid cancer                                | 124<br>(88 - 176)            | --                    | 0<br>(0 - 1)           | 19<br>(12 - 29)          | 53<br>(35 - 82)             | 52<br>(35 - 77)             |
| Mesothelioma                                  | 101<br>(67 - 146)            | --                    | --                     | 12<br>(6 - 18)           | 71<br>(45 - 109)            | 18<br>(11 - 29)             |
| Hodgkin lymphoma                              | 163<br>(102 - 284)           | 5<br>(2 - 9)          | 5<br>(2 - 10)          | 75<br>(42 - 151)         | 49<br>(28 - 89)             | 28<br>(17 - 48)             |
| Non-Hodgkin lymphoma                          | 600<br>(431 - 811)           | 7<br>(4 - 12)         | 13<br>(9 - 19)         | 155<br>(106 - 224)       | 246<br>(170 - 351)          | 179<br>(119 - 254)          |
| Multiple myeloma                              | 143<br>(102 - 195)           | --                    | --                     | 23<br>(16 - 34)          | 68<br>(47 - 96)             | 52<br>(36 - 74)             |
| Leukemia                                      | 1,358<br>(1,117 - 1,659)     | 85<br>(43 - 146)      | 112<br>(79 - 150)      | 553<br>(434 - 702)       | 380<br>(290 - 483)          | 228<br>(179 - 288)          |
| Other neoplasms                               | 1,261<br>(989 - 1,696)       | 63<br>(38 - 96)       | 51<br>(34 - 70)        | 307<br>(220 - 440)       | 478<br>(341 - 688)          | 363<br>(267 - 502)          |
| Cardiovascular diseases                       | 88,432<br>(76,444 - 100,363) | 149<br>(97 - 219)     | 98<br>(67 - 133)       | 7,708<br>(6,047 - 9,991) | 28,941<br>(23,750 - 33,978) | 51,535<br>(44,750 - 57,314) |
| Rheumatic heart disease                       | 2,365<br>(1,509 - 3,308)     | 4<br>(2 - 8)          | 9<br>(5 - 14)          | 372<br>(239 - 539)       | 882<br>(574 - 1,260)        | 1,097<br>(653 - 1,589)      |
| Ischemic heart disease                        | 32,395<br>(26,455 - 39,669)  | 24<br>(11 - 45)       | 28<br>(18 - 42)        | 2,954<br>(2,201 - 3,888) | 10,034<br>(7,785 - 12,617)  | 19,355<br>(15,796 - 23,647) |
| Cerebrovascular disease                       | 45,075<br>(38,318 - 53,207)  | 45<br>(27 - 69)       | 36<br>(23 - 50)        | 3,674<br>(2,792 - 4,931) | 15,458<br>(12,479 - 18,802) | 25,863<br>(21,894 - 30,102) |
| Ischemic stroke                               | 12,680<br>(8,108 - 16,484)   | 3<br>(1 - 6)          | 3<br>(2 - 5)           | 374<br>(188 - 622)       | 3,298<br>(1,929 - 4,742)    | 9,002<br>(5,752 - 11,444)   |
| Hemorrhagic stroke                            | 32,396<br>(26,755 - 41,223)  | 42<br>(25 - 65)       | 33<br>(21 - 46)        | 3,301<br>(2,477 - 4,489) | 12,159<br>(9,593 - 15,431)  | 16,861<br>(13,802 - 21,709) |
| Hypertensive heart disease                    | 5,593<br>(3,968 - 7,468)     | 3<br>(1 - 5)          | 2<br>(1 - 3)           | 289<br>(188 - 428)       | 1,450<br>(973 - 2,048)      | 3,850<br>(2,602 - 5,298)    |
| Cardiomyopathy and myocarditis                | 485<br>(361 - 633)           | 26<br>(14 - 45)       | 11<br>(6 - 17)         | 114<br>(77 - 157)        | 153<br>(106 - 207)          | 182<br>(118 - 272)          |
| Atrial fibrillation and flutter               | 9<br>(6 - 13)                | --                    | --                     | 1<br>(1 - 2)             | 2<br>(1 - 3)                | 6<br>(3 - 10)               |
| Aortic aneurysm                               | 244<br>(159 - 331)           | --                    | --                     | 49<br>(29 - 72)          | 92<br>(58 - 127)            | 103<br>(68 - 144)           |
| Peripheral vascular disease                   | 9<br>(6 - 14)                | --                    | --                     | 1<br>(1 - 1)             | 2<br>(1 - 4)                | 5<br>(4 - 9)                |
| Endocarditis                                  | 67<br>(43 - 98)              | 3<br>(2 - 5)          | 1<br>(1 - 1)           | 16<br>(10 - 25)          | 17<br>(11 - 26)             | 30<br>(17 - 46)             |
| Other cardiovascular and circulatory diseases | 2,190<br>(1,506 - 3,305)     | 45<br>(27 - 71)       | 11<br>(7 - 19)         | 237<br>(149 - 378)       | 852<br>(539 - 1,304)        | 1,045<br>(704 - 1,583)      |
| Chronic respiratory diseases                  | 20,843<br>(15,596 - 26,513)  | 37<br>(20 - 59)       | 15<br>(10 - 21)        | 718<br>(500 - 1,003)     | 5,043<br>(3,608 - 6,638)    | 15,030<br>(11,007 - 19,162) |

Web Table 31- North Korea deaths with 95% UI by age, sex, and cause in 2013

| Cause                                               | Both Sexes, All Ages        | Both Sexes, 0-4 Years | Both Sexes, 5-14 Years | Both Sexes, 15-49 Years  | Both Sexes, 50-69 Years  | Both Sexes, 70-80 Years    |
|-----------------------------------------------------|-----------------------------|-----------------------|------------------------|--------------------------|--------------------------|----------------------------|
| Chronic obstructive pulmonary disease               | 18,585<br>(13,829 - 23,464) | 23<br>(12 - 39)       | 8<br>(5 - 11)          | 522<br>(365 - 738)       | 4,431<br>(3,187 - 5,810) | 13,601<br>(9,955 - 17,303) |
| Pneumoconiosis                                      | 248<br>(133 - 419)          | 1<br>(0 - 1)          | 1<br>(0 - 1)           | 43<br>(21 - 83)          | 100<br>(51 - 180)        | 104<br>(56 - 179)          |
| Silicosis                                           | 133<br>(66 - 230)           | 0<br>(0 - 0)          | 0<br>(0 - 0)           | 23<br>(10 - 47)          | 58<br>(27 - 102)         | 52<br>(27 - 90)            |
| Asbestosis                                          | 7<br>(4 - 11)               | 0<br>(0 - 0)          | 0<br>(0 - 0)           | 2<br>(1 - 4)             | 2<br>(1 - 3)             | 3<br>(2 - 5)               |
| Coal workers pneumoconiosis                         | 41<br>(18 - 78)             | 0<br>(0 - 0)          | 0<br>(0 - 0)           | 5<br>(2 - 10)            | 19<br>(8 - 38)           | 16<br>(7 - 33)             |
| Other pneumoconiosis                                | 67<br>(35 - 126)            | 0<br>(0 - 0)          | 0<br>(0 - 0)           | 13<br>(6 - 27)           | 21<br>(10 - 42)          | 33<br>(17 - 62)            |
| Asthma                                              | 843<br>(361 - 1,590)        | 3<br>(1 - 8)          | 4<br>(2 - 7)           | 123<br>(53 - 229)        | 255<br>(98 - 527)        | 458<br>(192 - 861)         |
| Interstitial lung disease and pulmonary sarcoidosis | 793<br>(428 - 1,369)        | 1<br>(0 - 2)          | 1<br>(0 - 1)           | 11<br>(6 - 19)           | 196<br>(96 - 346)        | 584<br>(294 - 1,044)       |
| Other chronic respiratory diseases                  | 373<br>(211 - 662)          | 9<br>(4 - 16)         | 2<br>(1 - 3)           | 19<br>(10 - 34)          | 61<br>(32 - 107)         | 283<br>(148 - 524)         |
| Cirrhosis                                           | 5,165<br>(4,131 - 6,296)    | 5<br>(2 - 10)         | 8<br>(6 - 11)          | 1,475<br>(1,086 - 2,037) | 2,343<br>(1,816 - 2,916) | 1,334<br>(1,059 - 1,652)   |
| Cirrhosis due to hepatitis B                        | 2,328<br>(1,513 - 3,160)    | 1<br>(0 - 1)          | 3<br>(1 - 4)           | 648<br>(372 - 1,014)     | 1,034<br>(660 - 1,455)   | 643<br>(398 - 891)         |
| Cirrhosis due to hepatitis C                        | 1,257<br>(717 - 1,912)      | 0<br>(0 - 1)          | 1<br>(1 - 2)           | 355<br>(203 - 598)       | 581<br>(318 - 924)       | 319<br>(153 - 491)         |
| Cirrhosis due to alcohol use                        | 1,219<br>(762 - 1,802)      | --                    | --                     | 319<br>(149 - 557)       | 588<br>(358 - 886)       | 312<br>(199 - 449)         |
| Cirrhosis due to other causes                       | 360<br>(226 - 528)          | 4<br>(2 - 8)          | 4<br>(3 - 6)           | 153<br>(96 - 243)        | 139<br>(82 - 215)        | 60<br>(31 - 101)           |
| Digestive diseases                                  | 3,258<br>(2,562 - 4,154)    | 31<br>(14 - 53)       | 15<br>(10 - 22)        | 452<br>(328 - 638)       | 1,050<br>(769 - 1,387)   | 1,710<br>(1,306 - 2,214)   |
| Peptic ulcer disease                                | 1,252<br>(919 - 1,668)      | 2<br>(1 - 3)          | 2<br>(1 - 3)           | 165<br>(108 - 247)       | 436<br>(299 - 610)       | 647<br>(455 - 874)         |
| Gastritis and duodenitis                            | 322<br>(169 - 492)          | 1<br>(0 - 2)          | 1<br>(1 - 2)           | 39<br>(18 - 65)          | 108<br>(51 - 170)        | 173<br>(84 - 280)          |
| Appendicitis                                        | 63<br>(37 - 93)             | 1<br>(0 - 1)          | 1<br>(1 - 2)           | 13<br>(8 - 20)           | 18<br>(10 - 29)          | 30<br>(17 - 52)            |
| Paralytic ileus and intestinal obstruction          | 322<br>(199 - 558)          | 6<br>(2 - 13)         | 4<br>(2 - 7)           | 43<br>(24 - 83)          | 80<br>(44 - 158)         | 189<br>(107 - 327)         |
| Inguinal, femoral, and abdominal hernia             | 24<br>(11 - 37)             | 1<br>(0 - 1)          | 0<br>(0 - 1)           | 3<br>(1 - 5)             | 6<br>(3 - 11)            | 13<br>(6 - 23)             |
| Inflammatory bowel disease                          | 156<br>(105 - 241)          | 8<br>(3 - 15)         | 2<br>(1 - 3)           | 24<br>(15 - 40)          | 44<br>(29 - 71)          | 78<br>(46 - 132)           |
| Vascular intestinal disorders                       | 14<br>(7 - 25)              | 0<br>(0 - 0)          | 0<br>(0 - 1)           | 3<br>(1 - 5)             | 4<br>(2 - 7)             | 7<br>(3 - 12)              |
| Gallbladder and biliary diseases                    | 526<br>(353 - 745)          | 1<br>(0 - 3)          | 1<br>(1 - 2)           | 45<br>(29 - 71)          | 148<br>(97 - 219)        | 330<br>(198 - 493)         |
| Pancreatitis                                        | 224<br>(127 - 343)          | 0<br>(0 - 1)          | 1<br>(0 - 1)           | 62<br>(33 - 99)          | 78<br>(43 - 121)         | 84<br>(44 - 143)           |
| Other digestive diseases                            | 355<br>(245 - 504)          | 11<br>(5 - 20)        | 3<br>(2 - 5)           | 56<br>(35 - 92)          | 127<br>(82 - 196)        | 158<br>(100 - 238)         |
| Neurological disorders                              | 3,797<br>(3,043 - 4,672)    | 32<br>(17 - 53)       | 34<br>(21 - 48)        | 359<br>(252 - 495)       | 498<br>(358 - 663)       | 2,875<br>(2,194 - 3,626)   |
| Alzheimer disease and other dementias               | 3,063<br>(2,358 - 3,865)    | --                    | --                     | 3<br>(0 - 7)             | 330<br>(220 - 466)       | 2,730<br>(2,053 - 3,476)   |
| Parkinson disease                                   | 111<br>(76 - 158)           | --                    | --                     | 4<br>(3 - 6)             | 31<br>(21 - 47)          | 76<br>(48 - 116)           |
| Epilepsy                                            | 487<br>(338 - 679)          | 24<br>(11 - 42)       | 28<br>(17 - 42)        | 298<br>(200 - 424)       | 89<br>(54 - 132)         | 48<br>(29 - 72)            |
| Multiple sclerosis                                  | 6<br>(3 - 10)               | --                    | --                     | 3<br>(1 - 6)             | 2<br>(1 - 3)             | 1<br>(0 - 1)               |
| Other neurological disorders                        | 130<br>(105 - 159)          | 8<br>(5 - 12)         | 5<br>(4 - 7)           | 51<br>(37 - 66)          | 45<br>(36 - 57)          | 21<br>(16 - 26)            |
| Mental and substance use disorders                  | 1,254<br>(911 - 1,746)      | 8<br>(3 - 21)         | 0<br>(0 - 0)           | 676<br>(464 - 983)       | 385<br>(271 - 554)       | 185<br>(133 - 256)         |
| Schizophrenia                                       | 388<br>(228 - 648)          | --                    | --                     | 163<br>(94 - 288)        | 142<br>(79 - 238)        | 83<br>(40 - 139)           |
| Alcohol use disorders                               | 424<br>(250 - 776)          | --                    | --                     | 249<br>(135 - 464)       | 146<br>(81 - 295)        | 28<br>(17 - 48)            |
| Drug use disorders                                  | 442<br>(284 - 710)          | 8<br>(3 - 21)         | --                     | 263<br>(170 - 432)       | 96<br>(57 - 164)         | 74<br>(45 - 112)           |
| Opioid use disorders                                | 174<br>(112 - 278)          | 3<br>(1 - 9)          | --                     | 106<br>(68 - 173)        | 35<br>(21 - 60)          | 29<br>(18 - 44)            |
| Cocaine use disorders                               | 38<br>(24 - 62)             | 1<br>(0 - 2)          | --                     | 24<br>(15 - 40)          | 7<br>(4 - 12)            | 6<br>(3 - 9)               |
| Amphetamine use disorders                           | 41<br>(25 - 67)             | 1<br>(0 - 3)          | --                     | 23<br>(14 - 39)          | 9<br>(5 - 16)            | 7<br>(4 - 12)              |
| Other drug use disorders                            | 189<br>(122 - 302)          | 3<br>(1 - 8)          | --                     | 110<br>(69 - 180)        | 45<br>(27 - 76)          | 31<br>(19 - 48)            |
| Eating disorders                                    | 0<br>(0 - 1)                | --                    | 0<br>(0 - 0)           | 0<br>(0 - 1)             | --                       | --                         |

Web Table 31- North Korea deaths with 95% UI by age, sex, and cause in 2013

| Cause                                               | Both Sexes, All Ages     | Both Sexes, 0-4 Years    | Both Sexes, 5-14 Years | Both Sexes, 15-49 Years | Both Sexes, 50-69 Years  | Both Sexes, 70-80 Years  |
|-----------------------------------------------------|--------------------------|--------------------------|------------------------|-------------------------|--------------------------|--------------------------|
| Anorexia nervosa                                    | 0<br>(0 - 1)             | --                       | 0<br>(0 - 0)           | 0<br>(0 - 1)            | --                       | --                       |
| Diabetes, urogenital, blood, and endocrine diseases | 6,926<br>(5,691 - 8,182) | 77<br>(51 - 113)         | 46<br>(34 - 60)        | 1,082<br>(817 - 1,385)  | 2,590<br>(2,077 - 3,163) | 3,130<br>(2,494 - 3,810) |
| Diabetes mellitus                                   | 3,095<br>(2,517 - 3,786) | 8<br>(5 - 13)            | 4<br>(3 - 8)           | 317<br>(243 - 414)      | 1,244<br>(983 - 1,572)   | 1,522<br>(1,159 - 1,939) |
| Acute glomerulonephritis                            | 95<br>(39 - 163)         | 1<br>(1 - 2)             | 2<br>(1 - 4)           | 31<br>(12 - 56)         | 31<br>(12 - 55)          | 30<br>(12 - 53)          |
| Chronic kidney disease                              | 2,740<br>(1,913 - 3,550) | 6<br>(3 - 10)            | 9<br>(6 - 13)          | 482<br>(328 - 652)      | 1,020<br>(711 - 1,358)   | 1,223<br>(828 - 1,664)   |
| Chronic kidney disease due to diabetes mellitus     | 437<br>(238 - 601)       | 0<br>(0 - 0)             | 0<br>(0 - 1)           | 56<br>(25 - 85)         | 188<br>(99 - 267)        | 191<br>(102 - 281)       |
| Chronic kidney disease due to hypertension          | 558<br>(336 - 899)       | 1<br>(0 - 1)             | 1<br>(0 - 1)           | 60<br>(33 - 106)        | 180<br>(106 - 302)       | 317<br>(181 - 530)       |
| Chronic kidney disease due to glomerulonephritis    | 639<br>(428 - 833)       | 2<br>(1 - 4)             | 4<br>(3 - 6)           | 165<br>(105 - 228)      | 234<br>(149 - 319)       | 233<br>(149 - 337)       |
| Chronic kidney disease due to other causes          | 1,106<br>(683 - 1,601)   | 3<br>(1 - 5)             | 4<br>(2 - 7)           | 200<br>(120 - 303)      | 418<br>(246 - 652)       | 481<br>(266 - 736)       |
| Urinary diseases and male infertility               | 391<br>(289 - 487)       | 5<br>(2 - 9)             | 2<br>(2 - 3)           | 72<br>(49 - 100)        | 127<br>(92 - 167)        | 185<br>(128 - 252)       |
| Interstitial nephritis and urinary tract infections | 191<br>(116 - 254)       | 4<br>(2 - 7)             | 1<br>(1 - 2)           | 37<br>(20 - 54)         | 58<br>(32 - 82)          | 91<br>(53 - 135)         |
| Urolithiasis                                        | 79<br>(47 - 114)         | --                       | 0<br>(0 - 1)           | 14<br>(7 - 22)          | 29<br>(16 - 46)          | 35<br>(19 - 58)          |
| Other urinary diseases                              | 121<br>(83 - 165)        | 1<br>(1 - 2)             | 1<br>(0 - 1)           | 21<br>(13 - 32)         | 39<br>(25 - 57)          | 59<br>(37 - 87)          |
| Gynecological diseases                              | 13<br>(5 - 32)           | --                       | --                     | 4<br>(2 - 12)           | 5<br>(2 - 11)            | 4<br>(1 - 10)            |
| Uterine fibroids                                    | 3<br>(1 - 9)             | --                       | --                     | 1<br>(0 - 3)            | 1<br>(0 - 3)             | 1<br>(0 - 3)             |
| Polycystic ovarian syndrome                         | 0<br>(0 - 1)             | --                       | --                     | 0<br>(0 - 1)            | 0<br>(0 - 0)             | --                       |
| Endometriosis                                       | 1<br>(0 - 2)             | --                       | --                     | 1<br>(0 - 2)            | 0<br>(0 - 0)             | --                       |
| Genital prolapse                                    | 2<br>(1 - 6)             | --                       | --                     | 1<br>(0 - 1)            | 1<br>(0 - 2)             | 1<br>(0 - 2)             |
| Other gynecological diseases                        | 6<br>(3 - 15)            | --                       | --                     | 2<br>(1 - 5)            | 2<br>(1 - 6)             | 2<br>(1 - 4)             |
| Hemoglobinopathies and hemolytic anemias            | 308<br>(176 - 439)       | 30<br>(16 - 49)          | 18<br>(10 - 28)        | 103<br>(58 - 153)       | 88<br>(49 - 129)         | 69<br>(39 - 103)         |
| Thalassemias                                        | 95<br>(55 - 137)         | 25<br>(13 - 42)          | 17<br>(9 - 26)         | 52<br>(30 - 76)         | 1<br>(1 - 2)             | 0<br>(0 - 0)             |
| Sickle cell disorders                               | 0<br>(0 - 0)             | 0<br>(0 - 0)             | 0<br>(0 - 0)           | 0<br>(0 - 0)            | 0<br>(0 - 0)             | 0<br>(0 - 0)             |
| G6PD deficiency                                     | 12<br>(7 - 18)           | 0<br>(0 - 1)             | 0<br>(0 - 0)           | 5<br>(3 - 8)            | 6<br>(3 - 8)             | 1<br>(1 - 1)             |
| Other hemoglobinopathies and hemolytic anemias      | 200<br>(113 - 286)       | 4<br>(2 - 7)             | 1<br>(1 - 2)           | 46<br>(25 - 70)         | 81<br>(45 - 119)         | 68<br>(38 - 101)         |
| Endocrine, metabolic, blood, and immune disorders   | 284<br>(181 - 360)       | 28<br>(14 - 41)          | 9<br>(5 - 15)          | 73<br>(48 - 101)        | 76<br>(50 - 105)         | 97<br>(55 - 142)         |
| Musculoskeletal disorders                           | 428<br>(278 - 898)       | --                       | 8<br>(5 - 16)          | 152<br>(91 - 301)       | 143<br>(86 - 275)        | 124<br>(79 - 237)        |
| Rheumatoid arthritis                                | 208<br>(125 - 386)       | --                       | 2<br>(1 - 3)           | 31<br>(15 - 60)         | 83<br>(45 - 150)         | 92<br>(54 - 169)         |
| Other musculoskeletal disorders                     | 219<br>(137 - 454)       | --                       | 7<br>(4 - 13)          | 121<br>(73 - 226)       | 60<br>(33 - 125)         | 31<br>(19 - 60)          |
| Other non-communicable diseases                     | 2,097<br>(1,545 - 2,796) | 1,568<br>(1,078 - 2,161) | 100<br>(64 - 146)      | 253<br>(171 - 381)      | 70<br>(48 - 101)         | 105<br>(75 - 148)        |
| Congenital anomalies                                | 1,970<br>(1,423 - 2,668) | 1,558<br>(1,072 - 2,149) | 99<br>(63 - 144)       | 238<br>(157 - 363)      | 49<br>(31 - 77)          | 26<br>(17 - 40)          |
| Neural tube defects                                 | 211<br>(93 - 410)        | 188<br>(77 - 381)        | 6<br>(3 - 11)          | 13<br>(7 - 23)          | 3<br>(2 - 6)             | 1<br>(1 - 3)             |
| Congenital heart anomalies                          | 1,274<br>(879 - 1,744)   | 980<br>(646 - 1,380)     | 73<br>(46 - 107)       | 182<br>(119 - 285)      | 27<br>(16 - 45)          | 12<br>(7 - 19)           |
| Cleft lip and cleft palate                          | 10<br>(3 - 25)           | 10<br>(3 - 25)           | --                     | --                      | --                       | --                       |
| Down syndrome                                       | 20<br>(10 - 37)          | 13<br>(6 - 28)           | 1<br>(1 - 2)           | 4<br>(2 - 6)            | 1<br>(1 - 2)             | 0<br>(0 - 0)             |
| Chromosomal unbalanced rearrangements               | 15<br>(6 - 32)           | 9<br>(4 - 19)            | 2<br>(0 - 3)           | 4<br>(1 - 9)            | 1<br>(0 - 2)             | 0<br>(0 - 0)             |
| Other congenital anomalies                          | 440<br>(271 - 692)       | 357<br>(205 - 574)       | 17<br>(10 - 31)        | 35<br>(21 - 64)         | 17<br>(10 - 30)          | 13<br>(8 - 21)           |
| Skin and subcutaneous diseases                      | 121<br>(90 - 169)        | 4<br>(2 - 6)             | 2<br>(1 - 2)           | 16<br>(11 - 22)         | 22<br>(15 - 29)          | 79<br>(52 - 124)         |
| Cellulitis                                          | 13<br>(6 - 25)           | 1<br>(0 - 2)             | 0<br>(0 - 1)           | 3<br>(1 - 5)            | 3<br>(1 - 5)             | 6<br>(2 - 14)            |
| Pyoderma                                            | 45<br>(28 - 65)          | 2<br>(1 - 4)             | 1<br>(0 - 1)           | 8<br>(4 - 12)           | 10<br>(6 - 15)           | 24<br>(14 - 41)          |
| Decubitus ulcer                                     | 58<br>(37 - 88)          | 0<br>(0 - 0)             | 0<br>(0 - 1)           | 4<br>(2 - 6)            | 8<br>(5 - 12)            | 46<br>(27 - 76)          |



Web Table 31- North Korea deaths with 95% UI by age, sex, and cause in 2013

| Cause                                           | Both Sexes, All Ages     | Both Sexes, 0-4 Years | Both Sexes, 5-14 Years | Both Sexes, 15-49 Years  | Both Sexes, 50-69 Years  | Both Sexes, 70-80 Years |
|-------------------------------------------------|--------------------------|-----------------------|------------------------|--------------------------|--------------------------|-------------------------|
| Other skin and subcutaneous diseases            | 5<br>(3 - 8)             | 0<br>(0 - 0)          | 0<br>(0 - 0)           | 1<br>(1 - 2)             | 1<br>(1 - 2)             | 2<br>(1 - 4)            |
| Sudden infant death syndrome                    | 6<br>18,321<br>(1 - 15)  | 6<br>955<br>(1 - 15)  | --                     | --                       | --                       | --                      |
| Injuries                                        | 15,478 - 21,991          | 582 - 1,439           | 562 - 853              | 7,970 - 12,267           | 3,462 - 5,300            | 2,098 - 3,103           |
| Transport injuries                              | 6,432<br>(4,921 - 8,689) | 155<br>(77 - 266)     | 197<br>(131 - 272)     | 4,150<br>(3,063 - 5,706) | 4,463<br>(1,061 - 2,014) | 466<br>(335 - 634)      |
| Road injuries                                   | 6,097<br>(4,677 - 8,223) | 144<br>(71 - 247)     | 187<br>(125 - 258)     | 3,944<br>(2,901 - 5,409) | 1,381<br>(1,005 - 1,909) | 441<br>(320 - 600)      |
| Pedestrian road injuries                        | 3,141<br>(2,277 - 4,476) | 96<br>(47 - 175)      | 122<br>(81 - 177)      | 1,801<br>(1,237 - 2,680) | 799<br>(565 - 1,134)     | 322<br>(227 - 447)      |
| Cyclist road injuries                           | 418<br>(269 - 658)       | 6<br>(2 - 12)         | 15<br>(8 - 26)         | 238<br>(147 - 377)       | 131<br>(79 - 223)        | 29<br>(17 - 48)         |
| Motorcyclist road injuries                      | 1,040<br>(633 - 1,611)   | 8<br>(3 - 15)         | 13<br>(7 - 23)         | 846<br>(515 - 1,322)     | 153<br>(89 - 252)        | 20<br>(11 - 34)         |
| Motor vehicle road injuries                     | 1,457<br>(976 - 2,025)   | 33<br>(16 - 59)       | 35<br>(20 - 53)        | 1,035<br>(660 - 1,466)   | 288<br>(188 - 418)       | 66<br>(40 - 100)        |
| Other road injuries                             | 41<br>(21 - 90)          | 1<br>(1 - 4)          | 2<br>(1 - 4)           | 24<br>(11 - 54)          | 10<br>(5 - 23)           | 4<br>(2 - 8)            |
| Other transport injuries                        | 335<br>(207 - 527)       | 11<br>(5 - 22)        | 10<br>(6 - 17)         | 207<br>(124 - 345)       | 82<br>(47 - 137)         | 25<br>(14 - 39)         |
| Unintentional injuries                          | 6,351<br>(4,893 - 7,809) | 750<br>(424 - 1,167)  | 433<br>(297 - 560)     | 2,685<br>(1,964 - 3,526) | 1,280<br>(970 - 1,619)   | 1,203<br>(902 - 1,551)  |
| Falls                                           | 1,923<br>(1,400 - 2,531) | 78<br>(37 - 141)      | 46<br>(29 - 69)        | 694<br>(455 - 1,023)     | 468<br>(309 - 676)       | 637<br>(417 - 915)      |
| Drowning                                        | 1,551<br>(888 - 2,083)   | 279<br>(123 - 501)    | 299<br>(175 - 421)     | 613<br>(334 - 890)       | 209<br>(109 - 307)       | 150<br>(86 - 219)       |
| Fire, heat, and hot substances                  | 355<br>(246 - 502)       | 30<br>(14 - 56)       | 15<br>(9 - 24)         | 128<br>(82 - 187)        | 74<br>(44 - 108)         | 108<br>(71 - 163)       |
| Poisonings                                      | 600<br>(409 - 801)       | 35<br>(15 - 64)       | 19<br>(11 - 30)        | 291<br>(191 - 423)       | 158<br>(100 - 229)       | 96<br>(60 - 140)        |
| Exposure to mechanical forces                   | 790<br>(383 - 1,138)     | 222<br>(73 - 461)     | 19<br>(11 - 29)        | 371<br>(169 - 585)       | 128<br>(59 - 196)        | 51<br>(27 - 73)         |
| Unintentional firearm injuries                  | 23<br>(16 - 36)          | 1<br>(1 - 3)          | 1<br>(1 - 2)           | 15<br>(9 - 24)           | 4<br>(2 - 6)             | 2<br>(1 - 4)            |
| Unintentional suffocation                       | 274<br>(93 - 523)        | 207<br>(57 - 441)     | 5<br>(2 - 9)           | 30<br>(12 - 53)          | 16<br>(6 - 26)           | 15<br>(6 - 25)          |
| Other exposure to mechanical forces             | 494<br>(214 - 760)       | 13<br>(5 - 26)        | 13<br>(6 - 22)         | 326<br>(130 - 533)       | 108<br>(44 - 176)        | 33<br>(17 - 51)         |
| Adverse effects of medical treatment            | 257<br>(190 - 335)       | 39<br>(20 - 79)       | 7<br>(5 - 12)          | 71<br>(48 - 97)          | 65<br>(42 - 95)          | 74<br>(48 - 111)        |
| Animal contact                                  | 77<br>(39 - 113)         | 4<br>(2 - 7)          | 4<br>(2 - 7)           | 27<br>(14 - 43)          | 26<br>(13 - 42)          | 15<br>(6 - 24)          |
| Venomous animal contact                         | 30<br>(14 - 49)          | 1<br>(0 - 2)          | 2<br>(1 - 4)           | 11<br>(5 - 19)           | 11<br>(5 - 19)           | 6<br>(2 - 10)           |
| Non-venomous animal contact                     | 46<br>(21 - 70)          | 3<br>(1 - 5)          | 2<br>(1 - 4)           | 16<br>(7 - 26)           | 15<br>(7 - 25)           | 9<br>(4 - 16)           |
| Foreign body                                    | 128<br>(74 - 209)        | 42<br>(21 - 72)       | 4<br>(2 - 7)           | 20<br>(12 - 37)          | 24<br>(14 - 40)          | 39<br>(21 - 63)         |
| Pulmonary aspiration and foreign body in airway | 118<br>(66 - 199)        | 39<br>(19 - 70)       | 3<br>(2 - 6)           | 17<br>(9 - 34)           | 22<br>(12 - 38)          | 37<br>(20 - 61)         |
| Foreign body in other body part                 | 10<br>(6 - 14)           | 3<br>(1 - 5)          | 1<br>(0 - 1)           | 3<br>(2 - 4)             | 2<br>(1 - 3)             | 2<br>(1 - 3)            |
| Other unintentional injuries                    | 671<br>(478 - 947)       | 20<br>(12 - 31)       | 19<br>(12 - 27)        | 470<br>(312 - 696)       | 128<br>(85 - 185)        | 34<br>(22 - 47)         |
| Self-harm and interpersonal violence            | 5,391<br>(4,188 - 7,552) | 47<br>(24 - 94)       | 76<br>(47 - 122)       | 2,889<br>(2,115 - 4,232) | 1,510<br>(1,084 - 2,192) | 870<br>(615 - 1,259)    |
| Self-harm                                       | 4,373<br>(3,354 - 6,204) | --                    | 39<br>(19 - 68)        | 2,183<br>(1,577 - 3,195) | 1,349<br>(942 - 1,968)   | 802<br>(547 - 1,167)    |
| Interpersonal violence                          | 1,018<br>(634 - 1,978)   | 47<br>(24 - 94)       | 37<br>(21 - 73)        | 706<br>(414 - 1,406)     | 162<br>(87 - 353)        | 67<br>(39 - 120)        |
| Assault by firearm                              | 117<br>(45 - 355)        | 4<br>(2 - 13)         | 2<br>(1 - 7)           | 90<br>(32 - 275)         | 15<br>(4 - 46)           | 5<br>(2 - 14)           |
| Assault by sharp object                         | 421<br>(236 - 879)       | 9<br>(3 - 20)         | 13<br>(6 - 28)         | 329<br>(180 - 684)       | 55<br>(26 - 133)         | 15<br>(7 - 29)          |
| Assault by other means                          | 481<br>(284 - 919)       | 34<br>(17 - 65)       | 22<br>(12 - 43)        | 286<br>(152 - 560)       | 92<br>(47 - 198)         | 48<br>(26 - 88)         |
| Forces of nature, war, and legal intervention   | 147<br>(101 - 268)       | 2<br>(0 - 0)          | 2<br>(1 - 4)           | 48<br>(30 - 96)          | 62<br>(42 - 112)         | 33<br>(25 - 51)         |
| Exposure to forces of nature                    | 147<br>(101 - 268)       | 2<br>(0 - 0)          | 2<br>(1 - 4)           | 48<br>(30 - 96)          | 62<br>(42 - 112)         | 33<br>(25 - 51)         |

Web Table 31- North Korea deaths with 95% UI by age, sex, and cause in 2013

| Cause                                                             | Males, All Ages              | Males, 0-4 Years         | Males, 5-14 Years    | Males, 15-49 Years          | Males, 50-69 Years          | Males, 70-80 Years          |
|-------------------------------------------------------------------|------------------------------|--------------------------|----------------------|-----------------------------|-----------------------------|-----------------------------|
| All causes                                                        | 99,760<br>(79,839 - 116,636) | 4,186<br>(3,363 - 5,317) | 863<br>(750 - 1,009) | 21,953<br>(17,005 - 29,069) | 40,757<br>(31,779 - 48,154) | 32,002<br>(26,021 - 34,835) |
| Communicable, maternal, neonatal, and nutritional diseases        | 6,880<br>(5,419 - 8,926)     | 2,487<br>(1,867 - 3,272) | 110<br>(67 - 223)    | 1,222<br>(881 - 1,774)      | 1,592<br>(1,123 - 2,459)    | 1,468<br>(1,061 - 2,044)    |
| HIV/AIDS and tuberculosis                                         | 1,594<br>(935 - 3,243)       | 8<br>(4 - 16)            | 6<br>(4 - 13)        | 515<br>(318 - 1,004)        | 674<br>(358 - 1,482)        | 391<br>(217 - 820)          |
| Tuberculosis                                                      | 1,442<br>(791 - 3,100)       | 5<br>(2 - 13)            | 5<br>(2 - 11)        | 408<br>(218 - 894)          | 637<br>(323 - 1,448)        | 387<br>(212 - 815)          |
| HIV/AIDS                                                          | 152<br>(118 - 194)           | 3<br>(1 - 5)             | 2<br>(1 - 3)         | 107<br>(84 - 133)           | 36<br>(24 - 51)             | 5<br>(3 - 7)                |
| HIV/AIDS resulting in mycobacterial infection                     | 10<br>(7 - 13)               | 0<br>(0 - 0)             | 0<br>(0 - 0)         | 7<br>(5 - 9)                | 2<br>(2 - 4)                | 0<br>(0 - 1)                |
| HIV/AIDS resulting in other diseases                              | 142<br>(111 - 181)           | 3<br>(1 - 4)             | 2<br>(1 - 3)         | 100<br>(79 - 124)           | 34<br>(22 - 48)             | 4<br>(3 - 7)                |
| Diarrhea, lower respiratory, and other common infectious diseases | 2,900<br>(2,179 - 3,844)     | 838<br>(481 - 1,415)     | 89<br>(50 - 202)     | 410<br>(284 - 588)          | 638<br>(430 - 923)          | 925<br>(638 - 1,350)        |
| Diarrheal diseases                                                | 180<br>(96 - 315)            | 72<br>(13 - 196)         | 5<br>(2 - 11)        | 34<br>(18 - 59)             | 40<br>(19 - 72)             | 29<br>(15 - 52)             |
| Intestinal infectious diseases                                    | 18<br>(8 - 34)               | 6<br>(2 - 13)            | 5<br>(2 - 10)        | 6<br>(2 - 13)               | 1<br>(0 - 4)                | 0<br>(0 - 1)                |
| Typhoid fever                                                     | 12<br>(6 - 24)               | 4<br>(1 - 9)             | 3<br>(1 - 7)         | 4<br>(1 - 9)                | 1<br>(0 - 2)                | 0<br>(0 - 1)                |
| Paratyphoid fever                                                 | 4<br>(2 - 9)                 | 1<br>(0 - 4)             | 1<br>(0 - 3)         | 1<br>(0 - 3)                | 0<br>(0 - 0)                | 0<br>(0 - 0)                |
| Other intestinal infectious diseases                              | 2<br>(0 - 6)                 | 1<br>(0 - 3)             | 0<br>(0 - 1)         | 1<br>(0 - 4)                | 0<br>(0 - 2)                | 0<br>(0 - 1)                |
| Lower respiratory infections                                      | 2,182<br>(1,595 - 2,919)     | 478<br>(249 - 751)       | 27<br>(14 - 45)      | 266<br>(169 - 405)          | 540<br>(343 - 802)          | 871<br>(591 - 1,285)        |
| Upper respiratory infections                                      | 11<br>(4 - 22)               | 0<br>(0 - 2)             | 0<br>(0 - 1)         | 3<br>(1 - 9)                | 4<br>(0 - 14)               | 3<br>(0 - 9)                |
| Otitis media                                                      | 2<br>(2 - 4)                 | 0<br>(0 - 0)             | 0<br>(0 - 0)         | 1<br>(1 - 2)                | 1<br>(0 - 1)                | 0<br>(0 - 1)                |
| Meningitis                                                        | 145<br>(95 - 217)            | 44<br>(16 - 97)          | 10<br>(5 - 19)       | 50<br>(30 - 78)             | 29<br>(16 - 48)             | 13<br>(7 - 22)              |
| Pneumococcal meningitis                                           | 36<br>(22 - 57)              | 7<br>(2 - 16)            | 2<br>(1 - 4)         | 15<br>(8 - 27)              | 8<br>(4 - 16)               | 4<br>(2 - 7)                |
| H influenzae type B meningitis                                    | 16<br>(9 - 27)               | 7<br>(2 - 16)            | 1<br>(0 - 3)         | 5<br>(2 - 8)                | 2<br>(1 - 5)                | 1<br>(0 - 2)                |
| Meningococcal meningitis                                          | 23<br>(15 - 37)              | 6<br>(2 - 16)            | 2<br>(1 - 3)         | 8<br>(4 - 15)               | 5<br>(2 - 9)                | 2<br>(1 - 4)                |
| Other meningitis                                                  | 70<br>(45 - 107)             | 23<br>(8 - 49)           | 5<br>(2 - 10)        | 22<br>(13 - 36)             | 13<br>(7 - 23)              | 6<br>(3 - 11)               |
| Encephalitis                                                      | 87<br>(51 - 142)             | 34<br>(10 - 89)          | 9<br>(5 - 14)        | 27<br>(14 - 40)             | 13<br>(7 - 20)              | 4<br>(2 - 6)                |
| Diphtheria                                                        | 5<br>(0 - 16)                | 2<br>(0 - 11)            | 1<br>(0 - 6)         | 2<br>(0 - 7)                | 1<br>(0 - 4)                | --                          |
| Whooping cough                                                    | 82<br>(0 - 378)              | 73<br>(0 - 335)          | 6<br>(0 - 29)        | 2<br>(0 - 12)               | 0<br>(0 - 2)                | --                          |
| Tetanus                                                           | 26<br>(11 - 86)              | 4<br>(1 - 21)            | 1<br>(0 - 3)         | 11<br>(4 - 43)              | 8<br>(3 - 32)               | 2<br>(1 - 8)                |
| Measles                                                           | 155<br>(3 - 819)             | 123<br>(3 - 648)         | 25<br>(1 - 145)      | 6<br>(0 - 37)               | 0<br>(0 - 3)                | --                          |
| Varicella and herpes zoster                                       | 5<br>(2 - 11)                | 1<br>(0 - 4)             | 0<br>(0 - 1)         | 2<br>(0 - 5)                | 1<br>(0 - 3)                | 1<br>(0 - 5)                |
| Neglected tropical diseases and malaria                           | 39<br>(23 - 57)              | 7<br>(2 - 16)            | 3<br>(2 - 8)         | 16<br>(9 - 26)              | 9<br>(5 - 16)               | 3<br>(2 - 6)                |
| Malaria                                                           | 0<br>(0 - 1)                 | 0<br>(0 - 0)             | 0<br>(0 - 0)         | 0<br>(0 - 0)                | 0<br>(0 - 0)                | 0<br>(0 - 0)                |
| Leishmaniasis                                                     | 12<br>(5 - 22)               | 4<br>(0 - 13)            | 1<br>(0 - 3)         | 5<br>(2 - 10)               | 2<br>(0 - 4)                | 0<br>(0 - 1)                |
| Visceral leishmaniasis                                            | 12<br>(5 - 22)               | 4<br>(0 - 13)            | 1<br>(0 - 3)         | 5<br>(2 - 10)               | 2<br>(0 - 4)                | 0<br>(0 - 1)                |
| Cysticercosis                                                     | 0<br>(0 - 0)                 | 0<br>(0 - 0)             | 0<br>(0 - 0)         | 0<br>(0 - 0)                | 0<br>(0 - 0)                | 0<br>(0 - 0)                |
| Cystic echinococcosis                                             | 2<br>(2 - 3)                 | 0<br>(0 - 0)             | 0<br>(0 - 0)         | 1<br>(1 - 1)                | 1<br>(1 - 1)                | 0<br>(0 - 0)                |
| Dengue                                                            | 2<br>(1 - 3)                 | 0<br>(0 - 0)             | 0<br>(0 - 0)         | 1<br>(1 - 2)                | 0<br>(0 - 0)                | 0<br>(0 - 0)                |
| Rabies                                                            | 7<br>(3 - 12)                | 0<br>(0 - 1)             | 1<br>(0 - 2)         | 3<br>(1 - 6)                | 2<br>(1 - 4)                | 0<br>(0 - 1)                |
| Intestinal nematode infections                                    | 4<br>(0 - 13)                | 1<br>(0 - 6)             | 1<br>(0 - 5)         | 1<br>(0 - 7)                | 1<br>(0 - 5)                | 1<br>(0 - 4)                |
| Ascariasis                                                        | 4<br>(0 - 13)                | 1<br>(0 - 6)             | 1<br>(0 - 5)         | 1<br>(0 - 7)                | 1<br>(0 - 5)                | 1<br>(0 - 4)                |
| Other neglected tropical diseases                                 | 10<br>(5 - 17)               | 1<br>(0 - 1)             | 0<br>(0 - 1)         | 4<br>(2 - 8)                | 4<br>(2 - 7)                | 1<br>(1 - 2)                |
| Maternal disorders                                                | --                           | --                       | --                   | --                          | --                          | --                          |
| Maternal hemorrhage                                               | --                           | --                       | --                   | --                          | --                          | --                          |

Web Table 31- North Korea deaths with 95% UI by age, sex, and cause in 2013

| Cause                                                            | Males, All Ages             | Males, 0-4 Years         | Males, 5-14 Years  | Males, 15-49 Years          | Males, 50-69 Years          | Males, 70-80 Years          |
|------------------------------------------------------------------|-----------------------------|--------------------------|--------------------|-----------------------------|-----------------------------|-----------------------------|
| Maternal sepsis and other maternal infections                    | --                          | --                       | --                 | --                          | --                          | --                          |
| Maternal hypertensive disorders                                  | --                          | --                       | --                 | --                          | --                          | --                          |
| Maternal obstructed labor                                        | --                          | --                       | --                 | --                          | --                          | --                          |
| Maternal abortive outcome                                        | --                          | --                       | --                 | --                          | --                          | --                          |
| Indirect maternal deaths                                         | --                          | --                       | --                 | --                          | --                          | --                          |
| Late maternal deaths                                             | --                          | --                       | --                 | --                          | --                          | --                          |
| Maternal deaths aggravated by HIV/AIDS                           | --                          | --                       | --                 | --                          | --                          | --                          |
| Other maternal disorders                                         | --                          | --                       | --                 | --                          | --                          | --                          |
| Neonatal disorders                                               | 1,564<br>(1,155 - 2,076)    | 1,564<br>(1,155 - 2,076) | --                 | --                          | --                          | --                          |
| Neonatal preterm birth complications                             | 798<br>(416 - 1,218)        | 798<br>(416 - 1,218)     | --                 | --                          | --                          | --                          |
| Neonatal encephalopathy due to birth asphyxia and trauma         | 468<br>(216 - 836)          | 468<br>(216 - 836)       | --                 | --                          | --                          | --                          |
| Neonatal sepsis and other neonatal infections                    | 55<br>(14 - 128)            | 55<br>(14 - 128)         | --                 | --                          | --                          | --                          |
| Hemolytic disease and other neonatal jaundice                    | 27<br>(6 - 89)              | 27<br>(6 - 89)           | --                 | --                          | --                          | --                          |
| Other neonatal disorders                                         | 215<br>(77 - 481)           | 215<br>(77 - 481)        | --                 | --                          | --                          | --                          |
| Nutritional deficiencies                                         | 262<br>(108 - 514)          | 40<br>(14 - 85)          | 6<br>(2 - 13)      | 64<br>(25 - 130)            | 67<br>(26 - 145)            | 85<br>(36 - 174)            |
| Protein-energy malnutrition                                      | 95<br>(35 - 197)            | 26<br>(7 - 59)           | 2<br>(0 - 4)       | 17<br>(5 - 41)              | 19<br>(5 - 45)              | 31<br>(10 - 70)             |
| Iodine deficiency                                                | 3<br>(0 - 12)               | 0<br>(0 - 1)             | 0<br>(0 - 1)       | 1<br>(0 - 4)                | 1<br>(0 - 7)                | 1<br>(0 - 6)                |
| Iron-deficiency anemia                                           | 125<br>(44 - 280)           | 7<br>(1 - 20)            | 3<br>(1 - 7)       | 35<br>(13 - 74)             | 38<br>(13 - 94)             | 42<br>(14 - 99)             |
| Other nutritional deficiencies                                   | 38<br>(12 - 97)             | 7<br>(1 - 20)            | 1<br>(0 - 4)       | 11<br>(3 - 29)              | 9<br>(2 - 25)               | 11<br>(3 - 30)              |
| Other communicable, maternal, neonatal, and nutritional diseases | 522<br>(328 - 768)          | 31<br>(12 - 59)          | 5<br>(3 - 8)       | 218<br>(126 - 356)          | 204<br>(115 - 314)          | 64<br>(36 - 100)            |
| Sexually transmitted diseases excluding HIV                      | 19<br>(3 - 44)              | 15<br>(0 - 38)           | 1<br>(0 - 3)       | 1<br>(1 - 2)                | 1<br>(0 - 2)                | 1<br>(0 - 1)                |
| Syphilis                                                         | 18<br>(2 - 43)              | 15<br>(0 - 38)           | 1<br>(0 - 3)       | 1<br>(0 - 1)                | 1<br>(0 - 2)                | 0<br>(0 - 1)                |
| Chlamydial infection                                             | --                          | --                       | --                 | --                          | --                          | --                          |
| Gonococcal infection                                             | 1<br>(0 - 1)                | --                       | 0<br>(0 - 0)       | 0<br>(0 - 1)                | 0<br>(0 - 0)                | 0<br>(0 - 0)                |
| Other sexually transmitted diseases                              | 0<br>(0 - 1)                | --                       | 0<br>(0 - 0)       | 0<br>(0 - 0)                | 0<br>(0 - 0)                | 0<br>(0 - 0)                |
| Hepatitis                                                        | 470<br>(277 - 705)          | 9<br>(3 - 19)            | 2<br>(1 - 4)       | 207<br>(113 - 344)          | 194<br>(106 - 303)          | 58<br>(32 - 93)             |
| Acute hepatitis A                                                | 19<br>(4 - 45)              | 3<br>(1 - 8)             | 1<br>(0 - 1)       | 11<br>(2 - 28)              | 4<br>(1 - 11)               | 0<br>(0 - 1)                |
| Acute hepatitis B                                                | 303<br>(165 - 480)          | 6<br>(2 - 15)            | 1<br>(0 - 2)       | 98<br>(41 - 187)            | 148<br>(79 - 237)           | 51<br>(27 - 83)             |
| Acute hepatitis C                                                | 9<br>(1 - 29)               | --                       | 0<br>(0 - 0)       | 5<br>(1 - 15)               | 4<br>(0 - 13)               | 1<br>(0 - 4)                |
| Acute hepatitis E                                                | 140<br>(62 - 258)           | 0<br>(0 - 0)             | 1<br>(0 - 2)       | 94<br>(45 - 174)            | 39<br>(12 - 88)             | 6<br>(1 - 14)               |
| Other infectious diseases                                        | 32<br>(17 - 61)             | 7<br>(2 - 20)            | 1<br>(0 - 3)       | 10<br>(5 - 18)              | 9<br>(3 - 22)               | 5<br>(2 - 14)               |
| Non-communicable diseases                                        | 81,350<br>(64,520 - 95,022) | 1,149<br>(791 - 1,610)   | 302<br>(229 - 385) | 13,578<br>(10,318 - 18,351) | 36,608<br>(28,338 - 43,263) | 29,713<br>(24,160 - 32,639) |
| Neoplasms                                                        | 26,273<br>(20,044 - 31,566) | 103<br>(55 - 164)        | 134<br>(97 - 177)  | 5,153<br>(3,816 - 7,077)    | 13,892<br>(10,504 - 16,782) | 6,992<br>(5,408 - 8,121)    |
| Esophageal cancer                                                | 1,809<br>(1,067 - 2,688)    | --                       | --                 | 217<br>(120 - 380)          | 1,082<br>(623 - 1,666)      | 510<br>(290 - 809)          |
| Stomach cancer                                                   | 4,676<br>(3,261 - 5,986)    | --                       | --                 | 654<br>(412 - 990)          | 2,605<br>(1,748 - 3,460)    | 1,417<br>(940 - 1,920)      |
| Liver cancer                                                     | 5,799<br>(4,095 - 8,128)    | --                       | 7<br>(4 - 13)      | 1,698<br>(1,068 - 2,637)    | 3,076<br>(2,047 - 4,571)    | 1,018<br>(669 - 1,470)      |
| Liver cancer due to hepatitis B                                  | 2,757<br>(1,276 - 4,694)    | --                       | 4<br>(2 - 8)       | 888<br>(442 - 1,538)        | 1,414<br>(545 - 2,482)      | 450<br>(204 - 800)          |
| Liver cancer due to hepatitis C                                  | 2,246<br>(1,017 - 4,508)    | --                       | 1<br>(0 - 2)       | 575<br>(202 - 1,251)        | 1,250<br>(523 - 2,579)      | 420<br>(226 - 751)          |
| Liver cancer due to alcohol use                                  | 385<br>(168 - 866)          | --                       | --                 | 79<br>(30 - 187)            | 212<br>(88 - 504)           | 95<br>(39 - 184)            |
| Liver cancer due to other causes                                 | 411<br>(170 - 946)          | --                       | 2<br>(1 - 5)       | 156<br>(59 - 375)           | 200<br>(67 - 505)           | 53<br>(21 - 102)            |

Web Table 31- North Korea deaths with 95% UI by age, sex, and cause in 2013

| Cause                                         | Males, All Ages             | Males, 0-4 Years | Males, 5-14 Years | Males, 15-49 Years       | Males, 50-69 Years          | Males, 70-80 Years          |
|-----------------------------------------------|-----------------------------|------------------|-------------------|--------------------------|-----------------------------|-----------------------------|
| Larynx cancer                                 | 265<br>(158 - 384)          | --               | --                | 42<br>(21 - 70)          | 151<br>(85 - 227)           | 73<br>(43 - 109)            |
| Tracheal, bronchus and lung cancer            | 7,998<br>(5,537 - 9,968)    | --               | --                | 1,066<br>(643 - 1,567)   | 4,479<br>(3,016 - 5,686)    | 2,452<br>(1,694 - 3,126)    |
| Breast cancer                                 | 23<br>(13 - 39)             | --               | --                | 7<br>(3 - 14)            | 11<br>(5 - 19)              | 5<br>(2 - 9)                |
| Cervical cancer                               | --                          | --               | --                | --                       | --                          | --                          |
| Uterine cancer                                | --                          | --               | --                | --                       | --                          | --                          |
| Prostate cancer                               | 187<br>(119 - 296)          | --               | --                | 5<br>(3 - 9)             | 60<br>(35 - 102)            | 121<br>(77 - 191)           |
| Colon and rectum cancer                       | 1,253<br>(940 - 1,557)      | --               | --                | 222<br>(155 - 315)       | 617<br>(443 - 800)          | 415<br>(307 - 531)          |
| Lip and oral cavity cancer                    | 174<br>(108 - 252)          | --               | --                | 49<br>(29 - 77)          | 84<br>(49 - 128)            | 40<br>(23 - 61)             |
| Nasopharynx cancer                            | 287<br>(179 - 433)          | --               | 1<br>(0 - 3)      | 108<br>(61 - 194)        | 142<br>(81 - 226)           | 37<br>(20 - 61)             |
| Other pharynx cancer                          | 80<br>(47 - 133)            | --               | --                | 22<br>(12 - 41)          | 43<br>(24 - 76)             | 16<br>(9 - 27)              |
| Gallbladder and biliary tract cancer          | 171<br>(94 - 264)           | --               | --                | 20<br>(10 - 37)          | 84<br>(43 - 145)            | 67<br>(37 - 110)            |
| Pancreatic cancer                             | 403<br>(304 - 499)          | --               | --                | 64<br>(42 - 95)          | 215<br>(154 - 279)          | 124<br>(91 - 165)           |
| Malignant skin melanoma                       | 35<br>(19 - 59)             | --               | --                | 12<br>(7 - 22)           | 14<br>(7 - 24)              | 9<br>(5 - 15)               |
| Non-melanoma skin cancer                      | 110<br>(65 - 192)           | --               | --                | 22<br>(12 - 39)          | 45<br>(24 - 81)             | 43<br>(24 - 76)             |
| Ovarian cancer                                | --                          | --               | --                | --                       | --                          | --                          |
| Testicular cancer                             | 18<br>(12 - 27)             | --               | --                | 12<br>(7 - 19)           | 4<br>(2 - 6)                | 2<br>(1 - 4)                |
| Kidney cancer                                 | 147<br>(105 - 197)          | 2<br>(1 - 3)     | 1<br>(0 - 1)      | 31<br>(19 - 48)          | 76<br>(50 - 109)            | 38<br>(25 - 54)             |
| Bladder cancer                                | 438<br>(322 - 559)          | --               | --                | 37<br>(23 - 58)          | 210<br>(147 - 284)          | 191<br>(130 - 262)          |
| Brain and nervous system cancer               | 513<br>(308 - 763)          | 11<br>(4 - 24)   | 25<br>(14 - 40)   | 184<br>(109 - 314)       | 212<br>(117 - 331)          | 82<br>(46 - 134)            |
| Thyroid cancer                                | 42<br>(26 - 66)             | --               | 0<br>(0 - 0)      | 10<br>(5 - 17)           | 21<br>(13 - 36)             | 11<br>(7 - 18)              |
| Mesothelioma                                  | 41<br>(26 - 65)             | --               | --                | 4<br>(2 - 8)             | 28<br>(17 - 49)             | 8<br>(5 - 14)               |
| Hodgkin lymphoma                              | 102<br>(48 - 230)           | 3<br>(1 - 6)     | 3<br>(1 - 7)      | 58<br>(25 - 134)         | 28<br>(12 - 65)             | 11<br>(5 - 24)              |
| Non-Hodgkin lymphoma                          | 317<br>(212 - 467)          | 4<br>(2 - 7)     | 8<br>(5 - 13)     | 97<br>(62 - 151)         | 138<br>(88 - 215)           | 70<br>(44 - 106)            |
| Multiple myeloma                              | 69<br>(42 - 116)            | --               | --                | 14<br>(8 - 24)           | 36<br>(21 - 62)             | 20<br>(11 - 34)             |
| Leukemia                                      | 707<br>(549 - 906)          | 48<br>(21 - 91)  | 61<br>(39 - 89)   | 320<br>(234 - 444)       | 191<br>(135 - 255)          | 87<br>(63 - 116)            |
| Other neoplasms                               | 608<br>(444 - 832)          | 35<br>(18 - 59)  | 28<br>(16 - 42)   | 178<br>(118 - 279)       | 242<br>(159 - 352)          | 125<br>(82 - 182)           |
| Cardiovascular diseases                       | 35,335<br>(27,645 - 41,716) | 84<br>(50 - 130) | 51<br>(32 - 74)   | 4,948<br>(3,695 - 6,770) | 15,733<br>(11,888 - 18,890) | 14,518<br>(11,602 - 16,608) |
| Rheumatic heart disease                       | 663<br>(414 - 1,014)        | 2<br>(1 - 5)     | 3<br>(2 - 6)      | 128<br>(74 - 212)        | 298<br>(175 - 472)          | 232<br>(138 - 368)          |
| Ischemic heart disease                        | 12,427<br>(9,298 - 15,612)  | 14<br>(5 - 28)   | 17<br>(9 - 26)    | 1,983<br>(1,359 - 2,858) | 5,589<br>(3,988 - 7,241)    | 4,823<br>(3,623 - 6,117)    |
| Cerebrovascular disease                       | 19,242<br>(14,583 - 23,757) | 29<br>(16 - 47)  | 21<br>(13 - 31)   | 2,411<br>(1,721 - 3,496) | 8,672<br>(6,379 - 10,978)   | 8,110<br>(6,252 - 9,790)    |
| Ischemic stroke                               | 4,872<br>(2,517 - 7,390)    | 2<br>(1 - 4)     | 2<br>(1 - 4)      | 246<br>(98 - 481)        | 1,875<br>(889 - 3,229)      | 2,747<br>(1,472 - 3,992)    |
| Hemorrhagic stroke                            | 14,370<br>(10,488 - 19,513) | 27<br>(15 - 44)  | 19<br>(12 - 29)   | 2,165<br>(1,508 - 3,169) | 6,796<br>(4,882 - 9,330)    | 5,363<br>(3,832 - 7,386)    |
| Hypertensive heart disease                    | 1,865<br>(1,069 - 2,761)    | 1<br>(0 - 3)     | 1<br>(0 - 2)      | 175<br>(97 - 296)        | 725<br>(409 - 1,138)        | 963<br>(511 - 1,493)        |
| Cardiomyopathy and myocarditis                | 194<br>(130 - 284)          | 10<br>(5 - 19)   | 3<br>(2 - 6)      | 63<br>(38 - 101)         | 77<br>(47 - 116)            | 41<br>(26 - 63)             |
| Atrial fibrillation and flutter               | 2<br>(1 - 3)                | --               | --                | 1<br>(0 - 1)             | 1<br>(0 - 1)                | 1<br>(0 - 2)                |
| Aortic aneurysm                               | 136<br>(82 - 196)           | --               | --                | 35<br>(20 - 56)          | 57<br>(33 - 85)             | 43<br>(25 - 66)             |
| Peripheral vascular disease                   | 3<br>(2 - 5)                | --               | --                | 0<br>(0 - 1)             | 1<br>(1 - 2)                | 2<br>(1 - 3)                |
| Endocarditis                                  | 31<br>(18 - 48)             | 2<br>(1 - 3)     | 0<br>(0 - 1)      | 12<br>(6 - 19)           | 9<br>(5 - 15)               | 8<br>(4 - 13)               |
| Other cardiovascular and circulatory diseases | 772<br>(498 - 1,329)        | 26<br>(14 - 42)  | 6<br>(3 - 10)     | 140<br>(82 - 248)        | 305<br>(177 - 558)          | 296<br>(180 - 534)          |
| Chronic respiratory diseases                  | 9,064<br>(6,400 - 11,602)   | 23<br>(11 - 40)  | 9<br>(6 - 14)     | 471<br>(299 - 702)       | 3,114<br>(2,055 - 4,319)    | 5,448<br>(3,955 - 6,856)    |

Web Table 31- North Korea deaths with 95% UI by age, sex, and cause in 2013

| Cause                                               | Males, All Ages           | Males, 0-4 Years | Males, 5-14 Years | Males, 15-49 Years     | Males, 50-69 Years       | Males, 70-80 Years       |
|-----------------------------------------------------|---------------------------|------------------|-------------------|------------------------|--------------------------|--------------------------|
| Chronic obstructive pulmonary disease               | 7,841<br>(5,592 - 10,059) | 14<br>(6 - 25)   | 5<br>(2 - 8)      | 324<br>(198 - 517)     | 2,665<br>(1,768 - 3,694) | 4,835<br>(3,525 - 6,152) |
| Pneumoconiosis                                      | 232<br>(121 - 404)        | 0<br>(0 - 1)     | 0<br>(0 - 1)      | 41<br>(19 - 81)        | 96<br>(47 - 176)         | 94<br>(49 - 167)         |
| Silicosis                                           | 127<br>(60 - 224)         | 0<br>(0 - 0)     | 0<br>(0 - 0)      | 22<br>(9 - 46)         | 57<br>(26 - 102)         | 48<br>(22 - 86)          |
| Asbestosis                                          | 6<br>(3 - 10)             | 0<br>(0 - 0)     | 0<br>(0 - 0)      | 2<br>(1 - 4)           | 1<br>(1 - 3)             | 2<br>(1 - 4)             |
| Coal workers pneumoconiosis                         | 40<br>(16 - 76)           | 0<br>(0 - 0)     | 0<br>(0 - 0)      | 5<br>(2 - 10)          | 19<br>(8 - 38)           | 16<br>(6 - 32)           |
| Other pneumoconiosis                                | 59<br>(27 - 119)          | 0<br>(0 - 0)     | 0<br>(0 - 0)      | 12<br>(5 - 26)         | 18<br>(7 - 40)           | 28<br>(13 - 57)          |
| Asthma                                              | 445<br>(148 - 914)        | 2<br>(0 - 6)     | 3<br>(1 - 5)      | 85<br>(29 - 176)       | 173<br>(52 - 390)        | 182<br>(57 - 400)        |
| Interstitial lung disease and pulmonary sarcoidosis | 401<br>(186 - 714)        | 1<br>(0 - 2)     | 0<br>(0 - 1)      | 8<br>(4 - 14)          | 145<br>(63 - 263)        | 247<br>(109 - 457)       |
| Other chronic respiratory diseases                  | 145<br>(74 - 260)         | 6<br>(2 - 12)    | 1<br>(1 - 2)      | 14<br>(6 - 28)         | 35<br>(16 - 68)          | 90<br>(42 - 171)         |
| Cirrhosis                                           | 3,184<br>(2,308 - 4,196)  | 3<br>(1 - 6)     | 4<br>(3 - 7)      | 1,184<br>(803 - 1,750) | 1,523<br>(1,036 - 2,011) | 470<br>(339 - 617)       |
| Cirrhosis due to hepatitis B                        | 1,303<br>(722 - 2,077)    | 0<br>(0 - 1)     | 2<br>(0 - 3)      | 509<br>(254 - 892)     | 613<br>(339 - 992)       | 178<br>(97 - 280)        |
| Cirrhosis due to hepatitis C                        | 715<br>(317 - 1,281)      | 0<br>(0 - 1)     | 1<br>(0 - 1)      | 270<br>(118 - 507)     | 346<br>(137 - 646)       | 98<br>(36 - 180)         |
| Cirrhosis due to alcohol use                        | 951<br>(520 - 1,543)      | -                | -                 | 291<br>(120 - 530)     | 483<br>(260 - 781)       | 177<br>(96 - 275)        |
| Cirrhosis due to other causes                       | 216<br>(117 - 370)        | 2<br>(1 - 5)     | 2<br>(1 - 4)      | 114<br>(59 - 205)      | 80<br>(38 - 146)         | 17<br>(8 - 29)           |
| Digestive diseases                                  | 1,402<br>(937 - 2,013)    | 16<br>(7 - 31)   | 8<br>(5 - 13)     | 302<br>(188 - 468)     | 590<br>(373 - 880)       | 487<br>(323 - 712)       |
| Peptic ulcer disease                                | 602<br>(372 - 904)        | 1<br>(0 - 2)     | 1<br>(0 - 2)      | 121<br>(67 - 200)      | 269<br>(157 - 423)       | 211<br>(123 - 330)       |
| Gastritis and duodenitis                            | 133<br>(47 - 232)         | 1<br>(0 - 2)     | 0<br>(0 - 1)      | 24<br>(8 - 46)         | 62<br>(21 - 110)         | 46<br>(17 - 84)          |
| Appendicitis                                        | 20<br>(11 - 33)           | 0<br>(0 - 1)     | 0<br>(0 - 1)      | 7<br>(3 - 12)          | 7<br>(3 - 12)            | 6<br>(3 - 10)            |
| Paralytic ileus and intestinal obstruction          | 148<br>(76 - 317)         | 4<br>(1 - 9)     | 2<br>(1 - 5)      | 30<br>(14 - 65)        | 49<br>(22 - 122)         | 62<br>(29 - 129)         |
| Inguinal, femoral, and abdominal hernia             | 12<br>(5 - 21)            | 0<br>(0 - 1)     | 0<br>(0 - 0)      | 2<br>(1 - 4)           | 4<br>(2 - 8)             | 5<br>(2 - 10)            |
| Inflammatory bowel disease                          | 61<br>(35 - 109)          | 4<br>(1 - 9)     | 1<br>(0 - 2)      | 14<br>(7 - 26)         | 22<br>(11 - 42)          | 19<br>(10 - 34)          |
| Vascular intestinal disorders                       | 6<br>(2 - 15)             | 0<br>(0 - 0)     | 0<br>(0 - 1)      | 2<br>(1 - 4)           | 2<br>(1 - 5)             | 2<br>(1 - 5)             |
| Gallbladder and biliary diseases                    | 143<br>(76 - 232)         | 0<br>(0 - 1)     | 0<br>(0 - 1)      | 22<br>(11 - 42)        | 57<br>(27 - 104)         | 63<br>(32 - 109)         |
| Pancreatitis                                        | 101<br>(43 - 172)         | 0<br>(0 - 0)     | 0<br>(0 - 1)      | 40<br>(17 - 73)        | 38<br>(16 - 68)          | 22<br>(8 - 43)           |
| Other digestive diseases                            | 176<br>(107 - 300)        | 6<br>(2 - 12)    | 1<br>(1 - 3)      | 39<br>(21 - 73)        | 79<br>(43 - 142)         | 50<br>(26 - 92)          |
| Neurological disorders                              | 1,306<br>(994 - 1,716)    | 18<br>(8 - 33)   | 19<br>(10 - 30)   | 222<br>(141 - 327)     | 259<br>(168 - 378)       | 789<br>(570 - 1,093)     |
| Alzheimer disease and other dementias               | 916<br>(653 - 1,251)      | -                | -                 | 1<br>(0 - 5)           | 175<br>(95 - 275)        | 740<br>(526 - 1,038)     |
| Parkinson disease                                   | 44<br>(26 - 73)           | -                | -                 | 2<br>(1 - 3)           | 15<br>(8 - 25)           | 27<br>(13 - 49)          |
| Epilepsy                                            | 273<br>(169 - 397)        | 13<br>(5 - 29)   | 15<br>(7 - 26)    | 182<br>(106 - 281)     | 48<br>(26 - 76)          | 15<br>(8 - 23)           |
| Multiple sclerosis                                  | 2<br>(1 - 4)              | -                | -                 | 1<br>(0 - 3)           | 1<br>(0 - 1)             | 0<br>(0 - 0)             |
| Other neurological disorders                        | 71<br>(49 - 93)           | 5<br>(3 - 7)     | 3<br>(2 - 5)      | 35<br>(23 - 49)        | 21<br>(14 - 29)          | 7<br>(5 - 9)             |
| Mental and substance use disorders                  | 781<br>(510 - 1,252)      | 4<br>(2 - 10)    | 0<br>(0 - 0)      | 490<br>(308 - 794)     | 232<br>(140 - 393)       | 55<br>(35 - 86)          |
| Schizophrenia                                       | 144<br>(58 - 317)         | -                | -                 | 77<br>(30 - 173)       | 52<br>(20 - 119)         | 15<br>(6 - 35)           |
| Alcohol use disorders                               | 383<br>(209 - 749)        | -                | -                 | 232<br>(118 - 447)     | 132<br>(69 - 278)        | 19<br>(10 - 38)          |
| Drug use disorders                                  | 253<br>(156 - 434)        | 4<br>(2 - 10)    | -                 | 181<br>(107 - 320)     | 48<br>(27 - 84)          | 21<br>(12 - 33)          |
| Opioid use disorders                                | 104<br>(63 - 178)         | 2<br>(1 - 4)     | -                 | 75<br>(44 - 132)       | 18<br>(10 - 33)          | 9<br>(5 - 14)            |
| Cocaine use disorders                               | 19<br>(11 - 33)           | 0<br>(0 - 1)     | -                 | 15<br>(9 - 26)         | 3<br>(2 - 5)             | 1<br>(1 - 2)             |
| Amphetamine use disorders                           | 19<br>(11 - 34)           | 0<br>(0 - 1)     | -                 | 14<br>(8 - 25)         | 4<br>(2 - 7)             | 1<br>(1 - 3)             |
| Other drug use disorders                            | 111<br>(69 - 188)         | 2<br>(1 - 4)     | -                 | 77<br>(46 - 136)       | 23<br>(13 - 41)          | 9<br>(6 - 15)            |
| Eating disorders                                    | 0<br>(0 - 0)              | -                | 0<br>(0 - 0)      | 0<br>(0 - 0)           | -                        | -                        |

Web Table 31- North Korea deaths with 95% UI by age, sex, and cause in 2013

| Cause                                               | Males, All Ages          | Males, 0-4 Years     | Males, 5-14 Years | Males, 15-49 Years | Males, 50-69 Years     | Males, 70-80 Years   |
|-----------------------------------------------------|--------------------------|----------------------|-------------------|--------------------|------------------------|----------------------|
| Anorexia nervosa                                    | 0<br>(0 - 0)             | --                   | 0<br>(0 - 0)      | 0<br>(0 - 0)       | --                     | --                   |
| Diabetes, urogenital, blood, and endocrine diseases | 2,785<br>(2,071 - 3,407) | 45<br>(28 - 68)      | 23<br>(16 - 34)   | 630<br>(451 - 868) | 1,187<br>(866 - 1,489) | 900<br>(677 - 1,119) |
| Diabetes mellitus                                   | 1,086<br>(795 - 1,363)   | 5<br>(3 - 7)         | 2<br>(1 - 3)      | 182<br>(127 - 260) | 516<br>(364 - 688)     | 382<br>(276 - 508)   |
| Acute glomerulonephritis                            | 45<br>(18 - 88)          | 1<br>(0 - 1)         | 1<br>(1 - 2)      | 17<br>(7 - 37)     | 16<br>(6 - 32)         | 10<br>(4 - 20)       |
| Chronic kidney disease                              | 1,171<br>(798 - 1,539)   | 4<br>(2 - 7)         | 5<br>(3 - 8)      | 289<br>(178 - 415) | 497<br>(318 - 680)     | 376<br>(252 - 526)   |
| Chronic kidney disease due to diabetes mellitus     | 161<br>(33 - 258)        | 0<br>(0 - 0)         | 0<br>(0 - 0)      | 31<br>(6 - 56)     | 78<br>(17 - 131)       | 52<br>(10 - 92)      |
| Chronic kidney disease due to hypertension          | 220<br>(104 - 356)       | 0<br>(0 - 1)         | 0<br>(0 - 1)      | 35<br>(14 - 64)    | 89<br>(41 - 155)       | 95<br>(45 - 162)     |
| Chronic kidney disease due to glomerulonephritis    | 303<br>(176 - 405)       | 2<br>(1 - 3)         | 2<br>(2 - 3)      | 99<br>(54 - 148)   | 120<br>(64 - 178)      | 80<br>(46 - 117)     |
| Chronic kidney disease due to other causes          | 486<br>(285 - 743)       | 2<br>(1 - 4)         | 2<br>(1 - 4)      | 123<br>(67 - 207)  | 209<br>(110 - 353)     | 150<br>(77 - 253)    |
| Urinary diseases and male infertility               | 218<br>(153 - 285)       | 3<br>(2 - 7)         | 1<br>(1 - 2)      | 49<br>(32 - 72)    | 80<br>(53 - 112)       | 84<br>(55 - 118)     |
| Interstitial nephritis and urinary tract infections | 93<br>(50 - 130)         | 3<br>(1 - 5)         | 1<br>(0 - 1)      | 24<br>(12 - 38)    | 34<br>(16 - 53)        | 32<br>(16 - 51)      |
| Urolithiasis                                        | 41<br>(19 - 66)          | --                   | 0<br>(0 - 0)      | 9<br>(3 - 16)      | 18<br>(7 - 32)         | 15<br>(6 - 28)       |
| Other urinary diseases                              | 84<br>(55 - 118)         | 1<br>(0 - 2)         | 0<br>(0 - 1)      | 16<br>(10 - 26)    | 29<br>(17 - 46)        | 37<br>(22 - 59)      |
| Gynecological diseases                              | --                       | --                   | --                | --                 | --                     | --                   |
| Uterine fibroids                                    | --                       | --                   | --                | --                 | --                     | --                   |
| Polycystic ovarian syndrome                         | --                       | --                   | --                | --                 | --                     | --                   |
| Endometriosis                                       | --                       | --                   | --                | --                 | --                     | --                   |
| Genital prolapse                                    | --                       | --                   | --                | --                 | --                     | --                   |
| Other gynecological diseases                        | --                       | --                   | --                | --                 | --                     | --                   |
| Hemoglobinopathies and hemolytic anemias            | 149<br>(81 - 246)        | 16<br>(8 - 30)       | 9<br>(4 - 17)     | 56<br>(29 - 93)    | 45<br>(22 - 77)        | 24<br>(12 - 41)      |
| Thalassemias                                        | 51<br>(28 - 86)          | 14<br>(6 - 27)       | 8<br>(4 - 15)     | 29<br>(16 - 49)    | 1<br>(0 - 1)           | 0<br>(0 - 0)         |
| Sickle cell disorders                               | 0<br>(0 - 0)             | 0<br>(0 - 0)         | 0<br>(0 - 0)      | 0<br>(0 - 0)       | 0<br>(0 - 0)           | 0<br>(0 - 0)         |
| G6PD deficiency                                     | 7<br>(4 - 12)            | 0<br>(0 - 1)         | 0<br>(0 - 0)      | 3<br>(1 - 5)       | 3<br>(2 - 6)           | 0<br>(0 - 1)         |
| Other hemoglobinopathies and hemolytic anemias      | 91<br>(48 - 150)         | 2<br>(1 - 4)         | 1<br>(0 - 1)      | 24<br>(12 - 41)    | 41<br>(20 - 70)        | 23<br>(12 - 40)      |
| Endocrine, metabolic, blood, and immune disorders   | 117<br>(66 - 162)        | 17<br>(8 - 28)       | 5<br>(2 - 8)      | 37<br>(21 - 57)    | 34<br>(19 - 52)        | 24<br>(13 - 37)      |
| Musculoskeletal disorders                           | 121<br>(78 - 182)        | --                   | 3<br>(2 - 5)      | 40<br>(24 - 62)    | 47<br>(29 - 74)        | 31<br>(20 - 47)      |
| Rheumatoid arthritis                                | 53<br>(34 - 82)          | --                   | 1<br>(0 - 2)      | 9<br>(6 - 17)      | 24<br>(14 - 40)        | 19<br>(11 - 30)      |
| Other musculoskeletal disorders                     | 68<br>(38 - 103)         | --                   | 2<br>(1 - 4)      | 31<br>(17 - 48)    | 23<br>(12 - 39)        | 12<br>(6 - 21)       |
| Other non-communicable diseases                     | 1,097<br>(773 - 1,541)   | 854<br>(566 - 1,237) | 51<br>(30 - 81)   | 137<br>(86 - 228)  | 32<br>(21 - 48)        | 24<br>(16 - 35)      |
| Congenital anomalies                                | 1,051<br>(724 - 1,487)   | 848<br>(560 - 1,232) | 50<br>(29 - 81)   | 127<br>(78 - 218)  | 20<br>(12 - 35)        | 7<br>(4 - 11)        |
| Neural tube defects                                 | 116<br>(34 - 251)        | 103<br>(27 - 235)    | 3<br>(1 - 7)      | 8<br>(3 - 15)      | 2<br>(1 - 4)           | 0<br>(0 - 1)         |
| Congenital heart anomalies                          | 673<br>(454 - 981)       | 531<br>(336 - 798)   | 36<br>(21 - 58)   | 94<br>(57 - 162)   | 10<br>(5 - 18)         | 3<br>(1 - 5)         |
| Cleft lip and cleft palate                          | 7<br>(1 - 19)            | 7<br>(1 - 19)        | --                | --                 | --                     | --                   |
| Down syndrome                                       | 11<br>(4 - 25)           | 8<br>(3 - 21)        | 1<br>(0 - 1)      | 2<br>(1 - 4)       | 0<br>(0 - 1)           | 0<br>(0 - 0)         |
| Chromosomal unbalanced rearrangements               | 6<br>(2 - 13)            | 4<br>(1 - 8)         | 1<br>(0 - 1)      | 2<br>(0 - 4)       | 0<br>(0 - 1)           | 0<br>(0 - 0)         |
| Other congenital anomalies                          | 238<br>(130 - 416)       | 195<br>(97 - 353)    | 10<br>(4 - 20)    | 22<br>(12 - 46)    | 7<br>(4 - 15)          | 4<br>(2 - 7)         |
| Skin and subcutaneous diseases                      | 43<br>(30 - 62)          | 2<br>(1 - 4)         | 1<br>(0 - 1)      | 11<br>(7 - 17)     | 12<br>(8 - 18)         | 17<br>(11 - 27)      |
| Cellulitis                                          | 5<br>(2 - 9)             | 0<br>(0 - 1)         | 0<br>(0 - 0)      | 1<br>(1 - 3)       | 1<br>(0 - 3)           | 1<br>(0 - 3)         |
| Pyoderma                                            | 18<br>(11 - 29)          | 1<br>(1 - 2)         | 0<br>(0 - 1)      | 5<br>(3 - 9)       | 6<br>(3 - 9)           | 6<br>(3 - 11)        |
| Decubitus ulcer                                     | 17<br>(11 - 27)          | 0<br>(0 - 0)         | 0<br>(0 - 0)      | 3<br>(2 - 5)       | 5<br>(3 - 8)           | 9<br>(5 - 16)        |

Web Table 31- North Korea deaths with 95% UI by age, sex, and cause in 2013

| Cause                                           | Males, All Ages          | Males, 0-4 Years   | Males, 5-14 Years  | Males, 15-49 Years       | Males, 50-69 Years   | Males, 70-80 Years |
|-------------------------------------------------|--------------------------|--------------------|--------------------|--------------------------|----------------------|--------------------|
| Other skin and subcutaneous diseases            | 2<br>(1 - 4)             | 0<br>(0 - 0)       | 0<br>(0 - 0)       | 1<br>(0 - 1)             | 1<br>(0 - 1)         | 1<br>(0 - 1)       |
| Sudden infant death syndrome                    | 3<br>11,531              | 3<br>550           | --                 | --                       | --                   | --                 |
| Injuries                                        | (8,924 - 14,771)         | (312 - 857)        | (353 - 558)        | (5,454 - 9,634)          | (1,852 - 3,287)      | (606 - 1,053)      |
| Transport injuries                              | 4,706<br>(3,324 - 6,681) | 90<br>(40 - 176)   | 118<br>(73 - 180)  | 3,332<br>(2,330 - 4,781) | 970<br>(609 - 1,442) | 195<br>(125 - 286) |
| Road injuries                                   | 4,451<br>(3,167 - 6,285) | 84<br>(36 - 165)   | 111<br>(69 - 170)  | 3,162<br>(2,219 - 4,547) | 911<br>(577 - 1,361) | 184<br>(117 - 268) |
| Pedestrian road injuries                        | 2,093<br>(1,335 - 3,221) | 55<br>(22 - 114)   | 72<br>(42 - 112)   | 1,356<br>(855 - 2,165)   | 486<br>(278 - 758)   | 124<br>(75 - 191)  |
| Cyclist road injuries                           | 302<br>(174 - 536)       | 4<br>(1 - 10)      | 10<br>(5 - 20)     | 176<br>(102 - 306)       | 93<br>(46 - 176)     | 19<br>(10 - 35)    |
| Motorcyclist road injuries                      | 929<br>(537 - 1,490)     | 5<br>(2 - 11)      | 9<br>(4 - 17)      | 773<br>(449 - 1,252)     | 130<br>(67 - 225)    | 12<br>(5 - 22)     |
| Motor vehicle road injuries                     | 1,097<br>(682 - 1,681)   | 19<br>(8 - 39)     | 19<br>(10 - 33)    | 837<br>(509 - 1,278)     | 195<br>(109 - 316)   | 28<br>(14 - 47)    |
| Other road injuries                             | 30<br>(10 - 77)          | 1<br>(0 - 3)       | 1<br>(0 - 4)       | 19<br>(6 - 51)           | 7<br>(2 - 20)        | 2<br>(0 - 5)       |
| Other transport injuries                        | 255<br>(140 - 445)       | 7<br>(2 - 15)      | 7<br>(3 - 12)      | 171<br>(90 - 308)        | 60<br>(28 - 111)     | 11<br>(5 - 21)     |
| Unintentional injuries                          | 4,036<br>(2,995 - 5,178) | 433<br>(224 - 693) | 291<br>(192 - 396) | 2,136<br>(1,532 - 2,920) | 834<br>(583 - 1,127) | 342<br>(241 - 466) |
| Falls                                           | 1,130<br>(748 - 1,613)   | 47<br>(18 - 98)    | 29<br>(16 - 49)    | 573<br>(350 - 878)       | 320<br>(183 - 523)   | 160<br>(88 - 264)  |
| Drowning                                        | 1,002<br>(537 - 1,414)   | 165<br>(60 - 328)  | 212<br>(116 - 321) | 467<br>(244 - 716)       | 116<br>(55 - 189)    | 42<br>(23 - 66)    |
| Fire, heat, and hot substances                  | 195<br>(123 - 283)       | 17<br>(6 - 35)     | 7<br>(4 - 13)      | 93<br>(53 - 145)         | 45<br>(25 - 71)      | 33<br>(20 - 50)    |
| Poisonings                                      | 338<br>(211 - 503)       | 21<br>(8 - 44)     | 10<br>(5 - 17)     | 182<br>(108 - 286)       | 91<br>(47 - 146)     | 34<br>(18 - 61)    |
| Exposure to mechanical forces                   | 570<br>(262 - 858)       | 123<br>(28 - 286)  | 12<br>(6 - 20)     | 319<br>(134 - 525)       | 98<br>(39 - 163)     | 19<br>(9 - 29)     |
| Unintentional firearm injuries                  | 16<br>(9 - 28)           | 1<br>(0 - 1)       | 1<br>(0 - 1)       | 12<br>(7 - 22)           | 2<br>(1 - 4)         | 1<br>(0 - 1)       |
| Unintentional suffocation                       | 156<br>(39 - 323)        | 114<br>(21 - 279)  | 3<br>(1 - 6)       | 23<br>(8 - 44)           | 10<br>(3 - 20)       | 5<br>(2 - 9)       |
| Other exposure to mechanical forces             | 398<br>(149 - 652)       | 8<br>(3 - 16)      | 8<br>(3 - 16)      | 284<br>(103 - 488)       | 85<br>(29 - 148)     | 13<br>(5 - 23)     |
| Adverse effects of medical treatment            | 123<br>(82 - 167)        | 21<br>(9 - 48)     | 4<br>(2 - 6)       | 43<br>(26 - 65)          | 33<br>(19 - 55)      | 22<br>(12 - 37)    |
| Animal contact                                  | 43<br>(21 - 67)          | 2<br>(1 - 4)       | 2<br>(1 - 4)       | 18<br>(8 - 31)           | 16<br>(7 - 27)       | 5<br>(2 - 9)       |
| Venomous animal contact                         | 16<br>(7 - 29)           | 1<br>(0 - 1)       | 1<br>(0 - 2)       | 7<br>(3 - 13)            | 6<br>(2 - 12)        | 2<br>(1 - 3)       |
| Non-venomous animal contact                     | 27<br>(11 - 43)          | 1<br>(1 - 3)       | 1<br>(0 - 2)       | 11<br>(4 - 20)           | 10<br>(3 - 18)       | 3<br>(1 - 6)       |
| Foreign body                                    | 74<br>(37 - 149)         | 26<br>(12 - 55)    | 3<br>(1 - 5)       | 15<br>(7 - 31)           | 15<br>(7 - 31)       | 14<br>(7 - 29)     |
| Pulmonary aspiration and foreign body in airway | 68<br>(32 - 142)         | 24<br>(10 - 53)    | 2<br>(1 - 5)       | 13<br>(6 - 29)           | 14<br>(6 - 30)       | 14<br>(6 - 28)     |
| Foreign body in other body part                 | 6<br>(3 - 9)             | 2<br>(1 - 4)       | 0<br>(0 - 1)       | 2<br>(1 - 3)             | 1<br>(0 - 2)         | 1<br>(0 - 1)       |
| Other unintentional injuries                    | 562<br>(380 - 828)       | 11<br>(6 - 19)     | 12<br>(7 - 19)     | 426<br>(278 - 654)       | 101<br>(62 - 156)    | 12<br>(7 - 18)     |
| Self-harm and interpersonal violence            | 2,746<br>(1,852 - 4,429) | 26<br>(10 - 66)    | 42<br>(21 - 82)    | 1,666<br>(1,070 - 2,877) | 734<br>(443 - 1,197) | 278<br>(168 - 451) |
| Self-harm                                       | 2,006<br>(1,341 - 3,327) | --                 | 19<br>(6 - 39)     | 1,116<br>(705 - 1,965)   | 620<br>(369 - 1,033) | 251<br>(144 - 424) |
| Interpersonal violence                          | 740<br>(410 - 1,640)     | 26<br>(10 - 66)    | 23<br>(11 - 54)    | 550<br>(294 - 1,189)     | 114<br>(53 - 293)    | 27<br>(12 - 66)    |
| Assault by firearm                              | 96<br>(30 - 313)         | 3<br>(1 - 10)      | 2<br>(0 - 6)       | 77<br>(23 - 256)         | 12<br>(3 - 43)       | 3<br>(1 - 11)      |
| Assault by sharp object                         | 315<br>(157 - 772)       | 5<br>(1 - 16)      | 8<br>(3 - 23)      | 257<br>(123 - 620)       | 38<br>(15 - 111)     | 6<br>(2 - 17)      |
| Assault by other means                          | 328<br>(170 - 716)       | 18<br>(7 - 46)     | 13<br>(6 - 31)     | 216<br>(105 - 470)       | 64<br>(27 - 155)     | 18<br>(8 - 41)     |
| Forces of nature, war, and legal intervention   | 43<br>(13 - 150)         | 1<br>(0 - 0)       | 1<br>(0 - 2)       | 18<br>(6 - 63)           | 18<br>(6 - 64)       | 5<br>(1 - 19)      |
| Exposure to forces of nature                    | 43<br>(13 - 150)         | 1<br>(0 - 0)       | 1<br>(0 - 2)       | 18<br>(6 - 63)           | 18<br>(6 - 64)       | 5<br>(1 - 19)      |

Web Table 31- North Korea deaths with 95% UI by age, sex, and cause in 2013

| Cause                                                             | Females, All Ages             | Females, 0-4 Years       | Females, 5-14 Years | Females, 15-49 Years       | Females, 50-69 Years        | Females, 70-80 Years        |
|-------------------------------------------------------------------|-------------------------------|--------------------------|---------------------|----------------------------|-----------------------------|-----------------------------|
| All causes                                                        | 112,814<br>(90,109 - 127,050) | 3,381<br>(2,644 - 4,249) | 629<br>(524 - 734)  | 11,311<br>(8,465 - 14,437) | 29,828<br>(22,522 - 35,666) | 67,665<br>(54,726 - 72,747) |
| Communicable, maternal, neonatal, and nutritional diseases        | 7,692<br>(6,222 - 9,573)      | 2,035<br>(1,469 - 2,765) | 108<br>(68 - 218)   | 905<br>(706 - 1,157)       | 1,104<br>(795 - 1,505)      | 3,541<br>(2,577 - 4,878)    |
| HIV/AIDS and tuberculosis                                         | 1,192<br>(708 - 2,098)        | 9<br>(5 - 16)            | 8<br>(4 - 16)       | 274<br>(155 - 500)         | 396<br>(201 - 748)          | 505<br>(290 - 915)          |
| Tuberculosis                                                      | 1,117<br>(625 - 2,029)        | 6<br>(2 - 13)            | 7<br>(3 - 14)       | 223<br>(104 - 444)         | 379<br>(184 - 732)          | 502<br>(287 - 911)          |
| HIV/AIDS                                                          | 75<br>(56 - 98)               | 3<br>(1 - 4)             | 2<br>(1 - 3)        | 51<br>(39 - 65)            | 17<br>(11 - 24)             | 3<br>(1 - 5)                |
| HIV/AIDS resulting in mycobacterial infection                     | 4<br>(3 - 5)                  | 0<br>(0 - 0)             | 0<br>(0 - 0)        | 2<br>(2 - 3)               | 1<br>(1 - 1)                | 0<br>(0 - 0)                |
| HIV/AIDS resulting in other diseases                              | 71<br>(53 - 93)               | 3<br>(1 - 4)             | 2<br>(1 - 2)        | 49<br>(37 - 62)            | 16<br>(10 - 23)             | 3<br>(1 - 5)                |
| Diarrhea, lower respiratory, and other common infectious diseases | 4,078<br>(2,961 - 5,460)      | 696<br>(409 - 1,142)     | 84<br>(46 - 196)    | 219<br>(151 - 319)         | 485<br>(332 - 671)          | 2,593<br>(1,701 - 3,796)    |
| Diarrheal diseases                                                | 171<br>(100 - 281)            | 40<br>(10 - 112)         | 4<br>(2 - 9)        | 17<br>(8 - 29)             | 32<br>(15 - 58)             | 79<br>(38 - 140)            |
| Intestinal infectious diseases                                    | 16<br>(7 - 31)                | 4<br>(1 - 8)             | 4<br>(1 - 8)        | 6<br>(2 - 13)              | 2<br>(1 - 5)                | 1<br>(0 - 3)                |
| Typhoid fever                                                     | 11<br>(5 - 23)                | 2<br>(1 - 5)             | 3<br>(1 - 6)        | 4<br>(1 - 10)              | 1<br>(0 - 4)                | 1<br>(0 - 2)                |
| Paratyphoid fever                                                 | 3<br>(1 - 7)                  | 1<br>(0 - 2)             | 1<br>(0 - 2)        | 1<br>(0 - 3)               | 0<br>(0 - 1)                | 0<br>(0 - 0)                |
| Other intestinal infectious diseases                              | 1<br>(0 - 6)                  | 0<br>(0 - 2)             | 0<br>(0 - 1)        | 0<br>(0 - 3)               | 0<br>(0 - 2)                | 0<br>(0 - 2)                |
| Lower respiratory infections                                      | 3,401<br>(2,438 - 4,720)      | 378<br>(191 - 615)       | 23<br>(13 - 38)     | 133<br>(86 - 202)          | 408<br>(267 - 589)          | 2,459<br>(1,584 - 3,652)    |
| Upper respiratory infections                                      | 11<br>(3 - 26)                | 0<br>(0 - 1)             | 0<br>(0 - 0)        | 2<br>(0 - 5)               | 3<br>(0 - 10)               | 6<br>(0 - 20)               |
| Otitis media                                                      | 4<br>(3 - 6)                  | 0<br>(0 - 0)             | 0<br>(0 - 0)        | 1<br>(1 - 2)               | 1<br>(1 - 1)                | 1<br>(1 - 2)                |
| Meningitis                                                        | 127<br>(83 - 184)             | 41<br>(18 - 81)          | 9<br>(4 - 16)       | 27<br>(15 - 42)            | 22<br>(12 - 36)             | 29<br>(16 - 47)             |
| Pneumococcal meningitis                                           | 32<br>(20 - 47)               | 6<br>(2 - 13)            | 2<br>(1 - 3)        | 7<br>(4 - 13)              | 7<br>(3 - 12)               | 10<br>(5 - 19)              |
| H influenzae type B meningitis                                    | 15<br>(9 - 24)                | 8<br>(3 - 16)            | 1<br>(0 - 3)        | 2<br>(1 - 4)               | 2<br>(1 - 3)                | 2<br>(1 - 5)                |
| Meningococcal meningitis                                          | 19<br>(11 - 28)               | 6<br>(2 - 11)            | 1<br>(1 - 3)        | 4<br>(2 - 7)               | 3<br>(1 - 6)                | 5<br>(2 - 9)                |
| Other meningitis                                                  | 62<br>(37 - 96)               | 22<br>(10 - 46)          | 5<br>(2 - 9)        | 13<br>(7 - 22)             | 10<br>(5 - 18)              | 12<br>(5 - 22)              |
| Encephalitis                                                      | 81<br>(52 - 116)              | 33<br>(13 - 66)          | 8<br>(5 - 14)       | 17<br>(10 - 25)            | 12<br>(7 - 18)              | 10<br>(6 - 14)              |
| Diphtheria                                                        | 3<br>(0 - 11)                 | 1<br>(0 - 7)             | 1<br>(0 - 5)        | 1<br>(0 - 4)               | 0<br>(0 - 3)                | --                          |
| Whooping cough                                                    | 93<br>(0 - 421)               | 83<br>(0 - 372)          | 7<br>(0 - 38)       | 2<br>(0 - 12)              | 1<br>(0 - 3)                | --                          |
| Tetanus                                                           | 13<br>(6 - 37)                | 2<br>(1 - 7)             | 0<br>(0 - 1)        | 4<br>(1 - 13)              | 3<br>(1 - 10)               | 4<br>(1 - 9)                |
| Measles                                                           | 147<br>(3 - 748)              | 113<br>(3 - 560)         | 26<br>(1 - 141)     | 8<br>(0 - 45)              | 0<br>(0 - 2)                | --                          |
| Varicella and herpes zoster                                       | 10<br>(3 - 28)                | 1<br>(0 - 4)             | 0<br>(0 - 2)        | 2<br>(0 - 5)               | 1<br>(0 - 4)                | 5<br>(0 - 25)               |
| Neglected tropical diseases and malaria                           | 33<br>(23 - 47)               | 4<br>(1 - 11)            | 3<br>(1 - 7)        | 10<br>(6 - 15)             | 8<br>(5 - 14)               | 8<br>(4 - 15)               |
| Malaria                                                           | 0<br>(0 - 1)                  | 0<br>(0 - 0)             | 0<br>(0 - 0)        | 0<br>(0 - 0)               | 0<br>(0 - 0)                | 0<br>(0 - 0)                |
| Leishmaniasis                                                     | 8<br>(4 - 14)                 | 2<br>(0 - 6)             | 1<br>(0 - 2)        | 2<br>(1 - 4)               | 1<br>(1 - 2)                | 2<br>(1 - 5)                |
| Visceral leishmaniasis                                            | 8<br>(4 - 14)                 | 2<br>(0 - 6)             | 1<br>(0 - 2)        | 2<br>(1 - 4)               | 1<br>(1 - 2)                | 2<br>(1 - 5)                |
| Cysticercosis                                                     | 0<br>(0 - 0)                  | 0<br>(0 - 0)             | 0<br>(0 - 0)        | 0<br>(0 - 0)               | 0<br>(0 - 0)                | 0<br>(0 - 0)                |
| Cystic echinococcosis                                             | 3<br>(2 - 3)                  | 0<br>(0 - 0)             | 0<br>(0 - 0)        | 1<br>(1 - 1)               | 1<br>(1 - 1)                | 1<br>(1 - 1)                |
| Dengue                                                            | 2<br>(1 - 4)                  | 0<br>(0 - 0)             | 0<br>(0 - 0)        | 1<br>(1 - 2)               | 0<br>(0 - 1)                | 0<br>(0 - 0)                |
| Rabies                                                            | 5<br>(2 - 10)                 | 0<br>(0 - 1)             | 1<br>(0 - 2)        | 2<br>(1 - 4)               | 2<br>(1 - 3)                | 1<br>(0 - 1)                |
| Intestinal nematode infections                                    | 4<br>(0 - 13)                 | 1<br>(0 - 6)             | 1<br>(0 - 4)        | 1<br>(0 - 4)               | 1<br>(0 - 6)                | 1<br>(0 - 7)                |
| Ascariasis                                                        | 4<br>(0 - 13)                 | 1<br>(0 - 6)             | 1<br>(0 - 4)        | 1<br>(0 - 4)               | 1<br>(0 - 6)                | 1<br>(0 - 7)                |
| Other neglected tropical diseases                                 | 10<br>(5 - 17)                | 1<br>(0 - 1)             | 0<br>(0 - 1)        | 3<br>(1 - 6)               | 3<br>(1 - 6)                | 3<br>(1 - 6)                |
| Maternal disorders                                                | 275<br>(172 - 398)            | --                       | 1<br>(1 - 3)        | 274<br>(171 - 397)         | --                          | --                          |
| Maternal hemorrhage                                               | 51<br>(25 - 85)               | --                       | 0<br>(0 - 0)        | 51<br>(25 - 84)            | --                          | --                          |



Web Table 31- North Korea deaths with 95% UI by age, sex, and cause in 2013

| Cause                                                            | Females, All Ages            | Females, 0-4 Years     | Females, 5-14 Years | Females, 15-49 Years      | Females, 50-69 Years        | Females, 70-80 Years        |
|------------------------------------------------------------------|------------------------------|------------------------|---------------------|---------------------------|-----------------------------|-----------------------------|
| Maternal sepsis and other maternal infections                    | 26<br>(13 - 43)              | --                     | 0<br>(0 - 0)        | 26<br>(13 - 43)           | --                          | --                          |
| Maternal hypertensive disorders                                  | 25<br>(12 - 45)              | --                     | 0<br>(0 - 0)        | 25<br>(12 - 45)           | --                          | --                          |
| Maternal obstructed labor                                        | 32<br>(15 - 53)              | --                     | 0<br>(0 - 0)        | 32<br>(15 - 53)           | --                          | --                          |
| Maternal abortive outcome                                        | 31<br>(16 - 52)              | --                     | 0<br>(0 - 0)        | 31<br>(16 - 52)           | --                          | --                          |
| Indirect maternal deaths                                         | 35<br>(17 - 59)              | --                     | 0<br>(0 - 0)        | 35<br>(17 - 59)           | --                          | --                          |
| Late maternal deaths                                             | 32<br>(17 - 59)              | --                     | 0<br>(0 - 1)        | 32<br>(17 - 59)           | --                          | --                          |
| Maternal deaths aggravated by HIV/AIDS                           | 0<br>(0 - 0)                 | --                     | --                  | 0<br>(0 - 0)              | --                          | --                          |
| Other maternal disorders                                         | 43<br>(23 - 68)              | --                     | 0<br>(0 - 1)        | 43<br>(23 - 68)           | --                          | --                          |
| Neonatal disorders                                               | 1,260<br>(880 - 1,758)       | 1,260<br>(880 - 1,758) | --                  | --                        | --                          | --                          |
| Neonatal preterm birth complications                             | 657<br>(351 - 1,050)         | 657<br>(351 - 1,050)   | --                  | --                        | --                          | --                          |
| Neonatal encephalopathy due to birth asphyxia and trauma         | 384<br>(158 - 705)           | 384<br>(158 - 705)     | --                  | --                        | --                          | --                          |
| Neonatal sepsis and other neonatal infections                    | 34<br>(7 - 82)               | 34<br>(7 - 82)         | --                  | --                        | --                          | --                          |
| Hemolytic disease and other neonatal jaundice                    | 19<br>(5 - 54)               | 19<br>(5 - 54)         | --                  | --                        | --                          | --                          |
| Other neonatal disorders                                         | 165<br>(62 - 394)            | 165<br>(62 - 394)      | --                  | --                        | --                          | --                          |
| Nutritional deficiencies                                         | 479<br>(240 - 775)           | 40<br>(15 - 80)        | 5<br>(2 - 9)        | 53<br>(23 - 91)           | 70<br>(30 - 121)            | 311<br>(154 - 542)          |
| Protein-energy malnutrition                                      | 161<br>(50 - 340)            | 23<br>(5 - 58)         | 1<br>(0 - 3)        | 7<br>(2 - 19)             | 14<br>(3 - 36)              | 115<br>(33 - 259)           |
| Iodine deficiency                                                | 6<br>(0 - 24)                | 0<br>(0 - 3)           | 0<br>(0 - 1)        | 1<br>(0 - 3)              | 1<br>(0 - 7)                | 3<br>(0 - 21)               |
| Iron-deficiency anemia                                           | 257<br>(121 - 438)           | 9<br>(1 - 25)          | 3<br>(1 - 5)        | 39<br>(16 - 67)           | 47<br>(20 - 86)             | 159<br>(67 - 295)           |
| Other nutritional deficiencies                                   | 55<br>(18 - 127)             | 7<br>(1 - 20)          | 1<br>(0 - 2)        | 6<br>(2 - 15)             | 7<br>(2 - 18)               | 34<br>(10 - 87)             |
| Other communicable, maternal, neonatal, and nutritional diseases | 375<br>(239 - 496)           | 26<br>(9 - 52)         | 5<br>(3 - 8)        | 75<br>(43 - 114)          | 145<br>(82 - 216)           | 124<br>(74 - 178)           |
| Sexually transmitted diseases excluding HIV                      | 26<br>(8 - 53)               | 15<br>(0 - 38)         | 2<br>(0 - 4)        | 3<br>(1 - 7)              | 4<br>(1 - 10)               | 3<br>(1 - 8)                |
| Syphilis                                                         | 22<br>(5 - 48)               | 15<br>(0 - 38)         | 2<br>(0 - 4)        | 1<br>(0 - 3)              | 2<br>(1 - 5)                | 2<br>(1 - 6)                |
| Chlamydial infection                                             | 1<br>(0 - 3)                 | --                     | 0<br>(0 - 0)        | 1<br>(0 - 1)              | 0<br>(0 - 1)                | 0<br>(0 - 1)                |
| Gonococcal infection                                             | 2<br>(1 - 3)                 | --                     | 0<br>(0 - 0)        | 1<br>(0 - 1)              | 1<br>(0 - 2)                | 0<br>(0 - 1)                |
| Other sexually transmitted diseases                              | 1<br>(0 - 3)                 | --                     | 0<br>(0 - 0)        | 1<br>(0 - 1)              | 0<br>(0 - 1)                | 0<br>(0 - 1)                |
| Hepatitis                                                        | 320<br>(193 - 440)           | 6<br>(3 - 12)          | 3<br>(1 - 4)        | 67<br>(37 - 103)          | 134<br>(73 - 206)           | 110<br>(64 - 162)           |
| Acute hepatitis A                                                | 10<br>(3 - 23)               | 2<br>(1 - 5)           | 1<br>(0 - 2)        | 3<br>(1 - 7)              | 3<br>(1 - 8)                | 1<br>(0 - 3)                |
| Acute hepatitis B                                                | 210<br>(116 - 304)           | 4<br>(1 - 8)           | 1<br>(0 - 2)        | 25<br>(11 - 46)           | 93<br>(47 - 150)            | 88<br>(44 - 135)            |
| Acute hepatitis C                                                | 8<br>(1 - 24)                | --                     | 0<br>(0 - 0)        | 2<br>(0 - 5)              | 3<br>(0 - 11)               | 3<br>(0 - 10)               |
| Acute hepatitis E                                                | 91<br>(42 - 172)             | 0<br>(0 - 0)           | 1<br>(0 - 1)        | 38<br>(19 - 63)           | 35<br>(13 - 73)             | 18<br>(5 - 44)              |
| Other infectious diseases                                        | 29<br>(16 - 52)              | 5<br>(2 - 12)          | 1<br>(0 - 2)        | 5<br>(3 - 10)             | 7<br>(3 - 16)               | 11<br>(3 - 27)              |
| Non-communicable diseases                                        | 98,331<br>(77,426 - 110,823) | 941<br>(606 - 1,341)   | 265<br>(197 - 332)  | 7,786<br>(5,652 - 10,202) | 26,966<br>(20,189 - 32,330) | 62,373<br>(50,518 - 67,258) |
| Neoplasms                                                        | 21,210<br>(15,823 - 25,565)  | 81<br>(45 - 128)       | 108<br>(77 - 142)   | 3,335<br>(2,359 - 4,440)  | 8,619<br>(6,267 - 10,835)   | 9,068<br>(6,923 - 10,688)   |
| Esophageal cancer                                                | 619<br>(191 - 1,249)         | --                     | --                  | 25<br>(7 - 55)            | 228<br>(65 - 483)           | 366<br>(111 - 759)          |
| Stomach cancer                                                   | 3,362<br>(2,461 - 4,417)     | --                     | --                  | 455<br>(291 - 695)        | 1,294<br>(906 - 1,807)      | 1,612<br>(1,107 - 2,219)    |
| Liver cancer                                                     | 3,299<br>(2,175 - 4,766)     | --                     | 4<br>(2 - 6)        | 439<br>(243 - 742)        | 1,438<br>(860 - 2,211)      | 1,419<br>(870 - 2,153)      |
| Liver cancer due to hepatitis B                                  | 1,274<br>(671 - 2,064)       | --                     | 1<br>(1 - 2)        | 208<br>(104 - 374)        | 594<br>(281 - 1,005)        | 471<br>(230 - 811)          |
| Liver cancer due to hepatitis C                                  | 1,224<br>(541 - 2,191)       | --                     | 0<br>(0 - 1)        | 118<br>(30 - 278)         | 512<br>(182 - 1,033)        | 594<br>(249 - 1,036)        |
| Liver cancer due to alcohol use                                  | 186<br>(105 - 298)           | --                     | --                  | 12<br>(5 - 23)            | 67<br>(33 - 114)            | 108<br>(54 - 186)           |
| Liver cancer due to other causes                                 | 615<br>(329 - 1,029)         | --                     | 2<br>(1 - 4)        | 102<br>(49 - 185)         | 265<br>(126 - 482)          | 246<br>(126 - 421)          |

Web Table 31- North Korea deaths with 95% UI by age, sex, and cause in 2013

| Cause                                         | Females, All Ages           | Females, 0-4 Years | Females, 5-14 Years | Females, 15-49 Years     | Females, 50-69 Years       | Females, 70-80 Years        |
|-----------------------------------------------|-----------------------------|--------------------|---------------------|--------------------------|----------------------------|-----------------------------|
| Larynx cancer                                 | 97<br>(48 - 209)            | --                 | --                  | 10<br>(4 - 22)           | 38<br>(17 - 85)            | 49<br>(24 - 101)            |
| Tracheal, bronchus and lung cancer            | 5,244<br>(3,257 - 6,846)    | --                 | --                  | 536<br>(302 - 791)       | 2,139<br>(1,315 - 2,946)   | 2,570<br>(1,608 - 3,477)    |
| Breast cancer                                 | 1,208<br>(856 - 1,630)      | --                 | --                  | 384<br>(255 - 558)       | 553<br>(384 - 770)         | 271<br>(195 - 359)          |
| Cervical cancer                               | 980<br>(688 - 1,322)        | --                 | --                  | 314<br>(201 - 463)       | 428<br>(289 - 612)         | 237<br>(161 - 328)          |
| Uterine cancer                                | 402<br>(223 - 634)          | --                 | --                  | 82<br>(41 - 145)         | 205<br>(108 - 343)         | 115<br>(65 - 189)           |
| Prostate cancer                               | --                          | --                 | --                  | --                       | --                         | --                          |
| Colon and rectum cancer                       | 1,547<br>(1,175 - 1,962)    | --                 | --                  | 177<br>(118 - 248)       | 591<br>(418 - 792)         | 779<br>(581 - 1,018)        |
| Lip and oral cavity cancer                    | 102<br>(63 - 156)           | --                 | --                  | 20<br>(11 - 37)          | 41<br>(24 - 69)            | 40<br>(25 - 62)             |
| Nasopharynx cancer                            | 255<br>(131 - 388)          | --                 | 1<br>(0 - 2)        | 78<br>(36 - 135)         | 122<br>(60 - 206)          | 54<br>(27 - 91)             |
| Other pharynx cancer                          | 39<br>(24 - 57)             | --                 | --                  | 8<br>(4 - 15)            | 17<br>(9 - 27)             | 14<br>(8 - 22)              |
| Gallbladder and biliary tract cancer          | 279<br>(172 - 470)          | --                 | --                  | 19<br>(10 - 35)          | 101<br>(60 - 183)          | 159<br>(90 - 279)           |
| Pancreatic cancer                             | 479<br>(357 - 609)          | --                 | --                  | 38<br>(25 - 56)          | 195<br>(137 - 263)         | 245<br>(178 - 328)          |
| Malignant skin melanoma                       | 43<br>(29 - 64)             | --                 | --                  | 8<br>(5 - 14)            | 19<br>(12 - 31)            | 15<br>(10 - 24)             |
| Non-melanoma skin cancer                      | 130<br>(72 - 243)           | --                 | --                  | 16<br>(9 - 32)           | 32<br>(17 - 63)            | 82<br>(42 - 156)            |
| Ovarian cancer                                | 382<br>(242 - 561)          | --                 | --                  | 97<br>(53 - 157)         | 192<br>(116 - 300)         | 93<br>(59 - 139)            |
| Testicular cancer                             | --                          | --                 | --                  | --                       | --                         | --                          |
| Kidney cancer                                 | 158<br>(105 - 227)          | 2<br>(1 - 4)       | 1<br>(1 - 2)        | 21<br>(13 - 35)          | 65<br>(38 - 103)           | 69<br>(39 - 107)            |
| Bladder cancer                                | 225<br>(130 - 318)          | --                 | --                  | 14<br>(8 - 23)           | 67<br>(37 - 99)            | 144<br>(82 - 210)           |
| Brain and nervous system cancer               | 495<br>(354 - 648)          | 9<br>(3 - 18)      | 21<br>(12 - 32)     | 129<br>(85 - 186)        | 192<br>(127 - 274)         | 145<br>(91 - 211)           |
| Thyroid cancer                                | 82<br>(52 - 126)            | --                 | 0<br>(0 - 0)        | 9<br>(5 - 16)            | 32<br>(18 - 54)            | 41<br>(25 - 64)             |
| Mesothelioma                                  | 60<br>(29 - 94)             | --                 | --                  | 7<br>(3 - 12)            | 43<br>(20 - 74)            | 10<br>(5 - 18)              |
| Hodgkin lymphoma                              | 61<br>(31 - 124)            | 2<br>(1 - 5)       | 2<br>(1 - 5)        | 17<br>(7 - 38)           | 21<br>(9 - 48)             | 18<br>(9 - 34)              |
| Non-Hodgkin lymphoma                          | 283<br>(173 - 438)          | 3<br>(2 - 6)       | 5<br>(3 - 9)        | 58<br>(33 - 99)          | 108<br>(63 - 177)          | 108<br>(62 - 177)           |
| Multiple myeloma                              | 73<br>(49 - 101)            | --                 | --                  | 9<br>(6 - 13)            | 32<br>(20 - 47)            | 32<br>(20 - 48)             |
| Leukemia                                      | 651<br>(473 - 854)          | 37<br>(16 - 74)    | 51<br>(32 - 76)     | 233<br>(158 - 333)       | 189<br>(127 - 266)         | 141<br>(100 - 191)          |
| Other neoplasms                               | 653<br>(450 - 966)          | 27<br>(14 - 47)    | 23<br>(13 - 36)     | 129<br>(80 - 207)        | 236<br>(146 - 380)         | 238<br>(156 - 361)          |
| Cardiovascular diseases                       | 53,097<br>(42,189 - 62,403) | 65<br>(37 - 107)   | 47<br>(29 - 70)     | 2,760<br>(1,875 - 3,821) | 13,208<br>(9,761 - 16,629) | 37,017<br>(30,384 - 42,013) |
| Rheumatic heart disease                       | 1,702<br>(894 - 2,572)      | 2<br>(1 - 4)       | 6<br>(3 - 10)       | 244<br>(124 - 396)       | 584<br>(302 - 936)         | 866<br>(429 - 1,353)        |
| Ischemic heart disease                        | 19,968<br>(14,967 - 25,706) | 10<br>(4 - 22)     | 11<br>(6 - 19)      | 971<br>(593 - 1,460)     | 4,445<br>(2,914 - 6,241)   | 14,531<br>(11,267 - 18,697) |
| Cerebrovascular disease                       | 25,833<br>(19,976 - 31,867) | 16<br>(8 - 28)     | 15<br>(9 - 24)      | 1,264<br>(817 - 1,815)   | 6,786<br>(4,899 - 8,840)   | 17,753<br>(13,932 - 21,584) |
| Ischemic stroke                               | 7,808<br>(4,059 - 10,223)   | 1<br>(0 - 3)       | 1<br>(1 - 3)        | 128<br>(41 - 215)        | 1,423<br>(605 - 2,047)     | 6,254<br>(3,397 - 8,261)    |
| Hemorrhagic stroke                            | 18,026<br>(13,738 - 24,128) | 15<br>(7 - 26)     | 14<br>(8 - 22)      | 1,136<br>(751 - 1,661)   | 5,363<br>(3,873 - 7,248)   | 11,498<br>(8,734 - 15,504)  |
| Hypertensive heart disease                    | 3,728<br>(2,211 - 5,311)    | 1<br>(0 - 3)       | 1<br>(0 - 1)        | 114<br>(53 - 190)        | 725<br>(370 - 1,145)       | 2,887<br>(1,673 - 4,238)    |
| Cardiomyopathy and myocarditis                | 292<br>(180 - 420)          | 16<br>(7 - 31)     | 8<br>(4 - 13)       | 51<br>(27 - 79)          | 77<br>(41 - 123)           | 141<br>(82 - 232)           |
| Atrial fibrillation and flutter               | 7<br>(4 - 11)               | --                 | --                  | 1<br>(0 - 1)             | 1<br>(1 - 2)               | 5<br>(2 - 9)                |
| Aortic aneurysm                               | 108<br>(58 - 174)           | --                 | --                  | 14<br>(6 - 24)           | 34<br>(17 - 59)            | 60<br>(33 - 99)             |
| Peripheral vascular disease                   | 5<br>(3 - 10)               | --                 | --                  | 0<br>(0 - 1)             | 1<br>(1 - 2)               | 4<br>(2 - 7)                |
| Endocarditis                                  | 36<br>(19 - 58)             | 1<br>(1 - 3)       | 0<br>(0 - 1)        | 5<br>(2 - 9)             | 8<br>(4 - 14)              | 21<br>(11 - 38)             |
| Other cardiovascular and circulatory diseases | 1,418<br>(847 - 2,130)      | 19<br>(10 - 35)    | 6<br>(3 - 11)       | 97<br>(48 - 161)         | 547<br>(300 - 862)         | 749<br>(449 - 1,140)        |
| Chronic respiratory diseases                  | 11,778<br>(7,329 - 16,303)  | 14<br>(6 - 27)     | 6<br>(3 - 10)       | 247<br>(127 - 401)       | 1,929<br>(1,066 - 2,934)   | 9,582<br>(5,911 - 13,395)   |

Web Table 31- North Korea deaths with 95% UI by age, sex, and cause in 2013

| Cause                                               | Females, All Ages          | Females, 0-4 Years | Females, 5-14 Years | Females, 15-49 Years | Females, 50-69 Years   | Females, 70-80 Years      |
|-----------------------------------------------------|----------------------------|--------------------|---------------------|----------------------|------------------------|---------------------------|
| Chronic obstructive pulmonary disease               | 10,744<br>(6,431 - 14,839) | 10<br>(4 - 20)     | 3<br>(2 - 6)        | 198<br>(93 - 317)    | 1,766<br>(966 - 2,683) | 8,766<br>(5,190 - 12,178) |
| Pneumoconiosis                                      | 16<br>(8 - 29)             | 0<br>(0 - 0)       | 0<br>(0 - 0)        | 2<br>(1 - 4)         | 4<br>(2 - 7)           | 10<br>(4 - 19)            |
| Silicosis                                           | 6<br>(3 - 11)              | 0<br>(0 - 0)       | 0<br>(0 - 0)        | 0<br>(0 - 1)         | 1<br>(0 - 1)           | 4<br>(2 - 9)              |
| Asbestosis                                          | 1<br>(0 - 3)               | 0<br>(0 - 0)       | 0<br>(0 - 0)        | 0<br>(0 - 1)         | 0<br>(0 - 1)           | 1<br>(0 - 1)              |
| Coal workers pneumoconiosis                         | 1<br>(1 - 3)               | 0<br>(0 - 0)       | 0<br>(0 - 0)        | 0<br>(0 - 1)         | 0<br>(0 - 1)           | 1<br>(0 - 2)              |
| Other pneumoconiosis                                | 8<br>(3 - 15)              | 0<br>(0 - 0)       | 0<br>(0 - 0)        | 1<br>(0 - 2)         | 3<br>(1 - 5)           | 4<br>(1 - 9)              |
| Asthma                                              | 398<br>(143 - 994)         | 1<br>(0 - 3)       | 1<br>(0 - 3)        | 38<br>(13 - 89)      | 83<br>(27 - 215)       | 276<br>(95 - 684)         |
| Interstitial lung disease and pulmonary sarcoidosis | 392<br>(155 - 818)         | 0<br>(0 - 1)       | 0<br>(0 - 0)        | 3<br>(1 - 8)         | 51<br>(18 - 114)       | 337<br>(130 - 725)        |
| Other chronic respiratory diseases                  | 228<br>(94 - 492)          | 3<br>(1 - 7)       | 1<br>(0 - 2)        | 5<br>(2 - 12)        | 26<br>(9 - 60)         | 193<br>(77 - 423)         |
| Cirrhosis                                           | 1,981<br>(1,507 - 2,525)   | 2<br>(1 - 5)       | 4<br>(2 - 6)        | 291<br>(192 - 412)   | 820<br>(583 - 1,103)   | 864<br>(626 - 1,152)      |
| Cirrhosis due to hepatitis B                        | 1,026<br>(533 - 1,466)     | 0<br>(0 - 1)       | 1<br>(0 - 2)        | 138<br>(65 - 224)    | 421<br>(206 - 631)     | 465<br>(240 - 693)        |
| Cirrhosis due to hepatitis C                        | 543<br>(311 - 826)         | 0<br>(0 - 0)       | 1<br>(0 - 1)        | 86<br>(44 - 137)     | 235<br>(131 - 372)     | 221<br>(108 - 368)        |
| Cirrhosis due to alcohol use                        | 268<br>(144 - 483)         | -                  | -                   | 28<br>(14 - 54)      | 105<br>(53 - 186)      | 135<br>(65 - 248)         |
| Cirrhosis due to other causes                       | 144<br>(72 - 260)          | 2<br>(1 - 4)       | 2<br>(1 - 3)        | 39<br>(21 - 68)      | 59<br>(26 - 112)       | 43<br>(18 - 83)           |
| Digestive diseases                                  | 1,855<br>(1,352 - 2,525)   | 14<br>(6 - 26)     | 8<br>(5 - 12)       | 151<br>(99 - 222)    | 460<br>(306 - 659)     | 1,222<br>(877 - 1,688)    |
| Peptic ulcer disease                                | 650<br>(425 - 975)         | 1<br>(0 - 2)       | 1<br>(0 - 2)        | 44<br>(26 - 72)      | 168<br>(101 - 266)     | 437<br>(273 - 684)        |
| Gastritis and duodenitis                            | 189<br>(80 - 337)          | 1<br>(0 - 1)       | 1<br>(0 - 1)        | 15<br>(6 - 28)       | 46<br>(17 - 84)        | 127<br>(50 - 237)         |
| Appendicitis                                        | 43<br>(22 - 72)            | 0<br>(0 - 1)       | 1<br>(0 - 2)        | 6<br>(3 - 11)        | 11<br>(6 - 21)         | 24<br>(11 - 45)           |
| Paralytic ileus and intestinal obstruction          | 174<br>(86 - 327)          | 2<br>(1 - 6)       | 2<br>(1 - 3)        | 13<br>(6 - 26)       | 31<br>(14 - 60)        | 127<br>(55 - 241)         |
| Inguinal, femoral, and abdominal hernia             | 11<br>(4 - 21)             | 0<br>(0 - 0)       | 0<br>(0 - 0)        | 1<br>(0 - 2)         | 2<br>(1 - 4)           | 8<br>(3 - 16)             |
| Inflammatory bowel disease                          | 96<br>(56 - 164)           | 4<br>(1 - 9)       | 1<br>(0 - 2)        | 10<br>(5 - 18)       | 22<br>(12 - 41)        | 59<br>(29 - 112)          |
| Vascular intestinal disorders                       | 7<br>(3 - 14)              | 0<br>(0 - 0)       | 0<br>(0 - 0)        | 1<br>(1 - 3)         | 1<br>(1 - 3)           | 5<br>(2 - 9)              |
| Gallbladder and biliary diseases                    | 383<br>(225 - 585)         | 1<br>(0 - 2)       | 1<br>(0 - 1)        | 23<br>(12 - 39)      | 91<br>(50 - 151)       | 267<br>(142 - 428)        |
| Pancreatitis                                        | 123<br>(58 - 223)          | 0<br>(0 - 0)       | 0<br>(0 - 1)        | 21<br>(9 - 39)       | 40<br>(18 - 75)        | 61<br>(28 - 117)          |
| Other digestive diseases                            | 179<br>(112 - 274)         | 5<br>(2 - 11)      | 2<br>(1 - 3)        | 17<br>(10 - 28)      | 48<br>(26 - 80)        | 107<br>(59 - 176)         |
| Neurological disorders                              | 2,491<br>(1,844 - 3,212)   | 14<br>(7 - 27)     | 15<br>(8 - 25)      | 137<br>(76 - 216)    | 239<br>(160 - 339)     | 2,086<br>(1,478 - 2,756)  |
| Alzheimer disease and other dementias               | 2,147<br>(1,507 - 2,867)   | -                  | -                   | 1<br>(0 - 3)         | 156<br>(90 - 240)      | 1,990<br>(1,382 - 2,659)  |
| Parkinson disease                                   | 66<br>(40 - 107)           | -                  | -                   | 2<br>(1 - 3)         | 16<br>(9 - 28)         | 48<br>(27 - 79)           |
| Epilepsy                                            | 214<br>(116 - 338)         | 11<br>(4 - 22)     | 13<br>(6 - 22)      | 117<br>(59 - 191)    | 41<br>(19 - 70)        | 33<br>(16 - 56)           |
| Multiple sclerosis                                  | 4<br>(2 - 7)               | -                  | -                   | 2<br>(1 - 4)         | 1<br>(1 - 3)           | 1<br>(0 - 1)              |
| Other neurological disorders                        | 60<br>(45 - 79)            | 4<br>(2 - 6)       | 2<br>(1 - 3)        | 15<br>(11 - 22)      | 25<br>(17 - 35)        | 14<br>(10 - 19)           |
| Mental and substance use disorders                  | 473<br>(299 - 656)         | 4<br>(1 - 12)      | 0<br>(0 - 0)        | 186<br>(110 - 270)   | 152<br>(89 - 229)      | 130<br>(80 - 192)         |
| Schizophrenia                                       | 244<br>(109 - 403)         | -                  | -                   | 87<br>(36 - 148)     | 90<br>(37 - 158)       | 68<br>(27 - 118)          |
| Alcohol use disorders                               | 40<br>(17 - 107)           | -                  | -                   | 17<br>(7 - 46)       | 14<br>(5 - 39)         | 9<br>(4 - 23)             |
| Drug use disorders                                  | 188<br>(94 - 328)          | 4<br>(1 - 12)      | -                   | 83<br>(37 - 150)     | 49<br>(22 - 94)        | 53<br>(27 - 87)           |
| Opioid use disorders                                | 70<br>(35 - 122)           | 2<br>(1 - 5)       | -                   | 31<br>(14 - 57)      | 17<br>(7 - 33)         | 21<br>(10 - 34)           |
| Cocaine use disorders                               | 19<br>(9 - 33)             | 0<br>(0 - 2)       | -                   | 10<br>(4 - 18)       | 4<br>(2 - 8)           | 5<br>(2 - 8)              |
| Amphetamine use disorders                           | 22<br>(11 - 38)            | 1<br>(0 - 2)       | -                   | 10<br>(4 - 18)       | 6<br>(2 - 11)          | 6<br>(3 - 10)             |
| Other drug use disorders                            | 78<br>(38 - 136)           | 1<br>(0 - 4)       | -                   | 32<br>(15 - 60)      | 22<br>(10 - 42)        | 22<br>(11 - 37)           |
| Eating disorders                                    | 0<br>(0 - 0)               | -                  | 0<br>(0 - 0)        | 0<br>(0 - 0)         | -                      | -                         |

Web Table 31- North Korea deaths with 95% UI by age, sex, and cause in 2013

| Cause                                               | Females, All Ages        | Females, 0-4 Years   | Females, 5-14 Years | Females, 15-49 Years | Females, 50-69 Years     | Females, 70-80 Years     |
|-----------------------------------------------------|--------------------------|----------------------|---------------------|----------------------|--------------------------|--------------------------|
| Anorexia nervosa                                    | 0<br>(0 - 0)             | --                   | 0<br>(0 - 0)        | 0<br>(0 - 0)         | --                       | --                       |
| Diabetes, urogenital, blood, and endocrine diseases | 4,140<br>(3,089 - 5,181) | 32<br>(20 - 50)      | 23<br>(15 - 32)     | 452<br>(314 - 608)   | 1,403<br>(1,020 - 1,879) | 2,230<br>(1,669 - 2,868) |
| Diabetes mellitus                                   | 2,009<br>(1,492 - 2,694) | 3<br>(1 - 7)         | 2<br>(1 - 6)        | 135<br>(92 - 198)    | 728<br>(509 - 1,028)     | 1,140<br>(813 - 1,540)   |
| Acute glomerulonephritis                            | 51<br>(18 - 91)          | 1<br>(0 - 1)         | 1<br>(0 - 2)        | 13<br>(4 - 26)       | 15<br>(5 - 31)           | 20<br>(7 - 39)           |
| Chronic kidney disease                              | 1,569<br>(1,016 - 2,170) | 2<br>(1 - 4)         | 4<br>(3 - 7)        | 192<br>(116 - 290)   | 523<br>(320 - 783)       | 847<br>(526 - 1,223)     |
| Chronic kidney disease due to diabetes mellitus     | 276<br>(157 - 402)       | 0<br>(0 - 0)         | 0<br>(0 - 0)        | 25<br>(13 - 41)      | 110<br>(58 - 174)        | 140<br>(72 - 218)        |
| Chronic kidney disease due to hypertension          | 338<br>(160 - 667)       | 0<br>(0 - 1)         | 0<br>(0 - 1)        | 24<br>(9 - 58)       | 91<br>(36 - 202)         | 222<br>(108 - 422)       |
| Chronic kidney disease due to glomerulonephritis    | 335<br>(192 - 487)       | 1<br>(0 - 1)         | 2<br>(1 - 3)        | 66<br>(36 - 101)     | 113<br>(58 - 183)        | 154<br>(82 - 247)        |
| Chronic kidney disease due to other causes          | 620<br>(327 - 1,010)     | 1<br>(0 - 2)         | 2<br>(1 - 4)        | 77<br>(38 - 137)     | 209<br>(93 - 393)        | 331<br>(145 - 577)       |
| Urinary diseases and male infertility               | 173<br>(104 - 245)       | 1<br>(1 - 3)         | 1<br>(0 - 1)        | 23<br>(13 - 37)      | 47<br>(26 - 71)          | 101<br>(57 - 158)        |
| Interstitial nephritis and urinary tract infections | 98<br>(53 - 151)         | 1<br>(0 - 2)         | 0<br>(0 - 1)        | 13<br>(6 - 22)       | 25<br>(12 - 42)          | 59<br>(29 - 101)         |
| Urolithiasis                                        | 38<br>(19 - 61)          | --                   | 0<br>(0 - 0)        | 5<br>(2 - 10)        | 12<br>(5 - 22)           | 20<br>(8 - 39)           |
| Other urinary diseases                              | 38<br>(17 - 64)          | 0<br>(0 - 1)         | 0<br>(0 - 0)        | 5<br>(2 - 10)        | 10<br>(4 - 19)           | 22<br>(9 - 42)           |
| Gynecological diseases                              | 13<br>(5 - 32)           | --                   | --                  | 4<br>(2 - 12)        | 5<br>(2 - 11)            | 4<br>(1 - 10)            |
| Uterine fibroids                                    | 3<br>(1 - 9)             | --                   | --                  | 1<br>(0 - 3)         | 1<br>(0 - 3)             | 1<br>(0 - 3)             |
| Polycystic ovarian syndrome                         | 0<br>(0 - 1)             | --                   | --                  | 0<br>(0 - 1)         | 0<br>(0 - 0)             | --                       |
| Endometriosis                                       | 1<br>(0 - 2)             | --                   | --                  | 1<br>(0 - 2)         | 0<br>(0 - 0)             | --                       |
| Genital prolapse                                    | 2<br>(1 - 6)             | --                   | --                  | 1<br>(0 - 1)         | 1<br>(0 - 2)             | 1<br>(0 - 2)             |
| Other gynecological diseases                        | 6<br>(3 - 15)            | --                   | --                  | 2<br>(1 - 5)         | 2<br>(1 - 6)             | 2<br>(1 - 4)             |
| Hemoglobinopathies and hemolytic anemias            | 159<br>(74 - 256)        | 14<br>(6 - 25)       | 9<br>(4 - 16)       | 48<br>(21 - 83)      | 43<br>(19 - 70)          | 45<br>(21 - 76)          |
| Thalassemias                                        | 44<br>(22 - 71)          | 11<br>(5 - 21)       | 9<br>(4 - 15)       | 23<br>(10 - 39)      | 1<br>(0 - 1)             | 0<br>(0 - 0)             |
| Sickle cell disorders                               | 0<br>(0 - 0)             | 0<br>(0 - 0)         | 0<br>(0 - 0)        | 0<br>(0 - 0)         | 0<br>(0 - 0)             | 0<br>(0 - 0)             |
| G6PD deficiency                                     | 5<br>(2 - 9)             | 0<br>(0 - 0)         | 0<br>(0 - 0)        | 2<br>(1 - 4)         | 2<br>(1 - 4)             | 1<br>(0 - 1)             |
| Other hemoglobinopathies and hemolytic anemias      | 109<br>(50 - 177)        | 2<br>(1 - 4)         | 0<br>(0 - 1)        | 22<br>(9 - 41)       | 40<br>(17 - 65)          | 45<br>(21 - 75)          |
| Endocrine, metabolic, blood, and immune disorders   | 168<br>(93 - 228)        | 11<br>(5 - 19)       | 5<br>(2 - 8)        | 36<br>(20 - 55)      | 43<br>(24 - 66)          | 73<br>(38 - 117)         |
| Musculoskeletal disorders                           | 306<br>(162 - 751)       | --                   | 5<br>(2 - 12)       | 112<br>(53 - 261)    | 97<br>(45 - 229)         | 92<br>(49 - 194)         |
| Rheumatoid arthritis                                | 155<br>(75 - 325)        | --                   | 1<br>(0 - 2)        | 22<br>(7 - 48)       | 60<br>(25 - 124)         | 73<br>(37 - 146)         |
| Other musculoskeletal disorders                     | 151<br>(80 - 350)        | --                   | 5<br>(2 - 10)       | 90<br>(45 - 188)     | 37<br>(17 - 103)         | 19<br>(9 - 46)           |
| Other non-communicable diseases                     | 999<br>(656 - 1,416)     | 714<br>(425 - 1,064) | 50<br>(27 - 82)     | 116<br>(66 - 192)    | 38<br>(23 - 62)          | 81<br>(53 - 121)         |
| Congenital anomalies                                | 919<br>(577 - 1,335)     | 710<br>(422 - 1,060) | 49<br>(26 - 81)     | 111<br>(62 - 185)    | 29<br>(16 - 51)          | 19<br>(12 - 31)          |
| Neural tube defects                                 | 95<br>(33 - 233)         | 85<br>(24 - 222)     | 3<br>(1 - 6)        | 5<br>(3 - 11)        | 1<br>(1 - 3)             | 1<br>(0 - 2)             |
| Congenital heart anomalies                          | 601<br>(363 - 894)       | 449<br>(249 - 687)   | 37<br>(19 - 62)     | 89<br>(49 - 148)     | 17<br>(9 - 31)           | 9<br>(5 - 16)            |
| Cleft lip and cleft palate                          | 4<br>(0 - 11)            | 4<br>(0 - 11)        | --                  | --                   | --                       | --                       |
| Down syndrome                                       | 8<br>(4 - 15)            | 5<br>(2 - 10)        | 1<br>(0 - 1)        | 2<br>(1 - 3)         | 1<br>(0 - 2)             | 0<br>(0 - 0)             |
| Chromosomal unbalanced rearrangements               | 9<br>(2 - 20)            | 5<br>(1 - 12)        | 1<br>(0 - 3)        | 2<br>(0 - 5)         | 0<br>(0 - 1)             | 0<br>(0 - 0)             |
| Other congenital anomalies                          | 202<br>(106 - 353)       | 163<br>(77 - 297)    | 8<br>(3 - 15)       | 13<br>(6 - 26)       | 10<br>(5 - 19)           | 9<br>(5 - 16)            |
| Skin and subcutaneous diseases                      | 79<br>(52 - 124)         | 2<br>(1 - 4)         | 1<br>(0 - 1)        | 5<br>(3 - 8)         | 9<br>(6 - 14)            | 61<br>(37 - 105)         |
| Cellulitis                                          | 9<br>(3 - 19)            | 1<br>(0 - 1)         | 0<br>(0 - 0)        | 1<br>(0 - 3)         | 1<br>(0 - 3)             | 5<br>(1 - 13)            |
| Pyoderma                                            | 26<br>(15 - 44)          | 1<br>(0 - 2)         | 0<br>(0 - 0)        | 2<br>(1 - 4)         | 4<br>(2 - 7)             | 18<br>(9 - 34)           |
| Decubitus ulcer                                     | 41<br>(22 - 71)          | 0<br>(0 - 0)         | 0<br>(0 - 0)        | 1<br>(0 - 2)         | 3<br>(2 - 5)             | 37<br>(19 - 66)          |

Web Table 31- North Korea deaths with 95% UI by age, sex, and cause in 2013

| Cause                                           | Females, All Ages        | Females, 0-4 Years | Females, 5-14 Years | Females, 15-49 Years     | Females, 50-69 Years     | Females, 70-80 Years     |
|-------------------------------------------------|--------------------------|--------------------|---------------------|--------------------------|--------------------------|--------------------------|
| Other skin and subcutaneous diseases            | 3<br>(1 - 5)             | 0<br>(0 - 0)       | 0<br>(0 - 0)        | 1<br>(0 - 1)             | 1<br>(0 - 1)             | 1<br>(1 - 3)             |
| Sudden infant death syndrome                    | 2<br>(0 - 8)             | 2<br>(0 - 8)       | --                  | --                       | --                       | --                       |
| Injuries                                        | 6,791<br>(5,186 - 8,532) | 404<br>(225 - 633) | 257<br>(186 - 331)  | 2,620<br>(1,893 - 3,501) | 1,759<br>(1,249 - 2,360) | 1,751<br>(1,301 - 2,208) |
| Transport injuries                              | 1,726<br>(1,176 - 2,405) | 65<br>(29 - 119)   | 79<br>(49 - 122)    | 818<br>(531 - 1,190)     | 493<br>(314 - 711)       | 270<br>(176 - 404)       |
| Road injuries                                   | 1,645<br>(1,133 - 2,269) | 60<br>(26 - 112)   | 76<br>(46 - 116)    | 782<br>(505 - 1,137)     | 470<br>(296 - 679)       | 257<br>(167 - 379)       |
| Pedestrian road injuries                        | 1,048<br>(688 - 1,471)   | 41<br>(17 - 79)    | 51<br>(28 - 80)     | 444<br>(262 - 682)       | 313<br>(195 - 459)       | 199<br>(126 - 297)       |
| Cyclist road injuries                           | 116<br>(57 - 209)        | 2<br>(0 - 4)       | 4<br>(2 - 9)        | 62<br>(28 - 115)         | 38<br>(17 - 74)          | 10<br>(4 - 18)           |
| Motorcyclist road injuries                      | 111<br>(55 - 244)        | 3<br>(1 - 7)       | 4<br>(2 - 9)        | 73<br>(34 - 165)         | 23<br>(10 - 57)          | 8<br>(4 - 19)            |
| Motor vehicle road injuries                     | 359<br>(191 - 587)       | 14<br>(5 - 30)     | 16<br>(7 - 29)      | 198<br>(101 - 329)       | 93<br>(43 - 161)         | 38<br>(19 - 68)          |
| Other road injuries                             | 11<br>(4 - 21)           | 1<br>(0 - 2)       | 1<br>(0 - 2)        | 5<br>(2 - 9)             | 3<br>(1 - 7)             | 2<br>(1 - 4)             |
| Other transport injuries                        | 81<br>(27 - 130)         | 5<br>(1 - 11)      | 4<br>(1 - 7)        | 36<br>(12 - 60)          | 23<br>(7 - 41)           | 14<br>(5 - 25)           |
| Unintentional injuries                          | 2,314<br>(1,647 - 2,923) | 317<br>(170 - 523) | 142<br>(94 - 197)   | 549<br>(362 - 755)       | 445<br>(303 - 599)       | 861<br>(590 - 1,153)     |
| Falls                                           | 793<br>(480 - 1,123)     | 31<br>(13 - 66)    | 16<br>(9 - 27)      | 121<br>(68 - 189)        | 148<br>(86 - 235)        | 477<br>(270 - 750)       |
| Drowning                                        | 549<br>(320 - 765)       | 114<br>(49 - 211)  | 87<br>(48 - 139)    | 146<br>(77 - 229)        | 94<br>(45 - 151)         | 108<br>(55 - 168)        |
| Fire, heat, and hot substances                  | 160<br>(101 - 256)       | 14<br>(6 - 29)     | 8<br>(4 - 15)       | 35<br>(19 - 61)          | 29<br>(15 - 52)          | 74<br>(42 - 124)         |
| Poisonings                                      | 261<br>(126 - 387)       | 15<br>(5 - 32)     | 10<br>(4 - 18)      | 109<br>(51 - 180)        | 67<br>(32 - 115)         | 62<br>(30 - 99)          |
| Exposure to mechanical forces                   | 220<br>(96 - 401)        | 99<br>(18 - 280)   | 7<br>(4 - 12)       | 52<br>(25 - 86)          | 30<br>(15 - 48)          | 32<br>(15 - 49)          |
| Unintentional firearm injuries                  | 7<br>(3 - 11)            | 1<br>(0 - 2)       | 1<br>(0 - 1)        | 2<br>(1 - 4)             | 1<br>(0 - 2)             | 2<br>(1 - 3)             |
| Unintentional suffocation                       | 118<br>(22 - 303)        | 93<br>(12 - 273)   | 2<br>(1 - 5)        | 7<br>(2 - 13)            | 5<br>(2 - 10)            | 10<br>(2 - 20)           |
| Other exposure to mechanical forces             | 95<br>(48 - 148)         | 6<br>(2 - 11)      | 4<br>(2 - 8)        | 42<br>(18 - 73)          | 23<br>(10 - 38)          | 20<br>(9 - 34)           |
| Adverse effects of medical treatment            | 134<br>(88 - 196)        | 18<br>(8 - 42)     | 4<br>(2 - 7)        | 29<br>(17 - 44)          | 32<br>(18 - 54)          | 52<br>(27 - 87)          |
| Animal contact                                  | 34<br>(10 - 55)          | 2<br>(1 - 4)       | 2<br>(1 - 5)        | 9<br>(3 - 17)            | 11<br>(3 - 20)           | 10<br>(3 - 17)           |
| Venomous animal contact                         | 14<br>(4 - 26)           | 1<br>(0 - 2)       | 1<br>(0 - 2)        | 4<br>(1 - 8)             | 5<br>(1 - 9)             | 4<br>(1 - 8)             |
| Non-venomous animal contact                     | 20<br>(5 - 35)           | 2<br>(0 - 3)       | 1<br>(0 - 3)        | 5<br>(1 - 10)            | 6<br>(1 - 11)            | 6<br>(1 - 11)            |
| Foreign body                                    | 54<br>(24 - 97)          | 15<br>(6 - 33)     | 1<br>(1 - 2)        | 5<br>(3 - 8)             | 8<br>(4 - 16)            | 24<br>(9 - 45)           |
| Pulmonary aspiration and foreign body in airway | 50<br>(20 - 94)          | 15<br>(5 - 32)     | 1<br>(0 - 2)        | 4<br>(2 - 7)             | 8<br>(3 - 16)            | 23<br>(8 - 44)           |
| Foreign body in other body part                 | 4<br>(2 - 6)             | 1<br>(0 - 2)       | 0<br>(0 - 0)        | 1<br>(1 - 2)             | 1<br>(0 - 1)             | 1<br>(0 - 2)             |
| Other unintentional injuries                    | 109<br>(62 - 149)        | 9<br>(4 - 16)      | 6<br>(3 - 10)       | 44<br>(22 - 67)          | 27<br>(14 - 41)          | 22<br>(11 - 34)          |
| Self-harm and interpersonal violence            | 2,646<br>(1,829 - 3,995) | 21<br>(10 - 39)    | 34<br>(19 - 59)     | 1,223<br>(789 - 1,853)   | 776<br>(455 - 1,292)     | 591<br>(354 - 934)       |
| Self-harm                                       | 2,367<br>(1,564 - 3,626) | --                 | 20<br>(7 - 44)      | 1,067<br>(652 - 1,666)   | 729<br>(415 - 1,241)     | 551<br>(321 - 883)       |
| Interpersonal violence                          | 279<br>(174 - 448)       | 21<br>(10 - 39)    | 14<br>(7 - 26)      | 156<br>(85 - 268)        | 48<br>(25 - 88)          | 40<br>(19 - 77)          |
| Assault by firearm                              | 20<br>(7 - 46)           | 2<br>(1 - 4)       | 1<br>(0 - 2)        | 13<br>(5 - 31)           | 2<br>(1 - 6)             | 2<br>(1 - 6)             |
| Assault by sharp object                         | 106<br>(46 - 184)        | 3<br>(1 - 8)       | 5<br>(2 - 10)       | 72<br>(31 - 127)         | 17<br>(6 - 34)           | 8<br>(2 - 18)            |
| Assault by other means                          | 152<br>(84 - 287)        | 16<br>(8 - 30)     | 9<br>(4 - 18)       | 70<br>(30 - 149)         | 28<br>(13 - 61)          | 29<br>(14 - 58)          |
| Forces of nature, war, and legal intervention   | 105<br>(85 - 141)        | 1<br>(0 - 0)       | 1<br>(1 - 2)        | 30<br>(22 - 42)          | 44<br>(35 - 60)          | 29<br>(23 - 38)          |
| Exposure to forces of nature                    | 105<br>(85 - 141)        | 1<br>(0 - 0)       | 1<br>(1 - 2)        | 30<br>(22 - 42)          | 44<br>(35 - 60)          | 29<br>(23 - 38)          |

Web Table 31- Northern Ireland deaths with 95% UI by age, sex, and cause in 2013

| Cause                                                             | Both Sexes, All Ages        | Both Sexes, 0-4 Years | Both Sexes, 5-14 Years | Both Sexes, 15-49 Years | Both Sexes, 50-69 Years  | Both Sexes, 70-80 Years     |
|-------------------------------------------------------------------|-----------------------------|-----------------------|------------------------|-------------------------|--------------------------|-----------------------------|
| All causes                                                        | 16,158<br>(15,422 - 16,923) | 109<br>(78 - 146)     | 24<br>(20 - 29)        | 803<br>(739 - 864)      | 3,190<br>(2,966 - 3,402) | 12,031<br>(11,552 - 12,543) |
| Communicable, maternal, neonatal, and nutritional diseases        | 1,327<br>(1,092 - 1,884)    | 52<br>(37 - 71)       | 2<br>(2 - 3)           | 29<br>(25 - 33)         | 92<br>(77 - 108)         | 1,152<br>(920 - 1,707)      |
| HIV/AIDS and tuberculosis                                         | 14<br>(12 - 16)             | 0<br>(0 - 0)          | 0<br>(0 - 0)           | 3<br>(3 - 4)            | 4<br>(3 - 5)             | 6<br>(5 - 8)                |
| Tuberculosis                                                      | 11<br>(9 - 12)              | 0<br>(0 - 0)          | 0<br>(0 - 0)           | 1<br>(1 - 1)            | 3<br>(3 - 4)             | 6<br>(5 - 8)                |
| HIV/AIDS                                                          | 3<br>(2 - 5)                | 0<br>(0 - 0)          | 0<br>(0 - 0)           | 2<br>(1 - 3)            | 1<br>(0 - 2)             | 0<br>(0 - 1)                |
| HIV/AIDS resulting in mycobacterial infection                     | 0<br>(0 - 0)                | 0<br>(0 - 0)          | 0<br>(0 - 0)           | 0<br>(0 - 0)            | 0<br>(0 - 0)             | 0<br>(0 - 0)                |
| HIV/AIDS resulting in other diseases                              | 3<br>(2 - 5)                | 0<br>(0 - 0)          | 0<br>(0 - 0)           | 2<br>(1 - 3)            | 1<br>(0 - 2)             | 0<br>(0 - 1)                |
| Diarrhea, lower respiratory, and other common infectious diseases | 1,235<br>(999 - 1,798)      | 9<br>(6 - 13)         | 2<br>(1 - 2)           | 21<br>(17 - 24)         | 81<br>(67 - 97)          | 1,123<br>(854 - 1,642)      |
| Diarrheal diseases                                                | 35<br>(26 - 49)             | 1<br>(1 - 2)          | 0<br>(0 - 0)           | 1<br>(1 - 1)            | 3<br>(2 - 4)             | 30<br>(21 - 45)             |
| Intestinal infectious diseases                                    | 2<br>(1 - 5)                | 0<br>(0 - 1)          | 0<br>(0 - 1)           | 1<br>(0 - 2)            | 0<br>(0 - 1)             | 0<br>(0 - 1)                |
| Typhoid fever                                                     | 2<br>(1 - 4)                | 0<br>(0 - 1)          | 0<br>(0 - 1)           | 1<br>(0 - 2)            | 0<br>(0 - 1)             | 0<br>(0 - 0)                |
| Paratyphoid fever                                                 | 0<br>(0 - 1)                | 0<br>(0 - 0)          | 0<br>(0 - 0)           | 0<br>(0 - 0)            | 0<br>(0 - 0)             | 0<br>(0 - 0)                |
| Other intestinal infectious diseases                              | 0<br>(0 - 1)                | 0<br>(0 - 1)          | 0<br>(0 - 0)           | 0<br>(0 - 0)            | 0<br>(0 - 0)             | 0<br>(0 - 0)                |
| Lower respiratory infections                                      | 1,184<br>(951 - 1,749)      | 6<br>(4 - 9)          | 1<br>(1 - 1)           | 16<br>(13 - 19)         | 75<br>(61 - 91)          | 1,086<br>(854 - 1,642)      |
| Upper respiratory infections                                      | 0<br>(0 - 1)                | 0<br>(0 - 0)          | 0<br>(0 - 0)           | 0<br>(0 - 0)            | 0<br>(0 - 0)             | 0<br>(0 - 1)                |
| Otitis media                                                      | 0<br>(0 - 0)                | 0<br>(0 - 0)          | 0<br>(0 - 0)           | 0<br>(0 - 0)            | 0<br>(0 - 0)             | 0<br>(0 - 0)                |
| Meningitis                                                        | 8<br>(7 - 9)                | 1<br>(1 - 2)          | 0<br>(0 - 0)           | 1<br>(1 - 2)            | 2<br>(1 - 2)             | 3<br>(3 - 4)                |
| Pneumococcal meningitis                                           | 1<br>(1 - 2)                | 0<br>(0 - 0)          | 0<br>(0 - 0)           | 0<br>(0 - 0)            | 0<br>(0 - 1)             | 1<br>(0 - 1)                |
| H influenzae type B meningitis                                    | 1<br>(1 - 1)                | 0<br>(0 - 0)          | 0<br>(0 - 0)           | 0<br>(0 - 0)            | 0<br>(0 - 0)             | 0<br>(0 - 0)                |
| Meningococcal meningitis                                          | 2<br>(2 - 3)                | 0<br>(0 - 1)          | 0<br>(0 - 0)           | 0<br>(0 - 1)            | 1<br>(0 - 1)             | 1<br>(1 - 1)                |
| Other meningitis                                                  | 3<br>(2 - 3)                | 0<br>(0 - 1)          | 0<br>(0 - 0)           | 1<br>(0 - 1)            | 1<br>(0 - 1)             | 1<br>(1 - 2)                |
| Encephalitis                                                      | 4<br>(2 - 5)                | 0<br>(0 - 0)          | 0<br>(0 - 0)           | 1<br>(1 - 1)            | 1<br>(1 - 1)             | 1<br>(1 - 2)                |
| Diphtheria                                                        | 0<br>(0 - 0)                | 0<br>(0 - 0)          | 0<br>(0 - 0)           | 0<br>(0 - 0)            | 0<br>(0 - 0)             | --                          |
| Whooping cough                                                    | 0<br>(0 - 0)                | 0<br>(0 - 0)          | 0<br>(0 - 0)           | 0<br>(0 - 0)            | 0<br>(0 - 0)             | --                          |
| Tetanus                                                           | 0<br>(0 - 0)                | 0<br>(0 - 0)          | 0<br>(0 - 0)           | 0<br>(0 - 0)            | 0<br>(0 - 0)             | 0<br>(0 - 0)                |
| Measles                                                           | 0<br>(0 - 0)                | 0<br>(0 - 0)          | 0<br>(0 - 0)           | 0<br>(0 - 0)            | 0<br>(0 - 0)             | --                          |
| Varicella and herpes zoster                                       | 2<br>(0 - 5)                | 0<br>(0 - 0)          | 0<br>(0 - 0)           | 0<br>(0 - 0)            | 0<br>(0 - 0)             | 1<br>(0 - 4)                |
| Neglected tropical diseases and malaria                           | 1<br>(1 - 2)                | 0<br>(0 - 0)          | 0<br>(0 - 0)           | 1<br>(0 - 1)            | 1<br>(0 - 1)             | 0<br>(0 - 0)                |
| Cysticercosis                                                     | 0<br>(0 - 0)                | 0<br>(0 - 0)          | 0<br>(0 - 0)           | 0<br>(0 - 0)            | 0<br>(0 - 0)             | 0<br>(0 - 0)                |
| Cystic echinococcosis                                             | 0<br>(0 - 0)                | 0<br>(0 - 0)          | 0<br>(0 - 0)           | 0<br>(0 - 0)            | 0<br>(0 - 0)             | 0<br>(0 - 0)                |
| Dengue                                                            | 0<br>(0 - 0)                | 0<br>(0 - 0)          | 0<br>(0 - 0)           | 0<br>(0 - 0)            | 0<br>(0 - 0)             | 0<br>(0 - 0)                |
| Rabies                                                            | 0<br>(0 - 0)                | 0<br>(0 - 0)          | 0<br>(0 - 0)           | 0<br>(0 - 0)            | 0<br>(0 - 0)             | 0<br>(0 - 0)                |
| Other neglected tropical diseases                                 | 1<br>(1 - 1)                | 0<br>(0 - 0)          | 0<br>(0 - 0)           | 0<br>(0 - 0)            | 0<br>(0 - 0)             | 0<br>(0 - 0)                |
| Maternal disorders                                                | 1<br>(1 - 2)                | --                    | 0<br>(0 - 0)           | 1<br>(1 - 2)            | --                       | --                          |
| Maternal hemorrhage                                               | 0<br>(0 - 0)                | --                    | 0<br>(0 - 0)           | 0<br>(0 - 0)            | --                       | --                          |
| Maternal sepsis and other maternal infections                     | 0<br>(0 - 0)                | --                    | 0<br>(0 - 0)           | 0<br>(0 - 0)            | --                       | --                          |
| Maternal hypertensive disorders                                   | 0<br>(0 - 0)                | --                    | 0<br>(0 - 0)           | 0<br>(0 - 0)            | --                       | --                          |
| Maternal obstructed labor                                         | 0<br>(0 - 0)                | --                    | 0<br>(0 - 0)           | 0<br>(0 - 0)            | --                       | --                          |
| Maternal abortive outcome                                         | 0<br>(0 - 0)                | --                    | 0<br>(0 - 0)           | 0<br>(0 - 0)            | --                       | --                          |
| Indirect maternal deaths                                          | 0<br>(0 - 0)                | --                    | 0<br>(0 - 0)           | 0<br>(0 - 0)            | --                       | --                          |

Web Table 31- Northern Ireland deaths with 95% UI by age, sex, and cause in 2013

| Cause                                                            | Both Sexes, All Ages        | Both Sexes, 0-4 Years | Both Sexes, 5-14 Years | Both Sexes, 15-49 Years | Both Sexes, 50-69 Years  | Both Sexes, 70-80 Years    |
|------------------------------------------------------------------|-----------------------------|-----------------------|------------------------|-------------------------|--------------------------|----------------------------|
| Late maternal deaths                                             | 0<br>(0 - 0)                | --                    | 0<br>(0 - 0)           | 0<br>(0 - 0)            | --                       | --                         |
| Maternal deaths aggravated by HIV/AIDS                           | 0<br>(0 - 0)                | --                    | --                     | 0<br>(0 - 0)            | --                       | --                         |
| Other maternal disorders                                         | 0<br>(0 - 0)                | --                    | 0<br>(0 - 0)           | 0<br>(0 - 0)            | --                       | --                         |
| Neonatal disorders                                               | 42<br>(29 - 58)             | 42<br>(29 - 58)       | --                     | --                      | --                       | --                         |
| Neonatal preterm birth complications                             | 28<br>(18 - 40)             | 28<br>(18 - 40)       | --                     | --                      | --                       | --                         |
| Neonatal encephalopathy due to birth asphyxia and trauma         | 6<br>(4 - 9)                | 6<br>(4 - 9)          | --                     | --                      | --                       | --                         |
| Neonatal sepsis and other neonatal infections                    | 4<br>(2 - 7)                | 4<br>(2 - 7)          | --                     | --                      | --                       | --                         |
| Hemolytic disease and other neonatal jaundice                    | 0<br>(0 - 0)                | 0<br>(0 - 0)          | --                     | --                      | --                       | --                         |
| Other neonatal disorders                                         | 5<br>(3 - 7)                | 5<br>(3 - 7)          | --                     | --                      | --                       | --                         |
| Nutritional deficiencies                                         | 17<br>(13 - 22)             | 0<br>(0 - 0)          | 0<br>(0 - 0)           | 0<br>(0 - 1)            | 1<br>(1 - 2)             | 15<br>(11 - 20)            |
| Protein-energy malnutrition                                      | 3<br>(1 - 5)                | 0<br>(0 - 0)          | 0<br>(0 - 0)           | 0<br>(0 - 0)            | 0<br>(0 - 1)             | 2<br>(1 - 4)               |
| Iodine deficiency                                                | 0<br>(0 - 1)                | 0<br>(0 - 0)          | 0<br>(0 - 0)           | 0<br>(0 - 0)            | 0<br>(0 - 0)             | 0<br>(0 - 0)               |
| Iron-deficiency anemia                                           | 12<br>(9 - 17)              | 0<br>(0 - 0)          | 0<br>(0 - 0)           | 0<br>(0 - 0)            | 1<br>(1 - 1)             | 12<br>(8 - 16)             |
| Other nutritional deficiencies                                   | 1<br>(1 - 3)                | 0<br>(0 - 0)          | 0<br>(0 - 0)           | 0<br>(0 - 0)            | 0<br>(0 - 0)             | 1<br>(0 - 3)               |
| Other communicable, maternal, neonatal, and nutritional diseases | 16<br>(11 - 20)             | 1<br>(0 - 1)          | 0<br>(0 - 0)           | 3<br>(2 - 4)            | 5<br>(3 - 6)             | 8<br>(5 - 10)              |
| Sexually transmitted diseases excluding HIV                      | 1<br>(1 - 2)                | 0<br>(0 - 1)          | 0<br>(0 - 0)           | 0<br>(0 - 0)            | 0<br>(0 - 0)             | 1<br>(1 - 1)               |
| Syphilis                                                         | 1<br>(1 - 1)                | 0<br>(0 - 1)          | 0<br>(0 - 0)           | 0<br>(0 - 0)            | 0<br>(0 - 0)             | 1<br>(0 - 1)               |
| Chlamydial infection                                             | 0<br>(0 - 0)                | --                    | 0<br>(0 - 0)           | 0<br>(0 - 0)            | 0<br>(0 - 0)             | 0<br>(0 - 0)               |
| Gonococcal infection                                             | 0<br>(0 - 0)                | --                    | 0<br>(0 - 0)           | 0<br>(0 - 0)            | 0<br>(0 - 0)             | 0<br>(0 - 0)               |
| Other sexually transmitted diseases                              | 0<br>(0 - 0)                | --                    | 0<br>(0 - 0)           | 0<br>(0 - 0)            | 0<br>(0 - 0)             | 0<br>(0 - 0)               |
| Hepatitis                                                        | 2<br>(2 - 3)                | 0<br>(0 - 0)          | 0<br>(0 - 0)           | 1<br>(0 - 1)            | 1<br>(1 - 1)             | 1<br>(0 - 1)               |
| Acute hepatitis A                                                | 1<br>(0 - 1)                | 0<br>(0 - 0)          | 0<br>(0 - 0)           | 0<br>(0 - 0)            | 0<br>(0 - 0)             | 0<br>(0 - 0)               |
| Acute hepatitis B                                                | 1<br>(1 - 2)                | 0<br>(0 - 0)          | 0<br>(0 - 0)           | 0<br>(0 - 1)            | 1<br>(0 - 1)             | 0<br>(0 - 1)               |
| Acute hepatitis C                                                | 0<br>(0 - 1)                | --                    | 0<br>(0 - 0)           | 0<br>(0 - 0)            | 0<br>(0 - 0)             | 0<br>(0 - 0)               |
| Other infectious diseases                                        | 13<br>(8 - 17)              | 1<br>(0 - 1)          | 0<br>(0 - 0)           | 2<br>(1 - 3)            | 4<br>(2 - 5)             | 6<br>(3 - 8)               |
| Non-communicable diseases                                        | 14,145<br>(13,340 - 14,907) | 50<br>(35 - 67)       | 14<br>(12 - 17)        | 537<br>(492 - 580)      | 2,972<br>(2,765 - 3,178) | 10,572<br>(9,983 - 11,095) |
| Neoplasms                                                        | 4,603<br>(4,153 - 4,953)    | 3<br>(2 - 4)          | 7<br>(6 - 8)           | 232<br>(211 - 253)      | 1,490<br>(1,367 - 1,612) | 2,870<br>(2,541 - 3,094)   |
| Esophageal cancer                                                | 188<br>(152 - 217)          | --                    | --                     | 7<br>(5 - 10)           | 70<br>(56 - 84)          | 111<br>(88 - 129)          |
| Stomach cancer                                                   | 264<br>(230 - 304)          | --                    | --                     | 7<br>(6 - 9)            | 59<br>(51 - 69)          | 198<br>(168 - 232)         |
| Liver cancer                                                     | 108<br>(73 - 132)           | --                    | 0<br>(0 - 0)           | 6<br>(4 - 7)            | 37<br>(25 - 47)          | 65<br>(42 - 82)            |
| Liver cancer due to hepatitis B                                  | 23<br>(12 - 38)             | --                    | 0<br>(0 - 0)           | 2<br>(1 - 3)            | 10<br>(5 - 16)           | 11<br>(5 - 20)             |
| Liver cancer due to hepatitis C                                  | 59<br>(38 - 75)             | --                    | 0<br>(0 - 0)           | 2<br>(1 - 3)            | 19<br>(12 - 25)          | 37<br>(23 - 50)            |
| Liver cancer due to alcohol use                                  | 19<br>(10 - 30)             | --                    | --                     | 1<br>(0 - 1)            | 6<br>(3 - 10)            | 13<br>(6 - 21)             |
| Liver cancer due to other causes                                 | 6<br>(3 - 11)               | --                    | 0<br>(0 - 0)           | 1<br>(0 - 1)            | 2<br>(1 - 4)             | 4<br>(1 - 7)               |
| Larynx cancer                                                    | 24<br>(18 - 30)             | --                    | --                     | 1<br>(1 - 2)            | 10<br>(8 - 13)           | 13<br>(9 - 16)             |
| Tracheal, bronchus and lung cancer                               | 1,099<br>(948 - 1,218)      | --                    | --                     | 29<br>(24 - 34)         | 424<br>(369 - 475)       | 647<br>(533 - 732)         |
| Breast cancer                                                    | 333<br>(256 - 405)          | --                    | --                     | 37<br>(29 - 49)         | 122<br>(97 - 154)        | 174<br>(122 - 216)         |
| Cervical cancer                                                  | 36<br>(29 - 44)             | --                    | --                     | 7<br>(5 - 9)            | 12<br>(10 - 16)          | 16<br>(12 - 22)            |
| Uterine cancer                                                   | 39<br>(30 - 48)             | --                    | --                     | 1<br>(1 - 1)            | 12<br>(9 - 16)           | 26<br>(18 - 33)            |
| Prostate cancer                                                  | 315<br>(228 - 413)          | --                    | --                     | 1<br>(0 - 1)            | 52<br>(36 - 71)          | 263<br>(184 - 349)         |

Web Table 31- Northern Ireland deaths with 95% UI by age, sex, and cause in 2013

| Cause                                         | Both Sexes, All Ages     | Both Sexes, 0-4 Years | Both Sexes, 5-14 Years | Both Sexes, 15-49 Years | Both Sexes, 50-69 Years | Both Sexes, 70-80 Years  |
|-----------------------------------------------|--------------------------|-----------------------|------------------------|-------------------------|-------------------------|--------------------------|
| Colon and rectum cancer                       | 630<br>(578 - 690)       | --                    | --                     | 21<br>(18 - 24)         | 178<br>(158 - 199)      | 431<br>(388 - 479)       |
| Lip and oral cavity cancer                    | 45<br>(38 - 51)          | --                    | --                     | 4<br>(3 - 5)            | 19<br>(15 - 22)         | 23<br>(19 - 27)          |
| Nasopharynx cancer                            | 5<br>(4 - 8)             | --                    | 0<br>(0 - 0)           | 1<br>(1 - 1)            | 2<br>(2 - 3)            | 2<br>(1 - 3)             |
| Other pharynx cancer                          | 21<br>(15 - 25)          | --                    | --                     | 2<br>(1 - 2)            | 11<br>(8 - 14)          | 8<br>(6 - 10)            |
| Gallbladder and biliary tract cancer          | 44<br>(31 - 55)          | --                    | --                     | 1<br>(1 - 1)            | 9<br>(7 - 12)           | 34<br>(23 - 44)          |
| Pancreatic cancer                             | 279<br>(255 - 307)       | --                    | --                     | 9<br>(8 - 11)           | 90<br>(79 - 101)        | 180<br>(160 - 203)       |
| Malignant skin melanoma                       | 54<br>(36 - 75)          | --                    | --                     | 9<br>(6 - 13)           | 19<br>(12 - 26)         | 26<br>(16 - 37)          |
| Non-melanoma skin cancer                      | 21<br>(15 - 27)          | --                    | --                     | 1<br>(0 - 1)            | 3<br>(2 - 4)            | 17<br>(12 - 23)          |
| Ovarian cancer                                | 144<br>(113 - 169)       | --                    | --                     | 9<br>(7 - 12)           | 57<br>(46 - 70)         | 77<br>(53 - 93)          |
| Testicular cancer                             | 2<br>(2 - 4)             | --                    | --                     | 2<br>(1 - 2)            | 0<br>(0 - 1)            | 0<br>(0 - 1)             |
| Kidney cancer                                 | 123<br>(105 - 141)       | 0<br>(0 - 0)          | 0<br>(0 - 0)           | 6<br>(5 - 8)            | 47<br>(40 - 55)         | 69<br>(56 - 84)          |
| Bladder cancer                                | 116<br>(93 - 135)        | --                    | --                     | 1<br>(1 - 2)            | 24<br>(19 - 29)         | 90<br>(72 - 108)         |
| Brain and nervous system cancer               | 104<br>(83 - 121)        | 1<br>(0 - 1)          | 2<br>(1 - 3)           | 19<br>(15 - 23)         | 52<br>(40 - 62)         | 31<br>(22 - 38)          |
| Thyroid cancer                                | 12<br>(10 - 15)          | --                    | 0<br>(0 - 0)           | 1<br>(0 - 1)            | 4<br>(3 - 4)            | 8<br>(6 - 10)            |
| Mesothelioma                                  | 62<br>(33 - 81)          | --                    | --                     | 2<br>(1 - 4)            | 25<br>(14 - 33)         | 35<br>(16 - 49)          |
| Hodgkin lymphoma                              | 11<br>(9 - 15)           | 0<br>(0 - 0)          | 0<br>(0 - 0)           | 4<br>(3 - 5)            | 3<br>(3 - 4)            | 4<br>(3 - 5)             |
| Non-Hodgkin lymphoma                          | 151<br>(91 - 189)        | 0<br>(0 - 0)          | 0<br>(0 - 1)           | 12<br>(7 - 15)          | 48<br>(28 - 62)         | 91<br>(51 - 120)         |
| Multiple myeloma                              | 84<br>(58 - 117)         | --                    | --                     | 2<br>(2 - 4)            | 26<br>(17 - 39)         | 55<br>(37 - 80)          |
| Leukemia                                      | 117<br>(101 - 132)       | 1<br>(0 - 1)          | 2<br>(2 - 3)           | 12<br>(10 - 14)         | 30<br>(25 - 35)         | 72<br>(60 - 85)          |
| Other neoplasms                               | 170<br>(130 - 198)       | 1<br>(1 - 2)          | 2<br>(2 - 3)           | 18<br>(15 - 21)         | 45<br>(37 - 53)         | 104<br>(72 - 127)        |
| Cardiovascular diseases                       | 5,413<br>(4,977 - 6,119) | 1<br>(1 - 1)          | 1<br>(1 - 1)           | 114<br>(102 - 129)      | 871<br>(785 - 1,001)    | 4,426<br>(4,044 - 5,002) |
| Rheumatic heart disease                       | 37<br>(27 - 50)          | 0<br>(0 - 0)          | 0<br>(0 - 0)           | 2<br>(2 - 3)            | 10<br>(8 - 14)          | 25<br>(17 - 33)          |
| Ischemic heart disease                        | 3,147<br>(2,804 - 3,866) | 0<br>(0 - 0)          | 0<br>(0 - 0)           | 69<br>(60 - 83)         | 604<br>(531 - 739)      | 2,474<br>(2,190 - 3,037) |
| Cerebrovascular disease                       | 1,569<br>(1,343 - 1,876) | 0<br>(0 - 0)          | 0<br>(0 - 0)           | 25<br>(20 - 30)         | 161<br>(125 - 194)      | 1,383<br>(1,182 - 1,666) |
| Ischemic stroke                               | 937<br>(796 - 1,188)     | 0<br>(0 - 0)          | 0<br>(0 - 0)           | 3<br>(2 - 4)            | 52<br>(39 - 68)         | 882<br>(747 - 1,123)     |
| Hemorrhagic stroke                            | 632<br>(466 - 765)       | 0<br>(0 - 0)          | 0<br>(0 - 0)           | 22<br>(18 - 27)         | 109<br>(85 - 131)       | 501<br>(353 - 614)       |
| Hypertensive heart disease                    | 49<br>(33 - 63)          | 0<br>(0 - 0)          | 0<br>(0 - 0)           | 1<br>(1 - 2)            | 9<br>(7 - 12)           | 38<br>(24 - 52)          |
| Cardiomyopathy and myocarditis                | 55<br>(45 - 77)          | 0<br>(0 - 1)          | 0<br>(0 - 0)           | 5<br>(4 - 7)            | 11<br>(8 - 14)          | 38<br>(29 - 58)          |
| Atrial fibrillation and flutter               | 105<br>(78 - 136)        | --                    | --                     | 0<br>(0 - 0)            | 4<br>(3 - 6)            | 100<br>(74 - 132)        |
| Aortic aneurysm                               | 153<br>(120 - 187)       | --                    | --                     | 2<br>(1 - 2)            | 26<br>(19 - 31)         | 125<br>(97 - 156)        |
| Peripheral vascular disease                   | 61<br>(46 - 78)          | --                    | --                     | 0<br>(0 - 0)            | 5<br>(4 - 7)            | 55<br>(40 - 73)          |
| Endocarditis                                  | 22<br>(16 - 30)          | 0<br>(0 - 0)          | 0<br>(0 - 0)           | 1<br>(1 - 2)            | 5<br>(4 - 8)            | 15<br>(10 - 20)          |
| Other cardiovascular and circulatory diseases | 216<br>(128 - 270)       | 0<br>(0 - 0)          | 0<br>(0 - 0)           | 7<br>(4 - 9)            | 36<br>(21 - 45)         | 172<br>(101 - 222)       |
| Chronic respiratory diseases                  | 1,139<br>(855 - 1,272)   | 1<br>(1 - 1)          | 1<br>(0 - 1)           | 16<br>(13 - 18)         | 196<br>(160 - 222)      | 925<br>(669 - 1,047)     |
| Chronic obstructive pulmonary disease         | 937<br>(727 - 1,084)     | 0<br>(0 - 1)          | 0<br>(0 - 0)           | 6<br>(5 - 8)            | 156<br>(129 - 180)      | 775<br>(581 - 905)       |
| Pneumoconiosis                                | 17<br>(10 - 25)          | 0<br>(0 - 0)          | 0<br>(0 - 0)           | 0<br>(0 - 0)            | 2<br>(1 - 3)            | 15<br>(8 - 22)           |
| Silicosis                                     | 0<br>(0 - 0)             | 0<br>(0 - 0)          | 0<br>(0 - 0)           | 0<br>(0 - 0)            | 0<br>(0 - 0)            | 0<br>(0 - 0)             |
| Asbestosis                                    | 14<br>(8 - 20)           | 0<br>(0 - 0)          | 0<br>(0 - 0)           | 0<br>(0 - 0)            | 2<br>(1 - 3)            | 12<br>(7 - 18)           |
| Coal workers pneumoconiosis                   | 1<br>(0 - 1)             | 0<br>(0 - 0)          | 0<br>(0 - 0)           | 0<br>(0 - 0)            | 0<br>(0 - 0)            | 0<br>(0 - 1)             |
| Other pneumoconiosis                          | 3<br>(2 - 4)             | 0<br>(0 - 0)          | 0<br>(0 - 0)           | 0<br>(0 - 0)            | 0<br>(0 - 0)            | 2<br>(1 - 3)             |



Web Table 31- Northern Ireland deaths with 95% UI by age, sex, and cause in 2013

| Cause                                               | Both Sexes, All Ages     | Both Sexes, 0-4 Years | Both Sexes, 5-14 Years | Both Sexes, 15-49 Years | Both Sexes, 50-69 Years | Both Sexes, 70-80 Years  |
|-----------------------------------------------------|--------------------------|-----------------------|------------------------|-------------------------|-------------------------|--------------------------|
| Asthma                                              | 43<br>(26 - 60)          | 0<br>(0 - 0)          | 0<br>(0 - 1)           | 6<br>(5 - 7)            | 10<br>(7 - 14)          | 27<br>(13 - 40)          |
| Interstitial lung disease and pulmonary sarcoidosis | 132<br>(59 - 201)        | 0<br>(0 - 0)          | 0<br>(0 - 0)           | 3<br>(2 - 5)            | 27<br>(13 - 40)         | 102<br>(43 - 159)        |
| Other chronic respiratory diseases                  | 9<br>(6 - 12)            | 0<br>(0 - 0)          | 0<br>(0 - 0)           | 0<br>(0 - 0)            | 1<br>(1 - 1)            | 7<br>(5 - 11)            |
| Cirrhosis                                           | 232<br>(211 - 254)       | 0<br>(0 - 0)          | 0<br>(0 - 0)           | 48<br>(42 - 55)         | 115<br>(103 - 129)      | 69<br>(60 - 78)          |
| Cirrhosis due to hepatitis B                        | 27<br>(18 - 38)          | 0<br>(0 - 0)          | 0<br>(0 - 0)           | 5<br>(3 - 7)            | 13<br>(9 - 19)          | 9<br>(5 - 13)            |
| Cirrhosis due to hepatitis C                        | 110<br>(72 - 152)        | 0<br>(0 - 0)          | 0<br>(0 - 0)           | 23<br>(15 - 32)         | 54<br>(36 - 77)         | 33<br>(21 - 46)          |
| Cirrhosis due to alcohol use                        | 65<br>(39 - 92)          | --                    | --                     | 10<br>(5 - 16)          | 33<br>(19 - 49)         | 21<br>(13 - 30)          |
| Cirrhosis due to other causes                       | 30<br>(13 - 48)          | 0<br>(0 - 0)          | 0<br>(0 - 0)           | 10<br>(4 - 15)          | 15<br>(5 - 25)          | 5<br>(2 - 10)            |
| Digestive diseases                                  | 443<br>(344 - 500)       | 0<br>(0 - 0)          | 0<br>(0 - 0)           | 14<br>(11 - 16)         | 69<br>(54 - 78)         | 360<br>(275 - 410)       |
| Peptic ulcer disease                                | 72<br>(58 - 91)          | 0<br>(0 - 0)          | 0<br>(0 - 0)           | 2<br>(1 - 3)            | 12<br>(9 - 16)          | 58<br>(46 - 75)          |
| Gastritis and duodenitis                            | 6<br>(3 - 8)             | 0<br>(0 - 0)          | 0<br>(0 - 0)           | 0<br>(0 - 1)            | 1<br>(1 - 2)            | 4<br>(2 - 6)             |
| Appendicitis                                        | 5<br>(3 - 7)             | 0<br>(0 - 0)          | 0<br>(0 - 0)           | 0<br>(0 - 1)            | 1<br>(1 - 1)            | 3<br>(2 - 5)             |
| Paralytic ileus and intestinal obstruction          | 64<br>(35 - 87)          | 0<br>(0 - 0)          | 0<br>(0 - 0)           | 2<br>(1 - 2)            | 7<br>(4 - 10)           | 55<br>(30 - 77)          |
| Inguinal, femoral, and abdominal hernia             | 14<br>(7 - 19)           | 0<br>(0 - 0)          | 0<br>(0 - 0)           | 0<br>(0 - 0)            | 2<br>(1 - 2)            | 12<br>(6 - 17)           |
| Inflammatory bowel disease                          | 33<br>(21 - 44)          | 0<br>(0 - 0)          | 0<br>(0 - 0)           | 1<br>(1 - 2)            | 5<br>(3 - 7)            | 26<br>(16 - 36)          |
| Vascular intestinal disorders                       | 75<br>(43 - 113)         | 0<br>(0 - 0)          | 0<br>(0 - 0)           | 1<br>(1 - 2)            | 13<br>(8 - 19)          | 61<br>(33 - 92)          |
| Gallbladder and biliary diseases                    | 52<br>(30 - 68)          | 0<br>(0 - 0)          | 0<br>(0 - 0)           | 1<br>(1 - 1)            | 6<br>(4 - 8)            | 44<br>(25 - 60)          |
| Pancreatitis                                        | 34<br>(24 - 44)          | 0<br>(0 - 0)          | 0<br>(0 - 0)           | 4<br>(3 - 5)            | 10<br>(7 - 12)          | 21<br>(14 - 29)          |
| Other digestive diseases                            | 89<br>(66 - 110)         | 0<br>(0 - 0)          | 0<br>(0 - 0)           | 2<br>(1 - 2)            | 11<br>(8 - 14)          | 76<br>(55 - 96)          |
| Neurological disorders                              | 1,425<br>(1,137 - 1,724) | 2<br>(1 - 3)          | 1<br>(1 - 2)           | 27<br>(22 - 32)         | 89<br>(75 - 102)        | 1,306<br>(1,019 - 1,598) |
| Alzheimer disease and other dementias               | 1,166<br>(883 - 1,460)   | --                    | --                     | 0<br>(0 - 0)            | 32<br>(22 - 41)         | 1,134<br>(857 - 1,421)   |
| Parkinson disease                                   | 126<br>(86 - 153)        | --                    | --                     | 0<br>(0 - 0)            | 7<br>(5 - 9)            | 118<br>(80 - 145)        |
| Epilepsy                                            | 24<br>(17 - 29)          | 0<br>(0 - 1)          | 1<br>(0 - 1)           | 11<br>(8 - 13)          | 6<br>(4 - 7)            | 6<br>(4 - 9)             |
| Multiple sclerosis                                  | 32<br>(20 - 45)          | --                    | --                     | 7<br>(5 - 10)           | 16<br>(10 - 23)         | 9<br>(5 - 13)            |
| Other neurological disorders                        | 78<br>(66 - 88)          | 2<br>(1 - 3)          | 1<br>(1 - 1)           | 9<br>(7 - 11)           | 28<br>(23 - 33)         | 38<br>(31 - 44)          |
| Mental and substance use disorders                  | 90<br>(57 - 107)         | 0<br>(0 - 0)          | 0<br>(0 - 0)           | 47<br>(32 - 56)         | 35<br>(18 - 46)         | 8<br>(5 - 10)            |
| Schizophrenia                                       | 1<br>(1 - 1)             | --                    | --                     | 0<br>(0 - 0)            | 0<br>(0 - 0)            | 1<br>(0 - 1)             |
| Alcohol use disorders                               | 64<br>(32 - 79)          | --                    | --                     | 25<br>(12 - 32)         | 32<br>(15 - 42)         | 6<br>(3 - 8)             |
| Drug use disorders                                  | 26<br>(19 - 30)          | 0<br>(0 - 0)          | --                     | 22<br>(16 - 26)         | 3<br>(2 - 4)            | 1<br>(1 - 2)             |
| Opioid use disorders                                | 9<br>(7 - 11)            | 0<br>(0 - 0)          | --                     | 8<br>(6 - 10)           | 1<br>(1 - 1)            | 0<br>(0 - 1)             |
| Cocaine use disorders                               | 1<br>(1 - 1)             | 0<br>(0 - 0)          | --                     | 1<br>(1 - 1)            | 0<br>(0 - 0)            | 0<br>(0 - 0)             |
| Amphetamine use disorders                           | 1<br>(1 - 1)             | 0<br>(0 - 0)          | --                     | 1<br>(0 - 1)            | 0<br>(0 - 0)            | 0<br>(0 - 0)             |
| Other drug use disorders                            | 15<br>(11 - 17)          | 0<br>(0 - 0)          | --                     | 12<br>(9 - 15)          | 2<br>(1 - 2)            | 1<br>(1 - 1)             |
| Eating disorders                                    | 0<br>(0 - 0)             | --                    | 0<br>(0 - 0)           | 0<br>(0 - 0)            | --                      | --                       |
| Anorexia nervosa                                    | 0<br>(0 - 0)             | --                    | 0<br>(0 - 0)           | 0<br>(0 - 0)            | --                      | --                       |
| Diabetes, urogenital, blood, and endocrine diseases | 639<br>(540 - 716)       | 2<br>(1 - 3)          | 1<br>(1 - 2)           | 23<br>(20 - 27)         | 81<br>(71 - 91)         | 531<br>(440 - 605)       |
| Diabetes mellitus                                   | 149<br>(126 - 169)       | 0<br>(0 - 0)          | 0<br>(0 - 0)           | 5<br>(4 - 6)            | 25<br>(21 - 30)         | 119<br>(97 - 139)        |
| Acute glomerulonephritis                            | 0<br>(0 - 0)             | 0<br>(0 - 0)          | 0<br>(0 - 0)           | 0<br>(0 - 0)            | 0<br>(0 - 0)            | 0<br>(0 - 0)             |
| Chronic kidney disease                              | 261<br>(223 - 305)       | 0<br>(0 - 0)          | 0<br>(0 - 0)           | 7<br>(6 - 9)            | 27<br>(22 - 34)         | 227<br>(190 - 269)       |
| Chronic kidney disease due to diabetes mellitus     | 41<br>(31 - 75)          | 0<br>(0 - 0)          | 0<br>(0 - 0)           | 1<br>(1 - 2)            | 6<br>(4 - 9)            | 34<br>(25 - 64)          |

Web Table 31- Northern Ireland deaths with 95% UI by age, sex, and cause in 2013

| Cause                                               | Both Sexes, All Ages | Both Sexes, 0-4 Years | Both Sexes, 5-14 Years | Both Sexes, 15-49 Years | Both Sexes, 50-69 Years | Both Sexes, 70-80 Years |
|-----------------------------------------------------|----------------------|-----------------------|------------------------|-------------------------|-------------------------|-------------------------|
| Chronic kidney disease due to hypertension          | 64<br>(45 - 86)      | 0<br>(0 - 0)          | 0<br>(0 - 0)           | 1<br>(1 - 2)            | 6<br>(5 - 9)            | 56<br>(38 - 76)         |
| Chronic kidney disease due to glomerulonephritis    | 9<br>(5 - 15)        | 0<br>(0 - 0)          | 0<br>(0 - 0)           | 0<br>(0 - 1)            | 1<br>(1 - 2)            | 7<br>(3 - 13)           |
| Chronic kidney disease due to other causes          | 147<br>(108 - 184)   | 0<br>(0 - 0)          | 0<br>(0 - 0)           | 4<br>(3 - 6)            | 13<br>(10 - 18)         | 129<br>(92 - 166)       |
| Urinary diseases and male infertility               | 174<br>(99 - 225)    | 0<br>(0 - 0)          | 0<br>(0 - 0)           | 3<br>(2 - 4)            | 16<br>(10 - 20)         | 154<br>(84 - 203)       |
| Interstitial nephritis and urinary tract infections | 161<br>(89 - 210)    | 0<br>(0 - 0)          | 0<br>(0 - 0)           | 3<br>(2 - 4)            | 14<br>(8 - 18)          | 144<br>(77 - 191)       |
| Urolithiasis                                        | 4<br>(2 - 7)         | --                    | 0<br>(0 - 0)           | 0<br>(0 - 0)            | 1<br>(0 - 1)            | 3<br>(2 - 5)            |
| Other urinary diseases                              | 9<br>(5 - 16)        | 0<br>(0 - 0)          | 0<br>(0 - 0)           | 0<br>(0 - 0)            | 1<br>(1 - 2)            | 7<br>(4 - 14)           |
| Gynecological diseases                              | 0<br>(0 - 1)         | --                    | --                     | 0<br>(0 - 0)            | 0<br>(0 - 0)            | 0<br>(0 - 0)            |
| Uterine fibroids                                    | 0<br>(0 - 0)         | --                    | --                     | 0<br>(0 - 0)            | 0<br>(0 - 0)            | 0<br>(0 - 0)            |
| Polycystic ovarian syndrome                         | 0<br>(0 - 0)         | --                    | --                     | 0<br>(0 - 0)            | 0<br>(0 - 0)            | --                      |
| Endometriosis                                       | 0<br>(0 - 0)         | --                    | --                     | 0<br>(0 - 0)            | 0<br>(0 - 0)            | --                      |
| Genital prolapse                                    | 0<br>(0 - 0)         | --                    | --                     | 0<br>(0 - 0)            | 0<br>(0 - 0)            | 0<br>(0 - 0)            |
| Other gynecological diseases                        | 0<br>(0 - 0)         | --                    | --                     | 0<br>(0 - 0)            | 0<br>(0 - 0)            | 0<br>(0 - 0)            |
| Hemoglobinopathies and hemolytic anemias            | 8<br>(6 - 11)        | 0<br>(0 - 0)          | 0<br>(0 - 0)           | 1<br>(1 - 1)            | 1<br>(1 - 2)            | 5<br>(3 - 8)            |
| Thalassemias                                        | 0<br>(0 - 1)         | 0<br>(0 - 0)          | 0<br>(0 - 0)           | 0<br>(0 - 0)            | 0<br>(0 - 0)            | 0<br>(0 - 0)            |
| Sickle cell disorders                               | 1<br>(1 - 2)         | 0<br>(0 - 0)          | 0<br>(0 - 0)           | 0<br>(0 - 1)            | 1<br>(0 - 1)            | 0<br>(0 - 0)            |
| G6PD deficiency                                     | 0<br>(0 - 0)         | 0<br>(0 - 0)          | 0<br>(0 - 0)           | 0<br>(0 - 0)            | 0<br>(0 - 0)            | 0<br>(0 - 0)            |
| Other hemoglobinopathies and hemolytic anemias      | 6<br>(4 - 9)         | 0<br>(0 - 0)          | 0<br>(0 - 0)           | 0<br>(0 - 0)            | 1<br>(1 - 1)            | 5<br>(3 - 7)            |
| Endocrine, metabolic, blood, and immune disorders   | 47<br>(38 - 62)      | 2<br>(1 - 2)          | 1<br>(1 - 1)           | 6<br>(5 - 9)            | 11<br>(9 - 16)          | 27<br>(20 - 35)         |
| Musculoskeletal disorders                           | 50<br>(39 - 60)      | --                    | 0<br>(0 - 0)           | 3<br>(2 - 4)            | 11<br>(9 - 14)          | 36<br>(26 - 45)         |
| Rheumatoid arthritis                                | 19<br>(14 - 24)      | --                    | 0<br>(0 - 0)           | 0<br>(0 - 0)            | 4<br>(3 - 5)            | 15<br>(10 - 20)         |
| Other musculoskeletal disorders                     | 31<br>(24 - 39)      | --                    | 0<br>(0 - 0)           | 3<br>(2 - 3)            | 8<br>(6 - 10)           | 21<br>(15 - 27)         |
| Other non-communicable diseases                     | 111<br>(95 - 133)    | 40<br>(28 - 55)       | 3<br>(2 - 4)           | 14<br>(12 - 17)         | 15<br>(13 - 17)         | 40<br>(30 - 51)         |
| Congenital anomalies                                | 72<br>(59 - 89)      | 38<br>(27 - 52)       | 3<br>(2 - 3)           | 13<br>(11 - 15)         | 10<br>(9 - 13)          | 9<br>(7 - 11)           |
| Neural tube defects                                 | 4<br>(3 - 7)         | 3<br>(2 - 5)          | 0<br>(0 - 0)           | 1<br>(1 - 1)            | 0<br>(0 - 0)            | 0<br>(0 - 0)            |
| Congenital heart anomalies                          | 24<br>(20 - 30)      | 9<br>(6 - 13)         | 1<br>(1 - 2)           | 7<br>(6 - 8)            | 3<br>(3 - 5)            | 3<br>(2 - 4)            |
| Cleft lip and cleft palate                          | 0<br>(0 - 0)         | 0<br>(0 - 0)          | --                     | --                      | --                      | --                      |
| Down syndrome                                       | 10<br>(7 - 12)       | 1<br>(0 - 2)          | 0<br>(0 - 0)           | 2<br>(1 - 3)            | 6<br>(4 - 8)            | 1<br>(0 - 1)            |
| Chromosomal unbalanced rearrangements               | 8<br>(5 - 11)        | 7<br>(4 - 10)         | 0<br>(0 - 0)           | 1<br>(0 - 1)            | 0<br>(0 - 0)            | 0<br>(0 - 0)            |
| Other congenital anomalies                          | 27<br>(20 - 35)      | 18<br>(12 - 27)       | 1<br>(1 - 1)           | 2<br>(1 - 2)            | 1<br>(0 - 1)            | 5<br>(4 - 7)            |
| Skin and subcutaneous diseases                      | 37<br>(26 - 47)      | 0<br>(0 - 0)          | 0<br>(0 - 0)           | 1<br>(1 - 1)            | 4<br>(3 - 6)            | 31<br>(21 - 41)         |
| Cellulitis                                          | 12<br>(5 - 19)       | 0<br>(0 - 0)          | 0<br>(0 - 0)           | 0<br>(0 - 0)            | 2<br>(1 - 3)            | 10<br>(3 - 17)          |
| Pyoderma                                            | 13<br>(8 - 20)       | 0<br>(0 - 0)          | 0<br>(0 - 0)           | 0<br>(0 - 1)            | 2<br>(1 - 2)            | 11<br>(6 - 17)          |
| Decubitus ulcer                                     | 0<br>(6 - 15)        | 0<br>(0 - 0)          | 0<br>(0 - 0)           | 0<br>(0 - 0)            | 1<br>(1 - 1)            | 9<br>(5 - 14)           |
| Other skin and subcutaneous diseases                | 2<br>(1 - 4)         | 0<br>(0 - 0)          | 0<br>(0 - 0)           | 0<br>(0 - 0)            | 0<br>(0 - 0)            | 1<br>(1 - 3)            |
| Sudden infant death syndrome                        | 2<br>(1 - 5)         | 2<br>(1 - 5)          | --                     | --                      | --                      | --                      |
| Injuries                                            | 686<br>(605 - 758)   | 7<br>(5 - 10)         | 8<br>(6 - 10)          | 237<br>(210 - 264)      | 126<br>(111 - 141)      | 308<br>(242 - 357)      |
| Transport injuries                                  | 117<br>(105 - 132)   | 1<br>(1 - 2)          | 4<br>(3 - 5)           | 64<br>(56 - 72)         | 23<br>(19 - 26)         | 26<br>(22 - 31)         |
| Road injuries                                       | 112<br>(100 - 127)   | 1<br>(1 - 2)          | 3<br>(3 - 4)           | 61<br>(54 - 69)         | 21<br>(18 - 25)         | 25<br>(21 - 31)         |
| Pedestrian road injuries                            | 31<br>(22 - 43)      | 0<br>(0 - 1)          | 2<br>(1 - 2)           | 9<br>(5 - 14)           | 7<br>(5 - 11)           | 13<br>(9 - 17)          |

Web Table 31- Northern Ireland deaths with 95% UI by age, sex, and cause in 2013

| Cause                                           | Both Sexes, All Ages | Both Sexes, 0-4 Years | Both Sexes, 5-14 Years | Both Sexes, 15-49 Years | Both Sexes, 50-69 Years | Both Sexes, 70-80 Years |
|-------------------------------------------------|----------------------|-----------------------|------------------------|-------------------------|-------------------------|-------------------------|
| Cyclist road injuries                           | 5<br>(4 - 7)         | 0<br>(0 - 0)          | 1<br>(0 - 1)           | 2<br>(2 - 3)            | 1<br>(1 - 2)            | 1<br>(1 - 2)            |
| Motorcyclist road injuries                      | 12<br>(7 - 16)       | 0<br>(0 - 0)          | 0<br>(0 - 0)           | 10<br>(6 - 14)          | 1<br>(1 - 2)            | 0<br>(0 - 1)            |
| Motor vehicle road injuries                     | 63<br>(51 - 76)      | 0<br>(0 - 1)          | 1<br>(1 - 2)           | 39<br>(32 - 47)         | 11<br>(8 - 14)          | 11<br>(8 - 14)          |
| Other road injuries                             | 1<br>(1 - 2)         | 0<br>(0 - 0)          | 0<br>(0 - 0)           | 0<br>(0 - 1)            | 0<br>(0 - 1)            | 0<br>(0 - 1)            |
| Other transport injuries                        | 5<br>(4 - 6)         | 0<br>(0 - 0)          | 0<br>(0 - 0)           | 3<br>(2 - 4)            | 1<br>(1 - 2)            | 1<br>(0 - 1)            |
| Unintentional injuries                          | 358<br>(288 - 411)   | 5<br>(3 - 6)          | 3<br>(3 - 4)           | 43<br>(38 - 50)         | 50<br>(42 - 57)         | 257<br>(193 - 306)      |
| Falls                                           | 243<br>(175 - 297)   | 1<br>(0 - 1)          | 1<br>(0 - 1)           | 14<br>(10 - 17)         | 26<br>(18 - 32)         | 202<br>(142 - 252)      |
| Drowning                                        | 12<br>(9 - 16)       | 1<br>(0 - 1)          | 1<br>(1 - 1)           | 6<br>(4 - 8)            | 3<br>(2 - 4)            | 2<br>(2 - 3)            |
| Fire, heat, and hot substances                  | 18<br>(15 - 24)      | 1<br>(0 - 1)          | 0<br>(0 - 1)           | 4<br>(3 - 5)            | 4<br>(3 - 6)            | 9<br>(7 - 12)           |
| Poisonings                                      | 9<br>(7 - 15)        | 0<br>(0 - 0)          | 0<br>(0 - 0)           | 5<br>(3 - 8)            | 2<br>(2 - 4)            | 2<br>(1 - 3)            |
| Exposure to mechanical forces                   | 12<br>(10 - 14)      | 1<br>(0 - 1)          | 1<br>(0 - 1)           | 6<br>(5 - 7)            | 3<br>(2 - 3)            | 2<br>(2 - 3)            |
| Unintentional firearm injuries                  | 1<br>(1 - 1)         | 0<br>(0 - 0)          | 0<br>(0 - 0)           | 1<br>(1 - 1)            | 0<br>(0 - 0)            | 0<br>(0 - 0)            |
| Unintentional suffocation                       | 3<br>(1 - 3)         | 1<br>(0 - 1)          | 0<br>(0 - 0)           | 1<br>(0 - 1)            | 0<br>(0 - 0)            | 0<br>(0 - 1)            |
| Other exposure to mechanical forces             | 8<br>(7 - 10)        | 0<br>(0 - 0)          | 0<br>(0 - 0)           | 4<br>(3 - 6)            | 2<br>(2 - 3)            | 1<br>(1 - 2)            |
| Adverse effects of medical treatment            | 18<br>(14 - 24)      | 0<br>(0 - 0)          | 0<br>(0 - 0)           | 1<br>(1 - 2)            | 4<br>(3 - 5)            | 13<br>(10 - 18)         |
| Animal contact                                  | 3<br>(2 - 4)         | 0<br>(0 - 0)          | 0<br>(0 - 0)           | 1<br>(0 - 1)            | 1<br>(1 - 1)            | 1<br>(1 - 1)            |
| Venomous animal contact                         | 0<br>(0 - 1)         | 0<br>(0 - 0)          | 0<br>(0 - 0)           | 0<br>(0 - 0)            | 0<br>(0 - 0)            | 0<br>(0 - 0)            |
| Non-venomous animal contact                     | 3<br>(1 - 3)         | 0<br>(0 - 0)          | 0<br>(0 - 0)           | 1<br>(0 - 1)            | 1<br>(0 - 1)            | 1<br>(1 - 1)            |
| Foreign body                                    | 40<br>(22 - 53)      | 1<br>(1 - 2)          | 1<br>(0 - 1)           | 6<br>(3 - 8)            | 7<br>(4 - 9)            | 25<br>(13 - 35)         |
| Pulmonary aspiration and foreign body in airway | 40<br>(22 - 52)      | 1<br>(1 - 2)          | 0<br>(0 - 1)           | 6<br>(3 - 7)            | 7<br>(4 - 9)            | 25<br>(13 - 35)         |
| Foreign body in other body part                 | 0<br>(0 - 0)         | 0<br>(0 - 0)          | 0<br>(0 - 0)           | 0<br>(0 - 0)            | 0<br>(0 - 0)            | 0<br>(0 - 0)            |
| Other unintentional injuries                    | 2<br>(2 - 3)         | 0<br>(0 - 0)          | 0<br>(0 - 0)           | 1<br>(1 - 1)            | 0<br>(0 - 1)            | 1<br>(0 - 1)            |
| Self-harm and interpersonal violence            | 211<br>(174 - 247)   | 2<br>(1 - 2)          | 1<br>(1 - 2)           | 130<br>(108 - 154)      | 54<br>(43 - 65)         | 25<br>(19 - 30)         |
| Self-harm                                       | 172<br>(130 - 199)   | --                    | 0<br>(0 - 0)           | 105<br>(80 - 124)       | 47<br>(35 - 57)         | 21<br>(15 - 25)         |
| Interpersonal violence                          | 39<br>(30 - 59)      | 2<br>(1 - 2)          | 1<br>(1 - 1)           | 25<br>(19 - 40)         | 7<br>(5 - 11)           | 4<br>(3 - 6)            |
| Assault by firearm                              | 18<br>(12 - 33)      | 0<br>(0 - 1)          | 0<br>(0 - 0)           | 13<br>(9 - 24)          | 3<br>(2 - 6)            | 1<br>(1 - 2)            |
| Assault by sharp object                         | 5<br>(3 - 9)         | 0<br>(0 - 0)          | 0<br>(0 - 0)           | 4<br>(2 - 7)            | 1<br>(0 - 2)            | 0<br>(0 - 1)            |
| Assault by other means                          | 15<br>(11 - 24)      | 1<br>(1 - 2)          | 1<br>(0 - 1)           | 8<br>(5 - 14)           | 3<br>(2 - 5)            | 2<br>(2 - 4)            |

Web Table 31- Northern Ireland deaths with 95% UI by age, sex, and cause in 2013

| Cause                                                             | Males, All Ages          | Males, 0-4 Years | Males, 5-14 Years | Males, 15-49 Years | Males, 50-69 Years       | Males, 70-80 Years       |
|-------------------------------------------------------------------|--------------------------|------------------|-------------------|--------------------|--------------------------|--------------------------|
| All causes                                                        | 8,072<br>(7,560 - 8,640) | 61<br>(43 - 83)  | 15<br>(12 - 18)   | 522<br>(472 - 576) | 1,959<br>(1,789 - 2,142) | 5,516<br>(5,220 - 5,840) |
| Communicable, maternal, neonatal, and nutritional diseases        | 557<br>(432 - 812)       | 29<br>(20 - 40)  | 1<br>(1 - 2)      | 18<br>(15 - 21)    | 56<br>(45 - 69)          | 453<br>(330 - 703)       |
| HIV/AIDS and tuberculosis                                         | 9<br>(7 - 11)            | 0<br>(0 - 0)     | 0<br>(0 - 0)      | 3<br>(2 - 3)       | 3<br>(2 - 4)             | 4<br>(3 - 5)             |
| Tuberculosis                                                      | 6<br>(5 - 7)             | 0<br>(0 - 0)     | 0<br>(0 - 0)      | 1<br>(0 - 1)       | 2<br>(2 - 2)             | 3<br>(3 - 4)             |
| HIV/AIDS                                                          | 3<br>(2 - 5)             | --               | 0<br>(0 - 0)      | 2<br>(1 - 3)       | 1<br>(0 - 2)             | 0<br>(0 - 1)             |
| HIV/AIDS resulting in mycobacterial infection                     | 0<br>(0 - 0)             | --               | 0<br>(0 - 0)      | 0<br>(0 - 0)       | 0<br>(0 - 0)             | 0<br>(0 - 0)             |
| HIV/AIDS resulting in other diseases                              | 3<br>(2 - 4)             | --               | 0<br>(0 - 0)      | 2<br>(1 - 3)       | 1<br>(0 - 2)             | 0<br>(0 - 1)             |
| Diarrhea, lower respiratory, and other common infectious diseases | 509<br>(385 - 764)       | 5<br>(3 - 7)     | 1<br>(1 - 1)      | 13<br>(10 - 16)    | 50<br>(38 - 63)          | 441<br>(319 - 689)       |
| Diarrheal diseases                                                | 11<br>(8 - 16)           | 1<br>(0 - 1)     | 0<br>(0 - 0)      | 0<br>(0 - 1)       | 1<br>(1 - 2)             | 9<br>(6 - 14)            |
| Intestinal infectious diseases                                    | 1<br>(0 - 3)             | 0<br>(0 - 1)     | 0<br>(0 - 1)      | 1<br>(0 - 1)       | 0<br>(0 - 1)             | 0<br>(0 - 0)             |
| Typhoid fever                                                     | 1<br>(0 - 2)             | 0<br>(0 - 0)     | 0<br>(0 - 0)      | 0<br>(0 - 1)       | 0<br>(0 - 0)             | 0<br>(0 - 0)             |
| Paratyphoid fever                                                 | 0<br>(0 - 1)             | 0<br>(0 - 0)     | 0<br>(0 - 0)      | 0<br>(0 - 0)       | 0<br>(0 - 0)             | 0<br>(0 - 0)             |
| Other intestinal infectious diseases                              | 0<br>(0 - 1)             | 0<br>(0 - 0)     | 0<br>(0 - 0)      | 0<br>(0 - 0)       | 0<br>(0 - 0)             | 0<br>(0 - 0)             |
| Lower respiratory infections                                      | 490<br>(365 - 745)       | 3<br>(2 - 5)     | 0<br>(0 - 1)      | 10<br>(8 - 13)     | 46<br>(35 - 60)          | 429<br>(307 - 679)       |
| Upper respiratory infections                                      | 0<br>(0 - 1)             | 0<br>(0 - 0)     | 0<br>(0 - 0)      | 0<br>(0 - 0)       | 0<br>(0 - 0)             | 0<br>(0 - 0)             |
| Otitis media                                                      | 0<br>(0 - 0)             | 0<br>(0 - 0)     | 0<br>(0 - 0)      | 0<br>(0 - 0)       | 0<br>(0 - 0)             | 0<br>(0 - 0)             |
| Meningitis                                                        | 4<br>(3 - 5)             | 1<br>(0 - 1)     | 0<br>(0 - 0)      | 1<br>(1 - 1)       | 1<br>(1 - 1)             | 1<br>(1 - 2)             |
| Pneumococcal meningitis                                           | 1<br>(0 - 1)             | 0<br>(0 - 0)     | 0<br>(0 - 0)      | 0<br>(0 - 0)       | 0<br>(0 - 0)             | 0<br>(0 - 0)             |
| H influenzae type B meningitis                                    | 1<br>(0 - 1)             | 0<br>(0 - 0)     | 0<br>(0 - 0)      | 0<br>(0 - 0)       | 0<br>(0 - 0)             | 0<br>(0 - 0)             |
| Meningococcal meningitis                                          | 1<br>(1 - 2)             | 0<br>(0 - 0)     | 0<br>(0 - 0)      | 0<br>(0 - 0)       | 0<br>(0 - 0)             | 0<br>(0 - 1)             |
| Other meningitis                                                  | 2<br>(1 - 2)             | 0<br>(0 - 0)     | 0<br>(0 - 0)      | 0<br>(0 - 0)       | 0<br>(0 - 1)             | 1<br>(0 - 1)             |
| Encephalitis                                                      | 2<br>(1 - 3)             | 0<br>(0 - 0)     | 0<br>(0 - 0)      | 1<br>(0 - 1)       | 0<br>(0 - 1)             | 1<br>(0 - 1)             |
| Diphtheria                                                        | 0<br>(0 - 0)             | 0<br>(0 - 0)     | 0<br>(0 - 0)      | 0<br>(0 - 0)       | 0<br>(0 - 0)             | --                       |
| Whooping cough                                                    | 0<br>(0 - 0)             | 0<br>(0 - 0)     | 0<br>(0 - 0)      | 0<br>(0 - 0)       | 0<br>(0 - 0)             | --                       |
| Tetanus                                                           | 0<br>(0 - 0)             | 0<br>(0 - 0)     | 0<br>(0 - 0)      | 0<br>(0 - 0)       | 0<br>(0 - 0)             | 0<br>(0 - 0)             |
| Measles                                                           | 0<br>(0 - 0)             | 0<br>(0 - 0)     | 0<br>(0 - 0)      | 0<br>(0 - 0)       | 0<br>(0 - 0)             | --                       |
| Varicella and herpes zoster                                       | 1<br>(0 - 2)             | 0<br>(0 - 0)     | 0<br>(0 - 0)      | 0<br>(0 - 0)       | 0<br>(0 - 0)             | 0<br>(0 - 2)             |
| Neglected tropical diseases and malaria                           | 1<br>(0 - 1)             | 0<br>(0 - 0)     | 0<br>(0 - 0)      | 0<br>(0 - 0)       | 0<br>(0 - 0)             | 0<br>(0 - 0)             |
| Cysticercosis                                                     | 0<br>(0 - 0)             | 0<br>(0 - 0)     | 0<br>(0 - 0)      | 0<br>(0 - 0)       | 0<br>(0 - 0)             | 0<br>(0 - 0)             |
| Cystic echinococcosis                                             | 0<br>(0 - 0)             | 0<br>(0 - 0)     | 0<br>(0 - 0)      | 0<br>(0 - 0)       | 0<br>(0 - 0)             | 0<br>(0 - 0)             |
| Dengue                                                            | 0<br>(0 - 0)             | 0<br>(0 - 0)     | 0<br>(0 - 0)      | 0<br>(0 - 0)       | 0<br>(0 - 0)             | 0<br>(0 - 0)             |
| Rabies                                                            | 0<br>(0 - 0)             | 0<br>(0 - 0)     | 0<br>(0 - 0)      | 0<br>(0 - 0)       | 0<br>(0 - 0)             | 0<br>(0 - 0)             |
| Other neglected tropical diseases                                 | 1<br>(0 - 1)             | 0<br>(0 - 0)     | 0<br>(0 - 0)      | 0<br>(0 - 0)       | 0<br>(0 - 0)             | 0<br>(0 - 0)             |
| Maternal disorders                                                | --                       | --               | --                | --                 | --                       | --                       |
| Maternal hemorrhage                                               | --                       | --               | --                | --                 | --                       | --                       |
| Maternal sepsis and other maternal infections                     | --                       | --               | --                | --                 | --                       | --                       |
| Maternal hypertensive disorders                                   | --                       | --               | --                | --                 | --                       | --                       |
| Maternal obstructed labor                                         | --                       | --               | --                | --                 | --                       | --                       |
| Maternal abortive outcome                                         | --                       | --               | --                | --                 | --                       | --                       |
| Indirect maternal deaths                                          | --                       | --               | --                | --                 | --                       | --                       |

Web Table 31- Northern Ireland deaths with 95% UI by age, sex, and cause in 2013

| Cause                                                            | Males, All Ages          | Males, 0-4 Years | Males, 5-14 Years | Males, 15-49 Years | Males, 50-69 Years       | Males, 70-80 Years       |
|------------------------------------------------------------------|--------------------------|------------------|-------------------|--------------------|--------------------------|--------------------------|
| Late maternal deaths                                             | --                       | --               | --                | --                 | --                       | --                       |
| Maternal deaths aggravated by HIV/AIDS                           | --                       | --               | --                | --                 | --                       | --                       |
| Other maternal disorders                                         | --                       | --               | --                | --                 | --                       | --                       |
| Neonatal disorders                                               | 24<br>(16 - 33)          | 24<br>(16 - 33)  | --                | --                 | --                       | --                       |
| Neonatal preterm birth complications                             | 16<br>(10 - 23)          | 16<br>(10 - 23)  | --                | --                 | --                       | --                       |
| Neonatal encephalopathy due to birth asphyxia and trauma         | 3<br>(2 - 5)             | 3<br>(2 - 5)     | --                | --                 | --                       | --                       |
| Neonatal sepsis and other neonatal infections                    | 2<br>(1 - 4)             | 2<br>(1 - 4)     | --                | --                 | --                       | --                       |
| Hemolytic disease and other neonatal jaundice                    | 0<br>(0 - 0)             | 0<br>(0 - 0)     | --                | --                 | --                       | --                       |
| Other neonatal disorders                                         | 3<br>(1 - 5)             | 3<br>(1 - 5)     | --                | --                 | --                       | --                       |
| Nutritional deficiencies                                         | 5<br>(3 - 9)             | 0<br>(0 - 0)     | 0<br>(0 - 0)      | 0<br>(0 - 0)       | 1<br>(0 - 1)             | 4<br>(3 - 7)             |
| Protein-energy malnutrition                                      | 1<br>(0 - 2)             | 0<br>(0 - 0)     | 0<br>(0 - 0)      | 0<br>(0 - 0)       | 0<br>(0 - 0)             | 1<br>(0 - 2)             |
| Iodine deficiency                                                | 0<br>(0 - 0)             | 0<br>(0 - 0)     | 0<br>(0 - 0)      | 0<br>(0 - 0)       | 0<br>(0 - 0)             | 0<br>(0 - 0)             |
| Iron-deficiency anemia                                           | 3<br>(2 - 6)             | 0<br>(0 - 0)     | 0<br>(0 - 0)      | 0<br>(0 - 0)       | 0<br>(0 - 1)             | 3<br>(2 - 5)             |
| Other nutritional deficiencies                                   | 0<br>(0 - 1)             | 0<br>(0 - 0)     | 0<br>(0 - 0)      | 0<br>(0 - 0)       | 0<br>(0 - 0)             | 0<br>(0 - 1)             |
| Other communicable, maternal, neonatal, and nutritional diseases | 9<br>(6 - 11)            | 1<br>(0 - 1)     | 0<br>(0 - 0)      | 2<br>(1 - 2)       | 3<br>(2 - 4)             | 4<br>(2 - 5)             |
| Sexually transmitted diseases excluding HIV                      | 0<br>(0 - 1)             | 0<br>(0 - 0)     | 0<br>(0 - 0)      | 0<br>(0 - 0)       | 0<br>(0 - 0)             | 0<br>(0 - 0)             |
| Syphilis                                                         | 0<br>(0 - 0)             | 0<br>(0 - 0)     | 0<br>(0 - 0)      | 0<br>(0 - 0)       | 0<br>(0 - 0)             | 0<br>(0 - 0)             |
| Chlamydial infection                                             | --                       | --               | --                | --                 | --                       | --                       |
| Gonococcal infection                                             | 0<br>(0 - 0)             | --               | 0<br>(0 - 0)      | 0<br>(0 - 0)       | 0<br>(0 - 0)             | 0<br>(0 - 0)             |
| Other sexually transmitted diseases                              | 0<br>(0 - 0)             | --               | 0<br>(0 - 0)      | 0<br>(0 - 0)       | 0<br>(0 - 0)             | 0<br>(0 - 0)             |
| Hepatitis                                                        | 1<br>(1 - 2)             | 0<br>(0 - 0)     | 0<br>(0 - 0)      | 0<br>(0 - 1)       | 1<br>(0 - 1)             | 0<br>(0 - 0)             |
| Acute hepatitis A                                                | 0<br>(0 - 1)             | 0<br>(0 - 0)     | 0<br>(0 - 0)      | 0<br>(0 - 0)       | 0<br>(0 - 0)             | 0<br>(0 - 0)             |
| Acute hepatitis B                                                | 1<br>(1 - 1)             | 0<br>(0 - 0)     | 0<br>(0 - 0)      | 0<br>(0 - 0)       | 0<br>(0 - 1)             | 0<br>(0 - 0)             |
| Acute hepatitis C                                                | 0<br>(0 - 0)             | --               | 0<br>(0 - 0)      | 0<br>(0 - 0)       | 0<br>(0 - 0)             | 0<br>(0 - 0)             |
| Other infectious diseases                                        | 7<br>(4 - 10)            | 0<br>(0 - 1)     | 0<br>(0 - 0)      | 2<br>(1 - 2)       | 2<br>(1 - 3)             | 3<br>(2 - 5)             |
| Non-communicable diseases                                        | 7,082<br>(6,559 - 7,610) | 27<br>(19 - 38)  | 8<br>(6 - 10)     | 308<br>(274 - 343) | 1,812<br>(1,655 - 1,984) | 4,928<br>(4,569 - 5,259) |
| Neoplasms                                                        | 2,507<br>(2,274 - 2,732) | 1<br>(1 - 2)     | 4<br>(3 - 5)      | 108<br>(95 - 122)  | 846<br>(762 - 934)       | 1,546<br>(1,388 - 1,695) |
| Esophageal cancer                                                | 126<br>(92 - 150)        | --               | --                | 6<br>(4 - 8)       | 56<br>(41 - 69)          | 64<br>(43 - 78)          |
| Stomach cancer                                                   | 155<br>(137 - 177)       | --               | --                | 4<br>(3 - 6)       | 42<br>(35 - 49)          | 109<br>(94 - 127)        |
| Liver cancer                                                     | 60<br>(35 - 79)          | --               | 0<br>(0 - 0)      | 3<br>(2 - 5)       | 24<br>(14 - 32)          | 33<br>(17 - 47)          |
| Liver cancer due to hepatitis B                                  | 15<br>(5 - 27)           | --               | 0<br>(0 - 0)      | 1<br>(1 - 2)       | 7<br>(2 - 13)            | 6<br>(2 - 13)            |
| Liver cancer due to hepatitis C                                  | 33<br>(18 - 47)          | --               | 0<br>(0 - 0)      | 1<br>(1 - 2)       | 12<br>(6 - 18)           | 19<br>(10 - 29)          |
| Liver cancer due to alcohol use                                  | 12<br>(5 - 20)           | --               | --                | 0<br>(0 - 1)       | 4<br>(2 - 7)             | 7<br>(3 - 13)            |
| Liver cancer due to other causes                                 | 1<br>(0 - 2)             | --               | 0<br>(0 - 0)      | 0<br>(0 - 0)       | 0<br>(0 - 1)             | 1<br>(0 - 1)             |
| Larynx cancer                                                    | 19<br>(13 - 24)          | --               | --                | 1<br>(1 - 1)       | 8<br>(5 - 11)            | 10<br>(6 - 13)           |
| Tracheal, bronchus and lung cancer                               | 674<br>(595 - 756)       | --               | --                | 15<br>(12 - 18)    | 260<br>(222 - 302)       | 399<br>(349 - 451)       |
| Breast cancer                                                    | 3<br>(1 - 9)             | --               | --                | 0<br>(0 - 0)       | 1<br>(0 - 2)             | 2<br>(1 - 7)             |
| Cervical cancer                                                  | --                       | --               | --                | --                 | --                       | --                       |
| Uterine cancer                                                   | --                       | --               | --                | --                 | --                       | --                       |
| Prostate cancer                                                  | 315<br>(228 - 413)       | --               | --                | 1<br>(0 - 1)       | 52<br>(36 - 71)          | 263<br>(184 - 349)       |

Web Table 31- Northern Ireland deaths with 95% UI by age, sex, and cause in 2013

| Cause                                         | Males, All Ages          | Males, 0-4 Years | Males, 5-14 Years | Males, 15-49 Years | Males, 50-69 Years | Males, 70-80 Years       |
|-----------------------------------------------|--------------------------|------------------|-------------------|--------------------|--------------------|--------------------------|
| Colon and rectum cancer                       | 352<br>(313 - 392)       | --               | --                | 13<br>(10 - 15)    | 116<br>(101 - 135) | 223<br>(195 - 255)       |
| Lip and oral cavity cancer                    | 30<br>(24 - 35)          | --               | --                | 3<br>(2 - 3)       | 14<br>(10 - 17)    | 14<br>(11 - 17)          |
| Nasopharynx cancer                            | 4<br>(3 - 5)             | --               | 0<br>(0 - 0)      | 1<br>(1 - 1)       | 2<br>(1 - 3)       | 1<br>(1 - 1)             |
| Other pharynx cancer                          | 15<br>(10 - 19)          | --               | --                | 1<br>(1 - 2)       | 9<br>(5 - 12)      | 5<br>(3 - 7)             |
| Gallbladder and biliary tract cancer          | 10<br>(7 - 15)           | --               | --                | 0<br>(0 - 0)       | 3<br>(2 - 4)       | 7<br>(5 - 11)            |
| Pancreatic cancer                             | 137<br>(120 - 155)       | --               | --                | 6<br>(4 - 7)       | 53<br>(45 - 63)    | 78<br>(67 - 91)          |
| Malignant skin melanoma                       | 28<br>(13 - 47)          | --               | --                | 5<br>(2 - 8)       | 10<br>(4 - 17)     | 12<br>(5 - 22)           |
| Non-melanoma skin cancer                      | 11<br>(7 - 17)           | --               | --                | 0<br>(0 - 1)       | 2<br>(1 - 3)       | 9<br>(5 - 14)            |
| Ovarian cancer                                | --                       | --               | --                | --                 | --                 | --                       |
| Testicular cancer                             | 2<br>(2 - 4)             | --               | --                | 2<br>(1 - 2)       | 0<br>(0 - 1)       | 0<br>(0 - 1)             |
| Kidney cancer                                 | 79<br>(66 - 93)          | 0<br>(0 - 0)     | 0<br>(0 - 0)      | 4<br>(3 - 6)       | 32<br>(25 - 39)    | 43<br>(34 - 52)          |
| Bladder cancer                                | 79<br>(60 - 94)          | --               | --                | 1<br>(1 - 1)       | 18<br>(13 - 22)    | 60<br>(45 - 74)          |
| Brain and nervous system cancer               | 62<br>(44 - 77)          | 0<br>(0 - 1)     | 1<br>(1 - 1)      | 12<br>(8 - 15)     | 32<br>(23 - 41)    | 17<br>(11 - 23)          |
| Thyroid cancer                                | 5<br>(4 - 6)             | --               | 0<br>(0 - 0)      | 0<br>(0 - 0)       | 2<br>(1 - 3)       | 3<br>(2 - 4)             |
| Mesothelioma                                  | 54<br>(26 - 73)          | --               | --                | 2<br>(1 - 3)       | 21<br>(11 - 29)    | 31<br>(12 - 44)          |
| Hodgkin lymphoma                              | 6<br>(4 - 9)             | 0<br>(0 - 0)     | 0<br>(0 - 0)      | 2<br>(2 - 3)       | 2<br>(1 - 3)       | 2<br>(1 - 3)             |
| Non-Hodgkin lymphoma                          | 84<br>(35 - 109)         | 0<br>(0 - 0)     | 0<br>(0 - 0)      | 7<br>(3 - 10)      | 29<br>(12 - 39)    | 47<br>(18 - 66)          |
| Multiple myeloma                              | 47<br>(26 - 73)          | --               | --                | 2<br>(1 - 3)       | 16<br>(9 - 28)     | 29<br>(16 - 44)          |
| Leukemia                                      | 69<br>(59 - 81)          | 0<br>(0 - 1)     | 1<br>(1 - 2)      | 7<br>(6 - 9)       | 19<br>(15 - 24)    | 41<br>(33 - 50)          |
| Other neoplasms                               | 81<br>(59 - 98)          | 1<br>(0 - 1)     | 1<br>(1 - 2)      | 10<br>(8 - 12)     | 24<br>(19 - 31)    | 45<br>(28 - 58)          |
| Cardiovascular diseases                       | 2,589<br>(2,358 - 2,833) | 0<br>(0 - 1)     | 0<br>(0 - 0)      | 79<br>(68 - 92)    | 604<br>(539 - 676) | 1,905<br>(1,723 - 2,085) |
| Rheumatic heart disease                       | 10<br>(6 - 15)           | 0<br>(0 - 0)     | 0<br>(0 - 0)      | 1<br>(1 - 2)       | 3<br>(2 - 5)       | 6<br>(3 - 10)            |
| Ischemic heart disease                        | 1,644<br>(1,466 - 1,918) | 0<br>(0 - 0)     | 0<br>(0 - 0)      | 54<br>(45 - 66)    | 442<br>(392 - 513) | 1,148<br>(1,008 - 1,354) |
| Cerebrovascular disease                       | 630<br>(452 - 768)       | 0<br>(0 - 0)     | 0<br>(0 - 0)      | 13<br>(8 - 16)     | 94<br>(60 - 121)   | 523<br>(380 - 641)       |
| Ischemic stroke                               | 363<br>(267 - 456)       | 0<br>(0 - 0)     | 0<br>(0 - 0)      | 2<br>(1 - 2)       | 33<br>(20 - 46)    | 328<br>(242 - 412)       |
| Hemorrhagic stroke                            | 267<br>(166 - 348)       | 0<br>(0 - 0)     | 0<br>(0 - 0)      | 11<br>(7 - 14)     | 61<br>(38 - 80)    | 194<br>(119 - 261)       |
| Hypertensive heart disease                    | 17<br>(10 - 24)          | 0<br>(0 - 0)     | 0<br>(0 - 0)      | 1<br>(1 - 1)       | 5<br>(3 - 8)       | 11<br>(6 - 17)           |
| Cardiomyopathy and myocarditis                | 31<br>(23 - 44)          | 0<br>(0 - 0)     | 0<br>(0 - 0)      | 4<br>(3 - 6)       | 9<br>(6 - 11)      | 17<br>(12 - 28)          |
| Atrial fibrillation and flutter               | 31<br>(20 - 44)          | --               | --                | 0<br>(0 - 0)       | 3<br>(2 - 4)       | 29<br>(18 - 40)          |
| Aortic aneurysm                               | 96<br>(69 - 114)         | --               | --                | 1<br>(1 - 2)       | 20<br>(14 - 25)    | 74<br>(54 - 90)          |
| Peripheral vascular disease                   | 26<br>(17 - 35)          | --               | --                | 0<br>(0 - 0)       | 4<br>(2 - 5)       | 22<br>(14 - 31)          |
| Endocarditis                                  | 10<br>(6 - 16)           | 0<br>(0 - 0)     | 0<br>(0 - 0)      | 1<br>(1 - 1)       | 3<br>(2 - 5)       | 6<br>(3 - 10)            |
| Other cardiovascular and circulatory diseases | 93<br>(47 - 116)         | 0<br>(0 - 0)     | 0<br>(0 - 0)      | 4<br>(2 - 5)       | 21<br>(10 - 27)    | 68<br>(34 - 89)          |
| Chronic respiratory diseases                  | 627<br>(482 - 716)       | 0<br>(0 - 1)     | 0<br>(0 - 0)      | 8<br>(7 - 10)      | 113<br>(90 - 133)  | 505<br>(385 - 585)       |
| Chronic obstructive pulmonary disease         | 518<br>(407 - 609)       | 0<br>(0 - 0)     | 0<br>(0 - 0)      | 3<br>(2 - 4)       | 89<br>(71 - 109)   | 426<br>(328 - 505)       |
| Pneumoconiosis                                | 17<br>(10 - 24)          | 0<br>(0 - 0)     | 0<br>(0 - 0)      | 0<br>(0 - 0)       | 2<br>(1 - 3)       | 14<br>(8 - 21)           |
| Silicosis                                     | 0<br>(0 - 0)             | 0<br>(0 - 0)     | 0<br>(0 - 0)      | 0<br>(0 - 0)       | 0<br>(0 - 0)       | 0<br>(0 - 0)             |
| Asbestosis                                    | 14<br>(8 - 20)           | 0<br>(0 - 0)     | 0<br>(0 - 0)      | 0<br>(0 - 0)       | 2<br>(1 - 3)       | 12<br>(7 - 17)           |
| Coal workers pneumoconiosis                   | 0<br>(0 - 1)             | 0<br>(0 - 0)     | 0<br>(0 - 0)      | 0<br>(0 - 0)       | 0<br>(0 - 0)       | 0<br>(0 - 1)             |
| Other pneumoconiosis                          | 2<br>(1 - 3)             | 0<br>(0 - 0)     | 0<br>(0 - 0)      | 0<br>(0 - 0)       | 0<br>(0 - 0)       | 2<br>(1 - 3)             |

Web Table 31- Northern Ireland deaths with 95% UI by age, sex, and cause in 2013

| Cause                                               | Males, All Ages    | Males, 0-4 Years | Males, 5-14 Years | Males, 15-49 Years | Males, 50-69 Years | Males, 70-80 Years |
|-----------------------------------------------------|--------------------|------------------|-------------------|--------------------|--------------------|--------------------|
| Asthma                                              | 13<br>(10 - 16)    | 0<br>(0 - 0)     | 0<br>(0 - 0)      | 3<br>(2 - 4)       | 4<br>(3 - 5)       | 6<br>(4 - 8)       |
| Interstitial lung disease and pulmonary sarcoidosis | 75<br>(32 - 112)   | 0<br>(0 - 0)     | 0<br>(0 - 0)      | 2<br>(1 - 3)       | 18<br>(8 - 27)     | 55<br>(23 - 85)    |
| Other chronic respiratory diseases                  | 5<br>(3 - 7)       | 0<br>(0 - 0)     | 0<br>(0 - 0)      | 0<br>(0 - 0)       | 1<br>(0 - 1)       | 4<br>(3 - 6)       |
| Cirrhosis                                           | 143<br>(126 - 162) | 0<br>(0 - 0)     | 0<br>(0 - 0)      | 31<br>(26 - 37)    | 77<br>(66 - 89)    | 35<br>(30 - 41)    |
| Cirrhosis due to hepatitis B                        | 14<br>(8 - 22)     | 0<br>(0 - 0)     | 0<br>(0 - 0)      | 3<br>(2 - 5)       | 8<br>(4 - 13)      | 3<br>(2 - 6)       |
| Cirrhosis due to hepatitis C                        | 61<br>(35 - 92)    | 0<br>(0 - 0)     | 0<br>(0 - 0)      | 13<br>(7 - 21)     | 32<br>(17 - 51)    | 16<br>(9 - 22)     |
| Cirrhosis due to alcohol use                        | 50<br>(26 - 75)    | --               | --                | 9<br>(4 - 14)      | 27<br>(14 - 42)    | 14<br>(8 - 21)     |
| Cirrhosis due to other causes                       | 18<br>(7 - 33)     | 0<br>(0 - 0)     | 0<br>(0 - 0)      | 6<br>(2 - 10)      | 9<br>(3 - 18)      | 2<br>(1 - 5)       |
| Digestive diseases                                  | 181<br>(140 - 208) | 0<br>(0 - 0)     | 0<br>(0 - 0)      | 9<br>(7 - 11)      | 40<br>(31 - 48)    | 132<br>(101 - 155) |
| Peptic ulcer disease                                | 36<br>(27 - 47)    | 0<br>(0 - 0)     | 0<br>(0 - 0)      | 1<br>(1 - 2)       | 8<br>(6 - 11)      | 26<br>(19 - 36)    |
| Gastritis and duodenitis                            | 3<br>(1 - 5)       | 0<br>(0 - 0)     | 0<br>(0 - 0)      | 0<br>(0 - 1)       | 1<br>(0 - 1)       | 2<br>(1 - 3)       |
| Appendicitis                                        | 2<br>(1 - 3)       | 0<br>(0 - 0)     | 0<br>(0 - 0)      | 0<br>(0 - 0)       | 1<br>(0 - 1)       | 1<br>(1 - 2)       |
| Paralytic ileus and intestinal obstruction          | 26<br>(13 - 37)    | 0<br>(0 - 0)     | 0<br>(0 - 0)      | 1<br>(0 - 1)       | 4<br>(2 - 6)       | 21<br>(10 - 31)    |
| Inguinal, femoral, and abdominal hernia             | 6<br>(3 - 10)      | 0<br>(0 - 0)     | 0<br>(0 - 0)      | 0<br>(0 - 0)       | 1<br>(0 - 2)       | 5<br>(2 - 8)       |
| Inflammatory bowel disease                          | 11<br>(7 - 16)     | 0<br>(0 - 0)     | 0<br>(0 - 0)      | 1<br>(0 - 1)       | 2<br>(1 - 4)       | 8<br>(5 - 12)      |
| Vascular intestinal disorders                       | 27<br>(11 - 50)    | 0<br>(0 - 0)     | 0<br>(0 - 0)      | 1<br>(0 - 1)       | 7<br>(3 - 12)      | 20<br>(8 - 38)     |
| Gallbladder and biliary diseases                    | 20<br>(11 - 28)    | 0<br>(0 - 0)     | 0<br>(0 - 0)      | 0<br>(0 - 1)       | 3<br>(2 - 5)       | 16<br>(9 - 23)     |
| Pancreatitis                                        | 18<br>(12 - 25)    | 0<br>(0 - 0)     | 0<br>(0 - 0)      | 3<br>(2 - 4)       | 7<br>(4 - 9)       | 9<br>(5 - 13)      |
| Other digestive diseases                            | 30<br>(18 - 40)    | 0<br>(0 - 0)     | 0<br>(0 - 0)      | 1<br>(1 - 2)       | 6<br>(4 - 8)       | 23<br>(13 - 31)    |
| Neurological disorders                              | 621<br>(461 - 778) | 1<br>(1 - 2)     | 1<br>(1 - 1)      | 17<br>(13 - 21)    | 50<br>(40 - 61)    | 552<br>(400 - 710) |
| Alzheimer disease and other dementias               | 476<br>(321 - 639) | --               | --                | 0<br>(0 - 0)       | 18<br>(11 - 27)    | 458<br>(306 - 618) |
| Parkinson disease                                   | 76<br>(42 - 97)    | --               | --                | 0<br>(0 - 0)       | 5<br>(4 - 7)       | 70<br>(40 - 91)    |
| Epilepsy                                            | 14<br>(10 - 18)    | 0<br>(0 - 0)     | 0<br>(0 - 0)      | 7<br>(5 - 9)       | 3<br>(2 - 5)       | 3<br>(2 - 4)       |
| Multiple sclerosis                                  | 13<br>(5 - 22)     | --               | --                | 3<br>(1 - 5)       | 6<br>(2 - 11)      | 3<br>(1 - 5)       |
| Other neurological disorders                        | 43<br>(32 - 51)    | 1<br>(1 - 2)     | 1<br>(0 - 1)      | 6<br>(5 - 8)       | 17<br>(13 - 22)    | 18<br>(12 - 22)    |
| Mental and substance use disorders                  | 64<br>(33 - 78)    | 0<br>(0 - 0)     | 0<br>(0 - 0)      | 34<br>(20 - 42)    | 24<br>(10 - 32)    | 5<br>(2 - 7)       |
| Schizophrenia                                       | 0<br>(0 - 0)       | --               | --                | 0<br>(0 - 0)       | 0<br>(0 - 0)       | 0<br>(0 - 0)       |
| Alcohol use disorders                               | 46<br>(18 - 58)    | --               | --                | 19<br>(8 - 25)     | 23<br>(8 - 30)     | 5<br>(2 - 6)       |
| Drug use disorders                                  | 17<br>(10 - 22)    | 0<br>(0 - 0)     | --                | 16<br>(9 - 20)     | 1<br>(1 - 2)       | 0<br>(0 - 1)       |
| Opioid use disorders                                | 6<br>(4 - 8)       | 0<br>(0 - 0)     | --                | 6<br>(3 - 8)       | 0<br>(0 - 1)       | 0<br>(0 - 0)       |
| Cocaine use disorders                               | 0<br>(0 - 1)       | 0<br>(0 - 0)     | --                | 0<br>(0 - 1)       | 0<br>(0 - 0)       | 0<br>(0 - 0)       |
| Amphetamine use disorders                           | 0<br>(0 - 1)       | 0<br>(0 - 0)     | --                | 0<br>(0 - 1)       | 0<br>(0 - 0)       | 0<br>(0 - 0)       |
| Other drug use disorders                            | 10<br>(6 - 12)     | 0<br>(0 - 0)     | --                | 9<br>(5 - 11)      | 1<br>(1 - 1)       | 0<br>(0 - 0)       |
| Eating disorders                                    | 0<br>(0 - 0)       | --               | 0<br>(0 - 0)      | 0<br>(0 - 0)       | --                 | --                 |
| Anorexia nervosa                                    | 0<br>(0 - 0)       | --               | 0<br>(0 - 0)      | 0<br>(0 - 0)       | --                 | --                 |
| Diabetes, urogenital, blood, and endocrine diseases | 282<br>(247 - 318) | 1<br>(1 - 2)     | 1<br>(1 - 1)      | 13<br>(11 - 16)    | 45<br>(39 - 54)    | 222<br>(190 - 254) |
| Diabetes mellitus                                   | 74<br>(63 - 85)    | 0<br>(0 - 0)     | 0<br>(0 - 0)      | 3<br>(3 - 4)       | 16<br>(13 - 19)    | 54<br>(45 - 65)    |
| Acute glomerulonephritis                            | 0<br>(0 - 0)       | 0<br>(0 - 0)     | 0<br>(0 - 0)      | 0<br>(0 - 0)       | 0<br>(0 - 0)       | 0<br>(0 - 0)       |
| Chronic kidney disease                              | 116<br>(96 - 145)  | 0<br>(0 - 0)     | 0<br>(0 - 0)      | 4<br>(3 - 6)       | 14<br>(11 - 19)    | 97<br>(79 - 123)   |
| Chronic kidney disease due to diabetes mellitus     | 20<br>(13 - 48)    | 0<br>(0 - 0)     | 0<br>(0 - 0)      | 1<br>(0 - 2)       | 3<br>(2 - 7)       | 16<br>(10 - 40)    |

Web Table 31- Northern Ireland deaths with 95% UI by age, sex, and cause in 2013

| Cause                                               | Males, All Ages    | Males, 0-4 Years | Males, 5-14 Years | Males, 15-49 Years | Males, 50-69 Years | Males, 70-80 Years |
|-----------------------------------------------------|--------------------|------------------|-------------------|--------------------|--------------------|--------------------|
| Chronic kidney disease due to hypertension          | 26<br>(14 - 38)    | 0<br>(0 - 0)     | 0<br>(0 - 0)      | 1<br>(0 - 1)       | 3<br>(2 - 5)       | 22<br>(12 - 32)    |
| Chronic kidney disease due to glomerulonephritis    | 4<br>(2 - 5)       | 0<br>(0 - 0)     | 0<br>(0 - 0)      | 0<br>(0 - 0)       | 1<br>(0 - 1)       | 3<br>(1 - 4)       |
| Chronic kidney disease due to other causes          | 65<br>(44 - 89)    | 0<br>(0 - 0)     | 0<br>(0 - 0)      | 2<br>(2 - 3)       | 7<br>(4 - 10)      | 56<br>(36 - 77)    |
| Urinary diseases and male infertility               | 67<br>(36 - 87)    | 0<br>(0 - 0)     | 0<br>(0 - 0)      | 2<br>(1 - 2)       | 8<br>(4 - 10)      | 57<br>(30 - 76)    |
| Interstitial nephritis and urinary tract infections | 59<br>(31 - 77)    | 0<br>(0 - 0)     | 0<br>(0 - 0)      | 1<br>(1 - 2)       | 6<br>(3 - 9)       | 51<br>(26 - 69)    |
| Urolithiasis                                        | 2<br>(1 - 3)       | --               | 0<br>(0 - 0)      | 0<br>(0 - 0)       | 0<br>(0 - 1)       | 1<br>(1 - 3)       |
| Other urinary diseases                              | 6<br>(3 - 12)      | 0<br>(0 - 0)     | 0<br>(0 - 0)      | 0<br>(0 - 0)       | 1<br>(1 - 2)       | 5<br>(2 - 10)      |
| Gynecological diseases                              | --                 | --               | --                | --                 | --                 | --                 |
| Uterine fibroids                                    | --                 | --               | --                | --                 | --                 | --                 |
| Polycystic ovarian syndrome                         | --                 | --               | --                | --                 | --                 | --                 |
| Endometriosis                                       | --                 | --               | --                | --                 | --                 | --                 |
| Genital prolapse                                    | --                 | --               | --                | --                 | --                 | --                 |
| Other gynecological diseases                        | --                 | --               | --                | --                 | --                 | --                 |
| Hemoglobinopathies and hemolytic anemias            | 4<br>(2 - 6)       | 0<br>(0 - 0)     | 0<br>(0 - 0)      | 1<br>(0 - 1)       | 1<br>(0 - 1)       | 2<br>(1 - 3)       |
| Thalassemias                                        | 0<br>(0 - 0)       | 0<br>(0 - 0)     | 0<br>(0 - 0)      | 0<br>(0 - 0)       | 0<br>(0 - 0)       | 0<br>(0 - 0)       |
| Sickle cell disorders                               | 1<br>(0 - 1)       | 0<br>(0 - 0)     | 0<br>(0 - 0)      | 0<br>(0 - 0)       | 0<br>(0 - 1)       | 0<br>(0 - 0)       |
| G6PD deficiency                                     | 0<br>(0 - 0)       | 0<br>(0 - 0)     | 0<br>(0 - 0)      | 0<br>(0 - 0)       | 0<br>(0 - 0)       | 0<br>(0 - 0)       |
| Other hemoglobinopathies and hemolytic anemias      | 3<br>(2 - 4)       | 0<br>(0 - 0)     | 0<br>(0 - 0)      | 0<br>(0 - 0)       | 0<br>(0 - 1)       | 2<br>(1 - 3)       |
| Endocrine, metabolic, blood, and immune disorders   | 22<br>(17 - 35)    | 1<br>(1 - 2)     | 1<br>(0 - 1)      | 4<br>(3 - 6)       | 6<br>(4 - 10)      | 11<br>(7 - 17)     |
| Musculoskeletal disorders                           | 17<br>(10 - 21)    | --               | 0<br>(0 - 0)      | 1<br>(1 - 1)       | 5<br>(3 - 6)       | 11<br>(6 - 15)     |
| Rheumatoid arthritis                                | 5<br>(3 - 7)       | --               | 0<br>(0 - 0)      | 0<br>(0 - 0)       | 1<br>(1 - 2)       | 3<br>(2 - 5)       |
| Other musculoskeletal disorders                     | 12<br>(7 - 15)     | --               | 0<br>(0 - 0)      | 1<br>(1 - 1)       | 3<br>(2 - 4)       | 8<br>(4 - 11)      |
| Other non-communicable diseases                     | 53<br>(44 - 64)    | 22<br>(15 - 31)  | 1<br>(1 - 2)      | 8<br>(6 - 10)      | 8<br>(6 - 9)       | 14<br>(10 - 18)    |
| Congenital anomalies                                | 39<br>(31 - 49)    | 21<br>(14 - 30)  | 1<br>(1 - 2)      | 7<br>(6 - 9)       | 5<br>(4 - 7)       | 4<br>(3 - 5)       |
| Neural tube defects                                 | 2<br>(1 - 3)       | 1<br>(1 - 2)     | 0<br>(0 - 0)      | 1<br>(0 - 1)       | 0<br>(0 - 0)       | 0<br>(0 - 0)       |
| Congenital heart anomalies                          | 13<br>(11 - 17)    | 5<br>(3 - 8)     | 1<br>(0 - 1)      | 4<br>(3 - 5)       | 2<br>(1 - 3)       | 1<br>(1 - 2)       |
| Cleft lip and cleft palate                          | 0<br>(0 - 0)       | 0<br>(0 - 0)     | --                | --                 | --                 | --                 |
| Down syndrome                                       | 5<br>(3 - 7)       | 1<br>(0 - 1)     | 0<br>(0 - 0)      | 1<br>(1 - 2)       | 3<br>(2 - 4)       | 0<br>(0 - 1)       |
| Chromosomal unbalanced rearrangements               | 3<br>(2 - 5)       | 3<br>(1 - 4)     | 0<br>(0 - 0)      | 0<br>(0 - 0)       | 0<br>(0 - 0)       | 0<br>(0 - 0)       |
| Other congenital anomalies                          | 15<br>(10 - 21)    | 11<br>(7 - 17)   | 0<br>(0 - 1)      | 1<br>(0 - 1)       | 0<br>(0 - 1)       | 2<br>(2 - 3)       |
| Skin and subcutaneous diseases                      | 13<br>(8 - 17)     | 0<br>(0 - 0)     | 0<br>(0 - 0)      | 1<br>(0 - 1)       | 2<br>(1 - 3)       | 10<br>(6 - 14)     |
| Cellulitis                                          | 4<br>(1 - 6)       | 0<br>(0 - 0)     | 0<br>(0 - 0)      | 0<br>(0 - 0)       | 1<br>(0 - 1)       | 3<br>(1 - 5)       |
| Pyoderma                                            | 5<br>(3 - 7)       | 0<br>(0 - 0)     | 0<br>(0 - 0)      | 0<br>(0 - 0)       | 1<br>(0 - 1)       | 3<br>(2 - 6)       |
| Decubitus ulcer                                     | 4<br>(2 - 6)       | 0<br>(0 - 0)     | 0<br>(0 - 0)      | 0<br>(0 - 0)       | 1<br>(0 - 1)       | 3<br>(2 - 5)       |
| Other skin and subcutaneous diseases                | 1<br>(0 - 1)       | 0<br>(0 - 0)     | 0<br>(0 - 0)      | 0<br>(0 - 0)       | 0<br>(0 - 0)       | 0<br>(0 - 1)       |
| Sudden infant death syndrome                        | 1<br>(0 - 3)       | 1<br>(0 - 3)     | --                | --                 | --                 | --                 |
| Injuries                                            | 433<br>(367 - 487) | 4<br>(3 - 6)     | 6<br>(4 - 7)      | 197<br>(170 - 224) | 91<br>(75 - 105)   | 135<br>(102 - 161) |
| Transport injuries                                  | 86<br>(75 - 97)    | 1<br>(0 - 1)     | 2<br>(2 - 3)      | 52<br>(44 - 60)    | 16<br>(13 - 19)    | 15<br>(12 - 19)    |
| Road injuries                                       | 82<br>(72 - 93)    | 1<br>(0 - 1)     | 2<br>(2 - 3)      | 50<br>(43 - 57)    | 15<br>(12 - 18)    | 15<br>(12 - 18)    |
| Pedestrian road injuries                            | 22<br>(13 - 33)    | 0<br>(0 - 1)     | 1<br>(1 - 2)      | 7<br>(4 - 12)      | 6<br>(3 - 8)       | 8<br>(5 - 11)      |



Web Table 31- Northern Ireland deaths with 95% UI by age, sex, and cause in 2013

| Cause                                           | Males, All Ages    | Males, 0-4 Years | Males, 5-14 Years | Males, 15-49 Years | Males, 50-69 Years | Males, 70-80 Years |
|-------------------------------------------------|--------------------|------------------|-------------------|--------------------|--------------------|--------------------|
| Cyclist road injuries                           | 4<br>(3 - 6)       | 0<br>(0 - 0)     | 0<br>(0 - 1)      | 2<br>(1 - 3)       | 1<br>(1 - 1)       | 1<br>(0 - 1)       |
| Motorcyclist road injuries                      | 11<br>(7 - 15)     | 0<br>(0 - 0)     | 0<br>(0 - 0)      | 10<br>(6 - 14)     | 1<br>(0 - 1)       | 0<br>(0 - 0)       |
| Motor vehicle road injuries                     | 45<br>(33 - 56)    | 0<br>(0 - 0)     | 1<br>(0 - 1)      | 31<br>(23 - 38)    | 7<br>(5 - 10)      | 6<br>(3 - 9)       |
| Other road injuries                             | 0<br>(0 - 1)       | 0<br>(0 - 0)     | 0<br>(0 - 0)      | 0<br>(0 - 0)       | 0<br>(0 - 0)       | 0<br>(0 - 0)       |
| Other transport injuries                        | 4<br>(3 - 5)       | 0<br>(0 - 0)     | 0<br>(0 - 0)      | 2<br>(2 - 3)       | 1<br>(1 - 2)       | 0<br>(0 - 1)       |
| Unintentional injuries                          | 177<br>(135 - 204) | 3<br>(2 - 4)     | 2<br>(2 - 3)      | 34<br>(29 - 40)    | 34<br>(26 - 40)    | 104<br>(71 - 126)  |
| Falls                                           | 110<br>(71 - 136)  | 0<br>(0 - 1)     | 0<br>(0 - 1)      | 12<br>(8 - 15)     | 19<br>(12 - 24)    | 78<br>(48 - 100)   |
| Drowning                                        | 10<br>(7 - 14)     | 0<br>(0 - 1)     | 1<br>(0 - 1)      | 5<br>(4 - 7)       | 2<br>(1 - 3)       | 1<br>(1 - 2)       |
| Fire, heat, and hot substances                  | 10<br>(8 - 14)     | 0<br>(0 - 1)     | 0<br>(0 - 0)      | 3<br>(2 - 4)       | 2<br>(2 - 4)       | 4<br>(3 - 6)       |
| Poisonings                                      | 5<br>(4 - 10)      | 0<br>(0 - 0)     | 0<br>(0 - 0)      | 3<br>(2 - 6)       | 1<br>(1 - 2)       | 1<br>(0 - 2)       |
| Exposure to mechanical forces                   | 9<br>(8 - 11)      | 0<br>(0 - 1)     | 0<br>(0 - 1)      | 5<br>(4 - 7)       | 2<br>(2 - 3)       | 1<br>(1 - 1)       |
| Unintentional firearm injuries                  | 1<br>(1 - 1)       | 0<br>(0 - 0)     | 0<br>(0 - 0)      | 1<br>(0 - 1)       | 0<br>(0 - 0)       | 0<br>(0 - 0)       |
| Unintentional suffocation                       | 2<br>(0 - 2)       | 0<br>(0 - 0)     | 0<br>(0 - 0)      | 1<br>(0 - 1)       | 0<br>(0 - 0)       | 0<br>(0 - 0)       |
| Other exposure to mechanical forces             | 7<br>(6 - 9)       | 0<br>(0 - 0)     | 0<br>(0 - 0)      | 4<br>(3 - 5)       | 2<br>(1 - 2)       | 1<br>(1 - 1)       |
| Adverse effects of medical treatment            | 8<br>(6 - 11)      | 0<br>(0 - 0)     | 0<br>(0 - 0)      | 1<br>(0 - 1)       | 2<br>(1 - 3)       | 5<br>(3 - 8)       |
| Animal contact                                  | 2<br>(1 - 3)       | 0<br>(0 - 0)     | 0<br>(0 - 0)      | 1<br>(0 - 1)       | 1<br>(0 - 1)       | 1<br>(0 - 1)       |
| Venomous animal contact                         | 0<br>(0 - 0)       | 0<br>(0 - 0)     | 0<br>(0 - 0)      | 0<br>(0 - 0)       | 0<br>(0 - 0)       | 0<br>(0 - 0)       |
| Non-venomous animal contact                     | 2<br>(1 - 3)       | 0<br>(0 - 0)     | 0<br>(0 - 0)      | 1<br>(0 - 1)       | 1<br>(0 - 1)       | 1<br>(0 - 1)       |
| Foreign body                                    | 21<br>(9 - 29)     | 1<br>(0 - 1)     | 0<br>(0 - 1)      | 4<br>(2 - 6)       | 4<br>(2 - 6)       | 12<br>(5 - 18)     |
| Pulmonary aspiration and foreign body in airway | 21<br>(9 - 29)     | 1<br>(0 - 1)     | 0<br>(0 - 1)      | 4<br>(2 - 6)       | 4<br>(2 - 6)       | 12<br>(5 - 18)     |
| Foreign body in other body part                 | 0<br>(0 - 0)       | 0<br>(0 - 0)     | 0<br>(0 - 0)      | 0<br>(0 - 0)       | 0<br>(0 - 0)       | 0<br>(0 - 0)       |
| Other unintentional injuries                    | 2<br>(1 - 2)       | 0<br>(0 - 0)     | 0<br>(0 - 0)      | 1<br>(0 - 1)       | 0<br>(0 - 1)       | 0<br>(0 - 1)       |
| Self-harm and interpersonal violence            | 170<br>(132 - 206) | 1<br>(1 - 2)     | 1<br>(1 - 1)      | 110<br>(87 - 134)  | 41<br>(30 - 52)    | 17<br>(12 - 21)    |
| Self-harm                                       | 139<br>(96 - 164)  | --               | 0<br>(0 - 0)      | 89<br>(62 - 108)   | 36<br>(24 - 45)    | 14<br>(9 - 18)     |
| Interpersonal violence                          | 32<br>(24 - 51)    | 1<br>(1 - 2)     | 1<br>(0 - 1)      | 22<br>(16 - 37)    | 6<br>(4 - 10)      | 3<br>(2 - 4)       |
| Assault by firearm                              | 16<br>(11 - 31)    | 0<br>(0 - 0)     | 0<br>(0 - 0)      | 12<br>(8 - 23)     | 3<br>(2 - 5)       | 1<br>(1 - 2)       |
| Assault by sharp object                         | 4<br>(2 - 8)       | 0<br>(0 - 0)     | 0<br>(0 - 0)      | 3<br>(1 - 6)       | 1<br>(0 - 1)       | 0<br>(0 - 0)       |
| Assault by other means                          | 11<br>(7 - 19)     | 1<br>(0 - 1)     | 0<br>(0 - 1)      | 6<br>(3 - 12)      | 2<br>(1 - 4)       | 1<br>(1 - 2)       |

Web Table 31- Northern Ireland deaths with 95% UI by age, sex, and cause in 2013

| Cause                                                             | Females, All Ages        | Females, 0-4 Years | Females, 5-14 Years | Females, 15-49 Years | Females, 50-69 Years     | Females, 70-80 Years     |
|-------------------------------------------------------------------|--------------------------|--------------------|---------------------|----------------------|--------------------------|--------------------------|
| All causes                                                        | 8,085<br>(7,562 - 8,682) | 48<br>(35 - 64)    | 10<br>(8 - 11)      | 281<br>(250 - 317)   | 1,231<br>(1,116 - 1,364) | 6,516<br>(6,143 - 6,926) |
| Communicable, maternal, neonatal, and nutritional diseases        | 770<br>(586 - 1,154)     | 23<br>(15 - 31)    | 1<br>(1 - 1)        | 11<br>(9 - 14)       | 35<br>(27 - 45)          | 700<br>(519 - 1,077)     |
| HIV/AIDS and tuberculosis                                         | 5<br>(4 - 6)             | 0<br>(0 - 0)       | 0<br>(0 - 0)        | 1<br>(1 - 1)         | 1<br>(1 - 2)             | 3<br>(2 - 4)             |
| Tuberculosis                                                      | 5<br>(3 - 6)             | 0<br>(0 - 0)       | 0<br>(0 - 0)        | 1<br>(0 - 1)         | 1<br>(1 - 2)             | 3<br>(2 - 4)             |
| HIV/AIDS                                                          | 0<br>(0 - 0)             | 0<br>(0 - 0)       | --                  | 0<br>(0 - 0)         | 0<br>(0 - 0)             | --                       |
| HIV/AIDS resulting in mycobacterial infection                     | 0<br>(0 - 0)             | 0<br>(0 - 0)       | --                  | 0<br>(0 - 0)         | 0<br>(0 - 0)             | --                       |
| HIV/AIDS resulting in other diseases                              | 0<br>(0 - 0)             | 0<br>(0 - 0)       | --                  | 0<br>(0 - 0)         | 0<br>(0 - 0)             | --                       |
| Diarrhea, lower respiratory, and other common infectious diseases | 726<br>(542 - 1,112)     | 4<br>(3 - 6)       | 1<br>(1 - 1)        | 8<br>(6 - 10)        | 31<br>(24 - 40)          | 682<br>(501 - 1,061)     |
| Diarrheal diseases                                                | 24<br>(16 - 38)          | 1<br>(0 - 1)       | 0<br>(0 - 0)        | 0<br>(0 - 0)         | 1<br>(1 - 2)             | 22<br>(13 - 35)          |
| Intestinal infectious diseases                                    | 1<br>(0 - 2)             | 0<br>(0 - 0)       | 0<br>(0 - 0)        | 0<br>(0 - 1)         | 0<br>(0 - 0)             | 0<br>(0 - 0)             |
| Typhoid fever                                                     | 1<br>(0 - 2)             | 0<br>(0 - 0)       | 0<br>(0 - 0)        | 0<br>(0 - 1)         | 0<br>(0 - 0)             | 0<br>(0 - 0)             |
| Paratyphoid fever                                                 | 0<br>(0 - 0)             | 0<br>(0 - 0)       | 0<br>(0 - 0)        | 0<br>(0 - 0)         | 0<br>(0 - 0)             | 0<br>(0 - 0)             |
| Other intestinal infectious diseases                              | 0<br>(0 - 1)             | 0<br>(0 - 0)       | 0<br>(0 - 0)        | 0<br>(0 - 0)         | 0<br>(0 - 0)             | 0<br>(0 - 0)             |
| Lower respiratory infections                                      | 694<br>(510 - 1,079)     | 3<br>(2 - 4)       | 0<br>(0 - 1)        | 6<br>(5 - 8)         | 28<br>(21 - 37)          | 657<br>(474 - 1,036)     |
| Upper respiratory infections                                      | 0<br>(0 - 1)             | 0<br>(0 - 0)       | 0<br>(0 - 0)        | 0<br>(0 - 0)         | 0<br>(0 - 0)             | 0<br>(0 - 1)             |
| Otitis media                                                      | 0<br>(0 - 0)             | 0<br>(0 - 0)       | 0<br>(0 - 0)        | 0<br>(0 - 0)         | 0<br>(0 - 0)             | 0<br>(0 - 0)             |
| Meningitis                                                        | 4<br>(3 - 5)             | 0<br>(0 - 1)       | 0<br>(0 - 0)        | 1<br>(0 - 1)         | 1<br>(1 - 1)             | 2<br>(1 - 2)             |
| Pneumococcal meningitis                                           | 1<br>(1 - 1)             | 0<br>(0 - 0)       | 0<br>(0 - 0)        | 0<br>(0 - 0)         | 0<br>(0 - 0)             | 0<br>(0 - 1)             |
| H influenzae type B meningitis                                    | 0<br>(0 - 1)             | 0<br>(0 - 0)       | 0<br>(0 - 0)        | 0<br>(0 - 0)         | 0<br>(0 - 0)             | 0<br>(0 - 0)             |
| Meningococcal meningitis                                          | 1<br>(1 - 2)             | 0<br>(0 - 0)       | 0<br>(0 - 0)        | 0<br>(0 - 0)         | 0<br>(0 - 0)             | 1<br>(0 - 1)             |
| Other meningitis                                                  | 1<br>(1 - 2)             | 0<br>(0 - 0)       | 0<br>(0 - 0)        | 0<br>(0 - 0)         | 0<br>(0 - 0)             | 1<br>(0 - 1)             |
| Encephalitis                                                      | 2<br>(1 - 3)             | 0<br>(0 - 0)       | 0<br>(0 - 0)        | 0<br>(0 - 1)         | 0<br>(0 - 1)             | 1<br>(0 - 1)             |
| Diphtheria                                                        | 0<br>(0 - 0)             | 0<br>(0 - 0)       | 0<br>(0 - 0)        | 0<br>(0 - 0)         | 0<br>(0 - 0)             | --                       |
| Whooping cough                                                    | 0<br>(0 - 0)             | 0<br>(0 - 0)       | 0<br>(0 - 0)        | 0<br>(0 - 0)         | 0<br>(0 - 0)             | --                       |
| Tetanus                                                           | 0<br>(0 - 0)             | 0<br>(0 - 0)       | 0<br>(0 - 0)        | 0<br>(0 - 0)         | 0<br>(0 - 0)             | 0<br>(0 - 0)             |
| Measles                                                           | 0<br>(0 - 0)             | 0<br>(0 - 0)       | 0<br>(0 - 0)        | 0<br>(0 - 0)         | 0<br>(0 - 0)             | --                       |
| Varicella and herpes zoster                                       | 1<br>(0 - 4)             | 0<br>(0 - 0)       | 0<br>(0 - 0)        | 0<br>(0 - 0)         | 0<br>(0 - 0)             | 1<br>(0 - 4)             |
| Neglected tropical diseases and malaria                           | 1<br>(0 - 1)             | 0<br>(0 - 0)       | 0<br>(0 - 0)        | 0<br>(0 - 0)         | 0<br>(0 - 0)             | 0<br>(0 - 0)             |
| Cysticercosis                                                     | 0<br>(0 - 0)             | 0<br>(0 - 0)       | 0<br>(0 - 0)        | 0<br>(0 - 0)         | 0<br>(0 - 0)             | 0<br>(0 - 0)             |
| Cystic echinococcosis                                             | 0<br>(0 - 0)             | 0<br>(0 - 0)       | 0<br>(0 - 0)        | 0<br>(0 - 0)         | 0<br>(0 - 0)             | 0<br>(0 - 0)             |
| Dengue                                                            | 0<br>(0 - 0)             | 0<br>(0 - 0)       | 0<br>(0 - 0)        | 0<br>(0 - 0)         | 0<br>(0 - 0)             | 0<br>(0 - 0)             |
| Rabies                                                            | 0<br>(0 - 0)             | 0<br>(0 - 0)       | 0<br>(0 - 0)        | 0<br>(0 - 0)         | 0<br>(0 - 0)             | 0<br>(0 - 0)             |
| Other neglected tropical diseases                                 | 0<br>(0 - 1)             | 0<br>(0 - 0)       | 0<br>(0 - 0)        | 0<br>(0 - 0)         | 0<br>(0 - 0)             | 0<br>(0 - 0)             |
| Maternal disorders                                                | 1<br>(1 - 2)             | --                 | 0<br>(0 - 0)        | 1<br>(1 - 2)         | --                       | --                       |
| Maternal hemorrhage                                               | 0<br>(0 - 0)             | --                 | 0<br>(0 - 0)        | 0<br>(0 - 0)         | --                       | --                       |
| Maternal sepsis and other maternal infections                     | 0<br>(0 - 0)             | --                 | 0<br>(0 - 0)        | 0<br>(0 - 0)         | --                       | --                       |
| Maternal hypertensive disorders                                   | 0<br>(0 - 0)             | --                 | 0<br>(0 - 0)        | 0<br>(0 - 0)         | --                       | --                       |
| Maternal obstructed labor                                         | 0<br>(0 - 0)             | --                 | 0<br>(0 - 0)        | 0<br>(0 - 0)         | --                       | --                       |
| Maternal abortive outcome                                         | 0<br>(0 - 0)             | --                 | 0<br>(0 - 0)        | 0<br>(0 - 0)         | --                       | --                       |
| Indirect maternal deaths                                          | 0<br>(0 - 0)             | --                 | 0<br>(0 - 0)        | 0<br>(0 - 0)         | --                       | --                       |

Web Table 31- Northern Ireland deaths with 95% UI by age, sex, and cause in 2013

| Cause                                                            | Females, All Ages        | Females, 0-4 Years | Females, 5-14 Years | Females, 15-49 Years | Females, 50-69 Years     | Females, 70-80 Years     |
|------------------------------------------------------------------|--------------------------|--------------------|---------------------|----------------------|--------------------------|--------------------------|
| Late maternal deaths                                             | 0<br>(0 - 0)             | --                 | 0<br>(0 - 0)        | 0<br>(0 - 0)         | --                       | --                       |
| Maternal deaths aggravated by HIV/AIDS                           | 0<br>(0 - 0)             | --                 | --                  | 0<br>(0 - 0)         | --                       | --                       |
| Other maternal disorders                                         | 0<br>(0 - 0)             | --                 | 0<br>(0 - 0)        | 0<br>(0 - 0)         | --                       | --                       |
| Neonatal disorders                                               | 18<br>(12 - 25)          | 18<br>(12 - 25)    | --                  | --                   | --                       | --                       |
| Neonatal preterm birth complications                             | 12<br>(8 - 17)           | 12<br>(8 - 17)     | --                  | --                   | --                       | --                       |
| Neonatal encephalopathy due to birth asphyxia and trauma         | 3<br>(2 - 5)             | 3<br>(2 - 5)       | --                  | --                   | --                       | --                       |
| Neonatal sepsis and other neonatal infections                    | 2<br>(1 - 3)             | 2<br>(1 - 3)       | --                  | --                   | --                       | --                       |
| Hemolytic disease and other neonatal jaundice                    | 0<br>(0 - 0)             | 0<br>(0 - 0)       | --                  | --                   | --                       | --                       |
| Other neonatal disorders                                         | 2<br>(1 - 3)             | 2<br>(1 - 3)       | --                  | --                   | --                       | --                       |
| Nutritional deficiencies                                         | 12<br>(8 - 16)           | 0<br>(0 - 0)       | 0<br>(0 - 0)        | 0<br>(0 - 0)         | 1<br>(0 - 1)             | 11<br>(7 - 15)           |
| Protein-energy malnutrition                                      | 2<br>(1 - 3)             | 0<br>(0 - 0)       | 0<br>(0 - 0)        | 0<br>(0 - 0)         | 0<br>(0 - 0)             | 2<br>(0 - 3)             |
| Iodine deficiency                                                | 0<br>(0 - 0)             | 0<br>(0 - 0)       | 0<br>(0 - 0)        | 0<br>(0 - 0)         | 0<br>(0 - 0)             | 0<br>(0 - 0)             |
| Iron-deficiency anemia                                           | 9<br>(6 - 13)            | 0<br>(0 - 0)       | 0<br>(0 - 0)        | 0<br>(0 - 0)         | 0<br>(0 - 1)             | 8<br>(5 - 12)            |
| Other nutritional deficiencies                                   | 1<br>(0 - 2)             | 0<br>(0 - 0)       | 0<br>(0 - 0)        | 0<br>(0 - 0)         | 0<br>(0 - 0)             | 1<br>(0 - 2)             |
| Other communicable, maternal, neonatal, and nutritional diseases | 7<br>(5 - 10)            | 0<br>(0 - 1)       | 0<br>(0 - 0)        | 1<br>(1 - 1)         | 2<br>(1 - 2)             | 4<br>(2 - 6)             |
| Sexually transmitted diseases excluding HIV                      | 1<br>(1 - 1)             | 0<br>(0 - 0)       | 0<br>(0 - 0)        | 0<br>(0 - 0)         | 0<br>(0 - 0)             | 1<br>(0 - 1)             |
| Syphilis                                                         | 1<br>(0 - 1)             | 0<br>(0 - 0)       | 0<br>(0 - 0)        | 0<br>(0 - 0)         | 0<br>(0 - 0)             | 1<br>(0 - 1)             |
| Chlamydial infection                                             | 0<br>(0 - 0)             | --                 | 0<br>(0 - 0)        | 0<br>(0 - 0)         | 0<br>(0 - 0)             | 0<br>(0 - 0)             |
| Gonococcal infection                                             | 0<br>(0 - 0)             | --                 | 0<br>(0 - 0)        | 0<br>(0 - 0)         | 0<br>(0 - 0)             | 0<br>(0 - 0)             |
| Other sexually transmitted diseases                              | 0<br>(0 - 0)             | --                 | 0<br>(0 - 0)        | 0<br>(0 - 0)         | 0<br>(0 - 0)             | 0<br>(0 - 0)             |
| Hepatitis                                                        | 1<br>(1 - 1)             | 0<br>(0 - 0)       | 0<br>(0 - 0)        | 0<br>(0 - 0)         | 0<br>(0 - 0)             | 0<br>(0 - 1)             |
| Acute hepatitis A                                                | 0<br>(0 - 1)             | 0<br>(0 - 0)       | 0<br>(0 - 0)        | 0<br>(0 - 0)         | 0<br>(0 - 0)             | 0<br>(0 - 0)             |
| Acute hepatitis B                                                | 1<br>(0 - 1)             | 0<br>(0 - 0)       | 0<br>(0 - 0)        | 0<br>(0 - 0)         | 0<br>(0 - 0)             | 0<br>(0 - 0)             |
| Acute hepatitis C                                                | 0<br>(0 - 0)             | --                 | 0<br>(0 - 0)        | 0<br>(0 - 0)         | 0<br>(0 - 0)             | 0<br>(0 - 0)             |
| Other infectious diseases                                        | 6<br>(3 - 7)             | 0<br>(0 - 0)       | 0<br>(0 - 0)        | 1<br>(0 - 1)         | 1<br>(1 - 2)             | 3<br>(2 - 4)             |
| Non-communicable diseases                                        | 7,063<br>(6,564 - 7,595) | 23<br>(16 - 31)    | 6<br>(5 - 8)        | 229<br>(202 - 258)   | 1,161<br>(1,051 - 1,285) | 5,644<br>(5,228 - 6,036) |
| Neoplasms                                                        | 2,096<br>(1,769 - 2,341) | 1<br>(1 - 2)       | 3<br>(2 - 4)        | 124<br>(108 - 141)   | 644<br>(549 - 725)       | 1,324<br>(1,085 - 1,489) |
| Esophageal cancer                                                | 62<br>(51 - 76)          | --                 | --                  | 1<br>(1 - 2)         | 14<br>(10 - 18)          | 47<br>(37 - 59)          |
| Stomach cancer                                                   | 110<br>(81 - 144)        | --                 | --                  | 3<br>(2 - 4)         | 17<br>(12 - 23)          | 90<br>(65 - 117)         |
| Liver cancer                                                     | 48<br>(28 - 59)          | --                 | 0<br>(0 - 0)        | 2<br>(1 - 3)         | 13<br>(8 - 17)           | 32<br>(18 - 41)          |
| Liver cancer due to hepatitis B                                  | 9<br>(2 - 20)            | --                 | 0<br>(0 - 0)        | 1<br>(0 - 1)         | 3<br>(1 - 7)             | 5<br>(1 - 12)            |
| Liver cancer due to hepatitis C                                  | 27<br>(9 - 40)           | --                 | 0<br>(0 - 0)        | 1<br>(0 - 2)         | 7<br>(2 - 11)            | 19<br>(5 - 28)           |
| Liver cancer due to alcohol use                                  | 7<br>(3 - 15)            | --                 | --                  | 0<br>(0 - 0)         | 2<br>(1 - 3)             | 6<br>(2 - 12)            |
| Liver cancer due to other causes                                 | 5<br>(2 - 10)            | --                 | 0<br>(0 - 0)        | 0<br>(0 - 1)         | 2<br>(1 - 3)             | 3<br>(1 - 6)             |
| Larynx cancer                                                    | 5<br>(4 - 8)             | --                 | --                  | 0<br>(0 - 0)         | 2<br>(1 - 3)             | 3<br>(2 - 4)             |
| Tracheal, bronchus and lung cancer                               | 426<br>(269 - 519)       | --                 | --                  | 14<br>(10 - 18)      | 164<br>(112 - 200)       | 248<br>(134 - 316)       |
| Breast cancer                                                    | 330<br>(255 - 402)       | --                 | --                  | 37<br>(29 - 49)      | 121<br>(96 - 153)        | 172<br>(120 - 214)       |
| Cervical cancer                                                  | 36<br>(29 - 44)          | --                 | --                  | 7<br>(5 - 9)         | 12<br>(10 - 16)          | 16<br>(12 - 22)          |
| Uterine cancer                                                   | 39<br>(30 - 48)          | --                 | --                  | 1<br>(1 - 1)         | 12<br>(9 - 16)           | 26<br>(18 - 33)          |
| Prostate cancer                                                  | --                       | --                 | --                  | --                   | --                       | --                       |

Web Table 31- Northern Ireland deaths with 95% UI by age, sex, and cause in 2013

| Cause                                         | Females, All Ages        | Females, 0-4 Years | Females, 5-14 Years | Females, 15-49 Years | Females, 50-69 Years | Females, 70-80 Years     |
|-----------------------------------------------|--------------------------|--------------------|---------------------|----------------------|----------------------|--------------------------|
| Colon and rectum cancer                       | 279<br>(240 - 324)       | --                 | --                  | 8<br>(6 - 10)        | 62<br>(52 - 73)      | 208<br>(176 - 250)       |
| Lip and oral cavity cancer                    | 15<br>(12 - 18)          | --                 | --                  | 1<br>(1 - 1)         | 5<br>(4 - 6)         | 9<br>(7 - 11)            |
| Nasopharynx cancer                            | 2<br>(1 - 4)             | --                 | 0<br>(0 - 0)        | 0<br>(0 - 0)         | 1<br>(0 - 1)         | 1<br>(0 - 2)             |
| Other pharynx cancer                          | 6<br>(4 - 7)             | --                 | --                  | 0<br>(0 - 0)         | 2<br>(2 - 3)         | 3<br>(2 - 4)             |
| Gallbladder and biliary tract cancer          | 33<br>(22 - 44)          | --                 | --                  | 0<br>(0 - 1)         | 6<br>(4 - 8)         | 27<br>(16 - 36)          |
| Pancreatic cancer                             | 142<br>(122 - 164)       | --                 | --                  | 3<br>(3 - 5)         | 37<br>(31 - 44)      | 102<br>(86 - 120)        |
| Malignant skin melanoma                       | 26<br>(17 - 34)          | --                 | --                  | 4<br>(3 - 6)         | 8<br>(5 - 11)        | 14<br>(8 - 19)           |
| Non-melanoma skin cancer                      | 10<br>(6 - 13)           | --                 | --                  | 0<br>(0 - 0)         | 1<br>(1 - 1)         | 8<br>(6 - 11)            |
| Ovarian cancer                                | 144<br>(113 - 169)       | --                 | --                  | 9<br>(7 - 12)        | 57<br>(46 - 70)      | 77<br>(53 - 93)          |
| Testicular cancer                             | --                       | --                 | --                  | --                   | --                   | --                       |
| Kidney cancer                                 | 44<br>(30 - 58)          | 0<br>(0 - 0)       | 0<br>(0 - 0)        | 2<br>(2 - 3)         | 15<br>(11 - 20)      | 27<br>(16 - 38)          |
| Bladder cancer                                | 37<br>(24 - 51)          | --                 | --                  | 1<br>(0 - 1)         | 6<br>(4 - 9)         | 30<br>(19 - 43)          |
| Brain and nervous system cancer               | 42<br>(30 - 51)          | 0<br>(0 - 0)       | 1<br>(1 - 1)        | 7<br>(5 - 9)         | 20<br>(14 - 25)      | 14<br>(9 - 19)           |
| Thyroid cancer                                | 7<br>(5 - 9)             | --                 | 0<br>(0 - 0)        | 0<br>(0 - 0)         | 2<br>(1 - 2)         | 5<br>(4 - 7)             |
| Mesothelioma                                  | 8<br>(5 - 11)            | --                 | --                  | 0<br>(0 - 1)         | 3<br>(2 - 5)         | 4<br>(2 - 7)             |
| Hodgkin lymphoma                              | 5<br>(3 - 7)             | 0<br>(0 - 0)       | 0<br>(0 - 0)        | 2<br>(1 - 2)         | 1<br>(1 - 2)         | 2<br>(1 - 3)             |
| Non-Hodgkin lymphoma                          | 68<br>(30 - 96)          | 0<br>(0 - 0)       | 0<br>(0 - 0)        | 4<br>(2 - 6)         | 19<br>(8 - 26)       | 44<br>(18 - 65)          |
| Multiple myeloma                              | 37<br>(22 - 59)          | --                 | --                  | 1<br>(1 - 2)         | 10<br>(6 - 16)       | 26<br>(15 - 43)          |
| Leukemia                                      | 48<br>(37 - 58)          | 0<br>(0 - 1)       | 1<br>(1 - 1)        | 5<br>(4 - 6)         | 10<br>(7 - 13)       | 32<br>(23 - 41)          |
| Other neoplasms                               | 89<br>(60 - 111)         | 1<br>(0 - 1)       | 1<br>(1 - 1)        | 8<br>(6 - 10)        | 21<br>(15 - 26)      | 58<br>(35 - 77)          |
| Cardiovascular diseases                       | 2,824<br>(2,465 - 3,515) | 0<br>(0 - 1)       | 0<br>(0 - 0)        | 35<br>(28 - 44)      | 267<br>(220 - 382)   | 2,521<br>(2,204 - 3,117) |
| Rheumatic heart disease                       | 27<br>(18 - 37)          | 0<br>(0 - 0)       | 0<br>(0 - 0)        | 1<br>(1 - 2)         | 7<br>(4 - 10)        | 19<br>(12 - 26)          |
| Ischemic heart disease                        | 1,503<br>(1,262 - 2,077) | 0<br>(0 - 0)       | 0<br>(0 - 0)        | 15<br>(12 - 21)      | 162<br>(126 - 257)   | 1,326<br>(1,108 - 1,809) |
| Cerebrovascular disease                       | 939<br>(773 - 1,239)     | 0<br>(0 - 0)       | 0<br>(0 - 0)        | 12<br>(10 - 16)      | 66<br>(52 - 97)      | 860<br>(701 - 1,144)     |
| Ischemic stroke                               | 574<br>(459 - 803)       | 0<br>(0 - 0)       | 0<br>(0 - 0)        | 1<br>(1 - 2)         | 19<br>(13 - 30)      | 554<br>(439 - 776)       |
| Hemorrhagic stroke                            | 365<br>(263 - 493)       | 0<br>(0 - 0)       | 0<br>(0 - 0)        | 11<br>(9 - 15)       | 48<br>(36 - 69)      | 306<br>(205 - 418)       |
| Hypertensive heart disease                    | 32<br>(18 - 44)          | 0<br>(0 - 0)       | 0<br>(0 - 0)        | 0<br>(0 - 1)         | 4<br>(2 - 6)         | 27<br>(15 - 39)          |
| Cardiomyopathy and myocarditis                | 24<br>(17 - 42)          | 0<br>(0 - 0)       | 0<br>(0 - 0)        | 1<br>(1 - 2)         | 2<br>(2 - 4)         | 21<br>(14 - 37)          |
| Atrial fibrillation and flutter               | 73<br>(51 - 103)         | --                 | --                  | 0<br>(0 - 0)         | 2<br>(1 - 3)         | 71<br>(49 - 101)         |
| Aortic aneurysm                               | 57<br>(34 - 89)          | --                 | --                  | 0<br>(0 - 1)         | 6<br>(3 - 9)         | 51<br>(29 - 80)          |
| Peripheral vascular disease                   | 35<br>(24 - 50)          | --                 | --                  | 0<br>(0 - 0)         | 2<br>(1 - 2)         | 33<br>(22 - 48)          |
| Endocarditis                                  | 11<br>(7 - 18)           | 0<br>(0 - 0)       | 0<br>(0 - 0)        | 1<br>(0 - 1)         | 2<br>(1 - 4)         | 9<br>(5 - 14)            |
| Other cardiovascular and circulatory diseases | 122<br>(66 - 161)        | 0<br>(0 - 0)       | 0<br>(0 - 0)        | 3<br>(2 - 5)         | 15<br>(9 - 21)       | 104<br>(52 - 142)        |
| Chronic respiratory diseases                  | 512<br>(326 - 606)       | 0<br>(0 - 1)       | 0<br>(0 - 0)        | 8<br>(6 - 9)         | 84<br>(62 - 100)     | 420<br>(257 - 505)       |
| Chronic obstructive pulmonary disease         | 420<br>(277 - 512)       | 0<br>(0 - 0)       | 0<br>(0 - 0)        | 3<br>(2 - 4)         | 67<br>(50 - 83)      | 349<br>(225 - 433)       |
| Pneumoconiosis                                | 1<br>(0 - 1)             | 0<br>(0 - 0)       | 0<br>(0 - 0)        | 0<br>(0 - 0)         | 0<br>(0 - 0)         | 0<br>(0 - 1)             |
| Silicosis                                     | 0<br>(0 - 0)             | 0<br>(0 - 0)       | 0<br>(0 - 0)        | 0<br>(0 - 0)         | 0<br>(0 - 0)         | 0<br>(0 - 0)             |
| Asbestosis                                    | 0<br>(0 - 0)             | 0<br>(0 - 0)       | 0<br>(0 - 0)        | 0<br>(0 - 0)         | 0<br>(0 - 0)         | 0<br>(0 - 0)             |
| Coal workers pneumoconiosis                   | 0<br>(0 - 0)             | 0<br>(0 - 0)       | 0<br>(0 - 0)        | 0<br>(0 - 0)         | 0<br>(0 - 0)         | 0<br>(0 - 0)             |
| Other pneumoconiosis                          | 0<br>(0 - 1)             | 0<br>(0 - 0)       | 0<br>(0 - 0)        | 0<br>(0 - 0)         | 0<br>(0 - 0)         | 0<br>(0 - 1)             |

Web Table 31- Northern Ireland deaths with 95% UI by age, sex, and cause in 2013

| Cause                                               | Females, All Ages    | Females, 0-4 Years | Females, 5-14 Years | Females, 15-49 Years | Females, 50-69 Years | Females, 70-80 Years |
|-----------------------------------------------------|----------------------|--------------------|---------------------|----------------------|----------------------|----------------------|
| Asthma                                              | 31<br>(13 - 46)      | 0<br>(0 - 0)       | 0<br>(0 - 0)        | 3<br>(2 - 4)         | 6<br>(3 - 9)         | 21<br>(7 - 34)       |
| Interstitial lung disease and pulmonary sarcoidosis | 57<br>(18 - 105)     | 0<br>(0 - 0)       | 0<br>(0 - 0)        | 1<br>(1 - 2)         | 9<br>(3 - 17)        | 46<br>(13 - 88)      |
| Other chronic respiratory diseases                  | 3<br>(2 - 6)         | 0<br>(0 - 0)       | 0<br>(0 - 0)        | 0<br>(0 - 0)         | 0<br>(0 - 0)         | 3<br>(1 - 6)         |
| Cirrhosis                                           | 89<br>(77 - 101)     | 0<br>(0 - 0)       | 0<br>(0 - 0)        | 17<br>(14 - 20)      | 38<br>(32 - 46)      | 33<br>(27 - 40)      |
| Cirrhosis due to hepatitis B                        | 12<br>(6 - 22)       | 0<br>(0 - 0)       | 0<br>(0 - 0)        | 2<br>(1 - 3)         | 5<br>(3 - 9)         | 5<br>(2 - 10)        |
| Cirrhosis due to hepatitis C                        | 49<br>(21 - 69)      | 0<br>(0 - 0)       | 0<br>(0 - 0)        | 10<br>(5 - 14)       | 22<br>(10 - 32)      | 18<br>(7 - 27)       |
| Cirrhosis due to alcohol use                        | 15<br>(5 - 25)       | --                 | --                  | 2<br>(0 - 3)         | 6<br>(2 - 10)        | 7<br>(3 - 14)        |
| Cirrhosis due to other causes                       | 12<br>(5 - 25)       | 0<br>(0 - 0)       | 0<br>(0 - 0)        | 4<br>(2 - 7)         | 5<br>(2 - 12)        | 3<br>(1 - 8)         |
| Digestive diseases                                  | 263<br>(186 - 310)   | 0<br>(0 - 0)       | 0<br>(0 - 0)        | 5<br>(4 - 6)         | 29<br>(20 - 35)      | 229<br>(162 - 273)   |
| Peptic ulcer disease                                | 36<br>(26 - 52)      | 0<br>(0 - 0)       | 0<br>(0 - 0)        | 1<br>(0 - 1)         | 4<br>(3 - 6)         | 32<br>(22 - 47)      |
| Gastritis and duodenitis                            | 3<br>(1 - 5)         | 0<br>(0 - 0)       | 0<br>(0 - 0)        | 0<br>(0 - 0)         | 0<br>(0 - 1)         | 3<br>(1 - 4)         |
| Appendicitis                                        | 3<br>(1 - 4)         | 0<br>(0 - 0)       | 0<br>(0 - 0)        | 0<br>(0 - 0)         | 0<br>(0 - 1)         | 2<br>(1 - 3)         |
| Paralytic ileus and intestinal obstruction          | 37<br>(17 - 56)      | 0<br>(0 - 0)       | 0<br>(0 - 0)        | 1<br>(0 - 1)         | 3<br>(1 - 5)         | 33<br>(15 - 51)      |
| Inguinal, femoral, and abdominal hernia             | 7<br>(2 - 12)        | 0<br>(0 - 0)       | 0<br>(0 - 0)        | 0<br>(0 - 0)         | 1<br>(0 - 1)         | 7<br>(2 - 11)        |
| Inflammatory bowel disease                          | 21<br>(11 - 31)      | 0<br>(0 - 0)       | 0<br>(0 - 0)        | 1<br>(0 - 1)         | 3<br>(1 - 4)         | 18<br>(9 - 27)       |
| Vascular intestinal disorders                       | 49<br>(20 - 72)      | 0<br>(0 - 0)       | 0<br>(0 - 0)        | 1<br>(0 - 1)         | 6<br>(3 - 9)         | 42<br>(16 - 63)      |
| Gallbladder and biliary diseases                    | 32<br>(16 - 45)      | 0<br>(0 - 0)       | 0<br>(0 - 0)        | 0<br>(0 - 1)         | 3<br>(1 - 4)         | 28<br>(14 - 41)      |
| Pancreatitis                                        | 16<br>(9 - 24)       | 0<br>(0 - 0)       | 0<br>(0 - 0)        | 1<br>(1 - 1)         | 3<br>(2 - 4)         | 12<br>(7 - 18)       |
| Other digestive diseases                            | 59<br>(41 - 79)      | 0<br>(0 - 0)       | 0<br>(0 - 0)        | 1<br>(0 - 1)         | 5<br>(3 - 7)         | 53<br>(37 - 72)      |
| Neurological disorders                              | 804<br>(555 - 1,023) | 1<br>(1 - 1)       | 1<br>(0 - 1)        | 11<br>(8 - 13)       | 39<br>(30 - 47)      | 753<br>(508 - 971)   |
| Alzheimer disease and other dementias               | 690<br>(446 - 905)   | --                 | --                  | 0<br>(0 - 0)         | 14<br>(8 - 20)       | 676<br>(435 - 890)   |
| Parkinson disease                                   | 50<br>(23 - 68)      | --                 | --                  | 0<br>(0 - 0)         | 2<br>(1 - 3)         | 48<br>(21 - 66)      |
| Epilepsy                                            | 10<br>(6 - 13)       | 0<br>(0 - 0)       | 0<br>(0 - 0)        | 4<br>(2 - 5)         | 2<br>(1 - 3)         | 4<br>(2 - 5)         |
| Multiple sclerosis                                  | 20<br>(11 - 28)      | --                 | --                  | 4<br>(2 - 6)         | 10<br>(5 - 15)       | 6<br>(3 - 9)         |
| Other neurological disorders                        | 35<br>(29 - 41)      | 1<br>(1 - 1)       | 0<br>(0 - 0)        | 3<br>(2 - 3)         | 11<br>(9 - 14)       | 20<br>(16 - 25)      |
| Mental and substance use disorders                  | 27<br>(16 - 38)      | 0<br>(0 - 0)       | 0<br>(0 - 0)        | 13<br>(9 - 18)       | 11<br>(5 - 18)       | 3<br>(2 - 4)         |
| Schizophrenia                                       | 1<br>(0 - 1)         | --                 | --                  | 0<br>(0 - 0)         | 0<br>(0 - 0)         | 0<br>(0 - 1)         |
| Alcohol use disorders                               | 17<br>(6 - 28)       | --                 | --                  | 7<br>(2 - 10)        | 9<br>(3 - 16)        | 2<br>(1 - 3)         |
| Drug use disorders                                  | 8<br>(7 - 11)        | 0<br>(0 - 0)       | --                  | 6<br>(5 - 8)         | 2<br>(1 - 2)         | 1<br>(1 - 1)         |
| Opioid use disorders                                | 3<br>(2 - 4)         | 0<br>(0 - 0)       | --                  | 2<br>(2 - 3)         | 1<br>(0 - 1)         | 0<br>(0 - 0)         |
| Cocaine use disorders                               | 0<br>(0 - 0)         | 0<br>(0 - 0)       | --                  | 0<br>(0 - 0)         | 0<br>(0 - 0)         | 0<br>(0 - 0)         |
| Amphetamine use disorders                           | 0<br>(0 - 0)         | 0<br>(0 - 0)       | --                  | 0<br>(0 - 0)         | 0<br>(0 - 0)         | 0<br>(0 - 0)         |
| Other drug use disorders                            | 5<br>(4 - 6)         | 0<br>(0 - 0)       | --                  | 3<br>(3 - 4)         | 1<br>(1 - 1)         | 0<br>(0 - 1)         |
| Eating disorders                                    | 0<br>(0 - 0)         | --                 | 0<br>(0 - 0)        | 0<br>(0 - 0)         | --                   | --                   |
| Anorexia nervosa                                    | 0<br>(0 - 0)         | --                 | 0<br>(0 - 0)        | 0<br>(0 - 0)         | --                   | --                   |
| Diabetes, urogenital, blood, and endocrine diseases | 357<br>(272 - 422)   | 1<br>(1 - 1)       | 1<br>(1 - 1)        | 10<br>(8 - 12)       | 36<br>(28 - 42)      | 310<br>(228 - 371)   |
| Diabetes mellitus                                   | 75<br>(56 - 91)      | 0<br>(0 - 0)       | 0<br>(0 - 0)        | 2<br>(1 - 2)         | 9<br>(7 - 12)        | 65<br>(44 - 80)      |
| Acute glomerulonephritis                            | 0<br>(0 - 0)         | 0<br>(0 - 0)       | 0<br>(0 - 0)        | 0<br>(0 - 0)         | 0<br>(0 - 0)         | 0<br>(0 - 0)         |
| Chronic kidney disease                              | 145<br>(113 - 180)   | 0<br>(0 - 0)       | 0<br>(0 - 0)        | 3<br>(3 - 4)         | 12<br>(9 - 17)       | 130<br>(99 - 164)    |
| Chronic kidney disease due to diabetes mellitus     | 21<br>(14 - 31)      | 0<br>(0 - 0)       | 0<br>(0 - 0)        | 1<br>(0 - 1)         | 2<br>(1 - 3)         | 18<br>(11 - 27)      |

Web Table 31- Northern Ireland deaths with 95% UI by age, sex, and cause in 2013

| Cause                                               | Females, All Ages  | Females, 0-4 Years | Females, 5-14 Years | Females, 15-49 Years | Females, 50-69 Years | Females, 70-80 Years |
|-----------------------------------------------------|--------------------|--------------------|---------------------|----------------------|----------------------|----------------------|
| Chronic kidney disease due to hypertension          | 37<br>(21 - 58)    | 0<br>(0 - 0)       | 0<br>(0 - 0)        | 0<br>(0 - 1)         | 3<br>(2 - 5)         | 34<br>(19 - 53)      |
| Chronic kidney disease due to glomerulonephritis    | 5<br>(2 - 11)      | 0<br>(0 - 0)       | 0<br>(0 - 0)        | 0<br>(0 - 0)         | 1<br>(0 - 1)         | 5<br>(2 - 9)         |
| Chronic kidney disease due to other causes          | 81<br>(52 - 112)   | 0<br>(0 - 0)       | 0<br>(0 - 0)        | 2<br>(1 - 3)         | 6<br>(4 - 10)        | 73<br>(45 - 103)     |
| Urinary diseases and male infertility               | 107<br>(48 - 152)  | 0<br>(0 - 0)       | 0<br>(0 - 0)        | 2<br>(1 - 3)         | 9<br>(4 - 12)        | 97<br>(42 - 140)     |
| Interstitial nephritis and urinary tract infections | 103<br>(45 - 146)  | 0<br>(0 - 0)       | 0<br>(0 - 0)        | 2<br>(1 - 2)         | 8<br>(4 - 11)        | 93<br>(39 - 135)     |
| Urolithiasis                                        | 2<br>(1 - 4)       | --                 | 0<br>(0 - 0)        | 0<br>(0 - 0)         | 0<br>(0 - 1)         | 1<br>(1 - 3)         |
| Other urinary diseases                              | 3<br>(1 - 6)       | 0<br>(0 - 0)       | 0<br>(0 - 0)        | 0<br>(0 - 0)         | 0<br>(0 - 1)         | 2<br>(1 - 6)         |
| Gynecological diseases                              | 0<br>(0 - 1)       | --                 | --                  | 0<br>(0 - 0)         | 0<br>(0 - 0)         | 0<br>(0 - 0)         |
| Uterine fibroids                                    | 0<br>(0 - 0)       | --                 | --                  | 0<br>(0 - 0)         | 0<br>(0 - 0)         | 0<br>(0 - 0)         |
| Polycystic ovarian syndrome                         | 0<br>(0 - 0)       | --                 | --                  | 0<br>(0 - 0)         | 0<br>(0 - 0)         | --                   |
| Endometriosis                                       | 0<br>(0 - 0)       | --                 | --                  | 0<br>(0 - 0)         | 0<br>(0 - 0)         | --                   |
| Genital prolapse                                    | 0<br>(0 - 0)       | --                 | --                  | 0<br>(0 - 0)         | 0<br>(0 - 0)         | 0<br>(0 - 0)         |
| Other gynecological diseases                        | 0<br>(0 - 0)       | --                 | --                  | 0<br>(0 - 0)         | 0<br>(0 - 0)         | 0<br>(0 - 0)         |
| Hemoglobinopathies and hemolytic anemias            | 4<br>(3 - 7)       | 0<br>(0 - 0)       | 0<br>(0 - 0)        | 0<br>(0 - 1)         | 1<br>(0 - 1)         | 3<br>(2 - 5)         |
| Thalassemias                                        | 0<br>(0 - 0)       | 0<br>(0 - 0)       | 0<br>(0 - 0)        | 0<br>(0 - 0)         | 0<br>(0 - 0)         | 0<br>(0 - 0)         |
| Sickle cell disorders                               | 1<br>(0 - 1)       | 0<br>(0 - 0)       | 0<br>(0 - 0)        | 0<br>(0 - 0)         | 0<br>(0 - 0)         | 0<br>(0 - 0)         |
| G6PD deficiency                                     | 0<br>(0 - 0)       | 0<br>(0 - 0)       | 0<br>(0 - 0)        | 0<br>(0 - 0)         | 0<br>(0 - 0)         | 0<br>(0 - 0)         |
| Other hemoglobinopathies and hemolytic anemias      | 3<br>(2 - 5)       | 0<br>(0 - 0)       | 0<br>(0 - 0)        | 0<br>(0 - 0)         | 0<br>(0 - 1)         | 3<br>(2 - 5)         |
| Endocrine, metabolic, blood, and immune disorders   | 24<br>(18 - 33)    | 1<br>(0 - 1)       | 0<br>(0 - 1)        | 3<br>(2 - 4)         | 5<br>(3 - 7)         | 16<br>(10 - 22)      |
| Musculoskeletal disorders                           | 33<br>(25 - 43)    | --                 | 0<br>(0 - 0)        | 2<br>(1 - 2)         | 7<br>(5 - 9)         | 25<br>(17 - 33)      |
| Rheumatoid arthritis                                | 14<br>(9 - 20)     | --                 | 0<br>(0 - 0)        | 0<br>(0 - 0)         | 2<br>(2 - 3)         | 12<br>(7 - 17)       |
| Other musculoskeletal disorders                     | 19<br>(14 - 25)    | --                 | 0<br>(0 - 0)        | 2<br>(1 - 2)         | 4<br>(3 - 6)         | 13<br>(9 - 19)       |
| Other non-communicable diseases                     | 58<br>(48 - 72)    | 18<br>(13 - 26)    | 1<br>(1 - 2)        | 6<br>(5 - 7)         | 7<br>(6 - 9)         | 26<br>(18 - 36)      |
| Congenital anomalies                                | 33<br>(27 - 42)    | 17<br>(12 - 24)    | 1<br>(1 - 2)        | 5<br>(4 - 7)         | 5<br>(4 - 6)         | 5<br>(3 - 7)         |
| Neural tube defects                                 | 2<br>(1 - 4)       | 2<br>(1 - 3)       | 0<br>(0 - 0)        | 0<br>(0 - 1)         | 0<br>(0 - 0)         | 0<br>(0 - 0)         |
| Congenital heart anomalies                          | 10<br>(8 - 14)     | 4<br>(2 - 6)       | 1<br>(0 - 1)        | 3<br>(2 - 4)         | 2<br>(1 - 2)         | 2<br>(1 - 3)         |
| Cleft lip and cleft palate                          | 0<br>(0 - 0)       | 0<br>(0 - 0)       | --                  | --                   | --                   | --                   |
| Down syndrome                                       | 4<br>(2 - 6)       | 0<br>(0 - 1)       | 0<br>(0 - 0)        | 1<br>(0 - 1)         | 3<br>(2 - 4)         | 0<br>(0 - 0)         |
| Chromosomal unbalanced rearrangements               | 4<br>(2 - 7)       | 4<br>(2 - 6)       | 0<br>(0 - 0)        | 0<br>(0 - 0)         | 0<br>(0 - 0)         | 0<br>(0 - 0)         |
| Other congenital anomalies                          | 12<br>(9 - 16)     | 8<br>(5 - 11)      | 0<br>(0 - 1)        | 1<br>(1 - 1)         | 0<br>(0 - 1)         | 3<br>(2 - 4)         |
| Skin and subcutaneous diseases                      | 24<br>(15 - 33)    | 0<br>(0 - 0)       | 0<br>(0 - 0)        | 0<br>(0 - 1)         | 2<br>(1 - 3)         | 21<br>(13 - 31)      |
| Cellulitis                                          | 8<br>(3 - 14)      | 0<br>(0 - 0)       | 0<br>(0 - 0)        | 0<br>(0 - 0)         | 1<br>(0 - 1)         | 7<br>(2 - 13)        |
| Pyoderma                                            | 8<br>(4 - 14)      | 0<br>(0 - 0)       | 0<br>(0 - 0)        | 0<br>(0 - 0)         | 1<br>(0 - 1)         | 8<br>(4 - 13)        |
| Decubitus ulcer                                     | 6<br>(3 - 11)      | 0<br>(0 - 0)       | 0<br>(0 - 0)        | 0<br>(0 - 0)         | 0<br>(0 - 1)         | 6<br>(3 - 10)        |
| Other skin and subcutaneous diseases                | 1<br>(0 - 3)       | 0<br>(0 - 0)       | 0<br>(0 - 0)        | 0<br>(0 - 0)         | 0<br>(0 - 0)         | 1<br>(0 - 3)         |
| Sudden infant death syndrome                        | 1<br>(0 - 3)       | 1<br>(0 - 3)       | --                  | --                   | --                   | --                   |
| Injuries                                            | 253<br>(200 - 302) | 3<br>(2 - 4)       | 2<br>(2 - 3)        | 40<br>(35 - 49)      | 35<br>(30 - 41)      | 172<br>(124 - 220)   |
| Transport injuries                                  | 31<br>(26 - 40)    | 0<br>(0 - 1)       | 1<br>(1 - 2)        | 12<br>(9 - 15)       | 6<br>(5 - 9)         | 11<br>(8 - 15)       |
| Road injuries                                       | 30<br>(25 - 39)    | 0<br>(0 - 1)       | 1<br>(1 - 2)        | 11<br>(9 - 14)       | 6<br>(5 - 8)         | 11<br>(8 - 15)       |
| Pedestrian road injuries                            | 9<br>(7 - 14)      | 0<br>(0 - 0)       | 0<br>(0 - 1)        | 1<br>(1 - 2)         | 2<br>(1 - 3)         | 5<br>(3 - 8)         |

Web Table 31- Northern Ireland deaths with 95% UI by age, sex, and cause in 2013

| Cause                                           | Females, All Ages  | Females, 0-4 Years | Females, 5-14 Years | Females, 15-49 Years | Females, 50-69 Years | Females, 70-80 Years |
|-------------------------------------------------|--------------------|--------------------|---------------------|----------------------|----------------------|----------------------|
| Cyclist road injuries                           | 1<br>(1 - 2)       | 0<br>(0 - 0)       | 0<br>(0 - 0)        | 0<br>(0 - 1)         | 0<br>(0 - 0)         | 0<br>(0 - 0)         |
| Motorcyclist road injuries                      | 1<br>(0 - 2)       | 0<br>(0 - 0)       | 0<br>(0 - 0)        | 1<br>(0 - 1)         | 0<br>(0 - 0)         | 0<br>(0 - 0)         |
| Motor vehicle road injuries                     | 18<br>(13 - 23)    | 0<br>(0 - 0)       | 1<br>(0 - 1)        | 9<br>(7 - 11)        | 4<br>(3 - 5)         | 5<br>(3 - 7)         |
| Other road injuries                             | 1<br>(0 - 1)       | 0<br>(0 - 0)       | 0<br>(0 - 0)        | 0<br>(0 - 0)         | 0<br>(0 - 0)         | 0<br>(0 - 0)         |
| Other transport injuries                        | 1<br>(1 - 2)       | 0<br>(0 - 0)       | 0<br>(0 - 0)        | 0<br>(0 - 1)         | 0<br>(0 - 0)         | 0<br>(0 - 0)         |
| Unintentional injuries                          | 181<br>(131 - 227) | 2<br>(1 - 3)       | 1<br>(1 - 1)        | 9<br>(7 - 11)        | 16<br>(13 - 20)      | 153<br>(106 - 198)   |
| Falls                                           | 133<br>(87 - 180)  | 0<br>(0 - 0)       | 0<br>(0 - 0)        | 2<br>(2 - 3)         | 7<br>(5 - 9)         | 124<br>(80 - 170)    |
| Drowning                                        | 2<br>(2 - 3)       | 0<br>(0 - 0)       | 0<br>(0 - 0)        | 1<br>(0 - 1)         | 1<br>(0 - 1)         | 1<br>(0 - 1)         |
| Fire, heat, and hot substances                  | 9<br>(6 - 12)      | 0<br>(0 - 0)       | 0<br>(0 - 0)        | 1<br>(1 - 2)         | 2<br>(2 - 3)         | 5<br>(3 - 7)         |
| Poisonings                                      | 4<br>(3 - 6)       | 0<br>(0 - 0)       | 0<br>(0 - 0)        | 1<br>(1 - 3)         | 1<br>(1 - 2)         | 1<br>(1 - 2)         |
| Exposure to mechanical forces                   | 3<br>(2 - 4)       | 0<br>(0 - 1)       | 0<br>(0 - 0)        | 1<br>(0 - 1)         | 0<br>(0 - 1)         | 1<br>(1 - 2)         |
| Unintentional firearm injuries                  | 0<br>(0 - 0)       | 0<br>(0 - 0)       | 0<br>(0 - 0)        | 0<br>(0 - 0)         | 0<br>(0 - 0)         | 0<br>(0 - 0)         |
| Unintentional suffocation                       | 1<br>(0 - 2)       | 0<br>(0 - 1)       | 0<br>(0 - 0)        | 0<br>(0 - 0)         | 0<br>(0 - 0)         | 0<br>(0 - 1)         |
| Other exposure to mechanical forces             | 2<br>(1 - 2)       | 0<br>(0 - 0)       | 0<br>(0 - 0)        | 0<br>(0 - 0)         | 0<br>(0 - 0)         | 1<br>(1 - 1)         |
| Adverse effects of medical treatment            | 10<br>(7 - 15)     | 0<br>(0 - 0)       | 0<br>(0 - 0)        | 1<br>(0 - 1)         | 2<br>(1 - 3)         | 8<br>(5 - 12)        |
| Animal contact                                  | 1<br>(0 - 1)       | 0<br>(0 - 0)       | 0<br>(0 - 0)        | 0<br>(0 - 0)         | 0<br>(0 - 0)         | 0<br>(0 - 1)         |
| Venomous animal contact                         | 0<br>(0 - 0)       | 0<br>(0 - 0)       | 0<br>(0 - 0)        | 0<br>(0 - 0)         | 0<br>(0 - 0)         | 0<br>(0 - 0)         |
| Non-venomous animal contact                     | 1<br>(0 - 1)       | 0<br>(0 - 0)       | 0<br>(0 - 0)        | 0<br>(0 - 0)         | 0<br>(0 - 0)         | 0<br>(0 - 0)         |
| Foreign body                                    | 19<br>(9 - 27)     | 1<br>(0 - 1)       | 0<br>(0 - 0)        | 2<br>(1 - 3)         | 3<br>(2 - 4)         | 13<br>(6 - 21)       |
| Pulmonary aspiration and foreign body in airway | 18<br>(9 - 27)     | 1<br>(0 - 1)       | 0<br>(0 - 0)        | 2<br>(1 - 3)         | 3<br>(1 - 4)         | 13<br>(6 - 21)       |
| Foreign body in other body part                 | 0<br>(0 - 0)       | 0<br>(0 - 0)       | 0<br>(0 - 0)        | 0<br>(0 - 0)         | 0<br>(0 - 0)         | 0<br>(0 - 0)         |
| Other unintentional injuries                    | 1<br>(0 - 1)       | 0<br>(0 - 0)       | 0<br>(0 - 0)        | 0<br>(0 - 0)         | 0<br>(0 - 0)         | 0<br>(0 - 1)         |
| Self-harm and interpersonal violence            | 41<br>(34 - 51)    | 0<br>(0 - 1)       | 0<br>(0 - 0)        | 20<br>(16 - 24)      | 12<br>(10 - 16)      | 8<br>(6 - 10)        |
| Self-harm                                       | 34<br>(28 - 42)    | --                 | 0<br>(0 - 0)        | 16<br>(13 - 21)      | 11<br>(9 - 15)       | 6<br>(5 - 9)         |
| Interpersonal violence                          | 7<br>(5 - 10)      | 0<br>(0 - 1)       | 0<br>(0 - 0)        | 4<br>(3 - 5)         | 1<br>(1 - 2)         | 1<br>(1 - 2)         |
| Assault by firearm                              | 2<br>(1 - 3)       | 0<br>(0 - 0)       | 0<br>(0 - 0)        | 1<br>(1 - 2)         | 0<br>(0 - 1)         | 0<br>(0 - 0)         |
| Assault by sharp object                         | 1<br>(1 - 2)       | 0<br>(0 - 0)       | 0<br>(0 - 0)        | 1<br>(0 - 1)         | 0<br>(0 - 0)         | 0<br>(0 - 0)         |
| Assault by other means                          | 4<br>(3 - 6)       | 0<br>(0 - 1)       | 0<br>(0 - 0)        | 2<br>(1 - 3)         | 1<br>(0 - 1)         | 1<br>(1 - 2)         |

Web Table 31- Norway deaths with 95% UI by age, sex, and cause in 2013

| Cause                                                              | Both Sexes, All Ages        | Both Sexes, 0-4 Years | Both Sexes, 5-14 Years | Both Sexes, 15-49 Years  | Both Sexes, 50-69 Years  | Both Sexes, 70-80 Years     |
|--------------------------------------------------------------------|-----------------------------|-----------------------|------------------------|--------------------------|--------------------------|-----------------------------|
| All causes                                                         | 42,298<br>(41,013 - 43,419) | 185<br>(154 - 222)    | 54<br>(49 - 61)        | 1,922<br>(1,840 - 2,007) | 7,683<br>(7,393 - 7,984) | 32,454<br>(31,530 - 33,246) |
| Communicable, maternal, neonatal, and nutritional diseases         | 2,767<br>(2,351 - 3,627)    | 76<br>(60 - 95)       | 4<br>(3 - 5)           | 46<br>(40 - 53)          | 157<br>(137 - 176)       | 2,483<br>(2,066 - 3,363)    |
| HIV/AIDS and tuberculosis                                          | 65<br>(54 - 78)             | 0<br>(0 - 0)          | 0<br>(0 - 0)           | 12<br>(8 - 16)           | 13<br>(10 - 16)          | 41<br>(31 - 50)             |
| Tuberculosis                                                       | 50<br>(41 - 60)             | 0<br>(0 - 0)          | 0<br>(0 - 0)           | 1<br>(1 - 2)             | 9<br>(7 - 11)            | 40<br>(31 - 49)             |
| HIV/AIDS                                                           | 15<br>(10 - 23)             | 0<br>(0 - 0)          | 0<br>(0 - 0)           | 10<br>(7 - 15)           | 4<br>(2 - 7)             | 1<br>(0 - 1)                |
| HIV/AIDS resulting in mycobacterial infection                      | 1<br>(0 - 1)                | 0<br>(0 - 0)          | 0<br>(0 - 0)           | 0<br>(0 - 1)             | 0<br>(0 - 0)             | 0<br>(0 - 0)                |
| HIV/AIDS resulting in other diseases                               | 14<br>(9 - 22)              | 0<br>(0 - 0)          | 0<br>(0 - 0)           | 10<br>(7 - 14)           | 4<br>(2 - 7)             | 0<br>(0 - 1)                |
| Diarrrhea, lower respiratory, and other common infectious diseases | 2,435<br>(2,016 - 3,332)    | 12<br>(9 - 15)        | 3<br>(2 - 4)           | 24<br>(20 - 28)          | 119<br>(103 - 138)       | 2,277<br>(1,854 - 3,188)    |
| Diarrheal diseases                                                 | 305<br>(224 - 414)          | 3<br>(2 - 4)          | 0<br>(0 - 1)           | 3<br>(2 - 3)             | 14<br>(11 - 18)          | 285<br>(204 - 393)          |
| Intestinal infectious diseases                                     | 5<br>(2 - 11)               | 1<br>(0 - 2)          | 1<br>(0 - 2)           | 2<br>(1 - 5)             | 1<br>(0 - 2)             | 1<br>(0 - 2)                |
| Typhoid fever                                                      | 4<br>(1 - 8)                | 1<br>(0 - 1)          | 1<br>(0 - 1)           | 1<br>(0 - 3)             | 0<br>(0 - 1)             | 0<br>(0 - 1)                |
| Paratyphoid fever                                                  | 1<br>(0 - 2)                | 0<br>(0 - 0)          | 0<br>(0 - 0)           | 0<br>(0 - 1)             | 0<br>(0 - 0)             | 0<br>(0 - 0)                |
| Other intestinal infectious diseases                               | 0<br>(0 - 3)                | 0<br>(0 - 1)          | 0<br>(0 - 0)           | 0<br>(0 - 1)             | 0<br>(0 - 1)             | 0<br>(0 - 1)                |
| Lower respiratory infections                                       | 2,083<br>(1,677 - 2,976)    | 5<br>(3 - 7)          | 1<br>(1 - 1)           | 12<br>(10 - 15)          | 95<br>(80 - 114)         | 1,969<br>(1,567 - 2,855)    |
| Upper respiratory infections                                       | 1<br>(0 - 2)                | 0<br>(0 - 0)          | 0<br>(0 - 0)           | 0<br>(0 - 0)             | 0<br>(0 - 0)             | 1<br>(0 - 2)                |
| Otitis media                                                       | 2<br>(1 - 2)                | 0<br>(0 - 0)          | 0<br>(0 - 0)           | 0<br>(0 - 0)             | 0<br>(0 - 0)             | 1<br>(1 - 1)                |
| Meningitis                                                         | 27<br>(24 - 31)             | 3<br>(2 - 4)          | 1<br>(1 - 1)           | 4<br>(3 - 5)             | 6<br>(5 - 7)             | 13<br>(11 - 17)             |
| Pneumococcal meningitis                                            | 5<br>(3 - 6)                | 0<br>(0 - 0)          | 0<br>(0 - 0)           | 1<br>(0 - 1)             | 1<br>(1 - 2)             | 2<br>(1 - 4)                |
| H influenzae type B meningitis                                     | 3<br>(2 - 3)                | 0<br>(0 - 1)          | 0<br>(0 - 0)           | 0<br>(0 - 1)             | 0<br>(0 - 1)             | 1<br>(1 - 2)                |
| Meningococcal meningitis                                           | 6<br>(5 - 9)                | 0<br>(0 - 1)          | 0<br>(0 - 0)           | 1<br>(1 - 1)             | 1<br>(1 - 2)             | 4<br>(2 - 6)                |
| Other meningitis                                                   | 13<br>(11 - 15)             | 1<br>(1 - 2)          | 0<br>(0 - 1)           | 2<br>(2 - 2)             | 3<br>(2 - 4)             | 6<br>(5 - 8)                |
| Encephalitis                                                       | 8<br>(4 - 10)               | 0<br>(0 - 0)          | 0<br>(0 - 0)           | 1<br>(1 - 2)             | 2<br>(1 - 3)             | 2<br>(2 - 6)                |
| Diphtheria                                                         | 0<br>(0 - 0)                | 0<br>(0 - 0)          | 0<br>(0 - 0)           | 0<br>(0 - 0)             | 0<br>(0 - 0)             | --                          |
| Whooping cough                                                     | 0<br>(0 - 0)                | 0<br>(0 - 0)          | 0<br>(0 - 0)           | 0<br>(0 - 0)             | 0<br>(0 - 0)             | --                          |
| Tetanus                                                            | 1<br>(0 - 1)                | 0<br>(0 - 0)          | 0<br>(0 - 0)           | 0<br>(0 - 0)             | 0<br>(0 - 0)             | 0<br>(0 - 0)                |
| Measles                                                            | 0<br>(0 - 0)                | 0<br>(0 - 0)          | 0<br>(0 - 0)           | 0<br>(0 - 0)             | 0<br>(0 - 0)             | --                          |
| Varicella and herpes zoster                                        | 5<br>(1 - 14)               | 0<br>(0 - 1)          | 0<br>(0 - 0)           | 0<br>(0 - 1)             | 0<br>(0 - 1)             | 3<br>(0 - 13)               |
| Neglected tropical diseases and malaria                            | 4<br>(3 - 5)                | 0<br>(0 - 0)          | 0<br>(0 - 0)           | 1<br>(1 - 1)             | 1<br>(1 - 2)             | 2<br>(1 - 2)                |
| Cysticercosis                                                      | 0<br>(0 - 0)                | 0<br>(0 - 0)          | 0<br>(0 - 0)           | 0<br>(0 - 0)             | 0<br>(0 - 0)             | 0<br>(0 - 0)                |
| Cystic echinococcosis                                              | 0<br>(0 - 0)                | 0<br>(0 - 0)          | 0<br>(0 - 0)           | 0<br>(0 - 0)             | 0<br>(0 - 0)             | 0<br>(0 - 0)                |
| Dengue                                                             | 1<br>(0 - 1)                | 0<br>(0 - 0)          | 0<br>(0 - 0)           | 0<br>(0 - 0)             | 0<br>(0 - 0)             | 0<br>(0 - 0)                |
| Rabies                                                             | 0<br>(0 - 1)                | 0<br>(0 - 0)          | 0<br>(0 - 0)           | 0<br>(0 - 0)             | 0<br>(0 - 0)             | 0<br>(0 - 0)                |
| Other neglected tropical diseases                                  | 3<br>(1 - 4)                | 0<br>(0 - 0)          | 0<br>(0 - 0)           | 0<br>(0 - 0)             | 1<br>(0 - 2)             | 1<br>(0 - 2)                |
| Maternal disorders                                                 | 3<br>(2 - 4)                | --                    | 0<br>(0 - 0)           | 3<br>(2 - 3)             | --                       | --                          |
| Maternal hemorrhage                                                | 0<br>(0 - 0)                | --                    | 0<br>(0 - 0)           | 0<br>(0 - 0)             | --                       | --                          |
| Maternal sepsis and other maternal infections                      | 0<br>(0 - 0)                | --                    | 0<br>(0 - 0)           | 0<br>(0 - 0)             | --                       | --                          |
| Maternal hypertensive disorders                                    | 0<br>(0 - 1)                | --                    | 0<br>(0 - 0)           | 0<br>(0 - 1)             | --                       | --                          |
| Maternal obstructed labor                                          | 0<br>(0 - 0)                | --                    | 0<br>(0 - 0)           | 0<br>(0 - 0)             | --                       | --                          |
| Maternal abortive outcome                                          | 1<br>(0 - 1)                | --                    | 0<br>(0 - 0)           | 1<br>(0 - 1)             | --                       | --                          |
| Indirect maternal deaths                                           | 0<br>(0 - 0)                | --                    | 0<br>(0 - 0)           | 0<br>(0 - 0)             | --                       | --                          |



Web Table 31- Norway deaths with 95% UI by age, sex, and cause in 2013

| Cause                                                            | Both Sexes, All Ages        | Both Sexes, 0-4 Years | Both Sexes, 5-14 Years | Both Sexes, 15-49 Years  | Both Sexes, 50-69 Years  | Both Sexes, 70-80 Years     |
|------------------------------------------------------------------|-----------------------------|-----------------------|------------------------|--------------------------|--------------------------|-----------------------------|
| Late maternal deaths                                             | 0<br>(0 - 0)                | --                    | 0<br>(0 - 0)           | 0<br>(0 - 0)             | --                       | --                          |
| Maternal deaths aggravated by HIV/AIDS                           | 0<br>(0 - 0)                | --                    | --                     | 0<br>(0 - 0)             | --                       | --                          |
| Other maternal disorders                                         | 1<br>(0 - 1)                | --                    | 0<br>(0 - 0)           | 1<br>(0 - 1)             | --                       | --                          |
| Neonatal disorders                                               | 63<br>(48 - 79)             | 63<br>(48 - 79)       | --                     | --                       | --                       | --                          |
| Neonatal preterm birth complications                             | 23<br>(14 - 32)             | 23<br>(14 - 32)       | --                     | --                       | --                       | --                          |
| Neonatal encephalopathy due to birth asphyxia and trauma         | 24<br>(16 - 33)             | 24<br>(16 - 33)       | --                     | --                       | --                       | --                          |
| Neonatal sepsis and other neonatal infections                    | 2<br>(1 - 3)                | 2<br>(1 - 3)          | --                     | --                       | --                       | --                          |
| Hemolytic disease and other neonatal jaundice                    | 0<br>(0 - 0)                | 0<br>(0 - 0)          | --                     | --                       | --                       | --                          |
| Other neonatal disorders                                         | 14<br>(10 - 20)             | 14<br>(10 - 20)       | --                     | --                       | --                       | --                          |
| Nutritional deficiencies                                         | 130<br>(63 - 168)           | 0<br>(0 - 0)          | 0<br>(0 - 0)           | 2<br>(1 - 2)             | 7<br>(5 - 9)             | 121<br>(56 - 158)           |
| Protein-energy malnutrition                                      | 39<br>(5 - 68)              | 0<br>(0 - 0)          | 0<br>(0 - 0)           | 0<br>(0 - 0)             | 1<br>(0 - 2)             | 37<br>(5 - 67)              |
| Iodine deficiency                                                | 0<br>(0 - 2)                | 0<br>(0 - 0)          | 0<br>(0 - 0)           | 0<br>(0 - 0)             | 0<br>(0 - 0)             | 0<br>(0 - 2)                |
| Iron-deficiency anemia                                           | 84<br>(43 - 111)            | 0<br>(0 - 0)          | 0<br>(0 - 0)           | 1<br>(1 - 1)             | 4<br>(2 - 5)             | 79<br>(41 - 105)            |
| Other nutritional deficiencies                                   | 7<br>(4 - 14)               | 0<br>(0 - 0)          | 0<br>(0 - 0)           | 0<br>(0 - 1)             | 2<br>(1 - 4)             | 4<br>(2 - 10)               |
| Other communicable, maternal, neonatal, and nutritional diseases | 66<br>(42 - 82)             | 1<br>(1 - 2)          | 0<br>(0 - 1)           | 5<br>(4 - 7)             | 16<br>(10 - 20)          | 44<br>(25 - 57)             |
| Sexually transmitted diseases excluding HIV                      | 4<br>(2 - 5)                | 0<br>(0 - 1)          | 0<br>(0 - 0)           | 0<br>(0 - 0)             | 0<br>(0 - 1)             | 2<br>(1 - 4)                |
| Syphilis                                                         | 3<br>(2 - 4)                | 0<br>(0 - 1)          | 0<br>(0 - 0)           | 0<br>(0 - 0)             | 0<br>(0 - 0)             | 2<br>(1 - 3)                |
| Chlamydial infection                                             | 0<br>(0 - 0)                | --                    | 0<br>(0 - 0)           | 0<br>(0 - 0)             | 0<br>(0 - 0)             | 0<br>(0 - 0)                |
| Gonococcal infection                                             | 0<br>(0 - 1)                | --                    | 0<br>(0 - 0)           | 0<br>(0 - 0)             | 0<br>(0 - 0)             | 0<br>(0 - 0)                |
| Other sexually transmitted diseases                              | 0<br>(0 - 0)                | --                    | 0<br>(0 - 0)           | 0<br>(0 - 0)             | 0<br>(0 - 0)             | 0<br>(0 - 0)                |
| Hepatitis                                                        | 5<br>(4 - 5)                | 0<br>(0 - 0)          | 0<br>(0 - 0)           | 2<br>(1 - 2)             | 2<br>(1 - 2)             | 1<br>(1 - 1)                |
| Acute hepatitis A                                                | 1<br>(0 - 2)                | 0<br>(0 - 0)          | 0<br>(0 - 0)           | 1<br>(0 - 1)             | 0<br>(0 - 1)             | 0<br>(0 - 0)                |
| Acute hepatitis B                                                | 3<br>(2 - 4)                | 0<br>(0 - 0)          | 0<br>(0 - 0)           | 1<br>(1 - 1)             | 1<br>(1 - 2)             | 1<br>(0 - 1)                |
| Acute hepatitis C                                                | 0<br>(0 - 1)                | --                    | 0<br>(0 - 0)           | 0<br>(0 - 0)             | 0<br>(0 - 0)             | 0<br>(0 - 0)                |
| Other infectious diseases                                        | 58<br>(34 - 74)             | 1<br>(0 - 1)          | 0<br>(0 - 0)           | 4<br>(2 - 5)             | 13<br>(8 - 17)           | 40<br>(21 - 54)             |
| Non-communicable diseases                                        | 37,083<br>(35,724 - 38,308) | 95<br>(78 - 117)      | 32<br>(28 - 36)        | 1,261<br>(1,186 - 1,323) | 7,088<br>(6,809 - 7,370) | 28,608<br>(27,476 - 29,575) |
| Neoplasms                                                        | 11,366<br>(10,406 - 12,050) | 7<br>(5 - 9)          | 15<br>(13 - 18)        | 518<br>(485 - 552)       | 3,741<br>(3,546 - 3,923) | 7,086<br>(6,264 - 7,659)    |
| Esophageal cancer                                                | 193<br>(146 - 218)          | --                    | --                     | 6<br>(5 - 8)             | 85<br>(63 - 99)          | 102<br>(75 - 118)           |
| Stomach cancer                                                   | 482<br>(413 - 572)          | --                    | --                     | 16<br>(14 - 19)          | 131<br>(114 - 152)       | 335<br>(275 - 415)          |
| Liver cancer                                                     | 167<br>(103 - 211)          | --                    | 0<br>(0 - 0)           | 9<br>(6 - 12)            | 57<br>(36 - 73)          | 101<br>(60 - 133)           |
| Liver cancer due to hepatitis B                                  | 34<br>(14 - 59)             | --                    | 0<br>(0 - 0)           | 3<br>(2 - 6)             | 15<br>(5 - 26)           | 16<br>(6 - 28)              |
| Liver cancer due to hepatitis C                                  | 93<br>(46 - 131)            | --                    | 0<br>(0 - 0)           | 4<br>(2 - 6)             | 30<br>(15 - 45)          | 59<br>(27 - 84)             |
| Liver cancer due to alcohol use                                  | 31<br>(16 - 52)             | --                    | --                     | 1<br>(0 - 2)             | 9<br>(4 - 17)            | 21<br>(11 - 35)             |
| Liver cancer due to other causes                                 | 8<br>(4 - 15)               | --                    | 0<br>(0 - 0)           | 1<br>(0 - 1)             | 3<br>(1 - 5)             | 5<br>(2 - 9)                |
| Larynx cancer                                                    | 38<br>(28 - 46)             | --                    | --                     | 2<br>(1 - 2)             | 16<br>(11 - 19)          | 21<br>(15 - 26)             |
| Tracheal, bronchus and lung cancer                               | 2,283<br>(1,885 - 2,503)    | --                    | --                     | 63<br>(54 - 72)          | 976<br>(834 - 1,064)     | 1,244<br>(966 - 1,411)      |
| Breast cancer                                                    | 686<br>(552 - 853)          | --                    | --                     | 68<br>(57 - 87)          | 260<br>(216 - 328)       | 358<br>(274 - 447)          |
| Cervical cancer                                                  | 116<br>(88 - 140)           | --                    | --                     | 20<br>(15 - 25)          | 40<br>(32 - 50)          | 56<br>(38 - 74)             |
| Uterine cancer                                                   | 119<br>(49 - 151)           | --                    | --                     | 3<br>(2 - 5)             | 36<br>(17 - 47)          | 80<br>(28 - 108)            |
| Prostate cancer                                                  | 1,138<br>(869 - 1,582)      | --                    | --                     | 2<br>(1 - 3)             | 181<br>(137 - 267)       | 955<br>(702 - 1,340)        |

Web Table 31- Norway deaths with 95% UI by age, sex, and cause in 2013

| Cause                                         | Both Sexes, All Ages        | Both Sexes, 0-4 Years | Both Sexes, 5-14 Years | Both Sexes, 15-49 Years | Both Sexes, 50-69 Years  | Both Sexes, 70-80 Years     |
|-----------------------------------------------|-----------------------------|-----------------------|------------------------|-------------------------|--------------------------|-----------------------------|
| Colon and rectum cancer                       | 1,999<br>(1,821 - 2,197)    | --                    | --                     | 52<br>(46 - 58)         | 552<br>(513 - 594)       | 1,395<br>(1,237 - 1,582)    |
| Lip and oral cavity cancer                    | 89<br>(74 - 101)            | --                    | --                     | 7<br>(5 - 8)            | 36<br>(28 - 43)          | 46<br>(38 - 56)             |
| Nasopharynx cancer                            | 10<br>(8 - 17)              | --                    | 0<br>(0 - 0)           | 1<br>(1 - 2)            | 5<br>(4 - 9)             | 3<br>(2 - 5)                |
| Other pharynx cancer                          | 45<br>(34 - 56)             | --                    | --                     | 3<br>(2 - 4)            | 27<br>(20 - 35)          | 16<br>(11 - 20)             |
| Gallbladder and biliary tract cancer          | 117<br>(90 - 155)           | --                    | --                     | 4<br>(3 - 5)            | 32<br>(25 - 43)          | 81<br>(59 - 107)            |
| Pancreatic cancer                             | 738<br>(681 - 797)          | --                    | --                     | 21<br>(17 - 24)         | 261<br>(239 - 285)       | 457<br>(409 - 509)          |
| Malignant skin melanoma                       | 283<br>(168 - 378)          | --                    | --                     | 42<br>(28 - 61)         | 116<br>(70 - 160)        | 125<br>(68 - 166)           |
| Non-melanoma skin cancer                      | 47<br>(34 - 64)             | --                    | --                     | 1<br>(0 - 1)            | 6<br>(5 - 9)             | 40<br>(29 - 54)             |
| Ovarian cancer                                | 331<br>(274 - 382)          | --                    | --                     | 20<br>(16 - 24)         | 146<br>(124 - 169)       | 165<br>(117 - 207)          |
| Testicular cancer                             | 12<br>(8 - 15)              | --                    | --                     | 6<br>(4 - 8)            | 3<br>(2 - 4)             | 2<br>(1 - 3)                |
| Kidney cancer                                 | 306<br>(264 - 353)          | 0<br>(0 - 0)          | 0<br>(0 - 0)           | 11<br>(9 - 14)          | 112<br>(96 - 130)        | 183<br>(145 - 225)          |
| Bladder cancer                                | 324<br>(249 - 378)          | --                    | --                     | 4<br>(3 - 4)            | 62<br>(51 - 73)          | 258<br>(192 - 308)          |
| Brain and nervous system cancer               | 313<br>(250 - 354)          | 2<br>(1 - 3)          | 6<br>(4 - 7)           | 57<br>(46 - 66)         | 153<br>(125 - 177)       | 96<br>(65 - 119)            |
| Thyroid cancer                                | 38<br>(32 - 48)             | --                    | 0<br>(0 - 0)           | 2<br>(2 - 3)            | 11<br>(9 - 14)           | 25<br>(20 - 32)             |
| Mesothelioma                                  | 79<br>(48 - 102)            | --                    | --                     | 2<br>(1 - 3)            | 34<br>(21 - 49)          | 43<br>(24 - 60)             |
| Hodgkin lymphoma                              | 20<br>(16 - 30)             | 0<br>(0 - 0)          | 0<br>(0 - 0)           | 6<br>(4 - 9)            | 6<br>(4 - 9)             | 8<br>(6 - 11)               |
| Non-Hodgkin lymphoma                          | 339<br>(218 - 414)          | 0<br>(0 - 1)          | 1<br>(1 - 1)           | 23<br>(16 - 32)         | 108<br>(69 - 143)        | 207<br>(123 - 264)          |
| Multiple myeloma                              | 266<br>(184 - 375)          | --                    | --                     | 7<br>(5 - 11)           | 81<br>(56 - 119)         | 178<br>(119 - 256)          |
| Leukemia                                      | 348<br>(316 - 382)          | 2<br>(1 - 3)          | 5<br>(4 - 6)           | 27<br>(23 - 30)         | 93<br>(82 - 105)         | 221<br>(194 - 251)          |
| Other neoplasms                               | 440<br>(342 - 515)          | 2<br>(2 - 3)          | 3<br>(2 - 4)           | 35<br>(29 - 40)         | 114<br>(93 - 133)        | 287<br>(204 - 357)          |
| Cardiovascular diseases                       | 14,085<br>(12,988 - 15,700) | 1<br>(1 - 1)          | 1<br>(1 - 1)           | 216<br>(192 - 238)      | 1,800<br>(1,666 - 2,049) | 12,068<br>(11,061 - 13,485) |
| Rheumatic heart disease                       | 57<br>(39 - 123)            | 0<br>(0 - 0)          | 0<br>(0 - 0)           | 1<br>(1 - 2)            | 9<br>(6 - 19)            | 47<br>(31 - 104)            |
| Ischemic heart disease                        | 7,290<br>(6,482 - 8,820)    | 0<br>(0 - 0)          | 0<br>(0 - 0)           | 127<br>(113 - 145)      | 1,119<br>(1,008 - 1,374) | 6,044<br>(5,285 - 7,339)    |
| Cerebrovascular disease                       | 4,020<br>(3,449 - 4,993)    | 0<br>(0 - 0)          | 0<br>(0 - 0)           | 46<br>(35 - 54)         | 369<br>(294 - 457)       | 3,605<br>(3,079 - 4,511)    |
| Ischemic stroke                               | 2,377<br>(1,953 - 3,061)    | 0<br>(0 - 0)          | 0<br>(0 - 0)           | 6<br>(4 - 7)            | 121<br>(89 - 152)        | 2,251<br>(1,834 - 2,911)    |
| Hemorrhagic stroke                            | 1,642<br>(1,254 - 2,107)    | 0<br>(0 - 0)          | 0<br>(0 - 0)           | 40<br>(30 - 48)         | 248<br>(194 - 312)       | 1,354<br>(1,032 - 1,787)    |
| Hypertensive heart disease                    | 131<br>(97 - 192)           | 0<br>(0 - 0)          | 0<br>(0 - 0)           | 1<br>(1 - 1)            | 10<br>(7 - 14)           | 120<br>(87 - 179)           |
| Cardiomyopathy and myocarditis                | 306<br>(153 - 385)          | 1<br>(0 - 1)          | 1<br>(0 - 1)           | 18<br>(11 - 22)         | 56<br>(33 - 68)          | 231<br>(104 - 303)          |
| Atrial fibrillation and flutter               | 835<br>(616 - 1,066)        | --                    | --                     | 1<br>(1 - 1)            | 35<br>(25 - 45)          | 800<br>(585 - 1,028)        |
| Aortic aneurysm                               | 492<br>(389 - 602)          | --                    | --                     | 7<br>(5 - 8)            | 100<br>(77 - 119)        | 385<br>(299 - 485)          |
| Peripheral vascular disease                   | 103<br>(80 - 129)           | --                    | --                     | 0<br>(0 - 0)            | 8<br>(6 - 11)            | 95<br>(72 - 121)            |
| Endocarditis                                  | 45<br>(31 - 63)             | 0<br>(0 - 0)          | 0<br>(0 - 0)           | 2<br>(1 - 3)            | 8<br>(6 - 12)            | 34<br>(23 - 49)             |
| Other cardiovascular and circulatory diseases | 806<br>(625 - 1,020)        | 0<br>(0 - 0)          | 0<br>(0 - 0)           | 13<br>(9 - 16)          | 86<br>(61 - 105)         | 708<br>(538 - 918)          |
| Chronic respiratory diseases                  | 2,593<br>(1,613 - 2,954)    | 1<br>(1 - 2)          | 1<br>(0 - 1)           | 27<br>(19 - 32)         | 423<br>(285 - 476)       | 2,140<br>(1,304 - 2,472)    |
| Chronic obstructive pulmonary disease         | 2,176<br>(1,297 - 2,507)    | 0<br>(0 - 0)          | 0<br>(0 - 0)           | 13<br>(7 - 16)          | 354<br>(225 - 406)       | 1,808<br>(1,065 - 2,108)    |
| Pneumoconiosis                                | 38<br>(22 - 55)             | 0<br>(0 - 0)          | 0<br>(0 - 0)           | 1<br>(0 - 1)            | 4<br>(3 - 6)             | 33<br>(18 - 48)             |
| Silicosis                                     | 1<br>(1 - 2)                | 0<br>(0 - 0)          | 0<br>(0 - 0)           | 0<br>(0 - 0)            | 0<br>(0 - 0)             | 1<br>(0 - 1)                |
| Asbestosis                                    | 18<br>(10 - 27)             | 0<br>(0 - 0)          | 0<br>(0 - 0)           | 0<br>(0 - 0)            | 3<br>(1 - 4)             | 16<br>(8 - 24)              |
| Coal workers pneumoconiosis                   | 2<br>(1 - 3)                | 0<br>(0 - 0)          | 0<br>(0 - 0)           | 0<br>(0 - 0)            | 0<br>(0 - 0)             | 2<br>(1 - 3)                |
| Other pneumoconiosis                          | 16<br>(9 - 23)              | 0<br>(0 - 0)          | 0<br>(0 - 0)           | 0<br>(0 - 0)            | 2<br>(1 - 2)             | 14<br>(8 - 21)              |

Web Table 31- Norway deaths with 95% UI by age, sex, and cause in 2013

| Cause                                               | Both Sexes, All Ages     | Both Sexes, 0-4 Years | Both Sexes, 5-14 Years | Both Sexes, 15-49 Years | Both Sexes, 50-69 Years | Both Sexes, 70-80 Years  |
|-----------------------------------------------------|--------------------------|-----------------------|------------------------|-------------------------|-------------------------|--------------------------|
| Asthma                                              | 151<br>(97 - 211)        | 0<br>(0 - 0)          | 0<br>(0 - 0)           | 7<br>(5 - 9)            | 27<br>(20 - 37)         | 116<br>(68 - 173)        |
| Interstitial lung disease and pulmonary sarcoidosis | 215<br>(132 - 293)       | 0<br>(0 - 0)          | 0<br>(0 - 0)           | 5<br>(4 - 7)            | 36<br>(23 - 48)         | 173<br>(101 - 240)       |
| Other chronic respiratory diseases                  | 13<br>(8 - 18)           | 0<br>(0 - 1)          | 0<br>(0 - 0)           | 1<br>(1 - 2)            | 2<br>(1 - 2)            | 9<br>(6 - 14)            |
| Cirrhosis                                           | 347<br>(323 - 376)       | 0<br>(0 - 0)          | 0<br>(0 - 0)           | 37<br>(32 - 42)         | 154<br>(139 - 169)      | 156<br>(139 - 178)       |
| Cirrhosis due to hepatitis B                        | 39<br>(24 - 54)          | 0<br>(0 - 0)          | 0<br>(0 - 0)           | 4<br>(2 - 5)            | 16<br>(10 - 23)         | 19<br>(10 - 29)          |
| Cirrhosis due to hepatitis C                        | 172<br>(128 - 211)       | 0<br>(0 - 0)          | 0<br>(0 - 0)           | 18<br>(11 - 24)         | 76<br>(50 - 98)         | 78<br>(61 - 97)          |
| Cirrhosis due to alcohol use                        | 100<br>(66 - 142)        | --                    | --                     | 8<br>(3 - 14)           | 44<br>(25 - 67)         | 48<br>(34 - 66)          |
| Cirrhosis due to other causes                       | 36<br>(21 - 57)          | 0<br>(0 - 0)          | 0<br>(0 - 0)           | 7<br>(4 - 10)           | 17<br>(9 - 29)          | 12<br>(6 - 20)           |
| Digestive diseases                                  | 968<br>(840 - 1,095)     | 0<br>(0 - 0)          | 0<br>(0 - 0)           | 18<br>(15 - 21)         | 123<br>(100 - 139)      | 826<br>(710 - 947)       |
| Peptic ulcer disease                                | 192<br>(141 - 243)       | 0<br>(0 - 0)          | 0<br>(0 - 0)           | 3<br>(2 - 4)            | 28<br>(19 - 36)         | 161<br>(117 - 208)       |
| Gastritis and duodenitis                            | 11<br>(7 - 17)           | 0<br>(0 - 0)          | 0<br>(0 - 0)           | 1<br>(1 - 2)            | 3<br>(2 - 4)            | 8<br>(4 - 12)            |
| Appendicitis                                        | 14<br>(9 - 20)           | 0<br>(0 - 0)          | 0<br>(0 - 0)           | 1<br>(1 - 1)            | 2<br>(2 - 3)            | 11<br>(7 - 16)           |
| Paralytic ileus and intestinal obstruction          | 169<br>(118 - 257)       | 0<br>(0 - 0)          | 0<br>(0 - 0)           | 2<br>(1 - 2)            | 17<br>(11 - 26)         | 150<br>(105 - 231)       |
| Inguinal, femoral, and abdominal hernia             | 29<br>(15 - 42)          | 0<br>(0 - 0)          | 0<br>(0 - 0)           | 0<br>(0 - 1)            | 3<br>(2 - 4)            | 26<br>(12 - 38)          |
| Inflammatory bowel disease                          | 35<br>(25 - 48)          | 0<br>(0 - 0)          | 0<br>(0 - 0)           | 3<br>(2 - 4)            | 6<br>(4 - 8)            | 27<br>(18 - 39)          |
| Vascular intestinal disorders                       | 124<br>(77 - 198)        | 0<br>(0 - 0)          | 0<br>(0 - 0)           | 1<br>(1 - 2)            | 18<br>(11 - 30)         | 104<br>(62 - 173)        |
| Gallbladder and biliary diseases                    | 141<br>(109 - 200)       | 0<br>(0 - 0)          | 0<br>(0 - 0)           | 1<br>(1 - 1)            | 10<br>(7 - 12)          | 130<br>(99 - 188)        |
| Pancreatitis                                        | 65<br>(47 - 85)          | 0<br>(0 - 0)          | 0<br>(0 - 0)           | 4<br>(3 - 5)            | 17<br>(12 - 21)         | 44<br>(32 - 62)          |
| Other digestive diseases                            | 188<br>(141 - 232)       | 0<br>(0 - 0)          | 0<br>(0 - 0)           | 2<br>(1 - 3)            | 20<br>(14 - 25)         | 166<br>(123 - 208)       |
| Neurological disorders                              | 4,822<br>(3,721 - 5,812) | 6<br>(4 - 8)          | 4<br>(3 - 4)           | 62<br>(52 - 72)         | 318<br>(270 - 366)      | 4,433<br>(3,351 - 5,400) |
| Alzheimer disease and other dementias               | 4,126<br>(3,023 - 5,117) | --                    | --                     | 0<br>(0 - 1)            | 131<br>(93 - 169)       | 3,995<br>(2,913 - 4,976) |
| Parkinson disease                                   | 299<br>(245 - 409)       | --                    | --                     | 0<br>(0 - 0)            | 22<br>(17 - 28)         | 277<br>(223 - 385)       |
| Epilepsy                                            | 72<br>(51 - 87)          | 1<br>(1 - 2)          | 1<br>(1 - 2)           | 24<br>(18 - 29)         | 20<br>(15 - 25)         | 26<br>(16 - 36)          |
| Multiple sclerosis                                  | 96<br>(62 - 133)         | --                    | --                     | 16<br>(11 - 24)         | 52<br>(33 - 73)         | 28<br>(17 - 40)          |
| Other neurological disorders                        | 230<br>(200 - 260)       | 5<br>(4 - 7)          | 2<br>(2 - 3)           | 22<br>(18 - 25)         | 94<br>(80 - 110)        | 108<br>(90 - 127)        |
| Mental and substance use disorders                  | 552<br>(446 - 631)       | 0<br>(0 - 0)          | 0<br>(0 - 0)           | 279<br>(234 - 314)      | 208<br>(150 - 263)      | 65<br>(45 - 79)          |
| Schizophrenia                                       | 17<br>(4 - 26)           | --                    | --                     | 1<br>(1 - 2)            | 5<br>(1 - 7)            | 11<br>(2 - 18)           |
| Alcohol use disorders                               | 230<br>(154 - 307)       | --                    | --                     | 43<br>(32 - 66)         | 145<br>(91 - 198)       | 42<br>(29 - 58)          |
| Drug use disorders                                  | 304<br>(245 - 339)       | 0<br>(0 - 0)          | --                     | 233<br>(189 - 265)      | 59<br>(41 - 70)         | 12<br>(10 - 15)          |
| Opioid use disorders                                | 111<br>(90 - 126)        | 0<br>(0 - 0)          | --                     | 87<br>(69 - 100)        | 20<br>(13 - 25)         | 5<br>(4 - 6)             |
| Cocaine use disorders                               | 9<br>(7 - 10)            | 0<br>(0 - 0)          | --                     | 7<br>(6 - 9)            | 1<br>(1 - 2)            | 0<br>(0 - 0)             |
| Amphetamine use disorders                           | 9<br>(7 - 10)            | 0<br>(0 - 0)          | --                     | 6<br>(5 - 8)            | 2<br>(1 - 2)            | 0<br>(0 - 1)             |
| Other drug use disorders                            | 176<br>(140 - 198)       | 0<br>(0 - 0)          | --                     | 133<br>(107 - 153)      | 36<br>(25 - 43)         | 7<br>(6 - 9)             |
| Eating disorders                                    | 1<br>(1 - 1)             | --                    | 0<br>(0 - 0)           | 1<br>(1 - 1)            | --                      | --                       |
| Anorexia nervosa                                    | 1<br>(1 - 1)             | --                    | 0<br>(0 - 0)           | 1<br>(1 - 1)            | --                      | --                       |
| Diabetes, urogenital, blood, and endocrine diseases | 1,889<br>(1,563 - 2,106) | 6<br>(3 - 8)          | 4<br>(2 - 5)           | 67<br>(53 - 75)         | 251<br>(215 - 276)      | 1,562<br>(1,273 - 1,759) |
| Diabetes mellitus                                   | 697<br>(617 - 790)       | 0<br>(0 - 0)          | 0<br>(0 - 0)           | 31<br>(27 - 36)         | 123<br>(110 - 139)      | 542<br>(463 - 634)       |
| Acute glomerulonephritis                            | 1<br>(1 - 1)             | 0<br>(0 - 0)          | 0<br>(0 - 0)           | 0<br>(0 - 0)            | 0<br>(0 - 0)            | 0<br>(0 - 0)             |
| Chronic kidney disease                              | 592<br>(455 - 691)       | 0<br>(0 - 0)          | 0<br>(0 - 0)           | 10<br>(9 - 12)          | 59<br>(49 - 72)         | 523<br>(388 - 614)       |
| Chronic kidney disease due to diabetes mellitus     | 129<br>(85 - 186)        | 0<br>(0 - 0)          | 0<br>(0 - 0)           | 3<br>(2 - 4)            | 18<br>(11 - 26)         | 108<br>(72 - 157)        |

Web Table 31- Norway deaths with 95% UI by age, sex, and cause in 2013

| Cause                                               | Both Sexes, All Ages     | Both Sexes, 0-4 Years | Both Sexes, 5-14 Years | Both Sexes, 15-49 Years | Both Sexes, 50-69 Years | Both Sexes, 70-80 Years  |
|-----------------------------------------------------|--------------------------|-----------------------|------------------------|-------------------------|-------------------------|--------------------------|
| Chronic kidney disease due to hypertension          | 193<br>(118 - 250)       | 0<br>(0 - 0)          | 0<br>(0 - 0)           | 2<br>(1 - 2)            | 14<br>(9 - 20)          | 178<br>(108 - 231)       |
| Chronic kidney disease due to glomerulonephritis    | 17<br>(12 - 25)          | 0<br>(0 - 0)          | 0<br>(0 - 0)           | 1<br>(1 - 2)            | 4<br>(3 - 5)            | 12<br>(8 - 19)           |
| Chronic kidney disease due to other causes          | 253<br>(162 - 336)       | 0<br>(0 - 0)          | 0<br>(0 - 0)           | 5<br>(3 - 6)            | 23<br>(16 - 32)         | 225<br>(139 - 306)       |
| Urinary diseases and male infertility               | 415<br>(274 - 515)       | 0<br>(0 - 0)          | 0<br>(0 - 0)           | 4<br>(3 - 4)            | 25<br>(17 - 30)         | 386<br>(251 - 487)       |
| Interstitial nephritis and urinary tract infections | 381<br>(248 - 478)       | 0<br>(0 - 0)          | 0<br>(0 - 0)           | 3<br>(2 - 3)            | 19<br>(13 - 23)         | 359<br>(231 - 454)       |
| Urolithiasis                                        | 11<br>(7 - 18)           | --                    | 0<br>(0 - 0)           | 0<br>(0 - 0)            | 2<br>(1 - 3)            | 9<br>(5 - 15)            |
| Other urinary diseases                              | 23<br>(12 - 36)          | 0<br>(0 - 0)          | 0<br>(0 - 0)           | 1<br>(0 - 1)            | 4<br>(2 - 6)            | 19<br>(9 - 30)           |
| Gynecological diseases                              | 2<br>(1 - 3)             | --                    | --                     | 0<br>(0 - 0)            | 0<br>(0 - 0)            | 2<br>(1 - 3)             |
| Uterine fibroids                                    | 1<br>(0 - 1)             | --                    | --                     | 0<br>(0 - 0)            | 0<br>(0 - 0)            | 1<br>(0 - 1)             |
| Polycystic ovarian syndrome                         | 0<br>(0 - 0)             | --                    | --                     | 0<br>(0 - 0)            | 0<br>(0 - 0)            | --                       |
| Endometriosis                                       | 0<br>(0 - 0)             | --                    | --                     | 0<br>(0 - 0)            | 0<br>(0 - 0)            | --                       |
| Genital prolapse                                    | 1<br>(0 - 1)             | --                    | --                     | 0<br>(0 - 0)            | 0<br>(0 - 0)            | 0<br>(0 - 1)             |
| Other gynecological diseases                        | 1<br>(1 - 2)             | --                    | --                     | 0<br>(0 - 0)            | 0<br>(0 - 0)            | 1<br>(0 - 1)             |
| Hemoglobinopathies and hemolytic anemias            | 22<br>(16 - 31)          | 0<br>(0 - 0)          | 0<br>(0 - 1)           | 2<br>(1 - 2)            | 3<br>(2 - 3)            | 18<br>(12 - 25)          |
| Thalassemias                                        | 1<br>(0 - 1)             | 0<br>(0 - 0)          | 0<br>(0 - 0)           | 0<br>(0 - 1)            | 0<br>(0 - 0)            | 0<br>(0 - 0)             |
| Sickle cell disorders                               | 2<br>(2 - 3)             | 0<br>(0 - 0)          | 0<br>(0 - 0)           | 1<br>(0 - 1)            | 1<br>(1 - 1)            | 1<br>(0 - 1)             |
| G6PD deficiency                                     | 0<br>(0 - 0)             | 0<br>(0 - 0)          | 0<br>(0 - 0)           | 0<br>(0 - 0)            | 0<br>(0 - 0)            | 0<br>(0 - 0)             |
| Other hemoglobinopathies and hemolytic anemias      | 19<br>(13 - 28)          | 0<br>(0 - 0)          | 0<br>(0 - 0)           | 1<br>(0 - 1)            | 2<br>(1 - 2)            | 17<br>(12 - 25)          |
| Endocrine, metabolic, blood, and immune disorders   | 159<br>(68 - 196)        | 5<br>(2 - 7)          | 3<br>(1 - 4)           | 20<br>(9 - 25)          | 41<br>(17 - 51)         | 91<br>(34 - 120)         |
| Musculoskeletal disorders                           | 168<br>(139 - 231)       | --                    | 0<br>(0 - 1)           | 8<br>(6 - 11)           | 32<br>(26 - 49)         | 128<br>(102 - 178)       |
| Rheumatoid arthritis                                | 60<br>(46 - 91)          | --                    | 0<br>(0 - 0)           | 1<br>(1 - 2)            | 11<br>(8 - 19)          | 48<br>(35 - 71)          |
| Other musculoskeletal disorders                     | 107<br>(87 - 143)        | --                    | 0<br>(0 - 0)           | 7<br>(6 - 10)           | 21<br>(17 - 30)         | 80<br>(61 - 108)         |
| Other non-communicable diseases                     | 293<br>(243 - 338)       | 73<br>(58 - 95)       | 6<br>(5 - 8)           | 30<br>(26 - 35)         | 39<br>(34 - 46)         | 145<br>(80 - 185)        |
| Congenital anomalies                                | 144<br>(127 - 171)       | 58<br>(47 - 75)       | 6<br>(5 - 8)           | 28<br>(25 - 34)         | 31<br>(27 - 38)         | 19<br>(16 - 24)          |
| Neural tube defects                                 | 2<br>(1 - 2)             | 1<br>(1 - 1)          | 0<br>(0 - 0)           | 0<br>(0 - 0)            | 0<br>(0 - 0)            | 0<br>(0 - 0)             |
| Congenital heart anomalies                          | 43<br>(36 - 52)          | 20<br>(15 - 27)       | 2<br>(2 - 3)           | 12<br>(10 - 15)         | 5<br>(4 - 7)            | 3<br>(2 - 4)             |
| Cleft lip and cleft palate                          | 0<br>(0 - 0)             | 0<br>(0 - 0)          | --                     | --                      | --                      | --                       |
| Down syndrome                                       | 28<br>(21 - 35)          | 2<br>(1 - 4)          | 0<br>(0 - 0)           | 5<br>(3 - 6)            | 19<br>(14 - 24)         | 1<br>(1 - 2)             |
| Chromosomal unbalanced rearrangements               | 11<br>(8 - 15)           | 10<br>(6 - 13)        | 0<br>(0 - 1)           | 1<br>(0 - 1)            | 0<br>(0 - 0)            | 0<br>(0 - 0)             |
| Other congenital anomalies                          | 61<br>(52 - 73)          | 26<br>(19 - 34)       | 3<br>(2 - 4)           | 11<br>(9 - 13)          | 7<br>(5 - 9)            | 15<br>(12 - 18)          |
| Skin and subcutaneous diseases                      | 134<br>(64 - 174)        | 0<br>(0 - 0)          | 0<br>(0 - 0)           | 1<br>(1 - 2)            | 8<br>(4 - 10)           | 125<br>(60 - 165)        |
| Cellulitis                                          | 6<br>(3 - 11)            | 0<br>(0 - 0)          | 0<br>(0 - 0)           | 0<br>(0 - 0)            | 1<br>(0 - 1)            | 5<br>(2 - 10)            |
| Pyoderma                                            | 98<br>(41 - 130)         | 0<br>(0 - 0)          | 0<br>(0 - 0)           | 1<br>(0 - 1)            | 6<br>(3 - 7)            | 91<br>(38 - 122)         |
| Decubitus ulcer                                     | 26<br>(14 - 39)          | 0<br>(0 - 0)          | 0<br>(0 - 0)           | 0<br>(0 - 0)            | 1<br>(1 - 1)            | 24<br>(13 - 37)          |
| Other skin and subcutaneous diseases                | 5<br>(2 - 9)             | 0<br>(0 - 0)          | 0<br>(0 - 0)           | 0<br>(0 - 0)            | 0<br>(0 - 1)            | 4<br>(1 - 8)             |
| Sudden infant death syndrome                        | 15<br>(9 - 25)           | 15<br>(9 - 25)        | --                     | --                      | --                      | --                       |
| Injuries                                            | 2,448<br>(2,198 - 2,843) | 13<br>(10 - 18)       | 19<br>(16 - 22)        | 615<br>(571 - 683)      | 439<br>(401 - 527)      | 1,362<br>(1,130 - 1,696) |
| Transport injuries                                  | 296<br>(272 - 330)       | 3<br>(2 - 4)          | 8<br>(6 - 9)           | 147<br>(132 - 163)      | 75<br>(66 - 87)         | 63<br>(54 - 76)          |
| Road injuries                                       | 261<br>(238 - 292)       | 3<br>(2 - 3)          | 6<br>(5 - 8)           | 128<br>(115 - 143)      | 65<br>(56 - 75)         | 59<br>(50 - 71)          |
| Pedestrian road injuries                            | 46<br>(33 - 69)          | 1<br>(1 - 2)          | 3<br>(2 - 4)           | 11<br>(6 - 18)          | 10<br>(7 - 16)          | 21<br>(15 - 32)          |

Web Table 31- Norway deaths with 95% UI by age, sex, and cause in 2013

| Cause                                           | Both Sexes, All Ages     | Both Sexes, 0-4 Years | Both Sexes, 5-14 Years | Both Sexes, 15-49 Years | Both Sexes, 50-69 Years | Both Sexes, 70-80 Years |
|-------------------------------------------------|--------------------------|-----------------------|------------------------|-------------------------|-------------------------|-------------------------|
| Cyclist road injuries                           | 16<br>(11 - 21)          | 0<br>(0 - 0)          | 1<br>(1 - 2)           | 4<br>(2 - 5)            | 5<br>(4 - 8)            | 5<br>(3 - 8)            |
| Motorcyclist road injuries                      | 30<br>(18 - 41)          | 0<br>(0 - 0)          | 0<br>(0 - 0)           | 24<br>(14 - 33)         | 4<br>(2 - 5)            | 3<br>(2 - 4)            |
| Motor vehicle road injuries                     | 168<br>(142 - 192)       | 1<br>(1 - 2)          | 2<br>(2 - 3)           | 89<br>(75 - 103)        | 45<br>(37 - 54)         | 30<br>(22 - 37)         |
| Other road injuries                             | 1<br>(1 - 2)             | 0<br>(0 - 0)          | 0<br>(0 - 0)           | 0<br>(0 - 1)            | 0<br>(0 - 1)            | 0<br>(0 - 1)            |
| Other transport injuries                        | 35<br>(29 - 45)          | 0<br>(0 - 1)          | 1<br>(1 - 2)           | 18<br>(14 - 25)         | 11<br>(8 - 15)          | 4<br>(3 - 6)            |
| Unintentional injuries                          | 1,500<br>(1,262 - 1,826) | 9<br>(7 - 13)         | 8<br>(7 - 11)          | 109<br>(96 - 137)       | 159<br>(138 - 192)      | 1,214<br>(987 - 1,533)  |
| Falls                                           | 1,193<br>(971 - 1,537)   | 1<br>(1 - 2)          | 1<br>(1 - 2)           | 28<br>(23 - 37)         | 75<br>(62 - 94)         | 1,089<br>(873 - 1,421)  |
| Drowning                                        | 87<br>(68 - 147)         | 3<br>(2 - 7)          | 3<br>(2 - 6)           | 35<br>(27 - 59)         | 31<br>(23 - 54)         | 15<br>(11 - 24)         |
| Fire, heat, and hot substances                  | 65<br>(49 - 79)          | 2<br>(1 - 3)          | 1<br>(1 - 2)           | 14<br>(11 - 18)         | 14<br>(10 - 18)         | 35<br>(25 - 44)         |
| Poisonings                                      | 14<br>(10 - 16)          | 0<br>(0 - 0)          | 0<br>(0 - 0)           | 6<br>(4 - 7)            | 6<br>(4 - 7)            | 2<br>(1 - 3)            |
| Exposure to mechanical forces                   | 31<br>(27 - 36)          | 1<br>(1 - 2)          | 1<br>(1 - 2)           | 13<br>(11 - 16)         | 9<br>(7 - 11)           | 6<br>(5 - 8)            |
| Unintentional firearm injuries                  | 1<br>(1 - 2)             | 0<br>(0 - 0)          | 0<br>(0 - 0)           | 1<br>(1 - 1)            | 0<br>(0 - 0)            | 0<br>(0 - 0)            |
| Unintentional suffocation                       | 3<br>(2 - 4)             | 1<br>(0 - 1)          | 0<br>(0 - 1)           | 0<br>(0 - 1)            | 0<br>(0 - 0)            | 1<br>(0 - 1)            |
| Other exposure to mechanical forces             | 27<br>(23 - 32)          | 1<br>(0 - 1)          | 1<br>(1 - 1)           | 12<br>(10 - 15)         | 8<br>(7 - 11)           | 5<br>(4 - 7)            |
| Adverse effects of medical treatment            | 28<br>(9 - 44)           | 1<br>(0 - 1)          | 0<br>(0 - 0)           | 2<br>(1 - 3)            | 5<br>(2 - 8)            | 20<br>(6 - 33)          |
| Animal contact                                  | 4<br>(2 - 6)             | 0<br>(0 - 0)          | 0<br>(0 - 0)           | 1<br>(0 - 1)            | 1<br>(1 - 2)            | 2<br>(1 - 3)            |
| Venomous animal contact                         | 1<br>(1 - 2)             | 0<br>(0 - 0)          | 0<br>(0 - 0)           | 0<br>(0 - 0)            | 1<br>(0 - 1)            | 0<br>(0 - 0)            |
| Non-venomous animal contact                     | 3<br>(2 - 5)             | 0<br>(0 - 0)          | 0<br>(0 - 0)           | 0<br>(0 - 1)            | 1<br>(1 - 1)            | 1<br>(1 - 2)            |
| Foreign body                                    | 69<br>(39 - 88)          | 1<br>(1 - 2)          | 1<br>(1 - 1)           | 7<br>(4 - 9)            | 16<br>(10 - 21)         | 44<br>(23 - 60)         |
| Pulmonary aspiration and foreign body in airway | 68<br>(38 - 87)          | 1<br>(1 - 2)          | 1<br>(1 - 1)           | 7<br>(4 - 9)            | 16<br>(10 - 21)         | 43<br>(23 - 60)         |
| Foreign body in other body part                 | 1<br>(1 - 1)             | 0<br>(0 - 0)          | 0<br>(0 - 0)           | 0<br>(0 - 0)            | 0<br>(0 - 0)            | 0<br>(0 - 1)            |
| Other unintentional injuries                    | 10<br>(8 - 14)           | 0<br>(0 - 0)          | 0<br>(0 - 0)           | 4<br>(3 - 5)            | 2<br>(2 - 4)            | 3<br>(2 - 6)            |
| Self-harm and interpersonal violence            | 652<br>(555 - 781)       | 1<br>(1 - 1)          | 3<br>(2 - 5)           | 359<br>(308 - 411)      | 204<br>(171 - 264)      | 84<br>(68 - 108)        |
| Self-harm                                       | 608<br>(516 - 728)       | --                    | 2<br>(1 - 3)           | 332<br>(282 - 385)      | 194<br>(163 - 255)      | 79<br>(64 - 102)        |
| Interpersonal violence                          | 44<br>(31 - 56)          | 1<br>(1 - 1)          | 1<br>(1 - 1)           | 27<br>(19 - 35)         | 9<br>(7 - 13)           | 5<br>(3 - 6)            |
| Assault by firearm                              | 12<br>(7 - 17)           | 0<br>(0 - 0)          | 0<br>(0 - 0)           | 9<br>(5 - 12)           | 2<br>(1 - 3)            | 1<br>(1 - 1)            |
| Assault by sharp object                         | 15<br>(10 - 22)          | 0<br>(0 - 0)          | 0<br>(0 - 0)           | 10<br>(7 - 15)          | 3<br>(2 - 5)            | 1<br>(1 - 2)            |
| Assault by other means                          | 17<br>(11 - 22)          | 1<br>(0 - 1)          | 1<br>(0 - 1)           | 8<br>(6 - 11)           | 4<br>(3 - 6)            | 3<br>(2 - 3)            |

Web Table 31- Norway deaths with 95% UI by age, sex, and cause in 2013

| Cause                                                             | Males, All Ages             | Males, 0-4 Years  | Males, 5-14 Years | Males, 15-49 Years       | Males, 50-69 Years       | Males, 70-80 Years          |
|-------------------------------------------------------------------|-----------------------------|-------------------|-------------------|--------------------------|--------------------------|-----------------------------|
| All causes                                                        | 20,951<br>(20,224 - 21,799) | 104<br>(86 - 125) | 30<br>(27 - 34)   | 1,283<br>(1,218 - 1,358) | 4,822<br>(4,603 - 5,080) | 14,712<br>(14,263 - 15,226) |
| Communicable, maternal, neonatal, and nutritional diseases        | 1,195<br>(992 - 1,570)      | 44<br>(33 - 54)   | 2<br>(1 - 3)      | 26<br>(22 - 31)          | 96<br>(81 - 114)         | 1,028<br>(823 - 1,413)      |
| HIV/AIDS and tuberculosis                                         | 33<br>(27 - 41)             | 0<br>(0 - 0)      | 0<br>(0 - 0)      | 6<br>(4 - 10)            | 7<br>(5 - 10)            | 20<br>(15 - 25)             |
| Tuberculosis                                                      | 25<br>(20 - 31)             | 0<br>(0 - 0)      | 0<br>(0 - 0)      | 1<br>(1 - 1)             | 5<br>(4 - 6)             | 20<br>(15 - 25)             |
| HIV/AIDS                                                          | 8<br>(5 - 14)               | 0<br>(0 - 0)      | 0<br>(0 - 0)      | 5<br>(3 - 9)             | 2<br>(1 - 5)             | 0<br>(0 - 1)                |
| HIV/AIDS resulting in mycobacterial infection                     | 0<br>(0 - 1)                | 0<br>(0 - 0)      | 0<br>(0 - 0)      | 0<br>(0 - 0)             | 0<br>(0 - 0)             | 0<br>(0 - 0)                |
| HIV/AIDS resulting in other diseases                              | 8<br>(4 - 13)               | 0<br>(0 - 0)      | 0<br>(0 - 0)      | 5<br>(3 - 9)             | 2<br>(1 - 4)             | 0<br>(0 - 1)                |
| Diarrhea, lower respiratory, and other common infectious diseases | 1,053<br>(841 - 1,458)      | 7<br>(5 - 10)     | 2<br>(1 - 2)      | 15<br>(12 - 17)          | 75<br>(61 - 91)          | 955<br>(747 - 1,237)        |
| Diarrheal diseases                                                | 108<br>(74 - 152)           | 2<br>(1 - 3)      | 0<br>(0 - 0)      | 2<br>(1 - 2)             | 7<br>(5 - 10)            | 97<br>(64 - 142)            |
| Intestinal infectious diseases                                    | 3<br>(1 - 6)                | 0<br>(0 - 1)      | 0<br>(0 - 1)      | 1<br>(0 - 3)             | 0<br>(0 - 1)             | 0<br>(0 - 1)                |
| Typhoid fever                                                     | 2<br>(1 - 4)                | 0<br>(0 - 1)      | 0<br>(0 - 1)      | 1<br>(0 - 2)             | 0<br>(0 - 1)             | 0<br>(0 - 0)                |
| Paratyphoid fever                                                 | 0<br>(0 - 1)                | 0<br>(0 - 0)      | 0<br>(0 - 0)      | 0<br>(0 - 1)             | 0<br>(0 - 0)             | 0<br>(0 - 0)                |
| Other intestinal infectious diseases                              | 0<br>(0 - 2)                | 0<br>(0 - 1)      | 0<br>(0 - 0)      | 0<br>(0 - 1)             | 0<br>(0 - 1)             | 0<br>(0 - 1)                |
| Lower respiratory infections                                      | 922<br>(712 - 1,315)        | 3<br>(2 - 4)      | 0<br>(0 - 0)      | 8<br>(6 - 10)            | 62<br>(49 - 78)          | 848<br>(644 - 1,233)        |
| Upper respiratory infections                                      | 0<br>(0 - 1)                | 0<br>(0 - 0)      | 0<br>(0 - 0)      | 0<br>(0 - 0)             | 0<br>(0 - 0)             | 0<br>(0 - 1)                |
| Otitis media                                                      | 1<br>(1 - 1)                | 0<br>(0 - 0)      | 0<br>(0 - 0)      | 0<br>(0 - 0)             | 0<br>(0 - 0)             | 0<br>(0 - 1)                |
| Meningitis                                                        | 13<br>(11 - 16)             | 2<br>(1 - 3)      | 0<br>(0 - 0)      | 2<br>(2 - 3)             | 3<br>(3 - 4)             | 6<br>(4 - 8)                |
| Pneumococcal meningitis                                           | 2<br>(1 - 3)                | 0<br>(0 - 0)      | 0<br>(0 - 0)      | 0<br>(0 - 1)             | 1<br>(0 - 1)             | 1<br>(1 - 2)                |
| H influenzae type B meningitis                                    | 1<br>(1 - 2)                | 0<br>(0 - 1)      | 0<br>(0 - 0)      | 0<br>(0 - 0)             | 0<br>(0 - 1)             | 1<br>(0 - 1)                |
| Meningococcal meningitis                                          | 3<br>(2 - 5)                | 0<br>(0 - 0)      | 0<br>(0 - 0)      | 1<br>(0 - 1)             | 1<br>(0 - 1)             | 1<br>(1 - 2)                |
| Other meningitis                                                  | 7<br>(5 - 8)                | 1<br>(0 - 2)      | 0<br>(0 - 0)      | 1<br>(1 - 2)             | 2<br>(1 - 2)             | 3<br>(2 - 4)                |
| Encephalitis                                                      | 4<br>(2 - 6)                | 0<br>(0 - 0)      | 0<br>(0 - 0)      | 1<br>(0 - 1)             | 1<br>(1 - 2)             | 2<br>(1 - 3)                |
| Diphtheria                                                        | 0<br>(0 - 0)                | 0<br>(0 - 0)      | 0<br>(0 - 0)      | 0<br>(0 - 0)             | 0<br>(0 - 0)             | --                          |
| Whooping cough                                                    | 0<br>(0 - 0)                | 0<br>(0 - 0)      | 0<br>(0 - 0)      | 0<br>(0 - 0)             | 0<br>(0 - 0)             | --                          |
| Tetanus                                                           | 0<br>(0 - 0)                | 0<br>(0 - 0)      | 0<br>(0 - 0)      | 0<br>(0 - 0)             | 0<br>(0 - 0)             | 0<br>(0 - 0)                |
| Measles                                                           | 0<br>(0 - 0)                | 0<br>(0 - 0)      | 0<br>(0 - 0)      | 0<br>(0 - 0)             | 0<br>(0 - 0)             | --                          |
| Varicella and herpes zoster                                       | 2<br>(0 - 7)                | 0<br>(0 - 1)      | 0<br>(0 - 0)      | 0<br>(0 - 1)             | 0<br>(0 - 1)             | 1<br>(0 - 6)                |
| Neglected tropical diseases and malaria                           | 3<br>(1 - 4)                | 0<br>(0 - 0)      | 0<br>(0 - 0)      | 0<br>(0 - 1)             | 1<br>(0 - 2)             | 1<br>(0 - 2)                |
| Cysticercosis                                                     | 0<br>(0 - 0)                | 0<br>(0 - 0)      | 0<br>(0 - 0)      | 0<br>(0 - 0)             | 0<br>(0 - 0)             | 0<br>(0 - 0)                |
| Cystic echinococcosis                                             | 0<br>(0 - 0)                | 0<br>(0 - 0)      | 0<br>(0 - 0)      | 0<br>(0 - 0)             | 0<br>(0 - 0)             | 0<br>(0 - 0)                |
| Dengue                                                            | 0<br>(0 - 0)                | 0<br>(0 - 0)      | 0<br>(0 - 0)      | 0<br>(0 - 0)             | 0<br>(0 - 0)             | 0<br>(0 - 0)                |
| Rabies                                                            | 0<br>(0 - 0)                | 0<br>(0 - 0)      | 0<br>(0 - 0)      | 0<br>(0 - 0)             | 0<br>(0 - 0)             | 0<br>(0 - 0)                |
| Other neglected tropical diseases                                 | 2<br>(1 - 3)                | 0<br>(0 - 0)      | 0<br>(0 - 0)      | 0<br>(0 - 0)             | 1<br>(0 - 1)             | 1<br>(0 - 1)                |
| Maternal disorders                                                | --                          | --                | --                | --                       | --                       | --                          |
| Maternal hemorrhage                                               | --                          | --                | --                | --                       | --                       | --                          |
| Maternal sepsis and other maternal infections                     | --                          | --                | --                | --                       | --                       | --                          |
| Maternal hypertensive disorders                                   | --                          | --                | --                | --                       | --                       | --                          |
| Maternal obstructed labor                                         | --                          | --                | --                | --                       | --                       | --                          |
| Maternal abortive outcome                                         | --                          | --                | --                | --                       | --                       | --                          |
| Indirect maternal deaths                                          | --                          | --                | --                | --                       | --                       | --                          |

Web Table 31- Norway deaths with 95% UI by age, sex, and cause in 2013

| Cause                                                            | Males, All Ages             | Males, 0-4 Years | Males, 5-14 Years | Males, 15-49 Years | Males, 50-69 Years       | Males, 70-80 Years          |
|------------------------------------------------------------------|-----------------------------|------------------|-------------------|--------------------|--------------------------|-----------------------------|
| Late maternal deaths                                             | --                          | --               | --                | --                 | --                       | --                          |
| Maternal deaths aggravated by HIV/AIDS                           | --                          | --               | --                | --                 | --                       | --                          |
| Other maternal disorders                                         | --                          | --               | --                | --                 | --                       | --                          |
| Neonatal disorders                                               | 36<br>(27 - 45)             | 36<br>(27 - 45)  | --                | --                 | --                       | --                          |
| Neonatal preterm birth complications                             | 13<br>(7 - 18)              | 13<br>(7 - 18)   | --                | --                 | --                       | --                          |
| Neonatal encephalopathy due to birth asphyxia and trauma         | 13<br>(8 - 18)              | 13<br>(8 - 18)   | --                | --                 | --                       | --                          |
| Neonatal sepsis and other neonatal infections                    | 1<br>(0 - 2)                | 1<br>(0 - 2)     | --                | --                 | --                       | --                          |
| Hemolytic disease and other neonatal jaundice                    | 0<br>(0 - 0)                | 0<br>(0 - 0)     | --                | --                 | --                       | --                          |
| Other neonatal disorders                                         | 8<br>(5 - 12)               | 8<br>(5 - 12)    | --                | --                 | --                       | --                          |
| Nutritional deficiencies                                         | 38<br>(13 - 55)             | 0<br>(0 - 0)     | 0<br>(0 - 0)      | 1<br>(0 - 1)       | 4<br>(2 - 6)             | 33<br>(10 - 49)             |
| Protein-energy malnutrition                                      | 9<br>(1 - 19)               | 0<br>(0 - 0)     | 0<br>(0 - 0)      | 0<br>(0 - 0)       | 1<br>(0 - 1)             | 9<br>(1 - 18)               |
| Iodine deficiency                                                | 0<br>(0 - 1)                | 0<br>(0 - 0)     | 0<br>(0 - 0)      | 0<br>(0 - 0)       | 0<br>(0 - 0)             | 0<br>(0 - 1)                |
| Iron-deficiency anemia                                           | 25<br>(8 - 37)              | 0<br>(0 - 0)     | 0<br>(0 - 0)      | 1<br>(0 - 1)       | 2<br>(1 - 3)             | 22<br>(7 - 34)              |
| Other nutritional deficiencies                                   | 4<br>(2 - 7)                | 0<br>(0 - 0)     | 0<br>(0 - 0)      | 0<br>(0 - 0)       | 1<br>(1 - 3)             | 2<br>(1 - 5)                |
| Other communicable, maternal, neonatal, and nutritional diseases | 32<br>(17 - 41)             | 1<br>(0 - 1)     | 0<br>(0 - 0)      | 4<br>(2 - 4)       | 9<br>(5 - 12)            | 18<br>(8 - 25)              |
| Sexually transmitted diseases excluding HIV                      | 1<br>(1 - 2)                | 0<br>(0 - 0)     | 0<br>(0 - 0)      | 0<br>(0 - 0)       | 0<br>(0 - 0)             | 0<br>(0 - 1)                |
| Syphilis                                                         | 1<br>(0 - 1)                | 0<br>(0 - 0)     | 0<br>(0 - 0)      | 0<br>(0 - 0)       | 0<br>(0 - 0)             | 0<br>(0 - 1)                |
| Chlamydial infection                                             | --                          | --               | --                | --                 | --                       | --                          |
| Gonococcal infection                                             | 0<br>(0 - 0)                | --               | 0<br>(0 - 0)      | 0<br>(0 - 0)       | 0<br>(0 - 0)             | 0<br>(0 - 0)                |
| Other sexually transmitted diseases                              | 0<br>(0 - 0)                | --               | 0<br>(0 - 0)      | 0<br>(0 - 0)       | 0<br>(0 - 0)             | 0<br>(0 - 0)                |
| Hepatitis                                                        | 3<br>(3 - 4)                | 0<br>(0 - 0)     | 0<br>(0 - 0)      | 1<br>(1 - 2)       | 1<br>(1 - 2)             | 0<br>(0 - 1)                |
| Acute hepatitis A                                                | 1<br>(0 - 2)                | 0<br>(0 - 0)     | 0<br>(0 - 0)      | 0<br>(0 - 1)       | 0<br>(0 - 1)             | 0<br>(0 - 0)                |
| Acute hepatitis B                                                | 2<br>(1 - 3)                | 0<br>(0 - 0)     | 0<br>(0 - 0)      | 1<br>(0 - 1)       | 1<br>(1 - 2)             | 0<br>(0 - 1)                |
| Acute hepatitis C                                                | 0<br>(0 - 1)                | --               | 0<br>(0 - 0)      | 0<br>(0 - 0)       | 0<br>(0 - 0)             | 0<br>(0 - 0)                |
| Other infectious diseases                                        | 28<br>(13 - 37)             | 1<br>(0 - 1)     | 0<br>(0 - 0)      | 2<br>(1 - 3)       | 8<br>(4 - 10)            | 17<br>(7 - 24)              |
| Non-communicable diseases                                        | 18,357<br>(17,621 - 19,162) | 52<br>(42 - 66)  | 16<br>(14 - 19)   | 781<br>(720 - 840) | 4,407<br>(4,211 - 4,642) | 13,099<br>(12,542 - 13,640) |
| Neoplasms                                                        | 6,273<br>(5,844 - 6,736)    | 4<br>(2 - 5)     | 8<br>(7 - 10)     | 241<br>(218 - 267) | 2,127<br>(1,991 - 2,277) | 3,893<br>(3,567 - 4,244)    |
| Esophageal cancer                                                | 148<br>(100 - 171)          | --               | --                | 5<br>(4 - 7)       | 71<br>(49 - 85)          | 71<br>(46 - 86)             |
| Stomach cancer                                                   | 259<br>(228 - 296)          | --               | --                | 9<br>(7 - 11)      | 84<br>(73 - 97)          | 166<br>(138 - 201)          |
| Liver cancer                                                     | 88<br>(51 - 119)            | --               | 0<br>(0 - 0)      | 6<br>(3 - 8)       | 36<br>(20 - 51)          | 46<br>(25 - 66)             |
| Liver cancer due to hepatitis B                                  | 21<br>(8 - 36)              | --               | 0<br>(0 - 0)      | 2<br>(1 - 4)       | 10<br>(3 - 19)           | 8<br>(3 - 16)               |
| Liver cancer due to hepatitis C                                  | 45<br>(21 - 74)             | --               | 0<br>(0 - 0)      | 2<br>(1 - 4)       | 18<br>(8 - 32)           | 25<br>(11 - 40)             |
| Liver cancer due to alcohol use                                  | 20<br>(9 - 39)              | --               | --                | 1<br>(0 - 2)       | 7<br>(2 - 14)            | 12<br>(5 - 24)              |
| Liver cancer due to other causes                                 | 2<br>(1 - 4)                | --               | 0<br>(0 - 0)      | 0<br>(0 - 1)       | 1<br>(0 - 2)             | 1<br>(0 - 2)                |
| Larynx cancer                                                    | 31<br>(22 - 38)             | --               | --                | 1<br>(1 - 2)       | 13<br>(9 - 17)           | 17<br>(11 - 22)             |
| Tracheal, bronchus and lung cancer                               | 1,424<br>(1,312 - 1,547)    | --               | --                | 33<br>(28 - 40)    | 611<br>(559 - 672)       | 779<br>(701 - 865)          |
| Breast cancer                                                    | 5<br>(2 - 12)               | --               | --                | 0<br>(0 - 1)       | 2<br>(1 - 4)             | 3<br>(1 - 7)                |
| Cervical cancer                                                  | --                          | --               | --                | --                 | --                       | --                          |
| Uterine cancer                                                   | --                          | --               | --                | --                 | --                       | --                          |
| Prostate cancer                                                  | 1,138<br>(869 - 1,582)      | --               | --                | 2<br>(1 - 3)       | 181<br>(137 - 267)       | 955<br>(702 - 1,340)        |

Web Table 31- Norway deaths with 95% UI by age, sex, and cause in 2013

| Cause                                         | Males, All Ages          | Males, 0-4 Years | Males, 5-14 Years | Males, 15-49 Years | Males, 50-69 Years       | Males, 70-80 Years       |
|-----------------------------------------------|--------------------------|------------------|-------------------|--------------------|--------------------------|--------------------------|
| Colon and rectum cancer                       | 1,016<br>(924 - 1,121)   | --               | --                | 28<br>(23 - 32)    | 330<br>(300 - 362)       | 658<br>(575 - 753)       |
| Lip and oral cavity cancer                    | 56<br>(40 - 65)          | --               | --                | 4<br>(3 - 6)       | 26<br>(18 - 33)          | 25<br>(19 - 32)          |
| Nasopharynx cancer                            | 7<br>(6 - 12)            | --               | 0<br>(0 - 0)      | 1<br>(1 - 2)       | 4<br>(3 - 7)             | 2<br>(1 - 3)             |
| Other pharynx cancer                          | 35<br>(25 - 47)          | --               | --                | 2<br>(1 - 3)       | 22<br>(15 - 30)          | 12<br>(8 - 15)           |
| Gallbladder and biliary tract cancer          | 45<br>(33 - 68)          | --               | --                | 2<br>(1 - 3)       | 15<br>(10 - 23)          | 28<br>(20 - 42)          |
| Pancreatic cancer                             | 372<br>(340 - 408)       | --               | --                | 12<br>(10 - 15)    | 153<br>(136 - 171)       | 207<br>(182 - 234)       |
| Malignant skin melanoma                       | 169<br>(79 - 261)        | --               | --                | 25<br>(13 - 44)    | 76<br>(36 - 121)         | 69<br>(29 - 102)         |
| Non-melanoma skin cancer                      | 26<br>(16 - 40)          | --               | --                | 0<br>(0 - 1)       | 5<br>(3 - 8)             | 21<br>(13 - 33)          |
| Ovarian cancer                                | --                       | --               | --                | --                 | --                       | --                       |
| Testicular cancer                             | 12<br>(8 - 15)           | --               | --                | 6<br>(4 - 8)       | 3<br>(2 - 4)             | 2<br>(1 - 3)             |
| Kidney cancer                                 | 206<br>(177 - 242)       | 0<br>(0 - 0)     | 0<br>(0 - 0)      | 8<br>(6 - 11)      | 83<br>(69 - 99)          | 114<br>(92 - 142)        |
| Bladder cancer                                | 233<br>(176 - 275)       | --               | --                | 2<br>(2 - 3)       | 47<br>(37 - 56)          | 183<br>(134 - 221)       |
| Brain and nervous system cancer               | 175<br>(127 - 206)       | 1<br>(1 - 2)     | 3<br>(2 - 4)      | 35<br>(26 - 43)    | 89<br>(66 - 110)         | 47<br>(28 - 62)          |
| Thyroid cancer                                | 15<br>(12 - 18)          | --               | 0<br>(0 - 0)      | 1<br>(1 - 1)       | 5<br>(4 - 7)             | 8<br>(6 - 11)            |
| Mesothelioma                                  | 67<br>(39 - 90)          | --               | --                | 1<br>(1 - 2)       | 29<br>(16 - 44)          | 37<br>(18 - 54)          |
| Hodgkin lymphoma                              | 11<br>(8 - 17)           | 0<br>(0 - 0)     | 0<br>(0 - 0)      | 3<br>(2 - 5)       | 4<br>(2 - 6)             | 4<br>(3 - 6)             |
| Non-Hodgkin lymphoma                          | 189<br>(88 - 235)        | 0<br>(0 - 1)     | 1<br>(0 - 1)      | 15<br>(8 - 21)     | 68<br>(29 - 92)          | 105<br>(47 - 139)        |
| Multiple myeloma                              | 147<br>(82 - 229)        | --               | --                | 4<br>(2 - 7)       | 50<br>(27 - 82)          | 93<br>(50 - 151)         |
| Leukemia                                      | 199<br>(180 - 221)       | 1<br>(1 - 2)     | 3<br>(2 - 4)      | 15<br>(13 - 18)    | 58<br>(50 - 67)          | 121<br>(105 - 141)       |
| Other neoplasms                               | 202<br>(144 - 248)       | 1<br>(1 - 2)     | 1<br>(1 - 2)      | 19<br>(14 - 24)    | 60<br>(45 - 74)          | 120<br>(74 - 158)        |
| Cardiovascular diseases                       | 6,428<br>(6,019 - 6,900) | 0<br>(0 - 1)     | 0<br>(0 - 1)      | 164<br>(147 - 183) | 1,318<br>(1,228 - 1,415) | 4,945<br>(4,593 - 5,360) |
| Rheumatic heart disease                       | 17<br>(10 - 41)          | 0<br>(0 - 0)     | 0<br>(0 - 0)      | 1<br>(0 - 1)       | 4<br>(3 - 10)            | 12<br>(7 - 31)           |
| Ischemic heart disease                        | 3,493<br>(3,099 - 4,295) | 0<br>(0 - 0)     | 0<br>(0 - 0)      | 107<br>(93 - 124)  | 861<br>(778 - 1,019)     | 2,524<br>(2,195 - 3,159) |
| Cerebrovascular disease                       | 1,734<br>(1,283 - 2,097) | 0<br>(0 - 0)     | 0<br>(0 - 0)      | 28<br>(19 - 35)    | 237<br>(155 - 294)       | 1,468<br>(1,094 - 1,786) |
| Ischemic stroke                               | 981<br>(721 - 1,220)     | 0<br>(0 - 0)     | 0<br>(0 - 0)      | 4<br>(3 - 6)       | 84<br>(52 - 110)         | 893<br>(658 - 1,121)     |
| Hemorrhagic stroke                            | 753<br>(465 - 980)       | 0<br>(0 - 0)     | 0<br>(0 - 0)      | 24<br>(16 - 30)    | 154<br>(97 - 193)        | 575<br>(353 - 772)       |
| Hypertensive heart disease                    | 42<br>(28 - 68)          | 0<br>(0 - 0)     | 0<br>(0 - 0)      | 1<br>(0 - 1)       | 7<br>(4 - 11)            | 35<br>(22 - 58)          |
| Cardiomyopathy and myocarditis                | 137<br>(69 - 183)        | 0<br>(0 - 0)     | 0<br>(0 - 0)      | 13<br>(8 - 17)     | 40<br>(21 - 52)          | 84<br>(36 - 119)         |
| Atrial fibrillation and flutter               | 319<br>(223 - 424)       | --               | --                | 1<br>(0 - 1)       | 25<br>(16 - 34)          | 293<br>(203 - 395)       |
| Aortic aneurysm                               | 306<br>(235 - 360)       | --               | --                | 5<br>(4 - 7)       | 77<br>(52 - 92)          | 224<br>(173 - 267)       |
| Peripheral vascular disease                   | 47<br>(34 - 60)          | --               | --                | 0<br>(0 - 0)       | 6<br>(4 - 8)             | 41<br>(29 - 53)          |
| Endocarditis                                  | 23<br>(14 - 37)          | 0<br>(0 - 0)     | 0<br>(0 - 0)      | 1<br>(1 - 2)       | 6<br>(3 - 9)             | 16<br>(10 - 26)          |
| Other cardiovascular and circulatory diseases | 309<br>(211 - 394)       | 0<br>(0 - 0)     | 0<br>(0 - 0)      | 8<br>(5 - 10)      | 55<br>(32 - 68)          | 247<br>(173 - 330)       |
| Chronic respiratory diseases                  | 1,398<br>(859 - 1,604)   | 1<br>(0 - 1)     | 0<br>(0 - 0)      | 14<br>(9 - 17)     | 237<br>(149 - 276)       | 1,145<br>(703 - 1,331)   |
| Chronic obstructive pulmonary disease         | 1,193<br>(711 - 1,386)   | 0<br>(0 - 0)     | 0<br>(0 - 0)      | 7<br>(4 - 9)       | 201<br>(120 - 237)       | 984<br>(583 - 1,157)     |
| Pneumoconiosis                                | 35<br>(19 - 51)          | 0<br>(0 - 0)     | 0<br>(0 - 0)      | 0<br>(0 - 1)       | 4<br>(2 - 6)             | 30<br>(16 - 45)          |
| Silicosis                                     | 1<br>(1 - 1)             | 0<br>(0 - 0)     | 0<br>(0 - 0)      | 0<br>(0 - 0)       | 0<br>(0 - 0)             | 1<br>(0 - 1)             |
| Asbestosis                                    | 18<br>(10 - 27)          | 0<br>(0 - 0)     | 0<br>(0 - 0)      | 0<br>(0 - 0)       | 3<br>(1 - 4)             | 16<br>(8 - 23)           |
| Coal workers pneumoconiosis                   | 2<br>(1 - 3)             | 0<br>(0 - 0)     | 0<br>(0 - 0)      | 0<br>(0 - 0)       | 0<br>(0 - 0)             | 2<br>(1 - 3)             |
| Other pneumoconiosis                          | 13<br>(7 - 20)           | 0<br>(0 - 0)     | 0<br>(0 - 0)      | 0<br>(0 - 0)       | 1<br>(1 - 2)             | 12<br>(6 - 19)           |



Web Table 31- Norway deaths with 95% UI by age, sex, and cause in 2013

| Cause                                               | Males, All Ages          | Males, 0-4 Years | Males, 5-14 Years | Males, 15-49 Years | Males, 50-69 Years | Males, 70-80 Years       |
|-----------------------------------------------------|--------------------------|------------------|-------------------|--------------------|--------------------|--------------------------|
| Asthma                                              | 38<br>(25 - 48)          | 0<br>(0 - 0)     | 0<br>(0 - 0)      | 3<br>(2 - 3)       | 9<br>(6 - 12)      | 25<br>(16 - 34)          |
| Interstitial lung disease and pulmonary sarcoidosis | 126<br>(71 - 186)        | 0<br>(0 - 0)     | 0<br>(0 - 0)      | 3<br>(2 - 4)       | 22<br>(12 - 32)    | 102<br>(54 - 153)        |
| Other chronic respiratory diseases                  | 6<br>(4 - 8)             | 0<br>(0 - 0)     | 0<br>(0 - 0)      | 1<br>(1 - 1)       | 1<br>(1 - 1)       | 4<br>(2 - 6)             |
| Cirrhosis                                           | 204<br>(186 - 225)       | 0<br>(0 - 0)     | 0<br>(0 - 0)      | 25<br>(21 - 30)    | 105<br>(93 - 119)  | 74<br>(64 - 86)          |
| Cirrhosis due to hepatitis B                        | 20<br>(10 - 33)          | 0<br>(0 - 0)     | 0<br>(0 - 0)      | 2<br>(1 - 4)       | 10<br>(5 - 17)     | 7<br>(3 - 13)            |
| Cirrhosis due to hepatitis C                        | 86<br>(47 - 122)         | 0<br>(0 - 0)     | 0<br>(0 - 0)      | 11<br>(4 - 17)     | 46<br>(23 - 66)    | 29<br>(16 - 44)          |
| Cirrhosis due to alcohol use                        | 78<br>(49 - 118)         | --               | --                | 7<br>(1 - 13)      | 38<br>(20 - 60)    | 33<br>(21 - 48)          |
| Cirrhosis due to other causes                       | 20<br>(9 - 34)           | 0<br>(0 - 0)     | 0<br>(0 - 0)      | 4<br>(2 - 7)       | 11<br>(4 - 20)     | 5<br>(2 - 9)             |
| Digestive diseases                                  | 391<br>(338 - 449)       | 0<br>(0 - 0)     | 0<br>(0 - 0)      | 12<br>(9 - 14)     | 75<br>(57 - 87)    | 304<br>(260 - 366)       |
| Peptic ulcer disease                                | 82<br>(60 - 108)         | 0<br>(0 - 0)     | 0<br>(0 - 0)      | 2<br>(1 - 3)       | 18<br>(11 - 24)    | 62<br>(45 - 84)          |
| Gastritis and duodenitis                            | 6<br>(3 - 10)            | 0<br>(0 - 0)     | 0<br>(0 - 0)      | 1<br>(1 - 1)       | 2<br>(1 - 3)       | 3<br>(2 - 6)             |
| Appendicitis                                        | 7<br>(5 - 11)            | 0<br>(0 - 0)     | 0<br>(0 - 0)      | 1<br>(0 - 1)       | 1<br>(1 - 2)       | 5<br>(3 - 8)             |
| Paralytic ileus and intestinal obstruction          | 70<br>(44 - 118)         | 0<br>(0 - 0)     | 0<br>(0 - 0)      | 1<br>(0 - 1)       | 10<br>(6 - 17)     | 59<br>(37 - 101)         |
| Inguinal, femoral, and abdominal hernia             | 13<br>(6 - 21)           | 0<br>(0 - 0)     | 0<br>(0 - 0)      | 0<br>(0 - 0)       | 2<br>(1 - 3)       | 11<br>(5 - 18)           |
| Inflammatory bowel disease                          | 14<br>(9 - 20)           | 0<br>(0 - 0)     | 0<br>(0 - 0)      | 2<br>(1 - 2)       | 3<br>(2 - 5)       | 9<br>(6 - 14)            |
| Vascular intestinal disorders                       | 50<br>(21 - 98)          | 0<br>(0 - 0)     | 0<br>(0 - 0)      | 1<br>(0 - 1)       | 11<br>(4 - 21)     | 39<br>(16 - 76)          |
| Gallbladder and biliary diseases                    | 56<br>(40 - 80)          | 0<br>(0 - 0)     | 0<br>(0 - 0)      | 0<br>(0 - 1)       | 5<br>(3 - 7)       | 50<br>(35 - 74)          |
| Pancreatitis                                        | 32<br>(21 - 45)          | 0<br>(0 - 0)     | 0<br>(0 - 0)      | 3<br>(2 - 4)       | 11<br>(7 - 15)     | 18<br>(11 - 28)          |
| Other digestive diseases                            | 61<br>(40 - 79)          | 0<br>(0 - 0)     | 0<br>(0 - 0)      | 1<br>(1 - 2)       | 12<br>(7 - 16)     | 48<br>(32 - 63)          |
| Neurological disorders                              | 2,135<br>(1,691 - 2,638) | 4<br>(2 - 5)     | 2<br>(1 - 2)      | 38<br>(31 - 46)    | 184<br>(152 - 223) | 1,908<br>(1,482 - 2,399) |
| Alzheimer disease and other dementias               | 1,763<br>(1,322 - 2,271) | --               | --                | 0<br>(0 - 1)       | 77<br>(50 - 106)   | 1,686<br>(1,252 - 2,193) |
| Parkinson disease                                   | 160<br>(129 - 197)       | --               | --                | 0<br>(0 - 0)       | 15<br>(11 - 19)    | 146<br>(115 - 182)       |
| Epilepsy                                            | 41<br>(30 - 49)          | 1<br>(0 - 1)     | 1<br>(0 - 1)      | 15<br>(11 - 19)    | 13<br>(10 - 17)    | 11<br>(7 - 15)           |
| Multiple sclerosis                                  | 42<br>(19 - 68)          | --               | --                | 7<br>(3 - 12)      | 23<br>(10 - 38)    | 11<br>(5 - 20)           |
| Other neurological disorders                        | 129<br>(101 - 158)       | 3<br>(2 - 5)     | 1<br>(1 - 2)      | 15<br>(11 - 18)    | 56<br>(44 - 71)    | 54<br>(40 - 69)          |
| Mental and substance use disorders                  | 427<br>(320 - 504)       | 0<br>(0 - 0)     | 0<br>(0 - 0)      | 222<br>(175 - 258) | 161<br>(98 - 202)  | 44<br>(28 - 57)          |
| Schizophrenia                                       | 8<br>(2 - 12)            | --               | --                | 1<br>(0 - 2)       | 3<br>(1 - 5)       | 3<br>(1 - 6)             |
| Alcohol use disorders                               | 191<br>(118 - 260)       | --               | --                | 35<br>(25 - 56)    | 121<br>(70 - 166)  | 35<br>(21 - 52)          |
| Drug use disorders                                  | 228<br>(170 - 263)       | 0<br>(0 - 0)     | --                | 186<br>(143 - 217) | 38<br>(19 - 48)    | 5<br>(3 - 7)             |
| Opioid use disorders                                | 85<br>(64 - 99)          | 0<br>(0 - 0)     | --                | 70<br>(53 - 83)    | 13<br>(7 - 17)     | 2<br>(1 - 3)             |
| Cocaine use disorders                               | 6<br>(4 - 7)             | 0<br>(0 - 0)     | --                | 5<br>(4 - 6)       | 1<br>(0 - 1)       | 0<br>(0 - 0)             |
| Amphetamine use disorders                           | 6<br>(4 - 7)             | 0<br>(0 - 0)     | --                | 5<br>(3 - 6)       | 1<br>(0 - 1)       | 0<br>(0 - 0)             |
| Other drug use disorders                            | 132<br>(97 - 154)        | 0<br>(0 - 0)     | --                | 106<br>(81 - 126)  | 23<br>(12 - 29)    | 3<br>(2 - 4)             |
| Eating disorders                                    | 0<br>(0 - 0)             | --               | 0<br>(0 - 0)      | 0<br>(0 - 0)       | --                 | --                       |
| Anorexia nervosa                                    | 0<br>(0 - 0)             | --               | 0<br>(0 - 0)      | 0<br>(0 - 0)       | --                 | --                       |
| Diabetes, urogenital, blood, and endocrine diseases | 908<br>(774 - 1,012)     | 3<br>(2 - 5)     | 2<br>(1 - 3)      | 45<br>(36 - 52)    | 166<br>(144 - 186) | 692<br>(588 - 785)       |
| Diabetes mellitus                                   | 340<br>(302 - 386)       | 0<br>(0 - 0)     | 0<br>(0 - 0)      | 23<br>(20 - 28)    | 86<br>(75 - 99)    | 230<br>(196 - 271)       |
| Acute glomerulonephritis                            | 0<br>(0 - 1)             | 0<br>(0 - 0)     | 0<br>(0 - 0)      | 0<br>(0 - 0)       | 0<br>(0 - 0)       | 0<br>(0 - 0)             |
| Chronic kidney disease                              | 318<br>(264 - 390)       | 0<br>(0 - 0)     | 0<br>(0 - 0)      | 7<br>(5 - 8)       | 39<br>(32 - 54)    | 271<br>(220 - 333)       |
| Chronic kidney disease due to diabetes mellitus     | 74<br>(43 - 132)         | 0<br>(0 - 0)     | 0<br>(0 - 0)      | 2<br>(1 - 3)       | 13<br>(7 - 21)     | 60<br>(34 - 112)         |

Web Table 31- Norway deaths with 95% UI by age, sex, and cause in 2013

| Cause                                               | Males, All Ages          | Males, 0-4 Years | Males, 5-14 Years | Males, 15-49 Years | Males, 50-69 Years | Males, 70-80 Years |
|-----------------------------------------------------|--------------------------|------------------|-------------------|--------------------|--------------------|--------------------|
| Chronic kidney disease due to hypertension          | 103<br>(57 - 142)        | 0<br>(0 - 0)     | 0<br>(0 - 0)      | 1<br>(1 - 2)       | 9<br>(5 - 16)      | 93<br>(50 - 128)   |
| Chronic kidney disease due to glomerulonephritis    | 9<br>(6 - 14)            | 0<br>(0 - 0)     | 0<br>(0 - 0)      | 1<br>(0 - 1)       | 2<br>(1 - 4)       | 6<br>(4 - 10)      |
| Chronic kidney disease due to other causes          | 131<br>(82 - 185)        | 0<br>(0 - 0)     | 0<br>(0 - 0)      | 3<br>(2 - 4)       | 15<br>(9 - 24)     | 113<br>(68 - 161)  |
| Urinary diseases and male infertility               | 164<br>(98 - 208)        | 0<br>(0 - 0)     | 0<br>(0 - 0)      | 2<br>(1 - 2)       | 13<br>(8 - 16)     | 150<br>(87 - 193)  |
| Interstitial nephritis and urinary tract infections | 141<br>(82 - 182)        | 0<br>(0 - 0)     | 0<br>(0 - 0)      | 1<br>(1 - 1)       | 8<br>(5 - 11)      | 132<br>(75 - 171)  |
| Urolithiasis                                        | 5<br>(3 - 9)             | --               | 0<br>(0 - 0)      | 0<br>(0 - 0)       | 1<br>(0 - 1)       | 4<br>(2 - 8)       |
| Other urinary diseases                              | 17<br>(8 - 29)           | 0<br>(0 - 0)     | 0<br>(0 - 0)      | 0<br>(0 - 1)       | 3<br>(2 - 5)       | 13<br>(6 - 24)     |
| Gynecological diseases                              | --                       | --               | --                | --                 | --                 | --                 |
| Uterine fibroids                                    | --                       | --               | --                | --                 | --                 | --                 |
| Polycystic ovarian syndrome                         | --                       | --               | --                | --                 | --                 | --                 |
| Endometriosis                                       | --                       | --               | --                | --                 | --                 | --                 |
| Genital prolapse                                    | --                       | --               | --                | --                 | --                 | --                 |
| Other gynecological diseases                        | --                       | --               | --                | --                 | --                 | --                 |
| Hemoglobinopathies and hemolytic anemias            | 10<br>(6 - 16)           | 0<br>(0 - 0)     | 0<br>(0 - 0)      | 1<br>(1 - 1)       | 1<br>(1 - 2)       | 8<br>(5 - 12)      |
| Thalassemias                                        | 0<br>(0 - 1)             | 0<br>(0 - 0)     | 0<br>(0 - 0)      | 0<br>(0 - 0)       | 0<br>(0 - 0)       | 0<br>(0 - 0)       |
| Sickle cell disorders                               | 1<br>(1 - 2)             | 0<br>(0 - 0)     | 0<br>(0 - 0)      | 0<br>(0 - 1)       | 1<br>(0 - 1)       | 0<br>(0 - 0)       |
| G6PD deficiency                                     | 0<br>(0 - 0)             | 0<br>(0 - 0)     | 0<br>(0 - 0)      | 0<br>(0 - 0)       | 0<br>(0 - 0)       | 0<br>(0 - 0)       |
| Other hemoglobinopathies and hemolytic anemias      | 9<br>(5 - 14)            | 0<br>(0 - 0)     | 0<br>(0 - 0)      | 0<br>(0 - 1)       | 1<br>(1 - 1)       | 7<br>(4 - 12)      |
| Endocrine, metabolic, blood, and immune disorders   | 76<br>(28 - 96)          | 3<br>(1 - 4)     | 2<br>(1 - 2)      | 13<br>(5 - 17)     | 26<br>(9 - 34)     | 33<br>(10 - 45)    |
| Musculoskeletal disorders                           | 57<br>(44 - 85)          | --               | 0<br>(0 - 0)      | 3<br>(2 - 4)       | 13<br>(10 - 21)    | 41<br>(30 - 61)    |
| Rheumatoid arthritis                                | 17<br>(11 - 29)          | --               | 0<br>(0 - 0)      | 1<br>(0 - 1)       | 5<br>(2 - 9)       | 12<br>(7 - 21)     |
| Other musculoskeletal disorders                     | 40<br>(28 - 58)          | --               | 0<br>(0 - 0)      | 2<br>(2 - 3)       | 8<br>(5 - 12)      | 29<br>(20 - 43)    |
| Other non-communicable diseases                     | 135<br>(113 - 157)       | 40<br>(32 - 53)  | 3<br>(2 - 4)      | 17<br>(14 - 20)    | 21<br>(18 - 25)    | 53<br>(27 - 70)    |
| Congenital anomalies                                | 77<br>(66 - 92)          | 32<br>(24 - 42)  | 3<br>(2 - 4)      | 16<br>(14 - 20)    | 17<br>(14 - 21)    | 9<br>(7 - 12)      |
| Neural tube defects                                 | 1<br>(1 - 1)             | 0<br>(0 - 1)     | 0<br>(0 - 0)      | 0<br>(0 - 0)       | 0<br>(0 - 0)       | 0<br>(0 - 0)       |
| Congenital heart anomalies                          | 25<br>(20 - 33)          | 12<br>(9 - 17)   | 1<br>(1 - 2)      | 7<br>(6 - 10)      | 3<br>(2 - 5)       | 1<br>(1 - 2)       |
| Cleft lip and cleft palate                          | 0<br>(0 - 0)             | 0<br>(0 - 0)     | --                | --                 | --                 | --                 |
| Down syndrome                                       | 15<br>(10 - 19)          | 1<br>(1 - 3)     | 0<br>(0 - 0)      | 3<br>(2 - 4)       | 10<br>(6 - 13)     | 1<br>(0 - 1)       |
| Chromosomal unbalanced rearrangements               | 5<br>(3 - 7)             | 4<br>(2 - 6)     | 0<br>(0 - 0)      | 0<br>(0 - 0)       | 0<br>(0 - 0)       | 0<br>(0 - 0)       |
| Other congenital anomalies                          | 31<br>(25 - 39)          | 14<br>(10 - 19)  | 2<br>(1 - 2)      | 5<br>(4 - 7)       | 4<br>(2 - 6)       | 7<br>(5 - 9)       |
| Skin and subcutaneous diseases                      | 50<br>(20 - 66)          | 0<br>(0 - 0)     | 0<br>(0 - 0)      | 1<br>(0 - 1)       | 4<br>(2 - 6)       | 45<br>(17 - 61)    |
| Cellulitis                                          | 3<br>(1 - 6)             | 0<br>(0 - 0)     | 0<br>(0 - 0)      | 0<br>(0 - 0)       | 0<br>(0 - 1)       | 2<br>(1 - 5)       |
| Pyoderma                                            | 38<br>(14 - 51)          | 0<br>(0 - 0)     | 0<br>(0 - 0)      | 0<br>(0 - 1)       | 4<br>(1 - 5)       | 33<br>(13 - 47)    |
| Decubitus ulcer                                     | 8<br>(3 - 12)            | 0<br>(0 - 0)     | 0<br>(0 - 0)      | 0<br>(0 - 0)       | 0<br>(0 - 1)       | 8<br>(3 - 12)      |
| Other skin and subcutaneous diseases                | 2<br>(1 - 3)             | 0<br>(0 - 0)     | 0<br>(0 - 0)      | 0<br>(0 - 0)       | 0<br>(0 - 0)       | 1<br>(0 - 3)       |
| Sudden infant death syndrome                        | 9<br>(5 - 16)            | 9<br>(5 - 16)    | --                | --                 | --                 | --                 |
| Injuries                                            | 1,399<br>(1,272 - 1,626) | 8<br>(5 - 11)    | 12<br>(10 - 14)   | 476<br>(435 - 539) | 318<br>(286 - 389) | 585<br>(483 - 733) |
| Transport injuries                                  | 221<br>(200 - 241)       | 2<br>(1 - 3)     | 4<br>(3 - 6)      | 118<br>(104 - 133) | 57<br>(49 - 65)    | 40<br>(33 - 47)    |
| Road injuries                                       | 191<br>(171 - 211)       | 1<br>(1 - 2)     | 4<br>(3 - 5)      | 103<br>(89 - 116)  | 47<br>(39 - 55)    | 36<br>(30 - 43)    |
| Pedestrian road injuries                            | 27<br>(15 - 46)          | 1<br>(0 - 1)     | 1<br>(1 - 2)      | 8<br>(4 - 15)      | 6<br>(3 - 11)      | 11<br>(6 - 18)     |

Web Table 31- Norway deaths with 95% UI by age, sex, and cause in 2013

| Cause                                           | Males, All Ages    | Males, 0-4 Years | Males, 5-14 Years | Males, 15-49 Years | Males, 50-69 Years | Males, 70-80 Years |
|-------------------------------------------------|--------------------|------------------|-------------------|--------------------|--------------------|--------------------|
| Cyclist road injuries                           | 12<br>(7 - 17)     | 0<br>(0 - 0)     | 1<br>(0 - 1)      | 3<br>(2 - 4)       | 4<br>(2 - 6)       | 4<br>(2 - 6)       |
| Motorcyclist road injuries                      | 28<br>(16 - 39)    | 0<br>(0 - 0)     | 0<br>(0 - 0)      | 22<br>(12 - 31)    | 3<br>(2 - 5)       | 2<br>(1 - 4)       |
| Motor vehicle road injuries                     | 123<br>(99 - 144)  | 1<br>(0 - 1)     | 1<br>(1 - 2)      | 69<br>(56 - 83)    | 33<br>(26 - 40)    | 19<br>(12 - 25)    |
| Other road injuries                             | 1<br>(0 - 2)       | 0<br>(0 - 0)     | 0<br>(0 - 0)      | 0<br>(0 - 1)       | 0<br>(0 - 1)       | 0<br>(0 - 0)       |
| Other transport injuries                        | 29<br>(23 - 39)    | 0<br>(0 - 1)     | 1<br>(0 - 1)      | 15<br>(12 - 21)    | 9<br>(7 - 13)      | 4<br>(2 - 6)       |
| Unintentional injuries                          | 705<br>(595 - 889) | 5<br>(4 - 9)     | 5<br>(4 - 7)      | 90<br>(78 - 119)   | 118<br>(101 - 148) | 486<br>(388 - 632) |
| Falls                                           | 500<br>(398 - 664) | 1<br>(0 - 1)     | 1<br>(1 - 1)      | 24<br>(19 - 33)    | 53<br>(41 - 69)    | 421<br>(326 - 576) |
| Drowning                                        | 76<br>(57 - 131)   | 2<br>(1 - 5)     | 2<br>(1 - 4)      | 31<br>(24 - 55)    | 28<br>(20 - 50)    | 12<br>(9 - 19)     |
| Fire, heat, and hot substances                  | 35<br>(27 - 49)    | 1<br>(0 - 2)     | 1<br>(0 - 1)      | 10<br>(7 - 14)     | 9<br>(6 - 13)      | 15<br>(11 - 21)    |
| Poisonings                                      | 8<br>(6 - 11)      | 0<br>(0 - 0)     | 0<br>(0 - 0)      | 4<br>(3 - 5)       | 3<br>(2 - 5)       | 1<br>(1 - 1)       |
| Exposure to mechanical forces                   | 26<br>(23 - 31)    | 1<br>(0 - 1)     | 1<br>(1 - 1)      | 12<br>(10 - 15)    | 8<br>(6 - 10)      | 4<br>(3 - 5)       |
| Unintentional firearm injuries                  | 1<br>(1 - 1)       | 0<br>(0 - 0)     | 0<br>(0 - 0)      | 1<br>(1 - 1)       | 0<br>(0 - 0)       | 0<br>(0 - 0)       |
| Unintentional suffocation                       | 1<br>(1 - 2)       | 0<br>(0 - 1)     | 0<br>(0 - 0)      | 0<br>(0 - 0)       | 0<br>(0 - 0)       | 0<br>(0 - 0)       |
| Other exposure to mechanical forces             | 24<br>(20 - 29)    | 0<br>(0 - 0)     | 1<br>(0 - 1)      | 11<br>(9 - 14)     | 8<br>(6 - 10)      | 4<br>(3 - 5)       |
| Adverse effects of medical treatment            | 13<br>(4 - 22)     | 0<br>(0 - 0)     | 0<br>(0 - 0)      | 1<br>(0 - 2)       | 3<br>(1 - 5)       | 8<br>(2 - 15)      |
| Animal contact                                  | 2<br>(1 - 3)       | 0<br>(0 - 0)     | 0<br>(0 - 0)      | 0<br>(0 - 1)       | 1<br>(1 - 1)       | 1<br>(0 - 1)       |
| Venomous animal contact                         | 1<br>(0 - 1)       | 0<br>(0 - 0)     | 0<br>(0 - 0)      | 0<br>(0 - 0)       | 0<br>(0 - 1)       | 0<br>(0 - 0)       |
| Non-venomous animal contact                     | 1<br>(1 - 2)       | 0<br>(0 - 0)     | 0<br>(0 - 0)      | 0<br>(0 - 0)       | 0<br>(0 - 1)       | 0<br>(0 - 1)       |
| Foreign body                                    | 39<br>(19 - 53)    | 1<br>(0 - 1)     | 1<br>(0 - 1)      | 5<br>(3 - 7)       | 11<br>(5 - 16)     | 22<br>(10 - 32)    |
| Pulmonary aspiration and foreign body in airway | 39<br>(18 - 53)    | 1<br>(0 - 1)     | 1<br>(0 - 1)      | 5<br>(2 - 7)       | 10<br>(5 - 16)     | 22<br>(9 - 32)     |
| Foreign body in other body part                 | 0<br>(0 - 0)       | 0<br>(0 - 0)     | 0<br>(0 - 0)      | 0<br>(0 - 0)       | 0<br>(0 - 0)       | 0<br>(0 - 0)       |
| Other unintentional injuries                    | 7<br>(5 - 8)       | 0<br>(0 - 0)     | 0<br>(0 - 0)      | 3<br>(2 - 4)       | 2<br>(1 - 3)       | 1<br>(1 - 2)       |
| Self-harm and interpersonal violence            | 474<br>(377 - 579) | 1<br>(0 - 1)     | 2<br>(1 - 3)      | 268<br>(217 - 313) | 144<br>(107 - 190) | 59<br>(45 - 76)    |
| Self-harm                                       | 447<br>(354 - 546) | --               | 2<br>(1 - 3)      | 251<br>(202 - 294) | 138<br>(102 - 184) | 57<br>(44 - 75)    |
| Interpersonal violence                          | 27<br>(17 - 38)    | 1<br>(0 - 1)     | 0<br>(0 - 1)      | 17<br>(11 - 24)    | 6<br>(4 - 10)      | 2<br>(1 - 3)       |
| Assault by firearm                              | 8<br>(4 - 13)      | 0<br>(0 - 0)     | 0<br>(0 - 0)      | 6<br>(3 - 9)       | 1<br>(1 - 3)       | 0<br>(0 - 1)       |
| Assault by sharp object                         | 10<br>(6 - 16)     | 0<br>(0 - 0)     | 0<br>(0 - 0)      | 7<br>(4 - 12)      | 2<br>(1 - 4)       | 1<br>(0 - 1)       |
| Assault by other means                          | 9<br>(5 - 13)      | 0<br>(0 - 1)     | 0<br>(0 - 0)      | 5<br>(2 - 7)       | 3<br>(2 - 4)       | 1<br>(1 - 2)       |

Web Table 31- Norway deaths with 95% UI by age, sex, and cause in 2013

| Cause                                                             | Females, All Ages           | Females, 0-4 Years | Females, 5-14 Years | Females, 15-49 Years | Females, 50-69 Years     | Females, 70-80 Years        |
|-------------------------------------------------------------------|-----------------------------|--------------------|---------------------|----------------------|--------------------------|-----------------------------|
| All causes                                                        | 21,346<br>(20,453 - 22,192) | 81<br>(66 - 98)    | 24<br>(22 - 27)     | 638<br>(593 - 680)   | 2,861<br>(2,697 - 3,019) | 17,742<br>(17,046 - 18,402) |
| Communicable, maternal, neonatal, and nutritional diseases        | 1,572<br>(1,228 - 2,224)    | 33<br>(25 - 42)    | 2<br>(2 - 3)        | 21<br>(17 - 24)      | 61<br>(52 - 70)          | 1,456<br>(1,117 - 2,107)    |
| HIV/AIDS and tuberculosis                                         | 32<br>(25 - 42)             | 0<br>(0 - 0)       | 0<br>(0 - 0)        | 6<br>(4 - 9)         | 6<br>(4 - 8)             | 21<br>(14 - 29)             |
| Tuberculosis                                                      | 25<br>(18 - 33)             | 0<br>(0 - 0)       | 0<br>(0 - 0)        | 1<br>(0 - 1)         | 4<br>(3 - 5)             | 20<br>(14 - 28)             |
| HIV/AIDS                                                          | 7<br>(4 - 12)               | 0<br>(0 - 0)       | 0<br>(0 - 0)        | 5<br>(3 - 8)         | 2<br>(1 - 3)             | 0<br>(0 - 1)                |
| HIV/AIDS resulting in mycobacterial infection                     | 0<br>(0 - 0)                | 0<br>(0 - 0)       | 0<br>(0 - 0)        | 0<br>(0 - 0)         | 0<br>(0 - 0)             | 0<br>(0 - 0)                |
| HIV/AIDS resulting in other diseases                              | 7<br>(4 - 12)               | 0<br>(0 - 0)       | 0<br>(0 - 0)        | 5<br>(3 - 8)         | 2<br>(1 - 3)             | 0<br>(0 - 1)                |
| Diarrhea, lower respiratory, and other common infectious diseases | 1,382<br>(1,046 - 2,071)    | 5<br>(3 - 7)       | 2<br>(1 - 2)        | 9<br>(8 - 11)        | 44<br>(37 - 54)          | 1,322<br>(989 - 2,013)      |
| Diarrheal diseases                                                | 197<br>(128 - 296)          | 1<br>(1 - 2)       | 0<br>(0 - 0)        | 1<br>(1 - 1)         | 7<br>(5 - 10)            | 188<br>(119 - 286)          |
| Intestinal infectious diseases                                    | 2<br>(1 - 5)                | 0<br>(0 - 1)       | 0<br>(0 - 1)        | 1<br>(0 - 2)         | 0<br>(0 - 1)             | 0<br>(0 - 1)                |
| Typhoid fever                                                     | 2<br>(1 - 4)                | 0<br>(0 - 1)       | 0<br>(0 - 1)        | 1<br>(0 - 2)         | 0<br>(0 - 1)             | 0<br>(0 - 0)                |
| Paratyphoid fever                                                 | 0<br>(0 - 1)                | 0<br>(0 - 0)       | 0<br>(0 - 0)        | 0<br>(0 - 0)         | 0<br>(0 - 0)             | 0<br>(0 - 0)                |
| Other intestinal infectious diseases                              | 0<br>(0 - 2)                | 0<br>(0 - 1)       | 0<br>(0 - 0)        | 0<br>(0 - 1)         | 0<br>(0 - 0)             | 0<br>(0 - 1)                |
| Lower respiratory infections                                      | 1,161<br>(851 - 1,817)      | 2<br>(1 - 3)       | 0<br>(0 - 1)        | 4<br>(3 - 6)         | 33<br>(26 - 42)          | 1,121<br>(814 - 1,774)      |
| Upper respiratory infections                                      | 0<br>(0 - 1)                | 0<br>(0 - 0)       | 0<br>(0 - 0)        | 0<br>(0 - 0)         | 0<br>(0 - 0)             | 0<br>(0 - 1)                |
| Otitis media                                                      | 1<br>(1 - 1)                | 0<br>(0 - 0)       | 0<br>(0 - 0)        | 0<br>(0 - 0)         | 0<br>(0 - 0)             | 1<br>(0 - 1)                |
| Meningitis                                                        | 13<br>(11 - 17)             | 1<br>(1 - 1)       | 0<br>(0 - 1)        | 2<br>(1 - 2)         | 3<br>(2 - 3)             | 8<br>(6 - 10)               |
| Pneumococcal meningitis                                           | 2<br>(1 - 3)                | 0<br>(0 - 0)       | 0<br>(0 - 0)        | 0<br>(0 - 0)         | 0<br>(0 - 1)             | 1<br>(0 - 2)                |
| H influenzae type B meningitis                                    | 1<br>(1 - 2)                | 0<br>(0 - 0)       | 0<br>(0 - 0)        | 0<br>(0 - 0)         | 0<br>(0 - 0)             | 1<br>(0 - 1)                |
| Meningococcal meningitis                                          | 3<br>(2 - 5)                | 0<br>(0 - 0)       | 0<br>(0 - 0)        | 0<br>(0 - 1)         | 1<br>(0 - 1)             | 2<br>(1 - 4)                |
| Other meningitis                                                  | 7<br>(5 - 8)                | 1<br>(0 - 1)       | 0<br>(0 - 0)        | 1<br>(1 - 1)         | 1<br>(1 - 2)             | 3<br>(2 - 5)                |
| Encephalitis                                                      | 4<br>(2 - 5)                | 0<br>(0 - 0)       | 0<br>(0 - 0)        | 1<br>(0 - 1)         | 1<br>(0 - 1)             | 2<br>(1 - 3)                |
| Diphtheria                                                        | 0<br>(0 - 0)                | 0<br>(0 - 0)       | 0<br>(0 - 0)        | 0<br>(0 - 0)         | 0<br>(0 - 0)             | --                          |
| Whooping cough                                                    | 0<br>(0 - 0)                | 0<br>(0 - 0)       | 0<br>(0 - 0)        | 0<br>(0 - 0)         | 0<br>(0 - 0)             | --                          |
| Tetanus                                                           | 0<br>(0 - 0)                | 0<br>(0 - 0)       | 0<br>(0 - 0)        | 0<br>(0 - 0)         | 0<br>(0 - 0)             | 0<br>(0 - 0)                |
| Measles                                                           | 0<br>(0 - 0)                | 0<br>(0 - 0)       | 0<br>(0 - 0)        | 0<br>(0 - 0)         | 0<br>(0 - 0)             | --                          |
| Varicella and herpes zoster                                       | 3<br>(0 - 12)               | 0<br>(0 - 0)       | 0<br>(0 - 0)        | 0<br>(0 - 1)         | 0<br>(0 - 1)             | 2<br>(0 - 11)               |
| Neglected tropical diseases and malaria                           | 1<br>(1 - 2)                | 0<br>(0 - 0)       | 0<br>(0 - 0)        | 0<br>(0 - 0)         | 0<br>(0 - 0)             | 0<br>(0 - 1)                |
| Cysticercosis                                                     | 0<br>(0 - 0)                | 0<br>(0 - 0)       | 0<br>(0 - 0)        | 0<br>(0 - 0)         | 0<br>(0 - 0)             | 0<br>(0 - 0)                |
| Cystic echinococcosis                                             | 0<br>(0 - 0)                | 0<br>(0 - 0)       | 0<br>(0 - 0)        | 0<br>(0 - 0)         | 0<br>(0 - 0)             | 0<br>(0 - 0)                |
| Dengue                                                            | 0<br>(0 - 0)                | 0<br>(0 - 0)       | 0<br>(0 - 0)        | 0<br>(0 - 0)         | 0<br>(0 - 0)             | 0<br>(0 - 0)                |
| Rabies                                                            | 0<br>(0 - 0)                | 0<br>(0 - 0)       | 0<br>(0 - 0)        | 0<br>(0 - 0)         | 0<br>(0 - 0)             | 0<br>(0 - 0)                |
| Other neglected tropical diseases                                 | 1<br>(0 - 1)                | 0<br>(0 - 0)       | 0<br>(0 - 0)        | 0<br>(0 - 0)         | 0<br>(0 - 0)             | 0<br>(0 - 0)                |
| Maternal disorders                                                | 3<br>(2 - 4)                | --                 | 0<br>(0 - 0)        | 3<br>(2 - 3)         | --                       | --                          |
| Maternal hemorrhage                                               | 0<br>(0 - 0)                | --                 | 0<br>(0 - 0)        | 0<br>(0 - 0)         | --                       | --                          |
| Maternal sepsis and other maternal infections                     | 0<br>(0 - 0)                | --                 | 0<br>(0 - 0)        | 0<br>(0 - 0)         | --                       | --                          |
| Maternal hypertensive disorders                                   | 0<br>(0 - 1)                | --                 | 0<br>(0 - 0)        | 0<br>(0 - 1)         | --                       | --                          |
| Maternal obstructed labor                                         | 0<br>(0 - 0)                | --                 | 0<br>(0 - 0)        | 0<br>(0 - 0)         | --                       | --                          |
| Maternal abortive outcome                                         | 1<br>(0 - 1)                | --                 | 0<br>(0 - 0)        | 1<br>(0 - 1)         | --                       | --                          |
| Indirect maternal deaths                                          | 0<br>(0 - 0)                | --                 | 0<br>(0 - 0)        | 0<br>(0 - 0)         | --                       | --                          |

Web Table 31- Norway deaths with 95% UI by age, sex, and cause in 2013

| Cause                                                            | Females, All Ages           | Females, 0-4 Years | Females, 5-14 Years | Females, 15-49 Years | Females, 50-69 Years     | Females, 70-80 Years        |
|------------------------------------------------------------------|-----------------------------|--------------------|---------------------|----------------------|--------------------------|-----------------------------|
| Late maternal deaths                                             | 0<br>(0 - 0)                | --                 | 0<br>(0 - 0)        | 0<br>(0 - 0)         | --                       | --                          |
| Maternal deaths aggravated by HIV/AIDS                           | 0<br>(0 - 0)                | --                 | --                  | 0<br>(0 - 0)         | --                       | --                          |
| Other maternal disorders                                         | 1<br>(0 - 1)                | --                 | 0<br>(0 - 0)        | 1<br>(0 - 1)         | --                       | --                          |
| Neonatal disorders                                               | 27<br>(20 - 36)             | 27<br>(20 - 36)    | --                  | --                   | --                       | --                          |
| Neonatal preterm birth complications                             | 10<br>(5 - 15)              | 10<br>(5 - 15)     | --                  | --                   | --                       | --                          |
| Neonatal encephalopathy due to birth asphyxia and trauma         | 11<br>(7 - 15)              | 11<br>(7 - 15)     | --                  | --                   | --                       | --                          |
| Neonatal sepsis and other neonatal infections                    | 1<br>(0 - 1)                | 1<br>(0 - 1)       | --                  | --                   | --                       | --                          |
| Hemolytic disease and other neonatal jaundice                    | 0<br>(0 - 0)                | 0<br>(0 - 0)       | --                  | --                   | --                       | --                          |
| Other neonatal disorders                                         | 6<br>(4 - 9)                | 6<br>(4 - 9)       | --                  | --                   | --                       | --                          |
| Nutritional deficiencies                                         | 92<br>(42 - 121)            | 0<br>(0 - 0)       | 0<br>(0 - 0)        | 1<br>(0 - 1)         | 3<br>(2 - 4)             | 88<br>(39 - 117)            |
| Protein-energy malnutrition                                      | 29<br>(4 - 56)              | 0<br>(0 - 0)       | 0<br>(0 - 0)        | 0<br>(0 - 0)         | 0<br>(0 - 1)             | 29<br>(3 - 55)              |
| Iodine deficiency                                                | 0<br>(0 - 1)                | 0<br>(0 - 0)       | 0<br>(0 - 0)        | 0<br>(0 - 0)         | 0<br>(0 - 0)             | 0<br>(0 - 1)                |
| Iron-deficiency anemia                                           | 59<br>(29 - 86)             | 0<br>(0 - 0)       | 0<br>(0 - 0)        | 1<br>(0 - 1)         | 2<br>(1 - 3)             | 56<br>(27 - 83)             |
| Other nutritional deficiencies                                   | 3<br>(1 - 9)                | 0<br>(0 - 0)       | 0<br>(0 - 0)        | 0<br>(0 - 0)         | 1<br>(0 - 2)             | 3<br>(1 - 7)                |
| Other communicable, maternal, neonatal, and nutritional diseases | 34<br>(21 - 45)             | 1<br>(0 - 1)       | 0<br>(0 - 0)        | 2<br>(1 - 2)         | 7<br>(4 - 9)             | 25<br>(14 - 35)             |
| Sexually transmitted diseases excluding HIV                      | 3<br>(2 - 4)                | 0<br>(0 - 1)       | 0<br>(0 - 0)        | 0<br>(0 - 0)         | 0<br>(0 - 1)             | 2<br>(1 - 3)                |
| Syphilis                                                         | 2<br>(1 - 3)                | 0<br>(0 - 1)       | 0<br>(0 - 0)        | 0<br>(0 - 0)         | 0<br>(0 - 0)             | 2<br>(1 - 3)                |
| Chlamydial infection                                             | 0<br>(0 - 0)                | --                 | 0<br>(0 - 0)        | 0<br>(0 - 0)         | 0<br>(0 - 0)             | 0<br>(0 - 0)                |
| Gonococcal infection                                             | 0<br>(0 - 0)                | --                 | 0<br>(0 - 0)        | 0<br>(0 - 0)         | 0<br>(0 - 0)             | 0<br>(0 - 0)                |
| Other sexually transmitted diseases                              | 0<br>(0 - 0)                | --                 | 0<br>(0 - 0)        | 0<br>(0 - 0)         | 0<br>(0 - 0)             | 0<br>(0 - 0)                |
| Hepatitis                                                        | 1<br>(1 - 2)                | 0<br>(0 - 0)       | 0<br>(0 - 0)        | 0<br>(0 - 0)         | 0<br>(0 - 1)             | 0<br>(0 - 1)                |
| Acute hepatitis A                                                | 0<br>(0 - 1)                | 0<br>(0 - 0)       | 0<br>(0 - 0)        | 0<br>(0 - 0)         | 0<br>(0 - 0)             | 0<br>(0 - 0)                |
| Acute hepatitis B                                                | 1<br>(0 - 1)                | 0<br>(0 - 0)       | 0<br>(0 - 0)        | 0<br>(0 - 0)         | 0<br>(0 - 1)             | 0<br>(0 - 1)                |
| Acute hepatitis C                                                | 0<br>(0 - 0)                | --                 | 0<br>(0 - 0)        | 0<br>(0 - 0)         | 0<br>(0 - 0)             | 0<br>(0 - 0)                |
| Other infectious diseases                                        | 31<br>(17 - 41)             | 0<br>(0 - 1)       | 0<br>(0 - 0)        | 1<br>(1 - 2)         | 6<br>(3 - 8)             | 23<br>(11 - 32)             |
| Non-communicable diseases                                        | 18,726<br>(17,681 - 19,609) | 43<br>(34 - 54)    | 15<br>(13 - 17)     | 479<br>(440 - 514)   | 2,680<br>(2,523 - 2,830) | 15,509<br>(14,599 - 16,264) |
| Neoplasms                                                        | 5,093<br>(4,238 - 5,634)    | 3<br>(2 - 5)       | 7<br>(6 - 8)        | 277<br>(253 - 299)   | 1,614<br>(1,432 - 1,741) | 3,192<br>(2,509 - 3,634)    |
| Esophageal cancer                                                | 45<br>(38 - 53)             | --                 | --                  | 1<br>(1 - 1)         | 13<br>(11 - 17)          | 30<br>(24 - 38)             |
| Stomach cancer                                                   | 223<br>(159 - 309)          | --                 | --                  | 7<br>(5 - 10)        | 47<br>(36 - 62)          | 169<br>(114 - 243)          |
| Liver cancer                                                     | 79<br>(41 - 102)            | --                 | 0<br>(0 - 0)        | 3<br>(2 - 4)         | 21<br>(11 - 27)          | 55<br>(26 - 75)             |
| Liver cancer due to hepatitis B                                  | 14<br>(3 - 28)              | --                 | 0<br>(0 - 0)        | 1<br>(0 - 2)         | 4<br>(1 - 9)             | 8<br>(2 - 18)               |
| Liver cancer due to hepatitis C                                  | 48<br>(19 - 72)             | --                 | 0<br>(0 - 0)        | 2<br>(1 - 3)         | 12<br>(6 - 19)           | 34<br>(12 - 53)             |
| Liver cancer due to alcohol use                                  | 11<br>(5 - 21)              | --                 | --                  | 0<br>(0 - 0)         | 2<br>(1 - 4)             | 9<br>(4 - 17)               |
| Liver cancer due to other causes                                 | 7<br>(3 - 11)               | --                 | 0<br>(0 - 0)        | 0<br>(0 - 1)         | 2<br>(1 - 4)             | 4<br>(1 - 8)                |
| Larynx cancer                                                    | 7<br>(4 - 10)               | --                 | --                  | 0<br>(0 - 1)         | 3<br>(2 - 4)             | 4<br>(2 - 6)                |
| Tracheal, bronchus and lung cancer                               | 859<br>(463 - 1,049)        | --                 | --                  | 30<br>(22 - 37)      | 364<br>(230 - 432)       | 465<br>(191 - 611)          |
| Breast cancer                                                    | 681<br>(541 - 848)          | --                 | --                  | 67<br>(56 - 86)      | 258<br>(215 - 327)       | 355<br>(269 - 444)          |
| Cervical cancer                                                  | 116<br>(88 - 140)           | --                 | --                  | 20<br>(15 - 25)      | 40<br>(32 - 50)          | 56<br>(38 - 74)             |
| Uterine cancer                                                   | 119<br>(49 - 151)           | --                 | --                  | 3<br>(2 - 5)         | 36<br>(17 - 47)          | 80<br>(28 - 108)            |
| Prostate cancer                                                  | --                          | --                 | --                  | --                   | --                       | --                          |

Web Table 31- Norway deaths with 95% UI by age, sex, and cause in 2013

| Cause                                         | Females, All Ages        | Females, 0-4 Years | Females, 5-14 Years | Females, 15-49 Years | Females, 50-69 Years | Females, 70-80 Years     |
|-----------------------------------------------|--------------------------|--------------------|---------------------|----------------------|----------------------|--------------------------|
| Colon and rectum cancer                       | 983<br>(830 - 1,160)     | --                 | --                  | 24<br>(21 - 28)      | 222<br>(197 - 248)   | 736<br>(593 - 908)       |
| Lip and oral cavity cancer                    | 33<br>(26 - 41)          | --                 | --                  | 2<br>(2 - 3)         | 10<br>(8 - 12)       | 21<br>(15 - 28)          |
| Nasopharynx cancer                            | 3<br>(2 - 7)             | --                 | 0<br>(0 - 0)        | 0<br>(0 - 1)         | 1<br>(1 - 3)         | 1<br>(1 - 3)             |
| Other pharynx cancer                          | 10<br>(7 - 13)           | --                 | --                  | 1<br>(1 - 1)         | 5<br>(4 - 7)         | 4<br>(3 - 6)             |
| Gallbladder and biliary tract cancer          | 72<br>(48 - 100)         | --                 | --                  | 2<br>(1 - 2)         | 17<br>(13 - 24)      | 53<br>(33 - 75)          |
| Pancreatic cancer                             | 366<br>(318 - 419)       | --                 | --                  | 8<br>(7 - 10)        | 108<br>(94 - 122)    | 250<br>(209 - 296)       |
| Malignant skin melanoma                       | 114<br>(66 - 139)        | --                 | --                  | 17<br>(11 - 22)      | 40<br>(24 - 51)      | 56<br>(28 - 75)          |
| Non-melanoma skin cancer                      | 22<br>(14 - 30)          | --                 | --                  | 0<br>(0 - 0)         | 2<br>(1 - 2)         | 20<br>(13 - 27)          |
| Ovarian cancer                                | 331<br>(274 - 382)       | --                 | --                  | 20<br>(16 - 24)      | 146<br>(124 - 169)   | 165<br>(117 - 207)       |
| Testicular cancer                             | --                       | --                 | --                  | --                   | --                   | --                       |
| Kidney cancer                                 | 101<br>(69 - 138)        | 0<br>(0 - 0)       | 0<br>(0 - 0)        | 3<br>(2 - 4)         | 29<br>(22 - 38)      | 68<br>(40 - 104)         |
| Bladder cancer                                | 91<br>(58 - 125)         | --                 | --                  | 1<br>(1 - 2)         | 15<br>(10 - 21)      | 75<br>(45 - 104)         |
| Brain and nervous system cancer               | 139<br>(95 - 162)        | 1<br>(0 - 1)       | 3<br>(2 - 4)        | 22<br>(17 - 27)      | 64<br>(46 - 76)      | 49<br>(29 - 65)          |
| Thyroid cancer                                | 23<br>(18 - 32)          | --                 | 0<br>(0 - 0)        | 1<br>(1 - 2)         | 5<br>(4 - 8)         | 17<br>(12 - 24)          |
| Mesothelioma                                  | 12<br>(7 - 16)           | --                 | --                  | 1<br>(0 - 1)         | 5<br>(3 - 7)         | 6<br>(4 - 9)             |
| Hodgkin lymphoma                              | 9<br>(7 - 14)            | 0<br>(0 - 0)       | 0<br>(0 - 0)        | 2<br>(2 - 4)         | 2<br>(2 - 4)         | 4<br>(3 - 6)             |
| Non-Hodgkin lymphoma                          | 151<br>(67 - 213)        | 0<br>(0 - 0)       | 0<br>(0 - 0)        | 9<br>(5 - 14)        | 40<br>(20 - 60)      | 102<br>(42 - 143)        |
| Multiple myeloma                              | 119<br>(75 - 189)        | --                 | --                  | 3<br>(2 - 5)         | 31<br>(19 - 51)      | 85<br>(50 - 139)         |
| Leukemia                                      | 149<br>(124 - 174)       | 1<br>(0 - 1)       | 2<br>(1 - 3)        | 11<br>(9 - 14)       | 35<br>(27 - 42)      | 100<br>(77 - 123)        |
| Other neoplasms                               | 238<br>(168 - 302)       | 1<br>(1 - 2)       | 2<br>(1 - 2)        | 16<br>(12 - 19)      | 53<br>(41 - 64)      | 166<br>(106 - 229)       |
| Cardiovascular diseases                       | 7,657<br>(6,668 - 9,220) | 0<br>(0 - 1)       | 1<br>(0 - 1)        | 51<br>(37 - 62)      | 482<br>(403 - 706)   | 7,123<br>(6,194 - 8,436) |
| Rheumatic heart disease                       | 40<br>(26 - 92)          | 0<br>(0 - 0)       | 0<br>(0 - 0)        | 0<br>(0 - 1)         | 5<br>(3 - 11)        | 34<br>(22 - 82)          |
| Ischemic heart disease                        | 3,798<br>(3,044 - 4,990) | 0<br>(0 - 0)       | 0<br>(0 - 0)        | 21<br>(13 - 26)      | 257<br>(206 - 429)   | 3,520<br>(2,807 - 4,557) |
| Cerebrovascular disease                       | 2,286<br>(1,871 - 3,191) | 0<br>(0 - 0)       | 0<br>(0 - 0)        | 18<br>(13 - 23)      | 132<br>(104 - 208)   | 2,136<br>(1,734 - 2,970) |
| Ischemic stroke                               | 1,397<br>(1,060 - 2,039) | 0<br>(0 - 0)       | 0<br>(0 - 0)        | 2<br>(1 - 2)         | 37<br>(25 - 64)      | 1,358<br>(1,030 - 1,977) |
| Hemorrhagic stroke                            | 890<br>(678 - 1,314)     | 0<br>(0 - 0)       | 0<br>(0 - 0)        | 16<br>(12 - 21)      | 95<br>(74 - 150)     | 779<br>(573 - 1,175)     |
| Hypertensive heart disease                    | 88<br>(56 - 142)         | 0<br>(0 - 0)       | 0<br>(0 - 0)        | 0<br>(0 - 1)         | 3<br>(2 - 5)         | 85<br>(53 - 138)         |
| Cardiomyopathy and myocarditis                | 169<br>(72 - 224)        | 0<br>(0 - 1)       | 0<br>(0 - 1)        | 5<br>(2 - 6)         | 16<br>(9 - 22)       | 147<br>(57 - 201)        |
| Atrial fibrillation and flutter               | 516<br>(334 - 715)       | --                 | --                  | 0<br>(0 - 0)         | 9<br>(6 - 13)        | 506<br>(325 - 701)       |
| Aortic aneurysm                               | 185<br>(110 - 293)       | --                 | --                  | 1<br>(1 - 2)         | 23<br>(14 - 37)      | 161<br>(95 - 260)        |
| Peripheral vascular disease                   | 57<br>(39 - 78)          | --                 | --                  | 0<br>(0 - 0)         | 2<br>(2 - 4)         | 54<br>(37 - 75)          |
| Endocarditis                                  | 21<br>(12 - 34)          | 0<br>(0 - 0)       | 0<br>(0 - 0)        | 0<br>(0 - 1)         | 3<br>(2 - 5)         | 18<br>(10 - 28)          |
| Other cardiovascular and circulatory diseases | 497<br>(334 - 656)       | 0<br>(0 - 0)       | 0<br>(0 - 0)        | 5<br>(3 - 7)         | 31<br>(20 - 44)      | 461<br>(302 - 622)       |
| Chronic respiratory diseases                  | 1,195<br>(633 - 1,430)   | 1<br>(0 - 1)       | 0<br>(0 - 1)        | 13<br>(8 - 16)       | 186<br>(113 - 216)   | 995<br>(495 - 1,221)     |
| Chronic obstructive pulmonary disease         | 983<br>(501 - 1,204)     | 0<br>(0 - 0)       | 0<br>(0 - 0)        | 6<br>(3 - 8)         | 153<br>(99 - 182)    | 824<br>(399 - 1,028)     |
| Pneumoconiosis                                | 3<br>(1 - 6)             | 0<br>(0 - 0)       | 0<br>(0 - 0)        | 0<br>(0 - 0)         | 0<br>(0 - 0)         | 3<br>(1 - 5)             |
| Silicosis                                     | 0<br>(0 - 0)             | 0<br>(0 - 0)       | 0<br>(0 - 0)        | 0<br>(0 - 0)         | 0<br>(0 - 0)         | 0<br>(0 - 0)             |
| Asbestosis                                    | 0<br>(0 - 0)             | 0<br>(0 - 0)       | 0<br>(0 - 0)        | 0<br>(0 - 0)         | 0<br>(0 - 0)         | 0<br>(0 - 0)             |
| Coal workers pneumoconiosis                   | 0<br>(0 - 0)             | 0<br>(0 - 0)       | 0<br>(0 - 0)        | 0<br>(0 - 0)         | 0<br>(0 - 0)         | 0<br>(0 - 0)             |
| Other pneumoconiosis                          | 3<br>(1 - 5)             | 0<br>(0 - 0)       | 0<br>(0 - 0)        | 0<br>(0 - 0)         | 0<br>(0 - 0)         | 2<br>(1 - 5)             |

Web Table 31- Norway deaths with 95% UI by age, sex, and cause in 2013

| Cause                                               | Females, All Ages        | Females, 0-4 Years | Females, 5-14 Years | Females, 15-49 Years | Females, 50-69 Years | Females, 70-80 Years     |
|-----------------------------------------------------|--------------------------|--------------------|---------------------|----------------------|----------------------|--------------------------|
| Asthma                                              | 113<br>(57 - 172)        | 0<br>(0 - 0)       | 0<br>(0 - 0)        | 4<br>(2 - 6)         | 18<br>(10 - 27)      | 91<br>(42 - 145)         |
| Interstitial lung disease and pulmonary sarcoidosis | 89<br>(36 - 145)         | 0<br>(0 - 0)       | 0<br>(0 - 0)        | 2<br>(1 - 3)         | 14<br>(7 - 25)       | 72<br>(26 - 123)         |
| Other chronic respiratory diseases                  | 7<br>(3 - 11)            | 0<br>(0 - 0)       | 0<br>(0 - 0)        | 0<br>(0 - 1)         | 1<br>(0 - 1)         | 6<br>(2 - 10)            |
| Cirrhosis                                           | 142<br>(124 - 163)       | 0<br>(0 - 0)       | 0<br>(0 - 0)        | 12<br>(10 - 14)      | 49<br>(42 - 56)      | 82<br>(67 - 99)          |
| Cirrhosis due to hepatitis B                        | 19<br>(6 - 30)           | 0<br>(0 - 0)       | 0<br>(0 - 0)        | 1<br>(1 - 2)         | 6<br>(2 - 10)        | 11<br>(3 - 19)           |
| Cirrhosis due to hepatitis C                        | 86<br>(63 - 108)         | 0<br>(0 - 0)       | 0<br>(0 - 0)        | 7<br>(5 - 9)         | 30<br>(21 - 37)      | 50<br>(34 - 67)          |
| Cirrhosis due to alcohol use                        | 22<br>(11 - 38)          | --                 | --                  | 1<br>(0 - 2)         | 6<br>(3 - 11)        | 15<br>(6 - 27)           |
| Cirrhosis due to other causes                       | 15<br>(6 - 31)           | 0<br>(0 - 0)       | 0<br>(0 - 0)        | 2<br>(1 - 4)         | 6<br>(2 - 13)        | 7<br>(2 - 14)            |
| Digestive diseases                                  | 577<br>(465 - 679)       | 0<br>(0 - 0)       | 0<br>(0 - 0)        | 6<br>(5 - 8)         | 49<br>(37 - 57)      | 522<br>(417 - 623)       |
| Peptic ulcer disease                                | 110<br>(67 - 152)        | 0<br>(0 - 0)       | 0<br>(0 - 0)        | 1<br>(1 - 1)         | 10<br>(6 - 14)       | 99<br>(60 - 140)         |
| Gastritis and duodenitis                            | 5<br>(2 - 10)            | 0<br>(0 - 0)       | 0<br>(0 - 0)        | 0<br>(0 - 0)         | 1<br>(0 - 1)         | 4<br>(2 - 8)             |
| Appendicitis                                        | 7<br>(4 - 12)            | 0<br>(0 - 0)       | 0<br>(0 - 0)        | 0<br>(0 - 1)         | 1<br>(1 - 2)         | 6<br>(3 - 10)            |
| Paralytic ileus and intestinal obstruction          | 99<br>(54 - 170)         | 0<br>(0 - 0)       | 0<br>(0 - 0)        | 1<br>(0 - 1)         | 7<br>(4 - 12)        | 91<br>(48 - 158)         |
| Inguinal, femoral, and abdominal hernia             | 16<br>(6 - 26)           | 0<br>(0 - 0)       | 0<br>(0 - 0)        | 0<br>(0 - 0)         | 1<br>(0 - 2)         | 15<br>(5 - 25)           |
| Inflammatory bowel disease                          | 21<br>(13 - 34)          | 0<br>(0 - 0)       | 0<br>(0 - 0)        | 1<br>(1 - 2)         | 3<br>(1 - 4)         | 18<br>(10 - 29)          |
| Vascular intestinal disorders                       | 74<br>(39 - 139)         | 0<br>(0 - 0)       | 0<br>(0 - 0)        | 0<br>(0 - 1)         | 8<br>(4 - 14)        | 66<br>(34 - 127)         |
| Gallbladder and biliary diseases                    | 85<br>(59 - 134)         | 0<br>(0 - 0)       | 0<br>(0 - 0)        | 1<br>(0 - 1)         | 5<br>(3 - 7)         | 80<br>(54 - 127)         |
| Pancreatitis                                        | 32<br>(20 - 49)          | 0<br>(0 - 0)       | 0<br>(0 - 0)        | 1<br>(1 - 1)         | 5<br>(3 - 8)         | 26<br>(16 - 41)          |
| Other digestive diseases                            | 127<br>(87 - 168)        | 0<br>(0 - 0)       | 0<br>(0 - 0)        | 1<br>(1 - 1)         | 8<br>(6 - 11)        | 118<br>(81 - 157)        |
| Neurological disorders                              | 2,687<br>(1,686 - 3,551) | 2<br>(2 - 3)       | 2<br>(1 - 2)        | 24<br>(19 - 29)      | 133<br>(109 - 166)   | 2,525<br>(1,511 - 3,394) |
| Alzheimer disease and other dementias               | 2,363<br>(1,345 - 3,245) | --                 | --                  | 0<br>(0 - 1)         | 54<br>(36 - 80)      | 2,309<br>(1,285 - 3,188) |
| Parkinson disease                                   | 138<br>(98 - 231)        | --                 | --                  | 0<br>(0 - 0)         | 7<br>(5 - 11)        | 131<br>(90 - 220)        |
| Epilepsy                                            | 31<br>(18 - 42)          | 0<br>(0 - 1)       | 1<br>(0 - 1)        | 8<br>(5 - 11)        | 6<br>(4 - 9)         | 15<br>(7 - 23)           |
| Multiple sclerosis                                  | 54<br>(31 - 81)          | --                 | --                  | 9<br>(5 - 14)        | 28<br>(15 - 41)      | 17<br>(9 - 26)           |
| Other neurological disorders                        | 101<br>(88 - 115)        | 2<br>(1 - 3)       | 1<br>(1 - 1)        | 7<br>(6 - 8)         | 38<br>(32 - 45)      | 53<br>(44 - 65)          |
| Mental and substance use disorders                  | 125<br>(98 - 157)        | 0<br>(0 - 0)       | 0<br>(0 - 0)        | 57<br>(48 - 69)      | 46<br>(32 - 67)      | 21<br>(11 - 30)          |
| Schizophrenia                                       | 9<br>(1 - 16)            | --                 | --                  | 0<br>(0 - 0)         | 2<br>(0 - 3)         | 7<br>(1 - 14)            |
| Alcohol use disorders                               | 39<br>(17 - 71)          | --                 | --                  | 8<br>(4 - 16)        | 24<br>(11 - 46)      | 7<br>(3 - 12)            |
| Drug use disorders                                  | 76<br>(65 - 88)          | 0<br>(0 - 0)       | --                  | 48<br>(40 - 57)      | 21<br>(17 - 26)      | 7<br>(5 - 10)            |
| Opioid use disorders                                | 26<br>(23 - 31)          | 0<br>(0 - 0)       | --                  | 17<br>(14 - 21)      | 7<br>(5 - 9)         | 3<br>(2 - 4)             |
| Cocaine use disorders                               | 3<br>(2 - 3)             | 0<br>(0 - 0)       | --                  | 2<br>(2 - 3)         | 1<br>(0 - 1)         | 0<br>(0 - 0)             |
| Amphetamine use disorders                           | 3<br>(3 - 4)             | 0<br>(0 - 0)       | --                  | 2<br>(2 - 2)         | 1<br>(1 - 1)         | 0<br>(0 - 0)             |
| Other drug use disorders                            | 44<br>(37 - 50)          | 0<br>(0 - 0)       | --                  | 27<br>(22 - 32)      | 13<br>(10 - 16)      | 4<br>(3 - 6)             |
| Eating disorders                                    | 1<br>(0 - 1)             | --                 | 0<br>(0 - 0)        | 1<br>(0 - 1)         | --                   | --                       |
| Anorexia nervosa                                    | 1<br>(0 - 1)             | --                 | 0<br>(0 - 0)        | 1<br>(0 - 1)         | --                   | --                       |
| Diabetes, urogenital, blood, and endocrine diseases | 981<br>(733 - 1,154)     | 2<br>(1 - 4)       | 2<br>(1 - 2)        | 22<br>(16 - 25)      | 85<br>(66 - 97)      | 870<br>(637 - 1,033)     |
| Diabetes mellitus                                   | 358<br>(284 - 445)       | 0<br>(0 - 0)       | 0<br>(0 - 0)        | 8<br>(6 - 9)         | 37<br>(31 - 45)      | 312<br>(242 - 397)       |
| Acute glomerulonephritis                            | 0<br>(0 - 0)             | 0<br>(0 - 0)       | 0<br>(0 - 0)        | 0<br>(0 - 0)         | 0<br>(0 - 0)         | 0<br>(0 - 0)             |
| Chronic kidney disease                              | 275<br>(147 - 349)       | 0<br>(0 - 0)       | 0<br>(0 - 0)        | 4<br>(2 - 5)         | 19<br>(13 - 24)      | 251<br>(130 - 326)       |
| Chronic kidney disease due to diabetes mellitus     | 55<br>(33 - 76)          | 0<br>(0 - 0)       | 0<br>(0 - 0)        | 1<br>(1 - 1)         | 5<br>(3 - 7)         | 49<br>(28 - 70)          |

Web Table 31- Norway deaths with 95% UI by age, sex, and cause in 2013

| Cause                                               | Females, All Ages      | Females, 0-4 Years | Females, 5-14 Years | Females, 15-49 Years | Females, 50-69 Years | Females, 70-80 Years |
|-----------------------------------------------------|------------------------|--------------------|---------------------|----------------------|----------------------|----------------------|
| Chronic kidney disease due to hypertension          | 90<br>(41 - 133)       | 0<br>(0 - 0)       | 0<br>(0 - 0)        | 0<br>(0 - 1)         | 4<br>(2 - 7)         | 85<br>(38 - 127)     |
| Chronic kidney disease due to glomerulonephritis    | 8<br>(5 - 14)          | 0<br>(0 - 0)       | 0<br>(0 - 0)        | 0<br>(0 - 1)         | 1<br>(1 - 2)         | 6<br>(3 - 11)        |
| Chronic kidney disease due to other causes          | 122<br>(51 - 186)      | 0<br>(0 - 0)       | 0<br>(0 - 0)        | 2<br>(1 - 3)         | 8<br>(4 - 14)        | 111<br>(44 - 174)    |
| Urinary diseases and male infertility               | 251<br>(134 - 343)     | 0<br>(0 - 0)       | 0<br>(0 - 0)        | 2<br>(1 - 2)         | 12<br>(8 - 16)       | 237<br>(122 - 328)   |
| Interstitial nephritis and urinary tract infections | 239<br>(126 - 327)     | 0<br>(0 - 0)       | 0<br>(0 - 0)        | 1<br>(1 - 2)         | 11<br>(7 - 14)       | 227<br>(116 - 314)   |
| Urolithiasis                                        | 6<br>(3 - 11)          | --                 | 0<br>(0 - 0)        | 0<br>(0 - 0)         | 1<br>(1 - 2)         | 5<br>(2 - 9)         |
| Other urinary diseases                              | 6<br>(2 - 11)          | 0<br>(0 - 0)       | 0<br>(0 - 0)        | 0<br>(0 - 0)         | 1<br>(0 - 1)         | 5<br>(2 - 10)        |
| Gynecological diseases                              | 2<br>(1 - 3)           | --                 | --                  | 0<br>(0 - 0)         | 0<br>(0 - 0)         | 2<br>(1 - 3)         |
| Uterine fibroids                                    | 1<br>(0 - 1)           | --                 | --                  | 0<br>(0 - 0)         | 0<br>(0 - 0)         | 1<br>(0 - 1)         |
| Polycystic ovarian syndrome                         | 0<br>(0 - 0)           | --                 | --                  | 0<br>(0 - 0)         | 0<br>(0 - 0)         | --                   |
| Endometriosis                                       | 0<br>(0 - 0)           | --                 | --                  | 0<br>(0 - 0)         | 0<br>(0 - 0)         | --                   |
| Genital prolapse                                    | 1<br>(0 - 1)           | --                 | --                  | 0<br>(0 - 0)         | 0<br>(0 - 0)         | 0<br>(0 - 1)         |
| Other gynecological diseases                        | 1<br>(1 - 2)           | --                 | --                  | 0<br>(0 - 0)         | 0<br>(0 - 0)         | 1<br>(0 - 1)         |
| Hemoglobinopathies and hemolytic anemias            | 12<br>(7 - 20)         | 0<br>(0 - 0)       | 0<br>(0 - 0)        | 1<br>(0 - 1)         | 1<br>(1 - 2)         | 10<br>(6 - 17)       |
| Thalassemias                                        | 0<br>(0 - 0)           | 0<br>(0 - 0)       | 0<br>(0 - 0)        | 0<br>(0 - 0)         | 0<br>(0 - 0)         | 0<br>(0 - 0)         |
| Sickle cell disorders                               | 1<br>(1 - 2)           | 0<br>(0 - 0)       | 0<br>(0 - 0)        | 0<br>(0 - 0)         | 0<br>(0 - 1)         | 0<br>(0 - 1)         |
| G6PD deficiency                                     | 0<br>(0 - 0)           | 0<br>(0 - 0)       | 0<br>(0 - 0)        | 0<br>(0 - 0)         | 0<br>(0 - 0)         | 0<br>(0 - 0)         |
| Other hemoglobinopathies and hemolytic anemias      | 10<br>(6 - 18)         | 0<br>(0 - 0)       | 0<br>(0 - 0)        | 0<br>(0 - 0)         | 1<br>(0 - 1)         | 16<br>(6 - 16)       |
| Endocrine, metabolic, blood, and immune disorders   | 84<br>(29 - 111)       | 2<br>(1 - 3)       | 1<br>(1 - 2)        | 7<br>(3 - 10)        | 15<br>(6 - 20)       | 58<br>(18 - 83)      |
| Musculoskeletal disorders                           | 111<br>(87 - 151)      | --                 | 0<br>(0 - 0)        | 5<br>(4 - 7)         | 19<br>(15 - 29)      | 87<br>(65 - 121)     |
| Rheumatoid arthritis                                | 44<br>(31 - 67)        | --                 | 0<br>(0 - 0)        | 1<br>(0 - 1)         | 7<br>(5 - 12)        | 36<br>(25 - 58)      |
| Other musculoskeletal disorders                     | 67<br>(51 - 92)        | --                 | 0<br>(0 - 0)        | 4<br>(3 - 6)         | 12<br>(10 - 19)      | 50<br>(34 - 73)      |
| Other non-communicable diseases                     | 158<br>(121 - 192)     | 33<br>(25 - 44)    | 3<br>(2 - 4)        | 13<br>(10 - 16)      | 18<br>(14 - 22)      | 91<br>(46 - 124)     |
| Congenital anomalies                                | 67<br>(56 - 82)        | 27<br>(20 - 35)    | 3<br>(2 - 4)        | 12<br>(10 - 15)      | 14<br>(11 - 19)      | 11<br>(7 - 15)       |
| Neural tube defects                                 | 1<br>(0 - 1)           | 0<br>(0 - 1)       | 0<br>(0 - 0)        | 0<br>(0 - 0)         | 0<br>(0 - 0)         | 0<br>(0 - 0)         |
| Congenital heart anomalies                          | 18<br>(14 - 22)        | 8<br>(6 - 11)      | 1<br>(1 - 1)        | 4<br>(3 - 6)         | 2<br>(1 - 3)         | 2<br>(1 - 3)         |
| Cleft lip and cleft palate                          | 0<br>(0 - 0)           | 0<br>(0 - 0)       | --                  | --                   | --                   | --                   |
| Down syndrome                                       | 13<br>(8 - 18)         | 1<br>(0 - 2)       | 0<br>(0 - 0)        | 2<br>(1 - 3)         | 9<br>(6 - 13)        | 1<br>(0 - 1)         |
| Chromosomal unbalanced rearrangements               | 6<br>(3 - 9)           | 5<br>(3 - 8)       | 0<br>(0 - 0)        | 0<br>(0 - 1)         | 0<br>(0 - 0)         | 0<br>(0 - 0)         |
| Other congenital anomalies                          | 30<br>(24 - 37)        | 12<br>(8 - 16)     | 2<br>(1 - 2)        | 5<br>(4 - 7)         | 3<br>(2 - 5)         | 8<br>(5 - 11)        |
| Skin and subcutaneous diseases                      | 84<br>(39 - 117)       | 0<br>(0 - 0)       | 0<br>(0 - 0)        | 1<br>(0 - 1)         | 3<br>(2 - 4)         | 80<br>(37 - 112)     |
| Cellulitis                                          | 3<br>(1 - 7)           | 0<br>(0 - 0)       | 0<br>(0 - 0)        | 0<br>(0 - 0)         | 0<br>(0 - 1)         | 3<br>(1 - 7)         |
| Pyoderma                                            | 60<br>(24 - 85)        | 0<br>(0 - 0)       | 0<br>(0 - 0)        | 0<br>(0 - 0)         | 2<br>(1 - 3)         | 58<br>(23 - 83)      |
| Decubitus ulcer                                     | 18<br>(9 - 28)         | 0<br>(0 - 0)       | 0<br>(0 - 0)        | 0<br>(0 - 0)         | 1<br>(0 - 1)         | 17<br>(8 - 28)       |
| Other skin and subcutaneous diseases                | 3<br>(1 - 7)           | 0<br>(0 - 0)       | 0<br>(0 - 0)        | 0<br>(0 - 0)         | 0<br>(0 - 1)         | 3<br>(1 - 6)         |
| Sudden infant death syndrome                        | 6<br>(3 - 14)          | 6<br>(3 - 14)      | --                  | --                   | --                   | --                   |
| Injuries                                            | 1,048<br>(833 - 1,339) | 6<br>(4 - 7)       | 7<br>(6 - 9)        | 139<br>(124 - 160)   | 120<br>(104 - 155)   | 777<br>(571 - 1,030) |
| Transport injuries                                  | 75<br>(64 - 108)       | 1<br>(1 - 2)       | 3<br>(2 - 4)        | 28<br>(24 - 39)      | 19<br>(15 - 29)      | 24<br>(18 - 36)      |
| Road injuries                                       | 69<br>(59 - 101)       | 1<br>(1 - 2)       | 3<br>(2 - 4)        | 25<br>(21 - 36)      | 17<br>(13 - 27)      | 23<br>(18 - 35)      |
| Pedestrian road injuries                            | 19<br>(13 - 32)        | 1<br>(0 - 1)       | 1<br>(1 - 2)        | 2<br>(2 - 4)         | 4<br>(2 - 7)         | 11<br>(7 - 18)       |



Web Table 31- Norway deaths with 95% UI by age, sex, and cause in 2013

| Cause                                           | Females, All Ages    | Females, 0-4 Years | Females, 5-14 Years | Females, 15-49 Years | Females, 50-69 Years | Females, 70-80 Years |
|-------------------------------------------------|----------------------|--------------------|---------------------|----------------------|----------------------|----------------------|
| Cyclist road injuries                           | 4<br>(2 - 5)         | 0<br>(0 - 0)       | 0<br>(0 - 0)        | 1<br>(1 - 1)         | 1<br>(1 - 2)         | 1<br>(1 - 2)         |
| Motorcyclist road injuries                      | 2<br>(1 - 5)         | 0<br>(0 - 0)       | 0<br>(0 - 0)        | 2<br>(1 - 3)         | 0<br>(0 - 1)         | 0<br>(0 - 0)         |
| Motor vehicle road injuries                     | 44<br>(35 - 62)      | 1<br>(0 - 1)       | 1<br>(1 - 2)        | 20<br>(16 - 28)      | 12<br>(8 - 18)       | 11<br>(7 - 16)       |
| Other road injuries                             | 0<br>(0 - 1)         | 0<br>(0 - 0)       | 0<br>(0 - 0)        | 0<br>(0 - 0)         | 0<br>(0 - 0)         | 0<br>(0 - 0)         |
| Other transport injuries                        | 6<br>(4 - 9)         | 0<br>(0 - 0)       | 0<br>(0 - 1)        | 3<br>(2 - 5)         | 1<br>(1 - 3)         | 1<br>(0 - 1)         |
| Unintentional injuries                          | 795<br>(583 - 1,050) | 4<br>(3 - 5)       | 3<br>(2 - 3)        | 19<br>(15 - 22)      | 41<br>(33 - 49)      | 728<br>(524 - 975)   |
| Falls                                           | 693<br>(494 - 955)   | 0<br>(0 - 0)       | 0<br>(0 - 1)        | 4<br>(3 - 5)         | 21<br>(16 - 29)      | 667<br>(476 - 926)   |
| Drowning                                        | 11<br>(9 - 18)       | 1<br>(1 - 2)       | 1<br>(0 - 1)        | 3<br>(3 - 5)         | 3<br>(2 - 5)         | 3<br>(2 - 5)         |
| Fire, heat, and hot substances                  | 30<br>(18 - 40)      | 1<br>(0 - 1)       | 1<br>(0 - 1)        | 4<br>(3 - 6)         | 5<br>(3 - 6)         | 20<br>(11 - 28)      |
| Poisonings                                      | 5<br>(2 - 7)         | 0<br>(0 - 0)       | 0<br>(0 - 0)        | 2<br>(1 - 3)         | 2<br>(1 - 3)         | 1<br>(0 - 2)         |
| Exposure to mechanical forces                   | 5<br>(4 - 6)         | 1<br>(0 - 1)       | 0<br>(0 - 0)        | 1<br>(1 - 1)         | 1<br>(1 - 1)         | 2<br>(1 - 3)         |
| Unintentional firearm injuries                  | 0<br>(0 - 0)         | 0<br>(0 - 0)       | 0<br>(0 - 0)        | 0<br>(0 - 0)         | 0<br>(0 - 0)         | 0<br>(0 - 0)         |
| Unintentional suffocation                       | 1<br>(1 - 2)         | 0<br>(0 - 1)       | 0<br>(0 - 0)        | 0<br>(0 - 0)         | 0<br>(0 - 0)         | 1<br>(0 - 1)         |
| Other exposure to mechanical forces             | 3<br>(3 - 4)         | 0<br>(0 - 0)       | 0<br>(0 - 0)        | 1<br>(1 - 1)         | 1<br>(1 - 1)         | 1<br>(1 - 2)         |
| Adverse effects of medical treatment            | 15<br>(5 - 25)       | 0<br>(0 - 1)       | 0<br>(0 - 0)        | 1<br>(0 - 1)         | 2<br>(1 - 4)         | 11<br>(3 - 20)       |
| Animal contact                                  | 2<br>(1 - 4)         | 0<br>(0 - 0)       | 0<br>(0 - 0)        | 0<br>(0 - 1)         | 0<br>(0 - 1)         | 1<br>(0 - 2)         |
| Venomous animal contact                         | 0<br>(0 - 1)         | 0<br>(0 - 0)       | 0<br>(0 - 0)        | 0<br>(0 - 0)         | 0<br>(0 - 0)         | 0<br>(0 - 0)         |
| Non-venomous animal contact                     | 1<br>(1 - 3)         | 0<br>(0 - 0)       | 0<br>(0 - 0)        | 0<br>(0 - 0)         | 0<br>(0 - 1)         | 1<br>(0 - 2)         |
| Foreign body                                    | 30<br>(15 - 45)      | 1<br>(0 - 1)       | 0<br>(0 - 0)        | 2<br>(1 - 3)         | 6<br>(3 - 8)         | 21<br>(10 - 34)      |
| Pulmonary aspiration and foreign body in airway | 30<br>(15 - 44)      | 1<br>(0 - 1)       | 0<br>(0 - 0)        | 2<br>(1 - 3)         | 6<br>(3 - 8)         | 21<br>(9 - 34)       |
| Foreign body in other body part                 | 1<br>(0 - 1)         | 0<br>(0 - 0)       | 0<br>(0 - 0)        | 0<br>(0 - 0)         | 0<br>(0 - 0)         | 0<br>(0 - 1)         |
| Other unintentional injuries                    | 3<br>(2 - 7)         | 0<br>(0 - 0)       | 0<br>(0 - 0)        | 1<br>(0 - 1)         | 1<br>(0 - 1)         | 2<br>(1 - 4)         |
| Self-harm and interpersonal violence            | 178<br>(156 - 219)   | 1<br>(0 - 1)       | 1<br>(1 - 2)        | 92<br>(80 - 107)     | 60<br>(50 - 82)      | 25<br>(20 - 33)      |
| Self-harm                                       | 161<br>(140 - 202)   | --                 | 1<br>(0 - 1)        | 82<br>(70 - 98)      | 57<br>(47 - 79)      | 22<br>(17 - 31)      |
| Interpersonal violence                          | 17<br>(11 - 21)      | 1<br>(0 - 1)       | 1<br>(0 - 1)        | 10<br>(6 - 13)       | 3<br>(2 - 4)         | 3<br>(2 - 4)         |
| Assault by firearm                              | 4<br>(2 - 7)         | 0<br>(0 - 0)       | 0<br>(0 - 0)        | 3<br>(2 - 5)         | 1<br>(0 - 1)         | 0<br>(0 - 1)         |
| Assault by sharp object                         | 5<br>(3 - 7)         | 0<br>(0 - 0)       | 0<br>(0 - 0)        | 3<br>(2 - 4)         | 1<br>(1 - 2)         | 1<br>(0 - 1)         |
| Assault by other means                          | 7<br>(5 - 10)        | 0<br>(0 - 0)       | 0<br>(0 - 1)        | 4<br>(2 - 5)         | 2<br>(1 - 2)         | 2<br>(1 - 2)         |

Web Table 31- Oman deaths with 95% UI by age, sex, and cause in 2013

| Cause                                                             | Both Sexes, All Ages       | Both Sexes, 0-4 Years | Both Sexes, 5-14 Years | Both Sexes, 15-49 Years  | Both Sexes, 50-69 Years  | Both Sexes, 70-80 Years  |
|-------------------------------------------------------------------|----------------------------|-----------------------|------------------------|--------------------------|--------------------------|--------------------------|
| All causes                                                        | 10,541<br>(8,584 - 12,310) | 619<br>(534 - 722)    | 96<br>(81 - 113)       | 2,872<br>(2,197 - 3,760) | 2,449<br>(1,872 - 2,997) | 4,505<br>(3,809 - 4,893) |
| Communicable, maternal, neonatal, and nutritional diseases        | 1,276<br>(1,089 - 1,454)   | 295<br>(242 - 356)    | 21<br>(13 - 33)        | 249<br>(198 - 317)       | 193<br>(147 - 236)       | 519<br>(418 - 616)       |
| HIV/AIDS and tuberculosis                                         | 70<br>(56 - 87)            | 1<br>(1 - 1)          | 0<br>(0 - 0)           | 46<br>(35 - 59)          | 13<br>(9 - 16)           | 11<br>(8 - 13)           |
| Tuberculosis                                                      | 32<br>(25 - 40)            | 1<br>(0 - 1)          | 0<br>(0 - 0)           | 12<br>(9 - 16)           | 10<br>(7 - 13)           | 10<br>(8 - 13)           |
| HIV/AIDS                                                          | 38<br>(28 - 53)            | 0<br>(0 - 1)          | 0<br>(0 - 0)           | 34<br>(25 - 47)          | 3<br>(2 - 5)             | 0<br>(0 - 1)             |
| HIV/AIDS resulting in mycobacterial infection                     | 2<br>(1 - 3)               | 0<br>(0 - 0)          | 0<br>(0 - 0)           | 2<br>(1 - 3)             | 0<br>(0 - 0)             | 0<br>(0 - 0)             |
| HIV/AIDS resulting in other diseases                              | 36<br>(26 - 50)            | 0<br>(0 - 1)          | 0<br>(0 - 0)           | 32<br>(24 - 44)          | 3<br>(1 - 5)             | 0<br>(0 - 1)             |
| Diarrhea, lower respiratory, and other common infectious diseases | 775<br>(614 - 925)         | 59<br>(43 - 82)       | 18<br>(10 - 30)        | 141<br>(100 - 199)       | 135<br>(98 - 170)        | 422<br>(332 - 516)       |
| Diarrheal diseases                                                | 32<br>(24 - 41)            | 2<br>(1 - 4)          | 0<br>(0 - 0)           | 8<br>(5 - 12)            | 5<br>(3 - 7)             | 16<br>(11 - 24)          |
| Intestinal infectious diseases                                    | 68<br>(28 - 144)           | 18<br>(7 - 35)        | 12<br>(4 - 24)         | 34<br>(12 - 78)          | 3<br>(1 - 7)             | 1<br>(0 - 4)             |
| Typhoid fever                                                     | 46<br>(15 - 104)           | 11<br>(4 - 24)        | 9<br>(3 - 18)          | 24<br>(7 - 59)           | 2<br>(1 - 4)             | 1<br>(0 - 2)             |
| Paratyphoid fever                                                 | 13<br>(4 - 30)             | 4<br>(1 - 8)          | 2<br>(1 - 5)           | 6<br>(2 - 15)            | 0<br>(0 - 1)             | 0<br>(0 - 0)             |
| Other intestinal infectious diseases                              | 8<br>(3 - 16)              | 3<br>(1 - 8)          | 0<br>(0 - 3)           | 3<br>(1 - 9)             | 1<br>(0 - 3)             | 0<br>(0 - 3)             |
| Lower respiratory infections                                      | 635<br>(496 - 764)         | 30<br>(21 - 42)       | 5<br>(3 - 7)           | 90<br>(65 - 119)         | 120<br>(86 - 153)        | 390<br>(301 - 483)       |
| Upper respiratory infections                                      | 0<br>(0 - 1)               | 0<br>(0 - 0)          | 0<br>(0 - 0)           | 0<br>(0 - 0)             | 0<br>(0 - 0)             | 0<br>(0 - 0)             |
| Otitis media                                                      | 2<br>(1 - 2)               | 0<br>(0 - 0)          | 0<br>(0 - 0)           | 0<br>(0 - 1)             | 0<br>(0 - 0)             | 1<br>(1 - 1)             |
| Meningitis                                                        | 24<br>(18 - 30)            | 3<br>(2 - 5)          | 0<br>(0 - 1)           | 4<br>(3 - 5)             | 5<br>(3 - 8)             | 11<br>(7 - 16)           |
| Pneumococcal meningitis                                           | 6<br>(4 - 8)               | 1<br>(0 - 1)          | 0<br>(0 - 0)           | 1<br>(1 - 2)             | 1<br>(1 - 2)             | 2<br>(1 - 4)             |
| H influenzae type B meningitis                                    | 3<br>(2 - 5)               | 1<br>(1 - 2)          | 0<br>(0 - 0)           | 0<br>(0 - 1)             | 1<br>(0 - 1)             | 1<br>(1 - 2)             |
| Meningococcal meningitis                                          | 6<br>(5 - 9)               | 1<br>(1 - 2)          | 0<br>(0 - 0)           | 1<br>(1 - 1)             | 1<br>(1 - 2)             | 3<br>(2 - 5)             |
| Other meningitis                                                  | 8<br>(6 - 11)              | 0<br>(0 - 1)          | 0<br>(0 - 0)           | 1<br>(1 - 2)             | 2<br>(1 - 4)             | 4<br>(2 - 6)             |
| Encephalitis                                                      | 10<br>(8 - 14)             | 2<br>(1 - 3)          | 1<br>(0 - 1)           | 4<br>(3 - 5)             | 2<br>(1 - 3)             | 2<br>(2 - 3)             |
| Diphtheria                                                        | 0<br>(0 - 0)               | 0<br>(0 - 0)          | 0<br>(0 - 0)           | 0<br>(0 - 0)             | 0<br>(0 - 0)             | --                       |
| Whooping cough                                                    | 1<br>(0 - 6)               | 1<br>(0 - 5)          | 0<br>(0 - 0)           | 0<br>(0 - 0)             | 0<br>(0 - 0)             | --                       |
| Tetanus                                                           | 1<br>(0 - 1)               | 0<br>(0 - 0)          | 0<br>(0 - 0)           | 0<br>(0 - 1)             | 0<br>(0 - 0)             | 0<br>(0 - 0)             |
| Measles                                                           | 2<br>(0 - 11)              | 2<br>(0 - 10)         | 0<br>(0 - 1)           | 0<br>(0 - 0)             | 0<br>(0 - 0)             | --                       |
| Varicella and herpes zoster                                       | 1<br>(1 - 2)               | 0<br>(0 - 1)          | 0<br>(0 - 0)           | 0<br>(0 - 1)             | 0<br>(0 - 0)             | 0<br>(0 - 1)             |
| Neglected tropical diseases and malaria                           | 6<br>(5 - 10)              | 0<br>(0 - 2)          | 0<br>(0 - 1)           | 3<br>(2 - 5)             | 1<br>(1 - 2)             | 1<br>(1 - 2)             |
| Malaria                                                           | 0<br>(0 - 1)               | 0<br>(0 - 0)          | 0<br>(0 - 0)           | 0<br>(0 - 0)             | 0<br>(0 - 0)             | 0<br>(0 - 0)             |
| Leishmaniasis                                                     | 0<br>(0 - 0)               | 0<br>(0 - 0)          | 0<br>(0 - 0)           | 0<br>(0 - 0)             | 0<br>(0 - 0)             | 0<br>(0 - 0)             |
| Visceral leishmaniasis                                            | 0<br>(0 - 0)               | 0<br>(0 - 0)          | 0<br>(0 - 0)           | 0<br>(0 - 0)             | 0<br>(0 - 0)             | 0<br>(0 - 0)             |
| Schistosomiasis                                                   | 3<br>(2 - 5)               | 0<br>(0 - 0)          | 0<br>(0 - 0)           | 1<br>(1 - 2)             | 1<br>(1 - 2)             | 1<br>(1 - 1)             |
| Cysticercosis                                                     | 0<br>(0 - 0)               | 0<br>(0 - 0)          | 0<br>(0 - 0)           | 0<br>(0 - 0)             | 0<br>(0 - 0)             | 0<br>(0 - 0)             |
| Cystic echinococcosis                                             | 0<br>(0 - 0)               | 0<br>(0 - 0)          | 0<br>(0 - 0)           | 0<br>(0 - 0)             | 0<br>(0 - 0)             | 0<br>(0 - 0)             |
| Dengue                                                            | 1<br>(0 - 1)               | 0<br>(0 - 0)          | 0<br>(0 - 0)           | 0<br>(0 - 0)             | 0<br>(0 - 0)             | 0<br>(0 - 0)             |
| Rabies                                                            | 0<br>(0 - 1)               | 0<br>(0 - 0)          | 0<br>(0 - 0)           | 0<br>(0 - 0)             | 0<br>(0 - 0)             | 0<br>(0 - 0)             |
| Intestinal nematode infections                                    | 0<br>(0 - 3)               | 0<br>(0 - 1)          | 0<br>(0 - 0)           | 0<br>(0 - 1)             | 0<br>(0 - 0)             | 0<br>(0 - 0)             |
| Ascariasis                                                        | 0<br>(0 - 3)               | 0<br>(0 - 1)          | 0<br>(0 - 0)           | 0<br>(0 - 1)             | 0<br>(0 - 0)             | 0<br>(0 - 0)             |
| Other neglected tropical diseases                                 | 1<br>(1 - 1)               | 0<br>(0 - 0)          | 0<br>(0 - 0)           | 1<br>(0 - 1)             | 0<br>(0 - 0)             | 0<br>(0 - 0)             |
| Maternal disorders                                                | 9<br>(6 - 15)              | --                    | 0<br>(0 - 0)           | 9<br>(6 - 15)            | --                       | --                       |

Web Table 31- Oman deaths with 95% UI by age, sex, and cause in 2013

| Cause                                                            | Both Sexes, All Ages     | Both Sexes, 0-4 Years | Both Sexes, 5-14 Years | Both Sexes, 15-49 Years | Both Sexes, 50-69 Years  | Both Sexes, 70-80 Years  |
|------------------------------------------------------------------|--------------------------|-----------------------|------------------------|-------------------------|--------------------------|--------------------------|
| Maternal hemorrhage                                              | 2<br>(1 - 3)             | --                    | 0<br>(0 - 0)           | 2<br>(1 - 3)            | --                       | --                       |
| Maternal sepsis and other maternal infections                    | 1<br>(0 - 1)             | --                    | 0<br>(0 - 0)           | 1<br>(0 - 1)            | --                       | --                       |
| Maternal hypertensive disorders                                  | 1<br>(1 - 2)             | --                    | 0<br>(0 - 0)           | 1<br>(1 - 2)            | --                       | --                       |
| Maternal obstructed labor                                        | 1<br>(1 - 2)             | --                    | 0<br>(0 - 0)           | 1<br>(1 - 2)            | --                       | --                       |
| Maternal abortive outcome                                        | 1<br>(1 - 2)             | --                    | 0<br>(0 - 0)           | 1<br>(1 - 2)            | --                       | --                       |
| Indirect maternal deaths                                         | 1<br>(0 - 2)             | --                    | 0<br>(0 - 0)           | 1<br>(0 - 2)            | --                       | --                       |
| Late maternal deaths                                             | 1<br>(0 - 2)             | --                    | 0<br>(0 - 0)           | 1<br>(0 - 2)            | --                       | --                       |
| Maternal deaths aggravated by HIV/AIDS                           | 0<br>(0 - 0)             | --                    | --                     | 0<br>(0 - 0)            | --                       | --                       |
| Other maternal disorders                                         | 1<br>(1 - 2)             | --                    | 0<br>(0 - 0)           | 1<br>(1 - 2)            | --                       | --                       |
| Neonatal disorders                                               | 227<br>(183 - 283)       | 227<br>(183 - 283)    | --                     | --                      | --                       | --                       |
| Neonatal preterm birth complications                             | 107<br>(72 - 146)        | 107<br>(72 - 146)     | --                     | --                      | --                       | --                       |
| Neonatal encephalopathy due to birth asphyxia and trauma         | 1<br>(0 - 1)             | 1<br>(0 - 1)          | --                     | --                      | --                       | --                       |
| Neonatal sepsis and other neonatal infections                    | 6<br>(3 - 11)            | 6<br>(3 - 11)         | --                     | --                      | --                       | --                       |
| Hemolytic disease and other neonatal jaundice                    | 0<br>(0 - 0)             | 0<br>(0 - 0)          | --                     | --                      | --                       | --                       |
| Other neonatal disorders                                         | 113<br>(80 - 152)        | 113<br>(80 - 152)     | --                     | --                      | --                       | --                       |
| Nutritional deficiencies                                         | 79<br>(60 - 107)         | 4<br>(2 - 5)          | 1<br>(1 - 2)           | 20<br>(14 - 28)         | 14<br>(10 - 22)          | 41<br>(29 - 56)          |
| Protein-energy malnutrition                                      | 8<br>(4 - 16)            | 1<br>(1 - 3)          | 0<br>(0 - 1)           | 1<br>(1 - 3)            | 1<br>(0 - 1)             | 4<br>(2 - 10)            |
| Iodine deficiency                                                | 0<br>(0 - 1)             | 0<br>(0 - 0)          | 0<br>(0 - 0)           | 0<br>(0 - 0)            | 0<br>(0 - 0)             | 0<br>(0 - 0)             |
| Iron-deficiency anemia                                           | 69<br>(52 - 92)          | 2<br>(1 - 3)          | 1<br>(1 - 1)           | 16<br>(12 - 24)         | 13<br>(9 - 20)           | 36<br>(25 - 48)          |
| Other nutritional deficiencies                                   | 3<br>(1 - 4)             | 0<br>(0 - 1)          | 0<br>(0 - 0)           | 2<br>(1 - 3)            | 0<br>(0 - 1)             | 0<br>(0 - 1)             |
| Other communicable, maternal, neonatal, and nutritional diseases | 108<br>(78 - 150)        | 4<br>(2 - 7)          | 1<br>(1 - 1)           | 30<br>(21 - 43)         | 29<br>(20 - 43)          | 44<br>(23 - 77)          |
| Sexually transmitted diseases excluding HIV                      | 3<br>(2 - 5)             | 1<br>(0 - 2)          | 0<br>(0 - 0)           | 1<br>(0 - 1)            | 0<br>(0 - 1)             | 1<br>(1 - 3)             |
| Syphilis                                                         | 3<br>(1 - 4)             | 1<br>(0 - 2)          | 0<br>(0 - 0)           | 0<br>(0 - 1)            | 0<br>(0 - 1)             | 1<br>(0 - 2)             |
| Chlamydial infection                                             | 0<br>(0 - 0)             | --                    | 0<br>(0 - 0)           | 0<br>(0 - 0)            | 0<br>(0 - 0)             | 0<br>(0 - 0)             |
| Gonococcal infection                                             | 0<br>(0 - 1)             | --                    | 0<br>(0 - 0)           | 0<br>(0 - 0)            | 0<br>(0 - 0)             | 0<br>(0 - 0)             |
| Other sexually transmitted diseases                              | 0<br>(0 - 0)             | --                    | 0<br>(0 - 0)           | 0<br>(0 - 0)            | 0<br>(0 - 0)             | 0<br>(0 - 0)             |
| Hepatitis                                                        | 26<br>(20 - 34)          | 1<br>(0 - 1)          | 0<br>(0 - 0)           | 9<br>(6 - 13)           | 12<br>(8 - 17)           | 4<br>(3 - 5)             |
| Acute hepatitis A                                                | 2<br>(1 - 4)             | 0<br>(0 - 1)          | 0<br>(0 - 0)           | 1<br>(0 - 2)            | 0<br>(0 - 1)             | 0<br>(0 - 0)             |
| Acute hepatitis B                                                | 16<br>(11 - 22)          | 0<br>(0 - 1)          | 0<br>(0 - 0)           | 4<br>(2 - 6)            | 8<br>(5 - 12)            | 3<br>(2 - 5)             |
| Acute hepatitis C                                                | 2<br>(0 - 5)             | --                    | 0<br>(0 - 0)           | 1<br>(0 - 2)            | 1<br>(0 - 2)             | 0<br>(0 - 1)             |
| Acute hepatitis E                                                | 7<br>(4 - 11)            | 0<br>(0 - 0)          | 0<br>(0 - 0)           | 4<br>(2 - 6)            | 2<br>(1 - 4)             | 0<br>(0 - 1)             |
| Other infectious diseases                                        | 79<br>(51 - 119)         | 3<br>(1 - 5)          | 1<br>(0 - 1)           | 21<br>(13 - 30)         | 17<br>(9 - 29)           | 38<br>(19 - 71)          |
| Non-communicable diseases                                        | 6,959<br>(5,685 - 7,995) | 241<br>(200 - 294)    | 30<br>(24 - 38)        | 989<br>(748 - 1,304)    | 1,984<br>(1,515 - 2,435) | 3,716<br>(3,143 - 4,046) |
| Neoplasms                                                        | 834<br>(661 - 999)       | 8<br>(5 - 10)         | 9<br>(7 - 12)          | 223<br>(170 - 292)      | 314<br>(238 - 389)       | 279<br>(230 - 313)       |
| Esophageal cancer                                                | 28<br>(21 - 37)          | --                    | --                     | 4<br>(3 - 7)            | 12<br>(8 - 17)           | 12<br>(9 - 15)           |
| Stomach cancer                                                   | 96<br>(75 - 117)         | --                    | --                     | 17<br>(13 - 24)         | 38<br>(28 - 49)          | 40<br>(32 - 48)          |
| Liver cancer                                                     | 71<br>(53 - 88)          | --                    | 0<br>(0 - 0)           | 12<br>(8 - 17)          | 37<br>(26 - 48)          | 22<br>(16 - 28)          |
| Liver cancer due to hepatitis B                                  | 22<br>(9 - 38)           | --                    | 0<br>(0 - 0)           | 5<br>(3 - 9)            | 11<br>(3 - 22)           | 5<br>(2 - 9)             |
| Liver cancer due to hepatitis C                                  | 34<br>(18 - 49)          | --                    | 0<br>(0 - 0)           | 4<br>(2 - 7)            | 18<br>(8 - 28)           | 12<br>(7 - 18)           |
| Liver cancer due to alcohol use                                  | 8<br>(4 - 13)            | --                    | --                     | 1<br>(0 - 1)            | 4<br>(2 - 7)             | 3<br>(2 - 6)             |

Web Table 31- Oman deaths with 95% UI by age, sex, and cause in 2013

| Cause                                         | Both Sexes, All Ages     | Both Sexes, 0-4 Years | Both Sexes, 5-14 Years | Both Sexes, 15-49 Years | Both Sexes, 50-69 Years | Both Sexes, 70-80 Years  |
|-----------------------------------------------|--------------------------|-----------------------|------------------------|-------------------------|-------------------------|--------------------------|
| Liver cancer due to other causes              | 7<br>(3 - 12)            | --                    | 0<br>(0 - 0)           | 2<br>(1 - 3)            | 4<br>(2 - 6)            | 2<br>(1 - 3)             |
| Larynx cancer                                 | 6<br>(4 - 9)             | --                    | --                     | 1<br>(1 - 2)            | 3<br>(2 - 4)            | 2<br>(1 - 3)             |
| Tracheal, bronchus and lung cancer            | 85<br>(65 - 102)         | --                    | --                     | 11<br>(8 - 15)          | 41<br>(30 - 51)         | 33<br>(25 - 39)          |
| Breast cancer                                 | 65<br>(45 - 91)          | --                    | --                     | 30<br>(20 - 46)         | 24<br>(15 - 33)         | 12<br>(8 - 15)           |
| Cervical cancer                               | 15<br>(10 - 21)          | --                    | --                     | 5<br>(3 - 8)            | 6<br>(3 - 9)            | 4<br>(3 - 6)             |
| Uterine cancer                                | 3<br>(2 - 4)             | --                    | --                     | 1<br>(0 - 1)            | 1<br>(1 - 2)            | 1<br>(1 - 1)             |
| Prostate cancer                               | 33<br>(20 - 46)          | --                    | --                     | 1<br>(0 - 1)            | 9<br>(5 - 13)           | 23<br>(14 - 34)          |
| Colon and rectum cancer                       | 60<br>(47 - 74)          | --                    | --                     | 19<br>(14 - 26)         | 23<br>(17 - 29)         | 18<br>(14 - 21)          |
| Lip and oral cavity cancer                    | 13<br>(10 - 17)          | --                    | --                     | 4<br>(3 - 6)            | 6<br>(4 - 8)            | 3<br>(2 - 4)             |
| Nasopharynx cancer                            | 2<br>(2 - 3)             | --                    | 0<br>(0 - 0)           | 2<br>(1 - 2)            | 1<br>(0 - 1)            | 0<br>(0 - 0)             |
| Other pharynx cancer                          | 3<br>(2 - 4)             | --                    | --                     | 1<br>(1 - 2)            | 1<br>(1 - 2)            | 1<br>(1 - 1)             |
| Gallbladder and biliary tract cancer          | 11<br>(8 - 15)           | --                    | --                     | 2<br>(2 - 4)            | 5<br>(3 - 6)            | 4<br>(3 - 6)             |
| Pancreatic cancer                             | 32<br>(25 - 39)          | --                    | --                     | 5<br>(4 - 7)            | 15<br>(11 - 20)         | 11<br>(9 - 14)           |
| Malignant skin melanoma                       | 4<br>(2 - 6)             | --                    | --                     | 2<br>(1 - 3)            | 1<br>(1 - 2)            | 1<br>(0 - 1)             |
| Non-melanoma skin cancer                      | 1<br>(1 - 1)             | --                    | --                     | 1<br>(0 - 1)            | 0<br>(0 - 0)            | 0<br>(0 - 0)             |
| Ovarian cancer                                | 16<br>(11 - 22)          | --                    | --                     | 4<br>(3 - 7)            | 6<br>(4 - 9)            | 6<br>(4 - 8)             |
| Testicular cancer                             | 1<br>(1 - 2)             | --                    | --                     | 1<br>(1 - 2)            | 0<br>(0 - 0)            | 0<br>(0 - 0)             |
| Kidney cancer                                 | 9<br>(7 - 11)            | 0<br>(0 - 0)          | 0<br>(0 - 0)           | 3<br>(2 - 4)            | 3<br>(2 - 4)            | 2<br>(2 - 3)             |
| Bladder cancer                                | 26<br>(19 - 32)          | --                    | --                     | 2<br>(2 - 3)            | 10<br>(7 - 13)          | 14<br>(10 - 17)          |
| Brain and nervous system cancer               | 32<br>(23 - 45)          | 1<br>(0 - 2)          | 2<br>(1 - 3)           | 14<br>(10 - 20)         | 10<br>(7 - 15)          | 5<br>(3 - 7)             |
| Thyroid cancer                                | 4<br>(3 - 5)             | --                    | 0<br>(0 - 0)           | 1<br>(1 - 2)            | 1<br>(1 - 2)            | 1<br>(1 - 1)             |
| Mesothelioma                                  | 1<br>(1 - 1)             | --                    | --                     | 0<br>(0 - 1)            | 0<br>(0 - 1)            | 0<br>(0 - 0)             |
| Hodgkin lymphoma                              | 4<br>(3 - 6)             | 0<br>(0 - 0)          | 0<br>(0 - 0)           | 3<br>(2 - 4)            | 1<br>(0 - 1)            | 0<br>(0 - 1)             |
| Non-Hodgkin lymphoma                          | 57<br>(43 - 76)          | 1<br>(0 - 1)          | 1<br>(0 - 1)           | 21<br>(15 - 30)         | 19<br>(14 - 26)         | 16<br>(12 - 21)          |
| Multiple myeloma                              | 18<br>(13 - 24)          | --                    | --                     | 3<br>(2 - 4)            | 9<br>(6 - 13)           | 6<br>(4 - 8)             |
| Leukemia                                      | 53<br>(42 - 66)          | 2<br>(1 - 3)          | 4<br>(3 - 5)           | 28<br>(21 - 37)         | 9<br>(7 - 12)           | 10<br>(8 - 13)           |
| Other neoplasms                               | 84<br>(65 - 105)         | 4<br>(2 - 5)          | 2<br>(1 - 3)           | 25<br>(18 - 35)         | 23<br>(16 - 30)         | 31<br>(23 - 39)          |
| Cardiovascular diseases                       | 3,670<br>(2,984 - 4,253) | 29<br>(22 - 39)       | 8<br>(6 - 10)          | 458<br>(340 - 622)      | 1,025<br>(780 - 1,267)  | 2,150<br>(1,817 - 2,385) |
| Rheumatic heart disease                       | 31<br>(18 - 41)          | 0<br>(0 - 1)          | 0<br>(0 - 0)           | 8<br>(5 - 11)           | 7<br>(4 - 10)           | 16<br>(8 - 22)           |
| Ischemic heart disease                        | 1,970<br>(1,552 - 2,363) | 4<br>(2 - 8)          | 2<br>(1 - 2)           | 227<br>(163 - 317)      | 603<br>(451 - 757)      | 1,133<br>(932 - 1,356)   |
| Cerebrovascular disease                       | 943<br>(757 - 1,131)     | 7<br>(4 - 10)         | 3<br>(2 - 4)           | 96<br>(69 - 132)        | 224<br>(164 - 286)      | 614<br>(497 - 720)       |
| Ischemic stroke                               | 383<br>(264 - 486)       | 0<br>(0 - 0)          | 0<br>(0 - 0)           | 16<br>(10 - 23)         | 66<br>(42 - 92)         | 301<br>(207 - 379)       |
| Hemorrhagic stroke                            | 560<br>(438 - 702)       | 6<br>(4 - 9)          | 3<br>(2 - 4)           | 81<br>(58 - 110)        | 157<br>(116 - 204)      | 314<br>(246 - 403)       |
| Hypertensive heart disease                    | 109<br>(74 - 139)        | 0<br>(0 - 0)          | 0<br>(0 - 0)           | 9<br>(6 - 14)           | 24<br>(15 - 34)         | 76<br>(51 - 100)         |
| Cardiomyopathy and myocarditis                | 19<br>(14 - 24)          | 2<br>(1 - 3)          | 0<br>(0 - 1)           | 4<br>(3 - 6)            | 6<br>(4 - 9)            | 6<br>(4 - 9)             |
| Atrial fibrillation and flutter               | 10<br>(7 - 13)           | --                    | --                     | 0<br>(0 - 1)            | 2<br>(1 - 3)            | 8<br>(5 - 10)            |
| Aortic aneurysm                               | 49<br>(36 - 63)          | --                    | --                     | 9<br>(6 - 13)           | 17<br>(11 - 24)         | 23<br>(17 - 31)          |
| Peripheral vascular disease                   | 1<br>(1 - 1)             | --                    | --                     | 0<br>(0 - 0)            | 0<br>(0 - 0)            | 1<br>(0 - 1)             |
| Endocarditis                                  | 49<br>(35 - 66)          | 2<br>(1 - 3)          | 0<br>(0 - 0)           | 8<br>(5 - 12)           | 10<br>(7 - 15)          | 29<br>(20 - 39)          |
| Other cardiovascular and circulatory diseases | 489<br>(378 - 601)       | 15<br>(10 - 20)       | 3<br>(2 - 4)           | 96<br>(69 - 133)        | 131<br>(94 - 172)       | 245<br>(186 - 309)       |

Web Table 31- Oman deaths with 95% UI by age, sex, and cause in 2013

| Cause                                               | Both Sexes, All Ages | Both Sexes, 0-4 Years | Both Sexes, 5-14 Years | Both Sexes, 15-49 Years | Both Sexes, 50-69 Years | Both Sexes, 70-80 Years |
|-----------------------------------------------------|----------------------|-----------------------|------------------------|-------------------------|-------------------------|-------------------------|
| Chronic respiratory diseases                        | 265<br>(209 - 309)   | 3<br>(2 - 5)          | 1<br>(1 - 1)           | 27<br>(20 - 36)         | 60<br>(43 - 75)         | 174<br>(138 - 203)      |
| Chronic obstructive pulmonary disease               | 248<br>(196 - 289)   | 3<br>(2 - 4)          | 1<br>(0 - 1)           | 20<br>(15 - 27)         | 57<br>(42 - 72)         | 168<br>(133 - 196)      |
| Pneumoconiosis                                      | 2<br>(2 - 3)         | 0<br>(0 - 0)          | 0<br>(0 - 0)           | 1<br>(0 - 1)            | 0<br>(0 - 1)            | 1<br>(1 - 1)            |
| Silicosis                                           | 1<br>(0 - 1)         | 0<br>(0 - 0)          | 0<br>(0 - 0)           | 0<br>(0 - 0)            | 0<br>(0 - 0)            | 0<br>(0 - 0)            |
| Asbestosis                                          | 0<br>(0 - 0)         | 0<br>(0 - 0)          | 0<br>(0 - 0)           | 0<br>(0 - 0)            | 0<br>(0 - 0)            | 0<br>(0 - 0)            |
| Coal workers pneumoconiosis                         | 0<br>(0 - 1)         | 0<br>(0 - 0)          | 0<br>(0 - 0)           | 0<br>(0 - 0)            | 0<br>(0 - 0)            | 0<br>(0 - 0)            |
| Other pneumoconiosis                                | 1<br>(1 - 1)         | 0<br>(0 - 0)          | 0<br>(0 - 0)           | 0<br>(0 - 0)            | 0<br>(0 - 0)            | 0<br>(0 - 1)            |
| Asthma                                              | 1<br>(1 - 2)         | 0<br>(0 - 0)          | 0<br>(0 - 0)           | 1<br>(0 - 1)            | 0<br>(0 - 0)            | 0<br>(0 - 0)            |
| Interstitial lung disease and pulmonary sarcoidosis | 4<br>(2 - 6)         | 0<br>(0 - 0)          | 0<br>(0 - 0)           | 1<br>(1 - 2)            | 1<br>(0 - 1)            | 2<br>(1 - 4)            |
| Other chronic respiratory diseases                  | 9<br>(6 - 12)        | 0<br>(0 - 1)          | 0<br>(0 - 0)           | 4<br>(3 - 5)            | 1<br>(1 - 2)            | 3<br>(2 - 4)            |
| Cirrhosis                                           | 189<br>(146 - 232)   | 2<br>(1 - 3)          | 1<br>(1 - 1)           | 47<br>(34 - 65)         | 80<br>(59 - 103)        | 59<br>(47 - 71)         |
| Cirrhosis due to hepatitis B                        | 67<br>(46 - 99)      | 0<br>(0 - 0)          | 0<br>(0 - 0)           | 15<br>(9 - 24)          | 28<br>(17 - 43)         | 24<br>(17 - 34)         |
| Cirrhosis due to hepatitis C                        | 83<br>(51 - 114)     | 0<br>(0 - 0)          | 0<br>(0 - 0)           | 23<br>(13 - 34)         | 37<br>(21 - 55)         | 23<br>(15 - 31)         |
| Cirrhosis due to alcohol use                        | 20<br>(12 - 33)      | --                    | --                     | 3<br>(1 - 5)            | 8<br>(4 - 15)           | 9<br>(5 - 15)           |
| Cirrhosis due to other causes                       | 18<br>(11 - 29)      | 2<br>(1 - 3)          | 0<br>(0 - 1)           | 7<br>(4 - 12)           | 6<br>(3 - 11)           | 3<br>(2 - 5)            |
| Digestive diseases                                  | 83<br>(58 - 101)     | 1<br>(0 - 1)          | 0<br>(0 - 0)           | 13<br>(9 - 18)          | 19<br>(13 - 25)         | 50<br>(34 - 61)         |
| Peptic ulcer disease                                | 38<br>(28 - 48)      | 0<br>(0 - 0)          | 0<br>(0 - 0)           | 5<br>(3 - 7)            | 10<br>(7 - 14)          | 23<br>(16 - 30)         |
| Gastritis and duodenitis                            | 1<br>(0 - 1)         | 0<br>(0 - 0)          | 0<br>(0 - 0)           | 0<br>(0 - 1)            | 0<br>(0 - 0)            | 0<br>(0 - 0)            |
| Appendicitis                                        | 11<br>(7 - 16)       | 0<br>(0 - 0)          | 0<br>(0 - 0)           | 2<br>(1 - 2)            | 2<br>(1 - 4)            | 7<br>(4 - 11)           |
| Paralytic ileus and intestinal obstruction          | 3<br>(1 - 5)         | 0<br>(0 - 0)          | 0<br>(0 - 0)           | 1<br>(1 - 2)            | 1<br>(0 - 2)            | 1<br>(0 - 2)            |
| Inguinal, femoral, and abdominal hernia             | 1<br>(0 - 1)         | 0<br>(0 - 0)          | 0<br>(0 - 0)           | 0<br>(0 - 1)            | 0<br>(0 - 0)            | 0<br>(0 - 0)            |
| Inflammatory bowel disease                          | 1<br>(1 - 2)         | 0<br>(0 - 0)          | 0<br>(0 - 0)           | 1<br>(0 - 1)            | 0<br>(0 - 0)            | 0<br>(0 - 0)            |
| Vascular intestinal disorders                       | 1<br>(0 - 1)         | 0<br>(0 - 0)          | 0<br>(0 - 0)           | 0<br>(0 - 1)            | 0<br>(0 - 0)            | 0<br>(0 - 0)            |
| Gallbladder and biliary diseases                    | 19<br>(11 - 25)      | 0<br>(0 - 0)          | 0<br>(0 - 0)           | 2<br>(2 - 4)            | 3<br>(1 - 4)            | 13<br>(8 - 19)          |
| Pancreatitis                                        | 1<br>(1 - 2)         | 0<br>(0 - 0)          | 0<br>(0 - 0)           | 1<br>(0 - 1)            | 0<br>(0 - 0)            | 0<br>(0 - 0)            |
| Other digestive diseases                            | 6<br>(4 - 9)         | 0<br>(0 - 0)          | 0<br>(0 - 0)           | 1<br>(1 - 1)            | 1<br>(1 - 2)            | 4<br>(2 - 6)            |
| Neurological disorders                              | 323<br>(259 - 386)   | 0<br>(0 - 0)          | 0<br>(0 - 0)           | 3<br>(2 - 5)            | 29<br>(21 - 39)         | 290<br>(229 - 345)      |
| Alzheimer disease and other dementias               | 318<br>(253 - 380)   | --                    | --                     | 0<br>(0 - 0)            | 29<br>(21 - 38)         | 289<br>(228 - 344)      |
| Parkinson disease                                   | 1<br>(1 - 1)         | --                    | --                     | 0<br>(0 - 0)            | 0<br>(0 - 0)            | 0<br>(0 - 1)            |
| Epilepsy                                            | 2<br>(1 - 3)         | 0<br>(0 - 0)          | 0<br>(0 - 0)           | 1<br>(1 - 2)            | 0<br>(0 - 0)            | 0<br>(0 - 0)            |
| Multiple sclerosis                                  | 1<br>(1 - 2)         | --                    | --                     | 1<br>(0 - 1)            | 0<br>(0 - 1)            | 0<br>(0 - 0)            |
| Other neurological disorders                        | 2<br>(1 - 2)         | 0<br>(0 - 0)          | 0<br>(0 - 0)           | 1<br>(1 - 1)            | 0<br>(0 - 0)            | 0<br>(0 - 0)            |
| Mental and substance use disorders                  | 29<br>(14 - 39)      | 0<br>(0 - 0)          | 0<br>(0 - 0)           | 25<br>(11 - 34)         | 3<br>(2 - 4)            | 1<br>(1 - 2)            |
| Schizophrenia                                       | 0<br>(0 - 1)         | --                    | --                     | 0<br>(0 - 0)            | 0<br>(0 - 0)            | 0<br>(0 - 0)            |
| Alcohol use disorders                               | 3<br>(2 - 5)         | --                    | --                     | 2<br>(1 - 3)            | 1<br>(0 - 1)            | 1<br>(0 - 2)            |
| Drug use disorders                                  | 24<br>(10 - 33)      | 0<br>(0 - 0)          | --                     | 22<br>(8 - 31)          | 2<br>(1 - 3)            | 0<br>(0 - 0)            |
| Opioid use disorders                                | 14<br>(6 - 19)       | 0<br>(0 - 0)          | --                     | 13<br>(5 - 18)          | 1<br>(1 - 1)            | 0<br>(0 - 0)            |
| Cocaine use disorders                               | 0<br>(0 - 0)         | 0<br>(0 - 0)          | --                     | 0<br>(0 - 0)            | 0<br>(0 - 0)            | 0<br>(0 - 0)            |
| Amphetamine use disorders                           | 0<br>(0 - 0)         | 0<br>(0 - 0)          | --                     | 0<br>(0 - 0)            | 0<br>(0 - 0)            | 0<br>(0 - 0)            |
| Other drug use disorders                            | 10<br>(4 - 14)       | 0<br>(0 - 0)          | --                     | 9<br>(4 - 13)           | 1<br>(1 - 1)            | 0<br>(0 - 0)            |

Web Table 31- Oman deaths with 95% UI by age, sex, and cause in 2013

| Cause                                               | Both Sexes, All Ages     | Both Sexes, 0-4 Years | Both Sexes, 5-14 Years | Both Sexes, 15-49 Years | Both Sexes, 50-69 Years | Both Sexes, 70-80 Years |
|-----------------------------------------------------|--------------------------|-----------------------|------------------------|-------------------------|-------------------------|-------------------------|
| Eating disorders                                    | 1<br>(0 - 1)             | --                    | 0<br>(0 - 0)           | 1<br>(0 - 1)            | --                      | --                      |
| Anorexia nervosa                                    | 1<br>(0 - 1)             | --                    | 0<br>(0 - 0)           | 1<br>(0 - 1)            | --                      | --                      |
| Diabetes, urogenital, blood, and endocrine diseases | 1,281<br>(1,014 - 1,495) | 12<br>(9 - 16)        | 5<br>(3 - 6)           | 159<br>(118 - 212)      | 440<br>(329 - 542)      | 666<br>(552 - 762)      |
| Diabetes mellitus                                   | 855<br>(679 - 1,016)     | 2<br>(1 - 3)          | 1<br>(1 - 1)           | 71<br>(53 - 97)         | 329<br>(244 - 413)      | 451<br>(368 - 527)      |
| Acute glomerulonephritis                            | 5<br>(4 - 8)             | 0<br>(0 - 0)          | 0<br>(0 - 0)           | 1<br>(1 - 2)            | 1<br>(1 - 2)            | 2<br>(1 - 3)            |
| Chronic kidney disease                              | 282<br>(222 - 343)       | 2<br>(1 - 3)          | 1<br>(0 - 1)           | 42<br>(31 - 57)         | 85<br>(60 - 110)        | 152<br>(119 - 189)      |
| Chronic kidney disease due to diabetes mellitus     | 15<br>(9 - 21)           | 0<br>(0 - 0)          | 0<br>(0 - 0)           | 3<br>(2 - 5)            | 4<br>(2 - 6)            | 8<br>(5 - 12)           |
| Chronic kidney disease due to hypertension          | 163<br>(125 - 211)       | 1<br>(0 - 1)          | 0<br>(0 - 0)           | 20<br>(14 - 28)         | 52<br>(37 - 70)         | 91<br>(70 - 118)        |
| Chronic kidney disease due to glomerulonephritis    | 7<br>(4 - 9)             | 0<br>(0 - 0)          | 0<br>(0 - 0)           | 2<br>(1 - 4)            | 1<br>(1 - 2)            | 3<br>(2 - 4)            |
| Chronic kidney disease due to other causes          | 97<br>(65 - 134)         | 1<br>(1 - 2)          | 0<br>(0 - 1)           | 17<br>(10 - 24)         | 29<br>(17 - 42)         | 50<br>(31 - 75)         |
| Urinary diseases and male infertility               | 64<br>(38 - 84)          | 1<br>(1 - 2)          | 0<br>(0 - 0)           | 7<br>(5 - 10)           | 12<br>(8 - 16)          | 44<br>(24 - 60)         |
| Interstitial nephritis and urinary tract infections | 45<br>(24 - 63)          | 1<br>(1 - 2)          | 0<br>(0 - 0)           | 5<br>(3 - 7)            | 7<br>(4 - 11)           | 32<br>(15 - 47)         |
| Urolithiasis                                        | 1<br>(0 - 1)             | --                    | 0<br>(0 - 0)           | 0<br>(0 - 1)            | 0<br>(0 - 0)            | 0<br>(0 - 0)            |
| Other urinary diseases                              | 19<br>(11 - 31)          | 0<br>(0 - 0)          | 0<br>(0 - 0)           | 2<br>(1 - 3)            | 5<br>(3 - 7)            | 12<br>(6 - 22)          |
| Gynecological diseases                              | 0<br>(0 - 1)             | --                    | --                     | 0<br>(0 - 0)            | 0<br>(0 - 0)            | 0<br>(0 - 0)            |
| Uterine fibroids                                    | 0<br>(0 - 0)             | --                    | --                     | 0<br>(0 - 0)            | 0<br>(0 - 0)            | 0<br>(0 - 0)            |
| Polycystic ovarian syndrome                         | 0<br>(0 - 0)             | --                    | --                     | 0<br>(0 - 0)            | 0<br>(0 - 0)            | --                      |
| Endometriosis                                       | 0<br>(0 - 0)             | --                    | --                     | 0<br>(0 - 0)            | 0<br>(0 - 0)            | --                      |
| Genital prolapse                                    | 0<br>(0 - 0)             | --                    | --                     | 0<br>(0 - 0)            | 0<br>(0 - 0)            | 0<br>(0 - 0)            |
| Other gynecological diseases                        | 0<br>(0 - 0)             | --                    | --                     | 0<br>(0 - 0)            | 0<br>(0 - 0)            | 0<br>(0 - 0)            |
| Hemoglobinopathies and hemolytic anemias            | 55<br>(33 - 78)          | 4<br>(2 - 6)          | 2<br>(1 - 3)           | 32<br>(19 - 48)         | 7<br>(4 - 11)           | 10<br>(6 - 16)          |
| Thalassemias                                        | 9<br>(6 - 14)            | 2<br>(1 - 2)          | 1<br>(0 - 1)           | 7<br>(4 - 11)           | 0<br>(0 - 0)            | 0<br>(0 - 0)            |
| Sickle cell disorders                               | 32<br>(19 - 47)          | 2<br>(1 - 3)          | 1<br>(1 - 2)           | 22<br>(13 - 34)         | 6<br>(3 - 10)           | 1<br>(0 - 1)            |
| G6PD deficiency                                     | 2<br>(1 - 3)             | 0<br>(0 - 0)          | 0<br>(0 - 0)           | 1<br>(1 - 2)            | 0<br>(0 - 0)            | 0<br>(0 - 1)            |
| Other hemoglobinopathies and hemolytic anemias      | 12<br>(7 - 18)           | 0<br>(0 - 1)          | 0<br>(0 - 0)           | 1<br>(1 - 2)            | 1<br>(1 - 2)            | 9<br>(5 - 14)           |
| Endocrine, metabolic, blood, and immune disorders   | 20<br>(9 - 26)           | 3<br>(1 - 4)          | 1<br>(0 - 1)           | 5<br>(2 - 7)            | 4<br>(2 - 6)            | 7<br>(3 - 11)           |
| Musculoskeletal disorders                           | 17<br>(13 - 22)          | --                    | 0<br>(0 - 1)           | 7<br>(5 - 9)            | 3<br>(2 - 4)            | 7<br>(5 - 10)           |
| Rheumatoid arthritis                                | 1<br>(0 - 1)             | --                    | 0<br>(0 - 0)           | 0<br>(0 - 1)            | 0<br>(0 - 0)            | 0<br>(0 - 0)            |
| Other musculoskeletal disorders                     | 16<br>(13 - 22)          | --                    | 0<br>(0 - 1)           | 6<br>(5 - 9)            | 3<br>(2 - 4)            | 7<br>(5 - 10)           |
| Other non-communicable diseases                     | 268<br>(226 - 318)       | 185<br>(147 - 233)    | 6<br>(4 - 9)           | 26<br>(20 - 35)         | 12<br>(8 - 15)          | 39<br>(30 - 50)         |
| Congenital anomalies                                | 224<br>(185 - 273)       | 183<br>(145 - 230)    | 6<br>(4 - 8)           | 21<br>(16 - 29)         | 5<br>(4 - 7)            | 9<br>(7 - 12)           |
| Neural tube defects                                 | 38<br>(23 - 60)          | 33<br>(19 - 55)       | 1<br>(0 - 1)           | 2<br>(2 - 4)            | 0<br>(0 - 0)            | 1<br>(1 - 2)            |
| Congenital heart anomalies                          | 81<br>(60 - 105)         | 68<br>(47 - 91)       | 3<br>(2 - 4)           | 7<br>(5 - 9)            | 2<br>(1 - 2)            | 2<br>(2 - 3)            |
| Cleft lip and cleft palate                          | 1<br>(0 - 1)             | 1<br>(0 - 1)          | --                     | --                      | --                      | --                      |
| Down syndrome                                       | 4<br>(2 - 9)             | 3<br>(1 - 7)          | 0<br>(0 - 1)           | 1<br>(0 - 2)            | 0<br>(0 - 0)            | 0<br>(0 - 0)            |
| Chromosomal unbalanced rearrangements               | 0<br>(0 - 1)             | 0<br>(0 - 0)          | 0<br>(0 - 0)           | 0<br>(0 - 0)            | 0<br>(0 - 0)            | 0<br>(0 - 0)            |
| Other congenital anomalies                          | 100<br>(78 - 128)        | 78<br>(57 - 104)      | 2<br>(1 - 3)           | 11<br>(8 - 15)          | 4<br>(2 - 5)            | 6<br>(4 - 8)            |
| Skin and subcutaneous diseases                      | 42<br>(32 - 53)          | 1<br>(0 - 1)          | 0<br>(0 - 0)           | 5<br>(4 - 7)            | 6<br>(4 - 8)            | 30<br>(21 - 40)         |
| Cellulitis                                          | 1<br>(0 - 1)             | 0<br>(0 - 0)          | 0<br>(0 - 0)           | 0<br>(0 - 0)            | 0<br>(0 - 0)            | 0<br>(0 - 1)            |
| Pyoderma                                            | 39<br>(29 - 49)          | 1<br>(0 - 1)          | 0<br>(0 - 0)           | 4<br>(3 - 5)            | 6<br>(4 - 8)            | 28<br>(20 - 38)         |

Web Table 31- Oman deaths with 95% UI by age, sex, and cause in 2013

| Cause                                           | Both Sexes, All Ages     | Both Sexes, 0-4 Years | Both Sexes, 5-14 Years | Both Sexes, 15-49 Years  | Both Sexes, 50-69 Years | Both Sexes, 70-80 Years |
|-------------------------------------------------|--------------------------|-----------------------|------------------------|--------------------------|-------------------------|-------------------------|
| Decubitus ulcer                                 | 2<br>(1 - 3)             | 0<br>(0 - 0)          | 0<br>(0 - 0)           | 0<br>(0 - 1)             | 0<br>(0 - 0)            | 1<br>(0 - 3)            |
| Other skin and subcutaneous diseases            | 0<br>(0 - 1)             | 0<br>(0 - 0)          | 0<br>(0 - 0)           | 0<br>(0 - 0)             | 0<br>(0 - 0)            | 0<br>(0 - 0)            |
| Sudden infant death syndrome                    | 2<br>(0 - 5)             | 2<br>(0 - 5)          | --                     | --                       | --                      | --                      |
| Injuries                                        | 2,307<br>(1,783 - 2,916) | 83<br>(64 - 107)      | 45<br>(36 - 56)        | 1,635<br>(1,236 - 2,145) | 273<br>(201 - 350)      | 270<br>(224 - 315)      |
| Transport injuries                              | 1,708<br>(1,306 - 2,187) | 45<br>(34 - 60)       | 30<br>(24 - 38)        | 1,298<br>(975 - 1,711)   | 199<br>(144 - 260)      | 136<br>(105 - 167)      |
| Road injuries                                   | 1,633<br>(1,241 - 2,100) | 42<br>(31 - 56)       | 29<br>(22 - 37)        | 1,245<br>(931 - 1,647)   | 191<br>(137 - 250)      | 126<br>(97 - 155)       |
| Pedestrian road injuries                        | 1,408<br>(1,047 - 1,828) | 34<br>(24 - 46)       | 24<br>(19 - 31)        | 1,090<br>(791 - 1,464)   | 163<br>(116 - 217)      | 97<br>(74 - 123)        |
| Cyclist road injuries                           | 19<br>(12 - 27)          | 0<br>(0 - 1)          | 0<br>(0 - 1)           | 9<br>(6 - 14)            | 5<br>(3 - 7)            | 4<br>(3 - 6)            |
| Motorcyclist road injuries                      | 29<br>(16 - 51)          | 1<br>(0 - 1)          | 0<br>(0 - 0)           | 20<br>(11 - 40)          | 3<br>(2 - 5)            | 4<br>(2 - 7)            |
| Motor vehicle road injuries                     | 172<br>(99 - 268)        | 7<br>(4 - 10)         | 4<br>(2 - 5)           | 124<br>(65 - 205)        | 19<br>(12 - 29)         | 19<br>(13 - 26)         |
| Other road injuries                             | 5<br>(3 - 8)             | 1<br>(0 - 1)          | 0<br>(0 - 0)           | 2<br>(1 - 3)             | 1<br>(0 - 1)            | 2<br>(1 - 3)            |
| Other transport injuries                        | 75<br>(45 - 105)         | 3<br>(2 - 4)          | 1<br>(1 - 2)           | 53<br>(28 - 79)          | 8<br>(5 - 12)           | 10<br>(7 - 13)          |
| Unintentional injuries                          | 457<br>(366 - 563)       | 37<br>(26 - 50)       | 14<br>(10 - 18)        | 235<br>(173 - 319)       | 57<br>(42 - 72)         | 115<br>(94 - 136)       |
| Falls                                           | 97<br>(75 - 128)         | 5<br>(3 - 8)          | 2<br>(1 - 3)           | 40<br>(26 - 59)          | 15<br>(10 - 22)         | 36<br>(26 - 51)         |
| Drowning                                        | 146<br>(93 - 207)        | 16<br>(9 - 26)        | 7<br>(4 - 11)          | 103<br>(60 - 155)        | 9<br>(6 - 13)           | 12<br>(8 - 16)          |
| Fire, heat, and hot substances                  | 32<br>(24 - 42)          | 2<br>(1 - 4)          | 1<br>(1 - 2)           | 13<br>(9 - 19)           | 4<br>(3 - 6)            | 11<br>(8 - 16)          |
| Poisonings                                      | 10<br>(7 - 17)           | 0<br>(0 - 1)          | 0<br>(0 - 0)           | 6<br>(4 - 12)            | 2<br>(1 - 3)            | 2<br>(1 - 2)            |
| Exposure to mechanical forces                   | 91<br>(68 - 120)         | 7<br>(4 - 11)         | 2<br>(1 - 3)           | 48<br>(32 - 69)          | 14<br>(9 - 19)          | 21<br>(15 - 31)         |
| Unintentional firearm injuries                  | 10<br>(7 - 13)           | 1<br>(0 - 1)          | 0<br>(0 - 0)           | 6<br>(4 - 9)             | 1<br>(1 - 2)            | 2<br>(1 - 2)            |
| Unintentional suffocation                       | 3<br>(2 - 5)             | 0<br>(0 - 1)          | 0<br>(0 - 0)           | 1<br>(1 - 2)             | 1<br>(0 - 1)            | 1<br>(0 - 1)            |
| Other exposure to mechanical forces             | 78<br>(58 - 105)         | 6<br>(3 - 10)         | 2<br>(1 - 3)           | 40<br>(27 - 60)          | 12<br>(8 - 17)          | 19<br>(13 - 28)         |
| Adverse effects of medical treatment            | 38<br>(27 - 51)          | 3<br>(2 - 6)          | 1<br>(0 - 1)           | 11<br>(8 - 16)           | 7<br>(5 - 11)           | 16<br>(10 - 24)         |
| Animal contact                                  | 12<br>(8 - 20)           | 1<br>(1 - 2)          | 0<br>(0 - 1)           | 5<br>(3 - 9)             | 2<br>(1 - 3)            | 3<br>(2 - 5)            |
| Venomous animal contact                         | 4<br>(3 - 8)             | 0<br>(0 - 1)          | 0<br>(0 - 0)           | 2<br>(1 - 4)             | 1<br>(0 - 1)            | 1<br>(1 - 2)            |
| Non-venomous animal contact                     | 8<br>(5 - 12)            | 1<br>(0 - 1)          | 0<br>(0 - 0)           | 3<br>(2 - 5)             | 1<br>(1 - 2)            | 2<br>(1 - 4)            |
| Foreign body                                    | 14<br>(8 - 18)           | 1<br>(1 - 2)          | 0<br>(0 - 0)           | 2<br>(1 - 3)             | 2<br>(1 - 3)            | 8<br>(4 - 12)           |
| Pulmonary aspiration and foreign body in airway | 12<br>(7 - 17)           | 1<br>(1 - 2)          | 0<br>(0 - 0)           | 1<br>(1 - 2)             | 2<br>(1 - 3)            | 8<br>(4 - 11)           |
| Foreign body in other body part                 | 1<br>(1 - 2)             | 0<br>(0 - 0)          | 0<br>(0 - 0)           | 1<br>(0 - 1)             | 0<br>(0 - 0)            | 0<br>(0 - 1)            |
| Other unintentional injuries                    | 16<br>(12 - 20)          | 1<br>(1 - 2)          | 0<br>(0 - 1)           | 7<br>(5 - 10)            | 3<br>(2 - 3)            | 5<br>(3 - 6)            |
| Self-harm and interpersonal violence            | 141<br>(96 - 189)        | 2<br>(1 - 3)          | 1<br>(1 - 2)           | 102<br>(67 - 144)        | 17<br>(11 - 23)         | 20<br>(13 - 27)         |
| Self-harm                                       | 100<br>(66 - 134)        | --                    | 1<br>(0 - 1)           | 72<br>(44 - 103)         | 12<br>(8 - 17)          | 15<br>(10 - 20)         |
| Interpersonal violence                          | 42<br>(24 - 60)          | 2<br>(1 - 3)          | 1<br>(0 - 1)           | 30<br>(17 - 46)          | 5<br>(2 - 7)            | 5<br>(2 - 9)            |
| Assault by firearm                              | 9<br>(4 - 15)            | 0<br>(0 - 1)          | 0<br>(0 - 0)           | 7<br>(3 - 12)            | 1<br>(0 - 2)            | 1<br>(0 - 1)            |
| Assault by sharp object                         | 4<br>(2 - 6)             | 0<br>(0 - 0)          | 0<br>(0 - 0)           | 2<br>(1 - 4)             | 1<br>(0 - 1)            | 0<br>(0 - 1)            |
| Assault by other means                          | 29<br>(17 - 43)          | 1<br>(1 - 2)          | 0<br>(0 - 1)           | 20<br>(12 - 33)          | 3<br>(2 - 5)            | 4<br>(1 - 8)            |

Web Table 31- Oman deaths with 95% UI by age, sex, and cause in 2013

| Cause                                                             | Males, All Ages          | Males, 0-4 Years   | Males, 5-14 Years | Males, 15-49 Years       | Males, 50-69 Years       | Males, 70-80 Years       |
|-------------------------------------------------------------------|--------------------------|--------------------|-------------------|--------------------------|--------------------------|--------------------------|
| All causes                                                        | 6,895<br>(5,181 - 8,487) | 336<br>(283 - 394) | 53<br>(43 - 66)   | 2,276<br>(1,658 - 3,116) | 1,636<br>(1,151 - 2,092) | 2,593<br>(1,976 - 2,798) |
| Communicable, maternal, neonatal, and nutritional diseases        | 751<br>(604 - 889)       | 158<br>(127 - 195) | 10<br>(6 - 16)    | 168<br>(123 - 226)       | 122<br>(83 - 157)        | 294<br>(215 - 369)       |
| HIV/AIDS and tuberculosis                                         | 52<br>(41 - 66)          | 0<br>(0 - 1)       | 0<br>(0 - 0)      | 37<br>(28 - 48)          | 9<br>(7 - 13)            | 6<br>(4 - 7)             |
| Tuberculosis                                                      | 21<br>(15 - 29)          | 0<br>(0 - 0)       | 0<br>(0 - 0)      | 9<br>(6 - 13)            | 7<br>(5 - 10)            | 5<br>(4 - 7)             |
| HIV/AIDS                                                          | 31<br>(23 - 43)          | 0<br>(0 - 0)       | 0<br>(0 - 0)      | 28<br>(20 - 39)          | 2<br>(1 - 4)             | 0<br>(0 - 1)             |
| HIV/AIDS resulting in mycobacterial infection                     | 2<br>(1 - 3)             | 0<br>(0 - 0)       | 0<br>(0 - 0)      | 2<br>(1 - 2)             | 0<br>(0 - 0)             | 0<br>(0 - 0)             |
| HIV/AIDS resulting in other diseases                              | 29<br>(21 - 40)          | 0<br>(0 - 0)       | 0<br>(0 - 0)      | 26<br>(19 - 37)          | 2<br>(1 - 4)             | 0<br>(0 - 1)             |
| Diarrhea, lower respiratory, and other common infectious diseases | 460<br>(336 - 573)       | 28<br>(18 - 42)    | 9<br>(5 - 15)     | 98<br>(64 - 144)         | 84<br>(55 - 115)         | 241<br>(169 - 310)       |
| Diarrheal diseases                                                | 17<br>(12 - 23)          | 1<br>(1 - 3)       | 0<br>(0 - 0)      | 7<br>(4 - 10)            | 2<br>(1 - 4)             | 7<br>(4 - 11)            |
| Intestinal infectious diseases                                    | 41<br>(16 - 87)          | 9<br>(3 - 19)      | 6<br>(2 - 13)     | 23<br>(8 - 54)           | 2<br>(0 - 4)             | 1<br>(0 - 2)             |
| Typhoid fever                                                     | 28<br>(9 - 65)           | 5<br>(2 - 13)      | 4<br>(1 - 10)     | 16<br>(5 - 41)           | 1<br>(0 - 3)             | 0<br>(0 - 1)             |
| Paratyphoid fever                                                 | 8<br>(2 - 18)            | 2<br>(1 - 4)       | 1<br>(0 - 3)      | 4<br>(1 - 11)            | 0<br>(0 - 1)             | 0<br>(0 - 0)             |
| Other intestinal infectious diseases                              | 5<br>(1 - 12)            | 2<br>(0 - 6)       | 0<br>(0 - 2)      | 3<br>(0 - 8)             | 0<br>(0 - 2)             | 0<br>(0 - 2)             |
| Lower respiratory infections                                      | 377<br>(264 - 470)       | 14<br>(8 - 21)     | 2<br>(1 - 3)      | 62<br>(40 - 89)          | 75<br>(47 - 104)         | 224<br>(155 - 292)       |
| Upper respiratory infections                                      | 0<br>(0 - 0)             | 0<br>(0 - 0)       | 0<br>(0 - 0)      | 0<br>(0 - 0)             | 0<br>(0 - 0)             | 0<br>(0 - 0)             |
| Otitis media                                                      | 1<br>(1 - 1)             | 0<br>(0 - 0)       | 0<br>(0 - 0)      | 0<br>(0 - 0)             | 0<br>(0 - 0)             | 0<br>(0 - 1)             |
| Meningitis                                                        | 15<br>(10 - 20)          | 1<br>(0 - 1)       | 0<br>(0 - 0)      | 2<br>(1 - 4)             | 4<br>(2 - 6)             | 7<br>(4 - 12)            |
| Pneumococcal meningitis                                           | 3<br>(2 - 5)             | 0<br>(0 - 0)       | 0<br>(0 - 0)      | 1<br>(0 - 1)             | 1<br>(0 - 2)             | 2<br>(1 - 3)             |
| H influenzae type B meningitis                                    | 2<br>(1 - 3)             | 0<br>(0 - 0)       | 0<br>(0 - 0)      | 0<br>(0 - 1)             | 0<br>(0 - 1)             | 1<br>(0 - 2)             |
| Meningococcal meningitis                                          | 4<br>(2 - 6)             | 0<br>(0 - 0)       | 0<br>(0 - 0)      | 1<br>(0 - 1)             | 1<br>(0 - 2)             | 2<br>(1 - 4)             |
| Other meningitis                                                  | 5<br>(3 - 8)             | 0<br>(0 - 0)       | 0<br>(0 - 0)      | 1<br>(0 - 1)             | 2<br>(1 - 3)             | 3<br>(1 - 5)             |
| Encephalitis                                                      | 7<br>(5 - 9)             | 1<br>(1 - 2)       | 0<br>(0 - 0)      | 3<br>(2 - 4)             | 1<br>(1 - 2)             | 1<br>(1 - 2)             |
| Diphtheria                                                        | 0<br>(0 - 0)             | 0<br>(0 - 0)       | 0<br>(0 - 0)      | 0<br>(0 - 0)             | 0<br>(0 - 0)             | --                       |
| Whooping cough                                                    | 1<br>(0 - 3)             | 1<br>(0 - 2)       | 0<br>(0 - 0)      | 0<br>(0 - 0)             | 0<br>(0 - 0)             | --                       |
| Tetanus                                                           | 0<br>(0 - 1)             | 0<br>(0 - 0)       | 0<br>(0 - 0)      | 0<br>(0 - 1)             | 0<br>(0 - 0)             | 0<br>(0 - 0)             |
| Measles                                                           | 1<br>(0 - 6)             | 1<br>(0 - 5)       | 0<br>(0 - 0)      | 0<br>(0 - 0)             | 0<br>(0 - 0)             | --                       |
| Varicella and herpes zoster                                       | 1<br>(0 - 1)             | 0<br>(0 - 1)       | 0<br>(0 - 0)      | 0<br>(0 - 1)             | 0<br>(0 - 0)             | 0<br>(0 - 1)             |
| Neglected tropical diseases and malaria                           | 4<br>(3 - 7)             | 0<br>(0 - 1)       | 0<br>(0 - 0)      | 2<br>(2 - 4)             | 1<br>(1 - 1)             | 1<br>(0 - 1)             |
| Malaria                                                           | 0<br>(0 - 0)             | 0<br>(0 - 0)       | 0<br>(0 - 0)      | 0<br>(0 - 0)             | 0<br>(0 - 0)             | 0<br>(0 - 0)             |
| Leishmaniasis                                                     | 0<br>(0 - 0)             | 0<br>(0 - 0)       | 0<br>(0 - 0)      | 0<br>(0 - 0)             | 0<br>(0 - 0)             | 0<br>(0 - 0)             |
| Visceral leishmaniasis                                            | 0<br>(0 - 0)             | 0<br>(0 - 0)       | 0<br>(0 - 0)      | 0<br>(0 - 0)             | 0<br>(0 - 0)             | 0<br>(0 - 0)             |
| Schistosomiasis                                                   | 2<br>(1 - 4)             | 0<br>(0 - 0)       | 0<br>(0 - 0)      | 1<br>(1 - 2)             | 1<br>(0 - 1)             | 1<br>(0 - 1)             |
| Cysticercosis                                                     | 0<br>(0 - 0)             | 0<br>(0 - 0)       | 0<br>(0 - 0)      | 0<br>(0 - 0)             | 0<br>(0 - 0)             | 0<br>(0 - 0)             |
| Cystic echinococcosis                                             | 0<br>(0 - 0)             | 0<br>(0 - 0)       | 0<br>(0 - 0)      | 0<br>(0 - 0)             | 0<br>(0 - 0)             | 0<br>(0 - 0)             |
| Dengue                                                            | 0<br>(0 - 1)             | 0<br>(0 - 0)       | 0<br>(0 - 0)      | 0<br>(0 - 0)             | 0<br>(0 - 0)             | 0<br>(0 - 0)             |
| Rabies                                                            | 0<br>(0 - 0)             | 0<br>(0 - 0)       | 0<br>(0 - 0)      | 0<br>(0 - 0)             | 0<br>(0 - 0)             | 0<br>(0 - 0)             |
| Intestinal nematode infections                                    | 0<br>(0 - 2)             | 0<br>(0 - 1)       | 0<br>(0 - 0)      | 0<br>(0 - 1)             | 0<br>(0 - 0)             | 0<br>(0 - 0)             |
| Ascariasis                                                        | 0<br>(0 - 2)             | 0<br>(0 - 1)       | 0<br>(0 - 0)      | 0<br>(0 - 1)             | 0<br>(0 - 0)             | 0<br>(0 - 0)             |
| Other neglected tropical diseases                                 | 1<br>(0 - 1)             | 0<br>(0 - 0)       | 0<br>(0 - 0)      | 0<br>(0 - 1)             | 0<br>(0 - 0)             | 0<br>(0 - 0)             |
| Maternal disorders                                                | --                       | --                 | --                | --                       | --                       | --                       |



Web Table 31- Oman deaths with 95% UI by age, sex, and cause in 2013

| Cause                                                            | Males, All Ages          | Males, 0-4 Years   | Males, 5-14 Years | Males, 15-49 Years | Males, 50-69 Years     | Males, 70-80 Years       |
|------------------------------------------------------------------|--------------------------|--------------------|-------------------|--------------------|------------------------|--------------------------|
| Maternal hemorrhage                                              | --                       | --                 | --                | --                 | --                     | --                       |
| Maternal sepsis and other maternal infections                    | --                       | --                 | --                | --                 | --                     | --                       |
| Maternal hypertensive disorders                                  | --                       | --                 | --                | --                 | --                     | --                       |
| Maternal obstructed labor                                        | --                       | --                 | --                | --                 | --                     | --                       |
| Maternal abortive outcome                                        | --                       | --                 | --                | --                 | --                     | --                       |
| Indirect maternal deaths                                         | --                       | --                 | --                | --                 | --                     | --                       |
| Late maternal deaths                                             | --                       | --                 | --                | --                 | --                     | --                       |
| Maternal deaths aggravated by HIV/AIDS                           | --                       | --                 | --                | --                 | --                     | --                       |
| Other maternal disorders                                         | --                       | --                 | --                | --                 | --                     | --                       |
| Neonatal disorders                                               | 127<br>(99 - 161)        | 127<br>(99 - 161)  | --                | --                 | --                     | --                       |
| Neonatal preterm birth complications                             | 66<br>(38 - 96)          | 66<br>(38 - 96)    | --                | --                 | --                     | --                       |
| Neonatal encephalopathy due to birth asphyxia and trauma         | 0<br>(0 - 1)             | 0<br>(0 - 1)       | --                | --                 | --                     | --                       |
| Neonatal sepsis and other neonatal infections                    | 2<br>(1 - 5)             | 2<br>(1 - 5)       | --                | --                 | --                     | --                       |
| Hemolytic disease and other neonatal jaundice                    | 0<br>(0 - 0)             | 0<br>(0 - 0)       | --                | --                 | --                     | --                       |
| Other neonatal disorders                                         | 58<br>(35 - 88)          | 58<br>(35 - 88)    | --                | --                 | --                     | --                       |
| Nutritional deficiencies                                         | 42<br>(26 - 66)          | 1<br>(1 - 2)       | 1<br>(0 - 1)      | 11<br>(6 - 18)     | 9<br>(5 - 15)          | 21<br>(12 - 34)          |
| Protein-energy malnutrition                                      | 4<br>(2 - 9)             | 1<br>(0 - 1)       | 0<br>(0 - 0)      | 1<br>(0 - 2)       | 0<br>(0 - 1)           | 2<br>(1 - 6)             |
| Iodine deficiency                                                | 0<br>(0 - 0)             | 0<br>(0 - 0)       | 0<br>(0 - 0)      | 0<br>(0 - 0)       | 0<br>(0 - 0)           | 0<br>(0 - 0)             |
| Iron-deficiency anemia                                           | 36<br>(22 - 56)          | 0<br>(0 - 1)       | 0<br>(0 - 1)      | 9<br>(5 - 15)      | 8<br>(5 - 14)          | 18<br>(10 - 29)          |
| Other nutritional deficiencies                                   | 2<br>(1 - 3)             | 0<br>(0 - 0)       | 0<br>(0 - 0)      | 1<br>(0 - 2)       | 0<br>(0 - 0)           | 0<br>(0 - 0)             |
| Other communicable, maternal, neonatal, and nutritional diseases | 66<br>(41 - 100)         | 1<br>(1 - 2)       | 0<br>(0 - 1)      | 20<br>(12 - 31)    | 19<br>(11 - 30)        | 26<br>(11 - 52)          |
| Sexually transmitted diseases excluding HIV                      | 2<br>(1 - 4)             | 0<br>(0 - 1)       | 0<br>(0 - 0)      | 0<br>(0 - 1)       | 0<br>(0 - 1)           | 1<br>(0 - 2)             |
| Syphilis                                                         | 2<br>(1 - 3)             | 0<br>(0 - 1)       | 0<br>(0 - 0)      | 0<br>(0 - 0)       | 0<br>(0 - 1)           | 1<br>(0 - 2)             |
| Chlamydial infection                                             | --                       | --                 | --                | --                 | --                     | --                       |
| Gonococcal infection                                             | 0<br>(0 - 0)             | --                 | 0<br>(0 - 0)      | 0<br>(0 - 0)       | 0<br>(0 - 0)           | 0<br>(0 - 0)             |
| Other sexually transmitted diseases                              | 0<br>(0 - 0)             | --                 | 0<br>(0 - 0)      | 0<br>(0 - 0)       | 0<br>(0 - 0)           | 0<br>(0 - 0)             |
| Hepatitis                                                        | 17<br>(12 - 23)          | 0<br>(0 - 0)       | 0<br>(0 - 0)      | 6<br>(4 - 9)       | 8<br>(5 - 12)          | 3<br>(2 - 4)             |
| Acute hepatitis A                                                | 1<br>(0 - 2)             | 0<br>(0 - 0)       | 0<br>(0 - 0)      | 1<br>(0 - 1)       | 0<br>(0 - 1)           | 0<br>(0 - 0)             |
| Acute hepatitis B                                                | 11<br>(7 - 16)           | 0<br>(0 - 0)       | 0<br>(0 - 0)      | 3<br>(1 - 5)       | 6<br>(3 - 9)           | 2<br>(1 - 3)             |
| Acute hepatitis C                                                | 1<br>(0 - 3)             | --                 | 0<br>(0 - 0)      | 0<br>(0 - 1)       | 0<br>(0 - 1)           | 0<br>(0 - 1)             |
| Acute hepatitis E                                                | 4<br>(2 - 8)             | 0<br>(0 - 0)       | 0<br>(0 - 0)      | 2<br>(1 - 4)       | 1<br>(0 - 3)           | 0<br>(0 - 1)             |
| Other infectious diseases                                        | 47<br>(25 - 79)          | 1<br>(0 - 2)       | 0<br>(0 - 0)      | 13<br>(7 - 23)     | 11<br>(4 - 21)         | 22<br>(7 - 49)           |
| Non-communicable diseases                                        | 4,239<br>(3,161 - 5,079) | 130<br>(104 - 159) | 15<br>(11 - 20)   | 668<br>(475 - 962) | 1,304<br>(910 - 1,665) | 2,122<br>(1,617 - 2,326) |
| Neoplasms                                                        | 508<br>(366 - 636)       | 3<br>(2 - 5)       | 5<br>(3 - 7)      | 125<br>(88 - 177)  | 195<br>(134 - 253)     | 180<br>(136 - 206)       |
| Esophageal cancer                                                | 18<br>(12 - 28)          | --                 | --                | 3<br>(2 - 6)       | 8<br>(5 - 13)          | 7<br>(5 - 10)            |
| Stomach cancer                                                   | 68<br>(48 - 86)          | --                 | --                | 12<br>(8 - 18)     | 28<br>(19 - 38)        | 29<br>(21 - 36)          |
| Liver cancer                                                     | 53<br>(37 - 69)          | --                 | 0<br>(0 - 0)      | 9<br>(6 - 14)      | 28<br>(19 - 40)        | 16<br>(11 - 21)          |
| Liver cancer due to hepatitis B                                  | 17<br>(7 - 33)           | --                 | 0<br>(0 - 0)      | 4<br>(2 - 8)       | 9<br>(3 - 19)          | 4<br>(1 - 8)             |
| Liver cancer due to hepatitis C                                  | 25<br>(12 - 39)          | --                 | 0<br>(0 - 0)      | 3<br>(1 - 6)       | 14<br>(6 - 23)         | 9<br>(4 - 14)            |
| Liver cancer due to alcohol use                                  | 6<br>(3 - 11)            | --                 | --                | 1<br>(0 - 1)       | 3<br>(2 - 6)           | 2<br>(1 - 4)             |

Web Table 31- Oman deaths with 95% UI by age, sex, and cause in 2013

| Cause                                         | Males, All Ages          | Males, 0-4 Years | Males, 5-14 Years | Males, 15-49 Years | Males, 50-69 Years | Males, 70-80 Years     |
|-----------------------------------------------|--------------------------|------------------|-------------------|--------------------|--------------------|------------------------|
| Liver cancer due to other causes              | 4<br>(1 - 8)             | --               | 0<br>(0 - 0)      | 1<br>(0 - 2)       | 2<br>(0 - 5)       | 1<br>(0 - 2)           |
| Larynx cancer                                 | 5<br>(4 - 8)             | --               | --                | 1<br>(1 - 2)       | 2<br>(1 - 3)       | 2<br>(1 - 3)           |
| Tracheal, bronchus and lung cancer            | 64<br>(46 - 81)          | --               | --                | 8<br>(5 - 12)      | 32<br>(22 - 42)    | 25<br>(18 - 31)        |
| Breast cancer                                 | 2<br>(1 - 3)             | --               | --                | 1<br>(0 - 1)       | 1<br>(0 - 1)       | 1<br>(0 - 2)           |
| Cervical cancer                               | --                       | --               | --                | --                 | --                 | --                     |
| Uterine cancer                                | --                       | --               | --                | --                 | --                 | --                     |
| Prostate cancer                               | 33<br>(20 - 46)          | --               | --                | 1<br>(0 - 1)       | 9<br>(5 - 13)      | 23<br>(14 - 34)        |
| Colon and rectum cancer                       | 35<br>(25 - 46)          | --               | --                | 12<br>(8 - 17)     | 14<br>(10 - 19)    | 9<br>(7 - 12)          |
| Lip and oral cavity cancer                    | 9<br>(6 - 13)            | --               | --                | 3<br>(2 - 4)       | 5<br>(3 - 7)       | 2<br>(1 - 3)           |
| Nasopharynx cancer                            | 2<br>(1 - 2)             | --               | 0<br>(0 - 0)      | 1<br>(1 - 1)       | 0<br>(0 - 1)       | 0<br>(0 - 0)           |
| Other pharynx cancer                          | 2<br>(1 - 3)             | --               | --                | 1<br>(0 - 1)       | 1<br>(1 - 1)       | 0<br>(0 - 1)           |
| Gallbladder and biliary tract cancer          | 4<br>(3 - 6)             | --               | --                | 1<br>(0 - 1)       | 2<br>(1 - 2)       | 2<br>(1 - 3)           |
| Pancreatic cancer                             | 20<br>(14 - 25)          | --               | --                | 3<br>(2 - 4)       | 10<br>(7 - 13)     | 7<br>(5 - 9)           |
| Malignant skin melanoma                       | 2<br>(1 - 5)             | --               | --                | 1<br>(1 - 3)       | 1<br>(0 - 2)       | 0<br>(0 - 1)           |
| Non-melanoma skin cancer                      | 1<br>(0 - 1)             | --               | --                | 0<br>(0 - 1)       | 0<br>(0 - 0)       | 0<br>(0 - 0)           |
| Ovarian cancer                                | --                       | --               | --                | --                 | --                 | --                     |
| Testicular cancer                             | 1<br>(1 - 2)             | --               | --                | 1<br>(1 - 2)       | 0<br>(0 - 0)       | 0<br>(0 - 0)           |
| Kidney cancer                                 | 6<br>(4 - 8)             | 0<br>(0 - 0)     | 0<br>(0 - 0)      | 2<br>(1 - 3)       | 2<br>(1 - 3)       | 2<br>(1 - 3)           |
| Bladder cancer                                | 18<br>(12 - 23)          | --               | --                | 2<br>(1 - 3)       | 7<br>(4 - 10)      | 9<br>(6 - 12)          |
| Brain and nervous system cancer               | 22<br>(15 - 34)          | 1<br>(0 - 1)     | 1<br>(1 - 2)      | 9<br>(6 - 16)      | 7<br>(4 - 12)      | 4<br>(2 - 6)           |
| Thyroid cancer                                | 1<br>(1 - 2)             | --               | 0<br>(0 - 0)      | 1<br>(0 - 1)       | 0<br>(0 - 1)       | 0<br>(0 - 0)           |
| Mesothelioma                                  | 1<br>(1 - 1)             | --               | --                | 0<br>(0 - 0)       | 0<br>(0 - 1)       | 0<br>(0 - 0)           |
| Hodgkin lymphoma                              | 3<br>(2 - 5)             | 0<br>(0 - 0)     | 0<br>(0 - 0)      | 2<br>(1 - 4)       | 1<br>(0 - 1)       | 0<br>(0 - 1)           |
| Non-Hodgkin lymphoma                          | 40<br>(27 - 58)          | 0<br>(0 - 1)     | 1<br>(0 - 1)      | 15<br>(10 - 24)    | 13<br>(9 - 19)     | 11<br>(7 - 15)         |
| Multiple myeloma                              | 12<br>(8 - 17)           | --               | --                | 2<br>(1 - 3)       | 6<br>(4 - 9)       | 4<br>(3 - 6)           |
| Leukemia                                      | 35<br>(25 - 46)          | 1<br>(0 - 2)     | 2<br>(1 - 3)      | 21<br>(14 - 29)    | 6<br>(4 - 8)       | 6<br>(4 - 8)           |
| Other neoplasms                               | 49<br>(35 - 64)          | 2<br>(1 - 2)     | 1<br>(1 - 2)      | 16<br>(11 - 24)    | 13<br>(8 - 18)     | 18<br>(12 - 25)        |
| Cardiovascular diseases                       | 2,238<br>(1,645 - 2,699) | 13<br>(9 - 20)   | 4<br>(3 - 6)      | 345<br>(243 - 505) | 689<br>(488 - 883) | 1,188<br>(902 - 1,318) |
| Rheumatic heart disease                       | 16<br>(8 - 22)           | 0<br>(0 - 1)     | 0<br>(0 - 0)      | 4<br>(2 - 6)       | 4<br>(2 - 5)       | 9<br>(4 - 13)          |
| Ischemic heart disease                        | 1,237<br>(896 - 1,525)   | 2<br>(1 - 3)     | 1<br>(1 - 2)      | 187<br>(129 - 276) | 420<br>(291 - 538) | 628<br>(467 - 755)     |
| Cerebrovascular disease                       | 529<br>(386 - 668)       | 2<br>(1 - 3)     | 1<br>(1 - 2)      | 59<br>(38 - 90)    | 138<br>(93 - 188)  | 329<br>(243 - 407)     |
| Ischemic stroke                               | 216<br>(138 - 284)       | 0<br>(0 - 0)     | 0<br>(0 - 0)      | 12<br>(7 - 19)     | 43<br>(25 - 63)    | 162<br>(105 - 212)     |
| Hemorrhagic stroke                            | 313<br>(217 - 421)       | 2<br>(1 - 3)     | 1<br>(1 - 2)      | 47<br>(30 - 73)    | 96<br>(62 - 133)   | 167<br>(118 - 230)     |
| Hypertensive heart disease                    | 53<br>(30 - 77)          | 0<br>(0 - 0)     | 0<br>(0 - 0)      | 6<br>(3 - 10)      | 14<br>(7 - 23)     | 33<br>(17 - 50)        |
| Cardiomyopathy and myocarditis                | 12<br>(8 - 17)           | 1<br>(0 - 1)     | 0<br>(0 - 0)      | 3<br>(2 - 5)       | 5<br>(3 - 7)       | 4<br>(2 - 6)           |
| Atrial fibrillation and flutter               | 5<br>(3 - 7)             | --               | --                | 0<br>(0 - 0)       | 1<br>(1 - 2)       | 4<br>(2 - 5)           |
| Aortic aneurysm                               | 45<br>(32 - 59)          | --               | --                | 8<br>(5 - 12)      | 17<br>(11 - 23)    | 20<br>(14 - 28)        |
| Peripheral vascular disease                   | 1<br>(0 - 1)             | --               | --                | 0<br>(0 - 0)       | 0<br>(0 - 0)       | 0<br>(0 - 0)           |
| Endocarditis                                  | 30<br>(19 - 46)          | 1<br>(0 - 2)     | 0<br>(0 - 0)      | 6<br>(3 - 10)      | 7<br>(4 - 12)      | 16<br>(9 - 24)         |
| Other cardiovascular and circulatory diseases | 309<br>(216 - 403)       | 8<br>(5 - 12)    | 1<br>(1 - 2)      | 72<br>(48 - 105)   | 82<br>(52 - 117)   | 146<br>(101 - 194)     |

Web Table 31- Oman deaths with 95% UI by age, sex, and cause in 2013

| Cause                                               | Males, All Ages    | Males, 0-4 Years | Males, 5-14 Years | Males, 15-49 Years | Males, 50-69 Years | Males, 70-80 Years |
|-----------------------------------------------------|--------------------|------------------|-------------------|--------------------|--------------------|--------------------|
| Chronic respiratory diseases                        | 172<br>(125 - 208) | 2<br>(1 - 3)     | 1<br>(0 - 1)      | 16<br>(10 - 23)    | 37<br>(24 - 50)    | 117<br>(86 - 143)  |
| Chronic obstructive pulmonary disease               | 164<br>(118 - 198) | 2<br>(1 - 3)     | 0<br>(0 - 0)      | 13<br>(9 - 18)     | 35<br>(23 - 47)    | 114<br>(84 - 140)  |
| Pneumoconiosis                                      | 1<br>(1 - 2)       | 0<br>(0 - 0)     | 0<br>(0 - 0)      | 1<br>(0 - 1)       | 0<br>(0 - 1)       | 0<br>(0 - 1)       |
| Silicosis                                           | 0<br>(0 - 1)       | 0<br>(0 - 0)     | 0<br>(0 - 0)      | 0<br>(0 - 0)       | 0<br>(0 - 0)       | 0<br>(0 - 0)       |
| Asbestosis                                          | 0<br>(0 - 0)       | 0<br>(0 - 0)     | 0<br>(0 - 0)      | 0<br>(0 - 0)       | 0<br>(0 - 0)       | 0<br>(0 - 0)       |
| Coal workers pneumoconiosis                         | 0<br>(0 - 0)       | 0<br>(0 - 0)     | 0<br>(0 - 0)      | 0<br>(0 - 0)       | 0<br>(0 - 0)       | 0<br>(0 - 0)       |
| Other pneumoconiosis                                | 1<br>(0 - 1)       | 0<br>(0 - 0)     | 0<br>(0 - 0)      | 0<br>(0 - 0)       | 0<br>(0 - 0)       | 0<br>(0 - 0)       |
| Asthma                                              | 1<br>(0 - 1)       | 0<br>(0 - 0)     | 0<br>(0 - 0)      | 0<br>(0 - 1)       | 0<br>(0 - 0)       | 0<br>(0 - 0)       |
| Interstitial lung disease and pulmonary sarcoidosis | 2<br>(1 - 4)       | 0<br>(0 - 0)     | 0<br>(0 - 0)      | 0<br>(0 - 1)       | 0<br>(0 - 1)       | 1<br>(0 - 3)       |
| Other chronic respiratory diseases                  | 4<br>(3 - 6)       | 0<br>(0 - 0)     | 0<br>(0 - 0)      | 2<br>(1 - 3)       | 1<br>(1 - 2)       | 1<br>(1 - 2)       |
| Cirrhosis                                           | 127<br>(91 - 163)  | 1<br>(0 - 2)     | 0<br>(0 - 1)      | 33<br>(22 - 48)    | 57<br>(39 - 78)    | 36<br>(26 - 45)    |
| Cirrhosis due to hepatitis B                        | 43<br>(24 - 68)    | 0<br>(0 - 0)     | 0<br>(0 - 0)      | 10<br>(5 - 18)     | 19<br>(10 - 32)    | 14<br>(7 - 21)     |
| Cirrhosis due to hepatitis C                        | 56<br>(28 - 82)    | 0<br>(0 - 0)     | 0<br>(0 - 0)      | 16<br>(7 - 25)     | 27<br>(13 - 42)    | 13<br>(6 - 21)     |
| Cirrhosis due to alcohol use                        | 17<br>(9 - 29)     | --               | --                | 2<br>(1 - 5)       | 7<br>(3 - 13)      | 7<br>(4 - 14)      |
| Cirrhosis due to other causes                       | 11<br>(6 - 22)     | 1<br>(0 - 1)     | 0<br>(0 - 0)      | 4<br>(2 - 8)       | 4<br>(2 - 9)       | 2<br>(1 - 4)       |
| Digestive diseases                                  | 50<br>(34 - 63)    | 0<br>(0 - 0)     | 0<br>(0 - 0)      | 9<br>(6 - 14)      | 13<br>(8 - 18)     | 27<br>(18 - 35)    |
| Peptic ulcer disease                                | 25<br>(17 - 33)    | 0<br>(0 - 0)     | 0<br>(0 - 0)      | 4<br>(2 - 6)       | 8<br>(5 - 11)      | 13<br>(9 - 18)     |
| Gastritis and duodenitis                            | 0<br>(0 - 1)       | 0<br>(0 - 0)     | 0<br>(0 - 0)      | 0<br>(0 - 0)       | 0<br>(0 - 0)       | 0<br>(0 - 0)       |
| Appendicitis                                        | 7<br>(4 - 10)      | 0<br>(0 - 0)     | 0<br>(0 - 0)      | 1<br>(1 - 2)       | 2<br>(1 - 3)       | 4<br>(2 - 7)       |
| Paralytic ileus and intestinal obstruction          | 2<br>(1 - 3)       | 0<br>(0 - 0)     | 0<br>(0 - 0)      | 1<br>(0 - 1)       | 1<br>(0 - 1)       | 1<br>(0 - 1)       |
| Inguinal, femoral, and abdominal hernia             | 0<br>(0 - 1)       | 0<br>(0 - 0)     | 0<br>(0 - 0)      | 0<br>(0 - 0)       | 0<br>(0 - 0)       | 0<br>(0 - 0)       |
| Inflammatory bowel disease                          | 1<br>(0 - 1)       | 0<br>(0 - 0)     | 0<br>(0 - 0)      | 1<br>(0 - 1)       | 0<br>(0 - 0)       | 0<br>(0 - 0)       |
| Vascular intestinal disorders                       | 1<br>(0 - 1)       | 0<br>(0 - 0)     | 0<br>(0 - 0)      | 0<br>(0 - 1)       | 0<br>(0 - 0)       | 0<br>(0 - 0)       |
| Gallbladder and biliary diseases                    | 9<br>(6 - 13)      | 0<br>(0 - 0)     | 0<br>(0 - 0)      | 2<br>(1 - 3)       | 2<br>(1 - 3)       | 6<br>(3 - 9)       |
| Pancreatitis                                        | 1<br>(0 - 1)       | 0<br>(0 - 0)     | 0<br>(0 - 0)      | 1<br>(0 - 1)       | 0<br>(0 - 0)       | 0<br>(0 - 0)       |
| Other digestive diseases                            | 4<br>(2 - 6)       | 0<br>(0 - 0)     | 0<br>(0 - 0)      | 0<br>(0 - 1)       | 1<br>(1 - 2)       | 2<br>(1 - 4)       |
| Neurological disorders                              | 183<br>(135 - 230) | 0<br>(0 - 0)     | 0<br>(0 - 0)      | 2<br>(1 - 3)       | 17<br>(12 - 24)    | 163<br>(121 - 210) |
| Alzheimer disease and other dementias               | 179<br>(133 - 226) | --               | --                | 0<br>(0 - 0)       | 17<br>(11 - 23)    | 163<br>(121 - 210) |
| Parkinson disease                                   | 1<br>(0 - 1)       | --               | --                | 0<br>(0 - 0)       | 0<br>(0 - 0)       | 0<br>(0 - 1)       |
| Epilepsy                                            | 1<br>(1 - 2)       | 0<br>(0 - 0)     | 0<br>(0 - 0)      | 1<br>(0 - 1)       | 0<br>(0 - 0)       | 0<br>(0 - 0)       |
| Multiple sclerosis                                  | 1<br>(0 - 2)       | --               | --                | 1<br>(0 - 1)       | 0<br>(0 - 0)       | 0<br>(0 - 0)       |
| Other neurological disorders                        | 1<br>(1 - 1)       | 0<br>(0 - 0)     | 0<br>(0 - 0)      | 1<br>(0 - 1)       | 0<br>(0 - 0)       | 0<br>(0 - 0)       |
| Mental and substance use disorders                  | 25<br>(11 - 35)    | 0<br>(0 - 0)     | 0<br>(0 - 0)      | 22<br>(8 - 31)     | 2<br>(1 - 3)       | 1<br>(0 - 2)       |
| Schizophrenia                                       | 0<br>(0 - 0)       | --               | --                | 0<br>(0 - 0)       | 0<br>(0 - 0)       | 0<br>(0 - 0)       |
| Alcohol use disorders                               | 3<br>(2 - 4)       | --               | --                | 1<br>(1 - 2)       | 1<br>(0 - 1)       | 1<br>(0 - 1)       |
| Drug use disorders                                  | 22<br>(7 - 31)     | 0<br>(0 - 0)     | --                | 20<br>(6 - 28)     | 2<br>(1 - 2)       | 0<br>(0 - 0)       |
| Opioid use disorders                                | 12<br>(4 - 17)     | 0<br>(0 - 0)     | --                | 11<br>(4 - 16)     | 1<br>(0 - 1)       | 0<br>(0 - 0)       |
| Cocaine use disorders                               | 0<br>(0 - 0)       | 0<br>(0 - 0)     | --                | 0<br>(0 - 0)       | 0<br>(0 - 0)       | 0<br>(0 - 0)       |
| Amphetamine use disorders                           | 0<br>(0 - 0)       | 0<br>(0 - 0)     | --                | 0<br>(0 - 0)       | 0<br>(0 - 0)       | 0<br>(0 - 0)       |
| Other drug use disorders                            | 9<br>(3 - 13)      | 0<br>(0 - 0)     | --                | 8<br>(3 - 12)      | 1<br>(0 - 1)       | 0<br>(0 - 0)       |

Web Table 31- Oman deaths with 95% UI by age, sex, and cause in 2013

| Cause                                               | Males, All Ages    | Males, 0-4 Years  | Males, 5-14 Years | Males, 15-49 Years | Males, 50-69 Years | Males, 70-80 Years |
|-----------------------------------------------------|--------------------|-------------------|-------------------|--------------------|--------------------|--------------------|
| Eating disorders                                    | 0<br>(0 - 0)       | --                | 0<br>(0 - 0)      | 0<br>(0 - 0)       | --                 | --                 |
| Anorexia nervosa                                    | 0<br>(0 - 0)       | --                | 0<br>(0 - 0)      | 0<br>(0 - 0)       | --                 | --                 |
| Diabetes, urogenital, blood, and endocrine diseases | 777<br>(568 - 942) | 6<br>(4 - 9)      | 2<br>(1 - 3)      | 96<br>(65 - 140)   | 285<br>(196 - 375) | 388<br>(292 - 451) |
| Diabetes mellitus                                   | 515<br>(372 - 633) | 1<br>(1 - 2)      | 0<br>(0 - 0)      | 43<br>(28 - 64)    | 213<br>(144 - 280) | 258<br>(193 - 311) |
| Acute glomerulonephritis                            | 3<br>(2 - 5)       | 0<br>(0 - 0)      | 0<br>(0 - 0)      | 1<br>(1 - 2)       | 1<br>(1 - 2)       | 1<br>(1 - 2)       |
| Chronic kidney disease                              | 173<br>(121 - 222) | 1<br>(1 - 2)      | 0<br>(0 - 0)      | 24<br>(15 - 35)    | 56<br>(38 - 76)    | 92<br>(65 - 119)   |
| Chronic kidney disease due to diabetes mellitus     | 8<br>(3 - 13)      | 0<br>(0 - 0)      | 0<br>(0 - 0)      | 2<br>(1 - 4)       | 1<br>(0 - 2)       | 4<br>(2 - 7)       |
| Chronic kidney disease due to hypertension          | 102<br>(70 - 141)  | 0<br>(0 - 1)      | 0<br>(0 - 0)      | 10<br>(6 - 16)     | 35<br>(23 - 51)    | 56<br>(38 - 78)    |
| Chronic kidney disease due to glomerulonephritis    | 4<br>(2 - 6)       | 0<br>(0 - 0)      | 0<br>(0 - 0)      | 2<br>(1 - 3)       | 1<br>(0 - 1)       | 2<br>(1 - 2)       |
| Chronic kidney disease due to other causes          | 59<br>(35 - 88)    | 0<br>(0 - 1)      | 0<br>(0 - 0)      | 9<br>(5 - 15)      | 19<br>(9 - 32)     | 30<br>(15 - 51)    |
| Urinary diseases and male infertility               | 40<br>(21 - 55)    | 0<br>(0 - 1)      | 0<br>(0 - 0)      | 3<br>(2 - 5)       | 8<br>(4 - 11)      | 29<br>(14 - 41)    |
| Interstitial nephritis and urinary tract infections | 22<br>(8 - 34)     | 0<br>(0 - 1)      | 0<br>(0 - 0)      | 1<br>(1 - 2)       | 3<br>(1 - 5)       | 17<br>(5 - 28)     |
| Urolithiasis                                        | 0<br>(0 - 1)       | --                | 0<br>(0 - 0)      | 0<br>(0 - 0)       | 0<br>(0 - 0)       | 0<br>(0 - 0)       |
| Other urinary diseases                              | 18<br>(10 - 30)    | 0<br>(0 - 0)      | 0<br>(0 - 0)      | 2<br>(1 - 3)       | 4<br>(2 - 7)       | 12<br>(6 - 22)     |
| Gynecological diseases                              | --                 | --                | --                | --                 | --                 | --                 |
| Uterine fibroids                                    | --                 | --                | --                | --                 | --                 | --                 |
| Polycystic ovarian syndrome                         | --                 | --                | --                | --                 | --                 | --                 |
| Endometriosis                                       | --                 | --                | --                | --                 | --                 | --                 |
| Genital prolapse                                    | --                 | --                | --                | --                 | --                 | --                 |
| Other gynecological diseases                        | --                 | --                | --                | --                 | --                 | --                 |
| Hemoglobinopathies and hemolytic anemias            | 35<br>(19 - 55)    | 2<br>(1 - 4)      | 1<br>(0 - 2)      | 23<br>(12 - 38)    | 5<br>(3 - 8)       | 4<br>(2 - 6)       |
| Thalassemias                                        | 6<br>(3 - 10)      | 1<br>(0 - 2)      | 0<br>(0 - 0)      | 5<br>(3 - 8)       | 0<br>(0 - 0)       | 0<br>(0 - 0)       |
| Sickle cell disorders                               | 22<br>(11 - 35)    | 1<br>(1 - 2)      | 1<br>(0 - 1)      | 16<br>(8 - 26)     | 4<br>(2 - 6)       | 0<br>(0 - 0)       |
| G6PD deficiency                                     | 1<br>(1 - 2)       | 0<br>(0 - 0)      | 0<br>(0 - 0)      | 1<br>(0 - 1)       | 0<br>(0 - 0)       | 0<br>(0 - 0)       |
| Other hemoglobinopathies and hemolytic anemias      | 6<br>(3 - 9)       | 0<br>(0 - 0)      | 0<br>(0 - 0)      | 1<br>(1 - 2)       | 1<br>(0 - 1)       | 4<br>(2 - 6)       |
| Endocrine, metabolic, blood, and immune disorders   | 11<br>(4 - 15)     | 1<br>(1 - 2)      | 0<br>(0 - 0)      | 3<br>(1 - 5)       | 2<br>(1 - 4)       | 4<br>(1 - 6)       |
| Musculoskeletal disorders                           | 9<br>(6 - 13)      | --                | 0<br>(0 - 0)      | 4<br>(2 - 5)       | 2<br>(1 - 3)       | 3<br>(2 - 5)       |
| Rheumatoid arthritis                                | 0<br>(0 - 1)       | --                | 0<br>(0 - 0)      | 0<br>(0 - 0)       | 0<br>(0 - 0)       | 0<br>(0 - 0)       |
| Other musculoskeletal disorders                     | 8<br>(6 - 12)      | --                | 0<br>(0 - 0)      | 3<br>(2 - 5)       | 2<br>(1 - 3)       | 3<br>(2 - 5)       |
| Other non-communicable diseases                     | 151<br>(123 - 180) | 104<br>(80 - 131) | 3<br>(2 - 5)      | 16<br>(11 - 23)    | 7<br>(5 - 10)      | 19<br>(14 - 27)    |
| Congenital anomalies                                | 128<br>(102 - 156) | 104<br>(79 - 130) | 3<br>(2 - 5)      | 13<br>(9 - 19)     | 3<br>(2 - 5)       | 5<br>(3 - 7)       |
| Neural tube defects                                 | 17<br>(9 - 32)     | 15<br>(7 - 29)    | 0<br>(0 - 1)      | 1<br>(1 - 2)       | 0<br>(0 - 0)       | 0<br>(0 - 1)       |
| Congenital heart anomalies                          | 44<br>(30 - 61)    | 37<br>(24 - 55)   | 1<br>(1 - 2)      | 4<br>(2 - 5)       | 1<br>(1 - 1)       | 1<br>(1 - 2)       |
| Cleft lip and cleft palate                          | 0<br>(0 - 0)       | 0<br>(0 - 0)      | --                | --                 | --                 | --                 |
| Down syndrome                                       | 2<br>(1 - 6)       | 2<br>(0 - 4)      | 0<br>(0 - 0)      | 1<br>(0 - 1)       | 0<br>(0 - 0)       | 0<br>(0 - 0)       |
| Chromosomal unbalanced rearrangements               | 0<br>(0 - 0)       | 0<br>(0 - 0)      | 0<br>(0 - 0)      | 0<br>(0 - 0)       | 0<br>(0 - 0)       | 0<br>(0 - 0)       |
| Other congenital anomalies                          | 64<br>(48 - 85)    | 50<br>(34 - 70)   | 1<br>(1 - 2)      | 8<br>(5 - 11)      | 2<br>(1 - 3)       | 3<br>(2 - 5)       |
| Skin and subcutaneous diseases                      | 22<br>(16 - 29)    | 0<br>(0 - 1)      | 0<br>(0 - 0)      | 3<br>(2 - 5)       | 4<br>(3 - 6)       | 15<br>(10 - 21)    |
| Cellulitis                                          | 0<br>(0 - 1)       | 0<br>(0 - 0)      | 0<br>(0 - 0)      | 0<br>(0 - 0)       | 0<br>(0 - 0)       | 0<br>(0 - 0)       |
| Pyoderma                                            | 21<br>(15 - 29)    | 0<br>(0 - 0)      | 0<br>(0 - 0)      | 3<br>(2 - 4)       | 4<br>(2 - 5)       | 15<br>(9 - 21)     |

Web Table 31- Oman deaths with 95% UI by age, sex, and cause in 2013

| Cause                                           | Males, All Ages          | Males, 0-4 Years | Males, 5-14 Years | Males, 15-49 Years       | Males, 50-69 Years | Males, 70-80 Years |
|-------------------------------------------------|--------------------------|------------------|-------------------|--------------------------|--------------------|--------------------|
| Decubitus ulcer                                 | 0<br>(0 - 0)             | 0<br>(0 - 0)     | 0<br>(0 - 0)      | 0<br>(0 - 0)             | 0<br>(0 - 0)       | 0<br>(0 - 0)       |
| Other skin and subcutaneous diseases            | 0<br>(0 - 0)             | 0<br>(0 - 0)     | 0<br>(0 - 0)      | 0<br>(0 - 0)             | 0<br>(0 - 0)       | 0<br>(0 - 0)       |
| Sudden infant death syndrome                    | 0<br>(0 - 0)             | 0<br>(0 - 0)     | --                | --                       | --                 | --                 |
| Injuries                                        | 1,904<br>(1,408 - 2,502) | 47<br>(32 - 65)  | 29<br>(22 - 36)   | 1,441<br>(1,041 - 1,948) | 211<br>(145 - 283) | 177<br>(135 - 208) |
| Transport injuries                              | 1,452<br>(1,059 - 1,922) | 24<br>(15 - 35)  | 19<br>(14 - 24)   | 1,149<br>(828 - 1,558)   | 158<br>(107 - 218) | 103<br>(74 - 130)  |
| Road injuries                                   | 1,394<br>(1,015 - 1,860) | 23<br>(15 - 34)  | 18<br>(13 - 24)   | 1,103<br>(791 - 1,504)   | 153<br>(103 - 211) | 98<br>(71 - 125)   |
| Pedestrian road injuries                        | 1,227<br>(879 - 1,646)   | 19<br>(12 - 29)  | 16<br>(11 - 21)   | 978<br>(690 - 1,350)     | 133<br>(90 - 182)  | 81<br>(57 - 104)   |
| Cyclist road injuries                           | 13<br>(7 - 21)           | 0<br>(0 - 0)     | 0<br>(0 - 0)      | 7<br>(4 - 12)            | 3<br>(1 - 5)       | 3<br>(1 - 4)       |
| Motorcyclist road injuries                      | 24<br>(11 - 46)          | 0<br>(0 - 0)     | 0<br>(0 - 0)      | 18<br>(8 - 37)           | 3<br>(1 - 5)       | 3<br>(2 - 5)       |
| Motor vehicle road injuries                     | 127<br>(61 - 220)        | 3<br>(1 - 5)     | 2<br>(1 - 3)      | 99<br>(42 - 180)         | 13<br>(7 - 22)     | 10<br>(6 - 16)     |
| Other road injuries                             | 3<br>(2 - 5)             | 0<br>(0 - 1)     | 0<br>(0 - 0)      | 1<br>(1 - 2)             | 1<br>(0 - 1)       | 1<br>(1 - 2)       |
| Other transport injuries                        | 58<br>(29 - 87)          | 1<br>(1 - 2)     | 1<br>(0 - 1)      | 46<br>(22 - 72)          | 5<br>(3 - 9)       | 5<br>(3 - 8)       |
| Unintentional injuries                          | 335<br>(252 - 436)       | 22<br>(14 - 34)  | 9<br>(6 - 13)     | 204<br>(143 - 286)       | 39<br>(27 - 54)    | 61<br>(46 - 76)    |
| Falls                                           | 69<br>(48 - 96)          | 3<br>(1 - 6)     | 1<br>(1 - 2)      | 36<br>(22 - 56)          | 11<br>(7 - 18)     | 18<br>(11 - 29)    |
| Drowning                                        | 127<br>(76 - 184)        | 11<br>(6 - 20)   | 5<br>(3 - 9)      | 94<br>(53 - 146)         | 7<br>(4 - 11)      | 9<br>(6 - 13)      |
| Fire, heat, and hot substances                  | 19<br>(13 - 27)          | 1<br>(1 - 2)     | 0<br>(0 - 0)      | 9<br>(6 - 15)            | 2<br>(1 - 3)       | 6<br>(4 - 9)       |
| Poisonings                                      | 7<br>(4 - 13)            | 0<br>(0 - 0)     | 0<br>(0 - 0)      | 6<br>(3 - 11)            | 1<br>(0 - 1)       | 0<br>(0 - 1)       |
| Exposure to mechanical forces                   | 67<br>(46 - 91)          | 3<br>(2 - 5)     | 1<br>(1 - 2)      | 42<br>(27 - 62)          | 10<br>(6 - 15)     | 11<br>(7 - 16)     |
| Unintentional firearm injuries                  | 7<br>(4 - 11)            | 0<br>(0 - 0)     | 0<br>(0 - 0)      | 5<br>(3 - 8)             | 1<br>(1 - 1)       | 1<br>(1 - 1)       |
| Unintentional suffocation                       | 2<br>(1 - 3)             | 0<br>(0 - 1)     | 0<br>(0 - 0)      | 1<br>(0 - 1)             | 0<br>(0 - 1)       | 0<br>(0 - 1)       |
| Other exposure to mechanical forces             | 57<br>(40 - 80)          | 2<br>(1 - 4)     | 1<br>(0 - 1)      | 36<br>(23 - 55)          | 9<br>(5 - 14)      | 10<br>(6 - 14)     |
| Adverse effects of medical treatment            | 22<br>(14 - 30)          | 2<br>(1 - 4)     | 0<br>(0 - 0)      | 7<br>(4 - 11)            | 4<br>(2 - 7)       | 9<br>(4 - 14)      |
| Animal contact                                  | 7<br>(5 - 12)            | 1<br>(0 - 1)     | 0<br>(0 - 0)      | 4<br>(2 - 6)             | 1<br>(1 - 2)       | 2<br>(1 - 3)       |
| Venomous animal contact                         | 3<br>(2 - 5)             | 0<br>(0 - 0)     | 0<br>(0 - 0)      | 2<br>(1 - 3)             | 0<br>(0 - 1)       | 1<br>(0 - 1)       |
| Non-venomous animal contact                     | 4<br>(3 - 7)             | 0<br>(0 - 1)     | 0<br>(0 - 0)      | 2<br>(1 - 3)             | 1<br>(0 - 1)       | 1<br>(1 - 2)       |
| Foreign body                                    | 7<br>(4 - 11)            | 1<br>(0 - 1)     | 0<br>(0 - 0)      | 1<br>(1 - 1)             | 1<br>(1 - 2)       | 5<br>(2 - 7)       |
| Pulmonary aspiration and foreign body in airway | 7<br>(3 - 10)            | 1<br>(0 - 1)     | 0<br>(0 - 0)      | 1<br>(0 - 1)             | 1<br>(0 - 1)       | 4<br>(2 - 7)       |
| Foreign body in other body part                 | 1<br>(0 - 1)             | 0<br>(0 - 0)     | 0<br>(0 - 0)      | 0<br>(0 - 1)             | 0<br>(0 - 0)       | 0<br>(0 - 0)       |
| Other unintentional injuries                    | 11<br>(8 - 14)           | 1<br>(0 - 1)     | 0<br>(0 - 0)      | 6<br>(4 - 9)             | 2<br>(1 - 2)       | 3<br>(2 - 3)       |
| Self-harm and interpersonal violence            | 116<br>(73 - 164)        | 1<br>(0 - 2)     | 1<br>(0 - 2)      | 89<br>(54 - 130)         | 14<br>(8 - 20)     | 13<br>(7 - 18)     |
| Self-harm                                       | 83<br>(50 - 118)         | --               | 1<br>(0 - 1)      | 63<br>(35 - 94)          | 10<br>(6 - 15)     | 9<br>(6 - 14)      |
| Interpersonal violence                          | 33<br>(17 - 50)          | 1<br>(0 - 2)     | 0<br>(0 - 0)      | 25<br>(14 - 41)          | 4<br>(2 - 6)       | 3<br>(1 - 6)       |
| Assault by firearm                              | 8<br>(3 - 14)            | 0<br>(0 - 0)     | 0<br>(0 - 0)      | 7<br>(2 - 12)            | 1<br>(0 - 2)       | 0<br>(0 - 1)       |
| Assault by sharp object                         | 3<br>(1 - 5)             | 0<br>(0 - 0)     | 0<br>(0 - 0)      | 2<br>(1 - 3)             | 1<br>(0 - 1)       | 0<br>(0 - 0)       |
| Assault by other means                          | 22<br>(12 - 35)          | 1<br>(0 - 2)     | 0<br>(0 - 0)      | 17<br>(9 - 30)           | 2<br>(1 - 4)       | 3<br>(1 - 5)       |

Web Table 31- Oman deaths with 95% UI by age, sex, and cause in 2013

| Cause                                                             | Females, All Ages        | Females, 0-4 Years | Females, 5-14 Years | Females, 15-49 Years | Females, 50-69 Years | Females, 70-80 Years     |
|-------------------------------------------------------------------|--------------------------|--------------------|---------------------|----------------------|----------------------|--------------------------|
| All causes                                                        | 3,646<br>(2,826 - 4,366) | 283<br>(242 - 338) | 43<br>(35 - 55)     | 596<br>(436 - 851)   | 813<br>(530 - 1,034) | 1,912<br>(1,542 - 2,141) |
| Communicable, maternal, neonatal, and nutritional diseases        | 524<br>(423 - 641)       | 137<br>(110 - 170) | 11<br>(7 - 17)      | 81<br>(61 - 115)     | 71<br>(45 - 98)      | 225<br>(168 - 289)       |
| HIV/AIDS and tuberculosis                                         | 18<br>(13 - 24)          | 0<br>(0 - 1)       | 0<br>(0 - 0)        | 9<br>(6 - 14)        | 3<br>(2 - 4)         | 5<br>(3 - 7)             |
| Tuberculosis                                                      | 11<br>(8 - 15)           | 0<br>(0 - 1)       | 0<br>(0 - 0)        | 3<br>(2 - 5)         | 3<br>(2 - 4)         | 5<br>(3 - 7)             |
| HIV/AIDS                                                          | 7<br>(4 - 12)            | 0<br>(0 - 0)       | 0<br>(0 - 0)        | 6<br>(4 - 11)        | 0<br>(0 - 1)         | 0<br>(0 - 0)             |
| HIV/AIDS resulting in mycobacterial infection                     | 0<br>(0 - 1)             | 0<br>(0 - 0)       | 0<br>(0 - 0)        | 0<br>(0 - 0)         | 0<br>(0 - 0)         | 0<br>(0 - 0)             |
| HIV/AIDS resulting in other diseases                              | 7<br>(4 - 12)            | 0<br>(0 - 0)       | 0<br>(0 - 0)        | 6<br>(4 - 10)        | 0<br>(0 - 1)         | 0<br>(0 - 0)             |
| Diarrhea, lower respiratory, and other common infectious diseases | 315<br>(234 - 407)       | 31<br>(21 - 43)    | 9<br>(5 - 16)       | 43<br>(28 - 66)      | 51<br>(31 - 73)      | 181<br>(128 - 241)       |
| Diarrheal diseases                                                | 14<br>(9 - 22)           | 1<br>(0 - 2)       | 0<br>(0 - 0)        | 1<br>(1 - 2)         | 2<br>(1 - 4)         | 9<br>(5 - 16)            |
| Intestinal infectious diseases                                    | 27<br>(10 - 57)          | 8<br>(3 - 18)      | 6<br>(2 - 12)       | 11<br>(3 - 26)       | 1<br>(0 - 3)         | 1<br>(0 - 2)             |
| Typhoid fever                                                     | 19<br>(6 - 42)           | 5<br>(2 - 12)      | 4<br>(1 - 9)        | 8<br>(2 - 20)        | 1<br>(0 - 2)         | 0<br>(0 - 1)             |
| Paratyphoid fever                                                 | 5<br>(2 - 13)            | 2<br>(1 - 4)       | 1<br>(0 - 3)        | 2<br>(1 - 6)         | 0<br>(0 - 1)         | 0<br>(0 - 0)             |
| Other intestinal infectious diseases                              | 3<br>(0 - 8)             | 1<br>(0 - 5)       | 0<br>(0 - 2)        | 1<br>(0 - 4)         | 0<br>(0 - 2)         | 0<br>(0 - 1)             |
| Lower respiratory infections                                      | 258<br>(187 - 337)       | 16<br>(10 - 25)    | 3<br>(2 - 4)        | 28<br>(19 - 44)      | 45<br>(27 - 66)      | 166<br>(116 - 226)       |
| Upper respiratory infections                                      | 0<br>(0 - 0)             | 0<br>(0 - 0)       | 0<br>(0 - 0)        | 0<br>(0 - 0)         | 0<br>(0 - 0)         | 0<br>(0 - 0)             |
| Otitis media                                                      | 1<br>(0 - 1)             | 0<br>(0 - 0)       | 0<br>(0 - 0)        | 0<br>(0 - 0)         | 0<br>(0 - 0)         | 0<br>(0 - 0)             |
| Meningitis                                                        | 9<br>(6 - 12)            | 3<br>(2 - 4)       | 0<br>(0 - 1)        | 1<br>(1 - 2)         | 1<br>(1 - 2)         | 3<br>(2 - 5)             |
| Pneumococcal meningitis                                           | 2<br>(1 - 3)             | 0<br>(0 - 1)       | 0<br>(0 - 0)        | 0<br>(0 - 1)         | 0<br>(0 - 1)         | 1<br>(0 - 1)             |
| H influenzae type B meningitis                                    | 2<br>(1 - 3)             | 1<br>(1 - 2)       | 0<br>(0 - 0)        | 0<br>(0 - 0)         | 0<br>(0 - 0)         | 0<br>(0 - 1)             |
| Meningococcal meningitis                                          | 2<br>(2 - 4)             | 1<br>(0 - 1)       | 0<br>(0 - 0)        | 0<br>(0 - 1)         | 0<br>(0 - 1)         | 1<br>(0 - 2)             |
| Other meningitis                                                  | 3<br>(2 - 4)             | 0<br>(0 - 1)       | 0<br>(0 - 0)        | 0<br>(0 - 1)         | 1<br>(0 - 1)         | 1<br>(1 - 2)             |
| Encephalitis                                                      | 4<br>(3 - 5)             | 1<br>(0 - 1)       | 0<br>(0 - 1)        | 1<br>(1 - 2)         | 1<br>(0 - 1)         | 1<br>(1 - 1)             |
| Diphtheria                                                        | 0<br>(0 - 0)             | 0<br>(0 - 0)       | 0<br>(0 - 0)        | 0<br>(0 - 0)         | 0<br>(0 - 0)         | --                       |
| Whooping cough                                                    | 1<br>(0 - 3)             | 1<br>(0 - 3)       | 0<br>(0 - 0)        | 0<br>(0 - 0)         | 0<br>(0 - 0)         | --                       |
| Tetanus                                                           | 0<br>(0 - 0)             | 0<br>(0 - 0)       | 0<br>(0 - 0)        | 0<br>(0 - 0)         | 0<br>(0 - 0)         | 0<br>(0 - 0)             |
| Measles                                                           | 1<br>(0 - 5)             | 1<br>(0 - 5)       | 0<br>(0 - 1)        | 0<br>(0 - 0)         | 0<br>(0 - 0)         | --                       |
| Varicella and herpes zoster                                       | 0<br>(0 - 1)             | 0<br>(0 - 1)       | 0<br>(0 - 0)        | 0<br>(0 - 0)         | 0<br>(0 - 0)         | 0<br>(0 - 1)             |
| Neglected tropical diseases and malaria                           | 2<br>(1 - 4)             | 0<br>(0 - 1)       | 0<br>(0 - 0)        | 1<br>(1 - 1)         | 0<br>(0 - 1)         | 0<br>(0 - 1)             |
| Malaria                                                           | 0<br>(0 - 0)             | 0<br>(0 - 0)       | 0<br>(0 - 0)        | 0<br>(0 - 0)         | 0<br>(0 - 0)         | 0<br>(0 - 0)             |
| Leishmaniasis                                                     | 0<br>(0 - 0)             | 0<br>(0 - 0)       | 0<br>(0 - 0)        | 0<br>(0 - 0)         | 0<br>(0 - 0)         | 0<br>(0 - 0)             |
| Visceral leishmaniasis                                            | 0<br>(0 - 0)             | 0<br>(0 - 0)       | 0<br>(0 - 0)        | 0<br>(0 - 0)         | 0<br>(0 - 0)         | 0<br>(0 - 0)             |
| Schistosomiasis                                                   | 1<br>(1 - 2)             | 0<br>(0 - 0)       | 0<br>(0 - 0)        | 0<br>(0 - 1)         | 0<br>(0 - 1)         | 0<br>(0 - 1)             |
| Cysticercosis                                                     | 0<br>(0 - 0)             | 0<br>(0 - 0)       | 0<br>(0 - 0)        | 0<br>(0 - 0)         | 0<br>(0 - 0)         | 0<br>(0 - 0)             |
| Cystic echinococcosis                                             | 0<br>(0 - 0)             | 0<br>(0 - 0)       | 0<br>(0 - 0)        | 0<br>(0 - 0)         | 0<br>(0 - 0)         | 0<br>(0 - 0)             |
| Dengue                                                            | 0<br>(0 - 0)             | 0<br>(0 - 0)       | 0<br>(0 - 0)        | 0<br>(0 - 0)         | 0<br>(0 - 0)         | 0<br>(0 - 0)             |
| Rabies                                                            | 0<br>(0 - 0)             | 0<br>(0 - 0)       | 0<br>(0 - 0)        | 0<br>(0 - 0)         | 0<br>(0 - 0)         | 0<br>(0 - 0)             |
| Intestinal nematode infections                                    | 0<br>(0 - 2)             | 0<br>(0 - 1)       | 0<br>(0 - 0)        | 0<br>(0 - 0)         | 0<br>(0 - 0)         | 0<br>(0 - 0)             |
| Ascariasis                                                        | 0<br>(0 - 2)             | 0<br>(0 - 1)       | 0<br>(0 - 0)        | 0<br>(0 - 0)         | 0<br>(0 - 0)         | 0<br>(0 - 0)             |
| Other neglected tropical diseases                                 | 0<br>(0 - 0)             | 0<br>(0 - 0)       | 0<br>(0 - 0)        | 0<br>(0 - 0)         | 0<br>(0 - 0)         | 0<br>(0 - 0)             |
| Maternal disorders                                                | 9<br>(6 - 15)            | --                 | 0<br>(0 - 0)        | 9<br>(6 - 15)        | --                   | --                       |

Web Table 31- Oman deaths with 95% UI by age, sex, and cause in 2013

| Cause                                                            | Females, All Ages        | Females, 0-4 Years | Females, 5-14 Years | Females, 15-49 Years | Females, 50-69 Years | Females, 70-80 Years     |
|------------------------------------------------------------------|--------------------------|--------------------|---------------------|----------------------|----------------------|--------------------------|
| Maternal hemorrhage                                              | 2<br>(1 - 3)             | --                 | 0<br>(0 - 0)        | 2<br>(1 - 3)         | --                   | --                       |
| Maternal sepsis and other maternal infections                    | 1<br>(0 - 1)             | --                 | 0<br>(0 - 0)        | 1<br>(0 - 1)         | --                   | --                       |
| Maternal hypertensive disorders                                  | 1<br>(1 - 2)             | --                 | 0<br>(0 - 0)        | 1<br>(1 - 2)         | --                   | --                       |
| Maternal obstructed labor                                        | 1<br>(1 - 2)             | --                 | 0<br>(0 - 0)        | 1<br>(1 - 2)         | --                   | --                       |
| Maternal abortive outcome                                        | 1<br>(1 - 2)             | --                 | 0<br>(0 - 0)        | 1<br>(1 - 2)         | --                   | --                       |
| Indirect maternal deaths                                         | 1<br>(0 - 2)             | --                 | 0<br>(0 - 0)        | 1<br>(0 - 2)         | --                   | --                       |
| Late maternal deaths                                             | 1<br>(0 - 2)             | --                 | 0<br>(0 - 0)        | 1<br>(0 - 2)         | --                   | --                       |
| Maternal deaths aggravated by HIV/AIDS                           | 0<br>(0 - 0)             | --                 | --                  | 0<br>(0 - 0)         | --                   | --                       |
| Other maternal disorders                                         | 1<br>(1 - 2)             | --                 | 0<br>(0 - 0)        | 1<br>(1 - 2)         | --                   | --                       |
| Neonatal disorders                                               | 100<br>(77 - 130)        | 100<br>(77 - 130)  | --                  | --                   | --                   | --                       |
| Neonatal preterm birth complications                             | 41<br>(24 - 62)          | 41<br>(24 - 62)    | --                  | --                   | --                   | --                       |
| Neonatal encephalopathy due to birth asphyxia and trauma         | 0<br>(0 - 1)             | 0<br>(0 - 1)       | --                  | --                   | --                   | --                       |
| Neonatal sepsis and other neonatal infections                    | 4<br>(1 - 8)             | 4<br>(1 - 8)       | --                  | --                   | --                   | --                       |
| Hemolytic disease and other neonatal jaundice                    | 0<br>(0 - 0)             | 0<br>(0 - 0)       | --                  | --                   | --                   | --                       |
| Other neonatal disorders                                         | 55<br>(34 - 81)          | 55<br>(34 - 81)    | --                  | --                   | --                   | --                       |
| Nutritional deficiencies                                         | 37<br>(27 - 50)          | 2<br>(1 - 4)       | 1<br>(0 - 1)        | 9<br>(6 - 13)        | 6<br>(3 - 9)         | 20<br>(13 - 29)          |
| Protein-energy malnutrition                                      | 3<br>(2 - 8)             | 1<br>(0 - 2)       | 0<br>(0 - 0)        | 1<br>(0 - 1)         | 0<br>(0 - 1)         | 2<br>(1 - 4)             |
| Iodine deficiency                                                | 0<br>(0 - 0)             | 0<br>(0 - 0)       | 0<br>(0 - 0)        | 0<br>(0 - 0)         | 0<br>(0 - 0)         | 0<br>(0 - 0)             |
| Iron-deficiency anemia                                           | 33<br>(23 - 44)          | 2<br>(1 - 3)       | 1<br>(0 - 1)        | 8<br>(5 - 12)        | 5<br>(3 - 8)         | 18<br>(11 - 26)          |
| Other nutritional deficiencies                                   | 1<br>(0 - 2)             | 0<br>(0 - 0)       | 0<br>(0 - 0)        | 0<br>(0 - 1)         | 0<br>(0 - 0)         | 0<br>(0 - 0)             |
| Other communicable, maternal, neonatal, and nutritional diseases | 42<br>(26 - 68)          | 3<br>(2 - 5)       | 1<br>(0 - 1)        | 11<br>(6 - 17)       | 10<br>(5 - 18)       | 18<br>(8 - 39)           |
| Sexually transmitted diseases excluding HIV                      | 1<br>(1 - 2)             | 0<br>(0 - 1)       | 0<br>(0 - 0)        | 0<br>(0 - 1)         | 0<br>(0 - 0)         | 0<br>(0 - 1)             |
| Syphilis                                                         | 1<br>(0 - 2)             | 0<br>(0 - 1)       | 0<br>(0 - 0)        | 0<br>(0 - 0)         | 0<br>(0 - 0)         | 0<br>(0 - 1)             |
| Chlamydial infection                                             | 0<br>(0 - 0)             | --                 | 0<br>(0 - 0)        | 0<br>(0 - 0)         | 0<br>(0 - 0)         | 0<br>(0 - 0)             |
| Gonococcal infection                                             | 0<br>(0 - 0)             | --                 | 0<br>(0 - 0)        | 0<br>(0 - 0)         | 0<br>(0 - 0)         | 0<br>(0 - 0)             |
| Other sexually transmitted diseases                              | 0<br>(0 - 0)             | --                 | 0<br>(0 - 0)        | 0<br>(0 - 0)         | 0<br>(0 - 0)         | 0<br>(0 - 0)             |
| Hepatitis                                                        | 9<br>(6 - 13)            | 1<br>(0 - 1)       | 0<br>(0 - 0)        | 3<br>(2 - 5)         | 4<br>(2 - 6)         | 1<br>(1 - 2)             |
| Acute hepatitis A                                                | 1<br>(0 - 2)             | 0<br>(0 - 1)       | 0<br>(0 - 0)        | 0<br>(0 - 1)         | 0<br>(0 - 1)         | 0<br>(0 - 0)             |
| Acute hepatitis B                                                | 5<br>(3 - 8)             | 0<br>(0 - 1)       | 0<br>(0 - 0)        | 1<br>(0 - 2)         | 3<br>(1 - 4)         | 1<br>(1 - 1)             |
| Acute hepatitis C                                                | 1<br>(0 - 2)             | --                 | 0<br>(0 - 0)        | 0<br>(0 - 1)         | 0<br>(0 - 1)         | 0<br>(0 - 0)             |
| Acute hepatitis E                                                | 3<br>(1 - 5)             | 0<br>(0 - 0)       | 0<br>(0 - 0)        | 2<br>(1 - 3)         | 1<br>(0 - 2)         | 0<br>(0 - 0)             |
| Other infectious diseases                                        | 32<br>(17 - 56)          | 2<br>(1 - 4)       | 0<br>(0 - 1)        | 7<br>(4 - 13)        | 6<br>(2 - 14)        | 16<br>(6 - 37)           |
| Non-communicable diseases                                        | 2,720<br>(2,073 - 3,273) | 110<br>(86 - 139)  | 15<br>(11 - 20)     | 321<br>(224 - 470)   | 680<br>(441 - 872)   | 1,593<br>(1,284 - 1,809) |
| Neoplasms                                                        | 326<br>(232 - 421)       | 4<br>(3 - 6)       | 4<br>(3 - 6)        | 98<br>(68 - 145)     | 119<br>(77 - 157)    | 100<br>(77 - 118)        |
| Esophageal cancer                                                | 10<br>(7 - 13)           | --                 | --                  | 1<br>(1 - 2)         | 4<br>(2 - 6)         | 5<br>(3 - 7)             |
| Stomach cancer                                                   | 27<br>(19 - 37)          | --                 | --                  | 6<br>(4 - 9)         | 10<br>(6 - 15)       | 11<br>(8 - 16)           |
| Liver cancer                                                     | 18<br>(12 - 25)          | --                 | 0<br>(0 - 0)        | 3<br>(2 - 5)         | 8<br>(5 - 12)        | 6<br>(4 - 9)             |
| Liver cancer due to hepatitis B                                  | 5<br>(1 - 9)             | --                 | 0<br>(0 - 0)        | 1<br>(1 - 3)         | 2<br>(0 - 5)         | 1<br>(0 - 2)             |
| Liver cancer due to hepatitis C                                  | 9<br>(4 - 16)            | --                 | 0<br>(0 - 0)        | 1<br>(0 - 2)         | 4<br>(2 - 8)         | 3<br>(2 - 6)             |
| Liver cancer due to alcohol use                                  | 2<br>(0 - 4)             | --                 | --                  | 0<br>(0 - 0)         | 1<br>(0 - 2)         | 1<br>(0 - 2)             |

Web Table 31- Oman deaths with 95% UI by age, sex, and cause in 2013

| Cause                                         | Females, All Ages        | Females, 0-4 Years | Females, 5-14 Years | Females, 15-49 Years | Females, 50-69 Years | Females, 70-80 Years |
|-----------------------------------------------|--------------------------|--------------------|---------------------|----------------------|----------------------|----------------------|
| Liver cancer due to other causes              | 3<br>(1 - 6)             | --                 | 0<br>(0 - 0)        | 1<br>(0 - 2)         | 1<br>(1 - 3)         | 1<br>(0 - 2)         |
| Larynx cancer                                 | 0<br>(0 - 1)             | --                 | --                  | 0<br>(0 - 0)         | 0<br>(0 - 0)         | 0<br>(0 - 0)         |
| Tracheal, bronchus and lung cancer            | 20<br>(14 - 27)          | --                 | --                  | 3<br>(2 - 5)         | 9<br>(6 - 13)        | 8<br>(5 - 11)        |
| Breast cancer                                 | 63<br>(43 - 88)          | --                 | --                  | 30<br>(20 - 45)      | 23<br>(14 - 32)      | 11<br>(7 - 14)       |
| Cervical cancer                               | 15<br>(10 - 21)          | --                 | --                  | 5<br>(3 - 8)         | 6<br>(3 - 9)         | 4<br>(3 - 6)         |
| Uterine cancer                                | 3<br>(2 - 4)             | --                 | --                  | 1<br>(0 - 1)         | 1<br>(1 - 2)         | 1<br>(1 - 1)         |
| Prostate cancer                               | --                       | --                 | --                  | --                   | --                   | --                   |
| Colon and rectum cancer                       | 25<br>(17 - 33)          | --                 | --                  | 8<br>(5 - 12)        | 9<br>(6 - 12)        | 8<br>(6 - 11)        |
| Lip and oral cavity cancer                    | 4<br>(2 - 6)             | --                 | --                  | 1<br>(1 - 2)         | 1<br>(1 - 2)         | 1<br>(1 - 2)         |
| Nasopharynx cancer                            | 1<br>(1 - 1)             | --                 | 0<br>(0 - 0)        | 1<br>(0 - 1)         | 0<br>(0 - 0)         | 0<br>(0 - 0)         |
| Other pharynx cancer                          | 1<br>(1 - 1)             | --                 | --                  | 0<br>(0 - 0)         | 0<br>(0 - 0)         | 0<br>(0 - 0)         |
| Gallbladder and biliary tract cancer          | 7<br>(4 - 10)            | --                 | --                  | 2<br>(1 - 3)         | 3<br>(2 - 4)         | 2<br>(1 - 4)         |
| Pancreatic cancer                             | 12<br>(8 - 17)           | --                 | --                  | 3<br>(2 - 4)         | 6<br>(4 - 8)         | 4<br>(3 - 5)         |
| Malignant skin melanoma                       | 1<br>(1 - 2)             | --                 | --                  | 1<br>(0 - 1)         | 0<br>(0 - 1)         | 0<br>(0 - 0)         |
| Non-melanoma skin cancer                      | 0<br>(0 - 1)             | --                 | --                  | 0<br>(0 - 0)         | 0<br>(0 - 0)         | 0<br>(0 - 0)         |
| Ovarian cancer                                | 16<br>(11 - 22)          | --                 | --                  | 4<br>(3 - 7)         | 6<br>(4 - 9)         | 6<br>(4 - 8)         |
| Testicular cancer                             | --                       | --                 | --                  | --                   | --                   | --                   |
| Kidney cancer                                 | 3<br>(2 - 4)             | 0<br>(0 - 0)       | 0<br>(0 - 0)        | 1<br>(1 - 1)         | 1<br>(1 - 2)         | 1<br>(0 - 1)         |
| Bladder cancer                                | 8<br>(5 - 12)            | --                 | --                  | 1<br>(0 - 1)         | 3<br>(2 - 5)         | 4<br>(3 - 7)         |
| Brain and nervous system cancer               | 10<br>(7 - 14)           | 0<br>(0 - 1)       | 1<br>(0 - 1)        | 4<br>(3 - 7)         | 3<br>(2 - 4)         | 1<br>(1 - 2)         |
| Thyroid cancer                                | 2<br>(1 - 3)             | --                 | 0<br>(0 - 0)        | 1<br>(0 - 1)         | 1<br>(0 - 1)         | 1<br>(0 - 1)         |
| Mesothelioma                                  | 0<br>(0 - 0)             | --                 | --                  | 0<br>(0 - 0)         | 0<br>(0 - 0)         | 0<br>(0 - 0)         |
| Hodgkin lymphoma                              | 1<br>(1 - 2)             | 0<br>(0 - 0)       | 0<br>(0 - 0)        | 1<br>(0 - 1)         | 0<br>(0 - 1)         | 0<br>(0 - 0)         |
| Non-Hodgkin lymphoma                          | 17<br>(11 - 24)          | 0<br>(0 - 1)       | 0<br>(0 - 0)        | 6<br>(3 - 9)         | 6<br>(3 - 9)         | 5<br>(3 - 8)         |
| Multiple myeloma                              | 6<br>(4 - 9)             | --                 | --                  | 1<br>(1 - 2)         | 3<br>(2 - 5)         | 2<br>(1 - 3)         |
| Leukemia                                      | 18<br>(13 - 24)          | 1<br>(0 - 2)       | 2<br>(1 - 3)        | 7<br>(5 - 11)        | 4<br>(2 - 5)         | 4<br>(3 - 6)         |
| Other neoplasms                               | 35<br>(23 - 49)          | 2<br>(1 - 4)       | 1<br>(1 - 2)        | 9<br>(6 - 15)        | 10<br>(6 - 15)       | 12<br>(8 - 18)       |
| Cardiovascular diseases                       | 1,432<br>(1,080 - 1,740) | 16<br>(11 - 23)    | 4<br>(3 - 6)        | 113<br>(76 - 166)    | 337<br>(214 - 439)   | 962<br>(764 - 1,124) |
| Rheumatic heart disease                       | 15<br>(7 - 22)           | 0<br>(0 - 0)       | 0<br>(0 - 0)        | 4<br>(2 - 6)         | 4<br>(2 - 6)         | 7<br>(3 - 11)        |
| Ischemic heart disease                        | 732<br>(542 - 955)       | 3<br>(1 - 5)       | 1<br>(0 - 1)        | 41<br>(26 - 62)      | 183<br>(116 - 250)   | 505<br>(391 - 647)   |
| Cerebrovascular disease                       | 414<br>(288 - 529)       | 5<br>(3 - 7)       | 2<br>(1 - 3)        | 37<br>(24 - 57)      | 85<br>(51 - 119)     | 286<br>(203 - 358)   |
| Ischemic stroke                               | 166<br>(95 - 220)        | 0<br>(0 - 0)       | 0<br>(0 - 0)        | 4<br>(2 - 6)         | 24<br>(12 - 35)      | 139<br>(77 - 184)    |
| Hemorrhagic stroke                            | 248<br>(175 - 333)       | 4<br>(3 - 7)       | 2<br>(1 - 3)        | 33<br>(21 - 52)      | 61<br>(37 - 87)      | 147<br>(105 - 198)   |
| Hypertensive heart disease                    | 56<br>(35 - 81)          | 0<br>(0 - 0)       | 0<br>(0 - 0)        | 3<br>(2 - 5)         | 10<br>(5 - 15)       | 43<br>(27 - 64)      |
| Cardiomyopathy and myocarditis                | 6<br>(4 - 9)             | 1<br>(0 - 2)       | 0<br>(0 - 0)        | 1<br>(1 - 2)         | 1<br>(1 - 2)         | 3<br>(1 - 4)         |
| Atrial fibrillation and flutter               | 5<br>(3 - 6)             | --                 | --                  | 0<br>(0 - 0)         | 0<br>(0 - 1)         | 4<br>(2 - 6)         |
| Aortic aneurysm                               | 4<br>(3 - 7)             | --                 | --                  | 1<br>(0 - 1)         | 1<br>(0 - 1)         | 3<br>(2 - 4)         |
| Peripheral vascular disease                   | 0<br>(0 - 0)             | --                 | --                  | 0<br>(0 - 0)         | 0<br>(0 - 0)         | 0<br>(0 - 0)         |
| Endocarditis                                  | 19<br>(11 - 28)          | 1<br>(0 - 1)       | 0<br>(0 - 0)        | 2<br>(1 - 3)         | 3<br>(2 - 5)         | 13<br>(7 - 20)       |
| Other cardiovascular and circulatory diseases | 180<br>(123 - 239)       | 7<br>(4 - 11)      | 1<br>(1 - 2)        | 24<br>(15 - 37)      | 49<br>(29 - 68)      | 99<br>(67 - 132)     |



Web Table 31- Oman deaths with 95% UI by age, sex, and cause in 2013

| Cause                                               | Females, All Ages  | Females, 0-4 Years | Females, 5-14 Years | Females, 15-49 Years | Females, 50-69 Years | Females, 70-80 Years |
|-----------------------------------------------------|--------------------|--------------------|---------------------|----------------------|----------------------|----------------------|
| Chronic respiratory diseases                        | 93<br>(66 - 119)   | 2<br>(1 - 2)       | 0<br>(0 - 1)        | 11<br>(7 - 17)       | 23<br>(14 - 32)      | 57<br>(42 - 73)      |
| Chronic obstructive pulmonary disease               | 85<br>(61 - 109)   | 1<br>(1 - 2)       | 0<br>(0 - 0)        | 8<br>(5 - 12)        | 22<br>(13 - 31)      | 54<br>(40 - 69)      |
| Pneumoconiosis                                      | 1<br>(1 - 1)       | 0<br>(0 - 0)       | 0<br>(0 - 0)        | 0<br>(0 - 0)         | 0<br>(0 - 0)         | 1<br>(0 - 1)         |
| Silicosis                                           | 0<br>(0 - 0)       | 0<br>(0 - 0)       | 0<br>(0 - 0)        | 0<br>(0 - 0)         | 0<br>(0 - 0)         | 0<br>(0 - 0)         |
| Asbestosis                                          | 0<br>(0 - 0)       | 0<br>(0 - 0)       | 0<br>(0 - 0)        | 0<br>(0 - 0)         | 0<br>(0 - 0)         | 0<br>(0 - 0)         |
| Coal workers pneumoconiosis                         | 0<br>(0 - 0)       | 0<br>(0 - 0)       | 0<br>(0 - 0)        | 0<br>(0 - 0)         | 0<br>(0 - 0)         | 0<br>(0 - 0)         |
| Other pneumoconiosis                                | 0<br>(0 - 0)       | 0<br>(0 - 0)       | 0<br>(0 - 0)        | 0<br>(0 - 0)         | 0<br>(0 - 0)         | 0<br>(0 - 0)         |
| Asthma                                              | 1<br>(0 - 1)       | 0<br>(0 - 0)       | 0<br>(0 - 0)        | 0<br>(0 - 1)         | 0<br>(0 - 0)         | 0<br>(0 - 0)         |
| Interstitial lung disease and pulmonary sarcoidosis | 2<br>(1 - 3)       | 0<br>(0 - 0)       | 0<br>(0 - 0)        | 1<br>(0 - 2)         | 0<br>(0 - 0)         | 1<br>(0 - 2)         |
| Other chronic respiratory diseases                  | 5<br>(3 - 7)       | 0<br>(0 - 0)       | 0<br>(0 - 0)        | 2<br>(1 - 3)         | 0<br>(0 - 1)         | 2<br>(1 - 3)         |
| Cirrhosis                                           | 62<br>(43 - 82)    | 1<br>(0 - 2)       | 0<br>(0 - 1)        | 15<br>(10 - 23)      | 23<br>(14 - 32)      | 23<br>(16 - 31)      |
| Cirrhosis due to hepatitis B                        | 24<br>(14 - 39)    | 0<br>(0 - 0)       | 0<br>(0 - 0)        | 5<br>(2 - 9)         | 9<br>(4 - 16)        | 10<br>(6 - 17)       |
| Cirrhosis due to hepatitis C                        | 28<br>(13 - 45)    | 0<br>(0 - 0)       | 0<br>(0 - 0)        | 7<br>(3 - 13)        | 11<br>(5 - 18)       | 10<br>(5 - 17)       |
| Cirrhosis due to alcohol use                        | 3<br>(2 - 5)       | --                 | --                  | 0<br>(0 - 1)         | 1<br>(0 - 2)         | 2<br>(1 - 3)         |
| Cirrhosis due to other causes                       | 7<br>(4 - 12)      | 1<br>(0 - 2)       | 0<br>(0 - 0)        | 3<br>(1 - 5)         | 2<br>(1 - 4)         | 1<br>(1 - 3)         |
| Digestive diseases                                  | 32<br>(19 - 44)    | 0<br>(0 - 1)       | 0<br>(0 - 0)        | 4<br>(2 - 6)         | 6<br>(3 - 9)         | 22<br>(13 - 31)      |
| Peptic ulcer disease                                | 13<br>(8 - 19)     | 0<br>(0 - 0)       | 0<br>(0 - 0)        | 1<br>(0 - 1)         | 3<br>(1 - 4)         | 10<br>(6 - 15)       |
| Gastritis and duodenitis                            | 0<br>(0 - 0)       | 0<br>(0 - 0)       | 0<br>(0 - 0)        | 0<br>(0 - 0)         | 0<br>(0 - 0)         | 0<br>(0 - 0)         |
| Appendicitis                                        | 4<br>(2 - 7)       | 0<br>(0 - 0)       | 0<br>(0 - 0)        | 0<br>(0 - 1)         | 1<br>(0 - 2)         | 3<br>(1 - 5)         |
| Paralytic ileus and intestinal obstruction          | 2<br>(0 - 3)       | 0<br>(0 - 0)       | 0<br>(0 - 0)        | 0<br>(0 - 1)         | 0<br>(0 - 1)         | 1<br>(0 - 1)         |
| Inguinal, femoral, and abdominal hernia             | 0<br>(0 - 1)       | 0<br>(0 - 0)       | 0<br>(0 - 0)        | 0<br>(0 - 0)         | 0<br>(0 - 0)         | 0<br>(0 - 0)         |
| Inflammatory bowel disease                          | 1<br>(0 - 1)       | 0<br>(0 - 0)       | 0<br>(0 - 0)        | 0<br>(0 - 0)         | 0<br>(0 - 0)         | 0<br>(0 - 0)         |
| Vascular intestinal disorders                       | 0<br>(0 - 0)       | 0<br>(0 - 0)       | 0<br>(0 - 0)        | 0<br>(0 - 0)         | 0<br>(0 - 0)         | 0<br>(0 - 0)         |
| Gallbladder and biliary diseases                    | 9<br>(5 - 15)      | 0<br>(0 - 0)       | 0<br>(0 - 0)        | 1<br>(0 - 1)         | 1<br>(0 - 2)         | 7<br>(3 - 12)        |
| Pancreatitis                                        | 0<br>(0 - 1)       | 0<br>(0 - 0)       | 0<br>(0 - 0)        | 0<br>(0 - 0)         | 0<br>(0 - 0)         | 0<br>(0 - 0)         |
| Other digestive diseases                            | 2<br>(1 - 4)       | 0<br>(0 - 0)       | 0<br>(0 - 0)        | 0<br>(0 - 1)         | 0<br>(0 - 1)         | 1<br>(1 - 2)         |
| Neurological disorders                              | 141<br>(101 - 184) | 0<br>(0 - 0)       | 0<br>(0 - 0)        | 1<br>(1 - 2)         | 12<br>(7 - 19)       | 127<br>(91 - 168)    |
| Alzheimer disease and other dementias               | 139<br>(99 - 182)  | --                 | --                  | 0<br>(0 - 0)         | 12<br>(7 - 19)       | 127<br>(91 - 167)    |
| Parkinson disease                                   | 0<br>(0 - 1)       | --                 | --                  | 0<br>(0 - 0)         | 0<br>(0 - 0)         | 0<br>(0 - 0)         |
| Epilepsy                                            | 1<br>(0 - 1)       | 0<br>(0 - 0)       | 0<br>(0 - 0)        | 0<br>(0 - 1)         | 0<br>(0 - 0)         | 0<br>(0 - 0)         |
| Multiple sclerosis                                  | 0<br>(0 - 1)       | --                 | --                  | 0<br>(0 - 1)         | 0<br>(0 - 0)         | 0<br>(0 - 0)         |
| Other neurological disorders                        | 1<br>(1 - 1)       | 0<br>(0 - 0)       | 0<br>(0 - 0)        | 0<br>(0 - 0)         | 0<br>(0 - 0)         | 0<br>(0 - 0)         |
| Mental and substance use disorders                  | 4<br>(3 - 6)       | 0<br>(0 - 0)       | 0<br>(0 - 0)        | 3<br>(2 - 5)         | 1<br>(0 - 1)         | 0<br>(0 - 0)         |
| Schizophrenia                                       | 0<br>(0 - 0)       | --                 | --                  | 0<br>(0 - 0)         | 0<br>(0 - 0)         | 0<br>(0 - 0)         |
| Alcohol use disorders                               | 1<br>(0 - 1)       | --                 | --                  | 0<br>(0 - 1)         | 0<br>(0 - 0)         | 0<br>(0 - 0)         |
| Drug use disorders                                  | 3<br>(2 - 4)       | 0<br>(0 - 0)       | --                  | 2<br>(2 - 4)         | 0<br>(0 - 0)         | 0<br>(0 - 0)         |
| Opioid use disorders                                | 2<br>(1 - 2)       | 0<br>(0 - 0)       | --                  | 1<br>(1 - 2)         | 0<br>(0 - 0)         | 0<br>(0 - 0)         |
| Cocaine use disorders                               | 0<br>(0 - 0)       | 0<br>(0 - 0)       | --                  | 0<br>(0 - 0)         | 0<br>(0 - 0)         | 0<br>(0 - 0)         |
| Amphetamine use disorders                           | 0<br>(0 - 0)       | 0<br>(0 - 0)       | --                  | 0<br>(0 - 0)         | 0<br>(0 - 0)         | 0<br>(0 - 0)         |
| Other drug use disorders                            | 1<br>(1 - 2)       | 0<br>(0 - 0)       | --                  | 1<br>(1 - 1)         | 0<br>(0 - 0)         | 0<br>(0 - 0)         |

Web Table 31- Oman deaths with 95% UI by age, sex, and cause in 2013

| Cause                                               | Females, All Ages  | Females, 0-4 Years | Females, 5-14 Years | Females, 15-49 Years | Females, 50-69 Years | Females, 70-80 Years |
|-----------------------------------------------------|--------------------|--------------------|---------------------|----------------------|----------------------|----------------------|
| Eating disorders                                    | 1<br>(0 - 1)       | --                 | 0<br>(0 - 0)        | 0<br>(0 - 1)         | --                   | --                   |
| Anorexia nervosa                                    | 1<br>(0 - 1)       | --                 | 0<br>(0 - 0)        | 0<br>(0 - 1)         | --                   | --                   |
| Diabetes, urogenital, blood, and endocrine diseases | 504<br>(365 - 643) | 6<br>(4 - 8)       | 3<br>(2 - 4)        | 62<br>(42 - 94)      | 155<br>(100 - 211)   | 278<br>(213 - 343)   |
| Diabetes mellitus                                   | 340<br>(244 - 440) | 1<br>(1 - 2)       | 1<br>(0 - 1)        | 29<br>(19 - 45)      | 117<br>(75 - 161)    | 193<br>(143 - 250)   |
| Acute glomerulonephritis                            | 2<br>(1 - 3)       | 0<br>(0 - 0)       | 0<br>(0 - 0)        | 1<br>(0 - 1)         | 0<br>(0 - 1)         | 1<br>(0 - 1)         |
| Chronic kidney disease                              | 109<br>(76 - 145)  | 1<br>(1 - 2)       | 0<br>(0 - 1)        | 18<br>(12 - 28)      | 29<br>(18 - 43)      | 60<br>(41 - 82)      |
| Chronic kidney disease due to diabetes mellitus     | 7<br>(4 - 11)      | 0<br>(0 - 0)       | 0<br>(0 - 0)        | 1<br>(1 - 2)         | 2<br>(1 - 4)         | 4<br>(2 - 6)         |
| Chronic kidney disease due to hypertension          | 61<br>(39 - 88)    | 0<br>(0 - 1)       | 0<br>(0 - 0)        | 9<br>(6 - 15)        | 16<br>(9 - 25)       | 35<br>(23 - 51)      |
| Chronic kidney disease due to glomerulonephritis    | 3<br>(1 - 5)       | 0<br>(0 - 0)       | 0<br>(0 - 0)        | 1<br>(0 - 1)         | 1<br>(0 - 1)         | 1<br>(1 - 2)         |
| Chronic kidney disease due to other causes          | 38<br>(20 - 59)    | 1<br>(0 - 1)       | 0<br>(0 - 0)        | 7<br>(3 - 12)        | 10<br>(4 - 17)       | 20<br>(9 - 34)       |
| Urinary diseases and male infertility               | 24<br>(14 - 36)    | 1<br>(0 - 2)       | 0<br>(0 - 0)        | 4<br>(2 - 6)         | 5<br>(2 - 7)         | 15<br>(8 - 25)       |
| Interstitial nephritis and urinary tract infections | 23<br>(13 - 35)    | 1<br>(0 - 1)       | 0<br>(0 - 0)        | 3<br>(2 - 6)         | 4<br>(2 - 6)         | 15<br>(7 - 24)       |
| Urolithiasis                                        | 0<br>(0 - 0)       | --                 | 0<br>(0 - 0)        | 0<br>(0 - 0)         | 0<br>(0 - 0)         | 0<br>(0 - 0)         |
| Other urinary diseases                              | 1<br>(0 - 1)       | 0<br>(0 - 0)       | 0<br>(0 - 0)        | 0<br>(0 - 0)         | 0<br>(0 - 1)         | 0<br>(0 - 0)         |
| Gynecological diseases                              | 0<br>(0 - 1)       | --                 | --                  | 0<br>(0 - 0)         | 0<br>(0 - 0)         | 0<br>(0 - 0)         |
| Uterine fibroids                                    | 0<br>(0 - 0)       | --                 | --                  | 0<br>(0 - 0)         | 0<br>(0 - 0)         | 0<br>(0 - 0)         |
| Polycystic ovarian syndrome                         | 0<br>(0 - 0)       | --                 | --                  | 0<br>(0 - 0)         | 0<br>(0 - 0)         | --                   |
| Endometriosis                                       | 0<br>(0 - 0)       | --                 | --                  | 0<br>(0 - 0)         | 0<br>(0 - 0)         | --                   |
| Genital prolapse                                    | 0<br>(0 - 0)       | --                 | --                  | 0<br>(0 - 0)         | 0<br>(0 - 0)         | 0<br>(0 - 0)         |
| Other gynecological diseases                        | 0<br>(0 - 0)       | --                 | --                  | 0<br>(0 - 0)         | 0<br>(0 - 0)         | 0<br>(0 - 0)         |
| Hemoglobinopathies and hemolytic anemias            | 20<br>(10 - 31)    | 2<br>(1 - 3)       | 1<br>(1 - 2)        | 9<br>(4 - 14)        | 2<br>(1 - 5)         | 6<br>(3 - 11)        |
| Thalassemias                                        | 3<br>(2 - 5)       | 1<br>(0 - 1)       | 0<br>(0 - 1)        | 2<br>(1 - 3)         | 0<br>(0 - 0)         | 0<br>(0 - 0)         |
| Sickle cell disorders                               | 10<br>(5 - 16)     | 1<br>(0 - 1)       | 1<br>(0 - 1)        | 6<br>(3 - 10)        | 2<br>(1 - 4)         | 0<br>(0 - 1)         |
| G6PD deficiency                                     | 1<br>(0 - 1)       | 0<br>(0 - 0)       | 0<br>(0 - 0)        | 0<br>(0 - 0)         | 0<br>(0 - 0)         | 0<br>(0 - 0)         |
| Other hemoglobinopathies and hemolytic anemias      | 6<br>(3 - 11)      | 0<br>(0 - 0)       | 0<br>(0 - 0)        | 0<br>(0 - 1)         | 0<br>(0 - 1)         | 5<br>(2 - 10)        |
| Endocrine, metabolic, blood, and immune disorders   | 9<br>(3 - 13)      | 1<br>(0 - 2)       | 0<br>(0 - 1)        | 2<br>(1 - 3)         | 2<br>(1 - 3)         | 4<br>(1 - 6)         |
| Musculoskeletal disorders                           | 8<br>(6 - 12)      | --                 | 0<br>(0 - 0)        | 3<br>(2 - 5)         | 1<br>(1 - 2)         | 4<br>(3 - 6)         |
| Rheumatoid arthritis                                | 0<br>(0 - 0)       | --                 | 0<br>(0 - 0)        | 0<br>(0 - 0)         | 0<br>(0 - 0)         | 0<br>(0 - 0)         |
| Other musculoskeletal disorders                     | 8<br>(6 - 12)      | --                 | 0<br>(0 - 0)        | 3<br>(2 - 5)         | 1<br>(1 - 1)         | 4<br>(3 - 6)         |
| Other non-communicable diseases                     | 117<br>(92 - 148)  | 81<br>(60 - 107)   | 3<br>(2 - 4)        | 10<br>(6 - 15)       | 4<br>(3 - 6)         | 20<br>(13 - 27)      |
| Congenital anomalies                                | 96<br>(74 - 123)   | 79<br>(58 - 104)   | 3<br>(2 - 4)        | 8<br>(5 - 13)        | 2<br>(1 - 3)         | 4<br>(3 - 6)         |
| Neural tube defects                                 | 20<br>(10 - 35)    | 18<br>(8 - 32)     | 0<br>(0 - 1)        | 1<br>(1 - 2)         | 0<br>(0 - 0)         | 1<br>(0 - 1)         |
| Congenital heart anomalies                          | 37<br>(25 - 52)    | 30<br>(19 - 45)    | 1<br>(1 - 2)        | 3<br>(2 - 5)         | 1<br>(0 - 1)         | 1<br>(1 - 2)         |
| Cleft lip and cleft palate                          | 1<br>(0 - 1)       | 1<br>(0 - 1)       | --                  | --                   | --                   | --                   |
| Down syndrome                                       | 2<br>(1 - 4)       | 2<br>(1 - 3)       | 0<br>(0 - 1)        | 0<br>(0 - 0)         | 0<br>(0 - 0)         | 0<br>(0 - 0)         |
| Chromosomal unbalanced rearrangements               | 0<br>(0 - 0)       | 0<br>(0 - 0)       | 0<br>(0 - 0)        | 0<br>(0 - 0)         | 0<br>(0 - 0)         | 0<br>(0 - 0)         |
| Other congenital anomalies                          | 36<br>(24 - 51)    | 28<br>(17 - 42)    | 1<br>(0 - 1)        | 3<br>(2 - 5)         | 1<br>(1 - 2)         | 2<br>(2 - 4)         |
| Skin and subcutaneous diseases                      | 20<br>(13 - 28)    | 0<br>(0 - 1)       | 0<br>(0 - 0)        | 2<br>(1 - 3)         | 2<br>(1 - 3)         | 15<br>(9 - 23)       |
| Cellulitis                                          | 0<br>(0 - 1)       | 0<br>(0 - 0)       | 0<br>(0 - 0)        | 0<br>(0 - 0)         | 0<br>(0 - 0)         | 0<br>(0 - 1)         |
| Pyoderma                                            | 17<br>(11 - 25)    | 0<br>(0 - 1)       | 0<br>(0 - 0)        | 1<br>(1 - 2)         | 2<br>(1 - 3)         | 14<br>(9 - 20)       |

Web Table 31- Oman deaths with 95% UI by age, sex, and cause in 2013

| Cause                                           | Females, All Ages  | Females, 0-4 Years | Females, 5-14 Years | Females, 15-49 Years | Females, 50-69 Years | Females, 70-80 Years |
|-------------------------------------------------|--------------------|--------------------|---------------------|----------------------|----------------------|----------------------|
| Decubitus ulcer                                 | 2<br>(1 - 3)       | 0<br>(0 - 0)       | 0<br>(0 - 0)        | 0<br>(0 - 0)         | 0<br>(0 - 0)         | 1<br>(0 - 3)         |
| Other skin and subcutaneous diseases            | 0<br>(0 - 0)       | 0<br>(0 - 0)       | 0<br>(0 - 0)        | 0<br>(0 - 0)         | 0<br>(0 - 0)         | 0<br>(0 - 0)         |
| Sudden infant death syndrome                    | 2<br>(0 - 5)       | 2<br>(0 - 5)       | --                  | --                   | --                   | --                   |
| Injuries                                        | 402<br>(305 - 534) | 36<br>(27 - 46)    | 17<br>(12 - 23)     | 194<br>(139 - 284)   | 62<br>(39 - 86)      | 94<br>(72 - 116)     |
| Transport injuries                              | 256<br>(188 - 353) | 21<br>(15 - 28)    | 12<br>(8 - 16)      | 149<br>(105 - 221)   | 41<br>(25 - 60)      | 33<br>(23 - 46)      |
| Road injuries                                   | 239<br>(176 - 332) | 19<br>(13 - 26)    | 11<br>(8 - 15)      | 142<br>(101 - 211)   | 38<br>(23 - 56)      | 28<br>(20 - 40)      |
| Pedestrian road injuries                        | 181<br>(131 - 256) | 14<br>(10 - 21)    | 9<br>(6 - 12)       | 112<br>(79 - 168)    | 29<br>(18 - 44)      | 17<br>(11 - 25)      |
| Cyclist road injuries                           | 6<br>(4 - 8)       | 0<br>(0 - 0)       | 0<br>(0 - 0)        | 2<br>(1 - 3)         | 2<br>(1 - 3)         | 2<br>(1 - 2)         |
| Motorcyclist road injuries                      | 5<br>(3 - 8)       | 0<br>(0 - 1)       | 0<br>(0 - 0)        | 3<br>(1 - 5)         | 1<br>(0 - 1)         | 1<br>(1 - 2)         |
| Motor vehicle road injuries                     | 45<br>(29 - 64)    | 4<br>(2 - 6)       | 2<br>(1 - 3)        | 25<br>(15 - 40)      | 6<br>(3 - 10)        | 8<br>(5 - 12)        |
| Other road injuries                             | 2<br>(1 - 3)       | 0<br>(0 - 0)       | 0<br>(0 - 0)        | 1<br>(0 - 1)         | 0<br>(0 - 1)         | 1<br>(0 - 1)         |
| Other transport injuries                        | 17<br>(11 - 23)    | 2<br>(1 - 3)       | 1<br>(0 - 1)        | 7<br>(4 - 11)        | 3<br>(2 - 5)         | 5<br>(3 - 7)         |
| Unintentional injuries                          | 121<br>(93 - 156)  | 15<br>(10 - 20)    | 5<br>(3 - 7)        | 31<br>(22 - 48)      | 17<br>(11 - 24)      | 53<br>(40 - 68)      |
| Falls                                           | 28<br>(19 - 40)    | 2<br>(1 - 3)       | 0<br>(0 - 1)        | 4<br>(3 - 6)         | 3<br>(2 - 5)         | 18<br>(11 - 29)      |
| Drowning                                        | 20<br>(13 - 29)    | 5<br>(3 - 9)       | 2<br>(1 - 3)        | 8<br>(5 - 14)        | 2<br>(1 - 4)         | 3<br>(2 - 4)         |
| Fire, heat, and hot substances                  | 13<br>(9 - 20)     | 1<br>(1 - 2)       | 1<br>(0 - 1)        | 4<br>(2 - 6)         | 2<br>(1 - 3)         | 6<br>(3 - 9)         |
| Poisonings                                      | 3<br>(2 - 5)       | 0<br>(0 - 0)       | 0<br>(0 - 0)        | 1<br>(0 - 1)         | 1<br>(0 - 2)         | 1<br>(1 - 2)         |
| Exposure to mechanical forces                   | 24<br>(17 - 34)    | 4<br>(2 - 7)       | 1<br>(1 - 2)        | 6<br>(4 - 10)        | 3<br>(2 - 5)         | 10<br>(6 - 16)       |
| Unintentional firearm injuries                  | 2<br>(2 - 3)       | 0<br>(0 - 1)       | 0<br>(0 - 0)        | 1<br>(1 - 2)         | 0<br>(0 - 1)         | 1<br>(0 - 1)         |
| Unintentional suffocation                       | 1<br>(1 - 2)       | 0<br>(0 - 1)       | 0<br>(0 - 0)        | 0<br>(0 - 1)         | 0<br>(0 - 0)         | 0<br>(0 - 1)         |
| Other exposure to mechanical forces             | 21<br>(14 - 30)    | 3<br>(2 - 6)       | 1<br>(0 - 2)        | 5<br>(3 - 8)         | 3<br>(2 - 4)         | 9<br>(6 - 15)        |
| Adverse effects of medical treatment            | 17<br>(10 - 24)    | 1<br>(1 - 3)       | 0<br>(0 - 1)        | 4<br>(2 - 7)         | 3<br>(2 - 5)         | 8<br>(4 - 13)        |
| Animal contact                                  | 4<br>(2 - 11)      | 1<br>(0 - 1)       | 0<br>(0 - 0)        | 2<br>(1 - 4)         | 1<br>(0 - 2)         | 1<br>(1 - 3)         |
| Venomous animal contact                         | 1<br>(1 - 4)       | 0<br>(0 - 0)       | 0<br>(0 - 0)        | 1<br>(0 - 1)         | 0<br>(0 - 1)         | 0<br>(0 - 1)         |
| Non-venomous animal contact                     | 3<br>(2 - 7)       | 0<br>(0 - 1)       | 0<br>(0 - 0)        | 1<br>(1 - 3)         | 0<br>(0 - 1)         | 1<br>(0 - 2)         |
| Foreign body                                    | 6<br>(3 - 9)       | 0<br>(0 - 1)       | 0<br>(0 - 0)        | 1<br>(1 - 2)         | 1<br>(1 - 2)         | 4<br>(2 - 6)         |
| Pulmonary aspiration and foreign body in airway | 6<br>(3 - 9)       | 0<br>(0 - 1)       | 0<br>(0 - 0)        | 1<br>(0 - 1)         | 1<br>(0 - 1)         | 3<br>(2 - 6)         |
| Foreign body in other body part                 | 1<br>(0 - 1)       | 0<br>(0 - 0)       | 0<br>(0 - 0)        | 0<br>(0 - 0)         | 0<br>(0 - 0)         | 0<br>(0 - 0)         |
| Other unintentional injuries                    | 5<br>(4 - 7)       | 0<br>(0 - 1)       | 0<br>(0 - 0)        | 2<br>(1 - 2)         | 1<br>(0 - 1)         | 2<br>(1 - 3)         |
| Self-harm and interpersonal violence            | 25<br>(17 - 35)    | 1<br>(0 - 2)       | 0<br>(0 - 1)        | 13<br>(9 - 20)       | 3<br>(2 - 5)         | 7<br>(4 - 12)        |
| Self-harm                                       | 16<br>(11 - 23)    | --                 | 0<br>(0 - 0)        | 9<br>(5 - 14)        | 2<br>(1 - 3)         | 5<br>(3 - 8)         |
| Interpersonal violence                          | 9<br>(4 - 14)      | 1<br>(0 - 2)       | 0<br>(0 - 0)        | 4<br>(2 - 7)         | 1<br>(0 - 2)         | 2<br>(1 - 5)         |
| Assault by firearm                              | 1<br>(0 - 2)       | 0<br>(0 - 0)       | 0<br>(0 - 0)        | 1<br>(0 - 1)         | 0<br>(0 - 0)         | 0<br>(0 - 1)         |
| Assault by sharp object                         | 1<br>(0 - 2)       | 0<br>(0 - 0)       | 0<br>(0 - 0)        | 1<br>(0 - 1)         | 0<br>(0 - 0)         | 0<br>(0 - 0)         |
| Assault by other means                          | 7<br>(3 - 11)      | 1<br>(0 - 1)       | 0<br>(0 - 0)        | 3<br>(2 - 5)         | 1<br>(0 - 2)         | 2<br>(0 - 4)         |

Web Table 31- Pakistan deaths with 95% UI by age, sex, and cause in 2013

| Cause                                                             | Both Sexes, All Ages                 | Both Sexes, 0-4 Years          | Both Sexes, 5-14 Years      | Both Sexes, 15-49 Years        | Both Sexes, 50-69 Years        | Both Sexes, 70-80 Years        |
|-------------------------------------------------------------------|--------------------------------------|--------------------------------|-----------------------------|--------------------------------|--------------------------------|--------------------------------|
| All causes                                                        | 1,326,126<br>(1,166,731 - 1,487,797) | 348,496<br>(321,922 - 379,223) | 42,689<br>(37,425 - 47,427) | 254,998<br>(203,337 - 315,898) | 298,032<br>(234,553 - 362,644) | 381,912<br>(337,213 - 428,507) |
| Communicable, maternal, neonatal, and nutritional diseases        | 461,554<br>(425,034 - 497,149)       | 304,107<br>(280,109 - 330,543) | 22,146<br>(18,268 - 26,407) | 66,327<br>(53,716 - 79,651)    | 29,601<br>(23,860 - 36,186)    | 39,371<br>(32,526 - 46,817)    |
| HIV/AIDS and tuberculosis                                         | 39,921<br>(29,672 - 52,845)          | 1,999<br>(1,347 - 2,864)       | 1,595<br>(977 - 2,267)      | 17,389<br>(11,530 - 25,702)    | 11,064<br>(7,782 - 14,871)     | 7,874<br>(5,964 - 10,148)      |
| Tuberculosis                                                      | 37,499<br>(27,926 - 47,069)          | 1,864<br>(1,265 - 2,616)       | 1,572<br>(962 - 2,240)      | 15,555<br>(10,438 - 21,617)    | 10,698<br>(7,609 - 13,906)     | 7,809<br>(5,800 - 10,033)      |
| HIV/AIDS                                                          | 2,422<br>(191 - 11,133)              | 135<br>(14 - 674)              | 22<br>(3 - 103)             | 1,834<br>(148 - 8,140)         | 366<br>(22 - 1,888)            | 65<br>(3 - 343)                |
| HIV/AIDS resulting in mycobacterial infection                     | 154<br>(12 - 732)                    | 8<br>(1 - 38)                  | 1<br>(0 - 6)                | 115<br>(9 - 529)               | 25<br>(1 - 140)                | 5<br>(0 - 26)                  |
| HIV/AIDS resulting in other diseases                              | 2,268<br>(180 - 10,460)              | 127<br>(13 - 633)              | 21<br>(3 - 97)              | 1,719<br>(138 - 7,621)         | 341<br>(20 - 1,768)            | 60<br>(3 - 316)                |
| Diarrhea, lower respiratory, and other common infectious diseases | 214,308<br>(189,096 - 241,026)       | 140,184<br>(121,694 - 160,009) | 16,090<br>(12,287 - 20,317) | 20,290<br>(13,905 - 28,698)    | 13,132<br>(9,678 - 17,425)     | 24,612<br>(19,121 - 30,664)    |
| Diarrheal diseases                                                | 69,323<br>(50,550 - 88,911)          | 48,321<br>(30,955 - 67,766)    | 3,303<br>(1,918 - 5,238)    | 4,022<br>(2,642 - 5,825)       | 4,633<br>(2,831 - 6,985)       | 9,044<br>(5,618 - 13,132)      |
| Intestinal infectious diseases                                    | 23,801<br>(12,866 - 38,953)          | 5,530<br>(2,681 - 9,806)       | 7,874<br>(4,451 - 12,366)   | 8,963<br>(4,348 - 15,834)      | 1,001<br>(439 - 1,887)         | 433<br>(211 - 781)             |
| Typhoid fever                                                     | 17,035<br>(9,002 - 28,979)           | 3,844<br>(1,749 - 6,892)       | 5,719<br>(3,200 - 9,294)    | 6,422<br>(3,072 - 11,827)      | 733<br>(301 - 1,411)           | 316<br>(150 - 586)             |
| Paratyphoid fever                                                 | 6,693<br>(3,407 - 11,469)            | 1,651<br>(718 - 3,047)         | 2,146<br>(1,046 - 3,689)    | 2,521<br>(1,173 - 4,765)       | 262<br>(105 - 518)             | 113<br>(48 - 227)              |
| Other intestinal infectious diseases                              | 73<br>(51 - 98)                      | 34<br>(20 - 53)                | 9<br>(3 - 18)               | 20<br>(10 - 34)                | 6<br>(2 - 13)                  | 4<br>(1 - 10)                  |
| Lower respiratory infections                                      | 87,719<br>(70,510 - 106,017)         | 61,669<br>(45,648 - 78,026)    | 2,378<br>(1,534 - 3,449)    | 3,947<br>(2,733 - 5,417)       | 6,047<br>(4,268 - 8,405)       | 13,678<br>(9,970 - 18,081)     |
| Upper respiratory infections                                      | 117<br>(61 - 197)                    | 32<br>(6 - 89)                 | 6<br>(1 - 20)               | 29<br>(9 - 61)                 | 23<br>(6 - 54)                 | 25<br>(4 - 66)                 |
| Otitis media                                                      | 50<br>(31 - 70)                      | 14<br>(8 - 21)                 | 11<br>(7 - 17)              | 15<br>(9 - 21)                 | 6<br>(4 - 10)                  | 4<br>(2 - 6)                   |
| Meningitis                                                        | 22,832<br>(15,480 - 31,478)          | 17,091<br>(10,232 - 25,407)    | 1,223<br>(733 - 1,887)      | 2,388<br>(1,545 - 3,384)       | 996<br>(432 - 1,562)           | 1,134<br>(407 - 1,744)         |
| Pneumococcal meningitis                                           | 4,871<br>(3,189 - 6,751)             | 3,257<br>(1,859 - 5,056)       | 378<br>(201 - 675)          | 662<br>(378 - 1,040)           | 263<br>(119 - 453)             | 311<br>(121 - 506)             |
| H influenzae type B meningitis                                    | 6,959<br>(4,273 - 10,196)            | 6,110<br>(3,568 - 9,348)       | 329<br>(184 - 554)          | 312<br>(179 - 526)             | 98<br>(39 - 179)               | 110<br>(32 - 184)              |
| Meningococcal meningitis                                          | 1,773<br>(1,129 - 2,405)             | 1,046<br>(595 - 1,636)         | 111<br>(55 - 201)           | 314<br>(169 - 501)             | 134<br>(45 - 238)              | 167<br>(49 - 268)              |
| Other meningitis                                                  | 9,229<br>(5,806 - 13,215)            | 6,678<br>(3,748 - 10,448)      | 405<br>(205 - 688)          | 1,100<br>(673 - 1,652)         | 500<br>(211 - 833)             | 547<br>(202 - 880)             |
| Encephalitis                                                      | 2,267<br>(1,592 - 3,336)             | 1,049<br>(549 - 1,795)         | 403<br>(274 - 600)          | 561<br>(361 - 851)             | 167<br>(100 - 327)             | 88<br>(45 - 200)               |
| Diphtheria                                                        | 60<br>(5 - 275)                      | 40<br>(0 - 259)                | 14<br>(0 - 81)              | 5<br>(0 - 16)                  | 1<br>(0 - 7)                   | --                             |
| Whooping cough                                                    | 2,073<br>(2 - 10,526)                | 1,899<br>(2 - 9,701)           | 142<br>(0 - 697)            | 28<br>(0 - 144)                | 3<br>(0 - 15)                  | --                             |
| Tetanus                                                           | 1,709<br>(905 - 2,482)               | 1,104<br>(616 - 1,814)         | 95<br>(32 - 147)            | 163<br>(83 - 246)              | 227<br>(47 - 383)              | 120<br>(24 - 221)              |
| Measles                                                           | 4,068<br>(906 - 11,407)              | 3,353<br>(731 - 9,596)         | 615<br>(134 - 1,721)        | 97<br>(21 - 286)               | 2<br>(1 - 7)                   | --                             |
| Varicella and herpes zoster                                       | 290<br>(135 - 564)                   | 83<br>(10 - 282)               | 25<br>(1 - 81)              | 71<br>(21 - 148)               | 26<br>(4 - 66)                 | 86<br>(7 - 272)                |
| Neglected tropical diseases and malaria                           | 9,604<br>(7,751 - 11,887)            | 2,795<br>(1,755 - 4,097)       | 2,117<br>(1,573 - 2,724)    | 3,263<br>(2,258 - 4,571)       | 943<br>(649 - 1,350)           | 487<br>(349 - 692)             |
| Malaria                                                           | 3,159<br>(2,008 - 5,012)             | 367<br>(195 - 631)             | 823<br>(445 - 1,381)        | 1,337<br>(690 - 2,480)         | 417<br>(207 - 811)             | 216<br>(102 - 426)             |
| Leishmaniasis                                                     | 3,125<br>(2,147 - 4,326)             | 1,027<br>(570 - 1,722)         | 596<br>(338 - 941)          | 1,122<br>(690 - 1,672)         | 281<br>(159 - 433)             | 98<br>(47 - 157)               |
| Visceral leishmaniasis                                            | 3,125<br>(2,147 - 4,326)             | 1,027<br>(570 - 1,722)         | 596<br>(338 - 941)          | 1,122<br>(690 - 1,672)         | 281<br>(159 - 433)             | 98<br>(47 - 157)               |
| Cysticercosis                                                     | 5<br>(1 - 14)                        | 0<br>(0 - 0)                   | 0<br>(0 - 1)                | 3<br>(1 - 8)                   | 1<br>(0 - 3)                   | 0<br>(0 - 1)                   |
| Cystic echinococcosis                                             | 42<br>(34 - 50)                      | 3<br>(2 - 4)                   | 9<br>(7 - 11)               | 19<br>(14 - 24)                | 8<br>(6 - 10)                  | 4<br>(4 - 5)                   |
| Dengue                                                            | 174<br>(133 - 270)                   | 41<br>(27 - 80)                | 20<br>(13 - 51)             | 61<br>(41 - 101)               | 27<br>(16 - 40)                | 24<br>(12 - 34)                |
| Rabies                                                            | 1,211<br>(875 - 1,756)               | 120<br>(57 - 223)              | 470<br>(281 - 739)          | 398<br>(254 - 723)             | 169<br>(110 - 243)             | 55<br>(32 - 83)                |
| Intestinal nematode infections                                    | 151<br>(108 - 205)                   | 92<br>(59 - 139)               | 36<br>(18 - 61)             | 12<br>(4 - 25)                 | 5<br>(1 - 14)                  | 6<br>(1 - 16)                  |
| Ascariasis                                                        | 151<br>(108 - 205)                   | 92<br>(59 - 139)               | 36<br>(18 - 61)             | 12<br>(4 - 25)                 | 5<br>(1 - 14)                  | 6<br>(1 - 16)                  |
| Other neglected tropical diseases                                 | 1,737<br>(473 - 2,837)               | 1,146<br>(176 - 2,166)         | 162<br>(36 - 277)           | 311<br>(122 - 481)             | 35<br>(20 - 62)                | 84<br>(46 - 144)               |
| Maternal disorders                                                | 17,876<br>(10,397 - 25,026)          | --                             | 54<br>(19 - 121)            | 17,821<br>(10,379 - 24,993)    | --                             | --                             |
| Maternal hemorrhage                                               | 2,365<br>(1,268 - 3,731)             | --                             | 5<br>(1 - 13)               | 2,360<br>(1,265 - 3,722)       | --                             | --                             |

Web Table 31- Pakistan deaths with 95% UI by age, sex, and cause in 2013

| Cause                                                            | Both Sexes, All Ages           | Both Sexes, 0-4 Years          | Both Sexes, 5-14 Years     | Both Sexes, 15-49 Years       | Both Sexes, 50-69 Years        | Both Sexes, 70-80 Years        |
|------------------------------------------------------------------|--------------------------------|--------------------------------|----------------------------|-------------------------------|--------------------------------|--------------------------------|
| Maternal sepsis and other maternal infections                    | 972<br>(496 - 1,510)           | --                             | 4<br>(1 - 10)              | 968<br>(494 - 1,506)          | --                             | --                             |
| Maternal hypertensive disorders                                  | 2,117<br>(1,142 - 3,167)       | --                             | 12<br>(3 - 29)             | 2,105<br>(1,133 - 3,158)      | --                             | --                             |
| Maternal obstructed labor                                        | 915<br>(491 - 1,365)           | --                             | 2<br>(1 - 5)               | 913<br>(490 - 1,361)          | --                             | --                             |
| Maternal abortive outcome                                        | 2,187<br>(1,176 - 3,305)       | --                             | 5<br>(2 - 12)              | 2,182<br>(1,172 - 3,299)      | --                             | --                             |
| Indirect maternal deaths                                         | 2,154<br>(1,143 - 3,214)       | --                             | 5<br>(2 - 14)              | 2,149<br>(1,139 - 3,211)      | --                             | --                             |
| Late maternal deaths                                             | 3,089<br>(1,301 - 4,903)       | --                             | 12<br>(3 - 32)             | 3,076<br>(1,296 - 4,892)      | --                             | --                             |
| Maternal deaths aggravated by HIV/AIDS                           | 2<br>(1 - 4)                   | --                             | --                         | 2<br>(1 - 4)                  | --                             | --                             |
| Other maternal disorders                                         | 4,042<br>(2,079 - 6,364)       | --                             | 8<br>(3 - 21)              | 4,033<br>(2,069 - 6,353)      | --                             | --                             |
| Neonatal disorders                                               | 149,523<br>(131,242 - 167,753) | 149,523<br>(131,242 - 167,753) | --                         | --                            | --                             | --                             |
| Neonatal preterm birth complications                             | 36,320<br>(21,450 - 55,314)    | 36,320<br>(21,450 - 55,314)    | --                         | --                            | --                             | --                             |
| Neonatal encephalopathy due to birth asphyxia and trauma         | 64,388<br>(46,033 - 83,438)    | 64,388<br>(46,033 - 83,438)    | --                         | --                            | --                             | --                             |
| Neonatal sepsis and other neonatal infections                    | 34,161<br>(18,060 - 55,575)    | 34,161<br>(18,060 - 55,575)    | --                         | --                            | --                             | --                             |
| Hemolytic disease and other neonatal jaundice                    | 2,213<br>(830 - 4,965)         | 2,213<br>(830 - 4,965)         | --                         | --                            | --                             | --                             |
| Other neonatal disorders                                         | 12,441<br>(3,179 - 22,973)     | 12,441<br>(3,179 - 22,973)     | --                         | --                            | --                             | --                             |
| Nutritional deficiencies                                         | 13,321<br>(10,256 - 18,169)    | 4,075<br>(2,585 - 6,259)       | 919<br>(609 - 1,363)       | 2,328<br>(1,634 - 3,263)      | 1,565<br>(1,078 - 2,417)       | 4,434<br>(3,083 - 6,292)       |
| Protein-energy malnutrition                                      | 10,615<br>(7,651 - 13,869)     | 3,367<br>(2,110 - 5,225)       | 753<br>(480 - 1,113)       | 1,677<br>(977 - 2,362)        | 1,168<br>(732 - 1,738)         | 3,650<br>(2,176 - 5,193)       |
| Iodine deficiency                                                | 162<br>(34 - 481)              | 47<br>(0 - 329)                | 12<br>(0 - 66)             | 45<br>(3 - 149)               | 28<br>(0 - 112)                | 31<br>(0 - 144)                |
| Iron-deficiency anemia                                           | 1,894<br>(958 - 4,422)         | 547<br>(183 - 1,244)           | 135<br>(45 - 304)          | 498<br>(246 - 1,180)          | 262<br>(88 - 693)              | 452<br>(86 - 1,524)            |
| Other nutritional deficiencies                                   | 650<br>(298 - 1,492)           | 114<br>(42 - 287)              | 20<br>(6 - 91)             | 108<br>(45 - 314)             | 108<br>(47 - 282)              | 301<br>(112 - 673)             |
| Other communicable, maternal, neonatal, and nutritional diseases | 17,001<br>(13,287 - 21,237)    | 5,531<br>(3,275 - 8,268)       | 1,372<br>(969 - 1,971)     | 5,237<br>(3,751 - 7,076)      | 2,897<br>(2,076 - 4,082)       | 1,964<br>(1,337 - 2,881)       |
| Sexually transmitted diseases excluding HIV                      | 3,370<br>(1,670 - 5,802)       | 2,668<br>(1,147 - 4,850)       | 264<br>(114 - 490)         | 124<br>(73 - 202)             | 143<br>(48 - 420)              | 171<br>(51 - 457)              |
| Syphilis                                                         | 3,204<br>(1,530 - 5,634)       | 2,668<br>(1,147 - 4,850)       | 262<br>(111 - 487)         | 57<br>(33 - 92)               | 85<br>(29 - 235)               | 133<br>(40 - 347)              |
| Chlamydial infection                                             | 39<br>(16 - 83)                | --                             | 0<br>(0 - 1)               | 16<br>(7 - 30)                | 14<br>(3 - 48)                 | 8<br>(2 - 26)                  |
| Gonococcal infection                                             | 74<br>(37 - 146)               | --                             | 1<br>(1 - 2)               | 28<br>(16 - 45)               | 25<br>(8 - 74)                 | 20<br>(6 - 56)                 |
| Other sexually transmitted diseases                              | 53<br>(28 - 101)               | --                             | 1<br>(1 - 2)               | 24<br>(14 - 39)               | 18<br>(6 - 55)                 | 10<br>(3 - 28)                 |
| Hepatitis                                                        | 9,851<br>(7,664 - 12,712)      | 1,377<br>(844 - 2,195)         | 750<br>(537 - 1,028)       | 4,542<br>(3,191 - 6,310)      | 2,111<br>(1,489 - 3,100)       | 1,070<br>(783 - 1,487)         |
| Acute hepatitis A                                                | 1,386<br>(486 - 2,504)         | 721<br>(275 - 1,344)           | 268<br>(92 - 481)          | 304<br>(77 - 696)             | 78<br>(18 - 190)               | 16<br>(3 - 39)                 |
| Acute hepatitis B                                                | 3,467<br>(2,176 - 5,116)       | 628<br>(257 - 1,210)           | 171<br>(74 - 317)          | 761<br>(356 - 1,359)          | 1,125<br>(643 - 1,765)         | 782<br>(500 - 1,147)           |
| Acute hepatitis C                                                | 347<br>(70 - 811)              | --                             | 63<br>(12 - 157)           | 160<br>(29 - 414)             | 78<br>(14 - 205)               | 47<br>(9 - 131)                |
| Acute hepatitis E                                                | 4,651<br>(3,016 - 6,854)       | 28<br>(6 - 78)                 | 249<br>(123 - 434)         | 3,318<br>(2,156 - 4,805)      | 830<br>(420 - 1,453)           | 226<br>(93 - 461)              |
| Other infectious diseases                                        | 3,780<br>(2,283 - 6,199)       | 1,486<br>(585 - 3,070)         | 358<br>(140 - 767)         | 571<br>(212 - 1,087)          | 644<br>(263 - 1,279)           | 722<br>(261 - 1,534)           |
| Non-communicable diseases                                        | 746,015<br>(621,426 - 876,079) | 25,562<br>(19,829 - 33,837)    | 10,673<br>(8,669 - 12,876) | 129,800<br>(98,510 - 165,042) | 251,304<br>(196,893 - 310,459) | 328,676<br>(289,010 - 370,087) |
| Neoplasms                                                        | 129,478<br>(102,878 - 158,516) | 1,146<br>(846 - 1,568)         | 2,522<br>(1,996 - 3,131)   | 34,833<br>(26,195 - 44,069)   | 61,410<br>(47,395 - 77,363)    | 29,567<br>(25,085 - 34,729)    |
| Esophageal cancer                                                | 11,209<br>(8,539 - 14,924)     | --                             | --                         | 2,586<br>(1,836 - 3,526)      | 5,540<br>(4,014 - 7,792)       | 3,083<br>(2,226 - 4,353)       |
| Stomach cancer                                                   | 5,888<br>(4,529 - 7,390)       | --                             | --                         | 2,069<br>(1,468 - 2,768)      | 2,615<br>(1,976 - 3,430)       | 1,204<br>(935 - 1,535)         |
| Liver cancer                                                     | 7,398<br>(5,584 - 9,557)       | --                             | 64<br>(38 - 103)           | 1,644<br>(1,104 - 2,290)      | 4,066<br>(2,887 - 5,368)       | 1,624<br>(1,187 - 2,113)       |
| Liver cancer due to hepatitis B                                  | 1,493<br>(889 - 2,241)         | --                             | 22<br>(11 - 40)            | 466<br>(271 - 700)            | 769<br>(408 - 1,236)           | 236<br>(130 - 367)             |
| Liver cancer due to hepatitis C                                  | 4,247<br>(3,162 - 5,513)       | --                             | 7<br>(3 - 15)              | 776<br>(502 - 1,103)          | 2,457<br>(1,727 - 3,325)       | 1,008<br>(717 - 1,340)         |
| Liver cancer due to alcohol use                                  | 642<br>(419 - 893)             | --                             | --                         | 87<br>(45 - 138)              | 347<br>(205 - 514)             | 208<br>(132 - 308)             |
| Liver cancer due to other causes                                 | 1,015<br>(648 - 1,497)         | --                             | 35<br>(20 - 58)            | 316<br>(193 - 492)            | 493<br>(290 - 767)             | 172<br>(101 - 275)             |

Web Table 31- Pakistan deaths with 95% UI by age, sex, and cause in 2013

| Cause                                         | Both Sexes, All Ages           | Both Sexes, 0-4 Years    | Both Sexes, 5-14 Years | Both Sexes, 15-49 Years     | Both Sexes, 50-69 Years       | Both Sexes, 70-80 Years        |
|-----------------------------------------------|--------------------------------|--------------------------|------------------------|-----------------------------|-------------------------------|--------------------------------|
| Larynx cancer                                 | 4,444<br>(3,119 - 6,096)       | --                       | --                     | 744<br>(479 - 1,108)        | 2,292<br>(1,488 - 3,293)      | 1,408<br>(947 - 1,927)         |
| Tracheal, bronchus and lung cancer            | 16,844<br>(12,683 - 21,377)    | --                       | --                     | 2,276<br>(1,537 - 3,303)    | 9,708<br>(6,874 - 12,577)     | 4,859<br>(3,815 - 5,951)       |
| Breast cancer                                 | 16,555<br>(11,499 - 24,058)    | --                       | --                     | 5,623<br>(3,615 - 8,101)    | 8,097<br>(5,337 - 12,578)     | 2,835<br>(2,065 - 3,965)       |
| Cervical cancer                               | 2,278<br>(1,521 - 3,476)       | --                       | --                     | 549<br>(329 - 871)          | 1,222<br>(756 - 2,030)        | 506<br>(330 - 794)             |
| Uterine cancer                                | 1,235<br>(674 - 1,975)         | --                       | --                     | 206<br>(104 - 363)          | 634<br>(328 - 1,093)          | 394<br>(207 - 608)             |
| Prostate cancer                               | 1,568<br>(962 - 2,335)         | --                       | --                     | 29<br>(13 - 50)             | 325<br>(186 - 516)            | 1,215<br>(737 - 1,844)         |
| Colon and rectum cancer                       | 6,264<br>(4,921 - 7,817)       | --                       | --                     | 2,343<br>(1,736 - 3,061)    | 2,790<br>(2,152 - 3,635)      | 1,131<br>(903 - 1,399)         |
| Lip and oral cavity cancer                    | 6,649<br>(4,709 - 8,904)       | --                       | --                     | 2,181<br>(1,384 - 3,087)    | 3,019<br>(2,106 - 4,208)      | 1,449<br>(1,050 - 2,004)       |
| Nasopharynx cancer                            | 1,852<br>(1,332 - 2,475)       | --                       | 88<br>(33 - 204)       | 681<br>(457 - 981)          | 790<br>(523 - 1,147)          | 293<br>(199 - 420)             |
| Other pharynx cancer                          | 3,210<br>(2,336 - 4,245)       | --                       | --                     | 656<br>(426 - 955)          | 1,702<br>(1,136 - 2,388)      | 852<br>(601 - 1,171)           |
| Gallbladder and biliary tract cancer          | 2,882<br>(2,117 - 4,178)       | --                       | --                     | 382<br>(237 - 669)          | 1,829<br>(1,256 - 2,704)      | 672<br>(477 - 944)             |
| Pancreatic cancer                             | 1,837<br>(1,406 - 2,367)       | --                       | --                     | 498<br>(353 - 686)          | 999<br>(753 - 1,319)          | 341<br>(261 - 437)             |
| Malignant skin melanoma                       | 255<br>(186 - 393)             | --                       | --                     | 90<br>(58 - 139)            | 102<br>(69 - 156)             | 63<br>(43 - 108)               |
| Non-melanoma skin cancer                      | 193<br>(133 - 285)             | --                       | --                     | 41<br>(25 - 60)             | 57<br>(36 - 85)               | 95<br>(59 - 155)               |
| Ovarian cancer                                | 5,206<br>(3,573 - 7,708)       | --                       | --                     | 1,170<br>(733 - 1,839)      | 3,379<br>(2,226 - 5,233)      | 656<br>(429 - 1,009)           |
| Testicular cancer                             | 279<br>(157 - 431)             | --                       | --                     | 190<br>(101 - 314)          | 50<br>(26 - 82)               | 39<br>(18 - 67)                |
| Kidney cancer                                 | 1,426<br>(1,088 - 1,858)       | 25<br>(13 - 45)          | 43<br>(25 - 67)        | 312<br>(224 - 442)          | 746<br>(530 - 1,025)          | 300<br>(210 - 425)             |
| Bladder cancer                                | 6,373<br>(4,589 - 8,212)       | --                       | --                     | 662<br>(423 - 997)          | 3,246<br>(2,172 - 4,434)      | 2,464<br>(1,780 - 3,298)       |
| Brain and nervous system cancer               | 3,225<br>(2,349 - 4,234)       | 49<br>(24 - 89)          | 341<br>(233 - 476)     | 1,529<br>(1,041 - 2,085)    | 1,052<br>(758 - 1,470)        | 253<br>(182 - 365)             |
| Thyroid cancer                                | 821<br>(556 - 1,136)           | --                       | 9<br>(6 - 16)          | 159<br>(105 - 226)          | 416<br>(272 - 608)            | 236<br>(148 - 356)             |
| Mesothelioma                                  | 169<br>(117 - 241)             | --                       | --                     | 70<br>(41 - 118)            | 65<br>(41 - 99)               | 34<br>(20 - 59)                |
| Hodgkin lymphoma                              | 739<br>(532 - 990)             | 31<br>(16 - 68)          | 77<br>(31 - 169)       | 291<br>(189 - 423)          | 226<br>(137 - 348)            | 114<br>(75 - 168)              |
| Non-Hodgkin lymphoma                          | 7,607<br>(5,022 - 10,266)      | 100<br>(59 - 155)        | 414<br>(267 - 605)     | 2,708<br>(1,739 - 3,964)    | 2,893<br>(1,949 - 4,039)      | 1,491<br>(855 - 2,125)         |
| Multiple myeloma                              | 1,262<br>(930 - 1,690)         | --                       | --                     | 249<br>(170 - 352)          | 632<br>(440 - 872)            | 381<br>(270 - 536)             |
| Leukemia                                      | 6,346<br>(4,914 - 7,977)       | 135<br>(78 - 234)        | 868<br>(623 - 1,157)   | 3,536<br>(2,540 - 4,631)    | 1,441<br>(1,060 - 1,994)      | 366<br>(290 - 470)             |
| Other neoplasms                               | 5,466<br>(4,169 - 7,480)       | 806<br>(568 - 1,175)     | 617<br>(408 - 867)     | 1,357<br>(893 - 2,079)      | 1,478<br>(984 - 2,236)        | 1,208<br>(811 - 1,705)         |
| Cardiovascular diseases                       | 342,323<br>(282,795 - 409,281) | 931<br>(546 - 1,532)     | 1,371<br>(921 - 2,196) | 44,157<br>(33,040 - 57,335) | 113,416<br>(87,018 - 143,512) | 182,448<br>(155,983 - 211,091) |
| Rheumatic heart disease                       | 11,676<br>(7,625 - 19,651)     | 72<br>(27 - 159)         | 450<br>(259 - 787)     | 4,268<br>(2,705 - 6,705)    | 3,620<br>(2,226 - 6,290)      | 3,266<br>(2,041 - 5,879)       |
| Ischemic heart disease                        | 168,804<br>(133,363 - 209,735) | 174<br>(53 - 430)        | 293<br>(169 - 513)     | 23,280<br>(17,336 - 31,213) | 59,663<br>(44,395 - 78,945)   | 85,393<br>(69,052 - 103,503)   |
| Cerebrovascular disease                       | 118,545<br>(89,239 - 147,413)  | 251<br>(131 - 462)       | 355<br>(214 - 596)     | 10,570<br>(7,490 - 14,197)  | 36,242<br>(25,611 - 48,484)   | 71,126<br>(53,445 - 86,947)    |
| Ischemic stroke                               | 59,235<br>(41,445 - 77,652)    | 41<br>(14 - 92)          | 52<br>(23 - 111)       | 1,782<br>(1,030 - 2,864)    | 13,180<br>(8,235 - 19,247)    | 44,181<br>(30,432 - 56,197)    |
| Hemorrhagic stroke                            | 59,309<br>(39,064 - 79,834)    | 210<br>(108 - 399)       | 304<br>(183 - 510)     | 8,788<br>(6,189 - 12,029)   | 23,062<br>(14,503 - 32,451)   | 26,946<br>(16,928 - 36,952)    |
| Hypertensive heart disease                    | 29,990<br>(21,979 - 42,607)    | 77<br>(26 - 192)         | 61<br>(38 - 96)        | 3,052<br>(2,031 - 4,513)    | 9,822<br>(6,632 - 14,090)     | 16,979<br>(11,995 - 25,326)    |
| Cardiomyopathy and myocarditis                | 6,430<br>(4,217 - 9,023)       | 307<br>(103 - 587)       | 169<br>(89 - 320)      | 1,849<br>(1,122 - 2,728)    | 1,977<br>(1,215 - 2,978)      | 2,128<br>(1,362 - 3,316)       |
| Atrial fibrillation and flutter               | 180<br>(84 - 314)              | --                       | --                     | 9<br>(5 - 16)               | 38<br>(18 - 69)               | 133<br>(58 - 240)              |
| Aortic aneurysm                               | 2,296<br>(1,550 - 3,202)       | --                       | --                     | 274<br>(175 - 407)          | 759<br>(491 - 1,091)          | 1,263<br>(831 - 1,756)         |
| Peripheral vascular disease                   | 164<br>(105 - 246)             | --                       | --                     | 6<br>(3 - 10)               | 40<br>(23 - 60)               | 118<br>(75 - 177)              |
| Endocarditis                                  | 1,275<br>(759 - 1,883)         | 29<br>(12 - 68)          | 20<br>(9 - 38)         | 367<br>(207 - 582)          | 362<br>(215 - 574)            | 497<br>(304 - 733)             |
| Other cardiovascular and circulatory diseases | 2,962<br>(2,143 - 4,266)       | 20<br>(6 - 66)           | 24<br>(12 - 58)        | 482<br>(307 - 766)          | 893<br>(586 - 1,422)          | 1,544<br>(1,073 - 2,139)       |
| Chronic respiratory diseases                  | 82,003<br>(65,195 - 117,214)   | 2,817<br>(1,706 - 4,960) | 818<br>(602 - 1,240)   | 7,657<br>(5,450 - 10,637)   | 24,559<br>(17,812 - 35,727)   | 46,152<br>(37,375 - 67,010)    |

Web Table 31- Pakistan deaths with 95% UI by age, sex, and cause in 2013

| Cause                                               | Both Sexes, All Ages        | Both Sexes, 0-4 Years  | Both Sexes, 5-14 Years | Both Sexes, 15-49 Years    | Both Sexes, 50-69 Years    | Both Sexes, 70-80 Years     |
|-----------------------------------------------------|-----------------------------|------------------------|------------------------|----------------------------|----------------------------|-----------------------------|
| Chronic obstructive pulmonary disease               | 43,366<br>(33,265 - 59,000) | 653<br>(260 - 1,749)   | 140<br>(93 - 209)      | 2,635<br>(1,657 - 3,916)   | 12,319<br>(8,626 - 17,855) | 27,619<br>(21,426 - 38,233) |
| Pneumoconiosis                                      | 10,272<br>(7,180 - 15,337)  | 9<br>(1 - 27)          | 24<br>(7 - 47)         | 1,103<br>(719 - 1,669)     | 3,681<br>(2,399 - 5,888)   | 5,454<br>(3,486 - 8,632)    |
| Silicosis                                           | 2,495<br>(1,360 - 3,925)    | 3<br>(0 - 10)          | 8<br>(2 - 18)          | 232<br>(114 - 427)         | 794<br>(418 - 1,390)       | 1,458<br>(705 - 2,503)      |
| Asbestosis                                          | 879<br>(560 - 1,401)        | 2<br>(0 - 5)           | 5<br>(1 - 10)          | 139<br>(80 - 239)          | 400<br>(234 - 677)         | 334<br>(192 - 565)          |
| Coal workers pneumoconiosis                         | 1,213<br>(687 - 1,934)      | 1<br>(0 - 4)           | 4<br>(1 - 9)           | 186<br>(99 - 336)          | 494<br>(269 - 824)         | 527<br>(262 - 892)          |
| Other pneumoconiosis                                | 5,685<br>(3,800 - 9,875)    | 3<br>(1 - 9)           | 8<br>(2 - 15)          | 546<br>(325 - 864)         | 1,993<br>(1,260 - 3,686)   | 3,134<br>(1,870 - 5,811)    |
| Asthma                                              | 15,302<br>(10,943 - 25,411) | 565<br>(276 - 1,178)   | 467<br>(316 - 790)     | 2,643<br>(1,787 - 4,192)   | 4,613<br>(3,036 - 8,173)   | 7,014<br>(4,500 - 11,804)   |
| Interstitial lung disease and pulmonary sarcoidosis | 9,830<br>(6,280 - 15,778)   | 18<br>(1 - 70)         | 27<br>(5 - 77)         | 909<br>(451 - 1,576)       | 3,470<br>(1,988 - 5,389)   | 5,407<br>(3,380 - 9,844)    |
| Other chronic respiratory diseases                  | 3,233<br>(2,207 - 4,591)    | 1,572<br>(905 - 2,583) | 160<br>(93 - 255)      | 367<br>(207 - 620)         | 476<br>(282 - 755)         | 658<br>(377 - 983)          |
| Cirrhosis                                           | 27,662<br>(20,892 - 35,795) | 363<br>(190 - 613)     | 929<br>(651 - 1,294)   | 10,463<br>(7,771 - 13,892) | 9,635<br>(6,946 - 12,927)  | 6,273<br>(4,641 - 8,482)    |
| Cirrhosis due to hepatitis B                        | 7,411<br>(4,639 - 11,119)   | 14<br>(6 - 29)         | 131<br>(67 - 229)      | 2,714<br>(1,685 - 4,134)   | 2,710<br>(1,536 - 4,454)   | 1,842<br>(1,038 - 2,944)    |
| Cirrhosis due to hepatitis C                        | 10,911<br>(7,281 - 15,648)  | 23<br>(8 - 51)         | 149<br>(59 - 264)      | 3,705<br>(2,357 - 5,469)   | 4,242<br>(2,771 - 6,255)   | 2,792<br>(1,732 - 4,211)    |
| Cirrhosis due to alcohol use                        | 3,351<br>(2,144 - 4,828)    | -                      | -                      | 968<br>(540 - 1,562)       | 1,355<br>(823 - 2,040)     | 1,028<br>(602 - 1,511)      |
| Cirrhosis due to other causes                       | 5,990<br>(4,209 - 8,279)    | 326<br>(172 - 553)     | 649<br>(442 - 944)     | 3,076<br>(2,000 - 4,393)   | 1,329<br>(760 - 2,057)     | 610<br>(339 - 916)          |
| Digestive diseases                                  | 32,444<br>(23,975 - 42,637) | 182<br>(76 - 429)      | 789<br>(509 - 1,277)   | 8,866<br>(6,196 - 12,132)  | 10,787<br>(7,304 - 14,448) | 11,820<br>(8,687 - 16,129)  |
| Peptic ulcer disease                                | 8,632<br>(5,307 - 12,041)   | 14<br>(4 - 38)         | 68<br>(37 - 121)       | 1,611<br>(950 - 2,436)     | 3,771<br>(1,805 - 4,649)   | 3,777<br>(2,318 - 5,465)    |
| Gastritis and duodenitis                            | 1,801<br>(1,069 - 3,590)    | 12<br>(4 - 31)         | 45<br>(17 - 116)       | 439<br>(228 - 947)         | 588<br>(321 - 1,090)       | 717<br>(366 - 1,428)        |
| Appendicitis                                        | 1,724<br>(1,072 - 2,460)    | 11<br>(4 - 32)         | 120<br>(63 - 206)      | 789<br>(460 - 1,262)       | 416<br>(238 - 637)         | 388<br>(224 - 612)          |
| Paralytic ileus and intestinal obstruction          | 10,755<br>(7,148 - 17,303)  | 89<br>(31 - 238)       | 377<br>(221 - 626)     | 3,250<br>(1,989 - 4,820)   | 3,412<br>(2,112 - 5,429)   | 3,627<br>(2,059 - 6,635)    |
| Inguinal, femoral, and abdominal hernia             | 594<br>(330 - 1,193)        | 5<br>(1 - 15)          | 20<br>(9 - 49)         | 117<br>(63 - 241)          | 125<br>(52 - 296)          | 327<br>(172 - 624)          |
| Inflammatory bowel disease                          | 1,179<br>(749 - 1,742)      | 29<br>(8 - 72)         | 46<br>(24 - 93)        | 400<br>(245 - 629)         | 327<br>(181 - 530)         | 377<br>(219 - 580)          |
| Vascular intestinal disorders                       | 908<br>(488 - 1,687)        | 4<br>(0 - 14)          | 16<br>(3 - 42)         | 151<br>(73 - 311)          | 286<br>(143 - 542)         | 451<br>(223 - 836)          |
| Gallbladder and biliary diseases                    | 1,273<br>(814 - 2,058)      | 3<br>(1 - 8)           | 17<br>(9 - 34)         | 232<br>(139 - 382)         | 486<br>(270 - 826)         | 535<br>(305 - 960)          |
| Pancreatitis                                        | 4,095<br>(2,219 - 6,250)    | 6<br>(1 - 16)          | 38<br>(19 - 73)        | 1,463<br>(843 - 2,466)     | 1,468<br>(741 - 2,330)     | 1,120<br>(486 - 1,929)      |
| Other digestive diseases                            | 1,482<br>(824 - 2,412)      | 9<br>(3 - 22)          | 42<br>(20 - 84)        | 413<br>(234 - 680)         | 518<br>(259 - 905)         | 500<br>(263 - 850)          |
| Neurological disorders                              | 20,616<br>(16,853 - 24,684) | 790<br>(398 - 1,607)   | 818<br>(372 - 1,506)   | 3,129<br>(2,044 - 4,516)   | 2,051<br>(1,540 - 2,676)   | 13,828<br>(11,095 - 17,046) |
| Alzheimer disease and other dementias               | 14,179<br>(11,301 - 17,583) | -                      | -                      | 8<br>(3 - 13)              | 1,159<br>(865 - 1,531)     | 13,012<br>(10,297 - 16,210) |
| Parkinson disease                                   | 38<br>(25 - 78)             | -                      | -                      | 10<br>(7 - 14)             | 4<br>(3 - 6)               | 24<br>(13 - 60)             |
| Epilepsy                                            | 4,776<br>(2,699 - 7,203)    | 614<br>(252 - 1,422)   | 718<br>(274 - 1,422)   | 2,565<br>(1,558 - 3,933)   | 433<br>(205 - 762)         | 445<br>(203 - 766)          |
| Multiple sclerosis                                  | 318<br>(143 - 491)          | -                      | -                      | 119<br>(62 - 187)          | 108<br>(48 - 185)          | 91<br>(28 - 159)            |
| Other neurological disorders                        | 1,306<br>(1,024 - 1,712)    | 176<br>(118 - 362)     | 100<br>(70 - 167)      | 427<br>(308 - 602)         | 347<br>(256 - 483)         | 255<br>(203 - 328)          |
| Mental and substance use disorders                  | 1,085<br>(569 - 1,666)      | 161<br>(26 - 336)      | 2<br>(1 - 4)           | 390<br>(194 - 664)         | 393<br>(180 - 674)         | 139<br>(70 - 235)           |
| Schizophrenia                                       | 87<br>(17 - 200)            | -                      | -                      | 34<br>(6 - 87)             | 30<br>(6 - 70)             | 23<br>(5 - 46)              |
| Alcohol use disorders                               | 119<br>(68 - 216)           | -                      | -                      | 63<br>(34 - 123)           | 33<br>(18 - 64)            | 23<br>(10 - 43)             |
| Drug use disorders                                  | 869<br>(418 - 1,368)        | 161<br>(26 - 336)      | -                      | 286<br>(131 - 521)         | 329<br>(145 - 578)         | 94<br>(41 - 178)            |
| Opioid use disorders                                | 469<br>(225 - 737)          | 93<br>(15 - 196)       | -                      | 156<br>(72 - 283)          | 169<br>(75 - 298)          | 51<br>(22 - 96)             |
| Cocaine use disorders                               | 12<br>(5 - 21)              | 3<br>(0 - 7)           | -                      | 4<br>(2 - 8)               | 4<br>(1 - 7)               | 1<br>(0 - 2)                |
| Amphetamine use disorders                           | 13<br>(5 - 22)              | 4<br>(0 - 9)           | -                      | 4<br>(1 - 7)               | 5<br>(2 - 9)               | 1<br>(0 - 2)                |
| Other drug use disorders                            | 375<br>(183 - 601)          | 61<br>(10 - 129)       | -                      | 121<br>(55 - 222)          | 152<br>(67 - 265)          | 40<br>(18 - 77)             |
| Eating disorders                                    | 10<br>(6 - 16)              | -                      | 2<br>(1 - 4)           | 8<br>(4 - 14)              | -                          | -                           |

Web Table 31- Pakistan deaths with 95% UI by age, sex, and cause in 2013

| Cause                                               | Both Sexes, All Ages         | Both Sexes, 0-4 Years       | Both Sexes, 5-14 Years   | Both Sexes, 15-49 Years     | Both Sexes, 50-69 Years     | Both Sexes, 70-80 Years     |
|-----------------------------------------------------|------------------------------|-----------------------------|--------------------------|-----------------------------|-----------------------------|-----------------------------|
| Anorexia nervosa                                    | 10<br>(6 - 16)               | --                          | 2<br>(1 - 4)             | 8<br>(4 - 14)               | --                          | --                          |
| Diabetes, urogenital, blood, and endocrine diseases | 87,686<br>(64,545 - 113,128) | 2,791<br>(1,999 - 3,951)    | 1,748<br>(1,323 - 2,400) | 18,301<br>(11,600 - 26,126) | 27,661<br>(19,617 - 37,031) | 37,186<br>(28,240 - 46,042) |
| Diabetes mellitus                                   | 40,084<br>(28,528 - 50,810)  | 342<br>(220 - 512)          | 204<br>(139 - 290)       | 5,285<br>(3,685 - 7,133)    | 13,781<br>(9,371 - 18,472)  | 20,471<br>(14,572 - 25,933) |
| Acute glomerulonephritis                            | 215<br>(28 - 805)            | 14<br>(4 - 52)              | 36<br>(4 - 140)          | 81<br>(7 - 322)             | 43<br>(4 - 181)             | 41<br>(4 - 170)             |
| Chronic kidney disease                              | 35,544<br>(15,663 - 51,288)  | 588<br>(352 - 966)          | 470<br>(292 - 657)       | 9,729<br>(3,045 - 15,456)   | 11,452<br>(5,331 - 17,648)  | 13,304<br>(6,294 - 18,554)  |
| Chronic kidney disease due to diabetes mellitus     | 1,829<br>(664 - 3,067)       | 19<br>(4 - 38)              | 20<br>(5 - 38)           | 393<br>(114 - 747)          | 785<br>(285 - 1,370)        | 612<br>(232 - 1,074)        |
| Chronic kidney disease due to hypertension          | 6,861<br>(3,679 - 11,125)    | 49<br>(15 - 111)            | 35<br>(12 - 67)          | 1,186<br>(548 - 2,230)      | 2,278<br>(1,119 - 4,139)    | 3,313<br>(1,767 - 5,605)    |
| Chronic kidney disease due to glomerulonephritis    | 4,623<br>(3,116 - 7,232)     | 244<br>(134 - 437)          | 225<br>(149 - 322)       | 1,499<br>(940 - 2,391)      | 1,289<br>(710 - 2,327)      | 1,366<br>(844 - 2,232)      |
| Chronic kidney disease due to other causes          | 22,231<br>(5,218 - 33,075)   | 277<br>(132 - 528)          | 190<br>(61 - 327)        | 6,651<br>(758 - 11,055)     | 7,100<br>(1,963 - 11,566)   | 8,014<br>(2,084 - 12,589)   |
| Urinary diseases and male infertility               | 6,312<br>(4,537 - 8,246)     | 559<br>(199 - 1,110)        | 337<br>(155 - 585)       | 1,404<br>(914 - 2,007)      | 1,638<br>(1,119 - 2,299)    | 2,372<br>(1,704 - 3,252)    |
| Interstitial nephritis and urinary tract infections | 4,446<br>(3,250 - 6,061)     | 442<br>(149 - 888)          | 234<br>(96 - 421)        | 993<br>(638 - 1,449)        | 1,123<br>(767 - 1,628)      | 1,653<br>(1,089 - 2,407)    |
| Urolithiasis                                        | 473<br>(274 - 804)           | --                          | 34<br>(17 - 65)          | 120<br>(61 - 227)           | 151<br>(71 - 305)           | 168<br>(87 - 316)           |
| Other urinary diseases                              | 1,393<br>(672 - 2,144)       | 117<br>(43 - 279)           | 69<br>(31 - 143)         | 291<br>(140 - 488)          | 364<br>(155 - 618)          | 552<br>(233 - 933)          |
| Gynecological diseases                              | 165<br>(55 - 326)            | --                          | --                       | 75<br>(32 - 152)            | 11<br>(5 - 24)              | 79<br>(12 - 181)            |
| Uterine fibroids                                    | 44<br>(12 - 89)              | --                          | --                       | 16<br>(5 - 35)              | 3<br>(1 - 7)                | 25<br>(4 - 57)              |
| Polycystic ovarian syndrome                         | 5<br>(2 - 9)                 | --                          | --                       | 5<br>(2 - 9)                | 0<br>(0 - 0)                | --                          |
| Endometriosis                                       | 11<br>(5 - 23)               | --                          | --                       | 11<br>(5 - 22)              | 0<br>(0 - 1)                | --                          |
| Genital prolapse                                    | 31<br>(9 - 63)               | --                          | --                       | 9<br>(4 - 18)               | 2<br>(1 - 4)                | 20<br>(3 - 45)              |
| Other gynecological diseases                        | 73<br>(25 - 144)             | --                          | --                       | 34<br>(14 - 68)             | 6<br>(2 - 12)               | 34<br>(5 - 78)              |
| Hemoglobinopathies and hemolytic anemias            | 3,768<br>(2,282 - 5,724)     | 1,107<br>(662 - 1,722)      | 555<br>(318 - 835)       | 1,279<br>(647 - 2,235)      | 350<br>(166 - 656)          | 476<br>(203 - 969)          |
| Thalassemias                                        | 2,433<br>(1,582 - 3,517)     | 1,008<br>(594 - 1,570)      | 506<br>(290 - 761)       | 906<br>(459 - 1,618)        | 12<br>(6 - 21)              | 3<br>(1 - 5)                |
| Sickle cell disorders                               | 243<br>(131 - 407)           | 22<br>(13 - 35)             | 20<br>(11 - 30)          | 121<br>(59 - 215)           | 77<br>(37 - 144)            | 4<br>(1 - 9)                |
| G6PD deficiency                                     | 45<br>(25 - 74)              | 7<br>(5 - 12)               | 4<br>(2 - 6)             | 18<br>(9 - 33)              | 11<br>(5 - 20)              | 4<br>(2 - 8)                |
| Other hemoglobinopathies and hemolytic anemias      | 1,047<br>(517 - 1,900)       | 70<br>(43 - 116)            | 26<br>(15 - 38)          | 235<br>(116 - 407)          | 250<br>(118 - 479)          | 466<br>(199 - 949)          |
| Endocrine, metabolic, blood, and immune disorders   | 1,600<br>(519 - 8,509)       | 181<br>(51 - 885)           | 145<br>(41 - 775)        | 448<br>(125 - 2,358)        | 385<br>(89 - 2,215)         | 441<br>(133 - 2,310)        |
| Musculoskeletal disorders                           | 1,893<br>(1,104 - 2,518)     | --                          | 133<br>(65 - 191)        | 659<br>(334 - 987)          | 715<br>(321 - 1,044)        | 386<br>(271 - 521)          |
| Rheumatoid arthritis                                | 559<br>(328 - 771)           | --                          | 20<br>(7 - 43)           | 94<br>(45 - 162)            | 249<br>(117 - 383)          | 195<br>(127 - 283)          |
| Other musculoskeletal disorders                     | 1,335<br>(714 - 1,845)       | --                          | 113<br>(50 - 166)        | 565<br>(280 - 851)          | 466<br>(193 - 700)          | 191<br>(126 - 279)          |
| Other non-communicable diseases                     | 20,825<br>(15,709 - 27,461)  | 16,381<br>(11,948 - 22,645) | 1,544<br>(940 - 2,228)   | 1,346<br>(871 - 1,905)      | 676<br>(417 - 1,013)        | 878<br>(614 - 1,284)        |
| Congenital anomalies                                | 19,188<br>(14,199 - 25,490)  | 15,729<br>(11,328 - 21,846) | 1,484<br>(886 - 2,168)   | 1,107<br>(698 - 1,608)      | 415<br>(234 - 588)          | 453<br>(253 - 625)          |
| Neural tube defects                                 | 1,057<br>(390 - 2,465)       | 963<br>(323 - 2,345)        | 47<br>(19 - 112)         | 35<br>(17 - 74)             | 7<br>(2 - 16)               | 5<br>(1 - 11)               |
| Congenital heart anomalies                          | 10,340<br>(5,439 - 15,111)   | 8,473<br>(4,227 - 13,010)   | 841<br>(391 - 1,327)     | 440<br>(245 - 668)          | 260<br>(140 - 382)          | 326<br>(157 - 467)          |
| Cleft lip and cleft palate                          | 174<br>(45 - 426)            | 174<br>(45 - 426)           | --                       | --                          | --                          | --                          |
| Down syndrome                                       | 1,224<br>(502 - 2,710)       | 873<br>(282 - 2,100)        | 146<br>(49 - 343)        | 170<br>(94 - 290)           | 31<br>(16 - 54)             | 4<br>(2 - 7)                |
| Chromosomal unbalanced rearrangements               | 540<br>(193 - 1,292)         | 458<br>(148 - 1,150)        | 33<br>(12 - 79)          | 39<br>(21 - 64)             | 6<br>(3 - 9)                | 3<br>(1 - 5)                |
| Other congenital anomalies                          | 5,853<br>(3,609 - 9,233)     | 4,788<br>(2,672 - 8,136)    | 416<br>(232 - 717)       | 423<br>(258 - 643)          | 112<br>(59 - 173)           | 114<br>(60 - 173)           |
| Skin and subcutaneous diseases                      | 1,159<br>(831 - 1,900)       | 175<br>(104 - 277)          | 60<br>(41 - 89)          | 239<br>(150 - 425)          | 261<br>(156 - 504)          | 424<br>(262 - 812)          |
| Cellulitis                                          | 591<br>(290 - 1,090)         | 126<br>(69 - 205)           | 40<br>(23 - 64)          | 127<br>(52 - 257)           | 128<br>(42 - 284)           | 171<br>(67 - 380)           |
| Pyoderma                                            | 357<br>(126 - 693)           | 35<br>(8 - 88)              | 10<br>(3 - 22)           | 73<br>(24 - 148)            | 97<br>(28 - 193)            | 142<br>(41 - 305)           |
| Decubitus ulcer                                     | 184<br>(70 - 426)            | 8<br>(2 - 19)               | 8<br>(3 - 17)            | 30<br>(10 - 72)             | 32<br>(9 - 86)              | 107<br>(34 - 255)           |



Web Table 31- Pakistan deaths with 95% UI by age, sex, and cause in 2013

| Cause                                           | Both Sexes, All Ages        | Both Sexes, 0-4 Years       | Both Sexes, 5-14 Years    | Both Sexes, 15-49 Years     | Both Sexes, 50-69 Years     | Both Sexes, 70-80 Years     |
|-------------------------------------------------|-----------------------------|-----------------------------|---------------------------|-----------------------------|-----------------------------|-----------------------------|
| Other skin and subcutaneous diseases            | 26<br>(10 - 49)             | 6<br>(1 - 14)               | 3<br>(1 - 7)              | 9<br>(4 - 19)               | 4<br>(1 - 10)               | 4<br>(2 - 10)               |
| Sudden infant death syndrome                    | 478<br>(139 - 1,619)        | 478<br>(139 - 1,619)        | --                        | --                          | --                          | --                          |
| Injuries                                        | 18,558<br>(9,604 - 145,839) | 18,826<br>(14,968 - 23,644) | 9,869<br>(7,946 - 11,874) | 58,871<br>(42,966 - 81,166) | 17,126<br>(12,895 - 21,370) | 13,864<br>(11,243 - 16,731) |
| Transport injuries                              | 32,625<br>(24,315 - 43,389) | 2,596<br>(1,778 - 3,708)    | 2,924<br>(2,090 - 3,889)  | 20,142<br>(13,811 - 29,422) | 4,518<br>(3,263 - 5,996)    | 2,445<br>(1,842 - 3,126)    |
| Road injuries                                   | 26,912<br>(20,018 - 36,246) | 2,084<br>(1,433 - 3,033)    | 2,485<br>(1,798 - 3,241)  | 17,099<br>(11,660 - 24,985) | 3,402<br>(2,335 - 5,039)    | 1,842<br>(1,322 - 2,631)    |
| Pedestrian road injuries                        | 11,433<br>(8,254 - 15,489)  | 1,116<br>(749 - 1,648)      | 1,612<br>(1,075 - 2,231)  | 5,835<br>(3,641 - 9,003)    | 1,775<br>(1,204 - 2,589)    | 1,095<br>(764 - 1,595)      |
| Cyclist road injuries                           | 1,741<br>(1,115 - 2,649)    | 57<br>(24 - 114)            | 183<br>(69 - 341)         | 1,135<br>(708 - 1,740)      | 234<br>(118 - 427)          | 133<br>(71 - 237)           |
| Motorcyclist road injuries                      | 4,476<br>(2,488 - 7,532)    | 162<br>(94 - 271)           | 126<br>(55 - 229)         | 3,769<br>(2,000 - 6,504)    | 294<br>(139 - 519)          | 125<br>(74 - 218)           |
| Motor vehicle road injuries                     | 8,731<br>(6,031 - 12,867)   | 646<br>(402 - 998)          | 501<br>(304 - 753)        | 6,144<br>(3,896 - 9,647)    | 990<br>(631 - 1,557)        | 450<br>(295 - 685)          |
| Other road injuries                             | 530<br>(278 - 1,282)        | 102<br>(47 - 215)           | 63<br>(25 - 164)          | 216<br>(83 - 684)           | 110<br>(50 - 279)           | 39<br>(18 - 103)            |
| Other transport injuries                        | 5,713<br>(2,065 - 8,805)    | 512<br>(251 - 824)          | 440<br>(184 - 756)        | 3,043<br>(899 - 5,379)      | 1,116<br>(376 - 1,781)      | 603<br>(191 - 973)          |
| Unintentional injuries                          | 65,139<br>(54,385 - 78,101) | 15,636<br>(12,284 - 20,162) | 6,143<br>(4,790 - 7,638)  | 22,388<br>(16,395 - 30,593) | 10,135<br>(7,667 - 12,839)  | 10,837<br>(8,429 - 13,397)  |
| Falls                                           | 12,229<br>(9,447 - 15,703)  | 1,894<br>(1,168 - 2,843)    | 530<br>(334 - 822)        | 2,964<br>(1,870 - 4,632)    | 2,419<br>(1,603 - 3,493)    | 4,420<br>(3,150 - 6,312)    |
| Drowning                                        | 9,756<br>(7,134 - 13,712)   | 3,298<br>(1,936 - 5,552)    | 2,050<br>(1,343 - 3,011)  | 2,875<br>(1,919 - 4,455)    | 918<br>(505 - 1,420)        | 615<br>(299 - 995)          |
| Fire, heat, and hot substances                  | 5,982<br>(4,302 - 8,498)    | 1,420<br>(860 - 2,155)      | 637<br>(305 - 1,150)      | 1,876<br>(1,214 - 2,926)    | 1,083<br>(686 - 1,757)      | 965<br>(627 - 1,472)        |
| Poisonings                                      | 11,763<br>(4,838 - 16,956)  | 1,551<br>(718 - 2,732)      | 681<br>(286 - 1,069)      | 6,646<br>(2,527 - 10,746)   | 1,919<br>(775 - 2,947)      | 965<br>(387 - 1,507)        |
| Exposure to mechanical forces                   | 3,410<br>(2,609 - 4,586)    | 870<br>(509 - 1,400)        | 421<br>(253 - 714)        | 1,225<br>(798 - 1,963)      | 552<br>(359 - 809)          | 342<br>(205 - 478)          |
| Unintentional firearm injuries                  | 633<br>(412 - 885)          | 96<br>(43 - 177)            | 41<br>(25 - 65)           | 323<br>(190 - 531)          | 97<br>(55 - 148)            | 76<br>(31 - 118)            |
| Unintentional suffocation                       | 285<br>(159 - 559)          | 166<br>(57 - 415)           | 42<br>(22 - 73)           | 48<br>(29 - 103)            | 18<br>(11 - 33)             | 11<br>(6 - 18)              |
| Other exposure to mechanical forces             | 2,492<br>(1,839 - 3,498)    | 608<br>(311 - 1,118)        | 338<br>(180 - 626)        | 855<br>(522 - 1,452)        | 436<br>(272 - 665)          | 256<br>(136 - 374)          |
| Adverse effects of medical treatment            | 3,407<br>(2,344 - 4,502)    | 447<br>(124 - 1,060)        | 174<br>(98 - 279)         | 1,244<br>(560 - 2,050)      | 786<br>(408 - 1,220)        | 757<br>(458 - 1,169)        |
| Animal contact                                  | 2,255<br>(1,168 - 6,751)    | 436<br>(163 - 1,431)        | 473<br>(198 - 1,460)      | 776<br>(344 - 2,235)        | 333<br>(137 - 1,125)        | 235<br>(103 - 721)          |
| Venomous animal contact                         | 1,748<br>(867 - 5,481)      | 322<br>(100 - 1,140)        | 400<br>(165 - 1,249)      | 674<br>(298 - 1,947)        | 245<br>(93 - 889)           | 107<br>(35 - 456)           |
| Non-venomous animal contact                     | 507<br>(235 - 1,497)        | 115<br>(40 - 350)           | 73<br>(22 - 241)          | 102<br>(35 - 408)           | 88<br>(34 - 274)            | 128<br>(52 - 321)           |
| Foreign body                                    | 6,413<br>(4,127 - 9,435)    | 4,861<br>(3,098 - 7,510)    | 58<br>(22 - 138)          | 349<br>(189 - 578)          | 153<br>(85 - 279)           | 992<br>(394 - 1,881)        |
| Pulmonary aspiration and foreign body in airway | 6,320<br>(4,032 - 9,357)    | 4,847<br>(3,083 - 7,491)    | 48<br>(15 - 127)          | 320<br>(163 - 550)          | 133<br>(68 - 253)           | 972<br>(375 - 1,858)        |
| Foreign body in other body part                 | 93<br>(67 - 140)            | 14<br>(8 - 26)              | 9<br>(6 - 17)             | 29<br>(20 - 49)             | 21<br>(13 - 34)             | 20<br>(12 - 32)             |
| Other unintentional injuries                    | 9,925<br>(7,463 - 13,409)   | 858<br>(569 - 1,353)        | 1,118<br>(795 - 1,557)    | 4,434<br>(2,905 - 6,888)    | 1,972<br>(1,312 - 2,937)    | 1,544<br>(1,139 - 2,046)    |
| Self-harm and interpersonal violence            | 19,923<br>(14,187 - 27,501) | 591<br>(351 - 941)          | 763<br>(502 - 1,095)      | 15,902<br>(10,929 - 22,692) | 2,189<br>(1,489 - 3,060)    | 477<br>(333 - 663)          |
| Self-harm                                       | 7,752<br>(5,430 - 11,065)   | --                          | 192<br>(88 - 377)         | 5,873<br>(3,995 - 8,550)    | 1,353<br>(855 - 2,012)      | 334<br>(213 - 497)          |
| Interpersonal violence                          | 12,171<br>(8,057 - 17,374)  | 591<br>(351 - 941)          | 571<br>(358 - 869)        | 10,029<br>(6,313 - 14,684)  | 836<br>(498 - 1,339)        | 144<br>(85 - 222)           |
| Assault by firearm                              | 5,170<br>(3,224 - 8,713)    | 225<br>(109 - 412)          | 227<br>(117 - 404)        | 4,261<br>(2,592 - 7,496)    | 413<br>(208 - 691)          | 44<br>(22 - 74)             |
| Assault by sharp object                         | 3,558<br>(1,912 - 6,112)    | 36<br>(14 - 88)             | 77<br>(34 - 151)          | 3,184<br>(1,671 - 5,629)    | 244<br>(114 - 441)          | 16<br>(8 - 31)              |
| Assault by other means                          | 3,443<br>(1,959 - 5,346)    | 330<br>(187 - 585)          | 266<br>(154 - 423)        | 2,584<br>(1,276 - 4,335)    | 179<br>(95 - 323)           | 84<br>(45 - 136)            |
| Forces of nature, war, and legal intervention   | 871<br>(650 - 1,259)        | 3<br>(0 - 2)                | 39<br>(29 - 58)           | 439<br>(309 - 622)          | 285<br>(218 - 398)          | 105<br>(76 - 142)           |
| Exposure to forces of nature                    | 871<br>(650 - 1,259)        | 3<br>(0 - 2)                | 39<br>(29 - 58)           | 439<br>(309 - 622)          | 285<br>(218 - 398)          | 105<br>(76 - 142)           |

Web Table 31- Pakistan deaths with 95% UI by age, sex, and cause in 2013

| Cause                                                             | Males, All Ages                | Males, 0-4 Years               | Males, 5-14 Years           | Males, 15-49 Years             | Males, 50-69 Years             | Males, 70-80 Years             |
|-------------------------------------------------------------------|--------------------------------|--------------------------------|-----------------------------|--------------------------------|--------------------------------|--------------------------------|
| All causes                                                        | 736,152<br>(607,554 - 863,693) | 183,697<br>(161,397 - 204,526) | 23,314<br>(20,387 - 26,002) | 146,817<br>(102,388 - 205,879) | 172,259<br>(123,471 - 220,952) | 210,065<br>(175,005 - 234,097) |
| Communicable, maternal, neonatal, and nutritional diseases        | 236,391<br>(211,025 - 262,404) | 160,333<br>(141,206 - 177,490) | 10,498<br>(8,313 - 12,859)  | 25,208<br>(18,348 - 34,046)    | 17,543<br>(13,062 - 22,216)    | 22,809<br>(17,949 - 28,418)    |
| HIV/AIDS and tuberculosis                                         | 25,032<br>(17,221 - 36,153)    | 1,009<br>(567 - 1,659)         | 536<br>(346 - 809)          | 10,199<br>(6,271 - 16,643)     | 7,499<br>(4,764 - 10,970)      | 5,788<br>(4,023 - 8,024)       |
| Tuberculosis                                                      | 23,311<br>(16,082 - 32,229)    | 942<br>(520 - 1,531)           | 525<br>(337 - 792)          | 8,885<br>(5,332 - 14,047)      | 7,225<br>(4,588 - 10,278)      | 5,734<br>(3,959 - 7,880)       |
| HIV/AIDS                                                          | 1,721<br>(140 - 7,984)         | 67<br>(7 - 331)                | 11<br>(1 - 52)              | 1,314<br>(111 - 6,038)         | 274<br>(18 - 1,411)            | 55<br>(3 - 287)                |
| HIV/AIDS resulting in mycobacterial infection                     | 117<br>(10 - 578)              | 4<br>(0 - 21)                  | 1<br>(0 - 3)                | 89<br>(7 - 417)                | 20<br>(1 - 112)                | 4<br>(0 - 24)                  |
| HIV/AIDS resulting in other diseases                              | 1,604<br>(130 - 7,417)         | 63<br>(7 - 309)                | 11<br>(1 - 49)              | 1,225<br>(103 - 5,639)         | 254<br>(17 - 1,307)            | 51<br>(3 - 263)                |
| Diarrhea, lower respiratory, and other common infectious diseases | 107,594<br>(89,080 - 127,414)  | 69,301<br>(54,766 - 83,690)    | 7,756<br>(5,572 - 10,260)   | 9,924<br>(6,259 - 15,801)      | 7,299<br>(4,744 - 10,501)      | 13,314<br>(9,290 - 17,906)     |
| Diarrheal diseases                                                | 35,284<br>(22,968 - 48,865)    | 23,268<br>(11,864 - 36,661)    | 1,460<br>(647 - 2,827)      | 2,036<br>(1,091 - 3,481)       | 2,930<br>(1,524 - 5,025)       | 5,590<br>(2,879 - 9,298)       |
| Intestinal infectious diseases                                    | 12,247<br>(6,350 - 20,955)     | 2,779<br>(1,218 - 5,384)       | 4,210<br>(2,227 - 6,793)    | 4,537<br>(2,076 - 8,833)       | 521<br>(194 - 1,112)           | 200<br>(80 - 396)              |
| Typhoid fever                                                     | 8,722<br>(4,466 - 15,301)      | 1,915<br>(759 - 3,758)         | 3,061<br>(1,577 - 5,161)    | 3,222<br>(1,432 - 6,502)       | 378<br>(135 - 813)             | 146<br>(54 - 298)              |
| Paratyphoid fever                                                 | 3,482<br>(1,604 - 6,362)       | 844<br>(297 - 1,801)           | 1,144<br>(490 - 2,190)      | 1,303<br>(516 - 2,578)         | 139<br>(42 - 334)              | 52<br>(17 - 119)               |
| Other intestinal infectious diseases                              | 42<br>(26 - 63)                | 20<br>(9 - 35)                 | 5<br>(1 - 12)               | 12<br>(5 - 23)                 | 3<br>(1 - 9)                   | 2<br>(0 - 7)                   |
| Lower respiratory infections                                      | 43,933<br>(32,376 - 56,259)    | 30,299<br>(19,648 - 41,857)    | 1,078<br>(595 - 1,743)      | 1,339<br>(1,256 - 3,371)       | 3,389<br>(2,065 - 5,061)       | 7,028<br>(4,542 - 10,268)      |
| Upper respiratory infections                                      | 62<br>(25 - 118)               | 17<br>(1 - 59)                 | 3<br>(0 - 12)               | 16<br>(3 - 45)                 | 13<br>(1 - 40)                 | 12<br>(1 - 44)                 |
| Otitis media                                                      | 25<br>(14 - 41)                | 6<br>(2 - 11)                  | 6<br>(3 - 11)               | 8<br>(4 - 14)                  | 3<br>(1 - 6)                   | 2<br>(1 - 4)                   |
| Meningitis                                                        | 10,553<br>(5,505 - 17,387)     | 9,018<br>(3,879 - 15,900)      | 302<br>(151 - 536)          | 653<br>(389 - 1,083)           | 236<br>(133 - 384)             | 344<br>(181 - 572)             |
| Pneumococcal meningitis                                           | 2,218<br>(1,162 - 3,802)       | 1,774<br>(695 - 3,393)         | 98<br>(43 - 190)            | 187<br>(96 - 329)              | 62<br>(24 - 118)               | 97<br>(45 - 176)               |
| H influenzae type B meningitis                                    | 3,545<br>(1,496 - 6,450)       | 3,321<br>(1,269 - 6,209)       | 81<br>(35 - 161)            | 87<br>(43 - 160)               | 22<br>(10 - 42)                | 34<br>(13 - 64)                |
| Meningococcal meningitis                                          | 760<br>(412 - 1,290)           | 559<br>(227 - 1,100)           | 25<br>(10 - 51)             | 88<br>(37 - 164)               | 36<br>(17 - 65)                | 52<br>(21 - 94)                |
| Other meningitis                                                  | 4,030<br>(2,033 - 6,864)       | 3,365<br>(1,370 - 6,211)       | 98<br>(46 - 177)            | 291<br>(155 - 508)             | 116<br>(49 - 204)              | 161<br>(77 - 285)              |
| Encephalitis                                                      | 1,511<br>(1,024 - 2,180)       | 704<br>(362 - 1,288)           | 284<br>(141 - 442)          | 372<br>(207 - 629)             | 97<br>(55 - 195)               | 54<br>(28 - 117)               |
| Diphtheria                                                        | 28<br>(1 - 154)                | 17<br>(0 - 136)                | 7<br>(0 - 57)               | 3<br>(0 - 11)                  | 1<br>(0 - 6)                   | --                             |
| Whooping cough                                                    | 945<br>(1 - 4,992)             | 870<br>(1 - 4,635)             | 61<br>(0 - 315)             | 13<br>(0 - 69)                 | 2<br>(0 - 8)                   | --                             |
| Tetanus                                                           | 885<br>(464 - 1,437)           | 630<br>(305 - 1,195)           | 46<br>(14 - 78)             | 74<br>(24 - 139)               | 93<br>(19 - 164)               | 42<br>(9 - 89)                 |
| Measles                                                           | 1,976<br>(415 - 5,425)         | 1,650<br>(345 - 4,553)         | 287<br>(61 - 848)           | 37<br>(8 - 112)                | 1<br>(0 - 4)                   | --                             |
| Varicella and herpes zoster                                       | 144<br>(44 - 351)              | 44<br>(2 - 175)                | 12<br>(0 - 50)              | 35<br>(5 - 99)                 | 13<br>(1 - 41)                 | 41<br>(1 - 177)                |
| Neglected tropical diseases and malaria                           | 4,643<br>(3,234 - 6,470)       | 1,017<br>(552 - 1,719)         | 999<br>(684 - 1,395)        | 1,779<br>(966 - 3,026)         | 545<br>(313 - 932)             | 303<br>(190 - 505)             |
| Malaria                                                           | 1,427<br>(668 - 3,316)         | 160<br>(50 - 282)              | 270<br>(90 - 684)           | 676<br>(243 - 1,781)           | 205<br>(70 - 557)              | 116<br>(39 - 308)              |
| Leishmaniasis                                                     | 2,007<br>(1,224 - 3,081)       | 614<br>(224 - 1,247)           | 374<br>(184 - 660)          | 762<br>(363 - 1,306)           | 192<br>(83 - 324)              | 65<br>(25 - 118)               |
| Visceral leishmaniasis                                            | 2,007<br>(1,224 - 3,081)       | 614<br>(224 - 1,247)           | 374<br>(184 - 660)          | 762<br>(363 - 1,306)           | 192<br>(83 - 324)              | 65<br>(25 - 118)               |
| Cysticercosis                                                     | 2<br>(0 - 6)                   | 0<br>(0 - 0)                   | 0<br>(0 - 0)                | 1<br>(0 - 4)                   | 1<br>(0 - 1)                   | 0<br>(0 - 0)                   |
| Cystic echinococcosis                                             | 19<br>(14 - 24)                | 1<br>(1 - 2)                   | 4<br>(3 - 5)                | 9<br>(6 - 12)                  | 4<br>(2 - 5)                   | 2<br>(1 - 2)                   |
| Dengue                                                            | 73<br>(54 - 109)               | 21<br>(12 - 38)                | 9<br>(6 - 21)               | 20<br>(13 - 34)                | 14<br>(7 - 21)                 | 10<br>(4 - 13)                 |
| Rabies                                                            | 752<br>(481 - 1,222)           | 67<br>(21 - 153)               | 301<br>(159 - 508)          | 248<br>(137 - 494)             | 101<br>(53 - 161)              | 36<br>(15 - 60)                |
| Intestinal nematode infections                                    | 66<br>(39 - 97)                | 37<br>(18 - 64)                | 17<br>(6 - 34)              | 6<br>(1 - 17)                  | 3<br>(0 - 9)                   | 3<br>(0 - 10)                  |
| Ascariasis                                                        | 66<br>(39 - 97)                | 37<br>(18 - 64)                | 17<br>(6 - 34)              | 6<br>(1 - 17)                  | 3<br>(0 - 9)                   | 3<br>(0 - 10)                  |
| Other neglected tropical diseases                                 | 297<br>(162 - 486)             | 117<br>(42 - 252)              | 26<br>(13 - 47)             | 57<br>(29 - 104)               | 27<br>(13 - 51)                | 71<br>(32 - 129)               |
| Maternal disorders                                                | --                             | --                             | --                          | --                             | --                             | --                             |
| Maternal hemorrhage                                               | --                             | --                             | --                          | --                             | --                             | --                             |

Web Table 31- Pakistan deaths with 95% UI by age, sex, and cause in 2013

| Cause                                                            | Males, All Ages                | Males, 0-4 Years            | Males, 5-14 Years        | Males, 15-49 Years           | Males, 50-69 Years             | Males, 70-80 Years             |
|------------------------------------------------------------------|--------------------------------|-----------------------------|--------------------------|------------------------------|--------------------------------|--------------------------------|
| Maternal sepsis and other maternal infections                    | --                             | --                          | --                       | --                           | --                             | --                             |
| Maternal hypertensive disorders                                  | --                             | --                          | --                       | --                           | --                             | --                             |
| Maternal obstructed labor                                        | --                             | --                          | --                       | --                           | --                             | --                             |
| Maternal abortive outcome                                        | --                             | --                          | --                       | --                           | --                             | --                             |
| Indirect maternal deaths                                         | --                             | --                          | --                       | --                           | --                             | --                             |
| Late maternal deaths                                             | --                             | --                          | --                       | --                           | --                             | --                             |
| Maternal deaths aggravated by HIV/AIDS                           | --                             | --                          | --                       | --                           | --                             | --                             |
| Other maternal disorders                                         | --                             | --                          | --                       | --                           | --                             | --                             |
| Neonatal disorders                                               | 84,403<br>(73,197 - 96,987)    | 84,403<br>(73,197 - 96,987) | --                       | --                           | --                             | --                             |
| Neonatal preterm birth complications                             | 20,547<br>(9,785 - 34,550)     | 20,547<br>(9,785 - 34,550)  | --                       | --                           | --                             | --                             |
| Neonatal encephalopathy due to birth asphyxia and trauma         | 36,559<br>(22,459 - 51,273)    | 36,559<br>(22,459 - 51,273) | --                       | --                           | --                             | --                             |
| Neonatal sepsis and other neonatal infections                    | 19,883<br>(7,445 - 35,950)     | 19,883<br>(7,445 - 35,950)  | --                       | --                           | --                             | --                             |
| Hemolytic disease and other neonatal jaundice                    | 1,139<br>(260 - 3,405)         | 1,139<br>(260 - 3,405)      | --                       | --                           | --                             | --                             |
| Other neonatal disorders                                         | 6,275<br>(1,412 - 15,294)      | 6,275<br>(1,412 - 15,294)   | --                       | --                           | --                             | --                             |
| Nutritional deficiencies                                         | 6,954<br>(4,518 - 10,724)      | 1,965<br>(978 - 3,683)      | 458<br>(271 - 761)       | 1,076<br>(609 - 1,804)       | 985<br>(554 - 1,573)           | 2,469<br>(1,392 - 3,767)       |
| Protein-energy malnutrition                                      | 5,358<br>(2,977 - 8,024)       | 1,569<br>(776 - 2,968)      | 354<br>(188 - 607)       | 731<br>(327 - 1,263)         | 741<br>(356 - 1,238)           | 1,962<br>(841 - 3,157)         |
| Iodine deficiency                                                | 65<br>(5 - 209)                | 16<br>(0 - 130)             | 4<br>(0 - 32)            | 16<br>(0 - 76)               | 14<br>(0 - 82)                 | 14<br>(0 - 78)                 |
| Iron-deficiency anemia                                           | 1,198<br>(469 - 3,109)         | 335<br>(87 - 912)           | 92<br>(29 - 217)         | 276<br>(106 - 644)           | 184<br>(33 - 547)              | 311<br>(38 - 1,012)            |
| Other nutritional deficiencies                                   | 333<br>(114 - 688)             | 44<br>(10 - 123)            | 8<br>(2 - 28)            | 53<br>(18 - 131)             | 45<br>(14 - 103)               | 183<br>(45 - 420)              |
| Other communicable, maternal, neonatal, and nutritional diseases | 7,766<br>(5,563 - 10,672)      | 2,637<br>(1,377 - 4,639)    | 748<br>(452 - 1,172)     | 2,230<br>(1,382 - 3,533)     | 1,216<br>(699 - 1,971)         | 935<br>(443 - 1,700)           |
| Sexually transmitted diseases excluding HIV                      | 1,535<br>(707 - 2,765)         | 1,295<br>(543 - 2,412)      | 115<br>(51 - 222)        | 44<br>(11 - 79)              | 37<br>(7 - 81)                 | 44<br>(7 - 115)                |
| Syphilis                                                         | 1,497<br>(671 - 2,721)         | 1,295<br>(543 - 2,412)      | 114<br>(50 - 221)        | 24<br>(6 - 44)               | 27<br>(5 - 59)                 | 37<br>(6 - 96)                 |
| Chlamydial infection                                             | --                             | --                          | --                       | --                           | --                             | --                             |
| Gonococcal infection                                             | 23<br>(6 - 41)                 | --                          | 1<br>(0 - 1)             | 11<br>(3 - 20)               | 6<br>(1 - 14)                  | 5<br>(1 - 13)                  |
| Other sexually transmitted diseases                              | 15<br>(4 - 27)                 | --                          | 1<br>(0 - 1)             | 9<br>(2 - 16)                | 4<br>(1 - 8)                   | 2<br>(0 - 5)                   |
| Hepatitis                                                        | 3,662<br>(2,636 - 5,065)       | 562<br>(263 - 1,114)        | 390<br>(248 - 569)       | 1,667<br>(1,020 - 2,637)     | 700<br>(415 - 1,087)           | 343<br>(224 - 496)             |
| Acute hepatitis A                                                | 526<br>(165 - 1,078)           | 259<br>(66 - 606)           | 128<br>(39 - 250)        | 117<br>(29 - 284)            | 19<br>(4 - 51)                 | 4<br>(1 - 10)                  |
| Acute hepatitis B                                                | 1,365<br>(789 - 2,134)         | 288<br>(93 - 669)           | 101<br>(39 - 196)        | 337<br>(135 - 681)           | 382<br>(196 - 637)             | 257<br>(151 - 399)             |
| Acute hepatitis C                                                | 115<br>(22 - 286)              | --                          | 29<br>(5 - 72)           | 51<br>(8 - 133)              | 23<br>(4 - 63)                 | 13<br>(2 - 38)                 |
| Acute hepatitis E                                                | 1,656<br>(943 - 2,673)         | 15<br>(1 - 57)              | 133<br>(52 - 269)        | 1,162<br>(654 - 1,924)       | 277<br>(117 - 522)             | 69<br>(18 - 149)               |
| Other infectious diseases                                        | 2,569<br>(747 - 4,732)         | 780<br>(219 - 2,260)        | 243<br>(35 - 605)        | 519<br>(115 - 1,049)         | 479<br>(91 - 1,090)            | 548<br>(87 - 1,326)            |
| Non-communicable diseases                                        | 414,843<br>(319,399 - 508,613) | 14,867<br>(10,839 - 20,633) | 6,255<br>(4,991 - 7,679) | 72,476<br>(48,486 - 104,215) | 142,243<br>(100,208 - 185,031) | 179,001<br>(149,018 - 200,802) |
| Neoplasms                                                        | 66,417<br>(49,036 - 85,903)    | 601<br>(379 - 916)          | 1,510<br>(1,134 - 1,949) | 15,894<br>(10,730 - 23,187)  | 30,988<br>(21,489 - 40,607)    | 17,425<br>(13,989 - 20,720)    |
| Esophageal cancer                                                | 5,501<br>(3,677 - 8,336)       | --                          | --                       | 1,215<br>(721 - 1,919)       | 2,594<br>(1,626 - 3,878)       | 1,692<br>(1,077 - 2,750)       |
| Stomach cancer                                                   | 3,393<br>(2,366 - 4,538)       | --                          | --                       | 939<br>(589 - 1,423)         | 1,619<br>(1,065 - 2,209)       | 835<br>(601 - 1,103)           |
| Liver cancer                                                     | 4,378<br>(3,045 - 5,940)       | --                          | 46<br>(24 - 80)          | 850<br>(511 - 1,321)         | 2,489<br>(1,600 - 3,576)       | 992<br>(688 - 1,364)           |
| Liver cancer due to hepatitis B                                  | 978<br>(554 - 1,570)           | --                          | 18<br>(8 - 34)           | 279<br>(149 - 453)           | 524<br>(263 - 910)             | 157<br>(81 - 260)              |
| Liver cancer due to hepatitis C                                  | 2,596<br>(1,721 - 3,639)       | --                          | 6<br>(2 - 14)            | 420<br>(239 - 692)           | 1,543<br>(946 - 2,266)         | 626<br>(420 - 909)             |
| Liver cancer due to alcohol use                                  | 469<br>(272 - 721)             | --                          | --                       | 58<br>(24 - 106)             | 258<br>(131 - 416)             | 153<br>(84 - 241)              |
| Liver cancer due to other causes                                 | 335<br>(187 - 550)             | --                          | 22<br>(10 - 41)          | 93<br>(47 - 169)             | 165<br>(77 - 294)              | 56<br>(27 - 96)                |

Web Table 31- Pakistan deaths with 95% UI by age, sex, and cause in 2013

| Cause                                         | Males, All Ages                | Males, 0-4 Years         | Males, 5-14 Years    | Males, 15-49 Years          | Males, 50-69 Years          | Males, 70-80 Years           |
|-----------------------------------------------|--------------------------------|--------------------------|----------------------|-----------------------------|-----------------------------|------------------------------|
| Larynx cancer                                 | 3,740<br>(2,400 - 5,369)       | --                       | --                   | 602<br>(346 - 976)          | 2,012<br>(1,243 - 3,019)    | 1,126<br>(657 - 1,590)       |
| Tracheal, bronchus and lung cancer            | 14,466<br>(10,500 - 19,015)    | --                       | --                   | 1,869<br>(1,169 - 2,896)    | 8,364<br>(5,608 - 11,169)   | 4,233<br>(3,227 - 5,325)     |
| Breast cancer                                 | 373<br>(140 - 581)             | --                       | --                   | 95<br>(32 - 170)            | 146<br>(57 - 255)           | 131<br>(44 - 242)            |
| Cervical cancer                               | --                             | --                       | --                   | --                          | --                          | --                           |
| Uterine cancer                                | --                             | --                       | --                   | --                          | --                          | --                           |
| Prostate cancer                               | 1,568<br>(962 - 2,335)         | --                       | --                   | 29<br>(13 - 50)             | 325<br>(186 - 516)          | 1,215<br>(737 - 1,844)       |
| Colon and rectum cancer                       | 3,420<br>(2,429 - 4,567)       | --                       | --                   | 1,296<br>(847 - 1,936)      | 1,404<br>(964 - 1,895)      | 720<br>(546 - 916)           |
| Lip and oral cavity cancer                    | 3,389<br>(2,150 - 4,835)       | --                       | --                   | 1,214<br>(668 - 1,929)      | 1,527<br>(927 - 2,245)      | 648<br>(408 - 929)           |
| Nasopharynx cancer                            | 1,156<br>(741 - 1,702)         | --                       | 67<br>(19 - 186)     | 398<br>(237 - 643)          | 523<br>(292 - 835)          | 169<br>(104 - 265)           |
| Other pharynx cancer                          | 2,396<br>(1,586 - 3,319)       | --                       | --                   | 420<br>(242 - 677)          | 1,282<br>(772 - 1,890)      | 694<br>(461 - 991)           |
| Gallbladder and biliary tract cancer          | 673<br>(450 - 930)             | --                       | --                   | 143<br>(83 - 229)           | 341<br>(207 - 495)          | 189<br>(124 - 279)           |
| Pancreatic cancer                             | 1,039<br>(704 - 1,411)         | --                       | --                   | 319<br>(199 - 490)          | 546<br>(356 - 751)          | 174<br>(124 - 230)           |
| Malignant skin melanoma                       | 120<br>(67 - 240)              | --                       | --                   | 55<br>(26 - 101)            | 38<br>(21 - 73)             | 27<br>(14 - 72)              |
| Non-melanoma skin cancer                      | 101<br>(63 - 159)              | --                       | --                   | 20<br>(11 - 34)             | 31<br>(17 - 51)             | 50<br>(30 - 81)              |
| Ovarian cancer                                | --                             | --                       | --                   | --                          | --                          | --                           |
| Testicular cancer                             | 279<br>(157 - 431)             | --                       | --                   | 190<br>(101 - 314)          | 50<br>(26 - 82)             | 39<br>(18 - 67)              |
| Kidney cancer                                 | 1,061<br>(742 - 1,469)         | 14<br>(5 - 31)           | 27<br>(14 - 48)      | 194<br>(123 - 313)          | 553<br>(353 - 828)          | 273<br>(179 - 399)           |
| Bladder cancer                                | 5,023<br>(3,425 - 6,711)       | --                       | --                   | 485<br>(283 - 795)          | 2,543<br>(1,560 - 3,688)    | 1,995<br>(1,373 - 2,786)     |
| Brain and nervous system cancer               | 1,843<br>(1,122 - 2,720)       | 25<br>(8 - 54)           | 189<br>(108 - 302)   | 865<br>(501 - 1,369)        | 650<br>(375 - 984)          | 115<br>(69 - 195)            |
| Thyroid cancer                                | 274<br>(181 - 383)             | --                       | 5<br>(3 - 7)         | 75<br>(44 - 122)            | 137<br>(82 - 204)           | 57<br>(37 - 86)              |
| Mesothelioma                                  | 143<br>(93 - 215)              | --                       | --                   | 62<br>(34 - 109)            | 53<br>(29 - 88)             | 28<br>(14 - 53)              |
| Hodgkin lymphoma                              | 506<br>(314 - 738)             | 16<br>(7 - 36)           | 65<br>(21 - 156)     | 209<br>(117 - 335)          | 158<br>(85 - 269)           | 57<br>(30 - 98)              |
| Non-Hodgkin lymphoma                          | 4,947<br>(2,978 - 7,261)       | 67<br>(32 - 117)         | 285<br>(168 - 439)   | 1,866<br>(1,067 - 3,041)    | 1,786<br>(1,005 - 2,681)    | 943<br>(572 - 1,406)         |
| Multiple myeloma                              | 735<br>(468 - 1,056)           | --                       | --                   | 144<br>(82 - 232)           | 374<br>(222 - 566)          | 217<br>(139 - 315)           |
| Leukemia                                      | 2,833<br>(2,037 - 3,743)       | 91<br>(41 - 186)         | 488<br>(319 - 703)   | 1,481<br>(969 - 2,200)      | 571<br>(375 - 810)          | 201<br>(144 - 266)           |
| Other neoplasms                               | 3,061<br>(2,148 - 4,209)       | 388<br>(225 - 617)       | 337<br>(207 - 510)   | 859<br>(508 - 1,379)        | 871<br>(511 - 1,332)        | 606<br>(372 - 843)           |
| Cardiovascular diseases                       | 176,463<br>(134,919 - 221,592) | 910<br>(527 - 1,507)     | 800<br>(537 - 1,161) | 25,004<br>(16,452 - 36,631) | 62,653<br>(43,865 - 82,923) | 87,096<br>(71,504 - 100,779) |
| Rheumatic heart disease                       | 5,436<br>(2,898 - 9,574)       | 69<br>(24 - 156)         | 252<br>(129 - 414)   | 1,929<br>(971 - 3,207)      | 1,616<br>(762 - 3,045)      | 1,570<br>(765 - 2,959)       |
| Ischemic heart disease                        | 88,529<br>(65,778 - 116,433)   | 171<br>(50 - 425)        | 201<br>(108 - 350)   | 13,915<br>(9,020 - 20,994)  | 34,872<br>(24,450 - 47,979) | 39,370<br>(30,601 - 49,561)  |
| Cerebrovascular disease                       | 57,256<br>(41,475 - 74,014)    | 247<br>(129 - 458)       | 197<br>(116 - 324)   | 5,553<br>(3,388 - 8,606)    | 17,676<br>(11,538 - 24,494) | 33,582<br>(25,157 - 42,338)  |
| Ischemic stroke                               | 28,709<br>(16,588 - 39,151)    | 40<br>(14 - 92)          | 28<br>(12 - 53)      | 937<br>(416 - 1,714)        | 6,784<br>(3,548 - 10,747)   | 20,921<br>(12,691 - 28,002)  |
| Hemorrhagic stroke                            | 28,546<br>(18,292 - 41,241)    | 207<br>(106 - 394)       | 170<br>(98 - 279)    | 4,616<br>(2,742 - 7,157)    | 10,892<br>(6,489 - 16,147)  | 12,662<br>(7,210 - 19,983)   |
| Hypertensive heart disease                    | 17,387<br>(10,863 - 29,100)    | 76<br>(24 - 190)         | 38<br>(19 - 65)      | 1,945<br>(1,036 - 3,441)    | 5,943<br>(3,313 - 9,811)    | 9,386<br>(5,661 - 16,351)    |
| Cardiomyopathy and myocarditis                | 3,742<br>(2,073 - 5,816)       | 300<br>(95 - 580)        | 90<br>(32 - 166)     | 1,041<br>(526 - 1,751)      | 1,216<br>(594 - 2,056)      | 1,096<br>(578 - 1,851)       |
| Atrial fibrillation and flutter               | 105<br>(46 - 209)              | --                       | --                   | 6<br>(3 - 12)               | 24<br>(10 - 49)             | 75<br>(31 - 162)             |
| Aortic aneurysm                               | 1,518<br>(897 - 2,199)         | --                       | --                   | 169<br>(94 - 281)           | 529<br>(309 - 810)          | 820<br>(467 - 1,220)         |
| Peripheral vascular disease                   | 84<br>(46 - 125)               | --                       | --                   | 3<br>(2 - 6)                | 23<br>(12 - 37)             | 57<br>(31 - 89)              |
| Endocarditis                                  | 783<br>(439 - 1,232)           | 29<br>(12 - 67)          | 10<br>(5 - 20)       | 222<br>(118 - 380)          | 245<br>(129 - 417)          | 277<br>(149 - 440)           |
| Other cardiovascular and circulatory diseases | 1,625<br>(1,052 - 2,501)       | 19<br>(6 - 65)           | 11<br>(6 - 27)       | 222<br>(130 - 410)          | 509<br>(305 - 819)          | 863<br>(539 - 1,279)         |
| Chronic respiratory diseases                  | 58,777<br>(44,443 - 74,867)    | 2,027<br>(1,154 - 3,377) | 607<br>(442 - 821)   | 5,907<br>(3,811 - 9,001)    | 17,279<br>(11,601 - 23,539) | 32,957<br>(25,576 - 41,172)  |

Web Table 31- Pakistan deaths with 95% UI by age, sex, and cause in 2013

| Cause                                               | Males, All Ages             | Males, 0-4 Years       | Males, 5-14 Years  | Males, 15-49 Years       | Males, 50-69 Years        | Males, 70-80 Years          |
|-----------------------------------------------------|-----------------------------|------------------------|--------------------|--------------------------|---------------------------|-----------------------------|
| Chronic obstructive pulmonary disease               | 32,469<br>(23,696 - 41,285) | 339<br>(82 - 911)      | 114<br>(69 - 178)  | 2,175<br>(1,100 - 3,507) | 9,097<br>(5,897 - 12,829) | 20,744<br>(15,422 - 26,869) |
| Pneumoconiosis                                      | 7,042<br>(4,487 - 10,302)   | 9<br>(1 - 26)          | 23<br>(6 - 45)     | 906<br>(497 - 1,475)     | 2,484<br>(1,491 - 3,872)  | 3,621<br>(2,063 - 5,648)    |
| Silicosis                                           | 2,346<br>(1,243 - 3,706)    | 3<br>(0 - 10)          | 8<br>(2 - 18)      | 215<br>(101 - 408)       | 724<br>(367 - 1,292)      | 1,397<br>(654 - 2,439)      |
| Asbestosis                                          | 751<br>(445 - 1,251)        | 2<br>(0 - 5)           | 4<br>(1 - 10)      | 124<br>(66 - 222)        | 340<br>(188 - 594)        | 280<br>(144 - 495)          |
| Coal workers pneumoconiosis                         | 1,097<br>(591 - 1,815)      | 1<br>(0 - 4)           | 4<br>(1 - 8)       | 171<br>(85 - 317)        | 440<br>(224 - 780)        | 481<br>(220 - 839)          |
| Other pneumoconiosis                                | 2,849<br>(1,643 - 4,449)    | 3<br>(0 - 8)           | 7<br>(2 - 14)      | 396<br>(178 - 724)       | 980<br>(509 - 1,651)      | 1,463<br>(756 - 2,478)      |
| Asthma                                              | 9,853<br>(6,217 - 15,739)   | 375<br>(138 - 817)     | 316<br>(195 - 508) | 1,784<br>(1,032 - 3,115) | 2,870<br>(1,674 - 5,131)  | 4,509<br>(2,441 - 7,075)    |
| Interstitial lung disease and pulmonary sarcoidosis | 6,872<br>(4,228 - 10,243)   | 14<br>(1 - 63)         | 21<br>(4 - 69)     | 736<br>(303 - 1,406)     | 2,499<br>(1,339 - 4,041)  | 3,603<br>(2,066 - 5,940)    |
| Other chronic respiratory diseases                  | 2,541<br>(1,618 - 3,804)    | 1,290<br>(700 - 2,210) | 134<br>(69 - 231)  | 307<br>(147 - 563)       | 330<br>(174 - 560)        | 480<br>(241 - 808)          |
| Cirrhosis                                           | 11,409<br>(7,760 - 15,287)  | 148<br>(58 - 305)      | 316<br>(207 - 440) | 4,574<br>(2,850 - 6,905) | 4,179<br>(2,708 - 5,844)  | 2,192<br>(1,531 - 2,907)    |
| Cirrhosis due to hepatitis B                        | 2,515<br>(1,342 - 4,047)    | 5<br>(2 - 13)          | 40<br>(15 - 76)    | 1,038<br>(553 - 1,842)   | 961<br>(451 - 1,609)      | 471<br>(157 - 819)          |
| Cirrhosis due to hepatitis C                        | 4,178<br>(2,515 - 6,211)    | 12<br>(3 - 31)         | 62<br>(17 - 127)   | 1,563<br>(812 - 2,627)   | 1,626<br>(877 - 2,604)    | 915<br>(532 - 1,379)        |
| Cirrhosis due to alcohol use                        | 2,263<br>(1,273 - 3,445)    | -                      | -                  | 745<br>(367 - 1,288)     | 950<br>(527 - 1,483)      | 569<br>(304 - 894)          |
| Cirrhosis due to other causes                       | 2,452<br>(1,380 - 3,855)    | 131<br>(52 - 273)      | 214<br>(127 - 327) | 1,228<br>(593 - 2,058)   | 643<br>(284 - 1,167)      | 237<br>(101 - 450)          |
| Digestive diseases                                  | 16,179<br>(9,652 - 24,085)  | 178<br>(72 - 426)      | 498<br>(294 - 800) | 4,398<br>(2,379 - 7,418) | 5,571<br>(3,132 - 8,592)  | 5,533<br>(3,475 - 8,755)    |
| Peptic ulcer disease                                | 5,003<br>(2,601 - 8,034)    | 14<br>(4 - 38)         | 50<br>(22 - 100)   | 1,016<br>(495 - 1,778)   | 1,894<br>(914 - 3,114)    | 2,029<br>(1,080 - 3,359)    |
| Gastritis and duodenitis                            | 768<br>(399 - 1,618)        | 11<br>(3 - 31)         | 27<br>(11 - 71)    | 196<br>(95 - 428)        | 261<br>(120 - 550)        | 273<br>(122 - 604)          |
| Appendicitis                                        | 874<br>(476 - 1,497)        | 11<br>(3 - 32)         | 51<br>(18 - 114)   | 434<br>(196 - 827)       | 208<br>(102 - 375)        | 170<br>(80 - 338)           |
| Paralytic ileus and intestinal obstruction          | 4,800<br>(2,641 - 9,193)    | 87<br>(30 - 236)       | 257<br>(133 - 439) | 1,184<br>(582 - 2,273)   | 1,649<br>(808 - 3,216)    | 1,623<br>(793 - 3,356)      |
| Inguinal, femoral, and abdominal hernia             | 395<br>(204 - 807)          | 5<br>(1 - 15)          | 13<br>(6 - 31)     | 67<br>(31 - 156)         | 73<br>(28 - 193)          | 236<br>(110 - 457)          |
| Inflammatory bowel disease                          | 530<br>(282 - 871)          | 29<br>(7 - 72)         | 29<br>(12 - 59)    | 164<br>(80 - 297)        | 148<br>(67 - 258)         | 160<br>(73 - 297)           |
| Vascular intestinal disorders                       | 391<br>(122 - 957)          | 4<br>(0 - 14)          | 13<br>(2 - 38)     | 74<br>(20 - 187)         | 132<br>(37 - 327)         | 168<br>(52 - 420)           |
| Gallbladder and biliary diseases                    | 449<br>(227 - 1,025)        | 3<br>(1 - 8)           | 9<br>(4 - 20)      | 94<br>(46 - 188)         | 159<br>(70 - 341)         | 184<br>(75 - 504)           |
| Pancreatitis                                        | 2,362<br>(883 - 4,301)      | 6<br>(1 - 16)          | 26<br>(10 - 53)    | 972<br>(402 - 1,869)     | 832<br>(294 - 1,569)      | 527<br>(146 - 1,006)        |
| Other digestive diseases                            | 608<br>(201 - 1,135)        | 9<br>(2 - 22)          | 24<br>(9 - 52)     | 196<br>(47 - 391)        | 215<br>(65 - 432)         | 164<br>(60 - 336)           |
| Neurological disorders                              | 10,337<br>(8,087 - 12,743)  | 307<br>(150 - 559)     | 346<br>(183 - 610) | 1,262<br>(773 - 2,011)   | 1,085<br>(728 - 1,511)    | 7,337<br>(5,599 - 9,342)    |
| Alzheimer disease and other dementias               | 7,531<br>(5,742 - 9,692)    | -                      | -                  | 4<br>(1 - 8)             | 633<br>(396 - 917)        | 6,894<br>(5,250 - 8,896)    |
| Parkinson disease                                   | 10<br>(7 - 17)              | -                      | -                  | 5<br>(3 - 8)             | 1<br>(1 - 2)              | 4<br>(2 - 11)               |
| Epilepsy                                            | 1,868<br>(1,182 - 2,764)    | 208<br>(79 - 440)      | 286<br>(130 - 548) | 904<br>(503 - 1,530)     | 210<br>(125 - 355)        | 260<br>(138 - 430)          |
| Multiple sclerosis                                  | 143<br>(39 - 249)           | -                      | -                  | 55<br>(17 - 100)         | 47<br>(13 - 91)           | 40<br>(9 - 83)              |
| Other neurological disorders                        | 786<br>(554 - 1,178)        | 99<br>(54 - 297)       | 59<br>(39 - 131)   | 294<br>(185 - 456)       | 194<br>(124 - 281)        | 139<br>(100 - 182)          |
| Mental and substance use disorders                  | 566<br>(360 - 947)          | 44<br>(9 - 100)        | 0<br>(0 - 0)       | 240<br>(136 - 441)       | 210<br>(99 - 383)         | 72<br>(41 - 117)            |
| Schizophrenia                                       | 49<br>(8 - 116)             | -                      | -                  | 20<br>(3 - 56)           | 17<br>(3 - 41)            | 11<br>(2 - 22)              |
| Alcohol use disorders                               | 81<br>(44 - 163)            | -                      | -                  | 45<br>(22 - 94)          | 20<br>(10 - 45)           | 16<br>(6 - 32)              |
| Drug use disorders                                  | 435<br>(252 - 812)          | 44<br>(9 - 100)        | -                  | 174<br>(91 - 369)        | 173<br>(47 - 342)         | 45<br>(14 - 89)             |
| Opioid use disorders                                | 235<br>(138 - 434)          | 26<br>(5 - 61)         | -                  | 96<br>(50 - 205)         | 89<br>(24 - 177)          | 25<br>(8 - 47)              |
| Cocaine use disorders                               | 5<br>(3 - 9)                | 1<br>(0 - 1)           | -                  | 2<br>(1 - 5)             | 2<br>(0 - 3)              | 0<br>(0 - 1)                |
| Amphetamine use disorders                           | 5<br>(3 - 8)                | 1<br>(0 - 2)           | -                  | 2<br>(1 - 4)             | 2<br>(0 - 4)              | 0<br>(0 - 1)                |
| Other drug use disorders                            | 191<br>(110 - 357)          | 17<br>(3 - 39)         | -                  | 74<br>(38 - 154)         | 80<br>(22 - 162)          | 20<br>(6 - 39)              |
| Eating disorders                                    | 1<br>(1 - 2)                | -                      | 0<br>(0 - 0)       | 1<br>(1 - 2)             | -                         | -                           |

Web Table 31- Pakistan deaths with 95% UI by age, sex, and cause in 2013

| Cause                                               | Males, All Ages             | Males, 0-4 Years          | Males, 5-14 Years      | Males, 15-49 Years         | Males, 50-69 Years          | Males, 70-80 Years          |
|-----------------------------------------------------|-----------------------------|---------------------------|------------------------|----------------------------|-----------------------------|-----------------------------|
| Anorexia nervosa                                    | 1<br>(1 - 2)                | --                        | 0<br>(0 - 0)           | 1<br>(1 - 2)               | --                          | --                          |
| Diabetes, urogenital, blood, and endocrine diseases | 61,181<br>(38,522 - 82,803) | 1,728<br>(1,159 - 2,684)  | 1,039<br>(728 - 1,702) | 13,688<br>(6,914 - 21,122) | 19,223<br>(11,362 - 27,848) | 25,504<br>(17,044 - 32,536) |
| Diabetes mellitus                                   | 22,727<br>(14,138 - 29,624) | 221<br>(132 - 360)        | 124<br>(78 - 189)      | 3,005<br>(1,658 - 4,720)   | 7,622<br>(4,332 - 10,918)   | 11,755<br>(7,398 - 15,756)  |
| Acute glomerulonephritis                            | 123<br>(19 - 473)           | 12<br>(3 - 47)            | 19<br>(3 - 78)         | 41<br>(4 - 172)            | 25<br>(2 - 109)             | 25<br>(2 - 102)             |
| Chronic kidney disease                              | 32,617<br>(8,580 - 47,902)  | 498<br>(280 - 807)        | 365<br>(151 - 548)     | 9,210<br>(2,101 - 14,921)  | 10,413<br>(2,553 - 16,214)  | 12,130<br>(3,103 - 17,373)  |
| Chronic kidney disease due to diabetes mellitus     | 1,470<br>(325 - 2,752)      | 15<br>(3 - 29)            | 14<br>(3 - 27)         | 336<br>(77 - 707)          | 621<br>(125 - 1,183)        | 485<br>(110 - 965)          |
| Chronic kidney disease due to hypertension          | 5,928<br>(2,236 - 10,230)   | 43<br>(9 - 107)           | 26<br>(5 - 57)         | 1,080<br>(423 - 2,138)     | 1,969<br>(662 - 3,874)      | 2,811<br>(1,068 - 4,981)    |
| Chronic kidney disease due to glomerulonephritis    | 3,588<br>(2,092 - 5,751)    | 185<br>(97 - 325)         | 154<br>(93 - 230)      | 1,212<br>(650 - 2,081)     | 971<br>(469 - 1,852)        | 1,067<br>(559 - 1,721)      |
| Chronic kidney disease due to other causes          | 21,630<br>(2,702 - 32,140)  | 256<br>(108 - 490)        | 172<br>(28 - 304)      | 6,582<br>(575 - 10,952)    | 6,852<br>(896 - 11,252)     | 7,768<br>(1,012 - 12,205)   |
| Urinary diseases and male infertility               | 2,605<br>(1,712 - 3,858)    | 122<br>(45 - 272)         | 69<br>(40 - 115)       | 546<br>(311 - 924)         | 740<br>(415 - 1,182)        | 1,127<br>(687 - 1,818)      |
| Interstitial nephritis and urinary tract infections | 1,662<br>(989 - 2,705)      | 92<br>(34 - 210)          | 39<br>(22 - 69)        | 358<br>(197 - 648)         | 463<br>(230 - 807)          | 710<br>(352 - 1,267)        |
| Urolithiasis                                        | 264<br>(114 - 584)          | --                        | 9<br>(4 - 21)          | 61<br>(21 - 146)           | 90<br>(30 - 223)            | 105<br>(42 - 252)           |
| Other urinary diseases                              | 679<br>(346 - 1,087)        | 30<br>(9 - 82)            | 22<br>(10 - 39)        | 128<br>(56 - 237)          | 188<br>(81 - 343)           | 311<br>(132 - 577)          |
| Gynecological diseases                              | --                          | --                        | --                     | --                         | --                          | --                          |
| Uterine fibroids                                    | --                          | --                        | --                     | --                         | --                          | --                          |
| Polycystic ovarian syndrome                         | --                          | --                        | --                     | --                         | --                          | --                          |
| Endometriosis                                       | --                          | --                        | --                     | --                         | --                          | --                          |
| Genital prolapse                                    | --                          | --                        | --                     | --                         | --                          | --                          |
| Other gynecological diseases                        | --                          | --                        | --                     | --                         | --                          | --                          |
| Hemoglobinopathies and hemolytic anemias            | 2,339<br>(1,342 - 3,811)    | 784<br>(431 - 1,317)      | 400<br>(204 - 678)     | 649<br>(306 - 1,170)       | 227<br>(114 - 401)          | 279<br>(136 - 509)          |
| Thalassemias                                        | 1,524<br>(872 - 2,446)      | 714<br>(387 - 1,208)      | 365<br>(187 - 620)     | 436<br>(202 - 814)         | 8<br>(4 - 14)               | 1<br>(1 - 3)                |
| Sickle cell disorders                               | 147<br>(78 - 255)           | 15<br>(8 - 26)            | 14<br>(7 - 23)         | 66<br>(32 - 123)           | 51<br>(25 - 93)             | 1<br>(1 - 3)                |
| G6PD deficiency                                     | 27<br>(15 - 44)             | 5<br>(3 - 9)              | 3<br>(1 - 5)           | 9<br>(4 - 16)              | 7<br>(4 - 13)               | 2<br>(1 - 4)                |
| Other hemoglobinopathies and hemolytic anemias      | 641<br>(337 - 1,087)        | 49<br>(28 - 86)           | 18<br>(9 - 30)         | 138<br>(67 - 262)          | 161<br>(81 - 289)           | 275<br>(133 - 500)          |
| Endocrine, metabolic, blood, and immune disorders   | 771<br>(114 - 5,880)        | 89<br>(25 - 429)          | 62<br>(5 - 559)        | 237<br>(21 - 1,920)        | 195<br>(19 - 1,561)         | 188<br>(23 - 1,350)         |
| Musculoskeletal disorders                           | 1,438<br>(532 - 2,093)      | --                        | 113<br>(40 - 171)      | 528<br>(170 - 863)         | 560<br>(161 - 876)          | 237<br>(141 - 343)          |
| Rheumatoid arthritis                                | 357<br>(132 - 559)          | --                        | 18<br>(5 - 41)         | 76<br>(26 - 145)           | 96<br>(44 - 300)            | 141<br>(46 - 165)           |
| Other musculoskeletal disorders                     | 1,081<br>(391 - 1,594)      | --                        | 95<br>(31 - 147)       | 453<br>(143 - 747)         | 392<br>(111 - 633)          | 141<br>(81 - 217)           |
| Other non-communicable diseases                     | 12,074<br>(8,480 - 16,501)  | 8,925<br>(5,970 - 12,957) | 1,027<br>(563 - 1,629) | 982<br>(551 - 1,533)       | 494<br>(258 - 805)          | 647<br>(389 - 984)          |
| Congenital anomalies                                | 11,013<br>(7,545 - 15,330)  | 8,598<br>(5,673 - 12,722) | 999<br>(530 - 1,599)   | 812<br>(437 - 1,311)       | 284<br>(128 - 439)          | 320<br>(137 - 466)          |
| Neural tube defects                                 | 581<br>(175 - 1,671)        | 514<br>(122 - 1,579)      | 34<br>(10 - 90)        | 26<br>(9 - 59)             | 4<br>(1 - 10)               | 4<br>(1 - 9)                |
| Congenital heart anomalies                          | 5,558<br>(2,546 - 9,042)    | 4,281<br>(1,730 - 7,588)  | 552<br>(216 - 979)     | 317<br>(139 - 532)         | 178<br>(71 - 284)           | 230<br>(82 - 350)           |
| Cleft lip and cleft palate                          | 84<br>(19 - 224)            | 84<br>(19 - 224)          | --                     | --                         | --                          | --                          |
| Down syndrome                                       | 693<br>(263 - 1,757)        | 465<br>(123 - 1,399)      | 87<br>(23 - 219)       | 119<br>(53 - 220)          | 19<br>(8 - 36)              | 3<br>(1 - 5)                |
| Chromosomal unbalanced rearrangements               | 275<br>(73 - 865)           | 222<br>(48 - 751)         | 23<br>(6 - 65)         | 24<br>(11 - 44)            | 4<br>(2 - 7)                | 2<br>(1 - 4)                |
| Other congenital anomalies                          | 3,820<br>(2,216 - 6,003)    | 3,032<br>(1,490 - 5,052)  | 303<br>(133 - 577)     | 326<br>(166 - 536)         | 79<br>(34 - 132)            | 82<br>(34 - 135)            |
| Skin and subcutaneous diseases                      | 798<br>(516 - 1,439)        | 64<br>(31 - 132)          | 28<br>(16 - 53)        | 170<br>(96 - 329)          | 210<br>(115 - 433)          | 327<br>(183 - 615)          |
| Cellulitis                                          | 357<br>(120 - 811)          | 41<br>(14 - 95)           | 16<br>(6 - 34)         | 79<br>(22 - 191)           | 98<br>(25 - 244)            | 124<br>(36 - 313)           |
| Pyoderma                                            | 290<br>(74 - 582)           | 16<br>(2 - 43)            | 6<br>(1 - 14)          | 63<br>(16 - 132)           | 83<br>(20 - 167)            | 122<br>(29 - 263)           |
| Decubitus ulcer                                     | 135<br>(35 - 341)           | 4<br>(1 - 11)             | 5<br>(1 - 11)          | 22<br>(5 - 59)             | 26<br>(6 - 75)              | 78<br>(19 - 200)            |

Web Table 31- Pakistan deaths with 95% UI by age, sex, and cause in 2013

| Cause                                           | Males, All Ages              | Males, 0-4 Years          | Males, 5-14 Years        | Males, 15-49 Years          | Males, 50-69 Years         | Males, 70-80 Years        |
|-------------------------------------------------|------------------------------|---------------------------|--------------------------|-----------------------------|----------------------------|---------------------------|
| Other skin and subcutaneous diseases            | 16<br>(5 - 36)               | 2<br>(0 - 7)              | 2<br>(0 - 4)             | 6<br>(2 - 14)               | 3<br>(1 - 9)               | 3<br>(1 - 8)              |
| Sudden infant death syndrome                    | 263<br>(52 - 877)            | 263<br>(52 - 877)         | --                       | --                          | --                         | --                        |
| Injuries                                        | 84,918<br>(64,739 - 111,879) | 8,497<br>(6,019 - 11,942) | 6,560<br>(5,130 - 8,187) | 49,133<br>(33,710 - 71,176) | 12,472<br>(8,601 - 16,702) | 8,255<br>(6,285 - 10,283) |
| Transport injuries                              | 28,246<br>(20,325 - 38,798)  | 1,505<br>(855 - 2,440)    | 2,339<br>(1,566 - 3,198) | 18,915<br>(12,659 - 28,198) | 3,596<br>(2,319 - 4,961)   | 1,892<br>(1,314 - 2,500)  |
| Road injuries                                   | 23,278<br>(16,396 - 32,460)  | 1,163<br>(678 - 1,948)    | 1,987<br>(1,327 - 2,720) | 16,053<br>(10,580 - 23,986) | 2,658<br>(1,675 - 3,953)   | 1,417<br>(959 - 2,036)    |
| Pedestrian road injuries                        | 9,642<br>(6,577 - 13,668)    | 616<br>(334 - 1,017)      | 1,290<br>(802 - 1,852)   | 5,524<br>(3,369 - 8,736)    | 1,374<br>(839 - 2,085)     | 839<br>(530 - 1,275)      |
| Cyclist road injuries                           | 1,534<br>(934 - 2,415)       | 28<br>(8 - 71)            | 154<br>(44 - 309)        | 1,038<br>(626 - 1,666)      | 210<br>(101 - 391)         | 105<br>(49 - 194)         |
| Motorcyclist road injuries                      | 4,160<br>(2,187 - 7,171)     | 104<br>(51 - 196)         | 107<br>(39 - 212)        | 3,621<br>(1,851 - 6,336)    | 228<br>(94 - 417)          | 100<br>(52 - 180)         |
| Motor vehicle road injuries                     | 7,508<br>(4,913 - 11,681)    | 350<br>(180 - 646)        | 387<br>(203 - 645)       | 5,673<br>(3,444 - 9,244)    | 750<br>(422 - 1,221)       | 347<br>(207 - 558)        |
| Other road injuries                             | 434<br>(201 - 1,180)         | 65<br>(22 - 158)          | 49<br>(16 - 140)         | 197<br>(69 - 654)           | 96<br>(40 - 258)           | 26<br>(9 - 79)            |
| Other transport injuries                        | 4,968<br>(1,356 - 8,069)     | 342<br>(119 - 631)        | 351<br>(108 - 663)       | 2,862<br>(718 - 5,209)      | 937<br>(207 - 1,608)       | 475<br>(93 - 834)         |
| Unintentional injuries                          | 40,519<br>(31,197 - 52,692)  | 6,708<br>(4,594 - 9,804)  | 3,739<br>(2,765 - 4,847) | 17,232<br>(11,492 - 25,499) | 6,893<br>(4,644 - 9,432)   | 5,947<br>(4,424 - 7,756)  |
| Falls                                           | 8,975<br>(6,369 - 11,974)    | 914<br>(488 - 1,557)      | 416<br>(227 - 692)       | 2,719<br>(1,649 - 4,416)    | 2,009<br>(1,174 - 3,081)   | 2,917<br>(1,774 - 4,436)  |
| Drowning                                        | 5,233<br>(3,587 - 7,772)     | 1,288<br>(610 - 2,526)    | 1,198<br>(717 - 1,841)   | 1,955<br>(1,181 - 3,447)    | 537<br>(284 - 879)         | 256<br>(149 - 398)        |
| Fire, heat, and hot substances                  | 2,291<br>(1,184 - 4,191)     | 339<br>(70 - 827)         | 222<br>(69 - 520)        | 1,066<br>(495 - 2,066)      | 411<br>(213 - 731)         | 154<br>(131 - 447)        |
| Poisonings                                      | 9,111<br>(2,776 - 13,966)    | 957<br>(328 - 1,965)      | 471<br>(148 - 794)       | 5,567<br>(1,639 - 9,362)    | 1,440<br>(393 - 2,363)     | 676<br>(185 - 1,146)      |
| Exposure to mechanical forces                   | 2,315<br>(1,682 - 3,203)     | 464<br>(245 - 818)        | 261<br>(148 - 459)       | 1,011<br>(617 - 1,620)      | 386<br>(231 - 592)         | 192<br>(107 - 267)        |
| Unintentional firearm injuries                  | 415<br>(242 - 642)           | 43<br>(15 - 100)          | 18<br>(9 - 33)           | 249<br>(125 - 457)          | 53<br>(26 - 92)            | 51<br>(15 - 87)           |
| Unintentional suffocation                       | 190<br>(79 - 452)            | 121<br>(26 - 358)         | 23<br>(9 - 50)           | 28<br>(14 - 62)             | 10<br>(5 - 20)             | 8<br>(3 - 14)             |
| Other exposure to mechanical forces             | 1,710<br>(1,199 - 2,478)     | 300<br>(144 - 593)        | 220<br>(110 - 397)       | 734<br>(432 - 1,229)        | 323<br>(185 - 512)         | 134<br>(71 - 199)         |
| Adverse effects of medical treatment            | 1,617<br>(1,040 - 2,423)     | 200<br>(34 - 615)         | 100<br>(50 - 178)        | 558<br>(243 - 1,029)        | 378<br>(195 - 626)         | 382<br>(206 - 656)        |
| Animal contact                                  | 421<br>(93 - 3,541)          | 39<br>(7 - 305)           | 103<br>(18 - 900)        | 165<br>(33 - 1,346)         | 70<br>(11 - 616)           | 44<br>(6 - 381)           |
| Venomous animal contact                         | 339<br>(72 - 2,858)          | 27<br>(3 - 237)           | 89<br>(16 - 796)         | 138<br>(28 - 1,143)         | 56<br>(8 - 517)            | 29<br>(3 - 267)           |
| Non-venomous animal contact                     | 82<br>(18 - 680)             | 12<br>(2 - 83)            | 14<br>(1 - 127)          | 27<br>(5 - 215)             | 14<br>(2 - 125)            | 15<br>(2 - 127)           |
| Foreign body                                    | 2,126<br>(1,230 - 4,272)     | 1,873<br>(1,085 - 3,522)  | 28<br>(6 - 96)           | 68<br>(17 - 210)            | 45<br>(14 - 127)           | 111<br>(29 - 333)         |
| Pulmonary aspiration and foreign body in airway | 2,073<br>(1,178 - 4,200)     | 1,868<br>(1,076 - 3,513)  | 23<br>(2 - 87)           | 48<br>(4 - 180)             | 28<br>(3 - 103)            | 107<br>(25 - 327)         |
| Foreign body in other body part                 | 53<br>(32 - 97)              | 6<br>(3 - 14)             | 5<br>(3 - 12)            | 20<br>(11 - 38)             | 17<br>(9 - 31)             | 4<br>(3 - 8)              |
| Other unintentional injuries                    | 8,430<br>(5,993 - 11,915)    | 634<br>(369 - 1,069)      | 940<br>(642 - 1,367)     | 4,124<br>(2,631 - 6,539)    | 1,618<br>(967 - 2,595)     | 1,114<br>(742 - 1,581)    |
| Self-harm and interpersonal violence            | 15,923<br>(10,441 - 23,217)  | 282<br>(137 - 526)        | 472<br>(279 - 766)       | 12,867<br>(8,018 - 19,330)  | 1,909<br>(1,157 - 2,826)   | 393<br>(253 - 582)        |
| Self-harm                                       | 6,294<br>(3,976 - 9,518)     | --                        | 144<br>(52 - 328)        | 4,640<br>(2,842 - 7,328)    | 1,218<br>(703 - 1,867)     | 292<br>(176 - 453)        |
| Interpersonal violence                          | 9,629<br>(5,516 - 14,568)    | 282<br>(137 - 526)        | 328<br>(168 - 544)       | 8,227<br>(4,583 - 12,885)   | 691<br>(349 - 1,199)       | 100<br>(46 - 173)         |
| Assault by firearm                              | 3,370<br>(1,645 - 6,547)     | 34<br>(8 - 96)            | 74<br>(26 - 167)         | 2,925<br>(1,394 - 5,742)    | 314<br>(119 - 584)         | 23<br>(7 - 47)            |
| Assault by sharp object                         | 3,328<br>(1,653 - 5,821)     | 14<br>(4 - 45)            | 61<br>(23 - 125)         | 3,007<br>(1,473 - 5,375)    | 234<br>(101 - 434)         | 11<br>(5 - 25)            |
| Assault by other means                          | 2,931<br>(1,396 - 4,889)     | 233<br>(115 - 435)        | 194<br>(92 - 331)        | 2,295<br>(919 - 4,098)      | 143<br>(61 - 292)          | 66<br>(27 - 118)          |
| Forces of nature, war, and legal intervention   | 230<br>(112 - 537)           | 2<br>(0 - 2)              | 11<br>(5 - 25)           | 120<br>(59 - 287)           | 75<br>(36 - 176)           | 23<br>(10 - 59)           |
| Exposure to forces of nature                    | 230<br>(112 - 537)           | 2<br>(0 - 2)              | 11<br>(5 - 25)           | 120<br>(59 - 287)           | 75<br>(36 - 176)           | 23<br>(10 - 59)           |

Web Table 31- Pakistan deaths with 95% UI by age, sex, and cause in 2013

| Cause                                                             | Females, All Ages              | Females, 0-4 Years             | Females, 5-14 Years         | Females, 15-49 Years          | Females, 50-69 Years          | Females, 70-80 Years           |
|-------------------------------------------------------------------|--------------------------------|--------------------------------|-----------------------------|-------------------------------|-------------------------------|--------------------------------|
| All causes                                                        | 589,974<br>(499,634 - 712,217) | 164,799<br>(146,524 - 187,146) | 19,375<br>(14,810 - 23,298) | 108,181<br>(78,040 - 135,295) | 125,773<br>(93,600 - 181,914) | 171,847<br>(150,052 - 212,998) |
| Communicable, maternal, neonatal, and nutritional diseases        | 225,162<br>(201,285 - 252,511) | 143,775<br>(126,461 - 164,298) | 11,648<br>(8,786 - 14,733)  | 41,120<br>(31,458 - 50,438)   | 12,057<br>(8,906 - 16,675)    | 16,562<br>(12,537 - 22,706)    |
| HIV/AIDS and tuberculosis                                         | 14,889<br>(9,294 - 20,808)     | 990<br>(602 - 1,623)           | 1,058<br>(491 - 1,663)      | 7,190<br>(3,711 - 11,027)     | 3,565<br>(2,116 - 5,561)      | 2,085<br>(1,261 - 2,970)       |
| Tuberculosis                                                      | 14,188<br>(8,804 - 19,462)     | 922<br>(563 - 1,488)           | 1,047<br>(475 - 1,654)      | 6,670<br>(3,397 - 9,841)      | 3,474<br>(2,069 - 5,407)      | 2,075<br>(1,258 - 2,953)       |
| HIV/AIDS                                                          | 701<br>(49 - 3,405)            | 68<br>(7 - 342)                | 11<br>(1 - 51)              | 520<br>(35 - 2,435)           | 92<br>(4 - 489)               | 10<br>(0 - 52)                 |
| HIV/AIDS resulting in mycobacterial infection                     | 36<br>(3 - 178)                | 3<br>(0 - 17)                  | 1<br>(0 - 3)                | 27<br>(2 - 131)               | 5<br>(0 - 25)                 | 1<br>(0 - 3)                   |
| HIV/AIDS resulting in other diseases                              | 664<br>(47 - 3,245)            | 64<br>(7 - 324)                | 10<br>(1 - 48)              | 493<br>(34 - 2,301)           | 87<br>(3 - 464)               | 10<br>(0 - 49)                 |
| Diarrhea, lower respiratory, and other common infectious diseases | 106,714<br>(89,687 - 126,330)  | 70,883<br>(58,225 - 84,519)    | 8,333<br>(5,783 - 11,084)   | 10,366<br>(6,153 - 15,469)    | 5,833<br>(3,723 - 8,990)      | 11,298<br>(7,748 - 16,310)     |
| Diarrheal diseases                                                | 34,039<br>(21,434 - 48,122)    | 25,053<br>(13,310 - 38,822)    | 1,843<br>(897 - 3,296)      | 1,986<br>(1,116 - 3,077)      | 1,703<br>(830 - 3,009)        | 3,455<br>(1,930 - 5,869)       |
| Intestinal infectious diseases                                    | 11,554<br>(5,911 - 20,026)     | 2,751<br>(1,326 - 4,901)       | 3,665<br>(1,845 - 6,319)    | 4,426<br>(1,861 - 8,509)      | 480<br>(175 - 994)            | 233<br>(107 - 436)             |
| Typhoid fever                                                     | 8,313<br>(4,136 - 14,629)      | 1,929<br>(901 - 3,619)         | 2,658<br>(1,272 - 4,704)    | 3,200<br>(1,284 - 6,315)      | 355<br>(131 - 772)            | 170<br>(69 - 343)              |
| Paratyphoid fever                                                 | 3,211<br>(1,494 - 5,950)       | 807<br>(310 - 1,609)           | 1,003<br>(406 - 1,946)      | 1,218<br>(472 - 2,602)        | 122<br>(40 - 276)             | 61<br>(21 - 143)               |
| Other intestinal infectious diseases                              | 31<br>(18 - 49)                | 14<br>(7 - 26)                 | 4<br>(0 - 11)               | 9<br>(3 - 19)                 | 2<br>(0 - 8)                  | 2<br>(0 - 7)                   |
| Lower respiratory infections                                      | 43,786<br>(32,752 - 55,989)    | 31,370<br>(21,143 - 43,188)    | 1,300<br>(685 - 2,198)      | 1,808<br>(1,070 - 2,702)      | 2,658<br>(1,602 - 4,263)      | 6,650<br>(4,137 - 9,934)       |
| Upper respiratory infections                                      | 55<br>(21 - 111)               | 16<br>(1 - 57)                 | 3<br>(0 - 13)               | 13<br>(2 - 32)                | 10<br>(1 - 31)                | 13<br>(1 - 45)                 |
| Otitis media                                                      | 26<br>(15 - 37)                | 8<br>(4 - 15)                  | 5<br>(3 - 8)                | 7<br>(4 - 11)                 | 3<br>(2 - 6)                  | 2<br>(1 - 3)                   |
| Meningitis                                                        | 12,279<br>(7,723 - 17,154)     | 8,073<br>(4,662 - 12,534)      | 921<br>(445 - 1,583)        | 1,735<br>(960 - 2,635)        | 760<br>(210 - 1,334)          | 790<br>(182 - 1,370)           |
| Pneumococcal meningitis                                           | 2,653<br>(1,565 - 3,837)       | 1,483<br>(801 - 2,526)         | 280<br>(108 - 552)          | 476<br>(211 - 857)            | 201<br>(58 - 403)             | 213<br>(54 - 411)              |
| H influenzae type B meningitis                                    | 3,414<br>(2,042 - 5,182)       | 2,789<br>(1,555 - 4,476)       | 248<br>(114 - 471)          | 225<br>(103 - 416)            | 76<br>(17 - 155)              | 76<br>(15 - 146)               |
| Meningococcal meningitis                                          | 1,013<br>(614 - 1,468)         | 487<br>(257 - 814)             | 87<br>(35 - 174)            | 226<br>(98 - 405)             | 98<br>(21 - 201)              | 115<br>(21 - 222)              |
| Other meningitis                                                  | 5,199<br>(3,064 - 7,754)       | 3,313<br>(1,733 - 5,672)       | 307<br>(120 - 598)          | 809<br>(440 - 1,341)          | 384<br>(110 - 714)            | 386<br>(94 - 684)              |
| Encephalitis                                                      | 755<br>(385 - 1,582)           | 345<br>(108 - 907)             | 119<br>(57 - 243)           | 189<br>(95 - 387)             | 69<br>(35 - 157)              | 34<br>(14 - 99)                |
| Diphtheria                                                        | 32<br>(1 - 174)                | 23<br>(0 - 156)                | 6<br>(0 - 54)               | 2<br>(0 - 9)                  | 1<br>(0 - 4)                  | --                             |
| Whooping cough                                                    | 1,127<br>(1 - 5,666)           | 1,029<br>(1 - 5,251)           | 82<br>(0 - 427)             | 15<br>(0 - 79)                | 1<br>(0 - 8)                  | --                             |
| Tetanus                                                           | 824<br>(309 - 1,331)           | 475<br>(167 - 957)             | 49<br>(12 - 90)             | 89<br>(43 - 145)              | 133<br>(18 - 260)             | 78<br>(12 - 164)               |
| Measles                                                           | 2,092<br>(456 - 6,165)         | 1,703<br>(364 - 5,169)         | 328<br>(68 - 922)           | 60<br>(12 - 179)              | 1<br>(0 - 3)                  | --                             |
| Varicella and herpes zoster                                       | 145<br>(44 - 330)              | 39<br>(2 - 170)                | 13<br>(0 - 56)              | 36<br>(5 - 95)                | 13<br>(1 - 45)                | 45<br>(1 - 183)                |
| Neglected tropical diseases and malaria                           | 4,962<br>(3,657 - 6,381)       | 1,778<br>(923 - 2,890)         | 1,118<br>(751 - 1,600)      | 1,484<br>(966 - 2,042)        | 398<br>(248 - 591)            | 185<br>(114 - 294)             |
| Malaria                                                           | 1,733<br>(1,023 - 2,640)       | 207<br>(86 - 421)              | 553<br>(276 - 969)          | 662<br>(308 - 1,085)          | 212<br>(99 - 397)             | 99<br>(45 - 198)               |
| Leishmaniasis                                                     | 1,118<br>(676 - 1,656)         | 412<br>(181 - 703)             | 223<br>(95 - 401)           | 360<br>(135 - 632)            | 89<br>(32 - 161)              | 34<br>(12 - 67)                |
| Visceral leishmaniasis                                            | 1,118<br>(676 - 1,656)         | 412<br>(181 - 703)             | 223<br>(95 - 401)           | 360<br>(135 - 632)            | 89<br>(32 - 161)              | 34<br>(12 - 67)                |
| Cysticercosis                                                     | 3<br>(1 - 8)                   | 0<br>(0 - 0)                   | 0<br>(0 - 1)                | 1<br>(0 - 5)                  | 1<br>(0 - 2)                  | 0<br>(0 - 1)                   |
| Cystic echinococcosis                                             | 24<br>(17 - 30)                | 2<br>(1 - 3)                   | 5<br>(4 - 7)                | 10<br>(6 - 14)                | 4<br>(3 - 6)                  | 2<br>(2 - 3)                   |
| Dengue                                                            | 101<br>(66 - 178)              | 20<br>(12 - 49)                | 12<br>(6 - 34)              | 41<br>(22 - 74)               | 14<br>(7 - 22)                | 14<br>(6 - 23)                 |
| Rabies                                                            | 459<br>(280 - 699)             | 53<br>(24 - 102)               | 169<br>(84 - 298)           | 150<br>(81 - 271)             | 68<br>(38 - 112)              | 19<br>(10 - 32)                |
| Intestinal nematode infections                                    | 85<br>(55 - 126)               | 55<br>(32 - 88)                | 19<br>(7 - 40)              | 6<br>(1 - 16)                 | 3<br>(0 - 9)                  | 3<br>(0 - 11)                  |
| Ascariasis                                                        | 85<br>(55 - 126)               | 55<br>(32 - 88)                | 19<br>(7 - 40)              | 6<br>(1 - 16)                 | 3<br>(0 - 9)                  | 3<br>(0 - 11)                  |
| Other neglected tropical diseases                                 | 1,440<br>(242 - 2,514)         | 1,028<br>(87 - 2,033)          | 137<br>(15 - 247)           | 254<br>(78 - 426)             | 8<br>(4 - 20)                 | 13<br>(6 - 27)                 |
| Maternal disorders                                                | 17,876<br>(10,397 - 25,026)    | --                             | 54<br>(19 - 121)            | 17,821<br>(10,379 - 24,993)   | --                            | --                             |
| Maternal hemorrhage                                               | 2,365<br>(1,268 - 3,731)       | --                             | 5<br>(1 - 13)               | 2,360<br>(1,265 - 3,722)      | --                            | --                             |



Web Table 31- Pakistan deaths with 95% UI by age, sex, and cause in 2013

| Cause                                                            | Females, All Ages              | Females, 0-4 Years          | Females, 5-14 Years      | Females, 15-49 Years        | Females, 50-69 Years          | Females, 70-80 Years           |
|------------------------------------------------------------------|--------------------------------|-----------------------------|--------------------------|-----------------------------|-------------------------------|--------------------------------|
| Maternal sepsis and other maternal infections                    | 972<br>(496 - 1,510)           | --                          | 4<br>(1 - 10)            | 968<br>(494 - 1,506)        | --                            | --                             |
| Maternal hypertensive disorders                                  | 2,117<br>(1,142 - 3,167)       | --                          | 12<br>(3 - 29)           | 2,105<br>(1,133 - 3,158)    | --                            | --                             |
| Maternal obstructed labor                                        | 915<br>(491 - 1,365)           | --                          | 2<br>(1 - 5)             | 913<br>(490 - 1,361)        | --                            | --                             |
| Maternal abortive outcome                                        | 2,187<br>(1,176 - 3,305)       | --                          | 5<br>(2 - 12)            | 2,182<br>(1,172 - 3,299)    | --                            | --                             |
| Indirect maternal deaths                                         | 2,154<br>(1,143 - 3,214)       | --                          | 5<br>(2 - 14)            | 2,149<br>(1,139 - 3,211)    | --                            | --                             |
| Late maternal deaths                                             | 3,089<br>(1,301 - 4,903)       | --                          | 12<br>(3 - 32)           | 3,076<br>(1,296 - 4,892)    | --                            | --                             |
| Maternal deaths aggravated by HIV/AIDS                           | 2<br>(1 - 4)                   | --                          | --                       | 2<br>(1 - 4)                | --                            | --                             |
| Other maternal disorders                                         | 4,042<br>(2,079 - 6,364)       | --                          | 8<br>(3 - 21)            | 4,033<br>(2,069 - 6,353)    | --                            | --                             |
| Neonatal disorders                                               | 65,121<br>(54,710 - 78,687)    | 65,121<br>(54,710 - 78,687) | --                       | --                          | --                            | --                             |
| Neonatal preterm birth complications                             | 15,773<br>(7,488 - 26,196)     | 15,773<br>(7,488 - 26,196)  | --                       | --                          | --                            | --                             |
| Neonatal encephalopathy due to birth asphyxia and trauma         | 27,829<br>(16,941 - 40,152)    | 27,829<br>(16,941 - 40,152) | --                       | --                          | --                            | --                             |
| Neonatal sepsis and other neonatal infections                    | 14,277<br>(6,182 - 26,344)     | 14,277<br>(6,182 - 26,344)  | --                       | --                          | --                            | --                             |
| Hemolytic disease and other neonatal jaundice                    | 1,075<br>(320 - 2,682)         | 1,075<br>(320 - 2,682)      | --                       | --                          | --                            | --                             |
| Other neonatal disorders                                         | 6,166<br>(1,169 - 11,566)      | 6,166<br>(1,169 - 11,566)   | --                       | --                          | --                            | --                             |
| Nutritional deficiencies                                         | 6,367<br>(4,599 - 8,856)       | 2,110<br>(1,191 - 3,393)    | 461<br>(266 - 760)       | 1,251<br>(751 - 1,817)      | 579<br>(352 - 992)            | 1,965<br>(1,222 - 3,072)       |
| Protein-energy malnutrition                                      | 5,257<br>(3,362 - 7,242)       | 1,798<br>(961 - 2,999)      | 399<br>(206 - 680)       | 946<br>(374 - 1,452)        | 426<br>(212 - 734)            | 1,689<br>(863 - 2,681)         |
| Iodine deficiency                                                | 98<br>(7 - 354)                | 31<br>(0 - 264)             | 7<br>(0 - 53)            | 29<br>(0 - 128)             | 13<br>(0 - 76)                | 18<br>(0 - 119)                |
| Iron-deficiency anemia                                           | 695<br>(199 - 1,916)           | 212<br>(30 - 577)           | 43<br>(6 - 124)          | 222<br>(74 - 634)           | 78<br>(19 - 245)              | 141<br>(31 - 638)              |
| Other nutritional deficiencies                                   | 317<br>(106 - 1,144)           | 69<br>(15 - 220)            | 12<br>(2 - 67)           | 55<br>(14 - 236)            | 63<br>(19 - 220)              | 118<br>(30 - 480)              |
| Other communicable, maternal, neonatal, and nutritional diseases | 9,235<br>(6,664 - 12,604)      | 2,894<br>(1,687 - 4,561)    | 624<br>(384 - 945)       | 3,007<br>(1,810 - 4,533)    | 1,682<br>(991 - 2,743)        | 1,029<br>(652 - 1,683)         |
| Sexually transmitted diseases excluding HIV                      | 1,835<br>(900 - 3,161)         | 1,372<br>(561 - 2,586)      | 149<br>(60 - 288)        | 81<br>(37 - 155)            | 106<br>(23 - 366)             | 127<br>(26 - 400)              |
| Syphilis                                                         | 1,707<br>(794 - 2,991)         | 1,372<br>(561 - 2,586)      | 148<br>(59 - 287)        | 33<br>(15 - 63)             | 59<br>(13 - 206)              | 96<br>(20 - 301)               |
| Chlamydial infection                                             | 39<br>(16 - 83)                | --                          | 0<br>(0 - 1)             | 16<br>(7 - 30)              | 14<br>(3 - 48)                | 8<br>(2 - 26)                  |
| Gonococcal infection                                             | 51<br>(20 - 117)               | --                          | 0<br>(0 - 1)             | 17<br>(8 - 32)              | 19<br>(4 - 64)                | 15<br>(3 - 49)                 |
| Other sexually transmitted diseases                              | 38<br>(16 - 83)                | --                          | 0<br>(0 - 1)             | 15<br>(7 - 29)              | 14<br>(3 - 49)                | 8<br>(2 - 26)                  |
| Hepatitis                                                        | 6,189<br>(4,413 - 8,753)       | 816<br>(450 - 1,420)        | 361<br>(214 - 570)       | 2,875<br>(1,736 - 4,358)    | 1,411<br>(843 - 2,331)        | 727<br>(468 - 1,118)           |
| Acute hepatitis A                                                | 860<br>(299 - 1,581)           | 462<br>(162 - 936)          | 141<br>(47 - 273)        | 187<br>(44 - 448)           | 58<br>(13 - 146)              | 12<br>(3 - 32)                 |
| Acute hepatitis B                                                | 2,102<br>(1,167 - 3,327)       | 340<br>(113 - 742)          | 70<br>(24 - 152)         | 424<br>(162 - 842)          | 743<br>(346 - 1,350)          | 525<br>(290 - 874)             |
| Acute hepatitis C                                                | 232<br>(44 - 580)              | --                          | 34<br>(6 - 94)           | 109<br>(17 - 290)           | 55<br>(8 - 159)               | 34<br>(6 - 104)                |
| Acute hepatitis E                                                | 2,995<br>(1,725 - 4,616)       | 13<br>(2 - 41)              | 116<br>(50 - 220)        | 2,156<br>(1,238 - 3,273)    | 554<br>(232 - 1,102)          | 156<br>(53 - 352)              |
| Other infectious diseases                                        | 1,212<br>(468 - 2,482)         | 706<br>(167 - 1,739)        | 115<br>(33 - 275)        | 52<br>(11 - 146)            | 165<br>(47 - 493)             | 175<br>(43 - 535)              |
| Non-communicable diseases                                        | 331,172<br>(262,226 - 435,696) | 10,695<br>(7,659 - 16,184)  | 4,417<br>(3,090 - 5,935) | 57,324<br>(38,194 - 78,898) | 109,061<br>(80,633 - 158,614) | 149,675<br>(128,645 - 184,729) |
| Neoplasms                                                        | 63,061<br>(44,861 - 90,399)    | 545<br>(364 - 835)          | 1,012<br>(674 - 1,386)   | 18,939<br>(12,503 - 26,322) | 30,423<br>(20,902 - 46,190)   | 12,142<br>(9,444 - 16,308)     |
| Esophageal cancer                                                | 5,708<br>(3,725 - 8,625)       | --                          | --                       | 1,371<br>(790 - 2,165)      | 2,945<br>(1,772 - 4,826)      | 1,392<br>(884 - 2,166)         |
| Stomach cancer                                                   | 2,495<br>(1,682 - 3,655)       | --                          | --                       | 1,130<br>(684 - 1,699)      | 966<br>(650 - 1,553)          | 369<br>(236 - 565)             |
| Liver cancer                                                     | 3,020<br>(1,863 - 4,660)       | --                          | 18<br>(9 - 36)           | 794<br>(440 - 1,300)        | 1,576<br>(893 - 2,608)        | 632<br>(367 - 1,018)           |
| Liver cancer due to hepatitis B                                  | 515<br>(189 - 1,007)           | --                          | 4<br>(1 - 9)             | 186<br>(75 - 339)           | 245<br>(63 - 538)             | 80<br>(23 - 166)               |
| Liver cancer due to hepatitis C                                  | 1,652<br>(958 - 2,667)         | --                          | 1<br>(0 - 3)             | 356<br>(179 - 622)          | 913<br>(490 - 1,535)          | 381<br>(219 - 614)             |
| Liver cancer due to alcohol use                                  | 173<br>(88 - 309)              | --                          | --                       | 28<br>(12 - 55)             | 90<br>(42 - 168)              | 55<br>(26 - 103)               |
| Liver cancer due to other causes                                 | 680<br>(366 - 1,148)           | --                          | 13<br>(6 - 25)           | 223<br>(115 - 392)          | 329<br>(157 - 620)            | 116<br>(57 - 219)              |

Web Table 31- Pakistan deaths with 95% UI by age, sex, and cause in 2013

| Cause                                         | Females, All Ages              | Females, 0-4 Years   | Females, 5-14 Years  | Females, 15-49 Years        | Females, 50-69 Years        | Females, 70-80 Years         |
|-----------------------------------------------|--------------------------------|----------------------|----------------------|-----------------------------|-----------------------------|------------------------------|
| Larynx cancer                                 | 704<br>(334 - 1,242)           | --                   | --                   | 142<br>(61 - 257)           | 280<br>(121 - 510)          | 282<br>(137 - 529)           |
| Tracheal, bronchus and lung cancer            | 2,378<br>(1,600 - 3,782)       | --                   | --                   | 407<br>(242 - 644)          | 1,344<br>(852 - 2,254)      | 627<br>(417 - 953)           |
| Breast cancer                                 | 16,183<br>(11,182 - 23,643)    | --                   | --                   | 5,528<br>(3,525 - 7,991)    | 7,951<br>(5,213 - 12,420)   | 2,704<br>(1,932 - 3,803)     |
| Cervical cancer                               | 2,278<br>(1,521 - 3,476)       | --                   | --                   | 549<br>(329 - 871)          | 1,222<br>(756 - 2,030)      | 506<br>(330 - 794)           |
| Uterine cancer                                | 1,235<br>(674 - 1,975)         | --                   | --                   | 206<br>(104 - 363)          | 634<br>(328 - 1,093)        | 394<br>(207 - 608)           |
| Prostate cancer                               | --                             | --                   | --                   | --                          | --                          | --                           |
| Colon and rectum cancer                       | 2,844<br>(1,982 - 4,048)       | --                   | --                   | 1,047<br>(686 - 1,480)      | 1,386<br>(941 - 2,097)      | 410<br>(292 - 592)           |
| Lip and oral cavity cancer                    | 3,260<br>(1,912 - 5,042)       | --                   | --                   | 967<br>(467 - 1,669)        | 1,493<br>(824 - 2,504)      | 800<br>(505 - 1,282)         |
| Nasopharynx cancer                            | 696<br>(401 - 1,094)           | --                   | 21<br>(7 - 53)       | 284<br>(140 - 491)          | 267<br>(143 - 474)          | 124<br>(66 - 204)            |
| Other pharynx cancer                          | 814<br>(498 - 1,308)           | --                   | --                   | 236<br>(119 - 418)          | 420<br>(217 - 751)          | 158<br>(94 - 259)            |
| Gallbladder and biliary tract cancer          | 2,210<br>(1,466 - 3,490)       | --                   | --                   | 239<br>(117 - 527)          | 1,488<br>(935 - 2,354)      | 483<br>(296 - 747)           |
| Pancreatic cancer                             | 798<br>(525 - 1,168)           | --                   | --                   | 179<br>(111 - 265)          | 452<br>(283 - 696)          | 167<br>(108 - 247)           |
| Malignant skin melanoma                       | 135<br>(92 - 201)              | --                   | --                   | 35<br>(21 - 52)             | 64<br>(39 - 105)            | 36<br>(24 - 56)              |
| Non-melanoma skin cancer                      | 92<br>(52 - 160)               | --                   | --                   | 21<br>(10 - 35)             | 26<br>(13 - 47)             | 45<br>(21 - 87)              |
| Ovarian cancer                                | 5,206<br>(3,573 - 7,708)       | --                   | --                   | 1,170<br>(733 - 1,839)      | 3,379<br>(2,226 - 5,233)    | 656<br>(429 - 1,009)         |
| Testicular cancer                             | --                             | --                   | --                   | --                          | --                          | --                           |
| Kidney cancer                                 | 365<br>(237 - 557)             | 11<br>(5 - 22)       | 15<br>(7 - 30)       | 118<br>(71 - 190)           | 193<br>(114 - 327)          | 27<br>(16 - 44)              |
| Bladder cancer                                | 1,349<br>(788 - 2,089)         | --                   | --                   | 177<br>(85 - 299)           | 703<br>(396 - 1,200)        | 469<br>(274 - 721)           |
| Brain and nervous system cancer               | 1,382<br>(909 - 1,919)         | 24<br>(11 - 51)      | 152<br>(86 - 240)    | 665<br>(390 - 970)          | 402<br>(252 - 621)          | 139<br>(89 - 215)            |
| Thyroid cancer                                | 547<br>(288 - 853)             | --                   | 5<br>(2 - 11)        | 84<br>(43 - 135)            | 280<br>(143 - 452)          | 179<br>(94 - 298)            |
| Mesothelioma                                  | 26<br>(16 - 38)                | --                   | --                   | 8<br>(4 - 12)               | 12<br>(6 - 20)              | 6<br>(3 - 11)                |
| Hodgkin lymphoma                              | 234<br>(154 - 347)             | 15<br>(6 - 42)       | 12<br>(4 - 28)       | 83<br>(48 - 132)            | 68<br>(36 - 123)            | 57<br>(32 - 99)              |
| Non-Hodgkin lymphoma                          | 2,660<br>(1,441 - 3,974)       | 33<br>(16 - 59)      | 129<br>(61 - 223)    | 842<br>(418 - 1,279)        | 1,107<br>(623 - 1,770)      | 549<br>(195 - 907)           |
| Multiple myeloma                              | 527<br>(351 - 799)             | --                   | --                   | 106<br>(65 - 162)           | 257<br>(157 - 403)          | 165<br>(90 - 279)            |
| Leukemia                                      | 3,513<br>(2,311 - 4,851)       | 44<br>(23 - 75)      | 380<br>(225 - 587)   | 2,055<br>(1,272 - 2,887)    | 869<br>(561 - 1,361)        | 165<br>(113 - 240)           |
| Other neoplasms                               | 2,405<br>(1,641 - 3,722)       | 418<br>(253 - 687)   | 280<br>(142 - 454)   | 498<br>(281 - 814)          | 608<br>(343 - 1,114)        | 603<br>(375 - 1,049)         |
| Cardiovascular diseases                       | 165,859<br>(119,580 - 223,884) | 21<br>(9 - 50)       | 572<br>(273 - 1,283) | 19,153<br>(12,217 - 27,510) | 50,762<br>(31,363 - 76,106) | 95,351<br>(72,492 - 122,300) |
| Rheumatic heart disease                       | 6,240<br>(3,275 - 12,370)      | 4<br>(1 - 11)        | 198<br>(73 - 514)    | 2,339<br>(1,128 - 4,296)    | 2,004<br>(957 - 4,228)      | 1,696<br>(813 - 3,673)       |
| Ischemic heart disease                        | 80,276<br>(53,176 - 117,916)   | 3<br>(1 - 12)        | 92<br>(33 - 236)     | 9,366<br>(5,788 - 14,060)   | 24,791<br>(14,022 - 40,828) | 46,023<br>(31,793 - 62,657)  |
| Cerebrovascular disease                       | 61,289<br>(39,424 - 86,657)    | 4<br>(1 - 12)        | 158<br>(69 - 361)    | 5,018<br>(3,132 - 7,418)    | 18,565<br>(10,644 - 29,377) | 37,544<br>(24,533 - 51,400)  |
| Ischemic stroke                               | 30,526<br>(17,267 - 44,951)    | 1<br>(0 - 3)         | 24<br>(7 - 73)       | 845<br>(407 - 1,602)        | 6,396<br>(3,131 - 10,849)   | 23,260<br>(13,487 - 32,935)  |
| Hemorrhagic stroke                            | 30,763<br>(17,030 - 46,336)    | 3<br>(1 - 9)         | 134<br>(59 - 302)    | 4,173<br>(2,532 - 6,259)    | 12,169<br>(6,226 - 20,239)  | 14,284<br>(7,155 - 22,601)   |
| Hypertensive heart disease                    | 12,603<br>(7,926 - 18,403)     | 2<br>(1 - 4)         | 23<br>(10 - 55)      | 1,106<br>(570 - 1,832)      | 3,879<br>(1,988 - 6,398)    | 7,593<br>(4,856 - 11,636)    |
| Cardiomyopathy and myocarditis                | 2,688<br>(1,411 - 4,539)       | 7<br>(3 - 19)        | 79<br>(32 - 216)     | 808<br>(369 - 1,356)        | 761<br>(377 - 1,412)        | 1,033<br>(505 - 1,982)       |
| Atrial fibrillation and flutter               | 75<br>(23 - 182)               | --                   | --                   | 4<br>(2 - 9)                | 14<br>(4 - 37)              | 57<br>(16 - 144)             |
| Aortic aneurysm                               | 779<br>(400 - 1,421)           | --                   | --                   | 105<br>(48 - 207)           | 230<br>(110 - 434)          | 443<br>(226 - 822)           |
| Peripheral vascular disease                   | 81<br>(40 - 146)               | --                   | --                   | 3<br>(1 - 5)                | 17<br>(7 - 34)              | 61<br>(30 - 113)             |
| Endocarditis                                  | 492<br>(247 - 886)             | 1<br>(0 - 2)         | 10<br>(2 - 23)       | 145<br>(60 - 286)           | 116<br>(54 - 215)           | 221<br>(110 - 418)           |
| Other cardiovascular and circulatory diseases | 1,337<br>(908 - 2,191)         | 1<br>(0 - 2)         | 12<br>(4 - 36)       | 259<br>(141 - 431)          | 384<br>(224 - 728)          | 681<br>(450 - 1,088)         |
| Chronic respiratory diseases                  | 23,226<br>(15,715 - 53,323)    | 790<br>(393 - 2,555) | 210<br>(119 - 526)   | 1,750<br>(1,105 - 2,703)    | 7,280<br>(4,325 - 16,969)   | 13,196<br>(8,822 - 30,757)   |

Web Table 31- Pakistan deaths with 95% UI by age, sex, and cause in 2013

| Cause                                               | Females, All Ages           | Females, 0-4 Years   | Females, 5-14 Years  | Females, 15-49 Years     | Females, 50-69 Years     | Females, 70-80 Years      |
|-----------------------------------------------------|-----------------------------|----------------------|----------------------|--------------------------|--------------------------|---------------------------|
| Chronic obstructive pulmonary disease               | 10,898<br>(6,495 - 25,833)  | 314<br>(103 - 1,021) | 26<br>(11 - 86)      | 460<br>(249 - 859)       | 3,222<br>(1,638 - 8,483) | 6,875<br>(4,067 - 16,112) |
| Pneumoconiosis                                      | 3,230<br>(1,728 - 8,095)    | 1<br>(0 - 5)         | 2<br>(1 - 6)         | 197<br>(117 - 335)       | 1,197<br>(562 - 3,317)   | 1,833<br>(901 - 4,713)    |
| Silicosis                                           | 149<br>(62 - 408)           | 0<br>(0 - 1)         | 0<br>(0 - 2)         | 17<br>(8 - 39)           | 70<br>(24 - 233)         | 62<br>(22 - 171)          |
| Asbestosis                                          | 128<br>(54 - 308)           | 0<br>(0 - 1)         | 0<br>(0 - 1)         | 15<br>(7 - 32)           | 60<br>(21 - 162)         | 54<br>(19 - 130)          |
| Coal workers pneumoconiosis                         | 116<br>(48 - 285)           | 0<br>(0 - 1)         | 0<br>(0 - 1)         | 15<br>(7 - 31)           | 54<br>(20 - 153)         | 46<br>(14 - 123)          |
| Other pneumoconiosis                                | 2,836<br>(1,513 - 7,060)    | 0<br>(0 - 2)         | 1<br>(0 - 3)         | 150<br>(87 - 254)        | 1,013<br>(489 - 2,869)   | 1,671<br>(810 - 4,317)    |
| Asthma                                              | 5,449<br>(3,349 - 10,473)   | 189<br>(79 - 589)    | 152<br>(85 - 328)    | 859<br>(528 - 1,311)     | 1,744<br>(968 - 3,411)   | 2,505<br>(1,420 - 5,098)  |
| Interstitial lung disease and pulmonary sarcoidosis | 2,958<br>(1,258 - 7,508)    | 4<br>(0 - 28)        | 6<br>(1 - 27)        | 173<br>(85 - 305)        | 971<br>(332 - 2,214)     | 1,804<br>(764 - 4,968)    |
| Other chronic respiratory diseases                  | 692<br>(395 - 1,982)        | 282<br>(124 - 1,009) | 26<br>(10 - 96)      | 60<br>(33 - 106)         | 146<br>(73 - 380)        | 178<br>(86 - 429)         |
| Cirrhosis                                           | 16,253<br>(11,238 - 23,215) | 215<br>(98 - 404)    | 613<br>(365 - 948)   | 5,889<br>(3,730 - 8,380) | 5,456<br>(3,485 - 8,631) | 4,081<br>(2,741 - 6,339)  |
| Cirrhosis due to hepatitis B                        | 4,896<br>(2,623 - 7,948)    | 9<br>(3 - 22)        | 91<br>(27 - 181)     | 1,676<br>(853 - 2,932)   | 1,749<br>(818 - 3,178)   | 1,372<br>(624 - 2,357)    |
| Cirrhosis due to hepatitis C                        | 6,732<br>(3,762 - 11,000)   | 11<br>(2 - 35)       | 87<br>(9 - 201)      | 2,142<br>(1,099 - 3,576) | 2,616<br>(1,370 - 4,494) | 1,877<br>(900 - 3,160)    |
| Cirrhosis due to alcohol use                        | 1,087<br>(519 - 2,009)      | --                   | --                   | 223<br>(87 - 450)        | 405<br>(184 - 825)       | 459<br>(189 - 937)        |
| Cirrhosis due to other causes                       | 3,537<br>(2,135 - 5,400)    | 195<br>(87 - 371)    | 435<br>(242 - 694)   | 1,848<br>(942 - 2,986)   | 687<br>(292 - 1,284)     | 373<br>(169 - 669)        |
| Digestive diseases                                  | 16,265<br>(11,139 - 23,300) | 4<br>(2 - 6)         | 290<br>(157 - 626)   | 4,468<br>(2,770 - 6,576) | 5,216<br>(2,984 - 8,114) | 6,287<br>(4,112 - 9,219)  |
| Peptic ulcer disease                                | 3,628<br>(1,891 - 5,603)    | 0<br>(0 - 0)         | 18<br>(6 - 43)       | 595<br>(321 - 989)       | 1,267<br>(561 - 2,173)   | 1,748<br>(853 - 2,887)    |
| Gastritis and duodenitis                            | 1,033<br>(439 - 2,423)      | 0<br>(0 - 1)         | 19<br>(3 - 76)       | 243<br>(98 - 696)        | 327<br>(118 - 729)       | 444<br>(168 - 1,042)      |
| Appendicitis                                        | 851<br>(454 - 1,335)        | 1<br>(0 - 2)         | 69<br>(28 - 132)     | 355<br>(178 - 593)       | 208<br>(95 - 389)        | 218<br>(92 - 385)         |
| Paralytic ileus and intestinal obstruction          | 5,955<br>(3,551 - 9,937)    | 2<br>(1 - 3)         | 120<br>(51 - 264)    | 2,066<br>(1,126 - 3,229) | 1,763<br>(879 - 3,133)   | 2,004<br>(934 - 4,031)    |
| Inguinal, femoral, and abdominal hernia             | 199<br>(85 - 528)           | 0<br>(0 - 0)         | 7<br>(2 - 24)        | 50<br>(22 - 125)         | 51<br>(17 - 155)         | 91<br>(35 - 244)          |
| Inflammatory bowel disease                          | 650<br>(346 - 1,116)        | 0<br>(0 - 1)         | 17<br>(5 - 52)       | 236<br>(118 - 413)       | 179<br>(81 - 349)        | 218<br>(96 - 400)         |
| Vascular intestinal disorders                       | 517<br>(233 - 1,123)        | 0<br>(0 - 0)         | 3<br>(0 - 14)        | 77<br>(33 - 206)         | 155<br>(60 - 367)        | 282<br>(115 - 620)        |
| Gallbladder and biliary diseases                    | 824<br>(444 - 1,408)        | 0<br>(0 - 0)         | 8<br>(3 - 18)        | 138<br>(70 - 251)        | 327<br>(142 - 604)       | 352<br>(162 - 626)        |
| Pancreatitis                                        | 1,733<br>(820 - 2,969)      | 0<br>(0 - 0)         | 13<br>(4 - 32)       | 491<br>(246 - 913)       | 636<br>(269 - 1,151)     | 593<br>(233 - 1,180)      |
| Other digestive diseases                            | 874<br>(394 - 1,578)        | 0<br>(0 - 1)         | 18<br>(5 - 63)       | 217<br>(96 - 414)        | 303<br>(121 - 594)       | 336<br>(130 - 668)        |
| Neurological disorders                              | 10,279<br>(7,503 - 13,747)  | 483<br>(170 - 1,274) | 472<br>(135 - 1,085) | 1,867<br>(977 - 3,127)   | 966<br>(625 - 1,485)     | 6,491<br>(4,560 - 9,223)  |
| Alzheimer disease and other dementias               | 6,648<br>(4,603 - 9,611)    | --                   | --                   | 4<br>(1 - 8)             | 526<br>(334 - 812)       | 6,118<br>(4,142 - 8,855)  |
| Parkinson disease                                   | 28<br>(15 - 64)             | --                   | --                   | 5<br>(3 - 7)             | 3<br>(1 - 5)             | 20<br>(9 - 53)            |
| Epilepsy                                            | 2,908<br>(1,222 - 5,104)    | 406<br>(95 - 1,196)  | 432<br>(97 - 1,049)  | 1,661<br>(824 - 2,891)   | 223<br>(56 - 511)        | 185<br>(52 - 439)         |
| Multiple sclerosis                                  | 175<br>(63 - 301)           | --                   | --                   | 63<br>(27 - 117)         | 60<br>(21 - 119)         | 51<br>(12 - 110)          |
| Other neurological disorders                        | 520<br>(376 - 748)          | 77<br>(51 - 116)     | 41<br>(25 - 62)      | 133<br>(81 - 206)        | 154<br>(99 - 247)        | 116<br>(80 - 174)         |
| Mental and substance use disorders                  | 518<br>(122 - 985)          | 117<br>(7 - 282)     | 2<br>(0 - 3)         | 150<br>(31 - 307)        | 182<br>(29 - 415)        | 67<br>(14 - 155)          |
| Schizophrenia                                       | 38<br>(6 - 119)             | --                   | --                   | 14<br>(2 - 48)           | 13<br>(2 - 43)           | 11<br>(2 - 32)            |
| Alcohol use disorders                               | 38<br>(10 - 92)             | --                   | --                   | 18<br>(5 - 48)           | 12<br>(3 - 35)           | 7<br>(1 - 15)             |
| Drug use disorders                                  | 434<br>(56 - 846)           | 117<br>(7 - 282)     | --                   | 111<br>(14 - 243)        | 157<br>(19 - 364)        | 49<br>(5 - 130)           |
| Opioid use disorders                                | 233<br>(30 - 459)           | 67<br>(4 - 162)      | --                   | 60<br>(7 - 131)          | 79<br>(10 - 186)         | 26<br>(3 - 71)            |
| Cocaine use disorders                               | 8<br>(1 - 15)               | 3<br>(0 - 7)         | --                   | 2<br>(0 - 5)             | 2<br>(0 - 5)             | 1<br>(0 - 2)              |
| Amphetamine use disorders                           | 9<br>(1 - 17)               | 3<br>(0 - 8)         | --                   | 2<br>(0 - 4)             | 3<br>(0 - 7)             | 1<br>(0 - 2)              |
| Other drug use disorders                            | 184<br>(23 - 366)           | 44<br>(3 - 108)      | --                   | 47<br>(6 - 103)          | 72<br>(8 - 165)          | 21<br>(2 - 57)            |
| Eating disorders                                    | 9<br>(4 - 15)               | --                   | 2<br>(0 - 3)         | 7<br>(3 - 13)            | --                       | --                        |

Web Table 31- Pakistan deaths with 95% UI by age, sex, and cause in 2013

| Cause                                               | Females, All Ages           | Females, 0-4 Years        | Females, 5-14 Years  | Females, 15-49 Years     | Females, 50-69 Years      | Females, 70-80 Years       |
|-----------------------------------------------------|-----------------------------|---------------------------|----------------------|--------------------------|---------------------------|----------------------------|
| Anorexia nervosa                                    | 9<br>(4 - 15)               | --                        | 2<br>(0 - 3)         | 7<br>(3 - 13)            | --                        | --                         |
| Diabetes, urogenital, blood, and endocrine diseases | 26,505<br>(18,913 - 38,595) | 1,063<br>(637 - 1,653)    | 709<br>(456 - 1,014) | 4,613<br>(2,857 - 6,570) | 8,438<br>(5,427 - 13,682) | 11,682<br>(8,297 - 17,216) |
| Diabetes mellitus                                   | 17,356<br>(11,179 - 24,900) | 120<br>(57 - 242)         | 80<br>(39 - 144)     | 2,280<br>(1,299 - 3,406) | 6,159<br>(3,762 - 9,784)  | 8,717<br>(5,481 - 12,542)  |
| Acute glomerulonephritis                            | 92<br>(8 - 412)             | 2<br>(1 - 6)              | 17<br>(1 - 73)       | 40<br>(2 - 187)          | 18<br>(1 - 87)            | 16<br>(1 - 82)             |
| Chronic kidney disease                              | 2,927<br>(1,633 - 8,749)    | 90<br>(38 - 339)          | 105<br>(59 - 177)    | 519<br>(279 - 1,048)     | 1,040<br>(492 - 3,268)    | 1,174<br>(594 - 3,713)     |
| Chronic kidney disease due to diabetes mellitus     | 359<br>(102 - 682)          | 4<br>(0 - 12)             | 6<br>(1 - 18)        | 57<br>(13 - 124)         | 164<br>(46 - 344)         | 127<br>(32 - 258)          |
| Chronic kidney disease due to hypertension          | 933<br>(432 - 2,387)        | 6<br>(2 - 14)             | 9<br>(3 - 21)        | 106<br>(44 - 222)        | 309<br>(118 - 776)        | 502<br>(233 - 1,342)       |
| Chronic kidney disease due to glomerulonephritis    | 1,035<br>(418 - 2,672)      | 59<br>(24 - 177)          | 71<br>(36 - 127)     | 287<br>(118 - 609)       | 319<br>(100 - 967)        | 299<br>(90 - 892)          |
| Chronic kidney disease due to other causes          | 601<br>(178 - 3,206)        | 21<br>(3 - 144)           | 18<br>(6 - 42)       | 68<br>(25 - 195)         | 248<br>(55 - 1,380)       | 246<br>(49 - 1,420)        |
| Urinary diseases and male infertility               | 3,707<br>(2,166 - 5,348)    | 437<br>(102 - 1,000)      | 268<br>(99 - 502)    | 858<br>(489 - 1,346)     | 898<br>(481 - 1,475)      | 1,246<br>(762 - 1,923)     |
| Interstitial nephritis and urinary tract infections | 2,784<br>(1,736 - 4,072)    | 350<br>(72 - 800)         | 195<br>(65 - 378)    | 635<br>(363 - 1,012)     | 661<br>(377 - 1,110)      | 943<br>(577 - 1,487)       |
| Urolithiasis                                        | 209<br>(82 - 376)           | --                        | 26<br>(9 - 55)       | 60<br>(26 - 116)         | 61<br>(17 - 133)          | 62<br>(18 - 142)           |
| Other urinary diseases                              | 714<br>(226 - 1,361)        | 87<br>(17 - 240)          | 47<br>(16 - 120)     | 163<br>(58 - 329)        | 176<br>(44 - 370)         | 240<br>(54 - 558)          |
| Gynecological diseases                              | 165<br>(55 - 326)           | --                        | --                   | 75<br>(32 - 152)         | 11<br>(5 - 24)            | 79<br>(12 - 181)           |
| Uterine fibroids                                    | 44<br>(12 - 89)             | --                        | --                   | 16<br>(5 - 35)           | 3<br>(1 - 7)              | 25<br>(4 - 57)             |
| Polycystic ovarian syndrome                         | 5<br>(2 - 9)                | --                        | --                   | 5<br>(2 - 9)             | 0<br>(0 - 0)              | --                         |
| Endometriosis                                       | 11<br>(5 - 23)              | --                        | --                   | 11<br>(5 - 22)           | 0<br>(0 - 1)              | --                         |
| Genital prolapse                                    | 31<br>(9 - 63)              | --                        | --                   | 9<br>(4 - 18)            | 2<br>(1 - 4)              | 20<br>(3 - 45)             |
| Other gynecological diseases                        | 73<br>(25 - 144)            | --                        | --                   | 34<br>(14 - 68)          | 6<br>(2 - 12)             | 34<br>(5 - 78)             |
| Hemoglobinopathies and hemolytic anemias            | 1,429<br>(706 - 2,690)      | 323<br>(125 - 626)        | 155<br>(76 - 298)    | 631<br>(232 - 1,360)     | 123<br>(34 - 339)         | 197<br>(47 - 531)          |
| Thalassemias                                        | 908<br>(526 - 1,486)        | 293<br>(114 - 566)        | 141<br>(69 - 269)    | 470<br>(181 - 971)       | 4<br>(1 - 10)             | 1<br>(0 - 3)               |
| Sickle cell disorders                               | 96<br>(35 - 220)            | 7<br>(3 - 13)             | 6<br>(3 - 11)        | 55<br>(17 - 129)         | 27<br>(7 - 73)            | 2<br>(0 - 7)               |
| G6PD deficiency                                     | 18<br>(7 - 40)              | 2<br>(1 - 4)              | 1<br>(1 - 3)         | 9<br>(3 - 21)            | 4<br>(1 - 10)             | 2<br>(0 - 5)               |
| Other hemoglobinopathies and hemolytic anemias      | 406<br>(129 - 980)          | 21<br>(7 - 43)            | 8<br>(4 - 15)        | 97<br>(30 - 230)         | 89<br>(25 - 249)          | 191<br>(46 - 517)          |
| Endocrine, metabolic, blood, and immune disorders   | 829<br>(362 - 2,990)        | 92<br>(18 - 515)          | 83<br>(34 - 240)     | 211<br>(91 - 543)        | 190<br>(60 - 874)         | 253<br>(97 - 1,069)        |
| Musculoskeletal disorders                           | 455<br>(297 - 730)          | --                        | 20<br>(12 - 32)      | 131<br>(73 - 304)        | 156<br>(93 - 262)         | 149<br>(88 - 251)          |
| Rheumatoid arthritis                                | 202<br>(127 - 323)          | --                        | 3<br>(1 - 9)         | 18<br>(8 - 58)           | 81<br>(45 - 136)          | 99<br>(58 - 169)           |
| Other musculoskeletal disorders                     | 254<br>(154 - 432)          | --                        | 18<br>(11 - 27)      | 113<br>(62 - 243)        | 74<br>(40 - 133)          | 49<br>(24 - 101)           |
| Other non-communicable diseases                     | 8,750<br>(5,832 - 13,369)   | 7,457<br>(4,834 - 11,599) | 517<br>(260 - 861)   | 364<br>(215 - 616)       | 182<br>(105 - 329)        | 231<br>(149 - 447)         |
| Congenital anomalies                                | 8,175<br>(5,324 - 12,485)   | 7,131<br>(4,498 - 11,126) | 485<br>(233 - 826)   | 295<br>(174 - 487)       | 131<br>(74 - 227)         | 133<br>(79 - 212)          |
| Neural tube defects                                 | 476<br>(111 - 1,314)        | 449<br>(94 - 1,279)       | 13<br>(4 - 35)       | 9<br>(4 - 22)            | 3<br>(1 - 8)              | 1<br>(0 - 3)               |
| Congenital heart anomalies                          | 4,782<br>(2,363 - 7,682)    | 4,191<br>(1,988 - 6,875)  | 289<br>(114 - 534)   | 123<br>(61 - 219)        | 82<br>(42 - 142)          | 97<br>(50 - 160)           |
| Cleft lip and cleft palate                          | 90<br>(17 - 283)            | 90<br>(17 - 283)          | --                   | --                       | --                        | --                         |
| Down syndrome                                       | 530<br>(150 - 1,421)        | 408<br>(96 - 1,164)       | 59<br>(13 - 180)     | 50<br>(21 - 108)         | 12<br>(5 - 28)            | 1<br>(0 - 3)               |
| Chromosomal unbalanced rearrangements               | 264<br>(75 - 963)           | 236<br>(61 - 890)         | 10<br>(3 - 37)       | 15<br>(6 - 35)           | 2<br>(1 - 4)              | 1<br>(0 - 2)               |
| Other congenital anomalies                          | 2,032<br>(675 - 4,482)      | 1,756<br>(542 - 4,023)    | 113<br>(38 - 275)    | 97<br>(42 - 211)         | 33<br>(13 - 66)           | 33<br>(13 - 59)            |
| Skin and subcutaneous diseases                      | 361<br>(244 - 785)          | 111<br>(53 - 196)         | 33<br>(20 - 52)      | 69<br>(34 - 141)         | 50<br>(25 - 170)          | 98<br>(51 - 358)           |
| Cellulitis                                          | 234<br>(135 - 444)          | 85<br>(40 - 149)          | 24<br>(12 - 40)      | 48<br>(20 - 101)         | 30<br>(11 - 106)          | 47<br>(16 - 172)           |
| Pyoderma                                            | 67<br>(8 - 186)             | 19<br>(1 - 54)            | 4<br>(0 - 11)        | 10<br>(1 - 30)           | 13<br>(2 - 46)            | 21<br>(3 - 73)             |
| Decubitus ulcer                                     | 50<br>(12 - 139)            | 4<br>(0 - 14)             | 3<br>(1 - 10)        | 8<br>(1 - 23)            | 6<br>(1 - 20)             | 29<br>(6 - 87)             |

Web Table 31- Pakistan deaths with 95% UI by age, sex, and cause in 2013

| Cause                                           | Females, All Ages           | Females, 0-4 Years         | Females, 5-14 Years      | Females, 15-49 Years      | Females, 50-69 Years     | Females, 70-80 Years     |
|-------------------------------------------------|-----------------------------|----------------------------|--------------------------|---------------------------|--------------------------|--------------------------|
| Other skin and subcutaneous diseases            | 10<br>(1 - 23)              | 3<br>(0 - 13)              | 1<br>(0 - 4)             | 3<br>(0 - 8)              | 1<br>(0 - 3)             | 1<br>(0 - 4)             |
| Sudden infant death syndrome                    | 215<br>(28 - 839)           | 215<br>(28 - 839)          | --                       | --                        | --                       | --                       |
| Injuries                                        | 33,640<br>(25,735 - 42,166) | 10,329<br>(7,574 - 13,805) | 3,309<br>(2,240 - 4,416) | 9,738<br>(6,220 - 13,253) | 4,654<br>(3,163 - 7,050) | 5,610<br>(3,844 - 7,579) |
| Transport injuries                              | 4,379<br>(3,170 - 5,791)    | 1,091<br>(674 - 1,699)     | 586<br>(348 - 910)       | 1,228<br>(693 - 1,790)    | 922<br>(572 - 1,598)     | 553<br>(364 - 864)       |
| Road injuries                                   | 3,634<br>(2,608 - 4,827)    | 921<br>(571 - 1,413)       | 497<br>(292 - 784)       | 1,047<br>(591 - 1,543)    | 744<br>(450 - 1,318)     | 425<br>(273 - 709)       |
| Pedestrian road injuries                        | 1,791<br>(1,248 - 2,434)    | 500<br>(287 - 788)         | 322<br>(175 - 540)       | 311<br>(163 - 500)        | 401<br>(234 - 691)       | 257<br>(158 - 442)       |
| Cyclist road injuries                           | 207<br>(120 - 330)          | 29<br>(10 - 70)            | 29<br>(13 - 55)          | 97<br>(37 - 178)          | 24<br>(10 - 68)          | 28<br>(15 - 53)          |
| Motorcyclist road injuries                      | 316<br>(191 - 587)          | 58<br>(29 - 117)           | 19<br>(7 - 43)           | 148<br>(77 - 272)         | 66<br>(31 - 156)         | 25<br>(12 - 49)          |
| Motor vehicle road injuries                     | 1,233<br>(812 - 1,731)      | 296<br>(169 - 487)         | 113<br>(56 - 204)        | 471<br>(246 - 783)        | 240<br>(136 - 450)       | 103<br>(59 - 182)        |
| Other road injuries                             | 97<br>(46 - 215)            | 38<br>(14 - 98)            | 15<br>(5 - 40)           | 19<br>(8 - 46)            | 13<br>(5 - 41)           | 12<br>(5 - 32)           |
| Other transport injuries                        | 745<br>(519 - 1,055)        | 170<br>(89 - 307)          | 88<br>(43 - 163)         | 181<br>(100 - 283)        | 178<br>(105 - 311)       | 128<br>(72 - 197)        |
| Unintentional injuries                          | 24,620<br>(18,453 - 31,142) | 8,927<br>(6,486 - 12,295)  | 2,404<br>(1,559 - 3,399) | 5,157<br>(3,055 - 7,337)  | 3,242<br>(2,115 - 4,903) | 4,890<br>(3,194 - 6,668) |
| Falls                                           | 3,254<br>(2,345 - 4,828)    | 981<br>(473 - 1,655)       | 115<br>(62 - 185)        | 244<br>(131 - 437)        | 411<br>(229 - 796)       | 1,503<br>(869 - 2,755)   |
| Drowning                                        | 4,523<br>(2,759 - 7,202)    | 2,010<br>(1,025 - 3,775)   | 853<br>(426 - 1,513)     | 920<br>(459 - 1,607)      | 381<br>(152 - 724)       | 359<br>(118 - 706)       |
| Fire, heat, and hot substances                  | 3,690<br>(2,500 - 5,368)    | 1,081<br>(587 - 1,846)     | 416<br>(203 - 754)       | 810<br>(437 - 1,237)      | 673<br>(368 - 1,233)     | 711<br>(424 - 1,166)     |
| Poisonings                                      | 2,652<br>(1,226 - 3,984)    | 595<br>(233 - 1,184)       | 210<br>(86 - 388)        | 1,079<br>(454 - 1,836)    | 479<br>(218 - 837)       | 289<br>(125 - 474)       |
| Exposure to mechanical forces                   | 1,095<br>(764 - 1,541)      | 405<br>(219 - 710)         | 160<br>(90 - 279)        | 214<br>(122 - 422)        | 166<br>(100 - 271)       | 150<br>(75 - 235)        |
| Unintentional firearm injuries                  | 218<br>(138 - 315)          | 53<br>(20 - 110)           | 23<br>(10 - 43)          | 74<br>(40 - 119)          | 44<br>(20 - 78)          | 25<br>(12 - 44)          |
| Unintentional suffocation                       | 95<br>(44 - 205)            | 45<br>(13 - 132)           | 19<br>(6 - 36)           | 19<br>(9 - 45)            | 8<br>(2 - 17)            | 3<br>(1 - 7)             |
| Other exposure to mechanical forces             | 782<br>(509 - 1,198)        | 308<br>(148 - 606)         | 118<br>(61 - 238)        | 121<br>(63 - 303)         | 114<br>(62 - 194)        | 122<br>(47 - 195)        |
| Adverse effects of medical treatment            | 1,790<br>(965 - 2,687)      | 246<br>(71 - 639)          | 74<br>(35 - 147)         | 686<br>(228 - 1,314)      | 408<br>(155 - 765)       | 375<br>(172 - 677)       |
| Animal contact                                  | 1,834<br>(989 - 4,947)      | 398<br>(147 - 1,298)       | 370<br>(164 - 1,025)     | 612<br>(270 - 1,538)      | 263<br>(119 - 764)       | 191<br>(85 - 505)        |
| Venomous animal contact                         | 1,409<br>(713 - 3,886)      | 295<br>(88 - 1,039)        | 311<br>(136 - 852)       | 537<br>(232 - 1,330)      | 188<br>(81 - 564)        | 78<br>(30 - 268)         |
| Non-venomous animal contact                     | 425<br>(190 - 1,127)        | 103<br>(32 - 326)          | 59<br>(18 - 169)         | 75<br>(26 - 241)          | 75<br>(29 - 196)         | 113<br>(40 - 263)        |
| Foreign body                                    | 4,287<br>(2,165 - 6,961)    | 2,987<br>(1,569 - 5,170)   | 29<br>(14 - 62)          | 281<br>(121 - 511)        | 108<br>(54 - 195)        | 880<br>(266 - 1,840)     |
| Pulmonary aspiration and foreign body in airway | 4,246<br>(2,128 - 6,920)    | 2,979<br>(1,561 - 5,165)   | 25<br>(11 - 57)          | 272<br>(112 - 500)        | 105<br>(52 - 189)        | 865<br>(249 - 1,819)     |
| Foreign body in other body part                 | 41<br>(27 - 61)             | 8<br>(4 - 16)              | 4<br>(2 - 7)             | 9<br>(5 - 17)             | 3<br>(2 - 6)             | 16<br>(7 - 27)           |
| Other unintentional injuries                    | 1,495<br>(1,049 - 2,206)    | 224<br>(129 - 423)         | 177<br>(96 - 308)        | 310<br>(173 - 546)        | 354<br>(189 - 605)       | 431<br>(234 - 678)       |
| Self-harm and interpersonal violence            | 4,000<br>(2,480 - 5,957)    | 309<br>(154 - 588)         | 291<br>(161 - 514)       | 3,034<br>(1,714 - 4,684)  | 280<br>(166 - 482)       | 85<br>(53 - 147)         |
| Self-harm                                       | 1,458<br>(878 - 2,156)      | --                         | 48<br>(17 - 111)         | 1,232<br>(703 - 1,880)    | 136<br>(77 - 237)        | 41<br>(23 - 83)          |
| Interpersonal violence                          | 2,542<br>(1,474 - 4,124)    | 309<br>(154 - 588)         | 243<br>(126 - 447)       | 1,802<br>(965 - 3,151)    | 145<br>(78 - 284)        | 43<br>(22 - 82)          |
| Assault by firearm                              | 1,800<br>(1,005 - 2,893)    | 191<br>(82 - 369)          | 154<br>(71 - 303)        | 1,336<br>(696 - 2,240)    | 99<br>(49 - 189)         | 21<br>(10 - 42)          |
| Assault by sharp object                         | 230<br>(70 - 577)           | 22<br>(6 - 60)             | 16<br>(5 - 47)           | 177<br>(45 - 469)         | 10<br>(3 - 31)           | 5<br>(1 - 12)            |
| Assault by other means                          | 512<br>(268 - 978)          | 97<br>(34 - 236)           | 73<br>(31 - 152)         | 289<br>(125 - 557)        | 36<br>(14 - 83)          | 18<br>(8 - 37)           |
| Forces of nature, war, and legal intervention   | 641<br>(490 - 830)          | 2<br>(0 - 2)               | 29<br>(22 - 37)          | 319<br>(221 - 411)        | 209<br>(167 - 263)       | 82<br>(56 - 109)         |
| Exposure to forces of nature                    | 641<br>(490 - 830)          | 2<br>(0 - 2)               | 29<br>(22 - 37)          | 319<br>(221 - 411)        | 209<br>(167 - 263)       | 82<br>(56 - 109)         |

Web Table 31- Palestine deaths with 95% UI by age, sex, and cause in 2013

| Cause                                                             | Both Sexes, All Ages        | Both Sexes, 0-4 Years    | Both Sexes, 5-14 Years | Both Sexes, 15-49 Years  | Both Sexes, 50-69 Years  | Both Sexes, 70-80 Years  |
|-------------------------------------------------------------------|-----------------------------|--------------------------|------------------------|--------------------------|--------------------------|--------------------------|
| All causes                                                        | 13,907<br>(11,684 - 16,564) | 2,556<br>(2,211 - 2,979) | 402<br>(365 - 445)     | 3,001<br>(2,297 - 3,771) | 3,579<br>(2,724 - 4,660) | 4,369<br>(3,738 - 5,193) |
| Communicable, maternal, neonatal, and nutritional diseases        | 1,623<br>(1,304 - 1,910)    | 926<br>(623 - 1,183)     | 120<br>(96 - 150)      | 264<br>(201 - 338)       | 107<br>(80 - 143)        | 206<br>(156 - 286)       |
| HIV/AIDS and tuberculosis                                         | 13<br>(11 - 17)             | 1<br>(0 - 1)             | 0<br>(0 - 1)           | 9<br>(8 - 11)            | 2<br>(1 - 2)             | 1<br>(1 - 2)             |
| Tuberculosis                                                      | 4<br>(3 - 8)                | 0<br>(0 - 1)             | 0<br>(0 - 1)           | 2<br>(1 - 4)             | 1<br>(0 - 1)             | 1<br>(1 - 2)             |
| HIV/AIDS                                                          | 9<br>(8 - 11)               | 0<br>(0 - 0)             | 0<br>(0 - 0)           | 7<br>(6 - 9)             | 1<br>(1 - 2)             | 0<br>(0 - 0)             |
| HIV/AIDS resulting in mycobacterial infection                     | 0<br>(0 - 1)                | 0<br>(0 - 0)             | 0<br>(0 - 0)           | 0<br>(0 - 0)             | 0<br>(0 - 0)             | 0<br>(0 - 0)             |
| HIV/AIDS resulting in other diseases                              | 8<br>(7 - 10)               | 0<br>(0 - 0)             | 0<br>(0 - 0)           | 7<br>(6 - 8)             | 1<br>(1 - 2)             | 0<br>(0 - 0)             |
| Diarrhea, lower respiratory, and other common infectious diseases | 908<br>(750 - 1,119)        | 323<br>(244 - 446)       | 102<br>(79 - 132)      | 203<br>(147 - 268)       | 91<br>(66 - 122)         | 188<br>(140 - 263)       |
| Diarrheal diseases                                                | 33<br>(24 - 46)             | 22<br>(14 - 36)          | 1<br>(1 - 2)           | 4<br>(3 - 5)             | 1<br>(1 - 2)             | 4<br>(3 - 6)             |
| Intestinal infectious diseases                                    | 144<br>(78 - 246)           | 45<br>(22 - 79)          | 44<br>(24 - 74)        | 47<br>(22 - 88)          | 5<br>(2 - 10)            | 2<br>(1 - 4)             |
| Typhoid fever                                                     | 107<br>(56 - 184)           | 31<br>(15 - 57)          | 34<br>(18 - 57)        | 36<br>(17 - 68)          | 4<br>(2 - 7)             | 1<br>(1 - 3)             |
| Paratyphoid fever                                                 | 32<br>(16 - 57)             | 11<br>(5 - 22)           | 10<br>(5 - 18)         | 10<br>(4 - 18)           | 1<br>(0 - 2)             | 0<br>(0 - 1)             |
| Other intestinal infectious diseases                              | 5<br>(1 - 12)               | 3<br>(0 - 7)             | 1<br>(0 - 3)           | 1<br>(0 - 5)             | 0<br>(0 - 2)             | 0<br>(0 - 2)             |
| Lower respiratory infections                                      | 614<br>(508 - 752)          | 184<br>(134 - 245)       | 44<br>(32 - 57)        | 133<br>(96 - 180)        | 80<br>(57 - 108)         | 173<br>(126 - 245)       |
| Upper respiratory infections                                      | 1<br>(1 - 2)                | 0<br>(0 - 1)             | 0<br>(0 - 0)           | 0<br>(0 - 1)             | 0<br>(0 - 1)             | 0<br>(0 - 1)             |
| Otitis media                                                      | 2<br>(2 - 2)                | 0<br>(0 - 0)             | 0<br>(0 - 0)           | 1<br>(0 - 1)             | 0<br>(0 - 0)             | 1<br>(0 - 1)             |
| Meningitis                                                        | 41<br>(32 - 54)             | 20<br>(13 - 31)          | 4<br>(3 - 5)           | 9<br>(6 - 12)            | 3<br>(2 - 4)             | 6<br>(4 - 9)             |
| Pneumococcal meningitis                                           | 9<br>(7 - 13)               | 4<br>(2 - 6)             | 1<br>(1 - 2)           | 2<br>(2 - 4)             | 1<br>(0 - 1)             | 1<br>(1 - 2)             |
| H influenzae type B meningitis                                    | 10<br>(7 - 15)              | 7<br>(5 - 12)            | 1<br>(1 - 2)           | 1<br>(1 - 2)             | 0<br>(0 - 0)             | 1<br>(0 - 1)             |
| Meningococcal meningitis                                          | 12<br>(9 - 16)              | 6<br>(4 - 10)            | 1<br>(1 - 2)           | 2<br>(1 - 4)             | 1<br>(0 - 1)             | 2<br>(1 - 3)             |
| Other meningitis                                                  | 10<br>(7 - 13)              | 3<br>(2 - 6)             | 1<br>(0 - 1)           | 3<br>(1 - 4)             | 1<br>(1 - 2)             | 2<br>(1 - 3)             |
| Encephalitis                                                      | 21<br>(14 - 33)             | 9<br>(5 - 14)            | 2<br>(1 - 4)           | 8<br>(4 - 15)            | 1<br>(0 - 1)             | 1<br>(1 - 3)             |
| Diphtheria                                                        | 0<br>(0 - 1)                | 0<br>(0 - 1)             | 0<br>(0 - 0)           | 0<br>(0 - 0)             | 0<br>(0 - 0)             | --<br>(0 - 0)            |
| Whooping cough                                                    | 2<br>(0 - 11)               | 2<br>(0 - 10)            | 0<br>(0 - 1)           | 0<br>(0 - 0)             | 0<br>(0 - 0)             | --<br>(0 - 0)            |
| Tetanus                                                           | 1<br>(1 - 1)                | 0<br>(0 - 1)             | 0<br>(0 - 0)           | 0<br>(0 - 0)             | 0<br>(0 - 0)             | 0<br>(0 - 0)             |
| Measles                                                           | 48<br>(4 - 217)             | 41<br>(4 - 180)          | 6<br>(0 - 29)          | 1<br>(0 - 5)             | 0<br>(0 - 0)             | --<br>(0 - 0)            |
| Varicella and herpes zoster                                       | 1<br>(1 - 3)                | 1<br>(0 - 2)             | 0<br>(0 - 0)           | 0<br>(0 - 1)             | 0<br>(0 - 0)             | 0<br>(0 - 1)             |
| Neglected tropical diseases and malaria                           | 53<br>(33 - 80)             | 22<br>(11 - 41)          | 10<br>(5 - 16)         | 17<br>(9 - 31)           | 3<br>(1 - 6)             | 1<br>(1 - 2)             |
| Leishmaniasis                                                     | 49<br>(29 - 76)             | 21<br>(10 - 40)          | 9<br>(5 - 16)          | 15<br>(7 - 28)           | 3<br>(1 - 6)             | 1<br>(0 - 1)             |
| Visceral leishmaniasis                                            | 49<br>(29 - 76)             | 21<br>(10 - 40)          | 9<br>(5 - 16)          | 15<br>(7 - 28)           | 3<br>(1 - 6)             | 1<br>(0 - 1)             |
| Cysticercosis                                                     | 0<br>(0 - 0)                | 0<br>(0 - 0)             | 0<br>(0 - 0)           | 0<br>(0 - 0)             | 0<br>(0 - 0)             | 0<br>(0 - 0)             |
| Cystic echinococcosis                                             | 0<br>(0 - 0)                | 0<br>(0 - 0)             | 0<br>(0 - 0)           | 0<br>(0 - 0)             | 0<br>(0 - 0)             | 0<br>(0 - 0)             |
| Dengue                                                            | 0<br>(0 - 1)                | 0<br>(0 - 0)             | 0<br>(0 - 0)           | 0<br>(0 - 0)             | 0<br>(0 - 0)             | 0<br>(0 - 0)             |
| Rabies                                                            | 0<br>(0 - 1)                | 0<br>(0 - 0)             | 0<br>(0 - 0)           | 0<br>(0 - 0)             | 0<br>(0 - 0)             | 0<br>(0 - 0)             |
| Intestinal nematode infections                                    | 1<br>(0 - 3)                | 0<br>(0 - 2)             | 0<br>(0 - 1)           | 0<br>(0 - 1)             | 0<br>(0 - 0)             | 0<br>(0 - 0)             |
| Ascariasis                                                        | 1<br>(0 - 3)                | 0<br>(0 - 2)             | 0<br>(0 - 1)           | 0<br>(0 - 1)             | 0<br>(0 - 0)             | 0<br>(0 - 0)             |
| Other neglected tropical diseases                                 | 3<br>(2 - 4)                | 1<br>(0 - 1)             | 0<br>(0 - 0)           | 1<br>(1 - 2)             | 0<br>(0 - 0)             | 0<br>(0 - 1)             |
| Maternal disorders                                                | 12<br>(7 - 17)              | --                       | 0<br>(0 - 0)           | 12<br>(7 - 17)           | --                       | --                       |
| Maternal hemorrhage                                               | 2<br>(1 - 4)                | --                       | 0<br>(0 - 0)           | 2<br>(1 - 4)             | --                       | --                       |
| Maternal sepsis and other maternal infections                     | 1<br>(1 - 2)                | --                       | 0<br>(0 - 0)           | 1<br>(1 - 2)             | --                       | --                       |

Web Table 31- Palestine deaths with 95% UI by age, sex, and cause in 2013

| Cause                                                            | Both Sexes, All Ages       | Both Sexes, 0-4 Years    | Both Sexes, 5-14 Years | Both Sexes, 15-49 Years  | Both Sexes, 50-69 Years  | Both Sexes, 70-80 Years  |
|------------------------------------------------------------------|----------------------------|--------------------------|------------------------|--------------------------|--------------------------|--------------------------|
| Maternal hypertensive disorders                                  | 2<br>(1 - 3)               | --                       | 0<br>(0 - 0)           | 2<br>(1 - 3)             | --                       | --                       |
| Maternal obstructed labor                                        | 1<br>(1 - 2)               | --                       | 0<br>(0 - 0)           | 1<br>(1 - 2)             | --                       | --                       |
| Maternal abortive outcome                                        | 2<br>(1 - 3)               | --                       | 0<br>(0 - 0)           | 2<br>(1 - 3)             | --                       | --                       |
| Indirect maternal deaths                                         | 1<br>(1 - 2)               | --                       | 0<br>(0 - 0)           | 1<br>(1 - 2)             | --                       | --                       |
| Late maternal deaths                                             | 1<br>(1 - 2)               | --                       | 0<br>(0 - 0)           | 1<br>(1 - 2)             | --                       | --                       |
| Maternal deaths aggravated by HIV/AIDS                           | 0<br>(0 - 0)               | --                       | --                     | 0<br>(0 - 0)             | --                       | --                       |
| Other maternal disorders                                         | 2<br>(1 - 3)               | --                       | 0<br>(0 - 0)           | 2<br>(1 - 3)             | --                       | --                       |
| Neonatal disorders                                               | 551<br>(279 - 754)         | 551<br>(279 - 754)       | --                     | --                       | --                       | --                       |
| Neonatal preterm birth complications                             | 332<br>(169 - 476)         | 332<br>(169 - 476)       | --                     | --                       | --                       | --                       |
| Neonatal encephalopathy due to birth asphyxia and trauma         | 118<br>(33 - 227)          | 118<br>(33 - 227)        | --                     | --                       | --                       | --                       |
| Neonatal sepsis and other neonatal infections                    | 30<br>(8 - 76)             | 30<br>(8 - 76)           | --                     | --                       | --                       | --                       |
| Hemolytic disease and other neonatal jaundice                    | 0<br>(0 - 1)               | 0<br>(0 - 1)             | --                     | --                       | --                       | --                       |
| Other neonatal disorders                                         | 70<br>(34 - 127)           | 70<br>(34 - 127)         | --                     | --                       | --                       | --                       |
| Nutritional deficiencies                                         | 23<br>(17 - 35)            | 3<br>(2 - 5)             | 2<br>(1 - 3)           | 5<br>(4 - 8)             | 5<br>(3 - 9)             | 8<br>(6 - 12)            |
| Protein-energy malnutrition                                      | 6<br>(4 - 10)              | 0<br>(0 - 1)             | 1<br>(0 - 1)           | 1<br>(1 - 2)             | 1<br>(0 - 2)             | 3<br>(2 - 4)             |
| Iodine deficiency                                                | 0<br>(0 - 1)               | 0<br>(0 - 0)             | 0<br>(0 - 0)           | 0<br>(0 - 0)             | 0<br>(0 - 0)             | 0<br>(0 - 0)             |
| Iron-deficiency anemia                                           | 15<br>(11 - 22)            | 2<br>(1 - 4)             | 1<br>(0 - 1)           | 3<br>(2 - 5)             | 3<br>(2 - 6)             | 5<br>(3 - 8)             |
| Other nutritional deficiencies                                   | 2<br>(1 - 4)               | 0<br>(0 - 0)             | 0<br>(0 - 0)           | 1<br>(0 - 1)             | 1<br>(0 - 1)             | 1<br>(0 - 1)             |
| Other communicable, maternal, neonatal, and nutritional diseases | 63<br>(44 - 88)            | 26<br>(12 - 44)          | 5<br>(3 - 8)           | 18<br>(11 - 27)          | 6<br>(4 - 8)             | 8<br>(5 - 14)            |
| Sexually transmitted diseases excluding HIV                      | 23<br>(8 - 42)             | 18<br>(3 - 36)           | 1<br>(0 - 2)           | 3<br>(2 - 5)             | 0<br>(0 - 1)             | 1<br>(0 - 2)             |
| Syphilis                                                         | 21<br>(6 - 40)             | 18<br>(3 - 36)           | 1<br>(0 - 2)           | 2<br>(1 - 3)             | 0<br>(0 - 0)             | 1<br>(0 - 1)             |
| Chlamydial infection                                             | 0<br>(0 - 0)               | --                       | 0<br>(0 - 0)           | 0<br>(0 - 0)             | 0<br>(0 - 0)             | 0<br>(0 - 0)             |
| Gonococcal infection                                             | 1<br>(1 - 2)               | --                       | 0<br>(0 - 0)           | 1<br>(0 - 1)             | 0<br>(0 - 0)             | 0<br>(0 - 0)             |
| Other sexually transmitted diseases                              | 1<br>(1 - 1)               | --                       | 0<br>(0 - 0)           | 1<br>(0 - 1)             | 0<br>(0 - 0)             | 0<br>(0 - 0)             |
| Hepatitis                                                        | 8<br>(6 - 10)              | 1<br>(1 - 2)             | 0<br>(0 - 0)           | 2<br>(1 - 3)             | 3<br>(2 - 4)             | 1<br>(1 - 2)             |
| Acute hepatitis A                                                | 1<br>(0 - 1)               | 0<br>(0 - 1)             | 0<br>(0 - 0)           | 0<br>(0 - 0)             | 0<br>(0 - 0)             | 0<br>(0 - 0)             |
| Acute hepatitis B                                                | 5<br>(3 - 7)               | 0<br>(0 - 1)             | 0<br>(0 - 0)           | 1<br>(0 - 2)             | 2<br>(1 - 3)             | 1<br>(1 - 2)             |
| Acute hepatitis C                                                | 0<br>(0 - 1)               | --                       | 0<br>(0 - 0)           | 0<br>(0 - 0)             | 0<br>(0 - 1)             | 0<br>(0 - 0)             |
| Acute hepatitis E                                                | 2<br>(1 - 3)               | 0<br>(0 - 0)             | 0<br>(0 - 0)           | 1<br>(0 - 2)             | 1<br>(0 - 1)             | 0<br>(0 - 0)             |
| Other infectious diseases                                        | 32<br>(23 - 47)            | 8<br>(4 - 14)            | 4<br>(2 - 7)           | 12<br>(7 - 21)           | 2<br>(1 - 4)             | 6<br>(2 - 11)            |
| Non-communicable diseases                                        | 11,179<br>(9,226 - 13,590) | 1,461<br>(1,205 - 1,822) | 174<br>(150 - 201)     | 2,086<br>(1,593 - 2,626) | 3,373<br>(2,559 - 4,387) | 4,085<br>(3,498 - 4,839) |
| Neoplasms                                                        | 1,631<br>(1,289 - 2,055)   | 30<br>(20 - 43)          | 43<br>(36 - 52)        | 522<br>(405 - 666)       | 646<br>(488 - 840)       | 390<br>(317 - 485)       |
| Esophageal cancer                                                | 9<br>(7 - 12)              | --                       | --                     | 2<br>(2 - 3)             | 3<br>(2 - 5)             | 3<br>(2 - 4)             |
| Stomach cancer                                                   | 110<br>(86 - 142)          | --                       | --                     | 31<br>(23 - 42)          | 49<br>(36 - 66)          | 30<br>(23 - 39)          |
| Liver cancer                                                     | 127<br>(97 - 162)          | --                       | 2<br>(1 - 3)           | 30<br>(22 - 40)          | 60<br>(43 - 80)          | 35<br>(26 - 47)          |
| Liver cancer due to hepatitis B                                  | 40<br>(24 - 58)            | --                       | 1<br>(0 - 1)           | 13<br>(9 - 18)           | 18<br>(10 - 29)          | 8<br>(4 - 13)            |
| Liver cancer due to hepatitis C                                  | 62<br>(42 - 86)            | --                       | 0<br>(0 - 0)           | 11<br>(7 - 17)           | 31<br>(20 - 45)          | 20<br>(13 - 28)          |
| Liver cancer due to alcohol use                                  | 10<br>(4 - 17)             | --                       | --                     | 1<br>(1 - 2)             | 5<br>(2 - 8)             | 4<br>(2 - 8)             |
| Liver cancer due to other causes                                 | 15<br>(9 - 23)             | --                       | 1<br>(1 - 2)           | 5<br>(3 - 8)             | 6<br>(3 - 10)            | 3<br>(2 - 5)             |
| Larynx cancer                                                    | 11<br>(7 - 16)             | --                       | --                     | 2<br>(1 - 3)             | 6<br>(4 - 9)             | 3<br>(2 - 5)             |

Web Table 31- Palestine deaths with 95% UI by age, sex, and cause in 2013

| Cause                                         | Both Sexes, All Ages     | Both Sexes, 0-4 Years | Both Sexes, 5-14 Years | Both Sexes, 15-49 Years | Both Sexes, 50-69 Years  | Both Sexes, 70-80 Years  |
|-----------------------------------------------|--------------------------|-----------------------|------------------------|-------------------------|--------------------------|--------------------------|
| Tracheal, bronchus and lung cancer            | 274<br>(206 - 365)       | --                    | --                     | 61<br>(44 - 81)         | 138<br>(101 - 188)       | 75<br>(58 - 99)          |
| Breast cancer                                 | 182<br>(126 - 264)       | --                    | --                     | 88<br>(60 - 131)        | 74<br>(48 - 109)         | 20<br>(15 - 28)          |
| Cervical cancer                               | 3<br>(2 - 5)             | --                    | --                     | 2<br>(1 - 2)            | 1<br>(1 - 2)             | 0<br>(0 - 0)             |
| Uterine cancer                                | 12<br>(7 - 18)           | --                    | --                     | 3<br>(2 - 5)            | 6<br>(3 - 10)            | 3<br>(2 - 5)             |
| Prostate cancer                               | 64<br>(40 - 108)         | --                    | --                     | 1<br>(0 - 1)            | 20<br>(12 - 36)          | 44<br>(27 - 71)          |
| Colon and rectum cancer                       | 203<br>(158 - 257)       | --                    | --                     | 59<br>(44 - 77)         | 92<br>(69 - 120)         | 52<br>(41 - 65)          |
| Lip and oral cavity cancer                    | 4<br>(3 - 6)             | --                    | --                     | 1<br>(1 - 2)            | 2<br>(1 - 3)             | 1<br>(1 - 1)             |
| Nasopharynx cancer                            | 3<br>(2 - 4)             | --                    | 0<br>(0 - 0)           | 1<br>(1 - 2)            | 1<br>(1 - 2)             | 0<br>(0 - 1)             |
| Other pharynx cancer                          | 1<br>(1 - 2)             | --                    | --                     | 0<br>(0 - 1)            | 0<br>(0 - 1)             | 0<br>(0 - 0)             |
| Gallbladder and biliary tract cancer          | 5<br>(3 - 7)             | --                    | --                     | 1<br>(1 - 2)            | 3<br>(2 - 4)             | 1<br>(1 - 1)             |
| Pancreatic cancer                             | 66<br>(51 - 84)          | --                    | --                     | 11<br>(8 - 16)          | 33<br>(24 - 43)          | 22<br>(17 - 28)          |
| Malignant skin melanoma                       | 6<br>(4 - 14)            | --                    | --                     | 2<br>(1 - 4)            | 2<br>(1 - 5)             | 2<br>(1 - 6)             |
| Non-melanoma skin cancer                      | 5<br>(3 - 9)             | --                    | --                     | 3<br>(1 - 6)            | 1<br>(0 - 2)             | 1<br>(1 - 2)             |
| Ovarian cancer                                | 13<br>(9 - 19)           | --                    | --                     | 6<br>(4 - 8)            | 6<br>(4 - 8)             | 2<br>(1 - 2)             |
| Testicular cancer                             | 3<br>(1 - 6)             | --                    | --                     | 2<br>(1 - 5)            | 0<br>(0 - 0)             | 0<br>(0 - 1)             |
| Kidney cancer                                 | 22<br>(16 - 29)          | 1<br>(1 - 2)          | 1<br>(1 - 2)           | 5<br>(3 - 7)            | 11<br>(7 - 16)           | 4<br>(3 - 6)             |
| Bladder cancer                                | 44<br>(30 - 61)          | --                    | --                     | 6<br>(4 - 9)            | 22<br>(13 - 33)          | 16<br>(11 - 22)          |
| Brain and nervous system cancer               | 147<br>(108 - 195)       | 4<br>(2 - 7)          | 13<br>(9 - 17)         | 65<br>(46 - 88)         | 43<br>(29 - 61)          | 22<br>(15 - 31)          |
| Thyroid cancer                                | 3<br>(2 - 4)             | --                    | 0<br>(0 - 0)           | 1<br>(1 - 2)            | 1<br>(1 - 2)             | 0<br>(0 - 1)             |
| Mesothelioma                                  | 1<br>(1 - 1)             | --                    | --                     | 0<br>(0 - 1)            | 0<br>(0 - 0)             | 0<br>(0 - 0)             |
| Hodgkin lymphoma                              | 30<br>(22 - 42)          | 1<br>(0 - 2)          | 2<br>(1 - 4)           | 18<br>(12 - 25)         | 7<br>(4 - 10)            | 3<br>(2 - 4)             |
| Non-Hodgkin lymphoma                          | 57<br>(42 - 80)          | 2<br>(1 - 4)          | 2<br>(2 - 3)           | 24<br>(18 - 35)         | 18<br>(12 - 27)          | 10<br>(7 - 14)           |
| Multiple myeloma                              | 14<br>(10 - 20)          | --                    | --                     | 4<br>(2 - 6)            | 6<br>(4 - 9)             | 4<br>(2 - 6)             |
| Leukemia                                      | 115<br>(91 - 144)        | 4<br>(2 - 7)          | 15<br>(11 - 19)        | 51<br>(38 - 68)         | 23<br>(17 - 31)          | 22<br>(17 - 29)          |
| Other neoplasms                               | 101<br>(81 - 128)        | 18<br>(11 - 27)       | 8<br>(6 - 12)          | 40<br>(30 - 53)         | 20<br>(14 - 29)          | 15<br>(11 - 19)          |
| Cardiovascular diseases                       | 5,253<br>(4,244 - 6,433) | 87<br>(66 - 116)      | 22<br>(17 - 28)        | 837<br>(624 - 1,082)    | 1,900<br>(1,433 - 2,473) | 2,407<br>(2,050 - 2,877) |
| Rheumatic heart disease                       | 45<br>(33 - 61)          | 2<br>(1 - 3)          | 1<br>(1 - 2)           | 18<br>(12 - 26)         | 9<br>(6 - 14)            | 15<br>(11 - 21)          |
| Ischemic heart disease                        | 3,252<br>(2,582 - 4,125) | 14<br>(7 - 23)        | 5<br>(4 - 7)           | 575<br>(423 - 751)      | 1,307<br>(985 - 1,742)   | 1,351<br>(1,129 - 1,663) |
| Cerebrovascular disease                       | 1,572<br>(1,281 - 1,924) | 43<br>(31 - 58)       | 9<br>(7 - 12)          | 155<br>(111 - 204)      | 468<br>(347 - 608)       | 896<br>(744 - 1,085)     |
| Ischemic stroke                               | 352<br>(233 - 453)       | 1<br>(0 - 1)          | 1<br>(0 - 2)           | 18<br>(12 - 26)         | 96<br>(62 - 132)         | 237<br>(152 - 308)       |
| Hemorrhagic stroke                            | 1,220<br>(983 - 1,520)   | 42<br>(31 - 57)       | 8<br>(6 - 11)          | 137<br>(98 - 180)       | 372<br>(277 - 489)       | 659<br>(540 - 819)       |
| Hypertensive heart disease                    | 113<br>(36 - 214)        | 0<br>(0 - 0)          | 0<br>(0 - 1)           | 14<br>(6 - 26)          | 39<br>(12 - 78)          | 59<br>(15 - 118)         |
| Cardiomyopathy and myocarditis                | 70<br>(54 - 100)         | 13<br>(8 - 20)        | 3<br>(2 - 4)           | 25<br>(17 - 37)         | 16<br>(11 - 24)          | 14<br>(10 - 21)          |
| Atrial fibrillation and flutter               | 52<br>(38 - 71)          | --                    | --                     | 3<br>(2 - 5)            | 15<br>(10 - 22)          | 34<br>(23 - 49)          |
| Aortic aneurysm                               | 22<br>(16 - 31)          | --                    | --                     | 8<br>(5 - 12)           | 8<br>(6 - 13)            | 6<br>(4 - 8)             |
| Peripheral vascular disease                   | 2<br>(2 - 3)             | --                    | --                     | 0<br>(0 - 1)            | 0<br>(0 - 1)             | 1<br>(1 - 2)             |
| Endocarditis                                  | 32<br>(23 - 46)          | 4<br>(3 - 7)          | 1<br>(0 - 1)           | 9<br>(6 - 13)           | 7<br>(5 - 12)            | 11<br>(7 - 16)           |
| Other cardiovascular and circulatory diseases | 93<br>(38 - 121)         | 12<br>(5 - 19)        | 2<br>(1 - 3)           | 32<br>(14 - 43)         | 29<br>(11 - 42)          | 18<br>(5 - 25)           |
| Chronic respiratory diseases                  | 692<br>(538 - 872)       | 6<br>(4 - 8)          | 4<br>(3 - 5)           | 74<br>(56 - 97)         | 208<br>(148 - 282)       | 400<br>(317 - 498)       |
| Chronic obstructive pulmonary disease         | 459<br>(348 - 597)       | 3<br>(2 - 5)          | 2<br>(2 - 3)           | 39<br>(27 - 54)         | 136<br>(95 - 192)        | 278<br>(212 - 351)       |



Web Table 31- Palestine deaths with 95% UI by age, sex, and cause in 2013

| Cause                                               | Both Sexes, All Ages | Both Sexes, 0-4 Years | Both Sexes, 5-14 Years | Both Sexes, 15-49 Years | Both Sexes, 50-69 Years | Both Sexes, 70-80 Years |
|-----------------------------------------------------|----------------------|-----------------------|------------------------|-------------------------|-------------------------|-------------------------|
| Pneumoconiosis                                      | 7<br>(4 - 12)        | 0<br>(0 - 0)          | 0<br>(0 - 0)           | 3<br>(1 - 5)            | 2<br>(1 - 4)            | 2<br>(1 - 4)            |
| Silicosis                                           | 2<br>(1 - 3)         | 0<br>(0 - 0)          | 0<br>(0 - 0)           | 0<br>(0 - 0)            | 0<br>(0 - 1)            | 1<br>(1 - 3)            |
| Asbestosis                                          | 1<br>(0 - 1)         | 0<br>(0 - 0)          | 0<br>(0 - 0)           | 0<br>(0 - 1)            | 0<br>(0 - 0)            | 0<br>(0 - 0)            |
| Coal workers pneumoconiosis                         | 0<br>(0 - 0)         | 0<br>(0 - 0)          | 0<br>(0 - 0)           | 0<br>(0 - 0)            | 0<br>(0 - 0)            | 0<br>(0 - 0)            |
| Other pneumoconiosis                                | 5<br>(2 - 8)         | 0<br>(0 - 0)          | 0<br>(0 - 0)           | 2<br>(1 - 4)            | 2<br>(1 - 3)            | 1<br>(0 - 2)            |
| Asthma                                              | 59<br>(43 - 79)      | 1<br>(0 - 1)          | 1<br>(0 - 1)           | 10<br>(7 - 14)          | 19<br>(13 - 26)         | 29<br>(20 - 40)         |
| Interstitial lung disease and pulmonary sarcoidosis | 149<br>(105 - 217)   | 0<br>(0 - 1)          | 0<br>(0 - 1)           | 18<br>(11 - 29)         | 48<br>(31 - 75)         | 83<br>(56 - 122)        |
| Other chronic respiratory diseases                  | 17<br>(12 - 22)      | 1<br>(1 - 2)          | 0<br>(0 - 1)           | 4<br>(3 - 6)            | 2<br>(2 - 4)            | 9<br>(6 - 13)           |
| Cirrhosis                                           | 226<br>(178 - 290)   | 8<br>(5 - 14)         | 9<br>(7 - 11)          | 69<br>(51 - 90)         | 84<br>(62 - 115)        | 56<br>(44 - 72)         |
| Cirrhosis due to hepatitis B                        | 70<br>(45 - 104)     | 1<br>(0 - 1)          | 2<br>(1 - 3)           | 21<br>(11 - 35)         | 27<br>(16 - 42)         | 20<br>(13 - 28)         |
| Cirrhosis due to hepatitis C                        | 100<br>(55 - 145)    | 1<br>(0 - 2)          | 2<br>(1 - 4)           | 32<br>(15 - 49)         | 42<br>(22 - 64)         | 23<br>(15 - 34)         |
| Cirrhosis due to alcohol use                        | 22<br>(12 - 38)      | --                    | --                     | 4<br>(2 - 7)            | 9<br>(5 - 17)           | 9<br>(5 - 16)           |
| Cirrhosis due to other causes                       | 34<br>(23 - 52)      | 7<br>(4 - 12)         | 5<br>(3 - 7)           | 12<br>(8 - 19)          | 7<br>(3 - 15)           | 3<br>(2 - 6)            |
| Digestive diseases                                  | 105<br>(84 - 135)    | 5<br>(3 - 9)          | 3<br>(3 - 4)           | 24<br>(18 - 33)         | 24<br>(17 - 32)         | 48<br>(38 - 63)         |
| Peptic ulcer disease                                | 16<br>(11 - 22)      | 0<br>(0 - 0)          | 0<br>(0 - 0)           | 3<br>(2 - 4)            | 4<br>(3 - 6)            | 8<br>(6 - 12)           |
| Gastritis and duodenitis                            | 3<br>(2 - 5)         | 0<br>(0 - 0)          | 0<br>(0 - 1)           | 1<br>(1 - 2)            | 1<br>(0 - 1)            | 1<br>(0 - 1)            |
| Appendicitis                                        | 7<br>(5 - 10)        | 1<br>(0 - 2)          | 0<br>(0 - 0)           | 2<br>(1 - 3)            | 2<br>(1 - 3)            | 2<br>(1 - 3)            |
| Paralytic ileus and intestinal obstruction          | 20<br>(14 - 29)      | 1<br>(0 - 1)          | 1<br>(0 - 1)           | 5<br>(3 - 7)            | 4<br>(3 - 7)            | 9<br>(6 - 14)           |
| Inguinal, femoral, and abdominal hernia             | 3<br>(2 - 5)         | 0<br>(0 - 0)          | 0<br>(0 - 0)           | 1<br>(0 - 1)            | 0<br>(0 - 0)            | 2<br>(1 - 4)            |
| Inflammatory bowel disease                          | 15<br>(10 - 25)      | 1<br>(0 - 2)          | 0<br>(0 - 1)           | 2<br>(2 - 4)            | 4<br>(2 - 6)            | 8<br>(5 - 13)           |
| Vascular intestinal disorders                       | 5<br>(3 - 8)         | 0<br>(0 - 0)          | 0<br>(0 - 0)           | 1<br>(1 - 2)            | 1<br>(1 - 2)            | 2<br>(1 - 4)            |
| Gallbladder and biliary diseases                    | 13<br>(9 - 18)       | 1<br>(1 - 2)          | 1<br>(0 - 1)           | 3<br>(2 - 4)            | 3<br>(2 - 4)            | 5<br>(3 - 8)            |
| Pancreatitis                                        | 9<br>(6 - 14)        | 0<br>(0 - 0)          | 0<br>(0 - 1)           | 3<br>(2 - 5)            | 2<br>(1 - 4)            | 3<br>(2 - 5)            |
| Other digestive diseases                            | 15<br>(10 - 19)      | 1<br>(1 - 2)          | 0<br>(0 - 1)           | 4<br>(3 - 6)            | 3<br>(2 - 4)            | 7<br>(4 - 9)            |
| Neurological disorders                              | 406<br>(334 - 496)   | 17<br>(12 - 24)       | 9<br>(6 - 13)          | 63<br>(45 - 87)         | 47<br>(34 - 64)         | 269<br>(215 - 332)      |
| Alzheimer disease and other dementias               | 303<br>(244 - 375)   | --                    | --                     | 0<br>(0 - 1)            | 39<br>(28 - 53)         | 264<br>(210 - 327)      |
| Parkinson disease                                   | 1<br>(1 - 2)         | --                    | --                     | 0<br>(0 - 0)            | 0<br>(0 - 1)            | 0<br>(0 - 1)            |
| Epilepsy                                            | 76<br>(56 - 104)     | 6<br>(3 - 11)         | 8<br>(5 - 12)          | 52<br>(36 - 74)         | 6<br>(4 - 10)           | 3<br>(2 - 4)            |
| Multiple sclerosis                                  | 7<br>(4 - 10)        | --                    | --                     | 5<br>(3 - 8)            | 1<br>(1 - 2)            | 0<br>(0 - 1)            |
| Other neurological disorders                        | 20<br>(16 - 27)      | 11<br>(8 - 15)        | 1<br>(1 - 1)           | 6<br>(4 - 10)           | 0<br>(0 - 0)            | 2<br>(1 - 3)            |
| Mental and substance use disorders                  | 180<br>(130 - 243)   | 2<br>(2 - 3)          | 0<br>(0 - 0)           | 156<br>(112 - 213)      | 19<br>(13 - 28)         | 3<br>(2 - 3)            |
| Schizophrenia                                       | 0<br>(0 - 1)         | --                    | --                     | 0<br>(0 - 0)            | 0<br>(0 - 0)            | 0<br>(0 - 0)            |
| Alcohol use disorders                               | 7<br>(5 - 12)        | --                    | --                     | 4<br>(3 - 7)            | 3<br>(2 - 4)            | 1<br>(0 - 1)            |
| Drug use disorders                                  | 173<br>(124 - 233)   | 2<br>(2 - 3)          | --                     | 152<br>(108 - 208)      | 17<br>(11 - 24)         | 2<br>(1 - 2)            |
| Opioid use disorders                                | 96<br>(69 - 132)     | 1<br>(1 - 2)          | --                     | 85<br>(61 - 117)        | 9<br>(6 - 13)           | 1<br>(1 - 1)            |
| Cocaine use disorders                               | 2<br>(2 - 3)         | 0<br>(0 - 0)          | --                     | 2<br>(2 - 3)            | 0<br>(0 - 0)            | 0<br>(0 - 0)            |
| Amphetamine use disorders                           | 2<br>(2 - 3)         | 0<br>(0 - 0)          | --                     | 2<br>(1 - 3)            | 0<br>(0 - 0)            | 0<br>(0 - 0)            |
| Other drug use disorders                            | 72<br>(52 - 100)     | 1<br>(1 - 1)          | --                     | 63<br>(45 - 88)         | 8<br>(5 - 11)           | 1<br>(1 - 1)            |
| Eating disorders                                    | 0<br>(0 - 0)         | --                    | 0<br>(0 - 0)           | 0<br>(0 - 0)            | --                      | --                      |
| Anorexia nervosa                                    | 0<br>(0 - 0)         | --                    | 0<br>(0 - 0)           | 0<br>(0 - 0)            | --                      | --                      |

Web Table 31- Palestine deaths with 95% UI by age, sex, and cause in 2013

| Cause                                               | Both Sexes, All Ages     | Both Sexes, 0-4 Years  | Both Sexes, 5-14 Years | Both Sexes, 15-49 Years | Both Sexes, 50-69 Years | Both Sexes, 70-80 Years |
|-----------------------------------------------------|--------------------------|------------------------|------------------------|-------------------------|-------------------------|-------------------------|
| Diabetes, urogenital, blood, and endocrine diseases | 1,296<br>(1,059 - 1,585) | 114<br>(85 - 162)      | 29<br>(24 - 36)        | 253<br>(195 - 323)      | 431<br>(325 - 561)      | 468<br>(378 - 575)      |
| Diabetes mellitus                                   | 430<br>(346 - 543)       | 36<br>(25 - 53)        | 2<br>(1 - 2)           | 45<br>(32 - 59)         | 170<br>(128 - 225)      | 177<br>(141 - 225)      |
| Acute glomerulonephritis                            | 2<br>(1 - 3)             | 0<br>(0 - 0)           | 0<br>(0 - 0)           | 1<br>(0 - 1)            | 0<br>(0 - 1)            | 0<br>(0 - 1)            |
| Chronic kidney disease                              | 718<br>(561 - 899)       | 26<br>(17 - 37)        | 16<br>(12 - 20)        | 171<br>(128 - 225)      | 245<br>(180 - 325)      | 260<br>(201 - 332)      |
| Chronic kidney disease due to diabetes mellitus     | 15<br>(9 - 28)           | 0<br>(0 - 1)           | 1<br>(0 - 1)           | 6<br>(4 - 13)           | 4<br>(3 - 7)            | 3<br>(2 - 5)            |
| Chronic kidney disease due to hypertension          | 95<br>(58 - 139)         | 1<br>(0 - 1)           | 1<br>(1 - 2)           | 18<br>(11 - 28)         | 35<br>(19 - 55)         | 40<br>(23 - 59)         |
| Chronic kidney disease due to glomerulonephritis    | 35<br>(24 - 49)          | 1<br>(0 - 1)           | 1<br>(0 - 1)           | 7<br>(5 - 10)           | 13<br>(8 - 19)          | 14<br>(9 - 21)          |
| Chronic kidney disease due to other causes          | 573<br>(437 - 718)       | 24<br>(16 - 35)        | 13<br>(10 - 17)        | 139<br>(102 - 184)      | 193<br>(137 - 261)      | 203<br>(149 - 267)      |
| Urinary diseases and male infertility               | 39<br>(31 - 49)          | 5<br>(3 - 8)           | 1<br>(1 - 2)           | 11<br>(8 - 15)          | 9<br>(6 - 12)           | 13<br>(9 - 17)          |
| Interstitial nephritis and urinary tract infections | 24<br>(19 - 31)          | 4<br>(2 - 7)           | 1<br>(0 - 1)           | 7<br>(5 - 10)           | 5<br>(3 - 7)            | 7<br>(5 - 10)           |
| Urolithiasis                                        | 1<br>(1 - 2)             | --                     | 0<br>(0 - 0)           | 0<br>(0 - 1)            | 0<br>(0 - 1)            | 0<br>(0 - 1)            |
| Other urinary diseases                              | 14<br>(10 - 18)          | 1<br>(1 - 2)           | 0<br>(0 - 1)           | 3<br>(2 - 5)            | 4<br>(2 - 6)            | 5<br>(3 - 7)            |
| Gynecological diseases                              | 0<br>(0 - 0)             | --                     | --                     | 0<br>(0 - 0)            | 0<br>(0 - 0)            | 0<br>(0 - 0)            |
| Uterine fibroids                                    | 0<br>(0 - 0)             | --                     | --                     | 0<br>(0 - 0)            | 0<br>(0 - 0)            | 0<br>(0 - 0)            |
| Polycystic ovarian syndrome                         | 0<br>(0 - 0)             | --                     | --                     | 0<br>(0 - 0)            | 0<br>(0 - 0)            | --                      |
| Endometriosis                                       | 0<br>(0 - 0)             | --                     | --                     | 0<br>(0 - 0)            | 0<br>(0 - 0)            | --                      |
| Genital prolapse                                    | 0<br>(0 - 0)             | --                     | --                     | 0<br>(0 - 0)            | 0<br>(0 - 0)            | 0<br>(0 - 0)            |
| Other gynecological diseases                        | 0<br>(0 - 0)             | --                     | --                     | 0<br>(0 - 0)            | 0<br>(0 - 0)            | 0<br>(0 - 0)            |
| Hemoglobinopathies and hemolytic anemias            | 22<br>(17 - 32)          | 8<br>(5 - 11)          | 4<br>(3 - 6)           | 9<br>(6 - 13)           | 0<br>(0 - 1)            | 1<br>(1 - 2)            |
| Thalassemias                                        | 14<br>(10 - 20)          | 5<br>(4 - 8)           | 3<br>(2 - 5)           | 6<br>(4 - 8)            | 0<br>(0 - 0)            | 0<br>(0 - 0)            |
| Sickle cell disorders                               | 4<br>(3 - 6)             | 1<br>(1 - 1)           | 1<br>(0 - 1)           | 2<br>(1 - 3)            | 0<br>(0 - 0)            | 0<br>(0 - 0)            |
| G6PD deficiency                                     | 0<br>(0 - 1)             | 0<br>(0 - 0)           | 0<br>(0 - 0)           | 0<br>(0 - 0)            | 0<br>(0 - 0)            | 0<br>(0 - 0)            |
| Other hemoglobinopathies and hemolytic anemias      | 4<br>(3 - 6)             | 1<br>(1 - 2)           | 0<br>(0 - 0)           | 1<br>(1 - 1)            | 0<br>(0 - 0)            | 1<br>(1 - 2)            |
| Endocrine, metabolic, blood, and immune disorders   | 85<br>(64 - 143)         | 40<br>(25 - 73)        | 7<br>(4 - 10)          | 17<br>(12 - 27)         | 6<br>(4 - 9)            | 16<br>(10 - 30)         |
| Musculoskeletal disorders                           | 65<br>(51 - 95)          | --                     | 5<br>(4 - 7)           | 37<br>(27 - 59)         | 9<br>(6 - 13)           | 14<br>(10 - 20)         |
| Rheumatoid arthritis                                | 9<br>(7 - 15)            | --                     | 1<br>(1 - 2)           | 6<br>(4 - 10)           | 1<br>(0 - 1)            | 2<br>(1 - 3)            |
| Other musculoskeletal disorders                     | 56<br>(43 - 81)          | --                     | 4<br>(3 - 5)           | 31<br>(23 - 48)         | 8<br>(6 - 12)           | 12<br>(9 - 17)          |
| Other non-communicable diseases                     | 1,324<br>(1,086 - 1,690) | 1,190<br>(968 - 1,508) | 49<br>(37 - 64)        | 49<br>(36 - 70)         | 5<br>(4 - 7)            | 31<br>(18 - 101)        |
| Congenital anomalies                                | 1,189<br>(950 - 1,568)   | 1,072<br>(846 - 1,404) | 48<br>(35 - 62)        | 41<br>(29 - 60)         | 2<br>(2 - 3)            | 25<br>(13 - 95)         |
| Neural tube defects                                 | 7<br>(2 - 18)            | 6<br>(2 - 18)          | 0<br>(0 - 0)           | 0<br>(0 - 0)            | 0<br>(0 - 0)            | 0<br>(0 - 0)            |
| Congenital heart anomalies                          | 596<br>(449 - 803)       | 551<br>(410 - 736)     | 20<br>(14 - 28)        | 12<br>(8 - 17)          | 1<br>(0 - 1)            | 13<br>(6 - 54)          |
| Cleft lip and cleft palate                          | 0<br>(0 - 1)             | 0<br>(0 - 1)           | --                     | --                      | --                      | --                      |
| Down syndrome                                       | 43<br>(25 - 85)          | 31<br>(15 - 67)        | 2<br>(1 - 3)           | 8<br>(5 - 12)           | 0<br>(0 - 0)            | 2<br>(0 - 9)            |
| Chromosomal unbalanced rearrangements               | 7<br>(3 - 16)            | 6<br>(2 - 15)          | 0<br>(0 - 0)           | 1<br>(0 - 1)            | 0<br>(0 - 0)            | 0<br>(0 - 2)            |
| Other congenital anomalies                          | 536<br>(406 - 715)       | 478<br>(355 - 646)     | 25<br>(18 - 34)        | 21<br>(14 - 31)         | 1<br>(1 - 2)            | 10<br>(5 - 37)          |
| Skin and subcutaneous diseases                      | 20<br>(16 - 25)          | 2<br>(1 - 3)           | 1<br>(1 - 2)           | 8<br>(6 - 11)           | 3<br>(2 - 4)            | 5<br>(4 - 8)            |
| Cellulitis                                          | 3<br>(2 - 5)             | 0<br>(0 - 1)           | 0<br>(0 - 0)           | 1<br>(1 - 2)            | 1<br>(0 - 1)            | 1<br>(1 - 2)            |
| Pyoderma                                            | 12<br>(10 - 16)          | 2<br>(1 - 2)           | 1<br>(0 - 1)           | 5<br>(3 - 7)            | 2<br>(1 - 3)            | 4<br>(2 - 5)            |
| Decubitus ulcer                                     | 3<br>(2 - 4)             | 0<br>(0 - 0)           | 0<br>(0 - 1)           | 2<br>(1 - 3)            | 0<br>(0 - 0)            | 1<br>(0 - 1)            |
| Other skin and subcutaneous diseases                | 1<br>(1 - 1)             | 0<br>(0 - 0)           | 0<br>(0 - 0)           | 1<br>(0 - 1)            | 0<br>(0 - 0)            | 0<br>(0 - 0)            |

Web Table 31- Palestine deaths with 95% UI by age, sex, and cause in 2013

| Cause                                           | Both Sexes, All Ages   | Both Sexes, 0-4 Years | Both Sexes, 5-14 Years | Both Sexes, 15-49 Years | Both Sexes, 50-69 Years | Both Sexes, 70-80 Years |
|-------------------------------------------------|------------------------|-----------------------|------------------------|-------------------------|-------------------------|-------------------------|
| Sudden infant death syndrome                    | 116<br>(42 - 220)      | 116<br>(42 - 220)     | -                      | -                       | -                       | -                       |
| Injuries                                        | 1,105<br>(890 - 1,351) | 169<br>(124 - 224)    | 108<br>(90 - 127)      | 652<br>(483 - 835)      | 99<br>(74 - 133)        | 78<br>(64 - 94)         |
| Transport injuries                              | 420<br>(314 - 527)     | 66<br>(43 - 99)       | 56<br>(43 - 70)        | 242<br>(169 - 330)      | 34<br>(24 - 47)         | 22<br>(16 - 28)         |
| Road injuries                                   | 399<br>(298 - 502)     | 62<br>(40 - 94)       | 54<br>(42 - 68)        | 234<br>(164 - 319)      | 31<br>(22 - 42)         | 18<br>(13 - 24)         |
| Pedestrian road injuries                        | 33<br>(22 - 45)        | 9<br>(6 - 15)         | 5<br>(3 - 8)           | 11<br>(7 - 18)          | 4<br>(2 - 6)            | 3<br>(2 - 4)            |
| Cyclist road injuries                           | 9<br>(6 - 12)          | 1<br>(0 - 2)          | 1<br>(1 - 2)           | 4<br>(3 - 6)            | 2<br>(1 - 3)            | 1<br>(1 - 2)            |
| Motorcyclist road injuries                      | 17<br>(11 - 24)        | 1<br>(1 - 2)          | 1<br>(1 - 2)           | 13<br>(8 - 19)          | 1<br>(1 - 2)            | 1<br>(0 - 1)            |
| Motor vehicle road injuries                     | 336<br>(251 - 429)     | 49<br>(31 - 74)       | 46<br>(35 - 59)        | 205<br>(143 - 281)      | 23<br>(17 - 32)         | 13<br>(9 - 17)          |
| Other road injuries                             | 3<br>(2 - 4)           | 1<br>(1 - 2)          | 1<br>(0 - 1)           | 1<br>(0 - 1)            | 0<br>(0 - 1)            | 0<br>(0 - 1)            |
| Other transport injuries                        | 20<br>(16 - 26)        | 4<br>(3 - 6)          | 2<br>(1 - 3)           | 8<br>(5 - 11)           | 3<br>(2 - 5)            | 3<br>(2 - 5)            |
| Unintentional injuries                          | 385<br>(310 - 477)     | 98<br>(69 - 141)      | 41<br>(33 - 50)        | 165<br>(125 - 214)      | 36<br>(26 - 48)         | 45<br>(36 - 58)         |
| Falls                                           | 88<br>(68 - 114)       | 16<br>(10 - 27)       | 11<br>(7 - 15)         | 40<br>(27 - 58)         | 8<br>(5 - 12)           | 13<br>(9 - 18)          |
| Drowning                                        | 83<br>(63 - 113)       | 22<br>(13 - 35)       | 13<br>(9 - 19)         | 40<br>(28 - 58)         | 3<br>(2 - 6)            | 5<br>(3 - 9)            |
| Fire, heat, and hot substances                  | 35<br>(26 - 47)        | 7<br>(4 - 10)         | 3<br>(2 - 4)           | 15<br>(10 - 21)         | 4<br>(3 - 6)            | 7<br>(5 - 10)           |
| Poisonings                                      | 9<br>(7 - 15)          | 2<br>(1 - 3)          | 1<br>(1 - 1)           | 6<br>(4 - 9)            | 0<br>(0 - 1)            | 1<br>(0 - 1)            |
| Exposure to mechanical forces                   | 35<br>(27 - 45)        | 7<br>(4 - 11)         | 3<br>(2 - 5)           | 16<br>(11 - 23)         | 5<br>(3 - 7)            | 4<br>(3 - 5)            |
| Unintentional firearm injuries                  | 10<br>(7 - 14)         | 1<br>(0 - 1)          | 0<br>(0 - 1)           | 6<br>(4 - 10)           | 1<br>(1 - 2)            | 1<br>(1 - 1)            |
| Unintentional suffocation                       | 4<br>(3 - 7)           | 1<br>(0 - 3)          | 0<br>(0 - 1)           | 2<br>(1 - 4)            | 0<br>(0 - 1)            | 0<br>(0 - 0)            |
| Other exposure to mechanical forces             | 21<br>(16 - 28)        | 5<br>(3 - 8)          | 3<br>(2 - 4)           | 8<br>(5 - 11)           | 3<br>(2 - 4)            | 3<br>(2 - 4)            |
| Adverse effects of medical treatment            | 73<br>(55 - 102)       | 24<br>(13 - 42)       | 3<br>(2 - 5)           | 22<br>(15 - 32)         | 12<br>(8 - 17)          | 12<br>(8 - 18)          |
| Animal contact                                  | 8<br>(6 - 12)          | 2<br>(1 - 4)          | 1<br>(1 - 2)           | 3<br>(2 - 5)            | 1<br>(0 - 1)            | 1<br>(0 - 1)            |
| Venomous animal contact                         | 3<br>(2 - 6)           | 1<br>(0 - 2)          | 1<br>(0 - 1)           | 1<br>(1 - 2)            | 0<br>(0 - 1)            | 0<br>(0 - 0)            |
| Non-venomous animal contact                     | 5<br>(3 - 7)           | 1<br>(1 - 2)          | 1<br>(0 - 1)           | 2<br>(1 - 3)            | 0<br>(0 - 1)            | 1<br>(0 - 1)            |
| Foreign body                                    | 22<br>(14 - 39)        | 13<br>(8 - 25)        | 3<br>(2 - 5)           | 3<br>(2 - 5)            | 1<br>(1 - 2)            | 2<br>(1 - 4)            |
| Pulmonary aspiration and foreign body in airway | 21<br>(14 - 38)        | 13<br>(7 - 25)        | 3<br>(2 - 5)           | 3<br>(2 - 5)            | 1<br>(0 - 1)            | 2<br>(1 - 3)            |
| Foreign body in other body part                 | 1<br>(1 - 2)           | 0<br>(0 - 0)          | 0<br>(0 - 0)           | 0<br>(0 - 0)            | 0<br>(0 - 0)            | 0<br>(0 - 0)            |
| Other unintentional injuries                    | 31<br>(24 - 39)        | 5<br>(4 - 8)          | 2<br>(2 - 3)           | 20<br>(14 - 27)         | 2<br>(2 - 3)            | 2<br>(1 - 2)            |
| Self-harm and interpersonal violence            | 291<br>(189 - 395)     | 5<br>(3 - 8)          | 11<br>(7 - 16)         | 240<br>(151 - 336)      | 26<br>(17 - 39)         | 9<br>(6 - 13)           |
| Self-harm                                       | 89<br>(57 - 116)       | -                     | 4<br>(2 - 7)           | 66<br>(41 - 88)         | 13<br>(9 - 18)          | 6<br>(4 - 9)            |
| Interpersonal violence                          | 202<br>(117 - 290)     | 5<br>(3 - 8)          | 7<br>(4 - 12)          | 174<br>(98 - 254)       | 13<br>(7 - 22)          | 3<br>(2 - 5)            |
| Assault by firearm                              | 134<br>(70 - 203)      | 1<br>(0 - 2)          | 2<br>(1 - 5)           | 123<br>(64 - 189)       | 7<br>(3 - 13)           | 1<br>(1 - 2)            |
| Assault by sharp object                         | 53<br>(28 - 87)        | 1<br>(1 - 2)          | 3<br>(2 - 5)           | 43<br>(22 - 72)         | 5<br>(2 - 9)            | 1<br>(0 - 1)            |
| Assault by other means                          | 16<br>(9 - 23)         | 3<br>(2 - 5)          | 2<br>(1 - 3)           | 8<br>(4 - 14)           | 2<br>(1 - 2)            | 1<br>(1 - 2)            |
| Forces of nature, war, and legal intervention   | 10<br>(8 - 14)         | 0<br>(0 - 0)          | 0<br>(0 - 1)           | 5<br>(4 - 7)            | 3<br>(3 - 4)            | 1<br>(1 - 2)            |
| Exposure to forces of nature                    | 10<br>(8 - 14)         | 0<br>(0 - 0)          | 0<br>(0 - 1)           | 5<br>(4 - 7)            | 3<br>(3 - 4)            | 1<br>(1 - 2)            |

Web Table 31- Palestine deaths with 95% UI by age, sex, and cause in 2013

| Cause                                                             | Males, All Ages           | Males, 0-4 Years         | Males, 5-14 Years  | Males, 15-49 Years       | Males, 50-69 Years       | Males, 70-80 Years       |
|-------------------------------------------------------------------|---------------------------|--------------------------|--------------------|--------------------------|--------------------------|--------------------------|
| All causes                                                        | 8,419<br>(6,616 - 10,685) | 1,405<br>(1,205 - 1,644) | 241<br>(214 - 269) | 2,143<br>(1,534 - 2,794) | 2,345<br>(1,666 - 3,303) | 2,285<br>(1,756 - 2,909) |
| Communicable, maternal, neonatal, and nutritional diseases        | 948<br>(759 - 1,154)      | 523<br>(353 - 684)       | 68<br>(52 - 87)    | 177<br>(126 - 246)       | 68<br>(44 - 99)          | 113<br>(77 - 159)        |
| HIV/AIDS and tuberculosis                                         | 9<br>(7 - 12)             | 0<br>(0 - 0)             | 0<br>(0 - 0)       | 6<br>(5 - 8)             | 1<br>(1 - 2)             | 1<br>(1 - 2)             |
| Tuberculosis                                                      | 3<br>(2 - 6)              | 0<br>(0 - 0)             | 0<br>(0 - 0)       | 1<br>(1 - 3)             | 0<br>(0 - 1)             | 1<br>(0 - 2)             |
| HIV/AIDS                                                          | 6<br>(5 - 7)              | 0<br>(0 - 0)             | 0<br>(0 - 0)       | 5<br>(4 - 6)             | 1<br>(1 - 1)             | 0<br>(0 - 0)             |
| HIV/AIDS resulting in mycobacterial infection                     | 0<br>(0 - 0)              | 0<br>(0 - 0)             | 0<br>(0 - 0)       | 0<br>(0 - 0)             | 0<br>(0 - 0)             | 0<br>(0 - 0)             |
| HIV/AIDS resulting in other diseases                              | 6<br>(5 - 7)              | 0<br>(0 - 0)             | 0<br>(0 - 0)       | 5<br>(4 - 6)             | 1<br>(1 - 1)             | 0<br>(0 - 0)             |
| Diarrhea, lower respiratory, and other common infectious diseases | 528<br>(414 - 672)        | 170<br>(118 - 244)       | 56<br>(41 - 76)    | 140<br>(97 - 199)        | 57<br>(37 - 86)          | 104<br>(70 - 149)        |
| Diarrheal diseases                                                | 22<br>(15 - 35)           | 16<br>(8 - 28)           | 1<br>(0 - 2)       | 2<br>(1 - 3)             | 1<br>(1 - 2)             | 3<br>(2 - 4)             |
| Intestinal infectious diseases                                    | 77<br>(40 - 134)          | 24<br>(11 - 43)          | 24<br>(13 - 42)    | 26<br>(11 - 51)          | 3<br>(1 - 6)             | 1<br>(0 - 2)             |
| Typhoid fever                                                     | 57<br>(28 - 100)          | 16<br>(7 - 31)           | 18<br>(9 - 33)     | 19<br>(8 - 39)           | 2<br>(1 - 4)             | 1<br>(0 - 1)             |
| Paratyphoid fever                                                 | 17<br>(8 - 32)            | 5<br>(2 - 11)            | 5<br>(2 - 11)      | 5<br>(2 - 12)            | 0<br>(0 - 1)             | 0<br>(0 - 0)             |
| Other intestinal infectious diseases                              | 3<br>(1 - 8)              | 2<br>(0 - 5)             | 0<br>(0 - 2)       | 1<br>(0 - 4)             | 0<br>(0 - 2)             | 0<br>(0 - 1)             |
| Lower respiratory infections                                      | 365<br>(282 - 460)        | 94<br>(62 - 137)         | 25<br>(16 - 35)    | 99<br>(67 - 141)         | 51<br>(32 - 78)          | 96<br>(64 - 140)         |
| Upper respiratory infections                                      | 1<br>(0 - 1)              | 0<br>(0 - 0)             | 0<br>(0 - 0)       | 0<br>(0 - 1)             | 0<br>(0 - 1)             | 0<br>(0 - 0)             |
| Otitis media                                                      | 1<br>(1 - 2)              | 0<br>(0 - 0)             | 0<br>(0 - 0)       | 0<br>(0 - 1)             | 0<br>(0 - 0)             | 0<br>(0 - 0)             |
| Meningitis                                                        | 22<br>(15 - 31)           | 9<br>(4 - 17)            | 2<br>(1 - 4)       | 6<br>(4 - 8)             | 2<br>(1 - 3)             | 3<br>(2 - 6)             |
| Pneumococcal meningitis                                           | 5<br>(3 - 8)              | 2<br>(1 - 3)             | 1<br>(0 - 1)       | 2<br>(1 - 3)             | 0<br>(0 - 1)             | 1<br>(0 - 2)             |
| H influenzae type B meningitis                                    | 5<br>(3 - 8)              | 3<br>(2 - 7)             | 1<br>(0 - 1)       | 1<br>(0 - 1)             | 0<br>(0 - 0)             | 0<br>(0 - 1)             |
| Meningococcal meningitis                                          | 6<br>(4 - 9)              | 2<br>(1 - 5)             | 1<br>(0 - 1)       | 2<br>(1 - 3)             | 0<br>(0 - 1)             | 1<br>(0 - 2)             |
| Other meningitis                                                  | 5<br>(4 - 8)              | 1<br>(1 - 3)             | 0<br>(0 - 1)       | 2<br>(1 - 3)             | 1<br>(0 - 1)             | 1<br>(1 - 2)             |
| Encephalitis                                                      | 13<br>(8 - 23)            | 5<br>(3 - 8)             | 1<br>(1 - 2)       | 6<br>(3 - 14)            | 0<br>(0 - 0)             | 1<br>(0 - 1)             |
| Diphtheria                                                        | 0<br>(0 - 1)              | 0<br>(0 - 1)             | 0<br>(0 - 0)       | 0<br>(0 - 0)             | 0<br>(0 - 0)             | --                       |
| Whooping cough                                                    | 1<br>(0 - 5)              | 1<br>(0 - 5)             | 0<br>(0 - 0)       | 0<br>(0 - 0)             | 0<br>(0 - 0)             | --                       |
| Tetanus                                                           | 1<br>(0 - 1)              | 0<br>(0 - 1)             | 0<br>(0 - 0)       | 0<br>(0 - 0)             | 0<br>(0 - 0)             | 0<br>(0 - 0)             |
| Measles                                                           | 24<br>(2 - 109)           | 21<br>(2 - 95)           | 3<br>(0 - 14)      | 0<br>(0 - 2)             | 0<br>(0 - 0)             | --                       |
| Varicella and herpes zoster                                       | 1<br>(0 - 2)              | 0<br>(0 - 1)             | 0<br>(0 - 0)       | 0<br>(0 - 1)             | 0<br>(0 - 0)             | 0<br>(0 - 1)             |
| Neglected tropical diseases and malaria                           | 40<br>(21 - 68)           | 16<br>(6 - 36)           | 7<br>(3 - 14)      | 14<br>(5 - 27)           | 3<br>(1 - 6)             | 1<br>(0 - 1)             |
| Leishmaniasis                                                     | 37<br>(18 - 64)           | 15<br>(5 - 35)           | 7<br>(3 - 14)      | 7<br>(4 - 26)            | 2<br>(1 - 6)             | 0<br>(0 - 1)             |
| Visceral leishmaniasis                                            | 37<br>(18 - 64)           | 15<br>(5 - 35)           | 7<br>(3 - 14)      | 7<br>(4 - 26)            | 2<br>(1 - 6)             | 0<br>(0 - 1)             |
| Cysticercosis                                                     | 0<br>(0 - 0)              | 0<br>(0 - 0)             | 0<br>(0 - 0)       | 0<br>(0 - 0)             | 0<br>(0 - 0)             | 0<br>(0 - 0)             |
| Cystic echinococcosis                                             | 0<br>(0 - 0)              | 0<br>(0 - 0)             | 0<br>(0 - 0)       | 0<br>(0 - 0)             | 0<br>(0 - 0)             | 0<br>(0 - 0)             |
| Dengue                                                            | 0<br>(0 - 0)              | 0<br>(0 - 0)             | 0<br>(0 - 0)       | 0<br>(0 - 0)             | 0<br>(0 - 0)             | 0<br>(0 - 0)             |
| Rabies                                                            | 0<br>(0 - 0)              | 0<br>(0 - 0)             | 0<br>(0 - 0)       | 0<br>(0 - 0)             | 0<br>(0 - 0)             | 0<br>(0 - 0)             |
| Intestinal nematode infections                                    | 0<br>(0 - 2)              | 0<br>(0 - 2)             | 0<br>(0 - 1)       | 0<br>(0 - 0)             | 0<br>(0 - 0)             | 0<br>(0 - 0)             |
| Ascariasis                                                        | 0<br>(0 - 2)              | 0<br>(0 - 2)             | 0<br>(0 - 1)       | 0<br>(0 - 0)             | 0<br>(0 - 0)             | 0<br>(0 - 0)             |
| Other neglected tropical diseases                                 | 2<br>(1 - 3)              | 1<br>(0 - 1)             | 0<br>(0 - 0)       | 1<br>(1 - 2)             | 0<br>(0 - 0)             | 0<br>(0 - 0)             |
| Maternal disorders                                                | --                        | --                       | --                 | --                       | --                       | --                       |
| Maternal hemorrhage                                               | --                        | --                       | --                 | --                       | --                       | --                       |
| Maternal sepsis and other maternal infections                     | --                        | --                       | --                 | --                       | --                       | --                       |

Web Table 31- Palestine deaths with 95% UI by age, sex, and cause in 2013

| Cause                                                            | Males, All Ages          | Males, 0-4 Years   | Males, 5-14 Years | Males, 15-49 Years     | Males, 50-69 Years       | Males, 70-80 Years       |
|------------------------------------------------------------------|--------------------------|--------------------|-------------------|------------------------|--------------------------|--------------------------|
| Maternal hypertensive disorders                                  | --                       | --                 | --                | --                     | --                       | --                       |
| Maternal obstructed labor                                        | --                       | --                 | --                | --                     | --                       | --                       |
| Maternal abortive outcome                                        | --                       | --                 | --                | --                     | --                       | --                       |
| Indirect maternal deaths                                         | --                       | --                 | --                | --                     | --                       | --                       |
| Late maternal deaths                                             | --                       | --                 | --                | --                     | --                       | --                       |
| Maternal deaths aggravated by HIV/AIDS                           | --                       | --                 | --                | --                     | --                       | --                       |
| Other maternal disorders                                         | --                       | --                 | --                | --                     | --                       | --                       |
| Neonatal disorders                                               | 323<br>(166 - 456)       | 323<br>(166 - 456) | --                | --                     | --                       | --                       |
| Neonatal preterm birth complications                             | 209<br>(113 - 309)       | 209<br>(113 - 309) | --                | --                     | --                       | --                       |
| Neonatal encephalopathy due to birth asphyxia and trauma         | 81<br>(23 - 170)         | 81<br>(23 - 170)   | --                | --                     | --                       | --                       |
| Neonatal sepsis and other neonatal infections                    | 16<br>(2 - 57)           | 16<br>(2 - 57)     | --                | --                     | --                       | --                       |
| Hemolytic disease and other neonatal jaundice                    | 0<br>(0 - 1)             | 0<br>(0 - 1)       | --                | --                     | --                       | --                       |
| Other neonatal disorders                                         | 16<br>(5 - 42)           | 16<br>(5 - 42)     | --                | --                     | --                       | --                       |
| Nutritional deficiencies                                         | 12<br>(8 - 23)           | 1<br>(0 - 3)       | 1<br>(0 - 1)      | 2<br>(1 - 5)           | 3<br>(2 - 7)             | 5<br>(3 - 8)             |
| Protein-energy malnutrition                                      | 3<br>(1 - 5)             | 0<br>(0 - 0)       | 0<br>(0 - 1)      | 1<br>(0 - 2)           | 1<br>(0 - 1)             | 1<br>(0 - 2)             |
| Iodine deficiency                                                | 0<br>(0 - 0)             | 0<br>(0 - 0)       | 0<br>(0 - 0)      | 0<br>(0 - 0)           | 0<br>(0 - 0)             | 0<br>(0 - 0)             |
| Iron-deficiency anemia                                           | 8<br>(5 - 16)            | 1<br>(0 - 2)       | 0<br>(0 - 1)      | 1<br>(1 - 3)           | 2<br>(1 - 5)             | 3<br>(2 - 6)             |
| Other nutritional deficiencies                                   | 1<br>(0 - 3)             | 0<br>(0 - 0)       | 0<br>(0 - 0)      | 0<br>(0 - 1)           | 0<br>(0 - 1)             | 0<br>(0 - 1)             |
| Other communicable, maternal, neonatal, and nutritional diseases | 37<br>(25 - 55)          | 13<br>(6 - 24)     | 3<br>(2 - 6)      | 14<br>(8 - 24)         | 4<br>(2 - 6)             | 3<br>(2 - 4)             |
| Sexually transmitted diseases excluding HIV                      | 12<br>(5 - 22)           | 9<br>(2 - 17)      | 1<br>(0 - 1)      | 3<br>(1 - 5)           | 0<br>(0 - 0)             | 0<br>(0 - 1)             |
| Syphilis                                                         | 11<br>(4 - 20)           | 9<br>(2 - 17)      | 0<br>(0 - 1)      | 1<br>(1 - 3)           | 0<br>(0 - 0)             | 0<br>(0 - 1)             |
| Chlamydial infection                                             | --                       | --                 | --                | --                     | --                       | --                       |
| Gonococcal infection                                             | 1<br>(0 - 1)             | --                 | 0<br>(0 - 0)      | 1<br>(0 - 1)           | 0<br>(0 - 0)             | 0<br>(0 - 0)             |
| Other sexually transmitted diseases                              | 1<br>(0 - 1)             | --                 | 0<br>(0 - 0)      | 1<br>(0 - 1)           | 0<br>(0 - 0)             | 0<br>(0 - 0)             |
| Hepatitis                                                        | 6<br>(4 - 8)             | 0<br>(0 - 1)       | 0<br>(0 - 0)      | 2<br>(1 - 3)           | 2<br>(1 - 3)             | 1<br>(1 - 1)             |
| Acute hepatitis A                                                | 0<br>(0 - 1)             | 0<br>(0 - 1)       | 0<br>(0 - 0)      | 0<br>(0 - 0)           | 0<br>(0 - 0)             | 0<br>(0 - 0)             |
| Acute hepatitis B                                                | 3<br>(2 - 5)             | 0<br>(0 - 1)       | 0<br>(0 - 0)      | 1<br>(0 - 1)           | 2<br>(1 - 3)             | 1<br>(0 - 1)             |
| Acute hepatitis C                                                | 0<br>(0 - 1)             | --                 | 0<br>(0 - 0)      | 0<br>(0 - 0)           | 0<br>(0 - 0)             | 0<br>(0 - 0)             |
| Acute hepatitis E                                                | 1<br>(1 - 2)             | 0<br>(0 - 0)       | 0<br>(0 - 0)      | 1<br>(0 - 1)           | 0<br>(0 - 1)             | 0<br>(0 - 0)             |
| Other infectious diseases                                        | 19<br>(12 - 31)          | 4<br>(2 - 9)       | 3<br>(1 - 5)      | 10<br>(5 - 18)         | 1<br>(0 - 3)             | 1<br>(1 - 3)             |
| Non-communicable diseases                                        | 6,627<br>(5,066 - 8,620) | 790<br>(629 - 998) | 96<br>(80 - 113)  | 1,402<br>(983 - 1,870) | 2,209<br>(1,567 - 3,115) | 2,130<br>(1,642 - 2,718) |
| Neoplasms                                                        | 995<br>(723 - 1,342)     | 24<br>(15 - 36)    | 26<br>(21 - 33)   | 285<br>(201 - 385)     | 399<br>(280 - 570)       | 260<br>(194 - 344)       |
| Esophageal cancer                                                | 6<br>(4 - 8)             | --                 | --                | 1<br>(1 - 2)           | 3<br>(2 - 4)             | 2<br>(1 - 2)             |
| Stomach cancer                                                   | 66<br>(46 - 91)          | --                 | --                | 18<br>(12 - 26)        | 31<br>(21 - 46)          | 17<br>(12 - 24)          |
| Liver cancer                                                     | 74<br>(52 - 105)         | --                 | 0<br>(0 - 1)      | 17<br>(11 - 25)        | 37<br>(25 - 56)          | 20<br>(13 - 28)          |
| Liver cancer due to hepatitis B                                  | 27<br>(14 - 43)          | --                 | 0<br>(0 - 0)      | 8<br>(5 - 13)          | 13<br>(6 - 22)           | 5<br>(2 - 9)             |
| Liver cancer due to hepatitis C                                  | 37<br>(22 - 57)          | --                 | 0<br>(0 - 0)      | 6<br>(3 - 11)          | 19<br>(11 - 32)          | 11<br>(7 - 17)           |
| Liver cancer due to alcohol use                                  | 6<br>(2 - 11)            | --                 | --                | 1<br>(0 - 2)           | 3<br>(1 - 6)             | 2<br>(1 - 4)             |
| Liver cancer due to other causes                                 | 5<br>(2 - 10)            | --                 | 0<br>(0 - 0)      | 2<br>(1 - 3)           | 2<br>(1 - 5)             | 1<br>(0 - 2)             |
| Larynx cancer                                                    | 10<br>(7 - 15)           | --                 | --                | 1<br>(1 - 2)           | 6<br>(4 - 9)             | 3<br>(2 - 5)             |

Web Table 31- Palestine deaths with 95% UI by age, sex, and cause in 2013

| Cause                                         | Males, All Ages          | Males, 0-4 Years | Males, 5-14 Years | Males, 15-49 Years | Males, 50-69 Years     | Males, 70-80 Years     |
|-----------------------------------------------|--------------------------|------------------|-------------------|--------------------|------------------------|------------------------|
| Tracheal, bronchus and lung cancer            | 220<br>(156 - 306)       | --               | --                | 45<br>(30 - 64)    | 113<br>(78 - 163)      | 62<br>(45 - 85)        |
| Breast cancer                                 | 3<br>(2 - 4)             | --               | --                | 2<br>(1 - 3)       | 1<br>(0 - 2)           | 0<br>(0 - 1)           |
| Cervical cancer                               | --                       | --               | --                | --                 | --                     | --                     |
| Uterine cancer                                | --                       | --               | --                | --                 | --                     | --                     |
| Prostate cancer                               | 64<br>(40 - 108)         | --               | --                | 1<br>(0 - 1)       | 20<br>(12 - 36)        | 44<br>(27 - 71)        |
| Colon and rectum cancer                       | 113<br>(80 - 159)        | --               | --                | 32<br>(22 - 46)    | 52<br>(35 - 75)        | 29<br>(21 - 40)        |
| Lip and oral cavity cancer                    | 3<br>(2 - 5)             | --               | --                | 1<br>(0 - 1)       | 1<br>(1 - 3)           | 1<br>(0 - 1)           |
| Nasopharynx cancer                            | 2<br>(1 - 3)             | --               | 0<br>(0 - 0)      | 1<br>(0 - 1)       | 1<br>(0 - 1)           | 0<br>(0 - 1)           |
| Other pharynx cancer                          | 1<br>(0 - 1)             | --               | --                | 0<br>(0 - 1)       | 0<br>(0 - 1)           | 0<br>(0 - 0)           |
| Gallbladder and biliary tract cancer          | 1<br>(1 - 2)             | --               | --                | 0<br>(0 - 1)       | 1<br>(0 - 1)           | 0<br>(0 - 0)           |
| Pancreatic cancer                             | 37<br>(26 - 51)          | --               | --                | 7<br>(4 - 10)      | 19<br>(13 - 28)        | 11<br>(8 - 15)         |
| Malignant skin melanoma                       | 5<br>(3 - 13)            | --               | --                | 2<br>(1 - 3)       | 2<br>(1 - 5)           | 2<br>(1 - 5)           |
| Non-melanoma skin cancer                      | 3<br>(2 - 7)             | --               | --                | 2<br>(1 - 5)       | 1<br>(0 - 2)           | 0<br>(0 - 1)           |
| Ovarian cancer                                | --                       | --               | --                | --                 | --                     | --                     |
| Testicular cancer                             | 3<br>(1 - 6)             | --               | --                | 2<br>(1 - 5)       | 0<br>(0 - 0)           | 0<br>(0 - 1)           |
| Kidney cancer                                 | 17<br>(12 - 25)          | 0<br>(0 - 1)     | 1<br>(0 - 1)      | 4<br>(2 - 5)       | 9<br>(6 - 14)          | 4<br>(2 - 5)           |
| Bladder cancer                                | 41<br>(27 - 58)          | --               | --                | 5<br>(3 - 8)       | 21<br>(12 - 32)        | 14<br>(10 - 21)        |
| Brain and nervous system cancer               | 98<br>(63 - 142)         | 3<br>(1 - 5)     | 7<br>(5 - 11)     | 45<br>(28 - 68)    | 28<br>(16 - 44)        | 15<br>(9 - 23)         |
| Thyroid cancer                                | 1<br>(1 - 2)             | --               | 0<br>(0 - 0)      | 0<br>(0 - 1)       | 0<br>(0 - 1)           | 0<br>(0 - 0)           |
| Mesothelioma                                  | 0<br>(0 - 1)             | --               | --                | 0<br>(0 - 0)       | 0<br>(0 - 0)           | 0<br>(0 - 0)           |
| Hodgkin lymphoma                              | 21<br>(14 - 32)          | 1<br>(0 - 2)     | 2<br>(1 - 3)      | 12<br>(7 - 18)     | 5<br>(3 - 9)           | 2<br>(1 - 4)           |
| Non-Hodgkin lymphoma                          | 36<br>(25 - 55)          | 2<br>(1 - 3)     | 1<br>(1 - 2)      | 15<br>(10 - 23)    | 12<br>(8 - 20)         | 6<br>(4 - 9)           |
| Multiple myeloma                              | 11<br>(7 - 17)           | --               | --                | 3<br>(2 - 5)       | 5<br>(3 - 8)           | 3<br>(2 - 5)           |
| Leukemia                                      | 85<br>(62 - 111)         | 2<br>(1 - 5)     | 10<br>(7 - 14)    | 40<br>(27 - 55)    | 16<br>(11 - 24)        | 16<br>(12 - 22)        |
| Other neoplasms                               | 75<br>(57 - 100)         | 16<br>(9 - 25)   | 5<br>(3 - 8)      | 29<br>(20 - 41)    | 16<br>(10 - 24)        | 9<br>(6 - 13)          |
| Cardiovascular diseases                       | 3,100<br>(2,270 - 4,180) | 40<br>(28 - 55)  | 13<br>(9 - 17)    | 620<br>(430 - 843) | 1,271<br>(902 - 1,791) | 1,157<br>(884 - 1,484) |
| Rheumatic heart disease                       | 17<br>(11 - 26)          | 1<br>(0 - 1)     | 1<br>(0 - 1)      | 7<br>(4 - 12)      | 4<br>(3 - 7)           | 4<br>(3 - 6)           |
| Ischemic heart disease                        | 2,073<br>(1,501 - 2,837) | 7<br>(3 - 13)    | 3<br>(2 - 5)      | 441<br>(303 - 614) | 929<br>(650 - 1,324)   | 693<br>(518 - 913)     |
| Cerebrovascular disease                       | 802<br>(570 - 1,090)     | 17<br>(11 - 25)  | 5<br>(4 - 8)      | 107<br>(69 - 154)  | 272<br>(181 - 391)     | 402<br>(289 - 541)     |
| Ischemic stroke                               | 176<br>(106 - 258)       | 0<br>(0 - 0)     | 0<br>(0 - 1)      | 13<br>(7 - 20)     | 59<br>(34 - 91)        | 104<br>(59 - 154)      |
| Hemorrhagic stroke                            | 626<br>(443 - 869)       | 17<br>(11 - 24)  | 5<br>(3 - 7)      | 94<br>(60 - 138)   | 213<br>(140 - 312)     | 298<br>(213 - 411)     |
| Hypertensive heart disease                    | 50<br>(13 - 115)         | 0<br>(0 - 0)     | 0<br>(0 - 0)      | 10<br>(4 - 20)     | 20<br>(5 - 49)         | 20<br>(4 - 48)         |
| Cardiomyopathy and myocarditis                | 52<br>(37 - 78)          | 8<br>(4 - 12)    | 2<br>(1 - 3)      | 21<br>(13 - 32)    | 13<br>(8 - 21)         | 9<br>(6 - 15)          |
| Atrial fibrillation and flutter               | 21<br>(14 - 32)          | --               | --                | 2<br>(1 - 4)       | 9<br>(5 - 14)          | 10<br>(6 - 16)         |
| Aortic aneurysm                               | 18<br>(13 - 27)          | --               | --                | 6<br>(4 - 10)      | 8<br>(5 - 12)          | 4<br>(3 - 7)           |
| Peripheral vascular disease                   | 1<br>(1 - 2)             | --               | --                | 0<br>(0 - 0)       | 0<br>(0 - 0)           | 1<br>(0 - 1)           |
| Endocarditis                                  | 20<br>(13 - 32)          | 2<br>(1 - 4)     | 1<br>(0 - 1)      | 6<br>(3 - 9)       | 6<br>(4 - 11)          | 5<br>(3 - 9)           |
| Other cardiovascular and circulatory diseases | 45<br>(17 - 64)          | 5<br>(2 - 8)     | 1<br>(1 - 2)      | 20<br>(8 - 29)     | 10<br>(3 - 15)         | 9<br>(2 - 13)          |
| Chronic respiratory diseases                  | 469<br>(332 - 637)       | 4<br>(2 - 6)     | 2<br>(2 - 3)      | 48<br>(31 - 67)    | 153<br>(101 - 225)     | 262<br>(189 - 346)     |
| Chronic obstructive pulmonary disease         | 338<br>(241 - 466)       | 3<br>(1 - 4)     | 2<br>(1 - 2)      | 27<br>(17 - 39)    | 106<br>(68 - 159)      | 202<br>(143 - 269)     |

Web Table 31- Palestine deaths with 95% UI by age, sex, and cause in 2013

| Cause                                               | Males, All Ages    | Males, 0-4 Years | Males, 5-14 Years | Males, 15-49 Years | Males, 50-69 Years | Males, 70-80 Years |
|-----------------------------------------------------|--------------------|------------------|-------------------|--------------------|--------------------|--------------------|
| Pneumoconiosis                                      | 7<br>(4 - 12)      | 0<br>(0 - 0)     | 0<br>(0 - 0)      | 3<br>(1 - 5)       | 2<br>(1 - 4)       | 2<br>(1 - 4)       |
| Silicosis                                           | 2<br>(1 - 3)       | 0<br>(0 - 0)     | 0<br>(0 - 0)      | 0<br>(0 - 0)       | 0<br>(0 - 1)       | 1<br>(1 - 3)       |
| Asbestosis                                          | 0<br>(0 - 1)       | 0<br>(0 - 0)     | 0<br>(0 - 0)      | 0<br>(0 - 1)       | 0<br>(0 - 0)       | 0<br>(0 - 0)       |
| Coal workers pneumoconiosis                         | 0<br>(0 - 0)       | 0<br>(0 - 0)     | 0<br>(0 - 0)      | 0<br>(0 - 0)       | 0<br>(0 - 0)       | 0<br>(0 - 0)       |
| Other pneumoconiosis                                | 5<br>(2 - 8)       | 0<br>(0 - 0)     | 0<br>(0 - 0)      | 2<br>(1 - 4)       | 2<br>(1 - 3)       | 1<br>(0 - 1)       |
| Asthma                                              | 28<br>(19 - 40)    | 0<br>(0 - 1)     | 0<br>(0 - 1)      | 5<br>(3 - 7)       | 10<br>(6 - 15)     | 13<br>(8 - 19)     |
| Interstitial lung disease and pulmonary sarcoidosis | 89<br>(54 - 147)   | 0<br>(0 - 0)     | 0<br>(0 - 0)      | 12<br>(6 - 21)     | 34<br>(19 - 60)    | 43<br>(25 - 71)    |
| Other chronic respiratory diseases                  | 7<br>(5 - 10)      | 1<br>(0 - 1)     | 0<br>(0 - 0)      | 2<br>(1 - 3)       | 1<br>(1 - 2)       | 3<br>(2 - 4)       |
| Cirrhosis                                           | 154<br>(112 - 210) | 4<br>(2 - 9)     | 6<br>(4 - 8)      | 49<br>(33 - 68)    | 61<br>(42 - 89)    | 34<br>(24 - 47)    |
| Cirrhosis due to hepatitis B                        | 41<br>(21 - 71)    | 0<br>(0 - 1)     | 1<br>(0 - 2)      | 12<br>(5 - 24)     | 17<br>(8 - 31)     | 11<br>(5 - 18)     |
| Cirrhosis due to hepatitis C                        | 72<br>(38 - 113)   | 0<br>(0 - 1)     | 2<br>(1 - 3)      | 25<br>(11 - 40)    | 31<br>(16 - 50)    | 14<br>(7 - 23)     |
| Cirrhosis due to alcohol use                        | 19<br>(10 - 35)    | --               | --                | 4<br>(2 - 7)       | 8<br>(4 - 16)      | 7<br>(3 - 14)      |
| Cirrhosis due to other causes                       | 21<br>(13 - 38)    | 4<br>(2 - 8)     | 3<br>(2 - 5)      | 8<br>(4 - 14)      | 5<br>(2 - 12)      | 2<br>(1 - 5)       |
| Digestive diseases                                  | 60<br>(43 - 81)    | 2<br>(1 - 4)     | 2<br>(1 - 3)      | 17<br>(11 - 24)    | 14<br>(9 - 21)     | 24<br>(18 - 34)    |
| Peptic ulcer disease                                | 10<br>(6 - 14)     | 0<br>(0 - 0)     | 0<br>(0 - 0)      | 2<br>(1 - 3)       | 3<br>(2 - 4)       | 5<br>(3 - 7)       |
| Gastritis and duodenitis                            | 2<br>(1 - 3)       | 0<br>(0 - 0)     | 0<br>(0 - 0)      | 1<br>(0 - 1)       | 0<br>(0 - 0)       | 0<br>(0 - 1)       |
| Appendicitis                                        | 5<br>(3 - 7)       | 1<br>(0 - 1)     | 0<br>(0 - 0)      | 2<br>(1 - 3)       | 1<br>(0 - 1)       | 1<br>(1 - 2)       |
| Paralytic ileus and intestinal obstruction          | 12<br>(7 - 18)     | 1<br>(0 - 1)     | 1<br>(0 - 1)      | 3<br>(2 - 6)       | 3<br>(2 - 5)       | 4<br>(2 - 7)       |
| Inguinal, femoral, and abdominal hernia             | 1<br>(1 - 2)       | 0<br>(0 - 0)     | 0<br>(0 - 0)      | 0<br>(0 - 1)       | 0<br>(0 - 0)       | 1<br>(0 - 2)       |
| Inflammatory bowel disease                          | 10<br>(6 - 16)     | 0<br>(0 - 1)     | 0<br>(0 - 0)      | 2<br>(1 - 3)       | 3<br>(1 - 5)       | 4<br>(3 - 7)       |
| Vascular intestinal disorders                       | 3<br>(1 - 6)       | 0<br>(0 - 0)     | 0<br>(0 - 0)      | 0<br>(0 - 1)       | 1<br>(0 - 2)       | 1<br>(1 - 3)       |
| Gallbladder and biliary diseases                    | 6<br>(3 - 9)       | 0<br>(0 - 1)     | 0<br>(0 - 0)      | 1<br>(1 - 2)       | 1<br>(1 - 2)       | 2<br>(1 - 4)       |
| Pancreatitis                                        | 5<br>(3 - 8)       | 0<br>(0 - 0)     | 0<br>(0 - 0)      | 2<br>(1 - 4)       | 1<br>(0 - 1)       | 1<br>(1 - 3)       |
| Other digestive diseases                            | 9<br>(5 - 13)      | 0<br>(0 - 1)     | 0<br>(0 - 0)      | 3<br>(2 - 5)       | 2<br>(1 - 3)       | 3<br>(2 - 5)       |
| Neurological disorders                              | 204<br>(155 - 268) | 7<br>(4 - 11)    | 4<br>(3 - 7)      | 40<br>(26 - 62)    | 25<br>(16 - 37)    | 128<br>(92 - 170)  |
| Alzheimer disease and other dementias               | 146<br>(105 - 194) | --               | --                | 0<br>(0 - 0)       | 20<br>(13 - 32)    | 126<br>(90 - 168)  |
| Parkinson disease                                   | 1<br>(1 - 2)       | --               | --                | 0<br>(0 - 0)       | 0<br>(0 - 1)       | 0<br>(0 - 1)       |
| Epilepsy                                            | 46<br>(30 - 70)    | 3<br>(1 - 6)     | 4<br>(2 - 7)      | 34<br>(21 - 54)    | 4<br>(2 - 6)       | 1<br>(1 - 2)       |
| Multiple sclerosis                                  | 2<br>(1 - 4)       | --               | --                | 1<br>(1 - 3)       | 0<br>(0 - 1)       | 0<br>(0 - 0)       |
| Other neurological disorders                        | 9<br>(7 - 16)      | 4<br>(3 - 6)     | 0<br>(0 - 1)      | 4<br>(3 - 9)       | 0<br>(0 - 0)       | 0<br>(0 - 1)       |
| Mental and substance use disorders                  | 154<br>(105 - 216) | 2<br>(1 - 3)     | 0<br>(0 - 0)      | 133<br>(90 - 192)  | 17<br>(11 - 25)    | 1<br>(1 - 2)       |
| Schizophrenia                                       | 0<br>(0 - 0)       | --               | --                | 0<br>(0 - 0)       | 0<br>(0 - 0)       | 0<br>(0 - 0)       |
| Alcohol use disorders                               | 5<br>(3 - 9)       | --               | --                | 3<br>(2 - 5)       | 2<br>(1 - 3)       | 0<br>(0 - 1)       |
| Drug use disorders                                  | 148<br>(101 - 210) | 2<br>(1 - 3)     | --                | 130<br>(88 - 188)  | 15<br>(10 - 23)    | 1<br>(1 - 1)       |
| Opioid use disorders                                | 82<br>(56 - 116)   | 1<br>(1 - 2)     | --                | 73<br>(49 - 105)   | 8<br>(5 - 12)      | 0<br>(0 - 1)       |
| Cocaine use disorders                               | 2<br>(1 - 3)       | 0<br>(0 - 0)     | --                | 2<br>(1 - 3)       | 0<br>(0 - 0)       | 0<br>(0 - 0)       |
| Amphetamine use disorders                           | 2<br>(1 - 2)       | 0<br>(0 - 0)     | --                | 1<br>(1 - 2)       | 0<br>(0 - 0)       | 0<br>(0 - 0)       |
| Other drug use disorders                            | 62<br>(42 - 89)    | 1<br>(0 - 1)     | --                | 54<br>(36 - 79)    | 7<br>(5 - 11)      | 0<br>(0 - 1)       |
| Eating disorders                                    | 0<br>(0 - 0)       | --               | 0<br>(0 - 0)      | 0<br>(0 - 0)       | --                 | --                 |
| Anorexia nervosa                                    | 0<br>(0 - 0)       | --               | 0<br>(0 - 0)      | 0<br>(0 - 0)       | --                 | --                 |

Web Table 31- Palestine deaths with 95% UI by age, sex, and cause in 2013

| Cause                                               | Males, All Ages    | Males, 0-4 Years   | Males, 5-14 Years | Males, 15-49 Years | Males, 50-69 Years | Males, 70-80 Years |
|-----------------------------------------------------|--------------------|--------------------|-------------------|--------------------|--------------------|--------------------|
| Diabetes, urogenital, blood, and endocrine diseases | 746<br>(565 - 985) | 71<br>(50 - 110)   | 16<br>(12 - 21)   | 154<br>(106 - 211) | 262<br>(181 - 371) | 243<br>(183 - 321) |
| Diabetes mellitus                                   | 227<br>(167 - 306) | 23<br>(14 - 35)    | 0<br>(0 - 0)      | 30<br>(20 - 42)    | 97<br>(65 - 140)   | 78<br>(56 - 107)   |
| Acute glomerulonephritis                            | 1<br>(1 - 1)       | 0<br>(0 - 0)       | 0<br>(0 - 0)      | 0<br>(0 - 0)       | 0<br>(0 - 0)       | 0<br>(0 - 0)       |
| Chronic kidney disease                              | 431<br>(309 - 585) | 13<br>(8 - 20)     | 7<br>(5 - 10)     | 106<br>(72 - 151)  | 155<br>(102 - 229) | 150<br>(108 - 205) |
| Chronic kidney disease due to diabetes mellitus     | 9<br>(5 - 21)      | 0<br>(0 - 1)       | 0<br>(0 - 1)      | 5<br>(3 - 11)      | 2<br>(1 - 5)       | 2<br>(1 - 4)       |
| Chronic kidney disease due to hypertension          | 58<br>(30 - 90)    | 0<br>(0 - 1)       | 1<br>(0 - 1)      | 14<br>(7 - 23)     | 22<br>(10 - 37)    | 21<br>(10 - 36)    |
| Chronic kidney disease due to glomerulonephritis    | 21<br>(12 - 31)    | 0<br>(0 - 1)       | 0<br>(0 - 1)      | 5<br>(3 - 8)       | 8<br>(4 - 13)      | 7<br>(4 - 12)      |
| Chronic kidney disease due to other causes          | 343<br>(242 - 478) | 12<br>(7 - 19)     | 6<br>(4 - 9)      | 82<br>(54 - 118)   | 123<br>(77 - 188)  | 120<br>(82 - 170)  |
| Urinary diseases and male infertility               | 22<br>(16 - 30)    | 4<br>(2 - 7)       | 1<br>(0 - 1)      | 5<br>(3 - 6)       | 6<br>(4 - 10)      | 7<br>(5 - 10)      |
| Interstitial nephritis and urinary tract infections | 10<br>(7 - 14)     | 3<br>(1 - 5)       | 0<br>(0 - 0)      | 1<br>(1 - 2)       | 3<br>(2 - 5)       | 3<br>(1 - 4)       |
| Urolithiasis                                        | 1<br>(0 - 1)       | --                 | 0<br>(0 - 0)      | 0<br>(0 - 0)       | 0<br>(0 - 0)       | 0<br>(0 - 0)       |
| Other urinary diseases                              | 12<br>(8 - 16)     | 1<br>(0 - 2)       | 0<br>(0 - 0)      | 3<br>(2 - 4)       | 3<br>(2 - 5)       | 4<br>(3 - 7)       |
| Gynecological diseases                              | --                 | --                 | --                | --                 | --                 | --                 |
| Uterine fibroids                                    | --                 | --                 | --                | --                 | --                 | --                 |
| Polycystic ovarian syndrome                         | --                 | --                 | --                | --                 | --                 | --                 |
| Endometriosis                                       | --                 | --                 | --                | --                 | --                 | --                 |
| Genital prolapse                                    | --                 | --                 | --                | --                 | --                 | --                 |
| Other gynecological diseases                        | --                 | --                 | --                | --                 | --                 | --                 |
| Hemoglobinopathies and hemolytic anemias            | 12<br>(8 - 20)     | 4<br>(3 - 7)       | 3<br>(2 - 5)      | 4<br>(2 - 7)       | 0<br>(0 - 1)       | 1<br>(0 - 1)       |
| Thalassemias                                        | 8<br>(5 - 13)      | 3<br>(2 - 5)       | 2<br>(1 - 3)      | 3<br>(1 - 4)       | 0<br>(0 - 0)       | 0<br>(0 - 0)       |
| Sickle cell disorders                               | 2<br>(1 - 3)       | 1<br>(0 - 1)       | 1<br>(0 - 1)      | 1<br>(0 - 1)       | 0<br>(0 - 0)       | 0<br>(0 - 0)       |
| G6PD deficiency                                     | 0<br>(0 - 0)       | 0<br>(0 - 0)       | 0<br>(0 - 0)      | 0<br>(0 - 0)       | 0<br>(0 - 0)       | 0<br>(0 - 0)       |
| Other hemoglobinopathies and hemolytic anemias      | 2<br>(1 - 3)       | 1<br>(0 - 1)       | 0<br>(0 - 0)      | 0<br>(0 - 0)       | 0<br>(0 - 0)       | 1<br>(0 - 1)       |
| Endocrine, metabolic, blood, and immune disorders   | 53<br>(37 - 101)   | 28<br>(16 - 58)    | 5<br>(3 - 8)      | 10<br>(6 - 17)     | 4<br>(2 - 7)       | 7<br>(4 - 14)      |
| Musculoskeletal disorders                           | 39<br>(27 - 66)    | --                 | 3<br>(2 - 4)      | 25<br>(16 - 44)    | 5<br>(3 - 8)       | 7<br>(4 - 12)      |
| Rheumatoid arthritis                                | 7<br>(4 - 12)      | --                 | 1<br>(0 - 1)      | 5<br>(3 - 9)       | 0<br>(0 - 1)       | 1<br>(0 - 2)       |
| Other musculoskeletal disorders                     | 32<br>(22 - 54)    | --                 | 2<br>(1 - 3)      | 20<br>(13 - 36)    | 4<br>(3 - 7)       | 6<br>(4 - 10)      |
| Other non-communicable diseases                     | 706<br>(561 - 898) | 636<br>(497 - 810) | 24<br>(17 - 34)   | 31<br>(20 - 46)    | 3<br>(2 - 5)       | 12<br>(7 - 40)     |
| Congenital anomalies                                | 642<br>(499 - 830) | 583<br>(446 - 755) | 23<br>(16 - 33)   | 24<br>(15 - 38)    | 1<br>(1 - 2)       | 9<br>(5 - 37)      |
| Neural tube defects                                 | 0<br>(0 - 0)       | 0<br>(0 - 0)       | 0<br>(0 - 0)      | 0<br>(0 - 0)       | 0<br>(0 - 0)       | 0<br>(0 - 0)       |
| Congenital heart anomalies                          | 319<br>(229 - 437) | 299<br>(210 - 411) | 10<br>(6 - 15)    | 6<br>(4 - 11)      | 0<br>(0 - 1)       | 4<br>(1 - 19)      |
| Cleft lip and cleft palate                          | 0<br>(0 - 0)       | 0<br>(0 - 0)       | --                | --                 | --                 | --                 |
| Down syndrome                                       | 32<br>(17 - 68)    | 23<br>(9 - 55)     | 1<br>(1 - 2)      | 6<br>(4 - 11)      | 0<br>(0 - 0)       | 1<br>(0 - 4)       |
| Chromosomal unbalanced rearrangements               | 6<br>(2 - 15)      | 5<br>(2 - 14)      | 0<br>(0 - 0)      | 0<br>(0 - 1)       | 0<br>(0 - 0)       | 0<br>(0 - 1)       |
| Other congenital anomalies                          | 284<br>(202 - 392) | 255<br>(174 - 359) | 12<br>(8 - 18)    | 11<br>(7 - 18)     | 1<br>(1 - 2)       | 4<br>(2 - 11)      |
| Skin and subcutaneous diseases                      | 13<br>(9 - 17)     | 1<br>(1 - 2)       | 1<br>(0 - 1)      | 7<br>(4 - 9)       | 2<br>(1 - 3)       | 3<br>(2 - 4)       |
| Cellulitis                                          | 2<br>(1 - 3)       | 0<br>(0 - 0)       | 0<br>(0 - 0)      | 1<br>(0 - 1)       | 0<br>(0 - 1)       | 1<br>(0 - 1)       |
| Pyoderma                                            | 8<br>(6 - 11)      | 1<br>(0 - 1)       | 0<br>(0 - 1)      | 4<br>(3 - 6)       | 1<br>(1 - 2)       | 2<br>(1 - 3)       |
| Decubitus ulcer                                     | 2<br>(1 - 3)       | 0<br>(0 - 0)       | 0<br>(0 - 0)      | 2<br>(1 - 2)       | 0<br>(0 - 0)       | 0<br>(0 - 1)       |
| Other skin and subcutaneous diseases                | 1<br>(0 - 1)       | 0<br>(0 - 0)       | 0<br>(0 - 0)      | 0<br>(0 - 1)       | 0<br>(0 - 0)       | 0<br>(0 - 0)       |



Web Table 31- Palestine deaths with 95% UI by age, sex, and cause in 2013

| Cause                                           | Males, All Ages      | Males, 0-4 Years | Males, 5-14 Years | Males, 15-49 Years | Males, 50-69 Years | Males, 70-80 Years |
|-------------------------------------------------|----------------------|------------------|-------------------|--------------------|--------------------|--------------------|
| Sudden infant death syndrome                    | 51<br>(15 - 107)     | 51<br>(15 - 107) | -                 | -                  | -                  | -                  |
| Injuries                                        | 844<br>(637 - 1,073) | 92<br>(62 - 131) | 77<br>(63 - 94)   | 564<br>(394 - 745) | 68<br>(46 - 98)    | 43<br>(32 - 56)    |
| Transport injuries                              | 330<br>(235 - 437)   | 38<br>(22 - 62)  | 41<br>(30 - 53)   | 216<br>(144 - 301) | 22<br>(14 - 34)    | 13<br>(9 - 19)     |
| Road injuries                                   | 316<br>(225 - 419)   | 35<br>(20 - 58)  | 40<br>(29 - 51)   | 210<br>(140 - 292) | 21<br>(13 - 31)    | 11<br>(7 - 16)     |
| Pedestrian road injuries                        | 22<br>(13 - 32)      | 5<br>(3 - 9)     | 4<br>(2 - 6)      | 9<br>(5 - 15)      | 2<br>(1 - 4)       | 2<br>(1 - 3)       |
| Cyclist road injuries                           | 7<br>(4 - 9)         | 1<br>(0 - 1)     | 1<br>(0 - 1)      | 4<br>(2 - 5)       | 1<br>(1 - 2)       | 1<br>(0 - 1)       |
| Motorcyclist road injuries                      | 14<br>(9 - 21)       | 1<br>(0 - 2)     | 1<br>(1 - 2)      | 11<br>(6 - 18)     | 1<br>(0 - 1)       | 0<br>(0 - 1)       |
| Motor vehicle road injuries                     | 272<br>(192 - 364)   | 28<br>(15 - 47)  | 34<br>(25 - 44)   | 186<br>(123 - 260) | 16<br>(10 - 24)    | 9<br>(6 - 12)      |
| Other road injuries                             | 2<br>(1 - 3)         | 1<br>(0 - 1)     | 0<br>(0 - 1)      | 1<br>(0 - 1)       | 0<br>(0 - 1)       | 0<br>(0 - 0)       |
| Other transport injuries                        | 13<br>(9 - 18)       | 3<br>(1 - 4)     | 1<br>(1 - 2)      | 6<br>(4 - 9)       | 2<br>(1 - 3)       | 2<br>(1 - 3)       |
| Unintentional injuries                          | 258<br>(199 - 329)   | 52<br>(34 - 76)  | 28<br>(21 - 36)   | 132<br>(94 - 178)  | 23<br>(15 - 34)    | 23<br>(17 - 32)    |
| Falls                                           | 67<br>(48 - 91)      | 10<br>(5 - 19)   | 8<br>(5 - 12)     | 36<br>(23 - 53)    | 6<br>(3 - 9)       | 7<br>(4 - 11)      |
| Drowning                                        | 61<br>(43 - 86)      | 13<br>(7 - 24)   | 10<br>(6 - 15)    | 32<br>(21 - 50)    | 3<br>(2 - 5)       | 3<br>(2 - 4)       |
| Fire, heat, and hot substances                  | 21<br>(14 - 30)      | 4<br>(2 - 6)     | 1<br>(1 - 2)      | 11<br>(7 - 17)     | 2<br>(1 - 4)       | 3<br>(2 - 4)       |
| Poisonings                                      | 6<br>(4 - 11)        | 1<br>(0 - 2)     | 0<br>(0 - 1)      | 4<br>(2 - 7)       | 0<br>(0 - 1)       | 0<br>(0 - 1)       |
| Exposure to mechanical forces                   | 26<br>(19 - 35)      | 3<br>(2 - 5)     | 2<br>(2 - 3)      | 15<br>(10 - 22)    | 3<br>(2 - 5)       | 2<br>(1 - 3)       |
| Unintentional firearm injuries                  | 9<br>(6 - 13)        | 0<br>(0 - 1)     | 0<br>(0 - 1)      | 6<br>(4 - 10)      | 1<br>(1 - 2)       | 1<br>(0 - 1)       |
| Unintentional suffocation                       | 3<br>(2 - 5)         | 0<br>(0 - 1)     | 0<br>(0 - 1)      | 2<br>(1 - 4)       | 0<br>(0 - 1)       | 0<br>(0 - 0)       |
| Other exposure to mechanical forces             | 14<br>(10 - 19)      | 2<br>(1 - 4)     | 2<br>(1 - 3)      | 7<br>(4 - 10)      | 2<br>(1 - 3)       | 1<br>(1 - 2)       |
| Adverse effects of medical treatment            | 44<br>(30 - 65)      | 12<br>(6 - 25)   | 2<br>(1 - 3)      | 17<br>(10 - 26)    | 7<br>(4 - 11)      | 6<br>(4 - 10)      |
| Animal contact                                  | 5<br>(3 - 7)         | 1<br>(0 - 1)     | 1<br>(1 - 2)      | 2<br>(1 - 4)       | 1<br>(0 - 1)       | 0<br>(0 - 1)       |
| Venomous animal contact                         | 2<br>(1 - 3)         | 0<br>(0 - 1)     | 0<br>(0 - 1)      | 1<br>(0 - 1)       | 0<br>(0 - 1)       | 0<br>(0 - 0)       |
| Non-venomous animal contact                     | 3<br>(2 - 4)         | 0<br>(0 - 1)     | 0<br>(0 - 1)      | 2<br>(1 - 3)       | 0<br>(0 - 0)       | 0<br>(0 - 1)       |
| Foreign body                                    | 9<br>(5 - 18)        | 5<br>(2 - 11)    | 1<br>(1 - 3)      | 1<br>(0 - 1)       | 0<br>(0 - 0)       | 1<br>(1 - 3)       |
| Pulmonary aspiration and foreign body in airway | 8<br>(5 - 17)        | 5<br>(2 - 11)    | 1<br>(1 - 3)      | 0<br>(0 - 1)       | 0<br>(0 - 0)       | 1<br>(1 - 3)       |
| Foreign body in other body part                 | 1<br>(0 - 1)         | 0<br>(0 - 0)     | 0<br>(0 - 0)      | 0<br>(0 - 0)       | 0<br>(0 - 0)       | 0<br>(0 - 0)       |
| Other unintentional injuries                    | 22<br>(16 - 29)      | 3<br>(2 - 5)     | 2<br>(1 - 2)      | 15<br>(10 - 22)    | 1<br>(1 - 2)       | 0<br>(0 - 1)       |
| Self-harm and interpersonal violence            | 250<br>(155 - 355)   | 2<br>(1 - 4)     | 8<br>(5 - 13)     | 213<br>(130 - 308) | 20<br>(12 - 32)    | 6<br>(3 - 9)       |
| Self-harm                                       | 65<br>(38 - 91)      | -                | 3<br>(1 - 5)      | 50<br>(29 - 72)    | 9<br>(5 - 14)      | 4<br>(2 - 6)       |
| Interpersonal violence                          | 185<br>(104 - 275)   | 2<br>(1 - 4)     | 6<br>(3 - 10)     | 164<br>(91 - 244)  | 12<br>(6 - 21)     | 2<br>(1 - 3)       |
| Assault by firearm                              | 130<br>(66 - 200)    | 0<br>(0 - 1)     | 2<br>(1 - 4)      | 120<br>(61 - 187)  | 7<br>(3 - 12)      | 1<br>(0 - 2)       |
| Assault by sharp object                         | 45<br>(21 - 79)      | 0<br>(0 - 1)     | 3<br>(1 - 5)      | 38<br>(17 - 66)    | 4<br>(2 - 8)       | 0<br>(0 - 1)       |
| Assault by other means                          | 10<br>(5 - 16)       | 2<br>(1 - 3)     | 1<br>(0 - 2)      | 6<br>(3 - 11)      | 1<br>(0 - 1)       | 1<br>(0 - 1)       |
| Forces of nature, war, and legal intervention   | 7<br>(5 - 10)        | 0<br>(0 - 0)     | 0<br>(0 - 0)      | 4<br>(3 - 5)       | 2<br>(2 - 3)       | 1<br>(0 - 1)       |
| Exposure to forces of nature                    | 7<br>(5 - 10)        | 0<br>(0 - 0)     | 0<br>(0 - 0)      | 4<br>(3 - 5)       | 2<br>(2 - 3)       | 1<br>(0 - 1)       |

Web Table 31- Palestine deaths with 95% UI by age, sex, and cause in 2013

| Cause                                                             | Females, All Ages        | Females, 0-4 Years     | Females, 5-14 Years | Females, 15-49 Years | Females, 50-69 Years   | Females, 70-80 Years     |
|-------------------------------------------------------------------|--------------------------|------------------------|---------------------|----------------------|------------------------|--------------------------|
| All causes                                                        | 5,488<br>(4,549 - 6,966) | 1,150<br>(973 - 1,361) | 161<br>(143 - 190)  | 859<br>(606 - 1,186) | 1,234<br>(875 - 1,752) | 2,084<br>(1,808 - 2,730) |
| Communicable, maternal, neonatal, and nutritional diseases        | 674<br>(515 - 833)       | 402<br>(242 - 538)     | 52<br>(39 - 69)     | 87<br>(62 - 118)     | 39<br>(26 - 59)        | 94<br>(65 - 143)         |
| HIV/AIDS and tuberculosis                                         | 4<br>(3 - 5)             | 0<br>(0 - 0)           | 0<br>(0 - 0)        | 3<br>(2 - 3)         | 1<br>(0 - 1)           | 0<br>(0 - 1)             |
| Tuberculosis                                                      | 2<br>(1 - 3)             | 0<br>(0 - 0)           | 0<br>(0 - 0)        | 0<br>(0 - 1)         | 0<br>(0 - 1)           | 0<br>(0 - 1)             |
| HIV/AIDS                                                          | 3<br>(2 - 4)             | 0<br>(0 - 0)           | 0<br>(0 - 0)        | 2<br>(2 - 3)         | 0<br>(0 - 0)           | 0<br>(0 - 0)             |
| HIV/AIDS resulting in mycobacterial infection                     | 0<br>(0 - 0)             | 0<br>(0 - 0)           | 0<br>(0 - 0)        | 0<br>(0 - 0)         | 0<br>(0 - 0)           | 0<br>(0 - 0)             |
| HIV/AIDS resulting in other diseases                              | 3<br>(2 - 3)             | 0<br>(0 - 0)           | 0<br>(0 - 0)        | 2<br>(2 - 3)         | 0<br>(0 - 0)           | 0<br>(0 - 0)             |
| Diarrhea, lower respiratory, and other common infectious diseases | 380<br>(302 - 494)       | 154<br>(110 - 219)     | 46<br>(33 - 63)     | 63<br>(41 - 93)      | 34<br>(22 - 51)        | 84<br>(56 - 132)         |
| Diarrheal diseases                                                | 11<br>(7 - 17)           | 7<br>(3 - 13)          | 1<br>(0 - 1)        | 1<br>(1 - 2)         | 1<br>(0 - 1)           | 2<br>(1 - 3)             |
| Intestinal infectious diseases                                    | 67<br>(34 - 117)         | 21<br>(10 - 38)        | 20<br>(10 - 35)     | 22<br>(8 - 42)       | 3<br>(1 - 6)           | 1<br>(0 - 2)             |
| Typhoid fever                                                     | 50<br>(25 - 89)          | 15<br>(7 - 27)         | 16<br>(8 - 28)      | 17<br>(6 - 33)       | 2<br>(1 - 4)           | 1<br>(0 - 2)             |
| Paratyphoid fever                                                 | 15<br>(7 - 27)           | 5<br>(2 - 10)          | 4<br>(2 - 9)        | 4<br>(2 - 9)         | 1<br>(0 - 1)           | 0<br>(0 - 0)             |
| Other intestinal infectious diseases                              | 2<br>(0 - 7)             | 1<br>(0 - 5)           | 0<br>(0 - 2)        | 1<br>(0 - 3)         | 0<br>(0 - 1)           | 0<br>(0 - 1)             |
| Lower respiratory infections                                      | 249<br>(195 - 328)       | 89<br>(58 - 133)       | 19<br>(12 - 27)     | 34<br>(23 - 50)      | 28<br>(18 - 44)        | 78<br>(51 - 124)         |
| Upper respiratory infections                                      | 0<br>(0 - 1)             | 0<br>(0 - 0)           | 0<br>(0 - 0)        | 0<br>(0 - 0)         | 0<br>(0 - 0)           | 0<br>(0 - 0)             |
| Otitis media                                                      | 1<br>(1 - 1)             | 0<br>(0 - 0)           | 0<br>(0 - 0)        | 0<br>(0 - 0)         | 0<br>(0 - 0)           | 0<br>(0 - 0)             |
| Meningitis                                                        | 19<br>(14 - 28)          | 11<br>(7 - 19)         | 1<br>(1 - 2)        | 3<br>(2 - 5)         | 1<br>(1 - 2)           | 3<br>(1 - 4)             |
| Pneumococcal meningitis                                           | 4<br>(3 - 6)             | 2<br>(1 - 4)           | 0<br>(0 - 1)        | 1<br>(0 - 1)         | 0<br>(0 - 1)           | 1<br>(0 - 1)             |
| H influenzae type B meningitis                                    | 5<br>(3 - 8)             | 4<br>(2 - 7)           | 0<br>(0 - 1)        | 0<br>(0 - 1)         | 0<br>(0 - 0)           | 0<br>(0 - 1)             |
| Meningococcal meningitis                                          | 6<br>(4 - 9)             | 3<br>(2 - 6)           | 0<br>(0 - 1)        | 1<br>(0 - 1)         | 0<br>(0 - 1)           | 1<br>(0 - 1)             |
| Other meningitis                                                  | 4<br>(3 - 7)             | 2<br>(1 - 4)           | 0<br>(0 - 0)        | 1<br>(0 - 2)         | 1<br>(0 - 1)           | 1<br>(0 - 2)             |
| Encephalitis                                                      | 8<br>(5 - 13)            | 4<br>(2 - 8)           | 1<br>(1 - 2)        | 2<br>(1 - 3)         | 0<br>(0 - 1)           | 1<br>(0 - 2)             |
| Diphtheria                                                        | 0<br>(0 - 1)             | 0<br>(0 - 1)           | 0<br>(0 - 0)        | 0<br>(0 - 0)         | 0<br>(0 - 0)           | --                       |
| Whooping cough                                                    | 1<br>(0 - 6)             | 1<br>(0 - 5)           | 0<br>(0 - 0)        | 0<br>(0 - 0)         | 0<br>(0 - 0)           | --                       |
| Tetanus                                                           | 0<br>(0 - 0)             | 0<br>(0 - 0)           | 0<br>(0 - 0)        | 0<br>(0 - 0)         | 0<br>(0 - 0)           | 0<br>(0 - 0)             |
| Measles                                                           | 24<br>(2 - 100)          | 20<br>(2 - 83)         | 3<br>(0 - 15)       | 1<br>(0 - 3)         | 0<br>(0 - 0)           | --                       |
| Varicella and herpes zoster                                       | 1<br>(0 - 2)             | 0<br>(0 - 1)           | 0<br>(0 - 0)        | 0<br>(0 - 0)         | 0<br>(0 - 0)           | 0<br>(0 - 1)             |
| Neglected tropical diseases and malaria                           | 13<br>(7 - 22)           | 6<br>(2 - 12)          | 3<br>(1 - 5)        | 3<br>(1 - 6)         | 1<br>(0 - 2)           | 0<br>(0 - 1)             |
| Leishmaniasis                                                     | 12<br>(6 - 20)           | 5<br>(2 - 12)          | 3<br>(1 - 5)        | 3<br>(1 - 6)         | 1<br>(0 - 1)           | 0<br>(0 - 0)             |
| Visceral leishmaniasis                                            | 12<br>(6 - 20)           | 5<br>(2 - 12)          | 3<br>(1 - 5)        | 3<br>(1 - 6)         | 1<br>(0 - 1)           | 0<br>(0 - 0)             |
| Cysticercosis                                                     | 0<br>(0 - 0)             | 0<br>(0 - 0)           | 0<br>(0 - 0)        | 0<br>(0 - 0)         | 0<br>(0 - 0)           | 0<br>(0 - 0)             |
| Cystic echinococcosis                                             | 0<br>(0 - 0)             | 0<br>(0 - 0)           | 0<br>(0 - 0)        | 0<br>(0 - 0)         | 0<br>(0 - 0)           | 0<br>(0 - 0)             |
| Dengue                                                            | 0<br>(0 - 0)             | 0<br>(0 - 0)           | 0<br>(0 - 0)        | 0<br>(0 - 0)         | 0<br>(0 - 0)           | 0<br>(0 - 0)             |
| Rabies                                                            | 0<br>(0 - 0)             | 0<br>(0 - 0)           | 0<br>(0 - 0)        | 0<br>(0 - 0)         | 0<br>(0 - 0)           | 0<br>(0 - 0)             |
| Intestinal nematode infections                                    | 0<br>(0 - 2)             | 0<br>(0 - 1)           | 0<br>(0 - 0)        | 0<br>(0 - 0)         | 0<br>(0 - 0)           | 0<br>(0 - 0)             |
| Ascariasis                                                        | 0<br>(0 - 2)             | 0<br>(0 - 1)           | 0<br>(0 - 0)        | 0<br>(0 - 0)         | 0<br>(0 - 0)           | 0<br>(0 - 0)             |
| Other neglected tropical diseases                                 | 1<br>(1 - 1)             | 0<br>(0 - 0)           | 0<br>(0 - 0)        | 0<br>(0 - 0)         | 0<br>(0 - 0)           | 0<br>(0 - 0)             |
| Maternal disorders                                                | 12<br>(7 - 17)           | --                     | 0<br>(0 - 0)        | 12<br>(7 - 17)       | --                     | --                       |
| Maternal hemorrhage                                               | 2<br>(1 - 4)             | --                     | 0<br>(0 - 0)        | 2<br>(1 - 4)         | --                     | --                       |
| Maternal sepsis and other maternal infections                     | 1<br>(1 - 2)             | --                     | 0<br>(0 - 0)        | 1<br>(1 - 2)         | --                     | --                       |

Web Table 31- Palestine deaths with 95% UI by age, sex, and cause in 2013

| Cause                                                            | Females, All Ages        | Females, 0-4 Years | Females, 5-14 Years | Females, 15-49 Years | Females, 50-69 Years   | Females, 70-80 Years     |
|------------------------------------------------------------------|--------------------------|--------------------|---------------------|----------------------|------------------------|--------------------------|
| Maternal hypertensive disorders                                  | 2<br>(1 - 3)             | --                 | 0<br>(0 - 0)        | 2<br>(1 - 3)         | --                     | --                       |
| Maternal obstructed labor                                        | 1<br>(1 - 2)             | --                 | 0<br>(0 - 0)        | 1<br>(1 - 2)         | --                     | --                       |
| Maternal abortive outcome                                        | 2<br>(1 - 3)             | --                 | 0<br>(0 - 0)        | 2<br>(1 - 3)         | --                     | --                       |
| Indirect maternal deaths                                         | 1<br>(1 - 2)             | --                 | 0<br>(0 - 0)        | 1<br>(1 - 2)         | --                     | --                       |
| Late maternal deaths                                             | 1<br>(1 - 2)             | --                 | 0<br>(0 - 0)        | 1<br>(1 - 2)         | --                     | --                       |
| Maternal deaths aggravated by HIV/AIDS                           | 0<br>(0 - 0)             | --                 | --                  | 0<br>(0 - 0)         | --                     | --                       |
| Other maternal disorders                                         | 2<br>(1 - 3)             | --                 | 0<br>(0 - 0)        | 2<br>(1 - 3)         | --                     | --                       |
| Neonatal disorders                                               | 228<br>(92 - 348)        | 228<br>(92 - 348)  | --                  | --                   | --                     | --                       |
| Neonatal preterm birth complications                             | 123<br>(42 - 204)        | 123<br>(42 - 204)  | --                  | --                   | --                     | --                       |
| Neonatal encephalopathy due to birth asphyxia and trauma         | 38<br>(6 - 92)           | 38<br>(6 - 92)     | --                  | --                   | --                     | --                       |
| Neonatal sepsis and other neonatal infections                    | 14<br>(4 - 34)           | 14<br>(4 - 34)     | --                  | --                   | --                     | --                       |
| Hemolytic disease and other neonatal jaundice                    | 0<br>(0 - 1)             | 0<br>(0 - 1)       | --                  | --                   | --                     | --                       |
| Other neonatal disorders                                         | 54<br>(22 - 103)         | 54<br>(22 - 103)   | --                  | --                   | --                     | --                       |
| Nutritional deficiencies                                         | 11<br>(8 - 14)           | 2<br>(1 - 3)       | 1<br>(1 - 2)        | 3<br>(2 - 4)         | 2<br>(1 - 3)           | 4<br>(2 - 5)             |
| Protein-energy malnutrition                                      | 3<br>(2 - 5)             | 0<br>(0 - 1)       | 0<br>(0 - 1)        | 0<br>(0 - 0)         | 0<br>(0 - 1)           | 2<br>(1 - 3)             |
| Iodine deficiency                                                | 0<br>(0 - 0)             | 0<br>(0 - 0)       | 0<br>(0 - 0)        | 0<br>(0 - 0)         | 0<br>(0 - 0)           | 0<br>(0 - 0)             |
| Iron-deficiency anemia                                           | 7<br>(4 - 9)             | 1<br>(1 - 2)       | 0<br>(0 - 1)        | 2<br>(1 - 3)         | 1<br>(1 - 2)           | 2<br>(1 - 3)             |
| Other nutritional deficiencies                                   | 1<br>(0 - 2)             | 0<br>(0 - 0)       | 0<br>(0 - 0)        | 0<br>(0 - 0)         | 0<br>(0 - 1)           | 0<br>(0 - 0)             |
| Other communicable, maternal, neonatal, and nutritional diseases | 26<br>(16 - 39)          | 13<br>(5 - 23)     | 2<br>(1 - 3)        | 4<br>(2 - 6)         | 2<br>(1 - 4)           | 5<br>(2 - 11)            |
| Sexually transmitted diseases excluding HIV                      | 11<br>(3 - 21)           | 9<br>(2 - 19)      | 1<br>(0 - 1)        | 0<br>(0 - 1)         | 0<br>(0 - 1)           | 1<br>(0 - 1)             |
| Syphilis                                                         | 11<br>(3 - 20)           | 9<br>(2 - 19)      | 1<br>(0 - 1)        | 0<br>(0 - 0)         | 0<br>(0 - 0)           | 0<br>(0 - 1)             |
| Chlamydial infection                                             | 0<br>(0 - 0)             | --                 | 0<br>(0 - 0)        | 0<br>(0 - 0)         | 0<br>(0 - 0)           | 0<br>(0 - 0)             |
| Gonococcal infection                                             | 0<br>(0 - 0)             | --                 | 0<br>(0 - 0)        | 0<br>(0 - 0)         | 0<br>(0 - 0)           | 0<br>(0 - 0)             |
| Other sexually transmitted diseases                              | 0<br>(0 - 0)             | --                 | 0<br>(0 - 0)        | 0<br>(0 - 0)         | 0<br>(0 - 0)           | 0<br>(0 - 0)             |
| Hepatitis                                                        | 2<br>(2 - 3)             | 0<br>(0 - 1)       | 0<br>(0 - 0)        | 0<br>(0 - 0)         | 1<br>(0 - 1)           | 1<br>(0 - 1)             |
| Acute hepatitis A                                                | 0<br>(0 - 1)             | 0<br>(0 - 0)       | 0<br>(0 - 0)        | 0<br>(0 - 0)         | 0<br>(0 - 0)           | 0<br>(0 - 0)             |
| Acute hepatitis B                                                | 1<br>(1 - 2)             | 0<br>(0 - 0)       | 0<br>(0 - 0)        | 0<br>(0 - 0)         | 0<br>(0 - 1)           | 0<br>(0 - 1)             |
| Acute hepatitis C                                                | 0<br>(0 - 0)             | --                 | 0<br>(0 - 0)        | 0<br>(0 - 0)         | 0<br>(0 - 0)           | 0<br>(0 - 0)             |
| Acute hepatitis E                                                | 0<br>(0 - 1)             | 0<br>(0 - 0)       | 0<br>(0 - 0)        | 0<br>(0 - 0)         | 0<br>(0 - 0)           | 0<br>(0 - 0)             |
| Other infectious diseases                                        | 13<br>(7 - 21)           | 3<br>(1 - 7)       | 1<br>(1 - 3)        | 3<br>(1 - 5)         | 1<br>(1 - 2)           | 4<br>(1 - 10)            |
| Non-communicable diseases                                        | 4,553<br>(3,694 - 5,931) | 671<br>(526 - 871) | 78<br>(64 - 96)     | 684<br>(477 - 960)   | 1,164<br>(823 - 1,655) | 1,956<br>(1,696 - 2,579) |
| Neoplasms                                                        | 637<br>(466 - 896)       | 6<br>(4 - 9)       | 17<br>(13 - 22)     | 237<br>(163 - 337)   | 247<br>(171 - 356)     | 130<br>(105 - 179)       |
| Esophageal cancer                                                | 3<br>(2 - 4)             | --                 | --                  | 1<br>(1 - 2)         | 1<br>(0 - 1)           | 1<br>(1 - 2)             |
| Stomach cancer                                                   | 45<br>(31 - 64)          | --                 | --                  | 14<br>(9 - 20)       | 18<br>(11 - 27)        | 13<br>(9 - 19)           |
| Liver cancer                                                     | 53<br>(37 - 76)          | --                 | 1<br>(1 - 2)        | 13<br>(8 - 19)       | 23<br>(14 - 34)        | 16<br>(11 - 24)          |
| Liver cancer due to hepatitis B                                  | 13<br>(6 - 26)           | --                 | 0<br>(0 - 1)        | 5<br>(2 - 8)         | 5<br>(1 - 12)          | 3<br>(1 - 6)             |
| Liver cancer due to hepatitis C                                  | 25<br>(12 - 42)          | --                 | 0<br>(0 - 0)        | 5<br>(2 - 8)         | 12<br>(5 - 20)         | 9<br>(4 - 16)            |
| Liver cancer due to alcohol use                                  | 4<br>(1 - 9)             | --                 | --                  | 0<br>(0 - 1)         | 2<br>(0 - 4)           | 2<br>(0 - 5)             |
| Liver cancer due to other causes                                 | 10<br>(4 - 17)           | --                 | 1<br>(0 - 1)        | 3<br>(1 - 5)         | 4<br>(1 - 7)           | 2<br>(1 - 4)             |
| Larynx cancer                                                    | 1<br>(0 - 2)             | --                 | --                  | 0<br>(0 - 1)         | 0<br>(0 - 1)           | 0<br>(0 - 0)             |

Web Table 31- Palestine deaths with 95% UI by age, sex, and cause in 2013

| Cause                                         | Females, All Ages        | Females, 0-4 Years | Females, 5-14 Years | Females, 15-49 Years | Females, 50-69 Years | Females, 70-80 Years     |
|-----------------------------------------------|--------------------------|--------------------|---------------------|----------------------|----------------------|--------------------------|
| Tracheal, bronchus and lung cancer            | 54<br>(38 - 77)          | --                 | --                  | 16<br>(10 - 23)      | 25<br>(16 - 36)      | 13<br>(10 - 19)          |
| Breast cancer                                 | 179<br>(124 - 261)       | --                 | --                  | 87<br>(58 - 130)     | 73<br>(47 - 108)     | 20<br>(15 - 28)          |
| Cervical cancer                               | 3<br>(2 - 5)             | --                 | --                  | 2<br>(1 - 2)         | 1<br>(0 - 0)         | 0<br>(0 - 0)             |
| Uterine cancer                                | 12<br>(7 - 18)           | --                 | --                  | 3<br>(2 - 5)         | 6<br>(3 - 10)        | 3<br>(2 - 5)             |
| Prostate cancer                               | --                       | --                 | --                  | --                   | --                   | --                       |
| Colon and rectum cancer                       | 90<br>(65 - 128)         | --                 | --                  | 27<br>(18 - 40)      | 40<br>(27 - 58)      | 23<br>(17 - 32)          |
| Lip and oral cavity cancer                    | 1<br>(1 - 2)             | --                 | --                  | 1<br>(0 - 1)         | 0<br>(0 - 0)         | 0<br>(0 - 0)             |
| Nasopharynx cancer                            | 1<br>(1 - 2)             | --                 | 0<br>(0 - 0)        | 1<br>(0 - 1)         | 0<br>(0 - 0)         | 0<br>(0 - 0)             |
| Other pharynx cancer                          | 0<br>(0 - 0)             | --                 | --                  | 0<br>(0 - 0)         | 0<br>(0 - 0)         | 0<br>(0 - 0)             |
| Gallbladder and biliary tract cancer          | 3<br>(2 - 5)             | --                 | --                  | 1<br>(0 - 1)         | 2<br>(1 - 3)         | 1<br>(0 - 1)             |
| Pancreatic cancer                             | 29<br>(21 - 41)          | --                 | --                  | 4<br>(3 - 7)         | 14<br>(9 - 20)       | 11<br>(8 - 16)           |
| Malignant skin melanoma                       | 1<br>(1 - 2)             | --                 | --                  | 1<br>(0 - 1)         | 0<br>(0 - 1)         | 0<br>(0 - 1)             |
| Non-melanoma skin cancer                      | 1<br>(1 - 3)             | --                 | --                  | 1<br>(0 - 1)         | 0<br>(0 - 1)         | 1<br>(0 - 1)             |
| Ovarian cancer                                | 13<br>(9 - 19)           | --                 | --                  | 6<br>(4 - 8)         | 6<br>(4 - 8)         | 2<br>(1 - 2)             |
| Testicular cancer                             | --                       | --                 | --                  | --                   | --                   | --                       |
| Kidney cancer                                 | 4<br>(3 - 6)             | 1<br>(0 - 1)       | 1<br>(0 - 1)        | 1<br>(1 - 2)         | 1<br>(1 - 2)         | 1<br>(0 - 1)             |
| Bladder cancer                                | 3<br>(2 - 5)             | --                 | --                  | 1<br>(0 - 1)         | 1<br>(1 - 2)         | 1<br>(1 - 2)             |
| Brain and nervous system cancer               | 49<br>(35 - 67)          | 2<br>(1 - 3)       | 5<br>(3 - 8)        | 20<br>(13 - 29)      | 15<br>(9 - 22)       | 7<br>(5 - 11)            |
| Thyroid cancer                                | 2<br>(1 - 2)             | --                 | 0<br>(0 - 0)        | 1<br>(0 - 1)         | 1<br>(0 - 1)         | 0<br>(0 - 0)             |
| Mesothelioma                                  | 0<br>(0 - 0)             | --                 | --                  | 0<br>(0 - 0)         | 0<br>(0 - 0)         | 0<br>(0 - 0)             |
| Hodgkin lymphoma                              | 9<br>(6 - 14)            | 0<br>(0 - 0)       | 1<br>(0 - 2)        | 6<br>(4 - 10)        | 2<br>(1 - 3)         | 1<br>(0 - 1)             |
| Non-Hodgkin lymphoma                          | 21<br>(14 - 33)          | 1<br>(0 - 1)       | 1<br>(1 - 2)        | 10<br>(6 - 16)       | 6<br>(3 - 9)         | 4<br>(2 - 6)             |
| Multiple myeloma                              | 3<br>(2 - 6)             | --                 | --                  | 1<br>(1 - 2)         | 2<br>(1 - 3)         | 0<br>(0 - 1)             |
| Leukemia                                      | 30<br>(23 - 40)          | 1<br>(1 - 3)       | 4<br>(3 - 6)        | 12<br>(8 - 16)       | 6<br>(4 - 10)        | 6<br>(5 - 10)            |
| Other neoplasms                               | 26<br>(19 - 36)          | 2<br>(1 - 3)       | 4<br>(2 - 6)        | 11<br>(7 - 16)       | 5<br>(3 - 7)         | 6<br>(4 - 8)             |
| Cardiovascular diseases                       | 2,153<br>(1,717 - 2,921) | 47<br>(32 - 72)    | 9<br>(6 - 13)       | 217<br>(148 - 310)   | 629<br>(444 - 896)   | 1,250<br>(1,059 - 1,654) |
| Rheumatic heart disease                       | 28<br>(19 - 41)          | 1<br>(0 - 2)       | 1<br>(0 - 1)        | 11<br>(6 - 17)       | 5<br>(3 - 8)         | 11<br>(7 - 16)           |
| Ischemic heart disease                        | 1,179<br>(913 - 1,619)   | 7<br>(3 - 14)      | 2<br>(1 - 4)        | 133<br>(90 - 197)    | 379<br>(265 - 549)   | 658<br>(528 - 891)       |
| Cerebrovascular disease                       | 770<br>(595 - 1,039)     | 26<br>(17 - 39)    | 4<br>(2 - 6)        | 49<br>(30 - 72)      | 196<br>(129 - 283)   | 495<br>(395 - 661)       |
| Ischemic stroke                               | 176<br>(102 - 252)       | 1<br>(0 - 1)       | 0<br>(0 - 1)        | 5<br>(3 - 9)         | 37<br>(20 - 59)      | 133<br>(76 - 189)        |
| Hemorrhagic stroke                            | 594<br>(457 - 805)       | 25<br>(16 - 39)    | 3<br>(2 - 5)        | 43<br>(27 - 64)      | 160<br>(106 - 231)   | 362<br>(290 - 488)       |
| Hypertensive heart disease                    | 62<br>(16 - 126)         | 0<br>(0 - 0)       | 0<br>(0 - 0)        | 4<br>(1 - 7)         | 19<br>(5 - 39)       | 40<br>(9 - 83)           |
| Cardiomyopathy and myocarditis                | 18<br>(13 - 31)          | 5<br>(2 - 10)      | 1<br>(1 - 2)        | 4<br>(3 - 8)         | 3<br>(2 - 5)         | 5<br>(3 - 8)             |
| Atrial fibrillation and flutter               | 31<br>(21 - 48)          | --                 | --                  | 0<br>(0 - 0)         | 7<br>(4 - 11)        | 24<br>(15 - 38)          |
| Aortic aneurysm                               | 4<br>(2 - 7)             | --                 | --                  | 2<br>(1 - 4)         | 0<br>(0 - 1)         | 1<br>(1 - 3)             |
| Peripheral vascular disease                   | 1<br>(1 - 1)             | --                 | --                  | 0<br>(0 - 0)         | 0<br>(0 - 1)         | 1<br>(0 - 1)             |
| Endocarditis                                  | 12<br>(7 - 19)           | 2<br>(1 - 4)       | 0<br>(0 - 0)        | 3<br>(2 - 5)         | 1<br>(1 - 2)         | 6<br>(3 - 10)            |
| Other cardiovascular and circulatory diseases | 48<br>(18 - 70)          | 6<br>(2 - 12)      | 1<br>(1 - 2)        | 11<br>(5 - 17)       | 19<br>(7 - 30)       | 10<br>(3 - 15)           |
| Chronic respiratory diseases                  | 223<br>(169 - 304)       | 2<br>(1 - 3)       | 2<br>(1 - 3)        | 27<br>(18 - 38)      | 55<br>(36 - 80)      | 138<br>(105 - 188)       |
| Chronic obstructive pulmonary disease         | 121<br>(82 - 176)        | 1<br>(0 - 1)       | 1<br>(0 - 1)        | 13<br>(8 - 19)       | 30<br>(19 - 46)      | 76<br>(51 - 111)         |

Web Table 31- Palestine deaths with 95% UI by age, sex, and cause in 2013

| Cause                                               | Females, All Ages | Females, 0-4 Years | Females, 5-14 Years | Females, 15-49 Years | Females, 50-69 Years | Females, 70-80 Years |
|-----------------------------------------------------|-------------------|--------------------|---------------------|----------------------|----------------------|----------------------|
| Pneumoconiosis                                      | 0<br>(0-0)        | 0<br>(0-0)         | 0<br>(0-0)          | 0<br>(0-0)           | 0<br>(0-0)           | 0<br>(0-0)           |
| Silicosis                                           | 0<br>(0-0)        | 0<br>(0-0)         | 0<br>(0-0)          | 0<br>(0-0)           | 0<br>(0-0)           | 0<br>(0-0)           |
| Asbestosis                                          | 0<br>(0-0)        | 0<br>(0-0)         | 0<br>(0-0)          | 0<br>(0-0)           | 0<br>(0-0)           | 0<br>(0-0)           |
| Coal workers pneumoconiosis                         | 0<br>(0-0)        | 0<br>(0-0)         | 0<br>(0-0)          | 0<br>(0-0)           | 0<br>(0-0)           | 0<br>(0-0)           |
| Other pneumoconiosis                                | 0<br>(0-0)        | 0<br>(0-0)         | 0<br>(0-0)          | 0<br>(0-0)           | 0<br>(0-0)           | 0<br>(0-0)           |
| Asthma                                              | 31<br>(19-48)     | 0<br>(0-1)         | 0<br>(0-1)          | 6<br>(3-9)           | 9<br>(5-15)          | 16<br>(9-25)         |
| Interstitial lung disease and pulmonary sarcoidosis | 61<br>(37-99)     | 0<br>(0-1)         | 0<br>(0-1)          | 6<br>(3-11)          | 14<br>(7-24)         | 40<br>(22-66)        |
| Other chronic respiratory diseases                  | 10<br>(6-15)      | 0<br>(0-1)         | 0<br>(0-0)          | 2<br>(1-3)           | 1<br>(1-2)           | 6<br>(3-10)          |
| Cirrhosis                                           | 72<br>(54-100)    | 4<br>(2-7)         | 3<br>(2-4)          | 20<br>(13-29)        | 24<br>(16-35)        | 21<br>(16-31)        |
| Cirrhosis due to hepatitis B                        | 29<br>(12-49)     | 0<br>(0-1)         | 1<br>(0-1)          | 8<br>(3-15)          | 10<br>(4-19)         | 10<br>(4-17)         |
| Cirrhosis due to hepatitis C                        | 28<br>(12-48)     | 0<br>(0-1)         | 0<br>(0-1)          | 7<br>(3-14)          | 11<br>(3-20)         | 9<br>(3-16)          |
| Cirrhosis due to alcohol use                        | 3<br>(1-6)        | --                 | --                  | 0<br>(0-1)           | 1<br>(0-2)           | 2<br>(1-4)           |
| Cirrhosis due to other causes                       | 13<br>(8-19)      | 3<br>(2-6)         | 2<br>(1-3)          | 4<br>(2-7)           | 2<br>(1-4)           | 1<br>(1-3)           |
| Digestive diseases                                  | 45<br>(34-64)     | 3<br>(2-5)         | 2<br>(1-2)          | 7<br>(5-11)          | 9<br>(6-14)          | 24<br>(17-35)        |
| Peptic ulcer disease                                | 6<br>(4-10)       | 0<br>(0-0)         | 0<br>(0-0)          | 1<br>(0-2)           | 1<br>(1-2)           | 4<br>(2-6)           |
| Gastritis and duodenitis                            | 1<br>(1-2)        | 0<br>(0-0)         | 0<br>(0-0)          | 0<br>(0-1)           | 0<br>(0-1)           | 0<br>(0-0)           |
| Appendicitis                                        | 3<br>(2-5)        | 0<br>(0-1)         | 0<br>(0-0)          | 1<br>(0-1)           | 1<br>(0-2)           | 1<br>(1-2)           |
| Paralytic ileus and intestinal obstruction          | 8<br>(5-14)       | 0<br>(0-0)         | 0<br>(0-0)          | 2<br>(1-3)           | 2<br>(1-3)           | 5<br>(3-9)           |
| Inguinal, femoral, and abdominal hernia             | 1<br>(1-4)        | 0<br>(0-0)         | 0<br>(0-0)          | 0<br>(0-0)           | 0<br>(0-0)           | 1<br>(0-3)           |
| Inflammatory bowel disease                          | 5<br>(3-12)       | 0<br>(0-1)         | 0<br>(0-0)          | 0<br>(0-1)           | 1<br>(0-2)           | 3<br>(2-7)           |
| Vascular intestinal disorders                       | 2<br>(1-5)        | 0<br>(0-0)         | 0<br>(0-0)          | 1<br>(0-2)           | 0<br>(0-1)           | 1<br>(0-2)           |
| Gallbladder and biliary diseases                    | 7<br>(4-11)       | 1<br>(0-2)         | 0<br>(0-1)          | 1<br>(1-2)           | 1<br>(1-3)           | 3<br>(2-5)           |
| Pancreatitis                                        | 4<br>(3-7)        | 0<br>(0-0)         | 0<br>(0-1)          | 1<br>(0-1)           | 2<br>(1-3)           | 2<br>(1-3)           |
| Other digestive diseases                            | 6<br>(4-9)        | 1<br>(0-1)         | 0<br>(0-0)          | 1<br>(0-1)           | 1<br>(0-1)           | 3<br>(2-6)           |
| Neurological disorders                              | 202<br>(158-273)  | 11<br>(7-15)       | 5<br>(3-7)          | 23<br>(15-33)        | 22<br>(14-36)        | 141<br>(107-195)     |
| Alzheimer disease and other dementias               | 157<br>(119-218)  | --                 | --                  | 0<br>(0-0)           | 19<br>(11-31)        | 138<br>(104-192)     |
| Parkinson disease                                   | 0<br>(0-0)        | --                 | --                  | 0<br>(0-0)           | 0<br>(0-0)           | 0<br>(0-0)           |
| Epilepsy                                            | 29<br>(20-43)     | 4<br>(2-7)         | 4<br>(2-6)          | 18<br>(11-27)        | 3<br>(1-5)           | 2<br>(1-3)           |
| Multiple sclerosis                                  | 5<br>(2-8)        | --                 | --                  | 4<br>(2-7)           | 1<br>(0-2)           | 0<br>(0-0)           |
| Other neurological disorders                        | 11<br>(8-14)      | 7<br>(5-11)        | 1<br>(0-1)          | 1<br>(1-2)           | 0<br>(0-0)           | 2<br>(1-2)           |
| Mental and substance use disorders                  | 27<br>(19-38)     | 0<br>(0-1)         | 0<br>(0-0)          | 23<br>(16-32)        | 2<br>(1-4)           | 1<br>(1-2)           |
| Schizophrenia                                       | 0<br>(0-0)        | --                 | --                  | 0<br>(0-0)           | 0<br>(0-0)           | 0<br>(0-0)           |
| Alcohol use disorders                               | 2<br>(1-4)        | --                 | --                  | 1<br>(0-2)           | 1<br>(0-2)           | 0<br>(0-1)           |
| Drug use disorders                                  | 25<br>(17-35)     | 0<br>(0-1)         | --                  | 22<br>(15-31)        | 1<br>(1-2)           | 1<br>(1-1)           |
| Opioid use disorders                                | 13<br>(9-19)      | 0<br>(0-0)         | --                  | 12<br>(8-17)         | 1<br>(0-1)           | 1<br>(0-1)           |
| Cocaine use disorders                               | 1<br>(0-1)        | 0<br>(0-0)         | --                  | 0<br>(0-1)           | 0<br>(0-0)           | 0<br>(0-0)           |
| Amphetamine use disorders                           | 0<br>(0-1)        | 0<br>(0-0)         | --                  | 0<br>(0-1)           | 0<br>(0-0)           | 0<br>(0-0)           |
| Other drug use disorders                            | 10<br>(7-14)      | 0<br>(0-0)         | --                  | 9<br>(6-13)          | 1<br>(0-1)           | 0<br>(0-1)           |
| Eating disorders                                    | 0<br>(0-0)        | --                 | 0<br>(0-0)          | 0<br>(0-0)           | --                   | --                   |
| Anorexia nervosa                                    | 0<br>(0-0)        | --                 | 0<br>(0-0)          | 0<br>(0-0)           | --                   | --                   |

Web Table 31- Palestine deaths with 95% UI by age, sex, and cause in 2013

| Cause                                               | Females, All Ages  | Females, 0-4 Years | Females, 5-14 Years | Females, 15-49 Years | Females, 50-69 Years | Females, 70-80 Years |
|-----------------------------------------------------|--------------------|--------------------|---------------------|----------------------|----------------------|----------------------|
| Diabetes, urogenital, blood, and endocrine diseases | 550<br>(424 - 748) | 43<br>(29 - 64)    | 13<br>(10 - 18)     | 99<br>(70 - 140)     | 169<br>(117 - 244)   | 225<br>(175 - 303)   |
| Diabetes mellitus                                   | 203<br>(152 - 277) | 14<br>(7 - 24)     | 1<br>(1 - 2)        | 15<br>(10 - 22)      | 74<br>(49 - 110)     | 99<br>(74 - 139)     |
| Acute glomerulonephritis                            | 1<br>(1 - 1)       | 0<br>(0 - 0)       | 0<br>(0 - 0)        | 0<br>(0 - 1)         | 0<br>(0 - 0)         | 0<br>(0 - 0)         |
| Chronic kidney disease                              | 287<br>(209 - 402) | 13<br>(8 - 22)     | 8<br>(6 - 11)       | 65<br>(44 - 94)      | 90<br>(58 - 134)     | 110<br>(78 - 159)    |
| Chronic kidney disease due to diabetes mellitus     | 5<br>(3 - 8)       | 0<br>(0 - 0)       | 0<br>(0 - 0)        | 1<br>(1 - 2)         | 2<br>(1 - 4)         | 1<br>(1 - 2)         |
| Chronic kidney disease due to hypertension          | 37<br>(20 - 64)    | 0<br>(0 - 1)       | 0<br>(0 - 1)        | 4<br>(2 - 8)         | 13<br>(6 - 25)       | 18<br>(9 - 32)       |
| Chronic kidney disease due to glomerulonephritis    | 15<br>(9 - 23)     | 0<br>(0 - 1)       | 0<br>(0 - 0)        | 2<br>(1 - 3)         | 5<br>(3 - 9)         | 7<br>(4 - 12)        |
| Chronic kidney disease due to other causes          | 230<br>(162 - 324) | 12<br>(7 - 21)     | 7<br>(5 - 10)       | 58<br>(37 - 85)      | 69<br>(43 - 106)     | 83<br>(54 - 124)     |
| Urinary diseases and male infertility               | 17<br>(12 - 23)    | 2<br>(1 - 3)       | 1<br>(0 - 1)        | 6<br>(4 - 10)        | 3<br>(2 - 4)         | 6<br>(3 - 9)         |
| Interstitial nephritis and urinary tract infections | 14<br>(10 - 20)    | 1<br>(1 - 2)       | 0<br>(0 - 1)        | 6<br>(4 - 9)         | 2<br>(1 - 3)         | 5<br>(3 - 7)         |
| Urolithiasis                                        | 1<br>(0 - 1)       | --                 | 0<br>(0 - 0)        | 0<br>(0 - 0)         | 0<br>(0 - 0)         | 0<br>(0 - 0)         |
| Other urinary diseases                              | 2<br>(1 - 3)       | 0<br>(0 - 1)       | 0<br>(0 - 0)        | 0<br>(0 - 1)         | 0<br>(0 - 1)         | 1<br>(0 - 1)         |
| Gynecological diseases                              | 0<br>(0 - 0)       | --                 | --                  | 0<br>(0 - 0)         | 0<br>(0 - 0)         | 0<br>(0 - 0)         |
| Uterine fibroids                                    | 0<br>(0 - 0)       | --                 | --                  | 0<br>(0 - 0)         | 0<br>(0 - 0)         | 0<br>(0 - 0)         |
| Polycystic ovarian syndrome                         | 0<br>(0 - 0)       | --                 | --                  | 0<br>(0 - 0)         | 0<br>(0 - 0)         | --                   |
| Endometriosis                                       | 0<br>(0 - 0)       | --                 | --                  | 0<br>(0 - 0)         | 0<br>(0 - 0)         | --                   |
| Genital prolapse                                    | 0<br>(0 - 0)       | --                 | --                  | 0<br>(0 - 0)         | 0<br>(0 - 0)         | 0<br>(0 - 0)         |
| Other gynecological diseases                        | 0<br>(0 - 0)       | --                 | --                  | 0<br>(0 - 0)         | 0<br>(0 - 0)         | 0<br>(0 - 0)         |
| Hemoglobinopathies and hemolytic anemias            | 10<br>(7 - 16)     | 3<br>(2 - 5)       | 1<br>(1 - 2)        | 5<br>(3 - 8)         | 0<br>(0 - 0)         | 1<br>(0 - 1)         |
| Thalassemias                                        | 6<br>(4 - 10)      | 2<br>(1 - 4)       | 1<br>(1 - 2)        | 3<br>(2 - 5)         | 0<br>(0 - 0)         | 0<br>(0 - 0)         |
| Sickle cell disorders                               | 2<br>(1 - 3)       | 0<br>(0 - 1)       | 0<br>(0 - 0)        | 1<br>(1 - 2)         | 0<br>(0 - 0)         | 0<br>(0 - 0)         |
| G6PD deficiency                                     | 0<br>(0 - 0)       | 0<br>(0 - 0)       | 0<br>(0 - 0)        | 0<br>(0 - 0)         | 0<br>(0 - 0)         | 0<br>(0 - 0)         |
| Other hemoglobinopathies and hemolytic anemias      | 2<br>(1 - 3)       | 1<br>(0 - 1)       | 0<br>(0 - 0)        | 1<br>(0 - 1)         | 0<br>(0 - 0)         | 1<br>(0 - 1)         |
| Endocrine, metabolic, blood, and immune disorders   | 32<br>(22 - 54)    | 12<br>(6 - 20)     | 2<br>(1 - 3)        | 7<br>(5 - 12)        | 2<br>(1 - 4)         | 9<br>(4 - 19)        |
| Musculoskeletal disorders                           | 26<br>(19 - 37)    | --                 | 2<br>(2 - 4)        | 12<br>(8 - 18)       | 4<br>(3 - 7)         | 7<br>(5 - 11)        |
| Rheumatoid arthritis                                | 3<br>(2 - 4)       | --                 | 1<br>(0 - 1)        | 1<br>(1 - 1)         | 0<br>(0 - 0)         | 1<br>(0 - 2)         |
| Other musculoskeletal disorders                     | 24<br>(17 - 33)    | --                 | 2<br>(1 - 3)        | 11<br>(8 - 16)       | 4<br>(3 - 6)         | 6<br>(4 - 10)        |
| Other non-communicable diseases                     | 619<br>(475 - 839) | 555<br>(424 - 741) | 25<br>(16 - 35)     | 18<br>(12 - 28)      | 2<br>(1 - 3)         | 19<br>(9 - 74)       |
| Congenital anomalies                                | 547<br>(410 - 782) | 489<br>(358 - 677) | 24<br>(16 - 35)     | 17<br>(10 - 27)      | 1<br>(0 - 1)         | 16<br>(7 - 72)       |
| Neural tube defects                                 | 6<br>(2 - 18)      | 6<br>(1 - 18)      | 0<br>(0 - 0)        | 0<br>(0 - 0)         | 0<br>(0 - 0)         | 0<br>(0 - 0)         |
| Congenital heart anomalies                          | 277<br>(190 - 399) | 252<br>(170 - 362) | 10<br>(6 - 16)      | 5<br>(3 - 9)         | 0<br>(0 - 0)         | 9<br>(4 - 41)        |
| Cleft lip and cleft palate                          | 0<br>(0 - 0)       | 0<br>(0 - 0)       | --                  | --                   | --                   | --                   |
| Down syndrome                                       | 11<br>(5 - 23)     | 8<br>(4 - 16)      | 1<br>(0 - 1)        | 1<br>(1 - 2)         | 0<br>(0 - 0)         | 1<br>(0 - 5)         |
| Chromosomal unbalanced rearrangements               | 1<br>(0 - 2)       | 0<br>(0 - 1)       | 0<br>(0 - 0)        | 0<br>(0 - 0)         | 0<br>(0 - 0)         | 0<br>(0 - 1)         |
| Other congenital anomalies                          | 252<br>(175 - 375) | 223<br>(150 - 334) | 13<br>(8 - 20)      | 10<br>(6 - 16)       | 0<br>(0 - 1)         | 6<br>(2 - 26)        |
| Skin and subcutaneous diseases                      | 7<br>(5 - 10)      | 1<br>(1 - 2)       | 1<br>(0 - 1)        | 2<br>(1 - 2)         | 1<br>(1 - 2)         | 3<br>(2 - 4)         |
| Cellulitis                                          | 1<br>(1 - 2)       | 0<br>(0 - 1)       | 0<br>(0 - 0)        | 0<br>(0 - 0)         | 0<br>(0 - 0)         | 1<br>(0 - 1)         |
| Pyoderma                                            | 4<br>(3 - 6)       | 1<br>(0 - 1)       | 0<br>(0 - 1)        | 1<br>(1 - 1)         | 0<br>(0 - 1)         | 2<br>(1 - 3)         |
| Decubitus ulcer                                     | 1<br>(1 - 2)       | 0<br>(0 - 0)       | 0<br>(0 - 0)        | 0<br>(0 - 1)         | 0<br>(0 - 0)         | 0<br>(0 - 1)         |
| Other skin and subcutaneous diseases                | 0<br>(0 - 0)       | 0<br>(0 - 0)       | 0<br>(0 - 0)        | 0<br>(0 - 0)         | 0<br>(0 - 0)         | 0<br>(0 - 0)         |

Web Table 31- Palestine deaths with 95% UI by age, sex, and cause in 2013

| Cause                                           | Females, All Ages  | Females, 0-4 Years | Females, 5-14 Years | Females, 15-49 Years | Females, 50-69 Years | Females, 70-80 Years |
|-------------------------------------------------|--------------------|--------------------|---------------------|----------------------|----------------------|----------------------|
| Sudden infant death syndrome                    | 64<br>(13 - 149)   | 64<br>(13 - 149)   | -                   | -                    | -                    | -                    |
| Injuries                                        | 261<br>(209 - 326) | 76<br>(53 - 107)   | 31<br>(23 - 40)     | 87<br>(63 - 119)     | 32<br>(22 - 46)      | 35<br>(27 - 47)      |
| Transport injuries                              | 90<br>(69 - 117)   | 28<br>(17 - 42)    | 15<br>(10 - 22)     | 27<br>(18 - 40)      | 12<br>(7 - 17)       | 8<br>(6 - 12)        |
| Road injuries                                   | 83<br>(63 - 108)   | 26<br>(16 - 40)    | 15<br>(10 - 21)     | 25<br>(17 - 37)      | 10<br>(7 - 15)       | 7<br>(4 - 10)        |
| Pedestrian road injuries                        | 12<br>(8 - 17)     | 4<br>(2 - 7)       | 1<br>(1 - 2)        | 3<br>(1 - 4)         | 2<br>(1 - 3)         | 2<br>(1 - 3)         |
| Cyclist road injuries                           | 3<br>(2 - 4)       | 0<br>(0 - 1)       | 0<br>(0 - 1)        | 1<br>(0 - 1)         | 1<br>(0 - 1)         | 0<br>(0 - 1)         |
| Motorcyclist road injuries                      | 3<br>(2 - 5)       | 0<br>(0 - 1)       | 0<br>(0 - 0)        | 2<br>(1 - 3)         | 0<br>(0 - 1)         | 0<br>(0 - 1)         |
| Motor vehicle road injuries                     | 64<br>(48 - 84)    | 21<br>(12 - 33)    | 13<br>(8 - 18)      | 19<br>(13 - 29)      | 7<br>(5 - 11)        | 4<br>(3 - 6)         |
| Other road injuries                             | 1<br>(1 - 2)       | 0<br>(0 - 1)       | 0<br>(0 - 0)        | 0<br>(0 - 0)         | 0<br>(0 - 0)         | 0<br>(0 - 0)         |
| Other transport injuries                        | 7<br>(5 - 10)      | 2<br>(1 - 3)       | 1<br>(0 - 1)        | 2<br>(1 - 3)         | 1<br>(1 - 2)         | 2<br>(1 - 3)         |
| Unintentional injuries                          | 126<br>(99 - 166)  | 46<br>(31 - 69)    | 13<br>(10 - 16)     | 33<br>(23 - 46)      | 13<br>(9 - 19)       | 22<br>(17 - 30)      |
| Falls                                           | 22<br>(16 - 30)    | 6<br>(3 - 11)      | 3<br>(2 - 5)        | 4<br>(3 - 6)         | 3<br>(2 - 4)         | 6<br>(4 - 9)         |
| Drowning                                        | 22<br>(16 - 37)    | 9<br>(5 - 16)      | 3<br>(2 - 5)        | 8<br>(5 - 13)        | 1<br>(0 - 1)         | 2<br>(1 - 5)         |
| Fire, heat, and hot substances                  | 14<br>(10 - 21)    | 3<br>(2 - 6)       | 1<br>(1 - 2)        | 4<br>(2 - 6)         | 2<br>(1 - 3)         | 4<br>(2 - 6)         |
| Poisonings                                      | 4<br>(2 - 6)       | 1<br>(0 - 1)       | 1<br>(0 - 1)        | 2<br>(1 - 3)         | 0<br>(0 - 0)         | 0<br>(0 - 1)         |
| Exposure to mechanical forces                   | 9<br>(7 - 13)      | 4<br>(2 - 6)       | 1<br>(1 - 2)        | 2<br>(1 - 2)         | 1<br>(1 - 2)         | 2<br>(1 - 3)         |
| Unintentional firearm injuries                  | 1<br>(1 - 1)       | 0<br>(0 - 0)       | 0<br>(0 - 0)        | 0<br>(0 - 0)         | 0<br>(0 - 0)         | 0<br>(0 - 0)         |
| Unintentional suffocation                       | 1<br>(1 - 3)       | 1<br>(0 - 2)       | 0<br>(0 - 0)        | 0<br>(0 - 1)         | 0<br>(0 - 0)         | 0<br>(0 - 0)         |
| Other exposure to mechanical forces             | 7<br>(5 - 10)      | 3<br>(2 - 5)       | 1<br>(1 - 1)        | 1<br>(1 - 2)         | 1<br>(1 - 2)         | 1<br>(1 - 2)         |
| Adverse effects of medical treatment            | 29<br>(20 - 45)    | 11<br>(5 - 22)     | 2<br>(1 - 3)        | 6<br>(3 - 9)         | 5<br>(3 - 8)         | 6<br>(3 - 10)        |
| Animal contact                                  | 3<br>(1 - 6)       | 1<br>(1 - 3)       | 0<br>(0 - 0)        | 1<br>(0 - 2)         | 0<br>(0 - 0)         | 0<br>(0 - 1)         |
| Venomous animal contact                         | 1<br>(1 - 3)       | 1<br>(0 - 2)       | 0<br>(0 - 0)        | 0<br>(0 - 1)         | 0<br>(0 - 0)         | 0<br>(0 - 0)         |
| Non-venomous animal contact                     | 1<br>(1 - 3)       | 0<br>(0 - 1)       | 0<br>(0 - 0)        | 0<br>(0 - 1)         | 0<br>(0 - 0)         | 0<br>(0 - 1)         |
| Foreign body                                    | 13<br>(8 - 25)     | 8<br>(4 - 17)      | 2<br>(1 - 3)        | 2<br>(1 - 4)         | 1<br>(0 - 1)         | 1<br>(0 - 1)         |
| Pulmonary aspiration and foreign body in airway | 13<br>(8 - 25)     | 8<br>(4 - 16)      | 2<br>(1 - 2)        | 2<br>(1 - 4)         | 1<br>(0 - 1)         | 1<br>(0 - 1)         |
| Foreign body in other body part                 | 0<br>(0 - 1)       | 0<br>(0 - 0)       | 0<br>(0 - 0)        | 0<br>(0 - 0)         | 0<br>(0 - 0)         | 0<br>(0 - 0)         |
| Other unintentional injuries                    | 9<br>(7 - 13)      | 2<br>(1 - 4)       | 0<br>(0 - 1)        | 5<br>(3 - 7)         | 1<br>(1 - 2)         | 1<br>(1 - 2)         |
| Self-harm and interpersonal violence            | 41<br>(28 - 57)    | 3<br>(1 - 5)       | 3<br>(2 - 4)        | 26<br>(17 - 38)      | 6<br>(4 - 9)         | 3<br>(2 - 6)         |
| Self-harm                                       | 24<br>(15 - 35)    | -                  | 1<br>(0 - 2)        | 16<br>(9 - 24)       | 4<br>(3 - 7)         | 3<br>(1 - 4)         |
| Interpersonal violence                          | 17<br>(11 - 24)    | 3<br>(1 - 5)       | 2<br>(1 - 3)        | 10<br>(6 - 15)       | 2<br>(1 - 3)         | 1<br>(0 - 2)         |
| Assault by firearm                              | 4<br>(2 - 6)       | 0<br>(0 - 1)       | 0<br>(0 - 1)        | 3<br>(1 - 4)         | 0<br>(0 - 1)         | 0<br>(0 - 0)         |
| Assault by sharp object                         | 7<br>(4 - 11)      | 1<br>(0 - 1)       | 0<br>(0 - 1)        | 6<br>(3 - 9)         | 0<br>(0 - 1)         | 0<br>(0 - 0)         |
| Assault by other means                          | 6<br>(3 - 8)       | 1<br>(1 - 3)       | 1<br>(0 - 2)        | 2<br>(1 - 3)         | 1<br>(0 - 1)         | 1<br>(0 - 1)         |
| Forces of nature, war, and legal intervention   | 3<br>(3 - 5)       | 0<br>(0 - 0)       | 0<br>(0 - 0)        | 1<br>(1 - 2)         | 1<br>(1 - 2)         | 1<br>(0 - 1)         |
| Exposure to forces of nature                    | 3<br>(3 - 5)       | 0<br>(0 - 0)       | 0<br>(0 - 0)        | 1<br>(1 - 2)         | 1<br>(1 - 2)         | 1<br>(0 - 1)         |

Web Table 31- Panama deaths with 95% UI by age, sex, and cause in 2013

| Cause                                                             | Both Sexes, All Ages        | Both Sexes, 0-4 Years    | Both Sexes, 5-14 Years | Both Sexes, 15-49 Years  | Both Sexes, 50-69 Years  | Both Sexes, 70-80 Years    |
|-------------------------------------------------------------------|-----------------------------|--------------------------|------------------------|--------------------------|--------------------------|----------------------------|
| All causes                                                        | 19,391<br>(17,853 - 21,070) | 1,402<br>(1,275 - 1,549) | 247<br>(230 - 266)     | 3,246<br>(2,843 - 3,702) | 3,954<br>(3,493 - 4,479) | 10,542<br>(9,901 - 11,281) |
| Communicable, maternal, neonatal, and nutritional diseases        | 2,552<br>(2,307 - 2,822)    | 787<br>(695 - 876)       | 56<br>(47 - 65)        | 509<br>(430 - 639)       | 327<br>(282 - 378)       | 872<br>(709 - 1,032)       |
| HIV/AIDS and tuberculosis                                         | 561<br>(455 - 731)          | 8<br>(6 - 11)            | 4<br>(3 - 5)           | 307<br>(231 - 439)       | 158<br>(125 - 201)       | 84<br>(68 - 101)           |
| Tuberculosis                                                      | 221<br>(178 - 257)          | 8<br>(6 - 11)            | 4<br>(3 - 4)           | 75<br>(59 - 91)          | 63<br>(49 - 79)          | 71<br>(56 - 86)            |
| HIV/AIDS                                                          | 340<br>(233 - 505)          | 1<br>(0 - 1)             | 0<br>(0 - 1)           | 232<br>(154 - 369)       | 94<br>(66 - 135)         | 13<br>(7 - 21)             |
| HIV/AIDS resulting in mycobacterial infection                     | 21<br>(14 - 33)             | 0<br>(0 - 0)             | 0<br>(0 - 0)           | 14<br>(9 - 23)           | 6<br>(4 - 9)             | 1<br>(0 - 1)               |
| HIV/AIDS resulting in other diseases                              | 319<br>(219 - 475)          | 0<br>(0 - 1)             | 0<br>(0 - 1)           | 218<br>(145 - 345)       | 88<br>(61 - 125)         | 12<br>(7 - 19)             |
| Diarrhea, lower respiratory, and other common infectious diseases | 1,259<br>(1,033 - 1,454)    | 281<br>(234 - 329)       | 40<br>(32 - 49)        | 124<br>(99 - 150)        | 140<br>(105 - 173)       | 674<br>(512 - 830)         |
| Diarrheal diseases                                                | 207<br>(167 - 252)          | 89<br>(62 - 118)         | 10<br>(7 - 14)         | 24<br>(18 - 30)          | 21<br>(16 - 28)          | 64<br>(45 - 91)            |
| Intestinal infectious diseases                                    | 38<br>(19 - 67)             | 12<br>(6 - 21)           | 11<br>(5 - 19)         | 12<br>(5 - 23)           | 2<br>(1 - 4)             | 1<br>(0 - 2)               |
| Typhoid fever                                                     | 29<br>(14 - 53)             | 9<br>(4 - 16)            | 9<br>(4 - 15)          | 9<br>(4 - 18)            | 1<br>(1 - 3)             | 1<br>(0 - 1)               |
| Paratyphoid fever                                                 | 8<br>(4 - 15)               | 3<br>(1 - 5)             | 2<br>(1 - 4)           | 2<br>(1 - 5)             | 0<br>(0 - 1)             | 0<br>(0 - 0)               |
| Other intestinal infectious diseases                              | 1<br>(0 - 4)                | 0<br>(0 - 3)             | 0<br>(0 - 1)           | 0<br>(0 - 2)             | 0<br>(0 - 1)             | 0<br>(0 - 1)               |
| Lower respiratory infections                                      | 917<br>(707 - 1,102)        | 138<br>(107 - 173)       | 11<br>(8 - 14)         | 68<br>(49 - 85)          | 105<br>(73 - 136)        | 595<br>(435 - 747)         |
| Upper respiratory infections                                      | 1<br>(0 - 1)                | 0<br>(0 - 0)             | 0<br>(0 - 0)           | 0<br>(0 - 0)             | 0<br>(0 - 0)             | 0<br>(0 - 1)               |
| Otitis media                                                      | 1<br>(1 - 1)                | 0<br>(0 - 0)             | 0<br>(0 - 0)           | 0<br>(0 - 0)             | 0<br>(0 - 0)             | 0<br>(0 - 0)               |
| Meningitis                                                        | 61<br>(52 - 72)             | 25<br>(18 - 34)          | 4<br>(3 - 5)           | 14<br>(11 - 17)          | 8<br>(6 - 10)            | 10<br>(8 - 13)             |
| Pneumococcal meningitis                                           | 20<br>(17 - 24)             | 7<br>(5 - 10)            | 2<br>(1 - 2)           | 5<br>(4 - 7)             | 3<br>(2 - 4)             | 4<br>(3 - 5)               |
| H influenzae type B meningitis                                    | 13<br>(10 - 16)             | 9<br>(6 - 13)            | 1<br>(1 - 1)           | 1<br>(1 - 2)             | 1<br>(0 - 1)             | 1<br>(1 - 1)               |
| Meningococcal meningitis                                          | 7<br>(6 - 9)                | 2<br>(2 - 4)             | 1<br>(0 - 1)           | 2<br>(1 - 2)             | 1<br>(1 - 1)             | 1<br>(1 - 2)               |
| Other meningitis                                                  | 21<br>(17 - 27)             | 7<br>(4 - 9)             | 1<br>(1 - 2)           | 6<br>(4 - 8)             | 4<br>(3 - 5)             | 4<br>(3 - 6)               |
| Encephalitis                                                      | 20<br>(15 - 28)             | 7<br>(4 - 12)            | 3<br>(2 - 6)           | 5<br>(4 - 7)             | 3<br>(2 - 4)             | 2<br>(1 - 2)               |
| Diphtheria                                                        | 0<br>(0 - 2)                | 0<br>(0 - 2)             | 0<br>(0 - 0)           | 0<br>(0 - 0)             | 0<br>(0 - 0)             | --<br>(0 - 0)              |
| Whooping cough                                                    | 11<br>(5 - 26)              | 10<br>(3 - 25)           | 1<br>(0 - 1)           | 0<br>(0 - 1)             | 0<br>(0 - 0)             | --<br>(0 - 0)              |
| Tetanus                                                           | 1<br>(1 - 1)                | 0<br>(0 - 0)             | 0<br>(0 - 0)           | 0<br>(0 - 0)             | 0<br>(0 - 0)             | 0<br>(0 - 0)               |
| Measles                                                           | 0<br>(0 - 0)                | 0<br>(0 - 0)             | 0<br>(0 - 0)           | 0<br>(0 - 0)             | 0<br>(0 - 0)             | --<br>(0 - 0)              |
| Varicella and herpes zoster                                       | 2<br>(1 - 5)                | 0<br>(0 - 1)             | 0<br>(0 - 0)           | 0<br>(0 - 1)             | 0<br>(0 - 1)             | 1<br>(0 - 4)               |
| Neglected tropical diseases and malaria                           | 17<br>(13 - 28)             | 5<br>(3 - 11)            | 2<br>(1 - 3)           | 4<br>(3 - 7)             | 3<br>(2 - 6)             | 3<br>(2 - 7)               |
| Malaria                                                           | 1<br>(0 - 1)                | 0<br>(0 - 0)             | 0<br>(0 - 0)           | 0<br>(0 - 1)             | 0<br>(0 - 0)             | 0<br>(0 - 0)               |
| Chagas disease                                                    | 3<br>(1 - 10)               | 0<br>(0 - 0)             | 0<br>(0 - 0)           | 1<br>(0 - 3)             | 1<br>(0 - 4)             | 1<br>(0 - 4)               |
| Leishmaniasis                                                     | 2<br>(1 - 3)                | 0<br>(0 - 1)             | 0<br>(0 - 0)           | 1<br>(0 - 1)             | 0<br>(0 - 1)             | 0<br>(0 - 0)               |
| Visceral leishmaniasis                                            | 2<br>(1 - 3)                | 0<br>(0 - 1)             | 0<br>(0 - 0)           | 1<br>(0 - 1)             | 0<br>(0 - 1)             | 0<br>(0 - 0)               |
| Cysticercosis                                                     | 1<br>(1 - 1)                | 0<br>(0 - 0)             | 0<br>(0 - 0)           | 1<br>(0 - 1)             | 0<br>(0 - 0)             | 0<br>(0 - 0)               |
| Cystic echinococcosis                                             | 0<br>(0 - 0)                | 0<br>(0 - 0)             | 0<br>(0 - 0)           | 0<br>(0 - 0)             | 0<br>(0 - 0)             | 0<br>(0 - 0)               |
| Dengue                                                            | 4<br>(3 - 6)                | 1<br>(1 - 2)             | 0<br>(0 - 1)           | 1<br>(1 - 1)             | 1<br>(0 - 1)             | 1<br>(1 - 2)               |
| Yellow fever                                                      | 0<br>(0 - 0)                | 0<br>(0 - 0)             | 0<br>(0 - 0)           | 0<br>(0 - 0)             | 0<br>(0 - 0)             | 0<br>(0 - 0)               |
| Rabies                                                            | 0<br>(0 - 0)                | 0<br>(0 - 0)             | 0<br>(0 - 0)           | 0<br>(0 - 0)             | 0<br>(0 - 0)             | 0<br>(0 - 0)               |
| Intestinal nematode infections                                    | 1<br>(0 - 7)                | 1<br>(0 - 6)             | 0<br>(0 - 2)           | 0<br>(0 - 2)             | 0<br>(0 - 1)             | 0<br>(0 - 1)               |
| Ascariasis                                                        | 1<br>(0 - 7)                | 1<br>(0 - 6)             | 0<br>(0 - 2)           | 0<br>(0 - 2)             | 0<br>(0 - 1)             | 0<br>(0 - 1)               |
| Other neglected tropical diseases                                 | 5<br>(4 - 8)                | 3<br>(2 - 5)             | 1<br>(0 - 1)           | 1<br>(0 - 1)             | 0<br>(0 - 1)             | 1<br>(0 - 1)               |



Web Table 31- Panama deaths with 95% UI by age, sex, and cause in 2013

| Cause                                                            | Both Sexes, All Ages        | Both Sexes, 0-4 Years | Both Sexes, 5-14 Years | Both Sexes, 15-49 Years  | Both Sexes, 50-69 Years  | Both Sexes, 70-80 Years  |
|------------------------------------------------------------------|-----------------------------|-----------------------|------------------------|--------------------------|--------------------------|--------------------------|
| Maternal disorders                                               | 42<br>(31 - 56)             | --                    | 0<br>(0 - 1)           | 42<br>(31 - 56)          | --                       | --                       |
| Maternal hemorrhage                                              | 6<br>(4 - 9)                | --                    | 0<br>(0 - 0)           | 6<br>(4 - 9)             | --                       | --                       |
| Maternal sepsis and other maternal infections                    | 4<br>(3 - 6)                | --                    | 0<br>(0 - 0)           | 4<br>(3 - 6)             | --                       | --                       |
| Maternal hypertensive disorders                                  | 7<br>(5 - 10)               | --                    | 0<br>(0 - 0)           | 7<br>(4 - 10)            | --                       | --                       |
| Maternal obstructed labor                                        | 3<br>(2 - 5)                | --                    | 0<br>(0 - 0)           | 3<br>(2 - 5)             | --                       | --                       |
| Maternal abortive outcome                                        | 6<br>(4 - 9)                | --                    | 0<br>(0 - 0)           | 6<br>(4 - 9)             | --                       | --                       |
| Indirect maternal deaths                                         | 6<br>(4 - 9)                | --                    | 0<br>(0 - 0)           | 6<br>(4 - 9)             | --                       | --                       |
| Late maternal deaths                                             | 3<br>(2 - 5)                | --                    | 0<br>(0 - 0)           | 3<br>(2 - 5)             | --                       | --                       |
| Maternal deaths aggravated by HIV/AIDS                           | 0<br>(0 - 0)                | --                    | --                     | 0<br>(0 - 0)             | --                       | --                       |
| Other maternal disorders                                         | 6<br>(4 - 9)                | --                    | 0<br>(0 - 0)           | 6<br>(4 - 9)             | --                       | --                       |
| Neonatal disorders                                               | 396<br>(333 - 466)          | 396<br>(333 - 466)    | --                     | --                       | --                       | --                       |
| Neonatal preterm birth complications                             | 178<br>(133 - 227)          | 178<br>(133 - 227)    | --                     | --                       | --                       | --                       |
| Neonatal encephalopathy due to birth asphyxia and trauma         | 91<br>(66 - 123)            | 91<br>(66 - 123)      | --                     | --                       | --                       | --                       |
| Neonatal sepsis and other neonatal infections                    | 82<br>(49 - 124)            | 82<br>(49 - 124)      | --                     | --                       | --                       | --                       |
| Hemolytic disease and other neonatal jaundice                    | 1<br>(0 - 2)                | 1<br>(0 - 2)          | --                     | --                       | --                       | --                       |
| Other neonatal disorders                                         | 44<br>(29 - 62)             | 44<br>(29 - 62)       | --                     | --                       | --                       | --                       |
| Nutritional deficiencies                                         | 235<br>(191 - 307)          | 81<br>(60 - 108)      | 8<br>(6 - 11)          | 22<br>(17 - 30)          | 21<br>(16 - 30)          | 102<br>(77 - 139)        |
| Protein-energy malnutrition                                      | 168<br>(122 - 218)          | 74<br>(52 - 99)       | 6<br>(4 - 8)           | 12<br>(7 - 16)           | 12<br>(7 - 16)           | 64<br>(40 - 90)          |
| Iodine deficiency                                                | 0<br>(0 - 1)                | 0<br>(0 - 0)          | 0<br>(0 - 0)           | 0<br>(0 - 0)             | 0<br>(0 - 0)             | 0<br>(0 - 0)             |
| Iron-deficiency anemia                                           | 46<br>(29 - 82)             | 5<br>(2 - 12)         | 1<br>(1 - 2)           | 8<br>(5 - 13)            | 6<br>(4 - 10)            | 27<br>(15 - 48)          |
| Other nutritional deficiencies                                   | 20<br>(13 - 42)             | 3<br>(1 - 7)          | 1<br>(0 - 1)           | 3<br>(2 - 5)             | 3<br>(2 - 6)             | 11<br>(6 - 23)           |
| Other communicable, maternal, neonatal, and nutritional diseases | 41<br>(29 - 58)             | 15<br>(6 - 29)        | 2<br>(2 - 4)           | 9<br>(7 - 11)            | 6<br>(4 - 7)             | 10<br>(7 - 13)           |
| Sexually transmitted diseases excluding HIV                      | 11<br>(2 - 25)              | 8<br>(0 - 22)         | 1<br>(0 - 2)           | 0<br>(0 - 1)             | 0<br>(0 - 1)             | 1<br>(0 - 2)             |
| Syphilis                                                         | 10<br>(1 - 25)              | 8<br>(0 - 22)         | 1<br>(0 - 2)           | 0<br>(0 - 0)             | 0<br>(0 - 1)             | 1<br>(0 - 1)             |
| Chlamydial infection                                             | 0<br>(0 - 0)                | --                    | 0<br>(0 - 0)           | 0<br>(0 - 0)             | 0<br>(0 - 0)             | 0<br>(0 - 0)             |
| Gonococcal infection                                             | 0<br>(0 - 0)                | --                    | 0<br>(0 - 0)           | 0<br>(0 - 0)             | 0<br>(0 - 0)             | 0<br>(0 - 0)             |
| Other sexually transmitted diseases                              | 0<br>(0 - 0)                | --                    | 0<br>(0 - 0)           | 0<br>(0 - 0)             | 0<br>(0 - 0)             | 0<br>(0 - 0)             |
| Hepatitis                                                        | 7<br>(5 - 8)                | 1<br>(0 - 1)          | 0<br>(0 - 1)           | 3<br>(2 - 4)             | 2<br>(1 - 2)             | 1<br>(1 - 2)             |
| Acute hepatitis A                                                | 2<br>(1 - 4)                | 0<br>(0 - 1)          | 0<br>(0 - 0)           | 1<br>(0 - 2)             | 0<br>(0 - 1)             | 0<br>(0 - 0)             |
| Acute hepatitis B                                                | 3<br>(2 - 4)                | 0<br>(0 - 0)          | 0<br>(0 - 0)           | 1<br>(0 - 2)             | 1<br>(0 - 1)             | 1<br>(0 - 1)             |
| Acute hepatitis C                                                | 1<br>(0 - 3)                | --                    | 0<br>(0 - 0)           | 1<br>(0 - 1)             | 0<br>(0 - 1)             | 0<br>(0 - 1)             |
| Other infectious diseases                                        | 24<br>(18 - 29)             | 6<br>(4 - 8)          | 1<br>(1 - 2)           | 5<br>(4 - 7)             | 4<br>(3 - 5)             | 8<br>(5 - 11)            |
| Non-communicable diseases                                        | 14,473<br>(13,332 - 15,756) | 487<br>(423 - 557)    | 99<br>(89 - 109)       | 1,297<br>(1,105 - 1,508) | 3,281<br>(2,886 - 3,742) | 9,309<br>(8,742 - 9,972) |
| Neoplasms                                                        | 3,359<br>(3,000 - 3,768)    | 28<br>(22 - 35)       | 36<br>(30 - 40)        | 459<br>(388 - 535)       | 1,065<br>(930 - 1,225)   | 1,771<br>(1,583 - 1,992) |
| Esophageal cancer                                                | 61<br>(45 - 76)             | --                    | --                     | 4<br>(3 - 5)             | 22<br>(16 - 28)          | 35<br>(25 - 45)          |
| Stomach cancer                                                   | 400<br>(345 - 461)          | --                    | --                     | 43<br>(36 - 52)          | 129<br>(107 - 152)       | 228<br>(196 - 267)       |
| Liver cancer                                                     | 156<br>(133 - 180)          | --                    | 1<br>(1 - 1)           | 17<br>(14 - 20)          | 53<br>(44 - 63)          | 85<br>(70 - 102)         |
| Liver cancer due to hepatitis B                                  | 28<br>(16 - 45)             | --                    | 0<br>(0 - 0)           | 5<br>(2 - 8)             | 11<br>(6 - 19)           | 12<br>(7 - 20)           |
| Liver cancer due to hepatitis C                                  | 79<br>(57 - 101)            | --                    | 0<br>(0 - 0)           | 7<br>(5 - 11)            | 27<br>(18 - 37)          | 44<br>(31 - 58)          |
| Liver cancer due to alcohol use                                  | 37<br>(25 - 50)             | --                    | --                     | 2<br>(1 - 3)             | 11<br>(7 - 14)           | 24<br>(16 - 33)          |

Web Table 31- Panama deaths with 95% UI by age, sex, and cause in 2013

| Cause                                         | Both Sexes, All Ages     | Both Sexes, 0-4 Years | Both Sexes, 5-14 Years | Both Sexes, 15-49 Years | Both Sexes, 50-69 Years | Both Sexes, 70-80 Years  |
|-----------------------------------------------|--------------------------|-----------------------|------------------------|-------------------------|-------------------------|--------------------------|
| Liver cancer due to other causes              | 12<br>(8 - 17)           | --                    | 0<br>(0 - 0)           | 2<br>(2 - 3)            | 4<br>(3 - 6)            | 5<br>(3 - 9)             |
| Larynx cancer                                 | 35<br>(26 - 47)          | --                    | --                     | 3<br>(2 - 4)            | 14<br>(10 - 19)         | 18<br>(13 - 24)          |
| Tracheal, bronchus and lung cancer            | 377<br>(330 - 439)       | --                    | --                     | 26<br>(22 - 32)         | 141<br>(116 - 170)      | 210<br>(182 - 245)       |
| Breast cancer                                 | 223<br>(182 - 272)       | --                    | --                     | 57<br>(44 - 75)         | 92<br>(72 - 115)        | 74<br>(59 - 92)          |
| Cervical cancer                               | 183<br>(145 - 237)       | --                    | --                     | 57<br>(43 - 78)         | 64<br>(48 - 86)         | 62<br>(48 - 82)          |
| Uterine cancer                                | 29<br>(17 - 38)          | --                    | --                     | 2<br>(1 - 3)            | 11<br>(7 - 15)          | 16<br>(9 - 21)           |
| Prostate cancer                               | 424<br>(273 - 663)       | --                    | --                     | 2<br>(1 - 3)            | 68<br>(43 - 102)        | 354<br>(225 - 558)       |
| Colon and rectum cancer                       | 321<br>(281 - 365)       | --                    | --                     | 31<br>(26 - 37)         | 104<br>(89 - 122)       | 186<br>(160 - 214)       |
| Lip and oral cavity cancer                    | 45<br>(36 - 61)          | --                    | --                     | 4<br>(3 - 6)            | 14<br>(11 - 20)         | 26<br>(21 - 36)          |
| Nasopharynx cancer                            | 10<br>(9 - 15)           | --                    | 0<br>(0 - 0)           | 3<br>(2 - 4)            | 4<br>(3 - 5)            | 4<br>(3 - 5)             |
| Other pharynx cancer                          | 21<br>(18 - 26)          | --                    | --                     | 2<br>(2 - 3)            | 9<br>(7 - 12)           | 10<br>(8 - 12)           |
| Gallbladder and biliary tract cancer          | 49<br>(34 - 84)          | --                    | --                     | 3<br>(2 - 5)            | 17<br>(11 - 28)         | 29<br>(20 - 51)          |
| Pancreatic cancer                             | 144<br>(125 - 165)       | --                    | --                     | 10<br>(8 - 12)          | 52<br>(43 - 62)         | 82<br>(69 - 96)          |
| Malignant skin melanoma                       | 24<br>(18 - 38)          | --                    | --                     | 5<br>(4 - 8)            | 8<br>(6 - 12)           | 11<br>(8 - 19)           |
| Non-melanoma skin cancer                      | 20<br>(15 - 27)          | --                    | --                     | 2<br>(1 - 3)            | 4<br>(3 - 6)            | 14<br>(10 - 18)          |
| Ovarian cancer                                | 68<br>(56 - 84)          | --                    | --                     | 13<br>(10 - 17)         | 26<br>(21 - 34)         | 29<br>(23 - 36)          |
| Testicular cancer                             | 4<br>(1 - 6)             | --                    | --                     | 3<br>(1 - 5)            | 1<br>(0 - 1)            | 0<br>(0 - 1)             |
| Kidney cancer                                 | 59<br>(50 - 69)          | 1<br>(1 - 1)          | 0<br>(0 - 1)           | 8<br>(6 - 9)            | 25<br>(21 - 30)         | 25<br>(21 - 30)          |
| Bladder cancer                                | 41<br>(34 - 52)          | --                    | --                     | 2<br>(1 - 2)            | 10<br>(8 - 13)          | 29<br>(24 - 37)          |
| Brain and nervous system cancer               | 96<br>(46 - 121)         | 5<br>(2 - 8)          | 7<br>(3 - 9)           | 29<br>(14 - 39)         | 30<br>(14 - 40)         | 25<br>(12 - 32)          |
| Thyroid cancer                                | 19<br>(16 - 24)          | --                    | 0<br>(0 - 0)           | 2<br>(2 - 3)            | 7<br>(5 - 9)            | 10<br>(8 - 13)           |
| Mesothelioma                                  | 3<br>(2 - 3)             | --                    | --                     | 1<br>(0 - 1)            | 1<br>(1 - 1)            | 1<br>(1 - 2)             |
| Hodgkin lymphoma                              | 7<br>(3 - 10)            | 1<br>(0 - 1)          | 1<br>(0 - 1)           | 2<br>(1 - 3)            | 2<br>(0 - 2)            | 2<br>(1 - 3)             |
| Non-Hodgkin lymphoma                          | 123<br>(94 - 152)        | 3<br>(2 - 5)          | 3<br>(2 - 4)           | 23<br>(17 - 29)         | 41<br>(30 - 53)         | 53<br>(37 - 66)          |
| Multiple myeloma                              | 54<br>(43 - 66)          | --                    | --                     | 5<br>(4 - 6)            | 23<br>(17 - 29)         | 26<br>(20 - 33)          |
| Leukemia                                      | 157<br>(138 - 178)       | 10<br>(7 - 13)        | 15<br>(12 - 17)        | 52<br>(44 - 62)         | 34<br>(29 - 41)         | 46<br>(39 - 54)          |
| Other neoplasms                               | 204<br>(170 - 247)       | 8<br>(5 - 12)         | 9<br>(7 - 12)          | 48<br>(39 - 60)         | 59<br>(47 - 75)         | 81<br>(62 - 104)         |
| Cardiovascular diseases                       | 5,550<br>(5,036 - 6,131) | 11<br>(9 - 13)        | 8<br>(7 - 10)          | 344<br>(286 - 410)      | 1,127<br>(972 - 1,307)  | 4,061<br>(3,699 - 4,479) |
| Rheumatic heart disease                       | 41<br>(30 - 51)          | 0<br>(0 - 1)          | 1<br>(1 - 2)           | 18<br>(12 - 23)         | 11<br>(8 - 14)          | 10<br>(6 - 14)           |
| Ischemic heart disease                        | 2,696<br>(2,371 - 3,211) | 1<br>(0 - 1)          | 1<br>(1 - 1)           | 140<br>(113 - 175)      | 589<br>(498 - 698)      | 1,965<br>(1,726 - 2,409) |
| Cerebrovascular disease                       | 2,167<br>(1,877 - 2,488) | 3<br>(2 - 4)          | 3<br>(2 - 3)           | 108<br>(87 - 135)       | 384<br>(317 - 466)      | 1,669<br>(1,431 - 1,911) |
| Ischemic stroke                               | 678<br>(443 - 1,188)     | 0<br>(0 - 1)          | 0<br>(0 - 1)           | 19<br>(12 - 35)         | 102<br>(68 - 177)       | 556<br>(354 - 983)       |
| Hemorrhagic stroke                            | 1,489<br>(954 - 1,845)   | 2<br>(2 - 3)          | 2<br>(2 - 3)           | 89<br>(67 - 113)        | 281<br>(203 - 354)      | 1,113<br>(670 - 1,392)   |
| Hypertensive heart disease                    | 153<br>(90 - 214)        | 0<br>(0 - 0)          | 0<br>(0 - 0)           | 7<br>(5 - 10)           | 30<br>(19 - 42)         | 115<br>(64 - 165)        |
| Cardiomyopathy and myocarditis                | 132<br>(102 - 161)       | 3<br>(3 - 5)          | 1<br>(1 - 2)           | 30<br>(23 - 38)         | 33<br>(24 - 42)         | 64<br>(46 - 83)          |
| Atrial fibrillation and flutter               | 18<br>(13 - 25)          | --                    | --                     | 0<br>(0 - 0)            | 2<br>(1 - 2)            | 16<br>(11 - 22)          |
| Aortic aneurysm                               | 77<br>(62 - 98)          | --                    | --                     | 8<br>(6 - 10)           | 19<br>(15 - 25)         | 51<br>(40 - 66)          |
| Peripheral vascular disease                   | 42<br>(32 - 55)          | --                    | --                     | 1<br>(0 - 1)            | 4<br>(3 - 6)            | 37<br>(27 - 50)          |
| Endocarditis                                  | 27<br>(19 - 36)          | 2<br>(1 - 2)          | 1<br>(0 - 1)           | 6<br>(4 - 9)            | 7<br>(4 - 9)            | 12<br>(8 - 17)           |
| Other cardiovascular and circulatory diseases | 197<br>(145 - 246)       | 2<br>(1 - 3)          | 1<br>(1 - 2)           | 25<br>(19 - 32)         | 47<br>(32 - 60)         | 121<br>(87 - 163)        |

Web Table 31- Panama deaths with 95% UI by age, sex, and cause in 2013

| Cause                                               | Both Sexes, All Ages   | Both Sexes, 0-4 Years | Both Sexes, 5-14 Years | Both Sexes, 15-49 Years | Both Sexes, 50-69 Years | Both Sexes, 70-80 Years |
|-----------------------------------------------------|------------------------|-----------------------|------------------------|-------------------------|-------------------------|-------------------------|
| Chronic respiratory diseases                        | 1,028<br>(855 - 1,184) | 30<br>(23 - 38)       | 5<br>(4 - 6)           | 53<br>(43 - 63)         | 155<br>(131 - 183)      | 785<br>(644 - 916)      |
| Chronic obstructive pulmonary disease               | 851<br>(704 - 982)     | 12<br>(9 - 16)        | 1<br>(1 - 2)           | 27<br>(21 - 33)         | 116<br>(95 - 140)       | 695<br>(567 - 815)      |
| Pneumoconiosis                                      | 7<br>(5 - 10)          | 0<br>(0 - 0)          | 0<br>(0 - 0)           | 1<br>(1 - 1)            | 2<br>(1 - 3)            | 4<br>(2 - 6)            |
| Silicosis                                           | 0<br>(0 - 0)           | 0<br>(0 - 0)          | 0<br>(0 - 0)           | 0<br>(0 - 0)            | 0<br>(0 - 0)            | 0<br>(0 - 0)            |
| Asbestosis                                          | 1<br>(1 - 2)           | 0<br>(0 - 0)          | 0<br>(0 - 0)           | 0<br>(0 - 0)            | 0<br>(0 - 1)            | 1<br>(0 - 1)            |
| Coal workers pneumoconiosis                         | 1<br>(1 - 1)           | 0<br>(0 - 0)          | 0<br>(0 - 0)           | 0<br>(0 - 0)            | 0<br>(0 - 0)            | 0<br>(0 - 1)            |
| Other pneumoconiosis                                | 5<br>(3 - 7)           | 0<br>(0 - 0)          | 0<br>(0 - 0)           | 1<br>(0 - 1)            | 1<br>(1 - 2)            | 3<br>(2 - 4)            |
| Asthma                                              | 94<br>(70 - 118)       | 13<br>(9 - 18)        | 3<br>(2 - 3)           | 15<br>(11 - 19)         | 21<br>(15 - 27)         | 43<br>(29 - 59)         |
| Interstitial lung disease and pulmonary sarcoidosis | 57<br>(38 - 78)        | 1<br>(1 - 2)          | 0<br>(0 - 1)           | 7<br>(5 - 10)           | 15<br>(11 - 21)         | 33<br>(20 - 48)         |
| Other chronic respiratory diseases                  | 19<br>(14 - 25)        | 4<br>(3 - 5)          | 0<br>(0 - 1)           | 2<br>(1 - 3)            | 2<br>(1 - 2)            | 11<br>(7 - 16)          |
| Cirrhosis                                           | 418<br>(365 - 477)     | 3<br>(2 - 3)          | 2<br>(2 - 3)           | 68<br>(55 - 83)         | 167<br>(140 - 200)      | 178<br>(154 - 205)      |
| Cirrhosis due to hepatitis B                        | 13<br>(8 - 19)         | 0<br>(0 - 0)          | 0<br>(0 - 0)           | 2<br>(1 - 3)            | 5<br>(3 - 8)            | 6<br>(3 - 9)            |
| Cirrhosis due to hepatitis C                        | 166<br>(125 - 207)     | 0<br>(0 - 1)          | 1<br>(0 - 1)           | 22<br>(14 - 31)         | 63<br>(43 - 82)         | 81<br>(61 - 100)        |
| Cirrhosis due to alcohol use                        | 190<br>(153 - 238)     | --                    | --                     | 30<br>(22 - 40)         | 81<br>(62 - 106)        | 79<br>(63 - 101)        |
| Cirrhosis due to other causes                       | 48<br>(33 - 64)        | 2<br>(2 - 3)          | 2<br>(1 - 2)           | 14<br>(9 - 19)          | 18<br>(11 - 26)         | 12<br>(8 - 17)          |
| Digestive diseases                                  | 420<br>(365 - 509)     | 7<br>(5 - 9)          | 4<br>(3 - 5)           | 51<br>(41 - 62)         | 85<br>(70 - 105)        | 274<br>(232 - 339)      |
| Peptic ulcer disease                                | 79<br>(60 - 112)       | 0<br>(0 - 1)          | 0<br>(0 - 0)           | 8<br>(6 - 12)           | 19<br>(14 - 28)         | 52<br>(37 - 74)         |
| Gastritis and duodenitis                            | 8<br>(5 - 13)          | 1<br>(0 - 1)          | 0<br>(0 - 0)           | 1<br>(1 - 2)            | 2<br>(1 - 3)            | 4<br>(2 - 7)            |
| Appendicitis                                        | 16<br>(12 - 22)        | 1<br>(0 - 1)          | 1<br>(1 - 1)           | 5<br>(4 - 7)            | 4<br>(3 - 5)            | 6<br>(4 - 10)           |
| Paralytic ileus and intestinal obstruction          | 61<br>(21 - 95)        | 2<br>(1 - 4)          | 1<br>(1 - 2)           | 6<br>(2 - 9)            | 9<br>(3 - 15)           | 43<br>(14 - 69)         |
| Inguinal, femoral, and abdominal hernia             | 24<br>(12 - 55)        | 1<br>(0 - 2)          | 0<br>(0 - 1)           | 2<br>(1 - 5)            | 5<br>(2 - 10)           | 16<br>(7 - 39)          |
| Inflammatory bowel disease                          | 18<br>(14 - 29)        | 1<br>(0 - 1)          | 0<br>(0 - 0)           | 3<br>(2 - 5)            | 3<br>(2 - 4)            | 12<br>(8 - 20)          |
| Vascular intestinal disorders                       | 64<br>(40 - 105)       | 0<br>(0 - 0)          | 0<br>(0 - 0)           | 4<br>(2 - 7)            | 11<br>(7 - 19)          | 49<br>(30 - 81)         |
| Gallbladder and biliary diseases                    | 57<br>(43 - 86)        | 0<br>(0 - 0)          | 0<br>(0 - 0)           | 6<br>(5 - 8)            | 11<br>(8 - 16)          | 40<br>(28 - 64)         |
| Pancreatitis                                        | 35<br>(26 - 49)        | 0<br>(0 - 0)          | 0<br>(0 - 0)           | 9<br>(6 - 12)           | 10<br>(7 - 15)          | 16<br>(11 - 23)         |
| Other digestive diseases                            | 56<br>(44 - 72)        | 1<br>(1 - 2)          | 1<br>(0 - 1)           | 6<br>(4 - 7)            | 12<br>(9 - 15)          | 36<br>(27 - 50)         |
| Neurological disorders                              | 1,065<br>(849 - 1,291) | 6<br>(4 - 7)          | 4<br>(3 - 5)           | 40<br>(32 - 50)         | 78<br>(61 - 97)         | 936<br>(726 - 1,151)    |
| Alzheimer disease and other dementias               | 878<br>(666 - 1,096)   | --                    | --                     | 0<br>(0 - 1)            | 43<br>(29 - 58)         | 835<br>(629 - 1,047)    |
| Parkinson disease                                   | 95<br>(63 - 118)       | --                    | --                     | 1<br>(1 - 1)            | 13<br>(9 - 16)          | 82<br>(53 - 104)        |
| Epilepsy                                            | 52<br>(39 - 65)        | 2<br>(1 - 3)          | 3<br>(2 - 3)           | 28<br>(20 - 36)         | 10<br>(7 - 13)          | 10<br>(7 - 13)          |
| Multiple sclerosis                                  | 5<br>(4 - 10)          | --                    | --                     | 2<br>(1 - 4)            | 2<br>(1 - 4)            | 1<br>(1 - 2)            |
| Other neurological disorders                        | 34<br>(28 - 40)        | 4<br>(3 - 5)          | 1<br>(1 - 2)           | 9<br>(7 - 11)           | 11<br>(9 - 13)          | 9<br>(7 - 10)           |
| Mental and substance use disorders                  | 51<br>(38 - 63)        | 2<br>(1 - 3)          | 0<br>(0 - 0)           | 24<br>(18 - 31)         | 16<br>(11 - 22)         | 8<br>(6 - 10)           |
| Schizophrenia                                       | 1<br>(0 - 1)           | --                    | --                     | 0<br>(0 - 0)            | 0<br>(0 - 0)            | 0<br>(0 - 0)            |
| Alcohol use disorders                               | 27<br>(17 - 37)        | --                    | --                     | 10<br>(6 - 14)          | 12<br>(7 - 17)          | 5<br>(3 - 6)            |
| Drug use disorders                                  | 23<br>(18 - 28)        | 2<br>(1 - 3)          | --                     | 13<br>(10 - 17)         | 4<br>(3 - 6)            | 3<br>(2 - 5)            |
| Opioid use disorders                                | 5<br>(4 - 6)           | 0<br>(0 - 1)          | --                     | 3<br>(2 - 4)            | 1<br>(1 - 1)            | 1<br>(1 - 1)            |
| Cocaine use disorders                               | 1<br>(1 - 1)           | 0<br>(0 - 0)          | --                     | 0<br>(0 - 1)            | 0<br>(0 - 0)            | 0<br>(0 - 0)            |
| Amphetamine use disorders                           | 1<br>(0 - 1)           | 0<br>(0 - 0)          | --                     | 0<br>(0 - 0)            | 0<br>(0 - 0)            | 0<br>(0 - 0)            |
| Other drug use disorders                            | 17<br>(14 - 21)        | 1<br>(1 - 2)          | --                     | 10<br>(7 - 13)          | 3<br>(2 - 4)            | 2<br>(2 - 3)            |

Web Table 31- Panama deaths with 95% UI by age, sex, and cause in 2013

| Cause                                               | Both Sexes, All Ages     | Both Sexes, 0-4 Years | Both Sexes, 5-14 Years | Both Sexes, 15-49 Years | Both Sexes, 50-69 Years | Both Sexes, 70-80 Years  |
|-----------------------------------------------------|--------------------------|-----------------------|------------------------|-------------------------|-------------------------|--------------------------|
| Eating disorders                                    | 0<br>(0 - 1)             | --                    | 0<br>(0 - 0)           | 0<br>(0 - 1)            | --                      | --                       |
| Anorexia nervosa                                    | 0<br>(0 - 1)             | --                    | 0<br>(0 - 0)           | 0<br>(0 - 1)            | --                      | --                       |
| Diabetes, urogenital, blood, and endocrine diseases | 2,034<br>(1,798 - 2,276) | 26<br>(20 - 36)       | 15<br>(12 - 17)        | 212<br>(178 - 251)      | 562<br>(472 - 653)      | 1,219<br>(1,071 - 1,371) |
| Diabetes mellitus                                   | 946<br>(817 - 1,082)     | 1<br>(1 - 1)          | 1<br>(1 - 2)           | 49<br>(41 - 59)         | 269<br>(226 - 321)      | 625<br>(530 - 726)       |
| Acute glomerulonephritis                            | 2<br>(2 - 3)             | 0<br>(0 - 0)          | 0<br>(0 - 0)           | 0<br>(0 - 1)            | 0<br>(0 - 1)            | 1<br>(0 - 1)             |
| Chronic kidney disease                              | 864<br>(701 - 1,009)     | 9<br>(7 - 11)         | 6<br>(5 - 8)           | 112<br>(90 - 140)       | 248<br>(179 - 302)      | 488<br>(390 - 579)       |
| Chronic kidney disease due to diabetes mellitus     | 394<br>(300 - 480)       | 1<br>(0 - 1)          | 0<br>(0 - 0)           | 38<br>(27 - 51)         | 137<br>(96 - 170)       | 218<br>(161 - 277)       |
| Chronic kidney disease due to hypertension          | 143<br>(88 - 197)        | 1<br>(1 - 2)          | 1<br>(0 - 1)           | 22<br>(14 - 31)         | 31<br>(16 - 45)         | 88<br>(53 - 127)         |
| Chronic kidney disease due to glomerulonephritis    | 21<br>(15 - 27)          | 2<br>(1 - 3)          | 2<br>(1 - 2)           | 9<br>(6 - 12)           | 4<br>(2 - 5)            | 5<br>(3 - 7)             |
| Chronic kidney disease due to other causes          | 305<br>(180 - 396)       | 5<br>(3 - 7)          | 4<br>(2 - 5)           | 44<br>(28 - 60)         | 77<br>(38 - 107)        | 177<br>(101 - 241)       |
| Urinary diseases and male infertility               | 102<br>(60 - 130)        | 2<br>(1 - 3)          | 1<br>(0 - 1)           | 10<br>(6 - 13)          | 17<br>(10 - 22)         | 72<br>(40 - 95)          |
| Interstitial nephritis and urinary tract infections | 75<br>(40 - 100)         | 1<br>(1 - 2)          | 0<br>(0 - 0)           | 7<br>(4 - 9)            | 11<br>(6 - 15)          | 56<br>(29 - 77)          |
| Urolithiasis                                        | 3<br>(2 - 4)             | --                    | 0<br>(0 - 0)           | 0<br>(0 - 1)            | 1<br>(0 - 1)            | 1<br>(1 - 2)             |
| Other urinary diseases                              | 24<br>(15 - 35)          | 1<br>(1 - 1)          | 0<br>(0 - 0)           | 3<br>(2 - 4)            | 5<br>(3 - 8)            | 15<br>(8 - 23)           |
| Gynecological diseases                              | 1<br>(0 - 2)             | --                    | --                     | 0<br>(0 - 1)            | 0<br>(0 - 0)            | 0<br>(0 - 1)             |
| Uterine fibroids                                    | 0<br>(0 - 0)             | --                    | --                     | 0<br>(0 - 0)            | 0<br>(0 - 0)            | 0<br>(0 - 0)             |
| Polycystic ovarian syndrome                         | 0<br>(0 - 0)             | --                    | --                     | 0<br>(0 - 0)            | 0<br>(0 - 0)            | --                       |
| Endometriosis                                       | 0<br>(0 - 0)             | --                    | --                     | 0<br>(0 - 0)            | 0<br>(0 - 0)            | --                       |
| Genital prolapse                                    | 0<br>(0 - 0)             | --                    | --                     | 0<br>(0 - 0)            | 0<br>(0 - 0)            | 0<br>(0 - 0)             |
| Other gynecological diseases                        | 0<br>(0 - 1)             | --                    | --                     | 0<br>(0 - 0)            | 0<br>(0 - 0)            | 0<br>(0 - 0)             |
| Hemoglobinopathies and hemolytic anemias            | 51<br>(35 - 70)          | 6<br>(4 - 8)          | 5<br>(3 - 6)           | 24<br>(17 - 34)         | 9<br>(6 - 12)           | 7<br>(5 - 11)            |
| Thalassemias                                        | 1<br>(1 - 1)             | 0<br>(0 - 0)          | 0<br>(0 - 0)           | 0<br>(0 - 1)            | 0<br>(0 - 0)            | 0<br>(0 - 0)             |
| Sickle cell disorders                               | 28<br>(20 - 39)          | 4<br>(2 - 6)          | 3<br>(2 - 5)           | 17<br>(12 - 24)         | 4<br>(3 - 6)            | 0<br>(0 - 0)             |
| G6PD deficiency                                     | 2<br>(2 - 3)             | 0<br>(0 - 1)          | 0<br>(0 - 0)           | 1<br>(1 - 2)            | 0<br>(0 - 1)            | 0<br>(0 - 0)             |
| Other hemoglobinopathies and hemolytic anemias      | 19<br>(13 - 26)          | 1<br>(1 - 2)          | 1<br>(1 - 1)           | 6<br>(4 - 8)            | 4<br>(3 - 6)            | 7<br>(5 - 10)            |
| Endocrine, metabolic, blood, and immune disorders   | 69<br>(52 - 141)         | 8<br>(5 - 17)         | 2<br>(1 - 4)           | 15<br>(11 - 28)         | 18<br>(13 - 38)         | 27<br>(18 - 56)          |
| Musculoskeletal disorders                           | 61<br>(27 - 76)          | --                    | 2<br>(1 - 2)           | 21<br>(9 - 28)          | 16<br>(7 - 21)          | 22<br>(9 - 29)           |
| Rheumatoid arthritis                                | 15<br>(8 - 20)           | --                    | 0<br>(0 - 0)           | 1<br>(1 - 2)            | 5<br>(2 - 7)            | 9<br>(4 - 13)            |
| Other musculoskeletal disorders                     | 45<br>(19 - 57)          | --                    | 2<br>(1 - 2)           | 20<br>(8 - 26)          | 11<br>(5 - 15)          | 13<br>(5 - 17)           |
| Other non-communicable diseases                     | 489<br>(421 - 560)       | 376<br>(319 - 439)    | 24<br>(18 - 30)        | 25<br>(20 - 32)         | 10<br>(5 - 12)          | 55<br>(23 - 74)          |
| Congenital anomalies                                | 414<br>(353 - 480)       | 367<br>(309 - 428)    | 23<br>(18 - 29)        | 20<br>(16 - 27)         | 1<br>(1 - 2)            | 3<br>(2 - 4)             |
| Neural tube defects                                 | 13<br>(8 - 19)           | 12<br>(7 - 18)        | 0<br>(0 - 1)           | 0<br>(0 - 0)            | 0<br>(0 - 0)            | 0<br>(0 - 0)             |
| Congenital heart anomalies                          | 207<br>(170 - 253)       | 181<br>(145 - 225)    | 13<br>(9 - 17)         | 13<br>(9 - 17)          | 0<br>(0 - 0)            | 0<br>(0 - 0)             |
| Cleft lip and cleft palate                          | 1<br>(0 - 2)             | 1<br>(0 - 2)          | --                     | --                      | --                      | --                       |
| Down syndrome                                       | 9<br>(6 - 15)            | 8<br>(5 - 13)         | 1<br>(0 - 1)           | 1<br>(1 - 2)            | 0<br>(0 - 0)            | 0<br>(0 - 0)             |
| Chromosomal unbalanced rearrangements               | 7<br>(4 - 10)            | 6<br>(4 - 9)          | 0<br>(0 - 0)           | 0<br>(0 - 0)            | 0<br>(0 - 0)            | 0<br>(0 - 0)             |
| Other congenital anomalies                          | 178<br>(141 - 219)       | 159<br>(124 - 199)    | 9<br>(6 - 12)          | 6<br>(4 - 9)            | 1<br>(1 - 1)            | 2<br>(2 - 3)             |
| Skin and subcutaneous diseases                      | 70<br>(27 - 90)          | 3<br>(1 - 5)          | 1<br>(0 - 1)           | 5<br>(2 - 6)            | 8<br>(3 - 11)           | 52<br>(20 - 71)          |
| Cellulitis                                          | 3<br>(1 - 4)             | 0<br>(0 - 1)          | 0<br>(0 - 0)           | 0<br>(0 - 1)            | 0<br>(0 - 1)            | 1<br>(0 - 3)             |
| Pyoderma                                            | 19<br>(7 - 25)           | 2<br>(1 - 3)          | 0<br>(0 - 0)           | 2<br>(1 - 2)            | 3<br>(1 - 4)            | 11<br>(4 - 17)           |

Web Table 31- Panama deaths with 95% UI by age, sex, and cause in 2013

| Cause                                           | Both Sexes, All Ages     | Both Sexes, 0-4 Years | Both Sexes, 5-14 Years | Both Sexes, 15-49 Years  | Both Sexes, 50-69 Years | Both Sexes, 70-80 Years |
|-------------------------------------------------|--------------------------|-----------------------|------------------------|--------------------------|-------------------------|-------------------------|
| Decubitus ulcer                                 | 45<br>(17 - 61)          | 0<br>(0 - 0)          | 0<br>(0 - 0)           | 2<br>(1 - 2)             | 5<br>(2 - 6)            | 38<br>(15 - 54)         |
| Other skin and subcutaneous diseases            | 4<br>(1 - 5)             | 1<br>(0 - 1)          | 0<br>(0 - 0)           | 1<br>(0 - 1)             | 0<br>(0 - 1)            | 1<br>(0 - 3)            |
| Sudden infant death syndrome                    | 6<br>(2 - 13)            | 6<br>(2 - 13)         | --                     | --                       | --                      | --                      |
| Injuries                                        | 2,366<br>(2,039 - 2,744) | 127<br>(104 - 155)    | 92<br>(82 - 104)       | 1,440<br>(1,209 - 1,728) | 346<br>(287 - 415)      | 361<br>(313 - 435)      |
| Transport injuries                              | 738<br>(608 - 969)       | 20<br>(14 - 27)       | 33<br>(26 - 41)        | 454<br>(361 - 615)       | 139<br>(110 - 182)      | 93<br>(77 - 127)        |
| Road injuries                                   | 720<br>(594 - 945)       | 19<br>(14 - 26)       | 32<br>(25 - 40)        | 443<br>(353 - 603)       | 136<br>(108 - 178)      | 91<br>(75 - 124)        |
| Pedestrian road injuries                        | 316<br>(247 - 426)       | 11<br>(8 - 16)        | 17<br>(13 - 22)        | 151<br>(108 - 215)       | 73<br>(55 - 99)         | 64<br>(51 - 89)         |
| Cyclist road injuries                           | 42<br>(31 - 60)          | 1<br>(1 - 1)          | 3<br>(2 - 5)           | 25<br>(18 - 37)          | 8<br>(6 - 13)           | 4<br>(3 - 6)            |
| Motorcyclist road injuries                      | 28<br>(18 - 41)          | 0<br>(0 - 0)          | 0<br>(0 - 1)           | 23<br>(14 - 34)          | 4<br>(2 - 6)            | 1<br>(1 - 2)            |
| Motor vehicle road injuries                     | 319<br>(249 - 433)       | 6<br>(4 - 8)          | 10<br>(7 - 13)         | 236<br>(180 - 324)       | 47<br>(34 - 69)         | 20<br>(15 - 28)         |
| Other road injuries                             | 15<br>(9 - 25)           | 1<br>(0 - 1)          | 1<br>(1 - 2)           | 8<br>(5 - 13)            | 3<br>(2 - 6)            | 2<br>(1 - 3)            |
| Other transport injuries                        | 17<br>(13 - 26)          | 1<br>(1 - 1)          | 1<br>(1 - 2)           | 10<br>(7 - 16)           | 3<br>(2 - 5)            | 2<br>(1 - 3)            |
| Unintentional injuries                          | 716<br>(605 - 865)       | 95<br>(75 - 120)      | 43<br>(36 - 56)        | 246<br>(190 - 322)       | 105<br>(85 - 129)       | 227<br>(189 - 284)      |
| Falls                                           | 163<br>(131 - 209)       | 4<br>(3 - 5)          | 3<br>(2 - 4)           | 34<br>(23 - 45)          | 29<br>(20 - 37)         | 93<br>(70 - 134)        |
| Drowning                                        | 206<br>(150 - 316)       | 25<br>(15 - 42)       | 24<br>(17 - 37)        | 117<br>(80 - 184)        | 28<br>(19 - 46)         | 13<br>(9 - 20)          |
| Fire, heat, and hot substances                  | 27<br>(18 - 34)          | 5<br>(4 - 8)          | 1<br>(1 - 2)           | 7<br>(5 - 9)             | 4<br>(3 - 5)            | 10<br>(6 - 14)          |
| Poisonings                                      | 19<br>(12 - 24)          | 3<br>(2 - 4)          | 1<br>(1 - 1)           | 5<br>(3 - 7)             | 4<br>(2 - 5)            | 7<br>(4 - 10)           |
| Exposure to mechanical forces                   | 48<br>(39 - 72)          | 4<br>(3 - 8)          | 4<br>(3 - 6)           | 28<br>(22 - 41)          | 8<br>(6 - 12)           | 4<br>(3 - 6)            |
| Unintentional firearm injuries                  | 6<br>(5 - 9)             | 0<br>(0 - 0)          | 0<br>(0 - 1)           | 5<br>(3 - 7)             | 1<br>(1 - 1)            | 0<br>(0 - 0)            |
| Unintentional suffocation                       | 5<br>(4 - 11)            | 2<br>(1 - 4)          | 0<br>(0 - 1)           | 1<br>(1 - 3)             | 1<br>(0 - 1)            | 1<br>(0 - 2)            |
| Other exposure to mechanical forces             | 37<br>(28 - 56)          | 2<br>(1 - 4)          | 3<br>(2 - 5)           | 22<br>(17 - 34)          | 6<br>(4 - 10)           | 3<br>(2 - 5)            |
| Adverse effects of medical treatment            | 47<br>(37 - 62)          | 4<br>(3 - 7)          | 1<br>(1 - 1)           | 8<br>(6 - 11)            | 8<br>(6 - 11)           | 25<br>(18 - 36)         |
| Animal contact                                  | 34<br>(21 - 46)          | 5<br>(3 - 9)          | 4<br>(3 - 7)           | 10<br>(6 - 14)           | 8<br>(4 - 11)           | 7<br>(4 - 10)           |
| Venomous animal contact                         | 30<br>(18 - 41)          | 5<br>(2 - 8)          | 4<br>(3 - 6)           | 9<br>(5 - 13)            | 7<br>(3 - 10)           | 6<br>(3 - 8)            |
| Non-venomous animal contact                     | 4<br>(2 - 6)             | 1<br>(0 - 1)          | 0<br>(0 - 1)           | 1<br>(0 - 1)             | 1<br>(0 - 1)            | 1<br>(1 - 2)            |
| Foreign body                                    | 135<br>(95 - 195)        | 42<br>(29 - 60)       | 3<br>(2 - 4)           | 14<br>(9 - 21)           | 12<br>(7 - 17)          | 64<br>(42 - 99)         |
| Pulmonary aspiration and foreign body in airway | 134<br>(94 - 194)        | 42<br>(29 - 59)       | 3<br>(2 - 4)           | 13<br>(9 - 20)           | 12<br>(7 - 17)          | 63<br>(42 - 99)         |
| Foreign body in other body part                 | 1<br>(1 - 2)             | 0<br>(0 - 0)          | 0<br>(0 - 0)           | 0<br>(0 - 1)             | 0<br>(0 - 0)            | 0<br>(0 - 0)            |
| Other unintentional injuries                    | 37<br>(27 - 50)          | 2<br>(1 - 3)          | 2<br>(1 - 3)           | 23<br>(15 - 35)          | 6<br>(3 - 9)            | 5<br>(3 - 7)            |
| Self-harm and interpersonal violence            | 913<br>(650 - 1,145)     | 13<br>(7 - 22)        | 16<br>(10 - 22)        | 740<br>(509 - 938)       | 102<br>(73 - 134)       | 41<br>(32 - 54)         |
| Self-harm                                       | 271<br>(216 - 359)       | --                    | 4<br>(3 - 5)           | 192<br>(148 - 255)       | 49<br>(38 - 69)         | 26<br>(20 - 37)         |
| Interpersonal violence                          | 641<br>(379 - 836)       | 13<br>(7 - 22)        | 12<br>(6 - 18)         | 548<br>(317 - 725)       | 53<br>(28 - 77)         | 15<br>(8 - 24)          |
| Assault by firearm                              | 434<br>(213 - 596)       | 3<br>(1 - 5)          | 8<br>(4 - 12)          | 391<br>(195 - 544)       | 29<br>(12 - 45)         | 4<br>(2 - 6)            |
| Assault by sharp object                         | 141<br>(74 - 246)        | 2<br>(1 - 3)          | 2<br>(1 - 3)           | 120<br>(60 - 213)        | 14<br>(6 - 24)          | 4<br>(2 - 7)            |
| Assault by other means                          | 67<br>(37 - 102)         | 9<br>(4 - 15)         | 3<br>(1 - 5)           | 37<br>(20 - 61)          | 10<br>(5 - 16)          | 8<br>(4 - 12)           |

Web Table 31- Panama deaths with 95% UI by age, sex, and cause in 2013

| Cause                                                             | Males, All Ages            | Males, 0-4 Years   | Males, 5-14 Years  | Males, 15-49 Years       | Males, 50-69 Years       | Males, 70-80 Years       |
|-------------------------------------------------------------------|----------------------------|--------------------|--------------------|--------------------------|--------------------------|--------------------------|
| All causes                                                        | 11,207<br>(9,932 - 12,700) | 782<br>(695 - 875) | 148<br>(135 - 160) | 2,313<br>(1,938 - 2,741) | 2,474<br>(2,079 - 2,952) | 5,491<br>(4,997 - 6,063) |
| Communicable, maternal, neonatal, and nutritional diseases        | 1,510<br>(1,335 - 1,705)   | 444<br>(386 - 506) | 31<br>(25 - 38)    | 334<br>(265 - 434)       | 234<br>(197 - 279)       | 468<br>(366 - 582)       |
| HIV/AIDS and tuberculosis                                         | 429<br>(335 - 557)         | 4<br>(3 - 6)       | 2<br>(1 - 2)       | 237<br>(174 - 332)       | 127<br>(99 - 163)        | 59<br>(47 - 76)          |
| Tuberculosis                                                      | 147<br>(117 - 182)         | 4<br>(3 - 6)       | 2<br>(1 - 2)       | 49<br>(37 - 62)          | 44<br>(32 - 58)          | 48<br>(37 - 61)          |
| HIV/AIDS                                                          | 282<br>(193 - 410)         | 0<br>(0 - 1)       | 0<br>(0 - 0)       | 188<br>(123 - 283)       | 82<br>(57 - 115)         | 11<br>(6 - 19)           |
| HIV/AIDS resulting in mycobacterial infection                     | 18<br>(12 - 28)            | 0<br>(0 - 0)       | 0<br>(0 - 0)       | 12<br>(8 - 19)           | 5<br>(4 - 8)             | 1<br>(0 - 1)             |
| HIV/AIDS resulting in other diseases                              | 264<br>(180 - 384)         | 0<br>(0 - 1)       | 0<br>(0 - 0)       | 176<br>(115 - 267)       | 77<br>(53 - 107)         | 11<br>(6 - 17)           |
| Diarrhea, lower respiratory, and other common infectious diseases | 697<br>(546 - 844)         | 157<br>(123 - 193) | 23<br>(17 - 29)    | 77<br>(56 - 99)          | 89<br>(63 - 118)         | 351<br>(248 - 461)       |
| Diarrheal diseases                                                | 111<br>(85 - 142)          | 50<br>(32 - 74)    | 5<br>(3 - 8)       | 13<br>(9 - 18)           | 12<br>(8 - 18)           | 31<br>(19 - 49)          |
| Intestinal infectious diseases                                    | 21<br>(10 - 37)            | 6<br>(3 - 12)      | 6<br>(3 - 12)      | 7<br>(3 - 14)            | 1<br>(0 - 2)             | 0<br>(0 - 1)             |
| Typhoid fever                                                     | 16<br>(7 - 28)             | 5<br>(2 - 9)       | 5<br>(2 - 9)       | 5<br>(2 - 11)            | 1<br>(0 - 1)             | 0<br>(0 - 1)             |
| Paratyphoid fever                                                 | 4<br>(2 - 8)               | 1<br>(1 - 3)       | 1<br>(0 - 3)       | 1<br>(1 - 3)             | 0<br>(0 - 0)             | 0<br>(0 - 0)             |
| Other intestinal infectious diseases                              | 1<br>(0 - 3)               | 0<br>(0 - 2)       | 0<br>(0 - 1)       | 0<br>(0 - 2)             | 0<br>(0 - 1)             | 0<br>(0 - 1)             |
| Lower respiratory infections                                      | 507<br>(369 - 639)         | 77<br>(54 - 103)   | 6<br>(4 - 9)       | 44<br>(29 - 60)          | 68<br>(45 - 95)          | 312<br>(210 - 426)       |
| Upper respiratory infections                                      | 0<br>(0 - 1)               | 0<br>(0 - 0)       | 0<br>(0 - 0)       | 0<br>(0 - 0)             | 0<br>(0 - 0)             | 0<br>(0 - 1)             |
| Otitis media                                                      | 0<br>(0 - 1)               | 0<br>(0 - 0)       | 0<br>(0 - 0)       | 0<br>(0 - 0)             | 0<br>(0 - 0)             | 0<br>(0 - 0)             |
| Meningitis                                                        | 38<br>(30 - 47)            | 13<br>(8 - 21)     | 3<br>(2 - 4)       | 10<br>(7 - 13)           | 6<br>(4 - 7)             | 6<br>(5 - 9)             |
| Pneumococcal meningitis                                           | 13<br>(10 - 16)            | 4<br>(2 - 6)       | 1<br>(1 - 1)       | 3<br>(2 - 5)             | 2<br>(1 - 3)             | 2<br>(2 - 4)             |
| H influenzae type B meningitis                                    | 7<br>(5 - 10)              | 5<br>(3 - 8)       | 1<br>(0 - 1)       | 1<br>(1 - 2)             | 0<br>(0 - 1)             | 1<br>(0 - 1)             |
| Meningococcal meningitis                                          | 4<br>(3 - 6)               | 1<br>(1 - 2)       | 0<br>(0 - 1)       | 1<br>(1 - 2)             | 1<br>(0 - 1)             | 1<br>(1 - 1)             |
| Other meningitis                                                  | 13<br>(10 - 18)            | 3<br>(2 - 6)       | 1<br>(0 - 1)       | 4<br>(2 - 6)             | 3<br>(2 - 4)             | 3<br>(2 - 4)             |
| Encephalitis                                                      | 12<br>(8 - 18)             | 4<br>(2 - 9)       | 2<br>(1 - 4)       | 3<br>(2 - 5)             | 2<br>(1 - 3)             | 1<br>(0 - 1)             |
| Diphtheria                                                        | 0<br>(0 - 1)               | 0<br>(0 - 1)       | 0<br>(0 - 0)       | 0<br>(0 - 0)             | 0<br>(0 - 0)             | --<br>(0 - 0)            |
| Whooping cough                                                    | 6<br>(2 - 16)              | 5<br>(1 - 16)      | 0<br>(0 - 1)       | 0<br>(0 - 0)             | 0<br>(0 - 0)             | --<br>(0 - 0)            |
| Tetanus                                                           | 0<br>(0 - 1)               | 0<br>(0 - 0)       | 0<br>(0 - 0)       | 0<br>(0 - 0)             | 0<br>(0 - 0)             | 0<br>(0 - 0)             |
| Measles                                                           | 0<br>(0 - 0)               | 0<br>(0 - 0)       | 0<br>(0 - 0)       | 0<br>(0 - 0)             | 0<br>(0 - 0)             | --<br>(0 - 0)            |
| Varicella and herpes zoster                                       | 1<br>(0 - 3)               | 0<br>(0 - 1)       | 0<br>(0 - 0)       | 0<br>(0 - 1)             | 0<br>(0 - 0)             | 0<br>(0 - 2)             |
| Neglected tropical diseases and malaria                           | 11<br>(8 - 18)             | 3<br>(2 - 7)       | 1<br>(1 - 2)       | 3<br>(2 - 5)             | 2<br>(1 - 5)             | 2<br>(1 - 4)             |
| Malaria                                                           | 0<br>(0 - 1)               | 0<br>(0 - 0)       | 0<br>(0 - 0)       | 0<br>(0 - 0)             | 0<br>(0 - 0)             | 0<br>(0 - 0)             |
| Chagas disease                                                    | 2<br>(0 - 7)               | 0<br>(0 - 0)       | 0<br>(0 - 0)       | 0<br>(0 - 2)             | 1<br>(0 - 3)             | 0<br>(0 - 2)             |
| Leishmaniasis                                                     | 2<br>(1 - 3)               | 0<br>(0 - 1)       | 0<br>(0 - 0)       | 1<br>(0 - 1)             | 0<br>(0 - 1)             | 0<br>(0 - 0)             |
| Visceral leishmaniasis                                            | 2<br>(1 - 3)               | 0<br>(0 - 1)       | 0<br>(0 - 0)       | 1<br>(0 - 1)             | 0<br>(0 - 1)             | 0<br>(0 - 0)             |
| Cysticercosis                                                     | 1<br>(0 - 1)               | 0<br>(0 - 0)       | 0<br>(0 - 0)       | 0<br>(0 - 0)             | 0<br>(0 - 0)             | 0<br>(0 - 0)             |
| Cystic echinococcosis                                             | 0<br>(0 - 0)               | 0<br>(0 - 0)       | 0<br>(0 - 0)       | 0<br>(0 - 0)             | 0<br>(0 - 0)             | 0<br>(0 - 0)             |
| Dengue                                                            | 2<br>(2 - 3)               | 1<br>(0 - 1)       | 0<br>(0 - 0)       | 1<br>(0 - 1)             | 0<br>(0 - 0)             | 1<br>(0 - 1)             |
| Yellow fever                                                      | 0<br>(0 - 0)               | 0<br>(0 - 0)       | 0<br>(0 - 0)       | 0<br>(0 - 0)             | 0<br>(0 - 0)             | 0<br>(0 - 0)             |
| Rabies                                                            | 0<br>(0 - 0)               | 0<br>(0 - 0)       | 0<br>(0 - 0)       | 0<br>(0 - 0)             | 0<br>(0 - 0)             | 0<br>(0 - 0)             |
| Intestinal nematode infections                                    | 1<br>(0 - 5)               | 0<br>(0 - 3)       | 0<br>(0 - 1)       | 0<br>(0 - 2)             | 0<br>(0 - 1)             | 0<br>(0 - 1)             |
| Ascariasis                                                        | 1<br>(0 - 5)               | 0<br>(0 - 3)       | 0<br>(0 - 1)       | 0<br>(0 - 2)             | 0<br>(0 - 1)             | 0<br>(0 - 1)             |
| Other neglected tropical diseases                                 | 3<br>(2 - 4)               | 2<br>(1 - 3)       | 0<br>(0 - 0)       | 0<br>(0 - 0)             | 0<br>(0 - 0)             | 0<br>(0 - 0)             |

Web Table 31- Panama deaths with 95% UI by age, sex, and cause in 2013

| Cause                                                            | Males, All Ages          | Males, 0-4 Years   | Males, 5-14 Years | Males, 15-49 Years | Males, 50-69 Years       | Males, 70-80 Years       |
|------------------------------------------------------------------|--------------------------|--------------------|-------------------|--------------------|--------------------------|--------------------------|
| Maternal disorders                                               | --                       | --                 | --                | --                 | --                       | --                       |
| Maternal hemorrhage                                              | --                       | --                 | --                | --                 | --                       | --                       |
| Maternal sepsis and other maternal infections                    | --                       | --                 | --                | --                 | --                       | --                       |
| Maternal hypertensive disorders                                  | --                       | --                 | --                | --                 | --                       | --                       |
| Maternal obstructed labor                                        | --                       | --                 | --                | --                 | --                       | --                       |
| Maternal abortive outcome                                        | --                       | --                 | --                | --                 | --                       | --                       |
| Indirect maternal deaths                                         | --                       | --                 | --                | --                 | --                       | --                       |
| Late maternal deaths                                             | --                       | --                 | --                | --                 | --                       | --                       |
| Maternal deaths aggravated by HIV/AIDS                           | --                       | --                 | --                | --                 | --                       | --                       |
| Other maternal disorders                                         | --                       | --                 | --                | --                 | --                       | --                       |
| Neonatal disorders                                               | 230<br>(197 - 266)       | 230<br>(197 - 266) | --                | --                 | --                       | --                       |
| Neonatal preterm birth complications                             | 103<br>(70 - 142)        | 103<br>(70 - 142)  | --                | --                 | --                       | --                       |
| Neonatal encephalopathy due to birth asphyxia and trauma         | 51<br>(32 - 74)          | 51<br>(32 - 74)    | --                | --                 | --                       | --                       |
| Neonatal sepsis and other neonatal infections                    | 47<br>(21 - 80)          | 47<br>(21 - 80)    | --                | --                 | --                       | --                       |
| Hemolytic disease and other neonatal jaundice                    | 1<br>(0 - 2)             | 1<br>(0 - 2)       | --                | --                 | --                       | --                       |
| Other neonatal disorders                                         | 28<br>(17 - 42)          | 28<br>(17 - 42)    | --                | --                 | --                       | --                       |
| Nutritional deficiencies                                         | 120<br>(82 - 189)        | 42<br>(27 - 63)    | 4<br>(3 - 7)      | 11<br>(7 - 19)     | 13<br>(8 - 21)           | 50<br>(32 - 85)          |
| Protein-energy malnutrition                                      | 85<br>(49 - 125)         | 38<br>(23 - 58)    | 3<br>(2 - 5)      | 6<br>(3 - 9)       | 7<br>(3 - 11)            | 30<br>(15 - 53)          |
| Iodine deficiency                                                | 0<br>(0 - 0)             | 0<br>(0 - 0)       | 0<br>(0 - 0)      | 0<br>(0 - 0)       | 0<br>(0 - 0)             | 0<br>(0 - 0)             |
| Iron-deficiency anemia                                           | 24<br>(12 - 49)          | 2<br>(1 - 7)       | 0<br>(0 - 1)      | 4<br>(2 - 8)       | 4<br>(2 - 8)             | 14<br>(6 - 29)           |
| Other nutritional deficiencies                                   | 12<br>(6 - 29)           | 2<br>(0 - 5)       | 0<br>(0 - 1)      | 2<br>(1 - 4)       | 2<br>(1 - 4)             | 6<br>(2 - 16)            |
| Other communicable, maternal, neonatal, and nutritional diseases | 24<br>(16 - 33)          | 8<br>(3 - 15)      | 1<br>(1 - 2)      | 5<br>(4 - 7)       | 4<br>(2 - 5)             | 6<br>(3 - 8)             |
| Sexually transmitted diseases excluding HIV                      | 5<br>(1 - 13)            | 4<br>(0 - 11)      | 0<br>(0 - 1)      | 0<br>(0 - 0)       | 0<br>(0 - 1)             | 1<br>(0 - 1)             |
| Syphilis                                                         | 5<br>(1 - 13)            | 4<br>(0 - 11)      | 0<br>(0 - 1)      | 0<br>(0 - 0)       | 0<br>(0 - 1)             | 0<br>(0 - 1)             |
| Chlamydial infection                                             | --                       | --                 | --                | --                 | --                       | --                       |
| Gonococcal infection                                             | 0<br>(0 - 0)             | --                 | 0<br>(0 - 0)      | 0<br>(0 - 0)       | 0<br>(0 - 0)             | 0<br>(0 - 0)             |
| Other sexually transmitted diseases                              | 0<br>(0 - 0)             | --                 | 0<br>(0 - 0)      | 0<br>(0 - 0)       | 0<br>(0 - 0)             | 0<br>(0 - 0)             |
| Hepatitis                                                        | 4<br>(3 - 5)             | 0<br>(0 - 1)       | 0<br>(0 - 0)      | 2<br>(1 - 2)       | 1<br>(1 - 1)             | 1<br>(0 - 1)             |
| Acute hepatitis A                                                | 1<br>(1 - 2)             | 0<br>(0 - 1)       | 0<br>(0 - 0)      | 1<br>(0 - 1)       | 0<br>(0 - 0)             | 0<br>(0 - 0)             |
| Acute hepatitis B                                                | 2<br>(1 - 3)             | 0<br>(0 - 0)       | 0<br>(0 - 0)      | 1<br>(0 - 1)       | 1<br>(0 - 1)             | 0<br>(0 - 1)             |
| Acute hepatitis C                                                | 1<br>(0 - 2)             | --                 | 0<br>(0 - 0)      | 0<br>(0 - 1)       | 0<br>(0 - 0)             | 0<br>(0 - 0)             |
| Other infectious diseases                                        | 14<br>(10 - 20)          | 3<br>(2 - 5)       | 1<br>(0 - 1)      | 4<br>(2 - 5)       | 3<br>(2 - 4)             | 4<br>(3 - 7)             |
| Non-communicable diseases                                        | 7,793<br>(6,870 - 8,847) | 264<br>(219 - 309) | 54<br>(46 - 61)   | 719<br>(569 - 883) | 1,952<br>(1,607 - 2,358) | 4,804<br>(4,344 - 5,295) |
| Neoplasms                                                        | 1,849<br>(1,557 - 2,163) | 15<br>(11 - 19)    | 20<br>(15 - 23)   | 196<br>(152 - 244) | 566<br>(459 - 691)       | 1,054<br>(896 - 1,264)   |
| Esophageal cancer                                                | 43<br>(29 - 57)          | --                 | --                | 3<br>(2 - 4)       | 17<br>(11 - 23)          | 23<br>(15 - 31)          |
| Stomach cancer                                                   | 251<br>(207 - 305)       | --                 | --                | 24<br>(19 - 31)    | 87<br>(67 - 110)         | 140<br>(115 - 171)       |
| Liver cancer                                                     | 84<br>(68 - 103)         | --                 | 0<br>(0 - 0)      | 10<br>(8 - 13)     | 28<br>(21 - 36)          | 46<br>(36 - 58)          |
| Liver cancer due to hepatitis B                                  | 17<br>(6 - 31)           | --                 | 0<br>(0 - 0)      | 3<br>(1 - 5)       | 6<br>(2 - 12)            | 7<br>(3 - 15)            |
| Liver cancer due to hepatitis C                                  | 44<br>(27 - 63)          | --                 | 0<br>(0 - 0)      | 5<br>(2 - 8)       | 15<br>(8 - 22)           | 25<br>(14 - 35)          |
| Liver cancer due to alcohol use                                  | 19<br>(11 - 30)          | --                 | --                | 1<br>(1 - 2)       | 6<br>(3 - 9)             | 12<br>(7 - 20)           |

Web Table 31- Panama deaths with 95% UI by age, sex, and cause in 2013

| Cause                                         | Males, All Ages          | Males, 0-4 Years | Males, 5-14 Years | Males, 15-49 Years | Males, 50-69 Years | Males, 70-80 Years       |
|-----------------------------------------------|--------------------------|------------------|-------------------|--------------------|--------------------|--------------------------|
| Liver cancer due to other causes              | 4<br>(3 - 7)             | --               | 0<br>(0 - 0)      | 1<br>(1 - 2)       | 1<br>(1 - 2)       | 2<br>(1 - 3)             |
| Larynx cancer                                 | 32<br>(23 - 43)          | --               | --                | 2<br>(2 - 3)       | 13<br>(10 - 18)    | 16<br>(12 - 23)          |
| Tracheal, bronchus and lung cancer            | 263<br>(220 - 315)       | --               | --                | 17<br>(13 - 22)    | 104<br>(82 - 132)  | 142<br>(118 - 175)       |
| Breast cancer                                 | 2<br>(1 - 5)             | --               | --                | 0<br>(0 - 1)       | 0<br>(0 - 2)       | 1<br>(0 - 3)             |
| Cervical cancer                               | --                       | --               | --                | --                 | --                 | --                       |
| Uterine cancer                                | --                       | --               | --                | --                 | --                 | --                       |
| Prostate cancer                               | 424<br>(273 - 663)       | --               | --                | 2<br>(1 - 3)       | 68<br>(43 - 102)   | 354<br>(225 - 558)       |
| Colon and rectum cancer                       | 166<br>(139 - 199)       | --               | --                | 18<br>(14 - 22)    | 57<br>(46 - 72)    | 92<br>(74 - 112)         |
| Lip and oral cavity cancer                    | 27<br>(21 - 40)          | --               | --                | 3<br>(2 - 4)       | 10<br>(8 - 15)     | 14<br>(11 - 21)          |
| Nasopharynx cancer                            | 7<br>(5 - 8)             | --               | 0<br>(0 - 0)      | 2<br>(1 - 3)       | 3<br>(2 - 4)       | 2<br>(1 - 2)             |
| Other pharynx cancer                          | 17<br>(13 - 21)          | --               | --                | 2<br>(1 - 2)       | 8<br>(6 - 10)      | 7<br>(6 - 9)             |
| Gallbladder and biliary tract cancer          | 18<br>(11 - 32)          | --               | --                | 1<br>(1 - 2)       | 6<br>(4 - 11)      | 10<br>(6 - 18)           |
| Pancreatic cancer                             | 70<br>(58 - 85)          | --               | --                | 6<br>(4 - 7)       | 27<br>(21 - 35)    | 37<br>(29 - 47)          |
| Malignant skin melanoma                       | 15<br>(9 - 29)           | --               | --                | 3<br>(2 - 6)       | 5<br>(3 - 9)       | 7<br>(4 - 14)            |
| Non-melanoma skin cancer                      | 12<br>(8 - 18)           | --               | --                | 1<br>(1 - 2)       | 3<br>(2 - 5)       | 8<br>(5 - 12)            |
| Ovarian cancer                                | --                       | --               | --                | --                 | --                 | --                       |
| Testicular cancer                             | 4<br>(1 - 6)             | --               | --                | 3<br>(1 - 5)       | 1<br>(0 - 1)       | 0<br>(0 - 1)             |
| Kidney cancer                                 | 37<br>(30 - 45)          | 1<br>(0 - 1)     | 0<br>(0 - 0)      | 5<br>(4 - 7)       | 17<br>(13 - 21)    | 14<br>(11 - 17)          |
| Bladder cancer                                | 26<br>(21 - 35)          | --               | --                | 1<br>(1 - 1)       | 6<br>(5 - 9)       | 19<br>(15 - 26)          |
| Brain and nervous system cancer               | 51<br>(16 - 72)          | 2<br>(1 - 4)     | 4<br>(1 - 6)      | 16<br>(5 - 24)     | 16<br>(5 - 24)     | 13<br>(4 - 18)           |
| Thyroid cancer                                | 7<br>(6 - 9)             | --               | 0<br>(0 - 0)      | 1<br>(1 - 1)       | 3<br>(2 - 4)       | 3<br>(2 - 4)             |
| Mesothelioma                                  | 2<br>(1 - 2)             | --               | --                | 0<br>(0 - 0)       | 1<br>(0 - 1)       | 1<br>(1 - 1)             |
| Hodgkin lymphoma                              | 4<br>(1 - 6)             | 0<br>(0 - 1)     | 1<br>(0 - 1)      | 1<br>(0 - 2)       | 1<br>(0 - 1)       | 1<br>(0 - 2)             |
| Non-Hodgkin lymphoma                          | 73<br>(53 - 97)          | 2<br>(1 - 3)     | 2<br>(2 - 3)      | 15<br>(10 - 20)    | 25<br>(17 - 35)    | 29<br>(18 - 41)          |
| Multiple myeloma                              | 31<br>(22 - 41)          | --               | --                | 3<br>(2 - 4)       | 13<br>(9 - 18)     | 14<br>(10 - 20)          |
| Leukemia                                      | 82<br>(69 - 98)          | 5<br>(3 - 7)     | 8<br>(6 - 10)     | 28<br>(22 - 36)    | 17<br>(13 - 22)    | 24<br>(19 - 31)          |
| Other neoplasms                               | 101<br>(81 - 125)        | 4<br>(3 - 6)     | 5<br>(3 - 6)      | 27<br>(20 - 35)    | 30<br>(23 - 39)    | 35<br>(26 - 47)          |
| Cardiovascular diseases                       | 2,991<br>(2,616 - 3,430) | 7<br>(5 - 8)     | 5<br>(4 - 6)      | 226<br>(177 - 284) | 746<br>(613 - 913) | 2,008<br>(1,783 - 2,259) |
| Rheumatic heart disease                       | 18<br>(10 - 25)          | 0<br>(0 - 1)     | 1<br>(0 - 1)      | 8<br>(4 - 11)      | 5<br>(2 - 7)       | 5<br>(2 - 8)             |
| Ischemic heart disease                        | 1,503<br>(1,269 - 1,803) | 0<br>(0 - 1)     | 1<br>(0 - 1)      | 104<br>(78 - 136)  | 412<br>(331 - 507) | 986<br>(831 - 1,184)     |
| Cerebrovascular disease                       | 1,127<br>(903 - 1,368)   | 2<br>(1 - 2)     | 2<br>(1 - 2)      | 66<br>(46 - 88)    | 241<br>(182 - 311) | 816<br>(654 - 987)       |
| Ischemic stroke                               | 357<br>(212 - 645)       | 0<br>(0 - 1)     | 0<br>(0 - 1)      | 12<br>(7 - 23)     | 67<br>(42 - 120)   | 278<br>(156 - 513)       |
| Hemorrhagic stroke                            | 770<br>(454 - 1,018)     | 1<br>(1 - 2)     | 1<br>(1 - 2)      | 54<br>(34 - 74)    | 175<br>(113 - 242) | 539<br>(296 - 718)       |
| Hypertensive heart disease                    | 65<br>(32 - 100)         | 0<br>(0 - 0)     | 0<br>(0 - 0)      | 4<br>(2 - 6)       | 17<br>(8 - 27)     | 44<br>(20 - 71)          |
| Cardiomyopathy and myocarditis                | 85<br>(58 - 111)         | 2<br>(1 - 3)     | 1<br>(0 - 1)      | 21<br>(14 - 29)    | 25<br>(16 - 34)    | 36<br>(23 - 50)          |
| Atrial fibrillation and flutter               | 9<br>(6 - 13)            | --               | --                | 0<br>(0 - 0)       | 1<br>(1 - 1)       | 8<br>(5 - 12)            |
| Aortic aneurysm                               | 52<br>(41 - 69)          | --               | --                | 6<br>(4 - 8)       | 15<br>(11 - 21)    | 31<br>(24 - 42)          |
| Peripheral vascular disease                   | 23<br>(16 - 34)          | --               | --                | 0<br>(0 - 1)       | 3<br>(2 - 4)       | 20<br>(13 - 30)          |
| Endocarditis                                  | 16<br>(10 - 24)          | 1<br>(1 - 2)     | 0<br>(0 - 1)      | 4<br>(2 - 6)       | 4<br>(2 - 7)       | 6<br>(4 - 10)            |
| Other cardiovascular and circulatory diseases | 94<br>(65 - 119)         | 1<br>(1 - 2)     | 1<br>(0 - 1)      | 14<br>(9 - 19)     | 22<br>(15 - 30)    | 56<br>(37 - 76)          |



Web Table 31- Panama deaths with 95% UI by age, sex, and cause in 2013

| Cause                                               | Males, All Ages    | Males, 0-4 Years | Males, 5-14 Years | Males, 15-49 Years | Males, 50-69 Years | Males, 70-80 Years |
|-----------------------------------------------------|--------------------|------------------|-------------------|--------------------|--------------------|--------------------|
| Chronic respiratory diseases                        | 569<br>(449 - 673) | 16<br>(11 - 23)  | 3<br>(2 - 3)      | 30<br>(22 - 38)    | 96<br>(75 - 124)   | 424<br>(331 - 502) |
| Chronic obstructive pulmonary disease               | 482<br>(379 - 570) | 7<br>(4 - 10)    | 1<br>(0 - 1)      | 18<br>(13 - 23)    | 76<br>(58 - 98)    | 381<br>(295 - 451) |
| Pneumoconiosis                                      | 7<br>(4 - 10)      | 0<br>(0 - 0)     | 0<br>(0 - 0)      | 1<br>(0 - 1)       | 2<br>(1 - 3)       | 4<br>(2 - 5)       |
| Silicosis                                           | 0<br>(0 - 0)       | 0<br>(0 - 0)     | 0<br>(0 - 0)      | 0<br>(0 - 0)       | 0<br>(0 - 0)       | 0<br>(0 - 0)       |
| Asbestosis                                          | 1<br>(1 - 2)       | 0<br>(0 - 0)     | 0<br>(0 - 0)      | 0<br>(0 - 0)       | 0<br>(0 - 1)       | 1<br>(0 - 1)       |
| Coal workers pneumoconiosis                         | 1<br>(1 - 1)       | 0<br>(0 - 0)     | 0<br>(0 - 0)      | 0<br>(0 - 0)       | 0<br>(0 - 0)       | 0<br>(0 - 1)       |
| Other pneumoconiosis                                | 4<br>(3 - 6)       | 0<br>(0 - 0)     | 0<br>(0 - 0)      | 0<br>(0 - 1)       | 1<br>(1 - 2)       | 3<br>(1 - 4)       |
| Asthma                                              | 45<br>(34 - 57)    | 7<br>(4 - 11)    | 1<br>(1 - 2)      | 7<br>(5 - 10)      | 9<br>(7 - 13)      | 20<br>(13 - 28)    |
| Interstitial lung disease and pulmonary sarcoidosis | 27<br>(17 - 39)    | 1<br>(0 - 2)     | 0<br>(0 - 1)      | 3<br>(2 - 4)       | 8<br>(5 - 13)      | 15<br>(8 - 23)     |
| Other chronic respiratory diseases                  | 9<br>(6 - 13)      | 2<br>(1 - 3)     | 0<br>(0 - 0)      | 1<br>(1 - 1)       | 1<br>(1 - 1)       | 5<br>(3 - 8)       |
| Cirrhosis                                           | 256<br>(212 - 305) | 1<br>(1 - 2)     | 1<br>(1 - 1)      | 49<br>(37 - 64)    | 114<br>(90 - 141)  | 91<br>(74 - 110)   |
| Cirrhosis due to hepatitis B                        | 8<br>(4 - 12)      | 0<br>(0 - 0)     | 0<br>(0 - 0)      | 1<br>(1 - 2)       | 3<br>(2 - 6)       | 3<br>(1 - 4)       |
| Cirrhosis due to hepatitis C                        | 76<br>(40 - 110)   | 0<br>(0 - 0)     | 0<br>(0 - 0)      | 11<br>(4 - 19)     | 33<br>(14 - 50)    | 32<br>(18 - 45)    |
| Cirrhosis due to alcohol use                        | 145<br>(111 - 191) | --               | --                | 27<br>(19 - 37)    | 67<br>(49 - 91)    | 52<br>(38 - 70)    |
| Cirrhosis due to other causes                       | 27<br>(16 - 42)    | 1<br>(1 - 2)     | 1<br>(1 - 1)      | 9<br>(5 - 14)      | 11<br>(6 - 18)     | 5<br>(3 - 9)       |
| Digestive diseases                                  | 222<br>(183 - 291) | 4<br>(3 - 6)     | 2<br>(2 - 3)      | 32<br>(24 - 42)    | 53<br>(40 - 71)    | 131<br>(107 - 178) |
| Peptic ulcer disease                                | 48<br>(34 - 71)    | 0<br>(0 - 0)     | 0<br>(0 - 0)      | 6<br>(4 - 9)       | 13<br>(9 - 21)     | 28<br>(19 - 43)    |
| Gastritis and duodenitis                            | 3<br>(2 - 6)       | 0<br>(0 - 0)     | 0<br>(0 - 0)      | 1<br>(0 - 1)       | 1<br>(0 - 1)       | 1<br>(1 - 3)       |
| Appendicitis                                        | 9<br>(6 - 14)      | 0<br>(0 - 1)     | 1<br>(0 - 1)      | 3<br>(2 - 5)       | 2<br>(1 - 4)       | 3<br>(2 - 5)       |
| Paralytic ileus and intestinal obstruction          | 33<br>(9 - 53)     | 1<br>(0 - 3)     | 1<br>(0 - 1)      | 4<br>(1 - 6)       | 6<br>(1 - 10)      | 21<br>(5 - 36)     |
| Inguinal, femoral, and abdominal hernia             | 14<br>(6 - 34)     | 0<br>(0 - 1)     | 0<br>(0 - 1)      | 2<br>(1 - 4)       | 3<br>(2 - 7)       | 9<br>(4 - 23)      |
| Inflammatory bowel disease                          | 9<br>(6 - 17)      | 0<br>(0 - 1)     | 0<br>(0 - 0)      | 1<br>(1 - 3)       | 1<br>(1 - 2)       | 6<br>(3 - 12)      |
| Vascular intestinal disorders                       | 33<br>(14 - 63)    | 0<br>(0 - 0)     | 0<br>(0 - 0)      | 3<br>(1 - 6)       | 7<br>(3 - 13)      | 23<br>(9 - 45)     |
| Gallbladder and biliary diseases                    | 27<br>(19 - 45)    | 0<br>(0 - 0)     | 0<br>(0 - 0)      | 3<br>(2 - 5)       | 6<br>(4 - 9)       | 19<br>(12 - 32)    |
| Pancreatitis                                        | 21<br>(14 - 31)    | 0<br>(0 - 0)     | 0<br>(0 - 0)      | 7<br>(5 - 10)      | 7<br>(4 - 11)      | 6<br>(4 - 10)      |
| Other digestive diseases                            | 26<br>(18 - 36)    | 1<br>(0 - 1)     | 0<br>(0 - 0)      | 3<br>(2 - 4)       | 7<br>(4 - 9)       | 15<br>(9 - 23)     |
| Neurological disorders                              | 561<br>(348 - 714) | 3<br>(2 - 4)     | 3<br>(2 - 4)      | 25<br>(18 - 33)    | 47<br>(34 - 63)    | 483<br>(272 - 627) |
| Alzheimer disease and other dementias               | 452<br>(236 - 602) | --               | --                | 0<br>(0 - 0)       | 26<br>(15 - 38)    | 427<br>(209 - 570) |
| Parkinson disease                                   | 54<br>(37 - 72)    | --               | --                | 1<br>(0 - 1)       | 8<br>(5 - 11)      | 46<br>(29 - 63)    |
| Epilepsy                                            | 33<br>(23 - 43)    | 1<br>(1 - 2)     | 2<br>(1 - 2)      | 18<br>(11 - 24)    | 7<br>(5 - 9)       | 6<br>(4 - 8)       |
| Multiple sclerosis                                  | 2<br>(1 - 4)       | --               | --                | 1<br>(0 - 1)       | 1<br>(0 - 2)       | 1<br>(0 - 1)       |
| Other neurological disorders                        | 19<br>(15 - 25)    | 2<br>(1 - 3)     | 1<br>(1 - 1)      | 6<br>(4 - 8)       | 6<br>(4 - 8)       | 5<br>(3 - 6)       |
| Mental and substance use disorders                  | 40<br>(26 - 52)    | 1<br>(0 - 2)     | 0<br>(0 - 0)      | 19<br>(12 - 25)    | 14<br>(9 - 20)     | 6<br>(4 - 8)       |
| Schizophrenia                                       | 0<br>(0 - 1)       | --               | --                | 0<br>(0 - 0)       | 0<br>(0 - 0)       | 0<br>(0 - 0)       |
| Alcohol use disorders                               | 25<br>(15 - 34)    | --               | --                | 10<br>(5 - 13)     | 11<br>(6 - 16)     | 4<br>(2 - 6)       |
| Drug use disorders                                  | 14<br>(10 - 19)    | 1<br>(0 - 2)     | --                | 9<br>(6 - 12)      | 3<br>(2 - 4)       | 1<br>(1 - 2)       |
| Opioid use disorders                                | 3<br>(2 - 4)       | 0<br>(0 - 0)     | --                | 2<br>(1 - 3)       | 1<br>(0 - 1)       | 0<br>(0 - 1)       |
| Cocaine use disorders                               | 0<br>(0 - 0)       | 0<br>(0 - 0)     | --                | 0<br>(0 - 0)       | 0<br>(0 - 0)       | 0<br>(0 - 0)       |
| Amphetamine use disorders                           | 0<br>(0 - 0)       | 0<br>(0 - 0)     | --                | 0<br>(0 - 0)       | 0<br>(0 - 0)       | 0<br>(0 - 0)       |
| Other drug use disorders                            | 10<br>(8 - 14)     | 1<br>(0 - 1)     | --                | 7<br>(4 - 9)       | 2<br>(1 - 3)       | 1<br>(1 - 2)       |

Web Table 31- Panama deaths with 95% UI by age, sex, and cause in 2013

| Cause                                               | Males, All Ages        | Males, 0-4 Years   | Males, 5-14 Years | Males, 15-49 Years | Males, 50-69 Years | Males, 70-80 Years |
|-----------------------------------------------------|------------------------|--------------------|-------------------|--------------------|--------------------|--------------------|
| Eating disorders                                    | 0<br>(0 - 0)           | --                 | 0<br>(0 - 0)      | 0<br>(0 - 0)       | --                 | --                 |
| Anorexia nervosa                                    | 0<br>(0 - 0)           | --                 | 0<br>(0 - 0)      | 0<br>(0 - 0)       | --                 | --                 |
| Diabetes, urogenital, blood, and endocrine diseases | 1,028<br>(856 - 1,202) | 14<br>(11 - 21)    | 8<br>(6 - 10)     | 125<br>(97 - 158)  | 307<br>(236 - 380) | 574<br>(481 - 671) |
| Diabetes mellitus                                   | 412<br>(343 - 492)     | 1<br>(1 - 1)       | 0<br>(0 - 0)      | 27<br>(20 - 35)    | 136<br>(106 - 172) | 249<br>(203 - 301) |
| Acute glomerulonephritis                            | 1<br>(1 - 1)           | 0<br>(0 - 0)       | 0<br>(0 - 0)      | 0<br>(0 - 0)       | 0<br>(0 - 0)       | 0<br>(0 - 1)       |
| Chronic kidney disease                              | 498<br>(381 - 616)     | 5<br>(3 - 7)       | 3<br>(2 - 4)      | 73<br>(54 - 97)    | 148<br>(95 - 190)  | 269<br>(208 - 331) |
| Chronic kidney disease due to diabetes mellitus     | 208<br>(146 - 288)     | 0<br>(0 - 1)       | 0<br>(0 - 0)      | 23<br>(14 - 35)    | 75<br>(49 - 105)   | 109<br>(72 - 166)  |
| Chronic kidney disease due to hypertension          | 89<br>(39 - 125)       | 1<br>(1 - 2)       | 0<br>(0 - 1)      | 15<br>(7 - 23)     | 21<br>(7 - 33)     | 51<br>(22 - 76)    |
| Chronic kidney disease due to glomerulonephritis    | 14<br>(8 - 20)         | 1<br>(1 - 2)       | 1<br>(1 - 1)      | 6<br>(3 - 9)       | 3<br>(1 - 5)       | 3<br>(1 - 5)       |
| Chronic kidney disease due to other causes          | 186<br>(89 - 259)      | 2<br>(1 - 4)       | 2<br>(1 - 3)      | 29<br>(16 - 45)    | 48<br>(18 - 75)    | 105<br>(46 - 152)  |
| Urinary diseases and male infertility               | 59<br>(32 - 77)        | 2<br>(1 - 2)       | 0<br>(0 - 1)      | 6<br>(3 - 7)       | 10<br>(5 - 14)     | 41<br>(20 - 56)    |
| Interstitial nephritis and urinary tract infections | 38<br>(17 - 53)        | 1<br>(0 - 1)       | 0<br>(0 - 0)      | 4<br>(2 - 5)       | 5<br>(2 - 8)       | 28<br>(12 - 40)    |
| Urolithiasis                                        | 1<br>(1 - 2)           | --                 | 0<br>(0 - 0)      | 0<br>(0 - 0)       | 0<br>(0 - 1)       | 1<br>(0 - 1)       |
| Other urinary diseases                              | 20<br>(11 - 29)        | 1<br>(0 - 1)       | 0<br>(0 - 0)      | 2<br>(1 - 2)       | 5<br>(3 - 7)       | 13<br>(6 - 21)     |
| Gynecological diseases                              | --                     | --                 | --                | --                 | --                 | --                 |
| Uterine fibroids                                    | --                     | --                 | --                | --                 | --                 | --                 |
| Polycystic ovarian syndrome                         | --                     | --                 | --                | --                 | --                 | --                 |
| Endometriosis                                       | --                     | --                 | --                | --                 | --                 | --                 |
| Genital prolapse                                    | --                     | --                 | --                | --                 | --                 | --                 |
| Other gynecological diseases                        | --                     | --                 | --                | --                 | --                 | --                 |
| Hemoglobinopathies and hemolytic anemias            | 26<br>(16 - 41)        | 3<br>(2 - 5)       | 3<br>(1 - 4)      | 12<br>(7 - 20)     | 4<br>(3 - 7)       | 4<br>(3 - 7)       |
| Thalassemias                                        | 0<br>(0 - 1)           | 0<br>(0 - 0)       | 0<br>(0 - 0)      | 0<br>(0 - 0)       | 0<br>(0 - 0)       | 0<br>(0 - 0)       |
| Sickle cell disorders                               | 14<br>(9 - 23)         | 2<br>(1 - 4)       | 2<br>(1 - 3)      | 8<br>(5 - 14)      | 2<br>(1 - 3)       | 0<br>(0 - 0)       |
| G6PD deficiency                                     | 2<br>(1 - 2)           | 0<br>(0 - 1)       | 0<br>(0 - 0)      | 1<br>(0 - 1)       | 0<br>(0 - 0)       | 0<br>(0 - 0)       |
| Other hemoglobinopathies and hemolytic anemias      | 10<br>(6 - 16)         | 0<br>(0 - 1)       | 0<br>(0 - 1)      | 3<br>(2 - 5)       | 2<br>(1 - 3)       | 4<br>(2 - 6)       |
| Endocrine, metabolic, blood, and immune disorders   | 33<br>(23 - 73)        | 4<br>(2 - 11)      | 1<br>(1 - 2)      | 7<br>(5 - 15)      | 9<br>(6 - 21)      | 11<br>(7 - 24)     |
| Musculoskeletal disorders                           | 16<br>(8 - 20)         | --                 | 1<br>(0 - 1)      | 4<br>(2 - 6)       | 4<br>(2 - 5)       | 7<br>(3 - 10)      |
| Rheumatoid arthritis                                | 3<br>(1 - 4)           | --                 | 0<br>(0 - 0)      | 0<br>(0 - 0)       | 1<br>(0 - 1)       | 2<br>(1 - 3)       |
| Other musculoskeletal disorders                     | 13<br>(6 - 17)         | --                 | 1<br>(0 - 1)      | 4<br>(2 - 5)       | 3<br>(2 - 4)       | 5<br>(2 - 8)       |
| Other non-communicable diseases                     | 260<br>(218 - 304)     | 203<br>(165 - 246) | 12<br>(9 - 17)    | 14<br>(10 - 20)    | 6<br>(3 - 8)       | 25<br>(10 - 36)    |
| Congenital anomalies                                | 224<br>(184 - 267)     | 198<br>(161 - 240) | 12<br>(9 - 16)    | 12<br>(8 - 17)     | 1<br>(1 - 1)       | 1<br>(1 - 2)       |
| Neural tube defects                                 | 5<br>(3 - 9)           | 5<br>(3 - 9)       | 0<br>(0 - 0)      | 0<br>(0 - 0)       | 0<br>(0 - 0)       | 0<br>(0 - 0)       |
| Congenital heart anomalies                          | 113<br>(86 - 146)      | 99<br>(74 - 130)   | 6<br>(4 - 10)     | 7<br>(5 - 11)      | 0<br>(0 - 0)       | 0<br>(0 - 0)       |
| Cleft lip and cleft palate                          | 1<br>(0 - 1)           | 1<br>(0 - 1)       | --                | --                 | --                 | --                 |
| Down syndrome                                       | 4<br>(2 - 7)           | 3<br>(1 - 6)       | 0<br>(0 - 1)      | 1<br>(0 - 1)       | 0<br>(0 - 0)       | 0<br>(0 - 0)       |
| Chromosomal unbalanced rearrangements               | 2<br>(1 - 4)           | 2<br>(1 - 4)       | 0<br>(0 - 0)      | 0<br>(0 - 0)       | 0<br>(0 - 0)       | 0<br>(0 - 0)       |
| Other congenital anomalies                          | 99<br>(72 - 129)       | 89<br>(63 - 116)   | 5<br>(3 - 8)      | 3<br>(2 - 5)       | 0<br>(0 - 1)       | 1<br>(1 - 2)       |
| Skin and subcutaneous diseases                      | 34<br>(12 - 46)        | 2<br>(1 - 3)       | 0<br>(0 - 1)      | 3<br>(1 - 4)       | 5<br>(2 - 7)       | 24<br>(9 - 34)     |
| Cellulitis                                          | 1<br>(0 - 2)           | 0<br>(0 - 0)       | 0<br>(0 - 0)      | 0<br>(0 - 0)       | 0<br>(0 - 0)       | 1<br>(0 - 2)       |
| Pyoderma                                            | 11<br>(4 - 15)         | 1<br>(1 - 2)       | 0<br>(0 - 0)      | 1<br>(0 - 2)       | 2<br>(1 - 3)       | 6<br>(2 - 10)      |

Web Table 31- Panama deaths with 95% UI by age, sex, and cause in 2013

| Cause                                           | Males, All Ages          | Males, 0-4 Years | Males, 5-14 Years | Males, 15-49 Years       | Males, 50-69 Years | Males, 70-80 Years |
|-------------------------------------------------|--------------------------|------------------|-------------------|--------------------------|--------------------|--------------------|
| Decubitus ulcer                                 | 20<br>(7 - 29)           | 0<br>(0 - 0)     | 0<br>(0 - 0)      | 1<br>(0 - 2)             | 3<br>(1 - 4)       | 17<br>(6 - 25)     |
| Other skin and subcutaneous diseases            | 1<br>(0 - 2)             | 0<br>(0 - 0)     | 0<br>(0 - 0)      | 0<br>(0 - 1)             | 0<br>(0 - 0)       | 0<br>(0 - 1)       |
| Sudden infant death syndrome                    | 3<br>(1 - 8)             | 3<br>(1 - 8)     | --                | --                       | --                 | --                 |
| Injuries                                        | 1,904<br>(1,593 - 2,261) | 75<br>(56 - 98)  | 63<br>(54 - 72)   | 1,260<br>(1,029 - 1,539) | 287<br>(229 - 351) | 219<br>(185 - 270) |
| Transport injuries                              | 597<br>(473 - 807)       | 11<br>(7 - 17)   | 21<br>(16 - 28)   | 386<br>(292 - 535)       | 111<br>(84 - 149)  | 68<br>(52 - 95)    |
| Road injuries                                   | 584<br>(461 - 786)       | 11<br>(7 - 16)   | 21<br>(16 - 27)   | 377<br>(286 - 524)       | 109<br>(82 - 146)  | 66<br>(51 - 93)    |
| Pedestrian road injuries                        | 257<br>(189 - 356)       | 7<br>(4 - 11)    | 11<br>(8 - 15)    | 131<br>(88 - 191)        | 59<br>(41 - 82)    | 49<br>(38 - 70)    |
| Cyclist road injuries                           | 39<br>(27 - 56)          | 0<br>(0 - 1)     | 3<br>(2 - 4)      | 24<br>(17 - 36)          | 8<br>(5 - 12)      | 4<br>(2 - 6)       |
| Motorcyclist road injuries                      | 26<br>(16 - 38)          | 0<br>(0 - 0)     | 0<br>(0 - 0)      | 21<br>(13 - 32)          | 3<br>(2 - 5)       | 1<br>(0 - 2)       |
| Motor vehicle road injuries                     | 249<br>(177 - 351)       | 3<br>(2 - 5)     | 6<br>(4 - 9)      | 194<br>(139 - 276)       | 35<br>(22 - 54)    | 11<br>(7 - 17)     |
| Other road injuries                             | 14<br>(8 - 24)           | 0<br>(0 - 1)     | 1<br>(1 - 2)      | 7<br>(4 - 12)            | 3<br>(2 - 6)       | 1<br>(1 - 3)       |
| Other transport injuries                        | 13<br>(9 - 21)           | 0<br>(0 - 1)     | 1<br>(0 - 1)      | 9<br>(6 - 15)            | 2<br>(2 - 4)       | 1<br>(1 - 2)       |
| Unintentional injuries                          | 508<br>(414 - 636)       | 56<br>(41 - 78)  | 31<br>(24 - 40)   | 216<br>(160 - 289)       | 86<br>(67 - 109)   | 119<br>(94 - 155)  |
| Falls                                           | 107<br>(79 - 134)        | 3<br>(2 - 4)     | 3<br>(2 - 3)      | 32<br>(21 - 42)          | 25<br>(17 - 33)    | 45<br>(32 - 66)    |
| Drowning                                        | 175<br>(122 - 275)       | 15<br>(8 - 28)   | 17<br>(12 - 27)   | 106<br>(69 - 169)        | 25<br>(17 - 42)    | 11<br>(7 - 17)     |
| Fire, heat, and hot substances                  | 17<br>(11 - 23)          | 3<br>(2 - 6)     | 1<br>(0 - 1)      | 5<br>(3 - 7)             | 2<br>(2 - 4)       | 6<br>(3 - 9)       |
| Poisonings                                      | 13<br>(6 - 17)           | 2<br>(1 - 3)     | 0<br>(0 - 1)      | 4<br>(2 - 6)             | 3<br>(1 - 4)       | 4<br>(2 - 6)       |
| Exposure to mechanical forces                   | 40<br>(32 - 61)          | 3<br>(2 - 5)     | 2<br>(2 - 4)      | 26<br>(19 - 38)          | 6<br>(5 - 10)      | 3<br>(2 - 4)       |
| Unintentional firearm injuries                  | 5<br>(4 - 8)             | 0<br>(0 - 0)     | 0<br>(0 - 1)      | 4<br>(3 - 6)             | 1<br>(0 - 1)       | 0<br>(0 - 0)       |
| Unintentional suffocation                       | 4<br>(3 - 8)             | 2<br>(1 - 4)     | 0<br>(0 - 1)      | 1<br>(1 - 2)             | 0<br>(0 - 1)       | 0<br>(0 - 1)       |
| Other exposure to mechanical forces             | 31<br>(23 - 49)          | 1<br>(1 - 2)     | 2<br>(1 - 3)      | 21<br>(15 - 32)          | 5<br>(4 - 9)       | 2<br>(2 - 3)       |
| Adverse effects of medical treatment            | 23<br>(18 - 35)          | 3<br>(2 - 5)     | 1<br>(0 - 1)      | 4<br>(3 - 7)             | 4<br>(3 - 7)       | 11<br>(8 - 20)     |
| Animal contact                                  | 23<br>(11 - 30)          | 2<br>(1 - 5)     | 3<br>(2 - 5)      | 7<br>(3 - 10)            | 7<br>(3 - 10)      | 4<br>(1 - 6)       |
| Venomous animal contact                         | 21<br>(9 - 27)           | 2<br>(1 - 4)     | 3<br>(1 - 4)      | 7<br>(3 - 9)             | 6<br>(3 - 9)       | 4<br>(1 - 5)       |
| Non-venomous animal contact                     | 2<br>(1 - 3)             | 0<br>(0 - 1)     | 0<br>(0 - 1)      | 0<br>(0 - 1)             | 1<br>(0 - 1)       | 1<br>(0 - 1)       |
| Foreign body                                    | 76<br>(42 - 125)         | 24<br>(13 - 39)  | 2<br>(1 - 3)      | 10<br>(6 - 17)           | 8<br>(4 - 12)      | 32<br>(17 - 60)    |
| Pulmonary aspiration and foreign body in airway | 75<br>(41 - 124)         | 24<br>(13 - 39)  | 2<br>(1 - 3)      | 10<br>(5 - 16)           | 8<br>(4 - 12)      | 32<br>(17 - 60)    |
| Foreign body in other body part                 | 1<br>(0 - 1)             | 0<br>(0 - 0)     | 0<br>(0 - 0)      | 0<br>(0 - 1)             | 0<br>(0 - 0)       | 0<br>(0 - 0)       |
| Other unintentional injuries                    | 33<br>(24 - 46)          | 1<br>(1 - 3)     | 2<br>(1 - 3)      | 22<br>(14 - 33)          | 5<br>(3 - 9)       | 3<br>(2 - 6)       |
| Self-harm and interpersonal violence            | 798<br>(546 - 1,019)     | 8<br>(3 - 15)    | 11<br>(6 - 16)    | 657<br>(438 - 853)       | 89<br>(61 - 119)   | 33<br>(24 - 45)    |
| Self-harm                                       | 234<br>(181 - 313)       | --               | 3<br>(2 - 4)      | 166<br>(124 - 225)       | 44<br>(32 - 61)    | 21<br>(16 - 32)    |
| Interpersonal violence                          | 564<br>(318 - 751)       | 8<br>(3 - 15)    | 8<br>(3 - 13)     | 491<br>(274 - 660)       | 46<br>(22 - 70)    | 11<br>(5 - 20)     |
| Assault by firearm                              | 398<br>(193 - 559)       | 2<br>(0 - 4)     | 6<br>(2 - 10)     | 362<br>(176 - 512)       | 26<br>(10 - 42)    | 3<br>(1 - 5)       |
| Assault by sharp object                         | 119<br>(56 - 225)        | 1<br>(0 - 2)     | 1<br>(0 - 2)      | 102<br>(48 - 196)        | 12<br>(5 - 22)     | 4<br>(1 - 6)       |
| Assault by other means                          | 47<br>(23 - 77)          | 5<br>(2 - 10)    | 2<br>(1 - 3)      | 27<br>(13 - 49)          | 7<br>(3 - 13)      | 5<br>(2 - 9)       |

Web Table 31- Panama deaths with 95% UI by age, sex, and cause in 2013

| Cause                                                             | Females, All Ages        | Females, 0-4 Years | Females, 5-14 Years | Females, 15-49 Years | Females, 50-69 Years     | Females, 70-80 Years     |
|-------------------------------------------------------------------|--------------------------|--------------------|---------------------|----------------------|--------------------------|--------------------------|
| All causes                                                        | 8,184<br>(7,441 - 9,114) | 620<br>(543 - 713) | 100<br>(91 - 111)   | 933<br>(775 - 1,111) | 1,481<br>(1,250 - 1,743) | 5,051<br>(4,645 - 5,499) |
| Communicable, maternal, neonatal, and nutritional diseases        | 1,042<br>(911 - 1,184)   | 344<br>(291 - 403) | 25<br>(21 - 30)     | 175<br>(150 - 213)   | 93<br>(76 - 112)         | 404<br>(305 - 514)       |
| HIV/AIDS and tuberculosis                                         | 132<br>(102 - 179)       | 4<br>(3 - 6)       | 2<br>(1 - 3)        | 71<br>(52 - 108)     | 31<br>(23 - 42)          | 24<br>(16 - 33)          |
| Tuberculosis                                                      | 74<br>(52 - 94)          | 4<br>(2 - 6)       | 2<br>(1 - 3)        | 26<br>(18 - 35)      | 19<br>(13 - 26)          | 23<br>(15 - 32)          |
| HIV/AIDS                                                          | 58<br>(35 - 107)         | 0<br>(0 - 1)       | 0<br>(0 - 0)        | 44<br>(27 - 84)      | 12<br>(6 - 22)           | 1<br>(0 - 3)             |
| HIV/AIDS resulting in mycobacterial infection                     | 3<br>(2 - 5)             | 0<br>(0 - 0)       | 0<br>(0 - 0)        | 2<br>(1 - 4)         | 1<br>(0 - 1)             | 0<br>(0 - 0)             |
| HIV/AIDS resulting in other diseases                              | 55<br>(34 - 101)         | 0<br>(0 - 1)       | 0<br>(0 - 0)        | 42<br>(26 - 79)      | 11<br>(6 - 21)           | 1<br>(0 - 3)             |
| Diarrhea, lower respiratory, and other common infectious diseases | 562<br>(449 - 687)       | 124<br>(101 - 150) | 17<br>(14 - 22)     | 47<br>(36 - 62)      | 51<br>(37 - 65)          | 322<br>(228 - 426)       |
| Diarrheal diseases                                                | 96<br>(73 - 125)         | 39<br>(24 - 57)    | 5<br>(3 - 7)        | 11<br>(8 - 15)       | 9<br>(6 - 12)            | 33<br>(20 - 54)          |
| Intestinal infectious diseases                                    | 17<br>(8 - 32)           | 6<br>(3 - 11)      | 4<br>(2 - 8)        | 5<br>(2 - 12)        | 1<br>(0 - 2)             | 0<br>(0 - 1)             |
| Typhoid fever                                                     | 13<br>(6 - 24)           | 4<br>(2 - 8)       | 3<br>(2 - 6)        | 4<br>(2 - 9)         | 1<br>(0 - 2)             | 0<br>(0 - 1)             |
| Paratyphoid fever                                                 | 4<br>(2 - 7)             | 1<br>(1 - 3)       | 1<br>(0 - 2)        | 1<br>(0 - 3)         | 0<br>(0 - 0)             | 0<br>(0 - 0)             |
| Other intestinal infectious diseases                              | 0<br>(0 - 3)             | 0<br>(0 - 2)       | 0<br>(0 - 0)        | 0<br>(0 - 1)         | 0<br>(0 - 1)             | 0<br>(0 - 0)             |
| Lower respiratory infections                                      | 410<br>(303 - 523)       | 61<br>(44 - 81)    | 5<br>(3 - 7)        | 24<br>(16 - 31)      | 37<br>(25 - 49)          | 283<br>(193 - 384)       |
| Upper respiratory infections                                      | 0<br>(0 - 1)             | 0<br>(0 - 0)       | 0<br>(0 - 0)        | 0<br>(0 - 0)         | 0<br>(0 - 0)             | 0<br>(0 - 1)             |
| Otitis media                                                      | 0<br>(0 - 0)             | 0<br>(0 - 0)       | 0<br>(0 - 0)        | 0<br>(0 - 0)         | 0<br>(0 - 0)             | 0<br>(0 - 0)             |
| Meningitis                                                        | 24<br>(19 - 29)          | 12<br>(8 - 16)     | 2<br>(1 - 2)        | 4<br>(3 - 6)         | 2<br>(2 - 3)             | 4<br>(3 - 5)             |
| Pneumococcal meningitis                                           | 7<br>(6 - 9)             | 3<br>(2 - 5)       | 1<br>(0 - 1)        | 1<br>(1 - 2)         | 1<br>(1 - 1)             | 1<br>(1 - 2)             |
| H influenzae type B meningitis                                    | 6<br>(4 - 8)             | 4<br>(3 - 6)       | 0<br>(0 - 1)        | 0<br>(0 - 1)         | 0<br>(0 - 0)             | 0<br>(0 - 1)             |
| Meningococcal meningitis                                          | 3<br>(2 - 4)             | 1<br>(1 - 2)       | 0<br>(0 - 0)        | 1<br>(0 - 1)         | 0<br>(0 - 0)             | 1<br>(0 - 1)             |
| Other meningitis                                                  | 8<br>(6 - 10)            | 3<br>(2 - 5)       | 0<br>(0 - 1)        | 2<br>(1 - 3)         | 1<br>(1 - 2)             | 2<br>(1 - 2)             |
| Encephalitis                                                      | 8<br>(6 - 12)            | 2<br>(1 - 4)       | 1<br>(1 - 2)        | 2<br>(2 - 3)         | 1<br>(1 - 2)             | 1<br>(1 - 2)             |
| Diphtheria                                                        | 0<br>(0 - 1)             | 0<br>(0 - 1)       | 0<br>(0 - 0)        | 0<br>(0 - 0)         | 0<br>(0 - 0)             | --                       |
| Whooping cough                                                    | 5<br>(2 - 15)            | 5<br>(1 - 15)      | 0<br>(0 - 1)        | 0<br>(0 - 0)         | 0<br>(0 - 0)             | --                       |
| Tetanus                                                           | 0<br>(0 - 0)             | 0<br>(0 - 0)       | 0<br>(0 - 0)        | 0<br>(0 - 0)         | 0<br>(0 - 0)             | 0<br>(0 - 0)             |
| Measles                                                           | 0<br>(0 - 0)             | 0<br>(0 - 0)       | 0<br>(0 - 0)        | 0<br>(0 - 0)         | 0<br>(0 - 0)             | --                       |
| Varicella and herpes zoster                                       | 1<br>(0 - 4)             | 0<br>(0 - 1)       | 0<br>(0 - 0)        | 0<br>(0 - 1)         | 0<br>(0 - 0)             | 1<br>(0 - 3)             |
| Neglected tropical diseases and malaria                           | 7<br>(5 - 13)            | 2<br>(1 - 6)       | 1<br>(0 - 2)        | 1<br>(1 - 3)         | 1<br>(1 - 3)             | 1<br>(1 - 4)             |
| Malaria                                                           | 0<br>(0 - 0)             | 0<br>(0 - 0)       | 0<br>(0 - 0)        | 0<br>(0 - 0)         | 0<br>(0 - 0)             | 0<br>(0 - 0)             |
| Chagas disease                                                    | 1<br>(0 - 5)             | 0<br>(0 - 0)       | 0<br>(0 - 0)        | 0<br>(0 - 1)         | 0<br>(0 - 2)             | 0<br>(0 - 2)             |
| Leishmaniasis                                                     | 0<br>(0 - 0)             | 0<br>(0 - 0)       | 0<br>(0 - 0)        | 0<br>(0 - 0)         | 0<br>(0 - 0)             | 0<br>(0 - 0)             |
| Visceral leishmaniasis                                            | 0<br>(0 - 0)             | 0<br>(0 - 0)       | 0<br>(0 - 0)        | 0<br>(0 - 0)         | 0<br>(0 - 0)             | 0<br>(0 - 0)             |
| Cysticercosis                                                     | 0<br>(0 - 1)             | 0<br>(0 - 0)       | 0<br>(0 - 0)        | 0<br>(0 - 0)         | 0<br>(0 - 0)             | 0<br>(0 - 0)             |
| Cystic echinococcosis                                             | 0<br>(0 - 0)             | 0<br>(0 - 0)       | 0<br>(0 - 0)        | 0<br>(0 - 0)         | 0<br>(0 - 0)             | 0<br>(0 - 0)             |
| Dengue                                                            | 2<br>(1 - 3)             | 0<br>(0 - 1)       | 0<br>(0 - 0)        | 1<br>(0 - 1)         | 0<br>(0 - 0)             | 0<br>(0 - 1)             |
| Yellow fever                                                      | 0<br>(0 - 0)             | 0<br>(0 - 0)       | 0<br>(0 - 0)        | 0<br>(0 - 0)         | 0<br>(0 - 0)             | 0<br>(0 - 0)             |
| Rabies                                                            | 0<br>(0 - 0)             | 0<br>(0 - 0)       | 0<br>(0 - 0)        | 0<br>(0 - 0)         | 0<br>(0 - 0)             | 0<br>(0 - 0)             |
| Intestinal nematode infections                                    | 1<br>(0 - 5)             | 0<br>(0 - 4)       | 0<br>(0 - 1)        | 0<br>(0 - 1)         | 0<br>(0 - 0)             | 0<br>(0 - 1)             |
| Ascariasis                                                        | 1<br>(0 - 5)             | 0<br>(0 - 4)       | 0<br>(0 - 1)        | 0<br>(0 - 1)         | 0<br>(0 - 0)             | 0<br>(0 - 1)             |
| Other neglected tropical diseases                                 | 2<br>(1 - 4)             | 1<br>(1 - 3)       | 0<br>(0 - 0)        | 0<br>(0 - 0)         | 0<br>(0 - 0)             | 0<br>(0 - 1)             |

Web Table 31- Panama deaths with 95% UI by age, sex, and cause in 2013

| Cause                                                            | Females, All Ages        | Females, 0-4 Years | Females, 5-14 Years | Females, 15-49 Years | Females, 50-69 Years     | Females, 70-80 Years     |
|------------------------------------------------------------------|--------------------------|--------------------|---------------------|----------------------|--------------------------|--------------------------|
| Maternal disorders                                               | 42<br>(31 - 56)          | --                 | 0<br>(0 - 1)        | 42<br>(31 - 56)      | --                       | --                       |
| Maternal hemorrhage                                              | 6<br>(4 - 9)             | --                 | 0<br>(0 - 0)        | 6<br>(4 - 9)         | --                       | --                       |
| Maternal sepsis and other maternal infections                    | 4<br>(3 - 6)             | --                 | 0<br>(0 - 0)        | 4<br>(3 - 6)         | --                       | --                       |
| Maternal hypertensive disorders                                  | 7<br>(5 - 10)            | --                 | 0<br>(0 - 0)        | 7<br>(4 - 10)        | --                       | --                       |
| Maternal obstructed labor                                        | 3<br>(2 - 5)             | --                 | 0<br>(0 - 0)        | 3<br>(2 - 5)         | --                       | --                       |
| Maternal abortive outcome                                        | 6<br>(4 - 9)             | --                 | 0<br>(0 - 0)        | 6<br>(4 - 9)         | --                       | --                       |
| Indirect maternal deaths                                         | 6<br>(4 - 9)             | --                 | 0<br>(0 - 0)        | 6<br>(4 - 9)         | --                       | --                       |
| Late maternal deaths                                             | 3<br>(2 - 5)             | --                 | 0<br>(0 - 0)        | 3<br>(2 - 5)         | --                       | --                       |
| Maternal deaths aggravated by HIV/AIDS                           | 0<br>(0 - 0)             | --                 | --                  | 0<br>(0 - 0)         | --                       | --                       |
| Other maternal disorders                                         | 6<br>(4 - 9)             | --                 | 0<br>(0 - 0)        | 6<br>(4 - 9)         | --                       | --                       |
| Neonatal disorders                                               | 167<br>(131 - 211)       | 167<br>(131 - 211) | --                  | --                   | --                       | --                       |
| Neonatal preterm birth complications                             | 75<br>(48 - 103)         | 75<br>(48 - 103)   | --                  | --                   | --                       | --                       |
| Neonatal encephalopathy due to birth asphyxia and trauma         | 40<br>(26 - 61)          | 40<br>(26 - 61)    | --                  | --                   | --                       | --                       |
| Neonatal sepsis and other neonatal infections                    | 35<br>(17 - 62)          | 35<br>(17 - 62)    | --                  | --                   | --                       | --                       |
| Hemolytic disease and other neonatal jaundice                    | 0<br>(0 - 1)             | 0<br>(0 - 1)       | --                  | --                   | --                       | --                       |
| Other neonatal disorders                                         | 16<br>(10 - 26)          | 16<br>(10 - 26)    | --                  | --                   | --                       | --                       |
| Nutritional deficiencies                                         | 114<br>(91 - 143)        | 39<br>(28 - 52)    | 4<br>(3 - 5)        | 11<br>(8 - 14)       | 8<br>(6 - 11)            | 52<br>(37 - 73)          |
| Protein-energy malnutrition                                      | 83<br>(57 - 109)         | 36<br>(24 - 48)    | 3<br>(2 - 4)        | 6<br>(3 - 8)         | 5<br>(3 - 7)             | 34<br>(18 - 52)          |
| Iodine deficiency                                                | 0<br>(0 - 0)             | 0<br>(0 - 0)       | 0<br>(0 - 0)        | 0<br>(0 - 0)         | 0<br>(0 - 0)             | 0<br>(0 - 0)             |
| Iron-deficiency anemia                                           | 22<br>(11 - 43)          | 2<br>(1 - 7)       | 1<br>(0 - 1)        | 4<br>(2 - 7)         | 2<br>(1 - 4)             | 13<br>(6 - 27)           |
| Other nutritional deficiencies                                   | 9<br>(5 - 18)            | 1<br>(0 - 4)       | 0<br>(0 - 0)        | 1<br>(1 - 2)         | 1<br>(1 - 3)             | 5<br>(2 - 12)            |
| Other communicable, maternal, neonatal, and nutritional diseases | 18<br>(12 - 26)          | 7<br>(3 - 14)      | 1<br>(1 - 2)        | 3<br>(2 - 4)         | 2<br>(1 - 3)             | 4<br>(3 - 6)             |
| Sexually transmitted diseases excluding HIV                      | 5<br>(1 - 12)            | 4<br>(0 - 11)      | 0<br>(0 - 1)        | 0<br>(0 - 0)         | 0<br>(0 - 0)             | 0<br>(0 - 1)             |
| Syphilis                                                         | 5<br>(0 - 12)            | 4<br>(0 - 11)      | 0<br>(0 - 1)        | 0<br>(0 - 0)         | 0<br>(0 - 0)             | 0<br>(0 - 0)             |
| Chlamydial infection                                             | 0<br>(0 - 0)             | --                 | 0<br>(0 - 0)        | 0<br>(0 - 0)         | 0<br>(0 - 0)             | 0<br>(0 - 0)             |
| Gonococcal infection                                             | 0<br>(0 - 0)             | --                 | 0<br>(0 - 0)        | 0<br>(0 - 0)         | 0<br>(0 - 0)             | 0<br>(0 - 0)             |
| Other sexually transmitted diseases                              | 0<br>(0 - 0)             | --                 | 0<br>(0 - 0)        | 0<br>(0 - 0)         | 0<br>(0 - 0)             | 0<br>(0 - 0)             |
| Hepatitis                                                        | 3<br>(2 - 3)             | 0<br>(0 - 0)       | 0<br>(0 - 0)        | 1<br>(1 - 2)         | 1<br>(0 - 1)             | 1<br>(0 - 1)             |
| Acute hepatitis A                                                | 1<br>(0 - 1)             | 0<br>(0 - 0)       | 0<br>(0 - 0)        | 0<br>(0 - 1)         | 0<br>(0 - 0)             | 0<br>(0 - 0)             |
| Acute hepatitis B                                                | 1<br>(1 - 2)             | 0<br>(0 - 0)       | 0<br>(0 - 0)        | 0<br>(0 - 1)         | 0<br>(0 - 1)             | 0<br>(0 - 1)             |
| Acute hepatitis C                                                | 1<br>(0 - 1)             | --                 | 0<br>(0 - 0)        | 0<br>(0 - 1)         | 0<br>(0 - 0)             | 0<br>(0 - 0)             |
| Other infectious diseases                                        | 10<br>(7 - 13)           | 3<br>(2 - 4)       | 1<br>(0 - 1)        | 2<br>(1 - 3)         | 1<br>(1 - 2)             | 3<br>(2 - 5)             |
| Non-communicable diseases                                        | 6,680<br>(6,001 - 7,467) | 224<br>(184 - 269) | 45<br>(39 - 52)     | 578<br>(464 - 707)   | 1,329<br>(1,116 - 1,569) | 4,504<br>(4,126 - 4,929) |
| Neoplasms                                                        | 1,510<br>(1,293 - 1,777) | 13<br>(10 - 17)    | 16<br>(13 - 19)     | 264<br>(212 - 327)   | 499<br>(417 - 601)       | 717<br>(626 - 824)       |
| Esophageal cancer                                                | 18<br>(12 - 23)          | --                 | --                  | 1<br>(1 - 1)         | 5<br>(4 - 7)             | 12<br>(8 - 16)           |
| Stomach cancer                                                   | 149<br>(120 - 179)       | --                 | --                  | 19<br>(14 - 24)      | 42<br>(33 - 53)          | 88<br>(70 - 109)         |
| Liver cancer                                                     | 72<br>(56 - 88)          | --                 | 0<br>(0 - 0)        | 7<br>(5 - 9)         | 25<br>(19 - 33)          | 40<br>(28 - 52)          |
| Liver cancer due to hepatitis B                                  | 11<br>(5 - 20)           | --                 | 0<br>(0 - 0)        | 2<br>(1 - 3)         | 5<br>(2 - 9)             | 5<br>(2 - 10)            |
| Liver cancer due to hepatitis C                                  | 34<br>(23 - 47)          | --                 | 0<br>(0 - 0)        | 3<br>(1 - 4)         | 12<br>(8 - 18)           | 19<br>(12 - 28)          |
| Liver cancer due to alcohol use                                  | 18<br>(9 - 28)           | --                 | --                  | 1<br>(0 - 2)         | 5<br>(3 - 9)             | 12<br>(6 - 19)           |

Web Table 31- Panama deaths with 95% UI by age, sex, and cause in 2013

| Cause                                         | Females, All Ages        | Females, 0-4 Years | Females, 5-14 Years | Females, 15-49 Years | Females, 50-69 Years | Females, 70-80 Years     |
|-----------------------------------------------|--------------------------|--------------------|---------------------|----------------------|----------------------|--------------------------|
| Liver cancer due to other causes              | 8<br>(4 - 13)            | --                 | 0<br>(0 - 0)        | 1<br>(1 - 2)         | 3<br>(1 - 5)         | 3<br>(2 - 7)             |
| Larynx cancer                                 | 3<br>(2 - 5)             | --                 | --                  | 0<br>(0 - 1)         | 1<br>(0 - 2)         | 2<br>(1 - 3)             |
| Tracheal, bronchus and lung cancer            | 114<br>(95 - 138)        | --                 | --                  | 10<br>(7 - 13)       | 37<br>(29 - 48)      | 68<br>(55 - 84)          |
| Breast cancer                                 | 222<br>(180 - 271)       | --                 | --                  | 57<br>(43 - 74)      | 91<br>(72 - 115)     | 73<br>(58 - 91)          |
| Cervical cancer                               | 183<br>(145 - 237)       | --                 | --                  | 57<br>(43 - 78)      | 64<br>(48 - 86)      | 62<br>(48 - 82)          |
| Uterine cancer                                | 29<br>(17 - 38)          | --                 | --                  | 2<br>(1 - 3)         | 11<br>(7 - 15)       | 16<br>(9 - 21)           |
| Prostate cancer                               | --                       | --                 | --                  | --                   | --                   | --                       |
| Colon and rectum cancer                       | 155<br>(128 - 187)       | --                 | --                  | 14<br>(11 - 17)      | 47<br>(38 - 58)      | 94<br>(75 - 118)         |
| Lip and oral cavity cancer                    | 17<br>(13 - 27)          | --                 | --                  | 2<br>(1 - 2)         | 4<br>(3 - 6)         | 12<br>(9 - 19)           |
| Nasopharynx cancer                            | 4<br>(3 - 7)             | --                 | 0<br>(0 - 0)        | 1<br>(0 - 1)         | 1<br>(1 - 2)         | 2<br>(1 - 3)             |
| Other pharynx cancer                          | 4<br>(3 - 5)             | --                 | --                  | 0<br>(0 - 0)         | 1<br>(1 - 2)         | 3<br>(2 - 4)             |
| Gallbladder and biliary tract cancer          | 31<br>(21 - 55)          | --                 | --                  | 2<br>(1 - 3)         | 11<br>(7 - 18)       | 19<br>(12 - 34)          |
| Pancreatic cancer                             | 73<br>(59 - 90)          | --                 | --                  | 4<br>(3 - 6)         | 25<br>(19 - 31)      | 44<br>(34 - 56)          |
| Malignant skin melanoma                       | 9<br>(7 - 11)            | --                 | --                  | 2<br>(2 - 3)         | 3<br>(2 - 4)         | 4<br>(3 - 5)             |
| Non-melanoma skin cancer                      | 8<br>(5 - 12)            | --                 | --                  | 1<br>(1 - 1)         | 1<br>(1 - 2)         | 6<br>(4 - 9)             |
| Ovarian cancer                                | 68<br>(56 - 84)          | --                 | --                  | 13<br>(10 - 17)      | 26<br>(21 - 34)      | 29<br>(23 - 36)          |
| Testicular cancer                             | --                       | --                 | --                  | --                   | --                   | --                       |
| Kidney cancer                                 | 22<br>(18 - 27)          | 0<br>(0 - 0)       | 0<br>(0 - 0)        | 3<br>(2 - 3)         | 8<br>(6 - 10)        | 11<br>(9 - 14)           |
| Bladder cancer                                | 15<br>(9 - 20)           | --                 | --                  | 1<br>(1 - 2)         | 4<br>(2 - 5)         | 10<br>(6 - 14)           |
| Brain and nervous system cancer               | 45<br>(20 - 56)          | 3<br>(1 - 4)       | 3<br>(1 - 4)        | 13<br>(6 - 18)       | 14<br>(6 - 18)       | 12<br>(6 - 15)           |
| Thyroid cancer                                | 12<br>(9 - 16)           | --                 | 0<br>(0 - 0)        | 1<br>(1 - 2)         | 4<br>(3 - 5)         | 7<br>(5 - 10)            |
| Mesothelioma                                  | 1<br>(1 - 1)             | --                 | --                  | 0<br>(0 - 0)         | 0<br>(0 - 1)         | 0<br>(0 - 1)             |
| Hodgkin lymphoma                              | 3<br>(1 - 4)             | 0<br>(0 - 0)       | 0<br>(0 - 0)        | 1<br>(0 - 1)         | 1<br>(0 - 1)         | 1<br>(0 - 2)             |
| Non-Hodgkin lymphoma                          | 51<br>(32 - 65)          | 1<br>(1 - 2)       | 1<br>(1 - 1)        | 8<br>(5 - 12)        | 17<br>(9 - 23)       | 24<br>(13 - 33)          |
| Multiple myeloma                              | 23<br>(17 - 31)          | --                 | --                  | 2<br>(1 - 2)         | 10<br>(7 - 13)       | 12<br>(8 - 16)           |
| Leukemia                                      | 75<br>(62 - 89)          | 5<br>(3 - 7)       | 7<br>(5 - 9)        | 24<br>(19 - 30)      | 17<br>(13 - 22)      | 21<br>(16 - 27)          |
| Other neoplasms                               | 103<br>(78 - 143)        | 4<br>(2 - 6)       | 4<br>(3 - 6)        | 21<br>(15 - 29)      | 29<br>(20 - 43)      | 46<br>(31 - 66)          |
| Cardiovascular diseases                       | 2,559<br>(2,224 - 3,064) | 4<br>(3 - 6)       | 3<br>(3 - 5)        | 118<br>(90 - 153)    | 380<br>(304 - 486)   | 2,053<br>(1,801 - 2,433) |
| Rheumatic heart disease                       | 23<br>(15 - 32)          | 0<br>(0 - 0)       | 1<br>(0 - 1)        | 10<br>(7 - 15)       | 6<br>(4 - 9)         | 5<br>(3 - 7)             |
| Ischemic heart disease                        | 1,193<br>(987 - 1,598)   | 0<br>(0 - 0)       | 0<br>(0 - 1)        | 36<br>(26 - 51)      | 177<br>(137 - 243)   | 979<br>(806 - 1,318)     |
| Cerebrovascular disease                       | 1,040<br>(830 - 1,260)   | 1<br>(1 - 2)       | 1<br>(1 - 1)        | 43<br>(32 - 58)      | 142<br>(110 - 190)   | 853<br>(673 - 1,035)     |
| Ischemic stroke                               | 321<br>(206 - 620)       | 0<br>(0 - 0)       | 0<br>(0 - 0)        | 7<br>(4 - 15)        | 35<br>(21 - 74)      | 278<br>(175 - 539)       |
| Hemorrhagic stroke                            | 719<br>(421 - 901)       | 1<br>(1 - 2)       | 1<br>(1 - 1)        | 36<br>(25 - 47)      | 107<br>(74 - 135)    | 575<br>(318 - 730)       |
| Hypertensive heart disease                    | 88<br>(47 - 129)         | 0<br>(0 - 0)       | 0<br>(0 - 0)        | 3<br>(2 - 4)         | 13<br>(8 - 19)       | 72<br>(36 - 110)         |
| Cardiomyopathy and myocarditis                | 47<br>(34 - 65)          | 1<br>(1 - 2)       | 1<br>(0 - 1)        | 9<br>(7 - 13)        | 8<br>(6 - 11)        | 28<br>(18 - 40)          |
| Atrial fibrillation and flutter               | 9<br>(6 - 14)            | --                 | --                  | 0<br>(0 - 0)         | 1<br>(1 - 1)         | 8<br>(5 - 12)            |
| Aortic aneurysm                               | 25<br>(15 - 39)          | --                 | --                  | 2<br>(1 - 3)         | 4<br>(2 - 6)         | 19<br>(11 - 30)          |
| Peripheral vascular disease                   | 19<br>(12 - 28)          | --                 | --                  | 0<br>(0 - 0)         | 2<br>(1 - 2)         | 17<br>(10 - 26)          |
| Endocarditis                                  | 11<br>(6 - 16)           | 0<br>(0 - 1)       | 0<br>(0 - 0)        | 2<br>(1 - 4)         | 2<br>(1 - 3)         | 6<br>(3 - 9)             |
| Other cardiovascular and circulatory diseases | 103<br>(70 - 141)        | 1<br>(1 - 1)       | 1<br>(0 - 1)        | 11<br>(7 - 16)       | 25<br>(15 - 34)      | 65<br>(41 - 94)          |

Web Table 31- Panama deaths with 95% UI by age, sex, and cause in 2013

| Cause                                               | Females, All Ages  | Females, 0-4 Years | Females, 5-14 Years | Females, 15-49 Years | Females, 50-69 Years | Females, 70-80 Years |
|-----------------------------------------------------|--------------------|--------------------|---------------------|----------------------|----------------------|----------------------|
| Chronic respiratory diseases                        | 458<br>(356 - 563) | 14<br>(10 - 19)    | 2<br>(2 - 3)        | 23<br>(18 - 30)      | 59<br>(46 - 75)      | 361<br>(270 - 454)   |
| Chronic obstructive pulmonary disease               | 370<br>(281 - 460) | 6<br>(4 - 8)       | 1<br>(0 - 1)        | 10<br>(6 - 14)       | 40<br>(30 - 53)      | 314<br>(232 - 398)   |
| Pneumoconiosis                                      | 1<br>(0 - 1)       | 0<br>(0 - 0)       | 0<br>(0 - 0)        | 0<br>(0 - 0)         | 0<br>(0 - 0)         | 0<br>(0 - 1)         |
| Silicosis                                           | 0<br>(0 - 0)       | 0<br>(0 - 0)       | 0<br>(0 - 0)        | 0<br>(0 - 0)         | 0<br>(0 - 0)         | 0<br>(0 - 0)         |
| Asbestosis                                          | 0<br>(0 - 0)       | 0<br>(0 - 0)       | 0<br>(0 - 0)        | 0<br>(0 - 0)         | 0<br>(0 - 0)         | 0<br>(0 - 0)         |
| Coal workers pneumoconiosis                         | 0<br>(0 - 0)       | 0<br>(0 - 0)       | 0<br>(0 - 0)        | 0<br>(0 - 0)         | 0<br>(0 - 0)         | 0<br>(0 - 0)         |
| Other pneumoconiosis                                | 1<br>(0 - 1)       | 0<br>(0 - 0)       | 0<br>(0 - 0)        | 0<br>(0 - 0)         | 0<br>(0 - 0)         | 0<br>(0 - 1)         |
| Asthma                                              | 49<br>(29 - 70)    | 6<br>(4 - 9)       | 1<br>(1 - 2)        | 8<br>(5 - 11)        | 11<br>(7 - 17)       | 23<br>(11 - 37)      |
| Interstitial lung disease and pulmonary sarcoidosis | 30<br>(16 - 47)    | 0<br>(0 - 1)       | 0<br>(0 - 0)        | 5<br>(3 - 8)         | 7<br>(4 - 11)        | 18<br>(8 - 31)       |
| Other chronic respiratory diseases                  | 9<br>(6 - 15)      | 2<br>(1 - 2)       | 0<br>(0 - 0)        | 1<br>(1 - 1)         | 1<br>(0 - 1)         | 6<br>(3 - 11)        |
| Cirrhosis                                           | 161<br>(134 - 193) | 1<br>(1 - 2)       | 1<br>(1 - 2)        | 19<br>(14 - 24)      | 53<br>(42 - 66)      | 87<br>(70 - 106)     |
| Cirrhosis due to hepatitis B                        | 6<br>(3 - 9)       | 0<br>(0 - 0)       | 0<br>(0 - 0)        | 1<br>(0 - 1)         | 2<br>(1 - 3)         | 3<br>(2 - 5)         |
| Cirrhosis due to hepatitis C                        | 90<br>(64 - 118)   | 0<br>(0 - 0)       | 0<br>(0 - 1)        | 10<br>(7 - 14)       | 30<br>(20 - 41)      | 49<br>(33 - 65)      |
| Cirrhosis due to alcohol use                        | 45<br>(27 - 67)    | --                 | --                  | 3<br>(2 - 5)         | 14<br>(8 - 23)       | 28<br>(16 - 42)      |
| Cirrhosis due to other causes                       | 21<br>(12 - 33)    | 1<br>(1 - 2)       | 1<br>(1 - 1)        | 5<br>(3 - 7)         | 7<br>(3 - 13)        | 7<br>(3 - 12)        |
| Digestive diseases                                  | 197<br>(163 - 248) | 3<br>(2 - 4)       | 2<br>(1 - 2)        | 19<br>(14 - 24)      | 32<br>(25 - 40)      | 142<br>(114 - 183)   |
| Peptic ulcer disease                                | 32<br>(21 - 45)    | 0<br>(0 - 0)       | 0<br>(0 - 0)        | 2<br>(2 - 3)         | 5<br>(3 - 8)         | 24<br>(14 - 35)      |
| Gastritis and duodenitis                            | 5<br>(2 - 9)       | 0<br>(0 - 0)       | 0<br>(0 - 0)        | 1<br>(0 - 2)         | 1<br>(0 - 2)         | 3<br>(1 - 5)         |
| Appendicitis                                        | 7<br>(4 - 11)      | 0<br>(0 - 0)       | 0<br>(0 - 0)        | 2<br>(1 - 3)         | 1<br>(1 - 2)         | 3<br>(2 - 6)         |
| Paralytic ileus and intestinal obstruction          | 28<br>(8 - 47)     | 1<br>(0 - 1)       | 1<br>(0 - 1)        | 2<br>(1 - 3)         | 3<br>(1 - 5)         | 22<br>(6 - 38)       |
| Inguinal, femoral, and abdominal hernia             | 10<br>(4 - 26)     | 0<br>(0 - 1)       | 0<br>(0 - 0)        | 1<br>(0 - 1)         | 2<br>(1 - 4)         | 8<br>(3 - 21)        |
| Inflammatory bowel disease                          | 9<br>(6 - 15)      | 0<br>(0 - 1)       | 0<br>(0 - 0)        | 2<br>(1 - 2)         | 1<br>(1 - 2)         | 6<br>(3 - 10)        |
| Vascular intestinal disorders                       | 31<br>(18 - 58)    | 0<br>(0 - 0)       | 0<br>(0 - 0)        | 1<br>(1 - 3)         | 4<br>(2 - 8)         | 26<br>(14 - 47)      |
| Gallbladder and biliary diseases                    | 29<br>(21 - 46)    | 0<br>(0 - 0)       | 0<br>(0 - 0)        | 3<br>(2 - 5)         | 5<br>(4 - 7)         | 21<br>(14 - 35)      |
| Pancreatitis                                        | 15<br>(10 - 23)    | 0<br>(0 - 0)       | 0<br>(0 - 0)        | 2<br>(1 - 3)         | 3<br>(2 - 5)         | 9<br>(6 - 15)        |
| Other digestive diseases                            | 30<br>(21 - 42)    | 1<br>(0 - 1)       | 0<br>(0 - 1)        | 3<br>(2 - 4)         | 5<br>(4 - 7)         | 21<br>(14 - 32)      |
| Neurological disorders                              | 503<br>(382 - 661) | 2<br>(2 - 3)       | 1<br>(1 - 2)        | 16<br>(11 - 20)      | 31<br>(23 - 41)      | 453<br>(334 - 606)   |
| Alzheimer disease and other dementias               | 426<br>(310 - 574) | --                 | --                  | 0<br>(0 - 0)         | 17<br>(11 - 25)      | 408<br>(294 - 553)   |
| Parkinson disease                                   | 41<br>(19 - 58)    | --                 | --                  | 0<br>(0 - 1)         | 4<br>(2 - 6)         | 36<br>(16 - 52)      |
| Epilepsy                                            | 20<br>(13 - 26)    | 1<br>(0 - 1)       | 1<br>(1 - 1)        | 10<br>(7 - 14)       | 3<br>(2 - 4)         | 4<br>(3 - 7)         |
| Multiple sclerosis                                  | 3<br>(2 - 7)       | --                 | --                  | 2<br>(1 - 3)         | 1<br>(1 - 3)         | 0<br>(0 - 1)         |
| Other neurological disorders                        | 14<br>(12 - 17)    | 2<br>(1 - 2)       | 0<br>(0 - 1)        | 3<br>(2 - 4)         | 5<br>(4 - 7)         | 4<br>(3 - 5)         |
| Mental and substance use disorders                  | 11<br>(9 - 14)     | 1<br>(0 - 2)       | 0<br>(0 - 0)        | 6<br>(4 - 8)         | 2<br>(2 - 3)         | 2<br>(2 - 3)         |
| Schizophrenia                                       | 0<br>(0 - 0)       | --                 | --                  | 0<br>(0 - 0)         | 0<br>(0 - 0)         | 0<br>(0 - 0)         |
| Alcohol use disorders                               | 2<br>(1 - 4)       | --                 | --                  | 1<br>(0 - 2)         | 1<br>(0 - 2)         | 0<br>(0 - 1)         |
| Drug use disorders                                  | 9<br>(7 - 11)      | 1<br>(0 - 2)       | --                  | 4<br>(3 - 6)         | 2<br>(1 - 2)         | 2<br>(1 - 3)         |
| Opioid use disorders                                | 2<br>(1 - 2)       | 0<br>(0 - 0)       | --                  | 1<br>(1 - 1)         | 0<br>(0 - 0)         | 0<br>(0 - 1)         |
| Cocaine use disorders                               | 0<br>(0 - 0)       | 0<br>(0 - 0)       | --                  | 0<br>(0 - 0)         | 0<br>(0 - 0)         | 0<br>(0 - 0)         |
| Amphetamine use disorders                           | 0<br>(0 - 0)       | 0<br>(0 - 0)       | --                  | 0<br>(0 - 0)         | 0<br>(0 - 0)         | 0<br>(0 - 0)         |
| Other drug use disorders                            | 6<br>(5 - 8)       | 1<br>(0 - 1)       | --                  | 3<br>(2 - 4)         | 1<br>(1 - 2)         | 1<br>(1 - 2)         |

Web Table 31- Panama deaths with 95% UI by age, sex, and cause in 2013

| Cause                                               | Females, All Ages      | Females, 0-4 Years | Females, 5-14 Years | Females, 15-49 Years | Females, 50-69 Years | Females, 70-80 Years |
|-----------------------------------------------------|------------------------|--------------------|---------------------|----------------------|----------------------|----------------------|
| Eating disorders                                    | 0<br>(0 - 1)           | --                 | 0<br>(0 - 0)        | 0<br>(0 - 0)         | --                   | --                   |
| Anorexia nervosa                                    | 0<br>(0 - 1)           | --                 | 0<br>(0 - 0)        | 0<br>(0 - 0)         | --                   | --                   |
| Diabetes, urogenital, blood, and endocrine diseases | 1,005<br>(840 - 1,183) | 11<br>(9 - 17)     | 7<br>(5 - 8)        | 87<br>(68 - 108)     | 255<br>(201 - 310)   | 646<br>(529 - 764)   |
| Diabetes mellitus                                   | 533<br>(440 - 645)     | 0<br>(0 - 1)       | 1<br>(0 - 1)        | 22<br>(17 - 29)      | 134<br>(104 - 170)   | 376<br>(298 - 463)   |
| Acute glomerulonephritis                            | 1<br>(1 - 1)           | 0<br>(0 - 0)       | 0<br>(0 - 0)        | 0<br>(0 - 0)         | 0<br>(0 - 0)         | 0<br>(0 - 1)         |
| Chronic kidney disease                              | 366<br>(265 - 454)     | 4<br>(3 - 6)       | 3<br>(2 - 4)        | 39<br>(29 - 51)      | 101<br>(65 - 130)    | 219<br>(156 - 280)   |
| Chronic kidney disease due to diabetes mellitus     | 186<br>(129 - 240)     | 0<br>(0 - 0)       | 0<br>(0 - 0)        | 15<br>(10 - 21)      | 62<br>(40 - 82)      | 109<br>(73 - 148)    |
| Chronic kidney disease due to hypertension          | 54<br>(29 - 91)        | 0<br>(0 - 1)       | 0<br>(0 - 0)        | 7<br>(3 - 12)        | 10<br>(5 - 18)       | 36<br>(17 - 65)      |
| Chronic kidney disease due to glomerulonephritis    | 7<br>(5 - 10)          | 1<br>(1 - 1)       | 1<br>(0 - 1)        | 3<br>(2 - 4)         | 1<br>(0 - 1)         | 2<br>(1 - 4)         |
| Chronic kidney disease due to other causes          | 119<br>(67 - 170)      | 2<br>(2 - 4)       | 2<br>(1 - 3)        | 15<br>(9 - 22)       | 29<br>(12 - 45)      | 71<br>(38 - 112)     |
| Urinary diseases and male infertility               | 43<br>(21 - 62)        | 1<br>(0 - 1)       | 0<br>(0 - 0)        | 5<br>(3 - 7)         | 7<br>(3 - 10)        | 31<br>(13 - 47)      |
| Interstitial nephritis and urinary tract infections | 37<br>(17 - 55)        | 0<br>(0 - 1)       | 0<br>(0 - 0)        | 3<br>(2 - 5)         | 6<br>(2 - 8)         | 28<br>(11 - 43)      |
| Urolithiasis                                        | 1<br>(1 - 3)           | --                 | 0<br>(0 - 0)        | 0<br>(0 - 0)         | 0<br>(0 - 1)         | 1<br>(0 - 2)         |
| Other urinary diseases                              | 4<br>(2 - 9)           | 0<br>(0 - 0)       | 0<br>(0 - 0)        | 1<br>(1 - 2)         | 1<br>(0 - 2)         | 2<br>(1 - 5)         |
| Gynecological diseases                              | 1<br>(0 - 2)           | --                 | --                  | 0<br>(0 - 1)         | 0<br>(0 - 0)         | 0<br>(0 - 1)         |
| Uterine fibroids                                    | 0<br>(0 - 0)           | --                 | --                  | 0<br>(0 - 0)         | 0<br>(0 - 0)         | 0<br>(0 - 0)         |
| Polycystic ovarian syndrome                         | 0<br>(0 - 0)           | --                 | --                  | 0<br>(0 - 0)         | 0<br>(0 - 0)         | --                   |
| Endometriosis                                       | 0<br>(0 - 0)           | --                 | --                  | 0<br>(0 - 0)         | 0<br>(0 - 0)         | --                   |
| Genital prolapse                                    | 0<br>(0 - 0)           | --                 | --                  | 0<br>(0 - 0)         | 0<br>(0 - 0)         | 0<br>(0 - 0)         |
| Other gynecological diseases                        | 0<br>(0 - 1)           | --                 | --                  | 0<br>(0 - 0)         | 0<br>(0 - 0)         | 0<br>(0 - 0)         |
| Hemoglobinopathies and hemolytic anemias            | 25<br>(15 - 36)        | 3<br>(2 - 4)       | 2<br>(1 - 3)        | 12<br>(7 - 19)       | 4<br>(3 - 7)         | 3<br>(2 - 5)         |
| Thalassemias                                        | 0<br>(0 - 1)           | 0<br>(0 - 0)       | 0<br>(0 - 0)        | 0<br>(0 - 0)         | 0<br>(0 - 0)         | 0<br>(0 - 0)         |
| Sickle cell disorders                               | 14<br>(9 - 21)         | 2<br>(1 - 3)       | 2<br>(1 - 2)        | 9<br>(5 - 13)        | 2<br>(1 - 4)         | 0<br>(0 - 0)         |
| G6PD deficiency                                     | 1<br>(1 - 1)           | 0<br>(0 - 0)       | 0<br>(0 - 0)        | 0<br>(0 - 1)         | 0<br>(0 - 0)         | 0<br>(0 - 0)         |
| Other hemoglobinopathies and hemolytic anemias      | 9<br>(6 - 14)          | 1<br>(0 - 1)       | 0<br>(0 - 1)        | 3<br>(2 - 4)         | 2<br>(1 - 3)         | 3<br>(2 - 5)         |
| Endocrine, metabolic, blood, and immune disorders   | 37<br>(26 - 75)        | 3<br>(2 - 8)       | 1<br>(1 - 1)        | 8<br>(5 - 15)        | 9<br>(6 - 19)        | 16<br>(10 - 34)      |
| Musculoskeletal disorders                           | 45<br>(17 - 59)        | --                 | 1<br>(0 - 1)        | 17<br>(6 - 23)       | 13<br>(5 - 17)       | 14<br>(5 - 20)       |
| Rheumatoid arthritis                                | 13<br>(6 - 17)         | --                 | 0<br>(0 - 0)        | 1<br>(1 - 2)         | 4<br>(2 - 6)         | 7<br>(3 - 11)        |
| Other musculoskeletal disorders                     | 32<br>(11 - 42)        | --                 | 1<br>(0 - 1)        | 16<br>(6 - 22)       | 8<br>(3 - 12)        | 7<br>(2 - 11)        |
| Other non-communicable diseases                     | 229<br>(183 - 278)     | 173<br>(136 - 219) | 11<br>(8 - 15)      | 11<br>(8 - 15)       | 4<br>(2 - 5)         | 29<br>(12 - 45)      |
| Congenital anomalies                                | 190<br>(148 - 236)     | 169<br>(130 - 213) | 11<br>(8 - 15)      | 9<br>(6 - 13)        | 1<br>(0 - 1)         | 1<br>(1 - 2)         |
| Neural tube defects                                 | 7<br>(4 - 12)          | 7<br>(3 - 11)      | 0<br>(0 - 0)        | 0<br>(0 - 0)         | 0<br>(0 - 0)         | 0<br>(0 - 0)         |
| Congenital heart anomalies                          | 94<br>(70 - 124)       | 82<br>(59 - 108)   | 7<br>(4 - 9)        | 5<br>(3 - 8)         | 0<br>(0 - 0)         | 0<br>(0 - 0)         |
| Cleft lip and cleft palate                          | 0<br>(0 - 1)           | 0<br>(0 - 1)       | --                  | --                   | --                   | --                   |
| Down syndrome                                       | 6<br>(3 - 9)           | 5<br>(2 - 8)       | 0<br>(0 - 1)        | 1<br>(0 - 1)         | 0<br>(0 - 0)         | 0<br>(0 - 0)         |
| Chromosomal unbalanced rearrangements               | 4<br>(3 - 7)           | 4<br>(2 - 7)       | 0<br>(0 - 0)        | 0<br>(0 - 0)         | 0<br>(0 - 0)         | 0<br>(0 - 0)         |
| Other congenital anomalies                          | 78<br>(57 - 105)       | 71<br>(51 - 97)    | 4<br>(2 - 5)        | 3<br>(2 - 4)         | 0<br>(0 - 1)         | 1<br>(1 - 2)         |
| Skin and subcutaneous diseases                      | 36<br>(14 - 52)        | 2<br>(1 - 2)       | 0<br>(0 - 0)        | 2<br>(1 - 3)         | 4<br>(1 - 5)         | 28<br>(11 - 43)      |
| Cellulitis                                          | 1<br>(0 - 2)           | 0<br>(0 - 0)       | 0<br>(0 - 0)        | 0<br>(0 - 0)         | 0<br>(0 - 0)         | 1<br>(0 - 1)         |
| Pyoderma                                            | 8<br>(3 - 13)          | 1<br>(0 - 1)       | 0<br>(0 - 0)        | 1<br>(0 - 1)         | 1<br>(0 - 2)         | 5<br>(2 - 10)        |



Web Table 31- Panama deaths with 95% UI by age, sex, and cause in 2013

| Cause                                           | Females, All Ages  | Females, 0-4 Years | Females, 5-14 Years | Females, 15-49 Years | Females, 50-69 Years | Females, 70-80 Years |
|-------------------------------------------------|--------------------|--------------------|---------------------|----------------------|----------------------|----------------------|
| Decubitus ulcer                                 | 24<br>(9 - 37)     | 0<br>(0 - 0)       | 0<br>(0 - 0)        | 0<br>(0 - 1)         | 2<br>(1 - 3)         | 21<br>(8 - 34)       |
| Other skin and subcutaneous diseases            | 2<br>(1 - 4)       | 0<br>(0 - 1)       | 0<br>(0 - 0)        | 1<br>(0 - 1)         | 0<br>(0 - 0)         | 1<br>(0 - 2)         |
| Sudden infant death syndrome                    | 3<br>(1 - 9)       | 3<br>(1 - 9)       | --                  | --                   | --                   | --                   |
| Injuries                                        | 463<br>(395 - 560) | 53<br>(42 - 68)    | 29<br>(25 - 36)     | 180<br>(143 - 223)   | 59<br>(48 - 75)      | 142<br>(114 - 187)   |
| Transport injuries                              | 140<br>(114 - 184) | 9<br>(6 - 12)      | 11<br>(8 - 15)      | 67<br>(53 - 91)      | 27<br>(21 - 38)      | 26<br>(19 - 35)      |
| Road injuries                                   | 136<br>(111 - 177) | 8<br>(5 - 12)      | 11<br>(8 - 15)      | 66<br>(52 - 89)      | 27<br>(20 - 36)      | 25<br>(19 - 34)      |
| Pedestrian road injuries                        | 60<br>(46 - 83)    | 5<br>(3 - 7)       | 6<br>(4 - 8)        | 21<br>(15 - 29)      | 14<br>(10 - 22)      | 14<br>(10 - 21)      |
| Cyclist road injuries                           | 3<br>(2 - 5)       | 0<br>(0 - 1)       | 1<br>(0 - 1)        | 1<br>(1 - 2)         | 0<br>(0 - 1)         | 1<br>(0 - 1)         |
| Motorcyclist road injuries                      | 2<br>(1 - 4)       | 0<br>(0 - 0)       | 0<br>(0 - 0)        | 1<br>(1 - 2)         | 0<br>(0 - 1)         | 0<br>(0 - 1)         |
| Motor vehicle road injuries                     | 70<br>(54 - 93)    | 3<br>(2 - 4)       | 4<br>(3 - 6)        | 42<br>(31 - 57)      | 11<br>(8 - 16)       | 10<br>(7 - 14)       |
| Other road injuries                             | 1<br>(1 - 2)       | 0<br>(0 - 0)       | 0<br>(0 - 1)        | 0<br>(0 - 1)         | 0<br>(0 - 0)         | 0<br>(0 - 0)         |
| Other transport injuries                        | 4<br>(3 - 6)       | 1<br>(0 - 1)       | 0<br>(0 - 1)        | 1<br>(1 - 2)         | 1<br>(1 - 1)         | 1<br>(0 - 1)         |
| Unintentional injuries                          | 208<br>(170 - 274) | 38<br>(29 - 52)    | 13<br>(10 - 18)     | 30<br>(23 - 43)      | 19<br>(15 - 25)      | 108<br>(83 - 150)    |
| Falls                                           | 56<br>(38 - 90)    | 1<br>(1 - 2)       | 1<br>(0 - 1)        | 2<br>(2 - 4)         | 3<br>(2 - 5)         | 49<br>(31 - 80)      |
| Drowning                                        | 32<br>(23 - 52)    | 9<br>(5 - 17)      | 6<br>(4 - 11)       | 11<br>(8 - 19)       | 3<br>(2 - 4)         | 2<br>(2 - 4)         |
| Fire, heat, and hot substances                  | 10<br>(6 - 12)     | 2<br>(1 - 3)       | 1<br>(0 - 1)        | 2<br>(1 - 3)         | 1<br>(1 - 2)         | 4<br>(2 - 6)         |
| Poisonings                                      | 6<br>(3 - 8)       | 1<br>(1 - 2)       | 0<br>(0 - 1)        | 1<br>(1 - 2)         | 1<br>(0 - 1)         | 3<br>(1 - 4)         |
| Exposure to mechanical forces                   | 8<br>(6 - 13)      | 2<br>(1 - 3)       | 1<br>(1 - 2)        | 3<br>(2 - 4)         | 1<br>(1 - 2)         | 1<br>(1 - 2)         |
| Unintentional firearm injuries                  | 1<br>(1 - 1)       | 0<br>(0 - 0)       | 0<br>(0 - 0)        | 0<br>(0 - 1)         | 0<br>(0 - 0)         | 0<br>(0 - 0)         |
| Unintentional suffocation                       | 1<br>(1 - 4)       | 0<br>(0 - 2)       | 0<br>(0 - 0)        | 0<br>(0 - 1)         | 0<br>(0 - 0)         | 0<br>(0 - 1)         |
| Other exposure to mechanical forces             | 6<br>(4 - 9)       | 1<br>(1 - 2)       | 1<br>(1 - 2)        | 2<br>(1 - 3)         | 1<br>(1 - 2)         | 1<br>(1 - 1)         |
| Adverse effects of medical treatment            | 23<br>(16 - 33)    | 2<br>(1 - 3)       | 0<br>(0 - 1)        | 4<br>(3 - 5)         | 4<br>(3 - 6)         | 13<br>(8 - 21)       |
| Animal contact                                  | 11<br>(5 - 22)     | 3<br>(1 - 6)       | 1<br>(1 - 3)        | 3<br>(1 - 6)         | 1<br>(1 - 3)         | 3<br>(1 - 6)         |
| Venomous animal contact                         | 9<br>(4 - 19)      | 2<br>(1 - 5)       | 1<br>(1 - 3)        | 2<br>(1 - 5)         | 1<br>(0 - 2)         | 2<br>(1 - 4)         |
| Non-venomous animal contact                     | 2<br>(1 - 4)       | 0<br>(0 - 1)       | 0<br>(0 - 0)        | 0<br>(0 - 1)         | 0<br>(0 - 0)         | 1<br>(0 - 1)         |
| Foreign body                                    | 59<br>(35 - 96)    | 18<br>(11 - 28)    | 1<br>(1 - 2)        | 3<br>(2 - 6)         | 4<br>(2 - 6)         | 32<br>(17 - 61)      |
| Pulmonary aspiration and foreign body in airway | 58<br>(35 - 95)    | 18<br>(11 - 28)    | 1<br>(1 - 2)        | 3<br>(2 - 5)         | 4<br>(2 - 6)         | 32<br>(17 - 61)      |
| Foreign body in other body part                 | 0<br>(0 - 1)       | 0<br>(0 - 0)       | 0<br>(0 - 0)        | 0<br>(0 - 0)         | 0<br>(0 - 0)         | 0<br>(0 - 0)         |
| Other unintentional injuries                    | 4<br>(3 - 5)       | 0<br>(0 - 1)       | 0<br>(0 - 1)        | 1<br>(1 - 2)         | 1<br>(0 - 1)         | 1<br>(1 - 2)         |
| Self-harm and interpersonal violence            | 115<br>(76 - 149)  | 6<br>(2 - 11)      | 5<br>(3 - 8)        | 82<br>(54 - 110)     | 13<br>(9 - 17)       | 9<br>(6 - 13)        |
| Self-harm                                       | 37<br>(29 - 51)    | --                 | 1<br>(1 - 2)        | 26<br>(20 - 36)      | 6<br>(4 - 9)         | 4<br>(3 - 7)         |
| Interpersonal violence                          | 77<br>(42 - 106)   | 6<br>(2 - 11)      | 4<br>(2 - 7)        | 56<br>(30 - 81)      | 7<br>(4 - 11)        | 4<br>(2 - 8)         |
| Assault by firearm                              | 35<br>(16 - 54)    | 1<br>(0 - 3)       | 2<br>(1 - 3)        | 29<br>(13 - 44)      | 3<br>(1 - 5)         | 1<br>(0 - 2)         |
| Assault by sharp object                         | 22<br>(11 - 36)    | 1<br>(0 - 2)       | 1<br>(0 - 2)        | 18<br>(9 - 30)       | 2<br>(1 - 3)         | 0<br>(0 - 1)         |
| Assault by other means                          | 20<br>(10 - 30)    | 4<br>(2 - 7)       | 1<br>(1 - 3)        | 10<br>(4 - 16)       | 2<br>(1 - 4)         | 3<br>(1 - 5)         |

Web Table 31- Papua New Guinea deaths with 95% UI by age, sex, and cause in 2013

| Cause                                                             | Both Sexes, All Ages        | Both Sexes, 0-4 Years      | Both Sexes, 5-14 Years   | Both Sexes, 15-49 Years     | Both Sexes, 50-69 Years     | Both Sexes, 70-80 Years    |
|-------------------------------------------------------------------|-----------------------------|----------------------------|--------------------------|-----------------------------|-----------------------------|----------------------------|
| All causes                                                        | 66,118<br>(48,231 - 90,645) | 11,974<br>(7,720 - 18,111) | 1,791<br>(1,310 - 2,384) | 19,495<br>(12,250 - 30,933) | 20,195<br>(12,700 - 29,979) | 12,664<br>(9,620 - 15,610) |
| Communicable, maternal, neonatal, and nutritional diseases        | 24,224<br>(18,202 - 32,344) | 9,887<br>(6,460 - 14,756)  | 992<br>(692 - 1,374)     | 6,597<br>(4,361 - 10,307)   | 3,695<br>(2,331 - 5,693)    | 3,052<br>(2,248 - 4,014)   |
| HIV/AIDS and tuberculosis                                         | 2,225<br>(1,642 - 3,584)    | 42<br>(26 - 63)            | 40<br>(22 - 60)          | 1,482<br>(1,049 - 2,275)    | 480<br>(336 - 962)          | 182<br>(119 - 323)         |
| Tuberculosis                                                      | 733<br>(387 - 1,938)        | 2<br>(1 - 13)              | 5<br>(2 - 15)            | 298<br>(139 - 916)          | 264<br>(134 - 708)          | 164<br>(102 - 304)         |
| HIV/AIDS                                                          | 1,493<br>(1,071 - 2,046)    | 40<br>(25 - 58)            | 35<br>(18 - 51)          | 1,184<br>(824 - 1,679)      | 217<br>(151 - 294)          | 18<br>(10 - 27)            |
| HIV/AIDS resulting in mycobacterial infection                     | 94<br>(64 - 134)            | 2<br>(1 - 3)               | 2<br>(1 - 3)             | 74<br>(49 - 111)            | 14<br>(10 - 21)             | 1<br>(1 - 2)               |
| HIV/AIDS resulting in other diseases                              | 1,399<br>(1,007 - 1,914)    | 38<br>(23 - 55)            | 33<br>(18 - 49)          | 1,110<br>(776 - 1,569)      | 202<br>(141 - 275)          | 16<br>(10 - 25)            |
| Diarrhea, lower respiratory, and other common infectious diseases | 13,255<br>(9,758 - 17,914)  | 5,782<br>(3,350 - 9,416)   | 559<br>(369 - 809)       | 2,083<br>(1,246 - 3,479)    | 2,401<br>(1,454 - 3,756)    | 2,431<br>(1,773 - 3,250)   |
| Diarrheal diseases                                                | 3,185<br>(2,211 - 4,463)    | 724<br>(297 - 1,509)       | 159<br>(87 - 261)        | 474<br>(251 - 834)          | 798<br>(428 - 1,328)        | 1,030<br>(640 - 1,527)     |
| Intestinal infectious diseases                                    | 190<br>(97 - 335)           | 87<br>(35 - 175)           | 47<br>(24 - 85)          | 45<br>(21 - 82)             | 9<br>(3 - 19)               | 2<br>(1 - 6)               |
| Typhoid fever                                                     | 119<br>(55 - 226)           | 52<br>(19 - 112)           | 34<br>(17 - 63)          | 28<br>(12 - 55)             | 5<br>(2 - 10)               | 1<br>(0 - 2)               |
| Paratyphoid fever                                                 | 33<br>(14 - 64)             | 17<br>(6 - 36)             | 9<br>(4 - 18)            | 6<br>(2 - 13)               | 1<br>(0 - 2)                | 0<br>(0 - 0)               |
| Other intestinal infectious diseases                              | 38<br>(19 - 67)             | 18<br>(6 - 40)             | 4<br>(1 - 11)            | 11<br>(3 - 24)              | 3<br>(0 - 11)               | 1<br>(0 - 5)               |
| Lower respiratory infections                                      | 7,681<br>(5,446 - 10,516)   | 3,651<br>(2,115 - 5,835)   | 157<br>(92 - 255)        | 1,054<br>(597 - 1,846)      | 1,457<br>(832 - 2,441)      | 1,362<br>(916 - 2,126)     |
| Upper respiratory infections                                      | 8<br>(4 - 14)               | 1<br>(0 - 4)               | 0<br>(0 - 1)             | 3<br>(1 - 7)                | 3<br>(1 - 7)                | 1<br>(0 - 3)               |
| Otitis media                                                      | 18<br>(12 - 27)             | 2<br>(1 - 4)               | 2<br>(1 - 3)             | 10<br>(6 - 16)              | 3<br>(2 - 4)                | 1<br>(1 - 2)               |
| Meningitis                                                        | 963<br>(623 - 1,452)        | 333<br>(162 - 627)         | 62<br>(33 - 105)         | 430<br>(240 - 735)          | 113<br>(55 - 214)           | 25<br>(15 - 40)            |
| Pneumococcal meningitis                                           | 351<br>(222 - 521)          | 106<br>(50 - 210)          | 24<br>(13 - 44)          | 168<br>(91 - 298)           | 44<br>(21 - 78)             | 9<br>(6 - 15)              |
| H influenzae type B meningitis                                    | 116<br>(70 - 184)           | 65<br>(30 - 126)           | 9<br>(4 - 17)            | 33<br>(16 - 62)             | 8<br>(3 - 16)               | 2<br>(1 - 3)               |
| Meningococcal meningitis                                          | 175<br>(105 - 268)          | 52<br>(24 - 104)           | 11<br>(6 - 20)           | 84<br>(40 - 150)            | 22<br>(10 - 41)             | 6<br>(3 - 9)               |
| Other meningitis                                                  | 321<br>(196 - 479)          | 111<br>(50 - 219)          | 18<br>(9 - 32)           | 145<br>(76 - 262)           | 40<br>(18 - 84)             | 8<br>(3 - 14)              |
| Encephalitis                                                      | 72<br>(48 - 107)            | 15<br>(7 - 31)             | 4<br>(2 - 7)             | 33<br>(20 - 54)             | 14<br>(7 - 22)              | 6<br>(3 - 9)               |
| Diphtheria                                                        | 11<br>(1 - 40)              | 7<br>(0 - 36)              | 2<br>(0 - 10)            | 2<br>(0 - 6)                | 1<br>(0 - 3)                | --                         |
| Whooping cough                                                    | 318<br>(0 - 1,587)          | 294<br>(0 - 1,473)         | 19<br>(0 - 99)           | 4<br>(0 - 24)               | 1<br>(0 - 3)                | --                         |
| Tetanus                                                           | 16<br>(8 - 37)              | 5<br>(2 - 11)              | 1<br>(1 - 5)             | 6<br>(2 - 19)               | 2<br>(1 - 7)                | 1<br>(0 - 3)               |
| Measles                                                           | 783<br>(135 - 2,335)        | 659<br>(111 - 1,916)       | 105<br>(19 - 316)        | 18<br>(3 - 63)              | 1<br>(0 - 2)                | --                         |
| Varicella and herpes zoster                                       | 10<br>(5 - 20)              | 3<br>(0 - 10)              | 1<br>(0 - 3)             | 3<br>(1 - 7)                | 1<br>(0 - 3)                | 2<br>(0 - 7)               |
| Neglected tropical diseases and malaria                           | 1,892<br>(1,171 - 2,996)    | 245<br>(100 - 474)         | 257<br>(135 - 422)       | 1,013<br>(506 - 1,794)      | 316<br>(159 - 550)          | 62<br>(36 - 98)            |
| Malaria                                                           | 1,768<br>(1,075 - 2,810)    | 212<br>(80 - 424)          | 242<br>(122 - 402)       | 980<br>(486 - 1,743)        | 294<br>(142 - 515)          | 39<br>(20 - 67)            |
| Leishmaniasis                                                     | 0<br>(0 - 0)                | 0<br>(0 - 0)               | 0<br>(0 - 0)             | 0<br>(0 - 0)                | 0<br>(0 - 0)                | 0<br>(0 - 0)               |
| Visceral leishmaniasis                                            | 0<br>(0 - 0)                | 0<br>(0 - 0)               | 0<br>(0 - 0)             | 0<br>(0 - 0)                | 0<br>(0 - 0)                | 0<br>(0 - 0)               |
| Cysticercosis                                                     | 1<br>(0 - 1)                | 0<br>(0 - 0)               | 0<br>(0 - 0)             | 1<br>(0 - 1)                | 0<br>(0 - 0)                | 0<br>(0 - 0)               |
| Cystic echinococcosis                                             | 5<br>(3 - 7)                | 0<br>(0 - 0)               | 1<br>(0 - 1)             | 2<br>(1 - 4)                | 1<br>(1 - 2)                | 0<br>(0 - 0)               |
| Dengue                                                            | 40<br>(26 - 84)             | 13<br>(5 - 31)             | 4<br>(3 - 10)            | 11<br>(6 - 28)              | 6<br>(3 - 11)               | 6<br>(4 - 9)               |
| Rabies                                                            | 15<br>(7 - 39)              | 2<br>(0 - 5)               | 4<br>(2 - 9)             | 7<br>(3 - 19)               | 2<br>(1 - 5)                | 0<br>(0 - 1)               |
| Intestinal nematode infections                                    | 19<br>(7 - 41)              | 11<br>(3 - 28)             | 3<br>(0 - 11)            | 3<br>(0 - 11)               | 2<br>(0 - 9)                | 1<br>(0 - 5)               |
| Ascariasis                                                        | 19<br>(7 - 41)              | 11<br>(3 - 28)             | 3<br>(0 - 11)            | 3<br>(0 - 11)               | 2<br>(0 - 9)                | 1<br>(0 - 5)               |
| Other neglected tropical diseases                                 | 44<br>(22 - 90)             | 7<br>(3 - 14)              | 3<br>(1 - 6)             | 8<br>(3 - 19)               | 11<br>(4 - 23)              | 16<br>(6 - 37)             |
| Maternal disorders                                                | 1,260<br>(663 - 2,187)      | --                         | 8<br>(3 - 18)            | 1,252<br>(654 - 2,176)      | --                          | --                         |
| Maternal hemorrhage                                               | 232<br>(114 - 420)          | --                         | 1<br>(0 - 3)             | 231<br>(114 - 418)          | --                          | --                         |

Web Table 31- Papua New Guinea deaths with 95% UI by age, sex, and cause in 2013

| Cause                                                            | Both Sexes, All Ages        | Both Sexes, 0-4 Years    | Both Sexes, 5-14 Years | Both Sexes, 15-49 Years    | Both Sexes, 50-69 Years    | Both Sexes, 70-80 Years   |
|------------------------------------------------------------------|-----------------------------|--------------------------|------------------------|----------------------------|----------------------------|---------------------------|
| Maternal sepsis and other maternal infections                    | 97<br>(49 - 177)            | --                       | 1<br>(0 - 2)           | 96<br>(48 - 176)           | --                         | --                        |
| Maternal hypertensive disorders                                  | 130<br>(63 - 241)           | --                       | 1<br>(0 - 1)           | 129<br>(62 - 240)          | --                         | --                        |
| Maternal obstructed labor                                        | 111<br>(55 - 196)           | --                       | 1<br>(0 - 2)           | 111<br>(54 - 195)          | --                         | --                        |
| Maternal abortive outcome                                        | 201<br>(100 - 348)          | --                       | 1<br>(0 - 3)           | 200<br>(99 - 345)          | --                         | --                        |
| Indirect maternal deaths                                         | 110<br>(54 - 197)           | --                       | 1<br>(0 - 1)           | 110<br>(54 - 196)          | --                         | --                        |
| Late maternal deaths                                             | 172<br>(85 - 324)           | --                       | 2<br>(1 - 4)           | 170<br>(83 - 320)          | --                         | --                        |
| Maternal deaths aggravated by HIV/AIDS                           | 2<br>(1 - 3)                | --                       | --                     | 2<br>(1 - 3)               | --                         | --                        |
| Other maternal disorders                                         | 202<br>(103 - 366)          | --                       | 1<br>(0 - 3)           | 201<br>(102 - 363)         | --                         | --                        |
| Neonatal disorders                                               | 3,143<br>(2,226 - 4,373)    | 3,143<br>(2,226 - 4,373) | --                     | --                         | --                         | --                        |
| Neonatal preterm birth complications                             | 1,020<br>(561 - 1,630)      | 1,020<br>(561 - 1,630)   | --                     | --                         | --                         | --                        |
| Neonatal encephalopathy due to birth asphyxia and trauma         | 469<br>(213 - 868)          | 469<br>(213 - 868)       | --                     | --                         | --                         | --                        |
| Neonatal sepsis and other neonatal infections                    | 620<br>(264 - 1,236)        | 620<br>(264 - 1,236)     | --                     | --                         | --                         | --                        |
| Hemolytic disease and other neonatal jaundice                    | 31<br>(13 - 75)             | 31<br>(13 - 75)          | --                     | --                         | --                         | --                        |
| Other neonatal disorders                                         | 1,003<br>(386 - 1,687)      | 1,003<br>(386 - 1,687)   | --                     | --                         | --                         | --                        |
| Nutritional deficiencies                                         | 1,325<br>(894 - 1,910)      | 397<br>(186 - 747)       | 66<br>(41 - 103)       | 350<br>(196 - 572)         | 223<br>(130 - 363)         | 289<br>(189 - 412)        |
| Protein-energy malnutrition                                      | 678<br>(399 - 1,058)        | 356<br>(164 - 686)       | 36<br>(19 - 59)        | 80<br>(34 - 157)           | 70<br>(31 - 133)           | 136<br>(65 - 227)         |
| Iodine deficiency                                                | 5<br>(1 - 12)               | 1<br>(0 - 3)             | 0<br>(0 - 2)           | 2<br>(0 - 7)               | 1<br>(0 - 5)               | 1<br>(0 - 4)              |
| Iron-deficiency anemia                                           | 494<br>(285 - 760)          | 22<br>(5 - 60)           | 24<br>(12 - 43)        | 199<br>(103 - 346)         | 128<br>(67 - 209)          | 121<br>(69 - 198)         |
| Other nutritional deficiencies                                   | 149<br>(71 - 285)           | 18<br>(5 - 50)           | 6<br>(2 - 15)          | 69<br>(31 - 140)           | 24<br>(10 - 57)            | 31<br>(14 - 59)           |
| Other communicable, maternal, neonatal, and nutritional diseases | 1,123<br>(714 - 1,630)      | 279<br>(97 - 550)        | 62<br>(38 - 94)        | 418<br>(246 - 709)         | 275<br>(162 - 434)         | 90<br>(56 - 141)          |
| Sexually transmitted diseases excluding HIV                      | 317<br>(121 - 620)          | 182<br>(22 - 419)        | 17<br>(4 - 35)         | 71<br>(21 - 192)           | 32<br>(9 - 97)             | 15<br>(4 - 40)            |
| Syphilis                                                         | 257<br>(79 - 521)           | 182<br>(22 - 419)        | 15<br>(3 - 33)         | 30<br>(9 - 82)             | 18<br>(5 - 54)             | 11<br>(3 - 30)            |
| Chlamydial infection                                             | 18<br>(5 - 47)              | --                       | 1<br>(0 - 2)           | 12<br>(3 - 35)             | 4<br>(1 - 13)              | 1<br>(0 - 2)              |
| Gonococcal infection                                             | 23<br>(7 - 58)              | --                       | 1<br>(0 - 1)           | 15<br>(4 - 40)             | 6<br>(2 - 17)              | 2<br>(1 - 5)              |
| Other sexually transmitted diseases                              | 19<br>(6 - 49)              | --                       | 1<br>(0 - 1)           | 13<br>(4 - 36)             | 4<br>(1 - 13)              | 1<br>(0 - 3)              |
| Hepatitis                                                        | 570<br>(359 - 868)          | 43<br>(19 - 85)          | 35<br>(21 - 54)        | 247<br>(133 - 424)         | 193<br>(110 - 305)         | 53<br>(33 - 84)           |
| Acute hepatitis A                                                | 31<br>(8 - 64)              | 13<br>(3 - 32)           | 8<br>(2 - 17)          | 8<br>(2 - 21)              | 2<br>(0 - 5)               | 0<br>(0 - 0)              |
| Acute hepatitis B                                                | 389<br>(235 - 610)          | 30<br>(12 - 61)          | 19<br>(10 - 32)        | 136<br>(67 - 242)          | 157<br>(89 - 255)          | 47<br>(30 - 73)           |
| Acute hepatitis C                                                | 12<br>(2 - 30)              | --                       | 1<br>(0 - 3)           | 6<br>(1 - 16)              | 4<br>(1 - 11)              | 1<br>(0 - 3)              |
| Acute hepatitis E                                                | 138<br>(65 - 259)           | 0<br>(0 - 1)             | 7<br>(3 - 14)          | 97<br>(46 - 181)           | 30<br>(11 - 65)            | 4<br>(2 - 11)             |
| Other infectious diseases                                        | 236<br>(113 - 422)          | 53<br>(20 - 112)         | 11<br>(4 - 20)         | 100<br>(42 - 192)          | 50<br>(17 - 118)           | 22<br>(8 - 54)            |
| Non-communicable diseases                                        | 37,982<br>(25,282 - 54,752) | 1,717<br>(973 - 2,835)   | 593<br>(413 - 826)     | 10,456<br>(6,142 - 17,194) | 15,852<br>(9,900 - 23,631) | 9,364<br>(6,937 - 11,631) |
| Neoplasms                                                        | 5,568<br>(3,422 - 8,345)    | 99<br>(48 - 182)         | 94<br>(60 - 141)       | 2,067<br>(1,176 - 3,456)   | 2,381<br>(1,416 - 3,593)   | 926<br>(646 - 1,191)      |
| Esophageal cancer                                                | 219<br>(120 - 341)          | --                       | --                     | 55<br>(27 - 96)            | 107<br>(56 - 174)          | 57<br>(34 - 84)           |
| Stomach cancer                                                   | 533<br>(326 - 783)          | --                       | --                     | 126<br>(69 - 214)          | 272<br>(157 - 403)         | 135<br>(90 - 186)         |
| Liver cancer                                                     | 778<br>(455 - 1,253)        | --                       | 8<br>(4 - 15)          | 354<br>(194 - 619)         | 340<br>(192 - 549)         | 76<br>(48 - 119)          |
| Liver cancer due to hepatitis B                                  | 395<br>(210 - 676)          | --                       | 3<br>(1 - 7)           | 197<br>(97 - 372)          | 166<br>(87 - 271)          | 28<br>(16 - 45)           |
| Liver cancer due to hepatitis C                                  | 230<br>(94 - 421)           | --                       | 1<br>(0 - 3)           | 88<br>(22 - 177)           | 110<br>(47 - 203)          | 31<br>(18 - 50)           |
| Liver cancer due to alcohol use                                  | 47<br>(25 - 82)             | --                       | --                     | 18<br>(8 - 36)             | 22<br>(11 - 38)            | 7<br>(4 - 11)             |
| Liver cancer due to other causes                                 | 107<br>(59 - 187)           | --                       | 3<br>(2 - 6)           | 51<br>(27 - 95)            | 42<br>(21 - 75)            | 10<br>(5 - 18)            |

Web Table 31- Papua New Guinea deaths with 95% UI by age, sex, and cause in 2013

| Cause                                         | Both Sexes, All Ages       | Both Sexes, 0-4 Years | Both Sexes, 5-14 Years | Both Sexes, 15-49 Years  | Both Sexes, 50-69 Years  | Both Sexes, 70-80 Years  |
|-----------------------------------------------|----------------------------|-----------------------|------------------------|--------------------------|--------------------------|--------------------------|
| Larynx cancer                                 | 13<br>(8 - 21)             | --                    | --                     | 6<br>(3 - 9)             | 6<br>(3 - 9)             | 2<br>(1 - 3)             |
| Tracheal, bronchus and lung cancer            | 803<br>(483 - 1,204)       | --                    | --                     | 248<br>(144 - 418)       | 396<br>(227 - 588)       | 159<br>(112 - 208)       |
| Breast cancer                                 | 546<br>(315 - 967)         | --                    | --                     | 258<br>(137 - 494)       | 227<br>(133 - 387)       | 62<br>(39 - 101)         |
| Cervical cancer                               | 562<br>(327 - 909)         | --                    | --                     | 242<br>(125 - 451)       | 224<br>(126 - 365)       | 97<br>(55 - 147)         |
| Uterine cancer                                | 15<br>(6 - 39)             | --                    | --                     | 5<br>(2 - 11)            | 8<br>(3 - 23)            | 2<br>(1 - 6)             |
| Prostate cancer                               | 78<br>(41 - 121)           | --                    | --                     | 9<br>(4 - 18)            | 37<br>(18 - 60)          | 31<br>(18 - 48)          |
| Colon and rectum cancer                       | 417<br>(260 - 623)         | --                    | --                     | 120<br>(72 - 199)        | 202<br>(117 - 306)       | 95<br>(67 - 126)         |
| Lip and oral cavity cancer                    | 80<br>(36 - 128)           | --                    | --                     | 32<br>(15 - 54)          | 34<br>(15 - 59)          | 14<br>(5 - 23)           |
| Nasopharynx cancer                            | 73<br>(41 - 118)           | --                    | 1<br>(1 - 3)           | 38<br>(20 - 65)          | 29<br>(16 - 48)          | 4<br>(3 - 7)             |
| Other pharynx cancer                          | 72<br>(32 - 113)           | --                    | --                     | 26<br>(13 - 45)          | 33<br>(14 - 57)          | 12<br>(4 - 19)           |
| Gallbladder and biliary tract cancer          | 83<br>(43 - 135)           | --                    | --                     | 20<br>(8 - 37)           | 54<br>(28 - 87)          | 10<br>(6 - 14)           |
| Pancreatic cancer                             | 142<br>(86 - 209)          | --                    | --                     | 34<br>(19 - 58)          | 74<br>(40 - 111)         | 34<br>(23 - 46)          |
| Malignant skin melanoma                       | 24<br>(14 - 38)            | --                    | --                     | 15<br>(8 - 26)           | 4<br>(2 - 7)             | 4<br>(3 - 7)             |
| Non-melanoma skin cancer                      | 29<br>(17 - 46)            | --                    | --                     | 8<br>(4 - 14)            | 11<br>(6 - 19)           | 10<br>(6 - 15)           |
| Ovarian cancer                                | 10<br>(5 - 20)             | --                    | --                     | 5<br>(2 - 11)            | 4<br>(2 - 7)             | 1<br>(1 - 2)             |
| Testicular cancer                             | 5<br>(3 - 8)               | --                    | --                     | 4<br>(2 - 6)             | 1<br>(0 - 2)             | 0<br>(0 - 1)             |
| Kidney cancer                                 | 72<br>(40 - 117)           | 3<br>(1 - 8)          | 2<br>(1 - 2)           | 29<br>(14 - 53)          | 28<br>(13 - 48)          | 11<br>(6 - 19)           |
| Bladder cancer                                | 78<br>(39 - 127)           | --                    | --                     | 13<br>(6 - 23)           | 44<br>(22 - 75)          | 20<br>(10 - 35)          |
| Brain and nervous system cancer               | 24<br>(15 - 39)            | 2<br>(1 - 6)          | 1<br>(1 - 2)           | 13<br>(7 - 23)           | 7<br>(4 - 12)            | 0<br>(0 - 1)             |
| Thyroid cancer                                | 14<br>(7 - 24)             | --                    | 0<br>(0 - 1)           | 5<br>(2 - 10)            | 6<br>(3 - 10)            | 3<br>(2 - 5)             |
| Mesothelioma                                  | 15<br>(9 - 24)             | --                    | --                     | 8<br>(4 - 13)            | 6<br>(3 - 11)            | 1<br>(1 - 2)             |
| Hodgkin lymphoma                              | 11<br>(7 - 18)             | 1<br>(0 - 2)          | 1<br>(0 - 2)           | 7<br>(4 - 12)            | 2<br>(1 - 3)             | 1<br>(0 - 1)             |
| Non-Hodgkin lymphoma                          | 73<br>(38 - 122)           | 5<br>(2 - 11)         | 4<br>(2 - 8)           | 33<br>(15 - 58)          | 20<br>(10 - 35)          | 11<br>(6 - 18)           |
| Multiple myeloma                              | 83<br>(45 - 128)           | --                    | --                     | 29<br>(14 - 54)          | 36<br>(19 - 56)          | 17<br>(11 - 26)          |
| Leukemia                                      | 285<br>(192 - 420)         | 30<br>(12 - 63)       | 43<br>(28 - 64)        | 143<br>(87 - 232)        | 48<br>(28 - 74)          | 20<br>(14 - 28)          |
| Other neoplasms                               | 432<br>(255 - 672)         | 58<br>(24 - 112)      | 33<br>(17 - 57)        | 184<br>(94 - 317)        | 123<br>(63 - 194)        | 34<br>(21 - 48)          |
| Cardiovascular diseases                       | 12,367<br>(8,090 - 17,899) | 170<br>(89 - 293)     | 100<br>(62 - 153)      | 3,218<br>(1,873 - 5,334) | 5,462<br>(3,294 - 8,077) | 3,417<br>(2,490 - 4,333) |
| Rheumatic heart disease                       | 205<br>(121 - 395)         | 3<br>(1 - 7)          | 15<br>(9 - 26)         | 105<br>(58 - 205)        | 57<br>(29 - 123)         | 24<br>(15 - 46)          |
| Ischemic heart disease                        | 7,463<br>(4,898 - 10,886)  | 32<br>(13 - 68)       | 24<br>(12 - 43)        | 1,711<br>(964 - 2,862)   | 3,418<br>(2,087 - 5,136) | 2,278<br>(1,631 - 2,914) |
| Cerebrovascular disease                       | 1,673<br>(1,068 - 2,408)   | 26<br>(14 - 46)       | 13<br>(7 - 20)         | 374<br>(215 - 624)       | 732<br>(427 - 1,097)     | 528<br>(370 - 695)       |
| Ischemic stroke                               | 488<br>(309 - 719)         | 2<br>(1 - 4)          | 2<br>(1 - 4)           | 59<br>(30 - 106)         | 179<br>(102 - 288)       | 245<br>(167 - 337)       |
| Hemorrhagic stroke                            | 1,185<br>(743 - 1,747)     | 24<br>(13 - 42)       | 10<br>(6 - 16)         | 315<br>(180 - 530)       | 553<br>(318 - 840)       | 283<br>(190 - 404)       |
| Hypertensive heart disease                    | 183<br>(114 - 281)         | 1<br>(0 - 2)          | 1<br>(1 - 2)           | 41<br>(22 - 71)          | 85<br>(49 - 137)         | 54<br>(36 - 84)          |
| Cardiomyopathy and myocarditis                | 578<br>(319 - 913)         | 38<br>(18 - 72)       | 18<br>(10 - 32)        | 271<br>(123 - 476)       | 197<br>(105 - 312)       | 54<br>(33 - 87)          |
| Atrial fibrillation and flutter               | 12<br>(7 - 19)             | --                    | --                     | 1<br>(1 - 3)             | 4<br>(2 - 8)             | 6<br>(4 - 10)            |
| Aortic aneurysm                               | 84<br>(46 - 131)           | --                    | --                     | 23<br>(11 - 39)          | 37<br>(19 - 59)          | 24<br>(14 - 37)          |
| Peripheral vascular disease                   | 17<br>(10 - 30)            | --                    | --                     | 1<br>(1 - 3)             | 5<br>(3 - 10)            | 10<br>(6 - 19)           |
| Endocarditis                                  | 308<br>(169 - 592)         | 20<br>(9 - 49)        | 5<br>(2 - 12)          | 136<br>(68 - 258)        | 78<br>(38 - 164)         | 68<br>(32 - 160)         |
| Other cardiovascular and circulatory diseases | 1,845<br>(1,074 - 2,760)   | 50<br>(25 - 91)       | 24<br>(14 - 39)        | 554<br>(315 - 897)       | 848<br>(443 - 1,294)     | 369<br>(215 - 508)       |
| Chronic respiratory diseases                  | 5,529<br>(3,768 - 7,838)   | 135<br>(65 - 253)     | 49<br>(33 - 71)        | 991<br>(574 - 1,691)     | 2,371<br>(1,481 - 3,551) | 1,983<br>(1,456 - 2,516) |

Web Table 31- Papua New Guinea deaths with 95% UI by age, sex, and cause in 2013

| Cause                                               | Both Sexes, All Ages     | Both Sexes, 0-4 Years | Both Sexes, 5-14 Years | Both Sexes, 15-49 Years | Both Sexes, 50-69 Years  | Both Sexes, 70-80 Years |
|-----------------------------------------------------|--------------------------|-----------------------|------------------------|-------------------------|--------------------------|-------------------------|
| Chronic obstructive pulmonary disease               | 2,246<br>(1,463 - 3,155) | 76<br>(34 - 150)      | 4<br>(2 - 7)           | 242<br>(128 - 423)      | 898<br>(523 - 1,390)     | 1,026<br>(704 - 1,328)  |
| Pneumoconiosis                                      | 412<br>(228 - 672)       | 0<br>(0 - 1)          | 3<br>(1 - 5)           | 77<br>(37 - 140)        | 223<br>(112 - 386)       | 109<br>(62 - 171)       |
| Silicosis                                           | 152<br>(77 - 259)        | 0<br>(0 - 0)          | 1<br>(0 - 2)           | 29<br>(11 - 58)         | 81<br>(37 - 146)         | 41<br>(20 - 73)         |
| Asbestosis                                          | 43<br>(22 - 72)          | 0<br>(0 - 0)          | 0<br>(0 - 1)           | 6<br>(3 - 13)           | 27<br>(13 - 48)          | 9<br>(5 - 15)           |
| Coal workers pneumoconiosis                         | 44<br>(23 - 76)          | 0<br>(0 - 0)          | 0<br>(0 - 1)           | 7<br>(3 - 13)           | 25<br>(12 - 44)          | 11<br>(5 - 20)          |
| Other pneumoconiosis                                | 174<br>(97 - 291)        | 0<br>(0 - 1)          | 1<br>(0 - 2)           | 35<br>(16 - 70)         | 91<br>(47 - 162)         | 48<br>(27 - 77)         |
| Asthma                                              | 2,313<br>(1,447 - 3,764) | 35<br>(13 - 80)       | 29<br>(18 - 47)        | 527<br>(300 - 894)      | 1,070<br>(621 - 1,743)   | 651<br>(409 - 1,079)    |
| Interstitial lung disease and pulmonary sarcoidosis | 165<br>(95 - 257)        | 1<br>(0 - 2)          | 2<br>(1 - 4)           | 25<br>(10 - 49)         | 69<br>(35 - 118)         | 68<br>(39 - 111)        |
| Other chronic respiratory diseases                  | 393<br>(233 - 615)       | 23<br>(13 - 39)       | 11<br>(6 - 17)         | 119<br>(60 - 214)       | 111<br>(55 - 199)        | 129<br>(74 - 198)       |
| Cirrhosis                                           | 1,299<br>(792 - 2,007)   | 10<br>(3 - 21)        | 37<br>(24 - 55)        | 666<br>(393 - 1,103)    | 465<br>(273 - 708)       | 121<br>(81 - 173)       |
| Cirrhosis due to hepatitis B                        | 725<br>(431 - 1,137)     | 2<br>(0 - 4)          | 17<br>(11 - 27)        | 390<br>(226 - 634)      | 253<br>(145 - 393)       | 64<br>(41 - 93)         |
| Cirrhosis due to hepatitis C                        | 247<br>(129 - 426)       | 0<br>(0 - 1)          | 4<br>(1 - 8)           | 114<br>(51 - 213)       | 100<br>(51 - 173)        | 29<br>(16 - 44)         |
| Cirrhosis due to alcohol use                        | 195<br>(108 - 317)       | -                     | -                      | 85<br>(41 - 154)        | 86<br>(46 - 139)         | 24<br>(15 - 36)         |
| Cirrhosis due to other causes                       | 131<br>(79 - 214)        | 8<br>(3 - 17)         | 16<br>(9 - 25)         | 77<br>(43 - 136)        | 26<br>(13 - 43)          | 5<br>(2 - 8)            |
| Digestive diseases                                  | 4,513<br>(2,881 - 6,807) | 84<br>(30 - 191)      | 124<br>(81 - 182)      | 1,617<br>(978 - 2,714)  | 1,766<br>(1,069 - 2,770) | 923<br>(647 - 1,283)    |
| Peptic ulcer disease                                | 1,476<br>(929 - 2,286)   | 7<br>(2 - 20)         | 26<br>(15 - 44)        | 487<br>(283 - 820)      | 652<br>(371 - 1,053)     | 303<br>(204 - 448)      |
| Gastritis and duodenitis                            | 94<br>(31 - 228)         | 1<br>(0 - 3)          | 3<br>(1 - 7)           | 29<br>(10 - 64)         | 43<br>(12 - 112)         | 19<br>(6 - 47)          |
| Appendicitis                                        | 838<br>(502 - 1,322)     | 23<br>(6 - 59)        | 43<br>(24 - 70)        | 385<br>(220 - 662)      | 275<br>(147 - 458)       | 113<br>(65 - 186)       |
| Paralytic ileus and intestinal obstruction          | 872<br>(447 - 1,399)     | 27<br>(8 - 62)        | 20<br>(11 - 34)        | 275<br>(117 - 503)      | 327<br>(153 - 562)       | 223<br>(133 - 332)      |
| Inguinal, femoral, and abdominal hernia             | 185<br>(98 - 411)        | 5<br>(1 - 14)         | 5<br>(2 - 10)          | 52<br>(27 - 110)        | 72<br>(34 - 167)         | 51<br>(25 - 133)        |
| Inflammatory bowel disease                          | 131<br>(82 - 211)        | 8<br>(2 - 25)         | 2<br>(1 - 5)           | 41<br>(20 - 83)         | 38<br>(20 - 69)          | 42<br>(19 - 70)         |
| Vascular intestinal disorders                       | 21<br>(11 - 40)          | 1<br>(0 - 3)          | 0<br>(0 - 1)           | 9<br>(4 - 18)           | 5<br>(2 - 10)            | 6<br>(3 - 10)           |
| Gallbladder and biliary diseases                    | 428<br>(257 - 744)       | 5<br>(1 - 12)         | 12<br>(6 - 21)         | 143<br>(82 - 252)       | 172<br>(91 - 329)        | 96<br>(53 - 183)        |
| Pancreatitis                                        | 161<br>(83 - 286)        | 2<br>(0 - 4)          | 3<br>(1 - 7)           | 79<br>(39 - 145)        | 52<br>(26 - 95)          | 25<br>(11 - 52)         |
| Other digestive diseases                            | 306<br>(173 - 527)       | 5<br>(1 - 13)         | 10<br>(5 - 16)         | 118<br>(60 - 224)       | 129<br>(70 - 226)        | 45<br>(23 - 77)         |
| Neurological disorders                              | 587<br>(422 - 758)       | 16<br>(8 - 31)        | 8<br>(5 - 13)          | 72<br>(41 - 121)        | 103<br>(62 - 152)        | 387<br>(281 - 486)      |
| Alzheimer disease and other dementias               | 449<br>(320 - 574)       | -                     | -                      | 1<br>(0 - 1)            | 75<br>(45 - 112)         | 373<br>(271 - 469)      |
| Parkinson disease                                   | 2<br>(1 - 3)             | -                     | -                      | 1<br>(0 - 1)            | 1<br>(0 - 1)             | 0<br>(0 - 1)            |
| Epilepsy                                            | 75<br>(45 - 121)         | 8<br>(3 - 18)         | 7<br>(4 - 12)          | 51<br>(29 - 87)         | 7<br>(4 - 12)            | 1<br>(1 - 2)            |
| Multiple sclerosis                                  | 1<br>(0 - 1)             | -                     | -                      | 0<br>(0 - 1)            | 0<br>(0 - 0)             | 0<br>(0 - 0)            |
| Other neurological disorders                        | 61<br>(38 - 87)          | 8<br>(4 - 15)         | 1<br>(1 - 2)           | 19<br>(9 - 32)          | 20<br>(12 - 31)          | 12<br>(6 - 17)          |
| Mental and substance use disorders                  | 89<br>(51 - 141)         | 1<br>(0 - 2)          | 0<br>(0 - 0)           | 57<br>(33 - 97)         | 24<br>(13 - 40)          | 6<br>(3 - 11)           |
| Schizophrenia                                       | 3<br>(1 - 6)             | -                     | -                      | 2<br>(1 - 4)            | 1<br>(0 - 1)             | 0<br>(0 - 1)            |
| Alcohol use disorders                               | 59<br>(32 - 98)          | -                     | -                      | 33<br>(18 - 59)         | 21<br>(11 - 36)          | 5<br>(2 - 10)           |
| Drug use disorders                                  | 25<br>(13 - 43)          | 1<br>(0 - 2)          | -                      | 22<br>(10 - 38)         | 2<br>(1 - 3)             | 0<br>(0 - 1)            |
| Opioid use disorders                                | 5<br>(2 - 8)             | 0<br>(0 - 0)          | -                      | 4<br>(2 - 7)            | 0<br>(0 - 1)             | 0<br>(0 - 0)            |
| Cocaine use disorders                               | 2<br>(1 - 4)             | 0<br>(0 - 0)          | -                      | 2<br>(1 - 3)            | 0<br>(0 - 0)             | 0<br>(0 - 0)            |
| Amphetamine use disorders                           | 2<br>(1 - 3)             | 0<br>(0 - 0)          | -                      | 1<br>(1 - 2)            | 0<br>(0 - 0)             | 0<br>(0 - 0)            |
| Other drug use disorders                            | 17<br>(8 - 28)           | 1<br>(0 - 1)          | -                      | 14<br>(7 - 25)          | 1<br>(1 - 2)             | 0<br>(0 - 0)            |
| Eating disorders                                    | 1<br>(0 - 1)             | -                     | 0<br>(0 - 0)           | 1<br>(0 - 1)            | -                        | -                       |

Web Table 31- Papua New Guinea deaths with 95% UI by age, sex, and cause in 2013

| Cause                                               | Both Sexes, All Ages     | Both Sexes, 0-4 Years | Both Sexes, 5-14 Years | Both Sexes, 15-49 Years | Both Sexes, 50-69 Years  | Both Sexes, 70-80 Years |
|-----------------------------------------------------|--------------------------|-----------------------|------------------------|-------------------------|--------------------------|-------------------------|
| Anorexia nervosa                                    | 1<br>(0 - 1)             | --                    | 0<br>(0 - 0)           | 1<br>(0 - 1)            | --                       | --                      |
| Diabetes, urogenital, blood, and endocrine diseases | 6,321<br>(4,018 - 9,553) | 269<br>(148 - 481)    | 101<br>(63 - 160)      | 1,471<br>(812 - 2,534)  | 3,058<br>(1,866 - 4,807) | 1,422<br>(942 - 1,999)  |
| Diabetes mellitus                                   | 3,955<br>(2,436 - 6,225) | 12<br>(6 - 25)        | 4<br>(2 - 7)           | 652<br>(343 - 1,194)    | 2,230<br>(1,370 - 3,510) | 1,055<br>(691 - 1,523)  |
| Acute glomerulonephritis                            | 15<br>(6 - 33)           | 1<br>(0 - 2)          | 1<br>(0 - 3)           | 6<br>(2 - 13)           | 5<br>(2 - 13)            | 2<br>(1 - 5)            |
| Chronic kidney disease                              | 1,030<br>(581 - 1,723)   | 20<br>(9 - 39)        | 14<br>(7 - 23)         | 381<br>(203 - 668)      | 433<br>(232 - 748)       | 182<br>(109 - 294)      |
| Chronic kidney disease due to diabetes mellitus     | 96<br>(36 - 167)         | 1<br>(0 - 2)          | 1<br>(0 - 1)           | 31<br>(10 - 59)         | 50<br>(18 - 86)          | 14<br>(5 - 25)          |
| Chronic kidney disease due to hypertension          | 245<br>(108 - 424)       | 2<br>(1 - 5)          | 2<br>(1 - 4)           | 86<br>(29 - 161)        | 110<br>(46 - 193)        | 45<br>(23 - 82)         |
| Chronic kidney disease due to glomerulonephritis    | 157<br>(91 - 250)        | 4<br>(2 - 9)          | 3<br>(2 - 6)           | 60<br>(32 - 104)        | 51<br>(25 - 91)          | 38<br>(21 - 58)         |
| Chronic kidney disease due to other causes          | 531<br>(264 - 985)       | 12<br>(4 - 27)        | 8<br>(4 - 14)          | 204<br>(90 - 390)       | 222<br>(100 - 429)       | 85<br>(40 - 170)        |
| Urinary diseases and male infertility               | 164<br>(102 - 250)       | 9<br>(4 - 20)         | 2<br>(1 - 3)           | 59<br>(33 - 98)         | 57<br>(33 - 90)          | 36<br>(24 - 52)         |
| Interstitial nephritis and urinary tract infections | 74<br>(47 - 108)         | 6<br>(3 - 14)         | 1<br>(1 - 2)           | 25<br>(14 - 42)         | 25<br>(14 - 41)          | 17<br>(10 - 25)         |
| Urolithiasis                                        | 9<br>(5 - 16)            | --                    | 0<br>(0 - 0)           | 4<br>(2 - 8)            | 4<br>(2 - 7)             | 1<br>(1 - 2)            |
| Other urinary diseases                              | 80<br>(45 - 127)         | 3<br>(1 - 6)          | 1<br>(0 - 1)           | 30<br>(15 - 54)         | 28<br>(15 - 47)          | 18<br>(10 - 29)         |
| Gynecological diseases                              | 17<br>(9 - 34)           | --                    | --                     | 12<br>(6 - 25)          | 4<br>(2 - 8)             | 1<br>(1 - 3)            |
| Uterine fibroids                                    | 4<br>(2 - 7)             | --                    | --                     | 2<br>(1 - 5)            | 1<br>(1 - 2)             | 0<br>(0 - 1)            |
| Polycystic ovarian syndrome                         | 1<br>(0 - 2)             | --                    | --                     | 1<br>(0 - 1)            | 0<br>(0 - 0)             | --                      |
| Endometriosis                                       | 2<br>(1 - 4)             | --                    | --                     | 2<br>(1 - 4)            | 0<br>(0 - 0)             | --                      |
| Genital prolapse                                    | 3<br>(1 - 5)             | --                    | --                     | 2<br>(1 - 3)            | 1<br>(0 - 1)             | 0<br>(0 - 1)            |
| Other gynecological diseases                        | 8<br>(4 - 16)            | --                    | --                     | 6<br>(3 - 12)           | 2<br>(1 - 4)             | 1<br>(0 - 1)            |
| Hemoglobinopathies and hemolytic anemias            | 403<br>(230 - 627)       | 111<br>(50 - 230)     | 63<br>(34 - 115)       | 163<br>(88 - 270)       | 37<br>(19 - 58)          | 29<br>(17 - 44)         |
| Thalassemias                                        | 256<br>(140 - 429)       | 95<br>(42 - 201)      | 58<br>(32 - 106)       | 103<br>(56 - 173)       | 0<br>(0 - 0)             | 0<br>(0 - 0)            |
| Sickle cell disorders                               | 0<br>(0 - 0)             | 0<br>(0 - 0)          | 0<br>(0 - 0)           | 0<br>(0 - 0)            | 0<br>(0 - 0)             | 0<br>(0 - 0)            |
| G6PD deficiency                                     | 16<br>(9 - 25)           | 2<br>(1 - 4)          | 1<br>(1 - 2)           | 9<br>(4 - 15)           | 4<br>(2 - 6)             | 1<br>(0 - 1)            |
| Other hemoglobinopathies and hemolytic anemias      | 131<br>(75 - 197)        | 14<br>(7 - 28)        | 4<br>(2 - 7)           | 52<br>(26 - 89)         | 33<br>(17 - 53)          | 29<br>(17 - 43)         |
| Endocrine, metabolic, blood, and immune disorders   | 737<br>(297 - 1,140)     | 116<br>(50 - 229)     | 17<br>(9 - 30)         | 197<br>(85 - 344)       | 292<br>(92 - 505)        | 115<br>(34 - 178)       |
| Musculoskeletal disorders                           | 97<br>(44 - 154)         | --                    | 8<br>(4 - 14)          | 44<br>(18 - 76)         | 29<br>(14 - 47)          | 16<br>(6 - 23)          |
| Rheumatoid arthritis                                | 27<br>(12 - 45)          | --                    | 2<br>(1 - 3)           | 9<br>(3 - 16)           | 10<br>(5 - 18)           | 6<br>(2 - 10)           |
| Other musculoskeletal disorders                     | 70<br>(32 - 112)         | --                    | 7<br>(3 - 11)          | 35<br>(15 - 62)         | 19<br>(8 - 30)           | 10<br>(3 - 15)          |
| Other non-communicable diseases                     | 1,611<br>(1,116 - 2,207) | 933<br>(524 - 1,525)  | 70<br>(41 - 108)       | 252<br>(141 - 418)      | 193<br>(99 - 297)        | 163<br>(85 - 237)       |
| Congenital anomalies                                | 1,039<br>(638 - 1,633)   | 879<br>(490 - 1,459)  | 61<br>(35 - 94)        | 75<br>(47 - 125)        | 18<br>(10 - 28)          | 6<br>(4 - 9)            |
| Neural tube defects                                 | 36<br>(9 - 120)          | 29<br>(5 - 109)       | 1<br>(0 - 3)           | 5<br>(2 - 10)           | 0<br>(0 - 1)             | 0<br>(0 - 0)            |
| Congenital heart anomalies                          | 443<br>(247 - 749)       | 381<br>(197 - 678)    | 32<br>(17 - 52)        | 24<br>(13 - 42)         | 4<br>(2 - 7)             | 2<br>(1 - 3)            |
| Cleft lip and cleft palate                          | 1<br>(0 - 4)             | 1<br>(0 - 4)          | --                     | --                      | --                       | --                      |
| Down syndrome                                       | 64<br>(29 - 136)         | 51<br>(20 - 116)      | 4<br>(2 - 10)          | 7<br>(3 - 13)           | 2<br>(1 - 3)             | 0<br>(0 - 0)            |
| Chromosomal unbalanced rearrangements               | 31<br>(13 - 65)          | 28<br>(11 - 61)       | 1<br>(0 - 2)           | 2<br>(1 - 3)            | 0<br>(0 - 0)             | 0<br>(0 - 0)            |
| Other congenital anomalies                          | 464<br>(272 - 729)       | 387<br>(209 - 645)    | 23<br>(11 - 38)        | 38<br>(23 - 61)         | 11<br>(6 - 18)           | 5<br>(3 - 6)            |
| Skin and subcutaneous diseases                      | 551<br>(324 - 806)       | 34<br>(14 - 69)       | 9<br>(5 - 15)          | 176<br>(92 - 298)       | 176<br>(86 - 275)        | 156<br>(80 - 229)       |
| Cellulitis                                          | 236<br>(130 - 419)       | 17<br>(4 - 43)        | 5<br>(2 - 10)          | 87<br>(43 - 159)        | 66<br>(31 - 129)         | 61<br>(34 - 104)        |
| Pyoderma                                            | 214<br>(95 - 368)        | 15<br>(6 - 30)        | 3<br>(1 - 7)           | 69<br>(27 - 134)        | 82<br>(33 - 149)         | 44<br>(19 - 77)         |
| Decubitus ulcer                                     | 92<br>(26 - 156)         | 1<br>(0 - 2)          | 1<br>(0 - 2)           | 16<br>(5 - 32)          | 25<br>(6 - 47)           | 49<br>(13 - 87)         |

Web Table 31- Papua New Guinea deaths with 95% UI by age, sex, and cause in 2013

| Cause                                           | Both Sexes, All Ages     | Both Sexes, 0-4 Years | Both Sexes, 5-14 Years | Both Sexes, 15-49 Years  | Both Sexes, 50-69 Years | Both Sexes, 70-80 Years |
|-------------------------------------------------|--------------------------|-----------------------|------------------------|--------------------------|-------------------------|-------------------------|
| Other skin and subcutaneous diseases            | 10<br>(2 - 20)           | 1<br>(0 - 1)          | 0<br>(0 - 0)           | 4<br>(1 - 10)            | 3<br>(0 - 7)            | 2<br>(0 - 5)            |
| Sudden infant death syndrome                    | 21<br>(6 - 58)           | 21<br>(6 - 58)        | --                     | --                       | --                      | --                      |
| Injuries                                        | 3,912<br>(2,482 - 5,829) | 370<br>(156 - 739)    | 206<br>(136 - 302)     | 2,442<br>(1,507 - 3,793) | 647<br>(356 - 1,014)    | 247<br>(120 - 403)      |
| Transport injuries                              | 1,454<br>(971 - 2,257)   | 40<br>(17 - 82)       | 90<br>(59 - 132)       | 988<br>(627 - 1,575)     | 265<br>(156 - 405)      | 71<br>(47 - 94)         |
| Road injuries                                   | 1,439<br>(962 - 2,230)   | 39<br>(16 - 80)       | 89<br>(58 - 131)       | 979<br>(621 - 1,554)     | 262<br>(154 - 400)      | 70<br>(46 - 93)         |
| Pedestrian road injuries                        | 377<br>(225 - 597)       | 9<br>(3 - 19)         | 23<br>(13 - 38)        | 250<br>(139 - 419)       | 74<br>(41 - 121)        | 20<br>(13 - 29)         |
| Cyclist road injuries                           | 11<br>(7 - 19)           | 0<br>(0 - 1)          | 1<br>(0 - 1)           | 8<br>(4 - 13)            | 2<br>(1 - 4)            | 1<br>(0 - 1)            |
| Motorcyclist road injuries                      | 339<br>(207 - 543)       | 11<br>(5 - 24)        | 18<br>(10 - 29)        | 249<br>(137 - 425)       | 49<br>(28 - 80)         | 12<br>(6 - 20)          |
| Motor vehicle road injuries                     | 636<br>(410 - 989)       | 13<br>(5 - 29)        | 36<br>(23 - 56)        | 435<br>(269 - 697)       | 120<br>(69 - 189)       | 32<br>(21 - 44)         |
| Other road injuries                             | 76<br>(38 - 128)         | 6<br>(2 - 13)         | 11<br>(5 - 19)         | 38<br>(17 - 70)          | 17<br>(7 - 30)          | 5<br>(2 - 10)           |
| Other transport injuries                        | 15<br>(8 - 32)           | 1<br>(0 - 3)          | 1<br>(1 - 3)           | 9<br>(4 - 21)            | 3<br>(1 - 6)            | 1<br>(0 - 1)            |
| Unintentional injuries                          | 1,187<br>(564 - 1,919)   | 308<br>(120 - 644)    | 77<br>(41 - 118)       | 422<br>(207 - 696)       | 238<br>(86 - 403)       | 142<br>(45 - 282)       |
| Falls                                           | 15<br>(9 - 24)           | 1<br>(0 - 2)          | 1<br>(1 - 2)           | 8<br>(5 - 14)            | 3<br>(1 - 4)            | 2<br>(1 - 3)            |
| Drowning                                        | 114<br>(65 - 195)        | 27<br>(9 - 67)        | 13<br>(7 - 25)         | 55<br>(29 - 100)         | 14<br>(8 - 25)          | 5<br>(3 - 8)            |
| Fire, heat, and hot substances                  | 94<br>(54 - 143)         | 13<br>(5 - 28)        | 7<br>(4 - 12)          | 50<br>(26 - 83)          | 18<br>(9 - 30)          | 6<br>(3 - 8)            |
| Poisonings                                      | 20<br>(12 - 34)          | 1<br>(0 - 2)          | 2<br>(1 - 3)           | 11<br>(6 - 20)           | 4<br>(2 - 7)            | 2<br>(1 - 4)            |
| Exposure to mechanical forces                   | 80<br>(45 - 129)         | 10<br>(4 - 20)        | 6<br>(3 - 12)          | 48<br>(22 - 86)          | 12<br>(6 - 21)          | 3<br>(2 - 4)            |
| Unintentional firearm injuries                  | 8<br>(5 - 13)            | 0<br>(0 - 1)          | 1<br>(0 - 1)           | 5<br>(2 - 8)             | 2<br>(1 - 3)            | 0<br>(0 - 0)            |
| Unintentional suffocation                       | 31<br>(8 - 60)           | 5<br>(2 - 12)         | 3<br>(1 - 8)           | 20<br>(3 - 43)           | 3<br>(1 - 7)            | 0<br>(0 - 0)            |
| Other exposure to mechanical forces             | 41<br>(24 - 68)          | 5<br>(2 - 11)         | 3<br>(1 - 5)           | 23<br>(12 - 42)          | 8<br>(3 - 14)           | 2<br>(1 - 4)            |
| Adverse effects of medical treatment            | 423<br>(103 - 920)       | 163<br>(29 - 444)     | 20<br>(4 - 46)         | 122<br>(27 - 279)        | 33<br>(11 - 70)         | 85<br>(13 - 214)        |
| Animal contact                                  | 326<br>(39 - 523)        | 48<br>(5 - 102)       | 19<br>(3 - 35)         | 96<br>(14 - 175)         | 137<br>(12 - 257)       | 27<br>(3 - 45)          |
| Venomous animal contact                         | 269<br>(30 - 448)        | 36<br>(4 - 79)        | 16<br>(2 - 30)         | 75<br>(10 - 145)         | 125<br>(10 - 238)       | 18<br>(2 - 31)          |
| Non-venomous animal contact                     | 57<br>(8 - 91)           | 12<br>(1 - 26)        | 3<br>(0 - 6)           | 21<br>(4 - 39)           | 11<br>(1 - 23)          | 10<br>(1 - 16)          |
| Foreign body                                    | 103<br>(60 - 170)        | 45<br>(21 - 91)       | 7<br>(3 - 13)          | 24<br>(13 - 45)          | 15<br>(8 - 27)          | 11<br>(6 - 18)          |
| Pulmonary aspiration and foreign body in airway | 94<br>(52 - 161)         | 44<br>(20 - 90)       | 6<br>(3 - 12)          | 21<br>(11 - 41)          | 13<br>(7 - 24)          | 10<br>(5 - 17)          |
| Foreign body in other body part                 | 8<br>(5 - 13)            | 2<br>(1 - 3)          | 1<br>(0 - 1)           | 3<br>(2 - 5)             | 2<br>(1 - 3)            | 1<br>(1 - 2)            |
| Other unintentional injuries                    | 13<br>(7 - 31)           | 1<br>(0 - 3)          | 1<br>(1 - 3)           | 8<br>(4 - 17)            | 3<br>(1 - 6)            | 0<br>(0 - 1)            |
| Self-harm and interpersonal violence            | 1,271<br>(741 - 1,969)   | 22<br>(10 - 43)       | 39<br>(22 - 65)        | 1,032<br>(589 - 1,642)   | 144<br>(78 - 234)       | 34<br>(21 - 49)         |
| Self-harm                                       | 508<br>(320 - 800)       | --                    | 19<br>(9 - 39)         | 382<br>(231 - 616)       | 78<br>(43 - 127)        | 30<br>(18 - 44)         |
| Interpersonal violence                          | 762<br>(369 - 1,233)     | 22<br>(10 - 43)       | 20<br>(9 - 34)         | 650<br>(298 - 1,076)     | 66<br>(30 - 115)        | 5<br>(3 - 8)            |
| Assault by firearm                              | 271<br>(109 - 480)       | 4<br>(1 - 8)          | 3<br>(1 - 6)           | 240<br>(94 - 436)        | 24<br>(8 - 46)          | 1<br>(0 - 3)            |
| Assault by sharp object                         | 272<br>(111 - 479)       | 2<br>(1 - 4)          | 4<br>(1 - 7)           | 247<br>(95 - 434)        | 19<br>(8 - 39)          | 1<br>(0 - 1)            |
| Assault by other means                          | 219<br>(115 - 382)       | 16<br>(7 - 32)        | 14<br>(6 - 24)         | 163<br>(80 - 295)        | 23<br>(11 - 43)         | 3<br>(2 - 5)            |

Web Table 31- Papua New Guinea deaths with 95% UI by age, sex, and cause in 2013

| Cause                                                             | Males, All Ages             | Males, 0-4 Years          | Males, 5-14 Years    | Males, 15-49 Years         | Males, 50-69 Years         | Males, 70-80 Years       |
|-------------------------------------------------------------------|-----------------------------|---------------------------|----------------------|----------------------------|----------------------------|--------------------------|
| All causes                                                        | 33,929<br>(25,054 - 46,307) | 6,604<br>(4,171 - 10,064) | 967<br>(712 - 1,271) | 11,160<br>(7,433 - 17,023) | 10,304<br>(6,385 - 15,225) | 4,894<br>(3,680 - 5,783) |
| Communicable, maternal, neonatal, and nutritional diseases        | 12,270<br>(9,198 - 16,023)  | 5,400<br>(3,480 - 8,075)  | 515<br>(355 - 713)   | 3,454<br>(2,444 - 5,006)   | 1,983<br>(1,225 - 3,026)   | 918<br>(661 - 1,254)     |
| HIV/AIDS and tuberculosis                                         | 1,754<br>(1,297 - 2,718)    | 23<br>(14 - 35)           | 22<br>(13 - 34)      | 1,216<br>(849 - 1,808)     | 371<br>(266 - 676)         | 122<br>(80 - 201)        |
| Tuberculosis                                                      | 475<br>(241 - 1,242)        | 2<br>(1 - 8)              | 4<br>(2 - 12)        | 191<br>(87 - 618)          | 172<br>(82 - 459)          | 105<br>(63 - 184)        |
| HIV/AIDS                                                          | 1,279<br>(907 - 1,761)      | 21<br>(13 - 31)           | 18<br>(10 - 26)      | 1,025<br>(692 - 1,455)     | 199<br>(138 - 267)         | 17<br>(10 - 26)          |
| HIV/AIDS resulting in mycobacterial infection                     | 83<br>(57 - 120)            | 1<br>(1 - 2)              | 1<br>(1 - 2)         | 67<br>(44 - 100)           | 14<br>(9 - 19)             | 1<br>(1 - 2)             |
| HIV/AIDS resulting in other diseases                              | 1,196<br>(848 - 1,641)      | 19<br>(12 - 29)           | 17<br>(9 - 25)       | 959<br>(646 - 1,358)       | 185<br>(128 - 249)         | 15<br>(9 - 24)           |
| Diarrhea, lower respiratory, and other common infectious diseases | 6,615<br>(4,641 - 9,089)    | 3,199<br>(1,823 - 5,194)  | 287<br>(184 - 430)   | 1,255<br>(763 - 2,012)     | 1,206<br>(699 - 1,893)     | 668<br>(457 - 937)       |
| Diarrheal diseases                                                | 1,089<br>(673 - 1,725)      | 441<br>(150 - 999)        | 67<br>(31 - 136)     | 188<br>(97 - 343)          | 257<br>(127 - 466)         | 136<br>(78 - 215)        |
| Intestinal infectious diseases                                    | 100<br>(51 - 177)           | 44<br>(16 - 91)           | 26<br>(12 - 46)      | 24<br>(11 - 46)            | 5<br>(2 - 12)              | 1<br>(0 - 4)             |
| Typhoid fever                                                     | 61<br>(27 - 119)            | 25<br>(8 - 56)            | 18<br>(8 - 34)       | 14<br>(6 - 30)             | 3<br>(1 - 6)               | 0<br>(0 - 1)             |
| Paratyphoid fever                                                 | 17<br>(7 - 34)              | 8<br>(3 - 19)             | 5<br>(2 - 10)        | 3<br>(1 - 7)               | 0<br>(0 - 1)               | 0<br>(0 - 0)             |
| Other intestinal infectious diseases                              | 23<br>(10 - 45)             | 11<br>(3 - 27)            | 3<br>(0 - 8)         | 7<br>(2 - 16)              | 2<br>(0 - 7)               | 1<br>(0 - 4)             |
| Lower respiratory infections                                      | 4,099<br>(2,795 - 5,652)    | 2,024<br>(1,125 - 3,336)  | 84<br>(43 - 141)     | 634<br>(353 - 1,131)       | 848<br>(474 - 1,443)       | 508<br>(330 - 787)       |
| Upper respiratory infections                                      | 4<br>(2 - 9)                | 1<br>(0 - 2)              | 0<br>(0 - 1)         | 2<br>(0 - 4)               | 1<br>(0 - 4)               | 0<br>(0 - 1)             |
| Otitis media                                                      | 12<br>(7 - 18)              | 2<br>(1 - 3)              | 0<br>(0 - 1)         | 7<br>(4 - 13)              | 2<br>(1 - 3)               | 1<br>(0 - 1)             |
| Meningitis                                                        | 690<br>(439 - 1,023)        | 190<br>(79 - 403)         | 41<br>(20 - 74)      | 361<br>(197 - 617)         | 81<br>(37 - 157)           | 17<br>(9 - 28)           |
| Pneumococcal meningitis                                           | 254<br>(154 - 390)          | 59<br>(23 - 132)          | 16<br>(7 - 31)       | 141<br>(71 - 256)          | 31<br>(14 - 59)            | 6<br>(3 - 11)            |
| H influenzae type B meningitis                                    | 78<br>(44 - 126)            | 37<br>(15 - 84)           | 6<br>(2 - 12)        | 28<br>(12 - 54)            | 6<br>(2 - 12)              | 1<br>(1 - 3)             |
| Meningococcal meningitis                                          | 129<br>(75 - 203)           | 31<br>(12 - 74)           | 8<br>(3 - 15)        | 71<br>(32 - 129)           | 15<br>(6 - 31)             | 4<br>(2 - 7)             |
| Other meningitis                                                  | 228<br>(132 - 360)          | 61<br>(22 - 142)          | 11<br>(5 - 22)       | 122<br>(60 - 226)          | 28<br>(10 - 66)            | 5<br>(2 - 10)            |
| Encephalitis                                                      | 46<br>(28 - 69)             | 10<br>(4 - 24)            | 2<br>(1 - 5)         | 20<br>(11 - 33)            | 9<br>(4 - 16)              | 3<br>(1 - 6)             |
| Diphtheria                                                        | 6<br>(0 - 31)               | 4<br>(0 - 29)             | 1<br>(0 - 8)         | 1<br>(0 - 4)               | 0<br>(0 - 3)               | --                       |
| Whooping cough                                                    | 150<br>(0 - 781)            | 139<br>(0 - 730)          | 9<br>(0 - 47)        | 2<br>(0 - 12)              | 0<br>(0 - 2)               | --                       |
| Tetanus                                                           | 12<br>(5 - 34)              | 3<br>(1 - 8)              | 1<br>(0 - 5)         | 5<br>(2 - 19)              | 2<br>(1 - 7)               | 1<br>(0 - 2)             |
| Measles                                                           | 402<br>(66 - 1,191)         | 339<br>(55 - 1,009)       | 54<br>(9 - 164)      | 8<br>(1 - 28)              | 0<br>(0 - 1)               | --                       |
| Varicella and herpes zoster                                       | 5<br>(2 - 12)               | 2<br>(0 - 8)              | 1<br>(0 - 2)         | 2<br>(0 - 4)               | 1<br>(0 - 2)               | 1<br>(0 - 3)             |
| Neglected tropical diseases and malaria                           | 1,015<br>(462 - 1,733)      | 106<br>(40 - 217)         | 135<br>(53 - 235)    | 590<br>(222 - 1,108)       | 162<br>(56 - 320)          | 23<br>(11 - 41)          |
| Malaria                                                           | 964<br>(419 - 1,682)        | 92<br>(30 - 197)          | 127<br>(47 - 225)    | 575<br>(209 - 1,090)       | 153<br>(49 - 309)          | 17<br>(6 - 34)           |
| Leishmaniasis                                                     | 0<br>(0 - 0)                | 0<br>(0 - 0)              | 0<br>(0 - 0)         | 0<br>(0 - 0)               | 0<br>(0 - 0)               | 0<br>(0 - 0)             |
| Visceral leishmaniasis                                            | 0<br>(0 - 0)                | 0<br>(0 - 0)              | 0<br>(0 - 0)         | 0<br>(0 - 0)               | 0<br>(0 - 0)               | 0<br>(0 - 0)             |
| Cysticercosis                                                     | 0<br>(0 - 1)                | 0<br>(0 - 0)              | 0<br>(0 - 0)         | 0<br>(0 - 0)               | 0<br>(0 - 0)               | 0<br>(0 - 0)             |
| Cystic echinococcosis                                             | 2<br>(1 - 3)                | 0<br>(0 - 0)              | 0<br>(0 - 0)         | 1<br>(1 - 2)               | 1<br>(0 - 1)               | 0<br>(0 - 0)             |
| Dengue                                                            | 17<br>(11 - 41)             | 5<br>(2 - 14)             | 2<br>(1 - 5)         | 6<br>(3 - 15)              | 2<br>(1 - 5)               | 2<br>(1 - 3)             |
| Rabies                                                            | 4<br>(2 - 9)                | 0<br>(0 - 1)              | 1<br>(0 - 2)         | 2<br>(1 - 4)               | 0<br>(0 - 1)               | 0<br>(0 - 0)             |
| Intestinal nematode infections                                    | 10<br>(2 - 25)              | 6<br>(1 - 18)             | 2<br>(0 - 9)         | 1<br>(0 - 8)               | 1<br>(0 - 6)               | 0<br>(0 - 2)             |
| Ascariasis                                                        | 10<br>(2 - 25)              | 6<br>(1 - 18)             | 2<br>(0 - 9)         | 1<br>(0 - 8)               | 1<br>(0 - 6)               | 0<br>(0 - 2)             |
| Other neglected tropical diseases                                 | 17<br>(8 - 37)              | 2<br>(1 - 5)              | 2<br>(1 - 5)         | 5<br>(2 - 11)              | 5<br>(2 - 11)              | 4<br>(1 - 9)             |
| Maternal disorders                                                | --                          | --                        | --                   | --                         | --                         | --                       |
| Maternal hemorrhage                                               | --                          | --                        | --                   | --                         | --                         | --                       |



Web Table 31- Papua New Guinea deaths with 95% UI by age, sex, and cause in 2013

| Cause                                                            | Males, All Ages             | Males, 0-4 Years         | Males, 5-14 Years  | Males, 15-49 Years       | Males, 50-69 Years        | Males, 70-80 Years       |
|------------------------------------------------------------------|-----------------------------|--------------------------|--------------------|--------------------------|---------------------------|--------------------------|
| Maternal sepsis and other maternal infections                    | --                          | --                       | --                 | --                       | --                        | --                       |
| Maternal hypertensive disorders                                  | --                          | --                       | --                 | --                       | --                        | --                       |
| Maternal obstructed labor                                        | --                          | --                       | --                 | --                       | --                        | --                       |
| Maternal abortive outcome                                        | --                          | --                       | --                 | --                       | --                        | --                       |
| Indirect maternal deaths                                         | --                          | --                       | --                 | --                       | --                        | --                       |
| Late maternal deaths                                             | --                          | --                       | --                 | --                       | --                        | --                       |
| Maternal deaths aggravated by HIV/AIDS                           | --                          | --                       | --                 | --                       | --                        | --                       |
| Other maternal disorders                                         | --                          | --                       | --                 | --                       | --                        | --                       |
| Neonatal disorders                                               | 1,736<br>(1,168 - 2,504)    | 1,736<br>(1,168 - 2,504) | --                 | --                       | --                        | --                       |
| Neonatal preterm birth complications                             | 542<br>(239 - 972)          | 542<br>(239 - 972)       | --                 | --                       | --                        | --                       |
| Neonatal encephalopathy due to birth asphyxia and trauma         | 251<br>(86 - 532)           | 251<br>(86 - 532)        | --                 | --                       | --                        | --                       |
| Neonatal sepsis and other neonatal infections                    | 372<br>(113 - 855)          | 372<br>(113 - 855)       | --                 | --                       | --                        | --                       |
| Hemolytic disease and other neonatal jaundice                    | 17<br>(5 - 49)              | 17<br>(5 - 49)           | --                 | --                       | --                        | --                       |
| Other neonatal disorders                                         | 554<br>(194 - 996)          | 554<br>(194 - 996)       | --                 | --                       | --                        | --                       |
| Nutritional deficiencies                                         | 534<br>(328 - 945)          | 196<br>(75 - 427)        | 28<br>(15 - 49)    | 130<br>(70 - 231)        | 113<br>(60 - 203)         | 66<br>(37 - 112)         |
| Protein-energy malnutrition                                      | 262<br>(118 - 566)          | 172<br>(64 - 366)        | 12<br>(5 - 27)     | 27<br>(8 - 76)           | 36<br>(11 - 87)           | 15<br>(4 - 41)           |
| Iodine deficiency                                                | 2<br>(0 - 6)                | 0<br>(0 - 2)             | 0<br>(0 - 1)       | 1<br>(0 - 4)             | 0<br>(0 - 3)              | 0<br>(0 - 1)             |
| Iron-deficiency anemia                                           | 207<br>(82 - 367)           | 14<br>(2 - 46)           | 11<br>(3 - 23)     | 79<br>(31 - 148)         | 63<br>(24 - 118)          | 40<br>(15 - 70)          |
| Other nutritional deficiencies                                   | 62<br>(20 - 184)            | 9<br>(1 - 32)            | 4<br>(1 - 12)      | 24<br>(7 - 67)           | 14<br>(4 - 44)            | 11<br>(3 - 31)           |
| Other communicable, maternal, neonatal, and nutritional diseases | 616<br>(393 - 892)          | 140<br>(50 - 281)        | 43<br>(26 - 65)    | 263<br>(153 - 436)       | 130<br>(71 - 217)         | 40<br>(23 - 68)          |
| Sexually transmitted diseases excluding HIV                      | 109<br>(25 - 231)           | 87<br>(11 - 196)         | 7<br>(1 - 16)      | 6<br>(2 - 12)            | 5<br>(1 - 11)             | 3<br>(1 - 9)             |
| Syphilis                                                         | 104<br>(22 - 225)           | 87<br>(11 - 196)         | 7<br>(1 - 16)      | 3<br>(1 - 7)             | 3<br>(1 - 8)              | 3<br>(0 - 8)             |
| Chlamydial infection                                             | --                          | --                       | --                 | --                       | --                        | --                       |
| Gonococcal infection                                             | 3<br>(1 - 5)                | --                       | 0<br>(0 - 0)       | 2<br>(0 - 3)             | 1<br>(0 - 2)              | 0<br>(0 - 1)             |
| Other sexually transmitted diseases                              | 2<br>(0 - 4)                | --                       | 0<br>(0 - 0)       | 1<br>(0 - 2)             | 0<br>(0 - 1)              | 0<br>(0 - 0)             |
| Hepatitis                                                        | 372<br>(224 - 585)          | 23<br>(8 - 52)           | 31<br>(18 - 49)    | 191<br>(98 - 335)        | 101<br>(54 - 169)         | 27<br>(15 - 47)          |
| Acute hepatitis A                                                | 19<br>(5 - 42)              | 5<br>(1 - 15)            | 7<br>(2 - 15)      | 6<br>(1 - 16)            | 1<br>(0 - 2)              | 0<br>(0 - 0)             |
| Acute hepatitis B                                                | 262<br>(154 - 420)          | 17<br>(6 - 40)           | 17<br>(8 - 30)     | 117<br>(56 - 206)        | 86<br>(46 - 147)          | 25<br>(14 - 43)          |
| Acute hepatitis C                                                | 8<br>(1 - 22)               | --                       | 1<br>(0 - 3)       | 5<br>(1 - 14)            | 2<br>(0 - 6)              | 0<br>(0 - 2)             |
| Acute hepatitis E                                                | 83<br>(35 - 166)            | 0<br>(0 - 0)             | 6<br>(2 - 13)      | 63<br>(26 - 129)         | 12<br>(3 - 31)            | 2<br>(0 - 5)             |
| Other infectious diseases                                        | 136<br>(57 - 256)           | 30<br>(8 - 69)           | 5<br>(2 - 12)      | 66<br>(25 - 134)         | 25<br>(7 - 69)            | 10<br>(3 - 29)           |
| Non-communicable diseases                                        | 18,763<br>(12,487 - 26,632) | 981<br>(539 - 1,691)     | 317<br>(224 - 438) | 5,796<br>(3,546 - 9,247) | 7,861<br>(4,744 - 11,679) | 3,808<br>(2,830 - 4,540) |
| Neoplasms                                                        | 2,841<br>(1,737 - 4,205)    | 56<br>(25 - 108)         | 50<br>(33 - 73)    | 1,081<br>(636 - 1,724)   | 1,233<br>(707 - 1,840)    | 421<br>(289 - 525)       |
| Esophageal cancer                                                | 157<br>(78 - 253)           | --                       | --                 | 44<br>(21 - 77)          | 77<br>(36 - 129)          | 36<br>(19 - 57)          |
| Stomach cancer                                                   | 279<br>(167 - 408)          | --                       | --                 | 70<br>(39 - 118)         | 143<br>(81 - 218)         | 66<br>(42 - 92)          |
| Liver cancer                                                     | 539<br>(315 - 883)          | --                       | 7<br>(3 - 14)      | 295<br>(159 - 519)       | 203<br>(111 - 320)        | 34<br>(21 - 51)          |
| Liver cancer due to hepatitis B                                  | 290<br>(137 - 529)          | --                       | 3<br>(1 - 6)       | 168<br>(77 - 336)        | 104<br>(46 - 186)         | 15<br>(7 - 24)           |
| Liver cancer due to hepatitis C                                  | 156<br>(43 - 297)           | --                       | 1<br>(0 - 3)       | 75<br>(13 - 156)         | 66<br>(21 - 128)          | 14<br>(7 - 24)           |
| Liver cancer due to alcohol use                                  | 37<br>(18 - 69)             | --                       | --                 | 17<br>(7 - 34)           | 16<br>(7 - 30)            | 4<br>(2 - 7)             |
| Liver cancer due to other causes                                 | 56<br>(25 - 106)            | --                       | 3<br>(1 - 6)       | 35<br>(15 - 69)          | 15<br>(6 - 32)            | 2<br>(1 - 4)             |

Web Table 31- Papua New Guinea deaths with 95% UI by age, sex, and cause in 2013

| Cause                                         | Males, All Ages          | Males, 0-4 Years | Males, 5-14 Years | Males, 15-49 Years       | Males, 50-69 Years       | Males, 70-80 Years     |
|-----------------------------------------------|--------------------------|------------------|-------------------|--------------------------|--------------------------|------------------------|
| Larynx cancer                                 | 9<br>(6 - 15)            | --               | --                | 3<br>(2 - 6)             | 4<br>(2 - 7)             | 2<br>(1 - 3)           |
| Tracheal, bronchus and lung cancer            | 570<br>(338 - 849)       | --               | --                | 193<br>(112 - 318)       | 296<br>(168 - 446)       | 85<br>(54 - 105)       |
| Breast cancer                                 | 6<br>(3 - 10)            | --               | --                | 2<br>(1 - 4)             | 3<br>(1 - 6)             | 0<br>(0 - 1)           |
| Cervical cancer                               | --                       | --               | --                | --                       | --                       | --                     |
| Uterine cancer                                | --                       | --               | --                | --                       | --                       | --                     |
| Prostate cancer                               | 78<br>(41 - 121)         | --               | --                | 9<br>(4 - 18)            | 37<br>(18 - 60)          | 31<br>(18 - 48)        |
| Colon and rectum cancer                       | 280<br>(177 - 411)       | --               | --                | 79<br>(49 - 128)         | 140<br>(80 - 213)        | 61<br>(42 - 82)        |
| Lip and oral cavity cancer                    | 78<br>(35 - 126)         | --               | --                | 32<br>(14 - 53)          | 33<br>(14 - 57)          | 13<br>(5 - 22)         |
| Nasopharynx cancer                            | 42<br>(24 - 67)          | --               | 1<br>(0 - 2)      | 22<br>(12 - 39)          | 17<br>(8 - 28)           | 2<br>(1 - 4)           |
| Other pharynx cancer                          | 68<br>(28 - 106)         | --               | --                | 25<br>(13 - 43)          | 31<br>(12 - 54)          | 12<br>(3 - 18)         |
| Gallbladder and biliary tract cancer          | 51<br>(27 - 82)          | --               | --                | 9<br>(5 - 17)            | 37<br>(19 - 61)          | 5<br>(3 - 8)           |
| Pancreatic cancer                             | 100<br>(59 - 148)        | --               | --                | 25<br>(14 - 42)          | 52<br>(28 - 81)          | 23<br>(15 - 32)        |
| Malignant skin melanoma                       | 15<br>(7 - 27)           | --               | --                | 10<br>(4 - 18)           | 3<br>(1 - 6)             | 2<br>(1 - 3)           |
| Non-melanoma skin cancer                      | 14<br>(8 - 24)           | --               | --                | 4<br>(2 - 7)             | 7<br>(4 - 13)            | 4<br>(2 - 6)           |
| Ovarian cancer                                | --                       | --               | --                | --                       | --                       | --                     |
| Testicular cancer                             | 5<br>(3 - 8)             | --               | --                | 4<br>(2 - 6)             | 1<br>(0 - 2)             | 0<br>(0 - 1)           |
| Kidney cancer                                 | 57<br>(29 - 96)          | 1<br>(0 - 2)     | 1<br>(0 - 1)      | 25<br>(12 - 48)          | 20<br>(9 - 37)           | 9<br>(4 - 17)          |
| Bladder cancer                                | 21<br>(12 - 33)          | --               | --                | 9<br>(4 - 16)            | 8<br>(4 - 13)            | 4<br>(3 - 6)           |
| Brain and nervous system cancer               | 17<br>(10 - 28)          | 1<br>(0 - 4)     | 1<br>(0 - 1)      | 9<br>(5 - 17)            | 5<br>(3 - 9)             | 0<br>(0 - 0)           |
| Thyroid cancer                                | 2<br>(1 - 3)             | --               | 0<br>(0 - 0)      | 1<br>(0 - 1)             | 1<br>(0 - 1)             | 0<br>(0 - 0)           |
| Mesothelioma                                  | 12<br>(6 - 19)           | --               | --                | 6<br>(3 - 11)            | 5<br>(3 - 10)            | 1<br>(0 - 2)           |
| Hodgkin lymphoma                              | 5<br>(3 - 8)             | 0<br>(0 - 1)     | 1<br>(0 - 2)      | 3<br>(2 - 6)             | 1<br>(0 - 1)             | 0<br>(0 - 0)           |
| Non-Hodgkin lymphoma                          | 42<br>(17 - 78)          | 2<br>(0 - 4)     | 3<br>(1 - 6)      | 19<br>(7 - 37)           | 13<br>(5 - 25)           | 5<br>(2 - 9)           |
| Multiple myeloma                              | 57<br>(30 - 94)          | --               | --                | 27<br>(13 - 50)          | 19<br>(10 - 32)          | 11<br>(6 - 19)         |
| Leukemia                                      | 146<br>(97 - 215)        | 17<br>(6 - 39)   | 22<br>(13 - 35)   | 73<br>(46 - 112)         | 28<br>(16 - 45)          | 6<br>(4 - 9)           |
| Other neoplasms                               | 192<br>(119 - 284)       | 35<br>(14 - 71)  | 15<br>(8 - 25)    | 84<br>(47 - 139)         | 47<br>(26 - 71)          | 11<br>(7 - 16)         |
| Cardiovascular diseases                       | 5,962<br>(3,715 - 8,774) | 89<br>(45 - 164) | 39<br>(23 - 62)   | 1,945<br>(1,162 - 3,133) | 2,761<br>(1,593 - 4,121) | 1,128<br>(805 - 1,390) |
| Rheumatic heart disease                       | 130<br>(71 - 286)        | 1<br>(0 - 4)     | 9<br>(4 - 17)     | 62<br>(31 - 134)         | 41<br>(19 - 99)          | 17<br>(9 - 37)         |
| Ischemic heart disease                        | 3,211<br>(1,972 - 4,820) | 19<br>(6 - 45)   | 3<br>(1 - 5)      | 1,009<br>(598 - 1,688)   | 1,614<br>(938 - 2,446)   | 567<br>(400 - 722)     |
| Cerebrovascular disease                       | 1,097<br>(669 - 1,627)   | 19<br>(10 - 34)  | 8<br>(4 - 13)     | 277<br>(158 - 465)       | 501<br>(274 - 772)       | 292<br>(198 - 393)     |
| Ischemic stroke                               | 277<br>(152 - 430)       | 1<br>(0 - 3)     | 1<br>(1 - 3)      | 34<br>(15 - 67)          | 112<br>(54 - 194)        | 127<br>(76 - 179)      |
| Hemorrhagic stroke                            | 820<br>(490 - 1,265)     | 18<br>(9 - 32)   | 6<br>(3 - 11)     | 243<br>(137 - 410)       | 388<br>(209 - 609)       | 165<br>(104 - 248)     |
| Hypertensive heart disease                    | 86<br>(48 - 145)         | 0<br>(0 - 1)     | 1<br>(0 - 1)      | 20<br>(10 - 37)          | 46<br>(23 - 81)          | 19<br>(11 - 33)        |
| Cardiomyopathy and myocarditis                | 305<br>(144 - 514)       | 14<br>(6 - 31)   | 4<br>(2 - 8)      | 157<br>(61 - 289)        | 107<br>(48 - 183)        | 21<br>(11 - 35)        |
| Atrial fibrillation and flutter               | 5<br>(3 - 10)            | --               | --                | 0<br>(0 - 0)             | 2<br>(1 - 5)             | 3<br>(1 - 5)           |
| Aortic aneurysm                               | 48<br>(24 - 78)          | --               | --                | 15<br>(6 - 28)           | 21<br>(11 - 37)          | 11<br>(6 - 18)         |
| Peripheral vascular disease                   | 6<br>(3 - 11)            | --               | --                | 1<br>(0 - 2)             | 2<br>(1 - 5)             | 3<br>(1 - 5)           |
| Endocarditis                                  | 160<br>(69 - 317)        | 10<br>(4 - 21)   | 2<br>(1 - 4)      | 81<br>(32 - 158)         | 47<br>(19 - 103)         | 20<br>(9 - 43)         |
| Other cardiovascular and circulatory diseases | 914<br>(536 - 1,366)     | 25<br>(12 - 47)  | 13<br>(7 - 24)    | 323<br>(183 - 523)       | 378<br>(188 - 592)       | 175<br>(102 - 243)     |
| Chronic respiratory diseases                  | 3,594<br>(2,386 - 5,076) | 81<br>(33 - 164) | 31<br>(20 - 46)   | 548<br>(318 - 897)       | 1,689<br>(1,008 - 2,556) | 1,246<br>(895 - 1,607) |

Web Table 31- Papua New Guinea deaths with 95% UI by age, sex, and cause in 2013

| Cause                                               | Males, All Ages          | Males, 0-4 Years | Males, 5-14 Years | Males, 15-49 Years     | Males, 50-69 Years     | Males, 70-80 Years |
|-----------------------------------------------------|--------------------------|------------------|-------------------|------------------------|------------------------|--------------------|
| Chronic obstructive pulmonary disease               | 1,534<br>(909 - 2,212)   | 52<br>(19 - 112) | 3<br>(1 - 6)      | 166<br>(85 - 284)      | 639<br>(329 - 1,008)   | 674<br>(420 - 915) |
| Pneumoconiosis                                      | 394<br>(212 - 653)       | 0<br>(0 - 1)     | 2<br>(1 - 4)      | 73<br>(34 - 134)       | 218<br>(107 - 381)     | 100<br>(54 - 160)  |
| Silicosis                                           | 151<br>(76 - 258)        | 0<br>(0 - 0)     | 1<br>(0 - 1)      | 29<br>(11 - 58)        | 81<br>(37 - 145)       | 41<br>(20 - 73)    |
| Asbestosis                                          | 42<br>(21 - 71)          | 0<br>(0 - 0)     | 0<br>(0 - 1)      | 6<br>(2 - 12)          | 27<br>(13 - 48)        | 9<br>(5 - 15)      |
| Coal workers pneumoconiosis                         | 43<br>(22 - 76)          | 0<br>(0 - 0)     | 0<br>(0 - 1)      | 7<br>(3 - 13)          | 25<br>(12 - 44)        | 11<br>(5 - 20)     |
| Other pneumoconiosis                                | 157<br>(83 - 272)        | 0<br>(0 - 0)     | 1<br>(0 - 1)      | 31<br>(14 - 66)        | 86<br>(43 - 157)       | 39<br>(20 - 67)    |
| Asthma                                              | 1,343<br>(792 - 2,154)   | 15<br>(4 - 39)   | 20<br>(12 - 33)   | 247<br>(136 - 423)     | 695<br>(384 - 1,155)   | 366<br>(199 - 609) |
| Interstitial lung disease and pulmonary sarcoidosis | 104<br>(56 - 174)        | 0<br>(0 - 1)     | 1<br>(0 - 2)      | 17<br>(6 - 35)         | 55<br>(27 - 98)        | 31<br>(13 - 62)    |
| Other chronic respiratory diseases                  | 220<br>(114 - 376)       | 14<br>(7 - 27)   | 5<br>(2 - 8)      | 45<br>(19 - 88)        | 82<br>(35 - 159)       | 75<br>(35 - 134)   |
| Cirrhosis                                           | 819<br>(503 - 1,236)     | 5<br>(1 - 11)    | 24<br>(15 - 38)   | 444<br>(264 - 707)     | 292<br>(165 - 451)     | 55<br>(35 - 78)    |
| Cirrhosis due to hepatitis B                        | 461<br>(273 - 704)       | 1<br>(0 - 3)     | 13<br>(8 - 22)    | 270<br>(154 - 432)     | 152<br>(81 - 241)      | 25<br>(15 - 37)    |
| Cirrhosis due to hepatitis C                        | 139<br>(62 - 254)        | 0<br>(0 - 1)     | 2<br>(0 - 5)      | 63<br>(22 - 127)       | 60<br>(25 - 112)       | 13<br>(6 - 22)     |
| Cirrhosis due to alcohol use                        | 150<br>(77 - 251)        | -                | -                 | 69<br>(31 - 128)       | 66<br>(33 - 111)       | 15<br>(8 - 23)     |
| Cirrhosis due to other causes                       | 70<br>(39 - 119)         | 3<br>(1 - 9)     | 9<br>(5 - 15)     | 42<br>(21 - 76)        | 14<br>(6 - 26)         | 2<br>(1 - 3)       |
| Digestive diseases                                  | 2,652<br>(1,694 - 4,022) | 57<br>(19 - 139) | 73<br>(45 - 112)  | 1,009<br>(615 - 1,650) | 1,043<br>(603 - 1,675) | 470<br>(313 - 673) |
| Peptic ulcer disease                                | 992<br>(617 - 1,552)     | 7<br>(2 - 19)    | 23<br>(12 - 41)   | 352<br>(204 - 589)     | 435<br>(235 - 710)     | 174<br>(108 - 270) |
| Gastritis and duodenitis                            | 63<br>(18 - 181)         | 1<br>(0 - 3)     | 2<br>(1 - 6)      | 16<br>(5 - 44)         | 31<br>(7 - 95)         | 13<br>(3 - 41)     |
| Appendicitis                                        | 304<br>(172 - 515)       | 10<br>(2 - 28)   | 13<br>(5 - 26)    | 153<br>(82 - 266)      | 92<br>(46 - 169)       | 35<br>(17 - 61)    |
| Paralytic ileus and intestinal obstruction          | 456<br>(194 - 742)       | 19<br>(5 - 49)   | 12<br>(5 - 22)    | 185<br>(66 - 345)      | 144<br>(58 - 261)      | 97<br>(42 - 158)   |
| Inguinal, femoral, and abdominal hernia             | 144<br>(70 - 339)        | 5<br>(1 - 13)    | 4<br>(2 - 9)      | 40<br>(18 - 90)        | 56<br>(24 - 135)       | 40<br>(17 - 108)   |
| Inflammatory bowel disease                          | 69<br>(39 - 122)         | 6<br>(1 - 19)    | 1<br>(0 - 3)      | 26<br>(13 - 52)        | 23<br>(12 - 42)        | 13<br>(6 - 27)     |
| Vascular intestinal disorders                       | 12<br>(4 - 27)           | 1<br>(0 - 3)     | 0<br>(0 - 1)      | 5<br>(2 - 14)          | 3<br>(1 - 8)           | 2<br>(1 - 4)       |
| Gallbladder and biliary diseases                    | 363<br>(215 - 638)       | 4<br>(1 - 11)    | 11<br>(5 - 19)    | 123<br>(69 - 217)      | 151<br>(77 - 297)      | 74<br>(39 - 141)   |
| Pancreatitis                                        | 62<br>(25 - 116)         | 1<br>(0 - 2)     | 1<br>(0 - 3)      | 38<br>(15 - 74)        | 19<br>(8 - 39)         | 3<br>(2 - 7)       |
| Other digestive diseases                            | 186<br>(100 - 332)       | 4<br>(1 - 11)    | 7<br>(3 - 12)     | 71<br>(33 - 144)       | 87<br>(43 - 155)       | 18<br>(9 - 33)     |
| Neurological disorders                              | 276<br>(188 - 360)       | 5<br>(2 - 11)    | 4<br>(2 - 8)      | 44<br>(25 - 69)        | 52<br>(29 - 78)        | 171<br>(118 - 225) |
| Alzheimer disease and other dementias               | 206<br>(140 - 270)       | -                | -                 | 1<br>(0 - 1)           | 43<br>(23 - 65)        | 163<br>(113 - 214) |
| Parkinson disease                                   | 1<br>(1 - 2)             | -                | -                 | 0<br>(0 - 1)           | 0<br>(0 - 1)           | 0<br>(0 - 1)       |
| Epilepsy                                            | 35<br>(21 - 54)          | 3<br>(1 - 7)     | 4<br>(2 - 7)      | 26<br>(14 - 43)        | 2<br>(1 - 3)           | 1<br>(0 - 1)       |
| Multiple sclerosis                                  | 0<br>(0 - 0)             | -                | -                 | 0<br>(0 - 0)           | 0<br>(0 - 0)           | 0<br>(0 - 0)       |
| Other neurological disorders                        | 34<br>(15 - 51)          | 2<br>(1 - 5)     | 1<br>(0 - 1)      | 17<br>(7 - 28)         | 7<br>(3 - 11)          | 7<br>(2 - 11)      |
| Mental and substance use disorders                  | 63<br>(36 - 106)         | 0<br>(0 - 0)     | 0<br>(0 - 0)      | 45<br>(25 - 77)        | 16<br>(8 - 28)         | 3<br>(1 - 4)       |
| Schizophrenia                                       | 1<br>(1 - 3)             | -                | -                 | 1<br>(0 - 2)           | 0<br>(0 - 1)           | 0<br>(0 - 0)       |
| Alcohol use disorders                               | 42<br>(23 - 76)          | -                | -                 | 26<br>(14 - 48)        | 14<br>(7 - 26)         | 2<br>(1 - 4)       |
| Drug use disorders                                  | 19<br>(7 - 32)           | 0<br>(0 - 0)     | -                 | 18<br>(6 - 30)         | 1<br>(0 - 2)           | 0<br>(0 - 0)       |
| Opioid use disorders                                | 4<br>(1 - 7)             | 0<br>(0 - 0)     | -                 | 4<br>(1 - 6)           | 0<br>(0 - 0)           | 0<br>(0 - 0)       |
| Cocaine use disorders                               | 1<br>(1 - 2)             | 0<br>(0 - 0)     | -                 | 1<br>(0 - 2)           | 0<br>(0 - 0)           | 0<br>(0 - 0)       |
| Amphetamine use disorders                           | 1<br>(0 - 2)             | 0<br>(0 - 0)     | -                 | 1<br>(0 - 2)           | 0<br>(0 - 0)           | 0<br>(0 - 0)       |
| Other drug use disorders                            | 13<br>(4 - 22)           | 0<br>(0 - 0)     | -                 | 12<br>(4 - 20)         | 1<br>(0 - 2)           | 0<br>(0 - 0)       |
| Eating disorders                                    | 0<br>(0 - 0)             | -                | 0<br>(0 - 0)      | 0<br>(0 - 0)           | -                      | -                  |

Web Table 31- Papua New Guinea deaths with 95% UI by age, sex, and cause in 2013

| Cause                                               | Males, All Ages          | Males, 0-4 Years   | Males, 5-14 Years | Males, 15-49 Years | Males, 50-69 Years   | Males, 70-89 Years |
|-----------------------------------------------------|--------------------------|--------------------|-------------------|--------------------|----------------------|--------------------|
| Anorexia nervosa                                    | 0<br>(0 - 0)             | --                 | 0<br>(0 - 0)      | 0<br>(0 - 0)       | --                   | --                 |
| Diabetes, urogenital, blood, and endocrine diseases | 1,637<br>(1,028 - 2,391) | 159<br>(79 - 297)  | 54<br>(32 - 87)   | 512<br>(291 - 827) | 666<br>(359 - 1,028) | 247<br>(164 - 318) |
| Diabetes mellitus                                   | 332<br>(195 - 506)       | 2<br>(1 - 4)       | 1<br>(1 - 2)      | 69<br>(38 - 119)   | 190<br>(104 - 295)   | 69<br>(44 - 101)   |
| Acute glomerulonephritis                            | 9<br>(4 - 24)            | 1<br>(0 - 2)       | 1<br>(0 - 1)      | 4<br>(1 - 10)      | 3<br>(1 - 9)         | 1<br>(0 - 3)       |
| Chronic kidney disease                              | 468<br>(254 - 738)       | 10<br>(4 - 22)     | 6<br>(3 - 10)     | 192<br>(98 - 328)  | 190<br>(96 - 302)    | 69<br>(40 - 101)   |
| Chronic kidney disease due to diabetes mellitus     | 50<br>(13 - 89)          | 0<br>(0 - 1)       | 0<br>(0 - 1)      | 18<br>(4 - 35)     | 24<br>(6 - 45)       | 7<br>(2 - 14)      |
| Chronic kidney disease due to hypertension          | 137<br>(51 - 232)        | 1<br>(0 - 3)       | 1<br>(0 - 1)      | 52<br>(15 - 96)    | 61<br>(23 - 112)     | 22<br>(10 - 39)    |
| Chronic kidney disease due to glomerulonephritis    | 41<br>(22 - 64)          | 3<br>(1 - 7)       | 1<br>(1 - 2)      | 21<br>(9 - 37)     | 7<br>(3 - 15)        | 8<br>(4 - 14)      |
| Chronic kidney disease due to other causes          | 240<br>(113 - 418)       | 6<br>(2 - 14)      | 4<br>(2 - 8)      | 101<br>(44 - 187)  | 98<br>(39 - 182)     | 31<br>(13 - 59)    |
| Urinary diseases and male infertility               | 107<br>(62 - 165)        | 3<br>(1 - 6)       | 1<br>(0 - 1)      | 37<br>(19 - 62)    | 40<br>(20 - 66)      | 26<br>(15 - 39)    |
| Interstitial nephritis and urinary tract infections | 37<br>(19 - 59)          | 2<br>(1 - 4)       | 0<br>(0 - 0)      | 10<br>(5 - 17)     | 15<br>(7 - 27)       | 10<br>(5 - 17)     |
| Urolithiasis                                        | 6<br>(3 - 11)            | --                 | 0<br>(0 - 0)      | 3<br>(1 - 6)       | 2<br>(1 - 5)         | 0<br>(0 - 1)       |
| Other urinary diseases                              | 64<br>(36 - 104)         | 1<br>(0 - 3)       | 0<br>(0 - 1)      | 25<br>(12 - 44)    | 23<br>(11 - 39)      | 16<br>(8 - 25)     |
| Gynecological diseases                              | --                       | --                 | --                | --                 | --                   | --                 |
| Uterine fibroids                                    | --                       | --                 | --                | --                 | --                   | --                 |
| Polycystic ovarian syndrome                         | --                       | --                 | --                | --                 | --                   | --                 |
| Endometriosis                                       | --                       | --                 | --                | --                 | --                   | --                 |
| Genital prolapse                                    | --                       | --                 | --                | --                 | --                   | --                 |
| Other gynecological diseases                        | --                       | --                 | --                | --                 | --                   | --                 |
| Hemoglobinopathies and hemolytic anemias            | 210<br>(106 - 344)       | 54<br>(22 - 118)   | 34<br>(17 - 60)   | 85<br>(43 - 147)   | 24<br>(11 - 41)      | 14<br>(7 - 23)     |
| Thalassemias                                        | 133<br>(65 - 232)        | 48<br>(19 - 108)   | 31<br>(16 - 55)   | 53<br>(27 - 92)    | 0<br>(0 - 0)         | 0<br>(0 - 0)       |
| Sickle cell disorders                               | 0<br>(0 - 0)             | 0<br>(0 - 0)       | 0<br>(0 - 0)      | 0<br>(0 - 0)       | 0<br>(0 - 0)         | 0<br>(0 - 0)       |
| G6PD deficiency                                     | 9<br>(5 - 16)            | 1<br>(0 - 2)       | 1<br>(0 - 1)      | 5<br>(2 - 8)       | 3<br>(1 - 5)         | 0<br>(0 - 0)       |
| Other hemoglobinopathies and hemolytic anemias      | 68<br>(34 - 109)         | 5<br>(2 - 9)       | 2<br>(1 - 3)      | 27<br>(12 - 49)    | 21<br>(10 - 36)      | 14<br>(7 - 23)     |
| Endocrine, metabolic, blood, and immune disorders   | 512<br>(222 - 787)       | 89<br>(38 - 179)   | 11<br>(5 - 19)    | 126<br>(57 - 225)  | 218<br>(76 - 376)    | 67<br>(25 - 106)   |
| Musculoskeletal disorders                           | 26<br>(16 - 40)          | --                 | 2<br>(1 - 3)      | 13<br>(7 - 21)     | 8<br>(4 - 13)        | 4<br>(2 - 6)       |
| Rheumatoid arthritis                                | 6<br>(3 - 11)            | --                 | 0<br>(0 - 1)      | 2<br>(1 - 4)       | 2<br>(1 - 4)         | 1<br>(1 - 2)       |
| Other musculoskeletal disorders                     | 20<br>(12 - 31)          | --                 | 1<br>(1 - 2)      | 10<br>(6 - 18)     | 6<br>(3 - 10)        | 2<br>(1 - 4)       |
| Other non-communicable diseases                     | 893<br>(606 - 1,293)     | 530<br>(293 - 907) | 40<br>(22 - 66)   | 157<br>(86 - 261)  | 102<br>(52 - 163)    | 65<br>(35 - 99)    |
| Congenital anomalies                                | 594<br>(345 - 973)       | 502<br>(275 - 878) | 38<br>(21 - 63)   | 43<br>(26 - 70)    | 9<br>(5 - 14)        | 3<br>(2 - 4)       |
| Neural tube defects                                 | 17<br>(3 - 65)           | 13<br>(2 - 60)     | 1<br>(0 - 2)      | 3<br>(1 - 6)       | 0<br>(0 - 1)         | 0<br>(0 - 0)       |
| Congenital heart anomalies                          | 251<br>(127 - 460)       | 215<br>(96 - 421)  | 22<br>(10 - 37)   | 12<br>(6 - 21)     | 2<br>(1 - 4)         | 1<br>(0 - 1)       |
| Cleft lip and cleft palate                          | 1<br>(0 - 1)             | 1<br>(0 - 1)       | --                | --                 | --                   | --                 |
| Down syndrome                                       | 28<br>(10 - 74)          | 23<br>(6 - 67)     | 2<br>(1 - 4)      | 3<br>(1 - 5)       | 1<br>(0 - 1)         | 0<br>(0 - 0)       |
| Chromosomal unbalanced rearrangements               | 20<br>(7 - 48)           | 18<br>(5 - 46)     | 1<br>(0 - 2)      | 1<br>(0 - 2)       | 0<br>(0 - 0)         | 0<br>(0 - 0)       |
| Other congenital anomalies                          | 279<br>(158 - 453)       | 232<br>(121 - 400) | 13<br>(6 - 24)    | 26<br>(15 - 42)    | 6<br>(3 - 10)        | 2<br>(1 - 3)       |
| Skin and subcutaneous diseases                      | 284<br>(149 - 428)       | 14<br>(5 - 30)     | 2<br>(1 - 4)      | 113<br>(54 - 193)  | 93<br>(46 - 151)     | 62<br>(32 - 96)    |
| Cellulitis                                          | 109<br>(46 - 221)        | 4<br>(0 - 15)      | 1<br>(0 - 3)      | 50<br>(20 - 99)    | 28<br>(8 - 70)       | 27<br>(11 - 52)    |
| Pyoderma                                            | 137<br>(58 - 234)        | 9<br>(3 - 20)      | 1<br>(0 - 2)      | 54<br>(21 - 102)   | 50<br>(19 - 91)      | 24<br>(9 - 43)     |
| Decubitus ulcer                                     | 31<br>(9 - 56)           | 0<br>(0 - 1)       | 0<br>(0 - 1)      | 7<br>(2 - 13)      | 14<br>(3 - 27)       | 0<br>(3 - 20)      |

Web Table 31- Papua New Guinea deaths with 95% UI by age, sex, and cause in 2013

| Cause                                           | Males, All Ages          | Males, 0-4 Years   | Males, 5-14 Years | Males, 15-49 Years       | Males, 50-69 Years | Males, 70-80 Years |
|-------------------------------------------------|--------------------------|--------------------|-------------------|--------------------------|--------------------|--------------------|
| Other skin and subcutaneous diseases            | 7<br>(1 - 14)            | 0<br>(0 - 1)       | 0<br>(0 - 0)      | 3<br>(1 - 7)             | 2<br>(0 - 4)       | 2<br>(0 - 4)       |
| Sudden infant death syndrome                    | 14<br>(3 - 47)           | 14<br>(3 - 47)     | --                | --                       | --                 | --                 |
| Injuries                                        | 2,896<br>(1,853 - 4,262) | 223<br>(100 - 440) | 134<br>(88 - 193) | 1,910<br>(1,193 - 2,936) | 461<br>(248 - 729) | 168<br>(71 - 305)  |
| Transport injuries                              | 1,081<br>(722 - 1,657)   | 23<br>(8 - 53)     | 62<br>(38 - 94)   | 780<br>(505 - 1,227)     | 176<br>(102 - 278) | 40<br>(26 - 54)    |
| Road injuries                                   | 1,074<br>(717 - 1,640)   | 23<br>(8 - 52)     | 61<br>(38 - 93)   | 776<br>(502 - 1,219)     | 174<br>(101 - 275) | 40<br>(26 - 54)    |
| Pedestrian road injuries                        | 292<br>(167 - 476)       | 6<br>(2 - 13)      | 17<br>(9 - 29)    | 203<br>(112 - 343)       | 53<br>(27 - 88)    | 13<br>(7 - 20)     |
| Cyclist road injuries                           | 9<br>(5 - 16)            | 0<br>(0 - 0)       | 1<br>(0 - 1)      | 6<br>(4 - 11)            | 2<br>(1 - 3)       | 0<br>(0 - 1)       |
| Motorcyclist road injuries                      | 231<br>(134 - 389)       | 6<br>(2 - 15)      | 10<br>(6 - 18)    | 184<br>(100 - 323)       | 25<br>(13 - 44)    | 5<br>(2 - 8)       |
| Motor vehicle road injuries                     | 494<br>(314 - 762)       | 8<br>(2 - 20)      | 26<br>(15 - 43)   | 356<br>(219 - 562)       | 85<br>(49 - 138)   | 20<br>(13 - 28)    |
| Other road injuries                             | 48<br>(15 - 87)          | 3<br>(1 - 9)       | 7<br>(2 - 14)     | 26<br>(8 - 52)           | 9<br>(3 - 20)      | 2<br>(1 - 5)       |
| Other transport injuries                        | 7<br>(4 - 16)            | 0<br>(0 - 1)       | 1<br>(0 - 1)      | 5<br>(2 - 11)            | 1<br>(1 - 3)       | 0<br>(0 - 0)       |
| Unintentional injuries                          | 877<br>(71 - 1,429)      | 187<br>(74 - 389)  | 51<br>(26 - 80)   | 335<br>(153 - 553)       | 190<br>(56 - 326)  | 113<br>(27 - 251)  |
| Falls                                           | 7<br>(4 - 11)            | 0<br>(0 - 1)       | 1<br>(0 - 1)      | 4<br>(2 - 8)             | 1<br>(0 - 2)       | 0<br>(0 - 0)       |
| Drowning                                        | 73<br>(39 - 134)         | 13<br>(4 - 36)     | 10<br>(4 - 19)    | 41<br>(20 - 78)          | 8<br>(4 - 15)      | 1<br>(1 - 2)       |
| Fire, heat, and hot substances                  | 69<br>(39 - 108)         | 8<br>(3 - 20)      | 5<br>(3 - 9)      | 36<br>(18 - 61)          | 15<br>(8 - 26)     | 4<br>(2 - 6)       |
| Poisonings                                      | 14<br>(8 - 26)           | 0<br>(0 - 1)       | 1<br>(1 - 2)      | 8<br>(4 - 15)            | 3<br>(1 - 5)       | 2<br>(1 - 4)       |
| Exposure to mechanical forces                   | 44<br>(27 - 71)          | 6<br>(2 - 12)      | 3<br>(2 - 5)      | 26<br>(14 - 44)          | 7<br>(3 - 13)      | 2<br>(1 - 4)       |
| Unintentional firearm injuries                  | 3<br>(2 - 6)             | 0<br>(0 - 0)       | 0<br>(0 - 1)      | 2<br>(1 - 4)             | 1<br>(0 - 1)       | 0<br>(0 - 0)       |
| Unintentional suffocation                       | 6<br>(2 - 10)            | 1<br>(0 - 4)       | 0<br>(0 - 1)      | 3<br>(1 - 7)             | 1<br>(0 - 1)       | 0<br>(0 - 0)       |
| Other exposure to mechanical forces             | 35<br>(20 - 59)          | 4<br>(1 - 9)       | 2<br>(1 - 4)      | 20<br>(10 - 38)          | 6<br>(3 - 12)      | 2<br>(1 - 3)       |
| Adverse effects of medical treatment            | 323<br>(68 - 722)        | 100<br>(19 - 285)  | 14<br>(3 - 34)    | 103<br>(20 - 239)        | 26<br>(6 - 63)     | 79<br>(8 - 210)    |
| Animal contact                                  | 267<br>(21 - 446)        | 28<br>(2 - 64)     | 13<br>(1 - 26)    | 91<br>(11 - 166)         | 117<br>(7 - 230)   | 18<br>(2 - 32)     |
| Venomous animal contact                         | 225<br>(17 - 384)        | 21<br>(1 - 49)     | 11<br>(1 - 23)    | 73<br>(8 - 142)          | 109<br>(6 - 216)   | 11<br>(1 - 21)     |
| Non-venomous animal contact                     | 42<br>(4 - 75)           | 7<br>(0 - 18)      | 2<br>(0 - 6)      | 18<br>(2 - 35)           | 8<br>(0 - 17)      | 7<br>(1 - 14)      |
| Foreign body                                    | 75<br>(41 - 141)         | 32<br>(13 - 72)    | 4<br>(2 - 7)      | 22<br>(11 - 42)          | 12<br>(6 - 23)     | 6<br>(3 - 11)      |
| Pulmonary aspiration and foreign body in airway | 70<br>(37 - 135)         | 31<br>(12 - 71)    | 3<br>(2 - 6)      | 20<br>(10 - 40)          | 10<br>(5 - 22)     | 6<br>(3 - 11)      |
| Foreign body in other body part                 | 5<br>(2 - 7)             | 1<br>(0 - 1)       | 0<br>(0 - 1)      | 2<br>(1 - 3)             | 1<br>(0 - 2)       | 0<br>(0 - 1)       |
| Other unintentional injuries                    | 6<br>(4 - 8)             | 0<br>(0 - 0)       | 1<br>(0 - 1)      | 4<br>(2 - 6)             | 1<br>(0 - 1)       | 0<br>(0 - 0)       |
| Self-harm and interpersonal violence            | 938<br>(533 - 1,473)     | 12<br>(5 - 28)     | 21<br>(11 - 38)   | 794<br>(443 - 1,274)     | 95<br>(50 - 160)   | 16<br>(9 - 23)     |
| Self-harm                                       | 324<br>(198 - 523)       | --                 | 8<br>(3 - 19)     | 260<br>(153 - 420)       | 43<br>(22 - 75)    | 13<br>(7 - 20)     |
| Interpersonal violence                          | 614<br>(296 - 1,013)     | 12<br>(5 - 28)     | 13<br>(6 - 23)    | 534<br>(243 - 882)       | 52<br>(22 - 97)    | 3<br>(1 - 6)       |
| Assault by firearm                              | 226<br>(85 - 427)        | 2<br>(1 - 6)       | 1<br>(0 - 3)      | 203<br>(75 - 389)        | 20<br>(6 - 41)     | 1<br>(0 - 2)       |
| Assault by sharp object                         | 242<br>(95 - 425)        | 1<br>(0 - 3)       | 3<br>(1 - 6)      | 220<br>(83 - 387)        | 18<br>(7 - 37)     | 0<br>(0 - 1)       |
| Assault by other means                          | 146<br>(72 - 271)        | 9<br>(3 - 22)      | 9<br>(4 - 17)     | 111<br>(50 - 208)        | 15<br>(6 - 32)     | 2<br>(1 - 3)       |

Web Table 31- Papua New Guinea deaths with 95% UI by age, sex, and cause in 2013

| Cause                                                             | Females, All Ages           | Females, 0-4 Years       | Females, 5-14 Years  | Females, 15-49 Years      | Females, 50-69 Years      | Females, 70-80 Years     |
|-------------------------------------------------------------------|-----------------------------|--------------------------|----------------------|---------------------------|---------------------------|--------------------------|
| All causes                                                        | 32,189<br>(23,054 - 44,755) | 5,370<br>(3,406 - 8,100) | 824<br>(593 - 1,133) | 8,334<br>(4,799 - 13,970) | 9,891<br>(6,340 - 14,762) | 7,769<br>(5,898 - 9,833) |
| Communicable, maternal, neonatal, and nutritional diseases        | 11,954<br>(8,779 - 16,280)  | 4,487<br>(2,855 - 6,809) | 477<br>(324 - 680)   | 3,143<br>(1,822 - 5,400)  | 1,712<br>(1,055 - 2,660)  | 2,134<br>(1,552 - 2,902) |
| HIV/AIDS and tuberculosis                                         | 471<br>(309 - 1,002)        | 20<br>(12 - 29)          | 17<br>(9 - 26)       | 266<br>(169 - 543)        | 109<br>(60 - 297)         | 60<br>(34 - 136)         |
| Tuberculosis                                                      | 258<br>(134 - 765)          | 0<br>(0 - 4)             | 0<br>(0 - 4)         | 107<br>(46 - 365)         | 91<br>(45 - 274)          | 59<br>(33 - 135)         |
| HIV/AIDS                                                          | 213<br>(127 - 316)          | 19<br>(12 - 28)          | 17<br>(9 - 25)       | 159<br>(96 - 236)         | 17<br>(8 - 34)            | 1<br>(0 - 3)             |
| HIV/AIDS resulting in mycobacterial infection                     | 10<br>(6 - 16)              | 1<br>(0 - 1)             | 1<br>(0 - 1)         | 8<br>(5 - 13)             | 1<br>(0 - 2)              | 0<br>(0 - 0)             |
| HIV/AIDS resulting in other diseases                              | 203<br>(121 - 301)          | 18<br>(11 - 27)          | 16<br>(9 - 24)       | 151<br>(91 - 225)         | 17<br>(7 - 33)            | 1<br>(0 - 3)             |
| Diarrhea, lower respiratory, and other common infectious diseases | 6,640<br>(4,882 - 9,073)    | 2,583<br>(1,460 - 4,174) | 272<br>(171 - 405)   | 828<br>(461 - 1,468)      | 1,195<br>(702 - 1,922)    | 1,763<br>(1,233 - 2,455) |
| Diarrheal diseases                                                | 2,096<br>(1,420 - 3,043)    | 283<br>(84 - 647)        | 91<br>(42 - 168)     | 286<br>(144 - 533)        | 541<br>(270 - 946)        | 894<br>(531 - 1,369)     |
| Intestinal infectious diseases                                    | 90<br>(43 - 166)            | 43<br>(16 - 89)          | 22<br>(10 - 41)      | 21<br>(9 - 43)            | 4<br>(1 - 9)              | 1<br>(0 - 5)             |
| Typhoid fever                                                     | 59<br>(26 - 114)            | 27<br>(9 - 58)           | 16<br>(7 - 31)       | 13<br>(5 - 29)            | 2<br>(1 - 5)              | 1<br>(0 - 1)             |
| Paratyphoid fever                                                 | 16<br>(7 - 33)              | 9<br>(3 - 20)            | 4<br>(2 - 9)         | 3<br>(1 - 6)              | 0<br>(0 - 1)              | 0<br>(0 - 0)             |
| Other intestinal infectious diseases                              | 15<br>(6 - 31)              | 7<br>(2 - 17)            | 2<br>(0 - 6)         | 4<br>(1 - 13)             | 1<br>(0 - 6)              | 1<br>(0 - 4)             |
| Lower respiratory infections                                      | 3,582<br>(2,475 - 5,111)    | 1,627<br>(890 - 2,742)   | 73<br>(37 - 129)     | 420<br>(221 - 797)        | 608<br>(331 - 1,098)      | 854<br>(525 - 1,426)     |
| Upper respiratory infections                                      | 4<br>(1 - 8)                | 1<br>(0 - 2)             | 0<br>(0 - 0)         | 1<br>(0 - 3)              | 1<br>(0 - 4)              | 1<br>(0 - 2)             |
| Otitis media                                                      | 6<br>(4 - 9)                | 1<br>(0 - 1)             | 2<br>(1 - 2)         | 2<br>(1 - 4)              | 1<br>(1 - 2)              | 1<br>(0 - 1)             |
| Meningitis                                                        | 273<br>(159 - 470)          | 144<br>(64 - 285)        | 21<br>(10 - 47)      | 69<br>(34 - 150)          | 33<br>(15 - 64)           | 8<br>(4 - 19)            |
| Pneumococcal meningitis                                           | 97<br>(56 - 168)            | 46<br>(19 - 95)          | 8<br>(4 - 18)        | 27<br>(13 - 60)           | 12<br>(5 - 25)            | 3<br>(1 - 7)             |
| H influenzae type B meningitis                                    | 38<br>(20 - 69)             | 27<br>(12 - 58)          | 3<br>(1 - 6)         | 6<br>(2 - 13)             | 2<br>(1 - 4)              | 1<br>(0 - 1)             |
| Meningococcal meningitis                                          | 46<br>(26 - 82)             | 21<br>(9 - 42)           | 4<br>(2 - 8)         | 13<br>(5 - 31)            | 6<br>(3 - 15)             | 2<br>(1 - 4)             |
| Other meningitis                                                  | 93<br>(51 - 158)            | 50<br>(20 - 101)         | 6<br>(3 - 17)        | 23<br>(10 - 49)           | 12<br>(5 - 23)            | 3<br>(1 - 7)             |
| Encephalitis                                                      | 27<br>(17 - 42)             | 5<br>(2 - 11)            | 2<br>(1 - 3)         | 13<br>(7 - 24)            | 4<br>(2 - 7)              | 3<br>(2 - 4)             |
| Diphtheria                                                        | 4<br>(0 - 24)               | 3<br>(0 - 21)            | 1<br>(0 - 5)         | 1<br>(0 - 3)              | 0<br>(0 - 2)              | --                       |
| Whooping cough                                                    | 168<br>(0 - 833)            | 155<br>(0 - 775)         | 10<br>(0 - 51)       | 2<br>(0 - 12)             | 0<br>(0 - 2)              | --                       |
| Tetanus                                                           | 4<br>(2 - 9)                | 2<br>(1 - 4)             | 0<br>(0 - 0)         | 1<br>(0 - 3)              | 0<br>(0 - 2)              | 0<br>(0 - 2)             |
| Measles                                                           | 381<br>(65 - 1,107)         | 320<br>(53 - 939)        | 51<br>(9 - 160)      | 10<br>(1 - 35)            | 0<br>(0 - 1)              | --                       |
| Varicella and herpes zoster                                       | 5<br>(2 - 12)               | 2<br>(0 - 7)             | 0<br>(0 - 2)         | 1<br>(0 - 4)              | 1<br>(0 - 2)              | 1<br>(0 - 6)             |
| Neglected tropical diseases and malaria                           | 877<br>(488 - 1,484)        | 139<br>(45 - 296)        | 122<br>(63 - 217)    | 423<br>(209 - 798)        | 154<br>(73 - 265)         | 39<br>(20 - 67)          |
| Malaria                                                           | 804<br>(432 - 1,383)        | 120<br>(30 - 272)        | 115<br>(57 - 209)    | 406<br>(199 - 763)        | 142<br>(63 - 248)         | 22<br>(10 - 41)          |
| Leishmaniasis                                                     | 0<br>(0 - 0)                | 0<br>(0 - 0)             | 0<br>(0 - 0)         | 0<br>(0 - 0)              | 0<br>(0 - 0)              | 0<br>(0 - 0)             |
| Visceral leishmaniasis                                            | 0<br>(0 - 0)                | 0<br>(0 - 0)             | 0<br>(0 - 0)         | 0<br>(0 - 0)              | 0<br>(0 - 0)              | 0<br>(0 - 0)             |
| Cysticercosis                                                     | 0<br>(0 - 1)                | 0<br>(0 - 0)             | 0<br>(0 - 0)         | 0<br>(0 - 0)              | 0<br>(0 - 0)              | 0<br>(0 - 0)             |
| Cystic echinococcosis                                             | 3<br>(2 - 4)                | 0<br>(0 - 0)             | 0<br>(0 - 0)         | 1<br>(1 - 2)              | 1<br>(0 - 1)              | 0<br>(0 - 0)             |
| Dengue                                                            | 23<br>(14 - 49)             | 7<br>(3 - 17)            | 2<br>(1 - 5)         | 5<br>(3 - 15)             | 4<br>(2 - 7)              | 4<br>(2 - 7)             |
| Rabies                                                            | 11<br>(4 - 33)              | 1<br>(0 - 5)             | 3<br>(1 - 8)         | 5<br>(2 - 17)             | 2<br>(1 - 5)              | 0<br>(0 - 1)             |
| Intestinal nematode infections                                    | 9<br>(2 - 25)               | 5<br>(1 - 17)            | 1<br>(0 - 6)         | 1<br>(0 - 7)              | 1<br>(0 - 6)              | 0<br>(0 - 4)             |
| Ascariasis                                                        | 9<br>(2 - 25)               | 5<br>(1 - 17)            | 1<br>(0 - 6)         | 1<br>(0 - 7)              | 1<br>(0 - 6)              | 0<br>(0 - 4)             |
| Other neglected tropical diseases                                 | 26<br>(12 - 59)             | 5<br>(2 - 10)            | 1<br>(0 - 1)         | 4<br>(1 - 9)              | 6<br>(2 - 14)             | 12<br>(4 - 30)           |
| Maternal disorders                                                | 1,260<br>(663 - 2,187)      | --                       | 8<br>(3 - 18)        | 1,252<br>(654 - 2,176)    | --                        | --                       |
| Maternal hemorrhage                                               | 232<br>(114 - 420)          | --                       | 1<br>(0 - 3)         | 231<br>(114 - 418)        | --                        | --                       |

Web Table 31- Papua New Guinea deaths with 95% UI by age, sex, and cause in 2013

| Cause                                                            | Females, All Ages           | Females, 0-4 Years     | Females, 5-14 Years | Females, 15-49 Years     | Females, 50-69 Years      | Females, 70-80 Years     |
|------------------------------------------------------------------|-----------------------------|------------------------|---------------------|--------------------------|---------------------------|--------------------------|
| Maternal sepsis and other maternal infections                    | 97<br>(49 - 177)            | --                     | 1<br>(0 - 2)        | 96<br>(48 - 176)         | --                        | --                       |
| Maternal hypertensive disorders                                  | 130<br>(63 - 241)           | --                     | 1<br>(0 - 1)        | 129<br>(62 - 240)        | --                        | --                       |
| Maternal obstructed labor                                        | 111<br>(55 - 196)           | --                     | 1<br>(0 - 2)        | 111<br>(54 - 195)        | --                        | --                       |
| Maternal abortive outcome                                        | 201<br>(100 - 348)          | --                     | 1<br>(0 - 3)        | 200<br>(99 - 345)        | --                        | --                       |
| Indirect maternal deaths                                         | 110<br>(54 - 197)           | --                     | 1<br>(0 - 1)        | 110<br>(54 - 196)        | --                        | --                       |
| Late maternal deaths                                             | 172<br>(85 - 324)           | --                     | 2<br>(1 - 4)        | 170<br>(83 - 320)        | --                        | --                       |
| Maternal deaths aggravated by HIV/AIDS                           | 2<br>(1 - 3)                | --                     | --                  | 2<br>(1 - 3)             | --                        | --                       |
| Other maternal disorders                                         | 202<br>(103 - 366)          | --                     | 1<br>(0 - 3)        | 201<br>(102 - 363)       | --                        | --                       |
| Neonatal disorders                                               | 1,406<br>(949 - 2,024)      | 1,406<br>(949 - 2,024) | --                  | --                       | --                        | --                       |
| Neonatal preterm birth complications                             | 477<br>(214 - 820)          | 477<br>(214 - 820)     | --                  | --                       | --                        | --                       |
| Neonatal encephalopathy due to birth asphyxia and trauma         | 217<br>(85 - 444)           | 217<br>(85 - 444)      | --                  | --                       | --                        | --                       |
| Neonatal sepsis and other neonatal infections                    | 248<br>(80 - 535)           | 248<br>(80 - 535)      | --                  | --                       | --                        | --                       |
| Hemolytic disease and other neonatal jaundice                    | 14<br>(5 - 38)              | 14<br>(5 - 38)         | --                  | --                       | --                        | --                       |
| Other neonatal disorders                                         | 450<br>(146 - 893)          | 450<br>(146 - 893)     | --                  | --                       | --                        | --                       |
| Nutritional deficiencies                                         | 792<br>(524 - 1,147)        | 201<br>(84 - 394)      | 38<br>(21 - 64)     | 220<br>(116 - 379)       | 110<br>(62 - 184)         | 223<br>(135 - 340)       |
| Protein-energy malnutrition                                      | 416<br>(235 - 645)          | 184<br>(76 - 359)      | 23<br>(11 - 42)     | 53<br>(20 - 104)         | 35<br>(11 - 69)           | 121<br>(51 - 214)        |
| Iodine deficiency                                                | 3<br>(0 - 9)                | 0<br>(0 - 2)           | 0<br>(0 - 1)        | 1<br>(0 - 6)             | 1<br>(0 - 4)              | 1<br>(0 - 4)             |
| Iron-deficiency anemia                                           | 287<br>(155 - 512)          | 8<br>(1 - 24)          | 13<br>(5 - 27)      | 120<br>(55 - 227)        | 65<br>(33 - 114)          | 81<br>(38 - 153)         |
| Other nutritional deficiencies                                   | 86<br>(33 - 162)            | 9<br>(2 - 29)          | 1<br>(0 - 3)        | 45<br>(15 - 92)          | 10<br>(3 - 23)            | 21<br>(7 - 40)           |
| Other communicable, maternal, neonatal, and nutritional diseases | 507<br>(310 - 773)          | 138<br>(46 - 281)      | 19<br>(10 - 32)     | 155<br>(75 - 295)        | 145<br>(84 - 245)         | 50<br>(28 - 86)          |
| Sexually transmitted diseases excluding HIV                      | 208<br>(83 - 415)           | 95<br>(10 - 224)       | 10<br>(3 - 20)      | 65<br>(18 - 180)         | 28<br>(6 - 92)            | 11<br>(3 - 36)           |
| Syphilis                                                         | 153<br>(53 - 299)           | 95<br>(10 - 224)       | 8<br>(2 - 18)       | 27<br>(7 - 75)           | 15<br>(3 - 48)            | 8<br>(2 - 27)            |
| Chlamydial infection                                             | 18<br>(5 - 47)              | --                     | 1<br>(0 - 2)        | 12<br>(3 - 35)           | 4<br>(1 - 13)             | 1<br>(0 - 2)             |
| Gonococcal infection                                             | 20<br>(6 - 53)              | --                     | 1<br>(0 - 1)        | 13<br>(4 - 37)           | 5<br>(1 - 16)             | 1<br>(0 - 4)             |
| Other sexually transmitted diseases                              | 17<br>(5 - 45)              | --                     | 1<br>(0 - 1)        | 12<br>(3 - 34)           | 4<br>(1 - 13)             | 1<br>(0 - 2)             |
| Hepatitis                                                        | 198<br>(122 - 310)          | 21<br>(8 - 43)         | 4<br>(2 - 7)        | 56<br>(30 - 102)         | 92<br>(49 - 155)          | 26<br>(15 - 44)          |
| Acute hepatitis A                                                | 12<br>(3 - 25)              | 7<br>(2 - 18)          | 1<br>(0 - 3)        | 2<br>(0 - 5)             | 1<br>(0 - 3)              | 0<br>(0 - 0)             |
| Acute hepatitis B                                                | 127<br>(72 - 204)           | 13<br>(5 - 30)         | 2<br>(1 - 4)        | 20<br>(8 - 39)           | 70<br>(36 - 122)          | 22<br>(13 - 38)          |
| Acute hepatitis C                                                | 3<br>(1 - 10)               | --                     | 0<br>(0 - 0)        | 1<br>(0 - 2)             | 2<br>(0 - 6)              | 1<br>(0 - 2)             |
| Acute hepatitis E                                                | 56<br>(27 - 103)            | 0<br>(0 - 0)           | 1<br>(0 - 2)        | 33<br>(16 - 61)          | 18<br>(7 - 41)            | 3<br>(1 - 8)             |
| Other infectious diseases                                        | 100<br>(40 - 193)           | 23<br>(6 - 60)         | 5<br>(1 - 12)       | 34<br>(12 - 72)          | 25<br>(7 - 69)            | 12<br>(3 - 34)           |
| Non-communicable diseases                                        | 19,219<br>(12,835 - 28,361) | 736<br>(396 - 1,250)   | 276<br>(183 - 404)  | 4,659<br>(2,597 - 8,109) | 7,992<br>(5,082 - 11,954) | 5,557<br>(4,090 - 7,068) |
| Neoplasms                                                        | 2,728<br>(1,671 - 4,196)    | 44<br>(20 - 81)        | 45<br>(25 - 73)     | 987<br>(530 - 1,729)     | 1,148<br>(695 - 1,796)    | 505<br>(341 - 689)       |
| Esophageal cancer                                                | 62<br>(38 - 96)             | --                     | --                  | 11<br>(6 - 21)           | 30<br>(17 - 49)           | 21<br>(13 - 32)          |
| Stomach cancer                                                   | 254<br>(157 - 381)          | --                     | --                  | 56<br>(28 - 102)         | 129<br>(76 - 200)         | 69<br>(43 - 99)          |
| Liver cancer                                                     | 240<br>(129 - 443)          | --                     | 1<br>(0 - 2)        | 59<br>(27 - 114)         | 137<br>(68 - 262)         | 42<br>(22 - 79)          |
| Liver cancer due to hepatitis B                                  | 105<br>(50 - 200)           | --                     | 0<br>(0 - 1)        | 29<br>(13 - 58)          | 62<br>(26 - 123)          | 14<br>(6 - 28)           |
| Liver cancer due to hepatitis C                                  | 74<br>(35 - 143)            | --                     | 0<br>(0 - 0)        | 13<br>(5 - 29)           | 43<br>(18 - 91)           | 17<br>(9 - 34)           |
| Liver cancer due to alcohol use                                  | 10<br>(5 - 20)              | --                     | --                  | 1<br>(0 - 3)             | 6<br>(2 - 12)             | 3<br>(1 - 6)             |
| Liver cancer due to other causes                                 | 51<br>(26 - 100)            | --                     | 0<br>(0 - 1)        | 16<br>(7 - 33)           | 27<br>(12 - 56)           | 8<br>(4 - 16)            |

Web Table 31- Papua New Guinea deaths with 95% UI by age, sex, and cause in 2013

| Cause                                         | Females, All Ages        | Females, 0-4 Years | Females, 5-14 Years | Females, 15-49 Years   | Females, 50-69 Years     | Females, 70-80 Years     |
|-----------------------------------------------|--------------------------|--------------------|---------------------|------------------------|--------------------------|--------------------------|
| Larynx cancer                                 | 4<br>(2 - 7)             | --                 | --                  | 2<br>(1 - 4)           | 1<br>(1 - 3)             | 0<br>(0 - 0)             |
| Tracheal, bronchus and lung cancer            | 233<br>(143 - 348)       | --                 | --                  | 55<br>(29 - 97)        | 99<br>(57 - 152)         | 79<br>(50 - 113)         |
| Breast cancer                                 | 540<br>(312 - 960)       | --                 | --                  | 255<br>(136 - 490)     | 224<br>(131 - 384)       | 61<br>(39 - 101)         |
| Cervical cancer                               | 562<br>(327 - 909)       | --                 | --                  | 242<br>(125 - 451)     | 224<br>(126 - 365)       | 97<br>(55 - 147)         |
| Uterine cancer                                | 15<br>(6 - 39)           | --                 | --                  | 5<br>(2 - 11)          | 8<br>(3 - 23)            | 2<br>(1 - 6)             |
| Prostate cancer                               | --                       | --                 | --                  | --                     | --                       | --                       |
| Colon and rectum cancer                       | 137<br>(83 - 214)        | --                 | --                  | 41<br>(22 - 75)        | 61<br>(36 - 96)          | 34<br>(22 - 49)          |
| Lip and oral cavity cancer                    | 2<br>(1 - 4)             | --                 | --                  | 1<br>(0 - 2)           | 1<br>(0 - 2)             | 0<br>(0 - 1)             |
| Nasopharynx cancer                            | 31<br>(15 - 56)          | --                 | 1<br>(0 - 1)        | 15<br>(7 - 28)         | 13<br>(6 - 25)           | 2<br>(1 - 4)             |
| Other pharynx cancer                          | 4<br>(2 - 7)             | --                 | --                  | 1<br>(1 - 2)           | 2<br>(1 - 4)             | 1<br>(0 - 1)             |
| Gallbladder and biliary tract cancer          | 32<br>(10 - 56)          | --                 | --                  | 11<br>(2 - 22)         | 17<br>(6 - 29)           | 5<br>(2 - 8)             |
| Pancreatic cancer                             | 42<br>(25 - 66)          | --                 | --                  | 9<br>(5 - 17)          | 21<br>(12 - 35)          | 11<br>(7 - 17)           |
| Malignant skin melanoma                       | 9<br>(6 - 14)            | --                 | --                  | 5<br>(3 - 9)           | 1<br>(1 - 2)             | 2<br>(1 - 4)             |
| Non-melanoma skin cancer                      | 14<br>(7 - 25)           | --                 | --                  | 4<br>(2 - 9)           | 4<br>(2 - 7)             | 6<br>(3 - 11)            |
| Ovarian cancer                                | 10<br>(5 - 20)           | --                 | --                  | 5<br>(2 - 11)          | 4<br>(2 - 7)             | 1<br>(1 - 2)             |
| Testicular cancer                             | --                       | --                 | --                  | --                     | --                       | --                       |
| Kidney cancer                                 | 16<br>(10 - 25)          | 3<br>(1 - 7)       | 1<br>(0 - 1)        | 3<br>(2 - 6)           | 7<br>(3 - 13)            | 2<br>(1 - 3)             |
| Bladder cancer                                | 56<br>(25 - 96)          | --                 | --                  | 4<br>(2 - 8)           | 36<br>(16 - 63)          | 16<br>(6 - 30)           |
| Brain and nervous system cancer               | 7<br>(4 - 11)            | 1<br>(0 - 2)       | 1<br>(0 - 1)        | 3<br>(2 - 6)           | 2<br>(1 - 3)             | 0<br>(0 - 0)             |
| Thyroid cancer                                | 13<br>(6 - 22)           | --                 | 0<br>(0 - 1)        | 5<br>(2 - 9)           | 5<br>(2 - 9)             | 3<br>(1 - 5)             |
| Mesothelioma                                  | 3<br>(2 - 5)             | --                 | --                  | 2<br>(1 - 3)           | 1<br>(1 - 2)             | 0<br>(0 - 0)             |
| Hodgkin lymphoma                              | 6<br>(3 - 10)            | 1<br>(0 - 1)       | 0<br>(0 - 1)        | 4<br>(2 - 7)           | 1<br>(1 - 2)             | 1<br>(0 - 1)             |
| Non-Hodgkin lymphoma                          | 31<br>(18 - 54)          | 4<br>(1 - 7)       | 1<br>(1 - 2)        | 13<br>(6 - 25)         | 7<br>(3 - 13)            | 6<br>(3 - 11)            |
| Multiple myeloma                              | 26<br>(14 - 42)          | --                 | --                  | 3<br>(1 - 5)           | 17<br>(9 - 28)           | 7<br>(4 - 11)            |
| Leukemia                                      | 138<br>(90 - 205)        | 13<br>(5 - 28)     | 21<br>(12 - 35)     | 70<br>(39 - 118)       | 20<br>(11 - 32)          | 14<br>(9 - 21)           |
| Other neoplasms                               | 240<br>(121 - 396)       | 22<br>(8 - 49)     | 19<br>(8 - 37)      | 100<br>(43 - 186)      | 76<br>(36 - 126)         | 23<br>(13 - 36)          |
| Cardiovascular diseases                       | 6,406<br>(4,235 - 9,315) | 81<br>(36 - 161)   | 61<br>(35 - 103)    | 1,273<br>(712 - 2,207) | 2,701<br>(1,639 - 4,007) | 2,289<br>(1,630 - 3,042) |
| Rheumatic heart disease                       | 75<br>(41 - 138)         | 1<br>(0 - 3)       | 6<br>(3 - 13)       | 44<br>(22 - 82)        | 16<br>(8 - 31)           | 8<br>(4 - 13)            |
| Ischemic heart disease                        | 4,251<br>(2,753 - 6,180) | 13<br>(4 - 36)     | 21<br>(9 - 40)      | 702<br>(374 - 1,222)   | 1,804<br>(1,100 - 2,712) | 1,712<br>(1,196 - 2,289) |
| Cerebrovascular disease                       | 576<br>(367 - 901)       | 7<br>(3 - 15)      | 5<br>(2 - 9)        | 97<br>(49 - 176)       | 231<br>(135 - 378)       | 236<br>(152 - 364)       |
| Ischemic stroke                               | 211<br>(137 - 344)       | 1<br>(0 - 2)       | 1<br>(0 - 1)        | 25<br>(12 - 50)        | 67<br>(38 - 111)         | 118<br>(77 - 186)        |
| Hemorrhagic stroke                            | 365<br>(222 - 580)       | 7<br>(3 - 14)      | 4<br>(2 - 8)        | 72<br>(36 - 133)       | 164<br>(95 - 274)        | 118<br>(71 - 183)        |
| Hypertensive heart disease                    | 97<br>(57 - 161)         | 0<br>(0 - 1)       | 1<br>(0 - 1)        | 21<br>(10 - 40)        | 39<br>(21 - 70)          | 35<br>(21 - 61)          |
| Cardiomyopathy and myocarditis                | 274<br>(146 - 431)       | 24<br>(9 - 53)     | 14<br>(6 - 26)      | 114<br>(46 - 200)      | 90<br>(44 - 151)         | 32<br>(18 - 59)          |
| Atrial fibrillation and flutter               | 6<br>(3 - 12)            | --                 | --                  | 1<br>(1 - 2)           | 2<br>(1 - 4)             | 3<br>(1 - 7)             |
| Aortic aneurysm                               | 36<br>(17 - 63)          | --                 | --                  | 8<br>(3 - 16)          | 15<br>(7 - 28)           | 13<br>(6 - 22)           |
| Peripheral vascular disease                   | 12<br>(6 - 22)           | --                 | --                  | 1<br>(0 - 1)           | 3<br>(1 - 6)             | 8<br>(4 - 16)            |
| Endocarditis                                  | 147<br>(57 - 430)        | 10<br>(3 - 38)     | 3<br>(1 - 10)       | 55<br>(20 - 159)       | 31<br>(11 - 99)          | 48<br>(15 - 143)         |
| Other cardiovascular and circulatory diseases | 931<br>(498 - 1,438)     | 25<br>(10 - 50)    | 11<br>(5 - 20)      | 232<br>(113 - 413)     | 470<br>(236 - 728)       | 194<br>(102 - 289)       |
| Chronic respiratory diseases                  | 1,935<br>(1,264 - 2,979) | 54<br>(26 - 106)   | 18<br>(11 - 30)     | 443<br>(240 - 785)     | 683<br>(414 - 1,100)     | 737<br>(514 - 1,046)     |



Web Table 31- Papua New Guinea deaths with 95% UI by age, sex, and cause in 2013

| Cause                                               | Females, All Ages        | Females, 0-4 Years | Females, 5-14 Years | Females, 15-49 Years | Females, 50-69 Years | Females, 70-80 Years |
|-----------------------------------------------------|--------------------------|--------------------|---------------------|----------------------|----------------------|----------------------|
| Chronic obstructive pulmonary disease               | 712<br>(397 - 1,111)     | 24<br>(9 - 53)     | 1<br>(1 - 3)        | 76<br>(32 - 151)     | 259<br>(125 - 451)   | 352<br>(188 - 541)   |
| Pneumoconiosis                                      | 18<br>(10 - 31)          | 0<br>(0 - 1)       | 1<br>(0 - 1)        | 4<br>(2 - 7)         | 5<br>(2 - 9)         | 9<br>(4 - 16)        |
| Silicosis                                           | 1<br>(0 - 2)             | 0<br>(0 - 0)       | 0<br>(0 - 1)        | 0<br>(0 - 1)         | 0<br>(0 - 0)         | 0<br>(0 - 1)         |
| Asbestosis                                          | 1<br>(0 - 1)             | 0<br>(0 - 0)       | 0<br>(0 - 0)        | 0<br>(0 - 0)         | 0<br>(0 - 0)         | 0<br>(0 - 0)         |
| Coal workers pneumoconiosis                         | 1<br>(0 - 1)             | 0<br>(0 - 0)       | 0<br>(0 - 0)        | 0<br>(0 - 0)         | 0<br>(0 - 0)         | 0<br>(0 - 0)         |
| Other pneumoconiosis                                | 16<br>(9 - 29)           | 0<br>(0 - 0)       | 0<br>(0 - 1)        | 3<br>(1 - 6)         | 5<br>(2 - 9)         | 8<br>(4 - 15)        |
| Asthma                                              | 970<br>(568 - 1,708)     | 19<br>(6 - 45)     | 9<br>(5 - 18)       | 280<br>(146 - 512)   | 376<br>(206 - 670)   | 286<br>(165 - 499)   |
| Interstitial lung disease and pulmonary sarcoidosis | 61<br>(28 - 105)         | 0<br>(0 - 1)       | 1<br>(0 - 1)        | 9<br>(3 - 18)        | 14<br>(6 - 27)       | 37<br>(17 - 67)      |
| Other chronic respiratory diseases                  | 173<br>(96 - 283)        | 9<br>(5 - 16)      | 6<br>(3 - 10)       | 74<br>(35 - 139)     | 29<br>(14 - 55)      | 54<br>(27 - 94)      |
| Cirrhosis                                           | 480<br>(290 - 779)       | 5<br>(2 - 12)      | 13<br>(7 - 23)      | 222<br>(120 - 401)   | 173<br>(104 - 281)   | 67<br>(41 - 103)     |
| Cirrhosis due to hepatitis B                        | 265<br>(150 - 450)       | 1<br>(0 - 2)       | 4<br>(1 - 9)        | 120<br>(59 - 227)    | 101<br>(57 - 168)    | 39<br>(23 - 64)      |
| Cirrhosis due to hepatitis C                        | 109<br>(51 - 212)        | 0<br>(0 - 1)       | 2<br>(1 - 6)        | 51<br>(19 - 115)     | 40<br>(18 - 74)      | 16<br>(7 - 27)       |
| Cirrhosis due to alcohol use                        | 45<br>(22 - 81)          | -                  | -                   | 16<br>(6 - 35)       | 20<br>(10 - 35)      | 9<br>(5 - 15)        |
| Cirrhosis due to other causes                       | 61<br>(31 - 107)         | 4<br>(1 - 10)      | 7<br>(3 - 13)       | 35<br>(16 - 68)      | 12<br>(5 - 23)       | 3<br>(1 - 6)         |
| Digestive diseases                                  | 1,862<br>(1,145 - 2,896) | 27<br>(9 - 63)     | 50<br>(31 - 80)     | 609<br>(328 - 1,070) | 723<br>(426 - 1,136) | 453<br>(297 - 661)   |
| Peptic ulcer disease                                | 484<br>(274 - 801)       | 0<br>(0 - 1)       | 3<br>(2 - 6)        | 135<br>(66 - 246)    | 217<br>(111 - 366)   | 129<br>(73 - 212)    |
| Gastritis and duodenitis                            | 32<br>(8 - 83)           | 0<br>(0 - 1)       | 1<br>(0 - 2)        | 13<br>(3 - 35)       | 12<br>(3 - 33)       | 6<br>(2 - 17)        |
| Appendicitis                                        | 535<br>(308 - 892)       | 13<br>(3 - 34)     | 29<br>(16 - 49)     | 232<br>(121 - 424)   | 183<br>(92 - 325)    | 78<br>(40 - 142)     |
| Paralytic ileus and intestinal obstruction          | 415<br>(187 - 694)       | 8<br>(2 - 21)      | 9<br>(3 - 18)       | 90<br>(34 - 181)     | 183<br>(69 - 333)    | 126<br>(63 - 213)    |
| Inguinal, femoral, and abdominal hernia             | 41<br>(18 - 101)         | 1<br>(0 - 2)       | 1<br>(0 - 2)        | 12<br>(5 - 26)       | 16<br>(6 - 41)       | 11<br>(4 - 35)       |
| Inflammatory bowel disease                          | 62<br>(34 - 108)         | 3<br>(1 - 7)       | 1<br>(0 - 2)        | 15<br>(6 - 37)       | 15<br>(6 - 33)       | 30<br>(9 - 56)       |
| Vascular intestinal disorders                       | 9<br>(4 - 20)            | 0<br>(0 - 0)       | 0<br>(0 - 0)        | 4<br>(1 - 8)         | 2<br>(1 - 5)         | 4<br>(2 - 8)         |
| Gallbladder and biliary diseases                    | 65<br>(35 - 126)         | 0<br>(0 - 1)       | 2<br>(1 - 3)        | 20<br>(10 - 38)      | 22<br>(10 - 45)      | 22<br>(10 - 42)      |
| Pancreatitis                                        | 99<br>(47 - 180)         | 1<br>(0 - 2)       | 2<br>(1 - 5)        | 42<br>(18 - 83)      | 32<br>(15 - 63)      | 22<br>(9 - 46)       |
| Other digestive diseases                            | 120<br>(51 - 223)        | 1<br>(0 - 2)       | 3<br>(1 - 6)        | 47<br>(18 - 93)      | 42<br>(17 - 80)      | 27<br>(11 - 51)      |
| Neurological disorders                              | 312<br>(214 - 422)       | 11<br>(5 - 23)     | 4<br>(2 - 7)        | 28<br>(13 - 53)      | 52<br>(32 - 77)      | 216<br>(144 - 297)   |
| Alzheimer disease and other dementias               | 243<br>(163 - 329)       | -                  | -                   | 0<br>(0 - 1)         | 33<br>(19 - 50)      | 210<br>(139 - 289)   |
| Parkinson disease                                   | 1<br>(0 - 1)             | -                  | -                   | 0<br>(0 - 0)         | 0<br>(0 - 0)         | 0<br>(0 - 0)         |
| Epilepsy                                            | 40<br>(20 - 69)          | 5<br>(2 - 14)      | 3<br>(1 - 6)        | 26<br>(11 - 49)      | 5<br>(2 - 9)         | 1<br>(0 - 2)         |
| Multiple sclerosis                                  | 0<br>(0 - 1)             | -                  | -                   | 0<br>(0 - 0)         | 0<br>(0 - 0)         | 0<br>(0 - 0)         |
| Other neurological disorders                        | 28<br>(19 - 38)          | 6<br>(3 - 12)      | 1<br>(0 - 1)        | 2<br>(1 - 4)         | 14<br>(8 - 21)       | 5<br>(3 - 7)         |
| Mental and substance use disorders                  | 25<br>(11 - 45)          | 1<br>(0 - 2)       | 0<br>(0 - 0)        | 13<br>(6 - 24)       | 8<br>(3 - 16)        | 3<br>(1 - 8)         |
| Schizophrenia                                       | 2<br>(1 - 4)             | -                  | -                   | 1<br>(0 - 3)         | 0<br>(0 - 1)         | 0<br>(0 - 1)         |
| Alcohol use disorders                               | 17<br>(6 - 33)           | -                  | -                   | 7<br>(3 - 15)        | 7<br>(2 - 14)        | 3<br>(0 - 7)         |
| Drug use disorders                                  | 6<br>(3 - 13)            | 1<br>(0 - 2)       | -                   | 4<br>(2 - 10)        | 1<br>(0 - 2)         | 0<br>(0 - 0)         |
| Opioid use disorders                                | 1<br>(1 - 2)             | 0<br>(0 - 0)       | -                   | 1<br>(0 - 2)         | 0<br>(0 - 0)         | 0<br>(0 - 0)         |
| Cocaine use disorders                               | 1<br>(0 - 1)             | 0<br>(0 - 0)       | -                   | 0<br>(0 - 1)         | 0<br>(0 - 0)         | 0<br>(0 - 0)         |
| Amphetamine use disorders                           | 1<br>(0 - 1)             | 0<br>(0 - 0)       | -                   | 0<br>(0 - 1)         | 0<br>(0 - 0)         | 0<br>(0 - 0)         |
| Other drug use disorders                            | 4<br>(2 - 8)             | 1<br>(0 - 1)       | -                   | 3<br>(1 - 6)         | 0<br>(0 - 1)         | 0<br>(0 - 0)         |
| Eating disorders                                    | 1<br>(0 - 1)             | -                  | 0<br>(0 - 0)        | 1<br>(0 - 1)         | -                    | -                    |

Web Table 31- Papua New Guinea deaths with 95% UI by age, sex, and cause in 2013

| Cause                                               | Females, All Ages        | Females, 0-4 Years | Females, 5-14 Years | Females, 15-49 Years | Females, 50-69 Years     | Females, 70-80 Years   |
|-----------------------------------------------------|--------------------------|--------------------|---------------------|----------------------|--------------------------|------------------------|
| Anorexia nervosa                                    | 1<br>(0 - 1)             | --                 | 0<br>(0 - 0)        | 1<br>(0 - 1)         | --                       | --                     |
| Diabetes, urogenital, blood, and endocrine diseases | 4,683<br>(2,909 - 7,283) | 110<br>(58 - 197)  | 47<br>(28 - 79)     | 958<br>(500 - 1,723) | 2,392<br>(1,452 - 3,824) | 1,176<br>(767 - 1,718) |
| Diabetes mellitus                                   | 3,623<br>(2,199 - 5,748) | 10<br>(4 - 23)     | 3<br>(1 - 6)        | 584<br>(299 - 1,079) | 2,040<br>(1,246 - 3,253) | 986<br>(635 - 1,460)   |
| Acute glomerulonephritis                            | 6<br>(2 - 14)            | 0<br>(0 - 1)       | 1<br>(0 - 1)        | 2<br>(1 - 5)         | 2<br>(1 - 5)             | 1<br>(0 - 2)           |
| Chronic kidney disease                              | 562<br>(250 - 1,115)     | 9<br>(3 - 23)      | 7<br>(3 - 15)       | 189<br>(75 - 388)    | 243<br>(109 - 481)       | 114<br>(55 - 209)      |
| Chronic kidney disease due to diabetes mellitus     | 47<br>(16 - 92)          | 0<br>(0 - 1)       | 0<br>(0 - 1)        | 13<br>(4 - 28)       | 26<br>(8 - 52)           | 7<br>(3 - 14)          |
| Chronic kidney disease due to hypertension          | 108<br>(41 - 223)        | 1<br>(0 - 3)       | 1<br>(0 - 3)        | 34<br>(10 - 79)      | 49<br>(17 - 104)         | 23<br>(9 - 50)         |
| Chronic kidney disease due to glomerulonephritis    | 117<br>(58 - 198)        | 1<br>(0 - 3)       | 2<br>(1 - 5)        | 39<br>(17 - 74)      | 44<br>(20 - 80)          | 30<br>(14 - 47)        |
| Chronic kidney disease due to other causes          | 291<br>(99 - 675)        | 6<br>(1 - 18)      | 4<br>(1 - 9)        | 103<br>(30 - 252)    | 124<br>(40 - 311)        | 54<br>(17 - 135)       |
| Urinary diseases and male infertility               | 57<br>(32 - 91)          | 6<br>(2 - 15)      | 1<br>(1 - 2)        | 22<br>(11 - 39)      | 17<br>(8 - 30)           | 10<br>(5 - 17)         |
| Interstitial nephritis and urinary tract infections | 37<br>(21 - 59)          | 5<br>(2 - 12)      | 1<br>(0 - 1)        | 15<br>(8 - 26)       | 10<br>(5 - 19)           | 7<br>(3 - 12)          |
| Urolithiasis                                        | 4<br>(2 - 7)             | --                 | 0<br>(0 - 0)        | 1<br>(0 - 3)         | 1<br>(0 - 3)             | 1<br>(0 - 1)           |
| Other urinary diseases                              | 16<br>(7 - 29)           | 2<br>(1 - 4)       | 0<br>(0 - 1)        | 6<br>(2 - 13)        | 5<br>(2 - 11)            | 3<br>(1 - 6)           |
| Gynecological diseases                              | 17<br>(9 - 34)           | --                 | --                  | 12<br>(6 - 25)       | 4<br>(2 - 8)             | 1<br>(1 - 3)           |
| Uterine fibroids                                    | 4<br>(2 - 7)             | --                 | --                  | 2<br>(1 - 5)         | 1<br>(1 - 2)             | 0<br>(0 - 1)           |
| Polycystic ovarian syndrome                         | 1<br>(0 - 2)             | --                 | --                  | 1<br>(0 - 1)         | 0<br>(0 - 0)             | --                     |
| Endometriosis                                       | 2<br>(1 - 4)             | --                 | --                  | 2<br>(1 - 4)         | 0<br>(0 - 0)             | --                     |
| Genital prolapse                                    | 3<br>(1 - 5)             | --                 | --                  | 2<br>(1 - 3)         | 1<br>(0 - 1)             | 0<br>(0 - 1)           |
| Other gynecological diseases                        | 8<br>(4 - 16)            | --                 | --                  | 6<br>(3 - 12)        | 2<br>(1 - 4)             | 1<br>(0 - 1)           |
| Hemoglobinopathies and hemolytic anemias            | 192<br>(103 - 326)       | 57<br>(23 - 123)   | 29<br>(14 - 60)     | 79<br>(38 - 143)     | 13<br>(7 - 22)           | 15<br>(8 - 25)         |
| Thalassemias                                        | 123<br>(61 - 220)        | 47<br>(18 - 103)   | 27<br>(12 - 55)     | 50<br>(24 - 91)      | 0<br>(0 - 0)             | 0<br>(0 - 0)           |
| Sickle cell disorders                               | 0<br>(0 - 0)             | 0<br>(0 - 0)       | 0<br>(0 - 0)        | 0<br>(0 - 0)         | 0<br>(0 - 0)             | 0<br>(0 - 0)           |
| G6PD deficiency                                     | 6<br>(3 - 11)            | 1<br>(0 - 2)       | 0<br>(0 - 1)        | 4<br>(2 - 7)         | 1<br>(0 - 2)             | 0<br>(0 - 0)           |
| Other hemoglobinopathies and hemolytic anemias      | 63<br>(34 - 102)         | 9<br>(4 - 18)      | 2<br>(1 - 3)        | 25<br>(11 - 47)      | 12<br>(6 - 20)           | 15<br>(8 - 25)         |
| Endocrine, metabolic, blood, and immune disorders   | 225<br>(51 - 372)        | 27<br>(7 - 56)     | 6<br>(2 - 14)       | 70<br>(23 - 130)     | 73<br>(10 - 134)         | 48<br>(5 - 86)         |
| Musculoskeletal disorders                           | 71<br>(19 - 117)         | --                 | 7<br>(3 - 11)       | 31<br>(8 - 57)       | 21<br>(5 - 35)           | 12<br>(2 - 19)         |
| Rheumatoid arthritis                                | 20<br>(6 - 35)           | --                 | 1<br>(0 - 2)        | 6<br>(1 - 12)        | 8<br>(2 - 14)            | 5<br>(1 - 8)           |
| Other musculoskeletal disorders                     | 50<br>(14 - 82)          | --                 | 5<br>(2 - 9)        | 25<br>(6 - 46)       | 13<br>(3 - 22)           | 7<br>(1 - 12)          |
| Other non-communicable diseases                     | 718<br>(484 - 1,075)     | 404<br>(194 - 742) | 30<br>(16 - 51)     | 95<br>(52 - 164)     | 91<br>(45 - 154)         | 98<br>(49 - 154)       |
| Congenital anomalies                                | 445<br>(236 - 762)       | 377<br>(181 - 691) | 23<br>(11 - 43)     | 32<br>(18 - 58)      | 9<br>(5 - 15)            | 4<br>(2 - 5)           |
| Neural tube defects                                 | 19<br>(3 - 72)           | 16<br>(2 - 68)     | 0<br>(0 - 1)        | 2<br>(1 - 5)         | 0<br>(0 - 0)             | 0<br>(0 - 0)           |
| Congenital heart anomalies                          | 193<br>(98 - 355)        | 167<br>(78 - 324)  | 11<br>(5 - 20)      | 12<br>(6 - 25)       | 2<br>(1 - 5)             | 1<br>(0 - 2)           |
| Cleft lip and cleft palate                          | 1<br>(0 - 3)             | 1<br>(0 - 3)       | --                  | --                   | --                       | --                     |
| Down syndrome                                       | 36<br>(13 - 87)          | 28<br>(9 - 73)     | 2<br>(1 - 7)        | 4<br>(2 - 9)         | 1<br>(0 - 2)             | 0<br>(0 - 0)           |
| Chromosomal unbalanced rearrangements               | 11<br>(4 - 25)           | 10<br>(3 - 24)     | 0<br>(0 - 0)        | 1<br>(0 - 2)         | 0<br>(0 - 0)             | 0<br>(0 - 0)           |
| Other congenital anomalies                          | 185<br>(80 - 341)        | 155<br>(58 - 302)  | 9<br>(4 - 19)       | 12<br>(6 - 24)       | 6<br>(3 - 10)            | 3<br>(2 - 4)           |
| Skin and subcutaneous diseases                      | 267<br>(153 - 393)       | 20<br>(7 - 44)     | 7<br>(4 - 12)       | 63<br>(31 - 111)     | 82<br>(39 - 143)         | 94<br>(47 - 151)       |
| Cellulitis                                          | 126<br>(71 - 217)        | 13<br>(4 - 33)     | 4<br>(2 - 8)        | 37<br>(19 - 69)      | 38<br>(18 - 71)          | 34<br>(16 - 63)        |
| Pyoderma                                            | 76<br>(27 - 144)         | 7<br>(2 - 15)      | 3<br>(1 - 5)        | 16<br>(4 - 35)       | 32<br>(9 - 68)           | 20<br>(6 - 44)         |
| Decubitus ulcer                                     | 61<br>(16 - 113)         | 0<br>(0 - 1)       | 0<br>(0 - 1)        | 9<br>(2 - 20)        | 11<br>(3 - 24)           | 40<br>(9 - 73)         |

Web Table 31- Papua New Guinea deaths with 95% UI by age, sex, and cause in 2013

| Cause                                           | Females, All Ages      | Females, 0-4 Years | Females, 5-14 Years | Females, 15-49 Years | Females, 50-69 Years | Females, 70-80 Years |
|-------------------------------------------------|------------------------|--------------------|---------------------|----------------------|----------------------|----------------------|
| Other skin and subcutaneous diseases            | 3<br>(1 - 7)           | 0<br>(0 - 1)       | 0<br>(0 - 0)        | 1<br>(0 - 3)         | 1<br>(0 - 3)         | 0<br>(0 - 1)         |
| Sudden infant death syndrome                    | 7<br>(1 - 21)          | 7<br>(1 - 21)      | --                  | --                   | --                   | --                   |
| Injuries                                        | 1,016<br>(617 - 1,603) | 147<br>(52 - 331)  | 72<br>(43 - 114)    | 532<br>(306 - 897)   | 187<br>(110 - 286)   | 79<br>(47 - 109)     |
| Transport injuries                              | 373<br>(231 - 583)     | 17<br>(7 - 35)     | 28<br>(16 - 47)     | 207<br>(115 - 364)   | 89<br>(52 - 143)     | 31<br>(18 - 46)      |
| Road injuries                                   | 365<br>(226 - 572)     | 16<br>(7 - 34)     | 28<br>(15 - 46)     | 203<br>(113 - 356)   | 88<br>(51 - 140)     | 31<br>(18 - 45)      |
| Pedestrian road injuries                        | 85<br>(47 - 141)       | 3<br>(1 - 8)       | 6<br>(3 - 11)       | 46<br>(23 - 84)      | 21<br>(11 - 36)      | 8<br>(4 - 13)        |
| Cyclist road injuries                           | 2<br>(1 - 4)           | 0<br>(0 - 0)       | 0<br>(0 - 0)        | 1<br>(1 - 2)         | 1<br>(0 - 1)         | 0<br>(0 - 0)         |
| Motorcyclist road injuries                      | 108<br>(57 - 184)      | 5<br>(2 - 11)      | 8<br>(3 - 15)       | 64<br>(29 - 126)     | 23<br>(12 - 42)      | 8<br>(2 - 14)        |
| Motor vehicle road injuries                     | 142<br>(83 - 236)      | 6<br>(2 - 13)      | 10<br>(5 - 19)      | 80<br>(42 - 142)     | 35<br>(20 - 58)      | 12<br>(7 - 18)       |
| Other road injuries                             | 28<br>(6 - 50)         | 2<br>(1 - 6)       | 4<br>(1 - 8)        | 12<br>(2 - 25)       | 8<br>(2 - 14)        | 3<br>(1 - 6)         |
| Other transport injuries                        | 8<br>(4 - 17)          | 1<br>(0 - 2)       | 1<br>(0 - 2)        | 4<br>(2 - 10)        | 2<br>(1 - 4)         | 0<br>(0 - 1)         |
| Unintentional injuries                          | 310<br>(149 - 538)     | 120<br>(36 - 280)  | 26<br>(12 - 43)     | 87<br>(46 - 151)     | 49<br>(23 - 80)      | 29<br>(15 - 44)      |
| Falls                                           | 8<br>(5 - 13)          | 1<br>(0 - 1)       | 1<br>(0 - 1)        | 4<br>(2 - 7)         | 2<br>(1 - 3)         | 2<br>(1 - 3)         |
| Drowning                                        | 41<br>(22 - 76)        | 14<br>(5 - 36)     | 4<br>(1 - 7)        | 13<br>(6 - 26)       | 6<br>(3 - 11)        | 4<br>(2 - 7)         |
| Fire, heat, and hot substances                  | 25<br>(14 - 41)        | 4<br>(2 - 9)       | 2<br>(1 - 3)        | 14<br>(6 - 26)       | 3<br>(1 - 5)         | 2<br>(1 - 3)         |
| Poisonings                                      | 5<br>(3 - 11)          | 0<br>(0 - 1)       | 0<br>(0 - 1)        | 3<br>(1 - 6)         | 1<br>(1 - 3)         | 0<br>(0 - 1)         |
| Exposure to mechanical forces                   | 36<br>(13 - 67)        | 4<br>(2 - 11)      | 4<br>(1 - 8)        | 22<br>(6 - 47)       | 5<br>(2 - 9)         | 1<br>(0 - 1)         |
| Unintentional firearm injuries                  | 4<br>(2 - 7)           | 0<br>(0 - 1)       | 0<br>(0 - 1)        | 2<br>(1 - 5)         | 1<br>(0 - 2)         | 0<br>(0 - 0)         |
| Unintentional suffocation                       | 26<br>(4 - 54)         | 3<br>(1 - 10)      | 3<br>(0 - 7)        | 17<br>(1 - 39)       | 3<br>(0 - 6)         | 0<br>(0 - 0)         |
| Other exposure to mechanical forces             | 6<br>(4 - 10)          | 1<br>(0 - 2)       | 1<br>(0 - 1)        | 3<br>(1 - 6)         | 1<br>(1 - 2)         | 0<br>(0 - 1)         |
| Adverse effects of medical treatment            | 101<br>(27 - 249)      | 64<br>(8 - 200)    | 6<br>(1 - 15)       | 19<br>(6 - 41)       | 6<br>(3 - 14)        | 6<br>(2 - 11)        |
| Animal contact                                  | 59<br>(8 - 112)        | 19<br>(2 - 54)     | 6<br>(1 - 14)       | 5<br>(2 - 10)        | 20<br>(2 - 42)       | 9<br>(1 - 18)        |
| Venomous animal contact                         | 44<br>(6 - 88)         | 15<br>(1 - 42)     | 5<br>(1 - 12)       | 2<br>(0 - 4)         | 17<br>(2 - 34)       | 6<br>(0 - 14)        |
| Non-venomous animal contact                     | 15<br>(2 - 31)         | 5<br>(0 - 14)      | 1<br>(0 - 2)        | 4<br>(1 - 7)         | 4<br>(0 - 9)         | 2<br>(0 - 6)         |
| Foreign body                                    | 28<br>(11 - 60)        | 13<br>(4 - 33)     | 3<br>(1 - 8)        | 2<br>(1 - 4)         | 3<br>(1 - 7)         | 5<br>(2 - 12)        |
| Pulmonary aspiration and foreign body in airway | 24<br>(8 - 56)         | 13<br>(4 - 32)     | 3<br>(1 - 8)        | 1<br>(0 - 2)         | 3<br>(1 - 6)         | 5<br>(1 - 11)        |
| Foreign body in other body part                 | 4<br>(2 - 6)           | 1<br>(0 - 2)       | 0<br>(0 - 0)        | 1<br>(1 - 2)         | 1<br>(0 - 1)         | 1<br>(0 - 1)         |
| Other unintentional injuries                    | 7<br>(4 - 24)          | 0<br>(0 - 2)       | 1<br>(0 - 3)        | 4<br>(2 - 13)        | 2<br>(1 - 5)         | 0<br>(0 - 1)         |
| Self-harm and interpersonal violence            | 333<br>(184 - 551)     | 9<br>(4 - 20)      | 18<br>(8 - 35)      | 238<br>(121 - 408)   | 49<br>(26 - 80)      | 19<br>(11 - 30)      |
| Self-harm                                       | 185<br>(107 - 305)     | --                 | 10<br>(3 - 25)      | 122<br>(65 - 218)    | 35<br>(19 - 61)      | 17<br>(9 - 28)       |
| Interpersonal violence                          | 148<br>(55 - 267)      | 9<br>(4 - 20)      | 7<br>(2 - 15)       | 116<br>(37 - 219)    | 14<br>(5 - 25)       | 2<br>(1 - 4)         |
| Assault by firearm                              | 45<br>(12 - 88)        | 2<br>(0 - 4)       | 2<br>(0 - 4)        | 37<br>(9 - 75)       | 4<br>(1 - 8)         | 0<br>(0 - 1)         |
| Assault by sharp object                         | 30<br>(7 - 65)         | 1<br>(0 - 2)       | 1<br>(0 - 3)        | 27<br>(6 - 59)       | 1<br>(0 - 3)         | 0<br>(0 - 3)         |
| Assault by other means                          | 74<br>(31 - 137)       | 7<br>(3 - 15)      | 5<br>(2 - 10)       | 52<br>(20 - 106)     | 8<br>(3 - 15)        | 2<br>(1 - 3)         |

Web Table 31- Paraguay deaths with 95% UI by age, sex, and cause in 2013

| Cause                                                             | Both Sexes, All Ages        | Both Sexes, 0-4 Years    | Both Sexes, 5-14 Years | Both Sexes, 15-49 Years  | Both Sexes, 50-69 Years   | Both Sexes, 70-80 Years     |
|-------------------------------------------------------------------|-----------------------------|--------------------------|------------------------|--------------------------|---------------------------|-----------------------------|
| All causes                                                        | 36,257<br>(32,308 - 40,571) | 3,368<br>(3,097 - 3,679) | 541<br>(503 - 585)     | 5,936<br>(5,244 - 6,833) | 9,569<br>(8,187 - 11,100) | 16,844<br>(15,060 - 18,814) |
| Communicable, maternal, neonatal, and nutritional diseases        | 5,374<br>(4,823 - 5,873)    | 2,318<br>(2,097 - 2,578) | 148<br>(124 - 175)     | 759<br>(671 - 861)       | 607<br>(504 - 712)        | 1,542<br>(1,210 - 1,879)    |
| HIV/AIDS and tuberculosis                                         | 521<br>(444 - 633)          | 4<br>(3 - 6)             | 3<br>(2 - 4)           | 267<br>(220 - 342)       | 153<br>(123 - 189)        | 94<br>(76 - 116)            |
| Tuberculosis                                                      | 295<br>(243 - 359)          | 3<br>(2 - 4)             | 3<br>(2 - 4)           | 91<br>(72 - 119)         | 111<br>(87 - 142)         | 88<br>(70 - 109)            |
| HIV/AIDS                                                          | 227<br>(169 - 326)          | 1<br>(0 - 3)             | 0<br>(0 - 1)           | 177<br>(134 - 249)       | 43<br>(26 - 69)           | 6<br>(3 - 11)               |
| HIV/AIDS resulting in mycobacterial infection                     | 14<br>(10 - 20)             | 0<br>(0 - 0)             | 0<br>(0 - 0)           | 11<br>(7 - 15)           | 3<br>(2 - 5)              | 0<br>(0 - 1)                |
| HIV/AIDS resulting in other diseases                              | 213<br>(158 - 306)          | 1<br>(0 - 3)             | 0<br>(0 - 1)           | 166<br>(127 - 233)       | 40<br>(25 - 64)           | 6<br>(3 - 10)               |
| Diarrhea, lower respiratory, and other common infectious diseases | 2,498<br>(2,070 - 2,930)    | 533<br>(428 - 655)       | 107<br>(87 - 130)      | 266<br>(212 - 326)       | 364<br>(269 - 457)        | 1,229<br>(928 - 1,552)      |
| Diarrheal diseases                                                | 304<br>(239 - 383)          | 140<br>(87 - 212)        | 13<br>(8 - 20)         | 22<br>(17 - 29)          | 32<br>(23 - 45)           | 96<br>(68 - 133)            |
| Intestinal infectious diseases                                    | 103<br>(56 - 172)           | 35<br>(18 - 63)          | 28<br>(15 - 48)        | 34<br>(16 - 62)          | 4<br>(2 - 7)              | 2<br>(1 - 4)                |
| Typhoid fever                                                     | 77<br>(40 - 130)            | 25<br>(12 - 45)          | 22<br>(11 - 39)        | 26<br>(12 - 48)          | 3<br>(1 - 5)              | 1<br>(0 - 2)                |
| Paratyphoid fever                                                 | 21<br>(10 - 36)             | 7<br>(3 - 14)            | 6<br>(3 - 10)          | 7<br>(3 - 13)            | 1<br>(0 - 1)              | 0<br>(0 - 0)                |
| Other intestinal infectious diseases                              | 6<br>(2 - 13)               | 3<br>(0 - 8)             | 1<br>(0 - 3)           | 1<br>(0 - 5)             | 1<br>(0 - 3)              | 0<br>(0 - 3)                |
| Lower respiratory infections                                      | 1,881<br>(1,498 - 2,277)    | 274<br>(202 - 359)       | 42<br>(32 - 54)        | 161<br>(117 - 202)       | 296<br>(204 - 381)        | 1,108<br>(815 - 1,434)      |
| Upper respiratory infections                                      | 2<br>(1 - 3)                | 0<br>(0 - 1)             | 0<br>(0 - 0)           | 0<br>(0 - 1)             | 1<br>(0 - 1)              | 1<br>(0 - 2)                |
| Otitis media                                                      | 2<br>(2 - 2)                | 0<br>(0 - 1)             | 0<br>(0 - 0)           | 0<br>(0 - 1)             | 0<br>(0 - 0)              | 1<br>(0 - 1)                |
| Meningitis                                                        | 157<br>(126 - 191)          | 65<br>(44 - 96)          | 16<br>(11 - 22)        | 36<br>(27 - 47)          | 24<br>(18 - 31)           | 16<br>(12 - 22)             |
| Pneumococcal meningitis                                           | 27<br>(21 - 35)             | 10<br>(6 - 15)           | 3<br>(2 - 4)           | 7<br>(4 - 10)            | 5<br>(3 - 7)              | 3<br>(2 - 5)                |
| H influenzae type B meningitis                                    | 33<br>(24 - 44)             | 24<br>(16 - 34)          | 3<br>(2 - 5)           | 3<br>(2 - 5)             | 2<br>(1 - 3)              | 1<br>(1 - 2)                |
| Meningococcal meningitis                                          | 44<br>(35 - 55)             | 17<br>(12 - 26)          | 6<br>(4 - 9)           | 10<br>(7 - 14)           | 6<br>(4 - 9)              | 5<br>(3 - 6)                |
| Other meningitis                                                  | 53<br>(42 - 65)             | 14<br>(8 - 21)           | 4<br>(2 - 6)           | 16<br>(11 - 22)          | 12<br>(8 - 16)            | 8<br>(5 - 11)               |
| Encephalitis                                                      | 33<br>(26 - 45)             | 11<br>(7 - 18)           | 5<br>(4 - 8)           | 9<br>(7 - 13)            | 4<br>(3 - 7)              | 3<br>(2 - 4)                |
| Diphtheria                                                        | 1<br>(0 - 3)                | 0<br>(0 - 2)             | 0<br>(0 - 1)           | 0<br>(0 - 0)             | 0<br>(0 - 0)              | --                          |
| Whooping cough                                                    | 3<br>(1 - 7)                | 2<br>(1 - 6)             | 0<br>(0 - 0)           | 0<br>(0 - 1)             | 0<br>(0 - 0)              | --                          |
| Tetanus                                                           | 8<br>(6 - 11)               | 3<br>(2 - 5)             | 0<br>(0 - 1)           | 1<br>(1 - 2)             | 1<br>(1 - 2)              | 1<br>(1 - 2)                |
| Measles                                                           | 0<br>(0 - 0)                | 0<br>(0 - 0)             | 0<br>(0 - 0)           | 0<br>(0 - 0)             | 0<br>(0 - 0)              | --                          |
| Varicella and herpes zoster                                       | 4<br>(2 - 9)                | 1<br>(0 - 3)             | 0<br>(0 - 1)           | 1<br>(0 - 2)             | 0<br>(0 - 1)              | 2<br>(0 - 6)                |
| Neglected tropical diseases and malaria                           | 84<br>(53 - 139)            | 11<br>(7 - 15)           | 4<br>(3 - 6)           | 18<br>(13 - 24)          | 23<br>(11 - 47)           | 30<br>(13 - 61)             |
| Malaria                                                           | 0<br>(0 - 0)                | 0<br>(0 - 0)             | 0<br>(0 - 0)           | 0<br>(0 - 0)             | 0<br>(0 - 0)              | 0<br>(0 - 0)                |
| Chagas disease                                                    | 32<br>(10 - 92)             | 0<br>(0 - 0)             | 0<br>(0 - 0)           | 3<br>(1 - 9)             | 13<br>(4 - 37)            | 16<br>(4 - 50)              |
| Leishmaniasis                                                     | 17<br>(13 - 22)             | 7<br>(4 - 10)            | 2<br>(1 - 2)           | 6<br>(4 - 8)             | 2<br>(1 - 3)              | 1<br>(1 - 1)                |
| Visceral leishmaniasis                                            | 17<br>(13 - 22)             | 7<br>(4 - 10)            | 2<br>(1 - 2)           | 6<br>(4 - 8)             | 2<br>(1 - 3)              | 1<br>(1 - 1)                |
| Cysticercosis                                                     | 2<br>(2 - 3)                | 0<br>(0 - 0)             | 0<br>(0 - 0)           | 1<br>(1 - 1)             | 1<br>(1 - 1)              | 0<br>(0 - 0)                |
| Cystic echinococcosis                                             | 1<br>(1 - 1)                | 0<br>(0 - 0)             | 0<br>(0 - 0)           | 0<br>(0 - 0)             | 0<br>(0 - 0)              | 0<br>(0 - 0)                |
| Dengue                                                            | 24<br>(7 - 30)              | 1<br>(1 - 2)             | 0<br>(0 - 0)           | 4<br>(2 - 5)             | 6<br>(1 - 8)              | 12<br>(3 - 16)              |
| Yellow fever                                                      | 1<br>(1 - 1)                | 0<br>(0 - 0)             | 0<br>(0 - 1)           | 0<br>(0 - 1)             | 0<br>(0 - 0)              | 0<br>(0 - 0)                |
| Rabies                                                            | 1<br>(1 - 2)                | 0<br>(0 - 0)             | 0<br>(0 - 1)           | 0<br>(0 - 1)             | 0<br>(0 - 0)              | 0<br>(0 - 0)                |
| Intestinal nematode infections                                    | 1<br>(0 - 6)                | 0<br>(0 - 4)             | 0<br>(0 - 2)           | 0<br>(0 - 2)             | 0<br>(0 - 1)              | 0<br>(0 - 1)                |
| Ascariasis                                                        | 1<br>(0 - 6)                | 0<br>(0 - 4)             | 0<br>(0 - 2)           | 0<br>(0 - 2)             | 0<br>(0 - 1)              | 0<br>(0 - 1)                |
| Other neglected tropical diseases                                 | 5<br>(4 - 6)                | 2<br>(1 - 3)             | 1<br>(0 - 1)           | 1<br>(1 - 2)             | 1<br>(0 - 1)              | 1<br>(1 - 1)                |

Web Table 31- Paraguay deaths with 95% UI by age, sex, and cause in 2013

| Cause                                                            | Both Sexes, All Ages        | Both Sexes, 0-4 Years    | Both Sexes, 5-14 Years | Both Sexes, 15-49 Years  | Both Sexes, 50-69 Years  | Both Sexes, 70-80 Years     |
|------------------------------------------------------------------|-----------------------------|--------------------------|------------------------|--------------------------|--------------------------|-----------------------------|
| Maternal disorders                                               | 156<br>(117 - 208)          | --                       | 1<br>(0 - 2)           | 155<br>(116 - 207)       | --                       | --                          |
| Maternal hemorrhage                                              | 27<br>(19 - 38)             | --                       | 0<br>(0 - 0)           | 27<br>(19 - 38)          | --                       | --                          |
| Maternal sepsis and other maternal infections                    | 18<br>(12 - 25)             | --                       | 0<br>(0 - 0)           | 18<br>(12 - 25)          | --                       | --                          |
| Maternal hypertensive disorders                                  | 22<br>(16 - 30)             | --                       | 0<br>(0 - 0)           | 22<br>(16 - 29)          | --                       | --                          |
| Maternal obstructed labor                                        | 7<br>(5 - 10)               | --                       | 0<br>(0 - 0)           | 7<br>(5 - 10)            | --                       | --                          |
| Maternal abortive outcome                                        | 31<br>(23 - 43)             | --                       | 0<br>(0 - 0)           | 31<br>(23 - 43)          | --                       | --                          |
| Indirect maternal deaths                                         | 20<br>(14 - 28)             | --                       | 0<br>(0 - 0)           | 20<br>(14 - 28)          | --                       | --                          |
| Late maternal deaths                                             | 19<br>(12 - 28)             | --                       | 0<br>(0 - 0)           | 19<br>(12 - 28)          | --                       | --                          |
| Maternal deaths aggravated by HIV/AIDS                           | 0<br>(0 - 0)                | --                       | --                     | 0<br>(0 - 0)             | --                       | --                          |
| Other maternal disorders                                         | 11<br>(8 - 17)              | --                       | 0<br>(0 - 0)           | 11<br>(8 - 17)           | --                       | --                          |
| Neonatal disorders                                               | 1,393<br>(1,200 - 1,589)    | 1,393<br>(1,200 - 1,589) | --                     | --                       | --                       | --                          |
| Neonatal preterm birth complications                             | 651<br>(448 - 820)          | 651<br>(448 - 820)       | --                     | --                       | --                       | --                          |
| Neonatal encephalopathy due to birth asphyxia and trauma         | 297<br>(212 - 382)          | 297<br>(212 - 382)       | --                     | --                       | --                       | --                          |
| Neonatal sepsis and other neonatal infections                    | 302<br>(195 - 498)          | 302<br>(195 - 498)       | --                     | --                       | --                       | --                          |
| Hemolytic disease and other neonatal jaundice                    | 12<br>(5 - 26)              | 12<br>(5 - 26)           | --                     | --                       | --                       | --                          |
| Other neonatal disorders                                         | 129<br>(82 - 180)           | 129<br>(82 - 180)        | --                     | --                       | --                       | --                          |
| Nutritional deficiencies                                         | 364<br>(268 - 441)          | 100<br>(66 - 138)        | 9<br>(6 - 12)          | 37<br>(28 - 48)          | 48<br>(33 - 63)          | 171<br>(117 - 229)          |
| Protein-energy malnutrition                                      | 259<br>(170 - 326)          | 93<br>(62 - 130)         | 7<br>(5 - 10)          | 16<br>(9 - 23)           | 28<br>(16 - 39)          | 115<br>(62 - 161)           |
| Iodine deficiency                                                | 0<br>(0 - 1)                | 0<br>(0 - 0)             | 0<br>(0 - 0)           | 0<br>(0 - 0)             | 0<br>(0 - 0)             | 0<br>(0 - 1)                |
| Iron-deficiency anemia                                           | 96<br>(60 - 153)            | 6<br>(2 - 14)            | 1<br>(1 - 3)           | 20<br>(13 - 29)          | 18<br>(11 - 30)          | 51<br>(28 - 90)             |
| Other nutritional deficiencies                                   | 8<br>(4 - 15)               | 1<br>(0 - 2)             | 1<br>(0 - 1)           | 1<br>(0 - 1)             | 2<br>(1 - 3)             | 4<br>(2 - 9)                |
| Other communicable, maternal, neonatal, and nutritional diseases | 358<br>(96 - 634)           | 279<br>(29 - 541)        | 25<br>(5 - 46)         | 16<br>(11 - 23)          | 20<br>(12 - 29)          | 19<br>(12 - 30)             |
| Sexually transmitted diseases excluding HIV                      | 296<br>(28 - 582)           | 269<br>(20 - 533)        | 21<br>(2 - 43)         | 2<br>(1 - 3)             | 2<br>(1 - 4)             | 2<br>(1 - 3)                |
| Syphilis                                                         | 294<br>(26 - 580)           | 269<br>(20 - 533)        | 21<br>(2 - 43)         | 1<br>(1 - 1)             | 2<br>(1 - 3)             | 2<br>(1 - 3)                |
| Chlamydial infection                                             | 0<br>(0 - 1)                | --                       | 0<br>(0 - 0)           | 0<br>(0 - 0)             | 0<br>(0 - 0)             | 0<br>(0 - 0)                |
| Gonococcal infection                                             | 1<br>(1 - 2)                | --                       | 0<br>(0 - 0)           | 0<br>(0 - 1)             | 0<br>(0 - 1)             | 0<br>(0 - 0)                |
| Other sexually transmitted diseases                              | 1<br>(1 - 1)                | --                       | 0<br>(0 - 0)           | 0<br>(0 - 1)             | 0<br>(0 - 0)             | 0<br>(0 - 0)                |
| Hepatitis                                                        | 9<br>(8 - 11)               | 0<br>(0 - 1)             | 1<br>(0 - 1)           | 3<br>(2 - 3)             | 3<br>(2 - 4)             | 3<br>(2 - 4)                |
| Acute hepatitis A                                                | 2<br>(1 - 3)                | 0<br>(0 - 0)             | 0<br>(0 - 1)           | 1<br>(0 - 2)             | 0<br>(0 - 1)             | 0<br>(0 - 0)                |
| Acute hepatitis B                                                | 6<br>(5 - 8)                | 0<br>(0 - 0)             | 0<br>(0 - 0)           | 1<br>(1 - 2)             | 2<br>(2 - 3)             | 2<br>(2 - 3)                |
| Acute hepatitis C                                                | 1<br>(0 - 2)                | --                       | 0<br>(0 - 0)           | 0<br>(0 - 1)             | 0<br>(0 - 1)             | 0<br>(0 - 1)                |
| Other infectious diseases                                        | 53<br>(33 - 72)             | 9<br>(5 - 18)            | 3<br>(2 - 5)           | 12<br>(7 - 18)           | 14<br>(7 - 24)           | 14<br>(7 - 25)              |
| Non-communicable diseases                                        | 26,706<br>(23,515 - 30,198) | 843<br>(688 - 1,009)     | 188<br>(166 - 213)     | 2,644<br>(2,268 - 3,053) | 8,257<br>(7,053 - 9,581) | 14,774<br>(13,123 - 16,605) |
| Neoplasms                                                        | 5,843<br>(4,999 - 6,767)    | 41<br>(30 - 57)          | 74<br>(62 - 87)        | 859<br>(718 - 1,008)     | 2,307<br>(1,947 - 2,720) | 2,562<br>(2,161 - 2,967)    |
| Esophageal cancer                                                | 170<br>(134 - 214)          | --                       | --                     | 11<br>(8 - 14)           | 80<br>(59 - 106)         | 79<br>(62 - 101)            |
| Stomach cancer                                                   | 526<br>(443 - 616)          | --                       | --                     | 60<br>(49 - 74)          | 209<br>(171 - 252)       | 257<br>(208 - 312)          |
| Liver cancer                                                     | 160<br>(131 - 195)          | --                       | 1<br>(0 - 1)           | 16<br>(12 - 20)          | 68<br>(53 - 86)          | 76<br>(58 - 97)             |
| Liver cancer due to hepatitis B                                  | 28<br>(20 - 41)             | --                       | 0<br>(0 - 0)           | 5<br>(4 - 7)             | 13<br>(9 - 20)           | 10<br>(6 - 14)              |
| Liver cancer due to hepatitis C                                  | 92<br>(67 - 118)            | --                       | 0<br>(0 - 0)           | 7<br>(4 - 9)             | 38<br>(27 - 50)          | 47<br>(33 - 64)             |
| Liver cancer due to alcohol use                                  | 27<br>(18 - 37)             | --                       | --                     | 1<br>(1 - 2)             | 11<br>(7 - 16)           | 14<br>(9 - 21)              |

Web Table 31- Paraguay deaths with 95% UI by age, sex, and cause in 2013

| Cause                                         | Both Sexes, All Ages        | Both Sexes, 0-4 Years | Both Sexes, 5-14 Years | Both Sexes, 15-49 Years | Both Sexes, 50-69 Years  | Both Sexes, 70-80 Years  |
|-----------------------------------------------|-----------------------------|-----------------------|------------------------|-------------------------|--------------------------|--------------------------|
| Liver cancer due to other causes              | 13<br>(9 - 18)              | --                    | 0<br>(0 - 0)           | 2<br>(1 - 3)            | 5<br>(3 - 8)             | 5<br>(3 - 8)             |
| Larynx cancer                                 | 65<br>(47 - 89)             | --                    | --                     | 9<br>(6 - 12)           | 36<br>(25 - 51)          | 21<br>(15 - 30)          |
| Tracheal, bronchus and lung cancer            | 843<br>(710 - 995)          | --                    | --                     | 65<br>(52 - 80)         | 418<br>(339 - 511)       | 360<br>(303 - 429)       |
| Breast cancer                                 | 489<br>(375 - 612)          | --                    | --                     | 116<br>(87 - 149)       | 224<br>(167 - 290)       | 149<br>(110 - 194)       |
| Cervical cancer                               | 489<br>(356 - 623)          | --                    | --                     | 158<br>(112 - 211)      | 205<br>(144 - 268)       | 126<br>(81 - 175)        |
| Uterine cancer                                | 123<br>(80 - 179)           | --                    | --                     | 11<br>(7 - 16)          | 59<br>(38 - 91)          | 53<br>(30 - 81)          |
| Prostate cancer                               | 496<br>(259 - 691)          | --                    | --                     | 5<br>(2 - 7)            | 98<br>(49 - 145)         | 393<br>(205 - 549)       |
| Colon and rectum cancer                       | 553<br>(470 - 651)          | --                    | --                     | 58<br>(47 - 70)         | 196<br>(163 - 235)       | 299<br>(243 - 364)       |
| Lip and oral cavity cancer                    | 84<br>(59 - 109)            | --                    | --                     | 11<br>(8 - 15)          | 42<br>(28 - 57)          | 32<br>(22 - 42)          |
| Nasopharynx cancer                            | 15<br>(11 - 20)             | --                    | 0<br>(0 - 0)           | 4<br>(3 - 5)            | 7<br>(5 - 11)            | 3<br>(2 - 5)             |
| Other pharynx cancer                          | 50<br>(32 - 65)             | --                    | --                     | 7<br>(4 - 9)            | 30<br>(19 - 42)          | 13<br>(9 - 17)           |
| Gallbladder and biliary tract cancer          | 90<br>(65 - 126)            | --                    | --                     | 5<br>(4 - 7)            | 36<br>(26 - 51)          | 49<br>(33 - 72)          |
| Pancreatic cancer                             | 256<br>(216 - 301)          | --                    | --                     | 20<br>(16 - 26)         | 104<br>(84 - 126)        | 132<br>(107 - 161)       |
| Malignant skin melanoma                       | 50<br>(34 - 63)             | --                    | --                     | 11<br>(7 - 14)          | 18<br>(12 - 24)          | 21<br>(14 - 28)          |
| Non-melanoma skin cancer                      | 59<br>(44 - 83)             | --                    | --                     | 5<br>(4 - 7)            | 13<br>(9 - 19)           | 41<br>(30 - 56)          |
| Ovarian cancer                                | 111<br>(82 - 142)           | --                    | --                     | 21<br>(15 - 29)         | 53<br>(38 - 69)          | 36<br>(24 - 52)          |
| Testicular cancer                             | 11<br>(3 - 21)              | --                    | --                     | 8<br>(2 - 17)           | 1<br>(0 - 2)             | 1<br>(0 - 2)             |
| Kidney cancer                                 | 97<br>(80 - 117)            | 1<br>(0 - 1)          | 1<br>(1 - 1)           | 13<br>(10 - 16)         | 44<br>(34 - 56)          | 38<br>(29 - 50)          |
| Bladder cancer                                | 68<br>(53 - 90)             | --                    | --                     | 3<br>(3 - 5)            | 24<br>(18 - 31)          | 41<br>(31 - 55)          |
| Brain and nervous system cancer               | 96<br>(57 - 121)            | 3<br>(1 - 5)          | 8<br>(5 - 11)          | 31<br>(18 - 40)         | 36<br>(19 - 48)          | 19<br>(10 - 27)          |
| Thyroid cancer                                | 40<br>(26 - 51)             | --                    | 0<br>(0 - 0)           | 4<br>(3 - 6)            | 17<br>(11 - 22)          | 19<br>(12 - 25)          |
| Mesothelioma                                  | 6<br>(5 - 8)                | --                    | --                     | 1<br>(1 - 1)            | 3<br>(2 - 4)             | 2<br>(1 - 3)             |
| Hodgkin lymphoma                              | 17<br>(5 - 25)              | 0<br>(0 - 1)          | 2<br>(1 - 3)           | 7<br>(2 - 10)           | 5<br>(1 - 8)             | 3<br>(1 - 5)             |
| Non-Hodgkin lymphoma                          | 143<br>(91 - 187)           | 3<br>(2 - 5)          | 6<br>(4 - 8)           | 29<br>(18 - 38)         | 55<br>(33 - 75)          | 51<br>(30 - 69)          |
| Multiple myeloma                              | 41<br>(30 - 53)             | --                    | --                     | 4<br>(3 - 6)            | 19<br>(14 - 26)          | 17<br>(12 - 23)          |
| Leukemia                                      | 279<br>(240 - 322)          | 17<br>(11 - 26)       | 37<br>(30 - 47)        | 79<br>(66 - 97)         | 67<br>(54 - 82)          | 78<br>(64 - 95)          |
| Other neoplasms                               | 416<br>(297 - 514)          | 17<br>(9 - 25)        | 19<br>(14 - 25)        | 87<br>(63 - 110)        | 142<br>(97 - 186)        | 151<br>(100 - 200)       |
| Cardiovascular diseases                       | 11,556<br>(10,039 - 13,385) | 21<br>(16 - 29)       | 18<br>(14 - 23)        | 880<br>(741 - 1,059)    | 3,422<br>(2,906 - 4,066) | 7,215<br>(6,281 - 8,272) |
| Rheumatic heart disease                       | 68<br>(47 - 85)             | 0<br>(0 - 0)          | 2<br>(2 - 3)           | 21<br>(15 - 28)         | 23<br>(15 - 30)          | 22<br>(13 - 29)          |
| Ischemic heart disease                        | 5,730<br>(4,845 - 7,027)    | 2<br>(1 - 4)          | 3<br>(2 - 4)           | 417<br>(342 - 524)      | 1,740<br>(1,436 - 2,164) | 3,569<br>(2,968 - 4,448) |
| Cerebrovascular disease                       | 4,289<br>(3,609 - 5,119)    | 4<br>(3 - 5)          | 4<br>(3 - 6)           | 316<br>(257 - 383)      | 1,278<br>(1,053 - 1,565) | 2,688<br>(2,239 - 3,221) |
| Ischemic stroke                               | 2,186<br>(1,703 - 3,044)    | 0<br>(0 - 0)          | 1<br>(0 - 1)           | 48<br>(31 - 98)         | 432<br>(301 - 758)       | 1,705<br>(1,342 - 2,271) |
| Hemorrhagic stroke                            | 2,103<br>(1,386 - 2,562)    | 4<br>(3 - 5)          | 4<br>(3 - 5)           | 268<br>(209 - 328)      | 845<br>(571 - 1,051)     | 982<br>(577 - 1,253)     |
| Hypertensive heart disease                    | 628<br>(376 - 867)          | 1<br>(0 - 1)          | 0<br>(0 - 0)           | 21<br>(12 - 30)         | 145<br>(83 - 212)        | 461<br>(272 - 647)       |
| Cardiomyopathy and myocarditis                | 164<br>(131 - 207)          | 6<br>(4 - 9)          | 3<br>(2 - 5)           | 25<br>(19 - 32)         | 45<br>(35 - 59)          | 84<br>(64 - 111)         |
| Atrial fibrillation and flutter               | 61<br>(47 - 82)             | --                    | --                     | 2<br>(2 - 3)            | 9<br>(7 - 11)            | 50<br>(37 - 69)          |
| Aortic aneurysm                               | 156<br>(120 - 198)          | --                    | --                     | 17<br>(13 - 22)         | 60<br>(45 - 77)          | 80<br>(60 - 102)         |
| Peripheral vascular disease                   | 17<br>(13 - 21)             | --                    | --                     | 1<br>(1 - 1)            | 3<br>(3 - 4)             | 13<br>(9 - 17)           |
| Endocarditis                                  | 82<br>(59 - 108)            | 6<br>(4 - 9)          | 3<br>(2 - 4)           | 17<br>(12 - 23)         | 21<br>(15 - 29)          | 35<br>(23 - 48)          |
| Other cardiovascular and circulatory diseases | 361<br>(285 - 485)          | 3<br>(2 - 4)          | 2<br>(1 - 3)           | 44<br>(34 - 62)         | 98<br>(75 - 135)         | 214<br>(161 - 289)       |

Web Table 31- Paraguay deaths with 95% UI by age, sex, and cause in 2013

| Cause                                               | Both Sexes, All Ages     | Both Sexes, 0-4 Years | Both Sexes, 5-14 Years | Both Sexes, 15-49 Years | Both Sexes, 50-69 Years | Both Sexes, 70-80 Years |
|-----------------------------------------------------|--------------------------|-----------------------|------------------------|-------------------------|-------------------------|-------------------------|
| Chronic respiratory diseases                        | 1,188<br>(1,021 - 1,397) | 39<br>(28 - 50)       | 7<br>(5 - 8)           | 76<br>(63 - 95)         | 253<br>(204 - 310)      | 814<br>(689 - 970)      |
| Chronic obstructive pulmonary disease               | 887<br>(742 - 1,052)     | 24<br>(16 - 33)       | 3<br>(2 - 4)           | 35<br>(28 - 45)         | 180<br>(142 - 226)      | 644<br>(537 - 774)      |
| Pneumoconiosis                                      | 61<br>(42 - 86)          | 0<br>(0 - 0)          | 0<br>(0 - 0)           | 13<br>(9 - 19)          | 22<br>(14 - 33)         | 26<br>(17 - 39)         |
| Silicosis                                           | 14<br>(10 - 21)          | 0<br>(0 - 0)          | 0<br>(0 - 0)           | 5<br>(3 - 8)            | 7<br>(4 - 11)           | 2<br>(1 - 3)            |
| Asbestosis                                          | 11<br>(7 - 17)           | 0<br>(0 - 0)          | 0<br>(0 - 0)           | 1<br>(1 - 1)            | 3<br>(2 - 5)            | 7<br>(4 - 11)           |
| Coal workers pneumoconiosis                         | 3<br>(2 - 5)             | 0<br>(0 - 0)          | 0<br>(0 - 0)           | 0<br>(0 - 1)            | 0<br>(0 - 0)            | 2<br>(1 - 3)            |
| Other pneumoconiosis                                | 33<br>(23 - 47)          | 0<br>(0 - 0)          | 0<br>(0 - 0)           | 7<br>(5 - 10)           | 12<br>(8 - 17)          | 14<br>(9 - 22)          |
| Asthma                                              | 108<br>(82 - 144)        | 5<br>(2 - 7)          | 1<br>(1 - 2)           | 15<br>(11 - 19)         | 27<br>(20 - 36)         | 60<br>(42 - 88)         |
| Interstitial lung disease and pulmonary sarcoidosis | 108<br>(73 - 172)        | 1<br>(1 - 2)          | 1<br>(0 - 1)           | 7<br>(5 - 11)           | 20<br>(13 - 33)         | 79<br>(52 - 130)        |
| Other chronic respiratory diseases                  | 24<br>(20 - 29)          | 9<br>(7 - 12)         | 1<br>(1 - 2)           | 5<br>(4 - 7)            | 4<br>(3 - 5)            | 4<br>(3 - 6)            |
| Cirrhosis                                           | 679<br>(573 - 809)       | 2<br>(1 - 4)          | 5<br>(3 - 6)           | 159<br>(128 - 197)      | 318<br>(252 - 393)      | 195<br>(160 - 234)      |
| Cirrhosis due to hepatitis B                        | 53<br>(29 - 88)          | 0<br>(0 - 0)          | 0<br>(0 - 0)           | 12<br>(6 - 21)          | 25<br>(13 - 43)         | 16<br>(9 - 26)          |
| Cirrhosis due to hepatitis C                        | 241<br>(157 - 334)       | 0<br>(0 - 0)          | 1<br>(0 - 2)           | 51<br>(31 - 75)         | 111<br>(68 - 162)       | 78<br>(50 - 105)        |
| Cirrhosis due to alcohol use                        | 295<br>(215 - 392)       | --                    | --                     | 64<br>(42 - 88)         | 146<br>(103 - 200)      | 85<br>(62 - 116)        |
| Cirrhosis due to other causes                       | 90<br>(53 - 127)         | 2<br>(1 - 4)          | 3<br>(2 - 5)           | 33<br>(18 - 48)         | 36<br>(18 - 57)         | 15<br>(9 - 24)          |
| Digestive diseases                                  | 898<br>(767 - 1,074)     | 8<br>(5 - 11)         | 9<br>(7 - 12)          | 107<br>(87 - 137)       | 245<br>(201 - 309)      | 529<br>(440 - 642)      |
| Peptic ulcer disease                                | 150<br>(111 - 200)       | 0<br>(0 - 0)          | 0<br>(0 - 1)           | 16<br>(11 - 23)         | 45<br>(31 - 64)         | 89<br>(63 - 120)        |
| Gastritis and duodenitis                            | 10<br>(5 - 14)           | 0<br>(0 - 0)          | 0<br>(0 - 0)           | 1<br>(1 - 2)            | 2<br>(1 - 3)            | 6<br>(3 - 9)            |
| Appendicitis                                        | 43<br>(33 - 61)          | 1<br>(0 - 1)          | 3<br>(2 - 4)           | 13<br>(9 - 18)          | 11<br>(7 - 16)          | 17<br>(11 - 24)         |
| Paralytic ileus and intestinal obstruction          | 193<br>(134 - 272)       | 4<br>(2 - 6)          | 3<br>(2 - 4)           | 17<br>(11 - 25)         | 44<br>(29 - 64)         | 126<br>(82 - 180)       |
| Inguinal, femoral, and abdominal hernia             | 65<br>(39 - 127)         | 0<br>(0 - 1)          | 0<br>(0 - 1)           | 6<br>(3 - 12)           | 16<br>(9 - 33)          | 42<br>(24 - 82)         |
| Inflammatory bowel disease                          | 13<br>(10 - 17)          | 0<br>(0 - 0)          | 0<br>(0 - 1)           | 4<br>(3 - 5)            | 4<br>(3 - 5)            | 5<br>(3 - 7)            |
| Vascular intestinal disorders                       | 99<br>(57 - 159)         | 0<br>(0 - 1)          | 0<br>(0 - 1)           | 6<br>(3 - 11)           | 24<br>(13 - 41)         | 68<br>(39 - 110)        |
| Gallbladder and biliary diseases                    | 109<br>(82 - 144)        | 0<br>(0 - 0)          | 0<br>(0 - 0)           | 10<br>(7 - 13)          | 35<br>(25 - 49)         | 64<br>(45 - 88)         |
| Pancreatitis                                        | 104<br>(75 - 134)        | 0<br>(0 - 0)          | 0<br>(0 - 0)           | 21<br>(15 - 28)         | 33<br>(23 - 44)         | 50<br>(35 - 67)         |
| Other digestive diseases                            | 111<br>(83 - 141)        | 2<br>(1 - 3)          | 2<br>(1 - 2)           | 13<br>(10 - 17)         | 31<br>(21 - 41)         | 63<br>(45 - 86)         |
| Neurological disorders                              | 1,327<br>(1,110 - 1,563) | 12<br>(9 - 16)        | 10<br>(7 - 15)         | 76<br>(57 - 103)        | 118<br>(94 - 143)       | 1,111<br>(919 - 1,323)  |
| Alzheimer disease and other dementias               | 1,120<br>(924 - 1,341)   | --                    | --                     | 0<br>(0 - 1)            | 75<br>(57 - 95)         | 1,045<br>(855 - 1,259)  |
| Parkinson disease                                   | 55<br>(31 - 74)          | --                    | --                     | 1<br>(1 - 1)            | 9<br>(6 - 13)           | 45<br>(24 - 64)         |
| Epilepsy                                            | 99<br>(76 - 136)         | 3<br>(2 - 6)          | 8<br>(5 - 12)          | 61<br>(44 - 88)         | 17<br>(12 - 23)         | 10<br>(7 - 14)          |
| Multiple sclerosis                                  | 7<br>(4 - 10)            | --                    | --                     | 3<br>(2 - 4)            | 3<br>(2 - 4)            | 2<br>(1 - 2)            |
| Other neurological disorders                        | 47<br>(36 - 55)          | 9<br>(7 - 12)         | 2<br>(2 - 3)           | 11<br>(8 - 14)          | 15<br>(11 - 18)         | 10<br>(7 - 12)          |
| Mental and substance use disorders                  | 159<br>(117 - 255)       | 2<br>(1 - 2)          | 0<br>(0 - 0)           | 53<br>(38 - 88)         | 76<br>(51 - 124)        | 28<br>(20 - 44)         |
| Schizophrenia                                       | 1<br>(1 - 1)             | --                    | --                     | 0<br>(0 - 1)            | 0<br>(0 - 0)            | 0<br>(0 - 0)            |
| Alcohol use disorders                               | 142<br>(101 - 236)       | --                    | --                     | 45<br>(30 - 78)         | 72<br>(48 - 120)        | 24<br>(17 - 40)         |
| Drug use disorders                                  | 16<br>(13 - 19)          | 2<br>(1 - 2)          | --                     | 7<br>(6 - 9)            | 4<br>(3 - 4)            | 4<br>(3 - 5)            |
| Opioid use disorders                                | 6<br>(5 - 7)             | 1<br>(0 - 1)          | --                     | 3<br>(2 - 3)            | 1<br>(1 - 2)            | 1<br>(1 - 2)            |
| Cocaine use disorders                               | 1<br>(1 - 1)             | 0<br>(0 - 0)          | --                     | 1<br>(0 - 1)            | 0<br>(0 - 0)            | 0<br>(0 - 0)            |
| Amphetamine use disorders                           | 1<br>(1 - 1)             | 0<br>(0 - 0)          | --                     | 0<br>(0 - 0)            | 0<br>(0 - 0)            | 0<br>(0 - 0)            |
| Other drug use disorders                            | 8<br>(7 - 10)            | 1<br>(1 - 1)          | --                     | 4<br>(3 - 5)            | 2<br>(2 - 3)            | 2<br>(1 - 2)            |

Web Table 31- Paraguay deaths with 95% UI by age, sex, and cause in 2013

| Cause                                               | Both Sexes, All Ages     | Both Sexes, 0-4 Years | Both Sexes, 5-14 Years | Both Sexes, 15-49 Years | Both Sexes, 50-69 Years  | Both Sexes, 70-80 Years  |
|-----------------------------------------------------|--------------------------|-----------------------|------------------------|-------------------------|--------------------------|--------------------------|
| Eating disorders                                    | 0<br>(0 - 0)             | --                    | 0<br>(0 - 0)           | 0<br>(0 - 0)            | --                       | --                       |
| Anorexia nervosa                                    | 0<br>(0 - 0)             | --                    | 0<br>(0 - 0)           | 0<br>(0 - 0)            | --                       | --                       |
| Diabetes, urogenital, blood, and endocrine diseases | 4,102<br>(3,548 - 4,716) | 61<br>(43 - 112)      | 23<br>(19 - 30)        | 334<br>(283 - 395)      | 1,454<br>(1,226 - 1,708) | 2,230<br>(1,879 - 2,604) |
| Diabetes mellitus                                   | 2,347<br>(1,952 - 2,765) | 4<br>(3 - 6)          | 2<br>(1 - 3)           | 125<br>(101 - 151)      | 860<br>(709 - 1,030)     | 1,356<br>(1,104 - 1,627) |
| Acute glomerulonephritis                            | 3<br>(3 - 4)             | 0<br>(0 - 0)          | 0<br>(0 - 0)           | 1<br>(1 - 1)            | 1<br>(0 - 1)             | 1<br>(1 - 2)             |
| Chronic kidney disease                              | 1,355<br>(1,118 - 1,614) | 11<br>(8 - 16)        | 9<br>(7 - 12)          | 155<br>(126 - 190)      | 514<br>(399 - 629)       | 665<br>(535 - 813)       |
| Chronic kidney disease due to diabetes mellitus     | 644<br>(494 - 785)       | 2<br>(1 - 3)          | 1<br>(1 - 1)           | 59<br>(43 - 79)         | 297<br>(214 - 369)       | 285<br>(215 - 375)       |
| Chronic kidney disease due to hypertension          | 260<br>(162 - 353)       | 1<br>(1 - 2)          | 2<br>(1 - 3)           | 35<br>(24 - 49)         | 67<br>(35 - 101)         | 154<br>(96 - 213)        |
| Chronic kidney disease due to glomerulonephritis    | 18<br>(12 - 23)          | 2<br>(1 - 3)          | 1<br>(1 - 2)           | 5<br>(4 - 7)            | 4<br>(2 - 5)             | 5<br>(3 - 8)             |
| Chronic kidney disease due to other causes          | 433<br>(298 - 580)       | 7<br>(4 - 10)         | 5<br>(3 - 7)           | 55<br>(38 - 78)         | 147<br>(83 - 205)        | 220<br>(144 - 320)       |
| Urinary diseases and male infertility               | 238<br>(159 - 315)       | 8<br>(5 - 12)         | 2<br>(2 - 3)           | 25<br>(17 - 33)         | 46<br>(30 - 59)          | 157<br>(99 - 224)        |
| Interstitial nephritis and urinary tract infections | 182<br>(98 - 256)        | 7<br>(4 - 11)         | 2<br>(1 - 3)           | 18<br>(10 - 25)         | 30<br>(16 - 43)          | 125<br>(63 - 187)        |
| Urolithiasis                                        | 11<br>(8 - 17)           | --                    | 0<br>(0 - 0)           | 2<br>(2 - 4)            | 4<br>(2 - 6)             | 4<br>(2 - 9)             |
| Other urinary diseases                              | 45<br>(28 - 76)          | 1<br>(0 - 2)          | 0<br>(0 - 1)           | 5<br>(3 - 8)            | 12<br>(7 - 18)           | 27<br>(14 - 51)          |
| Gynecological diseases                              | 2<br>(1 - 3)             | --                    | --                     | 1<br>(1 - 2)            | 0<br>(0 - 0)             | 0<br>(0 - 1)             |
| Uterine fibroids                                    | 0<br>(0 - 1)             | --                    | --                     | 0<br>(0 - 0)            | 0<br>(0 - 0)             | 0<br>(0 - 0)             |
| Polycystic ovarian syndrome                         | 0<br>(0 - 0)             | --                    | --                     | 0<br>(0 - 0)            | 0<br>(0 - 0)             | --                       |
| Endometriosis                                       | 0<br>(0 - 0)             | --                    | --                     | 0<br>(0 - 0)            | 0<br>(0 - 0)             | --                       |
| Genital prolapse                                    | 0<br>(0 - 0)             | --                    | --                     | 0<br>(0 - 0)            | 0<br>(0 - 0)             | 0<br>(0 - 0)             |
| Other gynecological diseases                        | 1<br>(1 - 1)             | --                    | --                     | 1<br>(0 - 1)            | 0<br>(0 - 0)             | 0<br>(0 - 0)             |
| Hemoglobinopathies and hemolytic anemias            | 35<br>(26 - 53)          | 4<br>(3 - 7)          | 4<br>(3 - 7)           | 10<br>(7 - 16)          | 9<br>(6 - 14)            | 8<br>(5 - 11)            |
| Thalassemias                                        | 2<br>(2 - 3)             | 1<br>(0 - 1)          | 1<br>(0 - 1)           | 1<br>(0 - 1)            | 0<br>(0 - 0)             | 0<br>(0 - 0)             |
| Sickle cell disorders                               | 14<br>(10 - 20)          | 2<br>(1 - 3)          | 3<br>(2 - 4)           | 6<br>(4 - 9)            | 3<br>(2 - 4)             | 0<br>(0 - 0)             |
| G6PD deficiency                                     | 1<br>(1 - 2)             | 0<br>(0 - 0)          | 0<br>(0 - 0)           | 0<br>(0 - 1)            | 0<br>(0 - 1)             | 0<br>(0 - 0)             |
| Other hemoglobinopathies and hemolytic anemias      | 18<br>(13 - 27)          | 1<br>(1 - 2)          | 1<br>(1 - 1)           | 3<br>(2 - 5)            | 6<br>(4 - 9)             | 7<br>(5 - 11)            |
| Endocrine, metabolic, blood, and immune disorders   | 121<br>(90 - 225)        | 34<br>(20 - 81)       | 5<br>(3 - 10)          | 16<br>(12 - 28)         | 24<br>(17 - 38)          | 43<br>(28 - 80)          |
| Musculoskeletal disorders                           | 154<br>(76 - 191)        | --                    | 6<br>(4 - 8)           | 52<br>(26 - 67)         | 44<br>(21 - 58)          | 52<br>(24 - 70)          |
| Rheumatoid arthritis                                | 33<br>(14 - 45)          | --                    | 0<br>(0 - 1)           | 5<br>(2 - 7)            | 13<br>(5 - 18)           | 15<br>(6 - 22)           |
| Other musculoskeletal disorders                     | 121<br>(61 - 151)        | --                    | 6<br>(4 - 7)           | 47<br>(24 - 61)         | 31<br>(15 - 41)          | 37<br>(18 - 50)          |
| Other non-communicable diseases                     | 800<br>(645 - 956)       | 657<br>(515 - 809)    | 37<br>(28 - 48)        | 48<br>(38 - 61)         | 19<br>(13 - 25)          | 38<br>(26 - 50)          |
| Congenital anomalies                                | 694<br>(548 - 845)       | 602<br>(463 - 754)    | 36<br>(27 - 47)        | 40<br>(31 - 52)         | 8<br>(6 - 11)            | 8<br>(5 - 11)            |
| Neural tube defects                                 | 44<br>(26 - 65)          | 43<br>(25 - 63)       | 1<br>(0 - 1)           | 1<br>(0 - 1)            | 0<br>(0 - 0)             | 0<br>(0 - 0)             |
| Congenital heart anomalies                          | 342<br>(265 - 432)       | 285<br>(210 - 370)    | 25<br>(19 - 33)        | 28<br>(22 - 37)         | 3<br>(2 - 4)             | 1<br>(0 - 1)             |
| Cleft lip and cleft palate                          | 3<br>(2 - 6)             | 3<br>(2 - 6)          | --                     | --                      | --                       | --                       |
| Down syndrome                                       | 9<br>(5 - 14)            | 7<br>(4 - 12)         | 1<br>(0 - 1)           | 1<br>(1 - 2)            | 0<br>(0 - 0)             | 0<br>(0 - 0)             |
| Chromosomal unbalanced rearrangements               | 15<br>(9 - 23)           | 13<br>(7 - 20)        | 0<br>(0 - 0)           | 1<br>(1 - 2)            | 1<br>(0 - 1)             | 0<br>(0 - 0)             |
| Other congenital anomalies                          | 281<br>(211 - 358)       | 251<br>(182 - 327)    | 9<br>(6 - 13)          | 9<br>(6 - 12)           | 5<br>(3 - 7)             | 7<br>(4 - 9)             |
| Skin and subcutaneous diseases                      | 59<br>(40 - 72)          | 8<br>(5 - 13)         | 1<br>(1 - 2)           | 8<br>(6 - 10)           | 11<br>(7 - 14)           | 30<br>(19 - 41)          |
| Cellulitis                                          | 17<br>(9 - 25)           | 1<br>(1 - 2)          | 0<br>(0 - 0)           | 2<br>(1 - 3)            | 4<br>(2 - 6)             | 10<br>(4 - 16)           |
| Pyoderma                                            | 31<br>(23 - 42)          | 5<br>(3 - 9)          | 1<br>(0 - 1)           | 4<br>(3 - 5)            | 5<br>(3 - 7)             | 16<br>(10 - 23)          |



Web Table 31- Paraguay deaths with 95% UI by age, sex, and cause in 2013

| Cause                                           | Both Sexes, All Ages     | Both Sexes, 0-4 Years | Both Sexes, 5-14 Years | Both Sexes, 15-49 Years  | Both Sexes, 50-69 Years | Both Sexes, 70-80 Years |
|-------------------------------------------------|--------------------------|-----------------------|------------------------|--------------------------|-------------------------|-------------------------|
| Decubitus ulcer                                 | 5<br>(3 - 8)             | 0<br>(0 - 0)          | 0<br>(0 - 0)           | 1<br>(1 - 1)             | 1<br>(1 - 1)            | 3<br>(2 - 5)            |
| Other skin and subcutaneous diseases            | 6<br>(4 - 9)             | 2<br>(1 - 3)          | 0<br>(0 - 0)           | 1<br>(1 - 2)             | 1<br>(0 - 2)            | 2<br>(1 - 3)            |
| Sudden infant death syndrome                    | 46<br>(21 - 90)          | 46<br>(21 - 90)       | --                     | --                       | --                      | --                      |
| Injuries                                        | 4,178<br>(3,604 - 4,911) | 208<br>(159 - 266)    | 205<br>(180 - 231)     | 2,532<br>(2,163 - 3,030) | 705<br>(567 - 867)      | 527<br>(385 - 647)      |
| Transport injuries                              | 1,600<br>(1,072 - 1,950) | 46<br>(26 - 68)       | 90<br>(64 - 110)       | 1,022<br>(655 - 1,298)   | 293<br>(203 - 370)      | 148<br>(98 - 185)       |
| Road injuries                                   | 1,569<br>(1,048 - 1,913) | 45<br>(25 - 66)       | 88<br>(62 - 107)       | 1,006<br>(641 - 1,276)   | 286<br>(197 - 362)      | 144<br>(96 - 180)       |
| Pedestrian road injuries                        | 634<br>(438 - 824)       | 27<br>(15 - 41)       | 53<br>(38 - 66)        | 304<br>(196 - 434)       | 145<br>(102 - 189)      | 105<br>(71 - 134)       |
| Cyclist road injuries                           | 38<br>(24 - 50)          | 1<br>(1 - 3)          | 5<br>(3 - 7)           | 17<br>(11 - 23)          | 9<br>(5 - 12)           | 6<br>(3 - 9)            |
| Motorcyclist road injuries                      | 516<br>(286 - 731)       | 5<br>(2 - 9)          | 10<br>(6 - 15)         | 426<br>(231 - 614)       | 67<br>(38 - 95)         | 7<br>(3 - 11)           |
| Motor vehicle road injuries                     | 351<br>(236 - 459)       | 10<br>(5 - 15)        | 16<br>(10 - 21)        | 246<br>(163 - 333)       | 58<br>(39 - 77)         | 22<br>(14 - 30)         |
| Other road injuries                             | 31<br>(14 - 43)          | 2<br>(1 - 3)          | 4<br>(2 - 7)           | 12<br>(5 - 19)           | 8<br>(3 - 13)           | 5<br>(2 - 8)            |
| Other transport injuries                        | 31<br>(20 - 38)          | 1<br>(1 - 2)          | 2<br>(1 - 3)           | 16<br>(10 - 21)          | 7<br>(5 - 10)           | 4<br>(3 - 6)            |
| Unintentional injuries                          | 1,129<br>(935 - 1,316)   | 143<br>(102 - 189)    | 83<br>(69 - 102)       | 401<br>(326 - 500)       | 193<br>(145 - 243)      | 308<br>(200 - 405)      |
| Falls                                           | 178<br>(112 - 223)       | 8<br>(4 - 13)         | 5<br>(3 - 8)           | 34<br>(19 - 47)          | 42<br>(23 - 58)         | 89<br>(55 - 121)        |
| Drowning                                        | 231<br>(177 - 360)       | 25<br>(14 - 48)       | 32<br>(22 - 54)        | 131<br>(93 - 211)        | 31<br>(22 - 47)         | 12<br>(9 - 19)          |
| Fire, heat, and hot substances                  | 117<br>(74 - 161)        | 19<br>(11 - 30)       | 7<br>(4 - 10)          | 31<br>(20 - 42)          | 18<br>(11 - 26)         | 43<br>(21 - 70)         |
| Poisonings                                      | 19<br>(15 - 30)          | 2<br>(1 - 4)          | 1<br>(1 - 2)           | 8<br>(6 - 13)            | 5<br>(3 - 8)            | 3<br>(2 - 4)            |
| Exposure to mechanical forces                   | 88<br>(69 - 157)         | 7<br>(5 - 11)         | 9<br>(7 - 15)          | 53<br>(38 - 102)         | 13<br>(9 - 22)          | 6<br>(5 - 10)           |
| Unintentional firearm injuries                  | 26<br>(19 - 35)          | 1<br>(0 - 1)          | 3<br>(2 - 5)           | 17<br>(12 - 26)          | 3<br>(2 - 5)            | 1<br>(1 - 2)            |
| Unintentional suffocation                       | 6<br>(3 - 9)             | 3<br>(2 - 6)          | 0<br>(0 - 1)           | 1<br>(1 - 2)             | 0<br>(0 - 1)            | 1<br>(0 - 1)            |
| Other exposure to mechanical forces             | 57<br>(42 - 122)         | 3<br>(1 - 5)          | 5<br>(3 - 11)          | 34<br>(23 - 81)          | 9<br>(6 - 18)           | 5<br>(3 - 8)            |
| Adverse effects of medical treatment            | 144<br>(80 - 201)        | 12<br>(7 - 21)        | 3<br>(2 - 4)           | 24<br>(14 - 32)          | 36<br>(18 - 54)         | 69<br>(31 - 108)        |
| Animal contact                                  | 24<br>(9 - 31)           | 3<br>(1 - 5)          | 3<br>(1 - 4)           | 8<br>(3 - 11)            | 6<br>(2 - 9)            | 5<br>(1 - 8)            |
| Venomous animal contact                         | 16<br>(6 - 21)           | 2<br>(1 - 3)          | 2<br>(1 - 3)           | 6<br>(3 - 9)             | 4<br>(1 - 6)            | 2<br>(1 - 4)            |
| Non-venomous animal contact                     | 8<br>(3 - 11)            | 1<br>(0 - 2)          | 1<br>(0 - 1)           | 2<br>(1 - 3)             | 2<br>(0 - 3)            | 3<br>(1 - 4)            |
| Foreign body                                    | 173<br>(100 - 227)       | 59<br>(33 - 86)       | 9<br>(6 - 13)          | 19<br>(11 - 26)          | 18<br>(10 - 25)         | 68<br>(35 - 98)         |
| Pulmonary aspiration and foreign body in airway | 172<br>(99 - 226)        | 59<br>(33 - 86)       | 9<br>(5 - 13)          | 19<br>(10 - 25)          | 17<br>(10 - 25)         | 68<br>(34 - 97)         |
| Foreign body in other body part                 | 2<br>(1 - 2)             | 0<br>(0 - 0)          | 0<br>(0 - 0)           | 0<br>(0 - 1)             | 0<br>(0 - 1)            | 0<br>(0 - 1)            |
| Other unintentional injuries                    | 155<br>(127 - 188)       | 9<br>(6 - 14)         | 14<br>(10 - 18)        | 94<br>(74 - 120)         | 24<br>(17 - 32)         | 13<br>(8 - 18)          |
| Self-harm and interpersonal violence            | 1,449<br>(1,181 - 1,896) | 18<br>(11 - 30)       | 32<br>(24 - 43)        | 1,109<br>(894 - 1,451)   | 219<br>(162 - 317)      | 71<br>(52 - 97)         |
| Self-harm                                       | 449<br>(362 - 579)       | --                    | 12<br>(7 - 19)         | 308<br>(238 - 413)       | 88<br>(67 - 118)        | 41<br>(29 - 58)         |
| Interpersonal violence                          | 1,000<br>(777 - 1,407)   | 18<br>(11 - 30)       | 20<br>(13 - 31)        | 801<br>(618 - 1,113)     | 131<br>(86 - 218)       | 29<br>(18 - 46)         |
| Assault by firearm                              | 610<br>(431 - 921)       | 8<br>(4 - 13)         | 13<br>(8 - 21)         | 505<br>(357 - 746)       | 74<br>(45 - 133)        | 10<br>(6 - 19)          |
| Assault by sharp object                         | 305<br>(172 - 490)       | 4<br>(2 - 8)          | 3<br>(1 - 5)           | 249<br>(139 - 401)       | 41<br>(20 - 72)         | 9<br>(5 - 15)           |
| Assault by other means                          | 84<br>(55 - 121)         | 7<br>(4 - 11)         | 5<br>(3 - 8)           | 47<br>(29 - 69)          | 16<br>(9 - 28)          | 10<br>(6 - 16)          |

Web Table 31- Paraguay deaths with 95% UI by age, sex, and cause in 2013

| Cause                                                             | Males, All Ages             | Males, 0-4 Years         | Males, 5-14 Years  | Males, 15-49 Years       | Males, 50-69 Years       | Males, 70-80 Years       |
|-------------------------------------------------------------------|-----------------------------|--------------------------|--------------------|--------------------------|--------------------------|--------------------------|
| All causes                                                        | 20,270<br>(17,605 - 23,817) | 1,944<br>(1,758 - 2,168) | 328<br>(302 - 355) | 4,066<br>(3,421 - 4,854) | 5,761<br>(4,649 - 7,150) | 8,170<br>(7,265 - 9,436) |
| Communicable, maternal, neonatal, and nutritional diseases        | 3,002<br>(2,680 - 3,362)    | 1,352<br>(1,196 - 1,525) | 84<br>(68 - 101)   | 422<br>(355 - 499)       | 408<br>(326 - 504)       | 736<br>(562 - 936)       |
| HIV/AIDS and tuberculosis                                         | 399<br>(331 - 493)          | 2<br>(1 - 3)             | 2<br>(1 - 3)       | 206<br>(167 - 263)       | 123<br>(95 - 157)        | 65<br>(50 - 85)          |
| Tuberculosis                                                      | 219<br>(174 - 284)          | 2<br>(1 - 3)             | 2<br>(1 - 2)       | 70<br>(52 - 95)          | 87<br>(64 - 117)         | 60<br>(46 - 80)          |
| HIV/AIDS                                                          | 179<br>(132 - 254)          | 1<br>(0 - 1)             | 0<br>(0 - 0)       | 137<br>(103 - 190)       | 36<br>(23 - 59)          | 5<br>(3 - 10)            |
| HIV/AIDS resulting in mycobacterial infection                     | 12<br>(8 - 17)              | 0<br>(0 - 0)             | 0<br>(0 - 0)       | 9<br>(6 - 12)            | 2<br>(1 - 4)             | 0<br>(0 - 1)             |
| HIV/AIDS resulting in other diseases                              | 168<br>(123 - 239)          | 1<br>(0 - 1)             | 0<br>(0 - 0)       | 128<br>(97 - 178)        | 34<br>(21 - 55)          | 5<br>(3 - 9)             |
| Diarrhea, lower respiratory, and other common infectious diseases | 1,337<br>(1,082 - 1,625)    | 301<br>(227 - 387)       | 61<br>(47 - 76)    | 171<br>(129 - 224)       | 227<br>(158 - 308)       | 577<br>(417 - 764)       |
| Diarrheal diseases                                                | 158<br>(113 - 224)          | 78<br>(40 - 136)         | 7<br>(4 - 13)      | 14<br>(9 - 19)           | 18<br>(11 - 28)          | 42<br>(26 - 63)          |
| Intestinal infectious diseases                                    | 54<br>(28 - 93)             | 18<br>(9 - 33)           | 15<br>(7 - 28)     | 18<br>(8 - 36)           | 2<br>(1 - 4)             | 1<br>(0 - 3)             |
| Typhoid fever                                                     | 40<br>(19 - 72)             | 13<br>(6 - 24)           | 12<br>(6 - 22)     | 14<br>(6 - 27)           | 1<br>(0 - 3)             | 0<br>(0 - 1)             |
| Paratyphoid fever                                                 | 11<br>(5 - 20)              | 4<br>(1 - 8)             | 3<br>(1 - 6)       | 4<br>(1 - 8)             | 0<br>(0 - 1)             | 0<br>(0 - 0)             |
| Other intestinal infectious diseases                              | 3<br>(1 - 9)                | 2<br>(0 - 6)             | 0<br>(0 - 2)       | 1<br>(0 - 3)             | 0<br>(0 - 2)             | 0<br>(0 - 2)             |
| Lower respiratory infections                                      | 1,001<br>(763 - 1,249)      | 158<br>(109 - 223)       | 25<br>(17 - 35)    | 107<br>(76 - 146)        | 188<br>(124 - 260)       | 523<br>(365 - 711)       |
| Upper respiratory infections                                      | 1<br>(0 - 2)                | 0<br>(0 - 0)             | 0<br>(0 - 0)       | 0<br>(0 - 1)             | 0<br>(0 - 1)             | 0<br>(0 - 1)             |
| Otitis media                                                      | 1<br>(1 - 1)                | 0<br>(0 - 0)             | 0<br>(0 - 0)       | 0<br>(0 - 0)             | 0<br>(0 - 0)             | 0<br>(0 - 0)             |
| Meningitis                                                        | 95<br>(72 - 124)            | 37<br>(20 - 61)          | 10<br>(6 - 15)     | 25<br>(17 - 35)          | 15<br>(10 - 21)          | 8<br>(5 - 13)            |
| Pneumococcal meningitis                                           | 16<br>(11 - 22)             | 6<br>(3 - 9)             | 2<br>(1 - 3)       | 5<br>(2 - 7)             | 3<br>(1 - 5)             | 2<br>(1 - 3)             |
| H influenzae type B meningitis                                    | 19<br>(12 - 28)             | 13<br>(6 - 22)           | 2<br>(1 - 3)       | 2<br>(1 - 4)             | 1<br>(0 - 2)             | 1<br>(0 - 1)             |
| Meningococcal meningitis                                          | 27<br>(19 - 36)             | 10<br>(6 - 17)           | 4<br>(2 - 6)       | 7<br>(4 - 10)            | 4<br>(2 - 6)             | 2<br>(1 - 4)             |
| Other meningitis                                                  | 33<br>(24 - 44)             | 8<br>(4 - 15)            | 2<br>(1 - 4)       | 11<br>(7 - 17)           | 7<br>(4 - 11)            | 4<br>(2 - 6)             |
| Encephalitis                                                      | 18<br>(13 - 25)             | 6<br>(4 - 11)            | 3<br>(2 - 5)       | 5<br>(3 - 8)             | 2<br>(1 - 4)             | 1<br>(1 - 2)             |
| Diphtheria                                                        | 0<br>(0 - 2)                | 0<br>(0 - 1)             | 0<br>(0 - 1)       | 0<br>(0 - 0)             | 0<br>(0 - 0)             | --                       |
| Whooping cough                                                    | 1<br>(1 - 3)                | 1<br>(0 - 2)             | 0<br>(0 - 0)       | 0<br>(0 - 0)             | 0<br>(0 - 0)             | --                       |
| Tetanus                                                           | 6<br>(4 - 9)                | 2<br>(1 - 4)             | 0<br>(0 - 1)       | 1<br>(1 - 2)             | 1<br>(1 - 2)             | 1<br>(0 - 1)             |
| Measles                                                           | 0<br>(0 - 0)                | 0<br>(0 - 0)             | 0<br>(0 - 0)       | 0<br>(0 - 0)             | 0<br>(0 - 0)             | --                       |
| Varicella and herpes zoster                                       | 2<br>(1 - 5)                | 1<br>(0 - 2)             | 0<br>(0 - 1)       | 0<br>(0 - 1)             | 0<br>(0 - 1)             | 1<br>(0 - 3)             |
| Neglected tropical diseases and malaria                           | 55<br>(35 - 102)            | 8<br>(5 - 12)            | 3<br>(2 - 5)       | 13<br>(10 - 19)          | 16<br>(7 - 39)           | 15<br>(6 - 36)           |
| Malaria                                                           | 0<br>(0 - 0)                | 0<br>(0 - 0)             | 0<br>(0 - 0)       | 0<br>(0 - 0)             | 0<br>(0 - 0)             | 0<br>(0 - 0)             |
| Chagas disease                                                    | 19<br>(3 - 67)              | 0<br>(0 - 0)             | 0<br>(0 - 0)       | 2<br>(0 - 6)             | 9<br>(1 - 31)            | 8<br>(1 - 28)            |
| Leishmaniasis                                                     | 17<br>(13 - 21)             | 6<br>(4 - 9)             | 2<br>(1 - 2)       | 6<br>(4 - 8)             | 2<br>(1 - 3)             | 1<br>(1 - 1)             |
| Visceral leishmaniasis                                            | 17<br>(13 - 21)             | 6<br>(4 - 9)             | 2<br>(1 - 2)       | 6<br>(4 - 8)             | 2<br>(1 - 3)             | 1<br>(1 - 1)             |
| Cysticercosis                                                     | 1<br>(1 - 2)                | 0<br>(0 - 0)             | 0<br>(0 - 0)       | 1<br>(1 - 1)             | 0<br>(0 - 0)             | 0<br>(0 - 0)             |
| Cystic echinococcosis                                             | 0<br>(0 - 0)                | 0<br>(0 - 0)             | 0<br>(0 - 0)       | 0<br>(0 - 0)             | 0<br>(0 - 0)             | 0<br>(0 - 0)             |
| Dengue                                                            | 13<br>(4 - 17)              | 1<br>(0 - 1)             | 0<br>(0 - 0)       | 3<br>(1 - 4)             | 4<br>(1 - 7)             | 5<br>(1 - 7)             |
| Yellow fever                                                      | 1<br>(0 - 1)                | 0<br>(0 - 0)             | 0<br>(0 - 0)       | 0<br>(0 - 1)             | 0<br>(0 - 0)             | 0<br>(0 - 0)             |
| Rabies                                                            | 1<br>(0 - 2)                | 0<br>(0 - 0)             | 0<br>(0 - 1)       | 0<br>(0 - 1)             | 0<br>(0 - 0)             | 0<br>(0 - 0)             |
| Intestinal nematode infections                                    | 1<br>(0 - 4)                | 0<br>(0 - 2)             | 0<br>(0 - 2)       | 0<br>(0 - 1)             | 0<br>(0 - 0)             | 0<br>(0 - 0)             |
| Ascariasis                                                        | 1<br>(0 - 4)                | 0<br>(0 - 2)             | 0<br>(0 - 2)       | 0<br>(0 - 1)             | 0<br>(0 - 0)             | 0<br>(0 - 0)             |
| Other neglected tropical diseases                                 | 3<br>(2 - 4)                | 1<br>(0 - 2)             | 0<br>(0 - 0)       | 1<br>(0 - 1)             | 0<br>(0 - 1)             | 0<br>(0 - 1)             |

Web Table 31- Paraguay deaths with 95% UI by age, sex, and cause in 2013

| Cause                                                            | Males, All Ages             | Males, 0-4 Years   | Males, 5-14 Years | Males, 15-49 Years       | Males, 50-69 Years       | Males, 70-80 Years       |
|------------------------------------------------------------------|-----------------------------|--------------------|-------------------|--------------------------|--------------------------|--------------------------|
| Maternal disorders                                               | --                          | --                 | --                | --                       | --                       | --                       |
| Maternal hemorrhage                                              | --                          | --                 | --                | --                       | --                       | --                       |
| Maternal sepsis and other maternal infections                    | --                          | --                 | --                | --                       | --                       | --                       |
| Maternal hypertensive disorders                                  | --                          | --                 | --                | --                       | --                       | --                       |
| Maternal obstructed labor                                        | --                          | --                 | --                | --                       | --                       | --                       |
| Maternal abortive outcome                                        | --                          | --                 | --                | --                       | --                       | --                       |
| Indirect maternal deaths                                         | --                          | --                 | --                | --                       | --                       | --                       |
| Late maternal deaths                                             | --                          | --                 | --                | --                       | --                       | --                       |
| Maternal deaths aggravated by HIV/AIDS                           | --                          | --                 | --                | --                       | --                       | --                       |
| Other maternal disorders                                         | --                          | --                 | --                | --                       | --                       | --                       |
| Neonatal disorders                                               | 844<br>(731 - 963)          | 844<br>(731 - 963) | --                | --                       | --                       | --                       |
| Neonatal preterm birth complications                             | 397<br>(233 - 515)          | 397<br>(233 - 515) | --                | --                       | --                       | --                       |
| Neonatal encephalopathy due to birth asphyxia and trauma         | 180<br>(113 - 255)          | 180<br>(113 - 255) | --                | --                       | --                       | --                       |
| Neonatal sepsis and other neonatal infections                    | 183<br>(96 - 354)           | 183<br>(96 - 354)  | --                | --                       | --                       | --                       |
| Hemolytic disease and other neonatal jaundice                    | 9<br>(3 - 20)               | 9<br>(3 - 20)      | --                | --                       | --                       | --                       |
| Other neonatal disorders                                         | 75<br>(41 - 112)            | 75<br>(41 - 112)   | --                | --                       | --                       | --                       |
| Nutritional deficiencies                                         | 180<br>(99 - 241)           | 55<br>(29 - 87)    | 6<br>(3 - 9)      | 20<br>(11 - 31)          | 29<br>(16 - 44)          | 70<br>(34 - 102)         |
| Protein-energy malnutrition                                      | 135<br>(67 - 180)           | 51<br>(27 - 82)    | 4<br>(2 - 7)      | 11<br>(5 - 17)           | 18<br>(8 - 28)           | 50<br>(19 - 78)          |
| Iodine deficiency                                                | 0<br>(0 - 1)                | 0<br>(0 - 0)       | 0<br>(0 - 0)      | 0<br>(0 - 0)             | 0<br>(0 - 0)             | 0<br>(0 - 0)             |
| Iron-deficiency anemia                                           | 41<br>(19 - 77)             | 3<br>(1 - 8)       | 1<br>(0 - 2)      | 9<br>(4 - 16)            | 10<br>(4 - 20)           | 19<br>(8 - 37)           |
| Other nutritional deficiencies                                   | 3<br>(1 - 8)                | 1<br>(0 - 2)       | 0<br>(0 - 1)      | 0<br>(0 - 1)             | 1<br>(0 - 2)             | 1<br>(0 - 3)             |
| Other communicable, maternal, neonatal, and nutritional diseases | 187<br>(56 - 330)           | 141<br>(15 - 275)  | 12<br>(3 - 23)    | 11<br>(6 - 17)           | 13<br>(6 - 21)           | 10<br>(5 - 16)           |
| Sexually transmitted diseases excluding HIV                      | 149<br>(14 - 292)           | 135<br>(10 - 269)  | 10<br>(1 - 21)    | 1<br>(0 - 1)             | 2<br>(1 - 3)             | 1<br>(0 - 2)             |
| Syphilis                                                         | 148<br>(13 - 291)           | 135<br>(10 - 269)  | 10<br>(1 - 21)    | 0<br>(0 - 1)             | 1<br>(1 - 2)             | 1<br>(0 - 2)             |
| Chlamydial infection                                             | --                          | --                 | --                | --                       | --                       | --                       |
| Gonococcal infection                                             | 1<br>(0 - 1)                | --                 | 0<br>(0 - 0)      | 0<br>(0 - 0)             | 0<br>(0 - 0)             | 0<br>(0 - 0)             |
| Other sexually transmitted diseases                              | 0<br>(0 - 1)                | --                 | 0<br>(0 - 0)      | 0<br>(0 - 0)             | 0<br>(0 - 0)             | 0<br>(0 - 0)             |
| Hepatitis                                                        | 6<br>(4 - 7)                | 0<br>(0 - 0)       | 0<br>(0 - 1)      | 2<br>(1 - 2)             | 2<br>(1 - 3)             | 1<br>(1 - 2)             |
| Acute hepatitis A                                                | 1<br>(1 - 2)                | 0<br>(0 - 0)       | 0<br>(0 - 0)      | 1<br>(0 - 1)             | 0<br>(0 - 0)             | 0<br>(0 - 0)             |
| Acute hepatitis B                                                | 4<br>(3 - 5)                | 0<br>(0 - 0)       | 0<br>(0 - 0)      | 1<br>(0 - 1)             | 2<br>(1 - 2)             | 1<br>(1 - 2)             |
| Acute hepatitis C                                                | 0<br>(0 - 1)                | --                 | 0<br>(0 - 0)      | 0<br>(0 - 0)             | 0<br>(0 - 0)             | 0<br>(0 - 0)             |
| Other infectious diseases                                        | 32<br>(16 - 48)             | 6<br>(2 - 13)      | 2<br>(1 - 4)      | 9<br>(4 - 14)            | 9<br>(3 - 17)            | 7<br>(3 - 14)            |
| Non-communicable diseases                                        | 13,994<br>(11,893 - 16,581) | 468<br>(371 - 587) | 105<br>(90 - 122) | 1,470<br>(1,185 - 1,770) | 4,803<br>(3,845 - 5,970) | 7,148<br>(6,288 - 8,276) |
| Neoplasms                                                        | 3,053<br>(2,524 - 3,701)    | 22<br>(15 - 34)    | 43<br>(34 - 54)   | 358<br>(280 - 440)       | 1,223<br>(978 - 1,529)   | 1,407<br>(1,161 - 1,707) |
| Esophageal cancer                                                | 137<br>(99 - 181)           | --                 | --                | 9<br>(6 - 13)            | 70<br>(49 - 94)          | 58<br>(42 - 78)          |
| Stomach cancer                                                   | 328<br>(264 - 404)          | --                 | --                | 40<br>(30 - 51)          | 141<br>(108 - 181)       | 147<br>(114 - 189)       |
| Liver cancer                                                     | 84<br>(66 - 109)            | --                 | 0<br>(0 - 0)      | 8<br>(6 - 12)            | 40<br>(29 - 54)          | 35<br>(26 - 49)          |
| Liver cancer due to hepatitis B                                  | 17<br>(11 - 29)             | --                 | 0<br>(0 - 0)      | 3<br>(2 - 5)             | 9<br>(5 - 16)            | 5<br>(3 - 9)             |
| Liver cancer due to hepatitis C                                  | 45<br>(28 - 62)             | --                 | 0<br>(0 - 0)      | 4<br>(2 - 5)             | 21<br>(12 - 31)          | 20<br>(14 - 29)          |
| Liver cancer due to alcohol use                                  | 18<br>(11 - 27)             | --                 | --                | 1<br>(1 - 2)             | 8<br>(4 - 13)            | 9<br>(5 - 14)            |

Web Table 31- Paraguay deaths with 95% UI by age, sex, and cause in 2013

| Cause                                         | Males, All Ages          | Males, 0-4 Years | Males, 5-14 Years | Males, 15-49 Years | Males, 50-69 Years       | Males, 70-80 Years       |
|-----------------------------------------------|--------------------------|------------------|-------------------|--------------------|--------------------------|--------------------------|
| Liver cancer due to other causes              | 4<br>(2 - 6)             | --               | 0<br>(0 - 0)      | 1<br>(0 - 1)       | 2<br>(1 - 3)             | 1<br>(1 - 2)             |
| Larynx cancer                                 | 62<br>(45 - 86)          | --               | --                | 8<br>(5 - 12)      | 34<br>(23 - 50)          | 20<br>(13 - 28)          |
| Tracheal, bronchus and lung cancer            | 661<br>(541 - 808)       | --               | --                | 49<br>(36 - 64)    | 342<br>(266 - 438)       | 271<br>(223 - 334)       |
| Breast cancer                                 | 3<br>(2 - 7)             | --               | --                | 1<br>(0 - 2)       | 1<br>(1 - 4)             | 1<br>(1 - 3)             |
| Cervical cancer                               | --                       | --               | --                | --                 | --                       | --                       |
| Uterine cancer                                | --                       | --               | --                | --                 | --                       | --                       |
| Prostate cancer                               | 496<br>(259 - 691)       | --               | --                | 5<br>(2 - 7)       | 98<br>(49 - 145)         | 393<br>(205 - 549)       |
| Colon and rectum cancer                       | 273<br>(220 - 339)       | --               | --                | 35<br>(26 - 44)    | 106<br>(81 - 137)        | 132<br>(104 - 167)       |
| Lip and oral cavity cancer                    | 67<br>(44 - 90)          | --               | --                | 9<br>(6 - 13)      | 36<br>(23 - 51)          | 22<br>(14 - 31)          |
| Nasopharynx cancer                            | 12<br>(8 - 15)           | --               | 0<br>(0 - 0)      | 3<br>(2 - 5)       | 6<br>(4 - 9)             | 2<br>(2 - 4)             |
| Other pharynx cancer                          | 45<br>(27 - 59)          | --               | --                | 6<br>(4 - 9)       | 28<br>(16 - 39)          | 10<br>(6 - 15)           |
| Gallbladder and biliary tract cancer          | 25<br>(18 - 45)          | --               | --                | 2<br>(1 - 3)       | 11<br>(7 - 19)           | 12<br>(8 - 23)           |
| Pancreatic cancer                             | 123<br>(99 - 153)        | --               | --                | 13<br>(10 - 18)    | 55<br>(42 - 71)          | 55<br>(43 - 71)          |
| Malignant skin melanoma                       | 26<br>(11 - 37)          | --               | --                | 6<br>(3 - 8)       | 10<br>(4 - 14)           | 10<br>(5 - 15)           |
| Non-melanoma skin cancer                      | 34<br>(23 - 50)          | --               | --                | 3<br>(2 - 5)       | 9<br>(6 - 14)            | 22<br>(14 - 32)          |
| Ovarian cancer                                | --                       | --               | --                | --                 | --                       | --                       |
| Testicular cancer                             | 11<br>(3 - 21)           | --               | --                | 8<br>(2 - 17)      | 1<br>(0 - 2)             | 1<br>(0 - 2)             |
| Kidney cancer                                 | 61<br>(47 - 77)          | 0<br>(0 - 1)     | 1<br>(0 - 1)      | 8<br>(6 - 11)      | 30<br>(21 - 40)          | 22<br>(16 - 30)          |
| Bladder cancer                                | 53<br>(41 - 73)          | --               | --                | 3<br>(2 - 4)       | 19<br>(13 - 26)          | 32<br>(23 - 46)          |
| Brain and nervous system cancer               | 51<br>(21 - 70)          | 1<br>(0 - 3)     | 4<br>(2 - 6)      | 18<br>(7 - 26)     | 20<br>(8 - 29)           | 9<br>(3 - 14)            |
| Thyroid cancer                                | 14<br>(9 - 19)           | --               | 0<br>(0 - 0)      | 2<br>(1 - 3)       | 7<br>(4 - 9)             | 6<br>(4 - 8)             |
| Mesothelioma                                  | 3<br>(2 - 4)             | --               | --                | 0<br>(0 - 1)       | 1<br>(1 - 2)             | 1<br>(1 - 1)             |
| Hodgkin lymphoma                              | 10<br>(3 - 15)           | 0<br>(0 - 0)     | 1<br>(0 - 2)      | 4<br>(1 - 7)       | 3<br>(1 - 5)             | 1<br>(0 - 3)             |
| Non-Hodgkin lymphoma                          | 84<br>(51 - 115)         | 2<br>(1 - 4)     | 4<br>(3 - 6)      | 19<br>(11 - 26)    | 33<br>(19 - 49)          | 26<br>(15 - 38)          |
| Multiple myeloma                              | 22<br>(14 - 31)          | --               | --                | 3<br>(2 - 4)       | 11<br>(7 - 16)           | 9<br>(5 - 12)            |
| Leukemia                                      | 155<br>(128 - 189)       | 9<br>(4 - 15)    | 23<br>(17 - 30)   | 44<br>(34 - 58)    | 37<br>(27 - 49)          | 43<br>(33 - 56)          |
| Other neoplasms                               | 213<br>(144 - 282)       | 10<br>(5 - 16)   | 10<br>(7 - 15)    | 51<br>(32 - 69)    | 76<br>(48 - 107)         | 67<br>(43 - 94)          |
| Cardiovascular diseases                       | 5,923<br>(5,003 - 7,018) | 12<br>(8 - 17)   | 10<br>(7 - 13)    | 542<br>(429 - 657) | 2,098<br>(1,679 - 2,603) | 3,263<br>(2,861 - 3,781) |
| Rheumatic heart disease                       | 26<br>(17 - 37)          | 0<br>(0 - 0)     | 1<br>(1 - 2)      | 9<br>(6 - 15)      | 8<br>(5 - 12)            | 7<br>(5 - 11)            |
| Ischemic heart disease                        | 3,072<br>(2,477 - 3,817) | 1<br>(0 - 3)     | 2<br>(1 - 3)      | 292<br>(224 - 370) | 1,145<br>(889 - 1,482)   | 1,633<br>(1,331 - 2,038) |
| Cerebrovascular disease                       | 2,091<br>(1,668 - 2,579) | 2<br>(1 - 3)     | 2<br>(1 - 3)      | 170<br>(127 - 226) | 717<br>(544 - 921)       | 1,201<br>(942 - 1,491)   |
| Ischemic stroke                               | 1,056<br>(791 - 1,595)   | 0<br>(0 - 0)     | 0<br>(0 - 1)      | 28<br>(17 - 64)    | 259<br>(170 - 476)       | 768<br>(584 - 1,071)     |
| Hemorrhagic stroke                            | 1,036<br>(583 - 1,372)   | 2<br>(1 - 3)     | 2<br>(1 - 3)      | 142<br>(99 - 190)  | 457<br>(254 - 623)       | 432<br>(217 - 590)       |
| Hypertensive heart disease                    | 276<br>(135 - 430)       | 0<br>(0 - 1)     | 0<br>(0 - 0)      | 10<br>(5 - 17)     | 81<br>(36 - 137)         | 184<br>(90 - 292)        |
| Cardiomyopathy and myocarditis                | 86<br>(60 - 116)         | 3<br>(2 - 5)     | 2<br>(1 - 3)      | 13<br>(8 - 18)     | 26<br>(17 - 37)          | 43<br>(29 - 61)          |
| Atrial fibrillation and flutter               | 25<br>(17 - 34)          | --               | --                | 1<br>(0 - 1)       | 4<br>(3 - 6)             | 20<br>(13 - 29)          |
| Aortic aneurysm                               | 112<br>(82 - 142)        | --               | --                | 12<br>(9 - 16)     | 46<br>(32 - 60)          | 54<br>(39 - 70)          |
| Peripheral vascular disease                   | 7<br>(5 - 10)            | --               | --                | 1<br>(0 - 1)       | 2<br>(1 - 3)             | 5<br>(3 - 7)             |
| Endocarditis                                  | 47<br>(30 - 69)          | 4<br>(2 - 6)     | 2<br>(1 - 3)      | 10<br>(6 - 15)     | 13<br>(8 - 19)           | 18<br>(11 - 29)          |
| Other cardiovascular and circulatory diseases | 180<br>(139 - 257)       | 1<br>(1 - 2)     | 1<br>(1 - 2)      | 24<br>(18 - 36)    | 56<br>(40 - 82)          | 97<br>(70 - 140)         |

Web Table 31- Paraguay deaths with 95% UI by age, sex, and cause in 2013

| Cause                                               | Males, All Ages    | Males, 0-4 Years | Males, 5-14 Years | Males, 15-49 Years | Males, 50-69 Years | Males, 70-80 Years |
|-----------------------------------------------------|--------------------|------------------|-------------------|--------------------|--------------------|--------------------|
| Chronic respiratory diseases                        | 798<br>(654 - 973) | 21<br>(14 - 31)  | 4<br>(3 - 5)      | 49<br>(37 - 65)    | 195<br>(150 - 248) | 529<br>(432 - 651) |
| Chronic obstructive pulmonary disease               | 602<br>(481 - 747) | 14<br>(8 - 21)   | 2<br>(1 - 3)      | 22<br>(16 - 30)    | 147<br>(112 - 190) | 418<br>(326 - 520) |
| Pneumoconiosis                                      | 59<br>(40 - 85)    | 0<br>(0 - 0)     | 0<br>(0 - 0)      | 13<br>(9 - 19)     | 21<br>(13 - 32)    | 24<br>(16 - 38)    |
| Silicosis                                           | 14<br>(9 - 21)     | 0<br>(0 - 0)     | 0<br>(0 - 0)      | 5<br>(3 - 8)       | 7<br>(4 - 11)      | 2<br>(1 - 3)       |
| Asbestosis                                          | 11<br>(7 - 16)     | 0<br>(0 - 0)     | 0<br>(0 - 0)      | 1<br>(1 - 1)       | 3<br>(2 - 5)       | 7<br>(4 - 11)      |
| Coal workers pneumoconiosis                         | 3<br>(2 - 4)       | 0<br>(0 - 0)     | 0<br>(0 - 0)      | 0<br>(0 - 1)       | 0<br>(0 - 0)       | 2<br>(1 - 3)       |
| Other pneumoconiosis                                | 31<br>(21 - 45)    | 0<br>(0 - 0)     | 0<br>(0 - 0)      | 6<br>(4 - 9)       | 11<br>(7 - 17)     | 13<br>(8 - 22)     |
| Asthma                                              | 49<br>(38 - 63)    | 2<br>(1 - 5)     | 1<br>(1 - 1)      | 8<br>(5 - 11)      | 14<br>(10 - 20)    | 24<br>(17 - 33)    |
| Interstitial lung disease and pulmonary sarcoidosis | 75<br>(47 - 131)   | 0<br>(0 - 1)     | 0<br>(0 - 1)      | 3<br>(2 - 5)       | 11<br>(6 - 20)     | 60<br>(37 - 111)   |
| Other chronic respiratory diseases                  | 13<br>(10 - 17)    | 5<br>(3 - 7)     | 1<br>(0 - 1)      | 3<br>(2 - 5)       | 2<br>(1 - 3)       | 2<br>(1 - 4)       |
| Cirrhosis                                           | 516<br>(411 - 635) | 1<br>(1 - 2)     | 2<br>(2 - 3)      | 133<br>(101 - 169) | 259<br>(197 - 330) | 121<br>(94 - 154)  |
| Cirrhosis due to hepatitis B                        | 32<br>(12 - 63)    | 0<br>(0 - 0)     | 0<br>(0 - 0)      | 8<br>(3 - 16)      | 16<br>(6 - 34)     | 8<br>(2 - 15)      |
| Cirrhosis due to hepatitis C                        | 172<br>(97 - 262)  | 0<br>(0 - 0)     | 0<br>(0 - 1)      | 41<br>(22 - 65)    | 86<br>(46 - 135)   | 44<br>(23 - 65)    |
| Cirrhosis due to alcohol use                        | 253<br>(181 - 338) | --               | --                | 59<br>(38 - 83)    | 131<br>(90 - 181)  | 63<br>(43 - 89)    |
| Cirrhosis due to other causes                       | 60<br>(28 - 95)    | 1<br>(1 - 2)     | 2<br>(1 - 3)      | 25<br>(10 - 40)    | 25<br>(9 - 44)     | 7<br>(3 - 13)      |
| Digestive diseases                                  | 475<br>(387 - 599) | 4<br>(2 - 7)     | 5<br>(4 - 7)      | 69<br>(53 - 93)    | 148<br>(112 - 201) | 248<br>(195 - 309) |
| Peptic ulcer disease                                | 92<br>(63 - 131)   | 0<br>(0 - 0)     | 0<br>(0 - 0)      | 13<br>(9 - 20)     | 33<br>(21 - 49)    | 46<br>(30 - 68)    |
| Gastritis and duodenitis                            | 6<br>(2 - 9)       | 0<br>(0 - 0)     | 0<br>(0 - 0)      | 1<br>(0 - 1)       | 2<br>(1 - 3)       | 3<br>(1 - 5)       |
| Appendicitis                                        | 25<br>(17 - 38)    | 0<br>(0 - 1)     | 2<br>(1 - 3)      | 8<br>(5 - 13)      | 6<br>(4 - 10)      | 9<br>(5 - 14)      |
| Paralytic ileus and intestinal obstruction          | 101<br>(58 - 157)  | 2<br>(1 - 4)     | 2<br>(1 - 3)      | 10<br>(6 - 17)     | 28<br>(15 - 47)    | 59<br>(33 - 94)    |
| Inguinal, femoral, and abdominal hernia             | 38<br>(21 - 81)    | 0<br>(0 - 1)     | 0<br>(0 - 1)      | 4<br>(2 - 9)       | 11<br>(6 - 24)     | 23<br>(11 - 50)    |
| Inflammatory bowel disease                          | 7<br>(5 - 10)      | 0<br>(0 - 0)     | 0<br>(0 - 0)      | 2<br>(1 - 3)       | 2<br>(1 - 3)       | 3<br>(2 - 4)       |
| Vascular intestinal disorders                       | 51<br>(21 - 102)   | 0<br>(0 - 0)     | 0<br>(0 - 1)      | 4<br>(2 - 9)       | 15<br>(6 - 32)     | 31<br>(12 - 64)    |
| Gallbladder and biliary diseases                    | 47<br>(31 - 68)    | 0<br>(0 - 0)     | 0<br>(0 - 0)      | 5<br>(3 - 7)       | 17<br>(10 - 27)    | 25<br>(14 - 39)    |
| Pancreatitis                                        | 51<br>(31 - 71)    | 0<br>(0 - 0)     | 0<br>(0 - 0)      | 14<br>(9 - 21)     | 17<br>(10 - 25)    | 20<br>(11 - 29)    |
| Other digestive diseases                            | 57<br>(31 - 79)    | 1<br>(0 - 2)     | 1<br>(0 - 1)      | 8<br>(4 - 11)      | 18<br>(10 - 26)    | 30<br>(15 - 45)    |
| Neurological disorders                              | 725<br>(581 - 894) | 7<br>(4 - 10)    | 6<br>(4 - 10)     | 47<br>(33 - 70)    | 72<br>(53 - 93)    | 593<br>(461 - 753) |
| Alzheimer disease and other dementias               | 605<br>(462 - 766) | --               | --                | 0<br>(0 - 0)       | 47<br>(33 - 64)    | 558<br>(422 - 711) |
| Parkinson disease                                   | 30<br>(16 - 45)    | --               | --                | 0<br>(0 - 1)       | 6<br>(3 - 9)       | 24<br>(12 - 38)    |
| Epilepsy                                            | 61<br>(43 - 92)    | 2<br>(1 - 4)     | 5<br>(2 - 9)      | 39<br>(25 - 61)    | 10<br>(6 - 15)     | 6<br>(3 - 9)       |
| Multiple sclerosis                                  | 3<br>(1 - 4)       | --               | --                | 1<br>(0 - 2)       | 1<br>(1 - 2)       | 1<br>(0 - 1)       |
| Other neurological disorders                        | 26<br>(16 - 32)    | 5<br>(3 - 8)     | 1<br>(1 - 2)      | 7<br>(4 - 9)       | 8<br>(5 - 11)      | 5<br>(3 - 6)       |
| Mental and substance use disorders                  | 137<br>(96 - 234)  | 1<br>(0 - 1)     | 0<br>(0 - 0)      | 47<br>(31 - 79)    | 67<br>(43 - 111)   | 23<br>(16 - 40)    |
| Schizophrenia                                       | 0<br>(0 - 1)       | --               | --                | 0<br>(0 - 0)       | 0<br>(0 - 0)       | 0<br>(0 - 0)       |
| Alcohol use disorders                               | 127<br>(88 - 222)  | --               | --                | 41<br>(26 - 73)    | 65<br>(41 - 108)   | 21<br>(14 - 38)    |
| Drug use disorders                                  | 9<br>(7 - 12)      | 1<br>(0 - 1)     | --                | 5<br>(4 - 6)       | 2<br>(1 - 3)       | 2<br>(1 - 3)       |
| Opioid use disorders                                | 4<br>(3 - 5)       | 0<br>(0 - 1)     | --                | 2<br>(1 - 3)       | 1<br>(0 - 1)       | 1<br>(0 - 1)       |
| Cocaine use disorders                               | 1<br>(0 - 1)       | 0<br>(0 - 0)     | --                | 0<br>(0 - 0)       | 0<br>(0 - 0)       | 0<br>(0 - 0)       |
| Amphetamine use disorders                           | 0<br>(0 - 0)       | 0<br>(0 - 0)     | --                | 0<br>(0 - 0)       | 0<br>(0 - 0)       | 0<br>(0 - 0)       |
| Other drug use disorders                            | 5<br>(4 - 6)       | 0<br>(0 - 1)     | --                | 2<br>(2 - 3)       | 1<br>(1 - 2)       | 1<br>(0 - 1)       |

Web Table 31- Paraguay deaths with 95% UI by age, sex, and cause in 2013

| Cause                                               | Males, All Ages          | Males, 0-4 Years   | Males, 5-14 Years | Males, 15-49 Years | Males, 50-69 Years | Males, 70-80 Years   |
|-----------------------------------------------------|--------------------------|--------------------|-------------------|--------------------|--------------------|----------------------|
| Eating disorders                                    | 0<br>(0 - 0)             | --                 | 0<br>(0 - 0)      | 0<br>(0 - 0)       | --                 | --                   |
| Anorexia nervosa                                    | 0<br>(0 - 0)             | --                 | 0<br>(0 - 0)      | 0<br>(0 - 0)       | --                 | --                   |
| Diabetes, urogenital, blood, and endocrine diseases | 1,875<br>(1,547 - 2,314) | 33<br>(21 - 68)    | 12<br>(9 - 18)    | 187<br>(146 - 241) | 713<br>(557 - 909) | 930<br>(777 - 1,118) |
| Diabetes mellitus                                   | 944<br>(766 - 1,163)     | 2<br>(1 - 3)       | 1<br>(1 - 1)      | 68<br>(52 - 87)    | 392<br>(299 - 501) | 481<br>(388 - 600)   |
| Acute glomerulonephritis                            | 2<br>(1 - 3)             | 0<br>(0 - 0)       | 0<br>(0 - 0)      | 0<br>(0 - 1)       | 0<br>(0 - 1)       | 1<br>(0 - 1)         |
| Chronic kidney disease                              | 730<br>(574 - 927)       | 7<br>(4 - 10)      | 5<br>(3 - 7)      | 92<br>(69 - 124)   | 279<br>(209 - 364) | 348<br>(266 - 457)   |
| Chronic kidney disease due to diabetes mellitus     | 316<br>(225 - 457)       | 1<br>(0 - 2)       | 0<br>(0 - 1)      | 33<br>(20 - 52)    | 152<br>(99 - 211)  | 130<br>(85 - 209)    |
| Chronic kidney disease due to hypertension          | 159<br>(83 - 239)        | 1<br>(0 - 2)       | 1<br>(0 - 1)      | 23<br>(13 - 36)    | 44<br>(18 - 69)    | 91<br>(47 - 137)     |
| Chronic kidney disease due to glomerulonephritis    | 11<br>(7 - 16)           | 1<br>(1 - 2)       | 1<br>(1 - 1)      | 3<br>(2 - 5)       | 3<br>(1 - 4)       | 3<br>(2 - 5)         |
| Chronic kidney disease due to other causes          | 244<br>(148 - 364)       | 4<br>(2 - 7)       | 3<br>(2 - 4)      | 32<br>(20 - 55)    | 82<br>(42 - 132)   | 123<br>(68 - 195)    |
| Urinary diseases and male infertility               | 124<br>(91 - 162)        | 4<br>(2 - 8)       | 1<br>(1 - 2)      | 12<br>(9 - 17)     | 27<br>(19 - 36)    | 80<br>(54 - 114)     |
| Interstitial nephritis and urinary tract infections | 82<br>(46 - 118)         | 4<br>(2 - 7)       | 1<br>(1 - 1)      | 8<br>(4 - 11)      | 15<br>(7 - 22)     | 55<br>(29 - 85)      |
| Urolithiasis                                        | 5<br>(3 - 8)             | --                 | 0<br>(0 - 0)      | 1<br>(1 - 2)       | 2<br>(1 - 3)       | 2<br>(1 - 4)         |
| Other urinary diseases                              | 36<br>(22 - 63)          | 0<br>(0 - 1)       | 0<br>(0 - 1)      | 4<br>(2 - 6)       | 10<br>(6 - 16)     | 22<br>(11 - 42)      |
| Gynecological diseases                              | --                       | --                 | --                | --                 | --                 | --                   |
| Uterine fibroids                                    | --                       | --                 | --                | --                 | --                 | --                   |
| Polycystic ovarian syndrome                         | --                       | --                 | --                | --                 | --                 | --                   |
| Endometriosis                                       | --                       | --                 | --                | --                 | --                 | --                   |
| Genital prolapse                                    | --                       | --                 | --                | --                 | --                 | --                   |
| Other gynecological diseases                        | --                       | --                 | --                | --                 | --                 | --                   |
| Hemoglobinopathies and hemolytic anemias            | 20<br>(13 - 33)          | 2<br>(1 - 4)       | 2<br>(1 - 4)      | 6<br>(4 - 10)      | 4<br>(3 - 8)       | 5<br>(3 - 8)         |
| Thalassemias                                        | 1<br>(1 - 2)             | 1<br>(0 - 1)       | 0<br>(0 - 1)      | 0<br>(0 - 1)       | 0<br>(0 - 0)       | 0<br>(0 - 0)         |
| Sickle cell disorders                               | 7<br>(5 - 12)            | 1<br>(0 - 2)       | 1<br>(1 - 2)      | 3<br>(2 - 6)       | 1<br>(1 - 2)       | 0<br>(0 - 0)         |
| G6PD deficiency                                     | 1<br>(1 - 1)             | 0<br>(0 - 0)       | 0<br>(0 - 0)      | 0<br>(0 - 0)       | 0<br>(0 - 0)       | 0<br>(0 - 0)         |
| Other hemoglobinopathies and hemolytic anemias      | 11<br>(7 - 18)           | 0<br>(0 - 1)       | 0<br>(0 - 1)      | 2<br>(1 - 4)       | 3<br>(2 - 5)       | 5<br>(3 - 8)         |
| Endocrine, metabolic, blood, and immune disorders   | 55<br>(38 - 117)         | 18<br>(9 - 48)     | 3<br>(2 - 6)      | 8<br>(6 - 16)      | 10<br>(6 - 20)     | 16<br>(9 - 35)       |
| Musculoskeletal disorders                           | 51<br>(28 - 66)          | --                 | 3<br>(1 - 4)      | 13<br>(7 - 18)     | 18<br>(9 - 25)     | 18<br>(10 - 24)      |
| Rheumatoid arthritis                                | 8<br>(4 - 12)            | --                 | 0<br>(0 - 0)      | 1<br>(1 - 2)       | 3<br>(1 - 5)       | 3<br>(1 - 5)         |
| Other musculoskeletal disorders                     | 43<br>(24 - 57)          | --                 | 2<br>(1 - 3)      | 12<br>(6 - 16)     | 15<br>(7 - 21)     | 14<br>(8 - 20)       |
| Other non-communicable diseases                     | 440<br>(346 - 543)       | 367<br>(278 - 468) | 20<br>(14 - 28)   | 25<br>(18 - 34)    | 11<br>(8 - 15)     | 16<br>(11 - 23)      |
| Congenital anomalies                                | 388<br>(298 - 488)       | 338<br>(250 - 438) | 19<br>(13 - 27)   | 20<br>(15 - 29)    | 6<br>(4 - 8)       | 4<br>(3 - 6)         |
| Neural tube defects                                 | 22<br>(12 - 39)          | 22<br>(12 - 38)    | 0<br>(0 - 0)      | 0<br>(0 - 0)       | 0<br>(0 - 0)       | 0<br>(0 - 0)         |
| Congenital heart anomalies                          | 193<br>(140 - 255)       | 163<br>(111 - 224) | 13<br>(9 - 19)    | 15<br>(10 - 21)    | 2<br>(1 - 3)       | 0<br>(0 - 1)         |
| Cleft lip and cleft palate                          | 2<br>(1 - 5)             | 2<br>(1 - 5)       | --                | --                 | --                 | --                   |
| Down syndrome                                       | 6<br>(3 - 11)            | 5<br>(2 - 10)      | 0<br>(0 - 1)      | 0<br>(0 - 1)       | 0<br>(0 - 0)       | 0<br>(0 - 0)         |
| Chromosomal unbalanced rearrangements               | 7<br>(4 - 12)            | 6<br>(3 - 11)      | 0<br>(0 - 0)      | 0<br>(0 - 1)       | 0<br>(0 - 1)       | 0<br>(0 - 0)         |
| Other congenital anomalies                          | 158<br>(107 - 217)       | 141<br>(90 - 199)  | 5<br>(3 - 8)      | 5<br>(3 - 7)       | 3<br>(2 - 4)       | 4<br>(2 - 5)         |
| Skin and subcutaneous diseases                      | 27<br>(19 - 35)          | 4<br>(2 - 7)       | 1<br>(0 - 1)      | 4<br>(3 - 6)       | 6<br>(4 - 8)       | 12<br>(8 - 18)       |
| Cellulitis                                          | 8<br>(4 - 12)            | 1<br>(0 - 1)       | 0<br>(0 - 0)      | 1<br>(1 - 2)       | 2<br>(1 - 3)       | 4<br>(2 - 7)         |
| Pyoderma                                            | 15<br>(10 - 21)          | 3<br>(1 - 5)       | 0<br>(0 - 0)      | 2<br>(2 - 3)       | 3<br>(2 - 5)       | 7<br>(4 - 11)        |

Web Table 31- Paraguay deaths with 95% UI by age, sex, and cause in 2013

| Cause                                           | Males, All Ages          | Males, 0-4 Years  | Males, 5-14 Years  | Males, 15-49 Years       | Males, 50-69 Years | Males, 70-80 Years |
|-------------------------------------------------|--------------------------|-------------------|--------------------|--------------------------|--------------------|--------------------|
| Decubitus ulcer                                 | 2<br>(1 - 3)             | 0<br>(0 - 0)      | 0<br>(0 - 0)       | 0<br>(0 - 1)             | 0<br>(0 - 1)       | 1<br>(0 - 2)       |
| Other skin and subcutaneous diseases            | 2<br>(1 - 3)             | 1<br>(0 - 1)      | 0<br>(0 - 0)       | 1<br>(0 - 1)             | 0<br>(0 - 0)       | 0<br>(0 - 1)       |
| Sudden infant death syndrome                    | 25<br>(9 - 49)           | 25<br>(9 - 49)    | --                 | --                       | --                 | --                 |
| Injuries                                        | 3,274<br>(2,756 - 3,956) | 124<br>(89 - 168) | 140<br>(121 - 159) | 2,175<br>(1,808 - 2,671) | 550<br>(425 - 705) | 286<br>(209 - 356) |
| Transport injuries                              | 1,297<br>(832 - 1,623)   | 29<br>(14 - 47)   | 61<br>(39 - 76)    | 884<br>(553 - 1,145)     | 228<br>(149 - 300) | 94<br>(55 - 124)   |
| Road injuries                                   | 1,272<br>(816 - 1,596)   | 29<br>(13 - 46)   | 60<br>(38 - 75)    | 870<br>(542 - 1,126)     | 222<br>(144 - 294) | 92<br>(53 - 120)   |
| Pedestrian road injuries                        | 481<br>(303 - 661)       | 17<br>(8 - 28)    | 35<br>(22 - 47)    | 258<br>(156 - 384)       | 106<br>(69 - 147)  | 64<br>(37 - 87)    |
| Cyclist road injuries                           | 32<br>(19 - 43)          | 1<br>(0 - 3)      | 4<br>(2 - 6)       | 14<br>(9 - 20)           | 7<br>(4 - 11)      | 5<br>(3 - 8)       |
| Motorcyclist road injuries                      | 460<br>(255 - 665)       | 4<br>(2 - 7)      | 7<br>(3 - 12)      | 382<br>(203 - 562)       | 62<br>(35 - 90)    | 5<br>(2 - 9)       |
| Motor vehicle road injuries                     | 272<br>(176 - 384)       | 5<br>(2 - 10)     | 9<br>(5 - 14)      | 205<br>(129 - 292)       | 40<br>(24 - 58)    | 14<br>(7 - 22)     |
| Other road injuries                             | 27<br>(11 - 40)          | 1<br>(0 - 3)      | 4<br>(1 - 7)       | 11<br>(4 - 18)           | 7<br>(3 - 12)      | 4<br>(1 - 7)       |
| Other transport injuries                        | 24<br>(17 - 32)          | 1<br>(0 - 2)      | 1<br>(1 - 2)       | 14<br>(9 - 19)           | 6<br>(4 - 9)       | 3<br>(2 - 4)       |
| Unintentional injuries                          | 768<br>(624 - 928)       | 84<br>(57 - 120)  | 60<br>(48 - 76)    | 341<br>(268 - 443)       | 143<br>(106 - 185) | 141<br>(94 - 184)  |
| Falls                                           | 109<br>(63 - 143)        | 5<br>(2 - 10)     | 4<br>(2 - 6)       | 32<br>(17 - 44)          | 35<br>(17 - 51)    | 33<br>(18 - 48)    |
| Drowning                                        | 193<br>(143 - 305)       | 14<br>(7 - 29)    | 24<br>(16 - 41)    | 120<br>(84 - 194)        | 27<br>(18 - 42)    | 8<br>(5 - 13)      |
| Fire, heat, and hot substances                  | 60<br>(37 - 84)          | 10<br>(5 - 19)    | 3<br>(2 - 5)       | 18<br>(11 - 26)          | 11<br>(6 - 16)     | 18<br>(9 - 30)     |
| Poisonings                                      | 12<br>(9 - 19)           | 1<br>(1 - 2)      | 1<br>(0 - 1)       | 6<br>(4 - 10)            | 3<br>(2 - 5)       | 1<br>(1 - 2)       |
| Exposure to mechanical forces                   | 71<br>(54 - 134)         | 4<br>(2 - 7)      | 6<br>(4 - 10)      | 47<br>(33 - 95)          | 10<br>(7 - 19)     | 4<br>(3 - 6)       |
| Unintentional firearm injuries                  | 23<br>(16 - 32)          | 0<br>(0 - 1)      | 3<br>(1 - 4)       | 16<br>(10 - 24)          | 3<br>(2 - 4)       | 1<br>(0 - 1)       |
| Unintentional suffocation                       | 4<br>(2 - 7)             | 2<br>(1 - 5)      | 0<br>(0 - 1)       | 1<br>(0 - 1)             | 0<br>(0 - 0)       | 0<br>(0 - 1)       |
| Other exposure to mechanical forces             | 44<br>(31 - 103)         | 1<br>(0 - 2)      | 3<br>(2 - 7)       | 31<br>(20 - 76)          | 7<br>(5 - 16)      | 3<br>(2 - 5)       |
| Adverse effects of medical treatment            | 69<br>(38 - 98)          | 7<br>(3 - 13)     | 2<br>(1 - 3)       | 13<br>(6 - 19)           | 21<br>(10 - 35)    | 27<br>(12 - 43)    |
| Animal contact                                  | 17<br>(6 - 23)           | 2<br>(1 - 3)      | 2<br>(1 - 3)       | 6<br>(3 - 9)             | 4<br>(1 - 6)       | 3<br>(1 - 5)       |
| Venomous animal contact                         | 12<br>(5 - 15)           | 1<br>(0 - 2)      | 1<br>(0 - 2)       | 5<br>(2 - 7)             | 3<br>(1 - 4)       | 2<br>(1 - 3)       |
| Non-venomous animal contact                     | 6<br>(2 - 8)             | 1<br>(0 - 2)      | 1<br>(0 - 1)       | 1<br>(1 - 2)             | 1<br>(0 - 2)       | 2<br>(0 - 3)       |
| Foreign body                                    | 108<br>(52 - 149)        | 34<br>(16 - 55)   | 7<br>(4 - 11)      | 15<br>(7 - 21)           | 14<br>(7 - 21)     | 39<br>(17 - 59)    |
| Pulmonary aspiration and foreign body in airway | 107<br>(51 - 149)        | 34<br>(16 - 55)   | 7<br>(4 - 11)      | 15<br>(7 - 21)           | 13<br>(6 - 20)     | 38<br>(17 - 59)    |
| Foreign body in other body part                 | 1<br>(0 - 1)             | 0<br>(0 - 0)      | 0<br>(0 - 0)       | 0<br>(0 - 0)             | 0<br>(0 - 0)       | 0<br>(0 - 0)       |
| Other unintentional injuries                    | 128<br>(103 - 160)       | 7<br>(4 - 11)     | 10<br>(7 - 15)     | 84<br>(64 - 110)         | 19<br>(13 - 27)    | 8<br>(6 - 11)      |
| Self-harm and interpersonal violence            | 1,209<br>(950 - 1,657)   | 11<br>(5 - 20)    | 19<br>(12 - 28)    | 950<br>(748 - 1,289)     | 179<br>(127 - 273) | 51<br>(36 - 75)    |
| Self-harm                                       | 332<br>(247 - 445)       | --                | 5<br>(2 - 10)      | 229<br>(164 - 318)       | 67<br>(48 - 97)    | 30<br>(19 - 46)    |
| Interpersonal violence                          | 877<br>(648 - 1,259)     | 11<br>(5 - 20)    | 14<br>(8 - 23)     | 721<br>(532 - 1,017)     | 111<br>(71 - 192)  | 21<br>(12 - 36)    |
| Assault by firearm                              | 546<br>(374 - 843)       | 5<br>(2 - 10)     | 9<br>(5 - 16)      | 459<br>(311 - 692)       | 63<br>(35 - 121)   | 8<br>(4 - 17)      |
| Assault by sharp object                         | 275<br>(143 - 455)       | 2<br>(1 - 5)      | 2<br>(1 - 4)       | 228<br>(119 - 378)       | 36<br>(16 - 69)    | 7<br>(3 - 12)      |
| Assault by other means                          | 56<br>(29 - 90)          | 3<br>(1 - 7)      | 2<br>(1 - 4)       | 33<br>(17 - 54)          | 12<br>(5 - 23)     | 6<br>(3 - 11)      |

Web Table 31- Paraguay deaths with 95% UI by age, sex, and cause in 2013

| Cause                                                             | Females, All Ages           | Females, 0-4 Years       | Females, 5-14 Years | Females, 15-49 Years     | Females, 50-69 Years     | Females, 70-80 Years     |
|-------------------------------------------------------------------|-----------------------------|--------------------------|---------------------|--------------------------|--------------------------|--------------------------|
| All causes                                                        | 15,988<br>(13,112 - 18,438) | 1,424<br>(1,267 - 1,609) | 212<br>(189 - 248)  | 1,869<br>(1,526 - 2,265) | 3,808<br>(2,920 - 4,630) | 8,673<br>(7,024 - 9,925) |
| Communicable, maternal, neonatal, and nutritional diseases        | 2,372<br>(2,030 - 2,737)    | 966<br>(841 - 1,106)     | 64<br>(50 - 81)     | 337<br>(283 - 401)       | 199<br>(149 - 253)       | 805<br>(563 - 1,101)     |
| HIV/AIDS and tuberculosis                                         | 123<br>(95 - 160)           | 2<br>(1 - 3)             | 1<br>(1 - 2)        | 61<br>(46 - 85)          | 30<br>(22 - 41)          | 29<br>(20 - 40)          |
| Tuberculosis                                                      | 75<br>(57 - 96)             | 1<br>(1 - 2)             | 1<br>(1 - 1)        | 21<br>(15 - 28)          | 24<br>(17 - 33)          | 28<br>(20 - 39)          |
| HIV/AIDS                                                          | 47<br>(30 - 78)             | 1<br>(0 - 1)             | 0<br>(0 - 0)        | 40<br>(26 - 63)          | 6<br>(3 - 13)            | 1<br>(0 - 1)             |
| HIV/AIDS resulting in mycobacterial infection                     | 2<br>(1 - 4)                | 0<br>(0 - 0)             | 0<br>(0 - 0)        | 2<br>(1 - 3)             | 0<br>(0 - 1)             | 0<br>(0 - 0)             |
| HIV/AIDS resulting in other diseases                              | 45<br>(29 - 75)             | 1<br>(0 - 1)             | 0<br>(0 - 0)        | 38<br>(25 - 60)          | 6<br>(3 - 12)            | 1<br>(0 - 1)             |
| Diarrhea, lower respiratory, and other common infectious diseases | 1,161<br>(891 - 1,487)      | 231<br>(175 - 297)       | 46<br>(34 - 60)     | 94<br>(71 - 124)         | 137<br>(92 - 185)        | 652<br>(437 - 937)       |
| Diarrheal diseases                                                | 146<br>(103 - 202)          | 62<br>(33 - 111)         | 6<br>(3 - 10)       | 9<br>(6 - 13)            | 15<br>(9 - 24)           | 55<br>(31 - 89)          |
| Intestinal infectious diseases                                    | 49<br>(26 - 86)             | 17<br>(8 - 31)           | 13<br>(6 - 24)      | 16<br>(7 - 31)           | 2<br>(1 - 4)             | 1<br>(0 - 2)             |
| Typhoid fever                                                     | 36<br>(18 - 65)             | 12<br>(6 - 23)           | 10<br>(5 - 20)      | 12<br>(5 - 23)           | 1<br>(1 - 3)             | 1<br>(0 - 1)             |
| Paratyphoid fever                                                 | 10<br>(5 - 19)              | 4<br>(2 - 7)             | 3<br>(1 - 5)        | 3<br>(1 - 7)             | 0<br>(0 - 1)             | 0<br>(0 - 0)             |
| Other intestinal infectious diseases                              | 3<br>(0 - 7)                | 1<br>(0 - 5)             | 0<br>(0 - 2)        | 1<br>(0 - 3)             | 0<br>(0 - 2)             | 0<br>(0 - 2)             |
| Lower respiratory infections                                      | 880<br>(626 - 1,191)        | 116<br>(78 - 166)        | 18<br>(12 - 25)     | 53<br>(34 - 72)          | 108<br>(66 - 151)        | 585<br>(380 - 862)       |
| Upper respiratory infections                                      | 1<br>(0 - 2)                | 0<br>(0 - 0)             | 0<br>(0 - 0)        | 0<br>(0 - 0)             | 0<br>(0 - 1)             | 0<br>(0 - 1)             |
| Otitis media                                                      | 1<br>(1 - 1)                | 0<br>(0 - 0)             | 0<br>(0 - 0)        | 0<br>(0 - 0)             | 0<br>(0 - 0)             | 0<br>(0 - 0)             |
| Meningitis                                                        | 63<br>(48 - 80)             | 27<br>(17 - 42)          | 6<br>(4 - 10)       | 11<br>(8 - 16)           | 9<br>(6 - 14)            | 8<br>(5 - 13)            |
| Pneumococcal meningitis                                           | 11<br>(8 - 16)              | 5<br>(3 - 7)             | 1<br>(1 - 2)        | 2<br>(1 - 4)             | 2<br>(1 - 3)             | 2<br>(1 - 3)             |
| H influenzae type B meningitis                                    | 14<br>(10 - 20)             | 10<br>(6 - 16)           | 1<br>(1 - 2)        | 1<br>(1 - 2)             | 1<br>(0 - 1)             | 1<br>(0 - 1)             |
| Meningococcal meningitis                                          | 18<br>(13 - 24)             | 7<br>(4 - 11)            | 3<br>(1 - 4)        | 3<br>(2 - 5)             | 2<br>(1 - 4)             | 2<br>(1 - 4)             |
| Other meningitis                                                  | 20<br>(14 - 27)             | 5<br>(3 - 9)             | 1<br>(1 - 3)        | 5<br>(3 - 8)             | 5<br>(2 - 7)             | 4<br>(2 - 6)             |
| Encephalitis                                                      | 15<br>(11 - 23)             | 5<br>(3 - 10)            | 3<br>(2 - 4)        | 4<br>(3 - 6)             | 2<br>(1 - 3)             | 1<br>(1 - 2)             |
| Diphtheria                                                        | 0<br>(0 - 2)                | 0<br>(0 - 2)             | 0<br>(0 - 0)        | 0<br>(0 - 0)             | 0<br>(0 - 0)             | --                       |
| Whooping cough                                                    | 2<br>(1 - 5)                | 1<br>(0 - 5)             | 0<br>(0 - 0)        | 0<br>(0 - 0)             | 0<br>(0 - 0)             | --                       |
| Tetanus                                                           | 2<br>(1 - 3)                | 1<br>(0 - 1)             | 0<br>(0 - 0)        | 0<br>(0 - 0)             | 0<br>(0 - 1)             | 1<br>(0 - 1)             |
| Measles                                                           | 0<br>(0 - 0)                | 0<br>(0 - 0)             | 0<br>(0 - 0)        | 0<br>(0 - 0)             | 0<br>(0 - 0)             | --                       |
| Varicella and herpes zoster                                       | 2<br>(1 - 7)                | 1<br>(0 - 2)             | 0<br>(0 - 0)        | 0<br>(0 - 1)             | 0<br>(0 - 1)             | 1<br>(0 - 5)             |
| Neglected tropical diseases and malaria                           | 29<br>(12 - 57)             | 3<br>(2 - 5)             | 1<br>(1 - 2)        | 4<br>(2 - 8)             | 7<br>(2 - 15)            | 15<br>(4 - 32)           |
| Malaria                                                           | 0<br>(0 - 0)                | 0<br>(0 - 0)             | 0<br>(0 - 0)        | 0<br>(0 - 0)             | 0<br>(0 - 0)             | 0<br>(0 - 0)             |
| Chagas disease                                                    | 13<br>(2 - 45)              | 0<br>(0 - 0)             | 0<br>(0 - 0)        | 1<br>(0 - 4)             | 4<br>(1 - 13)            | 7<br>(1 - 25)            |
| Leishmaniasis                                                     | 1<br>(1 - 1)                | 1<br>(0 - 1)             | 0<br>(0 - 0)        | 0<br>(0 - 0)             | 0<br>(0 - 0)             | 0<br>(0 - 0)             |
| Visceral leishmaniasis                                            | 1<br>(1 - 1)                | 1<br>(0 - 1)             | 0<br>(0 - 0)        | 0<br>(0 - 0)             | 0<br>(0 - 0)             | 0<br>(0 - 0)             |
| Cysticercosis                                                     | 1<br>(1 - 1)                | 0<br>(0 - 0)             | 0<br>(0 - 0)        | 0<br>(0 - 1)             | 0<br>(0 - 0)             | 0<br>(0 - 0)             |
| Cystic echinococcosis                                             | 0<br>(0 - 0)                | 0<br>(0 - 0)             | 0<br>(0 - 0)        | 0<br>(0 - 0)             | 0<br>(0 - 0)             | 0<br>(0 - 0)             |
| Dengue                                                            | 11<br>(2 - 15)              | 1<br>(0 - 1)             | 0<br>(0 - 0)        | 1<br>(1 - 2)             | 2<br>(0 - 3)             | 6<br>(1 - 10)            |
| Yellow fever                                                      | 0<br>(0 - 0)                | 0<br>(0 - 0)             | 0<br>(0 - 0)        | 0<br>(0 - 0)             | 0<br>(0 - 0)             | 0<br>(0 - 0)             |
| Rabies                                                            | 0<br>(0 - 1)                | 0<br>(0 - 0)             | 0<br>(0 - 0)        | 0<br>(0 - 0)             | 0<br>(0 - 0)             | 0<br>(0 - 0)             |
| Intestinal nematode infections                                    | 1<br>(0 - 4)                | 0<br>(0 - 2)             | 0<br>(0 - 1)        | 0<br>(0 - 1)             | 0<br>(0 - 0)             | 0<br>(0 - 1)             |
| Ascariasis                                                        | 1<br>(0 - 4)                | 0<br>(0 - 2)             | 0<br>(0 - 1)        | 0<br>(0 - 1)             | 0<br>(0 - 0)             | 0<br>(0 - 1)             |
| Other neglected tropical diseases                                 | 2<br>(2 - 3)                | 1<br>(1 - 2)             | 0<br>(0 - 0)        | 0<br>(0 - 1)             | 0<br>(0 - 0)             | 0<br>(0 - 1)             |



Web Table 31- Paraguay deaths with 95% UI by age, sex, and cause in 2013

| Cause                                                            | Females, All Ages           | Females, 0-4 Years | Females, 5-14 Years | Females, 15-49 Years   | Females, 50-69 Years     | Females, 70-80 Years     |
|------------------------------------------------------------------|-----------------------------|--------------------|---------------------|------------------------|--------------------------|--------------------------|
| Maternal disorders                                               | 156<br>(117 - 208)          | --                 | 1<br>(0 - 2)        | 155<br>(116 - 207)     | --                       | --                       |
| Maternal hemorrhage                                              | 27<br>(19 - 38)             | --                 | 0<br>(0 - 0)        | 27<br>(19 - 38)        | --                       | --                       |
| Maternal sepsis and other maternal infections                    | 18<br>(12 - 25)             | --                 | 0<br>(0 - 0)        | 18<br>(12 - 25)        | --                       | --                       |
| Maternal hypertensive disorders                                  | 22<br>(16 - 30)             | --                 | 0<br>(0 - 0)        | 22<br>(16 - 29)        | --                       | --                       |
| Maternal obstructed labor                                        | 7<br>(5 - 10)               | --                 | 0<br>(0 - 0)        | 7<br>(5 - 10)          | --                       | --                       |
| Maternal abortive outcome                                        | 31<br>(23 - 43)             | --                 | 0<br>(0 - 0)        | 31<br>(23 - 43)        | --                       | --                       |
| Indirect maternal deaths                                         | 20<br>(14 - 28)             | --                 | 0<br>(0 - 0)        | 20<br>(14 - 28)        | --                       | --                       |
| Late maternal deaths                                             | 19<br>(12 - 28)             | --                 | 0<br>(0 - 0)        | 19<br>(12 - 28)        | --                       | --                       |
| Maternal deaths aggravated by HIV/AIDS                           | 0<br>(0 - 0)                | --                 | --                  | 0<br>(0 - 0)           | --                       | --                       |
| Other maternal disorders                                         | 11<br>(8 - 17)              | --                 | 0<br>(0 - 0)        | 11<br>(8 - 17)         | --                       | --                       |
| Neonatal disorders                                               | 548<br>(440 - 656)          | 548<br>(440 - 656) | --                  | --                     | --                       | --                       |
| Neonatal preterm birth complications                             | 254<br>(159 - 343)          | 254<br>(159 - 343) | --                  | --                     | --                       | --                       |
| Neonatal encephalopathy due to birth asphyxia and trauma         | 117<br>(75 - 164)           | 117<br>(75 - 164)  | --                  | --                     | --                       | --                       |
| Neonatal sepsis and other neonatal infections                    | 120<br>(67 - 225)           | 120<br>(67 - 225)  | --                  | --                     | --                       | --                       |
| Hemolytic disease and other neonatal jaundice                    | 3<br>(1 - 10)               | 3<br>(1 - 10)      | --                  | --                     | --                       | --                       |
| Other neonatal disorders                                         | 54<br>(29 - 84)             | 54<br>(29 - 84)    | --                  | --                     | --                       | --                       |
| Nutritional deficiencies                                         | 184<br>(133 - 242)          | 44<br>(28 - 65)    | 4<br>(2 - 5)        | 17<br>(12 - 24)        | 18<br>(12 - 26)          | 101<br>(62 - 151)        |
| Protein-energy malnutrition                                      | 124<br>(77 - 169)           | 41<br>(26 - 62)    | 3<br>(2 - 4)        | 5<br>(2 - 9)           | 9<br>(5 - 14)            | 64<br>(27 - 103)         |
| Iodine deficiency                                                | 0<br>(0 - 1)                | 0<br>(0 - 0)       | 0<br>(0 - 0)        | 0<br>(0 - 0)           | 0<br>(0 - 0)             | 0<br>(0 - 1)             |
| Iron-deficiency anemia                                           | 55<br>(28 - 95)             | 3<br>(1 - 8)       | 1<br>(0 - 1)        | 11<br>(7 - 16)         | 8<br>(4 - 13)            | 33<br>(15 - 64)          |
| Other nutritional deficiencies                                   | 5<br>(2 - 10)               | 0<br>(0 - 1)       | 0<br>(0 - 1)        | 0<br>(0 - 1)           | 1<br>(0 - 1)             | 3<br>(1 - 8)             |
| Other communicable, maternal, neonatal, and nutritional diseases | 171<br>(39 - 308)           | 137<br>(13 - 266)  | 12<br>(2 - 23)      | 5<br>(4 - 8)           | 7<br>(4 - 13)            | 9<br>(4 - 20)            |
| Sexually transmitted diseases excluding HIV                      | 148<br>(14 - 287)           | 134<br>(10 - 264)  | 11<br>(1 - 22)      | 1<br>(1 - 2)           | 1<br>(0 - 2)             | 1<br>(0 - 2)             |
| Syphilis                                                         | 147<br>(13 - 286)           | 134<br>(10 - 264)  | 11<br>(1 - 22)      | 0<br>(0 - 1)           | 0<br>(0 - 1)             | 1<br>(0 - 2)             |
| Chlamydial infection                                             | 0<br>(0 - 1)                | --                 | 0<br>(0 - 0)        | 0<br>(0 - 0)           | 0<br>(0 - 0)             | 0<br>(0 - 0)             |
| Gonococcal infection                                             | 1<br>(0 - 1)                | --                 | 0<br>(0 - 0)        | 0<br>(0 - 0)           | 0<br>(0 - 0)             | 0<br>(0 - 0)             |
| Other sexually transmitted diseases                              | 0<br>(0 - 1)                | --                 | 0<br>(0 - 0)        | 0<br>(0 - 0)           | 0<br>(0 - 0)             | 0<br>(0 - 0)             |
| Hepatitis                                                        | 3<br>(3 - 5)                | 0<br>(0 - 0)       | 0<br>(0 - 0)        | 1<br>(1 - 1)           | 1<br>(1 - 1)             | 1<br>(1 - 2)             |
| Acute hepatitis A                                                | 1<br>(0 - 1)                | 0<br>(0 - 0)       | 0<br>(0 - 0)        | 0<br>(0 - 1)           | 0<br>(0 - 0)             | 0<br>(0 - 0)             |
| Acute hepatitis B                                                | 2<br>(2 - 3)                | 0<br>(0 - 0)       | 0<br>(0 - 0)        | 0<br>(0 - 1)           | 1<br>(0 - 1)             | 1<br>(1 - 2)             |
| Acute hepatitis C                                                | 0<br>(0 - 1)                | --                 | 0<br>(0 - 0)        | 0<br>(0 - 0)           | 0<br>(0 - 0)             | 0<br>(0 - 0)             |
| Other infectious diseases                                        | 20<br>(11 - 32)             | 3<br>(2 - 8)       | 1<br>(0 - 2)        | 3<br>(2 - 5)           | 5<br>(2 - 11)            | 7<br>(2 - 11)            |
| Non-communicable diseases                                        | 12,712<br>(10,236 - 14,879) | 374<br>(287 - 471) | 83<br>(70 - 100)    | 1,175<br>(919 - 1,467) | 3,454<br>(2,657 - 4,179) | 7,626<br>(6,203 - 8,830) |
| Neoplasms                                                        | 2,790<br>(2,180 - 3,371)    | 18<br>(12 - 27)    | 31<br>(24 - 39)     | 501<br>(385 - 625)     | 1,084<br>(823 - 1,331)   | 1,155<br>(889 - 1,399)   |
| Esophageal cancer                                                | 34<br>(24 - 45)             | --                 | --                  | 1<br>(1 - 2)           | 11<br>(7 - 15)           | 22<br>(15 - 30)          |
| Stomach cancer                                                   | 198<br>(147 - 254)          | --                 | --                  | 20<br>(14 - 27)        | 68<br>(49 - 88)          | 110<br>(76 - 152)        |
| Liver cancer                                                     | 76<br>(55 - 101)            | --                 | 0<br>(0 - 1)        | 7<br>(5 - 10)          | 28<br>(19 - 39)          | 41<br>(27 - 59)          |
| Liver cancer due to hepatitis B                                  | 11<br>(6 - 17)              | --                 | 0<br>(0 - 0)        | 2<br>(1 - 3)           | 4<br>(2 - 8)             | 4<br>(2 - 7)             |
| Liver cancer due to hepatitis C                                  | 47<br>(32 - 66)             | --                 | 0<br>(0 - 0)        | 3<br>(2 - 5)           | 17<br>(11 - 25)          | 27<br>(16 - 40)          |
| Liver cancer due to alcohol use                                  | 9<br>(5 - 15)               | --                 | --                  | 0<br>(0 - 1)           | 3<br>(1 - 5)             | 6<br>(3 - 10)            |

Web Table 31- Paraguay deaths with 95% UI by age, sex, and cause in 2013

| Cause                                         | Females, All Ages        | Females, 0-4 Years | Females, 5-14 Years | Females, 15-49 Years | Females, 50-69 Years     | Females, 70-80 Years     |
|-----------------------------------------------|--------------------------|--------------------|---------------------|----------------------|--------------------------|--------------------------|
| Liver cancer due to other causes              | 9<br>(6 - 14)            | --                 | 0<br>(0 - 0)        | 2<br>(1 - 2)         | 4<br>(2 - 6)             | 4<br>(2 - 7)             |
| Larynx cancer                                 | 3<br>(2 - 6)             | --                 | --                  | 0<br>(0 - 1)         | 1<br>(1 - 2)             | 2<br>(1 - 3)             |
| Tracheal, bronchus and lung cancer            | 182<br>(130 - 229)       | --                 | --                  | 16<br>(11 - 21)      | 77<br>(53 - 100)         | 89<br>(59 - 120)         |
| Breast cancer                                 | 486<br>(372 - 609)       | --                 | --                  | 116<br>(87 - 149)    | 222<br>(166 - 289)       | 148<br>(109 - 194)       |
| Cervical cancer                               | 489<br>(356 - 623)       | --                 | --                  | 158<br>(112 - 211)   | 205<br>(144 - 268)       | 126<br>(81 - 175)        |
| Uterine cancer                                | 123<br>(80 - 179)        | --                 | --                  | 11<br>(7 - 16)       | 59<br>(38 - 91)          | 53<br>(30 - 81)          |
| Prostate cancer                               | --                       | --                 | --                  | --                   | --                       | --                       |
| Colon and rectum cancer                       | 280<br>(212 - 352)       | --                 | --                  | 23<br>(17 - 31)      | 90<br>(66 - 116)         | 167<br>(120 - 221)       |
| Lip and oral cavity cancer                    | 17<br>(11 - 24)          | --                 | --                  | 2<br>(1 - 3)         | 6<br>(3 - 8)             | 10<br>(6 - 15)           |
| Nasopharynx cancer                            | 3<br>(2 - 6)             | --                 | 0<br>(0 - 0)        | 1<br>(0 - 1)         | 1<br>(1 - 3)             | 1<br>(0 - 2)             |
| Other pharynx cancer                          | 5<br>(4 - 7)             | --                 | --                  | 1<br>(0 - 1)         | 2<br>(2 - 4)             | 2<br>(1 - 4)             |
| Gallbladder and biliary tract cancer          | 64<br>(42 - 90)          | --                 | --                  | 3<br>(2 - 4)         | 24<br>(15 - 35)          | 37<br>(23 - 56)          |
| Pancreatic cancer                             | 133<br>(100 - 169)       | --                 | --                  | 7<br>(5 - 10)        | 49<br>(36 - 63)          | 77<br>(55 - 103)         |
| Malignant skin melanoma                       | 24<br>(18 - 32)          | --                 | --                  | 5<br>(3 - 7)         | 8<br>(6 - 12)            | 11<br>(7 - 16)           |
| Non-melanoma skin cancer                      | 25<br>(16 - 39)          | --                 | --                  | 2<br>(1 - 3)         | 4<br>(2 - 6)             | 19<br>(12 - 30)          |
| Ovarian cancer                                | 111<br>(82 - 142)        | --                 | --                  | 21<br>(15 - 29)      | 53<br>(38 - 69)          | 36<br>(24 - 52)          |
| Testicular cancer                             | --                       | --                 | --                  | --                   | --                       | --                       |
| Kidney cancer                                 | 36<br>(26 - 48)          | 0<br>(0 - 1)       | 0<br>(0 - 1)        | 5<br>(3 - 7)         | 14<br>(9 - 20)           | 16<br>(10 - 24)          |
| Bladder cancer                                | 15<br>(10 - 23)          | --                 | --                  | 1<br>(1 - 1)         | 5<br>(3 - 8)             | 9<br>(6 - 14)            |
| Brain and nervous system cancer               | 45<br>(23 - 58)          | 1<br>(1 - 3)       | 4<br>(2 - 6)        | 13<br>(7 - 17)       | 16<br>(8 - 23)           | 11<br>(5 - 16)           |
| Thyroid cancer                                | 25<br>(15 - 36)          | --                 | 0<br>(0 - 0)        | 2<br>(1 - 3)         | 10<br>(6 - 15)           | 13<br>(7 - 20)           |
| Mesothelioma                                  | 4<br>(2 - 5)             | --                 | --                  | 0<br>(0 - 1)         | 2<br>(1 - 3)             | 1<br>(1 - 2)             |
| Hodgkin lymphoma                              | 7<br>(2 - 11)            | 0<br>(0 - 0)       | 1<br>(0 - 2)        | 3<br>(1 - 4)         | 2<br>(0 - 3)             | 2<br>(0 - 3)             |
| Non-Hodgkin lymphoma                          | 59<br>(29 - 82)          | 1<br>(1 - 2)       | 2<br>(1 - 3)        | 10<br>(5 - 14)       | 21<br>(10 - 32)          | 25<br>(12 - 37)          |
| Multiple myeloma                              | 19<br>(12 - 26)          | --                 | --                  | 1<br>(1 - 2)         | 9<br>(5 - 12)            | 9<br>(5 - 13)            |
| Leukemia                                      | 123<br>(96 - 154)        | 8<br>(4 - 14)      | 15<br>(10 - 20)     | 36<br>(27 - 46)      | 30<br>(21 - 39)          | 35<br>(24 - 47)          |
| Other neoplasms                               | 203<br>(130 - 267)       | 7<br>(4 - 12)      | 9<br>(6 - 13)       | 36<br>(25 - 50)      | 66<br>(42 - 92)          | 85<br>(49 - 123)         |
| Cardiovascular diseases                       | 5,633<br>(4,398 - 7,044) | 10<br>(6 - 15)     | 8<br>(6 - 11)       | 339<br>(251 - 457)   | 1,324<br>(1,008 - 1,704) | 3,952<br>(3,131 - 4,864) |
| Rheumatic heart disease                       | 42<br>(24 - 57)          | 0<br>(0 - 0)       | 1<br>(1 - 2)        | 12<br>(7 - 17)       | 15<br>(8 - 21)           | 14<br>(7 - 21)           |
| Ischemic heart disease                        | 2,657<br>(2,012 - 3,596) | 1<br>(0 - 2)       | 1<br>(1 - 2)        | 125<br>(88 - 189)    | 595<br>(432 - 821)       | 1,936<br>(1,457 - 2,619) |
| Cerebrovascular disease                       | 2,198<br>(1,674 - 2,807) | 2<br>(1 - 3)       | 2<br>(1 - 3)        | 146<br>(105 - 198)   | 561<br>(414 - 766)       | 1,487<br>(1,113 - 1,873) |
| Ischemic stroke                               | 1,131<br>(802 - 1,721)   | 0<br>(0 - 0)       | 0<br>(0 - 1)        | 20<br>(12 - 43)      | 173<br>(108 - 328)       | 937<br>(676 - 1,352)     |
| Hemorrhagic stroke                            | 1,067<br>(675 - 1,355)   | 2<br>(1 - 3)       | 2<br>(1 - 3)        | 126<br>(90 - 167)    | 388<br>(262 - 499)       | 550<br>(301 - 740)       |
| Hypertensive heart disease                    | 352<br>(184 - 512)       | 0<br>(0 - 1)       | 0<br>(0 - 0)        | 10<br>(5 - 16)       | 63<br>(35 - 93)          | 277<br>(140 - 420)       |
| Cardiomyopathy and myocarditis                | 78<br>(57 - 109)         | 3<br>(2 - 6)       | 1<br>(1 - 3)        | 12<br>(8 - 19)       | 20<br>(14 - 28)          | 41<br>(28 - 61)          |
| Atrial fibrillation and flutter               | 36<br>(24 - 54)          | --                 | --                  | 2<br>(1 - 2)         | 4<br>(3 - 6)             | 30<br>(20 - 46)          |
| Aortic aneurysm                               | 44<br>(24 - 70)          | --                 | --                  | 4<br>(2 - 8)         | 14<br>(7 - 22)           | 25<br>(14 - 41)          |
| Peripheral vascular disease                   | 9<br>(6 - 14)            | --                 | --                  | 0<br>(0 - 0)         | 1<br>(1 - 2)             | 8<br>(5 - 12)            |
| Endocarditis                                  | 35<br>(20 - 50)          | 2<br>(1 - 4)       | 1<br>(1 - 1)        | 7<br>(4 - 11)        | 8<br>(4 - 13)            | 16<br>(8 - 24)           |
| Other cardiovascular and circulatory diseases | 181<br>(130 - 256)       | 1<br>(1 - 2)       | 1<br>(0 - 2)        | 19<br>(13 - 31)      | 43<br>(29 - 63)          | 117<br>(79 - 168)        |

Web Table 31- Paraguay deaths with 95% UI by age, sex, and cause in 2013

| Cause                                               | Females, All Ages  | Females, 0-4 Years | Females, 5-14 Years | Females, 15-49 Years | Females, 50-69 Years | Females, 70-80 Years |
|-----------------------------------------------------|--------------------|--------------------|---------------------|----------------------|----------------------|----------------------|
| Chronic respiratory diseases                        | 390<br>(296 - 522) | 17<br>(12 - 24)    | 3<br>(2 - 3)        | 27<br>(20 - 36)      | 57<br>(41 - 78)      | 285<br>(210 - 389)   |
| Chronic obstructive pulmonary disease               | 285<br>(210 - 383) | 10<br>(6 - 15)     | 1<br>(1 - 2)        | 14<br>(9 - 19)       | 33<br>(21 - 47)      | 226<br>(167 - 308)   |
| Pneumoconiosis                                      | 2<br>(1 - 4)       | 0<br>(0 - 0)       | 0<br>(0 - 0)        | 0<br>(0 - 0)         | 0<br>(0 - 1)         | 1<br>(1 - 2)         |
| Silicosis                                           | 0<br>(0 - 0)       | 0<br>(0 - 0)       | 0<br>(0 - 0)        | 0<br>(0 - 0)         | 0<br>(0 - 0)         | 0<br>(0 - 0)         |
| Asbestosis                                          | 0<br>(0 - 0)       | 0<br>(0 - 0)       | 0<br>(0 - 0)        | 0<br>(0 - 0)         | 0<br>(0 - 0)         | 0<br>(0 - 0)         |
| Coal workers pneumoconiosis                         | 0<br>(0 - 0)       | 0<br>(0 - 0)       | 0<br>(0 - 0)        | 0<br>(0 - 0)         | 0<br>(0 - 0)         | 0<br>(0 - 0)         |
| Other pneumoconiosis                                | 2<br>(1 - 3)       | 0<br>(0 - 0)       | 0<br>(0 - 0)        | 0<br>(0 - 0)         | 0<br>(0 - 1)         | 1<br>(1 - 2)         |
| Asthma                                              | 59<br>(35 - 92)    | 2<br>(1 - 4)       | 1<br>(0 - 1)        | 7<br>(5 - 11)        | 12<br>(7 - 19)       | 37<br>(20 - 65)      |
| Interstitial lung disease and pulmonary sarcoidosis | 33<br>(18 - 57)    | 1<br>(0 - 1)       | 0<br>(0 - 0)        | 4<br>(2 - 7)         | 9<br>(5 - 17)        | 19<br>(9 - 35)       |
| Other chronic respiratory diseases                  | 11<br>(8 - 16)     | 4<br>(3 - 6)       | 1<br>(0 - 1)        | 2<br>(1 - 3)         | 2<br>(1 - 4)         | 2<br>(1 - 4)         |
| Cirrhosis                                           | 163<br>(125 - 203) | 1<br>(1 - 2)       | 2<br>(1 - 3)        | 26<br>(19 - 35)      | 59<br>(44 - 76)      | 74<br>(52 - 100)     |
| Cirrhosis due to hepatitis B                        | 21<br>(10 - 38)    | 0<br>(0 - 0)       | 0<br>(0 - 0)        | 4<br>(2 - 7)         | 8<br>(4 - 16)        | 8<br>(3 - 17)        |
| Cirrhosis due to hepatitis C                        | 69<br>(36 - 103)   | 0<br>(0 - 0)       | 0<br>(0 - 1)        | 10<br>(5 - 16)       | 24<br>(12 - 38)      | 35<br>(16 - 53)      |
| Cirrhosis due to alcohol use                        | 43<br>(25 - 68)    | --                 | --                  | 5<br>(2 - 8)         | 15<br>(9 - 24)       | 23<br>(12 - 40)      |
| Cirrhosis due to other causes                       | 30<br>(17 - 46)    | 1<br>(1 - 2)       | 2<br>(1 - 2)        | 8<br>(5 - 13)        | 11<br>(5 - 19)       | 8<br>(4 - 15)        |
| Digestive diseases                                  | 423<br>(322 - 541) | 3<br>(2 - 5)       | 4<br>(3 - 6)        | 37<br>(28 - 50)      | 97<br>(71 - 128)     | 281<br>(207 - 369)   |
| Peptic ulcer disease                                | 58<br>(35 - 86)    | 0<br>(0 - 0)       | 0<br>(0 - 0)        | 3<br>(2 - 5)         | 12<br>(7 - 20)       | 43<br>(25 - 67)      |
| Gastritis and duodenitis                            | 4<br>(2 - 7)       | 0<br>(0 - 0)       | 0<br>(0 - 0)        | 0<br>(0 - 1)         | 1<br>(0 - 1)         | 3<br>(1 - 5)         |
| Appendicitis                                        | 18<br>(12 - 28)    | 0<br>(0 - 1)       | 1<br>(1 - 2)        | 4<br>(3 - 7)         | 4<br>(3 - 8)         | 8<br>(4 - 14)        |
| Paralytic ileus and intestinal obstruction          | 93<br>(51 - 143)   | 2<br>(1 - 3)       | 1<br>(1 - 2)        | 6<br>(4 - 10)        | 16<br>(8 - 27)       | 67<br>(35 - 105)     |
| Inguinal, femoral, and abdominal hernia             | 27<br>(14 - 59)    | 0<br>(0 - 0)       | 0<br>(0 - 0)        | 2<br>(1 - 3)         | 6<br>(3 - 12)        | 19<br>(9 - 43)       |
| Inflammatory bowel disease                          | 6<br>(4 - 9)       | 0<br>(0 - 0)       | 0<br>(0 - 0)        | 2<br>(1 - 2)         | 2<br>(1 - 3)         | 2<br>(1 - 4)         |
| Vascular intestinal disorders                       | 48<br>(23 - 86)    | 0<br>(0 - 1)       | 0<br>(0 - 0)        | 2<br>(1 - 4)         | 9<br>(4 - 16)        | 37<br>(17 - 67)      |
| Gallbladder and biliary diseases                    | 62<br>(41 - 90)    | 0<br>(0 - 0)       | 0<br>(0 - 0)        | 5<br>(3 - 8)         | 18<br>(12 - 28)      | 39<br>(23 - 60)      |
| Pancreatitis                                        | 53<br>(32 - 78)    | 0<br>(0 - 0)       | 0<br>(0 - 0)        | 7<br>(4 - 11)        | 16<br>(10 - 24)      | 30<br>(17 - 46)      |
| Other digestive diseases                            | 54<br>(37 - 76)    | 1<br>(0 - 1)       | 1<br>(1 - 1)        | 6<br>(4 - 8)         | 13<br>(8 - 19)       | 34<br>(21 - 52)      |
| Neurological disorders                              | 602<br>(454 - 783) | 5<br>(4 - 7)       | 4<br>(2 - 6)        | 28<br>(20 - 42)      | 47<br>(33 - 62)      | 518<br>(376 - 687)   |
| Alzheimer disease and other dementias               | 515<br>(375 - 686) | --                 | --                  | 0<br>(0 - 0)         | 29<br>(19 - 40)      | 486<br>(348 - 653)   |
| Parkinson disease                                   | 25<br>(10 - 40)    | --                 | --                  | 0<br>(0 - 0)         | 3<br>(2 - 5)         | 21<br>(8 - 36)       |
| Epilepsy                                            | 37<br>(26 - 55)    | 1<br>(1 - 3)       | 3<br>(1 - 5)        | 22<br>(14 - 35)      | 7<br>(4 - 11)        | 5<br>(2 - 8)         |
| Multiple sclerosis                                  | 4<br>(2 - 7)       | --                 | --                  | 2<br>(1 - 2)         | 2<br>(1 - 2)         | 1<br>(0 - 2)         |
| Other neurological disorders                        | 21<br>(17 - 25)    | 4<br>(3 - 5)       | 1<br>(1 - 1)        | 4<br>(3 - 6)         | 6<br>(5 - 8)         | 5<br>(4 - 7)         |
| Mental and substance use disorders                  | 22<br>(13 - 34)    | 1<br>(1 - 1)       | 0<br>(0 - 0)        | 6<br>(4 - 9)         | 10<br>(5 - 17)       | 5<br>(3 - 8)         |
| Schizophrenia                                       | 0<br>(0 - 1)       | --                 | --                  | 0<br>(0 - 0)         | 0<br>(0 - 0)         | 0<br>(0 - 0)         |
| Alcohol use disorders                               | 14<br>(6 - 26)     | --                 | --                  | 3<br>(1 - 6)         | 8<br>(3 - 15)        | 3<br>(1 - 6)         |
| Drug use disorders                                  | 7<br>(5 - 8)       | 1<br>(1 - 1)       | --                  | 2<br>(2 - 3)         | 2<br>(1 - 2)         | 2<br>(1 - 2)         |
| Opioid use disorders                                | 2<br>(2 - 3)       | 0<br>(0 - 1)       | --                  | 1<br>(1 - 1)         | 1<br>(0 - 1)         | 1<br>(0 - 1)         |
| Cocaine use disorders                               | 1<br>(0 - 1)       | 0<br>(0 - 0)       | --                  | 0<br>(0 - 0)         | 0<br>(0 - 0)         | 0<br>(0 - 0)         |
| Amphetamine use disorders                           | 0<br>(0 - 0)       | 0<br>(0 - 0)       | --                  | 0<br>(0 - 0)         | 0<br>(0 - 0)         | 0<br>(0 - 0)         |
| Other drug use disorders                            | 3<br>(3 - 4)       | 0<br>(0 - 1)       | --                  | 1<br>(1 - 2)         | 1<br>(1 - 1)         | 1<br>(1 - 1)         |

Web Table 31- Paraguay deaths with 95% UI by age, sex, and cause in 2013

| Cause                                               | Females, All Ages        | Females, 0-4 Years | Females, 5-14 Years | Females, 15-49 Years | Females, 50-69 Years | Females, 70-80 Years   |
|-----------------------------------------------------|--------------------------|--------------------|---------------------|----------------------|----------------------|------------------------|
| Eating disorders                                    | 0<br>(0-0)               | --                 | 0<br>(0-0)          | 0<br>(0-0)           | --                   | --                     |
| Anorexia nervosa                                    | 0<br>(0-0)               | --                 | 0<br>(0-0)          | 0<br>(0-0)           | --                   | --                     |
| Diabetes, urogenital, blood, and endocrine diseases | 2,227<br>(1,682 - 2,699) | 28<br>(20 - 49)    | 11<br>(8 - 14)      | 147<br>(110 - 188)   | 742<br>(540 - 926)   | 1,300<br>(951 - 1,610) |
| Diabetes mellitus                                   | 1,403<br>(1,033 - 1,728) | 2<br>(1 - 3)       | 1<br>(1 - 2)        | 57<br>(39 - 76)      | 469<br>(338 - 593)   | 875<br>(625 - 1,117)   |
| Acute glomerulonephritis                            | 2<br>(1 - 2)             | 0<br>(0-0)         | 0<br>(0-0)          | 0<br>(0-1)           | 0<br>(0-0)           | 1<br>(0-1)             |
| Chronic kidney disease                              | 625<br>(418 - 789)       | 5<br>(3 - 7)       | 5<br>(3 - 6)        | 63<br>(44 - 83)      | 235<br>(143 - 311)   | 317<br>(217 - 423)     |
| Chronic kidney disease due to diabetes mellitus     | 328<br>(226 - 424)       | 1<br>(1 - 1)       | 0<br>(0-1)          | 26<br>(17 - 37)      | 146<br>(94 - 193)    | 155<br>(102 - 211)     |
| Chronic kidney disease due to hypertension          | 100<br>(48 - 164)        | 1<br>(0-1)         | 1<br>(1 - 2)        | 12<br>(6 - 20)       | 23<br>(10 - 43)      | 63<br>(28 - 103)       |
| Chronic kidney disease due to glomerulonephritis    | 6<br>(4 - 9)             | 0<br>(0-1)         | 1<br>(0-1)          | 2<br>(1 - 3)         | 1<br>(1 - 2)         | 2<br>(1 - 3)           |
| Chronic kidney disease due to other causes          | 190<br>(98 - 273)        | 3<br>(1 - 5)       | 3<br>(1 - 4)        | 23<br>(13 - 34)      | 65<br>(24 - 99)      | 96<br>(50 - 161)       |
| Urinary diseases and male infertility               | 114<br>(53 - 175)        | 4<br>(2 - 7)       | 1<br>(1 - 2)        | 13<br>(7 - 20)       | 19<br>(9 - 29)       | 78<br>(32 - 129)       |
| Interstitial nephritis and urinary tract infections | 100<br>(42 - 159)        | 3<br>(1 - 6)       | 1<br>(1 - 2)        | 10<br>(5 - 16)       | 16<br>(7 - 25)       | 70<br>(26 - 119)       |
| Urolithiasis                                        | 5<br>(3 - 11)            | --                 | 0<br>(0-0)          | 2<br>(1 - 3)         | 2<br>(1 - 4)         | 2<br>(1 - 5)           |
| Other urinary diseases                              | 8<br>(4 - 22)            | 0<br>(0-1)         | 0<br>(0-0)          | 1<br>(1 - 3)         | 1<br>(1 - 3)         | 5<br>(2 - 15)          |
| Gynecological diseases                              | 2<br>(1 - 3)             | --                 | --                  | 1<br>(1 - 2)         | 0<br>(0-0)           | 0<br>(0-1)             |
| Uterine fibroids                                    | 0<br>(0-1)               | --                 | --                  | 0<br>(0-0)           | 0<br>(0-0)           | 0<br>(0-0)             |
| Polycystic ovarian syndrome                         | 0<br>(0-0)               | --                 | --                  | 0<br>(0-0)           | 0<br>(0-0)           | --                     |
| Endometriosis                                       | 0<br>(0-0)               | --                 | --                  | 0<br>(0-0)           | 0<br>(0-0)           | --                     |
| Genital prolapse                                    | 0<br>(0-0)               | --                 | --                  | 0<br>(0-0)           | 0<br>(0-0)           | 0<br>(0-0)             |
| Other gynecological diseases                        | 1<br>(1 - 1)             | --                 | --                  | 1<br>(0-1)           | 0<br>(0-0)           | 0<br>(0-0)             |
| Hemoglobinopathies and hemolytic anemias            | 15<br>(10 - 24)          | 2<br>(1 - 4)       | 2<br>(1 - 3)        | 4<br>(3 - 7)         | 5<br>(3 - 8)         | 3<br>(2 - 4)           |
| Thalassemias                                        | 1<br>(0-1)               | 0<br>(0-1)         | 0<br>(0-0)          | 0<br>(0-0)           | 0<br>(0-0)           | 0<br>(0-0)             |
| Sickle cell disorders                               | 7<br>(5 - 11)            | 1<br>(0-2)         | 1<br>(1 - 2)        | 3<br>(2 - 4)         | 2<br>(1 - 3)         | 0<br>(0-0)             |
| G6PD deficiency                                     | 0<br>(0-1)               | 0<br>(0-0)         | 0<br>(0-0)          | 0<br>(0-0)           | 0<br>(0-0)           | 0<br>(0-0)             |
| Other hemoglobinopathies and hemolytic anemias      | 7<br>(5 - 12)            | 1<br>(0-1)         | 0<br>(0-1)          | 1<br>(1 - 2)         | 3<br>(2 - 5)         | 3<br>(1 - 4)           |
| Endocrine, metabolic, blood, and immune disorders   | 67<br>(46 - 119)         | 16<br>(9 - 36)     | 2<br>(1 - 4)        | 8<br>(6 - 14)        | 14<br>(9 - 21)       | 27<br>(16 - 53)        |
| Musculoskeletal disorders                           | 103<br>(41 - 135)        | --                 | 3<br>(2 - 5)        | 39<br>(17 - 53)      | 26<br>(10 - 38)      | 35<br>(12 - 50)        |
| Rheumatoid arthritis                                | 25<br>(9 - 36)           | --                 | 0<br>(0-0)          | 3<br>(1 - 5)         | 10<br>(3 - 15)       | 11<br>(4 - 18)         |
| Other musculoskeletal disorders                     | 78<br>(32 - 104)         | --                 | 3<br>(1 - 4)        | 36<br>(15 - 48)      | 16<br>(7 - 24)       | 23<br>(9 - 34)         |
| Other non-communicable diseases                     | 360<br>(260 - 456)       | 290<br>(202 - 383) | 17<br>(12 - 25)     | 23<br>(16 - 32)      | 8<br>(5 - 11)        | 22<br>(12 - 31)        |
| Congenital anomalies                                | 307<br>(220 - 398)       | 264<br>(182 - 354) | 16<br>(11 - 24)     | 19<br>(13 - 28)      | 3<br>(2 - 4)         | 4<br>(2 - 6)           |
| Neural tube defects                                 | 22<br>(11 - 35)          | 21<br>(11 - 34)    | 0<br>(0-1)          | 0<br>(0-0)           | 0<br>(0-0)           | 0<br>(0-0)             |
| Congenital heart anomalies                          | 149<br>(105 - 202)       | 123<br>(81 - 178)  | 12<br>(8 - 18)      | 14<br>(9 - 20)       | 0<br>(0-1)           | 0<br>(0-1)             |
| Cleft lip and cleft palate                          | 1<br>(0-3)               | 1<br>(0-3)         | --                  | --                   | --                   | --                     |
| Down syndrome                                       | 3<br>(1 - 4)             | 2<br>(1 - 3)       | 0<br>(0-1)          | 0<br>(0-1)           | 0<br>(0-0)           | 0<br>(0-0)             |
| Chromosomal unbalanced rearrangements               | 8<br>(4 - 13)            | 7<br>(3 - 12)      | 0<br>(0-0)          | 1<br>(0-1)           | 0<br>(0-0)           | 0<br>(0-0)             |
| Other congenital anomalies                          | 124<br>(84 - 170)        | 110<br>(71 - 156)  | 4<br>(2 - 6)        | 4<br>(3 - 6)         | 2<br>(1 - 3)         | 3<br>(2 - 5)           |
| Skin and subcutaneous diseases                      | 32<br>(20 - 42)          | 5<br>(3 - 8)       | 1<br>(0-1)          | 3<br>(2 - 5)         | 5<br>(3 - 7)         | 18<br>(10 - 27)        |
| Cellulitis                                          | 9<br>(4 - 15)            | 1<br>(0-1)         | 0<br>(0-0)          | 1<br>(0-1)           | 2<br>(1 - 3)         | 6<br>(2 - 11)          |
| Pyoderma                                            | 16<br>(10 - 23)          | 3<br>(1 - 6)       | 0<br>(0-0)          | 2<br>(1 - 3)         | 2<br>(1 - 3)         | 9<br>(5 - 14)          |

Web Table 31- Paraguay deaths with 95% UI by age, sex, and cause in 2013

| Cause                                           | Females, All Ages    | Females, 0-4 Years | Females, 5-14 Years | Females, 15-49 Years | Females, 50-69 Years | Females, 70-80 Years |
|-------------------------------------------------|----------------------|--------------------|---------------------|----------------------|----------------------|----------------------|
| Decubitus ulcer                                 | 3<br>(2 - 5)         | 0<br>(0 - 0)       | 0<br>(0 - 0)        | 0<br>(0 - 1)         | 0<br>(0 - 1)         | 2<br>(1 - 4)         |
| Other skin and subcutaneous diseases            | 4<br>(2 - 7)         | 1<br>(0 - 3)       | 0<br>(0 - 0)        | 1<br>(0 - 1)         | 1<br>(0 - 2)         | 1<br>(0 - 3)         |
| Sudden infant death syndrome                    | 21<br>(6 - 60)       | 21<br>(6 - 60)     | --                  | --                   | --                   | --                   |
| Injuries                                        | 904<br>(698 - 1,119) | 84<br>(61 - 112)   | 65<br>(54 - 81)     | 357<br>(278 - 449)   | 155<br>(109 - 200)   | 241<br>(152 - 328)   |
| Transport injuries                              | 303<br>(188 - 387)   | 17<br>(9 - 27)     | 29<br>(19 - 40)     | 138<br>(82 - 187)    | 65<br>(40 - 86)      | 54<br>(32 - 75)      |
| Road injuries                                   | 297<br>(185 - 380)   | 17<br>(9 - 26)     | 28<br>(18 - 39)     | 136<br>(81 - 184)    | 64<br>(39 - 85)      | 53<br>(31 - 73)      |
| Pedestrian road injuries                        | 154<br>(102 - 197)   | 10<br>(5 - 16)     | 18<br>(12 - 25)     | 46<br>(28 - 64)      | 39<br>(24 - 53)      | 41<br>(24 - 58)      |
| Cyclist road injuries                           | 6<br>(3 - 9)         | 0<br>(0 - 1)       | 1<br>(0 - 1)        | 3<br>(1 - 4)         | 2<br>(1 - 3)         | 1<br>(0 - 2)         |
| Motorcyclist road injuries                      | 55<br>(23 - 80)      | 2<br>(1 - 3)       | 3<br>(1 - 5)        | 44<br>(18 - 66)      | 4<br>(2 - 7)         | 2<br>(1 - 3)         |
| Motor vehicle road injuries                     | 78<br>(50 - 105)     | 4<br>(2 - 7)       | 6<br>(4 - 9)        | 42<br>(26 - 59)      | 18<br>(11 - 27)      | 8<br>(4 - 12)        |
| Other road injuries                             | 3<br>(2 - 5)         | 0<br>(0 - 1)       | 1<br>(0 - 1)        | 2<br>(1 - 3)         | 0<br>(0 - 1)         | 1<br>(0 - 1)         |
| Other transport injuries                        | 6<br>(3 - 9)         | 0<br>(0 - 1)       | 1<br>(0 - 1)        | 2<br>(1 - 3)         | 1<br>(1 - 2)         | 1<br>(1 - 2)         |
| Unintentional injuries                          | 360<br>(250 - 469)   | 59<br>(40 - 83)    | 23<br>(18 - 31)     | 60<br>(44 - 79)      | 50<br>(31 - 67)      | 168<br>(96 - 240)    |
| Falls                                           | 69<br>(41 - 101)     | 2<br>(1 - 4)       | 1<br>(1 - 2)        | 3<br>(2 - 4)         | 7<br>(4 - 10)        | 56<br>(31 - 86)      |
| Drowning                                        | 38<br>(27 - 61)      | 10<br>(5 - 20)     | 7<br>(4 - 12)       | 11<br>(7 - 20)       | 5<br>(3 - 8)         | 4<br>(2 - 7)         |
| Fire, heat, and hot substances                  | 57<br>(30 - 87)      | 9<br>(4 - 16)      | 3<br>(2 - 5)        | 12<br>(7 - 18)       | 8<br>(4 - 12)        | 25<br>(10 - 48)      |
| Poisonings                                      | 7<br>(5 - 12)        | 1<br>(0 - 2)       | 0<br>(0 - 1)        | 2<br>(1 - 4)         | 2<br>(1 - 3)         | 2<br>(1 - 3)         |
| Exposure to mechanical forces                   | 17<br>(13 - 25)      | 3<br>(2 - 5)       | 3<br>(2 - 5)        | 5<br>(4 - 8)         | 2<br>(2 - 4)         | 3<br>(2 - 4)         |
| Unintentional firearm injuries                  | 3<br>(2 - 4)         | 0<br>(0 - 0)       | 1<br>(0 - 1)        | 1<br>(1 - 2)         | 0<br>(0 - 1)         | 0<br>(0 - 0)         |
| Unintentional suffocation                       | 2<br>(1 - 3)         | 1<br>(0 - 2)       | 0<br>(0 - 0)        | 0<br>(0 - 1)         | 0<br>(0 - 0)         | 0<br>(0 - 1)         |
| Other exposure to mechanical forces             | 12<br>(9 - 21)       | 2<br>(1 - 4)       | 3<br>(2 - 4)        | 4<br>(2 - 6)         | 2<br>(1 - 3)         | 2<br>(1 - 4)         |
| Adverse effects of medical treatment            | 75<br>(32 - 120)     | 5<br>(3 - 10)      | 1<br>(1 - 2)        | 11<br>(6 - 17)       | 15<br>(6 - 25)       | 42<br>(14 - 77)      |
| Animal contact                                  | 7<br>(1 - 10)        | 1<br>(0 - 2)       | 1<br>(0 - 1)        | 1<br>(0 - 2)         | 2<br>(0 - 4)         | 2<br>(0 - 3)         |
| Venomous animal contact                         | 4<br>(1 - 7)         | 1<br>(0 - 1)       | 0<br>(0 - 1)        | 1<br>(0 - 2)         | 2<br>(0 - 3)         | 1<br>(0 - 1)         |
| Non-venomous animal contact                     | 2<br>(0 - 4)         | 0<br>(0 - 1)       | 0<br>(0 - 0)        | 0<br>(0 - 1)         | 0<br>(0 - 1)         | 1<br>(0 - 2)         |
| Foreign body                                    | 65<br>(32 - 97)      | 25<br>(12 - 44)    | 2<br>(1 - 3)        | 4<br>(2 - 6)         | 4<br>(2 - 6)         | 29<br>(12 - 50)      |
| Pulmonary aspiration and foreign body in airway | 64<br>(32 - 96)      | 25<br>(12 - 43)    | 2<br>(1 - 3)        | 4<br>(2 - 6)         | 4<br>(2 - 6)         | 29<br>(12 - 50)      |
| Foreign body in other body part                 | 1<br>(1 - 1)         | 0<br>(0 - 0)       | 0<br>(0 - 0)        | 0<br>(0 - 0)         | 0<br>(0 - 0)         | 0<br>(0 - 0)         |
| Other unintentional injuries                    | 27<br>(7 - 36)       | 3<br>(1 - 5)       | 4<br>(1 - 6)        | 10<br>(3 - 15)       | 5<br>(1 - 8)         | 5<br>(1 - 8)         |
| Self-harm and interpersonal violence            | 240<br>(184 - 321)   | 8<br>(4 - 15)      | 14<br>(9 - 20)      | 159<br>(119 - 217)   | 40<br>(27 - 57)      | 20<br>(13 - 31)      |
| Self-harm                                       | 117<br>(88 - 162)    | --                 | 7<br>(3 - 12)       | 79<br>(58 - 115)     | 21<br>(13 - 31)      | 11<br>(7 - 17)       |
| Interpersonal violence                          | 122<br>(86 - 179)    | 8<br>(4 - 15)      | 7<br>(4 - 11)       | 80<br>(54 - 119)     | 19<br>(11 - 33)      | 9<br>(4 - 17)        |
| Assault by firearm                              | 65<br>(41 - 103)     | 3<br>(1 - 6)       | 4<br>(2 - 7)        | 46<br>(28 - 73)      | 11<br>(6 - 20)       | 2<br>(1 - 5)         |
| Assault by sharp object                         | 30<br>(17 - 49)      | 2<br>(1 - 3)       | 1<br>(0 - 1)        | 21<br>(12 - 35)      | 4<br>(2 - 8)         | 2<br>(1 - 5)         |
| Assault by other means                          | 28<br>(17 - 44)      | 3<br>(2 - 7)       | 2<br>(1 - 4)        | 13<br>(7 - 21)       | 4<br>(2 - 7)         | 4<br>(2 - 9)         |

Web Table 31- Peru deaths with 95% UI by age, sex, and cause in 2013

| Cause                                                             | Both Sexes, All Ages           | Both Sexes, 0-4 Years       | Both Sexes, 5-14 Years   | Both Sexes, 15-49 Years     | Both Sexes, 50-69 Years     | Both Sexes, 70-80 Years     |
|-------------------------------------------------------------------|--------------------------------|-----------------------------|--------------------------|-----------------------------|-----------------------------|-----------------------------|
| All causes                                                        | 140,436<br>(127,453 - 156,469) | 13,209<br>(12,278 - 14,287) | 2,062<br>(1,934 - 2,205) | 19,824<br>(16,576 - 23,790) | 33,119<br>(27,910 - 38,942) | 72,222<br>(67,024 - 79,101) |
| Communicable, maternal, neonatal, and nutritional diseases        | 33,736<br>(29,914 - 37,254)    | 8,498<br>(7,791 - 9,299)    | 568<br>(495 - 651)       | 3,599<br>(3,104 - 4,156)    | 4,733<br>(3,860 - 5,693)    | 16,337<br>(13,831 - 18,878) |
| HIV/AIDS and tuberculosis                                         | 2,792<br>(2,302 - 3,625)       | 21<br>(15 - 29)             | 32<br>(25 - 45)          | 1,236<br>(981 - 1,635)      | 810<br>(648 - 1,073)        | 693<br>(560 - 960)          |
| Tuberculosis                                                      | 2,236<br>(1,825 - 3,032)       | 19<br>(14 - 27)             | 30<br>(24 - 42)          | 810<br>(638 - 1,099)        | 696<br>(547 - 954)          | 680<br>(549 - 947)          |
| HIV/AIDS                                                          | 556<br>(357 - 960)             | 2<br>(0 - 6)                | 2<br>(0 - 6)             | 426<br>(277 - 738)          | 114<br>(55 - 207)           | 13<br>(6 - 27)              |
| HIV/AIDS resulting in mycobacterial infection                     | 35<br>(21 - 61)                | 0<br>(0 - 0)                | 0<br>(0 - 0)             | 26<br>(16 - 46)             | 7<br>(3 - 14)               | 1<br>(0 - 2)                |
| HIV/AIDS resulting in other diseases                              | 522<br>(333 - 906)             | 2<br>(0 - 6)                | 2<br>(0 - 6)             | 400<br>(259 - 695)          | 106<br>(51 - 194)           | 12<br>(5 - 25)              |
| Diarrhea, lower respiratory, and other common infectious diseases | 22,486<br>(18,726 - 25,960)    | 2,928<br>(2,464 - 3,421)    | 433<br>(366 - 508)       | 1,634<br>(1,268 - 2,060)    | 3,451<br>(2,527 - 4,383)    | 14,039<br>(11,340 - 16,595) |
| Diarrheal diseases                                                | 822<br>(682 - 1,003)           | 349<br>(247 - 466)          | 26<br>(18 - 36)          | 67<br>(51 - 86)             | 96<br>(73 - 129)            | 284<br>(204 - 402)          |
| Intestinal infectious diseases                                    | 310<br>(167 - 542)             | 103<br>(54 - 180)           | 81<br>(42 - 147)         | 101<br>(46 - 190)           | 15<br>(7 - 28)              | 9<br>(4 - 16)               |
| Typhoid fever                                                     | 218<br>(109 - 399)             | 68<br>(32 - 131)            | 62<br>(30 - 113)         | 74<br>(32 - 145)            | 10<br>(4 - 20)              | 5<br>(2 - 9)                |
| Paratyphoid fever                                                 | 58<br>(28 - 105)               | 20<br>(9 - 38)              | 17<br>(7 - 31)           | 18<br>(8 - 36)              | 2<br>(1 - 5)                | 1<br>(0 - 2)                |
| Other intestinal infectious diseases                              | 34<br>(20 - 50)                | 16<br>(7 - 28)              | 3<br>(0 - 7)             | 9<br>(3 - 18)               | 3<br>(1 - 9)                | 3<br>(0 - 8)                |
| Lower respiratory infections                                      | 20,390<br>(16,715 - 23,684)    | 2,041<br>(1,632 - 2,419)    | 240<br>(193 - 292)       | 1,273<br>(959 - 1,645)      | 3,224<br>(2,306 - 4,110)    | 13,611<br>(10,946 - 16,144) |
| Upper respiratory infections                                      | 6<br>(3 - 11)                  | 1<br>(0 - 2)                | 0<br>(0 - 0)             | 1<br>(0 - 2)                | 1<br>(0 - 3)                | 2<br>(0 - 7)                |
| Otitis media                                                      | 17<br>(14 - 20)                | 3<br>(2 - 5)                | 1<br>(1 - 1)             | 2<br>(2 - 3)                | 3<br>(2 - 4)                | 7<br>(5 - 10)               |
| Meningitis                                                        | 391<br>(259 - 467)             | 149<br>(87 - 203)           | 33<br>(21 - 42)          | 86<br>(58 - 111)            | 52<br>(35 - 67)             | 70<br>(47 - 88)             |
| Pneumococcal meningitis                                           | 98<br>(60 - 122)               | 32<br>(17 - 46)             | 9<br>(5 - 12)            | 24<br>(15 - 35)             | 14<br>(8 - 21)              | 19<br>(11 - 26)             |
| H influenzae type B meningitis                                    | 75<br>(44 - 98)                | 49<br>(25 - 70)             | 7<br>(4 - 10)            | 8<br>(5 - 12)               | 4<br>(3 - 6)                | 6<br>(4 - 8)                |
| Meningococcal meningitis                                          | 67<br>(42 - 83)                | 23<br>(12 - 35)             | 7<br>(4 - 10)            | 15<br>(10 - 21)             | 8<br>(5 - 12)               | 13<br>(8 - 20)              |
| Other meningitis                                                  | 151<br>(110 - 189)             | 45<br>(28 - 62)             | 10<br>(6 - 15)           | 39<br>(24 - 53)             | 25<br>(17 - 34)             | 32<br>(21 - 43)             |
| Encephalitis                                                      | 369<br>(292 - 491)             | 150<br>(101 - 235)          | 41<br>(23 - 68)          | 88<br>(54 - 122)            | 50<br>(33 - 69)             | 39<br>(26 - 51)             |
| Diphtheria                                                        | 12<br>(1 - 42)                 | 8<br>(0 - 38)               | 2<br>(0 - 13)            | 2<br>(0 - 6)                | 1<br>(0 - 4)                | --                          |
| Whooping cough                                                    | 123<br>(34 - 385)              | 114<br>(26 - 376)           | 5<br>(3 - 8)             | 3<br>(2 - 4)                | 1<br>(1 - 1)                | --                          |
| Tetanus                                                           | 19<br>(7 - 43)                 | 4<br>(1 - 7)                | 1<br>(0 - 2)             | 5<br>(2 - 13)               | 6<br>(2 - 14)               | 4<br>(1 - 8)                |
| Measles                                                           | 0<br>(0 - 0)                   | 0<br>(0 - 0)                | 0<br>(0 - 0)             | 0<br>(0 - 0)                | 0<br>(0 - 0)                | --                          |
| Varicella and herpes zoster                                       | 27<br>(11 - 61)                | 6<br>(1 - 18)               | 1<br>(0 - 5)             | 5<br>(2 - 11)               | 3<br>(0 - 6)                | 12<br>(1 - 44)              |
| Neglected tropical diseases and malaria                           | 122<br>(93 - 203)              | 19<br>(12 - 30)             | 16<br>(11 - 23)          | 39<br>(30 - 52)             | 24<br>(17 - 50)             | 24<br>(15 - 67)             |
| Malaria                                                           | 8<br>(6 - 12)                  | 1<br>(0 - 2)                | 1<br>(0 - 1)             | 3<br>(2 - 5)                | 2<br>(1 - 4)                | 2<br>(1 - 4)                |
| Chagas disease                                                    | 17<br>(5 - 88)                 | 0<br>(0 - 1)                | 1<br>(0 - 2)             | 2<br>(1 - 8)                | 5<br>(1 - 31)               | 9<br>(2 - 49)               |
| Leishmaniasis                                                     | 7<br>(5 - 10)                  | 2<br>(1 - 4)                | 1<br>(0 - 1)             | 3<br>(2 - 4)                | 1<br>(0 - 2)                | 1<br>(0 - 1)                |
| Visceral leishmaniasis                                            | 7<br>(5 - 10)                  | 2<br>(1 - 4)                | 1<br>(0 - 1)             | 3<br>(2 - 4)                | 1<br>(0 - 2)                | 1<br>(0 - 1)                |
| Cysticercosis                                                     | 9<br>(8 - 11)                  | 0<br>(0 - 0)                | 0<br>(0 - 0)             | 4<br>(4 - 5)                | 3<br>(2 - 3)                | 1<br>(1 - 2)                |
| Cystic echinococcosis                                             | 18<br>(15 - 20)                | 1<br>(1 - 1)                | 2<br>(2 - 2)             | 7<br>(6 - 8)                | 4<br>(4 - 5)                | 4<br>(3 - 4)                |
| Dengue                                                            | 18<br>(13 - 32)                | 6<br>(3 - 15)               | 5<br>(3 - 8)             | 4<br>(3 - 6)                | 1<br>(1 - 2)                | 2<br>(1 - 4)                |
| Yellow fever                                                      | 16<br>(12 - 22)                | 2<br>(1 - 4)                | 4<br>(2 - 7)             | 9<br>(5 - 14)               | 2<br>(1 - 3)                | 1<br>(0 - 1)                |
| Rabies                                                            | 4<br>(3 - 8)                   | 0<br>(0 - 1)                | 1<br>(1 - 2)             | 2<br>(2 - 4)                | 1<br>(1 - 1)                | 0<br>(0 - 0)                |
| Intestinal nematode infections                                    | 6<br>(1 - 15)                  | 3<br>(0 - 11)               | 1<br>(0 - 6)             | 1<br>(0 - 4)                | 0<br>(0 - 3)                | 1<br>(0 - 4)                |
| Ascariasis                                                        | 6<br>(1 - 15)                  | 3<br>(0 - 11)               | 1<br>(0 - 6)             | 1<br>(0 - 4)                | 0<br>(0 - 3)                | 1<br>(0 - 4)                |
| Other neglected tropical diseases                                 | 17<br>(13 - 25)                | 2<br>(1 - 4)                | 1<br>(1 - 2)             | 5<br>(3 - 7)                | 5<br>(3 - 7)                | 5<br>(3 - 7)                |

Web Table 31- Peru deaths with 95% UI by age, sex, and cause in 2013

| Cause                                                            | Both Sexes, All Ages         | Both Sexes, 0-4 Years    | Both Sexes, 5-14 Years | Both Sexes, 15-49 Years    | Both Sexes, 50-69 Years     | Both Sexes, 70-80 Years     |
|------------------------------------------------------------------|------------------------------|--------------------------|------------------------|----------------------------|-----------------------------|-----------------------------|
| Maternal disorders                                               | 383<br>(274 - 513)           | --                       | 1<br>(1 - 2)           | 381<br>(273 - 512)         | --                          | --                          |
| Maternal hemorrhage                                              | 57<br>(38 - 78)              | --                       | 0<br>(0 - 0)           | 57<br>(38 - 78)            | --                          | --                          |
| Maternal sepsis and other maternal infections                    | 58<br>(39 - 80)              | --                       | 0<br>(0 - 0)           | 58<br>(39 - 79)            | --                          | --                          |
| Maternal hypertensive disorders                                  | 51<br>(35 - 71)              | --                       | 0<br>(0 - 0)           | 51<br>(35 - 70)            | --                          | --                          |
| Maternal obstructed labor                                        | 17<br>(11 - 27)              | --                       | 0<br>(0 - 0)           | 17<br>(11 - 27)            | --                          | --                          |
| Maternal abortive outcome                                        | 41<br>(27 - 58)              | --                       | 0<br>(0 - 0)           | 41<br>(27 - 58)            | --                          | --                          |
| Indirect maternal deaths                                         | 26<br>(16 - 38)              | --                       | 0<br>(0 - 0)           | 26<br>(16 - 38)            | --                          | --                          |
| Late maternal deaths                                             | 88<br>(56 - 125)             | --                       | 0<br>(0 - 0)           | 88<br>(56 - 124)           | --                          | --                          |
| Maternal deaths aggravated by HIV/AIDS                           | 0<br>(0 - 0)                 | --                       | --                     | 0<br>(0 - 0)               | --                          | --                          |
| Other maternal disorders                                         | 44<br>(30 - 60)              | --                       | 0<br>(0 - 0)           | 44<br>(30 - 60)            | --                          | --                          |
| Neonatal disorders                                               | 4,885<br>(4,358 - 5,409)     | 4,885<br>(4,358 - 5,409) | --                     | --                         | --                          | --                          |
| Neonatal preterm birth complications                             | 1,879<br>(1,399 - 2,401)     | 1,879<br>(1,399 - 2,401) | --                     | --                         | --                          | --                          |
| Neonatal encephalopathy due to birth asphyxia and trauma         | 1,463<br>(1,079 - 1,839)     | 1,463<br>(1,079 - 1,839) | --                     | --                         | --                          | --                          |
| Neonatal sepsis and other neonatal infections                    | 1,276<br>(815 - 1,853)       | 1,276<br>(815 - 1,853)   | --                     | --                         | --                          | --                          |
| Hemolytic disease and other neonatal jaundice                    | 23<br>(11 - 44)              | 23<br>(11 - 44)          | --                     | --                         | --                          | --                          |
| Other neonatal disorders                                         | 243<br>(174 - 346)           | 243<br>(174 - 346)       | --                     | --                         | --                          | --                          |
| Nutritional deficiencies                                         | 2,364<br>(1,949 - 3,150)     | 320<br>(238 - 477)       | 47<br>(37 - 65)        | 220<br>(168 - 309)         | 354<br>(269 - 494)          | 1,423<br>(1,104 - 1,857)    |
| Protein-energy malnutrition                                      | 1,670<br>(1,322 - 2,306)     | 281<br>(201 - 434)       | 32<br>(23 - 46)        | 108<br>(74 - 176)          | 212<br>(152 - 317)          | 1,038<br>(776 - 1,393)      |
| Iodine deficiency                                                | 2<br>(0 - 5)                 | 0<br>(0 - 1)             | 0<br>(0 - 0)           | 0<br>(0 - 1)               | 0<br>(0 - 1)                | 1<br>(0 - 3)                |
| Iron-deficiency anemia                                           | 517<br>(286 - 841)           | 26<br>(8 - 51)           | 11<br>(5 - 18)         | 85<br>(50 - 127)           | 104<br>(58 - 169)           | 291<br>(147 - 497)          |
| Other nutritional deficiencies                                   | 176<br>(99 - 275)            | 12<br>(4 - 24)           | 4<br>(2 - 7)           | 28<br>(15 - 43)            | 39<br>(21 - 65)             | 93<br>(48 - 162)            |
| Other communicable, maternal, neonatal, and nutritional diseases | 705<br>(348 - 1,114)         | 325<br>(45 - 693)        | 40<br>(17 - 69)        | 89<br>(62 - 117)           | 94<br>(60 - 125)            | 158<br>(87 - 222)           |
| Sexually transmitted diseases excluding HIV                      | 330<br>(27 - 729)            | 280<br>(0 - 648)         | 22<br>(0 - 50)         | 11<br>(8 - 16)             | 7<br>(4 - 10)               | 11<br>(7 - 16)              |
| Syphilis                                                         | 319<br>(17 - 716)            | 280<br>(0 - 648)         | 21<br>(0 - 50)         | 5<br>(3 - 7)               | 4<br>(3 - 6)                | 8<br>(6 - 13)               |
| Chlamydial infection                                             | 3<br>(2 - 4)                 | --                       | 0<br>(0 - 0)           | 2<br>(1 - 3)               | 1<br>(0 - 1)                | 0<br>(0 - 1)                |
| Gonococcal infection                                             | 5<br>(4 - 6)                 | --                       | 0<br>(0 - 0)           | 2<br>(2 - 3)               | 1<br>(1 - 2)                | 1<br>(1 - 2)                |
| Other sexually transmitted diseases                              | 4<br>(3 - 5)                 | --                       | 0<br>(0 - 0)           | 2<br>(1 - 3)               | 1<br>(1 - 1)                | 1<br>(0 - 1)                |
| Hepatitis                                                        | 82<br>(68 - 102)             | 4<br>(2 - 6)             | 5<br>(3 - 7)           | 29<br>(22 - 39)            | 25<br>(18 - 34)             | 19<br>(14 - 28)             |
| Acute hepatitis A                                                | 23<br>(10 - 37)              | 3<br>(1 - 4)             | 3<br>(2 - 5)           | 13<br>(5 - 21)             | 3<br>(1 - 7)                | 1<br>(0 - 3)                |
| Acute hepatitis B                                                | 54<br>(38 - 73)              | 1<br>(0 - 3)             | 1<br>(0 - 3)           | 14<br>(7 - 24)             | 21<br>(14 - 29)             | 17<br>(11 - 25)             |
| Acute hepatitis C                                                | 6<br>(1 - 14)                | --                       | 0<br>(0 - 1)           | 2<br>(0 - 6)               | 2<br>(0 - 5)                | 2<br>(0 - 4)                |
| Other infectious diseases                                        | 292<br>(159 - 392)           | 41<br>(23 - 64)          | 13<br>(8 - 18)         | 49<br>(26 - 69)            | 61<br>(32 - 87)             | 128<br>(59 - 189)           |
| Non-communicable diseases                                        | 92,724<br>(82,399 - 106,010) | 2,942<br>(2,519 - 3,462) | 785<br>(702 - 886)     | 10,374<br>(8,511 - 12,602) | 25,687<br>(21,592 - 30,447) | 52,936<br>(48,254 - 59,786) |
| Neoplasms                                                        | 25,896<br>(22,496 - 30,412)  | 171<br>(116 - 239)       | 284<br>(239 - 341)     | 3,408<br>(2,782 - 4,147)   | 9,186<br>(7,673 - 11,114)   | 12,847<br>(11,406 - 14,966) |
| Esophageal cancer                                                | 290<br>(228 - 374)           | --                       | --                     | 20<br>(15 - 26)            | 101<br>(73 - 138)           | 169<br>(131 - 221)          |
| Stomach cancer                                                   | 4,577<br>(3,854 - 5,452)     | --                       | --                     | 436<br>(345 - 550)         | 1,590<br>(1,295 - 1,938)    | 2,551<br>(2,097 - 3,139)    |
| Liver cancer                                                     | 1,715<br>(1,420 - 2,059)     | --                       | 11<br>(8 - 17)         | 209<br>(159 - 266)         | 644<br>(506 - 813)          | 850<br>(671 - 1,081)        |
| Liver cancer due to hepatitis B                                  | 741<br>(564 - 969)           | --                       | 6<br>(4 - 10)          | 130<br>(95 - 170)          | 318<br>(227 - 425)          | 287<br>(205 - 397)          |
| Liver cancer due to hepatitis C                                  | 273<br>(168 - 401)           | --                       | 0<br>(0 - 1)           | 15<br>(7 - 24)             | 87<br>(49 - 130)            | 171<br>(100 - 262)          |
| Liver cancer due to alcohol use                                  | 464<br>(320 - 627)           | --                       | --                     | 24<br>(15 - 36)            | 148<br>(97 - 211)           | 292<br>(197 - 403)          |

Web Table 31- Peru deaths with 95% UI by age, sex, and cause in 2013

| Cause                                         | Both Sexes, All Ages        | Both Sexes, 0-4 Years | Both Sexes, 5-14 Years | Both Sexes, 15-49 Years  | Both Sexes, 50-69 Years  | Both Sexes, 70-80 Years     |
|-----------------------------------------------|-----------------------------|-----------------------|------------------------|--------------------------|--------------------------|-----------------------------|
| Liver cancer due to other causes              | 237<br>(156 - 350)          | --                    | 5<br>(3 - 8)           | 40<br>(26 - 57)          | 91<br>(55 - 147)         | 100<br>(59 - 154)           |
| Larynx cancer                                 | 135<br>(103 - 202)          | --                    | --                     | 11<br>(8 - 16)           | 49<br>(35 - 78)          | 75<br>(57 - 108)            |
| Tracheal, bronchus and lung cancer            | 2,681<br>(2,280 - 3,148)    | --                    | --                     | 230<br>(183 - 294)       | 1,051<br>(860 - 1,283)   | 1,400<br>(1,185 - 1,633)    |
| Breast cancer                                 | 1,411<br>(1,088 - 1,879)    | --                    | --                     | 355<br>(256 - 472)       | 650<br>(478 - 879)       | 406<br>(325 - 528)          |
| Cervical cancer                               | 1,767<br>(1,318 - 2,371)    | --                    | --                     | 448<br>(308 - 610)       | 760<br>(537 - 1,075)     | 560<br>(417 - 764)          |
| Uterine cancer                                | 332<br>(216 - 498)          | --                    | --                     | 25<br>(15 - 39)          | 146<br>(90 - 225)        | 162<br>(98 - 241)           |
| Prostate cancer                               | 2,060<br>(1,368 - 3,080)    | --                    | --                     | 14<br>(8 - 23)           | 366<br>(236 - 579)       | 1,680<br>(1,075 - 2,512)    |
| Colon and rectum cancer                       | 2,195<br>(1,897 - 2,613)    | --                    | --                     | 201<br>(161 - 248)       | 710<br>(588 - 857)       | 1,285<br>(1,093 - 1,566)    |
| Lip and oral cavity cancer                    | 194<br>(143 - 243)          | --                    | --                     | 27<br>(19 - 36)          | 71<br>(49 - 92)          | 97<br>(70 - 127)            |
| Nasopharynx cancer                            | 29<br>(22 - 44)             | --                    | 1<br>(0 - 1)           | 7<br>(5 - 12)            | 11<br>(8 - 17)           | 10<br>(7 - 15)              |
| Other pharynx cancer                          | 78<br>(62 - 98)             | --                    | --                     | 13<br>(9 - 17)           | 39<br>(29 - 50)          | 27<br>(20 - 35)             |
| Gallbladder and biliary tract cancer          | 919<br>(717 - 1,279)        | --                    | --                     | 48<br>(35 - 68)          | 362<br>(263 - 513)       | 510<br>(382 - 727)          |
| Pancreatic cancer                             | 1,159<br>(989 - 1,377)      | --                    | --                     | 88<br>(69 - 111)         | 471<br>(383 - 584)       | 600<br>(504 - 732)          |
| Malignant skin melanoma                       | 206<br>(157 - 282)          | --                    | --                     | 40<br>(29 - 59)          | 78<br>(58 - 113)         | 89<br>(64 - 118)            |
| Non-melanoma skin cancer                      | 189<br>(138 - 255)          | --                    | --                     | 15<br>(11 - 22)          | 44<br>(32 - 61)          | 130<br>(94 - 176)           |
| Ovarian cancer                                | 526<br>(407 - 700)          | --                    | --                     | 109<br>(75 - 153)        | 246<br>(177 - 344)       | 171<br>(130 - 233)          |
| Testicular cancer                             | 34<br>(12 - 61)             | --                    | --                     | 21<br>(7 - 41)           | 5<br>(2 - 11)            | 7<br>(2 - 14)               |
| Kidney cancer                                 | 556<br>(463 - 675)          | 2<br>(1 - 3)          | 2<br>(1 - 2)           | 54<br>(41 - 71)          | 238<br>(190 - 303)       | 260<br>(207 - 324)          |
| Bladder cancer                                | 313<br>(251 - 412)          | --                    | --                     | 13<br>(9 - 18)           | 86<br>(63 - 117)         | 214<br>(169 - 283)          |
| Brain and nervous system cancer               | 675<br>(288 - 873)          | 23<br>(10 - 40)       | 41<br>(22 - 55)        | 194<br>(93 - 263)        | 239<br>(95 - 321)        | 178<br>(61 - 239)           |
| Thyroid cancer                                | 188<br>(141 - 244)          | --                    | 0<br>(0 - 0)           | 18<br>(13 - 24)          | 72<br>(51 - 98)          | 98<br>(70 - 128)            |
| Mesothelioma                                  | 59<br>(47 - 73)             | --                    | --                     | 6<br>(4 - 7)             | 27<br>(20 - 34)          | 27<br>(20 - 36)             |
| Hodgkin lymphoma                              | 51<br>(19 - 72)             | 1<br>(0 - 2)          | 2<br>(1 - 5)           | 14<br>(6 - 22)           | 15<br>(5 - 24)           | 17<br>(5 - 27)              |
| Non-Hodgkin lymphoma                          | 986<br>(784 - 1,256)        | 11<br>(6 - 19)        | 23<br>(15 - 36)        | 193<br>(143 - 267)       | 357<br>(277 - 473)       | 403<br>(297 - 511)          |
| Multiple myeloma                              | 282<br>(213 - 389)          | --                    | --                     | 26<br>(17 - 40)          | 126<br>(90 - 180)        | 130<br>(99 - 179)           |
| Leukemia                                      | 1,053<br>(902 - 1,220)      | 73<br>(43 - 116)      | 136<br>(109 - 165)     | 329<br>(263 - 406)       | 245<br>(199 - 300)       | 270<br>(225 - 324)          |
| Other neoplasms                               | 1,236<br>(953 - 1,841)      | 61<br>(33 - 104)      | 68<br>(46 - 110)       | 247<br>(173 - 393)       | 388<br>(275 - 613)       | 472<br>(372 - 687)          |
| Cardiovascular diseases                       | 28,204<br>(24,691 - 33,902) | 228<br>(173 - 288)    | 154<br>(127 - 184)     | 2,729<br>(2,183 - 3,382) | 6,675<br>(5,534 - 8,074) | 18,417<br>(16,366 - 22,229) |
| Rheumatic heart disease                       | 205<br>(133 - 262)          | 1<br>(0 - 1)          | 5<br>(3 - 7)           | 55<br>(36 - 72)          | 69<br>(46 - 94)          | 76<br>(45 - 100)            |
| Ischemic heart disease                        | 15,769<br>(13,550 - 18,748) | 23<br>(10 - 35)       | 52<br>(29 - 69)        | 1,440<br>(1,110 - 1,825) | 3,695<br>(3,005 - 4,500) | 10,559<br>(9,213 - 12,752)  |
| Cerebrovascular disease                       | 8,984<br>(7,503 - 11,374)   | 18<br>(13 - 24)       | 52<br>(42 - 66)        | 857<br>(659 - 1,115)     | 2,189<br>(1,747 - 2,816) | 5,867<br>(4,908 - 7,558)    |
| Ischemic stroke                               | 5,169<br>(4,215 - 7,027)    | 4<br>(3 - 8)          | 12<br>(8 - 20)         | 201<br>(138 - 318)       | 888<br>(656 - 1,345)     | 4,064<br>(3,327 - 5,405)    |
| Hemorrhagic stroke                            | 3,815<br>(2,956 - 4,771)    | 14<br>(9 - 18)        | 41<br>(30 - 50)        | 656<br>(484 - 864)       | 1,301<br>(966 - 1,649)   | 1,803<br>(1,361 - 2,334)    |
| Hypertensive heart disease                    | 440<br>(319 - 696)          | 1<br>(1 - 3)          | 1<br>(1 - 2)           | 32<br>(23 - 49)          | 84<br>(60 - 127)         | 322<br>(221 - 537)          |
| Cardiomyopathy and myocarditis                | 479<br>(382 - 602)          | 101<br>(74 - 142)     | 15<br>(11 - 21)        | 61<br>(46 - 89)          | 94<br>(70 - 127)         | 208<br>(156 - 274)          |
| Atrial fibrillation and flutter               | 190<br>(142 - 256)          | --                    | --                     | 6<br>(4 - 8)             | 24<br>(18 - 32)          | 159<br>(116 - 219)          |
| Aortic aneurysm                               | 366<br>(289 - 485)          | --                    | --                     | 28<br>(21 - 42)          | 107<br>(81 - 145)        | 232<br>(183 - 306)          |
| Peripheral vascular disease                   | 27<br>(21 - 36)             | --                    | --                     | 1<br>(1 - 1)             | 5<br>(3 - 6)             | 21<br>(16 - 30)             |
| Endocarditis                                  | 585<br>(380 - 753)          | 63<br>(42 - 86)       | 14<br>(10 - 20)        | 76<br>(49 - 105)         | 120<br>(77 - 163)        | 311<br>(190 - 427)          |
| Other cardiovascular and circulatory diseases | 1,159<br>(912 - 1,652)      | 21<br>(15 - 29)       | 14<br>(10 - 22)        | 173<br>(127 - 277)       | 289<br>(215 - 404)       | 662<br>(491 - 938)          |



Web Table 31- Peru deaths with 95% UI by age, sex, and cause in 2013

| Cause                                               | Both Sexes, All Ages     | Both Sexes, 0-4 Years | Both Sexes, 5-14 Years | Both Sexes, 15-49 Years | Both Sexes, 50-69 Years  | Both Sexes, 70-80 Years  |
|-----------------------------------------------------|--------------------------|-----------------------|------------------------|-------------------------|--------------------------|--------------------------|
| Chronic respiratory diseases                        | 8,414<br>(5,666 - 9,858) | 206<br>(152 - 262)    | 53<br>(37 - 64)        | 554<br>(345 - 713)      | 1,628<br>(1,107 - 1,989) | 5,973<br>(3,991 - 7,004) |
| Chronic obstructive pulmonary disease               | 5,247<br>(3,452 - 6,521) | 146<br>(100 - 193)    | 31<br>(20 - 39)        | 364<br>(221 - 476)      | 973<br>(640 - 1,238)     | 3,733<br>(2,383 - 4,706) |
| Pneumoconiosis                                      | 218<br>(143 - 303)       | 1<br>(1 - 1)          | 1<br>(1 - 1)           | 22<br>(13 - 31)         | 58<br>(37 - 83)          | 136<br>(86 - 198)        |
| Silicosis                                           | 18<br>(11 - 27)          | 0<br>(0 - 0)          | 0<br>(0 - 0)           | 4<br>(2 - 7)            | 5<br>(3 - 7)             | 9<br>(5 - 13)            |
| Asbestosis                                          | 37<br>(22 - 54)          | 0<br>(0 - 0)          | 0<br>(0 - 0)           | 4<br>(2 - 6)            | 10<br>(6 - 16)           | 22<br>(13 - 33)          |
| Coal workers pneumoconiosis                         | 16<br>(10 - 23)          | 0<br>(0 - 0)          | 0<br>(0 - 0)           | 1<br>(1 - 2)            | 3<br>(2 - 4)             | 11<br>(7 - 17)           |
| Other pneumoconiosis                                | 147<br>(95 - 206)        | 0<br>(0 - 0)          | 0<br>(0 - 0)           | 12<br>(7 - 17)          | 41<br>(26 - 58)          | 94<br>(60 - 138)         |
| Asthma                                              | 320<br>(204 - 416)       | 14<br>(8 - 22)        | 8<br>(5 - 10)          | 40<br>(25 - 53)         | 71<br>(48 - 96)          | 188<br>(113 - 264)       |
| Interstitial lung disease and pulmonary sarcoidosis | 2,489<br>(1,514 - 3,197) | 9<br>(5 - 15)         | 8<br>(5 - 11)          | 101<br>(62 - 137)       | 503<br>(317 - 663)       | 1,868<br>(1,078 - 2,432) |
| Other chronic respiratory diseases                  | 140<br>(107 - 176)       | 36<br>(27 - 49)       | 5<br>(3 - 8)           | 28<br>(18 - 38)         | 23<br>(16 - 32)          | 48<br>(32 - 67)          |
| Cirrhosis                                           | 5,836<br>(4,914 - 6,884) | 9<br>(6 - 12)         | 18<br>(16 - 22)        | 952<br>(745 - 1,217)    | 2,589<br>(2,098 - 3,117) | 2,268<br>(1,968 - 2,648) |
| Cirrhosis due to hepatitis B                        | 857<br>(399 - 1,373)     | 0<br>(0 - 0)          | 1<br>(1 - 2)           | 132<br>(65 - 217)       | 373<br>(169 - 600)       | 351<br>(155 - 579)       |
| Cirrhosis due to hepatitis C                        | 2,033<br>(1,450 - 2,811) | 1<br>(0 - 2)          | 3<br>(1 - 5)           | 276<br>(152 - 446)      | 900<br>(560 - 1,359)     | 853<br>(618 - 1,101)     |
| Cirrhosis due to alcohol use                        | 1,985<br>(1,391 - 2,788) | --                    | --                     | 273<br>(166 - 429)      | 902<br>(599 - 1,340)     | 810<br>(568 - 1,093)     |
| Cirrhosis due to other causes                       | 962<br>(684 - 1,383)     | 8<br>(6 - 11)         | 14<br>(12 - 17)        | 271<br>(186 - 394)      | 414<br>(278 - 632)       | 254<br>(159 - 381)       |
| Digestive diseases                                  | 4,138<br>(3,457 - 5,666) | 52<br>(36 - 71)       | 50<br>(42 - 64)        | 587<br>(453 - 830)      | 1,173<br>(917 - 1,704)   | 2,277<br>(1,941 - 3,042) |
| Peptic ulcer disease                                | 772<br>(603 - 1,130)     | 1<br>(1 - 2)          | 3<br>(2 - 3)           | 82<br>(59 - 119)        | 216<br>(158 - 330)       | 470<br>(364 - 678)       |
| Gastritis and duodenitis                            | 376<br>(221 - 529)       | 4<br>(2 - 7)          | 3<br>(2 - 4)           | 29<br>(18 - 45)         | 82<br>(50 - 121)         | 258<br>(140 - 367)       |
| Appendicitis                                        | 249<br>(183 - 373)       | 4<br>(2 - 6)          | 12<br>(8 - 17)         | 63<br>(44 - 96)         | 67<br>(45 - 108)         | 104<br>(70 - 164)        |
| Paralytic ileus and intestinal obstruction          | 566<br>(105 - 965)       | 21<br>(5 - 40)        | 13<br>(5 - 20)         | 71<br>(15 - 127)        | 162<br>(27 - 287)        | 298<br>(48 - 533)        |
| Inguinal, femoral, and abdominal hernia             | 340<br>(125 - 879)       | 5<br>(1 - 15)         | 4<br>(1 - 12)          | 40<br>(15 - 108)        | 98<br>(33 - 258)         | 192<br>(68 - 496)        |
| Inflammatory bowel disease                          | 96<br>(70 - 168)         | 7<br>(3 - 13)         | 2<br>(1 - 3)           | 17<br>(12 - 29)         | 22<br>(15 - 42)          | 48<br>(32 - 88)          |
| Vascular intestinal disorders                       | 169<br>(92 - 319)        | 1<br>(0 - 4)          | 2<br>(0 - 4)           | 13<br>(6 - 26)          | 41<br>(20 - 74)          | 113<br>(60 - 214)        |
| Gallbladder and biliary diseases                    | 721<br>(526 - 1,211)     | 1<br>(0 - 1)          | 3<br>(2 - 4)           | 69<br>(50 - 122)        | 205<br>(142 - 368)       | 443<br>(315 - 742)       |
| Pancreatitis                                        | 557<br>(410 - 859)       | 4<br>(2 - 7)          | 4<br>(3 - 6)           | 163<br>(117 - 251)      | 195<br>(139 - 311)       | 191<br>(137 - 301)       |
| Other digestive diseases                            | 293<br>(224 - 421)       | 5<br>(2 - 8)          | 5<br>(4 - 7)           | 39<br>(29 - 55)         | 85<br>(61 - 123)         | 160<br>(117 - 236)       |
| Neurological disorders                              | 4,486<br>(3,789 - 5,303) | 24<br>(17 - 40)       | 30<br>(22 - 49)        | 231<br>(172 - 322)      | 403<br>(327 - 507)       | 3,799<br>(3,190 - 4,503) |
| Alzheimer disease and other dementias               | 3,720<br>(3,106 - 4,413) | --                    | --                     | 1<br>(0 - 2)            | 229<br>(179 - 293)       | 3,490<br>(2,894 - 4,170) |
| Parkinson disease                                   | 259<br>(201 - 490)       | --                    | --                     | 4<br>(3 - 7)            | 51<br>(37 - 89)          | 204<br>(155 - 382)       |
| Epilepsy                                            | 343<br>(264 - 495)       | 15<br>(9 - 30)        | 26<br>(18 - 45)        | 189<br>(136 - 277)      | 68<br>(51 - 94)          | 46<br>(35 - 61)          |
| Multiple sclerosis                                  | 30<br>(15 - 41)          | --                    | --                     | 8<br>(4 - 12)           | 11<br>(5 - 16)           | 11<br>(5 - 16)           |
| Other neurological disorders                        | 134<br>(114 - 165)       | 9<br>(7 - 12)         | 4<br>(3 - 5)           | 29<br>(23 - 37)         | 44<br>(35 - 56)          | 48<br>(40 - 59)          |
| Mental and substance use disorders                  | 1,270<br>(601 - 1,700)   | 5<br>(3 - 8)          | 0<br>(0 - 0)           | 614<br>(307 - 854)      | 531<br>(217 - 728)       | 118<br>(66 - 153)        |
| Schizophrenia                                       | 4<br>(3 - 9)             | --                    | --                     | 2<br>(1 - 4)            | 1<br>(1 - 3)             | 1<br>(0 - 2)             |
| Alcohol use disorders                               | 958<br>(300 - 1,329)     | --                    | --                     | 406<br>(102 - 605)      | 464<br>(150 - 654)       | 88<br>(37 - 121)         |
| Drug use disorders                                  | 306<br>(235 - 390)       | 5<br>(3 - 8)          | --                     | 204<br>(153 - 263)      | 66<br>(48 - 87)          | 30<br>(22 - 38)          |
| Opioid use disorders                                | 46<br>(35 - 59)          | 1<br>(0 - 1)          | --                     | 31<br>(23 - 42)         | 9<br>(6 - 12)            | 5<br>(3 - 6)             |
| Cocaine use disorders                               | 8<br>(6 - 10)            | 0<br>(0 - 0)          | --                     | 6<br>(4 - 7)            | 1<br>(1 - 2)             | 1<br>(0 - 1)             |
| Amphetamine use disorders                           | 6<br>(5 - 8)             | 0<br>(0 - 0)          | --                     | 4<br>(3 - 6)            | 1<br>(1 - 2)             | 1<br>(0 - 1)             |
| Other drug use disorders                            | 245<br>(189 - 314)       | 4<br>(2 - 6)          | --                     | 163<br>(121 - 211)      | 55<br>(40 - 72)          | 24<br>(18 - 30)          |

Web Table 31- Peru deaths with 95% UI by age, sex, and cause in 2013

| Cause                                               | Both Sexes, All Ages       | Both Sexes, 0-4 Years    | Both Sexes, 5-14 Years | Both Sexes, 15-49 Years | Both Sexes, 50-69 Years  | Both Sexes, 70-80 Years  |
|-----------------------------------------------------|----------------------------|--------------------------|------------------------|-------------------------|--------------------------|--------------------------|
| Eating disorders                                    | 2<br>(1 - 3)               | --                       | 0<br>(0 - 0)           | 2<br>(1 - 3)            | --                       | --                       |
| Anorexia nervosa                                    | 2<br>(1 - 3)               | --                       | 0<br>(0 - 0)           | 2<br>(1 - 3)            | --                       | --                       |
| Diabetes, urogenital, blood, and endocrine diseases | 11,447<br>(9,997 - 13,270) | 338<br>(254 - 641)       | 90<br>(74 - 130)       | 1,064<br>(856 - 1,311)  | 3,230<br>(2,647 - 3,880) | 6,725<br>(5,854 - 7,724) |
| Diabetes mellitus                                   | 3,681<br>(3,166 - 4,360)   | 11<br>(8 - 13)           | 6<br>(4 - 8)           | 262<br>(205 - 328)      | 1,340<br>(1,094 - 1,634) | 2,062<br>(1,773 - 2,431) |
| Acute glomerulonephritis                            | 12<br>(9 - 18)             | 1<br>(1 - 1)             | 1<br>(1 - 1)           | 2<br>(2 - 4)            | 3<br>(2 - 4)             | 5<br>(3 - 9)             |
| Chronic kidney disease                              | 5,203<br>(3,973 - 6,186)   | 84<br>(57 - 112)         | 35<br>(26 - 43)        | 525<br>(385 - 661)      | 1,410<br>(1,062 - 1,738) | 3,149<br>(2,429 - 3,767) |
| Chronic kidney disease due to diabetes mellitus     | 1,728<br>(1,211 - 2,218)   | 5<br>(3 - 9)             | 2<br>(2 - 4)           | 112<br>(75 - 164)       | 601<br>(394 - 780)       | 1,008<br>(690 - 1,340)   |
| Chronic kidney disease due to hypertension          | 1,138<br>(769 - 1,549)     | 43<br>(30 - 56)          | 12<br>(8 - 15)         | 147<br>(96 - 196)       | 178<br>(104 - 256)       | 759<br>(507 - 1,059)     |
| Chronic kidney disease due to glomerulonephritis    | 163<br>(112 - 212)         | 8<br>(5 - 12)            | 5<br>(4 - 7)           | 36<br>(25 - 48)         | 39<br>(25 - 54)          | 74<br>(49 - 104)         |
| Chronic kidney disease due to other causes          | 2,175<br>(1,289 - 2,806)   | 28<br>(13 - 45)          | 15<br>(10 - 22)        | 230<br>(140 - 309)      | 593<br>(367 - 817)       | 1,308<br>(764 - 1,753)   |
| Urinary diseases and male infertility               | 1,669<br>(1,136 - 2,065)   | 80<br>(47 - 114)         | 12<br>(7 - 16)         | 122<br>(74 - 162)       | 288<br>(186 - 368)       | 1,168<br>(788 - 1,481)   |
| Interstitial nephritis and urinary tract infections | 1,455<br>(968 - 1,804)     | 76<br>(45 - 107)         | 10<br>(6 - 13)         | 94<br>(53 - 125)        | 229<br>(142 - 302)       | 1,046<br>(681 - 1,338)   |
| Urolithiasis                                        | 23<br>(16 - 37)            | --                       | 1<br>(0 - 1)           | 4<br>(2 - 7)            | 8<br>(5 - 13)            | 11<br>(7 - 20)           |
| Other urinary diseases                              | 191<br>(126 - 284)         | 4<br>(2 - 8)             | 1<br>(1 - 2)           | 24<br>(14 - 36)         | 51<br>(31 - 73)          | 111<br>(68 - 177)        |
| Gynecological diseases                              | 8<br>(5 - 24)              | --                       | --                     | 5<br>(3 - 13)           | 2<br>(1 - 4)             | 2<br>(1 - 7)             |
| Uterine fibroids                                    | 2<br>(1 - 5)               | --                       | --                     | 1<br>(0 - 2)            | 0<br>(0 - 1)             | 1<br>(0 - 2)             |
| Polycystic ovarian syndrome                         | 0<br>(0 - 1)               | --                       | --                     | 0<br>(0 - 1)            | 0<br>(0 - 0)             | --                       |
| Endometriosis                                       | 1<br>(0 - 2)               | --                       | --                     | 1<br>(0 - 2)            | 0<br>(0 - 0)             | --                       |
| Genital prolapse                                    | 1<br>(1 - 4)               | --                       | --                     | 1<br>(0 - 2)            | 0<br>(0 - 1)             | 1<br>(0 - 2)             |
| Other gynecological diseases                        | 4<br>(2 - 11)              | --                       | --                     | 2<br>(1 - 6)            | 1<br>(0 - 2)             | 1<br>(1 - 3)             |
| Hemoglobinopathies and hemolytic anemias            | 194<br>(142 - 287)         | 40<br>(23 - 81)          | 20<br>(14 - 36)        | 51<br>(36 - 78)         | 40<br>(28 - 58)          | 42<br>(30 - 61)          |
| Thalassemias                                        | 15<br>(10 - 27)            | 7<br>(4 - 14)            | 4<br>(3 - 7)           | 4<br>(3 - 7)            | 0<br>(0 - 0)             | 0<br>(0 - 0)             |
| Sickle cell disorders                               | 34<br>(24 - 52)            | 7<br>(4 - 15)            | 5<br>(3 - 9)           | 13<br>(9 - 19)          | 8<br>(6 - 12)            | 1<br>(0 - 1)             |
| G6PD deficiency                                     | 6<br>(4 - 10)              | 2<br>(1 - 4)             | 1<br>(1 - 2)           | 2<br>(2 - 3)            | 1<br>(1 - 1)             | 0<br>(0 - 0)             |
| Other hemoglobinopathies and hemolytic anemias      | 139<br>(103 - 199)         | 24<br>(14 - 50)          | 10<br>(7 - 18)         | 32<br>(23 - 48)         | 31<br>(22 - 45)          | 42<br>(29 - 60)          |
| Endocrine, metabolic, blood, and immune disorders   | 679<br>(433 - 1,838)       | 123<br>(62 - 426)        | 16<br>(10 - 46)        | 98<br>(60 - 244)        | 148<br>(91 - 382)        | 295<br>(174 - 846)       |
| Musculoskeletal disorders                           | 506<br>(359 - 640)         | --                       | 12<br>(9 - 16)         | 95<br>(68 - 121)        | 151<br>(94 - 197)        | 247<br>(175 - 318)       |
| Rheumatoid arthritis                                | 115<br>(79 - 153)          | --                       | 1<br>(1 - 2)           | 9<br>(6 - 13)           | 41<br>(25 - 58)          | 63<br>(42 - 89)          |
| Other musculoskeletal disorders                     | 391<br>(282 - 490)         | --                       | 11<br>(9 - 15)         | 86<br>(61 - 108)        | 110<br>(70 - 145)        | 184<br>(129 - 242)       |
| Other non-communicable diseases                     | 2,528<br>(2,118 - 2,921)   | 1,910<br>(1,517 - 2,302) | 93<br>(75 - 116)       | 140<br>(110 - 173)      | 120<br>(97 - 150)        | 265<br>(217 - 324)       |
| Congenital anomalies                                | 2,220<br>(1,821 - 2,603)   | 1,864<br>(1,472 - 2,250) | 88<br>(70 - 110)       | 115<br>(90 - 142)       | 64<br>(49 - 81)          | 90<br>(63 - 111)         |
| Neural tube defects                                 | 122<br>(84 - 177)          | 109<br>(71 - 162)        | 2<br>(1 - 2)           | 4<br>(3 - 6)            | 3<br>(2 - 4)             | 4<br>(3 - 6)             |
| Congenital heart anomalies                          | 978<br>(739 - 1,218)       | 821<br>(600 - 1,052)     | 50<br>(37 - 64)        | 60<br>(46 - 77)         | 25<br>(18 - 32)          | 22<br>(14 - 29)          |
| Cleft lip and cleft palate                          | 22<br>(5 - 71)             | 22<br>(5 - 71)           | --                     | --                      | --                       | --                       |
| Down syndrome                                       | 103<br>(70 - 158)          | 86<br>(56 - 137)         | 7<br>(4 - 11)          | 6<br>(4 - 9)            | 2<br>(1 - 3)             | 1<br>(1 - 2)             |
| Chromosomal unbalanced rearrangements               | 75<br>(47 - 119)           | 67<br>(41 - 108)         | 3<br>(1 - 5)           | 3<br>(2 - 4)            | 1<br>(1 - 2)             | 1<br>(1 - 1)             |
| Other congenital anomalies                          | 920<br>(704 - 1,123)       | 758<br>(560 - 953)       | 27<br>(18 - 37)        | 41<br>(30 - 53)         | 33<br>(24 - 43)          | 61<br>(42 - 78)          |
| Skin and subcutaneous diseases                      | 287<br>(236 - 350)         | 25<br>(16 - 37)          | 5<br>(4 - 7)           | 25<br>(19 - 33)         | 56<br>(43 - 72)          | 175<br>(136 - 230)       |
| Cellulitis                                          | 96<br>(62 - 129)           | 10<br>(6 - 16)           | 1<br>(1 - 2)           | 7<br>(4 - 9)            | 19<br>(12 - 27)          | 59<br>(34 - 88)          |
| Pyoderma                                            | 157<br>(122 - 201)         | 13<br>(7 - 20)           | 2<br>(1 - 3)           | 12<br>(9 - 17)          | 31<br>(22 - 41)          | 99<br>(71 - 137)         |

Web Table 31- Peru deaths with 95% UI by age, sex, and cause in 2013

| Cause                                           | Both Sexes, All Ages        | Both Sexes, 0-4 Years    | Both Sexes, 5-14 Years | Both Sexes, 15-49 Years  | Both Sexes, 50-69 Years  | Both Sexes, 70-80 Years  |
|-------------------------------------------------|-----------------------------|--------------------------|------------------------|--------------------------|--------------------------|--------------------------|
| Decubitus ulcer                                 | 22<br>(14 - 63)             | 0<br>(0 - 1)             | 1<br>(0 - 1)           | 4<br>(2 - 6)             | 4<br>(3 - 9)             | 13<br>(7 - 45)           |
| Other skin and subcutaneous diseases            | 12<br>(8 - 22)              | 2<br>(1 - 5)             | 1<br>(0 - 1)           | 2<br>(2 - 4)             | 3<br>(2 - 5)             | 4<br>(2 - 10)            |
| Sudden infant death syndrome                    | 21<br>(10 - 40)             | 21<br>(10 - 40)          | --                     | --                       | --                       | --                       |
| Injuries                                        | 13,976<br>(11,478 - 16,711) | 1,768<br>(1,364 - 2,130) | 709<br>(590 - 811)     | 5,851<br>(4,655 - 7,507) | 2,699<br>(2,128 - 3,294) | 2,949<br>(2,122 - 3,479) |
| Transport injuries                              | 4,911<br>(3,368 - 6,045)    | 330<br>(159 - 471)       | 319<br>(228 - 387)     | 2,381<br>(1,596 - 3,116) | 1,109<br>(762 - 1,378)   | 772<br>(510 - 958)       |
| Road injuries                                   | 4,783<br>(3,326 - 5,869)    | 318<br>(156 - 453)       | 309<br>(224 - 373)     | 2,328<br>(1,582 - 3,042) | 1,075<br>(750 - 1,337)   | 752<br>(504 - 931)       |
| Pedestrian road injuries                        | 1,900<br>(1,231 - 2,486)    | 181<br>(81 - 260)        | 168<br>(112 - 215)     | 649<br>(394 - 954)       | 488<br>(314 - 662)       | 414<br>(260 - 534)       |
| Cyclist road injuries                           | 372<br>(225 - 490)          | 29<br>(11 - 54)          | 36<br>(22 - 50)        | 112<br>(64 - 157)        | 105<br>(64 - 148)        | 89<br>(51 - 121)         |
| Motorcyclist road injuries                      | 475<br>(262 - 712)          | 10<br>(4 - 17)           | 8<br>(4 - 12)          | 376<br>(200 - 573)       | 67<br>(37 - 103)         | 14<br>(8 - 21)           |
| Motor vehicle road injuries                     | 1,972<br>(1,437 - 2,557)    | 85<br>(45 - 129)         | 87<br>(64 - 119)       | 1,183<br>(828 - 1,590)   | 399<br>(277 - 526)       | 217<br>(151 - 291)       |
| Other road injuries                             | 64<br>(33 - 90)             | 12<br>(5 - 21)           | 10<br>(5 - 15)         | 8<br>(4 - 12)            | 16<br>(8 - 26)           | 18<br>(7 - 31)           |
| Other transport injuries                        | 128<br>(40 - 185)           | 12<br>(3 - 21)           | 10<br>(3 - 16)         | 53<br>(17 - 82)          | 33<br>(10 - 52)          | 20<br>(5 - 30)           |
| Unintentional injuries                          | 6,439<br>(4,867 - 7,786)    | 1,383<br>(987 - 1,786)   | 320<br>(227 - 392)     | 1,848<br>(1,327 - 2,493) | 1,017<br>(705 - 1,307)   | 1,872<br>(1,222 - 2,284) |
| Falls                                           | 931<br>(384 - 1,218)        | 35<br>(9 - 62)           | 25<br>(8 - 37)         | 129<br>(46 - 186)        | 179<br>(70 - 247)        | 562<br>(227 - 757)       |
| Drowning                                        | 757<br>(314 - 1,227)        | 147<br>(43 - 273)        | 91<br>(39 - 145)       | 337<br>(136 - 593)       | 114<br>(53 - 182)        | 69<br>(28 - 112)         |
| Fire, heat, and hot substances                  | 314<br>(225 - 393)          | 58<br>(35 - 99)          | 20<br>(13 - 28)        | 67<br>(50 - 90)          | 48<br>(34 - 63)          | 121<br>(74 - 164)        |
| Poisonings                                      | 226<br>(80 - 308)           | 15<br>(6 - 23)           | 9<br>(4 - 13)          | 76<br>(30 - 108)         | 56<br>(19 - 83)          | 70<br>(21 - 103)         |
| Exposure to mechanical forces                   | 762<br>(584 - 1,071)        | 50<br>(35 - 72)          | 49<br>(37 - 81)        | 465<br>(332 - 665)       | 131<br>(97 - 200)        | 68<br>(54 - 90)          |
| Unintentional firearm injuries                  | 365<br>(115 - 498)          | 6<br>(3 - 8)             | 10<br>(5 - 15)         | 278<br>(76 - 395)        | 49<br>(17 - 71)          | 22<br>(8 - 31)           |
| Unintentional suffocation                       | 132<br>(98 - 184)           | 30<br>(18 - 47)          | 11<br>(7 - 19)         | 50<br>(33 - 76)          | 19<br>(12 - 29)          | 21<br>(14 - 34)          |
| Other exposure to mechanical forces             | 265<br>(187 - 664)          | 15<br>(9 - 25)           | 27<br>(17 - 60)        | 137<br>(85 - 401)        | 62<br>(42 - 147)         | 24<br>(17 - 42)          |
| Adverse effects of medical treatment            | 602<br>(308 - 864)          | 74<br>(28 - 120)         | 13<br>(6 - 21)         | 91<br>(50 - 136)         | 126<br>(57 - 195)        | 298<br>(133 - 446)       |
| Animal contact                                  | 42<br>(23 - 53)             | 8<br>(3 - 12)            | 5<br>(3 - 7)           | 10<br>(7 - 15)           | 12<br>(6 - 16)           | 7<br>(3 - 10)            |
| Venomous animal contact                         | 24<br>(14 - 30)             | 4<br>(2 - 6)             | 3<br>(2 - 5)           | 7<br>(4 - 10)            | 7<br>(4 - 10)            | 3<br>(1 - 4)             |
| Non-venomous animal contact                     | 18<br>(9 - 24)              | 4<br>(1 - 6)             | 2<br>(1 - 3)           | 3<br>(2 - 5)             | 5<br>(2 - 7)             | 4<br>(2 - 6)             |
| Foreign body                                    | 2,603<br>(1,869 - 3,607)    | 989<br>(702 - 1,417)     | 97<br>(63 - 132)       | 576<br>(362 - 788)       | 304<br>(210 - 455)       | 637<br>(444 - 1,011)     |
| Pulmonary aspiration and foreign body in airway | 2,581<br>(1,846 - 3,579)    | 981<br>(693 - 1,407)     | 96<br>(62 - 131)       | 572<br>(358 - 785)       | 301<br>(208 - 451)       | 630<br>(438 - 1,004)     |
| Foreign body in other body part                 | 22<br>(14 - 38)             | 8<br>(4 - 14)            | 1<br>(1 - 1)           | 3<br>(2 - 5)             | 3<br>(2 - 6)             | 7<br>(4 - 14)            |
| Other unintentional injuries                    | 202<br>(153 - 256)          | 8<br>(5 - 12)            | 11<br>(6 - 18)         | 96<br>(63 - 140)         | 47<br>(29 - 70)          | 41<br>(24 - 58)          |
| Self-harm and interpersonal violence            | 2,450<br>(1,902 - 3,443)    | 55<br>(33 - 101)         | 66<br>(48 - 98)        | 1,566<br>(1,173 - 2,222) | 511<br>(394 - 725)       | 252<br>(198 - 417)       |
| Self-harm                                       | 1,471<br>(1,154 - 2,180)    | --                       | 28<br>(19 - 43)        | 842<br>(641 - 1,206)     | 388<br>(302 - 563)       | 213<br>(165 - 378)       |
| Interpersonal violence                          | 979<br>(695 - 1,501)        | 55<br>(33 - 101)         | 38<br>(24 - 60)        | 724<br>(491 - 1,170)     | 123<br>(79 - 211)        | 39<br>(25 - 62)          |
| Assault by firearm                              | 469<br>(286 - 811)          | 9<br>(4 - 17)            | 9<br>(5 - 16)          | 396<br>(236 - 692)       | 48<br>(26 - 87)          | 7<br>(4 - 13)            |
| Assault by sharp object                         | 243<br>(144 - 417)          | 6<br>(3 - 13)            | 5<br>(3 - 9)           | 189<br>(105 - 339)       | 34<br>(20 - 60)          | 8<br>(5 - 15)            |
| Assault by other means                          | 267<br>(192 - 417)          | 40<br>(23 - 70)          | 24<br>(15 - 40)        | 138<br>(88 - 236)        | 41<br>(26 - 70)          | 23<br>(14 - 38)          |
| Forces of nature, war, and legal intervention   | 176<br>(142 - 238)          | 0<br>(0 - 0)             | 4<br>(3 - 5)           | 56<br>(43 - 79)          | 62<br>(49 - 83)          | 53<br>(46 - 67)          |
| Exposure to forces of nature                    | 176<br>(142 - 238)          | 0<br>(0 - 0)             | 4<br>(3 - 5)           | 56<br>(43 - 79)          | 62<br>(49 - 83)          | 53<br>(46 - 67)          |

Web Table 31- Peru deaths with 95% UI by age, sex, and cause in 2013

| Cause                                                             | Males, All Ages             | Males, 0-4 Years         | Males, 5-14 Years        | Males, 15-49 Years         | Males, 50-69 Years          | Males, 70-80 Years          |
|-------------------------------------------------------------------|-----------------------------|--------------------------|--------------------------|----------------------------|-----------------------------|-----------------------------|
| All causes                                                        | 72,983<br>(61,953 - 84,274) | 7,384<br>(6,635 - 8,085) | 1,197<br>(1,096 - 1,294) | 12,572<br>(9,517 - 16,317) | 18,415<br>(14,319 - 22,367) | 33,415<br>(29,230 - 37,019) |
| Communicable, maternal, neonatal, and nutritional diseases        | 17,503<br>(14,978 - 19,903) | 4,778<br>(4,296 - 5,299) | 313<br>(258 - 371)       | 2,118<br>(1,699 - 2,618)   | 2,791<br>(2,125 - 3,471)    | 7,502<br>(6,014 - 9,107)    |
| HIV/AIDS and tuberculosis                                         | 1,890<br>(1,476 - 2,638)    | 12<br>(8 - 19)           | 16<br>(12 - 27)          | 890<br>(666 - 1,238)       | 560<br>(425 - 786)          | 411<br>(316 - 654)          |
| Tuberculosis                                                      | 1,435<br>(1,100 - 2,157)    | 11<br>(8 - 18)           | 15<br>(12 - 25)          | 548<br>(391 - 801)         | 461<br>(338 - 698)          | 398<br>(306 - 641)          |
| HIV/AIDS                                                          | 455<br>(287 - 790)          | 1<br>(0 - 3)             | 1<br>(0 - 3)             | 342<br>(219 - 599)         | 99<br>(47 - 183)            | 12<br>(5 - 25)              |
| HIV/AIDS resulting in mycobacterial infection                     | 30<br>(18 - 52)             | 0<br>(0 - 0)             | 0<br>(0 - 0)             | 22<br>(14 - 38)            | 7<br>(3 - 13)               | 1<br>(0 - 2)                |
| HIV/AIDS resulting in other diseases                              | 425<br>(269 - 740)          | 1<br>(0 - 3)             | 1<br>(0 - 3)             | 320<br>(205 - 561)         | 93<br>(44 - 171)            | 11<br>(5 - 23)              |
| Diarrhea, lower respiratory, and other common infectious diseases | 11,323<br>(8,901 - 13,646)  | 1,614<br>(1,293 - 1,973) | 243<br>(192 - 301)       | 1,035<br>(717 - 1,425)     | 1,990<br>(1,337 - 2,652)    | 6,442<br>(4,935 - 8,078)    |
| Diarrheal diseases                                                | 432<br>(331 - 558)          | 203<br>(126 - 294)       | 14<br>(9 - 21)           | 40<br>(27 - 58)            | 54<br>(36 - 80)             | 121<br>(78 - 185)           |
| Intestinal infectious diseases                                    | 163<br>(85 - 291)           | 56<br>(28 - 103)         | 46<br>(21 - 86)          | 50<br>(22 - 102)           | 7<br>(3 - 14)               | 4<br>(2 - 8)                |
| Typhoid fever                                                     | 113<br>(53 - 214)           | 36<br>(16 - 72)          | 35<br>(15 - 67)          | 36<br>(14 - 78)            | 4<br>(2 - 9)                | 2<br>(1 - 4)                |
| Paratyphoid fever                                                 | 30<br>(14 - 57)             | 10<br>(4 - 22)           | 9<br>(4 - 19)            | 9<br>(3 - 18)              | 1<br>(0 - 2)                | 0<br>(0 - 1)                |
| Other intestinal infectious diseases                              | 20<br>(10 - 35)             | 9<br>(3 - 19)            | 2<br>(0 - 5)             | 5<br>(1 - 12)              | 2<br>(0 - 6)                | 2<br>(0 - 6)                |
| Lower respiratory infections                                      | 10,210<br>(7,877 - 12,527)  | 1,136<br>(853 - 1,442)   | 137<br>(96 - 185)        | 825<br>(553 - 1,167)       | 1,859<br>(1,229 - 2,508)    | 6,253<br>(4,744 - 7,899)    |
| Upper respiratory infections                                      | 3<br>(1 - 6)                | 0<br>(0 - 2)             | 0<br>(0 - 0)             | 1<br>(0 - 2)               | 1<br>(0 - 2)                | 1<br>(0 - 4)                |
| Otitis media                                                      | 8<br>(6 - 11)               | 2<br>(1 - 3)             | 1<br>(0 - 1)             | 1<br>(1 - 2)               | 1<br>(1 - 2)                | 3<br>(2 - 5)                |
| Meningitis                                                        | 209<br>(139 - 270)          | 74<br>(33 - 118)         | 18<br>(11 - 23)          | 54<br>(35 - 75)            | 31<br>(20 - 41)             | 33<br>(22 - 45)             |
| Pneumococcal meningitis                                           | 51<br>(29 - 69)             | 16<br>(6 - 27)           | 5<br>(3 - 8)             | 14<br>(7 - 22)             | 8<br>(4 - 12)               | 9<br>(5 - 14)               |
| H influenzae type B meningitis                                    | 38<br>(22 - 58)             | 24<br>(10 - 42)          | 4<br>(2 - 7)             | 5<br>(3 - 9)               | 2<br>(1 - 4)                | 3<br>(2 - 5)                |
| Meningococcal meningitis                                          | 36<br>(21 - 50)             | 12<br>(4 - 21)           | 4<br>(2 - 6)             | 10<br>(5 - 16)             | 4<br>(2 - 7)                | 6<br>(4 - 10)               |
| Other meningitis                                                  | 84<br>(58 - 115)            | 22<br>(10 - 40)          | 5<br>(2 - 9)             | 25<br>(13 - 39)            | 16<br>(10 - 23)             | 15<br>(8 - 23)              |
| Encephalitis                                                      | 214<br>(146 - 302)          | 86<br>(46 - 155)         | 23<br>(11 - 42)          | 55<br>(31 - 82)            | 32<br>(17 - 47)             | 19<br>(11 - 27)             |
| Diphtheria                                                        | 7<br>(0 - 36)               | 4<br>(0 - 33)            | 1<br>(0 - 10)            | 1<br>(0 - 4)               | 0<br>(0 - 3)                | --                          |
| Whooping cough                                                    | 50<br>(12 - 183)            | 46<br>(8 - 178)          | 2<br>(1 - 4)             | 2<br>(1 - 3)               | 0<br>(0 - 1)                | --                          |
| Tetanus                                                           | 13<br>(5 - 37)              | 3<br>(1 - 5)             | 1<br>(0 - 2)             | 4<br>(1 - 12)              | 4<br>(1 - 13)               | 2<br>(0 - 7)                |
| Measles                                                           | 0<br>(0 - 0)                | 0<br>(0 - 0)             | 0<br>(0 - 0)             | 0<br>(0 - 0)               | 0<br>(0 - 0)                | --                          |
| Varicella and herpes zoster                                       | 13<br>(4 - 34)              | 3<br>(0 - 11)            | 1<br>(0 - 3)             | 3<br>(0 - 8)               | 1<br>(0 - 4)                | 5<br>(0 - 25)               |
| Neglected tropical diseases and malaria                           | 71<br>(52 - 112)            | 11<br>(6 - 19)           | 9<br>(6 - 13)            | 25<br>(18 - 34)            | 14<br>(9 - 32)              | 12<br>(7 - 32)              |
| Malaria                                                           | 5<br>(4 - 8)                | 1<br>(0 - 1)             | 0<br>(0 - 1)             | 2<br>(1 - 3)               | 1<br>(1 - 3)                | 1<br>(1 - 3)                |
| Chagas disease                                                    | 9<br>(2 - 46)               | 0<br>(0 - 1)             | 0<br>(0 - 1)             | 1<br>(0 - 3)               | 3<br>(1 - 19)               | 4<br>(1 - 23)               |
| Leishmaniasis                                                     | 7<br>(5 - 10)               | 2<br>(1 - 4)             | 1<br>(0 - 1)             | 3<br>(2 - 4)               | 1<br>(0 - 2)                | 1<br>(0 - 1)                |
| Visceral leishmaniasis                                            | 7<br>(5 - 10)               | 2<br>(1 - 4)             | 1<br>(0 - 1)             | 3<br>(2 - 4)               | 1<br>(0 - 2)                | 1<br>(0 - 1)                |
| Cysticercosis                                                     | 4<br>(3 - 6)                | 0<br>(0 - 0)             | 0<br>(0 - 0)             | 2<br>(2 - 3)               | 1<br>(1 - 2)                | 1<br>(0 - 1)                |
| Cystic echinococcosis                                             | 9<br>(7 - 11)               | 0<br>(0 - 1)             | 1<br>(1 - 1)             | 4<br>(3 - 5)               | 2<br>(2 - 3)                | 1<br>(1 - 2)                |
| Dengue                                                            | 9<br>(6 - 15)               | 3<br>(1 - 6)             | 2<br>(1 - 4)             | 2<br>(1 - 4)               | 1<br>(0 - 1)                | 1<br>(1 - 2)                |
| Yellow fever                                                      | 11<br>(7 - 17)              | 1<br>(0 - 3)             | 3<br>(1 - 6)             | 6<br>(3 - 11)              | 1<br>(0 - 3)                | 0<br>(0 - 1)                |
| Rabies                                                            | 3<br>(2 - 5)                | 0<br>(0 - 0)             | 1<br>(0 - 1)             | 1<br>(1 - 2)               | 0<br>(0 - 1)                | 0<br>(0 - 0)                |
| Intestinal nematode infections                                    | 3<br>(0 - 10)               | 2<br>(0 - 8)             | 1<br>(0 - 4)             | 0<br>(0 - 3)               | 0<br>(0 - 3)                | 0<br>(0 - 3)                |
| Ascariasis                                                        | 3<br>(0 - 10)               | 2<br>(0 - 8)             | 1<br>(0 - 4)             | 0<br>(0 - 3)               | 0<br>(0 - 3)                | 0<br>(0 - 3)                |
| Other neglected tropical diseases                                 | 11<br>(8 - 15)              | 1<br>(1 - 3)             | 1<br>(0 - 1)             | 3<br>(2 - 5)               | 3<br>(2 - 5)                | 2<br>(1 - 4)                |

Web Table 31- Peru deaths with 95% UI by age, sex, and cause in 2013

| Cause                                                            | Males, All Ages             | Males, 0-4 Years         | Males, 5-14 Years  | Males, 15-49 Years       | Males, 50-69 Years          | Males, 70-80 Years          |
|------------------------------------------------------------------|-----------------------------|--------------------------|--------------------|--------------------------|-----------------------------|-----------------------------|
| Maternal disorders                                               | --                          | --                       | --                 | --                       | --                          | --                          |
| Maternal hemorrhage                                              | --                          | --                       | --                 | --                       | --                          | --                          |
| Maternal sepsis and other maternal infections                    | --                          | --                       | --                 | --                       | --                          | --                          |
| Maternal hypertensive disorders                                  | --                          | --                       | --                 | --                       | --                          | --                          |
| Maternal obstructed labor                                        | --                          | --                       | --                 | --                       | --                          | --                          |
| Maternal abortive outcome                                        | --                          | --                       | --                 | --                       | --                          | --                          |
| Indirect maternal deaths                                         | --                          | --                       | --                 | --                       | --                          | --                          |
| Late maternal deaths                                             | --                          | --                       | --                 | --                       | --                          | --                          |
| Maternal deaths aggravated by HIV/AIDS                           | --                          | --                       | --                 | --                       | --                          | --                          |
| Other maternal disorders                                         | --                          | --                       | --                 | --                       | --                          | --                          |
| Neonatal disorders                                               | 2,805<br>(2,534 - 3,105)    | 2,805<br>(2,534 - 3,105) | --                 | --                       | --                          | --                          |
| Neonatal preterm birth complications                             | 1,057<br>(693 - 1,465)      | 1,057<br>(693 - 1,465)   | --                 | --                       | --                          | --                          |
| Neonatal encephalopathy due to birth asphyxia and trauma         | 828<br>(519 - 1,130)        | 828<br>(519 - 1,130)     | --                 | --                       | --                          | --                          |
| Neonatal sepsis and other neonatal infections                    | 776<br>(372 - 1,278)        | 776<br>(372 - 1,278)     | --                 | --                       | --                          | --                          |
| Hemolytic disease and other neonatal jaundice                    | 14<br>(5 - 30)              | 14<br>(5 - 30)           | --                 | --                       | --                          | --                          |
| Other neonatal disorders                                         | 129<br>(80 - 207)           | 129<br>(80 - 207)        | --                 | --                       | --                          | --                          |
| Nutritional deficiencies                                         | 1,048<br>(719 - 1,644)      | 171<br>(105 - 310)       | 25<br>(17 - 40)    | 114<br>(73 - 193)        | 174<br>(112 - 305)          | 565<br>(359 - 886)          |
| Protein-energy malnutrition                                      | 740<br>(499 - 1,230)        | 150<br>(89 - 281)        | 17<br>(10 - 28)    | 61<br>(33 - 114)         | 108<br>(64 - 201)           | 405<br>(247 - 638)          |
| Iodine deficiency                                                | 1<br>(0 - 2)                | 0<br>(0 - 1)             | 0<br>(0 - 0)       | 0<br>(0 - 1)             | 0<br>(0 - 1)                | 0<br>(0 - 2)                |
| Iron-deficiency anemia                                           | 223<br>(88 - 424)           | 14<br>(3 - 31)           | 6<br>(2 - 12)      | 38<br>(15 - 72)          | 45<br>(17 - 90)             | 120<br>(44 - 244)           |
| Other nutritional deficiencies                                   | 84<br>(32 - 157)            | 7<br>(2 - 16)            | 2<br>(1 - 5)       | 15<br>(6 - 27)           | 20<br>(7 - 39)              | 40<br>(12 - 80)             |
| Other communicable, maternal, neonatal, and nutritional diseases | 366<br>(181 - 569)          | 165<br>(24 - 345)        | 20<br>(10 - 35)    | 55<br>(34 - 79)          | 53<br>(31 - 74)             | 73<br>(36 - 103)            |
| Sexually transmitted diseases excluding HIV                      | 157<br>(7 - 351)            | 140<br>(0 - 322)         | 10<br>(0 - 23)     | 2<br>(1 - 3)             | 2<br>(1 - 4)                | 3<br>(2 - 7)                |
| Syphilis                                                         | 155<br>(5 - 349)            | 140<br>(0 - 322)         | 10<br>(0 - 23)     | 1<br>(1 - 2)             | 2<br>(1 - 3)                | 3<br>(1 - 6)                |
| Chlamydial infection                                             | --                          | --                       | --                 | --                       | --                          | --                          |
| Gonococcal infection                                             | 1<br>(1 - 2)                | --                       | 0<br>(0 - 0)       | 0<br>(0 - 1)             | 0<br>(0 - 1)                | 0<br>(0 - 1)                |
| Other sexually transmitted diseases                              | 1<br>(0 - 1)                | --                       | 0<br>(0 - 0)       | 0<br>(0 - 1)             | 0<br>(0 - 0)                | 0<br>(0 - 0)                |
| Hepatitis                                                        | 53<br>(40 - 69)             | 3<br>(1 - 4)             | 3<br>(2 - 5)       | 20<br>(14 - 29)          | 17<br>(11 - 24)             | 10<br>(7 - 15)              |
| Acute hepatitis A                                                | 15<br>(6 - 26)              | 2<br>(1 - 3)             | 2<br>(1 - 4)       | 9<br>(3 - 15)            | 2<br>(0 - 5)                | 0<br>(0 - 1)                |
| Acute hepatitis B                                                | 35<br>(23 - 49)             | 1<br>(0 - 2)             | 1<br>(0 - 2)       | 10<br>(5 - 18)           | 14<br>(9 - 21)              | 9<br>(6 - 14)               |
| Acute hepatitis C                                                | 4<br>(1 - 9)                | --                       | 0<br>(0 - 1)       | 1<br>(0 - 4)             | 1<br>(0 - 3)                | 1<br>(0 - 3)                |
| Other infectious diseases                                        | 156<br>(77 - 214)           | 23<br>(11 - 39)          | 7<br>(4 - 11)      | 33<br>(15 - 50)          | 34<br>(15 - 50)             | 59<br>(23 - 88)             |
| Non-communicable diseases                                        | 46,070<br>(38,026 - 54,000) | 1,631<br>(1,312 - 1,984) | 447<br>(388 - 518) | 5,860<br>(4,265 - 7,723) | 13,753<br>(10,582 - 16,862) | 24,378<br>(21,024 - 27,457) |
| Neoplasms                                                        | 11,977<br>(9,620 - 14,325)  | 103<br>(66 - 154)        | 169<br>(137 - 205) | 1,349<br>(977 - 1,800)   | 4,024<br>(3,058 - 5,017)    | 6,332<br>(5,270 - 7,527)    |
| Esophageal cancer                                                | 220<br>(161 - 300)          | --                       | --                 | 14<br>(9 - 20)           | 79<br>(53 - 115)            | 127<br>(91 - 180)           |
| Stomach cancer                                                   | 2,319<br>(1,827 - 2,807)    | --                       | --                 | 219<br>(152 - 305)       | 888<br>(663 - 1,136)        | 1,213<br>(957 - 1,515)      |
| Liver cancer                                                     | 759<br>(592 - 968)          | --                       | 8<br>(5 - 13)      | 113<br>(77 - 158)        | 294<br>(213 - 389)          | 344<br>(261 - 455)          |
| Liver cancer due to hepatitis B                                  | 387<br>(256 - 532)          | --                       | 5<br>(3 - 8)       | 78<br>(51 - 110)         | 165<br>(99 - 235)           | 139<br>(84 - 210)           |
| Liver cancer due to hepatitis C                                  | 105<br>(52 - 177)           | --                       | 0<br>(0 - 0)       | 7<br>(2 - 13)            | 37<br>(17 - 66)             | 62<br>(29 - 109)            |
| Liver cancer due to alcohol use                                  | 210<br>(135 - 316)          | --                       | --                 | 14<br>(8 - 24)           | 73<br>(42 - 117)            | 123<br>(76 - 187)           |

Web Table 31- Peru deaths with 95% UI by age, sex, and cause in 2013

| Cause                                         | Males, All Ages             | Males, 0-4 Years   | Males, 5-14 Years | Males, 15-49 Years       | Males, 50-69 Years       | Males, 70-80 Years       |
|-----------------------------------------------|-----------------------------|--------------------|-------------------|--------------------------|--------------------------|--------------------------|
| Liver cancer due to other causes              | 56<br>(31 - 91)             | --                 | 3<br>(1 - 6)      | 14<br>(7 - 24)           | 20<br>(9 - 37)           | 20<br>(10 - 33)          |
| Larynx cancer                                 | 108<br>(79 - 169)           | --                 | --                | 8<br>(5 - 12)            | 39<br>(26 - 67)          | 61<br>(44 - 93)          |
| Tracheal, bronchus and lung cancer            | 1,460<br>(1,151 - 1,791)    | --                 | --                | 118<br>(84 - 163)        | 589<br>(442 - 749)       | 753<br>(609 - 923)       |
| Breast cancer                                 | 23<br>(15 - 50)             | --                 | --                | 3<br>(2 - 7)             | 9<br>(5 - 18)            | 11<br>(6 - 26)           |
| Cervical cancer                               | --                          | --                 | --                | --                       | --                       | --                       |
| Uterine cancer                                | --                          | --                 | --                | --                       | --                       | --                       |
| Prostate cancer                               | 2,060<br>(1,368 - 3,080)    | --                 | --                | 14<br>(8 - 23)           | 366<br>(236 - 579)       | 1,680<br>(1,075 - 2,512) |
| Colon and rectum cancer                       | 958<br>(759 - 1,155)        | --                 | --                | 103<br>(72 - 143)        | 329<br>(247 - 418)       | 526<br>(419 - 649)       |
| Lip and oral cavity cancer                    | 108<br>(74 - 146)           | --                 | --                | 17<br>(11 - 25)          | 44<br>(28 - 61)          | 47<br>(32 - 67)          |
| Nasopharynx cancer                            | 15<br>(11 - 20)             | --                 | 0<br>(0 - 0)      | 4<br>(3 - 7)             | 6<br>(4 - 9)             | 4<br>(3 - 6)             |
| Other pharynx cancer                          | 54<br>(39 - 73)             | --                 | --                | 9<br>(6 - 14)            | 27<br>(19 - 39)          | 17<br>(12 - 24)          |
| Gallbladder and biliary tract cancer          | 268<br>(193 - 394)          | --                 | --                | 17<br>(10 - 27)          | 100<br>(66 - 162)        | 151<br>(105 - 217)       |
| Pancreatic cancer                             | 531<br>(415 - 646)          | --                 | --                | 51<br>(36 - 71)          | 233<br>(174 - 300)       | 247<br>(194 - 309)       |
| Malignant skin melanoma                       | 100<br>(56 - 172)           | --                 | --                | 19<br>(11 - 36)          | 37<br>(21 - 66)          | 44<br>(22 - 70)          |
| Non-melanoma skin cancer                      | 89<br>(61 - 133)            | --                 | --                | 8<br>(5 - 13)            | 23<br>(15 - 34)          | 59<br>(39 - 89)          |
| Ovarian cancer                                | --                          | --                 | --                | --                       | --                       | --                       |
| Testicular cancer                             | 34<br>(12 - 61)             | --                 | --                | 21<br>(7 - 41)           | 5<br>(2 - 11)            | 7<br>(2 - 14)            |
| Kidney cancer                                 | 341<br>(262 - 433)          | 1<br>(1 - 2)       | 1<br>(1 - 2)      | 34<br>(23 - 48)          | 157<br>(114 - 211)       | 147<br>(109 - 191)       |
| Bladder cancer                                | 200<br>(149 - 289)          | --                 | --                | 7<br>(4 - 10)            | 57<br>(39 - 85)          | 136<br>(100 - 197)       |
| Brain and nervous system cancer               | 326<br>(91 - 475)           | 13<br>(2 - 27)     | 22<br>(6 - 33)    | 101<br>(30 - 160)        | 115<br>(31 - 175)        | 76<br>(17 - 119)         |
| Thyroid cancer                                | 57<br>(40 - 75)             | --                 | 0<br>(0 - 0)      | 7<br>(5 - 11)            | 25<br>(16 - 34)          | 25<br>(18 - 34)          |
| Mesothelioma                                  | 30<br>(23 - 40)             | --                 | --                | 3<br>(2 - 4)             | 12<br>(9 - 17)           | 15<br>(10 - 22)          |
| Hodgkin lymphoma                              | 28<br>(9 - 44)              | 0<br>(0 - 1)       | 2<br>(1 - 4)      | 9<br>(3 - 15)            | 9<br>(2 - 16)            | 8<br>(2 - 15)            |
| Non-Hodgkin lymphoma                          | 558<br>(410 - 779)          | 7<br>(3 - 13)      | 16<br>(10 - 28)   | 122<br>(84 - 188)        | 205<br>(141 - 296)       | 207<br>(146 - 289)       |
| Multiple myeloma                              | 159<br>(111 - 232)          | --                 | --                | 15<br>(9 - 24)           | 72<br>(48 - 110)         | 72<br>(51 - 106)         |
| Leukemia                                      | 580<br>(466 - 704)          | 44<br>(21 - 79)    | 82<br>(60 - 107)  | 184<br>(130 - 249)       | 124<br>(91 - 164)        | 146<br>(113 - 187)       |
| Other neoplasms                               | 592<br>(436 - 857)          | 39<br>(19 - 66)    | 38<br>(25 - 62)   | 128<br>(84 - 202)        | 181<br>(124 - 270)       | 206<br>(154 - 307)       |
| Cardiovascular diseases                       | 13,738<br>(11,233 - 16,374) | 132<br>(104 - 165) | 89<br>(74 - 108)  | 1,729<br>(1,233 - 2,311) | 3,877<br>(2,941 - 4,819) | 7,911<br>(6,728 - 9,187) |
| Rheumatic heart disease                       | 72<br>(45 - 102)            | 0<br>(0 - 1)       | 2<br>(1 - 4)      | 22<br>(13 - 35)          | 23<br>(14 - 35)          | 25<br>(13 - 37)          |
| Ischemic heart disease                        | 7,746<br>(6,171 - 9,418)    | 14<br>(5 - 21)     | 32<br>(16 - 41)   | 1,003<br>(693 - 1,356)   | 2,279<br>(1,725 - 2,862) | 4,419<br>(3,632 - 5,394) |
| Cerebrovascular disease                       | 4,368<br>(3,391 - 5,702)    | 11<br>(7 - 16)     | 32<br>(24 - 45)   | 484<br>(330 - 716)       | 1,184<br>(861 - 1,598)   | 2,657<br>(2,077 - 3,425) |
| Ischemic stroke                               | 2,491<br>(1,872 - 3,307)    | 3<br>(1 - 5)       | 7<br>(4 - 12)     | 124<br>(73 - 204)        | 521<br>(349 - 769)       | 1,836<br>(1,413 - 2,406) |
| Hemorrhagic stroke                            | 1,877<br>(1,319 - 2,500)    | 8<br>(5 - 13)      | 25<br>(18 - 36)   | 360<br>(239 - 544)       | 663<br>(458 - 913)       | 821<br>(527 - 1,111)     |
| Hypertensive heart disease                    | 185<br>(118 - 319)          | 1<br>(0 - 2)       | 0<br>(0 - 1)      | 16<br>(10 - 28)          | 46<br>(29 - 75)          | 122<br>(73 - 220)        |
| Cardiomyopathy and myocarditis                | 229<br>(169 - 298)          | 55<br>(39 - 75)    | 8<br>(5 - 12)     | 31<br>(20 - 47)          | 49<br>(33 - 72)          | 86<br>(57 - 119)         |
| Atrial fibrillation and flutter               | 71<br>(51 - 98)             | --                 | --                | 3<br>(2 - 5)             | 10<br>(7 - 14)           | 58<br>(39 - 83)          |
| Aortic aneurysm                               | 245<br>(190 - 341)          | --                 | --                | 19<br>(13 - 31)          | 72<br>(51 - 103)         | 154<br>(118 - 212)       |
| Peripheral vascular disease                   | 13<br>(9 - 18)              | --                 | --                | 0<br>(0 - 1)             | 3<br>(2 - 4)             | 10<br>(6 - 14)           |
| Endocarditis                                  | 276<br>(170 - 426)          | 39<br>(24 - 57)    | 8<br>(5 - 12)     | 48<br>(27 - 76)          | 64<br>(35 - 100)         | 116<br>(68 - 187)        |
| Other cardiovascular and circulatory diseases | 534<br>(399 - 799)          | 12<br>(8 - 17)     | 7<br>(5 - 12)     | 103<br>(69 - 184)        | 148<br>(106 - 220)       | 265<br>(188 - 377)       |

Web Table 31- Peru deaths with 95% UI by age, sex, and cause in 2013

| Cause                                               | Males, All Ages          | Males, 0-4 Years  | Males, 5-14 Years | Males, 15-49 Years | Males, 50-69 Years       | Males, 70-80 Years       |
|-----------------------------------------------------|--------------------------|-------------------|-------------------|--------------------|--------------------------|--------------------------|
| Chronic respiratory diseases                        | 4,396<br>(2,841 - 5,365) | 120<br>(80 - 170) | 29<br>(18 - 37)   | 325<br>(175 - 454) | 941<br>(607 - 1,216)     | 2,982<br>(1,912 - 3,657) |
| Chronic obstructive pulmonary disease               | 2,804<br>(1,794 - 3,513) | 87<br>(52 - 128)  | 19<br>(10 - 24)   | 215<br>(113 - 308) | 594<br>(358 - 800)       | 1,889<br>(1,193 - 2,414) |
| Pneumoconiosis                                      | 157<br>(88 - 240)        | 0<br>(0 - 1)      | 0<br>(0 - 1)      | 16<br>(9 - 26)     | 45<br>(25 - 70)          | 95<br>(52 - 149)         |
| Silicosis                                           | 15<br>(8 - 23)           | 0<br>(0 - 0)      | 0<br>(0 - 0)      | 4<br>(2 - 6)       | 4<br>(2 - 7)             | 6<br>(3 - 10)            |
| Asbestosis                                          | 34<br>(19 - 51)          | 0<br>(0 - 0)      | 0<br>(0 - 0)      | 4<br>(2 - 6)       | 9<br>(5 - 15)            | 20<br>(11 - 32)          |
| Coal workers pneumoconiosis                         | 13<br>(7 - 20)           | 0<br>(0 - 0)      | 0<br>(0 - 0)      | 1<br>(0 - 1)       | 2<br>(1 - 4)             | 9<br>(5 - 15)            |
| Other pneumoconiosis                                | 96<br>(54 - 146)         | 0<br>(0 - 0)      | 0<br>(0 - 0)      | 8<br>(4 - 12)      | 29<br>(16 - 45)          | 59<br>(32 - 92)          |
| Asthma                                              | 132<br>(90 - 173)        | 7<br>(3 - 12)     | 4<br>(2 - 5)      | 21<br>(12 - 30)    | 32<br>(21 - 45)          | 69<br>(45 - 98)          |
| Interstitial lung disease and pulmonary sarcoidosis | 1,227<br>(685 - 1,627)   | 5<br>(2 - 9)      | 4<br>(2 - 6)      | 53<br>(26 - 80)    | 257<br>(137 - 361)       | 907<br>(497 - 1,230)     |
| Other chronic respiratory diseases                  | 76<br>(52 - 100)         | 21<br>(13 - 31)   | 3<br>(1 - 4)      | 19<br>(10 - 28)    | 13<br>(8 - 20)           | 21<br>(12 - 32)          |
| Cirrhosis                                           | 3,738<br>(2,903 - 4,626) | 5<br>(3 - 7)      | 11<br>(9 - 14)    | 724<br>(525 - 981) | 1,778<br>(1,321 - 2,224) | 1,220<br>(986 - 1,476)   |
| Cirrhosis due to hepatitis B                        | 438<br>(123 - 776)       | 0<br>(0 - 0)      | 1<br>(0 - 2)      | 92<br>(20 - 165)   | 216<br>(61 - 394)        | 130<br>(41 - 244)        |
| Cirrhosis due to hepatitis C                        | 1,257<br>(696 - 1,928)   | 1<br>(0 - 2)      | 3<br>(1 - 5)      | 205<br>(92 - 366)  | 584<br>(265 - 974)       | 464<br>(290 - 653)       |
| Cirrhosis due to alcohol use                        | 1,520<br>(980 - 2,366)   | --                | --                | 244<br>(136 - 401) | 744<br>(458 - 1,203)     | 532<br>(352 - 809)       |
| Cirrhosis due to other causes                       | 523<br>(309 - 865)       | 4<br>(2 - 6)      | 8<br>(6 - 11)     | 182<br>(103 - 297) | 235<br>(122 - 413)       | 94<br>(51 - 169)         |
| Digestive diseases                                  | 2,151<br>(1,667 - 3,147) | 30<br>(19 - 45)   | 29<br>(23 - 39)   | 377<br>(262 - 568) | 678<br>(486 - 1,059)     | 1,036<br>(828 - 1,459)   |
| Peptic ulcer disease                                | 411<br>(300 - 629)       | 1<br>(0 - 1)      | 2<br>(1 - 2)      | 58<br>(38 - 90)    | 131<br>(86 - 218)        | 221<br>(158 - 343)       |
| Gastritis and duodenitis                            | 165<br>(84 - 246)        | 2<br>(1 - 4)      | 2<br>(1 - 3)      | 16<br>(8 - 27)     | 42<br>(21 - 67)          | 103<br>(49 - 156)        |
| Appendicitis                                        | 132<br>(88 - 232)        | 2<br>(1 - 4)      | 7<br>(4 - 11)     | 39<br>(24 - 68)    | 37<br>(22 - 68)          | 48<br>(29 - 86)          |
| Paralytic ileus and intestinal obstruction          | 347<br>(55 - 594)        | 13<br>(3 - 25)    | 8<br>(2 - 13)     | 48<br>(8 - 90)     | 112<br>(16 - 201)        | 166<br>(21 - 296)        |
| Inguinal, femoral, and abdominal hernia             | 184<br>(60 - 525)        | 3<br>(1 - 10)     | 3<br>(1 - 8)      | 26<br>(9 - 79)     | 59<br>(18 - 180)         | 92<br>(29 - 274)         |
| Inflammatory bowel disease                          | 48<br>(32 - 92)          | 4<br>(2 - 8)      | 1<br>(1 - 2)      | 10<br>(6 - 18)     | 13<br>(8 - 27)           | 20<br>(12 - 39)          |
| Vascular intestinal disorders                       | 91<br>(33 - 197)         | 1<br>(0 - 2)      | 1<br>(0 - 3)      | 9<br>(3 - 22)      | 26<br>(9 - 55)           | 53<br>(18 - 119)         |
| Gallbladder and biliary diseases                    | 291<br>(196 - 550)       | 0<br>(0 - 1)      | 1<br>(1 - 2)      | 31<br>(19 - 60)    | 87<br>(53 - 187)         | 171<br>(113 - 302)       |
| Pancreatitis                                        | 328<br>(220 - 558)       | 2<br>(1 - 4)      | 2<br>(1 - 3)      | 117<br>(75 - 194)  | 122<br>(77 - 216)        | 85<br>(56 - 151)         |
| Other digestive diseases                            | 155<br>(108 - 236)       | 3<br>(1 - 6)      | 3<br>(2 - 5)      | 24<br>(15 - 37)    | 49<br>(31 - 81)          | 77<br>(51 - 122)         |
| Neurological disorders                              | 2,054<br>(1,644 - 2,521) | 13<br>(8 - 23)    | 17<br>(12 - 29)   | 141<br>(95 - 207)  | 223<br>(164 - 290)       | 1,660<br>(1,303 - 2,052) |
| Alzheimer disease and other dementias               | 1,626<br>(1,271 - 1,993) | --                | --                | 0<br>(0 - 1)       | 121<br>(83 - 163)        | 1,504<br>(1,162 - 1,851) |
| Parkinson disease                                   | 140<br>(104 - 246)       | --                | --                | 3<br>(2 - 4)       | 32<br>(22 - 54)          | 105<br>(76 - 179)        |
| Epilepsy                                            | 209<br>(149 - 304)       | 8<br>(5 - 17)     | 15<br>(10 - 26)   | 118<br>(78 - 180)  | 42<br>(29 - 61)          | 26<br>(18 - 37)          |
| Multiple sclerosis                                  | 13<br>(5 - 20)           | --                | --                | 3<br>(1 - 6)       | 6<br>(2 - 10)            | 4<br>(1 - 7)             |
| Other neurological disorders                        | 67<br>(51 - 92)          | 5<br>(3 - 8)      | 2<br>(2 - 3)      | 16<br>(11 - 23)    | 22<br>(16 - 32)          | 21<br>(15 - 28)          |
| Mental and substance use disorders                  | 1,099<br>(457 - 1,510)   | 3<br>(1 - 5)      | 0<br>(0 - 0)      | 534<br>(227 - 776) | 469<br>(177 - 651)       | 93<br>(46 - 125)         |
| Schizophrenia                                       | 2<br>(1 - 6)             | --                | --                | 1<br>(1 - 3)       | 1<br>(0 - 2)             | 0<br>(0 - 1)             |
| Alcohol use disorders                               | 889<br>(257 - 1,242)     | --                | --                | 393<br>(93 - 591)  | 420<br>(128 - 594)       | 76<br>(30 - 106)         |
| Drug use disorders                                  | 207<br>(141 - 286)       | 3<br>(1 - 5)      | --                | 139<br>(90 - 197)  | 48<br>(31 - 69)          | 17<br>(11 - 24)          |
| Opioid use disorders                                | 32<br>(21 - 44)          | 0<br>(0 - 1)      | --                | 22<br>(14 - 32)    | 7<br>(4 - 10)            | 3<br>(2 - 4)             |
| Cocaine use disorders                               | 4<br>(3 - 6)             | 0<br>(0 - 0)      | --                | 3<br>(2 - 5)       | 1<br>(0 - 1)             | 0<br>(0 - 0)             |
| Amphetamine use disorders                           | 3<br>(2 - 5)             | 0<br>(0 - 0)      | --                | 2<br>(1 - 3)       | 1<br>(0 - 1)             | 0<br>(0 - 0)             |
| Other drug use disorders                            | 167<br>(114 - 229)       | 2<br>(1 - 4)      | --                | 111<br>(71 - 158)  | 40<br>(25 - 57)          | 14<br>(9 - 19)           |

Web Table 31- Peru deaths with 95% UI by age, sex, and cause in 2013

| Cause                                               | Males, All Ages          | Males, 0-4 Years       | Males, 5-14 Years | Males, 15-49 Years | Males, 50-69 Years       | Males, 70-80 Years       |
|-----------------------------------------------------|--------------------------|------------------------|-------------------|--------------------|--------------------------|--------------------------|
| Eating disorders                                    | 0<br>(0 - 1)             | --                     | 0<br>(0 - 0)      | 0<br>(0 - 1)       | --                       | --                       |
| Anorexia nervosa                                    | 0<br>(0 - 1)             | --                     | 0<br>(0 - 0)      | 0<br>(0 - 1)       | --                       | --                       |
| Diabetes, urogenital, blood, and endocrine diseases | 5,378<br>(4,371 - 6,445) | 185<br>(130 - 372)     | 47<br>(37 - 69)   | 572<br>(405 - 776) | 1,644<br>(1,248 - 2,037) | 2,930<br>(2,421 - 3,432) |
| Diabetes mellitus                                   | 1,731<br>(1,400 - 2,085) | 7<br>(5 - 9)           | 3<br>(2 - 3)      | 157<br>(110 - 215) | 694<br>(531 - 881)       | 870<br>(701 - 1,043)     |
| Acute glomerulonephritis                            | 6<br>(4 - 9)             | 0<br>(0 - 1)           | 0<br>(0 - 1)      | 1<br>(1 - 2)       | 1<br>(1 - 2)             | 2<br>(1 - 4)             |
| Chronic kidney disease                              | 2,495<br>(1,827 - 3,044) | 48<br>(29 - 69)        | 18<br>(13 - 23)   | 277<br>(185 - 384) | 724<br>(488 - 940)       | 1,427<br>(1,023 - 1,745) |
| Chronic kidney disease due to diabetes mellitus     | 822<br>(448 - 1,209)     | 3<br>(1 - 6)           | 1<br>(0 - 2)      | 64<br>(34 - 108)   | 302<br>(171 - 445)       | 453<br>(226 - 678)       |
| Chronic kidney disease due to hypertension          | 544<br>(323 - 816)       | 25<br>(15 - 37)        | 7<br>(5 - 10)     | 78<br>(42 - 114)   | 101<br>(47 - 159)        | 333<br>(199 - 531)       |
| Chronic kidney disease due to glomerulonephritis    | 85<br>(51 - 118)         | 5<br>(2 - 9)           | 3<br>(1 - 4)      | 21<br>(12 - 31)    | 22<br>(11 - 34)          | 34<br>(17 - 52)          |
| Chronic kidney disease due to other causes          | 1,043<br>(551 - 1,414)   | 15<br>(6 - 27)         | 7<br>(4 - 12)     | 114<br>(61 - 175)  | 300<br>(139 - 436)       | 608<br>(311 - 862)       |
| Urinary diseases and male infertility               | 739<br>(460 - 923)       | 43<br>(23 - 65)        | 6<br>(3 - 9)      | 52<br>(30 - 74)    | 138<br>(80 - 183)        | 500<br>(316 - 654)       |
| Interstitial nephritis and urinary tract infections | 564<br>(333 - 721)       | 40<br>(22 - 61)        | 5<br>(3 - 7)      | 29<br>(15 - 43)    | 89<br>(46 - 122)         | 400<br>(236 - 545)       |
| Urolithiasis                                        | 10<br>(6 - 17)           | --                     | 0<br>(0 - 1)      | 2<br>(1 - 3)       | 4<br>(2 - 6)             | 4<br>(3 - 8)             |
| Other urinary diseases                              | 165<br>(101 - 246)       | 3<br>(1 - 6)           | 1<br>(0 - 2)      | 21<br>(12 - 31)    | 45<br>(26 - 66)          | 96<br>(52 - 154)         |
| Gynecological diseases                              | --                       | --                     | --                | --                 | --                       | --                       |
| Uterine fibroids                                    | --                       | --                     | --                | --                 | --                       | --                       |
| Polycystic ovarian syndrome                         | --                       | --                     | --                | --                 | --                       | --                       |
| Endometriosis                                       | --                       | --                     | --                | --                 | --                       | --                       |
| Genital prolapse                                    | --                       | --                     | --                | --                 | --                       | --                       |
| Other gynecological diseases                        | --                       | --                     | --                | --                 | --                       | --                       |
| Hemoglobinopathies and hemolytic anemias            | 99<br>(64 - 154)         | 20<br>(11 - 42)        | 11<br>(6 - 20)    | 31<br>(18 - 50)    | 17<br>(11 - 27)          | 20<br>(12 - 33)          |
| Thalassemias                                        | 10<br>(6 - 18)           | 5<br>(2 - 10)          | 2<br>(1 - 4)      | 3<br>(2 - 5)       | 0<br>(0 - 0)             | 0<br>(0 - 0)             |
| Sickle cell disorders                               | 18<br>(11 - 29)          | 4<br>(2 - 9)           | 3<br>(2 - 5)      | 7<br>(4 - 12)      | 3<br>(2 - 5)             | 0<br>(0 - 0)             |
| G6PD deficiency                                     | 4<br>(2 - 6)             | 1<br>(1 - 3)           | 1<br>(0 - 1)      | 1<br>(1 - 2)       | 0<br>(0 - 1)             | 0<br>(0 - 0)             |
| Other hemoglobinopathies and hemolytic anemias      | 68<br>(43 - 107)         | 10<br>(6 - 21)         | 5<br>(3 - 9)      | 19<br>(12 - 31)    | 13<br>(8 - 22)           | 20<br>(12 - 32)          |
| Endocrine, metabolic, blood, and immune disorders   | 309<br>(181 - 919)       | 67<br>(29 - 267)       | 8<br>(4 - 27)     | 55<br>(30 - 154)   | 69<br>(39 - 197)         | 110<br>(58 - 337)        |
| Musculoskeletal disorders                           | 192<br>(116 - 250)       | --                     | 6<br>(3 - 9)      | 35<br>(19 - 50)    | 57<br>(30 - 79)          | 94<br>(60 - 130)         |
| Rheumatoid arthritis                                | 31<br>(18 - 48)          | --                     | 1<br>(0 - 1)      | 3<br>(2 - 5)       | 10<br>(5 - 17)           | 18<br>(10 - 30)          |
| Other musculoskeletal disorders                     | 161<br>(95 - 209)        | --                     | 6<br>(3 - 8)      | 32<br>(17 - 46)    | 48<br>(25 - 66)          | 76<br>(48 - 106)         |
| Other non-communicable diseases                     | 1,347<br>(1,079 - 1,626) | 1,040<br>(777 - 1,298) | 49<br>(36 - 64)   | 75<br>(54 - 103)   | 62<br>(46 - 80)          | 120<br>(92 - 156)        |
| Congenital anomalies                                | 1,200<br>(937 - 1,460)   | 1,018<br>(756 - 1,266) | 47<br>(34 - 61)   | 61<br>(43 - 84)    | 34<br>(24 - 45)          | 41<br>(29 - 54)          |
| Neural tube defects                                 | 64<br>(40 - 103)         | 57<br>(33 - 95)        | 1<br>(0 - 1)      | 2<br>(1 - 4)       | 2<br>(1 - 3)             | 2<br>(1 - 3)             |
| Congenital heart anomalies                          | 546<br>(366 - 716)       | 462<br>(290 - 627)     | 28<br>(19 - 39)   | 32<br>(22 - 45)    | 13<br>(8 - 18)           | 11<br>(6 - 16)           |
| Cleft lip and cleft palate                          | 12<br>(2 - 50)           | 12<br>(2 - 50)         | --                | --                 | --                       | --                       |
| Down syndrome                                       | 51<br>(28 - 95)          | 41<br>(20 - 81)        | 3<br>(2 - 6)      | 4<br>(2 - 7)       | 1<br>(1 - 3)             | 1<br>(0 - 2)             |
| Chromosomal unbalanced rearrangements               | 26<br>(16 - 43)          | 23<br>(13 - 40)        | 1<br>(1 - 2)      | 1<br>(1 - 2)       | 1<br>(0 - 1)             | 0<br>(0 - 1)             |
| Other congenital anomalies                          | 502<br>(344 - 659)       | 423<br>(275 - 577)     | 13<br>(7 - 22)    | 21<br>(13 - 32)    | 16<br>(11 - 23)          | 27<br>(19 - 36)          |
| Skin and subcutaneous diseases                      | 136<br>(103 - 173)       | 11<br>(7 - 19)         | 3<br>(2 - 4)      | 14<br>(10 - 20)    | 28<br>(19 - 39)          | 79<br>(56 - 109)         |
| Cellulitis                                          | 44<br>(26 - 64)          | 4<br>(2 - 8)           | 1<br>(0 - 1)      | 4<br>(2 - 6)       | 9<br>(5 - 15)            | 26<br>(12 - 44)          |
| Pyoderma                                            | 75<br>(52 - 102)         | 6<br>(3 - 10)          | 1<br>(1 - 2)      | 7<br>(5 - 11)      | 15<br>(10 - 22)          | 45<br>(28 - 67)          |



Web Table 31- Peru deaths with 95% UI by age, sex, and cause in 2013

| Cause                                           | Males, All Ages           | Males, 0-4 Years     | Males, 5-14 Years  | Males, 15-49 Years       | Males, 50-69 Years       | Males, 70-80 Years       |
|-------------------------------------------------|---------------------------|----------------------|--------------------|--------------------------|--------------------------|--------------------------|
| Decubitus ulcer                                 | 11<br>(6 - 33)            | 0<br>(0 - 0)         | 0<br>(0 - 1)       | 2<br>(1 - 3)             | 2<br>(1 - 5)             | 7<br>(3 - 24)            |
| Other skin and subcutaneous diseases            | 6<br>(4 - 9)              | 1<br>(0 - 2)         | 0<br>(0 - 1)       | 1<br>(1 - 2)             | 2<br>(1 - 3)             | 2<br>(1 - 3)             |
| Sudden infant death syndrome                    | 11<br>(2 - 23)            | 11<br>(2 - 23)       | --                 | --                       | --                       | --                       |
| Injuries                                        | 9,410<br>(7,463 - 11,904) | 975<br>(669 - 1,247) | 436<br>(354 - 506) | 4,593<br>(3,399 - 6,234) | 1,870<br>(1,407 - 2,393) | 1,535<br>(1,126 - 1,867) |
| Transport injuries                              | 3,533<br>(2,286 - 4,588)  | 190<br>(87 - 291)    | 203<br>(138 - 254) | 1,908<br>(1,220 - 2,615) | 777<br>(502 - 1,025)     | 456<br>(292 - 585)       |
| Road injuries                                   | 3,438<br>(2,253 - 4,443)  | 183<br>(85 - 283)    | 196<br>(136 - 245) | 1,864<br>(1,204 - 2,559) | 751<br>(492 - 991)       | 445<br>(288 - 569)       |
| Pedestrian road injuries                        | 1,276<br>(776 - 1,803)    | 109<br>(46 - 174)    | 108<br>(69 - 147)  | 505<br>(280 - 795)       | 329<br>(197 - 479)       | 225<br>(131 - 314)       |
| Cyclist road injuries                           | 275<br>(161 - 386)        | 24<br>(9 - 47)       | 31<br>(18 - 45)    | 81<br>(45 - 122)         | 78<br>(43 - 119)         | 62<br>(37 - 91)          |
| Motorcyclist road injuries                      | 433<br>(230 - 667)        | 8<br>(3 - 14)        | 6<br>(3 - 10)      | 347<br>(181 - 542)       | 61<br>(32 - 96)          | 11<br>(5 - 17)           |
| Motor vehicle road injuries                     | 1,406<br>(919 - 1,950)    | 34<br>(17 - 62)      | 44<br>(29 - 67)    | 927<br>(589 - 1,336)     | 270<br>(169 - 382)       | 131<br>(85 - 191)        |
| Other road injuries                             | 49<br>(23 - 73)           | 8<br>(3 - 16)        | 7<br>(3 - 12)      | 4<br>(1 - 6)             | 14<br>(7 - 23)           | 16<br>(6 - 29)           |
| Other transport injuries                        | 95<br>(31 - 143)          | 7<br>(2 - 13)        | 7<br>(2 - 12)      | 44<br>(14 - 72)          | 27<br>(8 - 43)           | 11<br>(3 - 18)           |
| Unintentional injuries                          | 3,992<br>(2,801 - 5,163)  | 757<br>(477 - 1,016) | 195<br>(134 - 246) | 1,438<br>(962 - 2,035)   | 696<br>(470 - 935)       | 907<br>(550 - 1,144)     |
| Falls                                           | 543<br>(205 - 732)        | 26<br>(6 - 48)       | 18<br>(6 - 28)     | 106<br>(36 - 157)        | 130<br>(49 - 183)        | 264<br>(101 - 363)       |
| Drowning                                        | 571<br>(218 - 972)        | 81<br>(21 - 176)     | 58<br>(22 - 101)   | 298<br>(111 - 546)       | 89<br>(37 - 148)         | 45<br>(17 - 79)          |
| Fire, heat, and hot substances                  | 186<br>(123 - 248)        | 33<br>(18 - 61)      | 10<br>(6 - 17)     | 45<br>(30 - 66)          | 30<br>(20 - 43)          | 67<br>(38 - 98)          |
| Poisonings                                      | 117<br>(41 - 160)         | 7<br>(2 - 12)        | 4<br>(2 - 7)       | 46<br>(18 - 68)          | 28<br>(9 - 41)           | 33<br>(9 - 49)           |
| Exposure to mechanical forces                   | 613<br>(445 - 870)        | 25<br>(15 - 39)      | 27<br>(20 - 43)    | 419<br>(288 - 615)       | 108<br>(75 - 168)        | 34<br>(25 - 50)          |
| Unintentional firearm injuries                  | 320<br>(81 - 452)         | 3<br>(1 - 5)         | 7<br>(2 - 11)      | 258<br>(65 - 377)        | 43<br>(13 - 65)          | 9<br>(3 - 15)            |
| Unintentional suffocation                       | 92<br>(61 - 130)          | 17<br>(8 - 31)       | 7<br>(3 - 13)      | 41<br>(24 - 63)          | 15<br>(9 - 24)           | 12<br>(6 - 20)           |
| Other exposure to mechanical forces             | 200<br>(129 - 553)        | 4<br>(2 - 9)         | 13<br>(8 - 34)     | 120<br>(71 - 362)        | 50<br>(32 - 128)         | 13<br>(9 - 25)           |
| Adverse effects of medical treatment            | 310<br>(151 - 461)        | 35<br>(14 - 63)      | 6<br>(3 - 9)       | 53<br>(27 - 84)          | 80<br>(33 - 131)         | 136<br>(59 - 208)        |
| Animal contact                                  | 28<br>(15 - 36)           | 5<br>(2 - 8)         | 3<br>(2 - 5)       | 7<br>(4 - 11)            | 8<br>(4 - 12)            | 5<br>(2 - 7)             |
| Venomous animal contact                         | 16<br>(10 - 22)           | 3<br>(1 - 3)         | 2<br>(1 - 3)       | 5<br>(3 - 8)             | 4<br>(2 - 7)             | 2<br>(1 - 4)             |
| Non-venomous animal contact                     | 12<br>(5 - 16)            | 2<br>(1 - 4)         | 1<br>(1 - 2)       | 2<br>(1 - 3)             | 4<br>(1 - 6)             | 3<br>(1 - 4)             |
| Foreign body                                    | 1,470<br>(853 - 2,132)    | 541<br>(311 - 806)   | 59<br>(33 - 91)    | 380<br>(186 - 564)       | 189<br>(101 - 312)       | 301<br>(169 - 528)       |
| Pulmonary aspiration and foreign body in airway | 1,458<br>(843 - 2,117)    | 537<br>(304 - 800)   | 59<br>(33 - 90)    | 378<br>(185 - 561)       | 187<br>(97 - 308)        | 298<br>(166 - 524)       |
| Foreign body in other body part                 | 12<br>(7 - 24)            | 4<br>(2 - 9)         | 0<br>(0 - 1)       | 2<br>(1 - 4)             | 2<br>(1 - 5)             | 3<br>(1 - 6)             |
| Other unintentional injuries                    | 154<br>(110 - 207)        | 4<br>(2 - 8)         | 7<br>(4 - 13)      | 84<br>(53 - 129)         | 35<br>(20 - 58)          | 22<br>(13 - 33)          |
| Self-harm and interpersonal violence            | 1,843<br>(1,306 - 2,766)  | 28<br>(14 - 58)      | 38<br>(25 - 59)    | 1,231<br>(857 - 1,884)   | 382<br>(272 - 579)       | 163<br>(120 - 288)       |
| Self-harm                                       | 1,053<br>(755 - 1,637)    | --                   | 16<br>(9 - 27)     | 614<br>(421 - 936)       | 285<br>(204 - 446)       | 138<br>(101 - 260)       |
| Interpersonal violence                          | 790<br>(516 - 1,318)      | 28<br>(14 - 58)      | 22<br>(13 - 42)    | 617<br>(393 - 1,034)     | 98<br>(56 - 176)         | 25<br>(12 - 48)          |
| Assault by firearm                              | 418<br>(235 - 764)        | 5<br>(2 - 10)        | 6<br>(2 - 13)      | 362<br>(202 - 659)       | 40<br>(19 - 78)          | 5<br>(2 - 11)            |
| Assault by sharp object                         | 200<br>(103 - 364)        | 2<br>(1 - 5)         | 3<br>(1 - 6)       | 162<br>(79 - 296)        | 28<br>(14 - 53)          | 6<br>(3 - 12)            |
| Assault by other means                          | 172<br>(103 - 310)        | 22<br>(10 - 44)      | 13<br>(7 - 25)     | 92<br>(47 - 185)         | 30<br>(16 - 60)          | 14<br>(7 - 29)           |
| Forces of nature, war, and legal intervention   | 42<br>(23 - 92)           | 0<br>(0 - 0)         | 1<br>(1 - 2)       | 17<br>(9 - 37)           | 15<br>(8 - 33)           | 9<br>(5 - 22)            |
| Exposure to forces of nature                    | 42<br>(23 - 92)           | 0<br>(0 - 0)         | 1<br>(1 - 2)       | 17<br>(9 - 37)           | 15<br>(8 - 33)           | 9<br>(5 - 22)            |

Web Table 31- Peru deaths with 95% UI by age, sex, and cause in 2013

| Cause                                                             | Females, All Ages           | Females, 0-4 Years       | Females, 5-14 Years | Females, 15-49 Years     | Females, 50-69 Years        | Females, 70-80 Years        |
|-------------------------------------------------------------------|-----------------------------|--------------------------|---------------------|--------------------------|-----------------------------|-----------------------------|
| All causes                                                        | 67,453<br>(59,733 - 78,555) | 5,825<br>(5,209 - 6,554) | 866<br>(789 - 961)  | 7,252<br>(5,676 - 8,785) | 14,704<br>(11,385 - 18,697) | 38,807<br>(35,983 - 44,458) |
| Communicable, maternal, neonatal, and nutritional diseases        | 16,233<br>(13,881 - 18,532) | 3,720<br>(3,235 - 4,264) | 255<br>(218 - 300)  | 1,481<br>(1,239 - 1,728) | 1,942<br>(1,436 - 2,543)    | 8,835<br>(7,066 - 10,608)   |
| HIV/AIDS and tuberculosis                                         | 903<br>(709 - 1,193)        | 9<br>(6 - 13)            | 16<br>(11 - 23)     | 346<br>(260 - 453)       | 249<br>(178 - 357)          | 283<br>(204 - 393)          |
| Tuberculosis                                                      | 801<br>(619 - 1,074)        | 8<br>(5 - 12)            | 15<br>(10 - 21)     | 262<br>(188 - 348)       | 235<br>(165 - 339)          | 282<br>(203 - 392)          |
| HIV/AIDS                                                          | 101<br>(64 - 178)           | 1<br>(0 - 3)             | 1<br>(0 - 3)        | 84<br>(53 - 145)         | 14<br>(6 - 29)              | 1<br>(0 - 3)                |
| HIV/AIDS resulting in mycobacterial infection                     | 5<br>(3 - 9)                | 0<br>(0 - 0)             | 0<br>(0 - 0)        | 4<br>(3 - 7)             | 1<br>(0 - 1)                | 0<br>(0 - 0)                |
| HIV/AIDS resulting in other diseases                              | 96<br>(61 - 168)            | 1<br>(0 - 3)             | 1<br>(0 - 3)        | 80<br>(50 - 138)         | 14<br>(6 - 27)              | 1<br>(0 - 3)                |
| Diarrhea, lower respiratory, and other common infectious diseases | 11,162<br>(9,042 - 13,291)  | 1,314<br>(1,059 - 1,622) | 190<br>(158 - 230)  | 599<br>(429 - 766)       | 1,462<br>(991 - 2,008)      | 7,598<br>(5,883 - 9,280)    |
| Diarrheal diseases                                                | 390<br>(298 - 527)          | 146<br>(93 - 218)        | 12<br>(7 - 19)      | 26<br>(18 - 36)          | 43<br>(27 - 64)             | 164<br>(103 - 267)          |
| Intestinal infectious diseases                                    | 147<br>(75 - 262)           | 48<br>(23 - 85)          | 36<br>(16 - 66)     | 51<br>(20 - 104)         | 8<br>(3 - 17)               | 5<br>(2 - 9)                |
| Typhoid fever                                                     | 105<br>(49 - 195)           | 32<br>(14 - 62)          | 27<br>(12 - 52)     | 38<br>(14 - 78)          | 6<br>(2 - 12)               | 3<br>(1 - 6)                |
| Paratyphoid fever                                                 | 29<br>(13 - 54)             | 9<br>(4 - 20)            | 7<br>(3 - 15)       | 10<br>(3 - 22)           | 1<br>(0 - 3)                | 1<br>(0 - 2)                |
| Other intestinal infectious diseases                              | 14<br>(7 - 24)              | 6<br>(2 - 14)            | 1<br>(0 - 5)        | 4<br>(1 - 10)            | 1<br>(0 - 5)                | 1<br>(0 - 5)                |
| Lower respiratory infections                                      | 10,180<br>(8,078 - 12,225)  | 905<br>(684 - 1,163)     | 103<br>(79 - 134)   | 448<br>(316 - 581)       | 1,365<br>(915 - 1,895)      | 7,358<br>(5,672 - 9,026)    |
| Upper respiratory infections                                      | 3<br>(1 - 7)                | 0<br>(0 - 1)             | 0<br>(0 - 0)        | 0<br>(0 - 1)             | 1<br>(0 - 2)                | 1<br>(0 - 5)                |
| Otitis media                                                      | 8<br>(6 - 11)               | 1<br>(1 - 2)             | 1<br>(0 - 1)        | 1<br>(1 - 1)             | 1<br>(1 - 2)                | 4<br>(3 - 6)                |
| Meningitis                                                        | 182<br>(113 - 226)          | 75<br>(40 - 104)         | 16<br>(9 - 22)      | 32<br>(19 - 43)          | 21<br>(13 - 30)             | 37<br>(21 - 52)             |
| Pneumococcal meningitis                                           | 47<br>(30 - 61)             | 16<br>(9 - 24)           | 4<br>(2 - 7)        | 10<br>(5 - 15)           | 7<br>(3 - 11)               | 10<br>(5 - 16)              |
| H influenzae type B meningitis                                    | 37<br>(21 - 52)             | 25<br>(12 - 39)          | 3<br>(2 - 6)        | 3<br>(2 - 6)             | 2<br>(1 - 4)                | 3<br>(2 - 5)                |
| Meningococcal meningitis                                          | 31<br>(18 - 41)             | 11<br>(5 - 18)           | 3<br>(2 - 5)        | 6<br>(3 - 8)             | 4<br>(2 - 7)                | 7<br>(3 - 12)               |
| Other meningitis                                                  | 67<br>(43 - 88)             | 22<br>(12 - 37)          | 5<br>(2 - 8)        | 14<br>(6 - 20)           | 9<br>(4 - 15)               | 17<br>(9 - 24)              |
| Encephalitis                                                      | 155<br>(118 - 231)          | 64<br>(37 - 119)         | 18<br>(9 - 34)      | 33<br>(18 - 56)          | 19<br>(11 - 30)             | 20<br>(12 - 31)             |
| Diphtheria                                                        | 5<br>(0 - 25)               | 3<br>(0 - 22)            | 1<br>(0 - 8)        | 1<br>(0 - 3)             | 0<br>(0 - 2)                | --                          |
| Whooping cough                                                    | 72<br>(14 - 294)            | 67<br>(10 - 289)         | 3<br>(2 - 5)        | 2<br>(1 - 2)             | 0<br>(0 - 1)                | --                          |
| Tetanus                                                           | 6<br>(2 - 10)               | 1<br>(0 - 3)             | 0<br>(0 - 1)        | 1<br>(0 - 2)             | 2<br>(0 - 3)                | 2<br>(0 - 3)                |
| Measles                                                           | 0<br>(0 - 0)                | 0<br>(0 - 0)             | 0<br>(0 - 0)        | 0<br>(0 - 0)             | 0<br>(0 - 0)                | --                          |
| Varicella and herpes zoster                                       | 14<br>(3 - 40)              | 3<br>(0 - 11)            | 1<br>(0 - 3)        | 2<br>(0 - 7)             | 1<br>(0 - 4)                | 7<br>(0 - 32)               |
| Neglected tropical diseases and malaria                           | 51<br>(37 - 104)            | 8<br>(4 - 16)            | 7<br>(5 - 11)       | 14<br>(10 - 22)          | 10<br>(6 - 23)              | 12<br>(7 - 44)              |
| Malaria                                                           | 3<br>(2 - 4)                | 0<br>(0 - 1)             | 0<br>(0 - 1)        | 1<br>(1 - 2)             | 1<br>(0 - 1)                | 1<br>(0 - 1)                |
| Chagas disease                                                    | 8<br>(2 - 57)               | 0<br>(0 - 0)             | 0<br>(0 - 1)        | 1<br>(0 - 6)             | 2<br>(0 - 13)               | 5<br>(1 - 37)               |
| Leishmaniasis                                                     | 0<br>(0 - 0)                | 0<br>(0 - 0)             | 0<br>(0 - 0)        | 0<br>(0 - 0)             | 0<br>(0 - 0)                | 0<br>(0 - 0)                |
| Visceral leishmaniasis                                            | 0<br>(0 - 0)                | 0<br>(0 - 0)             | 0<br>(0 - 0)        | 0<br>(0 - 0)             | 0<br>(0 - 0)                | 0<br>(0 - 0)                |
| Cysticercosis                                                     | 4<br>(4 - 6)                | 0<br>(0 - 0)             | 0<br>(0 - 0)        | 2<br>(1 - 2)             | 1<br>(1 - 2)                | 1<br>(1 - 1)                |
| Cystic echinococcosis                                             | 9<br>(8 - 11)               | 0<br>(0 - 1)             | 1<br>(1 - 1)        | 3<br>(2 - 4)             | 2<br>(2 - 3)                | 2<br>(2 - 3)                |
| Dengue                                                            | 9<br>(6 - 18)               | 4<br>(2 - 10)            | 2<br>(1 - 5)        | 2<br>(1 - 3)             | 1<br>(0 - 1)                | 1<br>(0 - 2)                |
| Yellow fever                                                      | 5<br>(3 - 8)                | 1<br>(0 - 2)             | 1<br>(0 - 3)        | 3<br>(1 - 5)             | 1<br>(0 - 2)                | 0<br>(0 - 1)                |
| Rabies                                                            | 2<br>(1 - 4)                | 0<br>(0 - 0)             | 0<br>(0 - 1)        | 1<br>(1 - 1)             | 0<br>(0 - 1)                | 0<br>(0 - 0)                |
| Intestinal nematode infections                                    | 3<br>(0 - 9)                | 2<br>(0 - 7)             | 0<br>(0 - 3)        | 0<br>(0 - 2)             | 0<br>(0 - 2)                | 0<br>(0 - 3)                |
| Ascariasis                                                        | 3<br>(0 - 9)                | 2<br>(0 - 7)             | 0<br>(0 - 3)        | 0<br>(0 - 2)             | 0<br>(0 - 2)                | 0<br>(0 - 3)                |
| Other neglected tropical diseases                                 | 7<br>(5 - 11)               | 1<br>(0 - 2)             | 0<br>(0 - 1)        | 1<br>(1 - 2)             | 2<br>(1 - 3)                | 2<br>(1 - 4)                |

Web Table 31- Peru deaths with 95% UI by age, sex, and cause in 2013

| Cause                                                            | Females, All Ages           | Females, 0-4 Years       | Females, 5-14 Years | Females, 15-49 Years     | Females, 50-69 Years       | Females, 70-80 Years        |
|------------------------------------------------------------------|-----------------------------|--------------------------|---------------------|--------------------------|----------------------------|-----------------------------|
| Maternal disorders                                               | 383<br>(274 - 513)          | --                       | 1<br>(1 - 2)        | 381<br>(273 - 512)       | --                         | --                          |
| Maternal hemorrhage                                              | 57<br>(38 - 78)             | --                       | 0<br>(0 - 0)        | 57<br>(38 - 78)          | --                         | --                          |
| Maternal sepsis and other maternal infections                    | 58<br>(39 - 80)             | --                       | 0<br>(0 - 0)        | 58<br>(39 - 79)          | --                         | --                          |
| Maternal hypertensive disorders                                  | 51<br>(35 - 71)             | --                       | 0<br>(0 - 0)        | 51<br>(35 - 70)          | --                         | --                          |
| Maternal obstructed labor                                        | 17<br>(11 - 27)             | --                       | 0<br>(0 - 0)        | 17<br>(11 - 27)          | --                         | --                          |
| Maternal abortive outcome                                        | 41<br>(27 - 58)             | --                       | 0<br>(0 - 0)        | 41<br>(27 - 58)          | --                         | --                          |
| Indirect maternal deaths                                         | 26<br>(16 - 38)             | --                       | 0<br>(0 - 0)        | 26<br>(16 - 38)          | --                         | --                          |
| Late maternal deaths                                             | 88<br>(56 - 125)            | --                       | 0<br>(0 - 0)        | 88<br>(56 - 124)         | --                         | --                          |
| Maternal deaths aggravated by HIV/AIDS                           | 0<br>(0 - 0)                | --                       | --                  | 0<br>(0 - 0)             | --                         | --                          |
| Other maternal disorders                                         | 44<br>(30 - 60)             | --                       | 0<br>(0 - 0)        | 44<br>(30 - 60)          | --                         | --                          |
| Neonatal disorders                                               | 2,080<br>(1,738 - 2,429)    | 2,080<br>(1,738 - 2,429) | --                  | --                       | --                         | --                          |
| Neonatal preterm birth complications                             | 822<br>(518 - 1,123)        | 822<br>(518 - 1,123)     | --                  | --                       | --                         | --                          |
| Neonatal encephalopathy due to birth asphyxia and trauma         | 636<br>(429 - 862)          | 636<br>(429 - 862)       | --                  | --                       | --                         | --                          |
| Neonatal sepsis and other neonatal infections                    | 500<br>(264 - 838)          | 500<br>(264 - 838)       | --                  | --                       | --                         | --                          |
| Hemolytic disease and other neonatal jaundice                    | 8<br>(2 - 24)               | 8<br>(2 - 24)            | --                  | --                       | --                         | --                          |
| Other neonatal disorders                                         | 114<br>(69 - 183)           | 114<br>(69 - 183)        | --                  | --                       | --                         | --                          |
| Nutritional deficiencies                                         | 1,316<br>(1,051 - 1,694)    | 149<br>(109 - 203)       | 22<br>(16 - 29)     | 106<br>(76 - 141)        | 180<br>(131 - 255)         | 858<br>(645 - 1,165)        |
| Protein-energy malnutrition                                      | 930<br>(703 - 1,263)        | 131<br>(91 - 184)        | 15<br>(10 - 22)     | 47<br>(27 - 77)          | 103<br>(63 - 158)          | 633<br>(447 - 877)          |
| Iodine deficiency                                                | 1<br>(0 - 4)                | 0<br>(0 - 1)             | 0<br>(0 - 0)        | 0<br>(0 - 1)             | 0<br>(0 - 1)               | 0<br>(0 - 3)                |
| Iron-deficiency anemia                                           | 294<br>(120 - 503)          | 13<br>(2 - 28)           | 5<br>(2 - 8)        | 46<br>(23 - 75)          | 58<br>(25 - 106)           | 172<br>(61 - 317)           |
| Other nutritional deficiencies                                   | 91<br>(41 - 152)            | 5<br>(1 - 12)            | 2<br>(1 - 3)        | 13<br>(6 - 22)           | 19<br>(8 - 33)             | 53<br>(22 - 100)            |
| Other communicable, maternal, neonatal, and nutritional diseases | 339<br>(157 - 562)          | 160<br>(18 - 343)        | 19<br>(7 - 35)      | 34<br>(23 - 45)          | 41<br>(24 - 59)            | 85<br>(41 - 128)            |
| Sexually transmitted diseases excluding HIV                      | 173<br>(20 - 371)           | 140<br>(0 - 323)         | 12<br>(0 - 28)      | 9<br>(6 - 14)            | 5<br>(3 - 7)               | 7<br>(4 - 11)               |
| Syphilis                                                         | 164<br>(11 - 361)           | 140<br>(0 - 323)         | 12<br>(0 - 27)      | 4<br>(2 - 6)             | 3<br>(2 - 4)               | 6<br>(3 - 9)                |
| Chlamydial infection                                             | 3<br>(2 - 4)                | --                       | 0<br>(0 - 0)        | 2<br>(1 - 3)             | 1<br>(0 - 1)               | 0<br>(0 - 1)                |
| Gonococcal infection                                             | 4<br>(2 - 5)                | --                       | 0<br>(0 - 0)        | 2<br>(1 - 3)             | 1<br>(1 - 1)               | 1<br>(1 - 1)                |
| Other sexually transmitted diseases                              | 3<br>(2 - 4)                | --                       | 0<br>(0 - 0)        | 2<br>(1 - 3)             | 1<br>(0 - 1)               | 0<br>(0 - 1)                |
| Hepatitis                                                        | 30<br>(22 - 41)             | 1<br>(1 - 2)             | 2<br>(1 - 3)        | 9<br>(6 - 13)            | 9<br>(5 - 14)              | 9<br>(5 - 16)               |
| Acute hepatitis A                                                | 8<br>(3 - 14)               | 1<br>(0 - 2)             | 1<br>(1 - 2)        | 4<br>(2 - 8)             | 1<br>(0 - 3)               | 1<br>(0 - 2)                |
| Acute hepatitis B                                                | 19<br>(12 - 28)             | 0<br>(0 - 1)             | 0<br>(0 - 1)        | 4<br>(2 - 7)             | 7<br>(4 - 12)              | 8<br>(4 - 14)               |
| Acute hepatitis C                                                | 2<br>(0 - 6)                | --                       | 0<br>(0 - 0)        | 1<br>(0 - 2)             | 1<br>(0 - 2)               | 1<br>(0 - 2)                |
| Other infectious diseases                                        | 136<br>(66 - 199)           | 18<br>(9 - 30)           | 6<br>(3 - 9)        | 16<br>(8 - 22)           | 28<br>(13 - 43)            | 68<br>(27 - 110)            |
| Non-communicable diseases                                        | 46,654<br>(40,270 - 56,214) | 1,312<br>(1,035 - 1,616) | 338<br>(292 - 398)  | 4,514<br>(3,432 - 5,659) | 11,933<br>(9,210 - 15,390) | 28,558<br>(25,726 - 33,843) |
| Neoplasms                                                        | 13,919<br>(11,491 - 17,499) | 68<br>(44 - 103)         | 115<br>(91 - 153)   | 2,060<br>(1,556 - 2,628) | 5,162<br>(3,918 - 6,708)   | 6,515<br>(5,660 - 8,008)    |
| Esophageal cancer                                                | 70<br>(52 - 92)             | --                       | --                  | 6<br>(4 - 8)             | 22<br>(15 - 32)            | 42<br>(30 - 58)             |
| Stomach cancer                                                   | 2,258<br>(1,755 - 2,906)    | --                       | --                  | 217<br>(152 - 292)       | 702<br>(511 - 944)         | 1,339<br>(987 - 1,827)      |
| Liver cancer                                                     | 956<br>(723 - 1,248)        | --                       | 3<br>(2 - 5)        | 96<br>(66 - 135)         | 350<br>(247 - 480)         | 507<br>(363 - 707)          |
| Liver cancer due to hepatitis B                                  | 354<br>(229 - 536)          | --                       | 1<br>(1 - 2)        | 52<br>(33 - 77)          | 152<br>(91 - 234)          | 148<br>(86 - 237)           |
| Liver cancer due to hepatitis C                                  | 168<br>(77 - 294)           | --                       | 0<br>(0 - 0)        | 8<br>(3 - 16)            | 51<br>(25 - 95)            | 110<br>(44 - 200)           |
| Liver cancer due to alcohol use                                  | 254<br>(141 - 408)          | --                       | --                  | 10<br>(4 - 18)           | 76<br>(38 - 130)           | 169<br>(93 - 281)           |

Web Table 31- Peru deaths with 95% UI by age, sex, and cause in 2013

| Cause                                         | Females, All Ages           | Females, 0-4 Years | Females, 5-14 Years | Females, 15-49 Years   | Females, 50-69 Years     | Females, 70-80 Years       |
|-----------------------------------------------|-----------------------------|--------------------|---------------------|------------------------|--------------------------|----------------------------|
| Liver cancer due to other causes              | 180<br>(100 - 285)          | --                 | 2<br>(1 - 3)        | 26<br>(15 - 40)        | 71<br>(35 - 124)         | 81<br>(41 - 135)           |
| Larynx cancer                                 | 27<br>(14 - 49)             | --                 | --                  | 3<br>(2 - 6)           | 10<br>(5 - 19)           | 14<br>(7 - 25)             |
| Tracheal, bronchus and lung cancer            | 1,221<br>(970 - 1,578)      | --                 | --                  | 112<br>(79 - 160)      | 462<br>(340 - 624)       | 646<br>(493 - 849)         |
| Breast cancer                                 | 1,388<br>(1,070 - 1,834)    | --                 | --                  | 352<br>(252 - 469)     | 641<br>(471 - 868)       | 395<br>(316 - 512)         |
| Cervical cancer                               | 1,767<br>(1,318 - 2,371)    | --                 | --                  | 448<br>(308 - 610)     | 760<br>(537 - 1,075)     | 560<br>(417 - 764)         |
| Uterine cancer                                | 332<br>(216 - 498)          | --                 | --                  | 25<br>(15 - 39)        | 146<br>(90 - 225)        | 162<br>(98 - 241)          |
| Prostate cancer                               | --                          | --                 | --                  | --                     | --                       | --                         |
| Colon and rectum cancer                       | 1,237<br>(998 - 1,588)      | --                 | --                  | 98<br>(71 - 129)       | 381<br>(284 - 513)       | 758<br>(600 - 1,011)       |
| Lip and oral cavity cancer                    | 86<br>(49 - 121)            | --                 | --                  | 10<br>(5 - 15)         | 27<br>(14 - 41)          | 50<br>(27 - 73)            |
| Nasopharynx cancer                            | 14<br>(9 - 26)              | --                 | 0<br>(0 - 0)        | 3<br>(2 - 6)           | 5<br>(3 - 10)            | 6<br>(3 - 11)              |
| Other pharynx cancer                          | 24<br>(17 - 32)             | --                 | --                  | 3<br>(2 - 5)           | 11<br>(7 - 16)           | 10<br>(6 - 14)             |
| Gallbladder and biliary tract cancer          | 651<br>(470 - 954)          | --                 | --                  | 31<br>(20 - 46)        | 261<br>(179 - 387)       | 359<br>(242 - 544)         |
| Pancreatic cancer                             | 628<br>(512 - 822)          | --                 | --                  | 36<br>(25 - 50)        | 238<br>(175 - 324)       | 354<br>(281 - 473)         |
| Malignant skin melanoma                       | 106<br>(81 - 140)           | --                 | --                  | 20<br>(14 - 29)        | 41<br>(29 - 59)          | 45<br>(33 - 61)            |
| Non-melanoma skin cancer                      | 100<br>(62 - 158)           | --                 | --                  | 7<br>(5 - 12)          | 21<br>(13 - 34)          | 71<br>(43 - 111)           |
| Ovarian cancer                                | 526<br>(407 - 700)          | --                 | --                  | 109<br>(75 - 153)      | 246<br>(177 - 344)       | 171<br>(130 - 233)         |
| Testicular cancer                             | --                          | --                 | --                  | --                     | --                       | --                         |
| Kidney cancer                                 | 215<br>(158 - 293)          | 1<br>(0 - 2)       | 1<br>(0 - 1)        | 20<br>(13 - 29)        | 81<br>(54 - 117)         | 112<br>(76 - 161)          |
| Bladder cancer                                | 113<br>(75 - 166)           | --                 | --                  | 6<br>(4 - 10)          | 29<br>(18 - 49)          | 78<br>(49 - 114)           |
| Brain and nervous system cancer               | 349<br>(129 - 454)          | 10<br>(4 - 19)     | 19<br>(9 - 27)      | 93<br>(39 - 124)       | 124<br>(41 - 173)        | 102<br>(30 - 144)          |
| Thyroid cancer                                | 130<br>(84 - 183)           | --                 | 0<br>(0 - 0)        | 11<br>(6 - 16)         | 47<br>(29 - 72)          | 72<br>(45 - 102)           |
| Mesothelioma                                  | 29<br>(21 - 39)             | --                 | --                  | 3<br>(2 - 4)           | 14<br>(9 - 21)           | 12<br>(8 - 18)             |
| Hodgkin lymphoma                              | 23<br>(8 - 35)              | 1<br>(0 - 1)       | 1<br>(0 - 1)        | 6<br>(2 - 10)          | 7<br>(2 - 12)            | 9<br>(2 - 15)              |
| Non-Hodgkin lymphoma                          | 429<br>(285 - 598)          | 4<br>(2 - 8)       | 7<br>(4 - 11)       | 70<br>(44 - 104)       | 152<br>(98 - 224)        | 196<br>(122 - 276)         |
| Multiple myeloma                              | 123<br>(84 - 188)           | --                 | --                  | 12<br>(6 - 19)         | 54<br>(33 - 87)          | 57<br>(38 - 88)            |
| Leukemia                                      | 473<br>(381 - 573)          | 29<br>(15 - 53)    | 54<br>(39 - 73)     | 144<br>(106 - 185)     | 122<br>(89 - 166)        | 124<br>(97 - 164)          |
| Other neoplasms                               | 644<br>(461 - 1,072)        | 22<br>(11 - 46)    | 30<br>(18 - 53)     | 119<br>(74 - 221)      | 207<br>(129 - 383)       | 266<br>(198 - 446)         |
| Cardiovascular diseases                       | 14,465<br>(12,173 - 18,755) | 96<br>(53 - 158)   | 64<br>(41 - 86)     | 1,000<br>(672 - 1,322) | 2,799<br>(2,001 - 3,823) | 10,506<br>(8,946 - 13,727) |
| Rheumatic heart disease                       | 132<br>(75 - 181)           | 0<br>(0 - 1)       | 3<br>(1 - 4)        | 33<br>(18 - 47)        | 46<br>(26 - 69)          | 51<br>(26 - 73)            |
| Ischemic heart disease                        | 8,023<br>(6,511 - 10,461)   | 9<br>(2 - 20)      | 20<br>(8 - 32)      | 437<br>(272 - 611)     | 1,416<br>(973 - 1,965)   | 6,141<br>(5,047 - 7,957)   |
| Cerebrovascular disease                       | 4,615<br>(3,602 - 6,608)    | 7<br>(3 - 10)      | 21<br>(13 - 27)     | 373<br>(234 - 501)     | 1,005<br>(700 - 1,472)   | 3,210<br>(2,506 - 4,721)   |
| Ischemic stroke                               | 2,678<br>(2,072 - 4,249)    | 2<br>(1 - 4)       | 5<br>(3 - 9)        | 77<br>(49 - 135)       | 366<br>(236 - 638)       | 2,228<br>(1,708 - 3,477)   |
| Hemorrhagic stroke                            | 1,938<br>(1,341 - 2,656)    | 5<br>(2 - 8)       | 15<br>(9 - 21)      | 297<br>(175 - 401)     | 638<br>(414 - 892)       | 982<br>(665 - 1,465)       |
| Hypertensive heart disease                    | 256<br>(168 - 440)          | 0<br>(0 - 1)       | 1<br>(0 - 1)        | 16<br>(10 - 25)        | 38<br>(23 - 67)          | 201<br>(125 - 364)         |
| Cardiomyopathy and myocarditis                | 250<br>(179 - 344)          | 46<br>(27 - 85)    | 7<br>(5 - 11)       | 30<br>(20 - 45)        | 45<br>(30 - 66)          | 122<br>(81 - 176)          |
| Atrial fibrillation and flutter               | 119<br>(81 - 175)           | --                 | --                  | 3<br>(2 - 5)           | 15<br>(9 - 22)           | 102<br>(66 - 153)          |
| Aortic aneurysm                               | 121<br>(72 - 199)           | --                 | --                  | 9<br>(5 - 14)          | 35<br>(19 - 58)          | 78<br>(46 - 130)           |
| Peripheral vascular disease                   | 14<br>(9 - 21)              | --                 | --                  | 0<br>(0 - 0)           | 2<br>(1 - 3)             | 12<br>(7 - 18)             |
| Endocarditis                                  | 309<br>(153 - 436)          | 24<br>(10 - 39)    | 6<br>(3 - 9)        | 29<br>(15 - 42)        | 56<br>(26 - 87)          | 194<br>(88 - 288)          |
| Other cardiovascular and circulatory diseases | 625<br>(436 - 956)          | 9<br>(5 - 15)      | 7<br>(4 - 11)       | 70<br>(44 - 115)       | 141<br>(87 - 216)        | 397<br>(265 - 648)         |

Web Table 31- Peru deaths with 95% UI by age, sex, and cause in 2013

| Cause                                               | Females, All Ages        | Females, 0-4 Years | Females, 5-14 Years | Females, 15-49 Years | Females, 50-69 Years | Females, 70-80 Years     |
|-----------------------------------------------------|--------------------------|--------------------|---------------------|----------------------|----------------------|--------------------------|
| Chronic respiratory diseases                        | 4,018<br>(2,439 - 5,045) | 86<br>(61 - 117)   | 24<br>(17 - 30)     | 230<br>(137 - 302)   | 687<br>(425 - 935)   | 2,991<br>(1,765 - 3,792) |
| Chronic obstructive pulmonary disease               | 2,443<br>(1,467 - 3,381) | 59<br>(38 - 87)    | 13<br>(8 - 17)      | 149<br>(87 - 208)    | 379<br>(222 - 577)   | 1,844<br>(1,093 - 2,569) |
| Pneumoconiosis                                      | 61<br>(34 - 97)          | 0<br>(0 - 1)       | 1<br>(0 - 1)        | 5<br>(3 - 8)         | 13<br>(7 - 22)       | 41<br>(20 - 73)          |
| Silicosis                                           | 4<br>(2 - 7)             | 0<br>(0 - 0)       | 0<br>(0 - 0)        | 0<br>(0 - 1)         | 1<br>(0 - 1)         | 2<br>(1 - 6)             |
| Asbestosis                                          | 3<br>(2 - 5)             | 0<br>(0 - 0)       | 0<br>(0 - 0)        | 0<br>(0 - 1)         | 1<br>(0 - 1)         | 2<br>(1 - 4)             |
| Coal workers pneumoconiosis                         | 3<br>(1 - 5)             | 0<br>(0 - 0)       | 0<br>(0 - 0)        | 0<br>(0 - 1)         | 0<br>(0 - 1)         | 2<br>(1 - 4)             |
| Other pneumoconiosis                                | 51<br>(28 - 83)          | 0<br>(0 - 0)       | 0<br>(0 - 0)        | 4<br>(2 - 6)         | 12<br>(6 - 20)       | 35<br>(17 - 63)          |
| Asthma                                              | 187<br>(86 - 281)        | 7<br>(3 - 13)      | 4<br>(2 - 6)        | 18<br>(8 - 28)       | 39<br>(20 - 61)      | 119<br>(51 - 193)        |
| Interstitial lung disease and pulmonary sarcoidosis | 1,263<br>(621 - 1,872)   | 4<br>(2 - 7)       | 4<br>(2 - 7)        | 48<br>(23 - 73)      | 246<br>(123 - 366)   | 961<br>(445 - 1,452)     |
| Other chronic respiratory diseases                  | 64<br>(42 - 90)          | 16<br>(10 - 25)    | 3<br>(1 - 4)        | 9<br>(5 - 14)        | 10<br>(5 - 16)       | 27<br>(14 - 43)          |
| Cirrhosis                                           | 2,098<br>(1,704 - 2,643) | 4<br>(3 - 5)       | 7<br>(6 - 9)        | 228<br>(168 - 300)   | 811<br>(602 - 1,076) | 1,048<br>(869 - 1,306)   |
| Cirrhosis due to hepatitis B                        | 419<br>(138 - 766)       | 0<br>(0 - 0)       | 1<br>(0 - 1)        | 40<br>(11 - 80)      | 157<br>(48 - 297)    | 221<br>(72 - 408)        |
| Cirrhosis due to hepatitis C                        | 776<br>(465 - 1,144)     | 0<br>(0 - 0)       | 0<br>(0 - 1)        | 70<br>(30 - 118)     | 316<br>(175 - 486)   | 389<br>(222 - 596)       |
| Cirrhosis due to alcohol use                        | 465<br>(268 - 721)       | --                 | --                  | 29<br>(14 - 51)      | 158<br>(85 - 260)    | 278<br>(145 - 456)       |
| Cirrhosis due to other causes                       | 439<br>(257 - 657)       | 4<br>(3 - 5)       | 6<br>(5 - 8)        | 89<br>(56 - 132)     | 179<br>(97 - 295)    | 160<br>(80 - 252)        |
| Digestive diseases                                  | 1,987<br>(1,602 - 2,765) | 22<br>(16 - 29)    | 21<br>(17 - 27)     | 209<br>(150 - 296)   | 495<br>(350 - 747)   | 1,241<br>(1,010 - 1,718) |
| Peptic ulcer disease                                | 360<br>(258 - 557)       | 1<br>(0 - 1)       | 1<br>(1 - 1)        | 24<br>(16 - 35)      | 85<br>(55 - 135)     | 249<br>(172 - 388)       |
| Gastritis and duodenitis                            | 211<br>(96 - 357)        | 2<br>(1 - 3)       | 1<br>(1 - 2)        | 13<br>(7 - 23)       | 40<br>(19 - 74)      | 155<br>(67 - 261)        |
| Appendicitis                                        | 116<br>(79 - 183)        | 2<br>(1 - 3)       | 5<br>(3 - 8)        | 24<br>(15 - 37)      | 30<br>(18 - 51)      | 56<br>(31 - 97)          |
| Paralytic ileus and intestinal obstruction          | 219<br>(35 - 418)        | 8<br>(2 - 17)      | 5<br>(2 - 8)        | 24<br>(5 - 45)       | 50<br>(7 - 105)      | 132<br>(17 - 270)        |
| Inguinal, femoral, and abdominal hernia             | 157<br>(55 - 430)        | 2<br>(0 - 7)       | 2<br>(1 - 6)        | 14<br>(5 - 41)       | 39<br>(12 - 114)     | 100<br>(33 - 300)        |
| Inflammatory bowel disease                          | 48<br>(32 - 90)          | 3<br>(1 - 6)       | 1<br>(0 - 1)        | 7<br>(4 - 13)        | 9<br>(5 - 17)        | 29<br>(17 - 57)          |
| Vascular intestinal disorders                       | 79<br>(41 - 173)         | 0<br>(0 - 1)       | 0<br>(0 - 2)        | 4<br>(2 - 9)         | 15<br>(7 - 33)       | 60<br>(31 - 134)         |
| Gallbladder and biliary diseases                    | 430<br>(300 - 757)       | 0<br>(0 - 1)       | 1<br>(1 - 2)        | 39<br>(25 - 71)      | 118<br>(74 - 210)    | 271<br>(182 - 472)       |
| Pancreatitis                                        | 229<br>(149 - 382)       | 2<br>(1 - 4)       | 2<br>(1 - 4)        | 46<br>(29 - 75)      | 73<br>(45 - 121)     | 106<br>(66 - 182)        |
| Other digestive diseases                            | 137<br>(99 - 209)        | 2<br>(1 - 3)       | 2<br>(1 - 3)        | 15<br>(10 - 22)      | 36<br>(24 - 55)      | 83<br>(55 - 134)         |
| Neurological disorders                              | 2,432<br>(1,926 - 3,088) | 11<br>(8 - 20)     | 13<br>(9 - 21)      | 90<br>(61 - 140)     | 179<br>(130 - 250)   | 2,138<br>(1,678 - 2,741) |
| Alzheimer disease and other dementias               | 2,094<br>(1,631 - 2,690) | --                 | --                  | 1<br>(0 - 1)         | 108<br>(75 - 156)    | 1,986<br>(1,533 - 2,573) |
| Parkinson disease                                   | 119<br>(82 - 253)        | --                 | --                  | 2<br>(1 - 3)         | 19<br>(12 - 42)      | 99<br>(66 - 211)         |
| Epilepsy                                            | 134<br>(97 - 214)        | 7<br>(4 - 16)      | 11<br>(7 - 19)      | 70<br>(46 - 117)     | 25<br>(16 - 42)      | 20<br>(13 - 32)          |
| Multiple sclerosis                                  | 17<br>(6 - 26)           | --                 | --                  | 5<br>(2 - 8)         | 5<br>(2 - 8)         | 7<br>(2 - 12)            |
| Other neurological disorders                        | 67<br>(54 - 83)          | 4<br>(3 - 6)       | 2<br>(1 - 3)        | 12<br>(9 - 16)       | 22<br>(16 - 30)      | 27<br>(21 - 35)          |
| Mental and substance use disorders                  | 171<br>(111 - 232)       | 3<br>(0 - 4)       | 0<br>(0 - 0)        | 81<br>(58 - 104)     | 62<br>(26 - 99)      | 25<br>(15 - 36)          |
| Schizophrenia                                       | 2<br>(1 - 4)             | --                 | --                  | 1<br>(0 - 2)         | 1<br>(0 - 1)         | 0<br>(0 - 1)             |
| Alcohol use disorders                               | 69<br>(18 - 115)         | --                 | --                  | 13<br>(4 - 22)       | 44<br>(11 - 77)      | 12<br>(3 - 22)           |
| Drug use disorders                                  | 99<br>(73 - 127)         | 3<br>(0 - 4)       | --                  | 65<br>(45 - 88)      | 18<br>(12 - 26)      | 13<br>(9 - 18)           |
| Opioid use disorders                                | 14<br>(10 - 19)          | 0<br>(0 - 1)       | --                  | 10<br>(6 - 13)       | 2<br>(2 - 4)         | 2<br>(1 - 3)             |
| Cocaine use disorders                               | 3<br>(2 - 4)             | 0<br>(0 - 0)       | --                  | 2<br>(2 - 3)         | 0<br>(0 - 1)         | 0<br>(0 - 0)             |
| Amphetamine use disorders                           | 3<br>(2 - 4)             | 0<br>(0 - 0)       | --                  | 2<br>(1 - 3)         | 0<br>(0 - 1)         | 0<br>(0 - 0)             |
| Other drug use disorders                            | 78<br>(57 - 101)         | 2<br>(0 - 3)       | --                  | 51<br>(35 - 69)      | 15<br>(10 - 21)      | 10<br>(7 - 14)           |

Web Table 31- Peru deaths with 95% UI by age, sex, and cause in 2013

| Cause                                               | Females, All Ages        | Females, 0-4 Years   | Females, 5-14 Years | Females, 15-49 Years | Females, 50-69 Years     | Females, 70-80 Years     |
|-----------------------------------------------------|--------------------------|----------------------|---------------------|----------------------|--------------------------|--------------------------|
| Eating disorders                                    | 2<br>(1 - 2)             | --                   | 0<br>(0 - 0)        | 1<br>(1 - 2)         | --                       | --                       |
| Anorexia nervosa                                    | 2<br>(1 - 2)             | --                   | 0<br>(0 - 0)        | 1<br>(1 - 2)         | --                       | --                       |
| Diabetes, urogenital, blood, and endocrine diseases | 6,069<br>(4,996 - 7,548) | 153<br>(111 - 290)   | 44<br>(34 - 63)     | 492<br>(364 - 630)   | 1,586<br>(1,196 - 2,075) | 3,795<br>(3,125 - 4,735) |
| Diabetes mellitus                                   | 1,950<br>(1,565 - 2,533) | 4<br>(2 - 6)         | 3<br>(2 - 5)        | 105<br>(74 - 142)    | 646<br>(465 - 875)       | 1,192<br>(956 - 1,527)   |
| Acute glomerulonephritis                            | 7<br>(5 - 11)            | 0<br>(0 - 1)         | 0<br>(0 - 1)        | 1<br>(1 - 2)         | 2<br>(1 - 3)             | 3<br>(2 - 7)             |
| Chronic kidney disease                              | 2,709<br>(2,000 - 3,497) | 36<br>(24 - 51)      | 17<br>(12 - 23)     | 248<br>(168 - 325)   | 686<br>(464 - 948)       | 1,722<br>(1,223 - 2,250) |
| Chronic kidney disease due to diabetes mellitus     | 906<br>(644 - 1,230)     | 2<br>(1 - 4)         | 1<br>(1 - 2)        | 48<br>(30 - 71)      | 299<br>(189 - 434)       | 555<br>(387 - 760)       |
| Chronic kidney disease due to hypertension          | 593<br>(331 - 932)       | 18<br>(11 - 25)      | 5<br>(3 - 8)        | 69<br>(37 - 104)     | 77<br>(35 - 137)         | 426<br>(229 - 695)       |
| Chronic kidney disease due to glomerulonephritis    | 78<br>(48 - 115)         | 3<br>(2 - 5)         | 2<br>(2 - 4)        | 15<br>(9 - 23)       | 17<br>(10 - 26)          | 40<br>(22 - 64)          |
| Chronic kidney disease due to other causes          | 1,132<br>(655 - 1,592)   | 13<br>(5 - 23)       | 8<br>(5 - 13)       | 116<br>(59 - 175)    | 293<br>(164 - 451)       | 701<br>(358 - 1,052)     |
| Urinary diseases and male infertility               | 930<br>(567 - 1,259)     | 37<br>(19 - 63)      | 6<br>(3 - 8)        | 70<br>(36 - 101)     | 150<br>(86 - 211)        | 668<br>(383 - 944)       |
| Interstitial nephritis and urinary tract infections | 891<br>(533 - 1,196)     | 35<br>(18 - 61)      | 5<br>(2 - 7)        | 65<br>(33 - 92)      | 140<br>(80 - 198)        | 646<br>(362 - 907)       |
| Urolithiasis                                        | 13<br>(7 - 24)           | --                   | 0<br>(0 - 0)        | 2<br>(1 - 4)         | 4<br>(2 - 8)             | 6<br>(3 - 13)            |
| Other urinary diseases                              | 26<br>(15 - 57)          | 1<br>(1 - 3)         | 0<br>(0 - 1)        | 3<br>(2 - 7)         | 6<br>(3 - 12)            | 15<br>(7 - 38)           |
| Gynecological diseases                              | 8<br>(5 - 24)            | --                   | --                  | 5<br>(3 - 13)        | 2<br>(1 - 4)             | 2<br>(1 - 7)             |
| Uterine fibroids                                    | 2<br>(1 - 5)             | --                   | --                  | 1<br>(0 - 2)         | 0<br>(0 - 1)             | 1<br>(0 - 2)             |
| Polycystic ovarian syndrome                         | 0<br>(0 - 1)             | --                   | --                  | 0<br>(0 - 1)         | 0<br>(0 - 0)             | --                       |
| Endometriosis                                       | 1<br>(0 - 2)             | --                   | --                  | 1<br>(0 - 2)         | 0<br>(0 - 0)             | --                       |
| Genital prolapse                                    | 1<br>(1 - 4)             | --                   | --                  | 1<br>(0 - 2)         | 0<br>(0 - 1)             | 1<br>(0 - 2)             |
| Other gynecological diseases                        | 4<br>(2 - 11)            | --                   | --                  | 2<br>(1 - 6)         | 1<br>(0 - 2)             | 1<br>(1 - 3)             |
| Hemoglobinopathies and hemolytic anemias            | 95<br>(60 - 164)         | 20<br>(10 - 48)      | 9<br>(5 - 18)       | 20<br>(12 - 36)      | 23<br>(13 - 38)          | 23<br>(13 - 35)          |
| Thalassemias                                        | 5<br>(3 - 10)            | 2<br>(1 - 6)         | 1<br>(1 - 3)        | 1<br>(1 - 3)         | 0<br>(0 - 0)             | 0<br>(0 - 0)             |
| Sickle cell disorders                               | 16<br>(10 - 29)          | 3<br>(1 - 7)         | 2<br>(1 - 4)        | 5<br>(3 - 10)        | 5<br>(3 - 8)             | 0<br>(0 - 1)             |
| G6PD deficiency                                     | 3<br>(2 - 5)             | 1<br>(0 - 2)         | 0<br>(0 - 1)        | 1<br>(1 - 2)         | 0<br>(0 - 1)             | 0<br>(0 - 0)             |
| Other hemoglobinopathies and hemolytic anemias      | 71<br>(45 - 120)         | 14<br>(7 - 33)       | 5<br>(3 - 10)       | 13<br>(8 - 22)       | 17<br>(10 - 29)          | 22<br>(13 - 35)          |
| Endocrine, metabolic, blood, and immune disorders   | 371<br>(228 - 1,038)     | 56<br>(28 - 182)     | 8<br>(5 - 23)       | 43<br>(25 - 108)     | 79<br>(45 - 212)         | 185<br>(101 - 566)       |
| Musculoskeletal disorders                           | 314<br>(209 - 422)       | --                   | 6<br>(4 - 9)        | 61<br>(38 - 80)      | 94<br>(53 - 131)         | 153<br>(95 - 213)        |
| Rheumatoid arthritis                                | 84<br>(49 - 118)         | --                   | 0<br>(0 - 1)        | 6<br>(3 - 9)         | 32<br>(17 - 47)          | 45<br>(27 - 68)          |
| Other musculoskeletal disorders                     | 230<br>(146 - 306)       | --                   | 6<br>(4 - 8)        | 54<br>(34 - 71)      | 62<br>(36 - 88)          | 108<br>(65 - 157)        |
| Other non-communicable diseases                     | 1,182<br>(896 - 1,435)   | 870<br>(602 - 1,119) | 44<br>(31 - 58)     | 65<br>(45 - 82)      | 59<br>(41 - 80)          | 145<br>(108 - 191)       |
| Congenital anomalies                                | 1,020<br>(727 - 1,271)   | 846<br>(584 - 1,090) | 41<br>(29 - 55)     | 54<br>(37 - 70)      | 30<br>(20 - 43)          | 49<br>(32 - 66)          |
| Neural tube defects                                 | 58<br>(33 - 94)          | 52<br>(29 - 88)      | 1<br>(0 - 1)        | 2<br>(1 - 2)         | 1<br>(0 - 1)             | 2<br>(1 - 4)             |
| Congenital heart anomalies                          | 433<br>(296 - 585)       | 360<br>(234 - 508)   | 22<br>(14 - 30)     | 29<br>(19 - 38)      | 12<br>(7 - 17)           | 11<br>(6 - 17)           |
| Cleft lip and cleft palate                          | 10<br>(2 - 41)           | 10<br>(2 - 41)       | --                  | --                   | --                       | --                       |
| Down syndrome                                       | 52<br>(28 - 86)          | 45<br>(22 - 77)      | 4<br>(2 - 7)        | 2<br>(1 - 4)         | 1<br>(0 - 1)             | 1<br>(0 - 1)             |
| Chromosomal unbalanced rearrangements               | 48<br>(24 - 89)          | 44<br>(20 - 82)      | 2<br>(1 - 3)        | 2<br>(1 - 3)         | 1<br>(0 - 1)             | 0<br>(0 - 1)             |
| Other congenital anomalies                          | 419<br>(279 - 540)       | 335<br>(205 - 449)   | 13<br>(8 - 19)      | 20<br>(12 - 27)      | 17<br>(11 - 25)          | 34<br>(21 - 47)          |
| Skin and subcutaneous diseases                      | 151<br>(115 - 202)       | 13<br>(8 - 24)       | 2<br>(2 - 3)        | 11<br>(7 - 15)       | 28<br>(19 - 40)          | 96<br>(67 - 138)         |
| Cellulitis                                          | 51<br>(28 - 76)          | 5<br>(3 - 11)        | 1<br>(0 - 1)        | 3<br>(2 - 4)         | 9<br>(5 - 15)            | 33<br>(14 - 55)          |
| Pyoderma                                            | 82<br>(56 - 117)         | 7<br>(3 - 12)        | 1<br>(1 - 1)        | 5<br>(3 - 7)         | 15<br>(9 - 23)           | 54<br>(32 - 83)          |

Web Table 31- Peru deaths with 95% UI by age, sex, and cause in 2013

| Cause                                           | Females, All Ages        | Females, 0-4 Years   | Females, 5-14 Years | Females, 15-49 Years   | Females, 50-69 Years | Females, 70-80 Years   |
|-------------------------------------------------|--------------------------|----------------------|---------------------|------------------------|----------------------|------------------------|
| Decubitus ulcer                                 | 11<br>(7 - 36)           | 0<br>(0 - 1)         | 0<br>(0 - 1)        | 2<br>(1 - 3)           | 2<br>(1 - 4)         | 6<br>(3 - 28)          |
| Other skin and subcutaneous diseases            | 7<br>(4 - 16)            | 1<br>(0 - 3)         | 0<br>(0 - 1)        | 1<br>(1 - 2)           | 2<br>(1 - 3)         | 3<br>(1 - 9)           |
| Sudden infant death syndrome                    | 10<br>(3 - 27)           | 10<br>(3 - 27)       | --                  | --                     | --                   | --                     |
| Injuries                                        | 4,566<br>(3,398 - 5,539) | 794<br>(564 - 1,044) | 273<br>(216 - 327)  | 1,257<br>(919 - 1,548) | 829<br>(551 - 1,102) | 1,414<br>(928 - 1,792) |
| Transport injuries                              | 1,378<br>(834 - 1,756)   | 140<br>(58 - 215)    | 117<br>(76 - 156)   | 473<br>(300 - 611)     | 331<br>(185 - 468)   | 316<br>(162 - 437)     |
| Road injuries                                   | 1,345<br>(827 - 1,707)   | 135<br>(57 - 207)    | 113<br>(75 - 151)   | 464<br>(297 - 599)     | 325<br>(183 - 457)   | 308<br>(160 - 424)     |
| Pedestrian road injuries                        | 624<br>(339 - 833)       | 72<br>(28 - 117)     | 60<br>(35 - 83)     | 143<br>(72 - 204)      | 160<br>(77 - 238)    | 189<br>(93 - 266)      |
| Cyclist road injuries                           | 97<br>(47 - 135)         | 5<br>(2 - 11)        | 5<br>(3 - 8)        | 32<br>(14 - 46)        | 28<br>(14 - 43)      | 27<br>(11 - 43)        |
| Motorcyclist road injuries                      | 42<br>(18 - 62)          | 2<br>(1 - 4)         | 2<br>(1 - 3)        | 29<br>(13 - 43)        | 6<br>(2 - 10)        | 4<br>(1 - 6)           |
| Motor vehicle road injuries                     | 566<br>(377 - 777)       | 51<br>(22 - 85)      | 43<br>(28 - 63)     | 256<br>(173 - 351)     | 129<br>(79 - 191)    | 86<br>(49 - 130)       |
| Other road injuries                             | 16<br>(7 - 23)           | 4<br>(1 - 9)         | 3<br>(1 - 5)        | 4<br>(2 - 7)           | 2<br>(1 - 4)         | 2<br>(1 - 3)           |
| Other transport injuries                        | 33<br>(7 - 49)           | 5<br>(1 - 11)        | 3<br>(1 - 6)        | 9<br>(2 - 14)          | 7<br>(1 - 12)        | 9<br>(1 - 15)          |
| Unintentional injuries                          | 2,447<br>(1,640 - 3,068) | 626<br>(400 - 921)   | 125<br>(83 - 161)   | 410<br>(274 - 541)     | 321<br>(182 - 452)   | 965<br>(568 - 1,276)   |
| Falls                                           | 387<br>(148 - 565)       | 9<br>(3 - 18)        | 6<br>(2 - 10)       | 24<br>(7 - 38)         | 50<br>(16 - 80)      | 298<br>(113 - 444)     |
| Drowning                                        | 186<br>(77 - 293)        | 65<br>(18 - 128)     | 33<br>(13 - 53)     | 39<br>(19 - 60)        | 26<br>(12 - 42)      | 24<br>(10 - 38)        |
| Fire, heat, and hot substances                  | 128<br>(82 - 167)        | 25<br>(13 - 45)      | 9<br>(5 - 13)       | 22<br>(15 - 32)        | 18<br>(12 - 26)      | 54<br>(29 - 77)        |
| Poisonings                                      | 109<br>(28 - 167)        | 8<br>(2 - 14)        | 4<br>(1 - 7)        | 30<br>(7 - 49)         | 29<br>(6 - 49)       | 37<br>(9 - 64)         |
| Exposure to mechanical forces                   | 150<br>(120 - 214)       | 25<br>(17 - 39)      | 21<br>(15 - 37)     | 47<br>(34 - 68)        | 23<br>(16 - 34)      | 33<br>(24 - 47)        |
| Unintentional firearm injuries                  | 45<br>(23 - 59)          | 2<br>(1 - 4)         | 3<br>(2 - 5)        | 20<br>(11 - 27)        | 6<br>(4 - 10)        | 13<br>(5 - 20)         |
| Unintentional suffocation                       | 40<br>(24 - 64)          | 13<br>(7 - 22)       | 4<br>(2 - 8)        | 10<br>(6 - 17)         | 4<br>(2 - 7)         | 9<br>(4 - 17)          |
| Other exposure to mechanical forces             | 65<br>(50 - 119)         | 10<br>(6 - 19)       | 14<br>(9 - 29)      | 17<br>(12 - 38)        | 13<br>(8 - 22)       | 11<br>(8 - 17)         |
| Adverse effects of medical treatment            | 292<br>(124 - 445)       | 38<br>(12 - 71)      | 7<br>(3 - 13)       | 38<br>(16 - 60)        | 46<br>(17 - 77)      | 162<br>(58 - 258)      |
| Animal contact                                  | 14<br>(4 - 20)           | 3<br>(1 - 6)         | 2<br>(1 - 3)        | 3<br>(1 - 5)           | 4<br>(1 - 6)         | 2<br>(0 - 3)           |
| Venomous animal contact                         | 7<br>(2 - 12)            | 1<br>(0 - 3)         | 1<br>(0 - 2)        | 2<br>(1 - 3)           | 3<br>(1 - 5)         | 1<br>(0 - 1)           |
| Non-venomous animal contact                     | 6<br>(2 - 10)            | 2<br>(0 - 3)         | 1<br>(0 - 1)        | 1<br>(0 - 3)           | 1<br>(0 - 2)         | 1<br>(0 - 2)           |
| Foreign body                                    | 1,132<br>(729 - 1,754)   | 448<br>(271 - 733)   | 38<br>(20 - 54)     | 196<br>(112 - 298)     | 115<br>(66 - 189)    | 336<br>(194 - 607)     |
| Pulmonary aspiration and foreign body in airway | 1,122<br>(716 - 1,741)   | 445<br>(268 - 728)   | 37<br>(20 - 54)     | 195<br>(111 - 297)     | 115<br>(65 - 188)    | 331<br>(189 - 603)     |
| Foreign body in other body part                 | 10<br>(6 - 18)           | 3<br>(2 - 6)         | 0<br>(0 - 1)        | 1<br>(1 - 2)           | 1<br>(0 - 2)         | 4<br>(2 - 10)          |
| Other unintentional injuries                    | 49<br>(15 - 68)          | 3<br>(1 - 6)         | 4<br>(1 - 7)        | 12<br>(5 - 18)         | 11<br>(3 - 20)       | 19<br>(3 - 31)         |
| Self-harm and interpersonal violence            | 608<br>(465 - 856)       | 27<br>(12 - 52)      | 28<br>(19 - 44)     | 335<br>(244 - 460)     | 128<br>(91 - 187)    | 89<br>(66 - 144)       |
| Self-harm                                       | 418<br>(310 - 633)       | --                   | 12<br>(8 - 21)      | 228<br>(163 - 337)     | 103<br>(72 - 152)    | 75<br>(55 - 131)       |
| Interpersonal violence                          | 189<br>(126 - 279)       | 27<br>(12 - 52)      | 16<br>(8 - 29)      | 107<br>(67 - 169)      | 26<br>(15 - 43)      | 14<br>(7 - 25)         |
| Assault by firearm                              | 51<br>(28 - 84)          | 4<br>(1 - 10)        | 3<br>(1 - 5)        | 34<br>(18 - 58)        | 8<br>(4 - 15)        | 2<br>(1 - 4)           |
| Assault by sharp object                         | 43<br>(26 - 72)          | 4<br>(2 - 10)        | 2<br>(1 - 5)        | 27<br>(15 - 49)        | 6<br>(3 - 11)        | 3<br>(1 - 5)           |
| Assault by other means                          | 96<br>(61 - 147)         | 18<br>(8 - 38)       | 11<br>(5 - 20)      | 46<br>(27 - 74)        | 11<br>(6 - 20)       | 9<br>(4 - 17)          |
| Forces of nature, war, and legal intervention   | 134<br>(111 - 173)       | 0<br>(0 - 0)         | 3<br>(2 - 4)        | 39<br>(31 - 53)        | 48<br>(38 - 64)      | 44<br>(40 - 55)        |
| Exposure to forces of nature                    | 134<br>(111 - 173)       | 0<br>(0 - 0)         | 3<br>(2 - 4)        | 39<br>(31 - 53)        | 48<br>(38 - 64)      | 44<br>(40 - 55)        |

Web Table 31- Philippines deaths with 95% UI by age, sex, and cause in 2013

| Cause                                                             | Both Sexes, All Ages           | Both Sexes, 0-4 Years       | Both Sexes, 5-14 Years      | Both Sexes, 15-49 Years       | Both Sexes, 50-69 Years        | Both Sexes, 70-80 Years        |
|-------------------------------------------------------------------|--------------------------------|-----------------------------|-----------------------------|-------------------------------|--------------------------------|--------------------------------|
| All causes                                                        | 541,279<br>(476,375 - 615,923) | 65,074<br>(55,354 - 76,903) | 13,106<br>(11,748 - 14,611) | 118,589<br>(99,467 - 142,442) | 169,902<br>(144,890 - 200,090) | 174,608<br>(157,791 - 195,176) |
| Communicable, maternal, neonatal, and nutritional diseases        | 140,253<br>(126,214 - 156,674) | 48,852<br>(41,568 - 57,893) | 6,041<br>(5,024 - 7,246)    | 25,790<br>(22,248 - 29,880)   | 25,079<br>(20,903 - 30,164)    | 34,491<br>(29,388 - 40,362)    |
| HIV/AIDS and tuberculosis                                         | 34,351<br>(28,772 - 43,213)    | 323<br>(213 - 457)          | 310<br>(205 - 400)          | 12,687<br>(10,410 - 15,716)   | 13,368<br>(10,579 - 17,390)    | 7,663<br>(6,224 - 10,252)      |
| Tuberculosis                                                      | 29,278<br>(23,891 - 38,089)    | 195<br>(109 - 286)          | 263<br>(158 - 351)          | 8,842<br>(6,870 - 11,670)     | 12,411<br>(9,618 - 16,635)     | 7,567<br>(6,124 - 10,156)      |
| HIV/AIDS                                                          | 5,073<br>(3,423 - 6,397)       | 128<br>(59 - 232)           | 47<br>(29 - 74)             | 3,845<br>(2,692 - 4,773)      | 957<br>(541 - 1,492)           | 96<br>(52 - 146)               |
| HIV/AIDS resulting in mycobacterial infection                     | 328<br>(216 - 441)             | 7<br>(3 - 13)               | 3<br>(1 - 4)                | 246<br>(165 - 322)            | 66<br>(37 - 107)               | 7<br>(4 - 11)                  |
| HIV/AIDS resulting in other diseases                              | 4,745<br>(3,204 - 5,987)       | 121<br>(55 - 219)           | 45<br>(27 - 70)             | 3,599<br>(2,515 - 4,490)      | 891<br>(504 - 1,386)           | 89<br>(48 - 135)               |
| Diarrhea, lower respiratory, and other common infectious diseases | 67,726<br>(57,602 - 78,157)    | 21,166<br>(16,714 - 27,016) | 4,652<br>(3,626 - 5,838)    | 8,651<br>(6,614 - 11,064)     | 9,692<br>(7,442 - 12,326)      | 23,565<br>(18,556 - 28,989)    |
| Diarrheal diseases                                                | 6,107<br>(4,667 - 8,082)       | 3,287<br>(1,985 - 5,067)    | 364<br>(239 - 529)          | 846<br>(634 - 1,100)          | 714<br>(527 - 976)             | 897<br>(636 - 1,248)           |
| Intestinal infectious diseases                                    | 5,588<br>(2,881 - 9,428)       | 2,242<br>(1,095 - 3,969)    | 1,644<br>(889 - 2,710)      | 1,388<br>(619 - 2,521)        | 247<br>(105 - 468)             | 67<br>(34 - 119)               |
| Typhoid fever                                                     | 4,254<br>(2,150 - 7,408)       | 1,620<br>(769 - 2,869)      | 1,273<br>(679 - 2,112)      | 1,101<br>(478 - 2,035)        | 205<br>(87 - 394)              | 55<br>(27 - 99)                |
| Paratyphoid fever                                                 | 1,282<br>(627 - 2,247)         | 596<br>(269 - 1,146)        | 366<br>(178 - 636)          | 272<br>(118 - 535)            | 38<br>(15 - 74)                | 9<br>(4 - 18)                  |
| Other intestinal infectious diseases                              | 53<br>(34 - 74)                | 26<br>(14 - 42)             | 5<br>(1 - 12)               | 15<br>(7 - 25)                | 5<br>(1 - 11)                  | 2<br>(0 - 6)                   |
| Lower respiratory infections                                      | 47,353<br>(39,497 - 55,732)    | 10,432<br>(7,511 - 14,026)  | 1,428<br>(993 - 2,181)      | 4,934<br>(3,664 - 6,470)      | 8,230<br>(6,189 - 10,587)      | 22,330<br>(17,389 - 27,647)    |
| Upper respiratory infections                                      | 36<br>(19 - 60)                | 5<br>(1 - 15)               | 1<br>(0 - 4)                | 11<br>(3 - 23)                | 11<br>(2 - 26)                 | 9<br>(2 - 23)                  |
| Otitis media                                                      | 49<br>(41 - 57)                | 9<br>(5 - 13)               | 9<br>(7 - 11)               | 17<br>(13 - 22)               | 8<br>(6 - 11)                  | 6<br>(5 - 9)                   |
| Meningitis                                                        | 3,374<br>(2,524 - 4,300)       | 1,438<br>(870 - 2,193)      | 570<br>(373 - 798)          | 905<br>(648 - 1,213)          | 296<br>(198 - 403)             | 165<br>(108 - 234)             |
| Pneumococcal meningitis                                           | 1,013<br>(735 - 1,346)         | 325<br>(173 - 538)          | 202<br>(118 - 310)          | 327<br>(219 - 479)            | 103<br>(62 - 152)              | 57<br>(32 - 87)                |
| H influenzae type B meningitis                                    | 889<br>(644 - 1,221)           | 548<br>(333 - 835)          | 154<br>(94 - 235)           | 131<br>(82 - 196)             | 35<br>(22 - 53)                | 20<br>(12 - 30)                |
| Meningococcal meningitis                                          | 355<br>(250 - 478)             | 99<br>(51 - 173)            | 57<br>(34 - 92)             | 122<br>(73 - 186)             | 47<br>(24 - 73)                | 30<br>(15 - 47)                |
| Other meningitis                                                  | 1,117<br>(685 - 1,508)         | 465<br>(234 - 755)          | 157<br>(78 - 256)           | 325<br>(192 - 487)            | 112<br>(66 - 165)              | 59<br>(37 - 88)                |
| Encephalitis                                                      | 781<br>(508 - 1,071)           | 310<br>(158 - 506)          | 139<br>(76 - 199)           | 244<br>(144 - 336)            | 62<br>(37 - 85)                | 25<br>(15 - 35)                |
| Diphtheria                                                        | 18<br>(2 - 76)                 | 11<br>(0 - 64)              | 4<br>(0 - 20)               | 3<br>(0 - 9)                  | 1<br>(0 - 5)                   | --                             |
| Whooping cough                                                    | 662<br>(1 - 3,141)             | 615<br>(1 - 2,908)          | 36<br>(0 - 179)             | 9<br>(0 - 45)                 | 1<br>(0 - 6)                   | --                             |
| Tetanus                                                           | 516<br>(164 - 845)             | 93<br>(26 - 149)            | 55<br>(21 - 96)             | 205<br>(55 - 360)             | 114<br>(29 - 205)              | 49<br>(12 - 86)                |
| Measles                                                           | 3,177<br>(546 - 9,575)         | 2,706<br>(470 - 8,106)      | 396<br>(63 - 1,258)         | 72<br>(12 - 242)              | 2<br>(0 - 8)                   | --                             |
| Varicella and herpes zoster                                       | 64<br>(29 - 122)               | 19<br>(2 - 66)              | 5<br>(0 - 16)               | 17<br>(5 - 36)                | 7<br>(1 - 18)                  | 16<br>(2 - 57)                 |
| Neglected tropical diseases and malaria                           | 2,417<br>(1,532 - 2,941)       | 650<br>(322 - 943)          | 676<br>(354 - 855)          | 643<br>(476 - 803)            | 313<br>(242 - 390)             | 134<br>(106 - 164)             |
| Malaria                                                           | 230<br>(166 - 326)             | 16<br>(9 - 29)              | 21<br>(12 - 37)             | 124<br>(81 - 185)             | 50<br>(31 - 80)                | 19<br>(11 - 31)                |
| Leishmaniasis                                                     | 2<br>(1 - 2)                   | 1<br>(1 - 2)                | 0<br>(0 - 0)                | 0<br>(0 - 0)                  | 0<br>(0 - 0)                   | 0<br>(0 - 0)                   |
| Visceral leishmaniasis                                            | 2<br>(1 - 2)                   | 1<br>(1 - 2)                | 0<br>(0 - 0)                | 0<br>(0 - 0)                  | 0<br>(0 - 0)                   | 0<br>(0 - 0)                   |
| Schistosomiasis                                                   | 215<br>(162 - 284)             | 1<br>(0 - 2)                | 5<br>(3 - 7)                | 75<br>(52 - 111)              | 90<br>(59 - 131)               | 44<br>(28 - 64)                |
| Cysticercosis                                                     | 2<br>(2 - 3)                   | 0<br>(0 - 0)                | 0<br>(0 - 0)                | 1<br>(1 - 2)                  | 1<br>(0 - 1)                   | 0<br>(0 - 0)                   |
| Cystic echinococcosis                                             | 11<br>(9 - 13)                 | 1<br>(0 - 1)                | 1<br>(1 - 2)                | 5<br>(4 - 6)                  | 3<br>(2 - 3)                   | 1<br>(1 - 1)                   |
| Dengue                                                            | 1,210<br>(450 - 1,612)         | 502<br>(166 - 768)          | 491<br>(183 - 647)          | 170<br>(74 - 227)             | 31<br>(14 - 41)                | 16<br>(6 - 23)                 |
| Rabies                                                            | 520<br>(356 - 658)             | 36<br>(18 - 59)             | 124<br>(80 - 174)           | 219<br>(139 - 293)            | 106<br>(73 - 140)              | 35<br>(23 - 47)                |
| Intestinal nematode infections                                    | 77<br>(49 - 110)               | 44<br>(24 - 72)             | 14<br>(5 - 25)              | 9<br>(2 - 21)                 | 6<br>(1 - 15)                  | 4<br>(1 - 12)                  |
| Ascariasis                                                        | 77<br>(49 - 110)               | 44<br>(24 - 72)             | 14<br>(5 - 25)              | 9<br>(2 - 21)                 | 6<br>(1 - 15)                  | 4<br>(1 - 12)                  |
| Other neglected tropical diseases                                 | 150<br>(112 - 193)             | 49<br>(29 - 80)             | 21<br>(15 - 28)             | 39<br>(26 - 51)               | 26<br>(16 - 38)                | 15<br>(9 - 22)                 |
| Maternal disorders                                                | 1,959<br>(1,328 - 2,784)       | --                          | 7<br>(3 - 15)               | 1,952<br>(1,321 - 2,778)      | --                             | --                             |



Web Table 31- Philippines deaths with 95% UI by age, sex, and cause in 2013

| Cause                                                            | Both Sexes, All Ages           | Both Sexes, 0-4 Years       | Both Sexes, 5-14 Years   | Both Sexes, 15-49 Years     | Both Sexes, 50-69 Years        | Both Sexes, 70-80 Years        |
|------------------------------------------------------------------|--------------------------------|-----------------------------|--------------------------|-----------------------------|--------------------------------|--------------------------------|
| Maternal hemorrhage                                              | 365<br>(238 - 533)             | --                          | 1<br>(0 - 2)             | 364<br>(237 - 532)          | --                             | --                             |
| Maternal sepsis and other maternal infections                    | 128<br>(82 - 193)              | --                          | 1<br>(0 - 2)             | 127<br>(81 - 192)           | --                             | --                             |
| Maternal hypertensive disorders                                  | 479<br>(311 - 698)             | --                          | 1<br>(0 - 3)             | 478<br>(310 - 697)          | --                             | --                             |
| Maternal obstructed labor                                        | 92<br>(51 - 154)               | --                          | 0<br>(0 - 1)             | 92<br>(51 - 154)            | --                             | --                             |
| Maternal abortive outcome                                        | 208<br>(137 - 302)             | --                          | 1<br>(0 - 2)             | 207<br>(136 - 302)          | --                             | --                             |
| Indirect maternal deaths                                         | 114<br>(72 - 168)              | --                          | 0<br>(0 - 1)             | 113<br>(72 - 168)           | --                             | --                             |
| Late maternal deaths                                             | 233<br>(138 - 353)             | --                          | 1<br>(0 - 3)             | 232<br>(137 - 351)          | --                             | --                             |
| Maternal deaths aggravated by HIV/AIDS                           | 1<br>(0 - 1)                   | --                          | --                       | 1<br>(0 - 1)                | --                             | --                             |
| Other maternal disorders                                         | 337<br>(219 - 498)             | --                          | 1<br>(0 - 3)             | 336<br>(218 - 496)          | --                             | --                             |
| Neonatal disorders                                               | 24,929<br>(21,251 - 28,930)    | 24,929<br>(21,251 - 28,930) | --                       | --                          | --                             | --                             |
| Neonatal preterm birth complications                             | 10,566<br>(7,714 - 13,947)     | 10,566<br>(7,714 - 13,947)  | --                       | --                          | --                             | --                             |
| Neonatal encephalopathy due to birth asphyxia and trauma         | 5,117<br>(3,136 - 7,218)       | 5,117<br>(3,136 - 7,218)    | --                       | --                          | --                             | --                             |
| Neonatal sepsis and other neonatal infections                    | 4,078<br>(1,848 - 7,522)       | 4,078<br>(1,848 - 7,522)    | --                       | --                          | --                             | --                             |
| Hemolytic disease and other neonatal jaundice                    | 1,789<br>(633 - 3,446)         | 1,789<br>(633 - 3,446)      | --                       | --                          | --                             | --                             |
| Other neonatal disorders                                         | 3,378<br>(2,073 - 5,243)       | 3,378<br>(2,073 - 5,243)    | --                       | --                          | --                             | --                             |
| Nutritional deficiencies                                         | 6,358<br>(5,052 - 9,668)       | 1,277<br>(812 - 2,079)      | 284<br>(211 - 430)       | 1,004<br>(750 - 1,534)      | 1,044<br>(752 - 1,840)         | 2,749<br>(2,071 - 4,032)       |
| Protein-energy malnutrition                                      | 3,322<br>(2,387 - 5,331)       | 1,002<br>(599 - 1,664)      | 182<br>(127 - 287)       | 344<br>(206 - 659)          | 388<br>(215 - 769)             | 1,406<br>(942 - 2,129)         |
| Iodine deficiency                                                | 23<br>(5 - 64)                 | 5<br>(0 - 31)               | 2<br>(0 - 13)            | 5<br>(0 - 17)               | 5<br>(0 - 21)                  | 6<br>(0 - 28)                  |
| Iron-deficiency anemia                                           | 2,391<br>(1,530 - 3,915)       | 227<br>(96 - 496)           | 91<br>(53 - 157)         | 609<br>(390 - 909)          | 567<br>(352 - 1,024)           | 897<br>(528 - 1,526)           |
| Other nutritional deficiencies                                   | 622<br>(363 - 1,275)           | 43<br>(19 - 110)            | 9<br>(5 - 19)            | 46<br>(25 - 96)             | 84<br>(44 - 179)               | 440<br>(247 - 879)             |
| Other communicable, maternal, neonatal, and nutritional diseases | 2,515<br>(1,590 - 4,194)       | 508<br>(202 - 948)          | 112<br>(66 - 181)        | 852<br>(577 - 1,306)        | 662<br>(345 - 1,386)           | 381<br>(151 - 1,033)           |
| Sexually transmitted diseases excluding HIV                      | 429<br>(113 - 860)             | 366<br>(68 - 779)           | 29<br>(7 - 60)           | 18<br>(10 - 34)             | 9<br>(5 - 15)                  | 6<br>(3 - 12)                  |
| Syphilis                                                         | 413<br>(92 - 849)              | 366<br>(68 - 779)           | 28<br>(6 - 59)           | 8<br>(4 - 14)               | 5<br>(3 - 9)                   | 5<br>(3 - 9)                   |
| Chlamydial infection                                             | 4<br>(2 - 8)                   | --                          | 0<br>(0 - 1)             | 3<br>(1 - 6)                | 1<br>(0 - 2)                   | 0<br>(0 - 1)                   |
| Gonococcal infection                                             | 7<br>(4 - 11)                  | --                          | 0<br>(0 - 1)             | 4<br>(2 - 7)                | 2<br>(1 - 3)                   | 1<br>(0 - 1)                   |
| Other sexually transmitted diseases                              | 5<br>(3 - 9)                   | --                          | 0<br>(0 - 1)             | 4<br>(2 - 6)                | 1<br>(1 - 2)                   | 0<br>(0 - 1)                   |
| Hepatitis                                                        | 814<br>(635 - 1,035)           | 51<br>(30 - 84)             | 24<br>(16 - 35)          | 379<br>(268 - 517)          | 271<br>(188 - 385)             | 89<br>(62 - 129)               |
| Acute hepatitis A                                                | 78<br>(25 - 159)               | 26<br>(10 - 49)             | 9<br>(3 - 17)            | 32<br>(8 - 76)              | 10<br>(2 - 25)                 | 1<br>(0 - 4)                   |
| Acute hepatitis B                                                | 475<br>(322 - 664)             | 24<br>(10 - 49)             | 7<br>(3 - 13)            | 171<br>(93 - 282)           | 197<br>(126 - 289)             | 74<br>(49 - 111)               |
| Acute hepatitis C                                                | 13<br>(2 - 32)                 | --                          | 0<br>(0 - 1)             | 5<br>(1 - 15)               | 5<br>(1 - 14)                  | 2<br>(0 - 5)                   |
| Acute hepatitis E                                                | 248<br>(146 - 403)             | 1<br>(0 - 2)                | 7<br>(3 - 13)            | 171<br>(101 - 269)          | 59<br>(25 - 113)               | 11<br>(3 - 26)                 |
| Other infectious diseases                                        | 1,272<br>(612 - 2,840)         | 90<br>(32 - 175)            | 59<br>(25 - 121)         | 455<br>(244 - 844)          | 382<br>(121 - 1,103)           | 285<br>(66 - 934)              |
| Non-communicable diseases                                        | 359,340<br>(308,872 - 417,536) | 12,773<br>(9,746 - 16,210)  | 4,031<br>(3,344 - 4,742) | 69,129<br>(55,694 - 85,595) | 136,960<br>(114,371 - 164,273) | 136,447<br>(121,052 - 153,109) |
| Neoplasms                                                        | 68,440<br>(56,840 - 81,820)    | 662<br>(422 - 965)          | 1,040<br>(832 - 1,281)   | 15,775<br>(12,373 - 19,799) | 32,723<br>(26,792 - 39,554)    | 18,241<br>(15,651 - 21,086)    |
| Esophageal cancer                                                | 877<br>(698 - 1,156)           | --                          | --                       | 130<br>(92 - 177)           | 461<br>(346 - 644)             | 287<br>(225 - 378)             |
| Stomach cancer                                                   | 3,380<br>(2,760 - 4,098)       | --                          | --                       | 581<br>(444 - 758)          | 1,605<br>(1,268 - 2,021)       | 1,194<br>(939 - 1,478)         |
| Liver cancer                                                     | 6,379<br>(5,091 - 7,894)       | --                          | 28<br>(18 - 41)          | 1,658<br>(1,225 - 2,247)    | 3,179<br>(2,404 - 4,056)       | 1,513<br>(1,156 - 1,933)       |
| Liver cancer due to hepatitis B                                  | 2,801<br>(1,837 - 4,033)       | --                          | 12<br>(6 - 19)           | 883<br>(571 - 1,324)        | 1,402<br>(848 - 2,131)         | 504<br>(293 - 806)             |
| Liver cancer due to hepatitis C                                  | 2,464<br>(1,399 - 3,593)       | --                          | 3<br>(1 - 6)             | 490<br>(156 - 794)          | 1,272<br>(667 - 1,870)         | 698<br>(410 - 1,027)           |
| Liver cancer due to alcohol use                                  | 401<br>(251 - 579)             | --                          | --                       | 65<br>(35 - 106)            | 192<br>(115 - 296)             | 144<br>(81 - 219)              |

Web Table 31- Philippines deaths with 95% UI by age, sex, and cause in 2013

| Cause                                         | Both Sexes, All Ages           | Both Sexes, 0-4 Years | Both Sexes, 5-14 Years | Both Sexes, 15-49 Years     | Both Sexes, 50-69 Years     | Both Sexes, 70-80 Years     |
|-----------------------------------------------|--------------------------------|-----------------------|------------------------|-----------------------------|-----------------------------|-----------------------------|
| Liver cancer due to other causes              | 713<br>(413 - 1,097)           | --                    | 13<br>(8 - 20)         | 220<br>(133 - 332)          | 313<br>(167 - 518)          | 167<br>(91 - 292)           |
| Larynx cancer                                 | 682<br>(499 - 963)             | --                    | --                     | 86<br>(59 - 122)            | 392<br>(278 - 565)          | 204<br>(147 - 291)          |
| Tracheal, bronchus and lung cancer            | 13,358<br>(10,981 - 16,197)    | --                    | --                     | 1,664<br>(1,246 - 2,152)    | 7,822<br>(6,293 - 9,723)    | 3,872<br>(3,224 - 4,630)    |
| Breast cancer                                 | 6,313<br>(4,734 - 8,244)       | --                    | --                     | 2,062<br>(1,443 - 2,835)    | 3,189<br>(2,339 - 4,216)    | 1,061<br>(805 - 1,388)      |
| Cervical cancer                               | 2,536<br>(1,818 - 3,401)       | --                    | --                     | 886<br>(572 - 1,281)        | 1,225<br>(851 - 1,692)      | 425<br>(302 - 599)          |
| Uterine cancer                                | 788<br>(455 - 1,121)           | --                    | --                     | 151<br>(76 - 231)           | 440<br>(247 - 662)          | 197<br>(123 - 296)          |
| Prostate cancer                               | 1,934<br>(1,003 - 2,678)       | --                    | --                     | 32<br>(17 - 51)             | 502<br>(253 - 739)          | 1,400<br>(718 - 1,962)      |
| Colon and rectum cancer                       | 6,266<br>(5,182 - 7,443)       | --                    | --                     | 1,180<br>(929 - 1,494)      | 2,939<br>(2,369 - 3,541)    | 2,146<br>(1,767 - 2,565)    |
| Lip and oral cavity cancer                    | 1,462<br>(1,126 - 2,000)       | --                    | --                     | 279<br>(197 - 408)          | 696<br>(520 - 964)          | 486<br>(361 - 676)          |
| Nasopharynx cancer                            | 1,217<br>(935 - 1,672)         | --                    | 11<br>(5 - 22)         | 411<br>(293 - 588)          | 587<br>(415 - 858)          | 209<br>(147 - 293)          |
| Other pharynx cancer                          | 701<br>(532 - 1,080)           | --                    | --                     | 126<br>(87 - 198)           | 392<br>(280 - 631)          | 183<br>(134 - 279)          |
| Gallbladder and biliary tract cancer          | 1,064<br>(721 - 1,990)         | --                    | --                     | 189<br>(115 - 376)          | 528<br>(346 - 1,043)        | 347<br>(224 - 609)          |
| Pancreatic cancer                             | 2,175<br>(1,768 - 2,624)       | --                    | --                     | 331<br>(251 - 423)          | 1,139<br>(904 - 1,427)      | 705<br>(566 - 867)          |
| Malignant skin melanoma                       | 310<br>(207 - 401)             | --                    | --                     | 82<br>(52 - 114)            | 137<br>(89 - 188)           | 90<br>(61 - 116)            |
| Non-melanoma skin cancer                      | 246<br>(177 - 350)             | --                    | --                     | 52<br>(35 - 75)             | 97<br>(68 - 147)            | 97<br>(67 - 140)            |
| Ovarian cancer                                | 2,128<br>(1,554 - 2,794)       | --                    | --                     | 626<br>(418 - 894)          | 1,135<br>(801 - 1,545)      | 367<br>(255 - 506)          |
| Testicular cancer                             | 130<br>(86 - 199)              | --                    | --                     | 85<br>(52 - 139)            | 27<br>(16 - 43)             | 19<br>(11 - 32)             |
| Kidney cancer                                 | 876<br>(706 - 1,074)           | 15<br>(8 - 28)        | 6<br>(4 - 9)           | 152<br>(111 - 201)          | 460<br>(354 - 601)          | 243<br>(187 - 313)          |
| Bladder cancer                                | 848<br>(650 - 1,213)           | --                    | --                     | 87<br>(62 - 126)            | 376<br>(272 - 538)          | 385<br>(285 - 571)          |
| Brain and nervous system cancer               | 1,640<br>(1,283 - 2,243)       | 53<br>(27 - 93)       | 118<br>(82 - 175)      | 611<br>(452 - 834)          | 633<br>(480 - 893)          | 223<br>(169 - 305)          |
| Thyroid cancer                                | 870<br>(677 - 1,132)           | --                    | 3<br>(2 - 5)           | 121<br>(90 - 166)           | 428<br>(314 - 578)          | 318<br>(238 - 438)          |
| Mesothelioma                                  | 64<br>(49 - 84)                | --                    | --                     | 12<br>(9 - 17)              | 35<br>(24 - 49)             | 17<br>(11 - 25)             |
| Hodgkin lymphoma                              | 157<br>(119 - 219)             | 3<br>(2 - 6)          | 7<br>(3 - 13)          | 59<br>(41 - 81)             | 59<br>(39 - 91)             | 29<br>(19 - 45)             |
| Non-Hodgkin lymphoma                          | 1,940<br>(1,497 - 2,569)       | 37<br>(20 - 64)       | 74<br>(50 - 102)       | 557<br>(409 - 736)          | 805<br>(596 - 1,097)        | 467<br>(347 - 638)          |
| Multiple myeloma                              | 346<br>(263 - 455)             | --                    | --                     | 62<br>(45 - 86)             | 185<br>(137 - 249)          | 99<br>(71 - 134)            |
| Leukemia                                      | 3,603<br>(2,985 - 4,275)       | 365<br>(202 - 590)    | 580<br>(437 - 749)     | 1,456<br>(1,143 - 1,828)    | 765<br>(601 - 951)          | 437<br>(355 - 536)          |
| Other neoplasms                               | 6,152<br>(4,520 - 9,261)       | 188<br>(102 - 283)    | 213<br>(159 - 275)     | 2,047<br>(1,412 - 3,182)    | 2,485<br>(1,728 - 3,983)    | 1,220<br>(902 - 1,927)      |
| Cardiovascular diseases                       | 170,946<br>(146,994 - 199,761) | 588<br>(405 - 848)    | 894<br>(685 - 1,161)   | 30,231<br>(24,238 - 37,663) | 64,330<br>(53,503 - 77,947) | 74,903<br>(66,393 - 85,104) |
| Rheumatic heart disease                       | 3,353<br>(2,508 - 4,425)       | 58<br>(27 - 102)      | 406<br>(281 - 541)     | 1,978<br>(1,325 - 2,606)    | 499<br>(356 - 798)          | 412<br>(298 - 675)          |
| Ischemic heart disease                        | 83,139<br>(70,387 - 100,334)   | 95<br>(60 - 148)      | 143<br>(91 - 277)      | 15,616<br>(12,238 - 19,873) | 31,051<br>(25,070 - 38,447) | 36,233<br>(31,039 - 43,813) |
| Cerebrovascular disease                       | 62,050<br>(51,833 - 74,053)    | 190<br>(129 - 278)    | 215<br>(150 - 306)     | 8,953<br>(6,925 - 11,613)   | 24,739<br>(19,829 - 30,494) | 27,952<br>(23,708 - 32,813) |
| Ischemic stroke                               | 30,909<br>(23,829 - 37,366)    | 16<br>(8 - 26)        | 15<br>(10 - 22)        | 1,285<br>(892 - 1,782)      | 9,245<br>(6,441 - 11,893)   | 20,349<br>(16,186 - 24,309) |
| Hemorrhagic stroke                            | 31,141<br>(25,052 - 39,473)    | 174<br>(119 - 254)    | 201<br>(139 - 286)     | 7,669<br>(5,862 - 9,918)    | 15,495<br>(12,233 - 19,581) | 7,603<br>(5,709 - 10,812)   |
| Hypertensive heart disease                    | 15,056<br>(10,139 - 19,625)    | 34<br>(12 - 78)       | 22<br>(10 - 45)        | 1,947<br>(1,350 - 2,640)    | 5,734<br>(3,589 - 7,822)    | 7,319<br>(4,679 - 9,707)    |
| Cardiomyopathy and myocarditis                | 3,242<br>(2,437 - 4,984)       | 83<br>(50 - 145)      | 47<br>(30 - 74)        | 752<br>(547 - 1,102)        | 945<br>(671 - 1,524)        | 1,415<br>(940 - 2,366)      |
| Atrial fibrillation and flutter               | 154<br>(115 - 198)             | --                    | --                     | 22<br>(16 - 30)             | 56<br>(39 - 76)             | 75<br>(52 - 104)            |
| Aortic aneurysm                               | 794<br>(628 - 1,024)           | --                    | --                     | 145<br>(110 - 198)          | 213<br>(160 - 279)          | 437<br>(341 - 569)          |
| Peripheral vascular disease                   | 73<br>(57 - 91)                | --                    | --                     | 10<br>(6 - 14)              | 31<br>(23 - 42)             | 32<br>(25 - 41)             |
| Endocarditis                                  | 400<br>(275 - 505)             | 82<br>(49 - 126)      | 23<br>(15 - 33)        | 132<br>(85 - 182)           | 84<br>(53 - 116)            | 79<br>(52 - 110)            |
| Other cardiovascular and circulatory diseases | 2,685<br>(967 - 3,482)         | 47<br>(15 - 74)       | 37<br>(15 - 56)        | 677<br>(214 - 925)          | 977<br>(321 - 1,357)        | 948<br>(365 - 1,299)        |

Web Table 31- Philippines deaths with 95% UI by age, sex, and cause in 2013

| Cause                                               | Both Sexes, All Ages        | Both Sexes, 0-4 Years | Both Sexes, 5-14 Years | Both Sexes, 15-49 Years  | Both Sexes, 50-69 Years    | Both Sexes, 70-80 Years     |
|-----------------------------------------------------|-----------------------------|-----------------------|------------------------|--------------------------|----------------------------|-----------------------------|
| Chronic respiratory diseases                        | 29,490<br>(22,476 - 35,223) | 837<br>(551 - 1,214)  | 297<br>(225 - 367)     | 3,683<br>(2,762 - 4,678) | 10,214<br>(7,101 - 12,893) | 14,459<br>(11,318 - 16,996) |
| Chronic obstructive pulmonary disease               | 15,779<br>(11,822 - 19,220) | 208<br>(118 - 389)    | 43<br>(29 - 60)        | 1,235<br>(897 - 1,637)   | 5,788<br>(4,096 - 7,364)   | 8,506<br>(6,424 - 10,215)   |
| Pneumoconiosis                                      | 599<br>(364 - 900)          | 2<br>(1 - 3)          | 2<br>(2 - 3)           | 82<br>(49 - 128)         | 267<br>(147 - 418)         | 246<br>(147 - 383)          |
| Silicosis                                           | 269<br>(155 - 417)          | 0<br>(0 - 1)          | 1<br>(0 - 1)           | 3<br>(2 - 5)             | 63<br>(34 - 105)           | 202<br>(116 - 318)          |
| Asbestosis                                          | 80<br>(46 - 126)            | 0<br>(0 - 1)          | 1<br>(0 - 1)           | 14<br>(8 - 22)           | 63<br>(33 - 101)           | 3<br>(2 - 5)                |
| Coal workers pneumoconiosis                         | 149<br>(87 - 225)           | 0<br>(0 - 1)          | 1<br>(0 - 1)           | 45<br>(26 - 70)          | 97<br>(54 - 152)           | 6<br>(3 - 9)                |
| Other pneumoconiosis                                | 100<br>(65 - 150)           | 0<br>(0 - 1)          | 1<br>(0 - 1)           | 20<br>(13 - 31)          | 43<br>(25 - 69)            | 36<br>(22 - 55)             |
| Asthma                                              | 10,376<br>(7,127 - 12,937)  | 578<br>(359 - 876)    | 240<br>(173 - 299)     | 2,234<br>(1,609 - 2,846) | 3,514<br>(2,283 - 4,579)   | 3,810<br>(2,478 - 4,989)    |
| Interstitial lung disease and pulmonary sarcoidosis | 2,044<br>(1,315 - 3,428)    | 2<br>(1 - 3)          | 3<br>(2 - 5)           | 24<br>(15 - 39)          | 550<br>(341 - 961)         | 1,466<br>(894 - 2,486)      |
| Other chronic respiratory diseases                  | 693<br>(529 - 917)          | 48<br>(30 - 101)      | 9<br>(6 - 14)          | 109<br>(80 - 146)        | 96<br>(67 - 130)           | 431<br>(299 - 622)          |
| Cirrhosis                                           | 10,020<br>(8,085 - 12,338)  | 27<br>(15 - 46)       | 42<br>(31 - 56)        | 3,381<br>(2,540 - 4,526) | 4,817<br>(3,714 - 6,021)   | 1,752<br>(1,422 - 2,120)    |
| Cirrhosis due to hepatitis B                        | 2,975<br>(1,714 - 5,110)    | 1<br>(0 - 3)          | 7<br>(2 - 13)          | 1,013<br>(436 - 1,736)   | 1,400<br>(779 - 2,551)     | 553<br>(285 - 955)          |
| Cirrhosis due to hepatitis C                        | 2,516<br>(1,334 - 4,264)    | 1<br>(0 - 2)          | 6<br>(2 - 11)          | 816<br>(442 - 1,423)     | 1,231<br>(578 - 2,182)     | 462<br>(227 - 754)          |
| Cirrhosis due to alcohol use                        | 3,479<br>(2,114 - 5,610)    | --                    | --                     | 1,026<br>(542 - 1,749)   | 1,805<br>(1,041 - 2,954)   | 648<br>(408 - 975)          |
| Cirrhosis due to other causes                       | 1,050<br>(653 - 1,669)      | 25<br>(14 - 42)       | 29<br>(21 - 40)        | 527<br>(304 - 860)       | 382<br>(201 - 656)         | 88<br>(52 - 137)            |
| Digestive diseases                                  | 13,360<br>(11,077 - 16,177) | 227<br>(129 - 335)    | 213<br>(170 - 275)     | 3,295<br>(2,526 - 4,316) | 4,949<br>(3,918 - 6,292)   | 4,677<br>(4,014 - 5,469)    |
| Peptic ulcer disease                                | 7,254<br>(5,766 - 9,238)    | 6<br>(2 - 12)         | 22<br>(15 - 32)        | 1,318<br>(931 - 1,878)   | 2,969<br>(2,242 - 3,956)   | 2,939<br>(2,395 - 3,593)    |
| Gastritis and duodenitis                            | 317<br>(206 - 473)          | 10<br>(4 - 18)        | 11<br>(6 - 16)         | 64<br>(41 - 105)         | 100<br>(63 - 156)          | 131<br>(80 - 204)           |
| Appendicitis                                        | 527<br>(367 - 714)          | 13<br>(4 - 26)        | 59<br>(41 - 82)        | 233<br>(157 - 333)       | 139<br>(92 - 204)          | 84<br>(50 - 123)            |
| Paralytic ileus and intestinal obstruction          | 1,561<br>(1,140 - 2,426)    | 138<br>(78 - 213)     | 73<br>(50 - 115)       | 370<br>(245 - 634)       | 484<br>(321 - 823)         | 496<br>(333 - 786)          |
| Inguinal, femoral, and abdominal hernia             | 242<br>(136 - 344)          | 6<br>(2 - 12)         | 5<br>(3 - 7)           | 48<br>(29 - 76)          | 83<br>(45 - 129)           | 101<br>(44 - 159)           |
| Inflammatory bowel disease                          | 449<br>(327 - 621)          | 18<br>(8 - 33)        | 9<br>(5 - 12)          | 89<br>(62 - 127)         | 131<br>(89 - 193)          | 202<br>(134 - 308)          |
| Vascular intestinal disorders                       | 55<br>(30 - 97)             | 1<br>(0 - 2)          | 2<br>(0 - 4)           | 13<br>(7 - 24)           | 19<br>(9 - 37)             | 20<br>(10 - 33)             |
| Gallbladder and biliary diseases                    | 926<br>(497 - 1,233)        | 5<br>(1 - 10)         | 7<br>(4 - 9)           | 227<br>(123 - 316)       | 352<br>(188 - 497)         | 336<br>(166 - 472)          |
| Pancreatitis                                        | 1,538<br>(1,097 - 2,093)    | 11<br>(5 - 20)        | 13<br>(9 - 19)         | 796<br>(535 - 1,114)     | 496<br>(333 - 701)         | 221<br>(154 - 301)          |
| Other digestive diseases                            | 490<br>(368 - 635)          | 19<br>(6 - 34)        | 13<br>(9 - 18)         | 137<br>(95 - 197)        | 176<br>(122 - 249)         | 146<br>(103 - 195)          |
| Neurological disorders                              | 9,346<br>(7,894 - 10,867)   | 100<br>(63 - 152)     | 127<br>(95 - 168)      | 811<br>(626 - 1,068)     | 1,450<br>(1,130 - 1,834)   | 6,857<br>(5,709 - 8,075)    |
| Alzheimer disease and other dementias               | 7,501<br>(6,246 - 8,864)    | --                    | --                     | 8<br>(3 - 17)            | 1,053<br>(785 - 1,375)     | 6,440<br>(5,321 - 7,645)    |
| Parkinson disease                                   | 434<br>(349 - 583)          | --                    | --                     | 21<br>(15 - 30)          | 155<br>(118 - 212)         | 258<br>(200 - 358)          |
| Epilepsy                                            | 1,000<br>(788 - 1,260)      | 67<br>(35 - 111)      | 103<br>(74 - 141)      | 633<br>(477 - 854)       | 138<br>(96 - 184)          | 58<br>(41 - 75)             |
| Multiple sclerosis                                  | 51<br>(36 - 87)             | --                    | --                     | 24<br>(16 - 42)          | 16<br>(11 - 26)            | 10<br>(6 - 20)              |
| Other neurological disorders                        | 360<br>(299 - 434)          | 34<br>(23 - 47)       | 23<br>(18 - 30)        | 125<br>(95 - 158)        | 87<br>(69 - 111)           | 91<br>(72 - 116)            |
| Mental and substance use disorders                  | 3,647<br>(2,805 - 4,684)    | 21<br>(9 - 31)        | 1<br>(0 - 1)           | 2,493<br>(1,883 - 3,290) | 917<br>(699 - 1,191)       | 216<br>(163 - 267)          |
| Schizophrenia                                       | 292<br>(201 - 465)          | --                    | --                     | 185<br>(121 - 304)       | 77<br>(49 - 130)           | 30<br>(19 - 51)             |
| Alcohol use disorders                               | 669<br>(349 - 929)          | --                    | --                     | 349<br>(177 - 489)       | 275<br>(140 - 403)         | 45<br>(27 - 62)             |
| Drug use disorders                                  | 2,682<br>(2,022 - 3,444)    | 21<br>(9 - 31)        | --                     | 1,955<br>(1,435 - 2,596) | 565<br>(422 - 729)         | 141<br>(99 - 187)           |
| Opioid use disorders                                | 1,708<br>(1,283 - 2,205)    | 14<br>(6 - 21)        | --                     | 1,262<br>(915 - 1,671)   | 343<br>(253 - 445)         | 89<br>(63 - 118)            |
| Cocaine use disorders                               | 40<br>(30 - 53)             | 0<br>(0 - 1)          | --                     | 31<br>(22 - 42)          | 7<br>(5 - 9)               | 2<br>(1 - 3)                |
| Amphetamine use disorders                           | 42<br>(32 - 55)             | 1<br>(0 - 1)          | --                     | 30<br>(22 - 41)          | 9<br>(6 - 12)              | 3<br>(2 - 4)                |
| Other drug use disorders                            | 891<br>(670 - 1,147)        | 6<br>(3 - 9)          | --                     | 632<br>(462 - 842)       | 207<br>(153 - 272)         | 47<br>(32 - 63)             |

Web Table 31- Philippines deaths with 95% UI by age, sex, and cause in 2013

| Cause                                               | Both Sexes, All Ages        | Both Sexes, 0-4 Years     | Both Sexes, 5-14 Years | Both Sexes, 15-49 Years  | Both Sexes, 50-69 Years     | Both Sexes, 70-80 Years     |
|-----------------------------------------------------|-----------------------------|---------------------------|------------------------|--------------------------|-----------------------------|-----------------------------|
| Eating disorders                                    | 4<br>(3 - 6)                | --                        | 1<br>(0 - 1)           | 4<br>(2 - 6)             | --                          | --                          |
| Anorexia nervosa                                    | 4<br>(3 - 6)                | --                        | 1<br>(0 - 1)           | 4<br>(2 - 6)             | --                          | --                          |
| Diabetes, urogenital, blood, and endocrine diseases | 39,608<br>(33,062 - 47,088) | 623<br>(449 - 848)        | 521<br>(423 - 636)     | 7,753<br>(6,180 - 9,667) | 16,692<br>(13,477 - 20,254) | 14,018<br>(11,907 - 16,504) |
| Diabetes mellitus                                   | 22,109<br>(18,037 - 26,621) | 31<br>(20 - 46)           | 43<br>(29 - 61)        | 2,825<br>(2,162 - 3,651) | 10,923<br>(8,481 - 13,436)  | 8,286<br>(6,680 - 10,123)   |
| Acute glomerulonephritis                            | 276<br>(206 - 409)          | 17<br>(9 - 27)            | 16<br>(10 - 21)        | 89<br>(67 - 119)         | 78<br>(48 - 135)            | 76<br>(45 - 135)            |
| Chronic kidney disease                              | 11,156<br>(9,127 - 13,607)  | 135<br>(90 - 202)         | 189<br>(146 - 240)     | 3,122<br>(2,356 - 4,001) | 3,929<br>(3,026 - 4,914)    | 3,781<br>(3,082 - 4,828)    |
| Chronic kidney disease due to diabetes mellitus     | 656<br>(369 - 2,445)        | 3<br>(2 - 7)              | 5<br>(3 - 10)          | 169<br>(95 - 521)        | 315<br>(166 - 1,185)        | 165<br>(77 - 726)           |
| Chronic kidney disease due to hypertension          | 3,404<br>(2,317 - 4,534)    | 8<br>(4 - 14)             | 8<br>(5 - 14)          | 669<br>(452 - 1,006)     | 1,300<br>(783 - 1,794)      | 1,418<br>(951 - 1,875)      |
| Chronic kidney disease due to glomerulonephritis    | 2,213<br>(1,552 - 2,872)    | 55<br>(37 - 79)           | 87<br>(64 - 111)       | 922<br>(611 - 1,264)     | 625<br>(394 - 872)          | 524<br>(348 - 730)          |
| Chronic kidney disease due to other causes          | 4,883<br>(3,576 - 6,598)    | 69<br>(41 - 113)          | 89<br>(60 - 129)       | 1,362<br>(852 - 1,882)   | 1,689<br>(1,100 - 2,353)    | 1,674<br>(1,144 - 2,452)    |
| Urinary diseases and male infertility               | 2,818<br>(1,819 - 3,581)    | 52<br>(21 - 79)           | 38<br>(20 - 51)        | 695<br>(395 - 946)       | 977<br>(641 - 1,279)        | 1,057<br>(687 - 1,342)      |
| Interstitial nephritis and urinary tract infections | 1,110<br>(730 - 1,512)      | 26<br>(10 - 41)           | 16<br>(8 - 23)         | 281<br>(158 - 392)       | 362<br>(237 - 527)          | 425<br>(275 - 599)          |
| Urolithiasis                                        | 388<br>(190 - 531)          | --                        | 2<br>(1 - 4)           | 86<br>(37 - 130)         | 159<br>(78 - 231)           | 142<br>(67 - 199)           |
| Other urinary diseases                              | 1,320<br>(797 - 1,760)      | 26<br>(10 - 41)           | 20<br>(10 - 27)        | 329<br>(179 - 459)       | 456<br>(269 - 642)          | 490<br>(289 - 664)          |
| Gynecological diseases                              | 32<br>(22 - 46)             | --                        | --                     | 13<br>(8 - 23)           | 6<br>(4 - 10)               | 13<br>(7 - 20)              |
| Uterine fibroids                                    | 7<br>(5 - 11)               | --                        | --                     | 2<br>(1 - 4)             | 2<br>(1 - 3)                | 4<br>(2 - 6)                |
| Polycystic ovarian syndrome                         | 1<br>(1 - 2)                | --                        | --                     | 1<br>(1 - 2)             | 0<br>(0 - 0)                | --                          |
| Endometriosis                                       | 2<br>(1 - 4)                | --                        | --                     | 2<br>(1 - 4)             | 0<br>(0 - 0)                | --                          |
| Genital prolapse                                    | 6<br>(4 - 9)                | --                        | --                     | 2<br>(1 - 3)             | 1<br>(1 - 2)                | 3<br>(2 - 5)                |
| Other gynecological diseases                        | 15<br>(10 - 22)             | --                        | --                     | 6<br>(4 - 11)            | 3<br>(2 - 5)                | 6<br>(3 - 9)                |
| Hemoglobinopathies and hemolytic anemias            | 1,045<br>(743 - 1,422)      | 132<br>(82 - 209)         | 142<br>(100 - 210)     | 407<br>(284 - 577)       | 220<br>(147 - 299)          | 143<br>(91 - 193)           |
| Thalassemias                                        | 459<br>(336 - 645)          | 94<br>(57 - 153)          | 112<br>(79 - 165)      | 218<br>(152 - 315)       | 32<br>(21 - 44)             | 2<br>(2 - 3)                |
| Sickle cell disorders                               | 0<br>(0 - 0)                | 0<br>(0 - 0)              | 0<br>(0 - 0)           | 0<br>(0 - 0)             | 0<br>(0 - 0)                | 0<br>(0 - 0)                |
| G6PD deficiency                                     | 57<br>(40 - 81)             | 7<br>(4 - 11)             | 6<br>(4 - 10)          | 28<br>(19 - 40)          | 14<br>(9 - 20)              | 2<br>(1 - 3)                |
| Other hemoglobinopathies and hemolytic anemias      | 528<br>(363 - 704)          | 31<br>(20 - 47)           | 23<br>(16 - 34)        | 160<br>(109 - 227)       | 175<br>(116 - 238)          | 138<br>(88 - 187)           |
| Endocrine, metabolic, blood, and immune disorders   | 2,172<br>(1,717 - 3,116)    | 256<br>(164 - 385)        | 93<br>(65 - 132)       | 602<br>(447 - 824)       | 559<br>(417 - 817)          | 662<br>(478 - 1,120)        |
| Musculoskeletal disorders                           | 1,224<br>(956 - 1,664)      | --                        | 61<br>(45 - 81)        | 475<br>(339 - 635)       | 330<br>(248 - 507)          | 358<br>(263 - 575)          |
| Rheumatoid arthritis                                | 285<br>(206 - 459)          | --                        | 4<br>(3 - 7)           | 23<br>(15 - 35)          | 108<br>(71 - 184)           | 150<br>(103 - 242)          |
| Other musculoskeletal disorders                     | 939<br>(729 - 1,259)        | --                        | 56<br>(42 - 75)        | 452<br>(322 - 602)       | 222<br>(165 - 321)          | 207<br>(145 - 332)          |
| Other non-communicable diseases                     | 13,259<br>(10,595 - 16,268) | 9,688<br>(7,251 - 12,450) | 836<br>(559 - 1,042)   | 1,232<br>(945 - 1,551)   | 536<br>(425 - 683)          | 968<br>(725 - 1,277)        |
| Congenital anomalies                                | 10,940<br>(8,407 - 13,574)  | 9,014<br>(6,675 - 11,626) | 775<br>(500 - 980)     | 894<br>(673 - 1,138)     | 141<br>(106 - 217)          | 116<br>(87 - 210)           |
| Neural tube defects                                 | 388<br>(163 - 795)          | 373<br>(150 - 780)        | 6<br>(3 - 9)           | 7<br>(5 - 10)            | 2<br>(1 - 3)                | 1<br>(0 - 2)                |
| Congenital heart anomalies                          | 6,642<br>(5,026 - 8,447)    | 5,287<br>(3,755 - 7,019)  | 583<br>(387 - 742)     | 671<br>(490 - 866)       | 42<br>(31 - 68)             | 59<br>(42 - 114)            |
| Cleft lip and cleft palate                          | 95<br>(21 - 338)            | 95<br>(21 - 338)          | --                     | --                       | --                          | --                          |
| Down syndrome                                       | 245<br>(116 - 415)          | 175<br>(70 - 325)         | 30<br>(15 - 49)        | 34<br>(20 - 49)          | 5<br>(3 - 8)                | 0<br>(0 - 1)                |
| Chromosomal unbalanced rearrangements               | 118<br>(63 - 210)           | 89<br>(38 - 176)          | 3<br>(2 - 4)           | 16<br>(11 - 23)          | 7<br>(4 - 14)               | 3<br>(2 - 8)                |
| Other congenital anomalies                          | 3,452<br>(2,458 - 4,611)    | 2,995<br>(2,020 - 4,112)  | 154<br>(96 - 214)      | 166<br>(123 - 217)       | 85<br>(63 - 132)            | 52<br>(38 - 95)             |
| Skin and subcutaneous diseases                      | 1,827<br>(1,466 - 2,251)    | 182<br>(112 - 280)        | 60<br>(44 - 78)        | 338<br>(258 - 432)       | 395<br>(300 - 505)          | 852<br>(578 - 1,152)        |
| Cellulitis                                          | 257<br>(167 - 346)          | 41<br>(23 - 69)           | 14<br>(9 - 20)         | 66<br>(40 - 94)          | 66<br>(39 - 95)             | 71<br>(38 - 108)            |
| Pyoderma                                            | 544<br>(430 - 675)          | 130<br>(79 - 202)         | 33<br>(23 - 45)        | 138<br>(102 - 180)       | 131<br>(95 - 174)           | 113<br>(71 - 162)           |

Web Table 31- Philippines deaths with 95% UI by age, sex, and cause in 2013

| Cause                                           | Both Sexes, All Ages        | Both Sexes, 0-4 Years    | Both Sexes, 5-14 Years   | Both Sexes, 15-49 Years     | Both Sexes, 50-69 Years   | Both Sexes, 70-80 Years  |
|-------------------------------------------------|-----------------------------|--------------------------|--------------------------|-----------------------------|---------------------------|--------------------------|
| Decubitus ulcer                                 | 941<br>(693 - 1,223)        | 2<br>(1 - 3)             | 7<br>(5 - 9)             | 103<br>(76 - 137)           | 174<br>(128 - 233)        | 656<br>(443 - 906)       |
| Other skin and subcutaneous diseases            | 84<br>(61 - 141)            | 10<br>(4 - 22)           | 6<br>(4 - 10)            | 31<br>(21 - 53)             | 23<br>(16 - 39)           | 13<br>(8 - 21)           |
| Sudden infant death syndrome                    | 492<br>(195 - 1,025)        | 492<br>(195 - 1,025)     | --                       | --                          | --                        | --                       |
| Injuries                                        | 41,686<br>(32,953 - 50,947) | 3,448<br>(2,439 - 4,693) | 3,034<br>(2,415 - 3,636) | 23,671<br>(18,040 - 29,859) | 7,863<br>(6,145 - 10,134) | 3,669<br>(2,837 - 4,507) |
| Transport injuries                              | 9,944<br>(7,026 - 12,359)   | 443<br>(196 - 691)       | 830<br>(555 - 1,063)     | 5,826<br>(3,682 - 7,695)    | 1,924<br>(1,481 - 2,432)  | 921<br>(750 - 1,142)     |
| Road injuries                                   | 9,321<br>(6,592 - 11,544)   | 412<br>(183 - 638)       | 796<br>(542 - 1,016)     | 5,492<br>(3,538 - 7,226)    | 1,794<br>(1,388 - 2,258)  | 827<br>(670 - 1,026)     |
| Pedestrian road injuries                        | 2,181<br>(1,514 - 2,794)    | 163<br>(67 - 269)        | 313<br>(197 - 433)       | 814<br>(497 - 1,161)        | 533<br>(373 - 709)        | 358<br>(267 - 460)       |
| Cyclist road injuries                           | 765<br>(552 - 1,020)        | 41<br>(15 - 75)          | 89<br>(56 - 128)         | 373<br>(249 - 543)          | 181<br>(127 - 253)        | 81<br>(57 - 111)         |
| Motorcyclist road injuries                      | 1,119<br>(722 - 1,612)      | 33<br>(14 - 60)          | 57<br>(34 - 89)          | 853<br>(518 - 1,293)        | 131<br>(87 - 192)         | 44<br>(28 - 66)          |
| Motor vehicle road injuries                     | 5,181<br>(3,348 - 6,712)    | 171<br>(73 - 275)        | 328<br>(219 - 446)       | 3,412<br>(2,015 - 4,595)    | 933<br>(672 - 1,223)      | 337<br>(258 - 445)       |
| Other road injuries                             | 76<br>(48 - 159)            | 5<br>(2 - 11)            | 9<br>(5 - 19)            | 39<br>(22 - 90)             | 15<br>(8 - 32)            | 8<br>(5 - 17)            |
| Other transport injuries                        | 623<br>(350 - 855)          | 31<br>(11 - 53)          | 34<br>(14 - 55)          | 334<br>(144 - 509)          | 130<br>(75 - 185)         | 94<br>(69 - 131)         |
| Unintentional injuries                          | 13,362<br>(9,931 - 16,566)  | 2,406<br>(1,516 - 3,528) | 1,715<br>(1,349 - 2,154) | 5,221<br>(3,920 - 6,816)    | 2,191<br>(1,372 - 2,958)  | 1,828<br>(997 - 2,454)   |
| Falls                                           | 2,081<br>(1,012 - 2,749)    | 127<br>(54 - 197)        | 129<br>(68 - 178)        | 645<br>(307 - 899)          | 569<br>(279 - 785)        | 611<br>(236 - 849)       |
| Drowning                                        | 5,431<br>(4,115 - 7,437)    | 1,179<br>(673 - 2,023)   | 1,138<br>(872 - 1,544)   | 2,288<br>(1,682 - 3,296)    | 600<br>(423 - 845)        | 226<br>(170 - 310)       |
| Fire, heat, and hot substances                  | 503<br>(174 - 847)          | 112<br>(28 - 239)        | 43<br>(13 - 79)          | 161<br>(60 - 286)           | 79<br>(24 - 141)          | 108<br>(29 - 195)        |
| Poisonings                                      | 195<br>(113 - 254)          | 7<br>(3 - 11)            | 11<br>(6 - 15)           | 115<br>(70 - 156)           | 45<br>(21 - 64)           | 18<br>(10 - 24)          |
| Exposure to mechanical forces                   | 659<br>(384 - 849)          | 61<br>(32 - 132)         | 46<br>(32 - 61)          | 383<br>(197 - 515)          | 120<br>(62 - 159)         | 49<br>(24 - 63)          |
| Unintentional firearm injuries                  | 269<br>(92 - 359)           | 8<br>(4 - 12)            | 9<br>(5 - 13)            | 175<br>(55 - 250)           | 53<br>(18 - 76)           | 24<br>(7 - 35)           |
| Unintentional suffocation                       | 124<br>(82 - 244)           | 43<br>(16 - 113)         | 11<br>(6 - 19)           | 42<br>(26 - 78)             | 19<br>(11 - 33)           | 10<br>(7 - 18)           |
| Other exposure to mechanical forces             | 267<br>(124 - 348)          | 11<br>(6 - 16)           | 26<br>(15 - 35)          | 167<br>(74 - 229)           | 49<br>(21 - 68)           | 14<br>(6 - 19)           |
| Adverse effects of medical treatment            | 974<br>(401 - 1,580)        | 74<br>(31 - 129)         | 25<br>(11 - 40)          | 242<br>(100 - 410)          | 266<br>(84 - 473)         | 366<br>(140 - 618)       |
| Animal contact                                  | 614<br>(333 - 789)          | 52<br>(24 - 88)          | 115<br>(70 - 164)        | 274<br>(132 - 381)          | 132<br>(70 - 185)         | 42<br>(21 - 59)          |
| Venomous animal contact                         | 528<br>(280 - 688)          | 42<br>(18 - 70)          | 103<br>(61 - 148)        | 246<br>(114 - 345)          | 108<br>(56 - 152)         | 29<br>(14 - 43)          |
| Non-venomous animal contact                     | 87<br>(47 - 121)            | 10<br>(5 - 19)           | 12<br>(6 - 19)           | 28<br>(12 - 43)             | 24<br>(12 - 38)           | 13<br>(6 - 20)           |
| Foreign body                                    | 1,491<br>(857 - 2,007)      | 703<br>(389 - 1,080)     | 86<br>(45 - 123)         | 236<br>(129 - 335)          | 159<br>(82 - 237)         | 306<br>(173 - 435)       |
| Pulmonary aspiration and foreign body in airway | 1,475<br>(839 - 1,991)      | 701<br>(388 - 1,077)     | 84<br>(43 - 121)         | 229<br>(122 - 327)          | 155<br>(78 - 233)         | 305<br>(172 - 434)       |
| Foreign body in other body part                 | 16<br>(12 - 24)             | 2<br>(1 - 3)             | 2<br>(2 - 4)             | 7<br>(5 - 11)               | 4<br>(2 - 6)              | 1<br>(1 - 1)             |
| Other unintentional injuries                    | 1,415<br>(1,029 - 1,935)    | 92<br>(47 - 164)         | 123<br>(62 - 224)        | 877<br>(566 - 1,301)        | 221<br>(130 - 360)        | 102<br>(48 - 151)        |
| Self-harm and interpersonal violence            | 13,132<br>(9,041 - 17,281)  | 147<br>(73 - 262)        | 248<br>(159 - 357)       | 10,347<br>(6,879 - 13,843)  | 1,945<br>(1,351 - 2,770)  | 445<br>(327 - 656)       |
| Self-harm                                       | 3,675<br>(2,817 - 5,738)    | --                       | 41<br>(23 - 60)          | 2,716<br>(2,043 - 4,125)    | 658<br>(495 - 1,055)      | 259<br>(192 - 490)       |
| Interpersonal violence                          | 9,457<br>(5,294 - 12,911)   | 147<br>(73 - 262)        | 206<br>(121 - 307)       | 7,631<br>(4,228 - 10,610)   | 1,287<br>(750 - 1,994)    | 186<br>(93 - 290)        |
| Assault by firearm                              | 4,570<br>(2,368 - 6,922)    | 58<br>(26 - 109)         | 85<br>(43 - 138)         | 3,741<br>(1,829 - 5,734)    | 624<br>(313 - 1,060)      | 63<br>(27 - 114)         |
| Assault by sharp object                         | 4,468<br>(2,215 - 6,728)    | 60<br>(28 - 113)         | 87<br>(46 - 135)         | 3,624<br>(1,686 - 5,569)    | 598<br>(287 - 1,002)      | 99<br>(48 - 165)         |
| Assault by other means                          | 419<br>(196 - 623)          | 29<br>(12 - 53)          | 34<br>(18 - 56)          | 266<br>(116 - 413)          | 65<br>(30 - 112)          | 24<br>(11 - 41)          |
| Forces of nature, war, and legal intervention   | 5,248<br>(2,909 - 10,499)   | 452<br>(445 - 449)       | 241<br>(151 - 444)       | 2,277<br>(1,142 - 4,805)    | 1,803<br>(917 - 3,864)    | 476<br>(233 - 943)       |
| Exposure to forces of nature                    | 5,248<br>(2,909 - 10,499)   | 452<br>(445 - 449)       | 241<br>(151 - 444)       | 2,277<br>(1,142 - 4,805)    | 1,803<br>(917 - 3,864)    | 476<br>(233 - 943)       |

Web Table 31- Philippines deaths with 95% UI by age, sex, and cause in 2013

| Cause                                                             | Males, All Ages                | Males, 0-4 Years            | Males, 5-14 Years        | Males, 15-49 Years           | Males, 50-69 Years            | Males, 70-80 Years          |
|-------------------------------------------------------------------|--------------------------------|-----------------------------|--------------------------|------------------------------|-------------------------------|-----------------------------|
| All causes                                                        | 318,223<br>(266,505 - 377,689) | 37,534<br>(31,526 - 44,608) | 7,577<br>(6,695 - 8,613) | 80,681<br>(63,362 - 101,206) | 108,633<br>(86,753 - 134,050) | 83,797<br>(72,954 - 95,575) |
| Communicable, maternal, neonatal, and nutritional diseases        | 82,415<br>(71,864 - 94,232)    | 28,310<br>(23,659 - 33,608) | 3,397<br>(2,779 - 4,114) | 16,335<br>(13,538 - 19,758)  | 17,638<br>(14,208 - 21,839)   | 16,735<br>(13,793 - 20,269) |
| HIV/AIDS and tuberculosis                                         | 24,723<br>(19,544 - 32,482)    | 197<br>(121 - 282)          | 198<br>(123 - 271)       | 9,197<br>(7,158 - 11,796)    | 10,179<br>(7,470 - 13,887)    | 4,952<br>(3,799 - 7,070)    |
| Tuberculosis                                                      | 21,116<br>(16,010 - 28,500)    | 130<br>(69 - 201)           | 173<br>(97 - 247)        | 6,458<br>(4,691 - 8,940)     | 9,475<br>(6,821 - 13,119)     | 4,880<br>(3,717 - 6,993)    |
| HIV/AIDS                                                          | 3,607<br>(2,424 - 4,613)       | 67<br>(31 - 121)            | 25<br>(15 - 38)          | 2,739<br>(1,894 - 3,432)     | 704<br>(395 - 1,123)          | 72<br>(37 - 113)            |
| HIV/AIDS resulting in mycobacterial infection                     | 252<br>(162 - 342)             | 4<br>(2 - 8)                | 1<br>(1 - 2)             | 189<br>(126 - 252)           | 52<br>(29 - 86)               | 6<br>(3 - 9)                |
| HIV/AIDS resulting in other diseases                              | 3,355<br>(2,234 - 4,292)       | 63<br>(29 - 114)            | 23<br>(14 - 36)          | 2,551<br>(1,749 - 3,205)     | 652<br>(366 - 1,046)          | 66<br>(34 - 104)            |
| Diarrhea, lower respiratory, and other common infectious diseases | 36,594<br>(29,988 - 43,531)    | 11,924<br>(9,068 - 15,767)  | 2,612<br>(2,009 - 3,330) | 5,522<br>(3,955 - 7,585)     | 6,176<br>(4,364 - 8,449)      | 10,359<br>(7,653 - 13,557)  |
| Diarrheal diseases                                                | 3,590<br>(2,531 - 5,172)       | 1,977<br>(1,054 - 3,368)    | 214<br>(124 - 338)       | 555<br>(389 - 786)           | 444<br>(287 - 667)            | 400<br>(249 - 603)          |
| Intestinal infectious diseases                                    | 3,189<br>(1,652 - 5,536)       | 1,252<br>(573 - 2,322)      | 946<br>(497 - 1,613)     | 813<br>(355 - 1,570)         | 141<br>(51 - 295)             | 38<br>(18 - 69)             |
| Typhoid fever                                                     | 2,428<br>(1,233 - 4,263)       | 900<br>(397 - 1,681)        | 734<br>(375 - 1,271)     | 645<br>(277 - 1,269)         | 117<br>(40 - 243)             | 31<br>(14 - 59)             |
| Paratyphoid fever                                                 | 729<br>(356 - 1,340)           | 336<br>(143 - 681)          | 208<br>(96 - 386)        | 158<br>(65 - 329)            | 21<br>(7 - 49)                | 5<br>(2 - 11)               |
| Other intestinal infectious diseases                              | 32<br>(19 - 48)                | 16<br>(7 - 28)              | 3<br>(1 - 9)             | 9<br>(3 - 18)                | 3<br>(0 - 8)                  | 1<br>(0 - 4)                |
| Lower respiratory infections                                      | 25,026<br>(20,091 - 30,918)    | 5,989<br>(4,066 - 8,450)    | 785<br>(475 - 1,237)     | 3,203<br>(2,207 - 4,447)     | 5,261<br>(3,616 - 7,354)      | 9,788<br>(7,103 - 13,035)   |
| Upper respiratory infections                                      | 22<br>(9 - 41)                 | 3<br>(0 - 10)               | 1<br>(0 - 3)             | 7<br>(1 - 19)                | 7<br>(1 - 21)                 | 4<br>(0 - 14)               |
| Otitis media                                                      | 28<br>(22 - 35)                | 4<br>(2 - 7)                | 5<br>(3 - 7)             | 11<br>(8 - 16)               | 5<br>(3 - 7)                  | 3<br>(2 - 5)                |
| Meningitis                                                        | 1,907<br>(1,303 - 2,593)       | 763<br>(346 - 1,341)        | 324<br>(183 - 506)       | 557<br>(368 - 791)           | 186<br>(113 - 277)            | 78<br>(46 - 123)            |
| Pneumococcal meningitis                                           | 577<br>(386 - 831)             | 173<br>(69 - 335)           | 113<br>(57 - 210)        | 200<br>(118 - 318)           | 64<br>(34 - 108)              | 27<br>(13 - 49)             |
| H influenzae type B meningitis                                    | 486<br>(303 - 736)             | 289<br>(132 - 519)          | 87<br>(43 - 152)         | 78<br>(42 - 134)             | 22<br>(11 - 36)               | 10<br>(5 - 16)              |
| Meningococcal meningitis                                          | 199<br>(121 - 300)             | 52<br>(20 - 104)            | 32<br>(14 - 62)          | 72<br>(34 - 127)             | 29<br>(14 - 52)               | 13<br>(5 - 24)              |
| Other meningitis                                                  | 646<br>(370 - 953)             | 249<br>(90 - 461)           | 91<br>(37 - 167)         | 206<br>(114 - 338)           | 72<br>(37 - 121)              | 28<br>(13 - 48)             |
| Encephalitis                                                      | 442<br>(263 - 620)             | 165<br>(68 - 287)           | 80<br>(38 - 122)         | 148<br>(77 - 221)            | 37<br>(19 - 55)               | 12<br>(6 - 18)              |
| Diphtheria                                                        | 11<br>(0 - 48)                 | 6<br>(0 - 43)               | 2<br>(0 - 16)            | 2<br>(0 - 8)                 | 1<br>(0 - 4)                  | --                          |
| Whooping cough                                                    | 311<br>(1 - 1,516)             | 290<br>(1 - 1,418)          | 16<br>(0 - 81)           | 4<br>(0 - 22)                | 1<br>(0 - 3)                  | --                          |
| Tetanus                                                           | 407<br>(121 - 725)             | 62<br>(16 - 106)            | 43<br>(14 - 83)          | 181<br>(42 - 334)            | 90<br>(20 - 181)              | 31<br>(7 - 65)              |
| Measles                                                           | 1,632<br>(269 - 4,866)         | 1,404<br>(234 - 4,210)      | 194<br>(30 - 613)        | 33<br>(5 - 108)              | 1<br>(0 - 4)                  | --                          |
| Varicella and herpes zoster                                       | 30<br>(10 - 71)                | 10<br>(0 - 43)              | 2<br>(0 - 11)            | 9<br>(1 - 23)                | 3<br>(0 - 11)                 | 6<br>(0 - 25)               |
| Neglected tropical diseases and malaria                           | 1,417<br>(889 - 1,765)         | 328<br>(160 - 505)          | 365<br>(181 - 472)       | 451<br>(313 - 589)           | 202<br>(141 - 269)            | 71<br>(51 - 94)             |
| Malaria                                                           | 155<br>(105 - 233)             | 7<br>(4 - 13)               | 13<br>(7 - 23)           | 90<br>(56 - 142)             | 34<br>(19 - 60)               | 11<br>(6 - 20)              |
| Leishmaniasis                                                     | 1<br>(0 - 1)                   | 1<br>(0 - 1)                | 0<br>(0 - 0)             | 0<br>(0 - 0)                 | 0<br>(0 - 0)                  | 0<br>(0 - 0)                |
| Visceral leishmaniasis                                            | 1<br>(0 - 1)                   | 1<br>(0 - 1)                | 0<br>(0 - 0)             | 0<br>(0 - 0)                 | 0<br>(0 - 0)                  | 0<br>(0 - 0)                |
| Schistosomiasis                                                   | 141<br>(97 - 198)              | 1<br>(0 - 1)                | 3<br>(1 - 5)             | 54<br>(32 - 84)              | 61<br>(32 - 98)               | 23<br>(12 - 38)             |
| Cysticercosis                                                     | 1<br>(1 - 2)                   | 0<br>(0 - 0)                | 0<br>(0 - 0)             | 1<br>(1 - 1)                 | 0<br>(0 - 0)                  | 0<br>(0 - 0)                |
| Cystic echinococcosis                                             | 6<br>(5 - 8)                   | 0<br>(0 - 0)                | 1<br>(1 - 1)             | 3<br>(2 - 4)                 | 2<br>(1 - 2)                  | 0<br>(0 - 1)                |
| Dengue                                                            | 620<br>(215 - 837)             | 243<br>(72 - 391)           | 241<br>(74 - 323)        | 109<br>(43 - 154)            | 18<br>(7 - 26)                | 8<br>(3 - 13)               |
| Rabies                                                            | 355<br>(200 - 485)             | 25<br>(10 - 45)             | 87<br>(46 - 132)         | 160<br>(87 - 232)            | 65<br>(36 - 97)               | 18<br>(9 - 26)              |
| Intestinal nematode infections                                    | 42<br>(23 - 67)                | 23<br>(11 - 43)             | 7<br>(2 - 17)            | 6<br>(1 - 17)                | 3<br>(0 - 10)                 | 2<br>(0 - 7)                |
| Ascariasis                                                        | 42<br>(23 - 67)                | 23<br>(11 - 43)             | 7<br>(2 - 17)            | 6<br>(1 - 17)                | 3<br>(0 - 10)                 | 2<br>(0 - 7)                |
| Other neglected tropical diseases                                 | 96<br>(69 - 129)               | 28<br>(14 - 52)             | 14<br>(9 - 20)           | 28<br>(18 - 40)              | 18<br>(10 - 28)               | 8<br>(4 - 13)               |
| Maternal disorders                                                | --                             | --                          | --                       | --                           | --                            | --                          |

Web Table 31- Philippines deaths with 95% UI by age, sex, and cause in 2013

| Cause                                                            | Males, All Ages                | Males, 0-4 Years            | Males, 5-14 Years        | Males, 15-49 Years          | Males, 50-69 Years           | Males, 70-80 Years          |
|------------------------------------------------------------------|--------------------------------|-----------------------------|--------------------------|-----------------------------|------------------------------|-----------------------------|
| Maternal hemorrhage                                              | --                             | --                          | --                       | --                          | --                           | --                          |
| Maternal sepsis and other maternal infections                    | --                             | --                          | --                       | --                          | --                           | --                          |
| Maternal hypertensive disorders                                  | --                             | --                          | --                       | --                          | --                           | --                          |
| Maternal obstructed labor                                        | --                             | --                          | --                       | --                          | --                           | --                          |
| Maternal abortive outcome                                        | --                             | --                          | --                       | --                          | --                           | --                          |
| Indirect maternal deaths                                         | --                             | --                          | --                       | --                          | --                           | --                          |
| Late maternal deaths                                             | --                             | --                          | --                       | --                          | --                           | --                          |
| Maternal deaths aggravated by HIV/AIDS                           | --                             | --                          | --                       | --                          | --                           | --                          |
| Other maternal disorders                                         | --                             | --                          | --                       | --                          | --                           | --                          |
| Neonatal disorders                                               | 14,842<br>(12,708 - 17,233)    | 14,842<br>(12,708 - 17,233) | --                       | --                          | --                           | --                          |
| Neonatal preterm birth complications                             | 6,176<br>(3,924 - 8,829)       | 6,176<br>(3,924 - 8,829)    | --                       | --                          | --                           | --                          |
| Neonatal encephalopathy due to birth asphyxia and trauma         | 2,931<br>(1,532 - 4,554)       | 2,931<br>(1,532 - 4,554)    | --                       | --                          | --                           | --                          |
| Neonatal sepsis and other neonatal infections                    | 2,500<br>(854 - 5,238)         | 2,500<br>(854 - 5,238)      | --                       | --                          | --                           | --                          |
| Hemolytic disease and other neonatal jaundice                    | 1,232<br>(481 - 2,672)         | 1,232<br>(481 - 2,672)      | --                       | --                          | --                           | --                          |
| Other neonatal disorders                                         | 2,003<br>(1,072 - 3,393)       | 2,003<br>(1,072 - 3,393)    | --                       | --                          | --                           | --                          |
| Nutritional deficiencies                                         | 3,195<br>(2,290 - 5,920)       | 744<br>(415 - 1,412)        | 153<br>(99 - 274)        | 491<br>(320 - 922)          | 630<br>(401 - 1,267)         | 1,176<br>(773 - 2,143)      |
| Protein-energy malnutrition                                      | 1,629<br>(1,001 - 2,993)       | 575<br>(300 - 1,105)        | 100<br>(59 - 192)        | 191<br>(97 - 417)           | 231<br>(107 - 541)           | 530<br>(273 - 939)          |
| Iodine deficiency                                                | 11<br>(1 - 36)                 | 2<br>(0 - 17)               | 1<br>(0 - 8)             | 3<br>(0 - 12)               | 3<br>(0 - 15)                | 2<br>(0 - 14)               |
| Iron-deficiency anemia                                           | 1,247<br>(649 - 2,479)         | 140<br>(43 - 377)           | 46<br>(20 - 103)         | 266<br>(131 - 495)          | 345<br>(177 - 723)           | 450<br>(222 - 905)          |
| Other nutritional deficiencies                                   | 308<br>(149 - 759)             | 27<br>(9 - 85)              | 6<br>(2 - 13)            | 31<br>(13 - 72)             | 51<br>(22 - 125)             | 194<br>(86 - 459)           |
| Other communicable, maternal, neonatal, and nutritional diseases | 1,644<br>(1,049 - 2,866)       | 275<br>(109 - 494)          | 69<br>(38 - 116)         | 673<br>(431 - 1,078)        | 450<br>(224 - 1,082)         | 177<br>(68 - 530)           |
| Sexually transmitted diseases excluding HIV                      | 203<br>(45 - 413)              | 182<br>(35 - 378)           | 13<br>(3 - 27)           | 3<br>(2 - 5)                | 3<br>(1 - 6)                 | 2<br>(1 - 4)                |
| Syphilis                                                         | 200<br>(42 - 410)              | 182<br>(35 - 378)           | 13<br>(3 - 27)           | 2<br>(1 - 3)                | 2<br>(1 - 4)                 | 2<br>(1 - 3)                |
| Chlamydial infection                                             | --                             | --                          | --                       | --                          | --                           | --                          |
| Gonococcal infection                                             | 2<br>(1 - 3)                   | --                          | 0<br>(0 - 0)             | 1<br>(1 - 1)                | 1<br>(0 - 1)                 | 0<br>(0 - 0)                |
| Other sexually transmitted diseases                              | 1<br>(1 - 2)                   | --                          | 0<br>(0 - 0)             | 1<br>(0 - 1)                | 0<br>(0 - 1)                 | 0<br>(0 - 0)                |
| Hepatitis                                                        | 579<br>(419 - 775)             | 31<br>(16 - 60)             | 15<br>(9 - 24)           | 299<br>(196 - 432)          | 190<br>(118 - 293)           | 44<br>(28 - 67)             |
| Acute hepatitis A                                                | 53<br>(16 - 113)               | 15<br>(4 - 32)              | 6<br>(2 - 12)            | 25<br>(6 - 62)              | 7<br>(1 - 16)                | 1<br>(0 - 2)                |
| Acute hepatitis B                                                | 348<br>(217 - 513)             | 16<br>(6 - 35)              | 5<br>(2 - 10)            | 146<br>(72 - 248)           | 143<br>(78 - 228)            | 38<br>(23 - 60)             |
| Acute hepatitis C                                                | 8<br>(2 - 23)                  | --                          | 0<br>(0 - 1)             | 4<br>(1 - 12)               | 3<br>(0 - 10)                | 1<br>(0 - 2)                |
| Acute hepatitis E                                                | 170<br>(87 - 293)              | 0<br>(0 - 1)                | 4<br>(1 - 8)             | 124<br>(63 - 212)           | 37<br>(13 - 81)              | 4<br>(1 - 13)               |
| Other infectious diseases                                        | 861<br>(434 - 1,985)           | 62<br>(17 - 138)            | 41<br>(15 - 90)          | 371<br>(188 - 711)          | 257<br>(75 - 848)            | 131<br>(27 - 486)           |
| Non-communicable diseases                                        | 204,368<br>(165,643 - 250,012) | 7,107<br>(5,318 - 9,333)    | 2,196<br>(1,790 - 2,665) | 44,392<br>(33,837 - 57,728) | 85,421<br>(66,851 - 108,065) | 65,251<br>(55,898 - 75,148) |
| Neoplasms                                                        | 35,474<br>(28,167 - 43,872)    | 382<br>(224 - 622)          | 592<br>(454 - 768)       | 7,547<br>(5,607 - 10,122)   | 17,623<br>(13,665 - 22,401)  | 9,330<br>(7,735 - 11,054)   |
| Esophageal cancer                                                | 632<br>(458 - 891)             | --                          | --                       | 102<br>(67 - 147)           | 355<br>(247 - 524)           | 175<br>(123 - 257)          |
| Stomach cancer                                                   | 2,013<br>(1,570 - 2,538)       | --                          | --                       | 358<br>(254 - 495)          | 1,032<br>(758 - 1,366)       | 623<br>(468 - 795)          |
| Liver cancer                                                     | 4,534<br>(3,414 - 5,954)       | --                          | 17<br>(10 - 29)          | 1,285<br>(871 - 1,845)      | 2,340<br>(1,693 - 3,163)     | 892<br>(634 - 1,190)        |
| Liver cancer due to hepatitis B                                  | 2,301<br>(1,394 - 3,376)       | --                          | 9<br>(4 - 15)            | 753<br>(457 - 1,174)        | 1,170<br>(652 - 1,803)       | 370<br>(192 - 612)          |
| Liver cancer due to hepatitis C                                  | 1,616<br>(538 - 2,637)         | --                          | 2<br>(1 - 5)             | 360<br>(59 - 643)           | 876<br>(282 - 1,438)         | 378<br>(157 - 630)          |
| Liver cancer due to alcohol use                                  | 301<br>(152 - 465)             | --                          | --                       | 54<br>(25 - 95)             | 152<br>(75 - 256)            | 95<br>(42 - 166)            |

Web Table 31- Philippines deaths with 95% UI by age, sex, and cause in 2013

| Cause                                         | Males, All Ages              | Males, 0-4 Years   | Males, 5-14 Years  | Males, 15-49 Years          | Males, 50-69 Years          | Males, 70-80 Years          |
|-----------------------------------------------|------------------------------|--------------------|--------------------|-----------------------------|-----------------------------|-----------------------------|
| Liver cancer due to other causes              | 316<br>(146 - 555)           | --                 | 7<br>(3 - 12)      | 118<br>(58 - 197)           | 142<br>(56 - 274)           | 50<br>(21 - 90)             |
| Larynx cancer                                 | 530<br>(371 - 756)           | --                 | --                 | 68<br>(44 - 103)            | 320<br>(215 - 477)          | 142<br>(98 - 205)           |
| Tracheal, bronchus and lung cancer            | 9,749<br>(7,604 - 12,378)    | --                 | --                 | 1,149<br>(803 - 1,589)      | 5,979<br>(4,538 - 7,814)    | 2,621<br>(2,094 - 3,280)    |
| Breast cancer                                 | 44<br>(15 - 64)              | --                 | --                 | 12<br>(6 - 19)              | 20<br>(6 - 34)              | 12<br>(3 - 21)              |
| Cervical cancer                               | --                           | --                 | --                 | --                          | --                          | --                          |
| Uterine cancer                                | --                           | --                 | --                 | --                          | --                          | --                          |
| Prostate cancer                               | 1,934<br>(1,003 - 2,678)     | --                 | --                 | 32<br>(17 - 51)             | 502<br>(253 - 739)          | 1,400<br>(718 - 1,962)      |
| Colon and rectum cancer                       | 3,387<br>(2,636 - 4,271)     | --                 | --                 | 703<br>(498 - 937)          | 1,662<br>(1,236 - 2,164)    | 1,021<br>(798 - 1,271)      |
| Lip and oral cavity cancer                    | 775<br>(518 - 1,085)         | --                 | --                 | 174<br>(110 - 273)          | 407<br>(260 - 591)          | 194<br>(129 - 277)          |
| Nasopharynx cancer                            | 789<br>(557 - 1,068)         | --                 | 7<br>(2 - 19)      | 288<br>(187 - 435)          | 390<br>(250 - 555)          | 105<br>(69 - 160)           |
| Other pharynx cancer                          | 487<br>(343 - 841)           | --                 | --                 | 95<br>(62 - 164)            | 284<br>(186 - 487)          | 107<br>(70 - 189)           |
| Gallbladder and biliary tract cancer          | 360<br>(237 - 693)           | --                 | --                 | 52<br>(33 - 82)             | 202<br>(125 - 425)          | 107<br>(66 - 203)           |
| Pancreatic cancer                             | 1,107<br>(857 - 1,393)       | --                 | --                 | 214<br>(151 - 290)          | 614<br>(453 - 813)          | 279<br>(205 - 356)          |
| Malignant skin melanoma                       | 148<br>(56 - 220)            | --                 | --                 | 42<br>(15 - 67)             | 67<br>(24 - 106)            | 38<br>(14 - 58)             |
| Non-melanoma skin cancer                      | 134<br>(88 - 206)            | --                 | --                 | 30<br>(19 - 49)             | 58<br>(34 - 93)             | 46<br>(28 - 70)             |
| Ovarian cancer                                | --                           | --                 | --                 | --                          | --                          | --                          |
| Testicular cancer                             | 130<br>(86 - 199)            | --                 | --                 | 85<br>(52 - 139)            | 27<br>(16 - 43)             | 19<br>(11 - 32)             |
| Kidney cancer                                 | 564<br>(425 - 743)           | 7<br>(3 - 15)      | 3<br>(2 - 5)       | 100<br>(67 - 144)           | 320<br>(225 - 442)          | 134<br>(96 - 181)           |
| Bladder cancer                                | 592<br>(442 - 884)           | --                 | --                 | 59<br>(38 - 90)             | 277<br>(191 - 414)          | 256<br>(183 - 406)          |
| Brain and nervous system cancer               | 909<br>(588 - 1,409)         | 31<br>(12 - 65)    | 69<br>(41 - 111)   | 352<br>(209 - 524)          | 359<br>(226 - 589)          | 98<br>(63 - 158)            |
| Thyroid cancer                                | 319<br>(232 - 435)           | --                 | 1<br>(1 - 2)       | 55<br>(36 - 80)             | 175<br>(118 - 254)          | 88<br>(60 - 128)            |
| Mesothelioma                                  | 43<br>(30 - 58)              | --                 | --                 | 7<br>(4 - 10)               | 23<br>(15 - 35)             | 12<br>(7 - 19)              |
| Hodgkin lymphoma                              | 88<br>(60 - 137)             | 1<br>(1 - 3)       | 3<br>(1 - 8)       | 32<br>(21 - 49)             | 34<br>(19 - 60)             | 16<br>(9 - 30)              |
| Non-Hodgkin lymphoma                          | 1,184<br>(847 - 1,682)       | 23<br>(11 - 45)    | 49<br>(31 - 73)    | 373<br>(259 - 528)          | 499<br>(338 - 743)          | 239<br>(163 - 352)          |
| Multiple myeloma                              | 172<br>(122 - 250)           | --                 | --                 | 35<br>(23 - 55)             | 94<br>(62 - 140)            | 42<br>(28 - 64)             |
| Leukemia                                      | 1,869<br>(1,456 - 2,341)     | 215<br>(100 - 403) | 325<br>(224 - 453) | 762<br>(547 - 1,036)        | 369<br>(268 - 488)          | 198<br>(148 - 253)          |
| Other neoplasms                               | 2,982<br>(1,953 - 4,990)     | 103<br>(52 - 164)  | 117<br>(81 - 164)  | 1,082<br>(663 - 1,860)      | 1,215<br>(737 - 2,172)      | 466<br>(311 - 834)          |
| Cardiovascular diseases                       | 97,839<br>(78,329 - 120,550) | 357<br>(218 - 549) | 455<br>(324 - 617) | 21,099<br>(15,811 - 27,577) | 41,854<br>(32,334 - 52,719) | 34,074<br>(29,036 - 39,534) |
| Rheumatic heart disease                       | 1,504<br>(1,004 - 2,097)     | 34<br>(13 - 70)    | 186<br>(111 - 278) | 875<br>(525 - 1,300)        | 236<br>(141 - 424)          | 172<br>(99 - 338)           |
| Ischemic heart disease                        | 49,750<br>(38,984 - 63,364)  | 61<br>(32 - 102)   | 73<br>(42 - 145)   | 11,834<br>(8,849 - 15,553)  | 21,380<br>(15,994 - 27,922) | 16,403<br>(13,456 - 20,470) |
| Cerebrovascular disease                       | 34,643<br>(26,742 - 43,959)  | 117<br>(70 - 181)  | 133<br>(84 - 201)  | 6,068<br>(4,230 - 8,416)    | 15,382<br>(11,295 - 20,266) | 12,943<br>(10,345 - 16,092) |
| Ischemic stroke                               | 16,510<br>(12,314 - 21,214)  | 9<br>(4 - 16)      | 8<br>(4 - 13)      | 918<br>(581 - 1,349)        | 6,086<br>(4,047 - 8,385)    | 9,488<br>(7,299 - 11,858)   |
| Hemorrhagic stroke                            | 18,133<br>(13,123 - 24,888)  | 108<br>(65 - 166)  | 125<br>(78 - 188)  | 5,150<br>(3,582 - 7,198)    | 9,296<br>(6,646 - 12,666)   | 3,455<br>(2,323 - 5,407)    |
| Hypertensive heart disease                    | 8,011<br>(4,536 - 11,335)    | 21<br>(6 - 58)     | 13<br>(5 - 28)     | 1,296<br>(772 - 1,951)      | 3,533<br>(1,856 - 5,241)    | 3,148<br>(1,656 - 4,621)    |
| Cardiomyopathy and myocarditis                | 1,851<br>(1,287 - 2,930)     | 51<br>(28 - 89)    | 24<br>(13 - 39)    | 467<br>(304 - 745)          | 633<br>(401 - 1,112)        | 676<br>(410 - 1,163)        |
| Atrial fibrillation and flutter               | 65<br>(41 - 92)              | --                 | --                 | 11<br>(7 - 17)              | 27<br>(15 - 42)             | 26<br>(15 - 41)             |
| Aortic aneurysm                               | 516<br>(392 - 691)           | --                 | --                 | 93<br>(65 - 136)            | 140<br>(101 - 195)          | 283<br>(213 - 389)          |
| Peripheral vascular disease                   | 54<br>(39 - 72)              | --                 | --                 | 8<br>(5 - 13)               | 26<br>(18 - 37)             | 19<br>(13 - 26)             |
| Endocarditis                                  | 232<br>(140 - 334)           | 47<br>(24 - 86)    | 10<br>(6 - 18)     | 78<br>(43 - 120)            | 51<br>(29 - 76)             | 45<br>(24 - 69)             |
| Other cardiovascular and circulatory diseases | 1,214<br>(407 - 1,646)       | 25<br>(6 - 43)     | 17<br>(5 - 26)     | 368<br>(108 - 535)          | 445<br>(143 - 629)          | 359<br>(128 - 498)          |



Web Table 31- Philippines deaths with 95% UI by age, sex, and cause in 2013

| Cause                                               | Males, All Ages             | Males, 0-4 Years   | Males, 5-14 Years  | Males, 15-49 Years       | Males, 50-69 Years       | Males, 70-80 Years        |
|-----------------------------------------------------|-----------------------------|--------------------|--------------------|--------------------------|--------------------------|---------------------------|
| Chronic respiratory diseases                        | 19,320<br>(12,604 - 24,262) | 448<br>(267 - 708) | 168<br>(109 - 219) | 2,287<br>(1,480 - 3,097) | 7,467<br>(4,686 - 9,924) | 8,951<br>(5,855 - 10,871) |
| Chronic obstructive pulmonary disease               | 11,136<br>(7,313 - 14,109)  | 124<br>(61 - 242)  | 25<br>(15 - 37)    | 855<br>(552 - 1,205)     | 4,435<br>(2,757 - 5,943) | 5,698<br>(3,637 - 7,141)  |
| Pneumoconiosis                                      | 588<br>(351 - 887)          | 1<br>(0 - 2)       | 1<br>(1 - 2)       | 78<br>(45 - 125)         | 265<br>(144 - 415)       | 243<br>(144 - 381)        |
| Silicosis                                           | 268<br>(154 - 416)          | 0<br>(0 - 0)       | 0<br>(0 - 0)       | 3<br>(2 - 5)             | 63<br>(34 - 105)         | 202<br>(116 - 318)        |
| Asbestosis                                          | 79<br>(44 - 125)            | 0<br>(0 - 0)       | 0<br>(0 - 0)       | 13<br>(8 - 21)           | 63<br>(33 - 101)         | 3<br>(2 - 5)              |
| Coal workers pneumoconiosis                         | 148<br>(86 - 224)           | 0<br>(0 - 0)       | 0<br>(0 - 0)       | 45<br>(26 - 70)          | 97<br>(54 - 152)         | 6<br>(3 - 9)              |
| Other pneumoconiosis                                | 92<br>(57 - 141)            | 0<br>(0 - 0)       | 0<br>(0 - 0)       | 17<br>(10 - 29)          | 42<br>(23 - 67)          | 33<br>(19 - 52)           |
| Asthma                                              | 6,192<br>(3,850 - 8,028)    | 296<br>(157 - 513) | 134<br>(85 - 177)  | 1,283<br>(820 - 1,740)   | 2,325<br>(1,322 - 3,181) | 2,154<br>(1,251 - 2,952)  |
| Interstitial lung disease and pulmonary sarcoidosis | 1,117<br>(660 - 2,074)      | 1<br>(0 - 1)       | 1<br>(1 - 3)       | 13<br>(7 - 22)           | 386<br>(215 - 732)       | 716<br>(395 - 1,357)      |
| Other chronic respiratory diseases                  | 287<br>(201 - 389)          | 27<br>(15 - 59)    | 6<br>(3 - 10)      | 59<br>(38 - 87)          | 56<br>(33 - 83)          | 140<br>(83 - 209)         |
| Cirrhosis                                           | 7,767<br>(5,882 - 9,929)    | 17<br>(7 - 33)     | 21<br>(14 - 31)    | 2,877<br>(2,076 - 3,936) | 3,829<br>(2,770 - 4,999) | 1,023<br>(781 - 1,314)    |
| Cirrhosis due to hepatitis B                        | 2,120<br>(690 - 3,997)      | 1<br>(0 - 2)       | 5<br>(0 - 9)       | 859<br>(248 - 1,577)     | 1,019<br>(339 - 2,052)   | 238<br>(64 - 557)         |
| Cirrhosis due to hepatitis C                        | 1,696<br>(657 - 3,407)      | 0<br>(0 - 1)       | 2<br>(1 - 6)       | 619<br>(274 - 1,225)     | 854<br>(248 - 1,781)     | 221<br>(47 - 449)         |
| Cirrhosis due to alcohol use                        | 3,151<br>(1,787 - 5,306)    | --                 | --                 | 973<br>(495 - 1,681)     | 1,661<br>(900 - 2,833)   | 517<br>(298 - 844)        |
| Cirrhosis due to other causes                       | 800<br>(415 - 1,418)        | 15<br>(6 - 30)     | 14<br>(9 - 22)     | 427<br>(213 - 759)       | 296<br>(116 - 576)       | 48<br>(21 - 88)           |
| Digestive diseases                                  | 8,828<br>(6,932 - 11,247)   | 135<br>(69 - 216)  | 123<br>(93 - 168)  | 2,454<br>(1,789 - 3,409) | 3,548<br>(2,653 - 4,691) | 2,568<br>(2,061 - 3,162)  |
| Peptic ulcer disease                                | 4,895<br>(3,673 - 6,575)    | 4<br>(1 - 9)       | 11<br>(7 - 18)     | 1,005<br>(657 - 1,491)   | 2,199<br>(1,584 - 3,065) | 1,675<br>(1,266 - 2,173)  |
| Gastritis and duodenitis                            | 187<br>(103 - 316)          | 6<br>(1 - 12)      | 5<br>(2 - 9)       | 42<br>(23 - 76)          | 69<br>(35 - 120)         | 66<br>(34 - 114)          |
| Appendicitis                                        | 334<br>(217 - 484)          | 8<br>(2 - 18)      | 34<br>(22 - 51)    | 155<br>(98 - 238)        | 95<br>(56 - 149)         | 43<br>(22 - 67)           |
| Paralytic ileus and intestinal obstruction          | 945<br>(611 - 1,690)        | 81<br>(41 - 137)   | 46<br>(29 - 78)    | 245<br>(142 - 473)       | 316<br>(180 - 602)       | 258<br>(146 - 459)        |
| Inguinal, femoral, and abdominal hernia             | 207<br>(104 - 305)          | 5<br>(1 - 11)      | 3<br>(1 - 5)       | 40<br>(22 - 64)          | 71<br>(34 - 116)         | 87<br>(34 - 143)          |
| Inflammatory bowel disease                          | 260<br>(174 - 382)          | 11<br>(4 - 23)     | 5<br>(2 - 7)       | 60<br>(38 - 90)          | 85<br>(53 - 134)         | 99<br>(61 - 157)          |
| Vascular intestinal disorders                       | 34<br>(13 - 74)             | 1<br>(0 - 2)       | 1<br>(0 - 3)       | 8<br>(3 - 18)            | 14<br>(5 - 32)           | 10<br>(4 - 21)            |
| Gallbladder and biliary diseases                    | 450<br>(203 - 640)          | 3<br>(0 - 6)       | 4<br>(2 - 5)       | 126<br>(57 - 190)        | 186<br>(76 - 292)        | 132<br>(55 - 204)         |
| Pancreatitis                                        | 1,207<br>(794 - 1,711)      | 6<br>(2 - 11)      | 7<br>(4 - 11)      | 675<br>(430 - 985)       | 394<br>(244 - 597)       | 126<br>(76 - 187)         |
| Other digestive diseases                            | 308<br>(205 - 435)          | 12<br>(3 - 24)     | 6<br>(4 - 10)      | 99<br>(63 - 157)         | 119<br>(75 - 182)        | 73<br>(44 - 109)          |
| Neurological disorders                              | 4,442<br>(3,534 - 5,432)    | 62<br>(38 - 101)   | 75<br>(52 - 105)   | 517<br>(367 - 718)       | 800<br>(563 - 1,087)     | 2,987<br>(2,307 - 3,677)  |
| Alzheimer disease and other dementias               | 3,365<br>(2,606 - 4,177)    | --                 | --                 | 5<br>(1 - 14)            | 571<br>(379 - 809)       | 2,788<br>(2,128 - 3,471)  |
| Parkinson disease                                   | 234<br>(174 - 307)          | --                 | --                 | 13<br>(9 - 20)           | 89<br>(61 - 123)         | 131<br>(93 - 180)         |
| Epilepsy                                            | 638<br>(471 - 867)          | 41<br>(20 - 72)    | 62<br>(40 - 89)    | 415<br>(289 - 600)       | 90<br>(59 - 128)         | 30<br>(21 - 42)           |
| Multiple sclerosis                                  | 21<br>(12 - 42)             | --                 | --                 | 9<br>(5 - 19)            | 7<br>(3 - 14)            | 5<br>(2 - 11)             |
| Other neurological disorders                        | 185<br>(138 - 244)          | 21<br>(14 - 32)    | 14<br>(10 - 18)    | 74<br>(50 - 103)         | 43<br>(30 - 58)          | 33<br>(25 - 46)           |
| Mental and substance use disorders                  | 2,997<br>(2,175 - 3,994)    | 13<br>(6 - 19)     | 0<br>(0 - 0)       | 2,167<br>(1,573 - 2,960) | 735<br>(519 - 1,006)     | 82<br>(54 - 109)          |
| Schizophrenia                                       | 175<br>(107 - 310)          | --                 | --                 | 119<br>(67 - 218)        | 43<br>(23 - 81)          | 13<br>(7 - 23)            |
| Alcohol use disorders                               | 621<br>(312 - 875)          | --                 | --                 | 334<br>(161 - 475)       | 252<br>(123 - 372)       | 35<br>(19 - 51)           |
| Drug use disorders                                  | 2,199<br>(1,586 - 2,940)    | 13<br>(6 - 19)     | --                 | 1,712<br>(1,216 - 2,326) | 440<br>(302 - 605)       | 34<br>(16 - 48)           |
| Opioid use disorders                                | 1,407<br>(1,011 - 1,888)    | 8<br>(4 - 13)      | --                 | 1,108<br>(785 - 1,517)   | 268<br>(185 - 370)       | 22<br>(10 - 31)           |
| Cocaine use disorders                               | 30<br>(21 - 43)             | 0<br>(0 - 0)       | --                 | 25<br>(17 - 37)          | 5<br>(3 - 7)             | 0<br>(0 - 1)              |
| Amphetamine use disorders                           | 31<br>(22 - 43)             | 0<br>(0 - 0)       | --                 | 24<br>(17 - 34)          | 6<br>(4 - 9)             | 0<br>(0 - 1)              |
| Other drug use disorders                            | 731<br>(523 - 965)          | 4<br>(2 - 6)       | --                 | 555<br>(391 - 760)       | 161<br>(109 - 223)       | 11<br>(6 - 17)            |

Web Table 31- Philippines deaths with 95% UI by age, sex, and cause in 2013

| Cause                                               | Males, All Ages             | Males, 0-4 Years         | Males, 5-14 Years  | Males, 15-49 Years       | Males, 50-69 Years        | Males, 70-80 Years       |
|-----------------------------------------------------|-----------------------------|--------------------------|--------------------|--------------------------|---------------------------|--------------------------|
| Eating disorders                                    | 1<br>(1 - 1)                | --                       | 0<br>(0 - 0)       | 1<br>(0 - 1)             | --                        | --                       |
| Anorexia nervosa                                    | 1<br>(1 - 1)                | --                       | 0<br>(0 - 0)       | 1<br>(0 - 1)             | --                        | --                       |
| Diabetes, urogenital, blood, and endocrine diseases | 19,990<br>(15,676 - 24,706) | 341<br>(230 - 488)       | 290<br>(226 - 372) | 4,588<br>(3,368 - 6,089) | 9,058<br>(6,894 - 11,607) | 5,712<br>(4,696 - 6,982) |
| Diabetes mellitus                                   | 10,666<br>(8,279 - 13,550)  | 20<br>(12 - 32)          | 23<br>(14 - 33)    | 1,801<br>(1,265 - 2,513) | 5,749<br>(4,257 - 7,567)  | 3,073<br>(2,372 - 3,926) |
| Acute glomerulonephritis                            | 161<br>(109 - 251)          | 11<br>(5 - 19)           | 9<br>(5 - 13)      | 53<br>(35 - 79)          | 46<br>(25 - 87)           | 42<br>(21 - 82)          |
| Chronic kidney disease                              | 6,098<br>(4,621 - 7,802)    | 72<br>(43 - 116)         | 104<br>(75 - 139)  | 1,845<br>(1,264 - 2,471) | 2,300<br>(1,662 - 3,103)  | 1,777<br>(1,364 - 2,374) |
| Chronic kidney disease due to diabetes mellitus     | 352<br>(154 - 1,653)        | 1<br>(1 - 4)             | 2<br>(1 - 6)       | 99<br>(45 - 365)         | 165<br>(66 - 764)         | 85<br>(28 - 459)         |
| Chronic kidney disease due to hypertension          | 1,902<br>(1,037 - 2,627)    | 4<br>(2 - 9)             | 4<br>(2 - 9)       | 419<br>(241 - 666)       | 844<br>(423 - 1,242)      | 630<br>(346 - 887)       |
| Chronic kidney disease due to glomerulonephritis    | 1,274<br>(749 - 1,751)      | 30<br>(18 - 46)          | 50<br>(33 - 67)    | 549<br>(310 - 798)       | 370<br>(193 - 556)        | 276<br>(164 - 419)       |
| Chronic kidney disease due to other causes          | 2,570<br>(1,620 - 3,785)    | 37<br>(19 - 65)          | 48<br>(28 - 76)    | 778<br>(434 - 1,196)     | 920<br>(501 - 1,460)      | 787<br>(487 - 1,246)     |
| Urinary diseases and male infertility               | 1,598<br>(975 - 2,109)      | 31<br>(11 - 49)          | 22<br>(11 - 32)    | 399<br>(212 - 569)       | 603<br>(356 - 841)        | 542<br>(349 - 719)       |
| Interstitial nephritis and urinary tract infections | 570<br>(326 - 867)          | 16<br>(5 - 27)           | 10<br>(4 - 15)     | 141<br>(71 - 215)        | 205<br>(117 - 343)        | 198<br>(111 - 328)       |
| Urolithiasis                                        | 258<br>(118 - 369)          | --                       | 2<br>(1 - 2)       | 58<br>(23 - 92)          | 110<br>(53 - 170)         | 88<br>(38 - 133)         |
| Other urinary diseases                              | 769<br>(419 - 1,065)        | 15<br>(5 - 25)           | 11<br>(5 - 16)     | 200<br>(97 - 293)        | 288<br>(147 - 428)        | 256<br>(137 - 371)       |
| Gynecological diseases                              | --                          | --                       | --                 | --                       | --                        | --                       |
| Uterine fibroids                                    | --                          | --                       | --                 | --                       | --                        | --                       |
| Polycystic ovarian syndrome                         | --                          | --                       | --                 | --                       | --                        | --                       |
| Endometriosis                                       | --                          | --                       | --                 | --                       | --                        | --                       |
| Genital prolapse                                    | --                          | --                       | --                 | --                       | --                        | --                       |
| Other gynecological diseases                        | --                          | --                       | --                 | --                       | --                        | --                       |
| Hemoglobinopathies and hemolytic anemias            | 540<br>(326 - 845)          | 69<br>(38 - 122)         | 78<br>(46 - 131)   | 210<br>(123 - 343)       | 113<br>(64 - 179)         | 69<br>(38 - 103)         |
| Thalassemias                                        | 235<br>(145 - 378)          | 51<br>(28 - 93)          | 61<br>(36 - 103)   | 105<br>(62 - 177)        | 16<br>(9 - 26)            | 1<br>(1 - 2)             |
| Sickle cell disorders                               | 0<br>(0 - 0)                | 0<br>(0 - 0)             | 0<br>(0 - 0)       | 0<br>(0 - 0)             | 0<br>(0 - 0)              | 0<br>(0 - 0)             |
| G6PD deficiency                                     | 37<br>(22 - 58)             | 5<br>(3 - 8)             | 4<br>(3 - 8)       | 17<br>(10 - 28)          | 9<br>(5 - 14)             | 1<br>(1 - 2)             |
| Other hemoglobinopathies and hemolytic anemias      | 267<br>(157 - 409)          | 13<br>(7 - 21)           | 12<br>(7 - 20)     | 88<br>(50 - 138)         | 88<br>(49 - 140)          | 66<br>(37 - 99)          |
| Endocrine, metabolic, blood, and immune disorders   | 927<br>(674 - 1,377)        | 138<br>(75 - 231)        | 54<br>(35 - 88)    | 279<br>(185 - 418)       | 247<br>(162 - 406)        | 208<br>(134 - 330)       |
| Musculoskeletal disorders                           | 482<br>(346 - 817)          | --                       | 24<br>(17 - 36)    | 139<br>(94 - 219)        | 185<br>(126 - 346)        | 134<br>(91 - 242)        |
| Rheumatoid arthritis                                | 120<br>(77 - 210)           | --                       | 2<br>(1 - 4)       | 15<br>(9 - 25)           | 73<br>(43 - 140)          | 30<br>(13 - 57)          |
| Other musculoskeletal disorders                     | 361<br>(258 - 610)          | --                       | 21<br>(15 - 32)    | 124<br>(83 - 195)        | 112<br>(72 - 198)         | 104<br>(64 - 194)        |
| Other non-communicable diseases                     | 7,229<br>(5,594 - 9,194)    | 5,353<br>(3,870 - 7,142) | 448<br>(292 - 602) | 718<br>(521 - 958)       | 322<br>(233 - 437)        | 389<br>(284 - 520)       |
| Congenital anomalies                                | 6,010<br>(4,474 - 7,839)    | 4,979<br>(3,595 - 6,707) | 413<br>(261 - 567) | 489<br>(350 - 665)       | 79<br>(55 - 134)          | 51<br>(36 - 90)          |
| Neural tube defects                                 | 204<br>(72 - 491)           | 196<br>(65 - 482)        | 3<br>(2 - 6)       | 4<br>(2 - 6)             | 1<br>(0 - 1)              | 0<br>(0 - 0)             |
| Congenital heart anomalies                          | 3,662<br>(2,558 - 4,887)    | 2,938<br>(1,964 - 4,087) | 310<br>(192 - 420) | 368<br>(255 - 505)       | 24<br>(16 - 41)           | 22<br>(15 - 39)          |
| Cleft lip and cleft palate                          | 60<br>(7 - 277)             | 60<br>(7 - 277)          | --                 | --                       | --                        | --                       |
| Down syndrome                                       | 119<br>(45 - 237)           | 87<br>(28 - 197)         | 13<br>(5 - 25)     | 18<br>(9 - 28)           | 1<br>(1 - 2)              | 0<br>(0 - 0)             |
| Chromosomal unbalanced rearrangements               | 47<br>(22 - 113)            | 33<br>(10 - 95)          | 1<br>(1 - 2)       | 8<br>(5 - 12)            | 4<br>(2 - 9)              | 1<br>(1 - 2)             |
| Other congenital anomalies                          | 1,918<br>(1,278 - 2,787)    | 1,664<br>(1,059 - 2,527) | 85<br>(47 - 133)   | 92<br>(64 - 130)         | 49<br>(34 - 85)           | 27<br>(19 - 54)          |
| Skin and subcutaneous diseases                      | 938<br>(703 - 1,173)        | 94<br>(55 - 152)         | 35<br>(23 - 48)    | 229<br>(162 - 311)       | 243<br>(166 - 334)        | 338<br>(230 - 473)       |
| Cellulitis                                          | 159<br>(86 - 229)           | 23<br>(11 - 41)          | 9<br>(5 - 14)      | 45<br>(23 - 69)          | 44<br>(22 - 69)           | 38<br>(17 - 62)          |
| Pyoderma                                            | 323<br>(242 - 424)          | 65<br>(36 - 109)         | 19<br>(12 - 28)    | 97<br>(66 - 135)         | 86<br>(56 - 125)          | 56<br>(32 - 87)          |

Web Table 31- Philippines deaths with 95% UI by age, sex, and cause in 2013

| Cause                                           | Males, All Ages             | Males, 0-4 Years         | Males, 5-14 Years        | Males, 15-49 Years          | Males, 50-69 Years       | Males, 70-80 Years       |
|-------------------------------------------------|-----------------------------|--------------------------|--------------------------|-----------------------------|--------------------------|--------------------------|
| Decubitus ulcer                                 | 412<br>(290 - 546)          | 1<br>(0 - 2)             | 3<br>(2 - 5)             | 71<br>(46 - 101)            | 99<br>(64 - 144)         | 238<br>(155 - 342)       |
| Other skin and subcutaneous diseases            | 44<br>(29 - 79)             | 5<br>(2 - 12)            | 3<br>(2 - 5)             | 15<br>(10 - 28)             | 14<br>(8 - 25)           | 7<br>(4 - 13)            |
| Sudden infant death syndrome                    | 280<br>(93 - 680)           | 280<br>(93 - 680)        | --                       | --                          | --                       | --                       |
| Injuries                                        | 31,440<br>(23,709 - 39,512) | 2,118<br>(1,447 - 3,048) | 1,984<br>(1,540 - 2,440) | 19,953<br>(14,419 - 25,962) | 5,574<br>(4,072 - 7,418) | 1,811<br>(1,355 - 2,292) |
| Transport injuries                              | 7,497<br>(4,741 - 9,783)    | 300<br>(120 - 497)       | 545<br>(345 - 731)       | 4,899<br>(2,856 - 6,648)    | 1,282<br>(864 - 1,732)   | 471<br>(363 - 609)       |
| Road injuries                                   | 7,037<br>(4,517 - 9,154)    | 280<br>(111 - 468)       | 520<br>(331 - 701)       | 4,608<br>(2,723 - 6,288)    | 1,196<br>(816 - 1,615)   | 433<br>(333 - 567)       |
| Pedestrian road injuries                        | 1,463<br>(867 - 2,041)      | 106<br>(40 - 188)        | 203<br>(113 - 305)       | 651<br>(346 - 989)          | 333<br>(194 - 498)       | 169<br>(108 - 243)       |
| Cyclist road injuries                           | 616<br>(409 - 876)          | 32<br>(11 - 63)          | 69<br>(39 - 105)         | 315<br>(195 - 483)          | 142<br>(89 - 213)        | 58<br>(38 - 85)          |
| Motorcyclist road injuries                      | 988<br>(593 - 1,477)        | 27<br>(10 - 52)          | 46<br>(24 - 76)          | 779<br>(441 - 1,201)        | 104<br>(62 - 163)        | 33<br>(19 - 52)          |
| Motor vehicle road injuries                     | 3,914<br>(2,267 - 5,266)    | 111<br>(42 - 195)        | 196<br>(120 - 290)       | 2,831<br>(1,529 - 3,923)    | 607<br>(383 - 871)       | 169<br>(114 - 236)       |
| Other road injuries                             | 55<br>(31 - 133)            | 3<br>(1 - 9)             | 6<br>(3 - 15)            | 31<br>(15 - 80)             | 10<br>(4 - 24)           | 4<br>(2 - 11)            |
| Other transport injuries                        | 460<br>(212 - 678)          | 20<br>(7 - 37)           | 24<br>(9 - 43)           | 292<br>(109 - 457)          | 86<br>(43 - 134)         | 38<br>(24 - 55)          |
| Unintentional injuries                          | 9,548<br>(6,987 - 12,137)   | 1,481<br>(871 - 2,340)   | 1,148<br>(861 - 1,514)   | 4,418<br>(3,194 - 5,920)    | 1,643<br>(1,012 - 2,302) | 858<br>(475 - 1,175)     |
| Falls                                           | 1,450<br>(701 - 1,966)      | 73<br>(29 - 117)         | 99<br>(46 - 147)         | 567<br>(259 - 812)          | 437<br>(198 - 619)       | 274<br>(105 - 382)       |
| Drowning                                        | 4,045<br>(2,915 - 5,872)    | 752<br>(382 - 1,417)     | 740<br>(519 - 1,068)     | 1,943<br>(1,360 - 2,893)    | 467<br>(310 - 678)       | 143<br>(98 - 207)        |
| Fire, heat, and hot substances                  | 293<br>(99 - 501)           | 65<br>(15 - 156)         | 24<br>(7 - 47)           | 110<br>(40 - 199)           | 49<br>(15 - 95)          | 44<br>(13 - 83)          |
| Poisonings                                      | 144<br>(71 - 197)           | 4<br>(1 - 7)             | 6<br>(3 - 9)             | 91<br>(46 - 130)            | 35<br>(13 - 53)          | 9<br>(4 - 13)            |
| Exposure to mechanical forces                   | 531<br>(275 - 706)          | 36<br>(16 - 91)          | 29<br>(19 - 40)          | 341<br>(165 - 472)          | 93<br>(42 - 128)         | 32<br>(14 - 45)          |
| Unintentional firearm injuries                  | 230<br>(66 - 320)           | 5<br>(2 - 8)             | 6<br>(3 - 9)             | 160<br>(44 - 234)           | 41<br>(11 - 63)          | 18<br>(3 - 29)           |
| Unintentional suffocation                       | 92<br>(57 - 195)            | 27<br>(7 - 83)           | 7<br>(3 - 15)            | 36<br>(21 - 69)             | 15<br>(8 - 29)           | 7<br>(4 - 13)            |
| Other exposure to mechanical forces             | 209<br>(86 - 283)           | 5<br>(2 - 8)             | 16<br>(8 - 22)           | 145<br>(58 - 204)           | 37<br>(13 - 53)          | 7<br>(2 - 9)             |
| Adverse effects of medical treatment            | 559<br>(192 - 974)          | 41<br>(15 - 75)          | 15<br>(6 - 26)           | 163<br>(56 - 295)           | 178<br>(45 - 339)        | 162<br>(53 - 289)        |
| Animal contact                                  | 490<br>(234 - 654)          | 34<br>(12 - 62)          | 85<br>(49 - 129)         | 242<br>(109 - 345)          | 103<br>(51 - 151)        | 25<br>(10 - 38)          |
| Venomous animal contact                         | 423<br>(204 - 562)          | 27<br>(9 - 50)           | 77<br>(43 - 116)         | 219<br>(98 - 317)           | 84<br>(42 - 125)         | 16<br>(6 - 26)           |
| Non-venomous animal contact                     | 66<br>(29 - 95)             | 7<br>(2 - 14)            | 8<br>(4 - 15)            | 23<br>(9 - 37)              | 19<br>(8 - 33)           | 9<br>(4 - 14)            |
| Foreign body                                    | 852<br>(369 - 1,226)        | 415<br>(175 - 674)       | 53<br>(21 - 82)          | 163<br>(72 - 249)           | 105<br>(41 - 171)        | 116<br>(43 - 180)        |
| Pulmonary aspiration and foreign body in airway | 843<br>(354 - 1,215)        | 415<br>(174 - 673)       | 52<br>(20 - 81)          | 159<br>(68 - 244)           | 103<br>(38 - 168)        | 115<br>(43 - 180)        |
| Foreign body in other body part                 | 9<br>(6 - 16)               | 1<br>(0 - 2)             | 1<br>(1 - 2)             | 4<br>(3 - 7)                | 3<br>(2 - 5)             | 0<br>(0 - 0)             |
| Other unintentional injuries                    | 1,184<br>(812 - 1,668)      | 61<br>(28 - 119)         | 97<br>(41 - 193)         | 797<br>(493 - 1,209)        | 176<br>(93 - 311)        | 53<br>(31 - 85)          |
| Self-harm and interpersonal violence            | 11,255<br>(7,542 - 15,419)  | 82<br>(34 - 167)         | 150<br>(75 - 242)        | 9,137<br>(5,942 - 12,441)   | 1,592<br>(1,015 - 2,404) | 294<br>(198 - 443)       |
| Self-harm                                       | 2,777<br>(2,027 - 4,271)    | --                       | 24<br>(11 - 40)          | 2,104<br>(1,495 - 3,303)    | 476<br>(337 - 761)       | 173<br>(123 - 317)       |
| Interpersonal violence                          | 8,477<br>(4,667 - 11,880)   | 82<br>(34 - 167)         | 126<br>(56 - 214)        | 7,032<br>(3,843 - 9,926)    | 1,116<br>(607 - 1,847)   | 121<br>(47 - 220)        |
| Assault by firearm                              | 4,180<br>(2,042 - 6,454)    | 32<br>(11 - 70)          | 59<br>(21 - 110)         | 3,483<br>(1,676 - 5,480)    | 559<br>(259 - 999)       | 48<br>(15 - 99)          |
| Assault by sharp object                         | 3,977<br>(1,859 - 6,133)    | 35<br>(13 - 79)          | 50<br>(18 - 93)          | 3,327<br>(1,514 - 5,177)    | 505<br>(210 - 920)       | 60<br>(19 - 115)         |
| Assault by other means                          | 320<br>(137 - 503)          | 14<br>(4 - 32)           | 18<br>(7 - 34)           | 222<br>(94 - 366)           | 52<br>(21 - 97)          | 13<br>(4 - 27)           |
| Forces of nature, war, and legal intervention   | 3,140<br>(1,512 - 7,194)    | 254<br>(211 - 273)       | 140<br>(81 - 291)        | 1,500<br>(650 - 3,663)      | 1,058<br>(453 - 2,580)   | 188<br>(79 - 461)        |
| Exposure to forces of nature                    | 3,140<br>(1,512 - 7,194)    | 254<br>(211 - 273)       | 140<br>(81 - 291)        | 1,500<br>(650 - 3,663)      | 1,058<br>(453 - 2,580)   | 188<br>(79 - 461)        |

Web Table 31- Philippines deaths with 95% UI by age, sex, and cause in 2013

| Cause                                                             | Females, All Ages              | Females, 0-4 Years          | Females, 5-14 Years      | Females, 15-49 Years        | Females, 50-69 Years        | Females, 70-80 Years         |
|-------------------------------------------------------------------|--------------------------------|-----------------------------|--------------------------|-----------------------------|-----------------------------|------------------------------|
| All causes                                                        | 223,056<br>(188,287 - 264,489) | 27,539<br>(23,017 - 32,763) | 5,529<br>(4,776 - 6,280) | 37,909<br>(29,803 - 48,606) | 61,269<br>(48,956 - 76,468) | 90,811<br>(78,261 - 105,222) |
| Communicable, maternal, neonatal, and nutritional diseases        | 57,838<br>(50,164 - 66,477)    | 20,543<br>(17,042 - 24,960) | 2,644<br>(2,143 - 3,220) | 9,454<br>(7,787 - 11,427)   | 7,441<br>(5,979 - 9,455)    | 17,756<br>(13,900 - 21,945)  |
| HIV/AIDS and tuberculosis                                         | 9,628<br>(7,373 - 12,446)      | 126<br>(79 - 188)           | 112<br>(68 - 159)        | 3,490<br>(2,617 - 4,517)    | 3,188<br>(2,282 - 4,509)    | 2,711<br>(1,927 - 3,774)     |
| Tuberculosis                                                      | 8,162<br>(5,945 - 10,868)      | 65<br>(35 - 107)            | 90<br>(48 - 135)         | 2,385<br>(1,600 - 3,343)    | 2,936<br>(2,045 - 4,227)    | 2,687<br>(1,903 - 3,755)     |
| HIV/AIDS                                                          | 1,466<br>(967 - 1,924)         | 61<br>(28 - 111)            | 23<br>(14 - 35)          | 1,105<br>(750 - 1,462)      | 253<br>(138 - 397)          | 24<br>(10 - 41)              |
| HIV/AIDS resulting in mycobacterial infection                     | 76<br>(49 - 104)               | 3<br>(1 - 5)                | 1<br>(1 - 2)             | 57<br>(38 - 78)             | 14<br>(7 - 22)              | 1<br>(1 - 2)                 |
| HIV/AIDS resulting in other diseases                              | 1,390<br>(914 - 1,831)         | 58<br>(26 - 105)            | 22<br>(13 - 34)          | 1,048<br>(711 - 1,386)      | 239<br>(131 - 374)          | 23<br>(9 - 39)               |
| Diarrhea, lower respiratory, and other common infectious diseases | 31,132<br>(25,445 - 37,423)    | 9,242<br>(7,160 - 11,936)   | 2,039<br>(1,532 - 2,621) | 3,129<br>(2,180 - 4,311)    | 3,516<br>(2,504 - 4,760)    | 13,205<br>(9,507 - 17,433)   |
| Diarrheal diseases                                                | 2,518<br>(1,740 - 3,543)       | 1,310<br>(678 - 2,271)      | 150<br>(88 - 241)        | 291<br>(197 - 412)          | 270<br>(178 - 406)          | 497<br>(297 - 804)           |
| Intestinal infectious diseases                                    | 2,400<br>(1,192 - 4,115)       | 990<br>(432 - 1,790)        | 699<br>(348 - 1,164)     | 576<br>(239 - 1,063)        | 106<br>(41 - 224)           | 29<br>(13 - 57)              |
| Typhoid fever                                                     | 1,826<br>(893 - 3,162)         | 720<br>(312 - 1,334)        | 539<br>(264 - 906)       | 456<br>(186 - 878)          | 88<br>(32 - 184)            | 24<br>(10 - 48)              |
| Paratyphoid fever                                                 | 553<br>(257 - 978)             | 260<br>(101 - 515)          | 158<br>(66 - 295)        | 114<br>(42 - 229)           | 17<br>(6 - 36)              | 4<br>(2 - 9)                 |
| Other intestinal infectious diseases                              | 21<br>(12 - 34)                | 10<br>(4 - 20)              | 2<br>(0 - 7)             | 6<br>(2 - 13)               | 2<br>(0 - 6)                | 1<br>(0 - 4)                 |
| Lower respiratory infections                                      | 22,328<br>(17,563 - 27,604)    | 4,443<br>(3,018 - 6,286)    | 643<br>(392 - 1,028)     | 1,732<br>(1,171 - 2,549)    | 2,968<br>(2,066 - 4,116)    | 12,542<br>(8,901 - 16,767)   |
| Upper respiratory infections                                      | 14<br>(5 - 30)                 | 2<br>(0 - 8)                | 1<br>(0 - 2)             | 3<br>(1 - 9)                | 4<br>(0 - 11)               | 4<br>(0 - 15)                |
| Otitis media                                                      | 20<br>(16 - 26)                | 4<br>(2 - 7)                | 4<br>(3 - 6)             | 6<br>(4 - 8)                | 3<br>(2 - 4)                | 3<br>(2 - 5)                 |
| Meningitis                                                        | 1,467<br>(1,022 - 1,949)       | 675<br>(377 - 1,072)        | 246<br>(146 - 361)       | 349<br>(219 - 506)          | 110<br>(67 - 163)           | 88<br>(50 - 134)             |
| Pneumococcal meningitis                                           | 436<br>(274 - 624)             | 152<br>(64 - 274)           | 89<br>(37 - 157)         | 127<br>(61 - 215)           | 39<br>(18 - 65)             | 30<br>(15 - 51)              |
| H influenzae type B meningitis                                    | 403<br>(262 - 610)             | 259<br>(139 - 440)          | 67<br>(34 - 110)         | 53<br>(26 - 92)             | 13<br>(6 - 22)              | 10<br>(5 - 18)               |
| Meningococcal meningitis                                          | 156<br>(99 - 229)              | 47<br>(22 - 84)             | 25<br>(11 - 49)          | 50<br>(23 - 87)             | 18<br>(8 - 34)              | 17<br>(7 - 31)               |
| Other meningitis                                                  | 472<br>(291 - 703)             | 217<br>(102 - 376)          | 65<br>(28 - 128)         | 119<br>(59 - 205)           | 40<br>(19 - 69)             | 30<br>(16 - 52)              |
| Encephalitis                                                      | 339<br>(193 - 485)             | 145<br>(60 - 263)           | 59<br>(30 - 91)          | 96<br>(50 - 142)            | 25<br>(14 - 38)             | 13<br>(7 - 20)               |
| Diphtheria                                                        | 7<br>(0 - 39)                  | 5<br>(0 - 36)               | 1<br>(0 - 11)            | 1<br>(0 - 4)                | 0<br>(0 - 2)                | --                           |
| Whooping cough                                                    | 351<br>(1 - 1,640)             | 326<br>(1 - 1,518)          | 20<br>(0 - 97)           | 4<br>(0 - 22)               | 1<br>(0 - 3)                | --                           |
| Tetanus                                                           | 109<br>(31 - 178)              | 31<br>(6 - 61)              | 12<br>(5 - 22)           | 24<br>(8 - 44)              | 24<br>(6 - 46)              | 18<br>(4 - 36)               |
| Measles                                                           | 1,545<br>(268 - 4,596)         | 1,302<br>(230 - 3,841)      | 202<br>(32 - 634)        | 40<br>(6 - 133)             | 1<br>(0 - 3)                | --                           |
| Varicella and herpes zoster                                       | 34<br>(11 - 80)                | 9<br>(0 - 40)               | 2<br>(0 - 11)            | 8<br>(1 - 21)               | 4<br>(0 - 13)               | 11<br>(0 - 49)               |
| Neglected tropical diseases and malaria                           | 999<br>(567 - 1,278)           | 323<br>(124 - 493)          | 311<br>(137 - 421)       | 192<br>(131 - 253)          | 111<br>(81 - 152)           | 63<br>(46 - 84)              |
| Malaria                                                           | 75<br>(50 - 105)               | 9<br>(4 - 20)               | 9<br>(5 - 15)            | 34<br>(20 - 52)             | 16<br>(9 - 26)              | 8<br>(4 - 12)                |
| Leishmaniasis                                                     | 1<br>(0 - 1)                   | 1<br>(0 - 1)                | 0<br>(0 - 0)             | 0<br>(0 - 0)                | 0<br>(0 - 0)                | 0<br>(0 - 0)                 |
| Visceral leishmaniasis                                            | 1<br>(0 - 1)                   | 1<br>(0 - 1)                | 0<br>(0 - 0)             | 0<br>(0 - 0)                | 0<br>(0 - 0)                | 0<br>(0 - 0)                 |
| Schistosomiasis                                                   | 74<br>(50 - 105)               | 0<br>(0 - 1)                | 2<br>(1 - 3)             | 22<br>(13 - 34)             | 30<br>(17 - 48)             | 21<br>(11 - 34)              |
| Cysticercosis                                                     | 1<br>(1 - 1)                   | 0<br>(0 - 0)                | 0<br>(0 - 0)             | 0<br>(0 - 1)                | 0<br>(0 - 0)                | 0<br>(0 - 0)                 |
| Cystic echinococcosis                                             | 5<br>(4 - 6)                   | 0<br>(0 - 0)                | 1<br>(1 - 1)             | 2<br>(1 - 3)                | 1<br>(1 - 2)                | 1<br>(1 - 1)                 |
| Dengue                                                            | 590<br>(186 - 824)             | 259<br>(58 - 417)           | 250<br>(76 - 351)        | 61<br>(21 - 89)             | 13<br>(5 - 18)              | 7<br>(2 - 13)                |
| Rabies                                                            | 165<br>(109 - 240)             | 12<br>(6 - 19)              | 36<br>(23 - 55)          | 59<br>(37 - 88)             | 41<br>(27 - 67)             | 17<br>(10 - 27)              |
| Intestinal nematode infections                                    | 34<br>(18 - 55)                | 20<br>(9 - 39)              | 6<br>(1 - 15)            | 3<br>(0 - 10)               | 2<br>(0 - 8)                | 3<br>(0 - 9)                 |
| Ascariasis                                                        | 34<br>(18 - 55)                | 20<br>(9 - 39)              | 6<br>(1 - 15)            | 3<br>(0 - 10)               | 2<br>(0 - 8)                | 3<br>(0 - 9)                 |
| Other neglected tropical diseases                                 | 54<br>(35 - 75)                | 21<br>(10 - 39)             | 7<br>(4 - 11)            | 11<br>(6 - 16)              | 8<br>(4 - 13)               | 7<br>(4 - 12)                |
| Maternal disorders                                                | 1,959<br>(1,328 - 2,784)       | --                          | 7<br>(3 - 15)            | 1,952<br>(1,321 - 2,778)    | --                          | --                           |

Web Table 31- Philippines deaths with 95% UI by age, sex, and cause in 2013

| Cause                                                            | Females, All Ages              | Females, 0-4 Years         | Females, 5-14 Years      | Females, 15-49 Years        | Females, 50-69 Years        | Females, 70-80 Years        |
|------------------------------------------------------------------|--------------------------------|----------------------------|--------------------------|-----------------------------|-----------------------------|-----------------------------|
| Maternal hemorrhage                                              | 365<br>(238 - 533)             | --                         | 1<br>(0 - 2)             | 364<br>(237 - 532)          | --                          | --                          |
| Maternal sepsis and other maternal infections                    | 128<br>(82 - 193)              | --                         | 1<br>(0 - 2)             | 127<br>(81 - 192)           | --                          | --                          |
| Maternal hypertensive disorders                                  | 479<br>(311 - 698)             | --                         | 1<br>(0 - 3)             | 478<br>(310 - 697)          | --                          | --                          |
| Maternal obstructed labor                                        | 92<br>(51 - 154)               | --                         | 0<br>(0 - 1)             | 92<br>(51 - 154)            | --                          | --                          |
| Maternal abortive outcome                                        | 208<br>(137 - 302)             | --                         | 1<br>(0 - 2)             | 207<br>(136 - 302)          | --                          | --                          |
| Indirect maternal deaths                                         | 114<br>(72 - 168)              | --                         | 0<br>(0 - 1)             | 113<br>(72 - 168)           | --                          | --                          |
| Late maternal deaths                                             | 233<br>(138 - 353)             | --                         | 1<br>(0 - 3)             | 232<br>(137 - 351)          | --                          | --                          |
| Maternal deaths aggravated by HIV/AIDS                           | 1<br>(0 - 1)                   | --                         | --                       | 1<br>(0 - 1)                | --                          | --                          |
| Other maternal disorders                                         | 337<br>(219 - 498)             | --                         | 1<br>(0 - 3)             | 336<br>(218 - 496)          | --                          | --                          |
| Neonatal disorders                                               | 10,087<br>(8,143 - 12,346)     | 10,087<br>(8,143 - 12,346) | --                       | --                          | --                          | --                          |
| Neonatal preterm birth complications                             | 4,390<br>(2,978 - 6,157)       | 4,390<br>(2,978 - 6,157)   | --                       | --                          | --                          | --                          |
| Neonatal encephalopathy due to birth asphyxia and trauma         | 2,187<br>(1,240 - 3,236)       | 2,187<br>(1,240 - 3,236)   | --                       | --                          | --                          | --                          |
| Neonatal sepsis and other neonatal infections                    | 1,579<br>(639 - 3,068)         | 1,579<br>(639 - 3,068)     | --                       | --                          | --                          | --                          |
| Hemolytic disease and other neonatal jaundice                    | 557<br>(26 - 1,476)            | 557<br>(26 - 1,476)        | --                       | --                          | --                          | --                          |
| Other neonatal disorders                                         | 1,375<br>(744 - 2,353)         | 1,375<br>(744 - 2,353)     | --                       | --                          | --                          | --                          |
| Nutritional deficiencies                                         | 3,163<br>(2,416 - 4,639)       | 533<br>(328 - 824)         | 131<br>(93 - 186)        | 513<br>(351 - 755)          | 413<br>(278 - 669)          | 1,573<br>(1,093 - 2,318)    |
| Protein-energy malnutrition                                      | 1,693<br>(1,117 - 2,642)       | 427<br>(241 - 703)         | 81<br>(47 - 121)         | 153<br>(71 - 328)           | 157<br>(71 - 307)           | 876<br>(495 - 1,394)        |
| Iodine deficiency                                                | 13<br>(1 - 43)                 | 3<br>(0 - 23)              | 1<br>(0 - 9)             | 2<br>(0 - 12)               | 3<br>(0 - 14)               | 4<br>(0 - 24)               |
| Iron-deficiency anemia                                           | 1,144<br>(605 - 1,814)         | 88<br>(22 - 209)           | 45<br>(23 - 78)          | 342<br>(200 - 504)          | 221<br>(116 - 364)          | 447<br>(201 - 811)          |
| Other nutritional deficiencies                                   | 313<br>(154 - 663)             | 16<br>(5 - 41)             | 4<br>(2 - 7)             | 15<br>(7 - 35)              | 33<br>(14 - 71)             | 246<br>(116 - 520)          |
| Other communicable, maternal, neonatal, and nutritional diseases | 871<br>(467 - 1,680)           | 233<br>(87 - 468)          | 43<br>(21 - 78)          | 179<br>(97 - 305)           | 212<br>(93 - 542)           | 204<br>(65 - 654)           |
| Sexually transmitted diseases excluding HIV                      | 225<br>(68 - 452)              | 185<br>(33 - 399)          | 16<br>(4 - 32)           | 15<br>(7 - 30)              | 6<br>(3 - 11)               | 4<br>(2 - 9)                |
| Syphilis                                                         | 212<br>(53 - 438)              | 185<br>(33 - 399)          | 15<br>(3 - 32)           | 6<br>(3 - 12)               | 3<br>(1 - 6)                | 3<br>(1 - 7)                |
| Chlamydial infection                                             | 4<br>(2 - 8)                   | --                         | 0<br>(0 - 1)             | 3<br>(1 - 6)                | 1<br>(0 - 2)                | 0<br>(0 - 1)                |
| Gonococcal infection                                             | 5<br>(2 - 9)                   | --                         | 0<br>(0 - 0)             | 3<br>(1 - 6)                | 1<br>(0 - 2)                | 1<br>(0 - 1)                |
| Other sexually transmitted diseases                              | 4<br>(2 - 8)                   | --                         | 0<br>(0 - 0)             | 3<br>(1 - 6)                | 1<br>(0 - 2)                | 0<br>(0 - 1)                |
| Hepatitis                                                        | 235<br>(165 - 318)             | 20<br>(9 - 41)             | 9<br>(5 - 15)            | 80<br>(49 - 122)            | 81<br>(48 - 126)            | 45<br>(25 - 80)             |
| Acute hepatitis A                                                | 26<br>(8 - 50)                 | 11<br>(4 - 25)             | 4<br>(1 - 7)             | 7<br>(2 - 15)               | 3<br>(1 - 9)                | 1<br>(0 - 2)                |
| Acute hepatitis B                                                | 127<br>(78 - 188)              | 8<br>(2 - 20)              | 2<br>(1 - 4)             | 26<br>(12 - 48)             | 55<br>(28 - 93)             | 36<br>(19 - 64)             |
| Acute hepatitis C                                                | 4<br>(1 - 12)                  | --                         | 0<br>(0 - 1)             | 1<br>(0 - 3)                | 2<br>(0 - 5)                | 1<br>(0 - 4)                |
| Acute hepatitis E                                                | 79<br>(42 - 132)               | 0<br>(0 - 1)               | 3<br>(1 - 7)             | 47<br>(26 - 77)             | 21<br>(7 - 46)              | 7<br>(2 - 18)               |
| Other infectious diseases                                        | 410<br>(125 - 1,158)           | 28<br>(7 - 69)             | 19<br>(5 - 48)           | 84<br>(27 - 203)            | 125<br>(27 - 439)           | 154<br>(24 - 603)           |
| Non-communicable diseases                                        | 154,972<br>(126,337 - 188,872) | 5,666<br>(4,034 - 7,362)   | 1,835<br>(1,465 - 2,230) | 24,736<br>(18,173 - 32,939) | 51,539<br>(40,034 - 65,362) | 71,196<br>(59,884 - 83,708) |
| Neoplasms                                                        | 32,966<br>(25,678 - 41,815)    | 280<br>(174 - 441)         | 448<br>(342 - 576)       | 8,228<br>(5,948 - 10,981)   | 15,099<br>(11,578 - 19,414) | 8,911<br>(7,197 - 10,917)   |
| Esophageal cancer                                                | 245<br>(183 - 330)             | --                         | --                       | 28<br>(18 - 41)             | 106<br>(72 - 155)           | 112<br>(80 - 154)           |
| Stomach cancer                                                   | 1,368<br>(1,011 - 1,837)       | --                         | --                       | 224<br>(149 - 323)          | 573<br>(402 - 811)          | 571<br>(399 - 811)          |
| Liver cancer                                                     | 1,845<br>(1,354 - 2,497)       | --                         | 11<br>(6 - 17)           | 374<br>(232 - 556)          | 840<br>(584 - 1,218)        | 621<br>(426 - 889)          |
| Liver cancer due to hepatitis B                                  | 500<br>(200 - 931)             | --                         | 3<br>(1 - 7)             | 130<br>(58 - 230)           | 232<br>(73 - 478)           | 135<br>(38 - 274)           |
| Liver cancer due to hepatitis C                                  | 847<br>(474 - 1,363)           | --                         | 1<br>(0 - 2)             | 131<br>(52 - 236)           | 396<br>(195 - 642)          | 319<br>(183 - 517)          |
| Liver cancer due to alcohol use                                  | 100<br>(51 - 202)              | --                         | --                       | 10<br>(4 - 21)              | 40<br>(18 - 80)             | 49<br>(23 - 111)            |

Web Table 31- Philippines deaths with 95% UI by age, sex, and cause in 2013

| Cause                                         | Females, All Ages           | Females, 0-4 Years | Females, 5-14 Years | Females, 15-49 Years      | Females, 50-69 Years        | Females, 70-80 Years        |
|-----------------------------------------------|-----------------------------|--------------------|---------------------|---------------------------|-----------------------------|-----------------------------|
| Liver cancer due to other causes              | 398<br>(211 - 751)          | --                 | 7<br>(3 - 12)       | 102<br>(54 - 183)         | 171<br>(80 - 325)           | 117<br>(57 - 242)           |
| Larynx cancer                                 | 152<br>(80 - 289)           | --                 | --                  | 17<br>(9 - 34)            | 72<br>(37 - 136)            | 63<br>(32 - 118)            |
| Tracheal, bronchus and lung cancer            | 3,609<br>(2,760 - 4,649)    | --                 | --                  | 515<br>(355 - 725)        | 1,844<br>(1,343 - 2,452)    | 1,251<br>(949 - 1,639)      |
| Breast cancer                                 | 6,268<br>(4,683 - 8,197)    | --                 | --                  | 2,050<br>(1,431 - 2,826)  | 3,169<br>(2,323 - 4,190)    | 1,050<br>(792 - 1,377)      |
| Cervical cancer                               | 2,536<br>(1,818 - 3,401)    | --                 | --                  | 886<br>(572 - 1,281)      | 1,225<br>(851 - 1,692)      | 425<br>(302 - 599)          |
| Uterine cancer                                | 788<br>(455 - 1,121)        | --                 | --                  | 151<br>(76 - 231)         | 440<br>(247 - 662)          | 197<br>(123 - 296)          |
| Prostate cancer                               | --                          | --                 | --                  | --                        | --                          | --                          |
| Colon and rectum cancer                       | 2,879<br>(2,197 - 3,682)    | --                 | --                  | 477<br>(336 - 658)        | 1,277<br>(948 - 1,662)      | 1,125<br>(833 - 1,449)      |
| Lip and oral cavity cancer                    | 687<br>(468 - 1,092)        | --                 | --                  | 106<br>(61 - 189)         | 289<br>(185 - 480)          | 292<br>(191 - 462)          |
| Nasopharynx cancer                            | 428<br>(280 - 766)          | --                 | 4<br>(1 - 9)        | 124<br>(70 - 213)         | 197<br>(112 - 399)          | 104<br>(60 - 171)           |
| Other pharynx cancer                          | 214<br>(147 - 321)          | --                 | --                  | 30<br>(17 - 54)           | 108<br>(67 - 173)           | 76<br>(48 - 117)            |
| Gallbladder and biliary tract cancer          | 704<br>(442 - 1,338)        | --                 | --                  | 137<br>(73 - 309)         | 326<br>(199 - 647)          | 241<br>(143 - 434)          |
| Pancreatic cancer                             | 1,068<br>(815 - 1,365)      | --                 | --                  | 117<br>(79 - 165)         | 524<br>(384 - 697)          | 426<br>(316 - 569)          |
| Malignant skin melanoma                       | 162<br>(119 - 212)          | --                 | --                  | 40<br>(26 - 58)           | 70<br>(49 - 100)            | 52<br>(35 - 71)             |
| Non-melanoma skin cancer                      | 112<br>(71 - 178)           | --                 | --                  | 21<br>(12 - 34)           | 40<br>(23 - 68)             | 52<br>(30 - 86)             |
| Ovarian cancer                                | 2,128<br>(1,554 - 2,794)    | --                 | --                  | 626<br>(418 - 894)        | 1,135<br>(801 - 1,545)      | 367<br>(255 - 506)          |
| Testicular cancer                             | --                          | --                 | --                  | --                        | --                          | --                          |
| Kidney cancer                                 | 312<br>(228 - 419)          | 8<br>(3 - 16)      | 3<br>(2 - 6)        | 52<br>(33 - 80)           | 140<br>(92 - 204)           | 109<br>(71 - 163)           |
| Bladder cancer                                | 256<br>(171 - 435)          | --                 | --                  | 28<br>(17 - 47)           | 99<br>(60 - 177)            | 129<br>(80 - 221)           |
| Brain and nervous system cancer               | 730<br>(551 - 952)          | 22<br>(10 - 41)    | 50<br>(32 - 76)     | 259<br>(178 - 360)        | 275<br>(194 - 377)          | 125<br>(86 - 177)           |
| Thyroid cancer                                | 551<br>(387 - 766)          | --                 | 2<br>(1 - 3)        | 66<br>(39 - 103)          | 253<br>(166 - 369)          | 230<br>(155 - 340)          |
| Mesothelioma                                  | 22<br>(15 - 32)             | --                 | --                  | 5<br>(3 - 8)              | 12<br>(7 - 20)              | 5<br>(3 - 8)                |
| Hodgkin lymphoma                              | 69<br>(48 - 102)            | 2<br>(1 - 3)       | 3<br>(1 - 8)        | 26<br>(17 - 42)           | 24<br>(14 - 40)             | 13<br>(8 - 21)              |
| Non-Hodgkin lymphoma                          | 756<br>(515 - 1,055)        | 14<br>(7 - 25)     | 25<br>(14 - 38)     | 183<br>(114 - 266)        | 306<br>(195 - 451)          | 228<br>(146 - 345)          |
| Multiple myeloma                              | 174<br>(123 - 247)          | --                 | --                  | 27<br>(17 - 40)           | 90<br>(62 - 134)            | 57<br>(38 - 82)             |
| Leukemia                                      | 1,734<br>(1,322 - 2,202)    | 150<br>(71 - 270)  | 254<br>(177 - 350)  | 694<br>(488 - 962)        | 396<br>(284 - 537)          | 239<br>(179 - 318)          |
| Other neoplasms                               | 3,170<br>(2,234 - 4,859)    | 85<br>(42 - 138)   | 97<br>(62 - 135)    | 965<br>(630 - 1,548)      | 1,269<br>(841 - 2,100)      | 755<br>(529 - 1,242)        |
| Cardiovascular diseases                       | 73,107<br>(58,395 - 90,981) | 232<br>(136 - 365) | 439<br>(303 - 651)  | 9,132<br>(6,511 - 12,513) | 22,476<br>(16,991 - 29,224) | 40,828<br>(33,805 - 48,774) |
| Rheumatic heart disease                       | 1,850<br>(1,196 - 2,650)    | 23<br>(9 - 46)     | 221<br>(143 - 314)  | 1,103<br>(627 - 1,567)    | 263<br>(170 - 424)          | 239<br>(164 - 403)          |
| Ischemic heart disease                        | 33,389<br>(26,283 - 43,342) | 34<br>(16 - 67)    | 70<br>(40 - 166)    | 3,782<br>(2,599 - 5,466)  | 9,672<br>(7,165 - 12,920)   | 19,830<br>(15,782 - 25,379) |
| Cerebrovascular disease                       | 27,407<br>(20,349 - 35,174) | 73<br>(42 - 117)   | 83<br>(55 - 139)    | 2,885<br>(1,978 - 4,027)  | 9,357<br>(6,611 - 12,577)   | 15,010<br>(11,301 - 18,778) |
| Ischemic stroke                               | 14,399<br>(9,512 - 18,530)  | 7<br>(3 - 12)      | 7<br>(4 - 12)       | 366<br>(206 - 552)        | 3,158<br>(1,795 - 4,434)    | 10,861<br>(7,445 - 13,849)  |
| Hemorrhagic stroke                            | 13,008<br>(9,732 - 17,363)  | 66<br>(39 - 107)   | 76<br>(50 - 130)    | 2,519<br>(1,727 - 3,584)  | 6,199<br>(4,387 - 8,374)    | 4,148<br>(2,883 - 6,343)    |
| Hypertensive heart disease                    | 7,045<br>(4,089 - 9,572)    | 12<br>(5 - 30)     | 9<br>(4 - 21)       | 651<br>(397 - 976)        | 2,201<br>(1,291 - 3,127)    | 4,171<br>(2,290 - 5,849)    |
| Cardiomyopathy and myocarditis                | 1,391<br>(930 - 2,460)      | 32<br>(15 - 61)    | 23<br>(13 - 40)     | 285<br>(181 - 450)        | 312<br>(190 - 555)          | 739<br>(415 - 1,423)        |
| Atrial fibrillation and flutter               | 89<br>(59 - 127)            | --                 | --                  | 11<br>(7 - 16)            | 29<br>(18 - 44)             | 49<br>(30 - 76)             |
| Aortic aneurysm                               | 278<br>(168 - 435)          | --                 | --                  | 52<br>(30 - 85)           | 73<br>(41 - 117)            | 154<br>(90 - 237)           |
| Peripheral vascular disease                   | 19<br>(13 - 26)             | --                 | --                  | 1<br>(1 - 2)              | 5<br>(3 - 6)                | 13<br>(9 - 19)              |
| Endocarditis                                  | 168<br>(94 - 240)           | 35<br>(15 - 64)    | 13<br>(7 - 21)      | 54<br>(26 - 82)           | 33<br>(17 - 52)             | 34<br>(19 - 61)             |
| Other cardiovascular and circulatory diseases | 1,471<br>(500 - 2,041)      | 22<br>(7 - 37)     | 20<br>(8 - 34)      | 308<br>(92 - 466)         | 532<br>(149 - 784)          | 589<br>(217 - 860)          |

Web Table 31- Philippines deaths with 95% UI by age, sex, and cause in 2013

| Cause                                               | Females, All Ages          | Females, 0-4 Years | Females, 5-14 Years | Females, 15-49 Years   | Females, 50-69 Years     | Females, 70-80 Years     |
|-----------------------------------------------------|----------------------------|--------------------|---------------------|------------------------|--------------------------|--------------------------|
| Chronic respiratory diseases                        | 10,171<br>(7,947 - 12,819) | 389<br>(246 - 584) | 130<br>(93 - 169)   | 1,396<br>(980 - 1,869) | 2,748<br>(2,020 - 3,678) | 5,508<br>(4,238 - 7,237) |
| Chronic obstructive pulmonary disease               | 4,644<br>(3,218 - 6,475)   | 84<br>(45 - 183)   | 18<br>(10 - 32)     | 380<br>(219 - 605)     | 1,353<br>(909 - 1,910)   | 2,808<br>(1,945 - 3,908) |
| Pneumoconiosis                                      | 11<br>(8 - 16)             | 1<br>(0 - 2)       | 1<br>(1 - 2)        | 4<br>(2 - 6)           | 2<br>(1 - 3)             | 3<br>(2 - 5)             |
| Silicosis                                           | 1<br>(1 - 2)               | 0<br>(0 - 0)       | 0<br>(0 - 1)        | 0<br>(0 - 1)           | 0<br>(0 - 0)             | 0<br>(0 - 0)             |
| Asbestosis                                          | 1<br>(1 - 2)               | 0<br>(0 - 0)       | 0<br>(0 - 1)        | 0<br>(0 - 1)           | 0<br>(0 - 0)             | 0<br>(0 - 0)             |
| Coal workers pneumoconiosis                         | 1<br>(1 - 2)               | 0<br>(0 - 0)       | 0<br>(0 - 1)        | 0<br>(0 - 1)           | 0<br>(0 - 0)             | 0<br>(0 - 0)             |
| Other pneumoconiosis                                | 8<br>(5 - 12)              | 0<br>(0 - 0)       | 0<br>(0 - 1)        | 3<br>(2 - 4)           | 2<br>(1 - 3)             | 3<br>(1 - 5)             |
| Asthma                                              | 4,183<br>(2,647 - 5,697)   | 282<br>(159 - 442) | 105<br>(70 - 140)   | 951<br>(608 - 1,306)   | 1,189<br>(702 - 1,723)   | 1,656<br>(933 - 2,458)   |
| Interstitial lung disease and pulmonary sarcoidosis | 927<br>(495 - 1,846)       | 1<br>(0 - 2)       | 2<br>(1 - 3)        | 11<br>(6 - 22)         | 164<br>(85 - 345)        | 750<br>(379 - 1,528)     |
| Other chronic respiratory diseases                  | 406<br>(273 - 628)         | 21<br>(13 - 47)    | 3<br>(2 - 6)        | 50<br>(32 - 77)        | 40<br>(23 - 65)          | 291<br>(178 - 473)       |
| Cirrhosis                                           | 2,253<br>(1,694 - 2,924)   | 10<br>(5 - 20)     | 21<br>(14 - 31)     | 504<br>(345 - 731)     | 988<br>(723 - 1,307)     | 729<br>(514 - 974)       |
| Cirrhosis due to hepatitis B                        | 854<br>(403 - 1,364)       | 0<br>(0 - 1)       | 2<br>(0 - 6)        | 155<br>(66 - 276)      | 381<br>(167 - 623)       | 316<br>(142 - 517)       |
| Cirrhosis due to hepatitis C                        | 819<br>(472 - 1,245)       | 0<br>(0 - 1)       | 4<br>(1 - 7)        | 197<br>(106 - 314)     | 377<br>(202 - 595)       | 241<br>(126 - 422)       |
| Cirrhosis due to alcohol use                        | 328<br>(166 - 540)         | --                 | --                  | 53<br>(16 - 101)       | 144<br>(66 - 246)        | 131<br>(64 - 217)        |
| Cirrhosis due to other causes                       | 251<br>(146 - 397)         | 10<br>(4 - 18)     | 16<br>(9 - 24)      | 100<br>(55 - 163)      | 86<br>(38 - 149)         | 40<br>(17 - 72)          |
| Digestive diseases                                  | 4,532<br>(3,568 - 5,876)   | 91<br>(50 - 138)   | 91<br>(68 - 121)    | 841<br>(598 - 1,210)   | 1,401<br>(1,016 - 1,997) | 2,109<br>(1,658 - 2,631) |
| Peptic ulcer disease                                | 2,359<br>(1,742 - 3,321)   | 2<br>(1 - 5)       | 11<br>(6 - 17)      | 313<br>(200 - 494)     | 769<br>(525 - 1,149)     | 1,264<br>(930 - 1,676)   |
| Gastritis and duodenitis                            | 130<br>(63 - 251)          | 5<br>(1 - 9)       | 5<br>(2 - 10)       | 22<br>(11 - 45)        | 32<br>(15 - 66)          | 66<br>(29 - 127)         |
| Appendicitis                                        | 192<br>(120 - 281)         | 5<br>(1 - 12)      | 25<br>(14 - 40)     | 78<br>(46 - 125)       | 44<br>(24 - 77)          | 41<br>(21 - 70)          |
| Paralytic ileus and intestinal obstruction          | 616<br>(369 - 1,060)       | 57<br>(29 - 91)    | 27<br>(16 - 48)     | 125<br>(68 - 228)      | 168<br>(87 - 304)        | 239<br>(129 - 441)       |
| Inguinal, femoral, and abdominal hernia             | 35<br>(18 - 58)            | 1<br>(0 - 1)       | 1<br>(1 - 2)        | 8<br>(4 - 14)          | 12<br>(6 - 21)           | 14<br>(5 - 25)           |
| Inflammatory bowel disease                          | 190<br>(113 - 313)         | 7<br>(2 - 15)      | 4<br>(2 - 7)        | 30<br>(17 - 50)        | 46<br>(25 - 78)          | 103<br>(55 - 190)        |
| Vascular intestinal disorders                       | 21<br>(10 - 39)            | 0<br>(0 - 1)       | 0<br>(0 - 2)        | 5<br>(2 - 11)          | 5<br>(2 - 9)             | 10<br>(4 - 18)           |
| Gallbladder and biliary diseases                    | 477<br>(236 - 664)         | 2<br>(0 - 4)       | 3<br>(2 - 4)        | 101<br>(45 - 151)      | 166<br>(88 - 247)        | 204<br>(93 - 302)        |
| Pancreatitis                                        | 331<br>(207 - 500)         | 6<br>(2 - 13)      | 6<br>(3 - 10)       | 122<br>(72 - 189)      | 103<br>(61 - 160)        | 94<br>(56 - 152)         |
| Other digestive diseases                            | 182<br>(130 - 243)         | 7<br>(2 - 14)      | 7<br>(4 - 10)       | 38<br>(24 - 55)        | 57<br>(37 - 85)          | 73<br>(48 - 104)         |
| Neurological disorders                              | 4,904<br>(3,707 - 6,283)   | 38<br>(21 - 64)    | 52<br>(34 - 74)     | 294<br>(207 - 435)     | 650<br>(451 - 923)       | 3,870<br>(2,838 - 5,053) |
| Alzheimer disease and other dementias               | 4,137<br>(3,029 - 5,413)   | --                 | --                  | 3<br>(1 - 8)           | 482<br>(306 - 721)       | 3,652<br>(2,651 - 4,818) |
| Parkinson disease                                   | 200<br>(142 - 295)         | --                 | --                  | 7<br>(5 - 12)          | 67<br>(44 - 104)         | 126<br>(86 - 192)        |
| Epilepsy                                            | 362<br>(251 - 512)         | 26<br>(12 - 49)    | 42<br>(26 - 64)     | 218<br>(146 - 332)     | 49<br>(29 - 72)          | 27<br>(17 - 40)          |
| Multiple sclerosis                                  | 30<br>(19 - 56)            | --                 | --                  | 15<br>(9 - 28)         | 9<br>(5 - 16)            | 6<br>(3 - 13)            |
| Other neurological disorders                        | 175<br>(138 - 221)         | 12<br>(8 - 18)     | 10<br>(7 - 13)      | 51<br>(37 - 69)        | 44<br>(31 - 60)          | 58<br>(42 - 78)          |
| Mental and substance use disorders                  | 650<br>(464 - 843)         | 8<br>(3 - 15)      | 0<br>(0 - 1)        | 326<br>(224 - 444)     | 182<br>(129 - 243)       | 134<br>(91 - 180)        |
| Schizophrenia                                       | 116<br>(72 - 206)          | --                 | --                  | 66<br>(39 - 119)       | 34<br>(19 - 61)          | 17<br>(9 - 34)           |
| Alcohol use disorders                               | 47<br>(19 - 77)            | --                 | --                  | 15<br>(6 - 26)         | 23<br>(9 - 38)           | 10<br>(4 - 16)           |
| Drug use disorders                                  | 483<br>(341 - 638)         | 8<br>(3 - 15)      | --                  | 243<br>(162 - 332)     | 126<br>(85 - 171)        | 107<br>(68 - 150)        |
| Opioid use disorders                                | 301<br>(214 - 399)         | 5<br>(2 - 10)      | --                  | 154<br>(102 - 212)     | 75<br>(51 - 102)         | 67<br>(42 - 95)          |
| Cocaine use disorders                               | 10<br>(7 - 13)             | 0<br>(0 - 0)       | --                  | 6<br>(4 - 8)           | 2<br>(1 - 3)             | 2<br>(1 - 3)             |
| Amphetamine use disorders                           | 11<br>(8 - 15)             | 0<br>(0 - 1)       | --                  | 6<br>(4 - 8)           | 3<br>(2 - 4)             | 2<br>(1 - 3)             |
| Other drug use disorders                            | 160<br>(112 - 215)         | 2<br>(1 - 4)       | --                  | 77<br>(51 - 108)       | 46<br>(31 - 63)          | 35<br>(22 - 51)          |

Web Table 31- Philippines deaths with 95% UI by age, sex, and cause in 2013

| Cause                                               | Females, All Ages           | Females, 0-4 Years       | Females, 5-14 Years | Females, 15-49 Years     | Females, 50-69 Years     | Females, 70-80 Years      |
|-----------------------------------------------------|-----------------------------|--------------------------|---------------------|--------------------------|--------------------------|---------------------------|
| Eating disorders                                    | 3<br>(2 - 5)                | --                       | 0<br>(0 - 1)        | 3<br>(2 - 5)             | --                       | --                        |
| Anorexia nervosa                                    | 3<br>(2 - 5)                | --                       | 0<br>(0 - 1)        | 3<br>(2 - 5)             | --                       | --                        |
| Diabetes, urogenital, blood, and endocrine diseases | 19,618<br>(15,171 - 24,426) | 283<br>(193 - 389)       | 230<br>(171 - 294)  | 3,165<br>(2,280 - 4,245) | 7,634<br>(5,652 - 9,885) | 8,306<br>(6,543 - 10,310) |
| Diabetes mellitus                                   | 11,443<br>(8,375 - 14,713)  | 11<br>(6 - 19)           | 20<br>(10 - 34)     | 1,024<br>(676 - 1,490)   | 5,174<br>(3,573 - 6,841) | 5,213<br>(3,812 - 6,757)  |
| Acute glomerulonephritis                            | 115<br>(78 - 180)           | 7<br>(3 - 12)            | 7<br>(4 - 10)       | 36<br>(24 - 54)          | 32<br>(17 - 60)          | 34<br>(17 - 71)           |
| Chronic kidney disease                              | 5,058<br>(3,851 - 6,524)    | 64<br>(41 - 97)          | 85<br>(61 - 117)    | 1,277<br>(893 - 1,772)   | 1,629<br>(1,138 - 2,259) | 2,004<br>(1,478 - 2,706)  |
| Chronic kidney disease due to diabetes mellitus     | 305<br>(179 - 855)          | 2<br>(1 - 3)             | 3<br>(2 - 5)        | 70<br>(42 - 148)         | 150<br>(81 - 435)        | 80<br>(39 - 258)          |
| Chronic kidney disease due to hypertension          | 1,502<br>(872 - 2,352)      | 4<br>(2 - 8)             | 4<br>(2 - 8)        | 249<br>(126 - 458)       | 456<br>(225 - 740)       | 788<br>(469 - 1,185)      |
| Chronic kidney disease due to glomerulonephritis    | 939<br>(573 - 1,323)        | 25<br>(15 - 37)          | 37<br>(25 - 51)     | 374<br>(211 - 556)       | 255<br>(149 - 390)       | 248<br>(145 - 395)        |
| Chronic kidney disease due to other causes          | 2,313<br>(1,521 - 3,406)    | 33<br>(17 - 60)          | 41<br>(25 - 65)     | 584<br>(324 - 862)       | 768<br>(442 - 1,198)     | 887<br>(498 - 1,489)      |
| Urinary diseases and male infertility               | 1,220<br>(725 - 1,677)      | 21<br>(8 - 37)           | 16<br>(8 - 23)      | 296<br>(148 - 434)       | 373<br>(218 - 530)       | 514<br>(281 - 747)        |
| Interstitial nephritis and urinary tract infections | 539<br>(321 - 753)          | 10<br>(4 - 20)           | 6<br>(3 - 10)       | 139<br>(66 - 212)        | 157<br>(91 - 230)        | 227<br>(120 - 345)        |
| Urolithiasis                                        | 130<br>(54 - 199)           | --                       | 1<br>(0 - 2)        | 27<br>(10 - 49)          | 49<br>(20 - 77)          | 54<br>(19 - 88)           |
| Other urinary diseases                              | 550<br>(281 - 799)          | 11<br>(4 - 21)           | 9<br>(3 - 14)       | 129<br>(60 - 198)        | 168<br>(82 - 255)        | 234<br>(112 - 360)        |
| Gynecological diseases                              | 32<br>(22 - 46)             | --                       | --                  | 13<br>(8 - 23)           | 6<br>(4 - 10)            | 13<br>(7 - 20)            |
| Uterine fibroids                                    | 7<br>(5 - 11)               | --                       | --                  | 2<br>(1 - 4)             | 2<br>(1 - 3)             | 4<br>(2 - 6)              |
| Polycystic ovarian syndrome                         | 1<br>(1 - 2)                | --                       | --                  | 1<br>(1 - 2)             | 0<br>(0 - 0)             | --                        |
| Endometriosis                                       | 2<br>(1 - 4)                | --                       | --                  | 2<br>(1 - 4)             | 0<br>(0 - 0)             | --                        |
| Genital prolapse                                    | 6<br>(4 - 9)                | --                       | --                  | 2<br>(1 - 3)             | 1<br>(1 - 2)             | 3<br>(2 - 5)              |
| Other gynecological diseases                        | 15<br>(10 - 22)             | --                       | --                  | 6<br>(4 - 11)            | 3<br>(2 - 5)             | 6<br>(3 - 9)              |
| Hemoglobinopathies and hemolytic anemias            | 505<br>(307 - 721)          | 63<br>(34 - 106)         | 64<br>(38 - 101)    | 197<br>(117 - 292)       | 107<br>(63 - 163)        | 74<br>(39 - 112)          |
| Thalassemias                                        | 224<br>(137 - 326)          | 43<br>(23 - 74)          | 51<br>(31 - 80)     | 113<br>(67 - 169)        | 16<br>(9 - 24)           | 1<br>(1 - 2)              |
| Sickle cell disorders                               | 0<br>(0 - 0)                | 0<br>(0 - 0)             | 0<br>(0 - 0)        | 0<br>(0 - 0)             | 0<br>(0 - 0)             | 0<br>(0 - 0)              |
| G6PD deficiency                                     | 20<br>(12 - 29)             | 2<br>(1 - 3)             | 2<br>(1 - 3)        | 11<br>(6 - 16)           | 5<br>(3 - 7)             | 1<br>(0 - 1)              |
| Other hemoglobinopathies and hemolytic anemias      | 261<br>(156 - 373)          | 18<br>(10 - 30)          | 11<br>(7 - 18)      | 73<br>(42 - 108)         | 87<br>(51 - 132)         | 72<br>(38 - 109)          |
| Endocrine, metabolic, blood, and immune disorders   | 1,245<br>(897 - 1,983)      | 117<br>(64 - 191)        | 39<br>(21 - 64)     | 323<br>(209 - 486)       | 311<br>(214 - 484)       | 454<br>(291 - 880)        |
| Musculoskeletal disorders                           | 742<br>(533 - 1,008)        | --                       | 37<br>(24 - 51)     | 336<br>(206 - 471)       | 145<br>(101 - 209)       | 223<br>(150 - 356)        |
| Rheumatoid arthritis                                | 165<br>(106 - 275)          | --                       | 2<br>(1 - 3)        | 8<br>(5 - 13)            | 35<br>(21 - 61)          | 120<br>(73 - 207)         |
| Other musculoskeletal disorders                     | 578<br>(412 - 774)          | --                       | 35<br>(23 - 49)     | 329<br>(201 - 459)       | 110<br>(76 - 154)        | 104<br>(64 - 167)         |
| Other non-communicable diseases                     | 6,030<br>(4,307 - 7,665)    | 4,335<br>(2,860 - 5,874) | 388<br>(230 - 519)  | 514<br>(352 - 704)       | 214<br>(153 - 294)       | 579<br>(383 - 843)        |
| Congenital anomalies                                | 4,930<br>(3,334 - 6,483)    | 4,035<br>(2,576 - 5,467) | 362<br>(208 - 494)  | 405<br>(259 - 566)       | 62<br>(42 - 99)          | 65<br>(43 - 142)          |
| Neural tube defects                                 | 184<br>(54 - 458)           | 177<br>(49 - 449)        | 2<br>(1 - 4)        | 3<br>(2 - 5)             | 1<br>(0 - 1)             | 1<br>(0 - 1)              |
| Congenital heart anomalies                          | 2,981<br>(1,989 - 4,042)    | 2,348<br>(1,499 - 3,340) | 273<br>(158 - 379)  | 303<br>(191 - 427)       | 19<br>(12 - 30)          | 37<br>(23 - 80)           |
| Cleft lip and cleft palate                          | 35<br>(5 - 145)             | 35<br>(5 - 145)          | --                  | --                       | --                       | --                        |
| Down syndrome                                       | 125<br>(54 - 223)           | 88<br>(31 - 177)         | 17<br>(7 - 30)      | 16<br>(8 - 26)           | 4<br>(2 - 7)             | 0<br>(0 - 1)              |
| Chromosomal unbalanced rearrangements               | 71<br>(35 - 142)            | 56<br>(22 - 126)         | 1<br>(1 - 3)        | 8<br>(4 - 14)            | 3<br>(2 - 6)             | 2<br>(1 - 6)              |
| Other congenital anomalies                          | 1,534<br>(946 - 2,182)      | 1,331<br>(771 - 1,963)   | 69<br>(34 - 108)    | 73<br>(44 - 108)         | 36<br>(24 - 58)          | 25<br>(15 - 52)           |
| Skin and subcutaneous diseases                      | 889<br>(638 - 1,187)        | 88<br>(50 - 151)         | 25<br>(18 - 35)     | 109<br>(75 - 151)        | 152<br>(105 - 213)       | 514<br>(306 - 756)        |
| Cellulitis                                          | 99<br>(53 - 147)            | 18<br>(8 - 37)           | 4<br>(2 - 7)        | 21<br>(11 - 32)          | 22<br>(11 - 36)          | 33<br>(15 - 56)           |
| Pyoderma                                            | 220<br>(162 - 288)          | 65<br>(36 - 112)         | 14<br>(9 - 20)      | 41<br>(26 - 57)          | 44<br>(28 - 66)          | 57<br>(30 - 95)           |



Web Table 31- Philippines deaths with 95% UI by age, sex, and cause in 2013

| Cause                                           | Females, All Ages          | Females, 0-4 Years     | Females, 5-14 Years    | Females, 15-49 Years     | Females, 50-69 Years     | Females, 70-80 Years     |
|-------------------------------------------------|----------------------------|------------------------|------------------------|--------------------------|--------------------------|--------------------------|
| Decubitus ulcer                                 | 529<br>(342 - 767)         | 1<br>(0 - 1)           | 3<br>(2 - 5)           | 32<br>(21 - 45)          | 76<br>(49 - 110)         | 418<br>(249 - 630)       |
| Other skin and subcutaneous diseases            | 41<br>(27 - 69)            | 5<br>(2 - 12)          | 4<br>(2 - 6)           | 16<br>(10 - 28)          | 9<br>(6 - 18)            | 6<br>(3 - 10)            |
| Sudden infant death syndrome                    | 212<br>(41 - 574)          | 212<br>(41 - 574)      | --                     | --                       | --                       | --                       |
| Injuries                                        | 10,246<br>(7,811 - 13,264) | 1,330<br>(901 - 1,789) | 1,050<br>(809 - 1,302) | 3,718<br>(2,663 - 5,061) | 2,289<br>(1,679 - 3,359) | 1,858<br>(1,303 - 2,445) |
| Transport injuries                              | 2,447<br>(1,814 - 3,123)   | 143<br>(59 - 227)      | 285<br>(172 - 402)     | 927<br>(614 - 1,283)     | 642<br>(456 - 857)       | 450<br>(330 - 619)       |
| Road injuries                                   | 2,284<br>(1,688 - 2,914)   | 132<br>(55 - 211)      | 275<br>(168 - 387)     | 884<br>(590 - 1,220)     | 598<br>(428 - 796)       | 394<br>(287 - 550)       |
| Pedestrian road injuries                        | 718<br>(500 - 940)         | 57<br>(21 - 102)       | 110<br>(63 - 166)      | 163<br>(96 - 238)        | 200<br>(131 - 289)       | 189<br>(127 - 272)       |
| Cyclist road injuries                           | 148<br>(102 - 203)         | 9<br>(3 - 18)          | 19<br>(10 - 31)        | 58<br>(36 - 88)          | 39<br>(26 - 60)          | 23<br>(14 - 37)          |
| Motorcyclist road injuries                      | 131<br>(82 - 211)          | 6<br>(2 - 12)          | 11<br>(6 - 21)         | 75<br>(42 - 120)         | 28<br>(16 - 51)          | 11<br>(6 - 22)           |
| Motor vehicle road injuries                     | 1,266<br>(884 - 1,677)     | 60<br>(23 - 103)       | 131<br>(74 - 197)      | 581<br>(372 - 809)       | 326<br>(224 - 446)       | 168<br>(115 - 241)       |
| Other road injuries                             | 21<br>(13 - 40)            | 1<br>(1 - 3)           | 3<br>(1 - 7)           | 8<br>(4 - 16)            | 5<br>(3 - 11)            | 4<br>(2 - 8)             |
| Other transport injuries                        | 163<br>(103 - 221)         | 10<br>(3 - 21)         | 10<br>(4 - 18)         | 43<br>(23 - 64)          | 44<br>(24 - 66)          | 56<br>(35 - 89)          |
| Unintentional injuries                          | 3,815<br>(2,666 - 4,929)   | 925<br>(566 - 1,340)   | 567<br>(406 - 758)     | 804<br>(530 - 1,112)     | 549<br>(311 - 775)       | 969<br>(491 - 1,378)     |
| Falls                                           | 631<br>(271 - 896)         | 54<br>(21 - 92)        | 30<br>(17 - 43)        | 78<br>(38 - 114)         | 132<br>(63 - 192)        | 337<br>(117 - 525)       |
| Drowning                                        | 1,386<br>(993 - 2,003)     | 426<br>(226 - 777)     | 398<br>(270 - 587)     | 345<br>(234 - 528)       | 133<br>(88 - 199)        | 83<br>(56 - 122)         |
| Fire, heat, and hot substances                  | 210<br>(62 - 377)          | 47<br>(10 - 102)       | 19<br>(5 - 37)         | 51<br>(15 - 98)          | 29<br>(8 - 55)           | 64<br>(15 - 124)         |
| Poisonings                                      | 50<br>(28 - 70)            | 3<br>(1 - 5)           | 5<br>(2 - 7)           | 24<br>(15 - 37)          | 10<br>(5 - 15)           | 9<br>(4 - 13)            |
| Exposure to mechanical forces                   | 128<br>(92 - 187)          | 25<br>(11 - 63)        | 17<br>(11 - 25)        | 42<br>(29 - 59)          | 28<br>(19 - 39)          | 17<br>(10 - 23)          |
| Unintentional firearm injuries                  | 39<br>(27 - 51)            | 3<br>(2 - 5)           | 3<br>(2 - 6)           | 15<br>(10 - 21)          | 11<br>(7 - 16)           | 6<br>(3 - 10)            |
| Unintentional suffocation                       | 32<br>(17 - 87)            | 16<br>(4 - 54)         | 4<br>(2 - 7)           | 5<br>(3 - 13)            | 4<br>(2 - 9)             | 3<br>(2 - 7)             |
| Other exposure to mechanical forces             | 58<br>(35 - 75)            | 6<br>(3 - 10)          | 10<br>(6 - 15)         | 22<br>(14 - 30)          | 13<br>(7 - 18)           | 7<br>(3 - 11)            |
| Adverse effects of medical treatment            | 415<br>(159 - 684)         | 33<br>(13 - 59)        | 10<br>(4 - 17)         | 79<br>(32 - 131)         | 89<br>(27 - 158)         | 204<br>(71 - 355)        |
| Animal contact                                  | 125<br>(45 - 203)          | 19<br>(5 - 37)         | 30<br>(10 - 51)        | 31<br>(11 - 54)          | 28<br>(10 - 48)          | 17<br>(5 - 30)           |
| Venomous animal contact                         | 105<br>(36 - 167)          | 15<br>(4 - 30)         | 26<br>(8 - 46)         | 27<br>(9 - 47)           | 24<br>(8 - 41)           | 13<br>(4 - 23)           |
| Non-venomous animal contact                     | 20<br>(6 - 40)             | 3<br>(1 - 8)           | 3<br>(1 - 8)           | 5<br>(1 - 10)            | 5<br>(2 - 10)            | 4<br>(1 - 8)             |
| Foreign body                                    | 638<br>(327 - 943)         | 288<br>(139 - 502)     | 33<br>(17 - 51)        | 74<br>(35 - 113)         | 54<br>(25 - 85)          | 190<br>(96 - 295)        |
| Pulmonary aspiration and foreign body in airway | 632<br>(320 - 937)         | 287<br>(138 - 501)     | 32<br>(16 - 50)        | 71<br>(33 - 110)         | 53<br>(24 - 84)          | 190<br>(95 - 294)        |
| Foreign body in other body part                 | 6<br>(4 - 10)              | 1<br>(0 - 2)           | 1<br>(1 - 2)           | 3<br>(2 - 5)             | 1<br>(0 - 1)             | 1<br>(0 - 1)             |
| Other unintentional injuries                    | 231<br>(28 - 343)          | 31<br>(2 - 73)         | 26<br>(3 - 52)         | 80<br>(12 - 139)         | 46<br>(4 - 82)           | 49<br>(2 - 86)           |
| Self-harm and interpersonal violence            | 1,877<br>(1,240 - 2,565)   | 65<br>(26 - 135)       | 97<br>(60 - 150)       | 1,210<br>(745 - 1,757)   | 353<br>(244 - 518)       | 151<br>(99 - 276)        |
| Self-harm                                       | 897<br>(628 - 1,579)       | --                     | 17<br>(9 - 27)         | 612<br>(420 - 1,001)     | 182<br>(124 - 360)       | 86<br>(56 - 219)         |
| Interpersonal violence                          | 980<br>(458 - 1,443)       | 65<br>(26 - 135)       | 80<br>(45 - 132)       | 598<br>(230 - 993)       | 171<br>(88 - 272)        | 65<br>(32 - 116)         |
| Assault by firearm                              | 390<br>(148 - 624)         | 26<br>(8 - 55)         | 27<br>(13 - 49)        | 258<br>(78 - 449)        | 65<br>(25 - 114)         | 15<br>(6 - 31)           |
| Assault by sharp object                         | 490<br>(226 - 757)         | 25<br>(9 - 56)         | 37<br>(18 - 66)        | 297<br>(108 - 512)       | 93<br>(46 - 156)         | 39<br>(18 - 70)          |
| Assault by other means                          | 99<br>(39 - 155)           | 15<br>(5 - 32)         | 16<br>(8 - 28)         | 43<br>(12 - 81)          | 13<br>(5 - 23)           | 11<br>(4 - 22)           |
| Forces of nature, war, and legal intervention   | 2,108<br>(1,066 - 4,780)   | 197<br>(176 - 239)     | 100<br>(61 - 206)      | 777<br>(343 - 1,845)     | 746<br>(331 - 1,804)     | 288<br>(120 - 719)       |
| Exposure to forces of nature                    | 2,108<br>(1,066 - 4,780)   | 197<br>(176 - 239)     | 100<br>(61 - 206)      | 777<br>(343 - 1,845)     | 746<br>(331 - 1,804)     | 288<br>(120 - 719)       |

Web Table 31- Poland deaths with 95% UI by age, sex, and cause in 2013

| Cause                                                              | Both Sexes, All Ages           | Both Sexes, 0-4 Years    | Both Sexes, 5-14 Years | Both Sexes, 15-49 Years     | Both Sexes, 50-69 Years        | Both Sexes, 70-80 Years        |
|--------------------------------------------------------------------|--------------------------------|--------------------------|------------------------|-----------------------------|--------------------------------|--------------------------------|
| All causes                                                         | 398,398<br>(384,695 - 412,916) | 2,076<br>(1,439 - 2,976) | 426<br>(344 - 532)     | 25,976<br>(24,713 - 27,390) | 113,037<br>(108,026 - 118,204) | 256,883<br>(248,837 - 264,984) |
| Communicable, maternal, neonatal, and nutritional diseases         | 13,990<br>(11,976 - 15,781)    | 1,046<br>(729 - 1,495)   | 38<br>(28 - 52)        | 1,070<br>(929 - 1,201)      | 2,926<br>(2,388 - 3,347)       | 8,910<br>(7,401 - 10,678)      |
| HIV/AIDS and tuberculosis                                          | 1,060<br>(928 - 1,605)         | 0<br>(0 - 0)             | 0<br>(0 - 0)           | 282<br>(243 - 361)          | 471<br>(399 - 698)             | 306<br>(245 - 569)             |
| Tuberculosis                                                       | 834<br>(714 - 1,394)           | 0<br>(0 - 0)             | 0<br>(0 - 0)           | 145<br>(122 - 222)          | 393<br>(329 - 618)             | 295<br>(235 - 553)             |
| HIV/AIDS                                                           | 226<br>(177 - 281)             | 0<br>(0 - 0)             | 0<br>(0 - 0)           | 137<br>(106 - 171)          | 78<br>(53 - 105)               | 11<br>(6 - 17)                 |
| HIV/AIDS resulting in mycobacterial infection                      | 13<br>(10 - 18)                | 0<br>(0 - 0)             | 0<br>(0 - 0)           | 8<br>(6 - 11)               | 5<br>(3 - 7)                   | 1<br>(0 - 1)                   |
| HIV/AIDS resulting in other diseases                               | 212<br>(167 - 264)             | 0<br>(0 - 0)             | 0<br>(0 - 0)           | 129<br>(100 - 161)          | 73<br>(50 - 98)                | 10<br>(6 - 16)                 |
| Diarrrhea, lower respiratory, and other common infectious diseases | 11,273<br>(9,167 - 13,082)     | 129<br>(84 - 192)        | 32<br>(23 - 45)        | 683<br>(529 - 811)          | 2,268<br>(1,658 - 2,694)       | 8,160<br>(6,633 - 9,911)       |
| Diarrheal diseases                                                 | 90<br>(73 - 113)               | 8<br>(5 - 13)            | 0<br>(0 - 1)           | 6<br>(5 - 7)                | 18<br>(14 - 22)                | 57<br>(41 - 79)                |
| Intestinal infectious diseases                                     | 64<br>(20 - 150)               | 7<br>(2 - 17)            | 6<br>(2 - 14)          | 24<br>(7 - 64)              | 17<br>(5 - 42)                 | 10<br>(3 - 23)                 |
| Typhoid fever                                                      | 47<br>(13 - 113)               | 5<br>(1 - 12)            | 5<br>(1 - 11)          | 18<br>(4 - 50)              | 13<br>(3 - 33)                 | 7<br>(2 - 18)                  |
| Paratyphoid fever                                                  | 13<br>(4 - 33)                 | 2<br>(0 - 4)             | 2<br>(0 - 4)           | 5<br>(1 - 14)               | 3<br>(1 - 8)                   | 2<br>(0 - 5)                   |
| Other intestinal infectious diseases                               | 4<br>(1 - 10)                  | 1<br>(0 - 4)             | 0<br>(0 - 1)           | 1<br>(0 - 5)                | 1<br>(0 - 4)                   | 1<br>(0 - 4)                   |
| Lower respiratory infections                                       | 10,752<br>(8,618 - 12,526)     | 81<br>(50 - 126)         | 16<br>(11 - 23)        | 568<br>(408 - 690)          | 2,096<br>(1,493 - 2,513)       | 7,990<br>(6,446 - 9,744)       |
| Upper respiratory infections                                       | 11<br>(4 - 25)                 | 0<br>(0 - 0)             | 0<br>(0 - 0)           | 1<br>(0 - 3)                | 4<br>(1 - 10)                  | 6<br>(1 - 20)                  |
| Otitis media                                                       | 5<br>(5 - 6)                   | 1<br>(1 - 2)             | 0<br>(0 - 0)           | 2<br>(1 - 2)                | 1<br>(1 - 2)                   | 1<br>(1 - 2)                   |
| Meningitis                                                         | 190<br>(169 - 213)             | 19<br>(12 - 30)          | 3<br>(2 - 4)           | 41<br>(35 - 48)             | 78<br>(66 - 90)                | 49<br>(41 - 59)                |
| Pneumococcal meningitis                                            | 49<br>(36 - 63)                | 3<br>(1 - 6)             | 1<br>(0 - 1)           | 12<br>(7 - 17)              | 22<br>(12 - 33)                | 12<br>(8 - 19)                 |
| H influenzae type B meningitis                                     | 23<br>(16 - 30)                | 5<br>(3 - 10)            | 1<br>(0 - 1)           | 4<br>(2 - 6)                | 8<br>(4 - 13)                  | 5<br>(3 - 8)                   |
| Meningococcal meningitis                                           | 34<br>(24 - 43)                | 4<br>(2 - 7)             | 1<br>(0 - 1)           | 7<br>(4 - 10)               | 13<br>(7 - 20)                 | 9<br>(6 - 12)                  |
| Other meningitis                                                   | 83<br>(66 - 102)               | 6<br>(4 - 11)            | 1<br>(1 - 2)           | 18<br>(13 - 24)             | 35<br>(24 - 47)                | 23<br>(17 - 29)                |
| Encephalitis                                                       | 119<br>(89 - 161)              | 11<br>(6 - 21)           | 5<br>(3 - 9)           | 34<br>(23 - 48)             | 48<br>(32 - 64)                | 21<br>(13 - 28)                |
| Diphtheria                                                         | 1<br>(0 - 3)                   | 0<br>(0 - 1)             | 0<br>(0 - 0)           | 0<br>(0 - 1)                | 0<br>(0 - 2)                   | --                             |
| Whooping cough                                                     | 3<br>(2 - 4)                   | 0<br>(0 - 1)             | 0<br>(0 - 0)           | 2<br>(1 - 2)                | 1<br>(0 - 1)                   | --                             |
| Tetanus                                                            | 10<br>(7 - 20)                 | 0<br>(0 - 0)             | 0<br>(0 - 0)           | 2<br>(1 - 2)                | 3<br>(2 - 6)                   | 5<br>(2 - 13)                  |
| Measles                                                            | 0<br>(0 - 0)                   | 0<br>(0 - 0)             | 0<br>(0 - 0)           | 0<br>(0 - 0)                | 0<br>(0 - 0)                   | --                             |
| Varicella and herpes zoster                                        | 28<br>(7 - 90)                 | 1<br>(0 - 4)             | 0<br>(0 - 1)           | 3<br>(1 - 7)                | 3<br>(1 - 8)                   | 20<br>(1 - 82)                 |
| Neglected tropical diseases and malaria                            | 21<br>(19 - 24)                | 1<br>(1 - 2)             | 1<br>(1 - 1)           | 7<br>(6 - 8)                | 7<br>(6 - 8)                   | 5<br>(4 - 6)                   |
| Cysticercosis                                                      | 0<br>(0 - 0)                   | 0<br>(0 - 0)             | 0<br>(0 - 0)           | 0<br>(0 - 0)                | 0<br>(0 - 0)                   | 0<br>(0 - 0)                   |
| Cystic echinococcosis                                              | 5<br>(4 - 5)                   | 0<br>(0 - 0)             | 0<br>(0 - 0)           | 1<br>(1 - 1)                | 2<br>(2 - 2)                   | 2<br>(1 - 2)                   |
| Dengue                                                             | 4<br>(3 - 7)                   | 0<br>(0 - 0)             | 0<br>(0 - 1)           | 2<br>(2 - 3)                | 1<br>(1 - 2)                   | 0<br>(0 - 1)                   |
| Rabies                                                             | 4<br>(3 - 4)                   | 0<br>(0 - 0)             | 0<br>(0 - 0)           | 2<br>(1 - 2)                | 1<br>(1 - 1)                   | 0<br>(0 - 0)                   |
| Other neglected tropical diseases                                  | 9<br>(7 - 10)                  | 1<br>(0 - 2)             | 0<br>(0 - 0)           | 2<br>(2 - 2)                | 3<br>(2 - 4)                   | 3<br>(2 - 4)                   |
| Maternal disorders                                                 | 20<br>(16 - 26)                | --                       | 0<br>(0 - 0)           | 20<br>(16 - 26)             | --                             | --                             |
| Maternal hemorrhage                                                | 3<br>(2 - 5)                   | --                       | 0<br>(0 - 0)           | 3<br>(2 - 5)                | --                             | --                             |
| Maternal sepsis and other maternal infections                      | 2<br>(1 - 3)                   | --                       | 0<br>(0 - 0)           | 2<br>(1 - 3)                | --                             | --                             |
| Maternal hypertensive disorders                                    | 2<br>(1 - 3)                   | --                       | 0<br>(0 - 0)           | 2<br>(1 - 3)                | --                             | --                             |
| Maternal obstructed labor                                          | 2<br>(1 - 3)                   | --                       | 0<br>(0 - 0)           | 2<br>(1 - 3)                | --                             | --                             |
| Maternal abortive outcome                                          | 4<br>(3 - 5)                   | --                       | 0<br>(0 - 0)           | 4<br>(3 - 5)                | --                             | --                             |
| Indirect maternal deaths                                           | 1<br>(1 - 2)                   | --                       | 0<br>(0 - 0)           | 1<br>(1 - 2)                | --                             | --                             |

Web Table 31- Poland deaths with 95% UI by age, sex, and cause in 2013

| Cause                                                            | Both Sexes, All Ages           | Both Sexes, 0-4 Years | Both Sexes, 5-14 Years | Both Sexes, 15-49 Years     | Both Sexes, 50-69 Years       | Both Sexes, 70-80 Years        |
|------------------------------------------------------------------|--------------------------------|-----------------------|------------------------|-----------------------------|-------------------------------|--------------------------------|
| Late maternal deaths                                             | 2<br>(1 - 4)                   | --                    | 0<br>(0 - 0)           | 2<br>(1 - 4)                | --                            | --                             |
| Maternal deaths aggravated by HIV/AIDS                           | 0<br>(0 - 0)                   | --                    | --                     | 0<br>(0 - 0)                | --                            | --                             |
| Other maternal disorders                                         | 3<br>(2 - 4)                   | --                    | 0<br>(0 - 0)           | 3<br>(2 - 4)                | --                            | --                             |
| Neonatal disorders                                               | 893<br>(616 - 1,264)           | 893<br>(616 - 1,264)  | --                     | --                          | --                            | --                             |
| Neonatal preterm birth complications                             | 558<br>(353 - 835)             | 558<br>(353 - 835)    | --                     | --                          | --                            | --                             |
| Neonatal encephalopathy due to birth asphyxia and trauma         | 125<br>(75 - 192)              | 125<br>(75 - 192)     | --                     | --                          | --                            | --                             |
| Neonatal sepsis and other neonatal infections                    | 113<br>(59 - 233)              | 113<br>(59 - 233)     | --                     | --                          | --                            | --                             |
| Hemolytic disease and other neonatal jaundice                    | 3<br>(1 - 7)                   | 3<br>(1 - 7)          | --                     | --                          | --                            | --                             |
| Other neonatal disorders                                         | 93<br>(57 - 147)               | 93<br>(57 - 147)      | --                     | --                          | --                            | --                             |
| Nutritional deficiencies                                         | 514<br>(423 - 718)             | 2<br>(1 - 3)          | 1<br>(1 - 1)           | 48<br>(37 - 75)             | 104<br>(82 - 165)             | 360<br>(284 - 474)             |
| Protein-energy malnutrition                                      | 83<br>(36 - 134)               | 1<br>(0 - 2)          | 0<br>(0 - 0)           | 10<br>(5 - 16)              | 32<br>(14 - 50)               | 40<br>(15 - 73)                |
| Iodine deficiency                                                | 14<br>(2 - 54)                 | 0<br>(0 - 0)          | 0<br>(0 - 0)           | 1<br>(0 - 4)                | 4<br>(0 - 15)                 | 9<br>(0 - 46)                  |
| Iron-deficiency anemia                                           | 376<br>(288 - 552)             | 1<br>(0 - 1)          | 0<br>(0 - 0)           | 33<br>(24 - 57)             | 61<br>(40 - 111)              | 280<br>(206 - 372)             |
| Other nutritional deficiencies                                   | 42<br>(23 - 94)                | 0<br>(0 - 1)          | 0<br>(0 - 0)           | 3<br>(2 - 7)                | 7<br>(4 - 18)                 | 30<br>(15 - 70)                |
| Other communicable, maternal, neonatal, and nutritional diseases | 209<br>(167 - 248)             | 21<br>(7 - 43)        | 3<br>(2 - 5)           | 29<br>(24 - 36)             | 77<br>(64 - 94)               | 79<br>(55 - 98)                |
| Sexually transmitted diseases excluding HIV                      | 33<br>(17 - 56)                | 16<br>(3 - 37)        | 1<br>(0 - 3)           | 3<br>(2 - 4)                | 6<br>(3 - 11)                 | 7<br>(4 - 11)                  |
| Syphilis                                                         | 27<br>(12 - 50)                | 16<br>(3 - 37)        | 1<br>(0 - 3)           | 1<br>(1 - 2)                | 4<br>(2 - 7)                  | 5<br>(3 - 9)                   |
| Chlamydial infection                                             | 1<br>(1 - 2)                   | --                    | 0<br>(0 - 0)           | 0<br>(0 - 1)                | 1<br>(0 - 1)                  | 0<br>(0 - 1)                   |
| Gonococcal infection                                             | 2<br>(2 - 4)                   | --                    | 0<br>(0 - 0)           | 1<br>(0 - 1)                | 1<br>(1 - 2)                  | 1<br>(0 - 1)                   |
| Other sexually transmitted diseases                              | 2<br>(1 - 3)                   | --                    | 0<br>(0 - 0)           | 1<br>(0 - 1)                | 1<br>(0 - 1)                  | 0<br>(0 - 1)                   |
| Hepatitis                                                        | 40<br>(33 - 47)                | 0<br>(0 - 0)          | 0<br>(0 - 0)           | 6<br>(5 - 8)                | 17<br>(13 - 22)               | 16<br>(12 - 22)                |
| Acute hepatitis A                                                | 6<br>(2 - 12)                  | 0<br>(0 - 0)          | 0<br>(0 - 0)           | 2<br>(1 - 4)                | 2<br>(1 - 5)                  | 1<br>(0 - 3)                   |
| Acute hepatitis B                                                | 32<br>(24 - 41)                | 0<br>(0 - 0)          | 0<br>(0 - 0)           | 3<br>(2 - 5)                | 14<br>(10 - 19)               | 15<br>(10 - 20)                |
| Acute hepatitis C                                                | 1<br>(0 - 3)                   | --                    | 0<br>(0 - 0)           | 0<br>(0 - 1)                | 1<br>(0 - 2)                  | 1<br>(0 - 1)                   |
| Other infectious diseases                                        | 137<br>(96 - 164)              | 4<br>(3 - 7)          | 2<br>(1 - 2)           | 21<br>(15 - 26)             | 54<br>(41 - 69)               | 56<br>(32 - 74)                |
| Non-communicable diseases                                        | 360,117<br>(347,181 - 372,665) | 913<br>(626 - 1,297)  | 208<br>(165 - 264)     | 15,591<br>(14,731 - 16,586) | 101,673<br>(97,305 - 106,445) | 241,732<br>(233,698 - 249,435) |
| Neoplasms                                                        | 96,534<br>(89,748 - 102,051)   | 53<br>(33 - 82)       | 109<br>(85 - 142)      | 5,421<br>(5,069 - 5,817)    | 44,535<br>(41,407 - 47,262)   | 46,416<br>(42,380 - 49,286)    |
| Esophageal cancer                                                | 1,810<br>(1,615 - 2,138)       | --                    | --                     | 91<br>(72 - 122)            | 1,052<br>(902 - 1,265)        | 667<br>(580 - 792)             |
| Stomach cancer                                                   | 6,723<br>(6,034 - 7,478)       | --                    | --                     | 298<br>(255 - 348)          | 2,868<br>(2,546 - 3,204)      | 3,557<br>(3,026 - 4,109)       |
| Liver cancer                                                     | 2,638<br>(2,182 - 3,359)       | --                    | 1<br>(1 - 2)           | 111<br>(86 - 143)           | 1,027<br>(815 - 1,317)        | 1,499<br>(1,199 - 1,986)       |
| Liver cancer due to hepatitis B                                  | 409<br>(211 - 664)             | --                    | 0<br>(0 - 1)           | 32<br>(19 - 48)             | 203<br>(91 - 345)             | 174<br>(97 - 286)              |
| Liver cancer due to hepatitis C                                  | 1,261<br>(867 - 1,736)         | --                    | 0<br>(0 - 1)           | 46<br>(32 - 67)             | 493<br>(343 - 686)            | 722<br>(462 - 1,010)           |
| Liver cancer due to alcohol use                                  | 685<br>(468 - 992)             | --                    | --                     | 16<br>(8 - 25)              | 222<br>(144 - 315)            | 447<br>(290 - 681)             |
| Liver cancer due to other causes                                 | 283<br>(185 - 400)             | --                    | 1<br>(0 - 1)           | 17<br>(12 - 24)             | 109<br>(69 - 157)             | 156<br>(95 - 235)              |
| Larynx cancer                                                    | 1,481<br>(1,111 - 1,819)       | --                    | --                     | 81<br>(62 - 121)            | 943<br>(714 - 1,201)          | 457<br>(316 - 555)             |
| Tracheal, bronchus and lung cancer                               | 24,001<br>(21,932 - 25,901)    | --                    | --                     | 771<br>(669 - 878)          | 13,466<br>(12,080 - 14,697)   | 9,763<br>(8,743 - 10,678)      |
| Breast cancer                                                    | 5,710<br>(3,942 - 6,604)       | --                    | --                     | 569<br>(410 - 690)          | 2,850<br>(2,033 - 3,295)      | 2,290<br>(1,485 - 2,756)       |
| Cervical cancer                                                  | 2,170<br>(1,731 - 2,568)       | --                    | --                     | 287<br>(229 - 346)          | 812<br>(854 - 1,295)          | 1,072<br>(615 - 1,023)         |
| Uterine cancer                                                   | 1,278<br>(690 - 1,565)         | --                    | --                     | 31<br>(18 - 41)             | 543<br>(307 - 683)            | 704<br>(349 - 901)             |
| Prostate cancer                                                  | 4,381<br>(3,276 - 5,775)       | --                    | --                     | 13<br>(8 - 19)              | 964<br>(646 - 1,242)          | 3,404<br>(2,519 - 4,693)       |

Web Table 31- Poland deaths with 95% UI by age, sex, and cause in 2013

| Cause                                         | Both Sexes, All Ages           | Both Sexes, 0-4 Years | Both Sexes, 5-14 Years | Both Sexes, 15-49 Years  | Both Sexes, 50-69 Years     | Both Sexes, 70-80 Years        |
|-----------------------------------------------|--------------------------------|-----------------------|------------------------|--------------------------|-----------------------------|--------------------------------|
| Colon and rectum cancer                       | 11,543<br>(10,699 - 12,511)    | --                    | --                     | 404<br>(362 - 450)       | 4,335<br>(4,012 - 4,680)    | 6,804<br>(6,131 - 7,622)       |
| Lip and oral cavity cancer                    | 1,389<br>(1,101 - 1,562)       | --                    | --                     | 120<br>(93 - 145)        | 812<br>(604 - 954)          | 458<br>(385 - 534)             |
| Nasopharynx cancer                            | 271<br>(205 - 333)             | --                    | 0<br>(0 - 1)           | 43<br>(31 - 59)          | 166<br>(120 - 211)          | 62<br>(42 - 85)                |
| Other pharynx cancer                          | 903<br>(676 - 1,077)           | --                    | --                     | 69<br>(53 - 88)          | 663<br>(475 - 804)          | 171<br>(132 - 210)             |
| Gallbladder and biliary tract cancer          | 2,191<br>(1,566 - 2,631)       | --                    | --                     | 50<br>(34 - 62)          | 800<br>(574 - 962)          | 1,342<br>(935 - 1,676)         |
| Pancreatic cancer                             | 5,041<br>(4,659 - 5,429)       | --                    | --                     | 227<br>(198 - 260)       | 2,365<br>(2,170 - 2,565)    | 2,450<br>(2,189 - 2,712)       |
| Malignant skin melanoma                       | 1,258<br>(836 - 1,719)         | --                    | --                     | 181<br>(121 - 269)       | 548<br>(359 - 785)          | 529<br>(337 - 692)             |
| Non-melanoma skin cancer                      | 683<br>(463 - 1,011)           | --                    | --                     | 14<br>(11 - 22)          | 112<br>(79 - 179)           | 557<br>(361 - 828)             |
| Ovarian cancer                                | 2,946<br>(2,488 - 3,386)       | --                    | --                     | 257<br>(209 - 307)       | 1,519<br>(1,266 - 1,803)    | 1,170<br>(875 - 1,411)         |
| Testicular cancer                             | 152<br>(98 - 195)              | --                    | --                     | 92<br>(57 - 125)         | 34<br>(21 - 46)             | 26<br>(17 - 36)                |
| Kidney cancer                                 | 2,846<br>(2,470 - 3,225)       | 1<br>(1 - 2)          | 2<br>(1 - 3)           | 134<br>(109 - 165)       | 1,389<br>(1,186 - 1,605)    | 1,320<br>(1,058 - 1,625)       |
| Bladder cancer                                | 3,101<br>(2,471 - 3,518)       | --                    | --                     | 51<br>(41 - 62)          | 1,093<br>(874 - 1,259)      | 1,957<br>(1,523 - 2,285)       |
| Brain and nervous system cancer               | 3,034<br>(2,444 - 3,432)       | 12<br>(7 - 21)        | 34<br>(24 - 48)        | 458<br>(393 - 558)       | 1,545<br>(1,308 - 1,853)    | 984<br>(583 - 1,249)           |
| Thyroid cancer                                | 368<br>(269 - 437)             | --                    | 0<br>(0 - 0)           | 18<br>(14 - 22)          | 144<br>(109 - 170)          | 206<br>(143 - 261)             |
| Mesothelioma                                  | 252<br>(188 - 339)             | --                    | --                     | 20<br>(14 - 30)          | 147<br>(106 - 215)          | 85<br>(57 - 114)               |
| Hodgkin lymphoma                              | 285<br>(239 - 458)             | 0<br>(0 - 0)          | 2<br>(1 - 3)           | 97<br>(79 - 143)         | 116<br>(88 - 193)           | 70<br>(55 - 111)               |
| Non-Hodgkin lymphoma                          | 1,825<br>(1,238 - 2,308)       | 3<br>(1 - 5)          | 9<br>(5 - 15)          | 178<br>(123 - 232)       | 776<br>(548 - 1,064)        | 858<br>(524 - 1,092)           |
| Multiple myeloma                              | 1,149<br>(744 - 1,531)         | --                    | --                     | 44<br>(28 - 62)          | 506<br>(330 - 692)          | 599<br>(363 - 821)             |
| Leukemia                                      | 2,660<br>(2,380 - 2,903)       | 13<br>(7 - 22)        | 34<br>(25 - 45)        | 267<br>(236 - 298)       | 931<br>(825 - 1,037)        | 1,414<br>(1,229 - 1,595)       |
| Other neoplasms                               | 4,446<br>(3,522 - 5,093)       | 23<br>(14 - 37)       | 26<br>(19 - 35)        | 444<br>(382 - 549)       | 1,750<br>(1,490 - 2,087)    | 2,203<br>(1,482 - 2,696)       |
| Cardiovascular diseases                       | 178,204<br>(169,607 - 190,087) | 16<br>(11 - 23)       | 14<br>(10 - 18)        | 4,575<br>(4,182 - 5,001) | 36,946<br>(34,466 - 40,697) | 136,652<br>(129,778 - 145,020) |
| Rheumatic heart disease                       | 1,429<br>(1,025 - 1,745)       | 0<br>(0 - 0)          | 1<br>(1 - 1)           | 93<br>(67 - 166)         | 422<br>(311 - 791)          | 913<br>(438 - 1,191)           |
| Ischemic heart disease                        | 76,042<br>(69,198 - 90,496)    | 1<br>(0 - 1)          | 1<br>(1 - 2)           | 2,201<br>(1,891 - 2,865) | 18,889<br>(16,974 - 23,129) | 54,950<br>(49,111 - 65,561)    |
| Cerebrovascular disease                       | 68,738<br>(62,031 - 79,522)    | 4<br>(3 - 7)          | 5<br>(4 - 7)           | 1,238<br>(976 - 1,480)   | 10,990<br>(9,581 - 12,838)  | 56,499<br>(50,730 - 66,120)    |
| Ischemic stroke                               | 53,520<br>(46,790 - 60,372)    | 1<br>(0 - 1)          | 1<br>(1 - 2)           | 254<br>(187 - 331)       | 5,599<br>(4,615 - 6,743)    | 47,665<br>(41,198 - 53,620)    |
| Hemorrhagic stroke                            | 15,218<br>(11,608 - 22,471)    | 4<br>(2 - 5)          | 4<br>(3 - 5)           | 984<br>(761 - 1,175)     | 5,391<br>(4,433 - 6,646)    | 8,835<br>(5,816 - 14,905)      |
| Hypertensive heart disease                    | 11,213<br>(5,409 - 16,241)     | 0<br>(0 - 0)          | 0<br>(0 - 1)           | 159<br>(98 - 216)        | 1,513<br>(999 - 1,977)      | 9,540<br>(4,163 - 14,308)      |
| Cardiomyopathy and myocarditis                | 9,306<br>(7,725 - 12,362)      | 7<br>(5 - 11)         | 4<br>(3 - 6)           | 445<br>(299 - 544)       | 1,658<br>(1,264 - 2,029)    | 7,192<br>(5,697 - 9,991)       |
| Atrial fibrillation and flutter               | 1,402<br>(1,119 - 1,756)       | --                    | --                     | 11<br>(8 - 14)           | 174<br>(141 - 208)          | 1,217<br>(949 - 1,559)         |
| Aortic aneurysm                               | 2,094<br>(1,701 - 2,489)       | --                    | --                     | 100<br>(73 - 120)        | 761<br>(617 - 899)          | 1,233<br>(989 - 1,533)         |
| Peripheral vascular disease                   | 1,511<br>(1,254 - 1,808)       | --                    | --                     | 13<br>(10 - 18)          | 378<br>(308 - 461)          | 1,120<br>(895 - 1,376)         |
| Endocarditis                                  | 353<br>(236 - 449)             | 2<br>(1 - 3)          | 1<br>(0 - 1)           | 67<br>(41 - 93)          | 126<br>(83 - 164)           | 157<br>(100 - 203)             |
| Other cardiovascular and circulatory diseases | 6,116<br>(4,123 - 7,277)       | 1<br>(1 - 2)          | 1<br>(1 - 1)           | 248<br>(151 - 305)       | 2,036<br>(1,270 - 2,481)    | 3,830<br>(2,533 - 4,812)       |
| Chronic respiratory diseases                  | 23,652<br>(19,930 - 25,712)    | 5<br>(3 - 8)          | 3<br>(2 - 4)           | 353<br>(290 - 553)       | 4,954<br>(4,452 - 5,929)    | 18,337<br>(14,631 - 20,264)    |
| Chronic obstructive pulmonary disease         | 20,106<br>(16,665 - 22,209)    | 3<br>(2 - 5)          | 1<br>(1 - 2)           | 206<br>(166 - 324)       | 3,832<br>(3,380 - 4,532)    | 16,063<br>(12,821 - 17,893)    |
| Pneumoconiosis                                | 630<br>(434 - 862)             | 0<br>(0 - 0)          | 0<br>(0 - 0)           | 39<br>(25 - 74)          | 291<br>(190 - 418)          | 299<br>(190 - 441)             |
| Silicosis                                     | 205<br>(136 - 288)             | 0<br>(0 - 0)          | 0<br>(0 - 0)           | 12<br>(7 - 24)           | 60<br>(38 - 88)             | 133<br>(81 - 199)              |
| Asbestosis                                    | 58<br>(40 - 82)                | 0<br>(0 - 0)          | 0<br>(0 - 0)           | 6<br>(4 - 11)            | 32<br>(21 - 46)             | 21<br>(13 - 31)                |
| Coal workers pneumoconiosis                   | 113<br>(77 - 159)              | 0<br>(0 - 0)          | 0<br>(0 - 0)           | 3<br>(2 - 6)             | 61<br>(39 - 89)             | 49<br>(31 - 74)                |
| Other pneumoconiosis                          | 253<br>(173 - 348)             | 0<br>(0 - 0)          | 0<br>(0 - 0)           | 18<br>(11 - 33)          | 139<br>(89 - 205)           | 96<br>(59 - 141)               |

Web Table 31- Poland deaths with 95% UI by age, sex, and cause in 2013

| Cause                                               | Both Sexes, All Ages        | Both Sexes, 0-4 Years   | Both Sexes, 5-14 Years  | Both Sexes, 15-49 Years  | Both Sexes, 50-69 Years  | Both Sexes, 70-80 Years     |
|-----------------------------------------------------|-----------------------------|-------------------------|-------------------------|--------------------------|--------------------------|-----------------------------|
| Asthma                                              | 646<br>(503 - 830)          | 0<br>(0 - 0)            | 1<br>(0 - 1)            | 39<br>(30 - 62)          | 212<br>(167 - 272)       | 394<br>(273 - 544)          |
| Interstitial lung disease and pulmonary sarcoidosis | 1,959<br>(1,321 - 2,657)    | 0<br>(0 - 1)            | 0<br>(0 - 1)            | 41<br>(27 - 72)          | 571<br>(371 - 785)       | 1,346<br>(825 - 1,919)      |
| Other chronic respiratory diseases                  | 312<br>(223 - 444)          | 2<br>(1 - 2)            | 0<br>(0 - 1)            | 27<br>(20 - 45)          | 48<br>(37 - 63)          | 235<br>(145 - 363)          |
| Cirrhosis                                           | 8,509<br>(7,875 - 9,165)    | 1<br>(1 - 2)            | 2<br>(2 - 3)            | 1,709<br>(1,529 - 1,906) | 4,954<br>(4,485 - 5,431) | 1,843<br>(1,663 - 2,025)    |
| Cirrhosis due to hepatitis B                        | 2,211<br>(1,211 - 3,013)    | 0<br>(0 - 0)            | 0<br>(0 - 0)            | 434<br>(229 - 616)       | 1,259<br>(647 - 1,750)   | 517<br>(318 - 703)          |
| Cirrhosis due to hepatitis C                        | 2,069<br>(1,375 - 2,892)    | 0<br>(0 - 0)            | 0<br>(0 - 0)            | 359<br>(215 - 574)       | 1,218<br>(767 - 1,783)   | 491<br>(313 - 733)          |
| Cirrhosis due to alcohol use                        | 2,768<br>(1,986 - 3,556)    | --<br>(1,986 - 3,556)   | --<br>(1,986 - 3,556)   | 438<br>(239 - 617)       | 1,689<br>(1,142 - 2,210) | 641<br>(469 - 840)          |
| Cirrhosis due to other causes                       | 1,461<br>(968 - 2,134)      | 1<br>(1 - 2)            | 1<br>(1 - 2)            | 478<br>(318 - 676)       | 788<br>(474 - 1,223)     | 193<br>(125 - 277)          |
| Digestive diseases                                  | 8,779<br>(7,583 - 9,656)    | 4<br>(2 - 6)            | 4<br>(3 - 5)            | 688<br>(535 - 783)       | 2,335<br>(2,017 - 2,606) | 5,748<br>(4,951 - 6,498)    |
| Peptic ulcer disease                                | 1,683<br>(1,199 - 2,105)    | 0<br>(0 - 0)            | 0<br>(0 - 0)            | 118<br>(79 - 153)        | 539<br>(386 - 671)       | 1,026<br>(676 - 1,369)      |
| Gastritis and duodenitis                            | 139<br>(80 - 200)           | 0<br>(0 - 0)            | 0<br>(0 - 0)            | 12<br>(6 - 17)           | 43<br>(23 - 60)          | 83<br>(46 - 130)            |
| Appendicitis                                        | 109<br>(78 - 158)           | 0<br>(0 - 1)            | 0<br>(0 - 1)            | 10<br>(7 - 14)           | 34<br>(23 - 50)          | 65<br>(42 - 99)             |
| Paralytic ileus and intestinal obstruction          | 1,343<br>(953 - 2,078)      | 2<br>(1 - 3)            | 2<br>(1 - 2)            | 50<br>(36 - 84)          | 266<br>(189 - 437)       | 1,023<br>(710 - 1,650)      |
| Inguinal, femoral, and abdominal hernia             | 324<br>(206 - 560)          | 0<br>(0 - 0)            | 0<br>(0 - 0)            | 5<br>(3 - 7)             | 47<br>(32 - 75)          | 273<br>(164 - 471)          |
| Inflammatory bowel disease                          | 279<br>(175 - 351)          | 0<br>(0 - 1)            | 0<br>(0 - 1)            | 22<br>(14 - 28)          | 87<br>(58 - 110)         | 170<br>(96 - 226)           |
| Vascular intestinal disorders                       | 1,603<br>(1,020 - 2,314)    | 0<br>(0 - 0)            | 0<br>(0 - 0)            | 24<br>(13 - 41)          | 336<br>(194 - 531)       | 1,243<br>(784 - 1,803)      |
| Gallbladder and biliary diseases                    | 818<br>(612 - 1,196)        | 0<br>(0 - 0)            | 0<br>(0 - 0)            | 14<br>(10 - 19)          | 123<br>(91 - 203)        | 681<br>(498 - 974)          |
| Pancreatitis                                        | 1,973<br>(1,485 - 2,414)    | 0<br>(0 - 0)            | 0<br>(0 - 0)            | 408<br>(295 - 483)       | 727<br>(527 - 889)       | 838<br>(596 - 1,130)        |
| Other digestive diseases                            | 507<br>(327 - 619)          | 0<br>(0 - 1)            | 0<br>(0 - 0)            | 26<br>(14 - 33)          | 134<br>(83 - 165)        | 347<br>(223 - 439)          |
| Neurological disorders                              | 24,886<br>(21,467 - 28,386) | 17<br>(11 - 27)         | 15<br>(11 - 21)         | 501<br>(397 - 609)       | 1,946<br>(1,679 - 2,230) | 22,407<br>(19,203 - 25,843) |
| Alzheimer disease and other dementias               | 22,238<br>(19,029 - 25,788) | --<br>(19,029 - 25,788) | --<br>(19,029 - 25,788) | 3<br>(1 - 7)             | 930<br>(756 - 1,121)     | 21,305<br>(18,071 - 24,841) |
| Parkinson disease                                   | 883<br>(615 - 1,027)        | --<br>(615 - 1,027)     | --<br>(615 - 1,027)     | 5<br>(4 - 6)             | 133<br>(109 - 170)       | 745<br>(474 - 888)          |
| Epilepsy                                            | 585<br>(344 - 743)          | 2<br>(1 - 4)            | 7<br>(4 - 10)           | 244<br>(158 - 308)       | 246<br>(132 - 331)       | 86<br>(41 - 125)            |
| Multiple sclerosis                                  | 507<br>(378 - 869)          | --<br>(378 - 869)       | --<br>(378 - 869)       | 126<br>(89 - 232)        | 303<br>(212 - 519)       | 78<br>(51 - 125)            |
| Other neurological disorders                        | 673<br>(579 - 751)          | 15<br>(9 - 23)          | 9<br>(6 - 12)           | 123<br>(100 - 144)       | 334<br>(283 - 383)       | 193<br>(164 - 220)          |
| Mental and substance use disorders                  | 3,668<br>(2,095 - 4,304)    | 1<br>(0 - 1)            | 0<br>(0 - 0)            | 1,503<br>(975 - 1,792)   | 1,956<br>(941 - 2,413)   | 208<br>(120 - 254)          |
| Schizophrenia                                       | 42<br>(20 - 100)            | --<br>(20 - 100)        | --<br>(20 - 100)        | 11<br>(5 - 27)           | 22<br>(10 - 57)          | 8<br>(4 - 21)               |
| Alcohol use disorders                               | 3,127<br>(1,557 - 3,759)    | --<br>(1,557 - 3,759)   | --<br>(1,557 - 3,759)   | 1,204<br>(683 - 1,498)   | 1,781<br>(762 - 2,235)   | 143<br>(53 - 188)           |
| Drug use disorders                                  | 496<br>(331 - 573)          | 1<br>(0 - 1)            | --<br>(0 - 1)           | 285<br>(190 - 346)       | 153<br>(96 - 189)        | 56<br>(41 - 70)             |
| Opioid use disorders                                | 188<br>(126 - 219)          | 0<br>(0 - 1)            | --<br>(0 - 1)           | 111<br>(74 - 136)        | 54<br>(35 - 68)          | 22<br>(16 - 28)             |
| Cocaine use disorders                               | 26<br>(18 - 31)             | 0<br>(0 - 0)            | --<br>(0 - 0)           | 17<br>(11 - 21)          | 7<br>(4 - 9)             | 3<br>(2 - 4)                |
| Amphetamine use disorders                           | 23<br>(17 - 27)             | 0<br>(0 - 0)            | --<br>(0 - 0)           | 13<br>(9 - 16)           | 7<br>(5 - 10)            | 3<br>(2 - 4)                |
| Other drug use disorders                            | 258<br>(170 - 301)          | 0<br>(0 - 1)            | --<br>(0 - 1)           | 145<br>(95 - 177)        | 84<br>(52 - 104)         | 29<br>(21 - 36)             |
| Eating disorders                                    | 3<br>(2 - 5)                | --<br>(2 - 5)           | 0<br>(0 - 0)            | 3<br>(2 - 5)             | --<br>(2 - 5)            | --<br>(2 - 5)               |
| Anorexia nervosa                                    | 3<br>(2 - 5)                | --<br>(2 - 5)           | 0<br>(0 - 0)            | 3<br>(2 - 5)             | --<br>(2 - 5)            | --<br>(2 - 5)               |
| Diabetes, urogenital, blood, and endocrine diseases | 13,982<br>(12,112 - 15,106) | 30<br>(19 - 52)         | 17<br>(13 - 22)         | 651<br>(588 - 739)       | 3,659<br>(3,340 - 4,246) | 9,624<br>(7,555 - 10,711)   |
| Diabetes mellitus                                   | 6,644<br>(5,921 - 7,314)    | 0<br>(0 - 1)            | 1<br>(1 - 1)            | 254<br>(222 - 287)       | 1,901<br>(1,689 - 2,214) | 4,487<br>(3,820 - 5,094)    |
| Acute glomerulonephritis                            | 16<br>(13 - 21)             | 0<br>(0 - 0)            | 0<br>(0 - 0)            | 2<br>(2 - 3)             | 6<br>(4 - 8)             | 7<br>(5 - 11)               |
| Chronic kidney disease                              | 5,824<br>(3,639 - 6,701)    | 3<br>(2 - 4)            | 4<br>(3 - 5)            | 213<br>(184 - 265)       | 1,315<br>(1,119 - 1,529) | 4,289<br>(2,237 - 5,108)    |
| Chronic kidney disease due to diabetes mellitus     | 1,417<br>(951 - 1,736)      | 0<br>(0 - 0)            | 0<br>(0 - 1)            | 53<br>(39 - 81)          | 389<br>(285 - 546)       | 974<br>(579 - 1,221)        |

Web Table 31- Poland deaths with 95% UI by age, sex, and cause in 2013

| Cause                                               | Both Sexes, All Ages        | Both Sexes, 0-4 Years | Both Sexes, 5-14 Years | Both Sexes, 15-49 Years   | Both Sexes, 50-69 Years  | Both Sexes, 70-80 Years  |
|-----------------------------------------------------|-----------------------------|-----------------------|------------------------|---------------------------|--------------------------|--------------------------|
| Chronic kidney disease due to hypertension          | 1,062<br>(681 - 1,466)      | 0<br>(0 - 0)          | 0<br>(0 - 0)           | 25<br>(17 - 38)           | 149<br>(96 - 217)        | 888<br>(551 - 1,264)     |
| Chronic kidney disease due to glomerulonephritis    | 87<br>(64 - 117)            | 1<br>(0 - 1)          | 0<br>(0 - 1)           | 11<br>(9 - 15)            | 33<br>(25 - 47)          | 42<br>(27 - 61)          |
| Chronic kidney disease due to other causes          | 3,258<br>(1,493 - 4,004)    | 2<br>(1 - 3)          | 2<br>(2 - 3)           | 125<br>(99 - 162)         | 744<br>(523 - 934)       | 2,386<br>(817 - 3,109)   |
| Urinary diseases and male infertility               | 701<br>(547 - 1,156)        | 1<br>(0 - 1)          | 0<br>(0 - 1)           | 31<br>(25 - 47)           | 161<br>(120 - 297)       | 508<br>(382 - 847)       |
| Interstitial nephritis and urinary tract infections | 597<br>(453 - 996)          | 1<br>(0 - 1)          | 0<br>(0 - 0)           | 23<br>(17 - 36)           | 126<br>(89 - 237)        | 447<br>(332 - 748)       |
| Urolithiasis                                        | 32<br>(17 - 81)             | --                    | 0<br>(0 - 0)           | 3<br>(2 - 6)              | 13<br>(6 - 34)           | 17<br>(8 - 45)           |
| Other urinary diseases                              | 72<br>(42 - 112)            | 0<br>(0 - 0)          | 0<br>(0 - 0)           | 5<br>(3 - 7)              | 23<br>(12 - 37)          | 44<br>(23 - 69)          |
| Gynecological diseases                              | 4<br>(3 - 6)                | --                    | --                     | 1<br>(1 - 1)              | 1<br>(1 - 2)             | 2<br>(1 - 3)             |
| Uterine fibroids                                    | 1<br>(1 - 1)                | --                    | --                     | 0<br>(0 - 0)              | 0<br>(0 - 0)             | 0<br>(0 - 1)             |
| Polycystic ovarian syndrome                         | 0<br>(0 - 0)                | --                    | --                     | 0<br>(0 - 0)              | 0<br>(0 - 0)             | --                       |
| Endometriosis                                       | 0<br>(0 - 0)                | --                    | --                     | 0<br>(0 - 0)              | 0<br>(0 - 0)             | --                       |
| Genital prolapse                                    | 1<br>(1 - 1)                | --                    | --                     | 0<br>(0 - 0)              | 0<br>(0 - 0)             | 0<br>(0 - 1)             |
| Other gynecological diseases                        | 2<br>(1 - 3)                | --                    | --                     | 0<br>(0 - 1)              | 0<br>(0 - 1)             | 1<br>(0 - 1)             |
| Hemoglobinopathies and hemolytic anemias            | 213<br>(126 - 293)          | 6<br>(3 - 10)         | 3<br>(2 - 5)           | 56<br>(32 - 80)           | 55<br>(37 - 76)          | 93<br>(49 - 143)         |
| Thalassemias                                        | 21<br>(13 - 30)             | 4<br>(2 - 8)          | 3<br>(1 - 4)           | 15<br>(9 - 21)            | 0<br>(0 - 0)             | 0<br>(0 - 0)             |
| Sickle cell disorders                               | 10<br>(6 - 14)              | 1<br>(0 - 1)          | 0<br>(0 - 0)           | 6<br>(3 - 8)              | 4<br>(2 - 5)             | 0<br>(0 - 0)             |
| G6PD deficiency                                     | 4<br>(3 - 5)                | 0<br>(0 - 0)          | 0<br>(0 - 0)           | 2<br>(1 - 3)              | 2<br>(1 - 2)             | 0<br>(0 - 1)             |
| Other hemoglobinopathies and hemolytic anemias      | 177<br>(104 - 246)          | 1<br>(0 - 2)          | 0<br>(0 - 1)           | 34<br>(19 - 50)           | 50<br>(34 - 69)          | 93<br>(48 - 142)         |
| Endocrine, metabolic, blood, and immune disorders   | 581<br>(488 - 869)          | 21<br>(12 - 37)       | 8<br>(6 - 12)          | 94<br>(76 - 134)          | 221<br>(178 - 357)       | 238<br>(185 - 343)       |
| Musculoskeletal disorders                           | 647<br>(543 - 956)          | --                    | 2<br>(1 - 2)           | 47<br>(38 - 57)           | 274<br>(228 - 385)       | 324<br>(258 - 504)       |
| Rheumatoid arthritis                                | 343<br>(271 - 569)          | --                    | 0<br>(0 - 1)           | 9<br>(7 - 14)             | 126<br>(96 - 214)        | 207<br>(157 - 352)       |
| Other musculoskeletal disorders                     | 305<br>(244 - 366)          | --                    | 1<br>(1 - 2)           | 38<br>(30 - 45)           | 148<br>(116 - 184)       | 117<br>(86 - 162)        |
| Other non-communicable diseases                     | 1,256<br>(985 - 1,623)      | 785<br>(532 - 1,131)  | 43<br>(32 - 57)        | 142<br>(125 - 167)        | 113<br>(99 - 145)        | 173<br>(144 - 204)       |
| Congenital anomalies                                | 1,093<br>(835 - 1,431)      | 736<br>(493 - 1,067)  | 42<br>(32 - 57)        | 133<br>(116 - 156)        | 79<br>(66 - 102)         | 103<br>(81 - 126)        |
| Neural tube defects                                 | 34<br>(21 - 54)             | 28<br>(16 - 48)       | 2<br>(1 - 2)           | 3<br>(2 - 3)              | 1<br>(1 - 2)             | 0<br>(0 - 1)             |
| Congenital heart anomalies                          | 500<br>(382 - 665)          | 303<br>(199 - 448)    | 21<br>(15 - 29)        | 81<br>(68 - 98)           | 41<br>(33 - 57)          | 55<br>(40 - 71)          |
| Cleft lip and cleft palate                          | 3<br>(0 - 10)               | 3<br>(0 - 10)         | --                     | --                        | --                       | --                       |
| Down syndrome                                       | 31<br>(23 - 48)             | 7<br>(4 - 13)         | 1<br>(1 - 2)           | 12<br>(9 - 18)            | 11<br>(7 - 17)           | 1<br>(0 - 1)             |
| Chromosomal unbalanced rearrangements               | 71<br>(44 - 111)            | 65<br>(39 - 105)      | 1<br>(1 - 2)           | 3<br>(2 - 4)              | 1<br>(1 - 2)             | 0<br>(0 - 1)             |
| Other congenital anomalies                          | 455<br>(334 - 633)          | 331<br>(215 - 496)    | 18<br>(12 - 25)        | 35<br>(27 - 44)           | 25<br>(19 - 33)          | 47<br>(36 - 58)          |
| Skin and subcutaneous diseases                      | 116<br>(96 - 138)           | 2<br>(1 - 4)          | 0<br>(0 - 0)           | 9<br>(8 - 12)             | 35<br>(28 - 43)          | 70<br>(53 - 89)          |
| Cellulitis                                          | 17<br>(11 - 24)             | 0<br>(0 - 0)          | 0<br>(0 - 0)           | 2<br>(1 - 3)              | 5<br>(3 - 8)             | 10<br>(6 - 16)           |
| Pyoderma                                            | 86<br>(69 - 104)            | 1<br>(1 - 3)          | 0<br>(0 - 0)           | 5<br>(4 - 7)              | 26<br>(20 - 33)          | 53<br>(40 - 69)          |
| Decubitus ulcer                                     | 3<br>(2 - 4)                | 0<br>(0 - 0)          | 0<br>(0 - 0)           | 1<br>(1 - 2)              | 1<br>(1 - 1)             | 1<br>(0 - 1)             |
| Other skin and subcutaneous diseases                | 10<br>(7 - 17)              | 0<br>(0 - 1)          | 0<br>(0 - 0)           | 1<br>(1 - 2)              | 3<br>(2 - 4)             | 6<br>(3 - 12)            |
| Sudden infant death syndrome                        | 47<br>(23 - 85)             | 47<br>(23 - 85)       | --                     | --                        | --                       | --                       |
| Injuries                                            | 24,291<br>(22,813 - 26,156) | 117<br>(75 - 175)     | 180<br>(143 - 224)     | 9,315<br>(8,624 - 10,035) | 8,438<br>(7,332 - 9,201) | 6,241<br>(5,510 - 7,573) |
| Transport injuries                                  | 5,916<br>(5,409 - 6,444)    | 31<br>(19 - 49)       | 82<br>(62 - 107)       | 2,887<br>(2,581 - 3,169)  | 1,910<br>(1,699 - 2,124) | 1,006<br>(867 - 1,292)   |
| Road injuries                                       | 5,383<br>(4,857 - 5,846)    | 29<br>(17 - 45)       | 78<br>(59 - 102)       | 2,607<br>(2,281 - 2,876)  | 1,741<br>(1,536 - 1,930) | 928<br>(796 - 1,186)     |
| Pedestrian road injuries                            | 1,941<br>(1,344 - 2,559)    | 11<br>(6 - 19)        | 34<br>(23 - 47)        | 632<br>(364 - 922)        | 733<br>(473 - 977)       | 531<br>(411 - 712)       |

Web Table 31- Poland deaths with 95% UI by age, sex, and cause in 2013

| Cause                                           | Both Sexes, All Ages      | Both Sexes, 0-4 Years | Both Sexes, 5-14 Years | Both Sexes, 15-49 Years  | Both Sexes, 50-69 Years  | Both Sexes, 70-80 Years  |
|-------------------------------------------------|---------------------------|-----------------------|------------------------|--------------------------|--------------------------|--------------------------|
| Cyclist road injuries                           | 534<br>(386 - 790)        | 1<br>(0 - 2)          | 10<br>(6 - 16)         | 142<br>(100 - 218)       | 260<br>(175 - 383)       | 121<br>(82 - 190)        |
| Motorcyclist road injuries                      | 311<br>(169 - 413)        | 0<br>(0 - 1)          | 3<br>(1 - 5)           | 245<br>(125 - 328)       | 44<br>(25 - 66)          | 19<br>(11 - 31)          |
| Motor vehicle road injuries                     | 2,576<br>(1,976 - 3,076)  | 16<br>(9 - 26)        | 31<br>(20 - 43)        | 1,582<br>(1,230 - 1,866) | 696<br>(502 - 899)       | 251<br>(172 - 367)       |
| Other road injuries                             | 20<br>(12 - 37)           | 0<br>(0 - 0)          | 0<br>(0 - 1)           | 6<br>(3 - 11)            | 8<br>(4 - 16)            | 6<br>(3 - 12)            |
| Other transport injuries                        | 534<br>(423 - 752)        | 3<br>(1 - 4)          | 4<br>(3 - 6)           | 280<br>(212 - 408)       | 169<br>(124 - 251)       | 78<br>(52 - 120)         |
| Unintentional injuries                          | 9,806<br>(8,674 - 11,372) | 77<br>(48 - 119)      | 72<br>(54 - 101)       | 2,330<br>(2,021 - 2,794) | 3,011<br>(2,498 - 3,413) | 4,316<br>(3,640 - 5,494) |
| Falls                                           | 5,030<br>(4,248 - 6,418)  | 6<br>(4 - 11)         | 6<br>(4 - 9)           | 579<br>(421 - 689)       | 1,205<br>(867 - 1,421)   | 3,234<br>(2,582 - 4,554) |
| Drowning                                        | 1,145<br>(851 - 1,652)    | 20<br>(10 - 45)       | 37<br>(25 - 64)        | 593<br>(447 - 910)       | 374<br>(256 - 515)       | 121<br>(89 - 170)        |
| Fire, heat, and hot substances                  | 656<br>(420 - 839)        | 8<br>(4 - 15)         | 4<br>(2 - 6)           | 175<br>(112 - 234)       | 256<br>(143 - 362)       | 214<br>(139 - 271)       |
| Poisonings                                      | 387<br>(316 - 660)        | 3<br>(2 - 5)          | 4<br>(3 - 7)           | 137<br>(107 - 254)       | 143<br>(111 - 256)       | 100<br>(75 - 171)        |
| Exposure to mechanical forces                   | 483<br>(429 - 677)        | 8<br>(5 - 13)         | 8<br>(5 - 11)          | 208<br>(175 - 249)       | 185<br>(156 - 249)       | 75<br>(59 - 91)          |
| Unintentional firearm injuries                  | 36<br>(30 - 43)           | 1<br>(0 - 1)          | 1<br>(1 - 1)           | 17<br>(13 - 22)          | 12<br>(8 - 16)           | 6<br>(4 - 8)             |
| Unintentional suffocation                       | 46<br>(35 - 62)           | 4<br>(2 - 7)          | 1<br>(1 - 2)           | 14<br>(10 - 22)          | 19<br>(12 - 29)          | 7<br>(4 - 13)            |
| Other exposure to mechanical forces             | 401<br>(351 - 583)        | 3<br>(2 - 6)          | 6<br>(4 - 9)           | 177<br>(145 - 309)       | 154<br>(127 - 213)       | 62<br>(46 - 78)          |
| Adverse effects of medical treatment            | 527<br>(215 - 791)        | 6<br>(2 - 11)         | 2<br>(1 - 4)           | 56<br>(31 - 75)          | 176<br>(80 - 258)        | 287<br>(92 - 470)        |
| Animal contact                                  | 54<br>(40 - 83)           | 0<br>(0 - 1)          | 1<br>(0 - 1)           | 11<br>(8 - 16)           | 21<br>(15 - 31)          | 21<br>(14 - 39)          |
| Venomous animal contact                         | 14<br>(10 - 24)           | 0<br>(0 - 0)          | 0<br>(0 - 0)           | 5<br>(3 - 7)             | 6<br>(4 - 10)            | 3<br>(2 - 8)             |
| Non-venomous animal contact                     | 40<br>(29 - 60)           | 0<br>(0 - 1)          | 0<br>(0 - 1)           | 6<br>(4 - 9)             | 16<br>(11 - 22)          | 17<br>(12 - 31)          |
| Foreign body                                    | 887<br>(568 - 1,271)      | 22<br>(13 - 35)       | 5<br>(3 - 7)           | 284<br>(175 - 435)       | 352<br>(216 - 512)       | 225<br>(139 - 308)       |
| Pulmonary aspiration and foreign body in airway | 882<br>(562 - 1,263)      | 22<br>(12 - 35)       | 5<br>(3 - 7)           | 282<br>(174 - 433)       | 350<br>(214 - 509)       | 224<br>(137 - 306)       |
| Foreign body in other body part                 | 6<br>(4 - 9)              | 0<br>(0 - 0)          | 0<br>(0 - 0)           | 2<br>(1 - 3)             | 2<br>(1 - 3)             | 1<br>(1 - 2)             |
| Other unintentional injuries                    | 635<br>(486 - 840)        | 3<br>(1 - 6)          | 5<br>(3 - 9)           | 287<br>(208 - 397)       | 299<br>(195 - 465)       | 40<br>(25 - 56)          |
| Self-harm and interpersonal violence            | 8,569<br>(6,514 - 9,673)  | 9<br>(5 - 15)         | 26<br>(18 - 35)        | 4,098<br>(3,141 - 4,640) | 3,518<br>(2,500 - 4,080) | 919<br>(737 - 1,078)     |
| Self-harm                                       | 7,729<br>(5,530 - 8,689)  | --                    | 20<br>(13 - 29)        | 3,672<br>(2,653 - 4,183) | 3,209<br>(2,128 - 3,750) | 827<br>(635 - 983)       |
| Interpersonal violence                          | 841<br>(688 - 1,349)      | 9<br>(5 - 15)         | 5<br>(4 - 8)           | 426<br>(331 - 703)       | 309<br>(236 - 519)       | 92<br>(72 - 134)         |
| Assault by firearm                              | 109<br>(65 - 240)         | 1<br>(0 - 1)          | 1<br>(0 - 1)           | 63<br>(34 - 141)         | 37<br>(21 - 80)          | 9<br>(5 - 17)            |
| Assault by sharp object                         | 296<br>(216 - 505)        | 2<br>(1 - 4)          | 2<br>(1 - 3)           | 157<br>(112 - 281)       | 111<br>(76 - 193)        | 24<br>(17 - 39)          |
| Assault by other means                          | 435<br>(326 - 678)        | 6<br>(4 - 10)         | 3<br>(2 - 5)           | 206<br>(148 - 334)       | 161<br>(114 - 264)       | 59<br>(43 - 85)          |

Web Table 31- Poland deaths with 95% UI by age, sex, and cause in 2013

| Cause                                                             | Males, All Ages                | Males, 0-4 Years       | Males, 5-14 Years  | Males, 15-49 Years          | Males, 50-69 Years          | Males, 70-80 Years             |
|-------------------------------------------------------------------|--------------------------------|------------------------|--------------------|-----------------------------|-----------------------------|--------------------------------|
| All causes                                                        | 209,138<br>(200,201 - 219,503) | 1,175<br>(786 - 1,705) | 256<br>(201 - 325) | 20,005<br>(18,839 - 21,372) | 78,335<br>(74,275 - 83,032) | 109,366<br>(105,647 - 113,580) |
| Communicable, maternal, neonatal, and nutritional diseases        | 7,745<br>(6,364 - 8,844)       | 601<br>(403 - 880)     | 21<br>(14 - 30)    | 813<br>(692 - 941)          | 2,185<br>(1,749 - 2,575)    | 4,125<br>(3,228 - 5,102)       |
| HIV/AIDS and tuberculosis                                         | 846<br>(732 - 1,296)           | 0<br>(0 - 0)           | 0<br>(0 - 0)       | 239<br>(203 - 312)          | 415<br>(347 - 626)          | 192<br>(149 - 353)             |
| Tuberculosis                                                      | 658<br>(556 - 1,110)           | 0<br>(0 - 0)           | 0<br>(0 - 0)       | 129<br>(105 - 200)          | 347<br>(287 - 555)          | 182<br>(141 - 342)             |
| HIV/AIDS                                                          | 189<br>(147 - 236)             | 0<br>(0 - 0)           | 0<br>(0 - 0)       | 111<br>(85 - 139)           | 68<br>(46 - 92)             | 10<br>(5 - 16)                 |
| HIV/AIDS resulting in mycobacterial infection                     | 12<br>(8 - 16)                 | 0<br>(0 - 0)           | 0<br>(0 - 0)       | 7<br>(5 - 9)                | 4<br>(3 - 6)                | 1<br>(0 - 1)                   |
| HIV/AIDS resulting in other diseases                              | 177<br>(138 - 222)             | 0<br>(0 - 0)           | 0<br>(0 - 0)       | 104<br>(80 - 130)           | 64<br>(44 - 86)             | 9<br>(5 - 15)                  |
| Diarrhea, lower respiratory, and other common infectious diseases | 6,052<br>(4,583 - 7,154)       | 75<br>(46 - 113)       | 18<br>(12 - 27)    | 520<br>(387 - 642)          | 1,653<br>(1,168 - 2,038)    | 3,786<br>(2,864 - 4,769)       |
| Diarrheal diseases                                                | 36<br>(29 - 45)                | 4<br>(2 - 8)           | 0<br>(0 - 0)       | 4<br>(3 - 5)                | 10<br>(7 - 14)              | 18<br>(12 - 26)                |
| Intestinal infectious diseases                                    | 38<br>(10 - 99)                | 4<br>(1 - 9)           | 4<br>(1 - 10)      | 16<br>(3 - 47)              | 10<br>(2 - 29)              | 4<br>(1 - 12)                  |
| Typhoid fever                                                     | 28<br>(7 - 74)                 | 2<br>(0 - 6)           | 3<br>(1 - 7)       | 12<br>(2 - 36)              | 8<br>(2 - 23)               | 3<br>(1 - 9)                   |
| Paratyphoid fever                                                 | 8<br>(2 - 21)                  | 1<br>(0 - 2)           | 1<br>(0 - 2)       | 3<br>(1 - 10)               | 2<br>(0 - 6)                | 1<br>(0 - 2)                   |
| Other intestinal infectious diseases                              | 2<br>(0 - 7)                   | 1<br>(0 - 3)           | 0<br>(0 - 1)       | 1<br>(0 - 3)                | 1<br>(0 - 3)                | 0<br>(0 - 3)                   |
| Lower respiratory infections                                      | 5,762<br>(4,285 - 6,866)       | 47<br>(27 - 75)        | 9<br>(5 - 14)      | 442<br>(300 - 555)          | 1,543<br>(1,062 - 1,926)    | 3,720<br>(2,804 - 4,704)       |
| Upper respiratory infections                                      | 6<br>(2 - 14)                  | 0<br>(0 - 0)           | 0<br>(0 - 0)       | 1<br>(0 - 2)                | 3<br>(0 - 8)                | 3<br>(0 - 10)                  |
| Otitis media                                                      | 3<br>(2 - 3)                   | 1<br>(0 - 1)           | 0<br>(0 - 0)       | 1<br>(1 - 1)                | 1<br>(0 - 1)                | 0<br>(0 - 1)                   |
| Meningitis                                                        | 122<br>(106 - 141)             | 12<br>(6 - 21)         | 2<br>(1 - 2)       | 31<br>(26 - 38)             | 54<br>(44 - 66)             | 23<br>(18 - 30)                |
| Pneumococcal meningitis                                           | 34<br>(24 - 47)                | 2<br>(1 - 5)           | 0<br>(0 - 1)       | 9<br>(5 - 14)               | 16<br>(9 - 25)              | 7<br>(3 - 11)                  |
| H influenzae type B meningitis                                    | 15<br>(9 - 21)                 | 4<br>(2 - 8)           | 0<br>(0 - 1)       | 3<br>(1 - 5)                | 5<br>(2 - 10)               | 2<br>(1 - 4)                   |
| Meningococcal meningitis                                          | 21<br>(12 - 28)                | 2<br>(1 - 5)           | 0<br>(0 - 1)       | 5<br>(3 - 8)                | 9<br>(3 - 13)               | 4<br>(2 - 7)                   |
| Other meningitis                                                  | 52<br>(41 - 67)                | 4<br>(2 - 7)           | 1<br>(0 - 1)       | 14<br>(9 - 18)              | 23<br>(16 - 34)             | 11<br>(7 - 15)                 |
| Encephalitis                                                      | 69<br>(48 - 99)                | 6<br>(3 - 13)          | 3<br>(1 - 5)       | 22<br>(13 - 32)             | 29<br>(17 - 41)             | 9<br>(5 - 13)                  |
| Diphtheria                                                        | 1<br>(0 - 2)                   | 0<br>(0 - 0)           | 0<br>(0 - 0)       | 0<br>(0 - 1)                | 0<br>(0 - 2)                | --                             |
| Whooping cough                                                    | 2<br>(1 - 2)                   | 0<br>(0 - 1)           | 0<br>(0 - 0)       | 1<br>(1 - 1)                | 0<br>(0 - 0)                | --                             |
| Tetanus                                                           | 4<br>(3 - 8)                   | 0<br>(0 - 0)           | 0<br>(0 - 0)       | 1<br>(1 - 1)                | 1<br>(1 - 4)                | 1<br>(1 - 4)                   |
| Measles                                                           | 0<br>(0 - 0)                   | 0<br>(0 - 0)           | 0<br>(0 - 0)       | 0<br>(0 - 0)                | 0<br>(0 - 0)                | --                             |
| Varicella and herpes zoster                                       | 10<br>(2 - 35)                 | 1<br>(0 - 3)           | 0<br>(0 - 1)       | 2<br>(0 - 5)                | 1<br>(0 - 5)                | 6<br>(0 - 31)                  |
| Neglected tropical diseases and malaria                           | 12<br>(10 - 14)                | 1<br>(0 - 1)           | 1<br>(0 - 1)       | 4<br>(3 - 5)                | 4<br>(3 - 5)                | 2<br>(2 - 3)                   |
| Cysticercosis                                                     | 0<br>(0 - 0)                   | 0<br>(0 - 0)           | 0<br>(0 - 0)       | 0<br>(0 - 0)                | 0<br>(0 - 0)                | 0<br>(0 - 0)                   |
| Cystic echinococcosis                                             | 3<br>(2 - 3)                   | 0<br>(0 - 0)           | 0<br>(0 - 0)       | 1<br>(1 - 1)                | 1<br>(1 - 1)                | 1<br>(1 - 1)                   |
| Dengue                                                            | 2<br>(2 - 4)                   | 0<br>(0 - 0)           | 0<br>(0 - 0)       | 1<br>(1 - 2)                | 1<br>(0 - 1)                | 0<br>(0 - 0)                   |
| Rabies                                                            | 2<br>(1 - 2)                   | 0<br>(0 - 0)           | 0<br>(0 - 0)       | 1<br>(1 - 1)                | 0<br>(0 - 1)                | 0<br>(0 - 0)                   |
| Other neglected tropical diseases                                 | 5<br>(4 - 7)                   | 1<br>(0 - 1)           | 0<br>(0 - 0)       | 1<br>(1 - 1)                | 2<br>(1 - 3)                | 1<br>(1 - 2)                   |
| Maternal disorders                                                | --                             | --                     | --                 | --                          | --                          | --                             |
| Maternal hemorrhage                                               | --                             | --                     | --                 | --                          | --                          | --                             |
| Maternal sepsis and other maternal infections                     | --                             | --                     | --                 | --                          | --                          | --                             |
| Maternal hypertensive disorders                                   | --                             | --                     | --                 | --                          | --                          | --                             |
| Maternal obstructed labor                                         | --                             | --                     | --                 | --                          | --                          | --                             |
| Maternal abortive outcome                                         | --                             | --                     | --                 | --                          | --                          | --                             |
| Indirect maternal deaths                                          | --                             | --                     | --                 | --                          | --                          | --                             |



Web Table 31- Poland deaths with 95% UI by age, sex, and cause in 2013

| Cause                                                            | Males, All Ages                | Males, 0-4 Years   | Males, 5-14 Years | Males, 15-49 Years          | Males, 50-69 Years          | Males, 70-80 Years            |
|------------------------------------------------------------------|--------------------------------|--------------------|-------------------|-----------------------------|-----------------------------|-------------------------------|
| Late maternal deaths                                             | --                             | --                 | --                | --                          | --                          | --                            |
| Maternal deaths aggravated by HIV/AIDS                           | --                             | --                 | --                | --                          | --                          | --                            |
| Other maternal disorders                                         | --                             | --                 | --                | --                          | --                          | --                            |
| Neonatal disorders                                               | 514<br>(344 - 734)             | 514<br>(344 - 734) | --                | --                          | --                          | --                            |
| Neonatal preterm birth complications                             | 321<br>(186 - 490)             | 321<br>(186 - 490) | --                | --                          | --                          | --                            |
| Neonatal encephalopathy due to birth asphyxia and trauma         | 73<br>(40 - 124)               | 73<br>(40 - 124)   | --                | --                          | --                          | --                            |
| Neonatal sepsis and other neonatal infections                    | 65<br>(28 - 154)               | 65<br>(28 - 154)   | --                | --                          | --                          | --                            |
| Hemolytic disease and other neonatal jaundice                    | 2<br>(1 - 5)                   | 2<br>(1 - 5)       | --                | --                          | --                          | --                            |
| Other neonatal disorders                                         | 53<br>(29 - 93)                | 53<br>(29 - 93)    | --                | --                          | --                          | --                            |
| Nutritional deficiencies                                         | 215<br>(161 - 397)             | 1<br>(0 - 2)       | 0<br>(0 - 1)      | 30<br>(21 - 58)             | 69<br>(50 - 130)            | 114<br>(82 - 214)             |
| Protein-energy malnutrition                                      | 47<br>(17 - 83)                | 0<br>(0 - 1)       | 0<br>(0 - 0)      | 7<br>(3 - 13)               | 23<br>(9 - 42)              | 17<br>(4 - 32)                |
| Iodine deficiency                                                | 6<br>(0 - 24)                  | 0<br>(0 - 0)       | 0<br>(0 - 0)      | 1<br>(0 - 4)                | 2<br>(0 - 11)               | 3<br>(0 - 17)                 |
| Iron-deficiency anemia                                           | 145<br>(94 - 286)              | 0<br>(0 - 1)       | 0<br>(0 - 0)      | 21<br>(13 - 44)             | 40<br>(22 - 89)             | 84<br>(54 - 161)              |
| Other nutritional deficiencies                                   | 17<br>(8 - 50)                 | 0<br>(0 - 0)       | 0<br>(0 - 0)      | 2<br>(1 - 5)                | 4<br>(2 - 13)               | 10<br>(4 - 30)                |
| Other communicable, maternal, neonatal, and nutritional diseases | 106<br>(81 - 132)              | 10<br>(4 - 21)     | 2<br>(1 - 3)      | 19<br>(15 - 25)             | 44<br>(33 - 57)             | 31<br>(22 - 40)               |
| Sexually transmitted diseases excluding HIV                      | 12<br>(5 - 25)                 | 8<br>(1 - 18)      | 1<br>(0 - 1)      | 1<br>(1 - 2)                | 2<br>(1 - 5)                | 1<br>(0 - 3)                  |
| Syphilis                                                         | 11<br>(4 - 23)                 | 8<br>(1 - 18)      | 1<br>(0 - 1)      | 1<br>(0 - 1)                | 1<br>(1 - 4)                | 1<br>(0 - 3)                  |
| Chlamydial infection                                             | --                             | --                 | --                | --                          | --                          | --                            |
| Gonococcal infection                                             | 1<br>(0 - 2)                   | --                 | 0<br>(0 - 0)      | 0<br>(0 - 0)                | 0<br>(0 - 1)                | 0<br>(0 - 0)                  |
| Other sexually transmitted diseases                              | 0<br>(0 - 1)                   | --                 | 0<br>(0 - 0)      | 0<br>(0 - 0)                | 0<br>(0 - 1)                | 0<br>(0 - 0)                  |
| Hepatitis                                                        | 27<br>(21 - 34)                | 0<br>(0 - 0)       | 0<br>(0 - 0)      | 4<br>(3 - 6)                | 13<br>(9 - 17)              | 10<br>(7 - 14)                |
| Acute hepatitis A                                                | 4<br>(1 - 8)                   | 0<br>(0 - 0)       | 0<br>(0 - 0)      | 2<br>(1 - 3)                | 2<br>(0 - 4)                | 1<br>(0 - 2)                  |
| Acute hepatitis B                                                | 22<br>(16 - 29)                | 0<br>(0 - 0)       | 0<br>(0 - 0)      | 3<br>(1 - 4)                | 11<br>(7 - 15)              | 9<br>(6 - 13)                 |
| Acute hepatitis C                                                | 1<br>(0 - 2)                   | --                 | 0<br>(0 - 0)      | 0<br>(0 - 0)                | 0<br>(0 - 1)                | 0<br>(0 - 1)                  |
| Other infectious diseases                                        | 67<br>(43 - 87)                | 2<br>(1 - 4)       | 1<br>(0 - 1)      | 14<br>(9 - 20)              | 29<br>(19 - 41)             | 20<br>(11 - 28)               |
| Non-communicable diseases                                        | 183,082<br>(174,930 - 191,933) | 506<br>(331 - 743) | 117<br>(89 - 153) | 11,006<br>(10,209 - 11,902) | 69,109<br>(65,295 - 73,297) | 102,344<br>(98,599 - 106,451) |
| Neoplasms                                                        | 55,667<br>(52,397 - 59,325)    | 28<br>(16 - 46)    | 63<br>(47 - 85)   | 2,896<br>(2,645 - 3,199)    | 27,599<br>(25,790 - 29,562) | 25,080<br>(23,338 - 26,818)   |
| Esophageal cancer                                                | 1,383<br>(1,196 - 1,692)       | --                 | --                | 78<br>(61 - 110)            | 894<br>(752 - 1,107)        | 410<br>(344 - 527)            |
| Stomach cancer                                                   | 4,808<br>(4,329 - 5,330)       | --                 | --                | 217<br>(183 - 256)          | 2,307<br>(2,048 - 2,598)    | 2,284<br>(1,949 - 2,662)      |
| Liver cancer                                                     | 1,340<br>(918 - 1,921)         | --                 | 1<br>(0 - 2)      | 72<br>(49 - 102)            | 651<br>(446 - 899)          | 616<br>(419 - 936)            |
| Liver cancer due to hepatitis B                                  | 244<br>(28 - 447)              | --                 | 0<br>(0 - 1)      | 23<br>(9 - 37)              | 136<br>(10 - 263)           | 85<br>(6 - 160)               |
| Liver cancer due to hepatitis C                                  | 644<br>(399 - 1,021)           | --                 | 0<br>(0 - 1)      | 31<br>(18 - 49)             | 317<br>(195 - 513)          | 296<br>(165 - 491)            |
| Liver cancer due to alcohol use                                  | 378<br>(213 - 596)             | --                 | --                | 12<br>(5 - 21)              | 158<br>(85 - 250)           | 209<br>(110 - 338)            |
| Liver cancer due to other causes                                 | 74<br>(35 - 126)               | --                 | 0<br>(0 - 1)      | 7<br>(3 - 12)               | 40<br>(18 - 71)             | 27<br>(13 - 50)               |
| Larynx cancer                                                    | 1,338<br>(978 - 1,668)         | --                 | --                | 71<br>(53 - 112)            | 857<br>(632 - 1,120)        | 410<br>(266 - 505)            |
| Tracheal, bronchus and lung cancer                               | 17,667<br>(16,359 - 19,215)    | --                 | --                | 529<br>(442 - 629)          | 10,104<br>(9,203 - 11,118)  | 7,034<br>(6,400 - 7,762)      |
| Breast cancer                                                    | 71<br>(32 - 182)               | --                 | --                | 5<br>(2 - 12)               | 32<br>(15 - 79)             | 34<br>(15 - 85)               |
| Cervical cancer                                                  | --                             | --                 | --                | --                          | --                          | --                            |
| Uterine cancer                                                   | --                             | --                 | --                | --                          | --                          | --                            |
| Prostate cancer                                                  | 4,381<br>(3,276 - 5,775)       | --                 | --                | 13<br>(8 - 19)              | 964<br>(646 - 1,242)        | 3,404<br>(2,519 - 4,693)      |

Web Table 31- Poland deaths with 95% UI by age, sex, and cause in 2013

| Cause                                         | Males, All Ages             | Males, 0-4 Years | Males, 5-14 Years | Males, 15-49 Years       | Males, 50-69 Years          | Males, 70-80 Years          |
|-----------------------------------------------|-----------------------------|------------------|-------------------|--------------------------|-----------------------------|-----------------------------|
| Colon and rectum cancer                       | 6,598<br>(6,053 - 7,230)    | --               | --                | 249<br>(215 - 288)       | 2,787<br>(2,518 - 3,066)    | 3,562<br>(3,164 - 4,038)    |
| Lip and oral cavity cancer                    | 1,079<br>(784 - 1,241)      | --               | --                | 100<br>(75 - 126)        | 692<br>(491 - 827)          | 287<br>(222 - 346)          |
| Nasopharynx cancer                            | 210<br>(156 - 269)          | --               | 0<br>(0 - 1)      | 36<br>(24 - 51)          | 138<br>(96 - 180)           | 36<br>(25 - 50)             |
| Other pharynx cancer                          | 770<br>(553 - 940)          | --               | --                | 59<br>(43 - 77)          | 584<br>(406 - 728)          | 128<br>(92 - 164)           |
| Gallbladder and biliary tract cancer          | 631<br>(391 - 800)          | --               | --                | 18<br>(10 - 24)          | 272<br>(161 - 356)          | 342<br>(216 - 466)          |
| Pancreatic cancer                             | 2,637<br>(2,397 - 2,877)    | --               | --                | 160<br>(135 - 189)       | 1,490<br>(1,322 - 1,663)    | 988<br>(863 - 1,114)        |
| Malignant skin melanoma                       | 655<br>(309 - 1,064)        | --               | --                | 108<br>(53 - 189)        | 314<br>(148 - 535)          | 233<br>(105 - 369)          |
| Non-melanoma skin cancer                      | 305<br>(201 - 544)          | --               | --                | 10<br>(6 - 17)           | 80<br>(51 - 146)            | 215<br>(131 - 395)          |
| Ovarian cancer                                | --                          | --               | --                | --                       | --                          | --                          |
| Testicular cancer                             | 152<br>(98 - 195)           | --               | --                | 92<br>(57 - 125)         | 34<br>(21 - 46)             | 26<br>(17 - 36)             |
| Kidney cancer                                 | 1,855<br>(1,611 - 2,157)    | 1<br>(0 - 1)     | 1<br>(0 - 1)      | 97<br>(77 - 123)         | 1,004<br>(831 - 1,202)      | 753<br>(604 - 931)          |
| Bladder cancer                                | 2,465<br>(1,884 - 2,823)    | --               | --                | 38<br>(30 - 49)          | 914<br>(708 - 1,057)        | 1,513<br>(1,124 - 1,790)    |
| Brain and nervous system cancer               | 1,573<br>(1,201 - 1,946)    | 7<br>(3 - 12)    | 19<br>(13 - 30)   | 276<br>(223 - 363)       | 885<br>(701 - 1,190)        | 386<br>(227 - 529)          |
| Thyroid cancer                                | 119<br>(101 - 140)          | --               | 0<br>(0 - 0)      | 9<br>(7 - 11)            | 60<br>(48 - 73)             | 50<br>(40 - 62)             |
| Mesothelioma                                  | 173<br>(120 - 262)          | --               | --                | 13<br>(8 - 22)           | 108<br>(71 - 173)           | 51<br>(29 - 79)             |
| Hodgkin lymphoma                              | 173<br>(135 - 295)          | 0<br>(0 - 0)     | 1<br>(0 - 2)      | 59<br>(43 - 93)          | 76<br>(53 - 145)            | 37<br>(26 - 63)             |
| Non-Hodgkin lymphoma                          | 1,051<br>(662 - 1,350)      | 2<br>(1 - 3)     | 7<br>(3 - 12)     | 121<br>(72 - 167)        | 501<br>(311 - 693)          | 421<br>(230 - 561)          |
| Multiple myeloma                              | 578<br>(298 - 864)          | --               | --                | 28<br>(15 - 44)          | 280<br>(148 - 420)          | 270<br>(126 - 391)          |
| Leukemia                                      | 1,507<br>(1,360 - 1,656)    | 8<br>(4 - 14)    | 21<br>(15 - 29)   | 169<br>(147 - 194)       | 590<br>(513 - 675)          | 719<br>(618 - 830)          |
| Other neoplasms                               | 2,149<br>(1,611 - 2,549)    | 12<br>(5 - 20)   | 13<br>(8 - 20)    | 269<br>(221 - 352)       | 981<br>(745 - 1,221)        | 873<br>(530 - 1,124)        |
| Cardiovascular diseases                       | 80,077<br>(75,603 - 85,202) | 9<br>(5 - 13)    | 7<br>(5 - 9)      | 3,647<br>(3,297 - 4,028) | 26,942<br>(25,135 - 29,006) | 49,473<br>(46,547 - 52,658) |
| Rheumatic heart disease                       | 539<br>(375 - 790)          | 0<br>(0 - 0)     | 0<br>(0 - 1)      | 64<br>(44 - 119)         | 241<br>(168 - 440)          | 233<br>(112 - 331)          |
| Ischemic heart disease                        | 36,587<br>(32,417 - 45,434) | 0<br>(0 - 0)     | 1<br>(0 - 1)      | 1,874<br>(1,599 - 2,432) | 14,742<br>(13,147 - 17,576) | 19,970<br>(17,357 - 25,388) |
| Cerebrovascular disease                       | 30,556<br>(25,672 - 34,885) | 3<br>(1 - 4)     | 3<br>(2 - 4)      | 857<br>(587 - 1,078)     | 7,504<br>(6,020 - 8,893)    | 22,189<br>(18,892 - 25,365) |
| Ischemic stroke                               | 22,964<br>(18,423 - 26,916) | 0<br>(0 - 1)     | 1<br>(0 - 1)      | 189<br>(124 - 259)       | 4,027<br>(3,096 - 4,936)    | 18,747<br>(15,076 - 21,960) |
| Hemorrhagic stroke                            | 7,592<br>(5,740 - 10,476)   | 2<br>(1 - 3)     | 2<br>(1 - 3)      | 668<br>(435 - 846)       | 3,477<br>(2,511 - 4,430)    | 3,443<br>(2,224 - 5,604)    |
| Hypertensive heart disease                    | 2,610<br>(1,443 - 3,797)    | 0<br>(0 - 0)     | 0<br>(0 - 0)      | 128<br>(73 - 184)        | 988<br>(553 - 1,422)        | 1,494<br>(750 - 2,325)      |
| Cardiomyopathy and myocarditis                | 4,252<br>(3,208 - 5,822)    | 4<br>(2 - 6)     | 2<br>(1 - 3)      | 382<br>(238 - 485)       | 1,327<br>(925 - 1,673)      | 2,536<br>(1,833 - 3,812)    |
| Atrial fibrillation and flutter               | 502<br>(381 - 641)          | --               | --                | 9<br>(6 - 13)            | 125<br>(95 - 156)           | 367<br>(266 - 488)          |
| Aortic aneurysm                               | 1,481<br>(1,196 - 1,736)    | --               | --                | 84<br>(55 - 102)         | 620<br>(489 - 735)          | 777<br>(629 - 930)          |
| Peripheral vascular disease                   | 823<br>(660 - 1,012)        | --               | --                | 11<br>(8 - 16)           | 304<br>(235 - 383)          | 508<br>(380 - 662)          |
| Endocarditis                                  | 221<br>(130 - 310)          | 1<br>(1 - 2)     | 0<br>(0 - 1)      | 57<br>(31 - 83)          | 87<br>(49 - 124)            | 76<br>(44 - 113)            |
| Other cardiovascular and circulatory diseases | 2,506<br>(1,768 - 2,967)    | 1<br>(0 - 1)     | 0<br>(0 - 1)      | 181<br>(102 - 226)       | 1,003<br>(692 - 1,224)      | 1,321<br>(935 - 1,642)      |
| Chronic respiratory diseases                  | 15,933<br>(12,957 - 17,741) | 3<br>(2 - 5)     | 2<br>(1 - 2)      | 270<br>(213 - 460)       | 3,928<br>(3,433 - 4,940)    | 11,730<br>(8,887 - 13,180)  |
| Chronic obstructive pulmonary disease         | 13,705<br>(10,960 - 15,307) | 2<br>(1 - 3)     | 1<br>(0 - 1)      | 166<br>(128 - 275)       | 2,996<br>(2,597 - 3,738)    | 10,540<br>(7,873 - 11,949)  |
| Pneumoconiosis                                | 611<br>(419 - 846)          | 0<br>(0 - 0)     | 0<br>(0 - 0)      | 38<br>(24 - 72)          | 288<br>(187 - 417)          | 285<br>(175 - 426)          |
| Silicosis                                     | 204<br>(135 - 288)          | 0<br>(0 - 0)     | 0<br>(0 - 0)      | 12<br>(7 - 23)           | 60<br>(38 - 88)             | 133<br>(80 - 199)           |
| Asbestosis                                    | 58<br>(39 - 82)             | 0<br>(0 - 0)     | 0<br>(0 - 0)      | 6<br>(3 - 11)            | 32<br>(20 - 46)             | 21<br>(13 - 31)             |
| Coal workers pneumoconiosis                   | 113<br>(77 - 158)           | 0<br>(0 - 0)     | 0<br>(0 - 0)      | 3<br>(2 - 6)             | 61<br>(39 - 89)             | 49<br>(30 - 74)             |
| Other pneumoconiosis                          | 237<br>(156 - 329)          | 0<br>(0 - 0)     | 0<br>(0 - 0)      | 18<br>(11 - 32)          | 136<br>(87 - 201)           | 83<br>(47 - 126)            |

Web Table 31- Poland deaths with 95% UI by age, sex, and cause in 2013

| Cause                                               | Males, All Ages            | Males, 0-4 Years | Males, 5-14 Years | Males, 15-49 Years       | Males, 50-69 Years       | Males, 70-80 Years        |
|-----------------------------------------------------|----------------------------|------------------|-------------------|--------------------------|--------------------------|---------------------------|
| Asthma                                              | 305<br>(251 - 373)         | 0<br>(0 - 0)     | 0<br>(0 - 0)      | 22<br>(16 - 41)          | 114<br>(89 - 154)        | 169<br>(121 - 217)        |
| Interstitial lung disease and pulmonary sarcoidosis | 1,199<br>(755 - 1,676)     | 0<br>(0 - 1)     | 0<br>(0 - 0)      | 25<br>(14 - 49)          | 491<br>(294 - 700)       | 683<br>(392 - 968)        |
| Other chronic respiratory diseases                  | 113<br>(90 - 150)          | 1<br>(1 - 2)     | 0<br>(0 - 0)      | 20<br>(13 - 37)          | 39<br>(29 - 54)          | 53<br>(35 - 75)           |
| Cirrhosis                                           | 6,077<br>(5,544 - 6,675)   | 1<br>(0 - 1)     | 1<br>(1 - 1)      | 1,371<br>(1,204 - 1,559) | 3,741<br>(3,323 - 4,180) | 964<br>(855 - 1,091)      |
| Cirrhosis due to hepatitis B                        | 1,265<br>(378 - 1,937)     | 0<br>(0 - 0)     | 0<br>(0 - 0)      | 307<br>(105 - 480)       | 793<br>(237 - 1,227)     | 164<br>(36 - 280)         |
| Cirrhosis due to hepatitis C                        | 1,457<br>(818 - 2,179)     | 0<br>(0 - 0)     | 0<br>(0 - 0)      | 279<br>(123 - 496)       | 884<br>(459 - 1,394)     | 293<br>(159 - 477)        |
| Cirrhosis due to alcohol use                        | 2,324<br>(1,537 - 3,058)   | --               | --                | 404<br>(217 - 579)       | 1,497<br>(968 - 2,003)   | 423<br>(262 - 574)        |
| Cirrhosis due to other causes                       | 1,032<br>(597 - 1,638)     | 1<br>(0 - 1)     | 1<br>(1 - 1)      | 380<br>(227 - 575)       | 566<br>(281 - 977)       | 84<br>(44 - 140)          |
| Digestive diseases                                  | 4,241<br>(3,681 - 4,739)   | 2<br>(1 - 3)     | 2<br>(2 - 3)      | 564<br>(416 - 652)       | 1,586<br>(1,324 - 1,817) | 2,086<br>(1,790 - 2,435)  |
| Peptic ulcer disease                                | 937<br>(652 - 1,192)       | 0<br>(0 - 0)     | 0<br>(0 - 0)      | 97<br>(60 - 131)         | 404<br>(278 - 520)       | 437<br>(284 - 601)        |
| Gastritis and duodenitis                            | 80<br>(39 - 120)           | 0<br>(0 - 0)     | 0<br>(0 - 0)      | 10<br>(4 - 15)           | 34<br>(15 - 50)          | 36<br>(17 - 58)           |
| Appendicitis                                        | 56<br>(36 - 91)            | 0<br>(0 - 0)     | 0<br>(0 - 0)      | 7<br>(4 - 10)            | 22<br>(13 - 35)          | 27<br>(16 - 49)           |
| Paralytic ileus and intestinal obstruction          | 517<br>(329 - 943)         | 1<br>(1 - 2)     | 1<br>(1 - 2)      | 32<br>(18 - 64)          | 154<br>(95 - 293)        | 329<br>(203 - 589)        |
| Inguinal, femoral, and abdominal hernia             | 128<br>(70 - 219)          | 0<br>(0 - 0)     | 0<br>(0 - 0)      | 3<br>(2 - 5)             | 25<br>(13 - 42)          | 100<br>(53 - 182)         |
| Inflammatory bowel disease                          | 114<br>(72 - 151)          | 0<br>(0 - 0)     | 0<br>(0 - 0)      | 14<br>(8 - 20)           | 43<br>(27 - 58)          | 57<br>(32 - 81)           |
| Vascular intestinal disorders                       | 657<br>(292 - 1,204)       | 0<br>(0 - 0)     | 0<br>(0 - 0)      | 16<br>(6 - 34)           | 223<br>(97 - 409)        | 418<br>(186 - 780)        |
| Gallbladder and biliary diseases                    | 320<br>(233 - 481)         | 0<br>(0 - 0)     | 0<br>(0 - 0)      | 8<br>(6 - 11)            | 69<br>(48 - 113)         | 243<br>(168 - 362)        |
| Pancreatitis                                        | 1,202<br>(826 - 1,535)     | 0<br>(0 - 0)     | 0<br>(0 - 0)      | 357<br>(249 - 433)       | 527<br>(350 - 688)       | 318<br>(201 - 472)        |
| Other digestive diseases                            | 229<br>(106 - 296)         | 0<br>(0 - 0)     | 0<br>(0 - 0)      | 20<br>(8 - 27)           | 86<br>(41 - 114)         | 123<br>(55 - 169)         |
| Neurological disorders                              | 10,545<br>(8,888 - 12,464) | 10<br>(5 - 16)   | 10<br>(6 - 14)    | 349<br>(261 - 430)       | 1,105<br>(895 - 1,325)   | 9,072<br>(7,440 - 11,018) |
| Alzheimer disease and other dementias               | 9,059<br>(7,362 - 11,026)  | --               | --                | 2<br>(0 - 5)             | 509<br>(364 - 655)       | 8,548<br>(6,898 - 10,484) |
| Parkinson disease                                   | 448<br>(319 - 544)         | --               | --                | 3<br>(2 - 4)             | 81<br>(65 - 101)         | 364<br>(229 - 455)        |
| Epilepsy                                            | 450<br>(253 - 588)         | 1<br>(1 - 3)     | 4<br>(2 - 6)      | 198<br>(122 - 256)       | 201<br>(100 - 281)       | 45<br>(21 - 66)           |
| Multiple sclerosis                                  | 220<br>(133 - 481)         | --               | --                | 57<br>(33 - 137)         | 132<br>(77 - 292)        | 31<br>(16 - 65)           |
| Other neurological disorders                        | 368<br>(286 - 450)         | 8<br>(4 - 14)    | 6<br>(4 - 8)      | 89<br>(70 - 112)         | 183<br>(142 - 230)       | 83<br>(63 - 104)          |
| Mental and substance use disorders                  | 3,260<br>(1,811 - 3,896)   | 1<br>(0 - 1)     | 0<br>(0 - 0)      | 1,351<br>(856 - 1,648)   | 1,743<br>(789 - 2,215)   | 165<br>(80 - 211)         |
| Schizophrenia                                       | 25<br>(10 - 67)            | --               | --                | 8<br>(3 - 23)            | 13<br>(5 - 38)           | 4<br>(1 - 11)             |
| Alcohol use disorders                               | 2,824<br>(1,348 - 3,426)   | --               | --                | 1,086<br>(597 - 1,378)   | 1,608<br>(668 - 2,073)   | 129<br>(43 - 173)         |
| Drug use disorders                                  | 411<br>(249 - 485)         | 1<br>(0 - 1)     | --                | 256<br>(159 - 314)       | 122<br>(66 - 154)        | 33<br>(19 - 44)           |
| Opioid use disorders                                | 158<br>(96 - 187)          | 0<br>(0 - 0)     | --                | 100<br>(62 - 126)        | 44<br>(24 - 57)          | 13<br>(8 - 18)            |
| Cocaine use disorders                               | 20<br>(12 - 25)            | 0<br>(0 - 0)     | --                | 14<br>(9 - 18)           | 5<br>(3 - 7)             | 1<br>(1 - 2)              |
| Amphetamine use disorders                           | 17<br>(11 - 21)            | 0<br>(0 - 0)     | --                | 11<br>(7 - 14)           | 5<br>(3 - 7)             | 1<br>(1 - 2)              |
| Other drug use disorders                            | 215<br>(130 - 256)         | 0<br>(0 - 0)     | --                | 130<br>(81 - 162)        | 68<br>(36 - 87)          | 17<br>(10 - 23)           |
| Eating disorders                                    | 1<br>(1 - 1)               | --               | 0<br>(0 - 0)      | 1<br>(1 - 1)             | --                       | --                        |
| Anorexia nervosa                                    | 1<br>(1 - 1)               | --               | 0<br>(0 - 0)      | 1<br>(1 - 1)             | --                       | --                        |
| Diabetes, urogenital, blood, and endocrine diseases | 6,436<br>(5,775 - 7,187)   | 18<br>(10 - 34)  | 9<br>(6 - 13)     | 452<br>(397 - 530)       | 2,310<br>(2,070 - 2,636) | 3,647<br>(3,077 - 4,132)  |
| Diabetes mellitus                                   | 2,902<br>(2,622 - 3,216)   | 0<br>(0 - 0)     | 0<br>(0 - 1)      | 197<br>(168 - 228)       | 1,230<br>(1,079 - 1,407) | 1,473<br>(1,287 - 1,704)  |
| Acute glomerulonephritis                            | 8<br>(6 - 13)              | 0<br>(0 - 0)     | 0<br>(0 - 0)      | 1<br>(1 - 2)             | 4<br>(2 - 6)             | 3<br>(2 - 6)              |
| Chronic kidney disease                              | 2,821<br>(2,062 - 3,242)   | 1<br>(1 - 2)     | 1<br>(1 - 2)      | 142<br>(119 - 196)       | 834<br>(682 - 996)       | 1,842<br>(1,123 - 2,192)  |
| Chronic kidney disease due to diabetes mellitus     | 727<br>(427 - 1,120)       | 0<br>(0 - 0)     | 0<br>(0 - 0)      | 37<br>(21 - 65)          | 239<br>(136 - 404)       | 451<br>(245 - 658)        |

Web Table 31- Poland deaths with 95% UI by age, sex, and cause in 2013

| Cause                                               | Males, All Ages             | Males, 0-4 Years   | Males, 5-14 Years | Males, 15-49 Years       | Males, 50-69 Years       | Males, 70-80 Years       |
|-----------------------------------------------------|-----------------------------|--------------------|-------------------|--------------------------|--------------------------|--------------------------|
| Chronic kidney disease due to hypertension          | 442<br>(269 - 708)          | 0<br>(0 - 0)       | 0<br>(0 - 0)      | 16<br>(10 - 29)          | 104<br>(57 - 164)        | 321<br>(192 - 528)       |
| Chronic kidney disease due to glomerulonephritis    | 51<br>(35 - 74)             | 0<br>(0 - 1)       | 0<br>(0 - 0)      | 8<br>(6 - 11)            | 22<br>(14 - 33)          | 21<br>(13 - 34)          |
| Chronic kidney disease due to other causes          | 1,600<br>(874 - 2,013)      | 1<br>(0 - 1)       | 1<br>(0 - 1)      | 81<br>(59 - 120)         | 469<br>(287 - 631)       | 1,048<br>(449 - 1,379)   |
| Urinary diseases and male infertility               | 314<br>(244 - 612)          | 0<br>(0 - 1)       | 0<br>(0 - 0)      | 16<br>(13 - 28)          | 88<br>(65 - 171)         | 209<br>(155 - 411)       |
| Interstitial nephritis and urinary tract infections | 250<br>(188 - 490)          | 0<br>(0 - 1)       | 0<br>(0 - 0)      | 11<br>(8 - 19)           | 64<br>(45 - 135)         | 175<br>(127 - 338)       |
| Urolithiasis                                        | 16<br>(7 - 51)              | --                 | 0<br>(0 - 0)      | 1<br>(1 - 3)             | 6<br>(3 - 21)            | 8<br>(3 - 27)            |
| Other urinary diseases                              | 48<br>(25 - 83)             | 0<br>(0 - 0)       | 0<br>(0 - 0)      | 4<br>(2 - 6)             | 18<br>(8 - 32)           | 26<br>(12 - 50)          |
| Gynecological diseases                              | --                          | --                 | --                | --                       | --                       | --                       |
| Uterine fibroids                                    | --                          | --                 | --                | --                       | --                       | --                       |
| Polycystic ovarian syndrome                         | --                          | --                 | --                | --                       | --                       | --                       |
| Endometriosis                                       | --                          | --                 | --                | --                       | --                       | --                       |
| Genital prolapse                                    | --                          | --                 | --                | --                       | --                       | --                       |
| Other gynecological diseases                        | --                          | --                 | --                | --                       | --                       | --                       |
| Hemoglobinopathies and hemolytic anemias            | 114<br>(66 - 164)           | 3<br>(1 - 6)       | 2<br>(1 - 3)      | 38<br>(21 - 56)          | 27<br>(16 - 41)          | 45<br>(25 - 65)          |
| Thalassemias                                        | 12<br>(7 - 18)              | 2<br>(1 - 4)       | 1<br>(1 - 2)      | 9<br>(5 - 13)            | 0<br>(0 - 0)             | 0<br>(0 - 0)             |
| Sickle cell disorders                               | 6<br>(4 - 9)                | 0<br>(0 - 1)       | 0<br>(0 - 0)      | 4<br>(2 - 6)             | 2<br>(1 - 3)             | 0<br>(0 - 0)             |
| G6PD deficiency                                     | 3<br>(2 - 4)                | 0<br>(0 - 0)       | 0<br>(0 - 0)      | 1<br>(1 - 2)             | 1<br>(1 - 2)             | 0<br>(0 - 0)             |
| Other hemoglobinopathies and hemolytic anemias      | 93<br>(54 - 132)            | 0<br>(0 - 1)       | 0<br>(0 - 0)      | 24<br>(13 - 35)          | 24<br>(14 - 37)          | 44<br>(25 - 64)          |
| Endocrine, metabolic, blood, and immune disorders   | 277<br>(222 - 483)          | 13<br>(7 - 28)     | 5<br>(3 - 8)      | 57<br>(43 - 87)          | 127<br>(95 - 224)        | 75<br>(53 - 138)         |
| Musculoskeletal disorders                           | 178<br>(138 - 265)          | --                 | 1<br>(0 - 1)      | 21<br>(13 - 27)          | 87<br>(64 - 132)         | 69<br>(53 - 110)         |
| Rheumatoid arthritis                                | 74<br>(54 - 128)            | --                 | 0<br>(0 - 0)      | 4<br>(3 - 7)             | 34<br>(21 - 56)          | 36<br>(24 - 63)          |
| Other musculoskeletal disorders                     | 104<br>(72 - 149)           | --                 | 1<br>(0 - 1)      | 17<br>(10 - 21)          | 53<br>(36 - 79)          | 33<br>(20 - 50)          |
| Other non-communicable diseases                     | 668<br>(509 - 889)          | 435<br>(282 - 639) | 22<br>(15 - 32)   | 85<br>(72 - 102)         | 68<br>(57 - 84)          | 58<br>(48 - 71)          |
| Congenital anomalies                                | 587<br>(434 - 792)          | 406<br>(264 - 595) | 22<br>(15 - 31)   | 79<br>(66 - 95)          | 47<br>(37 - 61)          | 34<br>(27 - 43)          |
| Neural tube defects                                 | 16<br>(9 - 26)              | 13<br>(6 - 23)     | 1<br>(0 - 1)      | 1<br>(1 - 2)             | 1<br>(0 - 1)             | 0<br>(0 - 0)             |
| Congenital heart anomalies                          | 270<br>(202 - 373)          | 173<br>(111 - 271) | 11<br>(7 - 16)    | 49<br>(39 - 61)          | 25<br>(19 - 36)          | 12<br>(8 - 18)           |
| Cleft lip and cleft palate                          | 1<br>(0 - 7)                | 1<br>(0 - 7)       | --                | --                       | --                       | --                       |
| Down syndrome                                       | 17<br>(11 - 28)             | 4<br>(2 - 8)       | 1<br>(0 - 1)      | 7<br>(4 - 11)            | 6<br>(3 - 10)            | 0<br>(0 - 0)             |
| Chromosomal unbalanced rearrangements               | 31<br>(17 - 51)             | 29<br>(15 - 48)    | 0<br>(0 - 1)      | 1<br>(1 - 2)             | 1<br>(0 - 1)             | 0<br>(0 - 0)             |
| Other congenital anomalies                          | 252<br>(174 - 364)          | 186<br>(112 - 293) | 10<br>(5 - 15)    | 21<br>(15 - 28)          | 15<br>(10 - 21)          | 21<br>(16 - 28)          |
| Skin and subcutaneous diseases                      | 52<br>(43 - 65)             | 1<br>(0 - 2)       | 0<br>(0 - 0)      | 6<br>(5 - 8)             | 21<br>(16 - 28)          | 24<br>(18 - 32)          |
| Cellulitis                                          | 9<br>(5 - 14)               | 0<br>(0 - 0)       | 0<br>(0 - 0)      | 1<br>(1 - 2)             | 3<br>(2 - 6)             | 4<br>(2 - 8)             |
| Pyoderma                                            | 38<br>(31 - 49)             | 1<br>(0 - 1)       | 0<br>(0 - 0)      | 4<br>(3 - 5)             | 16<br>(12 - 22)          | 18<br>(13 - 25)          |
| Decubitus ulcer                                     | 1<br>(1 - 2)                | 0<br>(0 - 0)       | 0<br>(0 - 0)      | 1<br>(0 - 1)             | 0<br>(0 - 1)             | 0<br>(0 - 0)             |
| Other skin and subcutaneous diseases                | 4<br>(2 - 6)                | 0<br>(0 - 0)       | 0<br>(0 - 0)      | 1<br>(0 - 1)             | 1<br>(1 - 2)             | 2<br>(1 - 3)             |
| Sudden infant death syndrome                        | 28<br>(11 - 53)             | 28<br>(11 - 53)    | --                | --                       | --                       | --                       |
| Injuries                                            | 18,310<br>(16,633 - 19,760) | 68<br>(41 - 105)   | 119<br>(91 - 150) | 8,186<br>(7,497 - 8,896) | 7,041<br>(6,007 - 7,772) | 2,897<br>(2,550 - 3,323) |
| Transport injuries                                  | 4,559<br>(4,185 - 4,971)    | 17<br>(10 - 28)    | 49<br>(36 - 66)   | 2,447<br>(2,188 - 2,720) | 544<br>(1,314 - 1,701)   | 544<br>(464 - 628)       |
| Road injuries                                       | 4,124<br>(3,730 - 4,519)    | 16<br>(9 - 26)     | 46<br>(34 - 63)   | 2,197<br>(1,922 - 2,456) | 1,363<br>(1,190 - 1,549) | 503<br>(427 - 584)       |
| Pedestrian road injuries                            | 1,386<br>(770 - 1,958)      | 6<br>(3 - 12)      | 19<br>(10 - 29)   | 538<br>(270 - 830)       | 574<br>(320 - 803)       | 248<br>(150 - 335)       |

Web Table 31- Poland deaths with 95% UI by age, sex, and cause in 2013

| Cause                                           | Males, All Ages          | Males, 0-4 Years | Males, 5-14 Years | Males, 15-49 Years       | Males, 50-69 Years       | Males, 70-80 Years       |
|-------------------------------------------------|--------------------------|------------------|-------------------|--------------------------|--------------------------|--------------------------|
| Cyclist road injuries                           | 442<br>(297 - 686)       | 1<br>(0 - 1)     | 7<br>(4 - 12)     | 119<br>(76 - 197)        | 221<br>(139 - 344)       | 95<br>(58 - 157)         |
| Motorcyclist road injuries                      | 290<br>(150 - 392)       | 0<br>(0 - 1)     | 2<br>(1 - 4)      | 232<br>(115 - 316)       | 40<br>(21 - 62)          | 17<br>(9 - 29)           |
| Motor vehicle road injuries                     | 1,989<br>(1,426 - 2,493) | 8<br>(4 - 15)    | 17<br>(9 - 26)    | 1,303<br>(960 - 1,590)   | 521<br>(334 - 732)       | 139<br>(78 - 214)        |
| Other road injuries                             | 17<br>(9 - 32)           | 0<br>(0 - 0)     | 0<br>(0 - 0)      | 5<br>(3 - 10)            | 7<br>(3 - 15)            | 4<br>(2 - 10)            |
| Other transport injuries                        | 435<br>(339 - 642)       | 1<br>(1 - 3)     | 3<br>(2 - 4)      | 250<br>(184 - 367)       | 139<br>(97 - 219)        | 42<br>(26 - 73)          |
| Unintentional injuries                          | 6,398<br>(5,425 - 7,335) | 46<br>(27 - 73)  | 51<br>(37 - 74)   | 2,086<br>(1,793 - 2,509) | 2,524<br>(2,072 - 2,903) | 1,692<br>(1,341 - 2,072) |
| Falls                                           | 2,740<br>(2,059 - 3,294) | 4<br>(2 - 8)     | 5<br>(3 - 7)      | 526<br>(371 - 633)       | 1,021<br>(689 - 1,223)   | 1,184<br>(909 - 1,628)   |
| Drowning                                        | 959<br>(689 - 1,389)     | 13<br>(6 - 30)   | 28<br>(17 - 49)   | 539<br>(398 - 829)       | 310<br>(202 - 439)       | 68<br>(44 - 97)          |
| Fire, heat, and hot substances                  | 469<br>(277 - 624)       | 5<br>(2 - 9)     | 2<br>(1 - 4)      | 152<br>(94 - 207)        | 211<br>(112 - 309)       | 99<br>(59 - 138)         |
| Poisonings                                      | 267<br>(213 - 500)       | 1<br>(1 - 3)     | 2<br>(1 - 3)      | 107<br>(81 - 215)        | 112<br>(83 - 211)        | 45<br>(32 - 86)          |
| Exposure to mechanical forces                   | 409<br>(356 - 606)       | 4<br>(2 - 8)     | 5<br>(4 - 8)      | 192<br>(159 - 328)       | 166<br>(138 - 234)       | 41<br>(33 - 50)          |
| Unintentional firearm injuries                  | 29<br>(23 - 36)          | 0<br>(0 - 0)     | 1<br>(0 - 1)      | 15<br>(11 - 19)          | 10<br>(7 - 15)           | 3<br>(2 - 5)             |
| Unintentional suffocation                       | 37<br>(27 - 54)          | 2<br>(1 - 5)     | 1<br>(0 - 2)      | 13<br>(9 - 21)           | 17<br>(10 - 27)          | 4<br>(2 - 7)             |
| Other exposure to mechanical forces             | 343<br>(295 - 535)       | 2<br>(1 - 3)     | 4<br>(3 - 7)      | 164<br>(133 - 287)       | 139<br>(112 - 200)       | 34<br>(26 - 42)          |
| Adverse effects of medical treatment            | 259<br>(109 - 380)       | 3<br>(1 - 7)     | 1<br>(0 - 2)      | 35<br>(18 - 48)          | 109<br>(46 - 163)        | 110<br>(36 - 181)        |
| Animal contact                                  | 41<br>(30 - 63)          | 0<br>(0 - 1)     | 0<br>(0 - 1)      | 9<br>(6 - 14)            | 18<br>(12 - 26)          | 13<br>(9 - 24)           |
| Venomous animal contact                         | 12<br>(7 - 21)           | 0<br>(0 - 0)     | 0<br>(0 - 0)      | 4<br>(2 - 6)             | 5<br>(3 - 9)             | 3<br>(1 - 6)             |
| Non-venomous animal contact                     | 30<br>(20 - 43)          | 0<br>(0 - 0)     | 0<br>(0 - 0)      | 6<br>(3 - 8)             | 13<br>(8 - 19)           | 11<br>(7 - 17)           |
| Foreign body                                    | 656<br>(372 - 993)       | 12<br>(5 - 20)   | 3<br>(1 - 5)      | 247<br>(144 - 388)       | 286<br>(153 - 453)       | 109<br>(53 - 162)        |
| Pulmonary aspiration and foreign body in airway | 653<br>(368 - 989)       | 12<br>(5 - 20)   | 3<br>(1 - 4)      | 246<br>(143 - 387)       | 285<br>(151 - 450)       | 108<br>(52 - 162)        |
| Foreign body in other body part                 | 3<br>(2 - 6)             | 0<br>(0 - 0)     | 0<br>(0 - 0)      | 1<br>(1 - 2)             | 1<br>(1 - 3)             | 0<br>(0 - 1)             |
| Other unintentional injuries                    | 598<br>(452 - 804)       | 2<br>(1 - 5)     | 4<br>(2 - 8)      | 279<br>(200 - 388)       | 290<br>(187 - 456)       | 22<br>(14 - 33)          |
| Self-harm and interpersonal violence            | 7,352<br>(5,298 - 8,456) | 5<br>(3 - 9)     | 19<br>(12 - 27)   | 3,652<br>(2,659 - 4,178) | 3,015<br>(1,981 - 3,590) | 661<br>(474 - 794)       |
| Self-harm                                       | 6,709<br>(4,428 - 7,646) | --               | 16<br>(9 - 24)    | 3,311<br>(2,244 - 3,814) | 2,769<br>(1,678 - 3,302) | 613<br>(423 - 745)       |
| Interpersonal violence                          | 643<br>(497 - 1,146)     | 5<br>(3 - 9)     | 3<br>(2 - 5)      | 342<br>(252 - 614)       | 246<br>(173 - 458)       | 48<br>(32 - 80)          |
| Assault by firearm                              | 97<br>(51 - 226)         | 0<br>(0 - 1)     | 0<br>(0 - 0)      | 57<br>(30 - 136)         | 32<br>(16 - 75)          | 7<br>(3 - 14)            |
| Assault by sharp object                         | 229<br>(150 - 426)       | 1<br>(1 - 3)     | 1<br>(1 - 2)      | 124<br>(77 - 239)        | 90<br>(55 - 167)         | 13<br>(7 - 23)           |
| Assault by other means                          | 317<br>(216 - 561)       | 3<br>(2 - 6)     | 1<br>(1 - 3)      | 160<br>(105 - 288)       | 124<br>(80 - 228)        | 29<br>(18 - 46)          |

Web Table 31- Poland deaths with 95% UI by age, sex, and cause in 2013

| Cause                                                             | Females, All Ages              | Females, 0-4 Years   | Females, 5-14 Years | Females, 15-49 Years     | Females, 50-69 Years        | Females, 70-80 Years           |
|-------------------------------------------------------------------|--------------------------------|----------------------|---------------------|--------------------------|-----------------------------|--------------------------------|
| All causes                                                        | 189,261<br>(179,675 - 198,741) | 902<br>(635 - 1,275) | 170<br>(141 - 205)  | 5,971<br>(5,509 - 6,433) | 34,702<br>(32,461 - 36,943) | 147,516<br>(140,762 - 154,272) |
| Communicable, maternal, neonatal, and nutritional diseases        | 6,244<br>(4,999 - 7,656)       | 445<br>(304 - 640)   | 17<br>(13 - 22)     | 257<br>(214 - 292)       | 741<br>(557 - 872)          | 4,785<br>(3,648 - 6,227)       |
| HIV/AIDS and tuberculosis                                         | 213<br>(167 - 355)             | 0<br>(0 - 0)         | 0<br>(0 - 0)        | 43<br>(34 - 54)          | 55<br>(42 - 92)             | 115<br>(80 - 212)              |
| Tuberculosis                                                      | 176<br>(133 - 313)             | 0<br>(0 - 0)         | 0<br>(0 - 0)        | 17<br>(13 - 25)          | 46<br>(34 - 82)             | 113<br>(80 - 211)              |
| HIV/AIDS                                                          | 37<br>(26 - 52)                | 0<br>(0 - 0)         | 0<br>(0 - 0)        | 26<br>(18 - 35)          | 10<br>(6 - 16)              | 1<br>(0 - 3)                   |
| HIV/AIDS resulting in mycobacterial infection                     | 2<br>(1 - 2)                   | 0<br>(0 - 0)         | 0<br>(0 - 0)        | 1<br>(1 - 2)             | 0<br>(0 - 1)                | 0<br>(0 - 0)                   |
| HIV/AIDS resulting in other diseases                              | 36<br>(25 - 49)                | 0<br>(0 - 0)         | 0<br>(0 - 0)        | 25<br>(17 - 34)          | 9<br>(5 - 15)               | 1<br>(0 - 3)                   |
| Diarrhea, lower respiratory, and other common infectious diseases | 5,221<br>(3,966 - 6,620)       | 55<br>(35 - 84)      | 14<br>(10 - 19)     | 163<br>(121 - 195)       | 615<br>(417 - 751)          | 4,374<br>(3,246 - 5,784)       |
| Diarrheal diseases                                                | 53<br>(38 - 75)                | 4<br>(2 - 7)         | 0<br>(0 - 0)        | 2<br>(2 - 3)             | 8<br>(5 - 10)               | 40<br>(26 - 61)                |
| Intestinal infectious diseases                                    | 26<br>(7 - 60)                 | 4<br>(1 - 9)         | 2<br>(1 - 6)        | 9<br>(2 - 22)            | 6<br>(1 - 17)               | 5<br>(1 - 14)                  |
| Typhoid fever                                                     | 19<br>(5 - 46)                 | 2<br>(1 - 7)         | 2<br>(0 - 4)        | 6<br>(1 - 17)            | 5<br>(1 - 13)               | 4<br>(1 - 10)                  |
| Paratyphoid fever                                                 | 5<br>(1 - 13)                  | 1<br>(0 - 2)         | 1<br>(0 - 1)        | 2<br>(0 - 5)             | 1<br>(0 - 3)                | 1<br>(0 - 3)                   |
| Other intestinal infectious diseases                              | 2<br>(0 - 6)                   | 0<br>(0 - 2)         | 0<br>(0 - 1)        | 1<br>(0 - 3)             | 0<br>(0 - 2)                | 1<br>(0 - 3)                   |
| Lower respiratory infections                                      | 4,990<br>(3,745 - 6,405)       | 34<br>(20 - 56)      | 7<br>(5 - 10)       | 126<br>(87 - 152)        | 553<br>(360 - 686)          | 4,270<br>(3,132 - 5,690)       |
| Upper respiratory infections                                      | 5<br>(1 - 17)                  | 0<br>(0 - 0)         | 0<br>(0 - 0)        | 0<br>(0 - 1)             | 1<br>(0 - 3)                | 4<br>(0 - 16)                  |
| Otitis media                                                      | 3<br>(2 - 4)                   | 1<br>(0 - 1)         | 0<br>(0 - 0)        | 1<br>(1 - 1)             | 1<br>(0 - 1)                | 1<br>(0 - 1)                   |
| Meningitis                                                        | 68<br>(56 - 80)                | 7<br>(4 - 11)        | 1<br>(1 - 2)        | 10<br>(8 - 12)           | 24<br>(18 - 29)             | 26<br>(20 - 33)                |
| Pneumococcal meningitis                                           | 15<br>(9 - 22)                 | 1<br>(0 - 2)         | 0<br>(0 - 0)        | 2<br>(1 - 4)             | 6<br>(2 - 10)               | 6<br>(3 - 10)                  |
| H influenzae type B meningitis                                    | 8<br>(6 - 12)                  | 2<br>(1 - 3)         | 0<br>(0 - 1)        | 1<br>(1 - 2)             | 2<br>(1 - 4)                | 3<br>(2 - 5)                   |
| Meningococcal meningitis                                          | 13<br>(9 - 20)                 | 2<br>(1 - 3)         | 0<br>(0 - 1)        | 2<br>(1 - 3)             | 4<br>(2 - 9)                | 5<br>(3 - 8)                   |
| Other meningitis                                                  | 31<br>(21 - 40)                | 3<br>(1 - 5)         | 1<br>(0 - 1)        | 4<br>(3 - 7)             | 12<br>(6 - 17)              | 12<br>(7 - 18)                 |
| Encephalitis                                                      | 50<br>(36 - 71)                | 5<br>(2 - 11)        | 2<br>(1 - 4)        | 12<br>(7 - 18)           | 20<br>(12 - 29)             | 11<br>(6 - 16)                 |
| Diphtheria                                                        | 0<br>(0 - 1)                   | 0<br>(0 - 0)         | 0<br>(0 - 0)        | 0<br>(0 - 0)             | 0<br>(0 - 1)                | --                             |
| Whooping cough                                                    | 1<br>(1 - 2)                   | 0<br>(0 - 1)         | 0<br>(0 - 0)        | 1<br>(1 - 1)             | 0<br>(0 - 0)                | --                             |
| Tetanus                                                           | 6<br>(4 - 13)                  | 0<br>(0 - 0)         | 0<br>(0 - 0)        | 1<br>(0 - 1)             | 1<br>(1 - 3)                | 3<br>(2 - 9)                   |
| Measles                                                           | 0<br>(0 - 0)                   | 0<br>(0 - 0)         | 0<br>(0 - 0)        | 0<br>(0 - 0)             | 0<br>(0 - 0)                | --                             |
| Varicella and herpes zoster                                       | 18<br>(3 - 84)                 | 1<br>(0 - 3)         | 0<br>(0 - 1)        | 1<br>(0 - 4)             | 2<br>(0 - 6)                | 14<br>(0 - 79)                 |
| Neglected tropical diseases and malaria                           | 10<br>(8 - 11)                 | 1<br>(0 - 1)         | 1<br>(0 - 1)        | 3<br>(2 - 3)             | 3<br>(2 - 3)                | 3<br>(2 - 4)                   |
| Cysticercosis                                                     | 0<br>(0 - 0)                   | 0<br>(0 - 0)         | 0<br>(0 - 0)        | 0<br>(0 - 0)             | 0<br>(0 - 0)                | 0<br>(0 - 0)                   |
| Cystic echinococcosis                                             | 2<br>(2 - 2)                   | 0<br>(0 - 0)         | 0<br>(0 - 0)        | 0<br>(0 - 0)             | 1<br>(1 - 1)                | 1<br>(1 - 1)                   |
| Dengue                                                            | 2<br>(2 - 3)                   | 0<br>(0 - 0)         | 0<br>(0 - 0)        | 1<br>(1 - 1)             | 1<br>(0 - 1)                | 0<br>(0 - 1)                   |
| Rabies                                                            | 2<br>(1 - 2)                   | 0<br>(0 - 0)         | 0<br>(0 - 0)        | 1<br>(0 - 1)             | 1<br>(0 - 1)                | 0<br>(0 - 0)                   |
| Other neglected tropical diseases                                 | 3<br>(3 - 4)                   | 0<br>(0 - 1)         | 0<br>(0 - 0)        | 1<br>(1 - 1)             | 1<br>(1 - 1)                | 1<br>(1 - 2)                   |
| Maternal disorders                                                | 20<br>(16 - 26)                | --                   | 0<br>(0 - 0)        | 20<br>(16 - 26)          | --                          | --                             |
| Maternal hemorrhage                                               | 3<br>(2 - 5)                   | --                   | 0<br>(0 - 0)        | 3<br>(2 - 5)             | --                          | --                             |
| Maternal sepsis and other maternal infections                     | 2<br>(1 - 3)                   | --                   | 0<br>(0 - 0)        | 2<br>(1 - 3)             | --                          | --                             |
| Maternal hypertensive disorders                                   | 2<br>(1 - 3)                   | --                   | 0<br>(0 - 0)        | 2<br>(1 - 3)             | --                          | --                             |
| Maternal obstructed labor                                         | 2<br>(1 - 3)                   | --                   | 0<br>(0 - 0)        | 2<br>(1 - 3)             | --                          | --                             |
| Maternal abortive outcome                                         | 4<br>(3 - 5)                   | --                   | 0<br>(0 - 0)        | 4<br>(3 - 5)             | --                          | --                             |
| Indirect maternal deaths                                          | 1<br>(1 - 2)                   | --                   | 0<br>(0 - 0)        | 1<br>(1 - 2)             | --                          | --                             |

Web Table 31- Poland deaths with 95% UI by age, sex, and cause in 2013

| Cause                                                            | Females, All Ages              | Females, 0-4 Years | Females, 5-14 Years | Females, 15-49 Years     | Females, 50-69 Years        | Females, 70-80 Years           |
|------------------------------------------------------------------|--------------------------------|--------------------|---------------------|--------------------------|-----------------------------|--------------------------------|
| Late maternal deaths                                             | 2<br>(1 - 4)                   | --                 | 0<br>(0 - 0)        | 2<br>(1 - 4)             | --                          | --                             |
| Maternal deaths aggravated by HIV/AIDS                           | 0<br>(0 - 0)                   | --                 | --                  | 0<br>(0 - 0)             | --                          | --                             |
| Other maternal disorders                                         | 3<br>(2 - 4)                   | --                 | 0<br>(0 - 0)        | 3<br>(2 - 4)             | --                          | --                             |
| Neonatal disorders                                               | 379<br>(259 - 544)             | 379<br>(259 - 544) | --                  | --                       | --                          | --                             |
| Neonatal preterm birth complications                             | 237<br>(143 - 354)             | 237<br>(143 - 354) | --                  | --                       | --                          | --                             |
| Neonatal encephalopathy due to birth asphyxia and trauma         | 53<br>(30 - 86)                | 53<br>(30 - 86)    | --                  | --                       | --                          | --                             |
| Neonatal sepsis and other neonatal infections                    | 48<br>(23 - 97)                | 48<br>(23 - 97)    | --                  | --                       | --                          | --                             |
| Hemolytic disease and other neonatal jaundice                    | 1<br>(0 - 3)                   | 1<br>(0 - 3)       | --                  | --                       | --                          | --                             |
| Other neonatal disorders                                         | 39<br>(22 - 67)                | 39<br>(22 - 67)    | --                  | --                       | --                          | --                             |
| Nutritional deficiencies                                         | 299<br>(233 - 381)             | 1<br>(1 - 2)       | 0<br>(0 - 1)        | 18<br>(14 - 22)          | 34<br>(28 - 45)             | 245<br>(185 - 325)             |
| Protein-energy malnutrition                                      | 35<br>(11 - 70)                | 0<br>(0 - 1)       | 0<br>(0 - 0)        | 3<br>(1 - 5)             | 8<br>(3 - 14)               | 23<br>(7 - 51)                 |
| Iodine deficiency                                                | 8<br>(0 - 44)                  | 0<br>(0 - 0)       | 0<br>(0 - 0)        | 0<br>(0 - 2)             | 2<br>(0 - 7)                | 6<br>(0 - 43)                  |
| Iron-deficiency anemia                                           | 231<br>(157 - 309)             | 0<br>(0 - 1)       | 0<br>(0 - 0)        | 13<br>(9 - 17)           | 21<br>(13 - 32)             | 196<br>(130 - 270)             |
| Other nutritional deficiencies                                   | 25<br>(10 - 60)                | 0<br>(0 - 0)       | 0<br>(0 - 0)        | 1<br>(1 - 3)             | 3<br>(1 - 7)                | 20<br>(8 - 52)                 |
| Other communicable, maternal, neonatal, and nutritional diseases | 103<br>(75 - 129)              | 10<br>(3 - 22)     | 2<br>(1 - 3)        | 10<br>(8 - 13)           | 33<br>(26 - 44)             | 48<br>(29 - 65)                |
| Sexually transmitted diseases excluding HIV                      | 20<br>(11 - 34)                | 8<br>(1 - 19)      | 1<br>(0 - 2)        | 2<br>(1 - 3)             | 4<br>(2 - 8)                | 5<br>(3 - 10)                  |
| Syphilis                                                         | 16<br>(8 - 28)                 | 8<br>(1 - 19)      | 1<br>(0 - 2)        | 1<br>(0 - 1)             | 2<br>(1 - 4)                | 4<br>(2 - 7)                   |
| Chlamydial infection                                             | 1<br>(1 - 2)                   | --                 | 0<br>(0 - 0)        | 0<br>(0 - 1)             | 1<br>(0 - 1)                | 0<br>(0 - 1)                   |
| Gonococcal infection                                             | 2<br>(1 - 3)                   | --                 | 0<br>(0 - 0)        | 0<br>(0 - 1)             | 1<br>(0 - 1)                | 1<br>(0 - 1)                   |
| Other sexually transmitted diseases                              | 1<br>(1 - 2)                   | --                 | 0<br>(0 - 0)        | 0<br>(0 - 1)             | 1<br>(0 - 1)                | 0<br>(0 - 1)                   |
| Hepatitis                                                        | 13<br>(10 - 17)                | 0<br>(0 - 0)       | 0<br>(0 - 0)        | 2<br>(1 - 2)             | 4<br>(3 - 7)                | 6<br>(4 - 10)                  |
| Acute hepatitis A                                                | 2<br>(1 - 4)                   | 0<br>(0 - 0)       | 0<br>(0 - 0)        | 1<br>(0 - 1)             | 1<br>(0 - 2)                | 1<br>(0 - 2)                   |
| Acute hepatitis B                                                | 10<br>(7 - 14)                 | 0<br>(0 - 0)       | 0<br>(0 - 0)        | 1<br>(0 - 1)             | 4<br>(2 - 6)                | 6<br>(3 - 9)                   |
| Acute hepatitis C                                                | 1<br>(0 - 1)                   | --                 | 0<br>(0 - 0)        | 0<br>(0 - 0)             | 0<br>(0 - 1)                | 0<br>(0 - 1)                   |
| Other infectious diseases                                        | 70<br>(44 - 90)                | 2<br>(1 - 4)       | 1<br>(0 - 1)        | 7<br>(4 - 9)             | 25<br>(18 - 34)             | 36<br>(18 - 52)                |
| Non-communicable diseases                                        | 177,035<br>(167,596 - 185,765) | 407<br>(279 - 592) | 92<br>(75 - 113)    | 4,585<br>(4,206 - 4,959) | 32,563<br>(30,438 - 34,634) | 139,387<br>(132,435 - 145,748) |
| Neoplasms                                                        | 40,867<br>(34,813 - 44,698)    | 25<br>(15 - 38)    | 46<br>(36 - 59)     | 2,525<br>(2,248 - 2,796) | 16,936<br>(14,334 - 18,645) | 21,336<br>(18,033 - 23,512)    |
| Esophageal cancer                                                | 427<br>(362 - 490)             | --                 | --                  | 12<br>(9 - 15)           | 158<br>(130 - 189)          | 257<br>(210 - 306)             |
| Stomach cancer                                                   | 1,915<br>(1,376 - 2,598)       | --                 | --                  | 81<br>(56 - 114)         | 561<br>(396 - 747)          | 1,273<br>(885 - 1,807)         |
| Liver cancer                                                     | 1,298<br>(1,036 - 1,680)       | --                 | 0<br>(0 - 1)        | 39<br>(28 - 52)          | 377<br>(297 - 482)          | 882<br>(663 - 1,180)           |
| Liver cancer due to hepatitis B                                  | 165<br>(35 - 306)              | --                 | 0<br>(0 - 0)        | 9<br>(3 - 15)            | 67<br>(12 - 129)            | 89<br>(18 - 174)               |
| Liver cancer due to hepatitis C                                  | 618<br>(342 - 912)             | --                 | 0<br>(0 - 0)        | 16<br>(10 - 23)          | 176<br>(104 - 258)          | 426<br>(220 - 650)             |
| Liver cancer due to alcohol use                                  | 307<br>(158 - 512)             | --                 | --                  | 4<br>(2 - 7)             | 64<br>(35 - 106)            | 238<br>(113 - 416)             |
| Liver cancer due to other causes                                 | 208<br>(118 - 318)             | --                 | 0<br>(0 - 1)        | 10<br>(6 - 16)           | 69<br>(35 - 115)            | 129<br>(69 - 208)              |
| Larynx cancer                                                    | 142<br>(97 - 199)              | --                 | --                  | 10<br>(6 - 15)           | 86<br>(57 - 123)            | 47<br>(30 - 70)                |
| Tracheal, bronchus and lung cancer                               | 6,334<br>(4,501 - 7,393)       | --                 | --                  | 242<br>(190 - 295)       | 3,362<br>(2,213 - 4,015)    | 2,729<br>(1,854 - 3,314)       |
| Breast cancer                                                    | 5,639<br>(3,875 - 6,542)       | --                 | --                  | 564<br>(403 - 682)       | 2,818<br>(1,962 - 3,264)    | 2,257<br>(1,449 - 2,727)       |
| Cervical cancer                                                  | 2,170<br>(1,731 - 2,568)       | --                 | --                  | 287<br>(229 - 346)       | 812<br>(854 - 1,295)        | 812<br>(615 - 1,023)           |
| Uterine cancer                                                   | 1,278<br>(690 - 1,565)         | --                 | --                  | 31<br>(18 - 41)          | 543<br>(307 - 683)          | 704<br>(349 - 901)             |
| Prostate cancer                                                  | --                             | --                 | --                  | --                       | --                          | --                             |

Web Table 31- Poland deaths with 95% UI by age, sex, and cause in 2013

| Cause                                         | Females, All Ages            | Females, 0-4 Years | Females, 5-14 Years | Females, 15-49 Years | Females, 50-69 Years       | Females, 70-80 Years        |
|-----------------------------------------------|------------------------------|--------------------|---------------------|----------------------|----------------------------|-----------------------------|
| Colon and rectum cancer                       | 4,945<br>(4,286 - 5,642)     | --                 | --                  | 155<br>(129 - 181)   | 1,548<br>(1,335 - 1,745)   | 3,242<br>(2,684 - 3,868)    |
| Lip and oral cavity cancer                    | 310<br>(248 - 369)           | --                 | --                  | 20<br>(15 - 24)      | 120<br>(91 - 154)          | 171<br>(132 - 215)          |
| Nasopharynx cancer                            | 61<br>(25 - 103)             | --                 | 0<br>(0 - 0)        | 7<br>(3 - 12)        | 28<br>(12 - 48)            | 26<br>(10 - 46)             |
| Other pharynx cancer                          | 133<br>(102 - 171)           | --                 | --                  | 11<br>(7 - 16)       | 79<br>(56 - 109)           | 44<br>(31 - 58)             |
| Gallbladder and biliary tract cancer          | 1,561<br>(1,064 - 1,945)     | --                 | --                  | 32<br>(20 - 43)      | 528<br>(361 - 665)         | 1,000<br>(658 - 1,314)      |
| Pancreatic cancer                             | 2,405<br>(2,097 - 2,710)     | --                 | --                  | 67<br>(54 - 82)      | 875<br>(746 - 998)         | 1,462<br>(1,244 - 1,700)    |
| Malignant skin melanoma                       | 603<br>(369 - 758)           | --                 | --                  | 73<br>(50 - 98)      | 234<br>(147 - 305)         | 296<br>(166 - 385)          |
| Non-melanoma skin cancer                      | 379<br>(240 - 565)           | --                 | --                  | 4<br>(3 - 6)         | 32<br>(23 - 43)            | 343<br>(211 - 521)          |
| Ovarian cancer                                | 2,946<br>(2,488 - 3,386)     | --                 | --                  | 257<br>(209 - 307)   | 1,519<br>(1,266 - 1,803)   | 1,170<br>(875 - 1,411)      |
| Testicular cancer                             | --                           | --                 | --                  | --                   | --                         | --                          |
| Kidney cancer                                 | 991<br>(699 - 1,313)         | 1<br>(0 - 1)       | 1<br>(1 - 2)        | 37<br>(27 - 49)      | 385<br>(286 - 496)         | 567<br>(358 - 837)          |
| Bladder cancer                                | 636<br>(387 - 871)           | --                 | --                  | 13<br>(8 - 19)       | 179<br>(107 - 252)         | 444<br>(269 - 625)          |
| Brain and nervous system cancer               | 1,460<br>(1,002 - 1,725)     | 6<br>(3 - 10)      | 15<br>(10 - 21)     | 182<br>(144 - 231)   | 660<br>(514 - 846)         | 598<br>(287 - 789)          |
| Thyroid cancer                                | 249<br>(156 - 315)           | --                 | 0<br>(0 - 0)        | 9<br>(6 - 12)        | 84<br>(52 - 106)           | 156<br>(96 - 208)           |
| Mesothelioma                                  | 79<br>(52 - 102)             | --                 | --                  | 6<br>(4 - 9)         | 39<br>(24 - 53)            | 34<br>(20 - 49)             |
| Hodgkin lymphoma                              | 113<br>(85 - 171)            | 0<br>(0 - 0)       | 1<br>(0 - 1)        | 39<br>(28 - 55)      | 40<br>(28 - 62)            | 34<br>(24 - 55)             |
| Non-Hodgkin lymphoma                          | 773<br>(334 - 1,056)         | 1<br>(0 - 2)       | 3<br>(1 - 4)        | 57<br>(26 - 87)      | 276<br>(128 - 408)         | 437<br>(167 - 602)          |
| Multiple myeloma                              | 571<br>(339 - 818)           | --                 | --                  | 16<br>(9 - 26)       | 226<br>(132 - 346)         | 328<br>(178 - 491)          |
| Leukemia                                      | 1,152<br>(881 - 1,341)       | 6<br>(3 - 10)      | 13<br>(9 - 18)      | 98<br>(80 - 116)     | 341<br>(259 - 402)         | 695<br>(533 - 840)          |
| Other neoplasms                               | 2,297<br>(1,707 - 2,756)     | 12<br>(7 - 19)     | 13<br>(9 - 18)      | 175<br>(144 - 226)   | 768<br>(617 - 981)         | 1,330<br>(832 - 1,710)      |
| Cardiovascular diseases                       | 98,126<br>(91,475 - 107,779) | 7<br>(5 - 12)      | 7<br>(5 - 9)        | 929<br>(785 - 1,253) | 10,005<br>(8,733 - 13,112) | 87,179<br>(81,657 - 93,976) |
| Rheumatic heart disease                       | 890<br>(536 - 1,112)         | 0<br>(0 - 0)       | 0<br>(0 - 1)        | 29<br>(19 - 64)      | 180<br>(122 - 404)         | 680<br>(291 - 914)          |
| Ischemic heart disease                        | 39,455<br>(33,876 - 50,334)  | 0<br>(0 - 1)       | 1<br>(0 - 1)        | 327<br>(249 - 555)   | 4,148<br>(3,387 - 6,283)   | 34,980<br>(29,848 - 43,344) |
| Cerebrovascular disease                       | 38,182<br>(33,046 - 48,686)  | 2<br>(1 - 3)       | 3<br>(2 - 4)        | 381<br>(309 - 504)   | 3,486<br>(2,904 - 4,897)   | 34,310<br>(29,479 - 43,791) |
| Ischemic stroke                               | 30,556<br>(25,457 - 37,233)  | 0<br>(0 - 1)       | 1<br>(0 - 1)        | 65<br>(42 - 100)     | 1,572<br>(1,137 - 2,348)   | 28,918<br>(24,076 - 35,005) |
| Hemorrhagic stroke                            | 7,626<br>(5,349 - 13,785)    | 1<br>(1 - 2)       | 2<br>(1 - 3)        | 316<br>(256 - 417)   | 1,914<br>(1,517 - 2,800)   | 5,392<br>(3,337 - 10,805)   |
| Hypertensive heart disease                    | 8,602<br>(3,404 - 13,190)    | 0<br>(0 - 0)       | 0<br>(0 - 0)        | 31<br>(20 - 44)      | 525<br>(321 - 698)         | 8,046<br>(2,990 - 12,599)   |
| Cardiomyopathy and myocarditis                | 5,054<br>(3,705 - 7,241)     | 4<br>(2 - 6)       | 2<br>(1 - 3)        | 63<br>(46 - 88)      | 330<br>(260 - 444)         | 4,655<br>(3,352 - 6,828)    |
| Atrial fibrillation and flutter               | 901<br>(656 - 1,227)         | --                 | --                  | 2<br>(1 - 3)         | 49<br>(37 - 63)            | 850<br>(609 - 1,169)        |
| Aortic aneurysm                               | 613<br>(379 - 908)           | --                 | --                  | 16<br>(9 - 24)       | 141<br>(86 - 210)          | 456<br>(276 - 695)          |
| Peripheral vascular disease                   | 688<br>(512 - 907)           | --                 | --                  | 2<br>(1 - 3)         | 74<br>(57 - 96)            | 612<br>(438 - 827)          |
| Endocarditis                                  | 132<br>(73 - 176)            | 1<br>(0 - 1)       | 0<br>(0 - 0)        | 10<br>(6 - 15)       | 40<br>(22 - 55)            | 81<br>(43 - 112)            |
| Other cardiovascular and circulatory diseases | 3,610<br>(2,024 - 4,537)     | 1<br>(0 - 1)       | 0<br>(0 - 1)        | 67<br>(41 - 92)      | 1,032<br>(504 - 1,346)     | 2,509<br>(1,392 - 3,339)    |
| Chronic respiratory diseases                  | 7,719<br>(5,829 - 9,099)     | 2<br>(1 - 3)       | 1<br>(1 - 2)        | 83<br>(67 - 126)     | 1,026<br>(821 - 1,181)     | 6,607<br>(4,828 - 7,914)    |
| Chronic obstructive pulmonary disease         | 6,401<br>(4,666 - 7,638)     | 1<br>(1 - 2)       | 0<br>(0 - 1)        | 41<br>(29 - 63)      | 836<br>(653 - 986)         | 5,523<br>(3,895 - 6,698)    |
| Pneumoconiosis                                | 18<br>(10 - 30)              | 0<br>(0 - 0)       | 0<br>(0 - 0)        | 1<br>(1 - 2)         | 3<br>(1 - 5)               | 14<br>(7 - 25)              |
| Silicosis                                     | 1<br>(0 - 1)                 | 0<br>(0 - 0)       | 0<br>(0 - 0)        | 0<br>(0 - 0)         | 0<br>(0 - 0)               | 0<br>(0 - 0)                |
| Asbestosis                                    | 1<br>(0 - 1)                 | 0<br>(0 - 0)       | 0<br>(0 - 0)        | 0<br>(0 - 0)         | 0<br>(0 - 0)               | 0<br>(0 - 0)                |
| Coal workers pneumoconiosis                   | 0<br>(0 - 1)                 | 0<br>(0 - 0)       | 0<br>(0 - 0)        | 0<br>(0 - 0)         | 0<br>(0 - 0)               | 0<br>(0 - 0)                |
| Other pneumoconiosis                          | 17<br>(9 - 28)               | 0<br>(0 - 0)       | 0<br>(0 - 0)        | 1<br>(0 - 1)         | 2<br>(1 - 4)               | 14<br>(7 - 25)              |



Web Table 31- Poland deaths with 95% UI by age, sex, and cause in 2013

| Cause                                               | Females, All Ages           | Females, 0-4 Years | Females, 5-14 Years | Females, 15-49 Years | Females, 50-69 Years     | Females, 70-80 Years        |
|-----------------------------------------------------|-----------------------------|--------------------|---------------------|----------------------|--------------------------|-----------------------------|
| Asthma                                              | 341<br>(198 - 516)          | 0<br>(0 - 0)       | 0<br>(0 - 1)        | 17<br>(12 - 27)      | 98<br>(59 - 144)         | 226<br>(114 - 363)          |
| Interstitial lung disease and pulmonary sarcoidosis | 760<br>(358 - 1,338)        | 0<br>(0 - 0)       | 0<br>(0 - 0)        | 16<br>(9 - 29)       | 81<br>(42 - 136)         | 663<br>(294 - 1,203)        |
| Other chronic respiratory diseases                  | 199<br>(106 - 325)          | 0<br>(0 - 1)       | 0<br>(0 - 0)        | 8<br>(5 - 12)        | 9<br>(5 - 15)            | 182<br>(92 - 308)           |
| Cirrhosis                                           | 2,431<br>(2,109 - 2,726)    | 1<br>(0 - 1)       | 1<br>(1 - 1)        | 338<br>(283 - 399)   | 1,214<br>(1,022 - 1,398) | 878<br>(739 - 1,028)        |
| Cirrhosis due to hepatitis B                        | 946<br>(638 - 1,229)        | 0<br>(0 - 0)       | 0<br>(0 - 0)        | 127<br>(84 - 173)    | 466<br>(311 - 624)       | 353<br>(230 - 486)          |
| Cirrhosis due to hepatitis C                        | 612<br>(311 - 927)          | 0<br>(0 - 0)       | 0<br>(0 - 0)        | 80<br>(39 - 129)     | 334<br>(165 - 516)       | 198<br>(88 - 347)           |
| Cirrhosis due to alcohol use                        | 444<br>(279 - 629)          | --<br>(0 - 0)      | --<br>(0 - 0)       | 34<br>(11 - 57)      | 192<br>(114 - 287)       | 218<br>(127 - 320)          |
| Cirrhosis due to other causes                       | 430<br>(261 - 630)          | 0<br>(0 - 1)       | 1<br>(0 - 1)        | 97<br>(63 - 136)     | 221<br>(121 - 337)       | 110<br>(59 - 180)           |
| Digestive diseases                                  | 4,538<br>(3,661 - 5,252)    | 2<br>(1 - 2)       | 2<br>(1 - 3)        | 124<br>(104 - 147)   | 748<br>(610 - 871)       | 3,662<br>(2,899 - 4,322)    |
| Peptic ulcer disease                                | 746<br>(426 - 1,063)        | 0<br>(0 - 0)       | 0<br>(0 - 0)        | 22<br>(14 - 29)      | 135<br>(83 - 183)        | 589<br>(319 - 876)          |
| Gastritis and duodenitis                            | 59<br>(24 - 104)            | 0<br>(0 - 0)       | 0<br>(0 - 0)        | 2<br>(1 - 3)         | 9<br>(4 - 15)            | 48<br>(18 - 91)             |
| Appendicitis                                        | 53<br>(32 - 84)             | 0<br>(0 - 0)       | 0<br>(0 - 0)        | 3<br>(2 - 5)         | 12<br>(8 - 20)           | 38<br>(20 - 63)             |
| Paralytic ileus and intestinal obstruction          | 825<br>(466 - 1,445)        | 1<br>(0 - 1)       | 1<br>(0 - 1)        | 18<br>(11 - 35)      | 111<br>(65 - 209)        | 694<br>(384 - 1,203)        |
| Inguinal, femoral, and abdominal hernia             | 197<br>(97 - 399)           | 0<br>(0 - 0)       | 0<br>(0 - 0)        | 2<br>(1 - 3)         | 22<br>(12 - 44)          | 173<br>(78 - 357)           |
| Inflammatory bowel disease                          | 165<br>(81 - 228)           | 0<br>(0 - 0)       | 0<br>(0 - 0)        | 8<br>(4 - 11)        | 44<br>(22 - 61)          | 113<br>(52 - 166)           |
| Vascular intestinal disorders                       | 946<br>(496 - 1,517)        | 0<br>(0 - 0)       | 0<br>(0 - 0)        | 8<br>(4 - 15)        | 113<br>(56 - 193)        | 825<br>(416 - 1,335)        |
| Gallbladder and biliary diseases                    | 498<br>(311 - 774)          | 0<br>(0 - 0)       | 0<br>(0 - 0)        | 6<br>(4 - 9)         | 54<br>(35 - 106)         | 437<br>(269 - 673)          |
| Pancreatitis                                        | 771<br>(498 - 1,125)        | 0<br>(0 - 0)       | 0<br>(0 - 0)        | 50<br>(35 - 66)      | 200<br>(136 - 277)       | 520<br>(307 - 792)          |
| Other digestive diseases                            | 278<br>(179 - 372)          | 0<br>(0 - 0)       | 0<br>(0 - 0)        | 6<br>(4 - 8)         | 47<br>(32 - 62)          | 224<br>(138 - 310)          |
| Neurological disorders                              | 14,341<br>(11,380 - 17,464) | 8<br>(5 - 12)      | 6<br>(4 - 8)        | 153<br>(116 - 207)   | 840<br>(679 - 1,006)     | 13,335<br>(10,486 - 16,398) |
| Alzheimer disease and other dementias               | 13,180<br>(10,277 - 16,210) | --<br>(0 - 0)      | --<br>(0 - 0)       | 2<br>(0 - 3)         | 421<br>(304 - 552)       | 12,757<br>(9,918 - 15,775)  |
| Parkinson disease                                   | 435<br>(231 - 562)          | --<br>(0 - 0)      | --<br>(0 - 0)       | 2<br>(1 - 3)         | 52<br>(37 - 79)          | 381<br>(177 - 499)          |
| Epilepsy                                            | 135<br>(74 - 180)           | 1<br>(0 - 2)       | 3<br>(2 - 4)        | 46<br>(29 - 60)      | 45<br>(25 - 62)          | 40<br>(15 - 67)             |
| Multiple sclerosis                                  | 288<br>(175 - 477)          | --<br>(0 - 0)      | --<br>(0 - 0)       | 69<br>(43 - 127)     | 172<br>(104 - 279)       | 47<br>(26 - 74)             |
| Other neurological disorders                        | 304<br>(264 - 345)          | 7<br>(4 - 11)      | 3<br>(2 - 4)        | 34<br>(28 - 40)      | 151<br>(126 - 175)       | 110<br>(90 - 129)           |
| Mental and substance use disorders                  | 408<br>(209 - 545)          | 0<br>(0 - 0)       | 0<br>(0 - 0)        | 152<br>(76 - 214)    | 213<br>(97 - 302)        | 42<br>(30 - 56)             |
| Schizophrenia                                       | 17<br>(8 - 45)              | --<br>(0 - 0)      | --<br>(0 - 0)       | 3<br>(1 - 7)         | 9<br>(4 - 26)            | 5<br>(2 - 14)               |
| Alcohol use disorders                               | 303<br>(99 - 441)           | --<br>(0 - 0)      | --<br>(0 - 0)       | 117<br>(40 - 178)    | 172<br>(52 - 264)        | 14<br>(4 - 22)              |
| Drug use disorders                                  | 85<br>(72 - 101)            | 0<br>(0 - 0)       | --<br>(0 - 0)       | 30<br>(24 - 38)      | 31<br>(24 - 40)          | 24<br>(17 - 32)             |
| Opioid use disorders                                | 31<br>(26 - 37)             | 0<br>(0 - 0)       | --<br>(0 - 0)       | 11<br>(9 - 14)       | 11<br>(8 - 14)           | 9<br>(6 - 12)               |
| Cocaine use disorders                               | 6<br>(5 - 7)                | 0<br>(0 - 0)       | --<br>(0 - 0)       | 2<br>(2 - 3)         | 2<br>(1 - 3)             | 1<br>(1 - 2)                |
| Amphetamine use disorders                           | 6<br>(5 - 7)                | 0<br>(0 - 0)       | --<br>(0 - 0)       | 2<br>(2 - 3)         | 2<br>(2 - 3)             | 1<br>(1 - 2)                |
| Other drug use disorders                            | 43<br>(36 - 52)             | 0<br>(0 - 0)       | --<br>(0 - 0)       | 14<br>(11 - 18)      | 17<br>(13 - 21)          | 12<br>(8 - 16)              |
| Eating disorders                                    | 2<br>(1 - 4)                | --<br>(0 - 0)      | 0<br>(0 - 0)        | 2<br>(1 - 4)         | --<br>(0 - 0)            | --<br>(0 - 0)               |
| Anorexia nervosa                                    | 2<br>(1 - 4)                | --<br>(0 - 0)      | 0<br>(0 - 0)        | 2<br>(1 - 4)         | --<br>(0 - 0)            | --<br>(0 - 0)               |
| Diabetes, urogenital, blood, and endocrine diseases | 7,546<br>(5,860 - 8,527)    | 12<br>(8 - 20)     | 8<br>(6 - 11)       | 199<br>(173 - 229)   | 1,349<br>(1,156 - 1,630) | 5,978<br>(4,278 - 6,920)    |
| Diabetes mellitus                                   | 3,743<br>(3,127 - 4,351)    | 0<br>(0 - 0)       | 1<br>(0 - 1)        | 57<br>(46 - 68)      | 671<br>(542 - 916)       | 3,014<br>(2,441 - 3,589)    |
| Acute glomerulonephritis                            | 8<br>(5 - 11)               | 0<br>(0 - 0)       | 0<br>(0 - 0)        | 1<br>(1 - 1)         | 2<br>(1 - 3)             | 4<br>(2 - 7)                |
| Chronic kidney disease                              | 3,003<br>(1,455 - 3,707)    | 1<br>(1 - 2)       | 2<br>(1 - 3)        | 71<br>(58 - 86)      | 481<br>(363 - 586)       | 2,448<br>(971 - 3,127)      |
| Chronic kidney disease due to diabetes mellitus     | 689<br>(408 - 892)          | 0<br>(0 - 0)       | 0<br>(0 - 0)        | 16<br>(12 - 21)      | 150<br>(110 - 198)       | 523<br>(264 - 717)          |

Web Table 31- Poland deaths with 95% UI by age, sex, and cause in 2013

| Cause                                               | Females, All Ages        | Females, 0-4 Years | Females, 5-14 Years | Females, 15-49 Years   | Females, 50-69 Years     | Females, 70-80 Years     |
|-----------------------------------------------------|--------------------------|--------------------|---------------------|------------------------|--------------------------|--------------------------|
| Chronic kidney disease due to hypertension          | 619<br>(315 - 981)       | 0<br>(0 - 0)       | 0<br>(0 - 0)        | 8<br>(5 - 14)          | 44<br>(23 - 76)          | 566<br>(278 - 906)       |
| Chronic kidney disease due to glomerulonephritis    | 36<br>(23 - 57)          | 0<br>(0 - 0)       | 0<br>(0 - 0)        | 3<br>(2 - 5)           | 12<br>(8 - 18)           | 21<br>(10 - 35)          |
| Chronic kidney disease due to other causes          | 1,658<br>(509 - 2,266)   | 1<br>(0 - 2)       | 1<br>(1 - 2)        | 43<br>(31 - 58)        | 274<br>(172 - 372)       | 1,338<br>(285 - 1,943)   |
| Urinary diseases and male infertility               | 387<br>(279 - 663)       | 0<br>(0 - 1)       | 0<br>(0 - 0)        | 15<br>(11 - 24)        | 73<br>(49 - 144)         | 299<br>(205 - 507)       |
| Interstitial nephritis and urinary tract infections | 347<br>(245 - 595)       | 0<br>(0 - 1)       | 0<br>(0 - 0)        | 12<br>(9 - 20)         | 62<br>(40 - 126)         | 273<br>(186 - 470)       |
| Urolithiasis                                        | 17<br>(7 - 40)           | --                 | 0<br>(0 - 0)        | 1<br>(1 - 3)           | 6<br>(2 - 17)            | 9<br>(4 - 24)            |
| Other urinary diseases                              | 23<br>(10 - 39)          | 0<br>(0 - 0)       | 0<br>(0 - 0)        | 1<br>(0 - 2)           | 5<br>(2 - 8)             | 17<br>(7 - 31)           |
| Gynecological diseases                              | 4<br>(3 - 6)             | --                 | --                  | 1<br>(1 - 1)           | 1<br>(1 - 2)             | 2<br>(1 - 3)             |
| Uterine fibroids                                    | 1<br>(1 - 1)             | --                 | --                  | 0<br>(0 - 0)           | 0<br>(0 - 0)             | 0<br>(0 - 1)             |
| Polycystic ovarian syndrome                         | 0<br>(0 - 0)             | --                 | --                  | 0<br>(0 - 0)           | 0<br>(0 - 0)             | --                       |
| Endometriosis                                       | 0<br>(0 - 0)             | --                 | --                  | 0<br>(0 - 0)           | 0<br>(0 - 0)             | --                       |
| Genital prolapse                                    | 1<br>(1 - 1)             | --                 | --                  | 0<br>(0 - 0)           | 0<br>(0 - 0)             | 0<br>(0 - 1)             |
| Other gynecological diseases                        | 2<br>(1 - 3)             | --                 | --                  | 0<br>(0 - 1)           | 0<br>(0 - 1)             | 1<br>(0 - 1)             |
| Hemoglobinopathies and hemolytic anemias            | 99<br>(46 - 158)         | 3<br>(1 - 5)       | 2<br>(1 - 3)        | 18<br>(8 - 30)         | 28<br>(16 - 41)          | 49<br>(18 - 94)          |
| Thalassemias                                        | 9<br>(5 - 14)            | 2<br>(1 - 4)       | 1<br>(1 - 2)        | 6<br>(3 - 9)           | 0<br>(0 - 0)             | 0<br>(0 - 0)             |
| Sickle cell disorders                               | 4<br>(2 - 6)             | 0<br>(0 - 0)       | 0<br>(0 - 0)        | 2<br>(1 - 3)           | 2<br>(1 - 2)             | 0<br>(0 - 0)             |
| G6PD deficiency                                     | 1<br>(1 - 2)             | 0<br>(0 - 0)       | 0<br>(0 - 0)        | 0<br>(0 - 1)           | 1<br>(0 - 1)             | 0<br>(0 - 0)             |
| Other hemoglobinopathies and hemolytic anemias      | 85<br>(38 - 138)         | 1<br>(0 - 1)       | 0<br>(0 - 0)        | 10<br>(4 - 18)         | 25<br>(15 - 37)          | 49<br>(17 - 93)          |
| Endocrine, metabolic, blood, and immune disorders   | 304<br>(230 - 437)       | 7<br>(4 - 14)      | 3<br>(2 - 5)        | 37<br>(26 - 51)        | 94<br>(70 - 156)         | 163<br>(110 - 225)       |
| Musculoskeletal disorders                           | 470<br>(378 - 714)       | --                 | 1<br>(1 - 1)        | 26<br>(20 - 32)        | 188<br>(148 - 267)       | 255<br>(193 - 403)       |
| Rheumatoid arthritis                                | 269<br>(204 - 455)       | --                 | 0<br>(0 - 0)        | 5<br>(3 - 8)           | 92<br>(68 - 167)         | 172<br>(125 - 289)       |
| Other musculoskeletal disorders                     | 201<br>(155 - 248)       | --                 | 1<br>(0 - 1)        | 21<br>(16 - 27)        | 96<br>(69 - 118)         | 84<br>(58 - 123)         |
| Other non-communicable diseases                     | 589<br>(459 - 753)       | 351<br>(236 - 518) | 20<br>(15 - 27)     | 57<br>(46 - 69)        | 45<br>(37 - 63)          | 115<br>(88 - 144)        |
| Congenital anomalies                                | 506<br>(381 - 663)       | 330<br>(222 - 489) | 20<br>(14 - 27)     | 54<br>(43 - 66)        | 32<br>(24 - 45)          | 69<br>(48 - 91)          |
| Neural tube defects                                 | 18<br>(10 - 31)          | 15<br>(8 - 28)     | 1<br>(0 - 2)        | 1<br>(1 - 2)           | 1<br>(0 - 1)             | 0<br>(0 - 0)             |
| Congenital heart anomalies                          | 230<br>(168 - 304)       | 130<br>(82 - 199)  | 10<br>(7 - 14)      | 32<br>(24 - 40)        | 16<br>(11 - 24)          | 42<br>(28 - 58)          |
| Cleft lip and cleft palate                          | 1<br>(0 - 5)             | 1<br>(0 - 5)       | --                  | --                     | --                       | --                       |
| Down syndrome                                       | 14<br>(9 - 23)           | 3<br>(1 - 6)       | 1<br>(0 - 1)        | 5<br>(3 - 9)           | 5<br>(3 - 9)             | 0<br>(0 - 0)             |
| Chromosomal unbalanced rearrangements               | 40<br>(20 - 66)          | 37<br>(18 - 62)    | 1<br>(0 - 1)        | 2<br>(1 - 2)           | 1<br>(0 - 1)             | 0<br>(0 - 0)             |
| Other congenital anomalies                          | 203<br>(146 - 283)       | 145<br>(95 - 223)  | 8<br>(5 - 12)       | 14<br>(11 - 19)        | 10<br>(7 - 14)           | 26<br>(16 - 36)          |
| Skin and subcutaneous diseases                      | 63<br>(48 - 83)          | 1<br>(0 - 2)       | 0<br>(0 - 0)        | 3<br>(2 - 4)           | 13<br>(11 - 18)          | 46<br>(32 - 63)          |
| Cellulitis                                          | 8<br>(4 - 14)            | 0<br>(0 - 0)       | 0<br>(0 - 0)        | 1<br>(0 - 1)           | 2<br>(1 - 3)             | 5<br>(2 - 11)            |
| Pyoderma                                            | 47<br>(34 - 64)          | 1<br>(0 - 1)       | 0<br>(0 - 0)        | 1<br>(1 - 2)           | 10<br>(7 - 13)           | 36<br>(23 - 51)          |
| Decubitus ulcer                                     | 2<br>(1 - 2)             | 0<br>(0 - 0)       | 0<br>(0 - 0)        | 1<br>(0 - 1)           | 1<br>(0 - 1)             | 0<br>(0 - 1)             |
| Other skin and subcutaneous diseases                | 6<br>(3 - 13)            | 0<br>(0 - 0)       | 0<br>(0 - 0)        | 1<br>(0 - 1)           | 1<br>(1 - 3)             | 4<br>(2 - 11)            |
| Sudden infant death syndrome                        | 20<br>(6 - 45)           | 20<br>(6 - 45)     | --                  | --                     | --                       | --                       |
| Injuries                                            | 5,982<br>(5,167 - 7,338) | 50<br>(33 - 73)    | 61<br>(49 - 75)     | 1,129<br>(985 - 1,256) | 1,397<br>(1,121 - 1,570) | 3,344<br>(2,713 - 4,554) |
| Transport injuries                                  | 1,357<br>(1,055 - 1,661) | 14<br>(8 - 22)     | 33<br>(25 - 44)     | 440<br>(309 - 510)     | 408<br>(279 - 496)       | 462<br>(358 - 726)       |
| Road injuries                                       | 1,258<br>(970 - 1,565)   | 13<br>(7 - 21)     | 32<br>(24 - 42)     | 410<br>(284 - 480)     | 378<br>(261 - 463)       | 425<br>(325 - 675)       |
| Pedestrian road injuries                            | 555<br>(406 - 787)       | 5<br>(2 - 8)       | 14<br>(9 - 21)      | 93<br>(59 - 135)       | 159<br>(98 - 217)        | 283<br>(204 - 477)       |

Web Table 31- Poland deaths with 95% UI by age, sex, and cause in 2013

| Cause                                           | Females, All Ages        | Females, 0-4 Years | Females, 5-14 Years | Females, 15-49 Years | Females, 50-69 Years | Females, 70-80 Years     |
|-------------------------------------------------|--------------------------|--------------------|---------------------|----------------------|----------------------|--------------------------|
| Cyclist road injuries                           | 92<br>(60 - 125)         | 0<br>(0 - 0)       | 3<br>(2 - 5)        | 23<br>(14 - 32)      | 39<br>(23 - 57)      | 26<br>(15 - 46)          |
| Motorcyclist road injuries                      | 21<br>(8 - 41)           | 0<br>(0 - 0)       | 0<br>(0 - 1)        | 13<br>(5 - 25)       | 5<br>(2 - 9)         | 3<br>(1 - 6)             |
| Motor vehicle road injuries                     | 587<br>(385 - 728)       | 8<br>(4 - 13)      | 14<br>(8 - 20)      | 279<br>(181 - 335)   | 174<br>(105 - 228)   | 112<br>(63 - 192)        |
| Other road injuries                             | 3<br>(2 - 5)             | 0<br>(0 - 0)       | 0<br>(0 - 0)        | 1<br>(0 - 1)         | 1<br>(0 - 1)         | 1<br>(1 - 3)             |
| Other transport injuries                        | 99<br>(60 - 154)         | 1<br>(0 - 2)       | 1<br>(1 - 2)        | 30<br>(19 - 48)      | 30<br>(17 - 49)      | 36<br>(19 - 64)          |
| Unintentional injuries                          | 3,407<br>(2,759 - 4,550) | 32<br>(20 - 49)    | 21<br>(16 - 29)     | 244<br>(204 - 289)   | 486<br>(369 - 568)   | 2,624<br>(2,036 - 3,779) |
| Falls                                           | 2,290<br>(1,701 - 3,560) | 2<br>(1 - 3)       | 1<br>(1 - 2)        | 53<br>(40 - 71)      | 183<br>(132 - 234)   | 2,050<br>(1,485 - 3,297) |
| Drowning                                        | 186<br>(136 - 296)       | 7<br>(4 - 15)      | 9<br>(6 - 16)       | 54<br>(40 - 89)      | 64<br>(42 - 92)      | 52<br>(37 - 85)          |
| Fire, heat, and hot substances                  | 187<br>(113 - 244)       | 3<br>(2 - 7)       | 2<br>(1 - 2)        | 23<br>(13 - 32)      | 44<br>(25 - 61)      | 115<br>(68 - 158)        |
| Poisonings                                      | 121<br>(88 - 215)        | 2<br>(1 - 3)       | 2<br>(1 - 5)        | 30<br>(21 - 55)      | 31<br>(21 - 56)      | 55<br>(36 - 107)         |
| Exposure to mechanical forces                   | 75<br>(60 - 88)          | 3<br>(2 - 6)       | 2<br>(2 - 3)        | 17<br>(14 - 21)      | 19<br>(14 - 24)      | 34<br>(24 - 44)          |
| Unintentional firearm injuries                  | 7<br>(5 - 9)             | 0<br>(0 - 0)       | 0<br>(0 - 0)        | 2<br>(1 - 3)         | 2<br>(1 - 2)         | 3<br>(1 - 4)             |
| Unintentional suffocation                       | 9<br>(5 - 15)            | 2<br>(1 - 4)       | 0<br>(0 - 0)        | 2<br>(1 - 2)         | 2<br>(1 - 4)         | 3<br>(1 - 6)             |
| Other exposure to mechanical forces             | 59<br>(45 - 72)          | 1<br>(1 - 3)       | 2<br>(1 - 2)        | 13<br>(10 - 17)      | 15<br>(11 - 19)      | 28<br>(18 - 38)          |
| Adverse effects of medical treatment            | 269<br>(86 - 432)        | 3<br>(1 - 6)       | 1<br>(0 - 2)        | 21<br>(10 - 30)      | 67<br>(24 - 103)     | 177<br>(44 - 305)        |
| Animal contact                                  | 12<br>(6 - 30)           | 0<br>(0 - 0)       | 0<br>(0 - 0)        | 1<br>(1 - 3)         | 3<br>(1 - 7)         | 7<br>(3 - 20)            |
| Venomous animal contact                         | 2<br>(1 - 5)             | 0<br>(0 - 0)       | 0<br>(0 - 0)        | 1<br>(0 - 1)         | 1<br>(0 - 2)         | 1<br>(0 - 2)             |
| Non-venomous animal contact                     | 10<br>(5 - 24)           | 0<br>(0 - 0)       | 0<br>(0 - 0)        | 1<br>(0 - 1)         | 2<br>(1 - 5)         | 7<br>(3 - 18)            |
| Foreign body                                    | 231<br>(129 - 345)       | 10<br>(5 - 19)     | 2<br>(1 - 4)        | 37<br>(21 - 55)      | 66<br>(35 - 99)      | 116<br>(60 - 189)        |
| Pulmonary aspiration and foreign body in airway | 229<br>(126 - 342)       | 10<br>(5 - 18)     | 2<br>(1 - 3)        | 36<br>(20 - 54)      | 65<br>(35 - 98)      | 115<br>(59 - 188)        |
| Foreign body in other body part                 | 3<br>(2 - 4)             | 0<br>(0 - 0)       | 0<br>(0 - 0)        | 1<br>(1 - 1)         | 1<br>(0 - 1)         | 1<br>(0 - 2)             |
| Other unintentional injuries                    | 37<br>(8 - 52)           | 0<br>(0 - 1)       | 1<br>(0 - 1)        | 8<br>(2 - 13)        | 9<br>(2 - 14)        | 18<br>(4 - 29)           |
| Self-harm and interpersonal violence            | 1,217<br>(1,032 - 1,408) | 4<br>(2 - 7)       | 7<br>(5 - 9)        | 446<br>(374 - 525)   | 503<br>(397 - 586)   | 258<br>(211 - 345)       |
| Self-harm                                       | 1,020<br>(832 - 1,187)   | --                 | 4<br>(3 - 6)        | 362<br>(291 - 436)   | 440<br>(339 - 522)   | 214<br>(173 - 292)       |
| Interpersonal violence                          | 197<br>(147 - 280)       | 4<br>(2 - 7)       | 2<br>(2 - 4)        | 84<br>(62 - 123)     | 63<br>(45 - 88)      | 44<br>(32 - 65)          |
| Assault by firearm                              | 12<br>(7 - 24)           | 0<br>(0 - 1)       | 0<br>(0 - 1)        | 5<br>(3 - 10)        | 4<br>(2 - 8)         | 2<br>(1 - 5)             |
| Assault by sharp object                         | 67<br>(47 - 109)         | 1<br>(0 - 2)       | 1<br>(0 - 1)        | 33<br>(23 - 55)      | 22<br>(14 - 34)      | 11<br>(7 - 20)           |
| Assault by other means                          | 118<br>(81 - 164)        | 3<br>(2 - 5)       | 2<br>(1 - 2)        | 46<br>(30 - 67)      | 37<br>(24 - 52)      | 31<br>(21 - 46)          |

Web Table 31- Portugal deaths with 95% UI by age, sex, and cause in 2013

| Cause                                                             | Both Sexes, All Ages           | Both Sexes, 0-4 Years | Both Sexes, 5-14 Years | Both Sexes, 15-49 Years  | Both Sexes, 50-69 Years     | Both Sexes, 70-80 Years     |
|-------------------------------------------------------------------|--------------------------------|-----------------------|------------------------|--------------------------|-----------------------------|-----------------------------|
| All causes                                                        | 109,974<br>(105,200 - 114,249) | 322<br>(283 - 369)    | 141<br>(130 - 153)     | 6,234<br>(5,862 - 6,600) | 18,338<br>(17,284 - 19,337) | 84,939<br>(81,490 - 87,987) |
| Communicable, maternal, neonatal, and nutritional diseases        | 9,185<br>(6,498 - 10,835)      | 143<br>(114 - 168)    | 15<br>(12 - 17)        | 846<br>(698 - 995)       | 887<br>(702 - 1,081)        | 7,295<br>(4,806 - 8,835)    |
| HIV/AIDS and tuberculosis                                         | 1,094<br>(847 - 1,380)         | 1<br>(0 - 1)          | 0<br>(0 - 1)           | 613<br>(461 - 767)       | 276<br>(171 - 423)          | 204<br>(157 - 251)          |
| Tuberculosis                                                      | 269<br>(223 - 305)             | 0<br>(0 - 0)          | 0<br>(0 - 0)           | 40<br>(34 - 47)          | 64<br>(54 - 79)             | 164<br>(122 - 193)          |
| HIV/AIDS                                                          | 825<br>(574 - 1,109)           | 0<br>(0 - 1)          | 0<br>(0 - 0)           | 573<br>(418 - 727)       | 211<br>(107 - 360)          | 41<br>(16 - 76)             |
| HIV/AIDS resulting in mycobacterial infection                     | 48<br>(31 - 69)                | 0<br>(0 - 0)          | 0<br>(0 - 0)           | 33<br>(22 - 45)          | 13<br>(6 - 22)              | 3<br>(1 - 5)                |
| HIV/AIDS resulting in other diseases                              | 777<br>(543 - 1,043)           | 0<br>(0 - 1)          | 0<br>(0 - 0)           | 540<br>(395 - 687)       | 199<br>(101 - 340)          | 38<br>(15 - 71)             |
| Diarrhea, lower respiratory, and other common infectious diseases | 7,508<br>(4,929 - 9,102)       | 31<br>(22 - 38)       | 12<br>(10 - 14)        | 190<br>(150 - 224)       | 556<br>(402 - 664)          | 6,719<br>(4,306 - 8,267)    |
| Diarrheal diseases                                                | 121<br>(91 - 164)              | 5<br>(3 - 6)          | 1<br>(0 - 1)           | 4<br>(3 - 5)             | 9<br>(7 - 11)               | 103<br>(72 - 147)           |
| Intestinal infectious diseases                                    | 6<br>(2 - 13)                  | 1<br>(0 - 2)          | 1<br>(0 - 2)           | 2<br>(1 - 5)             | 1<br>(0 - 3)                | 1<br>(0 - 3)                |
| Typhoid fever                                                     | 4<br>(1 - 10)                  | 1<br>(0 - 1)          | 1<br>(0 - 2)           | 2<br>(1 - 4)             | 1<br>(0 - 1)                | 1<br>(0 - 1)                |
| Paratyphoid fever                                                 | 1<br>(0 - 3)                   | 0<br>(0 - 0)          | 0<br>(0 - 1)           | 0<br>(0 - 1)             | 0<br>(0 - 0)                | 0<br>(0 - 0)                |
| Other intestinal infectious diseases                              | 1<br>(0 - 4)                   | 0<br>(0 - 1)          | 0<br>(0 - 0)           | 0<br>(0 - 2)             | 0<br>(0 - 2)                | 0<br>(0 - 2)                |
| Lower respiratory infections                                      | 7,268<br>(4,687 - 8,869)       | 16<br>(11 - 21)       | 6<br>(4 - 8)           | 159<br>(119 - 192)       | 520<br>(365 - 628)          | 6,567<br>(4,154 - 8,117)    |
| Upper respiratory infections                                      | 3<br>(1 - 7)                   | 0<br>(0 - 0)          | 0<br>(0 - 0)           | 0<br>(0 - 1)             | 1<br>(0 - 1)                | 2<br>(0 - 6)                |
| Otitis media                                                      | 5<br>(4 - 6)                   | 1<br>(1 - 2)          | 0<br>(0 - 0)           | 1<br>(1 - 1)             | 1<br>(1 - 1)                | 2<br>(1 - 2)                |
| Meningitis                                                        | 59<br>(49 - 65)                | 5<br>(3 - 7)          | 2<br>(2 - 3)           | 13<br>(11 - 15)          | 15<br>(12 - 17)             | 24<br>(19 - 29)             |
| Pneumococcal meningitis                                           | 11<br>(8 - 13)                 | 1<br>(0 - 1)          | 0<br>(0 - 0)           | 2<br>(2 - 3)             | 3<br>(2 - 4)                | 5<br>(3 - 7)                |
| H influenzae type B meningitis                                    | 7<br>(5 - 9)                   | 1<br>(1 - 2)          | 0<br>(0 - 1)           | 1<br>(1 - 2)             | 1<br>(1 - 2)                | 1<br>(1 - 3)                |
| Meningococcal meningitis                                          | 19<br>(15 - 24)                | 1<br>(1 - 2)          | 1<br>(0 - 1)           | 4<br>(3 - 6)             | 4<br>(3 - 6)                | 8<br>(6 - 11)               |
| Other meningitis                                                  | 22<br>(16 - 27)                | 1<br>(1 - 2)          | 1<br>(0 - 1)           | 5<br>(3 - 7)             | 6<br>(4 - 8)                | 9<br>(5 - 12)               |
| Encephalitis                                                      | 33<br>(23 - 44)                | 2<br>(1 - 3)          | 2<br>(1 - 3)           | 8<br>(6 - 12)            | 8<br>(5 - 12)               | 12<br>(7 - 16)              |
| Diphtheria                                                        | 0<br>(0 - 1)                   | 0<br>(0 - 0)          | 0<br>(0 - 0)           | 0<br>(0 - 0)             | 0<br>(0 - 0)                | --                          |
| Whooping cough                                                    | 1<br>(1 - 1)                   | 0<br>(0 - 1)          | 0<br>(0 - 0)           | 0<br>(0 - 1)             | 0<br>(0 - 0)                | --                          |
| Tetanus                                                           | 3<br>(2 - 7)                   | 0<br>(0 - 0)          | 0<br>(0 - 0)           | 1<br>(0 - 1)             | 1<br>(1 - 2)                | 2<br>(1 - 4)                |
| Measles                                                           | 0<br>(0 - 0)                   | 0<br>(0 - 0)          | 0<br>(0 - 0)           | 0<br>(0 - 0)             | 0<br>(0 - 0)                | --                          |
| Varicella and herpes zoster                                       | 9<br>(2 - 26)                  | 0<br>(0 - 1)          | 0<br>(0 - 0)           | 1<br>(0 - 2)             | 1<br>(0 - 2)                | 7<br>(1 - 23)               |
| Neglected tropical diseases and malaria                           | 13<br>(12 - 17)                | 0<br>(0 - 0)          | 0<br>(0 - 0)           | 3<br>(2 - 3)             | 4<br>(3 - 5)                | 6<br>(5 - 9)                |
| Leishmaniasis                                                     | 2<br>(2 - 3)                   | 0<br>(0 - 0)          | 0<br>(0 - 0)           | 1<br>(0 - 1)             | 1<br>(1 - 1)                | 1<br>(0 - 1)                |
| Visceral leishmaniasis                                            | 2<br>(2 - 3)                   | 0<br>(0 - 0)          | 0<br>(0 - 0)           | 1<br>(0 - 1)             | 1<br>(1 - 1)                | 1<br>(0 - 1)                |
| Cysticercosis                                                     | 0<br>(0 - 0)                   | 0<br>(0 - 0)          | 0<br>(0 - 0)           | 0<br>(0 - 0)             | 0<br>(0 - 0)                | 0<br>(0 - 0)                |
| Cystic echinococcosis                                             | 1<br>(1 - 1)                   | 0<br>(0 - 0)          | 0<br>(0 - 0)           | 0<br>(0 - 0)             | 0<br>(0 - 0)                | 1<br>(0 - 1)                |
| Dengue                                                            | 1<br>(1 - 1)                   | 0<br>(0 - 0)          | 0<br>(0 - 0)           | 0<br>(0 - 1)             | 0<br>(0 - 0)                | 0<br>(0 - 0)                |
| Rabies                                                            | 1<br>(0 - 1)                   | 0<br>(0 - 0)          | 0<br>(0 - 0)           | 0<br>(0 - 1)             | 0<br>(0 - 0)                | 0<br>(0 - 0)                |
| Other neglected tropical diseases                                 | 8<br>(7 - 11)                  | 0<br>(0 - 0)          | 0<br>(0 - 0)           | 1<br>(1 - 1)             | 2<br>(2 - 3)                | 5<br>(3 - 8)                |
| Maternal disorders                                                | 9<br>(7 - 11)                  | --                    | 0<br>(0 - 0)           | 9<br>(7 - 11)            | --                          | --                          |
| Maternal hemorrhage                                               | 1<br>(1 - 1)                   | --                    | 0<br>(0 - 0)           | 1<br>(1 - 1)             | --                          | --                          |
| Maternal sepsis and other maternal infections                     | 1<br>(1 - 2)                   | --                    | 0<br>(0 - 0)           | 1<br>(1 - 2)             | --                          | --                          |
| Maternal hypertensive disorders                                   | 1<br>(1 - 2)                   | --                    | 0<br>(0 - 0)           | 1<br>(1 - 2)             | --                          | --                          |
| Maternal obstructed labor                                         | 1<br>(0 - 1)                   | --                    | 0<br>(0 - 0)           | 1<br>(0 - 1)             | --                          | --                          |

Web Table 31- Portugal deaths with 95% UI by age, sex, and cause in 2013

| Cause                                                            | Both Sexes, All Ages        | Both Sexes, 0-4 Years | Both Sexes, 5-14 Years | Both Sexes, 15-49 Years  | Both Sexes, 50-69 Years     | Both Sexes, 70-80 Years     |
|------------------------------------------------------------------|-----------------------------|-----------------------|------------------------|--------------------------|-----------------------------|-----------------------------|
| Maternal abortive outcome                                        | 2<br>(2 - 3)                | --                    | 0<br>(0 - 0)           | 2<br>(2 - 3)             | --                          | --                          |
| Indirect maternal deaths                                         | 1<br>(0 - 1)                | --                    | 0<br>(0 - 0)           | 1<br>(0 - 1)             | --                          | --                          |
| Late maternal deaths                                             | 0<br>(0 - 1)                | --                    | 0<br>(0 - 0)           | 0<br>(0 - 1)             | --                          | --                          |
| Maternal deaths aggravated by HIV/AIDS                           | 0<br>(0 - 0)                | --                    | --                     | 0<br>(0 - 0)             | --                          | --                          |
| Other maternal disorders                                         | 1<br>(1 - 2)                | --                    | 0<br>(0 - 0)           | 1<br>(1 - 2)             | --                          | --                          |
| Neonatal disorders                                               | 107<br>(87 - 127)           | 107<br>(87 - 127)     | --                     | --                       | --                          | --                          |
| Neonatal preterm birth complications                             | 48<br>(36 - 66)             | 48<br>(36 - 66)       | --                     | --                       | --                          | --                          |
| Neonatal encephalopathy due to birth asphyxia and trauma         | 18<br>(12 - 24)             | 18<br>(12 - 24)       | --                     | --                       | --                          | --                          |
| Neonatal sepsis and other neonatal infections                    | 15<br>(9 - 26)              | 15<br>(9 - 26)        | --                     | --                       | --                          | --                          |
| Hemolytic disease and other neonatal jaundice                    | 0<br>(0 - 0)                | 0<br>(0 - 0)          | --                     | --                       | --                          | --                          |
| Other neonatal disorders                                         | 26<br>(10 - 39)             | 26<br>(10 - 39)       | --                     | --                       | --                          | --                          |
| Nutritional deficiencies                                         | 349<br>(240 - 433)          | 1<br>(1 - 2)          | 0<br>(0 - 0)           | 9<br>(7 - 12)            | 21<br>(15 - 27)             | 316<br>(215 - 400)          |
| Protein-energy malnutrition                                      | 91<br>(55 - 146)            | 1<br>(1 - 2)          | 0<br>(0 - 0)           | 2<br>(1 - 3)             | 4<br>(2 - 8)                | 84<br>(50 - 138)            |
| Iodine deficiency                                                | 1<br>(0 - 4)                | 0<br>(0 - 0)          | 0<br>(0 - 0)           | 0<br>(0 - 0)             | 0<br>(0 - 1)                | 1<br>(0 - 4)                |
| Iron-deficiency anemia                                           | 221<br>(127 - 291)          | 0<br>(0 - 0)          | 0<br>(0 - 0)           | 7<br>(4 - 9)             | 15<br>(10 - 19)             | 199<br>(110 - 267)          |
| Other nutritional deficiencies                                   | 36<br>(11 - 62)             | 0<br>(0 - 0)          | 0<br>(0 - 0)           | 1<br>(1 - 2)             | 2<br>(1 - 3)                | 33<br>(9 - 58)              |
| Other communicable, maternal, neonatal, and nutritional diseases | 105<br>(72 - 126)           | 3<br>(1 - 5)          | 2<br>(1 - 2)           | 21<br>(16 - 26)          | 30<br>(22 - 37)             | 48<br>(28 - 63)             |
| Sexually transmitted diseases excluding HIV                      | 8<br>(5 - 11)               | 1<br>(0 - 3)          | 0<br>(0 - 0)           | 1<br>(1 - 2)             | 1<br>(1 - 2)                | 4<br>(2 - 6)                |
| Syphilis                                                         | 6<br>(4 - 8)                | 1<br>(0 - 3)          | 0<br>(0 - 0)           | 1<br>(0 - 1)             | 1<br>(1 - 1)                | 3<br>(2 - 5)                |
| Chlamydial infection                                             | 0<br>(0 - 1)                | --                    | 0<br>(0 - 0)           | 0<br>(0 - 0)             | 0<br>(0 - 0)                | 0<br>(0 - 0)                |
| Gonococcal infection                                             | 1<br>(1 - 1)                | --                    | 0<br>(0 - 0)           | 0<br>(0 - 0)             | 0<br>(0 - 0)                | 0<br>(0 - 1)                |
| Other sexually transmitted diseases                              | 1<br>(0 - 1)                | --                    | 0<br>(0 - 0)           | 0<br>(0 - 0)             | 0<br>(0 - 0)                | 0<br>(0 - 0)                |
| Hepatitis                                                        | 26<br>(22 - 30)             | 0<br>(0 - 0)          | 0<br>(0 - 0)           | 8<br>(6 - 11)            | 8<br>(6 - 11)               | 8<br>(6 - 11)               |
| Acute hepatitis A                                                | 6<br>(2 - 12)               | 0<br>(0 - 0)          | 0<br>(0 - 0)           | 3<br>(1 - 5)             | 2<br>(0 - 4)                | 1<br>(0 - 3)                |
| Acute hepatitis B                                                | 17<br>(11 - 23)             | 0<br>(0 - 0)          | 0<br>(0 - 0)           | 4<br>(2 - 7)             | 6<br>(4 - 8)                | 6<br>(4 - 9)                |
| Acute hepatitis C                                                | 3<br>(0 - 6)                | --                    | 0<br>(0 - 0)           | 1<br>(0 - 2)             | 1<br>(0 - 2)                | 1<br>(0 - 3)                |
| Other infectious diseases                                        | 71<br>(39 - 93)             | 1<br>(1 - 2)          | 1<br>(1 - 2)           | 12<br>(7 - 15)           | 21<br>(12 - 27)             | 36<br>(17 - 50)             |
| Non-communicable diseases                                        | 95,412<br>(90,699 - 99,746) | 146<br>(124 - 173)    | 77<br>(70 - 85)        | 3,797<br>(3,518 - 4,067) | 16,221<br>(15,267 - 17,101) | 75,170<br>(71,632 - 78,658) |
| Neoplasms                                                        | 27,776<br>(25,746 - 29,498) | 15<br>(11 - 20)       | 41<br>(36 - 49)        | 1,888<br>(1,723 - 2,045) | 8,477<br>(7,794 - 9,049)    | 17,355<br>(15,959 - 18,626) |
| Esophageal cancer                                                | 613<br>(512 - 697)          | --                    | --                     | 61<br>(42 - 77)          | 280<br>(212 - 327)          | 272<br>(235 - 332)          |
| Stomach cancer                                                   | 3,044<br>(2,653 - 3,547)    | --                    | --                     | 181<br>(153 - 212)       | 811<br>(719 - 913)          | 2,052<br>(1,731 - 2,437)    |
| Liver cancer                                                     | 886<br>(633 - 1,078)        | --                    | 0<br>(0 - 1)           | 50<br>(34 - 66)          | 307<br>(213 - 384)          | 530<br>(374 - 663)          |
| Liver cancer due to hepatitis B                                  | 161<br>(77 - 261)           | --                    | 0<br>(0 - 0)           | 16<br>(8 - 26)           | 68<br>(30 - 120)            | 77<br>(36 - 122)            |
| Liver cancer due to hepatitis C                                  | 497<br>(335 - 688)          | --                    | 0<br>(0 - 0)           | 24<br>(15 - 36)          | 171<br>(113 - 246)          | 302<br>(193 - 422)          |
| Liver cancer due to alcohol use                                  | 194<br>(108 - 290)          | --                    | --                     | 7<br>(3 - 13)            | 57<br>(30 - 98)             | 130<br>(71 - 194)           |
| Liver cancer due to other causes                                 | 34<br>(15 - 54)             | --                    | 0<br>(0 - 0)           | 3<br>(1 - 4)             | 10<br>(5 - 17)              | 21<br>(8 - 37)              |
| Larynx cancer                                                    | 408<br>(296 - 505)          | --                    | --                     | 46<br>(29 - 60)          | 194<br>(139 - 241)          | 168<br>(124 - 215)          |
| Tracheal, bronchus and lung cancer                               | 4,330<br>(3,920 - 4,682)    | --                    | --                     | 286<br>(244 - 330)       | 1,818<br>(1,633 - 2,004)    | 2,226<br>(1,964 - 2,443)    |
| Breast cancer                                                    | 1,810<br>(1,276 - 2,128)    | --                    | --                     | 225<br>(178 - 275)       | 638<br>(459 - 751)          | 947<br>(634 - 1,149)        |
| Cervical cancer                                                  | 403<br>(311 - 484)          | --                    | --                     | 72<br>(57 - 90)          | 135<br>(97 - 167)           | 196<br>(146 - 254)          |

Web Table 31- Portugal deaths with 95% UI by age, sex, and cause in 2013

| Cause                                         | Both Sexes, All Ages        | Both Sexes, 0-4 Years | Both Sexes, 5-14 Years | Both Sexes, 15-49 Years | Both Sexes, 50-69 Years  | Both Sexes, 70-80 Years     |
|-----------------------------------------------|-----------------------------|-----------------------|------------------------|-------------------------|--------------------------|-----------------------------|
| Uterine cancer                                | 321<br>(230 - 389)          | --                    | --                     | 7<br>(5 - 10)           | 96<br>(70 - 122)         | 218<br>(143 - 273)          |
| Prostate cancer                               | 2,323<br>(1,832 - 3,420)    | --                    | --                     | 6<br>(4 - 8)            | 271<br>(201 - 409)       | 2,046<br>(1,586 - 3,039)    |
| Colon and rectum cancer                       | 4,443<br>(4,034 - 4,872)    | --                    | --                     | 173<br>(151 - 194)      | 1,128<br>(1,026 - 1,220) | 3,143<br>(2,776 - 3,540)    |
| Lip and oral cavity cancer                    | 410<br>(349 - 461)          | --                    | --                     | 57<br>(43 - 71)         | 184<br>(145 - 215)       | 170<br>(141 - 203)          |
| Nasopharynx cancer                            | 63<br>(47 - 79)             | --                    | 0<br>(0 - 0)           | 15<br>(10 - 22)         | 30<br>(21 - 40)          | 17<br>(12 - 25)             |
| Other pharynx cancer                          | 278<br>(174 - 336)          | --                    | --                     | 48<br>(27 - 64)         | 160<br>(94 - 200)        | 70<br>(49 - 89)             |
| Gallbladder and biliary tract cancer          | 376<br>(280 - 473)          | --                    | --                     | 9<br>(7 - 12)           | 86<br>(67 - 108)         | 280<br>(201 - 361)          |
| Pancreatic cancer                             | 1,485<br>(1,356 - 1,619)    | --                    | --                     | 62<br>(54 - 72)         | 472<br>(423 - 518)       | 951<br>(848 - 1,061)        |
| Malignant skin melanoma                       | 241<br>(153 - 309)          | --                    | --                     | 35<br>(22 - 47)         | 76<br>(47 - 100)         | 131<br>(86 - 173)           |
| Non-melanoma skin cancer                      | 191<br>(143 - 256)          | --                    | --                     | 8<br>(5 - 11)           | 26<br>(19 - 38)          | 157<br>(116 - 210)          |
| Ovarian cancer                                | 484<br>(398 - 567)          | --                    | --                     | 39<br>(31 - 48)         | 179<br>(145 - 211)       | 266<br>(200 - 334)          |
| Testicular cancer                             | 16<br>(10 - 21)             | --                    | --                     | 7<br>(4 - 10)           | 3<br>(2 - 4)             | 6<br>(4 - 8)                |
| Kidney cancer                                 | 480<br>(409 - 560)          | 1<br>(0 - 1)          | 1<br>(1 - 2)           | 32<br>(26 - 39)         | 159<br>(132 - 187)       | 287<br>(229 - 361)          |
| Bladder cancer                                | 892<br>(713 - 1,044)        | --                    | --                     | 14<br>(11 - 18)         | 171<br>(129 - 200)       | 707<br>(562 - 847)          |
| Brain and nervous system cancer               | 778<br>(564 - 904)          | 3<br>(2 - 5)          | 11<br>(8 - 14)         | 128<br>(102 - 151)      | 321<br>(247 - 373)       | 316<br>(193 - 399)          |
| Thyroid cancer                                | 96<br>(76 - 126)            | --                    | 0<br>(0 - 0)           | 4<br>(3 - 5)            | 23<br>(18 - 28)          | 69<br>(52 - 96)             |
| Mesothelioma                                  | 60<br>(44 - 109)            | --                    | --                     | 5<br>(3 - 10)           | 22<br>(15 - 40)          | 33<br>(22 - 63)             |
| Hodgkin lymphoma                              | 61<br>(42 - 75)             | 0<br>(0 - 0)          | 0<br>(0 - 1)           | 18<br>(12 - 23)         | 18<br>(13 - 24)          | 24<br>(16 - 32)             |
| Non-Hodgkin lymphoma                          | 753<br>(464 - 929)          | 1<br>(1 - 2)          | 4<br>(2 - 6)           | 74<br>(47 - 93)         | 223<br>(145 - 272)       | 450<br>(245 - 583)          |
| Multiple myeloma                              | 405<br>(254 - 532)          | --                    | --                     | 15<br>(9 - 22)          | 121<br>(79 - 163)        | 269<br>(159 - 374)          |
| Leukemia                                      | 862<br>(757 - 953)          | 4<br>(2 - 6)          | 13<br>(10 - 16)        | 85<br>(74 - 97)         | 206<br>(177 - 232)       | 554<br>(472 - 629)          |
| Other neoplasms                               | 1,266<br>(994 - 1,459)      | 6<br>(4 - 8)          | 11<br>(9 - 16)         | 127<br>(101 - 151)      | 320<br>(260 - 380)       | 801<br>(575 - 973)          |
| Cardiovascular diseases                       | 37,937<br>(34,941 - 43,307) | 3<br>(2 - 3)          | 4<br>(3 - 5)           | 750<br>(669 - 853)      | 4,212<br>(3,823 - 4,878) | 32,968<br>(30,237 - 37,512) |
| Rheumatic heart disease                       | 196<br>(115 - 240)          | 0<br>(0 - 0)          | 0<br>(0 - 1)           | 17<br>(13 - 23)         | 44<br>(31 - 57)          | 134<br>(67 - 174)           |
| Ischemic heart disease                        | 13,772<br>(11,925 - 17,177) | 0<br>(0 - 0)          | 1<br>(0 - 1)           | 328<br>(276 - 436)      | 1,753<br>(1,504 - 2,355) | 11,690<br>(9,985 - 14,473)  |
| Cerebrovascular disease                       | 19,121<br>(16,770 - 23,473) | 1<br>(0 - 1)          | 1<br>(1 - 2)           | 269<br>(225 - 324)      | 1,857<br>(1,616 - 2,203) | 16,993<br>(14,799 - 21,095) |
| Ischemic stroke                               | 11,622<br>(9,472 - 15,539)  | 0<br>(0 - 0)          | 0<br>(0 - 0)           | 30<br>(20 - 48)         | 600<br>(422 - 869)       | 10,992<br>(9,006 - 14,706)  |
| Hemorrhagic stroke                            | 7,500<br>(6,245 - 9,469)    | 1<br>(0 - 1)          | 1<br>(1 - 1)           | 239<br>(196 - 286)      | 1,257<br>(1,044 - 1,501) | 6,001<br>(4,827 - 7,861)    |
| Hypertensive heart disease                    | 1,008<br>(700 - 1,332)      | 0<br>(0 - 0)          | 0<br>(0 - 0)           | 6<br>(5 - 8)            | 58<br>(44 - 80)          | 944<br>(641 - 1,263)        |
| Cardiomyopathy and myocarditis                | 564<br>(366 - 688)          | 1<br>(1 - 1)          | 1<br>(1 - 1)           | 31<br>(19 - 41)         | 93<br>(53 - 120)         | 438<br>(280 - 548)          |
| Atrial fibrillation and flutter               | 826<br>(639 - 1,046)        | --                    | --                     | 3<br>(2 - 4)            | 42<br>(33 - 52)          | 781<br>(596 - 999)          |
| Aortic aneurysm                               | 344<br>(261 - 412)          | --                    | --                     | 17<br>(13 - 21)         | 82<br>(59 - 99)          | 245<br>(182 - 300)          |
| Peripheral vascular disease                   | 493<br>(391 - 612)          | --                    | --                     | 2<br>(1 - 2)            | 36<br>(28 - 44)          | 456<br>(356 - 572)          |
| Endocarditis                                  | 143<br>(91 - 185)           | 0<br>(0 - 0)          | 0<br>(0 - 0)           | 15<br>(10 - 22)         | 29<br>(19 - 39)          | 98<br>(59 - 132)            |
| Other cardiovascular and circulatory diseases | 1,470<br>(796 - 1,807)      | 0<br>(0 - 1)          | 1<br>(0 - 1)           | 61<br>(32 - 76)         | 220<br>(124 - 268)       | 1,189<br>(618 - 1,507)      |
| Chronic respiratory diseases                  | 6,010<br>(5,365 - 6,858)    | 4<br>(2 - 5)          | 2<br>(1 - 3)           | 81<br>(70 - 103)        | 593<br>(525 - 727)       | 5,330<br>(4,708 - 6,125)    |
| Chronic obstructive pulmonary disease         | 5,132<br>(4,525 - 5,872)    | 3<br>(1 - 4)          | 1<br>(1 - 1)           | 52<br>(44 - 69)         | 472<br>(408 - 590)       | 4,604<br>(4,031 - 5,290)    |
| Pneumoconiosis                                | 201<br>(142 - 302)          | 0<br>(0 - 0)          | 0<br>(0 - 0)           | 5<br>(4 - 8)            | 34<br>(22 - 54)          | 161<br>(109 - 248)          |
| Silicosis                                     | 80<br>(56 - 124)            | 0<br>(0 - 0)          | 0<br>(0 - 0)           | 3<br>(2 - 5)            | 17<br>(10 - 27)          | 60<br>(40 - 96)             |
| Asbestosis                                    | 37<br>(25 - 57)             | 0<br>(0 - 0)          | 0<br>(0 - 0)           | 1<br>(0 - 1)            | 5<br>(3 - 9)             | 31<br>(20 - 48)             |

Web Table 31- Portugal deaths with 95% UI by age, sex, and cause in 2013

| Cause                                               | Both Sexes, All Ages      | Both Sexes, 0-4 Years | Both Sexes, 5-14 Years | Both Sexes, 15-49 Years | Both Sexes, 50-69 Years | Both Sexes, 70-80 Years   |
|-----------------------------------------------------|---------------------------|-----------------------|------------------------|-------------------------|-------------------------|---------------------------|
| Coal workers pneumoconiosis                         | 12<br>(8 - 18)            | 0<br>(0 - 0)          | 0<br>(0 - 0)           | 0<br>(0 - 0)            | 1<br>(0 - 1)            | 10<br>(7 - 16)            |
| Other pneumoconiosis                                | 72<br>(51 - 111)          | 0<br>(0 - 0)          | 0<br>(0 - 0)           | 1<br>(1 - 2)            | 11<br>(7 - 18)          | 60<br>(41 - 91)           |
| Asthma                                              | 171<br>(123 - 261)        | 0<br>(0 - 0)          | 0<br>(0 - 0)           | 9<br>(7 - 12)           | 21<br>(16 - 30)         | 140<br>(98 - 215)         |
| Interstitial lung disease and pulmonary sarcoidosis | 468<br>(270 - 639)        | 0<br>(0 - 1)          | 1<br>(0 - 1)           | 13<br>(8 - 17)          | 62<br>(33 - 88)         | 393<br>(219 - 545)        |
| Other chronic respiratory diseases                  | 39<br>(29 - 52)           | 1<br>(0 - 1)          | 0<br>(0 - 0)           | 1<br>(1 - 2)            | 4<br>(3 - 5)            | 33<br>(23 - 45)           |
| Cirrhosis                                           | 2,327<br>(2,143 - 2,509)  | 0<br>(0 - 0)          | 1<br>(1 - 1)           | 428<br>(376 - 482)      | 1,003<br>(906 - 1,100)  | 895<br>(810 - 989)        |
| Cirrhosis due to hepatitis B                        | 223<br>(130 - 328)        | 0<br>(0 - 0)          | 0<br>(0 - 0)           | 40<br>(23 - 62)         | 96<br>(55 - 144)        | 88<br>(47 - 133)          |
| Cirrhosis due to hepatitis C                        | 1,093<br>(725 - 1,415)    | 0<br>(0 - 0)          | 0<br>(0 - 0)           | 202<br>(121 - 271)      | 471<br>(279 - 622)      | 420<br>(282 - 542)        |
| Cirrhosis due to alcohol use                        | 784<br>(532 - 1,084)      | --                    | --                     | 116<br>(68 - 179)       | 336<br>(222 - 492)      | 332<br>(223 - 448)        |
| Cirrhosis due to other causes                       | 227<br>(142 - 340)        | 0<br>(0 - 0)          | 0<br>(0 - 0)           | 71<br>(44 - 102)        | 100<br>(58 - 156)       | 56<br>(33 - 86)           |
| Digestive diseases                                  | 2,470<br>(1,979 - 2,767)  | 1<br>(1 - 1)          | 2<br>(1 - 2)           | 88<br>(72 - 101)        | 311<br>(252 - 351)      | 2,067<br>(1,637 - 2,361)  |
| Peptic ulcer disease                                | 339<br>(261 - 458)        | 0<br>(0 - 0)          | 0<br>(0 - 0)           | 13<br>(10 - 17)         | 46<br>(34 - 60)         | 280<br>(208 - 387)        |
| Gastritis and duodenitis                            | 20<br>(12 - 40)           | 0<br>(0 - 0)          | 0<br>(0 - 0)           | 1<br>(1 - 2)            | 2<br>(2 - 5)            | 16<br>(9 - 33)            |
| Appendicitis                                        | 37<br>(21 - 54)           | 0<br>(0 - 0)          | 0<br>(0 - 1)           | 4<br>(2 - 6)            | 8<br>(4 - 11)           | 25<br>(13 - 38)           |
| Paralytic ileus and intestinal obstruction          | 333<br>(224 - 513)        | 0<br>(0 - 1)          | 0<br>(0 - 1)           | 9<br>(6 - 14)           | 35<br>(24 - 56)         | 289<br>(194 - 450)        |
| Inguinal, femoral, and abdominal hernia             | 88<br>(47 - 122)          | 0<br>(0 - 0)          | 0<br>(0 - 0)           | 1<br>(1 - 2)            | 10<br>(6 - 14)          | 76<br>(38 - 109)          |
| Inflammatory bowel disease                          | 194<br>(95 - 274)         | 0<br>(0 - 0)          | 0<br>(0 - 0)           | 7<br>(4 - 9)            | 18<br>(10 - 24)         | 169<br>(78 - 243)         |
| Vascular intestinal disorders                       | 581<br>(348 - 837)        | 0<br>(0 - 0)          | 0<br>(0 - 0)           | 8<br>(4 - 14)           | 63<br>(36 - 98)         | 510<br>(302 - 733)        |
| Gallbladder and biliary diseases                    | 366<br>(190 - 474)        | 0<br>(0 - 0)          | 0<br>(0 - 0)           | 7<br>(4 - 9)            | 36<br>(20 - 46)         | 323<br>(166 - 425)        |
| Pancreatitis                                        | 310<br>(227 - 415)        | 0<br>(0 - 0)          | 0<br>(0 - 0)           | 30<br>(22 - 37)         | 65<br>(47 - 84)         | 215<br>(148 - 300)        |
| Other digestive diseases                            | 202<br>(141 - 251)        | 0<br>(0 - 0)          | 0<br>(0 - 0)           | 7<br>(5 - 9)            | 27<br>(18 - 34)         | 166<br>(114 - 213)        |
| Neurological disorders                              | 9,343<br>(7,193 - 11,301) | 10<br>(7 - 13)        | 6<br>(5 - 7)           | 98<br>(81 - 112)        | 430<br>(352 - 501)      | 8,800<br>(6,657 - 10,748) |
| Alzheimer disease and other dementias               | 8,257<br>(6,069 - 10,242) | --                    | --                     | 1<br>(0 - 2)            | 201<br>(144 - 263)      | 8,055<br>(5,877 - 10,001) |
| Parkinson disease                                   | 589<br>(384 - 699)        | --                    | --                     | 2<br>(2 - 2)            | 55<br>(42 - 66)         | 532<br>(335 - 637)        |
| Epilepsy                                            | 126<br>(85 - 157)         | 1<br>(1 - 2)          | 2<br>(1 - 3)           | 41<br>(31 - 51)         | 28<br>(20 - 35)         | 54<br>(29 - 79)           |
| Multiple sclerosis                                  | 63<br>(39 - 92)           | --                    | --                     | 15<br>(9 - 22)          | 27<br>(16 - 39)         | 20<br>(13 - 33)           |
| Other neurological disorders                        | 308<br>(244 - 345)        | 9<br>(6 - 12)         | 4<br>(3 - 5)           | 39<br>(30 - 45)         | 119<br>(90 - 136)       | 138<br>(109 - 160)        |
| Mental and substance use disorders                  | 329<br>(234 - 384)        | 0<br>(0 - 0)          | 0<br>(0 - 0)           | 188<br>(150 - 222)      | 89<br>(47 - 110)        | 52<br>(30 - 65)           |
| Schizophrenia                                       | 10<br>(7 - 13)            | --                    | --                     | 3<br>(2 - 4)            | 4<br>(3 - 6)            | 4<br>(2 - 5)              |
| Alcohol use disorders                               | 179<br>(89 - 218)         | --                    | --                     | 60<br>(29 - 75)         | 79<br>(38 - 99)         | 40<br>(19 - 53)           |
| Drug use disorders                                  | 139<br>(114 - 170)        | 0<br>(0 - 0)          | --                     | 125<br>(101 - 154)      | 6<br>(5 - 8)            | 8<br>(6 - 10)             |
| Opioid use disorders                                | 52<br>(42 - 64)           | 0<br>(0 - 0)          | --                     | 47<br>(37 - 59)         | 2<br>(2 - 3)            | 3<br>(2 - 4)              |
| Cocaine use disorders                               | 4<br>(3 - 5)              | 0<br>(0 - 0)          | --                     | 4<br>(3 - 5)            | 0<br>(0 - 0)            | 0<br>(0 - 0)              |
| Amphetamine use disorders                           | 4<br>(3 - 5)              | 0<br>(0 - 0)          | --                     | 3<br>(2 - 4)            | 0<br>(0 - 0)            | 0<br>(0 - 0)              |
| Other drug use disorders                            | 80<br>(66 - 98)           | 0<br>(0 - 0)          | --                     | 72<br>(57 - 89)         | 4<br>(3 - 5)            | 5<br>(4 - 6)              |
| Eating disorders                                    | 1<br>(1 - 2)              | --                    | 0<br>(0 - 0)           | 1<br>(1 - 1)            | --                      | --                        |
| Anorexia nervosa                                    | 1<br>(1 - 2)              | --                    | 0<br>(0 - 0)           | 1<br>(1 - 1)            | --                      | --                        |
| Diabetes, urogenital, blood, and endocrine diseases | 8,679<br>(6,962 - 9,732)  | 11<br>(8 - 14)        | 9<br>(7 - 11)          | 208<br>(181 - 233)      | 1,020<br>(888 - 1,120)  | 7,432<br>(5,755 - 8,419)  |
| Diabetes mellitus                                   | 4,036<br>(3,548 - 4,525)  | 0<br>(0 - 1)          | 1<br>(1 - 1)           | 56<br>(48 - 64)         | 518<br>(450 - 590)      | 3,461<br>(2,995 - 3,938)  |
| Acute glomerulonephritis                            | 2<br>(2 - 3)              | 0<br>(0 - 0)          | 0<br>(0 - 0)           | 0<br>(0 - 1)            | 0<br>(0 - 1)            | 1<br>(1 - 1)              |

Web Table 31- Portugal deaths with 95% UI by age, sex, and cause in 2013

| Cause                                               | Both Sexes, All Ages     | Both Sexes, 0-4 Years | Both Sexes, 5-14 Years | Both Sexes, 15-49 Years  | Both Sexes, 50-69 Years  | Both Sexes, 70-80 Years  |
|-----------------------------------------------------|--------------------------|-----------------------|------------------------|--------------------------|--------------------------|--------------------------|
| Chronic kidney disease                              | 3,101<br>(2,319 - 3,576) | 1<br>(0 - 1)          | 1<br>(1 - 2)           | 66<br>(56 - 90)          | 314<br>(269 - 386)       | 2,718<br>(1,958 - 3,184) |
| Chronic kidney disease due to diabetes mellitus     | 1,150<br>(803 - 1,405)   | 0<br>(0 - 0)          | 0<br>(0 - 0)           | 22<br>(16 - 32)          | 137<br>(98 - 176)        | 991<br>(662 - 1,223)     |
| Chronic kidney disease due to hypertension          | 385<br>(227 - 524)       | 0<br>(0 - 0)          | 0<br>(0 - 0)           | 7<br>(5 - 12)            | 29<br>(19 - 50)          | 349<br>(200 - 480)       |
| Chronic kidney disease due to glomerulonephritis    | 16<br>(11 - 22)          | 0<br>(0 - 0)          | 0<br>(0 - 0)           | 2<br>(1 - 2)             | 3<br>(2 - 4)             | 12<br>(7 - 16)           |
| Chronic kidney disease due to other causes          | 1,549<br>(930 - 1,958)   | 0<br>(0 - 1)          | 1<br>(1 - 1)           | 35<br>(27 - 54)          | 145<br>(104 - 203)       | 1,366<br>(757 - 1,762)   |
| Urinary diseases and male infertility               | 990<br>(265 - 1,426)     | 0<br>(0 - 1)          | 0<br>(0 - 0)           | 16<br>(6 - 21)           | 73<br>(27 - 96)          | 901<br>(226 - 1,318)     |
| Interstitial nephritis and urinary tract infections | 907<br>(218 - 1,332)     | 0<br>(0 - 0)          | 0<br>(0 - 0)           | 13<br>(5 - 17)           | 59<br>(20 - 81)          | 835<br>(192 - 1,249)     |
| Urolithiasis                                        | 22<br>(10 - 70)          | --                    | 0<br>(0 - 0)           | 1<br>(1 - 3)             | 4<br>(2 - 9)             | 17<br>(7 - 59)           |
| Other urinary diseases                              | 61<br>(25 - 145)         | 0<br>(0 - 0)          | 0<br>(0 - 0)           | 2<br>(1 - 3)             | 10<br>(4 - 20)           | 49<br>(19 - 125)         |
| Gynecological diseases                              | 1<br>(1 - 2)             | --                    | --                     | 0<br>(0 - 0)             | 0<br>(0 - 1)             | 1<br>(0 - 1)             |
| Uterine fibroids                                    | 0<br>(0 - 0)             | --                    | --                     | 0<br>(0 - 0)             | 0<br>(0 - 0)             | 0<br>(0 - 0)             |
| Polycystic ovarian syndrome                         | 0<br>(0 - 0)             | --                    | --                     | 0<br>(0 - 0)             | 0<br>(0 - 0)             | --                       |
| Endometriosis                                       | 0<br>(0 - 0)             | --                    | --                     | 0<br>(0 - 0)             | 0<br>(0 - 0)             | --                       |
| Genital prolapse                                    | 0<br>(0 - 0)             | --                    | --                     | 0<br>(0 - 0)             | 0<br>(0 - 0)             | 0<br>(0 - 0)             |
| Other gynecological diseases                        | 1<br>(0 - 1)             | --                    | --                     | 0<br>(0 - 0)             | 0<br>(0 - 0)             | 0<br>(0 - 1)             |
| Hemoglobinopathies and hemolytic anemias            | 87<br>(56 - 120)         | 1<br>(1 - 2)          | 1<br>(1 - 2)           | 7<br>(5 - 10)            | 14<br>(9 - 19)           | 64<br>(39 - 91)          |
| Thalassemias                                        | 1<br>(1 - 1)             | 0<br>(0 - 0)          | 0<br>(0 - 0)           | 1<br>(0 - 1)             | 0<br>(0 - 0)             | 0<br>(0 - 0)             |
| Sickle cell disorders                               | 20<br>(13 - 27)          | 1<br>(0 - 1)          | 1<br>(0 - 1)           | 5<br>(3 - 6)             | 8<br>(6 - 11)            | 6<br>(3 - 8)             |
| G6PD deficiency                                     | 0<br>(0 - 0)             | 0<br>(0 - 0)          | 0<br>(0 - 0)           | 0<br>(0 - 0)             | 0<br>(0 - 0)             | 0<br>(0 - 0)             |
| Other hemoglobinopathies and hemolytic anemias      | 66<br>(42 - 93)          | 0<br>(0 - 1)          | 0<br>(0 - 0)           | 2<br>(1 - 3)             | 6<br>(4 - 8)             | 58<br>(35 - 83)          |
| Endocrine, metabolic, blood, and immune disorders   | 462<br>(245 - 567)       | 8<br>(5 - 11)         | 5<br>(3 - 7)           | 62<br>(44 - 74)          | 101<br>(55 - 123)        | 286<br>(125 - 377)       |
| Musculoskeletal disorders                           | 226<br>(173 - 268)       | --                    | 1<br>(1 - 1)           | 25<br>(20 - 31)          | 53<br>(43 - 66)          | 147<br>(99 - 184)        |
| Rheumatoid arthritis                                | 65<br>(49 - 83)          | --                    | 0<br>(0 - 0)           | 3<br>(2 - 4)             | 16<br>(12 - 22)          | 47<br>(32 - 63)          |
| Other musculoskeletal disorders                     | 161<br>(115 - 191)       | --                    | 1<br>(1 - 1)           | 22<br>(18 - 28)          | 37<br>(29 - 47)          | 101<br>(59 - 127)        |
| Other non-communicable diseases                     | 314<br>(277 - 353)       | 103<br>(85 - 128)     | 12<br>(9 - 15)         | 43<br>(36 - 50)          | 32<br>(27 - 36)          | 124<br>(101 - 158)       |
| Congenital anomalies                                | 192<br>(164 - 220)       | 102<br>(84 - 126)     | 12<br>(9 - 14)         | 38<br>(32 - 45)          | 18<br>(15 - 22)          | 22<br>(18 - 27)          |
| Neural tube defects                                 | 3<br>(2 - 4)             | 1<br>(1 - 3)          | 0<br>(0 - 0)           | 0<br>(0 - 1)             | 0<br>(0 - 0)             | 0<br>(0 - 1)             |
| Congenital heart anomalies                          | 79<br>(65 - 94)          | 45<br>(35 - 57)       | 6<br>(4 - 8)           | 18<br>(15 - 22)          | 6<br>(5 - 8)             | 3<br>(2 - 4)             |
| Cleft lip and cleft palate                          | 0<br>(0 - 0)             | 0<br>(0 - 0)          | --                     | --                       | --                       | --                       |
| Down syndrome                                       | 21<br>(14 - 30)          | 6<br>(3 - 11)         | 1<br>(1 - 2)           | 9<br>(6 - 12)            | 5<br>(3 - 6)             | 1<br>(1 - 2)             |
| Chromosomal unbalanced rearrangements               | 6<br>(4 - 9)             | 4<br>(3 - 6)          | 0<br>(0 - 1)           | 1<br>(1 - 1)             | 0<br>(0 - 1)             | 0<br>(0 - 0)             |
| Other congenital anomalies                          | 83<br>(68 - 100)         | 45<br>(34 - 60)       | 4<br>(3 - 5)           | 10<br>(7 - 12)           | 7<br>(5 - 9)             | 17<br>(13 - 22)          |
| Skin and subcutaneous diseases                      | 121<br>(96 - 154)        | 0<br>(0 - 1)          | 0<br>(0 - 0)           | 5<br>(4 - 6)             | 13<br>(10 - 16)          | 102<br>(78 - 135)        |
| Cellulitis                                          | 31<br>(20 - 47)          | 0<br>(0 - 0)          | 0<br>(0 - 0)           | 2<br>(1 - 3)             | 5<br>(3 - 8)             | 24<br>(14 - 39)          |
| Pyoderma                                            | 58<br>(39 - 78)          | 0<br>(0 - 0)          | 0<br>(0 - 0)           | 2<br>(1 - 3)             | 6<br>(4 - 8)             | 50<br>(31 - 69)          |
| Decubitus ulcer                                     | 15<br>(9 - 46)           | 0<br>(0 - 0)          | 0<br>(0 - 0)           | 0<br>(0 - 1)             | 1<br>(1 - 2)             | 14<br>(8 - 43)           |
| Other skin and subcutaneous diseases                | 17<br>(8 - 28)           | 0<br>(0 - 0)          | 0<br>(0 - 0)           | 1<br>(0 - 1)             | 1<br>(1 - 2)             | 15<br>(6 - 26)           |
| Sudden infant death syndrome                        | 1<br>(0 - 4)             | 1<br>(0 - 4)          | --                     | --                       | --                       | --                       |
| Injuries                                            | 5,377<br>(4,910 - 5,851) | 34<br>(25 - 48)       | 49<br>(43 - 55)        | 1,591<br>(1,451 - 1,740) | 1,230<br>(1,123 - 1,377) | 2,473<br>(2,155 - 2,748) |
| Transport injuries                                  | 1,478<br>(1,340 - 1,625) | 8<br>(6 - 11)         | 27<br>(22 - 32)        | 673<br>(589 - 748)       | 343<br>(303 - 391)       | 428<br>(369 - 497)       |



Web Table 31- Portugal deaths with 95% UI by age, sex, and cause in 2013

| Cause                                           | Both Sexes, All Ages     | Both Sexes, 0-4 Years | Both Sexes, 5-14 Years | Both Sexes, 15-49 Years | Both Sexes, 50-69 Years | Both Sexes, 70-80 Years  |
|-------------------------------------------------|--------------------------|-----------------------|------------------------|-------------------------|-------------------------|--------------------------|
| Road injuries                                   | 1,353<br>(1,221 - 1,480) | 8<br>(5 - 10)         | 25<br>(21 - 31)        | 628<br>(551 - 698)      | 299<br>(262 - 342)      | 392<br>(337 - 459)       |
| Pedestrian road injuries                        | 433<br>(300 - 561)       | 3<br>(2 - 5)          | 11<br>(7 - 14)         | 111<br>(69 - 174)       | 104<br>(70 - 141)       | 204<br>(138 - 252)       |
| Cyclist road injuries                           | 135<br>(100 - 188)       | 1<br>(0 - 1)          | 4<br>(2 - 6)           | 49<br>(34 - 74)         | 36<br>(25 - 51)         | 45<br>(31 - 65)          |
| Motorcyclist road injuries                      | 199<br>(137 - 334)       | 0<br>(0 - 1)          | 2<br>(1 - 4)           | 131<br>(91 - 214)       | 37<br>(22 - 70)         | 29<br>(15 - 62)          |
| Motor vehicle road injuries                     | 567<br>(392 - 683)       | 3<br>(2 - 5)          | 8<br>(5 - 11)          | 330<br>(216 - 409)      | 118<br>(83 - 148)       | 108<br>(71 - 143)        |
| Other road injuries                             | 18<br>(5 - 73)           | 0<br>(0 - 1)          | 0<br>(0 - 2)           | 8<br>(2 - 31)           | 5<br>(1 - 18)           | 6<br>(1 - 23)            |
| Other transport injuries                        | 126<br>(86 - 158)        | 0<br>(0 - 1)          | 1<br>(1 - 2)           | 44<br>(29 - 58)         | 44<br>(28 - 59)         | 36<br>(23 - 51)          |
| Unintentional injuries                          | 2,102<br>(1,814 - 2,347) | 23<br>(16 - 38)       | 17<br>(14 - 23)        | 251<br>(220 - 303)      | 361<br>(317 - 422)      | 1,450<br>(1,175 - 1,678) |
| Falls                                           | 981<br>(727 - 1,172)     | 2<br>(1 - 3)          | 3<br>(2 - 4)           | 82<br>(68 - 110)        | 125<br>(103 - 152)      | 769<br>(533 - 953)       |
| Drowning                                        | 94<br>(76 - 145)         | 3<br>(2 - 8)          | 6<br>(4 - 12)          | 35<br>(26 - 55)         | 25<br>(19 - 37)         | 26<br>(21 - 36)          |
| Fire, heat, and hot substances                  | 135<br>(111 - 176)       | 2<br>(1 - 4)          | 1<br>(1 - 2)           | 14<br>(11 - 19)         | 20<br>(16 - 27)         | 97<br>(77 - 127)         |
| Poisonings                                      | 52<br>(32 - 64)          | 1<br>(1 - 1)          | 1<br>(1 - 1)           | 15<br>(9 - 18)          | 10<br>(6 - 12)          | 25<br>(13 - 34)          |
| Exposure to mechanical forces                   | 48<br>(41 - 70)          | 1<br>(1 - 2)          | 2<br>(1 - 2)           | 22<br>(18 - 34)         | 14<br>(11 - 22)         | 9<br>(7 - 11)            |
| Unintentional firearm injuries                  | 4<br>(4 - 6)             | 0<br>(0 - 0)          | 0<br>(0 - 0)           | 2<br>(2 - 3)            | 1<br>(1 - 2)            | 1<br>(0 - 1)             |
| Unintentional suffocation                       | 5<br>(4 - 7)             | 1<br>(0 - 1)          | 1<br>(0 - 1)           | 1<br>(1 - 2)            | 1<br>(1 - 1)            | 2<br>(1 - 3)             |
| Other exposure to mechanical forces             | 38<br>(32 - 58)          | 0<br>(0 - 1)          | 1<br>(1 - 1)           | 18<br>(14 - 30)         | 12<br>(9 - 20)          | 6<br>(5 - 8)             |
| Adverse effects of medical treatment            | 344<br>(239 - 418)       | 2<br>(1 - 4)          | 1<br>(1 - 2)           | 24<br>(16 - 31)         | 100<br>(69 - 134)       | 217<br>(139 - 277)       |
| Animal contact                                  | 8<br>(6 - 15)            | 0<br>(0 - 0)          | 0<br>(0 - 0)           | 2<br>(1 - 3)            | 4<br>(3 - 7)            | 2<br>(2 - 4)             |
| Venomous animal contact                         | 3<br>(2 - 6)             | 0<br>(0 - 0)          | 0<br>(0 - 0)           | 1<br>(0 - 1)            | 2<br>(1 - 5)            | 0<br>(0 - 1)             |
| Non-venomous animal contact                     | 5<br>(4 - 9)             | 0<br>(0 - 0)          | 0<br>(0 - 0)           | 1<br>(1 - 2)            | 2<br>(1 - 3)            | 2<br>(1 - 3)             |
| Foreign body                                    | 353<br>(240 - 519)       | 10<br>(6 - 21)        | 2<br>(1 - 2)           | 22<br>(14 - 33)         | 42<br>(27 - 60)         | 277<br>(184 - 413)       |
| Pulmonary aspiration and foreign body in airway | 350<br>(237 - 517)       | 10<br>(6 - 21)        | 1<br>(1 - 2)           | 21<br>(14 - 32)         | 42<br>(26 - 60)         | 275<br>(182 - 412)       |
| Foreign body in other body part                 | 3<br>(1 - 6)             | 0<br>(0 - 0)          | 0<br>(0 - 0)           | 1<br>(0 - 1)            | 1<br>(0 - 1)            | 2<br>(0 - 5)             |
| Other unintentional injuries                    | 85<br>(65 - 105)         | 1<br>(1 - 2)          | 1<br>(1 - 2)           | 36<br>(26 - 50)         | 19<br>(13 - 29)         | 27<br>(14 - 40)          |
| Self-harm and interpersonal violence            | 1,797<br>(1,520 - 2,096) | 2<br>(2 - 4)          | 5<br>(4 - 8)           | 668<br>(561 - 786)      | 526<br>(447 - 627)      | 595<br>(491 - 725)       |
| Self-harm                                       | 1,638<br>(1,366 - 1,885) | -                     | 2<br>(2 - 4)           | 569<br>(465 - 653)      | 491<br>(415 - 585)      | 575<br>(473 - 707)       |
| Interpersonal violence                          | 159<br>(126 - 242)       | 2<br>(2 - 4)          | 3<br>(2 - 5)           | 98<br>(75 - 151)        | 35<br>(26 - 56)         | 20<br>(15 - 28)          |
| Assault by firearm                              | 70<br>(45 - 113)         | 0<br>(0 - 0)          | 1<br>(1 - 2)           | 50<br>(32 - 78)         | 15<br>(9 - 26)          | 4<br>(3 - 7)             |
| Assault by sharp object                         | 35<br>(21 - 65)          | 0<br>(0 - 0)          | 0<br>(0 - 0)           | 24<br>(14 - 44)         | 7<br>(4 - 13)           | 4<br>(2 - 6)             |
| Assault by other means                          | 53<br>(39 - 84)          | 2<br>(1 - 3)          | 2<br>(1 - 3)           | 24<br>(16 - 44)         | 12<br>(8 - 22)          | 12<br>(9 - 17)           |

Web Table 31- Portugal deaths with 95% UI by age, sex, and cause in 2013

| Cause                                                              | Males, All Ages             | Males, 0-4 Years   | Males, 5-14 Years | Males, 15-49 Years       | Males, 50-69 Years          | Males, 70-80 Years          |
|--------------------------------------------------------------------|-----------------------------|--------------------|-------------------|--------------------------|-----------------------------|-----------------------------|
| All causes                                                         | 57,055<br>(53,916 - 60,242) | 179<br>(155 - 211) | 82<br>(75 - 91)   | 4,493<br>(4,169 - 4,825) | 12,344<br>(11,463 - 13,251) | 39,956<br>(38,023 - 41,904) |
| Communicable, maternal, neonatal, and nutritional diseases         | 4,883<br>(3,547 - 5,889)    | 81<br>(63 - 97)    | 8<br>(6 - 9)      | 662<br>(520 - 811)       | 651<br>(500 - 814)          | 3,482<br>(2,297 - 4,435)    |
| HIV/AIDS and tuberculosis                                          | 870<br>(628 - 1,138)        | 0<br>(0 - 1)       | 0<br>(0 - 0)      | 501<br>(355 - 651)       | 229<br>(137 - 358)          | 140<br>(107 - 181)          |
| Tuberculosis                                                       | 191<br>(161 - 223)          | 0<br>(0 - 0)       | 0<br>(0 - 0)      | 32<br>(26 - 40)          | 53<br>(43 - 67)             | 106<br>(83 - 131)           |
| HIV/AIDS                                                           | 679<br>(436 - 944)          | 0<br>(0 - 1)       | 0<br>(0 - 0)      | 469<br>(321 - 618)       | 176<br>(86 - 308)           | 34<br>(12 - 69)             |
| HIV/AIDS resulting in mycobacterial infection                      | 41<br>(26 - 62)             | 0<br>(0 - 0)       | 0<br>(0 - 0)      | 28<br>(18 - 40)          | 11<br>(5 - 20)              | 2<br>(1 - 5)                |
| HIV/AIDS resulting in other diseases                               | 638<br>(408 - 889)          | 0<br>(0 - 0)       | 0<br>(0 - 0)      | 441<br>(302 - 582)       | 165<br>(81 - 288)           | 32<br>(11 - 64)             |
| Diarrrhea, lower respiratory, and other common infectious diseases | 3,760<br>(2,467 - 4,703)    | 17<br>(12 - 22)    | 6<br>(5 - 8)      | 138<br>(107 - 172)       | 388<br>(274 - 482)          | 3,210<br>(2,064 - 4,149)    |
| Diarrheal diseases                                                 | 46<br>(32 - 66)             | 3<br>(2 - 4)       | 0<br>(0 - 0)      | 3<br>(2 - 3)             | 5<br>(4 - 7)                | 35<br>(23 - 55)             |
| Intestinal infectious diseases                                     | 3<br>(1 - 7)                | 1<br>(0 - 2)       | 1<br>(0 - 1)      | 1<br>(0 - 3)             | 1<br>(0 - 2)                | 1<br>(0 - 2)                |
| Typhoid fever                                                      | 2<br>(1 - 5)                | 0<br>(0 - 1)       | 0<br>(0 - 1)      | 1<br>(0 - 2)             | 0<br>(0 - 1)                | 0<br>(0 - 1)                |
| Paratyphoid fever                                                  | 1<br>(0 - 1)                | 0<br>(0 - 0)       | 0<br>(0 - 0)      | 0<br>(0 - 1)             | 0<br>(0 - 0)                | 0<br>(0 - 0)                |
| Other intestinal infectious diseases                               | 1<br>(0 - 3)                | 0<br>(0 - 1)       | 0<br>(0 - 0)      | 0<br>(0 - 2)             | 0<br>(0 - 1)                | 0<br>(0 - 2)                |
| Lower respiratory infections                                       | 3,650<br>(2,346 - 4,586)    | 9<br>(6 - 13)      | 3<br>(2 - 4)      | 118<br>(86 - 152)        | 367<br>(252 - 460)          | 3,153<br>(2,012 - 4,094)    |
| Upper respiratory infections                                       | 1<br>(0 - 4)                | 0<br>(0 - 0)       | 0<br>(0 - 0)      | 0<br>(0 - 0)             | 0<br>(0 - 1)                | 1<br>(0 - 3)                |
| Otitis media                                                       | 2<br>(2 - 3)                | 1<br>(0 - 1)       | 0<br>(0 - 0)      | 1<br>(1 - 1)             | 0<br>(0 - 0)                | 1<br>(0 - 1)                |
| Meningitis                                                         | 33<br>(28 - 38)             | 3<br>(1 - 4)       | 1<br>(1 - 1)      | 9<br>(7 - 11)            | 9<br>(7 - 11)               | 11<br>(8 - 14)              |
| Pneumococcal meningitis                                            | 6<br>(4 - 8)                | 0<br>(0 - 1)       | 0<br>(0 - 0)      | 2<br>(1 - 2)             | 2<br>(1 - 3)                | 2<br>(1 - 3)                |
| H influenzae type B meningitis                                     | 4<br>(3 - 6)                | 1<br>(0 - 1)       | 0<br>(0 - 0)      | 1<br>(1 - 2)             | 1<br>(0 - 2)                | 1<br>(0 - 2)                |
| Meningococcal meningitis                                           | 11<br>(7 - 15)              | 1<br>(0 - 1)       | 0<br>(0 - 1)      | 3<br>(2 - 5)             | 3<br>(1 - 5)                | 4<br>(2 - 6)                |
| Other meningitis                                                   | 12<br>(9 - 16)              | 1<br>(0 - 1)       | 0<br>(0 - 1)      | 3<br>(2 - 5)             | 4<br>(2 - 6)                | 4<br>(3 - 7)                |
| Encephalitis                                                       | 19<br>(12 - 28)             | 1<br>(1 - 2)       | 1<br>(1 - 2)      | 6<br>(4 - 8)             | 5<br>(3 - 8)                | 6<br>(3 - 9)                |
| Diphtheria                                                         | 0<br>(0 - 0)                | 0<br>(0 - 0)       | 0<br>(0 - 0)      | 0<br>(0 - 0)             | 0<br>(0 - 0)                | --<br>(0 - 0)               |
| Whooping cough                                                     | 0<br>(0 - 1)                | 0<br>(0 - 0)       | 0<br>(0 - 0)      | 0<br>(0 - 0)             | 0<br>(0 - 0)                | --<br>(0 - 0)               |
| Tetanus                                                            | 1<br>(1 - 2)                | 0<br>(0 - 0)       | 0<br>(0 - 0)      | 0<br>(0 - 0)             | 0<br>(0 - 1)                | 0<br>(0 - 1)                |
| Measles                                                            | 0<br>(0 - 0)                | 0<br>(0 - 0)       | 0<br>(0 - 0)      | 0<br>(0 - 0)             | 0<br>(0 - 0)                | --<br>(0 - 0)               |
| Varicella and herpes zoster                                        | 4<br>(1 - 13)               | 0<br>(0 - 1)       | 0<br>(0 - 1)      | 0<br>(0 - 1)             | 0<br>(0 - 1)                | 3<br>(0 - 12)               |
| Neglected tropical diseases and malaria                            | 8<br>(7 - 10)               | 0<br>(0 - 0)       | 0<br>(0 - 0)      | 2<br>(1 - 2)             | 3<br>(2 - 3)                | 3<br>(2 - 5)                |
| Leishmaniasis                                                      | 2<br>(1 - 2)                | 0<br>(0 - 0)       | 0<br>(0 - 0)      | 0<br>(0 - 1)             | 1<br>(0 - 1)                | 0<br>(0 - 1)                |
| Visceral leishmaniasis                                             | 2<br>(1 - 2)                | 0<br>(0 - 0)       | 0<br>(0 - 0)      | 0<br>(0 - 1)             | 1<br>(0 - 1)                | 0<br>(0 - 1)                |
| Cysticercosis                                                      | 0<br>(0 - 0)                | 0<br>(0 - 0)       | 0<br>(0 - 0)      | 0<br>(0 - 0)             | 0<br>(0 - 0)                | 0<br>(0 - 0)                |
| Cystic echinococcosis                                              | 1<br>(1 - 1)                | 0<br>(0 - 0)       | 0<br>(0 - 0)      | 0<br>(0 - 0)             | 0<br>(0 - 0)                | 0<br>(0 - 0)                |
| Dengue                                                             | 0<br>(0 - 1)                | 0<br>(0 - 0)       | 0<br>(0 - 0)      | 0<br>(0 - 0)             | 0<br>(0 - 0)                | 0<br>(0 - 0)                |
| Rabies                                                             | 0<br>(0 - 1)                | 0<br>(0 - 0)       | 0<br>(0 - 0)      | 0<br>(0 - 0)             | 0<br>(0 - 0)                | 0<br>(0 - 0)                |
| Other neglected tropical diseases                                  | 5<br>(4 - 7)                | 0<br>(0 - 0)       | 0<br>(0 - 0)      | 1<br>(1 - 1)             | 2<br>(1 - 2)                | 3<br>(2 - 4)                |
| Maternal disorders                                                 | --                          | --                 | --                | --                       | --                          | --                          |
| Maternal hemorrhage                                                | --                          | --                 | --                | --                       | --                          | --                          |
| Maternal sepsis and other maternal infections                      | --                          | --                 | --                | --                       | --                          | --                          |
| Maternal hypertensive disorders                                    | --                          | --                 | --                | --                       | --                          | --                          |
| Maternal obstructed labor                                          | --                          | --                 | --                | --                       | --                          | --                          |

Web Table 31- Portugal deaths with 95% UI by age, sex, and cause in 2013

| Cause                                                            | Males, All Ages             | Males, 0-4 Years | Males, 5-14 Years | Males, 15-49 Years       | Males, 50-69 Years         | Males, 70-80 Years          |
|------------------------------------------------------------------|-----------------------------|------------------|-------------------|--------------------------|----------------------------|-----------------------------|
| Maternal abortive outcome                                        | --                          | --               | --                | --                       | --                         | --                          |
| Indirect maternal deaths                                         | --                          | --               | --                | --                       | --                         | --                          |
| Late maternal deaths                                             | --                          | --               | --                | --                       | --                         | --                          |
| Maternal deaths aggravated by HIV/AIDS                           | --                          | --               | --                | --                       | --                         | --                          |
| Other maternal disorders                                         | --                          | --               | --                | --                       | --                         | --                          |
| Neonatal disorders                                               | 61<br>(49 - 73)             | 61<br>(49 - 73)  | --                | --                       | --                         | --                          |
| Neonatal preterm birth complications                             | 27<br>(18 - 37)             | 27<br>(18 - 37)  | --                | --                       | --                         | --                          |
| Neonatal encephalopathy due to birth asphyxia and trauma         | 9<br>(6 - 14)               | 9<br>(6 - 14)    | --                | --                       | --                         | --                          |
| Neonatal sepsis and other neonatal infections                    | 10<br>(4 - 20)              | 10<br>(4 - 20)   | --                | --                       | --                         | --                          |
| Hemolytic disease and other neonatal jaundice                    | 0<br>(0 - 0)                | 0<br>(0 - 0)     | --                | --                       | --                         | --                          |
| Other neonatal disorders                                         | 15<br>(5 - 23)              | 15<br>(5 - 23)   | --                | --                       | --                         | --                          |
| Nutritional deficiencies                                         | 125<br>(60 - 169)           | 1<br>(0 - 1)     | 0<br>(0 - 0)      | 6<br>(3 - 8)             | 12<br>(7 - 18)             | 106<br>(48 - 149)           |
| Protein-energy malnutrition                                      | 39<br>(16 - 72)             | 1<br>(0 - 1)     | 0<br>(0 - 0)      | 1<br>(1 - 2)             | 3<br>(2 - 6)               | 34<br>(13 - 63)             |
| Iodine deficiency                                                | 0<br>(0 - 1)                | 0<br>(0 - 0)     | 0<br>(0 - 0)      | 0<br>(0 - 0)             | 0<br>(0 - 0)               | 0<br>(0 - 1)                |
| Iron-deficiency anemia                                           | 72<br>(28 - 105)            | 0<br>(0 - 0)     | 0<br>(0 - 0)      | 4<br>(2 - 6)             | 8<br>(4 - 12)              | 60<br>(21 - 92)             |
| Other nutritional deficiencies                                   | 13<br>(4 - 26)              | 0<br>(0 - 0)     | 0<br>(0 - 0)      | 1<br>(0 - 1)             | 1<br>(0 - 2)               | 12<br>(3 - 24)              |
| Other communicable, maternal, neonatal, and nutritional diseases | 60<br>(41 - 72)             | 1<br>(1 - 3)     | 1<br>(1 - 1)      | 15<br>(11 - 19)          | 19<br>(13 - 24)            | 24<br>(13 - 32)             |
| Sexually transmitted diseases excluding HIV                      | 2<br>(1 - 5)                | 1<br>(0 - 2)     | 0<br>(0 - 0)      | 0<br>(0 - 1)             | 1<br>(0 - 2)               | 1<br>(0 - 2)                |
| Syphilis                                                         | 2<br>(1 - 4)                | 1<br>(0 - 2)     | 0<br>(0 - 0)      | 0<br>(0 - 0)             | 0<br>(0 - 1)               | 1<br>(0 - 1)                |
| Chlamydial infection                                             | --                          | --               | --                | --                       | --                         | --                          |
| Gonococcal infection                                             | 0<br>(0 - 1)                | --               | 0<br>(0 - 0)      | 0<br>(0 - 0)             | 0<br>(0 - 0)               | 0<br>(0 - 0)                |
| Other sexually transmitted diseases                              | 0<br>(0 - 0)                | --               | 0<br>(0 - 0)      | 0<br>(0 - 0)             | 0<br>(0 - 0)               | 0<br>(0 - 0)                |
| Hepatitis                                                        | 17<br>(14 - 21)             | 0<br>(0 - 0)     | 0<br>(0 - 0)      | 6<br>(5 - 9)             | 6<br>(4 - 8)               | 4<br>(3 - 6)                |
| Acute hepatitis A                                                | 4<br>(1 - 8)                | 0<br>(0 - 0)     | 0<br>(0 - 0)      | 2<br>(1 - 4)             | 1<br>(0 - 3)               | 0<br>(0 - 1)                |
| Acute hepatitis B                                                | 11<br>(7 - 15)              | 0<br>(0 - 0)     | 0<br>(0 - 0)      | 4<br>(2 - 6)             | 4<br>(2 - 6)               | 3<br>(2 - 5)                |
| Acute hepatitis C                                                | 2<br>(0 - 4)                | --               | 0<br>(0 - 0)      | 1<br>(0 - 2)             | 1<br>(0 - 2)               | 1<br>(0 - 2)                |
| Other infectious diseases                                        | 40<br>(22 - 52)             | 1<br>(0 - 1)     | 1<br>(0 - 1)      | 8<br>(5 - 11)            | 12<br>(6 - 16)             | 19<br>(8 - 27)              |
| Non-communicable diseases                                        | 48,527<br>(45,656 - 51,572) | 80<br>(65 - 99)  | 43<br>(37 - 49)   | 2,512<br>(2,277 - 2,754) | 10,758<br>(9,947 - 11,583) | 35,136<br>(33,236 - 37,238) |
| Neoplasms                                                        | 16,724<br>(15,472 - 18,151) | 8<br>(5 - 12)    | 24<br>(20 - 29)   | 1,104<br>(984 - 1,224)   | 5,530<br>(5,069 - 6,001)   | 10,058<br>(9,220 - 11,105)  |
| Esophageal cancer                                                | 517<br>(415 - 600)          | --               | --                | 58<br>(39 - 74)          | 261<br>(192 - 308)         | 198<br>(164 - 255)          |
| Stomach cancer                                                   | 1,816<br>(1,594 - 2,088)    | --               | --                | 118<br>(98 - 145)        | 566<br>(498 - 639)         | 1,132<br>(950 - 1,345)      |
| Liver cancer                                                     | 591<br>(356 - 757)          | --               | 0<br>(0 - 0)      | 39<br>(24 - 54)          | 240<br>(145 - 315)         | 312<br>(173 - 423)          |
| Liver cancer due to hepatitis B                                  | 113<br>(44 - 206)           | --               | 0<br>(0 - 0)      | 13<br>(6 - 23)           | 54<br>(18 - 105)           | 46<br>(16 - 85)             |
| Liver cancer due to hepatitis C                                  | 334<br>(180 - 504)          | --               | 0<br>(0 - 0)      | 19<br>(10 - 30)          | 135<br>(75 - 205)          | 180<br>(87 - 279)           |
| Liver cancer due to alcohol use                                  | 135<br>(64 - 236)           | --               | --                | 6<br>(2 - 12)            | 48<br>(21 - 88)            | 81<br>(37 - 141)            |
| Liver cancer due to other causes                                 | 9<br>(3 - 21)               | --               | 0<br>(0 - 0)      | 1<br>(0 - 2)             | 4<br>(1 - 10)              | 4<br>(1 - 10)               |
| Larynx cancer                                                    | 380<br>(267 - 473)          | --               | --                | 44<br>(28 - 58)          | 187<br>(132 - 234)         | 149<br>(104 - 193)          |
| Tracheal, bronchus and lung cancer                               | 3,418<br>(3,103 - 3,746)    | --               | --                | 217<br>(181 - 259)       | 1,517<br>(1,358 - 1,693)   | 1,684<br>(1,500 - 1,887)    |
| Breast cancer                                                    | 24<br>(12 - 64)             | --               | --                | 2<br>(1 - 6)             | 7<br>(4 - 18)              | 15<br>(7 - 44)              |
| Cervical cancer                                                  | --                          | --               | --                | --                       | --                         | --                          |

Web Table 31- Portugal deaths with 95% UI by age, sex, and cause in 2013

| Cause                                         | Males, All Ages             | Males, 0-4 Years | Males, 5-14 Years | Males, 15-49 Years | Males, 50-69 Years       | Males, 70-80 Years          |
|-----------------------------------------------|-----------------------------|------------------|-------------------|--------------------|--------------------------|-----------------------------|
| Uterine cancer                                | --                          | --               | --                | --                 | --                       | --                          |
| Prostate cancer                               | 2,323<br>(1,832 - 3,420)    | --               | --                | 6<br>(4 - 8)       | 271<br>(201 - 409)       | 2,046<br>(1,586 - 3,039)    |
| Colon and rectum cancer                       | 2,578<br>(2,298 - 2,873)    | --               | --                | 106<br>(88 - 123)  | 735<br>(655 - 813)       | 1,738<br>(1,512 - 1,988)    |
| Lip and oral cavity cancer                    | 329<br>(275 - 376)          | --               | --                | 52<br>(39 - 66)    | 167<br>(129 - 197)       | 110<br>(88 - 134)           |
| Nasopharynx cancer                            | 51<br>(37 - 63)             | --               | 0<br>(0 - 0)      | 13<br>(9 - 20)     | 26<br>(17 - 35)          | 12<br>(8 - 16)              |
| Other pharynx cancer                          | 260<br>(159 - 317)          | --               | --                | 46<br>(25 - 63)    | 154<br>(89 - 194)        | 59<br>(39 - 78)             |
| Gallbladder and biliary tract cancer          | 156<br>(99 - 214)           | --               | --                | 6<br>(3 - 8)       | 43<br>(28 - 60)          | 108<br>(67 - 147)           |
| Pancreatic cancer                             | 789<br>(706 - 875)          | --               | --                | 44<br>(36 - 53)    | 304<br>(268 - 344)       | 442<br>(383 - 511)          |
| Malignant skin melanoma                       | 126<br>(58 - 202)           | --               | --                | 21<br>(10 - 34)    | 44<br>(19 - 71)          | 61<br>(28 - 99)             |
| Non-melanoma skin cancer                      | 101<br>(62 - 156)           | --               | --                | 6<br>(4 - 9)       | 19<br>(12 - 30)          | 76<br>(46 - 118)            |
| Ovarian cancer                                | --                          | --               | --                | --                 | --                       | --                          |
| Testicular cancer                             | 16<br>(10 - 21)             | --               | --                | 7<br>(4 - 10)      | 3<br>(2 - 4)             | 6<br>(4 - 8)                |
| Kidney cancer                                 | 327<br>(278 - 384)          | 0<br>(0 - 1)     | 1<br>(0 - 1)      | 24<br>(18 - 30)    | 119<br>(96 - 144)        | 183<br>(144 - 230)          |
| Bladder cancer                                | 669<br>(503 - 787)          | --               | --                | 11<br>(8 - 15)     | 146<br>(102 - 174)       | 512<br>(384 - 625)          |
| Brain and nervous system cancer               | 420<br>(294 - 508)          | 2<br>(1 - 3)     | 6<br>(4 - 9)      | 81<br>(59 - 104)   | 183<br>(132 - 226)       | 148<br>(87 - 203)           |
| Thyroid cancer                                | 30<br>(25 - 37)             | --               | 0<br>(0 - 0)      | 3<br>(2 - 3)       | 12<br>(9 - 15)           | 16<br>(12 - 21)             |
| Mesothelioma                                  | 42<br>(30 - 78)             | --               | --                | 4<br>(2 - 7)       | 16<br>(10 - 31)          | 22<br>(13 - 43)             |
| Hodgkin lymphoma                              | 36<br>(22 - 49)             | 0<br>(0 - 0)     | 0<br>(0 - 1)      | 12<br>(7 - 16)     | 11<br>(7 - 17)           | 12<br>(7 - 17)              |
| Non-Hodgkin lymphoma                          | 415<br>(193 - 522)          | 1<br>(0 - 2)     | 3<br>(1 - 5)      | 50<br>(24 - 64)    | 135<br>(66 - 169)        | 226<br>(97 - 308)           |
| Multiple myeloma                              | 212<br>(98 - 295)           | --               | --                | 9<br>(5 - 14)      | 67<br>(34 - 104)         | 136<br>(58 - 199)           |
| Leukemia                                      | 485<br>(429 - 550)          | 2<br>(1 - 4)     | 8<br>(5 - 10)     | 49<br>(41 - 57)    | 122<br>(104 - 141)       | 305<br>(259 - 358)          |
| Other neoplasms                               | 614<br>(408 - 733)          | 3<br>(1 - 5)     | 6<br>(3 - 9)      | 77<br>(52 - 96)    | 176<br>(124 - 220)       | 352<br>(217 - 451)          |
| Cardiovascular diseases                       | 16,621<br>(15,393 - 18,113) | 1<br>(1 - 2)     | 2<br>(2 - 3)      | 546<br>(481 - 614) | 2,826<br>(2,575 - 3,099) | 13,246<br>(12,179 - 14,626) |
| Rheumatic heart disease                       | 54<br>(29 - 73)             | 0<br>(0 - 0)     | 0<br>(0 - 0)      | 8<br>(5 - 12)      | 13<br>(8 - 19)           | 32<br>(14 - 48)             |
| Ischemic heart disease                        | 5,742<br>(4,804 - 7,766)    | 0<br>(0 - 0)     | 0<br>(0 - 0)      | 258<br>(213 - 339) | 1,220<br>(1,037 - 1,618) | 4,264<br>(3,512 - 5,827)    |
| Cerebrovascular disease                       | 8,858<br>(7,580 - 9,985)    | 0<br>(0 - 1)     | 1<br>(0 - 1)      | 187<br>(135 - 233) | 1,244<br>(958 - 1,448)   | 7,426<br>(6,342 - 8,461)    |
| Ischemic stroke                               | 5,086<br>(3,989 - 6,350)    | 0<br>(0 - 0)     | 0<br>(0 - 0)      | 20<br>(12 - 32)    | 412<br>(278 - 585)       | 4,654<br>(3,660 - 5,805)    |
| Hemorrhagic stroke                            | 3,772<br>(2,586 - 4,782)    | 0<br>(0 - 1)     | 1<br>(0 - 1)      | 167<br>(119 - 207) | 832<br>(580 - 1,031)     | 2,772<br>(1,845 - 3,640)    |
| Hypertensive heart disease                    | 294<br>(182 - 445)          | 0<br>(0 - 0)     | 0<br>(0 - 0)      | 4<br>(2 - 5)       | 30<br>(20 - 47)          | 260<br>(157 - 397)          |
| Cardiomyopathy and myocarditis                | 266<br>(143 - 353)          | 1<br>(0 - 1)     | 0<br>(0 - 1)      | 25<br>(13 - 35)    | 67<br>(33 - 94)          | 172<br>(90 - 237)           |
| Atrial fibrillation and flutter               | 285<br>(204 - 384)          | --               | --                | 2<br>(1 - 3)       | 23<br>(16 - 30)          | 260<br>(183 - 359)          |
| Aortic aneurysm                               | 249<br>(178 - 297)          | --               | --                | 13<br>(9 - 17)     | 69<br>(48 - 84)          | 167<br>(119 - 205)          |
| Peripheral vascular disease                   | 212<br>(159 - 276)          | --               | --                | 1<br>(1 - 2)       | 27<br>(20 - 35)          | 184<br>(135 - 247)          |
| Endocarditis                                  | 71<br>(41 - 103)            | 0<br>(0 - 0)     | 0<br>(0 - 0)      | 11<br>(6 - 17)     | 17<br>(10 - 27)          | 43<br>(24 - 61)             |
| Other cardiovascular and circulatory diseases | 590<br>(304 - 725)          | 0<br>(0 - 0)     | 0<br>(0 - 0)      | 36<br>(16 - 45)    | 117<br>(57 - 144)        | 437<br>(225 - 555)          |
| Chronic respiratory diseases                  | 3,759<br>(3,221 - 4,445)    | 2<br>(1 - 3)     | 1<br>(1 - 1)      | 56<br>(46 - 77)    | 447<br>(379 - 589)       | 3,253<br>(2,745 - 3,844)    |
| Chronic obstructive pulmonary disease         | 3,181<br>(2,700 - 3,791)    | 1<br>(1 - 2)     | 1<br>(0 - 1)      | 38<br>(31 - 53)    | 368<br>(311 - 485)       | 2,773<br>(2,322 - 3,293)    |
| Pneumoconiosis                                | 187<br>(129 - 288)          | 0<br>(0 - 0)     | 0<br>(0 - 0)      | 5<br>(3 - 8)       | 33<br>(21 - 52)          | 149<br>(95 - 235)           |
| Silicosis                                     | 79<br>(54 - 122)            | 0<br>(0 - 0)     | 0<br>(0 - 0)      | 3<br>(2 - 5)       | 16<br>(10 - 27)          | 59<br>(38 - 94)             |
| Asbestosis                                    | 36<br>(24 - 56)             | 0<br>(0 - 0)     | 0<br>(0 - 0)      | 1<br>(0 - 1)       | 5<br>(3 - 9)             | 30<br>(19 - 48)             |

Web Table 31- Portugal deaths with 95% UI by age, sex, and cause in 2013

| Cause                                               | Males, All Ages          | Males, 0-4 Years | Males, 5-14 Years | Males, 15-49 Years | Males, 50-69 Years | Males, 70-80 Years       |
|-----------------------------------------------------|--------------------------|------------------|-------------------|--------------------|--------------------|--------------------------|
| Coal workers pneumoconiosis                         | 11<br>(7 - 18)           | 0<br>(0 - 0)     | 0<br>(0 - 0)      | 0<br>(0 - 0)       | 1<br>(0 - 1)       | 10<br>(6 - 16)           |
| Other pneumoconiosis                                | 61<br>(40 - 97)          | 0<br>(0 - 0)     | 0<br>(0 - 0)      | 1<br>(1 - 2)       | 10<br>(6 - 17)     | 50<br>(32 - 81)          |
| Asthma                                              | 60<br>(47 - 79)          | 0<br>(0 - 0)     | 0<br>(0 - 0)      | 5<br>(4 - 6)       | 10<br>(7 - 14)     | 45<br>(33 - 61)          |
| Interstitial lung disease and pulmonary sarcoidosis | 308<br>(184 - 448)       | 0<br>(0 - 0)     | 0<br>(0 - 0)      | 7<br>(4 - 11)      | 33<br>(17 - 48)    | 267<br>(159 - 403)       |
| Other chronic respiratory diseases                  | 23<br>(17 - 32)          | 0<br>(0 - 1)     | 0<br>(0 - 0)      | 1<br>(1 - 1)       | 3<br>(2 - 4)       | 19<br>(13 - 28)          |
| Cirrhosis                                           | 1,723<br>(1,560 - 1,894) | 0<br>(0 - 0)     | 0<br>(0 - 0)      | 337<br>(288 - 392) | 791<br>(702 - 883) | 594<br>(523 - 676)       |
| Cirrhosis due to hepatitis B                        | 147<br>(79 - 237)        | 0<br>(0 - 0)     | 0<br>(0 - 0)      | 29<br>(15 - 49)    | 67<br>(36 - 112)   | 51<br>(26 - 89)          |
| Cirrhosis due to hepatitis C                        | 784<br>(504 - 1,055)     | 0<br>(0 - 0)     | 0<br>(0 - 0)      | 158<br>(86 - 220)  | 365<br>(216 - 503) | 261<br>(163 - 356)       |
| Cirrhosis due to alcohol use                        | 635<br>(417 - 896)       | --               | --                | 100<br>(56 - 163)  | 287<br>(179 - 426) | 248<br>(160 - 337)       |
| Cirrhosis due to other causes                       | 157<br>(85 - 264)        | 0<br>(0 - 0)     | 0<br>(0 - 0)      | 51<br>(29 - 83)    | 72<br>(34 - 128)   | 34<br>(16 - 59)          |
| Digestive diseases                                  | 1,182<br>(979 - 1,369)   | 1<br>(0 - 1)     | 1<br>(1 - 1)      | 67<br>(54 - 79)    | 203<br>(164 - 237) | 911<br>(740 - 1,077)     |
| Peptic ulcer disease                                | 182<br>(127 - 259)       | 0<br>(0 - 0)     | 0<br>(0 - 0)      | 11<br>(8 - 14)     | 34<br>(24 - 46)    | 137<br>(90 - 205)        |
| Gastritis and duodenitis                            | 9<br>(5 - 19)            | 0<br>(0 - 0)     | 0<br>(0 - 0)      | 1<br>(0 - 2)       | 2<br>(1 - 4)       | 6<br>(3 - 14)            |
| Appendicitis                                        | 20<br>(11 - 30)          | 0<br>(0 - 0)     | 0<br>(0 - 0)      | 3<br>(1 - 4)       | 5<br>(2 - 7)       | 12<br>(6 - 19)           |
| Paralytic ileus and intestinal obstruction          | 166<br>(100 - 278)       | 0<br>(0 - 0)     | 0<br>(0 - 0)      | 6<br>(4 - 11)      | 23<br>(13 - 40)    | 137<br>(79 - 234)        |
| Inguinal, femoral, and abdominal hernia             | 45<br>(20 - 69)          | 0<br>(0 - 0)     | 0<br>(0 - 0)      | 1<br>(0 - 1)       | 6<br>(3 - 10)      | 37<br>(16 - 60)          |
| Inflammatory bowel disease                          | 79<br>(37 - 112)         | 0<br>(0 - 0)     | 0<br>(0 - 0)      | 5<br>(3 - 6)       | 11<br>(6 - 15)     | 63<br>(28 - 94)          |
| Vascular intestinal disorders                       | 251<br>(115 - 456)       | 0<br>(0 - 0)     | 0<br>(0 - 0)      | 5<br>(2 - 11)      | 40<br>(18 - 74)    | 206<br>(90 - 379)        |
| Gallbladder and biliary diseases                    | 169<br>(82 - 237)        | 0<br>(0 - 0)     | 0<br>(0 - 0)      | 4<br>(2 - 6)       | 20<br>(10 - 28)    | 145<br>(67 - 207)        |
| Pancreatitis                                        | 164<br>(107 - 226)       | 0<br>(0 - 0)     | 0<br>(0 - 0)      | 26<br>(18 - 33)    | 45<br>(29 - 62)    | 94<br>(54 - 135)         |
| Other digestive diseases                            | 98<br>(55 - 134)         | 0<br>(0 - 0)     | 0<br>(0 - 0)      | 5<br>(3 - 7)       | 18<br>(10 - 24)    | 75<br>(38 - 106)         |
| Neurological disorders                              | 4,029<br>(2,953 - 5,112) | 5<br>(3 - 8)     | 4<br>(3 - 5)      | 65<br>(52 - 77)    | 245<br>(185 - 296) | 3,711<br>(2,648 - 4,788) |
| Alzheimer disease and other dementias               | 3,435<br>(2,355 - 4,505) | --               | --                | 0<br>(0 - 1)       | 108<br>(60 - 151)  | 3,326<br>(2,259 - 4,387) |
| Parkinson disease                                   | 322<br>(210 - 398)       | --               | --                | 1<br>(1 - 2)       | 34<br>(26 - 43)    | 286<br>(178 - 360)       |
| Epilepsy                                            | 74<br>(52 - 93)          | 1<br>(0 - 1)     | 1<br>(1 - 2)      | 29<br>(22 - 37)    | 19<br>(14 - 25)    | 25<br>(14 - 35)          |
| Multiple sclerosis                                  | 30<br>(14 - 54)          | --               | --                | 8<br>(3 - 14)      | 13<br>(5 - 23)     | 9<br>(4 - 19)            |
| Other neurological disorders                        | 169<br>(114 - 197)       | 5<br>(3 - 8)     | 3<br>(2 - 4)      | 26<br>(18 - 32)    | 69<br>(45 - 84)    | 66<br>(43 - 81)          |
| Mental and substance use disorders                  | 289<br>(198 - 343)       | 0<br>(0 - 0)     | 0<br>(0 - 0)      | 171<br>(134 - 203) | 77<br>(37 - 96)    | 41<br>(20 - 53)          |
| Schizophrenia                                       | 7<br>(4 - 9)             | --               | --                | 2<br>(1 - 3)       | 3<br>(2 - 4)       | 2<br>(1 - 3)             |
| Alcohol use disorders                               | 156<br>(70 - 190)        | --               | --                | 50<br>(22 - 65)    | 71<br>(31 - 89)    | 35<br>(14 - 47)          |
| Drug use disorders                                  | 127<br>(102 - 157)       | 0<br>(0 - 0)     | --                | 118<br>(95 - 148)  | 4<br>(3 - 6)       | 4<br>(3 - 6)             |
| Opioid use disorders                                | 47<br>(38 - 60)          | 0<br>(0 - 0)     | --                | 44<br>(35 - 56)    | 1<br>(1 - 2)       | 2<br>(1 - 2)             |
| Cocaine use disorders                               | 3<br>(3 - 5)             | 0<br>(0 - 0)     | --                | 3<br>(2 - 4)       | 0<br>(0 - 0)       | 0<br>(0 - 0)             |
| Amphetamine use disorders                           | 3<br>(2 - 4)             | 0<br>(0 - 0)     | --                | 3<br>(2 - 4)       | 0<br>(0 - 0)       | 0<br>(0 - 0)             |
| Other drug use disorders                            | 73<br>(59 - 92)          | 0<br>(0 - 0)     | --                | 68<br>(54 - 86)    | 3<br>(2 - 3)       | 3<br>(2 - 4)             |
| Eating disorders                                    | 0<br>(0 - 0)             | --               | 0<br>(0 - 0)      | 0<br>(0 - 0)       | --                 | --                       |
| Anorexia nervosa                                    | 0<br>(0 - 0)             | --               | 0<br>(0 - 0)      | 0<br>(0 - 0)       | --                 | --                       |
| Diabetes, urogenital, blood, and endocrine diseases | 3,970<br>(3,477 - 4,412) | 6<br>(4 - 9)     | 4<br>(3 - 5)      | 133<br>(114 - 159) | 600<br>(520 - 683) | 3,226<br>(2,786 - 3,645) |
| Diabetes mellitus                                   | 1,761<br>(1,523 - 2,012) | 0<br>(0 - 0)     | 0<br>(0 - 0)      | 39<br>(32 - 47)    | 313<br>(268 - 364) | 1,409<br>(1,190 - 1,639) |
| Acute glomerulonephritis                            | 1<br>(1 - 2)             | 0<br>(0 - 0)     | 0<br>(0 - 0)      | 0<br>(0 - 0)       | 0<br>(0 - 0)       | 1<br>(0 - 1)             |

Web Table 31- Portugal deaths with 95% UI by age, sex, and cause in 2013

| Cause                                               | Males, All Ages          | Males, 0-4 Years | Males, 5-14 Years | Males, 15-49 Years       | Males, 50-69 Years   | Males, 70-80 Years       |
|-----------------------------------------------------|--------------------------|------------------|-------------------|--------------------------|----------------------|--------------------------|
| Chronic kidney disease                              | 1,550<br>(1,291 - 1,839) | 0<br>(0 - 1)     | 1<br>(0 - 1)      | 44<br>(35 - 63)          | 188<br>(153 - 262)   | 1,317<br>(1,066 - 1,585) |
| Chronic kidney disease due to diabetes mellitus     | 570<br>(347 - 887)       | 0<br>(0 - 0)     | 0<br>(0 - 0)      | 15<br>(9 - 25)           | 82<br>(51 - 121)     | 473<br>(279 - 750)       |
| Chronic kidney disease due to hypertension          | 201<br>(102 - 299)       | 0<br>(0 - 0)     | 0<br>(0 - 0)      | 5<br>(2 - 8)             | 18<br>(10 - 38)      | 178<br>(88 - 262)        |
| Chronic kidney disease due to glomerulonephritis    | 8<br>(5 - 13)            | 0<br>(0 - 0)     | 0<br>(0 - 0)      | 1<br>(1 - 2)             | 2<br>(1 - 3)         | 5<br>(3 - 9)             |
| Chronic kidney disease due to other causes          | 770<br>(498 - 1,029)     | 0<br>(0 - 0)     | 0<br>(0 - 1)      | 23<br>(16 - 39)          | 86<br>(51 - 140)     | 661<br>(408 - 887)       |
| Urinary diseases and male infertility               | 423<br>(124 - 574)       | 0<br>(0 - 0)     | 0<br>(0 - 0)      | 9<br>(3 - 12)            | 41<br>(15 - 53)      | 374<br>(103 - 520)       |
| Interstitial nephritis and urinary tract infections | 366<br>(95 - 511)        | 0<br>(0 - 0)     | 0<br>(0 - 0)      | 7<br>(2 - 9)             | 30<br>(10 - 41)      | 329<br>(81 - 469)        |
| Urolithiasis                                        | 11<br>(4 - 30)           | --               | 0<br>(0 - 0)      | 1<br>(0 - 1)             | 2<br>(1 - 6)         | 8<br>(3 - 23)            |
| Other urinary diseases                              | 47<br>(17 - 117)         | 0<br>(0 - 0)     | 0<br>(0 - 0)      | 2<br>(1 - 3)             | 9<br>(3 - 17)        | 37<br>(13 - 102)         |
| Gynecological diseases                              | --                       | --               | --                | --                       | --                   | --                       |
| Uterine fibroids                                    | --                       | --               | --                | --                       | --                   | --                       |
| Polycystic ovarian syndrome                         | --                       | --               | --                | --                       | --                   | --                       |
| Endometriosis                                       | --                       | --               | --                | --                       | --                   | --                       |
| Genital prolapse                                    | --                       | --               | --                | --                       | --                   | --                       |
| Other gynecological diseases                        | --                       | --               | --                | --                       | --                   | --                       |
| Hemoglobinopathies and hemolytic anemias            | 42<br>(24 - 59)          | 1<br>(0 - 1)     | 1<br>(0 - 1)      | 5<br>(3 - 7)             | 7<br>(4 - 10)        | 30<br>(17 - 43)          |
| Thalassemias                                        | 0<br>(0 - 1)             | 0<br>(0 - 0)     | 0<br>(0 - 0)      | 0<br>(0 - 0)             | 0<br>(0 - 0)         | 0<br>(0 - 0)             |
| Sickle cell disorders                               | 10<br>(6 - 14)           | 0<br>(0 - 1)     | 0<br>(0 - 1)      | 3<br>(2 - 4)             | 4<br>(2 - 6)         | 2<br>(1 - 3)             |
| G6PD deficiency                                     | 0<br>(0 - 0)             | 0<br>(0 - 0)     | 0<br>(0 - 0)      | 0<br>(0 - 0)             | 0<br>(0 - 0)         | 0<br>(0 - 0)             |
| Other hemoglobinopathies and hemolytic anemias      | 32<br>(18 - 45)          | 0<br>(0 - 0)     | 0<br>(0 - 0)      | 1<br>(1 - 2)             | 3<br>(2 - 4)         | 28<br>(15 - 40)          |
| Endocrine, metabolic, blood, and immune disorders   | 192<br>(107 - 235)       | 4<br>(3 - 8)     | 2<br>(1 - 3)      | 37<br>(26 - 49)          | 52<br>(26 - 67)      | 96<br>(43 - 131)         |
| Musculoskeletal disorders                           | 73<br>(42 - 92)          | --               | 0<br>(0 - 0)      | 9<br>(5 - 11)            | 19<br>(11 - 24)      | 46<br>(24 - 61)          |
| Rheumatoid arthritis                                | 15<br>(9 - 23)           | --               | 0<br>(0 - 0)      | 1<br>(1 - 2)             | 4<br>(2 - 7)         | 10<br>(5 - 16)           |
| Other musculoskeletal disorders                     | 58<br>(31 - 73)          | --               | 0<br>(0 - 0)      | 7<br>(4 - 10)            | 14<br>(8 - 19)       | 36<br>(17 - 48)          |
| Other non-communicable diseases                     | 157<br>(137 - 178)       | 56<br>(44 - 72)  | 6<br>(4 - 8)      | 24<br>(20 - 29)          | 19<br>(15 - 22)      | 51<br>(40 - 65)          |
| Congenital anomalies                                | 104<br>(88 - 121)        | 56<br>(44 - 71)  | 6<br>(4 - 8)      | 21<br>(17 - 26)          | 11<br>(8 - 13)       | 11<br>(8 - 14)           |
| Neural tube defects                                 | 1<br>(1 - 2)             | 1<br>(0 - 2)     | 0<br>(0 - 0)      | 0<br>(0 - 0)             | 0<br>(0 - 0)         | 0<br>(0 - 0)             |
| Congenital heart anomalies                          | 45<br>(35 - 55)          | 26<br>(19 - 35)  | 3<br>(2 - 5)      | 10<br>(8 - 13)           | 4<br>(3 - 5)         | 1<br>(1 - 2)             |
| Cleft lip and cleft palate                          | 0<br>(0 - 0)             | 0<br>(0 - 0)     | --                | --                       | --                   | --                       |
| Down syndrome                                       | 11<br>(6 - 18)           | 3<br>(1 - 6)     | 1<br>(0 - 1)      | 4<br>(3 - 7)             | 2<br>(1 - 4)         | 1<br>(0 - 1)             |
| Chromosomal unbalanced rearrangements               | 2<br>(2 - 4)             | 1<br>(1 - 2)     | 0<br>(0 - 0)      | 0<br>(0 - 1)             | 0<br>(0 - 0)         | 0<br>(0 - 0)             |
| Other congenital anomalies                          | 45<br>(36 - 56)          | 25<br>(18 - 36)  | 2<br>(1 - 3)      | 5<br>(4 - 7)             | 4<br>(3 - 5)         | 9<br>(6 - 11)            |
| Skin and subcutaneous diseases                      | 52<br>(40 - 66)          | 0<br>(0 - 0)     | 0<br>(0 - 0)      | 3<br>(2 - 4)             | 8<br>(6 - 10)        | 40<br>(29 - 54)          |
| Cellulitis                                          | 14<br>(8 - 23)           | 0<br>(0 - 0)     | 0<br>(0 - 0)      | 1<br>(1 - 2)             | 3<br>(2 - 5)         | 10<br>(5 - 18)           |
| Pyoderma                                            | 24<br>(15 - 34)          | 0<br>(0 - 0)     | 0<br>(0 - 0)      | 1<br>(1 - 2)             | 4<br>(2 - 5)         | 19<br>(11 - 28)          |
| Decubitus ulcer                                     | 7<br>(4 - 20)            | 0<br>(0 - 0)     | 0<br>(0 - 0)      | 0<br>(0 - 0)             | 1<br>(0 - 1)         | 6<br>(3 - 19)            |
| Other skin and subcutaneous diseases                | 6<br>(3 - 11)            | 0<br>(0 - 0)     | 0<br>(0 - 0)      | 0<br>(0 - 1)             | 1<br>(0 - 1)         | 5<br>(2 - 10)            |
| Sudden infant death syndrome                        | 1<br>(0 - 3)             | 1<br>(0 - 3)     | --                | --                       | --                   | --                       |
| Injuries                                            | 3,645<br>(3,316 - 4,060) | 19<br>(13 - 27)  | 32<br>(27 - 37)   | 1,319<br>(1,180 - 1,472) | 936<br>(835 - 1,079) | 1,338<br>(1,183 - 1,518) |
| Transport injuries                                  | 1,122<br>(1,009 - 1,236) | 5<br>(3 - 7)     | 17<br>(13 - 22)   | 570<br>(495 - 643)       | 258<br>(223 - 300)   | 272<br>(229 - 321)       |

Web Table 31- Portugal deaths with 95% UI by age, sex, and cause in 2013

| Cause                                           | Males, All Ages          | Males, 0-4 Years | Males, 5-14 Years | Males, 15-49 Years | Males, 50-69 Years | Males, 70-80 Years |
|-------------------------------------------------|--------------------------|------------------|-------------------|--------------------|--------------------|--------------------|
| Road injuries                                   | 1,020<br>(912 - 1,134)   | 4<br>(3 - 6)     | 16<br>(12 - 21)   | 532<br>(462 - 598) | 222<br>(190 - 260) | 245<br>(204 - 293) |
| Pedestrian road injuries                        | 283<br>(169 - 426)       | 2<br>(1 - 3)     | 7<br>(4 - 10)     | 88<br>(47 - 153)   | 72<br>(39 - 107)   | 114<br>(68 - 156)  |
| Cyclist road injuries                           | 105<br>(68 - 152)        | 0<br>(0 - 1)     | 3<br>(1 - 4)      | 40<br>(26 - 64)    | 28<br>(17 - 42)    | 34<br>(19 - 53)    |
| Motorcyclist road injuries                      | 182<br>(127 - 308)       | 0<br>(0 - 1)     | 2<br>(1 - 3)      | 125<br>(86 - 207)  | 32<br>(19 - 63)    | 23<br>(12 - 51)    |
| Motor vehicle road injuries                     | 440<br>(288 - 553)       | 2<br>(1 - 3)     | 5<br>(2 - 7)      | 275<br>(172 - 349) | 88<br>(55 - 119)   | 71<br>(41 - 106)   |
| Other road injuries                             | 10<br>(3 - 51)           | 0<br>(0 - 0)     | 0<br>(0 - 1)      | 5<br>(1 - 25)      | 2<br>(1 - 12)      | 3<br>(1 - 15)      |
| Other transport injuries                        | 102<br>(63 - 130)        | 0<br>(0 - 0)     | 1<br>(1 - 2)      | 38<br>(23 - 51)    | 36<br>(21 - 51)    | 27<br>(15 - 39)    |
| Unintentional injuries                          | 1,134<br>(993 - 1,313)   | 13<br>(9 - 21)   | 11<br>(9 - 16)    | 206<br>(178 - 257) | 271<br>(231 - 331) | 633<br>(506 - 742) |
| Falls                                           | 494<br>(380 - 584)       | 1<br>(1 - 2)     | 2<br>(2 - 3)      | 72<br>(58 - 101)   | 97<br>(78 - 124)   | 321<br>(221 - 396) |
| Drowning                                        | 71<br>(54 - 112)         | 2<br>(1 - 5)     | 4<br>(3 - 10)     | 30<br>(22 - 50)    | 20<br>(14 - 31)    | 14<br>(10 - 22)    |
| Fire, heat, and hot substances                  | 75<br>(57 - 107)         | 1<br>(1 - 3)     | 1<br>(0 - 1)      | 11<br>(8 - 16)     | 14<br>(10 - 20)    | 48<br>(35 - 68)    |
| Poisonings                                      | 28<br>(16 - 34)          | 1<br>(0 - 1)     | 0<br>(0 - 1)      | 10<br>(6 - 13)     | 6<br>(4 - 8)       | 10<br>(5 - 14)     |
| Exposure to mechanical forces                   | 38<br>(32 - 60)          | 1<br>(0 - 1)     | 1<br>(1 - 2)      | 19<br>(15 - 31)    | 12<br>(10 - 20)    | 5<br>(4 - 7)       |
| Unintentional firearm injuries                  | 4<br>(3 - 5)             | 0<br>(0 - 0)     | 0<br>(0 - 0)      | 2<br>(2 - 3)       | 1<br>(1 - 1)       | 1<br>(0 - 1)       |
| Unintentional suffocation                       | 3<br>(2 - 4)             | 0<br>(0 - 1)     | 0<br>(0 - 1)      | 1<br>(1 - 1)       | 1<br>(0 - 1)       | 1<br>(0 - 1)       |
| Other exposure to mechanical forces             | 31<br>(26 - 53)          | 0<br>(0 - 0)     | 1<br>(0 - 1)      | 16<br>(12 - 27)    | 10<br>(8 - 18)     | 4<br>(3 - 6)       |
| Adverse effects of medical treatment            | 186<br>(119 - 245)       | 1<br>(1 - 2)     | 0<br>(0 - 1)      | 13<br>(8 - 18)     | 73<br>(47 - 106)   | 99<br>(55 - 132)   |
| Animal contact                                  | 5<br>(4 - 9)             | 0<br>(0 - 0)     | 0<br>(0 - 0)      | 1<br>(1 - 3)       | 2<br>(1 - 3)       | 2<br>(1 - 3)       |
| Venomous animal contact                         | 1<br>(1 - 2)             | 0<br>(0 - 0)     | 0<br>(0 - 0)      | 0<br>(0 - 1)       | 0<br>(0 - 1)       | 0<br>(0 - 0)       |
| Non-venomous animal contact                     | 4<br>(3 - 7)             | 0<br>(0 - 0)     | 0<br>(0 - 0)      | 1<br>(1 - 2)       | 1<br>(1 - 3)       | 1<br>(1 - 3)       |
| Foreign body                                    | 177<br>(97 - 282)        | 5<br>(3 - 11)    | 1<br>(1 - 2)      | 17<br>(10 - 28)    | 30<br>(16 - 47)    | 123<br>(64 - 198)  |
| Pulmonary aspiration and foreign body in airway | 176<br>(96 - 281)        | 5<br>(3 - 11)    | 1<br>(0 - 2)      | 17<br>(10 - 27)    | 30<br>(15 - 47)    | 123<br>(64 - 198)  |
| Foreign body in other body part                 | 1<br>(0 - 2)             | 0<br>(0 - 0)     | 0<br>(0 - 0)      | 0<br>(0 - 0)       | 0<br>(0 - 1)       | 0<br>(0 - 1)       |
| Other unintentional injuries                    | 61<br>(47 - 77)          | 1<br>(0 - 1)     | 1<br>(0 - 2)      | 33<br>(23 - 46)    | 16<br>(10 - 25)    | 10<br>(7 - 16)     |
| Self-harm and interpersonal violence            | 1,389<br>(1,144 - 1,688) | 1<br>(1 - 2)     | 3<br>(2 - 5)      | 543<br>(437 - 670) | 408<br>(329 - 504) | 433<br>(340 - 573) |
| Self-harm                                       | 1,266<br>(1,009 - 1,536) | -                | 1<br>(1 - 2)      | 463<br>(359 - 550) | 381<br>(301 - 476) | 422<br>(329 - 560) |
| Interpersonal violence                          | 122<br>(91 - 207)        | 1<br>(1 - 2)     | 2<br>(1 - 3)      | 80<br>(59 - 133)   | 27<br>(19 - 48)    | 12<br>(8 - 19)     |
| Assault by firearm                              | 57<br>(33 - 98)          | 0<br>(0 - 0)     | 1<br>(0 - 1)      | 41<br>(24 - 70)    | 12<br>(6 - 22)     | 3<br>(1 - 5)       |
| Assault by sharp object                         | 27<br>(14 - 57)          | 0<br>(0 - 0)     | 0<br>(0 - 0)      | 19<br>(10 - 39)    | 6<br>(3 - 12)      | 2<br>(1 - 4)       |
| Assault by other means                          | 38<br>(24 - 73)          | 1<br>(1 - 2)     | 1<br>(1 - 2)      | 20<br>(11 - 41)    | 10<br>(6 - 19)     | 6<br>(4 - 10)      |

Web Table 31- Portugal deaths with 95% UI by age, sex, and cause in 2013

| Cause                                                             | Females, All Ages           | Females, 0-4 Years | Females, 5-14 Years | Females, 15-49 Years     | Females, 50-69 Years     | Females, 70-80 Years        |
|-------------------------------------------------------------------|-----------------------------|--------------------|---------------------|--------------------------|--------------------------|-----------------------------|
| All causes                                                        | 52,919<br>(49,454 - 56,193) | 143<br>(123 - 164) | 58<br>(53 - 64)     | 1,741<br>(1,569 - 1,903) | 5,994<br>(5,477 - 6,486) | 44,982<br>(42,202 - 47,600) |
| Communicable, maternal, neonatal, and nutritional diseases        | 4,302<br>(2,642 - 5,465)    | 62<br>(49 - 74)    | 7<br>(6 - 8)        | 184<br>(142 - 238)       | 236<br>(170 - 290)       | 3,812<br>(2,227 - 4,957)    |
| HIV/AIDS and tuberculosis                                         | 224<br>(161 - 314)          | 0<br>(0 - 1)       | 0<br>(0 - 0)        | 112<br>(71 - 164)        | 47<br>(27 - 78)          | 65<br>(42 - 86)             |
| Tuberculosis                                                      | 78<br>(50 - 98)             | 0<br>(0 - 0)       | 0<br>(0 - 0)        | 8<br>(5 - 11)            | 12<br>(9 - 15)           | 58<br>(34 - 77)             |
| HIV/AIDS                                                          | 146<br>(85 - 234)           | 0<br>(0 - 0)       | 0<br>(0 - 0)        | 104<br>(63 - 154)        | 35<br>(15 - 66)          | 7<br>(2 - 16)               |
| HIV/AIDS resulting in mycobacterial infection                     | 6<br>(3 - 10)               | 0<br>(0 - 0)       | 0<br>(0 - 0)        | 5<br>(3 - 7)             | 2<br>(1 - 3)             | 0<br>(0 - 1)                |
| HIV/AIDS resulting in other diseases                              | 140<br>(81 - 223)           | 0<br>(0 - 0)       | 0<br>(0 - 0)        | 99<br>(60 - 148)         | 34<br>(14 - 63)          | 6<br>(2 - 15)               |
| Diarrhea, lower respiratory, and other common infectious diseases | 3,748<br>(2,108 - 4,901)    | 14<br>(10 - 17)    | 6<br>(4 - 7)        | 52<br>(36 - 62)          | 168<br>(106 - 210)       | 3,509<br>(1,943 - 4,641)    |
| Diarrheal diseases                                                | 75<br>(50 - 117)            | 2<br>(1 - 3)       | 0<br>(0 - 0)        | 1<br>(1 - 2)             | 4<br>(3 - 5)             | 68<br>(43 - 109)            |
| Intestinal infectious diseases                                    | 3<br>(1 - 6)                | 0<br>(0 - 1)       | 0<br>(0 - 1)        | 1<br>(0 - 2)             | 0<br>(0 - 1)             | 1<br>(0 - 2)                |
| Typhoid fever                                                     | 2<br>(1 - 5)                | 0<br>(0 - 1)       | 0<br>(0 - 1)        | 1<br>(0 - 2)             | 0<br>(0 - 1)             | 0<br>(0 - 1)                |
| Paratyphoid fever                                                 | 0<br>(0 - 1)                | 0<br>(0 - 0)       | 0<br>(0 - 0)        | 0<br>(0 - 0)             | 0<br>(0 - 0)             | 0<br>(0 - 0)                |
| Other intestinal infectious diseases                              | 0<br>(0 - 2)                | 0<br>(0 - 1)       | 0<br>(0 - 0)        | 0<br>(0 - 1)             | 0<br>(0 - 1)             | 0<br>(0 - 1)                |
| Lower respiratory infections                                      | 3,618<br>(1,996 - 4,768)    | 7<br>(5 - 10)      | 3<br>(2 - 4)        | 41<br>(27 - 51)          | 153<br>(91 - 196)        | 3,414<br>(1,851 - 4,556)    |
| Upper respiratory infections                                      | 1<br>(0 - 5)                | 0<br>(0 - 0)       | 0<br>(0 - 0)        | 0<br>(0 - 0)             | 0<br>(0 - 0)             | 1<br>(0 - 4)                |
| Otitis media                                                      | 2<br>(2 - 3)                | 1<br>(0 - 1)       | 0<br>(0 - 0)        | 0<br>(0 - 0)             | 0<br>(0 - 0)             | 1<br>(1 - 1)                |
| Meningitis                                                        | 26<br>(18 - 30)             | 2<br>(1 - 3)       | 1<br>(1 - 1)        | 4<br>(3 - 5)             | 5<br>(4 - 7)             | 13<br>(9 - 17)              |
| Pneumococcal meningitis                                           | 5<br>(3 - 7)                | 0<br>(0 - 0)       | 0<br>(0 - 0)        | 1<br>(0 - 1)             | 1<br>(1 - 2)             | 3<br>(1 - 5)                |
| H influenzae type B meningitis                                    | 3<br>(2 - 4)                | 1<br>(0 - 1)       | 0<br>(0 - 0)        | 0<br>(0 - 1)             | 0<br>(0 - 1)             | 1<br>(1 - 2)                |
| Meningococcal meningitis                                          | 8<br>(6 - 11)               | 1<br>(0 - 1)       | 0<br>(0 - 1)        | 1<br>(1 - 2)             | 1<br>(1 - 2)             | 5<br>(3 - 7)                |
| Other meningitis                                                  | 9<br>(6 - 12)               | 1<br>(0 - 1)       | 0<br>(0 - 0)        | 2<br>(1 - 3)             | 2<br>(1 - 3)             | 4<br>(2 - 7)                |
| Encephalitis                                                      | 14<br>(9 - 20)              | 1<br>(1 - 2)       | 1<br>(0 - 1)        | 3<br>(2 - 4)             | 3<br>(2 - 5)             | 6<br>(3 - 9)                |
| Diphtheria                                                        | 0<br>(0 - 0)                | 0<br>(0 - 0)       | 0<br>(0 - 0)        | 0<br>(0 - 0)             | 0<br>(0 - 0)             | --<br>(0 - 0)               |
| Whooping cough                                                    | 0<br>(0 - 1)                | 0<br>(0 - 0)       | 0<br>(0 - 0)        | 0<br>(0 - 0)             | 0<br>(0 - 0)             | --<br>(0 - 0)               |
| Tetanus                                                           | 2<br>(2 - 5)                | 0<br>(0 - 0)       | 0<br>(0 - 0)        | 0<br>(0 - 1)             | 1<br>(0 - 1)             | 1<br>(1 - 3)                |
| Measles                                                           | 0<br>(0 - 0)                | 0<br>(0 - 0)       | 0<br>(0 - 0)        | 0<br>(0 - 0)             | 0<br>(0 - 0)             | --<br>(0 - 0)               |
| Varicella and herpes zoster                                       | 5<br>(1 - 23)               | 0<br>(0 - 1)       | 0<br>(0 - 0)        | 0<br>(0 - 1)             | 0<br>(0 - 1)             | 4<br>(0 - 21)               |
| Neglected tropical diseases and malaria                           | 5<br>(4 - 7)                | 0<br>(0 - 0)       | 0<br>(0 - 0)        | 1<br>(1 - 1)             | 1<br>(1 - 1)             | 3<br>(2 - 5)                |
| Leishmaniasis                                                     | 1<br>(0 - 1)                | 0<br>(0 - 0)       | 0<br>(0 - 0)        | 0<br>(0 - 0)             | 0<br>(0 - 0)             | 0<br>(0 - 0)                |
| Visceral leishmaniasis                                            | 1<br>(0 - 1)                | 0<br>(0 - 0)       | 0<br>(0 - 0)        | 0<br>(0 - 0)             | 0<br>(0 - 0)             | 0<br>(0 - 0)                |
| Cysticercosis                                                     | 0<br>(0 - 0)                | 0<br>(0 - 0)       | 0<br>(0 - 0)        | 0<br>(0 - 0)             | 0<br>(0 - 0)             | 0<br>(0 - 0)                |
| Cystic echinococcosis                                             | 1<br>(0 - 1)                | 0<br>(0 - 0)       | 0<br>(0 - 0)        | 0<br>(0 - 0)             | 0<br>(0 - 0)             | 0<br>(0 - 0)                |
| Dengue                                                            | 0<br>(0 - 1)                | 0<br>(0 - 0)       | 0<br>(0 - 0)        | 0<br>(0 - 0)             | 0<br>(0 - 0)             | 0<br>(0 - 0)                |
| Rabies                                                            | 0<br>(0 - 1)                | 0<br>(0 - 0)       | 0<br>(0 - 0)        | 0<br>(0 - 0)             | 0<br>(0 - 0)             | 0<br>(0 - 0)                |
| Other neglected tropical diseases                                 | 3<br>(2 - 5)                | 0<br>(0 - 0)       | 0<br>(0 - 0)        | 0<br>(0 - 0)             | 1<br>(0 - 1)             | 2<br>(1 - 4)                |
| Maternal disorders                                                | 9<br>(7 - 11)               | --                 | 0<br>(0 - 0)        | 9<br>(7 - 11)            | --                       | --                          |
| Maternal hemorrhage                                               | 1<br>(1 - 1)                | --                 | 0<br>(0 - 0)        | 1<br>(1 - 1)             | --                       | --                          |
| Maternal sepsis and other maternal infections                     | 1<br>(1 - 2)                | --                 | 0<br>(0 - 0)        | 1<br>(1 - 2)             | --                       | --                          |
| Maternal hypertensive disorders                                   | 1<br>(1 - 2)                | --                 | 0<br>(0 - 0)        | 1<br>(1 - 2)             | --                       | --                          |
| Maternal obstructed labor                                         | 1<br>(0 - 1)                | --                 | 0<br>(0 - 0)        | 1<br>(0 - 1)             | --                       | --                          |



Web Table 31- Portugal deaths with 95% UI by age, sex, and cause in 2013

| Cause                                                            | Females, All Ages           | Females, 0-4 Years | Females, 5-14 Years | Females, 15-49 Years     | Females, 50-69 Years     | Females, 70-80 Years        |
|------------------------------------------------------------------|-----------------------------|--------------------|---------------------|--------------------------|--------------------------|-----------------------------|
| Maternal abortive outcome                                        | 2<br>(2 - 3)                | --                 | 0<br>(0 - 0)        | 2<br>(2 - 3)             | --                       | --                          |
| Indirect maternal deaths                                         | 1<br>(0 - 1)                | --                 | 0<br>(0 - 0)        | 1<br>(0 - 1)             | --                       | --                          |
| Late maternal deaths                                             | 0<br>(0 - 1)                | --                 | 0<br>(0 - 0)        | 0<br>(0 - 1)             | --                       | --                          |
| Maternal deaths aggravated by HIV/AIDS                           | 0<br>(0 - 0)                | --                 | --                  | 0<br>(0 - 0)             | --                       | --                          |
| Other maternal disorders                                         | 1<br>(1 - 2)                | --                 | 0<br>(0 - 0)        | 1<br>(1 - 2)             | --                       | --                          |
| Neonatal disorders                                               | 46<br>(36 - 56)             | 46<br>(36 - 56)    | --                  | --                       | --                       | --                          |
| Neonatal preterm birth complications                             | 21<br>(14 - 31)             | 21<br>(14 - 31)    | --                  | --                       | --                       | --                          |
| Neonatal encephalopathy due to birth asphyxia and trauma         | 9<br>(5 - 13)               | 9<br>(5 - 13)      | --                  | --                       | --                       | --                          |
| Neonatal sepsis and other neonatal infections                    | 5<br>(2 - 10)               | 5<br>(2 - 10)      | --                  | --                       | --                       | --                          |
| Hemolytic disease and other neonatal jaundice                    | 0<br>(0 - 0)                | 0<br>(0 - 0)       | --                  | --                       | --                       | --                          |
| Other neonatal disorders                                         | 11<br>(3 - 17)              | 11<br>(3 - 17)     | --                  | --                       | --                       | --                          |
| Nutritional deficiencies                                         | 224<br>(160 - 294)          | 1<br>(0 - 1)       | 0<br>(0 - 0)        | 4<br>(3 - 5)             | 9<br>(7 - 11)            | 211<br>(147 - 281)          |
| Protein-energy malnutrition                                      | 52<br>(24 - 101)            | 0<br>(0 - 1)       | 0<br>(0 - 0)        | 0<br>(0 - 1)             | 1<br>(0 - 2)             | 50<br>(23 - 98)             |
| Iodine deficiency                                                | 0<br>(0 - 3)                | 0<br>(0 - 0)       | 0<br>(0 - 0)        | 0<br>(0 - 0)             | 0<br>(0 - 0)             | 0<br>(0 - 3)                |
| Iron-deficiency anemia                                           | 149<br>(80 - 208)           | 0<br>(0 - 0)       | 0<br>(0 - 0)        | 3<br>(2 - 4)             | 7<br>(5 - 9)             | 139<br>(73 - 197)           |
| Other nutritional deficiencies                                   | 23<br>(5 - 45)              | 0<br>(0 - 0)       | 0<br>(0 - 0)        | 0<br>(0 - 1)             | 1<br>(0 - 2)             | 22<br>(4 - 43)              |
| Other communicable, maternal, neonatal, and nutritional diseases | 45<br>(27 - 59)             | 1<br>(0 - 2)       | 1<br>(0 - 1)        | 6<br>(4 - 9)             | 12<br>(7 - 16)           | 25<br>(13 - 35)             |
| Sexually transmitted diseases excluding HIV                      | 5<br>(3 - 8)                | 1<br>(0 - 2)       | 0<br>(0 - 0)        | 1<br>(1 - 1)             | 1<br>(0 - 1)             | 3<br>(2 - 5)                |
| Syphilis                                                         | 4<br>(2 - 6)                | 1<br>(0 - 2)       | 0<br>(0 - 0)        | 0<br>(0 - 1)             | 0<br>(0 - 1)             | 2<br>(1 - 4)                |
| Chlamydial infection                                             | 0<br>(0 - 1)                | --                 | 0<br>(0 - 0)        | 0<br>(0 - 0)             | 0<br>(0 - 0)             | 0<br>(0 - 0)                |
| Gonococcal infection                                             | 1<br>(0 - 1)                | --                 | 0<br>(0 - 0)        | 0<br>(0 - 0)             | 0<br>(0 - 0)             | 0<br>(0 - 1)                |
| Other sexually transmitted diseases                              | 0<br>(0 - 1)                | --                 | 0<br>(0 - 0)        | 0<br>(0 - 0)             | 0<br>(0 - 0)             | 0<br>(0 - 0)                |
| Hepatitis                                                        | 9<br>(7 - 12)               | 0<br>(0 - 0)       | 0<br>(0 - 0)        | 2<br>(1 - 3)             | 2<br>(2 - 4)             | 4<br>(2 - 7)                |
| Acute hepatitis A                                                | 2<br>(1 - 4)                | 0<br>(0 - 0)       | 0<br>(0 - 0)        | 1<br>(0 - 1)             | 1<br>(0 - 1)             | 1<br>(0 - 2)                |
| Acute hepatitis B                                                | 6<br>(3 - 8)                | 0<br>(0 - 0)       | 0<br>(0 - 0)        | 1<br>(0 - 1)             | 2<br>(1 - 3)             | 3<br>(1 - 5)                |
| Acute hepatitis C                                                | 1<br>(0 - 3)                | --                 | 0<br>(0 - 0)        | 0<br>(0 - 1)             | 0<br>(0 - 1)             | 1<br>(0 - 2)                |
| Other infectious diseases                                        | 31<br>(14 - 45)             | 1<br>(0 - 1)       | 1<br>(0 - 1)        | 4<br>(2 - 5)             | 9<br>(4 - 12)            | 17<br>(7 - 27)              |
| Non-communicable diseases                                        | 46,885<br>(43,538 - 50,084) | 66<br>(55 - 79)    | 35<br>(31 - 39)     | 1,286<br>(1,145 - 1,423) | 5,464<br>(4,981 - 5,913) | 40,035<br>(37,294 - 42,831) |
| Neoplasms                                                        | 11,052<br>(9,435 - 12,214)  | 6<br>(5 - 9)       | 17<br>(15 - 21)     | 785<br>(685 - 877)       | 2,947<br>(2,524 - 3,245) | 7,297<br>(6,066 - 8,195)    |
| Esophageal cancer                                                | 96<br>(80 - 116)            | --                 | --                  | 3<br>(2 - 4)             | 19<br>(15 - 24)          | 75<br>(59 - 93)             |
| Stomach cancer                                                   | 1,228<br>(903 - 1,649)      | --                 | --                  | 63<br>(45 - 83)          | 245<br>(180 - 326)       | 920<br>(652 - 1,280)        |
| Liver cancer                                                     | 295<br>(203 - 370)          | --                 | 0<br>(0 - 0)        | 11<br>(8 - 15)           | 67<br>(49 - 85)          | 218<br>(142 - 287)          |
| Liver cancer due to hepatitis B                                  | 48<br>(25 - 87)             | --                 | 0<br>(0 - 0)        | 3<br>(1 - 5)             | 15<br>(6 - 27)           | 31<br>(15 - 59)             |
| Liver cancer due to hepatitis C                                  | 164<br>(99 - 235)           | --                 | 0<br>(0 - 0)        | 5<br>(3 - 8)             | 36<br>(21 - 54)          | 122<br>(65 - 180)           |
| Liver cancer due to alcohol use                                  | 59<br>(23 - 112)            | --                 | --                  | 1<br>(0 - 2)             | 10<br>(4 - 21)           | 48<br>(18 - 93)             |
| Liver cancer due to other causes                                 | 25<br>(9 - 44)              | --                 | 0<br>(0 - 0)        | 2<br>(1 - 3)             | 6<br>(2 - 11)            | 17<br>(5 - 32)              |
| Larynx cancer                                                    | 28<br>(17 - 44)             | --                 | --                  | 2<br>(1 - 3)             | 7<br>(4 - 10)            | 20<br>(11 - 33)             |
| Tracheal, bronchus and lung cancer                               | 911<br>(606 - 1,096)        | --                 | --                  | 68<br>(46 - 85)          | 301<br>(195 - 365)       | 542<br>(332 - 677)          |
| Breast cancer                                                    | 1,786<br>(1,233 - 2,101)    | --                 | --                  | 222<br>(175 - 272)       | 631<br>(447 - 745)       | 932<br>(609 - 1,136)        |
| Cervical cancer                                                  | 403<br>(311 - 484)          | --                 | --                  | 72<br>(57 - 90)          | 135<br>(97 - 167)        | 196<br>(146 - 254)          |

Web Table 31- Portugal deaths with 95% UI by age, sex, and cause in 2013

| Cause                                         | Females, All Ages           | Females, 0-4 Years | Females, 5-14 Years | Females, 15-49 Years | Females, 50-69 Years     | Females, 70-80 Years        |
|-----------------------------------------------|-----------------------------|--------------------|---------------------|----------------------|--------------------------|-----------------------------|
| Uterine cancer                                | 321<br>(230 - 389)          | --                 | --                  | 7<br>(5 - 10)        | 96<br>(70 - 122)         | 218<br>(143 - 273)          |
| Prostate cancer                               | --                          | --                 | --                  | --                   | --                       | --                          |
| Colon and rectum cancer                       | 1,865<br>(1,549 - 2,237)    | --                 | --                  | 67<br>(55 - 80)      | 393<br>(333 - 445)       | 1,405<br>(1,134 - 1,750)    |
| Lip and oral cavity cancer                    | 82<br>(60 - 105)            | --                 | --                  | 5<br>(4 - 6)         | 17<br>(13 - 21)          | 60<br>(42 - 82)             |
| Nasopharynx cancer                            | 12<br>(5 - 22)              | --                 | 0<br>(0 - 0)        | 2<br>(1 - 4)         | 4<br>(2 - 8)             | 6<br>(2 - 12)               |
| Other pharynx cancer                          | 18<br>(14 - 23)             | --                 | --                  | 2<br>(2 - 3)         | 5<br>(4 - 7)             | 10<br>(7 - 14)              |
| Gallbladder and biliary tract cancer          | 220<br>(144 - 300)          | --                 | --                  | 4<br>(3 - 5)         | 43<br>(32 - 57)          | 173<br>(107 - 244)          |
| Pancreatic cancer                             | 695<br>(590 - 806)          | --                 | --                  | 19<br>(15 - 23)      | 168<br>(140 - 197)       | 509<br>(425 - 608)          |
| Malignant skin melanoma                       | 115<br>(64 - 145)           | --                 | --                  | 14<br>(8 - 18)       | 32<br>(17 - 40)          | 70<br>(38 - 94)             |
| Non-melanoma skin cancer                      | 90<br>(64 - 125)            | --                 | --                  | 2<br>(1 - 2)         | 7<br>(5 - 9)             | 81<br>(56 - 115)            |
| Ovarian cancer                                | 484<br>(398 - 567)          | --                 | --                  | 39<br>(31 - 48)      | 179<br>(145 - 211)       | 266<br>(200 - 334)          |
| Testicular cancer                             | --                          | --                 | --                  | --                   | --                       | --                          |
| Kidney cancer                                 | 152<br>(106 - 210)          | 0<br>(0 - 1)       | 1<br>(0 - 1)        | 8<br>(6 - 11)        | 40<br>(29 - 54)          | 104<br>(63 - 158)           |
| Bladder cancer                                | 224<br>(141 - 322)          | --                 | --                  | 3<br>(2 - 4)         | 25<br>(16 - 38)          | 196<br>(121 - 285)          |
| Brain and nervous system cancer               | 358<br>(216 - 430)          | 1<br>(1 - 2)       | 5<br>(3 - 6)        | 47<br>(33 - 58)      | 138<br>(89 - 169)        | 168<br>(85 - 223)           |
| Thyroid cancer                                | 65<br>(47 - 97)             | --                 | 0<br>(0 - 0)        | 2<br>(1 - 2)         | 11<br>(8 - 16)           | 53<br>(36 - 80)             |
| Mesothelioma                                  | 18<br>(12 - 41)             | --                 | --                  | 1<br>(1 - 3)         | 6<br>(4 - 13)            | 11<br>(6 - 26)              |
| Hodgkin lymphoma                              | 25<br>(15 - 33)             | 0<br>(0 - 0)       | 0<br>(0 - 0)        | 6<br>(4 - 9)         | 6<br>(4 - 9)             | 12<br>(7 - 17)              |
| Non-Hodgkin lymphoma                          | 338<br>(136 - 445)          | 0<br>(0 - 1)       | 1<br>(0 - 2)        | 25<br>(11 - 35)      | 88<br>(37 - 120)         | 223<br>(83 - 305)           |
| Multiple myeloma                              | 194<br>(112 - 283)          | --                 | --                  | 6<br>(3 - 10)        | 55<br>(33 - 84)          | 133<br>(72 - 205)           |
| Leukemia                                      | 377<br>(278 - 445)          | 2<br>(1 - 3)       | 5<br>(4 - 7)        | 36<br>(29 - 43)      | 84<br>(58 - 102)         | 250<br>(181 - 308)          |
| Other neoplasms                               | 652<br>(475 - 799)          | 3<br>(2 - 4)       | 5<br>(4 - 7)        | 50<br>(40 - 63)      | 145<br>(114 - 174)       | 449<br>(298 - 585)          |
| Cardiovascular diseases                       | 21,315<br>(18,691 - 25,892) | 1<br>(1 - 2)       | 2<br>(1 - 3)        | 204<br>(167 - 298)   | 1,386<br>(1,161 - 1,961) | 19,722<br>(17,290 - 23,779) |
| Rheumatic heart disease                       | 142<br>(76 - 182)           | 0<br>(0 - 0)       | 0<br>(0 - 0)        | 9<br>(6 - 14)        | 31<br>(20 - 43)          | 102<br>(46 - 136)           |
| Ischemic heart disease                        | 8,029<br>(6,397 - 10,366)   | 0<br>(0 - 0)       | 0<br>(0 - 1)        | 70<br>(53 - 118)     | 533<br>(409 - 838)       | 7,426<br>(5,872 - 9,455)    |
| Cerebrovascular disease                       | 10,263<br>(8,396 - 14,588)  | 0<br>(0 - 0)       | 1<br>(0 - 1)        | 82<br>(63 - 124)     | 614<br>(483 - 953)       | 9,567<br>(7,804 - 13,462)   |
| Ischemic stroke                               | 6,535<br>(5,058 - 9,660)    | 0<br>(0 - 0)       | 0<br>(0 - 0)        | 9<br>(6 - 21)        | 188<br>(115 - 359)       | 6,338<br>(4,897 - 9,400)    |
| Hemorrhagic stroke                            | 3,728<br>(2,896 - 5,444)    | 0<br>(0 - 0)       | 1<br>(0 - 1)        | 73<br>(56 - 109)     | 425<br>(332 - 643)       | 3,229<br>(2,446 - 4,798)    |
| Hypertensive heart disease                    | 714<br>(413 - 1,004)        | 0<br>(0 - 0)       | 0<br>(0 - 0)        | 3<br>(2 - 4)         | 28<br>(18 - 39)          | 684<br>(391 - 972)          |
| Cardiomyopathy and myocarditis                | 297<br>(177 - 390)          | 1<br>(0 - 1)       | 0<br>(0 - 1)        | 6<br>(4 - 8)         | 25<br>(15 - 34)          | 265<br>(157 - 353)          |
| Atrial fibrillation and flutter               | 542<br>(377 - 742)          | --                 | --                  | 1<br>(1 - 1)         | 20<br>(14 - 26)          | 521<br>(358 - 723)          |
| Aortic aneurysm                               | 95<br>(50 - 140)            | --                 | --                  | 3<br>(2 - 5)         | 13<br>(7 - 19)           | 78<br>(40 - 118)            |
| Peripheral vascular disease                   | 281<br>(195 - 385)          | --                 | --                  | 1<br>(0 - 1)         | 9<br>(6 - 12)            | 272<br>(187 - 374)          |
| Endocarditis                                  | 72<br>(35 - 102)            | 0<br>(0 - 0)       | 0<br>(0 - 0)        | 5<br>(3 - 8)         | 11<br>(6 - 17)           | 55<br>(26 - 81)             |
| Other cardiovascular and circulatory diseases | 880<br>(418 - 1,136)        | 0<br>(0 - 0)       | 0<br>(0 - 0)        | 25<br>(14 - 35)      | 103<br>(53 - 135)        | 751<br>(344 - 997)          |
| Chronic respiratory diseases                  | 2,252<br>(1,811 - 2,733)    | 2<br>(1 - 2)       | 1<br>(1 - 1)        | 25<br>(20 - 31)      | 147<br>(112 - 174)       | 2,077<br>(1,660 - 2,550)    |
| Chronic obstructive pulmonary disease         | 1,950<br>(1,554 - 2,396)    | 1<br>(1 - 2)       | 0<br>(0 - 1)        | 14<br>(10 - 19)      | 104<br>(78 - 132)        | 1,831<br>(1,451 - 2,268)    |
| Pneumoconiosis                                | 14<br>(8 - 23)              | 0<br>(0 - 0)       | 0<br>(0 - 0)        | 0<br>(0 - 0)         | 2<br>(1 - 3)             | 12<br>(6 - 21)              |
| Silicosis                                     | 2<br>(1 - 3)                | 0<br>(0 - 0)       | 0<br>(0 - 0)        | 0<br>(0 - 0)         | 0<br>(0 - 0)             | 1<br>(1 - 3)                |
| Asbestosis                                    | 1<br>(0 - 1)                | 0<br>(0 - 0)       | 0<br>(0 - 0)        | 0<br>(0 - 0)         | 0<br>(0 - 0)             | 0<br>(0 - 1)                |

Web Table 31- Portugal deaths with 95% UI by age, sex, and cause in 2013

| Cause                                               | Females, All Ages        | Females, 0-4 Years | Females, 5-14 Years | Females, 15-49 Years | Females, 50-69 Years | Females, 70-80 Years     |
|-----------------------------------------------------|--------------------------|--------------------|---------------------|----------------------|----------------------|--------------------------|
| Coal workers pneumoconiosis                         | 0<br>(0 - 1)             | 0<br>(0 - 0)       | 0<br>(0 - 0)        | 0<br>(0 - 0)         | 0<br>(0 - 0)         | 0<br>(0 - 1)             |
| Other pneumoconiosis                                | 11<br>(6 - 19)           | 0<br>(0 - 0)       | 0<br>(0 - 0)        | 0<br>(0 - 0)         | 1<br>(1 - 2)         | 10<br>(5 - 17)           |
| Asthma                                              | 111<br>(67 - 204)        | 0<br>(0 - 0)       | 0<br>(0 - 0)        | 5<br>(3 - 7)         | 11<br>(7 - 19)       | 95<br>(56 - 176)         |
| Interstitial lung disease and pulmonary sarcoidosis | 161<br>(51 - 293)        | 0<br>(0 - 0)       | 0<br>(0 - 1)        | 6<br>(3 - 9)         | 28<br>(11 - 47)      | 126<br>(35 - 240)        |
| Other chronic respiratory diseases                  | 16<br>(9 - 26)           | 0<br>(0 - 0)       | 0<br>(0 - 0)        | 0<br>(0 - 1)         | 1<br>(1 - 2)         | 14<br>(7 - 24)           |
| Cirrhosis                                           | 604<br>(523 - 682)       | 0<br>(0 - 0)       | 0<br>(0 - 0)        | 90<br>(75 - 109)     | 212<br>(178 - 244)   | 302<br>(254 - 354)       |
| Cirrhosis due to hepatitis B                        | 76<br>(27 - 137)         | 0<br>(0 - 0)       | 0<br>(0 - 0)        | 11<br>(4 - 23)       | 28<br>(10 - 55)      | 37<br>(10 - 72)          |
| Cirrhosis due to hepatitis C                        | 309<br>(127 - 429)       | 0<br>(0 - 0)       | 0<br>(0 - 0)        | 44<br>(16 - 66)      | 106<br>(32 - 155)    | 159<br>(68 - 224)        |
| Cirrhosis due to alcohol use                        | 149<br>(67 - 263)        | --                 | --                  | 15<br>(6 - 31)       | 50<br>(22 - 88)      | 84<br>(38 - 153)         |
| Cirrhosis due to other causes                       | 70<br>(29 - 129)         | 0<br>(0 - 0)       | 0<br>(0 - 0)        | 20<br>(8 - 36)       | 28<br>(11 - 56)      | 22<br>(9 - 41)           |
| Digestive diseases                                  | 1,287<br>(896 - 1,534)   | 0<br>(0 - 1)       | 1<br>(1 - 1)        | 21<br>(16 - 26)      | 108<br>(77 - 130)    | 1,156<br>(791 - 1,391)   |
| Peptic ulcer disease                                | 158<br>(105 - 241)       | 0<br>(0 - 0)       | 0<br>(0 - 0)        | 3<br>(2 - 4)         | 12<br>(8 - 18)       | 143<br>(94 - 224)        |
| Gastritis and duodenitis                            | 11<br>(5 - 26)           | 0<br>(0 - 0)       | 0<br>(0 - 0)        | 0<br>(0 - 1)         | 1<br>(0 - 2)         | 10<br>(4 - 23)           |
| Appendicitis                                        | 17<br>(8 - 29)           | 0<br>(0 - 0)       | 0<br>(0 - 0)        | 1<br>(1 - 2)         | 3<br>(1 - 5)         | 13<br>(5 - 23)           |
| Paralytic ileus and intestinal obstruction          | 167<br>(88 - 307)        | 0<br>(0 - 0)       | 0<br>(0 - 0)        | 2<br>(1 - 5)         | 13<br>(7 - 23)       | 152<br>(78 - 282)        |
| Inguinal, femoral, and abdominal hernia             | 43<br>(17 - 71)          | 0<br>(0 - 0)       | 0<br>(0 - 0)        | 0<br>(0 - 1)         | 4<br>(2 - 6)         | 39<br>(15 - 64)          |
| Inflammatory bowel disease                          | 116<br>(39 - 174)        | 0<br>(0 - 0)       | 0<br>(0 - 0)        | 3<br>(1 - 4)         | 8<br>(3 - 11)        | 105<br>(35 - 162)        |
| Vascular intestinal disorders                       | 330<br>(145 - 468)       | 0<br>(0 - 0)       | 0<br>(0 - 0)        | 2<br>(1 - 4)         | 23<br>(10 - 34)      | 304<br>(132 - 438)       |
| Gallbladder and biliary diseases                    | 196<br>(87 - 280)        | 0<br>(0 - 0)       | 0<br>(0 - 0)        | 3<br>(1 - 3)         | 15<br>(7 - 21)       | 178<br>(76 - 260)        |
| Pancreatitis                                        | 146<br>(88 - 223)        | 0<br>(0 - 0)       | 0<br>(0 - 0)        | 4<br>(3 - 6)         | 20<br>(13 - 30)      | 122<br>(72 - 189)        |
| Other digestive diseases                            | 104<br>(67 - 142)        | 0<br>(0 - 0)       | 0<br>(0 - 0)        | 2<br>(1 - 3)         | 10<br>(6 - 13)       | 92<br>(59 - 129)         |
| Neurological disorders                              | 5,314<br>(3,819 - 6,978) | 4<br>(3 - 6)       | 2<br>(2 - 3)        | 33<br>(26 - 39)      | 185<br>(142 - 233)   | 5,089<br>(3,618 - 6,728) |
| Alzheimer disease and other dementias               | 4,822<br>(3,340 - 6,469) | --                 | --                  | 0<br>(0 - 1)         | 93<br>(61 - 133)     | 4,729<br>(3,248 - 6,375) |
| Parkinson disease                                   | 268<br>(111 - 356)       | --                 | --                  | 1<br>(0 - 1)         | 21<br>(12 - 28)      | 246<br>(96 - 334)        |
| Epilepsy                                            | 52<br>(26 - 75)          | 0<br>(0 - 1)       | 1<br>(1 - 1)        | 12<br>(8 - 16)       | 9<br>(5 - 12)        | 30<br>(12 - 50)          |
| Multiple sclerosis                                  | 33<br>(15 - 45)          | --                 | --                  | 7<br>(3 - 11)        | 14<br>(7 - 21)       | 12<br>(6 - 18)           |
| Other neurological disorders                        | 139<br>(118 - 160)       | 4<br>(3 - 5)       | 1<br>(1 - 2)        | 13<br>(10 - 15)      | 49<br>(40 - 58)      | 72<br>(58 - 88)          |
| Mental and substance use disorders                  | 40<br>(25 - 55)          | 0<br>(0 - 0)       | 0<br>(0 - 0)        | 17<br>(11 - 23)      | 12<br>(6 - 17)       | 11<br>(7 - 15)           |
| Schizophrenia                                       | 4<br>(2 - 5)             | --                 | --                  | 1<br>(0 - 1)         | 1<br>(1 - 2)         | 2<br>(1 - 3)             |
| Alcohol use disorders                               | 23<br>(9 - 38)           | --                 | --                  | 9<br>(3 - 16)        | 9<br>(3 - 14)        | 5<br>(2 - 10)            |
| Drug use disorders                                  | 12<br>(10 - 15)          | 0<br>(0 - 0)       | --                  | 6<br>(5 - 8)         | 2<br>(2 - 3)         | 4<br>(3 - 5)             |
| Opioid use disorders                                | 4<br>(3 - 5)             | 0<br>(0 - 0)       | --                  | 2<br>(2 - 3)         | 1<br>(1 - 1)         | 1<br>(1 - 2)             |
| Cocaine use disorders                               | 0<br>(0 - 1)             | 0<br>(0 - 0)       | --                  | 0<br>(0 - 0)         | 0<br>(0 - 0)         | 0<br>(0 - 0)             |
| Amphetamine use disorders                           | 0<br>(0 - 1)             | 0<br>(0 - 0)       | --                  | 0<br>(0 - 0)         | 0<br>(0 - 0)         | 0<br>(0 - 0)             |
| Other drug use disorders                            | 7<br>(6 - 9)             | 0<br>(0 - 0)       | --                  | 4<br>(3 - 5)         | 1<br>(1 - 2)         | 2<br>(1 - 3)             |
| Eating disorders                                    | 1<br>(0 - 1)             | --                 | 0<br>(0 - 0)        | 1<br>(0 - 1)         | --                   | --                       |
| Anorexia nervosa                                    | 1<br>(0 - 1)             | --                 | 0<br>(0 - 0)        | 1<br>(0 - 1)         | --                   | --                       |
| Diabetes, urogenital, blood, and endocrine diseases | 4,710<br>(3,283 - 5,576) | 5<br>(3 - 7)       | 5<br>(3 - 6)        | 75<br>(58 - 88)      | 419<br>(329 - 483)   | 4,206<br>(2,844 - 5,037) |
| Diabetes mellitus                                   | 2,276<br>(1,841 - 2,686) | 0<br>(0 - 0)       | 0<br>(0 - 1)        | 17<br>(14 - 22)      | 205<br>(164 - 255)   | 2,053<br>(1,637 - 2,468) |
| Acute glomerulonephritis                            | 1<br>(1 - 1)             | 0<br>(0 - 0)       | 0<br>(0 - 0)        | 0<br>(0 - 0)         | 0<br>(0 - 0)         | 0<br>(0 - 1)             |

Web Table 31- Portugal deaths with 95% UI by age, sex, and cause in 2013

| Cause                                               | Females, All Ages        | Females, 0-4 Years | Females, 5-14 Years | Females, 15-49 Years | Females, 50-69 Years | Females, 70-89 Years   |
|-----------------------------------------------------|--------------------------|--------------------|---------------------|----------------------|----------------------|------------------------|
| Chronic kidney disease                              | 1,551<br>(860 - 1,929)   | 0<br>(0 - 1)       | 1<br>(1 - 1)        | 23<br>(18 - 29)      | 126<br>(92 - 153)    | 1,401<br>(734 - 1,771) |
| Chronic kidney disease due to diabetes mellitus     | 580<br>(349 - 757)       | 0<br>(0 - 0)       | 0<br>(0 - 0)        | 7<br>(5 - 9)         | 55<br>(39 - 70)      | 518<br>(300 - 695)     |
| Chronic kidney disease due to hypertension          | 184<br>(77 - 295)        | 0<br>(0 - 0)       | 0<br>(0 - 0)        | 3<br>(1 - 4)         | 10<br>(5 - 17)       | 171<br>(70 - 276)      |
| Chronic kidney disease due to glomerulonephritis    | 8<br>(4 - 12)            | 0<br>(0 - 0)       | 0<br>(0 - 0)        | 1<br>(0 - 1)         | 1<br>(1 - 2)         | 6<br>(3 - 10)          |
| Chronic kidney disease due to other causes          | 778<br>(324 - 1,091)     | 0<br>(0 - 0)       | 1<br>(0 - 1)        | 12<br>(9 - 19)       | 59<br>(38 - 83)      | 706<br>(261 - 1,013)   |
| Urinary diseases and male infertility               | 566<br>(103 - 914)       | 0<br>(0 - 0)       | 0<br>(0 - 0)        | 7<br>(2 - 10)        | 32<br>(9 - 48)       | 527<br>(89 - 869)      |
| Interstitial nephritis and urinary tract infections | 541<br>(95 - 885)        | 0<br>(0 - 0)       | 0<br>(0 - 0)        | 6<br>(2 - 9)         | 29<br>(8 - 44)       | 506<br>(82 - 840)      |
| Urolithiasis                                        | 11<br>(3 - 47)           | --                 | 0<br>(0 - 0)        | 1<br>(0 - 1)         | 2<br>(1 - 5)         | 9<br>(2 - 41)          |
| Other urinary diseases                              | 14<br>(3 - 53)           | 0<br>(0 - 0)       | 0<br>(0 - 0)        | 0<br>(0 - 1)         | 1<br>(1 - 4)         | 12<br>(2 - 48)         |
| Gynecological diseases                              | 1<br>(1 - 2)             | --                 | --                  | 0<br>(0 - 0)         | 0<br>(0 - 1)         | 1<br>(0 - 1)           |
| Uterine fibroids                                    | 0<br>(0 - 0)             | --                 | --                  | 0<br>(0 - 0)         | 0<br>(0 - 0)         | 0<br>(0 - 0)           |
| Polycystic ovarian syndrome                         | 0<br>(0 - 0)             | --                 | --                  | 0<br>(0 - 0)         | 0<br>(0 - 0)         | --                     |
| Endometriosis                                       | 0<br>(0 - 0)             | --                 | --                  | 0<br>(0 - 0)         | 0<br>(0 - 0)         | --                     |
| Genital prolapse                                    | 0<br>(0 - 0)             | --                 | --                  | 0<br>(0 - 0)         | 0<br>(0 - 0)         | 0<br>(0 - 0)           |
| Other gynecological diseases                        | 1<br>(0 - 1)             | --                 | --                  | 0<br>(0 - 0)         | 0<br>(0 - 0)         | 0<br>(0 - 1)           |
| Hemoglobinopathies and hemolytic anemias            | 45<br>(24 - 69)          | 1<br>(0 - 1)       | 1<br>(0 - 1)        | 3<br>(2 - 4)         | 7<br>(4 - 11)        | 34<br>(17 - 54)        |
| Thalassemias                                        | 0<br>(0 - 1)             | 0<br>(0 - 0)       | 0<br>(0 - 0)        | 0<br>(0 - 0)         | 0<br>(0 - 0)         | 0<br>(0 - 0)           |
| Sickle cell disorders                               | 10<br>(6 - 15)           | 0<br>(0 - 1)       | 0<br>(0 - 1)        | 2<br>(1 - 3)         | 4<br>(3 - 7)         | 3<br>(2 - 5)           |
| G6PD deficiency                                     | 0<br>(0 - 0)             | 0<br>(0 - 0)       | 0<br>(0 - 0)        | 0<br>(0 - 0)         | 0<br>(0 - 0)         | 0<br>(0 - 0)           |
| Other hemoglobinopathies and hemolytic anemias      | 34<br>(17 - 54)          | 0<br>(0 - 0)       | 0<br>(0 - 0)        | 1<br>(0 - 1)         | 3<br>(2 - 5)         | 30<br>(15 - 49)        |
| Endocrine, metabolic, blood, and immune disorders   | 269<br>(107 - 360)       | 4<br>(2 - 6)       | 3<br>(1 - 4)        | 25<br>(12 - 32)      | 48<br>(21 - 64)      | 190<br>(67 - 271)      |
| Musculoskeletal disorders                           | 153<br>(116 - 189)       | --                 | 1<br>(1 - 1)        | 16<br>(13 - 22)      | 35<br>(27 - 45)      | 101<br>(68 - 133)      |
| Rheumatoid arthritis                                | 50<br>(36 - 66)          | --                 | 0<br>(0 - 0)        | 2<br>(1 - 2)         | 12<br>(8 - 16)       | 37<br>(23 - 52)        |
| Other musculoskeletal disorders                     | 103<br>(74 - 130)        | --                 | 1<br>(0 - 1)        | 14<br>(11 - 20)      | 23<br>(17 - 29)      | 65<br>(36 - 89)        |
| Other non-communicable diseases                     | 158<br>(131 - 187)       | 47<br>(36 - 60)    | 6<br>(4 - 7)        | 19<br>(14 - 23)      | 13<br>(10 - 16)      | 73<br>(54 - 99)        |
| Congenital anomalies                                | 88<br>(69 - 103)         | 46<br>(36 - 59)    | 6<br>(4 - 7)        | 17<br>(13 - 21)      | 8<br>(5 - 10)        | 11<br>(8 - 15)         |
| Neural tube defects                                 | 1<br>(1 - 2)             | 1<br>(0 - 1)       | 0<br>(0 - 0)        | 0<br>(0 - 0)         | 0<br>(0 - 0)         | 0<br>(0 - 0)           |
| Congenital heart anomalies                          | 35<br>(25 - 42)          | 19<br>(14 - 26)    | 3<br>(2 - 4)        | 8<br>(6 - 10)        | 2<br>(2 - 3)         | 2<br>(1 - 3)           |
| Cleft lip and cleft palate                          | 0<br>(0 - 0)             | 0<br>(0 - 0)       | --                  | --                   | --                   | --                     |
| Down syndrome                                       | 10<br>(5 - 15)           | 3<br>(1 - 6)       | 1<br>(0 - 1)        | 4<br>(2 - 6)         | 2<br>(1 - 4)         | 0<br>(0 - 1)           |
| Chromosomal unbalanced rearrangements               | 4<br>(2 - 6)             | 3<br>(1 - 4)       | 0<br>(0 - 0)        | 1<br>(0 - 1)         | 0<br>(0 - 0)         | 0<br>(0 - 0)           |
| Other congenital anomalies                          | 38<br>(28 - 47)          | 21<br>(15 - 28)    | 2<br>(1 - 3)        | 4<br>(3 - 5)         | 3<br>(2 - 4)         | 9<br>(6 - 12)          |
| Skin and subcutaneous diseases                      | 69<br>(50 - 95)          | 0<br>(0 - 0)       | 0<br>(0 - 0)        | 1<br>(1 - 2)         | 5<br>(4 - 7)         | 62<br>(43 - 87)        |
| Cellulitis                                          | 17<br>(8 - 29)           | 0<br>(0 - 0)       | 0<br>(0 - 0)        | 0<br>(0 - 1)         | 2<br>(1 - 3)         | 14<br>(6 - 26)         |
| Pyoderma                                            | 33<br>(20 - 50)          | 0<br>(0 - 0)       | 0<br>(0 - 0)        | 1<br>(0 - 1)         | 2<br>(1 - 3)         | 30<br>(17 - 48)        |
| Decubitus ulcer                                     | 8<br>(4 - 28)            | 0<br>(0 - 0)       | 0<br>(0 - 0)        | 0<br>(0 - 0)         | 0<br>(0 - 1)         | 7<br>(3 - 25)          |
| Other skin and subcutaneous diseases                | 10<br>(3 - 22)           | 0<br>(0 - 0)       | 0<br>(0 - 0)        | 0<br>(0 - 0)         | 1<br>(0 - 1)         | 9<br>(2 - 20)          |
| Sudden infant death syndrome                        | 1<br>(0 - 2)             | 1<br>(0 - 2)       | --                  | --                   | --                   | --                     |
| Injuries                                            | 1,732<br>(1,426 - 2,002) | 15<br>(11 - 23)    | 17<br>(14 - 20)     | 272<br>(232 - 311)   | 293<br>(251 - 341)   | 1,135<br>(874 - 1,366) |
| Transport injuries                                  | 356<br>(262 - 426)       | 3<br>(2 - 5)       | 9<br>(7 - 12)       | 103<br>(79 - 125)    | 85<br>(65 - 108)     | 156<br>(111 - 201)     |

Web Table 31- Portugal deaths with 95% UI by age, sex, and cause in 2013

| Cause                                           | Females, All Ages    | Females, 0-4 Years | Females, 5-14 Years | Females, 15-49 Years | Females, 50-69 Years | Females, 70-80 Years |
|-------------------------------------------------|----------------------|--------------------|---------------------|----------------------|----------------------|----------------------|
| Road injuries                                   | 332<br>(248 - 400)   | 3<br>(2 - 5)       | 9<br>(7 - 12)       | 96<br>(74 - 116)     | 77<br>(57 - 98)      | 147<br>(102 - 191)   |
| Pedestrian road injuries                        | 151<br>(89 - 194)    | 1<br>(1 - 2)       | 4<br>(2 - 6)        | 23<br>(14 - 31)      | 32<br>(19 - 44)      | 90<br>(49 - 123)     |
| Cyclist road injuries                           | 30<br>(22 - 46)      | 0<br>(0 - 0)       | 1<br>(1 - 2)        | 9<br>(6 - 14)        | 8<br>(5 - 13)        | 11<br>(7 - 19)       |
| Motorcyclist road injuries                      | 17<br>(8 - 47)       | 0<br>(0 - 0)       | 0<br>(0 - 1)        | 6<br>(3 - 16)        | 4<br>(2 - 12)        | 6<br>(2 - 19)        |
| Motor vehicle road injuries                     | 127<br>(80 - 159)    | 1<br>(1 - 2)       | 3<br>(2 - 5)        | 56<br>(34 - 72)      | 30<br>(18 - 41)      | 37<br>(22 - 55)      |
| Other road injuries                             | 8<br>(2 - 27)        | 0<br>(0 - 0)       | 0<br>(0 - 1)        | 3<br>(1 - 10)        | 2<br>(0 - 7)         | 3<br>(0 - 12)        |
| Other transport injuries                        | 24<br>(15 - 38)      | 0<br>(0 - 0)       | 0<br>(0 - 1)        | 7<br>(4 - 10)        | 8<br>(5 - 13)        | 9<br>(5 - 16)        |
| Unintentional injuries                          | 968<br>(717 - 1,196) | 10<br>(7 - 19)     | 5<br>(4 - 7)        | 45<br>(37 - 52)      | 90<br>(72 - 107)     | 817<br>(585 - 1,034) |
| Falls                                           | 487<br>(295 - 656)   | 1<br>(0 - 1)       | 1<br>(0 - 1)        | 10<br>(7 - 12)       | 28<br>(20 - 37)      | 448<br>(265 - 611)   |
| Drowning                                        | 24<br>(17 - 39)      | 1<br>(1 - 3)       | 1<br>(1 - 3)        | 4<br>(3 - 7)         | 5<br>(4 - 8)         | 12<br>(8 - 17)       |
| Fire, heat, and hot substances                  | 60<br>(42 - 88)      | 1<br>(0 - 2)       | 0<br>(0 - 1)        | 3<br>(2 - 5)         | 6<br>(5 - 9)         | 49<br>(33 - 73)      |
| Poisonings                                      | 24<br>(10 - 34)      | 0<br>(0 - 1)       | 1<br>(0 - 1)        | 5<br>(2 - 7)         | 4<br>(1 - 5)         | 15<br>(5 - 23)       |
| Exposure to mechanical forces                   | 10<br>(8 - 11)       | 1<br>(0 - 1)       | 1<br>(0 - 1)        | 3<br>(2 - 4)         | 2<br>(1 - 2)         | 3<br>(2 - 5)         |
| Unintentional firearm injuries                  | 1<br>(1 - 1)         | 0<br>(0 - 0)       | 0<br>(0 - 0)        | 0<br>(0 - 0)         | 0<br>(0 - 0)         | 0<br>(0 - 0)         |
| Unintentional suffocation                       | 2<br>(1 - 3)         | 0<br>(0 - 1)       | 0<br>(0 - 0)        | 0<br>(0 - 0)         | 0<br>(0 - 0)         | 1<br>(0 - 2)         |
| Other exposure to mechanical forces             | 7<br>(5 - 8)         | 0<br>(0 - 0)       | 0<br>(0 - 1)        | 2<br>(2 - 3)         | 2<br>(1 - 2)         | 2<br>(2 - 3)         |
| Adverse effects of medical treatment            | 158<br>(92 - 212)    | 1<br>(0 - 2)       | 1<br>(0 - 1)        | 11<br>(7 - 16)       | 27<br>(16 - 39)      | 118<br>(63 - 164)    |
| Animal contact                                  | 3<br>(2 - 7)         | 0<br>(0 - 0)       | 0<br>(0 - 0)        | 0<br>(0 - 1)         | 2<br>(1 - 5)         | 1<br>(0 - 1)         |
| Venomous animal contact                         | 2<br>(1 - 5)         | 0<br>(0 - 0)       | 0<br>(0 - 0)        | 0<br>(0 - 0)         | 2<br>(1 - 4)         | 0<br>(0 - 0)         |
| Non-venomous animal contact                     | 1<br>(1 - 3)         | 0<br>(0 - 0)       | 0<br>(0 - 0)        | 0<br>(0 - 1)         | 0<br>(0 - 1)         | 1<br>(0 - 1)         |
| Foreign body                                    | 176<br>(98 - 301)    | 5<br>(3 - 12)      | 1<br>(0 - 1)        | 5<br>(3 - 8)         | 12<br>(7 - 19)       | 154<br>(83 - 265)    |
| Pulmonary aspiration and foreign body in airway | 174<br>(97 - 300)    | 5<br>(3 - 12)      | 0<br>(0 - 1)        | 5<br>(3 - 8)         | 12<br>(7 - 19)       | 152<br>(82 - 264)    |
| Foreign body in other body part                 | 2<br>(1 - 4)         | 0<br>(0 - 0)       | 0<br>(0 - 0)        | 0<br>(0 - 0)         | 0<br>(0 - 0)         | 2<br>(0 - 4)         |
| Other unintentional injuries                    | 25<br>(7 - 37)       | 1<br>(0 - 1)       | 0<br>(0 - 1)        | 4<br>(2 - 6)         | 3<br>(1 - 5)         | 17<br>(3 - 28)       |
| Self-harm and interpersonal violence            | 408<br>(338 - 480)   | 1<br>(1 - 2)       | 2<br>(2 - 3)        | 124<br>(103 - 150)   | 118<br>(94 - 144)    | 162<br>(119 - 201)   |
| Self-harm                                       | 372<br>(306 - 443)   | -                  | 1<br>(1 - 1)        | 107<br>(87 - 131)    | 111<br>(88 - 136)    | 153<br>(110 - 192)   |
| Interpersonal violence                          | 36<br>(24 - 47)      | 1<br>(1 - 2)       | 1<br>(1 - 2)        | 18<br>(11 - 23)      | 8<br>(5 - 10)        | 9<br>(6 - 12)        |
| Assault by firearm                              | 13<br>(8 - 21)       | 0<br>(0 - 0)       | 0<br>(0 - 0)        | 9<br>(5 - 13)        | 3<br>(2 - 5)         | 1<br>(1 - 2)         |
| Assault by sharp object                         | 8<br>(4 - 12)        | 0<br>(0 - 0)       | 0<br>(0 - 0)        | 5<br>(2 - 7)         | 2<br>(1 - 3)         | 1<br>(1 - 2)         |
| Assault by other means                          | 15<br>(9 - 21)       | 1<br>(1 - 2)       | 1<br>(1 - 1)        | 4<br>(2 - 7)         | 3<br>(2 - 4)         | 6<br>(4 - 9)         |

Web Table 31- Qatar deaths with 95% UI by age, sex, and cause in 2013

| Cause                                                             | Both Sexes, All Ages     | Both Sexes, 0-4 Years | Both Sexes, 5-14 Years | Both Sexes, 15-49 Years | Both Sexes, 50-69 Years | Both Sexes, 70-80 Years |
|-------------------------------------------------------------------|--------------------------|-----------------------|------------------------|-------------------------|-------------------------|-------------------------|
| All causes                                                        | 2,437<br>(2,115 - 2,788) | 232<br>(202 - 270)    | 35<br>(32 - 40)        | 1,134<br>(937 - 1,340)  | 542<br>(457 - 638)      | 494<br>(450 - 541)      |
| Communicable, maternal, neonatal, and nutritional diseases        | 203<br>(173 - 243)       | 99<br>(81 - 118)      | 6<br>(4 - 10)          | 62<br>(46 - 88)         | 18<br>(14 - 22)         | 19<br>(15 - 23)         |
| HIV/AIDS and tuberculosis                                         | 9<br>(7 - 11)            | 0<br>(0 - 0)          | 0<br>(0 - 0)           | 7<br>(5 - 8)            | 1<br>(1 - 1)            | 1<br>(1 - 1)            |
| Tuberculosis                                                      | 5<br>(4 - 6)             | 0<br>(0 - 0)          | 0<br>(0 - 0)           | 3<br>(2 - 4)            | 1<br>(0 - 1)            | 1<br>(1 - 1)            |
| HIV/AIDS                                                          | 4<br>(2 - 6)             | 0<br>(0 - 0)          | 0<br>(0 - 0)           | 4<br>(2 - 5)            | 0<br>(0 - 1)            | 0<br>(0 - 0)            |
| HIV/AIDS resulting in mycobacterial infection                     | 0<br>(0 - 0)             | 0<br>(0 - 0)          | 0<br>(0 - 0)           | 0<br>(0 - 0)            | 0<br>(0 - 0)            | 0<br>(0 - 0)            |
| HIV/AIDS resulting in other diseases                              | 4<br>(2 - 5)             | 0<br>(0 - 0)          | 0<br>(0 - 0)           | 4<br>(2 - 5)            | 0<br>(0 - 1)            | 0<br>(0 - 0)            |
| Diarrhea, lower respiratory, and other common infectious diseases | 84<br>(61 - 122)         | 13<br>(9 - 19)        | 6<br>(3 - 10)          | 41<br>(26 - 67)         | 10<br>(8 - 13)          | 15<br>(12 - 19)         |
| Diarrheal diseases                                                | 3<br>(2 - 4)             | 1<br>(1 - 2)          | 0<br>(0 - 0)           | 1<br>(1 - 2)            | 0<br>(0 - 0)            | 0<br>(0 - 0)            |
| Intestinal infectious diseases                                    | 30<br>(10 - 67)          | 5<br>(2 - 10)         | 4<br>(2 - 9)           | 19<br>(6 - 46)          | 1<br>(0 - 3)            | 0<br>(0 - 0)            |
| Typhoid fever                                                     | 23<br>(7 - 52)           | 3<br>(1 - 7)          | 3<br>(1 - 7)           | 15<br>(5 - 35)          | 1<br>(0 - 3)            | 0<br>(0 - 0)            |
| Paratyphoid fever                                                 | 7<br>(2 - 15)            | 1<br>(0 - 3)          | 1<br>(0 - 2)           | 4<br>(1 - 10)           | 0<br>(0 - 1)            | 0<br>(0 - 0)            |
| Other intestinal infectious diseases                              | 0<br>(0 - 2)             | 0<br>(0 - 1)          | 0<br>(0 - 0)           | 0<br>(0 - 1)            | 0<br>(0 - 0)            | 0<br>(0 - 0)            |
| Lower respiratory infections                                      | 41<br>(33 - 50)          | 5<br>(3 - 7)          | 1<br>(1 - 2)           | 15<br>(11 - 20)         | 7<br>(5 - 9)            | 13<br>(10 - 17)         |
| Upper respiratory infections                                      | 0<br>(0 - 0)             | 0<br>(0 - 0)          | 0<br>(0 - 0)           | 0<br>(0 - 0)            | 0<br>(0 - 0)            | 0<br>(0 - 0)            |
| Otitis media                                                      | 1<br>(1 - 1)             | 0<br>(0 - 0)          | 0<br>(0 - 0)           | 0<br>(0 - 0)            | 0<br>(0 - 0)            | 0<br>(0 - 0)            |
| Meningitis                                                        | 4<br>(3 - 6)             | 1<br>(1 - 2)          | 0<br>(0 - 0)           | 2<br>(1 - 3)            | 1<br>(0 - 1)            | 0<br>(0 - 0)            |
| Pneumococcal meningitis                                           | 1<br>(1 - 1)             | 0<br>(0 - 0)          | 0<br>(0 - 0)           | 1<br>(0 - 1)            | 0<br>(0 - 0)            | 0<br>(0 - 0)            |
| H influenzae type B meningitis                                    | 1<br>(1 - 1)             | 0<br>(0 - 1)          | 0<br>(0 - 0)           | 0<br>(0 - 0)            | 0<br>(0 - 0)            | 0<br>(0 - 0)            |
| Meningococcal meningitis                                          | 1<br>(1 - 2)             | 0<br>(0 - 1)          | 0<br>(0 - 0)           | 1<br>(0 - 1)            | 0<br>(0 - 0)            | 0<br>(0 - 0)            |
| Other meningitis                                                  | 1<br>(1 - 2)             | 0<br>(0 - 0)          | 0<br>(0 - 0)           | 1<br>(0 - 1)            | 0<br>(0 - 1)            | 0<br>(0 - 0)            |
| Encephalitis                                                      | 4<br>(3 - 6)             | 1<br>(1 - 1)          | 0<br>(0 - 0)           | 2<br>(1 - 3)            | 1<br>(0 - 1)            | 0<br>(0 - 1)            |
| Diphtheria                                                        | 0<br>(0 - 0)             | 0<br>(0 - 0)          | 0<br>(0 - 0)           | 0<br>(0 - 0)            | 0<br>(0 - 0)            | --                      |
| Whooping cough                                                    | 0<br>(0 - 1)             | 0<br>(0 - 1)          | 0<br>(0 - 0)           | 0<br>(0 - 0)            | 0<br>(0 - 0)            | --                      |
| Tetanus                                                           | 0<br>(0 - 0)             | 0<br>(0 - 0)          | 0<br>(0 - 0)           | 0<br>(0 - 0)            | 0<br>(0 - 0)            | 0<br>(0 - 0)            |
| Measles                                                           | 0<br>(0 - 0)             | 0<br>(0 - 0)          | 0<br>(0 - 0)           | 0<br>(0 - 0)            | 0<br>(0 - 0)            | --                      |
| Varicella and herpes zoster                                       | 0<br>(0 - 1)             | 0<br>(0 - 0)          | 0<br>(0 - 0)           | 0<br>(0 - 1)            | 0<br>(0 - 0)            | 0<br>(0 - 0)            |
| Neglected tropical diseases and malaria                           | 2<br>(2 - 3)             | 0<br>(0 - 0)          | 0<br>(0 - 0)           | 1<br>(1 - 2)            | 0<br>(0 - 0)            | 0<br>(0 - 0)            |
| Leishmaniasis                                                     | 0<br>(0 - 0)             | 0<br>(0 - 0)          | 0<br>(0 - 0)           | 0<br>(0 - 0)            | 0<br>(0 - 0)            | 0<br>(0 - 0)            |
| Visceral leishmaniasis                                            | 0<br>(0 - 0)             | 0<br>(0 - 0)          | 0<br>(0 - 0)           | 0<br>(0 - 0)            | 0<br>(0 - 0)            | 0<br>(0 - 0)            |
| Cysticercosis                                                     | 0<br>(0 - 0)             | 0<br>(0 - 0)          | 0<br>(0 - 0)           | 0<br>(0 - 0)            | 0<br>(0 - 0)            | 0<br>(0 - 0)            |
| Cystic echinococcosis                                             | 0<br>(0 - 0)             | 0<br>(0 - 0)          | 0<br>(0 - 0)           | 0<br>(0 - 0)            | 0<br>(0 - 0)            | 0<br>(0 - 0)            |
| Dengue                                                            | 0<br>(0 - 0)             | 0<br>(0 - 0)          | 0<br>(0 - 0)           | 0<br>(0 - 0)            | 0<br>(0 - 0)            | 0<br>(0 - 0)            |
| Rabies                                                            | 0<br>(0 - 0)             | 0<br>(0 - 0)          | 0<br>(0 - 0)           | 0<br>(0 - 0)            | 0<br>(0 - 0)            | 0<br>(0 - 0)            |
| Intestinal nematode infections                                    | 0<br>(0 - 1)             | 0<br>(0 - 0)          | 0<br>(0 - 0)           | 0<br>(0 - 0)            | 0<br>(0 - 0)            | 0<br>(0 - 0)            |
| Ascariasis                                                        | 0<br>(0 - 1)             | 0<br>(0 - 0)          | 0<br>(0 - 0)           | 0<br>(0 - 0)            | 0<br>(0 - 0)            | 0<br>(0 - 0)            |
| Other neglected tropical diseases                                 | 1<br>(1 - 2)             | 0<br>(0 - 0)          | 0<br>(0 - 0)           | 1<br>(1 - 1)            | 0<br>(0 - 0)            | 0<br>(0 - 0)            |
| Maternal disorders                                                | 4<br>(3 - 6)             | --                    | 0<br>(0 - 0)           | 4<br>(3 - 6)            | --                      | --                      |
| Maternal hemorrhage                                               | 1<br>(0 - 1)             | --                    | 0<br>(0 - 0)           | 1<br>(0 - 1)            | --                      | --                      |
| Maternal sepsis and other maternal infections                     | 0<br>(0 - 1)             | --                    | 0<br>(0 - 0)           | 0<br>(0 - 1)            | --                      | --                      |

Web Table 31- Qatar deaths with 95% UI by age, sex, and cause in 2013

| Cause                                                            | Both Sexes, All Ages     | Both Sexes, 0-4 Years | Both Sexes, 5-14 Years | Both Sexes, 15-49 Years | Both Sexes, 50-69 Years | Both Sexes, 70-80 Years |
|------------------------------------------------------------------|--------------------------|-----------------------|------------------------|-------------------------|-------------------------|-------------------------|
| Maternal hypertensive disorders                                  | 1<br>(0 - 1)             | --                    | 0<br>(0 - 0)           | 1<br>(0 - 1)            | --                      | --                      |
| Maternal obstructed labor                                        | 0<br>(0 - 1)             | --                    | 0<br>(0 - 0)           | 0<br>(0 - 1)            | --                      | --                      |
| Maternal abortive outcome                                        | 1<br>(0 - 1)             | --                    | 0<br>(0 - 0)           | 1<br>(0 - 1)            | --                      | --                      |
| Indirect maternal deaths                                         | 0<br>(0 - 1)             | --                    | 0<br>(0 - 0)           | 0<br>(0 - 1)            | --                      | --                      |
| Late maternal deaths                                             | 0<br>(0 - 1)             | --                    | 0<br>(0 - 0)           | 0<br>(0 - 1)            | --                      | --                      |
| Maternal deaths aggravated by HIV/AIDS                           | 0<br>(0 - 0)             | --                    | --                     | 0<br>(0 - 0)            | --                      | --                      |
| Other maternal disorders                                         | 1<br>(0 - 1)             | --                    | 0<br>(0 - 0)           | 1<br>(0 - 1)            | --                      | --                      |
| Neonatal disorders                                               | 83<br>(68 - 101)         | 83<br>(68 - 101)      | --                     | --                      | --                      | --                      |
| Neonatal preterm birth complications                             | 67<br>(54 - 82)          | 67<br>(54 - 82)       | --                     | --                      | --                      | --                      |
| Neonatal encephalopathy due to birth asphyxia and trauma         | 8<br>(5 - 12)            | 8<br>(5 - 12)         | --                     | --                      | --                      | --                      |
| Neonatal sepsis and other neonatal infections                    | 1<br>(0 - 1)             | 1<br>(0 - 1)          | --                     | --                      | --                      | --                      |
| Hemolytic disease and other neonatal jaundice                    | 0<br>(0 - 0)             | 0<br>(0 - 0)          | --                     | --                      | --                      | --                      |
| Other neonatal disorders                                         | 8<br>(4 - 12)            | 8<br>(4 - 12)         | --                     | --                      | --                      | --                      |
| Nutritional deficiencies                                         | 3<br>(2 - 3)             | 0<br>(0 - 0)          | 0<br>(0 - 0)           | 1<br>(1 - 2)            | 0<br>(0 - 1)            | 1<br>(1 - 1)            |
| Protein-energy malnutrition                                      | 1<br>(0 - 1)             | 0<br>(0 - 0)          | 0<br>(0 - 0)           | 0<br>(0 - 0)            | 0<br>(0 - 0)            | 0<br>(0 - 0)            |
| Iodine deficiency                                                | 0<br>(0 - 0)             | 0<br>(0 - 0)          | 0<br>(0 - 0)           | 0<br>(0 - 0)            | 0<br>(0 - 0)            | 0<br>(0 - 0)            |
| Iron-deficiency anemia                                           | 1<br>(0 - 1)             | 0<br>(0 - 0)          | 0<br>(0 - 0)           | 0<br>(0 - 1)            | 0<br>(0 - 0)            | 0<br>(0 - 0)            |
| Other nutritional deficiencies                                   | 2<br>(1 - 2)             | 0<br>(0 - 0)          | 0<br>(0 - 0)           | 1<br>(0 - 1)            | 0<br>(0 - 0)            | 0<br>(0 - 1)            |
| Other communicable, maternal, neonatal, and nutritional diseases | 18<br>(14 - 22)          | 2<br>(1 - 3)          | 0<br>(0 - 0)           | 8<br>(5 - 10)           | 6<br>(4 - 8)            | 2<br>(1 - 3)            |
| Sexually transmitted diseases excluding HIV                      | 2<br>(1 - 3)             | 0<br>(0 - 1)          | 0<br>(0 - 0)           | 1<br>(1 - 2)            | 0<br>(0 - 1)            | 0<br>(0 - 1)            |
| Syphilis                                                         | 2<br>(1 - 2)             | 0<br>(0 - 1)          | 0<br>(0 - 0)           | 1<br>(0 - 1)            | 0<br>(0 - 0)            | 0<br>(0 - 1)            |
| Chlamydial infection                                             | 0<br>(0 - 0)             | --                    | 0<br>(0 - 0)           | 0<br>(0 - 0)            | 0<br>(0 - 0)            | 0<br>(0 - 0)            |
| Gonococcal infection                                             | 0<br>(0 - 1)             | --                    | 0<br>(0 - 0)           | 0<br>(0 - 0)            | 0<br>(0 - 0)            | 0<br>(0 - 0)            |
| Other sexually transmitted diseases                              | 0<br>(0 - 0)             | --                    | 0<br>(0 - 0)           | 0<br>(0 - 0)            | 0<br>(0 - 0)            | 0<br>(0 - 0)            |
| Hepatitis                                                        | 8<br>(6 - 10)            | 0<br>(0 - 0)          | 0<br>(0 - 0)           | 3<br>(2 - 4)            | 4<br>(3 - 5)            | 1<br>(0 - 1)            |
| Acute hepatitis A                                                | 1<br>(0 - 1)             | 0<br>(0 - 0)          | 0<br>(0 - 0)           | 0<br>(0 - 1)            | 0<br>(0 - 0)            | 0<br>(0 - 0)            |
| Acute hepatitis B                                                | 5<br>(3 - 6)             | 0<br>(0 - 0)          | 0<br>(0 - 0)           | 1<br>(1 - 2)            | 3<br>(2 - 4)            | 0<br>(0 - 1)            |
| Acute hepatitis C                                                | 1<br>(0 - 2)             | --                    | 0<br>(0 - 0)           | 0<br>(0 - 1)            | 0<br>(0 - 1)            | 0<br>(0 - 0)            |
| Acute hepatitis E                                                | 2<br>(1 - 4)             | 0<br>(0 - 0)          | 0<br>(0 - 0)           | 1<br>(1 - 2)            | 1<br>(0 - 2)            | 0<br>(0 - 0)            |
| Other infectious diseases                                        | 8<br>(5 - 11)            | 1<br>(1 - 3)          | 0<br>(0 - 0)           | 3<br>(2 - 5)            | 2<br>(1 - 3)            | 1<br>(1 - 2)            |
| Non-communicable diseases                                        | 1,383<br>(1,206 - 1,573) | 108<br>(92 - 128)     | 14<br>(11 - 16)        | 403<br>(331 - 480)      | 421<br>(357 - 492)      | 437<br>(397 - 478)      |
| Neoplasms                                                        | 285<br>(242 - 336)       | 3<br>(2 - 4)          | 3<br>(2 - 4)           | 108<br>(89 - 130)       | 109<br>(92 - 130)       | 63<br>(55 - 72)         |
| Esophageal cancer                                                | 7<br>(5 - 9)             | --                    | --                     | 2<br>(1 - 3)            | 2<br>(1 - 3)            | 3<br>(2 - 4)            |
| Stomach cancer                                                   | 15<br>(12 - 18)          | --                    | --                     | 3<br>(3 - 4)            | 7<br>(5 - 8)            | 5<br>(4 - 6)            |
| Liver cancer                                                     | 30<br>(23 - 37)          | --                    | 0<br>(0 - 0)           | 5<br>(4 - 7)            | 15<br>(11 - 20)         | 9<br>(7 - 11)           |
| Liver cancer due to hepatitis B                                  | 6<br>(2 - 12)            | --                    | 0<br>(0 - 0)           | 2<br>(1 - 3)            | 3<br>(1 - 7)            | 2<br>(1 - 3)            |
| Liver cancer due to hepatitis C                                  | 16<br>(9 - 24)           | --                    | 0<br>(0 - 0)           | 2<br>(1 - 4)            | 8<br>(5 - 14)           | 5<br>(3 - 7)            |
| Liver cancer due to alcohol use                                  | 4<br>(2 - 9)             | --                    | --                     | 0<br>(0 - 1)            | 2<br>(1 - 5)            | 1<br>(1 - 3)            |
| Liver cancer due to other causes                                 | 4<br>(2 - 8)             | --                    | 0<br>(0 - 0)           | 1<br>(0 - 2)            | 2<br>(1 - 5)            | 1<br>(0 - 1)            |
| Larynx cancer                                                    | 3<br>(2 - 4)             | --                    | --                     | 1<br>(1 - 1)            | 1<br>(1 - 2)            | 1<br>(1 - 1)            |

Web Table 31- Qatar deaths with 95% UI by age, sex, and cause in 2013

| Cause                                         | Both Sexes, All Ages | Both Sexes, 0-4 Years | Both Sexes, 5-14 Years | Both Sexes, 15-49 Years | Both Sexes, 50-69 Years | Both Sexes, 70-80 Years |
|-----------------------------------------------|----------------------|-----------------------|------------------------|-------------------------|-------------------------|-------------------------|
| Tracheal, bronchus and lung cancer            | 39<br>(32 - 49)      | --                    | --                     | 11<br>(8 - 14)          | 18<br>(14 - 23)         | 11<br>(9 - 13)          |
| Breast cancer                                 | 35<br>(26 - 47)      | --                    | --                     | 19<br>(13 - 27)         | 13<br>(9 - 18)          | 3<br>(2 - 4)            |
| Cervical cancer                               | 3<br>(2 - 5)         | --                    | --                     | 1<br>(1 - 2)            | 2<br>(1 - 2)            | 1<br>(0 - 1)            |
| Uterine cancer                                | 1<br>(0 - 1)         | --                    | --                     | 0<br>(0 - 0)            | 0<br>(0 - 1)            | 0<br>(0 - 0)            |
| Prostate cancer                               | 7<br>(4 - 10)        | --                    | --                     | 0<br>(0 - 1)            | 2<br>(1 - 3)            | 5<br>(2 - 7)            |
| Colon and rectum cancer                       | 29<br>(24 - 34)      | --                    | --                     | 10<br>(8 - 12)          | 12<br>(10 - 14)         | 7<br>(6 - 8)            |
| Lip and oral cavity cancer                    | 2<br>(2 - 3)         | --                    | --                     | 1<br>(1 - 1)            | 1<br>(1 - 2)            | 0<br>(0 - 1)            |
| Nasopharynx cancer                            | 1<br>(1 - 1)         | --                    | 0<br>(0 - 0)           | 1<br>(0 - 1)            | 0<br>(0 - 0)            | 0<br>(0 - 0)            |
| Other pharynx cancer                          | 1<br>(1 - 1)         | --                    | --                     | 0<br>(0 - 1)            | 1<br>(0 - 1)            | 0<br>(0 - 0)            |
| Gallbladder and biliary tract cancer          | 2<br>(2 - 3)         | --                    | --                     | 1<br>(1 - 1)            | 1<br>(1 - 1)            | 1<br>(1 - 1)            |
| Pancreatic cancer                             | 15<br>(13 - 18)      | --                    | --                     | 4<br>(3 - 5)            | 8<br>(6 - 10)           | 3<br>(3 - 4)            |
| Malignant skin melanoma                       | 2<br>(1 - 3)         | --                    | --                     | 1<br>(1 - 2)            | 1<br>(0 - 1)            | 0<br>(0 - 1)            |
| Non-melanoma skin cancer                      | 2<br>(1 - 2)         | --                    | --                     | 1<br>(1 - 2)            | 0<br>(0 - 1)            | 0<br>(0 - 0)            |
| Ovarian cancer                                | 5<br>(3 - 6)         | --                    | --                     | 1<br>(1 - 2)            | 2<br>(1 - 3)            | 1<br>(1 - 1)            |
| Testicular cancer                             | 1<br>(1 - 2)         | --                    | --                     | 1<br>(0 - 1)            | 0<br>(0 - 0)            | 0<br>(0 - 0)            |
| Kidney cancer                                 | 5<br>(4 - 6)         | 0<br>(0 - 0)          | 0<br>(0 - 0)           | 2<br>(1 - 2)            | 2<br>(2 - 3)            | 1<br>(1 - 1)            |
| Bladder cancer                                | 3<br>(2 - 4)         | --                    | --                     | 0<br>(0 - 0)            | 1<br>(1 - 1)            | 2<br>(1 - 2)            |
| Brain and nervous system cancer               | 12<br>(8 - 19)       | 0<br>(0 - 1)          | 1<br>(0 - 1)           | 6<br>(4 - 10)           | 3<br>(2 - 5)            | 1<br>(1 - 2)            |
| Thyroid cancer                                | 1<br>(1 - 1)         | --                    | 0<br>(0 - 0)           | 0<br>(0 - 1)            | 0<br>(0 - 1)            | 0<br>(0 - 0)            |
| Mesothelioma                                  | 0<br>(0 - 0)         | --                    | --                     | 0<br>(0 - 0)            | 0<br>(0 - 0)            | 0<br>(0 - 0)            |
| Hodgkin lymphoma                              | 2<br>(1 - 3)         | 0<br>(0 - 0)          | 0<br>(0 - 0)           | 1<br>(1 - 2)            | 1<br>(0 - 1)            | 0<br>(0 - 0)            |
| Non-Hodgkin lymphoma                          | 20<br>(16 - 26)      | 0<br>(0 - 1)          | 0<br>(0 - 0)           | 11<br>(8 - 15)          | 6<br>(4 - 8)            | 3<br>(2 - 3)            |
| Multiple myeloma                              | 2<br>(2 - 3)         | --                    | --                     | 1<br>(1 - 2)            | 1<br>(0 - 1)            | 0<br>(0 - 1)            |
| Leukemia                                      | 24<br>(20 - 29)      | 0<br>(0 - 0)          | 1<br>(1 - 1)           | 15<br>(11 - 18)         | 6<br>(4 - 7)            | 3<br>(2 - 4)            |
| Other neoplasms                               | 17<br>(13 - 21)      | 2<br>(1 - 2)          | 1<br>(1 - 1)           | 8<br>(6 - 11)           | 3<br>(3 - 5)            | 2<br>(2 - 3)            |
| Cardiovascular diseases                       | 469<br>(399 - 542)   | 5<br>(4 - 6)          | 2<br>(1 - 2)           | 139<br>(113 - 168)      | 162<br>(136 - 191)      | 161<br>(142 - 181)      |
| Rheumatic heart disease                       | 3<br>(2 - 4)         | 0<br>(0 - 0)          | 0<br>(0 - 0)           | 2<br>(1 - 3)            | 1<br>(1 - 1)            | 0<br>(0 - 1)            |
| Ischemic heart disease                        | 287<br>(241 - 338)   | 1<br>(0 - 1)          | 0<br>(0 - 0)           | 72<br>(57 - 91)         | 114<br>(94 - 135)       | 100<br>(87 - 115)       |
| Cerebrovascular disease                       | 122<br>(101 - 148)   | 2<br>(2 - 3)          | 1<br>(1 - 1)           | 43<br>(33 - 56)         | 31<br>(24 - 39)         | 44<br>(36 - 53)         |
| Ischemic stroke                               | 47<br>(38 - 58)      | 0<br>(0 - 0)          | 0<br>(0 - 0)           | 7<br>(5 - 11)           | 10<br>(8 - 14)          | 29<br>(24 - 36)         |
| Hemorrhagic stroke                            | 75<br>(58 - 93)      | 2<br>(1 - 3)          | 1<br>(1 - 1)           | 36<br>(27 - 47)         | 21<br>(15 - 27)         | 15<br>(12 - 19)         |
| Hypertensive heart disease                    | 9<br>(6 - 13)        | 0<br>(0 - 0)          | 0<br>(0 - 0)           | 3<br>(2 - 5)            | 2<br>(2 - 4)            | 3<br>(2 - 5)            |
| Cardiomyopathy and myocarditis                | 8<br>(6 - 14)        | 1<br>(0 - 1)          | 0<br>(0 - 0)           | 4<br>(3 - 7)            | 2<br>(1 - 4)            | 1<br>(1 - 2)            |
| Atrial fibrillation and flutter               | 6<br>(5 - 8)         | --                    | --                     | 1<br>(1 - 1)            | 2<br>(1 - 3)            | 3<br>(3 - 5)            |
| Aortic aneurysm                               | 5<br>(4 - 7)         | --                    | --                     | 1<br>(0 - 1)            | 3<br>(2 - 4)            | 2<br>(1 - 2)            |
| Peripheral vascular disease                   | 3<br>(3 - 4)         | --                    | --                     | 1<br>(1 - 1)            | 1<br>(1 - 1)            | 2<br>(1 - 2)            |
| Endocarditis                                  | 1<br>(1 - 2)         | 0<br>(0 - 0)          | 0<br>(0 - 0)           | 1<br>(0 - 1)            | 0<br>(0 - 0)            | 0<br>(0 - 1)            |
| Other cardiovascular and circulatory diseases | 24<br>(18 - 30)      | 1<br>(1 - 1)          | 0<br>(0 - 0)           | 11<br>(8 - 15)          | 7<br>(5 - 9)            | 5<br>(4 - 6)            |
| Chronic respiratory diseases                  | 34<br>(29 - 43)      | 2<br>(1 - 2)          | 0<br>(0 - 1)           | 9<br>(7 - 13)           | 8<br>(7 - 10)           | 15<br>(12 - 18)         |
| Chronic obstructive pulmonary disease         | 24<br>(20 - 31)      | 1<br>(1 - 1)          | 0<br>(0 - 0)           | 5<br>(4 - 7)            | 5<br>(4 - 7)            | 13<br>(11 - 16)         |



Web Table 31- Qatar deaths with 95% UI by age, sex, and cause in 2013

| Cause                                               | Both Sexes, All Ages | Both Sexes, 0-4 Years | Both Sexes, 5-14 Years | Both Sexes, 15-49 Years | Both Sexes, 50-69 Years | Both Sexes, 70-80 Years |
|-----------------------------------------------------|----------------------|-----------------------|------------------------|-------------------------|-------------------------|-------------------------|
| Pneumoconiosis                                      | 1<br>(1 - 2)         | 0<br>(0 - 0)          | 0<br>(0 - 0)           | 1<br>(0 - 1)            | 0<br>(0 - 0)            | 0<br>(0 - 0)            |
| Silicosis                                           | 0<br>(0 - 0)         | 0<br>(0 - 0)          | 0<br>(0 - 0)           | 0<br>(0 - 0)            | 0<br>(0 - 0)            | 0<br>(0 - 0)            |
| Asbestosis                                          | 0<br>(0 - 0)         | 0<br>(0 - 0)          | 0<br>(0 - 0)           | 0<br>(0 - 0)            | 0<br>(0 - 0)            | 0<br>(0 - 0)            |
| Coal workers pneumoconiosis                         | 0<br>(0 - 0)         | 0<br>(0 - 0)          | 0<br>(0 - 0)           | 0<br>(0 - 0)            | 0<br>(0 - 0)            | 0<br>(0 - 0)            |
| Other pneumoconiosis                                | 1<br>(1 - 1)         | 0<br>(0 - 0)          | 0<br>(0 - 0)           | 0<br>(0 - 0)            | 0<br>(0 - 0)            | 0<br>(0 - 0)            |
| Asthma                                              | 3<br>(2 - 3)         | 0<br>(0 - 0)          | 0<br>(0 - 0)           | 1<br>(1 - 2)            | 1<br>(0 - 1)            | 0<br>(0 - 1)            |
| Interstitial lung disease and pulmonary sarcoidosis | 2<br>(2 - 3)         | 0<br>(0 - 0)          | 0<br>(0 - 0)           | 1<br>(1 - 1)            | 1<br>(1 - 1)            | 0<br>(0 - 1)            |
| Other chronic respiratory diseases                  | 4<br>(3 - 5)         | 1<br>(0 - 1)          | 0<br>(0 - 0)           | 2<br>(1 - 2)            | 1<br>(1 - 1)            | 0<br>(0 - 1)            |
| Cirrhosis                                           | 44<br>(35 - 53)      | 0<br>(0 - 0)          | 0<br>(0 - 0)           | 17<br>(13 - 22)         | 18<br>(13 - 22)         | 9<br>(7 - 11)           |
| Cirrhosis due to hepatitis B                        | 14<br>(7 - 23)       | 0<br>(0 - 0)          | 0<br>(0 - 0)           | 5<br>(3 - 9)            | 6<br>(3 - 10)           | 3<br>(2 - 5)            |
| Cirrhosis due to hepatitis C                        | 19<br>(9 - 29)       | 0<br>(0 - 0)          | 0<br>(0 - 0)           | 8<br>(3 - 12)           | 8<br>(3 - 13)           | 3<br>(2 - 5)            |
| Cirrhosis due to alcohol use                        | 6<br>(3 - 10)        | --                    | --                     | 2<br>(1 - 3)            | 2<br>(1 - 5)            | 2<br>(1 - 2)            |
| Cirrhosis due to other causes                       | 5<br>(2 - 8)         | 0<br>(0 - 0)          | 0<br>(0 - 0)           | 2<br>(1 - 4)            | 1<br>(1 - 3)            | 1<br>(0 - 1)            |
| Digestive diseases                                  | 23<br>(19 - 28)      | 1<br>(0 - 1)          | 0<br>(0 - 1)           | 11<br>(8 - 14)          | 6<br>(5 - 8)            | 5<br>(4 - 7)            |
| Peptic ulcer disease                                | 2<br>(2 - 3)         | 0<br>(0 - 0)          | 0<br>(0 - 0)           | 1<br>(1 - 1)            | 1<br>(0 - 1)            | 0<br>(0 - 1)            |
| Gastritis and duodenitis                            | 2<br>(1 - 2)         | 0<br>(0 - 0)          | 0<br>(0 - 0)           | 1<br>(0 - 1)            | 0<br>(0 - 1)            | 0<br>(0 - 1)            |
| Appendicitis                                        | 1<br>(0 - 1)         | 0<br>(0 - 0)          | 0<br>(0 - 0)           | 0<br>(0 - 1)            | 0<br>(0 - 0)            | 0<br>(0 - 0)            |
| Paralytic ileus and intestinal obstruction          | 3<br>(2 - 4)         | 0<br>(0 - 0)          | 0<br>(0 - 0)           | 1<br>(1 - 2)            | 0<br>(0 - 1)            | 1<br>(1 - 1)            |
| Inguinal, femoral, and abdominal hernia             | 1<br>(1 - 2)         | 0<br>(0 - 0)          | 0<br>(0 - 0)           | 1<br>(0 - 1)            | 0<br>(0 - 0)            | 0<br>(0 - 0)            |
| Inflammatory bowel disease                          | 4<br>(3 - 5)         | 0<br>(0 - 0)          | 0<br>(0 - 0)           | 2<br>(1 - 2)            | 1<br>(1 - 1)            | 1<br>(1 - 2)            |
| Vascular intestinal disorders                       | 1<br>(0 - 1)         | 0<br>(0 - 0)          | 0<br>(0 - 0)           | 0<br>(0 - 1)            | 0<br>(0 - 0)            | 0<br>(0 - 0)            |
| Gallbladder and biliary diseases                    | 3<br>(2 - 4)         | 0<br>(0 - 0)          | 0<br>(0 - 0)           | 1<br>(1 - 2)            | 1<br>(0 - 1)            | 1<br>(1 - 1)            |
| Pancreatitis                                        | 3<br>(2 - 5)         | 0<br>(0 - 0)          | 0<br>(0 - 0)           | 2<br>(1 - 3)            | 1<br>(1 - 2)            | 0<br>(0 - 0)            |
| Other digestive diseases                            | 5<br>(3 - 6)         | 0<br>(0 - 0)          | 0<br>(0 - 0)           | 2<br>(1 - 3)            | 1<br>(1 - 2)            | 1<br>(1 - 1)            |
| Neurological disorders                              | 74<br>(63 - 86)      | 2<br>(2 - 3)          | 1<br>(0 - 1)           | 9<br>(7 - 13)           | 12<br>(9 - 15)          | 50<br>(42 - 58)         |
| Alzheimer disease and other dementias               | 56<br>(47 - 66)      | --                    | --                     | 0<br>(0 - 0)            | 9<br>(7 - 12)           | 46<br>(39 - 55)         |
| Parkinson disease                                   | 3<br>(2 - 4)         | --                    | --                     | 0<br>(0 - 1)            | 0<br>(0 - 1)            | 2<br>(1 - 3)            |
| Epilepsy                                            | 7<br>(6 - 9)         | 1<br>(0 - 1)          | 0<br>(0 - 1)           | 5<br>(3 - 7)            | 1<br>(1 - 1)            | 0<br>(0 - 1)            |
| Multiple sclerosis                                  | 1<br>(0 - 3)         | --                    | --                     | 1<br>(0 - 2)            | 0<br>(0 - 1)            | 0<br>(0 - 0)            |
| Other neurological disorders                        | 8<br>(6 - 10)        | 2<br>(1 - 2)          | 0<br>(0 - 0)           | 4<br>(3 - 5)            | 2<br>(1 - 3)            | 1<br>(1 - 1)            |
| Mental and substance use disorders                  | 45<br>(35 - 62)      | 1<br>(0 - 1)          | 0<br>(0 - 0)           | 34<br>(26 - 47)         | 9<br>(7 - 13)           | 1<br>(1 - 2)            |
| Schizophrenia                                       | 0<br>(0 - 1)         | --                    | --                     | 0<br>(0 - 0)            | 0<br>(0 - 0)            | 0<br>(0 - 0)            |
| Alcohol use disorders                               | 3<br>(2 - 5)         | --                    | --                     | 2<br>(1 - 2)            | 1<br>(1 - 2)            | 0<br>(0 - 1)            |
| Drug use disorders                                  | 41<br>(31 - 57)      | 1<br>(0 - 1)          | --                     | 32<br>(23 - 44)         | 8<br>(6 - 11)           | 1<br>(1 - 1)            |
| Opioid use disorders                                | 23<br>(17 - 31)      | 0<br>(0 - 0)          | --                     | 18<br>(13 - 24)         | 4<br>(3 - 6)            | 0<br>(0 - 1)            |
| Cocaine use disorders                               | 1<br>(0 - 1)         | 0<br>(0 - 0)          | --                     | 0<br>(0 - 1)            | 0<br>(0 - 0)            | 0<br>(0 - 0)            |
| Amphetamine use disorders                           | 0<br>(0 - 1)         | 0<br>(0 - 0)          | --                     | 0<br>(0 - 0)            | 0<br>(0 - 0)            | 0<br>(0 - 0)            |
| Other drug use disorders                            | 18<br>(13 - 25)      | 0<br>(0 - 0)          | --                     | 13<br>(10 - 19)         | 4<br>(3 - 5)            | 0<br>(0 - 0)            |
| Eating disorders                                    | 1<br>(0 - 1)         | --                    | 0<br>(0 - 0)           | 1<br>(0 - 1)            | --                      | --                      |
| Anorexia nervosa                                    | 1<br>(0 - 1)         | --                    | 0<br>(0 - 0)           | 1<br>(0 - 1)            | --                      | --                      |

Web Table 31- Qatar deaths with 95% UI by age, sex, and cause in 2013

| Cause                                               | Both Sexes, All Ages | Both Sexes, 0-4 Years | Both Sexes, 5-14 Years | Both Sexes, 15-49 Years | Both Sexes, 50-69 Years | Both Sexes, 70-80 Years |
|-----------------------------------------------------|----------------------|-----------------------|------------------------|-------------------------|-------------------------|-------------------------|
| Diabetes, urogenital, blood, and endocrine diseases | 272<br>(234 - 308)   | 7<br>(6 - 9)          | 2<br>(2 - 3)           | 51<br>(41 - 63)         | 87<br>(72 - 102)        | 124<br>(109 - 140)      |
| Diabetes mellitus                                   | 169<br>(145 - 194)   | 0<br>(0 - 0)          | 0<br>(0 - 0)           | 19<br>(15 - 25)         | 59<br>(49 - 71)         | 90<br>(78 - 103)        |
| Acute glomerulonephritis                            | 1<br>(0 - 1)         | 0<br>(0 - 0)          | 0<br>(0 - 0)           | 0<br>(0 - 0)            | 0<br>(0 - 0)            | 0<br>(0 - 0)            |
| Chronic kidney disease                              | 57<br>(48 - 68)      | 0<br>(0 - 1)          | 0<br>(0 - 0)           | 12<br>(9 - 15)          | 19<br>(15 - 24)         | 26<br>(21 - 31)         |
| Chronic kidney disease due to diabetes mellitus     | 4<br>(2 - 6)         | 0<br>(0 - 0)          | 0<br>(0 - 0)           | 1<br>(1 - 2)            | 1<br>(1 - 2)            | 1<br>(1 - 2)            |
| Chronic kidney disease due to hypertension          | 25<br>(19 - 33)      | 0<br>(0 - 0)          | 0<br>(0 - 0)           | 5<br>(3 - 7)            | 9<br>(7 - 13)           | 11<br>(8 - 14)          |
| Chronic kidney disease due to glomerulonephritis    | 3<br>(2 - 4)         | 0<br>(0 - 0)          | 0<br>(0 - 0)           | 1<br>(1 - 2)            | 1<br>(1 - 1)            | 1<br>(1 - 2)            |
| Chronic kidney disease due to other causes          | 25<br>(18 - 33)      | 0<br>(0 - 0)          | 0<br>(0 - 0)           | 5<br>(3 - 7)            | 8<br>(5 - 11)           | 12<br>(8 - 17)          |
| Urinary diseases and male infertility               | 7<br>(6 - 9)         | 0<br>(0 - 1)          | 0<br>(0 - 0)           | 2<br>(2 - 3)            | 2<br>(1 - 3)            | 3<br>(2 - 3)            |
| Interstitial nephritis and urinary tract infections | 2<br>(1 - 3)         | 0<br>(0 - 0)          | 0<br>(0 - 0)           | 1<br>(0 - 1)            | 0<br>(0 - 1)            | 1<br>(0 - 1)            |
| Urolithiasis                                        | 1<br>(0 - 1)         | --                    | 0<br>(0 - 0)           | 0<br>(0 - 0)            | 0<br>(0 - 0)            | 0<br>(0 - 0)            |
| Other urinary diseases                              | 5<br>(4 - 6)         | 0<br>(0 - 1)          | 0<br>(0 - 0)           | 1<br>(1 - 2)            | 1<br>(1 - 2)            | 2<br>(1 - 2)            |
| Gynecological diseases                              | 0<br>(0 - 0)         | --                    | --                     | 0<br>(0 - 0)            | 0<br>(0 - 0)            | 0<br>(0 - 0)            |
| Uterine fibroids                                    | 0<br>(0 - 0)         | --                    | --                     | 0<br>(0 - 0)            | 0<br>(0 - 0)            | 0<br>(0 - 0)            |
| Polycystic ovarian syndrome                         | 0<br>(0 - 0)         | --                    | --                     | 0<br>(0 - 0)            | 0<br>(0 - 0)            | --                      |
| Endometriosis                                       | 0<br>(0 - 0)         | --                    | --                     | 0<br>(0 - 0)            | 0<br>(0 - 0)            | --                      |
| Genital prolapse                                    | 0<br>(0 - 0)         | --                    | --                     | 0<br>(0 - 0)            | 0<br>(0 - 0)            | 0<br>(0 - 0)            |
| Other gynecological diseases                        | 0<br>(0 - 0)         | --                    | --                     | 0<br>(0 - 0)            | 0<br>(0 - 0)            | 0<br>(0 - 0)            |
| Hemoglobinopathies and hemolytic anemias            | 11<br>(6 - 15)       | 2<br>(1 - 2)          | 1<br>(0 - 1)           | 6<br>(4 - 10)           | 1<br>(1 - 1)            | 1<br>(1 - 1)            |
| Thalassemias                                        | 4<br>(2 - 6)         | 1<br>(1 - 2)          | 0<br>(0 - 1)           | 3<br>(1 - 4)            | 0<br>(0 - 0)            | 0<br>(0 - 0)            |
| Sickle cell disorders                               | 5<br>(3 - 7)         | 0<br>(0 - 1)          | 0<br>(0 - 0)           | 3<br>(2 - 5)            | 1<br>(1 - 1)            | 0<br>(0 - 0)            |
| G6PD deficiency                                     | 0<br>(0 - 0)         | 0<br>(0 - 0)          | 0<br>(0 - 0)           | 0<br>(0 - 0)            | 0<br>(0 - 0)            | 0<br>(0 - 0)            |
| Other hemoglobinopathies and hemolytic anemias      | 2<br>(1 - 2)         | 0<br>(0 - 0)          | 0<br>(0 - 0)           | 0<br>(0 - 1)            | 0<br>(0 - 0)            | 1<br>(0 - 1)            |
| Endocrine, metabolic, blood, and immune disorders   | 27<br>(22 - 35)      | 4<br>(3 - 6)          | 1<br>(1 - 2)           | 11<br>(8 - 17)          | 6<br>(4 - 8)            | 4<br>(3 - 6)            |
| Musculoskeletal disorders                           | 18<br>(13 - 24)      | --                    | 0<br>(0 - 1)           | 10<br>(7 - 15)          | 4<br>(3 - 6)            | 3<br>(2 - 3)            |
| Rheumatoid arthritis                                | 4<br>(3 - 6)         | --                    | 0<br>(0 - 0)           | 3<br>(2 - 4)            | 1<br>(1 - 2)            | 1<br>(0 - 1)            |
| Other musculoskeletal disorders                     | 13<br>(10 - 19)      | --                    | 0<br>(0 - 0)           | 8<br>(5 - 11)           | 3<br>(2 - 5)            | 2<br>(2 - 3)            |
| Other non-communicable diseases                     | 119<br>(103 - 138)   | 88<br>(74 - 105)      | 5<br>(4 - 6)           | 14<br>(11 - 17)         | 6<br>(4 - 7)            | 7<br>(5 - 9)            |
| Congenital anomalies                                | 103<br>(89 - 122)    | 85<br>(71 - 102)      | 4<br>(3 - 5)           | 10<br>(8 - 12)          | 2<br>(2 - 3)            | 2<br>(1 - 2)            |
| Neural tube defects                                 | 2<br>(1 - 3)         | 1<br>(1 - 3)          | 0<br>(0 - 0)           | 0<br>(0 - 0)            | 0<br>(0 - 0)            | 0<br>(0 - 0)            |
| Congenital heart anomalies                          | 35<br>(28 - 45)      | 32<br>(25 - 40)       | 1<br>(1 - 2)           | 2<br>(1 - 2)            | 0<br>(0 - 0)            | 0<br>(0 - 0)            |
| Cleft lip and cleft palate                          | 0<br>(0 - 0)         | 0<br>(0 - 0)          | --                     | --                      | --                      | --                      |
| Down syndrome                                       | 3<br>(2 - 5)         | 2<br>(1 - 3)          | 0<br>(0 - 1)           | 1<br>(0 - 2)            | 0<br>(0 - 0)            | 0<br>(0 - 0)            |
| Chromosomal unbalanced rearrangements               | 7<br>(4 - 9)         | 6<br>(4 - 9)          | 0<br>(0 - 0)           | 0<br>(0 - 1)            | 0<br>(0 - 0)            | 0<br>(0 - 0)            |
| Other congenital anomalies                          | 56<br>(47 - 68)      | 44<br>(35 - 54)       | 3<br>(2 - 3)           | 7<br>(5 - 8)            | 2<br>(2 - 3)            | 1<br>(1 - 1)            |
| Skin and subcutaneous diseases                      | 13<br>(10 - 16)      | 1<br>(0 - 1)          | 0<br>(0 - 0)           | 4<br>(3 - 5)            | 3<br>(2 - 4)            | 6<br>(4 - 7)            |
| Cellulitis                                          | 1<br>(0 - 1)         | 0<br>(0 - 0)          | 0<br>(0 - 0)           | 0<br>(0 - 0)            | 0<br>(0 - 0)            | 0<br>(0 - 0)            |
| Pyoderma                                            | 8<br>(7 - 10)        | 0<br>(0 - 0)          | 0<br>(0 - 0)           | 2<br>(2 - 3)            | 2<br>(1 - 3)            | 4<br>(3 - 5)            |
| Decubitus ulcer                                     | 3<br>(3 - 4)         | 0<br>(0 - 0)          | 0<br>(0 - 0)           | 1<br>(1 - 2)            | 1<br>(1 - 2)            | 1<br>(1 - 2)            |
| Other skin and subcutaneous diseases                | 1<br>(1 - 1)         | 0<br>(0 - 0)          | 0<br>(0 - 0)           | 0<br>(0 - 0)            | 0<br>(0 - 0)            | 0<br>(0 - 0)            |

Web Table 31- Qatar deaths with 95% UI by age, sex, and cause in 2013

| Cause                                           | Both Sexes, All Ages | Both Sexes, 0-4 Years | Both Sexes, 5-14 Years | Both Sexes, 15-49 Years | Both Sexes, 50-69 Years | Both Sexes, 70-80 Years |
|-------------------------------------------------|----------------------|-----------------------|------------------------|-------------------------|-------------------------|-------------------------|
| Sudden infant death syndrome                    | 2<br>(1 - 5)         | 2<br>(1 - 5)          | --                     | --                      | --                      | --                      |
| Injuries                                        | 851<br>(701 - 1,013) | 25<br>(20 - 33)       | 16<br>(13 - 18)        | 669<br>(542 - 805)      | 103<br>(82 - 126)       | 38<br>(32 - 44)         |
| Transport injuries                              | 465<br>(376 - 560)   | 10<br>(7 - 14)        | 10<br>(8 - 12)         | 375<br>(302 - 456)      | 58<br>(42 - 74)         | 11<br>(8 - 14)          |
| Road injuries                                   | 441<br>(357 - 531)   | 9<br>(6 - 13)         | 9<br>(7 - 11)          | 358<br>(288 - 437)      | 55<br>(40 - 70)         | 10<br>(7 - 13)          |
| Pedestrian road injuries                        | 81<br>(48 - 118)     | 4<br>(2 - 5)          | 3<br>(2 - 5)           | 56<br>(32 - 84)         | 14<br>(8 - 22)          | 4<br>(2 - 6)            |
| Cyclist road injuries                           | 26<br>(18 - 39)      | 1<br>(0 - 1)          | 1<br>(1 - 2)           | 17<br>(12 - 25)         | 6<br>(4 - 10)           | 1<br>(1 - 2)            |
| Motorcyclist road injuries                      | 58<br>(38 - 87)      | 0<br>(0 - 1)          | 0<br>(0 - 1)           | 53<br>(34 - 80)         | 4<br>(2 - 6)            | 1<br>(0 - 1)            |
| Motor vehicle road injuries                     | 274<br>(199 - 344)   | 4<br>(3 - 6)          | 4<br>(3 - 6)           | 231<br>(170 - 289)      | 30<br>(19 - 42)         | 4<br>(3 - 6)            |
| Other road injuries                             | 1<br>(1 - 1)         | 0<br>(0 - 0)          | 0<br>(0 - 0)           | 0<br>(0 - 1)            | 0<br>(0 - 0)            | 0<br>(0 - 0)            |
| Other transport injuries                        | 23<br>(14 - 31)      | 1<br>(1 - 1)          | 1<br>(0 - 1)           | 17<br>(10 - 24)         | 3<br>(2 - 5)            | 1<br>(1 - 1)            |
| Unintentional injuries                          | 258<br>(209 - 318)   | 15<br>(11 - 19)       | 5<br>(4 - 7)           | 185<br>(146 - 233)      | 31<br>(24 - 40)         | 21<br>(17 - 27)         |
| Falls                                           | 63<br>(46 - 86)      | 2<br>(1 - 3)          | 0<br>(0 - 0)           | 52<br>(36 - 73)         | 6<br>(4 - 9)            | 3<br>(2 - 4)            |
| Drowning                                        | 36<br>(24 - 50)      | 5<br>(3 - 8)          | 2<br>(1 - 3)           | 25<br>(15 - 35)         | 3<br>(2 - 5)            | 0<br>(0 - 1)            |
| Fire, heat, and hot substances                  | 19<br>(13 - 26)      | 2<br>(1 - 3)          | 0<br>(0 - 1)           | 13<br>(9 - 20)          | 2<br>(1 - 3)            | 1<br>(1 - 1)            |
| Poisonings                                      | 5<br>(4 - 8)         | 0<br>(0 - 1)          | 0<br>(0 - 0)           | 4<br>(3 - 7)            | 0<br>(0 - 0)            | 0<br>(0 - 0)            |
| Exposure to mechanical forces                   | 57<br>(39 - 75)      | 1<br>(1 - 2)          | 0<br>(0 - 1)           | 48<br>(32 - 64)         | 6<br>(4 - 9)            | 1<br>(1 - 1)            |
| Unintentional firearm injuries                  | 4<br>(3 - 6)         | 0<br>(0 - 0)          | 0<br>(0 - 0)           | 3<br>(2 - 4)            | 1<br>(1 - 2)            | 0<br>(0 - 0)            |
| Unintentional suffocation                       | 2<br>(1 - 3)         | 0<br>(0 - 1)          | 0<br>(0 - 0)           | 1<br>(1 - 2)            | 0<br>(0 - 1)            | 0<br>(0 - 0)            |
| Other exposure to mechanical forces             | 51<br>(34 - 68)      | 1<br>(0 - 1)          | 0<br>(0 - 0)           | 45<br>(29 - 60)         | 5<br>(3 - 8)            | 1<br>(0 - 1)            |
| Adverse effects of medical treatment            | 32<br>(23 - 47)      | 2<br>(1 - 3)          | 1<br>(0 - 1)           | 14<br>(9 - 23)          | 9<br>(6 - 13)           | 7<br>(5 - 10)           |
| Animal contact                                  | 4<br>(3 - 6)         | 0<br>(0 - 0)          | 0<br>(0 - 0)           | 2<br>(1 - 3)            | 1<br>(1 - 2)            | 1<br>(0 - 1)            |
| Venomous animal contact                         | 1<br>(1 - 3)         | 0<br>(0 - 0)          | 0<br>(0 - 0)           | 1<br>(0 - 1)            | 0<br>(0 - 1)            | 0<br>(0 - 0)            |
| Non-venomous animal contact                     | 2<br>(2 - 4)         | 0<br>(0 - 0)          | 0<br>(0 - 0)           | 1<br>(1 - 2)            | 1<br>(0 - 1)            | 0<br>(0 - 1)            |
| Foreign body                                    | 14<br>(10 - 21)      | 2<br>(1 - 3)          | 1<br>(0 - 1)           | 3<br>(2 - 6)            | 1<br>(1 - 2)            | 7<br>(5 - 10)           |
| Pulmonary aspiration and foreign body in airway | 14<br>(10 - 21)      | 2<br>(1 - 3)          | 1<br>(0 - 1)           | 3<br>(2 - 6)            | 1<br>(1 - 2)            | 7<br>(5 - 10)           |
| Foreign body in other body part                 | 0<br>(0 - 1)         | 0<br>(0 - 0)          | 0<br>(0 - 0)           | 0<br>(0 - 0)            | 0<br>(0 - 0)            | 0<br>(0 - 0)            |
| Other unintentional injuries                    | 27<br>(20 - 36)      | 1<br>(0 - 1)          | 0<br>(0 - 1)           | 24<br>(17 - 33)         | 2<br>(1 - 2)            | 1<br>(1 - 1)            |
| Self-harm and interpersonal violence            | 129<br>(94 - 168)    | 0<br>(0 - 1)          | 0<br>(0 - 1)           | 109<br>(77 - 144)       | 14<br>(10 - 20)         | 5<br>(4 - 7)            |
| Self-harm                                       | 110<br>(79 - 147)    | --                    | 0<br>(0 - 0)           | 93<br>(63 - 125)        | 12<br>(8 - 18)          | 5<br>(3 - 7)            |
| Interpersonal violence                          | 19<br>(10 - 28)      | 0<br>(0 - 1)          | 0<br>(0 - 0)           | 16<br>(9 - 24)          | 2<br>(1 - 4)            | 0<br>(0 - 1)            |
| Assault by firearm                              | 5<br>(2 - 10)        | 0<br>(0 - 0)          | 0<br>(0 - 0)           | 5<br>(2 - 9)            | 1<br>(0 - 1)            | 0<br>(0 - 0)            |
| Assault by sharp object                         | 9<br>(5 - 14)        | 0<br>(0 - 0)          | 0<br>(0 - 0)           | 8<br>(4 - 13)           | 1<br>(0 - 2)            | 0<br>(0 - 0)            |
| Assault by other means                          | 5<br>(2 - 7)         | 0<br>(0 - 1)          | 0<br>(0 - 0)           | 4<br>(2 - 6)            | 1<br>(0 - 1)            | 0<br>(0 - 0)            |

Web Table 31- Qatar deaths with 95% UI by age, sex, and cause in 2013

| Cause                                                             | Males, All Ages          | Males, 0-4 Years   | Males, 5-14 Years | Males, 15-49 Years   | Males, 50-69 Years | Males, 70-80 Years |
|-------------------------------------------------------------------|--------------------------|--------------------|-------------------|----------------------|--------------------|--------------------|
| All causes                                                        | 1,864<br>(1,579 - 2,184) | 127<br>(108 - 147) | 20<br>(18 - 22)   | 996<br>(816 - 1,194) | 417<br>(342 - 498) | 304<br>(269 - 344) |
| Communicable, maternal, neonatal, and nutritional diseases        | 131<br>(107 - 163)       | 55<br>(45 - 67)    | 3<br>(2 - 6)      | 47<br>(34 - 71)      | 14<br>(11 - 17)    | 11<br>(9 - 15)     |
| HIV/AIDS and tuberculosis                                         | 7<br>(6 - 9)             | 0<br>(0 - 0)       | 0<br>(0 - 0)      | 6<br>(4 - 7)         | 1<br>(1 - 1)       | 1<br>(1 - 1)       |
| Tuberculosis                                                      | 4<br>(3 - 5)             | 0<br>(0 - 0)       | 0<br>(0 - 0)      | 2<br>(2 - 4)         | 0<br>(0 - 1)       | 1<br>(1 - 1)       |
| HIV/AIDS                                                          | 4<br>(2 - 5)             | 0<br>(0 - 0)       | 0<br>(0 - 0)      | 3<br>(2 - 4)         | 0<br>(0 - 1)       | 0<br>(0 - 0)       |
| HIV/AIDS resulting in mycobacterial infection                     | 0<br>(0 - 0)             | 0<br>(0 - 0)       | 0<br>(0 - 0)      | 0<br>(0 - 0)         | 0<br>(0 - 0)       | 0<br>(0 - 0)       |
| HIV/AIDS resulting in other diseases                              | 3<br>(2 - 5)             | 0<br>(0 - 0)       | 0<br>(0 - 0)      | 3<br>(2 - 4)         | 0<br>(0 - 1)       | 0<br>(0 - 0)       |
| Diarrhea, lower respiratory, and other common infectious diseases | 60<br>(42 - 89)          | 6<br>(4 - 10)      | 3<br>(2 - 5)      | 33<br>(21 - 57)      | 8<br>(6 - 11)      | 9<br>(7 - 13)      |
| Diarrheal diseases                                                | 2<br>(2 - 3)             | 1<br>(0 - 1)       | 0<br>(0 - 0)      | 1<br>(1 - 2)         | 0<br>(0 - 0)       | 0<br>(0 - 0)       |
| Intestinal infectious diseases                                    | 21<br>(7 - 49)           | 2<br>(1 - 5)       | 2<br>(1 - 5)      | 15<br>(4 - 37)       | 1<br>(0 - 2)       | 0<br>(0 - 0)       |
| Typhoid fever                                                     | 16<br>(5 - 38)           | 2<br>(1 - 4)       | 2<br>(1 - 4)      | 12<br>(3 - 28)       | 1<br>(0 - 2)       | 0<br>(0 - 0)       |
| Paratyphoid fever                                                 | 5<br>(1 - 11)            | 1<br>(0 - 1)       | 1<br>(0 - 1)      | 3<br>(1 - 9)         | 0<br>(0 - 0)       | 0<br>(0 - 0)       |
| Other intestinal infectious diseases                              | 0<br>(0 - 1)             | 0<br>(0 - 0)       | 0<br>(0 - 0)      | 0<br>(0 - 1)         | 0<br>(0 - 0)       | 0<br>(0 - 0)       |
| Lower respiratory infections                                      | 29<br>(22 - 36)          | 3<br>(2 - 4)       | 1<br>(0 - 1)      | 13<br>(9 - 17)       | 5<br>(4 - 7)       | 8<br>(6 - 12)      |
| Upper respiratory infections                                      | 0<br>(0 - 0)             | 0<br>(0 - 0)       | 0<br>(0 - 0)      | 0<br>(0 - 0)         | 0<br>(0 - 0)       | 0<br>(0 - 0)       |
| Otitis media                                                      | 1<br>(0 - 1)             | 0<br>(0 - 0)       | 0<br>(0 - 0)      | 0<br>(0 - 0)         | 0<br>(0 - 0)       | 0<br>(0 - 0)       |
| Meningitis                                                        | 3<br>(2 - 4)             | 0<br>(0 - 1)       | 0<br>(0 - 0)      | 2<br>(1 - 3)         | 1<br>(0 - 1)       | 0<br>(0 - 0)       |
| Pneumococcal meningitis                                           | 1<br>(0 - 1)             | 0<br>(0 - 0)       | 0<br>(0 - 0)      | 0<br>(0 - 1)         | 0<br>(0 - 0)       | 0<br>(0 - 0)       |
| H influenzae type B meningitis                                    | 0<br>(0 - 1)             | 0<br>(0 - 0)       | 0<br>(0 - 0)      | 0<br>(0 - 0)         | 0<br>(0 - 0)       | 0<br>(0 - 0)       |
| Meningococcal meningitis                                          | 1<br>(1 - 1)             | 0<br>(0 - 0)       | 0<br>(0 - 0)      | 0<br>(0 - 1)         | 0<br>(0 - 0)       | 0<br>(0 - 0)       |
| Other meningitis                                                  | 1<br>(1 - 2)             | 0<br>(0 - 0)       | 0<br>(0 - 0)      | 1<br>(0 - 1)         | 0<br>(0 - 0)       | 0<br>(0 - 0)       |
| Encephalitis                                                      | 3<br>(2 - 4)             | 0<br>(0 - 1)       | 0<br>(0 - 0)      | 1<br>(1 - 2)         | 1<br>(0 - 1)       | 0<br>(0 - 1)       |
| Diphtheria                                                        | 0<br>(0 - 0)             | 0<br>(0 - 0)       | 0<br>(0 - 0)      | 0<br>(0 - 0)         | 0<br>(0 - 0)       | --                 |
| Whooping cough                                                    | 0<br>(0 - 0)             | 0<br>(0 - 0)       | 0<br>(0 - 0)      | 0<br>(0 - 0)         | 0<br>(0 - 0)       | --                 |
| Tetanus                                                           | 0<br>(0 - 0)             | 0<br>(0 - 0)       | 0<br>(0 - 0)      | 0<br>(0 - 0)         | 0<br>(0 - 0)       | 0<br>(0 - 0)       |
| Measles                                                           | 0<br>(0 - 0)             | 0<br>(0 - 0)       | 0<br>(0 - 0)      | 0<br>(0 - 0)         | 0<br>(0 - 0)       | --                 |
| Varicella and herpes zoster                                       | 0<br>(0 - 1)             | 0<br>(0 - 0)       | 0<br>(0 - 0)      | 0<br>(0 - 1)         | 0<br>(0 - 0)       | 0<br>(0 - 0)       |
| Neglected tropical diseases and malaria                           | 2<br>(1 - 2)             | 0<br>(0 - 0)       | 0<br>(0 - 0)      | 1<br>(1 - 1)         | 0<br>(0 - 0)       | 0<br>(0 - 0)       |
| Leishmaniasis                                                     | 0<br>(0 - 0)             | 0<br>(0 - 0)       | 0<br>(0 - 0)      | 0<br>(0 - 0)         | 0<br>(0 - 0)       | 0<br>(0 - 0)       |
| Visceral leishmaniasis                                            | 0<br>(0 - 0)             | 0<br>(0 - 0)       | 0<br>(0 - 0)      | 0<br>(0 - 0)         | 0<br>(0 - 0)       | 0<br>(0 - 0)       |
| Cysticercosis                                                     | 0<br>(0 - 0)             | 0<br>(0 - 0)       | 0<br>(0 - 0)      | 0<br>(0 - 0)         | 0<br>(0 - 0)       | 0<br>(0 - 0)       |
| Cystic echinococcosis                                             | 0<br>(0 - 0)             | 0<br>(0 - 0)       | 0<br>(0 - 0)      | 0<br>(0 - 0)         | 0<br>(0 - 0)       | 0<br>(0 - 0)       |
| Dengue                                                            | 0<br>(0 - 0)             | 0<br>(0 - 0)       | 0<br>(0 - 0)      | 0<br>(0 - 0)         | 0<br>(0 - 0)       | 0<br>(0 - 0)       |
| Rabies                                                            | 0<br>(0 - 0)             | 0<br>(0 - 0)       | 0<br>(0 - 0)      | 0<br>(0 - 0)         | 0<br>(0 - 0)       | 0<br>(0 - 0)       |
| Intestinal nematode infections                                    | 0<br>(0 - 0)             | 0<br>(0 - 0)       | 0<br>(0 - 0)      | 0<br>(0 - 0)         | 0<br>(0 - 0)       | 0<br>(0 - 0)       |
| Ascariasis                                                        | 0<br>(0 - 0)             | 0<br>(0 - 0)       | 0<br>(0 - 0)      | 0<br>(0 - 0)         | 0<br>(0 - 0)       | 0<br>(0 - 0)       |
| Other neglected tropical diseases                                 | 1<br>(1 - 1)             | 0<br>(0 - 0)       | 0<br>(0 - 0)      | 1<br>(0 - 1)         | 0<br>(0 - 0)       | 0<br>(0 - 0)       |
| Maternal disorders                                                | --                       | --                 | --                | --                   | --                 | --                 |
| Maternal hemorrhage                                               | --                       | --                 | --                | --                   | --                 | --                 |
| Maternal sepsis and other maternal infections                     | --                       | --                 | --                | --                   | --                 | --                 |

Web Table 31- Qatar deaths with 95% UI by age, sex, and cause in 2013

| Cause                                                            | Males, All Ages      | Males, 0-4 Years | Males, 5-14 Years | Males, 15-49 Years | Males, 50-69 Years | Males, 70-80 Years |
|------------------------------------------------------------------|----------------------|------------------|-------------------|--------------------|--------------------|--------------------|
| Maternal hypertensive disorders                                  | --                   | --               | --                | --                 | --                 | --                 |
| Maternal obstructed labor                                        | --                   | --               | --                | --                 | --                 | --                 |
| Maternal abortive outcome                                        | --                   | --               | --                | --                 | --                 | --                 |
| Indirect maternal deaths                                         | --                   | --               | --                | --                 | --                 | --                 |
| Late maternal deaths                                             | --                   | --               | --                | --                 | --                 | --                 |
| Maternal deaths aggravated by HIV/AIDS                           | --                   | --               | --                | --                 | --                 | --                 |
| Other maternal disorders                                         | --                   | --               | --                | --                 | --                 | --                 |
| Neonatal disorders                                               | 47<br>(38 - 58)      | 47<br>(38 - 58)  | --                | --                 | --                 | --                 |
| Neonatal preterm birth complications                             | 39<br>(30 - 48)      | 39<br>(30 - 48)  | --                | --                 | --                 | --                 |
| Neonatal encephalopathy due to birth asphyxia and trauma         | 4<br>(2 - 7)         | 4<br>(2 - 7)     | --                | --                 | --                 | --                 |
| Neonatal sepsis and other neonatal infections                    | 0<br>(0 - 1)         | 0<br>(0 - 1)     | --                | --                 | --                 | --                 |
| Hemolytic disease and other neonatal jaundice                    | 0<br>(0 - 0)         | 0<br>(0 - 0)     | --                | --                 | --                 | --                 |
| Other neonatal disorders                                         | 4<br>(2 - 7)         | 4<br>(2 - 7)     | --                | --                 | --                 | --                 |
| Nutritional deficiencies                                         | 2<br>(1 - 2)         | 0<br>(0 - 0)     | 0<br>(0 - 0)      | 1<br>(1 - 1)       | 0<br>(0 - 0)       | 0<br>(0 - 0)       |
| Protein-energy malnutrition                                      | 0<br>(0 - 1)         | 0<br>(0 - 0)     | 0<br>(0 - 0)      | 0<br>(0 - 0)       | 0<br>(0 - 0)       | 0<br>(0 - 0)       |
| Iodine deficiency                                                | 0<br>(0 - 0)         | 0<br>(0 - 0)     | 0<br>(0 - 0)      | 0<br>(0 - 0)       | 0<br>(0 - 0)       | 0<br>(0 - 0)       |
| Iron-deficiency anemia                                           | 0<br>(0 - 1)         | 0<br>(0 - 0)     | 0<br>(0 - 0)      | 0<br>(0 - 1)       | 0<br>(0 - 0)       | 0<br>(0 - 0)       |
| Other nutritional deficiencies                                   | 1<br>(1 - 1)         | 0<br>(0 - 0)     | 0<br>(0 - 0)      | 1<br>(0 - 1)       | 0<br>(0 - 0)       | 0<br>(0 - 0)       |
| Other communicable, maternal, neonatal, and nutritional diseases | 13<br>(10 - 17)      | 1<br>(1 - 2)     | 0<br>(0 - 0)      | 6<br>(4 - 9)       | 4<br>(3 - 6)       | 1<br>(0 - 2)       |
| Sexually transmitted diseases excluding HIV                      | 2<br>(1 - 2)         | 0<br>(0 - 0)     | 0<br>(0 - 0)      | 1<br>(0 - 1)       | 0<br>(0 - 1)       | 0<br>(0 - 1)       |
| Syphilis                                                         | 1<br>(1 - 2)         | 0<br>(0 - 0)     | 0<br>(0 - 0)      | 0<br>(0 - 1)       | 0<br>(0 - 0)       | 0<br>(0 - 0)       |
| Chlamydial infection                                             | --                   | --               | --                | --                 | --                 | --                 |
| Gonococcal infection                                             | 0<br>(0 - 0)         | --               | 0<br>(0 - 0)      | 0<br>(0 - 0)       | 0<br>(0 - 0)       | 0<br>(0 - 0)       |
| Other sexually transmitted diseases                              | 0<br>(0 - 0)         | --               | 0<br>(0 - 0)      | 0<br>(0 - 0)       | 0<br>(0 - 0)       | 0<br>(0 - 0)       |
| Hepatitis                                                        | 6<br>(4 - 8)         | 0<br>(0 - 0)     | 0<br>(0 - 0)      | 3<br>(2 - 4)       | 3<br>(2 - 4)       | 0<br>(0 - 0)       |
| Acute hepatitis A                                                | 0<br>(0 - 1)         | 0<br>(0 - 0)     | 0<br>(0 - 0)      | 0<br>(0 - 0)       | 0<br>(0 - 0)       | 0<br>(0 - 0)       |
| Acute hepatitis B                                                | 3<br>(2 - 5)         | 0<br>(0 - 0)     | 0<br>(0 - 0)      | 1<br>(1 - 2)       | 2<br>(1 - 3)       | 0<br>(0 - 0)       |
| Acute hepatitis C                                                | 0<br>(0 - 1)         | --               | 0<br>(0 - 0)      | 0<br>(0 - 1)       | 0<br>(0 - 1)       | 0<br>(0 - 0)       |
| Acute hepatitis E                                                | 2<br>(1 - 3)         | 0<br>(0 - 0)     | 0<br>(0 - 0)      | 1<br>(0 - 2)       | 1<br>(0 - 1)       | 0<br>(0 - 0)       |
| Other infectious diseases                                        | 6<br>(3 - 9)         | 1<br>(0 - 2)     | 0<br>(0 - 0)      | 3<br>(2 - 5)       | 1<br>(1 - 3)       | 1<br>(0 - 1)       |
| Non-communicable diseases                                        | 954<br>(807 - 1,133) | 56<br>(46 - 68)  | 6<br>(5 - 7)      | 317<br>(256 - 393) | 309<br>(252 - 376) | 265<br>(234 - 302) |
| Neoplasms                                                        | 186<br>(152 - 229)   | 1<br>(1 - 2)     | 1<br>(1 - 2)      | 67<br>(53 - 84)    | 71<br>(56 - 89)    | 45<br>(38 - 53)    |
| Esophageal cancer                                                | 6<br>(4 - 8)         | --               | --                | 2<br>(1 - 3)       | 2<br>(1 - 3)       | 3<br>(2 - 4)       |
| Stomach cancer                                                   | 10<br>(8 - 13)       | --               | --                | 2<br>(1 - 2)       | 5<br>(4 - 7)       | 4<br>(3 - 5)       |
| Liver cancer                                                     | 23<br>(17 - 30)      | --               | 0<br>(0 - 0)      | 5<br>(3 - 6)       | 12<br>(8 - 17)     | 6<br>(5 - 9)       |
| Liver cancer due to hepatitis B                                  | 4<br>(1 - 10)        | --               | 0<br>(0 - 0)      | 1<br>(0 - 3)       | 2<br>(0 - 6)       | 1<br>(0 - 3)       |
| Liver cancer due to hepatitis C                                  | 13<br>(6 - 21)       | --               | 0<br>(0 - 0)      | 2<br>(1 - 4)       | 7<br>(3 - 12)      | 4<br>(2 - 6)       |
| Liver cancer due to alcohol use                                  | 3<br>(1 - 8)         | --               | --                | 0<br>(0 - 1)       | 2<br>(1 - 4)       | 1<br>(0 - 3)       |
| Liver cancer due to other causes                                 | 3<br>(1 - 6)         | --               | 0<br>(0 - 0)      | 1<br>(0 - 2)       | 1<br>(0 - 4)       | 0<br>(0 - 1)       |
| Larynx cancer                                                    | 3<br>(2 - 3)         | --               | --                | 1<br>(0 - 1)       | 1<br>(1 - 1)       | 1<br>(1 - 1)       |

Web Table 31- Qatar deaths with 95% UI by age, sex, and cause in 2013

| Cause                                         | Males, All Ages    | Males, 0-4 Years | Males, 5-14 Years | Males, 15-49 Years | Males, 50-69 Years | Males, 70-80 Years |
|-----------------------------------------------|--------------------|------------------|-------------------|--------------------|--------------------|--------------------|
| Tracheal, bronchus and lung cancer            | 34<br>(26 - 43)    | --               | --                | 9<br>(6 - 13)      | 15<br>(11 - 20)    | 10<br>(7 - 12)     |
| Breast cancer                                 | 1<br>(1 - 2)       | --               | --                | 1<br>(0 - 1)       | 0<br>(0 - 1)       | 0<br>(0 - 0)       |
| Cervical cancer                               | --                 | --               | --                | --                 | --                 | --                 |
| Uterine cancer                                | --                 | --               | --                | --                 | --                 | --                 |
| Prostate cancer                               | 7<br>(4 - 10)      | --               | --                | 0<br>(0 - 1)       | 2<br>(1 - 3)       | 5<br>(2 - 7)       |
| Colon and rectum cancer                       | 16<br>(13 - 19)    | --               | --                | 6<br>(4 - 7)       | 6<br>(5 - 8)       | 4<br>(3 - 5)       |
| Lip and oral cavity cancer                    | 2<br>(1 - 2)       | --               | --                | 1<br>(0 - 1)       | 1<br>(1 - 1)       | 0<br>(0 - 0)       |
| Nasopharynx cancer                            | 1<br>(1 - 1)       | --               | 0<br>(0 - 0)      | 0<br>(0 - 1)       | 0<br>(0 - 0)       | 0<br>(0 - 0)       |
| Other pharynx cancer                          | 1<br>(1 - 1)       | --               | --                | 0<br>(0 - 1)       | 1<br>(0 - 1)       | 0<br>(0 - 0)       |
| Gallbladder and biliary tract cancer          | 2<br>(1 - 2)       | --               | --                | 1<br>(0 - 1)       | 0<br>(0 - 1)       | 1<br>(0 - 1)       |
| Pancreatic cancer                             | 12<br>(9 - 15)     | --               | --                | 3<br>(2 - 4)       | 6<br>(5 - 8)       | 2<br>(2 - 3)       |
| Malignant skin melanoma                       | 2<br>(1 - 3)       | --               | --                | 1<br>(0 - 2)       | 1<br>(0 - 1)       | 0<br>(0 - 1)       |
| Non-melanoma skin cancer                      | 1<br>(1 - 2)       | --               | --                | 1<br>(1 - 1)       | 0<br>(0 - 0)       | 0<br>(0 - 0)       |
| Ovarian cancer                                | --                 | --               | --                | --                 | --                 | --                 |
| Testicular cancer                             | 1<br>(1 - 2)       | --               | --                | 1<br>(0 - 1)       | 0<br>(0 - 0)       | 0<br>(0 - 0)       |
| Kidney cancer                                 | 4<br>(3 - 6)       | 0<br>(0 - 0)     | 0<br>(0 - 0)      | 1<br>(1 - 2)       | 2<br>(1 - 3)       | 1<br>(1 - 1)       |
| Bladder cancer                                | 2<br>(2 - 3)       | --               | --                | 0<br>(0 - 0)       | 1<br>(1 - 1)       | 1<br>(1 - 2)       |
| Brain and nervous system cancer               | 9<br>(6 - 15)      | 0<br>(0 - 1)     | 0<br>(0 - 1)      | 4<br>(3 - 8)       | 3<br>(2 - 4)       | 1<br>(1 - 2)       |
| Thyroid cancer                                | 0<br>(0 - 1)       | --               | 0<br>(0 - 0)      | 0<br>(0 - 0)       | 0<br>(0 - 0)       | 0<br>(0 - 0)       |
| Mesothelioma                                  | 0<br>(0 - 0)       | --               | --                | 0<br>(0 - 0)       | 0<br>(0 - 0)       | 0<br>(0 - 0)       |
| Hodgkin lymphoma                              | 2<br>(1 - 3)       | 0<br>(0 - 0)     | 0<br>(0 - 0)      | 1<br>(1 - 2)       | 1<br>(0 - 1)       | 0<br>(0 - 0)       |
| Non-Hodgkin lymphoma                          | 14<br>(10 - 20)    | 0<br>(0 - 0)     | 0<br>(0 - 0)      | 8<br>(6 - 12)      | 4<br>(3 - 6)       | 2<br>(1 - 2)       |
| Multiple myeloma                              | 2<br>(1 - 3)       | --               | --                | 1<br>(0 - 1)       | 1<br>(0 - 1)       | 1<br>(0 - 1)       |
| Leukemia                                      | 20<br>(16 - 25)    | 0<br>(0 - 0)     | 0<br>(0 - 1)      | 12<br>(9 - 16)     | 5<br>(4 - 7)       | 3<br>(2 - 3)       |
| Other neoplasms                               | 11<br>(8 - 14)     | 1<br>(0 - 1)     | 0<br>(0 - 0)      | 6<br>(4 - 9)       | 2<br>(2 - 3)       | 1<br>(1 - 2)       |
| Cardiovascular diseases                       | 350<br>(292 - 415) | 2<br>(2 - 3)     | 1<br>(1 - 1)      | 122<br>(97 - 150)  | 129<br>(104 - 155) | 96<br>(84 - 111)   |
| Rheumatic heart disease                       | 2<br>(2 - 3)       | 0<br>(0 - 0)     | 0<br>(0 - 0)      | 2<br>(1 - 2)       | 1<br>(0 - 1)       | 0<br>(0 - 0)       |
| Ischemic heart disease                        | 223<br>(185 - 270) | 0<br>(0 - 1)     | 0<br>(0 - 0)      | 66<br>(51 - 84)    | 92<br>(75 - 112)   | 64<br>(54 - 75)    |
| Cerebrovascular disease                       | 83<br>(63 - 106)   | 1<br>(1 - 1)     | 1<br>(1 - 1)      | 35<br>(26 - 48)    | 23<br>(16 - 31)    | 23<br>(18 - 29)    |
| Ischemic stroke                               | 30<br>(23 - 39)    | 0<br>(0 - 0)     | 0<br>(0 - 0)      | 7<br>(4 - 9)       | 7<br>(5 - 10)      | 16<br>(12 - 21)    |
| Hemorrhagic stroke                            | 53<br>(38 - 69)    | 1<br>(1 - 1)     | 1<br>(0 - 1)      | 29<br>(21 - 39)    | 15<br>(10 - 21)    | 7<br>(4 - 9)       |
| Hypertensive heart disease                    | 6<br>(4 - 9)       | 0<br>(0 - 0)     | 0<br>(0 - 0)      | 3<br>(2 - 5)       | 1<br>(1 - 2)       | 1<br>(1 - 2)       |
| Cardiomyopathy and myocarditis                | 7<br>(5 - 11)      | 0<br>(0 - 1)     | 0<br>(0 - 0)      | 4<br>(2 - 6)       | 2<br>(1 - 4)       | 1<br>(0 - 1)       |
| Atrial fibrillation and flutter               | 5<br>(3 - 6)       | --               | --                | 1<br>(1 - 1)       | 2<br>(1 - 2)       | 2<br>(1 - 3)       |
| Aortic aneurysm                               | 4<br>(3 - 6)       | --               | --                | 1<br>(0 - 1)       | 3<br>(2 - 4)       | 1<br>(1 - 2)       |
| Peripheral vascular disease                   | 3<br>(2 - 3)       | --               | --                | 1<br>(0 - 1)       | 1<br>(0 - 1)       | 1<br>(1 - 2)       |
| Endocarditis                                  | 1<br>(1 - 2)       | 0<br>(0 - 0)     | 0<br>(0 - 0)      | 1<br>(0 - 1)       | 0<br>(0 - 0)       | 0<br>(0 - 0)       |
| Other cardiovascular and circulatory diseases | 17<br>(12 - 22)    | 0<br>(0 - 1)     | 0<br>(0 - 0)      | 10<br>(7 - 13)     | 5<br>(3 - 7)       | 2<br>(1 - 3)       |
| Chronic respiratory diseases                  | 23<br>(18 - 30)    | 1<br>(1 - 2)     | 0<br>(0 - 0)      | 7<br>(5 - 10)      | 6<br>(4 - 8)       | 9<br>(7 - 12)      |
| Chronic obstructive pulmonary disease         | 15<br>(12 - 20)    | 1<br>(0 - 1)     | 0<br>(0 - 0)      | 3<br>(2 - 5)       | 4<br>(3 - 5)       | 8<br>(6 - 10)      |

Web Table 31- Qatar deaths with 95% UI by age, sex, and cause in 2013

| Cause                                               | Males, All Ages | Males, 0-4 Years | Males, 5-14 Years | Males, 15-49 Years | Males, 50-69 Years | Males, 70-80 Years |
|-----------------------------------------------------|-----------------|------------------|-------------------|--------------------|--------------------|--------------------|
| Pneumoconiosis                                      | 1<br>(1 - 2)    | 0<br>(0 - 0)     | 0<br>(0 - 0)      | 1<br>(0 - 1)       | 0<br>(0 - 0)       | 0<br>(0 - 0)       |
| Silicosis                                           | 0<br>(0 - 0)    | 0<br>(0 - 0)     | 0<br>(0 - 0)      | 0<br>(0 - 0)       | 0<br>(0 - 0)       | 0<br>(0 - 0)       |
| Asbestosis                                          | 0<br>(0 - 0)    | 0<br>(0 - 0)     | 0<br>(0 - 0)      | 0<br>(0 - 0)       | 0<br>(0 - 0)       | 0<br>(0 - 0)       |
| Coal workers pneumoconiosis                         | 0<br>(0 - 0)    | 0<br>(0 - 0)     | 0<br>(0 - 0)      | 0<br>(0 - 0)       | 0<br>(0 - 0)       | 0<br>(0 - 0)       |
| Other pneumoconiosis                                | 1<br>(0 - 1)    | 0<br>(0 - 0)     | 0<br>(0 - 0)      | 0<br>(0 - 0)       | 0<br>(0 - 0)       | 0<br>(0 - 0)       |
| Asthma                                              | 2<br>(2 - 3)    | 0<br>(0 - 0)     | 0<br>(0 - 0)      | 1<br>(1 - 2)       | 1<br>(0 - 1)       | 0<br>(0 - 0)       |
| Interstitial lung disease and pulmonary sarcoidosis | 2<br>(1 - 2)    | 0<br>(0 - 0)     | 0<br>(0 - 0)      | 1<br>(0 - 1)       | 1<br>(0 - 1)       | 0<br>(0 - 1)       |
| Other chronic respiratory diseases                  | 3<br>(2 - 4)    | 0<br>(0 - 1)     | 0<br>(0 - 0)      | 1<br>(1 - 2)       | 1<br>(0 - 1)       | 0<br>(0 - 0)       |
| Cirrhosis                                           | 36<br>(28 - 45) | 0<br>(0 - 0)     | 0<br>(0 - 0)      | 15<br>(11 - 20)    | 15<br>(11 - 19)    | 6<br>(4 - 7)       |
| Cirrhosis due to hepatitis B                        | 11<br>(5 - 19)  | 0<br>(0 - 0)     | 0<br>(0 - 0)      | 5<br>(2 - 9)       | 5<br>(2 - 8)       | 2<br>(1 - 3)       |
| Cirrhosis due to hepatitis C                        | 16<br>(7 - 26)  | 0<br>(0 - 0)     | 0<br>(0 - 0)      | 7<br>(3 - 11)      | 7<br>(2 - 11)      | 2<br>(1 - 4)       |
| Cirrhosis due to alcohol use                        | 5<br>(3 - 9)    | --               | --                | 2<br>(1 - 3)       | 2<br>(1 - 4)       | 1<br>(1 - 2)       |
| Cirrhosis due to other causes                       | 4<br>(2 - 7)    | 0<br>(0 - 0)     | 0<br>(0 - 0)      | 2<br>(1 - 4)       | 1<br>(0 - 3)       | 0<br>(0 - 1)       |
| Digestive diseases                                  | 18<br>(14 - 22) | 0<br>(0 - 0)     | 0<br>(0 - 0)      | 10<br>(7 - 13)     | 5<br>(3 - 6)       | 3<br>(2 - 4)       |
| Peptic ulcer disease                                | 1<br>(1 - 2)    | 0<br>(0 - 0)     | 0<br>(0 - 0)      | 1<br>(0 - 1)       | 0<br>(0 - 1)       | 0<br>(0 - 0)       |
| Gastritis and duodenitis                            | 1<br>(1 - 2)    | 0<br>(0 - 0)     | 0<br>(0 - 0)      | 1<br>(0 - 1)       | 0<br>(0 - 1)       | 0<br>(0 - 0)       |
| Appendicitis                                        | 1<br>(0 - 1)    | 0<br>(0 - 0)     | 0<br>(0 - 0)      | 0<br>(0 - 1)       | 0<br>(0 - 0)       | 0<br>(0 - 0)       |
| Paralytic ileus and intestinal obstruction          | 2<br>(1 - 3)    | 0<br>(0 - 0)     | 0<br>(0 - 0)      | 1<br>(1 - 2)       | 0<br>(0 - 1)       | 0<br>(0 - 1)       |
| Inguinal, femoral, and abdominal hernia             | 1<br>(0 - 1)    | 0<br>(0 - 0)     | 0<br>(0 - 0)      | 1<br>(0 - 1)       | 0<br>(0 - 0)       | 0<br>(0 - 0)       |
| Inflammatory bowel disease                          | 3<br>(2 - 4)    | 0<br>(0 - 0)     | 0<br>(0 - 0)      | 1<br>(1 - 2)       | 1<br>(0 - 1)       | 1<br>(1 - 1)       |
| Vascular intestinal disorders                       | 1<br>(0 - 1)    | 0<br>(0 - 0)     | 0<br>(0 - 0)      | 0<br>(0 - 1)       | 0<br>(0 - 0)       | 0<br>(0 - 0)       |
| Gallbladder and biliary diseases                    | 2<br>(1 - 3)    | 0<br>(0 - 0)     | 0<br>(0 - 0)      | 1<br>(1 - 2)       | 0<br>(0 - 1)       | 1<br>(0 - 1)       |
| Pancreatitis                                        | 3<br>(2 - 4)    | 0<br>(0 - 0)     | 0<br>(0 - 0)      | 2<br>(1 - 2)       | 1<br>(1 - 2)       | 0<br>(0 - 0)       |
| Other digestive diseases                            | 4<br>(2 - 5)    | 0<br>(0 - 0)     | 0<br>(0 - 0)      | 2<br>(1 - 2)       | 1<br>(1 - 2)       | 1<br>(0 - 1)       |
| Neurological disorders                              | 49<br>(40 - 60) | 1<br>(1 - 2)     | 0<br>(0 - 1)      | 7<br>(5 - 10)      | 9<br>(6 - 11)      | 32<br>(25 - 39)    |
| Alzheimer disease and other dementias               | 35<br>(28 - 44) | --               | --                | 0<br>(0 - 0)       | 6<br>(4 - 8)       | 29<br>(23 - 36)    |
| Parkinson disease                                   | 3<br>(2 - 4)    | --               | --                | 0<br>(0 - 1)       | 0<br>(0 - 1)       | 2<br>(1 - 3)       |
| Epilepsy                                            | 5<br>(3 - 6)    | 0<br>(0 - 1)     | 0<br>(0 - 0)      | 3<br>(2 - 5)       | 1<br>(0 - 1)       | 0<br>(0 - 0)       |
| Multiple sclerosis                                  | 1<br>(0 - 2)    | --               | --                | 1<br>(0 - 2)       | 0<br>(0 - 0)       | 0<br>(0 - 0)       |
| Other neurological disorders                        | 6<br>(4 - 8)    | 1<br>(1 - 1)     | 0<br>(0 - 0)      | 3<br>(2 - 4)       | 1<br>(1 - 2)       | 0<br>(0 - 1)       |
| Mental and substance use disorders                  | 41<br>(30 - 58) | 0<br>(0 - 1)     | 0<br>(0 - 0)      | 31<br>(23 - 44)    | 9<br>(6 - 12)      | 1<br>(1 - 1)       |
| Schizophrenia                                       | 0<br>(0 - 0)    | --               | --                | 0<br>(0 - 0)       | 0<br>(0 - 0)       | 0<br>(0 - 0)       |
| Alcohol use disorders                               | 3<br>(2 - 4)    | --               | --                | 1<br>(1 - 2)       | 1<br>(1 - 2)       | 0<br>(0 - 0)       |
| Drug use disorders                                  | 38<br>(28 - 54) | 0<br>(0 - 1)     | --                | 29<br>(21 - 41)    | 8<br>(5 - 11)      | 0<br>(0 - 1)       |
| Opioid use disorders                                | 21<br>(15 - 29) | 0<br>(0 - 0)     | --                | 16<br>(12 - 23)    | 4<br>(3 - 6)       | 0<br>(0 - 0)       |
| Cocaine use disorders                               | 0<br>(0 - 1)    | 0<br>(0 - 0)     | --                | 0<br>(0 - 1)       | 0<br>(0 - 0)       | 0<br>(0 - 0)       |
| Amphetamine use disorders                           | 0<br>(0 - 1)    | 0<br>(0 - 0)     | --                | 0<br>(0 - 0)       | 0<br>(0 - 0)       | 0<br>(0 - 0)       |
| Other drug use disorders                            | 16<br>(12 - 23) | 0<br>(0 - 0)     | --                | 12<br>(9 - 18)     | 3<br>(2 - 5)       | 0<br>(0 - 0)       |
| Eating disorders                                    | 0<br>(0 - 1)    | --               | 0<br>(0 - 0)      | 0<br>(0 - 1)       | --                 | --                 |
| Anorexia nervosa                                    | 0<br>(0 - 1)    | --               | 0<br>(0 - 0)      | 0<br>(0 - 1)       | --                 | --                 |

Web Table 31- Qatar deaths with 95% UI by age, sex, and cause in 2013

| Cause                                               | Males, All Ages    | Males, 0-4 Years | Males, 5-14 Years | Males, 15-49 Years | Males, 50-69 Years | Males, 70-80 Years |
|-----------------------------------------------------|--------------------|------------------|-------------------|--------------------|--------------------|--------------------|
| Diabetes, urogenital, blood, and endocrine diseases | 173<br>(142 - 204) | 4<br>(3 - 6)     | 1<br>(1 - 1)      | 40<br>(31 - 51)    | 60<br>(47 - 73)    | 68<br>(57 - 80)    |
| Diabetes mellitus                                   | 105<br>(85 - 126)  | 0<br>(0 - 0)     | 0<br>(0 - 0)      | 15<br>(11 - 21)    | 40<br>(31 - 50)    | 49<br>(40 - 59)    |
| Acute glomerulonephritis                            | 0<br>(0 - 1)       | 0<br>(0 - 0)     | 0<br>(0 - 0)      | 0<br>(0 - 0)       | 0<br>(0 - 0)       | 0<br>(0 - 0)       |
| Chronic kidney disease                              | 39<br>(30 - 49)    | 0<br>(0 - 0)     | 0<br>(0 - 0)      | 10<br>(7 - 13)     | 14<br>(10 - 19)    | 15<br>(11 - 18)    |
| Chronic kidney disease due to diabetes mellitus     | 2<br>(1 - 5)       | 0<br>(0 - 0)     | 0<br>(0 - 0)      | 1<br>(0 - 2)       | 1<br>(0 - 1)       | 1<br>(0 - 2)       |
| Chronic kidney disease due to hypertension          | 17<br>(12 - 24)    | 0<br>(0 - 0)     | 0<br>(0 - 0)      | 4<br>(3 - 6)       | 7<br>(4 - 10)      | 6<br>(4 - 9)       |
| Chronic kidney disease due to glomerulonephritis    | 2<br>(2 - 4)       | 0<br>(0 - 0)     | 0<br>(0 - 0)      | 1<br>(1 - 2)       | 1<br>(0 - 1)       | 1<br>(0 - 1)       |
| Chronic kidney disease due to other causes          | 16<br>(11 - 23)    | 0<br>(0 - 0)     | 0<br>(0 - 0)      | 4<br>(2 - 6)       | 6<br>(3 - 9)       | 7<br>(4 - 10)      |
| Urinary diseases and male infertility               | 5<br>(4 - 7)       | 0<br>(0 - 1)     | 0<br>(0 - 0)      | 2<br>(1 - 3)       | 2<br>(1 - 2)       | 1<br>(1 - 2)       |
| Interstitial nephritis and urinary tract infections | 1<br>(1 - 2)       | 0<br>(0 - 0)     | 0<br>(0 - 0)      | 0<br>(0 - 1)       | 0<br>(0 - 1)       | 0<br>(0 - 0)       |
| Urolithiasis                                        | 0<br>(0 - 1)       | --               | 0<br>(0 - 0)      | 0<br>(0 - 0)       | 0<br>(0 - 0)       | 0<br>(0 - 0)       |
| Other urinary diseases                              | 4<br>(3 - 5)       | 0<br>(0 - 0)     | 0<br>(0 - 0)      | 1<br>(1 - 2)       | 1<br>(1 - 2)       | 1<br>(1 - 1)       |
| Gynecological diseases                              | --                 | --               | --                | --                 | --                 | --                 |
| Uterine fibroids                                    | --                 | --               | --                | --                 | --                 | --                 |
| Polycystic ovarian syndrome                         | --                 | --               | --                | --                 | --                 | --                 |
| Endometriosis                                       | --                 | --               | --                | --                 | --                 | --                 |
| Genital prolapse                                    | --                 | --               | --                | --                 | --                 | --                 |
| Other gynecological diseases                        | --                 | --               | --                | --                 | --                 | --                 |
| Hemoglobinopathies and hemolytic anemias            | 5<br>(3 - 9)       | 1<br>(0 - 1)     | 0<br>(0 - 1)      | 4<br>(2 - 6)       | 0<br>(0 - 1)       | 0<br>(0 - 1)       |
| Thalassemias                                        | 2<br>(1 - 3)       | 1<br>(0 - 1)     | 0<br>(0 - 0)      | 1<br>(1 - 2)       | 0<br>(0 - 0)       | 0<br>(0 - 0)       |
| Sickle cell disorders                               | 3<br>(1 - 4)       | 0<br>(0 - 0)     | 0<br>(0 - 0)      | 2<br>(1 - 3)       | 0<br>(0 - 1)       | 0<br>(0 - 0)       |
| G6PD deficiency                                     | 0<br>(0 - 0)       | 0<br>(0 - 0)     | 0<br>(0 - 0)      | 0<br>(0 - 0)       | 0<br>(0 - 0)       | 0<br>(0 - 0)       |
| Other hemoglobinopathies and hemolytic anemias      | 1<br>(0 - 1)       | 0<br>(0 - 0)     | 0<br>(0 - 0)      | 0<br>(0 - 0)       | 0<br>(0 - 0)       | 0<br>(0 - 1)       |
| Endocrine, metabolic, blood, and immune disorders   | 18<br>(12 - 25)    | 3<br>(2 - 4)     | 0<br>(0 - 1)      | 9<br>(6 - 14)      | 3<br>(2 - 5)       | 2<br>(1 - 4)       |
| Musculoskeletal disorders                           | 13<br>(9 - 19)     | --               | 0<br>(0 - 0)      | 8<br>(6 - 12)      | 3<br>(2 - 5)       | 1<br>(1 - 2)       |
| Rheumatoid arthritis                                | 3<br>(2 - 5)       | --               | 0<br>(0 - 0)      | 2<br>(1 - 3)       | 1<br>(0 - 1)       | 0<br>(0 - 1)       |
| Other musculoskeletal disorders                     | 10<br>(7 - 15)     | --               | 0<br>(0 - 0)      | 6<br>(4 - 10)      | 2<br>(2 - 4)       | 1<br>(1 - 2)       |
| Other non-communicable diseases                     | 65<br>(56 - 77)    | 45<br>(37 - 56)  | 2<br>(1 - 2)      | 10<br>(8 - 13)     | 4<br>(3 - 5)       | 4<br>(3 - 5)       |
| Congenital anomalies                                | 55<br>(46 - 67)    | 44<br>(35 - 54)  | 2<br>(1 - 2)      | 7<br>(5 - 10)      | 2<br>(1 - 3)       | 1<br>(1 - 1)       |
| Neural tube defects                                 | 1<br>(0 - 2)       | 1<br>(0 - 2)     | 0<br>(0 - 0)      | 0<br>(0 - 0)       | 0<br>(0 - 0)       | 0<br>(0 - 0)       |
| Congenital heart anomalies                          | 15<br>(11 - 21)    | 14<br>(10 - 19)  | 0<br>(0 - 0)      | 1<br>(1 - 1)       | 0<br>(0 - 0)       | 0<br>(0 - 0)       |
| Cleft lip and cleft palate                          | 0<br>(0 - 0)       | 0<br>(0 - 0)     | --                | --                 | --                 | --                 |
| Down syndrome                                       | 3<br>(1 - 4)       | 2<br>(1 - 3)     | 0<br>(0 - 0)      | 1<br>(0 - 2)       | 0<br>(0 - 0)       | 0<br>(0 - 0)       |
| Chromosomal unbalanced rearrangements               | 3<br>(2 - 5)       | 3<br>(2 - 5)     | 0<br>(0 - 0)      | 0<br>(0 - 0)       | 0<br>(0 - 0)       | 0<br>(0 - 0)       |
| Other congenital anomalies                          | 33<br>(26 - 41)    | 24<br>(18 - 31)  | 1<br>(1 - 2)      | 5<br>(4 - 7)       | 2<br>(1 - 2)       | 1<br>(1 - 1)       |
| Skin and subcutaneous diseases                      | 8<br>(6 - 11)      | 0<br>(0 - 0)     | 0<br>(0 - 0)      | 3<br>(2 - 5)       | 2<br>(1 - 3)       | 3<br>(2 - 4)       |
| Cellulitis                                          | 0<br>(0 - 1)       | 0<br>(0 - 0)     | 0<br>(0 - 0)      | 0<br>(0 - 0)       | 0<br>(0 - 0)       | 0<br>(0 - 0)       |
| Pyoderma                                            | 5<br>(4 - 7)       | 0<br>(0 - 0)     | 0<br>(0 - 0)      | 2<br>(1 - 3)       | 1<br>(1 - 2)       | 2<br>(1 - 3)       |
| Decubitus ulcer                                     | 2<br>(1 - 3)       | 0<br>(0 - 0)     | 0<br>(0 - 0)      | 1<br>(1 - 2)       | 0<br>(0 - 1)       | 1<br>(0 - 1)       |
| Other skin and subcutaneous diseases                | 1<br>(0 - 1)       | 0<br>(0 - 0)     | 0<br>(0 - 0)      | 0<br>(0 - 0)       | 0<br>(0 - 0)       | 0<br>(0 - 0)       |



Web Table 31- Qatar deaths with 95% UI by age, sex, and cause in 2013

| Cause                                           | Males, All Ages    | Males, 0-4 Years | Males, 5-14 Years | Males, 15-49 Years | Males, 50-69 Years | Males, 70-80 Years |
|-------------------------------------------------|--------------------|------------------|-------------------|--------------------|--------------------|--------------------|
| Sudden infant death syndrome                    | 1<br>(0 - 3)       | 1<br>(0 - 3)     | --                | --                 | --                 | --                 |
| Injuries                                        | 780<br>(634 - 938) | 15<br>(11 - 20)  | 11<br>(9 - 13)    | 631<br>(509 - 762) | 95<br>(73 - 117)   | 27<br>(22 - 33)    |
| Transport injuries                              | 430<br>(344 - 525) | 6<br>(4 - 9)     | 7<br>(5 - 9)      | 353<br>(281 - 436) | 55<br>(39 - 71)    | 9<br>(7 - 12)      |
| Road injuries                                   | 410<br>(330 - 501) | 5<br>(3 - 8)     | 7<br>(5 - 8)      | 337<br>(269 - 416) | 52<br>(37 - 67)    | 9<br>(6 - 11)      |
| Pedestrian road injuries                        | 73<br>(39 - 111)   | 2<br>(1 - 4)     | 2<br>(1 - 4)      | 52<br>(27 - 80)    | 13<br>(7 - 21)     | 3<br>(2 - 5)       |
| Cyclist road injuries                           | 24<br>(16 - 37)    | 1<br>(0 - 1)     | 1<br>(1 - 1)      | 16<br>(10 - 24)    | 6<br>(3 - 9)       | 1<br>(1 - 2)       |
| Motorcyclist road injuries                      | 56<br>(36 - 85)    | 0<br>(0 - 1)     | 0<br>(0 - 1)      | 51<br>(33 - 78)    | 4<br>(2 - 6)       | 1<br>(0 - 1)       |
| Motor vehicle road injuries                     | 255<br>(183 - 324) | 2<br>(1 - 4)     | 3<br>(2 - 4)      | 218<br>(158 - 275) | 29<br>(18 - 40)    | 4<br>(2 - 5)       |
| Other road injuries                             | 1<br>(0 - 1)       | 0<br>(0 - 0)     | 0<br>(0 - 0)      | 0<br>(0 - 1)       | 0<br>(0 - 0)       | 0<br>(0 - 0)       |
| Other transport injuries                        | 21<br>(12 - 28)    | 1<br>(0 - 1)     | 0<br>(0 - 1)      | 16<br>(9 - 22)     | 3<br>(2 - 4)       | 1<br>(0 - 1)       |
| Unintentional injuries                          | 230<br>(184 - 289) | 9<br>(6 - 13)    | 3<br>(3 - 4)      | 177<br>(139 - 224) | 27<br>(20 - 36)    | 14<br>(10 - 18)    |
| Falls                                           | 59<br>(42 - 82)    | 1<br>(1 - 2)     | 0<br>(0 - 0)      | 50<br>(35 - 72)    | 6<br>(4 - 9)       | 2<br>(1 - 3)       |
| Drowning                                        | 32<br>(21 - 46)    | 3<br>(2 - 6)     | 2<br>(1 - 3)      | 24<br>(14 - 34)    | 3<br>(2 - 5)       | 0<br>(0 - 1)       |
| Fire, heat, and hot substances                  | 15<br>(10 - 22)    | 1<br>(1 - 2)     | 0<br>(0 - 0)      | 12<br>(7 - 18)     | 2<br>(1 - 2)       | 1<br>(0 - 1)       |
| Poisonings                                      | 5<br>(3 - 7)       | 0<br>(0 - 0)     | 0<br>(0 - 0)      | 4<br>(3 - 7)       | 0<br>(0 - 0)       | 0<br>(0 - 0)       |
| Exposure to mechanical forces                   | 56<br>(37 - 73)    | 1<br>(0 - 1)     | 0<br>(0 - 0)      | 48<br>(31 - 64)    | 6<br>(4 - 9)       | 1<br>(0 - 1)       |
| Unintentional firearm injuries                  | 4<br>(3 - 6)       | 0<br>(0 - 0)     | 0<br>(0 - 0)      | 3<br>(2 - 4)       | 1<br>(1 - 2)       | 0<br>(0 - 0)       |
| Unintentional suffocation                       | 1<br>(1 - 3)       | 0<br>(0 - 1)     | 0<br>(0 - 0)      | 1<br>(0 - 2)       | 0<br>(0 - 1)       | 0<br>(0 - 0)       |
| Other exposure to mechanical forces             | 50<br>(33 - 67)    | 0<br>(0 - 1)     | 0<br>(0 - 0)      | 44<br>(28 - 59)    | 5<br>(3 - 8)       | 0<br>(0 - 1)       |
| Adverse effects of medical treatment            | 25<br>(17 - 39)    | 1<br>(1 - 2)     | 0<br>(0 - 0)      | 13<br>(8 - 21)     | 7<br>(4 - 11)      | 5<br>(3 - 8)       |
| Animal contact                                  | 3<br>(2 - 6)       | 0<br>(0 - 0)     | 0<br>(0 - 0)      | 2<br>(1 - 3)       | 1<br>(0 - 2)       | 0<br>(0 - 1)       |
| Venomous animal contact                         | 1<br>(1 - 2)       | 0<br>(0 - 0)     | 0<br>(0 - 0)      | 1<br>(0 - 1)       | 0<br>(0 - 1)       | 0<br>(0 - 0)       |
| Non-venomous animal contact                     | 2<br>(1 - 3)       | 0<br>(0 - 0)     | 0<br>(0 - 0)      | 1<br>(1 - 2)       | 0<br>(0 - 1)       | 0<br>(0 - 0)       |
| Foreign body                                    | 9<br>(5 - 14)      | 1<br>(1 - 2)     | 0<br>(0 - 1)      | 3<br>(2 - 5)       | 1<br>(0 - 1)       | 4<br>(2 - 6)       |
| Pulmonary aspiration and foreign body in airway | 8<br>(5 - 14)      | 1<br>(1 - 2)     | 0<br>(0 - 1)      | 2<br>(1 - 5)       | 1<br>(0 - 1)       | 4<br>(2 - 6)       |
| Foreign body in other body part                 | 0<br>(0 - 0)       | 0<br>(0 - 0)     | 0<br>(0 - 0)      | 0<br>(0 - 0)       | 0<br>(0 - 0)       | 0<br>(0 - 0)       |
| Other unintentional injuries                    | 26<br>(19 - 35)    | 0<br>(0 - 1)     | 0<br>(0 - 0)      | 23<br>(17 - 32)    | 1<br>(1 - 2)       | 1<br>(0 - 1)       |
| Self-harm and interpersonal violence            | 119<br>(82 - 158)  | 0<br>(0 - 1)     | 0<br>(0 - 1)      | 101<br>(68 - 136)  | 13<br>(8 - 19)     | 4<br>(3 - 6)       |
| Self-harm                                       | 102<br>(70 - 139)  | --               | 0<br>(0 - 0)      | 87<br>(57 - 119)   | 11<br>(7 - 17)     | 4<br>(2 - 6)       |
| Interpersonal violence                          | 17<br>(9 - 25)     | 0<br>(0 - 1)     | 0<br>(0 - 0)      | 15<br>(8 - 23)     | 2<br>(1 - 3)       | 0<br>(0 - 1)       |
| Assault by firearm                              | 5<br>(2 - 10)      | 0<br>(0 - 0)     | 0<br>(0 - 0)      | 4<br>(2 - 9)       | 1<br>(0 - 1)       | 0<br>(0 - 0)       |
| Assault by sharp object                         | 8<br>(4 - 13)      | 0<br>(0 - 0)     | 0<br>(0 - 0)      | 7<br>(4 - 12)      | 1<br>(0 - 2)       | 0<br>(0 - 0)       |
| Assault by other means                          | 4<br>(2 - 6)       | 0<br>(0 - 0)     | 0<br>(0 - 0)      | 3<br>(1 - 5)       | 0<br>(0 - 1)       | 0<br>(0 - 0)       |

Web Table 31- Qatar deaths with 95% UI by age, sex, and cause in 2013

| Cause                                                             | Females, All Ages  | Females, 0-4 Years | Females, 5-14 Years | Females, 15-49 Years | Females, 50-69 Years | Females, 70-80 Years |
|-------------------------------------------------------------------|--------------------|--------------------|---------------------|----------------------|----------------------|----------------------|
| All causes                                                        | 573<br>(477 - 683) | 105<br>(90 - 124)  | 15<br>(13 - 18)     | 138<br>(102 - 181)   | 125<br>(97 - 158)    | 190<br>(165 - 216)   |
| Communicable, maternal, neonatal, and nutritional diseases        | 73<br>(60 - 89)    | 44<br>(34 - 54)    | 3<br>(2 - 5)        | 15<br>(11 - 21)      | 4<br>(3 - 5)         | 8<br>(5 - 10)        |
| HIV/AIDS and tuberculosis                                         | 2<br>(1 - 2)       | 0<br>(0 - 0)       | 0<br>(0 - 0)        | 1<br>(1 - 1)         | 0<br>(0 - 0)         | 0<br>(0 - 0)         |
| Tuberculosis                                                      | 1<br>(1 - 1)       | 0<br>(0 - 0)       | 0<br>(0 - 0)        | 1<br>(0 - 1)         | 0<br>(0 - 0)         | 0<br>(0 - 0)         |
| HIV/AIDS                                                          | 0<br>(0 - 1)       | 0<br>(0 - 0)       | 0<br>(0 - 0)        | 0<br>(0 - 1)         | 0<br>(0 - 0)         | 0<br>(0 - 0)         |
| HIV/AIDS resulting in mycobacterial infection                     | 0<br>(0 - 0)       | 0<br>(0 - 0)       | 0<br>(0 - 0)        | 0<br>(0 - 0)         | 0<br>(0 - 0)         | 0<br>(0 - 0)         |
| HIV/AIDS resulting in other diseases                              | 0<br>(0 - 1)       | 0<br>(0 - 0)       | 0<br>(0 - 0)        | 0<br>(0 - 1)         | 0<br>(0 - 0)         | 0<br>(0 - 0)         |
| Diarrhea, lower respiratory, and other common infectious diseases | 25<br>(17 - 35)    | 7<br>(5 - 10)      | 3<br>(1 - 5)        | 8<br>(4 - 13)        | 2<br>(1 - 3)         | 6<br>(4 - 8)         |
| Diarrheal diseases                                                | 1<br>(1 - 2)       | 1<br>(0 - 1)       | 0<br>(0 - 0)        | 0<br>(0 - 0)         | 0<br>(0 - 0)         | 0<br>(0 - 0)         |
| Intestinal infectious diseases                                    | 8<br>(3 - 18)      | 2<br>(1 - 5)       | 2<br>(1 - 4)        | 4<br>(1 - 9)         | 0<br>(0 - 1)         | 0<br>(0 - 0)         |
| Typhoid fever                                                     | 6<br>(2 - 14)      | 2<br>(1 - 4)       | 2<br>(1 - 3)        | 3<br>(1 - 7)         | 0<br>(0 - 1)         | 0<br>(0 - 0)         |
| Paratyphoid fever                                                 | 2<br>(1 - 4)       | 1<br>(0 - 1)       | 0<br>(0 - 1)        | 1<br>(0 - 2)         | 0<br>(0 - 0)         | 0<br>(0 - 0)         |
| Other intestinal infectious diseases                              | 0<br>(0 - 1)       | 0<br>(0 - 0)       | 0<br>(0 - 0)        | 0<br>(0 - 0)         | 0<br>(0 - 0)         | 0<br>(0 - 0)         |
| Lower respiratory infections                                      | 12<br>(9 - 15)     | 2<br>(1 - 4)       | 1<br>(0 - 1)        | 3<br>(2 - 4)         | 1<br>(1 - 2)         | 5<br>(3 - 7)         |
| Upper respiratory infections                                      | 0<br>(0 - 0)       | 0<br>(0 - 0)       | 0<br>(0 - 0)        | 0<br>(0 - 0)         | 0<br>(0 - 0)         | 0<br>(0 - 0)         |
| Otitis media                                                      | 0<br>(0 - 0)       | 0<br>(0 - 0)       | 0<br>(0 - 0)        | 0<br>(0 - 0)         | 0<br>(0 - 0)         | 0<br>(0 - 0)         |
| Meningitis                                                        | 1<br>(1 - 2)       | 1<br>(1 - 1)       | 0<br>(0 - 0)        | 0<br>(0 - 1)         | 0<br>(0 - 0)         | 0<br>(0 - 0)         |
| Pneumococcal meningitis                                           | 0<br>(0 - 0)       | 0<br>(0 - 0)       | 0<br>(0 - 0)        | 0<br>(0 - 0)         | 0<br>(0 - 0)         | 0<br>(0 - 0)         |
| H influenzae type B meningitis                                    | 0<br>(0 - 1)       | 0<br>(0 - 1)       | 0<br>(0 - 0)        | 0<br>(0 - 0)         | 0<br>(0 - 0)         | 0<br>(0 - 0)         |
| Meningococcal meningitis                                          | 0<br>(0 - 1)       | 0<br>(0 - 0)       | 0<br>(0 - 0)        | 0<br>(0 - 0)         | 0<br>(0 - 0)         | 0<br>(0 - 0)         |
| Other meningitis                                                  | 0<br>(0 - 1)       | 0<br>(0 - 0)       | 0<br>(0 - 0)        | 0<br>(0 - 0)         | 0<br>(0 - 0)         | 0<br>(0 - 0)         |
| Encephalitis                                                      | 1<br>(1 - 2)       | 0<br>(0 - 1)       | 0<br>(0 - 0)        | 1<br>(0 - 1)         | 0<br>(0 - 0)         | 0<br>(0 - 0)         |
| Diphtheria                                                        | 0<br>(0 - 0)       | 0<br>(0 - 0)       | 0<br>(0 - 0)        | 0<br>(0 - 0)         | 0<br>(0 - 0)         | --                   |
| Whooping cough                                                    | 0<br>(0 - 0)       | 0<br>(0 - 0)       | 0<br>(0 - 0)        | 0<br>(0 - 0)         | 0<br>(0 - 0)         | --                   |
| Tetanus                                                           | 0<br>(0 - 0)       | 0<br>(0 - 0)       | 0<br>(0 - 0)        | 0<br>(0 - 0)         | 0<br>(0 - 0)         | 0<br>(0 - 0)         |
| Measles                                                           | 0<br>(0 - 0)       | 0<br>(0 - 0)       | 0<br>(0 - 0)        | 0<br>(0 - 0)         | 0<br>(0 - 0)         | --                   |
| Varicella and herpes zoster                                       | 0<br>(0 - 0)       | 0<br>(0 - 0)       | 0<br>(0 - 0)        | 0<br>(0 - 0)         | 0<br>(0 - 0)         | 0<br>(0 - 0)         |
| Neglected tropical diseases and malaria                           | 0<br>(0 - 1)       | 0<br>(0 - 0)       | 0<br>(0 - 0)        | 0<br>(0 - 0)         | 0<br>(0 - 0)         | 0<br>(0 - 0)         |
| Leishmaniasis                                                     | 0<br>(0 - 0)       | 0<br>(0 - 0)       | 0<br>(0 - 0)        | 0<br>(0 - 0)         | 0<br>(0 - 0)         | 0<br>(0 - 0)         |
| Visceral leishmaniasis                                            | 0<br>(0 - 0)       | 0<br>(0 - 0)       | 0<br>(0 - 0)        | 0<br>(0 - 0)         | 0<br>(0 - 0)         | 0<br>(0 - 0)         |
| Cysticercosis                                                     | 0<br>(0 - 0)       | 0<br>(0 - 0)       | 0<br>(0 - 0)        | 0<br>(0 - 0)         | 0<br>(0 - 0)         | 0<br>(0 - 0)         |
| Cystic echinococcosis                                             | 0<br>(0 - 0)       | 0<br>(0 - 0)       | 0<br>(0 - 0)        | 0<br>(0 - 0)         | 0<br>(0 - 0)         | 0<br>(0 - 0)         |
| Dengue                                                            | 0<br>(0 - 0)       | 0<br>(0 - 0)       | 0<br>(0 - 0)        | 0<br>(0 - 0)         | 0<br>(0 - 0)         | 0<br>(0 - 0)         |
| Rabies                                                            | 0<br>(0 - 0)       | 0<br>(0 - 0)       | 0<br>(0 - 0)        | 0<br>(0 - 0)         | 0<br>(0 - 0)         | 0<br>(0 - 0)         |
| Intestinal nematode infections                                    | 0<br>(0 - 0)       | 0<br>(0 - 0)       | 0<br>(0 - 0)        | 0<br>(0 - 0)         | 0<br>(0 - 0)         | 0<br>(0 - 0)         |
| Ascariasis                                                        | 0<br>(0 - 0)       | 0<br>(0 - 0)       | 0<br>(0 - 0)        | 0<br>(0 - 0)         | 0<br>(0 - 0)         | 0<br>(0 - 0)         |
| Other neglected tropical diseases                                 | 0<br>(0 - 0)       | 0<br>(0 - 0)       | 0<br>(0 - 0)        | 0<br>(0 - 0)         | 0<br>(0 - 0)         | 0<br>(0 - 0)         |
| Maternal disorders                                                | 4<br>(3 - 6)       | --                 | 0<br>(0 - 0)        | 4<br>(3 - 6)         | --                   | --                   |
| Maternal hemorrhage                                               | 1<br>(0 - 1)       | --                 | 0<br>(0 - 0)        | 1<br>(0 - 1)         | --                   | --                   |
| Maternal sepsis and other maternal infections                     | 0<br>(0 - 1)       | --                 | 0<br>(0 - 0)        | 0<br>(0 - 1)         | --                   | --                   |

Web Table 31- Qatar deaths with 95% UI by age, sex, and cause in 2013

| Cause                                                            | Females, All Ages  | Females, 0-4 Years | Females, 5-14 Years | Females, 15-49 Years | Females, 50-69 Years | Females, 70-80 Years |
|------------------------------------------------------------------|--------------------|--------------------|---------------------|----------------------|----------------------|----------------------|
| Maternal hypertensive disorders                                  | 1<br>(0 - 1)       | --                 | 0<br>(0 - 0)        | 1<br>(0 - 1)         | --                   | --                   |
| Maternal obstructed labor                                        | 0<br>(0 - 1)       | --                 | 0<br>(0 - 0)        | 0<br>(0 - 1)         | --                   | --                   |
| Maternal abortive outcome                                        | 1<br>(0 - 1)       | --                 | 0<br>(0 - 0)        | 1<br>(0 - 1)         | --                   | --                   |
| Indirect maternal deaths                                         | 0<br>(0 - 1)       | --                 | 0<br>(0 - 0)        | 0<br>(0 - 1)         | --                   | --                   |
| Late maternal deaths                                             | 0<br>(0 - 1)       | --                 | 0<br>(0 - 0)        | 0<br>(0 - 1)         | --                   | --                   |
| Maternal deaths aggravated by HIV/AIDS                           | 0<br>(0 - 0)       | --                 | --                  | 0<br>(0 - 0)         | --                   | --                   |
| Other maternal disorders                                         | 1<br>(0 - 1)       | --                 | 0<br>(0 - 0)        | 1<br>(0 - 1)         | --                   | --                   |
| Neonatal disorders                                               | 36<br>(28 - 46)    | 36<br>(28 - 46)    | --                  | --                   | --                   | --                   |
| Neonatal preterm birth complications                             | 29<br>(21 - 38)    | 29<br>(21 - 38)    | --                  | --                   | --                   | --                   |
| Neonatal encephalopathy due to birth asphyxia and trauma         | 4<br>(2 - 6)       | 4<br>(2 - 6)       | --                  | --                   | --                   | --                   |
| Neonatal sepsis and other neonatal infections                    | 0<br>(0 - 0)       | 0<br>(0 - 0)       | --                  | --                   | --                   | --                   |
| Hemolytic disease and other neonatal jaundice                    | 0<br>(0 - 0)       | 0<br>(0 - 0)       | --                  | --                   | --                   | --                   |
| Other neonatal disorders                                         | 4<br>(1 - 6)       | 4<br>(1 - 6)       | --                  | --                   | --                   | --                   |
| Nutritional deficiencies                                         | 1<br>(1 - 1)       | 0<br>(0 - 0)       | 0<br>(0 - 0)        | 0<br>(0 - 0)         | 0<br>(0 - 0)         | 1<br>(0 - 1)         |
| Protein-energy malnutrition                                      | 0<br>(0 - 0)       | 0<br>(0 - 0)       | 0<br>(0 - 0)        | 0<br>(0 - 0)         | 0<br>(0 - 0)         | 0<br>(0 - 0)         |
| Iodine deficiency                                                | 0<br>(0 - 0)       | 0<br>(0 - 0)       | 0<br>(0 - 0)        | 0<br>(0 - 0)         | 0<br>(0 - 0)         | 0<br>(0 - 0)         |
| Iron-deficiency anemia                                           | 0<br>(0 - 0)       | 0<br>(0 - 0)       | 0<br>(0 - 0)        | 0<br>(0 - 0)         | 0<br>(0 - 0)         | 0<br>(0 - 0)         |
| Other nutritional deficiencies                                   | 1<br>(0 - 1)       | 0<br>(0 - 0)       | 0<br>(0 - 0)        | 0<br>(0 - 0)         | 0<br>(0 - 0)         | 0<br>(0 - 1)         |
| Other communicable, maternal, neonatal, and nutritional diseases | 5<br>(3 - 6)       | 1<br>(0 - 1)       | 0<br>(0 - 0)        | 1<br>(1 - 2)         | 2<br>(1 - 2)         | 1<br>(1 - 2)         |
| Sexually transmitted diseases excluding HIV                      | 1<br>(0 - 1)       | 0<br>(0 - 0)       | 0<br>(0 - 0)        | 0<br>(0 - 1)         | 0<br>(0 - 0)         | 0<br>(0 - 0)         |
| Syphilis                                                         | 1<br>(0 - 1)       | 0<br>(0 - 0)       | 0<br>(0 - 0)        | 0<br>(0 - 0)         | 0<br>(0 - 0)         | 0<br>(0 - 0)         |
| Chlamydial infection                                             | 0<br>(0 - 0)       | --                 | 0<br>(0 - 0)        | 0<br>(0 - 0)         | 0<br>(0 - 0)         | 0<br>(0 - 0)         |
| Gonococcal infection                                             | 0<br>(0 - 0)       | --                 | 0<br>(0 - 0)        | 0<br>(0 - 0)         | 0<br>(0 - 0)         | 0<br>(0 - 0)         |
| Other sexually transmitted diseases                              | 0<br>(0 - 0)       | --                 | 0<br>(0 - 0)        | 0<br>(0 - 0)         | 0<br>(0 - 0)         | 0<br>(0 - 0)         |
| Hepatitis                                                        | 2<br>(2 - 3)       | 0<br>(0 - 0)       | 0<br>(0 - 0)        | 0<br>(0 - 1)         | 1<br>(1 - 2)         | 0<br>(0 - 1)         |
| Acute hepatitis A                                                | 0<br>(0 - 0)       | 0<br>(0 - 0)       | 0<br>(0 - 0)        | 0<br>(0 - 0)         | 0<br>(0 - 0)         | 0<br>(0 - 0)         |
| Acute hepatitis B                                                | 1<br>(1 - 2)       | 0<br>(0 - 0)       | 0<br>(0 - 0)        | 0<br>(0 - 0)         | 1<br>(0 - 1)         | 0<br>(0 - 1)         |
| Acute hepatitis C                                                | 0<br>(0 - 0)       | --                 | 0<br>(0 - 0)        | 0<br>(0 - 0)         | 0<br>(0 - 0)         | 0<br>(0 - 0)         |
| Acute hepatitis E                                                | 1<br>(0 - 1)       | 0<br>(0 - 0)       | 0<br>(0 - 0)        | 0<br>(0 - 0)         | 0<br>(0 - 1)         | 0<br>(0 - 0)         |
| Other infectious diseases                                        | 2<br>(1 - 3)       | 0<br>(0 - 1)       | 0<br>(0 - 0)        | 1<br>(0 - 1)         | 0<br>(0 - 1)         | 1<br>(0 - 1)         |
| Non-communicable diseases                                        | 429<br>(356 - 514) | 52<br>(43 - 63)    | 8<br>(6 - 9)        | 85<br>(62 - 116)     | 113<br>(87 - 142)    | 172<br>(148 - 196)   |
| Neoplasms                                                        | 100<br>(76 - 128)  | 1<br>(1 - 2)       | 2<br>(1 - 2)        | 41<br>(29 - 55)      | 38<br>(28 - 49)      | 18<br>(14 - 21)      |
| Esophageal cancer                                                | 1<br>(1 - 1)       | --                 | --                  | 0<br>(0 - 0)         | 0<br>(0 - 0)         | 0<br>(0 - 0)         |
| Stomach cancer                                                   | 5<br>(3 - 6)       | --                 | --                  | 2<br>(1 - 2)         | 2<br>(1 - 2)         | 1<br>(1 - 2)         |
| Liver cancer                                                     | 7<br>(5 - 9)       | --                 | 0<br>(0 - 0)        | 1<br>(1 - 1)         | 4<br>(2 - 5)         | 2<br>(1 - 3)         |
| Liver cancer due to hepatitis B                                  | 2<br>(1 - 4)       | --                 | 0<br>(0 - 0)        | 0<br>(0 - 1)         | 1<br>(0 - 2)         | 0<br>(0 - 1)         |
| Liver cancer due to hepatitis C                                  | 3<br>(1 - 5)       | --                 | 0<br>(0 - 0)        | 0<br>(0 - 0)         | 2<br>(1 - 3)         | 1<br>(1 - 2)         |
| Liver cancer due to alcohol use                                  | 1<br>(0 - 1)       | --                 | --                  | 0<br>(0 - 0)         | 0<br>(0 - 1)         | 0<br>(0 - 1)         |
| Liver cancer due to other causes                                 | 1<br>(0 - 2)       | --                 | 0<br>(0 - 0)        | 0<br>(0 - 0)         | 1<br>(0 - 1)         | 0<br>(0 - 1)         |
| Larynx cancer                                                    | 0<br>(0 - 1)       | --                 | --                  | 0<br>(0 - 0)         | 0<br>(0 - 0)         | 0<br>(0 - 0)         |

Web Table 31- Qatar deaths with 95% UI by age, sex, and cause in 2013

| Cause                                         | Females, All Ages | Females, 0-4 Years | Females, 5-14 Years | Females, 15-49 Years | Females, 50-69 Years | Females, 70-80 Years |
|-----------------------------------------------|-------------------|--------------------|---------------------|----------------------|----------------------|----------------------|
| Tracheal, bronchus and lung cancer            | 6<br>(4 - 7)      | --                 | --                  | 2<br>(1 - 2)         | 3<br>(2 - 4)         | 1<br>(1 - 2)         |
| Breast cancer                                 | 34<br>(25 - 46)   | --                 | --                  | 19<br>(13 - 26)      | 13<br>(9 - 17)       | 3<br>(2 - 4)         |
| Cervical cancer                               | 3<br>(2 - 5)      | --                 | --                  | 1<br>(1 - 2)         | 2<br>(1 - 2)         | 1<br>(0 - 1)         |
| Uterine cancer                                | 1<br>(0 - 1)      | --                 | --                  | 0<br>(0 - 0)         | 0<br>(0 - 1)         | 0<br>(0 - 0)         |
| Prostate cancer                               | --                | --                 | --                  | --                   | --                   | --                   |
| Colon and rectum cancer                       | 13<br>(9 - 16)    | --                 | --                  | 4<br>(3 - 6)         | 6<br>(4 - 8)         | 3<br>(2 - 3)         |
| Lip and oral cavity cancer                    | 1<br>(0 - 1)      | --                 | --                  | 0<br>(0 - 0)         | 0<br>(0 - 0)         | 0<br>(0 - 0)         |
| Nasopharynx cancer                            | 0<br>(0 - 0)      | --                 | 0<br>(0 - 0)        | 0<br>(0 - 0)         | 0<br>(0 - 0)         | 0<br>(0 - 0)         |
| Other pharynx cancer                          | 0<br>(0 - 0)      | --                 | --                  | 0<br>(0 - 0)         | 0<br>(0 - 0)         | 0<br>(0 - 0)         |
| Gallbladder and biliary tract cancer          | 1<br>(1 - 1)      | --                 | --                  | 0<br>(0 - 0)         | 0<br>(0 - 0)         | 0<br>(0 - 1)         |
| Pancreatic cancer                             | 3<br>(3 - 4)      | --                 | --                  | 1<br>(1 - 1)         | 2<br>(1 - 2)         | 1<br>(1 - 1)         |
| Malignant skin melanoma                       | 0<br>(0 - 0)      | --                 | --                  | 0<br>(0 - 0)         | 0<br>(0 - 0)         | 0<br>(0 - 0)         |
| Non-melanoma skin cancer                      | 0<br>(0 - 0)      | --                 | --                  | 0<br>(0 - 0)         | 0<br>(0 - 0)         | 0<br>(0 - 0)         |
| Ovarian cancer                                | 5<br>(3 - 6)      | --                 | --                  | 1<br>(1 - 2)         | 2<br>(1 - 3)         | 1<br>(1 - 1)         |
| Testicular cancer                             | --                | --                 | --                  | --                   | --                   | --                   |
| Kidney cancer                                 | 0<br>(0 - 1)      | 0<br>(0 - 0)       | 0<br>(0 - 0)        | 0<br>(0 - 0)         | 0<br>(0 - 0)         | 0<br>(0 - 0)         |
| Bladder cancer                                | 1<br>(0 - 1)      | --                 | --                  | 0<br>(0 - 0)         | 0<br>(0 - 0)         | 1<br>(0 - 1)         |
| Brain and nervous system cancer               | 3<br>(2 - 4)      | 0<br>(0 - 0)       | 0<br>(0 - 0)        | 2<br>(1 - 3)         | 1<br>(0 - 1)         | 0<br>(0 - 0)         |
| Thyroid cancer                                | 0<br>(0 - 1)      | --                 | 0<br>(0 - 0)        | 0<br>(0 - 0)         | 0<br>(0 - 0)         | 0<br>(0 - 0)         |
| Mesothelioma                                  | 0<br>(0 - 0)      | --                 | --                  | 0<br>(0 - 0)         | 0<br>(0 - 0)         | 0<br>(0 - 0)         |
| Hodgkin lymphoma                              | 0<br>(0 - 0)      | 0<br>(0 - 0)       | 0<br>(0 - 0)        | 0<br>(0 - 0)         | 0<br>(0 - 0)         | 0<br>(0 - 0)         |
| Non-Hodgkin lymphoma                          | 5<br>(4 - 8)      | 0<br>(0 - 0)       | 0<br>(0 - 0)        | 3<br>(2 - 4)         | 2<br>(1 - 3)         | 1<br>(1 - 1)         |
| Multiple myeloma                              | 0<br>(0 - 0)      | --                 | --                  | 0<br>(0 - 0)         | 0<br>(0 - 0)         | 0<br>(0 - 0)         |
| Leukemia                                      | 4<br>(3 - 5)      | 0<br>(0 - 0)       | 1<br>(0 - 1)        | 2<br>(2 - 3)         | 1<br>(0 - 1)         | 0<br>(0 - 1)         |
| Other neoplasms                               | 6<br>(4 - 8)      | 1<br>(1 - 2)       | 1<br>(0 - 1)        | 2<br>(1 - 3)         | 1<br>(1 - 2)         | 1<br>(1 - 1)         |
| Cardiovascular diseases                       | 119<br>(93 - 155) | 3<br>(2 - 4)       | 1<br>(0 - 1)        | 17<br>(12 - 26)      | 34<br>(25 - 46)      | 65<br>(52 - 80)      |
| Rheumatic heart disease                       | 1<br>(1 - 1)      | 0<br>(0 - 0)       | 0<br>(0 - 0)        | 0<br>(0 - 1)         | 0<br>(0 - 0)         | 0<br>(0 - 0)         |
| Ischemic heart disease                        | 63<br>(49 - 85)   | 0<br>(0 - 0)       | 0<br>(0 - 0)        | 6<br>(4 - 9)         | 21<br>(15 - 30)      | 36<br>(27 - 46)      |
| Cerebrovascular disease                       | 39<br>(30 - 54)   | 1<br>(1 - 2)       | 0<br>(0 - 1)        | 8<br>(5 - 12)        | 8<br>(6 - 12)        | 22<br>(16 - 29)      |
| Ischemic stroke                               | 17<br>(13 - 24)   | 0<br>(0 - 0)       | 0<br>(0 - 0)        | 1<br>(1 - 2)         | 3<br>(2 - 4)         | 13<br>(10 - 18)      |
| Hemorrhagic stroke                            | 22<br>(16 - 31)   | 1<br>(1 - 2)       | 0<br>(0 - 1)        | 7<br>(4 - 10)        | 5<br>(4 - 8)         | 8<br>(6 - 12)        |
| Hypertensive heart disease                    | 3<br>(2 - 5)      | 0<br>(0 - 0)       | 0<br>(0 - 0)        | 0<br>(0 - 1)         | 1<br>(1 - 2)         | 2<br>(1 - 3)         |
| Cardiomyopathy and myocarditis                | 2<br>(1 - 4)      | 0<br>(0 - 1)       | 0<br>(0 - 0)        | 1<br>(0 - 2)         | 0<br>(0 - 1)         | 0<br>(0 - 1)         |
| Atrial fibrillation and flutter               | 2<br>(1 - 2)      | --                 | --                  | 0<br>(0 - 0)         | 0<br>(0 - 0)         | 1<br>(1 - 2)         |
| Aortic aneurysm                               | 1<br>(0 - 1)      | --                 | --                  | 0<br>(0 - 0)         | 0<br>(0 - 0)         | 0<br>(0 - 1)         |
| Peripheral vascular disease                   | 1<br>(0 - 1)      | --                 | --                  | 0<br>(0 - 0)         | 0<br>(0 - 0)         | 0<br>(0 - 1)         |
| Endocarditis                                  | 0<br>(0 - 1)      | 0<br>(0 - 0)       | 0<br>(0 - 0)        | 0<br>(0 - 0)         | 0<br>(0 - 0)         | 0<br>(0 - 0)         |
| Other cardiovascular and circulatory diseases | 7<br>(5 - 10)     | 1<br>(0 - 1)       | 0<br>(0 - 0)        | 2<br>(1 - 2)         | 3<br>(1 - 3)         | 3<br>(2 - 4)         |
| Chronic respiratory diseases                  | 11<br>(9 - 15)    | 1<br>(0 - 1)       | 0<br>(0 - 0)        | 3<br>(2 - 4)         | 2<br>(1 - 3)         | 6<br>(5 - 8)         |
| Chronic obstructive pulmonary disease         | 9<br>(7 - 12)     | 0<br>(0 - 1)       | 0<br>(0 - 0)        | 2<br>(1 - 3)         | 2<br>(1 - 2)         | 6<br>(4 - 7)         |

Web Table 31- Qatar deaths with 95% UI by age, sex, and cause in 2013

| Cause                                               | Females, All Ages | Females, 0-4 Years | Females, 5-14 Years | Females, 15-49 Years | Females, 50-69 Years | Females, 70-80 Years |
|-----------------------------------------------------|-------------------|--------------------|---------------------|----------------------|----------------------|----------------------|
| Pneumoconiosis                                      | 0<br>(0-0)        | 0<br>(0-0)         | 0<br>(0-0)          | 0<br>(0-0)           | 0<br>(0-0)           | 0<br>(0-0)           |
| Silicosis                                           | 0<br>(0-0)        | 0<br>(0-0)         | 0<br>(0-0)          | 0<br>(0-0)           | 0<br>(0-0)           | 0<br>(0-0)           |
| Asbestosis                                          | 0<br>(0-0)        | 0<br>(0-0)         | 0<br>(0-0)          | 0<br>(0-0)           | 0<br>(0-0)           | 0<br>(0-0)           |
| Coal workers pneumoconiosis                         | 0<br>(0-0)        | 0<br>(0-0)         | 0<br>(0-0)          | 0<br>(0-0)           | 0<br>(0-0)           | 0<br>(0-0)           |
| Other pneumoconiosis                                | 0<br>(0-0)        | 0<br>(0-0)         | 0<br>(0-0)          | 0<br>(0-0)           | 0<br>(0-0)           | 0<br>(0-0)           |
| Asthma                                              | 0<br>(0-1)        | 0<br>(0-0)         | 0<br>(0-0)          | 0<br>(0-0)           | 0<br>(0-0)           | 0<br>(0-0)           |
| Interstitial lung disease and pulmonary sarcoidosis | 1<br>(0-1)        | 0<br>(0-0)         | 0<br>(0-0)          | 0<br>(0-0)           | 0<br>(0-1)           | 0<br>(0-0)           |
| Other chronic respiratory diseases                  | 1<br>(1-1)        | 0<br>(0-0)         | 0<br>(0-0)          | 0<br>(0-0)           | 0<br>(0-0)           | 0<br>(0-0)           |
| Cirrhosis                                           | 7<br>(5-9)        | 0<br>(0-0)         | 0<br>(0-0)          | 2<br>(1-2)           | 3<br>(2-4)           | 3<br>(2-4)           |
| Cirrhosis due to hepatitis B                        | 3<br>(1-5)        | 0<br>(0-0)         | 0<br>(0-0)          | 0<br>(0-1)           | 1<br>(0-2)           | 1<br>(0-3)           |
| Cirrhosis due to hepatitis C                        | 3<br>(1-5)        | 0<br>(0-0)         | 0<br>(0-0)          | 1<br>(0-1)           | 1<br>(1-2)           | 1<br>(0-2)           |
| Cirrhosis due to alcohol use                        | 0<br>(0-1)        | --                 | --                  | 0<br>(0-0)           | 0<br>(0-0)           | 0<br>(0-1)           |
| Cirrhosis due to other causes                       | 1<br>(0-1)        | 0<br>(0-0)         | 0<br>(0-0)          | 0<br>(0-0)           | 0<br>(0-0)           | 0<br>(0-0)           |
| Digestive diseases                                  | 5<br>(4-7)        | 0<br>(0-1)         | 0<br>(0-0)          | 1<br>(1-2)           | 1<br>(1-2)           | 2<br>(2-3)           |
| Peptic ulcer disease                                | 1<br>(0-1)        | 0<br>(0-0)         | 0<br>(0-0)          | 0<br>(0-0)           | 0<br>(0-0)           | 0<br>(0-0)           |
| Gastritis and duodenitis                            | 0<br>(0-0)        | 0<br>(0-0)         | 0<br>(0-0)          | 0<br>(0-0)           | 0<br>(0-0)           | 0<br>(0-0)           |
| Appendicitis                                        | 0<br>(0-0)        | 0<br>(0-0)         | 0<br>(0-0)          | 0<br>(0-0)           | 0<br>(0-0)           | 0<br>(0-0)           |
| Paralytic ileus and intestinal obstruction          | 1<br>(1-2)        | 0<br>(0-0)         | 0<br>(0-0)          | 0<br>(0-0)           | 0<br>(0-0)           | 1<br>(0-1)           |
| Inguinal, femoral, and abdominal hernia             | 0<br>(0-0)        | 0<br>(0-0)         | 0<br>(0-0)          | 0<br>(0-0)           | 0<br>(0-0)           | 0<br>(0-0)           |
| Inflammatory bowel disease                          | 1<br>(0-1)        | 0<br>(0-0)         | 0<br>(0-0)          | 0<br>(0-0)           | 0<br>(0-0)           | 0<br>(0-0)           |
| Vascular intestinal disorders                       | 0<br>(0-0)        | 0<br>(0-0)         | 0<br>(0-0)          | 0<br>(0-0)           | 0<br>(0-0)           | 0<br>(0-0)           |
| Gallbladder and biliary diseases                    | 1<br>(0-1)        | 0<br>(0-0)         | 0<br>(0-0)          | 0<br>(0-0)           | 0<br>(0-0)           | 0<br>(0-0)           |
| Pancreatitis                                        | 0<br>(0-1)        | 0<br>(0-0)         | 0<br>(0-0)          | 0<br>(0-0)           | 0<br>(0-0)           | 0<br>(0-0)           |
| Other digestive diseases                            | 1<br>(1-1)        | 0<br>(0-0)         | 0<br>(0-0)          | 0<br>(0-0)           | 0<br>(0-0)           | 0<br>(0-0)           |
| Neurological disorders                              | 25<br>(20-31)     | 1<br>(1-2)         | 0<br>(0-1)          | 2<br>(1-3)           | 3<br>(2-5)           | 18<br>(14-22)        |
| Alzheimer disease and other dementias               | 20<br>(16-25)     | --                 | --                  | 0<br>(0-0)           | 3<br>(2-4)           | 17<br>(13-21)        |
| Parkinson disease                                   | 0<br>(0-0)        | --                 | --                  | 0<br>(0-0)           | 0<br>(0-0)           | 0<br>(0-0)           |
| Epilepsy                                            | 3<br>(2-4)        | 0<br>(0-1)         | 0<br>(0-0)          | 2<br>(1-2)           | 0<br>(0-0)           | 0<br>(0-0)           |
| Multiple sclerosis                                  | 0<br>(0-0)        | --                 | --                  | 0<br>(0-0)           | 0<br>(0-0)           | 0<br>(0-0)           |
| Other neurological disorders                        | 2<br>(2-2)        | 1<br>(1-1)         | 0<br>(0-0)          | 0<br>(0-1)           | 0<br>(0-0)           | 0<br>(0-0)           |
| Mental and substance use disorders                  | 5<br>(3-6)        | 0<br>(0-0)         | 0<br>(0-0)          | 3<br>(2-5)           | 1<br>(1-1)           | 1<br>(0-1)           |
| Schizophrenia                                       | 0<br>(0-0)        | --                 | --                  | 0<br>(0-0)           | 0<br>(0-0)           | 0<br>(0-0)           |
| Alcohol use disorders                               | 0<br>(0-1)        | --                 | --                  | 0<br>(0-0)           | 0<br>(0-0)           | 0<br>(0-0)           |
| Drug use disorders                                  | 4<br>(3-5)        | 0<br>(0-0)         | --                  | 3<br>(2-4)           | 1<br>(0-1)           | 0<br>(0-1)           |
| Opioid use disorders                                | 2<br>(1-3)        | 0<br>(0-0)         | --                  | 1<br>(1-2)           | 0<br>(0-0)           | 0<br>(0-0)           |
| Cocaine use disorders                               | 0<br>(0-0)        | 0<br>(0-0)         | --                  | 0<br>(0-0)           | 0<br>(0-0)           | 0<br>(0-0)           |
| Amphetamine use disorders                           | 0<br>(0-0)        | 0<br>(0-0)         | --                  | 0<br>(0-0)           | 0<br>(0-0)           | 0<br>(0-0)           |
| Other drug use disorders                            | 2<br>(1-2)        | 0<br>(0-0)         | --                  | 1<br>(1-2)           | 0<br>(0-0)           | 0<br>(0-0)           |
| Eating disorders                                    | 0<br>(0-1)        | --                 | 0<br>(0-0)          | 0<br>(0-1)           | --                   | --                   |
| Anorexia nervosa                                    | 0<br>(0-1)        | --                 | 0<br>(0-0)          | 0<br>(0-1)           | --                   | --                   |

Web Table 31- Qatar deaths with 95% UI by age, sex, and cause in 2013

| Cause                                               | Females, All Ages | Females, 0-4 Years | Females, 5-14 Years | Females, 15-49 Years | Females, 50-69 Years | Females, 70-80 Years |
|-----------------------------------------------------|-------------------|--------------------|---------------------|----------------------|----------------------|----------------------|
| Diabetes, urogenital, blood, and endocrine diseases | 99<br>(79 - 119)  | 3<br>(2 - 4)       | 1<br>(1 - 2)        | 12<br>(8 - 16)       | 28<br>(21 - 36)      | 56<br>(45 - 65)      |
| Diabetes mellitus                                   | 64<br>(49 - 78)   | 0<br>(0 - 0)       | 0<br>(0 - 0)        | 4<br>(3 - 6)         | 19<br>(14 - 25)      | 41<br>(32 - 49)      |
| Acute glomerulonephritis                            | 0<br>(0 - 0)      | 0<br>(0 - 0)       | 0<br>(0 - 0)        | 0<br>(0 - 0)         | 0<br>(0 - 0)         | 0<br>(0 - 0)         |
| Chronic kidney disease                              | 18<br>(14 - 24)   | 0<br>(0 - 0)       | 0<br>(0 - 0)        | 2<br>(1 - 3)         | 5<br>(3 - 7)         | 11<br>(8 - 14)       |
| Chronic kidney disease due to diabetes mellitus     | 1<br>(1 - 2)      | 0<br>(0 - 0)       | 0<br>(0 - 0)        | 0<br>(0 - 0)         | 0<br>(0 - 1)         | 1<br>(0 - 1)         |
| Chronic kidney disease due to hypertension          | 8<br>(5 - 11)     | 0<br>(0 - 0)       | 0<br>(0 - 0)        | 1<br>(0 - 1)         | 2<br>(1 - 3)         | 5<br>(3 - 7)         |
| Chronic kidney disease due to glomerulonephritis    | 1<br>(0 - 1)      | 0<br>(0 - 0)       | 0<br>(0 - 0)        | 0<br>(0 - 0)         | 0<br>(0 - 0)         | 0<br>(0 - 1)         |
| Chronic kidney disease due to other causes          | 9<br>(5 - 13)     | 0<br>(0 - 0)       | 0<br>(0 - 0)        | 1<br>(0 - 1)         | 2<br>(1 - 4)         | 6<br>(3 - 9)         |
| Urinary diseases and male infertility               | 2<br>(2 - 3)      | 0<br>(0 - 0)       | 0<br>(0 - 0)        | 0<br>(0 - 1)         | 0<br>(0 - 0)         | 1<br>(1 - 2)         |
| Interstitial nephritis and urinary tract infections | 1<br>(1 - 1)      | 0<br>(0 - 0)       | 0<br>(0 - 0)        | 0<br>(0 - 0)         | 0<br>(0 - 0)         | 0<br>(0 - 1)         |
| Urolithiasis                                        | 0<br>(0 - 0)      | --                 | 0<br>(0 - 0)        | 0<br>(0 - 0)         | 0<br>(0 - 0)         | 0<br>(0 - 0)         |
| Other urinary diseases                              | 1<br>(1 - 2)      | 0<br>(0 - 0)       | 0<br>(0 - 0)        | 0<br>(0 - 0)         | 0<br>(0 - 0)         | 1<br>(1 - 1)         |
| Gynecological diseases                              | 0<br>(0 - 0)      | --                 | --                  | 0<br>(0 - 0)         | 0<br>(0 - 0)         | 0<br>(0 - 0)         |
| Uterine fibroids                                    | 0<br>(0 - 0)      | --                 | --                  | 0<br>(0 - 0)         | 0<br>(0 - 0)         | 0<br>(0 - 0)         |
| Polycystic ovarian syndrome                         | 0<br>(0 - 0)      | --                 | --                  | 0<br>(0 - 0)         | 0<br>(0 - 0)         | --                   |
| Endometriosis                                       | 0<br>(0 - 0)      | --                 | --                  | 0<br>(0 - 0)         | 0<br>(0 - 0)         | --                   |
| Genital prolapse                                    | 0<br>(0 - 0)      | --                 | --                  | 0<br>(0 - 0)         | 0<br>(0 - 0)         | 0<br>(0 - 0)         |
| Other gynecological diseases                        | 0<br>(0 - 0)      | --                 | --                  | 0<br>(0 - 0)         | 0<br>(0 - 0)         | 0<br>(0 - 0)         |
| Hemoglobinopathies and hemolytic anemias            | 5<br>(3 - 8)      | 1<br>(1 - 1)       | 0<br>(0 - 1)        | 3<br>(1 - 5)         | 1<br>(0 - 1)         | 0<br>(0 - 1)         |
| Thalassemias                                        | 2<br>(1 - 3)      | 1<br>(0 - 1)       | 0<br>(0 - 0)        | 1<br>(0 - 2)         | 0<br>(0 - 0)         | 0<br>(0 - 0)         |
| Sickle cell disorders                               | 2<br>(1 - 4)      | 0<br>(0 - 0)       | 0<br>(0 - 0)        | 2<br>(1 - 3)         | 0<br>(0 - 1)         | 0<br>(0 - 0)         |
| G6PD deficiency                                     | 0<br>(0 - 0)      | 0<br>(0 - 0)       | 0<br>(0 - 0)        | 0<br>(0 - 0)         | 0<br>(0 - 0)         | 0<br>(0 - 0)         |
| Other hemoglobinopathies and hemolytic anemias      | 1<br>(0 - 1)      | 0<br>(0 - 0)       | 0<br>(0 - 0)        | 0<br>(0 - 0)         | 0<br>(0 - 0)         | 0<br>(0 - 1)         |
| Endocrine, metabolic, blood, and immune disorders   | 9<br>(7 - 13)     | 2<br>(1 - 3)       | 1<br>(0 - 1)        | 2<br>(1 - 3)         | 3<br>(2 - 4)         | 2<br>(1 - 3)         |
| Musculoskeletal disorders                           | 4<br>(3 - 6)      | --                 | 0<br>(0 - 0)        | 2<br>(1 - 3)         | 1<br>(1 - 2)         | 1<br>(1 - 2)         |
| Rheumatoid arthritis                                | 1<br>(1 - 1)      | --                 | 0<br>(0 - 0)        | 0<br>(0 - 1)         | 0<br>(0 - 0)         | 0<br>(0 - 0)         |
| Other musculoskeletal disorders                     | 3<br>(2 - 5)      | --                 | 0<br>(0 - 0)        | 1<br>(1 - 2)         | 1<br>(1 - 1)         | 1<br>(1 - 1)         |
| Other non-communicable diseases                     | 54<br>(44 - 65)   | 43<br>(35 - 53)    | 3<br>(2 - 4)        | 3<br>(2 - 5)         | 2<br>(1 - 2)         | 3<br>(2 - 4)         |
| Congenital anomalies                                | 48<br>(39 - 59)   | 41<br>(33 - 52)    | 3<br>(2 - 4)        | 3<br>(2 - 4)         | 1<br>(0 - 1)         | 1<br>(0 - 1)         |
| Neural tube defects                                 | 1<br>(0 - 1)      | 1<br>(0 - 1)       | 0<br>(0 - 0)        | 0<br>(0 - 0)         | 0<br>(0 - 0)         | 0<br>(0 - 0)         |
| Congenital heart anomalies                          | 20<br>(15 - 26)   | 18<br>(13 - 24)    | 1<br>(1 - 2)        | 1<br>(1 - 1)         | 0<br>(0 - 0)         | 0<br>(0 - 0)         |
| Cleft lip and cleft palate                          | 0<br>(0 - 0)      | 0<br>(0 - 0)       | --                  | --                   | --                   | --                   |
| Down syndrome                                       | 0<br>(0 - 1)      | 0<br>(0 - 0)       | 0<br>(0 - 0)        | 0<br>(0 - 0)         | 0<br>(0 - 0)         | 0<br>(0 - 0)         |
| Chromosomal unbalanced rearrangements               | 3<br>(2 - 5)      | 3<br>(2 - 5)       | 0<br>(0 - 0)        | 0<br>(0 - 0)         | 0<br>(0 - 0)         | 0<br>(0 - 0)         |
| Other congenital anomalies                          | 23<br>(18 - 30)   | 19<br>(14 - 26)    | 1<br>(1 - 2)        | 2<br>(1 - 2)         | 0<br>(0 - 1)         | 0<br>(0 - 1)         |
| Skin and subcutaneous diseases                      | 5<br>(3 - 6)      | 0<br>(0 - 0)       | 0<br>(0 - 0)        | 1<br>(0 - 1)         | 1<br>(1 - 2)         | 2<br>(1 - 4)         |
| Cellulitis                                          | 0<br>(0 - 0)      | 0<br>(0 - 0)       | 0<br>(0 - 0)        | 0<br>(0 - 0)         | 0<br>(0 - 0)         | 0<br>(0 - 0)         |
| Pyoderma                                            | 3<br>(2 - 4)      | 0<br>(0 - 0)       | 0<br>(0 - 0)        | 0<br>(0 - 1)         | 1<br>(0 - 1)         | 2<br>(1 - 2)         |
| Decubitus ulcer                                     | 1<br>(1 - 2)      | 0<br>(0 - 0)       | 0<br>(0 - 0)        | 0<br>(0 - 0)         | 0<br>(0 - 1)         | 1<br>(0 - 1)         |
| Other skin and subcutaneous diseases                | 0<br>(0 - 0)      | 0<br>(0 - 0)       | 0<br>(0 - 0)        | 0<br>(0 - 0)         | 0<br>(0 - 0)         | 0<br>(0 - 0)         |

Web Table 31- Qatar deaths with 95% UI by age, sex, and cause in 2013

| Cause                                           | Females, All Ages | Females, 0-4 Years | Females, 5-14 Years | Females, 15-49 Years | Females, 50-69 Years | Females, 70-80 Years |
|-------------------------------------------------|-------------------|--------------------|---------------------|----------------------|----------------------|----------------------|
| Sudden infant death syndrome                    | 1<br>(0 - 3)      | 1<br>(0 - 3)       | --                  | --                   | --                   | --                   |
| Injuries                                        | 72<br>(54 - 90)   | 10<br>(8 - 12)     | 5<br>(4 - 6)        | 38<br>(26 - 51)      | 9<br>(6 - 11)        | 11<br>(8 - 14)       |
| Transport injuries                              | 34<br>(24 - 46)   | 4<br>(3 - 6)       | 3<br>(2 - 4)        | 22<br>(15 - 31)      | 3<br>(2 - 5)         | 2<br>(1 - 2)         |
| Road injuries                                   | 32<br>(22 - 43)   | 4<br>(2 - 5)       | 3<br>(2 - 4)        | 21<br>(14 - 29)      | 3<br>(2 - 4)         | 1<br>(1 - 2)         |
| Pedestrian road injuries                        | 8<br>(4 - 12)     | 2<br>(1 - 2)       | 1<br>(1 - 2)        | 4<br>(2 - 7)         | 1<br>(0 - 1)         | 1<br>(0 - 1)         |
| Cyclist road injuries                           | 2<br>(1 - 3)      | 0<br>(0 - 0)       | 0<br>(0 - 0)        | 1<br>(1 - 2)         | 0<br>(0 - 1)         | 0<br>(0 - 0)         |
| Motorcyclist road injuries                      | 2<br>(1 - 3)      | 0<br>(0 - 0)       | 0<br>(0 - 0)        | 2<br>(1 - 3)         | 0<br>(0 - 0)         | 0<br>(0 - 0)         |
| Motor vehicle road injuries                     | 19<br>(13 - 27)   | 2<br>(1 - 3)       | 1<br>(1 - 2)        | 14<br>(9 - 20)       | 1<br>(1 - 2)         | 1<br>(0 - 1)         |
| Other road injuries                             | 0<br>(0 - 0)      | 0<br>(0 - 0)       | 0<br>(0 - 0)        | 0<br>(0 - 0)         | 0<br>(0 - 0)         | 0<br>(0 - 0)         |
| Other transport injuries                        | 3<br>(2 - 4)      | 0<br>(0 - 1)       | 0<br>(0 - 0)        | 1<br>(1 - 2)         | 0<br>(0 - 1)         | 0<br>(0 - 0)         |
| Unintentional injuries                          | 27<br>(21 - 35)   | 6<br>(4 - 7)       | 2<br>(1 - 2)        | 8<br>(5 - 12)        | 4<br>(3 - 6)         | 4<br>(6 - 10)        |
| Falls                                           | 4<br>(2 - 5)      | 1<br>(0 - 1)       | 0<br>(0 - 0)        | 1<br>(1 - 2)         | 0<br>(0 - 1)         | 1<br>(0 - 1)         |
| Drowning                                        | 3<br>(2 - 5)      | 1<br>(1 - 2)       | 0<br>(0 - 1)        | 1<br>(1 - 2)         | 0<br>(0 - 0)         | 0<br>(0 - 0)         |
| Fire, heat, and hot substances                  | 4<br>(2 - 5)      | 1<br>(0 - 1)       | 0<br>(0 - 0)        | 2<br>(1 - 3)         | 0<br>(0 - 1)         | 0<br>(0 - 1)         |
| Poisonings                                      | 1<br>(0 - 1)      | 0<br>(0 - 0)       | 0<br>(0 - 0)        | 0<br>(0 - 1)         | 0<br>(0 - 0)         | 0<br>(0 - 0)         |
| Exposure to mechanical forces                   | 2<br>(1 - 2)      | 0<br>(0 - 1)       | 0<br>(0 - 0)        | 1<br>(0 - 1)         | 0<br>(0 - 0)         | 0<br>(0 - 0)         |
| Unintentional firearm injuries                  | 0<br>(0 - 0)      | 0<br>(0 - 0)       | 0<br>(0 - 0)        | 0<br>(0 - 0)         | 0<br>(0 - 0)         | 0<br>(0 - 0)         |
| Unintentional suffocation                       | 0<br>(0 - 1)      | 0<br>(0 - 0)       | 0<br>(0 - 0)        | 0<br>(0 - 0)         | 0<br>(0 - 0)         | 0<br>(0 - 0)         |
| Other exposure to mechanical forces             | 1<br>(1 - 2)      | 0<br>(0 - 1)       | 0<br>(0 - 0)        | 0<br>(0 - 1)         | 0<br>(0 - 0)         | 0<br>(0 - 0)         |
| Adverse effects of medical treatment            | 7<br>(5 - 10)     | 1<br>(0 - 1)       | 0<br>(0 - 1)        | 1<br>(1 - 2)         | 2<br>(1 - 4)         | 2<br>(1 - 4)         |
| Animal contact                                  | 1<br>(0 - 2)      | 0<br>(0 - 0)       | 0<br>(0 - 0)        | 0<br>(0 - 0)         | 0<br>(0 - 0)         | 0<br>(0 - 0)         |
| Venomous animal contact                         | 0<br>(0 - 1)      | 0<br>(0 - 0)       | 0<br>(0 - 0)        | 0<br>(0 - 0)         | 0<br>(0 - 0)         | 0<br>(0 - 0)         |
| Non-venomous animal contact                     | 1<br>(0 - 1)      | 0<br>(0 - 0)       | 0<br>(0 - 0)        | 0<br>(0 - 0)         | 0<br>(0 - 0)         | 0<br>(0 - 0)         |
| Foreign body                                    | 6<br>(3 - 9)      | 1<br>(0 - 1)       | 0<br>(0 - 1)        | 1<br>(0 - 1)         | 0<br>(0 - 1)         | 3<br>(2 - 5)         |
| Pulmonary aspiration and foreign body in airway | 6<br>(3 - 9)      | 1<br>(0 - 1)       | 0<br>(0 - 1)        | 1<br>(0 - 1)         | 0<br>(0 - 1)         | 3<br>(2 - 5)         |
| Foreign body in other body part                 | 0<br>(0 - 0)      | 0<br>(0 - 0)       | 0<br>(0 - 0)        | 0<br>(0 - 0)         | 0<br>(0 - 0)         | 0<br>(0 - 0)         |
| Other unintentional injuries                    | 1<br>(1 - 1)      | 0<br>(0 - 0)       | 0<br>(0 - 0)        | 0<br>(0 - 1)         | 0<br>(0 - 0)         | 0<br>(0 - 0)         |
| Self-harm and interpersonal violence            | 10<br>(6 - 15)    | 0<br>(0 - 0)       | 0<br>(0 - 0)        | 7<br>(4 - 11)        | 1<br>(1 - 2)         | 1<br>(1 - 2)         |
| Self-harm                                       | 8<br>(5 - 13)     | --                 | 0<br>(0 - 0)        | 6<br>(3 - 10)        | 1<br>(1 - 2)         | 1<br>(1 - 2)         |
| Interpersonal violence                          | 2<br>(1 - 3)      | 0<br>(0 - 0)       | 0<br>(0 - 0)        | 2<br>(1 - 3)         | 0<br>(0 - 0)         | 0<br>(0 - 0)         |
| Assault by firearm                              | 0<br>(0 - 0)      | 0<br>(0 - 0)       | 0<br>(0 - 0)        | 0<br>(0 - 0)         | 0<br>(0 - 0)         | 0<br>(0 - 0)         |
| Assault by sharp object                         | 1<br>(0 - 1)      | 0<br>(0 - 0)       | 0<br>(0 - 0)        | 1<br>(0 - 1)         | 0<br>(0 - 0)         | 0<br>(0 - 0)         |
| Assault by other means                          | 1<br>(0 - 2)      | 0<br>(0 - 0)       | 0<br>(0 - 0)        | 1<br>(0 - 1)         | 0<br>(0 - 0)         | 0<br>(0 - 0)         |

Web Table 31- Romania deaths with 95% UI by age, sex, and cause in 2013

| Cause                                                             | Both Sexes, All Ages           | Both Sexes, 0-4 Years    | Both Sexes, 5-14 Years | Both Sexes, 15-49 Years     | Both Sexes, 50-69 Years     | Both Sexes, 70-80 Years        |
|-------------------------------------------------------------------|--------------------------------|--------------------------|------------------------|-----------------------------|-----------------------------|--------------------------------|
| All causes                                                        | 240,995<br>(234,251 - 247,273) | 2,451<br>(1,474 - 3,961) | 495<br>(365 - 668)     | 15,930<br>(15,208 - 16,669) | 57,354<br>(55,039 - 59,640) | 164,765<br>(160,433 - 168,798) |
| Communicable, maternal, neonatal, and nutritional diseases        | 7,688<br>(6,710 - 8,942)       | 1,457<br>(865 - 2,336)   | 77<br>(55 - 110)       | 1,240<br>(1,059 - 1,379)    | 1,805<br>(1,497 - 2,048)    | 3,109<br>(2,613 - 3,644)       |
| HIV/AIDS and tuberculosis                                         | 1,264<br>(834 - 1,427)         | 6<br>(3 - 10)            | 2<br>(1 - 3)           | 536<br>(399 - 619)          | 528<br>(331 - 613)          | 192<br>(87 - 232)              |
| Tuberculosis                                                      | 1,121<br>(692 - 1,270)         | 6<br>(3 - 9)             | 2<br>(1 - 3)           | 435<br>(297 - 513)          | 493<br>(301 - 575)          | 186<br>(81 - 225)              |
| HIV/AIDS                                                          | 143<br>(99 - 194)              | 0<br>(0 - 1)             | 0<br>(0 - 0)           | 101<br>(74 - 130)           | 35<br>(19 - 58)             | 7<br>(3 - 12)                  |
| HIV/AIDS resulting in mycobacterial infection                     | 9<br>(6 - 12)                  | 0<br>(0 - 0)             | 0<br>(0 - 0)           | 6<br>(4 - 8)                | 2<br>(1 - 4)                | 0<br>(0 - 1)                   |
| HIV/AIDS resulting in other diseases                              | 134<br>(93 - 182)              | 0<br>(0 - 1)             | 0<br>(0 - 0)           | 95<br>(69 - 122)            | 33<br>(18 - 54)             | 6<br>(3 - 11)                  |
| Diarrhea, lower respiratory, and other common infectious diseases | 5,481<br>(4,773 - 6,277)       | 792<br>(482 - 1,182)     | 65<br>(46 - 94)        | 620<br>(514 - 728)          | 1,216<br>(989 - 1,431)      | 2,788<br>(2,313 - 3,336)       |
| Diarrheal diseases                                                | 57<br>(38 - 85)                | 39<br>(20 - 67)          | 1<br>(0 - 1)           | 3<br>(2 - 4)                | 5<br>(4 - 7)                | 9<br>(6 - 12)                  |
| Intestinal infectious diseases                                    | 57<br>(33 - 94)                | 9<br>(4 - 19)            | 6<br>(2 - 13)          | 19<br>(9 - 38)              | 12<br>(5 - 22)              | 11<br>(5 - 18)                 |
| Typhoid fever                                                     | 29<br>(13 - 54)                | 3<br>(1 - 7)             | 4<br>(1 - 8)           | 11<br>(4 - 24)              | 6<br>(2 - 13)               | 4<br>(2 - 9)                   |
| Paratyphoid fever                                                 | 8<br>(4 - 16)                  | 1<br>(0 - 3)             | 1<br>(0 - 3)           | 3<br>(1 - 7)                | 2<br>(1 - 4)                | 1<br>(0 - 3)                   |
| Other intestinal infectious diseases                              | 20<br>(11 - 32)                | 5<br>(1 - 11)            | 1<br>(0 - 4)           | 5<br>(2 - 12)               | 4<br>(1 - 10)               | 5<br>(2 - 11)                  |
| Lower respiratory infections                                      | 5,128<br>(4,469 - 5,877)       | 680<br>(410 - 1,025)     | 43<br>(30 - 64)        | 537<br>(437 - 635)          | 1,144<br>(922 - 1,358)      | 2,724<br>(2,252 - 3,279)       |
| Upper respiratory infections                                      | 8<br>(3 - 16)                  | 0<br>(0 - 0)             | 0<br>(0 - 0)           | 1<br>(0 - 2)                | 2<br>(0 - 5)                | 5<br>(1 - 14)                  |
| Otitis media                                                      | 3<br>(2 - 4)                   | 1<br>(0 - 2)             | 0<br>(0 - 0)           | 1<br>(1 - 1)                | 0<br>(0 - 1)                | 0<br>(0 - 0)                   |
| Meningitis                                                        | 96<br>(78 - 118)               | 30<br>(17 - 48)          | 4<br>(3 - 6)           | 22<br>(18 - 25)             | 26<br>(22 - 30)             | 14<br>(11 - 17)                |
| Pneumococcal meningitis                                           | 21<br>(16 - 28)                | 4<br>(2 - 7)             | 1<br>(0 - 1)           | 5<br>(3 - 8)                | 7<br>(5 - 10)               | 4<br>(2 - 5)                   |
| H influenzae type B meningitis                                    | 18<br>(13 - 25)                | 10<br>(6 - 17)           | 1<br>(1 - 1)           | 3<br>(2 - 4)                | 3<br>(2 - 5)                | 2<br>(1 - 2)                   |
| Meningococcal meningitis                                          | 25<br>(18 - 32)                | 9<br>(5 - 15)            | 1<br>(1 - 2)           | 5<br>(4 - 7)                | 6<br>(4 - 8)                | 3<br>(2 - 5)                   |
| Other meningitis                                                  | 32<br>(25 - 39)                | 7<br>(3 - 11)            | 1<br>(1 - 1)           | 9<br>(6 - 11)               | 10<br>(7 - 13)              | 5<br>(4 - 7)                   |
| Encephalitis                                                      | 106<br>(71 - 144)              | 29<br>(15 - 49)          | 10<br>(5 - 18)         | 33<br>(19 - 49)             | 23<br>(13 - 30)             | 11<br>(6 - 15)                 |
| Diphtheria                                                        | 1<br>(0 - 2)                   | 0<br>(0 - 1)             | 0<br>(0 - 1)           | 0<br>(0 - 1)                | 0<br>(0 - 1)                | --<br>(0 - 1)                  |
| Whooping cough                                                    | 2<br>(2 - 4)                   | 1<br>(0 - 2)             | 0<br>(0 - 0)           | 1<br>(1 - 1)                | 0<br>(0 - 0)                | --<br>(0 - 0)                  |
| Tetanus                                                           | 4<br>(2 - 5)                   | 0<br>(0 - 0)             | 0<br>(0 - 0)           | 1<br>(0 - 1)                | 1<br>(1 - 2)                | 1<br>(1 - 2)                   |
| Measles                                                           | 1<br>(1 - 3)                   | 1<br>(1 - 2)             | 0<br>(0 - 0)           | 0<br>(0 - 0)                | 0<br>(0 - 0)                | --<br>(0 - 0)                  |
| Varicella and herpes zoster                                       | 19<br>(6 - 56)                 | 1<br>(0 - 4)             | 0<br>(0 - 1)           | 2<br>(1 - 5)                | 2<br>(0 - 5)                | 13<br>(1 - 51)                 |
| Neglected tropical diseases and malaria                           | 27<br>(25 - 31)                | 2<br>(1 - 3)             | 1<br>(1 - 2)           | 7<br>(7 - 9)                | 9<br>(8 - 10)               | 8<br>(8 - 9)                   |
| Cysticercosis                                                     | 0<br>(0 - 0)                   | 0<br>(0 - 0)             | 0<br>(0 - 0)           | 0<br>(0 - 0)                | 0<br>(0 - 0)                | 0<br>(0 - 0)                   |
| Cystic echinococcosis                                             | 17<br>(16 - 18)                | 0<br>(0 - 0)             | 0<br>(0 - 1)           | 4<br>(3 - 4)                | 6<br>(6 - 7)                | 7<br>(6 - 7)                   |
| Dengue                                                            | 2<br>(2 - 6)                   | 0<br>(0 - 1)             | 0<br>(0 - 2)           | 1<br>(1 - 2)                | 0<br>(0 - 1)                | 0<br>(0 - 1)                   |
| Rabies                                                            | 2<br>(2 - 4)                   | 0<br>(0 - 0)             | 0<br>(0 - 0)           | 1<br>(1 - 2)                | 1<br>(0 - 1)                | 0<br>(0 - 0)                   |
| Other neglected tropical diseases                                 | 5<br>(4 - 7)                   | 1<br>(1 - 2)             | 0<br>(0 - 0)           | 2<br>(1 - 2)                | 1<br>(1 - 2)                | 1<br>(0 - 1)                   |
| Maternal disorders                                                | 37<br>(28 - 46)                | --                       | 0<br>(0 - 0)           | 37<br>(28 - 46)             | --                          | --                             |
| Maternal hemorrhage                                               | 5<br>(3 - 6)                   | --                       | 0<br>(0 - 0)           | 5<br>(3 - 6)                | --                          | --                             |
| Maternal sepsis and other maternal infections                     | 3<br>(2 - 4)                   | --                       | 0<br>(0 - 0)           | 3<br>(2 - 4)                | --                          | --                             |
| Maternal hypertensive disorders                                   | 3<br>(2 - 5)                   | --                       | 0<br>(0 - 0)           | 3<br>(2 - 4)                | --                          | --                             |
| Maternal obstructed labor                                         | 3<br>(2 - 5)                   | --                       | 0<br>(0 - 0)           | 3<br>(2 - 5)                | --                          | --                             |
| Maternal abortive outcome                                         | 8<br>(6 - 11)                  | --                       | 0<br>(0 - 0)           | 8<br>(6 - 11)               | --                          | --                             |
| Indirect maternal deaths                                          | 7<br>(5 - 9)                   | --                       | 0<br>(0 - 0)           | 7<br>(5 - 9)                | --                          | --                             |



Web Table 31- Romania deaths with 95% UI by age, sex, and cause in 2013

| Cause                                                            | Both Sexes, All Ages           | Both Sexes, 0-4 Years | Both Sexes, 5-14 Years | Both Sexes, 15-49 Years     | Both Sexes, 50-69 Years     | Both Sexes, 70-80 Years        |
|------------------------------------------------------------------|--------------------------------|-----------------------|------------------------|-----------------------------|-----------------------------|--------------------------------|
| Late maternal deaths                                             | 3<br>(2 - 4)                   | --                    | 0<br>(0 - 0)           | 3<br>(2 - 4)                | --                          | --                             |
| Maternal deaths aggravated by HIV/AIDS                           | 0<br>(0 - 0)                   | --                    | --                     | 0<br>(0 - 0)                | --                          | --                             |
| Other maternal disorders                                         | 5<br>(4 - 7)                   | --                    | 0<br>(0 - 0)           | 5<br>(4 - 7)                | --                          | --                             |
| Neonatal disorders                                               | 595<br>(341 - 1,048)           | 595<br>(341 - 1,048)  | --                     | --                          | --                          | --                             |
| Neonatal preterm birth complications                             | 247<br>(123 - 460)             | 247<br>(123 - 460)    | --                     | --                          | --                          | --                             |
| Neonatal encephalopathy due to birth asphyxia and trauma         | 86<br>(47 - 155)               | 86<br>(47 - 155)      | --                     | --                          | --                          | --                             |
| Neonatal sepsis and other neonatal infections                    | 10<br>(4 - 25)                 | 10<br>(4 - 25)        | --                     | --                          | --                          | --                             |
| Hemolytic disease and other neonatal jaundice                    | 6<br>(3 - 15)                  | 6<br>(3 - 15)         | --                     | --                          | --                          | --                             |
| Other neonatal disorders                                         | 245<br>(129 - 447)             | 245<br>(129 - 447)    | --                     | --                          | --                          | --                             |
| Nutritional deficiencies                                         | 147<br>(121 - 217)             | 2<br>(1 - 3)          | 1<br>(1 - 2)           | 19<br>(15 - 30)             | 27<br>(21 - 45)             | 97<br>(78 - 144)               |
| Protein-energy malnutrition                                      | 49<br>(25 - 72)                | 1<br>(0 - 2)          | 0<br>(0 - 1)           | 7<br>(4 - 12)               | 12<br>(7 - 18)              | 28<br>(12 - 44)                |
| Iodine deficiency                                                | 3<br>(0 - 12)                  | 0<br>(0 - 0)          | 0<br>(0 - 0)           | 0<br>(0 - 1)                | 1<br>(0 - 3)                | 2<br>(0 - 11)                  |
| Iron-deficiency anemia                                           | 78<br>(55 - 135)               | 0<br>(0 - 0)          | 0<br>(0 - 0)           | 6<br>(4 - 12)               | 12<br>(7 - 24)              | 59<br>(41 - 99)                |
| Other nutritional deficiencies                                   | 18<br>(12 - 34)                | 1<br>(0 - 2)          | 1<br>(1 - 1)           | 5<br>(3 - 10)               | 3<br>(2 - 7)                | 7<br>(4 - 15)                  |
| Other communicable, maternal, neonatal, and nutritional diseases | 137<br>(83 - 218)              | 60<br>(15 - 137)      | 7<br>(4 - 13)          | 20<br>(16 - 29)             | 25<br>(20 - 36)             | 24<br>(19 - 32)                |
| Sexually transmitted diseases excluding HIV                      | 60<br>(14 - 140)               | 50<br>(7 - 124)       | 4<br>(1 - 9)           | 2<br>(1 - 3)                | 2<br>(1 - 4)                | 2<br>(1 - 3)                   |
| Syphilis                                                         | 58<br>(12 - 137)               | 50<br>(7 - 124)       | 4<br>(1 - 9)           | 1<br>(1 - 1)                | 1<br>(1 - 2)                | 1<br>(1 - 2)                   |
| Chlamydial infection                                             | 1<br>(0 - 1)                   | --                    | 0<br>(0 - 0)           | 0<br>(0 - 1)                | 0<br>(0 - 0)                | 0<br>(0 - 0)                   |
| Gonococcal infection                                             | 1<br>(1 - 2)                   | --                    | 0<br>(0 - 0)           | 0<br>(0 - 1)                | 0<br>(0 - 1)                | 0<br>(0 - 0)                   |
| Other sexually transmitted diseases                              | 1<br>(1 - 1)                   | --                    | 0<br>(0 - 0)           | 0<br>(0 - 1)                | 0<br>(0 - 0)                | 0<br>(0 - 0)                   |
| Hepatitis                                                        | 17<br>(14 - 20)                | 1<br>(1 - 3)          | 1<br>(1 - 1)           | 6<br>(5 - 8)                | 5<br>(4 - 7)                | 3<br>(2 - 4)                   |
| Acute hepatitis A                                                | 5<br>(2 - 8)                   | 1<br>(0 - 2)          | 1<br>(0 - 1)           | 3<br>(1 - 4)                | 1<br>(0 - 1)                | 0<br>(0 - 0)                   |
| Acute hepatitis B                                                | 10<br>(7 - 14)                 | 1<br>(0 - 1)          | 0<br>(0 - 0)           | 3<br>(2 - 5)                | 4<br>(3 - 6)                | 3<br>(2 - 4)                   |
| Acute hepatitis C                                                | 2<br>(0 - 4)                   | --                    | 0<br>(0 - 0)           | 1<br>(0 - 2)                | 1<br>(0 - 2)                | 0<br>(0 - 1)                   |
| Other infectious diseases                                        | 60<br>(46 - 88)                | 9<br>(4 - 18)         | 3<br>(2 - 4)           | 12<br>(9 - 19)              | 18<br>(13 - 28)             | 19<br>(14 - 26)                |
| Non-communicable diseases                                        | 223,536<br>(217,305 - 229,685) | 749<br>(448 - 1,199)  | 187<br>(135 - 257)     | 10,606<br>(10,049 - 11,201) | 52,408<br>(50,331 - 54,595) | 159,585<br>(155,603 - 163,453) |
| Neoplasms                                                        | 41,848<br>(37,449 - 44,596)    | 60<br>(34 - 97)       | 101<br>(71 - 140)      | 4,161<br>(3,810 - 4,486)    | 18,635<br>(16,996 - 19,860) | 18,891<br>(16,169 - 20,419)    |
| Esophageal cancer                                                | 633<br>(423 - 769)             | --                    | --                     | 66<br>(42 - 90)             | 360<br>(222 - 455)          | 206<br>(152 - 248)             |
| Stomach cancer                                                   | 3,149<br>(2,764 - 3,612)       | --                    | --                     | 207<br>(174 - 253)          | 1,272<br>(1,113 - 1,505)    | 1,670<br>(1,412 - 1,975)       |
| Liver cancer                                                     | 2,076<br>(1,040 - 2,824)       | --                    | 1<br>(1 - 3)           | 135<br>(73 - 198)           | 895<br>(485 - 1,257)        | 1,044<br>(452 - 1,466)         |
| Liver cancer due to hepatitis B                                  | 590<br>(303 - 876)             | --                    | 0<br>(0 - 1)           | 55<br>(30 - 84)             | 307<br>(162 - 468)          | 227<br>(102 - 356)             |
| Liver cancer due to hepatitis C                                  | 849<br>(400 - 1,277)           | --                    | 0<br>(0 - 1)           | 48<br>(24 - 79)             | 350<br>(180 - 543)          | 451<br>(184 - 680)             |
| Liver cancer due to alcohol use                                  | 449<br>(218 - 714)             | --                    | --                     | 17<br>(8 - 30)              | 164<br>(84 - 271)           | 268<br>(113 - 431)             |
| Liver cancer due to other causes                                 | 189<br>(73 - 277)              | --                    | 1<br>(0 - 1)           | 16<br>(7 - 23)              | 75<br>(32 - 110)            | 97<br>(33 - 152)               |
| Larynx cancer                                                    | 758<br>(487 - 895)             | --                    | --                     | 91<br>(63 - 116)            | 462<br>(293 - 558)          | 206<br>(131 - 252)             |
| Tracheal, bronchus and lung cancer                               | 8,792<br>(7,871 - 9,775)       | --                    | --                     | 722<br>(597 - 852)          | 4,941<br>(4,296 - 5,584)    | 3,129<br>(2,755 - 3,507)       |
| Breast cancer                                                    | 2,880<br>(1,935 - 3,513)       | --                    | --                     | 352<br>(273 - 461)          | 1,251<br>(868 - 1,533)      | 1,278<br>(756 - 1,595)         |
| Cervical cancer                                                  | 1,701<br>(1,164 - 2,144)       | --                    | --                     | 388<br>(254 - 520)          | 760<br>(503 - 988)          | 553<br>(381 - 732)             |
| Uterine cancer                                                   | 355<br>(224 - 444)             | --                    | --                     | 24<br>(14 - 34)             | 164<br>(102 - 213)          | 168<br>(104 - 215)             |
| Prostate cancer                                                  | 1,875<br>(1,304 - 2,336)       | --                    | --                     | 10<br>(6 - 14)              | 410<br>(273 - 542)          | 1,456<br>(973 - 1,852)         |

Web Table 31- Romania deaths with 95% UI by age, sex, and cause in 2013

| Cause                                         | Both Sexes, All Ages           | Both Sexes, 0-4 Years | Both Sexes, 5-14 Years | Both Sexes, 15-49 Years  | Both Sexes, 50-69 Years     | Both Sexes, 70-80 Years        |
|-----------------------------------------------|--------------------------------|-----------------------|------------------------|--------------------------|-----------------------------|--------------------------------|
| Colon and rectum cancer                       | 5,193<br>(4,794 - 5,588)       | --                    | --                     | 301<br>(266 - 339)       | 1,835<br>(1,689 - 1,990)    | 3,057<br>(2,758 - 3,403)       |
| Lip and oral cavity cancer                    | 956<br>(531 - 1,100)           | --                    | --                     | 149<br>(75 - 190)        | 549<br>(275 - 658)          | 259<br>(181 - 303)             |
| Nasopharynx cancer                            | 205<br>(136 - 256)             | --                    | 1<br>(0 - 1)           | 52<br>(34 - 74)          | 116<br>(74 - 156)           | 36<br>(24 - 48)                |
| Other pharynx cancer                          | 565<br>(292 - 744)             | --                    | --                     | 95<br>(47 - 134)         | 374<br>(182 - 510)          | 96<br>(57 - 127)               |
| Gallbladder and biliary tract cancer          | 566<br>(455 - 722)             | --                    | --                     | 26<br>(20 - 37)          | 224<br>(180 - 309)          | 316<br>(232 - 396)             |
| Pancreatic cancer                             | 2,664<br>(2,444 - 2,858)       | --                    | --                     | 178<br>(152 - 206)       | 1,139<br>(1,032 - 1,249)    | 1,348<br>(1,217 - 1,478)       |
| Malignant skin melanoma                       | 350<br>(241 - 480)             | --                    | --                     | 76<br>(52 - 112)         | 139<br>(90 - 191)           | 134<br>(92 - 189)              |
| Non-melanoma skin cancer                      | 444<br>(341 - 595)             | --                    | --                     | 20<br>(13 - 28)          | 98<br>(68 - 144)            | 326<br>(253 - 438)             |
| Ovarian cancer                                | 1,016<br>(824 - 1,164)         | --                    | --                     | 135<br>(106 - 165)       | 499<br>(407 - 589)          | 382<br>(253 - 468)             |
| Testicular cancer                             | 63<br>(34 - 92)                | --                    | --                     | 36<br>(18 - 56)          | 15<br>(8 - 23)              | 12<br>(7 - 19)                 |
| Kidney cancer                                 | 740<br>(635 - 835)             | 1<br>(1 - 2)          | 1<br>(1 - 1)           | 62<br>(48 - 78)          | 348<br>(291 - 406)          | 328<br>(262 - 398)             |
| Bladder cancer                                | 1,167<br>(895 - 1,372)         | --                    | --                     | 29<br>(22 - 37)          | 377<br>(319 - 457)          | 762<br>(544 - 919)             |
| Brain and nervous system cancer               | 1,331<br>(905 - 1,595)         | 13<br>(7 - 22)        | 29<br>(20 - 43)        | 300<br>(246 - 355)       | 657<br>(460 - 797)          | 332<br>(136 - 463)             |
| Thyroid cancer                                | 135<br>(75 - 176)              | --                    | 0<br>(0 - 0)           | 12<br>(7 - 16)           | 52<br>(30 - 70)             | 71<br>(36 - 97)                |
| Mesothelioma                                  | 68<br>(54 - 101)               | --                    | --                     | 10<br>(7 - 16)           | 36<br>(26 - 57)             | 23<br>(15 - 33)                |
| Hodgkin lymphoma                              | 127<br>(99 - 180)              | 0<br>(0 - 1)          | 2<br>(1 - 4)           | 46<br>(35 - 70)          | 48<br>(36 - 69)             | 30<br>(20 - 40)                |
| Non-Hodgkin lymphoma                          | 652<br>(400 - 818)             | 5<br>(2 - 10)         | 11<br>(6 - 18)         | 126<br>(79 - 160)        | 275<br>(180 - 349)          | 235<br>(116 - 322)             |
| Multiple myeloma                              | 275<br>(177 - 363)             | --                    | --                     | 24<br>(16 - 34)          | 139<br>(90 - 186)           | 112<br>(65 - 163)              |
| Leukemia                                      | 1,129<br>(931 - 1,261)         | 18<br>(9 - 31)        | 28<br>(19 - 41)        | 178<br>(145 - 207)       | 393<br>(328 - 451)          | 512<br>(396 - 590)             |
| Other neoplasms                               | 1,982<br>(1,351 - 2,348)       | 23<br>(12 - 40)       | 27<br>(18 - 40)        | 311<br>(205 - 374)       | 808<br>(576 - 955)          | 812<br>(491 - 1,049)           |
| Cardiovascular diseases                       | 142,156<br>(137,318 - 147,207) | 11<br>(7 - 18)        | 12<br>(8 - 16)         | 3,497<br>(3,178 - 3,827) | 23,855<br>(22,505 - 25,495) | 114,781<br>(111,113 - 118,678) |
| Rheumatic heart disease                       | 522<br>(383 - 630)             | 0<br>(0 - 0)          | 1<br>(0 - 1)           | 61<br>(43 - 114)         | 160<br>(125 - 256)          | 300<br>(157 - 384)             |
| Ischemic heart disease                        | 61,276<br>(56,310 - 70,870)    | 0<br>(0 - 1)          | 1<br>(1 - 1)           | 1,769<br>(1,536 - 2,038) | 11,398<br>(10,370 - 13,120) | 48,107<br>(43,800 - 56,178)    |
| Cerebrovascular disease                       | 57,529<br>(51,255 - 62,772)    | 1<br>(1 - 2)          | 3<br>(2 - 5)           | 931<br>(789 - 1,117)     | 8,643<br>(7,629 - 9,742)    | 47,950<br>(42,301 - 52,426)    |
| Ischemic stroke                               | 42,026<br>(33,300 - 46,954)    | 0<br>(0 - 0)          | 0<br>(0 - 1)           | 175<br>(120 - 230)       | 3,594<br>(2,825 - 4,274)    | 38,257<br>(29,900 - 42,879)    |
| Hemorrhagic stroke                            | 15,503<br>(12,368 - 21,821)    | 1<br>(1 - 2)          | 3<br>(2 - 4)           | 756<br>(638 - 897)       | 5,049<br>(4,385 - 6,146)    | 9,693<br>(7,059 - 14,943)      |
| Hypertensive heart disease                    | 12,211<br>(7,912 - 15,712)     | 0<br>(0 - 0)          | 0<br>(0 - 0)           | 116<br>(75 - 164)        | 1,453<br>(1,024 - 1,832)    | 10,642<br>(6,716 - 13,874)     |
| Cardiomyopathy and myocarditis                | 7,109<br>(5,956 - 9,290)       | 8<br>(5 - 13)         | 5<br>(3 - 7)           | 430<br>(338 - 551)       | 1,271<br>(963 - 1,593)      | 5,395<br>(4,350 - 7,392)       |
| Atrial fibrillation and flutter               | 11<br>(9 - 14)                 | --                    | --                     | 1<br>(1 - 1)             | 1<br>(1 - 2)                | 9<br>(7 - 12)                  |
| Aortic aneurysm                               | 606<br>(502 - 713)             | --                    | --                     | 49<br>(38 - 60)          | 196<br>(161 - 239)          | 361<br>(292 - 434)             |
| Peripheral vascular disease                   | 391<br>(321 - 478)             | --                    | --                     | 9<br>(6 - 12)            | 90<br>(70 - 117)            | 293<br>(233 - 362)             |
| Endocarditis                                  | 108<br>(73 - 138)              | 1<br>(0 - 1)          | 1<br>(0 - 1)           | 22<br>(14 - 30)          | 35<br>(22 - 45)             | 50<br>(34 - 65)                |
| Other cardiovascular and circulatory diseases | 2,394<br>(1,965 - 2,957)       | 1<br>(0 - 1)          | 1<br>(0 - 1)           | 111<br>(85 - 145)        | 608<br>(486 - 770)          | 1,674<br>(1,320 - 2,144)       |
| Chronic respiratory diseases                  | 8,517<br>(7,361 - 12,954)      | 2<br>(1 - 4)          | 2<br>(1 - 2)           | 203<br>(170 - 274)       | 1,667<br>(1,425 - 2,491)    | 6,644<br>(5,642 - 10,423)      |
| Chronic obstructive pulmonary disease         | 7,495<br>(6,458 - 11,475)      | 1<br>(1 - 2)          | 0<br>(0 - 1)           | 152<br>(126 - 199)       | 1,374<br>(1,158 - 1,996)    | 5,966<br>(5,066 - 9,349)       |
| Pneumoconiosis                                | 169<br>(117 - 288)             | 0<br>(0 - 0)          | 0<br>(0 - 0)           | 7<br>(4 - 10)            | 72<br>(46 - 124)            | 91<br>(60 - 160)               |
| Silicosis                                     | 76<br>(50 - 136)               | 0<br>(0 - 0)          | 0<br>(0 - 0)           | 3<br>(2 - 5)             | 24<br>(15 - 45)             | 49<br>(31 - 88)                |
| Asbestosis                                    | 15<br>(10 - 26)                | 0<br>(0 - 0)          | 0<br>(0 - 0)           | 1<br>(1 - 2)             | 7<br>(4 - 13)               | 7<br>(4 - 12)                  |
| Coal workers pneumoconiosis                   | 20<br>(12 - 34)                | 0<br>(0 - 0)          | 0<br>(0 - 0)           | 1<br>(0 - 1)             | 12<br>(7 - 22)              | 7<br>(4 - 13)                  |
| Other pneumoconiosis                          | 59<br>(41 - 93)                | 0<br>(0 - 0)          | 0<br>(0 - 0)           | 2<br>(2 - 4)             | 28<br>(18 - 48)             | 28<br>(18 - 48)                |

Web Table 31- Romania deaths with 95% UI by age, sex, and cause in 2013

| Cause                                               | Both Sexes, All Ages        | Both Sexes, 0-4 Years | Both Sexes, 5-14 Years | Both Sexes, 15-49 Years  | Both Sexes, 50-69 Years  | Both Sexes, 70-80 Years    |
|-----------------------------------------------------|-----------------------------|-----------------------|------------------------|--------------------------|--------------------------|----------------------------|
| Asthma                                              | 300<br>(221 - 514)          | 0<br>(0 - 0)          | 0<br>(0 - 0)           | 13<br>(10 - 18)          | 67<br>(51 - 107)         | 220<br>(156 - 386)         |
| Interstitial lung disease and pulmonary sarcoidosis | 506<br>(343 - 991)          | 1<br>(0 - 1)          | 1<br>(1 - 1)           | 27<br>(18 - 47)          | 145<br>(95 - 278)        | 333<br>(215 - 690)         |
| Other chronic respiratory diseases                  | 47<br>(34 - 75)             | 0<br>(0 - 0)          | 0<br>(0 - 0)           | 4<br>(3 - 6)             | 9<br>(6 - 13)            | 34<br>(23 - 57)            |
| Cirrhosis                                           | 8,847<br>(8,181 - 9,506)    | 4<br>(3 - 7)          | 7<br>(5 - 10)          | 1,408<br>(1,249 - 1,585) | 4,599<br>(4,182 - 5,052) | 2,828<br>(2,563 - 3,096)   |
| Cirrhosis due to hepatitis B                        | 2,269<br>(1,629 - 2,984)    | 0<br>(0 - 0)          | 1<br>(0 - 1)           | 345<br>(222 - 511)       | 1,172<br>(846 - 1,548)   | 751<br>(501 - 1,000)       |
| Cirrhosis due to hepatitis C                        | 2,733<br>(1,989 - 3,472)    | 0<br>(0 - 0)          | 1<br>(0 - 1)           | 378<br>(217 - 511)       | 1,420<br>(1,032 - 1,821) | 934<br>(625 - 1,221)       |
| Cirrhosis due to alcohol use                        | 2,501<br>(1,848 - 3,140)    | --                    | --                     | 316<br>(164 - 457)       | 1,320<br>(959 - 1,693)   | 865<br>(599 - 1,114)       |
| Cirrhosis due to other causes                       | 1,344<br>(932 - 1,928)      | 4<br>(2 - 7)          | 5<br>(4 - 7)           | 368<br>(265 - 509)       | 688<br>(442 - 1,041)     | 279<br>(173 - 431)         |
| Digestive diseases                                  | 3,170<br>(2,183 - 3,555)    | 8<br>(5 - 14)         | 6<br>(4 - 9)           | 388<br>(305 - 443)       | 983<br>(743 - 1,112)     | 1,783<br>(1,090 - 2,079)   |
| Peptic ulcer disease                                | 466<br>(285 - 589)          | 0<br>(0 - 0)          | 0<br>(0 - 0)           | 54<br>(37 - 73)          | 164<br>(109 - 208)       | 248<br>(127 - 337)         |
| Gastritis and duodenitis                            | 79<br>(35 - 107)            | 0<br>(0 - 0)          | 0<br>(0 - 0)           | 7<br>(3 - 10)            | 23<br>(10 - 32)          | 49<br>(20 - 72)            |
| Appendicitis                                        | 34<br>(21 - 46)             | 1<br>(0 - 1)          | 1<br>(1 - 2)           | 7<br>(4 - 9)             | 12<br>(7 - 16)           | 14<br>(8 - 21)             |
| Paralytic ileus and intestinal obstruction          | 656<br>(373 - 944)          | 4<br>(2 - 7)          | 3<br>(2 - 4)           | 50<br>(30 - 74)          | 179<br>(110 - 259)       | 421<br>(214 - 626)         |
| Inguinal, femoral, and abdominal hernia             | 85<br>(49 - 132)            | 0<br>(0 - 0)          | 0<br>(0 - 0)           | 4<br>(2 - 6)             | 22<br>(13 - 33)          | 59<br>(31 - 100)           |
| Inflammatory bowel disease                          | 46<br>(25 - 60)             | 2<br>(1 - 3)          | 0<br>(0 - 1)           | 7<br>(4 - 9)             | 14<br>(8 - 18)           | 23<br>(11 - 34)            |
| Vascular intestinal disorders                       | 663<br>(379 - 962)          | 1<br>(0 - 1)          | 0<br>(0 - 1)           | 22<br>(11 - 39)          | 158<br>(90 - 251)        | 483<br>(270 - 695)         |
| Gallbladder and biliary diseases                    | 191<br>(119 - 244)          | 0<br>(0 - 0)          | 0<br>(0 - 0)           | 9<br>(6 - 12)            | 49<br>(36 - 63)          | 133<br>(70 - 186)          |
| Pancreatitis                                        | 782<br>(516 - 954)          | 1<br>(0 - 1)          | 1<br>(0 - 1)           | 211<br>(156 - 252)       | 308<br>(210 - 380)       | 262<br>(136 - 349)         |
| Other digestive diseases                            | 168<br>(82 - 215)           | 0<br>(0 - 1)          | 0<br>(0 - 0)           | 19<br>(9 - 24)           | 57<br>(29 - 72)          | 92<br>(43 - 128)           |
| Neurological disorders                              | 12,566<br>(10,535 - 14,506) | 13<br>(8 - 21)        | 16<br>(11 - 22)        | 221<br>(186 - 304)       | 757<br>(646 - 875)       | 11,559<br>(9,548 - 13,519) |
| Alzheimer disease and other dementias               | 11,673<br>(9,633 - 13,624)  | --                    | --                     | 2<br>(1 - 4)             | 507<br>(408 - 613)       | 11,164<br>(9,157 - 13,123) |
| Parkinson disease                                   | 385<br>(293 - 468)          | --                    | --                     | 4<br>(3 - 5)             | 61<br>(48 - 83)          | 320<br>(233 - 391)         |
| Epilepsy                                            | 248<br>(189 - 308)          | 4<br>(2 - 7)          | 11<br>(7 - 16)         | 121<br>(94 - 168)        | 81<br>(60 - 100)         | 32<br>(21 - 42)            |
| Multiple sclerosis                                  | 112<br>(79 - 212)           | --                    | --                     | 44<br>(28 - 90)          | 53<br>(36 - 95)          | 15<br>(10 - 25)            |
| Other neurological disorders                        | 148<br>(125 - 171)          | 9<br>(5 - 15)         | 5<br>(3 - 7)           | 51<br>(41 - 61)          | 55<br>(46 - 65)          | 28<br>(23 - 33)            |
| Mental and substance use disorders                  | 923<br>(781 - 1,392)        | 4<br>(2 - 7)          | 0<br>(0 - 0)           | 323<br>(264 - 499)       | 445<br>(359 - 705)       | 151<br>(126 - 195)         |
| Schizophrenia                                       | 64<br>(47 - 100)            | --                    | --                     | 17<br>(11 - 31)          | 25<br>(17 - 43)          | 22<br>(15 - 31)            |
| Alcohol use disorders                               | 616<br>(483 - 1,070)        | --                    | --                     | 206<br>(155 - 379)       | 332<br>(251 - 583)       | 78<br>(55 - 118)           |
| Drug use disorders                                  | 242<br>(170 - 279)          | 4<br>(2 - 7)          | --                     | 98<br>(68 - 119)         | 87<br>(58 - 105)         | 52<br>(38 - 64)            |
| Opioid use disorders                                | 90<br>(63 - 105)            | 2<br>(1 - 3)          | --                     | 38<br>(26 - 46)          | 31<br>(20 - 37)          | 20<br>(15 - 25)            |
| Cocaine use disorders                               | 13<br>(10 - 15)             | 0<br>(0 - 1)          | --                     | 6<br>(4 - 8)             | 4<br>(3 - 5)             | 3<br>(2 - 3)               |
| Amphetamine use disorders                           | 12<br>(9 - 14)              | 0<br>(0 - 1)          | --                     | 5<br>(3 - 6)             | 5<br>(3 - 6)             | 3<br>(2 - 4)               |
| Other drug use disorders                            | 126<br>(89 - 146)           | 2<br>(1 - 3)          | --                     | 50<br>(34 - 61)          | 48<br>(31 - 58)          | 27<br>(19 - 33)            |
| Eating disorders                                    | 1<br>(1 - 2)                | --                    | 0<br>(0 - 0)           | 1<br>(1 - 2)             | --                       | --                         |
| Anorexia nervosa                                    | 1<br>(1 - 2)                | --                    | 0<br>(0 - 0)           | 1<br>(1 - 2)             | --                       | --                         |
| Diabetes, urogenital, blood, and endocrine diseases | 4,644<br>(4,276 - 5,175)    | 20<br>(10 - 43)       | 12<br>(8 - 17)         | 330<br>(290 - 428)       | 1,405<br>(1,262 - 1,687) | 2,877<br>(2,566 - 3,177)   |
| Diabetes mellitus                                   | 1,955<br>(1,747 - 2,137)    | 1<br>(0 - 1)          | 2<br>(1 - 2)           | 98<br>(84 - 112)         | 631<br>(554 - 712)       | 1,224<br>(1,008 - 1,378)   |
| Acute glomerulonephritis                            | 6<br>(5 - 11)               | 0<br>(0 - 0)          | 0<br>(0 - 0)           | 2<br>(1 - 2)             | 2<br>(1 - 4)             | 2<br>(1 - 5)               |
| Chronic kidney disease                              | 2,172<br>(1,931 - 2,502)    | 3<br>(2 - 4)          | 4<br>(3 - 6)           | 161<br>(135 - 223)       | 613<br>(524 - 782)       | 1,391<br>(1,187 - 1,598)   |
| Chronic kidney disease due to diabetes mellitus     | 158<br>(122 - 276)          | 0<br>(0 - 0)          | 0<br>(0 - 0)           | 14<br>(10 - 30)          | 69<br>(52 - 124)         | 75<br>(53 - 121)           |

Web Table 31- Romania deaths with 95% UI by age, sex, and cause in 2013

| Cause                                               | Both Sexes, All Ages      | Both Sexes, 0-4 Years | Both Sexes, 5-14 Years | Both Sexes, 15-49 Years  | Both Sexes, 50-69 Years  | Both Sexes, 70-80 Years  |
|-----------------------------------------------------|---------------------------|-----------------------|------------------------|--------------------------|--------------------------|--------------------------|
| Chronic kidney disease due to hypertension          | 598<br>(446 - 785)        | 1<br>(1 - 2)          | 1<br>(0 - 1)           | 36<br>(25 - 51)          | 132<br>(97 - 176)        | 429<br>(315 - 578)       |
| Chronic kidney disease due to glomerulonephritis    | 76<br>(60 - 99)           | 1<br>(0 - 1)          | 1<br>(0 - 1)           | 13<br>(10 - 17)          | 26<br>(20 - 35)          | 36<br>(26 - 50)          |
| Chronic kidney disease due to other causes          | 1,340<br>(1,058 - 1,620)  | 1<br>(1 - 2)          | 3<br>(2 - 4)           | 98<br>(74 - 149)         | 385<br>(298 - 507)       | 852<br>(620 - 1,046)     |
| Urinary diseases and male infertility               | 349<br>(284 - 510)        | 1<br>(1 - 2)          | 1<br>(1 - 1)           | 30<br>(23 - 48)          | 107<br>(81 - 180)        | 211<br>(169 - 300)       |
| Interstitial nephritis and urinary tract infections | 322<br>(262 - 470)        | 1<br>(1 - 2)          | 1<br>(0 - 1)           | 26<br>(20 - 42)          | 98<br>(73 - 165)         | 197<br>(158 - 278)       |
| Urolithiasis                                        | 4<br>(2 - 15)             | --                    | 0<br>(0 - 0)           | 1<br>(1 - 2)             | 1<br>(1 - 6)             | 1<br>(0 - 6)             |
| Other urinary diseases                              | 23<br>(16 - 37)           | 0<br>(0 - 0)          | 0<br>(0 - 0)           | 3<br>(2 - 4)             | 8<br>(5 - 12)            | 12<br>(8 - 22)           |
| Gynecological diseases                              | 2<br>(1 - 3)              | --                    | --                     | 1<br>(0 - 1)             | 0<br>(0 - 1)             | 1<br>(0 - 1)             |
| Uterine fibroids                                    | 0<br>(0 - 1)              | --                    | --                     | 0<br>(0 - 0)             | 0<br>(0 - 0)             | 0<br>(0 - 0)             |
| Polycystic ovarian syndrome                         | 0<br>(0 - 0)              | --                    | --                     | 0<br>(0 - 0)             | 0<br>(0 - 0)             | --                       |
| Endometriosis                                       | 0<br>(0 - 0)              | --                    | --                     | 0<br>(0 - 0)             | 0<br>(0 - 0)             | --                       |
| Genital prolapse                                    | 0<br>(0 - 1)              | --                    | --                     | 0<br>(0 - 0)             | 0<br>(0 - 0)             | 0<br>(0 - 0)             |
| Other gynecological diseases                        | 1<br>(1 - 1)              | --                    | --                     | 0<br>(0 - 0)             | 0<br>(0 - 0)             | 0<br>(0 - 1)             |
| Hemoglobinopathies and hemolytic anemias            | 53<br>(39 - 79)           | 4<br>(2 - 7)          | 2<br>(1 - 3)           | 15<br>(11 - 23)          | 15<br>(10 - 24)          | 17<br>(12 - 26)          |
| Thalassemias                                        | 3<br>(2 - 6)              | 1<br>(1 - 2)          | 1<br>(0 - 1)           | 1<br>(1 - 2)             | 0<br>(0 - 0)             | 0<br>(0 - 0)             |
| Sickle cell disorders                               | 4<br>(3 - 6)              | 1<br>(0 - 1)          | 0<br>(0 - 1)           | 2<br>(1 - 3)             | 1<br>(1 - 2)             | 0<br>(0 - 0)             |
| G6PD deficiency                                     | 1<br>(1 - 2)              | 0<br>(0 - 0)          | 0<br>(0 - 0)           | 1<br>(0 - 1)             | 0<br>(0 - 1)             | 0<br>(0 - 0)             |
| Other hemoglobinopathies and hemolytic anemias      | 44<br>(33 - 67)           | 2<br>(1 - 3)          | 1<br>(0 - 1)           | 11<br>(8 - 17)           | 14<br>(9 - 22)           | 17<br>(12 - 26)          |
| Endocrine, metabolic, blood, and immune disorders   | 108<br>(79 - 212)         | 12<br>(5 - 32)        | 3<br>(2 - 6)           | 24<br>(17 - 50)          | 37<br>(26 - 76)          | 31<br>(23 - 60)          |
| Musculoskeletal disorders                           | 56<br>(42 - 68)           | --                    | 2<br>(1 - 3)           | 14<br>(11 - 18)          | 21<br>(15 - 26)          | 19<br>(14 - 24)          |
| Rheumatoid arthritis                                | 2<br>(2 - 3)              | --                    | 0<br>(0 - 0)           | 1<br>(1 - 1)             | 1<br>(0 - 1)             | 0<br>(0 - 1)             |
| Other musculoskeletal disorders                     | 54<br>(40 - 65)           | --                    | 2<br>(1 - 3)           | 13<br>(10 - 17)          | 20<br>(14 - 25)          | 19<br>(13 - 23)          |
| Other non-communicable diseases                     | 810<br>(536 - 1,220)      | 625<br>(365 - 1,020)  | 31<br>(20 - 46)        | 62<br>(50 - 73)          | 41<br>(34 - 48)          | 52<br>(42 - 61)          |
| Congenital anomalies                                | 734<br>(466 - 1,137)      | 611<br>(354 - 998)    | 30<br>(20 - 45)        | 53<br>(41 - 63)          | 21<br>(17 - 24)          | 19<br>(15 - 23)          |
| Neural tube defects                                 | 28<br>(16 - 48)           | 25<br>(13 - 45)       | 1<br>(0 - 1)           | 1<br>(1 - 1)             | 0<br>(0 - 1)             | 0<br>(0 - 1)             |
| Congenital heart anomalies                          | 363<br>(231 - 556)        | 290<br>(169 - 471)    | 19<br>(12 - 28)        | 36<br>(27 - 43)          | 11<br>(8 - 14)           | 7<br>(5 - 9)             |
| Cleft lip and cleft palate                          | 4<br>(1 - 13)             | 4<br>(1 - 13)         | --                     | --                       | --                       | --                       |
| Down syndrome                                       | 8<br>(4 - 15)             | 5<br>(2 - 11)         | 0<br>(0 - 1)           | 1<br>(1 - 2)             | 1<br>(0 - 1)             | 0<br>(0 - 0)             |
| Chromosomal unbalanced rearrangements               | 22<br>(11 - 39)           | 18<br>(8 - 34)        | 1<br>(1 - 2)           | 2<br>(1 - 3)             | 1<br>(1 - 1)             | 1<br>(0 - 1)             |
| Other congenital anomalies                          | 309<br>(192 - 504)        | 268<br>(152 - 459)    | 9<br>(6 - 15)          | 12<br>(9 - 17)           | 9<br>(6 - 11)            | 11<br>(9 - 14)           |
| Skin and subcutaneous diseases                      | 65<br>(52 - 78)           | 3<br>(2 - 6)          | 1<br>(0 - 1)           | 9<br>(7 - 12)            | 20<br>(15 - 25)          | 32<br>(24 - 41)          |
| Cellulitis                                          | 15<br>(11 - 21)           | 1<br>(0 - 1)          | 0<br>(0 - 0)           | 2<br>(1 - 3)             | 6<br>(4 - 9)             | 7<br>(4 - 10)            |
| Pyoderma                                            | 20<br>(15 - 25)           | 2<br>(1 - 3)          | 0<br>(0 - 0)           | 3<br>(2 - 4)             | 7<br>(5 - 9)             | 8<br>(6 - 12)            |
| Decubitus ulcer                                     | 23<br>(16 - 31)           | 0<br>(0 - 0)          | 0<br>(0 - 0)           | 3<br>(2 - 4)             | 5<br>(3 - 7)             | 15<br>(10 - 21)          |
| Other skin and subcutaneous diseases                | 7<br>(4 - 11)             | 1<br>(0 - 2)          | 0<br>(0 - 0)           | 1<br>(1 - 2)             | 2<br>(1 - 4)             | 2<br>(1 - 4)             |
| Sudden infant death syndrome                        | 11<br>(4 - 21)            | 11<br>(4 - 21)        | --                     | --                       | --                       | --                       |
| Injuries                                            | 9,771<br>(8,961 - 10,648) | 245<br>(145 - 380)    | 230<br>(169 - 312)     | 4,083<br>(3,730 - 4,448) | 3,141<br>(2,841 - 3,497) | 2,071<br>(1,779 - 2,281) |
| Transport injuries                                  | 2,660<br>(2,385 - 2,906)  | 44<br>(25 - 72)       | 86<br>(59 - 123)       | 1,225<br>(1,067 - 1,373) | 759<br>(669 - 859)       | 546<br>(474 - 628)       |
| Road injuries                                       | 2,340<br>(2,073 - 2,562)  | 41<br>(23 - 66)       | 80<br>(54 - 115)       | 1,080<br>(926 - 1,212)   | 658<br>(571 - 741)       | 481<br>(419 - 556)       |
| Pedestrian road injuries                            | 821<br>(578 - 1,076)      | 19<br>(10 - 33)       | 39<br>(24 - 57)        | 260<br>(159 - 378)       | 248<br>(169 - 324)       | 255<br>(193 - 318)       |

Web Table 31- Romania deaths with 95% UI by age, sex, and cause in 2013

| Cause                                           | Both Sexes, All Ages     | Both Sexes, 0-4 Years | Both Sexes, 5-14 Years | Both Sexes, 15-49 Years  | Both Sexes, 50-69 Years  | Both Sexes, 70-80 Years |
|-------------------------------------------------|--------------------------|-----------------------|------------------------|--------------------------|--------------------------|-------------------------|
| Cyclist road injuries                           | 181<br>(115 - 247)       | 2<br>(1 - 5)          | 9<br>(4 - 14)          | 55<br>(31 - 76)          | 73<br>(47 - 101)         | 43<br>(27 - 61)         |
| Motorcyclist road injuries                      | 164<br>(93 - 224)        | 1<br>(0 - 2)          | 2<br>(1 - 4)           | 118<br>(64 - 161)        | 28<br>(16 - 42)          | 15<br>(8 - 22)          |
| Motor vehicle road injuries                     | 1,093<br>(815 - 1,303)   | 17<br>(9 - 29)        | 30<br>(18 - 45)        | 630<br>(477 - 749)       | 273<br>(192 - 346)       | 142<br>(101 - 194)      |
| Other road injuries                             | 82<br>(50 - 143)         | 1<br>(0 - 2)          | 1<br>(1 - 2)           | 17<br>(9 - 32)           | 36<br>(19 - 68)          | 27<br>(14 - 47)         |
| Other transport injuries                        | 320<br>(240 - 405)       | 3<br>(2 - 6)          | 6<br>(4 - 10)          | 145<br>(104 - 184)       | 101<br>(70 - 135)        | 64<br>(45 - 88)         |
| Unintentional injuries                          | 4,188<br>(3,715 - 4,775) | 190<br>(110 - 300)    | 122<br>(84 - 175)      | 1,430<br>(1,246 - 1,829) | 1,375<br>(1,216 - 1,583) | 1,070<br>(824 - 1,243)  |
| Falls                                           | 1,324<br>(914 - 1,603)   | 12<br>(7 - 21)        | 9<br>(5 - 13)          | 345<br>(251 - 459)       | 495<br>(367 - 612)       | 463<br>(255 - 588)      |
| Drowning                                        | 808<br>(602 - 1,352)     | 34<br>(16 - 65)       | 66<br>(42 - 116)       | 369<br>(268 - 657)       | 227<br>(166 - 358)       | 112<br>(82 - 165)       |
| Fire, heat, and hot substances                  | 419<br>(322 - 538)       | 22<br>(12 - 39)       | 9<br>(5 - 15)          | 96<br>(72 - 137)         | 109<br>(85 - 148)        | 182<br>(136 - 229)      |
| Poisonings                                      | 371<br>(299 - 476)       | 18<br>(10 - 32)       | 8<br>(5 - 12)          | 113<br>(84 - 149)        | 112<br>(82 - 147)        | 120<br>(92 - 162)       |
| Exposure to mechanical forces                   | 265<br>(226 - 405)       | 9<br>(5 - 15)         | 10<br>(6 - 15)         | 142<br>(115 - 238)       | 77<br>(62 - 122)         | 27<br>(21 - 35)         |
| Unintentional firearm injuries                  | 11<br>(9 - 14)           | 0<br>(0 - 1)          | 1<br>(0 - 1)           | 7<br>(5 - 9)             | 3<br>(2 - 4)             | 1<br>(1 - 1)            |
| Unintentional suffocation                       | 8<br>(6 - 14)            | 2<br>(1 - 4)          | 0<br>(0 - 1)           | 3<br>(2 - 5)             | 2<br>(1 - 4)             | 1<br>(1 - 2)            |
| Other exposure to mechanical forces             | 245<br>(208 - 383)       | 7<br>(3 - 12)         | 9<br>(5 - 13)          | 132<br>(106 - 226)       | 72<br>(57 - 115)         | 25<br>(20 - 33)         |
| Adverse effects of medical treatment            | 134<br>(73 - 187)        | 4<br>(2 - 7)          | 1<br>(1 - 2)           | 23<br>(12 - 32)          | 43<br>(24 - 61)          | 63<br>(30 - 93)         |
| Animal contact                                  | 42<br>(21 - 52)          | 1<br>(0 - 1)          | 1<br>(1 - 2)           | 11<br>(5 - 15)           | 16<br>(8 - 22)           | 12<br>(5 - 17)          |
| Venomous animal contact                         | 7<br>(4 - 10)            | 0<br>(0 - 0)          | 0<br>(0 - 0)           | 3<br>(2 - 5)             | 3<br>(1 - 4)             | 1<br>(0 - 2)            |
| Non-venomous animal contact                     | 35<br>(17 - 44)          | 1<br>(0 - 1)          | 1<br>(1 - 2)           | 8<br>(4 - 11)            | 14<br>(7 - 19)           | 11<br>(5 - 15)          |
| Foreign body                                    | 545<br>(352 - 771)       | 83<br>(44 - 140)      | 8<br>(5 - 12)          | 182<br>(115 - 272)       | 197<br>(120 - 293)       | 75<br>(48 - 104)        |
| Pulmonary aspiration and foreign body in airway | 543<br>(350 - 768)       | 82<br>(43 - 140)      | 8<br>(5 - 12)          | 181<br>(114 - 271)       | 197<br>(119 - 292)       | 75<br>(48 - 104)        |
| Foreign body in other body part                 | 3<br>(2 - 4)             | 0<br>(0 - 0)          | 0<br>(0 - 0)           | 1<br>(1 - 2)             | 1<br>(0 - 1)             | 0<br>(0 - 1)            |
| Other unintentional injuries                    | 280<br>(226 - 349)       | 7<br>(3 - 14)         | 9<br>(5 - 16)          | 149<br>(111 - 201)       | 98<br>(65 - 145)         | 15<br>(10 - 21)         |
| Self-harm and interpersonal violence            | 2,923<br>(2,208 - 3,491) | 11<br>(6 - 19)        | 22<br>(13 - 32)        | 1,428<br>(1,026 - 1,729) | 1,006<br>(758 - 1,242)   | 455<br>(372 - 538)      |
| Self-harm                                       | 2,410<br>(1,661 - 2,837) | --                    | 15<br>(8 - 22)         | 1,178<br>(726 - 1,423)   | 850<br>(592 - 1,041)     | 368<br>(273 - 442)      |
| Interpersonal violence                          | 513<br>(414 - 790)       | 11<br>(6 - 19)        | 7<br>(4 - 11)          | 251<br>(193 - 396)       | 156<br>(120 - 256)       | 88<br>(69 - 131)        |
| Assault by firearm                              | 87<br>(48 - 163)         | 1<br>(0 - 2)          | 1<br>(0 - 1)           | 59<br>(31 - 113)         | 21<br>(11 - 40)          | 6<br>(3 - 10)           |
| Assault by sharp object                         | 176<br>(124 - 298)       | 2<br>(1 - 4)          | 2<br>(1 - 4)           | 94<br>(62 - 165)         | 53<br>(37 - 94)          | 25<br>(17 - 44)         |
| Assault by other means                          | 250<br>(195 - 385)       | 8<br>(4 - 14)         | 5<br>(3 - 7)           | 98<br>(70 - 154)         | 82<br>(60 - 142)         | 57<br>(44 - 84)         |
| Forces of nature, war, and legal intervention   | 0<br>(0 - 0)             | 0<br>(0 - 0)          | --                     | --                       | --                       | --                      |
| Exposure to forces of nature                    | 0<br>(0 - 0)             | 0<br>(0 - 0)          | --                     | --                       | --                       | --                      |

Web Table 31- Romania deaths with 95% UI by age, sex, and cause in 2013

| Cause                                                             | Males, All Ages                | Males, 0-4 Years       | Males, 5-14 Years  | Males, 15-49 Years          | Males, 50-69 Years          | Males, 70-80 Years          |
|-------------------------------------------------------------------|--------------------------------|------------------------|--------------------|-----------------------------|-----------------------------|-----------------------------|
| All causes                                                        | 122,399<br>(117,727 - 127,918) | 1,386<br>(825 - 2,221) | 302<br>(218 - 413) | 11,520<br>(10,865 - 12,318) | 37,560<br>(35,585 - 39,898) | 71,631<br>(69,449 - 74,142) |
| Communicable, maternal, neonatal, and nutritional diseases        | 4,725<br>(4,087 - 5,465)       | 835<br>(498 - 1,340)   | 41<br>(28 - 60)    | 925<br>(782 - 1,047)        | 1,351<br>(1,100 - 1,572)    | 1,574<br>(1,263 - 1,962)    |
| HIV/AIDS and tuberculosis                                         | 1,020<br>(668 - 1,164)         | 3<br>(2 - 5)           | 1<br>(1 - 2)       | 436<br>(316 - 510)          | 452<br>(286 - 534)          | 128<br>(57 - 159)           |
| Tuberculosis                                                      | 919<br>(571 - 1,059)           | 3<br>(1 - 5)           | 1<br>(0 - 1)       | 368<br>(249 - 441)          | 425<br>(260 - 505)          | 122<br>(52 - 153)           |
| HIV/AIDS                                                          | 101<br>(69 - 139)              | 0<br>(0 - 0)           | 0<br>(0 - 0)       | 68<br>(49 - 89)             | 27<br>(14 - 44)             | 6<br>(2 - 10)               |
| HIV/AIDS resulting in mycobacterial infection                     | 7<br>(4 - 10)                  | 0<br>(0 - 0)           | 0<br>(0 - 0)       | 4<br>(3 - 6)                | 2<br>(1 - 3)                | 0<br>(0 - 1)                |
| HIV/AIDS resulting in other diseases                              | 94<br>(64 - 130)               | 0<br>(0 - 0)           | 0<br>(0 - 0)       | 63<br>(45 - 83)             | 25<br>(13 - 41)             | 5<br>(2 - 9)                |
| Diarrhea, lower respiratory, and other common infectious diseases | 3,204<br>(2,712 - 3,747)       | 449<br>(264 - 675)     | 35<br>(23 - 52)    | 460<br>(370 - 563)          | 863<br>(689 - 1,062)        | 1,397<br>(1,098 - 1,779)    |
| Diarrheal diseases                                                | 29<br>(18 - 46)                | 20<br>(10 - 37)        | 0<br>(0 - 1)       | 2<br>(1 - 2)                | 3<br>(2 - 4)                | 4<br>(2 - 5)                |
| Intestinal infectious diseases                                    | 32<br>(18 - 56)                | 5<br>(1 - 12)          | 3<br>(1 - 8)       | 12<br>(5 - 24)              | 7<br>(3 - 14)               | 5<br>(1 - 10)               |
| Typhoid fever                                                     | 17<br>(7 - 34)                 | 2<br>(0 - 4)           | 2<br>(1 - 5)       | 7<br>(2 - 16)               | 4<br>(1 - 9)                | 2<br>(1 - 5)                |
| Paratyphoid fever                                                 | 5<br>(2 - 10)                  | 1<br>(0 - 2)           | 1<br>(0 - 2)       | 2<br>(1 - 4)                | 1<br>(0 - 2)                | 1<br>(0 - 1)                |
| Other intestinal infectious diseases                              | 11<br>(5 - 20)                 | 3<br>(0 - 8)           | 1<br>(0 - 3)       | 3<br>(1 - 8)                | 2<br>(0 - 6)                | 2<br>(0 - 7)                |
| Lower respiratory infections                                      | 3,008<br>(2,525 - 3,532)       | 390<br>(227 - 595)     | 23<br>(14 - 36)    | 406<br>(315 - 502)          | 819<br>(650 - 1,015)        | 1,369<br>(1,072 - 1,755)    |
| Upper respiratory infections                                      | 4<br>(1 - 11)                  | 0<br>(0 - 0)           | 0<br>(0 - 0)       | 1<br>(0 - 2)                | 1<br>(0 - 4)                | 2<br>(0 - 8)                |
| Otitis media                                                      | 1<br>(1 - 2)                   | 1<br>(0 - 1)           | 0<br>(0 - 0)       | 0<br>(0 - 1)                | 0<br>(0 - 0)                | 0<br>(0 - 0)                |
| Meningitis                                                        | 57<br>(46 - 72)                | 16<br>(8 - 28)         | 2<br>(1 - 3)       | 15<br>(12 - 19)             | 17<br>(14 - 21)             | 7<br>(5 - 9)                |
| Pneumococcal meningitis                                           | 12<br>(8 - 18)                 | 2<br>(1 - 5)           | 0<br>(0 - 1)       | 3<br>(1 - 6)                | 4<br>(2 - 7)                | 2<br>(1 - 3)                |
| H influenzae type B meningitis                                    | 10<br>(7 - 15)                 | 5<br>(2 - 10)          | 0<br>(0 - 1)       | 2<br>(1 - 3)                | 2<br>(1 - 3)                | 1<br>(0 - 1)                |
| Meningococcal meningitis                                          | 15<br>(10 - 21)                | 5<br>(2 - 9)           | 1<br>(0 - 1)       | 4<br>(2 - 6)                | 4<br>(2 - 6)                | 2<br>(1 - 2)                |
| Other meningitis                                                  | 19<br>(15 - 25)                | 4<br>(2 - 7)           | 1<br>(0 - 1)       | 6<br>(4 - 9)                | 7<br>(4 - 9)                | 2<br>(2 - 4)                |
| Encephalitis                                                      | 60<br>(39 - 89)                | 16<br>(7 - 30)         | 5<br>(3 - 11)      | 21<br>(12 - 33)             | 13<br>(7 - 20)              | 5<br>(3 - 7)                |
| Diphtheria                                                        | 0<br>(0 - 2)                   | 0<br>(0 - 1)           | 0<br>(0 - 1)       | 0<br>(0 - 1)                | 0<br>(0 - 1)                | --<br>(0 - 1)               |
| Whooping cough                                                    | 1<br>(1 - 2)                   | 0<br>(0 - 1)           | 0<br>(0 - 0)       | 1<br>(0 - 1)                | 0<br>(0 - 0)                | --<br>(0 - 0)               |
| Tetanus                                                           | 2<br>(1 - 3)                   | 0<br>(0 - 0)           | 0<br>(0 - 0)       | 1<br>(0 - 1)                | 1<br>(0 - 1)                | 0<br>(0 - 1)                |
| Measles                                                           | 1<br>(0 - 1)                   | 1<br>(0 - 1)           | 0<br>(0 - 0)       | 0<br>(0 - 0)                | 0<br>(0 - 0)                | --<br>(0 - 0)               |
| Varicella and herpes zoster                                       | 7<br>(2 - 25)                  | 1<br>(0 - 3)           | 0<br>(0 - 1)       | 1<br>(0 - 3)                | 1<br>(0 - 3)                | 5<br>(0 - 23)               |
| Neglected tropical diseases and malaria                           | 13<br>(12 - 16)                | 1<br>(0 - 1)           | 1<br>(0 - 1)       | 4<br>(4 - 5)                | 5<br>(4 - 6)                | 3<br>(3 - 3)                |
| Cysticercosis                                                     | 0<br>(0 - 0)                   | 0<br>(0 - 0)           | 0<br>(0 - 0)       | 0<br>(0 - 0)                | 0<br>(0 - 0)                | 0<br>(0 - 0)                |
| Cystic echinococcosis                                             | 9<br>(8 - 9)                   | 0<br>(0 - 0)           | 0<br>(0 - 0)       | 2<br>(2 - 3)                | 3<br>(3 - 4)                | 2<br>(2 - 3)                |
| Dengue                                                            | 1<br>(1 - 3)                   | 0<br>(0 - 1)           | 0<br>(0 - 1)       | 1<br>(0 - 1)                | 0<br>(0 - 1)                | 0<br>(0 - 0)                |
| Rabies                                                            | 1<br>(1 - 2)                   | 0<br>(0 - 0)           | 0<br>(0 - 0)       | 1<br>(0 - 1)                | 0<br>(0 - 1)                | 0<br>(0 - 0)                |
| Other neglected tropical diseases                                 | 3<br>(2 - 4)                   | 1<br>(0 - 1)           | 0<br>(0 - 0)       | 1<br>(1 - 1)                | 1<br>(0 - 1)                | 0<br>(0 - 0)                |
| Maternal disorders                                                | --                             | --                     | --                 | --                          | --                          | --                          |
| Maternal hemorrhage                                               | --                             | --                     | --                 | --                          | --                          | --                          |
| Maternal sepsis and other maternal infections                     | --                             | --                     | --                 | --                          | --                          | --                          |
| Maternal hypertensive disorders                                   | --                             | --                     | --                 | --                          | --                          | --                          |
| Maternal obstructed labor                                         | --                             | --                     | --                 | --                          | --                          | --                          |
| Maternal abortive outcome                                         | --                             | --                     | --                 | --                          | --                          | --                          |
| Indirect maternal deaths                                          | --                             | --                     | --                 | --                          | --                          | --                          |

Web Table 31- Romania deaths with 95% UI by age, sex, and cause in 2013

| Cause                                                            | Males, All Ages                | Males, 0-4 Years   | Males, 5-14 Years | Males, 15-49 Years       | Males, 50-69 Years          | Males, 70-80 Years          |
|------------------------------------------------------------------|--------------------------------|--------------------|-------------------|--------------------------|-----------------------------|-----------------------------|
| Late maternal deaths                                             | --                             | --                 | --                | --                       | --                          | --                          |
| Maternal deaths aggravated by HIV/AIDS                           | --                             | --                 | --                | --                       | --                          | --                          |
| Other maternal disorders                                         | --                             | --                 | --                | --                       | --                          | --                          |
| Neonatal disorders                                               | 350<br>(200 - 616)             | 350<br>(200 - 616) | --                | --                       | --                          | --                          |
| Neonatal preterm birth complications                             | 142<br>(65 - 261)              | 142<br>(65 - 261)  | --                | --                       | --                          | --                          |
| Neonatal encephalopathy due to birth asphyxia and trauma         | 51<br>(26 - 96)                | 51<br>(26 - 96)    | --                | --                       | --                          | --                          |
| Neonatal sepsis and other neonatal infections                    | 7<br>(3 - 19)                  | 7<br>(3 - 19)      | --                | --                       | --                          | --                          |
| Hemolytic disease and other neonatal jaundice                    | 4<br>(1 - 9)                   | 4<br>(1 - 9)       | --                | --                       | --                          | --                          |
| Other neonatal disorders                                         | 146<br>(75 - 274)              | 146<br>(75 - 274)  | --                | --                       | --                          | --                          |
| Nutritional deficiencies                                         | 67<br>(50 - 124)               | 1<br>(1 - 2)       | 1<br>(0 - 1)      | 12<br>(9 - 23)           | 17<br>(12 - 34)             | 36<br>(24 - 67)             |
| Protein-energy malnutrition                                      | 22<br>(9 - 40)                 | 1<br>(0 - 1)       | 0<br>(0 - 0)      | 5<br>(2 - 9)             | 7<br>(3 - 12)               | 9<br>(3 - 18)               |
| Iodine deficiency                                                | 1<br>(0 - 5)                   | 0<br>(0 - 0)       | 0<br>(0 - 0)      | 0<br>(0 - 1)             | 0<br>(0 - 2)                | 1<br>(0 - 4)                |
| Iron-deficiency anemia                                           | 35<br>(21 - 75)                | 0<br>(0 - 0)       | 0<br>(0 - 0)      | 4<br>(2 - 9)             | 8<br>(4 - 19)               | 23<br>(14 - 49)             |
| Other nutritional deficiencies                                   | 9<br>(5 - 20)                  | 0<br>(0 - 1)       | 0<br>(0 - 1)      | 3<br>(2 - 7)             | 2<br>(1 - 5)                | 2<br>(1 - 6)                |
| Other communicable, maternal, neonatal, and nutritional diseases | 71<br>(42 - 113)               | 30<br>(8 - 68)     | 4<br>(2 - 7)      | 13<br>(10 - 20)          | 14<br>(10 - 22)             | 10<br>(7 - 15)              |
| Sexually transmitted diseases excluding HIV                      | 29<br>(6 - 69)                 | 25<br>(4 - 63)     | 2<br>(0 - 4)      | 1<br>(0 - 1)             | 1<br>(0 - 2)                | 0<br>(0 - 1)                |
| Syphilis                                                         | 28<br>(5 - 69)                 | 25<br>(4 - 63)     | 2<br>(0 - 4)      | 0<br>(0 - 1)             | 1<br>(0 - 1)                | 0<br>(0 - 1)                |
| Chlamydial infection                                             | --                             | --                 | --                | --                       | --                          | --                          |
| Gonococcal infection                                             | 0<br>(0 - 1)                   | --                 | 0<br>(0 - 0)      | 0<br>(0 - 0)             | 0<br>(0 - 0)                | 0<br>(0 - 0)                |
| Other sexually transmitted diseases                              | 0<br>(0 - 0)                   | --                 | 0<br>(0 - 0)      | 0<br>(0 - 0)             | 0<br>(0 - 0)                | 0<br>(0 - 0)                |
| Hepatitis                                                        | 10<br>(8 - 13)                 | 1<br>(0 - 2)       | 0<br>(0 - 1)      | 4<br>(3 - 5)             | 4<br>(2 - 5)                | 2<br>(1 - 3)                |
| Acute hepatitis A                                                | 3<br>(1 - 5)                   | 1<br>(0 - 1)       | 0<br>(0 - 1)      | 1<br>(1 - 3)             | 0<br>(0 - 1)                | 0<br>(0 - 0)                |
| Acute hepatitis B                                                | 7<br>(5 - 9)                   | 0<br>(0 - 1)       | 0<br>(0 - 0)      | 2<br>(1 - 3)             | 3<br>(2 - 4)                | 2<br>(1 - 2)                |
| Acute hepatitis C                                                | 1<br>(0 - 2)                   | --                 | 0<br>(0 - 0)      | 0<br>(0 - 1)             | 0<br>(0 - 1)                | 0<br>(0 - 1)                |
| Other infectious diseases                                        | 32<br>(23 - 53)                | 5<br>(2 - 10)      | 1<br>(1 - 3)      | 9<br>(6 - 16)            | 9<br>(6 - 17)               | 8<br>(5 - 13)               |
| Non-communicable diseases                                        | 110,249<br>(105,974 - 115,243) | 414<br>(244 - 674) | 105<br>(72 - 149) | 7,155<br>(6,664 - 7,706) | 33,748<br>(31,970 - 35,872) | 68,827<br>(66,725 - 71,213) |
| Neoplasms                                                        | 24,830<br>(22,944 - 26,752)    | 32<br>(17 - 54)    | 58<br>(39 - 84)   | 2,374<br>(2,143 - 2,603) | 11,997<br>(11,132 - 12,941) | 10,370<br>(9,250 - 11,313)  |
| Esophageal cancer                                                | 518<br>(304 - 650)             | --                 | --                | 59<br>(34 - 82)          | 317<br>(176 - 409)          | 143<br>(84 - 181)           |
| Stomach cancer                                                   | 2,208<br>(1,972 - 2,615)       | --                 | --                | 156<br>(129 - 200)       | 966<br>(838 - 1,209)        | 1,085<br>(922 - 1,284)      |
| Liver cancer                                                     | 1,176<br>(517 - 1,808)         | --                 | 1<br>(0 - 2)      | 92<br>(41 - 151)         | 595<br>(265 - 930)          | 488<br>(197 - 813)          |
| Liver cancer due to hepatitis B                                  | 387<br>(158 - 654)             | --                 | 0<br>(0 - 1)      | 40<br>(18 - 69)          | 219<br>(89 - 379)           | 127<br>(45 - 234)           |
| Liver cancer due to hepatitis C                                  | 470<br>(192 - 828)             | --                 | 0<br>(0 - 1)      | 33<br>(13 - 62)          | 231<br>(98 - 411)           | 206<br>(73 - 384)           |
| Liver cancer due to alcohol use                                  | 268<br>(114 - 489)             | --                 | --                | 13<br>(5 - 25)           | 118<br>(52 - 213)           | 138<br>(50 - 267)           |
| Liver cancer due to other causes                                 | 51<br>(18 - 95)                | --                 | 0<br>(0 - 1)      | 6<br>(2 - 12)            | 27<br>(9 - 51)              | 17<br>(5 - 37)              |
| Larynx cancer                                                    | 705<br>(439 - 841)             | --                 | --                | 85<br>(56 - 110)         | 437<br>(269 - 533)          | 183<br>(106 - 230)          |
| Tracheal, bronchus and lung cancer                               | 6,948<br>(5,929 - 7,857)       | --                 | --                | 567<br>(441 - 698)       | 4,112<br>(3,442 - 4,766)    | 2,269<br>(1,934 - 2,568)    |
| Breast cancer                                                    | 76<br>(39 - 250)               | --                 | --                | 7<br>(3 - 21)            | 31<br>(16 - 99)             | 38<br>(16 - 142)            |
| Cervical cancer                                                  | --                             | --                 | --                | --                       | --                          | --                          |
| Uterine cancer                                                   | --                             | --                 | --                | --                       | --                          | --                          |
| Prostate cancer                                                  | 1,875<br>(1,304 - 2,336)       | --                 | --                | 10<br>(6 - 14)           | 410<br>(273 - 542)          | 1,456<br>(973 - 1,852)      |

Web Table 31- Romania deaths with 95% UI by age, sex, and cause in 2013

| Cause                                         | Males, All Ages             | Males, 0-4 Years | Males, 5-14 Years | Males, 15-49 Years       | Males, 50-69 Years          | Males, 70-80 Years          |
|-----------------------------------------------|-----------------------------|------------------|-------------------|--------------------------|-----------------------------|-----------------------------|
| Colon and rectum cancer                       | 3,072<br>(2,824 - 3,343)    | --               | --                | 198<br>(171 - 230)       | 1,205<br>(1,089 - 1,325)    | 1,668<br>(1,473 - 1,876)    |
| Lip and oral cavity cancer                    | 829<br>(408 - 968)          | --               | --                | 136<br>(64 - 176)        | 503<br>(232 - 613)          | 190<br>(110 - 234)          |
| Nasopharynx cancer                            | 167<br>(106 - 218)          | --               | 0<br>(0 - 1)      | 44<br>(27 - 66)          | 100<br>(57 - 138)           | 24<br>(16 - 33)             |
| Other pharynx cancer                          | 519<br>(250 - 702)          | --               | --                | 89<br>(42 - 129)         | 353<br>(162 - 488)          | 77<br>(39 - 107)            |
| Gallbladder and biliary tract cancer          | 238<br>(167 - 353)          | --               | --                | 14<br>(9 - 22)           | 103<br>(71 - 161)           | 121<br>(77 - 170)           |
| Pancreatic cancer                             | 1,515<br>(1,391 - 1,657)    | --               | --                | 128<br>(106 - 153)       | 740<br>(658 - 827)          | 648<br>(570 - 736)          |
| Malignant skin melanoma                       | 187<br>(94 - 313)           | --               | --                | 45<br>(22 - 79)          | 79<br>(38 - 128)            | 64<br>(31 - 105)            |
| Non-melanoma skin cancer                      | 231<br>(144 - 362)          | --               | --                | 14<br>(8 - 22)           | 72<br>(43 - 118)            | 145<br>(93 - 227)           |
| Ovarian cancer                                | --                          | --               | --                | --                       | --                          | --                          |
| Testicular cancer                             | 63<br>(34 - 92)             | --               | --                | 36<br>(18 - 56)          | 15<br>(8 - 23)              | 12<br>(7 - 19)              |
| Kidney cancer                                 | 494<br>(397 - 591)          | 0<br>(0 - 1)     | 0<br>(0 - 1)      | 47<br>(33 - 62)          | 256<br>(199 - 320)          | 190<br>(143 - 241)          |
| Bladder cancer                                | 914<br>(662 - 1,112)        | --               | --                | 23<br>(17 - 31)          | 313<br>(253 - 390)          | 578<br>(375 - 724)          |
| Brain and nervous system cancer               | 715<br>(469 - 879)          | 7<br>(3 - 13)    | 16<br>(9 - 26)    | 183<br>(140 - 232)       | 369<br>(245 - 464)          | 140<br>(59 - 222)           |
| Thyroid cancer                                | 45<br>(30 - 61)             | --               | 0<br>(0 - 0)      | 6<br>(4 - 8)             | 22<br>(15 - 30)             | 18<br>(10 - 26)             |
| Mesothelioma                                  | 42<br>(30 - 75)             | --               | --                | 7<br>(4 - 13)            | 12<br>(16 - 44)             | 12<br>(7 - 21)              |
| Hodgkin lymphoma                              | 77<br>(55 - 118)            | 0<br>(0 - 1)     | 1<br>(0 - 3)      | 29<br>(20 - 47)          | 31<br>(21 - 49)             | 15<br>(10 - 22)             |
| Non-Hodgkin lymphoma                          | 383<br>(190 - 482)          | 3<br>(1 - 6)     | 8<br>(3 - 14)     | 84<br>(40 - 110)         | 169<br>(86 - 221)           | 119<br>(55 - 167)           |
| Multiple myeloma                              | 144<br>(75 - 210)           | --               | --                | 14<br>(8 - 24)           | 74<br>(40 - 115)            | 56<br>(26 - 82)             |
| Leukemia                                      | 661<br>(546 - 736)          | 10<br>(4 - 19)   | 17<br>(11 - 26)   | 112<br>(87 - 134)        | 237<br>(190 - 277)          | 285<br>(236 - 330)          |
| Other neoplasms                               | 1,027<br>(544 - 1,272)      | 12<br>(5 - 22)   | 14<br>(7 - 23)    | 189<br>(88 - 242)        | 464<br>(253 - 580)          | 349<br>(175 - 472)          |
| Cardiovascular diseases                       | 63,396<br>(60,591 - 66,424) | 6<br>(3 - 10)    | 6<br>(4 - 9)      | 2,612<br>(2,342 - 2,903) | 15,251<br>(14,257 - 16,376) | 45,521<br>(43,636 - 47,466) |
| Rheumatic heart disease                       | 218<br>(140 - 286)          | 0<br>(0 - 0)     | 0<br>(0 - 1)      | 35<br>(23 - 68)          | 77<br>(53 - 128)            | 107<br>(46 - 155)           |
| Ischemic heart disease                        | 28,385<br>(25,220 - 32,097) | 0<br>(0 - 0)     | 1<br>(0 - 1)      | 1,412<br>(1,192 - 1,637) | 7,665<br>(6,740 - 8,761)    | 19,307<br>(17,041 - 22,051) |
| Cerebrovascular disease                       | 25,036<br>(21,514 - 28,605) | 1<br>(0 - 1)     | 2<br>(1 - 3)      | 604<br>(467 - 765)       | 5,203<br>(4,343 - 6,062)    | 19,226<br>(16,340 - 22,005) |
| Ischemic stroke                               | 18,097<br>(13,863 - 21,219) | 0<br>(0 - 0)     | 0<br>(0 - 0)      | 121<br>(71 - 172)        | 2,416<br>(1,738 - 3,024)    | 15,560<br>(11,864 - 18,333) |
| Hemorrhagic stroke                            | 6,939<br>(5,208 - 9,879)    | 1<br>(0 - 1)     | 2<br>(1 - 2)      | 483<br>(373 - 607)       | 2,788<br>(2,220 - 3,561)    | 3,666<br>(2,370 - 6,031)    |
| Hypertensive heart disease                    | 4,308<br>(2,521 - 5,977)    | 0<br>(0 - 0)     | 0<br>(0 - 0)      | 77<br>(42 - 121)         | 826<br>(502 - 1,158)        | 3,404<br>(1,912 - 4,856)    |
| Cardiomyopathy and myocarditis                | 3,582<br>(2,727 - 4,706)    | 5<br>(3 - 7)     | 3<br>(2 - 4)      | 346<br>(250 - 462)       | 910<br>(624 - 1,206)        | 2,318<br>(1,709 - 3,294)    |
| Atrial fibrillation and flutter               | 4<br>(3 - 5)                | --               | --                | 0<br>(0 - 1)             | 1<br>(1 - 1)                | 3<br>(2 - 4)                |
| Aortic aneurysm                               | 426<br>(334 - 499)          | --               | --                | 35<br>(25 - 45)          | 149<br>(119 - 186)          | 242<br>(187 - 284)          |
| Peripheral vascular disease                   | 268<br>(209 - 343)          | --               | --                | 7<br>(5 - 11)            | 77<br>(58 - 103)            | 184<br>(136 - 246)          |
| Endocarditis                                  | 65<br>(39 - 92)             | 0<br>(0 - 1)     | 0<br>(0 - 1)      | 18<br>(11 - 26)          | 22<br>(13 - 32)             | 24<br>(14 - 36)             |
| Other cardiovascular and circulatory diseases | 1,104<br>(892 - 1,431)      | 0<br>(0 - 1)     | 0<br>(0 - 1)      | 77<br>(58 - 102)         | 319<br>(247 - 423)          | 707<br>(549 - 917)          |
| Chronic respiratory diseases                  | 5,763<br>(4,903 - 9,027)    | 2<br>(1 - 3)     | 1<br>(1 - 2)      | 165<br>(136 - 229)       | 1,336<br>(1,125 - 2,104)    | 4,259<br>(3,570 - 6,662)    |
| Chronic obstructive pulmonary disease         | 5,071<br>(4,320 - 7,852)    | 1<br>(0 - 2)     | 0<br>(0 - 0)      | 128<br>(103 - 169)       | 1,098<br>(910 - 1,686)      | 3,844<br>(3,230 - 5,977)    |
| Pneumoconiosis                                | 160<br>(109 - 273)          | 0<br>(0 - 0)     | 0<br>(0 - 0)      | 6<br>(4 - 10)            | 70<br>(44 - 122)            | 84<br>(54 - 153)            |
| Silicosis                                     | 74<br>(50 - 134)            | 0<br>(0 - 0)     | 0<br>(0 - 0)      | 3<br>(2 - 4)             | 24<br>(15 - 45)             | 48<br>(30 - 88)             |
| Asbestosis                                    | 14<br>(9 - 26)              | 0<br>(0 - 0)     | 0<br>(0 - 0)      | 1<br>(1 - 1)             | 7<br>(4 - 13)               | 6<br>(4 - 12)               |
| Coal workers pneumoconiosis                   | 20<br>(12 - 34)             | 0<br>(0 - 0)     | 0<br>(0 - 0)      | 1<br>(0 - 1)             | 12<br>(7 - 21)              | 7<br>(4 - 13)               |
| Other pneumoconiosis                          | 51<br>(35 - 84)             | 0<br>(0 - 0)     | 0<br>(0 - 0)      | 2<br>(1 - 4)             | 27<br>(17 - 47)             | 22<br>(14 - 39)             |



Web Table 31- Romania deaths with 95% UI by age, sex, and cause in 2013

| Cause                                               | Males, All Ages          | Males, 0-4 Years | Males, 5-14 Years | Males, 15-49 Years     | Males, 50-69 Years       | Males, 70-80 Years       |
|-----------------------------------------------------|--------------------------|------------------|-------------------|------------------------|--------------------------|--------------------------|
| Asthma                                              | 150<br>(118 - 236)       | 0<br>(0 - 0)     | 0<br>(0 - 0)      | 7<br>(5 - 10)          | 37<br>(28 - 60)          | 106<br>(78 - 168)        |
| Interstitial lung disease and pulmonary sarcoidosis | 357<br>(237 - 718)       | 1<br>(0 - 1)     | 1<br>(0 - 1)      | 21<br>(13 - 37)        | 124<br>(78 - 252)        | 211<br>(134 - 419)       |
| Other chronic respiratory diseases                  | 24<br>(18 - 37)          | 0<br>(0 - 0)     | 0<br>(0 - 0)      | 3<br>(2 - 4)           | 7<br>(5 - 11)            | 14<br>(9 - 23)           |
| Cirrhosis                                           | 5,473<br>(5,018 - 5,992) | 2<br>(1 - 4)     | 4<br>(3 - 6)      | 1,051<br>(921 - 1,206) | 2,984<br>(2,677 - 3,324) | 1,431<br>(1,267 - 1,617) |
| Cirrhosis due to hepatitis B                        | 1,091<br>(650 - 1,571)   | 0<br>(0 - 0)     | 0<br>(0 - 1)      | 225<br>(112 - 365)     | 617<br>(369 - 896)       | 249<br>(144 - 397)       |
| Cirrhosis due to hepatitis C                        | 1,608<br>(1,089 - 2,175) | 0<br>(0 - 0)     | 1<br>(0 - 1)      | 270<br>(108 - 399)     | 856<br>(569 - 1,173)     | 481<br>(264 - 680)       |
| Cirrhosis due to alcohol use                        | 1,931<br>(1,288 - 2,514) | --               | --                | 278<br>(118 - 421)     | 1,072<br>(702 - 1,430)   | 581<br>(390 - 785)       |
| Cirrhosis due to other causes                       | 843<br>(547 - 1,232)     | 2<br>(1 - 4)     | 3<br>(2 - 4)      | 278<br>(180 - 398)     | 439<br>(262 - 683)       | 120<br>(65 - 190)        |
| Digestive diseases                                  | 1,729<br>(1,186 - 1,960) | 5<br>(2 - 8)     | 3<br>(2 - 5)      | 305<br>(234 - 355)     | 638<br>(472 - 743)       | 778<br>(473 - 921)       |
| Peptic ulcer disease                                | 296<br>(184 - 396)       | 0<br>(0 - 0)     | 0<br>(0 - 0)      | 45<br>(30 - 65)        | 122<br>(82 - 164)        | 129<br>(66 - 186)        |
| Gastritis and duodenitis                            | 45<br>(17 - 67)          | 0<br>(0 - 0)     | 0<br>(0 - 0)      | 6<br>(2 - 9)           | 17<br>(6 - 26)           | 22<br>(7 - 36)           |
| Appendicitis                                        | 19<br>(11 - 28)          | 0<br>(0 - 1)     | 0<br>(0 - 1)      | 4<br>(2 - 6)           | 7<br>(4 - 11)            | 7<br>(3 - 11)            |
| Paralytic ileus and intestinal obstruction          | 301<br>(158 - 465)       | 2<br>(1 - 4)     | 1<br>(1 - 2)      | 30<br>(16 - 51)        | 96<br>(55 - 158)         | 172<br>(81 - 256)        |
| Inguinal, femoral, and abdominal hernia             | 41<br>(19 - 67)          | 0<br>(0 - 0)     | 0<br>(0 - 0)      | 2<br>(1 - 4)           | 11<br>(5 - 17)           | 27<br>(12 - 48)          |
| Inflammatory bowel disease                          | 23<br>(12 - 32)          | 1<br>(0 - 2)     | 0<br>(0 - 0)      | 4<br>(2 - 6)           | 8<br>(4 - 11)            | 10<br>(4 - 15)           |
| Vascular intestinal disorders                       | 307<br>(137 - 547)       | 0<br>(0 - 1)     | 0<br>(0 - 1)      | 16<br>(6 - 33)         | 98<br>(41 - 181)         | 193<br>(84 - 352)        |
| Gallbladder and biliary diseases                    | 87<br>(55 - 118)         | 0<br>(0 - 0)     | 0<br>(0 - 0)      | 5<br>(3 - 8)           | 26<br>(18 - 40)          | 56<br>(30 - 81)          |
| Pancreatitis                                        | 519<br>(334 - 653)       | 0<br>(0 - 1)     | 0<br>(0 - 1)      | 179<br>(128 - 217)     | 216<br>(135 - 283)       | 123<br>(59 - 178)        |
| Other digestive diseases                            | 91<br>(29 - 119)         | 0<br>(0 - 0)     | 0<br>(0 - 0)      | 13<br>(5 - 19)         | 37<br>(13 - 51)          | 40<br>(11 - 60)          |
| Neurological disorders                              | 5,704<br>(4,686 - 6,825) | 8<br>(4 - 13)    | 10<br>(6 - 15)    | 148<br>(121 - 204)     | 421<br>(346 - 510)       | 5,118<br>(4,119 - 6,230) |
| Alzheimer disease and other dementias               | 5,176<br>(4,161 - 6,309) | --               | --                | 1<br>(0 - 3)           | 270<br>(200 - 347)       | 4,904<br>(3,909 - 6,009) |
| Parkinson disease                                   | 211<br>(159 - 258)       | --               | --                | 3<br>(2 - 3)           | 34<br>(25 - 47)          | 174<br>(124 - 217)       |
| Epilepsy                                            | 172<br>(126 - 218)       | 2<br>(1 - 5)     | 6<br>(4 - 10)     | 87<br>(64 - 120)       | 58<br>(41 - 75)          | 19<br>(11 - 26)          |
| Multiple sclerosis                                  | 51<br>(30 - 112)         | --               | --                | 20<br>(11 - 49)        | 25<br>(13 - 55)          | 7<br>(3 - 14)            |
| Other neurological disorders                        | 94<br>(72 - 117)         | 6<br>(3 - 9)     | 3<br>(2 - 5)      | 37<br>(27 - 47)        | 34<br>(25 - 42)          | 15<br>(10 - 19)          |
| Mental and substance use disorders                  | 677<br>(548 - 1,101)     | 2<br>(1 - 3)     | 0<br>(0 - 0)      | 256<br>(206 - 416)     | 332<br>(243 - 560)       | 88<br>(65 - 117)         |
| Schizophrenia                                       | 31<br>(19 - 61)          | --               | --                | 11<br>(6 - 23)         | 13<br>(7 - 28)           | 7<br>(4 - 14)            |
| Alcohol use disorders                               | 490<br>(376 - 909)       | --               | --                | 170<br>(125 - 330)     | 263<br>(185 - 483)       | 57<br>(35 - 85)          |
| Drug use disorders                                  | 156<br>(89 - 188)        | 2<br>(1 - 3)     | --                | 74<br>(46 - 94)        | 56<br>(27 - 72)          | 24<br>(9 - 31)           |
| Opioid use disorders                                | 59<br>(33 - 72)          | 1<br>(0 - 1)     | --                | 29<br>(17 - 37)        | 20<br>(10 - 26)          | 9<br>(4 - 13)            |
| Cocaine use disorders                               | 7<br>(4 - 9)             | 0<br>(0 - 0)     | --                | 4<br>(3 - 6)           | 2<br>(1 - 3)             | 1<br>(0 - 1)             |
| Amphetamine use disorders                           | 7<br>(3 - 8)             | 0<br>(0 - 0)     | --                | 3<br>(2 - 4)           | 2<br>(1 - 3)             | 1<br>(0 - 1)             |
| Other drug use disorders                            | 83<br>(46 - 99)          | 1<br>(0 - 2)     | --                | 38<br>(24 - 49)        | 31<br>(15 - 41)          | 13<br>(5 - 17)           |
| Eating disorders                                    | 0<br>(0 - 0)             | --               | 0<br>(0 - 0)      | 0<br>(0 - 0)           | --                       | --                       |
| Anorexia nervosa                                    | 0<br>(0 - 0)             | --               | 0<br>(0 - 0)      | 0<br>(0 - 0)           | --                       | --                       |
| Diabetes, urogenital, blood, and endocrine diseases | 2,213<br>(2,030 - 2,544) | 11<br>(5 - 28)   | 6<br>(4 - 9)      | 203<br>(175 - 271)     | 757<br>(668 - 923)       | 1,236<br>(1,102 - 1,395) |
| Diabetes mellitus                                   | 876<br>(793 - 964)       | 0<br>(0 - 1)     | 1<br>(0 - 1)      | 65<br>(54 - 77)        | 340<br>(293 - 392)       | 470<br>(409 - 536)       |
| Acute glomerulonephritis                            | 3<br>(2 - 6)             | 0<br>(0 - 0)     | 0<br>(0 - 0)      | 1<br>(1 - 2)           | 1<br>(1 - 2)             | 1<br>(1 - 2)             |
| Chronic kidney disease                              | 1,086<br>(944 - 1,317)   | 2<br>(1 - 3)     | 2<br>(1 - 3)      | 97<br>(79 - 145)       | 337<br>(278 - 462)       | 648<br>(523 - 761)       |
| Chronic kidney disease due to diabetes mellitus     | 77<br>(46 - 182)         | 0<br>(0 - 0)     | 0<br>(0 - 0)      | 9<br>(5 - 23)          | 33<br>(20 - 79)          | 35<br>(19 - 73)          |

Web Table 31- Romania deaths with 95% UI by age, sex, and cause in 2013

| Cause                                               | Males, All Ages          | Males, 0-4 Years   | Males, 5-14 Years  | Males, 15-49 Years       | Males, 50-69 Years       | Males, 70-80 Years       |
|-----------------------------------------------------|--------------------------|--------------------|--------------------|--------------------------|--------------------------|--------------------------|
| Chronic kidney disease due to hypertension          | 291<br>(190 - 428)       | 1<br>(0 - 1)       | 0<br>(0 - 1)       | 22<br>(13 - 36)          | 80<br>(50 - 120)         | 188<br>(118 - 282)       |
| Chronic kidney disease due to glomerulonephritis    | 40<br>(29 - 57)          | 0<br>(0 - 1)       | 0<br>(0 - 0)       | 8<br>(6 - 11)            | 15<br>(10 - 21)          | 17<br>(11 - 26)          |
| Chronic kidney disease due to other causes          | 678<br>(530 - 880)       | 1<br>(0 - 1)       | 1<br>(1 - 2)       | 59<br>(42 - 95)          | 209<br>(155 - 312)       | 408<br>(269 - 519)       |
| Urinary diseases and male infertility               | 159<br>(130 - 253)       | 1<br>(0 - 1)       | 0<br>(0 - 1)       | 15<br>(12 - 25)          | 50<br>(38 - 88)          | 93<br>(74 - 140)         |
| Interstitial nephritis and urinary tract infections | 143<br>(116 - 225)       | 1<br>(0 - 1)       | 0<br>(0 - 0)       | 12<br>(9 - 21)           | 44<br>(33 - 79)          | 85<br>(67 - 129)         |
| Urolithiasis                                        | 2<br>(1 - 8)             | --                 | 0<br>(0 - 0)       | 0<br>(0 - 1)             | 1<br>(0 - 4)             | 1<br>(0 - 3)             |
| Other urinary diseases                              | 15<br>(9 - 24)           | 0<br>(0 - 0)       | 0<br>(0 - 0)       | 2<br>(1 - 3)             | 5<br>(3 - 9)             | 8<br>(4 - 13)            |
| Gynecological diseases                              | --                       | --                 | --                 | --                       | --                       | --                       |
| Uterine fibroids                                    | --                       | --                 | --                 | --                       | --                       | --                       |
| Polycystic ovarian syndrome                         | --                       | --                 | --                 | --                       | --                       | --                       |
| Endometriosis                                       | --                       | --                 | --                 | --                       | --                       | --                       |
| Genital prolapse                                    | --                       | --                 | --                 | --                       | --                       | --                       |
| Other gynecological diseases                        | --                       | --                 | --                 | --                       | --                       | --                       |
| Hemoglobinopathies and hemolytic anemias            | 31<br>(21 - 52)          | 2<br>(1 - 4)       | 1<br>(0 - 2)       | 10<br>(7 - 17)           | 7<br>(4 - 11)            | 12<br>(8 - 21)           |
| Thalassemias                                        | 2<br>(1 - 3)             | 1<br>(0 - 1)       | 0<br>(0 - 1)       | 1<br>(0 - 1)             | 0<br>(0 - 0)             | 0<br>(0 - 0)             |
| Sickle cell disorders                               | 2<br>(1 - 4)             | 0<br>(0 - 1)       | 0<br>(0 - 0)       | 1<br>(1 - 2)             | 0<br>(0 - 1)             | 0<br>(0 - 0)             |
| G6PD deficiency                                     | 1<br>(1 - 1)             | 0<br>(0 - 0)       | 0<br>(0 - 0)       | 0<br>(0 - 1)             | 0<br>(0 - 0)             | 0<br>(0 - 0)             |
| Other hemoglobinopathies and hemolytic anemias      | 27<br>(18 - 44)          | 1<br>(0 - 1)       | 0<br>(0 - 1)       | 8<br>(5 - 13)            | 6<br>(4 - 10)            | 12<br>(8 - 21)           |
| Endocrine, metabolic, blood, and immune disorders   | 57<br>(39 - 129)         | 7<br>(3 - 22)      | 2<br>(1 - 4)       | 14<br>(9 - 34)           | 22<br>(14 - 51)          | 12<br>(8 - 25)           |
| Musculoskeletal disorders                           | 20<br>(14 - 28)          | --                 | 1<br>(1 - 2)       | 5<br>(3 - 7)             | 8<br>(6 - 11)            | 7<br>(4 - 9)             |
| Rheumatoid arthritis                                | 1<br>(1 - 2)             | --                 | 0<br>(0 - 0)       | 0<br>(0 - 1)             | 0<br>(0 - 1)             | 0<br>(0 - 1)             |
| Other musculoskeletal disorders                     | 19<br>(14 - 26)          | --                 | 1<br>(0 - 1)       | 4<br>(3 - 6)             | 8<br>(5 - 10)            | 6<br>(4 - 9)             |
| Other non-communicable diseases                     | 443<br>(288 - 679)       | 346<br>(200 - 574) | 16<br>(10 - 25)    | 37<br>(29 - 45)          | 24<br>(20 - 30)          | 19<br>(15 - 24)          |
| Congenital anomalies                                | 410<br>(259 - 642)       | 338<br>(194 - 563) | 16<br>(10 - 25)    | 32<br>(24 - 39)          | 15<br>(11 - 18)          | 9<br>(7 - 11)            |
| Neural tube defects                                 | 12<br>(6 - 23)           | 11<br>(5 - 21)     | 0<br>(0 - 1)       | 1<br>(0 - 1)             | 0<br>(0 - 0)             | 0<br>(0 - 0)             |
| Congenital heart anomalies                          | 203<br>(129 - 318)       | 159<br>(90 - 265)  | 10<br>(6 - 16)     | 22<br>(16 - 28)          | 8<br>(6 - 12)            | 3<br>(2 - 4)             |
| Cleft lip and cleft palate                          | 2<br>(0 - 9)             | 2<br>(0 - 9)       | --                 | --                       | --                       | --                       |
| Down syndrome                                       | 4<br>(2 - 9)             | 3<br>(1 - 8)       | 0<br>(0 - 0)       | 1<br>(0 - 1)             | 0<br>(0 - 0)             | 0<br>(0 - 0)             |
| Chromosomal unbalanced rearrangements               | 11<br>(5 - 22)           | 9<br>(4 - 19)      | 1<br>(0 - 1)       | 1<br>(1 - 2)             | 0<br>(0 - 1)             | 0<br>(0 - 0)             |
| Other congenital anomalies                          | 176<br>(105 - 303)       | 154<br>(84 - 276)  | 5<br>(2 - 8)       | 7<br>(5 - 11)            | 5<br>(4 - 7)             | 6<br>(4 - 8)             |
| Skin and subcutaneous diseases                      | 27<br>(22 - 36)          | 1<br>(1 - 2)       | 0<br>(0 - 1)       | 5<br>(4 - 8)             | 10<br>(7 - 13)           | 11<br>(7 - 15)           |
| Cellulitis                                          | 8<br>(5 - 12)            | 0<br>(0 - 1)       | 0<br>(0 - 0)       | 1<br>(1 - 2)             | 3<br>(2 - 5)             | 3<br>(1 - 5)             |
| Pyoderma                                            | 8<br>(6 - 11)            | 1<br>(0 - 1)       | 0<br>(0 - 0)       | 2<br>(1 - 3)             | 3<br>(2 - 5)             | 3<br>(1 - 4)             |
| Decubitus ulcer                                     | 9<br>(6 - 13)            | 0<br>(0 - 0)       | 0<br>(0 - 0)       | 1<br>(1 - 2)             | 2<br>(1 - 4)             | 5<br>(3 - 8)             |
| Other skin and subcutaneous diseases                | 3<br>(2 - 4)             | 0<br>(0 - 1)       | 0<br>(0 - 0)       | 1<br>(1 - 1)             | 1<br>(1 - 2)             | 0<br>(0 - 1)             |
| Sudden infant death syndrome                        | 6<br>(1 - 12)            | 6<br>(1 - 12)      | --                 | --                       | --                       | --                       |
| Injuries                                            | 7,425<br>(6,613 - 8,224) | 138<br>(80 - 218)  | 156<br>(112 - 215) | 3,439<br>(3,089 - 3,799) | 2,462<br>(2,174 - 2,801) | 1,230<br>(1,008 - 1,387) |
| Transport injuries                                  | 1,950<br>(1,758 - 2,154) | 26<br>(14 - 43)    | 53<br>(34 - 78)    | 992<br>(867 - 1,125)     | 558<br>(484 - 644)       | 322<br>(278 - 372)       |
| Road injuries                                       | 1,707<br>(1,516 - 1,886) | 23<br>(12 - 38)    | 49<br>(31 - 73)    | 871<br>(748 - 990)       | 481<br>(412 - 555)       | 283<br>(241 - 327)       |
| Pedestrian road injuries                            | 539<br>(311 - 788)       | 11<br>(5 - 19)     | 23<br>(13 - 37)    | 203<br>(105 - 325)       | 172<br>(98 - 249)        | 131<br>(77 - 179)        |

Web Table 31- Romania deaths with 95% UI by age, sex, and cause in 2013

| Cause                                           | Males, All Ages          | Males, 0-4 Years  | Males, 5-14 Years | Males, 15-49 Years       | Males, 50-69 Years     | Males, 70-80 Years |
|-------------------------------------------------|--------------------------|-------------------|-------------------|--------------------------|------------------------|--------------------|
| Cyclist road injuries                           | 144<br>(78 - 208)        | 2<br>(1 - 3)      | 7<br>(3 - 12)     | 44<br>(22 - 66)          | 58<br>(31 - 84)        | 33<br>(17 - 51)    |
| Motorcyclist road injuries                      | 145<br>(78 - 205)        | 1<br>(0 - 1)      | 2<br>(1 - 3)      | 108<br>(56 - 150)        | 24<br>(13 - 37)        | 12<br>(6 - 19)     |
| Motor vehicle road injuries                     | 810<br>(563 - 1,012)     | 9<br>(4 - 17)     | 17<br>(9 - 28)    | 502<br>(358 - 615)       | 196<br>(124 - 263)     | 86<br>(51 - 132)   |
| Other road injuries                             | 69<br>(35 - 126)         | 1<br>(0 - 2)      | 1<br>(0 - 2)      | 15<br>(7 - 29)           | 31<br>(15 - 62)        | 21<br>(10 - 40)    |
| Other transport injuries                        | 243<br>(171 - 304)       | 2<br>(1 - 4)      | 4<br>(2 - 7)      | 121<br>(83 - 155)        | 77<br>(49 - 105)       | 39<br>(24 - 55)    |
| Unintentional injuries                          | 3,105<br>(2,729 - 3,646) | 107<br>(60 - 174) | 88<br>(59 - 129)  | 1,225<br>(1,058 - 1,603) | 1,086<br>(936 - 1,289) | 599<br>(427 - 706) |
| Falls                                           | 1,024<br>(686 - 1,261)   | 8<br>(4 - 15)     | 7<br>(4 - 11)     | 307<br>(217 - 412)       | 409<br>(296 - 518)     | 293<br>(152 - 380) |
| Drowning                                        | 632<br>(448 - 1,080)     | 21<br>(9 - 41)    | 51<br>(31 - 88)   | 322<br>(228 - 583)       | 174<br>(120 - 271)     | 65<br>(45 - 95)    |
| Fire, heat, and hot substances                  | 235<br>(168 - 315)       | 11<br>(6 - 23)    | 4<br>(2 - 8)      | 72<br>(52 - 107)         | 72<br>(51 - 105)       | 75<br>(50 - 100)   |
| Poisonings                                      | 231<br>(161 - 304)       | 10<br>(5 - 17)    | 5<br>(3 - 7)      | 84<br>(53 - 116)         | 77<br>(50 - 102)       | 56<br>(39 - 78)    |
| Exposure to mechanical forces                   | 223<br>(188 - 358)       | 5<br>(2 - 8)      | 7<br>(4 - 10)     | 128<br>(103 - 222)       | 66<br>(53 - 107)       | 18<br>(14 - 23)    |
| Unintentional firearm injuries                  | 9<br>(7 - 12)            | 0<br>(0 - 0)      | 0<br>(0 - 1)      | 6<br>(4 - 8)             | 2<br>(1 - 3)           | 1<br>(0 - 1)       |
| Unintentional suffocation                       | 5<br>(4 - 11)            | 1<br>(0 - 2)      | 0<br>(0 - 1)      | 2<br>(1 - 4)             | 2<br>(1 - 3)           | 1<br>(0 - 1)       |
| Other exposure to mechanical forces             | 209<br>(174 - 339)       | 4<br>(2 - 7)      | 6<br>(4 - 9)      | 120<br>(96 - 212)        | 62<br>(50 - 102)       | 16<br>(13 - 22)    |
| Adverse effects of medical treatment            | 67<br>(37 - 94)          | 2<br>(1 - 4)      | 1<br>(0 - 1)      | 14<br>(7 - 20)           | 25<br>(13 - 35)        | 26<br>(12 - 38)    |
| Animal contact                                  | 34<br>(15 - 43)          | 0<br>(0 - 1)      | 1<br>(0 - 2)      | 10<br>(4 - 14)           | 14<br>(6 - 19)         | 9<br>(3 - 12)      |
| Venomous animal contact                         | 6<br>(3 - 8)             | 0<br>(0 - 0)      | 0<br>(0 - 0)      | 3<br>(1 - 4)             | 2<br>(1 - 3)           | 1<br>(0 - 1)       |
| Non-venomous animal contact                     | 28<br>(12 - 35)          | 0<br>(0 - 1)      | 1<br>(0 - 1)      | 7<br>(3 - 10)            | 12<br>(5 - 16)         | 8<br>(3 - 11)      |
| Foreign body                                    | 406<br>(227 - 616)       | 45<br>(20 - 79)   | 5<br>(2 - 9)      | 150<br>(85 - 238)        | 158<br>(86 - 255)      | 47<br>(24 - 72)    |
| Pulmonary aspiration and foreign body in airway | 405<br>(225 - 615)       | 45<br>(20 - 79)   | 5<br>(2 - 9)      | 150<br>(85 - 238)        | 158<br>(86 - 255)      | 47<br>(23 - 71)    |
| Foreign body in other body part                 | 1<br>(1 - 2)             | 0<br>(0 - 0)      | 0<br>(0 - 0)      | 1<br>(0 - 1)             | 0<br>(0 - 1)           | 0<br>(0 - 0)       |
| Other unintentional injuries                    | 254<br>(200 - 323)       | 5<br>(2 - 11)     | 8<br>(4 - 14)     | 138<br>(101 - 191)       | 92<br>(59 - 140)       | 11<br>(7 - 16)     |
| Self-harm and interpersonal violence            | 2,370<br>(1,606 - 2,921) | 5<br>(3 - 9)      | 15<br>(8 - 24)    | 1,222<br>(806 - 1,518)   | 818<br>(567 - 1,030)   | 310<br>(224 - 389) |
| Self-harm                                       | 2,017<br>(1,207 - 2,437) | --                | 11<br>(6 - 18)    | 1,035<br>(577 - 1,282)   | 706<br>(429 - 893)     | 264<br>(174 - 335) |
| Interpersonal violence                          | 353<br>(269 - 619)       | 5<br>(3 - 9)      | 4<br>(2 - 7)      | 187<br>(135 - 327)       | 111<br>(78 - 209)      | 45<br>(32 - 81)    |
| Assault by firearm                              | 73<br>(36 - 150)         | 1<br>(0 - 1)      | 0<br>(0 - 1)      | 52<br>(26 - 108)         | 17<br>(8 - 35)         | 3<br>(1 - 7)       |
| Assault by sharp object                         | 121<br>(73 - 243)        | 1<br>(0 - 2)      | 1<br>(1 - 3)      | 66<br>(38 - 135)         | 38<br>(23 - 76)        | 13<br>(8 - 28)     |
| Assault by other means                          | 159<br>(110 - 289)       | 3<br>(2 - 6)      | 2<br>(1 - 4)      | 68<br>(43 - 122)         | 56<br>(37 - 113)       | 29<br>(19 - 52)    |
| Forces of nature, war, and legal intervention   | 0<br>(0 - 0)             | 0<br>(0 - 0)      | --                | --                       | --                     | --                 |
| Exposure to forces of nature                    | 0<br>(0 - 0)             | 0<br>(0 - 0)      | --                | --                       | --                     | --                 |

Web Table 31- Romania deaths with 95% UI by age, sex, and cause in 2013

| Cause                                                             | Females, All Ages              | Females, 0-4 Years     | Females, 5-14 Years | Females, 15-49 Years     | Females, 50-69 Years        | Females, 70-80 Years        |
|-------------------------------------------------------------------|--------------------------------|------------------------|---------------------|--------------------------|-----------------------------|-----------------------------|
| All causes                                                        | 118,595<br>(113,584 - 123,540) | 1,065<br>(647 - 1,754) | 193<br>(147 - 256)  | 4,410<br>(4,081 - 4,744) | 19,794<br>(18,544 - 20,992) | 93,134<br>(89,744 - 96,381) |
| Communicable, maternal, neonatal, and nutritional diseases        | 2,963<br>(2,458 - 3,588)       | 622<br>(370 - 1,020)   | 36<br>(26 - 50)     | 315<br>(261 - 360)       | 454<br>(344 - 540)          | 1,535<br>(1,209 - 1,976)    |
| HIV/AIDS and tuberculosis                                         | 244<br>(138 - 288)             | 3<br>(1 - 5)           | 1<br>(0 - 2)        | 100<br>(68 - 121)        | 76<br>(42 - 96)             | 64<br>(25 - 84)             |
| Tuberculosis                                                      | 202<br>(92 - 244)              | 3<br>(1 - 5)           | 1<br>(0 - 1)        | 67<br>(32 - 86)          | 68<br>(34 - 87)             | 63<br>(23 - 83)             |
| HIV/AIDS                                                          | 42<br>(29 - 62)                | 0<br>(0 - 0)           | 0<br>(0 - 0)        | 33<br>(24 - 45)          | 8<br>(4 - 15)               | 1<br>(0 - 3)                |
| HIV/AIDS resulting in mycobacterial infection                     | 2<br>(1 - 3)                   | 0<br>(0 - 0)           | 0<br>(0 - 0)        | 2<br>(1 - 2)             | 0<br>(0 - 1)                | 0<br>(0 - 0)                |
| HIV/AIDS resulting in other diseases                              | 40<br>(28 - 59)                | 0<br>(0 - 0)           | 0<br>(0 - 0)        | 32<br>(23 - 43)          | 7<br>(4 - 14)               | 1<br>(0 - 3)                |
| Diarrhea, lower respiratory, and other common infectious diseases | 2,278<br>(1,859 - 2,781)       | 343<br>(205 - 526)     | 30<br>(22 - 43)     | 161<br>(128 - 192)       | 353<br>(264 - 434)          | 1,391<br>(1,037 - 1,832)    |
| Diarrheal diseases                                                | 28<br>(17 - 45)                | 19<br>(9 - 36)         | 0<br>(0 - 1)        | 1<br>(1 - 1)             | 2<br>(2 - 3)                | 5<br>(3 - 8)                |
| Intestinal infectious diseases                                    | 24<br>(13 - 43)                | 4<br>(1 - 10)          | 3<br>(1 - 6)        | 7<br>(2 - 15)            | 5<br>(2 - 10)               | 6<br>(2 - 11)               |
| Typhoid fever                                                     | 12<br>(5 - 24)                 | 2<br>(1 - 4)           | 2<br>(1 - 4)        | 4<br>(1 - 9)             | 2<br>(1 - 6)                | 2<br>(1 - 5)                |
| Paratyphoid fever                                                 | 4<br>(1 - 7)                   | 1<br>(0 - 2)           | 1<br>(0 - 1)        | 1<br>(0 - 3)             | 1<br>(0 - 2)                | 1<br>(0 - 2)                |
| Other intestinal infectious diseases                              | 9<br>(4 - 17)                  | 2<br>(0 - 6)           | 0<br>(0 - 2)        | 2<br>(0 - 6)             | 2<br>(0 - 5)                | 3<br>(0 - 8)                |
| Lower respiratory infections                                      | 2,121<br>(1,722 - 2,602)       | 290<br>(172 - 450)     | 20<br>(14 - 29)     | 131<br>(102 - 160)       | 325<br>(239 - 405)          | 1,354<br>(1,037 - 1,784)    |
| Upper respiratory infections                                      | 4<br>(1 - 12)                  | 0<br>(0 - 0)           | 0<br>(0 - 0)        | 0<br>(0 - 1)             | 1<br>(0 - 2)                | 3<br>(0 - 11)               |
| Otitis media                                                      | 1<br>(1 - 2)                   | 0<br>(0 - 1)           | 0<br>(0 - 0)        | 0<br>(0 - 1)             | 0<br>(0 - 0)                | 0<br>(0 - 0)                |
| Meningitis                                                        | 39<br>(30 - 49)                | 14<br>(8 - 23)         | 2<br>(1 - 3)        | 6<br>(5 - 8)             | 9<br>(7 - 12)               | 8<br>(5 - 10)               |
| Pneumococcal meningitis                                           | 9<br>(6 - 12)                  | 2<br>(1 - 3)           | 0<br>(0 - 1)        | 2<br>(1 - 3)             | 3<br>(1 - 4)                | 2<br>(1 - 3)                |
| H influenzae type B meningitis                                    | 8<br>(5 - 12)                  | 5<br>(2 - 8)           | 0<br>(0 - 1)        | 1<br>(0 - 1)             | 1<br>(0 - 2)                | 1<br>(0 - 2)                |
| Meningococcal meningitis                                          | 10<br>(6 - 14)                 | 4<br>(2 - 7)           | 1<br>(0 - 1)        | 1<br>(1 - 2)             | 2<br>(1 - 3)                | 2<br>(1 - 3)                |
| Other meningitis                                                  | 13<br>(9 - 17)                 | 3<br>(2 - 6)           | 0<br>(0 - 1)        | 2<br>(1 - 3)             | 4<br>(2 - 6)                | 3<br>(2 - 4)                |
| Encephalitis                                                      | 46<br>(29 - 65)                | 13<br>(7 - 25)         | 5<br>(2 - 8)        | 13<br>(6 - 19)           | 9<br>(5 - 14)               | 6<br>(3 - 9)                |
| Diphtheria                                                        | 0<br>(0 - 1)                   | 0<br>(0 - 1)           | 0<br>(0 - 0)        | 0<br>(0 - 0)             | 0<br>(0 - 0)                | --                          |
| Whooping cough                                                    | 1<br>(1 - 2)                   | 0<br>(0 - 1)           | 0<br>(0 - 0)        | 1<br>(0 - 1)             | 0<br>(0 - 0)                | --                          |
| Tetanus                                                           | 2<br>(1 - 3)                   | 0<br>(0 - 0)           | 0<br>(0 - 0)        | 0<br>(0 - 1)             | 1<br>(0 - 1)                | 1<br>(0 - 1)                |
| Measles                                                           | 1<br>(0 - 1)                   | 1<br>(0 - 1)           | 0<br>(0 - 0)        | 0<br>(0 - 0)             | 0<br>(0 - 0)                | --                          |
| Varicella and herpes zoster                                       | 11<br>(2 - 47)                 | 1<br>(0 - 3)           | 0<br>(0 - 1)        | 1<br>(0 - 3)             | 1<br>(0 - 4)                | 8<br>(0 - 43)               |
| Neglected tropical diseases and malaria                           | 14<br>(12 - 16)                | 1<br>(0 - 2)           | 1<br>(0 - 1)        | 3<br>(3 - 4)             | 4<br>(3 - 4)                | 5<br>(5 - 6)                |
| Cysticercosis                                                     | 0<br>(0 - 0)                   | 0<br>(0 - 0)           | 0<br>(0 - 0)        | 0<br>(0 - 0)             | 0<br>(0 - 0)                | 0<br>(0 - 0)                |
| Cystic echinococcosis                                             | 9<br>(8 - 9)                   | 0<br>(0 - 0)           | 0<br>(0 - 0)        | 1<br>(1 - 2)             | 3<br>(2 - 3)                | 4<br>(4 - 5)                |
| Dengue                                                            | 1<br>(1 - 3)                   | 0<br>(0 - 1)           | 0<br>(0 - 1)        | 1<br>(0 - 1)             | 0<br>(0 - 0)                | 0<br>(0 - 0)                |
| Rabies                                                            | 1<br>(1 - 2)                   | 0<br>(0 - 0)           | 0<br>(0 - 0)        | 0<br>(0 - 1)             | 0<br>(0 - 1)                | 0<br>(0 - 0)                |
| Other neglected tropical diseases                                 | 3<br>(1 - 4)                   | 1<br>(0 - 1)           | 0<br>(0 - 0)        | 1<br>(0 - 1)             | 1<br>(0 - 1)                | 0<br>(0 - 1)                |
| Maternal disorders                                                | 37<br>(28 - 46)                | --                     | 0<br>(0 - 0)        | 37<br>(28 - 46)          | --                          | --                          |
| Maternal hemorrhage                                               | 5<br>(3 - 6)                   | --                     | 0<br>(0 - 0)        | 5<br>(3 - 6)             | --                          | --                          |
| Maternal sepsis and other maternal infections                     | 3<br>(2 - 4)                   | --                     | 0<br>(0 - 0)        | 3<br>(2 - 4)             | --                          | --                          |
| Maternal hypertensive disorders                                   | 3<br>(2 - 5)                   | --                     | 0<br>(0 - 0)        | 3<br>(2 - 4)             | --                          | --                          |
| Maternal obstructed labor                                         | 3<br>(2 - 5)                   | --                     | 0<br>(0 - 0)        | 3<br>(2 - 5)             | --                          | --                          |
| Maternal abortive outcome                                         | 8<br>(6 - 11)                  | --                     | 0<br>(0 - 0)        | 8<br>(6 - 11)            | --                          | --                          |
| Indirect maternal deaths                                          | 7<br>(5 - 9)                   | --                     | 0<br>(0 - 0)        | 7<br>(5 - 9)             | --                          | --                          |

Web Table 31- Romania deaths with 95% UI by age, sex, and cause in 2013

| Cause                                                            | Females, All Ages              | Females, 0-4 Years | Females, 5-14 Years | Females, 15-49 Years     | Females, 50-69 Years        | Females, 70-80 Years        |
|------------------------------------------------------------------|--------------------------------|--------------------|---------------------|--------------------------|-----------------------------|-----------------------------|
| Late maternal deaths                                             | 3<br>(2 - 4)                   | --                 | 0<br>(0 - 0)        | 3<br>(2 - 4)             | --                          | --                          |
| Maternal deaths aggravated by HIV/AIDS                           | 0<br>(0 - 0)                   | --                 | --                  | 0<br>(0 - 0)             | --                          | --                          |
| Other maternal disorders                                         | 5<br>(4 - 7)                   | --                 | 0<br>(0 - 0)        | 5<br>(4 - 7)             | --                          | --                          |
| Neonatal disorders                                               | 245<br>(140 - 445)             | 245<br>(140 - 445) | --                  | --                       | --                          | --                          |
| Neonatal preterm birth complications                             | 105<br>(49 - 201)              | 105<br>(49 - 201)  | --                  | --                       | --                          | --                          |
| Neonatal encephalopathy due to birth asphyxia and trauma         | 35<br>(18 - 64)                | 35<br>(18 - 64)    | --                  | --                       | --                          | --                          |
| Neonatal sepsis and other neonatal infections                    | 3<br>(1 - 9)                   | 3<br>(1 - 9)       | --                  | --                       | --                          | --                          |
| Hemolytic disease and other neonatal jaundice                    | 3<br>(1 - 8)                   | 3<br>(1 - 8)       | --                  | --                       | --                          | --                          |
| Other neonatal disorders                                         | 99<br>(51 - 187)               | 99<br>(51 - 187)   | --                  | --                       | --                          | --                          |
| Nutritional deficiencies                                         | 80<br>(64 - 113)               | 1<br>(0 - 2)       | 1<br>(0 - 1)        | 7<br>(5 - 9)             | 10<br>(8 - 14)              | 61<br>(46 - 89)             |
| Protein-energy malnutrition                                      | 27<br>(10 - 43)                | 0<br>(0 - 1)       | 0<br>(0 - 0)        | 2<br>(1 - 3)             | 5<br>(2 - 7)                | 19<br>(6 - 34)              |
| Iodine deficiency                                                | 2<br>(0 - 10)                  | 0<br>(0 - 0)       | 0<br>(0 - 0)        | 0<br>(0 - 0)             | 0<br>(0 - 2)                | 1<br>(0 - 9)                |
| Iron-deficiency anemia                                           | 42<br>(24 - 72)                | 0<br>(0 - 0)       | 0<br>(0 - 0)        | 3<br>(1 - 4)             | 4<br>(2 - 7)                | 36<br>(21 - 64)             |
| Other nutritional deficiencies                                   | 9<br>(5 - 17)                  | 0<br>(0 - 1)       | 0<br>(0 - 1)        | 2<br>(1 - 3)             | 1<br>(1 - 3)                | 5<br>(2 - 11)               |
| Other communicable, maternal, neonatal, and nutritional diseases | 66<br>(40 - 106)               | 30<br>(8 - 67)     | 4<br>(2 - 6)        | 7<br>(6 - 10)            | 11<br>(8 - 18)              | 14<br>(10 - 19)             |
| Sexually transmitted diseases excluding HIV                      | 31<br>(8 - 70)                 | 25<br>(4 - 62)     | 2<br>(0 - 5)        | 1<br>(1 - 3)             | 1<br>(1 - 2)                | 1<br>(1 - 2)                |
| Syphilis                                                         | 30<br>(6 - 69)                 | 25<br>(4 - 62)     | 2<br>(0 - 5)        | 1<br>(0 - 1)             | 1<br>(0 - 1)                | 1<br>(1 - 2)                |
| Chlamydial infection                                             | 1<br>(0 - 1)                   | --                 | 0<br>(0 - 0)        | 0<br>(0 - 1)             | 0<br>(0 - 0)                | 0<br>(0 - 0)                |
| Gonococcal infection                                             | 1<br>(0 - 1)                   | --                 | 0<br>(0 - 0)        | 0<br>(0 - 1)             | 0<br>(0 - 0)                | 0<br>(0 - 0)                |
| Other sexually transmitted diseases                              | 1<br>(0 - 1)                   | --                 | 0<br>(0 - 0)        | 0<br>(0 - 1)             | 0<br>(0 - 0)                | 0<br>(0 - 0)                |
| Hepatitis                                                        | 7<br>(5 - 8)                   | 1<br>(0 - 1)       | 0<br>(0 - 1)        | 2<br>(2 - 3)             | 2<br>(1 - 3)                | 1<br>(1 - 2)                |
| Acute hepatitis A                                                | 2<br>(1 - 4)                   | 0<br>(0 - 1)       | 0<br>(0 - 0)        | 1<br>(0 - 2)             | 0<br>(0 - 1)                | 0<br>(0 - 0)                |
| Acute hepatitis B                                                | 4<br>(2 - 5)                   | 0<br>(0 - 0)       | 0<br>(0 - 0)        | 1<br>(0 - 2)             | 1<br>(1 - 2)                | 1<br>(1 - 2)                |
| Acute hepatitis C                                                | 1<br>(0 - 2)                   | --                 | 0<br>(0 - 0)        | 0<br>(0 - 1)             | 0<br>(0 - 1)                | 0<br>(0 - 1)                |
| Other infectious diseases                                        | 28<br>(21 - 42)                | 4<br>(2 - 9)       | 1<br>(1 - 2)        | 3<br>(3 - 5)             | 8<br>(6 - 14)               | 11<br>(7 - 16)              |
| Non-communicable diseases                                        | 113,287<br>(108,529 - 117,848) | 336<br>(196 - 545) | 82<br>(62 - 109)    | 3,451<br>(3,183 - 3,732) | 18,660<br>(17,475 - 19,821) | 90,758<br>(87,471 - 94,014) |
| Neoplasms                                                        | 17,017<br>(13,593 - 18,809)    | 28<br>(16 - 45)    | 43<br>(31 - 59)     | 1,787<br>(1,530 - 1,996) | 6,638<br>(5,435 - 7,379)    | 8,521<br>(6,557 - 9,490)    |
| Esophageal cancer                                                | 114<br>(95 - 138)              | --                 | --                  | 7<br>(5 - 10)            | 44<br>(35 - 55)             | 63<br>(51 - 79)             |
| Stomach cancer                                                   | 942<br>(685 - 1,266)           | --                 | --                  | 51<br>(35 - 70)          | 305<br>(225 - 396)          | 585<br>(409 - 835)          |
| Liver cancer                                                     | 900<br>(329 - 1,152)           | --                 | 1<br>(0 - 1)        | 43<br>(17 - 57)          | 301<br>(124 - 393)          | 556<br>(177 - 764)          |
| Liver cancer due to hepatitis B                                  | 202<br>(72 - 312)              | --                 | 0<br>(0 - 0)        | 15<br>(6 - 23)           | 87<br>(33 - 137)            | 100<br>(29 - 163)           |
| Liver cancer due to hepatitis C                                  | 378<br>(142 - 543)             | --                 | 0<br>(0 - 0)        | 15<br>(6 - 22)           | 118<br>(50 - 176)           | 245<br>(80 - 369)           |
| Liver cancer due to alcohol use                                  | 181<br>(59 - 277)              | --                 | --                  | 4<br>(1 - 8)             | 46<br>(17 - 75)             | 131<br>(38 - 207)           |
| Liver cancer due to other causes                                 | 138<br>(45 - 210)              | --                 | 0<br>(0 - 1)        | 9<br>(3 - 14)            | 48<br>(18 - 76)             | 80<br>(22 - 131)            |
| Larynx cancer                                                    | 53<br>(34 - 76)                | --                 | --                  | 6<br>(3 - 9)             | 24<br>(15 - 36)             | 22<br>(14 - 33)             |
| Tracheal, bronchus and lung cancer                               | 1,844<br>(1,250 - 2,180)       | --                 | --                  | 155<br>(117 - 189)       | 829<br>(575 - 987)          | 859<br>(484 - 1,067)        |
| Breast cancer                                                    | 2,805<br>(1,786 - 3,396)       | --                 | --                  | 345<br>(262 - 452)       | 1,219<br>(813 - 1,487)      | 1,240<br>(680 - 1,539)      |
| Cervical cancer                                                  | 1,701<br>(1,164 - 2,144)       | --                 | --                  | 388<br>(254 - 520)       | 760<br>(503 - 988)          | 553<br>(381 - 732)          |
| Uterine cancer                                                   | 355<br>(224 - 444)             | --                 | --                  | 24<br>(14 - 34)          | 164<br>(102 - 213)          | 168<br>(104 - 215)          |
| Prostate cancer                                                  | --                             | --                 | --                  | --                       | --                          | --                          |

Web Table 31- Romania deaths with 95% UI by age, sex, and cause in 2013

| Cause                                         | Females, All Ages           | Females, 0-4 Years | Females, 5-14 Years | Females, 15-49 Years | Females, 50-69 Years      | Females, 70-80 Years        |
|-----------------------------------------------|-----------------------------|--------------------|---------------------|----------------------|---------------------------|-----------------------------|
| Colon and rectum cancer                       | 2,122<br>(1,827 - 2,415)    | --                 | --                  | 103<br>(84 - 123)    | 630<br>(543 - 714)        | 1,389<br>(1,155 - 1,647)    |
| Lip and oral cavity cancer                    | 127<br>(104 - 151)          | --                 | --                  | 12<br>(9 - 15)       | 45<br>(36 - 56)           | 69<br>(54 - 86)             |
| Nasopharynx cancer                            | 38<br>(15 - 60)             | --                 | 0<br>(0 - 0)        | 8<br>(3 - 14)        | 17<br>(7 - 27)            | 12<br>(5 - 21)              |
| Other pharynx cancer                          | 46<br>(34 - 60)             | --                 | --                  | 6<br>(4 - 9)         | 21<br>(15 - 30)           | 19<br>(13 - 26)             |
| Gallbladder and biliary tract cancer          | 328<br>(239 - 427)          | --                 | --                  | 12<br>(9 - 18)       | 122<br>(91 - 167)         | 195<br>(130 - 258)          |
| Pancreatic cancer                             | 1,149<br>(984 - 1,279)      | --                 | --                  | 50<br>(39 - 62)      | 399<br>(339 - 459)        | 700<br>(592 - 811)          |
| Malignant skin melanoma                       | 162<br>(108 - 213)          | --                 | --                  | 31<br>(20 - 44)      | 61<br>(37 - 78)           | 71<br>(47 - 96)             |
| Non-melanoma skin cancer                      | 213<br>(163 - 280)          | --                 | --                  | 6<br>(4 - 8)         | 26<br>(20 - 34)           | 181<br>(134 - 244)          |
| Ovarian cancer                                | 1,016<br>(824 - 1,164)      | --                 | --                  | 135<br>(106 - 165)   | 499<br>(407 - 589)        | 382<br>(253 - 468)          |
| Testicular cancer                             | --                          | --                 | --                  | --                   | --                        | --                          |
| Kidney cancer                                 | 247<br>(167 - 337)          | 1<br>(0 - 1)       | 1<br>(0 - 1)        | 16<br>(11 - 22)      | 92<br>(64 - 125)          | 138<br>(87 - 200)           |
| Bladder cancer                                | 253<br>(149 - 350)          | --                 | --                  | 6<br>(3 - 10)        | 63<br>(43 - 98)           | 184<br>(102 - 263)          |
| Brain and nervous system cancer               | 617<br>(334 - 747)          | 6<br>(3 - 11)      | 14<br>(9 - 20)      | 117<br>(88 - 146)    | 288<br>(162 - 358)        | 192<br>(60 - 264)           |
| Thyroid cancer                                | 89<br>(41 - 121)            | --                 | 0<br>(0 - 0)        | 6<br>(3 - 9)         | 30<br>(14 - 43)           | 53<br>(24 - 76)             |
| Mesothelioma                                  | 26<br>(17 - 36)             | --                 | --                  | 3<br>(2 - 5)         | 12<br>(7 - 18)            | 11<br>(6 - 17)              |
| Hodgkin lymphoma                              | 50<br>(33 - 67)             | 0<br>(0 - 0)       | 1<br>(0 - 1)        | 17<br>(11 - 25)      | 17<br>(11 - 26)           | 15<br>(8 - 21)              |
| Non-Hodgkin lymphoma                          | 269<br>(92 - 364)           | 2<br>(1 - 4)       | 3<br>(1 - 5)        | 42<br>(15 - 61)      | 106<br>(38 - 145)         | 116<br>(34 - 168)           |
| Multiple myeloma                              | 131<br>(74 - 190)           | --                 | --                  | 10<br>(6 - 15)       | 65<br>(36 - 96)           | 56<br>(29 - 95)             |
| Leukemia                                      | 467<br>(273 - 563)          | 8<br>(3 - 14)      | 11<br>(7 - 17)      | 66<br>(46 - 84)      | 156<br>(107 - 195)        | 227<br>(107 - 283)          |
| Other neoplasms                               | 955<br>(681 - 1,142)        | 11<br>(6 - 19)     | 13<br>(9 - 19)      | 122<br>(97 - 150)    | 344<br>(259 - 414)        | 463<br>(270 - 612)          |
| Cardiovascular diseases                       | 78,760<br>(74,875 - 83,435) | 5<br>(3 - 8)       | 5<br>(3 - 7)        | 886<br>(741 - 1,142) | 8,604<br>(7,770 - 10,073) | 69,260<br>(66,135 - 72,754) |
| Rheumatic heart disease                       | 303<br>(206 - 400)          | 0<br>(0 - 0)       | 0<br>(0 - 1)        | 26<br>(18 - 54)      | 83<br>(61 - 155)          | 193<br>(95 - 256)           |
| Ischemic heart disease                        | 32,891<br>(29,072 - 40,941) | 0<br>(0 - 0)       | 0<br>(0 - 1)        | 357<br>(283 - 510)   | 3,733<br>(3,192 - 4,832)  | 28,800<br>(25,303 - 35,946) |
| Cerebrovascular disease                       | 32,492<br>(27,782 - 36,541) | 0<br>(0 - 1)       | 2<br>(1 - 2)        | 326<br>(265 - 422)   | 3,440<br>(2,941 - 4,307)  | 28,724<br>(24,289 - 32,204) |
| Ischemic stroke                               | 23,929<br>(17,699 - 27,065) | 0<br>(0 - 0)       | 0<br>(0 - 0)        | 53<br>(34 - 78)      | 1,178<br>(844 - 1,596)    | 22,697<br>(16,661 - 25,780) |
| Hemorrhagic stroke                            | 8,564<br>(6,781 - 12,952)   | 0<br>(0 - 1)       | 1<br>(1 - 2)        | 273<br>(222 - 354)   | 2,262<br>(1,931 - 2,960)  | 6,027<br>(4,395 - 9,843)    |
| Hypertensive heart disease                    | 7,903<br>(4,457 - 10,883)   | 0<br>(0 - 0)       | 0<br>(0 - 0)        | 39<br>(22 - 55)      | 627<br>(412 - 831)        | 7,237<br>(3,952 - 10,068)   |
| Cardiomyopathy and myocarditis                | 3,526<br>(2,751 - 5,163)    | 4<br>(2 - 6)       | 2<br>(1 - 3)        | 83<br>(63 - 126)     | 361<br>(278 - 475)        | 3,077<br>(2,330 - 4,654)    |
| Atrial fibrillation and flutter               | 7<br>(5 - 10)               | --                 | --                  | 0<br>(0 - 0)         | 1<br>(0 - 1)              | 6<br>(4 - 9)                |
| Aortic aneurysm                               | 181<br>(113 - 267)          | --                 | --                  | 14<br>(8 - 22)       | 47<br>(28 - 69)           | 120<br>(74 - 182)           |
| Peripheral vascular disease                   | 123<br>(94 - 161)           | --                 | --                  | 1<br>(1 - 2)         | 13<br>(9 - 18)            | 109<br>(81 - 145)           |
| Endocarditis                                  | 43<br>(25 - 58)             | 0<br>(0 - 0)       | 0<br>(0 - 1)        | 4<br>(2 - 6)         | 12<br>(7 - 17)            | 26<br>(14 - 37)             |
| Other cardiovascular and circulatory diseases | 1,290<br>(957 - 1,660)      | 0<br>(0 - 1)       | 0<br>(0 - 1)        | 33<br>(23 - 51)      | 289<br>(200 - 383)        | 967<br>(699 - 1,294)        |
| Chronic respiratory diseases                  | 2,755<br>(2,241 - 5,225)    | 1<br>(0 - 1)       | 1<br>(0 - 1)        | 37<br>(29 - 58)      | 331<br>(268 - 527)        | 2,385<br>(1,908 - 4,660)    |
| Chronic obstructive pulmonary disease         | 2,423<br>(1,946 - 4,502)    | 0<br>(0 - 1)       | 0<br>(0 - 0)        | 25<br>(18 - 36)      | 276<br>(221 - 421)        | 2,122<br>(1,678 - 4,052)    |
| Pneumoconiosis                                | 9<br>(5 - 19)               | 0<br>(0 - 0)       | 0<br>(0 - 0)        | 0<br>(0 - 1)         | 2<br>(1 - 4)              | 7<br>(3 - 15)               |
| Silicosis                                     | 1<br>(1 - 2)                | 0<br>(0 - 0)       | 0<br>(0 - 0)        | 0<br>(0 - 0)         | 1<br>(0 - 1)              | 0<br>(0 - 1)                |
| Asbestosis                                    | 0<br>(0 - 1)                | 0<br>(0 - 0)       | 0<br>(0 - 0)        | 0<br>(0 - 0)         | 0<br>(0 - 0)              | 0<br>(0 - 0)                |
| Coal workers pneumoconiosis                   | 0<br>(0 - 1)                | 0<br>(0 - 0)       | 0<br>(0 - 0)        | 0<br>(0 - 0)         | 0<br>(0 - 0)              | 0<br>(0 - 0)                |
| Other pneumoconiosis                          | 7<br>(4 - 15)               | 0<br>(0 - 0)       | 0<br>(0 - 0)        | 0<br>(0 - 0)         | 1<br>(1 - 2)              | 6<br>(3 - 13)               |

Web Table 31- Romania deaths with 95% UI by age, sex, and cause in 2013

| Cause                                               | Females, All Ages        | Females, 0-4 Years | Females, 5-14 Years | Females, 15-49 Years | Females, 50-69 Years     | Females, 70-80 Years     |
|-----------------------------------------------------|--------------------------|--------------------|---------------------|----------------------|--------------------------|--------------------------|
| Asthma                                              | 150<br>(86 - 333)        | 0<br>(0 - 0)       | 0<br>(0 - 0)        | 6<br>(3 - 9)         | 30<br>(17 - 56)          | 115<br>(62 - 266)        |
| Interstitial lung disease and pulmonary sarcoidosis | 149<br>(73 - 428)        | 0<br>(0 - 1)       | 0<br>(0 - 1)        | 6<br>(3 - 12)        | 21<br>(10 - 46)          | 122<br>(56 - 365)        |
| Other chronic respiratory diseases                  | 23<br>(12 - 45)          | 0<br>(0 - 0)       | 0<br>(0 - 0)        | 1<br>(1 - 2)         | 2<br>(1 - 3)             | 20<br>(10 - 41)          |
| Cirrhosis                                           | 3,374<br>(2,919 - 3,733) | 2<br>(1 - 3)       | 3<br>(2 - 4)        | 357<br>(293 - 416)   | 1,616<br>(1,382 - 1,841) | 1,397<br>(1,186 - 1,591) |
| Cirrhosis due to hepatitis B                        | 1,178<br>(704 - 1,658)   | 0<br>(0 - 0)       | 1<br>(0 - 1)        | 120<br>(70 - 174)    | 555<br>(328 - 789)       | 502<br>(288 - 723)       |
| Cirrhosis due to hepatitis C                        | 1,125<br>(676 - 1,550)   | 0<br>(0 - 0)       | 0<br>(0 - 0)        | 108<br>(51 - 160)    | 564<br>(326 - 792)       | 453<br>(259 - 645)       |
| Cirrhosis due to alcohol use                        | 570<br>(339 - 805)       | --                 | --                  | 39<br>(22 - 62)      | 248<br>(152 - 357)       | 284<br>(152 - 418)       |
| Cirrhosis due to other causes                       | 502<br>(278 - 820)       | 2<br>(1 - 3)       | 2<br>(2 - 3)        | 90<br>(57 - 137)     | 248<br>(127 - 421)       | 159<br>(79 - 271)        |
| Digestive diseases                                  | 1,441<br>(870 - 1,696)   | 4<br>(2 - 6)       | 3<br>(2 - 4)        | 83<br>(61 - 100)     | 346<br>(244 - 407)       | 1,005<br>(551 - 1,222)   |
| Peptic ulcer disease                                | 170<br>(76 - 248)        | 0<br>(0 - 0)       | 0<br>(0 - 0)        | 9<br>(5 - 13)        | 42<br>(22 - 60)          | 119<br>(47 - 182)        |
| Gastritis and duodenitis                            | 34<br>(10 - 54)          | 0<br>(0 - 0)       | 0<br>(0 - 0)        | 2<br>(1 - 2)         | 6<br>(2 - 9)             | 26<br>(7 - 44)           |
| Appendicitis                                        | 15<br>(8 - 22)           | 0<br>(0 - 1)       | 1<br>(0 - 1)        | 3<br>(1 - 4)         | 5<br>(2 - 7)             | 7<br>(3 - 12)            |
| Paralytic ileus and intestinal obstruction          | 355<br>(157 - 566)       | 2<br>(1 - 3)       | 1<br>(1 - 2)        | 19<br>(10 - 32)      | 83<br>(44 - 132)         | 250<br>(99 - 406)        |
| Inguinal, femoral, and abdominal hernia             | 44<br>(21 - 82)          | 0<br>(0 - 0)       | 0<br>(0 - 0)        | 1<br>(1 - 3)         | 11<br>(6 - 20)           | 32<br>(13 - 63)          |
| Inflammatory bowel disease                          | 23<br>(10 - 32)          | 1<br>(0 - 2)       | 0<br>(0 - 0)        | 2<br>(1 - 4)         | 6<br>(3 - 8)             | 13<br>(5 - 21)           |
| Vascular intestinal disorders                       | 356<br>(165 - 528)       | 0<br>(0 - 0)       | 0<br>(0 - 0)        | 6<br>(3 - 11)        | 60<br>(29 - 93)          | 290<br>(130 - 434)       |
| Gallbladder and biliary diseases                    | 104<br>(52 - 149)        | 0<br>(0 - 0)       | 0<br>(0 - 0)        | 4<br>(2 - 5)         | 23<br>(14 - 32)          | 77<br>(34 - 118)         |
| Pancreatitis                                        | 263<br>(144 - 367)       | 0<br>(0 - 0)       | 0<br>(0 - 1)        | 32<br>(21 - 43)      | 92<br>(54 - 128)         | 139<br>(64 - 211)        |
| Other digestive diseases                            | 77<br>(42 - 107)         | 0<br>(0 - 1)       | 0<br>(0 - 0)        | 5<br>(3 - 7)         | 19<br>(11 - 26)          | 52<br>(26 - 78)          |
| Neurological disorders                              | 6,862<br>(5,220 - 8,323) | 5<br>(3 - 9)       | 6<br>(4 - 9)        | 73<br>(58 - 107)     | 336<br>(261 - 415)       | 6,441<br>(4,837 - 7,905) |
| Alzheimer disease and other dementias               | 6,498<br>(4,895 - 7,929) | --                 | --                  | 1<br>(0 - 2)         | 237<br>(163 - 312)       | 6,260<br>(4,684 - 7,726) |
| Parkinson disease                                   | 174<br>(99 - 226)        | --                 | --                  | 2<br>(1 - 2)         | 26<br>(18 - 39)          | 146<br>(76 - 196)        |
| Epilepsy                                            | 76<br>(53 - 103)         | 2<br>(1 - 3)       | 4<br>(3 - 7)        | 33<br>(24 - 52)      | 23<br>(16 - 30)          | 13<br>(8 - 19)           |
| Multiple sclerosis                                  | 60<br>(39 - 111)         | --                 | --                  | 23<br>(14 - 50)      | 28<br>(17 - 49)          | 9<br>(5 - 15)            |
| Other neurological disorders                        | 54<br>(47 - 61)          | 4<br>(2 - 7)       | 2<br>(1 - 2)        | 14<br>(11 - 16)      | 22<br>(18 - 26)          | 13<br>(11 - 16)          |
| Mental and substance use disorders                  | 246<br>(185 - 390)       | 2<br>(1 - 4)       | 0<br>(0 - 0)        | 67<br>(49 - 119)     | 113<br>(78 - 192)        | 64<br>(50 - 87)          |
| Schizophrenia                                       | 32<br>(23 - 48)          | --                 | --                  | 6<br>(4 - 10)        | 12<br>(8 - 19)           | 14<br>(9 - 22)           |
| Alcohol use disorders                               | 127<br>(63 - 272)        | --                 | --                  | 36<br>(18 - 84)      | 70<br>(33 - 151)         | 21<br>(9 - 42)           |
| Drug use disorders                                  | 86<br>(69 - 103)         | 2<br>(1 - 4)       | --                  | 24<br>(18 - 32)      | 31<br>(24 - 40)          | 28<br>(21 - 37)          |
| Opioid use disorders                                | 31<br>(25 - 37)          | 1<br>(0 - 2)       | --                  | 9<br>(6 - 12)        | 10<br>(8 - 14)           | 11<br>(8 - 14)           |
| Cocaine use disorders                               | 6<br>(4 - 7)             | 0<br>(0 - 0)       | --                  | 2<br>(1 - 3)         | 2<br>(1 - 3)             | 2<br>(1 - 2)             |
| Amphetamine use disorders                           | 6<br>(5 - 7)             | 0<br>(0 - 0)       | --                  | 2<br>(1 - 2)         | 2<br>(2 - 3)             | 2<br>(1 - 2)             |
| Other drug use disorders                            | 43<br>(35 - 53)          | 1<br>(0 - 2)       | --                  | 12<br>(8 - 15)       | 17<br>(13 - 22)          | 14<br>(10 - 19)          |
| Eating disorders                                    | 1<br>(1 - 2)             | --                 | 0<br>(0 - 0)        | 1<br>(0 - 1)         | --                       | --                       |
| Anorexia nervosa                                    | 1<br>(1 - 2)             | --                 | 0<br>(0 - 0)        | 1<br>(0 - 1)         | --                       | --                       |
| Diabetes, urogenital, blood, and endocrine diseases | 2,431<br>(2,134 - 2,788) | 9<br>(5 - 18)      | 6<br>(4 - 8)        | 127<br>(107 - 170)   | 648<br>(555 - 791)       | 1,641<br>(1,382 - 1,881) |
| Diabetes mellitus                                   | 1,079<br>(910 - 1,238)   | 0<br>(0 - 1)       | 1<br>(1 - 2)        | 33<br>(26 - 41)      | 291<br>(240 - 354)       | 754<br>(550 - 897)       |
| Acute glomerulonephritis                            | 3<br>(2 - 5)             | 0<br>(0 - 0)       | 0<br>(0 - 0)        | 1<br>(0 - 1)         | 1<br>(1 - 2)             | 1<br>(1 - 3)             |
| Chronic kidney disease                              | 1,085<br>(861 - 1,301)   | 1<br>(1 - 2)       | 2<br>(2 - 3)        | 64<br>(50 - 91)      | 275<br>(217 - 357)       | 743<br>(547 - 901)       |
| Chronic kidney disease due to diabetes mellitus     | 81<br>(59 - 109)         | 0<br>(0 - 0)       | 0<br>(0 - 0)        | 5<br>(3 - 7)         | 36<br>(26 - 51)          | 39<br>(26 - 55)          |

Web Table 31- Romania deaths with 95% UI by age, sex, and cause in 2013

| Cause                                               | Females, All Ages        | Females, 0-4 Years | Females, 5-14 Years | Females, 15-49 Years | Females, 50-69 Years | Females, 70-80 Years |
|-----------------------------------------------------|--------------------------|--------------------|---------------------|----------------------|----------------------|----------------------|
| Chronic kidney disease due to hypertension          | 307<br>(191 - 449)       | 0<br>(0 - 1)       | 0<br>(0 - 1)        | 14<br>(8 - 23)       | 52<br>(29 - 83)      | 241<br>(148 - 355)   |
| Chronic kidney disease due to glomerulonephritis    | 36<br>(25 - 53)          | 0<br>(0 - 0)       | 0<br>(0 - 0)        | 5<br>(3 - 7)         | 12<br>(8 - 18)       | 19<br>(12 - 30)      |
| Chronic kidney disease due to other causes          | 661<br>(430 - 869)       | 0<br>(0 - 1)       | 2<br>(1 - 2)        | 39<br>(26 - 63)      | 176<br>(116 - 241)   | 444<br>(262 - 602)   |
| Urinary diseases and male infertility               | 190<br>(144 - 298)       | 0<br>(0 - 1)       | 0<br>(0 - 1)        | 15<br>(10 - 27)      | 57<br>(38 - 104)     | 117<br>(86 - 183)    |
| Interstitial nephritis and urinary tract infections | 179<br>(137 - 281)       | 0<br>(0 - 1)       | 0<br>(0 - 1)        | 14<br>(9 - 25)       | 53<br>(36 - 98)      | 111<br>(83 - 175)    |
| Urolithiasis                                        | 2<br>(1 - 8)             | --                 | 0<br>(0 - 0)        | 0<br>(0 - 1)         | 1<br>(0 - 3)         | 1<br>(0 - 3)         |
| Other urinary diseases                              | 8<br>(5 - 16)            | 0<br>(0 - 0)       | 0<br>(0 - 0)        | 1<br>(1 - 2)         | 2<br>(1 - 5)         | 5<br>(3 - 12)        |
| Gynecological diseases                              | 2<br>(1 - 3)             | --                 | --                  | 1<br>(0 - 1)         | 0<br>(0 - 1)         | 1<br>(0 - 1)         |
| Uterine fibroids                                    | 0<br>(0 - 1)             | --                 | --                  | 0<br>(0 - 0)         | 0<br>(0 - 0)         | 0<br>(0 - 0)         |
| Polycystic ovarian syndrome                         | 0<br>(0 - 0)             | --                 | --                  | 0<br>(0 - 0)         | 0<br>(0 - 0)         | --                   |
| Endometriosis                                       | 0<br>(0 - 0)             | --                 | --                  | 0<br>(0 - 0)         | 0<br>(0 - 0)         | --                   |
| Genital prolapse                                    | 0<br>(0 - 1)             | --                 | --                  | 0<br>(0 - 0)         | 0<br>(0 - 0)         | 0<br>(0 - 0)         |
| Other gynecological diseases                        | 1<br>(1 - 1)             | --                 | --                  | 0<br>(0 - 0)         | 0<br>(0 - 0)         | 0<br>(0 - 1)         |
| Hemoglobinopathies and hemolytic anemias            | 21<br>(13 - 33)          | 2<br>(1 - 4)       | 1<br>(1 - 2)        | 5<br>(3 - 7)         | 8<br>(5 - 14)        | 5<br>(3 - 8)         |
| Thalassemias                                        | 2<br>(1 - 3)             | 1<br>(0 - 1)       | 0<br>(0 - 1)        | 1<br>(0 - 1)         | 0<br>(0 - 0)         | 0<br>(0 - 0)         |
| Sickle cell disorders                               | 2<br>(1 - 3)             | 0<br>(0 - 1)       | 0<br>(0 - 0)        | 1<br>(0 - 1)         | 1<br>(0 - 1)         | 0<br>(0 - 0)         |
| G6PD deficiency                                     | 0<br>(0 - 1)             | 0<br>(0 - 0)       | 0<br>(0 - 0)        | 0<br>(0 - 0)         | 0<br>(0 - 0)         | 0<br>(0 - 0)         |
| Other hemoglobinopathies and hemolytic anemias      | 17<br>(11 - 27)          | 1<br>(0 - 2)       | 0<br>(0 - 1)        | 3<br>(2 - 5)         | 8<br>(5 - 13)        | 5<br>(3 - 8)         |
| Endocrine, metabolic, blood, and immune disorders   | 51<br>(38 - 103)         | 5<br>(2 - 12)      | 1<br>(1 - 2)        | 10<br>(7 - 20)       | 16<br>(11 - 34)      | 19<br>(13 - 39)      |
| Musculoskeletal disorders                           | 36<br>(23 - 44)          | --                 | 1<br>(1 - 2)        | 9<br>(6 - 13)        | 13<br>(7 - 16)       | 13<br>(8 - 16)       |
| Rheumatoid arthritis                                | 1<br>(1 - 2)             | --                 | 0<br>(0 - 0)        | 0<br>(0 - 1)         | 0<br>(0 - 1)         | 0<br>(0 - 0)         |
| Other musculoskeletal disorders                     | 35<br>(22 - 42)          | --                 | 1<br>(1 - 2)        | 9<br>(6 - 12)        | 12<br>(7 - 16)       | 12<br>(8 - 16)       |
| Other non-communicable diseases                     | 367<br>(242 - 556)       | 279<br>(160 - 458) | 14<br>(9 - 23)      | 24<br>(19 - 30)      | 16<br>(13 - 20)      | 32<br>(24 - 40)      |
| Congenital anomalies                                | 324<br>(202 - 506)       | 272<br>(156 - 446) | 14<br>(9 - 22)      | 21<br>(15 - 26)      | 6<br>(4 - 8)         | 11<br>(8 - 14)       |
| Neural tube defects                                 | 16<br>(8 - 28)           | 14<br>(7 - 26)     | 1<br>(0 - 1)        | 1<br>(0 - 1)         | 0<br>(0 - 0)         | 0<br>(0 - 0)         |
| Congenital heart anomalies                          | 159<br>(98 - 250)        | 131<br>(74 - 218)  | 8<br>(5 - 14)       | 13<br>(9 - 17)       | 2<br>(1 - 3)         | 5<br>(3 - 7)         |
| Cleft lip and cleft palate                          | 1<br>(0 - 6)             | 1<br>(0 - 6)       | --                  | --                   | --                   | --                   |
| Down syndrome                                       | 4<br>(2 - 7)             | 2<br>(1 - 5)       | 0<br>(0 - 0)        | 1<br>(0 - 1)         | 0<br>(0 - 0)         | 0<br>(0 - 0)         |
| Chromosomal unbalanced rearrangements               | 11<br>(5 - 22)           | 9<br>(3 - 19)      | 0<br>(0 - 1)        | 1<br>(1 - 2)         | 0<br>(0 - 1)         | 0<br>(0 - 1)         |
| Other congenital anomalies                          | 133<br>(80 - 214)        | 114<br>(65 - 193)  | 4<br>(3 - 8)        | 5<br>(4 - 7)         | 3<br>(2 - 4)         | 5<br>(4 - 7)         |
| Skin and subcutaneous diseases                      | 37<br>(27 - 47)          | 2<br>(1 - 4)       | 0<br>(0 - 1)        | 4<br>(3 - 5)         | 10<br>(7 - 13)       | 22<br>(14 - 29)      |
| Cellulitis                                          | 8<br>(4 - 12)            | 0<br>(0 - 1)       | 0<br>(0 - 0)        | 1<br>(1 - 1)         | 3<br>(1 - 4)         | 4<br>(2 - 7)         |
| Pyoderma                                            | 11<br>(8 - 15)           | 1<br>(0 - 2)       | 0<br>(0 - 0)        | 1<br>(1 - 1)         | 4<br>(2 - 5)         | 6<br>(3 - 9)         |
| Decubitus ulcer                                     | 14<br>(9 - 20)           | 0<br>(0 - 0)       | 0<br>(0 - 0)        | 1<br>(1 - 2)         | 3<br>(1 - 4)         | 10<br>(6 - 15)       |
| Other skin and subcutaneous diseases                | 4<br>(2 - 7)             | 1<br>(0 - 1)       | 0<br>(0 - 0)        | 1<br>(0 - 1)         | 1<br>(1 - 3)         | 2<br>(1 - 4)         |
| Sudden infant death syndrome                        | 6<br>(1 - 13)            | 6<br>(1 - 13)      | --                  | --                   | --                   | --                   |
| Injuries                                            | 2,345<br>(2,054 - 2,653) | 107<br>(63 - 170)  | 74<br>(55 - 101)    | 643<br>(570 - 735)   | 679<br>(586 - 788)   | 841<br>(695 - 963)   |
| Transport injuries                                  | 710<br>(515 - 854)       | 19<br>(10 - 31)    | 34<br>(22 - 49)     | 233<br>(157 - 277)   | 201<br>(145 - 253)   | 224<br>(174 - 293)   |
| Road injuries                                       | 634<br>(455 - 759)       | 18<br>(9 - 29)     | 32<br>(20 - 46)     | 209<br>(135 - 252)   | 177<br>(125 - 224)   | 199<br>(155 - 266)   |
| Pedestrian road injuries                            | 281<br>(192 - 365)       | 9<br>(4 - 15)      | 16<br>(9 - 24)      | 57<br>(33 - 80)      | 76<br>(50 - 104)     | 124<br>(87 - 166)    |



Web Table 31- Romania deaths with 95% UI by age, sex, and cause in 2013

| Cause                                           | Females, All Ages      | Females, 0-4 Years | Females, 5-14 Years | Females, 15-49 Years | Females, 50-69 Years | Females, 70-80 Years |
|-------------------------------------------------|------------------------|--------------------|---------------------|----------------------|----------------------|----------------------|
| Cyclist road injuries                           | 38<br>(25 - 53)        | 1<br>(0 - 1)       | 2<br>(1 - 3)        | 10<br>(6 - 15)       | 15<br>(10 - 22)      | 10<br>(6 - 15)       |
| Motorcyclist road injuries                      | 18<br>(7 - 34)         | 0<br>(0 - 1)       | 1<br>(0 - 1)        | 10<br>(4 - 19)       | 4<br>(1 - 8)         | 3<br>(1 - 6)         |
| Motor vehicle road injuries                     | 283<br>(176 - 362)     | 8<br>(3 - 14)      | 13<br>(7 - 20)      | 129<br>(78 - 158)    | 77<br>(47 - 104)     | 57<br>(32 - 85)      |
| Other road injuries                             | 13<br>(8 - 25)         | 0<br>(0 - 1)       | 1<br>(0 - 1)        | 2<br>(1 - 4)         | 5<br>(2 - 10)        | 5<br>(2 - 11)        |
| Other transport injuries                        | 76<br>(49 - 123)       | 1<br>(0 - 2)       | 2<br>(1 - 4)        | 24<br>(15 - 39)      | 24<br>(14 - 40)      | 25<br>(14 - 42)      |
| Unintentional injuries                          | 1,082<br>(898 - 1,249) | 83<br>(46 - 137)   | 34<br>(24 - 49)     | 205<br>(173 - 260)   | 290<br>(243 - 345)   | 471<br>(343 - 564)   |
| Falls                                           | 300<br>(186 - 387)     | 4<br>(2 - 7)       | 2<br>(1 - 3)        | 38<br>(28 - 53)      | 86<br>(59 - 111)     | 170<br>(86 - 235)    |
| Drowning                                        | 176<br>(126 - 313)     | 13<br>(6 - 26)     | 16<br>(10 - 28)     | 47<br>(33 - 90)      | 54<br>(37 - 87)      | 47<br>(32 - 71)      |
| Fire, heat, and hot substances                  | 184<br>(131 - 251)     | 11<br>(5 - 20)     | 4<br>(2 - 8)        | 24<br>(17 - 39)      | 37<br>(27 - 53)      | 107<br>(73 - 147)    |
| Poisonings                                      | 140<br>(90 - 207)      | 9<br>(4 - 17)      | 4<br>(2 - 6)        | 29<br>(17 - 41)      | 35<br>(19 - 53)      | 64<br>(37 - 98)      |
| Exposure to mechanical forces                   | 41<br>(34 - 54)        | 4<br>(2 - 7)       | 3<br>(2 - 5)        | 13<br>(10 - 18)      | 11<br>(8 - 15)       | 10<br>(7 - 13)       |
| Unintentional firearm injuries                  | 2<br>(2 - 3)           | 0<br>(0 - 0)       | 0<br>(0 - 0)        | 1<br>(1 - 1)         | 0<br>(0 - 1)         | 0<br>(0 - 0)         |
| Unintentional suffocation                       | 2<br>(2 - 6)           | 1<br>(0 - 2)       | 0<br>(0 - 0)        | 1<br>(0 - 1)         | 0<br>(0 - 1)         | 1<br>(0 - 1)         |
| Other exposure to mechanical forces             | 37<br>(30 - 50)        | 3<br>(2 - 6)       | 3<br>(2 - 5)        | 12<br>(9 - 17)       | 10<br>(7 - 14)       | 9<br>(6 - 12)        |
| Adverse effects of medical treatment            | 68<br>(30 - 99)        | 2<br>(1 - 4)       | 1<br>(0 - 1)        | 9<br>(4 - 14)        | 19<br>(8 - 29)       | 37<br>(14 - 58)      |
| Animal contact                                  | 8<br>(3 - 12)          | 0<br>(0 - 1)       | 0<br>(0 - 1)        | 1<br>(0 - 2)         | 3<br>(1 - 4)         | 3<br>(1 - 6)         |
| Venomous animal contact                         | 1<br>(0 - 2)           | 0<br>(0 - 0)       | 0<br>(0 - 0)        | 1<br>(0 - 1)         | 0<br>(0 - 1)         | 0<br>(0 - 0)         |
| Non-venomous animal contact                     | 7<br>(2 - 10)          | 0<br>(0 - 1)       | 0<br>(0 - 1)        | 0<br>(0 - 1)         | 2<br>(1 - 4)         | 3<br>(1 - 6)         |
| Foreign body                                    | 139<br>(84 - 220)      | 38<br>(18 - 71)    | 3<br>(2 - 5)        | 32<br>(19 - 52)      | 39<br>(23 - 59)      | 28<br>(16 - 44)      |
| Pulmonary aspiration and foreign body in airway | 138<br>(82 - 219)      | 38<br>(18 - 71)    | 3<br>(1 - 5)        | 31<br>(18 - 51)      | 39<br>(22 - 59)      | 28<br>(16 - 43)      |
| Foreign body in other body part                 | 1<br>(1 - 2)           | 0<br>(0 - 0)       | 0<br>(0 - 0)        | 1<br>(0 - 1)         | 0<br>(0 - 0)         | 0<br>(0 - 0)         |
| Other unintentional injuries                    | 26<br>(4 - 37)         | 2<br>(0 - 4)       | 2<br>(0 - 3)        | 11<br>(1 - 18)       | 7<br>(1 - 11)        | 5<br>(0 - 8)         |
| Self-harm and interpersonal violence            | 553<br>(474 - 671)     | 6<br>(3 - 11)      | 6<br>(4 - 9)        | 206<br>(172 - 259)   | 188<br>(156 - 233)   | 146<br>(120 - 180)   |
| Self-harm                                       | 392<br>(319 - 489)     | --                 | 3<br>(2 - 5)        | 142<br>(109 - 188)   | 143<br>(110 - 183)   | 103<br>(78 - 130)    |
| Interpersonal violence                          | 160<br>(111 - 228)     | 6<br>(3 - 11)      | 3<br>(2 - 5)        | 64<br>(45 - 94)      | 45<br>(32 - 64)      | 42<br>(29 - 61)      |
| Assault by firearm                              | 14<br>(7 - 25)         | 0<br>(0 - 1)       | 0<br>(0 - 0)        | 7<br>(3 - 12)        | 4<br>(2 - 8)         | 3<br>(1 - 5)         |
| Assault by sharp object                         | 55<br>(37 - 90)        | 1<br>(0 - 2)       | 1<br>(0 - 1)        | 28<br>(18 - 45)      | 15<br>(9 - 24)       | 11<br>(7 - 20)       |
| Assault by other means                          | 91<br>(58 - 127)       | 5<br>(2 - 8)       | 2<br>(1 - 4)        | 29<br>(18 - 44)      | 26<br>(17 - 38)      | 28<br>(19 - 43)      |
| Forces of nature, war, and legal intervention   | 0<br>(0 - 0)           | 0<br>(0 - 0)       | --                  | --                   | --                   | --                   |
| Exposure to forces of nature                    | 0<br>(0 - 0)           | 0<br>(0 - 0)       | --                  | --                   | --                   | --                   |

Web Table 31- Russia deaths with 95% UI by age, sex, and cause in 2013

| Cause                                                             | Both Sexes, All Ages                 | Both Sexes, 0-4 Years       | Both Sexes, 5-14 Years   | Both Sexes, 15-49 Years        | Both Sexes, 50-69 Years        | Both Sexes, 70-80 Years              |
|-------------------------------------------------------------------|--------------------------------------|-----------------------------|--------------------------|--------------------------------|--------------------------------|--------------------------------------|
| All causes                                                        | 1,854,350<br>(1,831,727 - 1,876,429) | 16,255<br>(12,630 - 20,451) | 3,801<br>(3,245 - 4,406) | 241,046<br>(236,920 - 244,884) | 539,089<br>(530,843 - 547,557) | 1,054,158<br>(1,040,751 - 1,067,481) |
| Communicable, maternal, neonatal, and nutritional diseases        | 73,903<br>(60,368 - 81,872)          | 8,229<br>(6,350 - 10,752)   | 313<br>(220 - 397)       | 28,340<br>(23,402 - 31,819)    | 25,220<br>(19,828 - 28,896)    | 11,802<br>(8,304 - 13,731)           |
| HIV/AIDS and tuberculosis                                         | 30,967<br>(26,553 - 37,155)          | 56<br>(34 - 91)             | 11<br>(4 - 30)           | 17,942<br>(15,152 - 21,315)    | 10,955<br>(8,903 - 13,679)     | 2,002<br>(1,594 - 2,571)             |
| Tuberculosis                                                      | 14,829<br>(10,158 - 16,436)          | 16<br>(8 - 22)              | 4<br>(2 - 6)             | 7,406<br>(4,489 - 8,491)       | 6,274<br>(4,562 - 7,193)       | 1,128<br>(939 - 1,325)               |
| HIV/AIDS                                                          | 16,138<br>(11,963 - 22,526)          | 40<br>(19 - 74)             | 7<br>(0 - 25)            | 10,536<br>(8,131 - 13,873)     | 4,681<br>(2,908 - 7,509)       | 874<br>(525 - 1,423)                 |
| HIV/AIDS resulting in mycobacterial infection                     | 1,078<br>(750 - 1,538)               | 2<br>(1 - 4)                | 0<br>(0 - 1)             | 700<br>(504 - 979)             | 319<br>(192 - 515)             | 57<br>(32 - 97)                      |
| HIV/AIDS resulting in other diseases                              | 15,060<br>(11,192 - 20,988)          | 38<br>(18 - 70)             | 6<br>(0 - 24)            | 9,836<br>(7,600 - 13,023)      | 4,362<br>(2,706 - 7,007)       | 817<br>(493 - 1,336)                 |
| Diarrhea, lower respiratory, and other common infectious diseases | 35,516<br>(24,780 - 40,225)          | 2,361<br>(1,734 - 3,057)    | 266<br>(181 - 344)       | 9,744<br>(6,757 - 11,535)      | 13,764<br>(9,134 - 16,669)     | 9,382<br>(5,885 - 11,263)            |
| Diarrheal diseases                                                | 399<br>(324 - 486)                   | 203<br>(132 - 290)          | 4<br>(3 - 6)             | 39<br>(33 - 47)                | 67<br>(54 - 83)                | 85<br>(67 - 111)                     |
| Intestinal infectious diseases                                    | 236<br>(86 - 527)                    | 39<br>(13 - 90)             | 28<br>(8 - 65)           | 84<br>(28 - 200)               | 46<br>(14 - 119)               | 38<br>(12 - 96)                      |
| Typhoid fever                                                     | 172<br>(56 - 399)                    | 26<br>(7 - 63)              | 21<br>(6 - 48)           | 63<br>(19 - 152)               | 34<br>(9 - 94)                 | 28<br>(8 - 75)                       |
| Paratyphoid fever                                                 | 50<br>(16 - 117)                     | 10<br>(3 - 23)              | 7<br>(2 - 16)            | 18<br>(5 - 44)                 | 9<br>(2 - 24)                  | 7<br>(2 - 20)                        |
| Other intestinal infectious diseases                              | 13<br>(6 - 23)                       | 3<br>(1 - 9)                | 1<br>(0 - 4)             | 4<br>(1 - 9)                   | 3<br>(0 - 8)                   | 3<br>(0 - 7)                         |
| Lower respiratory infections                                      | 32,231<br>(21,591 - 36,787)          | 1,656<br>(1,192 - 2,219)    | 159<br>(99 - 212)        | 8,784<br>(5,709 - 10,539)      | 12,799<br>(8,181 - 15,712)     | 8,833<br>(5,381 - 11,702)            |
| Upper respiratory infections                                      | 56<br>(22 - 113)                     | 1<br>(0 - 2)                | 0<br>(0 - 1)             | 11<br>(3 - 25)                 | 19<br>(4 - 46)                 | 26<br>(4 - 79)                       |
| Otitis media                                                      | 116<br>(103 - 130)                   | 3<br>(2 - 5)                | 1<br>(1 - 2)             | 32<br>(27 - 36)                | 50<br>(42 - 60)                | 30<br>(23 - 38)                      |
| Meningitis                                                        | 1,541<br>(1,375 - 1,728)             | 353<br>(244 - 499)          | 36<br>(26 - 46)          | 453<br>(400 - 540)             | 481<br>(420 - 549)             | 218<br>(150 - 252)                   |
| Pneumococcal meningitis                                           | 397<br>(323 - 474)                   | 63<br>(41 - 95)             | 9<br>(6 - 13)            | 136<br>(97 - 183)              | 130<br>(86 - 176)              | 59<br>(39 - 79)                      |
| H influenzae type B meningitis                                    | 289<br>(236 - 358)                   | 137<br>(94 - 193)           | 9<br>(6 - 13)            | 61<br>(42 - 92)                | 57<br>(38 - 78)                | 24<br>(16 - 34)                      |
| Meningococcal meningitis                                          | 326<br>(260 - 402)                   | 82<br>(53 - 122)            | 10<br>(7 - 14)           | 101<br>(73 - 148)              | 90<br>(59 - 128)               | 43<br>(25 - 61)                      |
| Other meningitis                                                  | 530<br>(406 - 636)                   | 70<br>(45 - 112)            | 8<br>(5 - 11)            | 155<br>(94 - 220)              | 205<br>(139 - 260)             | 92<br>(65 - 118)                     |
| Encephalitis                                                      | 808<br>(586 - 1,040)                 | 92<br>(55 - 133)            | 32<br>(20 - 47)          | 314<br>(214 - 428)             | 285<br>(190 - 398)             | 85<br>(47 - 112)                     |
| Diphtheria                                                        | 6<br>(1 - 18)                        | 1<br>(0 - 6)                | 1<br>(0 - 4)             | 3<br>(0 - 11)                  | 2<br>(0 - 10)                  | --                                   |
| Whooping cough                                                    | 16<br>(10 - 28)                      | 6<br>(1 - 18)               | 1<br>(1 - 2)             | 7<br>(6 - 8)                   | 2<br>(2 - 3)                   | --                                   |
| Tetanus                                                           | 14<br>(8 - 17)                       | 1<br>(0 - 1)                | 1<br>(0 - 2)             | 6<br>(3 - 7)                   | 4<br>(2 - 5)                   | 3<br>(2 - 5)                         |
| Measles                                                           | 1<br>(0 - 1)                         | 1<br>(0 - 1)                | 0<br>(0 - 0)             | 0<br>(0 - 0)                   | 0<br>(0 - 0)                   | --                                   |
| Varicella and herpes zoster                                       | 92<br>(27 - 291)                     | 6<br>(1 - 19)               | 1<br>(0 - 5)             | 11<br>(3 - 24)                 | 9<br>(2 - 25)                  | 64<br>(4 - 267)                      |
| Neglected tropical diseases and malaria                           | 90<br>(83 - 98)                      | 3<br>(2 - 4)                | 4<br>(3 - 5)             | 38<br>(34 - 43)                | 27<br>(25 - 30)                | 18<br>(16 - 20)                      |
| Cysticercosis                                                     | 1<br>(0 - 1)                         | 0<br>(0 - 0)                | 0<br>(0 - 0)             | 0<br>(0 - 0)                   | 0<br>(0 - 0)                   | 0<br>(0 - 0)                         |
| Cystic echinococcosis                                             | 45<br>(42 - 48)                      | 0<br>(0 - 0)                | 1<br>(1 - 1)             | 16<br>(15 - 17)                | 16<br>(15 - 17)                | 12<br>(11 - 13)                      |
| Dengue                                                            | 15<br>(13 - 22)                      | 1<br>(1 - 1)                | 1<br>(1 - 2)             | 8<br>(6 - 11)                  | 4<br>(3 - 5)                   | 2<br>(1 - 3)                         |
| Rabies                                                            | 13<br>(9 - 16)                       | 1<br>(0 - 1)                | 1<br>(1 - 2)             | 6<br>(4 - 8)                   | 3<br>(2 - 4)                   | 2<br>(1 - 2)                         |
| Other neglected tropical diseases                                 | 16<br>(13 - 19)                      | 1<br>(1 - 2)                | 1<br>(0 - 1)             | 8<br>(6 - 10)                  | 4<br>(3 - 6)                   | 2<br>(1 - 3)                         |
| Maternal disorders                                                | 291<br>(234 - 351)                   | --                          | 0<br>(0 - 0)             | 291<br>(234 - 351)             | --                             | --                                   |
| Maternal hemorrhage                                               | 35<br>(26 - 44)                      | --                          | 0<br>(0 - 0)             | 35<br>(26 - 44)                | --                             | --                                   |
| Maternal sepsis and other maternal infections                     | 16<br>(11 - 22)                      | --                          | 0<br>(0 - 0)             | 16<br>(11 - 22)                | --                             | --                                   |
| Maternal hypertensive disorders                                   | 22<br>(16 - 28)                      | --                          | 0<br>(0 - 0)             | 22<br>(16 - 28)                | --                             | --                                   |
| Maternal obstructed labor                                         | 31<br>(21 - 44)                      | --                          | 0<br>(0 - 0)             | 31<br>(21 - 44)                | --                             | --                                   |
| Maternal abortive outcome                                         | 45<br>(35 - 57)                      | --                          | 0<br>(0 - 0)             | 45<br>(35 - 57)                | --                             | --                                   |
| Indirect maternal deaths                                          | 49<br>(38 - 62)                      | --                          | 0<br>(0 - 0)             | 49<br>(38 - 62)                | --                             | --                                   |

Web Table 31- Russia deaths with 95% UI by age, sex, and cause in 2013

| Cause                                                            | Both Sexes, All Ages                 | Both Sexes, 0-4 Years    | Both Sexes, 5-14 Years | Both Sexes, 15-49 Years        | Both Sexes, 50-69 Years        | Both Sexes, 70-80 Years              |
|------------------------------------------------------------------|--------------------------------------|--------------------------|------------------------|--------------------------------|--------------------------------|--------------------------------------|
| Late maternal deaths                                             | 26<br>(16 - 38)                      | --                       | 0<br>(0 - 0)           | 26<br>(15 - 38)                | --                             | --                                   |
| Maternal deaths aggravated by HIV/AIDS                           | 0<br>(0 - 0)                         | --                       | --                     | 0<br>(0 - 0)                   | --                             | --                                   |
| Other maternal disorders                                         | 68<br>(52 - 85)                      | --                       | 0<br>(0 - 0)           | 68<br>(52 - 85)                | --                             | --                                   |
| Neonatal disorders                                               | 5,707<br>(4,329 - 7,522)             | 5,707<br>(4,329 - 7,522) | --                     | --                             | --                             | --                                   |
| Neonatal preterm birth complications                             | 1,837<br>(1,276 - 2,691)             | 1,837<br>(1,276 - 2,691) | --                     | --                             | --                             | --                                   |
| Neonatal encephalopathy due to birth asphyxia and trauma         | 993<br>(655 - 1,614)                 | 993<br>(655 - 1,614)     | --                     | --                             | --                             | --                                   |
| Neonatal sepsis and other neonatal infections                    | 473<br>(270 - 869)                   | 473<br>(270 - 869)       | --                     | --                             | --                             | --                                   |
| Hemolytic disease and other neonatal jaundice                    | 78<br>(37 - 148)                     | 78<br>(37 - 148)         | --                     | --                             | --                             | --                                   |
| Other neonatal disorders                                         | 2,326<br>(1,324 - 3,334)             | 2,326<br>(1,324 - 3,334) | --                     | --                             | --                             | --                                   |
| Nutritional deficiencies                                         | 1,072<br>(897 - 1,341)               | 61<br>(39 - 84)          | 25<br>(15 - 34)        | 233<br>(193 - 319)             | 394<br>(323 - 536)             | 358<br>(289 - 438)                   |
| Protein-energy malnutrition                                      | 464<br>(325 - 651)                   | 47<br>(27 - 66)          | 15<br>(8 - 21)         | 122<br>(85 - 182)              | 196<br>(131 - 297)             | 84<br>(44 - 134)                     |
| Iodine deficiency                                                | 41<br>(8 - 105)                      | 1<br>(0 - 5)             | 0<br>(0 - 2)           | 7<br>(1 - 20)                  | 12<br>(0 - 45)                 | 20<br>(0 - 84)                       |
| Iron-deficiency anemia                                           | 504<br>(337 - 701)                   | 12<br>(5 - 25)           | 9<br>(5 - 14)          | 89<br>(57 - 144)               | 166<br>(104 - 245)             | 228<br>(151 - 297)                   |
| Other nutritional deficiencies                                   | 63<br>(34 - 103)                     | 1<br>(0 - 2)             | 1<br>(0 - 1)           | 16<br>(7 - 22)                 | 20<br>(9 - 30)                 | 26<br>(14 - 49)                      |
| Other communicable, maternal, neonatal, and nutritional diseases | 260<br>(218 - 321)                   | 40<br>(21 - 71)          | 7<br>(4 - 9)           | 92<br>(78 - 116)               | 80<br>(64 - 100)               | 42<br>(32 - 59)                      |
| Sexually transmitted diseases excluding HIV                      | 53<br>(31 - 87)                      | 19<br>(1 - 47)           | 2<br>(1 - 4)           | 13<br>(9 - 21)                 | 13<br>(8 - 21)                 | 6<br>(3 - 9)                         |
| Syphilis                                                         | 40<br>(20 - 73)                      | 19<br>(1 - 47)           | 2<br>(0 - 4)           | 6<br>(5 - 10)                  | 9<br>(5 - 14)                  | 5<br>(3 - 7)                         |
| Chlamydial infection                                             | 2<br>(1 - 3)                         | --                       | 0<br>(0 - 0)           | 1<br>(1 - 2)                   | 1<br>(0 - 1)                   | 0<br>(0 - 0)                         |
| Gonococcal infection                                             | 6<br>(4 - 9)                         | --                       | 0<br>(0 - 0)           | 3<br>(2 - 5)                   | 2<br>(1 - 4)                   | 1<br>(0 - 1)                         |
| Other sexually transmitted diseases                              | 5<br>(3 - 7)                         | --                       | 0<br>(0 - 0)           | 3<br>(2 - 4)                   | 2<br>(1 - 3)                   | 0<br>(0 - 1)                         |
| Hepatitis                                                        | 163<br>(142 - 191)                   | 13<br>(8 - 20)           | 3<br>(2 - 5)           | 69<br>(57 - 87)                | 53<br>(42 - 68)                | 24<br>(18 - 31)                      |
| Acute hepatitis A                                                | 32<br>(11 - 60)                      | 5<br>(2 - 10)            | 2<br>(1 - 3)           | 19<br>(6 - 36)                 | 5<br>(1 - 11)                  | 1<br>(0 - 3)                         |
| Acute hepatitis B                                                | 125<br>(93 - 157)                    | 8<br>(4 - 14)            | 2<br>(1 - 3)           | 48<br>(31 - 67)                | 46<br>(34 - 60)                | 21<br>(16 - 28)                      |
| Acute hepatitis C                                                | 6<br>(1 - 14)                        | --                       | 0<br>(0 - 0)           | 3<br>(0 - 7)                   | 2<br>(0 - 6)                   | 1<br>(0 - 3)                         |
| Other infectious diseases                                        | 44<br>(30 - 77)                      | 8<br>(4 - 14)            | 1<br>(1 - 2)           | 10<br>(7 - 16)                 | 13<br>(8 - 25)                 | 13<br>(8 - 25)                       |
| Non-communicable diseases                                        | 1,615,494<br>(1,591,292 - 1,641,888) | 5,732<br>(4,311 - 7,347) | 1,158<br>(907 - 1,382) | 123,729<br>(118,606 - 132,166) | 463,643<br>(454,150 - 475,251) | 1,021,232<br>(1,007,656 - 1,035,856) |
| Neoplasms                                                        | 292,539<br>(279,216 - 308,021)       | 427<br>(291 - 587)       | 531<br>(397 - 656)     | 24,216<br>(22,516 - 26,459)    | 135,260<br>(128,227 - 142,977) | 132,104<br>(124,718 - 139,934)       |
| Esophageal cancer                                                | 7,066<br>(6,155 - 8,713)             | --                       | --                     | 368<br>(276 - 554)             | 3,909<br>(3,240 - 4,798)       | 2,788<br>(2,406 - 3,558)             |
| Stomach cancer                                                   | 35,651<br>(31,249 - 41,427)          | --                       | --                     | 2,522<br>(2,060 - 3,028)       | 15,141<br>(13,245 - 17,692)    | 17,988<br>(15,361 - 21,380)          |
| Liver cancer                                                     | 9,640<br>(7,803 - 12,757)            | --                       | 9<br>(6 - 14)          | 620<br>(464 - 842)             | 4,274<br>(3,346 - 5,774)       | 4,737<br>(3,675 - 6,256)             |
| Liver cancer due to hepatitis B                                  | 1,505<br>(980 - 2,283)               | --                       | 2<br>(1 - 4)           | 155<br>(98 - 230)              | 784<br>(467 - 1,202)           | 564<br>(341 - 909)                   |
| Liver cancer due to hepatitis C                                  | 4,635<br>(3,525 - 6,371)             | --                       | 2<br>(1 - 3)           | 262<br>(176 - 383)             | 2,042<br>(1,476 - 2,935)       | 2,330<br>(1,762 - 3,215)             |
| Liver cancer due to alcohol use                                  | 2,474<br>(1,802 - 3,429)             | --                       | --                     | 104<br>(64 - 160)              | 1,006<br>(683 - 1,459)         | 1,364<br>(969 - 1,899)               |
| Liver cancer due to other causes                                 | 1,026<br>(658 - 1,405)               | --                       | 5<br>(3 - 7)           | 99<br>(63 - 139)               | 443<br>(267 - 652)             | 479<br>(301 - 691)                   |
| Larynx cancer                                                    | 4,373<br>(3,619 - 6,213)             | --                       | --                     | 322<br>(235 - 589)             | 2,752<br>(2,226 - 3,935)       | 1,299<br>(971 - 1,723)               |
| Tracheal, bronchus and lung cancer                               | 55,541<br>(49,376 - 61,483)          | --                       | --                     | 2,843<br>(2,337 - 3,399)       | 30,863<br>(26,949 - 34,706)    | 21,835<br>(19,315 - 24,534)          |
| Breast cancer                                                    | 22,804<br>(15,673 - 27,319)          | --                       | --                     | 2,638<br>(2,173 - 3,895)       | 11,123<br>(7,516 - 13,625)     | 9,043<br>(5,184 - 10,973)            |
| Cervical cancer                                                  | 7,229<br>(5,997 - 8,537)             | --                       | --                     | 1,763<br>(1,167 - 2,239)       | 3,358<br>(2,580 - 4,091)       | 2,109<br>(1,598 - 3,012)             |
| Uterine cancer                                                   | 3,653<br>(2,968 - 4,484)             | --                       | --                     | 232<br>(171 - 296)             | 2,016<br>(1,488 - 2,534)       | 1,406<br>(1,119 - 1,792)             |
| Prostate cancer                                                  | 10,135<br>(6,449 - 12,415)           | --                       | --                     | 83<br>(55 - 115)               | 2,999<br>(1,808 - 3,914)       | 7,053<br>(4,330 - 8,807)             |

Web Table 31- Russia deaths with 95% UI by age, sex, and cause in 2013

| Cause                                         | Both Sexes, All Ages                 | Both Sexes, 0-4 Years | Both Sexes, 5-14 Years | Both Sexes, 15-49 Years     | Both Sexes, 50-69 Years        | Both Sexes, 70-80 Years        |
|-----------------------------------------------|--------------------------------------|-----------------------|------------------------|-----------------------------|--------------------------------|--------------------------------|
| Colon and rectum cancer                       | 39,091<br>(36,580 - 41,958)          | --                    | --                     | 1,736<br>(1,583 - 1,904)    | 14,162<br>(13,274 - 15,123)    | 23,193<br>(21,129 - 25,650)    |
| Lip and oral cavity cancer                    | 5,797<br>(4,396 - 6,527)             | --                    | --                     | 585<br>(466 - 698)          | 3,400<br>(2,453 - 3,969)       | 1,812<br>(1,448 - 2,082)       |
| Nasopharynx cancer                            | 423<br>(335 - 584)                   | --                    | 2<br>(1 - 3)           | 61<br>(43 - 82)             | 220<br>(170 - 304)             | 140<br>(93 - 218)              |
| Other pharynx cancer                          | 3,170<br>(2,351 - 3,959)             | --                    | --                     | 299<br>(224 - 408)          | 2,193<br>(1,520 - 2,791)       | 677<br>(527 - 852)             |
| Gallbladder and biliary tract cancer          | 3,671<br>(2,805 - 4,431)             | --                    | --                     | 165<br>(129 - 218)          | 1,357<br>(1,080 - 1,701)       | 2,149<br>(1,511 - 2,638)       |
| Pancreatic cancer                             | 17,691<br>(16,574 - 18,878)          | --                    | --                     | 1,167<br>(1,026 - 1,314)    | 8,111<br>(7,470 - 8,752)       | 8,412<br>(7,681 - 9,254)       |
| Malignant skin melanoma                       | 3,486<br>(2,408 - 4,722)             | --                    | --                     | 649<br>(465 - 931)          | 1,549<br>(1,036 - 2,105)       | 1,288<br>(856 - 1,725)         |
| Non-melanoma skin cancer                      | 1,763<br>(1,353 - 2,243)             | --                    | --                     | 115<br>(88 - 167)           | 455<br>(326 - 620)             | 1,193<br>(907 - 1,524)         |
| Ovarian cancer                                | 8,674<br>(7,547 - 9,689)             | --                    | --                     | 1,023<br>(854 - 1,201)      | 4,408<br>(3,730 - 5,057)       | 3,242<br>(2,634 - 3,839)       |
| Testicular cancer                             | 317<br>(230 - 419)                   | --                    | --                     | 195<br>(127 - 262)          | 63<br>(44 - 89)                | 59<br>(42 - 90)                |
| Kidney cancer                                 | 8,904<br>(7,848 - 10,107)            | 27<br>(17 - 41)       | 19<br>(12 - 29)        | 597<br>(473 - 749)          | 4,614<br>(3,885 - 5,351)       | 3,647<br>(3,042 - 4,335)       |
| Bladder cancer                                | 6,791<br>(5,952 - 8,151)             | --                    | --                     | 169<br>(135 - 229)          | 2,250<br>(1,935 - 2,804)       | 4,372<br>(3,707 - 5,231)       |
| Brain and nervous system cancer               | 7,239<br>(5,968 - 8,218)             | 104<br>(62 - 168)     | 170<br>(118 - 219)     | 1,726<br>(1,448 - 2,042)    | 3,811<br>(3,194 - 4,472)       | 1,427<br>(913 - 1,719)         |
| Thyroid cancer                                | 2,003<br>(1,635 - 2,360)             | --                    | 1<br>(1 - 2)           | 126<br>(100 - 162)          | 779<br>(637 - 952)             | 1,097<br>(841 - 1,340)         |
| Mesothelioma                                  | 326<br>(259 - 474)                   | --                    | --                     | 32<br>(23 - 48)             | 138<br>(100 - 212)             | 156<br>(111 - 224)             |
| Hodgkin lymphoma                              | 1,061<br>(894 - 1,716)               | 3<br>(1 - 5)          | 8<br>(4 - 15)          | 475<br>(390 - 734)          | 358<br>(276 - 573)             | 217<br>(171 - 350)             |
| Non-Hodgkin lymphoma                          | 5,330<br>(3,092 - 6,564)             | 28<br>(16 - 44)       | 43<br>(27 - 66)        | 751<br>(477 - 927)          | 2,306<br>(1,344 - 2,905)       | 2,201<br>(1,125 - 2,846)       |
| Multiple myeloma                              | 2,094<br>(1,368 - 2,831)             | --                    | --                     | 151<br>(95 - 211)           | 1,091<br>(699 - 1,497)         | 852<br>(537 - 1,154)           |
| Leukemia                                      | 7,399<br>(6,538 - 8,141)             | 137<br>(85 - 207)     | 158<br>(114 - 204)     | 1,150<br>(984 - 1,306)      | 2,822<br>(2,454 - 3,184)       | 3,131<br>(2,665 - 3,561)       |
| Other neoplasms                               | 11,218<br>(8,578 - 12,819)           | 129<br>(71 - 189)     | 121<br>(76 - 163)      | 1,654<br>(1,231 - 1,919)    | 4,734<br>(3,455 - 5,502)       | 4,580<br>(3,367 - 5,422)       |
| Cardiovascular diseases                       | 1,073,331<br>(1,047,809 - 1,099,788) | 148<br>(96 - 202)     | 103<br>(70 - 128)      | 57,188<br>(52,137 - 61,151) | 256,246<br>(246,311 - 266,426) | 759,646<br>(742,384 - 778,874) |
| Rheumatic heart disease                       | 3,908<br>(3,131 - 6,709)             | 1<br>(0 - 2)          | 4<br>(2 - 7)           | 627<br>(375 - 1,579)        | 2,108<br>(1,602 - 3,944)       | 1,168<br>(735 - 1,412)         |
| Ischemic heart disease                        | 592,548<br>(531,786 - 636,716)       | 4<br>(3 - 8)          | 4<br>(3 - 6)           | 22,019<br>(19,171 - 27,401) | 138,231<br>(126,312 - 150,728) | 432,289<br>(379,706 - 464,939) |
| Cerebrovascular disease                       | 360,288<br>(327,839 - 438,804)       | 10<br>(7 - 18)        | 16<br>(11 - 21)        | 9,506<br>(7,995 - 11,484)   | 71,136<br>(62,325 - 86,599)    | 279,621<br>(254,133 - 342,681) |
| Ischemic stroke                               | 302,820<br>(273,928 - 373,858)       | 1<br>(0 - 1)          | 1<br>(1 - 1)           | 2,381<br>(1,797 - 3,193)    | 46,412<br>(39,714 - 59,503)    | 254,026<br>(230,006 - 314,621) |
| Hemorrhagic stroke                            | 57,468<br>(49,156 - 70,248)          | 10<br>(6 - 17)        | 15<br>(10 - 20)        | 7,125<br>(6,019 - 8,632)    | 24,724<br>(20,742 - 30,508)    | 25,595<br>(20,620 - 32,507)    |
| Hypertensive heart disease                    | 22,806<br>(12,130 - 31,055)          | 1<br>(0 - 1)          | 1<br>(1 - 2)           | 679<br>(465 - 916)          | 5,027<br>(3,351 - 6,458)       | 17,097<br>(7,848 - 24,566)     |
| Cardiomyopathy and myocarditis                | 72,071<br>(41,106 - 85,831)          | 106<br>(63 - 148)     | 62<br>(34 - 80)        | 22,166<br>(14,927 - 25,507) | 32,933<br>(20,677 - 39,832)    | 16,804<br>(4,756 - 21,760)     |
| Atrial fibrillation and flutter               | 2,857<br>(2,282 - 3,554)             | --                    | --                     | 34<br>(26 - 44)             | 341<br>(273 - 417)             | 2,482<br>(1,943 - 3,129)       |
| Aortic aneurysm                               | 5,753<br>(4,796 - 6,988)             | --                    | --                     | 559<br>(448 - 677)          | 2,202<br>(1,788 - 2,675)       | 2,992<br>(2,434 - 3,840)       |
| Peripheral vascular disease                   | 127<br>(101 - 175)                   | --                    | --                     | 7<br>(5 - 9)                | 28<br>(23 - 36)                | 92<br>(69 - 133)               |
| Endocarditis                                  | 1,529<br>(235 - 3,286)               | 9<br>(3 - 22)         | 6<br>(2 - 12)          | 444<br>(87 - 955)           | 610<br>(87 - 1,387)            | 460<br>(46 - 988)              |
| Other cardiovascular and circulatory diseases | 11,443<br>(5,926 - 13,853)           | 16<br>(9 - 26)        | 9<br>(4 - 14)          | 1,148<br>(746 - 1,404)      | 3,629<br>(2,211 - 4,388)       | 6,640<br>(2,953 - 8,443)       |
| Chronic respiratory diseases                  | 34,820<br>(31,070 - 50,645)          | 13<br>(9 - 18)        | 12<br>(10 - 16)        | 1,373<br>(1,151 - 2,188)    | 9,929<br>(8,525 - 15,661)      | 23,493<br>(20,915 - 34,369)    |
| Chronic obstructive pulmonary disease         | 30,857<br>(27,312 - 43,377)          | 7<br>(4 - 10)         | 3<br>(2 - 4)           | 940<br>(761 - 1,435)        | 8,439<br>(7,112 - 12,867)      | 21,469<br>(19,021 - 30,314)    |
| Pneumoconiosis                                | 294<br>(201 - 426)                   | 0<br>(0 - 1)          | 1<br>(1 - 1)           | 17<br>(11 - 24)             | 115<br>(77 - 181)              | 162<br>(101 - 246)             |
| Silicosis                                     | 96<br>(54 - 150)                     | 0<br>(0 - 0)          | 0<br>(0 - 0)           | 4<br>(2 - 6)                | 41<br>(22 - 65)                | 52<br>(27 - 87)                |
| Asbestosis                                    | 56<br>(33 - 88)                      | 0<br>(0 - 0)          | 0<br>(0 - 0)           | 4<br>(2 - 7)                | 23<br>(13 - 37)                | 28<br>(15 - 51)                |
| Coal workers pneumoconiosis                   | 42<br>(23 - 75)                      | 0<br>(0 - 0)          | 0<br>(0 - 0)           | 3<br>(2 - 5)                | 14<br>(7 - 25)                 | 25<br>(11 - 51)                |
| Other pneumoconiosis                          | 100<br>(59 - 166)                    | 0<br>(0 - 0)          | 0<br>(0 - 0)           | 6<br>(4 - 9)                | 37<br>(20 - 73)                | 57<br>(31 - 99)                |

Web Table 31- Russia deaths with 95% UI by age, sex, and cause in 2013

| Cause                                               | Both Sexes, All Ages        | Both Sexes, 0-4 Years | Both Sexes, 5-14 Years | Both Sexes, 15-49 Years     | Both Sexes, 50-69 Years     | Both Sexes, 70-80 Years     |
|-----------------------------------------------------|-----------------------------|-----------------------|------------------------|-----------------------------|-----------------------------|-----------------------------|
| Asthma                                              | 2,214<br>(1,672 - 4,083)    | 1<br>(0 - 1)          | 5<br>(4 - 7)           | 233<br>(178 - 408)          | 794<br>(600 - 1,370)        | 1,180<br>(842 - 2,229)      |
| Interstitial lung disease and pulmonary sarcoidosis | 1,301<br>(483 - 3,418)      | 1<br>(0 - 2)          | 2<br>(1 - 3)           | 113<br>(50 - 280)           | 537<br>(214 - 1,437)        | 649<br>(212 - 1,782)        |
| Other chronic respiratory diseases                  | 154<br>(108 - 219)          | 4<br>(2 - 6)          | 2<br>(1 - 2)           | 71<br>(47 - 107)            | 43<br>(26 - 70)             | 35<br>(21 - 54)             |
| Cirrhosis                                           | 42,848<br>(40,279 - 45,454) | 13<br>(8 - 18)        | 16<br>(12 - 20)        | 13,691<br>(12,546 - 14,827) | 22,444<br>(20,699 - 24,074) | 6,684<br>(6,167 - 7,232)    |
| Cirrhosis due to hepatitis B                        | 7,036<br>(4,802 - 9,923)    | 0<br>(0 - 1)          | 2<br>(1 - 3)           | 2,342<br>(1,586 - 3,296)    | 3,640<br>(2,373 - 5,224)    | 1,052<br>(521 - 1,528)      |
| Cirrhosis due to hepatitis C                        | 15,062<br>(10,431 - 20,324) | 1<br>(0 - 2)          | 3<br>(1 - 5)           | 4,415<br>(2,804 - 6,161)    | 8,192<br>(5,507 - 11,295)   | 2,452<br>(1,814 - 3,292)    |
| Cirrhosis due to alcohol use                        | 16,349<br>(12,628 - 19,958) | --                    | --                     | 4,778<br>(3,640 - 6,085)    | 8,788<br>(6,516 - 10,880)   | 2,784<br>(2,007 - 3,412)    |
| Cirrhosis due to other causes                       | 4,400<br>(3,065 - 6,058)    | 11<br>(7 - 16)        | 11<br>(8 - 14)         | 2,157<br>(1,538 - 2,972)    | 1,824<br>(1,114 - 2,721)    | 397<br>(234 - 582)          |
| Digestive diseases                                  | 34,496<br>(23,667 - 38,043) | 36<br>(23 - 53)       | 23<br>(17 - 28)        | 5,893<br>(4,533 - 6,554)    | 11,638<br>(8,082 - 13,060)  | 16,906<br>(10,618 - 19,473) |
| Peptic ulcer disease                                | 6,717<br>(3,882 - 8,965)    | 2<br>(1 - 3)          | 2<br>(1 - 3)           | 1,067<br>(730 - 1,440)      | 2,818<br>(1,611 - 3,781)    | 2,829<br>(1,385 - 4,161)    |
| Gastritis and duodenitis                            | 348<br>(190 - 497)          | 1<br>(0 - 1)          | 1<br>(1 - 2)           | 66<br>(37 - 104)            | 134<br>(72 - 197)           | 145<br>(74 - 221)           |
| Appendicitis                                        | 390<br>(262 - 589)          | 7<br>(4 - 12)         | 4<br>(3 - 6)           | 74<br>(50 - 119)            | 139<br>(92 - 215)           | 165<br>(96 - 274)           |
| Paralytic ileus and intestinal obstruction          | 2,893<br>(1,905 - 4,892)    | 15<br>(8 - 24)        | 7<br>(5 - 9)           | 379<br>(262 - 692)          | 883<br>(577 - 1,583)        | 1,609<br>(934 - 2,784)      |
| Inguinal, femoral, and abdominal hernia             | 1,455<br>(594 - 2,244)      | 1<br>(1 - 2)          | 1<br>(0 - 2)           | 57<br>(31 - 82)             | 385<br>(168 - 557)          | 1,011<br>(364 - 1,643)      |
| Inflammatory bowel disease                          | 1,244<br>(859 - 2,302)      | 4<br>(2 - 6)          | 1<br>(1 - 2)           | 164<br>(115 - 302)          | 456<br>(313 - 822)          | 618<br>(393 - 1,306)        |
| Vascular intestinal disorders                       | 7,754<br>(4,007 - 11,293)   | 1<br>(0 - 2)          | 1<br>(0 - 2)           | 205<br>(100 - 381)          | 2,037<br>(1,061 - 3,296)    | 5,511<br>(2,619 - 7,887)    |
| Gallbladder and biliary diseases                    | 3,222<br>(2,418 - 4,388)    | 1<br>(0 - 1)          | 1<br>(1 - 2)           | 123<br>(97 - 169)           | 671<br>(531 - 907)          | 2,426<br>(1,684 - 3,399)    |
| Pancreatitis                                        | 9,319<br>(6,022 - 11,341)   | 2<br>(1 - 3)          | 2<br>(1 - 3)           | 3,428<br>(2,428 - 4,053)    | 3,680<br>(2,240 - 4,716)    | 2,208<br>(1,245 - 2,954)    |
| Other digestive diseases                            | 1,153<br>(438 - 1,551)      | 3<br>(1 - 5)          | 2<br>(1 - 3)           | 329<br>(92 - 464)           | 435<br>(153 - 596)          | 384<br>(179 - 555)          |
| Neurological disorders                              | 74,001<br>(62,813 - 85,734) | 113<br>(81 - 150)     | 71<br>(55 - 93)        | 1,506<br>(1,259 - 2,096)    | 4,340<br>(3,754 - 5,038)    | 67,970<br>(56,659 - 79,628) |
| Alzheimer disease and other dementias               | 69,784<br>(58,544 - 81,494) | --                    | --                     | 9<br>(3 - 20)               | 2,732<br>(2,161 - 3,409)    | 67,043<br>(55,772 - 78,731) |
| Parkinson disease                                   | 483<br>(374 - 574)          | --                    | --                     | 9<br>(7 - 12)               | 121<br>(96 - 149)           | 353<br>(267 - 426)          |
| Epilepsy                                            | 1,045<br>(807 - 1,562)      | 17<br>(10 - 31)       | 37<br>(25 - 57)        | 689<br>(514 - 1,066)        | 257<br>(197 - 381)          | 45<br>(34 - 67)             |
| Multiple sclerosis                                  | 739<br>(561 - 1,294)        | --                    | --                     | 337<br>(247 - 649)          | 341<br>(245 - 554)          | 62<br>(39 - 139)            |
| Other neurological disorders                        | 1,949<br>(1,631 - 2,205)    | 95<br>(64 - 128)      | 35<br>(23 - 45)        | 463<br>(357 - 561)          | 889<br>(721 - 1,043)        | 467<br>(388 - 575)          |
| Mental and substance use disorders                  | 30,187<br>(24,589 - 43,353) | 3<br>(2 - 5)          | 1<br>(0 - 2)           | 15,501<br>(13,001 - 22,915) | 13,044<br>(9,623 - 18,789)  | 1,638<br>(1,012 - 2,044)    |
| Schizophrenia                                       | 161<br>(121 - 224)          | --                    | --                     | 49<br>(34 - 67)             | 69<br>(50 - 105)            | 43<br>(29 - 64)             |
| Alcohol use disorders                               | 24,366<br>(18,427 - 35,826) | --                    | --                     | 11,324<br>(8,931 - 17,929)  | 11,726<br>(7,910 - 16,933)  | 1,316<br>(684 - 1,705)      |
| Drug use disorders                                  | 5,631<br>(4,563 - 9,015)    | 3<br>(2 - 5)          | --                     | 4,100<br>(3,326 - 6,001)    | 1,249<br>(914 - 2,736)      | 279<br>(222 - 367)          |
| Opioid use disorders                                | 2,451<br>(1,946 - 3,907)    | 2<br>(1 - 2)          | --                     | 1,822<br>(1,441 - 2,729)    | 504<br>(365 - 1,109)        | 123<br>(96 - 165)           |
| Cocaine use disorders                               | 143<br>(112 - 207)          | 0<br>(0 - 0)          | --                     | 112<br>(86 - 155)           | 24<br>(17 - 52)             | 6<br>(5 - 9)                |
| Amphetamine use disorders                           | 127<br>(102 - 187)          | 0<br>(0 - 0)          | --                     | 92<br>(71 - 126)            | 29<br>(20 - 55)             | 7<br>(5 - 9)                |
| Other drug use disorders                            | 2,911<br>(2,376 - 4,675)    | 2<br>(1 - 3)          | --                     | 2,074<br>(1,674 - 3,095)    | 692<br>(505 - 1,510)        | 143<br>(113 - 184)          |
| Eating disorders                                    | 29<br>(19 - 42)             | --                    | 1<br>(0 - 2)           | 28<br>(18 - 41)             | --                          | --                          |
| Anorexia nervosa                                    | 29<br>(19 - 42)             | --                    | 1<br>(0 - 2)           | 28<br>(18 - 41)             | --                          | --                          |
| Diabetes, urogenital, blood, and endocrine diseases | 23,037<br>(21,423 - 26,089) | 125<br>(87 - 174)     | 57<br>(45 - 71)        | 2,925<br>(2,600 - 4,304)    | 8,709<br>(7,971 - 10,716)   | 11,220<br>(9,711 - 12,321)  |
| Diabetes mellitus                                   | 9,075<br>(8,309 - 10,078)   | 4<br>(3 - 6)          | 14<br>(9 - 20)         | 884<br>(801 - 1,040)        | 3,364<br>(2,995 - 3,849)    | 4,809<br>(4,255 - 5,354)    |
| Acute glomerulonephritis                            | 194<br>(125 - 373)          | 1<br>(1 - 3)          | 2<br>(1 - 3)           | 66<br>(42 - 126)            | 89<br>(54 - 177)            | 36<br>(20 - 77)             |
| Chronic kidney disease                              | 4,999<br>(4,510 - 6,720)    | 7<br>(5 - 9)          | 9<br>(7 - 12)          | 821<br>(666 - 1,742)        | 2,078<br>(1,795 - 3,122)    | 2,085<br>(1,574 - 2,359)    |
| Chronic kidney disease due to diabetes mellitus     | 152<br>(105 - 291)          | 1<br>(0 - 1)          | 1<br>(1 - 2)           | 44<br>(27 - 83)             | 60<br>(39 - 118)            | 46<br>(28 - 88)             |

Web Table 31- Russia deaths with 95% UI by age, sex, and cause in 2013

| Cause                                               | Both Sexes, All Ages           | Both Sexes, 0-4 Years    | Both Sexes, 5-14 Years   | Both Sexes, 15-49 Years     | Both Sexes, 50-69 Years     | Both Sexes, 70-80 Years     |
|-----------------------------------------------------|--------------------------------|--------------------------|--------------------------|-----------------------------|-----------------------------|-----------------------------|
| Chronic kidney disease due to hypertension          | 1,882<br>(1,298 - 2,378)       | 1<br>(1 - 2)             | 1<br>(1 - 2)             | 146<br>(98 - 249)           | 748<br>(536 - 1,045)        | 986<br>(605 - 1,284)        |
| Chronic kidney disease due to glomerulonephritis    | 927<br>(666 - 1,187)           | 1<br>(1 - 2)             | 2<br>(2 - 3)             | 313<br>(248 - 499)          | 432<br>(283 - 550)          | 178<br>(101 - 260)          |
| Chronic kidney disease due to other causes          | 2,038<br>(1,502 - 3,514)       | 3<br>(2 - 5)             | 4<br>(2 - 6)             | 318<br>(204 - 998)          | 838<br>(596 - 1,654)        | 875<br>(570 - 1,272)        |
| Urinary diseases and male infertility               | 7,621<br>(6,357 - 8,715)       | 15<br>(11 - 21)          | 9<br>(6 - 12)            | 846<br>(728 - 1,166)        | 2,743<br>(2,340 - 3,512)    | 4,008<br>(2,928 - 4,727)    |
| Interstitial nephritis and urinary tract infections | 5,674<br>(4,869 - 7,125)       | 14<br>(9 - 20)           | 6<br>(5 - 9)             | 680<br>(537 - 1,024)        | 2,040<br>(1,644 - 2,879)    | 2,935<br>(2,293 - 3,694)    |
| Urolithiasis                                        | 1,050<br>(767 - 1,513)         | --                       | 1<br>(0 - 1)             | 57<br>(42 - 94)             | 355<br>(267 - 522)          | 637<br>(422 - 987)          |
| Other urinary diseases                              | 897<br>(221 - 1,471)           | 2<br>(1 - 3)             | 2<br>(1 - 3)             | 109<br>(33 - 175)           | 348<br>(81 - 581)           | 437<br>(85 - 768)           |
| Gynecological diseases                              | 135<br>(96 - 183)              | --                       | --                       | 62<br>(41 - 92)             | 45<br>(28 - 69)             | 27<br>(16 - 44)             |
| Uterine fibroids                                    | 35<br>(24 - 49)                | --                       | --                       | 14<br>(9 - 21)              | 13<br>(8 - 21)              | 8<br>(5 - 14)               |
| Polycystic ovarian syndrome                         | 4<br>(2 - 5)                   | --                       | --                       | 3<br>(2 - 5)                | 0<br>(0 - 1)                | --                          |
| Endometriosis                                       | 11<br>(7 - 15)                 | --                       | --                       | 9<br>(6 - 13)               | 2<br>(1 - 3)                | --                          |
| Genital prolapse                                    | 22<br>(16 - 30)                | --                       | --                       | 7<br>(5 - 11)               | 8<br>(5 - 12)               | 7<br>(4 - 11)               |
| Other gynecological diseases                        | 64<br>(45 - 88)                | --                       | --                       | 29<br>(19 - 43)             | 23<br>(14 - 35)             | 12<br>(7 - 19)              |
| Hemoglobinopathies and hemolytic anemias            | 85<br>(60 - 134)               | 9<br>(6 - 14)            | 5<br>(3 - 8)             | 29<br>(14 - 57)             | 22<br>(16 - 32)             | 19<br>(14 - 28)             |
| Thalassemias                                        | 25<br>(14 - 44)                | 7<br>(4 - 11)            | 4<br>(2 - 6)             | 14<br>(6 - 30)              | 0<br>(0 - 0)                | 0<br>(0 - 0)                |
| Sickle cell disorders                               | 3<br>(2 - 5)                   | 1<br>(0 - 1)             | 0<br>(0 - 1)             | 2<br>(1 - 3)                | 0<br>(0 - 1)                | 0<br>(0 - 0)                |
| G6PD deficiency                                     | 1<br>(1 - 2)                   | 0<br>(0 - 0)             | 0<br>(0 - 0)             | 1<br>(0 - 1)                | 1<br>(0 - 1)                | 0<br>(0 - 0)                |
| Other hemoglobinopathies and hemolytic anemias      | 55<br>(41 - 82)                | 1<br>(1 - 2)             | 1<br>(0 - 1)             | 12<br>(6 - 23)              | 21<br>(15 - 30)             | 19<br>(14 - 28)             |
| Endocrine, metabolic, blood, and immune disorders   | 928<br>(779 - 1,296)           | 89<br>(58 - 126)         | 19<br>(13 - 26)          | 217<br>(172 - 336)          | 368<br>(297 - 540)          | 236<br>(180 - 301)          |
| Musculoskeletal disorders                           | 3,303<br>(2,253 - 4,487)       | --                       | 29<br>(16 - 41)          | 723<br>(459 - 928)          | 1,353<br>(896 - 1,891)      | 1,198<br>(691 - 2,100)      |
| Rheumatoid arthritis                                | 1,865<br>(1,186 - 2,638)       | --                       | 6<br>(3 - 9)             | 160<br>(109 - 223)          | 831<br>(519 - 1,188)        | 868<br>(481 - 1,452)        |
| Other musculoskeletal disorders                     | 1,438<br>(1,008 - 1,972)       | --                       | 24<br>(12 - 33)          | 563<br>(341 - 730)          | 522<br>(348 - 745)          | 330<br>(197 - 653)          |
| Other non-communicable diseases                     | 6,934<br>(5,619 - 8,423)       | 4,854<br>(3,616 - 6,232) | 315<br>(230 - 398)       | 712<br>(608 - 1,023)        | 680<br>(525 - 792)          | 373<br>(186 - 442)          |
| Congenital anomalies                                | 5,637<br>(4,496 - 7,235)       | 4,119<br>(3,099 - 5,441) | 314<br>(229 - 397)       | 640<br>(539 - 949)          | 436<br>(370 - 518)          | 129<br>(101 - 147)          |
| Neural tube defects                                 | 691<br>(396 - 1,191)           | 594<br>(327 - 1,060)     | 61<br>(35 - 95)          | 26<br>(18 - 40)             | 7<br>(5 - 10)               | 2<br>(1 - 3)                |
| Congenital heart anomalies                          | 1,972<br>(1,484 - 2,653)       | 1,427<br>(1,024 - 2,009) | 91<br>(60 - 126)         | 270<br>(181 - 438)          | 158<br>(115 - 193)          | 27<br>(18 - 35)             |
| Cleft lip and cleft palate                          | 24<br>(7 - 52)                 | 24<br>(7 - 52)           | --                       | --                          | --                          | --                          |
| Down syndrome                                       | 249<br>(170 - 336)             | 84<br>(46 - 143)         | 21<br>(10 - 34)          | 91<br>(61 - 121)            | 46<br>(33 - 63)             | 7<br>(4 - 10)               |
| Chromosomal unbalanced rearrangements               | 173<br>(109 - 252)             | 129<br>(80 - 203)        | 12<br>(3 - 21)           | 20<br>(13 - 28)             | 8<br>(4 - 13)               | 5<br>(3 - 8)                |
| Other congenital anomalies                          | 2,528<br>(1,926 - 3,474)       | 1,862<br>(1,313 - 2,683) | 129<br>(85 - 182)        | 234<br>(189 - 354)          | 217<br>(181 - 279)          | 87<br>(71 - 103)            |
| Skin and subcutaneous diseases                      | 563<br>(173 - 691)             | 2<br>(1 - 2)             | 1<br>(1 - 2)             | 72<br>(17 - 99)             | 244<br>(70 - 303)           | 244<br>(80 - 305)           |
| Cellulitis                                          | 208<br>(51 - 261)              | 1<br>(0 - 1)             | 0<br>(0 - 0)             | 32<br>(6 - 42)              | 93<br>(20 - 122)            | 82<br>(23 - 115)            |
| Pyoderma                                            | 296<br>(99 - 403)              | 0<br>(0 - 0)             | 0<br>(0 - 0)             | 31<br>(9 - 50)              | 133<br>(42 - 190)           | 131<br>(46 - 177)           |
| Decubitus ulcer                                     | 47<br>(19 - 69)                | 0<br>(0 - 0)             | 0<br>(0 - 1)             | 6<br>(2 - 9)                | 14<br>(5 - 21)              | 27<br>(12 - 43)             |
| Other skin and subcutaneous diseases                | 12<br>(5 - 19)                 | 0<br>(0 - 1)             | 0<br>(0 - 0)             | 4<br>(1 - 6)                | 3<br>(1 - 6)                | 4<br>(2 - 8)                |
| Sudden infant death syndrome                        | 734<br>(169 - 1,591)           | 734<br>(169 - 1,591)     | --                       | --                          | --                          | --                          |
| Injuries                                            | 164,952<br>(150,287 - 174,169) | 2,295<br>(1,676 - 2,984) | 2,331<br>(1,976 - 2,799) | 88,977<br>(83,181 - 93,784) | 50,226<br>(43,791 - 54,739) | 21,124<br>(18,343 - 23,060) |
| Transport injuries                                  | 31,239<br>(29,007 - 34,669)    | 322<br>(205 - 462)       | 699<br>(497 - 871)       | 19,057<br>(17,329 - 21,276) | 7,829<br>(7,083 - 8,757)    | 3,332<br>(2,923 - 4,261)    |
| Road injuries                                       | 26,793<br>(24,773 - 30,408)    | 290<br>(183 - 419)       | 612<br>(436 - 766)       | 16,280<br>(14,733 - 18,545) | 6,736<br>(5,970 - 7,662)    | 2,875<br>(2,460 - 3,770)    |
| Pedestrian road injuries                            | 9,990<br>(7,491 - 13,882)      | 99<br>(54 - 163)         | 262<br>(175 - 356)       | 4,991<br>(3,523 - 7,885)    | 3,032<br>(2,235 - 4,015)    | 1,606<br>(1,135 - 2,049)    |

Web Table 31- Russia deaths with 95% UI by age, sex, and cause in 2013

| Cause                                           | Both Sexes, All Ages        | Both Sexes, 0-4 Years    | Both Sexes, 5-14 Years   | Both Sexes, 15-49 Years     | Both Sexes, 50-69 Years     | Both Sexes, 70-80 Years   |
|-------------------------------------------------|-----------------------------|--------------------------|--------------------------|-----------------------------|-----------------------------|---------------------------|
| Cyclist road injuries                           | 1,078<br>(514 - 1,498)      | 5<br>(2 - 11)            | 31<br>(11 - 51)          | 700<br>(323 - 1,032)        | 256<br>(117 - 368)          | 86<br>(42 - 126)          |
| Motorcyclist road injuries                      | 1,547<br>(946 - 2,289)      | 15<br>(7 - 28)           | 35<br>(17 - 57)          | 987<br>(616 - 1,510)        | 347<br>(206 - 544)          | 164<br>(81 - 265)         |
| Motor vehicle road injuries                     | 13,867<br>(10,336 - 16,814) | 166<br>(94 - 246)        | 276<br>(185 - 372)       | 9,372<br>(6,858 - 11,316)   | 3,055<br>(2,195 - 3,896)    | 999<br>(703 - 1,612)      |
| Other road injuries                             | 310<br>(109 - 595)          | 4<br>(2 - 9)             | 8<br>(3 - 17)            | 230<br>(67 - 455)           | 48<br>(17 - 136)            | 20<br>(8 - 51)            |
| Other transport injuries                        | 4,446<br>(3,232 - 5,580)    | 32<br>(15 - 61)          | 87<br>(48 - 150)         | 2,777<br>(1,926 - 3,625)    | 1,093<br>(741 - 1,571)      | 457<br>(288 - 707)        |
| Unintentional injuries                          | 61,035<br>(54,170 - 73,387) | 1,819<br>(1,314 - 2,407) | 1,332<br>(1,068 - 1,903) | 27,458<br>(24,251 - 36,623) | 21,122<br>(17,444 - 24,222) | 9,303<br>(8,335 - 11,085) |
| Falls                                           | 13,371<br>(11,164 - 16,106) | 184<br>(122 - 268)       | 98<br>(74 - 126)         | 4,923<br>(4,192 - 6,251)    | 4,586<br>(3,469 - 5,476)    | 3,580<br>(2,933 - 4,618)  |
| Drowning                                        | 14,347<br>(11,065 - 27,422) | 379<br>(226 - 802)       | 773<br>(553 - 1,423)     | 8,660<br>(6,151 - 17,285)   | 3,684<br>(2,714 - 7,182)    | 851<br>(667 - 1,556)      |
| Fire, heat, and hot substances                  | 10,517<br>(7,623 - 12,956)  | 307<br>(193 - 462)       | 137<br>(82 - 189)        | 3,740<br>(2,876 - 4,786)    | 4,222<br>(2,791 - 5,530)    | 2,111<br>(1,458 - 2,643)  |
| Poisonings                                      | 4,158<br>(3,267 - 5,607)    | 190<br>(117 - 300)       | 95<br>(59 - 129)         | 2,284<br>(1,836 - 3,213)    | 932<br>(713 - 1,407)        | 656<br>(454 - 850)        |
| Exposure to mechanical forces                   | 4,623<br>(4,121 - 6,438)    | 107<br>(70 - 163)        | 79<br>(58 - 102)         | 2,340<br>(1,995 - 3,603)    | 1,829<br>(1,563 - 2,441)    | 268<br>(226 - 341)        |
| Unintentional firearm injuries                  | 285<br>(233 - 343)          | 2<br>(1 - 3)             | 6<br>(3 - 8)             | 211<br>(168 - 263)          | 57<br>(40 - 76)             | 10<br>(6 - 14)            |
| Unintentional suffocation                       | 201<br>(144 - 279)          | 20<br>(7 - 52)           | 12<br>(6 - 24)           | 97<br>(62 - 147)            | 45<br>(28 - 69)             | 26<br>(16 - 44)           |
| Other exposure to mechanical forces             | 4,138<br>(3,654 - 5,909)    | 85<br>(57 - 125)         | 61<br>(43 - 81)          | 2,032<br>(1,714 - 3,297)    | 1,728<br>(1,461 - 2,363)    | 232<br>(192 - 302)        |
| Adverse effects of medical treatment            | 1,961<br>(1,565 - 2,622)    | 55<br>(35 - 108)         | 15<br>(11 - 23)          | 569<br>(449 - 865)          | 819<br>(609 - 1,126)        | 503<br>(324 - 634)        |
| Animal contact                                  | 501<br>(398 - 899)          | 4<br>(2 - 8)             | 4<br>(3 - 6)             | 99<br>(77 - 178)            | 262<br>(198 - 472)          | 132<br>(94 - 253)         |
| Venomous animal contact                         | 133<br>(92 - 250)           | 1<br>(0 - 2)             | 2<br>(1 - 3)             | 42<br>(30 - 82)             | 73<br>(47 - 143)            | 15<br>(7 - 31)            |
| Non-venomous animal contact                     | 368<br>(287 - 640)          | 3<br>(1 - 7)             | 2<br>(1 - 4)             | 57<br>(42 - 99)             | 188<br>(139 - 340)          | 117<br>(84 - 221)         |
| Foreign body                                    | 8,786<br>(3,817 - 12,988)   | 526<br>(265 - 810)       | 55<br>(28 - 84)          | 3,258<br>(1,200 - 5,201)    | 3,918<br>(1,486 - 6,316)    | 1,029<br>(617 - 1,826)    |
| Pulmonary aspiration and foreign body in airway | 8,744<br>(3,775 - 12,943)   | 524<br>(264 - 808)       | 53<br>(27 - 82)          | 3,242<br>(1,184 - 5,185)    | 3,906<br>(1,470 - 6,305)    | 1,019<br>(610 - 1,814)    |
| Foreign body in other body part                 | 42<br>(32 - 60)             | 1<br>(1 - 3)             | 2<br>(1 - 3)             | 16<br>(10 - 21)             | 12<br>(9 - 19)              | 10<br>(6 - 18)            |
| Other unintentional injuries                    | 2,771<br>(2,209 - 4,247)    | 67<br>(39 - 115)         | 76<br>(46 - 116)         | 1,584<br>(1,200 - 2,265)    | 870<br>(589 - 1,508)        | 174<br>(121 - 379)        |
| Self-harm and interpersonal violence            | 72,678<br>(49,247 - 82,315) | 153<br>(78 - 221)        | 299<br>(163 - 383)       | 42,463<br>(28,665 - 48,397) | 21,275<br>(14,357 - 24,852) | 8,488<br>(5,467 - 9,727)  |
| Self-harm                                       | 48,284<br>(29,150 - 55,617) | --                       | 178<br>(81 - 241)        | 27,313<br>(16,001 - 31,964) | 14,213<br>(8,869 - 16,937)  | 6,581<br>(4,004 - 7,722)  |
| Interpersonal violence                          | 24,394<br>(15,343 - 29,587) | 153<br>(78 - 221)        | 122<br>(69 - 161)        | 15,150<br>(9,572 - 18,634)  | 7,062<br>(4,166 - 9,143)    | 1,907<br>(1,090 - 2,358)  |
| Assault by firearm                              | 1,287<br>(574 - 2,384)      | 3<br>(1 - 5)             | 6<br>(3 - 12)            | 931<br>(400 - 1,721)        | 325<br>(134 - 616)          | 22<br>(11 - 44)           |
| Assault by sharp object                         | 6,977<br>(4,258 - 9,712)    | 32<br>(14 - 52)          | 14<br>(7 - 22)           | 3,962<br>(2,486 - 5,913)    | 2,044<br>(1,161 - 2,787)    | 925<br>(484 - 1,220)      |
| Assault by other means                          | 16,130<br>(9,887 - 20,192)  | 118<br>(60 - 172)        | 102<br>(57 - 137)        | 10,258<br>(6,282 - 12,908)  | 4,693<br>(2,644 - 6,253)    | 960<br>(529 - 1,257)      |

Web Table 31- Russia deaths with 95% UI by age, sex, and cause in 2013

| Cause                                                              | Males, All Ages                | Males, 0-4 Years          | Males, 5-14 Years        | Males, 15-49 Years             | Males, 50-69 Years             | Males, 70-80 Years             |
|--------------------------------------------------------------------|--------------------------------|---------------------------|--------------------------|--------------------------------|--------------------------------|--------------------------------|
| All causes                                                         | 937,708<br>(921,673 - 953,001) | 9,317<br>(7,064 - 12,018) | 2,358<br>(1,972 - 2,799) | 183,919<br>(180,255 - 187,611) | 359,104<br>(352,113 - 366,325) | 383,010<br>(378,025 - 388,339) |
| Communicable, maternal, neonatal, and nutritional diseases         | 55,053<br>(45,099 - 61,483)    | 4,787<br>(3,576 - 6,194)  | 164<br>(102 - 221)       | 22,987<br>(19,140 - 26,048)    | 20,671<br>(16,343 - 24,181)    | 6,445<br>(4,446 - 7,828)       |
| HIV/AIDS and tuberculosis                                          | 26,497<br>(22,692 - 31,616)    | 29<br>(17 - 47)           | 6<br>(2 - 15)            | 15,321<br>(13,030 - 18,176)    | 9,615<br>(7,771 - 11,971)      | 1,526<br>(1,178 - 2,051)       |
| Tuberculosis                                                       | 12,075<br>(8,364 - 13,569)     | 8<br>(4 - 12)             | 2<br>(1 - 3)             | 5,974<br>(3,748 - 6,954)       | 5,357<br>(3,860 - 6,186)       | 733<br>(602 - 915)             |
| HIV/AIDS                                                           | 14,423<br>(10,797 - 19,740)    | 20<br>(10 - 38)           | 3<br>(0 - 13)            | 9,347<br>(7,237 - 12,093)      | 4,258<br>(2,679 - 6,605)       | 794<br>(465 - 1,275)           |
| HIV/AIDS resulting in mycobacterial infection                      | 993<br>(702 - 1,412)           | 1<br>(1 - 2)              | 0<br>(0 - 1)             | 640<br>(463 - 879)             | 298<br>(179 - 473)             | 54<br>(30 - 89)                |
| HIV/AIDS resulting in other diseases                               | 13,430<br>(10,044 - 18,409)    | 19<br>(9 - 35)            | 3<br>(0 - 12)            | 8,707<br>(6,715 - 11,283)      | 3,960<br>(2,504 - 6,115)       | 740<br>(433 - 1,188)           |
| Diarrrhea, lower respiratory, and other common infectious diseases | 24,509<br>(16,349 - 28,468)    | 1,338<br>(947 - 1,761)    | 139<br>(85 - 193)        | 7,457<br>(4,816 - 9,083)       | 10,795<br>(6,913 - 13,511)     | 4,780<br>(2,733 - 6,138)       |
| Diarrheal diseases                                                 | 220<br>(166 - 285)             | 118<br>(68 - 180)         | 2<br>(1 - 4)             | 28<br>(22 - 34)                | 44<br>(33 - 56)                | 29<br>(21 - 39)                |
| Intestinal infectious diseases                                     | 109<br>(35 - 256)              | 19<br>(6 - 45)            | 14<br>(4 - 35)           | 45<br>(12 - 115)               | 20<br>(4 - 53)                 | 11<br>(3 - 31)                 |
| Typhoid fever                                                      | 79<br>(21 - 199)               | 13<br>(3 - 32)            | 10<br>(3 - 26)           | 34<br>(8 - 87)                 | 15<br>(2 - 40)                 | 8<br>(2 - 23)                  |
| Paratyphoid fever                                                  | 23<br>(6 - 57)                 | 4<br>(1 - 11)             | 3<br>(1 - 9)             | 10<br>(2 - 26)                 | 4<br>(1 - 12)                  | 2<br>(0 - 6)                   |
| Other intestinal infectious diseases                               | 7<br>(2 - 15)                  | 2<br>(0 - 7)              | 0<br>(0 - 3)             | 2<br>(0 - 6)                   | 1<br>(0 - 5)                   | 1<br>(0 - 4)                   |
| Lower respiratory infections                                       | 22,623<br>(14,318 - 26,580)    | 937<br>(641 - 1,281)      | 82<br>(44 - 120)         | 6,827<br>(4,180 - 8,448)       | 10,195<br>(6,272 - 12,892)     | 4,583<br>(2,545 - 5,949)       |
| Upper respiratory infections                                       | 31<br>(9 - 65)                 | 0<br>(0 - 1)              | 0<br>(0 - 0)             | 8<br>(1 - 22)                  | 12<br>(1 - 38)                 | 10<br>(0 - 34)                 |
| Otitis media                                                       | 59<br>(51 - 69)                | 2<br>(1 - 3)              | 1<br>(0 - 1)             | 21<br>(18 - 25)                | 27<br>(20 - 35)                | 9<br>(6 - 12)                  |
| Meningitis                                                         | 934<br>(818 - 1,081)           | 197<br>(116 - 314)        | 19<br>(12 - 25)          | 323<br>(278 - 381)             | 311<br>(262 - 367)             | 84<br>(66 - 101)               |
| Pneumococcal meningitis                                            | 250<br>(192 - 325)             | 36<br>(21 - 62)           | 5<br>(3 - 8)             | 102<br>(69 - 139)              | 83<br>(45 - 130)               | 23<br>(15 - 33)                |
| H influenzae type B meningitis                                     | 171<br>(128 - 226)             | 77<br>(43 - 120)          | 5<br>(2 - 8)             | 43<br>(26 - 64)                | 37<br>(18 - 60)                | 9<br>(5 - 14)                  |
| Meningococcal meningitis                                           | 194<br>(139 - 261)             | 46<br>(25 - 78)           | 5<br>(3 - 8)             | 71<br>(46 - 110)               | 55<br>(26 - 85)                | 16<br>(9 - 23)                 |
| Other meningitis                                                   | 320<br>(230 - 414)             | 38<br>(18 - 74)           | 4<br>(2 - 6)             | 106<br>(49 - 166)              | 135<br>(81 - 189)              | 37<br>(24 - 52)                |
| Encephalitis                                                       | 485<br>(326 - 667)             | 57<br>(28 - 90)           | 19<br>(10 - 31)          | 191<br>(117 - 277)             | 179<br>(108 - 278)             | 39<br>(20 - 55)                |
| Diphtheria                                                         | 4<br>(0 - 16)                  | 1<br>(0 - 5)              | 0<br>(0 - 3)             | 2<br>(0 - 10)                  | 1<br>(0 - 8)                   | --                             |
| Whooping cough                                                     | 7<br>(5 - 15)                  | 3<br>(0 - 11)             | 1<br>(0 - 1)             | 3<br>(3 - 4)                   | 1<br>(1 - 1)                   | --                             |
| Tetanus                                                            | 6<br>(3 - 8)                   | 0<br>(0 - 1)              | 1<br>(0 - 1)             | 3<br>(1 - 4)                   | 2<br>(1 - 3)                   | 1<br>(0 - 1)                   |
| Measles                                                            | 0<br>(0 - 1)                   | 0<br>(0 - 0)              | 0<br>(0 - 0)             | 0<br>(0 - 0)                   | 0<br>(0 - 0)                   | --                             |
| Varicella and herpes zoster                                        | 30<br>(8 - 96)                 | 3<br>(0 - 13)             | 1<br>(0 - 4)             | 5<br>(1 - 14)                  | 4<br>(0 - 14)                  | 17<br>(0 - 79)                 |
| Neglected tropical diseases and malaria                            | 45<br>(40 - 49)                | 1<br>(1 - 2)              | 2<br>(1 - 3)             | 22<br>(19 - 25)                | 14<br>(13 - 16)                | 6<br>(5 - 6)                   |
| Cysticercosis                                                      | 0<br>(0 - 1)                   | 0<br>(0 - 0)              | 0<br>(0 - 0)             | 0<br>(0 - 0)                   | 0<br>(0 - 0)                   | 0<br>(0 - 0)                   |
| Cystic echinococcosis                                              | 25<br>(23 - 26)                | 0<br>(0 - 0)              | 0<br>(0 - 1)             | 11<br>(10 - 12)                | 9<br>(9 - 10)                  | 4<br>(4 - 4)                   |
| Dengue                                                             | 7<br>(6 - 11)                  | 1<br>(0 - 1)              | 1<br>(0 - 1)             | 4<br>(3 - 6)                   | 2<br>(1 - 3)                   | 1<br>(0 - 1)                   |
| Rabies                                                             | 6<br>(3 - 8)                   | 0<br>(0 - 1)              | 1<br>(0 - 1)             | 3<br>(2 - 5)                   | 1<br>(1 - 2)                   | 0<br>(0 - 1)                   |
| Other neglected tropical diseases                                  | 6<br>(5 - 8)                   | 0<br>(0 - 1)              | 0<br>(0 - 0)             | 4<br>(2 - 5)                   | 2<br>(1 - 2)                   | 1<br>(0 - 1)                   |
| Maternal disorders                                                 | --                             | --                        | --                       | --                             | --                             | --                             |
| Maternal hemorrhage                                                | --                             | --                        | --                       | --                             | --                             | --                             |
| Maternal sepsis and other maternal infections                      | --                             | --                        | --                       | --                             | --                             | --                             |
| Maternal hypertensive disorders                                    | --                             | --                        | --                       | --                             | --                             | --                             |
| Maternal obstructed labor                                          | --                             | --                        | --                       | --                             | --                             | --                             |
| Maternal abortive outcome                                          | --                             | --                        | --                       | --                             | --                             | --                             |
| Indirect maternal deaths                                           | --                             | --                        | --                       | --                             | --                             | --                             |



Web Table 31- Russia deaths with 95% UI by age, sex, and cause in 2013

| Cause                                                            | Males, All Ages                | Males, 0-4 Years         | Males, 5-14 Years  | Males, 15-49 Years          | Males, 50-69 Years             | Males, 70-80 Years             |
|------------------------------------------------------------------|--------------------------------|--------------------------|--------------------|-----------------------------|--------------------------------|--------------------------------|
| Late maternal deaths                                             | --                             | --                       | --                 | --                          | --                             | --                             |
| Maternal deaths aggravated by HIV/AIDS                           | --                             | --                       | --                 | --                          | --                             | --                             |
| Other maternal disorders                                         | --                             | --                       | --                 | --                          | --                             | --                             |
| Neonatal disorders                                               | 3,365<br>(2,513 - 4,524)       | 3,365<br>(2,513 - 4,524) | --                 | --                          | --                             | --                             |
| Neonatal preterm birth complications                             | 1,075<br>(653 - 1,676)         | 1,075<br>(653 - 1,676)   | --                 | --                          | --                             | --                             |
| Neonatal encephalopathy due to birth asphyxia and trauma         | 603<br>(366 - 1,092)           | 603<br>(366 - 1,092)     | --                 | --                          | --                             | --                             |
| Neonatal sepsis and other neonatal infections                    | 275<br>(113 - 621)             | 275<br>(113 - 621)       | --                 | --                          | --                             | --                             |
| Hemolytic disease and other neonatal jaundice                    | 42<br>(16 - 90)                | 42<br>(16 - 90)          | --                 | --                          | --                             | --                             |
| Other neonatal disorders                                         | 1,370<br>(756 - 1,989)         | 1,370<br>(756 - 1,989)   | --                 | --                          | --                             | --                             |
| Nutritional deficiencies                                         | 488<br>(325 - 775)             | 34<br>(17 - 50)          | 13<br>(6 - 19)     | 131<br>(91 - 213)           | 197<br>(135 - 335)             | 112<br>(69 - 173)              |
| Protein-energy malnutrition                                      | 238<br>(142 - 405)             | 26<br>(12 - 41)          | 8<br>(3 - 13)      | 72<br>(44 - 130)            | 103<br>(61 - 192)              | 28<br>(11 - 57)                |
| Iodine deficiency                                                | 17<br>(2 - 52)                 | 0<br>(0 - 3)             | 0<br>(0 - 2)       | 5<br>(0 - 16)               | 7<br>(0 - 32)                  | 5<br>(0 - 26)                  |
| Iron-deficiency anemia                                           | 203<br>(104 - 357)             | 7<br>(2 - 17)            | 4<br>(1 - 8)       | 45<br>(20 - 84)             | 76<br>(36 - 139)               | 71<br>(37 - 114)               |
| Other nutritional deficiencies                                   | 30<br>(11 - 56)                | 1<br>(0 - 1)             | 0<br>(0 - 1)       | 9<br>(3 - 16)               | 12<br>(4 - 21)                 | 8<br>(3 - 19)                  |
| Other communicable, maternal, neonatal, and nutritional diseases | 149<br>(123 - 193)             | 21<br>(10 - 36)          | 4<br>(2 - 5)       | 56<br>(45 - 75)             | 49<br>(38 - 65)                | 20<br>(14 - 30)                |
| Sexually transmitted diseases excluding HIV                      | 28<br>(16 - 49)                | 9<br>(1 - 23)            | 1<br>(0 - 2)       | 7<br>(5 - 13)               | 8<br>(4 - 14)                  | 2<br>(1 - 5)                   |
| Syphilis                                                         | 22<br>(11 - 40)                | 9<br>(1 - 23)            | 1<br>(0 - 2)       | 4<br>(3 - 7)                | 6<br>(3 - 10)                  | 2<br>(1 - 4)                   |
| Chlamydial infection                                             | --                             | --                       | --                 | --                          | --                             | --                             |
| Gonococcal infection                                             | 3<br>(2 - 6)                   | --                       | 0<br>(0 - 0)       | 2<br>(1 - 3)                | 1<br>(1 - 3)                   | 0<br>(0 - 1)                   |
| Other sexually transmitted diseases                              | 2<br>(2 - 4)                   | --                       | 0<br>(0 - 0)       | 1<br>(1 - 3)                | 1<br>(0 - 2)                   | 0<br>(0 - 0)                   |
| Hepatitis                                                        | 97<br>(81 - 119)               | 7<br>(4 - 11)            | 2<br>(1 - 3)       | 43<br>(34 - 58)             | 33<br>(24 - 45)                | 13<br>(9 - 18)                 |
| Acute hepatitis A                                                | 17<br>(5 - 33)                 | 2<br>(1 - 5)             | 1<br>(0 - 2)       | 10<br>(3 - 22)              | 3<br>(1 - 7)                   | 1<br>(0 - 2)                   |
| Acute hepatitis B                                                | 77<br>(56 - 101)               | 4<br>(2 - 8)             | 1<br>(0 - 2)       | 31<br>(20 - 45)             | 29<br>(20 - 41)                | 12<br>(8 - 16)                 |
| Acute hepatitis C                                                | 3<br>(1 - 9)                   | --                       | 0<br>(0 - 0)       | 2<br>(0 - 4)                | 1<br>(0 - 4)                   | 0<br>(0 - 1)                   |
| Other infectious diseases                                        | 24<br>(15 - 49)                | 4<br>(2 - 9)             | 1<br>(0 - 2)       | 6<br>(4 - 12)               | 8<br>(5 - 18)                  | 5<br>(3 - 12)                  |
| Non-communicable diseases                                        | 756,118<br>(739,808 - 778,662) | 3,182<br>(2,363 - 4,129) | 647<br>(485 - 792) | 87,115<br>(82,110 - 95,221) | 299,462<br>(291,172 - 310,215) | 365,711<br>(360,413 - 371,227) |
| Neoplasms                                                        | 158,516<br>(150,331 - 167,099) | 234<br>(149 - 347)       | 305<br>(215 - 389) | 12,069<br>(11,080 - 13,557) | 81,906<br>(76,429 - 87,676)    | 64,001<br>(60,489 - 67,536)    |
| Esophageal cancer                                                | 5,527<br>(4,685 - 7,036)       | --                       | --                 | 322<br>(235 - 504)          | 3,432<br>(2,782 - 4,287)       | 1,773<br>(1,486 - 2,407)       |
| Stomach cancer                                                   | 19,280<br>(17,530 - 22,003)    | --                       | --                 | 1,335<br>(1,132 - 1,634)    | 9,559<br>(8,502 - 11,390)      | 8,386<br>(7,334 - 9,597)       |
| Liver cancer                                                     | 5,383<br>(3,924 - 8,290)       | --                       | 6<br>(3 - 10)      | 398<br>(262 - 608)          | 2,872<br>(2,069 - 4,302)       | 2,107<br>(1,402 - 3,413)       |
| Liver cancer due to hepatitis B                                  | 938<br>(451 - 1,591)           | --                       | 2<br>(1 - 4)       | 105<br>(57 - 173)           | 540<br>(224 - 915)             | 292<br>(149 - 515)             |
| Liver cancer due to hepatitis C                                  | 2,560<br>(1,568 - 4,010)       | --                       | 1<br>(0 - 2)       | 175<br>(94 - 284)           | 1,388<br>(844 - 2,216)         | 996<br>(579 - 1,664)           |
| Liver cancer due to alcohol use                                  | 1,564<br>(1,027 - 2,410)       | --                       | --                 | 79<br>(42 - 133)            | 764<br>(472 - 1,194)           | 722<br>(456 - 1,108)           |
| Liver cancer due to other causes                                 | 320<br>(151 - 561)             | --                       | 3<br>(1 - 5)       | 39<br>(19 - 65)             | 180<br>(81 - 321)              | 98<br>(45 - 185)               |
| Larynx cancer                                                    | 4,099<br>(3,326 - 5,924)       | --                       | --                 | 300<br>(213 - 566)          | 2,628<br>(2,101 - 3,821)       | 1,171<br>(850 - 1,592)         |
| Tracheal, bronchus and lung cancer                               | 45,246<br>(39,378 - 50,410)    | --                       | --                 | 2,261<br>(1,777 - 2,763)    | 26,706<br>(22,805 - 30,437)    | 16,279<br>(14,041 - 18,293)    |
| Breast cancer                                                    | 213<br>(44 - 300)              | --                       | --                 | 22<br>(7 - 39)              | 102<br>(22 - 161)              | 89<br>(14 - 138)               |
| Cervical cancer                                                  | --                             | --                       | --                 | --                          | --                             | --                             |
| Uterine cancer                                                   | --                             | --                       | --                 | --                          | --                             | --                             |
| Prostate cancer                                                  | 10,135<br>(6,449 - 12,415)     | --                       | --                 | 83<br>(55 - 115)            | 2,999<br>(1,808 - 3,914)       | 7,053<br>(4,330 - 8,807)       |

Web Table 31- Russia deaths with 95% UI by age, sex, and cause in 2013

| Cause                                         | Males, All Ages                | Males, 0-4 Years | Males, 5-14 Years | Males, 15-49 Years          | Males, 50-69 Years             | Males, 70-80 Years             |
|-----------------------------------------------|--------------------------------|------------------|-------------------|-----------------------------|--------------------------------|--------------------------------|
| Colon and rectum cancer                       | 18,842<br>(17,720 - 20,127)    | --               | --                | 956<br>(854 - 1,078)        | 7,809<br>(7,216 - 8,440)       | 10,077<br>(9,174 - 11,162)     |
| Lip and oral cavity cancer                    | 4,671<br>(3,291 - 5,305)       | --               | --                | 486<br>(370 - 590)          | 3,005<br>(2,098 - 3,538)       | 1,181<br>(792 - 1,429)         |
| Nasopharynx cancer                            | 279<br>(223 - 385)             | --               | 1<br>(1 - 2)      | 46<br>(31 - 67)             | 166<br>(126 - 241)             | 66<br>(47 - 94)                |
| Other pharynx cancer                          | 2,832<br>(2,010 - 3,589)       | --               | --                | 262<br>(193 - 371)          | 2,048<br>(1,381 - 2,648)       | 523<br>(384 - 680)             |
| Gallbladder and biliary tract cancer          | 1,123<br>(808 - 1,684)         | --               | --                | 65<br>(45 - 113)            | 481<br>(345 - 760)             | 578<br>(404 - 844)             |
| Pancreatic cancer                             | 8,957<br>(8,337 - 9,581)       | --               | --                | 829<br>(709 - 957)          | 4,989<br>(4,518 - 5,525)       | 3,139<br>(2,818 - 3,485)       |
| Malignant skin melanoma                       | 1,625<br>(838 - 2,702)         | --               | --                | 343<br>(180 - 590)          | 789<br>(408 - 1,308)           | 493<br>(236 - 843)             |
| Non-melanoma skin cancer                      | 815<br>(498 - 1,237)           | --               | --                | 72<br>(46 - 117)            | 293<br>(177 - 451)             | 450<br>(269 - 692)             |
| Ovarian cancer                                | --                             | --               | --                | --                          | --                             | --                             |
| Testicular cancer                             | 317<br>(230 - 419)             | --               | --                | 195<br>(127 - 262)          | 63<br>(44 - 89)                | 59<br>(42 - 90)                |
| Kidney cancer                                 | 5,686<br>(4,842 - 6,542)       | 14<br>(7 - 23)   | 8<br>(4 - 15)     | 441<br>(345 - 556)          | 3,298<br>(2,685 - 3,977)       | 1,925<br>(1,574 - 2,342)       |
| Bladder cancer                                | 5,254<br>(4,538 - 6,396)       | --               | --                | 128<br>(100 - 179)          | 1,908<br>(1,611 - 2,408)       | 3,218<br>(2,721 - 3,909)       |
| Brain and nervous system cancer               | 3,729<br>(2,860 - 4,576)       | 58<br>(29 - 105) | 90<br>(58 - 130)  | 984<br>(748 - 1,217)        | 2,044<br>(1,578 - 2,634)       | 554<br>(351 - 704)             |
| Thyroid cancer                                | 651<br>(540 - 808)             | --               | 0<br>(0 - 1)      | 75<br>(58 - 97)             | 329<br>(262 - 427)             | 247<br>(198 - 314)             |
| Mesothelioma                                  | 204<br>(138 - 316)             | --               | --                | 18<br>(11 - 30)             | 95<br>(59 - 161)               | 91<br>(49 - 149)               |
| Hodgkin lymphoma                              | 603<br>(477 - 1,034)           | 2<br>(1 - 5)     | 5<br>(2 - 11)     | 269<br>(198 - 455)          | 227<br>(162 - 409)             | 99<br>(70 - 180)               |
| Non-Hodgkin lymphoma                          | 2,943<br>(1,318 - 3,688)       | 17<br>(8 - 31)   | 30<br>(16 - 50)   | 454<br>(218 - 572)          | 1,395<br>(603 - 1,808)         | 1,047<br>(445 - 1,408)         |
| Multiple myeloma                              | 926<br>(500 - 1,448)           | --               | --                | 87<br>(45 - 139)            | 513<br>(267 - 839)             | 325<br>(171 - 514)             |
| Leukemia                                      | 3,806<br>(3,267 - 4,168)       | 77<br>(43 - 123) | 98<br>(66 - 133)  | 669<br>(547 - 758)          | 1,556<br>(1,286 - 1,781)       | 1,406<br>(1,190 - 1,610)       |
| Other neoplasms                               | 5,368<br>(3,611 - 6,240)       | 67<br>(29 - 108) | 65<br>(33 - 96)   | 968<br>(599 - 1,177)        | 2,601<br>(1,658 - 3,131)       | 1,666<br>(1,148 - 2,190)       |
| Cardiovascular diseases                       | 468,279<br>(452,975 - 481,589) | 87<br>(60 - 117) | 58<br>(41 - 75)   | 44,285<br>(41,042 - 47,470) | 172,866<br>(165,608 - 179,766) | 250,984<br>(243,916 - 257,739) |
| Rheumatic heart disease                       | 1,435<br>(982 - 3,178)         | 0<br>(0 - 1)     | 2<br>(1 - 4)      | 365<br>(196 - 980)          | 837<br>(546 - 1,877)           | 231<br>(154 - 384)             |
| Ischemic heart disease                        | 256,212<br>(232,195 - 279,093) | 2<br>(1 - 4)     | 2<br>(1 - 3)      | 17,979<br>(15,278 - 22,326) | 96,403<br>(86,755 - 106,046)   | 141,826<br>(127,970 - 155,491) |
| Cerebrovascular disease                       | 144,867<br>(125,707 - 168,925) | 6<br>(3 - 9)     | 7<br>(4 - 10)     | 6,404<br>(4,805 - 8,061)    | 44,428<br>(37,348 - 52,938)    | 94,022<br>(82,076 - 109,675)   |
| Ischemic stroke                               | 115,629<br>(100,042 - 136,462) | 0<br>(0 - 1)     | 0<br>(0 - 0)      | 1,706<br>(1,089 - 2,424)    | 29,688<br>(24,187 - 36,377)    | 84,235<br>(73,068 - 99,442)    |
| Hemorrhagic stroke                            | 29,238<br>(21,781 - 36,149)    | 6<br>(3 - 9)     | 6<br>(4 - 9)      | 4,699<br>(3,474 - 5,913)    | 14,740<br>(10,914 - 18,942)    | 9,787<br>(6,618 - 13,012)      |
| Hypertensive heart disease                    | 5,917<br>(3,136 - 9,063)       | 1<br>(0 - 1)     | 1<br>(0 - 1)      | 478<br>(307 - 723)          | 2,587<br>(1,459 - 3,785)       | 2,852<br>(1,163 - 4,860)       |
| Cardiomyopathy and myocarditis                | 49,548<br>(33,069 - 60,647)    | 63<br>(43 - 87)  | 38<br>(26 - 50)   | 17,633<br>(13,180 - 20,640) | 24,316<br>(15,991 - 31,021)    | 7,498<br>(3,397 - 10,539)      |
| Atrial fibrillation and flutter               | 897<br>(702 - 1,138)           | --               | --                | 23<br>(17 - 31)             | 201<br>(150 - 260)             | 673<br>(514 - 886)             |
| Aortic aneurysm                               | 3,672<br>(3,007 - 4,540)       | --               | --                | 420<br>(275 - 537)          | 1,642<br>(1,256 - 2,089)       | 1,611<br>(1,346 - 2,019)       |
| Peripheral vascular disease                   | 34<br>(26 - 46)                | --               | --                | 3<br>(2 - 6)                | 14<br>(10 - 21)                | 16<br>(11 - 23)                |
| Endocarditis                                  | 844<br>(123 - 2,075)           | 8<br>(2 - 19)    | 5<br>(2 - 10)     | 298<br>(52 - 715)           | 373<br>(46 - 974)              | 160<br>(16 - 427)              |
| Other cardiovascular and circulatory diseases | 4,853<br>(2,473 - 5,736)       | 7<br>(3 - 12)    | 4<br>(2 - 6)      | 682<br>(332 - 854)          | 2,065<br>(1,158 - 2,524)       | 2,095<br>(968 - 2,594)         |
| Chronic respiratory diseases                  | 23,669<br>(21,009 - 34,844)    | 8<br>(5 - 12)    | 8<br>(6 - 11)     | 1,006<br>(820 - 1,657)      | 7,869<br>(6,621 - 12,869)      | 14,778<br>(13,059 - 20,798)    |
| Chronic obstructive pulmonary disease         | 21,376<br>(18,693 - 31,196)    | 4<br>(2 - 6)     | 2<br>(1 - 3)      | 724<br>(567 - 1,182)        | 6,893<br>(5,707 - 10,967)      | 13,754<br>(12,065 - 19,204)    |
| Pneumoconiosis                                | 184<br>(112 - 269)             | 0<br>(0 - 0)     | 0<br>(0 - 1)      | 12<br>(6 - 18)              | 97<br>(60 - 161)               | 74<br>(41 - 113)               |
| Silicosis                                     | 73<br>(36 - 124)               | 0<br>(0 - 0)     | 0<br>(0 - 0)      | 3<br>(1 - 5)                | 36<br>(19 - 60)                | 34<br>(15 - 65)                |
| Asbestosis                                    | 30<br>(15 - 48)                | 0<br>(0 - 0)     | 0<br>(0 - 0)      | 3<br>(1 - 5)                | 19<br>(9 - 33)                 | 8<br>(3 - 16)                  |
| Coal workers pneumoconiosis                   | 19<br>(8 - 34)                 | 0<br>(0 - 0)     | 0<br>(0 - 0)      | 2<br>(1 - 4)                | 10<br>(5 - 20)                 | 6<br>(2 - 13)                  |
| Other pneumoconiosis                          | 61<br>(30 - 112)               | 0<br>(0 - 0)     | 0<br>(0 - 0)      | 4<br>(2 - 7)                | 32<br>(15 - 67)                | 25<br>(11 - 47)                |

Web Table 31- Russia deaths with 95% UI by age, sex, and cause in 2013

| Cause                                               | Males, All Ages             | Males, 0-4 Years | Males, 5-14 Years | Males, 15-49 Years          | Males, 50-69 Years          | Males, 70-80 Years          |
|-----------------------------------------------------|-----------------------------|------------------|-------------------|-----------------------------|-----------------------------|-----------------------------|
| Asthma                                              | 1,084<br>(909 - 1,607)      | 0<br>(0 - 1)     | 4<br>(2 - 5)      | 123<br>(97 - 192)           | 439<br>(346 - 676)          | 517<br>(406 - 719)          |
| Interstitial lung disease and pulmonary sarcoidosis | 881<br>(303 - 2,266)        | 0<br>(0 - 1)     | 1<br>(0 - 1)      | 81<br>(32 - 217)            | 399<br>(142 - 1,086)        | 400<br>(117 - 1,053)        |
| Other chronic respiratory diseases                  | 144<br>(99 - 210)           | 3<br>(2 - 5)     | 1<br>(1 - 2)      | 67<br>(43 - 103)            | 41<br>(23 - 68)             | 33<br>(19 - 52)             |
| Cirrhosis                                           | 25,285<br>(23,588 - 27,088) | 7<br>(4 - 11)    | 8<br>(6 - 11)     | 9,214<br>(8,225 - 10,176)   | 12,913<br>(11,604 - 14,211) | 3,143<br>(2,825 - 3,512)    |
| Cirrhosis due to hepatitis B                        | 3,771<br>(2,380 - 5,463)    | 0<br>(0 - 0)     | 1<br>(0 - 2)      | 1,423<br>(880 - 2,099)      | 1,897<br>(1,169 - 2,841)    | 449<br>(272 - 682)          |
| Cirrhosis due to hepatitis C                        | 7,494<br>(4,383 - 10,552)   | 1<br>(0 - 2)     | 2<br>(1 - 3)      | 2,616<br>(1,524 - 3,788)    | 3,919<br>(2,089 - 5,657)    | 956<br>(539 - 1,325)        |
| Cirrhosis due to alcohol use                        | 11,752<br>(8,944 - 14,775)  | --               | --                | 3,924<br>(2,908 - 5,054)    | 6,242<br>(4,580 - 7,961)    | 1,587<br>(1,199 - 2,025)    |
| Cirrhosis due to other causes                       | 2,269<br>(1,457 - 3,230)    | 6<br>(4 - 10)    | 5<br>(4 - 7)      | 1,252<br>(747 - 1,822)      | 855<br>(444 - 1,391)        | 151<br>(79 - 243)           |
| Digestive diseases                                  | 18,650<br>(12,830 - 20,630) | 21<br>(13 - 32)  | 13<br>(8 - 17)    | 4,594<br>(3,360 - 5,186)    | 7,705<br>(5,072 - 8,849)    | 6,316<br>(4,030 - 7,284)    |
| Peptic ulcer disease                                | 4,395<br>(2,487 - 6,108)    | 1<br>(0 - 1)     | 1<br>(0 - 1)      | 853<br>(566 - 1,242)        | 2,119<br>(1,135 - 2,955)    | 1,422<br>(653 - 2,157)      |
| Gastritis and duodenitis                            | 213<br>(99 - 325)           | 0<br>(0 - 1)     | 1<br>(0 - 1)      | 53<br>(27 - 94)             | 95<br>(42 - 154)            | 64<br>(27 - 102)            |
| Appendicitis                                        | 213<br>(134 - 334)          | 4<br>(2 - 8)     | 2<br>(1 - 4)      | 46<br>(29 - 81)             | 81<br>(47 - 125)            | 80<br>(41 - 131)            |
| Paralytic ileus and intestinal obstruction          | 1,390<br>(855 - 2,638)      | 9<br>(4 - 15)    | 3<br>(2 - 5)      | 257<br>(154 - 552)          | 534<br>(320 - 1,088)        | 587<br>(323 - 1,085)        |
| Inguinal, femoral, and abdominal hernia             | 376<br>(150 - 585)          | 1<br>(0 - 2)     | 1<br>(0 - 1)      | 29<br>(14 - 47)             | 118<br>(46 - 187)           | 228<br>(79 - 370)           |
| Inflammatory bowel disease                          | 607<br>(378 - 1,228)        | 2<br>(1 - 4)     | 1<br>(0 - 1)      | 104<br>(64 - 213)           | 277<br>(166 - 580)          | 223<br>(123 - 489)          |
| Vascular intestinal disorders                       | 3,391<br>(1,523 - 6,129)    | 0<br>(0 - 1)     | 1<br>(0 - 2)      | 153<br>(55 - 332)           | 1,459<br>(615 - 2,675)      | 1,778<br>(819 - 3,097)      |
| Gallbladder and biliary diseases                    | 1,231<br>(814 - 1,711)      | 0<br>(0 - 1)     | 1<br>(0 - 1)      | 73<br>(50 - 104)            | 268<br>(185 - 430)          | 889<br>(542 - 1,253)        |
| Pancreatitis                                        | 6,061<br>(3,590 - 7,632)    | 1<br>(0 - 2)     | 1<br>(0 - 2)      | 2,734<br>(1,843 - 3,284)    | 2,444<br>(1,299 - 3,333)    | 881<br>(402 - 1,289)        |
| Other digestive diseases                            | 771<br>(134 - 1,073)        | 2<br>(1 - 4)     | 2<br>(1 - 3)      | 293<br>(59 - 429)           | 311<br>(48 - 451)           | 164<br>(21 - 245)           |
| Neurological disorders                              | 24,825<br>(19,210 - 30,087) | 71<br>(45 - 101) | 44<br>(33 - 59)   | 915<br>(747 - 1,305)        | 2,160<br>(1,758 - 2,758)    | 21,634<br>(15,931 - 26,939) |
| Alzheimer disease and other dementias               | 22,591<br>(16,790 - 27,879) | --               | --                | 5<br>(1 - 15)               | 1,348<br>(958 - 1,902)      | 21,238<br>(15,561 - 26,546) |
| Parkinson disease                                   | 231<br>(183 - 274)          | --               | --                | 4<br>(3 - 6)                | 61<br>(45 - 75)             | 166<br>(130 - 202)          |
| Epilepsy                                            | 689<br>(541 - 1,049)        | 11<br>(6 - 21)   | 22<br>(15 - 36)   | 456<br>(344 - 735)          | 175<br>(133 - 264)          | 25<br>(18 - 39)             |
| Multiple sclerosis                                  | 295<br>(179 - 669)          | --               | --                | 140<br>(87 - 335)           | 132<br>(73 - 289)           | 22<br>(13 - 52)             |
| Other neurological disorders                        | 1,019<br>(755 - 1,224)      | 60<br>(36 - 86)  | 22<br>(13 - 30)   | 309<br>(215 - 402)          | 444<br>(324 - 562)          | 183<br>(140 - 269)          |
| Mental and substance use disorders                  | 23,408<br>(19,604 - 34,661) | 1<br>(1 - 3)     | 0<br>(0 - 0)      | 12,762<br>(10,740 - 19,405) | 9,633<br>(7,070 - 14,871)   | 1,012<br>(564 - 1,266)      |
| Schizophrenia                                       | 70<br>(48 - 124)            | --               | --                | 26<br>(16 - 45)             | 32<br>(20 - 62)             | 12<br>(7 - 23)              |
| Alcohol use disorders                               | 18,456<br>(13,218 - 28,637) | --               | --                | 9,081<br>(7,119 - 15,463)   | 8,529<br>(5,602 - 13,139)   | 846<br>(376 - 1,110)        |
| Drug use disorders                                  | 4,873<br>(3,822 - 8,224)    | 1<br>(1 - 3)     | --                | 3,647<br>(2,879 - 5,524)    | 1,071<br>(748 - 2,551)      | 154<br>(110 - 225)          |
| Opioid use disorders                                | 2,131<br>(1,641 - 3,567)    | 1<br>(0 - 1)     | --                | 1,627<br>(1,257 - 2,478)    | 435<br>(295 - 1,039)        | 69<br>(48 - 105)            |
| Cocaine use disorders                               | 116<br>(85 - 177)           | 0<br>(0 - 0)     | --                | 94<br>(68 - 136)            | 19<br>(12 - 48)             | 3<br>(2 - 5)                |
| Amphetamine use disorders                           | 101<br>(76 - 159)           | 0<br>(0 - 0)     | --                | 76<br>(56 - 110)            | 22<br>(14 - 50)             | 3<br>(2 - 5)                |
| Other drug use disorders                            | 2,526<br>(1,993 - 4,283)    | 1<br>(0 - 1)     | --                | 1,851<br>(1,444 - 2,837)    | 595<br>(414 - 1,406)        | 79<br>(56 - 116)            |
| Eating disorders                                    | 8<br>(4 - 13)               | --               | 0<br>(0 - 0)      | 8<br>(4 - 13)               | --                          | --                          |
| Anorexia nervosa                                    | 8<br>(4 - 13)               | --               | 0<br>(0 - 0)      | 8<br>(4 - 13)               | --                          | --                          |
| Diabetes, urogenital, blood, and endocrine diseases | 8,983<br>(8,358 - 11,212)   | 75<br>(49 - 113) | 29<br>(22 - 39)   | 1,624<br>(1,440 - 2,443)    | 3,749<br>(3,383 - 4,745)    | 3,507<br>(3,122 - 3,998)    |
| Diabetes mellitus                                   | 2,710<br>(2,510 - 2,912)    | 2<br>(1 - 3)     | 5<br>(3 - 6)      | 489<br>(439 - 545)          | 1,181<br>(1,040 - 1,336)    | 1,034<br>(907 - 1,174)      |
| Acute glomerulonephritis                            | 114<br>(69 - 235)           | 1<br>(0 - 2)     | 1<br>(1 - 1)      | 43<br>(26 - 90)             | 53<br>(30 - 109)            | 16<br>(7 - 38)              |
| Chronic kidney disease                              | 2,435<br>(2,130 - 3,904)    | 3<br>(2 - 4)     | 4<br>(3 - 5)      | 537<br>(432 - 1,142)        | 1,143<br>(958 - 1,862)      | 749<br>(641 - 938)          |
| Chronic kidney disease due to diabetes mellitus     | 71<br>(43 - 174)            | 0<br>(0 - 1)     | 1<br>(0 - 1)      | 26<br>(12 - 58)             | 29<br>(16 - 73)             | 15<br>(8 - 52)              |

Web Table 31- Russia deaths with 95% UI by age, sex, and cause in 2013

| Cause                                               | Males, All Ages                | Males, 0-4 Years         | Males, 5-14 Years        | Males, 15-49 Years          | Males, 50-69 Years          | Males, 70-80 Years         |
|-----------------------------------------------------|--------------------------------|--------------------------|--------------------------|-----------------------------|-----------------------------|----------------------------|
| Chronic kidney disease due to hypertension          | 915<br>(521 - 1,228)           | 1<br>(0 - 1)             | 0<br>(0 - 1)             | 103<br>(55 - 192)           | 440<br>(255 - 672)          | 371<br>(190 - 486)         |
| Chronic kidney disease due to glomerulonephritis    | 523<br>(355 - 734)             | 1<br>(0 - 1)             | 1<br>(1 - 2)             | 202<br>(152 - 344)          | 241<br>(142 - 321)          | 79<br>(41 - 116)           |
| Chronic kidney disease due to other causes          | 926<br>(647 - 2,085)           | 1<br>(1 - 2)             | 1<br>(1 - 3)             | 206<br>(128 - 612)          | 434<br>(267 - 1,015)        | 283<br>(180 - 518)         |
| Urinary diseases and male infertility               | 3,278<br>(2,782 - 4,107)       | 8<br>(6 - 12)            | 5<br>(3 - 6)             | 426<br>(361 - 607)          | 1,210<br>(1,006 - 1,591)    | 1,630<br>(1,210 - 2,037)   |
| Interstitial nephritis and urinary tract infections | 2,418<br>(2,018 - 3,299)       | 7<br>(5 - 11)            | 3<br>(2 - 5)             | 342<br>(276 - 542)          | 883<br>(691 - 1,311)        | 1,182<br>(919 - 1,643)     |
| Urolithiasis                                        | 440<br>(316 - 753)             | --                       | 1<br>(0 - 1)             | 29<br>(19 - 49)             | 154<br>(103 - 273)          | 257<br>(168 - 464)         |
| Other urinary diseases                              | 421<br>(90 - 720)              | 1<br>(0 - 2)             | 1<br>(0 - 2)             | 54<br>(13 - 92)             | 173<br>(35 - 303)           | 192<br>(35 - 348)          |
| Gynecological diseases                              | --                             | --                       | --                       | --                          | --                          | --                         |
| Uterine fibroids                                    | --                             | --                       | --                       | --                          | --                          | --                         |
| Polycystic ovarian syndrome                         | --                             | --                       | --                       | --                          | --                          | --                         |
| Endometriosis                                       | --                             | --                       | --                       | --                          | --                          | --                         |
| Genital prolapse                                    | --                             | --                       | --                       | --                          | --                          | --                         |
| Other gynecological diseases                        | --                             | --                       | --                       | --                          | --                          | --                         |
| Hemoglobinopathies and hemolytic anemias            | 46<br>(27 - 84)                | 5<br>(3 - 8)             | 4<br>(2 - 7)             | 24<br>(9 - 51)              | 8<br>(5 - 13)               | 6<br>(4 - 9)               |
| Thalassemias                                        | 19<br>(9 - 36)                 | 4<br>(2 - 6)             | 3<br>(2 - 5)             | 12<br>(4 - 27)              | 0<br>(0 - 0)                | 0<br>(0 - 0)               |
| Sickle cell disorders                               | 2<br>(1 - 4)                   | 0<br>(0 - 1)             | 0<br>(0 - 1)             | 1<br>(0 - 3)                | 0<br>(0 - 0)                | 0<br>(0 - 0)               |
| G6PD deficiency                                     | 1<br>(1 - 2)                   | 0<br>(0 - 0)             | 0<br>(0 - 0)             | 1<br>(0 - 1)                | 0<br>(0 - 0)                | 0<br>(0 - 0)               |
| Other hemoglobinopathies and hemolytic anemias      | 24<br>(16 - 42)                | 1<br>(0 - 1)             | 1<br>(0 - 1)             | 10<br>(4 - 20)              | 8<br>(5 - 12)               | 6<br>(4 - 9)               |
| Endocrine, metabolic, blood, and immune disorders   | 399<br>(311 - 651)             | 56<br>(34 - 90)          | 11<br>(7 - 18)           | 105<br>(77 - 188)           | 154<br>(114 - 265)          | 73<br>(51 - 114)           |
| Musculoskeletal disorders                           | 842<br>(644 - 1,462)           | --                       | 13<br>(6 - 20)           | 248<br>(160 - 363)          | 351<br>(249 - 603)          | 230<br>(148 - 481)         |
| Rheumatoid arthritis                                | 331<br>(222 - 607)             | --                       | 3<br>(1 - 6)             | 56<br>(32 - 92)             | 157<br>(94 - 287)           | 115<br>(64 - 257)          |
| Other musculoskeletal disorders                     | 511<br>(363 - 857)             | --                       | 10<br>(4 - 15)           | 192<br>(118 - 288)          | 194<br>(127 - 334)          | 115<br>(67 - 236)          |
| Other non-communicable diseases                     | 3,661<br>(2,894 - 4,596)       | 2,677<br>(1,944 - 3,573) | 169<br>(112 - 225)       | 399<br>(337 - 510)          | 311<br>(245 - 359)          | 106<br>(60 - 126)          |
| Congenital anomalies                                | 3,095<br>(2,411 - 3,994)       | 2,300<br>(1,685 - 3,141) | 168<br>(111 - 225)       | 357<br>(294 - 500)          | 217<br>(176 - 255)          | 53<br>(42 - 64)            |
| Neural tube defects                                 | 376<br>(189 - 696)             | 325<br>(144 - 619)       | 32<br>(15 - 55)          | 14<br>(9 - 21)              | 5<br>(3 - 7)                | 1<br>(0 - 2)               |
| Congenital heart anomalies                          | 1,094<br>(786 - 1,579)         | 814<br>(541 - 1,212)     | 48<br>(27 - 74)          | 147<br>(95 - 246)           | 75<br>(51 - 97)             | 10<br>(6 - 14)             |
| Cleft lip and cleft palate                          | 16<br>(4 - 41)                 | 16<br>(4 - 41)           | --                       | --                          | --                          | --                         |
| Down syndrome                                       | 124<br>(70 - 191)              | 45<br>(18 - 98)          | 11<br>(4 - 19)           | 45<br>(26 - 65)             | 22<br>(14 - 32)             | 1<br>(1 - 2)               |
| Chromosomal unbalanced rearrangements               | 81<br>(48 - 126)               | 59<br>(32 - 102)         | 8<br>(2 - 16)            | 9<br>(6 - 13)               | 3<br>(2 - 5)                | 2<br>(1 - 3)               |
| Other congenital anomalies                          | 1,405<br>(1,005 - 1,978)       | 1,041<br>(676 - 1,543)   | 70<br>(40 - 106)         | 142<br>(112 - 196)          | 112<br>(89 - 140)           | 40<br>(32 - 49)            |
| Skin and subcutaneous diseases                      | 190<br>(47 - 250)              | 1<br>(0 - 1)             | 1<br>(0 - 1)             | 42<br>(8 - 63)              | 94<br>(23 - 126)            | 52<br>(15 - 69)            |
| Cellulitis                                          | 89<br>(18 - 120)               | 0<br>(0 - 1)             | 0<br>(0 - 0)             | 22<br>(3 - 32)              | 44<br>(8 - 61)              | 23<br>(6 - 33)             |
| Pyoderma                                            | 80<br>(24 - 129)               | 0<br>(0 - 0)             | 0<br>(0 - 0)             | 16<br>(4 - 30)              | 41<br>(12 - 66)             | 23<br>(7 - 34)             |
| Decubitus ulcer                                     | 17<br>(5 - 28)                 | 0<br>(0 - 0)             | 0<br>(0 - 0)             | 3<br>(1 - 5)                | 8<br>(2 - 13)               | 6<br>(2 - 10)              |
| Other skin and subcutaneous diseases                | 3<br>(1 - 6)                   | 0<br>(0 - 0)             | 0<br>(0 - 0)             | 1<br>(0 - 3)                | 1<br>(0 - 2)                | 0<br>(0 - 1)               |
| Sudden infant death syndrome                        | 377<br>(52 - 986)              | 377<br>(52 - 986)        | --                       | --                          | --                          | --                         |
| Injuries                                            | 126,537<br>(110,958 - 135,336) | 1,348<br>(946 - 1,831)   | 1,547<br>(1,293 - 1,875) | 73,817<br>(67,020 - 78,606) | 38,971<br>(31,800 - 43,100) | 10,854<br>(8,286 - 12,204) |
| Transport injuries                                  | 22,504<br>(20,658 - 24,316)    | 176<br>(108 - 265)       | 429<br>(290 - 556)       | 15,066<br>(13,547 - 16,642) | 5,347<br>(4,784 - 5,937)    | 1,486<br>(1,298 - 1,699)   |
| Road injuries                                       | 19,038<br>(17,308 - 20,785)    | 158<br>(95 - 242)        | 373<br>(255 - 489)       | 12,728<br>(11,334 - 14,308) | 4,521<br>(3,873 - 5,106)    | 1,259<br>(1,055 - 1,480)   |
| Pedestrian road injuries                            | 6,584<br>(3,947 - 10,237)      | 55<br>(23 - 100)         | 159<br>(83 - 239)        | 3,766<br>(2,292 - 6,489)    | 1,962<br>(1,187 - 2,905)    | 642<br>(368 - 901)         |

Web Table 31- Russia deaths with 95% UI by age, sex, and cause in 2013

| Cause                                           | Males, All Ages             | Males, 0-4 Years       | Males, 5-14 Years    | Males, 15-49 Years          | Males, 50-69 Years          | Males, 70-80 Years       |
|-------------------------------------------------|-----------------------------|------------------------|----------------------|-----------------------------|-----------------------------|--------------------------|
| Cyclist road injuries                           | 873<br>(325 - 1,302)        | 3<br>(1 - 7)           | 23<br>(5 - 43)       | 592<br>(224 - 928)          | 198<br>(68 - 310)           | 57<br>(21 - 94)          |
| Motorcyclist road injuries                      | 1,131<br>(637 - 1,755)      | 8<br>(3 - 17)          | 21<br>(8 - 42)       | 785<br>(431 - 1,268)        | 241<br>(125 - 392)          | 76<br>(36 - 127)         |
| Motor vehicle road injuries                     | 10,170<br>(7,080 - 12,852)  | 88<br>(46 - 144)       | 163<br>(94 - 242)    | 7,368<br>(5,111 - 9,290)    | 2,081<br>(1,312 - 2,898)    | 470<br>(273 - 761)       |
| Other road injuries                             | 280<br>(80 - 571)           | 3<br>(1 - 8)           | 6<br>(2 - 15)        | 217<br>(56 - 443)           | 39<br>(10 - 127)            | 15<br>(4 - 44)           |
| Other transport injuries                        | 3,465<br>(2,405 - 4,497)    | 18<br>(5 - 42)         | 56<br>(26 - 115)     | 2,338<br>(1,548 - 3,135)    | 826<br>(511 - 1,266)        | 227<br>(131 - 366)       |
| Unintentional injuries                          | 46,350<br>(40,259 - 57,187) | 1,091<br>(748 - 1,504) | 926<br>(729 - 1,323) | 23,217<br>(20,234 - 31,528) | 16,707<br>(13,494 - 19,692) | 4,409<br>(3,756 - 5,155) |
| Falls                                           | 9,527<br>(7,442 - 11,470)   | 114<br>(70 - 177)      | 66<br>(48 - 91)      | 4,136<br>(3,419 - 5,468)    | 3,674<br>(2,589 - 4,501)    | 1,537<br>(1,051 - 1,851) |
| Drowning                                        | 12,004<br>(9,085 - 23,531)  | 243<br>(133 - 541)     | 557<br>(390 - 1,031) | 7,600<br>(5,339 - 15,560)   | 3,116<br>(2,099 - 6,028)    | 488<br>(314 - 875)       |
| Fire, heat, and hot substances                  | 7,315<br>(5,001 - 9,360)    | 175<br>(93 - 286)      | 82<br>(46 - 120)     | 2,996<br>(2,200 - 3,995)    | 3,190<br>(1,899 - 4,337)    | 872<br>(537 - 1,156)     |
| Poisonings                                      | 3,018<br>(2,257 - 4,320)    | 105<br>(55 - 176)      | 54<br>(26 - 74)      | 1,835<br>(1,403 - 2,763)    | 712<br>(526 - 1,153)        | 313<br>(196 - 415)       |
| Exposure to mechanical forces                   | 3,957<br>(3,486 - 5,371)    | 60<br>(36 - 102)       | 54<br>(37 - 71)      | 2,079<br>(1,743 - 3,141)    | 1,588<br>(1,334 - 2,034)    | 176<br>(145 - 224)       |
| Unintentional firearm injuries                  | 269<br>(218 - 327)          | 1<br>(1 - 2)           | 4<br>(2 - 7)         | 201<br>(157 - 252)          | 54<br>(37 - 73)             | 9<br>(5 - 13)            |
| Unintentional suffocation                       | 160<br>(106 - 226)          | 16<br>(4 - 48)         | 10<br>(4 - 22)       | 88<br>(54 - 138)            | 35<br>(19 - 58)             | 12<br>(6 - 22)           |
| Other exposure to mechanical forces             | 3,528<br>(3,080 - 4,886)    | 43<br>(28 - 66)        | 39<br>(26 - 54)      | 1,791<br>(1,473 - 2,817)    | 1,499<br>(1,252 - 1,977)    | 155<br>(126 - 202)       |
| Adverse effects of medical treatment            | 979<br>(753 - 1,497)        | 31<br>(18 - 61)        | 8<br>(6 - 14)        | 335<br>(255 - 557)          | 422<br>(286 - 644)          | 183<br>(115 - 251)       |
| Animal contact                                  | 306<br>(240 - 523)          | 2<br>(1 - 3)           | 3<br>(2 - 4)         | 72<br>(54 - 136)            | 166<br>(120 - 268)          | 64<br>(46 - 96)          |
| Venomous animal contact                         | 80<br>(58 - 157)            | 1<br>(0 - 2)           | 1<br>(0 - 2)         | 31<br>(22 - 71)             | 43<br>(26 - 81)             | 4<br>(2 - 8)             |
| Non-venomous animal contact                     | 226<br>(172 - 355)          | 1<br>(0 - 2)           | 2<br>(1 - 3)         | 40<br>(29 - 66)             | 124<br>(83 - 203)           | 60<br>(42 - 87)          |
| Foreign body                                    | 7,041<br>(2,581 - 11,004)   | 316<br>(130 - 527)     | 42<br>(18 - 70)      | 2,815<br>(946 - 4,691)      | 3,187<br>(1,057 - 5,441)    | 682<br>(350 - 1,407)     |
| Pulmonary aspiration and foreign body in airway | 7,021<br>(2,560 - 10,984)   | 316<br>(129 - 526)     | 41<br>(17 - 69)      | 2,806<br>(936 - 4,684)      | 3,181<br>(1,051 - 5,437)    | 677<br>(346 - 1,401)     |
| Foreign body in other body part                 | 20<br>(13 - 37)             | 1<br>(0 - 1)           | 1<br>(0 - 1)         | 8<br>(5 - 15)               | 5<br>(3 - 10)               | 5<br>(3 - 10)            |
| Other unintentional injuries                    | 2,202<br>(1,764 - 2,738)    | 46<br>(22 - 82)        | 60<br>(32 - 98)      | 1,349<br>(1,009 - 1,782)    | 653<br>(417 - 975)          | 94<br>(64 - 137)         |
| Self-harm and interpersonal violence            | 57,683<br>(34,950 - 67,019) | 80<br>(34 - 124)       | 192<br>(90 - 260)    | 35,534<br>(22,111 - 41,281) | 16,917<br>(10,070 - 20,544) | 4,960<br>(2,474 - 6,052) |
| Self-harm                                       | 39,688<br>(21,564 - 46,361) | --                     | 130<br>(53 - 188)    | 23,690<br>(12,947 - 28,273) | 11,722<br>(6,373 - 14,358)  | 4,146<br>(1,900 - 5,136) |
| Interpersonal violence                          | 17,995<br>(9,729 - 22,756)  | 80<br>(34 - 124)       | 62<br>(28 - 91)      | 11,845<br>(6,416 - 15,238)  | 5,195<br>(2,525 - 7,012)    | 813<br>(378 - 1,079)     |
| Assault by firearm                              | 1,178<br>(452 - 2,228)      | 1<br>(0 - 2)           | 4<br>(1 - 8)         | 870<br>(323 - 1,637)        | 294<br>(108 - 577)          | 10<br>(3 - 20)           |
| Assault by sharp object                         | 4,289<br>(2,097 - 6,901)    | 14<br>(5 - 26)         | 6<br>(2 - 11)        | 2,729<br>(1,320 - 4,543)    | 1,190<br>(504 - 1,873)      | 350<br>(155 - 541)       |
| Assault by other means                          | 12,528<br>(6,614 - 16,177)  | 65<br>(27 - 101)       | 53<br>(24 - 77)      | 8,246<br>(4,342 - 10,645)   | 3,711<br>(1,804 - 5,121)    | 453<br>(193 - 654)       |

Web Table 31- Russia deaths with 95% UI by age, sex, and cause in 2013

| Cause                                                             | Females, All Ages              | Females, 0-4 Years       | Females, 5-14 Years      | Females, 15-49 Years        | Females, 50-69 Years           | Females, 70-80 Years           |
|-------------------------------------------------------------------|--------------------------------|--------------------------|--------------------------|-----------------------------|--------------------------------|--------------------------------|
| All causes                                                        | 916,642<br>(899,182 - 936,320) | 6,938<br>(5,433 - 8,846) | 1,443<br>(1,257 - 1,671) | 57,128<br>(55,542 - 58,989) | 179,985<br>(175,694 - 184,868) | 671,148<br>(658,828 - 684,572) |
| Communicable, maternal, neonatal, and nutritional diseases        | 18,850<br>(14,084 - 21,290)    | 3,441<br>(2,591 - 4,559) | 149<br>(111 - 191)       | 5,354<br>(3,942 - 6,262)    | 4,549<br>(3,157 - 5,369)       | 5,357<br>(3,356 - 6,605)       |
| HIV/AIDS and tuberculosis                                         | 4,469<br>(3,134 - 5,997)       | 27<br>(16 - 45)          | 5<br>(2 - 15)            | 2,621<br>(1,772 - 3,466)    | 1,340<br>(897 - 1,887)         | 476<br>(349 - 633)             |
| Tuberculosis                                                      | 2,754<br>(1,332 - 3,200)       | 8<br>(3 - 11)            | 2<br>(1 - 3)             | 1,432<br>(553 - 1,731)      | 917<br>(461 - 1,156)           | 396<br>(286 - 488)             |
| HIV/AIDS                                                          | 1,715<br>(903 - 3,196)         | 20<br>(10 - 37)          | 3<br>(0 - 13)            | 1,189<br>(680 - 2,046)      | 423<br>(159 - 946)             | 81<br>(19 - 221)               |
| HIV/AIDS resulting in mycobacterial infection                     | 85<br>(43 - 162)               | 1<br>(0 - 2)             | 0<br>(0 - 0)             | 59<br>(32 - 104)            | 21<br>(8 - 47)                 | 4<br>(1 - 11)                  |
| HIV/AIDS resulting in other diseases                              | 1,630<br>(858 - 3,029)         | 19<br>(9 - 35)           | 3<br>(0 - 12)            | 1,129<br>(647 - 1,938)      | 402<br>(151 - 901)             | 77<br>(18 - 211)               |
| Diarrhea, lower respiratory, and other common infectious diseases | 11,007<br>(7,211 - 12,617)     | 1,024<br>(734 - 1,387)   | 126<br>(90 - 164)        | 2,287<br>(1,480 - 2,651)    | 2,969<br>(1,856 - 3,576)       | 4,601<br>(2,640 - 5,801)       |
| Diarrheal diseases                                                | 179<br>(137 - 233)             | 85<br>(49 - 136)         | 2<br>(1 - 4)             | 12<br>(9 - 15)              | 24<br>(18 - 32)                | 57<br>(41 - 80)                |
| Intestinal infectious diseases                                    | 127<br>(43 - 289)              | 20<br>(6 - 47)           | 14<br>(4 - 35)           | 39<br>(11 - 94)             | 26<br>(6 - 73)                 | 27<br>(8 - 75)                 |
| Typhoid fever                                                     | 93<br>(28 - 223)               | 14<br>(3 - 35)           | 11<br>(3 - 26)           | 29<br>(7 - 74)              | 20<br>(4 - 57)                 | 20<br>(5 - 59)                 |
| Paratyphoid fever                                                 | 27<br>(8 - 64)                 | 5<br>(1 - 13)            | 3<br>(1 - 8)             | 8<br>(2 - 22)               | 5<br>(1 - 15)                  | 5<br>(1 - 16)                  |
| Other intestinal infectious diseases                              | 6<br>(2 - 13)                  | 1<br>(0 - 5)             | 0<br>(0 - 2)             | 2<br>(0 - 5)                | 1<br>(0 - 5)                   | 2<br>(0 - 6)                   |
| Lower respiratory infections                                      | 9,609<br>(5,825 - 11,201)      | 719<br>(489 - 1,010)     | 77<br>(50 - 104)         | 1,957<br>(1,135 - 2,327)    | 2,605<br>(1,457 - 3,187)       | 4,251<br>(2,325 - 5,419)       |
| Upper respiratory infections                                      | 25<br>(6 - 75)                 | 0<br>(0 - 1)             | 0<br>(0 - 0)             | 3<br>(0 - 7)                | 6<br>(0 - 20)                  | 16<br>(1 - 63)                 |
| Otitis media                                                      | 57<br>(48 - 67)                | 1<br>(1 - 2)             | 1<br>(0 - 1)             | 11<br>(9 - 12)              | 23<br>(18 - 30)                | 21<br>(15 - 29)                |
| Meningitis                                                        | 607<br>(502 - 691)             | 155<br>(107 - 211)       | 17<br>(12 - 23)          | 130<br>(111 - 177)          | 170<br>(137 - 203)             | 133<br>(76 - 163)              |
| Pneumococcal meningitis                                           | 147<br>(110 - 186)             | 27<br>(17 - 39)          | 4<br>(2 - 7)             | 34<br>(20 - 64)             | 46<br>(27 - 69)                | 36<br>(19 - 52)                |
| H influenzae type B meningitis                                    | 117<br>(92 - 148)              | 60<br>(40 - 86)          | 5<br>(3 - 7)             | 18<br>(10 - 29)             | 20<br>(11 - 28)                | 15<br>(9 - 24)                 |
| Meningococcal meningitis                                          | 132<br>(102 - 167)             | 36<br>(23 - 52)          | 5<br>(3 - 7)             | 30<br>(19 - 51)             | 35<br>(20 - 53)                | 27<br>(12 - 42)                |
| Other meningitis                                                  | 210<br>(146 - 261)             | 33<br>(20 - 51)          | 4<br>(2 - 6)             | 49<br>(23 - 68)             | 70<br>(40 - 98)                | 55<br>(32 - 75)                |
| Encephalitis                                                      | 323<br>(216 - 445)             | 36<br>(20 - 57)          | 13<br>(8 - 23)           | 123<br>(76 - 179)           | 106<br>(64 - 165)              | 47<br>(20 - 66)                |
| Diphtheria                                                        | 2<br>(0 - 7)                   | 1<br>(0 - 4)             | 0<br>(0 - 3)             | 1<br>(0 - 3)                | 0<br>(0 - 3)                   | --                             |
| Whooping cough                                                    | 8<br>(5 - 18)                  | 3<br>(0 - 12)            | 1<br>(0 - 1)             | 3<br>(3 - 4)                | 1<br>(1 - 1)                   | --                             |
| Tetanus                                                           | 8<br>(4 - 10)                  | 0<br>(0 - 1)             | 1<br>(0 - 1)             | 3<br>(1 - 4)                | 2<br>(1 - 3)                   | 2<br>(1 - 4)                   |
| Measles                                                           | 0<br>(0 - 1)                   | 0<br>(0 - 0)             | 0<br>(0 - 0)             | 0<br>(0 - 0)                | 0<br>(0 - 0)                   | --                             |
| Varicella and herpes zoster                                       | 62<br>(10 - 262)               | 3<br>(0 - 12)            | 1<br>(0 - 3)             | 6<br>(1 - 16)               | 5<br>(0 - 18)                  | 48<br>(1 - 248)                |
| Neglected tropical diseases and malaria                           | 45<br>(40 - 51)                | 1<br>(1 - 2)             | 2<br>(1 - 3)             | 17<br>(14 - 19)             | 13<br>(11 - 15)                | 12<br>(11 - 14)                |
| Cysticercosis                                                     | 0<br>(0 - 0)                   | 0<br>(0 - 0)             | 0<br>(0 - 0)             | 0<br>(0 - 0)                | 0<br>(0 - 0)                   | 0<br>(0 - 0)                   |
| Cystic echinococcosis                                             | 21<br>(19 - 22)                | 0<br>(0 - 0)             | 0<br>(0 - 0)             | 5<br>(5 - 6)                | 7<br>(6 - 7)                   | 8<br>(8 - 9)                   |
| Dengue                                                            | 8<br>(6 - 13)                  | 0<br>(0 - 1)             | 1<br>(0 - 1)             | 4<br>(3 - 6)                | 2<br>(2 - 3)                   | 1<br>(1 - 2)                   |
| Rabies                                                            | 7<br>(4 - 9)                   | 0<br>(0 - 1)             | 1<br>(0 - 1)             | 3<br>(2 - 4)                | 2<br>(1 - 3)                   | 1<br>(1 - 2)                   |
| Other neglected tropical diseases                                 | 9<br>(7 - 12)                  | 1<br>(0 - 1)             | 0<br>(0 - 1)             | 4<br>(3 - 6)                | 2<br>(1 - 4)                   | 1<br>(1 - 2)                   |
| Maternal disorders                                                | 291<br>(234 - 351)             | --                       | 0<br>(0 - 0)             | 291<br>(234 - 351)          | --                             | --                             |
| Maternal hemorrhage                                               | 35<br>(26 - 44)                | --                       | 0<br>(0 - 0)             | 35<br>(26 - 44)             | --                             | --                             |
| Maternal sepsis and other maternal infections                     | 16<br>(11 - 22)                | --                       | 0<br>(0 - 0)             | 16<br>(11 - 22)             | --                             | --                             |
| Maternal hypertensive disorders                                   | 22<br>(16 - 28)                | --                       | 0<br>(0 - 0)             | 22<br>(16 - 28)             | --                             | --                             |
| Maternal obstructed labor                                         | 31<br>(21 - 44)                | --                       | 0<br>(0 - 0)             | 31<br>(21 - 44)             | --                             | --                             |
| Maternal abortive outcome                                         | 45<br>(35 - 57)                | --                       | 0<br>(0 - 0)             | 45<br>(35 - 57)             | --                             | --                             |
| Indirect maternal deaths                                          | 49<br>(38 - 62)                | --                       | 0<br>(0 - 0)             | 49<br>(38 - 62)             | --                             | --                             |

Web Table 31- Russia deaths with 95% UI by age, sex, and cause in 2013

| Cause                                                            | Females, All Ages              | Females, 0-4 Years       | Females, 5-14 Years | Females, 15-49 Years        | Females, 50-69 Years           | Females, 70-80 Years           |
|------------------------------------------------------------------|--------------------------------|--------------------------|---------------------|-----------------------------|--------------------------------|--------------------------------|
| Late maternal deaths                                             | 26<br>(16 - 38)                | --                       | 0<br>(0 - 0)        | 26<br>(15 - 38)             | --                             | --                             |
| Maternal deaths aggravated by HIV/AIDS                           | 0<br>(0 - 0)                   | --                       | --                  | 0<br>(0 - 0)                | --                             | --                             |
| Other maternal disorders                                         | 68<br>(52 - 85)                | --                       | 0<br>(0 - 0)        | 68<br>(52 - 85)             | --                             | --                             |
| Neonatal disorders                                               | 2,342<br>(1,754 - 3,139)       | 2,342<br>(1,754 - 3,139) | --                  | --                          | --                             | --                             |
| Neonatal preterm birth complications                             | 762<br>(472 - 1,236)           | 762<br>(472 - 1,236)     | --                  | --                          | --                             | --                             |
| Neonatal encephalopathy due to birth asphyxia and trauma         | 391<br>(254 - 658)             | 391<br>(254 - 658)       | --                  | --                          | --                             | --                             |
| Neonatal sepsis and other neonatal infections                    | 198<br>(95 - 373)              | 198<br>(95 - 373)        | --                  | --                          | --                             | --                             |
| Hemolytic disease and other neonatal jaundice                    | 35<br>(12 - 87)                | 35<br>(12 - 87)          | --                  | --                          | --                             | --                             |
| Other neonatal disorders                                         | 956<br>(481 - 1,419)           | 956<br>(481 - 1,419)     | --                  | --                          | --                             | --                             |
| Nutritional deficiencies                                         | 584<br>(511 - 667)             | 27<br>(17 - 39)          | 12<br>(8 - 16)      | 103<br>(88 - 122)           | 197<br>(163 - 234)             | 246<br>(191 - 295)             |
| Protein-energy malnutrition                                      | 226<br>(124 - 328)             | 21<br>(11 - 32)          | 6<br>(3 - 10)       | 49<br>(28 - 70)             | 93<br>(48 - 132)               | 57<br>(25 - 101)               |
| Iodine deficiency                                                | 24<br>(2 - 87)                 | 1<br>(0 - 4)             | 0<br>(0 - 2)        | 3<br>(0 - 10)               | 6<br>(0 - 30)                  | 15<br>(0 - 79)                 |
| Iron-deficiency anemia                                           | 301<br>(183 - 428)             | 5<br>(1 - 12)            | 5<br>(2 - 8)        | 44<br>(24 - 70)             | 91<br>(49 - 138)               | 157<br>(88 - 212)              |
| Other nutritional deficiencies                                   | 33<br>(15 - 58)                | 0<br>(0 - 1)             | 0<br>(0 - 1)        | 6<br>(2 - 10)               | 8<br>(3 - 13)                  | 17<br>(7 - 37)                 |
| Other communicable, maternal, neonatal, and nutritional diseases | 111<br>(87 - 139)              | 19<br>(9 - 35)           | 3<br>(2 - 5)        | 36<br>(28 - 47)             | 30<br>(23 - 40)                | 22<br>(15 - 33)                |
| Sexually transmitted diseases excluding HIV                      | 26<br>(13 - 43)                | 10<br>(1 - 24)           | 1<br>(0 - 2)        | 6<br>(4 - 9)                | 5<br>(3 - 9)                   | 3<br>(2 - 6)                   |
| Syphilis                                                         | 18<br>(8 - 35)                 | 10<br>(1 - 24)           | 1<br>(0 - 2)        | 3<br>(1 - 4)                | 3<br>(1 - 5)                   | 3<br>(1 - 4)                   |
| Chlamydial infection                                             | 2<br>(1 - 3)                   | --                       | 0<br>(0 - 0)        | 1<br>(1 - 2)                | 1<br>(0 - 1)                   | 0<br>(0 - 0)                   |
| Gonococcal infection                                             | 3<br>(2 - 4)                   | --                       | 0<br>(0 - 0)        | 1<br>(1 - 2)                | 1<br>(0 - 2)                   | 0<br>(0 - 1)                   |
| Other sexually transmitted diseases                              | 2<br>(1 - 3)                   | --                       | 0<br>(0 - 0)        | 1<br>(1 - 2)                | 1<br>(0 - 1)                   | 0<br>(0 - 0)                   |
| Hepatitis                                                        | 65<br>(54 - 79)                | 6<br>(4 - 11)            | 2<br>(1 - 2)        | 26<br>(19 - 34)             | 20<br>(14 - 28)                | 11<br>(7 - 17)                 |
| Acute hepatitis A                                                | 15<br>(5 - 27)                 | 3<br>(1 - 6)             | 1<br>(0 - 2)        | 8<br>(3 - 15)               | 2<br>(1 - 5)                   | 1<br>(0 - 2)                   |
| Acute hepatitis B                                                | 48<br>(34 - 62)                | 4<br>(1 - 8)             | 1<br>(0 - 1)        | 17<br>(10 - 25)             | 17<br>(11 - 24)                | 10<br>(6 - 15)                 |
| Acute hepatitis C                                                | 3<br>(0 - 6)                   | --                       | 0<br>(0 - 0)        | 1<br>(0 - 3)                | 1<br>(0 - 2)                   | 1<br>(0 - 2)                   |
| Other infectious diseases                                        | 20<br>(14 - 35)                | 3<br>(2 - 6)             | 1<br>(0 - 1)        | 4<br>(3 - 6)                | 5<br>(3 - 9)                   | 7<br>(4 - 15)                  |
| Non-communicable diseases                                        | 859,377<br>(842,677 - 878,012) | 2,550<br>(1,900 - 3,347) | 511<br>(398 - 611)  | 36,614<br>(34,657 - 38,350) | 164,181<br>(159,957 - 169,058) | 655,521<br>(643,848 - 668,852) |
| Neoplasms                                                        | 134,023<br>(122,585 - 144,740) | 193<br>(128 - 263)       | 226<br>(172 - 280)  | 12,147<br>(11,121 - 13,680) | 53,354<br>(47,868 - 58,006)    | 68,103<br>(61,970 - 74,496)    |
| Esophageal cancer                                                | 1,538<br>(1,340 - 1,829)       | --                       | --                  | 46<br>(37 - 60)             | 477<br>(399 - 581)             | 1,015<br>(850 - 1,237)         |
| Stomach cancer                                                   | 16,371<br>(12,606 - 21,907)    | --                       | --                  | 1,187<br>(806 - 1,615)      | 5,582<br>(4,154 - 7,508)       | 9,602<br>(7,101 - 12,754)      |
| Liver cancer                                                     | 4,257<br>(3,165 - 5,063)       | --                       | 3<br>(2 - 6)        | 222<br>(164 - 285)          | 1,402<br>(1,061 - 1,765)       | 2,629<br>(1,855 - 3,278)       |
| Liver cancer due to hepatitis B                                  | 567<br>(205 - 1,006)           | --                       | 1<br>(0 - 1)        | 50<br>(16 - 80)             | 243<br>(83 - 441)              | 272<br>(101 - 517)             |
| Liver cancer due to hepatitis C                                  | 2,075<br>(1,391 - 2,638)       | --                       | 1<br>(0 - 1)        | 87<br>(57 - 126)            | 654<br>(428 - 900)             | 1,334<br>(870 - 1,781)         |
| Liver cancer due to alcohol use                                  | 909<br>(546 - 1,356)           | --                       | --                  | 25<br>(11 - 46)             | 242<br>(139 - 386)             | 642<br>(364 - 970)             |
| Liver cancer due to other causes                                 | 706<br>(418 - 1,021)           | --                       | 2<br>(1 - 4)        | 60<br>(38 - 90)             | 263<br>(141 - 413)             | 380<br>(222 - 572)             |
| Larynx cancer                                                    | 275<br>(184 - 408)             | --                       | --                  | 22<br>(14 - 31)             | 125<br>(82 - 179)              | 128<br>(83 - 202)              |
| Tracheal, bronchus and lung cancer                               | 10,295<br>(8,770 - 12,740)     | --                       | --                  | 582<br>(462 - 777)          | 4,157<br>(3,456 - 5,375)       | 5,556<br>(4,538 - 7,110)       |
| Breast cancer                                                    | 22,591<br>(15,495 - 27,204)    | --                       | --                  | 2,615<br>(2,153 - 3,863)    | 11,021<br>(7,469 - 13,524)     | 8,954<br>(5,154 - 10,901)      |
| Cervical cancer                                                  | 7,229<br>(5,997 - 8,537)       | --                       | --                  | 1,763<br>(1,167 - 2,239)    | 3,358<br>(2,580 - 4,091)       | 2,109<br>(1,598 - 3,012)       |
| Uterine cancer                                                   | 3,653<br>(2,968 - 4,484)       | --                       | --                  | 232<br>(171 - 296)          | 2,016<br>(1,488 - 2,534)       | 1,406<br>(1,119 - 1,792)       |
| Prostate cancer                                                  | --                             | --                       | --                  | --                          | --                             | --                             |

Web Table 31- Russia deaths with 95% UI by age, sex, and cause in 2013

| Cause                                         | Females, All Ages              | Females, 0-4 Years | Females, 5-14 Years | Females, 15-49 Years        | Females, 50-69 Years        | Females, 70-80 Years           |
|-----------------------------------------------|--------------------------------|--------------------|---------------------|-----------------------------|-----------------------------|--------------------------------|
| Colon and rectum cancer                       | 20,249<br>(18,167 - 22,758)    | --                 | --                  | 780<br>(672 - 887)          | 6,353<br>(5,661 - 7,008)    | 13,116<br>(11,350 - 15,322)    |
| Lip and oral cavity cancer                    | 1,126<br>(921 - 1,369)         | --                 | --                  | 99<br>(79 - 130)            | 396<br>(302 - 540)          | 631<br>(498 - 780)             |
| Nasopharynx cancer                            | 144<br>(59 - 253)              | --                 | 1<br>(0 - 1)        | 15<br>(5 - 23)              | 54<br>(21 - 91)             | 75<br>(30 - 142)               |
| Other pharynx cancer                          | 337<br>(268 - 432)             | --                 | --                  | 37<br>(26 - 54)             | 146<br>(105 - 196)          | 154<br>(102 - 214)             |
| Gallbladder and biliary tract cancer          | 2,548<br>(1,682 - 3,145)       | --                 | --                  | 101<br>(64 - 130)           | 876<br>(597 - 1,100)        | 1,571<br>(947 - 2,050)         |
| Pancreatic cancer                             | 8,733<br>(7,812 - 9,671)       | --                 | --                  | 338<br>(285 - 397)          | 3,122<br>(2,714 - 3,528)    | 5,273<br>(4,581 - 5,992)       |
| Malignant skin melanoma                       | 1,861<br>(1,225 - 2,372)       | --                 | --                  | 306<br>(224 - 438)          | 760<br>(465 - 951)          | 795<br>(514 - 1,031)           |
| Non-melanoma skin cancer                      | 948<br>(697 - 1,206)           | --                 | --                  | 44<br>(33 - 59)             | 162<br>(121 - 206)          | 743<br>(528 - 968)             |
| Ovarian cancer                                | 8,674<br>(7,547 - 9,689)       | --                 | --                  | 1,023<br>(854 - 1,201)      | 4,408<br>(3,730 - 5,057)    | 3,242<br>(2,634 - 3,839)       |
| Testicular cancer                             | --                             | --                 | --                  | --                          | --                          | --                             |
| Kidney cancer                                 | 3,218<br>(2,450 - 4,021)       | 13<br>(7 - 22)     | 10<br>(6 - 17)      | 156<br>(108 - 216)          | 1,316<br>(1,000 - 1,680)    | 1,722<br>(1,218 - 2,338)       |
| Bladder cancer                                | 1,537<br>(1,043 - 2,295)       | --                 | --                  | 41<br>(28 - 62)             | 343<br>(242 - 543)          | 1,154<br>(761 - 1,726)         |
| Brain and nervous system cancer               | 3,510<br>(2,494 - 4,021)       | 46<br>(26 - 72)    | 80<br>(52 - 109)    | 742<br>(615 - 947)          | 1,768<br>(1,289 - 2,148)    | 874<br>(446 - 1,100)           |
| Thyroid cancer                                | 1,351<br>(991 - 1,658)         | --                 | 1<br>(0 - 2)        | 50<br>(36 - 79)             | 450<br>(326 - 585)          | 850<br>(587 - 1,090)           |
| Mesothelioma                                  | 122<br>(92 - 195)              | --                 | --                  | 13<br>(9 - 20)              | 43<br>(29 - 70)             | 66<br>(44 - 104)               |
| Hodgkin lymphoma                              | 458<br>(366 - 714)             | 1<br>(0 - 1)       | 2<br>(1 - 5)        | 206<br>(157 - 315)          | 131<br>(93 - 220)           | 118<br>(86 - 188)              |
| Non-Hodgkin lymphoma                          | 2,387<br>(914 - 3,112)         | 11<br>(5 - 18)     | 13<br>(6 - 22)      | 298<br>(125 - 412)          | 912<br>(345 - 1,211)        | 1,154<br>(406 - 1,582)         |
| Multiple myeloma                              | 1,168<br>(685 - 1,717)         | --                 | --                  | 63<br>(36 - 103)            | 578<br>(323 - 874)          | 527<br>(296 - 795)             |
| Leukemia                                      | 3,593<br>(3,094 - 4,188)       | 60<br>(34 - 100)   | 60<br>(43 - 81)     | 481<br>(398 - 596)          | 1,266<br>(1,056 - 1,520)    | 1,726<br>(1,351 - 2,079)       |
| Other neoplasms                               | 5,850<br>(4,292 - 6,876)       | 62<br>(35 - 93)    | 56<br>(37 - 76)     | 686<br>(549 - 809)          | 2,133<br>(1,509 - 2,579)    | 2,914<br>(1,905 - 3,595)       |
| Cardiovascular diseases                       | 605,052<br>(585,107 - 628,032) | 61<br>(27 - 92)    | 44<br>(25 - 58)     | 12,903<br>(10,024 - 14,818) | 83,381<br>(76,917 - 91,324) | 508,662<br>(493,110 - 525,851) |
| Rheumatic heart disease                       | 2,473<br>(1,917 - 4,058)       | 0<br>(0 - 1)       | 2<br>(1 - 4)        | 262<br>(150 - 776)          | 1,271<br>(932 - 2,404)      | 937<br>(490 - 1,166)           |
| Ischemic heart disease                        | 336,335<br>(275,457 - 368,840) | 2<br>(1 - 6)       | 2<br>(1 - 4)        | 4,040<br>(2,728 - 5,785)    | 41,828<br>(32,362 - 48,937) | 290,463<br>(239,901 - 317,839) |
| Cerebrovascular disease                       | 215,421<br>(191,329 - 285,012) | 5<br>(2 - 12)      | 9<br>(5 - 14)       | 3,101<br>(2,450 - 4,989)    | 26,708<br>(22,607 - 38,770) | 185,599<br>(163,876 - 245,005) |
| Ischemic stroke                               | 187,191<br>(165,542 - 248,975) | 0<br>(0 - 1)       | 1<br>(0 - 1)        | 675<br>(435 - 1,041)        | 16,724<br>(13,493 - 25,364) | 169,791<br>(149,763 - 224,929) |
| Hemorrhagic stroke                            | 28,231<br>(23,500 - 40,791)    | 4<br>(2 - 11)      | 9<br>(4 - 13)       | 2,426<br>(1,965 - 3,954)    | 9,984<br>(8,079 - 14,765)   | 15,808<br>(12,080 - 23,338)    |
| Hypertensive heart disease                    | 16,888<br>(7,914 - 24,177)     | 0<br>(0 - 1)       | 1<br>(0 - 1)        | 201<br>(109 - 283)          | 2,441<br>(1,410 - 3,245)    | 14,246<br>(6,054 - 21,176)     |
| Cardiomyopathy and myocarditis                | 22,523<br>(1,149 - 28,996)     | 43<br>(8 - 69)     | 24<br>(6 - 34)      | 4,533<br>(355 - 6,031)      | 8,617<br>(468 - 11,399)     | 9,306<br>(275 - 12,794)        |
| Atrial fibrillation and flutter               | 1,961<br>(1,477 - 2,574)       | --                 | --                  | 12<br>(8 - 17)              | 140<br>(106 - 175)          | 1,809<br>(1,338 - 2,399)       |
| Aortic aneurysm                               | 2,081<br>(1,264 - 3,112)       | --                 | --                  | 139<br>(76 - 219)           | 561<br>(314 - 810)          | 1,381<br>(851 - 2,099)         |
| Peripheral vascular disease                   | 93<br>(68 - 135)               | --                 | --                  | 3<br>(2 - 5)                | 13<br>(10 - 18)             | 76<br>(53 - 117)               |
| Endocarditis                                  | 685<br>(81 - 1,309)            | 2<br>(0 - 4)       | 1<br>(0 - 2)        | 145<br>(22 - 277)           | 237<br>(26 - 469)           | 300<br>(24 - 615)              |
| Other cardiovascular and circulatory diseases | 6,591<br>(3,149 - 8,216)       | 9<br>(4 - 16)      | 5<br>(2 - 8)        | 466<br>(283 - 672)          | 1,565<br>(894 - 1,988)      | 4,545<br>(1,715 - 5,944)       |
| Chronic respiratory diseases                  | 11,151<br>(9,407 - 20,452)     | 5<br>(3 - 7)       | 4<br>(3 - 7)        | 367<br>(302 - 660)          | 2,060<br>(1,716 - 3,434)    | 8,715<br>(7,199 - 16,052)      |
| Chronic obstructive pulmonary disease         | 9,481<br>(7,796 - 15,782)      | 3<br>(2 - 4)       | 1<br>(1 - 2)        | 216<br>(157 - 324)          | 1,546<br>(1,212 - 2,236)    | 7,714<br>(6,252 - 13,037)      |
| Pneumoconiosis                                | 111<br>(60 - 200)              | 0<br>(0 - 0)       | 0<br>(0 - 1)        | 5<br>(3 - 9)                | 17<br>(9 - 32)              | 87<br>(42 - 166)               |
| Silicosis                                     | 23<br>(11 - 43)                | 0<br>(0 - 0)       | 0<br>(0 - 0)        | 1<br>(1 - 2)                | 4<br>(2 - 8)                | 18<br>(7 - 37)                 |
| Asbestosis                                    | 25<br>(12 - 53)                | 0<br>(0 - 0)       | 0<br>(0 - 0)        | 1<br>(1 - 2)                | 4<br>(2 - 8)                | 20<br>(8 - 44)                 |
| Coal workers pneumoconiosis                   | 23<br>(10 - 49)                | 0<br>(0 - 0)       | 0<br>(0 - 0)        | 1<br>(1 - 2)                | 4<br>(2 - 7)                | 18<br>(7 - 43)                 |
| Other pneumoconiosis                          | 39<br>(19 - 77)                | 0<br>(0 - 0)       | 0<br>(0 - 0)        | 2<br>(1 - 3)                | 5<br>(3 - 10)               | 32<br>(13 - 65)                |



Web Table 31- Russia deaths with 95% UI by age, sex, and cause in 2013

| Cause                                               | Females, All Ages           | Females, 0-4 Years | Females, 5-14 Years | Females, 15-49 Years     | Females, 50-69 Years      | Females, 70-80 Years        |
|-----------------------------------------------------|-----------------------------|--------------------|---------------------|--------------------------|---------------------------|-----------------------------|
| Asthma                                              | 1,130<br>(650 - 2,759)      | 0<br>(0 - 1)       | 2<br>(1 - 3)        | 110<br>(71 - 253)        | 355<br>(204 - 863)        | 663<br>(358 - 1,637)        |
| Interstitial lung disease and pulmonary sarcoidosis | 420<br>(153 - 1,333)        | 0<br>(0 - 1)       | 1<br>(0 - 1)        | 32<br>(15 - 86)          | 138<br>(57 - 395)         | 249<br>(72 - 856)           |
| Other chronic respiratory diseases                  | 9<br>(6 - 15)               | 1<br>(1 - 1)       | 0<br>(0 - 0)        | 4<br>(3 - 7)             | 2<br>(1 - 5)              | 2<br>(1 - 3)                |
| Cirrhosis                                           | 17,563<br>(15,982 - 19,082) | 5<br>(4 - 8)       | 8<br>(6 - 10)       | 4,477<br>(3,955 - 4,973) | 9,531<br>(8,455 - 10,671) | 3,542<br>(3,130 - 4,011)    |
| Cirrhosis due to hepatitis B                        | 3,266<br>(1,478 - 5,463)    | 0<br>(0 - 0)       | 1<br>(0 - 2)        | 919<br>(444 - 1,515)     | 1,742<br>(754 - 2,954)    | 603<br>(212 - 1,045)        |
| Cirrhosis due to hepatitis C                        | 7,569<br>(4,289 - 11,330)   | 0<br>(0 - 0)       | 1<br>(0 - 2)        | 1,799<br>(896 - 2,924)   | 4,273<br>(2,296 - 6,384)  | 1,495<br>(837 - 2,192)      |
| Cirrhosis due to alcohol use                        | 4,597<br>(2,224 - 6,617)    | --                 | --                  | 854<br>(268 - 1,367)     | 2,546<br>(1,206 - 3,790)  | 1,197<br>(659 - 1,706)      |
| Cirrhosis due to other causes                       | 2,131<br>(1,023 - 3,420)    | 5<br>(3 - 7)       | 6<br>(4 - 8)        | 905<br>(446 - 1,373)     | 970<br>(414 - 1,714)      | 246<br>(102 - 413)          |
| Digestive diseases                                  | 15,846<br>(9,662 - 18,413)  | 15<br>(10 - 21)    | 10<br>(7 - 12)      | 1,299<br>(994 - 1,470)   | 3,932<br>(2,638 - 4,586)  | 10,590<br>(5,893 - 12,783)  |
| Peptic ulcer disease                                | 2,322<br>(1,084 - 3,493)    | 1<br>(1 - 3)       | 1<br>(0 - 1)        | 214<br>(125 - 341)       | 699<br>(366 - 1,049)      | 1,407<br>(574 - 2,247)      |
| Gastritis and duodenitis                            | 135<br>(56 - 243)           | 0<br>(0 - 1)       | 0<br>(0 - 1)        | 13<br>(6 - 22)           | 39<br>(17 - 65)           | 81<br>(32 - 157)            |
| Appendicitis                                        | 176<br>(106 - 316)          | 3<br>(2 - 6)       | 2<br>(1 - 3)        | 28<br>(17 - 48)          | 58<br>(34 - 104)          | 84<br>(40 - 161)            |
| Paralytic ileus and intestinal obstruction          | 1,503<br>(727 - 2,885)      | 6<br>(3 - 11)      | 3<br>(2 - 5)        | 122<br>(70 - 232)        | 349<br>(188 - 694)        | 1,022<br>(440 - 2,008)      |
| Inguinal, femoral, and abdominal hernia             | 1,079<br>(371 - 1,736)      | 0<br>(0 - 1)       | 0<br>(0 - 1)        | 28<br>(11 - 45)          | 267<br>(94 - 412)         | 784<br>(232 - 1,336)        |
| Inflammatory bowel disease                          | 637<br>(410 - 1,328)        | 2<br>(1 - 3)       | 1<br>(0 - 1)        | 60<br>(40 - 106)         | 179<br>(115 - 332)        | 396<br>(219 - 899)          |
| Vascular intestinal disorders                       | 4,363<br>(1,534 - 6,480)    | 0<br>(0 - 1)       | 0<br>(0 - 1)        | 53<br>(21 - 104)         | 577<br>(186 - 939)        | 3,733<br>(1,308 - 5,604)    |
| Gallbladder and biliary diseases                    | 1,991<br>(1,211 - 2,942)    | 0<br>(0 - 1)       | 0<br>(0 - 1)        | 50<br>(34 - 90)          | 403<br>(272 - 585)        | 1,537<br>(877 - 2,351)      |
| Pancreatitis                                        | 3,258<br>(1,922 - 4,369)    | 1<br>(0 - 2)       | 1<br>(0 - 1)        | 694<br>(482 - 870)       | 1,326<br>(759 - 1,641)    | 1,327<br>(627 - 2,013)      |
| Other digestive diseases                            | 382<br>(237 - 548)          | 1<br>(0 - 1)       | 1<br>(0 - 1)        | 36<br>(25 - 51)          | 125<br>(80 - 172)         | 220<br>(120 - 344)          |
| Neurological disorders                              | 49,176<br>(39,655 - 59,893) | 41<br>(27 - 60)    | 27<br>(20 - 39)     | 592<br>(459 - 904)       | 2,180<br>(1,796 - 2,621)  | 46,336<br>(36,914 - 56,930) |
| Alzheimer disease and other dementias               | 47,193<br>(37,774 - 57,970) | --                 | --                  | 4<br>(1 - 12)            | 1,384<br>(1,032 - 1,767)  | 45,805<br>(36,388 - 56,398) |
| Parkinson disease                                   | 252<br>(152 - 317)          | --                 | --                  | 5<br>(4 - 7)             | 61<br>(40 - 82)           | 187<br>(105 - 242)          |
| Epilepsy                                            | 356<br>(246 - 604)          | 7<br>(3 - 13)      | 15<br>(9 - 25)      | 233<br>(152 - 412)       | 82<br>(56 - 139)          | 20<br>(13 - 34)             |
| Multiple sclerosis                                  | 444<br>(321 - 816)          | --                 | --                  | 197<br>(136 - 405)       | 208<br>(116 - 331)        | 39<br>(23 - 97)             |
| Other neurological disorders                        | 930<br>(787 - 1,108)        | 35<br>(23 - 50)    | 13<br>(8 - 18)      | 154<br>(129 - 185)       | 445<br>(354 - 554)        | 284<br>(220 - 369)          |
| Mental and substance use disorders                  | 6,779<br>(3,557 - 11,376)   | 2<br>(1 - 3)       | 1<br>(0 - 1)        | 2,739<br>(1,560 - 4,450) | 3,411<br>(1,614 - 6,258)  | 626<br>(306 - 906)          |
| Schizophrenia                                       | 91<br>(58 - 123)            | --                 | --                  | 23<br>(12 - 32)          | 37<br>(23 - 55)           | 31<br>(17 - 48)             |
| Alcohol use disorders                               | 5,910<br>(2,638 - 10,475)   | --                 | --                  | 2,243<br>(1,020 - 3,951) | 3,197<br>(1,394 - 6,044)  | 470<br>(155 - 757)          |
| Drug use disorders                                  | 758<br>(644 - 899)          | 2<br>(1 - 3)       | --                  | 453<br>(382 - 551)       | 177<br>(139 - 229)        | 125<br>(94 - 166)           |
| Opioid use disorders                                | 320<br>(270 - 385)          | 1<br>(0 - 2)       | --                  | 195<br>(162 - 240)       | 69<br>(53 - 91)           | 54<br>(40 - 74)             |
| Cocaine use disorders                               | 27<br>(22 - 33)             | 0<br>(0 - 0)       | --                  | 18<br>(14 - 24)          | 5<br>(4 - 7)              | 4<br>(2 - 5)                |
| Amphetamine use disorders                           | 26<br>(21 - 32)             | 0<br>(0 - 0)       | --                  | 16<br>(12 - 21)          | 6<br>(4 - 9)              | 4<br>(3 - 6)                |
| Other drug use disorders                            | 385<br>(323 - 461)          | 1<br>(0 - 1)       | --                  | 224<br>(186 - 274)       | 97<br>(76 - 126)          | 64<br>(47 - 85)             |
| Eating disorders                                    | 21<br>(11 - 32)             | --                 | 1<br>(0 - 1)        | 20<br>(11 - 32)          | --                        | --                          |
| Anorexia nervosa                                    | 21<br>(11 - 32)             | --                 | 1<br>(0 - 1)        | 20<br>(11 - 32)          | --                        | --                          |
| Diabetes, urogenital, blood, and endocrine diseases | 14,054<br>(12,456 - 15,486) | 51<br>(34 - 71)    | 28<br>(21 - 37)     | 1,302<br>(1,122 - 1,935) | 4,961<br>(4,392 - 6,137)  | 7,713<br>(6,283 - 8,750)    |
| Diabetes mellitus                                   | 6,365<br>(5,599 - 7,306)    | 2<br>(1 - 4)       | 9<br>(5 - 15)       | 395<br>(336 - 531)       | 2,184<br>(1,836 - 2,697)  | 3,775<br>(3,199 - 4,321)    |
| Acute glomerulonephritis                            | 80<br>(51 - 165)            | 1<br>(0 - 1)       | 1<br>(1 - 2)        | 23<br>(14 - 46)          | 36<br>(20 - 79)           | 20<br>(10 - 48)             |
| Chronic kidney disease                              | 2,564<br>(2,225 - 3,182)    | 4<br>(3 - 6)       | 5<br>(4 - 7)        | 284<br>(215 - 654)       | 935<br>(762 - 1,365)      | 1,336<br>(789 - 1,585)      |
| Chronic kidney disease due to diabetes mellitus     | 80<br>(51 - 114)            | 0<br>(0 - 1)       | 1<br>(1 - 1)        | 17<br>(11 - 25)          | 31<br>(17 - 48)           | 31<br>(15 - 53)             |

Web Table 31- Russia deaths with 95% UI by age, sex, and cause in 2013

| Cause                                               | Females, All Ages           | Females, 0-4 Years       | Females, 5-14 Years | Females, 15-49 Years        | Females, 50-69 Years       | Females, 70-80 Years       |
|-----------------------------------------------------|-----------------------------|--------------------------|---------------------|-----------------------------|----------------------------|----------------------------|
| Chronic kidney disease due to hypertension          | 967<br>(530 - 1,333)        | 1<br>(0 - 1)             | 1<br>(0 - 1)        | 43<br>(22 - 77)             | 308<br>(165 - 473)         | 615<br>(310 - 887)         |
| Chronic kidney disease due to glomerulonephritis    | 404<br>(263 - 563)          | 1<br>(1 - 1)             | 1<br>(1 - 2)        | 111<br>(84 - 182)           | 192<br>(112 - 279)         | 99<br>(45 - 175)           |
| Chronic kidney disease due to other causes          | 1,113<br>(732 - 1,717)      | 2<br>(1 - 3)             | 2<br>(1 - 4)        | 112<br>(60 - 414)           | 405<br>(240 - 759)         | 592<br>(253 - 930)         |
| Urinary diseases and male infertility               | 4,343<br>(3,172 - 5,281)    | 7<br>(4 - 10)            | 5<br>(3 - 6)        | 420<br>(334 - 626)          | 1,533<br>(1,187 - 2,168)   | 2,378<br>(1,365 - 3,055)   |
| Interstitial nephritis and urinary tract infections | 3,257<br>(2,603 - 4,214)    | 6<br>(4 - 10)            | 3<br>(2 - 5)        | 337<br>(243 - 551)          | 1,157<br>(864 - 1,814)     | 1,753<br>(1,108 - 2,330)   |
| Urolithiasis                                        | 610<br>(323 - 971)          | --                       | 0<br>(0 - 1)        | 28<br>(18 - 53)             | 201<br>(113 - 325)         | 380<br>(167 - 692)         |
| Other urinary diseases                              | 477<br>(94 - 843)           | 0<br>(0 - 1)             | 1<br>(0 - 1)        | 55<br>(15 - 94)             | 175<br>(34 - 325)          | 245<br>(31 - 468)          |
| Gynecological diseases                              | 135<br>(96 - 183)           | --                       | --                  | 62<br>(41 - 92)             | 45<br>(28 - 69)            | 27<br>(16 - 44)            |
| Uterine fibroids                                    | 35<br>(24 - 49)             | --                       | --                  | 14<br>(9 - 21)              | 13<br>(8 - 21)             | 8<br>(5 - 14)              |
| Polycystic ovarian syndrome                         | 4<br>(2 - 5)                | --                       | --                  | 3<br>(2 - 5)                | 0<br>(0 - 1)               | --                         |
| Endometriosis                                       | 11<br>(7 - 15)              | --                       | --                  | 9<br>(6 - 13)               | 2<br>(1 - 3)               | --                         |
| Genital prolapse                                    | 22<br>(16 - 30)             | --                       | --                  | 7<br>(5 - 11)               | 8<br>(5 - 12)              | 7<br>(4 - 11)              |
| Other gynecological diseases                        | 64<br>(45 - 88)             | --                       | --                  | 29<br>(19 - 43)             | 23<br>(14 - 35)            | 12<br>(7 - 19)             |
| Hemoglobinopathies and hemolytic anemias            | 39<br>(25 - 60)             | 5<br>(3 - 8)             | 1<br>(1 - 2)        | 5<br>(3 - 8)                | 14<br>(9 - 23)             | 14<br>(9 - 22)             |
| Thalassemias                                        | 7<br>(4 - 11)               | 4<br>(2 - 6)             | 1<br>(1 - 2)        | 2<br>(2 - 4)                | 0<br>(0 - 0)               | 0<br>(0 - 0)               |
| Sickle cell disorders                               | 1<br>(1 - 1)                | 0<br>(0 - 1)             | 0<br>(0 - 0)        | 0<br>(0 - 0)                | 0<br>(0 - 0)               | 0<br>(0 - 0)               |
| G6PD deficiency                                     | 0<br>(0 - 1)                | 0<br>(0 - 0)             | 0<br>(0 - 0)        | 0<br>(0 - 0)                | 0<br>(0 - 0)               | 0<br>(0 - 0)               |
| Other hemoglobinopathies and hemolytic anemias      | 31<br>(20 - 48)             | 1<br>(0 - 1)             | 0<br>(0 - 0)        | 3<br>(2 - 4)                | 14<br>(8 - 22)             | 14<br>(9 - 22)             |
| Endocrine, metabolic, blood, and immune disorders   | 528<br>(384 - 710)          | 32<br>(19 - 49)          | 8<br>(5 - 11)       | 112<br>(86 - 167)           | 214<br>(156 - 315)         | 162<br>(99 - 215)          |
| Musculoskeletal disorders                           | 2,461<br>(1,486 - 3,518)    | --                       | 16<br>(8 - 25)      | 475<br>(257 - 674)          | 1,003<br>(566 - 1,510)     | 968<br>(498 - 1,797)       |
| Rheumatoid arthritis                                | 1,533<br>(877 - 2,263)      | --                       | 3<br>(1 - 4)        | 104<br>(58 - 157)           | 674<br>(376 - 1,027)       | 753<br>(383 - 1,335)       |
| Other musculoskeletal disorders                     | 928<br>(544 - 1,284)        | --                       | 13<br>(7 - 20)      | 371<br>(195 - 535)          | 329<br>(176 - 513)         | 215<br>(102 - 436)         |
| Other non-communicable diseases                     | 3,272<br>(2,631 - 4,101)    | 2,177<br>(1,582 - 2,937) | 146<br>(105 - 192)  | 314<br>(259 - 510)          | 369<br>(271 - 448)         | 267<br>(124 - 326)         |
| Congenital anomalies                                | 2,542<br>(2,000 - 3,285)    | 1,819<br>(1,320 - 2,457) | 145<br>(105 - 192)  | 284<br>(228 - 488)          | 220<br>(178 - 281)         | 75<br>(55 - 90)            |
| Neural tube defects                                 | 315<br>(170 - 555)          | 269<br>(139 - 498)       | 30<br>(15 - 49)     | 12<br>(7 - 21)              | 3<br>(2 - 4)               | 1<br>(1 - 2)               |
| Congenital heart anomalies                          | 878<br>(615 - 1,191)        | 613<br>(391 - 873)       | 43<br>(28 - 61)     | 123<br>(79 - 215)           | 82<br>(58 - 109)           | 18<br>(10 - 24)            |
| Cleft lip and cleft palate                          | 8<br>(2 - 21)               | 8<br>(2 - 21)            | --                  | --                          | --                         | --                         |
| Down syndrome                                       | 125<br>(80 - 187)           | 39<br>(19 - 71)          | 11<br>(5 - 19)      | 46<br>(28 - 67)             | 24<br>(15 - 37)            | 6<br>(3 - 9)               |
| Chromosomal unbalanced rearrangements               | 92<br>(49 - 147)            | 70<br>(37 - 117)         | 3<br>(1 - 7)        | 11<br>(6 - 17)              | 5<br>(2 - 10)              | 3<br>(1 - 6)               |
| Other congenital anomalies                          | 1,124<br>(802 - 1,630)      | 820<br>(542 - 1,240)     | 59<br>(36 - 91)     | 91<br>(62 - 175)            | 106<br>(79 - 150)          | 47<br>(35 - 59)            |
| Skin and subcutaneous diseases                      | 373<br>(117 - 463)          | 1<br>(0 - 1)             | 1<br>(0 - 1)        | 30<br>(8 - 40)              | 149<br>(44 - 191)          | 192<br>(61 - 245)          |
| Cellulitis                                          | 119<br>(29 - 165)           | 0<br>(0 - 1)             | 0<br>(0 - 0)        | 10<br>(2 - 15)              | 49<br>(10 - 72)            | 59<br>(16 - 90)            |
| Pyoderma                                            | 215<br>(71 - 295)           | 0<br>(0 - 0)             | 0<br>(0 - 0)        | 15<br>(4 - 23)              | 92<br>(30 - 133)           | 108<br>(37 - 149)          |
| Decubitus ulcer                                     | 30<br>(13 - 46)             | 0<br>(0 - 0)             | 0<br>(0 - 0)        | 3<br>(1 - 4)                | 6<br>(2 - 9)               | 21<br>(9 - 35)             |
| Other skin and subcutaneous diseases                | 9<br>(3 - 14)               | 0<br>(0 - 0)             | 0<br>(0 - 0)        | 2<br>(1 - 4)                | 2<br>(1 - 4)               | 4<br>(1 - 7)               |
| Sudden infant death syndrome                        | 357<br>(48 - 945)           | 357<br>(48 - 945)        | --                  | --                          | --                         | --                         |
| Injuries                                            | 38,416<br>(34,728 - 43,677) | 947<br>(700 - 1,238)     | 784<br>(666 - 956)  | 15,161<br>(13,915 - 17,428) | 11,255<br>(9,643 - 12,798) | 10,269<br>(9,057 - 12,075) |
| Transport injuries                                  | 8,735<br>(7,493 - 11,625)   | 146<br>(80 - 208)        | 270<br>(193 - 340)  | 3,991<br>(3,379 - 5,236)    | 2,482<br>(1,965 - 3,388)   | 1,846<br>(1,492 - 2,747)   |
| Road injuries                                       | 7,755<br>(6,582 - 10,543)   | 132<br>(68 - 188)        | 239<br>(169 - 299)  | 3,552<br>(2,991 - 4,699)    | 2,215<br>(1,771 - 3,116)   | 1,616<br>(1,272 - 2,443)   |
| Pedestrian road injuries                            | 3,406<br>(2,497 - 4,872)    | 44<br>(21 - 76)          | 103<br>(65 - 147)   | 1,225<br>(903 - 1,996)      | 1,070<br>(739 - 1,556)     | 964<br>(600 - 1,329)       |

Web Table 31- Russia deaths with 95% UI by age, sex, and cause in 2013

| Cause                                           | Females, All Ages           | Females, 0-4 Years | Females, 5-14 Years | Females, 15-49 Years     | Females, 50-69 Years     | Females, 70-80 Years     |
|-------------------------------------------------|-----------------------------|--------------------|---------------------|--------------------------|--------------------------|--------------------------|
| Cyclist road injuries                           | 205<br>(133 - 286)          | 2<br>(1 - 5)       | 8<br>(4 - 14)       | 108<br>(70 - 158)        | 57<br>(32 - 87)          | 29<br>(14 - 51)          |
| Motorcyclist road injuries                      | 416<br>(169 - 803)          | 7<br>(2 - 15)      | 13<br>(4 - 28)      | 202<br>(82 - 394)        | 105<br>(39 - 212)        | 89<br>(29 - 181)         |
| Motor vehicle road injuries                     | 3,698<br>(2,560 - 5,051)    | 78<br>(36 - 121)   | 113<br>(67 - 158)   | 2,004<br>(1,339 - 2,600) | 974<br>(623 - 1,381)     | 529<br>(334 - 977)       |
| Other road injuries                             | 30<br>(14 - 51)             | 1<br>(0 - 2)       | 2<br>(1 - 4)        | 13<br>(5 - 25)           | 9<br>(3 - 19)            | 5<br>(2 - 12)            |
| Other transport injuries                        | 981<br>(617 - 1,536)        | 14<br>(6 - 28)     | 31<br>(15 - 54)     | 439<br>(270 - 695)       | 267<br>(138 - 470)       | 230<br>(107 - 445)       |
| Unintentional injuries                          | 14,685<br>(12,877 - 18,152) | 728<br>(524 - 986) | 406<br>(319 - 611)  | 4,241<br>(3,694 - 5,565) | 4,415<br>(3,578 - 5,192) | 4,895<br>(4,150 - 6,337) |
| Falls                                           | 3,844<br>(2,962 - 5,058)    | 70<br>(44 - 103)   | 32<br>(20 - 44)     | 787<br>(615 - 995)       | 912<br>(670 - 1,137)     | 2,043<br>(1,541 - 3,070) |
| Drowning                                        | 2,343<br>(1,742 - 4,802)    | 136<br>(79 - 317)  | 216<br>(142 - 435)  | 1,060<br>(758 - 2,050)   | 568<br>(418 - 1,155)     | 363<br>(262 - 754)       |
| Fire, heat, and hot substances                  | 3,202<br>(2,152 - 4,041)    | 132<br>(80 - 204)  | 55<br>(29 - 81)     | 744<br>(489 - 973)       | 1,032<br>(645 - 1,335)   | 1,238<br>(790 - 1,646)   |
| Poisonings                                      | 1,140<br>(761 - 1,626)      | 85<br>(47 - 142)   | 41<br>(25 - 59)     | 450<br>(295 - 645)       | 221<br>(131 - 339)       | 342<br>(191 - 513)       |
| Exposure to mechanical forces                   | 666<br>(574 - 1,029)        | 47<br>(31 - 70)    | 25<br>(18 - 34)     | 261<br>(212 - 435)       | 242<br>(197 - 393)       | 92<br>(74 - 134)         |
| Unintentional firearm injuries                  | 16<br>(13 - 20)             | 0<br>(0 - 1)       | 1<br>(1 - 2)        | 10<br>(8 - 14)           | 3<br>(2 - 4)             | 1<br>(1 - 2)             |
| Unintentional suffocation                       | 40<br>(27 - 74)             | 5<br>(1 - 14)      | 2<br>(1 - 5)        | 9<br>(6 - 16)            | 11<br>(7 - 20)           | 14<br>(8 - 28)           |
| Other exposure to mechanical forces             | 610<br>(521 - 972)          | 42<br>(28 - 63)    | 22<br>(15 - 30)     | 241<br>(194 - 416)       | 229<br>(184 - 381)       | 77<br>(60 - 110)         |
| Adverse effects of medical treatment            | 982<br>(692 - 1,377)        | 24<br>(15 - 54)    | 7<br>(4 - 11)       | 234<br>(178 - 372)       | 397<br>(259 - 569)       | 321<br>(177 - 435)       |
| Animal contact                                  | 195<br>(99 - 465)           | 2<br>(1 - 6)       | 1<br>(1 - 3)        | 28<br>(13 - 57)          | 95<br>(48 - 234)         | 68<br>(31 - 166)         |
| Venomous animal contact                         | 53<br>(22 - 120)            | 1<br>(0 - 1)       | 1<br>(0 - 2)        | 11<br>(3 - 19)           | 31<br>(14 - 78)          | 10<br>(3 - 26)           |
| Non-venomous animal contact                     | 142<br>(74 - 347)           | 2<br>(1 - 6)       | 0<br>(0 - 1)        | 17<br>(8 - 41)           | 64<br>(31 - 155)         | 58<br>(26 - 151)         |
| Foreign body                                    | 1,745<br>(741 - 2,688)      | 210<br>(82 - 365)  | 13<br>(7 - 23)      | 443<br>(151 - 772)       | 732<br>(262 - 1,230)     | 347<br>(166 - 783)       |
| Pulmonary aspiration and foreign body in airway | 1,723<br>(722 - 2,665)      | 209<br>(81 - 364)  | 12<br>(5 - 21)      | 436<br>(147 - 764)       | 725<br>(251 - 1,223)     | 342<br>(163 - 779)       |
| Foreign body in other body part                 | 22<br>(14 - 31)             | 1<br>(0 - 2)       | 1<br>(0 - 2)        | 7<br>(3 - 10)            | 7<br>(5 - 12)            | 5<br>(3 - 10)            |
| Other unintentional injuries                    | 568<br>(380 - 1,795)        | 21<br>(10 - 53)    | 16<br>(8 - 37)      | 235<br>(144 - 698)       | 217<br>(127 - 791)       | 79<br>(44 - 285)         |
| Self-harm and interpersonal violence            | 14,995<br>(12,144 - 17,007) | 73<br>(34 - 110)   | 107<br>(61 - 138)   | 6,929<br>(5,731 - 8,136) | 4,358<br>(3,484 - 5,088) | 3,529<br>(2,562 - 4,145) |
| Self-harm                                       | 8,596<br>(6,461 - 10,232)   | --                 | 48<br>(19 - 65)     | 3,623<br>(2,707 - 4,424) | 2,491<br>(1,971 - 3,085) | 2,435<br>(1,714 - 2,975) |
| Interpersonal violence                          | 6,399<br>(4,244 - 7,868)    | 73<br>(34 - 110)   | 60<br>(33 - 82)     | 3,306<br>(2,424 - 4,361) | 1,867<br>(1,183 - 2,426) | 1,094<br>(579 - 1,411)   |
| Assault by firearm                              | 109<br>(60 - 208)           | 2<br>(1 - 3)       | 3<br>(1 - 6)        | 61<br>(32 - 116)         | 31<br>(14 - 63)          | 13<br>(5 - 31)           |
| Assault by sharp object                         | 2,687<br>(1,677 - 3,560)    | 18<br>(7 - 30)     | 8<br>(3 - 14)       | 1,233<br>(813 - 1,842)   | 853<br>(505 - 1,193)     | 574<br>(278 - 784)       |
| Assault by other means                          | 3,602<br>(2,294 - 4,710)    | 53<br>(25 - 84)    | 49<br>(27 - 68)     | 2,011<br>(1,357 - 2,689) | 983<br>(593 - 1,385)     | 507<br>(248 - 738)       |

Web Table 31- Rwanda deaths with 95% UI by age, sex, and cause in 2013

| Cause                                                             | Both Sexes, All Ages        | Both Sexes, 0-4 Years       | Both Sexes, 5-14 Years   | Both Sexes, 15-49 Years     | Both Sexes, 50-69 Years     | Both Sexes, 70-80 Years     |
|-------------------------------------------------------------------|-----------------------------|-----------------------------|--------------------------|-----------------------------|-----------------------------|-----------------------------|
| All causes                                                        | 75,508<br>(69,581 - 82,141) | 25,674<br>(20,756 - 32,093) | 3,027<br>(2,557 - 3,780) | 18,351<br>(16,364 - 20,092) | 14,600<br>(13,162 - 16,225) | 13,856<br>(12,865 - 14,812) |
| Communicable, maternal, neonatal, and nutritional diseases        | 43,723<br>(37,622 - 50,181) | 21,856<br>(17,289 - 27,350) | 2,063<br>(1,689 - 2,574) | 10,985<br>(9,522 - 12,453)  | 5,040<br>(4,130 - 5,969)    | 3,779<br>(2,952 - 4,526)    |
| HIV/AIDS and tuberculosis                                         | 12,198<br>(10,349 - 14,216) | 728<br>(540 - 938)          | 904<br>(705 - 1,092)     | 7,054<br>(6,054 - 8,055)    | 2,755<br>(2,097 - 3,601)    | 756<br>(518 - 997)          |
| Tuberculosis                                                      | 4,055<br>(2,621 - 5,504)    | 237<br>(127 - 406)          | 54<br>(33 - 86)          | 1,807<br>(1,118 - 2,568)    | 1,296<br>(826 - 1,776)      | 661<br>(429 - 894)          |
| HIV/AIDS                                                          | 8,143<br>(6,779 - 9,513)    | 491<br>(332 - 639)          | 850<br>(640 - 1,023)     | 5,247<br>(4,509 - 5,950)    | 1,459<br>(1,003 - 2,305)    | 96<br>(58 - 156)            |
| HIV/AIDS resulting in mycobacterial infection                     | 508<br>(394 - 656)          | 29<br>(19 - 39)             | 46<br>(34 - 60)          | 327<br>(257 - 411)          | 99<br>(63 - 161)            | 7<br>(4 - 11)               |
| HIV/AIDS resulting in other diseases                              | 7,635<br>(6,352 - 8,908)    | 463<br>(312 - 598)          | 804<br>(611 - 971)       | 4,921<br>(4,222 - 5,602)    | 1,359<br>(930 - 2,161)      | 89<br>(53 - 144)            |
| Diarrhea, lower respiratory, and other common infectious diseases | 14,127<br>(10,705 - 18,047) | 7,713<br>(5,272 - 11,015)   | 640<br>(429 - 1,023)     | 1,647<br>(1,222 - 2,145)    | 1,706<br>(1,222 - 2,264)    | 2,420<br>(1,777 - 3,098)    |
| Diarrheal diseases                                                | 3,747<br>(2,150 - 5,628)    | 1,795<br>(803 - 3,269)      | 140<br>(59 - 270)        | 544<br>(288 - 882)          | 567<br>(283 - 927)          | 701<br>(363 - 1,200)        |
| Intestinal infectious diseases                                    | 531<br>(258 - 967)          | 227<br>(88 - 445)           | 128<br>(63 - 235)        | 150<br>(71 - 280)           | 19<br>(8 - 35)              | 6<br>(3 - 12)               |
| Typhoid fever                                                     | 393<br>(186 - 737)          | 158<br>(59 - 324)           | 100<br>(48 - 187)        | 117<br>(54 - 221)           | 14<br>(6 - 27)              | 4<br>(2 - 8)                |
| Paratyphoid fever                                                 | 102<br>(44 - 192)           | 47<br>(17 - 96)             | 26<br>(11 - 50)          | 26<br>(11 - 53)             | 3<br>(1 - 6)                | 1<br>(0 - 2)                |
| Other intestinal infectious diseases                              | 35<br>(18 - 57)             | 23<br>(9 - 44)              | 3<br>(1 - 8)             | 7<br>(2 - 15)               | 2<br>(0 - 6)                | 1<br>(0 - 5)                |
| Lower respiratory infections                                      | 7,472<br>(5,511 - 9,874)    | 4,068<br>(2,607 - 6,139)    | 188<br>(119 - 285)       | 622<br>(451 - 856)          | 959<br>(679 - 1,308)        | 1,636<br>(1,172 - 2,173)    |
| Upper respiratory infections                                      | 11<br>(6 - 21)              | 5<br>(1 - 14)               | 0<br>(0 - 1)             | 3<br>(1 - 6)                | 2<br>(0 - 5)                | 1<br>(0 - 4)                |
| Otitis media                                                      | 7<br>(5 - 9)                | 3<br>(2 - 5)                | 0<br>(0 - 1)             | 1<br>(1 - 1)                | 1<br>(1 - 1)                | 1<br>(1 - 2)                |
| Meningitis                                                        | 1,354<br>(982 - 1,883)      | 751<br>(427 - 1,217)        | 100<br>(61 - 159)        | 288<br>(208 - 393)          | 147<br>(98 - 204)           | 68<br>(43 - 99)             |
| Pneumococcal meningitis                                           | 313<br>(225 - 446)          | 139<br>(76 - 240)           | 31<br>(16 - 53)          | 83<br>(53 - 124)            | 40<br>(24 - 61)             | 20<br>(12 - 31)             |
| H influenzae type B meningitis                                    | 308<br>(192 - 484)          | 234<br>(124 - 403)          | 21<br>(10 - 36)          | 33<br>(18 - 53)             | 14<br>(7 - 24)              | 6<br>(3 - 10)               |
| Meningococcal meningitis                                          | 192<br>(135 - 268)          | 80<br>(39 - 145)            | 11<br>(6 - 19)           | 52<br>(31 - 81)             | 31<br>(17 - 48)             | 17<br>(8 - 28)              |
| Other meningitis                                                  | 540<br>(383 - 757)          | 297<br>(163 - 499)          | 38<br>(22 - 61)          | 119<br>(75 - 176)           | 61<br>(40 - 91)             | 25<br>(14 - 39)             |
| Encephalitis                                                      | 60<br>(40 - 88)             | 32<br>(16 - 60)             | 4<br>(2 - 7)             | 13<br>(8 - 19)              | 7<br>(3 - 11)               | 4<br>(1 - 6)                |
| Diphtheria                                                        | 4<br>(0 - 19)               | 3<br>(0 - 17)               | 0<br>(0 - 3)             | 0<br>(0 - 1)                | 0<br>(0 - 0)                | --                          |
| Whooping cough                                                    | 16<br>(0 - 81)              | 15<br>(0 - 77)              | 1<br>(0 - 3)             | 0<br>(0 - 1)                | 0<br>(0 - 0)                | --                          |
| Tetanus                                                           | 86<br>(28 - 153)            | 67<br>(20 - 128)            | 2<br>(1 - 5)             | 12<br>(3 - 26)              | 5<br>(1 - 11)               | 1<br>(0 - 2)                |
| Measles                                                           | 831<br>(19 - 4,476)         | 743<br>(18 - 3,993)         | 75<br>(1 - 465)          | 12<br>(0 - 83)              | 0<br>(0 - 2)                | --                          |
| Varicella and herpes zoster                                       | 8<br>(4 - 17)               | 4<br>(0 - 12)               | 1<br>(0 - 2)             | 2<br>(0 - 4)                | 1<br>(0 - 2)                | 2<br>(0 - 6)                |
| Neglected tropical diseases and malaria                           | 4,779<br>(3,028 - 7,538)    | 3,506<br>(1,768 - 6,262)    | 352<br>(165 - 678)       | 675<br>(406 - 1,093)        | 170<br>(99 - 422)           | 76<br>(36 - 227)            |
| Malaria                                                           | 3,569<br>(1,754 - 6,572)    | 3,106<br>(1,333 - 6,024)    | 132<br>(46 - 379)        | 195<br>(85 - 639)           | 86<br>(32 - 333)            | 50<br>(16 - 195)            |
| Leishmaniasis                                                     | 1,064<br>(457 - 1,729)      | 355<br>(95 - 774)           | 201<br>(64 - 384)        | 432<br>(178 - 669)          | 61<br>(29 - 102)            | 15<br>(7 - 26)              |
| Visceral leishmaniasis                                            | 1,064<br>(457 - 1,729)      | 355<br>(95 - 774)           | 201<br>(64 - 384)        | 432<br>(178 - 669)          | 61<br>(29 - 102)            | 15<br>(7 - 26)              |
| Schistosomiasis                                                   | 34<br>(25 - 44)             | 1<br>(0 - 1)                | 1<br>(1 - 2)             | 15<br>(10 - 22)             | 12<br>(8 - 17)              | 5<br>(3 - 8)                |
| Cysticercosis                                                     | 4<br>(3 - 4)                | 0<br>(0 - 0)                | 0<br>(0 - 0)             | 2<br>(2 - 3)                | 1<br>(1 - 1)                | 0<br>(0 - 0)                |
| Cystic echinococcosis                                             | 16<br>(13 - 18)             | 2<br>(1 - 4)                | 2<br>(2 - 3)             | 8<br>(6 - 9)                | 2<br>(2 - 3)                | 1<br>(1 - 1)                |
| Dengue                                                            | 2<br>(1 - 2)                | 0<br>(0 - 1)                | 0<br>(0 - 0)             | 1<br>(0 - 1)                | 0<br>(0 - 0)                | 0<br>(0 - 0)                |
| Yellow fever                                                      | 0<br>(0 - 0)                | 0<br>(0 - 0)                | 0<br>(0 - 0)             | 0<br>(0 - 0)                | 0<br>(0 - 0)                | 0<br>(0 - 0)                |
| Rabies                                                            | 45<br>(20 - 75)             | 11<br>(4 - 25)              | 11<br>(5 - 22)           | 18<br>(8 - 29)              | 4<br>(2 - 6)                | 1<br>(0 - 2)                |
| Intestinal nematode infections                                    | 32<br>(13 - 62)             | 26<br>(9 - 54)              | 3<br>(0 - 10)            | 2<br>(0 - 8)                | 1<br>(0 - 4)                | 0<br>(0 - 4)                |
| Ascariasis                                                        | 32<br>(13 - 62)             | 26<br>(9 - 54)              | 3<br>(0 - 10)            | 2<br>(0 - 8)                | 1<br>(0 - 4)                | 0<br>(0 - 4)                |
| Other neglected tropical diseases                                 | 14<br>(6 - 33)              | 5<br>(2 - 11)               | 0<br>(0 - 1)             | 3<br>(1 - 6)                | 3<br>(1 - 7)                | 3<br>(1 - 9)                |

Web Table 31- Rwanda deaths with 95% UI by age, sex, and cause in 2013

| Cause                                                            | Both Sexes, All Ages        | Both Sexes, 0-4 Years    | Both Sexes, 5-14 Years | Both Sexes, 15-49 Years  | Both Sexes, 50-69 Years   | Both Sexes, 70-80 Years   |
|------------------------------------------------------------------|-----------------------------|--------------------------|------------------------|--------------------------|---------------------------|---------------------------|
| Maternal disorders                                               | 1,185<br>(773 - 1,631)      | --                       | 3<br>(1 - 7)           | 1,182<br>(770 - 1,628)   | --                        | --                        |
| Maternal hemorrhage                                              | 144<br>(85 - 216)           | --                       | 0<br>(0 - 1)           | 143<br>(85 - 216)        | --                        | --                        |
| Maternal sepsis and other maternal infections                    | 116<br>(71 - 169)           | --                       | 0<br>(0 - 1)           | 116<br>(71 - 169)        | --                        | --                        |
| Maternal hypertensive disorders                                  | 121<br>(66 - 191)           | --                       | 0<br>(0 - 1)           | 121<br>(65 - 190)        | --                        | --                        |
| Maternal obstructed labor                                        | 61<br>(35 - 93)             | --                       | 0<br>(0 - 0)           | 61<br>(35 - 92)          | --                        | --                        |
| Maternal abortive outcome                                        | 223<br>(138 - 325)          | --                       | 1<br>(0 - 1)           | 223<br>(137 - 324)       | --                        | --                        |
| Indirect maternal deaths                                         | 90<br>(45 - 155)            | --                       | 0<br>(0 - 0)           | 90<br>(45 - 155)         | --                        | --                        |
| Late maternal deaths                                             | 108<br>(55 - 169)           | --                       | 0<br>(0 - 1)           | 107<br>(55 - 168)        | --                        | --                        |
| Maternal deaths aggravated by HIV/AIDS                           | 16<br>(8 - 25)              | --                       | --                     | 16<br>(8 - 25)           | --                        | --                        |
| Other maternal disorders                                         | 303<br>(188 - 443)          | --                       | 1<br>(0 - 2)           | 302<br>(187 - 442)       | --                        | --                        |
| Neonatal disorders                                               | 7,519<br>(6,130 - 9,295)    | 7,519<br>(6,130 - 9,295) | --                     | --                       | --                        | --                        |
| Neonatal preterm birth complications                             | 2,421<br>(1,358 - 3,677)    | 2,421<br>(1,358 - 3,677) | --                     | --                       | --                        | --                        |
| Neonatal encephalopathy due to birth asphyxia and trauma         | 2,003<br>(1,221 - 3,098)    | 2,003<br>(1,221 - 3,098) | --                     | --                       | --                        | --                        |
| Neonatal sepsis and other neonatal infections                    | 2,026<br>(1,084 - 3,403)    | 2,026<br>(1,084 - 3,403) | --                     | --                       | --                        | --                        |
| Hemolytic disease and other neonatal jaundice                    | 37<br>(15 - 79)             | 37<br>(15 - 79)          | --                     | --                       | --                        | --                        |
| Other neonatal disorders                                         | 1,032<br>(538 - 1,675)      | 1,032<br>(538 - 1,675)   | --                     | --                       | --                        | --                        |
| Nutritional deficiencies                                         | 2,797<br>(1,755 - 3,943)    | 1,602<br>(820 - 2,571)   | 108<br>(63 - 168)      | 310<br>(194 - 421)       | 318<br>(210 - 420)        | 459<br>(305 - 621)        |
| Protein-energy malnutrition                                      | 2,269<br>(1,392 - 3,264)    | 1,462<br>(735 - 2,369)   | 92<br>(52 - 146)       | 159<br>(82 - 272)        | 222<br>(136 - 316)        | 334<br>(206 - 473)        |
| Iodine deficiency                                                | 3<br>(1 - 13)               | 2<br>(0 - 10)            | 0<br>(0 - 1)           | 1<br>(0 - 3)             | 1<br>(0 - 2)              | 0<br>(0 - 2)              |
| Iron-deficiency anemia                                           | 508<br>(235 - 889)          | 136<br>(28 - 344)        | 15<br>(5 - 32)         | 147<br>(66 - 231)        | 92<br>(38 - 157)          | 117<br>(52 - 228)         |
| Other nutritional deficiencies                                   | 16<br>(6 - 32)              | 2<br>(1 - 6)             | 0<br>(0 - 1)           | 3<br>(1 - 6)             | 3<br>(1 - 6)              | 8<br>(2 - 19)             |
| Other communicable, maternal, neonatal, and nutritional diseases | 1,119<br>(631 - 1,765)      | 788<br>(321 - 1,375)     | 56<br>(27 - 96)        | 117<br>(80 - 160)        | 90<br>(53 - 142)          | 67<br>(31 - 128)          |
| Sexually transmitted diseases excluding HIV                      | 719<br>(225 - 1,316)        | 639<br>(170 - 1,205)     | 40<br>(11 - 77)        | 20<br>(12 - 34)          | 13<br>(6 - 30)            | 8<br>(3 - 17)             |
| Syphilis                                                         | 701<br>(204 - 1,297)        | 639<br>(170 - 1,205)     | 39<br>(11 - 76)        | 9<br>(5 - 15)            | 8<br>(4 - 17)             | 6<br>(2 - 13)             |
| Chlamydial infection                                             | 4<br>(2 - 9)                | --                       | 0<br>(0 - 0)           | 3<br>(1 - 6)             | 1<br>(0 - 3)              | 0<br>(0 - 1)              |
| Gonococcal infection                                             | 8<br>(5 - 13)               | --                       | 0<br>(0 - 0)           | 4<br>(3 - 7)             | 2<br>(1 - 5)              | 1<br>(0 - 2)              |
| Other sexually transmitted diseases                              | 6<br>(4 - 11)               | --                       | 0<br>(0 - 0)           | 4<br>(2 - 7)             | 2<br>(1 - 4)              | 0<br>(0 - 1)              |
| Hepatitis                                                        | 90<br>(71 - 137)            | 15<br>(8 - 30)           | 5<br>(3 - 8)           | 42<br>(29 - 72)          | 21<br>(16 - 29)           | 7<br>(5 - 9)              |
| Acute hepatitis A                                                | 11<br>(3 - 24)              | 6<br>(1 - 14)            | 2<br>(1 - 4)           | 3<br>(1 - 7)             | 0<br>(0 - 1)              | 0<br>(0 - 0)              |
| Acute hepatitis B                                                | 57<br>(40 - 84)             | 9<br>(4 - 19)            | 2<br>(1 - 4)           | 21<br>(12 - 36)          | 18<br>(13 - 24)           | 6<br>(4 - 8)              |
| Acute hepatitis C                                                | 1<br>(0 - 3)                | --                       | 0<br>(0 - 0)           | 1<br>(0 - 2)             | 0<br>(0 - 1)              | 0<br>(0 - 0)              |
| Acute hepatitis E                                                | 21<br>(11 - 37)             | 0<br>(0 - 0)             | 1<br>(0 - 1)           | 17<br>(9 - 32)           | 3<br>(1 - 6)              | 0<br>(0 - 1)              |
| Other infectious diseases                                        | 310<br>(174 - 489)          | 134<br>(65 - 287)        | 12<br>(6 - 23)         | 56<br>(28 - 86)          | 56<br>(23 - 100)          | 52<br>(18 - 109)          |
| Non-communicable diseases                                        | 24,968<br>(22,124 - 28,427) | 2,526<br>(1,648 - 3,810) | 396<br>(289 - 546)     | 4,136<br>(3,215 - 5,073) | 8,519<br>(7,259 - 10,090) | 9,391<br>(8,309 - 10,560) |
| Neoplasms                                                        | 4,460<br>(3,702 - 5,207)    | 174<br>(88 - 285)        | 102<br>(64 - 151)      | 985<br>(671 - 1,216)     | 2,157<br>(1,785 - 2,581)  | 1,041<br>(896 - 1,190)    |
| Esophageal cancer                                                | 464<br>(321 - 632)          | --                       | --                     | 61<br>(41 - 90)          | 280<br>(187 - 397)        | 124<br>(80 - 176)         |
| Stomach cancer                                                   | 276<br>(232 - 329)          | --                       | --                     | 37<br>(28 - 48)          | 149<br>(122 - 186)        | 90<br>(70 - 112)          |
| Liver cancer                                                     | 397<br>(251 - 555)          | --                       | 5<br>(2 - 9)           | 125<br>(53 - 194)        | 191<br>(130 - 267)        | 77<br>(54 - 107)          |
| Liver cancer due to hepatitis B                                  | 106<br>(54 - 163)           | --                       | 1<br>(0 - 3)           | 42<br>(18 - 74)          | 49<br>(25 - 78)           | 13<br>(6 - 22)            |
| Liver cancer due to hepatitis C                                  | 166<br>(53 - 280)           | --                       | 1<br>(0 - 2)           | 47<br>(11 - 80)          | 81<br>(20 - 150)          | 38<br>(18 - 62)           |

Web Table 31- Rwanda deaths with 95% UI by age, sex, and cause in 2013

| Cause                                | Both Sexes, All Ages       | Both Sexes, 0-4 Years | Both Sexes, 5-14 Years | Both Sexes, 15-49 Years | Both Sexes, 50-69 Years  | Both Sexes, 70-80 Years  |
|--------------------------------------|----------------------------|-----------------------|------------------------|-------------------------|--------------------------|--------------------------|
| Liver cancer due to alcohol use      | 52<br>(35 - 74)            | --                    | --                     | 10<br>(5 - 17)          | 27<br>(17 - 42)          | 15<br>(9 - 23)           |
| Liver cancer due to other causes     | 73<br>(47 - 110)           | --                    | 2<br>(1 - 5)           | 26<br>(12 - 45)         | 34<br>(19 - 56)          | 11<br>(6 - 18)           |
| Larynx cancer                        | 29<br>(19 - 37)            | --                    | --                     | 4<br>(2 - 6)            | 15<br>(10 - 21)          | 10<br>(6 - 14)           |
| Tracheal, bronchus and lung cancer   | 215<br>(179 - 276)         | --                    | --                     | 17<br>(11 - 32)         | 142<br>(114 - 184)       | 56<br>(47 - 69)          |
| Breast cancer                        | 428<br>(265 - 558)         | --                    | --                     | 158<br>(65 - 219)       | 212<br>(142 - 294)       | 58<br>(41 - 75)          |
| Cervical cancer                      | 525<br>(324 - 730)         | --                    | --                     | 91<br>(56 - 133)        | 358<br>(204 - 518)       | 76<br>(46 - 112)         |
| Uterine cancer                       | 26<br>(14 - 39)            | --                    | --                     | 3<br>(1 - 6)            | 16<br>(8 - 25)           | 7<br>(4 - 11)            |
| Prostate cancer                      | 173<br>(111 - 251)         | --                    | --                     | 3<br>(1 - 6)            | 53<br>(32 - 78)          | 117<br>(75 - 176)        |
| Colon and rectum cancer              | 377<br>(305 - 456)         | --                    | --                     | 99<br>(75 - 123)        | 176<br>(137 - 225)       | 103<br>(79 - 130)        |
| Lip and oral cavity cancer           | 63<br>(46 - 83)            | --                    | --                     | 14<br>(8 - 23)          | 33<br>(23 - 44)          | 15<br>(11 - 21)          |
| Nasopharynx cancer                   | 19<br>(14 - 26)            | --                    | 1<br>(0 - 2)           | 9<br>(6 - 13)           | 7<br>(4 - 10)            | 2<br>(1 - 3)             |
| Other pharynx cancer                 | 28<br>(20 - 38)            | --                    | --                     | 7<br>(4 - 11)           | 16<br>(11 - 22)          | 5<br>(3 - 7)             |
| Gallbladder and biliary tract cancer | 59<br>(42 - 82)            | --                    | --                     | 17<br>(10 - 24)         | 30<br>(20 - 45)          | 11<br>(7 - 17)           |
| Pancreatic cancer                    | 107<br>(89 - 127)          | --                    | --                     | 21<br>(16 - 27)         | 63<br>(51 - 78)          | 22<br>(17 - 27)          |
| Malignant skin melanoma              | 23<br>(16 - 30)            | --                    | --                     | 5<br>(3 - 8)            | 12<br>(8 - 16)           | 6<br>(4 - 8)             |
| Non-melanoma skin cancer             | 20<br>(12 - 35)            | --                    | --                     | 3<br>(2 - 5)            | 7<br>(4 - 11)            | 10<br>(6 - 20)           |
| Ovarian cancer                       | 84<br>(52 - 125)           | --                    | --                     | 20<br>(9 - 36)          | 53<br>(33 - 81)          | 11<br>(8 - 16)           |
| Testicular cancer                    | 11<br>(7 - 16)             | --                    | --                     | 6<br>(4 - 10)           | 4<br>(2 - 6)             | 1<br>(1 - 2)             |
| Kidney cancer                        | 65<br>(48 - 97)            | 13<br>(5 - 30)        | 4<br>(2 - 8)           | 9<br>(6 - 15)           | 28<br>(20 - 38)          | 12<br>(9 - 16)           |
| Bladder cancer                       | 72<br>(57 - 93)            | --                    | --                     | 8<br>(5 - 13)           | 32<br>(23 - 42)          | 32<br>(24 - 43)          |
| Brain and nervous system cancer      | 70<br>(47 - 89)            | 4<br>(1 - 9)          | 7<br>(4 - 11)          | 32<br>(19 - 42)         | 19<br>(12 - 25)          | 9<br>(5 - 13)            |
| Thyroid cancer                       | 15<br>(10 - 22)            | --                    | 0<br>(0 - 0)           | 2<br>(1 - 2)            | 10<br>(5 - 15)           | 4<br>(3 - 6)             |
| Mesothelioma                         | 8<br>(5 - 12)              | --                    | --                     | 1<br>(1 - 2)            | 4<br>(2 - 7)             | 3<br>(1 - 4)             |
| Hodgkin lymphoma                     | 31<br>(20 - 44)            | 2<br>(1 - 4)          | 2<br>(1 - 4)           | 9<br>(5 - 16)           | 10<br>(6 - 15)           | 8<br>(4 - 12)            |
| Non-Hodgkin lymphoma                 | 265<br>(170 - 386)         | 53<br>(20 - 116)      | 34<br>(17 - 59)        | 74<br>(41 - 111)        | 66<br>(47 - 89)          | 38<br>(25 - 52)          |
| Multiple myeloma                     | 41<br>(32 - 52)            | --                    | --                     | 9<br>(6 - 13)           | 20<br>(15 - 27)          | 12<br>(8 - 15)           |
| Leukemia                             | 95<br>(67 - 114)           | 8<br>(3 - 15)         | 12<br>(7 - 18)         | 39<br>(25 - 50)         | 21<br>(16 - 27)          | 15<br>(11 - 19)          |
| Other neoplasms                      | 472<br>(254 - 627)         | 94<br>(40 - 160)      | 39<br>(21 - 63)        | 102<br>(56 - 149)       | 131<br>(73 - 181)        | 106<br>(54 - 146)        |
| Cardiovascular diseases              | 10,962<br>(9,333 - 13,582) | 167<br>(97 - 284)     | 53<br>(33 - 92)        | 1,235<br>(937 - 1,895)  | 3,961<br>(3,259 - 4,981) | 5,547<br>(4,777 - 6,576) |
| Rheumatic heart disease              | 360<br>(257 - 564)         | 5<br>(2 - 13)         | 10<br>(6 - 18)         | 126<br>(85 - 208)       | 127<br>(87 - 208)        | 91<br>(64 - 142)         |
| Ischemic heart disease               | 2,912<br>(2,208 - 4,239)   | 1<br>(0 - 3)          | 2<br>(1 - 6)           | 253<br>(162 - 524)      | 1,101<br>(818 - 1,619)   | 1,555<br>(1,150 - 2,120) |
| Cerebrovascular disease              | 4,194<br>(3,327 - 5,196)   | 19<br>(11 - 33)       | 7<br>(4 - 11)          | 322<br>(230 - 450)      | 1,527<br>(1,172 - 1,931) | 2,320<br>(1,825 - 2,867) |
| Ischemic stroke                      | 1,670<br>(629 - 2,391)     | 1<br>(0 - 3)          | 1<br>(0 - 1)           | 40<br>(9 - 69)          | 430<br>(127 - 664)       | 1,198<br>(492 - 1,707)   |
| Hemorrhagic stroke                   | 2,524<br>(1,801 - 3,932)   | 18<br>(10 - 30)       | 6<br>(4 - 10)          | 282<br>(201 - 400)      | 1,097<br>(784 - 1,598)   | 1,121<br>(721 - 1,995)   |
| Hypertensive heart disease           | 1,254<br>(794 - 2,323)     | 3<br>(1 - 7)          | 2<br>(1 - 3)           | 92<br>(56 - 155)        | 399<br>(242 - 715)       | 758<br>(463 - 1,481)     |
| Cardiomyopathy and myocarditis       | 552<br>(410 - 767)         | 70<br>(34 - 120)      | 15<br>(8 - 25)         | 138<br>(92 - 205)       | 174<br>(124 - 254)       | 156<br>(99 - 266)        |
| Atrial fibrillation and flutter      | 4<br>(1 - 7)               | --                    | --                     | 0<br>(0 - 0)            | 1<br>(0 - 2)             | 2<br>(0 - 5)             |
| Aortic aneurysm                      | 116<br>(65 - 259)          | --                    | --                     | 14<br>(7 - 30)          | 44<br>(25 - 93)          | 57<br>(30 - 136)         |
| Peripheral vascular disease          | 4<br>(2 - 10)              | --                    | --                     | 0<br>(0 - 0)            | 1<br>(1 - 3)             | 3<br>(1 - 7)             |
| Endocarditis                         | 144<br>(99 - 200)          | 11<br>(4 - 27)        | 3<br>(1 - 5)           | 35<br>(21 - 52)         | 45<br>(29 - 66)          | 51<br>(32 - 80)          |

Web Table 31- Rwanda deaths with 95% UI by age, sex, and cause in 2013

| Cause                                               | Both Sexes, All Ages     | Both Sexes, 0-4 Years | Both Sexes, 5-14 Years | Both Sexes, 15-49 Years | Both Sexes, 50-69 Years | Both Sexes, 70-80 Years |
|-----------------------------------------------------|--------------------------|-----------------------|------------------------|-------------------------|-------------------------|-------------------------|
| Other cardiovascular and circulatory diseases       | 1,422<br>(904 - 2,142)   | 58<br>(27 - 122)      | 15<br>(7 - 29)         | 254<br>(151 - 424)      | 542<br>(331 - 834)      | 553<br>(336 - 907)      |
| Chronic respiratory diseases                        | 1,559<br>(1,326 - 1,897) | 90<br>(49 - 145)      | 17<br>(12 - 25)        | 180<br>(138 - 234)      | 517<br>(419 - 643)      | 755<br>(625 - 936)      |
| Chronic obstructive pulmonary disease               | 902<br>(727 - 1,200)     | 20<br>(10 - 36)       | 6<br>(4 - 9)           | 69<br>(49 - 96)         | 313<br>(245 - 419)      | 494<br>(383 - 661)      |
| Pneumoconiosis                                      | 87<br>(58 - 131)         | 2<br>(1 - 4)          | 1<br>(1 - 1)           | 20<br>(12 - 32)         | 33<br>(21 - 53)         | 31<br>(19 - 49)         |
| Silicosis                                           | 23<br>(14 - 36)          | 0<br>(0 - 1)          | 0<br>(0 - 0)           | 4<br>(2 - 8)            | 9<br>(5 - 14)           | 9<br>(5 - 16)           |
| Asbestosis                                          | 11<br>(7 - 17)           | 0<br>(0 - 1)          | 0<br>(0 - 0)           | 3<br>(1 - 5)            | 5<br>(3 - 7)            | 3<br>(2 - 5)            |
| Coal workers pneumoconiosis                         | 12<br>(7 - 19)           | 0<br>(0 - 0)          | 0<br>(0 - 0)           | 3<br>(1 - 4)            | 5<br>(3 - 8)            | 4<br>(2 - 7)            |
| Other pneumoconiosis                                | 41<br>(26 - 64)          | 1<br>(0 - 2)          | 0<br>(0 - 1)           | 10<br>(6 - 17)          | 15<br>(9 - 25)          | 15<br>(8 - 25)          |
| Asthma                                              | 267<br>(163 - 360)       | 15<br>(5 - 32)        | 4<br>(2 - 7)           | 37<br>(26 - 53)         | 96<br>(54 - 135)        | 115<br>(64 - 163)       |
| Interstitial lung disease and pulmonary sarcoidosis | 160<br>(39 - 285)        | 3<br>(1 - 9)          | 1<br>(0 - 2)           | 18<br>(5 - 32)          | 54<br>(13 - 100)        | 84<br>(18 - 164)        |
| Other chronic respiratory diseases                  | 144<br>(107 - 199)       | 51<br>(28 - 83)       | 5<br>(3 - 8)           | 35<br>(25 - 50)         | 21<br>(14 - 32)         | 31<br>(20 - 49)         |
| Cirrhosis                                           | 1,045<br>(863 - 1,260)   | 17<br>(7 - 34)        | 13<br>(9 - 18)         | 284<br>(215 - 367)      | 491<br>(386 - 620)      | 241<br>(189 - 300)      |
| Cirrhosis due to hepatitis B                        | 229<br>(104 - 345)       | 1<br>(0 - 1)          | 1<br>(0 - 3)           | 54<br>(25 - 91)         | 114<br>(51 - 172)       | 60<br>(27 - 91)         |
| Cirrhosis due to hepatitis C                        | 247<br>(148 - 351)       | 1<br>(0 - 3)          | 2<br>(1 - 3)           | 60<br>(32 - 91)         | 122<br>(70 - 185)       | 63<br>(36 - 94)         |
| Cirrhosis due to alcohol use                        | 414<br>(316 - 557)       | --                    | --                     | 108<br>(72 - 155)       | 205<br>(150 - 280)      | 101<br>(74 - 141)       |
| Cirrhosis due to other causes                       | 155<br>(116 - 209)       | 16<br>(6 - 31)        | 10<br>(6 - 15)         | 62<br>(43 - 88)         | 50<br>(32 - 75)         | 17<br>(10 - 25)         |
| Digestive diseases                                  | 1,110<br>(813 - 1,482)   | 47<br>(20 - 93)       | 32<br>(20 - 50)        | 300<br>(203 - 438)      | 349<br>(246 - 480)      | 383<br>(276 - 509)      |
| Peptic ulcer disease                                | 263<br>(155 - 414)       | 3<br>(1 - 8)          | 3<br>(1 - 5)           | 60<br>(30 - 112)        | 92<br>(52 - 146)        | 106<br>(59 - 171)       |
| Gastritis and duodenitis                            | 38<br>(13 - 84)          | 2<br>(1 - 6)          | 2<br>(1 - 3)           | 10<br>(4 - 18)          | 10<br>(3 - 23)          | 14<br>(4 - 41)          |
| Appendicitis                                        | 78<br>(50 - 120)         | 4<br>(1 - 11)         | 5<br>(2 - 10)          | 27<br>(16 - 50)         | 21<br>(12 - 34)         | 21<br>(9 - 37)          |
| Paralytic ileus and intestinal obstruction          | 393<br>(268 - 582)       | 14<br>(5 - 30)        | 14<br>(8 - 23)         | 109<br>(65 - 165)       | 126<br>(81 - 192)       | 130<br>(77 - 214)       |
| Inguinal, femoral, and abdominal hernia             | 16<br>(9 - 25)           | 1<br>(0 - 3)          | 0<br>(0 - 1)           | 6<br>(3 - 9)            | 3<br>(2 - 6)            | 5<br>(3 - 9)            |
| Inflammatory bowel disease                          | 77<br>(42 - 178)         | 12<br>(4 - 34)        | 3<br>(1 - 8)           | 23<br>(12 - 57)         | 18<br>(9 - 44)          | 20<br>(10 - 46)         |
| Vascular intestinal disorders                       | 8<br>(4 - 15)            | 0<br>(0 - 1)          | 0<br>(0 - 0)           | 1<br>(1 - 3)            | 2<br>(1 - 5)            | 4<br>(2 - 7)            |
| Gallbladder and biliary diseases                    | 70<br>(45 - 103)         | 1<br>(0 - 3)          | 1<br>(0 - 1)           | 12<br>(8 - 18)          | 23<br>(14 - 37)         | 32<br>(18 - 53)         |
| Pancreatitis                                        | 58<br>(24 - 105)         | 1<br>(0 - 2)          | 1<br>(0 - 1)           | 25<br>(10 - 45)         | 19<br>(7 - 36)          | 13<br>(5 - 28)          |
| Other digestive diseases                            | 109<br>(72 - 162)        | 8<br>(3 - 18)         | 4<br>(2 - 6)           | 27<br>(16 - 43)         | 33<br>(20 - 54)         | 37<br>(22 - 58)         |
| Neurological disorders                              | 892<br>(731 - 1,093)     | 85<br>(40 - 162)      | 45<br>(28 - 81)        | 193<br>(128 - 295)      | 86<br>(69 - 108)        | 482<br>(393 - 578)      |
| Alzheimer disease and other dementias               | 475<br>(385 - 573)       | --                    | --                     | 0<br>(0 - 1)            | 42<br>(33 - 54)         | 432<br>(347 - 528)      |
| Parkinson disease                                   | 6<br>(3 - 11)            | --                    | --                     | 1<br>(0 - 1)            | 1<br>(1 - 2)            | 4<br>(2 - 9)            |
| Epilepsy                                            | 351<br>(243 - 526)       | 70<br>(30 - 142)      | 41<br>(24 - 76)        | 173<br>(110 - 276)      | 28<br>(19 - 43)         | 38<br>(22 - 63)         |
| Multiple sclerosis                                  | 2<br>(1 - 3)             | --                    | --                     | 1<br>(0 - 2)            | 1<br>(0 - 1)            | 0<br>(0 - 0)            |
| Other neurological disorders                        | 58<br>(35 - 80)          | 15<br>(7 - 27)        | 4<br>(2 - 6)           | 18<br>(9 - 26)          | 14<br>(9 - 19)          | 7<br>(5 - 10)           |
| Mental and substance use disorders                  | 442<br>(281 - 674)       | 22<br>(5 - 49)        | 0<br>(0 - 0)           | 307<br>(195 - 459)      | 95<br>(62 - 163)        | 19<br>(11 - 32)         |
| Schizophrenia                                       | 14<br>(8 - 25)           | --                    | --                     | 8<br>(4 - 14)           | 4<br>(2 - 8)            | 2<br>(1 - 4)            |
| Alcohol use disorders                               | 245<br>(153 - 399)       | --                    | --                     | 161<br>(93 - 267)       | 73<br>(45 - 126)        | 11<br>(7 - 20)          |
| Drug use disorders                                  | 183<br>(85 - 272)        | 22<br>(5 - 49)        | --                     | 138<br>(69 - 204)       | 18<br>(7 - 32)          | 5<br>(2 - 11)           |
| Opioid use disorders                                | 19<br>(9 - 29)           | 2<br>(1 - 6)          | --                     | 15<br>(7 - 22)          | 2<br>(1 - 3)            | 1<br>(0 - 1)            |
| Cocaine use disorders                               | 1<br>(0 - 1)             | 0<br>(0 - 0)          | --                     | 1<br>(0 - 1)            | 0<br>(0 - 0)            | 0<br>(0 - 0)            |
| Amphetamine use disorders                           | 1<br>(0 - 1)             | 0<br>(0 - 0)          | --                     | 0<br>(0 - 1)            | 0<br>(0 - 0)            | 0<br>(0 - 0)            |

Web Table 31- Rwanda deaths with 95% UI by age, sex, and cause in 2013

| Cause                                               | Both Sexes, All Ages     | Both Sexes, 0-4 Years  | Both Sexes, 5-14 Years | Both Sexes, 15-49 Years | Both Sexes, 50-69 Years | Both Sexes, 70-80 Years |
|-----------------------------------------------------|--------------------------|------------------------|------------------------|-------------------------|-------------------------|-------------------------|
| Other drug use disorders                            | 163<br>(76 - 242)        | 19<br>(5 - 43)         | --                     | 122<br>(61 - 180)       | 16<br>(6 - 29)          | 5<br>(1 - 10)           |
| Eating disorders                                    | 0<br>(0 - 0)             | --                     | 0<br>(0 - 0)           | 0<br>(0 - 0)            | --                      | --                      |
| Anorexia nervosa                                    | 0<br>(0 - 0)             | --                     | 0<br>(0 - 0)           | 0<br>(0 - 0)            | --                      | --                      |
| Diabetes, urogenital, blood, and endocrine diseases | 2,427<br>(2,052 - 2,807) | 273<br>(159 - 439)     | 65<br>(43 - 97)        | 507<br>(393 - 626)      | 774<br>(637 - 933)      | 809<br>(683 - 940)      |
| Diabetes mellitus                                   | 1,042<br>(879 - 1,223)   | 9<br>(5 - 14)          | 3<br>(2 - 5)           | 116<br>(90 - 144)       | 448<br>(361 - 549)      | 466<br>(380 - 570)      |
| Acute glomerulonephritis                            | 27<br>(16 - 44)          | 3<br>(1 - 7)           | 1<br>(0 - 2)           | 7<br>(3 - 13)           | 10<br>(4 - 18)          | 6<br>(3 - 11)           |
| Chronic kidney disease                              | 395<br>(301 - 513)       | 31<br>(15 - 53)        | 12<br>(7 - 20)         | 117<br>(79 - 174)       | 104<br>(78 - 136)       | 131<br>(94 - 169)       |
| Chronic kidney disease due to diabetes mellitus     | 2<br>(1 - 5)             | 0<br>(0 - 0)           | 0<br>(0 - 0)           | 1<br>(0 - 1)            | 1<br>(0 - 2)            | 1<br>(0 - 2)            |
| Chronic kidney disease due to hypertension          | 158<br>(111 - 209)       | 4<br>(2 - 8)           | 1<br>(1 - 2)           | 30<br>(19 - 44)         | 51<br>(35 - 71)         | 71<br>(47 - 97)         |
| Chronic kidney disease due to glomerulonephritis    | 127<br>(83 - 184)        | 19<br>(9 - 31)         | 7<br>(4 - 11)          | 48<br>(33 - 74)         | 28<br>(17 - 41)         | 26<br>(13 - 40)         |
| Chronic kidney disease due to other causes          | 108<br>(50 - 172)        | 8<br>(3 - 17)          | 4<br>(1 - 7)           | 38<br>(14 - 70)         | 24<br>(12 - 41)         | 34<br>(14 - 58)         |
| Urinary diseases and male infertility               | 354<br>(270 - 440)       | 30<br>(14 - 55)        | 7<br>(4 - 10)          | 97<br>(62 - 131)        | 116<br>(79 - 154)       | 105<br>(79 - 141)       |
| Interstitial nephritis and urinary tract infections | 260<br>(191 - 331)       | 21<br>(10 - 42)        | 4<br>(2 - 7)           | 67<br>(40 - 93)         | 86<br>(56 - 118)        | 82<br>(58 - 114)        |
| Urolithiasis                                        | 12<br>(7 - 22)           | --                     | 1<br>(0 - 1)           | 4<br>(2 - 8)            | 5<br>(2 - 9)            | 2<br>(1 - 5)            |
| Other urinary diseases                              | 82<br>(52 - 126)         | 8<br>(3 - 17)          | 2<br>(1 - 4)           | 26<br>(15 - 41)         | 25<br>(14 - 42)         | 21<br>(10 - 39)         |
| Gynecological diseases                              | 4<br>(1 - 17)            | --                     | --                     | 2<br>(0 - 10)           | 2<br>(0 - 4)            | 1<br>(0 - 3)            |
| Uterine fibroids                                    | 1<br>(0 - 3)             | --                     | --                     | 0<br>(0 - 1)            | 0<br>(0 - 1)            | 0<br>(0 - 1)            |
| Polycystic ovarian syndrome                         | 0<br>(0 - 1)             | --                     | --                     | 0<br>(0 - 1)            | 0<br>(0 - 0)            | --                      |
| Endometriosis                                       | 0<br>(0 - 2)             | --                     | --                     | 0<br>(0 - 2)            | 0<br>(0 - 0)            | --                      |
| Genital prolapse                                    | 1<br>(0 - 3)             | --                     | --                     | 0<br>(0 - 1)            | 0<br>(0 - 1)            | 0<br>(0 - 1)            |
| Other gynecological diseases                        | 2<br>(1 - 8)             | --                     | --                     | 1<br>(0 - 5)            | 1<br>(0 - 2)            | 0<br>(0 - 1)            |
| Hemoglobinopathies and hemolytic anemias            | 264<br>(151 - 414)       | 119<br>(53 - 223)      | 31<br>(17 - 53)        | 74<br>(44 - 125)        | 23<br>(13 - 48)         | 18<br>(9 - 41)          |
| Thalassemias                                        | 17<br>(9 - 30)           | 12<br>(5 - 23)         | 2<br>(1 - 3)           | 3<br>(2 - 6)            | 0<br>(0 - 0)            | 0<br>(0 - 0)            |
| Sickle cell disorders                               | 152<br>(86 - 241)        | 69<br>(29 - 132)       | 23<br>(12 - 39)        | 50<br>(30 - 83)         | 11<br>(6 - 22)          | 0<br>(0 - 0)            |
| G6PD deficiency                                     | 14<br>(8 - 22)           | 7<br>(3 - 14)          | 1<br>(1 - 3)           | 4<br>(2 - 6)            | 1<br>(0 - 2)            | 0<br>(0 - 1)            |
| Other hemoglobinopathies and hemolytic anemias      | 80<br>(49 - 128)         | 30<br>(15 - 55)        | 5<br>(3 - 8)           | 17<br>(10 - 30)         | 11<br>(6 - 24)          | 17<br>(8 - 40)          |
| Endocrine, metabolic, blood, and immune disorders   | 341<br>(205 - 470)       | 81<br>(43 - 139)       | 11<br>(5 - 20)         | 95<br>(50 - 147)        | 72<br>(39 - 103)        | 81<br>(37 - 118)        |
| Musculoskeletal disorders                           | 79<br>(55 - 117)         | --                     | 6<br>(3 - 9)           | 35<br>(23 - 51)         | 22<br>(15 - 36)         | 15<br>(10 - 27)         |
| Rheumatoid arthritis                                | 24<br>(13 - 43)          | --                     | 1<br>(1 - 2)           | 6<br>(3 - 10)           | 9<br>(4 - 16)           | 7<br>(4 - 15)           |
| Other musculoskeletal disorders                     | 55<br>(39 - 79)          | --                     | 5<br>(3 - 7)           | 29<br>(19 - 42)         | 13<br>(9 - 22)          | 8<br>(5 - 14)           |
| Other non-communicable diseases                     | 1,990<br>(1,241 - 3,145) | 1,651<br>(928 - 2,784) | 63<br>(37 - 101)       | 111<br>(79 - 152)       | 67<br>(49 - 88)         | 100<br>(68 - 137)       |
| Congenital anomalies                                | 1,703<br>(928 - 2,900)   | 1,557<br>(825 - 2,701) | 58<br>(33 - 97)        | 63<br>(41 - 91)         | 12<br>(8 - 17)          | 12<br>(7 - 17)          |
| Neural tube defects                                 | 402<br>(101 - 837)       | 384<br>(95 - 811)      | 8<br>(2 - 19)          | 9<br>(2 - 18)           | 1<br>(0 - 2)            | 1<br>(0 - 2)            |
| Congenital heart anomalies                          | 731<br>(341 - 1,496)     | 658<br>(288 - 1,397)   | 31<br>(16 - 56)        | 32<br>(18 - 49)         | 5<br>(3 - 8)            | 5<br>(2 - 9)            |
| Cleft lip and cleft palate                          | 9<br>(1 - 25)            | 9<br>(1 - 25)          | --                     | --                      | --                      | --                      |
| Down syndrome                                       | 122<br>(34 - 279)        | 105<br>(25 - 255)      | 6<br>(2 - 14)          | 9<br>(4 - 16)           | 2<br>(1 - 3)            | 0<br>(0 - 1)            |
| Chromosomal unbalanced rearrangements               | 64<br>(16 - 170)         | 59<br>(14 - 162)       | 1<br>(0 - 3)           | 2<br>(1 - 4)            | 0<br>(0 - 1)            | 0<br>(0 - 1)            |
| Other congenital anomalies                          | 375<br>(138 - 1,013)     | 341<br>(119 - 954)     | 11<br>(4 - 27)         | 12<br>(5 - 23)          | 4<br>(2 - 8)            | 6<br>(3 - 10)           |
| Skin and subcutaneous diseases                      | 262<br>(183 - 357)       | 68<br>(32 - 129)       | 4<br>(3 - 7)           | 48<br>(31 - 71)         | 54<br>(39 - 72)         | 88<br>(59 - 123)        |
| Cellulitis                                          | 79<br>(44 - 132)         | 21<br>(7 - 50)         | 1<br>(1 - 3)           | 15<br>(8 - 28)          | 18<br>(11 - 28)         | 23<br>(12 - 39)         |



Web Table 31- Rwanda deaths with 95% UI by age, sex, and cause in 2013

| Cause                                           | Both Sexes, All Ages      | Both Sexes, 0-4 Years  | Both Sexes, 5-14 Years | Both Sexes, 15-49 Years  | Both Sexes, 50-69 Years | Both Sexes, 70-80 Years |
|-------------------------------------------------|---------------------------|------------------------|------------------------|--------------------------|-------------------------|-------------------------|
| Pyoderma                                        | 141<br>(94 - 202)         | 44<br>(20 - 86)        | 2<br>(1 - 4)           | 25<br>(16 - 37)          | 29<br>(19 - 40)         | 41<br>(25 - 63)         |
| Decubitus ulcer                                 | 32<br>(18 - 49)           | 1<br>(0 - 2)           | 0<br>(0 - 1)           | 4<br>(3 - 7)             | 5<br>(3 - 9)            | 21<br>(10 - 34)         |
| Other skin and subcutaneous diseases            | 10<br>(6 - 17)            | 2<br>(1 - 5)           | 0<br>(0 - 1)           | 3<br>(2 - 5)             | 2<br>(1 - 3)            | 2<br>(1 - 4)            |
| Sudden infant death syndrome                    | 25<br>(7 - 65)            | 25<br>(7 - 65)         | --                     | --                       | --                      | --                      |
| Injuries                                        | 6,817<br>(5,429 - 10,237) | 1,292<br>(680 - 3,157) | 567<br>(393 - 857)     | 3,231<br>(2,427 - 4,562) | 1,041<br>(822 - 1,314)  | 687<br>(526 - 836)      |
| Transport injuries                              | 3,185<br>(2,502 - 3,859)  | 362<br>(177 - 643)     | 305<br>(208 - 434)     | 1,604<br>(1,185 - 2,035) | 590<br>(441 - 740)      | 324<br>(239 - 407)      |
| Road injuries                                   | 3,104<br>(2,437 - 3,762)  | 340<br>(167 - 610)     | 295<br>(200 - 417)     | 1,582<br>(1,171 - 2,014) | 576<br>(432 - 725)      | 312<br>(232 - 390)      |
| Pedestrian road injuries                        | 1,508<br>(1,127 - 1,929)  | 173<br>(82 - 309)      | 150<br>(97 - 220)      | 746<br>(506 - 1,013)     | 282<br>(198 - 375)      | 157<br>(113 - 208)      |
| Cyclist road injuries                           | 115<br>(68 - 186)         | 12<br>(4 - 27)         | 14<br>(7 - 26)         | 54<br>(26 - 94)          | 24<br>(15 - 37)         | 11<br>(6 - 16)          |
| Motorcyclist road injuries                      | 506<br>(293 - 711)        | 49<br>(19 - 100)       | 37<br>(20 - 60)        | 285<br>(162 - 418)       | 86<br>(48 - 128)        | 48<br>(25 - 75)         |
| Motor vehicle road injuries                     | 748<br>(552 - 1,103)      | 78<br>(36 - 142)       | 68<br>(41 - 107)       | 391<br>(265 - 603)       | 138<br>(94 - 202)       | 73<br>(48 - 107)        |
| Other road injuries                             | 228<br>(58 - 398)         | 27<br>(7 - 65)         | 26<br>(6 - 53)         | 107<br>(24 - 193)        | 46<br>(10 - 88)         | 23<br>(5 - 43)          |
| Other transport injuries                        | 80<br>(52 - 111)          | 22<br>(11 - 41)        | 11<br>(6 - 17)         | 22<br>(15 - 33)          | 13<br>(7 - 20)          | 12<br>(4 - 19)          |
| Unintentional injuries                          | 2,452<br>(1,723 - 5,960)  | 893<br>(442 - 2,843)   | 234<br>(133 - 525)     | 709<br>(443 - 1,649)     | 317<br>(222 - 559)      | 300<br>(195 - 410)      |
| Falls                                           | 229<br>(131 - 316)        | 28<br>(14 - 50)        | 17<br>(8 - 31)         | 69<br>(40 - 108)         | 40<br>(22 - 59)         | 75<br>(39 - 119)        |
| Drowning                                        | 555<br>(332 - 1,024)      | 193<br>(81 - 402)      | 92<br>(45 - 183)       | 210<br>(120 - 419)       | 42<br>(26 - 73)         | 18<br>(10 - 30)         |
| Fire, heat, and hot substances                  | 335<br>(199 - 573)        | 157<br>(64 - 325)      | 28<br>(14 - 55)        | 71<br>(46 - 131)         | 41<br>(23 - 67)         | 37<br>(20 - 59)         |
| Poisonings                                      | 84<br>(51 - 121)          | 23<br>(9 - 45)         | 4<br>(2 - 6)           | 40<br>(24 - 64)          | 13<br>(6 - 20)          | 4<br>(2 - 6)            |
| Exposure to mechanical forces                   | 594<br>(176 - 3,971)      | 278<br>(43 - 2,317)    | 49<br>(13 - 316)       | 166<br>(56 - 958)        | 72<br>(22 - 338)        | 29<br>(6 - 138)         |
| Unintentional firearm injuries                  | 43<br>(28 - 68)           | 6<br>(3 - 11)          | 2<br>(1 - 4)           | 28<br>(16 - 49)          | 4<br>(3 - 7)            | 3<br>(1 - 4)            |
| Unintentional suffocation                       | 410<br>(34 - 3,793)       | 227<br>(16 - 2,275)    | 33<br>(3 - 301)        | 96<br>(6 - 868)          | 41<br>(3 - 313)         | 14<br>(1 - 125)         |
| Other exposure to mechanical forces             | 141<br>(56 - 214)         | 45<br>(14 - 95)        | 15<br>(6 - 26)         | 43<br>(23 - 69)          | 27<br>(8 - 43)          | 12<br>(2 - 19)          |
| Adverse effects of medical treatment            | 337<br>(229 - 460)        | 103<br>(51 - 196)      | 10<br>(6 - 16)         | 63<br>(46 - 92)          | 67<br>(40 - 104)        | 94<br>(44 - 162)        |
| Animal contact                                  | 127<br>(84 - 219)         | 30<br>(12 - 74)        | 17<br>(8 - 35)         | 41<br>(25 - 74)          | 23<br>(14 - 38)         | 16<br>(8 - 24)          |
| Venomous animal contact                         | 69<br>(39 - 131)          | 19<br>(7 - 49)         | 7<br>(3 - 18)          | 22<br>(12 - 43)          | 11<br>(6 - 21)          | 10<br>(3 - 16)          |
| Non-venomous animal contact                     | 58<br>(34 - 113)          | 11<br>(3 - 30)         | 10<br>(4 - 22)         | 19<br>(11 - 41)          | 12<br>(6 - 23)          | 6<br>(3 - 12)           |
| Foreign body                                    | 103<br>(58 - 166)         | 62<br>(31 - 109)       | 5<br>(3 - 10)          | 9<br>(5 - 17)            | 6<br>(4 - 11)           | 20<br>(8 - 32)          |
| Pulmonary aspiration and foreign body in airway | 93<br>(51 - 150)          | 59<br>(29 - 104)       | 4<br>(2 - 7)           | 7<br>(4 - 12)            | 4<br>(2 - 6)            | 18<br>(7 - 31)          |
| Foreign body in other body part                 | 10<br>(4 - 40)            | 3<br>(1 - 12)          | 1<br>(0 - 5)           | 2<br>(1 - 9)             | 2<br>(1 - 7)            | 2<br>(1 - 7)            |
| Other unintentional injuries                    | 89<br>(58 - 143)          | 19<br>(10 - 36)        | 11<br>(6 - 19)         | 39<br>(24 - 68)          | 10<br>(7 - 17)          | 8<br>(5 - 13)           |
| Self-harm and interpersonal violence            | 1,180<br>(789 - 1,827)    | 37<br>(17 - 77)        | 27<br>(15 - 48)        | 918<br>(578 - 1,462)     | 134<br>(87 - 214)       | 63<br>(30 - 99)         |
| Self-harm                                       | 587<br>(328 - 942)        | --                     | 11<br>(4 - 25)         | 407<br>(218 - 718)       | 109<br>(63 - 176)       | 60<br>(27 - 96)         |
| Interpersonal violence                          | 594<br>(390 - 933)        | 37<br>(17 - 77)        | 16<br>(9 - 29)         | 511<br>(325 - 816)       | 26<br>(17 - 43)         | 3<br>(2 - 5)            |
| Assault by firearm                              | 215<br>(119 - 397)        | 8<br>(3 - 19)          | 4<br>(2 - 8)           | 195<br>(105 - 364)       | 8<br>(4 - 17)           | 0<br>(0 - 1)            |
| Assault by sharp object                         | 128<br>(74 - 240)         | 7<br>(3 - 14)          | 3<br>(1 - 5)           | 111<br>(62 - 216)        | 7<br>(4 - 12)           | 1<br>(0 - 1)            |
| Assault by other means                          | 251<br>(150 - 408)        | 23<br>(10 - 50)        | 10<br>(6 - 18)         | 205<br>(118 - 341)       | 11<br>(7 - 19)          | 2<br>(1 - 3)            |

Web Table 31- Rwanda deaths with 95% UI by age, sex, and cause in 2013

| Cause                                                             | Males, All Ages             | Males, 0-4 Years            | Males, 5-14 Years        | Males, 15-49 Years         | Males, 50-69 Years       | Males, 70-80 Years       |
|-------------------------------------------------------------------|-----------------------------|-----------------------------|--------------------------|----------------------------|--------------------------|--------------------------|
| All causes                                                        | 40,811<br>(37,003 - 45,288) | 13,934<br>(10,889 - 17,439) | 1,650<br>(1,396 - 2,040) | 10,783<br>(9,024 - 12,258) | 7,860<br>(7,132 - 9,155) | 6,584<br>(6,314 - 7,270) |
| Communicable, maternal, neonatal, and nutritional diseases        | 23,690<br>(20,208 - 27,243) | 11,938<br>(9,267 - 14,932)  | 1,093<br>(876 - 1,387)   | 5,721<br>(4,691 - 6,734)   | 2,998<br>(2,427 - 3,607) | 1,939<br>(1,508 - 2,355) |
| HIV/AIDS and tuberculosis                                         | 7,246<br>(5,817 - 8,703)    | 402<br>(288 - 555)          | 459<br>(359 - 555)       | 4,071<br>(3,262 - 4,900)   | 1,820<br>(1,333 - 2,450) | 494<br>(325 - 696)       |
| Tuberculosis                                                      | 2,827<br>(1,698 - 4,085)    | 153<br>(68 - 288)           | 33<br>(17 - 58)          | 1,330<br>(710 - 2,042)     | 882<br>(528 - 1,299)     | 429<br>(266 - 627)       |
| HIV/AIDS                                                          | 4,419<br>(3,595 - 5,205)    | 248<br>(168 - 322)          | 426<br>(320 - 513)       | 2,741<br>(2,237 - 3,310)   | 938<br>(627 - 1,333)     | 65<br>(38 - 113)         |
| HIV/AIDS resulting in mycobacterial infection                     | 312<br>(238 - 400)          | 16<br>(11 - 22)             | 26<br>(20 - 34)          | 194<br>(148 - 250)         | 70<br>(44 - 111)         | 5<br>(3 - 9)             |
| HIV/AIDS resulting in other diseases                              | 4,107<br>(3,335 - 4,823)    | 232<br>(157 - 301)          | 400<br>(304 - 485)       | 2,547<br>(2,079 - 3,081)   | 868<br>(585 - 1,416)     | 60<br>(35 - 104)         |
| Diarrhea, lower respiratory, and other common infectious diseases | 7,467<br>(5,492 - 9,742)    | 4,086<br>(2,567 - 6,003)    | 341<br>(213 - 549)       | 994<br>(638 - 1,388)       | 881<br>(600 - 1,218)     | 1,167<br>(841 - 1,538)   |
| Diarrheal diseases                                                | 1,933<br>(947 - 3,196)      | 912<br>(301 - 1,971)        | 81<br>(25 - 175)         | 330<br>(146 - 582)         | 286<br>(122 - 510)       | 324<br>(141 - 592)       |
| Intestinal infectious diseases                                    | 263<br>(123 - 491)          | 108<br>(40 - 225)           | 63<br>(29 - 120)         | 82<br>(33 - 160)           | 8<br>(3 - 17)            | 3<br>(1 - 6)             |
| Typhoid fever                                                     | 188<br>(83 - 359)           | 71<br>(25 - 155)            | 47<br>(21 - 92)          | 62<br>(24 - 122)           | 6<br>(2 - 12)            | 2<br>(1 - 3)             |
| Paratyphoid fever                                                 | 54<br>(21 - 111)            | 24<br>(7 - 52)              | 14<br>(5 - 30)           | 15<br>(5 - 34)             | 1<br>(0 - 3)             | 0<br>(0 - 1)             |
| Other intestinal infectious diseases                              | 21<br>(9 - 37)              | 14<br>(4 - 29)              | 2<br>(0 - 6)             | 4<br>(1 - 11)              | 1<br>(0 - 4)             | 1<br>(0 - 3)             |
| Lower respiratory infections                                      | 3,995<br>(2,754 - 5,372)    | 2,190<br>(1,207 - 3,436)    | 103<br>(57 - 179)        | 389<br>(247 - 578)         | 506<br>(334 - 747)       | 806<br>(532 - 1,130)     |
| Upper respiratory infections                                      | 6<br>(2 - 14)               | 2<br>(0 - 9)                | 0<br>(0 - 1)             | 2<br>(0 - 5)               | 1<br>(0 - 3)             | 1<br>(0 - 2)             |
| Otitis media                                                      | 3<br>(2 - 5)                | 2<br>(1 - 3)                | 0<br>(0 - 0)             | 1<br>(0 - 1)               | 0<br>(0 - 1)             | 0<br>(0 - 1)             |
| Meningitis                                                        | 744<br>(484 - 1,189)        | 419<br>(193 - 824)          | 54<br>(28 - 98)          | 168<br>(102 - 249)         | 73<br>(45 - 111)         | 30<br>(17 - 54)          |
| Pneumococcal meningitis                                           | 170<br>(105 - 265)          | 74<br>(32 - 147)            | 17<br>(6 - 35)           | 50<br>(25 - 84)            | 20<br>(10 - 36)          | 9<br>(4 - 17)            |
| H influenzae type B meningitis                                    | 177<br>(92 - 344)           | 137<br>(55 - 296)           | 11<br>(4 - 24)           | 19<br>(9 - 35)             | 7<br>(3 - 14)            | 3<br>(1 - 6)             |
| Meningococcal meningitis                                          | 104<br>(66 - 166)           | 46<br>(17 - 102)            | 6<br>(2 - 13)            | 31<br>(15 - 53)            | 15<br>(6 - 26)           | 7<br>(2 - 13)            |
| Other meningitis                                                  | 293<br>(172 - 482)          | 161<br>(67 - 332)           | 20<br>(8 - 41)           | 68<br>(34 - 108)           | 31<br>(17 - 52)          | 12<br>(6 - 22)           |
| Encephalitis                                                      | 35<br>(22 - 58)             | 20<br>(9 - 43)              | 2<br>(1 - 5)             | 8<br>(5 - 13)              | 3<br>(1 - 4)             | 2<br>(1 - 3)             |
| Diphtheria                                                        | 2<br>(0 - 12)               | 2<br>(0 - 11)               | 0<br>(0 - 2)             | 0<br>(0 - 1)               | 0<br>(0 - 0)             | --<br>(0 - 0)            |
| Whooping cough                                                    | 7<br>(0 - 37)               | 7<br>(0 - 35)               | 0<br>(0 - 1)             | 0<br>(0 - 0)               | 0<br>(0 - 0)             | --<br>(0 - 0)            |
| Tetanus                                                           | 56<br>(16 - 114)            | 44<br>(11 - 101)            | 1<br>(0 - 3)             | 8<br>(2 - 20)              | 3<br>(0 - 8)             | 0<br>(0 - 1)             |
| Measles                                                           | 420<br>(9 - 2,323)          | 379<br>(8 - 2,085)          | 36<br>(1 - 216)          | 5<br>(0 - 34)              | 0<br>(0 - 1)             | --<br>(0 - 1)            |
| Varicella and herpes zoster                                       | 4<br>(1 - 10)               | 2<br>(0 - 8)                | 0<br>(0 - 1)             | 1<br>(0 - 3)               | 0<br>(0 - 1)             | 1<br>(0 - 3)             |
| Neglected tropical diseases and malaria                           | 2,572<br>(1,483 - 4,058)    | 1,839<br>(836 - 3,286)      | 209<br>(98 - 387)        | 404<br>(230 - 709)         | 84<br>(48 - 183)         | 36<br>(17 - 91)          |
| Malaria                                                           | 1,806<br>(811 - 3,293)      | 1,565<br>(612 - 3,043)      | 65<br>(18 - 182)         | 116<br>(35 - 385)          | 39<br>(11 - 138)         | 21<br>(5 - 77)           |
| Leishmaniasis                                                     | 691<br>(278 - 1,299)        | 250<br>(69 - 635)           | 135<br>(39 - 272)        | 262<br>(107 - 481)         | 34<br>(13 - 62)          | 10<br>(3 - 21)           |
| Visceral leishmaniasis                                            | 691<br>(278 - 1,299)        | 250<br>(69 - 635)           | 135<br>(39 - 272)        | 262<br>(107 - 481)         | 34<br>(13 - 62)          | 10<br>(3 - 21)           |
| Schistosomiasis                                                   | 20<br>(14 - 28)             | 0<br>(0 - 1)                | 1<br>(0 - 1)             | 10<br>(6 - 16)             | 7<br>(4 - 11)            | 3<br>(1 - 4)             |
| Cysticercosis                                                     | 2<br>(1 - 2)                | 0<br>(0 - 0)                | 0<br>(0 - 0)             | 1<br>(1 - 2)               | 0<br>(0 - 0)             | 0<br>(0 - 0)             |
| Cystic echinococcosis                                             | 8<br>(6 - 9)                | 1<br>(0 - 2)                | 1<br>(1 - 1)             | 4<br>(3 - 5)               | 1<br>(1 - 1)             | 0<br>(0 - 0)             |
| Dengue                                                            | 1<br>(1 - 2)                | 0<br>(0 - 0)                | 0<br>(0 - 0)             | 1<br>(0 - 1)               | 0<br>(0 - 0)             | 0<br>(0 - 0)             |
| Yellow fever                                                      | 0<br>(0 - 0)                | 0<br>(0 - 0)                | 0<br>(0 - 0)             | 0<br>(0 - 0)               | 0<br>(0 - 0)             | 0<br>(0 - 0)             |
| Rabies                                                            | 20<br>(8 - 37)              | 5<br>(1 - 15)               | 6<br>(2 - 13)            | 7<br>(3 - 11)              | 2<br>(1 - 3)             | 0<br>(0 - 1)             |
| Intestinal nematode infections                                    | 16<br>(5 - 37)              | 13<br>(3 - 32)              | 2<br>(0 - 7)             | 1<br>(0 - 6)               | 0<br>(0 - 3)             | 0<br>(0 - 2)             |
| Ascariasis                                                        | 16<br>(5 - 37)              | 13<br>(3 - 32)              | 2<br>(0 - 7)             | 1<br>(0 - 6)               | 0<br>(0 - 3)             | 0<br>(0 - 2)             |
| Other neglected tropical diseases                                 | 8<br>(3 - 20)               | 3<br>(1 - 7)                | 0<br>(0 - 1)             | 2<br>(1 - 5)               | 2<br>(0 - 4)             | 1<br>(0 - 4)             |

Web Table 31- Rwanda deaths with 95% UI by age, sex, and cause in 2013

| Cause                                                            | Males, All Ages             | Males, 0-4 Years         | Males, 5-14 Years  | Males, 15-49 Years       | Males, 50-69 Years       | Males, 70-80 Years       |
|------------------------------------------------------------------|-----------------------------|--------------------------|--------------------|--------------------------|--------------------------|--------------------------|
| Maternal disorders                                               | --                          | --                       | --                 | --                       | --                       | --                       |
| Maternal hemorrhage                                              | --                          | --                       | --                 | --                       | --                       | --                       |
| Maternal sepsis and other maternal infections                    | --                          | --                       | --                 | --                       | --                       | --                       |
| Maternal hypertensive disorders                                  | --                          | --                       | --                 | --                       | --                       | --                       |
| Maternal obstructed labor                                        | --                          | --                       | --                 | --                       | --                       | --                       |
| Maternal abortive outcome                                        | --                          | --                       | --                 | --                       | --                       | --                       |
| Indirect maternal deaths                                         | --                          | --                       | --                 | --                       | --                       | --                       |
| Late maternal deaths                                             | --                          | --                       | --                 | --                       | --                       | --                       |
| Maternal deaths aggravated by HIV/AIDS                           | --                          | --                       | --                 | --                       | --                       | --                       |
| Other maternal disorders                                         | --                          | --                       | --                 | --                       | --                       | --                       |
| Neonatal disorders                                               | 4,366<br>(3,504 - 5,513)    | 4,366<br>(3,504 - 5,513) | --                 | --                       | --                       | --                       |
| Neonatal preterm birth complications                             | 1,417<br>(637 - 2,393)      | 1,417<br>(637 - 2,393)   | --                 | --                       | --                       | --                       |
| Neonatal encephalopathy due to birth asphyxia and trauma         | 1,097<br>(516 - 1,963)      | 1,097<br>(516 - 1,963)   | --                 | --                       | --                       | --                       |
| Neonatal sepsis and other neonatal infections                    | 1,241<br>(554 - 2,323)      | 1,241<br>(554 - 2,323)   | --                 | --                       | --                       | --                       |
| Hemolytic disease and other neonatal jaundice                    | 27<br>(7 - 68)              | 27<br>(7 - 68)           | --                 | --                       | --                       | --                       |
| Other neonatal disorders                                         | 584<br>(243 - 1,099)        | 584<br>(243 - 1,099)     | --                 | --                       | --                       | --                       |
| Nutritional deficiencies                                         | 1,467<br>(710 - 2,352)      | 857<br>(359 - 1,568)     | 57<br>(26 - 101)   | 179<br>(80 - 279)        | 162<br>(75 - 247)        | 212<br>(97 - 334)        |
| Protein-energy malnutrition                                      | 1,212<br>(553 - 2,002)      | 771<br>(318 - 1,448)     | 49<br>(19 - 90)    | 113<br>(42 - 206)        | 122<br>(52 - 196)        | 157<br>(63 - 269)        |
| Iodine deficiency                                                | 2<br>(0 - 7)                | 1<br>(0 - 6)             | 0<br>(0 - 1)       | 0<br>(0 - 2)             | 0<br>(0 - 1)             | 0<br>(0 - 1)             |
| Iron-deficiency anemia                                           | 248<br>(67 - 567)           | 85<br>(10 - 271)         | 8<br>(2 - 22)      | 64<br>(17 - 135)         | 38<br>(9 - 94)           | 54<br>(12 - 136)         |
| Other nutritional deficiencies                                   | 6<br>(2 - 12)               | 1<br>(0 - 3)             | 0<br>(0 - 1)       | 2<br>(0 - 5)             | 1<br>(0 - 3)             | 2<br>(0 - 4)             |
| Other communicable, maternal, neonatal, and nutritional diseases | 571<br>(302 - 925)          | 390<br>(154 - 725)       | 27<br>(13 - 47)    | 73<br>(46 - 110)         | 51<br>(30 - 85)          | 30<br>(13 - 65)          |
| Sexually transmitted diseases excluding HIV                      | 347<br>(102 - 670)          | 315<br>(82 - 620)        | 18<br>(5 - 35)     | 6<br>(3 - 10)            | 5<br>(2 - 10)            | 3<br>(1 - 6)             |
| Syphilis                                                         | 342<br>(97 - 664)           | 315<br>(82 - 620)        | 18<br>(5 - 35)     | 3<br>(2 - 5)             | 3<br>(1 - 7)             | 2<br>(1 - 5)             |
| Chlamydial infection                                             | --                          | --                       | --                 | --                       | --                       | --                       |
| Gonococcal infection                                             | 3<br>(1 - 4)                | --                       | 0<br>(0 - 0)       | 2<br>(1 - 3)             | 1<br>(0 - 2)             | 0<br>(0 - 1)             |
| Other sexually transmitted diseases                              | 2<br>(1 - 3)                | --                       | 0<br>(0 - 0)       | 1<br>(1 - 2)             | 0<br>(0 - 1)             | 0<br>(0 - 0)             |
| Hepatitis                                                        | 59<br>(43 - 93)             | 9<br>(4 - 20)            | 3<br>(2 - 5)       | 28<br>(18 - 48)          | 15<br>(10 - 21)          | 4<br>(3 - 6)             |
| Acute hepatitis A                                                | 6<br>(2 - 15)               | 3<br>(1 - 8)             | 1<br>(0 - 2)       | 2<br>(0 - 5)             | 0<br>(0 - 0)             | 0<br>(0 - 0)             |
| Acute hepatitis B                                                | 40<br>(27 - 61)             | 6<br>(2 - 13)            | 2<br>(1 - 3)       | 16<br>(8 - 30)           | 13<br>(8 - 19)           | 4<br>(3 - 6)             |
| Acute hepatitis C                                                | 1<br>(0 - 2)                | --                       | 0<br>(0 - 0)       | 0<br>(0 - 1)             | 0<br>(0 - 1)             | 0<br>(0 - 0)             |
| Acute hepatitis E                                                | 12<br>(5 - 25)              | 0<br>(0 - 0)             | 0<br>(0 - 1)       | 10<br>(4 - 20)           | 2<br>(0 - 4)             | 0<br>(0 - 1)             |
| Other infectious diseases                                        | 165<br>(87 - 286)           | 66<br>(26 - 160)         | 6<br>(2 - 12)      | 38<br>(17 - 67)          | 32<br>(13 - 67)          | 23<br>(6 - 59)           |
| Non-communicable diseases                                        | 12,433<br>(10,871 - 14,734) | 1,293<br>(685 - 2,267)   | 213<br>(152 - 303) | 2,472<br>(1,784 - 3,148) | 4,181<br>(3,541 - 5,131) | 4,275<br>(3,834 - 4,845) |
| Neoplasms                                                        | 1,900<br>(1,564 - 2,289)    | 88<br>(38 - 158)         | 54<br>(32 - 81)    | 420<br>(286 - 550)       | 807<br>(660 - 994)       | 531<br>(454 - 624)       |
| Esophageal cancer                                                | 209<br>(117 - 313)          | --                       | --                 | 23<br>(14 - 34)          | 122<br>(63 - 195)        | 64<br>(33 - 100)         |
| Stomach cancer                                                   | 156<br>(126 - 193)          | --                       | --                 | 28<br>(19 - 38)          | 74<br>(57 - 97)          | 54<br>(41 - 72)          |
| Liver cancer                                                     | 233<br>(135 - 342)          | --                       | 3<br>(1 - 6)       | 87<br>(36 - 142)         | 103<br>(65 - 159)        | 39<br>(26 - 58)          |
| Liver cancer due to hepatitis B                                  | 70<br>(36 - 109)            | --                       | 1<br>(0 - 2)       | 32<br>(13 - 58)          | 29<br>(12 - 49)          | 8<br>(3 - 14)            |
| Liver cancer due to hepatitis C                                  | 103<br>(30 - 175)           | --                       | 1<br>(0 - 2)       | 35<br>(8 - 63)           | 48<br>(10 - 91)          | 20<br>(8 - 36)           |

Web Table 31- Rwanda deaths with 95% UI by age, sex, and cause in 2013

| Cause                                | Males, All Ages          | Males, 0-4 Years | Males, 5-14 Years | Males, 15-49 Years | Males, 50-69 Years       | Males, 70-80 Years       |
|--------------------------------------|--------------------------|------------------|-------------------|--------------------|--------------------------|--------------------------|
| Liver cancer due to alcohol use      | 33<br>(18 - 52)          | --               | --                | 8<br>(3 - 15)      | 17<br>(8 - 29)           | 8<br>(4 - 14)            |
| Liver cancer due to other causes     | 27<br>(15 - 48)          | --               | 1<br>(0 - 3)      | 13<br>(5 - 26)     | 10<br>(5 - 19)           | 3<br>(1 - 5)             |
| Larynx cancer                        | 25<br>(17 - 33)          | --               | --                | 4<br>(2 - 5)       | 12<br>(8 - 17)           | 9<br>(6 - 13)            |
| Tracheal, bronchus and lung cancer   | 147<br>(119 - 194)       | --               | --                | 12<br>(8 - 24)     | 97<br>(76 - 131)         | 37<br>(30 - 47)          |
| Breast cancer                        | 14<br>(8 - 21)           | --               | --                | 3<br>(1 - 5)       | 7<br>(3 - 13)            | 4<br>(2 - 7)             |
| Cervical cancer                      | --                       | --               | --                | --                 | --                       | --                       |
| Uterine cancer                       | --                       | --               | --                | --                 | --                       | --                       |
| Prostate cancer                      | 173<br>(111 - 251)       | --               | --                | 3<br>(1 - 6)       | 53<br>(32 - 78)          | 117<br>(75 - 176)        |
| Colon and rectum cancer              | 190<br>(148 - 241)       | --               | --                | 58<br>(39 - 78)    | 83<br>(62 - 111)         | 49<br>(37 - 64)          |
| Lip and oral cavity cancer           | 31<br>(19 - 45)          | --               | --                | 6<br>(3 - 12)      | 16<br>(9 - 23)           | 9<br>(5 - 14)            |
| Nasopharynx cancer                   | 12<br>(8 - 16)           | --               | 0<br>(0 - 1)      | 6<br>(4 - 9)       | 4<br>(2 - 6)             | 1<br>(1 - 2)             |
| Other pharynx cancer                 | 19<br>(10 - 28)          | --               | --                | 5<br>(2 - 8)       | 11<br>(6 - 16)           | 4<br>(2 - 6)             |
| Gallbladder and biliary tract cancer | 19<br>(12 - 28)          | --               | --                | 7<br>(3 - 11)      | 8<br>(4 - 12)            | 4<br>(3 - 7)             |
| Pancreatic cancer                    | 54<br>(43 - 67)          | --               | --                | 13<br>(9 - 18)     | 31<br>(24 - 41)          | 10<br>(8 - 13)           |
| Malignant skin melanoma              | 10<br>(5 - 15)           | --               | --                | 4<br>(2 - 6)       | 4<br>(2 - 6)             | 2<br>(1 - 4)             |
| Non-melanoma skin cancer             | 9<br>(5 - 12)            | --               | --                | 1<br>(1 - 2)       | 3<br>(2 - 5)             | 4<br>(2 - 7)             |
| Ovarian cancer                       | --                       | --               | --                | --                 | --                       | --                       |
| Testicular cancer                    | 11<br>(7 - 16)           | --               | --                | 6<br>(4 - 10)      | 4<br>(2 - 6)             | 1<br>(1 - 2)             |
| Kidney cancer                        | 38<br>(26 - 57)          | 7<br>(2 - 19)    | 2<br>(1 - 5)      | 5<br>(3 - 8)       | 17<br>(12 - 24)          | 7<br>(5 - 10)            |
| Bladder cancer                       | 56<br>(43 - 74)          | --               | --                | 5<br>(3 - 8)       | 24<br>(17 - 33)          | 26<br>(19 - 37)          |
| Brain and nervous system cancer      | 39<br>(18 - 53)          | 0<br>(0 - 1)     | 5<br>(2 - 8)      | 16<br>(8 - 24)     | 12<br>(5 - 18)           | 6<br>(2 - 10)            |
| Thyroid cancer                       | 4<br>(3 - 6)             | --               | 0<br>(0 - 0)      | 1<br>(0 - 1)       | 2<br>(1 - 3)             | 1<br>(1 - 2)             |
| Mesothelioma                         | 6<br>(3 - 10)            | --               | --                | 1<br>(0 - 1)       | 4<br>(2 - 7)             | 2<br>(1 - 4)             |
| Hodgkin lymphoma                     | 15<br>(9 - 25)           | 1<br>(0 - 3)     | 1<br>(0 - 3)      | 6<br>(3 - 12)      | 4<br>(2 - 7)             | 3<br>(1 - 5)             |
| Non-Hodgkin lymphoma                 | 154<br>(97 - 222)        | 30<br>(10 - 70)  | 21<br>(10 - 39)   | 47<br>(26 - 73)    | 36<br>(25 - 52)          | 20<br>(14 - 29)          |
| Multiple myeloma                     | 18<br>(10 - 25)          | --               | --                | 4<br>(2 - 7)       | 8<br>(5 - 11)            | 6<br>(3 - 8)             |
| Leukemia                             | 48<br>(36 - 61)          | 4<br>(1 - 8)     | 5<br>(3 - 9)      | 24<br>(16 - 33)    | 8<br>(6 - 11)            | 7<br>(5 - 8)             |
| Other neoplasms                      | 212<br>(105 - 293)       | 46<br>(17 - 82)  | 16<br>(8 - 28)    | 46<br>(26 - 70)    | 60<br>(28 - 89)          | 45<br>(21 - 67)          |
| Cardiovascular diseases              | 5,145<br>(4,483 - 6,089) | 74<br>(41 - 124) | 27<br>(17 - 42)   | 736<br>(531 - 959) | 2,012<br>(1,665 - 2,507) | 2,296<br>(2,012 - 2,639) |
| Rheumatic heart disease              | 155<br>(100 - 270)       | 3<br>(1 - 7)     | 5<br>(3 - 10)     | 60<br>(35 - 103)   | 52<br>(31 - 95)          | 35<br>(21 - 63)          |
| Ischemic heart disease               | 1,404<br>(1,013 - 1,791) | 1<br>(0 - 1)     | 1<br>(1 - 2)      | 163<br>(104 - 233) | 618<br>(433 - 814)       | 621<br>(447 - 792)       |
| Cerebrovascular disease              | 2,073<br>(1,571 - 2,655) | 9<br>(5 - 18)    | 4<br>(2 - 8)      | 208<br>(132 - 307) | 802<br>(589 - 1,066)     | 1,049<br>(799 - 1,326)   |
| Ischemic stroke                      | 804<br>(164 - 1,275)     | 1<br>(0 - 2)     | 0<br>(0 - 1)      | 26<br>(3 - 53)     | 239<br>(37 - 415)        | 537<br>(122 - 831)       |
| Hemorrhagic stroke                   | 1,269<br>(894 - 1,994)   | 9<br>(4 - 16)    | 4<br>(2 - 7)      | 182<br>(117 - 269) | 563<br>(399 - 841)       | 512<br>(305 - 937)       |
| Hypertensive heart disease           | 460<br>(235 - 935)       | 1<br>(0 - 3)     | 1<br>(0 - 1)      | 49<br>(25 - 88)    | 172<br>(84 - 349)        | 238<br>(113 - 527)       |
| Cardiomyopathy and myocarditis       | 269<br>(176 - 378)       | 29<br>(9 - 55)   | 6<br>(3 - 12)     | 80<br>(45 - 123)   | 91<br>(55 - 137)         | 62<br>(35 - 103)         |
| Atrial fibrillation and flutter      | 1<br>(0 - 1)             | --               | --                | 0<br>(0 - 0)       | 0<br>(0 - 0)             | 0<br>(0 - 1)             |
| Aortic aneurysm                      | 56<br>(30 - 95)          | --               | --                | 8<br>(4 - 13)      | 23<br>(12 - 40)          | 25<br>(13 - 45)          |
| Peripheral vascular disease          | 2<br>(1 - 6)             | --               | --                | 0<br>(0 - 0)       | 1<br>(0 - 2)             | 1<br>(0 - 4)             |
| Endocarditis                         | 79<br>(45 - 124)         | 4<br>(2 - 10)    | 1<br>(1 - 2)      | 22<br>(11 - 35)    | 27<br>(15 - 46)          | 24<br>(14 - 40)          |

Web Table 31- Rwanda deaths with 95% UI by age, sex, and cause in 2013

| Cause                                               | Males, All Ages      | Males, 0-4 Years | Males, 5-14 Years | Males, 15-49 Years | Males, 50-69 Years | Males, 70-80 Years |
|-----------------------------------------------------|----------------------|------------------|-------------------|--------------------|--------------------|--------------------|
| Other cardiovascular and circulatory diseases       | 647<br>(357 - 1,118) | 27<br>(11 - 51)  | 8<br>(3 - 13)     | 146<br>(75 - 234)  | 225<br>(117 - 406) | 241<br>(129 - 433) |
| Chronic respiratory diseases                        | 862<br>(697 - 1,122) | 39<br>(19 - 73)  | 7<br>(5 - 11)     | 106<br>(72 - 146)  | 286<br>(214 - 386) | 423<br>(334 - 559) |
| Chronic obstructive pulmonary disease               | 519<br>(399 - 744)   | 10<br>(4 - 22)   | 3<br>(2 - 5)      | 45<br>(29 - 69)    | 176<br>(126 - 265) | 284<br>(208 - 410) |
| Pneumoconiosis                                      | 83<br>(54 - 127)     | 1<br>(0 - 3)     | 1<br>(0 - 1)      | 18<br>(10 - 30)    | 32<br>(20 - 52)    | 30<br>(18 - 49)    |
| Silicosis                                           | 22<br>(14 - 36)      | 0<br>(0 - 1)     | 0<br>(0 - 0)      | 4<br>(2 - 8)       | 8<br>(5 - 14)      | 9<br>(5 - 16)      |
| Asbestosis                                          | 10<br>(6 - 16)       | 0<br>(0 - 1)     | 0<br>(0 - 0)      | 3<br>(1 - 5)       | 5<br>(3 - 7)       | 3<br>(2 - 5)       |
| Coal workers pneumoconiosis                         | 12<br>(7 - 19)       | 0<br>(0 - 0)     | 0<br>(0 - 0)      | 3<br>(1 - 4)       | 5<br>(3 - 8)       | 4<br>(2 - 7)       |
| Other pneumoconiosis                                | 38<br>(23 - 61)      | 0<br>(0 - 1)     | 0<br>(0 - 0)      | 9<br>(5 - 15)      | 14<br>(8 - 24)     | 14<br>(8 - 24)     |
| Asthma                                              | 122<br>(63 - 177)    | 2<br>(0 - 5)     | 1<br>(0 - 2)      | 19<br>(10 - 29)    | 42<br>(20 - 67)    | 58<br>(29 - 91)    |
| Interstitial lung disease and pulmonary sarcoidosis | 71<br>(20 - 127)     | 1<br>(0 - 4)     | 0<br>(0 - 1)      | 7<br>(2 - 16)      | 25<br>(7 - 48)     | 37<br>(9 - 75)     |
| Other chronic respiratory diseases                  | 66<br>(44 - 94)      | 25<br>(12 - 47)  | 2<br>(1 - 4)      | 16<br>(10 - 26)    | 10<br>(6 - 16)     | 13<br>(7 - 21)     |
| Cirrhosis                                           | 652<br>(503 - 841)   | 10<br>(3 - 22)   | 6<br>(4 - 10)     | 212<br>(144 - 290) | 300<br>(217 - 403) | 123<br>(89 - 164)  |
| Cirrhosis due to hepatitis B                        | 136<br>(50 - 216)    | 0<br>(0 - 1)     | 1<br>(0 - 2)      | 42<br>(18 - 72)    | 66<br>(21 - 108)   | 28<br>(6 - 47)     |
| Cirrhosis due to hepatitis C                        | 147<br>(62 - 239)    | 1<br>(0 - 2)     | 1<br>(0 - 2)      | 41<br>(10 - 71)    | 71<br>(26 - 122)   | 34<br>(12 - 57)    |
| Cirrhosis due to alcohol use                        | 287<br>(201 - 398)   | --               | --                | 91<br>(55 - 136)   | 140<br>(94 - 202)  | 55<br>(37 - 81)    |
| Cirrhosis due to other causes                       | 81<br>(46 - 126)     | 9<br>(3 - 20)    | 5<br>(3 - 7)      | 38<br>(20 - 60)    | 24<br>(8 - 43)     | 6<br>(2 - 11)      |
| Digestive diseases                                  | 623<br>(402 - 965)   | 24<br>(8 - 55)   | 19<br>(10 - 32)   | 211<br>(125 - 343) | 195<br>(123 - 306) | 174<br>(111 - 266) |
| Peptic ulcer disease                                | 166<br>(84 - 298)    | 2<br>(0 - 6)     | 2<br>(1 - 4)      | 47<br>(20 - 98)    | 59<br>(29 - 109)   | 56<br>(28 - 104)   |
| Gastritis and duodenitis                            | 18<br>(6 - 37)       | 1<br>(0 - 3)     | 1<br>(0 - 2)      | 6<br>(2 - 12)      | 5<br>(1 - 12)      | 5<br>(1 - 14)      |
| Appendicitis                                        | 41<br>(21 - 78)      | 2<br>(0 - 5)     | 3<br>(1 - 7)      | 18<br>(8 - 39)     | 11<br>(5 - 20)     | 8<br>(3 - 14)      |
| Paralytic ileus and intestinal obstruction          | 220<br>(123 - 375)   | 6<br>(2 - 16)    | 8<br>(4 - 15)     | 78<br>(39 - 135)   | 70<br>(37 - 121)   | 57<br>(28 - 112)   |
| Inguinal, femoral, and abdominal hernia             | 8<br>(4 - 14)        | 0<br>(0 - 0)     | 0<br>(0 - 1)      | 3<br>(1 - 5)       | 3<br>(1 - 5)       | 3<br>(1 - 5)       |
| Inflammatory bowel disease                          | 40<br>(17 - 120)     | 7<br>(2 - 25)    | 2<br>(1 - 5)      | 14<br>(5 - 45)     | 9<br>(3 - 26)      | 9<br>(3 - 23)      |
| Vascular intestinal disorders                       | 4<br>(1 - 11)        | 0<br>(0 - 1)     | 0<br>(0 - 0)      | 1<br>(0 - 2)       | 1<br>(0 - 4)       | 2<br>(0 - 5)       |
| Gallbladder and biliary diseases                    | 28<br>(16 - 51)      | 1<br>(0 - 1)     | 0<br>(0 - 1)      | 6<br>(3 - 11)      | 9<br>(4 - 17)      | 12<br>(6 - 25)     |
| Pancreatitis                                        | 37<br>(12 - 81)      | 0<br>(0 - 1)     | 0<br>(0 - 1)      | 20<br>(7 - 40)     | 11<br>(3 - 27)     | 6<br>(1 - 16)      |
| Other digestive diseases                            | 61<br>(35 - 106)     | 5<br>(1 - 13)    | 2<br>(1 - 4)      | 19<br>(9 - 34)     | 19<br>(10 - 35)    | 17<br>(8 - 32)     |
| Neurological disorders                              | 468<br>(368 - 592)   | 36<br>(15 - 77)  | 28<br>(15 - 54)   | 126<br>(79 - 199)  | 40<br>(30 - 53)    | 238<br>(176 - 308) |
| Alzheimer disease and other dementias               | 227<br>(164 - 299)   | --               | --                | 0<br>(0 - 0)       | 21<br>(15 - 28)    | 206<br>(144 - 277) |
| Parkinson disease                                   | 4<br>(1 - 8)         | --               | --                | 0<br>(0 - 1)       | 0<br>(0 - 0)       | 4<br>(1 - 8)       |
| Epilepsy                                            | 203<br>(137 - 309)   | 28<br>(9 - 68)   | 26<br>(13 - 52)   | 113<br>(68 - 183)  | 12<br>(7 - 19)     | 25<br>(13 - 44)    |
| Multiple sclerosis                                  | 1<br>(0 - 1)         | --               | --                | 0<br>(0 - 1)       | 0<br>(0 - 0)       | 0<br>(0 - 0)       |
| Other neurological disorders                        | 33<br>(11 - 48)      | 8<br>(2 - 17)    | 2<br>(1 - 3)      | 12<br>(4 - 19)     | 7<br>(3 - 11)      | 4<br>(1 - 5)       |
| Mental and substance use disorders                  | 346<br>(223 - 549)   | 17<br>(3 - 42)   | 0<br>(0 - 0)      | 246<br>(154 - 372) | 71<br>(44 - 131)   | 12<br>(8 - 21)     |
| Schizophrenia                                       | 6<br>(2 - 15)        | --               | --                | 4<br>(1 - 9)       | 2<br>(1 - 5)       | 1<br>(0 - 2)       |
| Alcohol use disorders                               | 205<br>(120 - 384)   | --               | --                | 138<br>(75 - 256)  | 59<br>(34 - 117)   | 9<br>(5 - 17)      |
| Drug use disorders                                  | 135<br>(66 - 194)    | 17<br>(3 - 42)   | --                | 105<br>(56 - 152)  | 11<br>(5 - 15)     | 3<br>(1 - 4)       |
| Opioid use disorders                                | 15<br>(7 - 22)       | 2<br>(0 - 5)     | --                | 11<br>(6 - 17)     | 1<br>(0 - 2)       | 0<br>(0 - 0)       |
| Cocaine use disorders                               | 1<br>(0 - 1)         | 0<br>(0 - 0)     | --                | 0<br>(0 - 1)       | 0<br>(0 - 0)       | 0<br>(0 - 0)       |
| Amphetamine use disorders                           | 0<br>(0 - 1)         | 0<br>(0 - 0)     | --                | 0<br>(0 - 0)       | 0<br>(0 - 0)       | 0<br>(0 - 0)       |

Web Table 31- Rwanda deaths with 95% UI by age, sex, and cause in 2013

| Cause                                               | Males, All Ages          | Males, 0-4 Years     | Males, 5-14 Years | Males, 15-49 Years | Males, 50-69 Years | Males, 70-80 Years |
|-----------------------------------------------------|--------------------------|----------------------|-------------------|--------------------|--------------------|--------------------|
| Other drug use disorders                            | 120<br>(59 - 171)        | 15<br>(3 - 38)       | --                | 93<br>(49 - 134)   | 10<br>(4 - 14)     | 3<br>(1 - 4)       |
| Eating disorders                                    | 0<br>(0 - 0)             | --                   | 0<br>(0 - 0)      | 0<br>(0 - 0)       | --                 | --                 |
| Anorexia nervosa                                    | 0<br>(0 - 0)             | --                   | 0<br>(0 - 0)      | 0<br>(0 - 0)       | --                 | --                 |
| Diabetes, urogenital, blood, and endocrine diseases | 1,383<br>(1,161 - 1,667) | 153<br>(84 - 256)    | 36<br>(23 - 58)   | 335<br>(236 - 437) | 429<br>(344 - 538) | 430<br>(357 - 522) |
| Diabetes mellitus                                   | 595<br>(490 - 733)       | 7<br>(4 - 12)        | 2<br>(1 - 3)      | 82<br>(56 - 108)   | 255<br>(195 - 331) | 248<br>(191 - 316) |
| Acute glomerulonephritis                            | 12                       | 2                    | 1                 | 1                  | 5                  | 3                  |
| Chronic kidney disease                              | 218<br>(165 - 290)       | 19<br>(9 - 35)       | 5<br>(3 - 9)      | 82<br>(52 - 120)   | 50<br>(37 - 74)    | 62<br>(44 - 88)    |
| Chronic kidney disease due to diabetes mellitus     | 1<br>(0 - 3)             | 0<br>(0 - 0)         | 0<br>(0 - 0)      | 0<br>(0 - 1)       | 0<br>(0 - 1)       | 0<br>(0 - 1)       |
| Chronic kidney disease due to hypertension          | 84<br>(45 - 125)         | 2<br>(1 - 5)         | 1<br>(0 - 1)      | 20<br>(10 - 32)    | 26<br>(14 - 43)    | 35<br>(17 - 55)    |
| Chronic kidney disease due to glomerulonephritis    | 68<br>(43 - 112)         | 11<br>(5 - 20)       | 3<br>(2 - 6)      | 30<br>(19 - 49)    | 12<br>(5 - 22)     | 12<br>(5 - 21)     |
| Chronic kidney disease due to other causes          | 64<br>(29 - 114)         | 5<br>(1 - 12)        | 1<br>(0 - 3)      | 31<br>(10 - 59)    | 11<br>(4 - 23)     | 15<br>(5 - 31)     |
| Urinary diseases and male infertility               | 245<br>(180 - 316)       | 19<br>(7 - 43)       | 4<br>(2 - 6)      | 72<br>(42 - 99)    | 75<br>(50 - 105)   | 75<br>(49 - 110)   |
| Interstitial nephritis and urinary tract infections | 173<br>(122 - 231)       | 14<br>(5 - 33)       | 3<br>(1 - 4)      | 48<br>(26 - 69)    | 52<br>(34 - 78)    | 56<br>(34 - 85)    |
| Urolithiasis                                        | 6<br>(2 - 13)            | --                   | 0<br>(0 - 0)      | 2<br>(1 - 4)       | 2<br>(1 - 6)       | 1<br>(0 - 4)       |
| Other urinary diseases                              | 67<br>(39 - 104)         | 5<br>(1 - 13)        | 1<br>(1 - 2)      | 22<br>(11 - 36)    | 21<br>(10 - 37)    | 18<br>(8 - 36)     |
| Gynecological diseases                              | --                       | --                   | --                | --                 | --                 | --                 |
| Uterine fibroids                                    | --                       | --                   | --                | --                 | --                 | --                 |
| Polycystic ovarian syndrome                         | --                       | --                   | --                | --                 | --                 | --                 |
| Endometriosis                                       | --                       | --                   | --                | --                 | --                 | --                 |
| Genital prolapse                                    | --                       | --                   | --                | --                 | --                 | --                 |
| Other gynecological diseases                        | --                       | --                   | --                | --                 | --                 | --                 |
| Hemoglobinopathies and hemolytic anemias            | 149<br>(71 - 281)        | 69<br>(28 - 136)     | 18<br>(8 - 35)    | 42<br>(19 - 95)    | 12<br>(5 - 35)     | 10<br>(4 - 31)     |
| Thalassemias                                        | 12<br>(6 - 23)           | 9<br>(3 - 17)        | 1<br>(1 - 3)      | 2<br>(1 - 5)       | 0<br>(0 - 0)       | 0<br>(0 - 0)       |
| Sickle cell disorders                               | 87<br>(42 - 164)         | 41<br>(16 - 84)      | 13<br>(6 - 26)    | 27<br>(12 - 61)    | 5<br>(2 - 16)      | 0<br>(0 - 0)       |
| G6PD deficiency                                     | 7<br>(3 - 13)            | 4<br>(2 - 8)         | 1<br>(0 - 2)      | 2<br>(1 - 4)       | 0<br>(0 - 1)       | 0<br>(0 - 0)       |
| Other hemoglobinopathies and hemolytic anemias      | 43<br>(21 - 96)          | 15<br>(6 - 28)       | 3<br>(1 - 5)      | 11<br>(5 - 24)     | 6<br>(2 - 18)      | 9<br>(4 - 30)      |
| Endocrine, metabolic, blood, and immune disorders   | 164<br>(80 - 239)        | 37<br>(18 - 68)      | 7<br>(3 - 12)     | 57<br>(22 - 91)    | 32<br>(13 - 49)    | 32<br>(10 - 54)    |
| Musculoskeletal disorders                           | 49<br>(23 - 80)          | --                   | 5<br>(2 - 7)      | 22<br>(10 - 31)    | 14<br>(6 - 25)     | 10<br>(4 - 20)     |
| Rheumatoid arthritis                                | 12<br>(4 - 23)           | --                   | 1<br>(0 - 2)      | 4<br>(1 - 6)       | 4<br>(1 - 9)       | 4<br>(1 - 9)       |
| Other musculoskeletal disorders                     | 37<br>(19 - 58)          | --                   | 4<br>(1 - 6)      | 18<br>(9 - 27)     | 9<br>(4 - 17)      | 6<br>(3 - 12)      |
| Other non-communicable diseases                     | 1,005<br>(490 - 1,988)   | 851<br>(363 - 1,813) | 30<br>(13 - 61)   | 58<br>(37 - 87)    | 28<br>(20 - 39)    | 37<br>(23 - 57)    |
| Congenital anomalies                                | 877<br>(370 - 1,867)     | 806<br>(327 - 1,774) | 28<br>(11 - 59)   | 33<br>(17 - 56)    | 5<br>(3 - 8)       | 4<br>(2 - 7)       |
| Neural tube defects                                 | 208<br>(40 - 516)        | 198<br>(37 - 493)    | 4<br>(1 - 12)     | 5<br>(1 - 14)      | 0<br>(0 - 2)       | 0<br>(0 - 1)       |
| Congenital heart anomalies                          | 382<br>(125 - 985)       | 346<br>(103 - 922)   | 15<br>(5 - 34)    | 17<br>(8 - 31)     | 2<br>(1 - 4)       | 2<br>(1 - 3)       |
| Cleft lip and cleft palate                          | 6<br>(0 - 20)            | 6<br>(0 - 20)        | --                | --                 | --                 | --                 |
| Down syndrome                                       | 58<br>(11 - 171)         | 51<br>(8 - 161)      | 2<br>(1 - 6)      | 4<br>(1 - 9)       | 1<br>(0 - 1)       | 0<br>(0 - 0)       |
| Chromosomal unbalanced rearrangements               | 18<br>(4 - 71)           | 17<br>(3 - 68)       | 0<br>(0 - 2)      | 1<br>(0 - 1)       | 0<br>(0 - 0)       | 0<br>(0 - 0)       |
| Other congenital anomalies                          | 204<br>(45 - 711)        | 188<br>(38 - 665)    | 6<br>(1 - 18)     | 6<br>(2 - 13)      | 2<br>(1 - 3)       | 2<br>(1 - 4)       |
| Skin and subcutaneous diseases                      | 110<br>(77 - 164)        | 27<br>(12 - 60)      | 2<br>(1 - 4)      | 25<br>(15 - 42)    | 23<br>(15 - 33)    | 33<br>(19 - 52)    |
| Cellulitis                                          | 34<br>(14 - 71)          | 8<br>(2 - 25)        | 1<br>(0 - 2)      | 8<br>(3 - 17)      | 8<br>(3 - 15)      | 9<br>(4 - 20)      |

Web Table 31- Rwanda deaths with 95% UI by age, sex, and cause in 2013

| Cause                                           | Males, All Ages          | Males, 0-4 Years     | Males, 5-14 Years  | Males, 15-49 Years       | Males, 50-69 Years | Males, 70-80 Years |
|-------------------------------------------------|--------------------------|----------------------|--------------------|--------------------------|--------------------|--------------------|
| Pyoderma                                        | 61<br>(36 - 89)          | 17<br>(7 - 37)       | 1<br>(1 - 2)       | 13<br>(7 - 22)           | 13<br>(7 - 19)     | 17<br>(8 - 27)     |
| Decubitus ulcer                                 | 12<br>(7 - 20)           | 1<br>(0 - 2)         | 0<br>(0 - 0)       | 2<br>(1 - 4)             | 2<br>(1 - 4)       | 6<br>(3 - 13)      |
| Other skin and subcutaneous diseases            | 3<br>(1 - 7)             | 1<br>(0 - 3)         | 0<br>(0 - 0)       | 1<br>(0 - 2)             | 1<br>(0 - 1)       | 1<br>(0 - 1)       |
| Sudden infant death syndrome                    | 18<br>(5 - 51)           | 18<br>(5 - 51)       | --                 | --                       | --                 | --                 |
| Injuries                                        | 4,688<br>(3,576 - 7,524) | 703<br>(349 - 1,863) | 345<br>(237 - 540) | 2,590<br>(1,833 - 3,751) | 681<br>(507 - 949) | 369<br>(280 - 468) |
| Transport injuries                              | 2,300<br>(1,712 - 2,928) | 205<br>(84 - 404)    | 187<br>(119 - 285) | 1,310<br>(892 - 1,731)   | 399<br>(275 - 534) | 199<br>(138 - 264) |
| Road injuries                                   | 2,258<br>(1,680 - 2,863) | 194<br>(79 - 382)    | 181<br>(115 - 275) | 1,297<br>(883 - 1,710)   | 393<br>(271 - 523) | 193<br>(135 - 256) |
| Pedestrian road injuries                        | 1,076<br>(715 - 1,461)   | 99<br>(38 - 204)     | 88<br>(50 - 143)   | 609<br>(376 - 870)       | 187<br>(120 - 271) | 94<br>(58 - 132)   |
| Cyclist road injuries                           | 97<br>(50 - 167)         | 9<br>(2 - 24)        | 11<br>(4 - 23)     | 51<br>(23 - 90)          | 18<br>(9 - 29)     | 8<br>(4 - 14)      |
| Motorcyclist road injuries                      | 382<br>(210 - 556)       | 29<br>(9 - 67)       | 24<br>(12 - 41)    | 237<br>(128 - 360)       | 61<br>(32 - 96)    | 31<br>(16 - 50)    |
| Motor vehicle road injuries                     | 539<br>(371 - 856)       | 41<br>(15 - 85)      | 41<br>(21 - 73)    | 317<br>(200 - 513)       | 95<br>(61 - 148)   | 45<br>(27 - 75)    |
| Other road injuries                             | 165<br>(39 - 300)        | 17<br>(3 - 42)       | 17<br>(3 - 39)     | 83<br>(18 - 160)         | 32<br>(6 - 66)     | 16<br>(3 - 32)     |
| Other transport injuries                        | 41<br>(16 - 67)          | 10<br>(3 - 24)       | 6<br>(2 - 11)      | 13<br>(7 - 21)           | 7<br>(2 - 12)      | 5<br>(1 - 10)      |
| Unintentional injuries                          | 1,433<br>(939 - 4,115)   | 478<br>(208 - 1,728) | 139<br>(80 - 356)  | 511<br>(304 - 1,398)     | 178<br>(121 - 389) | 127<br>(85 - 182)  |
| Falls                                           | 132<br>(71 - 189)        | 16<br>(6 - 33)       | 12<br>(5 - 24)     | 55<br>(30 - 87)          | 24<br>(11 - 38)    | 25<br>(12 - 41)    |
| Drowning                                        | 356<br>(204 - 678)       | 99<br>(32 - 230)     | 59<br>(27 - 118)   | 166<br>(90 - 341)        | 23<br>(12 - 44)    | 10<br>(5 - 17)     |
| Fire, heat, and hot substances                  | 175<br>(97 - 317)        | 81<br>(29 - 193)     | 13<br>(6 - 27)     | 42<br>(25 - 72)          | 22<br>(12 - 37)    | 17<br>(9 - 29)     |
| Poisonings                                      | 54<br>(28 - 88)          | 12<br>(4 - 28)       | 2<br>(1 - 4)       | 32<br>(16 - 55)          | 6<br>(3 - 11)      | 2<br>(1 - 3)       |
| Exposure to mechanical forces                   | 382<br>(113 - 2,954)     | 159<br>(23 - 1,456)  | 30<br>(8 - 219)    | 126<br>(40 - 858)        | 52<br>(16 - 255)   | 15<br>(4 - 72)     |
| Unintentional firearm injuries                  | 26<br>(14 - 45)          | 3<br>(1 - 6)         | 1<br>(0 - 2)       | 19<br>(9 - 36)           | 2<br>(1 - 4)       | 1<br>(0 - 2)       |
| Unintentional suffocation                       | 271<br>(20 - 2,802)      | 136<br>(8 - 1,440)   | 20<br>(1 - 210)    | 75<br>(4 - 789)          | 31<br>(2 - 241)    | 9<br>(1 - 71)      |
| Other exposure to mechanical forces             | 85<br>(43 - 132)         | 20<br>(7 - 43)       | 9<br>(4 - 17)      | 32<br>(16 - 58)          | 19<br>(7 - 31)     | 5<br>(1 - 7)       |
| Adverse effects of medical treatment            | 167<br>(102 - 254)       | 60<br>(23 - 133)     | 5<br>(3 - 8)       | 33<br>(19 - 54)          | 30<br>(16 - 51)    | 40<br>(16 - 77)    |
| Animal contact                                  | 58<br>(32 - 98)          | 11<br>(4 - 27)       | 8<br>(3 - 17)      | 20<br>(10 - 38)          | 10<br>(5 - 17)     | 9<br>(3 - 15)      |
| Venomous animal contact                         | 27<br>(13 - 47)          | 3<br>(1 - 9)         | 2<br>(1 - 5)       | 9<br>(4 - 18)            | 6<br>(2 - 10)      | 6<br>(1 - 12)      |
| Non-venomous animal contact                     | 32<br>(16 - 58)          | 7<br>(2 - 19)        | 6<br>(2 - 13)      | 11<br>(5 - 21)           | 5<br>(2 - 8)       | 3<br>(1 - 5)       |
| Foreign body                                    | 45<br>(23 - 74)          | 28<br>(12 - 53)      | 3<br>(1 - 5)       | 6<br>(3 - 10)            | 3<br>(2 - 7)       | 5<br>(2 - 8)       |
| Pulmonary aspiration and foreign body in airway | 40<br>(17 - 68)          | 27<br>(11 - 51)      | 2<br>(1 - 3)       | 5<br>(2 - 7)             | 2<br>(1 - 3)       | 4<br>(2 - 7)       |
| Foreign body in other body part                 | 6<br>(2 - 20)            | 2<br>(1 - 7)         | 1<br>(0 - 3)       | 1<br>(0 - 4)             | 1<br>(1 - 5)       | 0<br>(0 - 1)       |
| Other unintentional injuries                    | 63<br>(36 - 104)         | 12<br>(5 - 24)       | 8<br>(4 - 15)      | 32<br>(18 - 56)          | 7<br>(4 - 12)      | 4<br>(2 - 7)       |
| Self-harm and interpersonal violence            | 955<br>(595 - 1,523)     | 20<br>(8 - 50)       | 19<br>(9 - 36)     | 769<br>(457 - 1,284)     | 103<br>(57 - 161)  | 43<br>(16 - 73)    |
| Self-harm                                       | 482<br>(230 - 794)       | --                   | 9<br>(3 - 23)      | 348<br>(165 - 628)       | 83<br>(38 - 134)   | 42<br>(14 - 72)    |
| Interpersonal violence                          | 473<br>(291 - 794)       | 20<br>(8 - 50)       | 10<br>(5 - 19)     | 422<br>(252 - 727)       | 20<br>(11 - 37)    | 2<br>(1 - 4)       |
| Assault by firearm                              | 189<br>(94 - 366)        | 4<br>(1 - 13)        | 3<br>(1 - 6)       | 175<br>(86 - 340)        | 7<br>(3 - 15)      | 0<br>(0 - 1)       |
| Assault by sharp object                         | 97<br>(51 - 197)         | 3<br>(1 - 9)         | 2<br>(1 - 3)       | 86<br>(42 - 179)         | 5<br>(3 - 11)      | 0<br>(0 - 1)       |
| Assault by other means                          | 188<br>(98 - 325)        | 13<br>(5 - 33)       | 6<br>(2 - 12)      | 161<br>(77 - 289)        | 8<br>(4 - 16)      | 1<br>(1 - 2)       |

Web Table 31- Rwanda deaths with 95% UI by age, sex, and cause in 2013

| Cause                                                              | Females, All Ages           | Females, 0-4 Years         | Females, 5-14 Years      | Females, 15-49 Years     | Females, 50-69 Years     | Females, 70-80 Years     |
|--------------------------------------------------------------------|-----------------------------|----------------------------|--------------------------|--------------------------|--------------------------|--------------------------|
| All causes                                                         | 34,697<br>(31,221 - 38,384) | 11,740<br>(9,379 - 15,036) | 1,376<br>(1,139 - 1,729) | 7,568<br>(6,810 - 8,345) | 6,740<br>(5,542 - 8,206) | 7,272<br>(6,370 - 8,096) |
| Communicable, maternal, neonatal, and nutritional diseases         | 20,033<br>(16,973 - 23,590) | 9,918<br>(7,809 - 12,825)  | 971<br>(778 - 1,257)     | 5,264<br>(4,453 - 6,142) | 2,042<br>(1,545 - 2,564) | 1,839<br>(1,291 - 2,399) |
| HIV/AIDS and tuberculosis                                          | 4,952<br>(4,031 - 6,049)    | 327<br>(235 - 420)         | 445<br>(346 - 538)       | 2,983<br>(2,417 - 3,594) | 935<br>(669 - 1,308)     | 262<br>(153 - 403)       |
| Tuberculosis                                                       | 1,228<br>(801 - 1,779)      | 84<br>(38 - 152)           | 21<br>(12 - 38)          | 477<br>(314 - 717)       | 414<br>(245 - 634)       | 232<br>(128 - 366)       |
| HIV/AIDS                                                           | 3,724<br>(2,919 - 4,754)    | 243<br>(164 - 314)         | 424<br>(320 - 510)       | 2,506<br>(1,919 - 3,174) | 521<br>(317 - 884)       | 31<br>(12 - 55)          |
| HIV/AIDS resulting in mycobacterial infection                      | 196<br>(141 - 266)          | 12<br>(8 - 17)             | 20<br>(15 - 26)          | 133<br>(96 - 178)        | 29<br>(17 - 50)          | 2<br>(1 - 3)             |
| HIV/AIDS resulting in other diseases                               | 3,529<br>(2,753 - 4,490)    | 231<br>(155 - 298)         | 404<br>(307 - 486)       | 2,373<br>(1,818 - 3,003) | 492<br>(300 - 835)       | 29<br>(12 - 52)          |
| Diarrrhea, lower respiratory, and other common infectious diseases | 6,659<br>(4,762 - 8,843)    | 3,628<br>(2,276 - 5,418)   | 299<br>(191 - 476)       | 653<br>(468 - 923)       | 826<br>(529 - 1,231)     | 1,254<br>(789 - 1,747)   |
| Diarrheal diseases                                                 | 1,814<br>(911 - 3,018)      | 883<br>(277 - 1,940)       | 59<br>(21 - 141)         | 214<br>(106 - 411)       | 281<br>(122 - 570)       | 377<br>(162 - 764)       |
| Intestinal infectious diseases                                     | 268<br>(126 - 489)          | 119<br>(43 - 250)          | 66<br>(31 - 120)         | 69<br>(30 - 129)         | 10<br>(4 - 21)           | 3<br>(1 - 7)             |
| Typhoid fever                                                      | 205<br>(93 - 391)           | 87<br>(29 - 188)           | 52<br>(23 - 100)         | 55<br>(24 - 107)         | 8<br>(3 - 17)            | 2<br>(1 - 5)             |
| Paratyphoid fever                                                  | 48<br>(20 - 91)             | 23<br>(8 - 50)             | 12<br>(4 - 24)           | 11<br>(4 - 21)           | 2<br>(0 - 4)             | 0<br>(0 - 1)             |
| Other intestinal infectious diseases                               | 15<br>(6 - 29)              | 9<br>(2 - 22)              | 1<br>(0 - 5)             | 3<br>(0 - 8)             | 1<br>(0 - 4)             | 1<br>(0 - 3)             |
| Lower respiratory infections                                       | 3,477<br>(2,387 - 5,051)    | 1,878<br>(989 - 3,175)     | 85<br>(46 - 140)         | 232<br>(154 - 338)       | 453<br>(276 - 698)       | 830<br>(511 - 1,238)     |
| Upper respiratory infections                                       | 5<br>(2 - 11)               | 2<br>(0 - 8)               | 0<br>(0 - 1)             | 1<br>(0 - 3)             | 1<br>(0 - 3)             | 1<br>(0 - 3)             |
| Otitis media                                                       | 4<br>(2 - 5)                | 2<br>(1 - 3)               | 0<br>(0 - 0)             | 0<br>(0 - 0)             | 1<br>(0 - 1)             | 1<br>(1 - 1)             |
| Meningitis                                                         | 610<br>(418 - 907)          | 332<br>(168 - 603)         | 46<br>(25 - 80)          | 120<br>(80 - 176)        | 74<br>(44 - 114)         | 38<br>(21 - 60)          |
| Pneumococcal meningitis                                            | 143<br>(97 - 207)           | 65<br>(30 - 117)           | 14<br>(6 - 26)           | 33<br>(19 - 56)          | 20<br>(11 - 33)          | 11<br>(6 - 19)           |
| H influenzae type B meningitis                                     | 131<br>(71 - 218)           | 97<br>(41 - 183)           | 10<br>(4 - 18)           | 14<br>(7 - 24)           | 7<br>(3 - 13)            | 3<br>(1 - 6)             |
| Meningococcal meningitis                                           | 88<br>(57 - 133)            | 34<br>(15 - 73)            | 5<br>(2 - 10)            | 22<br>(11 - 38)          | 17<br>(7 - 30)           | 11<br>(5 - 19)           |
| Other meningitis                                                   | 248<br>(163 - 378)          | 136<br>(63 - 264)          | 17<br>(9 - 31)           | 51<br>(27 - 84)          | 30<br>(16 - 51)          | 13<br>(6 - 23)           |
| Encephalitis                                                       | 25<br>(15 - 38)             | 12<br>(5 - 25)             | 2<br>(1 - 4)             | 5<br>(2 - 8)             | 4<br>(1 - 8)             | 2<br>(1 - 4)             |
| Diphtheria                                                         | 2<br>(0 - 11)               | 2<br>(0 - 11)              | 0<br>(0 - 2)             | 0<br>(0 - 0)             | 0<br>(0 - 0)             | --<br>(0 - 0)            |
| Whooping cough                                                     | 9<br>(0 - 45)               | 8<br>(0 - 43)              | 0<br>(0 - 2)             | 0<br>(0 - 0)             | 0<br>(0 - 0)             | --<br>(0 - 0)            |
| Tetanus                                                            | 30<br>(7 - 69)              | 23<br>(5 - 58)             | 1<br>(0 - 2)             | 4<br>(1 - 11)            | 2<br>(0 - 6)             | 1<br>(0 - 2)             |
| Measles                                                            | 411<br>(10 - 2,178)         | 365<br>(8 - 1,878)         | 39<br>(1 - 243)          | 7<br>(0 - 47)            | 0<br>(0 - 1)             | --<br>(0 - 1)            |
| Varicella and herpes zoster                                        | 4<br>(1 - 12)               | 2<br>(0 - 8)               | 0<br>(0 - 1)             | 1<br>(0 - 2)             | 0<br>(0 - 1)             | 1<br>(0 - 4)             |
| Neglected tropical diseases and malaria                            | 2,207<br>(1,147 - 4,030)    | 1,668<br>(697 - 3,383)     | 143<br>(49 - 364)        | 271<br>(136 - 514)       | 86<br>(37 - 308)         | 40<br>(14 - 149)         |
| Malaria                                                            | 1,764<br>(700 - 3,613)      | 1,541<br>(537 - 3,293)     | 67<br>(12 - 265)         | 79<br>(17 - 322)         | 47<br>(9 - 276)          | 30<br>(4 - 137)          |
| Leishmaniasis                                                      | 373<br>(146 - 692)          | 104<br>(13 - 266)          | 67<br>(16 - 155)         | 170<br>(55 - 326)        | 28<br>(9 - 51)           | 5<br>(2 - 10)            |
| Visceral leishmaniasis                                             | 373<br>(146 - 692)          | 104<br>(13 - 266)          | 67<br>(16 - 155)         | 170<br>(55 - 326)        | 28<br>(9 - 51)           | 5<br>(2 - 10)            |
| Schistosomiasis                                                    | 14<br>(9 - 19)              | 0<br>(0 - 1)               | 0<br>(0 - 1)             | 5<br>(3 - 8)             | 5<br>(3 - 8)             | 3<br>(1 - 4)             |
| Cysticercosis                                                      | 2<br>(1 - 2)                | 0<br>(0 - 0)               | 0<br>(0 - 0)             | 1<br>(1 - 1)             | 0<br>(0 - 1)             | 0<br>(0 - 0)             |
| Cystic echinococcosis                                              | 8<br>(7 - 10)               | 1<br>(1 - 2)               | 1<br>(1 - 2)             | 4<br>(3 - 4)             | 1<br>(1 - 2)             | 1<br>(0 - 1)             |
| Dengue                                                             | 0<br>(0 - 1)                | 0<br>(0 - 0)               | 0<br>(0 - 0)             | 0<br>(0 - 0)             | 0<br>(0 - 0)             | 0<br>(0 - 0)             |
| Yellow fever                                                       | 0<br>(0 - 0)                | 0<br>(0 - 0)               | 0<br>(0 - 0)             | 0<br>(0 - 0)             | 0<br>(0 - 0)             | 0<br>(0 - 0)             |
| Rabies                                                             | 25<br>(9 - 44)              | 5<br>(2 - 14)              | 5<br>(2 - 12)            | 11<br>(3 - 19)           | 2<br>(1 - 4)             | 1<br>(0 - 1)             |
| Intestinal nematode infections                                     | 16<br>(5 - 34)              | 13<br>(3 - 31)             | 2<br>(0 - 7)             | 1<br>(0 - 5)             | 0<br>(0 - 3)             | 0<br>(0 - 3)             |
| Ascariasis                                                         | 16<br>(5 - 34)              | 13<br>(3 - 31)             | 2<br>(0 - 7)             | 1<br>(0 - 5)             | 0<br>(0 - 3)             | 0<br>(0 - 3)             |
| Other neglected tropical diseases                                  | 6<br>(2 - 15)               | 2<br>(1 - 5)               | 0<br>(0 - 0)             | 1<br>(0 - 2)             | 1<br>(0 - 3)             | 2<br>(0 - 5)             |



Web Table 31- Rwanda deaths with 95% UI by age, sex, and cause in 2013

| Cause                                                            | Females, All Ages           | Females, 0-4 Years       | Females, 5-14 Years | Females, 15-49 Years     | Females, 50-69 Years     | Females, 70-80 Years     |
|------------------------------------------------------------------|-----------------------------|--------------------------|---------------------|--------------------------|--------------------------|--------------------------|
| Maternal disorders                                               | 1,185<br>(773 - 1,631)      | --                       | 3<br>(1 - 7)        | 1,182<br>(770 - 1,628)   | --                       | --                       |
| Maternal hemorrhage                                              | 144<br>(85 - 216)           | --                       | 0<br>(0 - 1)        | 143<br>(85 - 216)        | --                       | --                       |
| Maternal sepsis and other maternal infections                    | 116<br>(71 - 169)           | --                       | 0<br>(0 - 1)        | 116<br>(71 - 169)        | --                       | --                       |
| Maternal hypertensive disorders                                  | 121<br>(66 - 191)           | --                       | 0<br>(0 - 1)        | 121<br>(65 - 190)        | --                       | --                       |
| Maternal obstructed labor                                        | 61<br>(35 - 93)             | --                       | 0<br>(0 - 0)        | 61<br>(35 - 92)          | --                       | --                       |
| Maternal abortive outcome                                        | 223<br>(138 - 325)          | --                       | 1<br>(0 - 1)        | 223<br>(137 - 324)       | --                       | --                       |
| Indirect maternal deaths                                         | 90<br>(45 - 155)            | --                       | 0<br>(0 - 0)        | 90<br>(45 - 155)         | --                       | --                       |
| Late maternal deaths                                             | 108<br>(55 - 169)           | --                       | 0<br>(0 - 1)        | 107<br>(55 - 168)        | --                       | --                       |
| Maternal deaths aggravated by HIV/AIDS                           | 16<br>(8 - 25)              | --                       | --                  | 16<br>(8 - 25)           | --                       | --                       |
| Other maternal disorders                                         | 303<br>(188 - 443)          | --                       | 1<br>(0 - 2)        | 302<br>(187 - 442)       | --                       | --                       |
| Neonatal disorders                                               | 3,153<br>(2,440 - 4,039)    | 3,153<br>(2,440 - 4,039) | --                  | --                       | --                       | --                       |
| Neonatal preterm birth complications                             | 1,004<br>(476 - 1,674)      | 1,004<br>(476 - 1,674)   | --                  | --                       | --                       | --                       |
| Neonatal encephalopathy due to birth asphyxia and trauma         | 905<br>(460 - 1,508)        | 905<br>(460 - 1,508)     | --                  | --                       | --                       | --                       |
| Neonatal sepsis and other neonatal infections                    | 785<br>(361 - 1,436)        | 785<br>(361 - 1,436)     | --                  | --                       | --                       | --                       |
| Hemolytic disease and other neonatal jaundice                    | 10<br>(3 - 28)              | 10<br>(3 - 28)           | --                  | --                       | --                       | --                       |
| Other neonatal disorders                                         | 448<br>(216 - 772)          | 448<br>(216 - 772)       | --                  | --                       | --                       | --                       |
| Nutritional deficiencies                                         | 1,330<br>(843 - 1,947)      | 745<br>(342 - 1,319)     | 51<br>(29 - 84)     | 130<br>(93 - 178)        | 156<br>(104 - 226)       | 247<br>(157 - 371)       |
| Protein-energy malnutrition                                      | 1,057<br>(550 - 1,642)      | 690<br>(305 - 1,237)     | 43<br>(23 - 73)     | 46<br>(20 - 87)          | 100<br>(55 - 157)        | 177<br>(80 - 283)        |
| Iodine deficiency                                                | 2<br>(0 - 9)                | 1<br>(0 - 6)             | 0<br>(0 - 1)        | 0<br>(0 - 2)             | 0<br>(0 - 2)             | 0<br>(0 - 2)             |
| Iron-deficiency anemia                                           | 260<br>(113 - 441)          | 52<br>(7 - 153)          | 7<br>(2 - 16)       | 83<br>(37 - 126)         | 54<br>(20 - 93)          | 63<br>(23 - 142)         |
| Other nutritional deficiencies                                   | 11<br>(3 - 24)              | 2<br>(0 - 5)             | 0<br>(0 - 0)        | 1<br>(0 - 2)             | 2<br>(0 - 5)             | 6<br>(1 - 17)            |
| Other communicable, maternal, neonatal, and nutritional diseases | 547<br>(277 - 890)          | 399<br>(151 - 719)       | 29<br>(13 - 52)     | 45<br>(27 - 67)          | 38<br>(17 - 76)          | 36<br>(12 - 90)          |
| Sexually transmitted diseases excluding HIV                      | 372<br>(127 - 684)          | 324<br>(90 - 618)        | 22<br>(6 - 42)      | 14<br>(7 - 29)           | 8<br>(2 - 24)            | 5<br>(1 - 14)            |
| Syphilis                                                         | 359<br>(110 - 672)          | 324<br>(90 - 618)        | 21<br>(6 - 42)      | 6<br>(3 - 12)            | 4<br>(1 - 13)            | 4<br>(1 - 10)            |
| Chlamydial infection                                             | 4<br>(2 - 9)                | --                       | 0<br>(0 - 0)        | 3<br>(1 - 6)             | 1<br>(0 - 3)             | 0<br>(0 - 1)             |
| Gonococcal infection                                             | 5<br>(2 - 10)               | --                       | 0<br>(0 - 0)        | 3<br>(1 - 6)             | 1<br>(0 - 4)             | 1<br>(0 - 2)             |
| Other sexually transmitted diseases                              | 4<br>(2 - 9)                | --                       | 0<br>(0 - 0)        | 3<br>(1 - 6)             | 1<br>(0 - 3)             | 0<br>(0 - 1)             |
| Hepatitis                                                        | 31<br>(23 - 55)             | 6<br>(3 - 13)            | 2<br>(1 - 3)        | 14<br>(9 - 28)           | 7<br>(4 - 10)            | 2<br>(2 - 4)             |
| Acute hepatitis A                                                | 5<br>(1 - 12)               | 3<br>(1 - 7)             | 1<br>(0 - 2)        | 1<br>(0 - 4)             | 0<br>(0 - 0)             | 0<br>(0 - 0)             |
| Acute hepatitis B                                                | 17<br>(11 - 27)             | 4<br>(1 - 8)             | 1<br>(0 - 2)        | 5<br>(2 - 10)            | 6<br>(4 - 9)             | 2<br>(1 - 3)             |
| Acute hepatitis C                                                | 0<br>(0 - 1)                | --                       | 0<br>(0 - 0)        | 0<br>(0 - 0)             | 0<br>(0 - 0)             | 0<br>(0 - 0)             |
| Acute hepatitis E                                                | 9<br>(5 - 17)               | 0<br>(0 - 0)             | 0<br>(0 - 1)        | 7<br>(4 - 15)            | 1<br>(0 - 2)             | 0<br>(0 - 0)             |
| Other infectious diseases                                        | 144<br>(59 - 270)           | 69<br>(25 - 168)         | 6<br>(2 - 16)       | 17<br>(7 - 29)           | 24<br>(7 - 54)           | 29<br>(6 - 78)           |
| Non-communicable diseases                                        | 12,534<br>(10,441 - 15,219) | 1,233<br>(713 - 1,975)   | 184<br>(117 - 270)  | 1,664<br>(1,184 - 2,359) | 4,338<br>(3,378 - 5,623) | 5,115<br>(4,269 - 6,053) |
| Neoplasms                                                        | 2,560<br>(2,004 - 3,174)    | 85<br>(40 - 155)         | 48<br>(26 - 78)     | 566<br>(363 - 734)       | 1,351<br>(1,040 - 1,741) | 510<br>(407 - 624)       |
| Esophageal cancer                                                | 256<br>(171 - 437)          | --                       | --                  | 38<br>(24 - 65)          | 158<br>(99 - 269)        | 60<br>(37 - 124)         |
| Stomach cancer                                                   | 120<br>(87 - 161)           | --                       | --                  | 9<br>(6 - 12)            | 76<br>(54 - 105)         | 36<br>(22 - 53)          |
| Liver cancer                                                     | 164<br>(98 - 247)           | --                       | 2<br>(1 - 3)        | 37<br>(14 - 68)          | 87<br>(51 - 134)         | 38<br>(23 - 59)          |
| Liver cancer due to hepatitis B                                  | 36<br>(10 - 68)             | --                       | 0<br>(0 - 1)        | 10<br>(3 - 20)           | 20<br>(5 - 39)           | 6<br>(1 - 12)            |
| Liver cancer due to hepatitis C                                  | 63<br>(19 - 124)            | --                       | 0<br>(0 - 1)        | 12<br>(2 - 29)           | 33<br>(8 - 69)           | 18<br>(7 - 32)           |

Web Table 31- Rwanda deaths with 95% UI by age, sex, and cause in 2013

| Cause                                | Females, All Ages        | Females, 0-4 Years | Females, 5-14 Years | Females, 15-49 Years | Females, 50-69 Years     | Females, 70-80 Years     |
|--------------------------------------|--------------------------|--------------------|---------------------|----------------------|--------------------------|--------------------------|
| Liver cancer due to alcohol use      | 19<br>(10 - 33)          | --                 | --                  | 2<br>(1 - 4)         | 10<br>(5 - 19)           | 7<br>(3 - 13)            |
| Liver cancer due to other causes     | 46<br>(26 - 75)          | --                 | 1<br>(0 - 2)        | 13<br>(5 - 24)       | 24<br>(10 - 45)          | 8<br>(4 - 15)            |
| Larynx cancer                        | 4<br>(1 - 8)             | --                 | --                  | 0<br>(0 - 1)         | 3<br>(1 - 7)             | 0<br>(0 - 1)             |
| Tracheal, bronchus and lung cancer   | 68<br>(49 - 98)          | --                 | --                  | 5<br>(3 - 10)        | 44<br>(29 - 66)          | 20<br>(14 - 27)          |
| Breast cancer                        | 414<br>(250 - 543)       | --                 | --                  | 155<br>(63 - 216)    | 205<br>(136 - 287)       | 54<br>(38 - 72)          |
| Cervical cancer                      | 525<br>(324 - 730)       | --                 | --                  | 91<br>(56 - 133)     | 358<br>(204 - 518)       | 76<br>(46 - 112)         |
| Uterine cancer                       | 26<br>(14 - 39)          | --                 | --                  | 3<br>(1 - 6)         | 16<br>(8 - 25)           | 7<br>(4 - 11)            |
| Prostate cancer                      | --                       | --                 | --                  | --                   | --                       | --                       |
| Colon and rectum cancer              | 188<br>(138 - 251)       | --                 | --                  | 41<br>(28 - 55)      | 93<br>(65 - 133)         | 54<br>(36 - 76)          |
| Lip and oral cavity cancer           | 31<br>(18 - 48)          | --                 | --                  | 8<br>(3 - 15)        | 17<br>(10 - 27)          | 6<br>(3 - 10)            |
| Nasopharynx cancer                   | 7<br>(4 - 12)            | --                 | 0<br>(0 - 0)        | 3<br>(2 - 6)         | 3<br>(1 - 4)             | 1<br>(1 - 2)             |
| Other pharynx cancer                 | 9<br>(6 - 14)            | --                 | --                  | 2<br>(1 - 5)         | 5<br>(3 - 9)             | 1<br>(1 - 2)             |
| Gallbladder and biliary tract cancer | 40<br>(26 - 59)          | --                 | --                  | 10<br>(5 - 16)       | 23<br>(14 - 36)          | 7<br>(4 - 11)            |
| Pancreatic cancer                    | 53<br>(40 - 69)          | --                 | --                  | 8<br>(6 - 12)        | 32<br>(24 - 45)          | 12<br>(8 - 16)           |
| Malignant skin melanoma              | 13<br>(9 - 18)           | --                 | --                  | 2<br>(1 - 3)         | 8<br>(5 - 12)            | 3<br>(2 - 5)             |
| Non-melanoma skin cancer             | 12<br>(6 - 26)           | --                 | --                  | 2<br>(1 - 4)         | 3<br>(2 - 7)             | 6<br>(2 - 16)            |
| Ovarian cancer                       | 84<br>(52 - 125)         | --                 | --                  | 20<br>(9 - 36)       | 53<br>(33 - 81)          | 11<br>(8 - 16)           |
| Testicular cancer                    | --                       | --                 | --                  | --                   | --                       | --                       |
| Kidney cancer                        | 28<br>(18 - 48)          | 6<br>(2 - 14)      | 2<br>(1 - 5)        | 4<br>(3 - 9)         | 11<br>(7 - 17)           | 5<br>(3 - 8)             |
| Bladder cancer                       | 17<br>(10 - 28)          | --                 | --                  | 3<br>(2 - 7)         | 8<br>(4 - 13)            | 6<br>(4 - 10)            |
| Brain and nervous system cancer      | 32<br>(18 - 41)          | 4<br>(1 - 8)       | 2<br>(1 - 3)        | 16<br>(8 - 22)       | 7<br>(4 - 10)            | 3<br>(2 - 5)             |
| Thyroid cancer                       | 11<br>(5 - 18)           | --                 | 0<br>(0 - 0)        | 1<br>(0 - 1)         | 8<br>(3 - 14)            | 3<br>(1 - 4)             |
| Mesothelioma                         | 2<br>(1 - 3)             | --                 | --                  | 1<br>(0 - 1)         | 1<br>(0 - 2)             | 0<br>(0 - 1)             |
| Hodgkin lymphoma                     | 16<br>(9 - 24)           | 1<br>(0 - 1)       | 1<br>(0 - 2)        | 3<br>(2 - 7)         | 6<br>(3 - 10)            | 5<br>(2 - 9)             |
| Non-Hodgkin lymphoma                 | 110<br>(42 - 188)        | 23<br>(5 - 60)     | 13<br>(3 - 31)      | 27<br>(10 - 50)      | 30<br>(15 - 47)          | 18<br>(7 - 28)           |
| Multiple myeloma                     | 23<br>(16 - 32)          | --                 | --                  | 5<br>(3 - 7)         | 12<br>(8 - 18)           | 6<br>(4 - 8)             |
| Leukemia                             | 47<br>(27 - 60)          | 5<br>(1 - 10)      | 6<br>(3 - 11)       | 15<br>(6 - 21)       | 12<br>(8 - 18)           | 8<br>(5 - 12)            |
| Other neoplasms                      | 260<br>(135 - 371)       | 48<br>(20 - 92)    | 23<br>(10 - 41)     | 57<br>(23 - 94)      | 71<br>(38 - 107)         | 61<br>(29 - 94)          |
| Cardiovascular diseases              | 5,817<br>(4,502 - 8,308) | 93<br>(45 - 207)   | 26<br>(14 - 61)     | 499<br>(327 - 1,141) | 1,950<br>(1,423 - 2,849) | 3,250<br>(2,593 - 4,146) |
| Rheumatic heart disease              | 205<br>(129 - 355)       | 2<br>(1 - 8)       | 5<br>(2 - 12)       | 66<br>(38 - 139)     | 75<br>(44 - 134)         | 56<br>(32 - 99)          |
| Ischemic heart disease               | 1,508<br>(878 - 2,812)   | 0<br>(0 - 2)       | 1<br>(0 - 4)        | 90<br>(40 - 354)     | 483<br>(254 - 992)       | 934<br>(557 - 1,503)     |
| Cerebrovascular disease              | 2,121<br>(1,429 - 3,130) | 10<br>(4 - 22)     | 2<br>(1 - 5)        | 114<br>(67 - 225)    | 724<br>(472 - 1,109)     | 1,271<br>(862 - 1,800)   |
| Ischemic stroke                      | 866<br>(285 - 1,423)     | 1<br>(0 - 2)       | 0<br>(0 - 1)        | 13<br>(3 - 35)       | 191<br>(45 - 350)        | 661<br>(232 - 1,053)     |
| Hemorrhagic stroke                   | 1,255<br>(767 - 2,392)   | 9<br>(4 - 20)      | 2<br>(1 - 5)        | 101<br>(57 - 204)    | 534<br>(329 - 943)       | 610<br>(314 - 1,292)     |
| Hypertensive heart disease           | 794<br>(452 - 1,914)     | 2<br>(1 - 6)       | 1<br>(0 - 2)        | 43<br>(22 - 96)      | 227<br>(115 - 567)       | 520<br>(276 - 1,295)     |
| Cardiomyopathy and myocarditis       | 284<br>(170 - 507)       | 41<br>(16 - 86)    | 8<br>(4 - 16)       | 58<br>(31 - 110)     | 83<br>(45 - 161)         | 94<br>(44 - 211)         |
| Atrial fibrillation and flutter      | 3<br>(1 - 6)             | --                 | --                  | 0<br>(0 - 0)         | 1<br>(0 - 1)             | 2<br>(0 - 4)             |
| Aortic aneurysm                      | 60<br>(23 - 200)         | --                 | --                  | 7<br>(2 - 22)        | 21<br>(8 - 70)           | 32<br>(12 - 116)         |
| Peripheral vascular disease          | 2<br>(1 - 5)             | --                 | --                  | 0<br>(0 - 0)         | 1<br>(0 - 1)             | 1<br>(1 - 4)             |
| Endocarditis                         | 65<br>(36 - 121)         | 6<br>(2 - 23)      | 1<br>(1 - 4)        | 13<br>(7 - 31)       | 17<br>(9 - 32)           | 27<br>(11 - 54)          |

Web Table 31- Rwanda deaths with 95% UI by age, sex, and cause in 2013

| Cause                                               | Females, All Ages    | Females, 0-4 Years | Females, 5-14 Years | Females, 15-49 Years | Females, 50-69 Years | Females, 70-80 Years |
|-----------------------------------------------------|----------------------|--------------------|---------------------|----------------------|----------------------|----------------------|
| Other cardiovascular and circulatory diseases       | 776<br>(466 - 1,336) | 31<br>(12 - 91)    | 7<br>(3 - 20)       | 108<br>(58 - 243)    | 317<br>(183 - 547)   | 312<br>(175 - 584)   |
| Chronic respiratory diseases                        | 697<br>(535 - 911)   | 51<br>(24 - 92)    | 10<br>(6 - 15)      | 74<br>(53 - 104)     | 231<br>(160 - 329)   | 332<br>(238 - 445)   |
| Chronic obstructive pulmonary disease               | 383<br>(266 - 531)   | 10<br>(4 - 21)     | 3<br>(2 - 5)        | 24<br>(15 - 36)      | 137<br>(90 - 201)    | 209<br>(141 - 305)   |
| Pneumoconiosis                                      | 4<br>(3 - 6)         | 1<br>(0 - 1)       | 0<br>(0 - 0)        | 2<br>(1 - 2)         | 1<br>(0 - 2)         | 1<br>(0 - 1)         |
| Silicosis                                           | 0<br>(0 - 1)         | 0<br>(0 - 0)       | 0<br>(0 - 0)        | 0<br>(0 - 0)         | 0<br>(0 - 0)         | 0<br>(0 - 0)         |
| Asbestosis                                          | 0<br>(0 - 1)         | 0<br>(0 - 0)       | 0<br>(0 - 0)        | 0<br>(0 - 0)         | 0<br>(0 - 0)         | 0<br>(0 - 0)         |
| Coal workers pneumoconiosis                         | 0<br>(0 - 1)         | 0<br>(0 - 0)       | 0<br>(0 - 0)        | 0<br>(0 - 0)         | 0<br>(0 - 0)         | 0<br>(0 - 0)         |
| Other pneumoconiosis                                | 3<br>(2 - 5)         | 0<br>(0 - 1)       | 0<br>(0 - 0)        | 1<br>(1 - 2)         | 1<br>(0 - 1)         | 1<br>(0 - 1)         |
| Asthma                                              | 145<br>(82 - 218)    | 13<br>(4 - 29)     | 3<br>(2 - 6)        | 19<br>(11 - 36)      | 53<br>(27 - 88)      | 56<br>(25 - 95)      |
| Interstitial lung disease and pulmonary sarcoidosis | 89<br>(12 - 185)     | 2<br>(0 - 6)       | 1<br>(0 - 1)        | 11<br>(2 - 21)       | 29<br>(4 - 65)       | 47<br>(5 - 109)      |
| Other chronic respiratory diseases                  | 78<br>(49 - 118)     | 26<br>(12 - 46)    | 3<br>(1 - 5)        | 19<br>(11 - 30)      | 11<br>(6 - 21)       | 19<br>(10 - 36)      |
| Cirrhosis                                           | 393<br>(298 - 514)   | 8<br>(3 - 18)      | 6<br>(4 - 10)       | 72<br>(53 - 99)      | 190<br>(136 - 267)   | 117<br>(81 - 166)    |
| Cirrhosis due to hepatitis B                        | 93<br>(31 - 155)     | 0<br>(0 - 1)       | 0<br>(0 - 1)        | 12<br>(3 - 26)       | 48<br>(15 - 86)      | 33<br>(11 - 58)      |
| Cirrhosis due to hepatitis C                        | 100<br>(48 - 177)    | 0<br>(0 - 1)       | 1<br>(0 - 2)        | 19<br>(9 - 34)       | 51<br>(21 - 94)      | 29<br>(12 - 53)      |
| Cirrhosis due to alcohol use                        | 127<br>(74 - 196)    | --                 | --                  | 17<br>(8 - 29)       | 64<br>(35 - 105)     | 46<br>(27 - 76)      |
| Cirrhosis due to other causes                       | 74<br>(48 - 107)     | 7<br>(2 - 17)      | 5<br>(3 - 9)        | 24<br>(14 - 36)      | 26<br>(14 - 45)      | 10<br>(5 - 19)       |
| Digestive diseases                                  | 487<br>(347 - 709)   | 23<br>(8 - 49)     | 14<br>(8 - 23)      | 88<br>(60 - 131)     | 154<br>(102 - 235)   | 209<br>(140 - 308)   |
| Peptic ulcer disease                                | 98<br>(50 - 185)     | 1<br>(0 - 3)       | 1<br>(0 - 2)        | 13<br>(6 - 25)       | 33<br>(16 - 64)      | 50<br>(24 - 98)      |
| Gastritis and duodenitis                            | 20<br>(4 - 63)       | 1<br>(0 - 3)       | 1<br>(0 - 2)        | 4<br>(1 - 10)        | 5<br>(1 - 18)        | 9<br>(2 - 34)        |
| Appendicitis                                        | 38<br>(19 - 62)      | 2<br>(1 - 7)       | 2<br>(1 - 5)        | 9<br>(5 - 18)        | 11<br>(5 - 21)       | 13<br>(4 - 27)       |
| Paralytic ileus and intestinal obstruction          | 173<br>(96 - 283)    | 8<br>(2 - 20)      | 6<br>(2 - 11)       | 31<br>(15 - 50)      | 57<br>(29 - 97)      | 73<br>(36 - 130)     |
| Inguinal, femoral, and abdominal hernia             | 8<br>(3 - 14)        | 1<br>(0 - 3)       | 0<br>(0 - 0)        | 3<br>(1 - 6)         | 1<br>(0 - 2)         | 3<br>(1 - 5)         |
| Inflammatory bowel disease                          | 37<br>(19 - 111)     | 5<br>(1 - 16)      | 1<br>(1 - 5)        | 9<br>(4 - 31)        | 9<br>(4 - 29)        | 12<br>(5 - 34)       |
| Vascular intestinal disorders                       | 3<br>(1 - 6)         | 0<br>(0 - 0)       | 0<br>(0 - 0)        | 0<br>(0 - 1)         | 1<br>(0 - 2)         | 2<br>(1 - 4)         |
| Gallbladder and biliary diseases                    | 41<br>(22 - 67)      | 1<br>(0 - 2)       | 0<br>(0 - 1)        | 6<br>(3 - 10)        | 14<br>(7 - 25)       | 20<br>(9 - 36)       |
| Pancreatitis                                        | 21<br>(9 - 51)       | 0<br>(0 - 1)       | 0<br>(0 - 1)        | 5<br>(2 - 11)        | 8<br>(3 - 20)        | 7<br>(3 - 20)        |
| Other digestive diseases                            | 48<br>(28 - 74)      | 3<br>(1 - 8)       | 2<br>(1 - 3)        | 8<br>(4 - 13)        | 15<br>(8 - 26)       | 20<br>(10 - 36)      |
| Neurological disorders                              | 424<br>(319 - 561)   | 49<br>(21 - 111)   | 18<br>(9 - 35)      | 67<br>(36 - 133)     | 46<br>(33 - 64)      | 244<br>(178 - 313)   |
| Alzheimer disease and other dementias               | 247<br>(181 - 320)   | --                 | --                  | 0<br>(0 - 0)         | 22<br>(15 - 31)      | 226<br>(159 - 294)   |
| Parkinson disease                                   | 2<br>(1 - 4)         | --                 | --                  | 0<br>(0 - 0)         | 1<br>(0 - 2)         | 1<br>(0 - 2)         |
| Epilepsy                                            | 147<br>(86 - 272)    | 42<br>(16 - 103)   | 16<br>(7 - 33)      | 60<br>(30 - 126)     | 16<br>(9 - 28)       | 14<br>(7 - 26)       |
| Multiple sclerosis                                  | 2<br>(1 - 3)         | --                 | --                  | 1<br>(0 - 1)         | 1<br>(0 - 1)         | 0<br>(0 - 0)         |
| Other neurological disorders                        | 25<br>(17 - 38)      | 7<br>(3 - 13)      | 2<br>(1 - 3)        | 6<br>(4 - 9)         | 7<br>(5 - 11)        | 4<br>(2 - 6)         |
| Mental and substance use disorders                  | 96<br>(49 - 199)     | 5<br>(1 - 10)      | 0<br>(0 - 0)        | 61<br>(29 - 125)     | 24<br>(13 - 55)      | 6<br>(3 - 14)        |
| Schizophrenia                                       | 8<br>(3 - 14)        | --                 | --                  | 4<br>(2 - 7)         | 3<br>(1 - 5)         | 1<br>(1 - 3)         |
| Alcohol use disorders                               | 40<br>(10 - 88)      | --                 | --                  | 23<br>(6 - 49)       | 14<br>(4 - 36)       | 2<br>(1 - 6)         |
| Drug use disorders                                  | 48<br>(14 - 114)     | 5<br>(1 - 10)      | --                  | 33<br>(10 - 84)      | 7<br>(2 - 20)        | 3<br>(1 - 7)         |
| Opioid use disorders                                | 5<br>(1 - 12)        | 1<br>(0 - 1)       | --                  | 3<br>(1 - 9)         | 1<br>(0 - 2)         | 0<br>(0 - 1)         |
| Cocaine use disorders                               | 0<br>(0 - 1)         | 0<br>(0 - 0)       | --                  | 0<br>(0 - 1)         | 0<br>(0 - 0)         | 0<br>(0 - 0)         |
| Amphetamine use disorders                           | 0<br>(0 - 1)         | 0<br>(0 - 0)       | --                  | 0<br>(0 - 0)         | 0<br>(0 - 0)         | 0<br>(0 - 0)         |

Web Table 31- Rwanda deaths with 95% UI by age, sex, and cause in 2013

| Cause                                               | Females, All Ages      | Females, 0-4 Years   | Females, 5-14 Years | Females, 15-49 Years | Females, 50-69 Years | Females, 70-80 Years |
|-----------------------------------------------------|------------------------|----------------------|---------------------|----------------------|----------------------|----------------------|
| Other drug use disorders                            | 43<br>(13 - 102)       | 5<br>(1 - 8)         | --                  | 29<br>(9 - 75)       | 7<br>(2 - 18)        | 2<br>(0 - 7)         |
| Eating disorders                                    | 0<br>(0 - 0)           | --                   | 0<br>(0 - 0)        | 0<br>(0 - 0)         | --                   | --                   |
| Anorexia nervosa                                    | 0<br>(0 - 0)           | --                   | 0<br>(0 - 0)        | 0<br>(0 - 0)         | --                   | --                   |
| Diabetes, urogenital, blood, and endocrine diseases | 1,044<br>(801 - 1,272) | 120<br>(62 - 212)    | 29<br>(17 - 46)     | 172<br>(127 - 230)   | 345<br>(254 - 468)   | 379<br>(276 - 479)   |
| Diabetes mellitus                                   | 448<br>(341 - 572)     | 2<br>(1 - 3)         | 1<br>(1 - 2)        | 34<br>(25 - 44)      | 193<br>(132 - 266)   | 218<br>(157 - 293)   |
| Acute glomerulonephritis                            | 15<br>(8 - 27)         | 1<br>(0 - 3)         | 1<br>(0 - 2)        | 6<br>(3 - 13)        | 4<br>(2 - 8)         | 3<br>(1 - 6)         |
| Chronic kidney disease                              | 177<br>(109 - 251)     | 12<br>(5 - 24)       | 7<br>(3 - 13)       | 35<br>(22 - 69)      | 54<br>(33 - 79)      | 69<br>(38 - 100)     |
| Chronic kidney disease due to diabetes mellitus     | 1<br>(0 - 3)           | 0<br>(0 - 0)         | 0<br>(0 - 0)        | 0<br>(0 - 0)         | 0<br>(0 - 1)         | 0<br>(0 - 1)         |
| Chronic kidney disease due to hypertension          | 74<br>(40 - 118)       | 2<br>(0 - 4)         | 1<br>(0 - 2)        | 10<br>(4 - 19)       | 25<br>(13 - 41)      | 36<br>(19 - 60)      |
| Chronic kidney disease due to glomerulonephritis    | 59<br>(30 - 88)        | 8<br>(3 - 14)        | 4<br>(2 - 6)        | 17<br>(10 - 31)      | 16<br>(6 - 26)       | 14<br>(5 - 24)       |
| Chronic kidney disease due to other causes          | 43<br>(17 - 76)        | 3<br>(1 - 8)         | 2<br>(1 - 5)        | 7<br>(2 - 22)        | 13<br>(4 - 25)       | 18<br>(5 - 37)       |
| Urinary diseases and male infertility               | 109<br>(74 - 146)      | 10<br>(4 - 22)       | 2<br>(1 - 5)        | 25<br>(16 - 44)      | 41<br>(23 - 63)      | 30<br>(18 - 45)      |
| Interstitial nephritis and urinary tract infections | 87<br>(56 - 120)       | 7<br>(3 - 16)        | 1<br>(1 - 3)        | 19<br>(11 - 34)      | 33<br>(18 - 53)      | 27<br>(16 - 40)      |
| Urolithiasis                                        | 6<br>(3 - 11)          | --                   | 0<br>(0 - 1)        | 2<br>(1 - 4)         | 3<br>(1 - 6)         | 1<br>(0 - 3)         |
| Other urinary diseases                              | 15<br>(9 - 26)         | 3<br>(1 - 8)         | 1<br>(0 - 2)        | 4<br>(2 - 8)         | 4<br>(2 - 8)         | 2<br>(1 - 5)         |
| Gynecological diseases                              | 4<br>(1 - 17)          | --                   | --                  | 2<br>(0 - 10)        | 2<br>(0 - 4)         | 1<br>(0 - 3)         |
| Uterine fibroids                                    | 1<br>(0 - 3)           | --                   | --                  | 0<br>(0 - 1)         | 0<br>(0 - 1)         | 0<br>(0 - 1)         |
| Polycystic ovarian syndrome                         | 0<br>(0 - 1)           | --                   | --                  | 0<br>(0 - 1)         | 0<br>(0 - 0)         | --                   |
| Endometriosis                                       | 0<br>(0 - 2)           | --                   | --                  | 0<br>(0 - 2)         | 0<br>(0 - 0)         | --                   |
| Genital prolapse                                    | 1<br>(0 - 3)           | --                   | --                  | 0<br>(0 - 1)         | 0<br>(0 - 1)         | 0<br>(0 - 1)         |
| Other gynecological diseases                        | 2<br>(1 - 8)           | --                   | --                  | 1<br>(0 - 5)         | 1<br>(0 - 2)         | 0<br>(0 - 1)         |
| Hemoglobinopathies and hemolytic anemias            | 115<br>(56 - 209)      | 50<br>(15 - 109)     | 13<br>(6 - 25)      | 32<br>(16 - 54)      | 11<br>(6 - 20)       | 8<br>(4 - 16)        |
| Thalassemias                                        | 5<br>(2 - 11)          | 4<br>(1 - 8)         | 1<br>(0 - 1)        | 1<br>(0 - 2)         | 0<br>(0 - 0)         | 0<br>(0 - 0)         |
| Sickle cell disorders                               | 66<br>(30 - 121)       | 28<br>(8 - 61)       | 10<br>(4 - 19)      | 23<br>(11 - 38)      | 5<br>(3 - 9)         | 0<br>(0 - 0)         |
| G6PD deficiency                                     | 6<br>(3 - 12)          | 3<br>(1 - 7)         | 1<br>(0 - 1)        | 2<br>(1 - 3)         | 0<br>(0 - 1)         | 0<br>(0 - 0)         |
| Other hemoglobinopathies and hemolytic anemias      | 37<br>(20 - 64)        | 16<br>(5 - 32)       | 2<br>(1 - 4)        | 6<br>(3 - 11)        | 6<br>(3 - 10)        | 8<br>(4 - 15)        |
| Endocrine, metabolic, blood, and immune disorders   | 176<br>(97 - 259)      | 44<br>(20 - 83)      | 4<br>(2 - 9)        | 38<br>(20 - 66)      | 40<br>(19 - 63)      | 49<br>(20 - 79)      |
| Musculoskeletal disorders                           | 30<br>(16 - 57)        | --                   | 2<br>(1 - 3)        | 14<br>(7 - 25)       | 9<br>(4 - 19)        | 6<br>(2 - 14)        |
| Rheumatoid arthritis                                | 12<br>(6 - 25)         | --                   | 0<br>(0 - 1)        | 3<br>(1 - 5)         | 5<br>(2 - 11)        | 4<br>(2 - 10)        |
| Other musculoskeletal disorders                     | 18<br>(10 - 36)        | --                   | 1<br>(1 - 2)        | 11<br>(6 - 21)       | 4<br>(2 - 10)        | 2<br>(1 - 6)         |
| Other non-communicable diseases                     | 985<br>(548 - 1,626)   | 799<br>(382 - 1,420) | 32<br>(16 - 57)     | 52<br>(32 - 80)      | 39<br>(25 - 56)      | 62<br>(39 - 93)      |
| Congenital anomalies                                | 826<br>(406 - 1,452)   | 751<br>(346 - 1,368) | 30<br>(14 - 54)     | 30<br>(16 - 47)      | 7<br>(3 - 12)        | 8<br>(3 - 12)        |
| Neural tube defects                                 | 194<br>(37 - 512)      | 186<br>(33 - 503)    | 4<br>(1 - 11)       | 4<br>(1 - 8)         | 0<br>(0 - 1)         | 0<br>(0 - 1)         |
| Congenital heart anomalies                          | 348<br>(130 - 711)     | 312<br>(108 - 665)   | 16<br>(6 - 31)      | 14<br>(7 - 25)       | 3<br>(1 - 5)         | 4<br>(1 - 7)         |
| Cleft lip and cleft palate                          | 3<br>(0 - 13)          | 3<br>(0 - 13)        | --                  | --                   | --                   | --                   |
| Down syndrome                                       | 64<br>(17 - 162)       | 54<br>(12 - 147)     | 4<br>(1 - 10)       | 4<br>(2 - 10)        | 1<br>(0 - 3)         | 0<br>(0 - 0)         |
| Chromosomal unbalanced rearrangements               | 45<br>(9 - 128)        | 42<br>(8 - 123)      | 1<br>(0 - 2)        | 2<br>(0 - 3)         | 0<br>(0 - 1)         | 0<br>(0 - 0)         |
| Other congenital anomalies                          | 170<br>(60 - 410)      | 153<br>(51 - 390)    | 6<br>(2 - 14)       | 6<br>(2 - 13)        | 3<br>(1 - 5)         | 4<br>(1 - 7)         |
| Skin and subcutaneous diseases                      | 152<br>(99 - 224)      | 41<br>(16 - 87)      | 2<br>(1 - 4)        | 23<br>(12 - 38)      | 31<br>(20 - 47)      | 55<br>(33 - 83)      |
| Cellulitis                                          | 45<br>(20 - 85)        | 13<br>(3 - 37)       | 1<br>(0 - 2)        | 7<br>(3 - 15)        | 10<br>(5 - 18)       | 14<br>(6 - 26)       |

Web Table 31- Rwanda deaths with 95% UI by age, sex, and cause in 2013

| Cause                                           | Females, All Ages        | Females, 0-4 Years   | Females, 5-14 Years | Females, 15-49 Years | Females, 50-69 Years | Females, 70-80 Years |
|-------------------------------------------------|--------------------------|----------------------|---------------------|----------------------|----------------------|----------------------|
| Pyoderma                                        | 80<br>(49 - 130)         | 27<br>(10 - 62)      | 1<br>(0 - 2)        | 11<br>(6 - 21)       | 16<br>(9 - 26)       | 25<br>(13 - 42)      |
| Decubitus ulcer                                 | 20<br>(10 - 35)          | 0<br>(0 - 1)         | 0<br>(0 - 0)        | 2<br>(1 - 3)         | 3<br>(1 - 6)         | 14<br>(6 - 27)       |
| Other skin and subcutaneous diseases            | 7<br>(4 - 12)            | 1<br>(0 - 4)         | 0<br>(0 - 0)        | 2<br>(1 - 4)         | 2<br>(1 - 3)         | 2<br>(1 - 3)         |
| Sudden infant death syndrome                    | 7<br>(1 - 24)            | 7<br>(1 - 24)        | --                  | --                   | --                   | --                   |
| Injuries                                        | 2,129<br>(1,646 - 3,690) | 589<br>(290 - 1,452) | 222<br>(136 - 375)  | 641<br>(464 - 1,070) | 360<br>(252 - 514)   | 318<br>(212 - 431)   |
| Transport injuries                              | 885<br>(658 - 1,122)     | 157<br>(68 - 294)    | 119<br>(72 - 181)   | 294<br>(208 - 399)   | 190<br>(128 - 272)   | 125<br>(82 - 177)    |
| Road injuries                                   | 846<br>(624 - 1,076)     | 145<br>(62 - 273)    | 114<br>(69 - 174)   | 285<br>(202 - 390)   | 184<br>(123 - 263)   | 118<br>(78 - 167)    |
| Pedestrian road injuries                        | 432<br>(304 - 570)       | 74<br>(30 - 146)     | 62<br>(35 - 100)    | 137<br>(90 - 195)    | 95<br>(62 - 142)     | 63<br>(39 - 93)      |
| Cyclist road injuries                           | 18<br>(10 - 34)          | 3<br>(1 - 7)         | 3<br>(1 - 6)        | 4<br>(2 - 11)        | 7<br>(3 - 12)        | 2<br>(1 - 5)         |
| Motorcyclist road injuries                      | 124<br>(51 - 186)        | 20<br>(6 - 47)       | 13<br>(5 - 25)      | 47<br>(20 - 75)      | 25<br>(9 - 43)       | 18<br>(6 - 32)       |
| Motor vehicle road injuries                     | 209<br>(138 - 320)       | 38<br>(14 - 75)      | 27<br>(13 - 50)     | 74<br>(43 - 119)     | 43<br>(25 - 72)      | 28<br>(15 - 48)      |
| Other road injuries                             | 63<br>(12 - 127)         | 10<br>(2 - 30)       | 8<br>(1 - 21)       | 24<br>(3 - 51)       | 14<br>(2 - 33)       | 7<br>(1 - 17)        |
| Other transport injuries                        | 39<br>(25 - 63)          | 12<br>(5 - 24)       | 5<br>(2 - 9)        | 9<br>(5 - 19)        | 7<br>(4 - 11)        | 7<br>(3 - 12)        |
| Unintentional injuries                          | 1,019<br>(698 - 2,571)   | 415<br>(189 - 1,279) | 95<br>(47 - 275)    | 198<br>(117 - 511)   | 138<br>(84 - 218)    | 173<br>(97 - 255)    |
| Falls                                           | 97<br>(48 - 149)         | 12<br>(5 - 25)       | 5<br>(2 - 10)       | 14<br>(7 - 28)       | 16<br>(8 - 27)       | 50<br>(21 - 90)      |
| Drowning                                        | 198<br>(106 - 392)       | 93<br>(37 - 211)     | 34<br>(13 - 76)     | 44<br>(20 - 99)      | 19<br>(10 - 34)      | 8<br>(4 - 15)        |
| Fire, heat, and hot substances                  | 160<br>(82 - 299)        | 76<br>(28 - 174)     | 15<br>(6 - 33)      | 30<br>(16 - 67)      | 20<br>(9 - 36)       | 19<br>(9 - 36)       |
| Poisonings                                      | 29<br>(11 - 47)          | 11<br>(3 - 24)       | 2<br>(1 - 3)        | 8<br>(4 - 14)        | 7<br>(2 - 13)        | 2<br>(1 - 4)         |
| Exposure to mechanical forces                   | 212<br>(41 - 1,786)      | 119<br>(15 - 1,040)  | 19<br>(4 - 186)     | 40<br>(12 - 310)     | 20<br>(4 - 101)      | 13<br>(2 - 63)       |
| Unintentional firearm injuries                  | 17<br>(10 - 29)          | 3<br>(1 - 7)         | 1<br>(0 - 2)        | 9<br>(4 - 18)        | 2<br>(1 - 4)         | 1<br>(1 - 3)         |
| Unintentional suffocation                       | 139<br>(7 - 1,717)       | 91<br>(4 - 1,013)    | 13<br>(1 - 179)     | 21<br>(1 - 280)      | 9<br>(0 - 90)        | 5<br>(0 - 51)        |
| Other exposure to mechanical forces             | 57<br>(11 - 101)         | 25<br>(4 - 63)       | 5<br>(2 - 12)       | 11<br>(3 - 20)       | 8<br>(1 - 14)        | 7<br>(1 - 12)        |
| Adverse effects of medical treatment            | 170<br>(99 - 258)        | 43<br>(17 - 93)      | 5<br>(3 - 10)       | 31<br>(18 - 49)      | 37<br>(18 - 66)      | 54<br>(20 - 100)     |
| Animal contact                                  | 69<br>(25 - 141)         | 19<br>(6 - 57)       | 9<br>(3 - 24)       | 21<br>(6 - 45)       | 13<br>(3 - 26)       | 7<br>(2 - 12)        |
| Venomous animal contact                         | 43<br>(12 - 99)          | 16<br>(5 - 44)       | 5<br>(1 - 15)       | 12<br>(3 - 32)       | 5<br>(1 - 13)        | 3<br>(0 - 7)         |
| Non-venomous animal contact                     | 26<br>(6 - 71)           | 3<br>(1 - 15)        | 4<br>(1 - 12)       | 8<br>(2 - 24)        | 8<br>(1 - 17)        | 3<br>(1 - 9)         |
| Foreign body                                    | 58<br>(26 - 106)         | 34<br>(15 - 70)      | 3<br>(1 - 6)        | 4<br>(2 - 9)         | 3<br>(1 - 6)         | 15<br>(5 - 26)       |
| Pulmonary aspiration and foreign body in airway | 53<br>(22 - 99)          | 32<br>(14 - 68)      | 2<br>(1 - 5)        | 3<br>(1 - 6)         | 2<br>(1 - 4)         | 14<br>(4 - 25)       |
| Foreign body in other body part                 | 4<br>(1 - 33)            | 1<br>(0 - 9)         | 0<br>(0 - 4)        | 1<br>(0 - 7)         | 1<br>(0 - 5)         | 1<br>(0 - 6)         |
| Other unintentional injuries                    | 26<br>(15 - 55)          | 7<br>(3 - 18)        | 3<br>(1 - 7)        | 7<br>(4 - 19)        | 4<br>(2 - 7)         | 4<br>(2 - 8)         |
| Self-harm and interpersonal violence            | 225<br>(142 - 406)       | 17<br>(7 - 40)       | 9<br>(4 - 17)       | 149<br>(86 - 294)    | 31<br>(19 - 54)      | 20<br>(10 - 35)      |
| Self-harm                                       | 105<br>(60 - 225)        | --                   | 2<br>(1 - 5)        | 59<br>(29 - 158)     | 25<br>(14 - 50)      | 19<br>(8 - 34)       |
| Interpersonal violence                          | 121<br>(68 - 212)        | 17<br>(7 - 40)       | 7<br>(3 - 14)       | 89<br>(48 - 169)     | 6<br>(3 - 10)        | 1<br>(1 - 2)         |
| Assault by firearm                              | 27<br>(12 - 55)          | 4<br>(1 - 9)         | 1<br>(0 - 3)        | 20<br>(8 - 45)       | 1<br>(1 - 3)         | 0<br>(0 - 0)         |
| Assault by sharp object                         | 31<br>(14 - 63)          | 3<br>(1 - 8)         | 1<br>(0 - 3)        | 25<br>(10 - 55)      | 1<br>(1 - 3)         | 0<br>(0 - 1)         |
| Assault by other means                          | 63<br>(32 - 116)         | 10<br>(4 - 25)       | 5<br>(2 - 10)       | 44<br>(20 - 85)      | 3<br>(2 - 6)         | 1<br>(0 - 1)         |

Web Table 31- Saint Lucia deaths with 95% UI by age, sex, and cause in 2013

| Cause                                                             | Both Sexes, All Ages     | Both Sexes, 0-4 Years | Both Sexes, 5-14 Years | Both Sexes, 15-49 Years | Both Sexes, 50-69 Years | Both Sexes, 70-80 Years |
|-------------------------------------------------------------------|--------------------------|-----------------------|------------------------|-------------------------|-------------------------|-------------------------|
| All causes                                                        | 1,398<br>(1,208 - 1,596) | 51<br>(23 - 105)      | 10<br>(6 - 15)         | 173<br>(140 - 209)      | 325<br>(257 - 392)      | 839<br>(727 - 938)      |
| Communicable, maternal, neonatal, and nutritional diseases        | 148<br>(125 - 182)       | 34<br>(15 - 69)       | 2<br>(1 - 3)           | 27<br>(24 - 31)         | 19<br>(16 - 23)         | 65<br>(52 - 81)         |
| HIV/AIDS and tuberculosis                                         | 26<br>(22 - 30)          | 0<br>(0 - 0)          | 0<br>(0 - 0)           | 17<br>(14 - 19)         | 7<br>(5 - 9)            | 3<br>(2 - 3)            |
| Tuberculosis                                                      | 5<br>(3 - 6)             | 0<br>(0 - 0)          | 0<br>(0 - 0)           | 1<br>(1 - 2)            | 2<br>(1 - 2)            | 2<br>(1 - 2)            |
| HIV/AIDS                                                          | 21<br>(18 - 25)          | 0<br>(0 - 0)          | 0<br>(0 - 0)           | 15<br>(13 - 18)         | 5<br>(3 - 7)            | 1<br>(1 - 1)            |
| HIV/AIDS resulting in mycobacterial infection                     | 1<br>(1 - 2)             | 0<br>(0 - 0)          | 0<br>(0 - 0)           | 1<br>(1 - 1)            | 0<br>(0 - 0)            | 0<br>(0 - 0)            |
| HIV/AIDS resulting in other diseases                              | 20<br>(17 - 24)          | 0<br>(0 - 0)          | 0<br>(0 - 0)           | 15<br>(12 - 17)         | 5<br>(3 - 7)            | 1<br>(0 - 1)            |
| Diarrhea, lower respiratory, and other common infectious diseases | 75<br>(61 - 93)          | 8<br>(3 - 16)         | 1<br>(1 - 2)           | 6<br>(5 - 8)            | 9<br>(7 - 12)           | 51<br>(39 - 66)         |
| Diarrheal diseases                                                | 7<br>(5 - 10)            | 2<br>(1 - 5)          | 0<br>(0 - 0)           | 1<br>(0 - 1)            | 1<br>(1 - 1)            | 3<br>(2 - 5)            |
| Intestinal infectious diseases                                    | 1<br>(1 - 3)             | 0<br>(0 - 1)          | 0<br>(0 - 1)           | 0<br>(0 - 1)            | 0<br>(0 - 0)            | 0<br>(0 - 0)            |
| Typhoid fever                                                     | 1<br>(0 - 2)             | 0<br>(0 - 1)          | 0<br>(0 - 0)           | 0<br>(0 - 1)            | 0<br>(0 - 0)            | 0<br>(0 - 0)            |
| Paratyphoid fever                                                 | 0<br>(0 - 1)             | 0<br>(0 - 0)          | 0<br>(0 - 0)           | 0<br>(0 - 0)            | 0<br>(0 - 0)            | 0<br>(0 - 0)            |
| Other intestinal infectious diseases                              | 0<br>(0 - 1)             | 0<br>(0 - 0)          | 0<br>(0 - 0)           | 0<br>(0 - 0)            | 0<br>(0 - 0)            | 0<br>(0 - 0)            |
| Lower respiratory infections                                      | 63<br>(50 - 79)          | 4<br>(2 - 9)          | 1<br>(0 - 1)           | 4<br>(3 - 6)            | 7<br>(5 - 10)           | 46<br>(35 - 61)         |
| Upper respiratory infections                                      | 0<br>(0 - 0)             | 0<br>(0 - 0)          | 0<br>(0 - 0)           | 0<br>(0 - 0)            | 0<br>(0 - 0)            | 0<br>(0 - 0)            |
| Otitis media                                                      | 0<br>(0 - 0)             | 0<br>(0 - 0)          | 0<br>(0 - 0)           | 0<br>(0 - 0)            | 0<br>(0 - 0)            | 0<br>(0 - 0)            |
| Meningitis                                                        | 2<br>(2 - 3)             | 0<br>(0 - 1)          | 0<br>(0 - 0)           | 1<br>(0 - 1)            | 1<br>(0 - 1)            | 1<br>(1 - 1)            |
| Pneumococcal meningitis                                           | 1<br>(1 - 1)             | 0<br>(0 - 0)          | 0<br>(0 - 0)           | 0<br>(0 - 0)            | 0<br>(0 - 0)            | 0<br>(0 - 0)            |
| H influenzae type B meningitis                                    | 0<br>(0 - 1)             | 0<br>(0 - 0)          | 0<br>(0 - 0)           | 0<br>(0 - 0)            | 0<br>(0 - 0)            | 0<br>(0 - 0)            |
| Meningococcal meningitis                                          | 0<br>(0 - 0)             | 0<br>(0 - 0)          | 0<br>(0 - 0)           | 0<br>(0 - 0)            | 0<br>(0 - 0)            | 0<br>(0 - 0)            |
| Other meningitis                                                  | 1<br>(1 - 1)             | 0<br>(0 - 0)          | 0<br>(0 - 0)           | 0<br>(0 - 0)            | 0<br>(0 - 0)            | 0<br>(0 - 1)            |
| Encephalitis                                                      | 2<br>(1 - 2)             | 0<br>(0 - 1)          | 0<br>(0 - 0)           | 1<br>(0 - 1)            | 0<br>(0 - 0)            | 0<br>(0 - 0)            |
| Diphtheria                                                        | 0<br>(0 - 0)             | 0<br>(0 - 0)          | 0<br>(0 - 0)           | 0<br>(0 - 0)            | 0<br>(0 - 0)            | --<br>(0 - 0)           |
| Whooping cough                                                    | 0<br>(0 - 0)             | 0<br>(0 - 0)          | 0<br>(0 - 0)           | 0<br>(0 - 0)            | 0<br>(0 - 0)            | --<br>(0 - 0)           |
| Tetanus                                                           | 0<br>(0 - 0)             | 0<br>(0 - 0)          | 0<br>(0 - 0)           | 0<br>(0 - 0)            | 0<br>(0 - 0)            | 0<br>(0 - 0)            |
| Measles                                                           | 0<br>(0 - 0)             | 0<br>(0 - 0)          | 0<br>(0 - 0)           | 0<br>(0 - 0)            | 0<br>(0 - 0)            | --<br>(0 - 0)           |
| Varicella and herpes zoster                                       | 0<br>(0 - 0)             | 0<br>(0 - 0)          | 0<br>(0 - 0)           | 0<br>(0 - 0)            | 0<br>(0 - 0)            | 0<br>(0 - 0)            |
| Neglected tropical diseases and malaria                           | 1<br>(1 - 2)             | 0<br>(0 - 0)          | 0<br>(0 - 0)           | 0<br>(0 - 1)            | 0<br>(0 - 1)            | 0<br>(0 - 1)            |
| Leishmaniasis                                                     | 0<br>(0 - 0)             | 0<br>(0 - 0)          | 0<br>(0 - 0)           | 0<br>(0 - 0)            | 0<br>(0 - 0)            | 0<br>(0 - 0)            |
| Visceral leishmaniasis                                            | 0<br>(0 - 0)             | 0<br>(0 - 0)          | 0<br>(0 - 0)           | 0<br>(0 - 0)            | 0<br>(0 - 0)            | 0<br>(0 - 0)            |
| Schistosomiasis                                                   | 0<br>(0 - 1)             | 0<br>(0 - 0)          | 0<br>(0 - 0)           | 0<br>(0 - 0)            | 0<br>(0 - 0)            | 0<br>(0 - 0)            |
| Cysticercosis                                                     | 0<br>(0 - 0)             | 0<br>(0 - 0)          | 0<br>(0 - 0)           | 0<br>(0 - 0)            | 0<br>(0 - 0)            | 0<br>(0 - 0)            |
| Cystic echinococcosis                                             | 0<br>(0 - 0)             | 0<br>(0 - 0)          | 0<br>(0 - 0)           | 0<br>(0 - 0)            | 0<br>(0 - 0)            | 0<br>(0 - 0)            |
| Dengue                                                            | 0<br>(0 - 1)             | 0<br>(0 - 0)          | 0<br>(0 - 0)           | 0<br>(0 - 0)            | 0<br>(0 - 0)            | 0<br>(0 - 0)            |
| Rabies                                                            | 0<br>(0 - 0)             | 0<br>(0 - 0)          | 0<br>(0 - 0)           | 0<br>(0 - 0)            | 0<br>(0 - 0)            | 0<br>(0 - 0)            |
| Intestinal nematode infections                                    | 0<br>(0 - 1)             | 0<br>(0 - 0)          | 0<br>(0 - 0)           | 0<br>(0 - 0)            | 0<br>(0 - 0)            | 0<br>(0 - 0)            |
| Ascariasis                                                        | 0<br>(0 - 1)             | 0<br>(0 - 0)          | 0<br>(0 - 0)           | 0<br>(0 - 0)            | 0<br>(0 - 0)            | 0<br>(0 - 0)            |
| Other neglected tropical diseases                                 | 0<br>(0 - 1)             | 0<br>(0 - 0)          | 0<br>(0 - 0)           | 0<br>(0 - 0)            | 0<br>(0 - 0)            | 0<br>(0 - 0)            |
| Maternal disorders                                                | 1<br>(1 - 2)             | --                    | 0<br>(0 - 0)           | 1<br>(1 - 2)            | --                      | --                      |
| Maternal hemorrhage                                               | 0<br>(0 - 0)             | --                    | 0<br>(0 - 0)           | 0<br>(0 - 0)            | --                      | --                      |

Web Table 31- Saint Lucia deaths with 95% UI by age, sex, and cause in 2013

| Cause                                                            | Both Sexes, All Ages   | Both Sexes, 0-4 Years | Both Sexes, 5-14 Years | Both Sexes, 15-49 Years | Both Sexes, 50-69 Years | Both Sexes, 70-80 Years |
|------------------------------------------------------------------|------------------------|-----------------------|------------------------|-------------------------|-------------------------|-------------------------|
| Maternal sepsis and other maternal infections                    | 0<br>(0 - 0)           | --                    | 0<br>(0 - 0)           | 0<br>(0 - 0)            | --                      | --                      |
| Maternal hypertensive disorders                                  | 0<br>(0 - 0)           | --                    | 0<br>(0 - 0)           | 0<br>(0 - 0)            | --                      | --                      |
| Maternal obstructed labor                                        | 0<br>(0 - 0)           | --                    | 0<br>(0 - 0)           | 0<br>(0 - 0)            | --                      | --                      |
| Maternal abortive outcome                                        | 0<br>(0 - 0)           | --                    | 0<br>(0 - 0)           | 0<br>(0 - 0)            | --                      | --                      |
| Indirect maternal deaths                                         | 0<br>(0 - 0)           | --                    | 0<br>(0 - 0)           | 0<br>(0 - 0)            | --                      | --                      |
| Late maternal deaths                                             | 0<br>(0 - 0)           | --                    | 0<br>(0 - 0)           | 0<br>(0 - 0)            | --                      | --                      |
| Maternal deaths aggravated by HIV/AIDS                           | 0<br>(0 - 0)           | --                    | 0<br>(0 - 0)           | 0<br>(0 - 0)            | --                      | --                      |
| Other maternal disorders                                         | 0<br>(0 - 0)           | --                    | 0<br>(0 - 0)           | 0<br>(0 - 0)            | --                      | --                      |
| Neonatal disorders                                               | 25<br>(10 - 47)        | 25<br>(10 - 47)       | --                     | --                      | --                      | --                      |
| Neonatal preterm birth complications                             | 12<br>(5 - 24)         | 12<br>(5 - 24)        | --                     | --                      | --                      | --                      |
| Neonatal encephalopathy due to birth asphyxia and trauma         | 6<br>(2 - 11)          | 6<br>(2 - 11)         | --                     | --                      | --                      | --                      |
| Neonatal sepsis and other neonatal infections                    | 4<br>(2 - 8)           | 4<br>(2 - 8)          | --                     | --                      | --                      | --                      |
| Hemolytic disease and other neonatal jaundice                    | 0<br>(0 - 1)           | 0<br>(0 - 1)          | --                     | --                      | --                      | --                      |
| Other neonatal disorders                                         | 3<br>(1 - 6)           | 3<br>(1 - 6)          | --                     | --                      | --                      | --                      |
| Nutritional deficiencies                                         | 16<br>(12 - 21)        | 2<br>(1 - 4)          | 0<br>(0 - 0)           | 2<br>(1 - 2)            | 2<br>(1 - 3)            | 10<br>(7 - 14)          |
| Protein-energy malnutrition                                      | 7<br>(5 - 11)          | 2<br>(1 - 4)          | 0<br>(0 - 0)           | 0<br>(0 - 1)            | 1<br>(0 - 1)            | 4<br>(3 - 7)            |
| Iodine deficiency                                                | 0<br>(0 - 0)           | 0<br>(0 - 0)          | 0<br>(0 - 0)           | 0<br>(0 - 0)            | 0<br>(0 - 0)            | 0<br>(0 - 0)            |
| Iron-deficiency anemia                                           | 8<br>(5 - 11)          | 0<br>(0 - 1)          | 0<br>(0 - 0)           | 1<br>(1 - 1)            | 1<br>(1 - 2)            | 5<br>(3 - 8)            |
| Other nutritional deficiencies                                   | 1<br>(0 - 1)           | 0<br>(0 - 0)          | 0<br>(0 - 0)           | 0<br>(0 - 0)            | 0<br>(0 - 0)            | 0<br>(0 - 1)            |
| Other communicable, maternal, neonatal, and nutritional diseases | 4<br>(2 - 4)           | 0<br>(0 - 0)          | 0<br>(0 - 0)           | 1<br>(1 - 1)            | 1<br>(1 - 1)            | 1<br>(1 - 2)            |
| Sexually transmitted diseases excluding HIV                      | 0<br>(0 - 1)           | 0<br>(0 - 0)          | 0<br>(0 - 0)           | 0<br>(0 - 0)            | 0<br>(0 - 0)            | 0<br>(0 - 0)            |
| Syphilis                                                         | 0<br>(0 - 0)           | 0<br>(0 - 0)          | 0<br>(0 - 0)           | 0<br>(0 - 0)            | 0<br>(0 - 0)            | 0<br>(0 - 0)            |
| Chlamydial infection                                             | 0<br>(0 - 0)           | --                    | 0<br>(0 - 0)           | 0<br>(0 - 0)            | 0<br>(0 - 0)            | 0<br>(0 - 0)            |
| Gonococcal infection                                             | 0<br>(0 - 0)           | --                    | 0<br>(0 - 0)           | 0<br>(0 - 0)            | 0<br>(0 - 0)            | 0<br>(0 - 0)            |
| Other sexually transmitted diseases                              | 0<br>(0 - 0)           | --                    | 0<br>(0 - 0)           | 0<br>(0 - 0)            | 0<br>(0 - 0)            | 0<br>(0 - 0)            |
| Hepatitis                                                        | 0<br>(0 - 0)           | 0<br>(0 - 0)          | 0<br>(0 - 0)           | 0<br>(0 - 0)            | 0<br>(0 - 0)            | 0<br>(0 - 0)            |
| Acute hepatitis A                                                | 0<br>(0 - 0)           | 0<br>(0 - 0)          | 0<br>(0 - 0)           | 0<br>(0 - 0)            | 0<br>(0 - 0)            | 0<br>(0 - 0)            |
| Acute hepatitis B                                                | 0<br>(0 - 0)           | 0<br>(0 - 0)          | 0<br>(0 - 0)           | 0<br>(0 - 0)            | 0<br>(0 - 0)            | 0<br>(0 - 0)            |
| Acute hepatitis C                                                | 0<br>(0 - 0)           | --                    | 0<br>(0 - 0)           | 0<br>(0 - 0)            | 0<br>(0 - 0)            | 0<br>(0 - 0)            |
| Other infectious diseases                                        | 3<br>(2 - 4)           | 0<br>(0 - 0)          | 0<br>(0 - 0)           | 1<br>(0 - 1)            | 1<br>(0 - 1)            | 1<br>(1 - 2)            |
| Non-communicable diseases                                        | 1,147<br>(972 - 1,319) | 13<br>(6 - 28)        | 4<br>(3 - 7)           | 93<br>(73 - 116)        | 286<br>(225 - 348)      | 750<br>(651 - 841)      |
| Neoplasms                                                        | 237<br>(197 - 280)     | 1<br>(0 - 2)          | 1<br>(1 - 2)           | 26<br>(21 - 34)         | 76<br>(60 - 92)         | 134<br>(110 - 157)      |
| Esophageal cancer                                                | 6<br>(4 - 7)           | --                    | --                     | 0<br>(0 - 0)            | 2<br>(2 - 3)            | 3<br>(2 - 4)            |
| Stomach cancer                                                   | 16<br>(13 - 19)        | --                    | --                     | 1<br>(1 - 1)            | 5<br>(4 - 6)            | 10<br>(8 - 12)          |
| Liver cancer                                                     | 7<br>(6 - 9)           | --                    | 0<br>(0 - 0)           | 1<br>(1 - 1)            | 3<br>(2 - 4)            | 4<br>(3 - 5)            |
| Liver cancer due to hepatitis B                                  | 2<br>(1 - 2)           | --                    | 0<br>(0 - 0)           | 0<br>(0 - 0)            | 1<br>(0 - 1)            | 1<br>(0 - 1)            |
| Liver cancer due to hepatitis C                                  | 3<br>(3 - 5)           | --                    | 0<br>(0 - 0)           | 0<br>(0 - 0)            | 1<br>(1 - 2)            | 2<br>(1 - 2)            |
| Liver cancer due to alcohol use                                  | 1<br>(1 - 2)           | --                    | --                     | 0<br>(0 - 0)            | 0<br>(0 - 1)            | 1<br>(1 - 1)            |
| Liver cancer due to other causes                                 | 1<br>(0 - 1)           | --                    | 0<br>(0 - 0)           | 0<br>(0 - 0)            | 0<br>(0 - 0)            | 0<br>(0 - 0)            |
| Larynx cancer                                                    | 2<br>(2 - 3)           | --                    | --                     | 0<br>(0 - 0)            | 1<br>(1 - 1)            | 1<br>(1 - 1)            |

Web Table 31- Saint Lucia deaths with 95% UI by age, sex, and cause in 2013

| Cause                                         | Both Sexes, All Ages | Both Sexes, 0-4 Years | Both Sexes, 5-14 Years | Both Sexes, 15-49 Years | Both Sexes, 50-69 Years | Both Sexes, 70-80 Years |
|-----------------------------------------------|----------------------|-----------------------|------------------------|-------------------------|-------------------------|-------------------------|
| Tracheal, bronchus and lung cancer            | 23<br>(19 - 29)      | --                    | --                     | 2<br>(2 - 3)            | 10<br>(8 - 13)          | 11<br>(9 - 14)          |
| Breast cancer                                 | 22<br>(16 - 29)      | --                    | --                     | 5<br>(3 - 7)            | 8<br>(6 - 12)           | 9<br>(6 - 12)           |
| Cervical cancer                               | 13<br>(9 - 17)       | --                    | --                     | 3<br>(2 - 4)            | 5<br>(3 - 6)            | 5<br>(4 - 7)            |
| Uterine cancer                                | 5<br>(2 - 6)         | --                    | --                     | 0<br>(0 - 0)            | 2<br>(1 - 2)            | 3<br>(2 - 4)            |
| Prostate cancer                               | 49<br>(31 - 69)      | --                    | --                     | 0<br>(0 - 0)            | 8<br>(5 - 13)           | 41<br>(26 - 57)         |
| Colon and rectum cancer                       | 26<br>(21 - 31)      | --                    | --                     | 2<br>(2 - 3)            | 8<br>(6 - 10)           | 16<br>(12 - 19)         |
| Lip and oral cavity cancer                    | 3<br>(2 - 4)         | --                    | --                     | 0<br>(0 - 0)            | 1<br>(1 - 2)            | 2<br>(1 - 2)            |
| Nasopharynx cancer                            | 1<br>(1 - 1)         | --                    | 0<br>(0 - 0)           | 0<br>(0 - 0)            | 0<br>(0 - 1)            | 0<br>(0 - 0)            |
| Other pharynx cancer                          | 1<br>(1 - 2)         | --                    | --                     | 0<br>(0 - 0)            | 1<br>(0 - 1)            | 1<br>(0 - 1)            |
| Gallbladder and biliary tract cancer          | 4<br>(2 - 7)         | --                    | --                     | 0<br>(0 - 0)            | 1<br>(1 - 2)            | 2<br>(1 - 4)            |
| Pancreatic cancer                             | 10<br>(8 - 12)       | --                    | --                     | 1<br>(0 - 1)            | 3<br>(2 - 4)            | 6<br>(4 - 7)            |
| Malignant skin melanoma                       | 1<br>(1 - 1)         | --                    | --                     | 0<br>(0 - 0)            | 0<br>(0 - 1)            | 0<br>(0 - 1)            |
| Non-melanoma skin cancer                      | 1<br>(1 - 1)         | --                    | --                     | 0<br>(0 - 0)            | 0<br>(0 - 0)            | 1<br>(0 - 1)            |
| Ovarian cancer                                | 6<br>(4 - 7)         | --                    | --                     | 1<br>(1 - 1)            | 2<br>(2 - 3)            | 3<br>(2 - 3)            |
| Testicular cancer                             | 0<br>(0 - 0)         | --                    | --                     | 0<br>(0 - 0)            | 0<br>(0 - 0)            | 0<br>(0 - 0)            |
| Kidney cancer                                 | 3<br>(3 - 4)         | 0<br>(0 - 0)          | 0<br>(0 - 0)           | 0<br>(0 - 0)            | 1<br>(1 - 2)            | 1<br>(1 - 2)            |
| Bladder cancer                                | 4<br>(3 - 5)         | --                    | --                     | 0<br>(0 - 0)            | 1<br>(1 - 1)            | 3<br>(2 - 4)            |
| Brain and nervous system cancer               | 3<br>(1 - 3)         | 0<br>(0 - 0)          | 0<br>(0 - 0)           | 1<br>(0 - 1)            | 1<br>(0 - 1)            | 1<br>(0 - 1)            |
| Thyroid cancer                                | 1<br>(1 - 1)         | --                    | 0<br>(0 - 0)           | 0<br>(0 - 0)            | 0<br>(0 - 0)            | 0<br>(0 - 1)            |
| Mesothelioma                                  | 1<br>(1 - 1)         | --                    | --                     | 0<br>(0 - 0)            | 0<br>(0 - 0)            | 0<br>(0 - 0)            |
| Hodgkin lymphoma                              | 0<br>(0 - 1)         | 0<br>(0 - 0)          | 0<br>(0 - 0)           | 0<br>(0 - 0)            | 0<br>(0 - 0)            | 0<br>(0 - 0)            |
| Non-Hodgkin lymphoma                          | 9<br>(7 - 11)        | 0<br>(0 - 0)          | 0<br>(0 - 0)           | 2<br>(2 - 3)            | 3<br>(2 - 4)            | 3<br>(2 - 4)            |
| Multiple myeloma                              | 4<br>(3 - 5)         | --                    | --                     | 0<br>(0 - 0)            | 2<br>(1 - 2)            | 2<br>(1 - 2)            |
| Leukemia                                      | 7<br>(5 - 8)         | 0<br>(0 - 0)          | 0<br>(0 - 1)           | 2<br>(1 - 2)            | 2<br>(1 - 2)            | 2<br>(2 - 3)            |
| Other neoplasms                               | 13<br>(10 - 16)      | 0<br>(0 - 1)          | 0<br>(0 - 1)           | 3<br>(2 - 4)            | 4<br>(3 - 5)            | 5<br>(4 - 6)            |
| Cardiovascular diseases                       | 485<br>(413 - 567)   | 1<br>(0 - 2)          | 1<br>(0 - 1)           | 28<br>(21 - 35)         | 109<br>(86 - 134)       | 347<br>(298 - 402)      |
| Rheumatic heart disease                       | 2<br>(2 - 3)         | 0<br>(0 - 0)          | 0<br>(0 - 0)           | 1<br>(0 - 1)            | 1<br>(0 - 1)            | 1<br>(1 - 1)            |
| Ischemic heart disease                        | 183<br>(149 - 239)   | 0<br>(0 - 0)          | 0<br>(0 - 0)           | 12<br>(9 - 15)          | 46<br>(36 - 59)         | 125<br>(101 - 168)      |
| Cerebrovascular disease                       | 192<br>(153 - 228)   | 0<br>(0 - 1)          | 0<br>(0 - 0)           | 8<br>(6 - 10)           | 40<br>(31 - 50)         | 143<br>(113 - 171)      |
| Ischemic stroke                               | 123<br>(93 - 149)    | 0<br>(0 - 0)          | 0<br>(0 - 0)           | 2<br>(1 - 3)            | 20<br>(15 - 26)         | 100<br>(75 - 122)       |
| Hemorrhagic stroke                            | 69<br>(52 - 86)      | 0<br>(0 - 0)          | 0<br>(0 - 0)           | 6<br>(4 - 7)            | 19<br>(14 - 25)         | 43<br>(32 - 57)         |
| Hypertensive heart disease                    | 52<br>(39 - 70)      | 0<br>(0 - 0)          | 0<br>(0 - 0)           | 2<br>(2 - 3)            | 11<br>(8 - 14)          | 39<br>(29 - 53)         |
| Cardiomyopathy and myocarditis                | 15<br>(11 - 18)      | 0<br>(0 - 1)          | 0<br>(0 - 0)           | 2<br>(2 - 3)            | 4<br>(3 - 5)            | 8<br>(6 - 11)           |
| Atrial fibrillation and flutter               | 8<br>(6 - 11)        | --                    | --                     | 0<br>(0 - 0)            | 1<br>(1 - 1)            | 7<br>(5 - 10)           |
| Aortic aneurysm                               | 6<br>(5 - 8)         | --                    | --                     | 0<br>(0 - 0)            | 2<br>(1 - 2)            | 4<br>(3 - 6)            |
| Peripheral vascular disease                   | 5<br>(3 - 7)         | --                    | --                     | 0<br>(0 - 0)            | 0<br>(0 - 0)            | 5<br>(3 - 7)            |
| Endocarditis                                  | 2<br>(1 - 3)         | 0<br>(0 - 0)          | 0<br>(0 - 0)           | 0<br>(0 - 0)            | 0<br>(0 - 1)            | 1<br>(1 - 2)            |
| Other cardiovascular and circulatory diseases | 20<br>(14 - 26)      | 0<br>(0 - 0)          | 0<br>(0 - 0)           | 2<br>(1 - 3)            | 5<br>(3 - 6)            | 13<br>(8 - 18)          |
| Chronic respiratory diseases                  | 50<br>(41 - 61)      | 1<br>(0 - 1)          | 0<br>(0 - 0)           | 3<br>(3 - 4)            | 10<br>(8 - 13)          | 36<br>(30 - 44)         |
| Chronic obstructive pulmonary disease         | 36<br>(29 - 45)      | 0<br>(0 - 0)          | 0<br>(0 - 0)           | 1<br>(1 - 2)            | 6<br>(5 - 8)            | 28<br>(23 - 35)         |



Web Table 31- Saint Lucia deaths with 95% UI by age, sex, and cause in 2013

| Cause                                               | Both Sexes, All Ages | Both Sexes, 0-4 Years | Both Sexes, 5-14 Years | Both Sexes, 15-49 Years | Both Sexes, 50-69 Years | Both Sexes, 70-80 Years |
|-----------------------------------------------------|----------------------|-----------------------|------------------------|-------------------------|-------------------------|-------------------------|
| Pneumoconiosis                                      | 1<br>(1 - 2)         | 0<br>(0 - 0)          | 0<br>(0 - 0)           | 0<br>(0 - 0)            | 0<br>(0 - 1)            | 1<br>(0 - 1)            |
| Silicosis                                           | 0<br>(0 - 0)         | 0<br>(0 - 0)          | 0<br>(0 - 0)           | 0<br>(0 - 0)            | 0<br>(0 - 0)            | 0<br>(0 - 0)            |
| Asbestosis                                          | 0<br>(0 - 0)         | 0<br>(0 - 0)          | 0<br>(0 - 0)           | 0<br>(0 - 0)            | 0<br>(0 - 0)            | 0<br>(0 - 0)            |
| Coal workers pneumoconiosis                         | 0<br>(0 - 0)         | 0<br>(0 - 0)          | 0<br>(0 - 0)           | 0<br>(0 - 0)            | 0<br>(0 - 0)            | 0<br>(0 - 0)            |
| Other pneumoconiosis                                | 1<br>(1 - 1)         | 0<br>(0 - 0)          | 0<br>(0 - 0)           | 0<br>(0 - 0)            | 0<br>(0 - 0)            | 1<br>(0 - 1)            |
| Asthma                                              | 8<br>(6 - 10)        | 0<br>(0 - 0)          | 0<br>(0 - 0)           | 1<br>(1 - 2)            | 2<br>(1 - 3)            | 4<br>(3 - 6)            |
| Interstitial lung disease and pulmonary sarcoidosis | 3<br>(2 - 5)         | 0<br>(0 - 0)          | 0<br>(0 - 0)           | 0<br>(0 - 1)            | 1<br>(1 - 1)            | 2<br>(1 - 3)            |
| Other chronic respiratory diseases                  | 1<br>(1 - 2)         | 0<br>(0 - 0)          | 0<br>(0 - 0)           | 0<br>(0 - 0)            | 0<br>(0 - 0)            | 1<br>(0 - 1)            |
| Cirrhosis                                           | 23<br>(18 - 28)      | 0<br>(0 - 0)          | 0<br>(0 - 0)           | 6<br>(4 - 7)            | 10<br>(8 - 13)          | 7<br>(5 - 8)            |
| Cirrhosis due to hepatitis B                        | 2<br>(1 - 3)         | 0<br>(0 - 0)          | 0<br>(0 - 0)           | 1<br>(0 - 1)            | 1<br>(1 - 2)            | 1<br>(0 - 1)            |
| Cirrhosis due to hepatitis C                        | 8<br>(5 - 11)        | 0<br>(0 - 0)          | 0<br>(0 - 0)           | 2<br>(1 - 2)            | 3<br>(2 - 5)            | 3<br>(2 - 4)            |
| Cirrhosis due to alcohol use                        | 9<br>(7 - 13)        | --                    | --                     | 2<br>(1 - 3)            | 4<br>(3 - 6)            | 3<br>(2 - 4)            |
| Cirrhosis due to other causes                       | 4<br>(2 - 5)         | 0<br>(0 - 0)          | 0<br>(0 - 0)           | 1<br>(1 - 2)            | 1<br>(1 - 2)            | 1<br>(0 - 1)            |
| Digestive diseases                                  | 27<br>(22 - 32)      | 0<br>(0 - 0)          | 0<br>(0 - 0)           | 4<br>(3 - 5)            | 7<br>(6 - 9)            | 15<br>(12 - 19)         |
| Peptic ulcer disease                                | 7<br>(5 - 9)         | 0<br>(0 - 0)          | 0<br>(0 - 0)           | 1<br>(1 - 1)            | 2<br>(2 - 3)            | 4<br>(3 - 5)            |
| Gastritis and duodenitis                            | 2<br>(1 - 2)         | 0<br>(0 - 0)          | 0<br>(0 - 0)           | 0<br>(0 - 0)            | 0<br>(0 - 1)            | 1<br>(1 - 2)            |
| Appendicitis                                        | 1<br>(1 - 1)         | 0<br>(0 - 0)          | 0<br>(0 - 0)           | 0<br>(0 - 0)            | 0<br>(0 - 0)            | 0<br>(0 - 1)            |
| Paralytic ileus and intestinal obstruction          | 4<br>(2 - 6)         | 0<br>(0 - 0)          | 0<br>(0 - 0)           | 0<br>(0 - 1)            | 1<br>(0 - 1)            | 2<br>(1 - 4)            |
| Inguinal, femoral, and abdominal hernia             | 2<br>(1 - 3)         | 0<br>(0 - 0)          | 0<br>(0 - 0)           | 0<br>(0 - 0)            | 0<br>(0 - 1)            | 1<br>(1 - 2)            |
| Inflammatory bowel disease                          | 3<br>(2 - 4)         | 0<br>(0 - 0)          | 0<br>(0 - 0)           | 0<br>(0 - 1)            | 1<br>(0 - 1)            | 2<br>(1 - 3)            |
| Vascular intestinal disorders                       | 1<br>(1 - 3)         | 0<br>(0 - 0)          | 0<br>(0 - 0)           | 0<br>(0 - 0)            | 0<br>(0 - 1)            | 1<br>(1 - 2)            |
| Gallbladder and biliary diseases                    | 2<br>(1 - 2)         | 0<br>(0 - 0)          | 0<br>(0 - 0)           | 0<br>(0 - 0)            | 1<br>(0 - 1)            | 1<br>(1 - 1)            |
| Pancreatitis                                        | 2<br>(1 - 2)         | 0<br>(0 - 0)          | 0<br>(0 - 0)           | 1<br>(0 - 1)            | 1<br>(0 - 1)            | 0<br>(0 - 1)            |
| Other digestive diseases                            | 4<br>(3 - 5)         | 0<br>(0 - 0)          | 0<br>(0 - 0)           | 1<br>(0 - 1)            | 1<br>(1 - 1)            | 2<br>(2 - 3)            |
| Neurological disorders                              | 76<br>(63 - 91)      | 0<br>(0 - 0)          | 0<br>(0 - 0)           | 3<br>(2 - 4)            | 6<br>(5 - 8)            | 67<br>(54 - 81)         |
| Alzheimer disease and other dementias               | 64<br>(51 - 78)      | --                    | --                     | 0<br>(0 - 0)            | 4<br>(2 - 5)            | 60<br>(48 - 74)         |
| Parkinson disease                                   | 5<br>(4 - 8)         | --                    | --                     | 0<br>(0 - 0)            | 1<br>(1 - 1)            | 5<br>(3 - 7)            |
| Epilepsy                                            | 4<br>(3 - 5)         | 0<br>(0 - 0)          | 0<br>(0 - 0)           | 2<br>(1 - 3)            | 1<br>(1 - 1)            | 1<br>(1 - 1)            |
| Multiple sclerosis                                  | 0<br>(0 - 0)         | --                    | --                     | 0<br>(0 - 0)            | 0<br>(0 - 0)            | 0<br>(0 - 0)            |
| Other neurological disorders                        | 3<br>(2 - 3)         | 0<br>(0 - 0)          | 0<br>(0 - 0)           | 1<br>(1 - 1)            | 1<br>(1 - 1)            | 1<br>(1 - 1)            |
| Mental and substance use disorders                  | 5<br>(3 - 6)         | 0<br>(0 - 0)          | 0<br>(0 - 0)           | 2<br>(1 - 2)            | 2<br>(1 - 2)            | 1<br>(1 - 2)            |
| Schizophrenia                                       | 0<br>(0 - 1)         | --                    | --                     | 0<br>(0 - 0)            | 0<br>(0 - 0)            | 0<br>(0 - 0)            |
| Alcohol use disorders                               | 3<br>(1 - 4)         | --                    | --                     | 1<br>(0 - 1)            | 1<br>(1 - 2)            | 1<br>(0 - 1)            |
| Drug use disorders                                  | 2<br>(1 - 2)         | 0<br>(0 - 0)          | --                     | 1<br>(0 - 1)            | 0<br>(0 - 1)            | 1<br>(0 - 1)            |
| Opioid use disorders                                | 0<br>(0 - 1)         | 0<br>(0 - 0)          | --                     | 0<br>(0 - 0)            | 0<br>(0 - 0)            | 0<br>(0 - 0)            |
| Cocaine use disorders                               | 0<br>(0 - 0)         | 0<br>(0 - 0)          | --                     | 0<br>(0 - 0)            | 0<br>(0 - 0)            | 0<br>(0 - 0)            |
| Amphetamine use disorders                           | 0<br>(0 - 0)         | 0<br>(0 - 0)          | --                     | 0<br>(0 - 0)            | 0<br>(0 - 0)            | 0<br>(0 - 0)            |
| Other drug use disorders                            | 1<br>(1 - 1)         | 0<br>(0 - 0)          | --                     | 0<br>(0 - 1)            | 0<br>(0 - 0)            | 0<br>(0 - 0)            |
| Eating disorders                                    | 0<br>(0 - 0)         | --                    | 0<br>(0 - 0)           | 0<br>(0 - 0)            | --                      | --                      |
| Anorexia nervosa                                    | 0<br>(0 - 0)         | --                    | 0<br>(0 - 0)           | 0<br>(0 - 0)            | --                      | --                      |

Web Table 31- Saint Lucia deaths with 95% UI by age, sex, and cause in 2013

| Cause                                               | Both Sexes, All Ages | Both Sexes, 0-4 Years | Both Sexes, 5-14 Years | Both Sexes, 15-49 Years | Both Sexes, 50-69 Years | Both Sexes, 70-80 Years |
|-----------------------------------------------------|----------------------|-----------------------|------------------------|-------------------------|-------------------------|-------------------------|
| Diabetes, urogenital, blood, and endocrine diseases | 214<br>(177 - 252)   | 1<br>(1 - 3)          | 1<br>(0 - 1)           | 18<br>(14 - 22)         | 62<br>(49 - 76)         | 132<br>(108 - 157)      |
| Diabetes mellitus                                   | 149<br>(120 - 179)   | 0<br>(0 - 0)          | 0<br>(0 - 0)           | 8<br>(6 - 10)           | 45<br>(35 - 56)         | 95<br>(75 - 116)        |
| Acute glomerulonephritis                            | 0<br>(0 - 0)         | 0<br>(0 - 0)          | 0<br>(0 - 0)           | 0<br>(0 - 0)            | 0<br>(0 - 0)            | 0<br>(0 - 0)            |
| Chronic kidney disease                              | 41<br>(32 - 54)      | 0<br>(0 - 1)          | 0<br>(0 - 0)           | 5<br>(4 - 7)            | 12<br>(8 - 16)          | 24<br>(18 - 32)         |
| Chronic kidney disease due to diabetes mellitus     | 7<br>(4 - 9)         | 0<br>(0 - 0)          | 0<br>(0 - 0)           | 1<br>(0 - 1)            | 3<br>(2 - 4)            | 3<br>(2 - 5)            |
| Chronic kidney disease due to hypertension          | 22<br>(16 - 30)      | 0<br>(0 - 0)          | 0<br>(0 - 0)           | 3<br>(2 - 4)            | 6<br>(4 - 9)            | 13<br>(9 - 18)          |
| Chronic kidney disease due to glomerulonephritis    | 1<br>(1 - 2)         | 0<br>(0 - 0)          | 0<br>(0 - 0)           | 0<br>(0 - 0)            | 0<br>(0 - 0)            | 1<br>(0 - 1)            |
| Chronic kidney disease due to other causes          | 11<br>(7 - 17)       | 0<br>(0 - 0)          | 0<br>(0 - 0)           | 2<br>(1 - 2)            | 3<br>(1 - 4)            | 7<br>(4 - 11)           |
| Urinary diseases and male infertility               | 9<br>(6 - 11)        | 0<br>(0 - 0)          | 0<br>(0 - 0)           | 1<br>(0 - 1)            | 2<br>(1 - 2)            | 6<br>(4 - 8)            |
| Interstitial nephritis and urinary tract infections | 7<br>(4 - 9)         | 0<br>(0 - 0)          | 0<br>(0 - 0)           | 0<br>(0 - 1)            | 1<br>(1 - 2)            | 5<br>(3 - 7)            |
| Urolithiasis                                        | 0<br>(0 - 1)         | --                    | 0<br>(0 - 0)           | 0<br>(0 - 0)            | 0<br>(0 - 0)            | 0<br>(0 - 0)            |
| Other urinary diseases                              | 2<br>(1 - 3)         | 0<br>(0 - 0)          | 0<br>(0 - 0)           | 0<br>(0 - 0)            | 0<br>(0 - 1)            | 1<br>(1 - 2)            |
| Gynecological diseases                              | 0<br>(0 - 0)         | --                    | --                     | 0<br>(0 - 0)            | 0<br>(0 - 0)            | 0<br>(0 - 0)            |
| Uterine fibroids                                    | 0<br>(0 - 0)         | --                    | --                     | 0<br>(0 - 0)            | 0<br>(0 - 0)            | 0<br>(0 - 0)            |
| Polycystic ovarian syndrome                         | 0<br>(0 - 0)         | --                    | --                     | 0<br>(0 - 0)            | 0<br>(0 - 0)            | --                      |
| Endometriosis                                       | 0<br>(0 - 0)         | --                    | --                     | 0<br>(0 - 0)            | 0<br>(0 - 0)            | --                      |
| Genital prolapse                                    | 0<br>(0 - 0)         | --                    | --                     | 0<br>(0 - 0)            | 0<br>(0 - 0)            | 0<br>(0 - 0)            |
| Other gynecological diseases                        | 0<br>(0 - 0)         | --                    | --                     | 0<br>(0 - 0)            | 0<br>(0 - 0)            | 0<br>(0 - 0)            |
| Hemoglobinopathies and hemolytic anemias            | 3<br>(2 - 4)         | 0<br>(0 - 1)          | 0<br>(0 - 0)           | 1<br>(1 - 2)            | 1<br>(0 - 1)            | 1<br>(0 - 1)            |
| Thalassemias                                        | 0<br>(0 - 0)         | 0<br>(0 - 0)          | 0<br>(0 - 0)           | 0<br>(0 - 0)            | 0<br>(0 - 0)            | 0<br>(0 - 0)            |
| Sickle cell disorders                               | 2<br>(1 - 3)         | 0<br>(0 - 1)          | 0<br>(0 - 0)           | 1<br>(1 - 1)            | 0<br>(0 - 1)            | 0<br>(0 - 0)            |
| G6PD deficiency                                     | 0<br>(0 - 0)         | 0<br>(0 - 0)          | 0<br>(0 - 0)           | 0<br>(0 - 0)            | 0<br>(0 - 0)            | 0<br>(0 - 0)            |
| Other hemoglobinopathies and hemolytic anemias      | 1<br>(0 - 1)         | 0<br>(0 - 0)          | 0<br>(0 - 0)           | 0<br>(0 - 0)            | 0<br>(0 - 0)            | 0<br>(0 - 1)            |
| Endocrine, metabolic, blood, and immune disorders   | 12<br>(9 - 20)       | 0<br>(0 - 1)          | 0<br>(0 - 0)           | 2<br>(2 - 4)            | 3<br>(2 - 5)            | 6<br>(4 - 10)           |
| Musculoskeletal disorders                           | 5<br>(3 - 7)         | --                    | 0<br>(0 - 0)           | 2<br>(1 - 2)            | 1<br>(1 - 2)            | 2<br>(1 - 3)            |
| Rheumatoid arthritis                                | 1<br>(0 - 1)         | --                    | 0<br>(0 - 0)           | 0<br>(0 - 0)            | 0<br>(0 - 0)            | 1<br>(0 - 1)            |
| Other musculoskeletal disorders                     | 4<br>(2 - 5)         | --                    | 0<br>(0 - 0)           | 2<br>(1 - 2)            | 1<br>(1 - 1)            | 2<br>(1 - 2)            |
| Other non-communicable diseases                     | 24<br>(17 - 35)      | 10<br>(5 - 20)        | 1<br>(1 - 2)           | 2<br>(1 - 3)            | 2<br>(1 - 3)            | 10<br>(4 - 14)          |
| Congenital anomalies                                | 13<br>(8 - 23)       | 9<br>(4 - 18)         | 1<br>(1 - 2)           | 2<br>(1 - 2)            | 1<br>(1 - 1)            | 1<br>(1 - 1)            |
| Neural tube defects                                 | 1<br>(0 - 1)         | 0<br>(0 - 1)          | 0<br>(0 - 0)           | 0<br>(0 - 0)            | 0<br>(0 - 0)            | 0<br>(0 - 0)            |
| Congenital heart anomalies                          | 7<br>(4 - 12)        | 4<br>(2 - 9)          | 1<br>(0 - 1)           | 1<br>(1 - 1)            | 0<br>(0 - 0)            | 0<br>(0 - 1)            |
| Cleft lip and cleft palate                          | 0<br>(0 - 0)         | 0<br>(0 - 0)          | --                     | --                      | --                      | --                      |
| Down syndrome                                       | 1<br>(0 - 1)         | 0<br>(0 - 1)          | 0<br>(0 - 0)           | 0<br>(0 - 0)            | 0<br>(0 - 0)            | 0<br>(0 - 0)            |
| Chromosomal unbalanced rearrangements               | 0<br>(0 - 1)         | 0<br>(0 - 0)          | 0<br>(0 - 0)           | 0<br>(0 - 0)            | 0<br>(0 - 0)            | 0<br>(0 - 0)            |
| Other congenital anomalies                          | 5<br>(3 - 10)        | 4<br>(2 - 8)          | 0<br>(0 - 0)           | 0<br>(0 - 1)            | 0<br>(0 - 1)            | 0<br>(0 - 1)            |
| Skin and subcutaneous diseases                      | 10<br>(4 - 14)       | 0<br>(0 - 0)          | 0<br>(0 - 0)           | 0<br>(0 - 1)            | 1<br>(0 - 2)            | 9<br>(3 - 12)           |
| Cellulitis                                          | 1<br>(0 - 1)         | 0<br>(0 - 0)          | 0<br>(0 - 0)           | 0<br>(0 - 0)            | 0<br>(0 - 0)            | 1<br>(0 - 1)            |
| Pyoderma                                            | 2<br>(1 - 3)         | 0<br>(0 - 0)          | 0<br>(0 - 0)           | 0<br>(0 - 0)            | 0<br>(0 - 0)            | 1<br>(0 - 2)            |
| Decubitus ulcer                                     | 7<br>(3 - 11)        | 0<br>(0 - 0)          | 0<br>(0 - 0)           | 0<br>(0 - 0)            | 1<br>(0 - 1)            | 6<br>(2 - 10)           |
| Other skin and subcutaneous diseases                | 0<br>(0 - 1)         | 0<br>(0 - 0)          | 0<br>(0 - 0)           | 0<br>(0 - 0)            | 0<br>(0 - 0)            | 0<br>(0 - 1)            |

Web Table 31- Saint Lucia deaths with 95% UI by age, sex, and cause in 2013

| Cause                                           | Both Sexes, All Ages | Both Sexes, 0-4 Years | Both Sexes, 5-14 Years | Both Sexes, 15-49 Years | Both Sexes, 50-69 Years | Both Sexes, 70-80 Years |
|-------------------------------------------------|----------------------|-----------------------|------------------------|-------------------------|-------------------------|-------------------------|
| Sudden infant death syndrome                    | 1<br>(0 - 3)         | 1<br>(0 - 3)          | -                      | -                       | -                       | -                       |
| Injuries                                        | 103<br>(83 - 126)    | 3<br>(2 - 7)          | 4<br>(2 - 6)           | 53<br>(39 - 67)         | 20<br>(15 - 25)         | 23<br>(19 - 28)         |
| Transport injuries                              | 25<br>(20 - 30)      | 1<br>(0 - 1)          | 1<br>(1 - 2)           | 12<br>(9 - 16)          | 6<br>(4 - 7)            | 5<br>(4 - 6)            |
| Road injuries                                   | 23<br>(18 - 28)      | 0<br>(0 - 1)          | 1<br>(1 - 2)           | 11<br>(8 - 15)          | 5<br>(4 - 7)            | 5<br>(4 - 6)            |
| Pedestrian road injuries                        | 6<br>(5 - 8)         | 0<br>(0 - 0)          | 0<br>(0 - 1)           | 2<br>(2 - 3)            | 2<br>(1 - 2)            | 2<br>(1 - 2)            |
| Cyclist road injuries                           | 1<br>(1 - 2)         | 0<br>(0 - 0)          | 0<br>(0 - 0)           | 1<br>(0 - 1)            | 0<br>(0 - 0)            | 0<br>(0 - 0)            |
| Motorcyclist road injuries                      | 2<br>(1 - 2)         | 0<br>(0 - 0)          | 0<br>(0 - 0)           | 1<br>(1 - 2)            | 0<br>(0 - 0)            | 0<br>(0 - 0)            |
| Motor vehicle road injuries                     | 13<br>(10 - 17)      | 0<br>(0 - 1)          | 1<br>(0 - 1)           | 7<br>(5 - 10)           | 3<br>(2 - 4)            | 2<br>(2 - 3)            |
| Other road injuries                             | 0<br>(0 - 0)         | 0<br>(0 - 0)          | 0<br>(0 - 0)           | 0<br>(0 - 0)            | 0<br>(0 - 0)            | 0<br>(0 - 0)            |
| Other transport injuries                        | 2<br>(1 - 2)         | 0<br>(0 - 0)          | 0<br>(0 - 0)           | 1<br>(0 - 1)            | 0<br>(0 - 1)            | 0<br>(0 - 1)            |
| Unintentional injuries                          | 38<br>(31 - 46)      | 2<br>(1 - 5)          | 1<br>(1 - 2)           | 12<br>(9 - 16)          | 7<br>(5 - 9)            | 15<br>(12 - 18)         |
| Falls                                           | 9<br>(7 - 11)        | 0<br>(0 - 0)          | 0<br>(0 - 0)           | 1<br>(1 - 2)            | 1<br>(1 - 2)            | 5<br>(4 - 7)            |
| Drowning                                        | 8<br>(6 - 11)        | 0<br>(0 - 1)          | 1<br>(0 - 1)           | 4<br>(3 - 7)            | 1<br>(1 - 2)            | 1<br>(1 - 1)            |
| Fire, heat, and hot substances                  | 4<br>(3 - 5)         | 0<br>(0 - 1)          | 0<br>(0 - 0)           | 1<br>(1 - 1)            | 1<br>(0 - 1)            | 2<br>(1 - 3)            |
| Poisonings                                      | 1<br>(1 - 1)         | 0<br>(0 - 0)          | 0<br>(0 - 0)           | 0<br>(0 - 1)            | 0<br>(0 - 0)            | 0<br>(0 - 0)            |
| Exposure to mechanical forces                   | 5<br>(3 - 6)         | 0<br>(0 - 0)          | 0<br>(0 - 0)           | 3<br>(2 - 4)            | 1<br>(1 - 1)            | 0<br>(0 - 1)            |
| Unintentional firearm injuries                  | 3<br>(2 - 4)         | 0<br>(0 - 0)          | 0<br>(0 - 0)           | 2<br>(1 - 3)            | 0<br>(0 - 1)            | 0<br>(0 - 0)            |
| Unintentional suffocation                       | 0<br>(0 - 1)         | 0<br>(0 - 0)          | 0<br>(0 - 0)           | 0<br>(0 - 0)            | 0<br>(0 - 0)            | 0<br>(0 - 0)            |
| Other exposure to mechanical forces             | 2<br>(1 - 3)         | 0<br>(0 - 0)          | 0<br>(0 - 0)           | 1<br>(1 - 2)            | 0<br>(0 - 1)            | 0<br>(0 - 0)            |
| Adverse effects of medical treatment            | 5<br>(3 - 7)         | 0<br>(0 - 1)          | 0<br>(0 - 0)           | 1<br>(0 - 1)            | 1<br>(1 - 1)            | 3<br>(2 - 4)            |
| Animal contact                                  | 1<br>(0 - 1)         | 0<br>(0 - 0)          | 0<br>(0 - 0)           | 0<br>(0 - 0)            | 0<br>(0 - 0)            | 0<br>(0 - 0)            |
| Venomous animal contact                         | 0<br>(0 - 1)         | 0<br>(0 - 0)          | 0<br>(0 - 0)           | 0<br>(0 - 0)            | 0<br>(0 - 0)            | 0<br>(0 - 0)            |
| Non-venomous animal contact                     | 0<br>(0 - 0)         | 0<br>(0 - 0)          | 0<br>(0 - 0)           | 0<br>(0 - 0)            | 0<br>(0 - 0)            | 0<br>(0 - 0)            |
| Foreign body                                    | 6<br>(4 - 8)         | 1<br>(0 - 2)          | 0<br>(0 - 0)           | 1<br>(1 - 1)            | 1<br>(1 - 1)            | 3<br>(2 - 4)            |
| Pulmonary aspiration and foreign body in airway | 5<br>(4 - 8)         | 1<br>(0 - 2)          | 0<br>(0 - 0)           | 1<br>(1 - 1)            | 1<br>(0 - 1)            | 3<br>(2 - 4)            |
| Foreign body in other body part                 | 0<br>(0 - 0)         | 0<br>(0 - 0)          | 0<br>(0 - 0)           | 0<br>(0 - 0)            | 0<br>(0 - 0)            | 0<br>(0 - 0)            |
| Other unintentional injuries                    | 1<br>(1 - 2)         | 0<br>(0 - 0)          | 0<br>(0 - 0)           | 0<br>(0 - 1)            | 0<br>(0 - 0)            | 0<br>(0 - 1)            |
| Self-harm and interpersonal violence            | 40<br>(28 - 53)      | 0<br>(0 - 1)          | 1<br>(0 - 1)           | 28<br>(19 - 38)         | 7<br>(5 - 10)           | 3<br>(2 - 4)            |
| Self-harm                                       | 16<br>(11 - 21)      | -                     | 0<br>(0 - 0)           | 10<br>(7 - 14)          | 4<br>(3 - 5)            | 2<br>(1 - 2)            |
| Interpersonal violence                          | 25<br>(14 - 33)      | 0<br>(0 - 1)          | 0<br>(0 - 1)           | 19<br>(10 - 26)         | 4<br>(2 - 6)            | 1<br>(1 - 2)            |
| Assault by firearm                              | 12<br>(6 - 18)       | 0<br>(0 - 0)          | 0<br>(0 - 0)           | 10<br>(5 - 16)          | 1<br>(1 - 2)            | 0<br>(0 - 0)            |
| Assault by sharp object                         | 7<br>(4 - 11)        | 0<br>(0 - 0)          | 0<br>(0 - 0)           | 5<br>(3 - 9)            | 1<br>(1 - 2)            | 0<br>(0 - 1)            |
| Assault by other means                          | 5<br>(3 - 8)         | 0<br>(0 - 1)          | 0<br>(0 - 0)           | 3<br>(1 - 5)            | 1<br>(1 - 2)            | 1<br>(0 - 1)            |

Web Table 31- Saint Lucia deaths with 95% UI by age, sex, and cause in 2013

| Cause                                                             | Males, All Ages    | Males, 0-4 Years | Males, 5-14 Years | Males, 15-49 Years | Males, 50-69 Years | Males, 70-80 Years |
|-------------------------------------------------------------------|--------------------|------------------|-------------------|--------------------|--------------------|--------------------|
| All causes                                                        | 728<br>(611 - 880) | 29<br>(13 - 59)  | 6<br>(3 - 9)      | 114<br>(86 - 146)  | 191<br>(145 - 248) | 389<br>(331 - 451) |
| Communicable, maternal, neonatal, and nutritional diseases        | 81<br>(68 - 101)   | 20<br>(8 - 39)   | 1<br>(1 - 2)      | 17<br>(15 - 20)    | 13<br>(10 - 16)    | 30<br>(23 - 38)    |
| HIV/AIDS and tuberculosis                                         | 18<br>(15 - 22)    | 0<br>(0 - 0)     | 0<br>(0 - 0)      | 11<br>(9 - 13)     | 5<br>(4 - 7)       | 2<br>(1 - 2)       |
| Tuberculosis                                                      | 4<br>(2 - 5)       | 0<br>(0 - 0)     | 0<br>(0 - 0)      | 1<br>(1 - 1)       | 1<br>(1 - 2)       | 1<br>(1 - 2)       |
| HIV/AIDS                                                          | 15<br>(12 - 18)    | 0<br>(0 - 0)     | 0<br>(0 - 0)      | 10<br>(8 - 12)     | 4<br>(2 - 5)       | 1<br>(0 - 1)       |
| HIV/AIDS resulting in mycobacterial infection                     | 1<br>(1 - 1)       | 0<br>(0 - 0)     | 0<br>(0 - 0)      | 1<br>(0 - 1)       | 0<br>(0 - 0)       | 0<br>(0 - 0)       |
| HIV/AIDS resulting in other diseases                              | 14<br>(11 - 17)    | 0<br>(0 - 0)     | 0<br>(0 - 0)      | 10<br>(8 - 12)     | 4<br>(2 - 5)       | 1<br>(0 - 1)       |
| Diarrhea, lower respiratory, and other common infectious diseases | 37<br>(30 - 47)    | 4<br>(2 - 9)     | 1<br>(0 - 1)      | 4<br>(3 - 6)       | 6<br>(4 - 8)       | 22<br>(16 - 30)    |
| Diarrheal diseases                                                | 4<br>(2 - 6)       | 1<br>(1 - 3)     | 0<br>(0 - 0)      | 0<br>(0 - 0)       | 0<br>(0 - 1)       | 1<br>(1 - 2)       |
| Intestinal infectious diseases                                    | 1<br>(0 - 1)       | 0<br>(0 - 1)     | 0<br>(0 - 0)      | 0<br>(0 - 0)       | 0<br>(0 - 0)       | 0<br>(0 - 0)       |
| Typhoid fever                                                     | 0<br>(0 - 1)       | 0<br>(0 - 0)     | 0<br>(0 - 0)      | 0<br>(0 - 0)       | 0<br>(0 - 0)       | 0<br>(0 - 0)       |
| Paratyphoid fever                                                 | 0<br>(0 - 0)       | 0<br>(0 - 0)     | 0<br>(0 - 0)      | 0<br>(0 - 0)       | 0<br>(0 - 0)       | 0<br>(0 - 0)       |
| Other intestinal infectious diseases                              | 0<br>(0 - 0)       | 0<br>(0 - 0)     | 0<br>(0 - 0)      | 0<br>(0 - 0)       | 0<br>(0 - 0)       | 0<br>(0 - 0)       |
| Lower respiratory infections                                      | 30<br>(23 - 39)    | 2<br>(1 - 5)     | 0<br>(0 - 1)      | 3<br>(2 - 4)       | 5<br>(3 - 7)       | 20<br>(14 - 27)    |
| Upper respiratory infections                                      | 0<br>(0 - 0)       | 0<br>(0 - 0)     | 0<br>(0 - 0)      | 0<br>(0 - 0)       | 0<br>(0 - 0)       | 0<br>(0 - 0)       |
| Otitis media                                                      | 0<br>(0 - 0)       | 0<br>(0 - 0)     | 0<br>(0 - 0)      | 0<br>(0 - 0)       | 0<br>(0 - 0)       | 0<br>(0 - 0)       |
| Meningitis                                                        | 1<br>(1 - 2)       | 0<br>(0 - 1)     | 0<br>(0 - 0)      | 0<br>(0 - 1)       | 0<br>(0 - 0)       | 0<br>(0 - 1)       |
| Pneumococcal meningitis                                           | 0<br>(0 - 1)       | 0<br>(0 - 0)     | 0<br>(0 - 0)      | 0<br>(0 - 0)       | 0<br>(0 - 0)       | 0<br>(0 - 0)       |
| H influenzae type B meningitis                                    | 0<br>(0 - 0)       | 0<br>(0 - 0)     | 0<br>(0 - 0)      | 0<br>(0 - 0)       | 0<br>(0 - 0)       | 0<br>(0 - 0)       |
| Meningococcal meningitis                                          | 0<br>(0 - 0)       | 0<br>(0 - 0)     | 0<br>(0 - 0)      | 0<br>(0 - 0)       | 0<br>(0 - 0)       | 0<br>(0 - 0)       |
| Other meningitis                                                  | 1<br>(0 - 1)       | 0<br>(0 - 0)     | 0<br>(0 - 0)      | 0<br>(0 - 0)       | 0<br>(0 - 0)       | 0<br>(0 - 0)       |
| Encephalitis                                                      | 1<br>(1 - 1)       | 0<br>(0 - 0)     | 0<br>(0 - 0)      | 0<br>(0 - 1)       | 0<br>(0 - 0)       | 0<br>(0 - 0)       |
| Diphtheria                                                        | 0<br>(0 - 0)       | 0<br>(0 - 0)     | 0<br>(0 - 0)      | 0<br>(0 - 0)       | 0<br>(0 - 0)       | --<br>(0 - 0)      |
| Whooping cough                                                    | 0<br>(0 - 0)       | 0<br>(0 - 0)     | 0<br>(0 - 0)      | 0<br>(0 - 0)       | 0<br>(0 - 0)       | --<br>(0 - 0)      |
| Tetanus                                                           | 0<br>(0 - 0)       | 0<br>(0 - 0)     | 0<br>(0 - 0)      | 0<br>(0 - 0)       | 0<br>(0 - 0)       | 0<br>(0 - 0)       |
| Measles                                                           | 0<br>(0 - 0)       | 0<br>(0 - 0)     | 0<br>(0 - 0)      | 0<br>(0 - 0)       | 0<br>(0 - 0)       | --<br>(0 - 0)      |
| Varicella and herpes zoster                                       | 0<br>(0 - 0)       | 0<br>(0 - 0)     | 0<br>(0 - 0)      | 0<br>(0 - 0)       | 0<br>(0 - 0)       | 0<br>(0 - 0)       |
| Neglected tropical diseases and malaria                           | 1<br>(1 - 1)       | 0<br>(0 - 0)     | 0<br>(0 - 0)      | 0<br>(0 - 0)       | 0<br>(0 - 0)       | 0<br>(0 - 0)       |
| Leishmaniasis                                                     | 0<br>(0 - 0)       | 0<br>(0 - 0)     | 0<br>(0 - 0)      | 0<br>(0 - 0)       | 0<br>(0 - 0)       | 0<br>(0 - 0)       |
| Visceral leishmaniasis                                            | 0<br>(0 - 0)       | 0<br>(0 - 0)     | 0<br>(0 - 0)      | 0<br>(0 - 0)       | 0<br>(0 - 0)       | 0<br>(0 - 0)       |
| Schistosomiasis                                                   | 0<br>(0 - 0)       | 0<br>(0 - 0)     | 0<br>(0 - 0)      | 0<br>(0 - 0)       | 0<br>(0 - 0)       | 0<br>(0 - 0)       |
| Cysticercosis                                                     | 0<br>(0 - 0)       | 0<br>(0 - 0)     | 0<br>(0 - 0)      | 0<br>(0 - 0)       | 0<br>(0 - 0)       | 0<br>(0 - 0)       |
| Cystic echinococcosis                                             | 0<br>(0 - 0)       | 0<br>(0 - 0)     | 0<br>(0 - 0)      | 0<br>(0 - 0)       | 0<br>(0 - 0)       | 0<br>(0 - 0)       |
| Dengue                                                            | 0<br>(0 - 0)       | 0<br>(0 - 0)     | 0<br>(0 - 0)      | 0<br>(0 - 0)       | 0<br>(0 - 0)       | 0<br>(0 - 0)       |
| Rabies                                                            | 0<br>(0 - 0)       | 0<br>(0 - 0)     | 0<br>(0 - 0)      | 0<br>(0 - 0)       | 0<br>(0 - 0)       | 0<br>(0 - 0)       |
| Intestinal nematode infections                                    | 0<br>(0 - 0)       | 0<br>(0 - 0)     | 0<br>(0 - 0)      | 0<br>(0 - 0)       | 0<br>(0 - 0)       | 0<br>(0 - 0)       |
| Ascariasis                                                        | 0<br>(0 - 0)       | 0<br>(0 - 0)     | 0<br>(0 - 0)      | 0<br>(0 - 0)       | 0<br>(0 - 0)       | 0<br>(0 - 0)       |
| Other neglected tropical diseases                                 | 0<br>(0 - 0)       | 0<br>(0 - 0)     | 0<br>(0 - 0)      | 0<br>(0 - 0)       | 0<br>(0 - 0)       | 0<br>(0 - 0)       |
| Maternal disorders                                                | --                 | --               | --                | --                 | --                 | --                 |
| Maternal hemorrhage                                               | --                 | --               | --                | --                 | --                 | --                 |

Web Table 31- Saint Lucia deaths with 95% UI by age, sex, and cause in 2013

| Cause                                                            | Males, All Ages    | Males, 0-4 Years | Males, 5-14 Years | Males, 15-49 Years | Males, 50-69 Years | Males, 70-80 Years |
|------------------------------------------------------------------|--------------------|------------------|-------------------|--------------------|--------------------|--------------------|
| Maternal sepsis and other maternal infections                    | --                 | --               | --                | --                 | --                 | --                 |
| Maternal hypertensive disorders                                  | --                 | --               | --                | --                 | --                 | --                 |
| Maternal obstructed labor                                        | --                 | --               | --                | --                 | --                 | --                 |
| Maternal abortive outcome                                        | --                 | --               | --                | --                 | --                 | --                 |
| Indirect maternal deaths                                         | --                 | --               | --                | --                 | --                 | --                 |
| Late maternal deaths                                             | --                 | --               | --                | --                 | --                 | --                 |
| Maternal deaths aggravated by HIV/AIDS                           | --                 | --               | --                | --                 | --                 | --                 |
| Other maternal disorders                                         | --                 | --               | --                | --                 | --                 | --                 |
| Neonatal disorders                                               | 14<br>(6 - 27)     | 14<br>(6 - 27)   | --                | --                 | --                 | --                 |
| Neonatal preterm birth complications                             | 7<br>(2 - 14)      | 7<br>(2 - 14)    | --                | --                 | --                 | --                 |
| Neonatal encephalopathy due to birth asphyxia and trauma         | 3<br>(1 - 7)       | 3<br>(1 - 7)     | --                | --                 | --                 | --                 |
| Neonatal sepsis and other neonatal infections                    | 2<br>(1 - 5)       | 2<br>(1 - 5)     | --                | --                 | --                 | --                 |
| Hemolytic disease and other neonatal jaundice                    | 0<br>(0 - 1)       | 0<br>(0 - 1)     | --                | --                 | --                 | --                 |
| Other neonatal disorders                                         | 2<br>(1 - 4)       | 2<br>(1 - 4)     | --                | --                 | --                 | --                 |
| Nutritional deficiencies                                         | 8<br>(5 - 12)      | 1<br>(0 - 3)     | 0<br>(0 - 0)      | 1<br>(0 - 1)       | 1<br>(1 - 2)       | 5<br>(3 - 7)       |
| Protein-energy malnutrition                                      | 4<br>(2 - 6)       | 1<br>(0 - 2)     | 0<br>(0 - 0)      | 0<br>(0 - 1)       | 1<br>(0 - 1)       | 2<br>(1 - 4)       |
| Iodine deficiency                                                | 0<br>(0 - 0)       | 0<br>(0 - 0)     | 0<br>(0 - 0)      | 0<br>(0 - 0)       | 0<br>(0 - 0)       | 0<br>(0 - 0)       |
| Iron-deficiency anemia                                           | 4<br>(2 - 6)       | 0<br>(0 - 0)     | 0<br>(0 - 0)      | 0<br>(0 - 1)       | 1<br>(0 - 1)       | 2<br>(1 - 4)       |
| Other nutritional deficiencies                                   | 0<br>(0 - 1)       | 0<br>(0 - 0)     | 0<br>(0 - 0)      | 0<br>(0 - 0)       | 0<br>(0 - 0)       | 0<br>(0 - 1)       |
| Other communicable, maternal, neonatal, and nutritional diseases | 2<br>(1 - 3)       | 0<br>(0 - 0)     | 0<br>(0 - 0)      | 1<br>(0 - 1)       | 1<br>(0 - 1)       | 1<br>(0 - 1)       |
| Sexually transmitted diseases excluding HIV                      | 0<br>(0 - 0)       | 0<br>(0 - 0)     | 0<br>(0 - 0)      | 0<br>(0 - 0)       | 0<br>(0 - 0)       | 0<br>(0 - 0)       |
| Syphilis                                                         | 0<br>(0 - 0)       | 0<br>(0 - 0)     | 0<br>(0 - 0)      | 0<br>(0 - 0)       | 0<br>(0 - 0)       | 0<br>(0 - 0)       |
| Chlamydial infection                                             | --                 | --               | --                | --                 | --                 | --                 |
| Gonococcal infection                                             | 0<br>(0 - 0)       | --               | 0<br>(0 - 0)      | 0<br>(0 - 0)       | 0<br>(0 - 0)       | 0<br>(0 - 0)       |
| Other sexually transmitted diseases                              | 0<br>(0 - 0)       | --               | 0<br>(0 - 0)      | 0<br>(0 - 0)       | 0<br>(0 - 0)       | 0<br>(0 - 0)       |
| Hepatitis                                                        | 0<br>(0 - 0)       | 0<br>(0 - 0)     | 0<br>(0 - 0)      | 0<br>(0 - 0)       | 0<br>(0 - 0)       | 0<br>(0 - 0)       |
| Acute hepatitis A                                                | 0<br>(0 - 0)       | 0<br>(0 - 0)     | 0<br>(0 - 0)      | 0<br>(0 - 0)       | 0<br>(0 - 0)       | 0<br>(0 - 0)       |
| Acute hepatitis B                                                | 0<br>(0 - 0)       | 0<br>(0 - 0)     | 0<br>(0 - 0)      | 0<br>(0 - 0)       | 0<br>(0 - 0)       | 0<br>(0 - 0)       |
| Acute hepatitis C                                                | 0<br>(0 - 0)       | --               | 0<br>(0 - 0)      | 0<br>(0 - 0)       | 0<br>(0 - 0)       | 0<br>(0 - 0)       |
| Other infectious diseases                                        | 2<br>(1 - 2)       | 0<br>(0 - 0)     | 0<br>(0 - 0)      | 1<br>(0 - 1)       | 0<br>(0 - 1)       | 1<br>(0 - 1)       |
| Non-communicable diseases                                        | 572<br>(469 - 695) | 7<br>(3 - 15)    | 2<br>(1 - 4)      | 52<br>(38 - 68)    | 163<br>(123 - 213) | 347<br>(295 - 403) |
| Neoplasms                                                        | 134<br>(106 - 168) | 0<br>(0 - 1)     | 1<br>(0 - 1)      | 11<br>(8 - 15)     | 41<br>(31 - 54)    | 80<br>(63 - 101)   |
| Esophageal cancer                                                | 4<br>(3 - 5)       | --               | --                | 0<br>(0 - 0)       | 2<br>(1 - 2)       | 2<br>(1 - 3)       |
| Stomach cancer                                                   | 9<br>(7 - 12)      | --               | --                | 1<br>(0 - 1)       | 3<br>(2 - 4)       | 5<br>(4 - 7)       |
| Liver cancer                                                     | 4<br>(3 - 5)       | --               | 0<br>(0 - 0)      | 1<br>(0 - 1)       | 2<br>(1 - 2)       | 2<br>(1 - 2)       |
| Liver cancer due to hepatitis B                                  | 1<br>(1 - 2)       | --               | 0<br>(0 - 0)      | 0<br>(0 - 0)       | 1<br>(0 - 1)       | 0<br>(0 - 1)       |
| Liver cancer due to hepatitis C                                  | 2<br>(1 - 3)       | --               | 0<br>(0 - 0)      | 0<br>(0 - 0)       | 1<br>(0 - 1)       | 1<br>(1 - 1)       |
| Liver cancer due to alcohol use                                  | 1<br>(0 - 1)       | --               | --                | 0<br>(0 - 0)       | 0<br>(0 - 1)       | 0<br>(0 - 1)       |
| Liver cancer due to other causes                                 | 0<br>(0 - 0)       | --               | 0<br>(0 - 0)      | 0<br>(0 - 0)       | 0<br>(0 - 0)       | 0<br>(0 - 0)       |
| Larynx cancer                                                    | 2<br>(1 - 3)       | --               | --                | 0<br>(0 - 0)       | 1<br>(1 - 1)       | 1<br>(1 - 1)       |

Web Table 31- Saint Lucia deaths with 95% UI by age, sex, and cause in 2013

| Cause                                         | Males, All Ages    | Males, 0-4 Years | Males, 5-14 Years | Males, 15-49 Years | Males, 50-69 Years | Males, 70-80 Years |
|-----------------------------------------------|--------------------|------------------|-------------------|--------------------|--------------------|--------------------|
| Tracheal, bronchus and lung cancer            | 17<br>(13 - 23)    | --               | --                | 2<br>(1 - 2)       | 8<br>(6 - 11)      | 8<br>(6 - 10)      |
| Breast cancer                                 | 1<br>(0 - 1)       | --               | --                | 0<br>(0 - 0)       | 0<br>(0 - 0)       | 0<br>(0 - 1)       |
| Cervical cancer                               | --                 | --               | --                | --                 | --                 | --                 |
| Uterine cancer                                | --                 | --               | --                | --                 | --                 | --                 |
| Prostate cancer                               | 49<br>(31 - 69)    | --               | --                | 0<br>(0 - 0)       | 8<br>(5 - 13)      | 41<br>(26 - 57)    |
| Colon and rectum cancer                       | 13<br>(10 - 16)    | --               | --                | 1<br>(1 - 2)       | 4<br>(3 - 6)       | 7<br>(5 - 9)       |
| Lip and oral cavity cancer                    | 2<br>(1 - 3)       | --               | --                | 0<br>(0 - 0)       | 1<br>(1 - 1)       | 1<br>(1 - 1)       |
| Nasopharynx cancer                            | 1<br>(0 - 1)       | --               | 0<br>(0 - 0)      | 0<br>(0 - 0)       | 0<br>(0 - 0)       | 0<br>(0 - 0)       |
| Other pharynx cancer                          | 1<br>(1 - 2)       | --               | --                | 0<br>(0 - 0)       | 1<br>(0 - 1)       | 0<br>(0 - 0)       |
| Gallbladder and biliary tract cancer          | 1<br>(1 - 3)       | --               | --                | 0<br>(0 - 0)       | 1<br>(0 - 1)       | 1<br>(0 - 2)       |
| Pancreatic cancer                             | 5<br>(4 - 6)       | --               | --                | 0<br>(0 - 1)       | 2<br>(1 - 3)       | 2<br>(2 - 3)       |
| Malignant skin melanoma                       | 1<br>(0 - 1)       | --               | --                | 0<br>(0 - 0)       | 0<br>(0 - 0)       | 0<br>(0 - 1)       |
| Non-melanoma skin cancer                      | 0<br>(0 - 1)       | --               | --                | 0<br>(0 - 0)       | 0<br>(0 - 0)       | 0<br>(0 - 0)       |
| Ovarian cancer                                | --                 | --               | --                | --                 | --                 | --                 |
| Testicular cancer                             | 0<br>(0 - 0)       | --               | --                | 0<br>(0 - 0)       | 0<br>(0 - 0)       | 0<br>(0 - 0)       |
| Kidney cancer                                 | 2<br>(1 - 2)       | 0<br>(0 - 0)     | 0<br>(0 - 0)      | 0<br>(0 - 0)       | 1<br>(1 - 1)       | 1<br>(1 - 1)       |
| Bladder cancer                                | 2<br>(2 - 3)       | --               | --                | 0<br>(0 - 0)       | 1<br>(0 - 1)       | 2<br>(1 - 2)       |
| Brain and nervous system cancer               | 1<br>(0 - 2)       | 0<br>(0 - 0)     | 0<br>(0 - 0)      | 0<br>(0 - 1)       | 1<br>(0 - 1)       | 0<br>(0 - 1)       |
| Thyroid cancer                                | 0<br>(0 - 0)       | --               | 0<br>(0 - 0)      | 0<br>(0 - 0)       | 0<br>(0 - 0)       | 0<br>(0 - 0)       |
| Mesothelioma                                  | 0<br>(0 - 1)       | --               | --                | 0<br>(0 - 0)       | 0<br>(0 - 0)       | 0<br>(0 - 0)       |
| Hodgkin lymphoma                              | 0<br>(0 - 0)       | 0<br>(0 - 0)     | 0<br>(0 - 0)      | 0<br>(0 - 0)       | 0<br>(0 - 0)       | 0<br>(0 - 0)       |
| Non-Hodgkin lymphoma                          | 5<br>(4 - 7)       | 0<br>(0 - 0)     | 0<br>(0 - 0)      | 1<br>(1 - 2)       | 2<br>(1 - 3)       | 2<br>(1 - 3)       |
| Multiple myeloma                              | 2<br>(1 - 3)       | --               | --                | 0<br>(0 - 0)       | 1<br>(0 - 1)       | 1<br>(0 - 1)       |
| Leukemia                                      | 4<br>(3 - 5)       | 0<br>(0 - 0)     | 0<br>(0 - 1)      | 1<br>(1 - 1)       | 1<br>(1 - 1)       | 1<br>(1 - 2)       |
| Other neoplasms                               | 6<br>(5 - 8)       | 0<br>(0 - 0)     | 0<br>(0 - 0)      | 2<br>(1 - 2)       | 2<br>(1 - 3)       | 2<br>(2 - 3)       |
| Cardiovascular diseases                       | 221<br>(180 - 271) | 0<br>(0 - 1)     | 0<br>(0 - 1)      | 17<br>(12 - 23)    | 64<br>(48 - 85)    | 138<br>(116 - 164) |
| Rheumatic heart disease                       | 1<br>(1 - 1)       | 0<br>(0 - 0)     | 0<br>(0 - 0)      | 0<br>(0 - 1)       | 0<br>(0 - 0)       | 0<br>(0 - 1)       |
| Ischemic heart disease                        | 92<br>(72 - 117)   | 0<br>(0 - 0)     | 0<br>(0 - 0)      | 8<br>(6 - 11)      | 30<br>(22 - 40)    | 54<br>(42 - 69)    |
| Cerebrovascular disease                       | 82<br>(61 - 105)   | 0<br>(0 - 0)     | 0<br>(0 - 0)      | 4<br>(3 - 6)       | 22<br>(16 - 30)    | 55<br>(42 - 70)    |
| Ischemic stroke                               | 52<br>(39 - 67)    | 0<br>(0 - 0)     | 0<br>(0 - 0)      | 1<br>(1 - 2)       | 12<br>(8 - 16)     | 39<br>(28 - 49)    |
| Hemorrhagic stroke                            | 30<br>(21 - 41)    | 0<br>(0 - 0)     | 0<br>(0 - 0)      | 3<br>(2 - 4)       | 10<br>(7 - 14)     | 16<br>(11 - 23)    |
| Hypertensive heart disease                    | 19<br>(13 - 29)    | 0<br>(0 - 0)     | 0<br>(0 - 0)      | 1<br>(1 - 2)       | 6<br>(3 - 8)       | 12<br>(8 - 20)     |
| Cardiomyopathy and myocarditis                | 8<br>(6 - 11)      | 0<br>(0 - 0)     | 0<br>(0 - 0)      | 1<br>(1 - 2)       | 3<br>(2 - 4)       | 4<br>(2 - 6)       |
| Atrial fibrillation and flutter               | 3<br>(2 - 4)       | --               | --                | 0<br>(0 - 0)       | 1<br>(0 - 1)       | 2<br>(1 - 4)       |
| Aortic aneurysm                               | 4<br>(3 - 5)       | --               | --                | 0<br>(0 - 0)       | 1<br>(1 - 2)       | 2<br>(2 - 3)       |
| Peripheral vascular disease                   | 2<br>(1 - 3)       | --               | --                | 0<br>(0 - 0)       | 0<br>(0 - 0)       | 2<br>(1 - 3)       |
| Endocarditis                                  | 1<br>(1 - 2)       | 0<br>(0 - 0)     | 0<br>(0 - 0)      | 0<br>(0 - 0)       | 0<br>(0 - 0)       | 1<br>(0 - 1)       |
| Other cardiovascular and circulatory diseases | 8<br>(6 - 11)      | 0<br>(0 - 0)     | 0<br>(0 - 0)      | 1<br>(1 - 2)       | 2<br>(1 - 3)       | 5<br>(3 - 7)       |
| Chronic respiratory diseases                  | 36<br>(28 - 46)    | 0<br>(0 - 1)     | 0<br>(0 - 0)      | 2<br>(1 - 3)       | 7<br>(5 - 10)      | 26<br>(21 - 33)    |
| Chronic obstructive pulmonary disease         | 27<br>(21 - 34)    | 0<br>(0 - 0)     | 0<br>(0 - 0)      | 1<br>(1 - 1)       | 5<br>(3 - 7)       | 21<br>(17 - 27)    |

Web Table 31- Saint Lucia deaths with 95% UI by age, sex, and cause in 2013

| Cause                                               | Males, All Ages | Males, 0-4 Years | Males, 5-14 Years | Males, 15-49 Years | Males, 50-69 Years | Males, 70-80 Years |
|-----------------------------------------------------|-----------------|------------------|-------------------|--------------------|--------------------|--------------------|
| Pneumoconiosis                                      | 1<br>(1 - 2)    | 0<br>(0 - 0)     | 0<br>(0 - 0)      | 0<br>(0 - 0)       | 0<br>(0 - 1)       | 1<br>(0 - 1)       |
| Silicosis                                           | 0<br>(0 - 0)    | 0<br>(0 - 0)     | 0<br>(0 - 0)      | 0<br>(0 - 0)       | 0<br>(0 - 0)       | 0<br>(0 - 0)       |
| Asbestosis                                          | 0<br>(0 - 0)    | 0<br>(0 - 0)     | 0<br>(0 - 0)      | 0<br>(0 - 0)       | 0<br>(0 - 0)       | 0<br>(0 - 0)       |
| Coal workers pneumoconiosis                         | 0<br>(0 - 0)    | 0<br>(0 - 0)     | 0<br>(0 - 0)      | 0<br>(0 - 0)       | 0<br>(0 - 0)       | 0<br>(0 - 0)       |
| Other pneumoconiosis                                | 1<br>(0 - 1)    | 0<br>(0 - 0)     | 0<br>(0 - 0)      | 0<br>(0 - 0)       | 0<br>(0 - 0)       | 0<br>(0 - 1)       |
| Asthma                                              | 5<br>(3 - 6)    | 0<br>(0 - 0)     | 0<br>(0 - 0)      | 1<br>(1 - 1)       | 1<br>(1 - 2)       | 2<br>(2 - 4)       |
| Interstitial lung disease and pulmonary sarcoidosis | 2<br>(1 - 4)    | 0<br>(0 - 0)     | 0<br>(0 - 0)      | 0<br>(0 - 0)       | 1<br>(0 - 1)       | 1<br>(1 - 2)       |
| Other chronic respiratory diseases                  | 1<br>(1 - 1)    | 0<br>(0 - 0)     | 0<br>(0 - 0)      | 0<br>(0 - 0)       | 0<br>(0 - 0)       | 0<br>(0 - 0)       |
| Cirrhosis                                           | 15<br>(12 - 20) | 0<br>(0 - 0)     | 0<br>(0 - 0)      | 4<br>(3 - 6)       | 7<br>(5 - 10)      | 4<br>(3 - 5)       |
| Cirrhosis due to hepatitis B                        | 1<br>(1 - 2)    | 0<br>(0 - 0)     | 0<br>(0 - 0)      | 0<br>(0 - 1)       | 1<br>(0 - 1)       | 0<br>(0 - 1)       |
| Cirrhosis due to hepatitis C                        | 4<br>(3 - 7)    | 0<br>(0 - 0)     | 0<br>(0 - 0)      | 1<br>(0 - 2)       | 2<br>(1 - 3)       | 1<br>(1 - 2)       |
| Cirrhosis due to alcohol use                        | 8<br>(5 - 11)   | --               | --                | 2<br>(1 - 3)       | 4<br>(2 - 6)       | 2<br>(1 - 3)       |
| Cirrhosis due to other causes                       | 2<br>(1 - 3)    | 0<br>(0 - 0)     | 0<br>(0 - 0)      | 1<br>(1 - 2)       | 1<br>(0 - 1)       | 0<br>(0 - 0)       |
| Digestive diseases                                  | 15<br>(11 - 19) | 0<br>(0 - 0)     | 0<br>(0 - 0)      | 3<br>(2 - 4)       | 5<br>(3 - 6)       | 7<br>(5 - 9)       |
| Peptic ulcer disease                                | 4<br>(3 - 6)    | 0<br>(0 - 0)     | 0<br>(0 - 0)      | 1<br>(1 - 1)       | 2<br>(1 - 2)       | 2<br>(1 - 3)       |
| Gastritis and duodenitis                            | 1<br>(1 - 2)    | 0<br>(0 - 0)     | 0<br>(0 - 0)      | 0<br>(0 - 0)       | 0<br>(0 - 1)       | 1<br>(0 - 1)       |
| Appendicitis                                        | 1<br>(0 - 1)    | 0<br>(0 - 0)     | 0<br>(0 - 0)      | 0<br>(0 - 0)       | 0<br>(0 - 0)       | 0<br>(0 - 0)       |
| Paralytic ileus and intestinal obstruction          | 2<br>(1 - 3)    | 0<br>(0 - 0)     | 0<br>(0 - 0)      | 0<br>(0 - 0)       | 1<br>(0 - 1)       | 1<br>(0 - 2)       |
| Inguinal, femoral, and abdominal hernia             | 1<br>(0 - 2)    | 0<br>(0 - 0)     | 0<br>(0 - 0)      | 0<br>(0 - 0)       | 0<br>(0 - 1)       | 1<br>(0 - 1)       |
| Inflammatory bowel disease                          | 2<br>(1 - 2)    | 0<br>(0 - 0)     | 0<br>(0 - 0)      | 0<br>(0 - 0)       | 0<br>(0 - 1)       | 1<br>(1 - 1)       |
| Vascular intestinal disorders                       | 1<br>(0 - 2)    | 0<br>(0 - 0)     | 0<br>(0 - 0)      | 0<br>(0 - 0)       | 0<br>(0 - 1)       | 0<br>(0 - 1)       |
| Gallbladder and biliary diseases                    | 1<br>(0 - 1)    | 0<br>(0 - 0)     | 0<br>(0 - 0)      | 0<br>(0 - 0)       | 0<br>(0 - 0)       | 0<br>(0 - 1)       |
| Pancreatitis                                        | 1<br>(1 - 2)    | 0<br>(0 - 0)     | 0<br>(0 - 0)      | 1<br>(0 - 1)       | 0<br>(0 - 1)       | 0<br>(0 - 0)       |
| Other digestive diseases                            | 2<br>(1 - 2)    | 0<br>(0 - 0)     | 0<br>(0 - 0)      | 0<br>(0 - 0)       | 1<br>(0 - 1)       | 1<br>(0 - 1)       |
| Neurological disorders                              | 41<br>(32 - 51) | 0<br>(0 - 0)     | 0<br>(0 - 0)      | 2<br>(1 - 3)       | 4<br>(3 - 6)       | 35<br>(27 - 43)    |
| Alzheimer disease and other dementias               | 33<br>(26 - 42) | --               | --                | 0<br>(0 - 0)       | 2<br>(1 - 3)       | 31<br>(24 - 39)    |
| Parkinson disease                                   | 3<br>(2 - 4)    | --               | --                | 0<br>(0 - 0)       | 1<br>(0 - 1)       | 2<br>(2 - 4)       |
| Epilepsy                                            | 3<br>(2 - 4)    | 0<br>(0 - 0)     | 0<br>(0 - 0)      | 1<br>(1 - 2)       | 1<br>(0 - 1)       | 1<br>(0 - 1)       |
| Multiple sclerosis                                  | 0<br>(0 - 0)    | --               | --                | 0<br>(0 - 0)       | 0<br>(0 - 0)       | 0<br>(0 - 0)       |
| Other neurological disorders                        | 2<br>(1 - 2)    | 0<br>(0 - 0)     | 0<br>(0 - 0)      | 0<br>(0 - 1)       | 1<br>(0 - 1)       | 0<br>(0 - 1)       |
| Mental and substance use disorders                  | 4<br>(2 - 5)    | 0<br>(0 - 0)     | 0<br>(0 - 0)      | 1<br>(1 - 2)       | 1<br>(1 - 2)       | 1<br>(1 - 1)       |
| Schizophrenia                                       | 0<br>(0 - 0)    | --               | --                | 0<br>(0 - 0)       | 0<br>(0 - 0)       | 0<br>(0 - 0)       |
| Alcohol use disorders                               | 2<br>(1 - 3)    | --               | --                | 1<br>(0 - 1)       | 1<br>(1 - 2)       | 0<br>(0 - 1)       |
| Drug use disorders                                  | 1<br>(1 - 2)    | 0<br>(0 - 0)     | --                | 1<br>(0 - 1)       | 0<br>(0 - 0)       | 0<br>(0 - 0)       |
| Opioid use disorders                                | 0<br>(0 - 1)    | 0<br>(0 - 0)     | --                | 0<br>(0 - 0)       | 0<br>(0 - 0)       | 0<br>(0 - 0)       |
| Cocaine use disorders                               | 0<br>(0 - 0)    | 0<br>(0 - 0)     | --                | 0<br>(0 - 0)       | 0<br>(0 - 0)       | 0<br>(0 - 0)       |
| Amphetamine use disorders                           | 0<br>(0 - 0)    | 0<br>(0 - 0)     | --                | 0<br>(0 - 0)       | 0<br>(0 - 0)       | 0<br>(0 - 0)       |
| Other drug use disorders                            | 1<br>(1 - 1)    | 0<br>(0 - 0)     | --                | 0<br>(0 - 1)       | 0<br>(0 - 0)       | 0<br>(0 - 0)       |
| Eating disorders                                    | 0<br>(0 - 0)    | --               | 0<br>(0 - 0)      | 0<br>(0 - 0)       | --                 | --                 |
| Anorexia nervosa                                    | 0<br>(0 - 0)    | --               | 0<br>(0 - 0)      | 0<br>(0 - 0)       | --                 | --                 |

Web Table 31- Saint Lucia deaths with 95% UI by age, sex, and cause in 2013

| Cause                                               | Males, All Ages  | Males, 0-4 Years | Males, 5-14 Years | Males, 15-49 Years | Males, 50-69 Years | Males, 70-80 Years |
|-----------------------------------------------------|------------------|------------------|-------------------|--------------------|--------------------|--------------------|
| Diabetes, urogenital, blood, and endocrine diseases | 94<br>(75 - 117) | 1<br>(0 - 1)     | 0<br>(0 - 1)      | 10<br>(7 - 13)     | 31<br>(22 - 41)    | 52<br>(42 - 65)    |
| Diabetes mellitus                                   | 59<br>(46 - 75)  | 0<br>(0 - 0)     | 0<br>(0 - 0)      | 4<br>(3 - 6)       | 21<br>(15 - 28)    | 34<br>(26 - 43)    |
| Acute glomerulonephritis                            | 0<br>(0 - 0)     | 0<br>(0 - 0)     | 0<br>(0 - 0)      | 0<br>(0 - 0)       | 0<br>(0 - 0)       | 0<br>(0 - 0)       |
| Chronic kidney disease                              | 22<br>(16 - 31)  | 0<br>(0 - 0)     | 0<br>(0 - 0)      | 3<br>(2 - 4)       | 7<br>(4 - 9)       | 12<br>(9 - 18)     |
| Chronic kidney disease due to diabetes mellitus     | 3<br>(2 - 6)     | 0<br>(0 - 0)     | 0<br>(0 - 0)      | 0<br>(0 - 1)       | 1<br>(1 - 3)       | 1<br>(1 - 3)       |
| Chronic kidney disease due to hypertension          | 12<br>(8 - 17)   | 0<br>(0 - 0)     | 0<br>(0 - 0)      | 2<br>(1 - 2)       | 4<br>(2 - 6)       | 7<br>(4 - 9)       |
| Chronic kidney disease due to glomerulonephritis    | 1<br>(0 - 1)     | 0<br>(0 - 0)     | 0<br>(0 - 0)      | 0<br>(0 - 0)       | 0<br>(0 - 0)       | 0<br>(0 - 1)       |
| Chronic kidney disease due to other causes          | 6<br>(4 - 11)    | 0<br>(0 - 0)     | 0<br>(0 - 0)      | 1<br>(0 - 2)       | 1<br>(1 - 3)       | 4<br>(2 - 7)       |
| Urinary diseases and male infertility               | 5<br>(3 - 7)     | 0<br>(0 - 0)     | 0<br>(0 - 0)      | 0<br>(0 - 0)       | 1<br>(1 - 2)       | 4<br>(2 - 5)       |
| Interstitial nephritis and urinary tract infections | 4<br>(2 - 5)     | 0<br>(0 - 0)     | 0<br>(0 - 0)      | 0<br>(0 - 0)       | 1<br>(0 - 1)       | 3<br>(1 - 4)       |
| Urolithiasis                                        | 0<br>(0 - 0)     | --               | 0<br>(0 - 0)      | 0<br>(0 - 0)       | 0<br>(0 - 0)       | 0<br>(0 - 0)       |
| Other urinary diseases                              | 1<br>(1 - 2)     | 0<br>(0 - 0)     | 0<br>(0 - 0)      | 0<br>(0 - 0)       | 0<br>(0 - 1)       | 1<br>(1 - 2)       |
| Gynecological diseases                              | --               | --               | --                | --                 | --                 | --                 |
| Uterine fibroids                                    | --               | --               | --                | --                 | --                 | --                 |
| Polycystic ovarian syndrome                         | --               | --               | --                | --                 | --                 | --                 |
| Endometriosis                                       | --               | --               | --                | --                 | --                 | --                 |
| Genital prolapse                                    | --               | --               | --                | --                 | --                 | --                 |
| Other gynecological diseases                        | --               | --               | --                | --                 | --                 | --                 |
| Hemoglobinopathies and hemolytic anemias            | 1<br>(1 - 2)     | 0<br>(0 - 0)     | 0<br>(0 - 0)      | 1<br>(0 - 1)       | 0<br>(0 - 0)       | 0<br>(0 - 0)       |
| Thalassemias                                        | 0<br>(0 - 0)     | 0<br>(0 - 0)     | 0<br>(0 - 0)      | 0<br>(0 - 0)       | 0<br>(0 - 0)       | 0<br>(0 - 0)       |
| Sickle cell disorders                               | 1<br>(1 - 2)     | 0<br>(0 - 0)     | 0<br>(0 - 0)      | 1<br>(0 - 1)       | 0<br>(0 - 0)       | 0<br>(0 - 0)       |
| G6PD deficiency                                     | 0<br>(0 - 0)     | 0<br>(0 - 0)     | 0<br>(0 - 0)      | 0<br>(0 - 0)       | 0<br>(0 - 0)       | 0<br>(0 - 0)       |
| Other hemoglobinopathies and hemolytic anemias      | 0<br>(0 - 0)     | 0<br>(0 - 0)     | 0<br>(0 - 0)      | 0<br>(0 - 0)       | 0<br>(0 - 0)       | 0<br>(0 - 0)       |
| Endocrine, metabolic, blood, and immune disorders   | 6<br>(4 - 11)    | 0<br>(0 - 1)     | 0<br>(0 - 0)      | 1<br>(1 - 3)       | 2<br>(1 - 4)       | 2<br>(1 - 5)       |
| Musculoskeletal disorders                           | 2<br>(1 - 2)     | --               | 0<br>(0 - 0)      | 1<br>(0 - 1)       | 0<br>(0 - 1)       | 1<br>(0 - 1)       |
| Rheumatoid arthritis                                | 0<br>(0 - 0)     | --               | 0<br>(0 - 0)      | 0<br>(0 - 0)       | 0<br>(0 - 0)       | 0<br>(0 - 0)       |
| Other musculoskeletal disorders                     | 1<br>(1 - 2)     | --               | 0<br>(0 - 0)      | 0<br>(0 - 1)       | 0<br>(0 - 1)       | 1<br>(0 - 1)       |
| Other non-communicable diseases                     | 11<br>(8 - 17)   | 5<br>(2 - 11)    | 1<br>(0 - 1)      | 1<br>(1 - 2)       | 1<br>(1 - 2)       | 3<br>(2 - 5)       |
| Congenital anomalies                                | 7<br>(4 - 12)    | 5<br>(2 - 9)     | 0<br>(0 - 1)      | 1<br>(1 - 1)       | 0<br>(0 - 1)       | 0<br>(0 - 1)       |
| Neural tube defects                                 | 0<br>(0 - 0)     | 0<br>(0 - 0)     | 0<br>(0 - 0)      | 0<br>(0 - 0)       | 0<br>(0 - 0)       | 0<br>(0 - 0)       |
| Congenital heart anomalies                          | 3<br>(2 - 6)     | 2<br>(1 - 5)     | 0<br>(0 - 1)      | 1<br>(0 - 1)       | 0<br>(0 - 0)       | 0<br>(0 - 0)       |
| Cleft lip and cleft palate                          | 0<br>(0 - 0)     | 0<br>(0 - 0)     | --                | --                 | --                 | --                 |
| Down syndrome                                       | 0<br>(0 - 0)     | 0<br>(0 - 0)     | 0<br>(0 - 0)      | 0<br>(0 - 0)       | 0<br>(0 - 0)       | 0<br>(0 - 0)       |
| Chromosomal unbalanced rearrangements               | 0<br>(0 - 0)     | 0<br>(0 - 0)     | 0<br>(0 - 0)      | 0<br>(0 - 0)       | 0<br>(0 - 0)       | 0<br>(0 - 0)       |
| Other congenital anomalies                          | 3<br>(1 - 5)     | 2<br>(1 - 4)     | 0<br>(0 - 0)      | 0<br>(0 - 0)       | 0<br>(0 - 0)       | 0<br>(0 - 0)       |
| Skin and subcutaneous diseases                      | 4<br>(2 - 5)     | 0<br>(0 - 0)     | 0<br>(0 - 0)      | 0<br>(0 - 0)       | 1<br>(0 - 1)       | 3<br>(1 - 4)       |
| Cellulitis                                          | 0<br>(0 - 1)     | 0<br>(0 - 0)     | 0<br>(0 - 0)      | 0<br>(0 - 0)       | 0<br>(0 - 0)       | 0<br>(0 - 1)       |
| Pyoderma                                            | 1<br>(0 - 1)     | 0<br>(0 - 0)     | 0<br>(0 - 0)      | 0<br>(0 - 0)       | 0<br>(0 - 0)       | 1<br>(0 - 1)       |
| Decubitus ulcer                                     | 2<br>(1 - 4)     | 0<br>(0 - 0)     | 0<br>(0 - 0)      | 0<br>(0 - 0)       | 0<br>(0 - 1)       | 2<br>(1 - 3)       |
| Other skin and subcutaneous diseases                | 0<br>(0 - 0)     | 0<br>(0 - 0)     | 0<br>(0 - 0)      | 0<br>(0 - 0)       | 0<br>(0 - 0)       | 0<br>(0 - 0)       |



Web Table 31- Saint Lucia deaths with 95% UI by age, sex, and cause in 2013

| Cause                                           | Males, All Ages | Males, 0-4 Years | Males, 5-14 Years | Males, 15-49 Years | Males, 50-69 Years | Males, 70-80 Years |
|-------------------------------------------------|-----------------|------------------|-------------------|--------------------|--------------------|--------------------|
| Sudden infant death syndrome                    | 1<br>(0 - 2)    | 1<br>(0 - 2)     | -                 | -                  | -                  | -                  |
| Injuries                                        | 76<br>(58 - 97) | 2<br>(1 - 4)     | 2<br>(1 - 4)      | 44<br>(31 - 58)    | 15<br>(11 - 21)    | 12<br>(9 - 14)     |
| Transport injuries                              | 18<br>(14 - 24) | 0<br>(0 - 1)     | 1<br>(0 - 1)      | 10<br>(7 - 14)     | 4<br>(3 - 6)       | 3<br>(2 - 4)       |
| Road injuries                                   | 17<br>(13 - 22) | 0<br>(0 - 1)     | 1<br>(0 - 1)      | 9<br>(6 - 13)      | 4<br>(3 - 5)       | 3<br>(2 - 4)       |
| Pedestrian road injuries                        | 5<br>(3 - 6)    | 0<br>(0 - 0)     | 0<br>(0 - 1)      | 2<br>(1 - 3)       | 1<br>(1 - 2)       | 1<br>(1 - 2)       |
| Cyclist road injuries                           | 1<br>(1 - 1)    | 0<br>(0 - 0)     | 0<br>(0 - 0)      | 0<br>(0 - 1)       | 0<br>(0 - 0)       | 0<br>(0 - 0)       |
| Motorcyclist road injuries                      | 1<br>(1 - 2)    | 0<br>(0 - 0)     | 0<br>(0 - 0)      | 1<br>(1 - 2)       | 0<br>(0 - 0)       | 0<br>(0 - 0)       |
| Motor vehicle road injuries                     | 10<br>(7 - 13)  | 0<br>(0 - 0)     | 0<br>(0 - 1)      | 6<br>(4 - 8)       | 2<br>(2 - 3)       | 1<br>(1 - 2)       |
| Other road injuries                             | 0<br>(0 - 0)    | 0<br>(0 - 0)     | 0<br>(0 - 0)      | 0<br>(0 - 0)       | 0<br>(0 - 0)       | 0<br>(0 - 0)       |
| Other transport injuries                        | 1<br>(1 - 2)    | 0<br>(0 - 0)     | 0<br>(0 - 0)      | 1<br>(0 - 1)       | 0<br>(0 - 0)       | 0<br>(0 - 0)       |
| Unintentional injuries                          | 24<br>(19 - 31) | 1<br>(1 - 3)     | 1<br>(1 - 2)      | 10<br>(7 - 14)     | 5<br>(4 - 7)       | 7<br>(5 - 8)       |
| Falls                                           | 5<br>(3 - 6)    | 0<br>(0 - 0)     | 0<br>(0 - 0)      | 1<br>(1 - 2)       | 1<br>(1 - 2)       | 2<br>(1 - 3)       |
| Drowning                                        | 6<br>(4 - 10)   | 0<br>(0 - 1)     | 1<br>(0 - 1)      | 4<br>(3 - 6)       | 1<br>(1 - 2)       | 1<br>(0 - 1)       |
| Fire, heat, and hot substances                  | 2<br>(1 - 3)    | 0<br>(0 - 0)     | 0<br>(0 - 0)      | 1<br>(0 - 1)       | 0<br>(0 - 1)       | 1<br>(1 - 1)       |
| Poisonings                                      | 0<br>(0 - 1)    | 0<br>(0 - 0)     | 0<br>(0 - 0)      | 0<br>(0 - 0)       | 0<br>(0 - 0)       | 0<br>(0 - 0)       |
| Exposure to mechanical forces                   | 4<br>(3 - 5)    | 0<br>(0 - 0)     | 0<br>(0 - 0)      | 3<br>(2 - 4)       | 1<br>(1 - 1)       | 0<br>(0 - 0)       |
| Unintentional firearm injuries                  | 2<br>(1 - 3)    | 0<br>(0 - 0)     | 0<br>(0 - 0)      | 2<br>(1 - 2)       | 0<br>(0 - 1)       | 0<br>(0 - 0)       |
| Unintentional suffocation                       | 0<br>(0 - 1)    | 0<br>(0 - 0)     | 0<br>(0 - 0)      | 0<br>(0 - 0)       | 0<br>(0 - 0)       | 0<br>(0 - 0)       |
| Other exposure to mechanical forces             | 1<br>(1 - 2)    | 0<br>(0 - 0)     | 0<br>(0 - 1)      | 1<br>(1 - 1)       | 0<br>(0 - 0)       | 0<br>(0 - 0)       |
| Adverse effects of medical treatment            | 2<br>(1 - 3)    | 0<br>(0 - 0)     | 0<br>(0 - 0)      | 0<br>(0 - 1)       | 1<br>(0 - 1)       | 1<br>(1 - 2)       |
| Animal contact                                  | 0<br>(0 - 1)    | 0<br>(0 - 0)     | 0<br>(0 - 0)      | 0<br>(0 - 0)       | 0<br>(0 - 0)       | 0<br>(0 - 0)       |
| Venomous animal contact                         | 0<br>(0 - 0)    | 0<br>(0 - 0)     | 0<br>(0 - 0)      | 0<br>(0 - 0)       | 0<br>(0 - 0)       | 0<br>(0 - 0)       |
| Non-venomous animal contact                     | 0<br>(0 - 0)    | 0<br>(0 - 0)     | 0<br>(0 - 0)      | 0<br>(0 - 0)       | 0<br>(0 - 0)       | 0<br>(0 - 0)       |
| Foreign body                                    | 3<br>(2 - 5)    | 1<br>(0 - 1)     | 0<br>(0 - 0)      | 1<br>(0 - 1)       | 1<br>(0 - 1)       | 1<br>(1 - 2)       |
| Pulmonary aspiration and foreign body in airway | 3<br>(2 - 5)    | 1<br>(0 - 1)     | 0<br>(0 - 0)      | 1<br>(0 - 1)       | 1<br>(0 - 1)       | 1<br>(1 - 2)       |
| Foreign body in other body part                 | 0<br>(0 - 0)    | 0<br>(0 - 0)     | 0<br>(0 - 0)      | 0<br>(0 - 0)       | 0<br>(0 - 0)       | 0<br>(0 - 0)       |
| Other unintentional injuries                    | 1<br>(1 - 1)    | 0<br>(0 - 0)     | 0<br>(0 - 0)      | 0<br>(0 - 1)       | 0<br>(0 - 0)       | 0<br>(0 - 0)       |
| Self-harm and interpersonal violence            | 33<br>(21 - 45) | 0<br>(0 - 1)     | 0<br>(0 - 1)      | 24<br>(15 - 33)    | 6<br>(4 - 9)       | 2<br>(1 - 3)       |
| Self-harm                                       | 12<br>(9 - 18)  | -                | 0<br>(0 - 0)      | 8<br>(5 - 12)      | 3<br>(2 - 4)       | 1<br>(1 - 2)       |
| Interpersonal violence                          | 21<br>(11 - 29) | 0<br>(0 - 1)     | 0<br>(0 - 1)      | 16<br>(8 - 23)     | 3<br>(1 - 5)       | 1<br>(0 - 2)       |
| Assault by firearm                              | 11<br>(5 - 17)  | 0<br>(0 - 0)     | 0<br>(0 - 0)      | 10<br>(5 - 15)     | 1<br>(0 - 2)       | 0<br>(0 - 0)       |
| Assault by sharp object                         | 6<br>(3 - 9)    | 0<br>(0 - 0)     | 0<br>(0 - 0)      | 4<br>(2 - 7)       | 1<br>(0 - 2)       | 0<br>(0 - 0)       |
| Assault by other means                          | 4<br>(2 - 6)    | 0<br>(0 - 0)     | 0<br>(0 - 0)      | 2<br>(1 - 3)       | 1<br>(0 - 2)       | 0<br>(0 - 1)       |

Web Table 31- Saint Lucia deaths with 95% UI by age, sex, and cause in 2013

| Cause                                                             | Females, All Ages  | Females, 0-4 Years | Females, 5-14 Years | Females, 15-49 Years | Females, 50-69 Years | Females, 70-80 Years |
|-------------------------------------------------------------------|--------------------|--------------------|---------------------|----------------------|----------------------|----------------------|
| All causes                                                        | 669<br>(544 - 804) | 22<br>(10 - 45)    | 4<br>(2 - 6)        | 59<br>(45 - 79)      | 134<br>(97 - 174)    | 450<br>(375 - 525)   |
| Communicable, maternal, neonatal, and nutritional diseases        | 67<br>(53 - 86)    | 15<br>(6 - 29)     | 1<br>(0 - 1)        | 10<br>(8 - 12)       | 6<br>(5 - 8)         | 35<br>(26 - 49)      |
| HIV/AIDS and tuberculosis                                         | 8<br>(6 - 9)       | 0<br>(0 - 0)       | 0<br>(0 - 0)        | 5<br>(4 - 7)         | 2<br>(1 - 2)         | 1<br>(0 - 1)         |
| Tuberculosis                                                      | 1<br>(1 - 2)       | 0<br>(0 - 0)       | 0<br>(0 - 0)        | 0<br>(0 - 0)         | 0<br>(0 - 0)         | 1<br>(0 - 1)         |
| HIV/AIDS                                                          | 7<br>(5 - 8)       | 0<br>(0 - 0)       | 0<br>(0 - 0)        | 5<br>(4 - 6)         | 1<br>(1 - 2)         | 0<br>(0 - 0)         |
| HIV/AIDS resulting in mycobacterial infection                     | 0<br>(0 - 0)       | 0<br>(0 - 0)       | 0<br>(0 - 0)        | 0<br>(0 - 0)         | 0<br>(0 - 0)         | 0<br>(0 - 0)         |
| HIV/AIDS resulting in other diseases                              | 6<br>(5 - 8)       | 0<br>(0 - 0)       | 0<br>(0 - 0)        | 5<br>(4 - 6)         | 1<br>(1 - 2)         | 0<br>(0 - 0)         |
| Diarrhea, lower respiratory, and other common infectious diseases | 38<br>(28 - 52)    | 3<br>(1 - 7)       | 1<br>(0 - 1)        | 2<br>(2 - 3)         | 3<br>(2 - 5)         | 29<br>(20 - 41)      |
| Diarrheal diseases                                                | 3<br>(2 - 5)       | 1<br>(0 - 2)       | 0<br>(0 - 0)        | 0<br>(0 - 0)         | 0<br>(0 - 0)         | 2<br>(1 - 3)         |
| Intestinal infectious diseases                                    | 1<br>(0 - 1)       | 0<br>(0 - 0)       | 0<br>(0 - 0)        | 0<br>(0 - 0)         | 0<br>(0 - 0)         | 0<br>(0 - 0)         |
| Typhoid fever                                                     | 0<br>(0 - 1)       | 0<br>(0 - 0)       | 0<br>(0 - 0)        | 0<br>(0 - 0)         | 0<br>(0 - 0)         | 0<br>(0 - 0)         |
| Paratyphoid fever                                                 | 0<br>(0 - 0)       | 0<br>(0 - 0)       | 0<br>(0 - 0)        | 0<br>(0 - 0)         | 0<br>(0 - 0)         | 0<br>(0 - 0)         |
| Other intestinal infectious diseases                              | 0<br>(0 - 0)       | 0<br>(0 - 0)       | 0<br>(0 - 0)        | 0<br>(0 - 0)         | 0<br>(0 - 0)         | 0<br>(0 - 0)         |
| Lower respiratory infections                                      | 32<br>(23 - 45)    | 2<br>(1 - 4)       | 0<br>(0 - 0)        | 1<br>(1 - 2)         | 3<br>(2 - 4)         | 26<br>(17 - 39)      |
| Upper respiratory infections                                      | 0<br>(0 - 0)       | 0<br>(0 - 0)       | 0<br>(0 - 0)        | 0<br>(0 - 0)         | 0<br>(0 - 0)         | 0<br>(0 - 0)         |
| Otitis media                                                      | 0<br>(0 - 0)       | 0<br>(0 - 0)       | 0<br>(0 - 0)        | 0<br>(0 - 0)         | 0<br>(0 - 0)         | 0<br>(0 - 0)         |
| Meningitis                                                        | 1<br>(1 - 1)       | 0<br>(0 - 0)       | 0<br>(0 - 0)        | 0<br>(0 - 0)         | 0<br>(0 - 0)         | 0<br>(0 - 1)         |
| Pneumococcal meningitis                                           | 0<br>(0 - 0)       | 0<br>(0 - 0)       | 0<br>(0 - 0)        | 0<br>(0 - 0)         | 0<br>(0 - 0)         | 0<br>(0 - 0)         |
| H influenzae type B meningitis                                    | 0<br>(0 - 0)       | 0<br>(0 - 0)       | 0<br>(0 - 0)        | 0<br>(0 - 0)         | 0<br>(0 - 0)         | 0<br>(0 - 0)         |
| Meningococcal meningitis                                          | 0<br>(0 - 0)       | 0<br>(0 - 0)       | 0<br>(0 - 0)        | 0<br>(0 - 0)         | 0<br>(0 - 0)         | 0<br>(0 - 0)         |
| Other meningitis                                                  | 0<br>(0 - 1)       | 0<br>(0 - 0)       | 0<br>(0 - 0)        | 0<br>(0 - 0)         | 0<br>(0 - 0)         | 0<br>(0 - 0)         |
| Encephalitis                                                      | 1<br>(0 - 1)       | 0<br>(0 - 0)       | 0<br>(0 - 0)        | 0<br>(0 - 0)         | 0<br>(0 - 0)         | 0<br>(0 - 0)         |
| Diphtheria                                                        | 0<br>(0 - 0)       | 0<br>(0 - 0)       | 0<br>(0 - 0)        | 0<br>(0 - 0)         | 0<br>(0 - 0)         | --<br>(0 - 0)        |
| Whooping cough                                                    | 0<br>(0 - 0)       | 0<br>(0 - 0)       | 0<br>(0 - 0)        | 0<br>(0 - 0)         | 0<br>(0 - 0)         | --<br>(0 - 0)        |
| Tetanus                                                           | 0<br>(0 - 0)       | 0<br>(0 - 0)       | 0<br>(0 - 0)        | 0<br>(0 - 0)         | 0<br>(0 - 0)         | 0<br>(0 - 0)         |
| Measles                                                           | 0<br>(0 - 0)       | 0<br>(0 - 0)       | 0<br>(0 - 0)        | 0<br>(0 - 0)         | 0<br>(0 - 0)         | --<br>(0 - 0)        |
| Varicella and herpes zoster                                       | 0<br>(0 - 0)       | 0<br>(0 - 0)       | 0<br>(0 - 0)        | 0<br>(0 - 0)         | 0<br>(0 - 0)         | 0<br>(0 - 0)         |
| Neglected tropical diseases and malaria                           | 1<br>(0 - 1)       | 0<br>(0 - 0)       | 0<br>(0 - 0)        | 0<br>(0 - 0)         | 0<br>(0 - 0)         | 0<br>(0 - 0)         |
| Leishmaniasis                                                     | 0<br>(0 - 0)       | 0<br>(0 - 0)       | 0<br>(0 - 0)        | 0<br>(0 - 0)         | 0<br>(0 - 0)         | 0<br>(0 - 0)         |
| Visceral leishmaniasis                                            | 0<br>(0 - 0)       | 0<br>(0 - 0)       | 0<br>(0 - 0)        | 0<br>(0 - 0)         | 0<br>(0 - 0)         | 0<br>(0 - 0)         |
| Schistosomiasis                                                   | 0<br>(0 - 0)       | 0<br>(0 - 0)       | 0<br>(0 - 0)        | 0<br>(0 - 0)         | 0<br>(0 - 0)         | 0<br>(0 - 0)         |
| Cysticercosis                                                     | 0<br>(0 - 0)       | 0<br>(0 - 0)       | 0<br>(0 - 0)        | 0<br>(0 - 0)         | 0<br>(0 - 0)         | 0<br>(0 - 0)         |
| Cystic echinococcosis                                             | 0<br>(0 - 0)       | 0<br>(0 - 0)       | 0<br>(0 - 0)        | 0<br>(0 - 0)         | 0<br>(0 - 0)         | 0<br>(0 - 0)         |
| Dengue                                                            | 0<br>(0 - 0)       | 0<br>(0 - 0)       | 0<br>(0 - 0)        | 0<br>(0 - 0)         | 0<br>(0 - 0)         | 0<br>(0 - 0)         |
| Rabies                                                            | 0<br>(0 - 0)       | 0<br>(0 - 0)       | 0<br>(0 - 0)        | 0<br>(0 - 0)         | 0<br>(0 - 0)         | 0<br>(0 - 0)         |
| Intestinal nematode infections                                    | 0<br>(0 - 0)       | 0<br>(0 - 0)       | 0<br>(0 - 0)        | 0<br>(0 - 0)         | 0<br>(0 - 0)         | 0<br>(0 - 0)         |
| Ascariasis                                                        | 0<br>(0 - 0)       | 0<br>(0 - 0)       | 0<br>(0 - 0)        | 0<br>(0 - 0)         | 0<br>(0 - 0)         | 0<br>(0 - 0)         |
| Other neglected tropical diseases                                 | 0<br>(0 - 0)       | 0<br>(0 - 0)       | 0<br>(0 - 0)        | 0<br>(0 - 0)         | 0<br>(0 - 0)         | 0<br>(0 - 0)         |
| Maternal disorders                                                | 1<br>(1 - 2)       | --                 | 0<br>(0 - 0)        | 1<br>(1 - 2)         | --                   | --                   |
| Maternal hemorrhage                                               | 0<br>(0 - 0)       | --                 | 0<br>(0 - 0)        | 0<br>(0 - 0)         | --                   | --                   |

Web Table 31- Saint Lucia deaths with 95% UI by age, sex, and cause in 2013

| Cause                                                            | Females, All Ages  | Females, 0-4 Years | Females, 5-14 Years | Females, 15-49 Years | Females, 50-69 Years | Females, 70-80 Years |
|------------------------------------------------------------------|--------------------|--------------------|---------------------|----------------------|----------------------|----------------------|
| Maternal sepsis and other maternal infections                    | 0<br>(0 - 0)       | --                 | 0<br>(0 - 0)        | 0<br>(0 - 0)         | --                   | --                   |
| Maternal hypertensive disorders                                  | 0<br>(0 - 0)       | --                 | 0<br>(0 - 0)        | 0<br>(0 - 0)         | --                   | --                   |
| Maternal obstructed labor                                        | 0<br>(0 - 0)       | --                 | 0<br>(0 - 0)        | 0<br>(0 - 0)         | --                   | --                   |
| Maternal abortive outcome                                        | 0<br>(0 - 0)       | --                 | 0<br>(0 - 0)        | 0<br>(0 - 0)         | --                   | --                   |
| Indirect maternal deaths                                         | 0<br>(0 - 0)       | --                 | 0<br>(0 - 0)        | 0<br>(0 - 0)         | --                   | --                   |
| Late maternal deaths                                             | 0<br>(0 - 0)       | --                 | 0<br>(0 - 0)        | 0<br>(0 - 0)         | --                   | --                   |
| Maternal deaths aggravated by HIV/AIDS                           | 0<br>(0 - 0)       | --                 | 0<br>(0 - 0)        | 0<br>(0 - 0)         | --                   | --                   |
| Other maternal disorders                                         | 0<br>(0 - 0)       | --                 | 0<br>(0 - 0)        | 0<br>(0 - 0)         | --                   | --                   |
| Neonatal disorders                                               | 11<br>(4 - 20)     | 11<br>(4 - 20)     | --                  | --                   | --                   | --                   |
| Neonatal preterm birth complications                             | 5<br>(2 - 10)      | 5<br>(2 - 10)      | --                  | --                   | --                   | --                   |
| Neonatal encephalopathy due to birth asphyxia and trauma         | 2<br>(1 - 5)       | 2<br>(1 - 5)       | --                  | --                   | --                   | --                   |
| Neonatal sepsis and other neonatal infections                    | 2<br>(1 - 4)       | 2<br>(1 - 4)       | --                  | --                   | --                   | --                   |
| Hemolytic disease and other neonatal jaundice                    | 0<br>(0 - 0)       | 0<br>(0 - 0)       | --                  | --                   | --                   | --                   |
| Other neonatal disorders                                         | 1<br>(0 - 3)       | 1<br>(0 - 3)       | --                  | --                   | --                   | --                   |
| Nutritional deficiencies                                         | 8<br>(5 - 11)      | 1<br>(0 - 2)       | 0<br>(0 - 0)        | 1<br>(1 - 1)         | 1<br>(1 - 1)         | 5<br>(3 - 7)         |
| Protein-energy malnutrition                                      | 3<br>(2 - 5)       | 1<br>(0 - 2)       | 0<br>(0 - 0)        | 0<br>(0 - 0)         | 0<br>(0 - 0)         | 2<br>(1 - 4)         |
| Iodine deficiency                                                | 0<br>(0 - 0)       | 0<br>(0 - 0)       | 0<br>(0 - 0)        | 0<br>(0 - 0)         | 0<br>(0 - 0)         | 0<br>(0 - 0)         |
| Iron-deficiency anemia                                           | 4<br>(2 - 6)       | 0<br>(0 - 0)       | 0<br>(0 - 0)        | 1<br>(0 - 1)         | 1<br>(0 - 1)         | 3<br>(1 - 5)         |
| Other nutritional deficiencies                                   | 0<br>(0 - 1)       | 0<br>(0 - 0)       | 0<br>(0 - 0)        | 0<br>(0 - 0)         | 0<br>(0 - 0)         | 0<br>(0 - 1)         |
| Other communicable, maternal, neonatal, and nutritional diseases | 1<br>(1 - 2)       | 0<br>(0 - 0)       | 0<br>(0 - 0)        | 0<br>(0 - 0)         | 0<br>(0 - 1)         | 1<br>(0 - 1)         |
| Sexually transmitted diseases excluding HIV                      | 0<br>(0 - 0)       | 0<br>(0 - 0)       | 0<br>(0 - 0)        | 0<br>(0 - 0)         | 0<br>(0 - 0)         | 0<br>(0 - 0)         |
| Syphilis                                                         | 0<br>(0 - 0)       | 0<br>(0 - 0)       | 0<br>(0 - 0)        | 0<br>(0 - 0)         | 0<br>(0 - 0)         | 0<br>(0 - 0)         |
| Chlamydial infection                                             | 0<br>(0 - 0)       | --                 | 0<br>(0 - 0)        | 0<br>(0 - 0)         | 0<br>(0 - 0)         | 0<br>(0 - 0)         |
| Gonococcal infection                                             | 0<br>(0 - 0)       | --                 | 0<br>(0 - 0)        | 0<br>(0 - 0)         | 0<br>(0 - 0)         | 0<br>(0 - 0)         |
| Other sexually transmitted diseases                              | 0<br>(0 - 0)       | --                 | 0<br>(0 - 0)        | 0<br>(0 - 0)         | 0<br>(0 - 0)         | 0<br>(0 - 0)         |
| Hepatitis                                                        | 0<br>(0 - 0)       | 0<br>(0 - 0)       | 0<br>(0 - 0)        | 0<br>(0 - 0)         | 0<br>(0 - 0)         | 0<br>(0 - 0)         |
| Acute hepatitis A                                                | 0<br>(0 - 0)       | 0<br>(0 - 0)       | 0<br>(0 - 0)        | 0<br>(0 - 0)         | 0<br>(0 - 0)         | 0<br>(0 - 0)         |
| Acute hepatitis B                                                | 0<br>(0 - 0)       | 0<br>(0 - 0)       | 0<br>(0 - 0)        | 0<br>(0 - 0)         | 0<br>(0 - 0)         | 0<br>(0 - 0)         |
| Acute hepatitis C                                                | 0<br>(0 - 0)       | --                 | 0<br>(0 - 0)        | 0<br>(0 - 0)         | 0<br>(0 - 0)         | 0<br>(0 - 0)         |
| Other infectious diseases                                        | 1<br>(1 - 2)       | 0<br>(0 - 0)       | 0<br>(0 - 0)        | 0<br>(0 - 0)         | 0<br>(0 - 0)         | 1<br>(0 - 1)         |
| Non-communicable diseases                                        | 575<br>(464 - 693) | 6<br>(3 - 13)      | 2<br>(1 - 3)        | 41<br>(29 - 57)      | 123<br>(90 - 160)    | 403<br>(335 - 474)   |
| Neoplasms                                                        | 104<br>(79 - 132)  | 0<br>(0 - 1)       | 1<br>(0 - 1)        | 15<br>(11 - 21)      | 35<br>(24 - 46)      | 53<br>(42 - 66)      |
| Esophageal cancer                                                | 2<br>(1 - 2)       | --                 | --                  | 0<br>(0 - 0)         | 1<br>(0 - 1)         | 1<br>(1 - 1)         |
| Stomach cancer                                                   | 6<br>(5 - 9)       | --                 | --                  | 0<br>(0 - 1)         | 2<br>(1 - 2)         | 5<br>(3 - 6)         |
| Liver cancer                                                     | 3<br>(2 - 4)       | --                 | 0<br>(0 - 0)        | 0<br>(0 - 0)         | 1<br>(1 - 1)         | 2<br>(1 - 3)         |
| Liver cancer due to hepatitis B                                  | 1<br>(0 - 1)       | --                 | 0<br>(0 - 0)        | 0<br>(0 - 0)         | 0<br>(0 - 0)         | 0<br>(0 - 1)         |
| Liver cancer due to hepatitis C                                  | 1<br>(1 - 2)       | --                 | 0<br>(0 - 0)        | 0<br>(0 - 0)         | 0<br>(0 - 1)         | 1<br>(1 - 1)         |
| Liver cancer due to alcohol use                                  | 1<br>(0 - 1)       | --                 | --                  | 0<br>(0 - 0)         | 0<br>(0 - 0)         | 0<br>(0 - 1)         |
| Liver cancer due to other causes                                 | 0<br>(0 - 1)       | --                 | 0<br>(0 - 0)        | 0<br>(0 - 0)         | 0<br>(0 - 0)         | 0<br>(0 - 0)         |
| Larynx cancer                                                    | 0<br>(0 - 0)       | --                 | --                  | 0<br>(0 - 0)         | 0<br>(0 - 0)         | 0<br>(0 - 0)         |

Web Table 31- Saint Lucia deaths with 95% UI by age, sex, and cause in 2013

| Cause                                         | Females, All Ages  | Females, 0-4 Years | Females, 5-14 Years | Females, 15-49 Years | Females, 50-69 Years | Females, 70-80 Years |
|-----------------------------------------------|--------------------|--------------------|---------------------|----------------------|----------------------|----------------------|
| Tracheal, bronchus and lung cancer            | 6<br>(4 - 8)       | --                 | --                  | 1<br>(0 - 1)         | 2<br>(2 - 3)         | 3<br>(2 - 4)         |
| Breast cancer                                 | 21<br>(15 - 28)    | --                 | --                  | 5<br>(3 - 7)         | 8<br>(5 - 11)        | 8<br>(6 - 11)        |
| Cervical cancer                               | 13<br>(9 - 17)     | --                 | --                  | 3<br>(2 - 4)         | 5<br>(3 - 6)         | 5<br>(4 - 7)         |
| Uterine cancer                                | 5<br>(2 - 6)       | --                 | --                  | 0<br>(0 - 0)         | 2<br>(1 - 2)         | 3<br>(2 - 4)         |
| Prostate cancer                               | --                 | --                 | --                  | --                   | --                   | --                   |
| Colon and rectum cancer                       | 13<br>(10 - 17)    | --                 | --                  | 1<br>(1 - 1)         | 4<br>(3 - 5)         | 8<br>(6 - 11)        |
| Lip and oral cavity cancer                    | 1<br>(1 - 1)       | --                 | --                  | 0<br>(0 - 0)         | 0<br>(0 - 0)         | 1<br>(0 - 1)         |
| Nasopharynx cancer                            | 0<br>(0 - 0)       | --                 | 0<br>(0 - 0)        | 0<br>(0 - 0)         | 0<br>(0 - 0)         | 0<br>(0 - 0)         |
| Other pharynx cancer                          | 0<br>(0 - 0)       | --                 | --                  | 0<br>(0 - 0)         | 0<br>(0 - 0)         | 0<br>(0 - 0)         |
| Gallbladder and biliary tract cancer          | 2<br>(1 - 4)       | --                 | --                  | 0<br>(0 - 0)         | 1<br>(0 - 1)         | 1<br>(1 - 3)         |
| Pancreatic cancer                             | 5<br>(4 - 7)       | --                 | --                  | 0<br>(0 - 0)         | 1<br>(1 - 2)         | 3<br>(2 - 5)         |
| Malignant skin melanoma                       | 0<br>(0 - 0)       | --                 | --                  | 0<br>(0 - 0)         | 0<br>(0 - 0)         | 0<br>(0 - 0)         |
| Non-melanoma skin cancer                      | 0<br>(0 - 1)       | --                 | --                  | 0<br>(0 - 0)         | 0<br>(0 - 0)         | 0<br>(0 - 1)         |
| Ovarian cancer                                | 6<br>(4 - 7)       | --                 | --                  | 1<br>(1 - 1)         | 2<br>(2 - 3)         | 3<br>(2 - 3)         |
| Testicular cancer                             | --                 | --                 | --                  | --                   | --                   | --                   |
| Kidney cancer                                 | 1<br>(1 - 2)       | 0<br>(0 - 0)       | 0<br>(0 - 0)        | 0<br>(0 - 0)         | 0<br>(0 - 1)         | 1<br>(1 - 1)         |
| Bladder cancer                                | 1<br>(1 - 2)       | --                 | --                  | 0<br>(0 - 0)         | 0<br>(0 - 0)         | 1<br>(1 - 2)         |
| Brain and nervous system cancer               | 1<br>(1 - 2)       | 0<br>(0 - 0)       | 0<br>(0 - 0)        | 0<br>(0 - 0)         | 0<br>(0 - 1)         | 0<br>(0 - 1)         |
| Thyroid cancer                                | 1<br>(0 - 1)       | --                 | 0<br>(0 - 0)        | 0<br>(0 - 0)         | 0<br>(0 - 0)         | 0<br>(0 - 1)         |
| Mesothelioma                                  | 0<br>(0 - 0)       | --                 | --                  | 0<br>(0 - 0)         | 0<br>(0 - 0)         | 0<br>(0 - 0)         |
| Hodgkin lymphoma                              | 0<br>(0 - 0)       | 0<br>(0 - 0)       | 0<br>(0 - 0)        | 0<br>(0 - 0)         | 0<br>(0 - 0)         | 0<br>(0 - 0)         |
| Non-Hodgkin lymphoma                          | 4<br>(2 - 5)       | 0<br>(0 - 0)       | 0<br>(0 - 0)        | 1<br>(1 - 1)         | 1<br>(1 - 2)         | 1<br>(1 - 2)         |
| Multiple myeloma                              | 2<br>(1 - 3)       | --                 | --                  | 0<br>(0 - 0)         | 1<br>(0 - 1)         | 1<br>(1 - 1)         |
| Leukemia                                      | 3<br>(2 - 4)       | 0<br>(0 - 0)       | 0<br>(0 - 0)        | 1<br>(1 - 1)         | 1<br>(1 - 1)         | 1<br>(1 - 2)         |
| Other neoplasms                               | 6<br>(4 - 9)       | 0<br>(0 - 0)       | 0<br>(0 - 0)        | 1<br>(1 - 2)         | 2<br>(1 - 3)         | 3<br>(2 - 4)         |
| Cardiovascular diseases                       | 265<br>(213 - 330) | 0<br>(0 - 1)       | 0<br>(0 - 1)        | 11<br>(7 - 15)       | 45<br>(33 - 60)      | 209<br>(170 - 255)   |
| Rheumatic heart disease                       | 1<br>(1 - 2)       | 0<br>(0 - 0)       | 0<br>(0 - 0)        | 0<br>(0 - 1)         | 0<br>(0 - 0)         | 0<br>(0 - 1)         |
| Ischemic heart disease                        | 91<br>(69 - 132)   | 0<br>(0 - 0)       | 0<br>(0 - 0)        | 4<br>(2 - 6)         | 16<br>(11 - 24)      | 71<br>(54 - 104)     |
| Cerebrovascular disease                       | 110<br>(81 - 139)  | 0<br>(0 - 0)       | 0<br>(0 - 0)        | 3<br>(2 - 5)         | 18<br>(12 - 25)      | 88<br>(65 - 111)     |
| Ischemic stroke                               | 71<br>(48 - 92)    | 0<br>(0 - 0)       | 0<br>(0 - 0)        | 1<br>(0 - 1)         | 9<br>(5 - 12)        | 61<br>(41 - 80)      |
| Hemorrhagic stroke                            | 39<br>(27 - 53)    | 0<br>(0 - 0)       | 0<br>(0 - 0)        | 3<br>(2 - 4)         | 9<br>(6 - 13)        | 27<br>(18 - 38)      |
| Hypertensive heart disease                    | 33<br>(21 - 48)    | 0<br>(0 - 0)       | 0<br>(0 - 0)        | 1<br>(1 - 1)         | 5<br>(3 - 8)         | 27<br>(17 - 39)      |
| Cardiomyopathy and myocarditis                | 6<br>(4 - 9)       | 0<br>(0 - 0)       | 0<br>(0 - 0)        | 1<br>(0 - 1)         | 1<br>(1 - 2)         | 4<br>(3 - 6)         |
| Atrial fibrillation and flutter               | 5<br>(3 - 8)       | --                 | --                  | 0<br>(0 - 0)         | 1<br>(0 - 1)         | 4<br>(3 - 7)         |
| Aortic aneurysm                               | 3<br>(2 - 4)       | --                 | --                  | 0<br>(0 - 0)         | 1<br>(0 - 1)         | 2<br>(1 - 3)         |
| Peripheral vascular disease                   | 3<br>(2 - 5)       | --                 | --                  | 0<br>(0 - 0)         | 0<br>(0 - 0)         | 3<br>(2 - 4)         |
| Endocarditis                                  | 1<br>(1 - 2)       | 0<br>(0 - 0)       | 0<br>(0 - 0)        | 0<br>(0 - 0)         | 0<br>(0 - 0)         | 1<br>(0 - 1)         |
| Other cardiovascular and circulatory diseases | 12<br>(7 - 17)     | 0<br>(0 - 0)       | 0<br>(0 - 0)        | 1<br>(1 - 2)         | 3<br>(1 - 4)         | 8<br>(5 - 12)        |
| Chronic respiratory diseases                  | 15<br>(11 - 19)    | 0<br>(0 - 0)       | 0<br>(0 - 0)        | 1<br>(1 - 2)         | 3<br>(2 - 4)         | 10<br>(7 - 14)       |
| Chronic obstructive pulmonary disease         | 9<br>(7 - 13)      | 0<br>(0 - 0)       | 0<br>(0 - 0)        | 0<br>(0 - 1)         | 1<br>(1 - 2)         | 7<br>(5 - 10)        |

Web Table 31- Saint Lucia deaths with 95% UI by age, sex, and cause in 2013

| Cause                                               | Females, All Ages | Females, 0-4 Years | Females, 5-14 Years | Females, 15-49 Years | Females, 50-69 Years | Females, 70-80 Years |
|-----------------------------------------------------|-------------------|--------------------|---------------------|----------------------|----------------------|----------------------|
| Pneumoconiosis                                      | 0<br>(0-0)        | 0<br>(0-0)         | 0<br>(0-0)          | 0<br>(0-0)           | 0<br>(0-0)           | 0<br>(0-0)           |
| Silicosis                                           | 0<br>(0-0)        | 0<br>(0-0)         | 0<br>(0-0)          | 0<br>(0-0)           | 0<br>(0-0)           | 0<br>(0-0)           |
| Asbestosis                                          | 0<br>(0-0)        | 0<br>(0-0)         | 0<br>(0-0)          | 0<br>(0-0)           | 0<br>(0-0)           | 0<br>(0-0)           |
| Coal workers pneumoconiosis                         | 0<br>(0-0)        | 0<br>(0-0)         | 0<br>(0-0)          | 0<br>(0-0)           | 0<br>(0-0)           | 0<br>(0-0)           |
| Other pneumoconiosis                                | 0<br>(0-0)        | 0<br>(0-0)         | 0<br>(0-0)          | 0<br>(0-0)           | 0<br>(0-0)           | 0<br>(0-0)           |
| Asthma                                              | 3<br>(2-5)        | 0<br>(0-0)         | 0<br>(0-0)          | 1<br>(0-1)           | 1<br>(0-1)           | 2<br>(1-3)           |
| Interstitial lung disease and pulmonary sarcoidosis | 1<br>(1-2)        | 0<br>(0-0)         | 0<br>(0-0)          | 0<br>(0-0)           | 0<br>(0-1)           | 1<br>(0-1)           |
| Other chronic respiratory diseases                  | 0<br>(0-1)        | 0<br>(0-0)         | 0<br>(0-0)          | 0<br>(0-0)           | 0<br>(0-0)           | 0<br>(0-1)           |
| Cirrhosis                                           | 7<br>(5-10)       | 0<br>(0-0)         | 0<br>(0-0)          | 2<br>(1-2)           | 3<br>(2-4)           | 3<br>(2-4)           |
| Cirrhosis due to hepatitis B                        | 1<br>(0-2)        | 0<br>(0-0)         | 0<br>(0-0)          | 0<br>(0-0)           | 0<br>(0-1)           | 0<br>(0-1)           |
| Cirrhosis due to hepatitis C                        | 3<br>(2-5)        | 0<br>(0-0)         | 0<br>(0-0)          | 1<br>(0-1)           | 1<br>(1-2)           | 1<br>(1-2)           |
| Cirrhosis due to alcohol use                        | 2<br>(1-2)        | --                 | --                  | 0<br>(0-0)           | 1<br>(0-1)           | 1<br>(0-1)           |
| Cirrhosis due to other causes                       | 1<br>(1-2)        | 0<br>(0-0)         | 0<br>(0-0)          | 0<br>(0-1)           | 1<br>(0-1)           | 0<br>(0-1)           |
| Digestive diseases                                  | 13<br>(9-16)      | 0<br>(0-0)         | 0<br>(0-0)          | 1<br>(1-2)           | 3<br>(2-4)           | 8<br>(6-11)          |
| Peptic ulcer disease                                | 3<br>(2-4)        | 0<br>(0-0)         | 0<br>(0-0)          | 0<br>(0-0)           | 1<br>(0-1)           | 2<br>(1-3)           |
| Gastritis and duodenitis                            | 1<br>(0-1)        | 0<br>(0-0)         | 0<br>(0-0)          | 0<br>(0-0)           | 0<br>(0-0)           | 0<br>(0-1)           |
| Appendicitis                                        | 1<br>(0-1)        | 0<br>(0-0)         | 0<br>(0-0)          | 0<br>(0-0)           | 0<br>(0-0)           | 0<br>(0-0)           |
| Paralytic ileus and intestinal obstruction          | 2<br>(1-3)        | 0<br>(0-0)         | 0<br>(0-0)          | 0<br>(0-0)           | 0<br>(0-1)           | 1<br>(0-2)           |
| Inguinal, femoral, and abdominal hernia             | 1<br>(0-2)        | 0<br>(0-0)         | 0<br>(0-0)          | 0<br>(0-0)           | 0<br>(0-0)           | 0<br>(0-1)           |
| Inflammatory bowel disease                          | 1<br>(1-2)        | 0<br>(0-0)         | 0<br>(0-0)          | 0<br>(0-0)           | 0<br>(0-0)           | 1<br>(1-2)           |
| Vascular intestinal disorders                       | 1<br>(0-2)        | 0<br>(0-0)         | 0<br>(0-0)          | 0<br>(0-0)           | 0<br>(0-0)           | 1<br>(0-1)           |
| Gallbladder and biliary diseases                    | 1<br>(1-2)        | 0<br>(0-0)         | 0<br>(0-0)          | 0<br>(0-0)           | 0<br>(0-0)           | 1<br>(0-1)           |
| Pancreatitis                                        | 1<br>(0-1)        | 0<br>(0-0)         | 0<br>(0-0)          | 0<br>(0-0)           | 0<br>(0-0)           | 0<br>(0-0)           |
| Other digestive diseases                            | 2<br>(1-3)        | 0<br>(0-0)         | 0<br>(0-0)          | 0<br>(0-0)           | 0<br>(0-1)           | 2<br>(1-2)           |
| Neurological disorders                              | 35<br>(25-47)     | 0<br>(0-0)         | 0<br>(0-0)          | 1<br>(1-1)           | 2<br>(2-3)           | 32<br>(22-43)        |
| Alzheimer disease and other dementias               | 30<br>(21-41)     | --                 | --                  | 0<br>(0-0)           | 1<br>(1-2)           | 29<br>(20-40)        |
| Parkinson disease                                   | 2<br>(2-4)        | --                 | --                  | 0<br>(0-0)           | 0<br>(0-1)           | 2<br>(1-3)           |
| Epilepsy                                            | 1<br>(1-2)        | 0<br>(0-0)         | 0<br>(0-0)          | 1<br>(0-1)           | 0<br>(0-0)           | 0<br>(0-1)           |
| Multiple sclerosis                                  | 0<br>(0-0)        | --                 | --                  | 0<br>(0-0)           | 0<br>(0-0)           | 0<br>(0-0)           |
| Other neurological disorders                        | 1<br>(1-1)        | 0<br>(0-0)         | 0<br>(0-0)          | 0<br>(0-0)           | 0<br>(0-0)           | 0<br>(0-1)           |
| Mental and substance use disorders                  | 1<br>(1-1)        | 0<br>(0-0)         | 0<br>(0-0)          | 0<br>(0-0)           | 0<br>(0-0)           | 0<br>(0-1)           |
| Schizophrenia                                       | 0<br>(0-0)        | --                 | --                  | 0<br>(0-0)           | 0<br>(0-0)           | 0<br>(0-0)           |
| Alcohol use disorders                               | 0<br>(0-1)        | --                 | --                  | 0<br>(0-0)           | 0<br>(0-0)           | 0<br>(0-0)           |
| Drug use disorders                                  | 0<br>(0-0)        | 0<br>(0-0)         | --                  | 0<br>(0-0)           | 0<br>(0-0)           | 0<br>(0-0)           |
| Opioid use disorders                                | 0<br>(0-0)        | 0<br>(0-0)         | --                  | 0<br>(0-0)           | 0<br>(0-0)           | 0<br>(0-0)           |
| Cocaine use disorders                               | 0<br>(0-0)        | 0<br>(0-0)         | --                  | 0<br>(0-0)           | 0<br>(0-0)           | 0<br>(0-0)           |
| Amphetamine use disorders                           | 0<br>(0-0)        | 0<br>(0-0)         | --                  | 0<br>(0-0)           | 0<br>(0-0)           | 0<br>(0-0)           |
| Other drug use disorders                            | 0<br>(0-0)        | 0<br>(0-0)         | --                  | 0<br>(0-0)           | 0<br>(0-0)           | 0<br>(0-0)           |
| Eating disorders                                    | 0<br>(0-0)        | --                 | 0<br>(0-0)          | 0<br>(0-0)           | --                   | --                   |
| Anorexia nervosa                                    | 0<br>(0-0)        | --                 | 0<br>(0-0)          | 0<br>(0-0)           | --                   | --                   |

Web Table 31- Saint Lucia deaths with 95% UI by age, sex, and cause in 2013

| Cause                                               | Females, All Ages | Females, 0-4 Years | Females, 5-14 Years | Females, 15-49 Years | Females, 50-69 Years | Females, 70-80 Years |
|-----------------------------------------------------|-------------------|--------------------|---------------------|----------------------|----------------------|----------------------|
| Diabetes, urogenital, blood, and endocrine diseases | 120<br>(90 - 154) | 1<br>(0 - 1)       | 0<br>(0 - 1)        | 8<br>(6 - 11)        | 32<br>(22 - 42)      | 79<br>(60 - 101)     |
| Diabetes mellitus                                   | 90<br>(66 - 116)  | 0<br>(0 - 0)       | 0<br>(0 - 0)        | 4<br>(3 - 5)         | 24<br>(17 - 33)      | 62<br>(45 - 80)      |
| Acute glomerulonephritis                            | 0<br>(0 - 0)      | 0<br>(0 - 0)       | 0<br>(0 - 0)        | 0<br>(0 - 0)         | 0<br>(0 - 0)         | 0<br>(0 - 0)         |
| Chronic kidney disease                              | 19<br>(12 - 28)   | 0<br>(0 - 0)       | 0<br>(0 - 0)        | 2<br>(1 - 4)         | 5<br>(3 - 7)         | 11<br>(7 - 18)       |
| Chronic kidney disease due to diabetes mellitus     | 3<br>(2 - 5)      | 0<br>(0 - 0)       | 0<br>(0 - 0)        | 0<br>(0 - 1)         | 1<br>(1 - 2)         | 2<br>(1 - 3)         |
| Chronic kidney disease due to hypertension          | 10<br>(6 - 15)    | 0<br>(0 - 0)       | 0<br>(0 - 0)        | 1<br>(1 - 2)         | 2<br>(1 - 4)         | 6<br>(4 - 10)        |
| Chronic kidney disease due to glomerulonephritis    | 0<br>(0 - 1)      | 0<br>(0 - 0)       | 0<br>(0 - 0)        | 0<br>(0 - 0)         | 0<br>(0 - 0)         | 0<br>(0 - 0)         |
| Chronic kidney disease due to other causes          | 5<br>(2 - 10)     | 0<br>(0 - 0)       | 0<br>(0 - 0)        | 1<br>(0 - 1)         | 1<br>(0 - 2)         | 3<br>(1 - 6)         |
| Urinary diseases and male infertility               | 3<br>(2 - 5)      | 0<br>(0 - 0)       | 0<br>(0 - 0)        | 0<br>(0 - 0)         | 1<br>(0 - 1)         | 2<br>(1 - 4)         |
| Interstitial nephritis and urinary tract infections | 3<br>(2 - 4)      | 0<br>(0 - 0)       | 0<br>(0 - 0)        | 0<br>(0 - 0)         | 0<br>(0 - 1)         | 2<br>(1 - 3)         |
| Urolithiasis                                        | 0<br>(0 - 0)      | --                 | 0<br>(0 - 0)        | 0<br>(0 - 0)         | 0<br>(0 - 0)         | 0<br>(0 - 0)         |
| Other urinary diseases                              | 0<br>(0 - 1)      | 0<br>(0 - 0)       | 0<br>(0 - 0)        | 0<br>(0 - 0)         | 0<br>(0 - 0)         | 0<br>(0 - 1)         |
| Gynecological diseases                              | 0<br>(0 - 0)      | --                 | --                  | 0<br>(0 - 0)         | 0<br>(0 - 0)         | 0<br>(0 - 0)         |
| Uterine fibroids                                    | 0<br>(0 - 0)      | --                 | --                  | 0<br>(0 - 0)         | 0<br>(0 - 0)         | 0<br>(0 - 0)         |
| Polycystic ovarian syndrome                         | 0<br>(0 - 0)      | --                 | --                  | 0<br>(0 - 0)         | 0<br>(0 - 0)         | --                   |
| Endometriosis                                       | 0<br>(0 - 0)      | --                 | --                  | 0<br>(0 - 0)         | 0<br>(0 - 0)         | --                   |
| Genital prolapse                                    | 0<br>(0 - 0)      | --                 | --                  | 0<br>(0 - 0)         | 0<br>(0 - 0)         | 0<br>(0 - 0)         |
| Other gynecological diseases                        | 0<br>(0 - 0)      | --                 | --                  | 0<br>(0 - 0)         | 0<br>(0 - 0)         | 0<br>(0 - 0)         |
| Hemoglobinopathies and hemolytic anemias            | 1<br>(1 - 2)      | 0<br>(0 - 0)       | 0<br>(0 - 0)        | 0<br>(0 - 1)         | 0<br>(0 - 0)         | 0<br>(0 - 0)         |
| Thalassemias                                        | 0<br>(0 - 0)      | 0<br>(0 - 0)       | 0<br>(0 - 0)        | 0<br>(0 - 0)         | 0<br>(0 - 0)         | 0<br>(0 - 0)         |
| Sickle cell disorders                               | 1<br>(1 - 2)      | 0<br>(0 - 0)       | 0<br>(0 - 0)        | 0<br>(0 - 1)         | 0<br>(0 - 0)         | 0<br>(0 - 0)         |
| G6PD deficiency                                     | 0<br>(0 - 0)      | 0<br>(0 - 0)       | 0<br>(0 - 0)        | 0<br>(0 - 0)         | 0<br>(0 - 0)         | 0<br>(0 - 0)         |
| Other hemoglobinopathies and hemolytic anemias      | 0<br>(0 - 0)      | 0<br>(0 - 0)       | 0<br>(0 - 0)        | 0<br>(0 - 0)         | 0<br>(0 - 0)         | 0<br>(0 - 0)         |
| Endocrine, metabolic, blood, and immune disorders   | 6<br>(4 - 11)     | 0<br>(0 - 0)       | 0<br>(0 - 0)        | 1<br>(1 - 2)         | 1<br>(1 - 2)         | 4<br>(2 - 7)         |
| Musculoskeletal disorders                           | 3<br>(1 - 5)      | --                 | 0<br>(0 - 0)        | 1<br>(1 - 2)         | 1<br>(0 - 1)         | 1<br>(1 - 2)         |
| Rheumatoid arthritis                                | 1<br>(0 - 1)      | --                 | 0<br>(0 - 0)        | 0<br>(0 - 0)         | 0<br>(0 - 0)         | 0<br>(0 - 1)         |
| Other musculoskeletal disorders                     | 3<br>(1 - 4)      | --                 | 0<br>(0 - 0)        | 1<br>(0 - 2)         | 1<br>(0 - 1)         | 1<br>(0 - 2)         |
| Other non-communicable diseases                     | 13<br>(8 - 19)    | 5<br>(2 - 10)      | 0<br>(0 - 1)        | 1<br>(1 - 1)         | 1<br>(0 - 1)         | 6<br>(2 - 10)        |
| Congenital anomalies                                | 6<br>(3 - 11)     | 4<br>(2 - 9)       | 0<br>(0 - 1)        | 1<br>(0 - 1)         | 0<br>(0 - 0)         | 1<br>(0 - 1)         |
| Neural tube defects                                 | 0<br>(0 - 1)      | 0<br>(0 - 1)       | 0<br>(0 - 0)        | 0<br>(0 - 0)         | 0<br>(0 - 0)         | 0<br>(0 - 0)         |
| Congenital heart anomalies                          | 3<br>(2 - 6)      | 2<br>(1 - 4)       | 0<br>(0 - 0)        | 0<br>(0 - 1)         | 0<br>(0 - 0)         | 0<br>(0 - 1)         |
| Cleft lip and cleft palate                          | 0<br>(0 - 0)      | 0<br>(0 - 0)       | --                  | --                   | --                   | --                   |
| Down syndrome                                       | 0<br>(0 - 0)      | 0<br>(0 - 0)       | 0<br>(0 - 0)        | 0<br>(0 - 0)         | 0<br>(0 - 0)         | 0<br>(0 - 0)         |
| Chromosomal unbalanced rearrangements               | 0<br>(0 - 0)      | 0<br>(0 - 0)       | 0<br>(0 - 0)        | 0<br>(0 - 0)         | 0<br>(0 - 0)         | 0<br>(0 - 0)         |
| Other congenital anomalies                          | 2<br>(1 - 4)      | 2<br>(1 - 3)       | 0<br>(0 - 0)        | 0<br>(0 - 0)         | 0<br>(0 - 0)         | 0<br>(0 - 0)         |
| Skin and subcutaneous diseases                      | 7<br>(2 - 10)     | 0<br>(0 - 0)       | 0<br>(0 - 0)        | 0<br>(0 - 0)         | 1<br>(0 - 1)         | 6<br>(2 - 9)         |
| Cellulitis                                          | 0<br>(0 - 1)      | 0<br>(0 - 0)       | 0<br>(0 - 0)        | 0<br>(0 - 0)         | 0<br>(0 - 0)         | 0<br>(0 - 1)         |
| Pyoderma                                            | 1<br>(0 - 2)      | 0<br>(0 - 0)       | 0<br>(0 - 0)        | 0<br>(0 - 0)         | 0<br>(0 - 0)         | 1<br>(0 - 2)         |
| Decubitus ulcer                                     | 5<br>(2 - 8)      | 0<br>(0 - 0)       | 0<br>(0 - 0)        | 0<br>(0 - 0)         | 0<br>(0 - 1)         | 5<br>(1 - 7)         |
| Other skin and subcutaneous diseases                | 0<br>(0 - 0)      | 0<br>(0 - 0)       | 0<br>(0 - 0)        | 0<br>(0 - 0)         | 0<br>(0 - 0)         | 0<br>(0 - 0)         |

Web Table 31- Saint Lucia deaths with 95% UI by age, sex, and cause in 2013

| Cause                                           | Females, All Ages | Females, 0-4 Years | Females, 5-14 Years | Females, 15-49 Years | Females, 50-69 Years | Females, 70-80 Years |
|-------------------------------------------------|-------------------|--------------------|---------------------|----------------------|----------------------|----------------------|
| Sudden infant death syndrome                    | 0<br>(0 - 1)      | 0<br>(0 - 1)       | -                   | -                    | -                    | -                    |
| Injuries                                        | 27<br>(20 - 35)   | 1<br>(1 - 3)       | 1<br>(1 - 2)        | 9<br>(6 - 12)        | 4<br>(3 - 6)         | 12<br>(8 - 15)       |
| Transport injuries                              | 6<br>(4 - 8)      | 0<br>(0 - 1)       | 0<br>(0 - 1)        | 2<br>(2 - 3)         | 1<br>(1 - 2)         | 2<br>(1 - 3)         |
| Road injuries                                   | 6<br>(4 - 8)      | 0<br>(0 - 0)       | 0<br>(0 - 1)        | 2<br>(1 - 3)         | 1<br>(1 - 2)         | 2<br>(1 - 3)         |
| Pedestrian road injuries                        | 2<br>(1 - 2)      | 0<br>(0 - 0)       | 0<br>(0 - 0)        | 1<br>(0 - 1)         | 0<br>(0 - 1)         | 1<br>(0 - 1)         |
| Cyclist road injuries                           | 0<br>(0 - 0)      | 0<br>(0 - 0)       | 0<br>(0 - 0)        | 0<br>(0 - 0)         | 0<br>(0 - 0)         | 0<br>(0 - 0)         |
| Motorcyclist road injuries                      | 0<br>(0 - 0)      | 0<br>(0 - 0)       | 0<br>(0 - 0)        | 0<br>(0 - 0)         | 0<br>(0 - 0)         | 0<br>(0 - 0)         |
| Motor vehicle road injuries                     | 4<br>(2 - 5)      | 0<br>(0 - 0)       | 0<br>(0 - 0)        | 1<br>(1 - 2)         | 1<br>(0 - 1)         | 1<br>(1 - 2)         |
| Other road injuries                             | 0<br>(0 - 0)      | 0<br>(0 - 0)       | 0<br>(0 - 0)        | 0<br>(0 - 0)         | 0<br>(0 - 0)         | 0<br>(0 - 0)         |
| Other transport injuries                        | 1<br>(0 - 1)      | 0<br>(0 - 0)       | 0<br>(0 - 0)        | 0<br>(0 - 0)         | 0<br>(0 - 0)         | 0<br>(0 - 0)         |
| Unintentional injuries                          | 14<br>(10 - 17)   | 1<br>(0 - 2)       | 0<br>(0 - 1)        | 2<br>(1 - 3)         | 2<br>(1 - 2)         | 8<br>(6 - 11)        |
| Falls                                           | 4<br>(3 - 6)      | 0<br>(0 - 0)       | 0<br>(0 - 0)        | 0<br>(0 - 0)         | 0<br>(0 - 0)         | 3<br>(2 - 5)         |
| Drowning                                        | 1<br>(1 - 2)      | 0<br>(0 - 0)       | 0<br>(0 - 0)        | 0<br>(0 - 1)         | 0<br>(0 - 0)         | 0<br>(0 - 0)         |
| Fire, heat, and hot substances                  | 2<br>(1 - 3)      | 0<br>(0 - 0)       | 0<br>(0 - 0)        | 0<br>(0 - 0)         | 0<br>(0 - 0)         | 1<br>(1 - 2)         |
| Poisonings                                      | 0<br>(0 - 0)      | 0<br>(0 - 0)       | 0<br>(0 - 0)        | 0<br>(0 - 0)         | 0<br>(0 - 0)         | 0<br>(0 - 0)         |
| Exposure to mechanical forces                   | 1<br>(1 - 1)      | 0<br>(0 - 0)       | 0<br>(0 - 0)        | 0<br>(0 - 0)         | 0<br>(0 - 0)         | 0<br>(0 - 0)         |
| Unintentional firearm injuries                  | 0<br>(0 - 0)      | 0<br>(0 - 0)       | 0<br>(0 - 0)        | 0<br>(0 - 0)         | 0<br>(0 - 0)         | 0<br>(0 - 0)         |
| Unintentional suffocation                       | 0<br>(0 - 0)      | 0<br>(0 - 0)       | 0<br>(0 - 0)        | 0<br>(0 - 0)         | 0<br>(0 - 0)         | 0<br>(0 - 0)         |
| Other exposure to mechanical forces             | 0<br>(0 - 0)      | 0<br>(0 - 0)       | 0<br>(0 - 0)        | 0<br>(0 - 0)         | 0<br>(0 - 0)         | 0<br>(0 - 0)         |
| Adverse effects of medical treatment            | 3<br>(1 - 4)      | 0<br>(0 - 0)       | 0<br>(0 - 0)        | 0<br>(0 - 1)         | 0<br>(0 - 1)         | 2<br>(1 - 3)         |
| Animal contact                                  | 0<br>(0 - 1)      | 0<br>(0 - 0)       | 0<br>(0 - 0)        | 0<br>(0 - 0)         | 0<br>(0 - 0)         | 0<br>(0 - 0)         |
| Venomous animal contact                         | 0<br>(0 - 0)      | 0<br>(0 - 0)       | 0<br>(0 - 0)        | 0<br>(0 - 0)         | 0<br>(0 - 0)         | 0<br>(0 - 0)         |
| Non-venomous animal contact                     | 0<br>(0 - 0)      | 0<br>(0 - 0)       | 0<br>(0 - 0)        | 0<br>(0 - 0)         | 0<br>(0 - 0)         | 0<br>(0 - 0)         |
| Foreign body                                    | 2<br>(1 - 3)      | 0<br>(0 - 1)       | 0<br>(0 - 0)        | 0<br>(0 - 0)         | 0<br>(0 - 0)         | 1<br>(1 - 2)         |
| Pulmonary aspiration and foreign body in airway | 2<br>(1 - 3)      | 0<br>(0 - 1)       | 0<br>(0 - 0)        | 0<br>(0 - 0)         | 0<br>(0 - 0)         | 1<br>(1 - 2)         |
| Foreign body in other body part                 | 0<br>(0 - 0)      | 0<br>(0 - 0)       | 0<br>(0 - 0)        | 0<br>(0 - 0)         | 0<br>(0 - 0)         | 0<br>(0 - 0)         |
| Other unintentional injuries                    | 0<br>(0 - 0)      | 0<br>(0 - 0)       | 0<br>(0 - 0)        | 0<br>(0 - 0)         | 0<br>(0 - 0)         | 0<br>(0 - 0)         |
| Self-harm and interpersonal violence            | 7<br>(5 - 10)     | 0<br>(0 - 0)       | 0<br>(0 - 0)        | 5<br>(3 - 6)         | 1<br>(1 - 2)         | 1<br>(1 - 1)         |
| Self-harm                                       | 3<br>(2 - 4)      | -                  | 0<br>(0 - 0)        | 2<br>(1 - 3)         | 1<br>(0 - 1)         | 1<br>(0 - 1)         |
| Interpersonal violence                          | 4<br>(2 - 6)      | 0<br>(0 - 0)       | 0<br>(0 - 0)        | 3<br>(1 - 4)         | 1<br>(0 - 1)         | 0<br>(0 - 1)         |
| Assault by firearm                              | 1<br>(0 - 2)      | 0<br>(0 - 0)       | 0<br>(0 - 0)        | 1<br>(0 - 1)         | 0<br>(0 - 0)         | 0<br>(0 - 0)         |
| Assault by sharp object                         | 1<br>(1 - 2)      | 0<br>(0 - 0)       | 0<br>(0 - 0)        | 1<br>(1 - 2)         | 0<br>(0 - 0)         | 0<br>(0 - 0)         |
| Assault by other means                          | 2<br>(1 - 3)      | 0<br>(0 - 0)       | 0<br>(0 - 0)        | 1<br>(0 - 2)         | 0<br>(0 - 1)         | 0<br>(0 - 1)         |

Web Table 31- Saint Vincent and the Grenadines deaths with 95% UI by age, sex, and cause in 2013

| Cause                                                             | Both Sexes, All Ages | Both Sexes, 0-4 Years | Both Sexes, 5-14 Years | Both Sexes, 15-49 Years | Both Sexes, 50-69 Years | Both Sexes, 70-80 Years |
|-------------------------------------------------------------------|----------------------|-----------------------|------------------------|-------------------------|-------------------------|-------------------------|
| All causes                                                        | 768<br>(679 - 861)   | 42<br>(20 - 83)       | 8<br>(5 - 12)          | 123<br>(107 - 139)      | 206<br>(172 - 242)      | 389<br>(337 - 434)      |
| Communicable, maternal, neonatal, and nutritional diseases        | 94<br>(77 - 120)     | 29<br>(13 - 54)       | 1<br>(1 - 2)           | 22<br>(19 - 25)         | 14<br>(11 - 16)         | 29<br>(23 - 35)         |
| HIV/AIDS and tuberculosis                                         | 22<br>(18 - 26)      | 0<br>(0 - 0)          | 0<br>(0 - 0)           | 14<br>(12 - 17)         | 6<br>(4 - 8)            | 1<br>(1 - 2)            |
| Tuberculosis                                                      | 3<br>(2 - 3)         | 0<br>(0 - 0)          | 0<br>(0 - 0)           | 1<br>(1 - 1)            | 1<br>(1 - 1)            | 1<br>(1 - 1)            |
| HIV/AIDS                                                          | 19<br>(15 - 23)      | 0<br>(0 - 0)          | 0<br>(0 - 0)           | 13<br>(11 - 16)         | 5<br>(3 - 7)            | 1<br>(0 - 1)            |
| HIV/AIDS resulting in mycobacterial infection                     | 1<br>(1 - 1)         | 0<br>(0 - 0)          | 0<br>(0 - 0)           | 1<br>(1 - 1)            | 0<br>(0 - 0)            | 0<br>(0 - 0)            |
| HIV/AIDS resulting in other diseases                              | 18<br>(14 - 22)      | 0<br>(0 - 0)          | 0<br>(0 - 0)           | 13<br>(10 - 15)         | 4<br>(3 - 6)            | 1<br>(0 - 1)            |
| Diarrhea, lower respiratory, and other common infectious diseases | 39<br>(32 - 48)      | 6<br>(3 - 13)         | 1<br>(1 - 2)           | 5<br>(4 - 5)            | 6<br>(4 - 7)            | 22<br>(17 - 27)         |
| Diarrheal diseases                                                | 4<br>(3 - 6)         | 2<br>(1 - 4)          | 0<br>(0 - 0)           | 0<br>(0 - 0)            | 0<br>(0 - 1)            | 1<br>(1 - 2)            |
| Intestinal infectious diseases                                    | 1<br>(0 - 2)         | 0<br>(0 - 1)          | 0<br>(0 - 0)           | 0<br>(0 - 1)            | 0<br>(0 - 0)            | 0<br>(0 - 0)            |
| Typhoid fever                                                     | 1<br>(0 - 1)         | 0<br>(0 - 0)          | 0<br>(0 - 0)           | 0<br>(0 - 0)            | 0<br>(0 - 0)            | 0<br>(0 - 0)            |
| Paratyphoid fever                                                 | 0<br>(0 - 0)         | 0<br>(0 - 0)          | 0<br>(0 - 0)           | 0<br>(0 - 0)            | 0<br>(0 - 0)            | 0<br>(0 - 0)            |
| Other intestinal infectious diseases                              | 0<br>(0 - 0)         | 0<br>(0 - 0)          | 0<br>(0 - 0)           | 0<br>(0 - 0)            | 0<br>(0 - 0)            | 0<br>(0 - 0)            |
| Lower respiratory infections                                      | 32<br>(26 - 39)      | 4<br>(2 - 8)          | 0<br>(0 - 1)           | 3<br>(2 - 4)            | 5<br>(4 - 6)            | 20<br>(16 - 26)         |
| Upper respiratory infections                                      | 0<br>(0 - 0)         | 0<br>(0 - 0)          | 0<br>(0 - 0)           | 0<br>(0 - 0)            | 0<br>(0 - 0)            | 0<br>(0 - 0)            |
| Otitis media                                                      | 0<br>(0 - 0)         | 0<br>(0 - 0)          | 0<br>(0 - 0)           | 0<br>(0 - 0)            | 0<br>(0 - 0)            | 0<br>(0 - 0)            |
| Meningitis                                                        | 1<br>(1 - 2)         | 0<br>(0 - 1)          | 0<br>(0 - 0)           | 0<br>(0 - 0)            | 0<br>(0 - 0)            | 0<br>(0 - 0)            |
| Pneumococcal meningitis                                           | 0<br>(0 - 0)         | 0<br>(0 - 0)          | 0<br>(0 - 0)           | 0<br>(0 - 0)            | 0<br>(0 - 0)            | 0<br>(0 - 0)            |
| H influenzae type B meningitis                                    | 0<br>(0 - 0)         | 0<br>(0 - 0)          | 0<br>(0 - 0)           | 0<br>(0 - 0)            | 0<br>(0 - 0)            | 0<br>(0 - 0)            |
| Meningococcal meningitis                                          | 0<br>(0 - 0)         | 0<br>(0 - 0)          | 0<br>(0 - 0)           | 0<br>(0 - 0)            | 0<br>(0 - 0)            | 0<br>(0 - 0)            |
| Other meningitis                                                  | 1<br>(0 - 1)         | 0<br>(0 - 0)          | 0<br>(0 - 0)           | 0<br>(0 - 0)            | 0<br>(0 - 0)            | 0<br>(0 - 0)            |
| Encephalitis                                                      | 1<br>(1 - 2)         | 0<br>(0 - 1)          | 0<br>(0 - 0)           | 0<br>(0 - 1)            | 0<br>(0 - 0)            | 0<br>(0 - 0)            |
| Diphtheria                                                        | 0<br>(0 - 0)         | 0<br>(0 - 0)          | 0<br>(0 - 0)           | 0<br>(0 - 0)            | 0<br>(0 - 0)            | --                      |
| Whooping cough                                                    | 0<br>(0 - 0)         | 0<br>(0 - 0)          | 0<br>(0 - 0)           | 0<br>(0 - 0)            | 0<br>(0 - 0)            | --                      |
| Tetanus                                                           | 0<br>(0 - 0)         | 0<br>(0 - 0)          | 0<br>(0 - 0)           | 0<br>(0 - 0)            | 0<br>(0 - 0)            | 0<br>(0 - 0)            |
| Measles                                                           | 0<br>(0 - 0)         | 0<br>(0 - 0)          | 0<br>(0 - 0)           | 0<br>(0 - 0)            | 0<br>(0 - 0)            | --                      |
| Varicella and herpes zoster                                       | 0<br>(0 - 0)         | 0<br>(0 - 0)          | 0<br>(0 - 0)           | 0<br>(0 - 0)            | 0<br>(0 - 0)            | 0<br>(0 - 0)            |
| Neglected tropical diseases and malaria                           | 1<br>(0 - 1)         | 0<br>(0 - 0)          | 0<br>(0 - 0)           | 0<br>(0 - 0)            | 0<br>(0 - 0)            | 0<br>(0 - 0)            |
| Leishmaniasis                                                     | 0<br>(0 - 0)         | 0<br>(0 - 0)          | 0<br>(0 - 0)           | 0<br>(0 - 0)            | 0<br>(0 - 0)            | 0<br>(0 - 0)            |
| Visceral leishmaniasis                                            | 0<br>(0 - 0)         | 0<br>(0 - 0)          | 0<br>(0 - 0)           | 0<br>(0 - 0)            | 0<br>(0 - 0)            | 0<br>(0 - 0)            |
| Cysticercosis                                                     | 0<br>(0 - 0)         | 0<br>(0 - 0)          | 0<br>(0 - 0)           | 0<br>(0 - 0)            | 0<br>(0 - 0)            | 0<br>(0 - 0)            |
| Cystic echinococcosis                                             | 0<br>(0 - 0)         | 0<br>(0 - 0)          | 0<br>(0 - 0)           | 0<br>(0 - 0)            | 0<br>(0 - 0)            | 0<br>(0 - 0)            |
| Dengue                                                            | 0<br>(0 - 0)         | 0<br>(0 - 0)          | 0<br>(0 - 0)           | 0<br>(0 - 0)            | 0<br>(0 - 0)            | 0<br>(0 - 0)            |
| Rabies                                                            | 0<br>(0 - 0)         | 0<br>(0 - 0)          | 0<br>(0 - 0)           | 0<br>(0 - 0)            | 0<br>(0 - 0)            | 0<br>(0 - 0)            |
| Intestinal nematode infections                                    | 0<br>(0 - 1)         | 0<br>(0 - 0)          | 0<br>(0 - 0)           | 0<br>(0 - 0)            | 0<br>(0 - 0)            | 0<br>(0 - 0)            |
| Ascariasis                                                        | 0<br>(0 - 1)         | 0<br>(0 - 0)          | 0<br>(0 - 0)           | 0<br>(0 - 0)            | 0<br>(0 - 0)            | 0<br>(0 - 0)            |
| Other neglected tropical diseases                                 | 0<br>(0 - 0)         | 0<br>(0 - 0)          | 0<br>(0 - 0)           | 0<br>(0 - 0)            | 0<br>(0 - 0)            | 0<br>(0 - 0)            |
| Maternal disorders                                                | 1<br>(1 - 1)         | --                    | 0<br>(0 - 0)           | 1<br>(1 - 1)            | --                      | --                      |
| Maternal hemorrhage                                               | 0<br>(0 - 0)         | --                    | 0<br>(0 - 0)           | 0<br>(0 - 0)            | --                      | --                      |
| Maternal sepsis and other maternal infections                     | 0<br>(0 - 0)         | --                    | 0<br>(0 - 0)           | 0<br>(0 - 0)            | --                      | --                      |



Web Table 31- Saint Vincent and the Grenadines deaths with 95% UI by age, sex, and cause in 2013

| Cause                                                            | Both Sexes, All Ages | Both Sexes, 0-4 Years | Both Sexes, 5-14 Years | Both Sexes, 15-49 Years | Both Sexes, 50-69 Years | Both Sexes, 70-80 Years |
|------------------------------------------------------------------|----------------------|-----------------------|------------------------|-------------------------|-------------------------|-------------------------|
| Maternal hypertensive disorders                                  | 0<br>(0 - 0)         | --                    | 0<br>(0 - 0)           | 0<br>(0 - 0)            | --                      | --                      |
| Maternal obstructed labor                                        | 0<br>(0 - 0)         | --                    | 0<br>(0 - 0)           | 0<br>(0 - 0)            | --                      | --                      |
| Maternal abortive outcome                                        | 0<br>(0 - 0)         | --                    | 0<br>(0 - 0)           | 0<br>(0 - 0)            | --                      | --                      |
| Indirect maternal deaths                                         | 0<br>(0 - 0)         | --                    | 0<br>(0 - 0)           | 0<br>(0 - 0)            | --                      | --                      |
| Late maternal deaths                                             | 0<br>(0 - 0)         | --                    | 0<br>(0 - 0)           | 0<br>(0 - 0)            | --                      | --                      |
| Maternal deaths aggravated by HIV/AIDS                           | 0<br>(0 - 0)         | --                    | --                     | 0<br>(0 - 0)            | --                      | --                      |
| Other maternal disorders                                         | 0<br>(0 - 0)         | --                    | 0<br>(0 - 0)           | 0<br>(0 - 0)            | --                      | --                      |
| Neonatal disorders                                               | 21<br>(9 - 37)       | 21<br>(9 - 37)        | --                     | --                      | --                      | --                      |
| Neonatal preterm birth complications                             | 11<br>(4 - 19)       | 11<br>(4 - 19)        | --                     | --                      | --                      | --                      |
| Neonatal encephalopathy due to birth asphyxia and trauma         | 5<br>(2 - 9)         | 5<br>(2 - 9)          | --                     | --                      | --                      | --                      |
| Neonatal sepsis and other neonatal infections                    | 3<br>(1 - 6)         | 3<br>(1 - 6)          | --                     | --                      | --                      | --                      |
| Hemolytic disease and other neonatal jaundice                    | 0<br>(0 - 0)         | 0<br>(0 - 0)          | --                     | --                      | --                      | --                      |
| Other neonatal disorders                                         | 2<br>(1 - 5)         | 2<br>(1 - 5)          | --                     | --                      | --                      | --                      |
| Nutritional deficiencies                                         | 9<br>(7 - 12)        | 2<br>(1 - 4)          | 0<br>(0 - 0)           | 1<br>(1 - 1)            | 1<br>(1 - 2)            | 5<br>(3 - 6)            |
| Protein-energy malnutrition                                      | 4<br>(3 - 6)         | 1<br>(1 - 3)          | 0<br>(0 - 0)           | 0<br>(0 - 1)            | 0<br>(0 - 1)            | 2<br>(1 - 3)            |
| Iodine deficiency                                                | 0<br>(0 - 0)         | 0<br>(0 - 0)          | 0<br>(0 - 0)           | 0<br>(0 - 0)            | 0<br>(0 - 0)            | 0<br>(0 - 0)            |
| Iron-deficiency anemia                                           | 4<br>(3 - 6)         | 0<br>(0 - 1)          | 0<br>(0 - 0)           | 1<br>(1 - 1)            | 1<br>(0 - 1)            | 2<br>(1 - 3)            |
| Other nutritional deficiencies                                   | 0<br>(0 - 1)         | 0<br>(0 - 0)          | 0<br>(0 - 0)           | 0<br>(0 - 0)            | 0<br>(0 - 0)            | 0<br>(0 - 0)            |
| Other communicable, maternal, neonatal, and nutritional diseases | 2<br>(2 - 3)         | 0<br>(0 - 0)          | 0<br>(0 - 0)           | 1<br>(0 - 1)            | 1<br>(0 - 1)            | 1<br>(0 - 1)            |
| Sexually transmitted diseases excluding HIV                      | 0<br>(0 - 0)         | 0<br>(0 - 0)          | 0<br>(0 - 0)           | 0<br>(0 - 0)            | 0<br>(0 - 0)            | 0<br>(0 - 0)            |
| Syphilis                                                         | 0<br>(0 - 0)         | 0<br>(0 - 0)          | 0<br>(0 - 0)           | 0<br>(0 - 0)            | 0<br>(0 - 0)            | 0<br>(0 - 0)            |
| Chlamydial infection                                             | 0<br>(0 - 0)         | --                    | 0<br>(0 - 0)           | 0<br>(0 - 0)            | 0<br>(0 - 0)            | 0<br>(0 - 0)            |
| Gonococcal infection                                             | 0<br>(0 - 0)         | --                    | 0<br>(0 - 0)           | 0<br>(0 - 0)            | 0<br>(0 - 0)            | 0<br>(0 - 0)            |
| Other sexually transmitted diseases                              | 0<br>(0 - 0)         | --                    | 0<br>(0 - 0)           | 0<br>(0 - 0)            | 0<br>(0 - 0)            | 0<br>(0 - 0)            |
| Hepatitis                                                        | 0<br>(0 - 0)         | 0<br>(0 - 0)          | 0<br>(0 - 0)           | 0<br>(0 - 0)            | 0<br>(0 - 0)            | 0<br>(0 - 0)            |
| Acute hepatitis A                                                | 0<br>(0 - 0)         | 0<br>(0 - 0)          | 0<br>(0 - 0)           | 0<br>(0 - 0)            | 0<br>(0 - 0)            | 0<br>(0 - 0)            |
| Acute hepatitis B                                                | 0<br>(0 - 0)         | 0<br>(0 - 0)          | 0<br>(0 - 0)           | 0<br>(0 - 0)            | 0<br>(0 - 0)            | 0<br>(0 - 0)            |
| Acute hepatitis C                                                | 0<br>(0 - 0)         | --                    | 0<br>(0 - 0)           | 0<br>(0 - 0)            | 0<br>(0 - 0)            | 0<br>(0 - 0)            |
| Other infectious diseases                                        | 2<br>(1 - 3)         | 0<br>(0 - 0)          | 0<br>(0 - 0)           | 1<br>(0 - 1)            | 1<br>(0 - 1)            | 1<br>(0 - 1)            |
| Non-communicable diseases                                        | 606<br>(523 - 684)   | 11<br>(5 - 22)        | 3<br>(2 - 5)           | 63<br>(53 - 72)         | 179<br>(149 - 211)      | 350<br>(302 - 391)      |
| Neoplasms                                                        | 127<br>(108 - 146)   | 1<br>(0 - 1)          | 1<br>(1 - 1)           | 17<br>(15 - 21)         | 47<br>(39 - 56)         | 61<br>(51 - 71)         |
| Esophageal cancer                                                | 3<br>(2 - 4)         | --                    | --                     | 0<br>(0 - 0)            | 1<br>(1 - 2)            | 1<br>(1 - 2)            |
| Stomach cancer                                                   | 7<br>(6 - 9)         | --                    | --                     | 1<br>(1 - 1)            | 3<br>(2 - 3)            | 4<br>(3 - 5)            |
| Liver cancer                                                     | 4<br>(4 - 5)         | --                    | 0<br>(0 - 0)           | 1<br>(1 - 1)            | 2<br>(2 - 2)            | 2<br>(1 - 2)            |
| Liver cancer due to hepatitis B                                  | 1<br>(1 - 2)         | --                    | 0<br>(0 - 0)           | 0<br>(0 - 0)            | 1<br>(0 - 1)            | 0<br>(0 - 0)            |
| Liver cancer due to hepatitis C                                  | 2<br>(1 - 3)         | --                    | 0<br>(0 - 0)           | 0<br>(0 - 0)            | 1<br>(1 - 1)            | 1<br>(1 - 1)            |
| Liver cancer due to alcohol use                                  | 1<br>(1 - 1)         | --                    | --                     | 0<br>(0 - 0)            | 0<br>(0 - 1)            | 0<br>(0 - 1)            |
| Liver cancer due to other causes                                 | 0<br>(0 - 1)         | --                    | 0<br>(0 - 0)           | 0<br>(0 - 0)            | 0<br>(0 - 0)            | 0<br>(0 - 0)            |
| Larynx cancer                                                    | 1<br>(1 - 2)         | --                    | 1<br>(1 - 1)           | 0<br>(0 - 0)            | 1<br>(0 - 1)            | 0<br>(0 - 1)            |
| Tracheal, bronchus and lung cancer                               | 12<br>(10 - 15)      | --                    | --                     | 1<br>(1 - 2)            | 6<br>(5 - 8)            | 5<br>(4 - 6)            |

Web Table 31- Saint Vincent and the Grenadines deaths with 95% UI by age, sex, and cause in 2013

| Cause                                         | Both Sexes, All Ages | Both Sexes, 0-4 Years | Both Sexes, 5-14 Years | Both Sexes, 15-49 Years | Both Sexes, 50-69 Years | Both Sexes, 70-80 Years |
|-----------------------------------------------|----------------------|-----------------------|------------------------|-------------------------|-------------------------|-------------------------|
| Breast cancer                                 | 13<br>(10 - 16)      | --                    | --                     | 3<br>(2 - 4)            | 5<br>(4 - 7)            | 4<br>(3 - 6)            |
| Cervical cancer                               | 7<br>(5 - 10)        | --                    | --                     | 2<br>(1 - 3)            | 3<br>(2 - 4)            | 3<br>(2 - 3)            |
| Uterine cancer                                | 3<br>(2 - 4)         | --                    | --                     | 0<br>(0 - 0)            | 1<br>(1 - 2)            | 2<br>(1 - 2)            |
| Prostate cancer                               | 23<br>(14 - 32)      | --                    | --                     | 0<br>(0 - 0)            | 5<br>(3 - 8)            | 18<br>(11 - 24)         |
| Colon and rectum cancer                       | 14<br>(11 - 16)      | --                    | --                     | 1<br>(1 - 2)            | 5<br>(4 - 6)            | 7<br>(6 - 9)            |
| Lip and oral cavity cancer                    | 2<br>(1 - 2)         | --                    | --                     | 0<br>(0 - 0)            | 1<br>(1 - 1)            | 1<br>(1 - 1)            |
| Nasopharynx cancer                            | 1<br>(0 - 1)         | --                    | 0<br>(0 - 0)           | 0<br>(0 - 0)            | 0<br>(0 - 0)            | 0<br>(0 - 0)            |
| Other pharynx cancer                          | 1<br>(1 - 1)         | --                    | --                     | 0<br>(0 - 0)            | 0<br>(0 - 1)            | 0<br>(0 - 0)            |
| Gallbladder and biliary tract cancer          | 1<br>(1 - 2)         | --                    | --                     | 0<br>(0 - 0)            | 1<br>(0 - 1)            | 1<br>(1 - 1)            |
| Pancreatic cancer                             | 6<br>(5 - 7)         | --                    | --                     | 1<br>(0 - 1)            | 2<br>(2 - 3)            | 3<br>(2 - 4)            |
| Malignant skin melanoma                       | 1<br>(0 - 1)         | --                    | --                     | 0<br>(0 - 0)            | 0<br>(0 - 0)            | 0<br>(0 - 0)            |
| Non-melanoma skin cancer                      | 0<br>(0 - 1)         | --                    | --                     | 0<br>(0 - 0)            | 0<br>(0 - 0)            | 0<br>(0 - 0)            |
| Ovarian cancer                                | 3<br>(2 - 4)         | --                    | --                     | 1<br>(0 - 1)            | 1<br>(1 - 2)            | 1<br>(1 - 2)            |
| Testicular cancer                             | 0<br>(0 - 0)         | --                    | --                     | 0<br>(0 - 0)            | 0<br>(0 - 0)            | 0<br>(0 - 0)            |
| Kidney cancer                                 | 2<br>(2 - 2)         | 0<br>(0 - 0)          | 0<br>(0 - 0)           | 0<br>(0 - 0)            | 1<br>(1 - 1)            | 1<br>(1 - 1)            |
| Bladder cancer                                | 2<br>(1 - 2)         | --                    | --                     | 0<br>(0 - 0)            | 0<br>(0 - 1)            | 1<br>(1 - 2)            |
| Brain and nervous system cancer               | 2<br>(1 - 2)         | 0<br>(0 - 0)          | 0<br>(0 - 0)           | 1<br>(0 - 1)            | 1<br>(0 - 1)            | 0<br>(0 - 1)            |
| Thyroid cancer                                | 1<br>(0 - 1)         | --                    | 0<br>(0 - 0)           | 0<br>(0 - 0)            | 0<br>(0 - 0)            | 0<br>(0 - 0)            |
| Mesothelioma                                  | 0<br>(0 - 0)         | --                    | --                     | 0<br>(0 - 0)            | 0<br>(0 - 0)            | 0<br>(0 - 0)            |
| Hodgkin lymphoma                              | 0<br>(0 - 0)         | 0<br>(0 - 0)          | 0<br>(0 - 0)           | 0<br>(0 - 0)            | 0<br>(0 - 0)            | 0<br>(0 - 0)            |
| Non-Hodgkin lymphoma                          | 5<br>(4 - 6)         | 0<br>(0 - 0)          | 0<br>(0 - 0)           | 2<br>(1 - 2)            | 2<br>(1 - 3)            | 1<br>(1 - 2)            |
| Multiple myeloma                              | 2<br>(2 - 3)         | --                    | --                     | 0<br>(0 - 0)            | 1<br>(1 - 1)            | 1<br>(1 - 1)            |
| Leukemia                                      | 3<br>(3 - 4)         | 0<br>(0 - 0)          | 0<br>(0 - 0)           | 1<br>(1 - 1)            | 1<br>(1 - 1)            | 1<br>(1 - 1)            |
| Other neoplasms                               | 7<br>(6 - 9)         | 0<br>(0 - 1)          | 0<br>(0 - 1)           | 2<br>(2 - 2)            | 2<br>(2 - 3)            | 2<br>(2 - 3)            |
| Cardiovascular diseases                       | 270<br>(229 - 305)   | 1<br>(0 - 2)          | 1<br>(0 - 1)           | 18<br>(15 - 21)         | 70<br>(58 - 84)         | 180<br>(153 - 201)      |
| Rheumatic heart disease                       | 1<br>(1 - 2)         | 0<br>(0 - 0)          | 0<br>(0 - 0)           | 0<br>(0 - 1)            | 0<br>(0 - 0)            | 0<br>(0 - 0)            |
| Ischemic heart disease                        | 120<br>(101 - 140)   | 0<br>(0 - 0)          | 0<br>(0 - 0)           | 7<br>(6 - 9)            | 32<br>(26 - 39)         | 81<br>(67 - 93)         |
| Cerebrovascular disease                       | 94<br>(77 - 110)     | 0<br>(0 - 0)          | 0<br>(0 - 0)           | 5<br>(4 - 6)            | 24<br>(19 - 29)         | 64<br>(53 - 76)         |
| Ischemic stroke                               | 60<br>(48 - 70)      | 0<br>(0 - 0)          | 0<br>(0 - 0)           | 1<br>(1 - 2)            | 12<br>(10 - 16)         | 46<br>(37 - 54)         |
| Hemorrhagic stroke                            | 34<br>(28 - 43)      | 0<br>(0 - 0)          | 0<br>(0 - 0)           | 4<br>(3 - 5)            | 12<br>(9 - 14)          | 19<br>(14 - 24)         |
| Hypertensive heart disease                    | 28<br>(21 - 35)      | 0<br>(0 - 0)          | 0<br>(0 - 0)           | 1<br>(1 - 2)            | 7<br>(5 - 9)            | 20<br>(14 - 25)         |
| Cardiomyopathy and myocarditis                | 7<br>(6 - 9)         | 0<br>(0 - 0)          | 0<br>(0 - 0)           | 1<br>(1 - 2)            | 2<br>(2 - 3)            | 3<br>(2 - 4)            |
| Atrial fibrillation and flutter               | 3<br>(2 - 4)         | --                    | --                     | 0<br>(0 - 0)            | 1<br>(0 - 1)            | 3<br>(2 - 4)            |
| Aortic aneurysm                               | 3<br>(2 - 4)         | --                    | --                     | 0<br>(0 - 0)            | 1<br>(1 - 1)            | 2<br>(1 - 2)            |
| Peripheral vascular disease                   | 2<br>(1 - 3)         | --                    | --                     | 0<br>(0 - 0)            | 0<br>(0 - 0)            | 2<br>(1 - 2)            |
| Endocarditis                                  | 1<br>(1 - 1)         | 0<br>(0 - 0)          | 0<br>(0 - 0)           | 0<br>(0 - 0)            | 0<br>(0 - 0)            | 1<br>(0 - 1)            |
| Other cardiovascular and circulatory diseases | 10<br>(7 - 13)       | 0<br>(0 - 0)          | 0<br>(0 - 0)           | 2<br>(1 - 2)            | 3<br>(2 - 4)            | 6<br>(4 - 7)            |
| Chronic respiratory diseases                  | 20<br>(17 - 24)      | 0<br>(0 - 1)          | 0<br>(0 - 0)           | 2<br>(2 - 3)            | 6<br>(4 - 7)            | 12<br>(10 - 14)         |
| Chronic obstructive pulmonary disease         | 13<br>(11 - 16)      | 0<br>(0 - 0)          | 0<br>(0 - 0)           | 1<br>(1 - 1)            | 3<br>(3 - 4)            | 9<br>(7 - 11)           |
| Pneumoconiosis                                | 1<br>(0 - 1)         | 0<br>(0 - 0)          | 0<br>(0 - 0)           | 0<br>(0 - 0)            | 0<br>(0 - 0)            | 0<br>(0 - 0)            |

Web Table 31- Saint Vincent and the Grenadines deaths with 95% UI by age, sex, and cause in 2013

| Cause                                               | Both Sexes, All Ages | Both Sexes, 0-4 Years | Both Sexes, 5-14 Years | Both Sexes, 15-49 Years | Both Sexes, 50-69 Years | Both Sexes, 70-80 Years |
|-----------------------------------------------------|----------------------|-----------------------|------------------------|-------------------------|-------------------------|-------------------------|
| Silicosis                                           | 0<br>(0 - 0)         | 0<br>(0 - 0)          | 0<br>(0 - 0)           | 0<br>(0 - 0)            | 0<br>(0 - 0)            | 0<br>(0 - 0)            |
| Asbestosis                                          | 0<br>(0 - 0)         | 0<br>(0 - 0)          | 0<br>(0 - 0)           | 0<br>(0 - 0)            | 0<br>(0 - 0)            | 0<br>(0 - 0)            |
| Coal workers pneumoconiosis                         | 0<br>(0 - 0)         | 0<br>(0 - 0)          | 0<br>(0 - 0)           | 0<br>(0 - 0)            | 0<br>(0 - 0)            | 0<br>(0 - 0)            |
| Other pneumoconiosis                                | 0<br>(0 - 0)         | 0<br>(0 - 0)          | 0<br>(0 - 0)           | 0<br>(0 - 0)            | 0<br>(0 - 0)            | 0<br>(0 - 0)            |
| Asthma                                              | 4<br>(3 - 5)         | 0<br>(0 - 0)          | 0<br>(0 - 0)           | 1<br>(1 - 1)            | 1<br>(1 - 2)            | 2<br>(1 - 2)            |
| Interstitial lung disease and pulmonary sarcoidosis | 2<br>(1 - 2)         | 0<br>(0 - 0)          | 0<br>(0 - 0)           | 0<br>(0 - 0)            | 1<br>(0 - 1)            | 1<br>(1 - 1)            |
| Other chronic respiratory diseases                  | 1<br>(0 - 1)         | 0<br>(0 - 0)          | 0<br>(0 - 0)           | 0<br>(0 - 0)            | 0<br>(0 - 0)            | 0<br>(0 - 0)            |
| Cirrhosis                                           | 14<br>(12 - 17)      | 0<br>(0 - 0)          | 0<br>(0 - 0)           | 4<br>(3 - 5)            | 7<br>(5 - 8)            | 3<br>(3 - 4)            |
| Cirrhosis due to hepatitis B                        | 1<br>(1 - 2)         | 0<br>(0 - 0)          | 0<br>(0 - 0)           | 0<br>(0 - 1)            | 1<br>(0 - 1)            | 0<br>(0 - 0)            |
| Cirrhosis due to hepatitis C                        | 5<br>(3 - 6)         | 0<br>(0 - 0)          | 0<br>(0 - 0)           | 1<br>(1 - 2)            | 2<br>(1 - 3)            | 1<br>(1 - 2)            |
| Cirrhosis due to alcohol use                        | 6<br>(4 - 7)         | --                    | --                     | 1<br>(1 - 2)            | 3<br>(2 - 4)            | 1<br>(1 - 2)            |
| Cirrhosis due to other causes                       | 2<br>(2 - 4)         | 0<br>(0 - 0)          | 0<br>(0 - 0)           | 1<br>(1 - 2)            | 1<br>(1 - 1)            | 0<br>(0 - 0)            |
| Digestive diseases                                  | 15<br>(13 - 18)      | 0<br>(0 - 0)          | 0<br>(0 - 0)           | 3<br>(2 - 4)            | 5<br>(4 - 6)            | 7<br>(6 - 9)            |
| Peptic ulcer disease                                | 4<br>(3 - 5)         | 0<br>(0 - 0)          | 0<br>(0 - 0)           | 1<br>(1 - 1)            | 1<br>(1 - 2)            | 2<br>(1 - 2)            |
| Gastritis and duodenitis                            | 1<br>(1 - 2)         | 0<br>(0 - 0)          | 0<br>(0 - 0)           | 0<br>(0 - 0)            | 0<br>(0 - 1)            | 1<br>(0 - 1)            |
| Appendicitis                                        | 1<br>(0 - 1)         | 0<br>(0 - 0)          | 0<br>(0 - 0)           | 0<br>(0 - 0)            | 0<br>(0 - 0)            | 0<br>(0 - 0)            |
| Paralytic ileus and intestinal obstruction          | 2<br>(1 - 3)         | 0<br>(0 - 0)          | 0<br>(0 - 0)           | 0<br>(0 - 0)            | 1<br>(0 - 1)            | 1<br>(1 - 2)            |
| Inguinal, femoral, and abdominal hernia             | 1<br>(1 - 2)         | 0<br>(0 - 0)          | 0<br>(0 - 0)           | 0<br>(0 - 0)            | 0<br>(0 - 0)            | 0<br>(0 - 1)            |
| Inflammatory bowel disease                          | 1<br>(1 - 2)         | 0<br>(0 - 0)          | 0<br>(0 - 0)           | 0<br>(0 - 0)            | 0<br>(0 - 0)            | 1<br>(1 - 1)            |
| Vascular intestinal disorders                       | 1<br>(0 - 1)         | 0<br>(0 - 0)          | 0<br>(0 - 0)           | 0<br>(0 - 0)            | 0<br>(0 - 0)            | 0<br>(0 - 0)            |
| Gallbladder and biliary diseases                    | 1<br>(1 - 1)         | 0<br>(0 - 0)          | 0<br>(0 - 0)           | 0<br>(0 - 0)            | 0<br>(0 - 1)            | 1<br>(0 - 1)            |
| Pancreatitis                                        | 1<br>(1 - 1)         | 0<br>(0 - 0)          | 0<br>(0 - 0)           | 0<br>(0 - 1)            | 0<br>(0 - 1)            | 0<br>(0 - 0)            |
| Other digestive diseases                            | 2<br>(2 - 3)         | 0<br>(0 - 0)          | 0<br>(0 - 0)           | 1<br>(0 - 1)            | 1<br>(1 - 1)            | 1<br>(1 - 2)            |
| Neurological disorders                              | 31<br>(26 - 37)      | 0<br>(0 - 0)          | 0<br>(0 - 0)           | 2<br>(1 - 2)            | 3<br>(3 - 4)            | 26<br>(21 - 31)         |
| Alzheimer disease and other dementias               | 26<br>(21 - 30)      | --                    | --                     | 0<br>(0 - 0)            | 2<br>(1 - 2)            | 24<br>(19 - 28)         |
| Parkinson disease                                   | 2<br>(1 - 3)         | --                    | --                     | 0<br>(0 - 0)            | 0<br>(0 - 1)            | 2<br>(1 - 2)            |
| Epilepsy                                            | 3<br>(2 - 3)         | 0<br>(0 - 0)          | 0<br>(0 - 0)           | 1<br>(1 - 2)            | 1<br>(0 - 1)            | 0<br>(0 - 1)            |
| Multiple sclerosis                                  | 0<br>(0 - 0)         | --                    | --                     | 0<br>(0 - 0)            | 0<br>(0 - 0)            | 0<br>(0 - 0)            |
| Other neurological disorders                        | 1<br>(1 - 2)         | 0<br>(0 - 0)          | 0<br>(0 - 0)           | 0<br>(0 - 0)            | 0<br>(0 - 1)            | 0<br>(0 - 0)            |
| Mental and substance use disorders                  | 3<br>(2 - 4)         | 0<br>(0 - 0)          | 0<br>(0 - 0)           | 1<br>(1 - 2)            | 1<br>(1 - 2)            | 1<br>(0 - 1)            |
| Schizophrenia                                       | 0<br>(0 - 0)         | --                    | --                     | 0<br>(0 - 0)            | 0<br>(0 - 0)            | 0<br>(0 - 0)            |
| Alcohol use disorders                               | 2<br>(1 - 3)         | --                    | --                     | 1<br>(0 - 1)            | 1<br>(0 - 1)            | 0<br>(0 - 0)            |
| Drug use disorders                                  | 1<br>(1 - 1)         | 0<br>(0 - 0)          | --                     | 0<br>(0 - 1)            | 0<br>(0 - 0)            | 0<br>(0 - 0)            |
| Opioid use disorders                                | 0<br>(0 - 0)         | 0<br>(0 - 0)          | --                     | 0<br>(0 - 0)            | 0<br>(0 - 0)            | 0<br>(0 - 0)            |
| Cocaine use disorders                               | 0<br>(0 - 0)         | 0<br>(0 - 0)          | --                     | 0<br>(0 - 0)            | 0<br>(0 - 0)            | 0<br>(0 - 0)            |
| Amphetamine use disorders                           | 0<br>(0 - 0)         | 0<br>(0 - 0)          | --                     | 0<br>(0 - 0)            | 0<br>(0 - 0)            | 0<br>(0 - 0)            |
| Other drug use disorders                            | 1<br>(1 - 1)         | 0<br>(0 - 0)          | --                     | 0<br>(0 - 0)            | 0<br>(0 - 0)            | 0<br>(0 - 0)            |
| Eating disorders                                    | 0<br>(0 - 0)         | --                    | 0<br>(0 - 0)           | 0<br>(0 - 0)            | --                      | --                      |
| Anorexia nervosa                                    | 0<br>(0 - 0)         | --                    | 0<br>(0 - 0)           | 0<br>(0 - 0)            | --                      | --                      |
| Diabetes, urogenital, blood, and endocrine diseases | 106<br>(88 - 129)    | 1<br>(0 - 2)          | 1<br>(0 - 1)           | 12<br>(10 - 16)         | 38<br>(31 - 46)         | 55<br>(45 - 67)         |

Web Table 31- Saint Vincent and the Grenadines deaths with 95% UI by age, sex, and cause in 2013

| Cause                                               | Both Sexes, All Ages | Both Sexes, 0-4 Years | Both Sexes, 5-14 Years | Both Sexes, 15-49 Years | Both Sexes, 50-69 Years | Both Sexes, 70-80 Years |
|-----------------------------------------------------|----------------------|-----------------------|------------------------|-------------------------|-------------------------|-------------------------|
| Diabetes mellitus                                   | 71<br>(58 - 85)      | 0<br>(0 - 0)          | 0<br>(0 - 0)           | 5<br>(4 - 7)            | 27<br>(22 - 33)         | 39<br>(31 - 48)         |
| Acute glomerulonephritis                            | 0<br>(0 - 0)         | 0<br>(0 - 0)          | 0<br>(0 - 0)           | 0<br>(0 - 0)            | 0<br>(0 - 0)            | 0<br>(0 - 0)            |
| Chronic kidney disease                              | 22<br>(17 - 30)      | 0<br>(0 - 0)          | 0<br>(0 - 0)           | 4<br>(3 - 5)            | 7<br>(6 - 10)           | 10<br>(8 - 15)          |
| Chronic kidney disease due to diabetes mellitus     | 3<br>(2 - 6)         | 0<br>(0 - 0)          | 0<br>(0 - 0)           | 2<br>(0 - 1)            | 1<br>(1 - 3)            | 1<br>(1 - 2)            |
| Chronic kidney disease due to hypertension          | 12<br>(9 - 15)       | 0<br>(0 - 0)          | 0<br>(0 - 0)           | 2<br>(1 - 2)            | 4<br>(3 - 5)            | 6<br>(5 - 8)            |
| Chronic kidney disease due to glomerulonephritis    | 1<br>(0 - 1)         | 0<br>(0 - 0)          | 0<br>(0 - 0)           | 0<br>(0 - 0)            | 0<br>(0 - 0)            | 0<br>(0 - 0)            |
| Chronic kidney disease due to other causes          | 6<br>(4 - 11)        | 0<br>(0 - 0)          | 0<br>(0 - 0)           | 1<br>(1 - 2)            | 2<br>(1 - 3)            | 3<br>(2 - 6)            |
| Urinary diseases and male infertility               | 5<br>(4 - 6)         | 0<br>(0 - 0)          | 0<br>(0 - 0)           | 1<br>(0 - 1)            | 1<br>(1 - 2)            | 3<br>(2 - 4)            |
| Interstitial nephritis and urinary tract infections | 4<br>(3 - 5)         | 0<br>(0 - 0)          | 0<br>(0 - 0)           | 0<br>(0 - 0)            | 1<br>(1 - 1)            | 2<br>(2 - 3)            |
| Urolithiasis                                        | 0<br>(0 - 0)         | --                    | 0<br>(0 - 0)           | 0<br>(0 - 0)            | 0<br>(0 - 0)            | 0<br>(0 - 0)            |
| Other urinary diseases                              | 1<br>(1 - 1)         | 0<br>(0 - 0)          | 0<br>(0 - 0)           | 0<br>(0 - 0)            | 0<br>(0 - 0)            | 0<br>(0 - 1)            |
| Gynecological diseases                              | 0<br>(0 - 0)         | --                    | --                     | 0<br>(0 - 0)            | 0<br>(0 - 0)            | 0<br>(0 - 0)            |
| Uterine fibroids                                    | 0<br>(0 - 0)         | --                    | --                     | 0<br>(0 - 0)            | 0<br>(0 - 0)            | 0<br>(0 - 0)            |
| Polycystic ovarian syndrome                         | 0<br>(0 - 0)         | --                    | --                     | 0<br>(0 - 0)            | 0<br>(0 - 0)            | --                      |
| Endometriosis                                       | 0<br>(0 - 0)         | --                    | --                     | 0<br>(0 - 0)            | 0<br>(0 - 0)            | --                      |
| Genital prolapse                                    | 0<br>(0 - 0)         | --                    | --                     | 0<br>(0 - 0)            | 0<br>(0 - 0)            | 0<br>(0 - 0)            |
| Other gynecological diseases                        | 0<br>(0 - 0)         | --                    | --                     | 0<br>(0 - 0)            | 0<br>(0 - 0)            | 0<br>(0 - 0)            |
| Hemoglobinopathies and hemolytic anemias            | 2<br>(1 - 3)         | 0<br>(0 - 1)          | 0<br>(0 - 0)           | 1<br>(1 - 1)            | 0<br>(0 - 1)            | 0<br>(0 - 0)            |
| Thalassemias                                        | 0<br>(0 - 0)         | 0<br>(0 - 0)          | 0<br>(0 - 0)           | 0<br>(0 - 0)            | 0<br>(0 - 0)            | 0<br>(0 - 0)            |
| Sickle cell disorders                               | 2<br>(1 - 2)         | 0<br>(0 - 1)          | 0<br>(0 - 0)           | 1<br>(1 - 1)            | 0<br>(0 - 0)            | 0<br>(0 - 0)            |
| G6PD deficiency                                     | 0<br>(0 - 0)         | 0<br>(0 - 0)          | 0<br>(0 - 0)           | 0<br>(0 - 0)            | 0<br>(0 - 0)            | 0<br>(0 - 0)            |
| Other hemoglobinopathies and hemolytic anemias      | 0<br>(0 - 0)         | 0<br>(0 - 0)          | 0<br>(0 - 0)           | 0<br>(0 - 0)            | 0<br>(0 - 0)            | 0<br>(0 - 0)            |
| Endocrine, metabolic, blood, and immune disorders   | 7<br>(5 - 13)        | 0<br>(0 - 1)          | 0<br>(0 - 0)           | 2<br>(1 - 3)            | 2<br>(1 - 4)            | 3<br>(2 - 5)            |
| Musculoskeletal disorders                           | 3<br>(2 - 4)         | --                    | 0<br>(0 - 0)           | 1<br>(1 - 2)            | 1<br>(1 - 1)            | 1<br>(1 - 1)            |
| Rheumatoid arthritis                                | 0<br>(0 - 0)         | --                    | 0<br>(0 - 0)           | 0<br>(0 - 0)            | 0<br>(0 - 0)            | 0<br>(0 - 0)            |
| Other musculoskeletal disorders                     | 3<br>(2 - 4)         | --                    | 0<br>(0 - 0)           | 1<br>(1 - 2)            | 1<br>(1 - 1)            | 1<br>(1 - 1)            |
| Other non-communicable diseases                     | 16<br>(11 - 23)      | 8<br>(4 - 16)         | 1<br>(0 - 1)           | 1<br>(1 - 2)            | 1<br>(1 - 2)            | 5<br>(3 - 6)            |
| Congenital anomalies                                | 9<br>(5 - 16)        | 6<br>(3 - 13)         | 1<br>(0 - 1)           | 1<br>(1 - 1)            | 0<br>(0 - 1)            | 0<br>(0 - 1)            |
| Neural tube defects                                 | 0<br>(0 - 0)         | 0<br>(0 - 0)          | 0<br>(0 - 0)           | 0<br>(0 - 0)            | 0<br>(0 - 0)            | 0<br>(0 - 0)            |
| Congenital heart anomalies                          | 5<br>(3 - 9)         | 3<br>(1 - 7)          | 0<br>(0 - 1)           | 1<br>(0 - 1)            | 0<br>(0 - 0)            | 0<br>(0 - 0)            |
| Cleft lip and cleft palate                          | 0<br>(0 - 0)         | 0<br>(0 - 0)          | --                     | --                      | --                      | --                      |
| Down syndrome                                       | 0<br>(0 - 1)         | 0<br>(0 - 0)          | 0<br>(0 - 0)           | 0<br>(0 - 0)            | 0<br>(0 - 0)            | 0<br>(0 - 0)            |
| Chromosomal unbalanced rearrangements               | 0<br>(0 - 1)         | 0<br>(0 - 1)          | 0<br>(0 - 0)           | 0<br>(0 - 0)            | 0<br>(0 - 0)            | 0<br>(0 - 0)            |
| Other congenital anomalies                          | 4<br>(2 - 7)         | 3<br>(1 - 6)          | 0<br>(0 - 0)           | 0<br>(0 - 0)            | 0<br>(0 - 0)            | 0<br>(0 - 0)            |
| Skin and subcutaneous diseases                      | 6<br>(3 - 7)         | 0<br>(0 - 0)          | 0<br>(0 - 0)           | 0<br>(0 - 1)            | 1<br>(0 - 1)            | 4<br>(2 - 6)            |
| Cellulitis                                          | 0<br>(0 - 1)         | 0<br>(0 - 0)          | 0<br>(0 - 0)           | 0<br>(0 - 0)            | 0<br>(0 - 0)            | 0<br>(0 - 0)            |
| Pyoderma                                            | 1<br>(1 - 2)         | 0<br>(0 - 0)          | 0<br>(0 - 0)           | 0<br>(0 - 0)            | 0<br>(0 - 0)            | 1<br>(0 - 1)            |
| Decubitus ulcer                                     | 4<br>(2 - 5)         | 0<br>(0 - 0)          | 0<br>(0 - 0)           | 0<br>(0 - 0)            | 1<br>(0 - 1)            | 3<br>(2 - 4)            |
| Other skin and subcutaneous diseases                | 0<br>(0 - 0)         | 0<br>(0 - 0)          | 0<br>(0 - 0)           | 0<br>(0 - 0)            | 0<br>(0 - 0)            | 0<br>(0 - 0)            |
| Sudden infant death syndrome                        | 1<br>(0 - 3)         | 1<br>(0 - 3)          | --                     | --                      | --                      | --                      |

Web Table 31- Saint Vincent and the Grenadines deaths with 95% UI by age, sex, and cause in 2013

| Cause                                           | Both Sexes, All Ages | Both Sexes, 0-4 Years | Both Sexes, 5-14 Years | Both Sexes, 15-49 Years | Both Sexes, 50-69 Years | Both Sexes, 70-80 Years |
|-------------------------------------------------|----------------------|-----------------------|------------------------|-------------------------|-------------------------|-------------------------|
| Injuries                                        | 68<br>(57 - 80)      | 3<br>(1 - 7)          | 3<br>(2 - 4)           | 38<br>(31 - 45)         | 13<br>(11 - 16)         | 11<br>(9 - 13)          |
| Transport injuries                              | 17<br>(14 - 20)      | 0<br>(0 - 1)          | 1<br>(1 - 2)           | 9<br>(7 - 11)           | 4<br>(3 - 5)            | 2<br>(2 - 3)            |
| Road injuries                                   | 16<br>(13 - 19)      | 0<br>(0 - 1)          | 1<br>(1 - 2)           | 8<br>(7 - 11)           | 3<br>(3 - 4)            | 2<br>(2 - 3)            |
| Pedestrian road injuries                        | 4<br>(3 - 5)         | 0<br>(0 - 0)          | 0<br>(0 - 1)           | 2<br>(1 - 2)            | 1<br>(1 - 1)            | 1<br>(1 - 1)            |
| Cyclist road injuries                           | 1<br>(1 - 1)         | 0<br>(0 - 0)          | 0<br>(0 - 0)           | 0<br>(0 - 1)            | 0<br>(0 - 0)            | 0<br>(0 - 0)            |
| Motorcyclist road injuries                      | 1<br>(1 - 2)         | 0<br>(0 - 0)          | 0<br>(0 - 0)           | 1<br>(1 - 2)            | 0<br>(0 - 0)            | 0<br>(0 - 0)            |
| Motor vehicle road injuries                     | 9<br>(7 - 11)        | 0<br>(0 - 0)          | 0<br>(0 - 1)           | 5<br>(4 - 7)            | 2<br>(1 - 3)            | 1<br>(1 - 1)            |
| Other road injuries                             | 0<br>(0 - 0)         | 0<br>(0 - 0)          | 0<br>(0 - 0)           | 0<br>(0 - 0)            | 0<br>(0 - 0)            | 0<br>(0 - 0)            |
| Other transport injuries                        | 1<br>(1 - 2)         | 0<br>(0 - 0)          | 0<br>(0 - 0)           | 1<br>(0 - 1)            | 0<br>(0 - 0)            | 0<br>(0 - 0)            |
| Unintentional injuries                          | 26<br>(21 - 31)      | 2<br>(1 - 5)          | 1<br>(1 - 2)           | 10<br>(8 - 12)          | 5<br>(4 - 6)            | 7<br>(5 - 8)            |
| Falls                                           | 5<br>(4 - 6)         | 0<br>(0 - 0)          | 0<br>(0 - 0)           | 1<br>(1 - 2)            | 1<br>(1 - 1)            | 2<br>(2 - 3)            |
| Drowning                                        | 6<br>(4 - 8)         | 0<br>(0 - 1)          | 1<br>(0 - 1)           | 3<br>(2 - 5)            | 1<br>(1 - 1)            | 0<br>(0 - 1)            |
| Fire, heat, and hot substances                  | 2<br>(2 - 3)         | 0<br>(0 - 1)          | 0<br>(0 - 0)           | 1<br>(0 - 1)            | 0<br>(0 - 1)            | 1<br>(1 - 1)            |
| Poisonings                                      | 1<br>(0 - 1)         | 0<br>(0 - 0)          | 0<br>(0 - 0)           | 0<br>(0 - 0)            | 0<br>(0 - 0)            | 0<br>(0 - 0)            |
| Exposure to mechanical forces                   | 4<br>(3 - 5)         | 0<br>(0 - 0)          | 0<br>(0 - 0)           | 3<br>(2 - 3)            | 1<br>(1 - 1)            | 0<br>(0 - 0)            |
| Unintentional firearm injuries                  | 2<br>(1 - 3)         | 0<br>(0 - 0)          | 0<br>(0 - 0)           | 2<br>(1 - 2)            | 0<br>(0 - 1)            | 0<br>(0 - 0)            |
| Unintentional suffocation                       | 0<br>(0 - 1)         | 0<br>(0 - 0)          | 0<br>(0 - 0)           | 0<br>(0 - 0)            | 0<br>(0 - 0)            | 0<br>(0 - 0)            |
| Other exposure to mechanical forces             | 1<br>(1 - 2)         | 0<br>(0 - 0)          | 0<br>(0 - 0)           | 1<br>(1 - 1)            | 0<br>(0 - 0)            | 0<br>(0 - 0)            |
| Adverse effects of medical treatment            | 3<br>(2 - 4)         | 0<br>(0 - 1)          | 0<br>(0 - 0)           | 1<br>(0 - 1)            | 1<br>(0 - 1)            | 1<br>(1 - 2)            |
| Animal contact                                  | 1<br>(0 - 1)         | 0<br>(0 - 0)          | 0<br>(0 - 0)           | 0<br>(0 - 0)            | 0<br>(0 - 0)            | 0<br>(0 - 0)            |
| Venomous animal contact                         | 0<br>(0 - 0)         | 0<br>(0 - 0)          | 0<br>(0 - 0)           | 0<br>(0 - 0)            | 0<br>(0 - 0)            | 0<br>(0 - 0)            |
| Non-venomous animal contact                     | 0<br>(0 - 0)         | 0<br>(0 - 0)          | 0<br>(0 - 0)           | 0<br>(0 - 0)            | 0<br>(0 - 0)            | 0<br>(0 - 0)            |
| Foreign body                                    | 4<br>(2 - 5)         | 1<br>(0 - 2)          | 0<br>(0 - 0)           | 1<br>(0 - 1)            | 1<br>(0 - 1)            | 1<br>(1 - 2)            |
| Pulmonary aspiration and foreign body in airway | 4<br>(2 - 5)         | 1<br>(0 - 2)          | 0<br>(0 - 0)           | 1<br>(0 - 1)            | 1<br>(0 - 1)            | 1<br>(1 - 2)            |
| Foreign body in other body part                 | 0<br>(0 - 0)         | 0<br>(0 - 0)          | 0<br>(0 - 0)           | 0<br>(0 - 0)            | 0<br>(0 - 0)            | 0<br>(0 - 0)            |
| Other unintentional injuries                    | 1<br>(1 - 1)         | 0<br>(0 - 0)          | 0<br>(0 - 0)           | 0<br>(0 - 1)            | 0<br>(0 - 0)            | 0<br>(0 - 0)            |
| Self-harm and interpersonal violence            | 25<br>(20 - 31)      | 0<br>(0 - 1)          | 0<br>(0 - 1)           | 19<br>(14 - 23)         | 4<br>(3 - 6)            | 1<br>(1 - 2)            |
| Self-harm                                       | 10<br>(8 - 12)       | --                    | 0<br>(0 - 0)           | 7<br>(5 - 9)            | 2<br>(2 - 3)            | 1<br>(1 - 1)            |
| Interpersonal violence                          | 16<br>(10 - 20)      | 0<br>(0 - 1)          | 0<br>(0 - 1)           | 12<br>(8 - 16)          | 2<br>(1 - 3)            | 1<br>(0 - 1)            |
| Assault by firearm                              | 8<br>(4 - 11)        | 0<br>(0 - 0)          | 0<br>(0 - 0)           | 7<br>(4 - 9)            | 1<br>(0 - 1)            | 0<br>(0 - 0)            |
| Assault by sharp object                         | 5<br>(3 - 7)         | 0<br>(0 - 0)          | 0<br>(0 - 0)           | 4<br>(2 - 6)            | 1<br>(0 - 1)            | 0<br>(0 - 0)            |
| Assault by other means                          | 3<br>(2 - 5)         | 0<br>(0 - 1)          | 0<br>(0 - 0)           | 2<br>(1 - 3)            | 1<br>(0 - 1)            | 0<br>(0 - 0)            |

Web Table 31- Saint Vincent and the Grenadines deaths with 95% UI by age, sex, and cause in 2013

| Cause                                                             | Males, All Ages    | Males, 0-4 Years | Males, 5-14 Years | Males, 15-49 Years | Males, 50-69 Years | Males, 70-80 Years |
|-------------------------------------------------------------------|--------------------|------------------|-------------------|--------------------|--------------------|--------------------|
| All causes                                                        | 409<br>(353 - 485) | 24<br>(11 - 46)  | 4<br>(3 - 7)      | 82<br>(68 - 95)    | 122<br>(99 - 153)  | 176<br>(154 - 208) |
| Communicable, maternal, neonatal, and nutritional diseases        | 54<br>(44 - 69)    | 16<br>(7 - 30)   | 1<br>(0 - 1)      | 14<br>(12 - 17)    | 10<br>(8 - 12)     | 13<br>(10 - 17)    |
| HIV/AIDS and tuberculosis                                         | 16<br>(13 - 19)    | 0<br>(0 - 0)     | 0<br>(0 - 0)      | 10<br>(8 - 12)     | 4<br>(3 - 6)       | 1<br>(1 - 1)       |
| Tuberculosis                                                      | 2<br>(1 - 3)       | 0<br>(0 - 0)     | 0<br>(0 - 0)      | 1<br>(0 - 1)       | 1<br>(1 - 1)       | 0<br>(0 - 1)       |
| HIV/AIDS                                                          | 13<br>(10 - 17)    | 0<br>(0 - 0)     | 0<br>(0 - 0)      | 9<br>(7 - 12)      | 4<br>(2 - 5)       | 0<br>(0 - 1)       |
| HIV/AIDS resulting in mycobacterial infection                     | 1<br>(1 - 1)       | 0<br>(0 - 0)     | 0<br>(0 - 0)      | 1<br>(0 - 1)       | 0<br>(0 - 0)       | 0<br>(0 - 0)       |
| HIV/AIDS resulting in other diseases                              | 12<br>(10 - 16)    | 0<br>(0 - 0)     | 0<br>(0 - 0)      | 9<br>(7 - 11)      | 3<br>(2 - 5)       | 0<br>(0 - 1)       |
| Diarrhea, lower respiratory, and other common infectious diseases | 20<br>(16 - 26)    | 3<br>(2 - 7)     | 1<br>(0 - 1)      | 4<br>(2 - 4)       | 4<br>(3 - 5)       | 10<br>(7 - 13)     |
| Diarrheal diseases                                                | 2<br>(1 - 3)       | 1<br>(0 - 2)     | 0<br>(0 - 0)      | 0<br>(0 - 0)       | 0<br>(0 - 0)       | 1<br>(0 - 1)       |
| Intestinal infectious diseases                                    | 0<br>(0 - 1)       | 0<br>(0 - 0)     | 0<br>(0 - 0)      | 0<br>(0 - 0)       | 0<br>(0 - 0)       | 0<br>(0 - 0)       |
| Typhoid fever                                                     | 0<br>(0 - 1)       | 0<br>(0 - 0)     | 0<br>(0 - 0)      | 0<br>(0 - 0)       | 0<br>(0 - 0)       | 0<br>(0 - 0)       |
| Paratyphoid fever                                                 | 0<br>(0 - 0)       | 0<br>(0 - 0)     | 0<br>(0 - 0)      | 0<br>(0 - 0)       | 0<br>(0 - 0)       | 0<br>(0 - 0)       |
| Other intestinal infectious diseases                              | 0<br>(0 - 0)       | 0<br>(0 - 0)     | 0<br>(0 - 0)      | 0<br>(0 - 0)       | 0<br>(0 - 0)       | 0<br>(0 - 0)       |
| Lower respiratory infections                                      | 16<br>(13 - 21)    | 2<br>(1 - 4)     | 0<br>(0 - 0)      | 2<br>(2 - 3)       | 3<br>(2 - 4)       | 9<br>(6 - 12)      |
| Upper respiratory infections                                      | 0<br>(0 - 0)       | 0<br>(0 - 0)     | 0<br>(0 - 0)      | 0<br>(0 - 0)       | 0<br>(0 - 0)       | 0<br>(0 - 0)       |
| Otitis media                                                      | 0<br>(0 - 0)       | 0<br>(0 - 0)     | 0<br>(0 - 0)      | 0<br>(0 - 0)       | 0<br>(0 - 0)       | 0<br>(0 - 0)       |
| Meningitis                                                        | 1<br>(1 - 1)       | 0<br>(0 - 0)     | 0<br>(0 - 0)      | 0<br>(0 - 0)       | 0<br>(0 - 0)       | 0<br>(0 - 0)       |
| Pneumococcal meningitis                                           | 0<br>(0 - 0)       | 0<br>(0 - 0)     | 0<br>(0 - 0)      | 0<br>(0 - 0)       | 0<br>(0 - 0)       | 0<br>(0 - 0)       |
| H influenzae type B meningitis                                    | 0<br>(0 - 0)       | 0<br>(0 - 0)     | 0<br>(0 - 0)      | 0<br>(0 - 0)       | 0<br>(0 - 0)       | 0<br>(0 - 0)       |
| Meningococcal meningitis                                          | 0<br>(0 - 0)       | 0<br>(0 - 0)     | 0<br>(0 - 0)      | 0<br>(0 - 0)       | 0<br>(0 - 0)       | 0<br>(0 - 0)       |
| Other meningitis                                                  | 0<br>(0 - 0)       | 0<br>(0 - 0)     | 0<br>(0 - 0)      | 0<br>(0 - 0)       | 0<br>(0 - 0)       | 0<br>(0 - 0)       |
| Encephalitis                                                      | 1<br>(0 - 1)       | 0<br>(0 - 0)     | 0<br>(0 - 0)      | 0<br>(0 - 0)       | 0<br>(0 - 0)       | 0<br>(0 - 0)       |
| Diphtheria                                                        | 0<br>(0 - 0)       | 0<br>(0 - 0)     | 0<br>(0 - 0)      | 0<br>(0 - 0)       | 0<br>(0 - 0)       | --                 |
| Whooping cough                                                    | 0<br>(0 - 0)       | 0<br>(0 - 0)     | 0<br>(0 - 0)      | 0<br>(0 - 0)       | 0<br>(0 - 0)       | --                 |
| Tetanus                                                           | 0<br>(0 - 0)       | 0<br>(0 - 0)     | 0<br>(0 - 0)      | 0<br>(0 - 0)       | 0<br>(0 - 0)       | 0<br>(0 - 0)       |
| Measles                                                           | 0<br>(0 - 0)       | 0<br>(0 - 0)     | 0<br>(0 - 0)      | 0<br>(0 - 0)       | 0<br>(0 - 0)       | --                 |
| Varicella and herpes zoster                                       | 0<br>(0 - 0)       | 0<br>(0 - 0)     | 0<br>(0 - 0)      | 0<br>(0 - 0)       | 0<br>(0 - 0)       | 0<br>(0 - 0)       |
| Neglected tropical diseases and malaria                           | 0<br>(0 - 1)       | 0<br>(0 - 0)     | 0<br>(0 - 0)      | 0<br>(0 - 0)       | 0<br>(0 - 0)       | 0<br>(0 - 0)       |
| Leishmaniasis                                                     | 0<br>(0 - 0)       | 0<br>(0 - 0)     | 0<br>(0 - 0)      | 0<br>(0 - 0)       | 0<br>(0 - 0)       | 0<br>(0 - 0)       |
| Visceral leishmaniasis                                            | 0<br>(0 - 0)       | 0<br>(0 - 0)     | 0<br>(0 - 0)      | 0<br>(0 - 0)       | 0<br>(0 - 0)       | 0<br>(0 - 0)       |
| Cysticercosis                                                     | 0<br>(0 - 0)       | 0<br>(0 - 0)     | 0<br>(0 - 0)      | 0<br>(0 - 0)       | 0<br>(0 - 0)       | 0<br>(0 - 0)       |
| Cystic echinococcosis                                             | 0<br>(0 - 0)       | 0<br>(0 - 0)     | 0<br>(0 - 0)      | 0<br>(0 - 0)       | 0<br>(0 - 0)       | 0<br>(0 - 0)       |
| Dengue                                                            | 0<br>(0 - 0)       | 0<br>(0 - 0)     | 0<br>(0 - 0)      | 0<br>(0 - 0)       | 0<br>(0 - 0)       | 0<br>(0 - 0)       |
| Rabies                                                            | 0<br>(0 - 0)       | 0<br>(0 - 0)     | 0<br>(0 - 0)      | 0<br>(0 - 0)       | 0<br>(0 - 0)       | 0<br>(0 - 0)       |
| Intestinal nematode infections                                    | 0<br>(0 - 0)       | 0<br>(0 - 0)     | 0<br>(0 - 0)      | 0<br>(0 - 0)       | 0<br>(0 - 0)       | 0<br>(0 - 0)       |
| Ascariasis                                                        | 0<br>(0 - 0)       | 0<br>(0 - 0)     | 0<br>(0 - 0)      | 0<br>(0 - 0)       | 0<br>(0 - 0)       | 0<br>(0 - 0)       |
| Other neglected tropical diseases                                 | 0<br>(0 - 0)       | 0<br>(0 - 0)     | 0<br>(0 - 0)      | 0<br>(0 - 0)       | 0<br>(0 - 0)       | 0<br>(0 - 0)       |
| Maternal disorders                                                | --                 | --               | --                | --                 | --                 | --                 |
| Maternal hemorrhage                                               | --                 | --               | --                | --                 | --                 | --                 |
| Maternal sepsis and other maternal infections                     | --                 | --               | --                | --                 | --                 | --                 |

Web Table 31- Saint Vincent and the Grenadines deaths with 95% UI by age, sex, and cause in 2013

| Cause                                                            | Males, All Ages    | Males, 0-4 Years | Males, 5-14 Years | Males, 15-49 Years | Males, 50-69 Years | Males, 70-80 Years |
|------------------------------------------------------------------|--------------------|------------------|-------------------|--------------------|--------------------|--------------------|
| Maternal hypertensive disorders                                  | --                 | --               | --                | --                 | --                 | --                 |
| Maternal obstructed labor                                        | --                 | --               | --                | --                 | --                 | --                 |
| Maternal abortive outcome                                        | --                 | --               | --                | --                 | --                 | --                 |
| Indirect maternal deaths                                         | --                 | --               | --                | --                 | --                 | --                 |
| Late maternal deaths                                             | --                 | --               | --                | --                 | --                 | --                 |
| Maternal deaths aggravated by HIV/AIDS                           | --                 | --               | --                | --                 | --                 | --                 |
| Other maternal disorders                                         | --                 | --               | --                | --                 | --                 | --                 |
| Neonatal disorders                                               | 12<br>(5 - 21)     | 12<br>(5 - 21)   | --                | --                 | --                 | --                 |
| Neonatal preterm birth complications                             | 6<br>(2 - 11)      | 6<br>(2 - 11)    | --                | --                 | --                 | --                 |
| Neonatal encephalopathy due to birth asphyxia and trauma         | 3<br>(1 - 6)       | 3<br>(1 - 6)     | --                | --                 | --                 | --                 |
| Neonatal sepsis and other neonatal infections                    | 2<br>(1 - 4)       | 2<br>(1 - 4)     | --                | --                 | --                 | --                 |
| Hemolytic disease and other neonatal jaundice                    | 0<br>(0 - 0)       | 0<br>(0 - 0)     | --                | --                 | --                 | --                 |
| Other neonatal disorders                                         | 1<br>(0 - 3)       | 1<br>(0 - 3)     | --                | --                 | --                 | --                 |
| Nutritional deficiencies                                         | 5<br>(3 - 7)       | 1<br>(0 - 2)     | 0<br>(0 - 0)      | 1<br>(0 - 1)       | 1<br>(0 - 1)       | 2<br>(1 - 3)       |
| Protein-energy malnutrition                                      | 2<br>(1 - 4)       | 1<br>(0 - 2)     | 0<br>(0 - 0)      | 0<br>(0 - 0)       | 0<br>(0 - 1)       | 1<br>(0 - 2)       |
| Iodine deficiency                                                | 0<br>(0 - 0)       | 0<br>(0 - 0)     | 0<br>(0 - 0)      | 0<br>(0 - 0)       | 0<br>(0 - 0)       | 0<br>(0 - 0)       |
| Iron-deficiency anemia                                           | 2<br>(1 - 3)       | 0<br>(0 - 0)     | 0<br>(0 - 0)      | 0<br>(0 - 0)       | 0<br>(0 - 1)       | 1<br>(0 - 2)       |
| Other nutritional deficiencies                                   | 0<br>(0 - 0)       | 0<br>(0 - 0)     | 0<br>(0 - 0)      | 0<br>(0 - 0)       | 0<br>(0 - 0)       | 0<br>(0 - 0)       |
| Other communicable, maternal, neonatal, and nutritional diseases | 1<br>(1 - 2)       | 0<br>(0 - 0)     | 1<br>(0 - 0)      | 1<br>(0 - 1)       | 0<br>(0 - 1)       | 0<br>(0 - 0)       |
| Sexually transmitted diseases excluding HIV                      | 0<br>(0 - 0)       | 0<br>(0 - 0)     | 0<br>(0 - 0)      | 0<br>(0 - 0)       | 0<br>(0 - 0)       | 0<br>(0 - 0)       |
| Syphilis                                                         | 0<br>(0 - 0)       | 0<br>(0 - 0)     | 0<br>(0 - 0)      | 0<br>(0 - 0)       | 0<br>(0 - 0)       | 0<br>(0 - 0)       |
| Chlamydial infection                                             | --                 | --               | --                | --                 | --                 | --                 |
| Gonococcal infection                                             | 0<br>(0 - 0)       | --               | 0<br>(0 - 0)      | 0<br>(0 - 0)       | 0<br>(0 - 0)       | 0<br>(0 - 0)       |
| Other sexually transmitted diseases                              | 0<br>(0 - 0)       | --               | 0<br>(0 - 0)      | 0<br>(0 - 0)       | 0<br>(0 - 0)       | 0<br>(0 - 0)       |
| Hepatitis                                                        | 0<br>(0 - 0)       | 0<br>(0 - 0)     | 0<br>(0 - 0)      | 0<br>(0 - 0)       | 0<br>(0 - 0)       | 0<br>(0 - 0)       |
| Acute hepatitis A                                                | 0<br>(0 - 0)       | 0<br>(0 - 0)     | 0<br>(0 - 0)      | 0<br>(0 - 0)       | 0<br>(0 - 0)       | 0<br>(0 - 0)       |
| Acute hepatitis B                                                | 0<br>(0 - 0)       | 0<br>(0 - 0)     | 0<br>(0 - 0)      | 0<br>(0 - 0)       | 0<br>(0 - 0)       | 0<br>(0 - 0)       |
| Acute hepatitis C                                                | 0<br>(0 - 0)       | --               | 0<br>(0 - 0)      | 0<br>(0 - 0)       | 0<br>(0 - 0)       | 0<br>(0 - 0)       |
| Other infectious diseases                                        | 1<br>(1 - 2)       | 0<br>(0 - 0)     | 0<br>(0 - 0)      | 1<br>(0 - 1)       | 0<br>(0 - 1)       | 0<br>(0 - 0)       |
| Non-communicable diseases                                        | 303<br>(256 - 365) | 6<br>(3 - 12)    | 2<br>(1 - 3)      | 35<br>(28 - 43)    | 102<br>(82 - 130)  | 157<br>(137 - 185) |
| Neoplasms                                                        | 69<br>(56 - 85)    | 1<br>(0 - 1)     | 1<br>(0 - 1)      | 8<br>(6 - 9)       | 26<br>(20 - 33)    | 35<br>(27 - 43)    |
| Esophageal cancer                                                | 2<br>(2 - 3)       | --               | --                | 0<br>(0 - 0)       | 1<br>(1 - 1)       | 1<br>(1 - 1)       |
| Stomach cancer                                                   | 4<br>(3 - 5)       | --               | --                | 0<br>(0 - 1)       | 2<br>(1 - 2)       | 2<br>(2 - 3)       |
| Liver cancer                                                     | 3<br>(2 - 3)       | --               | 0<br>(0 - 0)      | 0<br>(0 - 1)       | 1<br>(1 - 2)       | 1<br>(1 - 1)       |
| Liver cancer due to hepatitis B                                  | 1<br>(0 - 1)       | --               | 0<br>(0 - 0)      | 0<br>(0 - 0)       | 0<br>(0 - 1)       | 0<br>(0 - 0)       |
| Liver cancer due to hepatitis C                                  | 1<br>(1 - 2)       | --               | 0<br>(0 - 0)      | 0<br>(0 - 0)       | 1<br>(0 - 1)       | 0<br>(0 - 1)       |
| Liver cancer due to alcohol use                                  | 1<br>(0 - 1)       | --               | --                | 0<br>(0 - 0)       | 0<br>(0 - 0)       | 0<br>(0 - 0)       |
| Liver cancer due to other causes                                 | 0<br>(0 - 0)       | --               | 0<br>(0 - 0)      | 0<br>(0 - 0)       | 0<br>(0 - 0)       | 0<br>(0 - 0)       |
| Larynx cancer                                                    | 1<br>(1 - 2)       | --               | 1<br>(0 - 1)      | 0<br>(0 - 0)       | 1<br>(0 - 1)       | 0<br>(0 - 1)       |
| Tracheal, bronchus and lung cancer                               | 9<br>(7 - 11)      | --               | --                | 1<br>(1 - 1)       | 5<br>(4 - 6)       | 3<br>(2 - 4)       |

Web Table 31- Saint Vincent and the Grenadines deaths with 95% UI by age, sex, and cause in 2013

| Cause                                         | Males, All Ages    | Males, 0-4 Years | Males, 5-14 Years | Males, 15-49 Years | Males, 50-69 Years | Males, 70-80 Years |
|-----------------------------------------------|--------------------|------------------|-------------------|--------------------|--------------------|--------------------|
| Breast cancer                                 | 0<br>(0 - 0)       | --               | --                | 0<br>(0 - 0)       | 0<br>(0 - 0)       | 0<br>(0 - 0)       |
| Cervical cancer                               | --                 | --               | --                | --                 | --                 | --                 |
| Uterine cancer                                | --                 | --               | --                | --                 | --                 | --                 |
| Prostate cancer                               | 23<br>(14 - 32)    | --               | --                | 0<br>(0 - 0)       | 5<br>(3 - 8)       | 18<br>(11 - 24)    |
| Colon and rectum cancer                       | 7<br>(5 - 8)       | --               | --                | 1<br>(1 - 1)       | 3<br>(2 - 4)       | 3<br>(2 - 4)       |
| Lip and oral cavity cancer                    | 1<br>(1 - 2)       | --               | --                | 0<br>(0 - 0)       | 1<br>(0 - 1)       | 0<br>(0 - 1)       |
| Nasopharynx cancer                            | 0<br>(0 - 0)       | --               | 0<br>(0 - 0)      | 0<br>(0 - 0)       | 0<br>(0 - 0)       | 0<br>(0 - 0)       |
| Other pharynx cancer                          | 1<br>(0 - 1)       | --               | --                | 0<br>(0 - 0)       | 0<br>(0 - 0)       | 0<br>(0 - 0)       |
| Gallbladder and biliary tract cancer          | 1<br>(0 - 1)       | --               | --                | 0<br>(0 - 0)       | 0<br>(0 - 0)       | 0<br>(0 - 0)       |
| Pancreatic cancer                             | 3<br>(2 - 4)       | --               | --                | 0<br>(0 - 0)       | 1<br>(1 - 2)       | 1<br>(1 - 2)       |
| Malignant skin melanoma                       | 0<br>(0 - 1)       | --               | --                | 0<br>(0 - 0)       | 0<br>(0 - 0)       | 0<br>(0 - 0)       |
| Non-melanoma skin cancer                      | 0<br>(0 - 0)       | --               | --                | 0<br>(0 - 0)       | 0<br>(0 - 0)       | 0<br>(0 - 0)       |
| Ovarian cancer                                | --                 | --               | --                | --                 | --                 | --                 |
| Testicular cancer                             | 0<br>(0 - 0)       | --               | --                | 0<br>(0 - 0)       | 0<br>(0 - 0)       | 0<br>(0 - 0)       |
| Kidney cancer                                 | 1<br>(1 - 1)       | 0<br>(0 - 0)     | 0<br>(0 - 0)      | 0<br>(0 - 0)       | 1<br>(0 - 1)       | 0<br>(0 - 0)       |
| Bladder cancer                                | 1<br>(1 - 1)       | --               | --                | 0<br>(0 - 0)       | 0<br>(0 - 0)       | 1<br>(1 - 1)       |
| Brain and nervous system cancer               | 1<br>(0 - 1)       | 0<br>(0 - 0)     | 0<br>(0 - 0)      | 0<br>(0 - 0)       | 0<br>(0 - 1)       | 0<br>(0 - 0)       |
| Thyroid cancer                                | 0<br>(0 - 0)       | --               | 0<br>(0 - 0)      | 0<br>(0 - 0)       | 0<br>(0 - 0)       | 0<br>(0 - 0)       |
| Mesothelioma                                  | 0<br>(0 - 0)       | --               | --                | 0<br>(0 - 0)       | 0<br>(0 - 0)       | 0<br>(0 - 0)       |
| Hodgkin lymphoma                              | 0<br>(0 - 0)       | 0<br>(0 - 0)     | 0<br>(0 - 0)      | 0<br>(0 - 0)       | 0<br>(0 - 0)       | 0<br>(0 - 0)       |
| Non-Hodgkin lymphoma                          | 3<br>(2 - 4)       | 0<br>(0 - 0)     | 0<br>(0 - 0)      | 1<br>(1 - 1)       | 1<br>(1 - 2)       | 1<br>(0 - 1)       |
| Multiple myeloma                              | 1<br>(1 - 2)       | --               | --                | 0<br>(0 - 0)       | 1<br>(0 - 1)       | 0<br>(0 - 1)       |
| Leukemia                                      | 2<br>(1 - 2)       | 0<br>(0 - 0)     | 0<br>(0 - 0)      | 1<br>(0 - 1)       | 1<br>(0 - 1)       | 0<br>(0 - 1)       |
| Other neoplasms                               | 4<br>(3 - 5)       | 0<br>(0 - 0)     | 0<br>(0 - 0)      | 1<br>(1 - 1)       | 1<br>(1 - 2)       | 1<br>(1 - 1)       |
| Cardiovascular diseases                       | 125<br>(105 - 150) | 0<br>(0 - 1)     | 0<br>(0 - 0)      | 11<br>(9 - 14)     | 41<br>(33 - 52)    | 72<br>(62 - 85)    |
| Rheumatic heart disease                       | 1<br>(0 - 1)       | 0<br>(0 - 0)     | 0<br>(0 - 0)      | 0<br>(0 - 0)       | 0<br>(0 - 0)       | 0<br>(0 - 0)       |
| Ischemic heart disease                        | 60<br>(49 - 76)    | 0<br>(0 - 0)     | 0<br>(0 - 0)      | 5<br>(4 - 7)       | 21<br>(16 - 27)    | 34<br>(29 - 42)    |
| Cerebrovascular disease                       | 41<br>(32 - 51)    | 0<br>(0 - 0)     | 0<br>(0 - 0)      | 3<br>(2 - 4)       | 13<br>(10 - 17)    | 25<br>(19 - 31)    |
| Ischemic stroke                               | 26<br>(20 - 33)    | 0<br>(0 - 0)     | 0<br>(0 - 0)      | 1<br>(1 - 1)       | 7<br>(5 - 9)       | 18<br>(13 - 22)    |
| Hemorrhagic stroke                            | 15<br>(11 - 20)    | 0<br>(0 - 0)     | 0<br>(0 - 0)      | 2<br>(2 - 3)       | 6<br>(4 - 8)       | 7<br>(5 - 10)      |
| Hypertensive heart disease                    | 10<br>(7 - 15)     | 0<br>(0 - 0)     | 0<br>(0 - 0)      | 1<br>(0 - 1)       | 3<br>(2 - 5)       | 6<br>(4 - 9)       |
| Cardiomyopathy and myocarditis                | 4<br>(3 - 5)       | 0<br>(0 - 0)     | 0<br>(0 - 0)      | 1<br>(1 - 1)       | 2<br>(1 - 2)       | 1<br>(1 - 2)       |
| Atrial fibrillation and flutter               | 1<br>(1 - 2)       | --               | --                | 0<br>(0 - 0)       | 0<br>(0 - 0)       | 1<br>(1 - 1)       |
| Aortic aneurysm                               | 2<br>(1 - 3)       | --               | --                | 0<br>(0 - 0)       | 1<br>(1 - 1)       | 1<br>(1 - 1)       |
| Peripheral vascular disease                   | 1<br>(1 - 1)       | --               | --                | 0<br>(0 - 0)       | 0<br>(0 - 0)       | 1<br>(0 - 1)       |
| Endocarditis                                  | 1<br>(0 - 1)       | 0<br>(0 - 0)     | 0<br>(0 - 0)      | 0<br>(0 - 0)       | 0<br>(0 - 0)       | 0<br>(0 - 0)       |
| Other cardiovascular and circulatory diseases | 5<br>(3 - 6)       | 0<br>(0 - 0)     | 0<br>(0 - 0)      | 1<br>(1 - 1)       | 1<br>(1 - 2)       | 2<br>(1 - 3)       |
| Chronic respiratory diseases                  | 14<br>(11 - 17)    | 0<br>(0 - 1)     | 0<br>(0 - 0)      | 1<br>(1 - 2)       | 4<br>(3 - 5)       | 8<br>(6 - 10)      |
| Chronic obstructive pulmonary disease         | 10<br>(7 - 12)     | 0<br>(0 - 0)     | 0<br>(0 - 0)      | 1<br>(0 - 1)       | 3<br>(2 - 4)       | 6<br>(5 - 8)       |
| Pneumoconiosis                                | 1<br>(0 - 1)       | 0<br>(0 - 0)     | 0<br>(0 - 0)      | 0<br>(0 - 0)       | 0<br>(0 - 0)       | 0<br>(0 - 0)       |



Web Table 31- Saint Vincent and the Grenadines deaths with 95% UI by age, sex, and cause in 2013

| Cause                                               | Males, All Ages | Males, 0-4 Years | Males, 5-14 Years | Males, 15-49 Years | Males, 50-69 Years | Males, 70-80 Years |
|-----------------------------------------------------|-----------------|------------------|-------------------|--------------------|--------------------|--------------------|
| Silicosis                                           | 0<br>(0-0)      | 0<br>(0-0)       | 0<br>(0-0)        | 0<br>(0-0)         | 0<br>(0-0)         | 0<br>(0-0)         |
| Asbestosis                                          | 0<br>(0-0)      | 0<br>(0-0)       | 0<br>(0-0)        | 0<br>(0-0)         | 0<br>(0-0)         | 0<br>(0-0)         |
| Coal workers pneumoconiosis                         | 0<br>(0-0)      | 0<br>(0-0)       | 0<br>(0-0)        | 0<br>(0-0)         | 0<br>(0-0)         | 0<br>(0-0)         |
| Other pneumoconiosis                                | 0<br>(0-0)      | 0<br>(0-0)       | 0<br>(0-0)        | 0<br>(0-0)         | 0<br>(0-0)         | 0<br>(0-0)         |
| Asthma                                              | 2<br>(2-3)      | 0<br>(0-0)       | 0<br>(0-0)        | 1<br>(0-1)         | 1<br>(1-1)         | 1<br>(1-1)         |
| Interstitial lung disease and pulmonary sarcoidosis | 1<br>(1-1)      | 0<br>(0-0)       | 0<br>(0-0)        | 0<br>(0-0)         | 0<br>(0-1)         | 1<br>(0-1)         |
| Other chronic respiratory diseases                  | 0<br>(0-1)      | 0<br>(0-0)       | 0<br>(0-0)        | 0<br>(0-0)         | 0<br>(0-0)         | 0<br>(0-0)         |
| Cirrhosis                                           | 10<br>(8-12)    | 0<br>(0-0)       | 0<br>(0-0)        | 3<br>(2-4)         | 5<br>(4-6)         | 2<br>(1-2)         |
| Cirrhosis due to hepatitis B                        | 1<br>(0-1)      | 0<br>(0-0)       | 0<br>(0-0)        | 0<br>(0-0)         | 0<br>(0-1)         | 0<br>(0-0)         |
| Cirrhosis due to hepatitis C                        | 3<br>(2-4)      | 0<br>(0-0)       | 0<br>(0-0)        | 1<br>(0-1)         | 1<br>(1-2)         | 1<br>(0-1)         |
| Cirrhosis due to alcohol use                        | 5<br>(3-6)      | --               | --                | 1<br>(1-2)         | 2<br>(2-3)         | 1<br>(1-1)         |
| Cirrhosis due to other causes                       | 2<br>(1-2)      | 0<br>(0-0)       | 0<br>(0-0)        | 1<br>(0-1)         | 1<br>(0-1)         | 0<br>(0-0)         |
| Digestive diseases                                  | 8<br>(7-11)     | 0<br>(0-0)       | 0<br>(0-0)        | 2<br>(2-3)         | 3<br>(2-4)         | 3<br>(3-4)         |
| Peptic ulcer disease                                | 2<br>(2-3)      | 0<br>(0-0)       | 0<br>(0-0)        | 1<br>(0-1)         | 1<br>(1-1)         | 1<br>(1-1)         |
| Gastritis and duodenitis                            | 1<br>(1-1)      | 0<br>(0-0)       | 0<br>(0-0)        | 0<br>(0-0)         | 0<br>(0-1)         | 0<br>(0-1)         |
| Appendicitis                                        | 0<br>(0-1)      | 0<br>(0-0)       | 0<br>(0-0)        | 0<br>(0-0)         | 0<br>(0-0)         | 0<br>(0-0)         |
| Paralytic ileus and intestinal obstruction          | 1<br>(0-2)      | 0<br>(0-0)       | 0<br>(0-0)        | 0<br>(0-0)         | 0<br>(0-1)         | 1<br>(0-1)         |
| Inguinal, femoral, and abdominal hernia             | 0<br>(0-1)      | 0<br>(0-0)       | 0<br>(0-0)        | 0<br>(0-0)         | 0<br>(0-0)         | 0<br>(0-1)         |
| Inflammatory bowel disease                          | 1<br>(1-1)      | 0<br>(0-0)       | 0<br>(0-0)        | 0<br>(0-0)         | 0<br>(0-0)         | 0<br>(0-1)         |
| Vascular intestinal disorders                       | 0<br>(0-0)      | 0<br>(0-0)       | 0<br>(0-0)        | 0<br>(0-0)         | 0<br>(0-0)         | 0<br>(0-0)         |
| Gallbladder and biliary diseases                    | 0<br>(0-1)      | 0<br>(0-0)       | 0<br>(0-0)        | 0<br>(0-0)         | 0<br>(0-0)         | 0<br>(0-0)         |
| Pancreatitis                                        | 1<br>(0-1)      | 0<br>(0-0)       | 0<br>(0-0)        | 0<br>(0-1)         | 0<br>(0-0)         | 0<br>(0-0)         |
| Other digestive diseases                            | 1<br>(1-1)      | 0<br>(0-0)       | 0<br>(0-0)        | 0<br>(0-0)         | 0<br>(0-1)         | 0<br>(0-1)         |
| Neurological disorders                              | 17<br>(13-21)   | 0<br>(0-0)       | 0<br>(0-0)        | 1<br>(1-2)         | 2<br>(2-3)         | 13<br>(10-17)      |
| Alzheimer disease and other dementias               | 13<br>(10-17)   | --               | --                | 0<br>(0-0)         | 1<br>(1-2)         | 12<br>(9-16)       |
| Parkinson disease                                   | 1<br>(1-1)      | --               | --                | 0<br>(0-0)         | 0<br>(0-0)         | 1<br>(1-1)         |
| Epilepsy                                            | 2<br>(1-2)      | 0<br>(0-0)       | 0<br>(0-0)        | 1<br>(1-1)         | 0<br>(0-1)         | 0<br>(0-0)         |
| Multiple sclerosis                                  | 0<br>(0-0)      | --               | --                | 0<br>(0-0)         | 0<br>(0-0)         | 0<br>(0-0)         |
| Other neurological disorders                        | 1<br>(1-1)      | 0<br>(0-0)       | 0<br>(0-0)        | 0<br>(0-0)         | 0<br>(0-1)         | 0<br>(0-0)         |
| Mental and substance use disorders                  | 3<br>(2-4)      | 0<br>(0-0)       | 0<br>(0-0)        | 1<br>(1-1)         | 1<br>(1-2)         | 0<br>(0-1)         |
| Schizophrenia                                       | 0<br>(0-0)      | --               | --                | 0<br>(0-0)         | 0<br>(0-0)         | 0<br>(0-0)         |
| Alcohol use disorders                               | 2<br>(1-2)      | --               | --                | 1<br>(0-1)         | 1<br>(0-1)         | 0<br>(0-0)         |
| Drug use disorders                                  | 1<br>(1-1)      | 0<br>(0-0)       | --                | 0<br>(0-1)         | 0<br>(0-0)         | 0<br>(0-0)         |
| Opioid use disorders                                | 0<br>(0-0)      | 0<br>(0-0)       | --                | 0<br>(0-0)         | 0<br>(0-0)         | 0<br>(0-0)         |
| Cocaine use disorders                               | 0<br>(0-0)      | 0<br>(0-0)       | --                | 0<br>(0-0)         | 0<br>(0-0)         | 0<br>(0-0)         |
| Amphetamine use disorders                           | 0<br>(0-0)      | 0<br>(0-0)       | --                | 0<br>(0-0)         | 0<br>(0-0)         | 0<br>(0-0)         |
| Other drug use disorders                            | 1<br>(0-1)      | 0<br>(0-0)       | --                | 0<br>(0-0)         | 0<br>(0-0)         | 0<br>(0-0)         |
| Eating disorders                                    | 0<br>(0-0)      | --               | 0<br>(0-0)        | 0<br>(0-0)         | --                 | --                 |
| Anorexia nervosa                                    | 0<br>(0-0)      | --               | 0<br>(0-0)        | 0<br>(0-0)         | --                 | --                 |
| Diabetes, urogenital, blood, and endocrine diseases | 49<br>(40-61)   | 1<br>(0-1)       | 0<br>(0-0)        | 7<br>(5-9)         | 19<br>(15-25)      | 22<br>(18-28)      |

Web Table 31- Saint Vincent and the Grenadines deaths with 95% UI by age, sex, and cause in 2013

| Cause                                               | Males, All Ages | Males, 0-4 Years | Males, 5-14 Years | Males, 15-49 Years | Males, 50-69 Years | Males, 70-80 Years |
|-----------------------------------------------------|-----------------|------------------|-------------------|--------------------|--------------------|--------------------|
| Diabetes mellitus                                   | 30<br>(24 - 37) | 0<br>(0 - 0)     | 0<br>(0 - 0)      | 3<br>(2 - 4)       | 13<br>(10 - 17)    | 14<br>(11 - 17)    |
| Acute glomerulonephritis                            | 0<br>(0 - 0)    | 0<br>(0 - 0)     | 0<br>(0 - 0)      | 0<br>(0 - 0)       | 0<br>(0 - 0)       | 0<br>(0 - 0)       |
| Chronic kidney disease                              | 11<br>(9 - 16)  | 0<br>(0 - 0)     | 0<br>(0 - 0)      | 2<br>(2 - 3)       | 4<br>(3 - 6)       | 5<br>(4 - 8)       |
| Chronic kidney disease due to diabetes mellitus     | 2<br>(1 - 4)    | 0<br>(0 - 0)     | 0<br>(0 - 0)      | 0<br>(0 - 1)       | 1<br>(0 - 2)       | 1<br>(0 - 1)       |
| Chronic kidney disease due to hypertension          | 6<br>(4 - 8)    | 0<br>(0 - 0)     | 0<br>(0 - 0)      | 1<br>(1 - 1)       | 2<br>(1 - 3)       | 3<br>(2 - 4)       |
| Chronic kidney disease due to glomerulonephritis    | 0<br>(0 - 1)    | 0<br>(0 - 0)     | 0<br>(0 - 0)      | 0<br>(0 - 0)       | 0<br>(0 - 0)       | 0<br>(0 - 0)       |
| Chronic kidney disease due to other causes          | 3<br>(2 - 6)    | 0<br>(0 - 0)     | 0<br>(0 - 0)      | 1<br>(0 - 1)       | 1<br>(0 - 2)       | 1<br>(1 - 3)       |
| Urinary diseases and male infertility               | 3<br>(2 - 4)    | 0<br>(0 - 0)     | 0<br>(0 - 0)      | 0<br>(0 - 0)       | 1<br>(1 - 1)       | 2<br>(1 - 2)       |
| Interstitial nephritis and urinary tract infections | 2<br>(1 - 3)    | 0<br>(0 - 0)     | 0<br>(0 - 0)      | 0<br>(0 - 0)       | 1<br>(0 - 1)       | 1<br>(1 - 2)       |
| Urolithiasis                                        | 0<br>(0 - 0)    | --               | 0<br>(0 - 0)      | 0<br>(0 - 0)       | 0<br>(0 - 0)       | 0<br>(0 - 0)       |
| Other urinary diseases                              | 1<br>(0 - 1)    | 0<br>(0 - 0)     | 0<br>(0 - 0)      | 0<br>(0 - 0)       | 0<br>(0 - 0)       | 0<br>(0 - 1)       |
| Gynecological diseases                              | --              | --               | --                | --                 | --                 | --                 |
| Uterine fibroids                                    | --              | --               | --                | --                 | --                 | --                 |
| Polycystic ovarian syndrome                         | --              | --               | --                | --                 | --                 | --                 |
| Endometriosis                                       | --              | --               | --                | --                 | --                 | --                 |
| Genital prolapse                                    | --              | --               | --                | --                 | --                 | --                 |
| Other gynecological diseases                        | --              | --               | --                | --                 | --                 | --                 |
| Hemoglobinopathies and hemolytic anemias            | 1<br>(1 - 2)    | 0<br>(0 - 0)     | 0<br>(0 - 0)      | 0<br>(0 - 1)       | 0<br>(0 - 0)       | 0<br>(0 - 0)       |
| Thalassemias                                        | 0<br>(0 - 0)    | 0<br>(0 - 0)     | 0<br>(0 - 0)      | 0<br>(0 - 0)       | 0<br>(0 - 0)       | 0<br>(0 - 0)       |
| Sickle cell disorders                               | 1<br>(0 - 1)    | 0<br>(0 - 0)     | 0<br>(0 - 0)      | 0<br>(0 - 1)       | 0<br>(0 - 0)       | 0<br>(0 - 0)       |
| G6PD deficiency                                     | 0<br>(0 - 0)    | 0<br>(0 - 0)     | 0<br>(0 - 0)      | 0<br>(0 - 0)       | 0<br>(0 - 0)       | 0<br>(0 - 0)       |
| Other hemoglobinopathies and hemolytic anemias      | 0<br>(0 - 0)    | 0<br>(0 - 0)     | 0<br>(0 - 0)      | 0<br>(0 - 0)       | 0<br>(0 - 0)       | 0<br>(0 - 0)       |
| Endocrine, metabolic, blood, and immune disorders   | 3<br>(2 - 7)    | 0<br>(0 - 1)     | 0<br>(0 - 0)      | 1<br>(1 - 2)       | 1<br>(1 - 3)       | 1<br>(1 - 2)       |
| Musculoskeletal disorders                           | 1<br>(1 - 1)    | --               | 0<br>(0 - 0)      | 0<br>(0 - 1)       | 0<br>(0 - 0)       | 0<br>(0 - 0)       |
| Rheumatoid arthritis                                | 0<br>(0 - 0)    | --               | 0<br>(0 - 0)      | 0<br>(0 - 0)       | 0<br>(0 - 0)       | 0<br>(0 - 0)       |
| Other musculoskeletal disorders                     | 1<br>(1 - 1)    | --               | 0<br>(0 - 0)      | 0<br>(0 - 1)       | 0<br>(0 - 0)       | 0<br>(0 - 0)       |
| Other non-communicable diseases                     | 8<br>(5 - 12)   | 4<br>(2 - 8)     | 0<br>(0 - 1)      | 1<br>(1 - 1)       | 1<br>(0 - 1)       | 1<br>(1 - 2)       |
| Congenital anomalies                                | 5<br>(3 - 9)    | 4<br>(2 - 7)     | 0<br>(0 - 1)      | 1<br>(0 - 1)       | 0<br>(0 - 0)       | 0<br>(0 - 0)       |
| Neural tube defects                                 | 0<br>(0 - 0)    | 0<br>(0 - 0)     | 0<br>(0 - 0)      | 0<br>(0 - 0)       | 0<br>(0 - 0)       | 0<br>(0 - 0)       |
| Congenital heart anomalies                          | 2<br>(1 - 4)    | 2<br>(1 - 3)     | 0<br>(0 - 0)      | 0<br>(0 - 0)       | 0<br>(0 - 0)       | 0<br>(0 - 0)       |
| Cleft lip and cleft palate                          | 0<br>(0 - 0)    | 0<br>(0 - 0)     | --                | --                 | --                 | --                 |
| Down syndrome                                       | 0<br>(0 - 0)    | 0<br>(0 - 0)     | 0<br>(0 - 0)      | 0<br>(0 - 0)       | 0<br>(0 - 0)       | 0<br>(0 - 0)       |
| Chromosomal unbalanced rearrangements               | 0<br>(0 - 0)    | 0<br>(0 - 0)     | 0<br>(0 - 0)      | 0<br>(0 - 0)       | 0<br>(0 - 0)       | 0<br>(0 - 0)       |
| Other congenital anomalies                          | 2<br>(1 - 4)    | 2<br>(1 - 4)     | 0<br>(0 - 0)      | 0<br>(0 - 0)       | 0<br>(0 - 0)       | 0<br>(0 - 0)       |
| Skin and subcutaneous diseases                      | 2<br>(1 - 3)    | 0<br>(0 - 0)     | 0<br>(0 - 0)      | 0<br>(0 - 0)       | 1<br>(0 - 1)       | 1<br>(1 - 2)       |
| Cellulitis                                          | 0<br>(0 - 0)    | 0<br>(0 - 0)     | 0<br>(0 - 0)      | 0<br>(0 - 0)       | 0<br>(0 - 0)       | 0<br>(0 - 0)       |
| Pyoderma                                            | 1<br>(0 - 1)    | 0<br>(0 - 0)     | 0<br>(0 - 0)      | 0<br>(0 - 0)       | 0<br>(0 - 0)       | 0<br>(0 - 0)       |
| Decubitus ulcer                                     | 1<br>(1 - 2)    | 0<br>(0 - 0)     | 0<br>(0 - 0)      | 0<br>(0 - 0)       | 0<br>(0 - 0)       | 1<br>(0 - 1)       |
| Other skin and subcutaneous diseases                | 0<br>(0 - 0)    | 0<br>(0 - 0)     | 0<br>(0 - 0)      | 0<br>(0 - 0)       | 0<br>(0 - 0)       | 0<br>(0 - 0)       |
| Sudden infant death syndrome                        | 0<br>(0 - 1)    | 0<br>(0 - 1)     | --                | --                 | --                 | --                 |

Web Table 31- Saint Vincent and the Grenadines deaths with 95% UI by age, sex, and cause in 2013

| Cause                                           | Males, All Ages | Males, 0-4 Years | Males, 5-14 Years | Males, 15-49 Years | Males, 50-69 Years | Males, 70-80 Years |
|-------------------------------------------------|-----------------|------------------|-------------------|--------------------|--------------------|--------------------|
| Injuries                                        | 52<br>(43 - 62) | 2<br>(1 - 4)     | 2<br>(1 - 3)      | 32<br>(26 - 39)    | 10<br>(8 - 13)     | 5<br>(4 - 7)       |
| Transport injuries                              | 13<br>(10 - 16) | 0<br>(0 - 1)     | 1<br>(0 - 1)      | 8<br>(6 - 9)       | 3<br>(2 - 4)       | 1<br>(1 - 2)       |
| Road injuries                                   | 12<br>(9 - 15)  | 0<br>(0 - 0)     | 1<br>(0 - 1)      | 7<br>(5 - 9)       | 3<br>(2 - 4)       | 1<br>(1 - 2)       |
| Pedestrian road injuries                        | 3<br>(2 - 4)    | 0<br>(0 - 0)     | 0<br>(0 - 0)      | 1<br>(1 - 2)       | 1<br>(1 - 1)       | 0<br>(0 - 1)       |
| Cyclist road injuries                           | 1<br>(1 - 1)    | 0<br>(0 - 0)     | 0<br>(0 - 0)      | 0<br>(0 - 1)       | 0<br>(0 - 0)       | 0<br>(0 - 0)       |
| Motorcyclist road injuries                      | 1<br>(1 - 2)    | 0<br>(0 - 0)     | 0<br>(0 - 0)      | 1<br>(1 - 1)       | 0<br>(0 - 0)       | 0<br>(0 - 0)       |
| Motor vehicle road injuries                     | 7<br>(5 - 9)    | 0<br>(0 - 0)     | 0<br>(0 - 0)      | 4<br>(3 - 6)       | 2<br>(1 - 2)       | 1<br>(0 - 1)       |
| Other road injuries                             | 0<br>(0 - 0)    | 0<br>(0 - 0)     | 0<br>(0 - 0)      | 0<br>(0 - 0)       | 0<br>(0 - 0)       | 0<br>(0 - 0)       |
| Other transport injuries                        | 1<br>(1 - 1)    | 0<br>(0 - 0)     | 0<br>(0 - 0)      | 1<br>(0 - 1)       | 0<br>(0 - 0)       | 0<br>(0 - 0)       |
| Unintentional injuries                          | 18<br>(14 - 22) | 1<br>(1 - 3)     | 1<br>(1 - 1)      | 9<br>(7 - 11)      | 4<br>(3 - 5)       | 3<br>(2 - 4)       |
| Falls                                           | 3<br>(2 - 4)    | 0<br>(0 - 0)     | 0<br>(0 - 0)      | 1<br>(1 - 1)       | 1<br>(1 - 1)       | 1<br>(1 - 1)       |
| Drowning                                        | 5<br>(3 - 7)    | 0<br>(0 - 1)     | 0<br>(0 - 1)      | 3<br>(2 - 4)       | 1<br>(1 - 1)       | 0<br>(0 - 0)       |
| Fire, heat, and hot substances                  | 1<br>(1 - 2)    | 0<br>(0 - 0)     | 0<br>(0 - 0)      | 0<br>(0 - 1)       | 0<br>(0 - 0)       | 0<br>(0 - 1)       |
| Poisonings                                      | 0<br>(0 - 0)    | 0<br>(0 - 0)     | 0<br>(0 - 0)      | 0<br>(0 - 0)       | 0<br>(0 - 0)       | 0<br>(0 - 0)       |
| Exposure to mechanical forces                   | 3<br>(3 - 4)    | 0<br>(0 - 0)     | 0<br>(0 - 0)      | 2<br>(2 - 3)       | 1<br>(0 - 1)       | 0<br>(0 - 0)       |
| Unintentional firearm injuries                  | 2<br>(1 - 3)    | 0<br>(0 - 0)     | 0<br>(0 - 0)      | 1<br>(1 - 2)       | 0<br>(0 - 1)       | 0<br>(0 - 0)       |
| Unintentional suffocation                       | 0<br>(0 - 1)    | 0<br>(0 - 0)     | 0<br>(0 - 0)      | 0<br>(0 - 0)       | 0<br>(0 - 0)       | 0<br>(0 - 0)       |
| Other exposure to mechanical forces             | 1<br>(1 - 2)    | 0<br>(0 - 0)     | 0<br>(0 - 0)      | 1<br>(1 - 1)       | 0<br>(0 - 0)       | 0<br>(0 - 0)       |
| Adverse effects of medical treatment            | 1<br>(1 - 2)    | 0<br>(0 - 0)     | 0<br>(0 - 0)      | 0<br>(0 - 0)       | 0<br>(0 - 1)       | 1<br>(0 - 1)       |
| Animal contact                                  | 0<br>(0 - 1)    | 0<br>(0 - 0)     | 0<br>(0 - 0)      | 0<br>(0 - 0)       | 0<br>(0 - 0)       | 0<br>(0 - 0)       |
| Venomous animal contact                         | 0<br>(0 - 0)    | 0<br>(0 - 0)     | 0<br>(0 - 0)      | 0<br>(0 - 0)       | 0<br>(0 - 0)       | 0<br>(0 - 0)       |
| Non-venomous animal contact                     | 0<br>(0 - 0)    | 0<br>(0 - 0)     | 0<br>(0 - 0)      | 0<br>(0 - 0)       | 0<br>(0 - 0)       | 0<br>(0 - 0)       |
| Foreign body                                    | 2<br>(1 - 3)    | 1<br>(0 - 1)     | 0<br>(0 - 0)      | 1<br>(0 - 1)       | 0<br>(0 - 1)       | 1<br>(0 - 1)       |
| Pulmonary aspiration and foreign body in airway | 2<br>(1 - 3)    | 1<br>(0 - 1)     | 0<br>(0 - 0)      | 1<br>(0 - 1)       | 0<br>(0 - 1)       | 1<br>(0 - 1)       |
| Foreign body in other body part                 | 0<br>(0 - 0)    | 0<br>(0 - 0)     | 0<br>(0 - 0)      | 0<br>(0 - 0)       | 0<br>(0 - 0)       | 0<br>(0 - 0)       |
| Other unintentional injuries                    | 1<br>(0 - 1)    | 0<br>(0 - 0)     | 0<br>(0 - 0)      | 0<br>(0 - 1)       | 0<br>(0 - 0)       | 0<br>(0 - 0)       |
| Self-harm and interpersonal violence            | 21<br>(16 - 27) | 0<br>(0 - 1)     | 0<br>(0 - 1)      | 16<br>(12 - 21)    | 4<br>(3 - 5)       | 1<br>(1 - 1)       |
| Self-harm                                       | 8<br>(6 - 10)   | --               | 0<br>(0 - 0)      | 6<br>(4 - 7)       | 2<br>(1 - 3)       | 1<br>(0 - 1)       |
| Interpersonal violence                          | 13<br>(8 - 18)  | 0<br>(0 - 1)     | 0<br>(0 - 0)      | 11<br>(6 - 14)     | 2<br>(1 - 3)       | 0<br>(0 - 1)       |
| Assault by firearm                              | 7<br>(4 - 10)   | 0<br>(0 - 0)     | 0<br>(0 - 0)      | 6<br>(3 - 9)       | 1<br>(0 - 1)       | 0<br>(0 - 0)       |
| Assault by sharp object                         | 4<br>(2 - 6)    | 0<br>(0 - 0)     | 0<br>(0 - 0)      | 3<br>(1 - 5)       | 1<br>(0 - 1)       | 0<br>(0 - 0)       |
| Assault by other means                          | 2<br>(1 - 4)    | 0<br>(0 - 0)     | 0<br>(0 - 0)      | 1<br>(1 - 2)       | 1<br>(0 - 1)       | 0<br>(0 - 0)       |

Web Table 31- Saint Vincent and the Grenadines deaths with 95% UI by age, sex, and cause in 2013

| Cause                                                             | Females, All Ages  | Females, 0-4 Years | Females, 5-14 Years | Females, 15-49 Years | Females, 50-69 Years | Females, 70-80 Years |
|-------------------------------------------------------------------|--------------------|--------------------|---------------------|----------------------|----------------------|----------------------|
| All causes                                                        | 359<br>(295 - 408) | 19<br>(9 - 37)     | 3<br>(2 - 5)        | 41<br>(33 - 50)      | 84<br>(65 - 103)     | 213<br>(176 - 236)   |
| Communicable, maternal, neonatal, and nutritional diseases        | 40<br>(32 - 52)    | 12<br>(6 - 24)     | 1<br>(0 - 1)        | 8<br>(6 - 9)         | 4<br>(3 - 5)         | 15<br>(11 - 20)      |
| HIV/AIDS and tuberculosis                                         | 6<br>(4 - 8)       | 0<br>(0 - 0)       | 0<br>(0 - 0)        | 4<br>(3 - 6)         | 1<br>(1 - 2)         | 0<br>(0 - 0)         |
| Tuberculosis                                                      | 0<br>(0 - 1)       | 0<br>(0 - 0)       | 0<br>(0 - 0)        | 0<br>(0 - 0)         | 0<br>(0 - 0)         | 0<br>(0 - 0)         |
| HIV/AIDS                                                          | 5<br>(4 - 7)       | 0<br>(0 - 0)       | 0<br>(0 - 0)        | 4<br>(3 - 5)         | 1<br>(1 - 2)         | 0<br>(0 - 0)         |
| HIV/AIDS resulting in mycobacterial infection                     | 0<br>(0 - 0)       | 0<br>(0 - 0)       | 0<br>(0 - 0)        | 0<br>(0 - 0)         | 0<br>(0 - 0)         | 0<br>(0 - 0)         |
| HIV/AIDS resulting in other diseases                              | 5<br>(4 - 7)       | 0<br>(0 - 0)       | 0<br>(0 - 0)        | 4<br>(3 - 5)         | 1<br>(1 - 2)         | 0<br>(0 - 0)         |
| Diarrhea, lower respiratory, and other common infectious diseases | 19<br>(14 - 24)    | 3<br>(1 - 6)       | 0<br>(0 - 1)        | 1<br>(1 - 2)         | 2<br>(1 - 3)         | 12<br>(9 - 17)       |
| Diarrheal diseases                                                | 2<br>(1 - 3)       | 1<br>(0 - 2)       | 0<br>(0 - 0)        | 0<br>(0 - 0)         | 0<br>(0 - 0)         | 1<br>(0 - 1)         |
| Intestinal infectious diseases                                    | 0<br>(0 - 1)       | 0<br>(0 - 0)       | 0<br>(0 - 0)        | 0<br>(0 - 0)         | 0<br>(0 - 0)         | 0<br>(0 - 0)         |
| Typhoid fever                                                     | 0<br>(0 - 1)       | 0<br>(0 - 0)       | 0<br>(0 - 0)        | 0<br>(0 - 0)         | 0<br>(0 - 0)         | 0<br>(0 - 0)         |
| Paratyphoid fever                                                 | 0<br>(0 - 0)       | 0<br>(0 - 0)       | 0<br>(0 - 0)        | 0<br>(0 - 0)         | 0<br>(0 - 0)         | 0<br>(0 - 0)         |
| Other intestinal infectious diseases                              | 0<br>(0 - 0)       | 0<br>(0 - 0)       | 0<br>(0 - 0)        | 0<br>(0 - 0)         | 0<br>(0 - 0)         | 0<br>(0 - 0)         |
| Lower respiratory infections                                      | 16<br>(12 - 20)    | 2<br>(1 - 4)       | 0<br>(0 - 0)        | 1<br>(1 - 1)         | 2<br>(1 - 2)         | 11<br>(8 - 16)       |
| Upper respiratory infections                                      | 0<br>(0 - 0)       | 0<br>(0 - 0)       | 0<br>(0 - 0)        | 0<br>(0 - 0)         | 0<br>(0 - 0)         | 0<br>(0 - 0)         |
| Otitis media                                                      | 0<br>(0 - 0)       | 0<br>(0 - 0)       | 0<br>(0 - 0)        | 0<br>(0 - 0)         | 0<br>(0 - 0)         | 0<br>(0 - 0)         |
| Meningitis                                                        | 0<br>(0 - 1)       | 0<br>(0 - 0)       | 0<br>(0 - 0)        | 0<br>(0 - 0)         | 0<br>(0 - 0)         | 0<br>(0 - 0)         |
| Pneumococcal meningitis                                           | 0<br>(0 - 0)       | 0<br>(0 - 0)       | 0<br>(0 - 0)        | 0<br>(0 - 0)         | 0<br>(0 - 0)         | 0<br>(0 - 0)         |
| H influenzae type B meningitis                                    | 0<br>(0 - 0)       | 0<br>(0 - 0)       | 0<br>(0 - 0)        | 0<br>(0 - 0)         | 0<br>(0 - 0)         | 0<br>(0 - 0)         |
| Meningococcal meningitis                                          | 0<br>(0 - 0)       | 0<br>(0 - 0)       | 0<br>(0 - 0)        | 0<br>(0 - 0)         | 0<br>(0 - 0)         | 0<br>(0 - 0)         |
| Other meningitis                                                  | 0<br>(0 - 0)       | 0<br>(0 - 0)       | 0<br>(0 - 0)        | 0<br>(0 - 0)         | 0<br>(0 - 0)         | 0<br>(0 - 0)         |
| Encephalitis                                                      | 0<br>(0 - 1)       | 0<br>(0 - 0)       | 0<br>(0 - 0)        | 0<br>(0 - 0)         | 0<br>(0 - 0)         | 0<br>(0 - 0)         |
| Diphtheria                                                        | 0<br>(0 - 0)       | 0<br>(0 - 0)       | 0<br>(0 - 0)        | 0<br>(0 - 0)         | 0<br>(0 - 0)         | --                   |
| Whooping cough                                                    | 0<br>(0 - 0)       | 0<br>(0 - 0)       | 0<br>(0 - 0)        | 0<br>(0 - 0)         | 0<br>(0 - 0)         | --                   |
| Tetanus                                                           | 0<br>(0 - 0)       | 0<br>(0 - 0)       | 0<br>(0 - 0)        | 0<br>(0 - 0)         | 0<br>(0 - 0)         | 0<br>(0 - 0)         |
| Measles                                                           | 0<br>(0 - 0)       | 0<br>(0 - 0)       | 0<br>(0 - 0)        | 0<br>(0 - 0)         | 0<br>(0 - 0)         | --                   |
| Varicella and herpes zoster                                       | 0<br>(0 - 0)       | 0<br>(0 - 0)       | 0<br>(0 - 0)        | 0<br>(0 - 0)         | 0<br>(0 - 0)         | 0<br>(0 - 0)         |
| Neglected tropical diseases and malaria                           | 0<br>(0 - 1)       | 0<br>(0 - 0)       | 0<br>(0 - 0)        | 0<br>(0 - 0)         | 0<br>(0 - 0)         | 0<br>(0 - 0)         |
| Leishmaniasis                                                     | 0<br>(0 - 0)       | 0<br>(0 - 0)       | 0<br>(0 - 0)        | 0<br>(0 - 0)         | 0<br>(0 - 0)         | 0<br>(0 - 0)         |
| Visceral leishmaniasis                                            | 0<br>(0 - 0)       | 0<br>(0 - 0)       | 0<br>(0 - 0)        | 0<br>(0 - 0)         | 0<br>(0 - 0)         | 0<br>(0 - 0)         |
| Cysticercosis                                                     | 0<br>(0 - 0)       | 0<br>(0 - 0)       | 0<br>(0 - 0)        | 0<br>(0 - 0)         | 0<br>(0 - 0)         | 0<br>(0 - 0)         |
| Cystic echinococcosis                                             | 0<br>(0 - 0)       | 0<br>(0 - 0)       | 0<br>(0 - 0)        | 0<br>(0 - 0)         | 0<br>(0 - 0)         | 0<br>(0 - 0)         |
| Dengue                                                            | 0<br>(0 - 0)       | 0<br>(0 - 0)       | 0<br>(0 - 0)        | 0<br>(0 - 0)         | 0<br>(0 - 0)         | 0<br>(0 - 0)         |
| Rabies                                                            | 0<br>(0 - 0)       | 0<br>(0 - 0)       | 0<br>(0 - 0)        | 0<br>(0 - 0)         | 0<br>(0 - 0)         | 0<br>(0 - 0)         |
| Intestinal nematode infections                                    | 0<br>(0 - 0)       | 0<br>(0 - 0)       | 0<br>(0 - 0)        | 0<br>(0 - 0)         | 0<br>(0 - 0)         | 0<br>(0 - 0)         |
| Ascariasis                                                        | 0<br>(0 - 0)       | 0<br>(0 - 0)       | 0<br>(0 - 0)        | 0<br>(0 - 0)         | 0<br>(0 - 0)         | 0<br>(0 - 0)         |
| Other neglected tropical diseases                                 | 0<br>(0 - 0)       | 0<br>(0 - 0)       | 0<br>(0 - 0)        | 0<br>(0 - 0)         | 0<br>(0 - 0)         | 0<br>(0 - 0)         |
| Maternal disorders                                                | 1<br>(1 - 1)       | --                 | 0<br>(0 - 0)        | 1<br>(1 - 1)         | --                   | --                   |
| Maternal hemorrhage                                               | 0<br>(0 - 0)       | --                 | 0<br>(0 - 0)        | 0<br>(0 - 0)         | --                   | --                   |
| Maternal sepsis and other maternal infections                     | 0<br>(0 - 0)       | --                 | 0<br>(0 - 0)        | 0<br>(0 - 0)         | --                   | --                   |

Web Table 31- Saint Vincent and the Grenadines deaths with 95% UI by age, sex, and cause in 2013

| Cause                                                            | Females, All Ages  | Females, 0-4 Years | Females, 5-14 Years | Females, 15-49 Years | Females, 50-69 Years | Females, 70-80 Years |
|------------------------------------------------------------------|--------------------|--------------------|---------------------|----------------------|----------------------|----------------------|
| Maternal hypertensive disorders                                  | 0<br>(0 - 0)       | --                 | 0<br>(0 - 0)        | 0<br>(0 - 0)         | --                   | --                   |
| Maternal obstructed labor                                        | 0<br>(0 - 0)       | --                 | 0<br>(0 - 0)        | 0<br>(0 - 0)         | --                   | --                   |
| Maternal abortive outcome                                        | 0<br>(0 - 0)       | --                 | 0<br>(0 - 0)        | 0<br>(0 - 0)         | --                   | --                   |
| Indirect maternal deaths                                         | 0<br>(0 - 0)       | --                 | 0<br>(0 - 0)        | 0<br>(0 - 0)         | --                   | --                   |
| Late maternal deaths                                             | 0<br>(0 - 0)       | --                 | 0<br>(0 - 0)        | 0<br>(0 - 0)         | --                   | --                   |
| Maternal deaths aggravated by HIV/AIDS                           | 0<br>(0 - 0)       | --                 | 0<br>(0 - 0)        | 0<br>(0 - 0)         | --                   | --                   |
| Other maternal disorders                                         | 0<br>(0 - 0)       | --                 | 0<br>(0 - 0)        | 0<br>(0 - 0)         | --                   | --                   |
| Neonatal disorders                                               | 9<br>(4 - 16)      | 9<br>(4 - 16)      | --                  | --                   | --                   | --                   |
| Neonatal preterm birth complications                             | 5<br>(2 - 9)       | 5<br>(2 - 9)       | --                  | --                   | --                   | --                   |
| Neonatal encephalopathy due to birth asphyxia and trauma         | 2<br>(1 - 4)       | 2<br>(1 - 4)       | --                  | --                   | --                   | --                   |
| Neonatal sepsis and other neonatal infections                    | 1<br>(0 - 2)       | 1<br>(0 - 2)       | --                  | --                   | --                   | --                   |
| Hemolytic disease and other neonatal jaundice                    | 0<br>(0 - 0)       | 0<br>(0 - 0)       | --                  | --                   | --                   | --                   |
| Other neonatal disorders                                         | 1<br>(0 - 2)       | 1<br>(0 - 2)       | --                  | --                   | --                   | --                   |
| Nutritional deficiencies                                         | 4<br>(3 - 6)       | 1<br>(0 - 2)       | 0<br>(0 - 0)        | 1<br>(0 - 1)         | 1<br>(0 - 1)         | 2<br>(2 - 3)         |
| Protein-energy malnutrition                                      | 2<br>(1 - 3)       | 1<br>(0 - 1)       | 0<br>(0 - 0)        | 0<br>(0 - 0)         | 0<br>(0 - 0)         | 1<br>(0 - 2)         |
| Iodine deficiency                                                | 0<br>(0 - 0)       | 0<br>(0 - 0)       | 0<br>(0 - 0)        | 0<br>(0 - 0)         | 0<br>(0 - 0)         | 0<br>(0 - 0)         |
| Iron-deficiency anemia                                           | 2<br>(1 - 3)       | 0<br>(0 - 0)       | 0<br>(0 - 0)        | 0<br>(0 - 1)         | 0<br>(0 - 0)         | 1<br>(1 - 2)         |
| Other nutritional deficiencies                                   | 0<br>(0 - 0)       | 0<br>(0 - 0)       | 0<br>(0 - 0)        | 0<br>(0 - 0)         | 0<br>(0 - 0)         | 0<br>(0 - 0)         |
| Other communicable, maternal, neonatal, and nutritional diseases | 1<br>(1 - 1)       | 0<br>(0 - 0)       | 0<br>(0 - 0)        | 0<br>(0 - 0)         | 0<br>(0 - 0)         | 0<br>(0 - 0)         |
| Sexually transmitted diseases excluding HIV                      | 0<br>(0 - 0)       | 0<br>(0 - 0)       | 0<br>(0 - 0)        | 0<br>(0 - 0)         | 0<br>(0 - 0)         | 0<br>(0 - 0)         |
| Syphilis                                                         | 0<br>(0 - 0)       | 0<br>(0 - 0)       | 0<br>(0 - 0)        | 0<br>(0 - 0)         | 0<br>(0 - 0)         | 0<br>(0 - 0)         |
| Chlamydial infection                                             | 0<br>(0 - 0)       | --                 | 0<br>(0 - 0)        | 0<br>(0 - 0)         | 0<br>(0 - 0)         | 0<br>(0 - 0)         |
| Gonococcal infection                                             | 0<br>(0 - 0)       | --                 | 0<br>(0 - 0)        | 0<br>(0 - 0)         | 0<br>(0 - 0)         | 0<br>(0 - 0)         |
| Other sexually transmitted diseases                              | 0<br>(0 - 0)       | --                 | 0<br>(0 - 0)        | 0<br>(0 - 0)         | 0<br>(0 - 0)         | 0<br>(0 - 0)         |
| Hepatitis                                                        | 0<br>(0 - 0)       | 0<br>(0 - 0)       | 0<br>(0 - 0)        | 0<br>(0 - 0)         | 0<br>(0 - 0)         | 0<br>(0 - 0)         |
| Acute hepatitis A                                                | 0<br>(0 - 0)       | 0<br>(0 - 0)       | 0<br>(0 - 0)        | 0<br>(0 - 0)         | 0<br>(0 - 0)         | 0<br>(0 - 0)         |
| Acute hepatitis B                                                | 0<br>(0 - 0)       | 0<br>(0 - 0)       | 0<br>(0 - 0)        | 0<br>(0 - 0)         | 0<br>(0 - 0)         | 0<br>(0 - 0)         |
| Acute hepatitis C                                                | 0<br>(0 - 0)       | --                 | 0<br>(0 - 0)        | 0<br>(0 - 0)         | 0<br>(0 - 0)         | 0<br>(0 - 0)         |
| Other infectious diseases                                        | 1<br>(0 - 1)       | 0<br>(0 - 0)       | 0<br>(0 - 0)        | 0<br>(0 - 0)         | 0<br>(0 - 0)         | 0<br>(0 - 0)         |
| Non-communicable diseases                                        | 303<br>(247 - 349) | 5<br>(2 - 11)      | 2<br>(1 - 2)        | 27<br>(21 - 35)      | 77<br>(60 - 96)      | 193<br>(158 - 215)   |
| Neoplasms                                                        | 58<br>(45 - 70)    | 0<br>(0 - 1)       | 0<br>(0 - 1)        | 10<br>(7 - 12)       | 26<br>(17 - 28)      | 26<br>(20 - 31)      |
| Esophageal cancer                                                | 1<br>(1 - 1)       | --                 | --                  | 0<br>(0 - 0)         | 0<br>(0 - 0)         | 0<br>(0 - 1)         |
| Stomach cancer                                                   | 3<br>(2 - 4)       | --                 | --                  | 0<br>(0 - 0)         | 1<br>(1 - 1)         | 2<br>(1 - 3)         |
| Liver cancer                                                     | 2<br>(1 - 2)       | --                 | 0<br>(0 - 0)        | 0<br>(0 - 0)         | 1<br>(0 - 1)         | 1<br>(1 - 1)         |
| Liver cancer due to hepatitis B                                  | 0<br>(0 - 1)       | --                 | 0<br>(0 - 0)        | 0<br>(0 - 0)         | 0<br>(0 - 0)         | 0<br>(0 - 0)         |
| Liver cancer due to hepatitis C                                  | 1<br>(0 - 1)       | --                 | 0<br>(0 - 0)        | 0<br>(0 - 0)         | 0<br>(0 - 0)         | 0<br>(0 - 1)         |
| Liver cancer due to alcohol use                                  | 0<br>(0 - 1)       | --                 | --                  | 0<br>(0 - 0)         | 0<br>(0 - 0)         | 0<br>(0 - 0)         |
| Liver cancer due to other causes                                 | 0<br>(0 - 0)       | --                 | 0<br>(0 - 0)        | 0<br>(0 - 0)         | 0<br>(0 - 0)         | 0<br>(0 - 0)         |
| Larynx cancer                                                    | 0<br>(0 - 0)       | --                 | --                  | 0<br>(0 - 0)         | 0<br>(0 - 0)         | 0<br>(0 - 0)         |
| Tracheal, bronchus and lung cancer                               | 3<br>(2 - 4)       | --                 | --                  | 0<br>(0 - 1)         | 1<br>(1 - 2)         | 2<br>(1 - 2)         |

Web Table 31- Saint Vincent and the Grenadines deaths with 95% UI by age, sex, and cause in 2013

| Cause                                         | Females, All Ages  | Females, 0-4 Years | Females, 5-14 Years | Females, 15-49 Years | Females, 50-69 Years | Females, 70-80 Years |
|-----------------------------------------------|--------------------|--------------------|---------------------|----------------------|----------------------|----------------------|
| Breast cancer                                 | 12<br>(10 - 16)    | --                 | --                  | 3<br>(2 - 4)         | 5<br>(4 - 7)         | 4<br>(3 - 6)         |
| Cervical cancer                               | 7<br>(5 - 10)      | --                 | --                  | 3<br>(1 - 3)         | 2<br>(2 - 4)         | 3<br>(2 - 3)         |
| Uterine cancer                                | 3<br>(2 - 4)       | --                 | --                  | 0<br>(0 - 0)         | 1<br>(1 - 2)         | 2<br>(1 - 2)         |
| Prostate cancer                               | --                 | --                 | --                  | --                   | --                   | --                   |
| Colon and rectum cancer                       | 7<br>(5 - 9)       | --                 | --                  | 1<br>(0 - 1)         | 2<br>(2 - 3)         | 4<br>(3 - 5)         |
| Lip and oral cavity cancer                    | 1<br>(0 - 1)       | --                 | --                  | 0<br>(0 - 0)         | 0<br>(0 - 0)         | 0<br>(0 - 0)         |
| Nasopharynx cancer                            | 0<br>(0 - 0)       | --                 | 0<br>(0 - 0)        | 0<br>(0 - 0)         | 0<br>(0 - 0)         | 0<br>(0 - 0)         |
| Other pharynx cancer                          | 0<br>(0 - 0)       | --                 | --                  | 0<br>(0 - 0)         | 0<br>(0 - 0)         | 0<br>(0 - 0)         |
| Gallbladder and biliary tract cancer          | 1<br>(1 - 2)       | --                 | --                  | 0<br>(0 - 0)         | 1<br>(0 - 1)         | 1<br>(0 - 1)         |
| Pancreatic cancer                             | 3<br>(2 - 4)       | --                 | --                  | 0<br>(0 - 0)         | 1<br>(1 - 1)         | 2<br>(1 - 2)         |
| Malignant skin melanoma                       | 0<br>(0 - 0)       | --                 | --                  | 0<br>(0 - 0)         | 0<br>(0 - 0)         | 0<br>(0 - 0)         |
| Non-melanoma skin cancer                      | 0<br>(0 - 0)       | --                 | --                  | 0<br>(0 - 0)         | 0<br>(0 - 0)         | 0<br>(0 - 0)         |
| Ovarian cancer                                | 3<br>(2 - 4)       | --                 | --                  | 1<br>(0 - 1)         | 1<br>(1 - 2)         | 1<br>(1 - 2)         |
| Testicular cancer                             | --                 | --                 | --                  | --                   | --                   | --                   |
| Kidney cancer                                 | 1<br>(1 - 1)       | 0<br>(0 - 0)       | 0<br>(0 - 0)        | 0<br>(0 - 0)         | 0<br>(0 - 0)         | 0<br>(0 - 0)         |
| Bladder cancer                                | 1<br>(0 - 1)       | --                 | --                  | 0<br>(0 - 0)         | 0<br>(0 - 0)         | 0<br>(0 - 1)         |
| Brain and nervous system cancer               | 1<br>(0 - 1)       | 0<br>(0 - 0)       | 0<br>(0 - 0)        | 0<br>(0 - 0)         | 0<br>(0 - 0)         | 0<br>(0 - 0)         |
| Thyroid cancer                                | 0<br>(0 - 0)       | --                 | 0<br>(0 - 0)        | 0<br>(0 - 0)         | 0<br>(0 - 0)         | 0<br>(0 - 0)         |
| Mesothelioma                                  | 0<br>(0 - 0)       | --                 | --                  | 0<br>(0 - 0)         | 0<br>(0 - 0)         | 0<br>(0 - 0)         |
| Hodgkin lymphoma                              | 0<br>(0 - 0)       | 0<br>(0 - 0)       | 0<br>(0 - 0)        | 0<br>(0 - 0)         | 0<br>(0 - 0)         | 0<br>(0 - 0)         |
| Non-Hodgkin lymphoma                          | 2<br>(1 - 3)       | 0<br>(0 - 0)       | 0<br>(0 - 0)        | 1<br>(0 - 1)         | 1<br>(1 - 1)         | 1<br>(0 - 1)         |
| Multiple myeloma                              | 1<br>(1 - 1)       | --                 | --                  | 0<br>(0 - 0)         | 0<br>(0 - 1)         | 0<br>(0 - 1)         |
| Leukemia                                      | 2<br>(1 - 2)       | 0<br>(0 - 0)       | 0<br>(0 - 0)        | 0<br>(0 - 1)         | 0<br>(0 - 1)         | 1<br>(0 - 1)         |
| Other neoplasms                               | 3<br>(2 - 5)       | 0<br>(0 - 0)       | 0<br>(0 - 0)        | 1<br>(1 - 1)         | 1<br>(1 - 2)         | 1<br>(1 - 2)         |
| Cardiovascular diseases                       | 145<br>(117 - 169) | 0<br>(0 - 1)       | 0<br>(0 - 0)        | 7<br>(5 - 9)         | 29<br>(22 - 37)      | 108<br>(87 - 123)    |
| Rheumatic heart disease                       | 1<br>(0 - 1)       | 0<br>(0 - 0)       | 0<br>(0 - 0)        | 0<br>(0 - 0)         | 0<br>(0 - 0)         | 0<br>(0 - 0)         |
| Ischemic heart disease                        | 60<br>(46 - 74)    | 0<br>(0 - 0)       | 0<br>(0 - 0)        | 2<br>(2 - 3)         | 12<br>(8 - 16)       | 46<br>(35 - 56)      |
| Cerebrovascular disease                       | 53<br>(41 - 64)    | 0<br>(0 - 0)       | 0<br>(0 - 0)        | 2<br>(2 - 3)         | 11<br>(8 - 14)       | 40<br>(30 - 48)      |
| Ischemic stroke                               | 34<br>(25 - 41)    | 0<br>(0 - 0)       | 0<br>(0 - 0)        | 1<br>(0 - 1)         | 5<br>(4 - 7)         | 28<br>(20 - 34)      |
| Hemorrhagic stroke                            | 19<br>(14 - 26)    | 0<br>(0 - 0)       | 0<br>(0 - 0)        | 2<br>(1 - 2)         | 6<br>(4 - 8)         | 12<br>(8 - 17)       |
| Hypertensive heart disease                    | 17<br>(12 - 24)    | 0<br>(0 - 0)       | 0<br>(0 - 0)        | 1<br>(0 - 1)         | 3<br>(2 - 5)         | 13<br>(9 - 19)       |
| Cardiomyopathy and myocarditis                | 3<br>(2 - 4)       | 0<br>(0 - 0)       | 0<br>(0 - 0)        | 0<br>(0 - 1)         | 1<br>(0 - 1)         | 2<br>(1 - 2)         |
| Atrial fibrillation and flutter               | 2<br>(1 - 3)       | --                 | --                  | 0<br>(0 - 0)         | 0<br>(0 - 0)         | 2<br>(1 - 3)         |
| Aortic aneurysm                               | 1<br>(1 - 2)       | --                 | --                  | 0<br>(0 - 0)         | 0<br>(0 - 0)         | 1<br>(0 - 1)         |
| Peripheral vascular disease                   | 1<br>(1 - 2)       | --                 | --                  | 0<br>(0 - 0)         | 0<br>(0 - 0)         | 1<br>(1 - 2)         |
| Endocarditis                                  | 0<br>(0 - 1)       | 0<br>(0 - 0)       | 0<br>(0 - 0)        | 0<br>(0 - 0)         | 0<br>(0 - 0)         | 0<br>(0 - 0)         |
| Other cardiovascular and circulatory diseases | 6<br>(4 - 8)       | 0<br>(0 - 0)       | 0<br>(0 - 0)        | 1<br>(0 - 1)         | 2<br>(1 - 2)         | 3<br>(2 - 5)         |
| Chronic respiratory diseases                  | 6<br>(5 - 8)       | 0<br>(0 - 0)       | 0<br>(0 - 0)        | 0<br>(1 - 1)         | 1<br>(1 - 2)         | 4<br>(3 - 5)         |
| Chronic obstructive pulmonary disease         | 4<br>(3 - 5)       | 0<br>(0 - 0)       | 0<br>(0 - 0)        | 0<br>(0 - 0)         | 1<br>(0 - 1)         | 2<br>(2 - 4)         |
| Pneumoconiosis                                | 0<br>(0 - 0)       | 0<br>(0 - 0)       | 0<br>(0 - 0)        | 0<br>(0 - 0)         | 0<br>(0 - 0)         | 0<br>(0 - 0)         |

Web Table 31- Saint Vincent and the Grenadines deaths with 95% UI by age, sex, and cause in 2013

| Cause                                               | Females, All Ages | Females, 0-4 Years | Females, 5-14 Years | Females, 15-49 Years | Females, 50-69 Years | Females, 70-80 Years |
|-----------------------------------------------------|-------------------|--------------------|---------------------|----------------------|----------------------|----------------------|
| Silicosis                                           | 0<br>(0-0)        | 0<br>(0-0)         | 0<br>(0-0)          | 0<br>(0-0)           | 0<br>(0-0)           | 0<br>(0-0)           |
| Asbestosis                                          | 0<br>(0-0)        | 0<br>(0-0)         | 0<br>(0-0)          | 0<br>(0-0)           | 0<br>(0-0)           | 0<br>(0-0)           |
| Coal workers pneumoconiosis                         | 0<br>(0-0)        | 0<br>(0-0)         | 0<br>(0-0)          | 0<br>(0-0)           | 0<br>(0-0)           | 0<br>(0-0)           |
| Other pneumoconiosis                                | 0<br>(0-0)        | 0<br>(0-0)         | 0<br>(0-0)          | 0<br>(0-0)           | 0<br>(0-0)           | 0<br>(0-0)           |
| Asthma                                              | 2<br>(1-2)        | 0<br>(0-0)         | 0<br>(0-0)          | 0<br>(0-1)           | 0<br>(0-1)           | 1<br>(0-1)           |
| Interstitial lung disease and pulmonary sarcoidosis | 1<br>(0-1)        | 0<br>(0-0)         | 0<br>(0-0)          | 0<br>(0-0)           | 0<br>(0-0)           | 0<br>(0-1)           |
| Other chronic respiratory diseases                  | 0<br>(0-0)        | 0<br>(0-0)         | 0<br>(0-0)          | 0<br>(0-0)           | 0<br>(0-0)           | 0<br>(0-0)           |
| Cirrhosis                                           | 4<br>(3-5)        | 0<br>(0-0)         | 0<br>(0-0)          | 1<br>(1-1)           | 2<br>(1-2)           | 1<br>(1-2)           |
| Cirrhosis due to hepatitis B                        | 0<br>(0-1)        | 0<br>(0-0)         | 0<br>(0-0)          | 0<br>(0-0)           | 0<br>(0-0)           | 0<br>(0-0)           |
| Cirrhosis due to hepatitis C                        | 2<br>(1-3)        | 0<br>(0-0)         | 0<br>(0-0)          | 0<br>(0-1)           | 1<br>(0-1)           | 1<br>(0-1)           |
| Cirrhosis due to alcohol use                        | 1<br>(1-2)        | --                 | --                  | 0<br>(0-0)           | 0<br>(0-1)           | 0<br>(0-1)           |
| Cirrhosis due to other causes                       | 1<br>(1-1)        | 0<br>(0-0)         | 0<br>(0-0)          | 0<br>(0-1)           | 0<br>(0-1)           | 0<br>(0-0)           |
| Digestive diseases                                  | 7<br>(5-8)        | 0<br>(0-0)         | 0<br>(0-0)          | 1<br>(1-1)           | 2<br>(1-2)           | 4<br>(3-5)           |
| Peptic ulcer disease                                | 1<br>(1-2)        | 0<br>(0-0)         | 0<br>(0-0)          | 0<br>(0-0)           | 0<br>(0-1)           | 1<br>(1-1)           |
| Gastritis and duodenitis                            | 0<br>(0-1)        | 0<br>(0-0)         | 0<br>(0-0)          | 0<br>(0-0)           | 0<br>(0-0)           | 0<br>(0-0)           |
| Appendicitis                                        | 0<br>(0-0)        | 0<br>(0-0)         | 0<br>(0-0)          | 0<br>(0-0)           | 0<br>(0-0)           | 0<br>(0-0)           |
| Paralytic ileus and intestinal obstruction          | 1<br>(0-2)        | 0<br>(0-0)         | 0<br>(0-0)          | 0<br>(0-0)           | 0<br>(0-0)           | 1<br>(0-1)           |
| Inguinal, femoral, and abdominal hernia             | 0<br>(0-1)        | 0<br>(0-0)         | 0<br>(0-0)          | 0<br>(0-0)           | 0<br>(0-0)           | 0<br>(0-0)           |
| Inflammatory bowel disease                          | 1<br>(0-1)        | 0<br>(0-0)         | 0<br>(0-0)          | 0<br>(0-0)           | 0<br>(0-0)           | 0<br>(0-1)           |
| Vascular intestinal disorders                       | 0<br>(0-1)        | 0<br>(0-0)         | 0<br>(0-0)          | 0<br>(0-0)           | 0<br>(0-0)           | 0<br>(0-0)           |
| Gallbladder and biliary diseases                    | 1<br>(0-1)        | 0<br>(0-0)         | 0<br>(0-0)          | 0<br>(0-0)           | 0<br>(0-0)           | 0<br>(0-1)           |
| Pancreatitis                                        | 0<br>(0-1)        | 0<br>(0-0)         | 0<br>(0-0)          | 0<br>(0-0)           | 0<br>(0-0)           | 0<br>(0-0)           |
| Other digestive diseases                            | 1<br>(1-2)        | 0<br>(0-0)         | 0<br>(0-0)          | 0<br>(0-0)           | 0<br>(0-0)           | 1<br>(1-1)           |
| Neurological disorders                              | 14<br>(11-19)     | 0<br>(0-0)         | 0<br>(0-0)          | 1<br>(0-1)           | 1<br>(1-1)           | 13<br>(9-16)         |
| Alzheimer disease and other dementias               | 12<br>(9-16)      | --                 | --                  | 0<br>(0-0)           | 1<br>(0-1)           | 12<br>(9-15)         |
| Parkinson disease                                   | 1<br>(1-2)        | --                 | --                  | 0<br>(0-0)           | 0<br>(0-0)           | 1<br>(1-1)           |
| Epilepsy                                            | 1<br>(1-1)        | 0<br>(0-0)         | 0<br>(0-0)          | 0<br>(0-1)           | 0<br>(0-0)           | 0<br>(0-0)           |
| Multiple sclerosis                                  | 0<br>(0-0)        | --                 | --                  | 0<br>(0-0)           | 0<br>(0-0)           | 0<br>(0-0)           |
| Other neurological disorders                        | 0<br>(0-0)        | 0<br>(0-0)         | 0<br>(0-0)          | 0<br>(0-0)           | 0<br>(0-0)           | 0<br>(0-0)           |
| Mental and substance use disorders                  | 1<br>(0-1)        | 0<br>(0-0)         | 0<br>(0-0)          | 0<br>(0-0)           | 0<br>(0-0)           | 0<br>(0-0)           |
| Schizophrenia                                       | 0<br>(0-0)        | --                 | --                  | 0<br>(0-0)           | 0<br>(0-0)           | 0<br>(0-0)           |
| Alcohol use disorders                               | 0<br>(0-0)        | --                 | --                  | 0<br>(0-0)           | 0<br>(0-0)           | 0<br>(0-0)           |
| Drug use disorders                                  | 0<br>(0-0)        | 0<br>(0-0)         | --                  | 0<br>(0-0)           | 0<br>(0-0)           | 0<br>(0-0)           |
| Opioid use disorders                                | 0<br>(0-0)        | 0<br>(0-0)         | --                  | 0<br>(0-0)           | 0<br>(0-0)           | 0<br>(0-0)           |
| Cocaine use disorders                               | 0<br>(0-0)        | 0<br>(0-0)         | --                  | 0<br>(0-0)           | 0<br>(0-0)           | 0<br>(0-0)           |
| Amphetamine use disorders                           | 0<br>(0-0)        | 0<br>(0-0)         | --                  | 0<br>(0-0)           | 0<br>(0-0)           | 0<br>(0-0)           |
| Other drug use disorders                            | 0<br>(0-0)        | 0<br>(0-0)         | --                  | 0<br>(0-0)           | 0<br>(0-0)           | 0<br>(0-0)           |
| Eating disorders                                    | 0<br>(0-0)        | --                 | 0<br>(0-0)          | 0<br>(0-0)           | --                   | --                   |
| Anorexia nervosa                                    | 0<br>(0-0)        | --                 | 0<br>(0-0)          | 0<br>(0-0)           | --                   | --                   |
| Diabetes, urogenital, blood, and endocrine diseases | 58<br>(45-74)     | 0<br>(0-1)         | 0<br>(0-0)          | 6<br>(4-7)           | 19<br>(14-24)        | 33<br>(25-43)        |

Web Table 31- Saint Vincent and the Grenadines deaths with 95% UI by age, sex, and cause in 2013

| Cause                                               | Females, All Ages | Females, 0-4 Years | Females, 5-14 Years | Females, 15-49 Years | Females, 50-69 Years | Females, 70-80 Years |
|-----------------------------------------------------|-------------------|--------------------|---------------------|----------------------|----------------------|----------------------|
| Diabetes mellitus                                   | 41<br>(31 - 53)   | 0<br>(0 - 0)       | 0<br>(0 - 0)        | 2<br>(2 - 3)         | 14<br>(10 - 18)      | 25<br>(18 - 33)      |
| Acute glomerulonephritis                            | 0<br>(0 - 0)      | 0<br>(0 - 0)       | 0<br>(0 - 0)        | 0<br>(0 - 0)         | 0<br>(0 - 0)         | 0<br>(0 - 0)         |
| Chronic kidney disease                              | 10<br>(8 - 15)    | 0<br>(0 - 0)       | 0<br>(0 - 0)        | 2<br>(1 - 2)         | 3<br>(2 - 5)         | 5<br>(4 - 8)         |
| Chronic kidney disease due to diabetes mellitus     | 2<br>(1 - 2)      | 0<br>(0 - 0)       | 0<br>(0 - 0)        | 0<br>(0 - 0)         | 1<br>(0 - 1)         | 1<br>(0 - 1)         |
| Chronic kidney disease due to hypertension          | 6<br>(4 - 8)      | 0<br>(0 - 0)       | 0<br>(0 - 0)        | 1<br>(1 - 1)         | 2<br>(1 - 2)         | 3<br>(2 - 5)         |
| Chronic kidney disease due to glomerulonephritis    | 0<br>(0 - 0)      | 0<br>(0 - 0)       | 0<br>(0 - 0)        | 0<br>(0 - 0)         | 0<br>(0 - 0)         | 0<br>(0 - 0)         |
| Chronic kidney disease due to other causes          | 3<br>(2 - 6)      | 0<br>(0 - 0)       | 0<br>(0 - 0)        | 1<br>(0 - 1)         | 1<br>(0 - 2)         | 1<br>(1 - 3)         |
| Urinary diseases and male infertility               | 2<br>(1 - 2)      | 0<br>(0 - 0)       | 0<br>(0 - 0)        | 0<br>(0 - 0)         | 0<br>(0 - 1)         | 1<br>(1 - 2)         |
| Interstitial nephritis and urinary tract infections | 2<br>(1 - 2)      | 0<br>(0 - 0)       | 0<br>(0 - 0)        | 0<br>(0 - 0)         | 0<br>(0 - 0)         | 1<br>(1 - 2)         |
| Urolithiasis                                        | 0<br>(0 - 0)      | --                 | 0<br>(0 - 0)        | 0<br>(0 - 0)         | 0<br>(0 - 0)         | 0<br>(0 - 0)         |
| Other urinary diseases                              | 0<br>(0 - 0)      | 0<br>(0 - 0)       | 0<br>(0 - 0)        | 0<br>(0 - 0)         | 0<br>(0 - 0)         | 0<br>(0 - 0)         |
| Gynecological diseases                              | 0<br>(0 - 0)      | --                 | --                  | 0<br>(0 - 0)         | 0<br>(0 - 0)         | 0<br>(0 - 0)         |
| Uterine fibroids                                    | 0<br>(0 - 0)      | --                 | --                  | 0<br>(0 - 0)         | 0<br>(0 - 0)         | 0<br>(0 - 0)         |
| Polycystic ovarian syndrome                         | 0<br>(0 - 0)      | --                 | --                  | 0<br>(0 - 0)         | 0<br>(0 - 0)         | --                   |
| Endometriosis                                       | 0<br>(0 - 0)      | --                 | --                  | 0<br>(0 - 0)         | 0<br>(0 - 0)         | --                   |
| Genital prolapse                                    | 0<br>(0 - 0)      | --                 | --                  | 0<br>(0 - 0)         | 0<br>(0 - 0)         | 0<br>(0 - 0)         |
| Other gynecological diseases                        | 0<br>(0 - 0)      | --                 | --                  | 0<br>(0 - 0)         | 0<br>(0 - 0)         | 0<br>(0 - 0)         |
| Hemoglobinopathies and hemolytic anemias            | 1<br>(1 - 1)      | 0<br>(0 - 0)       | 0<br>(0 - 0)        | 0<br>(0 - 1)         | 0<br>(0 - 0)         | 0<br>(0 - 0)         |
| Thalassemias                                        | 0<br>(0 - 0)      | 0<br>(0 - 0)       | 0<br>(0 - 0)        | 0<br>(0 - 0)         | 0<br>(0 - 0)         | 0<br>(0 - 0)         |
| Sickle cell disorders                               | 1<br>(0 - 1)      | 0<br>(0 - 0)       | 0<br>(0 - 0)        | 0<br>(0 - 1)         | 0<br>(0 - 0)         | 0<br>(0 - 0)         |
| G6PD deficiency                                     | 0<br>(0 - 0)      | 0<br>(0 - 0)       | 0<br>(0 - 0)        | 0<br>(0 - 0)         | 0<br>(0 - 0)         | 0<br>(0 - 0)         |
| Other hemoglobinopathies and hemolytic anemias      | 0<br>(0 - 0)      | 0<br>(0 - 0)       | 0<br>(0 - 0)        | 0<br>(0 - 0)         | 0<br>(0 - 0)         | 0<br>(0 - 0)         |
| Endocrine, metabolic, blood, and immune disorders   | 4<br>(2 - 7)      | 0<br>(0 - 0)       | 0<br>(0 - 0)        | 1<br>(0 - 1)         | 1<br>(1 - 2)         | 2<br>(1 - 3)         |
| Musculoskeletal disorders                           | 2<br>(1 - 3)      | --                 | 0<br>(0 - 0)        | 1<br>(1 - 1)         | 1<br>(0 - 1)         | 1<br>(0 - 1)         |
| Rheumatoid arthritis                                | 0<br>(0 - 0)      | --                 | 0<br>(0 - 0)        | 0<br>(0 - 0)         | 0<br>(0 - 0)         | 0<br>(0 - 0)         |
| Other musculoskeletal disorders                     | 2<br>(1 - 3)      | --                 | 0<br>(0 - 0)        | 1<br>(1 - 1)         | 0<br>(0 - 1)         | 1<br>(0 - 1)         |
| Other non-communicable diseases                     | 8<br>(5 - 12)     | 3<br>(2 - 8)       | 0<br>(0 - 1)        | 1<br>(0 - 1)         | 1<br>(0 - 1)         | 3<br>(1 - 4)         |
| Congenital anomalies                                | 4<br>(2 - 7)      | 3<br>(1 - 6)       | 0<br>(0 - 1)        | 0<br>(0 - 1)         | 0<br>(0 - 0)         | 0<br>(0 - 0)         |
| Neural tube defects                                 | 0<br>(0 - 0)      | 0<br>(0 - 0)       | 0<br>(0 - 0)        | 0<br>(0 - 0)         | 0<br>(0 - 0)         | 0<br>(0 - 0)         |
| Congenital heart anomalies                          | 2<br>(1 - 4)      | 2<br>(1 - 3)       | 0<br>(0 - 0)        | 0<br>(0 - 0)         | 0<br>(0 - 0)         | 0<br>(0 - 0)         |
| Cleft lip and cleft palate                          | 0<br>(0 - 0)      | 0<br>(0 - 0)       | --                  | --                   | --                   | --                   |
| Down syndrome                                       | 0<br>(0 - 0)      | 0<br>(0 - 0)       | 0<br>(0 - 0)        | 0<br>(0 - 0)         | 0<br>(0 - 0)         | 0<br>(0 - 0)         |
| Chromosomal unbalanced rearrangements               | 0<br>(0 - 0)      | 0<br>(0 - 0)       | 0<br>(0 - 0)        | 0<br>(0 - 0)         | 0<br>(0 - 0)         | 0<br>(0 - 0)         |
| Other congenital anomalies                          | 1<br>(1 - 2)      | 1<br>(0 - 2)       | 0<br>(0 - 0)        | 0<br>(0 - 0)         | 0<br>(0 - 0)         | 0<br>(0 - 0)         |
| Skin and subcutaneous diseases                      | 3<br>(2 - 5)      | 0<br>(0 - 0)       | 0<br>(0 - 0)        | 0<br>(0 - 0)         | 0<br>(0 - 1)         | 3<br>(1 - 4)         |
| Cellulitis                                          | 0<br>(0 - 0)      | 0<br>(0 - 0)       | 0<br>(0 - 0)        | 0<br>(0 - 0)         | 0<br>(0 - 0)         | 0<br>(0 - 0)         |
| Pyoderma                                            | 1<br>(0 - 1)      | 0<br>(0 - 0)       | 0<br>(0 - 0)        | 0<br>(0 - 0)         | 0<br>(0 - 0)         | 0<br>(0 - 1)         |
| Decubitus ulcer                                     | 3<br>(1 - 4)      | 0<br>(0 - 0)       | 0<br>(0 - 0)        | 0<br>(0 - 0)         | 0<br>(0 - 0)         | 2<br>(1 - 3)         |
| Other skin and subcutaneous diseases                | 0<br>(0 - 0)      | 0<br>(0 - 0)       | 0<br>(0 - 0)        | 0<br>(0 - 0)         | 0<br>(0 - 0)         | 0<br>(0 - 0)         |
| Sudden infant death syndrome                        | 1<br>(0 - 2)      | 1<br>(0 - 2)       | --                  | --                   | --                   | --                   |



Web Table 31- Saint Vincent and the Grenadines deaths with 95% UI by age, sex, and cause in 2013

| Cause                                           | Females, All Ages | Females, 0-4 Years | Females, 5-14 Years | Females, 15-49 Years | Females, 50-69 Years | Females, 70-80 Years |
|-------------------------------------------------|-------------------|--------------------|---------------------|----------------------|----------------------|----------------------|
| Injuries                                        | 16<br>(13 - 20)   | 1<br>(1 - 3)       | 1<br>(1 - 1)        | 6<br>(4 - 8)         | 3<br>(2 - 4)         | 5<br>(4 - 7)         |
| Transport injuries                              | 4<br>(3 - 5)      | 0<br>(0 - 0)       | 0<br>(0 - 1)        | 2<br>(1 - 2)         | 1<br>(1 - 1)         | 1<br>(1 - 1)         |
| Road injuries                                   | 4<br>(3 - 5)      | 0<br>(0 - 0)       | 0<br>(0 - 1)        | 2<br>(1 - 2)         | 1<br>(1 - 1)         | 1<br>(1 - 1)         |
| Pedestrian road injuries                        | 1<br>(1 - 1)      | 0<br>(0 - 0)       | 0<br>(0 - 0)        | 0<br>(0 - 1)         | 0<br>(0 - 0)         | 0<br>(0 - 0)         |
| Cyclist road injuries                           | 0<br>(0 - 0)      | 0<br>(0 - 0)       | 0<br>(0 - 0)        | 0<br>(0 - 0)         | 0<br>(0 - 0)         | 0<br>(0 - 0)         |
| Motorcyclist road injuries                      | 0<br>(0 - 0)      | 0<br>(0 - 0)       | 0<br>(0 - 0)        | 0<br>(0 - 0)         | 0<br>(0 - 0)         | 0<br>(0 - 0)         |
| Motor vehicle road injuries                     | 2<br>(2 - 3)      | 0<br>(0 - 0)       | 0<br>(0 - 0)        | 1<br>(1 - 1)         | 0<br>(0 - 1)         | 1<br>(0 - 1)         |
| Other road injuries                             | 0<br>(0 - 0)      | 0<br>(0 - 0)       | 0<br>(0 - 0)        | 0<br>(0 - 0)         | 0<br>(0 - 0)         | 0<br>(0 - 0)         |
| Other transport injuries                        | 0<br>(0 - 1)      | 0<br>(0 - 0)       | 0<br>(0 - 0)        | 0<br>(0 - 0)         | 0<br>(0 - 0)         | 0<br>(0 - 0)         |
| Unintentional injuries                          | 8<br>(6 - 10)     | 1<br>(0 - 2)       | 0<br>(0 - 1)        | 2<br>(1 - 2)         | 1<br>(1 - 2)         | 4<br>(3 - 5)         |
| Falls                                           | 2<br>(1 - 2)      | 0<br>(0 - 0)       | 0<br>(0 - 0)        | 0<br>(0 - 0)         | 0<br>(0 - 0)         | 1<br>(1 - 2)         |
| Drowning                                        | 1<br>(1 - 1)      | 0<br>(0 - 0)       | 0<br>(0 - 0)        | 0<br>(0 - 0)         | 0<br>(0 - 0)         | 0<br>(0 - 0)         |
| Fire, heat, and hot substances                  | 1<br>(1 - 2)      | 0<br>(0 - 0)       | 0<br>(0 - 0)        | 0<br>(0 - 0)         | 0<br>(0 - 0)         | 1<br>(0 - 1)         |
| Poisonings                                      | 0<br>(0 - 0)      | 0<br>(0 - 0)       | 0<br>(0 - 0)        | 0<br>(0 - 0)         | 0<br>(0 - 0)         | 0<br>(0 - 0)         |
| Exposure to mechanical forces                   | 1<br>(0 - 1)      | 0<br>(0 - 0)       | 0<br>(0 - 0)        | 0<br>(0 - 0)         | 0<br>(0 - 0)         | 0<br>(0 - 0)         |
| Unintentional firearm injuries                  | 0<br>(0 - 0)      | 0<br>(0 - 0)       | 0<br>(0 - 0)        | 0<br>(0 - 0)         | 0<br>(0 - 0)         | 0<br>(0 - 0)         |
| Unintentional suffocation                       | 0<br>(0 - 0)      | 0<br>(0 - 0)       | 0<br>(0 - 0)        | 0<br>(0 - 0)         | 0<br>(0 - 0)         | 0<br>(0 - 0)         |
| Other exposure to mechanical forces             | 0<br>(0 - 0)      | 0<br>(0 - 0)       | 0<br>(0 - 0)        | 0<br>(0 - 0)         | 0<br>(0 - 0)         | 0<br>(0 - 0)         |
| Adverse effects of medical treatment            | 2<br>(1 - 2)      | 0<br>(0 - 0)       | 0<br>(0 - 0)        | 0<br>(0 - 1)         | 0<br>(0 - 1)         | 1<br>(0 - 1)         |
| Animal contact                                  | 0<br>(0 - 0)      | 0<br>(0 - 0)       | 0<br>(0 - 0)        | 0<br>(0 - 0)         | 0<br>(0 - 0)         | 0<br>(0 - 0)         |
| Venomous animal contact                         | 0<br>(0 - 0)      | 0<br>(0 - 0)       | 0<br>(0 - 0)        | 0<br>(0 - 0)         | 0<br>(0 - 0)         | 0<br>(0 - 0)         |
| Non-venomous animal contact                     | 0<br>(0 - 0)      | 0<br>(0 - 0)       | 0<br>(0 - 0)        | 0<br>(0 - 0)         | 0<br>(0 - 0)         | 0<br>(0 - 0)         |
| Foreign body                                    | 1<br>(1 - 2)      | 0<br>(0 - 1)       | 0<br>(0 - 0)        | 0<br>(0 - 0)         | 0<br>(0 - 0)         | 1<br>(0 - 1)         |
| Pulmonary aspiration and foreign body in airway | 1<br>(1 - 2)      | 0<br>(0 - 1)       | 0<br>(0 - 0)        | 0<br>(0 - 0)         | 0<br>(0 - 0)         | 1<br>(0 - 1)         |
| Foreign body in other body part                 | 0<br>(0 - 0)      | 0<br>(0 - 0)       | 0<br>(0 - 0)        | 0<br>(0 - 0)         | 0<br>(0 - 0)         | 0<br>(0 - 0)         |
| Other unintentional injuries                    | 0<br>(0 - 0)      | 0<br>(0 - 0)       | 0<br>(0 - 0)        | 0<br>(0 - 0)         | 0<br>(0 - 0)         | 0<br>(0 - 0)         |
| Self-harm and interpersonal violence            | 4<br>(3 - 5)      | 0<br>(0 - 0)       | 0<br>(0 - 0)        | 3<br>(2 - 4)         | 1<br>(0 - 1)         | 0<br>(0 - 1)         |
| Self-harm                                       | 2<br>(1 - 2)      | --                 | 0<br>(0 - 0)        | 1<br>(1 - 2)         | 0<br>(0 - 0)         | 0<br>(0 - 0)         |
| Interpersonal violence                          | 2<br>(1 - 3)      | 0<br>(0 - 0)       | 0<br>(0 - 0)        | 2<br>(1 - 2)         | 0<br>(0 - 1)         | 0<br>(0 - 0)         |
| Assault by firearm                              | 0<br>(0 - 1)      | 0<br>(0 - 0)       | 0<br>(0 - 0)        | 0<br>(0 - 1)         | 0<br>(0 - 0)         | 0<br>(0 - 0)         |
| Assault by sharp object                         | 1<br>(1 - 1)      | 0<br>(0 - 0)       | 0<br>(0 - 0)        | 1<br>(0 - 1)         | 0<br>(0 - 0)         | 0<br>(0 - 0)         |
| Assault by other means                          | 1<br>(1 - 1)      | 0<br>(0 - 0)       | 0<br>(0 - 0)        | 1<br>(0 - 1)         | 0<br>(0 - 0)         | 0<br>(0 - 0)         |

Web Table 31- Samoa deaths with 95% UI by age, sex, and cause in 2013

| Cause                                                             | Both Sexes, All Ages     | Both Sexes, 0-4 Years | Both Sexes, 5-14 Years | Both Sexes, 15-49 Years | Both Sexes, 50-69 Years | Both Sexes, 70-80 Years |
|-------------------------------------------------------------------|--------------------------|-----------------------|------------------------|-------------------------|-------------------------|-------------------------|
| All causes                                                        | 1,143<br>(1,007 - 1,291) | 61<br>(35 - 103)      | 14<br>(10 - 19)        | 186<br>(152 - 229)      | 330<br>(276 - 388)      | 551<br>(506 - 604)      |
| Communicable, maternal, neonatal, and nutritional diseases        | 177<br>(134 - 225)       | 45<br>(24 - 75)       | 6<br>(3 - 9)           | 25<br>(19 - 30)         | 28<br>(20 - 35)         | 74<br>(50 - 99)         |
| HIV/AIDS and tuberculosis                                         | 12<br>(5 - 22)           | 0<br>(0 - 0)          | 0<br>(0 - 0)           | 4<br>(2 - 6)            | 4<br>(1 - 7)            | 4<br>(1 - 9)            |
| Tuberculosis                                                      | 10<br>(2 - 20)           | 0<br>(0 - 0)          | 0<br>(0 - 0)           | 2<br>(1 - 4)            | 3<br>(1 - 6)            | 4<br>(1 - 9)            |
| HIV/AIDS                                                          | 2<br>(2 - 3)             | 0<br>(0 - 0)          | 0<br>(0 - 0)           | 2<br>(1 - 2)            | 0<br>(0 - 1)            | 0<br>(0 - 0)            |
| HIV/AIDS resulting in mycobacterial infection                     | 0<br>(0 - 0)             | 0<br>(0 - 0)          | 0<br>(0 - 0)           | 0<br>(0 - 0)            | 0<br>(0 - 0)            | 0<br>(0 - 0)            |
| HIV/AIDS resulting in other diseases                              | 2<br>(2 - 3)             | 0<br>(0 - 0)          | 0<br>(0 - 0)           | 2<br>(1 - 2)            | 0<br>(0 - 1)            | 0<br>(0 - 0)            |
| Diarrhea, lower respiratory, and other common infectious diseases | 114<br>(81 - 151)        | 19<br>(7 - 35)        | 5<br>(2 - 8)           | 12<br>(9 - 17)          | 19<br>(13 - 25)         | 60<br>(40 - 83)         |
| Diarrheal diseases                                                | 18<br>(10 - 32)          | 0<br>(0 - 1)          | 0<br>(0 - 1)           | 1<br>(1 - 2)            | 3<br>(1 - 5)            | 14<br>(6 - 26)          |
| Intestinal infectious diseases                                    | 3<br>(1 - 6)             | 1<br>(0 - 3)          | 1<br>(0 - 2)           | 1<br>(0 - 2)            | 0<br>(0 - 0)            | 0<br>(0 - 0)            |
| Typhoid fever                                                     | 3<br>(1 - 5)             | 1<br>(0 - 2)          | 1<br>(0 - 1)           | 1<br>(0 - 1)            | 0<br>(0 - 0)            | 0<br>(0 - 0)            |
| Paratyphoid fever                                                 | 1<br>(0 - 1)             | 0<br>(0 - 1)          | 0<br>(0 - 0)           | 0<br>(0 - 0)            | 0<br>(0 - 0)            | 0<br>(0 - 0)            |
| Other intestinal infectious diseases                              | 0<br>(0 - 0)             | 0<br>(0 - 0)          | 0<br>(0 - 0)           | 0<br>(0 - 0)            | 0<br>(0 - 0)            | 0<br>(0 - 0)            |
| Lower respiratory infections                                      | 72<br>(50 - 101)         | 5<br>(2 - 10)         | 1<br>(0 - 1)           | 8<br>(5 - 11)           | 14<br>(9 - 20)          | 45<br>(28 - 65)         |
| Upper respiratory infections                                      | 0<br>(0 - 0)             | 0<br>(0 - 0)          | 0<br>(0 - 0)           | 0<br>(0 - 0)            | 0<br>(0 - 0)            | 0<br>(0 - 0)            |
| Otitis media                                                      | 0<br>(0 - 0)             | 0<br>(0 - 0)          | 0<br>(0 - 0)           | 0<br>(0 - 0)            | 0<br>(0 - 0)            | 0<br>(0 - 0)            |
| Meningitis                                                        | 4<br>(3 - 7)             | 1<br>(0 - 2)          | 0<br>(0 - 1)           | 1<br>(1 - 2)            | 1<br>(0 - 1)            | 1<br>(0 - 2)            |
| Pneumococcal meningitis                                           | 2<br>(1 - 3)             | 0<br>(0 - 1)          | 0<br>(0 - 0)           | 1<br>(0 - 1)            | 0<br>(0 - 1)            | 0<br>(0 - 1)            |
| H influenzae type B meningitis                                    | 0<br>(0 - 1)             | 0<br>(0 - 0)          | 0<br>(0 - 0)           | 0<br>(0 - 0)            | 0<br>(0 - 0)            | 0<br>(0 - 0)            |
| Meningococcal meningitis                                          | 1<br>(1 - 1)             | 0<br>(0 - 0)          | 0<br>(0 - 0)           | 0<br>(0 - 0)            | 0<br>(0 - 0)            | 0<br>(0 - 0)            |
| Other meningitis                                                  | 1<br>(1 - 2)             | 0<br>(0 - 1)          | 0<br>(0 - 0)           | 0<br>(0 - 1)            | 0<br>(0 - 0)            | 0<br>(0 - 1)            |
| Encephalitis                                                      | 1<br>(1 - 2)             | 0<br>(0 - 0)          | 0<br>(0 - 0)           | 0<br>(0 - 1)            | 0<br>(0 - 0)            | 0<br>(0 - 0)            |
| Diphtheria                                                        | 0<br>(0 - 0)             | 0<br>(0 - 0)          | 0<br>(0 - 0)           | 0<br>(0 - 0)            | 0<br>(0 - 0)            | --                      |
| Whooping cough                                                    | 7<br>(0 - 27)            | 6<br>(0 - 23)         | 1<br>(0 - 3)           | 0<br>(0 - 1)            | 0<br>(0 - 0)            | --                      |
| Tetanus                                                           | 0<br>(0 - 1)             | 0<br>(0 - 0)          | 0<br>(0 - 0)           | 0<br>(0 - 0)            | 0<br>(0 - 0)            | 0<br>(0 - 0)            |
| Measles                                                           | 6<br>(0 - 28)            | 5<br>(0 - 21)         | 1<br>(0 - 6)           | 0<br>(0 - 2)            | 0<br>(0 - 0)            | --                      |
| Varicella and herpes zoster                                       | 0<br>(0 - 1)             | 0<br>(0 - 0)          | 0<br>(0 - 0)           | 0<br>(0 - 0)            | 0<br>(0 - 0)            | 0<br>(0 - 1)            |
| Neglected tropical diseases and malaria                           | 3<br>(2 - 6)             | 0<br>(0 - 1)          | 0<br>(0 - 0)           | 1<br>(0 - 1)            | 1<br>(0 - 1)            | 1<br>(1 - 3)            |
| Leishmaniasis                                                     | 0<br>(0 - 0)             | 0<br>(0 - 0)          | 0<br>(0 - 0)           | 0<br>(0 - 0)            | 0<br>(0 - 0)            | 0<br>(0 - 0)            |
| Visceral leishmaniasis                                            | 0<br>(0 - 0)             | 0<br>(0 - 0)          | 0<br>(0 - 0)           | 0<br>(0 - 0)            | 0<br>(0 - 0)            | 0<br>(0 - 0)            |
| Cysticercosis                                                     | 0<br>(0 - 0)             | 0<br>(0 - 0)          | 0<br>(0 - 0)           | 0<br>(0 - 0)            | 0<br>(0 - 0)            | 0<br>(0 - 0)            |
| Cystic echinococcosis                                             | 0<br>(0 - 0)             | 0<br>(0 - 0)          | 0<br>(0 - 0)           | 0<br>(0 - 0)            | 0<br>(0 - 0)            | 0<br>(0 - 0)            |
| Dengue                                                            | 1<br>(1 - 2)             | 0<br>(0 - 0)          | 0<br>(0 - 0)           | 0<br>(0 - 1)            | 0<br>(0 - 0)            | 1<br>(0 - 1)            |
| Rabies                                                            | 0<br>(0 - 0)             | 0<br>(0 - 0)          | 0<br>(0 - 0)           | 0<br>(0 - 0)            | 0<br>(0 - 0)            | 0<br>(0 - 0)            |
| Intestinal nematode infections                                    | 0<br>(0 - 0)             | 0<br>(0 - 0)          | 0<br>(0 - 0)           | 0<br>(0 - 0)            | 0<br>(0 - 0)            | 0<br>(0 - 0)            |
| Ascariasis                                                        | 0<br>(0 - 0)             | 0<br>(0 - 0)          | 0<br>(0 - 0)           | 0<br>(0 - 0)            | 0<br>(0 - 0)            | 0<br>(0 - 0)            |
| Other neglected tropical diseases                                 | 1<br>(0 - 3)             | 0<br>(0 - 0)          | 0<br>(0 - 0)           | 0<br>(0 - 0)            | 0<br>(0 - 1)            | 1<br>(0 - 2)            |
| Maternal disorders                                                | 2<br>(1 - 3)             | --                    | 0<br>(0 - 0)           | 2<br>(1 - 3)            | --                      | --                      |
| Maternal hemorrhage                                               | 0<br>(0 - 1)             | --                    | 0<br>(0 - 0)           | 0<br>(0 - 1)            | --                      | --                      |
| Maternal sepsis and other maternal infections                     | 0<br>(0 - 0)             | --                    | 0<br>(0 - 0)           | 0<br>(0 - 0)            | --                      | --                      |

Web Table 31- Samoa deaths with 95% UI by age, sex, and cause in 2013

| Cause                                                            | Both Sexes, All Ages | Both Sexes, 0-4 Years | Both Sexes, 5-14 Years | Both Sexes, 15-49 Years | Both Sexes, 50-69 Years | Both Sexes, 70-80 Years |
|------------------------------------------------------------------|----------------------|-----------------------|------------------------|-------------------------|-------------------------|-------------------------|
| Maternal hypertensive disorders                                  | 0<br>(0 - 0)         | --                    | 0<br>(0 - 0)           | 0<br>(0 - 0)            | --                      | --                      |
| Maternal obstructed labor                                        | 0<br>(0 - 0)         | --                    | 0<br>(0 - 0)           | 0<br>(0 - 0)            | --                      | --                      |
| Maternal abortive outcome                                        | 0<br>(0 - 1)         | --                    | 0<br>(0 - 0)           | 0<br>(0 - 1)            | --                      | --                      |
| Indirect maternal deaths                                         | 0<br>(0 - 0)         | --                    | 0<br>(0 - 0)           | 0<br>(0 - 0)            | --                      | --                      |
| Late maternal deaths                                             | 0<br>(0 - 0)         | --                    | 0<br>(0 - 0)           | 0<br>(0 - 0)            | --                      | --                      |
| Maternal deaths aggravated by HIV/AIDS                           | 0<br>(0 - 0)         | --                    | 0<br>(0 - 0)           | 0<br>(0 - 0)            | --                      | --                      |
| Other maternal disorders                                         | 0<br>(0 - 0)         | --                    | 0<br>(0 - 0)           | 0<br>(0 - 0)            | --                      | --                      |
| Neonatal disorders                                               | 23<br>(12 - 41)      | 23<br>(12 - 41)       | --                     | --                      | --                      | --                      |
| Neonatal preterm birth complications                             | 6<br>(2 - 14)        | 6<br>(2 - 14)         | --                     | --                      | --                      | --                      |
| Neonatal encephalopathy due to birth asphyxia and trauma         | 3<br>(1 - 8)         | 3<br>(1 - 8)          | --                     | --                      | --                      | --                      |
| Neonatal sepsis and other neonatal infections                    | 4<br>(1 - 9)         | 4<br>(1 - 9)          | --                     | --                      | --                      | --                      |
| Hemolytic disease and other neonatal jaundice                    | 0<br>(0 - 0)         | 0<br>(0 - 0)          | --                     | --                      | --                      | --                      |
| Other neonatal disorders                                         | 10<br>(3 - 20)       | 10<br>(3 - 20)        | --                     | --                      | --                      | --                      |
| Nutritional deficiencies                                         | 8<br>(4 - 14)        | 0<br>(0 - 1)          | 0<br>(0 - 0)           | 1<br>(1 - 2)            | 1<br>(1 - 2)            | 5<br>(2 - 9)            |
| Protein-energy malnutrition                                      | 5<br>(2 - 9)         | 0<br>(0 - 1)          | 0<br>(0 - 0)           | 0<br>(0 - 1)            | 1<br>(0 - 1)            | 3<br>(1 - 6)            |
| Iodine deficiency                                                | 0<br>(0 - 0)         | 0<br>(0 - 0)          | 0<br>(0 - 0)           | 0<br>(0 - 0)            | 0<br>(0 - 0)            | 0<br>(0 - 0)            |
| Iron-deficiency anemia                                           | 3<br>(1 - 6)         | 0<br>(0 - 0)          | 0<br>(0 - 0)           | 1<br>(0 - 1)            | 1<br>(0 - 1)            | 2<br>(1 - 4)            |
| Other nutritional deficiencies                                   | 0<br>(0 - 1)         | 0<br>(0 - 0)          | 0<br>(0 - 0)           | 0<br>(0 - 0)            | 0<br>(0 - 0)            | 0<br>(0 - 1)            |
| Other communicable, maternal, neonatal, and nutritional diseases | 14<br>(10 - 19)      | 2<br>(1 - 4)          | 1<br>(0 - 1)           | 4<br>(3 - 7)            | 4<br>(3 - 5)            | 4<br>(2 - 7)            |
| Sexually transmitted diseases excluding HIV                      | 2<br>(1 - 3)         | 1<br>(0 - 2)          | 0<br>(0 - 0)           | 0<br>(0 - 1)            | 0<br>(0 - 0)            | 0<br>(0 - 0)            |
| Syphilis                                                         | 1<br>(1 - 3)         | 1<br>(0 - 2)          | 0<br>(0 - 0)           | 0<br>(0 - 0)            | 0<br>(0 - 0)            | 0<br>(0 - 0)            |
| Chlamydial infection                                             | 0<br>(0 - 0)         | --                    | 0<br>(0 - 0)           | 0<br>(0 - 0)            | 0<br>(0 - 0)            | 0<br>(0 - 0)            |
| Gonococcal infection                                             | 0<br>(0 - 0)         | --                    | 0<br>(0 - 0)           | 0<br>(0 - 0)            | 0<br>(0 - 0)            | 0<br>(0 - 0)            |
| Other sexually transmitted diseases                              | 0<br>(0 - 0)         | --                    | 0<br>(0 - 0)           | 0<br>(0 - 0)            | 0<br>(0 - 0)            | 0<br>(0 - 0)            |
| Hepatitis                                                        | 6<br>(4 - 9)         | 0<br>(0 - 0)          | 0<br>(0 - 1)           | 2<br>(1 - 4)            | 2<br>(1 - 3)            | 1<br>(1 - 2)            |
| Acute hepatitis A                                                | 0<br>(0 - 0)         | 0<br>(0 - 0)          | 0<br>(0 - 0)           | 0<br>(0 - 0)            | 0<br>(0 - 0)            | 0<br>(0 - 0)            |
| Acute hepatitis B                                                | 4<br>(3 - 6)         | 0<br>(0 - 0)          | 0<br>(0 - 0)           | 1<br>(1 - 2)            | 2<br>(1 - 2)            | 1<br>(1 - 2)            |
| Acute hepatitis C                                                | 0<br>(0 - 0)         | --                    | 0<br>(0 - 0)           | 0<br>(0 - 0)            | 0<br>(0 - 0)            | 0<br>(0 - 0)            |
| Acute hepatitis E                                                | 1<br>(1 - 2)         | 0<br>(0 - 0)          | 0<br>(0 - 0)           | 1<br>(0 - 1)            | 0<br>(0 - 1)            | 0<br>(0 - 0)            |
| Other infectious diseases                                        | 7<br>(3 - 12)        | 1<br>(0 - 2)          | 0<br>(0 - 1)           | 2<br>(1 - 4)            | 2<br>(1 - 3)            | 2<br>(1 - 5)            |
| Non-communicable diseases                                        | 890<br>(779 - 1,014) | 14<br>(5 - 27)        | 6<br>(3 - 8)           | 124<br>(99 - 157)       | 288<br>(241 - 337)      | 458<br>(413 - 508)      |
| Neoplasms                                                        | 102<br>(82 - 126)    | 1<br>(0 - 2)          | 1<br>(1 - 2)           | 26<br>(20 - 33)         | 38<br>(30 - 47)         | 36<br>(28 - 44)         |
| Esophageal cancer                                                | 3<br>(1 - 4)         | --                    | --                     | 1<br>(0 - 1)            | 1<br>(0 - 1)            | 1<br>(1 - 1)            |
| Stomach cancer                                                   | 10<br>(8 - 14)       | --                    | --                     | 2<br>(1 - 3)            | 5<br>(4 - 7)            | 3<br>(3 - 5)            |
| Liver cancer                                                     | 10<br>(7 - 17)       | --                    | 0<br>(0 - 0)           | 2<br>(1 - 3)            | 5<br>(4 - 9)            | 3<br>(2 - 6)            |
| Liver cancer due to hepatitis B                                  | 5<br>(3 - 8)         | --                    | 0<br>(0 - 0)           | 1<br>(1 - 2)            | 3<br>(1 - 4)            | 1<br>(1 - 2)            |
| Liver cancer due to hepatitis C                                  | 4<br>(2 - 6)         | --                    | 0<br>(0 - 0)           | 1<br>(0 - 1)            | 2<br>(1 - 3)            | 1<br>(1 - 3)            |
| Liver cancer due to alcohol use                                  | 1<br>(0 - 1)         | --                    | --                     | 0<br>(0 - 0)            | 0<br>(0 - 1)            | 0<br>(0 - 1)            |
| Liver cancer due to other causes                                 | 1<br>(1 - 3)         | --                    | 0<br>(0 - 0)           | 0<br>(0 - 1)            | 1<br>(0 - 1)            | 0<br>(0 - 1)            |
| Larynx cancer                                                    | 0<br>(0 - 0)         | --                    | --                     | 0<br>(0 - 0)            | 0<br>(0 - 0)            | 0<br>(0 - 0)            |

Web Table 31- Samoa deaths with 95% UI by age, sex, and cause in 2013

| Cause                                         | Both Sexes, All Ages | Both Sexes, 0-4 Years | Both Sexes, 5-14 Years | Both Sexes, 15-49 Years | Both Sexes, 50-69 Years | Both Sexes, 70-80 Years |
|-----------------------------------------------|----------------------|-----------------------|------------------------|-------------------------|-------------------------|-------------------------|
| Tracheal, bronchus and lung cancer            | 8<br>(6 - 11)        | --                    | --                     | 1<br>(1 - 2)            | 3<br>(2 - 5)            | 3<br>(3 - 4)            |
| Breast cancer                                 | 8<br>(6 - 11)        | --                    | --                     | 3<br>(2 - 4)            | 3<br>(2 - 4)            | 2<br>(2 - 4)            |
| Cervical cancer                               | 8<br>(5 - 11)        | --                    | --                     | 2<br>(1 - 2)            | 3<br>(2 - 4)            | 3<br>(2 - 5)            |
| Uterine cancer                                | 2<br>(1 - 3)         | --                    | --                     | 0<br>(0 - 0)            | 1<br>(0 - 1)            | 1<br>(0 - 1)            |
| Prostate cancer                               | 3<br>(2 - 5)         | --                    | --                     | 0<br>(0 - 0)            | 1<br>(1 - 2)            | 2<br>(1 - 3)            |
| Colon and rectum cancer                       | 12<br>(10 - 15)      | --                    | --                     | 3<br>(2 - 4)            | 3<br>(3 - 4)            | 6<br>(4 - 8)            |
| Lip and oral cavity cancer                    | 1<br>(0 - 1)         | --                    | --                     | 0<br>(0 - 0)            | 0<br>(0 - 0)            | 0<br>(0 - 0)            |
| Nasopharynx cancer                            | 2<br>(1 - 3)         | --                    | 0<br>(0 - 0)           | 1<br>(0 - 1)            | 1<br>(1 - 2)            | 0<br>(0 - 0)            |
| Other pharynx cancer                          | 1<br>(0 - 1)         | --                    | --                     | 0<br>(0 - 0)            | 0<br>(0 - 0)            | 0<br>(0 - 0)            |
| Gallbladder and biliary tract cancer          | 0<br>(0 - 1)         | --                    | --                     | 0<br>(0 - 0)            | 0<br>(0 - 1)            | 0<br>(0 - 0)            |
| Pancreatic cancer                             | 6<br>(4 - 8)         | --                    | --                     | 1<br>(1 - 2)            | 2<br>(2 - 4)            | 2<br>(1 - 3)            |
| Malignant skin melanoma                       | 2<br>(1 - 3)         | --                    | --                     | 1<br>(0 - 1)            | 1<br>(0 - 1)            | 1<br>(0 - 2)            |
| Non-melanoma skin cancer                      | 1<br>(0 - 1)         | --                    | --                     | 0<br>(0 - 0)            | 0<br>(0 - 0)            | 0<br>(0 - 0)            |
| Ovarian cancer                                | 0<br>(0 - 0)         | --                    | --                     | 0<br>(0 - 0)            | 0<br>(0 - 0)            | 0<br>(0 - 0)            |
| Testicular cancer                             | 1<br>(0 - 2)         | --                    | --                     | 0<br>(0 - 0)            | 0<br>(0 - 1)            | 0<br>(0 - 1)            |
| Kidney cancer                                 | 1<br>(1 - 2)         | 0<br>(0 - 0)          | 0<br>(0 - 0)           | 0<br>(0 - 0)            | 1<br>(0 - 1)            | 0<br>(0 - 1)            |
| Bladder cancer                                | 1<br>(1 - 2)         | --                    | --                     | 0<br>(0 - 0)            | 0<br>(0 - 0)            | 1<br>(0 - 1)            |
| Brain and nervous system cancer               | 2<br>(1 - 3)         | 0<br>(0 - 0)          | 0<br>(0 - 0)           | 1<br>(0 - 2)            | 1<br>(0 - 1)            | 0<br>(0 - 0)            |
| Thyroid cancer                                | 0<br>(0 - 0)         | --                    | 0<br>(0 - 0)           | 0<br>(0 - 0)            | 0<br>(0 - 0)            | 0<br>(0 - 0)            |
| Mesothelioma                                  | 0<br>(0 - 0)         | --                    | --                     | 0<br>(0 - 0)            | 0<br>(0 - 0)            | 0<br>(0 - 0)            |
| Hodgkin lymphoma                              | 2<br>(0 - 4)         | 0<br>(0 - 0)          | 0<br>(0 - 0)           | 1<br>(0 - 1)            | 0<br>(0 - 1)            | 1<br>(0 - 2)            |
| Non-Hodgkin lymphoma                          | 3<br>(1 - 4)         | 0<br>(0 - 0)          | 0<br>(0 - 0)           | 1<br>(0 - 1)            | 1<br>(0 - 2)            | 1<br>(0 - 2)            |
| Multiple myeloma                              | 1<br>(1 - 2)         | --                    | --                     | 0<br>(0 - 0)            | 1<br>(0 - 1)            | 0<br>(0 - 1)            |
| Leukemia                                      | 8<br>(6 - 11)        | 0<br>(0 - 1)          | 1<br>(0 - 1)           | 4<br>(3 - 5)            | 2<br>(1 - 3)            | 2<br>(1 - 3)            |
| Other neoplasms                               | 4<br>(2 - 6)         | 0<br>(0 - 1)          | 0<br>(0 - 0)           | 1<br>(1 - 2)            | 1<br>(1 - 2)            | 1<br>(1 - 1)            |
| Cardiovascular diseases                       | 348<br>(293 - 432)   | 1<br>(0 - 2)          | 1<br>(1 - 2)           | 46<br>(35 - 62)         | 112<br>(92 - 140)       | 187<br>(158 - 235)      |
| Rheumatic heart disease                       | 5<br>(3 - 7)         | 0<br>(0 - 0)          | 0<br>(0 - 0)           | 2<br>(1 - 3)            | 1<br>(1 - 2)            | 2<br>(1 - 2)            |
| Ischemic heart disease                        | 168<br>(131 - 231)   | 0<br>(0 - 0)          | 0<br>(0 - 1)           | 23<br>(16 - 32)         | 59<br>(45 - 78)         | 86<br>(65 - 128)        |
| Cerebrovascular disease                       | 129<br>(99 - 162)    | 0<br>(0 - 1)          | 0<br>(0 - 1)           | 13<br>(9 - 17)          | 38<br>(29 - 50)         | 78<br>(60 - 98)         |
| Ischemic stroke                               | 51<br>(34 - 79)      | 0<br>(0 - 0)          | 0<br>(0 - 0)           | 2<br>(1 - 6)            | 10<br>(6 - 19)          | 39<br>(26 - 56)         |
| Hemorrhagic stroke                            | 78<br>(53 - 106)     | 0<br>(0 - 1)          | 0<br>(0 - 0)           | 10<br>(7 - 14)          | 28<br>(19 - 38)         | 39<br>(25 - 55)         |
| Hypertensive heart disease                    | 9<br>(5 - 14)        | 0<br>(0 - 0)          | 0<br>(0 - 0)           | 1<br>(1 - 1)            | 3<br>(2 - 4)            | 5<br>(3 - 9)            |
| Cardiomyopathy and myocarditis                | 10<br>(7 - 16)       | 0<br>(0 - 1)          | 0<br>(0 - 1)           | 4<br>(2 - 6)            | 4<br>(2 - 6)            | 3<br>(2 - 5)            |
| Atrial fibrillation and flutter               | 4<br>(2 - 7)         | --                    | --                     | 0<br>(0 - 0)            | 1<br>(0 - 2)            | 3<br>(1 - 5)            |
| Aortic aneurysm                               | 3<br>(2 - 4)         | --                    | --                     | 0<br>(0 - 1)            | 1<br>(1 - 1)            | 2<br>(1 - 3)            |
| Peripheral vascular disease                   | 3<br>(2 - 4)         | --                    | --                     | 0<br>(0 - 0)            | 0<br>(0 - 1)            | 2<br>(1 - 4)            |
| Endocarditis                                  | 4<br>(2 - 5)         | 0<br>(0 - 0)          | 0<br>(0 - 0)           | 1<br>(1 - 2)            | 1<br>(1 - 1)            | 1<br>(1 - 2)            |
| Other cardiovascular and circulatory diseases | 13<br>(9 - 17)       | 0<br>(0 - 0)          | 0<br>(0 - 0)           | 2<br>(2 - 4)            | 5<br>(3 - 7)            | 5<br>(3 - 8)            |
| Chronic respiratory diseases                  | 92<br>(70 - 113)     | 0<br>(0 - 1)          | 0<br>(0 - 0)           | 6<br>(4 - 9)            | 23<br>(17 - 30)         | 62<br>(47 - 76)         |
| Chronic obstructive pulmonary disease         | 36<br>(25 - 46)      | 0<br>(0 - 0)          | 0<br>(0 - 0)           | 1<br>(1 - 2)            | 7<br>(5 - 9)            | 27<br>(19 - 35)         |

Web Table 31- Samoa deaths with 95% UI by age, sex, and cause in 2013

| Cause                                               | Both Sexes, All Ages | Both Sexes, 0-4 Years | Both Sexes, 5-14 Years | Both Sexes, 15-49 Years | Both Sexes, 50-69 Years | Both Sexes, 70-80 Years |
|-----------------------------------------------------|----------------------|-----------------------|------------------------|-------------------------|-------------------------|-------------------------|
| Pneumoconiosis                                      | 8<br>(4 - 12)        | 0<br>(0 - 0)          | 0<br>(0 - 0)           | 1<br>(0 - 1)            | 3<br>(1 - 4)            | 5<br>(2 - 7)            |
| Silicosis                                           | 2<br>(1 - 3)         | 0<br>(0 - 0)          | 0<br>(0 - 0)           | 0<br>(0 - 0)            | 1<br>(0 - 1)            | 1<br>(1 - 2)            |
| Asbestosis                                          | 1<br>(0 - 1)         | 0<br>(0 - 0)          | 0<br>(0 - 0)           | 0<br>(0 - 0)            | 0<br>(0 - 1)            | 0<br>(0 - 1)            |
| Coal workers pneumoconiosis                         | 1<br>(1 - 2)         | 0<br>(0 - 0)          | 0<br>(0 - 0)           | 0<br>(0 - 0)            | 0<br>(0 - 1)            | 1<br>(0 - 1)            |
| Other pneumoconiosis                                | 4<br>(2 - 6)         | 0<br>(0 - 0)          | 0<br>(0 - 0)           | 0<br>(0 - 0)            | 1<br>(0 - 2)            | 2<br>(1 - 4)            |
| Asthma                                              | 34<br>(23 - 48)      | 0<br>(0 - 0)          | 0<br>(0 - 0)           | 3<br>(2 - 5)            | 11<br>(8 - 15)          | 20<br>(13 - 30)         |
| Interstitial lung disease and pulmonary sarcoidosis | 5<br>(3 - 9)         | 0<br>(0 - 0)          | 0<br>(0 - 0)           | 0<br>(0 - 1)            | 1<br>(1 - 3)            | 4<br>(2 - 6)            |
| Other chronic respiratory diseases                  | 9<br>(4 - 14)        | 0<br>(0 - 0)          | 0<br>(0 - 0)           | 1<br>(0 - 1)            | 1<br>(1 - 2)            | 6<br>(3 - 10)           |
| Cirrhosis                                           | 13<br>(11 - 17)      | 0<br>(0 - 0)          | 0<br>(0 - 0)           | 5<br>(3 - 6)            | 5<br>(4 - 6)            | 4<br>(3 - 5)            |
| Cirrhosis due to hepatitis B                        | 7<br>(6 - 10)        | 0<br>(0 - 0)          | 0<br>(0 - 0)           | 3<br>(2 - 4)            | 3<br>(2 - 4)            | 2<br>(1 - 3)            |
| Cirrhosis due to hepatitis C                        | 3<br>(2 - 4)         | 0<br>(0 - 0)          | 0<br>(0 - 0)           | 1<br>(0 - 1)            | 1<br>(1 - 2)            | 1<br>(1 - 1)            |
| Cirrhosis due to alcohol use                        | 2<br>(2 - 3)         | --                    | --                     | 1<br>(0 - 1)            | 1<br>(1 - 1)            | 1<br>(0 - 1)            |
| Cirrhosis due to other causes                       | 1<br>(1 - 1)         | 0<br>(0 - 0)          | 0<br>(0 - 0)           | 1<br>(0 - 1)            | 0<br>(0 - 0)            | 0<br>(0 - 0)            |
| Digestive diseases                                  | 39<br>(30 - 49)      | 0<br>(0 - 0)          | 0<br>(0 - 1)           | 7<br>(5 - 10)           | 12<br>(9 - 15)          | 19<br>(15 - 25)         |
| Peptic ulcer disease                                | 7<br>(4 - 10)        | 0<br>(0 - 0)          | 0<br>(0 - 0)           | 1<br>(1 - 2)            | 2<br>(1 - 3)            | 4<br>(2 - 5)            |
| Gastritis and duodenitis                            | 0<br>(0 - 1)         | 0<br>(0 - 0)          | 0<br>(0 - 0)           | 0<br>(0 - 0)            | 0<br>(0 - 0)            | 0<br>(0 - 0)            |
| Appendicitis                                        | 3<br>(1 - 4)         | 0<br>(0 - 0)          | 0<br>(0 - 0)           | 1<br>(0 - 1)            | 1<br>(0 - 1)            | 1<br>(0 - 2)            |
| Paralytic ileus and intestinal obstruction          | 10<br>(6 - 15)       | 0<br>(0 - 0)          | 0<br>(0 - 0)           | 2<br>(1 - 3)            | 3<br>(2 - 4)            | 5<br>(3 - 7)            |
| Inguinal, femoral, and abdominal hernia             | 1<br>(1 - 2)         | 0<br>(0 - 0)          | 0<br>(0 - 0)           | 0<br>(0 - 0)            | 0<br>(0 - 1)            | 1<br>(0 - 1)            |
| Inflammatory bowel disease                          | 1<br>(0 - 2)         | 0<br>(0 - 0)          | 0<br>(0 - 0)           | 0<br>(0 - 0)            | 0<br>(0 - 0)            | 1<br>(0 - 1)            |
| Vascular intestinal disorders                       | 0<br>(0 - 0)         | 0<br>(0 - 0)          | 0<br>(0 - 0)           | 0<br>(0 - 0)            | 0<br>(0 - 0)            | 0<br>(0 - 0)            |
| Gallbladder and biliary diseases                    | 5<br>(3 - 8)         | 0<br>(0 - 0)          | 0<br>(0 - 0)           | 1<br>(0 - 1)            | 1<br>(1 - 2)            | 3<br>(2 - 4)            |
| Pancreatitis                                        | 1<br>(1 - 2)         | 0<br>(0 - 0)          | 0<br>(0 - 0)           | 0<br>(0 - 1)            | 0<br>(0 - 1)            | 1<br>(0 - 1)            |
| Other digestive diseases                            | 11<br>(6 - 16)       | 0<br>(0 - 0)          | 0<br>(0 - 0)           | 2<br>(1 - 3)            | 4<br>(2 - 5)            | 5<br>(3 - 8)            |
| Neurological disorders                              | 31<br>(24 - 38)      | 0<br>(0 - 0)          | 0<br>(0 - 0)           | 1<br>(1 - 2)            | 3<br>(2 - 3)            | 26<br>(20 - 33)         |
| Alzheimer disease and other dementias               | 27<br>(21 - 34)      | --                    | --                     | 0<br>(0 - 0)            | 2<br>(1 - 2)            | 25<br>(19 - 32)         |
| Parkinson disease                                   | 0<br>(0 - 0)         | --                    | --                     | 0<br>(0 - 0)            | 0<br>(0 - 0)            | 0<br>(0 - 0)            |
| Epilepsy                                            | 1<br>(0 - 2)         | 0<br>(0 - 0)          | 0<br>(0 - 0)           | 1<br>(0 - 2)            | 0<br>(0 - 0)            | 0<br>(0 - 0)            |
| Multiple sclerosis                                  | 0<br>(0 - 0)         | --                    | --                     | 0<br>(0 - 0)            | 0<br>(0 - 0)            | 0<br>(0 - 0)            |
| Other neurological disorders                        | 2<br>(1 - 3)         | 0<br>(0 - 0)          | 0<br>(0 - 0)           | 0<br>(0 - 1)            | 1<br>(0 - 1)            | 1<br>(0 - 1)            |
| Mental and substance use disorders                  | 1<br>(1 - 2)         | 0<br>(0 - 0)          | 0<br>(0 - 0)           | 1<br>(0 - 1)            | 0<br>(0 - 0)            | 0<br>(0 - 0)            |
| Schizophrenia                                       | 0<br>(0 - 0)         | --                    | --                     | 0<br>(0 - 0)            | 0<br>(0 - 0)            | 0<br>(0 - 0)            |
| Alcohol use disorders                               | 1<br>(0 - 1)         | --                    | --                     | 0<br>(0 - 1)            | 0<br>(0 - 0)            | 0<br>(0 - 0)            |
| Drug use disorders                                  | 0<br>(0 - 0)         | 0<br>(0 - 0)          | --                     | 0<br>(0 - 0)            | 0<br>(0 - 0)            | 0<br>(0 - 0)            |
| Opioid use disorders                                | 0<br>(0 - 0)         | 0<br>(0 - 0)          | --                     | 0<br>(0 - 0)            | 0<br>(0 - 0)            | 0<br>(0 - 0)            |
| Cocaine use disorders                               | 0<br>(0 - 0)         | 0<br>(0 - 0)          | --                     | 0<br>(0 - 0)            | 0<br>(0 - 0)            | 0<br>(0 - 0)            |
| Amphetamine use disorders                           | 0<br>(0 - 0)         | 0<br>(0 - 0)          | --                     | 0<br>(0 - 0)            | 0<br>(0 - 0)            | 0<br>(0 - 0)            |
| Other drug use disorders                            | 0<br>(0 - 0)         | 0<br>(0 - 0)          | --                     | 0<br>(0 - 0)            | 0<br>(0 - 0)            | 0<br>(0 - 0)            |
| Eating disorders                                    | 0<br>(0 - 0)         | --                    | 0<br>(0 - 0)           | 0<br>(0 - 0)            | --                      | --                      |
| Anorexia nervosa                                    | 0<br>(0 - 0)         | --                    | 0<br>(0 - 0)           | 0<br>(0 - 0)            | --                      | --                      |

Web Table 31- Samoa deaths with 95% UI by age, sex, and cause in 2013

| Cause                                               | Both Sexes, All Ages | Both Sexes, 0-4 Years | Both Sexes, 5-14 Years | Both Sexes, 15-49 Years | Both Sexes, 50-69 Years | Both Sexes, 70-80 Years |
|-----------------------------------------------------|----------------------|-----------------------|------------------------|-------------------------|-------------------------|-------------------------|
| Diabetes, urogenital, blood, and endocrine diseases | 245<br>(190 - 326)   | 1<br>(0 - 4)          | 1<br>(0 - 2)           | 28<br>(19 - 43)         | 94<br>(72 - 122)        | 121<br>(93 - 161)       |
| Diabetes mellitus                                   | 187<br>(145 - 231)   | 0<br>(0 - 0)          | 0<br>(0 - 0)           | 17<br>(12 - 22)         | 75<br>(57 - 94)         | 95<br>(72 - 120)        |
| Acute glomerulonephritis                            | 0<br>(0 - 0)         | 0<br>(0 - 0)          | 0<br>(0 - 0)           | 0<br>(0 - 0)            | 0<br>(0 - 0)            | 0<br>(0 - 0)            |
| Chronic kidney disease                              | 42<br>(14 - 114)     | 0<br>(0 - 1)          | 0<br>(0 - 1)           | 8<br>(3 - 19)           | 14<br>(5 - 36)          | 20<br>(6 - 60)          |
| Chronic kidney disease due to diabetes mellitus     | 9<br>(1 - 19)        | 0<br>(0 - 0)          | 0<br>(0 - 0)           | 2<br>(0 - 4)            | 4<br>(1 - 8)            | 4<br>(0 - 9)            |
| Chronic kidney disease due to hypertension          | 11<br>(3 - 31)       | 0<br>(0 - 0)          | 0<br>(0 - 0)           | 2<br>(1 - 4)            | 3<br>(1 - 9)            | 5<br>(1 - 18)           |
| Chronic kidney disease due to glomerulonephritis    | 1<br>(0 - 2)         | 0<br>(0 - 0)          | 0<br>(0 - 0)           | 0<br>(0 - 1)            | 0<br>(0 - 0)            | 1<br>(0 - 2)            |
| Chronic kidney disease due to other causes          | 21<br>(3 - 75)       | 0<br>(0 - 0)          | 0<br>(0 - 1)           | 4<br>(1 - 13)           | 7<br>(1 - 24)           | 10<br>(1 - 38)          |
| Urinary diseases and male infertility               | 4<br>(3 - 7)         | 0<br>(0 - 0)          | 0<br>(0 - 0)           | 1<br>(1 - 1)            | 1<br>(1 - 2)            | 2<br>(1 - 4)            |
| Interstitial nephritis and urinary tract infections | 3<br>(2 - 5)         | 0<br>(0 - 0)          | 0<br>(0 - 0)           | 1<br>(0 - 1)            | 1<br>(0 - 1)            | 1<br>(1 - 3)            |
| Urolithiasis                                        | 0<br>(0 - 0)         | --                    | 0<br>(0 - 0)           | 0<br>(0 - 0)            | 0<br>(0 - 0)            | 0<br>(0 - 0)            |
| Other urinary diseases                              | 1<br>(1 - 2)         | 0<br>(0 - 0)          | 0<br>(0 - 0)           | 0<br>(0 - 0)            | 0<br>(0 - 1)            | 1<br>(0 - 1)            |
| Gynecological diseases                              | 0<br>(0 - 1)         | --                    | --                     | 0<br>(0 - 0)            | 0<br>(0 - 0)            | 0<br>(0 - 0)            |
| Uterine fibroids                                    | 0<br>(0 - 0)         | --                    | --                     | 0<br>(0 - 0)            | 0<br>(0 - 0)            | 0<br>(0 - 0)            |
| Polycystic ovarian syndrome                         | 0<br>(0 - 0)         | --                    | --                     | 0<br>(0 - 0)            | 0<br>(0 - 0)            | --                      |
| Endometriosis                                       | 0<br>(0 - 0)         | --                    | --                     | 0<br>(0 - 0)            | 0<br>(0 - 0)            | --                      |
| Genital prolapse                                    | 0<br>(0 - 0)         | --                    | --                     | 0<br>(0 - 0)            | 0<br>(0 - 0)            | 0<br>(0 - 0)            |
| Other gynecological diseases                        | 0<br>(0 - 0)         | --                    | --                     | 0<br>(0 - 0)            | 0<br>(0 - 0)            | 0<br>(0 - 0)            |
| Hemoglobinopathies and hemolytic anemias            | 3<br>(2 - 5)         | 0<br>(0 - 1)          | 0<br>(0 - 1)           | 1<br>(1 - 2)            | 0<br>(0 - 1)            | 1<br>(0 - 1)            |
| Thalassemias                                        | 1<br>(1 - 3)         | 0<br>(0 - 1)          | 0<br>(0 - 1)           | 1<br>(0 - 1)            | 0<br>(0 - 0)            | 0<br>(0 - 0)            |
| Sickle cell disorders                               | 0<br>(0 - 0)         | 0<br>(0 - 0)          | 0<br>(0 - 0)           | 0<br>(0 - 0)            | 0<br>(0 - 0)            | 0<br>(0 - 0)            |
| G6PD deficiency                                     | 0<br>(0 - 0)         | 0<br>(0 - 0)          | 0<br>(0 - 0)           | 0<br>(0 - 0)            | 0<br>(0 - 0)            | 0<br>(0 - 0)            |
| Other hemoglobinopathies and hemolytic anemias      | 1<br>(1 - 2)         | 0<br>(0 - 0)          | 0<br>(0 - 0)           | 0<br>(0 - 1)            | 0<br>(0 - 1)            | 1<br>(0 - 1)            |
| Endocrine, metabolic, blood, and immune disorders   | 9<br>(7 - 16)        | 1<br>(0 - 2)          | 0<br>(0 - 0)           | 2<br>(1 - 4)            | 3<br>(2 - 6)            | 3<br>(2 - 6)            |
| Musculoskeletal disorders                           | 2<br>(1 - 2)         | --                    | 0<br>(0 - 0)           | 0<br>(0 - 1)            | 0<br>(0 - 1)            | 1<br>(0 - 1)            |
| Rheumatoid arthritis                                | 0<br>(0 - 0)         | --                    | 0<br>(0 - 0)           | 0<br>(0 - 0)            | 0<br>(0 - 0)            | 0<br>(0 - 0)            |
| Other musculoskeletal disorders                     | 1<br>(1 - 2)         | --                    | 0<br>(0 - 0)           | 0<br>(0 - 1)            | 0<br>(0 - 1)            | 1<br>(0 - 1)            |
| Other non-communicable diseases                     | 17<br>(8 - 31)       | 10<br>(3 - 21)        | 1<br>(0 - 2)           | 2<br>(1 - 4)            | 1<br>(1 - 2)            | 2<br>(2 - 3)            |
| Congenital anomalies                                | 14<br>(5 - 27)       | 9<br>(3 - 21)         | 1<br>(0 - 2)           | 2<br>(1 - 3)            | 1<br>(0 - 1)            | 1<br>(0 - 1)            |
| Neural tube defects                                 | 0<br>(0 - 0)         | 0<br>(0 - 0)          | 0<br>(0 - 0)           | 0<br>(0 - 0)            | 0<br>(0 - 0)            | 0<br>(0 - 0)            |
| Congenital heart anomalies                          | 2<br>(1 - 5)         | 2<br>(0 - 4)          | 0<br>(0 - 1)           | 0<br>(0 - 1)            | 0<br>(0 - 0)            | 0<br>(0 - 0)            |
| Cleft lip and cleft palate                          | 0<br>(0 - 0)         | 0<br>(0 - 0)          | --                     | --                      | --                      | --                      |
| Down syndrome                                       | 1<br>(0 - 1)         | 0<br>(0 - 1)          | 0<br>(0 - 0)           | 0<br>(0 - 0)            | 0<br>(0 - 0)            | 0<br>(0 - 0)            |
| Chromosomal unbalanced rearrangements               | 0<br>(0 - 1)         | 0<br>(0 - 1)          | 0<br>(0 - 0)           | 0<br>(0 - 0)            | 0<br>(0 - 0)            | 0<br>(0 - 0)            |
| Other congenital anomalies                          | 11<br>(4 - 21)       | 7<br>(2 - 16)         | 1<br>(0 - 2)           | 1<br>(1 - 2)            | 0<br>(0 - 1)            | 1<br>(0 - 1)            |
| Skin and subcutaneous diseases                      | 3<br>(2 - 4)         | 0<br>(0 - 0)          | 0<br>(0 - 0)           | 0<br>(0 - 1)            | 1<br>(0 - 1)            | 2<br>(1 - 3)            |
| Cellulitis                                          | 1<br>(0 - 1)         | 0<br>(0 - 0)          | 0<br>(0 - 0)           | 0<br>(0 - 0)            | 0<br>(0 - 0)            | 0<br>(0 - 1)            |
| Pyoderma                                            | 1<br>(0 - 2)         | 0<br>(0 - 0)          | 0<br>(0 - 0)           | 0<br>(0 - 0)            | 0<br>(0 - 0)            | 0<br>(0 - 1)            |
| Decubitus ulcer                                     | 1<br>(1 - 2)         | 0<br>(0 - 0)          | 0<br>(0 - 0)           | 0<br>(0 - 0)            | 0<br>(0 - 0)            | 1<br>(0 - 1)            |
| Other skin and subcutaneous diseases                | 0<br>(0 - 0)         | 0<br>(0 - 0)          | 0<br>(0 - 0)           | 0<br>(0 - 0)            | 0<br>(0 - 0)            | 0<br>(0 - 0)            |

Web Table 31- Samoa deaths with 95% UI by age, sex, and cause in 2013

| Cause                                           | Both Sexes, All Ages | Both Sexes, 0-4 Years | Both Sexes, 5-14 Years | Both Sexes, 15-49 Years | Both Sexes, 50-69 Years | Both Sexes, 70-80 Years |
|-------------------------------------------------|----------------------|-----------------------|------------------------|-------------------------|-------------------------|-------------------------|
| Sudden infant death syndrome                    | 0<br>(0 - 1)         | 0<br>(0 - 1)          | --                     | --                      | --                      | --                      |
| Injuries                                        | 76<br>(60 - 96)      | 3<br>(1 - 6)          | 3<br>(2 - 4)           | 38<br>(29 - 49)         | 14<br>(11 - 18)         | 19<br>(13 - 24)         |
| Transport injuries                              | 22<br>(17 - 27)      | 0<br>(0 - 1)          | 1<br>(1 - 2)           | 10<br>(8 - 14)          | 4<br>(3 - 6)            | 5<br>(4 - 7)            |
| Road injuries                                   | 20<br>(16 - 25)      | 0<br>(0 - 1)          | 1<br>(1 - 2)           | 10<br>(7 - 13)          | 4<br>(3 - 5)            | 5<br>(4 - 7)            |
| Pedestrian road injuries                        | 4<br>(3 - 6)         | 0<br>(0 - 0)          | 0<br>(0 - 0)           | 2<br>(1 - 3)            | 1<br>(1 - 1)            | 1<br>(1 - 2)            |
| Cyclist road injuries                           | 1<br>(0 - 1)         | 0<br>(0 - 0)          | 0<br>(0 - 0)           | 0<br>(0 - 1)            | 0<br>(0 - 0)            | 0<br>(0 - 0)            |
| Motorcyclist road injuries                      | 3<br>(2 - 4)         | 0<br>(0 - 0)          | 0<br>(0 - 0)           | 2<br>(1 - 3)            | 0<br>(0 - 1)            | 0<br>(0 - 1)            |
| Motor vehicle road injuries                     | 11<br>(8 - 14)       | 0<br>(0 - 0)          | 1<br>(0 - 1)           | 5<br>(3 - 7)            | 2<br>(1 - 3)            | 3<br>(2 - 4)            |
| Other road injuries                             | 2<br>(1 - 3)         | 0<br>(0 - 0)          | 0<br>(0 - 0)           | 1<br>(0 - 1)            | 0<br>(0 - 1)            | 0<br>(0 - 1)            |
| Other transport injuries                        | 2<br>(1 - 2)         | 0<br>(0 - 0)          | 0<br>(0 - 0)           | 1<br>(0 - 1)            | 0<br>(0 - 1)            | 0<br>(0 - 1)            |
| Unintentional injuries                          | 23<br>(17 - 33)      | 2<br>(1 - 4)          | 1<br>(1 - 2)           | 8<br>(6 - 12)           | 4<br>(3 - 5)            | 8<br>(5 - 11)           |
| Falls                                           | 3<br>(1 - 5)         | 0<br>(0 - 0)          | 0<br>(0 - 0)           | 1<br>(0 - 1)            | 0<br>(0 - 1)            | 2<br>(1 - 3)            |
| Drowning                                        | 5<br>(3 - 9)         | 1<br>(0 - 2)          | 1<br>(0 - 1)           | 2<br>(1 - 4)            | 1<br>(0 - 1)            | 1<br>(1 - 2)            |
| Fire, heat, and hot substances                  | 2<br>(1 - 4)         | 0<br>(0 - 1)          | 0<br>(0 - 0)           | 1<br>(0 - 2)            | 0<br>(0 - 1)            | 1<br>(0 - 1)            |
| Poisonings                                      | 1<br>(0 - 1)         | 0<br>(0 - 0)          | 0<br>(0 - 0)           | 0<br>(0 - 0)            | 0<br>(0 - 0)            | 0<br>(0 - 1)            |
| Exposure to mechanical forces                   | 2<br>(1 - 3)         | 0<br>(0 - 0)          | 0<br>(0 - 0)           | 1<br>(1 - 1)            | 0<br>(0 - 1)            | 0<br>(0 - 1)            |
| Unintentional firearm injuries                  | 0<br>(0 - 0)         | 0<br>(0 - 0)          | 0<br>(0 - 0)           | 0<br>(0 - 0)            | 0<br>(0 - 0)            | 0<br>(0 - 0)            |
| Unintentional suffocation                       | 0<br>(0 - 1)         | 0<br>(0 - 0)          | 0<br>(0 - 0)           | 0<br>(0 - 1)            | 0<br>(0 - 0)            | 0<br>(0 - 0)            |
| Other exposure to mechanical forces             | 1<br>(1 - 2)         | 0<br>(0 - 0)          | 0<br>(0 - 0)           | 1<br>(0 - 1)            | 0<br>(0 - 0)            | 0<br>(0 - 0)            |
| Adverse effects of medical treatment            | 5<br>(2 - 10)        | 0<br>(0 - 1)          | 0<br>(0 - 0)           | 1<br>(0 - 4)            | 1<br>(0 - 2)            | 2<br>(1 - 4)            |
| Animal contact                                  | 1<br>(0 - 1)         | 0<br>(0 - 0)          | 0<br>(0 - 0)           | 0<br>(0 - 0)            | 0<br>(0 - 0)            | 0<br>(0 - 0)            |
| Venomous animal contact                         | 0<br>(0 - 0)         | 0<br>(0 - 0)          | 0<br>(0 - 0)           | 0<br>(0 - 0)            | 0<br>(0 - 0)            | 0<br>(0 - 0)            |
| Non-venomous animal contact                     | 0<br>(0 - 1)         | 0<br>(0 - 0)          | 0<br>(0 - 0)           | 0<br>(0 - 0)            | 0<br>(0 - 0)            | 0<br>(0 - 0)            |
| Foreign body                                    | 3<br>(2 - 5)         | 0<br>(0 - 1)          | 0<br>(0 - 0)           | 0<br>(0 - 1)            | 0<br>(0 - 1)            | 1<br>(1 - 2)            |
| Pulmonary aspiration and foreign body in airway | 3<br>(2 - 4)         | 0<br>(0 - 1)          | 0<br>(0 - 0)           | 0<br>(0 - 1)            | 0<br>(0 - 1)            | 1<br>(1 - 2)            |
| Foreign body in other body part                 | 0<br>(0 - 0)         | 0<br>(0 - 0)          | 0<br>(0 - 0)           | 0<br>(0 - 0)            | 0<br>(0 - 0)            | 0<br>(0 - 0)            |
| Other unintentional injuries                    | 2<br>(1 - 4)         | 0<br>(0 - 0)          | 0<br>(0 - 0)           | 1<br>(1 - 2)            | 0<br>(0 - 1)            | 0<br>(0 - 1)            |
| Self-harm and interpersonal violence            | 31<br>(20 - 42)      | 0<br>(0 - 1)          | 1<br>(0 - 1)           | 19<br>(12 - 27)         | 6<br>(4 - 8)            | 5<br>(3 - 7)            |
| Self-harm                                       | 16<br>(10 - 22)      | --                    | 0<br>(0 - 0)           | 7<br>(5 - 11)           | 4<br>(3 - 6)            | 4<br>(2 - 6)            |
| Interpersonal violence                          | 15<br>(7 - 23)       | 0<br>(0 - 1)          | 0<br>(0 - 1)           | 12<br>(6 - 18)          | 2<br>(1 - 3)            | 1<br>(0 - 2)            |
| Assault by firearm                              | 5<br>(2 - 9)         | 0<br>(0 - 0)          | 0<br>(0 - 0)           | 4<br>(1 - 7)            | 1<br>(0 - 1)            | 0<br>(0 - 1)            |
| Assault by sharp object                         | 6<br>(2 - 12)        | 0<br>(0 - 0)          | 0<br>(0 - 0)           | 5<br>(2 - 11)           | 1<br>(0 - 1)            | 0<br>(0 - 0)            |
| Assault by other means                          | 4<br>(1 - 7)         | 0<br>(0 - 1)          | 0<br>(0 - 0)           | 2<br>(1 - 5)            | 1<br>(0 - 1)            | 1<br>(0 - 1)            |

| Web Table 31- Samoa deaths with 95% UI by age, sex, and cause in 2013 |                    |                  |                   |                    |                    |                    |
|-----------------------------------------------------------------------|--------------------|------------------|-------------------|--------------------|--------------------|--------------------|
| Cause                                                                 | Males, All Ages    | Males, 0-4 Years | Males, 5-14 Years | Males, 15-49 Years | Males, 50-69 Years | Males, 70-80 Years |
| All causes                                                            | 551<br>(462 - 654) | 34<br>(19 - 59)  | 8<br>(5 - 10)     | 110<br>(81 - 144)  | 179<br>(142 - 218) | 220<br>(194 - 243) |
| Communicable, maternal, neonatal, and nutritional diseases            | 79<br>(61 - 103)   | 24<br>(13 - 42)  | 3<br>(2 - 5)      | 12<br>(9 - 16)     | 14<br>(10 - 19)    | 26<br>(19 - 33)    |
| HIV/AIDS and tuberculosis                                             | 5<br>(2 - 8)       | 0<br>(0 - 0)     | 0<br>(0 - 0)      | 2<br>(1 - 3)       | 1<br>(1 - 3)       | 1<br>(0 - 3)       |
| Tuberculosis                                                          | 3<br>(1 - 7)       | 0<br>(0 - 0)     | 0<br>(0 - 0)      | 1<br>(0 - 2)       | 1<br>(0 - 3)       | 1<br>(0 - 3)       |
| HIV/AIDS                                                              | 1<br>(1 - 2)       | 0<br>(0 - 0)     | 0<br>(0 - 0)      | 1<br>(1 - 1)       | 0<br>(0 - 0)       | 0<br>(0 - 0)       |
| HIV/AIDS resulting in mycobacterial infection                         | 0<br>(0 - 0)       | 0<br>(0 - 0)     | 0<br>(0 - 0)      | 0<br>(0 - 0)       | 0<br>(0 - 0)       | 0<br>(0 - 0)       |
| HIV/AIDS resulting in other diseases                                  | 1<br>(1 - 2)       | 0<br>(0 - 0)     | 0<br>(0 - 0)      | 1<br>(1 - 1)       | 0<br>(0 - 0)       | 0<br>(0 - 0)       |
| Diarrhea, lower respiratory, and other common infectious diseases     | 50<br>(36 - 68)    | 10<br>(4 - 19)   | 2<br>(1 - 4)      | 7<br>(5 - 10)      | 10<br>(6 - 14)     | 21<br>(15 - 29)    |
| Diarrheal diseases                                                    | 6<br>(3 - 10)      | 0<br>(0 - 1)     | 0<br>(0 - 0)      | 1<br>(0 - 1)       | 1<br>(0 - 2)       | 4<br>(2 - 7)       |
| Intestinal infectious diseases                                        | 1<br>(1 - 3)       | 1<br>(0 - 1)     | 0<br>(0 - 1)      | 0<br>(0 - 1)       | 0<br>(0 - 0)       | 0<br>(0 - 0)       |
| Typhoid fever                                                         | 1<br>(0 - 2)       | 0<br>(0 - 1)     | 0<br>(0 - 1)      | 0<br>(0 - 1)       | 0<br>(0 - 0)       | 0<br>(0 - 0)       |
| Paratyphoid fever                                                     | 0<br>(0 - 1)       | 0<br>(0 - 0)     | 0<br>(0 - 0)      | 0<br>(0 - 0)       | 0<br>(0 - 0)       | 0<br>(0 - 0)       |
| Other intestinal infectious diseases                                  | 0<br>(0 - 0)       | 0<br>(0 - 0)     | 0<br>(0 - 0)      | 0<br>(0 - 0)       | 0<br>(0 - 0)       | 0<br>(0 - 0)       |
| Lower respiratory infections                                          | 33<br>(22 - 46)    | 3<br>(1 - 6)     | 0<br>(0 - 1)      | 5<br>(3 - 7)       | 8<br>(5 - 12)      | 17<br>(11 - 25)    |
| Upper respiratory infections                                          | 0<br>(0 - 0)       | 0<br>(0 - 0)     | 0<br>(0 - 0)      | 0<br>(0 - 0)       | 0<br>(0 - 0)       | 0<br>(0 - 0)       |
| Otitis media                                                          | 0<br>(0 - 0)       | 0<br>(0 - 0)     | 0<br>(0 - 0)      | 0<br>(0 - 0)       | 0<br>(0 - 0)       | 0<br>(0 - 0)       |
| Meningitis                                                            | 2<br>(1 - 3)       | 0<br>(0 - 1)     | 0<br>(0 - 0)      | 1<br>(0 - 1)       | 0<br>(0 - 1)       | 0<br>(0 - 1)       |
| Pneumococcal meningitis                                               | 1<br>(0 - 1)       | 0<br>(0 - 0)     | 0<br>(0 - 0)      | 0<br>(0 - 1)       | 0<br>(0 - 0)       | 0<br>(0 - 0)       |
| H influenzae type B meningitis                                        | 0<br>(0 - 0)       | 0<br>(0 - 0)     | 0<br>(0 - 0)      | 0<br>(0 - 0)       | 0<br>(0 - 0)       | 0<br>(0 - 0)       |
| Meningococcal meningitis                                              | 0<br>(0 - 1)       | 0<br>(0 - 0)     | 0<br>(0 - 0)      | 0<br>(0 - 0)       | 0<br>(0 - 0)       | 0<br>(0 - 0)       |
| Other meningitis                                                      | 1<br>(0 - 1)       | 0<br>(0 - 0)     | 0<br>(0 - 0)      | 0<br>(0 - 0)       | 0<br>(0 - 0)       | 0<br>(0 - 0)       |
| Encephalitis                                                          | 0<br>(0 - 1)       | 0<br>(0 - 0)     | 0<br>(0 - 0)      | 0<br>(0 - 0)       | 0<br>(0 - 0)       | 0<br>(0 - 0)       |
| Diphtheria                                                            | 0<br>(0 - 0)       | 0<br>(0 - 0)     | 0<br>(0 - 0)      | 0<br>(0 - 0)       | 0<br>(0 - 0)       | --<br>(0 - 0)      |
| Whooping cough                                                        | 4<br>(0 - 14)      | 3<br>(0 - 12)    | 0<br>(0 - 1)      | 0<br>(0 - 0)       | 0<br>(0 - 0)       | --<br>(0 - 0)      |
| Tetanus                                                               | 0<br>(0 - 0)       | 0<br>(0 - 0)     | 0<br>(0 - 0)      | 0<br>(0 - 0)       | 0<br>(0 - 0)       | 0<br>(0 - 0)       |
| Measles                                                               | 4<br>(0 - 16)      | 3<br>(0 - 12)    | 1<br>(0 - 3)      | 0<br>(0 - 1)       | 0<br>(0 - 0)       | --<br>(0 - 0)      |
| Varicella and herpes zoster                                           | 0<br>(0 - 0)       | 0<br>(0 - 0)     | 0<br>(0 - 0)      | 0<br>(0 - 0)       | 0<br>(0 - 0)       | 0<br>(0 - 0)       |
| Neglected tropical diseases and malaria                               | 1<br>(1 - 2)       | 0<br>(0 - 0)     | 0<br>(0 - 0)      | 0<br>(0 - 1)       | 0<br>(0 - 0)       | 0<br>(0 - 1)       |
| Leishmaniasis                                                         | 0<br>(0 - 0)       | 0<br>(0 - 0)     | 0<br>(0 - 0)      | 0<br>(0 - 0)       | 0<br>(0 - 0)       | 0<br>(0 - 0)       |
| Visceral leishmaniasis                                                | 0<br>(0 - 0)       | 0<br>(0 - 0)     | 0<br>(0 - 0)      | 0<br>(0 - 0)       | 0<br>(0 - 0)       | 0<br>(0 - 0)       |
| Cysticercosis                                                         | 0<br>(0 - 0)       | 0<br>(0 - 0)     | 0<br>(0 - 0)      | 0<br>(0 - 0)       | 0<br>(0 - 0)       | 0<br>(0 - 0)       |
| Cystic echinococcosis                                                 | 0<br>(0 - 0)       | 0<br>(0 - 0)     | 0<br>(0 - 0)      | 0<br>(0 - 0)       | 0<br>(0 - 0)       | 0<br>(0 - 0)       |
| Dengue                                                                | 1<br>(0 - 1)       | 0<br>(0 - 0)     | 0<br>(0 - 0)      | 0<br>(0 - 0)       | 0<br>(0 - 0)       | 0<br>(0 - 0)       |
| Rabies                                                                | 0<br>(0 - 0)       | 0<br>(0 - 0)     | 0<br>(0 - 0)      | 0<br>(0 - 0)       | 0<br>(0 - 0)       | 0<br>(0 - 0)       |
| Intestinal nematode infections                                        | 0<br>(0 - 0)       | 0<br>(0 - 0)     | 0<br>(0 - 0)      | 0<br>(0 - 0)       | 0<br>(0 - 0)       | 0<br>(0 - 0)       |
| Ascariasis                                                            | 0<br>(0 - 0)       | 0<br>(0 - 0)     | 0<br>(0 - 0)      | 0<br>(0 - 0)       | 0<br>(0 - 0)       | 0<br>(0 - 0)       |
| Other neglected tropical diseases                                     | 0<br>(0 - 1)       | 0<br>(0 - 0)     | 0<br>(0 - 0)      | 0<br>(0 - 0)       | 0<br>(0 - 0)       | 0<br>(0 - 0)       |
| Maternal disorders                                                    | --                 | --               | --                | --                 | --                 | --                 |
| Maternal hemorrhage                                                   | --                 | --               | --                | --                 | --                 | --                 |
| Maternal sepsis and other maternal infections                         | --                 | --               | --                | --                 | --                 | --                 |



Web Table 31- Samoa deaths with 95% UI by age, sex, and cause in 2013

| Cause                                                            | Males, All Ages    | Males, 0-4 Years | Males, 5-14 Years | Males, 15-49 Years | Males, 50-69 Years | Males, 70-80 Years |
|------------------------------------------------------------------|--------------------|------------------|-------------------|--------------------|--------------------|--------------------|
| Maternal hypertensive disorders                                  | --                 | --               | --                | --                 | --                 | --                 |
| Maternal obstructed labor                                        | --                 | --               | --                | --                 | --                 | --                 |
| Maternal abortive outcome                                        | --                 | --               | --                | --                 | --                 | --                 |
| Indirect maternal deaths                                         | --                 | --               | --                | --                 | --                 | --                 |
| Late maternal deaths                                             | --                 | --               | --                | --                 | --                 | --                 |
| Maternal deaths aggravated by HIV/AIDS                           | --                 | --               | --                | --                 | --                 | --                 |
| Other maternal disorders                                         | --                 | --               | --                | --                 | --                 | --                 |
| Neonatal disorders                                               | 13<br>(6 - 23)     | 13<br>(6 - 23)   | --                | --                 | --                 | --                 |
| Neonatal preterm birth complications                             | 3<br>(1 - 7)       | 3<br>(1 - 7)     | --                | --                 | --                 | --                 |
| Neonatal encephalopathy due to birth asphyxia and trauma         | 2<br>(1 - 6)       | 2<br>(1 - 6)     | --                | --                 | --                 | --                 |
| Neonatal sepsis and other neonatal infections                    | 2<br>(1 - 6)       | 2<br>(1 - 6)     | --                | --                 | --                 | --                 |
| Hemolytic disease and other neonatal jaundice                    | 0<br>(0 - 0)       | 0<br>(0 - 0)     | --                | --                 | --                 | --                 |
| Other neonatal disorders                                         | 5<br>(2 - 12)      | 5<br>(2 - 12)    | --                | --                 | --                 | --                 |
| Nutritional deficiencies                                         | 3<br>(1 - 5)       | 0<br>(0 - 1)     | 0<br>(0 - 0)      | 1<br>(0 - 1)       | 1<br>(0 - 1)       | 1<br>(0 - 2)       |
| Protein-energy malnutrition                                      | 2<br>(1 - 4)       | 0<br>(0 - 1)     | 0<br>(0 - 0)      | 0<br>(0 - 1)       | 0<br>(0 - 1)       | 1<br>(0 - 2)       |
| Iodine deficiency                                                | 0<br>(0 - 0)       | 0<br>(0 - 0)     | 0<br>(0 - 0)      | 0<br>(0 - 0)       | 0<br>(0 - 0)       | 0<br>(0 - 0)       |
| Iron-deficiency anemia                                           | 1<br>(0 - 2)       | 0<br>(0 - 0)     | 0<br>(0 - 0)      | 0<br>(0 - 0)       | 0<br>(0 - 0)       | 0<br>(0 - 1)       |
| Other nutritional deficiencies                                   | 0<br>(0 - 1)       | 0<br>(0 - 0)     | 0<br>(0 - 0)      | 0<br>(0 - 0)       | 0<br>(0 - 0)       | 0<br>(0 - 0)       |
| Other communicable, maternal, neonatal, and nutritional diseases | 7<br>(5 - 12)      | 1<br>(0 - 2)     | 0<br>(0 - 1)      | 3<br>(2 - 5)       | 2<br>(1 - 3)       | 2<br>(1 - 3)       |
| Sexually transmitted diseases excluding HIV                      | 1<br>(0 - 1)       | 0<br>(0 - 1)     | 0<br>(0 - 0)      | 0<br>(0 - 0)       | 0<br>(0 - 0)       | 0<br>(0 - 0)       |
| Syphilis                                                         | 1<br>(0 - 1)       | 0<br>(0 - 1)     | 0<br>(0 - 0)      | 0<br>(0 - 0)       | 0<br>(0 - 0)       | 0<br>(0 - 0)       |
| Chlamydial infection                                             | --                 | --               | --                | --                 | --                 | --                 |
| Gonococcal infection                                             | 0<br>(0 - 0)       | --               | 0<br>(0 - 0)      | 0<br>(0 - 0)       | 0<br>(0 - 0)       | 0<br>(0 - 0)       |
| Other sexually transmitted diseases                              | 0<br>(0 - 0)       | --               | 0<br>(0 - 0)      | 0<br>(0 - 0)       | 0<br>(0 - 0)       | 0<br>(0 - 0)       |
| Hepatitis                                                        | 4<br>(2 - 7)       | 0<br>(0 - 0)     | 0<br>(0 - 0)      | 1<br>(1 - 3)       | 1<br>(1 - 2)       | 1<br>(0 - 1)       |
| Acute hepatitis A                                                | 0<br>(0 - 0)       | 0<br>(0 - 0)     | 0<br>(0 - 0)      | 0<br>(0 - 0)       | 0<br>(0 - 0)       | 0<br>(0 - 0)       |
| Acute hepatitis B                                                | 3<br>(2 - 5)       | 0<br>(0 - 0)     | 0<br>(0 - 0)      | 1<br>(0 - 2)       | 1<br>(1 - 2)       | 1<br>(0 - 1)       |
| Acute hepatitis C                                                | 0<br>(0 - 0)       | --               | 0<br>(0 - 0)      | 0<br>(0 - 0)       | 0<br>(0 - 0)       | 0<br>(0 - 0)       |
| Acute hepatitis E                                                | 1<br>(0 - 2)       | 0<br>(0 - 0)     | 0<br>(0 - 0)      | 0<br>(0 - 1)       | 0<br>(0 - 0)       | 0<br>(0 - 0)       |
| Other infectious diseases                                        | 3<br>(1 - 7)       | 0<br>(0 - 1)     | 0<br>(0 - 0)      | 1<br>(0 - 3)       | 1<br>(0 - 1)       | 1<br>(0 - 2)       |
| Non-communicable diseases                                        | 425<br>(355 - 503) | 9<br>(3 - 19)    | 3<br>(2 - 5)      | 69<br>(50 - 92)    | 157<br>(123 - 192) | 187<br>(165 - 207) |
| Neoplasms                                                        | 48<br>(38 - 58)    | 1<br>(0 - 1)     | 1<br>(0 - 1)      | 11<br>(8 - 15)     | 20<br>(15 - 26)    | 15<br>(13 - 18)    |
| Esophageal cancer                                                | 1<br>(1 - 1)       | --               | --                | 0<br>(0 - 0)       | 0<br>(0 - 0)       | 0<br>(0 - 1)       |
| Stomach cancer                                                   | 6<br>(5 - 8)       | --               | --                | 1<br>(1 - 1)       | 3<br>(2 - 4)       | 2<br>(2 - 3)       |
| Liver cancer                                                     | 6<br>(4 - 8)       | --               | 0<br>(0 - 0)      | 1<br>(1 - 2)       | 4<br>(2 - 5)       | 1<br>(1 - 2)       |
| Liver cancer due to hepatitis B                                  | 3<br>(2 - 5)       | --               | 0<br>(0 - 0)      | 1<br>(0 - 1)       | 2<br>(1 - 3)       | 0<br>(0 - 1)       |
| Liver cancer due to hepatitis C                                  | 2<br>(1 - 3)       | --               | 0<br>(0 - 0)      | 0<br>(0 - 1)       | 1<br>(1 - 2)       | 0<br>(0 - 1)       |
| Liver cancer due to alcohol use                                  | 1<br>(0 - 1)       | --               | --                | 0<br>(0 - 0)       | 0<br>(0 - 1)       | 0<br>(0 - 0)       |
| Liver cancer due to other causes                                 | 0<br>(0 - 1)       | --               | 0<br>(0 - 0)      | 0<br>(0 - 0)       | 0<br>(0 - 1)       | 0<br>(0 - 0)       |
| Larynx cancer                                                    | 0<br>(0 - 0)       | --               | --                | 0<br>(0 - 0)       | 0<br>(0 - 0)       | 0<br>(0 - 0)       |

Web Table 31- Samoa deaths with 95% UI by age, sex, and cause in 2013

| Cause                                         | Males, All Ages    | Males, 0-4 Years | Males, 5-14 Years | Males, 15-49 Years | Males, 50-69 Years | Males, 70-80 Years |
|-----------------------------------------------|--------------------|------------------|-------------------|--------------------|--------------------|--------------------|
| Tracheal, bronchus and lung cancer            | 6<br>(5 - 10)      | --               | --                | 1<br>(1 - 2)       | 3<br>(2 - 5)       | 2<br>(2 - 3)       |
| Breast cancer                                 | 0<br>(0 - 1)       | --               | --                | 0<br>(0 - 0)       | 0<br>(0 - 0)       | 0<br>(0 - 0)       |
| Cervical cancer                               | --                 | --               | --                | --                 | --                 | --                 |
| Uterine cancer                                | --                 | --               | --                | --                 | --                 | --                 |
| Prostate cancer                               | 3<br>(2 - 5)       | --               | --                | 0<br>(0 - 0)       | 1<br>(1 - 2)       | 2<br>(1 - 3)       |
| Colon and rectum cancer                       | 5<br>(4 - 7)       | --               | --                | 1<br>(1 - 2)       | 2<br>(2 - 3)       | 2<br>(2 - 3)       |
| Lip and oral cavity cancer                    | 1<br>(0 - 1)       | --               | --                | 0<br>(0 - 0)       | 0<br>(0 - 0)       | 0<br>(0 - 0)       |
| Nasopharynx cancer                            | 1<br>(1 - 2)       | --               | 0<br>(0 - 0)      | 0<br>(0 - 1)       | 1<br>(0 - 1)       | 0<br>(0 - 0)       |
| Other pharynx cancer                          | 1<br>(0 - 1)       | --               | --                | 0<br>(0 - 0)       | 0<br>(0 - 0)       | 0<br>(0 - 0)       |
| Gallbladder and biliary tract cancer          | 0<br>(0 - 1)       | --               | --                | 0<br>(0 - 0)       | 0<br>(0 - 0)       | 0<br>(0 - 0)       |
| Pancreatic cancer                             | 2<br>(1 - 3)       | --               | --                | 0<br>(0 - 0)       | 1<br>(1 - 2)       | 1<br>(1 - 1)       |
| Malignant skin melanoma                       | 2<br>(0 - 3)       | --               | --                | 0<br>(0 - 1)       | 1<br>(0 - 1)       | 1<br>(0 - 1)       |
| Non-melanoma skin cancer                      | 0<br>(0 - 0)       | --               | --                | 0<br>(0 - 0)       | 0<br>(0 - 0)       | 0<br>(0 - 0)       |
| Ovarian cancer                                | --                 | --               | --                | --                 | --                 | --                 |
| Testicular cancer                             | 1<br>(0 - 2)       | --               | --                | 0<br>(0 - 0)       | 0<br>(0 - 1)       | 0<br>(0 - 1)       |
| Kidney cancer                                 | 1<br>(1 - 1)       | 0<br>(0 - 0)     | 0<br>(0 - 0)      | 0<br>(0 - 0)       | 0<br>(0 - 0)       | 0<br>(0 - 0)       |
| Bladder cancer                                | 1<br>(1 - 2)       | --               | --                | 0<br>(0 - 0)       | 0<br>(0 - 0)       | 1<br>(0 - 1)       |
| Brain and nervous system cancer               | 1<br>(0 - 2)       | 0<br>(0 - 0)     | 0<br>(0 - 0)      | 0<br>(0 - 1)       | 0<br>(0 - 0)       | 0<br>(0 - 0)       |
| Thyroid cancer                                | 0<br>(0 - 0)       | --               | 0<br>(0 - 0)      | 0<br>(0 - 0)       | 0<br>(0 - 0)       | 0<br>(0 - 0)       |
| Mesothelioma                                  | 0<br>(0 - 0)       | --               | --                | 0<br>(0 - 0)       | 0<br>(0 - 0)       | 0<br>(0 - 0)       |
| Hodgkin lymphoma                              | 1<br>(0 - 1)       | 0<br>(0 - 0)     | 0<br>(0 - 0)      | 0<br>(0 - 0)       | 0<br>(0 - 0)       | 0<br>(0 - 0)       |
| Non-Hodgkin lymphoma                          | 0<br>(0 - 1)       | 0<br>(0 - 0)     | 0<br>(0 - 0)      | 0<br>(0 - 0)       | 0<br>(0 - 0)       | 0<br>(0 - 0)       |
| Multiple myeloma                              | 1<br>(0 - 1)       | --               | --                | 0<br>(0 - 0)       | 0<br>(0 - 0)       | 0<br>(0 - 0)       |
| Leukemia                                      | 4<br>(3 - 5)       | 0<br>(0 - 0)     | 0<br>(0 - 1)      | 2<br>(1 - 3)       | 1<br>(1 - 1)       | 0<br>(0 - 0)       |
| Other neoplasms                               | 3<br>(1 - 4)       | 0<br>(0 - 1)     | 0<br>(0 - 0)      | 1<br>(0 - 2)       | 1<br>(0 - 1)       | 0<br>(0 - 1)       |
| Cardiovascular diseases                       | 176<br>(141 - 212) | 1<br>(0 - 1)     | 0<br>(0 - 1)      | 31<br>(21 - 41)    | 69<br>(53 - 87)    | 75<br>(63 - 87)    |
| Rheumatic heart disease                       | 2<br>(1 - 4)       | 0<br>(0 - 0)     | 0<br>(0 - 0)      | 1<br>(0 - 1)       | 1<br>(0 - 1)       | 1<br>(0 - 1)       |
| Ischemic heart disease                        | 85<br>(64 - 111)   | 0<br>(0 - 0)     | 0<br>(0 - 0)      | 17<br>(11 - 24)    | 38<br>(28 - 50)    | 30<br>(23 - 40)    |
| Cerebrovascular disease                       | 69<br>(50 - 88)    | 0<br>(0 - 0)     | 0<br>(0 - 0)      | 8<br>(5 - 12)      | 24<br>(16 - 32)    | 36<br>(26 - 46)    |
| Ischemic stroke                               | 27<br>(13 - 44)    | 0<br>(0 - 0)     | 0<br>(0 - 0)      | 1<br>(0 - 4)       | 7<br>(2 - 14)      | 19<br>(10 - 28)    |
| Hemorrhagic stroke                            | 42<br>(23 - 59)    | 0<br>(0 - 0)     | 0<br>(0 - 0)      | 7<br>(4 - 10)      | 17<br>(9 - 25)     | 18<br>(9 - 26)     |
| Hypertensive heart disease                    | 3<br>(2 - 6)       | 0<br>(0 - 0)     | 0<br>(0 - 0)      | 0<br>(0 - 1)       | 1<br>(1 - 2)       | 1<br>(1 - 3)       |
| Cardiomyopathy and myocarditis                | 5<br>(3 - 9)       | 0<br>(0 - 0)     | 0<br>(0 - 0)      | 2<br>(1 - 4)       | 2<br>(1 - 3)       | 1<br>(0 - 1)       |
| Atrial fibrillation and flutter               | 2<br>(1 - 4)       | --               | --                | 0<br>(0 - 0)       | 1<br>(0 - 1)       | 2<br>(1 - 3)       |
| Aortic aneurysm                               | 1<br>(1 - 2)       | --               | --                | 0<br>(0 - 0)       | 0<br>(0 - 1)       | 1<br>(0 - 1)       |
| Peripheral vascular disease                   | 1<br>(0 - 1)       | --               | --                | 0<br>(0 - 0)       | 0<br>(0 - 0)       | 1<br>(0 - 1)       |
| Endocarditis                                  | 2<br>(1 - 4)       | 0<br>(0 - 0)     | 0<br>(0 - 0)      | 1<br>(1 - 2)       | 1<br>(0 - 1)       | 0<br>(0 - 1)       |
| Other cardiovascular and circulatory diseases | 5<br>(3 - 9)       | 0<br>(0 - 0)     | 0<br>(0 - 0)      | 1<br>(1 - 2)       | 2<br>(1 - 3)       | 2<br>(1 - 3)       |
| Chronic respiratory diseases                  | 55<br>(44 - 68)    | 0<br>(0 - 0)     | 0<br>(0 - 0)      | 3<br>(2 - 5)       | 16<br>(11 - 21)    | 36<br>(28 - 44)    |
| Chronic obstructive pulmonary disease         | 19<br>(14 - 25)    | 0<br>(0 - 0)     | 0<br>(0 - 0)      | 1<br>(0 - 1)       | 4<br>(3 - 6)       | 15<br>(11 - 19)    |

Web Table 31- Samoa deaths with 95% UI by age, sex, and cause in 2013

| Cause                                               | Males, All Ages | Males, 0-4 Years | Males, 5-14 Years | Males, 15-49 Years | Males, 50-69 Years | Males, 70-80 Years |
|-----------------------------------------------------|-----------------|------------------|-------------------|--------------------|--------------------|--------------------|
| Pneumoconiosis                                      | 7<br>(3 - 11)   | 0<br>(0 - 0)     | 0<br>(0 - 0)      | 1<br>(0 - 1)       | 3<br>(1 - 4)       | 4<br>(2 - 6)       |
| Silicosis                                           | 2<br>(1 - 3)    | 0<br>(0 - 0)     | 0<br>(0 - 0)      | 0<br>(0 - 0)       | 1<br>(0 - 1)       | 1<br>(1 - 2)       |
| Asbestosis                                          | 1<br>(0 - 1)    | 0<br>(0 - 0)     | 0<br>(0 - 0)      | 0<br>(0 - 0)       | 0<br>(0 - 1)       | 0<br>(0 - 1)       |
| Coal workers pneumoconiosis                         | 1<br>(0 - 2)    | 0<br>(0 - 0)     | 0<br>(0 - 0)      | 0<br>(0 - 0)       | 0<br>(0 - 1)       | 1<br>(0 - 1)       |
| Other pneumoconiosis                                | 3<br>(1 - 6)    | 0<br>(0 - 0)     | 0<br>(0 - 0)      | 0<br>(0 - 0)       | 1<br>(0 - 2)       | 2<br>(1 - 3)       |
| Asthma                                              | 20<br>(13 - 29) | 0<br>(0 - 0)     | 0<br>(0 - 0)      | 1<br>(1 - 2)       | 7<br>(5 - 11)      | 11<br>(7 - 17)     |
| Interstitial lung disease and pulmonary sarcoidosis | 3<br>(2 - 6)    | 0<br>(0 - 0)     | 0<br>(0 - 0)      | 0<br>(0 - 1)       | 1<br>(1 - 2)       | 2<br>(1 - 4)       |
| Other chronic respiratory diseases                  | 5<br>(2 - 10)   | 0<br>(0 - 0)     | 0<br>(0 - 0)      | 0<br>(0 - 1)       | 1<br>(0 - 2)       | 4<br>(1 - 7)       |
| Cirrhosis                                           | 8<br>(6 - 11)   | 0<br>(0 - 0)     | 0<br>(0 - 0)      | 3<br>(2 - 5)       | 3<br>(2 - 4)       | 2<br>(1 - 2)       |
| Cirrhosis due to hepatitis B                        | 4<br>(3 - 6)    | 0<br>(0 - 0)     | 0<br>(0 - 0)      | 2<br>(1 - 3)       | 2<br>(1 - 2)       | 1<br>(0 - 1)       |
| Cirrhosis due to hepatitis C                        | 2<br>(1 - 2)    | 0<br>(0 - 0)     | 0<br>(0 - 0)      | 1<br>(0 - 1)       | 1<br>(0 - 1)       | 0<br>(0 - 1)       |
| Cirrhosis due to alcohol use                        | 2<br>(1 - 3)    | --               | --                | 0<br>(0 - 1)       | 1<br>(0 - 1)       | 0<br>(0 - 1)       |
| Cirrhosis due to other causes                       | 1<br>(0 - 1)    | 0<br>(0 - 0)     | 0<br>(0 - 0)      | 0<br>(0 - 0)       | 0<br>(0 - 0)       | 0<br>(0 - 0)       |
| Digestive diseases                                  | 19<br>(15 - 26) | 0<br>(0 - 0)     | 0<br>(0 - 0)      | 4<br>(3 - 6)       | 6<br>(4 - 9)       | 9<br>(6 - 11)      |
| Peptic ulcer disease                                | 5<br>(3 - 7)    | 0<br>(0 - 0)     | 0<br>(0 - 0)      | 1<br>(0 - 1)       | 2<br>(1 - 2)       | 2<br>(1 - 4)       |
| Gastritis and duodenitis                            | 0<br>(0 - 0)    | 0<br>(0 - 0)     | 0<br>(0 - 0)      | 0<br>(0 - 0)       | 0<br>(0 - 0)       | 0<br>(0 - 0)       |
| Appendicitis                                        | 1<br>(0 - 2)    | 0<br>(0 - 0)     | 0<br>(0 - 0)      | 0<br>(0 - 1)       | 0<br>(0 - 1)       | 0<br>(0 - 1)       |
| Paralytic ileus and intestinal obstruction          | 5<br>(3 - 8)    | 0<br>(0 - 0)     | 0<br>(0 - 0)      | 1<br>(1 - 2)       | 1<br>(1 - 2)       | 2<br>(1 - 4)       |
| Inguinal, femoral, and abdominal hernia             | 1<br>(0 - 2)    | 0<br>(0 - 0)     | 0<br>(0 - 0)      | 0<br>(0 - 0)       | 0<br>(0 - 1)       | 1<br>(0 - 1)       |
| Inflammatory bowel disease                          | 0<br>(0 - 1)    | 0<br>(0 - 0)     | 0<br>(0 - 0)      | 0<br>(0 - 0)       | 0<br>(0 - 0)       | 0<br>(0 - 0)       |
| Vascular intestinal disorders                       | 0<br>(0 - 0)    | 0<br>(0 - 0)     | 0<br>(0 - 0)      | 0<br>(0 - 0)       | 0<br>(0 - 0)       | 0<br>(0 - 0)       |
| Gallbladder and biliary diseases                    | 2<br>(1 - 4)    | 0<br>(0 - 0)     | 0<br>(0 - 0)      | 0<br>(0 - 1)       | 1<br>(0 - 1)       | 1<br>(1 - 2)       |
| Pancreatitis                                        | 0<br>(0 - 1)    | 0<br>(0 - 0)     | 0<br>(0 - 0)      | 0<br>(0 - 0)       | 0<br>(0 - 0)       | 0<br>(0 - 0)       |
| Other digestive diseases                            | 4<br>(2 - 7)    | 0<br>(0 - 0)     | 0<br>(0 - 0)      | 1<br>(0 - 2)       | 2<br>(1 - 3)       | 1<br>(1 - 2)       |
| Neurological disorders                              | 13<br>(10 - 16) | 0<br>(0 - 0)     | 0<br>(0 - 0)      | 1<br>(1 - 2)       | 1<br>(1 - 2)       | 10<br>(8 - 13)     |
| Alzheimer disease and other dementias               | 11<br>(8 - 13)  | --               | --                | 0<br>(0 - 0)       | 1<br>(1 - 1)       | 10<br>(7 - 12)     |
| Parkinson disease                                   | 0<br>(0 - 0)    | --               | --                | 0<br>(0 - 0)       | 0<br>(0 - 0)       | 0<br>(0 - 0)       |
| Epilepsy                                            | 1<br>(0 - 2)    | 0<br>(0 - 0)     | 0<br>(0 - 0)      | 1<br>(0 - 1)       | 0<br>(0 - 0)       | 0<br>(0 - 0)       |
| Multiple sclerosis                                  | 0<br>(0 - 0)    | --               | --                | 0<br>(0 - 0)       | 0<br>(0 - 0)       | 0<br>(0 - 0)       |
| Other neurological disorders                        | 1<br>(1 - 2)    | 0<br>(0 - 0)     | 0<br>(0 - 0)      | 0<br>(0 - 1)       | 0<br>(0 - 0)       | 0<br>(0 - 1)       |
| Mental and substance use disorders                  | 1<br>(0 - 1)    | 0<br>(0 - 0)     | 0<br>(0 - 0)      | 1<br>(0 - 1)       | 0<br>(0 - 0)       | 0<br>(0 - 0)       |
| Schizophrenia                                       | 0<br>(0 - 0)    | --               | --                | 0<br>(0 - 0)       | 0<br>(0 - 0)       | 0<br>(0 - 0)       |
| Alcohol use disorders                               | 1<br>(0 - 1)    | --               | --                | 0<br>(0 - 1)       | 0<br>(0 - 0)       | 0<br>(0 - 0)       |
| Drug use disorders                                  | 0<br>(0 - 0)    | 0<br>(0 - 0)     | --                | 0<br>(0 - 0)       | 0<br>(0 - 0)       | 0<br>(0 - 0)       |
| Opioid use disorders                                | 0<br>(0 - 0)    | 0<br>(0 - 0)     | --                | 0<br>(0 - 0)       | 0<br>(0 - 0)       | 0<br>(0 - 0)       |
| Cocaine use disorders                               | 0<br>(0 - 0)    | 0<br>(0 - 0)     | --                | 0<br>(0 - 0)       | 0<br>(0 - 0)       | 0<br>(0 - 0)       |
| Amphetamine use disorders                           | 0<br>(0 - 0)    | 0<br>(0 - 0)     | --                | 0<br>(0 - 0)       | 0<br>(0 - 0)       | 0<br>(0 - 0)       |
| Other drug use disorders                            | 0<br>(0 - 0)    | 0<br>(0 - 0)     | --                | 0<br>(0 - 0)       | 0<br>(0 - 0)       | 0<br>(0 - 0)       |
| Eating disorders                                    | 0<br>(0 - 0)    | --               | 0<br>(0 - 0)      | 0<br>(0 - 0)       | --                 | --                 |
| Anorexia nervosa                                    | 0<br>(0 - 0)    | --               | 0<br>(0 - 0)      | 0<br>(0 - 0)       | --                 | --                 |

Web Table 31- Samoa deaths with 95% UI by age, sex, and cause in 2013

| Cause                                               | Males, All Ages  | Males, 0-4 Years | Males, 5-14 Years | Males, 15-49 Years | Males, 50-69 Years | Males, 70-80 Years |
|-----------------------------------------------------|------------------|------------------|-------------------|--------------------|--------------------|--------------------|
| Diabetes, urogenital, blood, and endocrine diseases | 94<br>(65 - 128) | 1<br>(0 - 2)     | 0<br>(0 - 1)      | 13<br>(8 - 20)     | 40<br>(27 - 54)    | 40<br>(27 - 54)    |
| Diabetes mellitus                                   | 73<br>(51 - 97)  | 0<br>(0 - 0)     | 0<br>(0 - 0)      | 8<br>(5 - 12)      | 33<br>(22 - 44)    | 33<br>(22 - 44)    |
| Acute glomerulonephritis                            | 0<br>(0 - 0)     | 0<br>(0 - 0)     | 0<br>(0 - 0)      | 0<br>(0 - 0)       | 0<br>(0 - 0)       | 0<br>(0 - 0)       |
| Chronic kidney disease                              | 12<br>(4 - 26)   | 0<br>(0 - 0)     | 0<br>(0 - 0)      | 3<br>(1 - 6)       | 4<br>(2 - 9)       | 5<br>(2 - 12)      |
| Chronic kidney disease due to diabetes mellitus     | 2<br>(0 - 9)     | 0<br>(0 - 0)     | 0<br>(0 - 0)      | 1<br>(0 - 2)       | 1<br>(0 - 4)       | 1<br>(0 - 3)       |
| Chronic kidney disease due to hypertension          | 3<br>(1 - 7)     | 0<br>(0 - 0)     | 0<br>(0 - 0)      | 1<br>(0 - 1)       | 1<br>(0 - 2)       | 1<br>(1 - 3)       |
| Chronic kidney disease due to glomerulonephritis    | 0<br>(0 - 1)     | 0<br>(0 - 0)     | 0<br>(0 - 0)      | 0<br>(0 - 0)       | 0<br>(0 - 0)       | 0<br>(0 - 0)       |
| Chronic kidney disease due to other causes          | 6<br>(1 - 15)    | 0<br>(0 - 0)     | 0<br>(0 - 0)      | 1<br>(0 - 4)       | 2<br>(0 - 5)       | 2<br>(0 - 6)       |
| Urinary diseases and male infertility               | 2<br>(1 - 3)     | 0<br>(0 - 0)     | 0<br>(0 - 0)      | 0<br>(0 - 1)       | 1<br>(0 - 1)       | 1<br>(1 - 2)       |
| Interstitial nephritis and urinary tract infections | 1<br>(0 - 2)     | 0<br>(0 - 0)     | 0<br>(0 - 0)      | 0<br>(0 - 0)       | 0<br>(0 - 1)       | 0<br>(0 - 1)       |
| Urolithiasis                                        | 0<br>(0 - 0)     | --               | 0<br>(0 - 0)      | 0<br>(0 - 0)       | 0<br>(0 - 0)       | 0<br>(0 - 0)       |
| Other urinary diseases                              | 1<br>(1 - 2)     | 0<br>(0 - 0)     | 0<br>(0 - 0)      | 0<br>(0 - 0)       | 0<br>(0 - 0)       | 1<br>(0 - 1)       |
| Gynecological diseases                              | --               | --               | --                | --                 | --                 | --                 |
| Uterine fibroids                                    | --               | --               | --                | --                 | --                 | --                 |
| Polycystic ovarian syndrome                         | --               | --               | --                | --                 | --                 | --                 |
| Endometriosis                                       | --               | --               | --                | --                 | --                 | --                 |
| Genital prolapse                                    | --               | --               | --                | --                 | --                 | --                 |
| Other gynecological diseases                        | --               | --               | --                | --                 | --                 | --                 |
| Hemoglobinopathies and hemolytic anemias            | 1<br>(1 - 3)     | 0<br>(0 - 1)     | 0<br>(0 - 0)      | 0<br>(0 - 1)       | 0<br>(0 - 0)       | 0<br>(0 - 1)       |
| Thalassemias                                        | 1<br>(0 - 1)     | 0<br>(0 - 1)     | 0<br>(0 - 0)      | 0<br>(0 - 1)       | 0<br>(0 - 0)       | 0<br>(0 - 0)       |
| Sickle cell disorders                               | 0<br>(0 - 0)     | 0<br>(0 - 0)     | 0<br>(0 - 0)      | 0<br>(0 - 0)       | 0<br>(0 - 0)       | 0<br>(0 - 0)       |
| G6PD deficiency                                     | 0<br>(0 - 0)     | 0<br>(0 - 0)     | 0<br>(0 - 0)      | 0<br>(0 - 0)       | 0<br>(0 - 0)       | 0<br>(0 - 0)       |
| Other hemoglobinopathies and hemolytic anemias      | 1<br>(0 - 1)     | 0<br>(0 - 0)     | 0<br>(0 - 0)      | 0<br>(0 - 0)       | 0<br>(0 - 0)       | 0<br>(0 - 0)       |
| Endocrine, metabolic, blood, and immune disorders   | 6<br>(4 - 13)    | 1<br>(0 - 1)     | 0<br>(0 - 0)      | 1<br>(1 - 3)       | 2<br>(1 - 4)       | 2<br>(1 - 4)       |
| Musculoskeletal disorders                           | 1<br>(0 - 1)     | --               | 0<br>(0 - 0)      | 0<br>(0 - 0)       | 0<br>(0 - 0)       | 0<br>(0 - 0)       |
| Rheumatoid arthritis                                | 0<br>(0 - 0)     | --               | 0<br>(0 - 0)      | 0<br>(0 - 0)       | 0<br>(0 - 0)       | 0<br>(0 - 0)       |
| Other musculoskeletal disorders                     | 0<br>(0 - 1)     | --               | 0<br>(0 - 0)      | 0<br>(0 - 0)       | 0<br>(0 - 0)       | 0<br>(0 - 0)       |
| Other non-communicable diseases                     | 10<br>(4 - 20)   | 6<br>(2 - 14)    | 1<br>(0 - 2)      | 2<br>(1 - 3)       | 1<br>(0 - 1)       | 1<br>(1 - 1)       |
| Congenital anomalies                                | 9<br>(3 - 18)    | 6<br>(2 - 14)    | 1<br>(0 - 2)      | 1<br>(1 - 2)       | 0<br>(0 - 1)       | 0<br>(0 - 1)       |
| Neural tube defects                                 | 0<br>(0 - 0)     | 0<br>(0 - 0)     | 0<br>(0 - 0)      | 0<br>(0 - 0)       | 0<br>(0 - 0)       | 0<br>(0 - 0)       |
| Congenital heart anomalies                          | 1<br>(0 - 4)     | 1<br>(0 - 3)     | 0<br>(0 - 1)      | 0<br>(0 - 0)       | 0<br>(0 - 0)       | 0<br>(0 - 0)       |
| Cleft lip and cleft palate                          | 0<br>(0 - 0)     | 0<br>(0 - 0)     | --                | --                 | --                 | --                 |
| Down syndrome                                       | 0<br>(0 - 1)     | 0<br>(0 - 1)     | 0<br>(0 - 0)      | 0<br>(0 - 0)       | 0<br>(0 - 0)       | 0<br>(0 - 0)       |
| Chromosomal unbalanced rearrangements               | 0<br>(0 - 1)     | 0<br>(0 - 1)     | 0<br>(0 - 0)      | 0<br>(0 - 0)       | 0<br>(0 - 0)       | 0<br>(0 - 0)       |
| Other congenital anomalies                          | 7<br>(2 - 14)    | 5<br>(1 - 11)    | 1<br>(0 - 1)      | 1<br>(0 - 2)       | 0<br>(0 - 0)       | 0<br>(0 - 1)       |
| Skin and subcutaneous diseases                      | 1<br>(1 - 2)     | 0<br>(0 - 0)     | 0<br>(0 - 0)      | 0<br>(0 - 1)       | 0<br>(0 - 1)       | 1<br>(0 - 1)       |
| Cellulitis                                          | 0<br>(0 - 1)     | 0<br>(0 - 0)     | 0<br>(0 - 0)      | 0<br>(0 - 0)       | 0<br>(0 - 0)       | 0<br>(0 - 0)       |
| Pyoderma                                            | 0<br>(0 - 1)     | 0<br>(0 - 0)     | 0<br>(0 - 0)      | 0<br>(0 - 0)       | 0<br>(0 - 0)       | 0<br>(0 - 0)       |
| Decubitus ulcer                                     | 0<br>(0 - 1)     | 0<br>(0 - 0)     | 0<br>(0 - 0)      | 0<br>(0 - 0)       | 0<br>(0 - 0)       | 0<br>(0 - 0)       |
| Other skin and subcutaneous diseases                | 0<br>(0 - 0)     | 0<br>(0 - 0)     | 0<br>(0 - 0)      | 0<br>(0 - 0)       | 0<br>(0 - 0)       | 0<br>(0 - 0)       |

Web Table 31- Samoa deaths with 95% UI by age, sex, and cause in 2013

| Cause                                           | Males, All Ages | Males, 0-4 Years | Males, 5-14 Years | Males, 15-49 Years | Males, 50-69 Years | Males, 70-80 Years |
|-------------------------------------------------|-----------------|------------------|-------------------|--------------------|--------------------|--------------------|
| Sudden infant death syndrome                    | 0<br>(0 - 1)    | 0<br>(0 - 1)     | --                | --                 | --                 | --                 |
| Injuries                                        | 47<br>(35 - 62) | 2<br>(1 - 3)     | 2<br>(1 - 3)      | 29<br>(20 - 39)    | 8<br>(5 - 10)      | 7<br>(6 - 10)      |
| Transport injuries                              | 13<br>(9 - 17)  | 0<br>(0 - 1)     | 1<br>(0 - 1)      | 7<br>(5 - 10)      | 2<br>(1 - 3)       | 2<br>(2 - 3)       |
| Road injuries                                   | 12<br>(8 - 16)  | 0<br>(0 - 1)     | 1<br>(0 - 1)      | 7<br>(5 - 10)      | 2<br>(1 - 3)       | 2<br>(1 - 3)       |
| Pedestrian road injuries                        | 2<br>(1 - 4)    | 0<br>(0 - 0)     | 0<br>(0 - 0)      | 1<br>(1 - 2)       | 0<br>(0 - 1)       | 1<br>(0 - 1)       |
| Cyclist road injuries                           | 0<br>(0 - 1)    | 0<br>(0 - 0)     | 0<br>(0 - 0)      | 0<br>(0 - 0)       | 0<br>(0 - 0)       | 0<br>(0 - 0)       |
| Motorcyclist road injuries                      | 2<br>(1 - 3)    | 0<br>(0 - 0)     | 0<br>(0 - 0)      | 2<br>(1 - 3)       | 0<br>(0 - 0)       | 0<br>(0 - 0)       |
| Motor vehicle road injuries                     | 6<br>(4 - 9)    | 0<br>(0 - 0)     | 0<br>(0 - 1)      | 4<br>(2 - 6)       | 1<br>(1 - 1)       | 1<br>(1 - 1)       |
| Other road injuries                             | 1<br>(0 - 2)    | 0<br>(0 - 0)     | 0<br>(0 - 0)      | 0<br>(0 - 1)       | 0<br>(0 - 0)       | 0<br>(0 - 0)       |
| Other transport injuries                        | 1<br>(0 - 1)    | 0<br>(0 - 0)     | 0<br>(0 - 0)      | 0<br>(0 - 1)       | 0<br>(0 - 0)       | 0<br>(0 - 0)       |
| Unintentional injuries                          | 13<br>(9 - 19)  | 1<br>(0 - 3)     | 1<br>(0 - 1)      | 6<br>(4 - 9)       | 2<br>(1 - 3)       | 3<br>(2 - 4)       |
| Falls                                           | 1<br>(0 - 2)    | 0<br>(0 - 0)     | 0<br>(0 - 0)      | 1<br>(0 - 1)       | 0<br>(0 - 0)       | 0<br>(0 - 1)       |
| Drowning                                        | 4<br>(2 - 7)    | 0<br>(0 - 1)     | 0<br>(0 - 1)      | 2<br>(1 - 4)       | 0<br>(0 - 1)       | 0<br>(0 - 1)       |
| Fire, heat, and hot substances                  | 1<br>(0 - 2)    | 0<br>(0 - 0)     | 0<br>(0 - 0)      | 0<br>(0 - 1)       | 0<br>(0 - 1)       | 0<br>(0 - 0)       |
| Poisonings                                      | 0<br>(0 - 1)    | 0<br>(0 - 0)     | 0<br>(0 - 0)      | 0<br>(0 - 0)       | 0<br>(0 - 0)       | 0<br>(0 - 0)       |
| Exposure to mechanical forces                   | 1<br>(1 - 2)    | 0<br>(0 - 0)     | 0<br>(0 - 0)      | 0<br>(0 - 1)       | 0<br>(0 - 0)       | 0<br>(0 - 0)       |
| Unintentional firearm injuries                  | 0<br>(0 - 0)    | 0<br>(0 - 0)     | 0<br>(0 - 0)      | 0<br>(0 - 0)       | 0<br>(0 - 0)       | 0<br>(0 - 0)       |
| Unintentional suffocation                       | 0<br>(0 - 0)    | 0<br>(0 - 0)     | 0<br>(0 - 0)      | 0<br>(0 - 0)       | 0<br>(0 - 0)       | 0<br>(0 - 0)       |
| Other exposure to mechanical forces             | 1<br>(0 - 2)    | 0<br>(0 - 0)     | 0<br>(0 - 0)      | 0<br>(0 - 1)       | 0<br>(0 - 0)       | 0<br>(0 - 0)       |
| Adverse effects of medical treatment            | 2<br>(1 - 6)    | 0<br>(0 - 1)     | 0<br>(0 - 0)      | 1<br>(0 - 3)       | 0<br>(0 - 1)       | 1<br>(0 - 2)       |
| Animal contact                                  | 0<br>(0 - 1)    | 0<br>(0 - 0)     | 0<br>(0 - 0)      | 0<br>(0 - 0)       | 0<br>(0 - 0)       | 0<br>(0 - 0)       |
| Venomous animal contact                         | 0<br>(0 - 0)    | 0<br>(0 - 0)     | 0<br>(0 - 0)      | 0<br>(0 - 0)       | 0<br>(0 - 0)       | 0<br>(0 - 0)       |
| Non-venomous animal contact                     | 0<br>(0 - 1)    | 0<br>(0 - 0)     | 0<br>(0 - 0)      | 0<br>(0 - 0)       | 0<br>(0 - 0)       | 0<br>(0 - 0)       |
| Foreign body                                    | 1<br>(1 - 2)    | 0<br>(0 - 1)     | 0<br>(0 - 0)      | 0<br>(0 - 1)       | 0<br>(0 - 0)       | 0<br>(0 - 1)       |
| Pulmonary aspiration and foreign body in airway | 1<br>(1 - 2)    | 0<br>(0 - 1)     | 0<br>(0 - 0)      | 0<br>(0 - 1)       | 0<br>(0 - 0)       | 0<br>(0 - 1)       |
| Foreign body in other body part                 | 0<br>(0 - 0)    | 0<br>(0 - 0)     | 0<br>(0 - 0)      | 0<br>(0 - 0)       | 0<br>(0 - 0)       | 0<br>(0 - 0)       |
| Other unintentional injuries                    | 1<br>(1 - 3)    | 0<br>(0 - 0)     | 0<br>(0 - 0)      | 1<br>(1 - 2)       | 0<br>(0 - 0)       | 0<br>(0 - 0)       |
| Self-harm and interpersonal violence            | 22<br>(13 - 32) | 0<br>(0 - 1)     | 0<br>(0 - 1)      | 15<br>(9 - 23)     | 3<br>(2 - 5)       | 3<br>(1 - 4)       |
| Self-harm                                       | 10<br>(5 - 15)  | --               | 0<br>(0 - 0)      | 5<br>(3 - 9)       | 2<br>(1 - 3)       | 2<br>(1 - 3)       |
| Interpersonal violence                          | 12<br>(5 - 19)  | 0<br>(0 - 1)     | 0<br>(0 - 1)      | 10<br>(5 - 16)     | 1<br>(0 - 2)       | 1<br>(0 - 1)       |
| Assault by firearm                              | 4<br>(1 - 8)    | 0<br>(0 - 0)     | 0<br>(0 - 0)      | 3<br>(1 - 7)       | 0<br>(0 - 1)       | 0<br>(0 - 0)       |
| Assault by sharp object                         | 6<br>(2 - 12)   | 0<br>(0 - 0)     | 0<br>(0 - 0)      | 5<br>(2 - 10)      | 0<br>(0 - 1)       | 0<br>(0 - 0)       |
| Assault by other means                          | 3<br>(1 - 5)    | 0<br>(0 - 0)     | 0<br>(0 - 0)      | 2<br>(0 - 4)       | 0<br>(0 - 1)       | 0<br>(0 - 1)       |

Web Table 31- Samoa deaths with 95% UI by age, sex, and cause in 2013

| Cause                                                             | Females, All Ages  | Females, 0-4 Years | Females, 5-14 Years | Females, 15-49 Years | Females, 50-69 Years | Females, 70-80 Years |
|-------------------------------------------------------------------|--------------------|--------------------|---------------------|----------------------|----------------------|----------------------|
| All causes                                                        | 592<br>(505 - 709) | 26<br>(15 - 45)    | 7<br>(5 - 9)        | 77<br>(59 - 100)     | 151<br>(119 - 193)   | 331<br>(298 - 380)   |
| Communicable, maternal, neonatal, and nutritional diseases        | 98<br>(64 - 131)   | 20<br>(11 - 35)    | 3<br>(2 - 5)        | 12<br>(8 - 16)       | 14<br>(7 - 20)       | 49<br>(28 - 73)      |
| HIV/AIDS and tuberculosis                                         | 8<br>(2 - 18)      | 0<br>(0 - 0)       | 0<br>(0 - 0)        | 2<br>(1 - 5)         | 2<br>(0 - 0)         | 3<br>(0 - 8)         |
| Tuberculosis                                                      | 6<br>(1 - 17)      | 0<br>(0 - 0)       | 0<br>(0 - 0)        | 2<br>(0 - 4)         | 2<br>(0 - 5)         | 3<br>(0 - 8)         |
| HIV/AIDS                                                          | 1<br>(1 - 2)       | 0<br>(0 - 0)       | 0<br>(0 - 0)        | 1<br>(1 - 1)         | 0<br>(0 - 0)         | 0<br>(0 - 0)         |
| HIV/AIDS resulting in mycobacterial infection                     | 0<br>(0 - 0)       | 0<br>(0 - 0)       | 0<br>(0 - 0)        | 0<br>(0 - 0)         | 0<br>(0 - 0)         | 0<br>(0 - 0)         |
| HIV/AIDS resulting in other diseases                              | 1<br>(1 - 2)       | 0<br>(0 - 0)       | 0<br>(0 - 0)        | 1<br>(1 - 1)         | 0<br>(0 - 0)         | 0<br>(0 - 0)         |
| Diarrhea, lower respiratory, and other common infectious diseases | 64<br>(39 - 93)    | 9<br>(3 - 16)      | 2<br>(1 - 4)        | 5<br>(3 - 8)         | 9<br>(5 - 14)        | 39<br>(21 - 62)      |
| Diarrheal diseases                                                | 13<br>(5 - 27)     | 0<br>(0 - 1)       | 0<br>(0 - 0)        | 1<br>(0 - 2)         | 2<br>(1 - 4)         | 10<br>(3 - 23)       |
| Intestinal infectious diseases                                    | 2<br>(1 - 4)       | 1<br>(0 - 2)       | 1<br>(0 - 1)        | 0<br>(0 - 1)         | 0<br>(0 - 0)         | 0<br>(0 - 0)         |
| Typhoid fever                                                     | 1<br>(1 - 3)       | 1<br>(0 - 1)       | 0<br>(0 - 1)        | 0<br>(0 - 1)         | 0<br>(0 - 0)         | 0<br>(0 - 0)         |
| Paratyphoid fever                                                 | 0<br>(0 - 1)       | 0<br>(0 - 0)       | 0<br>(0 - 0)        | 0<br>(0 - 0)         | 0<br>(0 - 0)         | 0<br>(0 - 0)         |
| Other intestinal infectious diseases                              | 0<br>(0 - 0)       | 0<br>(0 - 0)       | 0<br>(0 - 0)        | 0<br>(0 - 0)         | 0<br>(0 - 0)         | 0<br>(0 - 0)         |
| Lower respiratory infections                                      | 40<br>(21 - 63)    | 2<br>(1 - 5)       | 0<br>(0 - 1)        | 3<br>(2 - 5)         | 6<br>(3 - 10)        | 28<br>(13 - 48)      |
| Upper respiratory infections                                      | 0<br>(0 - 0)       | 0<br>(0 - 0)       | 0<br>(0 - 0)        | 0<br>(0 - 0)         | 0<br>(0 - 0)         | 0<br>(0 - 0)         |
| Otitis media                                                      | 0<br>(0 - 0)       | 0<br>(0 - 0)       | 0<br>(0 - 0)        | 0<br>(0 - 0)         | 0<br>(0 - 0)         | 0<br>(0 - 0)         |
| Meningitis                                                        | 2<br>(1 - 4)       | 0<br>(0 - 1)       | 0<br>(0 - 0)        | 1<br>(0 - 1)         | 0<br>(0 - 1)         | 1<br>(0 - 1)         |
| Pneumococcal meningitis                                           | 1<br>(0 - 1)       | 0<br>(0 - 0)       | 0<br>(0 - 0)        | 0<br>(0 - 0)         | 0<br>(0 - 0)         | 0<br>(0 - 0)         |
| H influenzae type B meningitis                                    | 0<br>(0 - 0)       | 0<br>(0 - 0)       | 0<br>(0 - 0)        | 0<br>(0 - 0)         | 0<br>(0 - 0)         | 0<br>(0 - 0)         |
| Meningococcal meningitis                                          | 0<br>(0 - 1)       | 0<br>(0 - 0)       | 0<br>(0 - 0)        | 0<br>(0 - 0)         | 0<br>(0 - 0)         | 0<br>(0 - 0)         |
| Other meningitis                                                  | 1<br>(0 - 1)       | 0<br>(0 - 0)       | 0<br>(0 - 0)        | 0<br>(0 - 0)         | 0<br>(0 - 0)         | 0<br>(0 - 0)         |
| Encephalitis                                                      | 0<br>(0 - 1)       | 0<br>(0 - 0)       | 0<br>(0 - 0)        | 0<br>(0 - 0)         | 0<br>(0 - 0)         | 0<br>(0 - 0)         |
| Diphtheria                                                        | 0<br>(0 - 0)       | 0<br>(0 - 0)       | 0<br>(0 - 0)        | 0<br>(0 - 0)         | 0<br>(0 - 0)         | --<br>(0 - 0)        |
| Whooping cough                                                    | 4<br>(0 - 13)      | 3<br>(0 - 11)      | 0<br>(0 - 2)        | 0<br>(0 - 0)         | 0<br>(0 - 0)         | --<br>(0 - 0)        |
| Tetanus                                                           | 0<br>(0 - 0)       | 0<br>(0 - 0)       | 0<br>(0 - 0)        | 0<br>(0 - 0)         | 0<br>(0 - 0)         | 0<br>(0 - 0)         |
| Measles                                                           | 3<br>(0 - 12)      | 2<br>(0 - 9)       | 1<br>(0 - 3)        | 0<br>(0 - 1)         | 0<br>(0 - 0)         | --<br>(0 - 0)        |
| Varicella and herpes zoster                                       | 0<br>(0 - 1)       | 0<br>(0 - 0)       | 0<br>(0 - 0)        | 0<br>(0 - 0)         | 0<br>(0 - 0)         | 0<br>(0 - 1)         |
| Neglected tropical diseases and malaria                           | 2<br>(1 - 4)       | 0<br>(0 - 0)       | 0<br>(0 - 0)        | 0<br>(0 - 1)         | 0<br>(0 - 1)         | 1<br>(0 - 2)         |
| Leishmaniasis                                                     | 0<br>(0 - 0)       | 0<br>(0 - 0)       | 0<br>(0 - 0)        | 0<br>(0 - 0)         | 0<br>(0 - 0)         | 0<br>(0 - 0)         |
| Visceral leishmaniasis                                            | 0<br>(0 - 0)       | 0<br>(0 - 0)       | 0<br>(0 - 0)        | 0<br>(0 - 0)         | 0<br>(0 - 0)         | 0<br>(0 - 0)         |
| Cysticercosis                                                     | 0<br>(0 - 0)       | 0<br>(0 - 0)       | 0<br>(0 - 0)        | 0<br>(0 - 0)         | 0<br>(0 - 0)         | 0<br>(0 - 0)         |
| Cystic echinococcosis                                             | 0<br>(0 - 0)       | 0<br>(0 - 0)       | 0<br>(0 - 0)        | 0<br>(0 - 0)         | 0<br>(0 - 0)         | 0<br>(0 - 0)         |
| Dengue                                                            | 1<br>(0 - 2)       | 0<br>(0 - 0)       | 0<br>(0 - 0)        | 0<br>(0 - 0)         | 0<br>(0 - 0)         | 0<br>(0 - 1)         |
| Rabies                                                            | 0<br>(0 - 0)       | 0<br>(0 - 0)       | 0<br>(0 - 0)        | 0<br>(0 - 0)         | 0<br>(0 - 0)         | 0<br>(0 - 0)         |
| Intestinal nematode infections                                    | 0<br>(0 - 0)       | 0<br>(0 - 0)       | 0<br>(0 - 0)        | 0<br>(0 - 0)         | 0<br>(0 - 0)         | 0<br>(0 - 0)         |
| Ascariasis                                                        | 0<br>(0 - 0)       | 0<br>(0 - 0)       | 0<br>(0 - 0)        | 0<br>(0 - 0)         | 0<br>(0 - 0)         | 0<br>(0 - 0)         |
| Other neglected tropical diseases                                 | 1<br>(0 - 2)       | 0<br>(0 - 0)       | 0<br>(0 - 0)        | 0<br>(0 - 0)         | 0<br>(0 - 0)         | 1<br>(0 - 2)         |
| Maternal disorders                                                | 2<br>(1 - 3)       | --                 | 0<br>(0 - 0)        | 2<br>(1 - 3)         | --                   | --                   |
| Maternal hemorrhage                                               | 0<br>(0 - 1)       | --                 | 0<br>(0 - 0)        | 0<br>(0 - 1)         | --                   | --                   |
| Maternal sepsis and other maternal infections                     | 0<br>(0 - 0)       | --                 | 0<br>(0 - 0)        | 0<br>(0 - 0)         | --                   | --                   |

Web Table 31- Samoa deaths with 95% UI by age, sex, and cause in 2013

| Cause                                                            | Females, All Ages | Females, 0-4 Years | Females, 5-14 Years | Females, 15-49 Years | Females, 50-69 Years | Females, 70-80 Years |
|------------------------------------------------------------------|-------------------|--------------------|---------------------|----------------------|----------------------|----------------------|
| Maternal hypertensive disorders                                  | 0<br>(0-0)        | --                 | 0<br>(0-0)          | 0<br>(0-0)           | --                   | --                   |
| Maternal obstructed labor                                        | 0<br>(0-0)        | --                 | 0<br>(0-0)          | 0<br>(0-0)           | --                   | --                   |
| Maternal abortive outcome                                        | 0<br>(0-1)        | --                 | 0<br>(0-0)          | 0<br>(0-1)           | --                   | --                   |
| Indirect maternal deaths                                         | 0<br>(0-0)        | --                 | 0<br>(0-0)          | 0<br>(0-0)           | --                   | --                   |
| Late maternal deaths                                             | 0<br>(0-0)        | --                 | 0<br>(0-0)          | 0<br>(0-0)           | --                   | --                   |
| Maternal deaths aggravated by HIV/AIDS                           | 0<br>(0-0)        | --                 | --                  | 0<br>(0-0)           | --                   | --                   |
| Other maternal disorders                                         | 0<br>(0-0)        | --                 | 0<br>(0-0)          | 0<br>(0-0)           | --                   | --                   |
| Neonatal disorders                                               | 11<br>(6-19)      | 11<br>(6-19)       | --                  | --                   | --                   | --                   |
| Neonatal preterm birth complications                             | 3<br>(1-8)        | 3<br>(1-8)         | --                  | --                   | --                   | --                   |
| Neonatal encephalopathy due to birth asphyxia and trauma         | 1<br>(0-3)        | 1<br>(0-3)         | --                  | --                   | --                   | --                   |
| Neonatal sepsis and other neonatal infections                    | 2<br>(0-4)        | 2<br>(0-4)         | --                  | --                   | --                   | --                   |
| Hemolytic disease and other neonatal jaundice                    | 0<br>(0-0)        | 0<br>(0-0)         | --                  | --                   | --                   | --                   |
| Other neonatal disorders                                         | 5<br>(1-10)       | 5<br>(1-10)        | --                  | --                   | --                   | --                   |
| Nutritional deficiencies                                         | 6<br>(2-9)        | 0<br>(0-1)         | 0<br>(0-0)          | 1<br>(0-2)           | 1<br>(0-1)           | 4<br>(1-7)           |
| Protein-energy malnutrition                                      | 3<br>(1-6)        | 0<br>(0-0)         | 0<br>(0-0)          | 0<br>(0-0)           | 0<br>(0-1)           | 2<br>(0-5)           |
| Iodine deficiency                                                | 0<br>(0-0)        | 0<br>(0-0)         | 0<br>(0-0)          | 0<br>(0-0)           | 0<br>(0-0)           | 0<br>(0-0)           |
| Iron-deficiency anemia                                           | 2<br>(1-5)        | 0<br>(0-0)         | 0<br>(0-0)          | 1<br>(0-1)           | 0<br>(0-1)           | 1<br>(0-3)           |
| Other nutritional deficiencies                                   | 0<br>(0-1)        | 0<br>(0-0)         | 0<br>(0-0)          | 0<br>(0-0)           | 0<br>(0-0)           | 0<br>(0-0)           |
| Other communicable, maternal, neonatal, and nutritional diseases | 7<br>(4-10)       | 1<br>(0-2)         | 0<br>(0-0)          | 1<br>(1-2)           | 2<br>(1-3)           | 2<br>(1-5)           |
| Sexually transmitted diseases excluding HIV                      | 1<br>(0-2)        | 0<br>(0-1)         | 0<br>(0-0)          | 0<br>(0-1)           | 0<br>(0-0)           | 0<br>(0-0)           |
| Syphilis                                                         | 1<br>(0-2)        | 0<br>(0-1)         | 0<br>(0-0)          | 0<br>(0-0)           | 0<br>(0-0)           | 0<br>(0-0)           |
| Chlamydial infection                                             | 0<br>(0-0)        | --                 | 0<br>(0-0)          | 0<br>(0-0)           | 0<br>(0-0)           | 0<br>(0-0)           |
| Gonococcal infection                                             | 0<br>(0-0)        | --                 | 0<br>(0-0)          | 0<br>(0-0)           | 0<br>(0-0)           | 0<br>(0-0)           |
| Other sexually transmitted diseases                              | 0<br>(0-0)        | --                 | 0<br>(0-0)          | 0<br>(0-0)           | 0<br>(0-0)           | 0<br>(0-0)           |
| Hepatitis                                                        | 2<br>(1-3)        | 0<br>(0-0)         | 0<br>(0-0)          | 0<br>(0-1)           | 1<br>(1-1)           | 1<br>(0-1)           |
| Acute hepatitis A                                                | 0<br>(0-0)        | 0<br>(0-0)         | 0<br>(0-0)          | 0<br>(0-0)           | 0<br>(0-0)           | 0<br>(0-0)           |
| Acute hepatitis B                                                | 1<br>(1-2)        | 0<br>(0-0)         | 0<br>(0-0)          | 0<br>(0-0)           | 1<br>(0-1)           | 1<br>(0-1)           |
| Acute hepatitis C                                                | 0<br>(0-0)        | --                 | 0<br>(0-0)          | 0<br>(0-0)           | 0<br>(0-0)           | 0<br>(0-0)           |
| Acute hepatitis E                                                | 0<br>(0-1)        | 0<br>(0-0)         | 0<br>(0-0)          | 0<br>(0-0)           | 0<br>(0-0)           | 0<br>(0-0)           |
| Other infectious diseases                                        | 4<br>(1-7)        | 0<br>(0-1)         | 0<br>(0-0)          | 1<br>(0-2)           | 1<br>(0-2)           | 1<br>(0-4)           |
| Non-communicable diseases                                        | 465<br>(388-564)  | 5<br>(2-11)        | 3<br>(1-4)          | 55<br>(41-75)        | 131<br>(103-168)     | 271<br>(235-316)     |
| Neoplasms                                                        | 54<br>(38-72)     | 0<br>(0-1)         | 1<br>(0-1)          | 15<br>(10-21)        | 17<br>(12-24)        | 21<br>(14-28)        |
| Esophageal cancer                                                | 2<br>(1-3)        | --                 | --                  | 1<br>(0-1)           | 1<br>(0-1)           | 1<br>(0-1)           |
| Stomach cancer                                                   | 4<br>(3-6)        | --                 | --                  | 1<br>(1-2)           | 2<br>(1-3)           | 1<br>(1-2)           |
| Liver cancer                                                     | 5<br>(2-10)       | --                 | 0<br>(0-0)          | 1<br>(0-2)           | 2<br>(1-5)           | 2<br>(1-5)           |
| Liver cancer due to hepatitis B                                  | 2<br>(1-4)        | --                 | 0<br>(0-0)          | 0<br>(0-1)           | 1<br>(0-2)           | 1<br>(0-2)           |
| Liver cancer due to hepatitis C                                  | 2<br>(1-4)        | --                 | 0<br>(0-0)          | 0<br>(0-1)           | 1<br>(0-2)           | 1<br>(0-2)           |
| Liver cancer due to alcohol use                                  | 0<br>(0-1)        | --                 | --                  | 0<br>(0-0)           | 0<br>(0-0)           | 0<br>(0-0)           |
| Liver cancer due to other causes                                 | 1<br>(0-2)        | --                 | 0<br>(0-0)          | 0<br>(0-0)           | 0<br>(0-1)           | 0<br>(0-1)           |
| Larynx cancer                                                    | 0<br>(0-0)        | --                 | --                  | 0<br>(0-0)           | 0<br>(0-0)           | 0<br>(0-0)           |

Web Table 31- Samoa deaths with 95% UI by age, sex, and cause in 2013

| Cause                                         | Females, All Ages  | Females, 0-4 Years | Females, 5-14 Years | Females, 15-49 Years | Females, 50-69 Years | Females, 70-80 Years |
|-----------------------------------------------|--------------------|--------------------|---------------------|----------------------|----------------------|----------------------|
| Tracheal, bronchus and lung cancer            | 2<br>(1 - 2)       | --                 | --                  | 0<br>(0 - 1)         | 0<br>(0 - 1)         | 1<br>(1 - 2)         |
| Breast cancer                                 | 8<br>(6 - 11)      | --                 | --                  | 3<br>(2 - 4)         | 2<br>(2 - 4)         | 2<br>(2 - 4)         |
| Cervical cancer                               | 8<br>(5 - 11)      | --                 | --                  | 2<br>(1 - 2)         | 3<br>(2 - 4)         | 3<br>(2 - 5)         |
| Uterine cancer                                | 2<br>(1 - 3)       | --                 | --                  | 0<br>(0 - 0)         | 1<br>(0 - 1)         | 1<br>(0 - 1)         |
| Prostate cancer                               | --                 | --                 | --                  | --                   | --                   | --                   |
| Colon and rectum cancer                       | 7<br>(5 - 9)       | --                 | --                  | 2<br>(1 - 2)         | 1<br>(1 - 2)         | 4<br>(2 - 5)         |
| Lip and oral cavity cancer                    | 0<br>(0 - 0)       | --                 | --                  | 0<br>(0 - 0)         | 0<br>(0 - 0)         | 0<br>(0 - 0)         |
| Nasopharynx cancer                            | 1<br>(0 - 1)       | --                 | 0<br>(0 - 0)        | 0<br>(0 - 1)         | 0<br>(0 - 1)         | 0<br>(0 - 0)         |
| Other pharynx cancer                          | 0<br>(0 - 0)       | --                 | --                  | 0<br>(0 - 0)         | 0<br>(0 - 0)         | 0<br>(0 - 0)         |
| Gallbladder and biliary tract cancer          | 0<br>(0 - 0)       | --                 | --                  | 0<br>(0 - 0)         | 0<br>(0 - 0)         | 0<br>(0 - 0)         |
| Pancreatic cancer                             | 3<br>(2 - 6)       | --                 | --                  | 1<br>(1 - 2)         | 1<br>(1 - 2)         | 1<br>(1 - 2)         |
| Malignant skin melanoma                       | 0<br>(0 - 1)       | --                 | --                  | 0<br>(0 - 0)         | 0<br>(0 - 0)         | 0<br>(0 - 0)         |
| Non-melanoma skin cancer                      | 0<br>(0 - 0)       | --                 | --                  | 0<br>(0 - 0)         | 0<br>(0 - 0)         | 0<br>(0 - 0)         |
| Ovarian cancer                                | 0<br>(0 - 0)       | --                 | --                  | 0<br>(0 - 0)         | 0<br>(0 - 0)         | 0<br>(0 - 0)         |
| Testicular cancer                             | --                 | --                 | --                  | --                   | --                   | --                   |
| Kidney cancer                                 | 0<br>(0 - 1)       | 0<br>(0 - 0)       | 0<br>(0 - 0)        | 0<br>(0 - 0)         | 0<br>(0 - 0)         | 0<br>(0 - 0)         |
| Bladder cancer                                | 0<br>(0 - 0)       | --                 | --                  | 0<br>(0 - 0)         | 0<br>(0 - 0)         | 0<br>(0 - 0)         |
| Brain and nervous system cancer               | 2<br>(0 - 2)       | 0<br>(0 - 0)       | 0<br>(0 - 0)        | 1<br>(0 - 1)         | 0<br>(0 - 0)         | 0<br>(0 - 0)         |
| Thyroid cancer                                | 0<br>(0 - 0)       | --                 | 0<br>(0 - 0)        | 0<br>(0 - 0)         | 0<br>(0 - 0)         | 0<br>(0 - 0)         |
| Mesothelioma                                  | 0<br>(0 - 0)       | --                 | --                  | 0<br>(0 - 0)         | 0<br>(0 - 0)         | 0<br>(0 - 0)         |
| Hodgkin lymphoma                              | 2<br>(0 - 3)       | 0<br>(0 - 0)       | 0<br>(0 - 0)        | 0<br>(0 - 1)         | 0<br>(0 - 1)         | 1<br>(0 - 2)         |
| Non-Hodgkin lymphoma                          | 2<br>(1 - 4)       | 0<br>(0 - 0)       | 0<br>(0 - 0)        | 1<br>(0 - 1)         | 1<br>(0 - 1)         | 1<br>(0 - 2)         |
| Multiple myeloma                              | 1<br>(0 - 1)       | --                 | --                  | 0<br>(0 - 0)         | 0<br>(0 - 0)         | 0<br>(0 - 0)         |
| Leukemia                                      | 5<br>(3 - 6)       | 0<br>(0 - 0)       | 0<br>(0 - 1)        | 2<br>(1 - 3)         | 1<br>(1 - 2)         | 1<br>(1 - 2)         |
| Other neoplasms                               | 1<br>(1 - 2)       | 0<br>(0 - 0)       | 0<br>(0 - 0)        | 0<br>(0 - 1)         | 0<br>(0 - 1)         | 0<br>(0 - 1)         |
| Cardiovascular diseases                       | 172<br>(132 - 249) | 0<br>(0 - 2)       | 1<br>(0 - 2)        | 15<br>(10 - 27)      | 43<br>(31 - 67)      | 112<br>(87 - 163)    |
| Rheumatic heart disease                       | 3<br>(1 - 4)       | 0<br>(0 - 0)       | 0<br>(0 - 0)        | 1<br>(0 - 2)         | 1<br>(0 - 1)         | 1<br>(0 - 1)         |
| Ischemic heart disease                        | 84<br>(59 - 141)   | 0<br>(0 - 0)       | 0<br>(0 - 1)        | 6<br>(4 - 14)        | 21<br>(14 - 39)      | 56<br>(39 - 97)      |
| Cerebrovascular disease                       | 61<br>(43 - 86)    | 0<br>(0 - 0)       | 0<br>(0 - 0)        | 5<br>(3 - 7)         | 14<br>(9 - 22)       | 41<br>(29 - 59)      |
| Ischemic stroke                               | 25<br>(11 - 42)    | 0<br>(0 - 0)       | 0<br>(0 - 0)        | 1<br>(0 - 2)         | 4<br>(1 - 8)         | 20<br>(9 - 33)       |
| Hemorrhagic stroke                            | 36<br>(21 - 59)    | 0<br>(0 - 0)       | 0<br>(0 - 0)        | 3<br>(2 - 5)         | 11<br>(6 - 17)       | 22<br>(12 - 38)      |
| Hypertensive heart disease                    | 6<br>(3 - 9)       | 0<br>(0 - 0)       | 0<br>(0 - 0)        | 0<br>(0 - 1)         | 1<br>(1 - 2)         | 4<br>(2 - 7)         |
| Cardiomyopathy and myocarditis                | 6<br>(3 - 11)      | 0<br>(0 - 1)       | 0<br>(0 - 1)        | 2<br>(1 - 4)         | 2<br>(1 - 3)         | 2<br>(1 - 4)         |
| Atrial fibrillation and flutter               | 2<br>(1 - 4)       | --                 | --                  | 0<br>(0 - 0)         | 0<br>(0 - 1)         | 1<br>(1 - 3)         |
| Aortic aneurysm                               | 1<br>(1 - 3)       | --                 | --                  | 0<br>(0 - 0)         | 0<br>(0 - 1)         | 1<br>(0 - 2)         |
| Peripheral vascular disease                   | 2<br>(1 - 3)       | --                 | --                  | 0<br>(0 - 0)         | 0<br>(0 - 0)         | 2<br>(1 - 3)         |
| Endocarditis                                  | 2<br>(1 - 3)       | 0<br>(0 - 0)       | 0<br>(0 - 0)        | 0<br>(0 - 1)         | 0<br>(0 - 0)         | 1<br>(0 - 2)         |
| Other cardiovascular and circulatory diseases | 7<br>(4 - 11)      | 0<br>(0 - 0)       | 0<br>(0 - 0)        | 1<br>(1 - 2)         | 3<br>(2 - 5)         | 3<br>(2 - 5)         |
| Chronic respiratory diseases                  | 37<br>(21 - 52)    | 0<br>(0 - 0)       | 0<br>(0 - 0)        | 3<br>(2 - 5)         | 7<br>(4 - 10)        | 26<br>(14 - 37)      |
| Chronic obstructive pulmonary disease         | 16<br>(7 - 25)     | 0<br>(0 - 0)       | 0<br>(0 - 0)        | 1<br>(0 - 1)         | 3<br>(1 - 5)         | 13<br>(5 - 20)       |



Web Table 31- Samoa deaths with 95% UI by age, sex, and cause in 2013

| Cause                                               | Females, All Ages | Females, 0-4 Years | Females, 5-14 Years | Females, 15-49 Years | Females, 50-69 Years | Females, 70-80 Years |
|-----------------------------------------------------|-------------------|--------------------|---------------------|----------------------|----------------------|----------------------|
| Pneumoconiosis                                      | 1<br>(0 - 1)      | 0<br>(0 - 0)       | 0<br>(0 - 0)        | 0<br>(0 - 0)         | 0<br>(0 - 0)         | 0<br>(0 - 1)         |
| Silicosis                                           | 0<br>(0 - 0)      | 0<br>(0 - 0)       | 0<br>(0 - 0)        | 0<br>(0 - 0)         | 0<br>(0 - 0)         | 0<br>(0 - 0)         |
| Asbestosis                                          | 0<br>(0 - 0)      | 0<br>(0 - 0)       | 0<br>(0 - 0)        | 0<br>(0 - 0)         | 0<br>(0 - 0)         | 0<br>(0 - 0)         |
| Coal workers pneumoconiosis                         | 0<br>(0 - 0)      | 0<br>(0 - 0)       | 0<br>(0 - 0)        | 0<br>(0 - 0)         | 0<br>(0 - 0)         | 0<br>(0 - 0)         |
| Other pneumoconiosis                                | 0<br>(0 - 1)      | 0<br>(0 - 0)       | 0<br>(0 - 0)        | 0<br>(0 - 0)         | 0<br>(0 - 0)         | 0<br>(0 - 1)         |
| Asthma                                              | 14<br>(4 - 29)    | 0<br>(0 - 0)       | 0<br>(0 - 0)        | 2<br>(1 - 3)         | 4<br>(1 - 7)         | 9<br>(2 - 19)        |
| Interstitial lung disease and pulmonary sarcoidosis | 2<br>(1 - 4)      | 0<br>(0 - 0)       | 0<br>(0 - 0)        | 0<br>(0 - 0)         | 0<br>(0 - 1)         | 2<br>(1 - 3)         |
| Other chronic respiratory diseases                  | 3<br>(1 - 6)      | 0<br>(0 - 0)       | 0<br>(0 - 0)        | 1<br>(0 - 1)         | 0<br>(0 - 1)         | 2<br>(1 - 5)         |
| Cirrhosis                                           | 6<br>(4 - 8)      | 0<br>(0 - 0)       | 0<br>(0 - 0)        | 2<br>(1 - 2)         | 2<br>(1 - 3)         | 2<br>(1 - 3)         |
| Cirrhosis due to hepatitis B                        | 3<br>(2 - 5)      | 0<br>(0 - 0)       | 0<br>(0 - 0)        | 1<br>(1 - 2)         | 1<br>(1 - 2)         | 1<br>(1 - 2)         |
| Cirrhosis due to hepatitis C                        | 1<br>(1 - 2)      | 0<br>(0 - 0)       | 0<br>(0 - 0)        | 0<br>(0 - 1)         | 0<br>(0 - 1)         | 0<br>(0 - 1)         |
| Cirrhosis due to alcohol use                        | 1<br>(0 - 1)      | --                 | --                  | 0<br>(0 - 0)         | 0<br>(0 - 0)         | 0<br>(0 - 0)         |
| Cirrhosis due to other causes                       | 1<br>(0 - 1)      | 0<br>(0 - 0)       | 0<br>(0 - 0)        | 0<br>(0 - 0)         | 0<br>(0 - 0)         | 0<br>(0 - 0)         |
| Digestive diseases                                  | 20<br>(13 - 27)   | 0<br>(0 - 0)       | 0<br>(0 - 0)        | 3<br>(2 - 4)         | 5<br>(3 - 8)         | 11<br>(7 - 15)       |
| Peptic ulcer disease                                | 2<br>(1 - 3)      | 0<br>(0 - 0)       | 0<br>(0 - 0)        | 0<br>(0 - 0)         | 1<br>(0 - 1)         | 1<br>(1 - 2)         |
| Gastritis and duodenitis                            | 0<br>(0 - 0)      | 0<br>(0 - 0)       | 0<br>(0 - 0)        | 0<br>(0 - 0)         | 0<br>(0 - 0)         | 0<br>(0 - 0)         |
| Appendicitis                                        | 2<br>(1 - 3)      | 0<br>(0 - 0)       | 0<br>(0 - 0)        | 0<br>(0 - 1)         | 1<br>(0 - 1)         | 1<br>(0 - 1)         |
| Paralytic ileus and intestinal obstruction          | 5<br>(2 - 9)      | 0<br>(0 - 0)       | 0<br>(0 - 0)        | 1<br>(0 - 1)         | 2<br>(1 - 3)         | 3<br>(1 - 5)         |
| Inguinal, femoral, and abdominal hernia             | 0<br>(0 - 1)      | 0<br>(0 - 0)       | 0<br>(0 - 0)        | 0<br>(0 - 0)         | 0<br>(0 - 0)         | 0<br>(0 - 0)         |
| Inflammatory bowel disease                          | 1<br>(0 - 1)      | 0<br>(0 - 0)       | 0<br>(0 - 0)        | 0<br>(0 - 0)         | 0<br>(0 - 0)         | 0<br>(0 - 1)         |
| Vascular intestinal disorders                       | 0<br>(0 - 0)      | 0<br>(0 - 0)       | 0<br>(0 - 0)        | 0<br>(0 - 0)         | 0<br>(0 - 0)         | 0<br>(0 - 0)         |
| Gallbladder and biliary diseases                    | 2<br>(1 - 4)      | 0<br>(0 - 0)       | 0<br>(0 - 0)        | 0<br>(0 - 1)         | 1<br>(0 - 1)         | 2<br>(0 - 3)         |
| Pancreatitis                                        | 1<br>(0 - 2)      | 0<br>(0 - 0)       | 0<br>(0 - 0)        | 0<br>(0 - 0)         | 0<br>(0 - 0)         | 0<br>(0 - 1)         |
| Other digestive diseases                            | 7<br>(3 - 11)     | 0<br>(0 - 0)       | 0<br>(0 - 0)        | 1<br>(1 - 2)         | 2<br>(1 - 3)         | 4<br>(1 - 6)         |
| Neurological disorders                              | 18<br>(12 - 24)   | 0<br>(0 - 0)       | 0<br>(0 - 0)        | 0<br>(0 - 1)         | 1<br>(1 - 2)         | 16<br>(11 - 22)      |
| Alzheimer disease and other dementias               | 17<br>(11 - 22)   | --                 | --                  | 0<br>(0 - 0)         | 1<br>(1 - 1)         | 16<br>(10 - 21)      |
| Parkinson disease                                   | 0<br>(0 - 0)      | --                 | --                  | 0<br>(0 - 0)         | 0<br>(0 - 0)         | 0<br>(0 - 0)         |
| Epilepsy                                            | 0<br>(0 - 1)      | 0<br>(0 - 0)       | 0<br>(0 - 0)        | 0<br>(0 - 1)         | 0<br>(0 - 0)         | 0<br>(0 - 0)         |
| Multiple sclerosis                                  | 0<br>(0 - 0)      | --                 | --                  | 0<br>(0 - 0)         | 0<br>(0 - 0)         | 0<br>(0 - 0)         |
| Other neurological disorders                        | 1<br>(1 - 1)      | 0<br>(0 - 0)       | 0<br>(0 - 0)        | 0<br>(0 - 0)         | 0<br>(0 - 1)         | 0<br>(0 - 1)         |
| Mental and substance use disorders                  | 0<br>(0 - 1)      | 0<br>(0 - 0)       | 0<br>(0 - 0)        | 0<br>(0 - 0)         | 0<br>(0 - 0)         | 0<br>(0 - 0)         |
| Schizophrenia                                       | 0<br>(0 - 0)      | --                 | --                  | 0<br>(0 - 0)         | 0<br>(0 - 0)         | 0<br>(0 - 0)         |
| Alcohol use disorders                               | 0<br>(0 - 0)      | --                 | --                  | 0<br>(0 - 0)         | 0<br>(0 - 0)         | 0<br>(0 - 0)         |
| Drug use disorders                                  | 0<br>(0 - 0)      | 0<br>(0 - 0)       | --                  | 0<br>(0 - 0)         | 0<br>(0 - 0)         | 0<br>(0 - 0)         |
| Opioid use disorders                                | 0<br>(0 - 0)      | 0<br>(0 - 0)       | --                  | 0<br>(0 - 0)         | 0<br>(0 - 0)         | 0<br>(0 - 0)         |
| Cocaine use disorders                               | 0<br>(0 - 0)      | 0<br>(0 - 0)       | --                  | 0<br>(0 - 0)         | 0<br>(0 - 0)         | 0<br>(0 - 0)         |
| Amphetamine use disorders                           | 0<br>(0 - 0)      | 0<br>(0 - 0)       | --                  | 0<br>(0 - 0)         | 0<br>(0 - 0)         | 0<br>(0 - 0)         |
| Other drug use disorders                            | 0<br>(0 - 0)      | 0<br>(0 - 0)       | --                  | 0<br>(0 - 0)         | 0<br>(0 - 0)         | 0<br>(0 - 0)         |
| Eating disorders                                    | 0<br>(0 - 0)      | --                 | 0<br>(0 - 0)        | 0<br>(0 - 0)         | --                   | --                   |
| Anorexia nervosa                                    | 0<br>(0 - 0)      | --                 | 0<br>(0 - 0)        | 0<br>(0 - 0)         | --                   | --                   |

Web Table 31- Samoa deaths with 95% UI by age, sex, and cause in 2013

| Cause                                               | Females, All Ages  | Females, 0-4 Years | Females, 5-14 Years | Females, 15-49 Years | Females, 50-69 Years | Females, 70-80 Years |
|-----------------------------------------------------|--------------------|--------------------|---------------------|----------------------|----------------------|----------------------|
| Diabetes, urogenital, blood, and endocrine diseases | 151<br>(110 - 211) | 1<br>(0 - 1)       | 0<br>(0 - 1)        | 15<br>(9 - 25)       | 54<br>(38 - 75)      | 80<br>(59 - 112)     |
| Diabetes mellitus                                   | 113<br>(77 - 151)  | 0<br>(0 - 0)       | 0<br>(0 - 0)        | 9<br>(5 - 13)        | 42<br>(28 - 59)      | 62<br>(41 - 84)      |
| Acute glomerulonephritis                            | 0<br>(0 - 0)       | 0<br>(0 - 0)       | 0<br>(0 - 0)        | 0<br>(0 - 0)         | 0<br>(0 - 0)         | 0<br>(0 - 0)         |
| Chronic kidney disease                              | 30<br>(9 - 90)     | 0<br>(0 - 0)       | 0<br>(0 - 1)        | 5<br>(1 - 15)        | 10<br>(3 - 27)       | 15<br>(4 - 48)       |
| Chronic kidney disease due to diabetes mellitus     | 7<br>(1 - 16)      | 0<br>(0 - 0)       | 0<br>(0 - 0)        | 1<br>(0 - 3)         | 3<br>(0 - 7)         | 3<br>(0 - 8)         |
| Chronic kidney disease due to hypertension          | 7<br>(1 - 27)      | 0<br>(0 - 0)       | 0<br>(0 - 0)        | 1<br>(0 - 3)         | 2<br>(0 - 8)         | 4<br>(1 - 15)        |
| Chronic kidney disease due to glomerulonephritis    | 1<br>(0 - 2)       | 0<br>(0 - 0)       | 0<br>(0 - 0)        | 0<br>(0 - 0)         | 0<br>(0 - 0)         | 1<br>(0 - 1)         |
| Chronic kidney disease due to other causes          | 15<br>(2 - 63)     | 0<br>(0 - 0)       | 0<br>(0 - 0)        | 3<br>(0 - 11)        | 5<br>(1 - 20)        | 7<br>(1 - 33)        |
| Urinary diseases and male infertility               | 2<br>(1 - 4)       | 0<br>(0 - 0)       | 0<br>(0 - 0)        | 0<br>(0 - 1)         | 1<br>(0 - 1)         | 1<br>(1 - 2)         |
| Interstitial nephritis and urinary tract infections | 2<br>(1 - 3)       | 0<br>(0 - 0)       | 0<br>(0 - 0)        | 0<br>(0 - 1)         | 0<br>(0 - 1)         | 1<br>(0 - 2)         |
| Urolithiasis                                        | 0<br>(0 - 0)       | --                 | 0<br>(0 - 0)        | 0<br>(0 - 0)         | 0<br>(0 - 0)         | 0<br>(0 - 0)         |
| Other urinary diseases                              | 0<br>(0 - 1)       | 0<br>(0 - 0)       | 0<br>(0 - 0)        | 0<br>(0 - 0)         | 0<br>(0 - 0)         | 0<br>(0 - 1)         |
| Gynecological diseases                              | 0<br>(0 - 1)       | --                 | --                  | 0<br>(0 - 0)         | 0<br>(0 - 0)         | 0<br>(0 - 0)         |
| Uterine fibroids                                    | 0<br>(0 - 0)       | --                 | --                  | 0<br>(0 - 0)         | 0<br>(0 - 0)         | 0<br>(0 - 0)         |
| Polycystic ovarian syndrome                         | 0<br>(0 - 0)       | --                 | --                  | 0<br>(0 - 0)         | 0<br>(0 - 0)         | --                   |
| Endometriosis                                       | 0<br>(0 - 0)       | --                 | --                  | 0<br>(0 - 0)         | 0<br>(0 - 0)         | --                   |
| Genital prolapse                                    | 0<br>(0 - 0)       | --                 | --                  | 0<br>(0 - 0)         | 0<br>(0 - 0)         | 0<br>(0 - 0)         |
| Other gynecological diseases                        | 0<br>(0 - 0)       | --                 | --                  | 0<br>(0 - 0)         | 0<br>(0 - 0)         | 0<br>(0 - 0)         |
| Hemoglobinopathies and hemolytic anemias            | 1<br>(1 - 3)       | 0<br>(0 - 1)       | 0<br>(0 - 0)        | 1<br>(0 - 1)         | 0<br>(0 - 0)         | 0<br>(0 - 1)         |
| Thalassemias                                        | 1<br>(0 - 2)       | 0<br>(0 - 1)       | 0<br>(0 - 0)        | 0<br>(0 - 1)         | 0<br>(0 - 0)         | 0<br>(0 - 0)         |
| Sickle cell disorders                               | 0<br>(0 - 0)       | 0<br>(0 - 0)       | 0<br>(0 - 0)        | 0<br>(0 - 0)         | 0<br>(0 - 0)         | 0<br>(0 - 0)         |
| G6PD deficiency                                     | 0<br>(0 - 0)       | 0<br>(0 - 0)       | 0<br>(0 - 0)        | 0<br>(0 - 0)         | 0<br>(0 - 0)         | 0<br>(0 - 0)         |
| Other hemoglobinopathies and hemolytic anemias      | 1<br>(0 - 1)       | 0<br>(0 - 0)       | 0<br>(0 - 0)        | 0<br>(0 - 0)         | 0<br>(0 - 0)         | 0<br>(0 - 1)         |
| Endocrine, metabolic, blood, and immune disorders   | 3<br>(2 - 5)       | 0<br>(0 - 0)       | 0<br>(0 - 0)        | 1<br>(0 - 1)         | 1<br>(1 - 2)         | 2<br>(1 - 3)         |
| Musculoskeletal disorders                           | 1<br>(1 - 2)       | --                 | 0<br>(0 - 0)        | 0<br>(0 - 0)         | 0<br>(0 - 0)         | 1<br>(0 - 1)         |
| Rheumatoid arthritis                                | 0<br>(0 - 0)       | --                 | 0<br>(0 - 0)        | 0<br>(0 - 0)         | 0<br>(0 - 0)         | 0<br>(0 - 0)         |
| Other musculoskeletal disorders                     | 1<br>(1 - 2)       | --                 | 0<br>(0 - 0)        | 0<br>(0 - 0)         | 0<br>(0 - 0)         | 0<br>(0 - 1)         |
| Other non-communicable diseases                     | 7<br>(3 - 13)      | 3<br>(1 - 9)       | 0<br>(0 - 1)        | 1<br>(0 - 2)         | 1<br>(0 - 1)         | 1<br>(1 - 2)         |
| Congenital anomalies                                | 5<br>(1 - 11)      | 3<br>(1 - 8)       | 0<br>(0 - 1)        | 1<br>(0 - 1)         | 0<br>(0 - 0)         | 0<br>(0 - 1)         |
| Neural tube defects                                 | 0<br>(0 - 0)       | 0<br>(0 - 0)       | 0<br>(0 - 0)        | 0<br>(0 - 0)         | 0<br>(0 - 0)         | 0<br>(0 - 0)         |
| Congenital heart anomalies                          | 1<br>(0 - 2)       | 1<br>(0 - 2)       | 0<br>(0 - 0)        | 0<br>(0 - 0)         | 0<br>(0 - 0)         | 0<br>(0 - 0)         |
| Cleft lip and cleft palate                          | 0<br>(0 - 0)       | 0<br>(0 - 0)       | --                  | --                   | --                   | --                   |
| Down syndrome                                       | 0<br>(0 - 1)       | 0<br>(0 - 1)       | 0<br>(0 - 0)        | 0<br>(0 - 0)         | 0<br>(0 - 0)         | 0<br>(0 - 0)         |
| Chromosomal unbalanced rearrangements               | 0<br>(0 - 0)       | 0<br>(0 - 0)       | 0<br>(0 - 0)        | 0<br>(0 - 0)         | 0<br>(0 - 0)         | 0<br>(0 - 0)         |
| Other congenital anomalies                          | 4<br>(1 - 8)       | 2<br>(1 - 6)       | 0<br>(0 - 1)        | 0<br>(0 - 1)         | 0<br>(0 - 0)         | 0<br>(0 - 1)         |
| Skin and subcutaneous diseases                      | 2<br>(1 - 3)       | 0<br>(0 - 0)       | 0<br>(0 - 0)        | 0<br>(0 - 0)         | 0<br>(0 - 1)         | 1<br>(1 - 2)         |
| Cellulitis                                          | 0<br>(0 - 1)       | 0<br>(0 - 0)       | 0<br>(0 - 0)        | 0<br>(0 - 0)         | 0<br>(0 - 0)         | 0<br>(0 - 1)         |
| Pyoderma                                            | 0<br>(0 - 1)       | 0<br>(0 - 0)       | 0<br>(0 - 0)        | 0<br>(0 - 0)         | 0<br>(0 - 0)         | 0<br>(0 - 0)         |
| Decubitus ulcer                                     | 1<br>(0 - 2)       | 0<br>(0 - 0)       | 0<br>(0 - 0)        | 0<br>(0 - 0)         | 0<br>(0 - 0)         | 1<br>(0 - 1)         |
| Other skin and subcutaneous diseases                | 0<br>(0 - 0)       | 0<br>(0 - 0)       | 0<br>(0 - 0)        | 0<br>(0 - 0)         | 0<br>(0 - 0)         | 0<br>(0 - 0)         |

Web Table 31- Samoa deaths with 95% UI by age, sex, and cause in 2013

| Cause                                           | Females, All Ages | Females, 0-4 Years | Females, 5-14 Years | Females, 15-49 Years | Females, 50-69 Years | Females, 70-80 Years |
|-------------------------------------------------|-------------------|--------------------|---------------------|----------------------|----------------------|----------------------|
| Sudden infant death syndrome                    | 0<br>(0 - 0)      | 0<br>(0 - 0)       | --                  | --                   | --                   | --                   |
| Injuries                                        | 29<br>(20 - 38)   | 1<br>(0 - 3)       | 1<br>(1 - 2)        | 9<br>(6 - 13)        | 7<br>(4 - 9)         | 11<br>(6 - 16)       |
| Transport injuries                              | 9<br>(6 - 12)     | 0<br>(0 - 0)       | 0<br>(0 - 1)        | 3<br>(2 - 4)         | 2<br>(1 - 3)         | 3<br>(2 - 5)         |
| Road injuries                                   | 8<br>(6 - 11)     | 0<br>(0 - 0)       | 0<br>(0 - 1)        | 3<br>(2 - 4)         | 2<br>(1 - 3)         | 3<br>(2 - 4)         |
| Pedestrian road injuries                        | 2<br>(1 - 3)      | 0<br>(0 - 0)       | 0<br>(0 - 0)        | 0<br>(0 - 1)         | 0<br>(0 - 1)         | 1<br>(0 - 1)         |
| Cyclist road injuries                           | 0<br>(0 - 1)      | 0<br>(0 - 0)       | 0<br>(0 - 0)        | 0<br>(0 - 0)         | 0<br>(0 - 0)         | 0<br>(0 - 0)         |
| Motorcyclist road injuries                      | 1<br>(0 - 2)      | 0<br>(0 - 0)       | 0<br>(0 - 0)        | 0<br>(0 - 1)         | 0<br>(0 - 0)         | 0<br>(0 - 1)         |
| Motor vehicle road injuries                     | 5<br>(3 - 7)      | 0<br>(0 - 0)       | 0<br>(0 - 0)        | 2<br>(1 - 2)         | 1<br>(1 - 2)         | 2<br>(1 - 3)         |
| Other road injuries                             | 1<br>(0 - 2)      | 0<br>(0 - 0)       | 0<br>(0 - 0)        | 0<br>(0 - 1)         | 0<br>(0 - 1)         | 0<br>(0 - 1)         |
| Other transport injuries                        | 1<br>(0 - 1)      | 0<br>(0 - 0)       | 0<br>(0 - 0)        | 0<br>(0 - 0)         | 0<br>(0 - 0)         | 0<br>(0 - 1)         |
| Unintentional injuries                          | 11<br>(7 - 16)    | 1<br>(0 - 2)       | 1<br>(0 - 1)        | 2<br>(1 - 4)         | 2<br>(1 - 3)         | 5<br>(3 - 8)         |
| Falls                                           | 2<br>(1 - 3)      | 0<br>(0 - 0)       | 0<br>(0 - 0)        | 0<br>(0 - 0)         | 0<br>(0 - 0)         | 1<br>(0 - 2)         |
| Drowning                                        | 2<br>(1 - 3)      | 0<br>(0 - 1)       | 0<br>(0 - 0)        | 0<br>(0 - 1)         | 0<br>(0 - 1)         | 1<br>(0 - 1)         |
| Fire, heat, and hot substances                  | 1<br>(1 - 3)      | 0<br>(0 - 0)       | 0<br>(0 - 0)        | 0<br>(0 - 1)         | 0<br>(0 - 0)         | 0<br>(0 - 1)         |
| Poisonings                                      | 0<br>(0 - 1)      | 0<br>(0 - 0)       | 0<br>(0 - 0)        | 0<br>(0 - 0)         | 0<br>(0 - 0)         | 0<br>(0 - 1)         |
| Exposure to mechanical forces                   | 1<br>(0 - 1)      | 0<br>(0 - 0)       | 0<br>(0 - 0)        | 0<br>(0 - 1)         | 0<br>(0 - 0)         | 0<br>(0 - 0)         |
| Unintentional firearm injuries                  | 0<br>(0 - 0)      | 0<br>(0 - 0)       | 0<br>(0 - 0)        | 0<br>(0 - 0)         | 0<br>(0 - 0)         | 0<br>(0 - 0)         |
| Unintentional suffocation                       | 0<br>(0 - 1)      | 0<br>(0 - 0)       | 0<br>(0 - 0)        | 0<br>(0 - 0)         | 0<br>(0 - 0)         | 0<br>(0 - 0)         |
| Other exposure to mechanical forces             | 0<br>(0 - 1)      | 0<br>(0 - 0)       | 0<br>(0 - 0)        | 0<br>(0 - 0)         | 0<br>(0 - 0)         | 0<br>(0 - 0)         |
| Adverse effects of medical treatment            | 3<br>(1 - 6)      | 0<br>(0 - 1)       | 0<br>(0 - 0)        | 1<br>(0 - 1)         | 0<br>(0 - 1)         | 1<br>(0 - 3)         |
| Animal contact                                  | 0<br>(0 - 0)      | 0<br>(0 - 0)       | 0<br>(0 - 0)        | 0<br>(0 - 0)         | 0<br>(0 - 0)         | 0<br>(0 - 0)         |
| Venomous animal contact                         | 0<br>(0 - 0)      | 0<br>(0 - 0)       | 0<br>(0 - 0)        | 0<br>(0 - 0)         | 0<br>(0 - 0)         | 0<br>(0 - 0)         |
| Non-venomous animal contact                     | 0<br>(0 - 0)      | 0<br>(0 - 0)       | 0<br>(0 - 0)        | 0<br>(0 - 0)         | 0<br>(0 - 0)         | 0<br>(0 - 0)         |
| Foreign body                                    | 2<br>(1 - 3)      | 0<br>(0 - 1)       | 0<br>(0 - 0)        | 0<br>(0 - 0)         | 0<br>(0 - 0)         | 1<br>(0 - 2)         |
| Pulmonary aspiration and foreign body in airway | 1<br>(1 - 3)      | 0<br>(0 - 1)       | 0<br>(0 - 0)        | 0<br>(0 - 0)         | 0<br>(0 - 0)         | 1<br>(0 - 2)         |
| Foreign body in other body part                 | 0<br>(0 - 0)      | 0<br>(0 - 0)       | 0<br>(0 - 0)        | 0<br>(0 - 0)         | 0<br>(0 - 0)         | 0<br>(0 - 0)         |
| Other unintentional injuries                    | 1<br>(0 - 1)      | 0<br>(0 - 0)       | 0<br>(0 - 0)        | 0<br>(0 - 0)         | 0<br>(0 - 0)         | 0<br>(0 - 0)         |
| Self-harm and interpersonal violence            | 9<br>(6 - 13)     | 0<br>(0 - 0)       | 0<br>(0 - 0)        | 4<br>(2 - 6)         | 3<br>(1 - 4)         | 3<br>(1 - 4)         |
| Self-harm                                       | 6<br>(4 - 9)      | --                 | 0<br>(0 - 0)        | 2<br>(1 - 3)         | 2<br>(1 - 3)         | 2<br>(1 - 4)         |
| Interpersonal violence                          | 3<br>(1 - 5)      | 0<br>(0 - 0)       | 0<br>(0 - 0)        | 2<br>(1 - 3)         | 1<br>(0 - 1)         | 0<br>(0 - 1)         |
| Assault by firearm                              | 1<br>(0 - 2)      | 0<br>(0 - 0)       | 0<br>(0 - 0)        | 1<br>(0 - 1)         | 0<br>(0 - 0)         | 0<br>(0 - 0)         |
| Assault by sharp object                         | 1<br>(0 - 1)      | 0<br>(0 - 0)       | 0<br>(0 - 0)        | 1<br>(0 - 1)         | 0<br>(0 - 0)         | 0<br>(0 - 0)         |
| Assault by other means                          | 2<br>(0 - 3)      | 0<br>(0 - 0)       | 0<br>(0 - 0)        | 1<br>(0 - 1)         | 0<br>(0 - 1)         | 0<br>(0 - 1)         |

Web Table 31- Sao Tome and Principe deaths with 95% UI by age, sex, and cause in 2013

| Cause                                                             | Both Sexes, All Ages   | Both Sexes, 0-4 Years | Both Sexes, 5-14 Years | Both Sexes, 15-49 Years | Both Sexes, 50-69 Years | Both Sexes, 70-80 Years |
|-------------------------------------------------------------------|------------------------|-----------------------|------------------------|-------------------------|-------------------------|-------------------------|
| All causes                                                        | 1,113<br>(953 - 1,289) | 265<br>(224 - 314)    | 31<br>(26 - 36)        | 247<br>(185 - 370)      | 208<br>(156 - 262)      | 363<br>(310 - 413)      |
| Communicable, maternal, neonatal, and nutritional diseases        | 484<br>(399 - 709)     | 215<br>(175 - 261)    | 18<br>(14 - 26)        | 110<br>(70 - 310)       | 51<br>(36 - 78)         | 89<br>(70 - 109)        |
| HIV/AIDS and tuberculosis                                         | 72<br>(19 - 375)       | 2<br>(0 - 14)         | 2<br>(0 - 10)          | 53<br>(11 - 281)        | 11<br>(4 - 49)          | 4<br>(2 - 11)           |
| Tuberculosis                                                      | 13<br>(8 - 19)         | 0<br>(0 - 0)          | 0<br>(0 - 0)           | 6<br>(3 - 10)           | 4<br>(2 - 6)            | 3<br>(2 - 4)            |
| HIV/AIDS                                                          | 59<br>(5 - 366)        | 2<br>(0 - 14)         | 2<br>(0 - 10)          | 47<br>(4 - 278)         | 7<br>(0 - 45)           | 1<br>(0 - 8)            |
| HIV/AIDS resulting in mycobacterial infection                     | 4<br>(0 - 23)          | 0<br>(0 - 1)          | 0<br>(0 - 1)           | 3<br>(0 - 18)           | 0<br>(0 - 3)            | 0<br>(0 - 1)            |
| HIV/AIDS resulting in other diseases                              | 56<br>(5 - 342)        | 2<br>(0 - 13)         | 2<br>(0 - 10)          | 44<br>(4 - 260)         | 7<br>(0 - 42)           | 1<br>(0 - 8)            |
| Diarrhea, lower respiratory, and other common infectious diseases | 155<br>(102 - 199)     | 64<br>(37 - 96)       | 8<br>(4 - 14)          | 19<br>(10 - 29)         | 17<br>(11 - 24)         | 46<br>(32 - 60)         |
| Diarrheal diseases                                                | 25<br>(14 - 39)        | 15<br>(6 - 26)        | 1<br>(0 - 2)           | 3<br>(1 - 6)            | 2<br>(1 - 4)            | 4<br>(2 - 7)            |
| Intestinal infectious diseases                                    | 9<br>(4 - 16)          | 3<br>(1 - 6)          | 3<br>(1 - 5)           | 3<br>(1 - 6)            | 0<br>(0 - 0)            | 0<br>(0 - 0)            |
| Typhoid fever                                                     | 6<br>(3 - 11)          | 2<br>(1 - 3)          | 2<br>(1 - 3)           | 2<br>(1 - 4)            | 0<br>(0 - 0)            | 0<br>(0 - 0)            |
| Paratyphoid fever                                                 | 3<br>(1 - 5)           | 1<br>(0 - 2)          | 1<br>(0 - 2)           | 1<br>(0 - 2)            | 0<br>(0 - 0)            | 0<br>(0 - 0)            |
| Other intestinal infectious diseases                              | 0<br>(0 - 1)           | 0<br>(0 - 1)          | 0<br>(0 - 0)           | 0<br>(0 - 0)            | 0<br>(0 - 0)            | 0<br>(0 - 0)            |
| Lower respiratory infections                                      | 100<br>(65 - 130)      | 35<br>(19 - 53)       | 2<br>(1 - 3)           | 10<br>(4 - 15)          | 13<br>(8 - 20)          | 40<br>(27 - 54)         |
| Upper respiratory infections                                      | 0<br>(0 - 0)           | 0<br>(0 - 0)          | 0<br>(0 - 0)           | 0<br>(0 - 0)            | 0<br>(0 - 0)            | 0<br>(0 - 0)            |
| Otitis media                                                      | 0<br>(0 - 0)           | 0<br>(0 - 0)          | 0<br>(0 - 0)           | 0<br>(0 - 0)            | 0<br>(0 - 0)            | 0<br>(0 - 0)            |
| Meningitis                                                        | 7<br>(5 - 10)          | 3<br>(1 - 5)          | 0<br>(0 - 1)           | 2<br>(1 - 3)            | 1<br>(1 - 1)            | 1<br>(0 - 1)            |
| Pneumococcal meningitis                                           | 2<br>(1 - 3)           | 1<br>(0 - 1)          | 0<br>(0 - 0)           | 1<br>(0 - 1)            | 0<br>(0 - 0)            | 0<br>(0 - 0)            |
| H influenzae type B meningitis                                    | 1<br>(1 - 2)           | 1<br>(0 - 1)          | 0<br>(0 - 0)           | 0<br>(0 - 0)            | 0<br>(0 - 0)            | 0<br>(0 - 0)            |
| Meningococcal meningitis                                          | 3<br>(2 - 5)           | 1<br>(1 - 2)          | 0<br>(0 - 0)           | 1<br>(0 - 2)            | 0<br>(0 - 1)            | 0<br>(0 - 1)            |
| Other meningitis                                                  | 1<br>(1 - 1)           | 0<br>(0 - 0)          | 0<br>(0 - 0)           | 0<br>(0 - 1)            | 0<br>(0 - 0)            | 0<br>(0 - 0)            |
| Encephalitis                                                      | 2<br>(1 - 3)           | 0<br>(0 - 1)          | 0<br>(0 - 0)           | 1<br>(0 - 1)            | 0<br>(0 - 0)            | 0<br>(0 - 0)            |
| Diphtheria                                                        | 0<br>(0 - 0)           | 0<br>(0 - 0)          | 0<br>(0 - 0)           | 0<br>(0 - 0)            | 0<br>(0 - 0)            | --                      |
| Whooping cough                                                    | 0<br>(0 - 2)           | 0<br>(0 - 2)          | 0<br>(0 - 0)           | 0<br>(0 - 0)            | 0<br>(0 - 0)            | --                      |
| Tetanus                                                           | 1<br>(0 - 2)           | 1<br>(0 - 1)          | 0<br>(0 - 0)           | 0<br>(0 - 1)            | 0<br>(0 - 1)            | 0<br>(0 - 0)            |
| Measles                                                           | 10<br>(0 - 47)         | 8<br>(0 - 39)         | 1<br>(0 - 8)           | 0<br>(0 - 2)            | 0<br>(0 - 0)            | --                      |
| Varicella and herpes zoster                                       | 0<br>(0 - 0)           | 0<br>(0 - 0)          | 0<br>(0 - 0)           | 0<br>(0 - 0)            | 0<br>(0 - 0)            | 0<br>(0 - 0)            |
| Neglected tropical diseases and malaria                           | 76<br>(40 - 122)       | 51<br>(20 - 92)       | 6<br>(3 - 10)          | 9<br>(4 - 17)           | 4<br>(2 - 8)            | 6<br>(3 - 13)           |
| Malaria                                                           | 71<br>(37 - 119)       | 49<br>(19 - 91)       | 5<br>(2 - 9)           | 8<br>(3 - 15)           | 4<br>(2 - 7)            | 6<br>(2 - 12)           |
| Leishmaniasis                                                     | 0<br>(0 - 0)           | 0<br>(0 - 0)          | 0<br>(0 - 0)           | 0<br>(0 - 0)            | 0<br>(0 - 0)            | 0<br>(0 - 0)            |
| Visceral leishmaniasis                                            | 0<br>(0 - 0)           | 0<br>(0 - 0)          | 0<br>(0 - 0)           | 0<br>(0 - 0)            | 0<br>(0 - 0)            | 0<br>(0 - 0)            |
| Schistosomiasis                                                   | 0<br>(0 - 1)           | 0<br>(0 - 0)          | 0<br>(0 - 0)           | 0<br>(0 - 0)            | 0<br>(0 - 0)            | 0<br>(0 - 0)            |
| Cysticercosis                                                     | 0<br>(0 - 0)           | 0<br>(0 - 0)          | 0<br>(0 - 0)           | 0<br>(0 - 0)            | 0<br>(0 - 0)            | 0<br>(0 - 0)            |
| Cystic echinococcosis                                             | 0<br>(0 - 0)           | 0<br>(0 - 0)          | 0<br>(0 - 0)           | 0<br>(0 - 0)            | 0<br>(0 - 0)            | 0<br>(0 - 0)            |
| Dengue                                                            | 0<br>(0 - 0)           | 0<br>(0 - 0)          | 0<br>(0 - 0)           | 0<br>(0 - 0)            | 0<br>(0 - 0)            | 0<br>(0 - 0)            |
| Yellow fever                                                      | 0<br>(0 - 0)           | 0<br>(0 - 0)          | 0<br>(0 - 0)           | 0<br>(0 - 0)            | 0<br>(0 - 0)            | 0<br>(0 - 0)            |
| Rabies                                                            | 1<br>(0 - 1)           | 0<br>(0 - 0)          | 0<br>(0 - 0)           | 0<br>(0 - 0)            | 0<br>(0 - 0)            | 0<br>(0 - 0)            |
| Intestinal nematode infections                                    | 0<br>(0 - 3)           | 0<br>(0 - 2)          | 0<br>(0 - 1)           | 0<br>(0 - 0)            | 0<br>(0 - 0)            | 0<br>(0 - 0)            |
| Ascariasis                                                        | 0<br>(0 - 3)           | 0<br>(0 - 2)          | 0<br>(0 - 1)           | 0<br>(0 - 0)            | 0<br>(0 - 0)            | 0<br>(0 - 0)            |
| Other neglected tropical diseases                                 | 3<br>(1 - 5)           | 1<br>(0 - 2)          | 0<br>(0 - 0)           | 1<br>(0 - 2)            | 0<br>(0 - 0)            | 0<br>(0 - 0)            |

Web Table 31- Sao Tome and Principe deaths with 95% UI by age, sex, and cause in 2013

| Cause                                                            | Both Sexes, All Ages | Both Sexes, 0-4 Years | Both Sexes, 5-14 Years | Both Sexes, 15-49 Years | Both Sexes, 50-69 Years | Both Sexes, 70-80 Years |
|------------------------------------------------------------------|----------------------|-----------------------|------------------------|-------------------------|-------------------------|-------------------------|
| Maternal disorders                                               | 9<br>(4 - 14)        | --                    | 0<br>(0 - 0)           | 9<br>(4 - 14)           | --                      | --                      |
| Maternal hemorrhage                                              | 2<br>(1 - 3)         | --                    | 0<br>(0 - 0)           | 2<br>(1 - 3)            | --                      | --                      |
| Maternal sepsis and other maternal infections                    | 1<br>(0 - 1)         | --                    | 0<br>(0 - 0)           | 0<br>(0 - 1)            | --                      | --                      |
| Maternal hypertensive disorders                                  | 1<br>(0 - 1)         | --                    | 0<br>(0 - 0)           | 1<br>(0 - 1)            | --                      | --                      |
| Maternal obstructed labor                                        | 0<br>(0 - 1)         | --                    | 0<br>(0 - 0)           | 0<br>(0 - 1)            | --                      | --                      |
| Maternal abortive outcome                                        | 2<br>(1 - 3)         | --                    | 0<br>(0 - 0)           | 2<br>(1 - 3)            | --                      | --                      |
| Indirect maternal deaths                                         | 1<br>(0 - 2)         | --                    | 0<br>(0 - 0)           | 1<br>(0 - 2)            | --                      | --                      |
| Late maternal deaths                                             | 1<br>(1 - 2)         | --                    | 0<br>(0 - 0)           | 1<br>(1 - 2)            | --                      | --                      |
| Maternal deaths aggravated by HIV/AIDS                           | 0<br>(0 - 0)         | --                    | --                     | 0<br>(0 - 0)            | --                      | --                      |
| Other maternal disorders                                         | 2<br>(1 - 3)         | --                    | 0<br>(0 - 0)           | 2<br>(1 - 3)            | --                      | --                      |
| Neonatal disorders                                               | 84<br>(70 - 100)     | 84<br>(70 - 100)      | --                     | --                      | --                      | --                      |
| Neonatal preterm birth complications                             | 27<br>(15 - 41)      | 27<br>(15 - 41)       | --                     | --                      | --                      | --                      |
| Neonatal encephalopathy due to birth asphyxia and trauma         | 25<br>(15 - 39)      | 25<br>(15 - 39)       | --                     | --                      | --                      | --                      |
| Neonatal sepsis and other neonatal infections                    | 26<br>(14 - 42)      | 26<br>(14 - 42)       | --                     | --                      | --                      | --                      |
| Hemolytic disease and other neonatal jaundice                    | 0<br>(0 - 1)         | 0<br>(0 - 1)          | --                     | --                      | --                      | --                      |
| Other neonatal disorders                                         | 6<br>(3 - 10)        | 6<br>(3 - 10)         | --                     | --                      | --                      | --                      |
| Nutritional deficiencies                                         | 68<br>(43 - 91)      | 12<br>(5 - 20)        | 2<br>(1 - 3)           | 14<br>(6 - 21)          | 12<br>(7 - 17)          | 29<br>(20 - 39)         |
| Protein-energy malnutrition                                      | 54<br>(32 - 75)      | 11<br>(4 - 19)        | 1<br>(1 - 2)           | 9<br>(3 - 14)           | 10<br>(5 - 14)          | 24<br>(15 - 32)         |
| Iodine deficiency                                                | 0<br>(0 - 0)         | 0<br>(0 - 0)          | 0<br>(0 - 0)           | 0<br>(0 - 0)            | 0<br>(0 - 0)            | 0<br>(0 - 0)            |
| Iron-deficiency anemia                                           | 14<br>(7 - 25)       | 1<br>(0 - 2)          | 0<br>(0 - 1)           | 5<br>(2 - 9)            | 2<br>(1 - 5)            | 11<br>(2 - 11)          |
| Other nutritional deficiencies                                   | 0<br>(0 - 0)         | 0<br>(0 - 0)          | 0<br>(0 - 0)           | 0<br>(0 - 0)            | 0<br>(0 - 0)            | 0<br>(0 - 0)            |
| Other communicable, maternal, neonatal, and nutritional diseases | 20<br>(12 - 28)      | 3<br>(1 - 6)          | 1<br>(0 - 1)           | 6<br>(2 - 9)            | 6<br>(3 - 9)            | 4<br>(3 - 6)            |
| Sexually transmitted diseases excluding HIV                      | 2<br>(0 - 5)         | 2<br>(0 - 4)          | 0<br>(0 - 0)           | 0<br>(0 - 0)            | 0<br>(0 - 0)            | 0<br>(0 - 0)            |
| Syphilis                                                         | 2<br>(0 - 5)         | 2<br>(0 - 4)          | 0<br>(0 - 0)           | 0<br>(0 - 0)            | 0<br>(0 - 0)            | 0<br>(0 - 0)            |
| Chlamydial infection                                             | 0<br>(0 - 0)         | --                    | 0<br>(0 - 0)           | 0<br>(0 - 0)            | 0<br>(0 - 0)            | 0<br>(0 - 0)            |
| Gonococcal infection                                             | 0<br>(0 - 0)         | --                    | 0<br>(0 - 0)           | 0<br>(0 - 0)            | 0<br>(0 - 0)            | 0<br>(0 - 0)            |
| Other sexually transmitted diseases                              | 0<br>(0 - 0)         | --                    | 0<br>(0 - 0)           | 0<br>(0 - 0)            | 0<br>(0 - 0)            | 0<br>(0 - 0)            |
| Hepatitis                                                        | 15<br>(9 - 22)       | 1<br>(0 - 2)          | 0<br>(0 - 1)           | 5<br>(2 - 8)            | 5<br>(3 - 8)            | 4<br>(2 - 5)            |
| Acute hepatitis A                                                | 1<br>(0 - 1)         | 0<br>(0 - 0)          | 0<br>(0 - 0)           | 0<br>(0 - 1)            | 0<br>(0 - 0)            | 0<br>(0 - 0)            |
| Acute hepatitis B                                                | 11<br>(6 - 16)       | 1<br>(0 - 1)          | 0<br>(0 - 0)           | 2<br>(1 - 4)            | 4<br>(2 - 7)            | 3<br>(2 - 5)            |
| Acute hepatitis C                                                | 1<br>(0 - 1)         | --                    | 0<br>(0 - 0)           | 0<br>(0 - 1)            | 0<br>(0 - 1)            | 0<br>(0 - 0)            |
| Acute hepatitis E                                                | 3<br>(1 - 6)         | 0<br>(0 - 0)          | 0<br>(0 - 0)           | 2<br>(1 - 4)            | 1<br>(0 - 2)            | 0<br>(0 - 1)            |
| Other infectious diseases                                        | 3<br>(2 - 4)         | 1<br>(0 - 2)          | 0<br>(0 - 0)           | 1<br>(0 - 2)            | 1<br>(0 - 1)            | 1<br>(0 - 1)            |
| Non-communicable diseases                                        | 552<br>(425 - 670)   | 43<br>(26 - 64)       | 8<br>(5 - 12)          | 92<br>(41 - 129)        | 146<br>(101 - 189)      | 263<br>(222 - 302)      |
| Neoplasms                                                        | 76<br>(55 - 95)      | 2<br>(1 - 3)          | 1<br>(1 - 2)           | 14<br>(6 - 20)          | 28<br>(19 - 37)         | 30<br>(25 - 36)         |
| Esophageal cancer                                                | 2<br>(1 - 3)         | --                    | --                     | 0<br>(0 - 0)            | 1<br>(1 - 1)            | 1<br>(1 - 1)            |
| Stomach cancer                                                   | 9<br>(7 - 12)        | --                    | --                     | 1<br>(1 - 2)            | 4<br>(2 - 5)            | 4<br>(3 - 5)            |
| Liver cancer                                                     | 7<br>(5 - 10)        | --                    | 0<br>(0 - 0)           | 1<br>(0 - 2)            | 3<br>(2 - 5)            | 3<br>(2 - 4)            |
| Liver cancer due to hepatitis B                                  | 3<br>(2 - 4)         | --                    | 0<br>(0 - 0)           | 1<br>(0 - 1)            | 1<br>(1 - 2)            | 1<br>(0 - 1)            |
| Liver cancer due to hepatitis C                                  | 2<br>(1 - 4)         | --                    | 0<br>(0 - 0)           | 0<br>(0 - 0)            | 1<br>(0 - 2)            | 1<br>(1 - 2)            |

Web Table 31- Sao Tome and Principe deaths with 95% UI by age, sex, and cause in 2013

| Cause                                | Both Sexes, All Ages | Both Sexes, 0-4 Years | Both Sexes, 5-14 Years | Both Sexes, 15-49 Years | Both Sexes, 50-69 Years | Both Sexes, 70-80 Years |
|--------------------------------------|----------------------|-----------------------|------------------------|-------------------------|-------------------------|-------------------------|
| Liver cancer due to alcohol use      | 1<br>(1 - 2)         | --                    | --                     | 0<br>(0 - 0)            | 0<br>(0 - 1)            | 1<br>(0 - 1)            |
| Liver cancer due to other causes     | 1<br>(1 - 1)         | --                    | 0<br>(0 - 0)           | 0<br>(0 - 0)            | 0<br>(0 - 0)            | 0<br>(0 - 0)            |
| Larynx cancer                        | 0<br>(0 - 1)         | --                    | --                     | 0<br>(0 - 0)            | 0<br>(0 - 0)            | 0<br>(0 - 0)            |
| Tracheal, bronchus and lung cancer   | 8<br>(6 - 10)        | --                    | --                     | 1<br>(0 - 1)            | 4<br>(3 - 4)            | 3<br>(3 - 4)            |
| Breast cancer                        | 7<br>(4 - 11)        | --                    | --                     | 2<br>(1 - 3)            | 3<br>(2 - 5)            | 2<br>(1 - 3)            |
| Cervical cancer                      | 9<br>(5 - 14)        | --                    | --                     | 3<br>(1 - 5)            | 4<br>(2 - 6)            | 2<br>(1 - 3)            |
| Uterine cancer                       | 1<br>(1 - 2)         | --                    | --                     | 0<br>(0 - 0)            | 0<br>(0 - 1)            | 1<br>(0 - 1)            |
| Prostate cancer                      | 5<br>(3 - 8)         | --                    | --                     | 0<br>(0 - 0)            | 1<br>(0 - 1)            | 4<br>(3 - 6)            |
| Colon and rectum cancer              | 4<br>(3 - 6)         | --                    | --                     | 0<br>(0 - 1)            | 1<br>(1 - 2)            | 2<br>(2 - 3)            |
| Lip and oral cavity cancer           | 0<br>(0 - 0)         | --                    | --                     | 0<br>(0 - 0)            | 0<br>(0 - 0)            | 0<br>(0 - 0)            |
| Nasopharynx cancer                   | 0<br>(0 - 0)         | --                    | 0<br>(0 - 0)           | 0<br>(0 - 0)            | 0<br>(0 - 0)            | 0<br>(0 - 0)            |
| Other pharynx cancer                 | 0<br>(0 - 0)         | --                    | --                     | 0<br>(0 - 0)            | 0<br>(0 - 0)            | 0<br>(0 - 0)            |
| Gallbladder and biliary tract cancer | 1<br>(0 - 1)         | --                    | --                     | 0<br>(0 - 0)            | 0<br>(0 - 1)            | 0<br>(0 - 1)            |
| Pancreatic cancer                    | 0<br>(0 - 0)         | --                    | --                     | 0<br>(0 - 0)            | 0<br>(0 - 0)            | 0<br>(0 - 0)            |
| Malignant skin melanoma              | 0<br>(0 - 0)         | --                    | --                     | 0<br>(0 - 0)            | 0<br>(0 - 0)            | 0<br>(0 - 0)            |
| Non-melanoma skin cancer             | 0<br>(0 - 0)         | --                    | --                     | 0<br>(0 - 0)            | 0<br>(0 - 0)            | 0<br>(0 - 0)            |
| Ovarian cancer                       | 3<br>(1 - 5)         | --                    | --                     | 1<br>(0 - 1)            | 2<br>(1 - 3)            | 1<br>(0 - 1)            |
| Testicular cancer                    | 0<br>(0 - 0)         | --                    | --                     | 0<br>(0 - 0)            | 0<br>(0 - 0)            | 0<br>(0 - 0)            |
| Kidney cancer                        | 1<br>(1 - 1)         | 0<br>(0 - 0)          | 0<br>(0 - 0)           | 0<br>(0 - 0)            | 0<br>(0 - 1)            | 0<br>(0 - 1)            |
| Bladder cancer                       | 3<br>(2 - 4)         | --                    | --                     | 0<br>(0 - 0)            | 1<br>(1 - 1)            | 2<br>(2 - 3)            |
| Brain and nervous system cancer      | 0<br>(0 - 0)         | 0<br>(0 - 0)          | 0<br>(0 - 0)           | 0<br>(0 - 0)            | 0<br>(0 - 0)            | 0<br>(0 - 0)            |
| Thyroid cancer                       | 0<br>(0 - 0)         | --                    | 0<br>(0 - 0)           | 0<br>(0 - 0)            | 0<br>(0 - 0)            | 0<br>(0 - 0)            |
| Mesothelioma                         | 0<br>(0 - 0)         | --                    | --                     | 0<br>(0 - 0)            | 0<br>(0 - 0)            | 0<br>(0 - 0)            |
| Hodgkin lymphoma                     | 0<br>(0 - 0)         | 0<br>(0 - 0)          | 0<br>(0 - 0)           | 0<br>(0 - 0)            | 0<br>(0 - 0)            | 0<br>(0 - 0)            |
| Non-Hodgkin lymphoma                 | 3<br>(2 - 5)         | 0<br>(0 - 1)          | 1<br>(0 - 1)           | 1<br>(1 - 2)            | 1<br>(0 - 1)            | 1<br>(0 - 1)            |
| Multiple myeloma                     | 0<br>(0 - 0)         | --                    | --                     | 0<br>(0 - 0)            | 0<br>(0 - 0)            | 0<br>(0 - 0)            |
| Leukemia                             | 1<br>(1 - 1)         | 0<br>(0 - 0)          | 0<br>(0 - 0)           | 0<br>(0 - 0)            | 0<br>(0 - 0)            | 0<br>(0 - 0)            |
| Other neoplasms                      | 8<br>(5 - 11)        | 1<br>(0 - 2)          | 1<br>(0 - 1)           | 2<br>(1 - 3)            | 2<br>(1 - 3)            | 3<br>(2 - 3)            |
| Cardiovascular diseases              | 243<br>(181 - 302)   | 8<br>(4 - 13)         | 2<br>(1 - 3)           | 41<br>(18 - 59)         | 63<br>(43 - 84)         | 129<br>(104 - 155)      |
| Rheumatic heart disease              | 11<br>(5 - 16)       | 0<br>(0 - 0)          | 0<br>(0 - 0)           | 4<br>(1 - 6)            | 4<br>(2 - 6)            | 4<br>(2 - 5)            |
| Ischemic heart disease               | 63<br>(44 - 79)      | 1<br>(0 - 2)          | 0<br>(0 - 1)           | 10<br>(4 - 14)          | 17<br>(10 - 23)         | 35<br>(26 - 45)         |
| Cerebrovascular disease              | 120<br>(90 - 150)    | 5<br>(3 - 8)          | 1<br>(0 - 1)           | 18<br>(8 - 27)          | 30<br>(20 - 41)         | 66<br>(52 - 81)         |
| Ischemic stroke                      | 43<br>(29 - 58)      | 0<br>(0 - 1)          | 0<br>(0 - 0)           | 4<br>(2 - 7)            | 11<br>(6 - 15)          | 28<br>(18 - 37)         |
| Hemorrhagic stroke                   | 77<br>(54 - 98)      | 5<br>(3 - 7)          | 1<br>(0 - 1)           | 14<br>(6 - 21)          | 19<br>(13 - 26)         | 38<br>(28 - 48)         |
| Hypertensive heart disease           | 4<br>(2 - 7)         | 0<br>(0 - 0)          | 0<br>(0 - 0)           | 0<br>(0 - 1)            | 1<br>(0 - 2)            | 2<br>(1 - 5)            |
| Cardiomyopathy and myocarditis       | 12<br>(8 - 17)       | 1<br>(0 - 2)          | 0<br>(0 - 1)           | 3<br>(1 - 5)            | 3<br>(2 - 4)            | 5<br>(3 - 7)            |
| Atrial fibrillation and flutter      | 0<br>(0 - 0)         | --                    | --                     | 0<br>(0 - 0)            | 0<br>(0 - 0)            | 0<br>(0 - 0)            |
| Aortic aneurysm                      | 2<br>(1 - 3)         | --                    | --                     | 0<br>(0 - 0)            | 1<br>(0 - 1)            | 1<br>(1 - 2)            |
| Peripheral vascular disease          | 0<br>(0 - 0)         | --                    | --                     | 0<br>(0 - 0)            | 0<br>(0 - 0)            | 0<br>(0 - 0)            |
| Endocarditis                         | 4<br>(2 - 5)         | 1<br>(0 - 1)          | 0<br>(0 - 0)           | 1<br>(0 - 2)            | 1<br>(0 - 1)            | 1<br>(1 - 2)            |

Web Table 31- Sao Tome and Principe deaths with 95% UI by age, sex, and cause in 2013

| Cause                                               | Both Sexes, All Ages | Both Sexes, 0-4 Years | Both Sexes, 5-14 Years | Both Sexes, 15-49 Years | Both Sexes, 50-69 Years | Both Sexes, 70-80 Years |
|-----------------------------------------------------|----------------------|-----------------------|------------------------|-------------------------|-------------------------|-------------------------|
| Other cardiovascular and circulatory diseases       | 29<br>(17 - 40)      | 1<br>(0 - 1)          | 0<br>(0 - 0)           | 4<br>(2 - 6)            | 8<br>(4 - 12)           | 16<br>(9 - 23)          |
| Chronic respiratory diseases                        | 89<br>(65 - 111)     | 2<br>(1 - 3)          | 0<br>(0 - 0)           | 8<br>(3 - 11)           | 24<br>(16 - 32)         | 56<br>(43 - 67)         |
| Chronic obstructive pulmonary disease               | 62<br>(46 - 79)      | 1<br>(0 - 2)          | 0<br>(0 - 0)           | 3<br>(1 - 5)            | 16<br>(11 - 22)         | 41<br>(32 - 53)         |
| Pneumoconiosis                                      | 3<br>(1 - 5)         | 0<br>(0 - 0)          | 0<br>(0 - 0)           | 1<br>(0 - 1)            | 1<br>(1 - 2)            | 1<br>(1 - 2)            |
| Silicosis                                           | 0<br>(0 - 1)         | 0<br>(0 - 0)          | 0<br>(0 - 0)           | 0<br>(0 - 0)            | 0<br>(0 - 0)            | 0<br>(0 - 1)            |
| Asbestosis                                          | 0<br>(0 - 0)         | 0<br>(0 - 0)          | 0<br>(0 - 0)           | 0<br>(0 - 0)            | 0<br>(0 - 0)            | 0<br>(0 - 0)            |
| Coal workers pneumoconiosis                         | 1<br>(0 - 1)         | 0<br>(0 - 0)          | 0<br>(0 - 0)           | 0<br>(0 - 0)            | 1<br>(0 - 1)            | 0<br>(0 - 0)            |
| Other pneumoconiosis                                | 1<br>(1 - 2)         | 0<br>(0 - 0)          | 0<br>(0 - 0)           | 0<br>(0 - 1)            | 0<br>(0 - 1)            | 0<br>(0 - 1)            |
| Asthma                                              | 12<br>(5 - 18)       | 0<br>(0 - 1)          | 0<br>(0 - 0)           | 2<br>(1 - 4)            | 4<br>(1 - 6)            | 6<br>(2 - 9)            |
| Interstitial lung disease and pulmonary sarcoidosis | 7<br>(1 - 15)        | 0<br>(0 - 0)          | 0<br>(0 - 0)           | 0<br>(0 - 1)            | 2<br>(0 - 4)            | 5<br>(1 - 11)           |
| Other chronic respiratory diseases                  | 5<br>(3 - 8)         | 1<br>(0 - 1)          | 0<br>(0 - 0)           | 1<br>(1 - 2)            | 1<br>(1 - 1)            | 2<br>(1 - 4)            |
| Cirrhosis                                           | 24<br>(15 - 33)      | 0<br>(0 - 0)          | 0<br>(0 - 0)           | 8<br>(3 - 12)           | 10<br>(7 - 15)          | 6<br>(4 - 8)            |
| Cirrhosis due to hepatitis B                        | 5<br>(3 - 10)        | 0<br>(0 - 0)          | 0<br>(0 - 0)           | 2<br>(1 - 3)            | 2<br>(1 - 4)            | 1<br>(1 - 2)            |
| Cirrhosis due to hepatitis C                        | 6<br>(3 - 10)        | 0<br>(0 - 0)          | 0<br>(0 - 0)           | 2<br>(0 - 4)            | 2<br>(1 - 5)            | 2<br>(1 - 2)            |
| Cirrhosis due to alcohol use                        | 10<br>(6 - 15)       | --                    | --                     | 3<br>(1 - 5)            | 4<br>(2 - 7)            | 3<br>(2 - 4)            |
| Cirrhosis due to other causes                       | 3<br>(1 - 5)         | 0<br>(0 - 0)          | 0<br>(0 - 0)           | 1<br>(1 - 2)            | 1<br>(1 - 2)            | 0<br>(0 - 1)            |
| Digestive diseases                                  | 18<br>(13 - 25)      | 0<br>(0 - 1)          | 0<br>(0 - 1)           | 5<br>(2 - 7)            | 5<br>(3 - 7)            | 8<br>(6 - 11)           |
| Peptic ulcer disease                                | 3<br>(2 - 4)         | 0<br>(0 - 0)          | 0<br>(0 - 0)           | 1<br>(0 - 1)            | 1<br>(0 - 1)            | 1<br>(1 - 2)            |
| Gastritis and duodenitis                            | 1<br>(0 - 2)         | 0<br>(0 - 0)          | 0<br>(0 - 0)           | 0<br>(0 - 0)            | 0<br>(0 - 0)            | 0<br>(0 - 1)            |
| Appendicitis                                        | 1<br>(1 - 1)         | 0<br>(0 - 0)          | 0<br>(0 - 0)           | 0<br>(0 - 1)            | 0<br>(0 - 0)            | 0<br>(0 - 0)            |
| Paralytic ileus and intestinal obstruction          | 5<br>(3 - 8)         | 0<br>(0 - 0)          | 0<br>(0 - 0)           | 1<br>(1 - 2)            | 1<br>(1 - 2)            | 2<br>(1 - 4)            |
| Inguinal, femoral, and abdominal hernia             | 1<br>(0 - 2)         | 0<br>(0 - 0)          | 0<br>(0 - 0)           | 0<br>(0 - 0)            | 0<br>(0 - 0)            | 0<br>(0 - 1)            |
| Inflammatory bowel disease                          | 1<br>(1 - 1)         | 0<br>(0 - 0)          | 0<br>(0 - 0)           | 0<br>(0 - 1)            | 0<br>(0 - 0)            | 0<br>(0 - 0)            |
| Vascular intestinal disorders                       | 0<br>(0 - 0)         | 0<br>(0 - 0)          | 0<br>(0 - 0)           | 0<br>(0 - 0)            | 0<br>(0 - 0)            | 0<br>(0 - 0)            |
| Gallbladder and biliary diseases                    | 1<br>(1 - 2)         | 0<br>(0 - 0)          | 0<br>(0 - 0)           | 0<br>(0 - 0)            | 0<br>(0 - 1)            | 1<br>(0 - 1)            |
| Pancreatitis                                        | 1<br>(1 - 2)         | 0<br>(0 - 0)          | 0<br>(0 - 0)           | 1<br>(0 - 1)            | 0<br>(0 - 1)            | 0<br>(0 - 0)            |
| Other digestive diseases                            | 5<br>(3 - 7)         | 0<br>(0 - 0)          | 0<br>(0 - 0)           | 1<br>(0 - 1)            | 1<br>(1 - 2)            | 3<br>(2 - 4)            |
| Neurological disorders                              | 16<br>(13 - 20)      | 1<br>(0 - 2)          | 0<br>(0 - 1)           | 2<br>(1 - 4)            | 1<br>(1 - 1)            | 11<br>(9 - 14)          |
| Alzheimer disease and other dementias               | 10<br>(7 - 12)       | --                    | --                     | 0<br>(0 - 0)            | 0<br>(0 - 1)            | 9<br>(7 - 11)           |
| Parkinson disease                                   | 2<br>(1 - 3)         | --                    | --                     | 0<br>(0 - 0)            | 0<br>(0 - 0)            | 2<br>(1 - 3)            |
| Epilepsy                                            | 3<br>(2 - 5)         | 0<br>(0 - 1)          | 0<br>(0 - 1)           | 2<br>(1 - 3)            | 0<br>(0 - 0)            | 0<br>(0 - 1)            |
| Multiple sclerosis                                  | 0<br>(0 - 0)         | --                    | --                     | 0<br>(0 - 0)            | 0<br>(0 - 0)            | 0<br>(0 - 0)            |
| Other neurological disorders                        | 1<br>(1 - 2)         | 0<br>(0 - 0)          | 0<br>(0 - 0)           | 0<br>(0 - 1)            | 0<br>(0 - 0)            | 0<br>(0 - 0)            |
| Mental and substance use disorders                  | 3<br>(1 - 5)         | 0<br>(0 - 1)          | 0<br>(0 - 0)           | 2<br>(1 - 4)            | 0<br>(0 - 1)            | 0<br>(0 - 0)            |
| Schizophrenia                                       | 0<br>(0 - 0)         | --                    | --                     | 0<br>(0 - 0)            | 0<br>(0 - 0)            | 0<br>(0 - 0)            |
| Alcohol use disorders                               | 1<br>(0 - 1)         | --                    | --                     | 0<br>(0 - 1)            | 0<br>(0 - 1)            | 0<br>(0 - 0)            |
| Drug use disorders                                  | 2<br>(1 - 3)         | 0<br>(0 - 1)          | --                     | 2<br>(1 - 3)            | 0<br>(0 - 0)            | 0<br>(0 - 0)            |
| Opioid use disorders                                | 0<br>(0 - 0)         | 0<br>(0 - 0)          | --                     | 0<br>(0 - 0)            | 0<br>(0 - 0)            | 0<br>(0 - 0)            |
| Cocaine use disorders                               | 0<br>(0 - 0)         | 0<br>(0 - 0)          | --                     | 0<br>(0 - 0)            | 0<br>(0 - 0)            | 0<br>(0 - 0)            |
| Amphetamine use disorders                           | 0<br>(0 - 0)         | 0<br>(0 - 0)          | --                     | 0<br>(0 - 0)            | 0<br>(0 - 0)            | 0<br>(0 - 0)            |

Web Table 31- Sao Tome and Principe deaths with 95% UI by age, sex, and cause in 2013

| Cause                                               | Both Sexes, All Ages | Both Sexes, 0-4 Years | Both Sexes, 5-14 Years | Both Sexes, 15-49 Years | Both Sexes, 50-69 Years | Both Sexes, 70-80 Years |
|-----------------------------------------------------|----------------------|-----------------------|------------------------|-------------------------|-------------------------|-------------------------|
| Other drug use disorders                            | 2<br>(1 - 3)         | 0<br>(0 - 0)          | --                     | 1<br>(0 - 2)            | 0<br>(0 - 0)            | 0<br>(0 - 0)            |
| Eating disorders                                    | 0<br>(0 - 0)         | --                    | 0<br>(0 - 0)           | 0<br>(0 - 0)            | --                      | --                      |
| Anorexia nervosa                                    | 0<br>(0 - 0)         | --                    | 0<br>(0 - 0)           | 0<br>(0 - 0)            | --                      | --                      |
| Diabetes, urogenital, blood, and endocrine diseases | 51<br>(36 - 73)      | 6<br>(3 - 13)         | 2<br>(1 - 6)           | 10<br>(5 - 17)          | 13<br>(9 - 18)          | 19<br>(15 - 25)         |
| Diabetes mellitus                                   | 15<br>(11 - 20)      | 0<br>(0 - 0)          | 0<br>(0 - 0)           | 2<br>(1 - 3)            | 6<br>(4 - 8)            | 7<br>(6 - 10)           |
| Acute glomerulonephritis                            | 0<br>(0 - 0)         | 0<br>(0 - 0)          | 0<br>(0 - 0)           | 0<br>(0 - 0)            | 0<br>(0 - 0)            | 0<br>(0 - 0)            |
| Chronic kidney disease                              | 9<br>(6 - 13)        | 0<br>(0 - 0)          | 0<br>(0 - 0)           | 2<br>(1 - 3)            | 3<br>(2 - 4)            | 4<br>(3 - 6)            |
| Chronic kidney disease due to diabetes mellitus     | 0<br>(0 - 0)         | 0<br>(0 - 0)          | 0<br>(0 - 0)           | 0<br>(0 - 0)            | 0<br>(0 - 0)            | 0<br>(0 - 0)            |
| Chronic kidney disease due to hypertension          | 5<br>(3 - 8)         | 0<br>(0 - 0)          | 0<br>(0 - 0)           | 1<br>(0 - 1)            | 2<br>(1 - 2)            | 3<br>(2 - 4)            |
| Chronic kidney disease due to glomerulonephritis    | 2<br>(1 - 3)         | 0<br>(0 - 0)          | 0<br>(0 - 0)           | 1<br>(0 - 1)            | 0<br>(0 - 1)            | 1<br>(0 - 1)            |
| Chronic kidney disease due to other causes          | 2<br>(1 - 4)         | 0<br>(0 - 0)          | 0<br>(0 - 0)           | 0<br>(0 - 1)            | 1<br>(0 - 1)            | 1<br>(1 - 2)            |
| Urinary diseases and male infertility               | 8<br>(6 - 10)        | 0<br>(0 - 0)          | 0<br>(0 - 0)           | 1<br>(0 - 1)            | 2<br>(1 - 3)            | 5<br>(3 - 7)            |
| Interstitial nephritis and urinary tract infections | 5<br>(3 - 7)         | 0<br>(0 - 0)          | 0<br>(0 - 0)           | 0<br>(0 - 1)            | 1<br>(1 - 2)            | 3<br>(2 - 5)            |
| Urolithiasis                                        | 2<br>(1 - 3)         | --                    | 0<br>(0 - 0)           | 0<br>(0 - 0)            | 1<br>(0 - 1)            | 1<br>(0 - 2)            |
| Other urinary diseases                              | 1<br>(1 - 2)         | 0<br>(0 - 0)          | 0<br>(0 - 0)           | 0<br>(0 - 0)            | 0<br>(0 - 0)            | 0<br>(0 - 1)            |
| Gynecological diseases                              | 0<br>(0 - 1)         | --                    | --                     | 0<br>(0 - 0)            | 0<br>(0 - 0)            | 0<br>(0 - 0)            |
| Uterine fibroids                                    | 0<br>(0 - 0)         | --                    | --                     | 0<br>(0 - 0)            | 0<br>(0 - 0)            | 0<br>(0 - 0)            |
| Polycystic ovarian syndrome                         | 0<br>(0 - 0)         | --                    | --                     | 0<br>(0 - 0)            | 0<br>(0 - 0)            | --                      |
| Endometriosis                                       | 0<br>(0 - 0)         | --                    | --                     | 0<br>(0 - 0)            | 0<br>(0 - 0)            | --                      |
| Genital prolapse                                    | 0<br>(0 - 0)         | --                    | --                     | 0<br>(0 - 0)            | 0<br>(0 - 0)            | 0<br>(0 - 0)            |
| Other gynecological diseases                        | 0<br>(0 - 0)         | --                    | --                     | 0<br>(0 - 0)            | 0<br>(0 - 0)            | 0<br>(0 - 0)            |
| Hemoglobinopathies and hemolytic anemias            | 11<br>(4 - 26)       | 4<br>(1 - 10)         | 2<br>(0 - 5)           | 3<br>(1 - 8)            | 1<br>(0 - 2)            | 1<br>(0 - 1)            |
| Thalassemias                                        | 0<br>(0 - 0)         | 0<br>(0 - 0)          | 0<br>(0 - 0)           | 0<br>(0 - 0)            | 0<br>(0 - 0)            | 0<br>(0 - 0)            |
| Sickle cell disorders                               | 10<br>(3 - 24)       | 4<br>(1 - 10)         | 2<br>(0 - 5)           | 3<br>(1 - 8)            | 1<br>(0 - 2)            | 0<br>(0 - 0)            |
| G6PD deficiency                                     | 0<br>(0 - 0)         | 0<br>(0 - 0)          | 0<br>(0 - 0)           | 0<br>(0 - 0)            | 0<br>(0 - 0)            | 0<br>(0 - 0)            |
| Other hemoglobinopathies and hemolytic anemias      | 1<br>(0 - 1)         | 0<br>(0 - 0)          | 0<br>(0 - 0)           | 0<br>(0 - 0)            | 0<br>(0 - 0)            | 0<br>(0 - 1)            |
| Endocrine, metabolic, blood, and immune disorders   | 8<br>(5 - 11)        | 2<br>(1 - 3)          | 0<br>(0 - 1)           | 2<br>(1 - 3)            | 2<br>(1 - 3)            | 2<br>(1 - 4)            |
| Musculoskeletal disorders                           | 2<br>(1 - 3)         | --                    | 0<br>(0 - 0)           | 1<br>(0 - 1)            | 0<br>(0 - 1)            | 1<br>(0 - 1)            |
| Rheumatoid arthritis                                | 0<br>(0 - 1)         | --                    | 0<br>(0 - 0)           | 0<br>(0 - 0)            | 0<br>(0 - 0)            | 0<br>(0 - 0)            |
| Other musculoskeletal disorders                     | 1<br>(1 - 2)         | --                    | 0<br>(0 - 0)           | 1<br>(0 - 1)            | 0<br>(0 - 0)            | 0<br>(0 - 1)            |
| Other non-communicable diseases                     | 30<br>(19 - 47)      | 24<br>(14 - 39)       | 1<br>(1 - 2)           | 2<br>(1 - 3)            | 1<br>(1 - 1)            | 2<br>(2 - 3)            |
| Congenital anomalies                                | 26<br>(16 - 43)      | 23<br>(13 - 39)       | 1<br>(1 - 2)           | 1<br>(1 - 2)            | 0<br>(0 - 0)            | 0<br>(0 - 0)            |
| Neural tube defects                                 | 3<br>(1 - 7)         | 3<br>(1 - 7)          | 0<br>(0 - 0)           | 0<br>(0 - 0)            | 0<br>(0 - 0)            | 0<br>(0 - 0)            |
| Congenital heart anomalies                          | 14<br>(8 - 22)       | 12<br>(7 - 20)        | 1<br>(0 - 1)           | 1<br>(0 - 1)            | 0<br>(0 - 0)            | 0<br>(0 - 0)            |
| Cleft lip and cleft palate                          | 0<br>(0 - 0)         | 0<br>(0 - 0)          | --                     | --                      | --                      | --                      |
| Down syndrome                                       | 3<br>(1 - 6)         | 2<br>(0 - 5)          | 0<br>(0 - 0)           | 0<br>(0 - 0)            | 0<br>(0 - 0)            | 0<br>(0 - 0)            |
| Chromosomal unbalanced rearrangements               | 1<br>(0 - 3)         | 1<br>(0 - 3)          | 0<br>(0 - 0)           | 0<br>(0 - 0)            | 0<br>(0 - 0)            | 0<br>(0 - 0)            |
| Other congenital anomalies                          | 6<br>(2 - 14)        | 5<br>(2 - 13)         | 0<br>(0 - 1)           | 0<br>(0 - 0)            | 0<br>(0 - 0)            | 0<br>(0 - 0)            |
| Skin and subcutaneous diseases                      | 3<br>(2 - 5)         | 0<br>(0 - 1)          | 0<br>(0 - 0)           | 1<br>(0 - 1)            | 1<br>(0 - 1)            | 2<br>(1 - 3)            |
| Cellulitis                                          | 0<br>(0 - 1)         | 0<br>(0 - 0)          | 0<br>(0 - 0)           | 0<br>(0 - 0)            | 0<br>(0 - 0)            | 0<br>(0 - 0)            |



Web Table 31- Sao Tome and Principe deaths with 95% UI by age, sex, and cause in 2013

| Cause                                           | Both Sexes, All Ages | Both Sexes, 0-4 Years | Both Sexes, 5-14 Years | Both Sexes, 15-49 Years | Both Sexes, 50-69 Years | Both Sexes, 70-80 Years |
|-------------------------------------------------|----------------------|-----------------------|------------------------|-------------------------|-------------------------|-------------------------|
| Pyoderma                                        | 3<br>(2 - 4)         | 0<br>(0 - 0)          | 0<br>(0 - 0)           | 0<br>(0 - 1)            | 1<br>(0 - 1)            | 2<br>(1 - 2)            |
| Decubitus ulcer                                 | 0<br>(0 - 0)         | 0<br>(0 - 0)          | 0<br>(0 - 0)           | 0<br>(0 - 0)            | 0<br>(0 - 0)            | 0<br>(0 - 0)            |
| Other skin and subcutaneous diseases            | 0<br>(0 - 0)         | 0<br>(0 - 0)          | 0<br>(0 - 0)           | 0<br>(0 - 0)            | 0<br>(0 - 0)            | 0<br>(0 - 0)            |
| Sudden infant death syndrome                    | 0<br>(0 - 1)         | 0<br>(0 - 1)          | --                     | --                      | --                      | --                      |
| Injuries                                        | 77<br>(47 - 137)     | 7<br>(3 - 26)         | 4<br>(2 - 8)           | 44<br>(22 - 70)         | 11<br>(7 - 21)          | 11<br>(8 - 18)          |
| Transport injuries                              | 26<br>(15 - 37)      | 1<br>(0 - 2)          | 1<br>(1 - 2)           | 17<br>(9 - 26)          | 4<br>(3 - 6)            | 3<br>(2 - 4)            |
| Road injuries                                   | 25<br>(15 - 35)      | 1<br>(0 - 2)          | 1<br>(1 - 2)           | 17<br>(8 - 25)          | 4<br>(2 - 5)            | 3<br>(2 - 4)            |
| Pedestrian road injuries                        | 6<br>(4 - 9)         | 0<br>(0 - 1)          | 0<br>(0 - 1)           | 4<br>(2 - 6)            | 1<br>(1 - 2)            | 1<br>(1 - 1)            |
| Cyclist road injuries                           | 1<br>(1 - 2)         | 0<br>(0 - 0)          | 0<br>(0 - 0)           | 1<br>(0 - 1)            | 0<br>(0 - 0)            | 0<br>(0 - 0)            |
| Motorcyclist road injuries                      | 3<br>(1 - 5)         | 0<br>(0 - 0)          | 0<br>(0 - 0)           | 2<br>(1 - 4)            | 0<br>(0 - 1)            | 0<br>(0 - 0)            |
| Motor vehicle road injuries                     | 15<br>(8 - 21)       | 0<br>(0 - 1)          | 1<br>(0 - 1)           | 10<br>(5 - 16)          | 2<br>(1 - 3)            | 1<br>(1 - 2)            |
| Other road injuries                             | 0<br>(0 - 0)         | 0<br>(0 - 0)          | 0<br>(0 - 0)           | 0<br>(0 - 0)            | 0<br>(0 - 0)            | 0<br>(0 - 0)            |
| Other transport injuries                        | 1<br>(1 - 2)         | 0<br>(0 - 0)          | 0<br>(0 - 0)           | 1<br>(0 - 1)            | 0<br>(0 - 0)            | 0<br>(0 - 0)            |
| Unintentional injuries                          | 31<br>(18 - 70)      | 5<br>(2 - 24)         | 2<br>(1 - 6)           | 12<br>(5 - 24)          | 5<br>(3 - 9)            | 7<br>(5 - 10)           |
| Falls                                           | 9<br>(6 - 13)        | 1<br>(0 - 2)          | 0<br>(0 - 1)           | 3<br>(1 - 5)            | 2<br>(1 - 3)            | 4<br>(2 - 5)            |
| Drowning                                        | 5<br>(3 - 9)         | 1<br>(0 - 3)          | 1<br>(0 - 2)           | 3<br>(1 - 4)            | 1<br>(0 - 1)            | 0<br>(0 - 0)            |
| Fire, heat, and hot substances                  | 1<br>(0 - 1)         | 0<br>(0 - 0)          | 0<br>(0 - 0)           | 0<br>(0 - 0)            | 0<br>(0 - 0)            | 0<br>(0 - 0)            |
| Poisonings                                      | 1<br>(0 - 3)         | 0<br>(0 - 0)          | 0<br>(0 - 0)           | 1<br>(0 - 2)            | 0<br>(0 - 0)            | 0<br>(0 - 0)            |
| Exposure to mechanical forces                   | 9<br>(2 - 52)        | 2<br>(0 - 21)         | 1<br>(0 - 5)           | 4<br>(1 - 19)           | 1<br>(0 - 5)            | 1<br>(0 - 3)            |
| Unintentional firearm injuries                  | 2<br>(1 - 4)         | 0<br>(0 - 0)          | 0<br>(0 - 0)           | 1<br>(1 - 3)            | 0<br>(0 - 0)            | 0<br>(0 - 0)            |
| Unintentional suffocation                       | 5<br>(0 - 49)        | 2<br>(0 - 20)         | 0<br>(0 - 5)           | 1<br>(0 - 17)           | 1<br>(0 - 5)            | 0<br>(0 - 3)            |
| Other exposure to mechanical forces             | 2<br>(0 - 3)         | 0<br>(0 - 0)          | 0<br>(0 - 0)           | 1<br>(0 - 2)            | 0<br>(0 - 0)            | 0<br>(0 - 0)            |
| Adverse effects of medical treatment            | 3<br>(2 - 5)         | 0<br>(0 - 1)          | 0<br>(0 - 0)           | 1<br>(0 - 2)            | 1<br>(0 - 1)            | 1<br>(1 - 2)            |
| Animal contact                                  | 0<br>(0 - 1)         | 0<br>(0 - 0)          | 0<br>(0 - 0)           | 0<br>(0 - 0)            | 0<br>(0 - 0)            | 0<br>(0 - 0)            |
| Venomous animal contact                         | 0<br>(0 - 0)         | 0<br>(0 - 0)          | 0<br>(0 - 0)           | 0<br>(0 - 0)            | 0<br>(0 - 0)            | 0<br>(0 - 0)            |
| Non-venomous animal contact                     | 0<br>(0 - 0)         | 0<br>(0 - 0)          | 0<br>(0 - 0)           | 0<br>(0 - 0)            | 0<br>(0 - 0)            | 0<br>(0 - 0)            |
| Foreign body                                    | 2<br>(2 - 4)         | 1<br>(1 - 2)          | 0<br>(0 - 0)           | 0<br>(0 - 1)            | 0<br>(0 - 0)            | 1<br>(0 - 1)            |
| Pulmonary aspiration and foreign body in airway | 2<br>(1 - 4)         | 1<br>(0 - 2)          | 0<br>(0 - 0)           | 0<br>(0 - 1)            | 0<br>(0 - 0)            | 1<br>(0 - 1)            |
| Foreign body in other body part                 | 0<br>(0 - 1)         | 0<br>(0 - 0)          | 0<br>(0 - 0)           | 0<br>(0 - 0)            | 0<br>(0 - 0)            | 0<br>(0 - 0)            |
| Other unintentional injuries                    | 0<br>(0 - 0)         | 0<br>(0 - 0)          | 0<br>(0 - 0)           | 0<br>(0 - 0)            | 0<br>(0 - 0)            | 0<br>(0 - 0)            |
| Self-harm and interpersonal violence            | 19<br>(9 - 43)       | 1<br>(0 - 1)          | 1<br>(0 - 1)           | 15<br>(7 - 28)          | 2<br>(1 - 9)            | 1<br>(1 - 6)            |
| Self-harm                                       | 6<br>(3 - 34)        | --                    | 0<br>(0 - 0)           | 4<br>(1 - 19)           | 1<br>(1 - 8)            | 1<br>(0 - 6)            |
| Interpersonal violence                          | 13<br>(6 - 19)       | 1<br>(0 - 1)          | 0<br>(0 - 1)           | 11<br>(4 - 17)          | 1<br>(0 - 1)            | 0<br>(0 - 0)            |
| Assault by firearm                              | 7<br>(2 - 12)        | 0<br>(0 - 0)          | 0<br>(0 - 0)           | 6<br>(2 - 11)           | 0<br>(0 - 0)            | 0<br>(0 - 0)            |
| Assault by sharp object                         | 3<br>(1 - 5)         | 0<br>(0 - 0)          | 0<br>(0 - 0)           | 2<br>(1 - 4)            | 0<br>(0 - 0)            | 0<br>(0 - 0)            |
| Assault by other means                          | 3<br>(1 - 5)         | 0<br>(0 - 1)          | 0<br>(0 - 0)           | 2<br>(1 - 4)            | 0<br>(0 - 0)            | 0<br>(0 - 0)            |

Web Table 31- Sao Tome and Principe deaths with 95% UI by age, sex, and cause in 2013

| Cause                                                             | Males, All Ages    | Males, 0-4 Years   | Males, 5-14 Years | Males, 15-49 Years | Males, 50-69 Years | Males, 70-80 Years |
|-------------------------------------------------------------------|--------------------|--------------------|-------------------|--------------------|--------------------|--------------------|
| All causes                                                        | 579<br>(470 - 734) | 145<br>(122 - 173) | 17<br>(14 - 20)   | 149<br>(102 - 229) | 99<br>(70 - 137)   | 169<br>(140 - 201) |
| Communicable, maternal, neonatal, and nutritional diseases        | 258<br>(202 - 403) | 119<br>(95 - 145)  | 10<br>(7 - 14)    | 63<br>(34 - 190)   | 25<br>(16 - 44)    | 42<br>(28 - 55)    |
| HIV/AIDS and tuberculosis                                         | 51<br>(14 - 236)   | 1<br>(0 - 7)       | 1<br>(0 - 5)      | 38<br>(8 - 179)    | 8<br>(3 - 31)      | 3<br>(2 - 9)       |
| Tuberculosis                                                      | 9<br>(5 - 15)      | 0<br>(0 - 0)       | 0<br>(0 - 0)      | 4<br>(2 - 8)       | 3<br>(1 - 4)       | 2<br>(1 - 3)       |
| HIV/AIDS                                                          | 42<br>(4 - 230)    | 1<br>(0 - 7)       | 1<br>(0 - 5)      | 33<br>(3 - 178)    | 5<br>(0 - 29)      | 1<br>(0 - 7)       |
| HIV/AIDS resulting in mycobacterial infection                     | 3<br>(0 - 16)      | 0<br>(0 - 0)       | 0<br>(0 - 0)      | 2<br>(0 - 12)      | 0<br>(0 - 2)       | 0<br>(0 - 0)       |
| HIV/AIDS resulting in other diseases                              | 39<br>(3 - 214)    | 1<br>(0 - 6)       | 1<br>(0 - 5)      | 31<br>(3 - 165)    | 5<br>(0 - 27)      | 1<br>(0 - 6)       |
| Diarrhea, lower respiratory, and other common infectious diseases | 79<br>(45 - 106)   | 36<br>(18 - 54)    | 4<br>(2 - 7)      | 10<br>(4 - 17)     | 8<br>(4 - 12)      | 21<br>(13 - 31)    |
| Diarrheal diseases                                                | 14<br>(7 - 25)     | 9<br>(3 - 18)      | 1<br>(0 - 1)      | 2<br>(1 - 4)       | 1<br>(0 - 2)       | 2<br>(1 - 4)       |
| Intestinal infectious diseases                                    | 4<br>(2 - 8)       | 1<br>(0 - 3)       | 1<br>(1 - 3)      | 1<br>(0 - 3)       | 0<br>(0 - 0)       | 0<br>(0 - 0)       |
| Typhoid fever                                                     | 3<br>(1 - 5)       | 1<br>(0 - 2)       | 1<br>(0 - 2)      | 1<br>(0 - 2)       | 0<br>(0 - 0)       | 0<br>(0 - 0)       |
| Paratyphoid fever                                                 | 2<br>(1 - 3)       | 0<br>(0 - 1)       | 1<br>(0 - 1)      | 0<br>(0 - 1)       | 0<br>(0 - 0)       | 0<br>(0 - 0)       |
| Other intestinal infectious diseases                              | 0<br>(0 - 0)       | 0<br>(0 - 0)       | 0<br>(0 - 0)      | 0<br>(0 - 0)       | 0<br>(0 - 0)       | 0<br>(0 - 0)       |
| Lower respiratory infections                                      | 51<br>(29 - 71)    | 19<br>(9 - 33)     | 1<br>(0 - 2)      | 6<br>(2 - 10)      | 6<br>(3 - 10)      | 19<br>(11 - 28)    |
| Upper respiratory infections                                      | 0<br>(0 - 0)       | 0<br>(0 - 0)       | 0<br>(0 - 0)      | 0<br>(0 - 0)       | 0<br>(0 - 0)       | 0<br>(0 - 0)       |
| Otitis media                                                      | 0<br>(0 - 0)       | 0<br>(0 - 0)       | 0<br>(0 - 0)      | 0<br>(0 - 0)       | 0<br>(0 - 0)       | 0<br>(0 - 0)       |
| Meningitis                                                        | 2<br>(1 - 4)       | 1<br>(0 - 2)       | 0<br>(0 - 0)      | 1<br>(0 - 1)       | 0<br>(0 - 0)       | 0<br>(0 - 0)       |
| Pneumococcal meningitis                                           | 1<br>(0 - 1)       | 0<br>(0 - 0)       | 0<br>(0 - 0)      | 0<br>(0 - 0)       | 0<br>(0 - 0)       | 0<br>(0 - 0)       |
| H influenzae type B meningitis                                    | 0<br>(0 - 1)       | 0<br>(0 - 1)       | 0<br>(0 - 0)      | 0<br>(0 - 0)       | 0<br>(0 - 0)       | 0<br>(0 - 0)       |
| Meningococcal meningitis                                          | 1<br>(1 - 2)       | 0<br>(0 - 1)       | 0<br>(0 - 0)      | 0<br>(0 - 1)       | 0<br>(0 - 0)       | 0<br>(0 - 0)       |
| Other meningitis                                                  | 0<br>(0 - 0)       | 0<br>(0 - 0)       | 0<br>(0 - 0)      | 0<br>(0 - 0)       | 0<br>(0 - 0)       | 0<br>(0 - 0)       |
| Encephalitis                                                      | 1<br>(1 - 2)       | 0<br>(0 - 1)       | 0<br>(0 - 0)      | 0<br>(0 - 1)       | 0<br>(0 - 0)       | 0<br>(0 - 0)       |
| Diphtheria                                                        | 0<br>(0 - 0)       | 0<br>(0 - 0)       | 0<br>(0 - 0)      | 0<br>(0 - 0)       | 0<br>(0 - 0)       | --                 |
| Whooping cough                                                    | 0<br>(0 - 1)       | 0<br>(0 - 1)       | 0<br>(0 - 0)      | 0<br>(0 - 0)       | 0<br>(0 - 0)       | --                 |
| Tetanus                                                           | 1<br>(0 - 1)       | 0<br>(0 - 1)       | 0<br>(0 - 0)      | 0<br>(0 - 0)       | 0<br>(0 - 0)       | 0<br>(0 - 0)       |
| Measles                                                           | 5<br>(0 - 25)      | 4<br>(0 - 21)      | 1<br>(0 - 4)      | 0<br>(0 - 1)       | 0<br>(0 - 0)       | --                 |
| Varicella and herpes zoster                                       | 0<br>(0 - 0)       | 0<br>(0 - 0)       | 0<br>(0 - 0)      | 0<br>(0 - 0)       | 0<br>(0 - 0)       | 0<br>(0 - 0)       |
| Neglected tropical diseases and malaria                           | 37<br>(18 - 66)    | 25<br>(9 - 51)     | 3<br>(1 - 6)      | 5<br>(2 - 10)      | 2<br>(1 - 4)       | 3<br>(1 - 6)       |
| Malaria                                                           | 35<br>(16 - 65)    | 24<br>(8 - 50)     | 3<br>(1 - 6)      | 4<br>(1 - 9)       | 2<br>(1 - 4)       | 3<br>(1 - 6)       |
| Leishmaniasis                                                     | 0<br>(0 - 0)       | 0<br>(0 - 0)       | 0<br>(0 - 0)      | 0<br>(0 - 0)       | 0<br>(0 - 0)       | 0<br>(0 - 0)       |
| Visceral leishmaniasis                                            | 0<br>(0 - 0)       | 0<br>(0 - 0)       | 0<br>(0 - 0)      | 0<br>(0 - 0)       | 0<br>(0 - 0)       | 0<br>(0 - 0)       |
| Schistosomiasis                                                   | 0<br>(0 - 0)       | 0<br>(0 - 0)       | 0<br>(0 - 0)      | 0<br>(0 - 0)       | 0<br>(0 - 0)       | 0<br>(0 - 0)       |
| Cysticercosis                                                     | 0<br>(0 - 0)       | 0<br>(0 - 0)       | 0<br>(0 - 0)      | 0<br>(0 - 0)       | 0<br>(0 - 0)       | 0<br>(0 - 0)       |
| Cystic echinococcosis                                             | 0<br>(0 - 0)       | 0<br>(0 - 0)       | 0<br>(0 - 0)      | 0<br>(0 - 0)       | 0<br>(0 - 0)       | 0<br>(0 - 0)       |
| Dengue                                                            | 0<br>(0 - 0)       | 0<br>(0 - 0)       | 0<br>(0 - 0)      | 0<br>(0 - 0)       | 0<br>(0 - 0)       | 0<br>(0 - 0)       |
| Yellow fever                                                      | 0<br>(0 - 0)       | 0<br>(0 - 0)       | 0<br>(0 - 0)      | 0<br>(0 - 0)       | 0<br>(0 - 0)       | 0<br>(0 - 0)       |
| Rabies                                                            | 0<br>(0 - 1)       | 0<br>(0 - 0)       | 0<br>(0 - 0)      | 0<br>(0 - 0)       | 0<br>(0 - 0)       | 0<br>(0 - 0)       |
| Intestinal nematode infections                                    | 0<br>(0 - 2)       | 0<br>(0 - 1)       | 0<br>(0 - 0)      | 0<br>(0 - 0)       | 0<br>(0 - 0)       | 0<br>(0 - 0)       |
| Ascariasis                                                        | 0<br>(0 - 2)       | 0<br>(0 - 1)       | 0<br>(0 - 0)      | 0<br>(0 - 0)       | 0<br>(0 - 0)       | 0<br>(0 - 0)       |
| Other neglected tropical diseases                                 | 1<br>(0 - 3)       | 1<br>(0 - 2)       | 0<br>(0 - 0)      | 0<br>(0 - 1)       | 0<br>(0 - 0)       | 0<br>(0 - 0)       |

Web Table 31- Sao Tome and Principe deaths with 95% UI by age, sex, and cause in 2013

| Cause                                                            | Males, All Ages    | Males, 0-4 Years | Males, 5-14 Years | Males, 15-49 Years | Males, 50-69 Years | Males, 70-80 Years |
|------------------------------------------------------------------|--------------------|------------------|-------------------|--------------------|--------------------|--------------------|
| Maternal disorders                                               | --                 | --               | --                | --                 | --                 | --                 |
| Maternal hemorrhage                                              | --                 | --               | --                | --                 | --                 | --                 |
| Maternal sepsis and other maternal infections                    | --                 | --               | --                | --                 | --                 | --                 |
| Maternal hypertensive disorders                                  | --                 | --               | --                | --                 | --                 | --                 |
| Maternal obstructed labor                                        | --                 | --               | --                | --                 | --                 | --                 |
| Maternal abortive outcome                                        | --                 | --               | --                | --                 | --                 | --                 |
| Indirect maternal deaths                                         | --                 | --               | --                | --                 | --                 | --                 |
| Late maternal deaths                                             | --                 | --               | --                | --                 | --                 | --                 |
| Maternal deaths aggravated by HIV/AIDS                           | --                 | --               | --                | --                 | --                 | --                 |
| Other maternal disorders                                         | --                 | --               | --                | --                 | --                 | --                 |
| Neonatal disorders                                               | 49<br>(39 - 59)    | 49<br>(39 - 59)  | --                | --                 | --                 | --                 |
| Neonatal preterm birth complications                             | 15<br>(6 - 27)     | 15<br>(6 - 27)   | --                | --                 | --                 | --                 |
| Neonatal encephalopathy due to birth asphyxia and trauma         | 14<br>(6 - 25)     | 14<br>(6 - 25)   | --                | --                 | --                 | --                 |
| Neonatal sepsis and other neonatal infections                    | 17<br>(8 - 31)     | 17<br>(8 - 31)   | --                | --                 | --                 | --                 |
| Hemolytic disease and other neonatal jaundice                    | 0<br>(0 - 1)       | 0<br>(0 - 1)     | --                | --                 | --                 | --                 |
| Other neonatal disorders                                         | 3<br>(1 - 7)       | 3<br>(1 - 7)     | --                | --                 | --                 | --                 |
| Nutritional deficiencies                                         | 32<br>(14 - 48)    | 7<br>(2 - 13)    | 1<br>(0 - 2)      | 7<br>(2 - 12)      | 5<br>(2 - 8)       | 13<br>(6 - 19)     |
| Protein-energy malnutrition                                      | 26<br>(10 - 40)    | 6<br>(2 - 12)    | 1<br>(0 - 1)      | 5<br>(1 - 9)       | 4<br>(1 - 7)       | 10<br>(4 - 16)     |
| Iodine deficiency                                                | 0<br>(0 - 0)       | 0<br>(0 - 0)     | 0<br>(0 - 0)      | 0<br>(0 - 0)       | 0<br>(0 - 0)       | 0<br>(0 - 0)       |
| Iron-deficiency anemia                                           | 6<br>(2 - 12)      | 1<br>(0 - 2)     | 0<br>(0 - 1)      | 2<br>(0 - 4)       | 1<br>(0 - 2)       | 2<br>(1 - 5)       |
| Other nutritional deficiencies                                   | 0<br>(0 - 0)       | 0<br>(0 - 0)     | 0<br>(0 - 0)      | 0<br>(0 - 0)       | 0<br>(0 - 0)       | 0<br>(0 - 0)       |
| Other communicable, maternal, neonatal, and nutritional diseases | 9<br>(5 - 13)      | 2<br>(0 - 3)     | 0<br>(0 - 1)      | 3<br>(1 - 5)       | 2<br>(1 - 4)       | 2<br>(1 - 3)       |
| Sexually transmitted diseases excluding HIV                      | 1<br>(0 - 2)       | 1<br>(0 - 2)     | 0<br>(0 - 0)      | 0<br>(0 - 0)       | 0<br>(0 - 0)       | 0<br>(0 - 0)       |
| Syphilis                                                         | 1<br>(0 - 2)       | 1<br>(0 - 2)     | 0<br>(0 - 0)      | 0<br>(0 - 0)       | 0<br>(0 - 0)       | 0<br>(0 - 0)       |
| Chlamydial infection                                             | --                 | --               | --                | --                 | --                 | --                 |
| Gonococcal infection                                             | 0<br>(0 - 0)       | --               | 0<br>(0 - 0)      | 0<br>(0 - 0)       | 0<br>(0 - 0)       | 0<br>(0 - 0)       |
| Other sexually transmitted diseases                              | 0<br>(0 - 0)       | --               | 0<br>(0 - 0)      | 0<br>(0 - 0)       | 0<br>(0 - 0)       | 0<br>(0 - 0)       |
| Hepatitis                                                        | 7<br>(4 - 10)      | 0<br>(0 - 1)     | 0<br>(0 - 0)      | 3<br>(1 - 4)       | 2<br>(1 - 3)       | 1<br>(1 - 2)       |
| Acute hepatitis A                                                | 0<br>(0 - 1)       | 0<br>(0 - 0)     | 0<br>(0 - 0)      | 0<br>(0 - 0)       | 0<br>(0 - 0)       | 0<br>(0 - 0)       |
| Acute hepatitis B                                                | 5<br>(3 - 7)       | 0<br>(0 - 1)     | 0<br>(0 - 0)      | 1<br>(0 - 3)       | 2<br>(1 - 3)       | 1<br>(1 - 2)       |
| Acute hepatitis C                                                | 0<br>(0 - 1)       | --               | 0<br>(0 - 0)      | 0<br>(0 - 0)       | 0<br>(0 - 0)       | 0<br>(0 - 0)       |
| Acute hepatitis E                                                | 1<br>(1 - 3)       | 0<br>(0 - 0)     | 0<br>(0 - 0)      | 1<br>(0 - 2)       | 0<br>(0 - 1)       | 0<br>(0 - 0)       |
| Other infectious diseases                                        | 1<br>(1 - 3)       | 0<br>(0 - 1)     | 0<br>(0 - 0)      | 0<br>(0 - 1)       | 0<br>(0 - 1)       | 0<br>(0 - 1)       |
| Non-communicable diseases                                        | 265<br>(189 - 347) | 22<br>(12 - 36)  | 5<br>(2 - 7)      | 50<br>(21 - 80)    | 67<br>(42 - 94)    | 121<br>(96 - 149)  |
| Neoplasms                                                        | 37<br>(26 - 48)    | 1<br>(0 - 3)     | 1<br>(0 - 1)      | 5<br>(2 - 8)       | 12<br>(8 - 17)     | 17<br>(13 - 22)    |
| Esophageal cancer                                                | 1<br>(1 - 2)       | --               | --                | 0<br>(0 - 0)       | 1<br>(0 - 1)       | 1<br>(0 - 1)       |
| Stomach cancer                                                   | 4<br>(3 - 6)       | --               | --                | 1<br>(0 - 1)       | 2<br>(1 - 2)       | 2<br>(1 - 3)       |
| Liver cancer                                                     | 5<br>(3 - 8)       | --               | 0<br>(0 - 0)      | 1<br>(0 - 1)       | 2<br>(1 - 4)       | 2<br>(1 - 3)       |
| Liver cancer due to hepatitis B                                  | 2<br>(1 - 4)       | --               | 0<br>(0 - 0)      | 0<br>(0 - 1)       | 1<br>(1 - 2)       | 1<br>(0 - 1)       |
| Liver cancer due to hepatitis C                                  | 2<br>(1 - 3)       | --               | 0<br>(0 - 0)      | 0<br>(0 - 0)       | 1<br>(0 - 2)       | 1<br>(0 - 2)       |

Web Table 31- Sao Tome and Principe deaths with 95% UI by age, sex, and cause in 2013

| Cause                                | Males, All Ages   | Males, 0-4 Years | Males, 5-14 Years | Males, 15-49 Years | Males, 50-69 Years | Males, 70-80 Years |
|--------------------------------------|-------------------|------------------|-------------------|--------------------|--------------------|--------------------|
| Liver cancer due to alcohol use      | 1<br>(0 - 1)      | --               | --                | 0<br>(0 - 0)       | 0<br>(0 - 1)       | 0<br>(0 - 1)       |
| Liver cancer due to other causes     | 0<br>(0 - 1)      | --               | 0<br>(0 - 0)      | 0<br>(0 - 0)       | 0<br>(0 - 0)       | 0<br>(0 - 0)       |
| Larynx cancer                        | 0<br>(0 - 1)      | --               | --                | 0<br>(0 - 0)       | 0<br>(0 - 0)       | 0<br>(0 - 0)       |
| Tracheal, bronchus and lung cancer   | 6<br>(4 - 8)      | --               | --                | 1<br>(0 - 1)       | 3<br>(2 - 4)       | 3<br>(2 - 3)       |
| Breast cancer                        | 0<br>(0 - 0)      | --               | --                | 0<br>(0 - 0)       | 0<br>(0 - 0)       | 0<br>(0 - 0)       |
| Cervical cancer                      | --                | --               | --                | --                 | --                 | --                 |
| Uterine cancer                       | --                | --               | --                | --                 | --                 | --                 |
| Prostate cancer                      | 5<br>(3 - 8)      | --               | --                | 0<br>(0 - 0)       | 1<br>(0 - 1)       | 4<br>(3 - 6)       |
| Colon and rectum cancer              | 3<br>(2 - 4)      | --               | --                | 0<br>(0 - 1)       | 1<br>(1 - 2)       | 2<br>(1 - 2)       |
| Lip and oral cavity cancer           | 0<br>(0 - 0)      | --               | --                | 0<br>(0 - 0)       | 0<br>(0 - 0)       | 0<br>(0 - 0)       |
| Nasopharynx cancer                   | 0<br>(0 - 0)      | --               | 0<br>(0 - 0)      | 0<br>(0 - 0)       | 0<br>(0 - 0)       | 0<br>(0 - 0)       |
| Other pharynx cancer                 | 0<br>(0 - 0)      | --               | --                | 0<br>(0 - 0)       | 0<br>(0 - 0)       | 0<br>(0 - 0)       |
| Gallbladder and biliary tract cancer | 0<br>(0 - 0)      | --               | --                | 0<br>(0 - 0)       | 0<br>(0 - 0)       | 0<br>(0 - 0)       |
| Pancreatic cancer                    | 0<br>(0 - 0)      | --               | --                | 0<br>(0 - 0)       | 0<br>(0 - 0)       | 0<br>(0 - 0)       |
| Malignant skin melanoma              | 0<br>(0 - 0)      | --               | --                | 0<br>(0 - 0)       | 0<br>(0 - 0)       | 0<br>(0 - 0)       |
| Non-melanoma skin cancer             | 0<br>(0 - 0)      | --               | --                | 0<br>(0 - 0)       | 0<br>(0 - 0)       | 0<br>(0 - 0)       |
| Ovarian cancer                       | --                | --               | --                | --                 | --                 | --                 |
| Testicular cancer                    | 0<br>(0 - 0)      | --               | --                | 0<br>(0 - 0)       | 0<br>(0 - 0)       | 0<br>(0 - 0)       |
| Kidney cancer                        | 1<br>(1 - 1)      | 0<br>(0 - 0)     | 0<br>(0 - 0)      | 0<br>(0 - 0)       | 0<br>(0 - 1)       | 0<br>(0 - 1)       |
| Bladder cancer                       | 2<br>(2 - 3)      | --               | --                | 0<br>(0 - 0)       | 1<br>(0 - 1)       | 2<br>(1 - 2)       |
| Brain and nervous system cancer      | 0<br>(0 - 0)      | 0<br>(0 - 0)     | 0<br>(0 - 0)      | 0<br>(0 - 0)       | 0<br>(0 - 0)       | 0<br>(0 - 0)       |
| Thyroid cancer                       | 0<br>(0 - 0)      | --               | 0<br>(0 - 0)      | 0<br>(0 - 0)       | 0<br>(0 - 0)       | 0<br>(0 - 0)       |
| Mesothelioma                         | 0<br>(0 - 0)      | --               | --                | 0<br>(0 - 0)       | 0<br>(0 - 0)       | 0<br>(0 - 0)       |
| Hodgkin lymphoma                     | 0<br>(0 - 0)      | 0<br>(0 - 0)     | 0<br>(0 - 0)      | 0<br>(0 - 0)       | 0<br>(0 - 0)       | 0<br>(0 - 0)       |
| Non-Hodgkin lymphoma                 | 2<br>(1 - 3)      | 0<br>(0 - 1)     | 0<br>(0 - 1)      | 1<br>(0 - 1)       | 0<br>(0 - 1)       | 0<br>(0 - 1)       |
| Multiple myeloma                     | 0<br>(0 - 0)      | --               | --                | 0<br>(0 - 0)       | 0<br>(0 - 0)       | 0<br>(0 - 0)       |
| Leukemia                             | 0<br>(0 - 0)      | 0<br>(0 - 0)     | 0<br>(0 - 0)      | 0<br>(0 - 0)       | 0<br>(0 - 0)       | 0<br>(0 - 0)       |
| Other neoplasms                      | 5<br>(2 - 7)      | 1<br>(0 - 2)     | 0<br>(0 - 1)      | 1<br>(0 - 2)       | 1<br>(1 - 2)       | 1<br>(1 - 2)       |
| Cardiovascular diseases              | 100<br>(71 - 131) | 4<br>(2 - 6)     | 1<br>(1 - 2)      | 22<br>(9 - 35)     | 25<br>(16 - 36)    | 48<br>(37 - 59)    |
| Rheumatic heart disease              | 4<br>(1 - 7)      | 0<br>(0 - 0)     | 0<br>(0 - 0)      | 2<br>(0 - 3)       | 1<br>(0 - 2)       | 1<br>(0 - 2)       |
| Ischemic heart disease               | 26<br>(17 - 36)   | 0<br>(0 - 1)     | 0<br>(0 - 0)      | 6<br>(2 - 10)      | 7<br>(4 - 11)      | 13<br>(9 - 17)     |
| Cerebrovascular disease              | 54<br>(38 - 72)   | 3<br>(1 - 4)     | 1<br>(0 - 1)      | 11<br>(4 - 17)     | 13<br>(8 - 18)     | 28<br>(21 - 35)    |
| Ischemic stroke                      | 19<br>(12 - 28)   | 0<br>(0 - 0)     | 0<br>(0 - 0)      | 3<br>(1 - 4)       | 4<br>(2 - 7)       | 11<br>(7 - 17)     |
| Hemorrhagic stroke                   | 36<br>(23 - 49)   | 2<br>(1 - 4)     | 0<br>(0 - 1)      | 8<br>(3 - 13)      | 8<br>(5 - 12)      | 16<br>(11 - 23)    |
| Hypertensive heart disease           | 0<br>(0 - 1)      | 0<br>(0 - 0)     | 0<br>(0 - 0)      | 0<br>(0 - 0)       | 0<br>(0 - 0)       | 0<br>(0 - 0)       |
| Cardiomyopathy and myocarditis       | 5<br>(3 - 8)      | 0<br>(0 - 1)     | 0<br>(0 - 0)      | 2<br>(1 - 3)       | 2<br>(1 - 2)       | 2<br>(1 - 3)       |
| Atrial fibrillation and flutter      | 0<br>(0 - 0)      | --               | --                | 0<br>(0 - 0)       | 0<br>(0 - 0)       | 0<br>(0 - 0)       |
| Aortic aneurysm                      | 1<br>(1 - 2)      | --               | --                | 0<br>(0 - 0)       | 0<br>(0 - 1)       | 1<br>(0 - 1)       |
| Peripheral vascular disease          | 0<br>(0 - 0)      | --               | --                | 0<br>(0 - 0)       | 0<br>(0 - 0)       | 0<br>(0 - 0)       |
| Endocarditis                         | 2<br>(1 - 4)      | 0<br>(0 - 1)     | 0<br>(0 - 0)      | 1<br>(0 - 1)       | 0<br>(0 - 1)       | 1<br>(0 - 1)       |

Web Table 31- Sao Tome and Principe deaths with 95% UI by age, sex, and cause in 2013

| Cause                                               | Males, All Ages | Males, 0-4 Years | Males, 5-14 Years | Males, 15-49 Years | Males, 50-69 Years | Males, 70-80 Years |
|-----------------------------------------------------|-----------------|------------------|-------------------|--------------------|--------------------|--------------------|
| Other cardiovascular and circulatory diseases       | 6<br>(4 - 10)   | 0<br>(0 - 0)     | 0<br>(0 - 0)      | 1<br>(1 - 2)       | 2<br>(1 - 3)       | 3<br>(2 - 5)       |
| Chronic respiratory diseases                        | 49<br>(32 - 65) | 1<br>(0 - 2)     | 0<br>(0 - 0)      | 4<br>(2 - 7)       | 12<br>(7 - 18)     | 32<br>(22 - 40)    |
| Chronic obstructive pulmonary disease               | 37<br>(25 - 50) | 1<br>(0 - 1)     | 0<br>(0 - 0)      | 2<br>(1 - 4)       | 9<br>(5 - 13)      | 26<br>(18 - 34)    |
| Pneumoconiosis                                      | 3<br>(1 - 4)    | 0<br>(0 - 0)     | 0<br>(0 - 0)      | 1<br>(0 - 1)       | 1<br>(0 - 2)       | 1<br>(0 - 2)       |
| Silicosis                                           | 0<br>(0 - 1)    | 0<br>(0 - 0)     | 0<br>(0 - 0)      | 0<br>(0 - 0)       | 0<br>(0 - 0)       | 0<br>(0 - 1)       |
| Asbestosis                                          | 0<br>(0 - 0)    | 0<br>(0 - 0)     | 0<br>(0 - 0)      | 0<br>(0 - 0)       | 0<br>(0 - 0)       | 0<br>(0 - 0)       |
| Coal workers pneumoconiosis                         | 1<br>(0 - 1)    | 0<br>(0 - 0)     | 0<br>(0 - 0)      | 0<br>(0 - 0)       | 1<br>(0 - 1)       | 0<br>(0 - 0)       |
| Other pneumoconiosis                                | 1<br>(1 - 2)    | 0<br>(0 - 0)     | 0<br>(0 - 0)      | 0<br>(0 - 1)       | 0<br>(0 - 1)       | 0<br>(0 - 1)       |
| Asthma                                              | 4<br>(2 - 7)    | 0<br>(0 - 0)     | 0<br>(0 - 0)      | 1<br>(0 - 2)       | 1<br>(0 - 2)       | 2<br>(1 - 3)       |
| Interstitial lung disease and pulmonary sarcoidosis | 4<br>(0 - 9)    | 0<br>(0 - 0)     | 0<br>(0 - 0)      | 0<br>(0 - 0)       | 1<br>(0 - 3)       | 3<br>(0 - 7)       |
| Other chronic respiratory diseases                  | 2<br>(1 - 3)    | 0<br>(0 - 0)     | 0<br>(0 - 0)      | 1<br>(0 - 1)       | 0<br>(0 - 1)       | 1<br>(0 - 1)       |
| Cirrhosis                                           | 18<br>(10 - 27) | 0<br>(0 - 0)     | 0<br>(0 - 0)      | 6<br>(2 - 11)      | 8<br>(4 - 12)      | 4<br>(3 - 6)       |
| Cirrhosis due to hepatitis B                        | 4<br>(1 - 8)    | 0<br>(0 - 0)     | 0<br>(0 - 0)      | 2<br>(0 - 3)       | 2<br>(1 - 4)       | 1<br>(0 - 2)       |
| Cirrhosis due to hepatitis C                        | 3<br>(1 - 8)    | 0<br>(0 - 0)     | 0<br>(0 - 0)      | 1<br>(0 - 3)       | 1<br>(0 - 3)       | 1<br>(0 - 2)       |
| Cirrhosis due to alcohol use                        | 8<br>(4 - 14)   | --               | --                | 3<br>(1 - 5)       | 4<br>(2 - 7)       | 2<br>(1 - 3)       |
| Cirrhosis due to other causes                       | 2<br>(1 - 4)    | 0<br>(0 - 0)     | 0<br>(0 - 0)      | 1<br>(0 - 2)       | 1<br>(0 - 2)       | 0<br>(0 - 0)       |
| Digestive diseases                                  | 10<br>(6 - 15)  | 0<br>(0 - 0)     | 0<br>(0 - 0)      | 3<br>(1 - 5)       | 3<br>(1 - 4)       | 4<br>(3 - 5)       |
| Peptic ulcer disease                                | 2<br>(1 - 3)    | 0<br>(0 - 0)     | 0<br>(0 - 0)      | 1<br>(0 - 1)       | 0<br>(0 - 1)       | 1<br>(0 - 1)       |
| Gastritis and duodenitis                            | 0<br>(0 - 1)    | 0<br>(0 - 0)     | 0<br>(0 - 0)      | 0<br>(0 - 0)       | 0<br>(0 - 0)       | 0<br>(0 - 0)       |
| Appendicitis                                        | 0<br>(0 - 1)    | 0<br>(0 - 0)     | 0<br>(0 - 0)      | 0<br>(0 - 0)       | 0<br>(0 - 0)       | 0<br>(0 - 0)       |
| Paralytic ileus and intestinal obstruction          | 3<br>(2 - 5)    | 0<br>(0 - 0)     | 0<br>(0 - 0)      | 1<br>(0 - 2)       | 1<br>(0 - 1)       | 1<br>(1 - 2)       |
| Inguinal, femoral, and abdominal hernia             | 1<br>(0 - 2)    | 0<br>(0 - 0)     | 0<br>(0 - 0)      | 0<br>(0 - 0)       | 0<br>(0 - 0)       | 0<br>(0 - 1)       |
| Inflammatory bowel disease                          | 0<br>(0 - 1)    | 0<br>(0 - 0)     | 0<br>(0 - 0)      | 0<br>(0 - 0)       | 0<br>(0 - 0)       | 0<br>(0 - 0)       |
| Vascular intestinal disorders                       | 0<br>(0 - 0)    | 0<br>(0 - 0)     | 0<br>(0 - 0)      | 0<br>(0 - 0)       | 0<br>(0 - 0)       | 0<br>(0 - 0)       |
| Gallbladder and biliary diseases                    | 0<br>(0 - 1)    | 0<br>(0 - 0)     | 0<br>(0 - 0)      | 0<br>(0 - 0)       | 0<br>(0 - 0)       | 0<br>(0 - 0)       |
| Pancreatitis                                        | 1<br>(0 - 2)    | 0<br>(0 - 0)     | 0<br>(0 - 0)      | 0<br>(0 - 1)       | 0<br>(0 - 0)       | 0<br>(0 - 0)       |
| Other digestive diseases                            | 2<br>(1 - 3)    | 0<br>(0 - 0)     | 0<br>(0 - 0)      | 0<br>(0 - 1)       | 1<br>(0 - 1)       | 1<br>(0 - 1)       |
| Neurological disorders                              | 9<br>(7 - 12)   | 0<br>(0 - 1)     | 0<br>(0 - 0)      | 1<br>(1 - 2)       | 1<br>(0 - 1)       | 7<br>(5 - 9)       |
| Alzheimer disease and other dementias               | 5<br>(4 - 7)    | --               | --                | 0<br>(0 - 0)       | 0<br>(0 - 0)       | 5<br>(4 - 7)       |
| Parkinson disease                                   | 1<br>(0 - 3)    | --               | --                | 0<br>(0 - 0)       | 0<br>(0 - 0)       | 1<br>(0 - 3)       |
| Epilepsy                                            | 2<br>(1 - 3)    | 0<br>(0 - 1)     | 0<br>(0 - 0)      | 1<br>(0 - 2)       | 0<br>(0 - 0)       | 0<br>(0 - 0)       |
| Multiple sclerosis                                  | 0<br>(0 - 0)    | --               | --                | 0<br>(0 - 0)       | 0<br>(0 - 0)       | 0<br>(0 - 0)       |
| Other neurological disorders                        | 1<br>(0 - 1)    | 0<br>(0 - 0)     | 0<br>(0 - 0)      | 0<br>(0 - 1)       | 0<br>(0 - 0)       | 0<br>(0 - 0)       |
| Mental and substance use disorders                  | 3<br>(1 - 5)    | 0<br>(0 - 0)     | 0<br>(0 - 0)      | 2<br>(1 - 4)       | 0<br>(0 - 1)       | 0<br>(0 - 0)       |
| Schizophrenia                                       | 0<br>(0 - 0)    | --               | --                | 0<br>(0 - 0)       | 0<br>(0 - 0)       | 0<br>(0 - 0)       |
| Alcohol use disorders                               | 1<br>(0 - 1)    | --               | --                | 0<br>(0 - 1)       | 0<br>(0 - 1)       | 0<br>(0 - 0)       |
| Drug use disorders                                  | 2<br>(1 - 3)    | 0<br>(0 - 0)     | --                | 2<br>(1 - 3)       | 0<br>(0 - 0)       | 0<br>(0 - 0)       |
| Opioid use disorders                                | 0<br>(0 - 0)    | 0<br>(0 - 0)     | --                | 0<br>(0 - 0)       | 0<br>(0 - 0)       | 0<br>(0 - 0)       |
| Cocaine use disorders                               | 0<br>(0 - 0)    | 0<br>(0 - 0)     | --                | 0<br>(0 - 0)       | 0<br>(0 - 0)       | 0<br>(0 - 0)       |
| Amphetamine use disorders                           | 0<br>(0 - 0)    | 0<br>(0 - 0)     | --                | 0<br>(0 - 0)       | 0<br>(0 - 0)       | 0<br>(0 - 0)       |

Web Table 31- Sao Tome and Principe deaths with 95% UI by age, sex, and cause in 2013

| Cause                                               | Males, All Ages | Males, 0-4 Years | Males, 5-14 Years | Males, 15-49 Years | Males, 50-69 Years | Males, 70-80 Years |
|-----------------------------------------------------|-----------------|------------------|-------------------|--------------------|--------------------|--------------------|
| Other drug use disorders                            | 2<br>(1 - 3)    | 0<br>(0 - 0)     | --                | 1<br>(0 - 2)       | 0<br>(0 - 0)       | 0<br>(0 - 0)       |
| Eating disorders                                    | 0<br>(0 - 0)    | --               | 0<br>(0 - 0)      | 0<br>(0 - 0)       | --                 | --                 |
| Anorexia nervosa                                    | 0<br>(0 - 0)    | --               | 0<br>(0 - 0)      | 0<br>(0 - 0)       | --                 | --                 |
| Diabetes, urogenital, blood, and endocrine diseases | 25<br>(15 - 41) | 4<br>(1 - 10)    | 1<br>(0 - 4)      | 5<br>(2 - 11)      | 5<br>(3 - 8)       | 9<br>(7 - 12)      |
| Diabetes mellitus                                   | 8<br>(5 - 11)   | 0<br>(0 - 0)     | 0<br>(0 - 0)      | 1<br>(0 - 2)       | 3<br>(2 - 4)       | 4<br>(3 - 5)       |
| Acute glomerulonephritis                            | 0<br>(0 - 0)    | 0<br>(0 - 0)     | 0<br>(0 - 0)      | 0<br>(0 - 0)       | 0<br>(0 - 0)       | 0<br>(0 - 0)       |
| Chronic kidney disease                              | 4<br>(3 - 6)    | 0<br>(0 - 0)     | 0<br>(0 - 0)      | 1<br>(0 - 2)       | 1<br>(1 - 2)       | 2<br>(1 - 3)       |
| Chronic kidney disease due to diabetes mellitus     | 0<br>(0 - 0)    | 0<br>(0 - 0)     | 0<br>(0 - 0)      | 0<br>(0 - 0)       | 0<br>(0 - 0)       | 0<br>(0 - 0)       |
| Chronic kidney disease due to hypertension          | 2<br>(1 - 3)    | 0<br>(0 - 0)     | 0<br>(0 - 0)      | 0<br>(0 - 1)       | 0<br>(0 - 1)       | 1<br>(1 - 2)       |
| Chronic kidney disease due to glomerulonephritis    | 1<br>(0 - 2)    | 0<br>(0 - 0)     | 0<br>(0 - 0)      | 0<br>(0 - 1)       | 0<br>(0 - 0)       | 0<br>(0 - 1)       |
| Chronic kidney disease due to other causes          | 1<br>(0 - 2)    | 0<br>(0 - 0)     | 0<br>(0 - 0)      | 0<br>(0 - 0)       | 0<br>(0 - 0)       | 0<br>(0 - 1)       |
| Urinary diseases and male infertility               | 4<br>(2 - 5)    | 0<br>(0 - 0)     | 0<br>(0 - 0)      | 0<br>(0 - 1)       | 1<br>(0 - 1)       | 2<br>(1 - 4)       |
| Interstitial nephritis and urinary tract infections | 3<br>(2 - 4)    | 0<br>(0 - 0)     | 0<br>(0 - 0)      | 0<br>(0 - 1)       | 1<br>(0 - 1)       | 2<br>(1 - 3)       |
| Urolithiasis                                        | 0<br>(0 - 0)    | --               | 0<br>(0 - 0)      | 0<br>(0 - 0)       | 0<br>(0 - 0)       | 0<br>(0 - 0)       |
| Other urinary diseases                              | 1<br>(0 - 1)    | 0<br>(0 - 0)     | 0<br>(0 - 0)      | 0<br>(0 - 0)       | 0<br>(0 - 0)       | 0<br>(0 - 1)       |
| Gynecological diseases                              | --              | --               | --                | --                 | --                 | --                 |
| Uterine fibroids                                    | --              | --               | --                | --                 | --                 | --                 |
| Polycystic ovarian syndrome                         | --              | --               | --                | --                 | --                 | --                 |
| Endometriosis                                       | --              | --               | --                | --                 | --                 | --                 |
| Genital prolapse                                    | --              | --               | --                | --                 | --                 | --                 |
| Other gynecological diseases                        | --              | --               | --                | --                 | --                 | --                 |
| Hemoglobinopathies and hemolytic anemias            | 6<br>(1 - 20)   | 3<br>(0 - 9)     | 1<br>(0 - 4)      | 2<br>(0 - 7)       | 0<br>(0 - 1)       | 0<br>(0 - 1)       |
| Thalassemias                                        | 0<br>(0 - 0)    | 0<br>(0 - 0)     | 0<br>(0 - 0)      | 0<br>(0 - 0)       | 0<br>(0 - 0)       | 0<br>(0 - 0)       |
| Sickle cell disorders                               | 6<br>(1 - 19)   | 3<br>(0 - 8)     | 1<br>(0 - 4)      | 2<br>(0 - 7)       | 0<br>(0 - 1)       | 0<br>(0 - 0)       |
| G6PD deficiency                                     | 0<br>(0 - 0)    | 0<br>(0 - 0)     | 0<br>(0 - 0)      | 0<br>(0 - 0)       | 0<br>(0 - 0)       | 0<br>(0 - 0)       |
| Other hemoglobinopathies and hemolytic anemias      | 0<br>(0 - 1)    | 0<br>(0 - 0)     | 0<br>(0 - 0)      | 0<br>(0 - 0)       | 0<br>(0 - 0)       | 0<br>(0 - 0)       |
| Endocrine, metabolic, blood, and immune disorders   | 2<br>(1 - 4)    | 1<br>(0 - 2)     | 0<br>(0 - 0)      | 0<br>(0 - 1)       | 0<br>(0 - 1)       | 0<br>(0 - 1)       |
| Musculoskeletal disorders                           | 1<br>(0 - 1)    | --               | 0<br>(0 - 0)      | 0<br>(0 - 0)       | 0<br>(0 - 0)       | 0<br>(0 - 0)       |
| Rheumatoid arthritis                                | 0<br>(0 - 0)    | --               | 0<br>(0 - 0)      | 0<br>(0 - 0)       | 0<br>(0 - 0)       | 0<br>(0 - 0)       |
| Other musculoskeletal disorders                     | 1<br>(0 - 1)    | --               | 0<br>(0 - 0)      | 0<br>(0 - 0)       | 0<br>(0 - 0)       | 0<br>(0 - 0)       |
| Other non-communicable diseases                     | 14<br>(8 - 23)  | 11<br>(6 - 20)   | 1<br>(0 - 1)      | 1<br>(0 - 1)       | 0<br>(0 - 1)       | 1<br>(0 - 1)       |
| Congenital anomalies                                | 12<br>(7 - 22)  | 11<br>(6 - 20)   | 1<br>(0 - 1)      | 1<br>(0 - 1)       | 0<br>(0 - 0)       | 0<br>(0 - 0)       |
| Neural tube defects                                 | 2<br>(0 - 4)    | 2<br>(0 - 4)     | 0<br>(0 - 0)      | 0<br>(0 - 0)       | 0<br>(0 - 0)       | 0<br>(0 - 0)       |
| Congenital heart anomalies                          | 7<br>(4 - 11)   | 6<br>(3 - 10)    | 0<br>(0 - 1)      | 0<br>(0 - 1)       | 0<br>(0 - 0)       | 0<br>(0 - 0)       |
| Cleft lip and cleft palate                          | 0<br>(0 - 0)    | 0<br>(0 - 0)     | --                | --                 | --                 | --                 |
| Down syndrome                                       | 1<br>(0 - 2)    | 1<br>(0 - 2)     | 0<br>(0 - 0)      | 0<br>(0 - 0)       | 0<br>(0 - 0)       | 0<br>(0 - 0)       |
| Chromosomal unbalanced rearrangements               | 0<br>(0 - 1)    | 0<br>(0 - 1)     | 0<br>(0 - 0)      | 0<br>(0 - 0)       | 0<br>(0 - 0)       | 0<br>(0 - 0)       |
| Other congenital anomalies                          | 3<br>(1 - 8)    | 3<br>(1 - 7)     | 0<br>(0 - 0)      | 0<br>(0 - 0)       | 0<br>(0 - 0)       | 0<br>(0 - 0)       |
| Skin and subcutaneous diseases                      | 1<br>(1 - 1)    | 0<br>(0 - 0)     | 0<br>(0 - 0)      | 0<br>(0 - 0)       | 0<br>(0 - 0)       | 1<br>(0 - 1)       |
| Cellulitis                                          | 0<br>(0 - 0)    | 0<br>(0 - 0)     | 0<br>(0 - 0)      | 0<br>(0 - 0)       | 0<br>(0 - 0)       | 0<br>(0 - 0)       |

Web Table 31- Sao Tome and Principe deaths with 95% UI by age, sex, and cause in 2013

| Cause                                           | Males, All Ages  | Males, 0-4 Years | Males, 5-14 Years | Males, 15-49 Years | Males, 50-69 Years | Males, 70-80 Years |
|-------------------------------------------------|------------------|------------------|-------------------|--------------------|--------------------|--------------------|
| Pyoderma                                        | 1<br>(0 - 1)     | 0<br>(0 - 0)     | 0<br>(0 - 0)      | 0<br>(0 - 0)       | 0<br>(0 - 0)       | 0<br>(0 - 1)       |
| Decubitus ulcer                                 | 0<br>(0 - 0)     | 0<br>(0 - 0)     | 0<br>(0 - 0)      | 0<br>(0 - 0)       | 0<br>(0 - 0)       | 0<br>(0 - 0)       |
| Other skin and subcutaneous diseases            | 0<br>(0 - 0)     | 0<br>(0 - 0)     | 0<br>(0 - 0)      | 0<br>(0 - 0)       | 0<br>(0 - 0)       | 0<br>(0 - 0)       |
| Sudden infant death syndrome                    | 0<br>(0 - 1)     | 0<br>(0 - 1)     | --                | --                 | --                 | --                 |
| Injuries                                        | 57<br>(31 - 107) | 4<br>(2 - 22)    | 3<br>(1 - 6)      | 36<br>(17 - 58)    | 7<br>(4 - 15)      | 7<br>(4 - 12)      |
| Transport injuries                              | 20<br>(10 - 30)  | 1<br>(0 - 1)     | 1<br>(0 - 1)      | 14<br>(6 - 22)     | 3<br>(1 - 4)       | 2<br>(1 - 2)       |
| Road injuries                                   | 19<br>(10 - 28)  | 1<br>(0 - 1)     | 1<br>(0 - 1)      | 13<br>(6 - 21)     | 2<br>(1 - 4)       | 2<br>(1 - 2)       |
| Pedestrian road injuries                        | 4<br>(2 - 7)     | 0<br>(0 - 0)     | 0<br>(0 - 1)      | 3<br>(1 - 5)       | 1<br>(0 - 1)       | 1<br>(0 - 1)       |
| Cyclist road injuries                           | 1<br>(0 - 1)     | 0<br>(0 - 0)     | 0<br>(0 - 0)      | 1<br>(0 - 1)       | 0<br>(0 - 0)       | 0<br>(0 - 0)       |
| Motorcyclist road injuries                      | 2<br>(1 - 4)     | 0<br>(0 - 0)     | 0<br>(0 - 0)      | 2<br>(1 - 4)       | 0<br>(0 - 0)       | 0<br>(0 - 0)       |
| Motor vehicle road injuries                     | 11<br>(5 - 17)   | 0<br>(0 - 1)     | 0<br>(0 - 1)      | 8<br>(4 - 13)      | 1<br>(1 - 2)       | 1<br>(1 - 1)       |
| Other road injuries                             | 0<br>(0 - 0)     | 0<br>(0 - 0)     | 0<br>(0 - 0)      | 0<br>(0 - 0)       | 0<br>(0 - 0)       | 0<br>(0 - 0)       |
| Other transport injuries                        | 1<br>(0 - 2)     | 0<br>(0 - 0)     | 0<br>(0 - 0)      | 1<br>(0 - 1)       | 0<br>(0 - 0)       | 0<br>(0 - 0)       |
| Unintentional injuries                          | 23<br>(12 - 62)  | 3<br>(1 - 21)    | 2<br>(1 - 6)      | 10<br>(4 - 22)     | 3<br>(2 - 7)       | 4<br>(3 - 7)       |
| Falls                                           | 8<br>(5 - 12)    | 1<br>(0 - 1)     | 0<br>(0 - 1)      | 3<br>(1 - 5)       | 2<br>(1 - 3)       | 3<br>(2 - 5)       |
| Drowning                                        | 4<br>(2 - 7)     | 1<br>(0 - 2)     | 1<br>(0 - 1)      | 2<br>(1 - 4)       | 0<br>(0 - 1)       | 0<br>(0 - 0)       |
| Fire, heat, and hot substances                  | 0<br>(0 - 1)     | 0<br>(0 - 0)     | 0<br>(0 - 0)      | 0<br>(0 - 0)       | 0<br>(0 - 0)       | 0<br>(0 - 0)       |
| Poisonings                                      | 1<br>(0 - 3)     | 0<br>(0 - 0)     | 0<br>(0 - 0)      | 1<br>(0 - 2)       | 0<br>(0 - 0)       | 0<br>(0 - 0)       |
| Exposure to mechanical forces                   | 7<br>(2 - 50)    | 2<br>(0 - 20)    | 1<br>(0 - 5)      | 4<br>(1 - 18)      | 1<br>(0 - 5)       | 0<br>(0 - 3)       |
| Unintentional firearm injuries                  | 2<br>(1 - 3)     | 0<br>(0 - 0)     | 0<br>(0 - 0)      | 1<br>(0 - 3)       | 0<br>(0 - 0)       | 0<br>(0 - 0)       |
| Unintentional suffocation                       | 4<br>(0 - 48)    | 1<br>(0 - 20)    | 0<br>(0 - 5)      | 1<br>(0 - 17)      | 0<br>(0 - 5)       | 0<br>(0 - 3)       |
| Other exposure to mechanical forces             | 2<br>(0 - 3)     | 0<br>(0 - 0)     | 0<br>(0 - 0)      | 1<br>(0 - 2)       | 0<br>(0 - 0)       | 0<br>(0 - 0)       |
| Adverse effects of medical treatment            | 1<br>(1 - 2)     | 0<br>(0 - 0)     | 0<br>(0 - 0)      | 0<br>(0 - 1)       | 0<br>(0 - 1)       | 0<br>(0 - 1)       |
| Animal contact                                  | 0<br>(0 - 0)     | 0<br>(0 - 0)     | 0<br>(0 - 0)      | 0<br>(0 - 0)       | 0<br>(0 - 0)       | 0<br>(0 - 0)       |
| Venomous animal contact                         | 0<br>(0 - 0)     | 0<br>(0 - 0)     | 0<br>(0 - 0)      | 0<br>(0 - 0)       | 0<br>(0 - 0)       | 0<br>(0 - 0)       |
| Non-venomous animal contact                     | 0<br>(0 - 0)     | 0<br>(0 - 0)     | 0<br>(0 - 0)      | 0<br>(0 - 0)       | 0<br>(0 - 0)       | 0<br>(0 - 0)       |
| Foreign body                                    | 1<br>(0 - 2)     | 0<br>(0 - 1)     | 0<br>(0 - 0)      | 0<br>(0 - 0)       | 0<br>(0 - 0)       | 0<br>(0 - 0)       |
| Pulmonary aspiration and foreign body in airway | 1<br>(0 - 2)     | 0<br>(0 - 1)     | 0<br>(0 - 0)      | 0<br>(0 - 0)       | 0<br>(0 - 0)       | 0<br>(0 - 0)       |
| Foreign body in other body part                 | 0<br>(0 - 0)     | 0<br>(0 - 0)     | 0<br>(0 - 0)      | 0<br>(0 - 0)       | 0<br>(0 - 0)       | 0<br>(0 - 0)       |
| Other unintentional injuries                    | 0<br>(0 - 0)     | 0<br>(0 - 0)     | 0<br>(0 - 0)      | 0<br>(0 - 0)       | 0<br>(0 - 0)       | 0<br>(0 - 0)       |
| Self-harm and interpersonal violence            | 14<br>(6 - 34)   | 0<br>(0 - 1)     | 0<br>(0 - 1)      | 12<br>(5 - 23)     | 1<br>(1 - 5)       | 1<br>(0 - 4)       |
| Self-harm                                       | 4<br>(2 - 25)    | --               | 0<br>(0 - 0)      | 3<br>(1 - 16)      | 1<br>(0 - 5)       | 1<br>(0 - 4)       |
| Interpersonal violence                          | 10<br>(4 - 17)   | 0<br>(0 - 1)     | 0<br>(0 - 1)      | 9<br>(3 - 15)      | 0<br>(0 - 1)       | 0<br>(0 - 0)       |
| Assault by firearm                              | 6<br>(2 - 11)    | 0<br>(0 - 0)     | 0<br>(0 - 0)      | 6<br>(2 - 10)      | 0<br>(0 - 0)       | 0<br>(0 - 0)       |
| Assault by sharp object                         | 2<br>(1 - 4)     | 0<br>(0 - 0)     | 0<br>(0 - 0)      | 1<br>(0 - 3)       | 0<br>(0 - 0)       | 0<br>(0 - 0)       |
| Assault by other means                          | 2<br>(1 - 4)     | 0<br>(0 - 0)     | 0<br>(0 - 0)      | 2<br>(0 - 3)       | 0<br>(0 - 0)       | 0<br>(0 - 0)       |

Web Table 31- Sao Tome and Principe deaths with 95% UI by age, sex, and cause in 2013

| Cause                                                             | Females, All Ages  | Females, 0-4 Years | Females, 5-14 Years | Females, 15-49 Years | Females, 50-69 Years | Females, 70-80 Years |
|-------------------------------------------------------------------|--------------------|--------------------|---------------------|----------------------|----------------------|----------------------|
| All causes                                                        | 533<br>(438 - 654) | 120<br>(99 - 144)  | 14<br>(11 - 17)     | 98<br>(72 - 142)     | 109<br>(75 - 147)    | 194<br>(158 - 231)   |
| Communicable, maternal, neonatal, and nutritional diseases        | 226<br>(185 - 296) | 97<br>(78 - 120)   | 9<br>(6 - 12)       | 48<br>(32 - 107)     | 26<br>(17 - 37)      | 48<br>(35 - 62)      |
| HIV/AIDS and tuberculosis                                         | 21<br>(5 - 123)    | 1<br>(0 - 7)       | 1<br>(0 - 6)        | 15<br>(3 - 93)       | 3<br>(1 - 14)        | 1<br>(1 - 3)         |
| Tuberculosis                                                      | 4<br>(2 - 6)       | 0<br>(0 - 0)       | 0<br>(0 - 0)        | 2<br>(1 - 3)         | 1<br>(1 - 2)         | 1<br>(0 - 1)         |
| HIV/AIDS                                                          | 18<br>(1 - 121)    | 1<br>(0 - 7)       | 1<br>(0 - 5)        | 13<br>(1 - 92)       | 2<br>(0 - 13)        | 0<br>(0 - 2)         |
| HIV/AIDS resulting in mycobacterial infection                     | 1<br>(0 - 6)       | 0<br>(0 - 0)       | 0<br>(0 - 0)        | 1<br>(0 - 4)         | 0<br>(0 - 1)         | 0<br>(0 - 0)         |
| HIV/AIDS resulting in other diseases                              | 17<br>(1 - 115)    | 1<br>(0 - 7)       | 1<br>(0 - 5)        | 13<br>(1 - 88)       | 2<br>(0 - 12)        | 0<br>(0 - 2)         |
| Diarrhea, lower respiratory, and other common infectious diseases | 76<br>(52 - 99)    | 29<br>(17 - 44)    | 4<br>(2 - 7)        | 9<br>(5 - 14)        | 10<br>(6 - 14)       | 24<br>(16 - 35)      |
| Diarrheal diseases                                                | 11<br>(6 - 19)     | 6<br>(2 - 13)      | 0<br>(0 - 1)        | 2<br>(1 - 3)         | 1<br>(1 - 3)         | 2<br>(1 - 4)         |
| Intestinal infectious diseases                                    | 4<br>(2 - 9)       | 1<br>(0 - 3)       | 1<br>(1 - 3)        | 2<br>(1 - 3)         | 0<br>(0 - 0)         | 0<br>(0 - 0)         |
| Typhoid fever                                                     | 3<br>(1 - 6)       | 1<br>(0 - 2)       | 1<br>(0 - 2)        | 1<br>(0 - 2)         | 0<br>(0 - 0)         | 0<br>(0 - 0)         |
| Paratyphoid fever                                                 | 1<br>(0 - 3)       | 0<br>(0 - 1)       | 0<br>(0 - 1)        | 0<br>(0 - 1)         | 0<br>(0 - 0)         | 0<br>(0 - 0)         |
| Other intestinal infectious diseases                              | 0<br>(0 - 0)       | 0<br>(0 - 0)       | 0<br>(0 - 0)        | 0<br>(0 - 0)         | 0<br>(0 - 0)         | 0<br>(0 - 0)         |
| Lower respiratory infections                                      | 49<br>(33 - 67)    | 15<br>(8 - 26)     | 1<br>(0 - 2)        | 4<br>(2 - 7)         | 7<br>(4 - 11)        | 21<br>(13 - 31)      |
| Upper respiratory infections                                      | 0<br>(0 - 0)       | 0<br>(0 - 0)       | 0<br>(0 - 0)        | 0<br>(0 - 0)         | 0<br>(0 - 0)         | 0<br>(0 - 0)         |
| Otitis media                                                      | 0<br>(0 - 0)       | 0<br>(0 - 0)       | 0<br>(0 - 0)        | 0<br>(0 - 0)         | 0<br>(0 - 0)         | 0<br>(0 - 0)         |
| Meningitis                                                        | 5<br>(3 - 7)       | 2<br>(1 - 4)       | 0<br>(0 - 0)        | 1<br>(1 - 2)         | 1<br>(0 - 1)         | 1<br>(0 - 1)         |
| Pneumococcal meningitis                                           | 1<br>(1 - 2)       | 0<br>(0 - 1)       | 0<br>(0 - 0)        | 0<br>(0 - 1)         | 0<br>(0 - 0)         | 0<br>(0 - 0)         |
| H influenzae type B meningitis                                    | 1<br>(0 - 1)       | 0<br>(0 - 1)       | 0<br>(0 - 0)        | 0<br>(0 - 0)         | 0<br>(0 - 0)         | 0<br>(0 - 0)         |
| Meningococcal meningitis                                          | 2<br>(1 - 3)       | 1<br>(0 - 2)       | 0<br>(0 - 0)        | 1<br>(0 - 1)         | 0<br>(0 - 1)         | 0<br>(0 - 0)         |
| Other meningitis                                                  | 1<br>(0 - 1)       | 0<br>(0 - 0)       | 0<br>(0 - 0)        | 0<br>(0 - 0)         | 0<br>(0 - 0)         | 0<br>(0 - 0)         |
| Encephalitis                                                      | 1<br>(0 - 1)       | 0<br>(0 - 0)       | 0<br>(0 - 0)        | 0<br>(0 - 0)         | 0<br>(0 - 0)         | 0<br>(0 - 0)         |
| Diphtheria                                                        | 0<br>(0 - 0)       | 0<br>(0 - 0)       | 0<br>(0 - 0)        | 0<br>(0 - 0)         | 0<br>(0 - 0)         | --                   |
| Whooping cough                                                    | 0<br>(0 - 1)       | 0<br>(0 - 1)       | 0<br>(0 - 0)        | 0<br>(0 - 0)         | 0<br>(0 - 0)         | --                   |
| Tetanus                                                           | 1<br>(0 - 2)       | 0<br>(0 - 0)       | 0<br>(0 - 0)        | 0<br>(0 - 1)         | 0<br>(0 - 0)         | 0<br>(0 - 0)         |
| Measles                                                           | 5<br>(0 - 23)      | 4<br>(0 - 17)      | 1<br>(0 - 4)        | 0<br>(0 - 1)         | 0<br>(0 - 0)         | --                   |
| Varicella and herpes zoster                                       | 0<br>(0 - 0)       | 0<br>(0 - 0)       | 0<br>(0 - 0)        | 0<br>(0 - 0)         | 0<br>(0 - 0)         | 0<br>(0 - 0)         |
| Neglected tropical diseases and malaria                           | 38<br>(19 - 63)    | 26<br>(9 - 46)     | 3<br>(1 - 6)        | 4<br>(1 - 10)        | 2<br>(1 - 5)         | 3<br>(1 - 9)         |
| Malaria                                                           | 36<br>(17 - 61)    | 25<br>(9 - 46)     | 2<br>(0 - 6)        | 3<br>(0 - 9)         | 2<br>(0 - 5)         | 3<br>(0 - 9)         |
| Leishmaniasis                                                     | 0<br>(0 - 0)       | 0<br>(0 - 0)       | 0<br>(0 - 0)        | 0<br>(0 - 0)         | 0<br>(0 - 0)         | 0<br>(0 - 0)         |
| Visceral leishmaniasis                                            | 0<br>(0 - 0)       | 0<br>(0 - 0)       | 0<br>(0 - 0)        | 0<br>(0 - 0)         | 0<br>(0 - 0)         | 0<br>(0 - 0)         |
| Schistosomiasis                                                   | 0<br>(0 - 0)       | 0<br>(0 - 0)       | 0<br>(0 - 0)        | 0<br>(0 - 0)         | 0<br>(0 - 0)         | 0<br>(0 - 0)         |
| Cysticercosis                                                     | 0<br>(0 - 0)       | 0<br>(0 - 0)       | 0<br>(0 - 0)        | 0<br>(0 - 0)         | 0<br>(0 - 0)         | 0<br>(0 - 0)         |
| Cystic echinococcosis                                             | 0<br>(0 - 0)       | 0<br>(0 - 0)       | 0<br>(0 - 0)        | 0<br>(0 - 0)         | 0<br>(0 - 0)         | 0<br>(0 - 0)         |
| Dengue                                                            | 0<br>(0 - 0)       | 0<br>(0 - 0)       | 0<br>(0 - 0)        | 0<br>(0 - 0)         | 0<br>(0 - 0)         | 0<br>(0 - 0)         |
| Yellow fever                                                      | 0<br>(0 - 0)       | 0<br>(0 - 0)       | 0<br>(0 - 0)        | 0<br>(0 - 0)         | 0<br>(0 - 0)         | 0<br>(0 - 0)         |
| Rabies                                                            | 0<br>(0 - 1)       | 0<br>(0 - 0)       | 0<br>(0 - 0)        | 0<br>(0 - 0)         | 0<br>(0 - 0)         | 0<br>(0 - 0)         |
| Intestinal nematode infections                                    | 0<br>(0 - 1)       | 0<br>(0 - 1)       | 0<br>(0 - 0)        | 0<br>(0 - 0)         | 0<br>(0 - 0)         | 0<br>(0 - 0)         |
| Ascariasis                                                        | 0<br>(0 - 1)       | 0<br>(0 - 1)       | 0<br>(0 - 0)        | 0<br>(0 - 0)         | 0<br>(0 - 0)         | 0<br>(0 - 0)         |
| Other neglected tropical diseases                                 | 1<br>(0 - 2)       | 0<br>(0 - 1)       | 0<br>(0 - 0)        | 1<br>(0 - 1)         | 0<br>(0 - 0)         | 0<br>(0 - 0)         |



Web Table 31- Sao Tome and Principe deaths with 95% UI by age, sex, and cause in 2013

| Cause                                                            | Females, All Ages  | Females, 0-4 Years | Females, 5-14 Years | Females, 15-49 Years | Females, 50-69 Years | Females, 70-80 Years |
|------------------------------------------------------------------|--------------------|--------------------|---------------------|----------------------|----------------------|----------------------|
| Maternal disorders                                               | 9<br>(4 - 14)      | --                 | 0<br>(0 - 0)        | 9<br>(4 - 14)        | --                   | --                   |
| Maternal hemorrhage                                              | 2<br>(1 - 3)       | --                 | 0<br>(0 - 0)        | 2<br>(1 - 3)         | --                   | --                   |
| Maternal sepsis and other maternal infections                    | 1<br>(0 - 1)       | --                 | 0<br>(0 - 0)        | 0<br>(0 - 1)         | --                   | --                   |
| Maternal hypertensive disorders                                  | 1<br>(0 - 1)       | --                 | 0<br>(0 - 0)        | 1<br>(0 - 1)         | --                   | --                   |
| Maternal obstructed labor                                        | 0<br>(0 - 1)       | --                 | 0<br>(0 - 0)        | 0<br>(0 - 1)         | --                   | --                   |
| Maternal abortive outcome                                        | 2<br>(1 - 3)       | --                 | 0<br>(0 - 0)        | 2<br>(1 - 3)         | --                   | --                   |
| Indirect maternal deaths                                         | 1<br>(0 - 2)       | --                 | 0<br>(0 - 0)        | 1<br>(0 - 2)         | --                   | --                   |
| Late maternal deaths                                             | 1<br>(1 - 2)       | --                 | 0<br>(0 - 0)        | 1<br>(1 - 2)         | --                   | --                   |
| Maternal deaths aggravated by HIV/AIDS                           | 0<br>(0 - 0)       | --                 | --                  | 0<br>(0 - 0)         | --                   | --                   |
| Other maternal disorders                                         | 2<br>(1 - 3)       | --                 | 0<br>(0 - 0)        | 2<br>(1 - 3)         | --                   | --                   |
| Neonatal disorders                                               | 35<br>(27 - 43)    | 35<br>(27 - 43)    | --                  | --                   | --                   | --                   |
| Neonatal preterm birth complications                             | 12<br>(5 - 20)     | 12<br>(5 - 20)     | --                  | --                   | --                   | --                   |
| Neonatal encephalopathy due to birth asphyxia and trauma         | 12<br>(6 - 21)     | 12<br>(6 - 21)     | --                  | --                   | --                   | --                   |
| Neonatal sepsis and other neonatal infections                    | 9<br>(4 - 17)      | 9<br>(4 - 17)      | --                  | --                   | --                   | --                   |
| Hemolytic disease and other neonatal jaundice                    | 0<br>(0 - 0)       | 0<br>(0 - 0)       | --                  | --                   | --                   | --                   |
| Other neonatal disorders                                         | 2<br>(1 - 5)       | 2<br>(1 - 5)       | --                  | --                   | --                   | --                   |
| Nutritional deficiencies                                         | 36<br>(23 - 50)    | 5<br>(2 - 10)      | 1<br>(0 - 1)        | 7<br>(3 - 11)        | 7<br>(4 - 11)        | 16<br>(10 - 24)      |
| Protein-energy malnutrition                                      | 29<br>(15 - 41)    | 5<br>(2 - 9)       | 1<br>(0 - 1)        | 4<br>(1 - 7)         | 6<br>(3 - 9)         | 13<br>(8 - 20)       |
| Iodine deficiency                                                | 0<br>(0 - 0)       | 0<br>(0 - 0)       | 0<br>(0 - 0)        | 0<br>(0 - 0)         | 0<br>(0 - 0)         | 0<br>(0 - 0)         |
| Iron-deficiency anemia                                           | 8<br>(3 - 15)      | 0<br>(0 - 1)       | 0<br>(0 - 0)        | 3<br>(1 - 6)         | 1<br>(0 - 3)         | 3<br>(1 - 7)         |
| Other nutritional deficiencies                                   | 0<br>(0 - 0)       | 0<br>(0 - 0)       | 0<br>(0 - 0)        | 0<br>(0 - 0)         | 0<br>(0 - 0)         | 0<br>(0 - 0)         |
| Other communicable, maternal, neonatal, and nutritional diseases | 11<br>(5 - 17)     | 1<br>(0 - 3)       | 0<br>(0 - 1)        | 3<br>(1 - 5)         | 4<br>(2 - 7)         | 3<br>(1 - 4)         |
| Sexually transmitted diseases excluding HIV                      | 1<br>(0 - 3)       | 1<br>(0 - 2)       | 0<br>(0 - 0)        | 0<br>(0 - 0)         | 0<br>(0 - 0)         | 0<br>(0 - 0)         |
| Syphilis                                                         | 1<br>(0 - 2)       | 1<br>(0 - 2)       | 0<br>(0 - 0)        | 0<br>(0 - 0)         | 0<br>(0 - 0)         | 0<br>(0 - 0)         |
| Chlamydial infection                                             | 0<br>(0 - 0)       | --                 | 0<br>(0 - 0)        | 0<br>(0 - 0)         | 0<br>(0 - 0)         | 0<br>(0 - 0)         |
| Gonococcal infection                                             | 0<br>(0 - 0)       | --                 | 0<br>(0 - 0)        | 0<br>(0 - 0)         | 0<br>(0 - 0)         | 0<br>(0 - 0)         |
| Other sexually transmitted diseases                              | 0<br>(0 - 0)       | --                 | 0<br>(0 - 0)        | 0<br>(0 - 0)         | 0<br>(0 - 0)         | 0<br>(0 - 0)         |
| Hepatitis                                                        | 9<br>(4 - 14)      | 0<br>(0 - 1)       | 0<br>(0 - 0)        | 2<br>(1 - 4)         | 3<br>(1 - 6)         | 2<br>(1 - 4)         |
| Acute hepatitis A                                                | 0<br>(0 - 1)       | 0<br>(0 - 0)       | 0<br>(0 - 0)        | 0<br>(0 - 0)         | 0<br>(0 - 0)         | 0<br>(0 - 0)         |
| Acute hepatitis B                                                | 6<br>(2 - 11)      | 0<br>(0 - 1)       | 0<br>(0 - 0)        | 1<br>(0 - 2)         | 3<br>(1 - 5)         | 2<br>(1 - 4)         |
| Acute hepatitis C                                                | 0<br>(0 - 1)       | --                 | 0<br>(0 - 0)        | 0<br>(0 - 0)         | 0<br>(0 - 0)         | 0<br>(0 - 0)         |
| Acute hepatitis E                                                | 2<br>(1 - 3)       | 0<br>(0 - 0)       | 0<br>(0 - 0)        | 1<br>(0 - 2)         | 0<br>(0 - 1)         | 0<br>(0 - 0)         |
| Other infectious diseases                                        | 1<br>(1 - 2)       | 0<br>(0 - 1)       | 0<br>(0 - 0)        | 0<br>(0 - 1)         | 0<br>(0 - 1)         | 0<br>(0 - 1)         |
| Non-communicable diseases                                        | 287<br>(214 - 374) | 21<br>(11 - 33)    | 4<br>(2 - 5)        | 42<br>(19 - 63)      | 79<br>(52 - 111)     | 142<br>(112 - 172)   |
| Neoplasms                                                        | 39<br>(26 - 54)    | 0<br>(0 - 1)       | 0<br>(0 - 1)        | 9<br>(4 - 14)        | 16<br>(10 - 23)      | 13<br>(10 - 17)      |
| Esophageal cancer                                                | 1<br>(0 - 1)       | --                 | --                  | 0<br>(0 - 0)         | 0<br>(0 - 0)         | 0<br>(0 - 0)         |
| Stomach cancer                                                   | 5<br>(3 - 7)       | --                 | --                  | 1<br>(0 - 1)         | 2<br>(1 - 3)         | 2<br>(1 - 3)         |
| Liver cancer                                                     | 2<br>(1 - 2)       | --                 | 0<br>(0 - 0)        | 0<br>(0 - 0)         | 1<br>(0 - 1)         | 1<br>(0 - 1)         |
| Liver cancer due to hepatitis B                                  | 1<br>(0 - 1)       | --                 | 0<br>(0 - 0)        | 0<br>(0 - 0)         | 0<br>(0 - 0)         | 0<br>(0 - 0)         |
| Liver cancer due to hepatitis C                                  | 1<br>(0 - 1)       | --                 | 0<br>(0 - 0)        | 0<br>(0 - 0)         | 0<br>(0 - 0)         | 0<br>(0 - 0)         |

Web Table 31- Sao Tome and Principe deaths with 95% UI by age, sex, and cause in 2013

| Cause                                | Females, All Ages | Females, 0-4 Years | Females, 5-14 Years | Females, 15-49 Years | Females, 50-69 Years | Females, 70-80 Years |
|--------------------------------------|-------------------|--------------------|---------------------|----------------------|----------------------|----------------------|
| Liver cancer due to alcohol use      | 0<br>(0-0)        | --                 | --                  | 0<br>(0-0)           | 0<br>(0-0)           | 0<br>(0-0)           |
| Liver cancer due to other causes     | 0<br>(0-1)        | --                 | 0<br>(0-0)          | 0<br>(0-0)           | 0<br>(0-0)           | 0<br>(0-0)           |
| Larynx cancer                        | 0<br>(0-0)        | --                 | --                  | 0<br>(0-0)           | 0<br>(0-0)           | 0<br>(0-0)           |
| Tracheal, bronchus and lung cancer   | 3<br>(2-4)        | --                 | --                  | 0<br>(0-0)           | 1<br>(1-2)           | 1<br>(1-1)           |
| Breast cancer                        | 7<br>(4-11)       | --                 | --                  | 2<br>(1-3)           | 3<br>(2-5)           | 2<br>(1-3)           |
| Cervical cancer                      | 9<br>(5-14)       | --                 | --                  | 3<br>(1-5)           | 4<br>(2-6)           | 2<br>(1-3)           |
| Uterine cancer                       | 1<br>(1-2)        | --                 | --                  | 0<br>(0-0)           | 0<br>(0-1)           | 1<br>(0-1)           |
| Prostate cancer                      | --                | --                 | --                  | --                   | --                   | --                   |
| Colon and rectum cancer              | 1<br>(1-2)        | --                 | --                  | 0<br>(0-0)           | 0<br>(0-1)           | 1<br>(0-1)           |
| Lip and oral cavity cancer           | 0<br>(0-0)        | --                 | --                  | 0<br>(0-0)           | 0<br>(0-0)           | 0<br>(0-0)           |
| Nasopharynx cancer                   | 0<br>(0-0)        | --                 | 0<br>(0-0)          | 0<br>(0-0)           | 0<br>(0-0)           | 0<br>(0-0)           |
| Other pharynx cancer                 | 0<br>(0-0)        | --                 | --                  | 0<br>(0-0)           | 0<br>(0-0)           | 0<br>(0-0)           |
| Gallbladder and biliary tract cancer | 1<br>(0-1)        | --                 | --                  | 0<br>(0-0)           | 0<br>(0-0)           | 0<br>(0-1)           |
| Pancreatic cancer                    | 0<br>(0-0)        | --                 | --                  | 0<br>(0-0)           | 0<br>(0-0)           | 0<br>(0-0)           |
| Malignant skin melanoma              | 0<br>(0-0)        | --                 | --                  | 0<br>(0-0)           | 0<br>(0-0)           | 0<br>(0-0)           |
| Non-melanoma skin cancer             | 0<br>(0-0)        | --                 | --                  | 0<br>(0-0)           | 0<br>(0-0)           | 0<br>(0-0)           |
| Ovarian cancer                       | 3<br>(1-5)        | --                 | --                  | 1<br>(0-1)           | 2<br>(1-3)           | 1<br>(0-1)           |
| Testicular cancer                    | --                | --                 | --                  | --                   | --                   | --                   |
| Kidney cancer                        | 0<br>(0-0)        | 0<br>(0-0)         | 0<br>(0-0)          | 0<br>(0-0)           | 0<br>(0-0)           | 0<br>(0-0)           |
| Bladder cancer                       | 1<br>(1-1)        | --                 | --                  | 0<br>(0-0)           | 0<br>(0-0)           | 1<br>(0-1)           |
| Brain and nervous system cancer      | 0<br>(0-0)        | 0<br>(0-0)         | 0<br>(0-0)          | 0<br>(0-0)           | 0<br>(0-0)           | 0<br>(0-0)           |
| Thyroid cancer                       | 0<br>(0-0)        | --                 | 0<br>(0-0)          | 0<br>(0-0)           | 0<br>(0-0)           | 0<br>(0-0)           |
| Mesothelioma                         | 0<br>(0-0)        | --                 | --                  | 0<br>(0-0)           | 0<br>(0-0)           | 0<br>(0-0)           |
| Hodgkin lymphoma                     | 0<br>(0-0)        | 0<br>(0-0)         | 0<br>(0-0)          | 0<br>(0-0)           | 0<br>(0-0)           | 0<br>(0-0)           |
| Non-Hodgkin lymphoma                 | 1<br>(1-2)        | 0<br>(0-0)         | 0<br>(0-0)          | 1<br>(0-1)           | 0<br>(0-1)           | 0<br>(0-0)           |
| Multiple myeloma                     | 0<br>(0-0)        | --                 | --                  | 0<br>(0-0)           | 0<br>(0-0)           | 0<br>(0-0)           |
| Leukemia                             | 1<br>(1-1)        | 0<br>(0-0)         | 0<br>(0-0)          | 0<br>(0-0)           | 0<br>(0-0)           | 0<br>(0-0)           |
| Other neoplasms                      | 4<br>(2-5)        | 0<br>(0-1)         | 0<br>(0-0)          | 1<br>(0-1)           | 1<br>(1-2)           | 1<br>(1-2)           |
| Cardiovascular diseases              | 143<br>(100-190)  | 4<br>(2-9)         | 1<br>(0-2)          | 19<br>(8-29)         | 38<br>(23-55)        | 82<br>(61-102)       |
| Rheumatic heart disease              | 7<br>(3-11)       | 0<br>(0-0)         | 0<br>(0-0)          | 2<br>(1-3)           | 2<br>(1-4)           | 2<br>(1-4)           |
| Ischemic heart disease               | 36<br>(22-51)     | 0<br>(0-2)         | 0<br>(0-1)          | 4<br>(1-6)           | 9<br>(5-14)          | 22<br>(13-31)        |
| Cerebrovascular disease              | 66<br>(45-88)     | 2<br>(1-5)         | 0<br>(0-1)          | 8<br>(3-12)          | 17<br>(10-25)        | 38<br>(27-50)        |
| Ischemic stroke                      | 25<br>(15-34)     | 0<br>(0-1)         | 0<br>(0-0)          | 2<br>(1-3)           | 6<br>(3-10)          | 16<br>(9-23)         |
| Hemorrhagic stroke                   | 41<br>(28-56)     | 2<br>(1-4)         | 0<br>(0-1)          | 6<br>(2-10)          | 11<br>(7-17)         | 22<br>(15-30)        |
| Hypertensive heart disease           | 3<br>(2-6)        | 0<br>(0-0)         | 0<br>(0-0)          | 0<br>(0-1)           | 1<br>(0-1)           | 2<br>(1-4)           |
| Cardiomyopathy and myocarditis       | 7<br>(4-12)       | 1<br>(0-2)         | 0<br>(0-0)          | 2<br>(1-3)           | 1<br>(1-3)           | 3<br>(2-5)           |
| Atrial fibrillation and flutter      | 0<br>(0-0)        | --                 | --                  | 0<br>(0-0)           | 0<br>(0-0)           | 0<br>(0-0)           |
| Aortic aneurysm                      | 1<br>(0-1)        | --                 | --                  | 0<br>(0-0)           | 0<br>(0-0)           | 1<br>(0-1)           |
| Peripheral vascular disease          | 0<br>(0-0)        | --                 | --                  | 0<br>(0-0)           | 0<br>(0-0)           | 0<br>(0-0)           |
| Endocarditis                         | 1<br>(1-2)        | 0<br>(0-1)         | 0<br>(0-0)          | 0<br>(0-1)           | 0<br>(0-0)           | 0<br>(0-1)           |

Web Table 31- Sao Tome and Principe deaths with 95% UI by age, sex, and cause in 2013

| Cause                                               | Females, All Ages | Females, 0-4 Years | Females, 5-14 Years | Females, 15-49 Years | Females, 50-69 Years | Females, 70-80 Years |
|-----------------------------------------------------|-------------------|--------------------|---------------------|----------------------|----------------------|----------------------|
| Other cardiovascular and circulatory diseases       | 22<br>(11 - 33)   | 0<br>(0 - 1)       | 0<br>(0 - 0)        | 3<br>(1 - 5)         | 6<br>(3 - 11)        | 13<br>(6 - 19)       |
| Chronic respiratory diseases                        | 40<br>(27 - 54)   | 1<br>(0 - 2)       | 0<br>(0 - 0)        | 3<br>(1 - 5)         | 12<br>(7 - 17)       | 24<br>(17 - 32)      |
| Chronic obstructive pulmonary disease               | 25<br>(16 - 36)   | 0<br>(0 - 1)       | 0<br>(0 - 0)        | 1<br>(0 - 2)         | 7<br>(4 - 12)        | 15<br>(10 - 23)      |
| Pneumoconiosis                                      | 0<br>(0 - 0)      | 0<br>(0 - 0)       | 0<br>(0 - 0)        | 0<br>(0 - 0)         | 0<br>(0 - 0)         | 0<br>(0 - 0)         |
| Silicosis                                           | 0<br>(0 - 0)      | 0<br>(0 - 0)       | 0<br>(0 - 0)        | 0<br>(0 - 0)         | 0<br>(0 - 0)         | 0<br>(0 - 0)         |
| Asbestosis                                          | 0<br>(0 - 0)      | 0<br>(0 - 0)       | 0<br>(0 - 0)        | 0<br>(0 - 0)         | 0<br>(0 - 0)         | 0<br>(0 - 0)         |
| Coal workers pneumoconiosis                         | 0<br>(0 - 0)      | 0<br>(0 - 0)       | 0<br>(0 - 0)        | 0<br>(0 - 0)         | 0<br>(0 - 0)         | 0<br>(0 - 0)         |
| Other pneumoconiosis                                | 0<br>(0 - 0)      | 0<br>(0 - 0)       | 0<br>(0 - 0)        | 0<br>(0 - 0)         | 0<br>(0 - 0)         | 0<br>(0 - 0)         |
| Asthma                                              | 8<br>(2 - 13)     | 0<br>(0 - 0)       | 0<br>(0 - 0)        | 1<br>(0 - 2)         | 3<br>(1 - 5)         | 4<br>(1 - 7)         |
| Interstitial lung disease and pulmonary sarcoidosis | 4<br>(0 - 8)      | 0<br>(0 - 0)       | 0<br>(0 - 0)        | 0<br>(0 - 1)         | 1<br>(0 - 2)         | 3<br>(0 - 6)         |
| Other chronic respiratory diseases                  | 3<br>(2 - 6)      | 0<br>(0 - 0)       | 0<br>(0 - 0)        | 1<br>(0 - 1)         | 1<br>(0 - 1)         | 2<br>(1 - 3)         |
| Cirrhosis                                           | 5<br>(4 - 8)      | 0<br>(0 - 0)       | 0<br>(0 - 0)        | 1<br>(1 - 2)         | 2<br>(1 - 4)         | 2<br>(1 - 3)         |
| Cirrhosis due to hepatitis B                        | 1<br>(0 - 2)      | 0<br>(0 - 0)       | 0<br>(0 - 0)        | 0<br>(0 - 0)         | 1<br>(0 - 1)         | 0<br>(0 - 1)         |
| Cirrhosis due to hepatitis C                        | 2<br>(1 - 4)      | 0<br>(0 - 0)       | 0<br>(0 - 0)        | 1<br>(0 - 1)         | 1<br>(1 - 2)         | 1<br>(0 - 1)         |
| Cirrhosis due to alcohol use                        | 1<br>(1 - 2)      | --                 | --                  | 0<br>(0 - 0)         | 1<br>(0 - 1)         | 1<br>(0 - 1)         |
| Cirrhosis due to other causes                       | 1<br>(0 - 1)      | 0<br>(0 - 0)       | 0<br>(0 - 0)        | 0<br>(0 - 0)         | 0<br>(0 - 0)         | 0<br>(0 - 0)         |
| Digestive diseases                                  | 9<br>(6 - 13)     | 0<br>(0 - 0)       | 0<br>(0 - 0)        | 2<br>(1 - 3)         | 2<br>(1 - 4)         | 4<br>(3 - 6)         |
| Peptic ulcer disease                                | 1<br>(1 - 2)      | 0<br>(0 - 0)       | 0<br>(0 - 0)        | 0<br>(0 - 0)         | 0<br>(0 - 1)         | 0<br>(0 - 1)         |
| Gastritis and duodenitis                            | 0<br>(0 - 1)      | 0<br>(0 - 0)       | 0<br>(0 - 0)        | 0<br>(0 - 0)         | 0<br>(0 - 0)         | 0<br>(0 - 1)         |
| Appendicitis                                        | 1<br>(0 - 1)      | 0<br>(0 - 0)       | 0<br>(0 - 0)        | 0<br>(0 - 0)         | 0<br>(0 - 0)         | 0<br>(0 - 0)         |
| Paralytic ileus and intestinal obstruction          | 2<br>(1 - 3)      | 0<br>(0 - 0)       | 0<br>(0 - 0)        | 0<br>(0 - 1)         | 0<br>(0 - 1)         | 1<br>(1 - 2)         |
| Inguinal, femoral, and abdominal hernia             | 0<br>(0 - 0)      | 0<br>(0 - 0)       | 0<br>(0 - 0)        | 0<br>(0 - 0)         | 0<br>(0 - 0)         | 0<br>(0 - 0)         |
| Inflammatory bowel disease                          | 0<br>(0 - 1)      | 0<br>(0 - 0)       | 0<br>(0 - 0)        | 0<br>(0 - 0)         | 0<br>(0 - 0)         | 0<br>(0 - 0)         |
| Vascular intestinal disorders                       | 0<br>(0 - 0)      | 0<br>(0 - 0)       | 0<br>(0 - 0)        | 0<br>(0 - 0)         | 0<br>(0 - 0)         | 0<br>(0 - 0)         |
| Gallbladder and biliary diseases                    | 1<br>(0 - 1)      | 0<br>(0 - 0)       | 0<br>(0 - 0)        | 0<br>(0 - 0)         | 0<br>(0 - 0)         | 0<br>(0 - 1)         |
| Pancreatitis                                        | 0<br>(0 - 1)      | 0<br>(0 - 0)       | 0<br>(0 - 0)        | 0<br>(0 - 0)         | 0<br>(0 - 0)         | 0<br>(0 - 0)         |
| Other digestive diseases                            | 3<br>(2 - 5)      | 0<br>(0 - 0)       | 0<br>(0 - 0)        | 0<br>(0 - 1)         | 1<br>(0 - 1)         | 2<br>(1 - 3)         |
| Neurological disorders                              | 7<br>(5 - 9)      | 0<br>(0 - 1)       | 0<br>(0 - 0)        | 1<br>(0 - 2)         | 1<br>(0 - 1)         | 5<br>(3 - 6)         |
| Alzheimer disease and other dementias               | 4<br>(3 - 6)      | --                 | --                  | 0<br>(0 - 0)         | 0<br>(0 - 0)         | 4<br>(3 - 6)         |
| Parkinson disease                                   | 0<br>(0 - 1)      | --                 | --                  | 0<br>(0 - 0)         | 0<br>(0 - 0)         | 0<br>(0 - 1)         |
| Epilepsy                                            | 2<br>(1 - 3)      | 0<br>(0 - 1)       | 0<br>(0 - 0)        | 1<br>(0 - 2)         | 0<br>(0 - 0)         | 0<br>(0 - 0)         |
| Multiple sclerosis                                  | 0<br>(0 - 0)      | --                 | --                  | 0<br>(0 - 0)         | 0<br>(0 - 0)         | 0<br>(0 - 0)         |
| Other neurological disorders                        | 0<br>(0 - 1)      | 0<br>(0 - 0)       | 0<br>(0 - 0)        | 0<br>(0 - 0)         | 0<br>(0 - 0)         | 0<br>(0 - 0)         |
| Mental and substance use disorders                  | 0<br>(0 - 0)      | 0<br>(0 - 0)       | 0<br>(0 - 0)        | 0<br>(0 - 0)         | 0<br>(0 - 0)         | 0<br>(0 - 0)         |
| Schizophrenia                                       | 0<br>(0 - 0)      | --                 | --                  | 0<br>(0 - 0)         | 0<br>(0 - 0)         | 0<br>(0 - 0)         |
| Alcohol use disorders                               | 0<br>(0 - 0)      | --                 | --                  | 0<br>(0 - 0)         | 0<br>(0 - 0)         | 0<br>(0 - 0)         |
| Drug use disorders                                  | 0<br>(0 - 0)      | 0<br>(0 - 0)       | --                  | 0<br>(0 - 0)         | 0<br>(0 - 0)         | 0<br>(0 - 0)         |
| Opioid use disorders                                | 0<br>(0 - 0)      | 0<br>(0 - 0)       | --                  | 0<br>(0 - 0)         | 0<br>(0 - 0)         | 0<br>(0 - 0)         |
| Cocaine use disorders                               | 0<br>(0 - 0)      | 0<br>(0 - 0)       | --                  | 0<br>(0 - 0)         | 0<br>(0 - 0)         | 0<br>(0 - 0)         |
| Amphetamine use disorders                           | 0<br>(0 - 0)      | 0<br>(0 - 0)       | --                  | 0<br>(0 - 0)         | 0<br>(0 - 0)         | 0<br>(0 - 0)         |

Web Table 31- Sao Tome and Principe deaths with 95% UI by age, sex, and cause in 2013

| Cause                                               | Females, All Ages | Females, 0-4 Years | Females, 5-14 Years | Females, 15-49 Years | Females, 50-69 Years | Females, 70-80 Years |
|-----------------------------------------------------|-------------------|--------------------|---------------------|----------------------|----------------------|----------------------|
| Other drug use disorders                            | 0<br>(0-0)        | 0<br>(0-0)         | --                  | 0<br>(0-0)           | 0<br>(0-0)           | 0<br>(0-0)           |
| Eating disorders                                    | 0<br>(0-0)        | --                 | 0<br>(0-0)          | 0<br>(0-0)           | --                   | --                   |
| Anorexia nervosa                                    | 0<br>(0-0)        | --                 | 0<br>(0-0)          | 0<br>(0-0)           | --                   | --                   |
| Diabetes, urogenital, blood, and endocrine diseases | 27<br>(18-37)     | 2<br>(1-5)         | 1<br>(0-2)          | 5<br>(2-8)           | 7<br>(5-11)          | 11<br>(8-14)         |
| Diabetes mellitus                                   | 7<br>(5-11)       | 0<br>(0-0)         | 0<br>(0-0)          | 1<br>(0-1)           | 3<br>(2-4)           | 4<br>(2-5)           |
| Acute glomerulonephritis                            | 0<br>(0-0)        | 0<br>(0-0)         | 0<br>(0-0)          | 0<br>(0-0)           | 0<br>(0-0)           | 0<br>(0-0)           |
| Chronic kidney disease                              | 5<br>(3-8)        | 0<br>(0-0)         | 0<br>(0-0)          | 1<br>(0-2)           | 2<br>(1-3)           | 2<br>(1-4)           |
| Chronic kidney disease due to diabetes mellitus     | 0<br>(0-0)        | 0<br>(0-0)         | 0<br>(0-0)          | 0<br>(0-0)           | 0<br>(0-0)           | 0<br>(0-0)           |
| Chronic kidney disease due to hypertension          | 3<br>(2-5)        | 0<br>(0-0)         | 0<br>(0-0)          | 1<br>(0-1)           | 1<br>(1-2)           | 2<br>(1-3)           |
| Chronic kidney disease due to glomerulonephritis    | 1<br>(0-1)        | 0<br>(0-0)         | 0<br>(0-0)          | 0<br>(0-0)           | 0<br>(0-0)           | 0<br>(0-0)           |
| Chronic kidney disease due to other causes          | 1<br>(1-2)        | 0<br>(0-0)         | 0<br>(0-0)          | 0<br>(0-0)           | 0<br>(0-1)           | 1<br>(0-1)           |
| Urinary diseases and male infertility               | 4<br>(2-6)        | 0<br>(0-0)         | 0<br>(0-0)          | 1<br>(0-1)           | 1<br>(1-2)           | 3<br>(1-4)           |
| Interstitial nephritis and urinary tract infections | 2<br>(1-3)        | 0<br>(0-0)         | 0<br>(0-0)          | 0<br>(0-0)           | 0<br>(0-1)           | 1<br>(1-2)           |
| Urolithiasis                                        | 2<br>(1-3)        | --                 | 0<br>(0-0)          | 0<br>(0-0)           | 1<br>(0-1)           | 1<br>(0-2)           |
| Other urinary diseases                              | 0<br>(0-1)        | 0<br>(0-0)         | 0<br>(0-0)          | 0<br>(0-0)           | 0<br>(0-0)           | 0<br>(0-0)           |
| Gynecological diseases                              | 0<br>(0-1)        | --                 | --                  | 0<br>(0-0)           | 0<br>(0-0)           | 0<br>(0-0)           |
| Uterine fibroids                                    | 0<br>(0-0)        | --                 | --                  | 0<br>(0-0)           | 0<br>(0-0)           | 0<br>(0-0)           |
| Polycystic ovarian syndrome                         | 0<br>(0-0)        | --                 | --                  | 0<br>(0-0)           | 0<br>(0-0)           | --                   |
| Endometriosis                                       | 0<br>(0-0)        | --                 | --                  | 0<br>(0-0)           | 0<br>(0-0)           | --                   |
| Genital prolapse                                    | 0<br>(0-0)        | --                 | --                  | 0<br>(0-0)           | 0<br>(0-0)           | 0<br>(0-0)           |
| Other gynecological diseases                        | 0<br>(0-0)        | --                 | --                  | 0<br>(0-0)           | 0<br>(0-0)           | 0<br>(0-0)           |
| Hemoglobinopathies and hemolytic anemias            | 4<br>(2-8)        | 1<br>(0-4)         | 1<br>(0-2)          | 2<br>(1-3)           | 1<br>(0-1)           | 0<br>(0-1)           |
| Thalassemias                                        | 0<br>(0-0)        | 0<br>(0-0)         | 0<br>(0-0)          | 0<br>(0-0)           | 0<br>(0-0)           | 0<br>(0-0)           |
| Sickle cell disorders                               | 4<br>(2-8)        | 1<br>(0-3)         | 1<br>(0-2)          | 2<br>(1-3)           | 0<br>(0-1)           | 0<br>(0-0)           |
| G6PD deficiency                                     | 0<br>(0-0)        | 0<br>(0-0)         | 0<br>(0-0)          | 0<br>(0-0)           | 0<br>(0-0)           | 0<br>(0-0)           |
| Other hemoglobinopathies and hemolytic anemias      | 0<br>(0-0)        | 0<br>(0-0)         | 0<br>(0-0)          | 0<br>(0-0)           | 0<br>(0-0)           | 0<br>(0-0)           |
| Endocrine, metabolic, blood, and immune disorders   | 5<br>(3-8)        | 1<br>(0-2)         | 0<br>(0-0)          | 1<br>(0-2)           | 1<br>(1-3)           | 2<br>(1-3)           |
| Musculoskeletal disorders                           | 1<br>(1-2)        | --                 | 0<br>(0-0)          | 0<br>(0-1)           | 0<br>(0-0)           | 0<br>(0-0)           |
| Rheumatoid arthritis                                | 0<br>(0-1)        | --                 | 0<br>(0-0)          | 0<br>(0-0)           | 0<br>(0-0)           | 0<br>(0-0)           |
| Other musculoskeletal disorders                     | 0<br>(0-1)        | --                 | 0<br>(0-0)          | 0<br>(0-1)           | 0<br>(0-0)           | 0<br>(0-0)           |
| Other non-communicable diseases                     | 16<br>(10-27)     | 12<br>(6-23)       | 1<br>(0-1)          | 1<br>(1-2)           | 1<br>(0-1)           | 2<br>(1-2)           |
| Congenital anomalies                                | 14<br>(7-25)      | 12<br>(6-22)       | 1<br>(0-1)          | 1<br>(0-1)           | 0<br>(0-0)           | 0<br>(0-0)           |
| Neural tube defects                                 | 1<br>(0-4)        | 1<br>(0-4)         | 0<br>(0-0)          | 0<br>(0-0)           | 0<br>(0-0)           | 0<br>(0-0)           |
| Congenital heart anomalies                          | 7<br>(4-13)       | 6<br>(3-12)        | 0<br>(0-1)          | 0<br>(0-1)           | 0<br>(0-0)           | 0<br>(0-0)           |
| Cleft lip and cleft palate                          | 0<br>(0-0)        | 0<br>(0-0)         | --                  | --                   | --                   | --                   |
| Down syndrome                                       | 2<br>(0-4)        | 1<br>(0-4)         | 0<br>(0-0)          | 0<br>(0-0)           | 0<br>(0-0)           | 0<br>(0-0)           |
| Chromosomal unbalanced rearrangements               | 1<br>(0-2)        | 1<br>(0-2)         | 0<br>(0-0)          | 0<br>(0-0)           | 0<br>(0-0)           | 0<br>(0-0)           |
| Other congenital anomalies                          | 3<br>(1-7)        | 2<br>(1-6)         | 0<br>(0-0)          | 0<br>(0-0)           | 0<br>(0-0)           | 0<br>(0-0)           |
| Skin and subcutaneous diseases                      | 2<br>(2-4)        | 0<br>(0-0)         | 0<br>(0-0)          | 0<br>(0-1)           | 1<br>(0-1)           | 1<br>(1-2)           |
| Cellulitis                                          | 0<br>(0-0)        | 0<br>(0-0)         | 0<br>(0-0)          | 0<br>(0-0)           | 0<br>(0-0)           | 0<br>(0-0)           |

Web Table 31- Sao Tome and Principe deaths with 95% UI by age, sex, and cause in 2013

| Cause                                           | Females, All Ages | Females, 0-4 Years | Females, 5-14 Years | Females, 15-49 Years | Females, 50-69 Years | Females, 70-80 Years |
|-------------------------------------------------|-------------------|--------------------|---------------------|----------------------|----------------------|----------------------|
| Pyoderma                                        | 2<br>(1 - 3)      | 0<br>(0 - 0)       | 0<br>(0 - 0)        | 0<br>(0 - 0)         | 0<br>(0 - 1)         | 1<br>(1 - 2)         |
| Decubitus ulcer                                 | 0<br>(0 - 0)      | 0<br>(0 - 0)       | 0<br>(0 - 0)        | 0<br>(0 - 0)         | 0<br>(0 - 0)         | 0<br>(0 - 0)         |
| Other skin and subcutaneous diseases            | 0<br>(0 - 0)      | 0<br>(0 - 0)       | 0<br>(0 - 0)        | 0<br>(0 - 0)         | 0<br>(0 - 0)         | 0<br>(0 - 0)         |
| Sudden infant death syndrome                    | 0<br>(0 - 0)      | 0<br>(0 - 0)       | --                  | --                   | --                   | --                   |
| Injuries                                        | 20<br>(13 - 36)   | 2<br>(1 - 7)       | 1<br>(1 - 2)        | 9<br>(4 - 15)        | 4<br>(2 - 7)         | 4<br>(3 - 6)         |
| Transport injuries                              | 7<br>(4 - 10)     | 0<br>(0 - 1)       | 0<br>(0 - 1)        | 4<br>(2 - 6)         | 1<br>(1 - 2)         | 1<br>(1 - 2)         |
| Road injuries                                   | 7<br>(4 - 10)     | 0<br>(0 - 1)       | 0<br>(0 - 1)        | 4<br>(2 - 6)         | 1<br>(1 - 2)         | 1<br>(1 - 2)         |
| Pedestrian road injuries                        | 2<br>(1 - 3)      | 0<br>(0 - 0)       | 0<br>(0 - 0)        | 1<br>(0 - 2)         | 1<br>(0 - 1)         | 0<br>(0 - 1)         |
| Cyclist road injuries                           | 0<br>(0 - 0)      | 0<br>(0 - 0)       | 0<br>(0 - 0)        | 0<br>(0 - 0)         | 0<br>(0 - 0)         | 0<br>(0 - 0)         |
| Motorcyclist road injuries                      | 0<br>(0 - 1)      | 0<br>(0 - 0)       | 0<br>(0 - 0)        | 0<br>(0 - 0)         | 0<br>(0 - 0)         | 0<br>(0 - 0)         |
| Motor vehicle road injuries                     | 4<br>(2 - 6)      | 0<br>(0 - 0)       | 0<br>(0 - 0)        | 2<br>(1 - 4)         | 1<br>(0 - 1)         | 0<br>(0 - 1)         |
| Other road injuries                             | 0<br>(0 - 0)      | 0<br>(0 - 0)       | 0<br>(0 - 0)        | 0<br>(0 - 0)         | 0<br>(0 - 0)         | 0<br>(0 - 0)         |
| Other transport injuries                        | 0<br>(0 - 0)      | 0<br>(0 - 0)       | 0<br>(0 - 0)        | 0<br>(0 - 0)         | 0<br>(0 - 0)         | 0<br>(0 - 0)         |
| Unintentional injuries                          | 8<br>(5 - 19)     | 2<br>(1 - 7)       | 1<br>(0 - 2)        | 2<br>(1 - 5)         | 1<br>(1 - 2)         | 2<br>(2 - 4)         |
| Falls                                           | 1<br>(1 - 2)      | 0<br>(0 - 0)       | 0<br>(0 - 0)        | 0<br>(0 - 0)         | 0<br>(0 - 0)         | 1<br>(0 - 1)         |
| Drowning                                        | 2<br>(1 - 3)      | 0<br>(0 - 1)       | 0<br>(0 - 1)        | 1<br>(0 - 1)         | 0<br>(0 - 0)         | 0<br>(0 - 0)         |
| Fire, heat, and hot substances                  | 0<br>(0 - 0)      | 0<br>(0 - 0)       | 0<br>(0 - 0)        | 0<br>(0 - 0)         | 0<br>(0 - 0)         | 0<br>(0 - 0)         |
| Poisonings                                      | 0<br>(0 - 0)      | 0<br>(0 - 0)       | 0<br>(0 - 0)        | 0<br>(0 - 0)         | 0<br>(0 - 0)         | 0<br>(0 - 0)         |
| Exposure to mechanical forces                   | 2<br>(0 - 12)     | 1<br>(0 - 6)       | 0<br>(0 - 1)        | 0<br>(0 - 3)         | 0<br>(0 - 1)         | 0<br>(0 - 1)         |
| Unintentional firearm injuries                  | 0<br>(0 - 1)      | 0<br>(0 - 0)       | 0<br>(0 - 0)        | 0<br>(0 - 0)         | 0<br>(0 - 0)         | 0<br>(0 - 0)         |
| Unintentional suffocation                       | 1<br>(0 - 11)     | 0<br>(0 - 6)       | 0<br>(0 - 1)        | 0<br>(0 - 3)         | 0<br>(0 - 1)         | 0<br>(0 - 1)         |
| Other exposure to mechanical forces             | 0<br>(0 - 0)      | 0<br>(0 - 0)       | 0<br>(0 - 0)        | 0<br>(0 - 0)         | 0<br>(0 - 0)         | 0<br>(0 - 0)         |
| Adverse effects of medical treatment            | 2<br>(1 - 3)      | 0<br>(0 - 1)       | 0<br>(0 - 0)        | 1<br>(0 - 1)         | 1<br>(0 - 1)         | 1<br>(0 - 1)         |
| Animal contact                                  | 0<br>(0 - 0)      | 0<br>(0 - 0)       | 0<br>(0 - 0)        | 0<br>(0 - 0)         | 0<br>(0 - 0)         | 0<br>(0 - 0)         |
| Venomous animal contact                         | 0<br>(0 - 0)      | 0<br>(0 - 0)       | 0<br>(0 - 0)        | 0<br>(0 - 0)         | 0<br>(0 - 0)         | 0<br>(0 - 0)         |
| Non-venomous animal contact                     | 0<br>(0 - 0)      | 0<br>(0 - 0)       | 0<br>(0 - 0)        | 0<br>(0 - 0)         | 0<br>(0 - 0)         | 0<br>(0 - 0)         |
| Foreign body                                    | 1<br>(1 - 3)      | 1<br>(0 - 1)       | 0<br>(0 - 0)        | 0<br>(0 - 0)         | 0<br>(0 - 0)         | 0<br>(0 - 1)         |
| Pulmonary aspiration and foreign body in airway | 1<br>(1 - 2)      | 1<br>(0 - 1)       | 0<br>(0 - 0)        | 0<br>(0 - 0)         | 0<br>(0 - 0)         | 0<br>(0 - 1)         |
| Foreign body in other body part                 | 0<br>(0 - 1)      | 0<br>(0 - 0)       | 0<br>(0 - 0)        | 0<br>(0 - 0)         | 0<br>(0 - 0)         | 0<br>(0 - 0)         |
| Other unintentional injuries                    | 0<br>(0 - 0)      | 0<br>(0 - 0)       | 0<br>(0 - 0)        | 0<br>(0 - 0)         | 0<br>(0 - 0)         | 0<br>(0 - 0)         |
| Self-harm and interpersonal violence            | 5<br>(2 - 15)     | 0<br>(0 - 1)       | 0<br>(0 - 0)        | 3<br>(1 - 7)         | 1<br>(0 - 4)         | 0<br>(0 - 2)         |
| Self-harm                                       | 2<br>(1 - 11)     | --                 | 0<br>(0 - 0)        | 1<br>(0 - 5)         | 1<br>(0 - 3)         | 0<br>(0 - 2)         |
| Interpersonal violence                          | 3<br>(1 - 5)      | 0<br>(0 - 1)       | 0<br>(0 - 0)        | 2<br>(1 - 4)         | 0<br>(0 - 0)         | 0<br>(0 - 0)         |
| Assault by firearm                              | 1<br>(0 - 2)      | 0<br>(0 - 0)       | 0<br>(0 - 0)        | 1<br>(0 - 1)         | 0<br>(0 - 0)         | 0<br>(0 - 0)         |
| Assault by sharp object                         | 1<br>(0 - 2)      | 0<br>(0 - 0)       | 0<br>(0 - 0)        | 1<br>(0 - 2)         | 0<br>(0 - 0)         | 0<br>(0 - 0)         |
| Assault by other means                          | 1<br>(0 - 2)      | 0<br>(0 - 0)       | 0<br>(0 - 0)        | 1<br>(0 - 1)         | 0<br>(0 - 0)         | 0<br>(0 - 0)         |

Web Table 31- Saudi Arabia deaths with 95% UI by age, sex, and cause in 2013

| Cause                                                             | Both Sexes, All Ages        | Both Sexes, 0-4 Years    | Both Sexes, 5-14 Years   | Both Sexes, 15-49 Years     | Both Sexes, 50-69 Years     | Both Sexes, 70-80 Years     |
|-------------------------------------------------------------------|-----------------------------|--------------------------|--------------------------|-----------------------------|-----------------------------|-----------------------------|
| All causes                                                        | 82,170<br>(72,386 - 92,714) | 6,775<br>(5,853 - 7,903) | 1,348<br>(1,163 - 1,523) | 17,624<br>(14,817 - 20,417) | 22,131<br>(18,298 - 26,722) | 34,293<br>(31,299 - 38,313) |
| Communicable, maternal, neonatal, and nutritional diseases        | 9,935<br>(8,931 - 11,057)   | 3,683<br>(3,065 - 4,368) | 238<br>(149 - 368)       | 1,455<br>(1,247 - 1,757)    | 1,575<br>(1,326 - 1,889)    | 2,984<br>(2,585 - 3,475)    |
| HIV/AIDS and tuberculosis                                         | 1,177<br>(1,015 - 1,385)    | 15<br>(8 - 27)           | 10<br>(7 - 13)           | 469<br>(396 - 548)          | 281<br>(231 - 343)          | 403<br>(326 - 551)          |
| Tuberculosis                                                      | 894<br>(760 - 1,066)        | 2<br>(1 - 3)             | 5<br>(4 - 6)             | 253<br>(206 - 302)          | 240<br>(190 - 301)          | 394<br>(322 - 510)          |
| HIV/AIDS                                                          | 283<br>(206 - 415)          | 13<br>(6 - 25)           | 5<br>(3 - 8)             | 216<br>(163 - 274)          | 41<br>(26 - 61)             | 9<br>(2 - 113)              |
| HIV/AIDS resulting in mycobacterial infection                     | 16<br>(11 - 25)             | 1<br>(0 - 1)             | 0<br>(0 - 0)             | 12<br>(9 - 16)              | 2<br>(2 - 4)                | 1<br>(0 - 8)                |
| HIV/AIDS resulting in other diseases                              | 267<br>(194 - 390)          | 12<br>(5 - 24)           | 5<br>(3 - 8)             | 204<br>(154 - 259)          | 38<br>(24 - 58)             | 8<br>(2 - 104)              |
| Diarrhea, lower respiratory, and other common infectious diseases | 4,910<br>(4,166 - 5,824)    | 386<br>(276 - 548)       | 214<br>(124 - 344)       | 844<br>(653 - 1,125)        | 1,178<br>(946 - 1,464)      | 2,288<br>(1,894 - 2,729)    |
| Diarrheal diseases                                                | 367<br>(302 - 452)          | 81<br>(58 - 109)         | 9<br>(6 - 13)            | 34<br>(26 - 42)             | 33<br>(25 - 43)             | 210<br>(154 - 291)          |
| Intestinal infectious diseases                                    | 519<br>(191 - 1,100)        | 135<br>(50 - 280)        | 134<br>(49 - 271)        | 210<br>(72 - 478)           | 31<br>(11 - 72)             | 9<br>(3 - 19)               |
| Typhoid fever                                                     | 379<br>(126 - 824)          | 92<br>(30 - 201)         | 103<br>(35 - 209)        | 155<br>(48 - 368)           | 22<br>(7 - 54)              | 6<br>(2 - 14)               |
| Paratyphoid fever                                                 | 111<br>(37 - 252)           | 31<br>(10 - 69)          | 29<br>(10 - 64)          | 44<br>(13 - 105)            | 6<br>(2 - 15)               | 1<br>(0 - 4)                |
| Other intestinal infectious diseases                              | 29<br>(18 - 43)             | 12<br>(5 - 21)           | 3<br>(0 - 7)             | 11<br>(4 - 20)              | 3<br>(0 - 7)                | 1<br>(0 - 4)                |
| Lower respiratory infections                                      | 3,749<br>(3,149 - 4,421)    | 121<br>(87 - 165)        | 52<br>(37 - 68)          | 504<br>(403 - 625)          | 1,062<br>(843 - 1,333)      | 2,010<br>(1,627 - 2,422)    |
| Upper respiratory infections                                      | 2<br>(1 - 4)                | 0<br>(0 - 1)             | 0<br>(0 - 0)             | 1<br>(0 - 2)                | 1<br>(0 - 2)                | 1<br>(0 - 2)                |
| Otitis media                                                      | 8<br>(7 - 10)               | 0<br>(0 - 0)             | 0<br>(0 - 1)             | 2<br>(1 - 2)                | 2<br>(1 - 2)                | 4<br>(3 - 6)                |
| Meningitis                                                        | 119<br>(101 - 139)          | 17<br>(12 - 25)          | 8<br>(6 - 10)            | 41<br>(33 - 50)             | 23<br>(18 - 30)             | 30<br>(24 - 37)             |
| Pneumococcal meningitis                                           | 29<br>(23 - 35)             | 3<br>(2 - 5)             | 2<br>(1 - 3)             | 10<br>(7 - 13)              | 6<br>(4 - 8)                | 7<br>(5 - 11)               |
| H influenzae type B meningitis                                    | 24<br>(19 - 30)             | 8<br>(5 - 11)            | 3<br>(2 - 4)             | 6<br>(4 - 9)                | 3<br>(2 - 5)                | 4<br>(3 - 6)                |
| Meningococcal meningitis                                          | 23<br>(17 - 30)             | 3<br>(2 - 5)             | 1<br>(1 - 2)             | 8<br>(5 - 12)               | 5<br>(3 - 7)                | 7<br>(4 - 10)               |
| Other meningitis                                                  | 44<br>(35 - 53)             | 3<br>(2 - 4)             | 2<br>(1 - 2)             | 17<br>(12 - 22)             | 10<br>(7 - 14)              | 12<br>(9 - 16)              |
| Encephalitis                                                      | 109<br>(84 - 162)           | 14<br>(9 - 24)           | 8<br>(5 - 13)            | 44<br>(32 - 69)             | 24<br>(16 - 40)             | 20<br>(14 - 32)             |
| Diphtheria                                                        | 1<br>(0 - 3)                | 0<br>(0 - 2)             | 0<br>(0 - 1)             | 0<br>(0 - 1)                | 0<br>(0 - 0)                | --<br>(0 - 0)               |
| Whooping cough                                                    | 12<br>(0 - 61)              | 11<br>(0 - 56)           | 1<br>(0 - 4)             | 0<br>(0 - 1)                | 0<br>(0 - 0)                | --<br>(0 - 0)               |
| Tetanus                                                           | 10<br>(7 - 13)              | 2<br>(1 - 3)             | 1<br>(0 - 1)             | 5<br>(3 - 6)                | 2<br>(1 - 3)                | 1<br>(1 - 2)                |
| Measles                                                           | 2<br>(0 - 15)               | 2<br>(0 - 13)            | 0<br>(0 - 2)             | 0<br>(0 - 0)                | 0<br>(0 - 0)                | --<br>(0 - 0)               |
| Varicella and herpes zoster                                       | 10<br>(4 - 19)              | 2<br>(0 - 7)             | 1<br>(0 - 2)             | 3<br>(1 - 8)                | 1<br>(0 - 2)                | 3<br>(0 - 11)               |
| Neglected tropical diseases and malaria                           | 66<br>(54 - 81)             | 6<br>(2 - 14)            | 4<br>(2 - 9)             | 28<br>(22 - 35)             | 18<br>(13 - 25)             | 11<br>(8 - 16)              |
| Malaria                                                           | 13<br>(9 - 18)              | 1<br>(0 - 1)             | 1<br>(0 - 1)             | 7<br>(4 - 11)               | 3<br>(2 - 5)                | 2<br>(1 - 3)                |
| Leishmaniasis                                                     | 2<br>(1 - 2)                | 1<br>(0 - 1)             | 0<br>(0 - 0)             | 1<br>(1 - 1)                | 0<br>(0 - 0)                | 0<br>(0 - 0)                |
| Visceral leishmaniasis                                            | 2<br>(1 - 2)                | 1<br>(0 - 1)             | 0<br>(0 - 0)             | 1<br>(1 - 1)                | 0<br>(0 - 0)                | 0<br>(0 - 0)                |
| Schistosomiasis                                                   | 28<br>(21 - 37)             | 0<br>(0 - 0)             | 0<br>(0 - 1)             | 0<br>(7 - 15)               | 0<br>(7 - 17)               | 0<br>(4 - 9)                |
| Cysticercosis                                                     | 0<br>(0 - 0)                | 0<br>(0 - 0)             | 0<br>(0 - 0)             | 0<br>(0 - 0)                | 0<br>(0 - 0)                | 0<br>(0 - 0)                |
| Cystic echinococcosis                                             | 2<br>(1 - 2)                | 0<br>(0 - 0)             | 0<br>(0 - 0)             | 1<br>(1 - 1)                | 0<br>(0 - 1)                | 0<br>(0 - 0)                |
| Dengue                                                            | 5<br>(4 - 6)                | 0<br>(0 - 1)             | 1<br>(0 - 1)             | 3<br>(2 - 4)                | 1<br>(1 - 1)                | 0<br>(0 - 1)                |
| Rabies                                                            | 3<br>(2 - 3)                | 0<br>(0 - 0)             | 0<br>(0 - 1)             | 2<br>(1 - 2)                | 0<br>(0 - 0)                | 0<br>(0 - 0)                |
| Intestinal nematode infections                                    | 8<br>(2 - 18)               | 4<br>(0 - 11)            | 1<br>(0 - 6)             | 1<br>(0 - 6)                | 1<br>(0 - 4)                | 1<br>(0 - 5)                |
| Ascariasis                                                        | 8<br>(2 - 18)               | 4<br>(0 - 11)            | 1<br>(0 - 6)             | 1<br>(0 - 6)                | 1<br>(0 - 4)                | 1<br>(0 - 5)                |
| Other neglected tropical diseases                                 | 5<br>(4 - 7)                | 0<br>(0 - 0)             | 0<br>(0 - 1)             | 2<br>(2 - 3)                | 1<br>(1 - 2)                | 1<br>(1 - 2)                |
| Maternal disorders                                                | 38<br>(28 - 50)             | --                       | 0<br>(0 - 0)             | 38<br>(28 - 50)             | --                          | --                          |

Web Table 31- Saudi Arabia deaths with 95% UI by age, sex, and cause in 2013

| Cause                                                            | Both Sexes, All Ages        | Both Sexes, 0-4 Years    | Both Sexes, 5-14 Years | Both Sexes, 15-49 Years  | Both Sexes, 50-69 Years     | Both Sexes, 70-80 Years     |
|------------------------------------------------------------------|-----------------------------|--------------------------|------------------------|--------------------------|-----------------------------|-----------------------------|
| Maternal hemorrhage                                              | 5<br>(3 - 7)                | --                       | 0<br>(0 - 0)           | 5<br>(3 - 7)             | --                          | --                          |
| Maternal sepsis and other maternal infections                    | 3<br>(2 - 5)                | --                       | 0<br>(0 - 0)           | 3<br>(2 - 5)             | --                          | --                          |
| Maternal hypertensive disorders                                  | 4<br>(3 - 6)                | --                       | 0<br>(0 - 0)           | 4<br>(3 - 6)             | --                          | --                          |
| Maternal obstructed labor                                        | 3<br>(2 - 4)                | --                       | 0<br>(0 - 0)           | 3<br>(2 - 4)             | --                          | --                          |
| Maternal abortive outcome                                        | 5<br>(4 - 7)                | --                       | 0<br>(0 - 0)           | 5<br>(4 - 7)             | --                          | --                          |
| Indirect maternal deaths                                         | 3<br>(2 - 5)                | --                       | 0<br>(0 - 0)           | 3<br>(2 - 5)             | --                          | --                          |
| Late maternal deaths                                             | 4<br>(2 - 7)                | --                       | 0<br>(0 - 0)           | 4<br>(2 - 7)             | --                          | --                          |
| Maternal deaths aggravated by HIV/AIDS                           | 0<br>(0 - 0)                | --                       | --                     | 0<br>(0 - 0)             | --                          | --                          |
| Other maternal disorders                                         | 10<br>(7 - 14)              | --                       | 0<br>(0 - 0)           | 10<br>(7 - 14)           | --                          | --                          |
| Neonatal disorders                                               | 3,240<br>(2,685 - 3,900)    | 3,240<br>(2,685 - 3,900) | --                     | --                       | --                          | --                          |
| Neonatal preterm birth complications                             | 1,906<br>(1,420 - 2,392)    | 1,906<br>(1,420 - 2,392) | --                     | --                       | --                          | --                          |
| Neonatal encephalopathy due to birth asphyxia and trauma         | 397<br>(294 - 544)          | 397<br>(294 - 544)       | --                     | --                       | --                          | --                          |
| Neonatal sepsis and other neonatal infections                    | 715<br>(466 - 1,116)        | 715<br>(466 - 1,116)     | --                     | --                       | --                          | --                          |
| Hemolytic disease and other neonatal jaundice                    | 14<br>(7 - 28)              | 14<br>(7 - 28)           | --                     | --                       | --                          | --                          |
| Other neonatal disorders                                         | 208<br>(146 - 310)          | 208<br>(146 - 310)       | --                     | --                       | --                          | --                          |
| Nutritional deficiencies                                         | 288<br>(232 - 375)          | 17<br>(12 - 24)          | 7<br>(5 - 9)           | 39<br>(30 - 51)          | 32<br>(24 - 45)             | 194<br>(150 - 256)          |
| Protein-energy malnutrition                                      | 87<br>(51 - 138)            | 10<br>(6 - 16)           | 3<br>(2 - 4)           | 7<br>(4 - 12)            | 5<br>(3 - 10)               | 62<br>(33 - 103)            |
| Iodine deficiency                                                | 1<br>(0 - 2)                | 0<br>(0 - 1)             | 0<br>(0 - 0)           | 0<br>(0 - 1)             | 0<br>(0 - 1)                | 0<br>(0 - 1)                |
| Iron-deficiency anemia                                           | 194<br>(143 - 256)          | 6<br>(3 - 11)            | 4<br>(2 - 5)           | 30<br>(23 - 39)          | 26<br>(19 - 35)             | 128<br>(90 - 173)           |
| Other nutritional deficiencies                                   | 6<br>(3 - 11)               | 0<br>(0 - 1)             | 0<br>(0 - 1)           | 2<br>(1 - 3)             | 1<br>(0 - 1)                | 3<br>(1 - 6)                |
| Other communicable, maternal, neonatal, and nutritional diseases | 216<br>(177 - 262)          | 19<br>(5 - 36)           | 4<br>(3 - 6)           | 39<br>(31 - 48)          | 66<br>(51 - 86)             | 88<br>(69 - 112)            |
| Sexually transmitted diseases excluding HIV                      | 22<br>(7 - 41)              | 13<br>(0 - 31)           | 1<br>(0 - 3)           | 3<br>(2 - 3)             | 1<br>(1 - 1)                | 4<br>(2 - 5)                |
| Syphilis                                                         | 19<br>(5 - 38)              | 13<br>(0 - 31)           | 1<br>(0 - 2)           | 1<br>(1 - 2)             | 1<br>(0 - 1)                | 3<br>(2 - 4)                |
| Chlamydial infection                                             | 0<br>(0 - 1)                | --                       | 0<br>(0 - 0)           | 0<br>(0 - 0)             | 0<br>(0 - 0)                | 0<br>(0 - 0)                |
| Gonococcal infection                                             | 1<br>(1 - 2)                | --                       | 0<br>(0 - 0)           | 1<br>(0 - 1)             | 0<br>(0 - 0)                | 0<br>(0 - 1)                |
| Other sexually transmitted diseases                              | 1<br>(1 - 1)                | --                       | 0<br>(0 - 0)           | 0<br>(0 - 1)             | 0<br>(0 - 0)                | 0<br>(0 - 0)                |
| Hepatitis                                                        | 123<br>(98 - 153)           | 2<br>(1 - 3)             | 1<br>(1 - 2)           | 25<br>(19 - 32)          | 49<br>(36 - 67)             | 46<br>(33 - 63)             |
| Acute hepatitis A                                                | 6<br>(2 - 13)               | 1<br>(0 - 1)             | 0<br>(0 - 0)           | 2<br>(1 - 5)             | 2<br>(0 - 5)                | 1<br>(0 - 2)                |
| Acute hepatitis B                                                | 88<br>(66 - 116)            | 1<br>(0 - 1)             | 0<br>(0 - 0)           | 10<br>(6 - 16)           | 37<br>(25 - 53)             | 40<br>(28 - 56)             |
| Acute hepatitis C                                                | 3<br>(1 - 7)                | --                       | 0<br>(0 - 0)           | 1<br>(0 - 2)             | 1<br>(0 - 4)                | 1<br>(0 - 3)                |
| Acute hepatitis E                                                | 26<br>(14 - 41)             | 0<br>(0 - 1)             | 1<br>(1 - 1)           | 12<br>(7 - 18)           | 9<br>(4 - 16)               | 4<br>(1 - 9)                |
| Other infectious diseases                                        | 71<br>(55 - 94)             | 3<br>(2 - 5)             | 2<br>(1 - 2)           | 11<br>(9 - 16)           | 16<br>(12 - 22)             | 38<br>(27 - 55)             |
| Non-communicable diseases                                        | 57,156<br>(50,404 - 65,203) | 2,582<br>(2,245 - 2,999) | 435<br>(359 - 513)     | 7,154<br>(6,019 - 8,370) | 17,034<br>(14,163 - 20,580) | 29,951<br>(27,250 - 33,579) |
| Neoplasms                                                        | 6,490<br>(5,651 - 7,482)    | 36<br>(25 - 51)          | 76<br>(61 - 95)        | 1,069<br>(899 - 1,272)   | 2,140<br>(1,783 - 2,556)    | 3,169<br>(2,761 - 3,693)    |
| Esophageal cancer                                                | 174<br>(136 - 240)          | --                       | --                     | 19<br>(14 - 27)          | 59<br>(42 - 86)             | 96<br>(75 - 129)            |
| Stomach cancer                                                   | 436<br>(361 - 524)          | --                       | --                     | 47<br>(37 - 58)          | 144<br>(113 - 180)          | 246<br>(197 - 302)          |
| Liver cancer                                                     | 910<br>(749 - 1,116)        | --                       | 2<br>(1 - 3)           | 62<br>(48 - 77)          | 262<br>(206 - 334)          | 585<br>(459 - 742)          |
| Liver cancer due to hepatitis B                                  | 155<br>(88 - 231)           | --                       | 0<br>(0 - 1)           | 17<br>(10 - 25)          | 61<br>(32 - 93)             | 77<br>(43 - 125)            |
| Liver cancer due to hepatitis C                                  | 301<br>(201 - 443)          | --                       | 0<br>(0 - 0)           | 14<br>(8 - 22)           | 83<br>(52 - 129)            | 203<br>(132 - 313)          |
| Liver cancer due to alcohol use                                  | 252<br>(162 - 372)          | --                       | --                     | 8<br>(3 - 14)            | 56<br>(33 - 88)             | 188<br>(118 - 283)          |

Web Table 31- Saudi Arabia deaths with 95% UI by age, sex, and cause in 2013

| Cause                                         | Both Sexes, All Ages        | Both Sexes, 0-4 Years | Both Sexes, 5-14 Years | Both Sexes, 15-49 Years  | Both Sexes, 50-69 Years   | Both Sexes, 70-80 Years     |
|-----------------------------------------------|-----------------------------|-----------------------|------------------------|--------------------------|---------------------------|-----------------------------|
| Liver cancer due to other causes              | 202<br>(126 - 285)          | --                    | 2<br>(1 - 2)           | 22<br>(16 - 30)          | 62<br>(35 - 90)           | 116<br>(65 - 177)           |
| Larynx cancer                                 | 73<br>(53 - 99)             | --                    | --                     | 11<br>(8 - 16)           | 30<br>(22 - 45)           | 31<br>(22 - 43)             |
| Tracheal, bronchus and lung cancer            | 754<br>(631 - 913)          | --                    | --                     | 83<br>(66 - 102)         | 322<br>(257 - 399)        | 349<br>(288 - 430)          |
| Breast cancer                                 | 491<br>(401 - 602)          | --                    | --                     | 156<br>(120 - 200)       | 175<br>(136 - 225)        | 160<br>(121 - 197)          |
| Cervical cancer                               | 75<br>(54 - 95)             | --                    | --                     | 19<br>(13 - 26)          | 27<br>(19 - 38)           | 29<br>(19 - 40)             |
| Uterine cancer                                | 15<br>(11 - 26)             | --                    | --                     | 2<br>(1 - 3)             | 8<br>(5 - 13)             | 6<br>(4 - 10)               |
| Prostate cancer                               | 207<br>(129 - 314)          | --                    | --                     | 3<br>(2 - 5)             | 39<br>(24 - 64)           | 164<br>(97 - 245)           |
| Colon and rectum cancer                       | 604<br>(512 - 720)          | --                    | --                     | 94<br>(77 - 114)         | 205<br>(168 - 252)        | 305<br>(255 - 369)          |
| Lip and oral cavity cancer                    | 83<br>(64 - 108)            | --                    | --                     | 15<br>(11 - 23)          | 30<br>(22 - 44)           | 38<br>(26 - 52)             |
| Nasopharynx cancer                            | 61<br>(46 - 90)             | --                    | 1<br>(0 - 1)           | 18<br>(12 - 29)          | 23<br>(16 - 38)           | 19<br>(14 - 27)             |
| Other pharynx cancer                          | 58<br>(45 - 73)             | --                    | --                     | 13<br>(10 - 17)          | 25<br>(19 - 34)           | 20<br>(14 - 26)             |
| Gallbladder and biliary tract cancer          | 193<br>(119 - 249)          | --                    | --                     | 17<br>(12 - 23)          | 64<br>(48 - 86)           | 113<br>(55 - 156)           |
| Pancreatic cancer                             | 343<br>(287 - 409)          | --                    | --                     | 35<br>(28 - 44)          | 120<br>(97 - 148)         | 187<br>(154 - 229)          |
| Malignant skin melanoma                       | 20<br>(14 - 29)             | --                    | --                     | 5<br>(4 - 7)             | 7<br>(5 - 12)             | 8<br>(5 - 11)               |
| Non-melanoma skin cancer                      | 23<br>(18 - 34)             | --                    | --                     | 3<br>(2 - 4)             | 4<br>(3 - 6)              | 16<br>(12 - 23)             |
| Ovarian cancer                                | 104<br>(83 - 131)           | --                    | --                     | 19<br>(14 - 26)          | 39<br>(28 - 53)           | 46<br>(34 - 61)             |
| Testicular cancer                             | 12<br>(8 - 18)              | --                    | --                     | 9<br>(6 - 13)            | 2<br>(1 - 3)              | 1<br>(1 - 2)                |
| Kidney cancer                                 | 117<br>(95 - 144)           | 1<br>(1 - 3)          | 2<br>(1 - 3)           | 17<br>(14 - 22)          | 44<br>(33 - 58)           | 52<br>(40 - 67)             |
| Bladder cancer                                | 158<br>(124 - 217)          | --                    | --                     | 13<br>(9 - 21)           | 57<br>(41 - 92)           | 87<br>(68 - 115)            |
| Brain and nervous system cancer               | 479<br>(344 - 578)          | 11<br>(6 - 17)        | 23<br>(17 - 33)        | 129<br>(97 - 171)        | 137<br>(104 - 185)        | 179<br>(79 - 240)           |
| Thyroid cancer                                | 71<br>(54 - 92)             | --                    | 0<br>(0 - 0)           | 9<br>(6 - 14)            | 24<br>(17 - 36)           | 38<br>(28 - 51)             |
| Mesothelioma                                  | 10<br>(8 - 13)              | --                    | --                     | 3<br>(2 - 4)             | 4<br>(2 - 5)              | 4<br>(3 - 6)                |
| Hodgkin lymphoma                              | 21<br>(14 - 38)             | 1<br>(0 - 1)          | 1<br>(1 - 3)           | 10<br>(6 - 20)           | 5<br>(3 - 10)             | 4<br>(3 - 7)                |
| Non-Hodgkin lymphoma                          | 272<br>(217 - 367)          | 2<br>(1 - 3)          | 6<br>(4 - 8)           | 72<br>(52 - 111)         | 87<br>(62 - 132)          | 106<br>(68 - 139)           |
| Multiple myeloma                              | 53<br>(41 - 71)             | --                    | --                     | 8<br>(6 - 12)            | 23<br>(16 - 33)           | 22<br>(16 - 28)             |
| Leukemia                                      | 360<br>(305 - 419)          | 8<br>(4 - 13)         | 19<br>(14 - 24)        | 103<br>(84 - 123)        | 86<br>(70 - 108)          | 145<br>(116 - 177)          |
| Other neoplasms                               | 312<br>(260 - 377)          | 14<br>(9 - 22)        | 22<br>(16 - 30)        | 79<br>(61 - 97)          | 86<br>(67 - 108)          | 112<br>(89 - 145)           |
| Cardiovascular diseases                       | 27,688<br>(24,233 - 31,995) | 58<br>(45 - 76)       | 62<br>(50 - 75)        | 3,145<br>(2,599 - 3,782) | 9,792<br>(8,129 - 11,837) | 14,630<br>(13,123 - 16,480) |
| Rheumatic heart disease                       | 136<br>(95 - 167)           | 1<br>(1 - 2)          | 4<br>(3 - 5)           | 54<br>(37 - 70)          | 40<br>(28 - 53)           | 38<br>(24 - 49)             |
| Ischemic heart disease                        | 15,303<br>(12,955 - 18,128) | 12<br>(8 - 17)        | 14<br>(10 - 18)        | 1,849<br>(1,492 - 2,250) | 6,327<br>(5,139 - 7,776)  | 7,101<br>(6,188 - 8,312)    |
| Cerebrovascular disease                       | 9,498<br>(8,118 - 11,189)   | 13<br>(9 - 18)        | 22<br>(16 - 28)        | 811<br>(654 - 1,016)     | 2,493<br>(1,999 - 3,127)  | 6,159<br>(5,282 - 7,143)    |
| Ischemic stroke                               | 5,960<br>(5,057 - 6,997)    | 2<br>(1 - 4)          | 5<br>(3 - 6)           | 230<br>(169 - 310)       | 1,226<br>(941 - 1,571)    | 4,497<br>(3,829 - 5,258)    |
| Hemorrhagic stroke                            | 3,538<br>(2,905 - 4,338)    | 11<br>(8 - 15)        | 17<br>(12 - 22)        | 581<br>(464 - 728)       | 1,268<br>(1,006 - 1,626)  | 1,662<br>(1,342 - 2,094)    |
| Hypertensive heart disease                    | 401<br>(290 - 505)          | 0<br>(0 - 0)          | 0<br>(0 - 1)           | 53<br>(38 - 72)          | 141<br>(99 - 183)         | 206<br>(141 - 274)          |
| Cardiomyopathy and myocarditis                | 1,034<br>(788 - 1,285)      | 21<br>(16 - 29)       | 15<br>(11 - 20)        | 172<br>(127 - 220)       | 360<br>(250 - 469)        | 466<br>(353 - 592)          |
| Atrial fibrillation and flutter               | 33<br>(25 - 42)             | --                    | --                     | 4<br>(3 - 5)             | 6<br>(4 - 8)              | 23<br>(16 - 30)             |
| Aortic aneurysm                               | 138<br>(109 - 184)          | --                    | --                     | 9<br>(7 - 12)            | 75<br>(56 - 108)          | 54<br>(41 - 70)             |
| Peripheral vascular disease                   | 16<br>(13 - 20)             | --                    | --                     | 2<br>(2 - 3)             | 5<br>(4 - 7)              | 8<br>(6 - 11)               |
| Endocarditis                                  | 160<br>(111 - 212)          | 5<br>(3 - 8)          | 2<br>(1 - 3)           | 27<br>(19 - 38)          | 41<br>(27 - 59)           | 84<br>(56 - 114)            |
| Other cardiovascular and circulatory diseases | 970<br>(796 - 1,195)        | 6<br>(4 - 9)          | 5<br>(3 - 7)           | 164<br>(130 - 215)       | 304<br>(238 - 395)        | 490<br>(374 - 636)          |



Web Table 31- Saudi Arabia deaths with 95% UI by age, sex, and cause in 2013

| Cause                                               | Both Sexes, All Ages     | Both Sexes, 0-4 Years | Both Sexes, 5-14 Years | Both Sexes, 15-49 Years | Both Sexes, 50-69 Years | Both Sexes, 70-80 Years  |
|-----------------------------------------------------|--------------------------|-----------------------|------------------------|-------------------------|-------------------------|--------------------------|
| Chronic respiratory diseases                        | 3,071<br>(2,620 - 3,657) | 10<br>(6 - 14)        | 11<br>(9 - 14)         | 221<br>(182 - 263)      | 799<br>(642 - 1,006)    | 2,030<br>(1,746 - 2,396) |
| Chronic obstructive pulmonary disease               | 1,879<br>(1,546 - 2,294) | 2<br>(2 - 3)          | 3<br>(2 - 4)           | 85<br>(67 - 105)        | 488<br>(383 - 630)      | 1,301<br>(1,076 - 1,599) |
| Pneumoconiosis                                      | 29<br>(20 - 41)          | 0<br>(0 - 0)          | 0<br>(0 - 0)           | 7<br>(5 - 11)           | 11<br>(7 - 17)          | 10<br>(7 - 15)           |
| Silicosis                                           | 10<br>(6 - 14)           | 0<br>(0 - 0)          | 0<br>(0 - 0)           | 1<br>(1 - 1)            | 3<br>(2 - 4)            | 6<br>(4 - 9)             |
| Asbestosis                                          | 3<br>(2 - 4)             | 0<br>(0 - 0)          | 0<br>(0 - 0)           | 1<br>(1 - 2)            | 1<br>(1 - 1)            | 0<br>(0 - 1)             |
| Coal workers pneumoconiosis                         | 2<br>(1 - 2)             | 0<br>(0 - 0)          | 0<br>(0 - 0)           | 1<br>(1 - 1)            | 0<br>(0 - 1)            | 0<br>(0 - 1)             |
| Other pneumoconiosis                                | 15<br>(10 - 22)          | 0<br>(0 - 0)          | 0<br>(0 - 0)           | 4<br>(3 - 7)            | 7<br>(4 - 11)           | 3<br>(2 - 5)             |
| Asthma                                              | 606<br>(489 - 749)       | 6<br>(4 - 10)         | 6<br>(5 - 8)           | 98<br>(77 - 121)        | 171<br>(130 - 221)      | 324<br>(246 - 421)       |
| Interstitial lung disease and pulmonary sarcoidosis | 525<br>(336 - 696)       | 0<br>(0 - 1)          | 1<br>(1 - 2)           | 24<br>(16 - 31)         | 123<br>(84 - 166)       | 377<br>(221 - 513)       |
| Other chronic respiratory diseases                  | 31<br>(23 - 41)          | 0<br>(0 - 1)          | 1<br>(0 - 1)           | 7<br>(5 - 9)            | 6<br>(4 - 8)            | 17<br>(11 - 25)          |
| Cirrhosis                                           | 2,087<br>(1,787 - 2,457) | 10<br>(6 - 14)        | 8<br>(7 - 10)          | 245<br>(199 - 297)      | 699<br>(569 - 850)      | 1,125<br>(971 - 1,319)   |
| Cirrhosis due to hepatitis B                        | 538<br>(329 - 825)       | 0<br>(0 - 1)          | 1<br>(0 - 2)           | 50<br>(26 - 85)         | 169<br>(96 - 277)       | 318<br>(191 - 475)       |
| Cirrhosis due to hepatitis C                        | 1,091<br>(691 - 1,464)   | 1<br>(0 - 2)          | 2<br>(1 - 4)           | 139<br>(92 - 188)       | 389<br>(232 - 544)      | 559<br>(335 - 769)       |
| Cirrhosis due to alcohol use                        | 279<br>(168 - 462)       | --                    | --                     | 19<br>(11 - 33)         | 81<br>(47 - 151)        | 179<br>(103 - 294)       |
| Cirrhosis due to other causes                       | 179<br>(119 - 259)       | 9<br>(6 - 12)         | 5<br>(4 - 7)           | 37<br>(25 - 54)         | 60<br>(34 - 96)         | 68<br>(40 - 104)         |
| Digestive diseases                                  | 700<br>(604 - 821)       | 5<br>(3 - 7)          | 5<br>(4 - 6)           | 91<br>(74 - 111)        | 153<br>(124 - 190)      | 447<br>(385 - 526)       |
| Peptic ulcer disease                                | 131<br>(100 - 166)       | 0<br>(0 - 0)          | 0<br>(0 - 1)           | 15<br>(11 - 20)         | 31<br>(22 - 43)         | 84<br>(63 - 108)         |
| Gastritis and duodenitis                            | 3<br>(2 - 4)             | 0<br>(0 - 0)          | 0<br>(0 - 0)           | 2<br>(1 - 2)            | 0<br>(0 - 1)            | 0<br>(0 - 1)             |
| Appendicitis                                        | 38<br>(26 - 51)          | 1<br>(0 - 1)          | 1<br>(0 - 1)           | 7<br>(5 - 10)           | 10<br>(6 - 13)          | 20<br>(12 - 30)          |
| Paralytic ileus and intestinal obstruction          | 172<br>(121 - 236)       | 1<br>(0 - 2)          | 1<br>(0 - 1)           | 20<br>(14 - 29)         | 35<br>(24 - 49)         | 116<br>(77 - 158)        |
| Inguinal, femoral, and abdominal hernia             | 9<br>(5 - 12)            | 0<br>(0 - 0)          | 0<br>(0 - 0)           | 2<br>(1 - 2)            | 2<br>(1 - 2)            | 5<br>(3 - 7)             |
| Inflammatory bowel disease                          | 13<br>(9 - 17)           | 0<br>(0 - 0)          | 0<br>(0 - 1)           | 3<br>(2 - 4)            | 3<br>(2 - 3)            | 7<br>(4 - 9)             |
| Vascular intestinal disorders                       | 6<br>(3 - 10)            | 0<br>(0 - 0)          | 0<br>(0 - 1)           | 2<br>(1 - 4)            | 1<br>(1 - 3)            | 1<br>(1 - 2)             |
| Gallbladder and biliary diseases                    | 174<br>(137 - 224)       | 1<br>(0 - 1)          | 0<br>(0 - 1)           | 14<br>(10 - 17)         | 32<br>(24 - 44)         | 127<br>(99 - 165)        |
| Pancreatitis                                        | 92<br>(69 - 129)         | 0<br>(0 - 0)          | 1<br>(0 - 1)           | 19<br>(13 - 25)         | 22<br>(16 - 32)         | 51<br>(36 - 74)          |
| Other digestive diseases                            | 62<br>(48 - 78)          | 1<br>(0 - 2)          | 1<br>(1 - 1)           | 8<br>(6 - 10)           | 17<br>(12 - 22)         | 36<br>(26 - 47)          |
| Neurological disorders                              | 3,341<br>(2,827 - 3,957) | 33<br>(24 - 43)       | 23<br>(17 - 31)        | 174<br>(139 - 212)      | 350<br>(268 - 436)      | 2,761<br>(2,295 - 3,311) |
| Alzheimer disease and other dementias               | 2,967<br>(2,480 - 3,562) | --                    | --                     | 2<br>(1 - 5)            | 282<br>(207 - 361)      | 2,682<br>(2,220 - 3,231) |
| Parkinson disease                                   | 22<br>(17 - 28)          | --                    | --                     | 3<br>(2 - 3)            | 4<br>(3 - 6)            | 15<br>(11 - 20)          |
| Epilepsy                                            | 255<br>(204 - 311)       | 12<br>(8 - 19)        | 19<br>(14 - 26)        | 142<br>(110 - 175)      | 44<br>(33 - 57)         | 38<br>(29 - 50)          |
| Multiple sclerosis                                  | 9<br>(6 - 16)            | --                    | --                     | 6<br>(4 - 10)           | 2<br>(2 - 5)            | 1<br>(1 - 2)             |
| Other neurological disorders                        | 89<br>(75 - 109)         | 20<br>(15 - 27)       | 4<br>(3 - 6)           | 22<br>(18 - 28)         | 17<br>(13 - 24)         | 25<br>(20 - 31)          |
| Mental and substance use disorders                  | 1,202<br>(465 - 1,507)   | 1<br>(0 - 1)          | 0<br>(0 - 1)           | 897<br>(372 - 1,113)    | 288<br>(72 - 401)       | 16<br>(12 - 20)          |
| Schizophrenia                                       | 3<br>(2 - 4)             | --                    | --                     | 2<br>(1 - 2)            | 1<br>(0 - 1)            | 0<br>(0 - 1)             |
| Alcohol use disorders                               | 59<br>(20 - 82)          | --                    | --                     | 26<br>(9 - 36)          | 29<br>(9 - 41)          | 4<br>(2 - 6)             |
| Drug use disorders                                  | 1,135<br>(430 - 1,420)   | 1<br>(0 - 1)          | --                     | 865<br>(353 - 1,075)    | 258<br>(58 - 363)       | 11<br>(8 - 14)           |
| Opioid use disorders                                | 618<br>(236 - 772)       | 0<br>(0 - 1)          | --                     | 479<br>(192 - 597)      | 133<br>(30 - 186)       | 6<br>(5 - 8)             |
| Cocaine use disorders                               | 16<br>(7 - 20)           | 0<br>(0 - 0)          | --                     | 13<br>(6 - 17)          | 2<br>(1 - 3)            | 0<br>(0 - 0)             |
| Amphetamine use disorders                           | 14<br>(7 - 18)           | 0<br>(0 - 0)          | --                     | 11<br>(6 - 14)          | 3<br>(1 - 4)            | 0<br>(0 - 0)             |
| Other drug use disorders                            | 488<br>(181 - 614)       | 0<br>(0 - 0)          | --                     | 363<br>(148 - 457)      | 120<br>(28 - 171)       | 5<br>(3 - 6)             |

Web Table 31- Saudi Arabia deaths with 95% UI by age, sex, and cause in 2013

| Cause                                               | Both Sexes, All Ages      | Both Sexes, 0-4 Years    | Both Sexes, 5-14 Years | Both Sexes, 15-49 Years | Both Sexes, 50-69 Years  | Both Sexes, 70-80 Years  |
|-----------------------------------------------------|---------------------------|--------------------------|------------------------|-------------------------|--------------------------|--------------------------|
| Eating disorders                                    | 4<br>(3 - 5)              | --                       | 0<br>(0 - 1)           | 3<br>(2 - 5)            | --                       | --                       |
| Anorexia nervosa                                    | 4<br>(3 - 5)              | --                       | 0<br>(0 - 1)           | 3<br>(2 - 5)            | --                       | --                       |
| Diabetes, urogenital, blood, and endocrine diseases | 8,662<br>(7,499 - 10,445) | 133<br>(104 - 172)       | 75<br>(59 - 96)        | 979<br>(805 - 1,295)    | 2,615<br>(2,133 - 3,388) | 4,859<br>(4,236 - 5,726) |
| Diabetes mellitus                                   | 2,147<br>(1,824 - 2,537)  | 7<br>(5 - 10)            | 6<br>(4 - 8)           | 180<br>(147 - 220)      | 632<br>(510 - 776)       | 1,322<br>(1,127 - 1,572) |
| Acute glomerulonephritis                            | 9<br>(5 - 12)             | 0<br>(0 - 1)             | 1<br>(0 - 1)           | 2<br>(2 - 3)            | 2<br>(1 - 3)             | 3<br>(1 - 6)             |
| Chronic kidney disease                              | 5,109<br>(4,285 - 6,481)  | 16<br>(11 - 22)          | 21<br>(16 - 28)        | 539<br>(428 - 818)      | 1,747<br>(1,403 - 2,359) | 2,787<br>(2,322 - 3,464) |
| Chronic kidney disease due to diabetes mellitus     | 2,548<br>(2,026 - 3,365)  | 2<br>(1 - 4)             | 3<br>(2 - 5)           | 240<br>(179 - 361)      | 973<br>(737 - 1,329)     | 1,329<br>(1,044 - 1,703) |
| Chronic kidney disease due to hypertension          | 163<br>(92 - 236)         | 0<br>(0 - 1)             | 1<br>(0 - 1)           | 40<br>(25 - 61)         | 77<br>(38 - 122)         | 45<br>(24 - 65)          |
| Chronic kidney disease due to glomerulonephritis    | 74<br>(42 - 100)          | 3<br>(2 - 4)             | 3<br>(2 - 4)           | 21<br>(12 - 28)         | 17<br>(9 - 26)           | 30<br>(16 - 44)          |
| Chronic kidney disease due to other causes          | 2,324<br>(1,522 - 3,495)  | 10<br>(7 - 16)           | 14<br>(10 - 22)        | 238<br>(160 - 437)      | 680<br>(414 - 1,096)     | 1,382<br>(905 - 1,941)   |
| Urinary diseases and male infertility               | 592<br>(481 - 771)        | 4<br>(3 - 6)             | 2<br>(2 - 3)           | 41<br>(34 - 51)         | 86<br>(68 - 110)         | 458<br>(356 - 629)       |
| Interstitial nephritis and urinary tract infections | 497<br>(399 - 679)        | 3<br>(2 - 5)             | 2<br>(1 - 2)           | 28<br>(22 - 36)         | 58<br>(45 - 75)          | 406<br>(316 - 580)       |
| Urolithiasis                                        | 12<br>(7 - 16)            | --                       | 0<br>(0 - 1)           | 2<br>(2 - 3)            | 3<br>(2 - 5)             | 6<br>(3 - 9)             |
| Other urinary diseases                              | 83<br>(52 - 115)          | 0<br>(0 - 1)             | 0<br>(0 - 1)           | 11<br>(7 - 15)          | 25<br>(15 - 37)          | 46<br>(24 - 68)          |
| Gynecological diseases                              | 1<br>(1 - 2)              | --                       | --                     | 1<br>(0 - 1)            | 0<br>(0 - 0)             | 0<br>(0 - 1)             |
| Uterine fibroids                                    | 0<br>(0 - 0)              | --                       | --                     | 0<br>(0 - 0)            | 0<br>(0 - 0)             | 0<br>(0 - 0)             |
| Polycystic ovarian syndrome                         | 0<br>(0 - 0)              | --                       | --                     | 0<br>(0 - 0)            | 0<br>(0 - 0)             | --                       |
| Endometriosis                                       | 0<br>(0 - 0)              | --                       | --                     | 0<br>(0 - 0)            | 0<br>(0 - 0)             | --                       |
| Genital prolapse                                    | 0<br>(0 - 0)              | --                       | --                     | 0<br>(0 - 0)            | 0<br>(0 - 0)             | 0<br>(0 - 0)             |
| Other gynecological diseases                        | 1<br>(0 - 1)              | --                       | --                     | 0<br>(0 - 0)            | 0<br>(0 - 0)             | 0<br>(0 - 0)             |
| Hemoglobinopathies and hemolytic anemias            | 202<br>(148 - 287)        | 38<br>(22 - 60)          | 24<br>(16 - 36)        | 98<br>(70 - 137)        | 22<br>(14 - 38)          | 20<br>(11 - 38)          |
| Thalassemias                                        | 64<br>(45 - 90)           | 20<br>(11 - 32)          | 11<br>(7 - 17)         | 33<br>(23 - 46)         | 0<br>(0 - 0)             | 0<br>(0 - 0)             |
| Sickle cell disorders                               | 109<br>(79 - 154)         | 15<br>(9 - 24)           | 12<br>(8 - 17)         | 61<br>(44 - 84)         | 20<br>(12 - 34)          | 1<br>(0 - 2)             |
| G6PD deficiency                                     | 3<br>(2 - 4)              | 0<br>(0 - 1)             | 0<br>(0 - 1)           | 1<br>(1 - 2)            | 0<br>(0 - 0)             | 0<br>(0 - 1)             |
| Other hemoglobinopathies and hemolytic anemias      | 27<br>(17 - 47)           | 3<br>(1 - 4)             | 1<br>(0 - 1)           | 3<br>(2 - 4)            | 2<br>(1 - 3)             | 19<br>(10 - 36)          |
| Endocrine, metabolic, blood, and immune disorders   | 601<br>(468 - 730)        | 67<br>(48 - 90)          | 22<br>(16 - 29)        | 118<br>(93 - 152)       | 125<br>(93 - 161)        | 268<br>(189 - 346)       |
| Musculoskeletal disorders                           | 196<br>(159 - 252)        | --                       | 5<br>(4 - 7)           | 57<br>(45 - 74)         | 39<br>(30 - 53)          | 94<br>(73 - 127)         |
| Rheumatoid arthritis                                | 13<br>(9 - 20)            | --                       | 1<br>(0 - 1)           | 2<br>(2 - 4)            | 2<br>(1 - 3)             | 8<br>(5 - 14)            |
| Other musculoskeletal disorders                     | 183<br>(149 - 234)        | --                       | 5<br>(4 - 6)           | 54<br>(43 - 71)         | 37<br>(29 - 50)          | 86<br>(66 - 116)         |
| Other non-communicable diseases                     | 3,722<br>(3,301 - 4,206)  | 2,297<br>(1,969 - 2,704) | 168<br>(131 - 205)     | 276<br>(229 - 327)      | 161<br>(131 - 200)       | 820<br>(638 - 1,040)     |
| Congenital anomalies                                | 2,760<br>(2,391 - 3,159)  | 2,194<br>(1,875 - 2,566) | 167<br>(130 - 204)     | 255<br>(209 - 304)      | 90<br>(72 - 119)         | 54<br>(42 - 69)          |
| Neural tube defects                                 | 71<br>(36 - 136)          | 60<br>(26 - 124)         | 3<br>(2 - 4)           | 6<br>(4 - 7)            | 2<br>(1 - 2)             | 1<br>(1 - 2)             |
| Congenital heart anomalies                          | 926<br>(774 - 1,109)      | 731<br>(589 - 905)       | 68<br>(49 - 87)        | 89<br>(71 - 112)        | 25<br>(18 - 37)          | 13<br>(9 - 19)           |
| Cleft lip and cleft palate                          | 1<br>(1 - 2)              | 1<br>(1 - 2)             | --                     | --                      | --                       | --                       |
| Down syndrome                                       | 116<br>(81 - 169)         | 80<br>(53 - 126)         | 11<br>(7 - 17)         | 20<br>(14 - 29)         | 3<br>(2 - 4)             | 2<br>(1 - 3)             |
| Chromosomal unbalanced rearrangements               | 42<br>(29 - 61)           | 35<br>(23 - 53)          | 2<br>(1 - 3)           | 3<br>(2 - 4)            | 1<br>(1 - 2)             | 1<br>(0 - 1)             |
| Other congenital anomalies                          | 1,604<br>(1,363 - 1,886)  | 1,286<br>(1,066 - 1,554) | 83<br>(63 - 105)       | 137<br>(109 - 168)      | 60<br>(47 - 79)          | 38<br>(29 - 49)          |
| Skin and subcutaneous diseases                      | 860<br>(679 - 1,084)      | 2<br>(1 - 3)             | 1<br>(1 - 2)           | 21<br>(16 - 26)         | 70<br>(58 - 89)          | 766<br>(588 - 980)       |
| Cellulitis                                          | 31<br>(15 - 82)           | 1<br>(0 - 1)             | 0<br>(0 - 0)           | 2<br>(2 - 4)            | 4<br>(3 - 7)             | 23<br>(9 - 74)           |
| Pyoderma                                            | 50<br>(31 - 134)          | 1<br>(1 - 2)             | 0<br>(0 - 1)           | 5<br>(4 - 6)            | 7<br>(5 - 10)            | 36<br>(19 - 120)         |

Web Table 31- Saudi Arabia deaths with 95% UI by age, sex, and cause in 2013

| Cause                                           | Both Sexes, All Ages        | Both Sexes, 0-4 Years | Both Sexes, 5-14 Years | Both Sexes, 15-49 Years   | Both Sexes, 50-69 Years  | Both Sexes, 70-80 Years  |
|-------------------------------------------------|-----------------------------|-----------------------|------------------------|---------------------------|--------------------------|--------------------------|
| Decubitus ulcer                                 | 776<br>(589 - 970)          | 0<br>(0 - 0)          | 0<br>(0 - 1)           | 12<br>(9 - 15)            | 58<br>(44 - 74)          | 706<br>(522 - 896)       |
| Other skin and subcutaneous diseases            | 4<br>(3 - 7)                | 0<br>(0 - 0)          | 0<br>(0 - 1)           | 2<br>(1 - 2)              | 1<br>(0 - 1)             | 1<br>(0 - 3)             |
| Sudden infant death syndrome                    | 101<br>(48 - 210)           | 101<br>(48 - 210)     | --                     | --                        | --                       | --                       |
| Injuries                                        | 15,079<br>(12,537 - 17,699) | 510<br>(358 - 698)    | 674<br>(560 - 792)     | 9,015<br>(7,395 - 10,551) | 3,522<br>(2,805 - 4,441) | 1,358<br>(1,157 - 1,631) |
| Transport injuries                              | 9,708<br>(8,004 - 11,444)   | 208<br>(139 - 295)    | 339<br>(268 - 411)     | 6,412<br>(5,244 - 7,527)  | 2,266<br>(1,756 - 2,909) | 482<br>(387 - 604)       |
| Road injuries                                   | 9,492<br>(7,829 - 11,203)   | 202<br>(134 - 287)    | 330<br>(259 - 400)     | 6,298<br>(5,155 - 7,384)  | 2,192<br>(1,691 - 2,816) | 470<br>(377 - 590)       |
| Pedestrian road injuries                        | 1,385<br>(972 - 1,933)      | 51<br>(31 - 77)       | 75<br>(55 - 98)        | 860<br>(573 - 1,230)      | 292<br>(199 - 429)       | 106<br>(73 - 163)        |
| Cyclist road injuries                           | 255<br>(188 - 346)          | 8<br>(4 - 14)         | 15<br>(10 - 21)        | 156<br>(111 - 213)        | 55<br>(38 - 79)          | 22<br>(15 - 34)          |
| Motorcyclist road injuries                      | 343<br>(234 - 467)          | 7<br>(4 - 11)         | 10<br>(6 - 14)         | 246<br>(159 - 337)        | 69<br>(47 - 106)         | 11<br>(7 - 16)           |
| Motor vehicle road injuries                     | 7,478<br>(6,103 - 8,949)    | 133<br>(88 - 196)     | 225<br>(171 - 280)     | 5,031<br>(4,105 - 5,985)  | 1,760<br>(1,316 - 2,301) | 328<br>(253 - 422)       |
| Other road injuries                             | 32<br>(21 - 65)             | 3<br>(2 - 7)          | 5<br>(3 - 9)           | 5<br>(3 - 10)             | 16<br>(9 - 40)           | 2<br>(1 - 5)             |
| Other transport injuries                        | 215<br>(169 - 292)          | 6<br>(3 - 10)         | 9<br>(7 - 14)          | 114<br>(89 - 151)         | 74<br>(51 - 119)         | 12<br>(9 - 17)           |
| Unintentional injuries                          | 4,249<br>(3,526 - 5,301)    | 293<br>(200 - 419)    | 318<br>(252 - 411)     | 1,839<br>(1,449 - 2,424)  | 1,010<br>(796 - 1,299)   | 789<br>(656 - 1,000)     |
| Falls                                           | 1,550<br>(1,215 - 2,222)    | 40<br>(27 - 58)       | 44<br>(34 - 57)        | 791<br>(580 - 1,250)      | 338<br>(257 - 462)       | 338<br>(264 - 481)       |
| Drowning                                        | 812<br>(652 - 1,084)        | 165<br>(105 - 258)    | 183<br>(137 - 256)     | 240<br>(182 - 318)        | 156<br>(109 - 241)       | 69<br>(52 - 99)          |
| Fire, heat, and hot substances                  | 303<br>(241 - 420)          | 22<br>(13 - 37)       | 19<br>(14 - 27)        | 142<br>(106 - 204)        | 44<br>(33 - 62)          | 75<br>(56 - 107)         |
| Poisonings                                      | 115<br>(90 - 147)           | 10<br>(6 - 17)        | 9<br>(7 - 13)          | 63<br>(46 - 82)           | 20<br>(14 - 28)          | 12<br>(9 - 18)           |
| Exposure to mechanical forces                   | 470<br>(376 - 584)          | 24<br>(16 - 36)       | 34<br>(26 - 46)        | 248<br>(187 - 312)        | 132<br>(97 - 182)        | 31<br>(24 - 41)          |
| Unintentional firearm injuries                  | 213<br>(157 - 275)          | 2<br>(1 - 4)          | 6<br>(4 - 9)           | 165<br>(120 - 216)        | 30<br>(20 - 44)          | 9<br>(6 - 14)            |
| Unintentional suffocation                       | 11<br>(5 - 14)              | 1<br>(0 - 1)          | 1<br>(1 - 2)           | 5<br>(2 - 7)              | 2<br>(1 - 3)             | 2<br>(1 - 3)             |
| Other exposure to mechanical forces             | 246<br>(196 - 315)          | 22<br>(13 - 32)       | 27<br>(20 - 37)        | 78<br>(51 - 100)          | 100<br>(72 - 141)        | 20<br>(15 - 28)          |
| Adverse effects of medical treatment            | 457<br>(353 - 656)          | 7<br>(5 - 14)         | 5<br>(4 - 8)           | 85<br>(66 - 120)          | 243<br>(173 - 381)       | 117<br>(88 - 169)        |
| Animal contact                                  | 48<br>(37 - 85)             | 3<br>(2 - 6)          | 5<br>(3 - 9)           | 28<br>(20 - 53)           | 4<br>(3 - 7)             | 8<br>(5 - 15)            |
| Venomous animal contact                         | 20<br>(14 - 34)             | 2<br>(1 - 4)          | 3<br>(2 - 6)           | 8<br>(5 - 13)             | 3<br>(2 - 5)             | 4<br>(3 - 7)             |
| Non-venomous animal contact                     | 29<br>(21 - 56)             | 1<br>(1 - 2)          | 2<br>(1 - 3)           | 20<br>(14 - 42)           | 1<br>(1 - 2)             | 4<br>(2 - 9)             |
| Foreign body                                    | 194<br>(129 - 278)          | 10<br>(6 - 16)        | 4<br>(3 - 6)           | 23<br>(17 - 33)           | 22<br>(14 - 31)          | 133<br>(84 - 203)        |
| Pulmonary aspiration and foreign body in airway | 189<br>(125 - 274)          | 10<br>(6 - 15)        | 4<br>(2 - 6)           | 21<br>(14 - 29)           | 21<br>(14 - 31)          | 133<br>(83 - 202)        |
| Foreign body in other body part                 | 4<br>(3 - 6)                | 0<br>(0 - 0)          | 1<br>(0 - 1)           | 3<br>(2 - 4)              | 1<br>(0 - 1)             | 0<br>(0 - 0)             |
| Other unintentional injuries                    | 1,122<br>(228 - 390)        | 8<br>(6 - 18)         | 17<br>(9 - 22)         | 764<br>(156 - 290)        | 245<br>(31 - 81)         | 88<br>(4 - 10)           |
| Self-harm and interpersonal violence            | 852<br>(364 - 1,493)        | --<br>(2 - 16)        | 10<br>(7 - 24)         | 557<br>(249 - 1,021)      | 204<br>(70 - 346)        | 81<br>(24 - 123)         |
| Self-harm                                       | 270<br>(249 - 1,117)        | 8<br>(--)             | 7<br>(4 - 14)          | 207<br>(169 - 729)        | 41<br>(54 - 287)         | 7<br>(21 - 116)          |
| Interpersonal violence                          | 131<br>(74 - 410)           | 2<br>(2 - 16)         | 2<br>(2 - 11)          | 106<br>(54 - 319)         | 20<br>(10 - 70)          | 2<br>(2 - 12)            |
| Assault by firearm                              | 39<br>(25 - 247)            | 1<br>(0 - 4)          | 1<br>(0 - 3)           | 29<br>(19 - 206)          | 8<br>(3 - 40)            | 1<br>(0 - 3)             |
| Assault by sharp object                         | 99<br>(13 - 65)             | 6<br>(0 - 2)          | 4<br>(0 - 2)           | 72<br>(10 - 49)           | 13<br>(2 - 16)           | 4<br>(0 - 2)             |
| Assault by other means                          | 99<br>(29 - 242)            | 6<br>(1 - 11)         | 4<br>(1 - 7)           | 72<br>(20 - 191)          | 13<br>(4 - 32)           | 4<br>(1 - 8)             |
| Forces of nature, war, and legal intervention   | 0<br>(0 - 0)                | 0<br>(0 - 0)          | --                     | --                        | --                       | --                       |
| Exposure to forces of nature                    | 0<br>(0 - 0)                | 0<br>(0 - 0)          | --                     | --                        | --                       | --                       |

Web Table 31- Saudi Arabia deaths with 95% UI by age, sex, and cause in 2013

| Cause                                                             | Males, All Ages             | Males, 0-4 Years         | Males, 5-14 Years  | Males, 15-49 Years          | Males, 50-69 Years          | Males, 70-80 Years          |
|-------------------------------------------------------------------|-----------------------------|--------------------------|--------------------|-----------------------------|-----------------------------|-----------------------------|
| All causes                                                        | 51,130<br>(42,132 - 62,341) | 3,684<br>(3,125 - 4,306) | 781<br>(662 - 901) | 13,505<br>(10,768 - 16,365) | 15,826<br>(12,331 - 20,370) | 17,335<br>(14,625 - 21,376) |
| Communicable, maternal, neonatal, and nutritional diseases        | 5,572<br>(4,910 - 6,414)    | 2,029<br>(1,690 - 2,435) | 120<br>(69 - 197)  | 898<br>(733 - 1,133)        | 1,055<br>(825 - 1,354)      | 1,470<br>(1,190 - 1,872)    |
| HIV/AIDS and tuberculosis                                         | 712<br>(579 - 888)          | 7<br>(4 - 13)            | 4<br>(3 - 6)       | 299<br>(242 - 362)          | 192<br>(147 - 250)          | 210<br>(156 - 337)          |
| Tuberculosis                                                      | 515<br>(405 - 678)          | 1<br>(1 - 2)             | 2<br>(1 - 2)       | 148<br>(114 - 189)          | 162<br>(119 - 221)          | 202<br>(152 - 303)          |
| HIV/AIDS                                                          | 197<br>(140 - 318)          | 6<br>(3 - 12)            | 3<br>(1 - 4)       | 150<br>(111 - 192)          | 29<br>(18 - 44)             | 8<br>(1 - 112)              |
| HIV/AIDS resulting in mycobacterial infection                     | 12<br>(8 - 20)              | 0<br>(0 - 1)             | 0<br>(0 - 0)       | 9<br>(6 - 12)               | 2<br>(1 - 3)                | 1<br>(0 - 8)                |
| HIV/AIDS resulting in other diseases                              | 185<br>(131 - 300)          | 6<br>(3 - 11)            | 2<br>(1 - 4)       | 141<br>(104 - 181)          | 27<br>(17 - 42)             | 8<br>(1 - 104)              |
| Diarrhea, lower respiratory, and other common infectious diseases | 2,757<br>(2,189 - 3,500)    | 199<br>(135 - 295)       | 108<br>(58 - 187)  | 535<br>(383 - 742)          | 784<br>(582 - 1,057)        | 1,131<br>(870 - 1,477)      |
| Diarrheal diseases                                                | 161<br>(123 - 203)          | 43<br>(26 - 65)          | 4<br>(2 - 6)       | 20<br>(14 - 27)             | 21<br>(14 - 30)             | 73<br>(47 - 109)            |
| Intestinal infectious diseases                                    | 300<br>(105 - 656)          | 70<br>(25 - 157)         | 74<br>(25 - 154)   | 133<br>(44 - 323)           | 18<br>(6 - 44)              | 4<br>(1 - 10)               |
| Typhoid fever                                                     | 218<br>(70 - 494)           | 47<br>(15 - 112)         | 57<br>(17 - 120)   | 98<br>(29 - 243)            | 13<br>(3 - 35)              | 3<br>(1 - 7)                |
| Paratyphoid fever                                                 | 63<br>(20 - 147)            | 16<br>(5 - 37)           | 16<br>(5 - 37)     | 27<br>(7 - 72)              | 3<br>(1 - 9)                | 1<br>(0 - 2)                |
| Other intestinal infectious diseases                              | 19<br>(10 - 30)             | 7<br>(2 - 15)            | 2<br>(0 - 5)       | 8<br>(2 - 16)               | 2<br>(0 - 6)                | 1<br>(0 - 3)                |
| Lower respiratory infections                                      | 2,142<br>(1,672 - 2,750)    | 62<br>(38 - 92)          | 22<br>(14 - 32)    | 320<br>(237 - 424)          | 711<br>(514 - 963)          | 1,028<br>(775 - 1,363)      |
| Upper respiratory infections                                      | 2<br>(1 - 3)                | 0<br>(0 - 0)             | 0<br>(0 - 0)       | 1<br>(0 - 1)                | 0<br>(0 - 2)                | 0<br>(0 - 1)                |
| Otitis media                                                      | 4<br>(3 - 6)                | 0<br>(0 - 0)             | 0<br>(0 - 0)       | 1<br>(1 - 1)                | 1<br>(1 - 2)                | 2<br>(1 - 3)                |
| Meningitis                                                        | 66<br>(52 - 82)             | 9<br>(5 - 16)            | 4<br>(2 - 5)       | 26<br>(19 - 34)             | 16<br>(11 - 22)             | 13<br>(9 - 17)              |
| Pneumococcal meningitis                                           | 16<br>(11 - 21)             | 2<br>(1 - 3)             | 1<br>(1 - 2)       | 6<br>(4 - 9)                | 4<br>(2 - 6)                | 3<br>(2 - 5)                |
| H influenzae type B meningitis                                    | 13<br>(9 - 18)              | 4<br>(2 - 7)             | 1<br>(1 - 2)       | 4<br>(2 - 6)                | 2<br>(1 - 4)                | 2<br>(1 - 3)                |
| Meningococcal meningitis                                          | 13<br>(8 - 19)              | 1<br>(1 - 3)             | 1<br>(0 - 1)       | 5<br>(3 - 9)                | 3<br>(1 - 6)                | 3<br>(1 - 5)                |
| Other meningitis                                                  | 25<br>(19 - 33)             | 2<br>(1 - 3)             | 1<br>(0 - 1)       | 11<br>(7 - 15)              | 7<br>(4 - 10)               | 5<br>(3 - 8)                |
| Encephalitis                                                      | 62<br>(44 - 100)            | 7<br>(4 - 14)            | 3<br>(2 - 6)       | 28<br>(18 - 48)             | 15<br>(10 - 28)             | 9<br>(6 - 16)               |
| Diphtheria                                                        | 1<br>(0 - 3)                | 0<br>(0 - 2)             | 0<br>(0 - 1)       | 0<br>(0 - 1)                | 0<br>(0 - 0)                | --                          |
| Whooping cough                                                    | 6<br>(0 - 27)               | 5<br>(0 - 25)            | 0<br>(0 - 2)       | 0<br>(0 - 1)                | 0<br>(0 - 0)                | --                          |
| Tetanus                                                           | 8<br>(5 - 10)               | 1<br>(1 - 2)             | 0<br>(0 - 0)       | 4<br>(2 - 5)                | 2<br>(1 - 3)                | 1<br>(0 - 1)                |
| Measles                                                           | 1<br>(0 - 8)                | 1<br>(0 - 7)             | 0<br>(0 - 1)       | 0<br>(0 - 0)                | 0<br>(0 - 0)                | --                          |
| Varicella and herpes zoster                                       | 5<br>(2 - 11)               | 1<br>(0 - 5)             | 0<br>(0 - 1)       | 2<br>(0 - 6)                | 1<br>(0 - 2)                | 1<br>(0 - 5)                |
| Neglected tropical diseases and malaria                           | 47<br>(37 - 60)             | 3<br>(1 - 9)             | 2<br>(1 - 6)       | 21<br>(16 - 28)             | 14<br>(9 - 20)              | 6<br>(4 - 10)               |
| Malaria                                                           | 11<br>(7 - 15)              | 1<br>(0 - 1)             | 0<br>(0 - 1)       | 6<br>(3 - 10)               | 3<br>(1 - 5)                | 1<br>(1 - 3)                |
| Leishmaniasis                                                     | 1<br>(1 - 2)                | 0<br>(0 - 1)             | 0<br>(0 - 0)       | 1<br>(0 - 1)                | 0<br>(0 - 0)                | 0<br>(0 - 0)                |
| Visceral leishmaniasis                                            | 1<br>(1 - 2)                | 0<br>(0 - 1)             | 0<br>(0 - 0)       | 1<br>(0 - 1)                | 0<br>(0 - 0)                | 0<br>(0 - 0)                |
| Schistosomiasis                                                   | 21<br>(14 - 28)             | 0<br>(0 - 0)             | 0<br>(0 - 0)       | 8<br>(5 - 12)               | 8<br>(5 - 14)               | 4<br>(2 - 6)                |
| Cysticercosis                                                     | 0<br>(0 - 0)                | 0<br>(0 - 0)             | 0<br>(0 - 0)       | 0<br>(0 - 0)                | 0<br>(0 - 0)                | 0<br>(0 - 0)                |
| Cystic echinococcosis                                             | 1<br>(1 - 1)                | 0<br>(0 - 0)             | 0<br>(0 - 0)       | 1<br>(0 - 1)                | 0<br>(0 - 0)                | 0<br>(0 - 0)                |
| Dengue                                                            | 4<br>(2 - 5)                | 0<br>(0 - 0)             | 0<br>(0 - 0)       | 2<br>(2 - 3)                | 1<br>(0 - 1)                | 0<br>(0 - 0)                |
| Rabies                                                            | 2<br>(1 - 2)                | 0<br>(0 - 0)             | 0<br>(0 - 0)       | 1<br>(1 - 2)                | 0<br>(0 - 0)                | 0<br>(0 - 0)                |
| Intestinal nematode infections                                    | 5<br>(1 - 13)               | 2<br>(0 - 7)             | 1<br>(0 - 4)       | 1<br>(0 - 6)                | 1<br>(0 - 4)                | 0<br>(0 - 3)                |
| Ascariasis                                                        | 5<br>(1 - 13)               | 2<br>(0 - 7)             | 1<br>(0 - 4)       | 1<br>(0 - 6)                | 1<br>(0 - 4)                | 0<br>(0 - 3)                |
| Other neglected tropical diseases                                 | 3<br>(2 - 4)                | 0<br>(0 - 0)             | 0<br>(0 - 0)       | 1<br>(1 - 2)                | 1<br>(0 - 1)                | 1<br>(0 - 1)                |
| Maternal disorders                                                | --                          | --                       | --                 | --                          | --                          | --                          |

Web Table 31- Saudi Arabia deaths with 95% UI by age, sex, and cause in 2013

| Cause                                                            | Males, All Ages             | Males, 0-4 Years         | Males, 5-14 Years  | Males, 15-49 Years       | Males, 50-69 Years         | Males, 70-80 Years          |
|------------------------------------------------------------------|-----------------------------|--------------------------|--------------------|--------------------------|----------------------------|-----------------------------|
| Maternal hemorrhage                                              | --                          | --                       | --                 | --                       | --                         | --                          |
| Maternal sepsis and other maternal infections                    | --                          | --                       | --                 | --                       | --                         | --                          |
| Maternal hypertensive disorders                                  | --                          | --                       | --                 | --                       | --                         | --                          |
| Maternal obstructed labor                                        | --                          | --                       | --                 | --                       | --                         | --                          |
| Maternal abortive outcome                                        | --                          | --                       | --                 | --                       | --                         | --                          |
| Indirect maternal deaths                                         | --                          | --                       | --                 | --                       | --                         | --                          |
| Late maternal deaths                                             | --                          | --                       | --                 | --                       | --                         | --                          |
| Maternal deaths aggravated by HIV/AIDS                           | --                          | --                       | --                 | --                       | --                         | --                          |
| Other maternal disorders                                         | --                          | --                       | --                 | --                       | --                         | --                          |
| Neonatal disorders                                               | 1,803<br>(1,490 - 2,171)    | 1,803<br>(1,490 - 2,171) | --                 | --                       | --                         | --                          |
| Neonatal preterm birth complications                             | 1,058<br>(704 - 1,377)      | 1,058<br>(704 - 1,377)   | --                 | --                       | --                         | --                          |
| Neonatal encephalopathy due to birth asphyxia and trauma         | 223<br>(150 - 338)          | 223<br>(150 - 338)       | --                 | --                       | --                         | --                          |
| Neonatal sepsis and other neonatal infections                    | 400<br>(203 - 735)          | 400<br>(203 - 735)       | --                 | --                       | --                         | --                          |
| Hemolytic disease and other neonatal jaundice                    | 6<br>(2 - 13)               | 6<br>(2 - 13)            | --                 | --                       | --                         | --                          |
| Other neonatal disorders                                         | 116<br>(73 - 188)           | 116<br>(73 - 188)        | --                 | --                       | --                         | --                          |
| Nutritional deficiencies                                         | 122<br>(81 - 203)           | 8<br>(5 - 13)            | 3<br>(2 - 5)       | 18<br>(11 - 28)          | 18<br>(11 - 31)            | 75<br>(47 - 127)            |
| Protein-energy malnutrition                                      | 39<br>(19 - 74)             | 5<br>(2 - 9)             | 1<br>(0 - 2)       | 4<br>(2 - 8)             | 3<br>(1 - 7)               | 27<br>(12 - 54)             |
| Iodine deficiency                                                | 0<br>(0 - 1)                | 0<br>(0 - 0)             | 0<br>(0 - 0)       | 0<br>(0 - 0)             | 0<br>(0 - 1)               | 0<br>(0 - 1)                |
| Iron-deficiency anemia                                           | 79<br>(43 - 132)            | 3<br>(1 - 6)             | 2<br>(1 - 3)       | 13<br>(8 - 21)           | 15<br>(8 - 24)             | 47<br>(23 - 80)             |
| Other nutritional deficiencies                                   | 3<br>(1 - 7)                | 0<br>(0 - 0)             | 0<br>(0 - 0)       | 1<br>(0 - 2)             | 0<br>(0 - 1)               | 1<br>(0 - 3)                |
| Other communicable, maternal, neonatal, and nutritional diseases | 132<br>(102 - 171)          | 9<br>(3 - 18)            | 2<br>(1 - 3)       | 26<br>(19 - 34)          | 47<br>(33 - 66)            | 48<br>(34 - 67)             |
| Sexually transmitted diseases excluding HIV                      | 10<br>(3 - 20)              | 7<br>(0 - 16)            | 1<br>(0 - 1)       | 1<br>(1 - 2)             | 0<br>(0 - 1)               | 2<br>(1 - 3)                |
| Syphilis                                                         | 9<br>(2 - 19)               | 7<br>(0 - 16)            | 1<br>(0 - 1)       | 1<br>(0 - 1)             | 0<br>(0 - 1)               | 1<br>(1 - 3)                |
| Chlamydial infection                                             | --                          | --                       | --                 | --                       | --                         | --                          |
| Gonococcal infection                                             | 1<br>(0 - 1)                | --                       | 0<br>(0 - 0)       | 0<br>(0 - 0)             | 0<br>(0 - 0)               | 0<br>(0 - 0)                |
| Other sexually transmitted diseases                              | 0<br>(0 - 1)                | --                       | 0<br>(0 - 0)       | 0<br>(0 - 0)             | 0<br>(0 - 0)               | 0<br>(0 - 0)                |
| Hepatitis                                                        | 81<br>(61 - 109)            | 1<br>(0 - 1)             | 1<br>(0 - 1)       | 16<br>(11 - 22)          | 36<br>(24 - 53)            | 27<br>(18 - 41)             |
| Acute hepatitis A                                                | 3<br>(1 - 8)                | 0<br>(0 - 0)             | 0<br>(0 - 0)       | 1<br>(0 - 3)             | 1<br>(0 - 3)               | 0<br>(0 - 1)                |
| Acute hepatitis B                                                | 59<br>(40 - 83)             | 0<br>(0 - 1)             | 0<br>(0 - 0)       | 7<br>(3 - 12)            | 28<br>(17 - 42)            | 24<br>(15 - 37)             |
| Acute hepatitis C                                                | 2<br>(0 - 5)                | --                       | 0<br>(0 - 0)       | 0<br>(0 - 1)             | 1<br>(0 - 3)               | 0<br>(0 - 2)                |
| Acute hepatitis E                                                | 17<br>(8 - 30)              | 0<br>(0 - 0)             | 0<br>(0 - 1)       | 7<br>(4 - 12)            | 7<br>(2 - 13)              | 3<br>(1 - 6)                |
| Other infectious diseases                                        | 40<br>(28 - 60)             | 2<br>(1 - 3)             | 1<br>(0 - 1)       | 8<br>(6 - 13)            | 10<br>(7 - 16)             | 19<br>(11 - 31)             |
| Non-communicable diseases                                        | 33,100<br>(27,073 - 41,012) | 1,342<br>(1,131 - 1,575) | 207<br>(164 - 253) | 4,794<br>(3,778 - 5,897) | 11,786<br>(9,098 - 15,190) | 14,971<br>(12,589 - 18,578) |
| Neoplasms                                                        | 3,713<br>(2,995 - 4,673)    | 19<br>(12 - 29)          | 39<br>(29 - 50)    | 565<br>(438 - 718)       | 1,315<br>(1,002 - 1,708)   | 1,775<br>(1,455 - 2,240)    |
| Esophageal cancer                                                | 98<br>(64 - 161)            | --                       | --                 | 10<br>(6 - 18)           | 36<br>(21 - 62)            | 51<br>(34 - 83)             |
| Stomach cancer                                                   | 290<br>(227 - 376)          | --                       | --                 | 34<br>(25 - 44)          | 110<br>(83 - 147)          | 145<br>(110 - 195)          |
| Liver cancer                                                     | 596<br>(458 - 780)          | --                       | 2<br>(1 - 3)       | 40<br>(29 - 54)          | 189<br>(137 - 258)         | 366<br>(268 - 503)          |
| Liver cancer due to hepatitis B                                  | 125<br>(58 - 199)           | --                       | 0<br>(0 - 1)       | 13<br>(5 - 21)           | 50<br>(22 - 81)            | 61<br>(27 - 105)            |
| Liver cancer due to hepatitis C                                  | 199<br>(105 - 344)          | --                       | 0<br>(0 - 0)       | 10<br>(4 - 18)           | 62<br>(31 - 107)           | 127<br>(63 - 240)           |
| Liver cancer due to alcohol use                                  | 183<br>(100 - 303)          | --                       | --                 | 6<br>(2 - 12)            | 46<br>(23 - 81)            | 131<br>(72 - 223)           |

Web Table 31- Saudi Arabia deaths with 95% UI by age, sex, and cause in 2013

| Cause                                         | Males, All Ages             | Males, 0-4 Years | Males, 5-14 Years | Males, 15-49 Years       | Males, 50-69 Years       | Males, 70-80 Years       |
|-----------------------------------------------|-----------------------------|------------------|-------------------|--------------------------|--------------------------|--------------------------|
| Liver cancer due to other causes              | 89<br>(32 - 155)            | --               | 1<br>(1 - 2)      | 10<br>(6 - 17)           | 31<br>(9 - 56)           | 47<br>(14 - 87)          |
| Larynx cancer                                 | 58<br>(42 - 84)             | --               | --                | 8<br>(6 - 13)            | 25<br>(17 - 40)          | 25<br>(17 - 35)          |
| Tracheal, bronchus and lung cancer            | 535<br>(424 - 691)          | --               | --                | 51<br>(37 - 67)          | 243<br>(182 - 320)       | 242<br>(191 - 318)       |
| Breast cancer                                 | 14<br>(9 - 21)              | --               | --                | 4<br>(2 - 6)             | 6<br>(4 - 10)            | 4<br>(2 - 7)             |
| Cervical cancer                               | --                          | --               | --                | --                       | --                       | --                       |
| Uterine cancer                                | --                          | --               | --                | --                       | --                       | --                       |
| Prostate cancer                               | 207<br>(129 - 314)          | --               | --                | 3<br>(2 - 5)             | 39<br>(24 - 64)          | 164<br>(97 - 245)        |
| Colon and rectum cancer                       | 356<br>(283 - 458)          | --               | --                | 53<br>(40 - 70)          | 130<br>(98 - 172)        | 173<br>(132 - 230)       |
| Lip and oral cavity cancer                    | 49<br>(36 - 70)             | --               | --                | 10<br>(6 - 16)           | 19<br>(13 - 30)          | 21<br>(12 - 31)          |
| Nasopharynx cancer                            | 42<br>(30 - 59)             | --               | 0<br>(0 - 1)      | 12<br>(8 - 18)           | 17<br>(11 - 25)          | 13<br>(8 - 19)           |
| Other pharynx cancer                          | 41<br>(29 - 55)             | --               | --                | 9<br>(6 - 12)            | 20<br>(13 - 28)          | 12<br>(8 - 18)           |
| Gallbladder and biliary tract cancer          | 71<br>(47 - 99)             | --               | --                | 6<br>(4 - 9)             | 26<br>(17 - 39)          | 39<br>(20 - 57)          |
| Pancreatic cancer                             | 204<br>(159 - 267)          | --               | --                | 25<br>(18 - 33)          | 75<br>(56 - 101)         | 104<br>(79 - 139)        |
| Malignant skin melanoma                       | 13<br>(7 - 21)              | --               | --                | 3<br>(2 - 5)             | 4<br>(3 - 8)             | 5<br>(2 - 8)             |
| Non-melanoma skin cancer                      | 14<br>(9 - 22)              | --               | --                | 2<br>(1 - 2)             | 3<br>(2 - 4)             | 9<br>(6 - 15)            |
| Ovarian cancer                                | --                          | --               | --                | --                       | --                       | --                       |
| Testicular cancer                             | 12<br>(8 - 18)              | --               | --                | 9<br>(6 - 13)            | 2<br>(1 - 3)             | 1<br>(1 - 2)             |
| Kidney cancer                                 | 78<br>(58 - 104)            | 1<br>(0 - 2)     | 1<br>(0 - 1)      | 12<br>(9 - 16)           | 33<br>(23 - 47)          | 31<br>(22 - 44)          |
| Bladder cancer                                | 125<br>(94 - 183)           | --               | --                | 10<br>(6 - 17)           | 49<br>(34 - 82)          | 67<br>(49 - 91)          |
| Brain and nervous system cancer               | 271<br>(156 - 357)          | 6<br>(2 - 11)    | 12<br>(8 - 20)    | 79<br>(53 - 119)         | 90<br>(58 - 136)         | 84<br>(27 - 128)         |
| Thyroid cancer                                | 24<br>(17 - 35)             | --               | 0<br>(0 - 0)      | 4<br>(3 - 7)             | 9<br>(6 - 15)            | 11<br>(7 - 15)           |
| Mesothelioma                                  | 8<br>(6 - 11)               | --               | --                | 2<br>(1 - 3)             | 3<br>(2 - 4)             | 3<br>(2 - 4)             |
| Hodgkin lymphoma                              | 14<br>(8 - 30)              | 0<br>(0 - 1)     | 1<br>(0 - 2)      | 7<br>(4 - 15)            | 4<br>(2 - 9)             | 2<br>(1 - 4)             |
| Non-Hodgkin lymphoma                          | 167<br>(123 - 252)          | 1<br>(1 - 2)     | 3<br>(2 - 6)      | 50<br>(34 - 84)          | 59<br>(38 - 97)          | 54<br>(34 - 77)          |
| Multiple myeloma                              | 32<br>(22 - 49)             | --               | --                | 5<br>(3 - 9)             | 15<br>(9 - 25)           | 12<br>(8 - 17)           |
| Leukemia                                      | 214<br>(167 - 269)          | 4<br>(2 - 7)     | 9<br>(6 - 12)     | 67<br>(50 - 85)          | 54<br>(40 - 73)          | 80<br>(60 - 108)         |
| Other neoplasms                               | 182<br>(140 - 232)          | 7<br>(4 - 13)    | 11<br>(7 - 15)    | 51<br>(36 - 65)          | 56<br>(39 - 75)          | 57<br>(40 - 79)          |
| Cardiovascular diseases                       | 16,418<br>(13,187 - 20,605) | 29<br>(20 - 40)  | 30<br>(23 - 38)   | 2,297<br>(1,790 - 2,838) | 6,969<br>(5,384 - 8,983) | 7,092<br>(5,895 - 8,792) |
| Rheumatic heart disease                       | 61<br>(37 - 90)             | 1<br>(0 - 1)     | 2<br>(1 - 3)      | 28<br>(16 - 42)          | 19<br>(11 - 31)          | 12<br>(7 - 19)           |
| Ischemic heart disease                        | 9,741<br>(7,749 - 12,234)   | 7<br>(4 - 11)    | 7<br>(5 - 9)      | 1,450<br>(1,117 - 1,817) | 4,687<br>(3,596 - 6,038) | 3,590<br>(2,877 - 4,606) |
| Cerebrovascular disease                       | 5,105<br>(3,963 - 6,736)    | 6<br>(4 - 9)     | 11<br>(8 - 15)    | 539<br>(393 - 733)       | 1,668<br>(1,232 - 2,286) | 2,881<br>(2,267 - 3,763) |
| Ischemic stroke                               | 3,080<br>(2,373 - 4,095)    | 1<br>(1 - 2)     | 2<br>(1 - 3)      | 172<br>(115 - 244)       | 832<br>(588 - 1,164)     | 2,073<br>(1,607 - 2,719) |
| Hemorrhagic stroke                            | 2,025<br>(1,459 - 2,779)    | 5<br>(3 - 7)     | 9<br>(6 - 12)     | 367<br>(264 - 502)       | 836<br>(599 - 1,189)     | 808<br>(559 - 1,135)     |
| Hypertensive heart disease                    | 174<br>(110 - 244)          | 0<br>(0 - 0)     | 0<br>(0 - 0)      | 34<br>(22 - 50)          | 75<br>(44 - 110)         | 65<br>(37 - 95)          |
| Cardiomyopathy and myocarditis                | 686<br>(454 - 923)          | 10<br>(6 - 14)   | 8<br>(5 - 10)     | 131<br>(87 - 177)        | 274<br>(170 - 388)       | 263<br>(169 - 375)       |
| Atrial fibrillation and flutter               | 16<br>(11 - 22)             | --               | --                | 3<br>(2 - 4)             | 4<br>(3 - 6)             | 9<br>(6 - 14)            |
| Aortic aneurysm                               | 118<br>(89 - 165)           | --               | --                | 5<br>(4 - 7)             | 72<br>(52 - 104)         | 41<br>(30 - 57)          |
| Peripheral vascular disease                   | 7<br>(5 - 10)               | --               | --                | 1<br>(1 - 2)             | 3<br>(2 - 4)             | 3<br>(2 - 5)             |
| Endocarditis                                  | 89<br>(54 - 131)            | 3<br>(1 - 5)     | 1<br>(1 - 2)      | 18<br>(11 - 27)          | 32<br>(19 - 51)          | 35<br>(20 - 55)          |
| Other cardiovascular and circulatory diseases | 420<br>(315 - 580)          | 2<br>(2 - 4)     | 2<br>(1 - 3)      | 88<br>(64 - 122)         | 135<br>(95 - 195)        | 193<br>(137 - 272)       |

Web Table 31- Saudi Arabia deaths with 95% UI by age, sex, and cause in 2013

| Cause                                               | Males, All Ages          | Males, 0-4 Years | Males, 5-14 Years | Males, 15-49 Years | Males, 50-69 Years | Males, 70-80 Years     |
|-----------------------------------------------------|--------------------------|------------------|-------------------|--------------------|--------------------|------------------------|
| Chronic respiratory diseases                        | 1,704<br>(1,349 - 2,221) | 6<br>(3 - 9)     | 6<br>(4 - 8)      | 129<br>(97 - 167)  | 561<br>(422 - 763) | 1,004<br>(793 - 1,285) |
| Chronic obstructive pulmonary disease               | 1,075<br>(846 - 1,435)   | 1<br>(1 - 2)     | 1<br>(1 - 2)      | 51<br>(38 - 68)    | 348<br>(257 - 477) | 673<br>(523 - 903)     |
| Pneumoconiosis                                      | 26<br>(17 - 38)          | 0<br>(0 - 0)     | 0<br>(0 - 0)      | 7<br>(4 - 10)      | 10<br>(6 - 16)     | 9<br>(5 - 14)          |
| Silicosis                                           | 9<br>(5 - 13)            | 0<br>(0 - 0)     | 0<br>(0 - 0)      | 1<br>(0 - 1)       | 2<br>(1 - 4)       | 6<br>(3 - 9)           |
| Asbestosis                                          | 2<br>(1 - 3)             | 0<br>(0 - 0)     | 0<br>(0 - 0)      | 1<br>(1 - 2)       | 1<br>(0 - 1)       | 0<br>(0 - 0)           |
| Coal workers pneumoconiosis                         | 1<br>(1 - 2)             | 0<br>(0 - 0)     | 0<br>(0 - 0)      | 1<br>(0 - 1)       | 0<br>(0 - 0)       | 0<br>(0 - 0)           |
| Other pneumoconiosis                                | 14<br>(9 - 21)           | 0<br>(0 - 0)     | 0<br>(0 - 0)      | 4<br>(3 - 6)       | 7<br>(4 - 11)      | 3<br>(2 - 5)           |
| Asthma                                              | 339<br>(255 - 447)       | 4<br>(2 - 6)     | 3<br>(2 - 4)      | 58<br>(43 - 77)    | 115<br>(82 - 162)  | 159<br>(115 - 217)     |
| Interstitial lung disease and pulmonary sarcoidosis | 250<br>(150 - 354)       | 0<br>(0 - 0)     | 1<br>(0 - 1)      | 10<br>(7 - 16)     | 83<br>(49 - 120)   | 156<br>(88 - 231)      |
| Other chronic respiratory diseases                  | 15<br>(11 - 20)          | 0<br>(0 - 1)     | 0<br>(0 - 1)      | 3<br>(2 - 4)       | 4<br>(3 - 7)       | 7<br>(4 - 10)          |
| Cirrhosis                                           | 1,341<br>(1,076 - 1,705) | 6<br>(3 - 9)     | 5<br>(4 - 6)      | 181<br>(139 - 230) | 507<br>(386 - 661) | 642<br>(513 - 822)     |
| Cirrhosis due to hepatitis B                        | 326<br>(162 - 539)       | 0<br>(0 - 0)     | 0<br>(0 - 1)      | 35<br>(13 - 64)    | 118<br>(52 - 205)  | 173<br>(85 - 286)      |
| Cirrhosis due to hepatitis C                        | 690<br>(371 - 1,009)     | 1<br>(0 - 1)     | 2<br>(1 - 3)      | 105<br>(65 - 146)  | 279<br>(137 - 413) | 303<br>(139 - 478)     |
| Cirrhosis due to alcohol use                        | 216<br>(118 - 410)       | --               | --                | 16<br>(9 - 31)     | 70<br>(37 - 144)   | 130<br>(67 - 249)      |
| Cirrhosis due to other causes                       | 108<br>(63 - 180)        | 5<br>(3 - 8)     | 3<br>(2 - 4)      | 24<br>(13 - 41)    | 40<br>(19 - 76)    | 36<br>(17 - 63)        |
| Digestive diseases                                  | 374<br>(297 - 483)       | 2<br>(1 - 4)     | 2<br>(2 - 3)      | 61<br>(47 - 78)    | 98<br>(73 - 133)   | 210<br>(164 - 271)     |
| Peptic ulcer disease                                | 85<br>(61 - 115)         | 0<br>(0 - 0)     | 0<br>(0 - 0)      | 11<br>(8 - 16)     | 24<br>(15 - 35)    | 50<br>(35 - 70)        |
| Gastritis and duodenitis                            | 2<br>(1 - 3)             | 0<br>(0 - 0)     | 0<br>(0 - 0)      | 1<br>(1 - 2)       | 0<br>(0 - 0)       | 0<br>(0 - 0)           |
| Appendicitis                                        | 22<br>(14 - 31)          | 0<br>(0 - 1)     | 0<br>(0 - 0)      | 5<br>(3 - 7)       | 6<br>(4 - 10)      | 10<br>(6 - 16)         |
| Paralytic ileus and intestinal obstruction          | 82<br>(51 - 124)         | 1<br>(0 - 1)     | 0<br>(0 - 1)      | 13<br>(8 - 20)     | 21<br>(12 - 34)    | 48<br>(28 - 72)        |
| Inguinal, femoral, and abdominal hernia             | 5<br>(2 - 7)             | 0<br>(0 - 0)     | 0<br>(0 - 0)      | 1<br>(1 - 1)       | 1<br>(0 - 2)       | 3<br>(1 - 4)           |
| Inflammatory bowel disease                          | 7<br>(4 - 10)            | 0<br>(0 - 0)     | 0<br>(0 - 0)      | 1<br>(1 - 2)       | 2<br>(1 - 3)       | 4<br>(2 - 6)           |
| Vascular intestinal disorders                       | 4<br>(1 - 8)             | 0<br>(0 - 0)     | 0<br>(0 - 0)      | 2<br>(1 - 4)       | 1<br>(0 - 2)       | 1<br>(0 - 1)           |
| Gallbladder and biliary diseases                    | 80<br>(57 - 110)         | 0<br>(0 - 1)     | 0<br>(0 - 0)      | 8<br>(5 - 11)      | 18<br>(12 - 27)    | 54<br>(37 - 76)        |
| Pancreatitis                                        | 54<br>(36 - 82)          | 0<br>(0 - 0)     | 0<br>(0 - 0)      | 14<br>(9 - 20)     | 15<br>(10 - 25)    | 25<br>(15 - 40)        |
| Other digestive diseases                            | 33<br>(22 - 46)          | 0<br>(0 - 1)     | 0<br>(0 - 0)      | 5<br>(4 - 7)       | 10<br>(7 - 16)     | 17<br>(10 - 25)        |
| Neurological disorders                              | 1,688<br>(1,292 - 2,163) | 15<br>(10 - 23)  | 11<br>(7 - 15)    | 111<br>(85 - 145)  | 211<br>(149 - 289) | 1,340<br>(995 - 1,767) |
| Alzheimer disease and other dementias               | 1,466<br>(1,096 - 1,904) | --               | --                | 1<br>(0 - 4)       | 165<br>(114 - 234) | 1,300<br>(960 - 1,722) |
| Parkinson disease                                   | 15<br>(11 - 21)          | --               | --                | 2<br>(1 - 2)       | 3<br>(2 - 5)       | 10<br>(7 - 15)         |
| Epilepsy                                            | 154<br>(116 - 200)       | 7<br>(4 - 12)    | 9<br>(6 - 13)     | 89<br>(66 - 116)   | 31<br>(21 - 44)    | 19<br>(13 - 26)        |
| Multiple sclerosis                                  | 5<br>(3 - 9)             | --               | --                | 4<br>(2 - 7)       | 1<br>(1 - 2)       | 0<br>(0 - 1)           |
| Other neurological disorders                        | 47<br>(37 - 69)          | 9<br>(6 - 14)    | 2<br>(1 - 3)      | 15<br>(11 - 21)    | 10<br>(7 - 16)     | 11<br>(8 - 17)         |
| Mental and substance use disorders                  | 920<br>(192 - 1,217)     | 1<br>(0 - 1)     | 0<br>(0 - 0)      | 644<br>(130 - 848) | 267<br>(55 - 379)  | 8<br>(5 - 12)          |
| Schizophrenia                                       | 2<br>(1 - 3)             | --               | --                | 1<br>(1 - 2)       | 0<br>(0 - 1)       | 0<br>(0 - 1)           |
| Alcohol use disorders                               | 51<br>(14 - 72)          | --               | --                | 23<br>(6 - 32)     | 24<br>(6 - 37)     | 3<br>(1 - 5)           |
| Drug use disorders                                  | 866<br>(170 - 1,141)     | 1<br>(0 - 1)     | --                | 619<br>(120 - 816) | 242<br>(45 - 349)  | 5<br>(3 - 7)           |
| Opioid use disorders                                | 471<br>(92 - 625)        | 0<br>(0 - 1)     | --                | 344<br>(66 - 454)  | 125<br>(23 - 179)  | 3<br>(2 - 4)           |
| Cocaine use disorders                               | 10<br>(2 - 14)           | 0<br>(0 - 0)     | --                | 8<br>(2 - 11)      | 2<br>(0 - 3)       | 0<br>(0 - 0)           |
| Amphetamine use disorders                           | 9<br>(2 - 12)            | 0<br>(0 - 0)     | --                | 6<br>(1 - 9)       | 3<br>(0 - 4)       | 0<br>(0 - 0)           |
| Other drug use disorders                            | 375<br>(74 - 499)        | 0<br>(0 - 0)     | --                | 260<br>(50 - 344)  | 112<br>(22 - 163)  | 2<br>(1 - 3)           |

Web Table 31- Saudi Arabia deaths with 95% UI by age, sex, and cause in 2013

| Cause                                               | Males, All Ages          | Males, 0-4 Years         | Males, 5-14 Years | Males, 15-49 Years | Males, 50-69 Years       | Males, 70-80 Years       |
|-----------------------------------------------------|--------------------------|--------------------------|-------------------|--------------------|--------------------------|--------------------------|
| Eating disorders                                    | 1<br>(1 - 2)             | --                       | 0<br>(0 - 0)      | 1<br>(1 - 2)       | --                       | --                       |
| Anorexia nervosa                                    | 1<br>(1 - 2)             | --                       | 0<br>(0 - 0)      | 1<br>(1 - 2)       | --                       | --                       |
| Diabetes, urogenital, blood, and endocrine diseases | 4,956<br>(3,970 - 6,558) | 69<br>(47 - 99)          | 36<br>(27 - 50)   | 618<br>(475 - 886) | 1,731<br>(1,306 - 2,406) | 2,502<br>(2,008 - 3,245) |
| Diabetes mellitus                                   | 1,203<br>(957 - 1,522)   | 3<br>(2 - 4)             | 2<br>(2 - 3)      | 120<br>(92 - 154)  | 431<br>(325 - 562)       | 646<br>(511 - 831)       |
| Acute glomerulonephritis                            | 5<br>(3 - 7)             | 0<br>(0 - 0)             | 0<br>(0 - 0)      | 1<br>(1 - 2)       | 1<br>(1 - 2)             | 2<br>(1 - 3)             |
| Chronic kidney disease                              | 3,060<br>(2,362 - 4,322) | 9<br>(6 - 14)            | 10<br>(6 - 15)    | 352<br>(259 - 598) | 1,161<br>(860 - 1,731)   | 1,529<br>(1,169 - 2,063) |
| Chronic kidney disease due to diabetes mellitus     | 1,578<br>(1,119 - 2,341) | 1<br>(1 - 3)             | 1<br>(0 - 2)      | 172<br>(116 - 284) | 640<br>(422 - 987)       | 763<br>(504 - 1,152)     |
| Chronic kidney disease due to hypertension          | 109<br>(43 - 175)        | 0<br>(0 - 0)             | 0<br>(0 - 1)      | 21<br>(8 - 34)     | 62<br>(25 - 107)         | 25<br>(9 - 40)           |
| Chronic kidney disease due to glomerulonephritis    | 40<br>(19 - 58)          | 2<br>(1 - 3)             | 1<br>(1 - 2)      | 12<br>(6 - 17)     | 12<br>(4 - 19)           | 13<br>(6 - 22)           |
| Chronic kidney disease due to other causes          | 1,334<br>(665 - 2,264)   | 6<br>(3 - 10)            | 7<br>(4 - 12)     | 147<br>(77 - 336)  | 447<br>(205 - 844)       | 727<br>(344 - 1,158)     |
| Urinary diseases and male infertility               | 298<br>(224 - 402)       | 2<br>(1 - 3)             | 1<br>(1 - 2)      | 19<br>(14 - 24)    | 55<br>(40 - 78)          | 221<br>(156 - 310)       |
| Interstitial nephritis and urinary tract infections | 220<br>(159 - 305)       | 2<br>(1 - 3)             | 1<br>(1 - 1)      | 8<br>(5 - 11)      | 31<br>(21 - 46)          | 179<br>(124 - 256)       |
| Urolithiasis                                        | 7<br>(4 - 10)            | --                       | 0<br>(0 - 0)      | 1<br>(1 - 2)       | 2<br>(1 - 4)             | 3<br>(1 - 5)             |
| Other urinary diseases                              | 71<br>(42 - 103)         | 0<br>(0 - 0)             | 0<br>(0 - 0)      | 10<br>(6 - 13)     | 22<br>(13 - 34)          | 39<br>(19 - 61)          |
| Gynecological diseases                              | --                       | --                       | --                | --                 | --                       | --                       |
| Uterine fibroids                                    | --                       | --                       | --                | --                 | --                       | --                       |
| Polycystic ovarian syndrome                         | --                       | --                       | --                | --                 | --                       | --                       |
| Endometriosis                                       | --                       | --                       | --                | --                 | --                       | --                       |
| Genital prolapse                                    | --                       | --                       | --                | --                 | --                       | --                       |
| Other gynecological diseases                        | --                       | --                       | --                | --                 | --                       | --                       |
| Hemoglobinopathies and hemolytic anemias            | 111<br>(68 - 178)        | 18<br>(8 - 34)           | 12<br>(7 - 19)    | 56<br>(35 - 90)    | 13<br>(7 - 24)           | 13<br>(6 - 26)           |
| Thalassemias                                        | 32<br>(18 - 49)          | 10<br>(4 - 18)           | 5<br>(3 - 8)      | 18<br>(11 - 29)    | 0<br>(0 - 0)             | 0<br>(0 - 0)             |
| Sickle cell disorders                               | 61<br>(38 - 97)          | 7<br>(3 - 14)            | 6<br>(3 - 10)     | 35<br>(22 - 58)    | 11<br>(6 - 22)           | 0<br>(0 - 1)             |
| G6PD deficiency                                     | 2<br>(1 - 3)             | 0<br>(0 - 0)             | 0<br>(0 - 0)      | 1<br>(0 - 1)       | 0<br>(0 - 0)             | 0<br>(0 - 1)             |
| Other hemoglobinopathies and hemolytic anemias      | 17<br>(10 - 31)          | 1<br>(0 - 2)             | 0<br>(0 - 1)      | 2<br>(1 - 3)       | 1<br>(1 - 2)             | 12<br>(6 - 25)           |
| Endocrine, metabolic, blood, and immune disorders   | 279<br>(200 - 389)       | 36<br>(22 - 54)          | 12<br>(7 - 17)    | 70<br>(49 - 103)   | 69<br>(45 - 103)         | 92<br>(55 - 129)         |
| Musculoskeletal disorders                           | 85<br>(63 - 124)         | --                       | 2<br>(1 - 3)      | 21<br>(16 - 31)    | 23<br>(15 - 36)          | 40<br>(27 - 62)          |
| Rheumatoid arthritis                                | 6<br>(4 - 11)            | --                       | 0<br>(0 - 1)      | 1<br>(1 - 3)       | 1<br>(1 - 2)             | 3<br>(2 - 6)             |
| Other musculoskeletal disorders                     | 79<br>(58 - 115)         | --                       | 2<br>(1 - 2)      | 20<br>(14 - 29)    | 22<br>(15 - 34)          | 36<br>(25 - 56)          |
| Other non-communicable diseases                     | 1,901<br>(1,644 - 2,165) | 1,195<br>(1,006 - 1,414) | 77<br>(56 - 100)  | 167<br>(130 - 210) | 104<br>(78 - 140)        | 358<br>(256 - 483)       |
| Congenital anomalies                                | 1,460<br>(1,246 - 1,703) | 1,143<br>(955 - 1,362)   | 76<br>(55 - 100)  | 154<br>(118 - 194) | 60<br>(44 - 86)          | 26<br>(19 - 38)          |
| Neural tube defects                                 | 35<br>(15 - 81)          | 29<br>(9 - 75)           | 1<br>(1 - 2)      | 3<br>(2 - 5)       | 1<br>(1 - 2)             | 1<br>(0 - 1)             |
| Congenital heart anomalies                          | 485<br>(388 - 603)       | 376<br>(282 - 488)       | 32<br>(20 - 47)   | 54<br>(40 - 73)    | 16<br>(10 - 27)          | 6<br>(4 - 10)            |
| Cleft lip and cleft palate                          | 1<br>(0 - 2)             | 1<br>(0 - 2)             | --                | --                 | --                       | --                       |
| Down syndrome                                       | 56<br>(35 - 94)          | 38<br>(21 - 68)          | 5<br>(2 - 9)      | 11<br>(7 - 18)     | 2<br>(1 - 4)             | 0<br>(0 - 1)             |
| Chromosomal unbalanced rearrangements               | 18<br>(10 - 28)          | 15<br>(8 - 25)           | 1<br>(0 - 1)      | 1<br>(1 - 2)       | 0<br>(0 - 1)             | 0<br>(0 - 0)             |
| Other congenital anomalies                          | 866<br>(715 - 1,055)     | 685<br>(547 - 850)       | 38<br>(24 - 54)   | 84<br>(61 - 111)   | 40<br>(28 - 58)          | 19<br>(13 - 27)          |
| Skin and subcutaneous diseases                      | 390<br>(283 - 525)       | 1<br>(0 - 1)             | 1<br>(0 - 1)      | 13<br>(10 - 17)    | 44<br>(31 - 61)          | 331<br>(231 - 453)       |
| Cellulitis                                          | 21<br>(8 - 70)           | 0<br>(0 - 0)             | 0<br>(0 - 0)      | 2<br>(1 - 2)       | 3<br>(1 - 6)             | 16<br>(5 - 64)           |
| Pyoderma                                            | 35<br>(18 - 121)         | 0<br>(0 - 1)             | 0<br>(0 - 0)      | 4<br>(2 - 5)       | 5<br>(3 - 7)             | 27<br>(10 - 110)         |



Web Table 31- Saudi Arabia deaths with 95% UI by age, sex, and cause in 2013

| Cause                                           | Males, All Ages            | Males, 0-4 Years   | Males, 5-14 Years  | Males, 15-49 Years       | Males, 50-69 Years       | Males, 70-80 Years   |
|-------------------------------------------------|----------------------------|--------------------|--------------------|--------------------------|--------------------------|----------------------|
| Decubitus ulcer                                 | 332<br>(168 - 457)         | 0<br>(0 - 0)       | 0<br>(0 - 0)       | 7<br>(5 - 9)             | 36<br>(25 - 49)          | 288<br>(134 - 406)   |
| Other skin and subcutaneous diseases            | 2<br>(2 - 5)               | 0<br>(0 - 0)       | 0<br>(0 - 0)       | 1<br>(1 - 2)             | 0<br>(0 - 1)             | 1<br>(0 - 3)         |
| Sudden infant death syndrome                    | 51<br>(21 - 104)           | 51<br>(21 - 104)   | --                 | --                       | --                       | --                   |
| Injuries                                        | 12,458<br>(9,977 - 15,148) | 313<br>(201 - 456) | 454<br>(368 - 540) | 7,813<br>(6,235 - 9,398) | 2,985<br>(2,290 - 3,892) | 894<br>(711 - 1,155) |
| Transport injuries                              | 8,281<br>(6,586 - 10,100)  | 133<br>(82 - 197)  | 233<br>(180 - 288) | 5,602<br>(4,473 - 6,768) | 1,939<br>(1,429 - 2,562) | 374<br>(282 - 495)   |
| Road injuries                                   | 8,105<br>(6,442 - 9,889)   | 128<br>(79 - 190)  | 224<br>(173 - 278) | 5,509<br>(4,403 - 6,656) | 1,878<br>(1,377 - 2,482) | 365<br>(275 - 482)   |
| Pedestrian road injuries                        | 1,147<br>(749 - 1,726)     | 32<br>(17 - 53)    | 50<br>(33 - 72)    | 733<br>(453 - 1,097)     | 240<br>(146 - 376)       | 92<br>(58 - 147)     |
| Cyclist road injuries                           | 224<br>(158 - 310)         | 8<br>(4 - 13)      | 14<br>(10 - 20)    | 135<br>(92 - 190)        | 46<br>(30 - 69)          | 20<br>(13 - 33)      |
| Motorcyclist road injuries                      | 317<br>(208 - 439)         | 5<br>(2 - 8)       | 7<br>(4 - 11)      | 237<br>(151 - 331)       | 60<br>(37 - 96)          | 8<br>(5 - 13)        |
| Motor vehicle road injuries                     | 6,394<br>(5,037 - 7,826)   | 81<br>(50 - 128)   | 149<br>(111 - 192) | 4,402<br>(3,475 - 5,382) | 1,519<br>(1,088 - 2,043) | 242<br>(170 - 334)   |
| Other road injuries                             | 23<br>(14 - 53)            | 2<br>(1 - 5)       | 3<br>(2 - 7)       | 1<br>(1 - 2)             | 14<br>(7 - 37)           | 2<br>(1 - 5)         |
| Other transport injuries                        | 176<br>(132 - 249)         | 5<br>(3 - 9)       | 8<br>(6 - 12)      | 92<br>(69 - 129)         | 61<br>(40 - 104)         | 9<br>(6 - 13)        |
| Unintentional injuries                          | 3,249<br>(2,582 - 4,132)   | 177<br>(109 - 264) | 212<br>(164 - 281) | 1,574<br>(1,200 - 2,102) | 835<br>(640 - 1,105)     | 451<br>(354 - 608)   |
| Falls                                           | 1,278<br>(960 - 1,892)     | 23<br>(13 - 35)    | 29<br>(21 - 40)    | 767<br>(554 - 1,226)     | 277<br>(200 - 394)       | 183<br>(134 - 280)   |
| Drowning                                        | 602<br>(458 - 829)         | 107<br>(60 - 178)  | 131<br>(93 - 196)  | 163<br>(111 - 225)       | 146<br>(100 - 229)       | 55<br>(39 - 82)      |
| Fire, heat, and hot substances                  | 193<br>(144 - 278)         | 12<br>(6 - 23)     | 9<br>(6 - 14)      | 105<br>(74 - 155)        | 33<br>(22 - 49)          | 34<br>(23 - 52)      |
| Poisonings                                      | 80<br>(55 - 110)           | 6<br>(3 - 11)      | 5<br>(3 - 8)       | 47<br>(30 - 67)          | 14<br>(9 - 22)           | 8<br>(5 - 12)        |
| Exposure to mechanical forces                   | 423<br>(331 - 534)         | 14<br>(9 - 22)     | 23<br>(17 - 30)    | 234<br>(172 - 297)       | 126<br>(91 - 175)        | 26<br>(19 - 36)      |
| Unintentional firearm injuries                  | 199<br>(142 - 260)         | 2<br>(1 - 3)       | 5<br>(3 - 7)       | 157<br>(111 - 209)       | 28<br>(18 - 43)          | 8<br>(5 - 12)        |
| Unintentional suffocation                       | 7<br>(3 - 10)              | 0<br>(0 - 1)       | 1<br>(0 - 1)       | 4<br>(1 - 5)             | 2<br>(1 - 3)             | 1<br>(0 - 1)         |
| Other exposure to mechanical forces             | 217<br>(167 - 281)         | 12<br>(7 - 19)     | 18<br>(13 - 24)    | 74<br>(46 - 95)          | 96<br>(69 - 137)         | 17<br>(12 - 24)      |
| Adverse effects of medical treatment            | 282<br>(199 - 453)         | 3<br>(2 - 7)       | 2<br>(1 - 4)       | 38<br>(27 - 57)          | 175<br>(114 - 299)       | 62<br>(42 - 99)      |
| Animal contact                                  | 39<br>(28 - 72)            | 2<br>(1 - 3)       | 3<br>(2 - 5)       | 25<br>(17 - 49)          | 3<br>(2 - 4)             | 6<br>(4 - 12)        |
| Venomous animal contact                         | 14<br>(10 - 21)            | 1<br>(0 - 2)       | 1<br>(1 - 2)       | 7<br>(4 - 11)            | 2<br>(1 - 3)             | 3<br>(2 - 5)         |
| Non-venomous animal contact                     | 25<br>(17 - 50)            | 1<br>(0 - 2)       | 2<br>(1 - 3)       | 19<br>(13 - 38)          | 1<br>(0 - 1)             | 3<br>(2 - 7)         |
| Foreign body                                    | 108<br>(61 - 177)          | 5<br>(2 - 8)       | 3<br>(1 - 4)       | 12<br>(7 - 19)           | 14<br>(8 - 23)           | 74<br>(39 - 126)     |
| Pulmonary aspiration and foreign body in airway | 106<br>(59 - 175)          | 5<br>(2 - 8)       | 2<br>(1 - 4)       | 11<br>(6 - 18)           | 13<br>(7 - 22)           | 74<br>(39 - 126)     |
| Foreign body in other body part                 | 2<br>(1 - 3)               | 0<br>(0 - 0)       | 0<br>(0 - 0)       | 1<br>(1 - 2)             | 0<br>(0 - 1)             | 0<br>(0 - 0)         |
| Other unintentional injuries                    | 245<br>(174 - 325)         | 4<br>(2 - 9)       | 7<br>(3 - 12)      | 182<br>(125 - 254)       | 49<br>(29 - 78)          | 3<br>(2 - 4)         |
| Self-harm and interpersonal violence            | 929<br>(252 - 1,278)       | 3<br>(1 - 7)       | 9<br>(3 - 14)      | 637<br>(481 - 882)       | 210<br>(50 - 310)        | 69<br>(14 - 103)     |
| Self-harm                                       | 696<br>(174 - 943)         | --                 | 7<br>(2 - 11)      | 450<br>(319 - 611)       | 174<br>(38 - 254)        | 65<br>(12 - 98)      |
| Interpersonal violence                          | 233<br>(55 - 364)          | 3<br>(1 - 7)       | 3<br>(1 - 4)       | 187<br>(42 - 296)        | 36<br>(7 - 65)           | 4<br>(1 - 9)         |
| Assault by firearm                              | 123<br>(21 - 237)          | 0<br>(0 - 1)       | 0<br>(0 - 1)       | 103<br>(17 - 202)        | 18<br>(2 - 38)           | 1<br>(0 - 3)         |
| Assault by sharp object                         | 31<br>(9 - 55)             | 0<br>(0 - 1)       | 0<br>(0 - 1)       | 22<br>(6 - 41)           | 8<br>(2 - 15)            | 1<br>(0 - 1)         |
| Assault by other means                          | 80<br>(19 - 215)           | 2<br>(0 - 5)       | 2<br>(0 - 3)       | 62<br>(15 - 179)         | 11<br>(2 - 30)           | 3<br>(1 - 6)         |
| Forces of nature, war, and legal intervention   | 0<br>(0 - 0)               | 0<br>(0 - 0)       | --                 | --                       | --                       | --                   |
| Exposure to forces of nature                    | 0<br>(0 - 0)               | 0<br>(0 - 0)       | --                 | --                       | --                       | --                   |

Web Table 31- Saudi Arabia deaths with 95% UI by age, sex, and cause in 2013

| Cause                                                             | Females, All Ages           | Females, 0-4 Years       | Females, 5-14 Years | Females, 15-49 Years     | Females, 50-69 Years     | Females, 70-80 Years        |
|-------------------------------------------------------------------|-----------------------------|--------------------------|---------------------|--------------------------|--------------------------|-----------------------------|
| All causes                                                        | 31,040<br>(27,785 - 34,579) | 3,091<br>(2,570 - 3,682) | 567<br>(484 - 646)  | 4,120<br>(3,309 - 4,952) | 6,305<br>(5,120 - 7,921) | 16,957<br>(15,736 - 18,088) |
| Communicable, maternal, neonatal, and nutritional diseases        | 4,363<br>(3,783 - 4,957)    | 1,653<br>(1,314 - 2,033) | 119<br>(78 - 182)   | 557<br>(454 - 677)       | 520<br>(413 - 659)       | 1,513<br>(1,254 - 1,839)    |
| HIV/AIDS and tuberculosis                                         | 465<br>(371 - 557)          | 7<br>(4 - 14)            | 6<br>(4 - 8)        | 170<br>(133 - 209)       | 89<br>(66 - 118)         | 193<br>(141 - 256)          |
| Tuberculosis                                                      | 378<br>(287 - 464)          | 1<br>(1 - 1)             | 3<br>(2 - 5)        | 104<br>(74 - 134)        | 78<br>(55 - 105)         | 192<br>(140 - 255)          |
| HIV/AIDS                                                          | 87<br>(62 - 118)            | 6<br>(3 - 13)            | 2<br>(1 - 4)        | 66<br>(48 - 88)          | 11<br>(7 - 17)           | 1<br>(0 - 2)                |
| HIV/AIDS resulting in mycobacterial infection                     | 4<br>(3 - 6)                | 0<br>(0 - 1)             | 0<br>(0 - 0)        | 3<br>(2 - 4)             | 1<br>(0 - 1)             | 0<br>(0 - 0)                |
| HIV/AIDS resulting in other diseases                              | 83<br>(59 - 112)            | 6<br>(3 - 12)            | 2<br>(1 - 4)        | 63<br>(46 - 84)          | 11<br>(7 - 17)           | 1<br>(0 - 1)                |
| Diarrhea, lower respiratory, and other common infectious diseases | 2,153<br>(1,778 - 2,555)    | 187<br>(132 - 261)       | 105<br>(66 - 168)   | 309<br>(220 - 420)       | 393<br>(297 - 517)       | 1,157<br>(913 - 1,460)      |
| Diarrheal diseases                                                | 206<br>(152 - 284)          | 38<br>(24 - 56)          | 5<br>(3 - 8)        | 13<br>(10 - 18)          | 12<br>(8 - 18)           | 137<br>(86 - 212)           |
| Intestinal infectious diseases                                    | 219<br>(83 - 459)           | 65<br>(25 - 133)         | 60<br>(22 - 130)    | 76<br>(25 - 174)         | 13<br>(4 - 30)           | 5<br>(1 - 11)               |
| Typhoid fever                                                     | 160<br>(54 - 347)           | 45<br>(14 - 96)          | 46<br>(16 - 102)    | 57<br>(17 - 133)         | 9<br>(3 - 23)            | 3<br>(1 - 8)                |
| Paratyphoid fever                                                 | 49<br>(16 - 108)            | 16<br>(5 - 37)           | 13<br>(4 - 30)      | 16<br>(4 - 42)           | 3<br>(1 - 8)             | 1<br>(0 - 2)                |
| Other intestinal infectious diseases                              | 10<br>(5 - 19)              | 5<br>(1 - 11)            | 1<br>(0 - 4)        | 3<br>(0 - 8)             | 1<br>(0 - 3)             | 1<br>(0 - 3)                |
| Lower respiratory infections                                      | 1,607<br>(1,294 - 1,961)    | 59<br>(40 - 86)          | 29<br>(20 - 40)     | 185<br>(139 - 236)       | 351<br>(262 - 466)       | 983<br>(752 - 1,258)        |
| Upper respiratory infections                                      | 1<br>(0 - 2)                | 0<br>(0 - 0)             | 0<br>(0 - 0)        | 0<br>(0 - 0)             | 0<br>(0 - 1)             | 0<br>(0 - 2)                |
| Otitis media                                                      | 4<br>(3 - 5)                | 0<br>(0 - 0)             | 0<br>(0 - 0)        | 1<br>(1 - 1)             | 1<br>(0 - 1)             | 2<br>(1 - 3)                |
| Meningitis                                                        | 53<br>(43 - 65)             | 8<br>(6 - 12)            | 4<br>(3 - 6)        | 15<br>(11 - 20)          | 8<br>(6 - 10)            | 17<br>(12 - 23)             |
| Pneumococcal meningitis                                           | 13<br>(10 - 17)             | 2<br>(1 - 2)             | 1<br>(1 - 2)        | 4<br>(2 - 7)             | 2<br>(1 - 3)             | 4<br>(2 - 7)                |
| H influenzae type B meningitis                                    | 11<br>(8 - 14)              | 4<br>(3 - 6)             | 1<br>(1 - 2)        | 2<br>(1 - 4)             | 1<br>(1 - 2)             | 2<br>(1 - 4)                |
| Meningococcal meningitis                                          | 10<br>(8 - 14)              | 2<br>(1 - 3)             | 1<br>(0 - 1)        | 3<br>(1 - 5)             | 1<br>(1 - 3)             | 4<br>(2 - 6)                |
| Other meningitis                                                  | 18<br>(14 - 24)             | 1<br>(1 - 2)             | 1<br>(0 - 1)        | 6<br>(4 - 9)             | 3<br>(2 - 5)             | 7<br>(4 - 11)               |
| Encephalitis                                                      | 48<br>(35 - 75)             | 7<br>(4 - 13)            | 5<br>(3 - 8)        | 16<br>(11 - 28)          | 9<br>(5 - 16)            | 11<br>(6 - 20)              |
| Diphtheria                                                        | 0<br>(0 - 2)                | 0<br>(0 - 2)             | 0<br>(0 - 1)        | 0<br>(0 - 0)             | 0<br>(0 - 0)             | --                          |
| Whooping cough                                                    | 7<br>(0 - 32)               | 6<br>(0 - 30)            | 0<br>(0 - 2)        | 0<br>(0 - 0)             | 0<br>(0 - 0)             | --                          |
| Tetanus                                                           | 3<br>(2 - 4)                | 1<br>(1 - 1)             | 0<br>(0 - 0)        | 1<br>(0 - 1)             | 0<br>(0 - 1)             | 0<br>(0 - 1)                |
| Measles                                                           | 1<br>(0 - 8)                | 1<br>(0 - 7)             | 0<br>(0 - 1)        | 0<br>(0 - 0)             | 0<br>(0 - 0)             | --                          |
| Varicella and herpes zoster                                       | 4<br>(1 - 11)               | 1<br>(0 - 4)             | 0<br>(0 - 1)        | 1<br>(0 - 3)             | 0<br>(0 - 1)             | 2<br>(0 - 8)                |
| Neglected tropical diseases and malaria                           | 19<br>(14 - 28)             | 3<br>(1 - 8)             | 2<br>(1 - 5)        | 6<br>(5 - 9)             | 4<br>(3 - 7)             | 5<br>(3 - 8)                |
| Malaria                                                           | 2<br>(1 - 3)                | 0<br>(0 - 1)             | 0<br>(0 - 1)        | 1<br>(1 - 2)             | 0<br>(0 - 1)             | 0<br>(0 - 0)                |
| Leishmaniasis                                                     | 0<br>(0 - 1)                | 0<br>(0 - 0)             | 0<br>(0 - 0)        | 0<br>(0 - 0)             | 0<br>(0 - 0)             | 0<br>(0 - 0)                |
| Visceral leishmaniasis                                            | 0<br>(0 - 1)                | 0<br>(0 - 0)             | 0<br>(0 - 0)        | 0<br>(0 - 0)             | 0<br>(0 - 0)             | 0<br>(0 - 0)                |
| Schistosomiasis                                                   | 8<br>(5 - 11)               | 0<br>(0 - 0)             | 0<br>(0 - 0)        | 2<br>(1 - 3)             | 3<br>(2 - 5)             | 3<br>(1 - 5)                |
| Cysticercosis                                                     | 0<br>(0 - 0)                | 0<br>(0 - 0)             | 0<br>(0 - 0)        | 0<br>(0 - 0)             | 0<br>(0 - 0)             | 0<br>(0 - 0)                |
| Cystic echinococcosis                                             | 1<br>(1 - 1)                | 0<br>(0 - 0)             | 0<br>(0 - 0)        | 0<br>(0 - 0)             | 0<br>(0 - 0)             | 0<br>(0 - 0)                |
| Dengue                                                            | 2<br>(1 - 2)                | 0<br>(0 - 0)             | 0<br>(0 - 0)        | 1<br>(0 - 1)             | 0<br>(0 - 0)             | 0<br>(0 - 0)                |
| Rabies                                                            | 1<br>(1 - 1)                | 0<br>(0 - 0)             | 0<br>(0 - 0)        | 1<br>(0 - 1)             | 0<br>(0 - 0)             | 0<br>(0 - 0)                |
| Intestinal nematode infections                                    | 3<br>(0 - 10)               | 2<br>(0 - 7)             | 1<br>(0 - 4)        | 0<br>(0 - 3)             | 0<br>(0 - 2)             | 0<br>(0 - 3)                |
| Ascariasis                                                        | 3<br>(0 - 10)               | 2<br>(0 - 7)             | 1<br>(0 - 4)        | 0<br>(0 - 3)             | 0<br>(0 - 2)             | 0<br>(0 - 3)                |
| Other neglected tropical diseases                                 | 3<br>(2 - 3)                | 0<br>(0 - 0)             | 0<br>(0 - 0)        | 1<br>(1 - 1)             | 0<br>(0 - 1)             | 1<br>(0 - 2)                |
| Maternal disorders                                                | 38<br>(28 - 50)             | --                       | 0<br>(0 - 0)        | 38<br>(28 - 50)          | --                       | --                          |

Web Table 31- Saudi Arabia deaths with 95% UI by age, sex, and cause in 2013

| Cause                                                            | Females, All Ages           | Females, 0-4 Years       | Females, 5-14 Years | Females, 15-49 Years     | Females, 50-69 Years     | Females, 70-80 Years        |
|------------------------------------------------------------------|-----------------------------|--------------------------|---------------------|--------------------------|--------------------------|-----------------------------|
| Maternal hemorrhage                                              | 5<br>(3 - 7)                | --                       | 0<br>(0 - 0)        | 5<br>(3 - 7)             | --                       | --                          |
| Maternal sepsis and other maternal infections                    | 3<br>(2 - 5)                | --                       | 0<br>(0 - 0)        | 3<br>(2 - 5)             | --                       | --                          |
| Maternal hypertensive disorders                                  | 4<br>(3 - 6)                | --                       | 0<br>(0 - 0)        | 4<br>(3 - 6)             | --                       | --                          |
| Maternal obstructed labor                                        | 3<br>(2 - 4)                | --                       | 0<br>(0 - 0)        | 3<br>(2 - 4)             | --                       | --                          |
| Maternal abortive outcome                                        | 5<br>(4 - 7)                | --                       | 0<br>(0 - 0)        | 5<br>(4 - 7)             | --                       | --                          |
| Indirect maternal deaths                                         | 3<br>(2 - 5)                | --                       | 0<br>(0 - 0)        | 3<br>(2 - 5)             | --                       | --                          |
| Late maternal deaths                                             | 4<br>(2 - 7)                | --                       | 0<br>(0 - 0)        | 4<br>(2 - 7)             | --                       | --                          |
| Maternal deaths aggravated by HIV/AIDS                           | 0<br>(0 - 0)                | --                       | --                  | 0<br>(0 - 0)             | --                       | --                          |
| Other maternal disorders                                         | 10<br>(7 - 14)              | --                       | 0<br>(0 - 0)        | 10<br>(7 - 14)           | --                       | --                          |
| Neonatal disorders                                               | 1,437<br>(1,123 - 1,807)    | 1,437<br>(1,123 - 1,807) | --                  | --                       | --                       | --                          |
| Neonatal preterm birth complications                             | 847<br>(580 - 1,124)        | 847<br>(580 - 1,124)     | --                  | --                       | --                       | --                          |
| Neonatal encephalopathy due to birth asphyxia and trauma         | 175<br>(117 - 254)          | 175<br>(117 - 254)       | --                  | --                       | --                       | --                          |
| Neonatal sepsis and other neonatal infections                    | 315<br>(178 - 544)          | 315<br>(178 - 544)       | --                  | --                       | --                       | --                          |
| Hemolytic disease and other neonatal jaundice                    | 8<br>(3 - 19)               | 8<br>(3 - 19)            | --                  | --                       | --                       | --                          |
| Other neonatal disorders                                         | 92<br>(56 - 148)            | 92<br>(56 - 148)         | --                  | --                       | --                       | --                          |
| Nutritional deficiencies                                         | 166<br>(131 - 206)          | 9<br>(6 - 13)            | 4<br>(3 - 5)        | 21<br>(16 - 27)          | 14<br>(10 - 19)          | 118<br>(87 - 157)           |
| Protein-energy malnutrition                                      | 47<br>(22 - 81)             | 6<br>(2 - 9)             | 2<br>(1 - 3)        | 3<br>(1 - 6)             | 2<br>(1 - 4)             | 35<br>(15 - 63)             |
| Iodine deficiency                                                | 0<br>(0 - 1)                | 0<br>(0 - 0)             | 0<br>(0 - 0)        | 0<br>(0 - 0)             | 0<br>(0 - 0)             | 0<br>(0 - 1)                |
| Iron-deficiency anemia                                           | 115<br>(76 - 153)           | 4<br>(1 - 7)             | 2<br>(1 - 3)        | 18<br>(12 - 23)          | 11<br>(8 - 16)           | 81<br>(51 - 112)            |
| Other nutritional deficiencies                                   | 3<br>(1 - 6)                | 0<br>(0 - 0)             | 0<br>(0 - 0)        | 1<br>(0 - 1)             | 0<br>(0 - 1)             | 2<br>(1 - 3)                |
| Other communicable, maternal, neonatal, and nutritional diseases | 84<br>(66 - 104)            | 9<br>(3 - 19)            | 2<br>(1 - 3)        | 13<br>(10 - 18)          | 19<br>(13 - 27)          | 40<br>(29 - 55)             |
| Sexually transmitted diseases excluding HIV                      | 11<br>(4 - 21)              | 7<br>(0 - 16)            | 1<br>(0 - 1)        | 1<br>(1 - 2)             | 0<br>(0 - 1)             | 2<br>(1 - 3)                |
| Syphilis                                                         | 10<br>(3 - 19)              | 7<br>(0 - 16)            | 1<br>(0 - 1)        | 1<br>(0 - 1)             | 0<br>(0 - 0)             | 2<br>(1 - 2)                |
| Chlamydial infection                                             | 0<br>(0 - 1)                | --                       | 0<br>(0 - 0)        | 0<br>(0 - 0)             | 0<br>(0 - 0)             | 0<br>(0 - 0)                |
| Gonococcal infection                                             | 1<br>(0 - 1)                | --                       | 0<br>(0 - 0)        | 0<br>(0 - 0)             | 0<br>(0 - 0)             | 0<br>(0 - 0)                |
| Other sexually transmitted diseases                              | 0<br>(0 - 1)                | --                       | 0<br>(0 - 0)        | 0<br>(0 - 0)             | 0<br>(0 - 0)             | 0<br>(0 - 0)                |
| Hepatitis                                                        | 42<br>(31 - 56)             | 1<br>(1 - 2)             | 1<br>(0 - 1)        | 9<br>(6 - 12)            | 13<br>(8 - 20)           | 19<br>(11 - 30)             |
| Acute hepatitis A                                                | 3<br>(1 - 5)                | 0<br>(0 - 1)             | 0<br>(0 - 0)        | 1<br>(0 - 2)             | 1<br>(0 - 2)             | 0<br>(0 - 1)                |
| Acute hepatitis B                                                | 30<br>(19 - 42)             | 0<br>(0 - 1)             | 0<br>(0 - 0)        | 3<br>(1 - 5)             | 10<br>(6 - 15)           | 16<br>(10 - 26)             |
| Acute hepatitis C                                                | 1<br>(0 - 3)                | --                       | 0<br>(0 - 0)        | 0<br>(0 - 1)             | 0<br>(0 - 1)             | 0<br>(0 - 1)                |
| Acute hepatitis E                                                | 9<br>(5 - 15)               | 0<br>(0 - 1)             | 0<br>(0 - 1)        | 5<br>(3 - 7)             | 2<br>(1 - 5)             | 1<br>(0 - 4)                |
| Other infectious diseases                                        | 31<br>(21 - 43)             | 2<br>(1 - 2)             | 1<br>(1 - 1)        | 3<br>(2 - 4)             | 6<br>(4 - 8)             | 20<br>(12 - 30)             |
| Non-communicable diseases                                        | 24,057<br>(21,474 - 27,025) | 1,241<br>(1,027 - 1,489) | 228<br>(184 - 273)  | 2,360<br>(1,867 - 2,872) | 5,248<br>(4,245 - 6,615) | 14,980<br>(13,890 - 16,053) |
| Neoplasms                                                        | 2,777<br>(2,368 - 3,265)    | 17<br>(12 - 25)          | 37<br>(29 - 48)     | 504<br>(395 - 625)       | 824<br>(652 - 1,060)     | 1,394<br>(1,159 - 1,583)    |
| Esophageal cancer                                                | 77<br>(60 - 98)             | --                       | --                  | 9<br>(6 - 12)            | 23<br>(16 - 34)          | 45<br>(33 - 61)             |
| Stomach cancer                                                   | 146<br>(110 - 186)          | --                       | --                  | 13<br>(9 - 17)           | 33<br>(25 - 44)          | 100<br>(71 - 138)           |
| Liver cancer                                                     | 315<br>(242 - 416)          | --                       | 1<br>(0 - 1)        | 22<br>(15 - 30)          | 73<br>(53 - 101)         | 219<br>(157 - 304)          |
| Liver cancer due to hepatitis B                                  | 30<br>(14 - 50)             | --                       | 0<br>(0 - 0)        | 4<br>(2 - 7)             | 10<br>(4 - 17)           | 16<br>(7 - 29)              |
| Liver cancer due to hepatitis C                                  | 102<br>(59 - 153)           | --                       | 0<br>(0 - 0)        | 4<br>(2 - 7)             | 21<br>(12 - 33)          | 77<br>(41 - 122)            |
| Liver cancer due to alcohol use                                  | 69<br>(21 - 133)            | --                       | --                  | 1<br>(0 - 3)             | 11<br>(3 - 21)           | 57<br>(16 - 115)            |

Web Table 31- Saudi Arabia deaths with 95% UI by age, sex, and cause in 2013

| Cause                                         | Females, All Ages          | Females, 0-4 Years | Females, 5-14 Years | Females, 15-49 Years | Females, 50-69 Years     | Females, 70-80 Years     |
|-----------------------------------------------|----------------------------|--------------------|---------------------|----------------------|--------------------------|--------------------------|
| Liver cancer due to other causes              | 113<br>(64 - 173)          | --                 | 0<br>(0 - 1)        | 12<br>(8 - 17)       | 31<br>(17 - 49)          | 69<br>(33 - 120)         |
| Larynx cancer                                 | 14<br>(6 - 24)             | --                 | --                  | 3<br>(1 - 4)         | 5<br>(2 - 9)             | 7<br>(3 - 12)            |
| Tracheal, bronchus and lung cancer            | 219<br>(171 - 268)         | --                 | --                  | 32<br>(23 - 43)      | 80<br>(59 - 106)         | 107<br>(75 - 137)        |
| Breast cancer                                 | 477<br>(387 - 588)         | --                 | --                  | 152<br>(117 - 196)   | 169<br>(129 - 219)       | 156<br>(118 - 193)       |
| Cervical cancer                               | 75<br>(54 - 95)            | --                 | --                  | 19<br>(13 - 26)      | 27<br>(19 - 38)          | 29<br>(19 - 40)          |
| Uterine cancer                                | 15<br>(11 - 26)            | --                 | --                  | 2<br>(1 - 3)         | 8<br>(5 - 13)            | 6<br>(4 - 10)            |
| Prostate cancer                               | --                         | --                 | --                  | --                   | --                       | --                       |
| Colon and rectum cancer                       | 248<br>(202 - 302)         | --                 | --                  | 41<br>(30 - 52)      | 75<br>(57 - 100)         | 132<br>(103 - 169)       |
| Lip and oral cavity cancer                    | 34<br>(23 - 46)            | --                 | --                  | 5<br>(3 - 9)         | 11<br>(7 - 17)           | 18<br>(10 - 27)          |
| Nasopharynx cancer                            | 19<br>(12 - 37)            | --                 | 0<br>(0 - 1)        | 6<br>(3 - 12)        | 7<br>(3 - 16)            | 6<br>(4 - 10)            |
| Other pharynx cancer                          | 17<br>(13 - 22)            | --                 | --                  | 4<br>(3 - 7)         | 5<br>(4 - 8)             | 7<br>(5 - 11)            |
| Gallbladder and biliary tract cancer          | 122<br>(58 - 169)          | --                 | --                  | 11<br>(7 - 16)       | 38<br>(24 - 54)          | 73<br>(25 - 111)         |
| Pancreatic cancer                             | 139<br>(110 - 171)         | --                 | --                  | 11<br>(8 - 14)       | 45<br>(33 - 59)          | 84<br>(63 - 107)         |
| Malignant skin melanoma                       | 7<br>(6 - 9)               | --                 | --                  | 2<br>(1 - 3)         | 3<br>(2 - 4)             | 3<br>(2 - 4)             |
| Non-melanoma skin cancer                      | 9<br>(7 - 14)              | --                 | --                  | 1<br>(1 - 2)         | 1<br>(1 - 2)             | 7<br>(5 - 11)            |
| Ovarian cancer                                | 104<br>(83 - 131)          | --                 | --                  | 19<br>(14 - 26)      | 39<br>(28 - 53)          | 46<br>(34 - 61)          |
| Testicular cancer                             | --                         | --                 | --                  | --                   | --                       | --                       |
| Kidney cancer                                 | 40<br>(30 - 51)            | 1<br>(0 - 1)       | 1<br>(1 - 2)        | 5<br>(4 - 7)         | 11<br>(8 - 16)           | 21<br>(14 - 30)          |
| Bladder cancer                                | 32<br>(23 - 51)            | --                 | --                  | 3<br>(2 - 6)         | 9<br>(6 - 15)            | 20<br>(13 - 31)          |
| Brain and nervous system cancer               | 209<br>(127 - 260)         | 5<br>(2 - 8)       | 11<br>(7 - 16)      | 50<br>(36 - 65)      | 48<br>(34 - 66)          | 95<br>(30 - 133)         |
| Thyroid cancer                                | 47<br>(33 - 65)            | --                 | 0<br>(0 - 0)        | 4<br>(3 - 8)         | 15<br>(9 - 25)           | 28<br>(18 - 39)          |
| Mesothelioma                                  | 3<br>(2 - 4)               | --                 | --                  | 1<br>(1 - 1)         | 1<br>(0 - 1)             | 1<br>(1 - 2)             |
| Hodgkin lymphoma                              | 6<br>(5 - 11)              | 0<br>(0 - 0)       | 0<br>(0 - 1)        | 3<br>(2 - 6)         | 1<br>(0 - 1)             | 2<br>(1 - 3)             |
| Non-Hodgkin lymphoma                          | 105<br>(67 - 137)          | 1<br>(0 - 2)       | 2<br>(1 - 4)        | 21<br>(14 - 32)      | 28<br>(19 - 43)          | 52<br>(26 - 74)          |
| Multiple myeloma                              | 21<br>(15 - 27)            | --                 | --                  | 3<br>(2 - 4)         | 8<br>(5 - 12)            | 10<br>(6 - 14)           |
| Leukemia                                      | 146<br>(115 - 177)         | 4<br>(2 - 8)       | 10<br>(7 - 14)      | 35<br>(26 - 45)      | 33<br>(24 - 44)          | 64<br>(46 - 83)          |
| Other neoplasms                               | 130<br>(98 - 180)          | 6<br>(4 - 10)      | 11<br>(8 - 17)      | 28<br>(19 - 39)      | 30<br>(20 - 42)          | 55<br>(38 - 84)          |
| Cardiovascular diseases                       | 11,270<br>(9,790 - 12,830) | 30<br>(22 - 41)    | 32<br>(23 - 41)     | 848<br>(645 - 1,072) | 2,823<br>(2,268 - 3,599) | 7,537<br>(6,716 - 8,331) |
| Rheumatic heart disease                       | 75<br>(46 - 98)            | 1<br>(0 - 1)       | 2<br>(1 - 3)        | 26<br>(16 - 36)      | 21<br>(13 - 30)          | 26<br>(14 - 35)          |
| Ischemic heart disease                        | 5,562<br>(4,608 - 6,703)   | 5<br>(3 - 8)       | 7<br>(5 - 10)       | 400<br>(284 - 523)   | 1,639<br>(1,274 - 2,125) | 3,511<br>(2,960 - 4,265) |
| Cerebrovascular disease                       | 4,393<br>(3,487 - 5,206)   | 7<br>(4 - 10)      | 11<br>(7 - 14)      | 272<br>(192 - 346)   | 825<br>(626 - 1,070)     | 3,278<br>(2,581 - 3,815) |
| Ischemic stroke                               | 2,880<br>(2,230 - 3,447)   | 1<br>(0 - 2)       | 3<br>(2 - 4)        | 58<br>(35 - 81)      | 394<br>(268 - 528)       | 2,424<br>(1,853 - 2,869) |
| Hemorrhagic stroke                            | 1,513<br>(1,141 - 1,956)   | 6<br>(4 - 8)       | 8<br>(5 - 11)       | 213<br>(153 - 275)   | 431<br>(312 - 575)       | 854<br>(619 - 1,163)     |
| Hypertensive heart disease                    | 227<br>(151 - 317)         | 0<br>(0 - 0)       | 0<br>(0 - 0)        | 18<br>(12 - 26)      | 67<br>(43 - 95)          | 142<br>(88 - 203)        |
| Cardiomyopathy and myocarditis                | 348<br>(255 - 446)         | 12<br>(8 - 18)     | 7<br>(5 - 11)       | 41<br>(29 - 58)      | 85<br>(59 - 118)         | 203<br>(141 - 273)       |
| Atrial fibrillation and flutter               | 17<br>(11 - 24)            | --                 | --                  | 1<br>(1 - 2)         | 2<br>(1 - 2)             | 14<br>(9 - 21)           |
| Aortic aneurysm                               | 20<br>(13 - 31)            | --                 | --                  | 4<br>(2 - 6)         | 3<br>(2 - 6)             | 13<br>(8 - 20)           |
| Peripheral vascular disease                   | 8<br>(6 - 11)              | --                 | --                  | 1<br>(1 - 1)         | 2<br>(2 - 3)             | 5<br>(3 - 7)             |
| Endocarditis                                  | 71<br>(42 - 104)           | 2<br>(1 - 4)       | 1<br>(1 - 2)        | 10<br>(6 - 15)       | 9<br>(5 - 13)            | 49<br>(27 - 73)          |
| Other cardiovascular and circulatory diseases | 550<br>(410 - 726)         | 3<br>(2 - 6)       | 3<br>(2 - 5)        | 76<br>(53 - 107)     | 169<br>(117 - 238)       | 297<br>(211 - 404)       |

Web Table 31- Saudi Arabia deaths with 95% UI by age, sex, and cause in 2013

| Cause                                               | Females, All Ages        | Females, 0-4 Years | Females, 5-14 Years | Females, 15-49 Years | Females, 50-69 Years | Females, 70-80 Years     |
|-----------------------------------------------------|--------------------------|--------------------|---------------------|----------------------|----------------------|--------------------------|
| Chronic respiratory diseases                        | 1,366<br>(1,133 - 1,644) | 4<br>(3 - 6)       | 6<br>(4 - 7)        | 92<br>(70 - 117)     | 238<br>(179 - 314)   | 1,026<br>(840 - 1,244)   |
| Chronic obstructive pulmonary disease               | 805<br>(610 - 1,050)     | 1<br>(1 - 2)       | 1<br>(1 - 2)        | 34<br>(22 - 48)      | 140<br>(99 - 192)    | 628<br>(461 - 830)       |
| Pneumoconiosis                                      | 3<br>(2 - 5)             | 0<br>(0 - 0)       | 0<br>(0 - 0)        | 1<br>(0 - 1)         | 1<br>(0 - 1)         | 1<br>(1 - 3)             |
| Silicosis                                           | 1<br>(1 - 1)             | 0<br>(0 - 0)       | 0<br>(0 - 0)        | 0<br>(0 - 0)         | 0<br>(0 - 0)         | 0<br>(0 - 1)             |
| Asbestosis                                          | 1<br>(0 - 1)             | 0<br>(0 - 0)       | 0<br>(0 - 0)        | 0<br>(0 - 0)         | 0<br>(0 - 0)         | 0<br>(0 - 1)             |
| Coal workers pneumoconiosis                         | 1<br>(0 - 1)             | 0<br>(0 - 0)       | 0<br>(0 - 0)        | 0<br>(0 - 0)         | 0<br>(0 - 0)         | 0<br>(0 - 1)             |
| Other pneumoconiosis                                | 1<br>(1 - 1)             | 0<br>(0 - 0)       | 0<br>(0 - 0)        | 0<br>(0 - 0)         | 0<br>(0 - 0)         | 0<br>(0 - 1)             |
| Asthma                                              | 267<br>(176 - 369)       | 3<br>(2 - 4)       | 3<br>(2 - 4)        | 40<br>(26 - 55)      | 57<br>(35 - 84)      | 164<br>(101 - 248)       |
| Interstitial lung disease and pulmonary sarcoidosis | 275<br>(132 - 407)       | 0<br>(0 - 0)       | 1<br>(0 - 1)        | 13<br>(7 - 20)       | 40<br>(21 - 65)      | 222<br>(99 - 339)        |
| Other chronic respiratory diseases                  | 16<br>(10 - 24)          | 0<br>(0 - 0)       | 0<br>(0 - 0)        | 4<br>(3 - 6)         | 1<br>(1 - 2)         | 10<br>(6 - 18)           |
| Cirrhosis                                           | 746<br>(625 - 874)       | 4<br>(3 - 6)       | 4<br>(3 - 5)        | 64<br>(49 - 82)      | 192<br>(150 - 245)   | 482<br>(401 - 574)       |
| Cirrhosis due to hepatitis B                        | 211<br>(85 - 371)        | 0<br>(0 - 0)       | 0<br>(0 - 1)        | 15<br>(5 - 30)       | 51<br>(17 - 103)     | 144<br>(56 - 260)        |
| Cirrhosis due to hepatitis C                        | 401<br>(175 - 595)       | 0<br>(0 - 1)       | 1<br>(0 - 2)        | 34<br>(13 - 53)      | 110<br>(40 - 170)    | 256<br>(92 - 395)        |
| Cirrhosis due to alcohol use                        | 63<br>(31 - 112)         | --                 | --                  | 2<br>(1 - 5)         | 11<br>(4 - 24)       | 49<br>(23 - 92)          |
| Cirrhosis due to other causes                       | 71<br>(41 - 125)         | 4<br>(2 - 5)       | 2<br>(2 - 3)        | 13<br>(7 - 23)       | 20<br>(8 - 39)       | 33<br>(13 - 63)          |
| Digestive diseases                                  | 326<br>(270 - 389)       | 2<br>(1 - 3)       | 3<br>(2 - 3)        | 30<br>(22 - 38)      | 54<br>(41 - 72)      | 237<br>(195 - 283)       |
| Peptic ulcer disease                                | 46<br>(29 - 63)          | 0<br>(0 - 0)       | 0<br>(0 - 0)        | 4<br>(2 - 5)         | 8<br>(5 - 11)        | 34<br>(20 - 48)          |
| Gastritis and duodenitis                            | 1<br>(1 - 2)             | 0<br>(0 - 0)       | 0<br>(0 - 0)        | 1<br>(0 - 1)         | 0<br>(0 - 0)         | 0<br>(0 - 1)             |
| Appendicitis                                        | 16<br>(10 - 25)          | 0<br>(0 - 1)       | 0<br>(0 - 0)        | 2<br>(1 - 3)         | 3<br>(2 - 5)         | 10<br>(5 - 18)           |
| Paralytic ileus and intestinal obstruction          | 90<br>(50 - 134)         | 0<br>(0 - 1)       | 0<br>(0 - 1)        | 7<br>(4 - 11)        | 14<br>(8 - 23)       | 68<br>(36 - 100)         |
| Inguinal, femoral, and abdominal hernia             | 4<br>(2 - 6)             | 0<br>(0 - 0)       | 0<br>(0 - 0)        | 1<br>(0 - 1)         | 1<br>(0 - 1)         | 2<br>(1 - 4)             |
| Inflammatory bowel disease                          | 6<br>(4 - 9)             | 0<br>(0 - 0)       | 0<br>(0 - 0)        | 2<br>(1 - 3)         | 1<br>(0 - 1)         | 3<br>(2 - 5)             |
| Vascular intestinal disorders                       | 2<br>(1 - 4)             | 0<br>(0 - 0)       | 0<br>(0 - 0)        | 1<br>(0 - 2)         | 0<br>(0 - 1)         | 1<br>(0 - 1)             |
| Gallbladder and biliary diseases                    | 94<br>(67 - 133)         | 0<br>(0 - 1)       | 0<br>(0 - 0)        | 6<br>(4 - 8)         | 14<br>(10 - 20)      | 73<br>(50 - 105)         |
| Pancreatitis                                        | 38<br>(26 - 60)          | 0<br>(0 - 0)       | 0<br>(0 - 1)        | 5<br>(3 - 7)         | 7<br>(5 - 11)        | 26<br>(16 - 43)          |
| Other digestive diseases                            | 29<br>(20 - 39)          | 0<br>(0 - 1)       | 1<br>(0 - 1)        | 2<br>(1 - 3)         | 6<br>(4 - 9)         | 19<br>(13 - 27)          |
| Neurological disorders                              | 1,653<br>(1,293 - 2,027) | 17<br>(12 - 23)    | 13<br>(9 - 17)      | 63<br>(41 - 83)      | 139<br>(98 - 191)    | 1,421<br>(1,081 - 1,788) |
| Alzheimer disease and other dementias               | 1,500<br>(1,154 - 1,869) | --                 | --                  | 1<br>(0 - 2)         | 117<br>(78 - 166)    | 1,382<br>(1,042 - 1,750) |
| Parkinson disease                                   | 7<br>(4 - 9)             | --                 | --                  | 1<br>(1 - 1)         | 1<br>(1 - 1)         | 5<br>(3 - 7)             |
| Epilepsy                                            | 100<br>(68 - 128)        | 6<br>(3 - 9)       | 10<br>(7 - 15)      | 52<br>(32 - 71)      | 13<br>(8 - 17)       | 19<br>(13 - 29)          |
| Multiple sclerosis                                  | 4<br>(3 - 8)             | --                 | --                  | 2<br>(1 - 4)         | 2<br>(1 - 3)         | 1<br>(0 - 1)             |
| Other neurological disorders                        | 42<br>(34 - 49)          | 12<br>(8 - 15)     | 3<br>(2 - 3)        | 7<br>(5 - 9)         | 7<br>(5 - 9)         | 14<br>(10 - 18)          |
| Mental and substance use disorders                  | 282<br>(212 - 356)       | 0<br>(0 - 0)       | 0<br>(0 - 1)        | 253<br>(188 - 320)   | 21<br>(15 - 29)      | 8<br>(6 - 10)            |
| Schizophrenia                                       | 1<br>(1 - 1)             | --                 | --                  | 1<br>(0 - 1)         | 0<br>(0 - 0)         | 0<br>(0 - 0)             |
| Alcohol use disorders                               | 9<br>(3 - 14)            | --                 | --                  | 3<br>(1 - 5)         | 4<br>(1 - 7)         | 1<br>(1 - 2)             |
| Drug use disorders                                  | 270<br>(202 - 340)       | 0<br>(0 - 0)       | --                  | 247<br>(183 - 314)   | 17<br>(12 - 23)      | 6<br>(4 - 9)             |
| Opioid use disorders                                | 147<br>(110 - 185)       | 0<br>(0 - 0)       | --                  | 135<br>(101 - 172)   | 8<br>(6 - 12)        | 3<br>(2 - 5)             |
| Cocaine use disorders                               | 5<br>(4 - 7)             | 0<br>(0 - 0)       | --                  | 5<br>(4 - 7)         | 0<br>(0 - 0)         | 0<br>(0 - 0)             |
| Amphetamine use disorders                           | 5<br>(4 - 6)             | 0<br>(0 - 0)       | --                  | 4<br>(3 - 6)         | 0<br>(0 - 0)         | 0<br>(0 - 0)             |
| Other drug use disorders                            | 113<br>(85 - 144)        | 0<br>(0 - 0)       | --                  | 102<br>(76 - 132)    | 8<br>(5 - 11)        | 3<br>(2 - 4)             |

Web Table 31- Saudi Arabia deaths with 95% UI by age, sex, and cause in 2013

| Cause                                               | Females, All Ages        | Females, 0-4 Years     | Females, 5-14 Years | Females, 15-49 Years | Females, 50-69 Years | Females, 70-80 Years     |
|-----------------------------------------------------|--------------------------|------------------------|---------------------|----------------------|----------------------|--------------------------|
| Eating disorders                                    | 3<br>(2 - 4)             | --                     | 0<br>(0 - 1)        | 2<br>(1 - 4)         | --                   | --                       |
| Anorexia nervosa                                    | 3<br>(2 - 4)             | --                     | 0<br>(0 - 1)        | 2<br>(1 - 4)         | --                   | --                       |
| Diabetes, urogenital, blood, and endocrine diseases | 3,705<br>(3,144 - 4,403) | 64<br>(49 - 87)        | 39<br>(29 - 52)     | 362<br>(276 - 469)   | 884<br>(691 - 1,155) | 2,357<br>(2,001 - 2,774) |
| Diabetes mellitus                                   | 944<br>(780 - 1,154)     | 4<br>(2 - 7)           | 4<br>(2 - 6)        | 59<br>(43 - 78)      | 201<br>(151 - 270)   | 676<br>(547 - 851)       |
| Acute glomerulonephritis                            | 4<br>(2 - 5)             | 0<br>(0 - 0)           | 0<br>(0 - 0)        | 1<br>(1 - 1)         | 1<br>(0 - 1)         | 2<br>(1 - 3)             |
| Chronic kidney disease                              | 2,049<br>(1,628 - 2,536) | 7<br>(5 - 10)          | 11<br>(8 - 16)      | 187<br>(139 - 256)   | 586<br>(438 - 784)   | 1,258<br>(988 - 1,579)   |
| Chronic kidney disease due to diabetes mellitus     | 970<br>(771 - 1,194)     | 1<br>(1 - 2)           | 2<br>(1 - 3)        | 68<br>(48 - 97)      | 333<br>(244 - 447)   | 566<br>(439 - 713)       |
| Chronic kidney disease due to hypertension          | 55<br>(25 - 90)          | 0<br>(0 - 0)           | 0<br>(0 - 1)        | 19<br>(10 - 34)      | 14<br>(6 - 25)       | 20<br>(8 - 35)           |
| Chronic kidney disease due to glomerulonephritis    | 34<br>(18 - 51)          | 1<br>(1 - 2)           | 1<br>(1 - 2)        | 9<br>(5 - 13)        | 6<br>(3 - 9)         | 17<br>(7 - 29)           |
| Chronic kidney disease due to other causes          | 991<br>(687 - 1,422)     | 4<br>(3 - 7)           | 8<br>(5 - 12)       | 91<br>(60 - 144)     | 233<br>(145 - 361)   | 655<br>(424 - 965)       |
| Urinary diseases and male infertility               | 294<br>(213 - 465)       | 2<br>(1 - 3)           | 1<br>(1 - 2)        | 23<br>(17 - 31)      | 31<br>(21 - 43)      | 237<br>(163 - 401)       |
| Interstitial nephritis and urinary tract infections | 277<br>(200 - 444)       | 2<br>(1 - 3)           | 1<br>(1 - 1)        | 20<br>(15 - 28)      | 27<br>(18 - 38)      | 227<br>(156 - 391)       |
| Urolithiasis                                        | 5<br>(2 - 8)             | --                     | 0<br>(0 - 0)        | 1<br>(0 - 1)         | 1<br>(0 - 2)         | 3<br>(1 - 5)             |
| Other urinary diseases                              | 12<br>(5 - 19)           | 0<br>(0 - 0)           | 0<br>(0 - 0)        | 2<br>(1 - 3)         | 3<br>(1 - 5)         | 7<br>(2 - 13)            |
| Gynecological diseases                              | 1<br>(1 - 2)             | --                     | --                  | 1<br>(0 - 1)         | 0<br>(0 - 0)         | 0<br>(0 - 1)             |
| Uterine fibroids                                    | 0<br>(0 - 0)             | --                     | --                  | 0<br>(0 - 0)         | 0<br>(0 - 0)         | 0<br>(0 - 0)             |
| Polycystic ovarian syndrome                         | 0<br>(0 - 0)             | --                     | --                  | 0<br>(0 - 0)         | 0<br>(0 - 0)         | --                       |
| Endometriosis                                       | 0<br>(0 - 0)             | --                     | --                  | 0<br>(0 - 0)         | 0<br>(0 - 0)         | --                       |
| Genital prolapse                                    | 0<br>(0 - 0)             | --                     | --                  | 0<br>(0 - 0)         | 0<br>(0 - 0)         | 0<br>(0 - 0)             |
| Other gynecological diseases                        | 1<br>(0 - 1)             | --                     | --                  | 0<br>(0 - 0)         | 0<br>(0 - 0)         | 0<br>(0 - 0)             |
| Hemoglobinopathies and hemolytic anemias            | 91<br>(58 - 146)         | 20<br>(11 - 35)        | 12<br>(7 - 21)      | 43<br>(27 - 67)      | 9<br>(5 - 17)        | 7<br>(3 - 14)            |
| Thalassemias                                        | 31<br>(20 - 50)          | 10<br>(6 - 18)         | 6<br>(3 - 11)       | 15<br>(9 - 25)       | 0<br>(0 - 0)         | 0<br>(0 - 0)             |
| Sickle cell disorders                               | 48<br>(30 - 76)          | 8<br>(4 - 13)          | 6<br>(3 - 10)       | 26<br>(16 - 40)      | 8<br>(5 - 15)        | 1<br>(0 - 1)             |
| G6PD deficiency                                     | 1<br>(1 - 2)             | 0<br>(0 - 0)           | 0<br>(0 - 0)        | 0<br>(0 - 1)         | 0<br>(0 - 0)         | 0<br>(0 - 0)             |
| Other hemoglobinopathies and hemolytic anemias      | 11<br>(6 - 19)           | 2<br>(1 - 3)           | 0<br>(0 - 1)        | 1<br>(1 - 2)         | 1<br>(0 - 2)         | 7<br>(3 - 13)            |
| Endocrine, metabolic, blood, and immune disorders   | 322<br>(222 - 412)       | 31<br>(21 - 43)        | 10<br>(7 - 15)      | 48<br>(33 - 65)      | 56<br>(37 - 77)      | 176<br>(109 - 244)       |
| Musculoskeletal disorders                           | 110<br>(83 - 142)        | --                     | 3<br>(2 - 5)        | 36<br>(26 - 50)      | 16<br>(11 - 23)      | 55<br>(38 - 77)          |
| Rheumatoid arthritis                                | 7<br>(4 - 11)            | --                     | 0<br>(0 - 0)        | 1<br>(1 - 1)         | 1<br>(0 - 1)         | 5<br>(3 - 9)             |
| Other musculoskeletal disorders                     | 104<br>(78 - 133)        | --                     | 3<br>(2 - 4)        | 35<br>(25 - 48)      | 16<br>(11 - 21)      | 50<br>(34 - 70)          |
| Other non-communicable diseases                     | 1,821<br>(1,530 - 2,120) | 1,102<br>(888 - 1,341) | 92<br>(69 - 116)    | 109<br>(81 - 138)    | 56<br>(43 - 76)      | 462<br>(328 - 631)       |
| Congenital anomalies                                | 1,301<br>(1,073 - 1,553) | 1,050<br>(851 - 1,282) | 90<br>(68 - 114)    | 101<br>(74 - 130)    | 30<br>(22 - 43)      | 28<br>(20 - 39)          |
| Neural tube defects                                 | 36<br>(14 - 82)          | 31<br>(10 - 77)        | 2<br>(1 - 3)        | 2<br>(1 - 3)         | 1<br>(0 - 1)         | 0<br>(0 - 1)             |
| Congenital heart anomalies                          | 441<br>(343 - 551)       | 354<br>(268 - 460)     | 36<br>(25 - 49)     | 35<br>(25 - 46)      | 9<br>(6 - 13)        | 7<br>(4 - 11)            |
| Cleft lip and cleft palate                          | 1<br>(0 - 1)             | 1<br>(0 - 1)           | --                  | --                   | --                   | --                       |
| Down syndrome                                       | 60<br>(35 - 95)          | 42<br>(21 - 71)        | 7<br>(3 - 11)       | 9<br>(6 - 15)        | 1<br>(0 - 1)         | 1<br>(1 - 2)             |
| Chromosomal unbalanced rearrangements               | 24<br>(13 - 43)          | 20<br>(10 - 38)        | 1<br>(1 - 2)        | 2<br>(1 - 3)         | 1<br>(0 - 1)         | 1<br>(0 - 1)             |
| Other congenital anomalies                          | 738<br>(593 - 892)       | 601<br>(468 - 748)     | 45<br>(33 - 58)     | 53<br>(39 - 71)      | 19<br>(14 - 28)      | 19<br>(13 - 27)          |
| Skin and subcutaneous diseases                      | 470<br>(334 - 636)       | 1<br>(1 - 2)           | 1<br>(1 - 1)        | 8<br>(5 - 10)        | 26<br>(18 - 36)      | 434<br>(303 - 601)       |
| Cellulitis                                          | 10<br>(4 - 19)           | 0<br>(0 - 1)           | 0<br>(0 - 0)        | 1<br>(0 - 1)         | 1<br>(1 - 2)         | 7<br>(2 - 16)            |
| Pyoderma                                            | 14<br>(9 - 22)           | 1<br>(0 - 1)           | 0<br>(0 - 0)        | 1<br>(1 - 2)         | 3<br>(2 - 4)         | 9<br>(5 - 17)            |

Web Table 31- Saudi Arabia deaths with 95% UI by age, sex, and cause in 2013

| Cause                                           | Females, All Ages        | Females, 0-4 Years | Females, 5-14 Years | Females, 15-49 Years   | Females, 50-69 Years | Females, 70-80 Years |
|-------------------------------------------------|--------------------------|--------------------|---------------------|------------------------|----------------------|----------------------|
| Decubitus ulcer                                 | 445<br>(315 - 606)       | 0<br>(0 - 0)       | 0<br>(0 - 0)        | 5<br>(3 - 7)           | 22<br>(15 - 30)      | 417<br>(291 - 576)   |
| Other skin and subcutaneous diseases            | 1<br>(1 - 3)             | 0<br>(0 - 0)       | 0<br>(0 - 0)        | 1<br>(0 - 1)           | 0<br>(0 - 0)         | 0<br>(0 - 1)         |
| Sudden infant death syndrome                    | 50<br>(15 - 132)         | 50<br>(15 - 132)   | --                  | --                     | --                   | --                   |
| Injuries                                        | 2,621<br>(2,183 - 3,128) | 197<br>(150 - 255) | 220<br>(175 - 265)  | 1,202<br>(935 - 1,469) | 537<br>(419 - 700)   | 465<br>(390 - 579)   |
| Transport injuries                              | 1,427<br>(1,119 - 1,737) | 75<br>(49 - 104)   | 107<br>(76 - 133)   | 810<br>(622 - 995)     | 327<br>(243 - 437)   | 108<br>(81 - 132)    |
| Road injuries                                   | 1,387<br>(1,088 - 1,694) | 74<br>(49 - 103)   | 105<br>(75 - 131)   | 789<br>(606 - 971)     | 314<br>(231 - 419)   | 105<br>(79 - 129)    |
| Pedestrian road injuries                        | 238<br>(177 - 325)       | 19<br>(11 - 29)    | 25<br>(16 - 35)     | 127<br>(87 - 185)      | 52<br>(35 - 76)      | 15<br>(10 - 21)      |
| Cyclist road injuries                           | 31<br>(23 - 42)          | 0<br>(0 - 1)       | 1<br>(0 - 1)        | 20<br>(14 - 29)        | 9<br>(6 - 12)        | 1<br>(1 - 2)         |
| Motorcyclist road injuries                      | 25<br>(15 - 36)          | 2<br>(1 - 4)       | 3<br>(1 - 4)        | 8<br>(4 - 13)          | 10<br>(6 - 16)       | 3<br>(1 - 4)         |
| Motor vehicle road injuries                     | 1,085<br>(832 - 1,328)   | 52<br>(32 - 74)    | 76<br>(51 - 96)     | 629<br>(476 - 784)     | 241<br>(174 - 326)   | 86<br>(62 - 107)     |
| Other road injuries                             | 8<br>(5 - 17)            | 1<br>(0 - 3)       | 1<br>(1 - 3)        | 4<br>(2 - 8)           | 2<br>(1 - 4)         | 0<br>(0 - 0)         |
| Other transport injuries                        | 39<br>(30 - 54)          | 1<br>(0 - 1)       | 1<br>(1 - 2)        | 22<br>(15 - 30)        | 13<br>(9 - 20)       | 3<br>(2 - 5)         |
| Unintentional injuries                          | 1,000<br>(827 - 1,285)   | 117<br>(85 - 159)  | 106<br>(81 - 146)   | 265<br>(200 - 364)     | 175<br>(130 - 246)   | 338<br>(271 - 449)   |
| Falls                                           | 273<br>(211 - 388)       | 18<br>(12 - 27)    | 15<br>(10 - 21)     | 24<br>(17 - 32)        | 61<br>(43 - 98)      | 155<br>(110 - 244)   |
| Drowning                                        | 210<br>(161 - 306)       | 58<br>(36 - 89)    | 52<br>(36 - 80)     | 77<br>(55 - 117)       | 10<br>(7 - 15)       | 14<br>(10 - 20)      |
| Fire, heat, and hot substances                  | 110<br>(83 - 163)        | 10<br>(6 - 18)     | 10<br>(7 - 16)      | 38<br>(26 - 58)        | 11<br>(8 - 17)       | 41<br>(27 - 65)      |
| Poisonings                                      | 34<br>(24 - 51)          | 4<br>(2 - 8)       | 4<br>(2 - 6)        | 15<br>(10 - 23)        | 6<br>(4 - 10)        | 5<br>(3 - 7)         |
| Exposure to mechanical forces                   | 47<br>(38 - 59)          | 10<br>(6 - 16)     | 11<br>(8 - 17)      | 14<br>(10 - 18)        | 6<br>(5 - 9)         | 5<br>(4 - 7)         |
| Unintentional firearm injuries                  | 14<br>(10 - 17)          | 1<br>(0 - 1)       | 2<br>(1 - 3)        | 8<br>(6 - 11)          | 2<br>(1 - 3)         | 1<br>(1 - 2)         |
| Unintentional suffocation                       | 3<br>(1 - 5)             | 0<br>(0 - 1)       | 0<br>(0 - 1)        | 1<br>(0 - 2)           | 1<br>(0 - 1)         | 1<br>(0 - 2)         |
| Other exposure to mechanical forces             | 30<br>(23 - 41)          | 9<br>(6 - 15)      | 9<br>(6 - 14)       | 5<br>(3 - 6)           | 4<br>(3 - 5)         | 3<br>(2 - 5)         |
| Adverse effects of medical treatment            | 175<br>(128 - 270)       | 4<br>(2 - 8)       | 3<br>(2 - 5)        | 47<br>(32 - 77)        | 67<br>(45 - 112)     | 54<br>(36 - 86)      |
| Animal contact                                  | 10<br>(5 - 23)           | 1<br>(1 - 3)       | 2<br>(1 - 5)        | 3<br>(2 - 7)           | 1<br>(1 - 4)         | 2<br>(1 - 5)         |
| Venomous animal contact                         | 6<br>(3 - 13)            | 1<br>(0 - 3)       | 2<br>(1 - 4)        | 1<br>(1 - 3)           | 1<br>(0 - 2)         | 1<br>(0 - 3)         |
| Non-venomous animal contact                     | 4<br>(2 - 10)            | 0<br>(0 - 1)       | 0<br>(0 - 1)        | 2<br>(1 - 5)           | 1<br>(0 - 2)         | 1<br>(0 - 2)         |
| Foreign body                                    | 86<br>(51 - 138)         | 5<br>(3 - 9)       | 2<br>(1 - 3)        | 11<br>(7 - 18)         | 8<br>(5 - 13)        | 59<br>(32 - 101)     |
| Pulmonary aspiration and foreign body in airway | 83<br>(48 - 135)         | 5<br>(3 - 9)       | 2<br>(1 - 3)        | 9<br>(6 - 15)          | 8<br>(4 - 12)        | 59<br>(32 - 100)     |
| Foreign body in other body part                 | 2<br>(2 - 4)             | 0<br>(0 - 0)       | 0<br>(0 - 0)        | 2<br>(1 - 3)           | 0<br>(0 - 0)         | 0<br>(0 - 0)         |
| Other unintentional injuries                    | 56<br>(41 - 93)          | 6<br>(3 - 12)      | 8<br>(4 - 14)       | 35<br>(23 - 61)        | 3<br>(2 - 6)         | 3<br>(2 - 6)         |
| Self-harm and interpersonal violence            | 193<br>(75 - 252)        | 5<br>(1 - 12)      | 7<br>(3 - 11)       | 127<br>(47 - 168)      | 35<br>(14 - 48)      | 19<br>(7 - 25)       |
| Self-harm                                       | 156<br>(52 - 205)        | --                 | 3<br>(1 - 4)        | 107<br>(33 - 143)      | 30<br>(11 - 43)      | 16<br>(6 - 22)       |
| Interpersonal violence                          | 37<br>(14 - 53)          | 5<br>(1 - 12)      | 5<br>(1 - 8)        | 20<br>(8 - 30)         | 5<br>(2 - 8)         | 2<br>(1 - 5)         |
| Assault by firearm                              | 8<br>(3 - 15)            | 1<br>(0 - 3)       | 1<br>(0 - 2)        | 3<br>(1 - 6)           | 2<br>(1 - 3)         | 1<br>(0 - 1)         |
| Assault by sharp object                         | 9<br>(3 - 14)            | 1<br>(0 - 1)       | 1<br>(0 - 1)        | 7<br>(2 - 11)          | 0<br>(0 - 1)         | 0<br>(0 - 1)         |
| Assault by other means                          | 20<br>(7 - 30)           | 3<br>(1 - 7)       | 3<br>(1 - 5)        | 10<br>(4 - 15)         | 3<br>(1 - 4)         | 2<br>(0 - 3)         |
| Forces of nature, war, and legal intervention   | 0<br>(0 - 0)             | 0<br>(0 - 0)       | --                  | --                     | --                   | --                   |
| Exposure to forces of nature                    | 0<br>(0 - 0)             | 0<br>(0 - 0)       | --                  | --                     | --                   | --                   |

Web Table 31- Scotland deaths with 95% UI by age, sex, and cause in 2013

| Cause                                                              | Both Sexes, All Ages        | Both Sexes, 0-4 Years | Both Sexes, 5-14 Years | Both Sexes, 15-49 Years  | Both Sexes, 50-69 Years     | Both Sexes, 70-80 Years     |
|--------------------------------------------------------------------|-----------------------------|-----------------------|------------------------|--------------------------|-----------------------------|-----------------------------|
| All causes                                                         | 55,844<br>(53,664 - 58,272) | 234<br>(171 - 309)    | 53<br>(44 - 63)        | 2,911<br>(2,736 - 3,106) | 11,189<br>(10,602 - 11,832) | 41,457<br>(39,955 - 43,010) |
| Communicable, maternal, neonatal, and nutritional diseases         | 3,618<br>(3,064 - 4,708)    | 113<br>(82 - 150)     | 5<br>(3 - 7)           | 100<br>(88 - 112)        | 306<br>(265 - 353)          | 3,094<br>(2,547 - 4,153)    |
| HIV/AIDS and tuberculosis                                          | 72<br>(58 - 85)             | 0<br>(0 - 0)          | 0<br>(0 - 0)           | 20<br>(15 - 25)          | 16<br>(13 - 19)             | 37<br>(26 - 46)             |
| Tuberculosis                                                       | 54<br>(42 - 63)             | 0<br>(0 - 0)          | 0<br>(0 - 0)           | 5<br>(4 - 6)             | 13<br>(11 - 15)             | 36<br>(26 - 45)             |
| HIV/AIDS                                                           | 19<br>(12 - 26)             | 0<br>(0 - 0)          | 0<br>(0 - 0)           | 15<br>(10 - 20)          | 3<br>(1 - 5)                | 1<br>(0 - 2)                |
| HIV/AIDS resulting in mycobacterial infection                      | 1<br>(1 - 1)                | 0<br>(0 - 0)          | 0<br>(0 - 0)           | 1<br>(0 - 1)             | 0<br>(0 - 0)                | 0<br>(0 - 0)                |
| HIV/AIDS resulting in other diseases                               | 18<br>(11 - 24)             | 0<br>(0 - 0)          | 0<br>(0 - 0)           | 14<br>(10 - 19)          | 3<br>(1 - 5)                | 1<br>(0 - 2)                |
| Diarrrhea, lower respiratory, and other common infectious diseases | 3,325<br>(2,774 - 4,405)    | 16<br>(11 - 22)       | 4<br>(3 - 5)           | 62<br>(53 - 72)          | 268<br>(230 - 315)          | 2,975<br>(2,436 - 4,040)    |
| Diarrrheal diseases                                                | 161<br>(124 - 212)          | 3<br>(2 - 5)          | 0<br>(0 - 0)           | 4<br>(3 - 4)             | 13<br>(11 - 17)             | 141<br>(105 - 191)          |
| Intestinal infectious diseases                                     | 6<br>(2 - 14)               | 1<br>(0 - 2)          | 1<br>(0 - 3)           | 2<br>(1 - 5)             | 1<br>(0 - 2)                | 1<br>(0 - 2)                |
| Typhoid fever                                                      | 4<br>(1 - 10)               | 1<br>(0 - 2)          | 1<br>(0 - 2)           | 2<br>(0 - 4)             | 1<br>(0 - 2)                | 0<br>(0 - 1)                |
| Paratyphoid fever                                                  | 1<br>(0 - 3)                | 0<br>(0 - 1)          | 0<br>(0 - 1)           | 0<br>(0 - 1)             | 0<br>(0 - 0)                | 0<br>(0 - 0)                |
| Other intestinal infectious diseases                               | 1<br>(0 - 3)                | 0<br>(0 - 1)          | 0<br>(0 - 0)           | 0<br>(0 - 1)             | 0<br>(0 - 1)                | 0<br>(0 - 1)                |
| Lower respiratory infections                                       | 3,114<br>(2,568 - 4,204)    | 8<br>(5 - 12)         | 1<br>(1 - 2)           | 47<br>(39 - 57)          | 244<br>(208 - 290)          | 2,813<br>(2,275 - 3,874)    |
| Upper respiratory infections                                       | 1<br>(0 - 3)                | 0<br>(0 - 0)          | 0<br>(0 - 0)           | 0<br>(0 - 0)             | 0<br>(0 - 1)                | 1<br>(0 - 3)                |
| Otitis media                                                       | 1<br>(1 - 1)                | 0<br>(0 - 0)          | 0<br>(0 - 0)           | 0<br>(0 - 0)             | 0<br>(0 - 0)                | 0<br>(0 - 1)                |
| Meningitis                                                         | 23<br>(20 - 31)             | 3<br>(2 - 4)          | 0<br>(0 - 1)           | 4<br>(4 - 5)             | 5<br>(5 - 7)                | 11<br>(8 - 16)              |
| Pneumococcal meningitis                                            | 4<br>(3 - 5)                | 0<br>(0 - 1)          | 0<br>(0 - 0)           | 1<br>(0 - 1)             | 1<br>(1 - 1)                | 2<br>(1 - 3)                |
| H influenzae type B meningitis                                     | 3<br>(2 - 4)                | 1<br>(0 - 1)          | 0<br>(0 - 0)           | 0<br>(0 - 1)             | 0<br>(0 - 1)                | 1<br>(1 - 2)                |
| Meningococcal meningitis                                           | 8<br>(6 - 10)               | 1<br>(0 - 1)          | 0<br>(0 - 0)           | 2<br>(1 - 2)             | 2<br>(1 - 2)                | 4<br>(2 - 5)                |
| Other meningitis                                                   | 9<br>(7 - 13)               | 1<br>(0 - 1)          | 0<br>(0 - 0)           | 2<br>(1 - 2)             | 2<br>(2 - 3)                | 4<br>(3 - 7)                |
| Encephalitis                                                       | 12<br>(7 - 15)              | 1<br>(0 - 1)          | 0<br>(0 - 0)           | 3<br>(2 - 4)             | 3<br>(2 - 4)                | 5<br>(2 - 6)                |
| Diphtheria                                                         | 0<br>(0 - 0)                | 0<br>(0 - 0)          | 0<br>(0 - 0)           | 0<br>(0 - 0)             | 0<br>(0 - 0)                | --                          |
| Whooping cough                                                     | 1<br>(0 - 1)                | 0<br>(0 - 1)          | 0<br>(0 - 0)           | 0<br>(0 - 0)             | 0<br>(0 - 0)                | --                          |
| Tetanus                                                            | 1<br>(0 - 1)                | 0<br>(0 - 0)          | 0<br>(0 - 0)           | 0<br>(0 - 0)             | 0<br>(0 - 0)                | 0<br>(0 - 0)                |
| Measles                                                            | 0<br>(0 - 0)                | 0<br>(0 - 0)          | 0<br>(0 - 0)           | 0<br>(0 - 0)             | 0<br>(0 - 0)                | --                          |
| Varicella and herpes zoster                                        | 5<br>(1 - 18)               | 0<br>(0 - 1)          | 0<br>(0 - 0)           | 0<br>(0 - 1)             | 0<br>(0 - 1)                | 4<br>(0 - 16)               |
| Neglected tropical diseases and malaria                            | 4<br>(3 - 4)                | 0<br>(0 - 0)          | 0<br>(0 - 0)           | 1<br>(1 - 1)             | 1<br>(1 - 2)                | 1<br>(1 - 1)                |
| Cysticercosis                                                      | 0<br>(0 - 0)                | 0<br>(0 - 0)          | 0<br>(0 - 0)           | 0<br>(0 - 0)             | 0<br>(0 - 0)                | 0<br>(0 - 0)                |
| Cystic echinococcosis                                              | 1<br>(0 - 1)                | 0<br>(0 - 0)          | 0<br>(0 - 0)           | 0<br>(0 - 0)             | 0<br>(0 - 0)                | 0<br>(0 - 0)                |
| Dengue                                                             | 0<br>(0 - 1)                | 0<br>(0 - 0)          | 0<br>(0 - 0)           | 0<br>(0 - 0)             | 0<br>(0 - 0)                | 0<br>(0 - 0)                |
| Rabies                                                             | 0<br>(0 - 1)                | 0<br>(0 - 0)          | 0<br>(0 - 0)           | 0<br>(0 - 0)             | 0<br>(0 - 0)                | 0<br>(0 - 0)                |
| Other neglected tropical diseases                                  | 2<br>(1 - 3)                | 0<br>(0 - 0)          | 0<br>(0 - 0)           | 1<br>(1 - 1)             | 1<br>(1 - 1)                | 1<br>(0 - 1)                |
| Maternal disorders                                                 | 6<br>(5 - 8)                | --                    | 0<br>(0 - 0)           | 6<br>(5 - 8)             | --                          | --                          |
| Maternal hemorrhage                                                | 1<br>(0 - 1)                | --                    | 0<br>(0 - 0)           | 1<br>(0 - 1)             | --                          | --                          |
| Maternal sepsis and other maternal infections                      | 1<br>(0 - 1)                | --                    | 0<br>(0 - 0)           | 1<br>(0 - 1)             | --                          | --                          |
| Maternal hypertensive disorders                                    | 1<br>(1 - 1)                | --                    | 0<br>(0 - 0)           | 1<br>(1 - 1)             | --                          | --                          |
| Maternal obstructed labor                                          | 0<br>(0 - 1)                | --                    | 0<br>(0 - 0)           | 0<br>(0 - 1)             | --                          | --                          |
| Maternal abortive outcome                                          | 1<br>(1 - 2)                | --                    | 0<br>(0 - 0)           | 1<br>(1 - 2)             | --                          | --                          |
| Indirect maternal deaths                                           | 1<br>(0 - 1)                | --                    | 0<br>(0 - 0)           | 1<br>(0 - 1)             | --                          | --                          |



Web Table 31- Scotland deaths with 95% UI by age, sex, and cause in 2013

| Cause                                                            | Both Sexes, All Ages        | Both Sexes, 0-4 Years | Both Sexes, 5-14 Years | Both Sexes, 15-49 Years  | Both Sexes, 50-69 Years    | Both Sexes, 70-80 Years     |
|------------------------------------------------------------------|-----------------------------|-----------------------|------------------------|--------------------------|----------------------------|-----------------------------|
| Late maternal deaths                                             | 0<br>(0 - 1)                | --                    | 0<br>(0 - 0)           | 0<br>(0 - 1)             | --                         | --                          |
| Maternal deaths aggravated by HIV/AIDS                           | 0<br>(0 - 0)                | --                    | --                     | 0<br>(0 - 0)             | --                         | --                          |
| Other maternal disorders                                         | 1<br>(1 - 2)                | --                    | 0<br>(0 - 0)           | 1<br>(1 - 2)             | --                         | --                          |
| Neonatal disorders                                               | 95<br>(69 - 126)            | 95<br>(69 - 126)      | --                     | --                       | --                         | --                          |
| Neonatal preterm birth complications                             | 50<br>(35 - 70)             | 50<br>(35 - 70)       | --                     | --                       | --                         | --                          |
| Neonatal encephalopathy due to birth asphyxia and trauma         | 19<br>(11 - 28)             | 19<br>(11 - 28)       | --                     | --                       | --                         | --                          |
| Neonatal sepsis and other neonatal infections                    | 9<br>(5 - 17)               | 9<br>(5 - 17)         | --                     | --                       | --                         | --                          |
| Hemolytic disease and other neonatal jaundice                    | 0<br>(0 - 1)                | 0<br>(0 - 1)          | --                     | --                       | --                         | --                          |
| Other neonatal disorders                                         | 16<br>(8 - 24)              | 16<br>(8 - 24)        | --                     | --                       | --                         | --                          |
| Nutritional deficiencies                                         | 58<br>(46 - 78)             | 0<br>(0 - 0)          | 0<br>(0 - 0)           | 2<br>(1 - 2)             | 5<br>(4 - 6)               | 52<br>(40 - 70)             |
| Protein-energy malnutrition                                      | 15<br>(8 - 23)              | 0<br>(0 - 0)          | 0<br>(0 - 0)           | 1<br>(0 - 1)             | 2<br>(1 - 3)               | 12<br>(6 - 19)              |
| Iodine deficiency                                                | 0<br>(0 - 1)                | 0<br>(0 - 0)          | 0<br>(0 - 0)           | 0<br>(0 - 0)             | 0<br>(0 - 0)               | 0<br>(0 - 1)                |
| Iron-deficiency anemia                                           | 38<br>(27 - 54)             | 0<br>(0 - 0)          | 0<br>(0 - 0)           | 1<br>(1 - 1)             | 2<br>(1 - 3)               | 35<br>(25 - 49)             |
| Other nutritional deficiencies                                   | 5<br>(2 - 11)               | 0<br>(0 - 0)          | 0<br>(0 - 0)           | 0<br>(0 - 0)             | 0<br>(0 - 1)               | 5<br>(2 - 10)               |
| Other communicable, maternal, neonatal, and nutritional diseases | 58<br>(40 - 71)             | 2<br>(1 - 3)          | 1<br>(0 - 1)           | 7<br>(7 - 12)            | 16<br>(11 - 21)            | 30<br>(19 - 37)             |
| Sexually transmitted diseases excluding HIV                      | 6<br>(4 - 9)                | 0<br>(0 - 1)          | 0<br>(0 - 0)           | 1<br>(0 - 1)             | 1<br>(1 - 2)               | 4<br>(3 - 7)                |
| Syphilis                                                         | 5<br>(3 - 7)                | 0<br>(0 - 1)          | 0<br>(0 - 0)           | 0<br>(0 - 0)             | 1<br>(0 - 1)               | 3<br>(2 - 5)                |
| Chlamydial infection                                             | 0<br>(0 - 1)                | --                    | 0<br>(0 - 0)           | 0<br>(0 - 0)             | 0<br>(0 - 0)               | 0<br>(0 - 0)                |
| Gonococcal infection                                             | 1<br>(1 - 1)                | --                    | 0<br>(0 - 0)           | 0<br>(0 - 0)             | 0<br>(0 - 0)               | 0<br>(0 - 1)                |
| Other sexually transmitted diseases                              | 0<br>(0 - 1)                | --                    | 0<br>(0 - 0)           | 0<br>(0 - 0)             | 0<br>(0 - 0)               | 0<br>(0 - 0)                |
| Hepatitis                                                        | 5<br>(4 - 6)                | 0<br>(0 - 0)          | 0<br>(0 - 0)           | 1<br>(1 - 2)             | 2<br>(1 - 2)               | 1<br>(1 - 2)                |
| Acute hepatitis A                                                | 1<br>(0 - 2)                | 0<br>(0 - 0)          | 0<br>(0 - 0)           | 1<br>(0 - 1)             | 0<br>(0 - 1)               | 0<br>(0 - 0)                |
| Acute hepatitis B                                                | 3<br>(2 - 4)                | 0<br>(0 - 0)          | 0<br>(0 - 0)           | 1<br>(0 - 1)             | 1<br>(1 - 2)               | 1<br>(1 - 1)                |
| Acute hepatitis C                                                | 0<br>(0 - 1)                | --                    | 0<br>(0 - 0)           | 0<br>(0 - 0)             | 0<br>(0 - 0)               | 0<br>(0 - 0)                |
| Other infectious diseases                                        | 47<br>(29 - 61)             | 1<br>(1 - 2)          | 1<br>(0 - 1)           | 8<br>(5 - 10)            | 14<br>(8 - 18)             | 24<br>(14 - 32)             |
| Non-communicable diseases                                        | 49,814<br>(47,719 - 51,978) | 103<br>(74 - 139)     | 33<br>(27 - 39)        | 2,110<br>(1,979 - 2,259) | 10,440<br>(9,899 - 11,041) | 37,128<br>(35,607 - 38,674) |
| Neoplasms                                                        | 16,350<br>(14,872 - 17,450) | 8<br>(5 - 12)         | 15<br>(12 - 19)        | 733<br>(676 - 802)       | 5,042<br>(4,714 - 5,379)   | 10,552<br>(9,328 - 11,362)  |
| Esophageal cancer                                                | 866<br>(765 - 1,052)        | --                    | --                     | 29<br>(23 - 37)          | 308<br>(261 - 393)         | 530<br>(463 - 644)          |
| Stomach cancer                                                   | 828<br>(711 - 979)          | --                    | --                     | 24<br>(20 - 28)          | 170<br>(147 - 199)         | 634<br>(538 - 762)          |
| Liver cancer                                                     | 402<br>(292 - 481)          | --                    | 0<br>(0 - 0)           | 18<br>(13 - 22)          | 136<br>(96 - 168)          | 248<br>(167 - 309)          |
| Liver cancer due to hepatitis B                                  | 84<br>(45 - 142)            | --                    | 0<br>(0 - 0)           | 7<br>(4 - 11)            | 36<br>(18 - 67)            | 41<br>(20 - 69)             |
| Liver cancer due to hepatitis C                                  | 212<br>(143 - 282)          | --                    | 0<br>(0 - 0)           | 7<br>(3 - 12)            | 69<br>(39 - 99)            | 136<br>(90 - 187)           |
| Liver cancer due to alcohol use                                  | 85<br>(52 - 131)            | --                    | --                     | 2<br>(1 - 4)             | 25<br>(15 - 36)            | 58<br>(32 - 96)             |
| Liver cancer due to other causes                                 | 21<br>(9 - 39)              | --                    | 0<br>(0 - 0)           | 1<br>(1 - 3)             | 7<br>(3 - 12)              | 13<br>(4 - 27)              |
| Larynx cancer                                                    | 100<br>(76 - 127)           | --                    | --                     | 4<br>(3 - 6)             | 40<br>(30 - 52)            | 55<br>(41 - 72)             |
| Tracheal, bronchus and lung cancer                               | 4,397<br>(3,722 - 4,868)    | --                    | --                     | 101<br>(86 - 120)        | 1,532<br>(1,368 - 1,693)   | 2,764<br>(2,211 - 3,145)    |
| Breast cancer                                                    | 1,118<br>(854 - 1,345)      | --                    | --                     | 115<br>(95 - 149)        | 398<br>(309 - 485)         | 605<br>(439 - 719)          |
| Cervical cancer                                                  | 133<br>(108 - 157)          | --                    | --                     | 29<br>(23 - 36)          | 46<br>(33 - 57)            | 58<br>(46 - 73)             |
| Uterine cancer                                                   | 167<br>(127 - 198)          | --                    | --                     | 4<br>(2 - 5)             | 51<br>(38 - 64)            | 112<br>(83 - 141)           |
| Prostate cancer                                                  | 975<br>(582 - 1,291)        | --                    | --                     | 2<br>(1 - 3)             | 153<br>(90 - 225)          | 821<br>(481 - 1,102)        |

Web Table 31- Scotland deaths with 95% UI by age, sex, and cause in 2013

| Cause                                         | Both Sexes, All Ages        | Both Sexes, 0-4 Years | Both Sexes, 5-14 Years | Both Sexes, 15-49 Years | Both Sexes, 50-69 Years  | Both Sexes, 70-80 Years     |
|-----------------------------------------------|-----------------------------|-----------------------|------------------------|-------------------------|--------------------------|-----------------------------|
| Colon and rectum cancer                       | 2,010<br>(1,831 - 2,176)    | --                    | --                     | 63<br>(55 - 72)         | 523<br>(473 - 574)       | 1,424<br>(1,280 - 1,572)    |
| Lip and oral cavity cancer                    | 183<br>(151 - 205)          | --                    | --                     | 13<br>(11 - 15)         | 76<br>(58 - 88)          | 93<br>(78 - 108)            |
| Nasopharynx cancer                            | 17<br>(14 - 25)             | --                    | 0<br>(0 - 0)           | 3<br>(3 - 5)            | 8<br>(6 - 11)            | 6<br>(5 - 12)               |
| Other pharynx cancer                          | 105<br>(67 - 128)           | --                    | --                     | 8<br>(6 - 10)           | 59<br>(36 - 72)          | 39<br>(23 - 49)             |
| Gallbladder and biliary tract cancer          | 145<br>(108 - 194)          | --                    | --                     | 2<br>(2 - 3)            | 30<br>(22 - 38)          | 113<br>(82 - 158)           |
| Pancreatic cancer                             | 853<br>(773 - 926)          | --                    | --                     | 28<br>(24 - 33)         | 272<br>(242 - 300)       | 553<br>(497 - 610)          |
| Malignant skin melanoma                       | 193<br>(122 - 275)          | --                    | --                     | 31<br>(20 - 45)         | 69<br>(43 - 100)         | 93<br>(59 - 132)            |
| Non-melanoma skin cancer                      | 81<br>(58 - 108)            | --                    | --                     | 3<br>(2 - 4)            | 11<br>(7 - 15)           | 67<br>(47 - 90)             |
| Ovarian cancer                                | 444<br>(377 - 508)          | --                    | --                     | 27<br>(21 - 33)         | 163<br>(135 - 191)       | 254<br>(207 - 299)          |
| Testicular cancer                             | 8<br>(6 - 12)               | --                    | --                     | 5<br>(4 - 8)            | 2<br>(1 - 2)             | 2<br>(1 - 3)                |
| Kidney cancer                                 | 427<br>(368 - 487)          | 0<br>(0 - 1)          | 1<br>(0 - 1)           | 20<br>(17 - 24)         | 152<br>(129 - 180)       | 253<br>(202 - 303)          |
| Bladder cancer                                | 491<br>(391 - 578)          | --                    | --                     | 7<br>(5 - 8)            | 98<br>(81 - 116)         | 386<br>(300 - 462)          |
| Brain and nervous system cancer               | 361<br>(294 - 414)          | 2<br>(1 - 3)          | 4<br>(3 - 6)           | 61<br>(49 - 72)         | 175<br>(143 - 207)       | 119<br>(85 - 143)           |
| Thyroid cancer                                | 33<br>(27 - 41)             | --                    | --                     | 2<br>(1 - 2)            | 9<br>(7 - 11)            | 22<br>(17 - 29)             |
| Mesothelioma                                  | 193<br>(105 - 294)          | --                    | --                     | 5<br>(3 - 7)            | 70<br>(42 - 107)         | 118<br>(53 - 187)           |
| Hodgkin lymphoma                              | 30<br>(23 - 40)             | 0<br>(0 - 0)          | 0<br>(0 - 0)           | 10<br>(8 - 14)          | 9<br>(6 - 12)            | 11<br>(7 - 15)              |
| Non-Hodgkin lymphoma                          | 512<br>(323 - 672)          | 0<br>(0 - 1)          | 1<br>(0 - 1)           | 33<br>(21 - 47)         | 151<br>(91 - 213)        | 326<br>(201 - 434)          |
| Multiple myeloma                              | 272<br>(186 - 390)          | --                    | --                     | 7<br>(5 - 11)           | 80<br>(57 - 120)         | 185<br>(121 - 269)          |
| Leukemia                                      | 419<br>(367 - 465)          | 2<br>(1 - 3)          | 4<br>(3 - 6)           | 32<br>(28 - 36)         | 101<br>(85 - 117)        | 279<br>(238 - 319)          |
| Other neoplasms                               | 589<br>(441 - 687)          | 3<br>(2 - 5)          | 5<br>(3 - 6)           | 49<br>(41 - 57)         | 150<br>(119 - 172)       | 382<br>(261 - 463)          |
| Cardiovascular diseases                       | 18,028<br>(16,844 - 20,012) | 2<br>(1 - 2)          | 1<br>(1 - 2)           | 421<br>(379 - 466)      | 2,858<br>(2,633 - 3,206) | 14,747<br>(13,711 - 16,490) |
| Rheumatic heart disease                       | 135<br>(104 - 221)          | 0<br>(0 - 0)          | 0<br>(0 - 0)           | 7<br>(6 - 11)           | 30<br>(22 - 57)          | 97<br>(71 - 155)            |
| Ischemic heart disease                        | 9,273<br>(8,332 - 11,066)   | 0<br>(0 - 0)          | 0<br>(0 - 0)           | 250<br>(221 - 283)      | 1,835<br>(1,653 - 2,142) | 7,188<br>(6,346 - 8,696)    |
| Cerebrovascular disease                       | 5,881<br>(5,111 - 7,031)    | 0<br>(0 - 1)          | 0<br>(0 - 1)           | 92<br>(77 - 109)        | 586<br>(491 - 700)       | 5,202<br>(4,476 - 6,279)    |
| Ischemic stroke                               | 3,474<br>(2,879 - 4,455)    | 0<br>(0 - 0)          | 0<br>(0 - 0)           | 10<br>(7 - 13)          | 193<br>(137 - 255)       | 3,271<br>(2,701 - 4,187)    |
| Hemorrhagic stroke                            | 2,407<br>(1,763 - 3,001)    | 0<br>(0 - 0)          | 0<br>(0 - 1)           | 82<br>(68 - 97)         | 393<br>(323 - 483)       | 1,931<br>(1,367 - 2,452)    |
| Hypertensive heart disease                    | 248<br>(153 - 313)          | 0<br>(0 - 0)          | 0<br>(0 - 0)           | 8<br>(5 - 11)           | 59<br>(38 - 79)          | 180<br>(104 - 235)          |
| Cardiomyopathy and myocarditis                | 212<br>(173 - 313)          | 1<br>(1 - 1)          | 0<br>(0 - 1)           | 20<br>(15 - 27)         | 44<br>(32 - 57)          | 147<br>(115 - 232)          |
| Atrial fibrillation and flutter               | 472<br>(354 - 595)          | --                    | --                     | 1<br>(0 - 1)            | 21<br>(15 - 26)          | 451<br>(335 - 572)          |
| Aortic aneurysm                               | 525<br>(410 - 675)          | --                    | --                     | 6<br>(5 - 8)            | 81<br>(64 - 100)         | 438<br>(333 - 575)          |
| Peripheral vascular disease                   | 327<br>(256 - 400)          | --                    | --                     | 1<br>(1 - 2)            | 31<br>(24 - 38)          | 295<br>(228 - 366)          |
| Endocarditis                                  | 74<br>(56 - 110)            | 0<br>(0 - 0)          | 0<br>(0 - 0)           | 5<br>(3 - 7)            | 19<br>(14 - 29)          | 50<br>(36 - 78)             |
| Other cardiovascular and circulatory diseases | 882<br>(554 - 1,061)        | 0<br>(0 - 0)          | 0<br>(0 - 0)           | 31<br>(19 - 37)         | 153<br>(99 - 186)        | 698<br>(431 - 858)          |
| Chronic respiratory diseases                  | 4,288<br>(3,572 - 4,813)    | 2<br>(1 - 3)          | 1<br>(1 - 2)           | 54<br>(47 - 62)         | 741<br>(626 - 828)       | 3,490<br>(2,862 - 3,950)    |
| Chronic obstructive pulmonary disease         | 3,580<br>(2,995 - 4,196)    | 1<br>(1 - 1)          | 0<br>(0 - 0)           | 26<br>(20 - 32)         | 623<br>(531 - 721)       | 2,930<br>(2,437 - 3,491)    |
| Pneumoconiosis                                | 64<br>(42 - 107)            | 0<br>(0 - 0)          | 0<br>(0 - 0)           | 1<br>(1 - 1)            | 7<br>(4 - 11)            | 56<br>(35 - 97)             |
| Silicosis                                     | 3<br>(2 - 5)                | 0<br>(0 - 0)          | 0<br>(0 - 0)           | 0<br>(0 - 0)            | 0<br>(0 - 1)             | 2<br>(1 - 4)                |
| Asbestosis                                    | 43<br>(27 - 76)             | 0<br>(0 - 0)          | 0<br>(0 - 0)           | 0<br>(0 - 0)            | 5<br>(3 - 7)             | 38<br>(23 - 68)             |
| Coal workers pneumoconiosis                   | 7<br>(4 - 12)               | 0<br>(0 - 0)          | 0<br>(0 - 0)           | 0<br>(0 - 0)            | 1<br>(0 - 1)             | 6<br>(3 - 10)               |
| Other pneumoconiosis                          | 11<br>(7 - 18)              | 0<br>(0 - 0)          | 0<br>(0 - 0)           | 0<br>(0 - 0)            | 1<br>(1 - 2)             | 10<br>(6 - 16)              |

Web Table 31- Scotland deaths with 95% UI by age, sex, and cause in 2013

| Cause                                               | Both Sexes, All Ages     | Both Sexes, 0-4 Years | Both Sexes, 5-14 Years | Both Sexes, 15-49 Years | Both Sexes, 50-69 Years | Both Sexes, 70-80 Years  |
|-----------------------------------------------------|--------------------------|-----------------------|------------------------|-------------------------|-------------------------|--------------------------|
| Asthma                                              | 141<br>(93 - 202)        | 0<br>(0 - 0)          | 1<br>(1 - 1)           | 18<br>(14 - 21)         | 28<br>(20 - 40)         | 95<br>(55 - 146)         |
| Interstitial lung disease and pulmonary sarcoidosis | 471<br>(192 - 743)       | 0<br>(0 - 1)          | 0<br>(0 - 0)           | 9<br>(5 - 14)           | 81<br>(36 - 121)        | 380<br>(146 - 621)       |
| Other chronic respiratory diseases                  | 33<br>(24 - 46)          | 0<br>(0 - 1)          | 0<br>(0 - 0)           | 1<br>(1 - 1)            | 2<br>(2 - 3)            | 29<br>(20 - 42)          |
| Cirrhosis                                           | 1,070<br>(983 - 1,154)   | 0<br>(0 - 1)          | 0<br>(0 - 1)           | 226<br>(203 - 250)      | 568<br>(515 - 621)      | 275<br>(244 - 308)       |
| Cirrhosis due to hepatitis B                        | 122<br>(73 - 190)        | 0<br>(0 - 0)          | 0<br>(0 - 0)           | 25<br>(14 - 41)         | 64<br>(38 - 105)        | 32<br>(19 - 50)          |
| Cirrhosis due to hepatitis C                        | 487<br>(281 - 657)       | 0<br>(0 - 0)          | 0<br>(0 - 0)           | 105<br>(64 - 149)       | 258<br>(143 - 361)      | 123<br>(63 - 163)        |
| Cirrhosis due to alcohol use                        | 343<br>(196 - 506)       | --<br>(0 - 0)         | --<br>(0 - 0)          | 56<br>(20 - 91)         | 186<br>(99 - 291)       | 100<br>(66 - 141)        |
| Cirrhosis due to other causes                       | 118<br>(69 - 178)        | 0<br>(0 - 1)          | 0<br>(0 - 0)           | 39<br>(23 - 59)         | 59<br>(32 - 93)         | 19<br>(9 - 31)           |
| Digestive diseases                                  | 1,844<br>(1,616 - 2,376) | 1<br>(1 - 1)          | 1<br>(1 - 1)           | 55<br>(48 - 64)         | 298<br>(257 - 346)      | 1,489<br>(1,286 - 1,987) |
| Peptic ulcer disease                                | 297<br>(228 - 468)       | 0<br>(0 - 0)          | 0<br>(0 - 0)           | 8<br>(6 - 10)           | 53<br>(40 - 71)         | 235<br>(174 - 386)       |
| Gastritis and duodenitis                            | 24<br>(14 - 38)          | 0<br>(0 - 0)          | 0<br>(0 - 0)           | 2<br>(1 - 3)            | 6<br>(3 - 9)            | 16<br>(9 - 26)           |
| Appendicitis                                        | 25<br>(13 - 49)          | 0<br>(0 - 0)          | 0<br>(0 - 0)           | 2<br>(1 - 3)            | 5<br>(3 - 9)            | 18<br>(8 - 38)           |
| Paralytic ileus and intestinal obstruction          | 242<br>(127 - 344)       | 0<br>(0 - 0)          | 0<br>(0 - 0)           | 6<br>(3 - 7)            | 28<br>(15 - 38)         | 208<br>(108 - 298)       |
| Inguinal, femoral, and abdominal hernia             | 73<br>(30 - 200)         | 0<br>(0 - 0)          | 0<br>(0 - 0)           | 1<br>(0 - 1)            | 8<br>(4 - 20)           | 64<br>(25 - 178)         |
| Inflammatory bowel disease                          | 117<br>(84 - 209)        | 0<br>(0 - 0)          | 0<br>(0 - 0)           | 6<br>(4 - 8)            | 20<br>(14 - 30)         | 91<br>(61 - 175)         |
| Vascular intestinal disorders                       | 346<br>(193 - 525)       | 0<br>(0 - 0)          | 0<br>(0 - 0)           | 6<br>(3 - 9)            | 61<br>(36 - 94)         | 279<br>(147 - 431)       |
| Gallbladder and biliary diseases                    | 247<br>(164 - 310)       | 0<br>(0 - 0)          | 0<br>(0 - 0)           | 4<br>(3 - 5)            | 29<br>(18 - 36)         | 214<br>(140 - 273)       |
| Pancreatitis                                        | 131<br>(94 - 184)        | 0<br>(0 - 0)          | 0<br>(0 - 0)           | 14<br>(10 - 18)         | 36<br>(24 - 49)         | 80<br>(56 - 124)         |
| Other digestive diseases                            | 343<br>(265 - 453)       | 0<br>(0 - 0)          | 0<br>(0 - 0)           | 7<br>(6 - 9)            | 51<br>(38 - 63)         | 284<br>(217 - 387)       |
| Neurological disorders                              | 4,906<br>(4,080 - 5,915) | 5<br>(3 - 8)          | 4<br>(3 - 5)           | 97<br>(85 - 113)        | 337<br>(285 - 383)      | 4,462<br>(3,665 - 5,459) |
| Alzheimer disease and other dementias               | 4,009<br>(3,195 - 5,016) | --<br>(0 - 0)         | --<br>(0 - 0)          | 0<br>(0 - 1)            | 112<br>(84 - 146)       | 3,897<br>(3,093 - 4,888) |
| Parkinson disease                                   | 374<br>(275 - 437)       | --<br>(0 - 0)         | --<br>(0 - 0)          | 0<br>(0 - 1)            | 23<br>(17 - 28)         | 350<br>(251 - 414)       |
| Epilepsy                                            | 94<br>(75 - 113)         | 1<br>(1 - 2)          | 2<br>(1 - 2)           | 42<br>(35 - 51)         | 23<br>(17 - 30)         | 27<br>(19 - 35)          |
| Multiple sclerosis                                  | 116<br>(76 - 155)        | --<br>(0 - 0)         | --<br>(0 - 0)          | 24<br>(16 - 36)         | 61<br>(38 - 82)         | 31<br>(18 - 44)          |
| Other neurological disorders                        | 312<br>(255 - 348)       | 4<br>(3 - 6)          | 2<br>(2 - 3)           | 30<br>(25 - 35)         | 118<br>(97 - 136)       | 157<br>(124 - 181)       |
| Mental and substance use disorders                  | 624<br>(422 - 725)       | 0<br>(0 - 0)          | 0<br>(0 - 0)           | 390<br>(243 - 453)      | 189<br>(114 - 244)      | 44<br>(29 - 55)          |
| Schizophrenia                                       | 5<br>(4 - 8)             | --<br>(0 - 0)         | --<br>(0 - 0)          | 0<br>(0 - 0)            | 1<br>(1 - 2)            | 4<br>(3 - 7)             |
| Alcohol use disorders                               | 287<br>(173 - 374)       | --<br>(0 - 0)         | --<br>(0 - 0)          | 97<br>(64 - 134)        | 159<br>(89 - 212)       | 31<br>(16 - 41)          |
| Drug use disorders                                  | 331<br>(178 - 386)       | 0<br>(0 - 0)          | --<br>(0 - 0)          | 293<br>(148 - 344)      | 29<br>(19 - 36)         | 9<br>(6 - 11)            |
| Opioid use disorders                                | 122<br>(65 - 145)        | 0<br>(0 - 0)          | --<br>(0 - 0)          | 109<br>(55 - 130)       | 10<br>(6 - 12)          | 3<br>(2 - 4)             |
| Cocaine use disorders                               | 10<br>(6 - 12)           | 0<br>(0 - 0)          | --<br>(0 - 0)          | 9<br>(5 - 11)           | 1<br>(0 - 1)            | 0<br>(0 - 0)             |
| Amphetamine use disorders                           | 9<br>(6 - 11)            | 0<br>(0 - 0)          | --<br>(0 - 0)          | 8<br>(5 - 10)           | 1<br>(1 - 1)            | 0<br>(0 - 0)             |
| Other drug use disorders                            | 190<br>(103 - 221)       | 0<br>(0 - 0)          | --<br>(0 - 0)          | 166<br>(84 - 196)       | 18<br>(12 - 22)         | 5<br>(4 - 7)             |
| Eating disorders                                    | 1<br>(1 - 1)             | --<br>(0 - 0)         | 0<br>(0 - 0)           | 1<br>(1 - 1)            | --<br>(0 - 0)           | --<br>(0 - 0)            |
| Anorexia nervosa                                    | 1<br>(1 - 1)             | --<br>(0 - 0)         | 0<br>(0 - 0)           | 1<br>(1 - 1)            | --<br>(0 - 0)           | --<br>(0 - 0)            |
| Diabetes, urogenital, blood, and endocrine diseases | 2,180<br>(1,858 - 2,399) | 6<br>(4 - 8)          | 4<br>(3 - 5)           | 85<br>(76 - 97)         | 314<br>(273 - 344)      | 1,771<br>(1,467 - 1,977) |
| Diabetes mellitus                                   | 612<br>(518 - 676)       | 0<br>(0 - 0)          | 0<br>(0 - 0)           | 24<br>(21 - 28)         | 123<br>(107 - 139)      | 464<br>(381 - 522)       |
| Acute glomerulonephritis                            | 1<br>(1 - 2)             | 0<br>(0 - 0)          | 0<br>(0 - 0)           | 0<br>(0 - 0)            | 0<br>(0 - 0)            | 1<br>(1 - 1)             |
| Chronic kidney disease                              | 760<br>(648 - 906)       | 0<br>(0 - 1)          | 0<br>(0 - 0)           | 20<br>(17 - 25)         | 78<br>(66 - 94)         | 661<br>(555 - 795)       |
| Chronic kidney disease due to diabetes mellitus     | 103<br>(76 - 182)        | 0<br>(0 - 0)          | 0<br>(0 - 0)           | 3<br>(2 - 6)            | 12<br>(9 - 22)          | 88<br>(63 - 151)         |

Web Table 31- Scotland deaths with 95% UI by age, sex, and cause in 2013

| Cause                                               | Both Sexes, All Ages     | Both Sexes, 0-4 Years | Both Sexes, 5-14 Years | Both Sexes, 15-49 Years | Both Sexes, 50-69 Years | Both Sexes, 70-80 Years  |
|-----------------------------------------------------|--------------------------|-----------------------|------------------------|-------------------------|-------------------------|--------------------------|
| Chronic kidney disease due to hypertension          | 169<br>(122 - 254)       | 0<br>(0 - 0)          | 0<br>(0 - 0)           | 3<br>(2 - 5)            | 17<br>(12 - 24)         | 149<br>(105 - 227)       |
| Chronic kidney disease due to glomerulonephritis    | 51<br>(16 - 92)          | 0<br>(0 - 0)          | 0<br>(0 - 0)           | 2<br>(1 - 3)            | 5<br>(3 - 7)            | 44<br>(11 - 83)          |
| Chronic kidney disease due to other causes          | 437<br>(324 - 577)       | 0<br>(0 - 0)          | 0<br>(0 - 0)           | 12<br>(9 - 15)          | 44<br>(32 - 56)         | 381<br>(279 - 508)       |
| Urinary diseases and male infertility               | 585<br>(341 - 730)       | 1<br>(0 - 1)          | 0<br>(0 - 0)           | 11<br>(7 - 14)          | 55<br>(31 - 68)         | 518<br>(301 - 653)       |
| Interstitial nephritis and urinary tract infections | 406<br>(290 - 584)       | 0<br>(0 - 0)          | 0<br>(0 - 0)           | 8<br>(5 - 9)            | 39<br>(24 - 49)         | 359<br>(256 - 534)       |
| Urolithiasis                                        | 16<br>(8 - 29)           | --                    | 0<br>(0 - 0)           | 1<br>(0 - 1)            | 3<br>(2 - 6)            | 12<br>(5 - 22)           |
| Other urinary diseases                              | 163<br>(32 - 275)        | 0<br>(0 - 0)          | 0<br>(0 - 0)           | 3<br>(1 - 4)            | 13<br>(4 - 20)          | 146<br>(26 - 255)        |
| Gynecological diseases                              | 3<br>(2 - 5)             | --                    | --                     | 1<br>(0 - 1)            | 1<br>(0 - 1)            | 2<br>(1 - 4)             |
| Uterine fibroids                                    | 1<br>(1 - 1)             | --                    | --                     | 0<br>(0 - 0)            | 0<br>(0 - 0)            | 1<br>(0 - 1)             |
| Polycystic ovarian syndrome                         | 0<br>(0 - 0)             | --                    | --                     | 0<br>(0 - 0)            | 0<br>(0 - 0)            | --                       |
| Endometriosis                                       | 0<br>(0 - 0)             | --                    | --                     | 0<br>(0 - 0)            | 0<br>(0 - 0)            | --                       |
| Genital prolapse                                    | 1<br>(0 - 1)             | --                    | --                     | 0<br>(0 - 0)            | 0<br>(0 - 0)            | 1<br>(0 - 1)             |
| Other gynecological diseases                        | 2<br>(1 - 2)             | --                    | --                     | 0<br>(0 - 0)            | 0<br>(0 - 0)            | 1<br>(1 - 2)             |
| Hemoglobinopathies and hemolytic anemias            | 25<br>(18 - 35)          | 0<br>(0 - 1)          | 0<br>(0 - 1)           | 3<br>(2 - 4)            | 5<br>(3 - 7)            | 17<br>(12 - 24)          |
| Thalassemias                                        | 1<br>(1 - 2)             | 0<br>(0 - 0)          | 0<br>(0 - 0)           | 1<br>(1 - 1)            | 0<br>(0 - 0)            | 0<br>(0 - 0)             |
| Sickle cell disorders                               | 4<br>(3 - 6)             | 0<br>(0 - 0)          | 0<br>(0 - 0)           | 1<br>(1 - 2)            | 2<br>(1 - 3)            | 1<br>(1 - 1)             |
| G6PD deficiency                                     | 0<br>(0 - 0)             | 0<br>(0 - 0)          | 0<br>(0 - 0)           | 0<br>(0 - 0)            | 0<br>(0 - 0)            | 0<br>(0 - 0)             |
| Other hemoglobinopathies and hemolytic anemias      | 19<br>(14 - 28)          | 0<br>(0 - 0)          | 0<br>(0 - 0)           | 1<br>(1 - 1)            | 3<br>(2 - 4)            | 16<br>(11 - 23)          |
| Endocrine, metabolic, blood, and immune disorders   | 193<br>(162 - 270)       | 4<br>(3 - 6)          | 3<br>(2 - 4)           | 27<br>(22 - 37)         | 52<br>(41 - 73)         | 108<br>(83 - 159)        |
| Musculoskeletal disorders                           | 204<br>(115 - 245)       | --                    | 0<br>(0 - 0)           | 11<br>(9 - 14)          | 46<br>(30 - 57)         | 146<br>(74 - 182)        |
| Rheumatoid arthritis                                | 97<br>(57 - 124)         | --                    | 0<br>(0 - 0)           | 1<br>(1 - 2)            | 20<br>(12 - 26)         | 76<br>(42 - 100)         |
| Other musculoskeletal disorders                     | 107<br>(56 - 131)        | --                    | 0<br>(0 - 0)           | 10<br>(8 - 12)          | 27<br>(17 - 33)         | 70<br>(29 - 90)          |
| Other non-communicable diseases                     | 319<br>(275 - 364)       | 79<br>(57 - 109)      | 6<br>(4 - 7)           | 37<br>(33 - 43)         | 46<br>(38 - 52)         | 151<br>(113 - 184)       |
| Congenital anomalies                                | 148<br>(126 - 175)       | 58<br>(42 - 78)       | 6<br>(4 - 7)           | 34<br>(29 - 39)         | 29<br>(24 - 34)         | 22<br>(17 - 26)          |
| Neural tube defects                                 | 7<br>(5 - 9)             | 4<br>(2 - 6)          | 0<br>(0 - 1)           | 2<br>(2 - 3)            | 0<br>(0 - 0)            | 0<br>(0 - 0)             |
| Congenital heart anomalies                          | 56<br>(47 - 66)          | 19<br>(13 - 26)       | 2<br>(2 - 3)           | 18<br>(15 - 21)         | 9<br>(7 - 12)           | 8<br>(6 - 10)            |
| Cleft lip and cleft palate                          | 0<br>(0 - 0)             | 0<br>(0 - 0)          | --                     | --                      | --                      | --                       |
| Down syndrome                                       | 19<br>(13 - 25)          | 1<br>(1 - 2)          | 0<br>(0 - 0)           | 4<br>(2 - 6)            | 12<br>(8 - 17)          | 1<br>(1 - 2)             |
| Chromosomal unbalanced rearrangements               | 10<br>(7 - 14)           | 8<br>(5 - 12)         | 0<br>(0 - 1)           | 1<br>(1 - 1)            | 0<br>(0 - 0)            | 0<br>(0 - 0)             |
| Other congenital anomalies                          | 56<br>(46 - 69)          | 26<br>(18 - 37)       | 2<br>(2 - 3)           | 8<br>(6 - 10)           | 7<br>(5 - 10)           | 13<br>(10 - 16)          |
| Skin and subcutaneous diseases                      | 150<br>(113 - 183)       | 0<br>(0 - 0)          | 0<br>(0 - 0)           | 4<br>(3 - 5)            | 17<br>(12 - 20)         | 129<br>(93 - 162)        |
| Cellulitis                                          | 60<br>(29 - 87)          | 0<br>(0 - 0)          | 0<br>(0 - 0)           | 1<br>(1 - 2)            | 8<br>(5 - 11)           | 51<br>(23 - 75)          |
| Pyoderma                                            | 64<br>(42 - 90)          | 0<br>(0 - 0)          | 0<br>(0 - 0)           | 2<br>(1 - 2)            | 7<br>(4 - 9)            | 55<br>(35 - 80)          |
| Decubitus ulcer                                     | 20<br>(13 - 32)          | 0<br>(0 - 0)          | 0<br>(0 - 0)           | 0<br>(0 - 0)            | 1<br>(1 - 2)            | 19<br>(11 - 30)          |
| Other skin and subcutaneous diseases                | 6<br>(3 - 13)            | 0<br>(0 - 0)          | 0<br>(0 - 0)           | 0<br>(0 - 0)            | 1<br>(0 - 1)            | 5<br>(2 - 12)            |
| Sudden infant death syndrome                        | 21<br>(12 - 36)          | 21<br>(12 - 36)       | --                     | --                      | --                      | --                       |
| Injuries                                            | 2,412<br>(2,194 - 2,661) | 18<br>(12 - 25)       | 16<br>(13 - 20)        | 701<br>(635 - 781)      | 442<br>(398 - 489)      | 1,235<br>(1,045 - 1,467) |
| Transport injuries                                  | 287<br>(261 - 329)       | 3<br>(2 - 4)          | 7<br>(5 - 9)           | 136<br>(121 - 158)      | 67<br>(59 - 77)         | 75<br>(63 - 96)          |
| Road injuries                                       | 268<br>(243 - 309)       | 3<br>(2 - 4)          | 6<br>(5 - 8)           | 125<br>(111 - 147)      | 61<br>(53 - 71)         | 73<br>(61 - 94)          |
| Pedestrian road injuries                            | 83<br>(61 - 113)         | 1<br>(1 - 2)          | 3<br>(2 - 4)           | 20<br>(12 - 31)         | 21<br>(14 - 29)         | 38<br>(28 - 52)          |

Web Table 31- Scotland deaths with 95% UI by age, sex, and cause in 2013

| Cause                                           | Both Sexes, All Ages     | Both Sexes, 0-4 Years | Both Sexes, 5-14 Years | Both Sexes, 15-49 Years | Both Sexes, 50-69 Years | Both Sexes, 70-80 Years |
|-------------------------------------------------|--------------------------|-----------------------|------------------------|-------------------------|-------------------------|-------------------------|
| Cyclist road injuries                           | 11<br>(7 - 14)           | 0<br>(0 - 0)          | 1<br>(0 - 1)           | 4<br>(3 - 6)            | 3<br>(2 - 4)            | 2<br>(1 - 4)            |
| Motorcyclist road injuries                      | 27<br>(16 - 35)          | 0<br>(0 - 0)          | 0<br>(0 - 0)           | 22<br>(13 - 30)         | 3<br>(2 - 5)            | 1<br>(1 - 2)            |
| Motor vehicle road injuries                     | 146<br>(117 - 183)       | 1<br>(1 - 2)          | 2<br>(1 - 3)           | 78<br>(65 - 99)         | 33<br>(25 - 42)         | 31<br>(22 - 42)         |
| Other road injuries                             | 2<br>(1 - 3)             | 0<br>(0 - 0)          | 0<br>(0 - 0)           | 1<br>(0 - 1)            | 1<br>(0 - 1)            | 1<br>(0 - 1)            |
| Other transport injuries                        | 19<br>(14 - 24)          | 0<br>(0 - 0)          | 0<br>(0 - 1)           | 10<br>(8 - 14)          | 6<br>(4 - 8)            | 2<br>(2 - 4)            |
| Unintentional injuries                          | 1,416<br>(1,220 - 1,647) | 13<br>(9 - 18)        | 8<br>(6 - 10)          | 122<br>(108 - 148)      | 187<br>(164 - 215)      | 1,088<br>(897 - 1,313)  |
| Falls                                           | 903<br>(736 - 1,148)     | 2<br>(1 - 2)          | 1<br>(1 - 2)           | 38<br>(32 - 49)         | 83<br>(64 - 100)        | 779<br>(622 - 1,016)    |
| Drowning                                        | 34<br>(26 - 47)          | 2<br>(1 - 3)          | 2<br>(1 - 3)           | 15<br>(11 - 18)         | 9<br>(6 - 13)           | 7<br>(5 - 14)           |
| Fire, heat, and hot substances                  | 69<br>(55 - 99)          | 2<br>(1 - 4)          | 1<br>(1 - 2)           | 14<br>(11 - 20)         | 18<br>(14 - 27)         | 33<br>(25 - 49)         |
| Poisonings                                      | 12<br>(9 - 21)           | 0<br>(0 - 0)          | 0<br>(0 - 0)           | 6<br>(5 - 10)           | 3<br>(2 - 6)            | 3<br>(2 - 6)            |
| Exposure to mechanical forces                   | 26<br>(22 - 30)          | 1<br>(1 - 2)          | 1<br>(1 - 1)           | 13<br>(10 - 16)         | 6<br>(5 - 7)            | 5<br>(4 - 6)            |
| Unintentional firearm injuries                  | 1<br>(1 - 1)             | 0<br>(0 - 0)          | 0<br>(0 - 0)           | 0<br>(0 - 1)            | 0<br>(0 - 0)            | 0<br>(0 - 0)            |
| Unintentional suffocation                       | 8<br>(4 - 10)            | 1<br>(0 - 2)          | 0<br>(0 - 1)           | 4<br>(2 - 5)            | 1<br>(1 - 2)            | 2<br>(1 - 2)            |
| Other exposure to mechanical forces             | 17<br>(15 - 23)          | 0<br>(0 - 1)          | 0<br>(0 - 1)           | 9<br>(7 - 12)           | 5<br>(4 - 6)            | 3<br>(2 - 5)            |
| Adverse effects of medical treatment            | 159<br>(106 - 194)       | 1<br>(1 - 2)          | 0<br>(0 - 1)           | 9<br>(7 - 12)           | 30<br>(21 - 41)         | 119<br>(73 - 151)       |
| Animal contact                                  | 3<br>(2 - 4)             | 0<br>(0 - 0)          | 0<br>(0 - 0)           | 1<br>(1 - 1)            | 1<br>(0 - 1)            | 1<br>(1 - 2)            |
| Venomous animal contact                         | 1<br>(0 - 1)             | 0<br>(0 - 0)          | 0<br>(0 - 0)           | 0<br>(0 - 0)            | 0<br>(0 - 0)            | 0<br>(0 - 0)            |
| Non-venomous animal contact                     | 3<br>(1 - 3)             | 0<br>(0 - 0)          | 0<br>(0 - 0)           | 1<br>(0 - 1)            | 1<br>(0 - 1)            | 1<br>(0 - 1)            |
| Foreign body                                    | 199<br>(114 - 256)       | 4<br>(2 - 6)          | 2<br>(1 - 2)           | 22<br>(16 - 35)         | 35<br>(22 - 48)         | 136<br>(67 - 189)       |
| Pulmonary aspiration and foreign body in airway | 198<br>(113 - 256)       | 4<br>(2 - 6)          | 1<br>(1 - 2)           | 22<br>(16 - 35)         | 34<br>(22 - 48)         | 136<br>(67 - 189)       |
| Foreign body in other body part                 | 1<br>(1 - 1)             | 0<br>(0 - 0)          | 0<br>(0 - 0)           | 0<br>(0 - 0)            | 0<br>(0 - 0)            | 0<br>(0 - 0)            |
| Other unintentional injuries                    | 11<br>(9 - 13)           | 1<br>(0 - 1)          | 0<br>(0 - 0)           | 4<br>(3 - 5)            | 2<br>(2 - 3)            | 4<br>(3 - 5)            |
| Self-harm and interpersonal violence            | 708<br>(606 - 797)       | 2<br>(1 - 3)          | 2<br>(1 - 2)           | 444<br>(381 - 505)      | 189<br>(151 - 219)      | 72<br>(61 - 88)         |
| Self-harm                                       | 633<br>(531 - 719)       | --                    | 0<br>(0 - 1)           | 390<br>(329 - 447)      | 177<br>(140 - 205)      | 65<br>(56 - 81)         |
| Interpersonal violence                          | 76<br>(50 - 97)          | 2<br>(1 - 3)          | 1<br>(1 - 2)           | 54<br>(34 - 71)         | 12<br>(8 - 16)          | 7<br>(4 - 9)            |
| Assault by firearm                              | 5<br>(2 - 9)             | 0<br>(0 - 0)          | 0<br>(0 - 0)           | 4<br>(2 - 7)            | 1<br>(0 - 1)            | 0<br>(0 - 0)            |
| Assault by sharp object                         | 34<br>(20 - 46)          | 0<br>(0 - 0)          | 0<br>(0 - 0)           | 27<br>(15 - 37)         | 5<br>(3 - 8)            | 1<br>(1 - 2)            |
| Assault by other means                          | 37<br>(24 - 50)          | 2<br>(1 - 3)          | 1<br>(1 - 1)           | 23<br>(15 - 32)         | 6<br>(4 - 9)            | 5<br>(3 - 7)            |

Web Table 31- Scotland deaths with 95% UI by age, sex, and cause in 2013

| Cause                                                             | Males, All Ages             | Males, 0-4 Years  | Males, 5-14 Years | Males, 15-49 Years       | Males, 50-69 Years       | Males, 70-80 Years          |
|-------------------------------------------------------------------|-----------------------------|-------------------|-------------------|--------------------------|--------------------------|-----------------------------|
| All causes                                                        | 26,787<br>(25,165 - 28,261) | 128<br>(91 - 173) | 32<br>(26 - 39)   | 1,855<br>(1,689 - 2,005) | 6,596<br>(6,076 - 7,097) | 18,177<br>(17,214 - 19,018) |
| Communicable, maternal, neonatal, and nutritional diseases        | 1,485<br>(1,242 - 1,912)    | 63<br>(45 - 85)   | 3<br>(2 - 4)      | 56<br>(47 - 66)          | 178<br>(147 - 217)       | 1,185<br>(943 - 1,590)      |
| HIV/AIDS and tuberculosis                                         | 45<br>(34 - 54)             | 0<br>(0 - 0)      | 0<br>(0 - 0)      | 13<br>(9 - 17)           | 10<br>(8 - 12)           | 22<br>(15 - 29)             |
| Tuberculosis                                                      | 32<br>(23 - 39)             | 0<br>(0 - 0)      | 0<br>(0 - 0)      | 3<br>(2 - 3)             | 8<br>(6 - 10)            | 21<br>(14 - 28)             |
| HIV/AIDS                                                          | 13<br>(8 - 19)              | --                | 0<br>(0 - 0)      | 10<br>(7 - 14)           | 2<br>(1 - 4)             | 1<br>(0 - 2)                |
| HIV/AIDS resulting in mycobacterial infection                     | 1<br>(0 - 1)                | --                | 0<br>(0 - 0)      | 1<br>(0 - 1)             | 0<br>(0 - 0)             | 0<br>(0 - 0)                |
| HIV/AIDS resulting in other diseases                              | 13<br>(8 - 18)              | --                | 0<br>(0 - 0)      | 10<br>(6 - 14)           | 2<br>(1 - 3)             | 1<br>(0 - 2)                |
| Diarrhea, lower respiratory, and other common infectious diseases | 1,341<br>(1,094 - 1,774)    | 9<br>(6 - 13)     | 2<br>(1 - 3)      | 36<br>(30 - 45)          | 157<br>(126 - 194)       | 1,137<br>(897 - 1,546)      |
| Diarrheal diseases                                                | 57<br>(41 - 79)             | 2<br>(1 - 3)      | 0<br>(0 - 0)      | 2<br>(1 - 3)             | 6<br>(4 - 8)             | 47<br>(32 - 68)             |
| Intestinal infectious diseases                                    | 3<br>(1 - 8)                | 1<br>(0 - 2)      | 1<br>(0 - 2)      | 1<br>(0 - 3)             | 0<br>(0 - 1)             | 0<br>(0 - 1)                |
| Typhoid fever                                                     | 2<br>(1 - 6)                | 0<br>(0 - 1)      | 0<br>(0 - 1)      | 1<br>(0 - 2)             | 0<br>(0 - 1)             | 0<br>(0 - 1)                |
| Paratyphoid fever                                                 | 1<br>(0 - 2)                | 0<br>(0 - 0)      | 0<br>(0 - 0)      | 0<br>(0 - 1)             | 0<br>(0 - 0)             | 0<br>(0 - 0)                |
| Other intestinal infectious diseases                              | 0<br>(0 - 2)                | 0<br>(0 - 1)      | 0<br>(0 - 0)      | 0<br>(0 - 1)             | 0<br>(0 - 1)             | 0<br>(0 - 1)                |
| Lower respiratory infections                                      | 1,261<br>(1,018 - 1,694)    | 5<br>(3 - 7)      | 1<br>(0 - 1)      | 28<br>(22 - 36)          | 145<br>(115 - 183)       | 1,082<br>(841 - 1,499)      |
| Upper respiratory infections                                      | 1<br>(0 - 2)                | 0<br>(0 - 0)      | 0<br>(0 - 0)      | 0<br>(0 - 0)             | 0<br>(0 - 1)             | 0<br>(0 - 1)                |
| Otitis media                                                      | 1<br>(0 - 1)                | 0<br>(0 - 0)      | 0<br>(0 - 0)      | 0<br>(0 - 0)             | 0<br>(0 - 0)             | 0<br>(0 - 0)                |
| Meningitis                                                        | 11<br>(10 - 14)             | 2<br>(1 - 3)      | 0<br>(0 - 0)      | 3<br>(2 - 3)             | 3<br>(2 - 4)             | 4<br>(3 - 6)                |
| Pneumococcal meningitis                                           | 2<br>(1 - 3)                | 0<br>(0 - 0)      | 0<br>(0 - 0)      | 0<br>(0 - 1)             | 1<br>(0 - 1)             | 1<br>(0 - 1)                |
| H influenzae type B meningitis                                    | 1<br>(1 - 2)                | 0<br>(0 - 1)      | 0<br>(0 - 0)      | 0<br>(0 - 0)             | 0<br>(0 - 0)             | 0<br>(0 - 1)                |
| Meningococcal meningitis                                          | 4<br>(3 - 5)                | 0<br>(0 - 1)      | 0<br>(0 - 0)      | 1<br>(0 - 1)             | 1<br>(0 - 1)             | 1<br>(1 - 2)                |
| Other meningitis                                                  | 4<br>(3 - 6)                | 1<br>(0 - 1)      | 0<br>(0 - 0)      | 1<br>(1 - 1)             | 1<br>(1 - 2)             | 2<br>(1 - 3)                |
| Encephalitis                                                      | 5<br>(3 - 7)                | 0<br>(0 - 1)      | 0<br>(0 - 0)      | 2<br>(1 - 2)             | 1<br>(1 - 2)             | 2<br>(1 - 3)                |
| Diphtheria                                                        | 0<br>(0 - 0)                | 0<br>(0 - 0)      | 0<br>(0 - 0)      | 0<br>(0 - 0)             | 0<br>(0 - 0)             | --                          |
| Whooping cough                                                    | 0<br>(0 - 1)                | 0<br>(0 - 1)      | 0<br>(0 - 0)      | 0<br>(0 - 0)             | 0<br>(0 - 0)             | --                          |
| Tetanus                                                           | 0<br>(0 - 0)                | 0<br>(0 - 0)      | 0<br>(0 - 0)      | 0<br>(0 - 0)             | 0<br>(0 - 0)             | 0<br>(0 - 0)                |
| Measles                                                           | 0<br>(0 - 0)                | 0<br>(0 - 0)      | 0<br>(0 - 0)      | 0<br>(0 - 0)             | 0<br>(0 - 0)             | --                          |
| Varicella and herpes zoster                                       | 2<br>(0 - 7)                | 0<br>(0 - 0)      | 0<br>(0 - 0)      | 0<br>(0 - 1)             | 0<br>(0 - 1)             | 1<br>(0 - 6)                |
| Neglected tropical diseases and malaria                           | 2<br>(2 - 2)                | 0<br>(0 - 0)      | 0<br>(0 - 0)      | 1<br>(1 - 1)             | 1<br>(0 - 1)             | 0<br>(0 - 1)                |
| Cysticercosis                                                     | 0<br>(0 - 0)                | 0<br>(0 - 0)      | 0<br>(0 - 0)      | 0<br>(0 - 0)             | 0<br>(0 - 0)             | 0<br>(0 - 0)                |
| Cystic echinococcosis                                             | 0<br>(0 - 0)                | 0<br>(0 - 0)      | 0<br>(0 - 0)      | 0<br>(0 - 0)             | 0<br>(0 - 0)             | 0<br>(0 - 0)                |
| Dengue                                                            | 0<br>(0 - 0)                | 0<br>(0 - 0)      | 0<br>(0 - 0)      | 0<br>(0 - 0)             | 0<br>(0 - 0)             | 0<br>(0 - 0)                |
| Rabies                                                            | 0<br>(0 - 0)                | 0<br>(0 - 0)      | 0<br>(0 - 0)      | 0<br>(0 - 0)             | 0<br>(0 - 0)             | 0<br>(0 - 0)                |
| Other neglected tropical diseases                                 | 1<br>(1 - 2)                | 0<br>(0 - 0)      | 0<br>(0 - 0)      | 0<br>(0 - 0)             | 0<br>(0 - 1)             | 0<br>(0 - 0)                |
| Maternal disorders                                                | --                          | --                | --                | --                       | --                       | --                          |
| Maternal hemorrhage                                               | --                          | --                | --                | --                       | --                       | --                          |
| Maternal sepsis and other maternal infections                     | --                          | --                | --                | --                       | --                       | --                          |
| Maternal hypertensive disorders                                   | --                          | --                | --                | --                       | --                       | --                          |
| Maternal obstructed labor                                         | --                          | --                | --                | --                       | --                       | --                          |
| Maternal abortive outcome                                         | --                          | --                | --                | --                       | --                       | --                          |
| Indirect maternal deaths                                          | --                          | --                | --                | --                       | --                       | --                          |

Web Table 31- Scotland deaths with 95% UI by age, sex, and cause in 2013

| Cause                                                            | Males, All Ages             | Males, 0-4 Years | Males, 5-14 Years | Males, 15-49 Years       | Males, 50-69 Years       | Males, 70-80 Years          |
|------------------------------------------------------------------|-----------------------------|------------------|-------------------|--------------------------|--------------------------|-----------------------------|
| Late maternal deaths                                             | --                          | --               | --                | --                       | --                       | --                          |
| Maternal deaths aggravated by HIV/AIDS                           | --                          | --               | --                | --                       | --                       | --                          |
| Other maternal disorders                                         | --                          | --               | --                | --                       | --                       | --                          |
| Neonatal disorders                                               | 53<br>(37 - 72)             | 53<br>(37 - 72)  | --                | --                       | --                       | --                          |
| Neonatal preterm birth complications                             | 29<br>(18 - 42)             | 29<br>(18 - 42)  | --                | --                       | --                       | --                          |
| Neonatal encephalopathy due to birth asphyxia and trauma         | 9<br>(5 - 15)               | 9<br>(5 - 15)    | --                | --                       | --                       | --                          |
| Neonatal sepsis and other neonatal infections                    | 5<br>(2 - 11)               | 5<br>(2 - 11)    | --                | --                       | --                       | --                          |
| Hemolytic disease and other neonatal jaundice                    | 0<br>(0 - 0)                | 0<br>(0 - 0)     | --                | --                       | --                       | --                          |
| Other neonatal disorders                                         | 9<br>(4 - 15)               | 9<br>(4 - 15)    | --                | --                       | --                       | --                          |
| Nutritional deficiencies                                         | 18<br>(12 - 33)             | 0<br>(0 - 0)     | 0<br>(0 - 0)      | 1<br>(1 - 1)             | 2<br>(1 - 4)             | 15<br>(10 - 29)             |
| Protein-energy malnutrition                                      | 6<br>(3 - 13)               | 0<br>(0 - 0)     | 0<br>(0 - 0)      | 0<br>(0 - 1)             | 1<br>(1 - 2)             | 5<br>(2 - 10)               |
| Iodine deficiency                                                | 0<br>(0 - 1)                | 0<br>(0 - 0)     | 0<br>(0 - 0)      | 0<br>(0 - 0)             | 0<br>(0 - 0)             | 0<br>(0 - 1)                |
| Iron-deficiency anemia                                           | 10<br>(5 - 19)              | 0<br>(0 - 0)     | 0<br>(0 - 0)      | 0<br>(0 - 1)             | 1<br>(0 - 2)             | 9<br>(4 - 17)               |
| Other nutritional deficiencies                                   | 2<br>(1 - 5)                | 0<br>(0 - 0)     | 0<br>(0 - 0)      | 0<br>(0 - 0)             | 0<br>(0 - 0)             | 2<br>(0 - 5)                |
| Other communicable, maternal, neonatal, and nutritional diseases | 26<br>(16 - 34)             | 1<br>(0 - 2)     | 0<br>(0 - 0)      | 6<br>(4 - 7)             | 8<br>(5 - 11)            | 11<br>(6 - 15)              |
| Sexually transmitted diseases excluding HIV                      | 1<br>(0 - 1)                | 0<br>(0 - 1)     | 0<br>(0 - 0)      | 0<br>(0 - 0)             | 0<br>(0 - 0)             | 0<br>(0 - 1)                |
| Syphilis                                                         | 1<br>(0 - 1)                | 0<br>(0 - 1)     | 0<br>(0 - 0)      | 0<br>(0 - 0)             | 0<br>(0 - 0)             | 0<br>(0 - 1)                |
| Chlamydial infection                                             | --                          | --               | --                | --                       | --                       | --                          |
| Gonococcal infection                                             | 0<br>(0 - 0)                | --               | 0<br>(0 - 0)      | 0<br>(0 - 0)             | 0<br>(0 - 0)             | 0<br>(0 - 0)                |
| Other sexually transmitted diseases                              | 0<br>(0 - 0)                | --               | 0<br>(0 - 0)      | 0<br>(0 - 0)             | 0<br>(0 - 0)             | 0<br>(0 - 0)                |
| Hepatitis                                                        | 3<br>(2 - 3)                | 0<br>(0 - 0)     | 0<br>(0 - 0)      | 1<br>(1 - 1)             | 1<br>(1 - 2)             | 1<br>(0 - 1)                |
| Acute hepatitis A                                                | 1<br>(0 - 1)                | 0<br>(0 - 0)     | 0<br>(0 - 0)      | 0<br>(0 - 1)             | 0<br>(0 - 0)             | 0<br>(0 - 0)                |
| Acute hepatitis B                                                | 2<br>(1 - 2)                | 0<br>(0 - 0)     | 0<br>(0 - 0)      | 1<br>(0 - 1)             | 1<br>(0 - 1)             | 0<br>(0 - 1)                |
| Acute hepatitis C                                                | 0<br>(0 - 1)                | --               | 0<br>(0 - 0)      | 0<br>(0 - 0)             | 0<br>(0 - 0)             | 0<br>(0 - 0)                |
| Other infectious diseases                                        | 23<br>(12 - 31)             | 1<br>(0 - 1)     | 0<br>(0 - 0)      | 5<br>(3 - 6)             | 7<br>(4 - 10)            | 10<br>(5 - 15)              |
| Non-communicable diseases                                        | 23,924<br>(22,433 - 25,308) | 54<br>(38 - 75)  | 18<br>(14 - 22)   | 1,254<br>(1,133 - 1,378) | 6,115<br>(5,632 - 6,573) | 16,484<br>(15,572 - 17,330) |
| Neoplasms                                                        | 8,427<br>(7,734 - 9,082)    | 4<br>(2 - 7)     | 9<br>(6 - 11)     | 327<br>(293 - 370)       | 2,730<br>(2,487 - 2,989) | 5,356<br>(4,833 - 5,811)    |
| Esophageal cancer                                                | 575<br>(485 - 765)          | --               | --                | 23<br>(18 - 31)          | 240<br>(195 - 321)       | 312<br>(256 - 421)          |
| Stomach cancer                                                   | 450<br>(402 - 512)          | --               | --                | 14<br>(11 - 17)          | 113<br>(98 - 130)        | 323<br>(282 - 375)          |
| Liver cancer                                                     | 239<br>(142 - 308)          | --               | 0<br>(0 - 0)      | 11<br>(7 - 15)           | 95<br>(55 - 126)         | 132<br>(68 - 184)           |
| Liver cancer due to hepatitis B                                  | 51<br>(22 - 96)             | --               | 0<br>(0 - 0)      | 5<br>(2 - 8)             | 25<br>(10 - 50)          | 21<br>(8 - 42)              |
| Liver cancer due to hepatitis C                                  | 128<br>(60 - 195)           | --               | 0<br>(0 - 0)      | 4<br>(1 - 8)             | 49<br>(20 - 78)          | 75<br>(34 - 118)            |
| Liver cancer due to alcohol use                                  | 55<br>(28 - 91)             | --               | --                | 2<br>(1 - 3)             | 19<br>(9 - 30)           | 35<br>(15 - 62)             |
| Liver cancer due to other causes                                 | 4<br>(1 - 9)                | --               | 0<br>(0 - 0)      | 0<br>(0 - 1)             | 2<br>(1 - 4)             | 2<br>(1 - 5)                |
| Larynx cancer                                                    | 79<br>(55 - 105)            | --               | --                | 3<br>(2 - 5)             | 31<br>(21 - 42)          | 44<br>(30 - 61)             |
| Tracheal, bronchus and lung cancer                               | 2,355<br>(2,095 - 2,626)    | --               | --                | 49<br>(40 - 59)          | 838<br>(729 - 949)       | 1,468<br>(1,299 - 1,652)    |
| Breast cancer                                                    | 8<br>(3 - 22)               | --               | --                | 0<br>(0 - 1)             | 3<br>(1 - 7)             | 5<br>(2 - 15)               |
| Cervical cancer                                                  | --                          | --               | --                | --                       | --                       | --                          |
| Uterine cancer                                                   | --                          | --               | --                | --                       | --                       | --                          |
| Prostate cancer                                                  | 975<br>(582 - 1,291)        | --               | --                | 2<br>(1 - 3)             | 153<br>(90 - 225)        | 821<br>(481 - 1,102)        |

Web Table 31- Scotland deaths with 95% UI by age, sex, and cause in 2013

| Cause                                         | Males, All Ages          | Males, 0-4 Years | Males, 5-14 Years | Males, 15-49 Years | Males, 50-69 Years       | Males, 70-80 Years       |
|-----------------------------------------------|--------------------------|------------------|-------------------|--------------------|--------------------------|--------------------------|
| Colon and rectum cancer                       | 1,044<br>(938 - 1,143)   | --               | --                | 33<br>(28 - 40)    | 314<br>(276 - 351)       | 697<br>(612 - 777)       |
| Lip and oral cavity cancer                    | 120<br>(88 - 138)        | --               | --                | 9<br>(7 - 11)      | 56<br>(38 - 67)          | 55<br>(40 - 66)          |
| Nasopharynx cancer                            | 11<br>(9 - 16)           | --               | 0<br>(0 - 0)      | 2<br>(2 - 4)       | 6<br>(4 - 8)             | 3<br>(2 - 5)             |
| Other pharynx cancer                          | 82<br>(46 - 102)         | --               | --                | 7<br>(4 - 9)       | 48<br>(26 - 60)          | 27<br>(12 - 37)          |
| Gallbladder and biliary tract cancer          | 36<br>(24 - 51)          | --               | --                | 1<br>(1 - 1)       | 10<br>(6 - 14)           | 26<br>(17 - 37)          |
| Pancreatic cancer                             | 417<br>(374 - 461)       | --               | --                | 17<br>(13 - 20)    | 160<br>(140 - 181)       | 241<br>(210 - 272)       |
| Malignant skin melanoma                       | 109<br>(49 - 186)        | --               | --                | 17<br>(8 - 30)     | 42<br>(17 - 71)          | 49<br>(21 - 84)          |
| Non-melanoma skin cancer                      | 44<br>(25 - 65)          | --               | --                | 2<br>(1 - 3)       | 7<br>(4 - 11)            | 34<br>(19 - 52)          |
| Ovarian cancer                                | --                       | --               | --                | --                 | --                       | --                       |
| Testicular cancer                             | 8<br>(6 - 12)            | --               | --                | 5<br>(4 - 8)       | 2<br>(1 - 2)             | 2<br>(1 - 3)             |
| Kidney cancer                                 | 257<br>(222 - 293)       | 0<br>(0 - 0)     | 0<br>(0 - 0)      | 13<br>(10 - 16)    | 99<br>(83 - 117)         | 145<br>(121 - 171)       |
| Bladder cancer                                | 311<br>(238 - 361)       | --               | --                | 4<br>(3 - 4)       | 68<br>(51 - 81)          | 240<br>(178 - 285)       |
| Brain and nervous system cancer               | 207<br>(152 - 254)       | 1<br>(1 - 2)     | 2<br>(2 - 3)      | 36<br>(26 - 45)    | 106<br>(79 - 133)        | 62<br>(39 - 79)          |
| Thyroid cancer                                | 13<br>(10 - 16)          | --               | 0<br>(0 - 0)      | 1<br>(1 - 1)       | 5<br>(3 - 6)             | 7<br>(5 - 10)            |
| Mesothelioma                                  | 161<br>(75 - 253)        | --               | --                | 4<br>(2 - 6)       | 57<br>(31 - 91)          | 100<br>(37 - 169)        |
| Hodgkin lymphoma                              | 15<br>(10 - 22)          | 0<br>(0 - 0)     | 0<br>(0 - 0)      | 5<br>(4 - 9)       | 5<br>(3 - 8)             | 4<br>(3 - 7)             |
| Non-Hodgkin lymphoma                          | 261<br>(110 - 350)       | 0<br>(0 - 0)     | 1<br>(0 - 1)      | 19<br>(9 - 28)     | 87<br>(35 - 128)         | 153<br>(62 - 205)        |
| Multiple myeloma                              | 145<br>(80 - 232)        | --               | --                | 4<br>(2 - 8)       | 47<br>(27 - 82)          | 94<br>(50 - 152)         |
| Leukemia                                      | 245<br>(209 - 278)       | 1<br>(1 - 2)     | 3<br>(2 - 4)      | 18<br>(15 - 21)    | 66<br>(53 - 79)          | 158<br>(131 - 186)       |
| Other neoplasms                               | 260<br>(179 - 314)       | 2<br>(1 - 3)     | 2<br>(1 - 3)      | 26<br>(21 - 32)    | 74<br>(55 - 94)          | 155<br>(91 - 203)        |
| Cardiovascular diseases                       | 8,205<br>(7,484 - 8,874) | 1<br>(1 - 1)     | 1<br>(1 - 1)      | 293<br>(258 - 331) | 1,932<br>(1,738 - 2,110) | 5,979<br>(5,409 - 6,455) |
| Rheumatic heart disease                       | 33<br>(23 - 55)          | 0<br>(0 - 0)     | 0<br>(0 - 0)      | 3<br>(2 - 5)       | 10<br>(6 - 18)           | 20<br>(13 - 34)          |
| Ischemic heart disease                        | 4,732<br>(4,164 - 5,358) | 0<br>(0 - 0)     | 0<br>(0 - 0)      | 195<br>(169 - 231) | 3,209<br>(1,173 - 1,493) | 3,209<br>(2,760 - 3,730) |
| Cerebrovascular disease                       | 2,269<br>(1,718 - 2,744) | 0<br>(0 - 0)     | 0<br>(0 - 0)      | 47<br>(35 - 60)    | 333<br>(231 - 414)       | 1,889<br>(1,425 - 2,317) |
| Ischemic stroke                               | 1,311<br>(896 - 1,696)   | 0<br>(0 - 0)     | 0<br>(0 - 0)      | 6<br>(3 - 8)       | 122<br>(70 - 167)        | 1,183<br>(807 - 1,536)   |
| Hemorrhagic stroke                            | 958<br>(560 - 1,271)     | 0<br>(0 - 0)     | 0<br>(0 - 0)      | 41<br>(31 - 53)    | 211<br>(146 - 272)       | 705<br>(366 - 982)       |
| Hypertensive heart disease                    | 109<br>(59 - 157)        | 0<br>(0 - 0)     | 0<br>(0 - 0)      | 6<br>(3 - 8)       | 39<br>(22 - 58)          | 64<br>(30 - 95)          |
| Cardiomyopathy and myocarditis                | 113<br>(82 - 175)        | 0<br>(0 - 1)     | 0<br>(0 - 0)      | 16<br>(11 - 22)    | 34<br>(21 - 46)          | 63<br>(45 - 111)         |
| Atrial fibrillation and flutter               | 139<br>(92 - 180)        | --               | --                | 0<br>(0 - 1)       | 12<br>(8 - 16)           | 126<br>(83 - 168)        |
| Aortic aneurysm                               | 293<br>(216 - 342)       | --               | --                | 5<br>(4 - 6)       | 57<br>(43 - 69)          | 232<br>(169 - 275)       |
| Peripheral vascular disease                   | 124<br>(92 - 158)        | --               | --                | 1<br>(0 - 1)       | 20<br>(15 - 26)          | 103<br>(74 - 134)        |
| Endocarditis                                  | 39<br>(24 - 65)          | 0<br>(0 - 0)     | 0<br>(0 - 0)      | 3<br>(2 - 5)       | 12<br>(7 - 19)           | 24<br>(14 - 43)          |
| Other cardiovascular and circulatory diseases | 354<br>(195 - 427)       | 0<br>(0 - 0)     | 0<br>(0 - 0)      | 16<br>(10 - 21)    | 88<br>(47 - 108)         | 250<br>(137 - 310)       |
| Chronic respiratory diseases                  | 2,112<br>(1,726 - 2,702) | 1<br>(1 - 1)     | 1<br>(0 - 1)      | 25<br>(20 - 30)    | 389<br>(312 - 462)       | 1,697<br>(1,377 - 2,220) |
| Chronic obstructive pulmonary disease         | 1,761<br>(1,430 - 2,321) | 0<br>(0 - 1)     | 0<br>(0 - 0)      | 12<br>(9 - 15)     | 324<br>(263 - 393)       | 1,424<br>(1,154 - 1,933) |
| Pneumoconiosis                                | 61<br>(39 - 105)         | 0<br>(0 - 0)     | 0<br>(0 - 0)      | 1<br>(0 - 1)       | 7<br>(4 - 11)            | 54<br>(33 - 95)          |
| Silicosis                                     | 3<br>(2 - 5)             | 0<br>(0 - 0)     | 0<br>(0 - 0)      | 0<br>(0 - 0)       | 0<br>(0 - 1)             | 2<br>(1 - 4)             |
| Asbestosis                                    | 42<br>(26 - 75)          | 0<br>(0 - 0)     | 0<br>(0 - 0)      | 0<br>(0 - 0)       | 4<br>(3 - 7)             | 38<br>(23 - 68)          |
| Coal workers pneumoconiosis                   | 7<br>(4 - 12)            | 0<br>(0 - 0)     | 0<br>(0 - 0)      | 0<br>(0 - 0)       | 1<br>(0 - 1)             | 6<br>(3 - 10)            |
| Other pneumoconiosis                          | 9<br>(6 - 16)            | 0<br>(0 - 0)     | 0<br>(0 - 0)      | 0<br>(0 - 0)       | 1<br>(1 - 2)             | 8<br>(5 - 15)            |



Web Table 31- Scotland deaths with 95% UI by age, sex, and cause in 2013

| Cause                                               | Males, All Ages          | Males, 0-4 Years | Males, 5-14 Years | Males, 15-49 Years | Males, 50-69 Years | Males, 70-80 Years       |
|-----------------------------------------------------|--------------------------|------------------|-------------------|--------------------|--------------------|--------------------------|
| Asthma                                              | 33<br>(27 - 44)          | 0<br>(0 - 0)     | 0<br>(0 - 0)      | 7<br>(5 - 9)       | 9<br>(7 - 12)      | 17<br>(12 - 24)          |
| Interstitial lung disease and pulmonary sarcoidosis | 240<br>(96 - 357)        | 0<br>(0 - 0)     | 0<br>(0 - 0)      | 5<br>(2 - 7)       | 47<br>(18 - 73)    | 188<br>(73 - 285)        |
| Other chronic respiratory diseases                  | 16<br>(12 - 24)          | 0<br>(0 - 0)     | 0<br>(0 - 0)      | 1<br>(0 - 1)       | 2<br>(1 - 2)       | 14<br>(9 - 21)           |
| Cirrhosis                                           | 660<br>(593 - 728)       | 0<br>(0 - 0)     | 0<br>(0 - 0)      | 141<br>(121 - 163) | 373<br>(328 - 417) | 146<br>(126 - 167)       |
| Cirrhosis due to hepatitis B                        | 66<br>(28 - 120)         | 0<br>(0 - 0)     | 0<br>(0 - 0)      | 15<br>(6 - 29)     | 37<br>(15 - 69)    | 14<br>(6 - 24)           |
| Cirrhosis due to hepatitis C                        | 264<br>(155 - 401)       | 0<br>(0 - 0)     | 0<br>(0 - 0)      | 57<br>(25 - 91)    | 150<br>(79 - 234)  | 57<br>(29 - 84)          |
| Cirrhosis due to alcohol use                        | 264<br>(140 - 390)       | --               | --                | 46<br>(16 - 77)    | 151<br>(76 - 233)  | 67<br>(45 - 95)          |
| Cirrhosis due to other causes                       | 66<br>(34 - 118)         | 0<br>(0 - 0)     | 0<br>(0 - 0)      | 23<br>(11 - 38)    | 35<br>(17 - 66)    | 8<br>(4 - 16)            |
| Digestive diseases                                  | 744<br>(625 - 1,095)     | 1<br>(0 - 1)     | 1<br>(0 - 1)      | 33<br>(28 - 41)    | 163<br>(136 - 200) | 547<br>(442 - 862)       |
| Peptic ulcer disease                                | 151<br>(103 - 281)       | 0<br>(0 - 0)     | 0<br>(0 - 0)      | 5<br>(4 - 7)       | 35<br>(24 - 51)    | 111<br>(71 - 232)        |
| Gastritis and duodenitis                            | 13<br>(6 - 23)           | 0<br>(0 - 0)     | 0<br>(0 - 0)      | 2<br>(1 - 2)       | 4<br>(2 - 7)       | 7<br>(3 - 14)            |
| Appendicitis                                        | 14<br>(6 - 30)           | 0<br>(0 - 0)     | 0<br>(0 - 0)      | 1<br>(1 - 2)       | 3<br>(2 - 6)       | 10<br>(3 - 23)           |
| Paralytic ileus and intestinal obstruction          | 102<br>(36 - 147)        | 0<br>(0 - 0)     | 0<br>(0 - 0)      | 3<br>(1 - 4)       | 16<br>(6 - 24)     | 83<br>(28 - 123)         |
| Inguinal, femoral, and abdominal hernia             | 33<br>(11 - 121)         | 0<br>(0 - 0)     | 0<br>(0 - 0)      | 1<br>(0 - 1)       | 4<br>(2 - 13)      | 28<br>(8 - 108)          |
| Inflammatory bowel disease                          | 42<br>(27 - 77)          | 0<br>(0 - 0)     | 0<br>(0 - 0)      | 3<br>(2 - 4)       | 9<br>(6 - 14)      | 30<br>(18 - 62)          |
| Vascular intestinal disorders                       | 116<br>(42 - 244)        | 0<br>(0 - 0)     | 0<br>(0 - 0)      | 3<br>(1 - 5)       | 28<br>(11 - 55)    | 85<br>(30 - 190)         |
| Gallbladder and biliary diseases                    | 96<br>(48 - 132)         | 0<br>(0 - 0)     | 0<br>(0 - 0)      | 2<br>(1 - 3)       | 15<br>(8 - 20)     | 79<br>(38 - 112)         |
| Pancreatitis                                        | 67<br>(40 - 98)          | 0<br>(0 - 0)     | 0<br>(0 - 0)      | 10<br>(7 - 13)     | 24<br>(14 - 34)    | 33<br>(18 - 56)          |
| Other digestive diseases                            | 111<br>(76 - 172)        | 0<br>(0 - 0)     | 0<br>(0 - 0)      | 5<br>(3 - 6)       | 25<br>(16 - 34)    | 81<br>(54 - 134)         |
| Neurological disorders                              | 2,165<br>(1,677 - 2,634) | 3<br>(2 - 5)     | 2<br>(2 - 3)      | 57<br>(46 - 70)    | 181<br>(145 - 218) | 1,922<br>(1,453 - 2,378) |
| Alzheimer disease and other dementias               | 1,685<br>(1,210 - 2,151) | --               | --                | 0<br>(0 - 1)       | 63<br>(41 - 89)    | 1,622<br>(1,156 - 2,080) |
| Parkinson disease                                   | 216<br>(158 - 261)       | --               | --                | 0<br>(0 - 0)       | 15<br>(11 - 20)    | 200<br>(147 - 245)       |
| Epilepsy                                            | 54<br>(43 - 70)          | 1<br>(0 - 1)     | 1<br>(1 - 1)      | 27<br>(21 - 35)    | 14<br>(10 - 20)    | 12<br>(8 - 17)           |
| Multiple sclerosis                                  | 40<br>(16 - 68)          | --               | --                | 10<br>(4 - 17)     | 21<br>(8 - 36)     | 10<br>(3 - 16)           |
| Other neurological disorders                        | 169<br>(119 - 198)       | 2<br>(1 - 4)     | 1<br>(1 - 2)      | 20<br>(15 - 24)    | 68<br>(49 - 83)    | 78<br>(51 - 94)          |
| Mental and substance use disorders                  | 466<br>(243 - 551)       | 0<br>(0 - 0)     | 0<br>(0 - 0)      | 306<br>(156 - 363) | 130<br>(64 - 167)  | 30<br>(15 - 38)          |
| Schizophrenia                                       | 2<br>(1 - 4)             | --               | --                | 0<br>(0 - 0)       | 1<br>(0 - 1)       | 1<br>(1 - 3)             |
| Alcohol use disorders                               | 200<br>(99 - 264)        | --               | --                | 67<br>(38 - 98)    | 110<br>(48 - 147)  | 23<br>(9 - 31)           |
| Drug use disorders                                  | 263<br>(102 - 313)       | 0<br>(0 - 0)     | --                | 239<br>(90 - 286)  | 19<br>(9 - 25)     | 5<br>(2 - 7)             |
| Opioid use disorders                                | 98<br>(38 - 119)         | 0<br>(0 - 0)     | --                | 90<br>(34 - 110)   | 7<br>(3 - 9)       | 2<br>(1 - 3)             |
| Cocaine use disorders                               | 7<br>(3 - 9)             | 0<br>(0 - 0)     | --                | 7<br>(3 - 8)       | 0<br>(0 - 1)       | 0<br>(0 - 0)             |
| Amphetamine use disorders                           | 6<br>(3 - 8)             | 0<br>(0 - 0)     | --                | 6<br>(2 - 8)       | 0<br>(0 - 1)       | 0<br>(0 - 0)             |
| Other drug use disorders                            | 151<br>(59 - 180)        | 0<br>(0 - 0)     | --                | 136<br>(53 - 164)  | 12<br>(6 - 16)     | 3<br>(2 - 4)             |
| Eating disorders                                    | 0<br>(0 - 0)             | --               | 0<br>(0 - 0)      | 0<br>(0 - 0)       | --                 | --                       |
| Anorexia nervosa                                    | 0<br>(0 - 0)             | --               | 0<br>(0 - 0)      | 0<br>(0 - 0)       | --                 | --                       |
| Diabetes, urogenital, blood, and endocrine diseases | 948<br>(821 - 1,053)     | 3<br>(2 - 5)     | 2<br>(1 - 3)      | 48<br>(42 - 58)    | 178<br>(152 - 200) | 716<br>(609 - 807)       |
| Diabetes mellitus                                   | 315<br>(279 - 352)       | 0<br>(0 - 0)     | 0<br>(0 - 0)      | 16<br>(13 - 19)    | 78<br>(67 - 90)    | 221<br>(191 - 252)       |
| Acute glomerulonephritis                            | 1<br>(0 - 1)             | 0<br>(0 - 0)     | 0<br>(0 - 0)      | 0<br>(0 - 0)       | 0<br>(0 - 0)       | 0<br>(0 - 1)             |
| Chronic kidney disease                              | 311<br>(264 - 380)       | 0<br>(0 - 0)     | 0<br>(0 - 0)      | 10<br>(8 - 14)     | 43<br>(34 - 55)    | 257<br>(215 - 323)       |
| Chronic kidney disease due to diabetes mellitus     | 52<br>(33 - 113)         | 0<br>(0 - 0)     | 0<br>(0 - 0)      | 2<br>(1 - 4)       | 8<br>(5 - 16)      | 42<br>(27 - 95)          |

Web Table 31- Scotland deaths with 95% UI by age, sex, and cause in 2013

| Cause                                               | Males, All Ages          | Males, 0-4 Years | Males, 5-14 Years | Males, 15-49 Years | Males, 50-69 Years | Males, 70-80 Years |
|-----------------------------------------------------|--------------------------|------------------|-------------------|--------------------|--------------------|--------------------|
| Chronic kidney disease due to hypertension          | 61<br>(37 - 100)         | 0<br>(0 - 0)     | 0<br>(0 - 0)      | 2<br>(1 - 3)       | 9<br>(5 - 14)      | 51<br>(30 - 85)    |
| Chronic kidney disease due to glomerulonephritis    | 21<br>(6 - 34)           | 0<br>(0 - 0)     | 0<br>(0 - 0)      | 1<br>(0 - 1)       | 3<br>(1 - 4)       | 17<br>(4 - 28)     |
| Chronic kidney disease due to other causes          | 178<br>(122 - 234)       | 0<br>(0 - 0)     | 0<br>(0 - 0)      | 6<br>(4 - 8)       | 24<br>(15 - 33)    | 148<br>(98 - 202)  |
| Urinary diseases and male infertility               | 220<br>(108 - 283)       | 0<br>(0 - 0)     | 0<br>(0 - 0)      | 5<br>(3 - 6)       | 25<br>(12 - 33)    | 189<br>(91 - 249)  |
| Interstitial nephritis and urinary tract infections | 151<br>(87 - 216)        | 0<br>(0 - 0)     | 0<br>(0 - 0)      | 3<br>(2 - 4)       | 16<br>(9 - 23)     | 132<br>(75 - 192)  |
| Urolithiasis                                        | 8<br>(2 - 16)            | --               | 0<br>(0 - 0)      | 0<br>(0 - 1)       | 2<br>(1 - 3)       | 6<br>(1 - 13)      |
| Other urinary diseases                              | 61<br>(12 - 100)         | 0<br>(0 - 0)     | 0<br>(0 - 0)      | 1<br>(1 - 2)       | 7<br>(2 - 11)      | 52<br>(9 - 89)     |
| Gynecological diseases                              | --                       | --               | --                | --                 | --                 | --                 |
| Uterine fibroids                                    | --                       | --               | --                | --                 | --                 | --                 |
| Polycystic ovarian syndrome                         | --                       | --               | --                | --                 | --                 | --                 |
| Endometriosis                                       | --                       | --               | --                | --                 | --                 | --                 |
| Genital prolapse                                    | --                       | --               | --                | --                 | --                 | --                 |
| Other gynecological diseases                        | --                       | --               | --                | --                 | --                 | --                 |
| Hemoglobinopathies and hemolytic anemias            | 10<br>(6 - 16)           | 0<br>(0 - 0)     | 0<br>(0 - 0)      | 2<br>(1 - 3)       | 2<br>(1 - 3)       | 6<br>(4 - 10)      |
| Thalassemias                                        | 1<br>(0 - 1)             | 0<br>(0 - 0)     | 0<br>(0 - 0)      | 0<br>(0 - 1)       | 0<br>(0 - 0)       | 0<br>(0 - 0)       |
| Sickle cell disorders                               | 2<br>(1 - 3)             | 0<br>(0 - 0)     | 0<br>(0 - 0)      | 1<br>(0 - 1)       | 1<br>(1 - 1)       | 0<br>(0 - 0)       |
| G6PD deficiency                                     | 0<br>(0 - 0)             | 0<br>(0 - 0)     | 0<br>(0 - 0)      | 0<br>(0 - 0)       | 0<br>(0 - 0)       | 0<br>(0 - 0)       |
| Other hemoglobinopathies and hemolytic anemias      | 8<br>(5 - 12)            | 0<br>(0 - 0)     | 0<br>(0 - 0)      | 1<br>(0 - 1)       | 1<br>(1 - 2)       | 6<br>(4 - 9)       |
| Endocrine, metabolic, blood, and immune disorders   | 91<br>(72 - 147)         | 3<br>(1 - 4)     | 1<br>(1 - 2)      | 16<br>(12 - 24)    | 29<br>(21 - 46)    | 42<br>(30 - 71)    |
| Musculoskeletal disorders                           | 62<br>(29 - 79)          | --               | 0<br>(0 - 0)      | 4<br>(2 - 5)       | 16<br>(9 - 21)     | 42<br>(16 - 55)    |
| Rheumatoid arthritis                                | 24<br>(9 - 34)           | --               | 0<br>(0 - 0)      | 0<br>(0 - 1)       | 7<br>(3 - 10)      | 17<br>(5 - 26)     |
| Other musculoskeletal disorders                     | 39<br>(19 - 52)          | --               | 0<br>(0 - 0)      | 4<br>(2 - 5)       | 10<br>(5 - 13)     | 25<br>(10 - 36)    |
| Other non-communicable diseases                     | 134<br>(115 - 157)       | 41<br>(29 - 57)  | 3<br>(2 - 4)      | 20<br>(17 - 24)    | 23<br>(19 - 27)    | 48<br>(35 - 59)    |
| Congenital anomalies                                | 73<br>(62 - 88)          | 29<br>(21 - 41)  | 3<br>(2 - 4)      | 18<br>(15 - 21)    | 14<br>(11 - 17)    | 9<br>(7 - 11)      |
| Neural tube defects                                 | 3<br>(2 - 4)             | 2<br>(1 - 3)     | 0<br>(0 - 0)      | 1<br>(1 - 1)       | 0<br>(0 - 0)       | 0<br>(0 - 0)       |
| Congenital heart anomalies                          | 30<br>(24 - 37)          | 10<br>(7 - 15)   | 1<br>(1 - 2)      | 10<br>(8 - 12)     | 5<br>(3 - 7)       | 3<br>(2 - 5)       |
| Cleft lip and cleft palate                          | 0<br>(0 - 0)             | 0<br>(0 - 0)     | --                | --                 | --                 | --                 |
| Down syndrome                                       | 9<br>(5 - 12)            | 1<br>(0 - 1)     | 0<br>(0 - 0)      | 2<br>(1 - 3)       | 6<br>(3 - 8)       | 1<br>(0 - 1)       |
| Chromosomal unbalanced rearrangements               | 4<br>(2 - 6)             | 3<br>(2 - 5)     | 0<br>(0 - 0)      | 0<br>(0 - 1)       | 0<br>(0 - 0)       | 0<br>(0 - 0)       |
| Other congenital anomalies                          | 28<br>(22 - 35)          | 13<br>(9 - 20)   | 1<br>(1 - 2)      | 4<br>(3 - 6)       | 4<br>(2 - 6)       | 5<br>(3 - 7)       |
| Skin and subcutaneous diseases                      | 50<br>(35 - 62)          | 0<br>(0 - 0)     | 0<br>(0 - 0)      | 2<br>(2 - 3)       | 8<br>(6 - 11)      | 39<br>(27 - 51)    |
| Cellulitis                                          | 21<br>(9 - 32)           | 0<br>(0 - 0)     | 0<br>(0 - 0)      | 1<br>(0 - 1)       | 4<br>(2 - 6)       | 16<br>(6 - 26)     |
| Pyoderma                                            | 21<br>(13 - 32)          | 0<br>(0 - 0)     | 0<br>(0 - 0)      | 1<br>(1 - 2)       | 3<br>(2 - 5)       | 17<br>(9 - 26)     |
| Decubitus ulcer                                     | 6<br>(4 - 12)            | 0<br>(0 - 0)     | 0<br>(0 - 0)      | 0<br>(0 - 0)       | 1<br>(0 - 1)       | 6<br>(3 - 11)      |
| Other skin and subcutaneous diseases                | 1<br>(1 - 3)             | 0<br>(0 - 0)     | 0<br>(0 - 0)      | 0<br>(0 - 0)       | 0<br>(0 - 1)       | 1<br>(0 - 2)       |
| Sudden infant death syndrome                        | 11<br>(6 - 20)           | 11<br>(6 - 20)   | --                | --                 | --                 | --                 |
| Injuries                                            | 1,378<br>(1,216 - 1,529) | 11<br>(7 - 17)   | 11<br>(9 - 14)    | 545<br>(481 - 622) | 303<br>(262 - 346) | 508<br>(403 - 592) |
| Transport injuries                                  | 203<br>(180 - 227)       | 2<br>(1 - 3)     | 5<br>(3 - 6)      | 107<br>(92 - 126)  | 48<br>(41 - 56)    | 42<br>(33 - 51)    |
| Road injuries                                       | 187<br>(166 - 210)       | 2<br>(1 - 3)     | 4<br>(3 - 6)      | 98<br>(85 - 116)   | 43<br>(37 - 50)    | 40<br>(32 - 49)    |
| Pedestrian road injuries                            | 55<br>(35 - 82)          | 1<br>(0 - 1)     | 2<br>(1 - 3)      | 16<br>(8 - 27)     | 16<br>(9 - 24)     | 21<br>(13 - 30)    |

Web Table 31- Scotland deaths with 95% UI by age, sex, and cause in 2013

| Cause                                           | Males, All Ages    | Males, 0-4 Years | Males, 5-14 Years | Males, 15-49 Years | Males, 50-69 Years | Males, 70-80 Years |
|-------------------------------------------------|--------------------|------------------|-------------------|--------------------|--------------------|--------------------|
| Cyclist road injuries                           | 9<br>(5 - 12)      | 0<br>(0 - 0)     | 1<br>(0 - 1)      | 3<br>(2 - 5)       | 2<br>(1 - 4)       | 2<br>(1 - 3)       |
| Motorcyclist road injuries                      | 24<br>(14 - 32)    | 0<br>(0 - 0)     | 0<br>(0 - 0)      | 20<br>(12 - 28)    | 3<br>(1 - 4)       | 1<br>(0 - 1)       |
| Motor vehicle road injuries                     | 98<br>(72 - 130)   | 1<br>(0 - 1)     | 1<br>(1 - 2)      | 58<br>(45 - 77)    | 22<br>(15 - 30)    | 16<br>(9 - 25)     |
| Other road injuries                             | 1<br>(0 - 2)       | 0<br>(0 - 0)     | 0<br>(0 - 0)      | 0<br>(0 - 1)       | 0<br>(0 - 0)       | 0<br>(0 - 0)       |
| Other transport injuries                        | 16<br>(11 - 21)    | 0<br>(0 - 0)     | 0<br>(0 - 0)      | 9<br>(6 - 12)      | 5<br>(3 - 7)       | 2<br>(1 - 3)       |
| Unintentional injuries                          | 644<br>(528 - 745) | 8<br>(5 - 12)    | 6<br>(4 - 8)      | 91<br>(79 - 115)   | 119<br>(100 - 144) | 419<br>(318 - 504) |
| Falls                                           | 367<br>(272 - 449) | 1<br>(1 - 2)     | 1<br>(1 - 2)      | 30<br>(24 - 41)    | 57<br>(40 - 71)    | 278<br>(198 - 350) |
| Drowning                                        | 29<br>(21 - 40)    | 1<br>(1 - 3)     | 2<br>(1 - 2)      | 13<br>(10 - 17)    | 7<br>(5 - 11)      | 5<br>(3 - 12)      |
| Fire, heat, and hot substances                  | 37<br>(29 - 60)    | 1<br>(1 - 3)     | 1<br>(0 - 1)      | 10<br>(7 - 14)     | 16<br>(7 - 17)     | 16<br>(11 - 26)    |
| Poisonings                                      | 7<br>(5 - 15)      | 0<br>(0 - 0)     | 0<br>(0 - 0)      | 4<br>(3 - 8)       | 2<br>(1 - 3)       | 1<br>(1 - 3)       |
| Exposure to mechanical forces                   | 19<br>(17 - 24)    | 1<br>(0 - 1)     | 1<br>(0 - 1)      | 11<br>(9 - 15)     | 5<br>(4 - 6)       | 2<br>(2 - 3)       |
| Unintentional firearm injuries                  | 0<br>(0 - 1)       | 0<br>(0 - 0)     | 0<br>(0 - 0)      | 0<br>(0 - 0)       | 0<br>(0 - 0)       | 0<br>(0 - 0)       |
| Unintentional suffocation                       | 5<br>(2 - 6)       | 1<br>(0 - 1)     | 0<br>(0 - 1)      | 3<br>(1 - 4)       | 1<br>(0 - 1)       | 1<br>(0 - 1)       |
| Other exposure to mechanical forces             | 14<br>(12 - 19)    | 0<br>(0 - 0)     | 0<br>(0 - 0)      | 8<br>(6 - 12)      | 4<br>(3 - 5)       | 2<br>(1 - 3)       |
| Adverse effects of medical treatment            | 69<br>(40 - 91)    | 1<br>(0 - 1)     | 0<br>(0 - 0)      | 5<br>(3 - 7)       | 16<br>(9 - 23)     | 47<br>(24 - 64)    |
| Animal contact                                  | 2<br>(1 - 3)       | 0<br>(0 - 0)     | 0<br>(0 - 0)      | 1<br>(0 - 1)       | 1<br>(0 - 1)       | 1<br>(0 - 1)       |
| Venomous animal contact                         | 0<br>(0 - 0)       | 0<br>(0 - 0)     | 0<br>(0 - 0)      | 0<br>(0 - 0)       | 0<br>(0 - 0)       | 0<br>(0 - 0)       |
| Non-venomous animal contact                     | 2<br>(1 - 2)       | 0<br>(0 - 0)     | 0<br>(0 - 0)      | 1<br>(0 - 1)       | 1<br>(0 - 1)       | 1<br>(0 - 1)       |
| Foreign body                                    | 105<br>(48 - 149)  | 2<br>(1 - 4)     | 1<br>(1 - 2)      | 14<br>(8 - 26)     | 20<br>(10 - 32)    | 67<br>(26 - 99)    |
| Pulmonary aspiration and foreign body in airway | 105<br>(48 - 148)  | 2<br>(1 - 4)     | 1<br>(1 - 2)      | 14<br>(8 - 26)     | 20<br>(10 - 32)    | 67<br>(26 - 99)    |
| Foreign body in other body part                 | 0<br>(0 - 0)       | 0<br>(0 - 0)     | 0<br>(0 - 0)      | 0<br>(0 - 0)       | 0<br>(0 - 0)       | 0<br>(0 - 0)       |
| Other unintentional injuries                    | 7<br>(5 - 9)       | 0<br>(0 - 1)     | 0<br>(0 - 0)      | 3<br>(2 - 5)       | 2<br>(1 - 3)       | 2<br>(1 - 2)       |
| Self-harm and interpersonal violence            | 531<br>(433 - 614) | 1<br>(1 - 2)     | 1<br>(1 - 1)      | 347<br>(288 - 405) | 135<br>(100 - 165) | 47<br>(36 - 60)    |
| Self-harm                                       | 474<br>(384 - 556) | --               | 0<br>(0 - 1)      | 304<br>(246 - 357) | 127<br>(92 - 156)  | 44<br>(34 - 57)    |
| Interpersonal violence                          | 57<br>(32 - 78)    | 1<br>(1 - 2)     | 1<br>(0 - 1)      | 43<br>(25 - 61)    | 9<br>(5 - 13)      | 3<br>(1 - 4)       |
| Assault by firearm                              | 4<br>(2 - 8)       | 0<br>(0 - 0)     | 0<br>(0 - 0)      | 3<br>(1 - 7)       | 1<br>(0 - 1)       | 0<br>(0 - 0)       |
| Assault by sharp object                         | 28<br>(15 - 41)    | 0<br>(0 - 0)     | 0<br>(0 - 0)      | 23<br>(12 - 33)    | 4<br>(2 - 7)       | 1<br>(0 - 2)       |
| Assault by other means                          | 25<br>(14 - 37)    | 1<br>(1 - 2)     | 0<br>(0 - 1)      | 17<br>(10 - 27)    | 4<br>(2 - 6)       | 2<br>(1 - 3)       |

Web Table 31- Scotland deaths with 95% UI by age, sex, and cause in 2013

| Cause                                                             | Females, All Ages           | Females, 0-4 Years | Females, 5-14 Years | Females, 15-49 Years   | Females, 50-69 Years     | Females, 70-80 Years        |
|-------------------------------------------------------------------|-----------------------------|--------------------|---------------------|------------------------|--------------------------|-----------------------------|
| All causes                                                        | 29,058<br>(27,544 - 30,869) | 106<br>(77 - 140)  | 22<br>(18 - 26)     | 1,056<br>(963 - 1,164) | 4,593<br>(4,257 - 4,996) | 23,280<br>(22,182 - 24,608) |
| Communicable, maternal, neonatal, and nutritional diseases        | 2,133<br>(1,680 - 3,011)    | 50<br>(35 - 68)    | 2<br>(2 - 3)        | 44<br>(37 - 50)        | 128<br>(105 - 154)       | 1,909<br>(1,466 - 2,781)    |
| HIV/AIDS and tuberculosis                                         | 28<br>(21 - 34)             | 0<br>(0 - 0)       | 0<br>(0 - 0)        | 7<br>(5 - 9)           | 6<br>(4 - 7)             | 15<br>(10 - 20)             |
| Tuberculosis                                                      | 22<br>(17 - 28)             | 0<br>(0 - 0)       | 0<br>(0 - 0)        | 2<br>(2 - 3)           | 5<br>(4 - 7)             | 15<br>(10 - 20)             |
| HIV/AIDS                                                          | 5<br>(3 - 8)                | 0<br>(0 - 0)       | 0<br>(0 - 0)        | 4<br>(3 - 7)           | 1<br>(0 - 2)             | 0<br>(0 - 0)                |
| HIV/AIDS resulting in mycobacterial infection                     | 0<br>(0 - 0)                | 0<br>(0 - 0)       | 0<br>(0 - 0)        | 0<br>(0 - 0)           | 0<br>(0 - 0)             | 0<br>(0 - 0)                |
| HIV/AIDS resulting in other diseases                              | 5<br>(3 - 8)                | 0<br>(0 - 0)       | 0<br>(0 - 0)        | 4<br>(3 - 6)           | 1<br>(0 - 2)             | 0<br>(0 - 0)                |
| Diarrhea, lower respiratory, and other common infectious diseases | 1,983<br>(1,529 - 2,855)    | 7<br>(5 - 10)      | 2<br>(1 - 3)        | 25<br>(21 - 31)        | 111<br>(90 - 136)        | 1,838<br>(1,399 - 2,697)    |
| Diarrheal diseases                                                | 104<br>(73 - 147)           | 1<br>(1 - 2)       | 0<br>(0 - 0)        | 2<br>(1 - 2)           | 7<br>(5 - 10)            | 94<br>(64 - 137)            |
| Intestinal infectious diseases                                    | 3<br>(1 - 7)                | 0<br>(0 - 1)       | 0<br>(0 - 1)        | 1<br>(0 - 3)           | 0<br>(0 - 1)             | 0<br>(0 - 1)                |
| Typhoid fever                                                     | 2<br>(1 - 5)                | 0<br>(0 - 1)       | 0<br>(0 - 1)        | 1<br>(0 - 2)           | 0<br>(0 - 1)             | 0<br>(0 - 1)                |
| Paratyphoid fever                                                 | 0<br>(0 - 1)                | 0<br>(0 - 0)       | 0<br>(0 - 0)        | 0<br>(0 - 0)           | 0<br>(0 - 0)             | 0<br>(0 - 0)                |
| Other intestinal infectious diseases                              | 0<br>(0 - 2)                | 0<br>(0 - 0)       | 0<br>(0 - 0)        | 0<br>(0 - 0)           | 0<br>(0 - 1)             | 0<br>(0 - 1)                |
| Lower respiratory infections                                      | 1,853<br>(1,416 - 2,723)    | 4<br>(2 - 5)       | 1<br>(0 - 1)        | 19<br>(15 - 23)        | 99<br>(79 - 123)         | 1,731<br>(1,299 - 2,577)    |
| Upper respiratory infections                                      | 1<br>(0 - 2)                | 0<br>(0 - 0)       | 0<br>(0 - 0)        | 0<br>(0 - 0)           | 0<br>(0 - 0)             | 0<br>(0 - 2)                |
| Otitis media                                                      | 1<br>(1 - 1)                | 0<br>(0 - 0)       | 0<br>(0 - 0)        | 0<br>(0 - 0)           | 0<br>(0 - 0)             | 0<br>(0 - 0)                |
| Meningitis                                                        | 12<br>(10 - 18)             | 1<br>(1 - 1)       | 0<br>(0 - 0)        | 2<br>(1 - 2)           | 3<br>(2 - 4)             | 6<br>(5 - 10)               |
| Pneumococcal meningitis                                           | 2<br>(1 - 3)                | 0<br>(0 - 0)       | 0<br>(0 - 0)        | 0<br>(0 - 0)           | 0<br>(0 - 1)             | 1<br>(1 - 2)                |
| H influenzae type B meningitis                                    | 1<br>(1 - 2)                | 0<br>(0 - 0)       | 0<br>(0 - 0)        | 0<br>(0 - 0)           | 0<br>(0 - 0)             | 1<br>(0 - 1)                |
| Meningococcal meningitis                                          | 4<br>(3 - 6)                | 0<br>(0 - 1)       | 0<br>(0 - 0)        | 1<br>(0 - 1)           | 1<br>(0 - 1)             | 2<br>(1 - 3)                |
| Other meningitis                                                  | 4<br>(3 - 8)                | 0<br>(0 - 0)       | 0<br>(0 - 0)        | 1<br>(0 - 1)           | 1<br>(1 - 2)             | 2<br>(1 - 4)                |
| Encephalitis                                                      | 7<br>(3 - 9)                | 0<br>(0 - 1)       | 0<br>(0 - 0)        | 1<br>(1 - 2)           | 2<br>(1 - 2)             | 3<br>(1 - 4)                |
| Diphtheria                                                        | 0<br>(0 - 0)                | 0<br>(0 - 0)       | 0<br>(0 - 0)        | 0<br>(0 - 0)           | 0<br>(0 - 0)             | --                          |
| Whooping cough                                                    | 0<br>(0 - 0)                | 0<br>(0 - 0)       | 0<br>(0 - 0)        | 0<br>(0 - 0)           | 0<br>(0 - 0)             | --                          |
| Tetanus                                                           | 0<br>(0 - 0)                | 0<br>(0 - 0)       | 0<br>(0 - 0)        | 0<br>(0 - 0)           | 0<br>(0 - 0)             | 0<br>(0 - 0)                |
| Measles                                                           | 0<br>(0 - 0)                | 0<br>(0 - 0)       | 0<br>(0 - 0)        | 0<br>(0 - 0)           | 0<br>(0 - 0)             | --                          |
| Varicella and herpes zoster                                       | 3<br>(0 - 16)               | 0<br>(0 - 0)       | 0<br>(0 - 0)        | 0<br>(0 - 1)           | 0<br>(0 - 1)             | 3<br>(0 - 15)               |
| Neglected tropical diseases and malaria                           | 2<br>(1 - 2)                | 0<br>(0 - 0)       | 0<br>(0 - 0)        | 1<br>(0 - 1)           | 1<br>(0 - 1)             | 1<br>(0 - 1)                |
| Cysticercosis                                                     | 0<br>(0 - 0)                | 0<br>(0 - 0)       | 0<br>(0 - 0)        | 0<br>(0 - 0)           | 0<br>(0 - 0)             | 0<br>(0 - 0)                |
| Cystic echinococcosis                                             | 0<br>(0 - 0)                | 0<br>(0 - 0)       | 0<br>(0 - 0)        | 0<br>(0 - 0)           | 0<br>(0 - 0)             | 0<br>(0 - 0)                |
| Dengue                                                            | 0<br>(0 - 0)                | 0<br>(0 - 0)       | 0<br>(0 - 0)        | 0<br>(0 - 0)           | 0<br>(0 - 0)             | 0<br>(0 - 0)                |
| Rabies                                                            | 0<br>(0 - 0)                | 0<br>(0 - 0)       | 0<br>(0 - 0)        | 0<br>(0 - 0)           | 0<br>(0 - 0)             | 0<br>(0 - 0)                |
| Other neglected tropical diseases                                 | 1<br>(0 - 1)                | 0<br>(0 - 0)       | 0<br>(0 - 0)        | 0<br>(0 - 0)           | 0<br>(0 - 1)             | 0<br>(0 - 0)                |
| Maternal disorders                                                | 6<br>(5 - 8)                | --                 | 0<br>(0 - 0)        | 6<br>(5 - 8)           | --                       | --                          |
| Maternal hemorrhage                                               | 1<br>(0 - 1)                | --                 | 0<br>(0 - 0)        | 1<br>(0 - 1)           | --                       | --                          |
| Maternal sepsis and other maternal infections                     | 1<br>(0 - 1)                | --                 | 0<br>(0 - 0)        | 1<br>(0 - 1)           | --                       | --                          |
| Maternal hypertensive disorders                                   | 1<br>(1 - 1)                | --                 | 0<br>(0 - 0)        | 1<br>(1 - 1)           | --                       | --                          |
| Maternal obstructed labor                                         | 0<br>(0 - 1)                | --                 | 0<br>(0 - 0)        | 0<br>(0 - 1)           | --                       | --                          |
| Maternal abortive outcome                                         | 1<br>(1 - 2)                | --                 | 0<br>(0 - 0)        | 1<br>(1 - 2)           | --                       | --                          |
| Indirect maternal deaths                                          | 1<br>(0 - 1)                | --                 | 0<br>(0 - 0)        | 1<br>(0 - 1)           | --                       | --                          |

Web Table 31- Scotland deaths with 95% UI by age, sex, and cause in 2013

| Cause                                                            | Females, All Ages           | Females, 0-4 Years | Females, 5-14 Years | Females, 15-49 Years | Females, 50-69 Years     | Females, 70-80 Years        |
|------------------------------------------------------------------|-----------------------------|--------------------|---------------------|----------------------|--------------------------|-----------------------------|
| Late maternal deaths                                             | 0<br>(0 - 1)                | --                 | 0<br>(0 - 0)        | 0<br>(0 - 1)         | --                       | --                          |
| Maternal deaths aggravated by HIV/AIDS                           | 0<br>(0 - 0)                | --                 | --                  | 0<br>(0 - 0)         | --                       | --                          |
| Other maternal disorders                                         | 1<br>(1 - 2)                | --                 | 0<br>(0 - 0)        | 1<br>(1 - 2)         | --                       | --                          |
| Neonatal disorders                                               | 42<br>(29 - 58)             | 42<br>(29 - 58)    | --                  | --                   | --                       | --                          |
| Neonatal preterm birth complications                             | 21<br>(14 - 32)             | 21<br>(14 - 32)    | --                  | --                   | --                       | --                          |
| Neonatal encephalopathy due to birth asphyxia and trauma         | 10<br>(5 - 15)              | 10<br>(5 - 15)     | --                  | --                   | --                       | --                          |
| Neonatal sepsis and other neonatal infections                    | 4<br>(2 - 9)                | 4<br>(2 - 9)       | --                  | --                   | --                       | --                          |
| Hemolytic disease and other neonatal jaundice                    | 0<br>(0 - 0)                | 0<br>(0 - 0)       | --                  | --                   | --                       | --                          |
| Other neonatal disorders                                         | 6<br>(3 - 11)               | 6<br>(3 - 11)      | --                  | --                   | --                       | --                          |
| Nutritional deficiencies                                         | 40<br>(29 - 54)             | 0<br>(0 - 0)       | 0<br>(0 - 0)        | 1<br>(1 - 1)         | 3<br>(2 - 3)             | 36<br>(26 - 50)             |
| Protein-energy malnutrition                                      | 9<br>(3 - 15)               | 0<br>(0 - 0)       | 0<br>(0 - 0)        | 0<br>(0 - 0)         | 1<br>(0 - 1)             | 7<br>(2 - 13)               |
| Iodine deficiency                                                | 0<br>(0 - 1)                | 0<br>(0 - 0)       | 0<br>(0 - 0)        | 0<br>(0 - 0)         | 0<br>(0 - 0)             | 0<br>(0 - 1)                |
| Iron-deficiency anemia                                           | 28<br>(19 - 40)             | 0<br>(0 - 0)       | 0<br>(0 - 0)        | 0<br>(0 - 1)         | 1<br>(1 - 2)             | 26<br>(17 - 38)             |
| Other nutritional deficiencies                                   | 3<br>(1 - 9)                | 0<br>(0 - 0)       | 0<br>(0 - 0)        | 0<br>(0 - 0)         | 0<br>(0 - 1)             | 3<br>(1 - 8)                |
| Other communicable, maternal, neonatal, and nutritional diseases | 32<br>(21 - 40)             | 1<br>(0 - 1)       | 0<br>(0 - 0)        | 4<br>(3 - 5)         | 8<br>(5 - 11)            | 19<br>(12 - 24)             |
| Sexually transmitted diseases excluding HIV                      | 6<br>(4 - 8)                | 0<br>(0 - 1)       | 0<br>(0 - 0)        | 0<br>(0 - 1)         | 1<br>(1 - 1)             | 4<br>(2 - 7)                |
| Syphilis                                                         | 4<br>(3 - 6)                | 0<br>(0 - 1)       | 0<br>(0 - 0)        | 0<br>(0 - 0)         | 1<br>(0 - 1)             | 3<br>(2 - 5)                |
| Chlamydial infection                                             | 0<br>(0 - 1)                | --                 | 0<br>(0 - 0)        | 0<br>(0 - 0)         | 0<br>(0 - 0)             | 0<br>(0 - 0)                |
| Gonococcal infection                                             | 1<br>(0 - 1)                | --                 | 0<br>(0 - 0)        | 0<br>(0 - 0)         | 0<br>(0 - 0)             | 0<br>(0 - 1)                |
| Other sexually transmitted diseases                              | 0<br>(0 - 1)                | --                 | 0<br>(0 - 0)        | 0<br>(0 - 0)         | 0<br>(0 - 0)             | 0<br>(0 - 0)                |
| Hepatitis                                                        | 2<br>(2 - 3)                | 0<br>(0 - 0)       | 0<br>(0 - 0)        | 1<br>(0 - 1)         | 1<br>(0 - 1)             | 1<br>(0 - 1)                |
| Acute hepatitis A                                                | 1<br>(0 - 1)                | 0<br>(0 - 0)       | 0<br>(0 - 0)        | 0<br>(0 - 0)         | 0<br>(0 - 0)             | 0<br>(0 - 0)                |
| Acute hepatitis B                                                | 1<br>(1 - 2)                | 0<br>(0 - 0)       | 0<br>(0 - 0)        | 0<br>(0 - 0)         | 0<br>(0 - 1)             | 1<br>(0 - 1)                |
| Acute hepatitis C                                                | 0<br>(0 - 0)                | --                 | 0<br>(0 - 0)        | 0<br>(0 - 0)         | 0<br>(0 - 0)             | 0<br>(0 - 0)                |
| Other infectious diseases                                        | 24<br>(14 - 32)             | 1<br>(0 - 1)       | 0<br>(0 - 0)        | 3<br>(2 - 4)         | 6<br>(3 - 9)             | 14<br>(7 - 19)              |
| Non-communicable diseases                                        | 25,891<br>(24,302 - 27,516) | 49<br>(36 - 67)    | 15<br>(12 - 18)     | 857<br>(779 - 944)   | 4,325<br>(4,002 - 4,695) | 20,644<br>(19,431 - 21,885) |
| Neoplasms                                                        | 7,924<br>(6,729 - 8,778)    | 3<br>(2 - 5)       | 7<br>(5 - 8)        | 406<br>(361 - 453)   | 2,312<br>(2,039 - 2,564) | 5,196<br>(4,250 - 5,796)    |
| Esophageal cancer                                                | 291<br>(254 - 336)          | --                 | --                  | 6<br>(4 - 8)         | 67<br>(56 - 82)          | 218<br>(183 - 258)          |
| Stomach cancer                                                   | 378<br>(275 - 514)          | --                 | --                  | 10<br>(7 - 13)       | 58<br>(41 - 81)          | 311<br>(223 - 432)          |
| Liver cancer                                                     | 164<br>(101 - 197)          | --                 | 0<br>(0 - 0)        | 7<br>(5 - 9)         | 41<br>(28 - 50)          | 116<br>(66 - 144)           |
| Liver cancer due to hepatitis B                                  | 33<br>(11 - 71)             | --                 | 0<br>(0 - 0)        | 2<br>(1 - 4)         | 11<br>(3 - 23)           | 20<br>(6 - 45)              |
| Liver cancer due to hepatitis C                                  | 84<br>(44 - 120)            | --                 | 0<br>(0 - 0)        | 3<br>(1 - 5)         | 20<br>(10 - 31)          | 61<br>(31 - 89)             |
| Liver cancer due to alcohol use                                  | 30<br>(11 - 52)             | --                 | --                  | 1<br>(0 - 1)         | 6<br>(3 - 11)            | 24<br>(8 - 42)              |
| Liver cancer due to other causes                                 | 17<br>(5 - 36)              | --                 | 0<br>(0 - 0)        | 1<br>(0 - 2)         | 5<br>(2 - 9)             | 11<br>(3 - 25)              |
| Larynx cancer                                                    | 21<br>(13 - 31)             | --                 | --                  | 1<br>(1 - 1)         | 9<br>(5 - 14)            | 11<br>(7 - 17)              |
| Tracheal, bronchus and lung cancer                               | 2,041<br>(1,409 - 2,397)    | --                 | --                  | 51<br>(41 - 68)      | 695<br>(539 - 801)       | 1,295<br>(759 - 1,595)      |
| Breast cancer                                                    | 1,109<br>(849 - 1,330)      | --                 | --                  | 115<br>(94 - 148)    | 395<br>(304 - 483)       | 599<br>(436 - 714)          |
| Cervical cancer                                                  | 133<br>(108 - 157)          | --                 | --                  | 29<br>(23 - 36)      | 46<br>(33 - 57)          | 58<br>(46 - 73)             |
| Uterine cancer                                                   | 167<br>(127 - 198)          | --                 | --                  | 4<br>(2 - 5)         | 51<br>(38 - 64)          | 112<br>(83 - 141)           |
| Prostate cancer                                                  | --                          | --                 | --                  | --                   | --                       | --                          |

Web Table 31- Scotland deaths with 95% UI by age, sex, and cause in 2013

| Cause                                         | Females, All Ages         | Females, 0-4 Years | Females, 5-14 Years | Females, 15-49 Years | Females, 50-69 Years | Females, 70-80 Years      |
|-----------------------------------------------|---------------------------|--------------------|---------------------|----------------------|----------------------|---------------------------|
| Colon and rectum cancer                       | 965<br>(838 - 1,097)      | --                 | --                  | 29<br>(24 - 36)      | 209<br>(177 - 237)   | 727<br>(620 - 846)        |
| Lip and oral cavity cancer                    | 63<br>(52 - 74)           | --                 | --                  | 4<br>(3 - 5)         | 20<br>(16 - 25)      | 39<br>(31 - 48)           |
| Nasopharynx cancer                            | 6<br>(3 - 14)             | --                 | 0<br>(0 - 0)        | 1<br>(0 - 2)         | 2<br>(1 - 4)         | 3<br>(2 - 8)              |
| Other pharynx cancer                          | 23<br>(18 - 29)           | --                 | --                  | 1<br>(1 - 2)         | 11<br>(8 - 14)       | 11<br>(8 - 15)            |
| Gallbladder and biliary tract cancer          | 109<br>(78 - 151)         | --                 | --                  | 1<br>(1 - 2)         | 20<br>(14 - 27)      | 87<br>(61 - 127)          |
| Pancreatic cancer                             | 436<br>(378 - 488)        | --                 | --                  | 11<br>(9 - 14)       | 112<br>(94 - 130)    | 312<br>(269 - 357)        |
| Malignant skin melanoma                       | 84<br>(51 - 108)          | --                 | --                  | 13<br>(9 - 18)       | 27<br>(17 - 35)      | 43<br>(26 - 59)           |
| Non-melanoma skin cancer                      | 37<br>(26 - 51)           | --                 | --                  | 1<br>(1 - 1)         | 3<br>(3 - 4)         | 33<br>(23 - 46)           |
| Ovarian cancer                                | 444<br>(377 - 508)        | --                 | --                  | 27<br>(21 - 33)      | 163<br>(135 - 191)   | 254<br>(207 - 299)        |
| Testicular cancer                             | --                        | --                 | --                  | --                   | --                   | --                        |
| Kidney cancer                                 | 169<br>(117 - 219)        | 0<br>(0 - 0)       | 0<br>(0 - 0)        | 7<br>(5 - 10)        | 53<br>(40 - 72)      | 109<br>(62 - 152)         |
| Bladder cancer                                | 181<br>(117 - 249)        | --                 | --                  | 3<br>(2 - 4)         | 31<br>(21 - 44)      | 147<br>(92 - 207)         |
| Brain and nervous system cancer               | 154<br>(110 - 182)        | 1<br>(0 - 1)       | 2<br>(1 - 3)        | 25<br>(18 - 31)      | 69<br>(49 - 85)      | 57<br>(35 - 72)           |
| Thyroid cancer                                | 20<br>(15 - 28)           | --                 | 0<br>(0 - 0)        | 1<br>(0 - 1)         | 4<br>(3 - 6)         | 15<br>(11 - 22)           |
| Mesothelioma                                  | 32<br>(22 - 51)           | --                 | --                  | 1<br>(1 - 2)         | 12<br>(8 - 22)       | 18<br>(11 - 29)           |
| Hodgkin lymphoma                              | 15<br>(10 - 20)           | 0<br>(0 - 0)       | 0<br>(0 - 0)        | 5<br>(3 - 6)         | 4<br>(3 - 5)         | 6<br>(4 - 9)              |
| Non-Hodgkin lymphoma                          | 251<br>(140 - 397)        | 0<br>(0 - 0)       | 0<br>(0 - 0)        | 14<br>(8 - 21)       | 63<br>(37 - 107)     | 173<br>(88 - 267)         |
| Multiple myeloma                              | 127<br>(78 - 198)         | --                 | --                  | 3<br>(2 - 5)         | 33<br>(20 - 56)      | 91<br>(52 - 145)          |
| Leukemia                                      | 174<br>(138 - 207)        | 1<br>(0 - 1)       | 2<br>(1 - 2)        | 14<br>(11 - 17)      | 36<br>(27 - 44)      | 122<br>(92 - 150)         |
| Other neoplasms                               | 329<br>(228 - 401)        | 2<br>(1 - 2)       | 2<br>(2 - 3)        | 23<br>(18 - 28)      | 76<br>(55 - 93)      | 226<br>(143 - 289)        |
| Cardiovascular diseases                       | 9,823<br>(8,784 - 11,888) | 1<br>(1 - 1)       | 1<br>(0 - 1)        | 128<br>(104 - 155)   | 926<br>(794 - 1,268) | 8,767<br>(7,845 - 10,497) |
| Rheumatic heart disease                       | 102<br>(74 - 186)         | 0<br>(0 - 0)       | 0<br>(0 - 0)        | 4<br>(3 - 7)         | 20<br>(14 - 47)      | 77<br>(53 - 136)          |
| Ischemic heart disease                        | 4,540<br>(3,802 - 6,208)  | 0<br>(0 - 0)       | 0<br>(0 - 0)        | 54<br>(40 - 70)      | 506<br>(420 - 779)   | 3,980<br>(3,254 - 5,304)  |
| Cerebrovascular disease                       | 3,611<br>(3,030 - 4,859)  | 0<br>(0 - 0)       | 0<br>(0 - 0)        | 45<br>(35 - 59)      | 253<br>(206 - 376)   | 3,313<br>(2,769 - 4,451)  |
| Ischemic stroke                               | 2,163<br>(1,743 - 3,085)  | 0<br>(0 - 0)       | 0<br>(0 - 0)        | 4<br>(3 - 6)         | 71<br>(49 - 115)     | 2,088<br>(1,680 - 2,974)  |
| Hemorrhagic stroke                            | 1,448<br>(1,044 - 1,988)  | 0<br>(0 - 0)       | 0<br>(0 - 0)        | 41<br>(32 - 53)      | 182<br>(146 - 275)   | 1,226<br>(859 - 1,701)    |
| Hypertensive heart disease                    | 139<br>(77 - 191)         | 0<br>(0 - 0)       | 0<br>(0 - 0)        | 2<br>(1 - 3)         | 20<br>(12 - 29)      | 116<br>(61 - 163)         |
| Cardiomyopathy and myocarditis                | 99<br>(72 - 167)          | 0<br>(0 - 1)       | 0<br>(0 - 0)        | 4<br>(3 - 6)         | 10<br>(8 - 16)       | 84<br>(59 - 144)          |
| Atrial fibrillation and flutter               | 334<br>(235 - 449)        | --                 | --                  | 0<br>(0 - 0)         | 9<br>(6 - 12)        | 325<br>(228 - 439)        |
| Aortic aneurysm                               | 232<br>(139 - 387)        | --                 | --                  | 2<br>(1 - 3)         | 24<br>(14 - 39)      | 206<br>(123 - 347)        |
| Peripheral vascular disease                   | 204<br>(147 - 267)        | --                 | --                  | 1<br>(0 - 1)         | 11<br>(8 - 14)       | 193<br>(138 - 256)        |
| Endocarditis                                  | 35<br>(24 - 60)           | 0<br>(0 - 0)       | 0<br>(0 - 0)        | 2<br>(1 - 3)         | 7<br>(5 - 14)        | 26<br>(17 - 46)           |
| Other cardiovascular and circulatory diseases | 527<br>(309 - 672)        | 0<br>(0 - 0)       | 0<br>(0 - 0)        | 14<br>(9 - 19)       | 66<br>(41 - 87)      | 448<br>(255 - 584)        |
| Chronic respiratory diseases                  | 2,177<br>(1,475 - 2,537)  | 1<br>(1 - 2)       | 1<br>(1 - 1)        | 30<br>(23 - 36)      | 352<br>(268 - 413)   | 1,793<br>(1,183 - 2,124)  |
| Chronic obstructive pulmonary disease         | 1,819<br>(1,324 - 2,186)  | 1<br>(0 - 1)       | 0<br>(0 - 0)        | 14<br>(9 - 18)       | 299<br>(232 - 356)   | 1,506<br>(1,054 - 1,839)  |
| Pneumoconiosis                                | 2<br>(1 - 4)              | 0<br>(0 - 0)       | 0<br>(0 - 0)        | 0<br>(0 - 0)         | 0<br>(0 - 1)         | 2<br>(1 - 4)              |
| Silicosis                                     | 0<br>(0 - 0)              | 0<br>(0 - 0)       | 0<br>(0 - 0)        | 0<br>(0 - 0)         | 0<br>(0 - 0)         | 0<br>(0 - 0)              |
| Asbestosis                                    | 0<br>(0 - 1)              | 0<br>(0 - 0)       | 0<br>(0 - 0)        | 0<br>(0 - 0)         | 0<br>(0 - 0)         | 0<br>(0 - 1)              |
| Coal workers pneumoconiosis                   | 0<br>(0 - 0)              | 0<br>(0 - 0)       | 0<br>(0 - 0)        | 0<br>(0 - 0)         | 0<br>(0 - 0)         | 0<br>(0 - 0)              |
| Other pneumoconiosis                          | 2<br>(1 - 3)              | 0<br>(0 - 0)       | 0<br>(0 - 0)        | 0<br>(0 - 0)         | 0<br>(0 - 0)         | 2<br>(1 - 3)              |

Web Table 31- Scotland deaths with 95% UI by age, sex, and cause in 2013

| Cause                                               | Females, All Ages        | Females, 0-4 Years | Females, 5-14 Years | Females, 15-49 Years | Females, 50-69 Years | Females, 70-80 Years     |
|-----------------------------------------------------|--------------------------|--------------------|---------------------|----------------------|----------------------|--------------------------|
| Asthma                                              | 108<br>(58 - 167)        | 0<br>(0 - 0)       | 0<br>(0 - 1)        | 11<br>(8 - 14)       | 18<br>(11 - 31)      | 78<br>(35 - 128)         |
| Interstitial lung disease and pulmonary sarcoidosis | 231<br>(63 - 431)        | 0<br>(0 - 0)       | 0<br>(0 - 0)        | 5<br>(2 - 8)         | 34<br>(11 - 60)      | 192<br>(49 - 372)        |
| Other chronic respiratory diseases                  | 17<br>(9 - 28)           | 0<br>(0 - 0)       | 0<br>(0 - 0)        | 0<br>(0 - 0)         | 1<br>(0 - 1)         | 16<br>(8 - 26)           |
| Cirrhosis                                           | 409<br>(360 - 457)       | 0<br>(0 - 0)       | 0<br>(0 - 0)        | 85<br>(73 - 99)      | 195<br>(168 - 223)   | 129<br>(108 - 150)       |
| Cirrhosis due to hepatitis B                        | 56<br>(26 - 113)         | 0<br>(0 - 0)       | 0<br>(0 - 0)        | 10<br>(5 - 20)       | 27<br>(12 - 59)      | 19<br>(8 - 34)           |
| Cirrhosis due to hepatitis C                        | 223<br>(91 - 318)        | 0<br>(0 - 0)       | 0<br>(0 - 0)        | 48<br>(22 - 69)      | 108<br>(40 - 160)    | 66<br>(27 - 96)          |
| Cirrhosis due to alcohol use                        | 79<br>(36 - 143)         | --                 | --                  | 10<br>(3 - 22)       | 36<br>(14 - 71)      | 33<br>(16 - 58)          |
| Cirrhosis due to other causes                       | 52<br>(17 - 101)         | 0<br>(0 - 0)       | 0<br>(0 - 0)        | 17<br>(7 - 32)       | 24<br>(5 - 50)       | 10<br>(3 - 22)           |
| Digestive diseases                                  | 1,100<br>(921 - 1,365)   | 0<br>(0 - 1)       | 0<br>(0 - 1)        | 21<br>(18 - 26)      | 136<br>(107 - 159)   | 942<br>(785 - 1,214)     |
| Peptic ulcer disease                                | 146<br>(99 - 232)        | 0<br>(0 - 0)       | 0<br>(0 - 0)        | 3<br>(2 - 4)         | 19<br>(12 - 26)      | 124<br>(82 - 205)        |
| Gastritis and duodenitis                            | 11<br>(5 - 20)           | 0<br>(0 - 0)       | 0<br>(0 - 0)        | 1<br>(0 - 1)         | 2<br>(1 - 3)         | 9<br>(4 - 16)            |
| Appendicitis                                        | 11<br>(6 - 24)           | 0<br>(0 - 0)       | 0<br>(0 - 0)        | 1<br>(0 - 1)         | 2<br>(1 - 5)         | 8<br>(4 - 19)            |
| Paralytic ileus and intestinal obstruction          | 140<br>(70 - 231)        | 0<br>(0 - 0)       | 0<br>(0 - 0)        | 3<br>(1 - 4)         | 125<br>(6 - 20)      | 125<br>(63 - 209)        |
| Inguinal, femoral, and abdominal hernia             | 40<br>(13 - 106)         | 0<br>(0 - 0)       | 0<br>(0 - 0)        | 0<br>(0 - 1)         | 4<br>(1 - 10)        | 35<br>(10 - 98)          |
| Inflammatory bowel disease                          | 75<br>(49 - 154)         | 0<br>(0 - 0)       | 0<br>(0 - 0)        | 3<br>(2 - 5)         | 10<br>(7 - 18)       | 61<br>(37 - 131)         |
| Vascular intestinal disorders                       | 230<br>(95 - 356)        | 0<br>(0 - 0)       | 0<br>(0 - 0)        | 3<br>(1 - 5)         | 34<br>(16 - 51)      | 193<br>(78 - 299)        |
| Gallbladder and biliary diseases                    | 151<br>(85 - 203)        | 0<br>(0 - 0)       | 0<br>(0 - 0)        | 2<br>(1 - 3)         | 14<br>(7 - 19)       | 135<br>(75 - 183)        |
| Pancreatitis                                        | 64<br>(40 - 100)         | 0<br>(0 - 0)       | 0<br>(0 - 0)        | 4<br>(3 - 5)         | 12<br>(7 - 19)       | 48<br>(28 - 78)          |
| Other digestive diseases                            | 232<br>(169 - 309)       | 0<br>(0 - 0)       | 0<br>(0 - 0)        | 3<br>(2 - 4)         | 26<br>(18 - 34)      | 203<br>(145 - 278)       |
| Neurological disorders                              | 2,741<br>(1,993 - 3,603) | 2<br>(2 - 3)       | 1<br>(1 - 2)        | 40<br>(33 - 49)      | 156<br>(126 - 187)   | 2,540<br>(1,789 - 3,389) |
| Alzheimer disease and other dementias               | 2,324<br>(1,577 - 3,158) | --                 | --                  | 0<br>(0 - 1)         | 49<br>(34 - 68)      | 2,274<br>(1,521 - 3,104) |
| Parkinson disease                                   | 158<br>(86 - 204)        | --                 | --                  | 0<br>(0 - 0)         | 7<br>(5 - 11)        | 150<br>(81 - 196)        |
| Epilepsy                                            | 40<br>(26 - 51)          | 0<br>(0 - 1)       | 1<br>(0 - 1)        | 15<br>(10 - 19)      | 9<br>(6 - 12)        | 15<br>(8 - 22)           |
| Multiple sclerosis                                  | 76<br>(44 - 106)         | --                 | --                  | 15<br>(9 - 24)       | 40<br>(21 - 55)      | 22<br>(11 - 31)          |
| Other neurological disorders                        | 143<br>(123 - 163)       | 2<br>(1 - 3)       | 1<br>(1 - 1)        | 11<br>(9 - 13)       | 51<br>(43 - 59)      | 79<br>(64 - 94)          |
| Mental and substance use disorders                  | 158<br>(112 - 224)       | 0<br>(0 - 0)       | 0<br>(0 - 0)        | 85<br>(68 - 113)     | 59<br>(30 - 93)      | 15<br>(9 - 21)           |
| Schizophrenia                                       | 3<br>(2 - 6)             | --                 | --                  | 0<br>(0 - 0)         | 0<br>(0 - 1)         | 3<br>(2 - 5)             |
| Alcohol use disorders                               | 86<br>(37 - 147)         | --                 | --                  | 30<br>(14 - 56)      | 48<br>(20 - 82)      | 8<br>(3 - 14)            |
| Drug use disorders                                  | 68<br>(58 - 80)          | 0<br>(0 - 0)       | --                  | 54<br>(45 - 65)      | 10<br>(8 - 13)       | 4<br>(3 - 5)             |
| Opioid use disorders                                | 24<br>(20 - 29)          | 0<br>(0 - 0)       | --                  | 19<br>(16 - 23)      | 3<br>(3 - 4)         | 1<br>(1 - 2)             |
| Cocaine use disorders                               | 3<br>(2 - 3)             | 0<br>(0 - 0)       | --                  | 2<br>(2 - 3)         | 0<br>(0 - 0)         | 0<br>(0 - 0)             |
| Amphetamine use disorders                           | 3<br>(2 - 3)             | 0<br>(0 - 0)       | --                  | 2<br>(2 - 3)         | 0<br>(0 - 1)         | 0<br>(0 - 0)             |
| Other drug use disorders                            | 38<br>(33 - 45)          | 0<br>(0 - 0)       | --                  | 30<br>(25 - 36)      | 6<br>(5 - 8)         | 2<br>(2 - 3)             |
| Eating disorders                                    | 1<br>(0 - 1)             | --                 | 0<br>(0 - 0)        | 1<br>(0 - 1)         | --                   | --                       |
| Anorexia nervosa                                    | 1<br>(0 - 1)             | --                 | 0<br>(0 - 0)        | 1<br>(0 - 1)         | --                   | --                       |
| Diabetes, urogenital, blood, and endocrine diseases | 1,232<br>(950 - 1,425)   | 2<br>(1 - 3)       | 2<br>(1 - 2)        | 37<br>(31 - 43)      | 136<br>(109 - 157)   | 1,055<br>(796 - 1,234)   |
| Diabetes mellitus                                   | 297<br>(217 - 349)       | 0<br>(0 - 0)       | 0<br>(0 - 0)        | 8<br>(6 - 10)        | 45<br>(35 - 55)      | 244<br>(174 - 291)       |
| Acute glomerulonephritis                            | 1<br>(0 - 1)             | 0<br>(0 - 0)       | 0<br>(0 - 0)        | 0<br>(0 - 0)         | 0<br>(0 - 0)         | 0<br>(0 - 1)             |
| Chronic kidney disease                              | 448<br>(351 - 572)       | 0<br>(0 - 0)       | 0<br>(0 - 0)        | 10<br>(8 - 12)       | 34<br>(27 - 46)      | 404<br>(311 - 521)       |
| Chronic kidney disease due to diabetes mellitus     | 51<br>(34 - 72)          | 0<br>(0 - 0)       | 0<br>(0 - 0)        | 2<br>(1 - 2)         | 4<br>(3 - 6)         | 45<br>(28 - 65)          |

Web Table 31- Scotland deaths with 95% UI by age, sex, and cause in 2013

| Cause                                               | Females, All Ages      | Females, 0-4 Years | Females, 5-14 Years | Females, 15-49 Years | Females, 50-69 Years | Females, 70-80 Years |
|-----------------------------------------------------|------------------------|--------------------|---------------------|----------------------|----------------------|----------------------|
| Chronic kidney disease due to hypertension          | 107<br>(63 - 182)      | 0<br>(0 - 0)       | 0<br>(0 - 0)        | 1<br>(1 - 2)         | 8<br>(5 - 13)        | 98<br>(57 - 169)     |
| Chronic kidney disease due to glomerulonephritis    | 30<br>(7 - 64)         | 0<br>(0 - 0)       | 0<br>(0 - 0)        | 1<br>(0 - 1)         | 2<br>(1 - 3)         | 27<br>(5 - 60)       |
| Chronic kidney disease due to other causes          | 259<br>(166 - 382)     | 0<br>(0 - 0)       | 0<br>(0 - 0)        | 6<br>(4 - 9)         | 20<br>(12 - 29)      | 234<br>(145 - 349)   |
| Urinary diseases and male infertility               | 366<br>(185 - 493)     | 0<br>(0 - 0)       | 0<br>(0 - 0)        | 7<br>(4 - 8)         | 30<br>(15 - 40)      | 329<br>(163 - 449)   |
| Interstitial nephritis and urinary tract infections | 255<br>(159 - 411)     | 0<br>(0 - 0)       | 0<br>(0 - 0)        | 5<br>(3 - 6)         | 23<br>(12 - 31)      | 228<br>(141 - 379)   |
| Urolithiasis                                        | 8<br>(4 - 15)          | --                 | 0<br>(0 - 0)        | 0<br>(0 - 1)         | 2<br>(1 - 3)         | 6<br>(3 - 13)        |
| Other urinary diseases                              | 102<br>(15 - 191)      | 0<br>(0 - 0)       | 0<br>(0 - 0)        | 1<br>(0 - 2)         | 6<br>(2 - 10)        | 94<br>(12 - 181)     |
| Gynecological diseases                              | 3<br>(2 - 5)           | --                 | --                  | 1<br>(0 - 1)         | 1<br>(0 - 1)         | 2<br>(1 - 4)         |
| Uterine fibroids                                    | 1<br>(1 - 1)           | --                 | --                  | 0<br>(0 - 0)         | 0<br>(0 - 0)         | 1<br>(0 - 1)         |
| Polycystic ovarian syndrome                         | 0<br>(0 - 0)           | --                 | --                  | 0<br>(0 - 0)         | 0<br>(0 - 0)         | --                   |
| Endometriosis                                       | 0<br>(0 - 0)           | --                 | --                  | 0<br>(0 - 0)         | 0<br>(0 - 0)         | --                   |
| Genital prolapse                                    | 1<br>(0 - 1)           | --                 | --                  | 0<br>(0 - 0)         | 0<br>(0 - 0)         | 1<br>(0 - 1)         |
| Other gynecological diseases                        | 2<br>(1 - 2)           | --                 | --                  | 0<br>(0 - 0)         | 0<br>(0 - 0)         | 1<br>(1 - 2)         |
| Hemoglobinopathies and hemolytic anemias            | 15<br>(9 - 23)         | 0<br>(0 - 0)       | 0<br>(0 - 0)        | 1<br>(1 - 2)         | 3<br>(2 - 4)         | 11<br>(6 - 17)       |
| Thalassemias                                        | 1<br>(0 - 1)           | 0<br>(0 - 0)       | 0<br>(0 - 0)        | 0<br>(0 - 1)         | 0<br>(0 - 0)         | 0<br>(0 - 0)         |
| Sickle cell disorders                               | 2<br>(2 - 4)           | 0<br>(0 - 0)       | 0<br>(0 - 0)        | 0<br>(0 - 1)         | 1<br>(1 - 2)         | 1<br>(0 - 1)         |
| G6PD deficiency                                     | 0<br>(0 - 0)           | 0<br>(0 - 0)       | 0<br>(0 - 0)        | 0<br>(0 - 0)         | 0<br>(0 - 0)         | 0<br>(0 - 0)         |
| Other hemoglobinopathies and hemolytic anemias      | 12<br>(7 - 19)         | 0<br>(0 - 0)       | 0<br>(0 - 0)        | 0<br>(0 - 1)         | 1<br>(1 - 2)         | 10<br>(6 - 16)       |
| Endocrine, metabolic, blood, and immune disorders   | 103<br>(74 - 147)      | 2<br>(1 - 2)       | 1<br>(1 - 2)        | 11<br>(8 - 16)       | 23<br>(16 - 31)      | 65<br>(46 - 101)     |
| Musculoskeletal disorders                           | 142<br>(68 - 176)      | --                 | 0<br>(0 - 0)        | 7<br>(6 - 9)         | 30<br>(14 - 39)      | 104<br>(45 - 135)    |
| Rheumatoid arthritis                                | 73<br>(40 - 96)        | --                 | 0<br>(0 - 0)        | 1<br>(1 - 1)         | 13<br>(7 - 19)       | 59<br>(30 - 80)      |
| Other musculoskeletal disorders                     | 69<br>(29 - 89)        | --                 | 0<br>(0 - 0)        | 6<br>(5 - 8)         | 17<br>(7 - 22)       | 45<br>(15 - 62)      |
| Other non-communicable diseases                     | 185<br>(151 - 220)     | 39<br>(27 - 55)    | 3<br>(2 - 4)        | 17<br>(14 - 21)      | 23<br>(19 - 27)      | 103<br>(72 - 134)    |
| Congenital anomalies                                | 75<br>(61 - 91)        | 29<br>(20 - 39)    | 3<br>(2 - 4)        | 16<br>(13 - 20)      | 15<br>(12 - 19)      | 13<br>(9 - 16)       |
| Neural tube defects                                 | 4<br>(2 - 5)           | 2<br>(1 - 4)       | 0<br>(0 - 0)        | 1<br>(1 - 2)         | 0<br>(0 - 0)         | 0<br>(0 - 0)         |
| Congenital heart anomalies                          | 26<br>(21 - 32)        | 8<br>(5 - 12)      | 1<br>(1 - 2)        | 8<br>(6 - 10)        | 5<br>(3 - 7)         | 4<br>(3 - 6)         |
| Cleft lip and cleft palate                          | 0<br>(0 - 0)           | 0<br>(0 - 0)       | --                  | --                   | --                   | --                   |
| Down syndrome                                       | 10<br>(5 - 14)         | 1<br>(0 - 1)       | 0<br>(0 - 0)        | 2<br>(1 - 4)         | 7<br>(4 - 10)        | 1<br>(0 - 1)         |
| Chromosomal unbalanced rearrangements               | 6<br>(3 - 9)           | 5<br>(3 - 8)       | 0<br>(0 - 0)        | 1<br>(0 - 1)         | 0<br>(0 - 0)         | 0<br>(0 - 0)         |
| Other congenital anomalies                          | 29<br>(23 - 37)        | 13<br>(9 - 19)     | 1<br>(1 - 2)        | 4<br>(3 - 5)         | 3<br>(2 - 5)         | 8<br>(5 - 10)        |
| Skin and subcutaneous diseases                      | 100<br>(69 - 132)      | 0<br>(0 - 0)       | 0<br>(0 - 0)        | 2<br>(1 - 2)         | 8<br>(6 - 11)        | 90<br>(60 - 122)     |
| Cellulitis                                          | 39<br>(15 - 61)        | 0<br>(0 - 0)       | 0<br>(0 - 0)        | 1<br>(0 - 1)         | 4<br>(2 - 6)         | 34<br>(12 - 56)      |
| Pyoderma                                            | 43<br>(25 - 65)        | 0<br>(0 - 0)       | 0<br>(0 - 0)        | 1<br>(0 - 1)         | 3<br>(2 - 5)         | 39<br>(22 - 60)      |
| Decubitus ulcer                                     | 14<br>(8 - 24)         | 0<br>(0 - 0)       | 0<br>(0 - 0)        | 0<br>(0 - 0)         | 1<br>(0 - 1)         | 13<br>(7 - 23)       |
| Other skin and subcutaneous diseases                | 4<br>(2 - 12)          | 0<br>(0 - 0)       | 0<br>(0 - 0)        | 0<br>(0 - 0)         | 0<br>(0 - 1)         | 4<br>(1 - 11)        |
| Sudden infant death syndrome                        | 10<br>(5 - 21)         | 10<br>(5 - 21)     | --                  | --                   | --                   | --                   |
| Injuries                                            | 1,034<br>(872 - 1,246) | 7<br>(5 - 9)       | 5<br>(4 - 6)        | 156<br>(135 - 179)   | 139<br>(120 - 163)   | 728<br>(579 - 933)   |
| Transport injuries                                  | 84<br>(70 - 121)       | 1<br>(1 - 1)       | 2<br>(1 - 3)        | 29<br>(24 - 38)      | 19<br>(14 - 25)      | 34<br>(25 - 52)      |
| Road injuries                                       | 82<br>(68 - 118)       | 1<br>(1 - 1)       | 2<br>(1 - 3)        | 28<br>(23 - 36)      | 18<br>(14 - 24)      | 33<br>(25 - 52)      |
| Pedestrian road injuries                            | 28<br>(18 - 42)        | 0<br>(0 - 1)       | 1<br>(1 - 2)        | 4<br>(2 - 6)         | 5<br>(3 - 8)         | 17<br>(11 - 28)      |



Web Table 31- Scotland deaths with 95% UI by age, sex, and cause in 2013

| Cause                                           | Females, All Ages  | Females, 0-4 Years | Females, 5-14 Years | Females, 15-49 Years | Females, 50-69 Years | Females, 70-80 Years |
|-------------------------------------------------|--------------------|--------------------|---------------------|----------------------|----------------------|----------------------|
| Cyclist road injuries                           | 2<br>(1 - 3)       | 0<br>(0 - 0)       | 0<br>(0 - 0)        | 1<br>(0 - 1)         | 1<br>(0 - 1)         | 0<br>(0 - 1)         |
| Motorcyclist road injuries                      | 3<br>(1 - 5)       | 0<br>(0 - 0)       | 0<br>(0 - 0)        | 2<br>(1 - 3)         | 1<br>(0 - 1)         | 0<br>(0 - 1)         |
| Motor vehicle road injuries                     | 47<br>(38 - 69)    | 1<br>(0 - 1)       | 1<br>(1 - 1)        | 21<br>(17 - 28)      | 11<br>(8 - 15)       | 15<br>(10 - 24)      |
| Other road injuries                             | 1<br>(1 - 2)       | 0<br>(0 - 0)       | 0<br>(0 - 0)        | 0<br>(0 - 1)         | 0<br>(0 - 1)         | 0<br>(0 - 1)         |
| Other transport injuries                        | 3<br>(2 - 4)       | 0<br>(0 - 0)       | 0<br>(0 - 0)        | 1<br>(1 - 2)         | 1<br>(0 - 1)         | 1<br>(0 - 1)         |
| Unintentional injuries                          | 773<br>(621 - 980) | 5<br>(3 - 7)       | 2<br>(1 - 2)        | 30<br>(26 - 37)      | 67<br>(55 - 81)      | 668<br>(515 - 877)   |
| Falls                                           | 536<br>(399 - 749) | 0<br>(0 - 1)       | 0<br>(0 - 0)        | 8<br>(6 - 10)        | 26<br>(18 - 33)      | 501<br>(369 - 713)   |
| Drowning                                        | 5<br>(4 - 7)       | 0<br>(0 - 1)       | 0<br>(0 - 0)        | 2<br>(1 - 2)         | 2<br>(1 - 2)         | 2<br>(1 - 3)         |
| Fire, heat, and hot substances                  | 31<br>(23 - 46)    | 1<br>(1 - 1)       | 0<br>(0 - 1)        | 4<br>(3 - 6)         | 8<br>(6 - 12)        | 17<br>(12 - 28)      |
| Poisonings                                      | 5<br>(4 - 9)       | 0<br>(0 - 0)       | 0<br>(0 - 0)        | 2<br>(1 - 3)         | 1<br>(1 - 3)         | 2<br>(1 - 3)         |
| Exposure to mechanical forces                   | 6<br>(4 - 8)       | 1<br>(0 - 1)       | 0<br>(0 - 0)        | 2<br>(1 - 2)         | 1<br>(1 - 1)         | 3<br>(2 - 4)         |
| Unintentional firearm injuries                  | 0<br>(0 - 0)       | 0<br>(0 - 0)       | 0<br>(0 - 0)        | 0<br>(0 - 0)         | 0<br>(0 - 0)         | 0<br>(0 - 0)         |
| Unintentional suffocation                       | 3<br>(1 - 4)       | 0<br>(0 - 1)       | 0<br>(0 - 0)        | 1<br>(0 - 1)         | 0<br>(0 - 1)         | 1<br>(0 - 2)         |
| Other exposure to mechanical forces             | 3<br>(2 - 4)       | 0<br>(0 - 0)       | 0<br>(0 - 0)        | 1<br>(1 - 1)         | 1<br>(0 - 1)         | 2<br>(1 - 3)         |
| Adverse effects of medical treatment            | 90<br>(55 - 120)   | 0<br>(0 - 1)       | 0<br>(0 - 0)        | 4<br>(3 - 6)         | 14<br>(9 - 22)       | 72<br>(40 - 99)      |
| Animal contact                                  | 1<br>(0 - 2)       | 0<br>(0 - 0)       | 0<br>(0 - 0)        | 0<br>(0 - 0)         | 0<br>(0 - 0)         | 0<br>(0 - 1)         |
| Venomous animal contact                         | 0<br>(0 - 1)       | 0<br>(0 - 0)       | 0<br>(0 - 0)        | 0<br>(0 - 0)         | 0<br>(0 - 0)         | 0<br>(0 - 0)         |
| Non-venomous animal contact                     | 1<br>(0 - 1)       | 0<br>(0 - 0)       | 0<br>(0 - 0)        | 0<br>(0 - 0)         | 0<br>(0 - 0)         | 0<br>(0 - 1)         |
| Foreign body                                    | 94<br>(45 - 136)   | 2<br>(1 - 3)       | 0<br>(0 - 1)        | 8<br>(5 - 13)        | 14<br>(8 - 22)       | 69<br>(30 - 106)     |
| Pulmonary aspiration and foreign body in airway | 93<br>(45 - 136)   | 2<br>(1 - 3)       | 0<br>(0 - 1)        | 8<br>(5 - 13)        | 14<br>(8 - 22)       | 69<br>(30 - 105)     |
| Foreign body in other body part                 | 0<br>(0 - 1)       | 0<br>(0 - 0)       | 0<br>(0 - 0)        | 0<br>(0 - 0)         | 0<br>(0 - 0)         | 0<br>(0 - 0)         |
| Other unintentional injuries                    | 4<br>(3 - 6)       | 0<br>(0 - 0)       | 0<br>(0 - 0)        | 1<br>(0 - 1)         | 1<br>(0 - 1)         | 2<br>(1 - 4)         |
| Self-harm and interpersonal violence            | 177<br>(146 - 203) | 1<br>(0 - 1)       | 1<br>(0 - 1)        | 97<br>(79 - 113)     | 54<br>(40 - 65)      | 26<br>(19 - 33)      |
| Self-harm                                       | 158<br>(128 - 184) | --                 | 0<br>(0 - 0)        | 86<br>(69 - 102)     | 50<br>(37 - 61)      | 22<br>(17 - 29)      |
| Interpersonal violence                          | 19<br>(12 - 24)    | 1<br>(0 - 1)       | 1<br>(0 - 1)        | 11<br>(6 - 14)       | 3<br>(2 - 5)         | 4<br>(2 - 5)         |
| Assault by firearm                              | 1<br>(1 - 2)       | 0<br>(0 - 0)       | 0<br>(0 - 0)        | 1<br>(0 - 1)         | 0<br>(0 - 0)         | 0<br>(0 - 0)         |
| Assault by sharp object                         | 6<br>(3 - 8)       | 0<br>(0 - 0)       | 0<br>(0 - 0)        | 4<br>(2 - 6)         | 1<br>(0 - 1)         | 1<br>(0 - 1)         |
| Assault by other means                          | 12<br>(7 - 16)     | 1<br>(0 - 1)       | 0<br>(0 - 1)        | 6<br>(3 - 8)         | 2<br>(1 - 3)         | 3<br>(2 - 4)         |

Web Table 31- Senegal deaths with 95% UI by age, sex, and cause in 2013

| Cause                                                             | Both Sexes, All Ages        | Both Sexes, 0-4 Years       | Both Sexes, 5-14 Years   | Both Sexes, 15-49 Years     | Both Sexes, 50-69 Years     | Both Sexes, 70-80 Years     |
|-------------------------------------------------------------------|-----------------------------|-----------------------------|--------------------------|-----------------------------|-----------------------------|-----------------------------|
| All causes                                                        | 92,248<br>(84,769 - 99,630) | 31,129<br>(27,920 - 34,983) | 3,454<br>(2,994 - 4,136) | 19,397<br>(16,885 - 21,961) | 18,402<br>(15,677 - 21,208) | 19,866<br>(18,073 - 21,661) |
| Communicable, maternal, neonatal, and nutritional diseases        | 49,368<br>(45,091 - 53,641) | 27,087<br>(24,320 - 30,594) | 2,121<br>(1,768 - 2,650) | 9,952<br>(8,871 - 11,160)   | 4,968<br>(4,169 - 5,850)    | 5,241<br>(4,265 - 6,183)    |
| HIV/AIDS and tuberculosis                                         | 7,473<br>(6,147 - 8,967)    | 286<br>(223 - 363)          | 262<br>(208 - 311)       | 4,520<br>(3,436 - 5,776)    | 1,634<br>(1,327 - 1,958)    | 771<br>(520 - 989)          |
| Tuberculosis                                                      | 3,621<br>(2,596 - 4,579)    | 102<br>(53 - 168)           | 66<br>(40 - 103)         | 1,580<br>(1,066 - 2,117)    | 1,159<br>(827 - 1,488)      | 714<br>(448 - 927)          |
| HIV/AIDS                                                          | 3,852<br>(2,494 - 5,417)    | 184<br>(117 - 266)          | 195<br>(143 - 252)       | 2,940<br>(1,804 - 4,401)    | 475<br>(325 - 649)          | 58<br>(35 - 88)             |
| HIV/AIDS resulting in mycobacterial infection                     | 226<br>(143 - 333)          | 10<br>(6 - 16)              | 172<br>(7 - 14)          | 10<br>(103 - 261)           | 29<br>(19 - 43)             | 4<br>(2 - 6)                |
| HIV/AIDS resulting in other diseases                              | 3,626<br>(2,352 - 5,121)    | 174<br>(110 - 251)          | 185<br>(135 - 239)       | 2,768<br>(1,687 - 4,128)    | 446<br>(305 - 609)          | 54<br>(32 - 82)             |
| Diarrhea, lower respiratory, and other common infectious diseases | 18,941<br>(15,032 - 22,257) | 9,684<br>(6,775 - 12,408)   | 1,150<br>(887 - 1,502)   | 2,361<br>(1,800 - 2,982)    | 2,326<br>(1,793 - 2,907)    | 3,419<br>(2,686 - 4,186)    |
| Diarrheal diseases                                                | 5,897<br>(4,198 - 7,830)    | 3,429<br>(2,024 - 5,168)    | 253<br>(145 - 408)       | 734<br>(520 - 1,016)        | 658<br>(440 - 978)          | 824<br>(560 - 1,188)        |
| Intestinal infectious diseases                                    | 766<br>(415 - 1,285)        | 230<br>(109 - 421)          | 238<br>(126 - 411)       | 255<br>(126 - 466)          | 31<br>(15 - 58)             | 12<br>(5 - 21)              |
| Typhoid fever                                                     | 491<br>(248 - 850)          | 137<br>(60 - 252)           | 158<br>(78 - 279)        | 168<br>(77 - 321)           | 21<br>(9 - 39)              | 7<br>(3 - 14)               |
| Paratyphoid fever                                                 | 237<br>(115 - 428)          | 72<br>(27 - 153)            | 76<br>(35 - 146)         | 78<br>(34 - 147)            | 8<br>(3 - 18)               | 3<br>(1 - 6)                |
| Other intestinal infectious diseases                              | 39<br>(23 - 60)             | 21<br>(9 - 38)              | 4<br>(1 - 11)            | 9<br>(3 - 20)               | 3<br>(0 - 8)                | 2<br>(0 - 7)                |
| Lower respiratory infections                                      | 8,427<br>(6,425 - 10,288)   | 3,660<br>(2,523 - 5,106)    | 261<br>(178 - 382)       | 752<br>(550 - 1,012)        | 1,346<br>(993 - 1,751)      | 2,407<br>(1,815 - 3,061)    |
| Upper respiratory infections                                      | 13<br>(7 - 21)              | 4<br>(1 - 11)               | 1<br>(0 - 2)             | 3<br>(1 - 7)                | 3<br>(1 - 7)                | 2<br>(0 - 6)                |
| Otitis media                                                      | 8<br>(6 - 10)               | 1<br>(1 - 2)                | 0<br>(0 - 1)             | 1<br>(1 - 2)                | 2<br>(1 - 3)                | 3<br>(2 - 4)                |
| Meningitis                                                        | 1,955<br>(1,443 - 2,479)    | 867<br>(504 - 1,329)        | 184<br>(115 - 284)       | 507<br>(357 - 681)          | 248<br>(163 - 348)          | 149<br>(96 - 212)           |
| Pneumococcal meningitis                                           | 615<br>(433 - 798)          | 232<br>(121 - 382)          | 65<br>(36 - 105)         | 178<br>(116 - 260)          | 88<br>(52 - 133)            | 53<br>(32 - 79)             |
| H influenzae type B meningitis                                    | 429<br>(300 - 588)          | 274<br>(159 - 435)          | 39<br>(20 - 66)          | 76<br>(45 - 116)            | 26<br>(15 - 43)             | 14<br>(8 - 24)              |
| Meningococcal meningitis                                          | 504<br>(373 - 658)          | 219<br>(121 - 358)          | 52<br>(29 - 88)          | 127<br>(81 - 195)           | 64<br>(36 - 106)            | 41<br>(21 - 67)             |
| Other meningitis                                                  | 407<br>(289 - 534)          | 142<br>(77 - 237)           | 28<br>(16 - 49)          | 127<br>(78 - 195)           | 70<br>(35 - 114)            | 40<br>(23 - 65)             |
| Encephalitis                                                      | 134<br>(95 - 184)           | 42<br>(22 - 75)             | 18<br>(9 - 31)           | 39<br>(26 - 60)             | 20<br>(14 - 28)             | 14<br>(7 - 21)              |
| Diphtheria                                                        | 8<br>(1 - 42)               | 6<br>(0 - 39)               | 1<br>(0 - 8)             | 1<br>(0 - 2)                | 0<br>(0 - 1)                | --                          |
| Whooping cough                                                    | 186<br>(0 - 992)            | 174<br>(0 - 919)            | 11<br>(0 - 52)           | 2<br>(0 - 10)               | 0<br>(0 - 1)                | --                          |
| Tetanus                                                           | 200<br>(80 - 316)           | 130<br>(37 - 235)           | 11<br>(5 - 23)           | 38<br>(14 - 63)             | 16<br>(6 - 27)              | 5<br>(2 - 10)               |
| Measles                                                           | 1,331<br>(502 - 2,698)      | 1,135<br>(414 - 2,361)      | 170<br>(70 - 359)        | 25<br>(9 - 54)              | 1<br>(0 - 1)                | --                          |
| Varicella and herpes zoster                                       | 16<br>(7 - 32)              | 6<br>(1 - 17)               | 2<br>(0 - 5)             | 4<br>(1 - 8)                | 1<br>(0 - 4)                | 4<br>(0 - 13)               |
| Neglected tropical diseases and malaria                           | 6,770<br>(3,743 - 10,582)   | 5,239<br>(2,446 - 8,957)    | 468<br>(250 - 877)       | 532<br>(299 - 1,119)        | 312<br>(162 - 818)          | 220<br>(96 - 564)           |
| Malaria                                                           | 6,570<br>(3,511 - 10,420)   | 5,202<br>(2,384 - 8,936)    | 431<br>(208 - 853)       | 462<br>(225 - 1,062)        | 274<br>(123 - 781)          | 201<br>(78 - 544)           |
| Leishmaniasis                                                     | 0<br>(0 - 1)                | 0<br>(0 - 0)                | 0<br>(0 - 0)             | 0<br>(0 - 0)                | 0<br>(0 - 0)                | 0<br>(0 - 0)                |
| Visceral leishmaniasis                                            | 0<br>(0 - 1)                | 0<br>(0 - 0)                | 0<br>(0 - 0)             | 0<br>(0 - 0)                | 0<br>(0 - 0)                | 0<br>(0 - 0)                |
| Schistosomiasis                                                   | 53<br>(39 - 69)             | 1<br>(0 - 1)                | 2<br>(1 - 3)             | 20<br>(13 - 28)             | 20<br>(13 - 29)             | 11<br>(7 - 16)              |
| Cysticercosis                                                     | 3<br>(1 - 8)                | 0<br>(0 - 0)                | 0<br>(0 - 1)             | 2<br>(0 - 5)                | 1<br>(0 - 2)                | 0<br>(0 - 1)                |
| Cystic echinococcosis                                             | 5<br>(4 - 6)                | 1<br>(0 - 1)                | 1<br>(1 - 1)             | 2<br>(2 - 3)                | 1<br>(1 - 1)                | 0<br>(0 - 1)                |
| Dengue                                                            | 8<br>(5 - 13)               | 3<br>(1 - 4)                | 2<br>(1 - 3)             | 2<br>(1 - 5)                | 1<br>(0 - 1)                | 0<br>(0 - 0)                |
| Yellow fever                                                      | 11<br>(7 - 16)              | 1<br>(0 - 2)                | 2<br>(1 - 5)             | 6<br>(3 - 10)               | 1<br>(1 - 2)                | 0<br>(0 - 1)                |
| Rabies                                                            | 88<br>(36 - 141)            | 15<br>(5 - 36)              | 26<br>(10 - 50)          | 32<br>(13 - 49)             | 11<br>(4 - 17)              | 4<br>(1 - 8)                |
| Intestinal nematode infections                                    | 17<br>(6 - 35)              | 12<br>(4 - 26)              | 2<br>(0 - 9)             | 1<br>(0 - 6)                | 1<br>(0 - 4)                | 0<br>(0 - 5)                |
| Ascariasis                                                        | 17<br>(6 - 35)              | 12<br>(4 - 26)              | 2<br>(0 - 9)             | 1<br>(0 - 6)                | 1<br>(0 - 4)                | 0<br>(0 - 5)                |
| Other neglected tropical diseases                                 | 16<br>(11 - 26)             | 4<br>(2 - 9)                | 1<br>(1 - 3)             | 5<br>(3 - 9)                | 3<br>(2 - 5)                | 3<br>(2 - 5)                |

Web Table 31- Senegal deaths with 95% UI by age, sex, and cause in 2013

| Cause                                                            | Both Sexes, All Ages        | Both Sexes, 0-4 Years     | Both Sexes, 5-14 Years | Both Sexes, 15-49 Years  | Both Sexes, 50-69 Years     | Both Sexes, 70-80 Years     |
|------------------------------------------------------------------|-----------------------------|---------------------------|------------------------|--------------------------|-----------------------------|-----------------------------|
| Maternal disorders                                               | 1,881<br>(1,350 - 2,466)    | --                        | 14<br>(5 - 31)         | 1,867<br>(1,335 - 2,450) | --                          | --                          |
| Maternal hemorrhage                                              | 346<br>(220 - 523)          | --                        | 1<br>(0 - 3)           | 344<br>(220 - 522)       | --                          | --                          |
| Maternal sepsis and other maternal infections                    | 103<br>(59 - 163)           | --                        | 1<br>(0 - 2)           | 102<br>(58 - 162)        | --                          | --                          |
| Maternal hypertensive disorders                                  | 141<br>(90 - 211)           | --                        | 1<br>(0 - 3)           | 140<br>(89 - 209)        | --                          | --                          |
| Maternal obstructed labor                                        | 93<br>(54 - 138)            | --                        | 0<br>(0 - 1)           | 92<br>(53 - 138)         | --                          | --                          |
| Maternal abortive outcome                                        | 335<br>(232 - 464)          | --                        | 3<br>(1 - 6)           | 332<br>(230 - 462)       | --                          | --                          |
| Indirect maternal deaths                                         | 198<br>(120 - 282)          | --                        | 1<br>(0 - 3)           | 197<br>(119 - 281)       | --                          | --                          |
| Late maternal deaths                                             | 301<br>(174 - 456)          | --                        | 4<br>(1 - 9)           | 297<br>(172 - 450)       | --                          | --                          |
| Maternal deaths aggravated by HIV/AIDS                           | 4<br>(2 - 6)                | --                        | --                     | 4<br>(2 - 6)             | --                          | --                          |
| Other maternal disorders                                         | 358<br>(237 - 499)          | --                        | 3<br>(1 - 6)           | 355<br>(235 - 497)       | --                          | --                          |
| Neonatal disorders                                               | 9,997<br>(8,590 - 11,662)   | 9,997<br>(8,590 - 11,662) | --                     | --                       | --                          | --                          |
| Neonatal preterm birth complications                             | 3,236<br>(1,725 - 5,260)    | 3,236<br>(1,725 - 5,260)  | --                     | --                       | --                          | --                          |
| Neonatal encephalopathy due to birth asphyxia and trauma         | 3,186<br>(1,620 - 5,132)    | 3,186<br>(1,620 - 5,132)  | --                     | --                       | --                          | --                          |
| Neonatal sepsis and other neonatal infections                    | 2,682<br>(1,493 - 4,307)    | 2,682<br>(1,493 - 4,307)  | --                     | --                       | --                          | --                          |
| Hemolytic disease and other neonatal jaundice                    | 61<br>(24 - 132)            | 61<br>(24 - 132)          | --                     | --                       | --                          | --                          |
| Other neonatal disorders                                         | 831<br>(433 - 1,458)        | 831<br>(433 - 1,458)      | --                     | --                       | --                          | --                          |
| Nutritional deficiencies                                         | 3,444<br>(2,300 - 4,462)    | 1,516<br>(832 - 2,375)    | 178<br>(112 - 264)     | 523<br>(353 - 735)       | 540<br>(379 - 723)          | 688<br>(496 - 939)          |
| Protein-energy malnutrition                                      | 2,438<br>(1,631 - 3,337)    | 1,377<br>(758 - 2,166)    | 135<br>(83 - 208)      | 224<br>(132 - 399)       | 306<br>(195 - 476)          | 397<br>(242 - 633)          |
| Iodine deficiency                                                | 14<br>(3 - 37)              | 4<br>(0 - 23)             | 1<br>(0 - 6)           | 3<br>(0 - 12)            | 3<br>(0 - 14)               | 2<br>(0 - 12)               |
| Iron-deficiency anemia                                           | 972<br>(477 - 1,439)        | 132<br>(19 - 327)         | 41<br>(15 - 76)        | 292<br>(151 - 438)       | 223<br>(102 - 344)          | 284<br>(141 - 450)          |
| Other nutritional deficiencies                                   | 20<br>(6 - 33)              | 3<br>(0 - 8)              | 1<br>(0 - 1)           | 5<br>(2 - 9)             | 8<br>(2 - 14)               | 4<br>(2 - 8)                |
| Other communicable, maternal, neonatal, and nutritional diseases | 863<br>(604 - 1,167)        | 366<br>(185 - 620)        | 49<br>(30 - 75)        | 149<br>(98 - 208)        | 156<br>(99 - 225)           | 143<br>(85 - 220)           |
| Sexually transmitted diseases excluding HIV                      | 333<br>(144 - 596)          | 270<br>(99 - 507)         | 28<br>(11 - 51)        | 16<br>(10 - 24)          | 10<br>(5 - 19)              | 9<br>(4 - 19)               |
| Syphilis                                                         | 318<br>(129 - 581)          | 270<br>(99 - 507)         | 27<br>(10 - 50)        | 8<br>(5 - 12)            | 7<br>(3 - 12)               | 7<br>(3 - 15)               |
| Chlamydial infection                                             | 2<br>(1 - 4)                | --                        | 0<br>(0 - 0)           | 1<br>(0 - 2)             | 1<br>(0 - 2)                | 0<br>(0 - 1)                |
| Gonococcal infection                                             | 7<br>(5 - 10)               | --                        | 0<br>(0 - 1)           | 4<br>(2 - 6)             | 2<br>(1 - 3)                | 1<br>(0 - 2)                |
| Other sexually transmitted diseases                              | 5<br>(3 - 8)                | --                        | 0<br>(0 - 1)           | 3<br>(2 - 5)             | 1<br>(1 - 2)                | 0<br>(0 - 1)                |
| Hepatitis                                                        | 286<br>(175 - 396)          | 25<br>(12 - 43)           | 11<br>(6 - 17)         | 87<br>(51 - 130)         | 88<br>(49 - 135)            | 76<br>(41 - 114)            |
| Acute hepatitis A                                                | 15<br>(4 - 32)              | 7<br>(2 - 15)             | 3<br>(1 - 6)           | 4<br>(1 - 10)            | 1<br>(0 - 3)                | 0<br>(0 - 1)                |
| Acute hepatitis B                                                | 205<br>(120 - 298)          | 18<br>(8 - 33)            | 5<br>(3 - 10)          | 41<br>(21 - 69)          | 73<br>(40 - 111)            | 67<br>(33 - 103)            |
| Acute hepatitis C                                                | 9<br>(2 - 27)               | --                        | 1<br>(0 - 2)           | 3<br>(0 - 8)             | 3<br>(0 - 9)                | 3<br>(0 - 10)               |
| Acute hepatitis E                                                | 57<br>(26 - 107)            | 0<br>(0 - 1)              | 2<br>(1 - 4)           | 39<br>(19 - 67)          | 12<br>(4 - 29)              | 5<br>(1 - 15)               |
| Other infectious diseases                                        | 244<br>(168 - 358)          | 71<br>(36 - 136)          | 11<br>(5 - 21)         | 46<br>(25 - 84)          | 57<br>(29 - 108)            | 59<br>(27 - 118)            |
| Non-communicable diseases                                        | 36,001<br>(31,420 - 41,548) | 3,115<br>(1,992 - 4,681)  | 692<br>(529 - 928)     | 6,165<br>(4,904 - 7,454) | 12,293<br>(10,185 - 14,535) | 13,736<br>(12,155 - 15,538) |
| Neoplasms                                                        | 6,264<br>(5,200 - 7,454)    | 119<br>(67 - 180)         | 134<br>(83 - 192)      | 1,709<br>(1,346 - 2,110) | 2,724<br>(2,175 - 3,337)    | 1,579<br>(1,352 - 1,909)    |
| Esophageal cancer                                                | 151<br>(103 - 225)          | --                        | --                     | 25<br>(16 - 38)          | 80<br>(51 - 121)            | 46<br>(30 - 75)             |
| Stomach cancer                                                   | 570<br>(456 - 700)          | --                        | --                     | 114<br>(84 - 151)        | 307<br>(236 - 390)          | 150<br>(116 - 192)          |
| Liver cancer                                                     | 1,744<br>(1,398 - 2,153)    | --                        | 7<br>(3 - 13)          | 622<br>(431 - 865)       | 751<br>(569 - 935)          | 364<br>(277 - 477)          |
| Liver cancer due to hepatitis B                                  | 904<br>(595 - 1,238)        | --                        | 4<br>(1 - 7)           | 390<br>(254 - 581)       | 371<br>(209 - 529)          | 140<br>(80 - 204)           |
| Liver cancer due to hepatitis C                                  | 349<br>(228 - 545)          | --                        | 0<br>(0 - 0)           | 76<br>(35 - 138)         | 167<br>(100 - 281)          | 106<br>(68 - 153)           |

Web Table 31- Senegal deaths with 95% UI by age, sex, and cause in 2013

| Cause                                | Both Sexes, All Ages        | Both Sexes, 0-4 Years | Both Sexes, 5-14 Years | Both Sexes, 15-49 Years  | Both Sexes, 50-69 Years  | Both Sexes, 70-80 Years  |
|--------------------------------------|-----------------------------|-----------------------|------------------------|--------------------------|--------------------------|--------------------------|
| Liver cancer due to alcohol use      | 186<br>(106 - 279)          | --                    | --                     | 36<br>(20 - 62)          | 86<br>(47 - 136)         | 64<br>(34 - 99)          |
| Liver cancer due to other causes     | 305<br>(190 - 432)          | --                    | 3<br>(1 - 6)           | 120<br>(70 - 183)        | 128<br>(72 - 205)        | 54<br>(33 - 82)          |
| Larynx cancer                        | 20<br>(14 - 47)             | --                    | --                     | 4<br>(2 - 7)             | 10<br>(6 - 25)           | 7<br>(5 - 16)            |
| Tracheal, bronchus and lung cancer   | 271<br>(225 - 327)          | --                    | --                     | 29<br>(21 - 40)          | 146<br>(116 - 182)       | 96<br>(79 - 116)         |
| Breast cancer                        | 377<br>(282 - 492)          | --                    | --                     | 144<br>(105 - 197)       | 169<br>(117 - 235)       | 64<br>(47 - 94)          |
| Cervical cancer                      | 864<br>(593 - 1,165)        | --                    | --                     | 211<br>(140 - 313)       | 487<br>(309 - 695)       | 166<br>(107 - 244)       |
| Uterine cancer                       | 79<br>(47 - 114)            | --                    | --                     | 12<br>(6 - 20)           | 40<br>(23 - 61)          | 27<br>(16 - 44)          |
| Prostate cancer                      | 232<br>(157 - 399)          | --                    | --                     | 5<br>(2 - 8)             | 61<br>(38 - 107)         | 166<br>(110 - 289)       |
| Colon and rectum cancer              | 296<br>(247 - 354)          | --                    | --                     | 85<br>(66 - 108)         | 106<br>(86 - 134)        | 104<br>(84 - 130)        |
| Lip and oral cavity cancer           | 39<br>(30 - 50)             | --                    | --                     | 11<br>(7 - 15)           | 16<br>(12 - 22)          | 12<br>(9 - 18)           |
| Nasopharynx cancer                   | 12<br>(9 - 16)              | --                    | 1<br>(0 - 1)           | 5<br>(4 - 7)             | 4<br>(3 - 6)             | 2<br>(1 - 2)             |
| Other pharynx cancer                 | 14<br>(11 - 20)             | --                    | --                     | 4<br>(3 - 6)             | 6<br>(4 - 10)            | 4<br>(3 - 6)             |
| Gallbladder and biliary tract cancer | 71<br>(52 - 97)             | --                    | --                     | 13<br>(8 - 19)           | 36<br>(25 - 53)          | 21<br>(14 - 33)          |
| Pancreatic cancer                    | 146<br>(119 - 175)          | --                    | --                     | 30<br>(22 - 38)          | 77<br>(59 - 96)          | 40<br>(31 - 51)          |
| Malignant skin melanoma              | 17<br>(13 - 25)             | --                    | --                     | 5<br>(3 - 8)             | 8<br>(6 - 11)            | 4<br>(3 - 7)             |
| Non-melanoma skin cancer             | 14<br>(10 - 20)             | --                    | --                     | 3<br>(2 - 4)             | 4<br>(2 - 7)             | 8<br>(5 - 11)            |
| Ovarian cancer                       | 115<br>(83 - 155)           | --                    | --                     | 28<br>(19 - 40)          | 69<br>(45 - 98)          | 18<br>(12 - 27)          |
| Testicular cancer                    | 6<br>(4 - 9)                | --                    | --                     | 5<br>(3 - 7)             | 1<br>(0 - 1)             | 1<br>(0 - 1)             |
| Kidney cancer                        | 50<br>(40 - 62)             | 5<br>(2 - 11)         | 3<br>(2 - 5)           | 9<br>(7 - 12)            | 23<br>(17 - 30)          | 11<br>(8 - 14)           |
| Bladder cancer                       | 125<br>(98 - 173)           | --                    | --                     | 22<br>(14 - 30)          | 45<br>(32 - 67)          | 58<br>(43 - 87)          |
| Brain and nervous system cancer      | 71<br>(46 - 89)             | 3<br>(1 - 6)          | 8<br>(4 - 12)          | 33<br>(19 - 44)          | 18<br>(12 - 23)          | 9<br>(6 - 12)            |
| Thyroid cancer                       | 17<br>(12 - 25)             | --                    | 0<br>(0 - 1)           | 2<br>(1 - 3)             | 9<br>(6 - 14)            | 6<br>(4 - 10)            |
| Mesothelioma                         | 8<br>(6 - 11)               | --                    | --                     | 2<br>(1 - 2)             | 4<br>(3 - 5)             | 3<br>(2 - 5)             |
| Hodgkin lymphoma                     | 31<br>(20 - 44)             | 2<br>(1 - 5)          | 3<br>(1 - 8)           | 12<br>(7 - 18)           | 6<br>(4 - 9)             | 7<br>(3 - 13)            |
| Non-Hodgkin lymphoma                 | 273<br>(213 - 357)          | 28<br>(13 - 53)       | 42<br>(22 - 70)        | 98<br>(70 - 131)         | 66<br>(46 - 103)         | 39<br>(25 - 64)          |
| Multiple myeloma                     | 32<br>(23 - 44)             | --                    | --                     | 6<br>(4 - 8)             | 16<br>(11 - 22)          | 10<br>(6 - 16)           |
| Leukemia                             | 113<br>(91 - 134)           | 9<br>(4 - 16)         | 18<br>(11 - 26)        | 48<br>(36 - 60)          | 20<br>(15 - 26)          | 18<br>(14 - 23)          |
| Other neoplasms                      | 504<br>(358 - 700)          | 72<br>(38 - 113)      | 52<br>(28 - 83)        | 123<br>(76 - 175)        | 140<br>(91 - 228)        | 117<br>(82 - 177)        |
| Cardiovascular diseases              | 14,534<br>(12,257 - 17,437) | 178<br>(117 - 269)    | 85<br>(56 - 128)       | 1,409<br>(1,089 - 1,752) | 5,433<br>(4,363 - 6,609) | 7,429<br>(6,213 - 8,921) |
| Rheumatic heart disease              | 176<br>(101 - 414)          | 4<br>(2 - 9)          | 6<br>(3 - 14)          | 36<br>(17 - 96)          | 58<br>(27 - 165)         | 72<br>(44 - 146)         |
| Ischemic heart disease               | 4,269<br>(3,300 - 5,981)    | 7<br>(3 - 15)         | 11<br>(6 - 18)         | 396<br>(288 - 531)       | 1,633<br>(1,224 - 2,295) | 2,222<br>(1,627 - 3,285) |
| Cerebrovascular disease              | 6,631<br>(5,282 - 8,131)    | 45<br>(28 - 66)       | 22<br>(14 - 35)        | 505<br>(348 - 672)       | 2,403<br>(1,804 - 2,999) | 3,656<br>(2,940 - 4,479) |
| Ischemic stroke                      | 4,262<br>(2,533 - 5,340)    | 6<br>(2 - 13)         | 3<br>(1 - 7)           | 119<br>(63 - 186)        | 1,386<br>(727 - 1,863)   | 2,748<br>(1,664 - 3,411) |
| Hemorrhagic stroke                   | 2,369<br>(1,603 - 3,838)    | 39<br>(25 - 58)       | 19<br>(12 - 30)        | 386<br>(260 - 520)       | 1,017<br>(661 - 1,614)   | 908<br>(514 - 1,747)     |
| Hypertensive heart disease           | 1,021<br>(529 - 1,510)      | 2<br>(1 - 5)          | 1<br>(1 - 2)           | 84<br>(30 - 148)         | 361<br>(166 - 585)       | 573<br>(310 - 810)       |
| Cardiomyopathy and myocarditis       | 779<br>(518 - 1,041)        | 42<br>(20 - 87)       | 18<br>(10 - 34)        | 145<br>(95 - 211)        | 274<br>(179 - 379)       | 301<br>(172 - 441)       |
| Atrial fibrillation and flutter      | 2<br>(1 - 3)                | --                    | --                     | 0<br>(0 - 0)             | 0<br>(0 - 1)             | 1<br>(0 - 2)             |
| Aortic aneurysm                      | 174<br>(120 - 250)          | --                    | --                     | 17<br>(11 - 26)          | 74<br>(50 - 108)         | 82<br>(54 - 126)         |
| Peripheral vascular disease          | 6<br>(4 - 9)                | --                    | --                     | 0<br>(0 - 0)             | 2<br>(2 - 4)             | 4<br>(2 - 6)             |
| Endocarditis                         | 269<br>(191 - 394)          | 32<br>(14 - 59)       | 7<br>(4 - 12)          | 56<br>(36 - 83)          | 78<br>(51 - 128)         | 95<br>(64 - 156)         |

Web Table 31- Senegal deaths with 95% UI by age, sex, and cause in 2013

| Cause                                               | Both Sexes, All Ages     | Both Sexes, 0-4 Years | Both Sexes, 5-14 Years | Both Sexes, 15-49 Years | Both Sexes, 50-69 Years | Both Sexes, 70-80 Years  |
|-----------------------------------------------------|--------------------------|-----------------------|------------------------|-------------------------|-------------------------|--------------------------|
| Other cardiovascular and circulatory diseases       | 1,206<br>(811 - 2,011)   | 45<br>(24 - 79)       | 19<br>(11 - 32)        | 171<br>(112 - 265)      | 549<br>(346 - 903)      | 423<br>(260 - 818)       |
| Chronic respiratory diseases                        | 2,676<br>(2,179 - 3,869) | 71<br>(39 - 120)      | 26<br>(19 - 38)        | 286<br>(211 - 409)      | 932<br>(717 - 1,397)    | 1,362<br>(1,093 - 1,991) |
| Chronic obstructive pulmonary disease               | 1,600<br>(1,275 - 2,387) | 29<br>(15 - 51)       | 10<br>(7 - 15)         | 92<br>(65 - 134)        | 561<br>(416 - 876)      | 909<br>(698 - 1,334)     |
| Pneumoconiosis                                      | 120<br>(74 - 193)        | 1<br>(0 - 2)          | 1<br>(1 - 2)           | 25<br>(14 - 39)         | 61<br>(35 - 99)         | 32<br>(18 - 61)          |
| Silicosis                                           | 23<br>(14 - 44)          | 0<br>(0 - 1)          | 0<br>(0 - 1)           | 5<br>(2 - 8)            | 6<br>(3 - 11)           | 12<br>(6 - 25)           |
| Asbestosis                                          | 9<br>(5 - 15)            | 0<br>(0 - 1)          | 0<br>(0 - 0)           | 2<br>(1 - 4)            | 5<br>(3 - 9)            | 1<br>(1 - 2)             |
| Coal workers pneumoconiosis                         | 32<br>(20 - 52)          | 0<br>(0 - 1)          | 0<br>(0 - 0)           | 2<br>(1 - 3)            | 26<br>(15 - 42)         | 4<br>(2 - 8)             |
| Other pneumoconiosis                                | 55<br>(35 - 85)          | 0<br>(0 - 0)          | 0<br>(0 - 0)           | 16<br>(9 - 26)          | 24<br>(13 - 40)         | 15<br>(8 - 27)           |
| Asthma                                              | 445<br>(307 - 659)       | 22<br>(8 - 41)        | 7<br>(4 - 13)          | 84<br>(56 - 129)        | 163<br>(101 - 253)      | 170<br>(109 - 256)       |
| Interstitial lung disease and pulmonary sarcoidosis | 274<br>(128 - 437)       | 1<br>(0 - 4)          | 1<br>(0 - 2)           | 14<br>(8 - 26)          | 91<br>(46 - 151)        | 166<br>(65 - 275)        |
| Other chronic respiratory diseases                  | 237<br>(164 - 382)       | 18<br>(10 - 33)       | 7<br>(5 - 11)          | 71<br>(48 - 105)        | 56<br>(34 - 94)         | 85<br>(52 - 150)         |
| Cirrhosis                                           | 1,471<br>(1,046 - 1,946) | 22<br>(9 - 45)        | 15<br>(9 - 24)         | 425<br>(279 - 606)      | 676<br>(472 - 916)      | 333<br>(231 - 463)       |
| Cirrhosis due to hepatitis B                        | 506<br>(338 - 742)       | 1<br>(0 - 4)          | 4<br>(1 - 7)           | 158<br>(91 - 264)       | 238<br>(152 - 350)      | 106<br>(68 - 153)        |
| Cirrhosis due to hepatitis C                        | 280<br>(148 - 410)       | 1<br>(0 - 3)          | 2<br>(0 - 3)           | 67<br>(38 - 106)        | 134<br>(59 - 207)       | 76<br>(30 - 136)         |
| Cirrhosis due to alcohol use                        | 470<br>(239 - 692)       | --                    | --                     | 113<br>(46 - 182)       | 232<br>(116 - 354)      | 125<br>(70 - 187)        |
| Cirrhosis due to other causes                       | 214<br>(132 - 322)       | 20<br>(8 - 40)        | 10<br>(6 - 16)         | 86<br>(50 - 141)        | 72<br>(39 - 114)        | 26<br>(13 - 48)          |
| Digestive diseases                                  | 2,003<br>(1,528 - 2,425) | 71<br>(34 - 119)      | 62<br>(43 - 86)        | 510<br>(349 - 662)      | 678<br>(497 - 853)      | 682<br>(530 - 854)       |
| Peptic ulcer disease                                | 440<br>(305 - 585)       | 5<br>(2 - 13)         | 7<br>(3 - 12)          | 102<br>(62 - 150)       | 158<br>(102 - 222)      | 168<br>(113 - 235)       |
| Gastritis and duodenitis                            | 85<br>(45 - 193)         | 4<br>(1 - 10)         | 4<br>(2 - 8)           | 20<br>(10 - 42)         | 26<br>(12 - 61)         | 32<br>(15 - 79)          |
| Appendicitis                                        | 136<br>(78 - 194)        | 8<br>(3 - 16)         | 10<br>(6 - 18)         | 37<br>(24 - 58)         | 40<br>(20 - 67)         | 40<br>(16 - 74)          |
| Paralytic ileus and intestinal obstruction          | 671<br>(415 - 893)       | 26<br>(10 - 49)       | 24<br>(13 - 36)        | 156<br>(77 - 229)       | 234<br>(131 - 324)      | 231<br>(154 - 332)       |
| Inguinal, femoral, and abdominal hernia             | 53<br>(33 - 82)          | 1<br>(0 - 3)          | 1<br>(0 - 2)           | 12<br>(7 - 21)          | 18<br>(11 - 28)         | 21<br>(12 - 32)          |
| Inflammatory bowel disease                          | 103<br>(38 - 146)        | 11<br>(5 - 24)        | 3<br>(1 - 5)           | 28<br>(9 - 45)          | 31<br>(9 - 48)          | 29<br>(9 - 48)           |
| Vascular intestinal disorders                       | 10<br>(4 - 24)           | 1<br>(0 - 1)          | 0<br>(0 - 1)           | 2<br>(1 - 5)            | 3<br>(1 - 8)            | 4<br>(1 - 10)            |
| Gallbladder and biliary diseases                    | 153<br>(104 - 207)       | 2<br>(1 - 4)          | 4<br>(1 - 7)           | 30<br>(17 - 46)         | 52<br>(33 - 81)         | 64<br>(40 - 92)          |
| Pancreatitis                                        | 141<br>(85 - 201)        | 1<br>(0 - 2)          | 2<br>(1 - 3)           | 61<br>(33 - 97)         | 47<br>(28 - 71)         | 31<br>(16 - 49)          |
| Other digestive diseases                            | 213<br>(151 - 299)       | 11<br>(4 - 28)        | 7<br>(5 - 12)          | 62<br>(40 - 89)         | 69<br>(45 - 103)        | 63<br>(40 - 96)          |
| Neurological disorders                              | 1,074<br>(886 - 1,322)   | 81<br>(43 - 153)      | 45<br>(25 - 78)        | 207<br>(137 - 299)      | 115<br>(87 - 147)       | 626<br>(495 - 781)       |
| Alzheimer disease and other dementias               | 630<br>(500 - 786)       | --                    | --                     | 0<br>(0 - 1)            | 57<br>(42 - 74)         | 572<br>(445 - 721)       |
| Parkinson disease                                   | 8<br>(4 - 15)            | --                    | --                     | 1<br>(1 - 1)            | 1<br>(1 - 2)            | 6<br>(3 - 12)            |
| Epilepsy                                            | 317<br>(222 - 482)       | 61<br>(26 - 130)      | 35<br>(16 - 68)        | 166<br>(104 - 256)      | 26<br>(16 - 42)         | 28<br>(18 - 44)          |
| Multiple sclerosis                                  | 1<br>(1 - 5)             | --                    | --                     | 1<br>(0 - 2)            | 1<br>(0 - 2)            | 0<br>(0 - 1)             |
| Other neurological disorders                        | 118<br>(96 - 142)        | 20<br>(12 - 33)       | 10<br>(7 - 13)         | 39<br>(28 - 52)         | 31<br>(22 - 39)         | 19<br>(14 - 24)          |
| Mental and substance use disorders                  | 622<br>(394 - 844)       | 17<br>(3 - 41)        | 0<br>(0 - 0)           | 454<br>(266 - 641)      | 110<br>(66 - 166)       | 41<br>(24 - 60)          |
| Schizophrenia                                       | 2<br>(1 - 3)             | --                    | --                     | 1<br>(1 - 1)            | 1<br>(0 - 1)            | 0<br>(0 - 0)             |
| Alcohol use disorders                               | 173<br>(69 - 323)        | --                    | --                     | 86<br>(37 - 166)        | 65<br>(25 - 125)        | 21<br>(5 - 41)           |
| Drug use disorders                                  | 446<br>(256 - 639)       | 17<br>(3 - 41)        | --                     | 366<br>(195 - 541)      | 44<br>(31 - 57)         | 19<br>(15 - 25)          |
| Opioid use disorders                                | 47<br>(27 - 69)          | 0<br>(0 - 5)          | --                     | 40<br>(21 - 59)         | 4<br>(3 - 5)            | 2<br>(1 - 3)             |
| Cocaine use disorders                               | 2<br>(1 - 3)             | 0<br>(0 - 0)          | --                     | 1<br>(1 - 2)            | 0<br>(0 - 0)            | 0<br>(0 - 0)             |
| Amphetamine use disorders                           | 1<br>(1 - 2)             | 0<br>(0 - 0)          | --                     | 1<br>(1 - 1)            | 0<br>(0 - 0)            | 0<br>(0 - 0)             |

Web Table 31- Senegal deaths with 95% UI by age, sex, and cause in 2013

| Cause                                               | Both Sexes, All Ages     | Both Sexes, 0-4 Years    | Both Sexes, 5-14 Years | Both Sexes, 15-49 Years | Both Sexes, 50-69 Years  | Both Sexes, 70-80 Years  |
|-----------------------------------------------------|--------------------------|--------------------------|------------------------|-------------------------|--------------------------|--------------------------|
| Other drug use disorders                            | 396<br>(226 - 564)       | 15<br>(3 - 36)           | --                     | 325<br>(173 - 481)      | 39<br>(28 - 51)          | 17<br>(13 - 22)          |
| Eating disorders                                    | 1<br>(0 - 1)             | --                       | 0<br>(0 - 0)           | 0<br>(0 - 1)            | --                       | --                       |
| Anorexia nervosa                                    | 1<br>(0 - 1)             | --                       | 0<br>(0 - 0)           | 0<br>(0 - 1)            | --                       | --                       |
| Diabetes, urogenital, blood, and endocrine diseases | 4,477<br>(3,763 - 5,261) | 419<br>(249 - 634)       | 180<br>(121 - 289)     | 927<br>(706 - 1,176)    | 1,459<br>(1,169 - 1,754) | 1,492<br>(1,234 - 1,786) |
| Diabetes mellitus                                   | 1,800<br>(1,450 - 2,156) | 11<br>(7 - 17)           | 7<br>(4 - 11)          | 197<br>(146 - 253)      | 791<br>(618 - 992)       | 794<br>(620 - 979)       |
| Acute glomerulonephritis                            | 16<br>(11 - 27)          | 2<br>(1 - 4)             | 2<br>(1 - 4)           | 6<br>(4 - 10)           | 5<br>(4 - 7)             | 2<br>(1 - 4)             |
| Chronic kidney disease                              | 841<br>(681 - 1,031)     | 44<br>(24 - 73)          | 32<br>(18 - 51)        | 258<br>(168 - 347)      | 248<br>(188 - 333)       | 260<br>(202 - 335)       |
| Chronic kidney disease due to diabetes mellitus     | 10<br>(4 - 16)           | 0<br>(0 - 0)             | 0<br>(0 - 1)           | 1<br>(0 - 1)            | 8<br>(3 - 14)            | 0<br>(0 - 1)             |
| Chronic kidney disease due to hypertension          | 325<br>(236 - 477)       | 5<br>(2 - 11)            | 3<br>(2 - 6)           | 68<br>(45 - 103)        | 116<br>(78 - 180)        | 132<br>(89 - 206)        |
| Chronic kidney disease due to glomerulonephritis    | 313<br>(220 - 400)       | 26<br>(15 - 44)          | 19<br>(12 - 28)        | 132<br>(83 - 180)       | 69<br>(46 - 94)          | 67<br>(39 - 94)          |
| Chronic kidney disease due to other causes          | 193<br>(109 - 277)       | 12<br>(4 - 23)           | 9<br>(3 - 18)          | 57<br>(25 - 102)        | 56<br>(29 - 87)          | 61<br>(29 - 99)          |
| Urinary diseases and male infertility               | 716<br>(506 - 884)       | 46<br>(22 - 88)          | 12<br>(7 - 20)         | 165<br>(91 - 235)       | 227<br>(155 - 297)       | 265<br>(203 - 348)       |
| Interstitial nephritis and urinary tract infections | 630<br>(436 - 786)       | 43<br>(20 - 85)          | 10<br>(5 - 16)         | 141<br>(75 - 203)       | 198<br>(133 - 263)       | 237<br>(179 - 315)       |
| Urolithiasis                                        | 9<br>(4 - 25)            | --                       | 1<br>(0 - 2)           | 3<br>(1 - 7)            | 4<br>(1 - 11)            | 2<br>(1 - 8)             |
| Other urinary diseases                              | 77<br>(41 - 113)         | 3<br>(1 - 8)             | 1<br>(1 - 3)           | 20<br>(9 - 36)          | 26<br>(12 - 40)          | 26<br>(13 - 45)          |
| Gynecological diseases                              | 6<br>(3 - 10)            | --                       | --                     | 3<br>(1 - 5)            | 2<br>(1 - 4)             | 1<br>(1 - 2)             |
| Uterine fibroids                                    | 1<br>(1 - 2)             | --                       | --                     | 0<br>(0 - 1)            | 1<br>(0 - 1)             | 0<br>(0 - 1)             |
| Polycystic ovarian syndrome                         | 0<br>(0 - 0)             | --                       | --                     | 0<br>(0 - 0)            | 0<br>(0 - 0)             | --                       |
| Endometriosis                                       | 0<br>(0 - 1)             | --                       | --                     | 0<br>(0 - 1)            | 0<br>(0 - 0)             | --                       |
| Genital prolapse                                    | 1<br>(1 - 2)             | --                       | --                     | 0<br>(0 - 1)            | 0<br>(0 - 1)             | 0<br>(0 - 1)             |
| Other gynecological diseases                        | 3<br>(2 - 5)             | --                       | --                     | 1<br>(1 - 2)            | 1<br>(0 - 2)             | 1<br>(0 - 1)             |
| Hemoglobinopathies and hemolytic anemias            | 589<br>(299 - 1,093)     | 217<br>(97 - 406)        | 104<br>(49 - 211)      | 170<br>(82 - 400)       | 60<br>(31 - 119)         | 38<br>(18 - 71)          |
| Thalassemias                                        | 3<br>(2 - 6)             | 2<br>(1 - 4)             | 1<br>(0 - 1)           | 1<br>(0 - 2)            | 0<br>(0 - 0)             | 0<br>(0 - 0)             |
| Sickle cell disorders                               | 540<br>(272 - 1,009)     | 208<br>(92 - 390)        | 102<br>(48 - 207)      | 166<br>(80 - 388)       | 54<br>(28 - 109)         | 10<br>(5 - 18)           |
| G6PD deficiency                                     | 6<br>(3 - 11)            | 2<br>(1 - 3)             | 1<br>(0 - 1)           | 1<br>(1 - 4)            | 1<br>(0 - 2)             | 1<br>(1 - 2)             |
| Other hemoglobinopathies and hemolytic anemias      | 40<br>(21 - 73)          | 5<br>(3 - 9)             | 1<br>(0 - 2)           | 3<br>(1 - 7)            | 5<br>(2 - 8)             | 27<br>(13 - 51)          |
| Endocrine, metabolic, blood, and immune disorders   | 508<br>(325 - 648)       | 99<br>(58 - 155)         | 24<br>(13 - 38)        | 128<br>(78 - 180)       | 126<br>(79 - 172)        | 131<br>(64 - 186)        |
| Musculoskeletal disorders                           | 136<br>(101 - 204)       | --                       | 12<br>(7 - 19)         | 45<br>(30 - 74)         | 44<br>(32 - 64)          | 35<br>(25 - 57)          |
| Rheumatoid arthritis                                | 17<br>(11 - 27)          | --                       | 1<br>(1 - 2)           | 3<br>(2 - 5)            | 5<br>(3 - 9)             | 8<br>(5 - 14)            |
| Other musculoskeletal disorders                     | 118<br>(87 - 179)        | --                       | 10<br>(6 - 18)         | 42<br>(28 - 70)         | 39<br>(27 - 57)          | 27<br>(19 - 44)          |
| Other non-communicable diseases                     | 2,745<br>(1,816 - 4,228) | 2,137<br>(1,246 - 3,564) | 134<br>(86 - 217)      | 193<br>(140 - 263)      | 123<br>(89 - 162)        | 158<br>(111 - 215)       |
| Congenital anomalies                                | 2,328<br>(1,387 - 3,800) | 2,051<br>(1,171 - 3,497) | 124<br>(76 - 207)      | 108<br>(72 - 164)       | 25<br>(17 - 37)          | 20<br>(15 - 28)          |
| Neural tube defects                                 | 290<br>(113 - 618)       | 271<br>(100 - 590)       | 9<br>(4 - 19)          | 8<br>(4 - 17)           | 1<br>(0 - 2)             | 1<br>(0 - 1)             |
| Congenital heart anomalies                          | 1,100<br>(713 - 1,885)   | 962<br>(594 - 1,698)     | 64<br>(38 - 109)       | 52<br>(34 - 79)         | 12<br>(8 - 19)           | 9<br>(6 - 13)            |
| Cleft lip and cleft palate                          | 8<br>(3 - 18)            | 8<br>(3 - 18)            | --                     | --                      | --                       | --                       |
| Down syndrome                                       | 284<br>(122 - 583)       | 242<br>(90 - 531)        | 20<br>(10 - 41)        | 18<br>(10 - 34)         | 4<br>(2 - 8)             | 1<br>(0 - 2)             |
| Chromosomal unbalanced rearrangements               | 102<br>(51 - 191)        | 91<br>(42 - 179)         | 4<br>(2 - 8)           | 5<br>(3 - 9)            | 1<br>(0 - 1)             | 1<br>(0 - 1)             |
| Other congenital anomalies                          | 545<br>(230 - 1,431)     | 478<br>(179 - 1,305)     | 26<br>(12 - 62)        | 25<br>(16 - 40)         | 7<br>(4 - 11)            | 9<br>(6 - 14)            |
| Skin and subcutaneous diseases                      | 391<br>(275 - 493)       | 60<br>(31 - 107)         | 10<br>(6 - 17)         | 85<br>(48 - 121)        | 98<br>(65 - 136)         | 138<br>(91 - 194)        |
| Cellulitis                                          | 115<br>(71 - 162)        | 14<br>(6 - 30)           | 4<br>(2 - 8)           | 22<br>(13 - 35)         | 29<br>(15 - 44)          | 47<br>(23 - 78)          |

Web Table 31- Senegal deaths with 95% UI by age, sex, and cause in 2013

| Cause                                           | Both Sexes, All Ages     | Both Sexes, 0-4 Years | Both Sexes, 5-14 Years | Both Sexes, 15-49 Years  | Both Sexes, 50-69 Years | Both Sexes, 70-80 Years |
|-------------------------------------------------|--------------------------|-----------------------|------------------------|--------------------------|-------------------------|-------------------------|
| Pyoderma                                        | 250<br>(172 - 337)       | 41<br>(21 - 74)       | 5<br>(3 - 8)           | 55<br>(31 - 81)          | 67<br>(42 - 100)        | 82<br>(51 - 125)        |
| Decubitus ulcer                                 | 11<br>(6 - 16)           | 0<br>(0 - 1)          | 1<br>(0 - 1)           | 2<br>(1 - 3)             | 1<br>(0 - 1)            | 7<br>(3 - 12)           |
| Other skin and subcutaneous diseases            | 15<br>(8 - 26)           | 4<br>(1 - 10)         | 1<br>(0 - 1)           | 6<br>(3 - 11)            | 1<br>(1 - 3)            | 3<br>(1 - 6)            |
| Sudden infant death syndrome                    | 26<br>(9 - 61)           | 26<br>(9 - 61)        | --                     | --                       | --                      | --                      |
| Injuries                                        | 6,879<br>(5,472 - 8,420) | 928<br>(590 - 1,452)  | 641<br>(472 - 875)     | 3,280<br>(2,440 - 4,138) | 1,142<br>(878 - 1,418)  | 889<br>(613 - 1,116)    |
| Transport injuries                              | 3,345<br>(2,506 - 4,263) | 241<br>(126 - 404)    | 293<br>(204 - 412)     | 1,920<br>(1,336 - 2,506) | 584<br>(420 - 760)      | 306<br>(204 - 401)      |
| Road injuries                                   | 3,234<br>(2,421 - 4,128) | 219<br>(114 - 367)    | 278<br>(193 - 393)     | 1,886<br>(1,309 - 2,466) | 562<br>(407 - 730)      | 287<br>(198 - 375)      |
| Pedestrian road injuries                        | 835<br>(560 - 1,162)     | 71<br>(32 - 138)      | 93<br>(57 - 142)       | 405<br>(242 - 606)       | 164<br>(107 - 232)      | 101<br>(66 - 140)       |
| Cyclist road injuries                           | 159<br>(105 - 222)       | 15<br>(6 - 30)        | 24<br>(14 - 41)        | 64<br>(41 - 94)          | 40<br>(22 - 58)         | 16<br>(9 - 23)          |
| Motorcyclist road injuries                      | 378<br>(242 - 592)       | 15<br>(7 - 28)        | 18<br>(10 - 31)        | 276<br>(162 - 460)       | 50<br>(32 - 76)         | 19<br>(11 - 29)         |
| Motor vehicle road injuries                     | 1,799<br>(1,324 - 2,305) | 108<br>(58 - 183)     | 132<br>(88 - 195)      | 1,121<br>(787 - 1,470)   | 296<br>(207 - 394)      | 143<br>(95 - 194)       |
| Other road injuries                             | 62<br>(38 - 90)          | 10<br>(4 - 21)        | 12<br>(6 - 21)         | 20<br>(12 - 37)          | 12<br>(7 - 18)          | 8<br>(4 - 13)           |
| Other transport injuries                        | 111<br>(64 - 155)        | 22<br>(8 - 41)        | 15<br>(7 - 25)         | 34<br>(22 - 55)          | 22<br>(10 - 34)         | 18<br>(4 - 30)          |
| Unintentional injuries                          | 2,831<br>(2,254 - 3,544) | 674<br>(416 - 1,079)  | 329<br>(228 - 472)     | 881<br>(636 - 1,191)     | 434<br>(324 - 552)      | 513<br>(333 - 665)      |
| Falls                                           | 741<br>(560 - 975)       | 83<br>(45 - 156)      | 48<br>(27 - 85)        | 221<br>(141 - 350)       | 139<br>(101 - 203)      | 251<br>(162 - 342)      |
| Drowning                                        | 630<br>(423 - 949)       | 209<br>(93 - 429)     | 132<br>(73 - 210)      | 216<br>(123 - 364)       | 49<br>(32 - 67)         | 25<br>(16 - 34)         |
| Fire, heat, and hot substances                  | 269<br>(136 - 427)       | 83<br>(33 - 174)      | 26<br>(13 - 54)        | 74<br>(44 - 113)         | 43<br>(21 - 66)         | 43<br>(20 - 71)         |
| Poisonings                                      | 122<br>(82 - 181)        | 27<br>(12 - 55)       | 10<br>(6 - 17)         | 53<br>(32 - 95)          | 22<br>(12 - 32)         | 9<br>(5 - 14)           |
| Exposure to mechanical forces                   | 395<br>(285 - 598)       | 94<br>(49 - 208)      | 50<br>(29 - 91)        | 159<br>(103 - 260)       | 61<br>(38 - 85)         | 30<br>(15 - 41)         |
| Unintentional firearm injuries                  | 122<br>(86 - 172)        | 15<br>(7 - 26)        | 9<br>(5 - 16)          | 72<br>(43 - 118)         | 18<br>(11 - 27)         | 8<br>(4 - 12)           |
| Unintentional suffocation                       | 69<br>(27 - 296)         | 35<br>(9 - 131)       | 10<br>(3 - 37)         | 17<br>(6 - 86)           | 6<br>(2 - 24)           | 2<br>(1 - 9)            |
| Other exposure to mechanical forces             | 203<br>(109 - 295)       | 44<br>(17 - 85)       | 31<br>(14 - 61)        | 70<br>(42 - 115)         | 38<br>(15 - 56)         | 20<br>(4 - 30)          |
| Adverse effects of medical treatment            | 256<br>(107 - 427)       | 52<br>(18 - 119)      | 13<br>(6 - 26)         | 57<br>(29 - 97)          | 60<br>(22 - 112)        | 74<br>(22 - 142)        |
| Animal contact                                  | 80<br>(45 - 123)         | 13<br>(6 - 26)        | 13<br>(7 - 25)         | 23<br>(12 - 39)          | 17<br>(8 - 27)          | 15<br>(5 - 24)          |
| Venomous animal contact                         | 39<br>(20 - 69)          | 7<br>(3 - 17)         | 6<br>(3 - 14)          | 12<br>(6 - 23)           | 7<br>(3 - 14)           | 6<br>(2 - 11)           |
| Non-venomous animal contact                     | 42<br>(20 - 61)          | 6<br>(3 - 11)         | 7<br>(3 - 13)          | 11<br>(5 - 18)           | 9<br>(4 - 15)           | 9<br>(3 - 14)           |
| Foreign body                                    | 198<br>(139 - 288)       | 92<br>(53 - 156)      | 16<br>(10 - 25)        | 26<br>(17 - 41)          | 21<br>(14 - 30)         | 43<br>(24 - 62)         |
| Pulmonary aspiration and foreign body in airway | 187<br>(128 - 276)       | 89<br>(51 - 153)      | 14<br>(9 - 23)         | 24<br>(15 - 39)          | 19<br>(12 - 27)         | 41<br>(23 - 60)         |
| Foreign body in other body part                 | 11<br>(7 - 18)           | 3<br>(1 - 5)          | 2<br>(1 - 3)           | 2<br>(1 - 5)             | 3<br>(2 - 4)            | 2<br>(1 - 3)            |
| Other unintentional injuries                    | 139<br>(77 - 198)        | 21<br>(11 - 36)       | 21<br>(10 - 33)        | 52<br>(26 - 83)          | 22<br>(12 - 33)         | 23<br>(11 - 35)         |
| Self-harm and interpersonal violence            | 703<br>(490 - 1,032)     | 12<br>(6 - 23)        | 19<br>(12 - 32)        | 478<br>(310 - 760)       | 124<br>(83 - 182)       | 70<br>(40 - 107)        |
| Self-harm                                       | 487<br>(325 - 769)       | --                    | 10<br>(4 - 22)         | 295<br>(177 - 542)       | 113<br>(74 - 171)       | 68<br>(39 - 106)        |
| Interpersonal violence                          | 216<br>(144 - 345)       | 12<br>(6 - 23)        | 9<br>(5 - 15)          | 183<br>(117 - 299)       | 11<br>(7 - 18)          | 2<br>(1 - 3)            |
| Assault by firearm                              | 114<br>(65 - 182)        | 3<br>(1 - 6)          | 2<br>(1 - 5)           | 104<br>(57 - 167)        | 5<br>(3 - 8)            | 0<br>(0 - 1)            |
| Assault by sharp object                         | 45<br>(26 - 86)          | 2<br>(1 - 5)          | 2<br>(1 - 3)           | 37<br>(18 - 75)          | 3<br>(2 - 5)            | 0<br>(0 - 1)            |
| Assault by other means                          | 57<br>(33 - 107)         | 6<br>(3 - 13)         | 4<br>(2 - 8)           | 43<br>(23 - 86)          | 3<br>(2 - 6)            | 1<br>(0 - 1)            |
| Forces of nature, war, and legal intervention   | 1<br>(0 - 0)             | 1<br>(0 - 0)          | --                     | --                       | --                      | --                      |
| Exposure to forces of nature                    | 1<br>(0 - 0)             | 1<br>(0 - 0)          | --                     | --                       | --                      | --                      |

Web Table 31- Senegal deaths with 95% UI by age, sex, and cause in 2013

| Cause                                                             | Males, All Ages             | Males, 0-4 Years            | Males, 5-14 Years        | Males, 15-49 Years         | Males, 50-69 Years        | Males, 70-80 Years       |
|-------------------------------------------------------------------|-----------------------------|-----------------------------|--------------------------|----------------------------|---------------------------|--------------------------|
| All causes                                                        | 47,081<br>(42,228 - 52,588) | 16,880<br>(14,940 - 19,115) | 1,883<br>(1,631 - 2,201) | 10,670<br>(8,402 - 12,844) | 8,905<br>(7,411 - 10,739) | 8,743<br>(8,220 - 9,717) |
| Communicable, maternal, neonatal, and nutritional diseases        | 24,731<br>(22,117 - 27,303) | 14,656<br>(12,857 - 16,787) | 1,090<br>(882 - 1,334)   | 4,218<br>(3,429 - 5,085)   | 2,375<br>(1,941 - 2,873)  | 2,392<br>(1,965 - 2,865) |
| HIV/AIDS and tuberculosis                                         | 3,699<br>(2,993 - 4,545)    | 163<br>(124 - 210)          | 142<br>(114 - 171)       | 2,146<br>(1,648 - 2,725)   | 818<br>(623 - 1,073)      | 429<br>(307 - 565)       |
| Tuberculosis                                                      | 2,252<br>(1,492 - 3,041)    | 70<br>(33 - 123)            | 44<br>(22 - 75)          | 1,094<br>(665 - 1,579)     | 641<br>(437 - 881)        | 403<br>(279 - 545)       |
| HIV/AIDS                                                          | 1,447<br>(953 - 2,073)      | 93<br>(59 - 134)            | 98<br>(72 - 127)         | 1,052<br>(660 - 1,585)     | 178<br>(112 - 263)        | 26<br>(14 - 42)          |
| HIV/AIDS resulting in mycobacterial infection                     | 99<br>(63 - 151)            | 6<br>(4 - 9)                | 6<br>(4 - 8)             | 73<br>(44 - 114)           | 13<br>(8 - 20)            | 2<br>(1 - 3)             |
| HIV/AIDS resulting in other diseases                              | 1,347<br>(898 - 1,925)      | 87<br>(56 - 125)            | 93<br>(68 - 119)         | 979<br>(617 - 1,476)       | 165<br>(103 - 244)        | 24<br>(13 - 39)          |
| Diarrhea, lower respiratory, and other common infectious diseases | 9,937<br>(7,812 - 12,023)   | 5,289<br>(3,536 - 7,015)    | 606<br>(452 - 796)       | 1,381<br>(929 - 1,873)     | 1,119<br>(822 - 1,482)    | 1,541<br>(1,197 - 1,943) |
| Diarrheal diseases                                                | 3,161<br>(2,075 - 4,590)    | 1,917<br>(921 - 3,208)      | 140<br>(67 - 259)        | 416<br>(246 - 654)         | 318<br>(184 - 516)        | 369<br>(220 - 592)       |
| Intestinal infectious diseases                                    | 405<br>(211 - 706)          | 116<br>(48 - 219)           | 121<br>(59 - 216)        | 148<br>(62 - 293)          | 14<br>(6 - 27)            | 5<br>(2 - 10)            |
| Typhoid fever                                                     | 249<br>(118 - 454)          | 64<br>(25 - 128)            | 78<br>(35 - 147)         | 96<br>(39 - 204)           | 9<br>(3 - 18)             | 3<br>(1 - 6)             |
| Paratyphoid fever                                                 | 132<br>(60 - 246)           | 40<br>(13 - 90)             | 40<br>(15 - 77)          | 46<br>(16 - 96)            | 4<br>(1 - 9)              | 1<br>(0 - 3)             |
| Other intestinal infectious diseases                              | 23<br>(12 - 41)             | 13<br>(5 - 26)              | 3<br>(0 - 8)             | 6<br>(1 - 15)              | 1<br>(0 - 6)              | 1<br>(0 - 4)             |
| Lower respiratory infections                                      | 4,334<br>(3,259 - 5,449)    | 1,996<br>(1,222 - 2,952)    | 141<br>(84 - 223)        | 451<br>(289 - 660)         | 649<br>(442 - 910)        | 1,097<br>(801 - 1,446)   |
| Upper respiratory infections                                      | 7<br>(3 - 14)               | 2<br>(0 - 8)                | 0<br>(0 - 1)             | 2<br>(0 - 5)               | 1<br>(0 - 4)              | 1<br>(0 - 3)             |
| Otitis media                                                      | 4<br>(3 - 5)                | 1<br>(0 - 1)                | 0<br>(0 - 0)             | 1<br>(1 - 1)               | 1<br>(0 - 1)              | 1<br>(1 - 1)             |
| Meningitis                                                        | 1,041<br>(707 - 1,446)      | 465<br>(218 - 800)          | 100<br>(53 - 167)        | 300<br>(186 - 448)         | 117<br>(67 - 184)         | 59<br>(34 - 94)          |
| Pneumococcal meningitis                                           | 336<br>(214 - 484)          | 130<br>(53 - 252)           | 38<br>(17 - 67)          | 108<br>(56 - 180)          | 40<br>(19 - 71)           | 20<br>(10 - 36)          |
| H influenzae type B meningitis                                    | 219<br>(135 - 353)          | 136<br>(57 - 249)           | 19<br>(7 - 38)           | 45<br>(20 - 81)            | 13<br>(6 - 23)            | 6<br>(2 - 11)            |
| Meningococcal meningitis                                          | 270<br>(174 - 390)          | 122<br>(52 - 229)           | 29<br>(12 - 54)          | 71<br>(34 - 125)           | 30<br>(15 - 57)           | 18<br>(10 - 32)          |
| Other meningitis                                                  | 216<br>(132 - 313)          | 78<br>(33 - 146)            | 14<br>(6 - 29)           | 75<br>(33 - 139)           | 34<br>(10 - 63)           | 15<br>(7 - 27)           |
| Encephalitis                                                      | 77<br>(53 - 116)            | 26<br>(11 - 53)             | 11<br>(5 - 20)           | 26<br>(15 - 44)            | 9<br>(6 - 14)             | 6<br>(3 - 9)             |
| Diphtheria                                                        | 5<br>(0 - 31)               | 3<br>(0 - 29)               | 1<br>(0 - 5)             | 0<br>(0 - 2)               | 0<br>(0 - 1)              | --                       |
| Whooping cough                                                    | 88<br>(0 - 447)             | 82<br>(0 - 418)             | 5<br>(0 - 22)            | 1<br>(0 - 5)               | 0<br>(0 - 0)              | --                       |
| Tetanus                                                           | 121<br>(43 - 208)           | 83<br>(22 - 173)            | 5<br>(2 - 11)            | 23<br>(7 - 45)             | 8<br>(3 - 16)             | 2<br>(1 - 4)             |
| Measles                                                           | 688<br>(242 - 1,444)        | 595<br>(197 - 1,278)        | 81<br>(32 - 168)         | 12<br>(4 - 25)             | 0<br>(0 - 1)              | --                       |
| Varicella and herpes zoster                                       | 8<br>(2 - 18)               | 3<br>(0 - 12)               | 1<br>(0 - 4)             | 2<br>(0 - 5)               | 1<br>(0 - 2)              | 1<br>(0 - 6)             |
| Neglected tropical diseases and malaria                           | 3,075<br>(1,533 - 5,363)    | 2,342<br>(890 - 4,613)      | 221<br>(112 - 430)       | 298<br>(160 - 691)         | 131<br>(67 - 333)         | 83<br>(35 - 241)         |
| Malaria                                                           | 2,970<br>(1,400 - 5,280)    | 2,322<br>(872 - 4,600)      | 199<br>(87 - 416)        | 259<br>(119 - 662)         | 114<br>(51 - 314)         | 75<br>(28 - 231)         |
| Leishmaniasis                                                     | 0<br>(0 - 0)                | 0<br>(0 - 0)                | 0<br>(0 - 0)             | 0<br>(0 - 0)               | 0<br>(0 - 0)              | 0<br>(0 - 0)             |
| Visceral leishmaniasis                                            | 0<br>(0 - 0)                | 0<br>(0 - 0)                | 0<br>(0 - 0)             | 0<br>(0 - 0)               | 0<br>(0 - 0)              | 0<br>(0 - 0)             |
| Schistosomiasis                                                   | 29<br>(20 - 41)             | 0<br>(0 - 1)                | 1<br>(0 - 2)             | 12<br>(7 - 19)             | 10<br>(6 - 16)            | 5<br>(2 - 8)             |
| Cysticercosis                                                     | 1<br>(0 - 4)                | 0<br>(0 - 0)                | 0<br>(0 - 0)             | 1<br>(0 - 3)               | 0<br>(0 - 1)              | 0<br>(0 - 0)             |
| Cystic echinococcosis                                             | 2<br>(2 - 3)                | 0<br>(0 - 0)                | 0<br>(0 - 0)             | 1<br>(1 - 1)               | 0<br>(0 - 0)              | 0<br>(0 - 0)             |
| Dengue                                                            | 5<br>(3 - 8)                | 2<br>(1 - 3)                | 1<br>(1 - 2)             | 2<br>(1 - 3)               | 0<br>(0 - 1)              | 0<br>(0 - 0)             |
| Yellow fever                                                      | 8<br>(5 - 13)               | 1<br>(0 - 2)                | 2<br>(1 - 4)             | 5<br>(2 - 9)               | 1<br>(0 - 2)              | 0<br>(0 - 1)             |
| Rabies                                                            | 44<br>(13 - 83)             | 9<br>(2 - 28)               | 16<br>(4 - 36)           | 15<br>(5 - 26)             | 4<br>(1 - 7)              | 0<br>(0 - 1)             |
| Intestinal nematode infections                                    | 8<br>(2 - 20)               | 6<br>(1 - 16)               | 1<br>(0 - 7)             | 1<br>(0 - 5)               | 0<br>(0 - 2)              | 0<br>(0 - 1)             |
| Ascariasis                                                        | 8<br>(2 - 20)               | 6<br>(1 - 16)               | 1<br>(0 - 7)             | 1<br>(0 - 5)               | 0<br>(0 - 2)              | 0<br>(0 - 1)             |
| Other neglected tropical diseases                                 | 2<br>(4 - 16)               | 2<br>(1 - 5)                | 1<br>(0 - 2)             | 3<br>(1 - 6)               | 1<br>(1 - 3)              | 1<br>(1 - 2)             |



Web Table 31- Senegal deaths with 95% UI by age, sex, and cause in 2013

| Cause                                                            | Males, All Ages             | Males, 0-4 Years         | Males, 5-14 Years  | Males, 15-49 Years       | Males, 50-69 Years       | Males, 70-80 Years       |
|------------------------------------------------------------------|-----------------------------|--------------------------|--------------------|--------------------------|--------------------------|--------------------------|
| Maternal disorders                                               | --                          | --                       | --                 | --                       | --                       | --                       |
| Maternal hemorrhage                                              | --                          | --                       | --                 | --                       | --                       | --                       |
| Maternal sepsis and other maternal infections                    | --                          | --                       | --                 | --                       | --                       | --                       |
| Maternal hypertensive disorders                                  | --                          | --                       | --                 | --                       | --                       | --                       |
| Maternal obstructed labor                                        | --                          | --                       | --                 | --                       | --                       | --                       |
| Maternal abortive outcome                                        | --                          | --                       | --                 | --                       | --                       | --                       |
| Indirect maternal deaths                                         | --                          | --                       | --                 | --                       | --                       | --                       |
| Late maternal deaths                                             | --                          | --                       | --                 | --                       | --                       | --                       |
| Maternal deaths aggravated by HIV/AIDS                           | --                          | --                       | --                 | --                       | --                       | --                       |
| Other maternal disorders                                         | --                          | --                       | --                 | --                       | --                       | --                       |
| Neonatal disorders                                               | 5,868<br>(5,090 - 6,901)    | 5,868<br>(5,090 - 6,901) | --                 | --                       | --                       | --                       |
| Neonatal preterm birth complications                             | 1,780<br>(770 - 3,179)      | 1,780<br>(770 - 3,179)   | --                 | --                       | --                       | --                       |
| Neonatal encephalopathy due to birth asphyxia and trauma         | 1,764<br>(758 - 3,187)      | 1,764<br>(758 - 3,187)   | --                 | --                       | --                       | --                       |
| Neonatal sepsis and other neonatal infections                    | 1,787<br>(824 - 3,245)      | 1,787<br>(824 - 3,245)   | --                 | --                       | --                       | --                       |
| Hemolytic disease and other neonatal jaundice                    | 43<br>(12 - 112)            | 43<br>(12 - 112)         | --                 | --                       | --                       | --                       |
| Other neonatal disorders                                         | 495<br>(209 - 1,015)        | 495<br>(209 - 1,015)     | --                 | --                       | --                       | --                       |
| Nutritional deficiencies                                         | 1,725<br>(889 - 2,481)      | 808<br>(333 - 1,385)     | 94<br>(47 - 152)   | 296<br>(153 - 447)       | 240<br>(123 - 359)       | 288<br>(170 - 468)       |
| Protein-energy malnutrition                                      | 1,233<br>(630 - 1,937)      | 717<br>(313 - 1,257)     | 68<br>(33 - 119)   | 151<br>(73 - 281)        | 140<br>(67 - 243)        | 157<br>(75 - 294)        |
| Iodine deficiency                                                | 5<br>(0 - 19)               | 2<br>(0 - 12)            | 0<br>(0 - 4)       | 2<br>(0 - 8)             | 1<br>(0 - 6)             | 1<br>(0 - 4)             |
| Iron-deficiency anemia                                           | 479<br>(147 - 792)          | 89<br>(8 - 246)          | 25<br>(6 - 51)     | 139<br>(41 - 244)        | 98<br>(28 - 173)         | 129<br>(44 - 229)        |
| Other nutritional deficiencies                                   | 8<br>(2 - 15)               | 0<br>(0 - 2)             | 0<br>(0 - 1)       | 4<br>(1 - 7)             | 2<br>(0 - 3)             | 2<br>(0 - 4)             |
| Other communicable, maternal, neonatal, and nutritional diseases | 427<br>(293 - 600)          | 187<br>(98 - 319)        | 26<br>(16 - 42)    | 98<br>(55 - 155)         | 66<br>(39 - 109)         | 50<br>(28 - 92)          |
| Sexually transmitted diseases excluding HIV                      | 168<br>(70 - 295)           | 134<br>(47 - 249)        | 13<br>(5 - 25)     | 10<br>(6 - 17)           | 6<br>(3 - 11)            | 5<br>(2 - 11)            |
| Syphilis                                                         | 160<br>(64 - 286)           | 134<br>(47 - 249)        | 12<br>(5 - 24)     | 5<br>(3 - 9)             | 4<br>(2 - 8)             | 4<br>(2 - 9)             |
| Chlamydial infection                                             | --                          | --                       | --                 | --                       | --                       | --                       |
| Gonococcal infection                                             | 5<br>(3 - 7)                | --                       | 0<br>(0 - 1)       | 3<br>(1 - 4)             | 1<br>(0 - 2)             | 1<br>(0 - 1)             |
| Other sexually transmitted diseases                              | 3<br>(2 - 5)                | --                       | 0<br>(0 - 1)       | 2<br>(1 - 4)             | 1<br>(0 - 1)             | 0<br>(0 - 1)             |
| Hepatitis                                                        | 121<br>(73 - 185)           | 14<br>(6 - 27)           | 7<br>(4 - 12)      | 54<br>(28 - 90)          | 29<br>(16 - 46)          | 17<br>(10 - 27)          |
| Acute hepatitis A                                                | 8<br>(2 - 18)               | 3<br>(1 - 8)             | 2<br>(0 - 4)       | 3<br>(1 - 7)             | 0<br>(0 - 1)             | 0<br>(0 - 0)             |
| Acute hepatitis B                                                | 81<br>(45 - 124)            | 11<br>(4 - 23)           | 4<br>(2 - 7)       | 27<br>(12 - 49)          | 24<br>(13 - 39)          | 15<br>(8 - 23)           |
| Acute hepatitis C                                                | 4<br>(1 - 11)               | --                       | 0<br>(0 - 1)       | 2<br>(0 - 6)             | 1<br>(0 - 3)             | 1<br>(0 - 2)             |
| Acute hepatitis E                                                | 28<br>(11 - 57)             | 0<br>(0 - 0)             | 1<br>(0 - 2)       | 22<br>(9 - 45)           | 4<br>(1 - 10)            | 1<br>(0 - 3)             |
| Other infectious diseases                                        | 138<br>(79 - 243)           | 38<br>(14 - 85)          | 7<br>(2 - 16)      | 33<br>(14 - 69)          | 31<br>(12 - 73)          | 29<br>(10 - 69)          |
| Non-communicable diseases                                        | 17,716<br>(15,085 - 21,277) | 1,655<br>(1,031 - 2,628) | 380<br>(281 - 530) | 3,846<br>(2,786 - 4,936) | 5,876<br>(4,712 - 7,330) | 5,959<br>(5,396 - 6,829) |
| Neoplasms                                                        | 2,988<br>(2,404 - 3,703)    | 80<br>(39 - 130)         | 75<br>(47 - 110)   | 922<br>(643 - 1,238)     | 1,113<br>(868 - 1,429)   | 798<br>(665 - 984)       |
| Esophageal cancer                                                | 106<br>(64 - 175)           | --                       | --                 | 20<br>(11 - 32)          | 55<br>(31 - 95)          | 31<br>(18 - 56)          |
| Stomach cancer                                                   | 298<br>(229 - 382)          | --                       | --                 | 73<br>(47 - 104)         | 145<br>(107 - 191)       | 80<br>(58 - 107)         |
| Liver cancer                                                     | 1,206<br>(908 - 1,597)      | --                       | 5<br>(2 - 11)      | 503<br>(330 - 738)       | 470<br>(342 - 637)       | 228<br>(158 - 318)       |
| Liver cancer due to hepatitis B                                  | 681<br>(397 - 997)          | --                       | 3<br>(1 - 6)       | 332<br>(203 - 519)       | 252<br>(111 - 382)       | 94<br>(47 - 150)         |
| Liver cancer due to hepatitis C                                  | 258<br>(153 - 430)          | --                       | 0<br>(0 - 0)       | 63<br>(25 - 122)         | 119<br>(66 - 224)        | 76<br>(45 - 115)         |

Web Table 31- Senegal deaths with 95% UI by age, sex, and cause in 2013

| Cause                                | Males, All Ages          | Males, 0-4 Years | Males, 5-14 Years | Males, 15-49 Years   | Males, 50-69 Years       | Males, 70-80 Years       |
|--------------------------------------|--------------------------|------------------|-------------------|----------------------|--------------------------|--------------------------|
| Liver cancer due to alcohol use      | 128<br>(63 - 222)        | --               | --                | 31<br>(15 - 58)      | 56<br>(25 - 104)         | 41<br>(16 - 74)          |
| Liver cancer due to other causes     | 138<br>(76 - 230)        | --               | 2<br>(1 - 5)      | 77<br>(38 - 136)     | 43<br>(19 - 78)          | 17<br>(9 - 29)           |
| Larynx cancer                        | 18<br>(11 - 46)          | --               | --                | 3<br>(2 - 7)         | 8<br>(4 - 24)            | 7<br>(4 - 15)            |
| Tracheal, bronchus and lung cancer   | 174<br>(140 - 216)       | --               | --                | 19<br>(13 - 27)      | 94<br>(72 - 122)         | 61<br>(49 - 74)          |
| Breast cancer                        | 6<br>(4 - 9)             | --               | --                | 2<br>(1 - 3)         | 3<br>(1 - 5)             | 1<br>(1 - 3)             |
| Cervical cancer                      | --                       | --               | --                | --                   | --                       | --                       |
| Uterine cancer                       | --                       | --               | --                | --                   | --                       | --                       |
| Prostate cancer                      | 232<br>(157 - 399)       | --               | --                | 5<br>(2 - 8)         | 61<br>(38 - 107)         | 166<br>(110 - 289)       |
| Colon and rectum cancer              | 145<br>(116 - 179)       | --               | --                | 47<br>(32 - 63)      | 50<br>(38 - 66)          | 48<br>(37 - 60)          |
| Lip and oral cavity cancer           | 19<br>(13 - 27)          | --               | --                | 5<br>(3 - 8)         | 8<br>(6 - 12)            | 6<br>(4 - 8)             |
| Nasopharynx cancer                   | 7<br>(5 - 10)            | --               | 0<br>(0 - 1)      | 4<br>(2 - 6)         | 2<br>(2 - 4)             | 1<br>(0 - 1)             |
| Other pharynx cancer                 | 9<br>(6 - 14)            | --               | --                | 3<br>(2 - 4)         | 3<br>(2 - 7)             | 3<br>(2 - 4)             |
| Gallbladder and biliary tract cancer | 14<br>(10 - 20)          | --               | --                | 4<br>(2 - 6)         | 5<br>(3 - 8)             | 5<br>(3 - 8)             |
| Pancreatic cancer                    | 71<br>(55 - 90)          | --               | --                | 20<br>(13 - 28)      | 36<br>(27 - 47)          | 15<br>(11 - 19)          |
| Malignant skin melanoma              | 8<br>(5 - 15)            | --               | --                | 3<br>(2 - 6)         | 3<br>(2 - 6)             | 2<br>(1 - 4)             |
| Non-melanoma skin cancer             | 7<br>(5 - 11)            | --               | --                | 1<br>(1 - 2)         | 2<br>(1 - 4)             | 3<br>(2 - 5)             |
| Ovarian cancer                       | --                       | --               | --                | --                   | --                       | --                       |
| Testicular cancer                    | 6<br>(4 - 9)             | --               | --                | 5<br>(3 - 7)         | 1<br>(0 - 1)             | 1<br>(0 - 1)             |
| Kidney cancer                        | 26<br>(20 - 34)          | 3<br>(1 - 8)     | 1<br>(1 - 3)      | 5<br>(3 - 7)         | 11<br>(8 - 15)           | 6<br>(4 - 9)             |
| Bladder cancer                       | 76<br>(58 - 114)         | --               | --                | 13<br>(8 - 20)       | 25<br>(17 - 42)          | 38<br>(27 - 61)          |
| Brain and nervous system cancer      | 32<br>(14 - 46)          | 1<br>(0 - 2)     | 5<br>(2 - 8)      | 14<br>(5 - 23)       | 8<br>(4 - 12)            | 4<br>(2 - 6)             |
| Thyroid cancer                       | 3<br>(2 - 4)             | --               | 0<br>(0 - 0)      | 1<br>(1 - 2)         | 1<br>(1 - 2)             | 1<br>(1 - 1)             |
| Mesothelioma                         | 5<br>(4 - 8)             | --               | --                | 1<br>(0 - 1)         | 2<br>(1 - 3)             | 2<br>(1 - 4)             |
| Hodgkin lymphoma                     | 16<br>(9 - 25)           | 1<br>(0 - 3)     | 2<br>(1 - 5)      | 8<br>(4 - 13)        | 3<br>(2 - 5)             | 2<br>(1 - 3)             |
| Non-Hodgkin lymphoma                 | 172<br>(128 - 235)       | 18<br>(7 - 39)   | 26<br>(12 - 45)   | 65<br>(42 - 91)      | 38<br>(25 - 61)          | 25<br>(16 - 41)          |
| Multiple myeloma                     | 10<br>(7 - 13)           | --               | --                | 3<br>(2 - 4)         | 5<br>(3 - 7)             | 2<br>(1 - 3)             |
| Leukemia                             | 60<br>(46 - 76)          | 6<br>(3 - 13)    | 9<br>(6 - 14)     | 30<br>(20 - 41)      | 7<br>(5 - 9)             | 8<br>(6 - 10)            |
| Other neoplasms                      | 264<br>(174 - 405)       | 50<br>(23 - 87)  | 26<br>(13 - 42)   | 69<br>(39 - 113)     | 66<br>(37 - 123)         | 53<br>(32 - 93)          |
| Cardiovascular diseases              | 6,243<br>(5,270 - 7,554) | 86<br>(51 - 139) | 45<br>(29 - 68)   | 822<br>(577 - 1,101) | 2,486<br>(1,991 - 3,133) | 2,804<br>(2,448 - 3,296) |
| Rheumatic heart disease              | 66<br>(37 - 161)         | 3<br>(1 - 7)     | 2<br>(1 - 7)      | 17<br>(7 - 48)       | 22<br>(10 - 60)          | 22<br>(13 - 49)          |
| Ischemic heart disease               | 2,169<br>(1,674 - 2,868) | 5<br>(2 - 13)    | 8<br>(4 - 13)     | 274<br>(180 - 388)   | 939<br>(694 - 1,267)     | 943<br>(726 - 1,251)     |
| Cerebrovascular disease              | 2,606<br>(2,075 - 3,290) | 23<br>(12 - 39)  | 12<br>(7 - 20)    | 262<br>(169 - 371)   | 983<br>(746 - 1,289)     | 1,326<br>(1,051 - 1,614) |
| Ischemic stroke                      | 1,685<br>(979 - 2,238)   | 2<br>(1 - 5)     | 2<br>(1 - 4)      | 73<br>(31 - 122)     | 603<br>(306 - 860)       | 1,006<br>(632 - 1,308)   |
| Hemorrhagic stroke                   | 921<br>(546 - 1,568)     | 21<br>(11 - 36)  | 10<br>(6 - 17)    | 189<br>(116 - 284)   | 381<br>(210 - 683)       | 320<br>(149 - 633)       |
| Hypertensive heart disease           | 267<br>(103 - 480)       | 1<br>(0 - 3)     | 1<br>(0 - 1)      | 39<br>(9 - 88)       | 101<br>(36 - 193)        | 125<br>(50 - 222)        |
| Cardiomyopathy and myocarditis       | 400<br>(222 - 581)       | 15<br>(6 - 34)   | 9<br>(4 - 15)     | 85<br>(47 - 131)     | 168<br>(83 - 259)        | 123<br>(59 - 201)        |
| Atrial fibrillation and flutter      | 1<br>(0 - 1)             | --               | --                | 0<br>(0 - 0)         | 0<br>(0 - 0)             | 0<br>(0 - 0)             |
| Aortic aneurysm                      | 96<br>(61 - 144)         | --               | --                | 10<br>(6 - 17)       | 46<br>(27 - 71)          | 40<br>(24 - 66)          |
| Peripheral vascular disease          | 4<br>(2 - 6)             | --               | --                | 0<br>(0 - 0)         | 1<br>(0 - 1)             | 3<br>(1 - 4)             |
| Endocarditis                         | 172<br>(108 - 268)       | 18<br>(6 - 38)   | 4<br>(2 - 7)      | 37<br>(21 - 63)      | 57<br>(33 - 95)          | 56<br>(34 - 94)          |

Web Table 31- Senegal deaths with 95% UI by age, sex, and cause in 2013

| Cause                                               | Males, All Ages          | Males, 0-4 Years | Males, 5-14 Years | Males, 15-49 Years | Males, 50-69 Years | Males, 70-80 Years   |
|-----------------------------------------------------|--------------------------|------------------|-------------------|--------------------|--------------------|----------------------|
| Other cardiovascular and circulatory diseases       | 464<br>(292 - 727)       | 21<br>(10 - 40)  | 10<br>(5 - 17)    | 98<br>(55 - 156)   | 170<br>(99 - 285)  | 166<br>(98 - 301)    |
| Chronic respiratory diseases                        | 1,527<br>(1,197 - 2,239) | 38<br>(18 - 70)  | 13<br>(9 - 21)    | 179<br>(116 - 272) | 523<br>(374 - 795) | 774<br>(603 - 1,140) |
| Chronic obstructive pulmonary disease               | 978<br>(751 - 1,459)     | 17<br>(7 - 30)   | 5<br>(3 - 8)      | 60<br>(38 - 91)    | 322<br>(223 - 498) | 575<br>(428 - 851)   |
| Pneumoconiosis                                      | 117<br>(70 - 188)        | 1<br>(0 - 2)     | 1<br>(0 - 1)      | 24<br>(14 - 38)    | 60<br>(33 - 97)    | 32<br>(18 - 60)      |
| Silicosis                                           | 23<br>(14 - 43)          | 0<br>(0 - 1)     | 0<br>(0 - 0)      | 5<br>(2 - 8)       | 6<br>(3 - 11)      | 12<br>(6 - 25)       |
| Asbestosis                                          | 9<br>(5 - 15)            | 0<br>(0 - 0)     | 0<br>(0 - 0)      | 2<br>(1 - 4)       | 5<br>(3 - 9)       | 1<br>(1 - 2)         |
| Coal workers pneumoconiosis                         | 32<br>(20 - 51)          | 0<br>(0 - 0)     | 0<br>(0 - 0)      | 2<br>(1 - 3)       | 26<br>(15 - 42)    | 4<br>(2 - 8)         |
| Other pneumoconiosis                                | 53<br>(33 - 82)          | 0<br>(0 - 0)     | 0<br>(0 - 0)      | 16<br>(9 - 25)     | 23<br>(12 - 39)    | 14<br>(8 - 27)       |
| Asthma                                              | 173<br>(95 - 303)        | 9<br>(3 - 22)    | 3<br>(1 - 5)      | 47<br>(25 - 82)    | 58<br>(28 - 110)   | 56<br>(28 - 111)     |
| Interstitial lung disease and pulmonary sarcoidosis | 146<br>(53 - 244)        | 1<br>(0 - 3)     | 0<br>(0 - 1)      | 6<br>(3 - 10)      | 55<br>(21 - 97)    | 83<br>(26 - 153)     |
| Other chronic respiratory diseases                  | 113<br>(70 - 181)        | 11<br>(5 - 22)   | 5<br>(3 - 8)      | 42<br>(25 - 67)    | 28<br>(15 - 50)    | 27<br>(14 - 49)      |
| Cirrhosis                                           | 1,010<br>(674 - 1,447)   | 14<br>(4 - 34)   | 10<br>(5 - 16)    | 331<br>(196 - 511) | 463<br>(292 - 683) | 192<br>(119 - 289)   |
| Cirrhosis due to hepatitis B                        | 388<br>(199 - 637)       | 1<br>(0 - 3)     | 3<br>(1 - 6)      | 132<br>(62 - 244)  | 181<br>(89 - 293)  | 71<br>(36 - 117)     |
| Cirrhosis due to hepatitis C                        | 144<br>(62 - 263)        | 1<br>(0 - 3)     | 1<br>(0 - 3)      | 40<br>(9 - 81)     | 67<br>(26 - 125)   | 36<br>(9 - 75)       |
| Cirrhosis due to alcohol use                        | 346<br>(161 - 540)       | --               | --                | 98<br>(41 - 162)   | 174<br>(84 - 282)  | 74<br>(36 - 123)     |
| Cirrhosis due to other causes                       | 132<br>(73 - 225)        | 13<br>(4 - 30)   | 6<br>(3 - 10)     | 61<br>(31 - 119)   | 41<br>(21 - 71)    | 11<br>(5 - 20)       |
| Digestive diseases                                  | 1,147<br>(799 - 1,437)   | 40<br>(17 - 78)  | 36<br>(22 - 52)   | 363<br>(218 - 502) | 388<br>(257 - 516) | 320<br>(236 - 412)   |
| Peptic ulcer disease                                | 281<br>(177 - 409)       | 4<br>(1 - 10)    | 5<br>(2 - 9)      | 80<br>(41 - 128)   | 103<br>(59 - 157)  | 89<br>(55 - 137)     |
| Gastritis and duodenitis                            | 37<br>(19 - 83)          | 2<br>(1 - 6)     | 2<br>(1 - 4)      | 10<br>(4 - 26)     | 12<br>(6 - 29)     | 11<br>(5 - 28)       |
| Appendicitis                                        | 55<br>(25 - 87)          | 3<br>(1 - 7)     | 4<br>(2 - 9)      | 18<br>(9 - 32)     | 16<br>(6 - 29)     | 13<br>(4 - 26)       |
| Paralytic ileus and intestinal obstruction          | 393<br>(194 - 558)       | 15<br>(5 - 34)   | 15<br>(7 - 24)    | 115<br>(43 - 185)  | 140<br>(62 - 208)  | 108<br>(60 - 166)    |
| Inguinal, femoral, and abdominal hernia             | 43<br>(26 - 74)          | 0<br>(0 - 2)     | 1<br>(0 - 2)      | 10<br>(5 - 19)     | 15<br>(8 - 26)     | 16<br>(9 - 29)       |
| Inflammatory bowel disease                          | 54<br>(11 - 91)          | 7<br>(2 - 17)    | 1<br>(0 - 3)      | 16<br>(3 - 34)     | 17<br>(2 - 31)     | 13<br>(2 - 23)       |
| Vascular intestinal disorders                       | 6<br>(2 - 12)            | 0<br>(0 - 1)     | 0<br>(0 - 1)      | 1<br>(0 - 3)       | 1<br>(0 - 3)       | 2<br>(1 - 4)         |
| Gallbladder and biliary diseases                    | 68<br>(34 - 103)         | 1<br>(0 - 2)     | 2<br>(1 - 5)      | 18<br>(6 - 34)     | 20<br>(10 - 32)    | 27<br>(13 - 46)      |
| Pancreatitis                                        | 96<br>(50 - 151)         | 0<br>(0 - 2)     | 1<br>(0 - 2)      | 53<br>(25 - 88)    | 26<br>(14 - 45)    | 16<br>(7 - 28)       |
| Other digestive diseases                            | 115<br>(73 - 180)        | 7<br>(2 - 20)    | 5<br>(2 - 8)      | 41<br>(22 - 68)    | 39<br>(22 - 61)    | 23<br>(12 - 42)      |
| Neurological disorders                              | 548<br>(435 - 693)       | 41<br>(19 - 89)  | 23<br>(12 - 42)   | 124<br>(76 - 194)  | 57<br>(42 - 74)    | 303<br>(235 - 374)   |
| Alzheimer disease and other dementias               | 309<br>(238 - 383)       | --               | --                | 0<br>(0 - 1)       | 30<br>(19 - 41)    | 279<br>(210 - 350)   |
| Parkinson disease                                   | 6<br>(3 - 11)            | --               | --                | 1<br>(0 - 1)       | 0<br>(0 - 1)       | 5<br>(2 - 10)        |
| Epilepsy                                            | 167<br>(106 - 267)       | 31<br>(10 - 77)  | 17<br>(7 - 36)    | 96<br>(53 - 161)   | 12<br>(7 - 19)     | 11<br>(7 - 17)       |
| Multiple sclerosis                                  | 0<br>(0 - 1)             | --               | --                | 0<br>(0 - 0)       | 0<br>(0 - 0)       | 0<br>(0 - 0)         |
| Other neurological disorders                        | 66<br>(46 - 87)          | 11<br>(5 - 21)   | 5<br>(3 - 8)      | 27<br>(17 - 39)    | 14<br>(8 - 20)     | 9<br>(5 - 12)        |
| Mental and substance use disorders                  | 539<br>(307 - 766)       | 13<br>(2 - 36)   | 0<br>(0 - 0)      | 420<br>(234 - 610) | 79<br>(45 - 127)   | 28<br>(12 - 46)      |
| Schizophrenia                                       | 0<br>(0 - 1)             | --               | --                | 0<br>(0 - 0)       | 0<br>(0 - 0)       | 0<br>(0 - 0)         |
| Alcohol use disorders                               | 141<br>(54 - 276)        | --               | --                | 71<br>(29 - 142)   | 52<br>(19 - 102)   | 19<br>(4 - 37)       |
| Drug use disorders                                  | 397<br>(212 - 591)       | 13<br>(2 - 36)   | --                | 348<br>(180 - 522) | 27<br>(17 - 38)    | 9<br>(6 - 13)        |
| Opioid use disorders                                | 43<br>(22 - 64)          | 1<br>(0 - 4)     | --                | 38<br>(18 - 57)    | 3<br>(2 - 4)       | 1<br>(1 - 1)         |
| Cocaine use disorders                               | 1<br>(1 - 2)             | 0<br>(0 - 0)     | --                | 1<br>(1 - 2)       | 0<br>(0 - 0)       | 0<br>(0 - 0)         |
| Amphetamine use disorders                           | 1<br>(1 - 1)             | 0<br>(0 - 0)     | --                | 1<br>(0 - 1)       | 0<br>(0 - 0)       | 0<br>(0 - 0)         |

Web Table 31- Senegal deaths with 95% UI by age, sex, and cause in 2013

| Cause                                               | Males, All Ages          | Males, 0-4 Years       | Males, 5-14 Years | Males, 15-49 Years | Males, 50-69 Years | Males, 70-80 Years |
|-----------------------------------------------------|--------------------------|------------------------|-------------------|--------------------|--------------------|--------------------|
| Other drug use disorders                            | 352<br>(189 - 525)       | 11<br>(2 - 32)         | --                | 308<br>(159 - 461) | 24<br>(15 - 34)    | 8<br>(5 - 11)      |
| Eating disorders                                    | 0<br>(0 - 0)             | --                     | 0<br>(0 - 0)      | 0<br>(0 - 0)       | --                 | --                 |
| Anorexia nervosa                                    | 0<br>(0 - 0)             | --                     | 0<br>(0 - 0)      | 0<br>(0 - 0)       | --                 | --                 |
| Diabetes, urogenital, blood, and endocrine diseases | 2,315<br>(1,803 - 2,900) | 255<br>(123 - 476)     | 107<br>(56 - 212) | 571<br>(373 - 820) | 707<br>(537 - 917) | 675<br>(556 - 816) |
| Diabetes mellitus                                   | 798<br>(624 - 994)       | 9<br>(5 - 14)          | 4<br>(2 - 6)      | 103<br>(67 - 150)  | 366<br>(265 - 494) | 316<br>(244 - 409) |
| Acute glomerulonephritis                            | 8<br>(4 - 17)            | 1<br>(0 - 3)           | 1<br>(0 - 2)      | 3<br>(1 - 6)       | 2<br>(1 - 4)       | 1<br>(0 - 3)       |
| Chronic kidney disease                              | 474<br>(354 - 616)       | 24<br>(12 - 46)        | 18<br>(9 - 31)    | 175<br>(103 - 255) | 124<br>(90 - 171)  | 133<br>(98 - 179)  |
| Chronic kidney disease due to diabetes mellitus     | 5<br>(1 - 8)             | 0<br>(0 - 0)           | 0<br>(0 - 0)      | 0<br>(0 - 1)       | 4<br>(0 - 7)       | 0<br>(0 - 1)       |
| Chronic kidney disease due to hypertension          | 136<br>(87 - 231)        | 3<br>(1 - 6)           | 1<br>(0 - 3)      | 36<br>(19 - 64)    | 45<br>(26 - 80)    | 51<br>(28 - 95)    |
| Chronic kidney disease due to glomerulonephritis    | 228<br>(143 - 305)       | 15<br>(7 - 29)         | 13<br>(8 - 21)    | 98<br>(55 - 144)   | 48<br>(26 - 71)    | 53<br>(27 - 78)    |
| Chronic kidney disease due to other causes          | 106<br>(54 - 162)        | 6<br>(2 - 15)          | 4<br>(1 - 10)     | 40<br>(15 - 80)    | 27<br>(13 - 45)    | 29<br>(13 - 49)    |
| Urinary diseases and male infertility               | 434<br>(272 - 573)       | 30<br>(13 - 69)        | 6<br>(4 - 10)     | 110<br>(50 - 171)  | 127<br>(75 - 179)  | 162<br>(108 - 231) |
| Interstitial nephritis and urinary tract infections | 376<br>(233 - 496)       | 27<br>(11 - 64)        | 5<br>(3 - 8)      | 92<br>(42 - 145)   | 109<br>(65 - 155)  | 142<br>(94 - 202)  |
| Urolithiasis                                        | 2<br>(1 - 5)             | --                     | 0<br>(0 - 1)      | 1<br>(0 - 3)       | 0<br>(0 - 1)       | 0<br>(0 - 1)       |
| Other urinary diseases                              | 56<br>(27 - 89)          | 2<br>(1 - 6)           | 1<br>(0 - 2)      | 17<br>(6 - 32)     | 17<br>(7 - 28)     | 20<br>(9 - 38)     |
| Gynecological diseases                              | --                       | --                     | --                | --                 | --                 | --                 |
| Uterine fibroids                                    | --                       | --                     | --                | --                 | --                 | --                 |
| Polycystic ovarian syndrome                         | --                       | --                     | --                | --                 | --                 | --                 |
| Endometriosis                                       | --                       | --                     | --                | --                 | --                 | --                 |
| Genital prolapse                                    | --                       | --                     | --                | --                 | --                 | --                 |
| Other gynecological diseases                        | --                       | --                     | --                | --                 | --                 | --                 |
| Hemoglobinopathies and hemolytic anemias            | 358<br>(102 - 938)       | 144<br>(40 - 347)      | 65<br>(16 - 173)  | 106<br>(26 - 339)  | 27<br>(8 - 96)     | 16<br>(7 - 47)     |
| Thalassemias                                        | 2<br>(1 - 5)             | 1<br>(0 - 3)           | 0<br>(0 - 1)      | 0<br>(0 - 1)       | 0<br>(0 - 0)       | 0<br>(0 - 0)       |
| Sickle cell disorders                               | 334<br>(93 - 867)        | 139<br>(38 - 335)      | 63<br>(16 - 170)  | 103<br>(25 - 328)  | 25<br>(7 - 89)     | 4<br>(2 - 12)      |
| G6PD deficiency                                     | 3<br>(1 - 9)             | 1<br>(0 - 3)           | 0<br>(0 - 1)      | 1<br>(0 - 3)       | 0<br>(0 - 1)       | 1<br>(0 - 2)       |
| Other hemoglobinopathies and hemolytic anemias      | 19<br>(7 - 54)           | 2<br>(1 - 6)           | 0<br>(0 - 1)      | 2<br>(0 - 6)       | 2<br>(1 - 6)       | 12<br>(5 - 35)     |
| Endocrine, metabolic, blood, and immune disorders   | 243<br>(116 - 344)       | 48<br>(23 - 88)        | 13<br>(6 - 23)    | 75<br>(31 - 117)   | 60<br>(25 - 91)    | 46<br>(18 - 72)    |
| Musculoskeletal disorders                           | 69<br>(46 - 109)         | --                     | 6<br>(4 - 12)     | 26<br>(16 - 43)    | 21<br>(13 - 32)    | 16<br>(10 - 27)    |
| Rheumatoid arthritis                                | 5<br>(3 - 8)             | --                     | 1<br>(0 - 1)      | 1<br>(1 - 2)       | 2<br>(1 - 3)       | 2<br>(1 - 3)       |
| Other musculoskeletal disorders                     | 63<br>(43 - 102)         | --                     | 6<br>(3 - 11)     | 24<br>(15 - 41)    | 19<br>(12 - 30)    | 14<br>(9 - 24)     |
| Other non-communicable diseases                     | 1,331<br>(812 - 2,232)   | 1,087<br>(595 - 1,941) | 65<br>(36 - 112)  | 88<br>(54 - 135)   | 40<br>(23 - 54)    | 51<br>(22 - 70)    |
| Congenital anomalies                                | 1,195<br>(683 - 2,099)   | 1,053<br>(564 - 1,915) | 61<br>(33 - 107)  | 62<br>(35 - 103)   | 11<br>(7 - 16)     | 9<br>(6 - 14)      |
| Neural tube defects                                 | 151<br>(42 - 398)        | 141<br>(36 - 386)      | 5<br>(2 - 10)     | 5<br>(2 - 12)      | 0<br>(0 - 1)       | 0<br>(0 - 1)       |
| Congenital heart anomalies                          | 578<br>(335 - 938)       | 499<br>(275 - 837)     | 36<br>(19 - 66)   | 33<br>(17 - 56)    | 6<br>(3 - 9)       | 4<br>(2 - 6)       |
| Cleft lip and cleft palate                          | 4<br>(1 - 10)            | 4<br>(1 - 10)          | --                | --                 | --                 | --                 |
| Down syndrome                                       | 102<br>(36 - 257)        | 90<br>(27 - 233)       | 4<br>(2 - 9)      | 6<br>(3 - 13)      | 1<br>(0 - 2)       | 0<br>(0 - 0)       |
| Chromosomal unbalanced rearrangements               | 46<br>(19 - 96)          | 41<br>(15 - 89)        | 2<br>(1 - 4)      | 2<br>(1 - 5)       | 0<br>(0 - 0)       | 0<br>(0 - 1)       |
| Other congenital anomalies                          | 314<br>(107 - 979)       | 277<br>(81 - 910)      | 14<br>(5 - 39)    | 15<br>(8 - 27)     | 3<br>(2 - 5)       | 5<br>(3 - 7)       |
| Skin and subcutaneous diseases                      | 118<br>(44 - 155)        | 18<br>(6 - 34)         | 4<br>(2 - 6)      | 26<br>(11 - 39)    | 29<br>(12 - 41)    | 42<br>(14 - 61)    |
| Cellulitis                                          | 42<br>(16 - 62)          | 7<br>(2 - 15)          | 2<br>(1 - 4)      | 8<br>(3 - 13)      | 13<br>(5 - 22)     | 13<br>(4 - 23)     |

Web Table 31- Senegal deaths with 95% UI by age, sex, and cause in 2013

| Cause                                           | Males, All Ages          | Males, 0-4 Years   | Males, 5-14 Years  | Males, 15-49 Years       | Males, 50-69 Years | Males, 70-80 Years |
|-------------------------------------------------|--------------------------|--------------------|--------------------|--------------------------|--------------------|--------------------|
| Pyoderma                                        | 70<br>(27 - 99)          | 11<br>(4 - 22)     | 1<br>(1 - 3)       | 18<br>(8 - 28)           | 15<br>(6 - 26)     | 25<br>(9 - 39)     |
| Decubitus ulcer                                 | 5<br>(1 - 10)            | 0<br>(0 - 0)       | 0<br>(0 - 0)       | 1<br>(0 - 1)             | 0<br>(0 - 0)       | 4<br>(1 - 9)       |
| Other skin and subcutaneous diseases            | 1<br>(0 - 2)             | 0<br>(0 - 0)       | 0<br>(0 - 0)       | 0<br>(0 - 1)             | 0<br>(0 - 0)       | 0<br>(0 - 0)       |
| Sudden infant death syndrome                    | 17<br>(4 - 47)           | 17<br>(4 - 47)     | --                 | --                       | --                 | --                 |
| Injuries                                        | 4,635<br>(3,568 - 5,950) | 569<br>(322 - 964) | 414<br>(299 - 578) | 2,606<br>(1,825 - 3,417) | 655<br>(498 - 859) | 391<br>(299 - 500) |
| Transport injuries                              | 2,346<br>(1,674 - 3,223) | 151<br>(68 - 284)  | 189<br>(119 - 281) | 1,523<br>(1,006 - 2,105) | 328<br>(226 - 464) | 156<br>(101 - 223) |
| Road injuries                                   | 2,274<br>(1,615 - 3,134) | 136<br>(60 - 256)  | 178<br>(112 - 265) | 1,498<br>(986 - 2,075)   | 316<br>(219 - 448) | 146<br>(98 - 208)  |
| Pedestrian road injuries                        | 566<br>(332 - 870)       | 49<br>(17 - 113)   | 62<br>(32 - 105)   | 322<br>(172 - 522)       | 86<br>(50 - 134)   | 47<br>(27 - 72)    |
| Cyclist road injuries                           | 112<br>(71 - 167)        | 10<br>(3 - 24)     | 17<br>(9 - 31)     | 54<br>(32 - 84)          | 20<br>(12 - 31)    | 10<br>(5 - 17)     |
| Motorcyclist road injuries                      | 307<br>(174 - 520)       | 11<br>(4 - 24)     | 14<br>(7 - 26)     | 234<br>(123 - 412)       | 36<br>(21 - 59)    | 12<br>(6 - 20)     |
| Motor vehicle road injuries                     | 1,250<br>(871 - 1,691)   | 59<br>(26 - 110)   | 77<br>(46 - 120)   | 873<br>(573 - 1,212)     | 167<br>(110 - 241) | 74<br>(40 - 109)   |
| Other road injuries                             | 39<br>(21 - 63)          | 7<br>(2 - 17)      | 8<br>(3 - 16)      | 14<br>(7 - 30)           | 6<br>(3 - 11)      | 4<br>(2 - 7)       |
| Other transport injuries                        | 72<br>(48 - 104)         | 15<br>(5 - 31)     | 11<br>(5 - 19)     | 25<br>(14 - 46)          | 12<br>(7 - 19)     | 10<br>(3 - 17)     |
| Unintentional injuries                          | 1,758<br>(1,349 - 2,299) | 412<br>(225 - 734) | 212<br>(137 - 312) | 689<br>(454 - 981)       | 249<br>(184 - 326) | 196<br>(140 - 259) |
| Falls                                           | 458<br>(320 - 711)       | 58<br>(25 - 128)   | 34<br>(15 - 64)    | 185<br>(109 - 319)       | 94<br>(61 - 159)   | 88<br>(54 - 146)   |
| Drowning                                        | 473<br>(293 - 747)       | 146<br>(51 - 321)  | 95<br>(48 - 156)   | 186<br>(99 - 334)        | 32<br>(20 - 51)    | 14<br>(9 - 21)     |
| Fire, heat, and hot substances                  | 141<br>(72 - 243)        | 44<br>(16 - 110)   | 13<br>(6 - 29)     | 46<br>(25 - 76)          | 20<br>(10 - 33)    | 18<br>(8 - 30)     |
| Poisonings                                      | 91<br>(59 - 157)         | 18<br>(7 - 41)     | 7<br>(4 - 13)      | 46<br>(25 - 89)          | 15<br>(8 - 25)     | 6<br>(3 - 9)       |
| Exposure to mechanical forces                   | 273<br>(187 - 478)       | 56<br>(25 - 127)   | 33<br>(19 - 66)    | 132<br>(80 - 228)        | 37<br>(24 - 55)    | 14<br>(8 - 20)     |
| Unintentional firearm injuries                  | 93<br>(59 - 142)         | 10<br>(4 - 20)     | 6<br>(3 - 12)      | 61<br>(33 - 106)         | 11<br>(6 - 19)     | 5<br>(2 - 7)       |
| Unintentional suffocation                       | 53<br>(18 - 281)         | 25<br>(4 - 107)    | 7<br>(2 - 35)      | 15<br>(5 - 84)           | 4<br>(2 - 22)      | 2<br>(1 - 8)       |
| Other exposure to mechanical forces             | 127<br>(72 - 196)        | 22<br>(8 - 46)     | 19<br>(8 - 39)     | 56<br>(32 - 99)          | 22<br>(9 - 36)     | 8<br>(2 - 12)      |
| Adverse effects of medical treatment            | 117<br>(46 - 206)        | 29<br>(8 - 77)     | 6<br>(2 - 14)      | 29<br>(13 - 51)          | 24<br>(8 - 47)     | 29<br>(7 - 60)     |
| Animal contact                                  | 34<br>(16 - 52)          | 6<br>(2 - 13)      | 6<br>(3 - 11)      | 9<br>(4 - 15)            | 6<br>(2 - 11)      | 7<br>(2 - 12)      |
| Venomous animal contact                         | 13<br>(6 - 21)           | 2<br>(1 - 5)       | 2<br>(1 - 4)       | 4<br>(2 - 7)             | 2<br>(1 - 5)       | 3<br>(0 - 6)       |
| Non-venomous animal contact                     | 21<br>(9 - 34)           | 4<br>(1 - 9)       | 4<br>(2 - 8)       | 5<br>(2 - 9)             | 4<br>(1 - 7)       | 4<br>(1 - 7)       |
| Foreign body                                    | 89<br>(46 - 152)         | 43<br>(19 - 88)    | 8<br>(4 - 14)      | 17<br>(9 - 29)           | 9<br>(5 - 14)      | 11<br>(5 - 17)     |
| Pulmonary aspiration and foreign body in airway | 81<br>(37 - 144)         | 41<br>(17 - 85)    | 6<br>(3 - 13)      | 16<br>(7 - 27)           | 7<br>(3 - 12)      | 11<br>(4 - 17)     |
| Foreign body in other body part                 | 7<br>(4 - 12)            | 2<br>(1 - 4)       | 1<br>(1 - 2)       | 1<br>(1 - 3)             | 2<br>(1 - 3)       | 1<br>(0 - 1)       |
| Other unintentional injuries                    | 83<br>(42 - 131)         | 11<br>(4 - 23)     | 11<br>(5 - 20)     | 40<br>(18 - 69)          | 11<br>(5 - 19)     | 9<br>(4 - 16)      |
| Self-harm and interpersonal violence            | 531<br>(340 - 833)       | 6<br>(3 - 14)      | 13<br>(6 - 24)     | 394<br>(239 - 653)       | 79<br>(48 - 130)   | 39<br>(20 - 68)    |
| Self-harm                                       | 355<br>(214 - 637)       | --                 | 8<br>(3 - 18)      | 238<br>(129 - 478)       | 71<br>(40 - 121)   | 38<br>(19 - 68)    |
| Interpersonal violence                          | 176<br>(106 - 303)       | 6<br>(3 - 14)      | 5<br>(2 - 10)      | 155<br>(90 - 271)        | 8<br>(5 - 15)      | 1<br>(0 - 2)       |
| Assault by firearm                              | 102<br>(53 - 169)        | 2<br>(0 - 4)       | 1<br>(0 - 3)       | 95<br>(49 - 160)         | 4<br>(2 - 7)       | 0<br>(0 - 1)       |
| Assault by sharp object                         | 32<br>(14 - 69)          | 1<br>(0 - 4)       | 1<br>(0 - 2)       | 27<br>(10 - 63)          | 3<br>(1 - 5)       | 0<br>(0 - 0)       |
| Assault by other means                          | 42<br>(20 - 92)          | 3<br>(1 - 9)       | 3<br>(1 - 6)       | 33<br>(14 - 77)          | 2<br>(1 - 5)       | 0<br>(0 - 1)       |
| Forces of nature, war, and legal intervention   | 0<br>(0 - 0)             | 0<br>(0 - 0)       | --                 | --                       | --                 | --                 |
| Exposure to forces of nature                    | 0<br>(0 - 0)             | 0<br>(0 - 0)       | --                 | --                       | --                 | --                 |

Web Table 31- Senegal deaths with 95% UI by age, sex, and cause in 2013

| Cause                                                              | Females, All Ages           | Females, 0-4 Years          | Females, 5-14 Years      | Females, 15-49 Years     | Females, 50-69 Years      | Females, 70-80 Years       |
|--------------------------------------------------------------------|-----------------------------|-----------------------------|--------------------------|--------------------------|---------------------------|----------------------------|
| All causes                                                         | 45,167<br>(40,069 - 50,795) | 14,249<br>(12,372 - 16,450) | 1,571<br>(1,308 - 2,134) | 8,727<br>(7,831 - 9,923) | 9,496<br>(7,415 - 11,900) | 11,124<br>(9,418 - 12,917) |
| Communicable, maternal, neonatal, and nutritional diseases         | 24,637<br>(21,953 - 27,454) | 12,431<br>(10,615 - 14,447) | 1,031<br>(807 - 1,403)   | 5,733<br>(4,958 - 6,530) | 2,593<br>(1,966 - 3,298)  | 2,849<br>(2,083 - 3,598)   |
| HIV/AIDS and tuberculosis                                          | 3,774<br>(2,766 - 4,767)    | 123<br>(89 - 167)           | 119<br>(90 - 147)        | 2,374<br>(1,591 - 3,243) | 815<br>(572 - 1,079)      | 342<br>(162 - 503)         |
| Tuberculosis                                                       | 1,369<br>(824 - 1,953)      | 32<br>(15 - 60)             | 23<br>(12 - 38)          | 486<br>(319 - 721)       | 518<br>(281 - 773)        | 310<br>(132 - 472)         |
| HIV/AIDS                                                           | 2,406<br>(1,483 - 3,468)    | 91<br>(58 - 132)            | 97<br>(71 - 125)         | 1,888<br>(1,078 - 2,840) | 297<br>(186 - 448)        | 32<br>(15 - 54)            |
| HIV/AIDS resulting in mycobacterial infection                      | 127<br>(76 - 191)           | 4<br>(3 - 7)                | 4<br>(3 - 6)             | 99<br>(55 - 153)         | 17<br>(10 - 25)           | 2<br>(1 - 3)               |
| HIV/AIDS resulting in other diseases                               | 2,279<br>(1,400 - 3,294)    | 87<br>(55 - 126)            | 92<br>(67 - 119)         | 1,789<br>(1,020 - 2,700) | 281<br>(176 - 424)        | 30<br>(14 - 51)            |
| Diarrrhea, lower respiratory, and other common infectious diseases | 9,004<br>(6,790 - 11,185)   | 4,395<br>(2,896 - 6,185)    | 545<br>(386 - 791)       | 980<br>(740 - 1,297)     | 1,207<br>(814 - 1,683)    | 1,878<br>(1,283 - 2,493)   |
| Diarrheal diseases                                                 | 2,737<br>(1,790 - 4,020)    | 1,512<br>(715 - 2,640)      | 113<br>(52 - 212)        | 318<br>(211 - 473)       | 340<br>(183 - 574)        | 454<br>(260 - 750)         |
| Intestinal infectious diseases                                     | 362<br>(189 - 637)          | 114<br>(48 - 215)           | 117<br>(57 - 219)        | 107<br>(50 - 197)        | 17<br>(7 - 34)            | 7<br>(3 - 14)              |
| Typhoid fever                                                      | 241<br>(120 - 428)          | 74<br>(30 - 146)            | 80<br>(36 - 148)         | 72<br>(31 - 138)         | 12<br>(4 - 25)            | 5<br>(2 - 9)               |
| Paratyphoid fever                                                  | 105<br>(47 - 196)           | 32<br>(10 - 76)             | 36<br>(14 - 78)          | 31<br>(12 - 68)          | 4<br>(1 - 10)             | 1<br>(0 - 4)               |
| Other intestinal infectious diseases                               | 15<br>(7 - 28)              | 8<br>(2 - 18)               | 2<br>(0 - 7)             | 3<br>(0 - 9)             | 1<br>(0 - 6)              | 1<br>(0 - 5)               |
| Lower respiratory infections                                       | 4,093<br>(2,963 - 5,334)    | 1,664<br>(1,001 - 2,615)    | 120<br>(70 - 209)        | 301<br>(207 - 425)       | 697<br>(428 - 1,010)      | 1,310<br>(852 - 1,851)     |
| Upper respiratory infections                                       | 6<br>(2 - 13)               | 2<br>(0 - 6)                | 0<br>(0 - 1)             | 1<br>(0 - 3)             | 1<br>(0 - 4)              | 1<br>(0 - 5)               |
| Otitis media                                                       | 4<br>(3 - 6)                | 1<br>(0 - 1)                | 0<br>(0 - 0)             | 0<br>(0 - 1)             | 1<br>(1 - 2)              | 2<br>(1 - 3)               |
| Meningitis                                                         | 914<br>(650 - 1,277)        | 402<br>(212 - 710)          | 84<br>(47 - 149)         | 207<br>(133 - 301)       | 131<br>(73 - 213)         | 90<br>(46 - 141)           |
| Pneumococcal meningitis                                            | 279<br>(192 - 391)          | 102<br>(50 - 197)           | 27<br>(12 - 50)          | 69<br>(41 - 110)         | 48<br>(20 - 87)           | 33<br>(16 - 56)            |
| H influenzae type B meningitis                                     | 210<br>(129 - 339)          | 138<br>(67 - 266)           | 20<br>(9 - 39)           | 30<br>(15 - 51)          | 13<br>(6 - 27)            | 9<br>(4 - 16)              |
| Meningococcal meningitis                                           | 234<br>(150 - 355)          | 97<br>(44 - 179)            | 23<br>(10 - 48)          | 56<br>(28 - 94)          | 34<br>(13 - 72)           | 23<br>(9 - 47)             |
| Other meningitis                                                   | 192<br>(126 - 272)          | 65<br>(30 - 130)            | 14<br>(6 - 27)           | 52<br>(29 - 83)          | 36<br>(16 - 71)           | 26<br>(11 - 48)            |
| Encephalitis                                                       | 57<br>(39 - 80)             | 17<br>(8 - 34)              | 7<br>(3 - 13)            | 14<br>(8 - 22)           | 11<br>(6 - 17)            | 8<br>(3 - 13)              |
| Diphtheria                                                         | 4<br>(0 - 23)               | 3<br>(0 - 21)               | 1<br>(0 - 6)             | 0<br>(0 - 1)             | 0<br>(0 - 1)              | --                         |
| Whooping cough                                                     | 99<br>(0 - 497)             | 92<br>(0 - 462)             | 6<br>(0 - 29)            | 1<br>(0 - 5)             | 0<br>(0 - 1)              | --                         |
| Tetanus                                                            | 79<br>(23 - 163)            | 47<br>(8 - 115)             | 6<br>(2 - 15)            | 15<br>(5 - 32)           | 8<br>(3 - 16)             | 3<br>(1 - 8)               |
| Measles                                                            | 643<br>(225 - 1,314)        | 540<br>(177 - 1,112)        | 89<br>(36 - 189)         | 13<br>(5 - 28)           | 0<br>(0 - 1)              | --                         |
| Varicella and herpes zoster                                        | 8<br>(2 - 20)               | 3<br>(0 - 11)               | 1<br>(0 - 3)             | 2<br>(0 - 4)             | 1<br>(0 - 3)              | 2<br>(0 - 11)              |
| Neglected tropical diseases and malaria                            | 3,695<br>(1,792 - 5,899)    | 2,896<br>(1,212 - 5,095)    | 246<br>(80 - 561)        | 234<br>(93 - 620)        | 180<br>(65 - 537)         | 138<br>(39 - 426)          |
| Malaria                                                            | 3,600<br>(1,687 - 5,828)    | 2,880<br>(1,178 - 5,085)    | 232<br>(65 - 550)        | 203<br>(62 - 596)        | 160<br>(44 - 520)         | 125<br>(30 - 417)          |
| Leishmaniasis                                                      | 0<br>(0 - 0)                | 0<br>(0 - 0)                | 0<br>(0 - 0)             | 0<br>(0 - 0)             | 0<br>(0 - 0)              | 0<br>(0 - 0)               |
| Visceral leishmaniasis                                             | 0<br>(0 - 0)                | 0<br>(0 - 0)                | 0<br>(0 - 0)             | 0<br>(0 - 0)             | 0<br>(0 - 0)              | 0<br>(0 - 0)               |
| Schistosomiasis                                                    | 24<br>(16 - 35)             | 0<br>(0 - 1)                | 1<br>(0 - 1)             | 7<br>(4 - 11)            | 10<br>(5 - 17)            | 6<br>(3 - 10)              |
| Cysticercosis                                                      | 1<br>(0 - 4)                | 0<br>(0 - 0)                | 0<br>(0 - 0)             | 1<br>(0 - 2)             | 0<br>(0 - 1)              | 0<br>(0 - 0)               |
| Cystic echinococcosis                                              | 3<br>(2 - 3)                | 0<br>(0 - 1)                | 0<br>(0 - 1)             | 1<br>(1 - 1)             | 1<br>(0 - 1)              | 0<br>(0 - 0)               |
| Dengue                                                             | 3<br>(1 - 7)                | 1<br>(0 - 1)                | 1<br>(0 - 2)             | 1<br>(0 - 3)             | 0<br>(0 - 1)              | 0<br>(0 - 0)               |
| Yellow fever                                                       | 3<br>(2 - 5)                | 0<br>(0 - 1)                | 1<br>(0 - 2)             | 2<br>(1 - 3)             | 0<br>(0 - 1)              | 0<br>(0 - 1)               |
| Rabies                                                             | 44<br>(17 - 73)             | 7<br>(2 - 16)               | 10<br>(4 - 20)           | 17<br>(7 - 29)           | 7<br>(2 - 12)             | 4<br>(1 - 8)               |
| Intestinal nematode infections                                     | 8<br>(2 - 21)               | 6<br>(1 - 17)               | 1<br>(0 - 7)             | 0<br>(0 - 4)             | 0<br>(0 - 3)              | 0<br>(0 - 3)               |
| Ascariasis                                                         | 8<br>(2 - 21)               | 6<br>(1 - 17)               | 1<br>(0 - 7)             | 0<br>(0 - 4)             | 0<br>(0 - 3)              | 0<br>(0 - 3)               |
| Other neglected tropical diseases                                  | 2<br>(4 - 15)               | 2<br>(1 - 5)                | 1<br>(0 - 2)             | 2<br>(1 - 4)             | 1<br>(1 - 3)              | 2<br>(1 - 3)               |

Web Table 31- Senegal deaths with 95% UI by age, sex, and cause in 2013

| Cause                                                            | Females, All Ages           | Females, 0-4 Years       | Females, 5-14 Years | Females, 15-49 Years     | Females, 50-69 Years     | Females, 70-80 Years     |
|------------------------------------------------------------------|-----------------------------|--------------------------|---------------------|--------------------------|--------------------------|--------------------------|
| Maternal disorders                                               | 1,881<br>(1,350 - 2,466)    | --                       | 14<br>(5 - 31)      | 1,867<br>(1,335 - 2,450) | --                       | --                       |
| Maternal hemorrhage                                              | 346<br>(220 - 523)          | --                       | 1<br>(0 - 3)        | 344<br>(220 - 522)       | --                       | --                       |
| Maternal sepsis and other maternal infections                    | 103<br>(59 - 163)           | --                       | 1<br>(0 - 2)        | 102<br>(58 - 162)        | --                       | --                       |
| Maternal hypertensive disorders                                  | 141<br>(90 - 211)           | --                       | 1<br>(0 - 3)        | 140<br>(89 - 209)        | --                       | --                       |
| Maternal obstructed labor                                        | 93<br>(54 - 138)            | --                       | 0<br>(0 - 1)        | 92<br>(53 - 138)         | --                       | --                       |
| Maternal abortive outcome                                        | 335<br>(232 - 464)          | --                       | 3<br>(1 - 6)        | 332<br>(230 - 462)       | --                       | --                       |
| Indirect maternal deaths                                         | 198<br>(120 - 282)          | --                       | 1<br>(0 - 3)        | 197<br>(119 - 281)       | --                       | --                       |
| Late maternal deaths                                             | 301<br>(174 - 456)          | --                       | 4<br>(1 - 9)        | 297<br>(172 - 450)       | --                       | --                       |
| Maternal deaths aggravated by HIV/AIDS                           | 4<br>(2 - 6)                | --                       | --                  | 4<br>(2 - 6)             | --                       | --                       |
| Other maternal disorders                                         | 358<br>(237 - 499)          | --                       | 3<br>(1 - 6)        | 355<br>(235 - 497)       | --                       | --                       |
| Neonatal disorders                                               | 4,128<br>(3,371 - 5,128)    | 4,128<br>(3,371 - 5,128) | --                  | --                       | --                       | --                       |
| Neonatal preterm birth complications                             | 1,456<br>(568 - 2,609)      | 1,456<br>(568 - 2,609)   | --                  | --                       | --                       | --                       |
| Neonatal encephalopathy due to birth asphyxia and trauma         | 1,422<br>(569 - 2,638)      | 1,422<br>(569 - 2,638)   | --                  | --                       | --                       | --                       |
| Neonatal sepsis and other neonatal infections                    | 895<br>(370 - 1,666)        | 895<br>(370 - 1,666)     | --                  | --                       | --                       | --                       |
| Hemolytic disease and other neonatal jaundice                    | 19<br>(5 - 52)              | 19<br>(5 - 52)           | --                  | --                       | --                       | --                       |
| Other neonatal disorders                                         | 336<br>(158 - 636)          | 336<br>(158 - 636)       | --                  | --                       | --                       | --                       |
| Nutritional deficiencies                                         | 1,719<br>(1,224 - 2,343)    | 708<br>(355 - 1,214)     | 84<br>(50 - 142)    | 228<br>(161 - 327)       | 300<br>(190 - 444)       | 399<br>(264 - 607)       |
| Protein-energy malnutrition                                      | 1,205<br>(750 - 1,777)      | 660<br>(331 - 1,161)     | 66<br>(37 - 116)    | 73<br>(32 - 163)         | 166<br>(86 - 284)        | 240<br>(122 - 410)       |
| Iodine deficiency                                                | 8<br>(1 - 28)               | 2<br>(0 - 18)            | 1<br>(0 - 5)        | 2<br>(0 - 7)             | 2<br>(0 - 12)            | 2<br>(0 - 11)            |
| Iron-deficiency anemia                                           | 493<br>(201 - 807)          | 43<br>(5 - 151)          | 17<br>(5 - 36)      | 152<br>(70 - 237)        | 126<br>(45 - 223)        | 155<br>(62 - 278)        |
| Other nutritional deficiencies                                   | 12<br>(2 - 23)              | 2<br>(0 - 7)             | 0<br>(0 - 1)        | 1<br>(0 - 3)             | 6<br>(1 - 12)            | 3<br>(1 - 5)             |
| Other communicable, maternal, neonatal, and nutritional diseases | 437<br>(280 - 634)          | 180<br>(83 - 324)        | 23<br>(12 - 40)     | 51<br>(32 - 76)          | 90<br>(48 - 151)         | 93<br>(48 - 154)         |
| Sexually transmitted diseases excluding HIV                      | 164<br>(68 - 306)           | 136<br>(49 - 267)        | 15<br>(5 - 29)      | 6<br>(2 - 10)            | 5<br>(1 - 12)            | 4<br>(1 - 11)            |
| Syphilis                                                         | 158<br>(62 - 302)           | 136<br>(49 - 267)        | 14<br>(5 - 28)      | 2<br>(1 - 4)             | 2<br>(1 - 6)             | 3<br>(1 - 9)             |
| Chlamydial infection                                             | 2<br>(1 - 4)                | --                       | 0<br>(0 - 0)        | 1<br>(0 - 2)             | 1<br>(0 - 2)             | 0<br>(0 - 1)             |
| Gonococcal infection                                             | 3<br>(1 - 5)                | --                       | 0<br>(0 - 0)        | 1<br>(0 - 2)             | 1<br>(0 - 2)             | 0<br>(0 - 1)             |
| Other sexually transmitted diseases                              | 2<br>(1 - 4)                | --                       | 0<br>(0 - 0)        | 1<br>(0 - 2)             | 1<br>(0 - 2)             | 0<br>(0 - 1)             |
| Hepatitis                                                        | 166<br>(88 - 255)           | 11<br>(4 - 22)           | 4<br>(2 - 7)        | 33<br>(17 - 53)          | 59<br>(28 - 101)         | 59<br>(27 - 98)          |
| Acute hepatitis A                                                | 7<br>(2 - 16)               | 4<br>(1 - 9)             | 1<br>(0 - 3)        | 1<br>(0 - 4)             | 1<br>(0 - 2)             | 0<br>(0 - 1)             |
| Acute hepatitis B                                                | 124<br>(61 - 196)           | 7<br>(2 - 16)            | 2<br>(1 - 4)        | 14<br>(6 - 26)           | 49<br>(22 - 83)          | 52<br>(23 - 88)          |
| Acute hepatitis C                                                | 5<br>(1 - 18)               | --                       | 0<br>(0 - 1)        | 1<br>(0 - 3)             | 2<br>(0 - 7)             | 2<br>(0 - 9)             |
| Acute hepatitis E                                                | 29<br>(12 - 62)             | 0<br>(0 - 1)             | 1<br>(0 - 2)        | 16<br>(7 - 31)           | 8<br>(2 - 22)            | 4<br>(0 - 13)            |
| Other infectious diseases                                        | 107<br>(59 - 180)           | 33<br>(13 - 84)          | 4<br>(2 - 10)       | 13<br>(7 - 22)           | 26<br>(11 - 61)          | 30<br>(9 - 76)           |
| Non-communicable diseases                                        | 18,286<br>(14,896 - 22,217) | 1,460<br>(856 - 2,473)   | 313<br>(211 - 462)  | 2,320<br>(1,815 - 3,026) | 6,417<br>(4,842 - 8,138) | 7,777<br>(6,392 - 9,315) |
| Neoplasms                                                        | 3,276<br>(2,515 - 4,231)    | 39<br>(21 - 67)          | 58<br>(33 - 96)     | 786<br>(600 - 1,040)     | 1,611<br>(1,166 - 2,113) | 781<br>(601 - 1,049)     |
| Esophageal cancer                                                | 45<br>(30 - 70)             | --                       | --                  | 6<br>(3 - 8)             | 24<br>(15 - 38)          | 15<br>(9 - 30)           |
| Stomach cancer                                                   | 272<br>(194 - 373)          | --                       | --                  | 41<br>(28 - 61)          | 162<br>(107 - 229)       | 69<br>(46 - 103)         |
| Liver cancer                                                     | 538<br>(376 - 726)          | --                       | 2<br>(1 - 3)        | 120<br>(72 - 181)        | 281<br>(175 - 406)       | 136<br>(86 - 206)        |
| Liver cancer due to hepatitis B                                  | 223<br>(110 - 337)          | --                       | 1<br>(0 - 1)        | 58<br>(30 - 98)          | 119<br>(46 - 195)        | 46<br>(18 - 79)          |
| Liver cancer due to hepatitis C                                  | 91<br>(42 - 160)            | --                       | 0<br>(0 - 0)        | 13<br>(5 - 27)           | 48<br>(20 - 90)          | 31<br>(14 - 55)          |

Web Table 31- Senegal deaths with 95% UI by age, sex, and cause in 2013

| Cause                                | Females, All Ages         | Females, 0-4 Years | Females, 5-14 Years | Females, 15-49 Years | Females, 50-69 Years     | Females, 70-80 Years     |
|--------------------------------------|---------------------------|--------------------|---------------------|----------------------|--------------------------|--------------------------|
| Liver cancer due to alcohol use      | 58<br>(25 - 109)          | --                 | --                  | 6<br>(2 - 13)        | 30<br>(11 - 61)          | 22<br>(10 - 39)          |
| Liver cancer due to other causes     | 167<br>(93 - 277)         | --                 | 1<br>(0 - 2)        | 43<br>(24 - 70)      | 85<br>(40 - 157)         | 38<br>(19 - 65)          |
| Larynx cancer                        | 2<br>(1 - 4)              | --                 | --                  | 0<br>(0 - 1)         | 1<br>(0 - 2)             | 1<br>(0 - 1)             |
| Tracheal, bronchus and lung cancer   | 97<br>(72 - 134)          | --                 | --                  | 10<br>(7 - 16)       | 52<br>(35 - 74)          | 35<br>(25 - 51)          |
| Breast cancer                        | 371<br>(277 - 487)        | --                 | --                  | 142<br>(103 - 195)   | 166<br>(115 - 233)       | 63<br>(45 - 92)          |
| Cervical cancer                      | 864<br>(593 - 1,165)      | --                 | --                  | 211<br>(140 - 313)   | 487<br>(309 - 695)       | 166<br>(107 - 244)       |
| Uterine cancer                       | 79<br>(47 - 114)          | --                 | --                  | 12<br>(6 - 20)       | 40<br>(23 - 61)          | 27<br>(16 - 44)          |
| Prostate cancer                      | --                        | --                 | --                  | --                   | --                       | --                       |
| Colon and rectum cancer              | 151<br>(114 - 195)        | --                 | --                  | 38<br>(28 - 52)      | 56<br>(39 - 79)          | 57<br>(40 - 79)          |
| Lip and oral cavity cancer           | 21<br>(14 - 29)           | --                 | --                  | 6<br>(3 - 11)        | 8<br>(5 - 12)            | 6<br>(4 - 11)            |
| Nasopharynx cancer                   | 5<br>(3 - 8)              | --                 | 0<br>(0 - 1)        | 2<br>(1 - 3)         | 2<br>(1 - 4)             | 1<br>(0 - 2)             |
| Other pharynx cancer                 | 6<br>(4 - 8)              | --                 | --                  | 1<br>(1 - 2)         | 3<br>(2 - 5)             | 1<br>(1 - 2)             |
| Gallbladder and biliary tract cancer | 57<br>(39 - 82)           | --                 | --                  | 9<br>(5 - 15)        | 31<br>(20 - 47)          | 16<br>(10 - 26)          |
| Pancreatic cancer                    | 75<br>(56 - 101)          | --                 | --                  | 10<br>(7 - 14)       | 41<br>(28 - 57)          | 25<br>(17 - 35)          |
| Malignant skin melanoma              | 9<br>(6 - 12)             | --                 | --                  | 2<br>(1 - 3)         | 5<br>(3 - 7)             | 2<br>(1 - 3)             |
| Non-melanoma skin cancer             | 7<br>(4 - 11)             | --                 | --                  | 1<br>(1 - 3)         | 2<br>(1 - 3)             | 4<br>(2 - 7)             |
| Ovarian cancer                       | 115<br>(83 - 155)         | --                 | --                  | 28<br>(19 - 40)      | 69<br>(45 - 98)          | 18<br>(12 - 27)          |
| Testicular cancer                    | --                        | --                 | --                  | --                   | --                       | --                       |
| Kidney cancer                        | 24<br>(17 - 33)           | 2<br>(1 - 6)       | 2<br>(1 - 3)        | 4<br>(3 - 7)         | 12<br>(7 - 19)           | 5<br>(3 - 8)             |
| Bladder cancer                       | 49<br>(32 - 82)           | --                 | --                  | 8<br>(4 - 14)        | 21<br>(12 - 35)          | 21<br>(12 - 40)          |
| Brain and nervous system cancer      | 39<br>(25 - 50)           | 2<br>(1 - 5)       | 3<br>(1 - 5)        | 19<br>(9 - 26)       | 9<br>(6 - 14)            | 5<br>(3 - 8)             |
| Thyroid cancer                       | 14<br>(10 - 22)           | --                 | 0<br>(0 - 0)        | 1<br>(1 - 2)         | 8<br>(5 - 13)            | 5<br>(3 - 9)             |
| Mesothelioma                         | 3<br>(2 - 5)              | --                 | --                  | 1<br>(1 - 1)         | 2<br>(1 - 3)             | 1<br>(0 - 1)             |
| Hodgkin lymphoma                     | 15<br>(8 - 24)            | 1<br>(0 - 2)       | 1<br>(0 - 4)        | 4<br>(2 - 7)         | 3<br>(2 - 5)             | 6<br>(2 - 11)            |
| Non-Hodgkin lymphoma                 | 100<br>(61 - 152)         | 10<br>(4 - 25)     | 15<br>(6 - 32)      | 33<br>(19 - 49)      | 28<br>(17 - 52)          | 14<br>(7 - 31)           |
| Multiple myeloma                     | 22<br>(15 - 33)           | --                 | --                  | 3<br>(2 - 5)         | 11<br>(7 - 17)           | 8<br>(4 - 13)            |
| Leukemia                             | 52<br>(40 - 67)           | 2<br>(1 - 4)       | 9<br>(4 - 14)       | 19<br>(12 - 25)      | 13<br>(9 - 19)           | 10<br>(7 - 15)           |
| Other neoplasms                      | 240<br>(165 - 338)        | 21<br>(9 - 39)     | 27<br>(12 - 50)     | 54<br>(31 - 79)      | 74<br>(46 - 123)         | 64<br>(42 - 100)         |
| Cardiovascular diseases              | 8,291<br>(6,177 - 10,876) | 92<br>(46 - 172)   | 39<br>(21 - 79)     | 588<br>(411 - 805)   | 2,946<br>(2,048 - 4,000) | 4,625<br>(3,461 - 6,073) |
| Rheumatic heart disease              | 110<br>(58 - 303)         | 2<br>(0 - 4)       | 4<br>(2 - 9)        | 18<br>(8 - 58)       | 36<br>(14 - 123)         | 49<br>(27 - 111)         |
| Ischemic heart disease               | 2,100<br>(1,076 - 3,634)  | 2<br>(0 - 6)       | 3<br>(1 - 8)        | 123<br>(74 - 191)    | 694<br>(327 - 1,206)     | 1,278<br>(642 - 2,272)   |
| Cerebrovascular disease              | 4,025<br>(2,760 - 5,363)  | 22<br>(10 - 45)    | 10<br>(5 - 21)      | 243<br>(125 - 355)   | 1,419<br>(903 - 1,982)   | 2,330<br>(1,684 - 3,122) |
| Ischemic stroke                      | 2,578<br>(1,143 - 3,488)  | 4<br>(1 - 10)      | 1<br>(0 - 3)        | 46<br>(18 - 82)      | 784<br>(278 - 1,185)     | 1,743<br>(827 - 2,306)   |
| Hemorrhagic stroke                   | 1,447<br>(929 - 2,596)    | 18<br>(9 - 36)     | 9<br>(4 - 18)       | 197<br>(102 - 290)   | 636<br>(394 - 1,113)     | 588<br>(312 - 1,257)     |
| Hypertensive heart disease           | 755<br>(365 - 1,185)      | 1<br>(0 - 3)       | 1<br>(0 - 2)        | 45<br>(17 - 93)      | 260<br>(106 - 455)       | 448<br>(223 - 681)       |
| Cardiomyopathy and myocarditis       | 380<br>(227 - 655)        | 26<br>(10 - 63)    | 9<br>(4 - 23)       | 60<br>(33 - 118)     | 105<br>(58 - 196)        | 178<br>(89 - 321)        |
| Atrial fibrillation and flutter      | 1<br>(0 - 2)              | --                 | --                  | 0<br>(0 - 0)         | 0<br>(0 - 1)             | 1<br>(0 - 2)             |
| Aortic aneurysm                      | 78<br>(42 - 139)          | --                 | --                  | 7<br>(3 - 13)        | 29<br>(14 - 52)          | 42<br>(22 - 78)          |
| Peripheral vascular disease          | 3<br>(2 - 4)              | --                 | --                  | 0<br>(0 - 0)         | 2<br>(1 - 3)             | 1<br>(1 - 2)             |
| Endocarditis                         | 97<br>(59 - 175)          | 15<br>(5 - 31)     | 3<br>(1 - 6)        | 97<br>(10 - 30)      | 22<br>(12 - 47)          | 39<br>(21 - 83)          |



Web Table 31- Senegal deaths with 95% UI by age, sex, and cause in 2013

| Cause                                               | Females, All Ages      | Females, 0-4 Years | Females, 5-14 Years | Females, 15-49 Years | Females, 50-69 Years | Females, 70-80 Years |
|-----------------------------------------------------|------------------------|--------------------|---------------------|----------------------|----------------------|----------------------|
| Other cardiovascular and circulatory diseases       | 742<br>(429 - 1,442)   | 24<br>(9 - 53)     | 9<br>(4 - 20)       | 73<br>(39 - 152)     | 379<br>(211 - 685)   | 257<br>(133 - 553)   |
| Chronic respiratory diseases                        | 1,150<br>(862 - 1,859) | 33<br>(15 - 65)    | 13<br>(9 - 20)      | 107<br>(78 - 171)    | 409<br>(281 - 687)   | 589<br>(425 - 964)   |
| Chronic obstructive pulmonary disease               | 622<br>(421 - 1,101)   | 12<br>(5 - 25)     | 5<br>(3 - 8)        | 31<br>(18 - 59)      | 239<br>(150 - 459)   | 334<br>(215 - 588)   |
| Pneumoconiosis                                      | 3<br>(2 - 6)           | 0<br>(0 - 1)       | 0<br>(0 - 1)        | 1<br>(1 - 2)         | 1<br>(1 - 2)         | 0<br>(0 - 1)         |
| Silicosis                                           | 0<br>(0 - 0)           | 0<br>(0 - 0)       | 0<br>(0 - 0)        | 0<br>(0 - 0)         | 0<br>(0 - 0)         | 0<br>(0 - 0)         |
| Asbestosis                                          | 0<br>(0 - 1)           | 0<br>(0 - 0)       | 0<br>(0 - 0)        | 0<br>(0 - 0)         | 0<br>(0 - 0)         | 0<br>(0 - 0)         |
| Coal workers pneumoconiosis                         | 0<br>(0 - 0)           | 0<br>(0 - 0)       | 0<br>(0 - 0)        | 0<br>(0 - 0)         | 0<br>(0 - 0)         | 0<br>(0 - 0)         |
| Other pneumoconiosis                                | 2<br>(1 - 4)           | 0<br>(0 - 0)       | 0<br>(0 - 0)        | 1<br>(0 - 2)         | 1<br>(1 - 2)         | 0<br>(0 - 1)         |
| Asthma                                              | 272<br>(127 - 412)     | 12<br>(4 - 26)     | 4<br>(3 - 9)        | 38<br>(23 - 59)      | 105<br>(45 - 175)    | 113<br>(38 - 187)    |
| Interstitial lung disease and pulmonary sarcoidosis | 129<br>(52 - 258)      | 1<br>(0 - 2)       | 1<br>(0 - 2)        | 9<br>(4 - 18)        | 36<br>(17 - 80)      | 83<br>(28 - 165)     |
| Other chronic respiratory diseases                  | 124<br>(74 - 227)      | 8<br>(3 - 17)      | 2<br>(1 - 4)        | 28<br>(16 - 50)      | 27<br>(14 - 57)      | 58<br>(30 - 115)     |
| Cirrhosis                                           | 461<br>(312 - 696)     | 8<br>(3 - 18)      | 6<br>(3 - 10)       | 93<br>(60 - 148)     | 213<br>(135 - 332)   | 141<br>(88 - 223)    |
| Cirrhosis due to hepatitis B                        | 118<br>(41 - 222)      | 0<br>(0 - 1)       | 1<br>(0 - 2)        | 26<br>(8 - 48)       | 57<br>(19 - 109)     | 34<br>(11 - 69)      |
| Cirrhosis due to hepatitis C                        | 136<br>(51 - 241)      | 0<br>(0 - 1)       | 1<br>(0 - 2)        | 28<br>(8 - 50)       | 67<br>(19 - 121)     | 40<br>(17 - 87)      |
| Cirrhosis due to alcohol use                        | 124<br>(52 - 254)      | --                 | --                  | 15<br>(5 - 41)       | 58<br>(23 - 124)     | 51<br>(18 - 107)     |
| Cirrhosis due to other causes                       | 82<br>(37 - 162)       | 7<br>(2 - 16)      | 4<br>(2 - 7)        | 25<br>(11 - 45)      | 31<br>(10 - 71)      | 15<br>(5 - 35)       |
| Digestive diseases                                  | 856<br>(611 - 1,165)   | 31<br>(12 - 58)    | 26<br>(17 - 40)     | 147<br>(103 - 204)   | 290<br>(189 - 420)   | 363<br>(247 - 509)   |
| Peptic ulcer disease                                | 159<br>(88 - 245)      | 2<br>(0 - 4)       | 2<br>(1 - 4)        | 22<br>(12 - 36)      | 55<br>(29 - 92)      | 78<br>(39 - 126)     |
| Gastritis and duodenitis                            | 48<br>(20 - 131)       | 2<br>(0 - 6)       | 2<br>(1 - 6)        | 9<br>(4 - 25)        | 14<br>(5 - 41)       | 21<br>(7 - 59)       |
| Appendicitis                                        | 81<br>(41 - 126)       | 5<br>(2 - 11)      | 6<br>(3 - 11)       | 19<br>(11 - 32)      | 25<br>(10 - 45)      | 26<br>(9 - 53)       |
| Paralytic ileus and intestinal obstruction          | 278<br>(165 - 435)     | 11<br>(3 - 24)     | 9<br>(4 - 16)       | 41<br>(20 - 65)      | 94<br>(49 - 153)     | 123<br>(67 - 210)    |
| Inguinal, femoral, and abdominal hernia             | 10<br>(4 - 17)         | 1<br>(0 - 2)       | 0<br>(0 - 1)        | 2<br>(1 - 4)         | 3<br>(1 - 5)         | 4<br>(1 - 8)         |
| Inflammatory bowel disease                          | 49<br>(9 - 76)         | 4<br>(1 - 11)      | 1<br>(0 - 3)        | 12<br>(2 - 20)       | 14<br>(2 - 26)       | 16<br>(3 - 29)       |
| Vascular intestinal disorders                       | 4<br>(1 - 16)          | 0<br>(0 - 0)       | 0<br>(0 - 0)        | 1<br>(0 - 3)         | 2<br>(0 - 6)         | 2<br>(0 - 7)         |
| Gallbladder and biliary diseases                    | 85<br>(52 - 129)       | 1<br>(0 - 3)       | 2<br>(0 - 4)        | 11<br>(7 - 18)       | 33<br>(17 - 57)      | 37<br>(21 - 61)      |
| Pancreatitis                                        | 45<br>(22 - 79)        | 1<br>(0 - 1)       | 1<br>(0 - 1)        | 8<br>(5 - 14)        | 20<br>(8 - 41)       | 15<br>(6 - 29)       |
| Other digestive diseases                            | 98<br>(61 - 148)       | 4<br>(1 - 10)      | 3<br>(1 - 5)        | 21<br>(12 - 31)      | 30<br>(17 - 52)      | 40<br>(20 - 67)      |
| Neurological disorders                              | 526<br>(392 - 690)     | 40<br>(18 - 89)    | 22<br>(10 - 43)     | 83<br>(50 - 142)     | 59<br>(39 - 85)      | 323<br>(227 - 455)   |
| Alzheimer disease and other dementias               | 320<br>(222 - 455)     | --                 | --                  | 0<br>(0 - 0)         | 27<br>(17 - 42)      | 293<br>(202 - 424)   |
| Parkinson disease                                   | 2<br>(1 - 6)           | --                 | --                  | 0<br>(0 - 1)         | 1<br>(0 - 2)         | 1<br>(0 - 4)         |
| Epilepsy                                            | 150<br>(95 - 253)      | 30<br>(11 - 76)    | 18<br>(7 - 38)      | 70<br>(39 - 130)     | 14<br>(7 - 27)       | 17<br>(8 - 33)       |
| Multiple sclerosis                                  | 1<br>(0 - 5)           | --                 | --                  | 0<br>(0 - 2)         | 0<br>(0 - 2)         | 0<br>(0 - 1)         |
| Other neurological disorders                        | 53<br>(41 - 67)        | 10<br>(5 - 15)     | 4<br>(3 - 6)        | 12<br>(9 - 15)       | 17<br>(12 - 23)      | 11<br>(8 - 15)       |
| Mental and substance use disorders                  | 83<br>(55 - 123)       | 4<br>(1 - 8)       | 0<br>(0 - 0)        | 35<br>(23 - 58)      | 31<br>(17 - 50)      | 13<br>(9 - 18)       |
| Schizophrenia                                       | 1<br>(1 - 2)           | --                 | --                  | 1<br>(0 - 1)         | 1<br>(0 - 1)         | 0<br>(0 - 0)         |
| Alcohol use disorders                               | 32<br>(6 - 70)         | --                 | --                  | 16<br>(3 - 38)       | 14<br>(3 - 30)       | 3<br>(1 - 6)         |
| Drug use disorders                                  | 49<br>(33 - 67)        | 4<br>(1 - 8)       | --                  | 18<br>(11 - 28)      | 17<br>(11 - 23)      | 10<br>(7 - 14)       |
| Opioid use disorders                                | 5<br>(3 - 7)           | 0<br>(0 - 1)       | --                  | 2<br>(1 - 3)         | 1<br>(1 - 2)         | 1<br>(1 - 2)         |
| Cocaine use disorders                               | 0<br>(0 - 0)           | 0<br>(0 - 0)       | --                  | 0<br>(0 - 0)         | 0<br>(0 - 0)         | 0<br>(0 - 0)         |
| Amphetamine use disorders                           | 0<br>(0 - 0)           | 0<br>(0 - 0)       | --                  | 0<br>(0 - 0)         | 0<br>(0 - 0)         | 0<br>(0 - 0)         |

Web Table 31- Senegal deaths with 95% UI by age, sex, and cause in 2013

| Cause                                               | Females, All Ages        | Females, 0-4 Years     | Females, 5-14 Years | Females, 15-49 Years | Females, 50-69 Years | Females, 70-80 Years |
|-----------------------------------------------------|--------------------------|------------------------|---------------------|----------------------|----------------------|----------------------|
| Other drug use disorders                            | 44<br>(30 - 59)          | 4<br>(1 - 7)           | --                  | 16<br>(10 - 25)      | 15<br>(10 - 21)      | 9<br>(6 - 13)        |
| Eating disorders                                    | 0<br>(0 - 1)             | --                     | 0<br>(0 - 0)        | 0<br>(0 - 1)         | --                   | --                   |
| Anorexia nervosa                                    | 0<br>(0 - 1)             | --                     | 0<br>(0 - 0)        | 0<br>(0 - 1)         | --                   | --                   |
| Diabetes, urogenital, blood, and endocrine diseases | 2,162<br>(1,660 - 2,681) | 164<br>(92 - 275)      | 73<br>(40 - 116)    | 355<br>(257 - 484)   | 752<br>(543 - 984)   | 817<br>(602 - 1,050) |
| Diabetes mellitus                                   | 1,003<br>(734 - 1,310)   | 2<br>(1 - 5)           | 3<br>(2 - 6)        | 94<br>(65 - 131)     | 425<br>(299 - 577)   | 478<br>(335 - 647)   |
| Acute glomerulonephritis                            | 8<br>(6 - 13)            | 1<br>(0 - 2)           | 1<br>(0 - 2)        | 3<br>(2 - 5)         | 3<br>(1 - 5)         | 1<br>(0 - 2)         |
| Chronic kidney disease                              | 367<br>(272 - 499)       | 20<br>(9 - 39)         | 13<br>(7 - 24)      | 83<br>(55 - 132)     | 124<br>(81 - 183)    | 127<br>(85 - 182)    |
| Chronic kidney disease due to diabetes mellitus     | 5<br>(2 - 10)            | 0<br>(0 - 0)           | 0<br>(0 - 1)        | 0<br>(0 - 1)         | 4<br>(2 - 9)         | 0<br>(0 - 0)         |
| Chronic kidney disease due to hypertension          | 189<br>(125 - 285)       | 3<br>(1 - 6)           | 2<br>(1 - 4)        | 32<br>(17 - 54)      | 71<br>(42 - 116)     | 82<br>(52 - 130)     |
| Chronic kidney disease due to glomerulonephritis    | 86<br>(53 - 127)         | 11<br>(5 - 20)         | 6<br>(3 - 10)       | 34<br>(18 - 54)      | 20<br>(10 - 36)      | 14<br>(6 - 27)       |
| Chronic kidney disease due to other causes          | 87<br>(39 - 141)         | 5<br>(2 - 15)          | 5<br>(2 - 12)       | 17<br>(7 - 37)       | 28<br>(11 - 55)      | 31<br>(11 - 64)      |
| Urinary diseases and male infertility               | 281<br>(187 - 387)       | 17<br>(6 - 40)         | 6<br>(3 - 13)       | 54<br>(32 - 94)      | 101<br>(60 - 153)    | 103<br>(67 - 155)    |
| Interstitial nephritis and urinary tract infections | 253<br>(161 - 346)       | 16<br>(5 - 37)         | 5<br>(2 - 10)       | 49<br>(26 - 83)      | 89<br>(51 - 135)     | 95<br>(62 - 142)     |
| Urolithiasis                                        | 7<br>(2 - 22)            | --                     | 0<br>(0 - 2)        | 2<br>(0 - 5)         | 3<br>(1 - 10)        | 2<br>(0 - 8)         |
| Other urinary diseases                              | 21<br>(11 - 34)          | 1<br>(0 - 4)           | 1<br>(0 - 2)        | 4<br>(2 - 9)         | 9<br>(3 - 17)        | 6<br>(2 - 12)        |
| Gynecological diseases                              | 6<br>(3 - 10)            | --                     | --                  | 3<br>(1 - 5)         | 2<br>(1 - 4)         | 1<br>(1 - 2)         |
| Uterine fibroids                                    | 1<br>(1 - 2)             | --                     | --                  | 0<br>(0 - 1)         | 1<br>(0 - 1)         | 0<br>(0 - 1)         |
| Polycystic ovarian syndrome                         | 0<br>(0 - 0)             | --                     | --                  | 0<br>(0 - 0)         | 0<br>(0 - 0)         | --                   |
| Endometriosis                                       | 0<br>(0 - 1)             | --                     | --                  | 0<br>(0 - 1)         | 0<br>(0 - 0)         | --                   |
| Genital prolapse                                    | 1<br>(1 - 2)             | --                     | --                  | 0<br>(0 - 1)         | 0<br>(0 - 1)         | 0<br>(0 - 1)         |
| Other gynecological diseases                        | 3<br>(2 - 5)             | --                     | --                  | 1<br>(1 - 2)         | 1<br>(0 - 2)         | 1<br>(0 - 1)         |
| Hemoglobinopathies and hemolytic anemias            | 231<br>(126 - 393)       | 73<br>(30 - 144)       | 39<br>(17 - 71)     | 64<br>(35 - 123)     | 32<br>(15 - 55)      | 22<br>(7 - 40)       |
| Thalassemias                                        | 1<br>(1 - 2)             | 1<br>(0 - 1)           | 0<br>(0 - 0)        | 0<br>(0 - 0)         | 0<br>(0 - 0)         | 0<br>(0 - 0)         |
| Sickle cell disorders                               | 206<br>(113 - 358)       | 69<br>(28 - 137)       | 39<br>(17 - 70)     | 63<br>(34 - 120)     | 29<br>(13 - 50)      | 6<br>(2 - 13)        |
| G6PD deficiency                                     | 3<br>(1 - 4)             | 1<br>(0 - 1)           | 0<br>(0 - 1)        | 1<br>(0 - 1)         | 0<br>(0 - 1)         | 1<br>(0 - 1)         |
| Other hemoglobinopathies and hemolytic anemias      | 21<br>(8 - 34)           | 2<br>(1 - 5)           | 0<br>(0 - 1)        | 1<br>(0 - 2)         | 3<br>(1 - 5)         | 15<br>(5 - 27)       |
| Endocrine, metabolic, blood, and immune disorders   | 265<br>(162 - 367)       | 51<br>(26 - 94)        | 10<br>(5 - 21)      | 53<br>(31 - 86)      | 66<br>(38 - 101)     | 85<br>(38 - 134)     |
| Musculoskeletal disorders                           | 67<br>(44 - 111)         | --                     | 5<br>(3 - 9)        | 20<br>(11 - 36)      | 23<br>(14 - 38)      | 19<br>(11 - 34)      |
| Rheumatoid arthritis                                | 12<br>(7 - 22)           | --                     | 1<br>(0 - 1)        | 2<br>(1 - 3)         | 3<br>(2 - 8)         | 7<br>(3 - 12)        |
| Other musculoskeletal disorders                     | 55<br>(35 - 91)          | --                     | 5<br>(2 - 8)        | 18<br>(10 - 33)      | 20<br>(11 - 33)      | 13<br>(7 - 23)       |
| Other non-communicable diseases                     | 1,415<br>(874 - 2,433)   | 1,050<br>(519 - 1,991) | 70<br>(38 - 127)    | 106<br>(71 - 148)    | 83<br>(54 - 122)     | 107<br>(70 - 167)    |
| Congenital anomalies                                | 1,133<br>(584 - 2,139)   | 999<br>(470 - 1,935)   | 63<br>(32 - 123)    | 46<br>(29 - 85)      | 14<br>(8 - 26)       | 11<br>(7 - 18)       |
| Neural tube defects                                 | 138<br>(36 - 355)        | 130<br>(30 - 341)      | 5<br>(2 - 12)       | 3<br>(1 - 7)         | 0<br>(0 - 1)         | 0<br>(0 - 1)         |
| Congenital heart anomalies                          | 522<br>(271 - 1,024)     | 463<br>(229 - 921)     | 28<br>(13 - 55)     | 19<br>(11 - 34)      | 7<br>(4 - 12)        | 5<br>(3 - 9)         |
| Cleft lip and cleft palate                          | 4<br>(1 - 10)            | 4<br>(1 - 10)          | --                  | --                   | --                   | --                   |
| Down syndrome                                       | 182<br>(57 - 435)        | 151<br>(38 - 392)      | 16<br>(6 - 36)      | 12<br>(6 - 25)       | 3<br>(1 - 7)         | 1<br>(0 - 1)         |
| Chromosomal unbalanced rearrangements               | 56<br>(21 - 132)         | 50<br>(18 - 122)       | 2<br>(1 - 5)        | 3<br>(1 - 6)         | 0<br>(0 - 1)         | 0<br>(0 - 1)         |
| Other congenital anomalies                          | 231<br>(84 - 587)        | 200<br>(62 - 531)      | 13<br>(5 - 30)      | 10<br>(5 - 19)       | 4<br>(2 - 7)         | 5<br>(3 - 8)         |
| Skin and subcutaneous diseases                      | 272<br>(194 - 367)       | 42<br>(18 - 86)        | 7<br>(3 - 12)       | 59<br>(34 - 92)      | 69<br>(40 - 104)     | 96<br>(59 - 154)     |
| Cellulitis                                          | 73<br>(39 - 116)         | 8<br>(2 - 20)          | 2<br>(1 - 5)        | 14<br>(7 - 27)       | 15<br>(6 - 28)       | 34<br>(13 - 61)      |

Web Table 31- Senegal deaths with 95% UI by age, sex, and cause in 2013

| Cause                                           | Females, All Ages        | Females, 0-4 Years | Females, 5-14 Years | Females, 15-49 Years | Females, 50-69 Years | Females, 70-80 Years |
|-------------------------------------------------|--------------------------|--------------------|---------------------|----------------------|----------------------|----------------------|
| Pyoderma                                        | 180<br>(123 - 261)       | 30<br>(13 - 61)    | 3<br>(2 - 6)        | 38<br>(21 - 60)      | 52<br>(30 - 81)      | 57<br>(33 - 99)      |
| Decubitus ulcer                                 | 5<br>(3 - 9)             | 0<br>(0 - 0)       | 0<br>(0 - 1)        | 2<br>(1 - 3)         | 1<br>(0 - 1)         | 2<br>(1 - 6)         |
| Other skin and subcutaneous diseases            | 14<br>(7 - 25)           | 4<br>(1 - 10)      | 1<br>(0 - 1)        | 6<br>(2 - 10)        | 1<br>(1 - 2)         | 3<br>(1 - 6)         |
| Sudden infant death syndrome                    | 9<br>(2 - 29)            | 9<br>(2 - 29)      | --                  | --                   | --                   | --                   |
| Injuries                                        | 2,244<br>(1,625 - 2,844) | 359<br>(211 - 561) | 227<br>(149 - 344)  | 674<br>(483 - 895)   | 486<br>(300 - 680)   | 498<br>(275 - 677)   |
| Transport injuries                              | 998<br>(676 - 1,352)     | 91<br>(39 - 173)   | 105<br>(60 - 175)   | 397<br>(261 - 576)   | 256<br>(151 - 387)   | 149<br>(77 - 220)    |
| Road injuries                                   | 959<br>(655 - 1,305)     | 84<br>(35 - 161)   | 100<br>(57 - 168)   | 388<br>(257 - 562)   | 246<br>(147 - 372)   | 141<br>(76 - 207)    |
| Pedestrian road injuries                        | 269<br>(163 - 390)       | 22<br>(8 - 46)     | 31<br>(15 - 55)     | 83<br>(46 - 128)     | 78<br>(39 - 127)     | 55<br>(25 - 88)      |
| Cyclist road injuries                           | 48<br>(23 - 72)          | 5<br>(1 - 13)      | 7<br>(3 - 14)       | 10<br>(6 - 17)       | 20<br>(7 - 34)       | 6<br>(2 - 10)        |
| Motorcyclist road injuries                      | 71<br>(38 - 119)         | 4<br>(1 - 10)      | 4<br>(2 - 9)        | 42<br>(21 - 76)      | 14<br>(6 - 25)       | 7<br>(2 - 13)        |
| Motor vehicle road injuries                     | 549<br>(375 - 759)       | 49<br>(21 - 95)    | 55<br>(30 - 96)     | 247<br>(161 - 365)   | 129<br>(78 - 199)    | 70<br>(39 - 108)     |
| Other road injuries                             | 22<br>(12 - 35)          | 3<br>(1 - 9)       | 3<br>(1 - 8)        | 6<br>(3 - 12)        | 5<br>(2 - 11)        | 4<br>(1 - 8)         |
| Other transport injuries                        | 39<br>(10 - 62)          | 7<br>(2 - 16)      | 4<br>(1 - 9)        | 9<br>(3 - 15)        | 10<br>(2 - 19)       | 8<br>(1 - 15)        |
| Unintentional injuries                          | 1,073<br>(714 - 1,401)   | 262<br>(154 - 425) | 116<br>(74 - 183)   | 192<br>(137 - 254)   | 185<br>(108 - 265)   | 318<br>(169 - 453)   |
| Falls                                           | 283<br>(156 - 398)       | 25<br>(12 - 49)    | 14<br>(7 - 28)      | 36<br>(21 - 58)      | 45<br>(28 - 67)      | 163<br>(81 - 248)    |
| Drowning                                        | 157<br>(98 - 272)        | 63<br>(26 - 143)   | 37<br>(18 - 71)     | 31<br>(19 - 49)      | 17<br>(9 - 26)       | 10<br>(5 - 16)       |
| Fire, heat, and hot substances                  | 128<br>(60 - 221)        | 39<br>(14 - 94)    | 13<br>(6 - 27)      | 27<br>(14 - 47)      | 23<br>(10 - 39)      | 26<br>(11 - 46)      |
| Poisonings                                      | 31<br>(10 - 53)          | 9<br>(2 - 24)      | 3<br>(1 - 6)        | 7<br>(3 - 12)        | 7<br>(2 - 13)        | 4<br>(1 - 7)         |
| Exposure to mechanical forces                   | 122<br>(70 - 199)        | 38<br>(18 - 82)    | 17<br>(8 - 35)      | 28<br>(17 - 48)      | 23<br>(10 - 36)      | 16<br>(6 - 24)       |
| Unintentional firearm injuries                  | 30<br>(19 - 46)          | 5<br>(2 - 12)      | 3<br>(1 - 7)        | 11<br>(6 - 20)       | 6<br>(3 - 11)        | 4<br>(2 - 6)         |
| Unintentional suffocation                       | 16<br>(6 - 31)           | 10<br>(2 - 45)     | 2<br>(1 - 8)        | 1<br>(0 - 10)        | 1<br>(1 - 5)         | 1<br>(0 - 2)         |
| Other exposure to mechanical forces             | 76<br>(29 - 120)         | 22<br>(8 - 45)     | 12<br>(4 - 28)      | 15<br>(7 - 26)       | 16<br>(5 - 25)       | 12<br>(2 - 18)       |
| Adverse effects of medical treatment            | 139<br>(49 - 247)        | 22<br>(7 - 56)     | 7<br>(2 - 15)       | 28<br>(12 - 56)      | 36<br>(11 - 75)      | 46<br>(11 - 95)      |
| Animal contact                                  | 47<br>(14 - 80)          | 7<br>(3 - 18)      | 7<br>(3 - 18)       | 14<br>(4 - 27)       | 10<br>(3 - 19)       | 8<br>(2 - 15)        |
| Venomous animal contact                         | 26<br>(9 - 54)           | 6<br>(2 - 15)      | 5<br>(1 - 12)       | 8<br>(2 - 18)        | 5<br>(1 - 11)        | 3<br>(1 - 7)         |
| Non-venomous animal contact                     | 21<br>(5 - 38)           | 2<br>(0 - 5)       | 3<br>(1 - 7)        | 6<br>(1 - 12)        | 6<br>(1 - 11)        | 5<br>(1 - 10)        |
| Foreign body                                    | 110<br>(66 - 177)        | 49<br>(24 - 95)    | 8<br>(4 - 15)       | 9<br>(5 - 17)        | 12<br>(7 - 19)       | 31<br>(15 - 50)      |
| Pulmonary aspiration and foreign body in airway | 106<br>(62 - 171)        | 48<br>(23 - 93)    | 8<br>(4 - 15)       | 8<br>(5 - 16)        | 11<br>(6 - 18)       | 30<br>(14 - 48)      |
| Foreign body in other body part                 | 4<br>(2 - 7)             | 1<br>(0 - 2)       | 0<br>(0 - 1)        | 1<br>(0 - 1)         | 1<br>(0 - 1)         | 1<br>(1 - 2)         |
| Other unintentional injuries                    | 56<br>(29 - 88)          | 10<br>(4 - 20)     | 9<br>(4 - 19)       | 12<br>(6 - 23)       | 11<br>(5 - 17)       | 14<br>(5 - 22)       |
| Self-harm and interpersonal violence            | 172<br>(124 - 243)       | 5<br>(2 - 12)      | 6<br>(3 - 12)       | 85<br>(56 - 136)     | 45<br>(26 - 71)      | 31<br>(14 - 50)      |
| Self-harm                                       | 132<br>(88 - 202)        | --                 | 3<br>(1 - 6)        | 57<br>(34 - 105)     | 42<br>(24 - 68)      | 30<br>(13 - 49)      |
| Interpersonal violence                          | 40<br>(26 - 63)          | 5<br>(2 - 12)      | 4<br>(2 - 7)        | 28<br>(17 - 46)      | 3<br>(2 - 5)         | 1<br>(0 - 1)         |
| Assault by firearm                              | 12<br>(6 - 22)           | 2<br>(1 - 4)       | 1<br>(0 - 2)        | 9<br>(4 - 16)        | 1<br>(1 - 2)         | 0<br>(0 - 0)         |
| Assault by sharp object                         | 13<br>(7 - 22)           | 1<br>(0 - 3)       | 1<br>(0 - 2)        | 10<br>(5 - 18)       | 1<br>(0 - 1)         | 0<br>(0 - 0)         |
| Assault by other means                          | 15<br>(9 - 25)           | 3<br>(1 - 6)       | 2<br>(1 - 4)        | 9<br>(5 - 16)        | 1<br>(1 - 2)         | 0<br>(0 - 1)         |
| Forces of nature, war, and legal intervention   | 0<br>(0 - 0)             | 0<br>(0 - 0)       | --                  | --                   | --                   | --                   |
| Exposure to forces of nature                    | 0<br>(0 - 0)             | 0<br>(0 - 0)       | --                  | --                   | --                   | --                   |

Web Table 31- Serbia deaths with 95% UI by age, sex, and cause in 2013

| Cause                                                             | Both Sexes, All Ages        | Both Sexes, 0-4 Years | Both Sexes, 5-14 Years | Both Sexes, 15-49 Years  | Both Sexes, 50-69 Years     | Both Sexes, 70-80 Years     |
|-------------------------------------------------------------------|-----------------------------|-----------------------|------------------------|--------------------------|-----------------------------|-----------------------------|
| All causes                                                        | 92,563<br>(89,900 - 95,653) | 458<br>(366 - 562)    | 129<br>(114 - 145)     | 5,317<br>(5,072 - 5,568) | 23,339<br>(22,452 - 24,416) | 63,321<br>(61,784 - 65,082) |
| Communicable, maternal, neonatal, and nutritional diseases        | 1,651<br>(1,449 - 1,816)    | 288<br>(226 - 357)    | 12<br>(10 - 15)        | 166<br>(146 - 190)       | 332<br>(279 - 373)          | 852<br>(721 - 976)          |
| HIV/AIDS and tuberculosis                                         | 182<br>(155 - 227)          | 1<br>(0 - 2)          | 0<br>(0 - 1)           | 47<br>(33 - 68)          | 60<br>(51 - 77)             | 74<br>(62 - 94)             |
| Tuberculosis                                                      | 148<br>(132 - 181)          | 0<br>(0 - 0)          | 0<br>(0 - 0)           | 23<br>(20 - 28)          | 52<br>(44 - 66)             | 72<br>(61 - 92)             |
| HIV/AIDS                                                          | 35<br>(17 - 67)             | 1<br>(0 - 2)          | 0<br>(0 - 1)           | 23<br>(11 - 44)          | 9<br>(4 - 18)               | 1<br>(0 - 3)                |
| HIV/AIDS resulting in mycobacterial infection                     | 2<br>(1 - 4)                | 0<br>(0 - 0)          | 0<br>(0 - 0)           | 1<br>(1 - 2)             | 1<br>(0 - 1)                | 0<br>(0 - 0)                |
| HIV/AIDS resulting in other diseases                              | 33<br>(16 - 64)             | 1<br>(0 - 2)          | 0<br>(0 - 1)           | 22<br>(10 - 42)          | 8<br>(4 - 17)               | 1<br>(0 - 3)                |
| Diarrhea, lower respiratory, and other common infectious diseases | 1,062<br>(872 - 1,198)      | 31<br>(23 - 41)       | 10<br>(8 - 12)         | 95<br>(81 - 108)         | 248<br>(193 - 287)          | 679<br>(549 - 798)          |
| Diarrheal diseases                                                | 26<br>(21 - 31)             | 2<br>(1 - 3)          | 0<br>(0 - 0)           | 2<br>(1 - 2)             | 4<br>(4 - 6)                | 17<br>(13 - 22)             |
| Intestinal infectious diseases                                    | 20<br>(10 - 37)             | 3<br>(1 - 5)          | 3<br>(1 - 5)           | 7<br>(3 - 14)            | 5<br>(2 - 10)               | 3<br>(1 - 6)                |
| Typhoid fever                                                     | 14<br>(7 - 28)              | 2<br>(1 - 3)          | 2<br>(1 - 4)           | 5<br>(2 - 11)            | 3<br>(1 - 8)                | 2<br>(1 - 4)                |
| Paratyphoid fever                                                 | 4<br>(2 - 8)                | 1<br>(0 - 1)          | 1<br>(0 - 1)           | 2<br>(1 - 3)             | 1<br>(0 - 2)                | 0<br>(0 - 1)                |
| Other intestinal infectious diseases                              | 1<br>(0 - 5)                | 0<br>(0 - 2)          | 0<br>(0 - 1)           | 0<br>(0 - 2)             | 0<br>(0 - 2)                | 0<br>(0 - 2)                |
| Lower respiratory infections                                      | 918<br>(724 - 1,048)        | 20<br>(14 - 27)       | 4<br>(3 - 5)           | 62<br>(48 - 72)          | 202<br>(149 - 240)          | 631<br>(503 - 750)          |
| Upper respiratory infections                                      | 3<br>(1 - 7)                | 0<br>(0 - 0)          | 0<br>(0 - 0)           | 0<br>(0 - 1)             | 1<br>(0 - 2)                | 2<br>(0 - 6)                |
| Otitis media                                                      | 1<br>(1 - 1)                | 0<br>(0 - 0)          | 0<br>(0 - 0)           | 0<br>(0 - 1)             | 0<br>(0 - 0)                | 0<br>(0 - 1)                |
| Meningitis                                                        | 22<br>(19 - 25)             | 4<br>(3 - 6)          | 1<br>(1 - 1)           | 4<br>(3 - 5)             | 8<br>(7 - 9)                | 5<br>(4 - 6)                |
| Pneumococcal meningitis                                           | 6<br>(5 - 8)                | 1<br>(0 - 1)          | 0<br>(0 - 0)           | 1<br>(1 - 2)             | 3<br>(2 - 3)                | 2<br>(1 - 2)                |
| H influenzae type B meningitis                                    | 3<br>(2 - 4)                | 1<br>(1 - 2)          | 0<br>(0 - 0)           | 0<br>(0 - 1)             | 1<br>(0 - 1)                | 1<br>(0 - 1)                |
| Meningococcal meningitis                                          | 5<br>(4 - 6)                | 1<br>(1 - 2)          | 0<br>(0 - 0)           | 1<br>(1 - 1)             | 2<br>(1 - 2)                | 1<br>(1 - 2)                |
| Other meningitis                                                  | 8<br>(7 - 10)               | 1<br>(1 - 2)          | 0<br>(0 - 0)           | 2<br>(1 - 2)             | 3<br>(2 - 4)                | 2<br>(1 - 3)                |
| Encephalitis                                                      | 60<br>(47 - 80)             | 2<br>(1 - 3)          | 2<br>(1 - 3)           | 17<br>(13 - 24)          | 26<br>(19 - 35)             | 14<br>(9 - 19)              |
| Diphtheria                                                        | 0<br>(0 - 1)                | 0<br>(0 - 0)          | 0<br>(0 - 0)           | 0<br>(0 - 0)             | 0<br>(0 - 0)                | --<br>(0 - 0)               |
| Whooping cough                                                    | 1<br>(1 - 1)                | 0<br>(0 - 0)          | 0<br>(0 - 0)           | 1<br>(0 - 1)             | 0<br>(0 - 0)                | --<br>(0 - 0)               |
| Tetanus                                                           | 3<br>(2 - 5)                | 0<br>(0 - 0)          | 0<br>(0 - 0)           | 0<br>(0 - 0)             | 0<br>(0 - 1)                | 2<br>(1 - 3)                |
| Measles                                                           | 0<br>(0 - 0)                | 0<br>(0 - 0)          | 0<br>(0 - 0)           | 0<br>(0 - 0)             | 0<br>(0 - 0)                | --<br>(0 - 0)               |
| Varicella and herpes zoster                                       | 8<br>(3 - 24)               | 0<br>(0 - 2)          | 0<br>(0 - 1)           | 1<br>(0 - 2)             | 1<br>(0 - 3)                | 6<br>(0 - 21)               |
| Neglected tropical diseases and malaria                           | 5<br>(4 - 5)                | 0<br>(0 - 0)          | 0<br>(0 - 0)           | 2<br>(2 - 2)             | 1<br>(1 - 2)                | 1<br>(1 - 1)                |
| Cysticercosis                                                     | 0<br>(0 - 0)                | 0<br>(0 - 0)          | 0<br>(0 - 0)           | 0<br>(0 - 0)             | 0<br>(0 - 0)                | 0<br>(0 - 0)                |
| Cystic echinococcosis                                             | 1<br>(1 - 1)                | 0<br>(0 - 0)          | 0<br>(0 - 0)           | 0<br>(0 - 0)             | 0<br>(0 - 0)                | 0<br>(0 - 0)                |
| Dengue                                                            | 1<br>(1 - 1)                | 0<br>(0 - 0)          | 0<br>(0 - 0)           | 0<br>(0 - 1)             | 0<br>(0 - 0)                | 0<br>(0 - 0)                |
| Rabies                                                            | 1<br>(1 - 1)                | 0<br>(0 - 0)          | 0<br>(0 - 0)           | 0<br>(0 - 1)             | 0<br>(0 - 0)                | 0<br>(0 - 0)                |
| Other neglected tropical diseases                                 | 2<br>(2 - 2)                | 0<br>(0 - 0)          | 0<br>(0 - 0)           | 1<br>(1 - 1)             | 0<br>(0 - 1)                | 1<br>(0 - 1)                |
| Maternal disorders                                                | 10<br>(8 - 12)              | --                    | 0<br>(0 - 0)           | 10<br>(8 - 12)           | --                          | --                          |
| Maternal hemorrhage                                               | 1<br>(1 - 2)                | --                    | 0<br>(0 - 0)           | 1<br>(1 - 2)             | --                          | --                          |
| Maternal sepsis and other maternal infections                     | 1<br>(1 - 1)                | --                    | 0<br>(0 - 0)           | 1<br>(0 - 1)             | --                          | --                          |
| Maternal hypertensive disorders                                   | 1<br>(1 - 2)                | --                    | 0<br>(0 - 0)           | 1<br>(1 - 2)             | --                          | --                          |
| Maternal obstructed labor                                         | 1<br>(1 - 2)                | --                    | 0<br>(0 - 0)           | 1<br>(1 - 2)             | --                          | --                          |
| Maternal abortive outcome                                         | 2<br>(1 - 3)                | --                    | 0<br>(0 - 0)           | 2<br>(1 - 3)             | --                          | --                          |
| Indirect maternal deaths                                          | 1<br>(0 - 1)                | --                    | 0<br>(0 - 0)           | 1<br>(0 - 1)             | --                          | --                          |

Web Table 31- Serbia deaths with 95% UI by age, sex, and cause in 2013

| Cause                                                            | Both Sexes, All Ages        | Both Sexes, 0-4 Years | Both Sexes, 5-14 Years | Both Sexes, 15-49 Years  | Both Sexes, 50-69 Years     | Both Sexes, 70-80 Years     |
|------------------------------------------------------------------|-----------------------------|-----------------------|------------------------|--------------------------|-----------------------------|-----------------------------|
| Late maternal deaths                                             | 1<br>(1 - 2)                | --                    | 0<br>(0 - 0)           | 1<br>(0 - 2)             | --                          | --                          |
| Maternal deaths aggravated by HIV/AIDS                           | 0<br>(0 - 0)                | --                    | --                     | 0<br>(0 - 0)             | --                          | --                          |
| Other maternal disorders                                         | 2<br>(1 - 2)                | --                    | 0<br>(0 - 0)           | 2<br>(1 - 2)             | --                          | --                          |
| Neonatal disorders                                               | 246<br>(191 - 306)          | 246<br>(191 - 306)    | --                     | --                       | --                          | --                          |
| Neonatal preterm birth complications                             | 148<br>(109 - 188)          | 148<br>(109 - 188)    | --                     | --                       | --                          | --                          |
| Neonatal encephalopathy due to birth asphyxia and trauma         | 54<br>(37 - 77)             | 54<br>(37 - 77)       | --                     | --                       | --                          | --                          |
| Neonatal sepsis and other neonatal infections                    | 14<br>(7 - 25)              | 14<br>(7 - 25)        | --                     | --                       | --                          | --                          |
| Hemolytic disease and other neonatal jaundice                    | 0<br>(0 - 1)                | 0<br>(0 - 1)          | --                     | --                       | --                          | --                          |
| Other neonatal disorders                                         | 30<br>(21 - 43)             | 30<br>(21 - 43)       | --                     | --                       | --                          | --                          |
| Nutritional deficiencies                                         | 105<br>(81 - 125)           | 1<br>(0 - 1)          | 0<br>(0 - 1)           | 6<br>(4 - 7)             | 13<br>(9 - 16)              | 85<br>(65 - 103)            |
| Protein-energy malnutrition                                      | 8<br>(3 - 13)               | 0<br>(0 - 1)          | 0<br>(0 - 0)           | 1<br>(1 - 2)             | 1<br>(0 - 2)                | 5<br>(2 - 9)                |
| Iodine deficiency                                                | 3<br>(0 - 11)               | 0<br>(0 - 0)          | 0<br>(0 - 0)           | 0<br>(0 - 1)             | 1<br>(0 - 2)                | 2<br>(0 - 11)               |
| Iron-deficiency anemia                                           | 89<br>(65 - 107)            | 0<br>(0 - 0)          | 0<br>(0 - 0)           | 4<br>(3 - 5)             | 10<br>(7 - 13)              | 74<br>(54 - 91)             |
| Other nutritional deficiencies                                   | 6<br>(3 - 11)               | 0<br>(0 - 0)          | 0<br>(0 - 0)           | 1<br>(0 - 1)             | 1<br>(0 - 1)                | 4<br>(2 - 9)                |
| Other communicable, maternal, neonatal, and nutritional diseases | 41<br>(33 - 51)             | 9<br>(3 - 18)         | 1<br>(1 - 2)           | 7<br>(6 - 8)             | 10<br>(8 - 13)              | 13<br>(10 - 18)             |
| Sexually transmitted diseases excluding HIV                      | 11<br>(5 - 21)              | 8<br>(2 - 17)         | 1<br>(0 - 1)           | 1<br>(1 - 2)             | 1<br>(0 - 1)                | 1<br>(0 - 1)                |
| Syphilis                                                         | 10<br>(3 - 20)              | 8<br>(2 - 17)         | 1<br>(0 - 1)           | 1<br>(0 - 1)             | 0<br>(0 - 0)                | 1<br>(0 - 1)                |
| Chlamydial infection                                             | 0<br>(0 - 0)                | --                    | 0<br>(0 - 0)           | 0<br>(0 - 0)             | 0<br>(0 - 0)                | 0<br>(0 - 0)                |
| Gonococcal infection                                             | 0<br>(0 - 1)                | --                    | 0<br>(0 - 0)           | 0<br>(0 - 0)             | 0<br>(0 - 0)                | 0<br>(0 - 0)                |
| Other sexually transmitted diseases                              | 0<br>(0 - 0)                | --                    | 0<br>(0 - 0)           | 0<br>(0 - 0)             | 0<br>(0 - 0)                | 0<br>(0 - 0)                |
| Hepatitis                                                        | 5<br>(5 - 6)                | 0<br>(0 - 0)          | 0<br>(0 - 0)           | 2<br>(1 - 2)             | 2<br>(2 - 3)                | 1<br>(1 - 2)                |
| Acute hepatitis A                                                | 1<br>(0 - 2)                | 0<br>(0 - 0)          | 0<br>(0 - 0)           | 1<br>(0 - 1)             | 0<br>(0 - 1)                | 0<br>(0 - 0)                |
| Acute hepatitis B                                                | 4<br>(3 - 5)                | 0<br>(0 - 0)          | 0<br>(0 - 0)           | 1<br>(0 - 1)             | 2<br>(1 - 2)                | 1<br>(1 - 2)                |
| Acute hepatitis C                                                | 0<br>(0 - 1)                | --                    | 0<br>(0 - 0)           | 0<br>(0 - 0)             | 0<br>(0 - 0)                | 0<br>(0 - 0)                |
| Other infectious diseases                                        | 24<br>(20 - 31)             | 1<br>(1 - 1)          | 0<br>(0 - 1)           | 4<br>(3 - 5)             | 8<br>(6 - 10)               | 11<br>(9 - 16)              |
| Non-communicable diseases                                        | 86,848<br>(84,400 - 89,662) | 143<br>(112 - 179)    | 65<br>(57 - 74)        | 3,612<br>(3,442 - 3,792) | 21,837<br>(20,994 - 22,837) | 61,191<br>(59,715 - 62,854) |
| Neoplasms                                                        | 19,628<br>(18,503 - 20,615) | 14<br>(10 - 19)       | 30<br>(26 - 36)        | 1,670<br>(1,578 - 1,764) | 9,276<br>(8,760 - 9,810)    | 8,637<br>(7,986 - 9,173)    |
| Esophageal cancer                                                | 289<br>(252 - 325)          | --                    | --                     | 22<br>(18 - 28)          | 165<br>(138 - 192)          | 102<br>(87 - 116)           |
| Stomach cancer                                                   | 1,209<br>(1,082 - 1,366)    | --                    | --                     | 83<br>(71 - 97)          | 522<br>(464 - 592)          | 604<br>(520 - 707)          |
| Liver cancer                                                     | 766<br>(623 - 955)          | --                    | 0<br>(0 - 0)           | 37<br>(29 - 49)          | 332<br>(271 - 432)          | 396<br>(310 - 498)          |
| Liver cancer due to hepatitis B                                  | 133<br>(75 - 212)           | --                    | 0<br>(0 - 0)           | 10<br>(6 - 16)           | 70<br>(37 - 115)            | 53<br>(29 - 86)             |
| Liver cancer due to hepatitis C                                  | 376<br>(288 - 494)          | --                    | 0<br>(0 - 0)           | 16<br>(11 - 22)          | 162<br>(121 - 215)          | 198<br>(146 - 269)          |
| Liver cancer due to alcohol use                                  | 185<br>(129 - 259)          | --                    | --                     | 5<br>(3 - 8)             | 69<br>(46 - 101)            | 111<br>(73 - 155)           |
| Liver cancer due to other causes                                 | 71<br>(46 - 98)             | --                    | 0<br>(0 - 0)           | 5<br>(3 - 7)             | 31<br>(20 - 44)             | 35<br>(21 - 52)             |
| Larynx cancer                                                    | 351<br>(265 - 443)          | --                    | --                     | 25<br>(18 - 33)          | 206<br>(157 - 263)          | 120<br>(88 - 152)           |
| Tracheal, bronchus and lung cancer                               | 4,703<br>(4,311 - 5,031)    | --                    | --                     | 320<br>(284 - 358)       | 2,836<br>(2,555 - 3,083)    | 1,547<br>(1,411 - 1,677)    |
| Breast cancer                                                    | 1,567<br>(1,157 - 1,780)    | --                    | --                     | 183<br>(151 - 225)       | 763<br>(572 - 881)          | 621<br>(412 - 725)          |
| Cervical cancer                                                  | 540<br>(442 - 626)          | --                    | --                     | 113<br>(90 - 132)        | 254<br>(195 - 304)          | 173<br>(139 - 218)          |
| Uterine cancer                                                   | 224<br>(182 - 263)          | --                    | --                     | 11<br>(8 - 15)           | 103<br>(82 - 126)           | 110<br>(85 - 137)           |
| Prostate cancer                                                  | 970<br>(694 - 1,224)        | --                    | --                     | 4<br>(3 - 5)             | 207<br>(143 - 262)          | 759<br>(529 - 983)          |

Web Table 31- Serbia deaths with 95% UI by age, sex, and cause in 2013

| Cause                                         | Both Sexes, All Ages        | Both Sexes, 0-4 Years | Both Sexes, 5-14 Years | Both Sexes, 15-49 Years  | Both Sexes, 50-69 Years  | Both Sexes, 70-80 Years     |
|-----------------------------------------------|-----------------------------|-----------------------|------------------------|--------------------------|--------------------------|-----------------------------|
| Colon and rectum cancer                       | 2,529<br>(2,371 - 2,686)    | --                    | --                     | 137<br>(124 - 151)       | 1,012<br>(935 - 1,089)   | 1,380<br>(1,261 - 1,522)    |
| Lip and oral cavity cancer                    | 274<br>(239 - 303)          | --                    | --                     | 32<br>(25 - 38)          | 150<br>(125 - 171)       | 93<br>(80 - 107)            |
| Nasopharynx cancer                            | 43<br>(33 - 55)             | --                    | 0<br>(0 - 0)           | 10<br>(7 - 13)           | 24<br>(18 - 31)          | 10<br>(7 - 15)              |
| Other pharynx cancer                          | 191<br>(160 - 229)          | --                    | --                     | 22<br>(18 - 29)          | 128<br>(104 - 158)       | 40<br>(32 - 49)             |
| Gallbladder and biliary tract cancer          | 364<br>(261 - 433)          | --                    | --                     | 13<br>(10 - 17)          | 150<br>(109 - 180)       | 201<br>(134 - 249)          |
| Pancreatic cancer                             | 1,048<br>(976 - 1,121)      | --                    | --                     | 57<br>(50 - 65)          | 483<br>(442 - 526)       | 508<br>(460 - 557)          |
| Malignant skin melanoma                       | 246<br>(160 - 348)          | --                    | --                     | 52<br>(35 - 76)          | 110<br>(72 - 157)        | 83<br>(54 - 114)            |
| Non-melanoma skin cancer                      | 169<br>(133 - 230)          | --                    | --                     | 4<br>(3 - 6)             | 30<br>(21 - 43)          | 135<br>(106 - 185)          |
| Ovarian cancer                                | 425<br>(373 - 486)          | --                    | --                     | 55<br>(47 - 67)          | 224<br>(191 - 266)       | 146<br>(119 - 176)          |
| Testicular cancer                             | 34<br>(22 - 44)             | --                    | --                     | 22<br>(14 - 30)          | 7<br>(4 - 10)            | 5<br>(3 - 7)                |
| Kidney cancer                                 | 420<br>(373 - 480)          | 0<br>(0 - 1)          | 1<br>(1 - 1)           | 33<br>(27 - 40)          | 195<br>(168 - 225)       | 190<br>(160 - 229)          |
| Bladder cancer                                | 569<br>(485 - 648)          | --                    | --                     | 12<br>(10 - 16)          | 186<br>(157 - 216)       | 371<br>(307 - 432)          |
| Brain and nervous system cancer               | 706<br>(591 - 816)          | 5<br>(3 - 8)          | 12<br>(9 - 15)         | 132<br>(112 - 156)       | 364<br>(310 - 447)       | 193<br>(133 - 233)          |
| Thyroid cancer                                | 70<br>(58 - 91)             | --                    | 0<br>(0 - 0)           | 4<br>(3 - 6)             | 30<br>(24 - 40)          | 35<br>(28 - 48)             |
| Mesothelioma                                  | 33<br>(23 - 42)             | --                    | --                     | 4<br>(3 - 6)             | 18<br>(13 - 26)          | 11<br>(6 - 14)              |
| Hodgkin lymphoma                              | 71<br>(55 - 96)             | 0<br>(0 - 0)          | 1<br>(0 - 1)           | 29<br>(22 - 39)          | 24<br>(18 - 35)          | 17<br>(13 - 24)             |
| Non-Hodgkin lymphoma                          | 328<br>(219 - 403)          | 1<br>(0 - 1)          | 2<br>(1 - 2)           | 55<br>(37 - 69)          | 146<br>(95 - 184)        | 124<br>(80 - 157)           |
| Multiple myeloma                              | 166<br>(110 - 225)          | --                    | --                     | 10<br>(7 - 15)           | 86<br>(58 - 122)         | 70<br>(44 - 95)             |
| Leukemia                                      | 525<br>(472 - 565)          | 3<br>(2 - 4)          | 7<br>(6 - 9)           | 80<br>(71 - 90)          | 236<br>(173 - 221)       | 236<br>(206 - 261)          |
| Other neoplasms                               | 798<br>(616 - 900)          | 5<br>(4 - 7)          | 8<br>(6 - 10)          | 106<br>(79 - 124)        | 321<br>(253 - 369)       | 358<br>(260 - 422)          |
| Cardiovascular diseases                       | 48,986<br>(47,292 - 51,147) | 5<br>(4 - 7)          | 7<br>(6 - 8)           | 1,099<br>(1,014 - 1,188) | 8,765<br>(8,315 - 9,462) | 39,111<br>(37,835 - 40,668) |
| Rheumatic heart disease                       | 138<br>(104 - 174)          | 0<br>(0 - 0)          | 0<br>(0 - 0)           | 6<br>(4 - 8)             | 28<br>(21 - 36)          | 103<br>(77 - 134)           |
| Ischemic heart disease                        | 14,601<br>(12,725 - 16,490) | 0<br>(0 - 1)          | 1<br>(1 - 1)           | 541<br>(480 - 604)       | 3,661<br>(3,304 - 4,119) | 10,398<br>(8,791 - 11,900)  |
| Cerebrovascular disease                       | 16,354<br>(14,570 - 17,961) | 2<br>(1 - 3)          | 3<br>(3 - 4)           | 317<br>(274 - 374)       | 2,831<br>(2,509 - 3,227) | 13,201<br>(11,634 - 14,520) |
| Ischemic stroke                               | 13,190<br>(11,332 - 14,527) | 0<br>(0 - 0)          | 0<br>(0 - 0)           | 65<br>(47 - 81)          | 1,540<br>(1,228 - 1,794) | 11,585<br>(10,019 - 12,779) |
| Hemorrhagic stroke                            | 3,163<br>(2,758 - 3,911)    | 2<br>(1 - 2)          | 3<br>(2 - 4)           | 252<br>(216 - 299)       | 1,291<br>(1,090 - 1,634) | 1,616<br>(1,335 - 2,061)    |
| Hypertensive heart disease                    | 2,284<br>(1,805 - 3,160)    | 0<br>(0 - 0)          | 0<br>(0 - 0)           | 22<br>(16 - 31)          | 254<br>(200 - 342)       | 2,008<br>(1,552 - 2,812)    |
| Cardiomyopathy and myocarditis                | 13,773<br>(12,298 - 16,681) | 1<br>(1 - 2)          | 1<br>(1 - 2)           | 115<br>(96 - 142)        | 1,415<br>(1,228 - 1,843) | 12,241<br>(10,846 - 14,881) |
| Atrial fibrillation and flutter               | 201<br>(160 - 237)          | --                    | --                     | 3<br>(2 - 4)             | 27<br>(21 - 32)          | 172<br>(133 - 207)          |
| Aortic aneurysm                               | 334<br>(261 - 384)          | --                    | --                     | 22<br>(18 - 27)          | 135<br>(106 - 157)       | 177<br>(134 - 209)          |
| Peripheral vascular disease                   | 28<br>(23 - 33)             | --                    | --                     | 1<br>(1 - 1)             | 6<br>(5 - 8)             | 20<br>(16 - 25)             |
| Endocarditis                                  | 39<br>(27 - 50)             | 0<br>(0 - 1)          | 0<br>(0 - 0)           | 10<br>(7 - 13)           | 15<br>(10 - 21)          | 13<br>(9 - 17)              |
| Other cardiovascular and circulatory diseases | 1,235<br>(931 - 1,426)      | 1<br>(1 - 1)          | 1<br>(1 - 1)           | 62<br>(49 - 75)          | 393<br>(321 - 475)       | 778<br>(524 - 949)          |
| Chronic respiratory diseases                  | 4,369<br>(3,982 - 5,033)    | 1<br>(1 - 1)          | 1<br>(1 - 2)           | 63<br>(54 - 72)          | 813<br>(703 - 921)       | 3,491<br>(3,159 - 4,042)    |
| Chronic obstructive pulmonary disease         | 3,715<br>(3,359 - 4,219)    | 0<br>(0 - 0)          | 1<br>(0 - 1)           | 40<br>(33 - 47)          | 657<br>(558 - 750)       | 3,017<br>(2,690 - 3,469)    |
| Pneumoconiosis                                | 71<br>(50 - 103)            | 0<br>(0 - 0)          | 0<br>(0 - 0)           | 3<br>(2 - 4)             | 26<br>(17 - 40)          | 42<br>(28 - 65)             |
| Silicosis                                     | 27<br>(18 - 41)             | 0<br>(0 - 0)          | 0<br>(0 - 0)           | 1<br>(0 - 1)             | 5<br>(3 - 8)             | 20<br>(13 - 32)             |
| Asbestosis                                    | 6<br>(4 - 9)                | 0<br>(0 - 0)          | 0<br>(0 - 0)           | 0<br>(0 - 1)             | 3<br>(2 - 4)             | 3<br>(2 - 5)                |
| Coal workers pneumoconiosis                   | 10<br>(7 - 15)              | 0<br>(0 - 0)          | 0<br>(0 - 0)           | 0<br>(0 - 1)             | 5<br>(3 - 8)             | 4<br>(3 - 7)                |
| Other pneumoconiosis                          | 28<br>(19 - 42)             | 0<br>(0 - 0)          | 0<br>(0 - 0)           | 1<br>(1 - 2)             | 13<br>(8 - 19)           | 14<br>(9 - 22)              |

Web Table 31- Serbia deaths with 95% UI by age, sex, and cause in 2013

| Cause                                               | Both Sexes, All Ages     | Both Sexes, 0-4 Years | Both Sexes, 5-14 Years | Both Sexes, 15-49 Years | Both Sexes, 50-69 Years  | Both Sexes, 70-80 Years  |
|-----------------------------------------------------|--------------------------|-----------------------|------------------------|-------------------------|--------------------------|--------------------------|
| Asthma                                              | 272<br>(215 - 339)       | 0<br>(0 - 0)          | 0<br>(0 - 1)           | 11<br>(9 - 14)          | 61<br>(47 - 77)          | 199<br>(154 - 253)       |
| Interstitial lung disease and pulmonary sarcoidosis | 257<br>(190 - 392)       | 0<br>(0 - 0)          | 0<br>(0 - 0)           | 5<br>(4 - 7)            | 59<br>(42 - 90)          | 193<br>(138 - 315)       |
| Other chronic respiratory diseases                  | 53<br>(40 - 72)          | 0<br>(0 - 0)          | 0<br>(0 - 0)           | 4<br>(3 - 5)            | 9<br>(7 - 12)            | 40<br>(28 - 57)          |
| Cirrhosis                                           | 903<br>(847 - 960)       | 0<br>(0 - 1)          | 1<br>(1 - 1)           | 142<br>(125 - 161)      | 500<br>(458 - 547)       | 259<br>(235 - 283)       |
| Cirrhosis due to hepatitis B                        | 241<br>(170 - 337)       | 0<br>(0 - 0)          | 0<br>(0 - 0)           | 37<br>(25 - 53)         | 133<br>(93 - 191)        | 71<br>(47 - 99)          |
| Cirrhosis due to hepatitis C                        | 238<br>(144 - 357)       | 0<br>(0 - 0)          | 0<br>(0 - 0)           | 33<br>(18 - 52)         | 130<br>(74 - 200)        | 75<br>(47 - 110)         |
| Cirrhosis due to alcohol use                        | 285<br>(191 - 405)       | --                    | --                     | 35<br>(21 - 54)         | 162<br>(108 - 232)       | 88<br>(57 - 123)         |
| Cirrhosis due to other causes                       | 139<br>(72 - 206)        | 0<br>(0 - 1)          | 1<br>(0 - 1)           | 37<br>(23 - 54)         | 76<br>(34 - 119)         | 25<br>(14 - 36)          |
| Digestive diseases                                  | 1,927<br>(1,510 - 2,109) | 1<br>(1 - 1)          | 1<br>(1 - 2)           | 106<br>(86 - 119)       | 495<br>(388 - 549)       | 1,324<br>(1,011 - 1,476) |
| Peptic ulcer disease                                | 459<br>(328 - 559)       | 0<br>(0 - 0)          | 0<br>(0 - 0)           | 17<br>(12 - 22)         | 120<br>(85 - 148)        | 322<br>(226 - 401)       |
| Gastritis and duodenitis                            | 24<br>(11 - 35)          | 0<br>(0 - 0)          | 0<br>(0 - 0)           | 1<br>(1 - 2)            | 5<br>(2 - 7)             | 18<br>(7 - 28)           |
| Appendicitis                                        | 25<br>(17 - 33)          | 0<br>(0 - 0)          | 0<br>(0 - 0)           | 3<br>(2 - 3)            | 7<br>(4 - 9)             | 16<br>(10 - 22)          |
| Paralytic ileus and intestinal obstruction          | 392<br>(249 - 541)       | 0<br>(0 - 1)          | 0<br>(0 - 0)           | 14<br>(9 - 20)          | 86<br>(52 - 120)         | 291<br>(183 - 394)       |
| Inguinal, femoral, and abdominal hernia             | 66<br>(38 - 93)          | 0<br>(0 - 0)          | 0<br>(0 - 0)           | 1<br>(1 - 2)            | 10<br>(6 - 14)           | 55<br>(29 - 78)          |
| Inflammatory bowel disease                          | 70<br>(38 - 92)          | 0<br>(0 - 0)          | 0<br>(0 - 0)           | 8<br>(5 - 10)           | 19<br>(10 - 25)          | 43<br>(22 - 60)          |
| Vascular intestinal disorders                       | 363<br>(233 - 537)       | 0<br>(0 - 0)          | 0<br>(0 - 0)           | 8<br>(4 - 12)           | 91<br>(56 - 139)         | 265<br>(163 - 394)       |
| Gallbladder and biliary diseases                    | 152<br>(100 - 197)       | 0<br>(0 - 0)          | 0<br>(0 - 0)           | 3<br>(2 - 4)            | 32<br>(21 - 40)          | 116<br>(75 - 155)        |
| Pancreatitis                                        | 280<br>(206 - 353)       | 0<br>(0 - 0)          | 0<br>(0 - 0)           | 44<br>(35 - 54)         | 102<br>(74 - 129)        | 133<br>(91 - 177)        |
| Other digestive diseases                            | 96<br>(66 - 120)         | 0<br>(0 - 0)          | 0<br>(0 - 0)           | 6<br>(5 - 8)            | 23<br>(16 - 29)          | 66<br>(45 - 86)          |
| Neurological disorders                              | 5,880<br>(4,899 - 6,340) | 6<br>(5 - 8)          | 7<br>(6 - 9)           | 112<br>(94 - 129)       | 437<br>(378 - 496)       | 5,018<br>(4,375 - 5,770) |
| Alzheimer disease and other dementias               | 4,777<br>(4,101 - 5,546) | --                    | --                     | 1<br>(0 - 1)            | 245<br>(197 - 301)       | 4,531<br>(3,862 - 5,274) |
| Parkinson disease                                   | 465<br>(359 - 553)       | --                    | --                     | 1<br>(1 - 2)            | 54<br>(44 - 67)          | 409<br>(308 - 495)       |
| Epilepsy                                            | 127<br>(99 - 147)        | 2<br>(2 - 4)          | 4<br>(3 - 6)           | 47<br>(35 - 56)         | 39<br>(30 - 48)          | 35<br>(26 - 42)          |
| Multiple sclerosis                                  | 87<br>(62 - 123)         | --                    | --                     | 31<br>(22 - 46)         | 42<br>(28 - 60)          | 14<br>(10 - 21)          |
| Other neurological disorders                        | 124<br>(102 - 137)       | 4<br>(3 - 5)          | 3<br>(2 - 4)           | 32<br>(26 - 37)         | 57<br>(45 - 65)          | 29<br>(23 - 34)          |
| Mental and substance use disorders                  | 455<br>(352 - 577)       | 1<br>(1 - 1)          | 0<br>(0 - 0)           | 170<br>(145 - 222)      | 203<br>(137 - 257)       | 81<br>(56 - 105)         |
| Schizophrenia                                       | 32<br>(19 - 41)          | --                    | --                     | 6<br>(4 - 9)            | 17<br>(9 - 22)           | 9<br>(5 - 13)            |
| Alcohol use disorders                               | 289<br>(184 - 393)       | --                    | --                     | 64<br>(41 - 99)         | 164<br>(102 - 222)       | 61<br>(38 - 85)          |
| Drug use disorders                                  | 134<br>(114 - 157)       | 1<br>(1 - 1)          | --                     | 99<br>(82 - 120)        | 22<br>(18 - 28)          | 11<br>(9 - 15)           |
| Opioid use disorders                                | 52<br>(44 - 63)          | 0<br>(0 - 1)          | --                     | 39<br>(32 - 49)         | 8<br>(6 - 10)            | 4<br>(4 - 6)             |
| Cocaine use disorders                               | 7<br>(6 - 9)             | 0<br>(0 - 0)          | --                     | 6<br>(5 - 7)            | 1<br>(1 - 1)             | 1<br>(0 - 1)             |
| Amphetamine use disorders                           | 6<br>(5 - 8)             | 0<br>(0 - 0)          | --                     | 5<br>(4 - 6)            | 1<br>(1 - 1)             | 1<br>(0 - 1)             |
| Other drug use disorders                            | 68<br>(58 - 81)          | 0<br>(0 - 1)          | --                     | 49<br>(40 - 61)         | 12<br>(10 - 16)          | 6<br>(5 - 8)             |
| Eating disorders                                    | 0<br>(0 - 1)             | --                    | 0<br>(0 - 0)           | 0<br>(0 - 1)            | --                       | --                       |
| Anorexia nervosa                                    | 0<br>(0 - 1)             | --                    | 0<br>(0 - 0)           | 0<br>(0 - 1)            | --                       | --                       |
| Diabetes, urogenital, blood, and endocrine diseases | 4,665<br>(4,248 - 4,995) | 7<br>(5 - 10)         | 6<br>(5 - 7)           | 193<br>(176 - 211)      | 1,281<br>(1,176 - 1,404) | 3,179<br>(2,802 - 3,462) |
| Diabetes mellitus                                   | 2,739<br>(2,505 - 2,995) | 0<br>(0 - 0)          | 0<br>(0 - 1)           | 78<br>(69 - 88)         | 776<br>(699 - 868)       | 1,884<br>(1,668 - 2,114) |
| Acute glomerulonephritis                            | 2<br>(2 - 3)             | 0<br>(0 - 0)          | 0<br>(0 - 0)           | 1<br>(1 - 1)            | 1<br>(0 - 1)             | 0<br>(0 - 1)             |
| Chronic kidney disease                              | 1,585<br>(1,310 - 1,751) | 0<br>(0 - 1)          | 1<br>(1 - 1)           | 68<br>(59 - 80)         | 409<br>(361 - 470)       | 1,106<br>(858 - 1,239)   |
| Chronic kidney disease due to diabetes mellitus     | 2<br>(1 - 4)             | 0<br>(0 - 0)          | 0<br>(0 - 0)           | 1<br>(1 - 2)            | 0<br>(0 - 1)             | 0<br>(0 - 0)             |

Web Table 31- Serbia deaths with 95% UI by age, sex, and cause in 2013

| Cause                                               | Both Sexes, All Ages     | Both Sexes, 0-4 Years | Both Sexes, 5-14 Years | Both Sexes, 15-49 Years  | Both Sexes, 50-69 Years  | Both Sexes, 70-80 Years  |
|-----------------------------------------------------|--------------------------|-----------------------|------------------------|--------------------------|--------------------------|--------------------------|
| Chronic kidney disease due to hypertension          | 242<br>(160 - 325)       | 0<br>(0 - 0)          | 0<br>(0 - 0)           | 11<br>(8 - 16)           | 53<br>(32 - 74)          | 178<br>(118 - 240)       |
| Chronic kidney disease due to glomerulonephritis    | 100<br>(72 - 123)        | 0<br>(0 - 0)          | 0<br>(0 - 0)           | 8<br>(6 - 10)            | 34<br>(25 - 43)          | 58<br>(38 - 77)          |
| Chronic kidney disease due to other causes          | 1,241<br>(987 - 1,402)   | 0<br>(0 - 0)          | 0<br>(0 - 1)           | 47<br>(39 - 57)          | 322<br>(272 - 387)       | 871<br>(635 - 1,008)     |
| Urinary diseases and male infertility               | 157<br>(136 - 195)       | 0<br>(0 - 1)          | 0<br>(0 - 0)           | 8<br>(7 - 10)            | 41<br>(34 - 51)          | 107<br>(90 - 138)        |
| Interstitial nephritis and urinary tract infections | 90<br>(73 - 127)         | 0<br>(0 - 0)          | 0<br>(0 - 0)           | 5<br>(4 - 7)             | 26<br>(20 - 36)          | 59<br>(44 - 90)          |
| Urolithiasis                                        | 7<br>(5 - 9)             | --                    | 0<br>(0 - 0)           | 1<br>(1 - 1)             | 2<br>(1 - 3)             | 4<br>(3 - 6)             |
| Other urinary diseases                              | 60<br>(40 - 74)          | 0<br>(0 - 0)          | 0<br>(0 - 0)           | 3<br>(2 - 3)             | 13<br>(8 - 16)           | 44<br>(28 - 56)          |
| Gynecological diseases                              | 1<br>(1 - 2)             | --                    | --                     | 0<br>(0 - 0)             | 0<br>(0 - 1)             | 1<br>(0 - 1)             |
| Uterine fibroids                                    | 0<br>(0 - 0)             | --                    | --                     | 0<br>(0 - 0)             | 0<br>(0 - 0)             | 0<br>(0 - 0)             |
| Polycystic ovarian syndrome                         | 0<br>(0 - 0)             | --                    | --                     | 0<br>(0 - 0)             | 0<br>(0 - 0)             | --                       |
| Endometriosis                                       | 0<br>(0 - 0)             | --                    | --                     | 0<br>(0 - 0)             | 0<br>(0 - 0)             | --                       |
| Genital prolapse                                    | 0<br>(0 - 0)             | --                    | --                     | 0<br>(0 - 0)             | 0<br>(0 - 0)             | 0<br>(0 - 0)             |
| Other gynecological diseases                        | 1<br>(0 - 1)             | --                    | --                     | 0<br>(0 - 0)             | 0<br>(0 - 0)             | 0<br>(0 - 0)             |
| Hemoglobinopathies and hemolytic anemias            | 40<br>(29 - 53)          | 1<br>(1 - 2)          | 1<br>(0 - 1)           | 10<br>(7 - 14)           | 8<br>(6 - 11)            | 20<br>(14 - 27)          |
| Thalassemias                                        | 4<br>(3 - 5)             | 1<br>(0 - 1)          | 0<br>(0 - 1)           | 3<br>(2 - 4)             | 0<br>(0 - 0)             | 0<br>(0 - 0)             |
| Sickle cell disorders                               | 2<br>(2 - 3)             | 0<br>(0 - 0)          | 0<br>(0 - 0)           | 1<br>(1 - 2)             | 1<br>(1 - 1)             | 0<br>(0 - 0)             |
| G6PD deficiency                                     | 1<br>(1 - 1)             | 0<br>(0 - 0)          | 0<br>(0 - 0)           | 0<br>(0 - 1)             | 0<br>(0 - 0)             | 0<br>(0 - 0)             |
| Other hemoglobinopathies and hemolytic anemias      | 33<br>(23 - 44)          | 0<br>(0 - 1)          | 0<br>(0 - 0)           | 6<br>(4 - 8)             | 7<br>(5 - 9)             | 20<br>(14 - 27)          |
| Endocrine, metabolic, blood, and immune disorders   | 142<br>(112 - 165)       | 5<br>(3 - 6)          | 4<br>(3 - 5)           | 27<br>(21 - 33)          | 46<br>(35 - 57)          | 60<br>(44 - 74)          |
| Musculoskeletal disorders                           | 104<br>(90 - 123)        | --                    | 1<br>(1 - 2)           | 23<br>(20 - 28)          | 41<br>(33 - 49)          | 39<br>(32 - 47)          |
| Rheumatoid arthritis                                | 29<br>(23 - 36)          | --                    | 0<br>(0 - 0)           | 2<br>(2 - 3)             | 9<br>(7 - 12)            | 17<br>(13 - 22)          |
| Other musculoskeletal disorders                     | 75<br>(64 - 89)          | --                    | 1<br>(1 - 1)           | 21<br>(18 - 25)          | 32<br>(26 - 38)          | 22<br>(17 - 28)          |
| Other non-communicable diseases                     | 231<br>(200 - 267)       | 108<br>(84 - 136)     | 11<br>(8 - 13)         | 34<br>(30 - 38)          | 26<br>(22 - 30)          | 52<br>(42 - 64)          |
| Congenital anomalies                                | 164<br>(138 - 197)       | 102<br>(79 - 129)     | 10<br>(8 - 12)         | 28<br>(24 - 33)          | 10<br>(8 - 12)           | 15<br>(12 - 20)          |
| Neural tube defects                                 | 3<br>(2 - 4)             | 2<br>(1 - 3)          | 0<br>(0 - 0)           | 0<br>(0 - 1)             | 0<br>(0 - 0)             | 0<br>(0 - 0)             |
| Congenital heart anomalies                          | 87<br>(73 - 105)         | 52<br>(40 - 68)       | 5<br>(4 - 6)           | 15<br>(13 - 18)          | 5<br>(4 - 5)             | 9<br>(7 - 13)            |
| Cleft lip and cleft palate                          | 1<br>(0 - 3)             | 1<br>(0 - 3)          | --                     | --                       | --                       | --                       |
| Down syndrome                                       | 12<br>(9 - 18)           | 5<br>(3 - 9)          | 1<br>(1 - 2)           | 4<br>(3 - 6)             | 1<br>(1 - 2)             | 0<br>(0 - 0)             |
| Chromosomal unbalanced rearrangements               | 4<br>(3 - 5)             | 2<br>(1 - 3)          | 0<br>(0 - 1)           | 1<br>(1 - 1)             | 0<br>(0 - 1)             | 0<br>(0 - 0)             |
| Other congenital anomalies                          | 59<br>(47 - 73)          | 39<br>(29 - 52)       | 4<br>(3 - 5)           | 7<br>(5 - 9)             | 3<br>(3 - 4)             | 6<br>(4 - 7)             |
| Skin and subcutaneous diseases                      | 61<br>(47 - 72)          | 1<br>(0 - 1)          | 0<br>(0 - 1)           | 6<br>(5 - 7)             | 16<br>(12 - 19)          | 37<br>(27 - 48)          |
| Cellulitis                                          | 20<br>(13 - 25)          | 0<br>(0 - 0)          | 0<br>(0 - 0)           | 2<br>(2 - 3)             | 7<br>(5 - 10)            | 10<br>(5 - 14)           |
| Pyoderma                                            | 11<br>(8 - 14)           | 0<br>(0 - 0)          | 0<br>(0 - 0)           | 1<br>(1 - 2)             | 3<br>(2 - 5)             | 6<br>(4 - 9)             |
| Decubitus ulcer                                     | 25<br>(16 - 33)          | 0<br>(0 - 0)          | 0<br>(0 - 0)           | 2<br>(1 - 2)             | 4<br>(3 - 6)             | 19<br>(12 - 26)          |
| Other skin and subcutaneous diseases                | 5<br>(3 - 8)             | 0<br>(0 - 0)          | 0<br>(0 - 0)           | 1<br>(1 - 1)             | 1<br>(1 - 2)             | 3<br>(1 - 6)             |
| Sudden infant death syndrome                        | 6<br>(3 - 11)            | 6<br>(3 - 11)         | --                     | --                       | --                       | --                       |
| Injuries                                            | 4,064<br>(3,825 - 4,455) | 26<br>(20 - 34)       | 51<br>(44 - 59)        | 1,539<br>(1,437 - 1,652) | 1,170<br>(1,080 - 1,320) | 1,277<br>(1,175 - 1,472) |
| Transport injuries                                  | 963<br>(888 - 1,041)     | 8<br>(6 - 11)         | 23<br>(19 - 27)        | 506<br>(461 - 549)       | 238<br>(212 - 265)       | 189<br>(162 - 217)       |
| Road injuries                                       | 868<br>(794 - 938)       | 7<br>(5 - 10)         | 21<br>(17 - 25)        | 461<br>(417 - 501)       | 207<br>(184 - 232)       | 172<br>(148 - 198)       |
| Pedestrian road injuries                            | 243<br>(174 - 326)       | 3<br>(2 - 5)          | 9<br>(7 - 12)          | 68<br>(43 - 105)         | 72<br>(48 - 97)          | 91<br>(67 - 115)         |



Web Table 31- Serbia deaths with 95% UI by age, sex, and cause in 2013

| Cause                                           | Both Sexes, All Ages     | Both Sexes, 0-4 Years | Both Sexes, 5-14 Years | Both Sexes, 15-49 Years | Both Sexes, 50-69 Years | Both Sexes, 70-80 Years |
|-------------------------------------------------|--------------------------|-----------------------|------------------------|-------------------------|-------------------------|-------------------------|
| Cyclist road injuries                           | 82<br>(55 - 110)         | 0<br>(0 - 1)          | 3<br>(2 - 4)           | 33<br>(21 - 46)         | 29<br>(19 - 40)         | 18<br>(11 - 26)         |
| Motorcyclist road injuries                      | 99<br>(60 - 134)         | 0<br>(0 - 0)          | 1<br>(0 - 1)           | 81<br>(47 - 108)        | 12<br>(7 - 17)          | 6<br>(3 - 9)            |
| Motor vehicle road injuries                     | 436<br>(345 - 520)       | 3<br>(2 - 4)          | 8<br>(5 - 10)          | 277<br>(222 - 323)      | 93<br>(69 - 117)        | 56<br>(40 - 78)         |
| Other road injuries                             | 7<br>(4 - 16)            | 0<br>(0 - 0)          | 0<br>(0 - 0)           | 3<br>(2 - 6)            | 2<br>(1 - 5)            | 2<br>(1 - 5)            |
| Other transport injuries                        | 95<br>(70 - 116)         | 1<br>(1 - 1)          | 2<br>(1 - 3)           | 45<br>(33 - 56)         | 30<br>(20 - 40)         | 17<br>(11 - 23)         |
| Unintentional injuries                          | 1,318<br>(1,206 - 1,474) | 16<br>(12 - 21)       | 23<br>(19 - 29)        | 279<br>(249 - 315)      | 362<br>(327 - 418)      | 638<br>(554 - 743)      |
| Falls                                           | 409<br>(339 - 477)       | 2<br>(1 - 2)          | 2<br>(1 - 2)           | 44<br>(31 - 53)         | 142<br>(118 - 178)      | 220<br>(173 - 262)      |
| Drowning                                        | 154<br>(121 - 208)       | 4<br>(2 - 6)          | 12<br>(9 - 16)         | 86<br>(65 - 120)        | 31<br>(23 - 42)         | 22<br>(18 - 30)         |
| Fire, heat, and hot substances                  | 103<br>(82 - 125)        | 2<br>(1 - 3)          | 1<br>(1 - 1)           | 16<br>(13 - 20)         | 23<br>(18 - 29)         | 60<br>(47 - 76)         |
| Poisonings                                      | 40<br>(30 - 48)          | 1<br>(0 - 1)          | 1<br>(0 - 1)           | 10<br>(8 - 13)          | 10<br>(7 - 13)          | 18<br>(13 - 23)         |
| Exposure to mechanical forces                   | 91<br>(79 - 102)         | 2<br>(1 - 2)          | 3<br>(2 - 4)           | 42<br>(35 - 49)         | 27<br>(22 - 33)         | 18<br>(14 - 21)         |
| Unintentional firearm injuries                  | 21<br>(18 - 26)          | 0<br>(0 - 0)          | 1<br>(0 - 1)           | 10<br>(7 - 12)          | 6<br>(5 - 8)            | 5<br>(3 - 6)            |
| Unintentional suffocation                       | 5<br>(4 - 8)             | 0<br>(0 - 1)          | 0<br>(0 - 1)           | 2<br>(1 - 2)            | 2<br>(1 - 2)            | 1<br>(1 - 2)            |
| Other exposure to mechanical forces             | 65<br>(51 - 74)          | 1<br>(1 - 2)          | 2<br>(1 - 3)           | 31<br>(24 - 37)         | 19<br>(14 - 24)         | 12<br>(9 - 15)          |
| Adverse effects of medical treatment            | 374<br>(299 - 485)       | 1<br>(1 - 2)          | 1<br>(1 - 1)           | 21<br>(16 - 28)         | 88<br>(68 - 120)        | 264<br>(200 - 353)      |
| Animal contact                                  | 13<br>(10 - 20)          | 0<br>(0 - 0)          | 0<br>(0 - 0)           | 3<br>(2 - 5)            | 5<br>(3 - 7)            | 5<br>(3 - 8)            |
| Venomous animal contact                         | 6<br>(4 - 9)             | 0<br>(0 - 0)          | 0<br>(0 - 0)           | 2<br>(2 - 3)            | 2<br>(1 - 3)            | 1<br>(1 - 2)            |
| Non-venomous animal contact                     | 8<br>(6 - 12)            | 0<br>(0 - 0)          | 0<br>(0 - 0)           | 1<br>(1 - 2)            | 3<br>(2 - 4)            | 4<br>(2 - 6)            |
| Foreign body                                    | 62<br>(39 - 83)          | 3<br>(2 - 5)          | 1<br>(1 - 2)           | 18<br>(11 - 24)         | 21<br>(13 - 27)         | 19<br>(13 - 27)         |
| Pulmonary aspiration and foreign body in airway | 60<br>(38 - 82)          | 3<br>(2 - 5)          | 1<br>(1 - 1)           | 17<br>(10 - 23)         | 20<br>(12 - 27)         | 19<br>(12 - 27)         |
| Foreign body in other body part                 | 1<br>(1 - 2)             | 0<br>(0 - 0)          | 0<br>(0 - 0)           | 1<br>(0 - 1)            | 1<br>(0 - 1)            | 0<br>(0 - 0)            |
| Other unintentional injuries                    | 71<br>(59 - 87)          | 1<br>(1 - 2)          | 3<br>(2 - 5)           | 38<br>(29 - 50)         | 16<br>(11 - 24)         | 12<br>(9 - 18)          |
| Self-harm and interpersonal violence            | 1,782<br>(1,617 - 2,101) | 3<br>(2 - 4)          | 6<br>(4 - 7)           | 754<br>(667 - 868)      | 570<br>(503 - 695)      | 451<br>(392 - 606)      |
| Self-harm                                       | 1,534<br>(1,382 - 1,824) | -                     | 3<br>(2 - 4)           | 601<br>(522 - 682)      | 515<br>(450 - 633)      | 416<br>(359 - 566)      |
| Interpersonal violence                          | 248<br>(196 - 350)       | 3<br>(2 - 4)          | 3<br>(2 - 4)           | 153<br>(114 - 218)      | 55<br>(41 - 82)         | 35<br>(28 - 50)         |
| Assault by firearm                              | 108<br>(73 - 179)        | 0<br>(0 - 1)          | 1<br>(1 - 2)           | 79<br>(54 - 128)        | 21<br>(13 - 37)         | 7<br>(4 - 13)           |
| Assault by sharp object                         | 53<br>(34 - 87)          | 0<br>(0 - 1)          | 1<br>(0 - 1)           | 30<br>(19 - 49)         | 15<br>(9 - 25)          | 7<br>(5 - 12)           |
| Assault by other means                          | 87<br>(57 - 117)         | 2<br>(1 - 3)          | 1<br>(1 - 2)           | 44<br>(25 - 60)         | 19<br>(12 - 27)         | 21<br>(16 - 29)         |

Web Table 31- Serbia deaths with 95% UI by age, sex, and cause in 2013

| Cause                                                              | Males, All Ages             | Males, 0-4 Years   | Males, 5-14 Years | Males, 15-49 Years       | Males, 50-69 Years          | Males, 70-80 Years          |
|--------------------------------------------------------------------|-----------------------------|--------------------|-------------------|--------------------------|-----------------------------|-----------------------------|
| All causes                                                         | 46,216<br>(44,497 - 48,285) | 260<br>(203 - 323) | 75<br>(64 - 88)   | 3,643<br>(3,422 - 3,854) | 14,620<br>(13,901 - 15,460) | 27,618<br>(26,816 - 28,722) |
| Communicable, maternal, neonatal, and nutritional diseases         | 917<br>(793 - 1,026)        | 166<br>(129 - 209) | 6<br>(5 - 8)      | 108<br>(91 - 127)        | 222<br>(183 - 256)          | 414<br>(334 - 492)          |
| HIV/AIDS and tuberculosis                                          | 129<br>(107 - 164)          | 1<br>(0 - 1)       | 0<br>(0 - 0)      | 37<br>(26 - 53)          | 48<br>(40 - 64)             | 43<br>(35 - 59)             |
| Tuberculosis                                                       | 101<br>(88 - 132)           | 0<br>(0 - 0)       | 0<br>(0 - 0)      | 18<br>(15 - 23)          | 41<br>(34 - 55)             | 42<br>(34 - 57)             |
| HIV/AIDS                                                           | 28<br>(14 - 52)             | 0<br>(0 - 1)       | 0<br>(0 - 0)      | 18<br>(9 - 34)           | 7<br>(3 - 14)               | 1<br>(0 - 3)                |
| HIV/AIDS resulting in mycobacterial infection                      | 2<br>(1 - 3)                | 0<br>(0 - 0)       | 0<br>(0 - 0)      | 1<br>(1 - 2)             | 0<br>(0 - 1)                | 0<br>(0 - 0)                |
| HIV/AIDS resulting in other diseases                               | 26<br>(13 - 49)             | 0<br>(0 - 1)       | 0<br>(0 - 0)      | 17<br>(8 - 32)           | 7<br>(3 - 14)               | 1<br>(0 - 3)                |
| Diarrrhea, lower respiratory, and other common infectious diseases | 586<br>(468 - 680)          | 17<br>(12 - 23)    | 5<br>(4 - 7)      | 63<br>(52 - 75)          | 160<br>(120 - 192)          | 340<br>(266 - 420)          |
| Diarrrheal diseases                                                | 11<br>(8 - 13)              | 1<br>(1 - 2)       | 0<br>(0 - 0)      | 1<br>(1 - 1)             | 2<br>(2 - 3)                | 6<br>(4 - 8)                |
| Intestinal infectious diseases                                     | 12<br>(5 - 24)              | 1<br>(0 - 3)       | 2<br>(1 - 3)      | 5<br>(2 - 10)            | 3<br>(1 - 7)                | 1<br>(0 - 3)                |
| Typhoid fever                                                      | 9<br>(4 - 18)               | 1<br>(0 - 2)       | 1<br>(0 - 2)      | 3<br>(1 - 7)             | 2<br>(1 - 5)                | 1<br>(0 - 2)                |
| Paratyphoid fever                                                  | 3<br>(1 - 5)                | 0<br>(0 - 1)       | 0<br>(0 - 1)      | 1<br>(0 - 2)             | 1<br>(0 - 2)                | 0<br>(0 - 1)                |
| Other intestinal infectious diseases                               | 1<br>(0 - 3)                | 0<br>(0 - 1)       | 0<br>(0 - 0)      | 0<br>(0 - 2)             | 0<br>(0 - 1)                | 0<br>(0 - 2)                |
| Lower respiratory infections                                       | 508<br>(391 - 599)          | 11<br>(7 - 15)     | 2<br>(1 - 3)      | 43<br>(32 - 53)          | 134<br>(94 - 165)           | 319<br>(244 - 397)          |
| Upper respiratory infections                                       | 2<br>(0 - 4)                | 0<br>(0 - 0)       | 0<br>(0 - 0)      | 0<br>(0 - 1)             | 1<br>(0 - 2)                | 1<br>(0 - 3)                |
| Otitis media                                                       | 1<br>(1 - 1)                | 0<br>(0 - 0)       | 0<br>(0 - 0)      | 0<br>(0 - 0)             | 0<br>(0 - 0)                | 0<br>(0 - 0)                |
| Meningitis                                                         | 13<br>(11 - 16)             | 2<br>(1 - 4)       | 0<br>(0 - 1)      | 3<br>(2 - 3)             | 5<br>(4 - 6)                | 3<br>(2 - 4)                |
| Pneumococcal meningitis                                            | 4<br>(3 - 5)                | 0<br>(0 - 1)       | 0<br>(0 - 0)      | 1<br>(1 - 1)             | 2<br>(1 - 2)                | 1<br>(1 - 2)                |
| H influenzae type B meningitis                                     | 2<br>(1 - 3)                | 1<br>(0 - 1)       | 0<br>(0 - 0)      | 0<br>(0 - 0)             | 0<br>(0 - 1)                | 0<br>(0 - 0)                |
| Meningococcal meningitis                                           | 3<br>(2 - 4)                | 1<br>(0 - 1)       | 0<br>(0 - 0)      | 1<br>(0 - 1)             | 1<br>(1 - 1)                | 1<br>(0 - 1)                |
| Other meningitis                                                   | 5<br>(4 - 6)                | 1<br>(0 - 1)       | 0<br>(0 - 0)      | 1<br>(1 - 2)             | 2<br>(1 - 3)                | 1<br>(0 - 2)                |
| Encephalitis                                                       | 35<br>(24 - 49)             | 1<br>(1 - 2)       | 1<br>(1 - 2)      | 11<br>(7 - 16)           | 15<br>(9 - 22)              | 8<br>(5 - 12)               |
| Diphtheria                                                         | 0<br>(0 - 1)                | 0<br>(0 - 0)       | 0<br>(0 - 0)      | 0<br>(0 - 0)             | 0<br>(0 - 0)                | --<br>(0 - 0)               |
| Whooping cough                                                     | 0<br>(0 - 1)                | 0<br>(0 - 0)       | 0<br>(0 - 0)      | 0<br>(0 - 0)             | 0<br>(0 - 0)                | --<br>(0 - 0)               |
| Tetanus                                                            | 1<br>(0 - 1)                | 0<br>(0 - 0)       | 0<br>(0 - 0)      | 0<br>(0 - 0)             | 0<br>(0 - 0)                | 0<br>(0 - 1)                |
| Measles                                                            | 0<br>(0 - 0)                | 0<br>(0 - 0)       | 0<br>(0 - 0)      | 0<br>(0 - 0)             | 0<br>(0 - 0)                | --<br>(0 - 0)               |
| Varicella and herpes zoster                                        | 3<br>(1 - 11)               | 0<br>(0 - 1)       | 0<br>(0 - 0)      | 1<br>(0 - 1)             | 0<br>(0 - 2)                | 2<br>(0 - 9)                |
| Neglected tropical diseases and malaria                            | 3<br>(2 - 3)                | 0<br>(0 - 0)       | 0<br>(0 - 0)      | 1<br>(1 - 1)             | 1<br>(1 - 1)                | 1<br>(0 - 1)                |
| Cysticercosis                                                      | 0<br>(0 - 0)                | 0<br>(0 - 0)       | 0<br>(0 - 0)      | 0<br>(0 - 0)             | 0<br>(0 - 0)                | 0<br>(0 - 0)                |
| Cystic echinococcosis                                              | 1<br>(0 - 1)                | 0<br>(0 - 0)       | 0<br>(0 - 0)      | 0<br>(0 - 0)             | 0<br>(0 - 0)                | 0<br>(0 - 0)                |
| Dengue                                                             | 0<br>(0 - 1)                | 0<br>(0 - 0)       | 0<br>(0 - 0)      | 0<br>(0 - 0)             | 0<br>(0 - 0)                | 0<br>(0 - 0)                |
| Rabies                                                             | 0<br>(0 - 1)                | 0<br>(0 - 0)       | 0<br>(0 - 0)      | 0<br>(0 - 0)             | 0<br>(0 - 0)                | 0<br>(0 - 0)                |
| Other neglected tropical diseases                                  | 1<br>(1 - 2)                | 0<br>(0 - 0)       | 0<br>(0 - 0)      | 0<br>(0 - 1)             | 0<br>(0 - 1)                | 0<br>(0 - 1)                |
| Maternal disorders                                                 | --                          | --                 | --                | --                       | --                          | --                          |
| Maternal hemorrhage                                                | --                          | --                 | --                | --                       | --                          | --                          |
| Maternal sepsis and other maternal infections                      | --                          | --                 | --                | --                       | --                          | --                          |
| Maternal hypertensive disorders                                    | --                          | --                 | --                | --                       | --                          | --                          |
| Maternal obstructed labor                                          | --                          | --                 | --                | --                       | --                          | --                          |
| Maternal abortive outcome                                          | --                          | --                 | --                | --                       | --                          | --                          |
| Indirect maternal deaths                                           | --                          | --                 | --                | --                       | --                          | --                          |

Web Table 31- Serbia deaths with 95% UI by age, sex, and cause in 2013

| Cause                                                            | Males, All Ages             | Males, 0-4 Years   | Males, 5-14 Years | Males, 15-49 Years       | Males, 50-69 Years          | Males, 70-80 Years          |
|------------------------------------------------------------------|-----------------------------|--------------------|-------------------|--------------------------|-----------------------------|-----------------------------|
| Late maternal deaths                                             | --                          | --                 | --                | --                       | --                          | --                          |
| Maternal deaths aggravated by HIV/AIDS                           | --                          | --                 | --                | --                       | --                          | --                          |
| Other maternal disorders                                         | --                          | --                 | --                | --                       | --                          | --                          |
| Neonatal disorders                                               | 143<br>(111 - 182)          | 143<br>(111 - 182) | --                | --                       | --                          | --                          |
| Neonatal preterm birth complications                             | 86<br>(61 - 113)            | 86<br>(61 - 113)   | --                | --                       | --                          | --                          |
| Neonatal encephalopathy due to birth asphyxia and trauma         | 33<br>(21 - 50)             | 33<br>(21 - 50)    | --                | --                       | --                          | --                          |
| Neonatal sepsis and other neonatal infections                    | 6<br>(3 - 14)               | 6<br>(3 - 14)      | --                | --                       | --                          | --                          |
| Hemolytic disease and other neonatal jaundice                    | 0<br>(0 - 0)                | 0<br>(0 - 0)       | --                | --                       | --                          | --                          |
| Other neonatal disorders                                         | 18<br>(12 - 28)             | 18<br>(12 - 28)    | --                | --                       | --                          | --                          |
| Nutritional deficiencies                                         | 35<br>(19 - 46)             | 0<br>(0 - 1)       | 0<br>(0 - 0)      | 3<br>(2 - 4)             | 7<br>(4 - 10)               | 25<br>(13 - 34)             |
| Protein-energy malnutrition                                      | 4<br>(1 - 7)                | 0<br>(0 - 0)       | 0<br>(0 - 0)      | 1<br>(0 - 1)             | 1<br>(0 - 2)                | 2<br>(0 - 3)                |
| Iodine deficiency                                                | 1<br>(0 - 4)                | 0<br>(0 - 0)       | 0<br>(0 - 0)      | 0<br>(0 - 0)             | 0<br>(0 - 1)                | 1<br>(0 - 3)                |
| Iron-deficiency anemia                                           | 29<br>(15 - 38)             | 0<br>(0 - 0)       | 0<br>(0 - 0)      | 2<br>(1 - 2)             | 6<br>(3 - 8)                | 21<br>(11 - 29)             |
| Other nutritional deficiencies                                   | 2<br>(1 - 4)                | 0<br>(0 - 0)       | 0<br>(0 - 0)      | 0<br>(0 - 1)             | 0<br>(0 - 1)                | 1<br>(0 - 3)                |
| Other communicable, maternal, neonatal, and nutritional diseases | 20<br>(15 - 27)             | 5<br>(1 - 9)       | 1<br>(0 - 1)      | 4<br>(3 - 5)             | 6<br>(4 - 8)                | 5<br>(4 - 8)                |
| Sexually transmitted diseases excluding HIV                      | 5<br>(2 - 10)               | 4<br>(1 - 8)       | 0<br>(0 - 1)      | 0<br>(0 - 1)             | 0<br>(0 - 0)                | 0<br>(0 - 0)                |
| Syphilis                                                         | 5<br>(2 - 9)                | 4<br>(1 - 8)       | 0<br>(0 - 1)      | 0<br>(0 - 0)             | 0<br>(0 - 0)                | 0<br>(0 - 0)                |
| Chlamydial infection                                             | --                          | --                 | --                | --                       | --                          | --                          |
| Gonococcal infection                                             | 0<br>(0 - 0)                | --                 | 0<br>(0 - 0)      | 0<br>(0 - 0)             | 0<br>(0 - 0)                | 0<br>(0 - 0)                |
| Other sexually transmitted diseases                              | 0<br>(0 - 0)                | --                 | 0<br>(0 - 0)      | 0<br>(0 - 0)             | 0<br>(0 - 0)                | 0<br>(0 - 0)                |
| Hepatitis                                                        | 3<br>(3 - 4)                | 0<br>(0 - 0)       | 0<br>(0 - 0)      | 1<br>(1 - 1)             | 1<br>(1 - 2)                | 1<br>(1 - 1)                |
| Acute hepatitis A                                                | 1<br>(0 - 1)                | 0<br>(0 - 0)       | 0<br>(0 - 0)      | 0<br>(0 - 1)             | 0<br>(0 - 0)                | 0<br>(0 - 0)                |
| Acute hepatitis B                                                | 2<br>(2 - 3)                | 0<br>(0 - 0)       | 0<br>(0 - 0)      | 1<br>(0 - 1)             | 1<br>(1 - 2)                | 1<br>(0 - 1)                |
| Acute hepatitis C                                                | 0<br>(0 - 1)                | --                 | 0<br>(0 - 0)      | 0<br>(0 - 0)             | 0<br>(0 - 0)                | 0<br>(0 - 0)                |
| Other infectious diseases                                        | 12<br>(8 - 16)              | 0<br>(0 - 1)       | 0<br>(0 - 0)      | 3<br>(2 - 4)             | 4<br>(3 - 6)                | 4<br>(3 - 7)                |
| Non-communicable diseases                                        | 42,389<br>(40,785 - 44,268) | 79<br>(60 - 102)   | 35<br>(30 - 43)   | 2,265<br>(2,116 - 2,415) | 13,530<br>(12,867 - 14,309) | 26,480<br>(25,710 - 27,540) |
| Neoplasms                                                        | 11,291<br>(10,686 - 11,942) | 8<br>(5 - 12)      | 17<br>(14 - 22)   | 870<br>(800 - 942)       | 5,589<br>(5,259 - 5,953)    | 4,806<br>(4,433 - 5,163)    |
| Esophageal cancer                                                | 221<br>(185 - 254)          | --                 | --                | 18<br>(14 - 23)          | 138<br>(113 - 163)          | 65<br>(51 - 78)             |
| Stomach cancer                                                   | 796<br>(720 - 885)          | --                 | --                | 55<br>(46 - 66)          | 373<br>(331 - 419)          | 368<br>(315 - 426)          |
| Liver cancer                                                     | 447<br>(332 - 618)          | --                 | 0<br>(0 - 0)      | 25<br>(17 - 35)          | 217<br>(159 - 312)          | 205<br>(143 - 293)          |
| Liver cancer due to hepatitis B                                  | 89<br>(34 - 162)            | --                 | 0<br>(0 - 0)      | 8<br>(4 - 13)            | 49<br>(17 - 93)             | 33<br>(11 - 61)             |
| Liver cancer due to hepatitis C                                  | 218<br>(142 - 315)          | --                 | 0<br>(0 - 0)      | 11<br>(6 - 16)           | 107<br>(68 - 156)           | 101<br>(61 - 153)           |
| Liver cancer due to alcohol use                                  | 117<br>(70 - 182)           | --                 | --                | 4<br>(2 - 7)             | 50<br>(29 - 81)             | 62<br>(35 - 99)             |
| Liver cancer due to other causes                                 | 22<br>(11 - 39)             | --                 | 0<br>(0 - 0)      | 2<br>(1 - 4)             | 11<br>(5 - 20)              | 8<br>(4 - 15)               |
| Larynx cancer                                                    | 316<br>(230 - 405)          | --                 | --                | 22<br>(16 - 30)          | 188<br>(138 - 245)          | 107<br>(75 - 137)           |
| Tracheal, bronchus and lung cancer                               | 3,483<br>(3,253 - 3,736)    | --                 | --                | 217<br>(187 - 250)       | 2,150<br>(1,970 - 2,349)    | 1,116<br>(1,025 - 1,223)    |
| Breast cancer                                                    | 30<br>(12 - 58)             | --                 | --                | 2<br>(1 - 4)             | 14<br>(5 - 29)              | 15<br>(6 - 28)              |
| Cervical cancer                                                  | --                          | --                 | --                | --                       | --                          | --                          |
| Uterine cancer                                                   | --                          | --                 | --                | --                       | --                          | --                          |
| Prostate cancer                                                  | 970<br>(694 - 1,224)        | --                 | --                | 4<br>(3 - 5)             | 207<br>(143 - 262)          | 759<br>(529 - 983)          |

Web Table 31- Serbia deaths with 95% UI by age, sex, and cause in 2013

| Cause                                         | Males, All Ages             | Males, 0-4 Years | Males, 5-14 Years | Males, 15-49 Years | Males, 50-69 Years       | Males, 70-80 Years          |
|-----------------------------------------------|-----------------------------|------------------|-------------------|--------------------|--------------------------|-----------------------------|
| Colon and rectum cancer                       | 1,500<br>(1,398 - 1,610)    | --               | --                | 80<br>(69 - 92)    | 634<br>(578 - 694)       | 785<br>(708 - 879)          |
| Lip and oral cavity cancer                    | 210<br>(181 - 239)          | --               | --                | 26<br>(20 - 32)    | 126<br>(102 - 148)       | 58<br>(47 - 71)             |
| Nasopharynx cancer                            | 32<br>(25 - 42)             | --               | 0<br>(0 - 0)      | 8<br>(5 - 11)      | 19<br>(14 - 26)          | 6<br>(4 - 8)                |
| Other pharynx cancer                          | 162<br>(132 - 201)          | --               | --                | 19<br>(14 - 26)    | 112<br>(89 - 143)        | 30<br>(23 - 38)             |
| Gallbladder and biliary tract cancer          | 124<br>(75 - 158)           | --               | --                | 5<br>(3 - 7)       | 54<br>(33 - 73)          | 66<br>(40 - 82)             |
| Pancreatic cancer                             | 558<br>(513 - 605)          | --               | --                | 38<br>(31 - 45)    | 290<br>(259 - 324)       | 231<br>(205 - 260)          |
| Malignant skin melanoma                       | 144<br>(71 - 238)           | --               | --                | 32<br>(16 - 54)    | 67<br>(34 - 113)         | 45<br>(21 - 73)             |
| Non-melanoma skin cancer                      | 84<br>(55 - 132)            | --               | --                | 3<br>(2 - 4)       | 21<br>(13 - 34)          | 60<br>(39 - 97)             |
| Ovarian cancer                                | --                          | --               | --                | --                 | --                       | --                          |
| Testicular cancer                             | 34<br>(22 - 44)             | --               | --                | 22<br>(14 - 30)    | 7<br>(4 - 10)            | 5<br>(3 - 7)                |
| Kidney cancer                                 | 272<br>(235 - 311)          | 0<br>(0 - 0)     | 0<br>(0 - 1)      | 24<br>(19 - 31)    | 140<br>(117 - 166)       | 108<br>(88 - 131)           |
| Bladder cancer                                | 428<br>(349 - 486)          | --               | --                | 9<br>(7 - 12)      | 149<br>(122 - 176)       | 270<br>(211 - 316)          |
| Brain and nervous system cancer               | 394<br>(310 - 489)          | 3<br>(1 - 5)     | 6<br>(4 - 9)      | 83<br>(66 - 105)   | 209<br>(169 - 275)       | 93<br>(61 - 120)            |
| Thyroid cancer                                | 23<br>(19 - 28)             | --               | 0<br>(0 - 0)      | 2<br>(1 - 2)       | 13<br>(10 - 16)          | 8<br>(6 - 11)               |
| Mesothelioma                                  | 23<br>(14 - 32)             | --               | --                | 3<br>(2 - 5)       | 14<br>(9 - 22)           | 6<br>(3 - 9)                |
| Hodgkin lymphoma                              | 44<br>(31 - 65)             | 0<br>(0 - 0)     | 0<br>(0 - 1)      | 19<br>(12 - 26)    | 16<br>(10 - 25)          | 10<br>(6 - 15)              |
| Non-Hodgkin lymphoma                          | 193<br>(102 - 237)          | 0<br>(0 - 1)     | 1<br>(1 - 2)      | 38<br>(21 - 50)    | 88<br>(46 - 112)         | 65<br>(33 - 85)             |
| Multiple myeloma                              | 90<br>(46 - 128)            | --               | --                | 6<br>(3 - 11)      | 47<br>(25 - 73)          | 36<br>(17 - 53)             |
| Leukemia                                      | 309<br>(277 - 337)          | 2<br>(1 - 3)     | 5<br>(3 - 6)      | 49<br>(42 - 57)    | 122<br>(105 - 138)       | 132<br>(114 - 151)          |
| Other neoplasms                               | 403<br>(265 - 469)          | 3<br>(2 - 5)     | 4<br>(3 - 6)      | 64<br>(39 - 78)    | 174<br>(107 - 207)       | 158<br>(96 - 197)           |
| Cardiovascular diseases                       | 21,372<br>(20,477 - 22,400) | 2<br>(2 - 3)     | 3<br>(3 - 4)      | 794<br>(726 - 866) | 5,501<br>(5,178 - 5,866) | 15,071<br>(14,441 - 15,799) |
| Rheumatic heart disease                       | 52<br>(36 - 75)             | 0<br>(0 - 0)     | 0<br>(0 - 0)      | 4<br>(3 - 6)       | 16<br>(11 - 24)          | 32<br>(20 - 49)             |
| Ischemic heart disease                        | 7,103<br>(6,064 - 8,091)    | 0<br>(0 - 0)     | 0<br>(0 - 0)      | 439<br>(381 - 502) | 2,528<br>(2,197 - 2,844) | 4,136<br>(3,373 - 4,854)    |
| Cerebrovascular disease                       | 7,058<br>(5,864 - 8,172)    | 1<br>(1 - 1)     | 2<br>(1 - 2)      | 186<br>(145 - 231) | 1,633<br>(1,323 - 1,915) | 5,237<br>(4,301 - 6,104)    |
| Ischemic stroke                               | 5,615<br>(4,580 - 6,553)    | 0<br>(0 - 0)     | 0<br>(0 - 0)      | 42<br>(27 - 57)    | 956<br>(718 - 1,169)     | 4,617<br>(3,770 - 5,414)    |
| Hemorrhagic stroke                            | 1,443<br>(1,131 - 1,808)    | 1<br>(1 - 1)     | 1<br>(1 - 2)      | 144<br>(113 - 179) | 677<br>(518 - 875)       | 620<br>(439 - 831)          |
| Hypertensive heart disease                    | 638<br>(468 - 939)          | 0<br>(0 - 0)     | 0<br>(0 - 0)      | 17<br>(11 - 24)    | 143<br>(102 - 212)       | 478<br>(329 - 743)          |
| Cardiomyopathy and myocarditis                | 5,629<br>(4,735 - 7,178)    | 1<br>(0 - 1)     | 1<br>(0 - 1)      | 83<br>(65 - 108)   | 873<br>(714 - 1,164)     | 4,672<br>(3,895 - 5,961)    |
| Atrial fibrillation and flutter               | 91<br>(65 - 114)            | --               | --                | 2<br>(1 - 3)       | 18<br>(13 - 22)          | 71<br>(49 - 94)             |
| Aortic aneurysm                               | 253<br>(190 - 289)          | --               | --                | 18<br>(14 - 22)    | 108<br>(82 - 128)        | 127<br>(91 - 149)           |
| Peripheral vascular disease                   | 16<br>(13 - 20)             | --               | --                | 1<br>(1 - 1)       | 5<br>(3 - 6)             | 11<br>(8 - 14)              |
| Endocarditis                                  | 25<br>(16 - 36)             | 0<br>(0 - 0)     | 0<br>(0 - 0)      | 7<br>(5 - 11)      | 10<br>(6 - 15)           | 7<br>(4 - 11)               |
| Other cardiovascular and circulatory diseases | 506<br>(339 - 598)          | 0<br>(0 - 1)     | 0<br>(0 - 1)      | 37<br>(26 - 47)    | 168<br>(121 - 204)       | 300<br>(182 - 372)          |
| Chronic respiratory diseases                  | 2,806<br>(2,502 - 3,407)    | 0<br>(0 - 1)     | 1<br>(1 - 1)      | 40<br>(31 - 47)    | 580<br>(486 - 693)       | 2,185<br>(1,937 - 2,672)    |
| Chronic obstructive pulmonary disease         | 2,405<br>(2,131 - 2,924)    | 0<br>(0 - 0)     | 0<br>(0 - 0)      | 26<br>(20 - 31)    | 464<br>(384 - 546)       | 1,914<br>(1,685 - 2,341)    |
| Pneumoconiosis                                | 69<br>(48 - 101)            | 0<br>(0 - 0)     | 0<br>(0 - 0)      | 2<br>(2 - 4)       | 26<br>(17 - 39)          | 41<br>(27 - 64)             |
| Silicosis                                     | 26<br>(18 - 41)             | 0<br>(0 - 0)     | 0<br>(0 - 0)      | 1<br>(0 - 1)       | 5<br>(3 - 8)             | 20<br>(13 - 32)             |
| Asbestosis                                    | 6<br>(4 - 9)                | 0<br>(0 - 0)     | 0<br>(0 - 0)      | 0<br>(0 - 1)       | 3<br>(2 - 4)             | 3<br>(2 - 5)                |
| Coal workers pneumoconiosis                   | 10<br>(7 - 15)              | 0<br>(0 - 0)     | 0<br>(0 - 0)      | 0<br>(0 - 0)       | 5<br>(3 - 8)             | 4<br>(3 - 7)                |
| Other pneumoconiosis                          | 27<br>(18 - 41)             | 0<br>(0 - 0)     | 0<br>(0 - 0)      | 1<br>(1 - 2)       | 12<br>(8 - 19)           | 13<br>(8 - 21)              |

Web Table 31- Serbia deaths with 95% UI by age, sex, and cause in 2013

| Cause                                               | Males, All Ages          | Males, 0-4 Years | Males, 5-14 Years | Males, 15-49 Years | Males, 50-69 Years | Males, 70-80 Years       |
|-----------------------------------------------------|--------------------------|------------------|-------------------|--------------------|--------------------|--------------------------|
| Asthma                                              | 152<br>(118 - 192)       | 0<br>(0 - 0)     | 0<br>(0 - 1)      | 6<br>(5 - 7)       | 35<br>(27 - 44)    | 111<br>(84 - 144)        |
| Interstitial lung disease and pulmonary sarcoidosis | 158<br>(108 - 246)       | 0<br>(0 - 0)     | 0<br>(0 - 0)      | 3<br>(2 - 5)       | 49<br>(32 - 77)    | 106<br>(71 - 177)        |
| Other chronic respiratory diseases                  | 23<br>(18 - 30)          | 0<br>(0 - 0)     | 0<br>(0 - 0)      | 3<br>(2 - 3)       | 7<br>(5 - 9)       | 14<br>(9 - 19)           |
| Cirrhosis                                           | 682<br>(633 - 736)       | 0<br>(0 - 0)     | 0<br>(0 - 0)      | 119<br>(102 - 136) | 395<br>(356 - 436) | 168<br>(148 - 188)       |
| Cirrhosis due to hepatitis B                        | 156<br>(90 - 242)        | 0<br>(0 - 0)     | 0<br>(0 - 0)      | 28<br>(17 - 43)    | 93<br>(55 - 144)   | 34<br>(17 - 57)          |
| Cirrhosis due to hepatitis C                        | 175<br>(91 - 288)        | 0<br>(0 - 0)     | 0<br>(0 - 0)      | 26<br>(12 - 45)    | 97<br>(45 - 167)   | 52<br>(26 - 80)          |
| Cirrhosis due to alcohol use                        | 247<br>(155 - 359)       | --<br>(0 - 0)    | --<br>(0 - 0)     | 33<br>(19 - 52)    | 146<br>(91 - 215)  | 68<br>(39 - 99)          |
| Cirrhosis due to other causes                       | 104<br>(44 - 170)        | 0<br>(0 - 0)     | 0<br>(0 - 0)      | 31<br>(17 - 47)    | 59<br>(20 - 101)   | 14<br>(5 - 24)           |
| Digestive diseases                                  | 960<br>(749 - 1,066)     | 1<br>(0 - 1)     | 1<br>(0 - 1)      | 75<br>(61 - 86)    | 295<br>(230 - 334) | 590<br>(442 - 672)       |
| Peptic ulcer disease                                | 247<br>(171 - 308)       | 0<br>(0 - 0)     | 0<br>(0 - 0)      | 12<br>(8 - 17)     | 80<br>(54 - 103)   | 154<br>(103 - 197)       |
| Gastritis and duodenitis                            | 11<br>(4 - 17)           | 0<br>(0 - 0)     | 0<br>(0 - 1)      | 1<br>(0 - 1)       | 3<br>(1 - 5)       | 8<br>(2 - 12)            |
| Appendicitis                                        | 13<br>(8 - 18)           | 0<br>(0 - 0)     | 0<br>(0 - 0)      | 1<br>(1 - 2)       | 4<br>(2 - 6)       | 7<br>(4 - 12)            |
| Paralytic ileus and intestinal obstruction          | 185<br>(102 - 279)       | 0<br>(0 - 0)     | 0<br>(0 - 0)      | 9<br>(5 - 14)      | 49<br>(26 - 76)    | 127<br>(70 - 194)        |
| Inguinal, femoral, and abdominal hernia             | 34<br>(17 - 52)          | 0<br>(0 - 0)     | 0<br>(0 - 0)      | 1<br>(0 - 1)       | 6<br>(3 - 9)       | 27<br>(13 - 43)          |
| Inflammatory bowel disease                          | 30<br>(16 - 42)          | 0<br>(0 - 0)     | 0<br>(0 - 0)      | 4<br>(2 - 5)       | 10<br>(5 - 14)     | 17<br>(8 - 25)           |
| Vascular intestinal disorders                       | 166<br>(75 - 303)        | 0<br>(0 - 0)     | 0<br>(0 - 0)      | 5<br>(2 - 9)       | 51<br>(23 - 94)    | 111<br>(48 - 204)        |
| Gallbladder and biliary diseases                    | 67<br>(40 - 90)          | 0<br>(0 - 0)     | 0<br>(0 - 0)      | 2<br>(1 - 3)       | 15<br>(9 - 21)     | 50<br>(28 - 69)          |
| Pancreatitis                                        | 162<br>(108 - 209)       | 0<br>(0 - 0)     | 0<br>(0 - 0)      | 36<br>(27 - 45)    | 64<br>(43 - 87)    | 62<br>(35 - 87)          |
| Other digestive diseases                            | 45<br>(24 - 60)          | 0<br>(0 - 0)     | 0<br>(0 - 0)      | 4<br>(2 - 5)       | 13<br>(6 - 17)     | 28<br>(13 - 40)          |
| Neurological disorders                              | 2,550<br>(2,082 - 3,003) | 3<br>(2 - 5)     | 4<br>(3 - 5)      | 69<br>(55 - 84)    | 238<br>(198 - 286) | 2,236<br>(1,788 - 2,685) |
| Alzheimer disease and other dementias               | 2,103<br>(1,650 - 2,568) | --<br>(0 - 0)    | --<br>(0 - 1)     | 0<br>(0 - 1)       | 133<br>(99 - 178)  | 1,970<br>(1,525 - 2,421) |
| Parkinson disease                                   | 260<br>(209 - 316)       | --<br>(0 - 0)    | --<br>(0 - 1)     | 1<br>(1 - 1)       | 32<br>(25 - 41)    | 227<br>(180 - 283)       |
| Epilepsy                                            | 83<br>(61 - 99)          | 1<br>(1 - 2)     | 2<br>(1 - 3)      | 33<br>(24 - 41)    | 27<br>(20 - 35)    | 19<br>(14 - 24)          |
| Multiple sclerosis                                  | 33<br>(16 - 57)          | --<br>(0 - 0)    | --<br>(0 - 0)     | 13<br>(6 - 22)     | 15<br>(7 - 28)     | 5<br>(2 - 9)             |
| Other neurological disorders                        | 72<br>(51 - 83)          | 2<br>(1 - 3)     | 2<br>(1 - 3)      | 23<br>(17 - 27)    | 30<br>(21 - 37)    | 16<br>(10 - 19)          |
| Mental and substance use disorders                  | 393<br>(296 - 517)       | 1<br>(0 - 1)     | 0<br>(0 - 0)      | 154<br>(129 - 206) | 176<br>(116 - 229) | 62<br>(40 - 86)          |
| Schizophrenia                                       | 15<br>(8 - 21)           | --<br>(0 - 0)    | --<br>(0 - 0)     | 4<br>(2 - 6)       | 8<br>(4 - 12)      | 3<br>(2 - 5)             |
| Alcohol use disorders                               | 264<br>(161 - 360)       | --<br>(0 - 0)    | --<br>(0 - 0)     | 60<br>(37 - 95)    | 152<br>(92 - 205)  | 52<br>(32 - 75)          |
| Drug use disorders                                  | 114<br>(94 - 138)        | 1<br>(0 - 1)     | --<br>(0 - 0)     | 90<br>(73 - 110)   | 16<br>(12 - 23)    | 7<br>(5 - 10)            |
| Opioid use disorders                                | 45<br>(36 - 55)          | 0<br>(0 - 0)     | --<br>(0 - 0)     | 36<br>(28 - 45)    | 6<br>(4 - 8)       | 3<br>(2 - 4)             |
| Cocaine use disorders                               | 6<br>(5 - 8)             | 0<br>(0 - 0)     | --<br>(0 - 0)     | 5<br>(4 - 7)       | 1<br>(0 - 1)       | 0<br>(0 - 0)             |
| Amphetamine use disorders                           | 5<br>(4 - 6)             | 0<br>(0 - 0)     | --<br>(0 - 0)     | 4<br>(3 - 5)       | 1<br>(0 - 1)       | 0<br>(0 - 0)             |
| Other drug use disorders                            | 58<br>(48 - 72)          | 0<br>(0 - 0)     | --<br>(0 - 0)     | 45<br>(36 - 56)    | 9<br>(7 - 12)      | 4<br>(3 - 5)             |
| Eating disorders                                    | 0<br>(0 - 0)             | --<br>(0 - 0)    | 0<br>(0 - 0)      | 0<br>(0 - 0)       | --<br>(0 - 0)      | --<br>(0 - 0)            |
| Anorexia nervosa                                    | 0<br>(0 - 0)             | --<br>(0 - 0)    | 0<br>(0 - 0)      | 0<br>(0 - 0)       | --<br>(0 - 0)      | --<br>(0 - 0)            |
| Diabetes, urogenital, blood, and endocrine diseases | 2,192<br>(2,005 - 2,373) | 4<br>(3 - 5)     | 3<br>(3 - 5)      | 119<br>(105 - 133) | 731<br>(663 - 813) | 1,335<br>(1,181 - 1,480) |
| Diabetes mellitus                                   | 1,172<br>(1,071 - 1,277) | 0<br>(0 - 0)     | 0<br>(0 - 0)      | 51<br>(44 - 59)    | 439<br>(387 - 496) | 681<br>(601 - 764)       |
| Acute glomerulonephritis                            | 1<br>(1 - 2)             | 0<br>(0 - 0)     | 0<br>(0 - 0)      | 0<br>(0 - 1)       | 0<br>(0 - 1)       | 0<br>(0 - 0)             |
| Chronic kidney disease                              | 853<br>(711 - 967)       | 0<br>(0 - 0)     | 1<br>(0 - 1)      | 43<br>(35 - 54)    | 243<br>(204 - 291) | 567<br>(447 - 658)       |
| Chronic kidney disease due to diabetes mellitus     | 1<br>(1 - 3)             | 0<br>(0 - 0)     | 0<br>(0 - 0)      | 1<br>(0 - 2)       | 0<br>(0 - 1)       | 0<br>(0 - 0)             |

Web Table 31- Serbia deaths with 95% UI by age, sex, and cause in 2013

| Cause                                               | Males, All Ages          | Males, 0-4 Years | Males, 5-14 Years | Males, 15-49 Years       | Males, 50-69 Years | Males, 70-80 Years |
|-----------------------------------------------------|--------------------------|------------------|-------------------|--------------------------|--------------------|--------------------|
| Chronic kidney disease due to hypertension          | 125<br>(66 - 173)        | 0<br>(0 - 0)     | 0<br>(0 - 0)      | 7<br>(4 - 11)            | 35<br>(18 - 54)    | 82<br>(42 - 111)   |
| Chronic kidney disease due to glomerulonephritis    | 54<br>(37 - 71)          | 0<br>(0 - 0)     | 0<br>(0 - 0)      | 5<br>(4 - 7)             | 17<br>(11 - 23)    | 31<br>(19 - 43)    |
| Chronic kidney disease due to other causes          | 673<br>(547 - 792)       | 0<br>(0 - 0)     | 0<br>(0 - 0)      | 29<br>(22 - 39)          | 190<br>(145 - 239) | 454<br>(349 - 551) |
| Urinary diseases and male infertility               | 82<br>(69 - 104)         | 0<br>(0 - 1)     | 0<br>(0 - 0)      | 5<br>(4 - 6)             | 22<br>(17 - 29)    | 55<br>(43 - 72)    |
| Interstitial nephritis and urinary tract infections | 41<br>(32 - 61)          | 0<br>(0 - 0)     | 0<br>(0 - 0)      | 2<br>(2 - 4)             | 12<br>(9 - 18)     | 26<br>(19 - 42)    |
| Urolithiasis                                        | 3<br>(2 - 4)             | --               | 0<br>(0 - 0)      | 0<br>(0 - 0)             | 1<br>(0 - 1)       | 2<br>(1 - 3)       |
| Other urinary diseases                              | 38<br>(23 - 51)          | 0<br>(0 - 0)     | 0<br>(0 - 0)      | 2<br>(1 - 2)             | 9<br>(5 - 12)      | 27<br>(16 - 38)    |
| Gynecological diseases                              | --                       | --               | --                | --                       | --                 | --                 |
| Uterine fibroids                                    | --                       | --               | --                | --                       | --                 | --                 |
| Polycystic ovarian syndrome                         | --                       | --               | --                | --                       | --                 | --                 |
| Endometriosis                                       | --                       | --               | --                | --                       | --                 | --                 |
| Genital prolapse                                    | --                       | --               | --                | --                       | --                 | --                 |
| Other gynecological diseases                        | --                       | --               | --                | --                       | --                 | --                 |
| Hemoglobinopathies and hemolytic anemias            | 17<br>(11 - 26)          | 1<br>(0 - 1)     | 0<br>(0 - 1)      | 5<br>(3 - 8)             | 3<br>(2 - 5)       | 8<br>(5 - 12)      |
| Thalassemias                                        | 2<br>(1 - 3)             | 0<br>(0 - 1)     | 0<br>(0 - 0)      | 1<br>(1 - 2)             | 0<br>(0 - 0)       | 0<br>(0 - 0)       |
| Sickle cell disorders                               | 1<br>(1 - 1)             | 0<br>(0 - 0)     | 0<br>(0 - 0)      | 1<br>(0 - 1)             | 0<br>(0 - 0)       | 0<br>(0 - 0)       |
| G6PD deficiency                                     | 0<br>(0 - 1)             | 0<br>(0 - 0)     | 0<br>(0 - 0)      | 0<br>(0 - 0)             | 0<br>(0 - 0)       | 0<br>(0 - 0)       |
| Other hemoglobinopathies and hemolytic anemias      | 14<br>(9 - 21)           | 0<br>(0 - 0)     | 0<br>(0 - 0)      | 3<br>(2 - 5)             | 3<br>(2 - 4)       | 8<br>(5 - 12)      |
| Endocrine, metabolic, blood, and immune disorders   | 66<br>(44 - 82)          | 2<br>(2 - 4)     | 2<br>(1 - 3)      | 14<br>(10 - 19)          | 23<br>(16 - 31)    | 24<br>(13 - 32)    |
| Musculoskeletal disorders                           | 27<br>(20 - 36)          | --               | 0<br>(0 - 1)      | 7<br>(5 - 10)            | 11<br>(8 - 14)     | 9<br>(6 - 12)      |
| Rheumatoid arthritis                                | 6<br>(4 - 8)             | --               | 0<br>(0 - 0)      | 1<br>(1 - 2)             | 2<br>(1 - 3)       | 2<br>(1 - 4)       |
| Other musculoskeletal disorders                     | 21<br>(15 - 29)          | --               | 0<br>(0 - 1)      | 6<br>(4 - 8)             | 9<br>(6 - 12)      | 7<br>(4 - 9)       |
| Other non-communicable diseases                     | 115<br>(97 - 137)        | 60<br>(45 - 78)  | 5<br>(4 - 7)      | 18<br>(16 - 21)          | 14<br>(12 - 17)    | 18<br>(14 - 22)    |
| Congenital anomalies                                | 85<br>(69 - 106)         | 56<br>(42 - 74)  | 5<br>(3 - 6)      | 15<br>(13 - 18)          | 6<br>(4 - 7)       | 5<br>(4 - 6)       |
| Neural tube defects                                 | 1<br>(1 - 2)             | 1<br>(1 - 2)     | 0<br>(0 - 0)      | 0<br>(0 - 0)             | 0<br>(0 - 0)       | 0<br>(0 - 0)       |
| Congenital heart anomalies                          | 47<br>(37 - 59)          | 31<br>(22 - 42)  | 3<br>(2 - 4)      | 9<br>(7 - 11)            | 3<br>(2 - 4)       | 2<br>(1 - 3)       |
| Cleft lip and cleft palate                          | 1<br>(0 - 2)             | 1<br>(0 - 2)     | --                | --                       | --                 | --                 |
| Down syndrome                                       | 5<br>(3 - 9)             | 3<br>(1 - 6)     | 0<br>(0 - 1)      | 1<br>(1 - 3)             | 1<br>(0 - 1)       | 0<br>(0 - 0)       |
| Chromosomal unbalanced rearrangements               | 1<br>(1 - 2)             | 1<br>(0 - 1)     | 0<br>(0 - 0)      | 0<br>(0 - 0)             | 0<br>(0 - 0)       | 0<br>(0 - 0)       |
| Other congenital anomalies                          | 30<br>(23 - 39)          | 20<br>(14 - 28)  | 2<br>(1 - 2)      | 4<br>(3 - 5)             | 2<br>(1 - 3)       | 3<br>(2 - 4)       |
| Skin and subcutaneous diseases                      | 26<br>(18 - 31)          | 0<br>(0 - 0)     | 0<br>(0 - 0)      | 3<br>(3 - 4)             | 9<br>(6 - 11)      | 13<br>(9 - 17)     |
| Cellulitis                                          | 11<br>(7 - 15)           | 0<br>(0 - 0)     | 0<br>(0 - 0)      | 1<br>(1 - 2)             | 4<br>(2 - 6)       | 6<br>(3 - 9)       |
| Pyoderma                                            | 5<br>(4 - 8)             | 0<br>(0 - 0)     | 0<br>(0 - 0)      | 1<br>(1 - 1)             | 2<br>(1 - 3)       | 2<br>(1 - 4)       |
| Decubitus ulcer                                     | 7<br>(5 - 11)            | 0<br>(0 - 0)     | 0<br>(0 - 0)      | 1<br>(1 - 1)             | 2<br>(1 - 3)       | 4<br>(2 - 7)       |
| Other skin and subcutaneous diseases                | 1<br>(1 - 2)             | 0<br>(0 - 0)     | 0<br>(0 - 0)      | 0<br>(0 - 0)             | 0<br>(0 - 1)       | 1<br>(0 - 1)       |
| Sudden infant death syndrome                        | 4<br>(2 - 7)             | 4<br>(2 - 7)     | --                | --                       | --                 | --                 |
| Injuries                                            | 2,911<br>(2,695 - 3,255) | 16<br>(11 - 22)  | 33<br>(28 - 40)   | 1,270<br>(1,167 - 1,378) | 868<br>(787 - 996) | 724<br>(648 - 869) |
| Transport injuries                                  | 724<br>(666 - 782)       | 5<br>(3 - 7)     | 13<br>(10 - 16)   | 418<br>(376 - 458)       | 175<br>(156 - 196) | 114<br>(98 - 132)  |
| Road injuries                                       | 646<br>(591 - 699)       | 4<br>(3 - 6)     | 12<br>(9 - 15)    | 380<br>(338 - 418)       | 149<br>(131 - 168) | 101<br>(86 - 119)  |
| Pedestrian road injuries                            | 152<br>(86 - 229)        | 2<br>(1 - 3)     | 5<br>(3 - 8)      | 50<br>(26 - 86)          | 47<br>(27 - 71)    | 47<br>(29 - 65)    |

Web Table 31- Serbia deaths with 95% UI by age, sex, and cause in 2013

| Cause                                           | Males, All Ages          | Males, 0-4 Years | Males, 5-14 Years | Males, 15-49 Years | Males, 50-69 Years | Males, 70-80 Years |
|-------------------------------------------------|--------------------------|------------------|-------------------|--------------------|--------------------|--------------------|
| Cyclist road injuries                           | 68<br>(42 - 94)          | 0<br>(0 - 1)     | 2<br>(1 - 3)      | 28<br>(16 - 40)    | 23<br>(13 - 33)    | 15<br>(8 - 23)     |
| Motorcyclist road injuries                      | 93<br>(54 - 126)         | 0<br>(0 - 0)     | 1<br>(0 - 1)      | 76<br>(43 - 104)   | 11<br>(6 - 16)     | 5<br>(3 - 9)       |
| Motor vehicle road injuries                     | 328<br>(244 - 409)       | 1<br>(1 - 3)     | 4<br>(2 - 6)      | 224<br>(172 - 271) | 67<br>(44 - 89)    | 32<br>(19 - 51)    |
| Other road injuries                             | 6<br>(3 - 14)            | 0<br>(0 - 0)     | 0<br>(0 - 0)      | 2<br>(1 - 6)       | 2<br>(1 - 4)       | 1<br>(1 - 4)       |
| Other transport injuries                        | 78<br>(54 - 96)          | 1<br>(0 - 1)     | 1<br>(1 - 2)      | 37<br>(26 - 47)    | 25<br>(16 - 34)    | 13<br>(8 - 18)     |
| Unintentional injuries                          | 850<br>(763 - 967)       | 9<br>(7 - 13)    | 17<br>(13 - 22)   | 240<br>(210 - 276) | 277<br>(244 - 330) | 307<br>(263 - 368) |
| Falls                                           | 274<br>(214 - 322)       | 1<br>(1 - 2)     | 1<br>(1 - 2)      | 39<br>(27 - 48)    | 123<br>(100 - 162) | 109<br>(77 - 132)  |
| Drowning                                        | 124<br>(91 - 171)        | 2<br>(1 - 4)     | 9<br>(6 - 12)     | 78<br>(57 - 108)   | 23<br>(16 - 32)    | 12<br>(9 - 17)     |
| Fire, heat, and hot substances                  | 60<br>(44 - 76)          | 1<br>(1 - 2)     | 1<br>(0 - 1)      | 13<br>(9 - 17)     | 16<br>(11 - 21)    | 30<br>(21 - 39)    |
| Poisonings                                      | 25<br>(17 - 32)          | 0<br>(0 - 0)     | 0<br>(0 - 1)      | 8<br>(5 - 11)      | 7<br>(5 - 10)      | 9<br>(6 - 13)      |
| Exposure to mechanical forces                   | 75<br>(62 - 85)          | 1<br>(0 - 1)     | 2<br>(1 - 3)      | 37<br>(30 - 44)    | 23<br>(18 - 28)    | 12<br>(10 - 15)    |
| Unintentional firearm injuries                  | 18<br>(14 - 22)          | 0<br>(0 - 0)     | 0<br>(0 - 1)      | 8<br>(6 - 11)      | 6<br>(4 - 8)       | 4<br>(3 - 6)       |
| Unintentional suffocation                       | 3<br>(3 - 6)             | 0<br>(0 - 0)     | 0<br>(0 - 1)      | 1<br>(1 - 2)       | 1<br>(1 - 2)       | 1<br>(0 - 1)       |
| Other exposure to mechanical forces             | 54<br>(39 - 61)          | 0<br>(0 - 1)     | 1<br>(1 - 2)      | 28<br>(21 - 34)    | 17<br>(11 - 20)    | 8<br>(6 - 10)      |
| Adverse effects of medical treatment            | 181<br>(136 - 266)       | 1<br>(0 - 1)     | 0<br>(0 - 1)      | 14<br>(10 - 21)    | 52<br>(37 - 80)    | 113<br>(81 - 173)  |
| Animal contact                                  | 9<br>(7 - 14)            | 0<br>(0 - 0)     | 0<br>(0 - 0)      | 3<br>(2 - 4)       | 3<br>(2 - 4)       | 3<br>(2 - 5)       |
| Venomous animal contact                         | 4<br>(3 - 6)             | 0<br>(0 - 0)     | 0<br>(0 - 0)      | 2<br>(1 - 3)       | 1<br>(1 - 2)       | 1<br>(1 - 2)       |
| Non-venomous animal contact                     | 5<br>(3 - 7)             | 0<br>(0 - 0)     | 0<br>(0 - 0)      | 1<br>(1 - 1)       | 2<br>(1 - 2)       | 2<br>(1 - 3)       |
| Foreign body                                    | 45<br>(24 - 65)          | 2<br>(1 - 4)     | 1<br>(0 - 1)      | 14<br>(7 - 19)     | 15<br>(8 - 22)     | 13<br>(7 - 21)     |
| Pulmonary aspiration and foreign body in airway | 44<br>(23 - 64)          | 2<br>(1 - 4)     | 1<br>(0 - 1)      | 13<br>(7 - 19)     | 15<br>(8 - 22)     | 13<br>(7 - 21)     |
| Foreign body in other body part                 | 1<br>(0 - 1)             | 0<br>(0 - 0)     | 0<br>(0 - 0)      | 0<br>(0 - 0)       | 0<br>(0 - 0)       | 0<br>(0 - 0)       |
| Other unintentional injuries                    | 57<br>(46 - 71)          | 1<br>(1 - 2)     | 3<br>(1 - 5)      | 34<br>(25 - 45)    | 14<br>(9 - 21)     | 6<br>(4 - 8)       |
| Self-harm and interpersonal violence            | 1,336<br>(1,165 - 1,657) | 2<br>(1 - 3)     | 4<br>(2 - 5)      | 612<br>(518 - 720) | 416<br>(353 - 527) | 303<br>(250 - 429) |
| Self-harm                                       | 1,152<br>(979 - 1,437)   | --               | 2<br>(1 - 3)      | 490<br>(399 - 571) | 376<br>(309 - 468) | 284<br>(232 - 401) |
| Interpersonal violence                          | 184<br>(125 - 283)       | 2<br>(1 - 3)     | 1<br>(1 - 2)      | 122<br>(82 - 187)  | 40<br>(27 - 64)    | 19<br>(13 - 31)    |
| Assault by firearm                              | 88<br>(54 - 155)         | 0<br>(0 - 0)     | 1<br>(0 - 1)      | 67<br>(41 - 115)   | 16<br>(9 - 31)     | 5<br>(2 - 10)      |
| Assault by sharp object                         | 36<br>(19 - 65)          | 0<br>(0 - 0)     | 0<br>(0 - 1)      | 21<br>(10 - 38)    | 10<br>(5 - 19)     | 4<br>(2 - 7)       |
| Assault by other means                          | 60<br>(32 - 85)          | 1<br>(1 - 2)     | 1<br>(0 - 1)      | 35<br>(15 - 50)    | 13<br>(7 - 21)     | 11<br>(6 - 17)     |

Web Table 31- Serbia deaths with 95% UI by age, sex, and cause in 2013

| Cause                                                             | Females, All Ages           | Females, 0-4 Years | Females, 5-14 Years | Females, 15-49 Years     | Females, 50-69 Years     | Females, 70-80 Years        |
|-------------------------------------------------------------------|-----------------------------|--------------------|---------------------|--------------------------|--------------------------|-----------------------------|
| All causes                                                        | 46,347<br>(44,417 - 48,189) | 197<br>(152 - 243) | 54<br>(49 - 58)     | 1,674<br>(1,578 - 1,774) | 8,719<br>(8,080 - 9,328) | 35,703<br>(34,488 - 36,846) |
| Communicable, maternal, neonatal, and nutritional diseases        | 734<br>(609 - 841)          | 122<br>(91 - 154)  | 6<br>(5 - 7)        | 58<br>(50 - 66)          | 110<br>(86 - 128)        | 438<br>(347 - 532)          |
| HIV/AIDS and tuberculosis                                         | 53<br>(43 - 68)             | 1<br>(0 - 1)       | 0<br>(0 - 0)        | 10<br>(7 - 17)           | 12<br>(9 - 16)           | 30<br>(23 - 39)             |
| Tuberculosis                                                      | 46<br>(37 - 56)             | 0<br>(0 - 0)       | 0<br>(0 - 0)        | 5<br>(4 - 6)             | 10<br>(8 - 14)           | 30<br>(23 - 39)             |
| HIV/AIDS                                                          | 7<br>(3 - 17)               | 0<br>(0 - 1)       | 0<br>(0 - 0)        | 5<br>(2 - 12)            | 1<br>(0 - 4)             | 0<br>(0 - 1)                |
| HIV/AIDS resulting in mycobacterial infection                     | 0<br>(0 - 1)                | 0<br>(0 - 0)       | 0<br>(0 - 0)        | 0<br>(0 - 0)             | 0<br>(0 - 0)             | 0<br>(0 - 0)                |
| HIV/AIDS resulting in other diseases                              | 7<br>(3 - 16)               | 0<br>(0 - 1)       | 0<br>(0 - 0)        | 5<br>(2 - 11)            | 1<br>(0 - 4)             | 0<br>(0 - 1)                |
| Diarrhea, lower respiratory, and other common infectious diseases | 476<br>(366 - 569)          | 14<br>(10 - 19)    | 4<br>(3 - 6)        | 31<br>(26 - 37)          | 87<br>(64 - 104)         | 339<br>(253 - 427)          |
| Diarrheal diseases                                                | 15<br>(11 - 19)             | 1<br>(0 - 1)       | 0<br>(0 - 0)        | 1<br>(0 - 1)             | 2<br>(1 - 3)             | 11<br>(8 - 16)              |
| Intestinal infectious diseases                                    | 8<br>(4 - 15)               | 1<br>(1 - 3)       | 1<br>(0 - 2)        | 3<br>(1 - 6)             | 2<br>(1 - 4)             | 1<br>(0 - 3)                |
| Typhoid fever                                                     | 6<br>(3 - 11)               | 1<br>(0 - 2)       | 1<br>(0 - 2)        | 2<br>(1 - 4)             | 1<br>(0 - 3)             | 1<br>(0 - 2)                |
| Paratyphoid fever                                                 | 2<br>(1 - 3)                | 0<br>(0 - 1)       | 0<br>(0 - 1)        | 1<br>(0 - 1)             | 0<br>(0 - 1)             | 0<br>(0 - 1)                |
| Other intestinal infectious diseases                              | 1<br>(0 - 3)                | 0<br>(0 - 1)       | 0<br>(0 - 0)        | 0<br>(0 - 1)             | 0<br>(0 - 1)             | 0<br>(0 - 1)                |
| Lower respiratory infections                                      | 410<br>(298 - 499)          | 9<br>(6 - 13)      | 2<br>(1 - 2)        | 19<br>(15 - 23)          | 68<br>(45 - 84)          | 312<br>(227 - 399)          |
| Upper respiratory infections                                      | 2<br>(0 - 5)                | 0<br>(0 - 0)       | 0<br>(0 - 0)        | 0<br>(0 - 0)             | 0<br>(0 - 1)             | 1<br>(0 - 5)                |
| Otitis media                                                      | 1<br>(1 - 1)                | 0<br>(0 - 0)       | 0<br>(0 - 0)        | 0<br>(0 - 0)             | 0<br>(0 - 0)             | 0<br>(0 - 0)                |
| Meningitis                                                        | 9<br>(7 - 10)               | 2<br>(1 - 2)       | 0<br>(0 - 0)        | 1<br>(1 - 2)             | 3<br>(2 - 4)             | 2<br>(2 - 3)                |
| Pneumococcal meningitis                                           | 2<br>(2 - 3)                | 0<br>(0 - 0)       | 0<br>(0 - 0)        | 0<br>(0 - 1)             | 1<br>(0 - 1)             | 1<br>(0 - 1)                |
| H influenzae type B meningitis                                    | 1<br>(1 - 1)                | 0<br>(0 - 1)       | 0<br>(0 - 0)        | 0<br>(0 - 0)             | 0<br>(0 - 0)             | 0<br>(0 - 0)                |
| Meningococcal meningitis                                          | 2<br>(1 - 3)                | 0<br>(0 - 1)       | 0<br>(0 - 0)        | 0<br>(0 - 0)             | 1<br>(0 - 1)             | 1<br>(0 - 1)                |
| Other meningitis                                                  | 3<br>(2 - 4)                | 0<br>(0 - 1)       | 0<br>(0 - 0)        | 0<br>(0 - 1)             | 1<br>(1 - 2)             | 1<br>(0 - 1)                |
| Encephalitis                                                      | 25<br>(19 - 36)             | 1<br>(1 - 2)       | 1<br>(1 - 1)        | 6<br>(5 - 10)            | 11<br>(7 - 17)           | 6<br>(4 - 9)                |
| Diphtheria                                                        | 0<br>(0 - 0)                | 0<br>(0 - 0)       | 0<br>(0 - 0)        | 0<br>(0 - 0)             | 0<br>(0 - 0)             | --<br>(0 - 0)               |
| Whooping cough                                                    | 0<br>(0 - 1)                | 0<br>(0 - 0)       | 0<br>(0 - 0)        | 0<br>(0 - 0)             | 0<br>(0 - 0)             | --<br>(0 - 0)               |
| Tetanus                                                           | 2<br>(1 - 3)                | 0<br>(0 - 0)       | 0<br>(0 - 0)        | 0<br>(0 - 0)             | 0<br>(0 - 1)             | 1<br>(1 - 3)                |
| Measles                                                           | 0<br>(0 - 0)                | 0<br>(0 - 0)       | 0<br>(0 - 0)        | 0<br>(0 - 0)             | 0<br>(0 - 0)             | --<br>(0 - 0)               |
| Varicella and herpes zoster                                       | 5<br>(1 - 20)               | 0<br>(0 - 1)       | 0<br>(0 - 0)        | 0<br>(0 - 1)             | 1<br>(0 - 2)             | 4<br>(0 - 18)               |
| Neglected tropical diseases and malaria                           | 2<br>(2 - 2)                | 0<br>(0 - 0)       | 0<br>(0 - 0)        | 1<br>(1 - 1)             | 1<br>(0 - 1)             | 0<br>(0 - 1)                |
| Cysticercosis                                                     | 0<br>(0 - 0)                | 0<br>(0 - 0)       | 0<br>(0 - 0)        | 0<br>(0 - 0)             | 0<br>(0 - 0)             | 0<br>(0 - 0)                |
| Cystic echinococcosis                                             | 1<br>(1 - 1)                | 0<br>(0 - 0)       | 0<br>(0 - 0)        | 0<br>(0 - 0)             | 0<br>(0 - 0)             | 0<br>(0 - 0)                |
| Dengue                                                            | 0<br>(0 - 1)                | 0<br>(0 - 0)       | 0<br>(0 - 0)        | 0<br>(0 - 0)             | 0<br>(0 - 0)             | 0<br>(0 - 0)                |
| Rabies                                                            | 0<br>(0 - 1)                | 0<br>(0 - 0)       | 0<br>(0 - 0)        | 0<br>(0 - 0)             | 0<br>(0 - 0)             | 0<br>(0 - 0)                |
| Other neglected tropical diseases                                 | 1<br>(0 - 1)                | 0<br>(0 - 0)       | 0<br>(0 - 0)        | 0<br>(0 - 0)             | 0<br>(0 - 0)             | 0<br>(0 - 0)                |
| Maternal disorders                                                | 10<br>(8 - 12)              | --                 | 0<br>(0 - 0)        | 10<br>(8 - 12)           | --                       | --                          |
| Maternal hemorrhage                                               | 1<br>(1 - 2)                | --                 | 0<br>(0 - 0)        | 1<br>(1 - 2)             | --                       | --                          |
| Maternal sepsis and other maternal infections                     | 1<br>(1 - 1)                | --                 | 0<br>(0 - 0)        | 1<br>(0 - 1)             | --                       | --                          |
| Maternal hypertensive disorders                                   | 1<br>(1 - 2)                | --                 | 0<br>(0 - 0)        | 1<br>(1 - 2)             | --                       | --                          |
| Maternal obstructed labor                                         | 1<br>(1 - 2)                | --                 | 0<br>(0 - 0)        | 1<br>(1 - 2)             | --                       | --                          |
| Maternal abortive outcome                                         | 2<br>(1 - 3)                | --                 | 0<br>(0 - 0)        | 2<br>(1 - 3)             | --                       | --                          |
| Indirect maternal deaths                                          | 1<br>(0 - 1)                | --                 | 0<br>(0 - 0)        | 1<br>(0 - 1)             | --                       | --                          |



Web Table 31- Serbia deaths with 95% UI by age, sex, and cause in 2013

| Cause                                                            | Females, All Ages           | Females, 0-4 Years | Females, 5-14 Years | Females, 15-49 Years     | Females, 50-69 Years     | Females, 70-80 Years        |
|------------------------------------------------------------------|-----------------------------|--------------------|---------------------|--------------------------|--------------------------|-----------------------------|
| Late maternal deaths                                             | 1<br>(1 - 2)                | --                 | 0<br>(0 - 0)        | 1<br>(0 - 2)             | --                       | --                          |
| Maternal deaths aggravated by HIV/AIDS                           | 0<br>(0 - 0)                | --                 | --                  | 0<br>(0 - 0)             | --                       | --                          |
| Other maternal disorders                                         | 2<br>(1 - 2)                | --                 | 0<br>(0 - 0)        | 2<br>(1 - 2)             | --                       | --                          |
| Neonatal disorders                                               | 103<br>(76 - 130)           | 103<br>(76 - 130)  | --                  | --                       | --                       | --                          |
| Neonatal preterm birth complications                             | 62<br>(43 - 81)             | 62<br>(43 - 81)    | --                  | --                       | --                       | --                          |
| Neonatal encephalopathy due to birth asphyxia and trauma         | 22<br>(14 - 32)             | 22<br>(14 - 32)    | --                  | --                       | --                       | --                          |
| Neonatal sepsis and other neonatal infections                    | 7<br>(4 - 15)               | 7<br>(4 - 15)      | --                  | --                       | --                       | --                          |
| Hemolytic disease and other neonatal jaundice                    | 0<br>(0 - 1)                | 0<br>(0 - 1)       | --                  | --                       | --                       | --                          |
| Other neonatal disorders                                         | 12<br>(7 - 18)              | 12<br>(7 - 18)     | --                  | --                       | --                       | --                          |
| Nutritional deficiencies                                         | 69<br>(52 - 85)             | 0<br>(0 - 1)       | 0<br>(0 - 0)        | 3<br>(2 - 4)             | 6<br>(4 - 7)             | 60<br>(44 - 75)             |
| Protein-energy malnutrition                                      | 4<br>(1 - 9)                | 0<br>(0 - 0)       | 0<br>(0 - 0)        | 0<br>(0 - 1)             | 0<br>(0 - 1)             | 3<br>(1 - 7)                |
| Iodine deficiency                                                | 2<br>(0 - 10)               | 0<br>(0 - 0)       | 0<br>(0 - 0)        | 0<br>(0 - 0)             | 0<br>(0 - 1)             | 1<br>(0 - 9)                |
| Iron-deficiency anemia                                           | 60<br>(42 - 75)             | 0<br>(0 - 0)       | 0<br>(0 - 0)        | 2<br>(1 - 3)             | 5<br>(3 - 6)             | 53<br>(37 - 67)             |
| Other nutritional deficiencies                                   | 3<br>(1 - 8)                | 0<br>(0 - 0)       | 0<br>(0 - 0)        | 0<br>(0 - 1)             | 0<br>(0 - 0)             | 3<br>(1 - 7)                |
| Other communicable, maternal, neonatal, and nutritional diseases | 21<br>(16 - 27)             | 5<br>(1 - 9)       | 1<br>(0 - 1)        | 3<br>(2 - 3)             | 5<br>(3 - 6)             | 8<br>(6 - 12)               |
| Sexually transmitted diseases excluding HIV                      | 6<br>(3 - 11)               | 4<br>(1 - 9)       | 0<br>(0 - 1)        | 1<br>(1 - 1)             | 0<br>(0 - 1)             | 0<br>(0 - 1)                |
| Syphilis                                                         | 5<br>(2 - 10)               | 4<br>(1 - 9)       | 0<br>(0 - 1)        | 0<br>(0 - 1)             | 0<br>(0 - 0)             | 0<br>(0 - 1)                |
| Chlamydial infection                                             | 0<br>(0 - 0)                | --                 | 0<br>(0 - 0)        | 0<br>(0 - 0)             | 0<br>(0 - 0)             | 0<br>(0 - 0)                |
| Gonococcal infection                                             | 0<br>(0 - 0)                | --                 | 0<br>(0 - 0)        | 0<br>(0 - 0)             | 0<br>(0 - 0)             | 0<br>(0 - 0)                |
| Other sexually transmitted diseases                              | 0<br>(0 - 0)                | --                 | 0<br>(0 - 0)        | 0<br>(0 - 0)             | 0<br>(0 - 0)             | 0<br>(0 - 0)                |
| Hepatitis                                                        | 2<br>(2 - 3)                | 0<br>(0 - 0)       | 0<br>(0 - 0)        | 1<br>(1 - 1)             | 1<br>(0 - 1)             | 1<br>(0 - 1)                |
| Acute hepatitis A                                                | 1<br>(0 - 1)                | 0<br>(0 - 0)       | 0<br>(0 - 0)        | 0<br>(0 - 1)             | 0<br>(0 - 0)             | 0<br>(0 - 0)                |
| Acute hepatitis B                                                | 1<br>(1 - 2)                | 0<br>(0 - 0)       | 0<br>(0 - 0)        | 0<br>(0 - 1)             | 1<br>(0 - 1)             | 0<br>(0 - 1)                |
| Acute hepatitis C                                                | 0<br>(0 - 1)                | --                 | 0<br>(0 - 0)        | 0<br>(0 - 0)             | 0<br>(0 - 0)             | 0<br>(0 - 0)                |
| Other infectious diseases                                        | 12<br>(9 - 17)              | 1<br>(0 - 1)       | 0<br>(0 - 0)        | 1<br>(1 - 1)             | 3<br>(2 - 5)             | 7<br>(5 - 11)               |
| Non-communicable diseases                                        | 44,460<br>(42,600 - 46,202) | 64<br>(50 - 81)    | 30<br>(26 - 33)     | 1,347<br>(1,263 - 1,433) | 8,307<br>(7,706 - 8,895) | 34,712<br>(33,500 - 35,832) |
| Neoplasms                                                        | 8,338<br>(7,412 - 9,001)    | 6<br>(4 - 8)       | 13<br>(11 - 15)     | 800<br>(738 - 862)       | 3,687<br>(3,213 - 4,024) | 3,832<br>(3,395 - 4,154)    |
| Esophageal cancer                                                | 69<br>(60 - 79)             | --                 | --                  | 4<br>(3 - 5)             | 27<br>(22 - 33)          | 37<br>(31 - 44)             |
| Stomach cancer                                                   | 413<br>(307 - 543)          | --                 | --                  | 28<br>(21 - 38)          | 149<br>(109 - 193)       | 236<br>(172 - 327)          |
| Liver cancer                                                     | 319<br>(263 - 385)          | --                 | 0<br>(0 - 0)        | 12<br>(9 - 17)           | 115<br>(90 - 150)        | 191<br>(148 - 242)          |
| Liver cancer due to hepatitis B                                  | 44<br>(25 - 67)             | --                 | 0<br>(0 - 0)        | 3<br>(2 - 4)             | 21<br>(12 - 34)          | 20<br>(11 - 31)             |
| Liver cancer due to hepatitis C                                  | 158<br>(105 - 210)          | --                 | 0<br>(0 - 0)        | 6<br>(4 - 8)             | 97<br>(38 - 77)          | 97<br>(62 - 135)            |
| Liver cancer due to alcohol use                                  | 68<br>(40 - 101)            | --                 | --                  | 1<br>(1 - 2)             | 19<br>(11 - 29)          | 48<br>(27 - 73)             |
| Liver cancer due to other causes                                 | 49<br>(29 - 74)             | --                 | 0<br>(0 - 0)        | 3<br>(2 - 4)             | 19<br>(11 - 30)          | 27<br>(13 - 43)             |
| Larynx cancer                                                    | 34<br>(23 - 48)             | --                 | --                  | 3<br>(2 - 4)             | 18<br>(12 - 27)          | 13<br>(9 - 20)              |
| Tracheal, bronchus and lung cancer                               | 1,220<br>(928 - 1,385)      | --                 | --                  | 104<br>(84 - 123)        | 686<br>(485 - 800)       | 431<br>(315 - 506)          |
| Breast cancer                                                    | 1,537<br>(1,110 - 1,745)    | --                 | --                  | 181<br>(148 - 222)       | 750<br>(555 - 869)       | 606<br>(400 - 711)          |
| Cervical cancer                                                  | 540<br>(442 - 626)          | --                 | --                  | 113<br>(90 - 132)        | 254<br>(195 - 304)       | 173<br>(139 - 218)          |
| Uterine cancer                                                   | 224<br>(182 - 263)          | --                 | --                  | 11<br>(8 - 15)           | 103<br>(82 - 126)        | 110<br>(85 - 137)           |
| Prostate cancer                                                  | --                          | --                 | --                  | --                       | --                       | --                          |

Web Table 31- Serbia deaths with 95% UI by age, sex, and cause in 2013

| Cause                                         | Females, All Ages           | Females, 0-4 Years | Females, 5-14 Years | Females, 15-49 Years | Females, 50-69 Years     | Females, 70-80 Years        |
|-----------------------------------------------|-----------------------------|--------------------|---------------------|----------------------|--------------------------|-----------------------------|
| Colon and rectum cancer                       | 1,029<br>(913 - 1,141)      | --                 | --                  | 57<br>(49 - 65)      | 377<br>(329 - 424)       | 595<br>(509 - 695)          |
| Lip and oral cavity cancer                    | 64<br>(53 - 75)             | --                 | --                  | 6<br>(4 - 7)         | 24<br>(19 - 29)          | 34<br>(27 - 43)             |
| Nasopharynx cancer                            | 11<br>(5 - 20)              | --                 | 0<br>(0 - 0)        | 2<br>(1 - 3)         | 5<br>(2 - 8)             | 5<br>(2 - 8)                |
| Other pharynx cancer                          | 29<br>(23 - 36)             | --                 | --                  | 3<br>(2 - 5)         | 16<br>(12 - 21)          | 10<br>(7 - 13)              |
| Gallbladder and biliary tract cancer          | 240<br>(154 - 296)          | --                 | --                  | 9<br>(6 - 11)        | 96<br>(66 - 121)         | 135<br>(80 - 177)           |
| Pancreatic cancer                             | 490<br>(436 - 543)          | --                 | --                  | 20<br>(16 - 24)      | 193<br>(165 - 223)       | 277<br>(240 - 318)          |
| Malignant skin melanoma                       | 102<br>(69 - 137)           | --                 | --                  | 21<br>(15 - 28)      | 43<br>(28 - 56)          | 38<br>(25 - 52)             |
| Non-melanoma skin cancer                      | 85<br>(64 - 116)            | --                 | --                  | 2<br>(1 - 2)         | 9<br>(7 - 11)            | 74<br>(54 - 104)            |
| Ovarian cancer                                | 425<br>(373 - 486)          | --                 | --                  | 55<br>(47 - 67)      | 224<br>(191 - 266)       | 146<br>(119 - 176)          |
| Testicular cancer                             | --                          | --                 | --                  | --                   | --                       | --                          |
| Kidney cancer                                 | 147<br>(115 - 189)          | 0<br>(0 - 0)       | 0<br>(0 - 1)        | 8<br>(6 - 11)        | 56<br>(42 - 72)          | 82<br>(58 - 113)            |
| Bladder cancer                                | 141<br>(96 - 194)           | --                 | --                  | 4<br>(2 - 6)         | 37<br>(25 - 52)          | 101<br>(66 - 139)           |
| Brain and nervous system cancer               | 311<br>(230 - 367)          | 2<br>(1 - 4)       | 5<br>(4 - 7)        | 49<br>(39 - 60)      | 155<br>(123 - 197)       | 100<br>(58 - 126)           |
| Thyroid cancer                                | 46<br>(36 - 66)             | --                 | 0<br>(0 - 0)        | 2<br>(2 - 4)         | 17<br>(13 - 25)          | 27<br>(20 - 39)             |
| Mesothelioma                                  | 10<br>(7 - 14)              | --                 | --                  | 1<br>(1 - 1)         | 5<br>(3 - 6)             | 5<br>(3 - 7)                |
| Hodgkin lymphoma                              | 27<br>(19 - 35)             | 0<br>(0 - 0)       | 0<br>(0 - 0)        | 11<br>(7 - 14)       | 8<br>(6 - 12)            | 8<br>(5 - 11)               |
| Non-Hodgkin lymphoma                          | 136<br>(67 - 189)           | 0<br>(0 - 0)       | 1<br>(0 - 1)        | 17<br>(9 - 26)       | 58<br>(28 - 83)          | 60<br>(28 - 81)             |
| Multiple myeloma                              | 77<br>(48 - 116)            | --                 | --                  | 4<br>(2 - 7)         | 39<br>(23 - 61)          | 34<br>(20 - 51)             |
| Leukemia                                      | 216<br>(170 - 245)          | 1<br>(0 - 2)       | 3<br>(2 - 4)        | 31<br>(26 - 37)      | 77<br>(60 - 92)          | 104<br>(81 - 123)           |
| Other neoplasms                               | 395<br>(297 - 458)          | 2<br>(1 - 3)       | 4<br>(3 - 5)        | 42<br>(34 - 51)      | 148<br>(109 - 176)       | 199<br>(133 - 244)          |
| Cardiovascular diseases                       | 27,614<br>(26,216 - 29,698) | 2<br>(2 - 4)       | 4<br>(3 - 5)        | 305<br>(262 - 360)   | 3,264<br>(2,937 - 3,896) | 24,040<br>(22,926 - 25,404) |
| Rheumatic heart disease                       | 85<br>(59 - 116)            | 0<br>(0 - 0)       | 0<br>(0 - 0)        | 2<br>(1 - 3)         | 12<br>(8 - 16)           | 71<br>(48 - 98)             |
| Ischemic heart disease                        | 7,497<br>(6,099 - 9,205)    | 0<br>(0 - 0)       | 0<br>(0 - 1)        | 102<br>(75 - 130)    | 1,133<br>(939 - 1,451)   | 6,262<br>(4,912 - 7,750)    |
| Cerebrovascular disease                       | 9,295<br>(8,047 - 10,635)   | 1<br>(1 - 1)       | 2<br>(1 - 2)        | 131<br>(107 - 163)   | 1,197<br>(1,035 - 1,526) | 7,965<br>(6,770 - 9,041)    |
| Ischemic stroke                               | 7,575<br>(6,252 - 8,512)    | 0<br>(0 - 0)       | 0<br>(0 - 0)        | 23<br>(15 - 30)      | 583<br>(415 - 711)       | 6,969<br>(5,791 - 7,888)    |
| Hemorrhagic stroke                            | 1,720<br>(1,431 - 2,387)    | 1<br>(1 - 1)       | 2<br>(1 - 2)        | 108<br>(90 - 139)    | 614<br>(498 - 883)       | 996<br>(777 - 1,448)        |
| Hypertensive heart disease                    | 1,646<br>(1,210 - 2,404)    | 0<br>(0 - 0)       | 0<br>(0 - 0)        | 6<br>(4 - 8)         | 111<br>(81 - 164)        | 1,529<br>(1,104 - 2,252)    |
| Cardiomyopathy and myocarditis                | 8,145<br>(6,915 - 10,465)   | 1<br>(0 - 1)       | 1<br>(0 - 1)        | 32<br>(25 - 44)      | 542<br>(444 - 772)       | 7,569<br>(6,396 - 9,671)    |
| Atrial fibrillation and flutter               | 110<br>(85 - 141)           | --                 | --                  | 1<br>(1 - 1)         | 9<br>(7 - 12)            | 100<br>(76 - 131)           |
| Aortic aneurysm                               | 81<br>(48 - 114)            | --                 | --                  | 4<br>(3 - 7)         | 26<br>(15 - 38)          | 50<br>(29 - 71)             |
| Peripheral vascular disease                   | 11<br>(9 - 15)              | --                 | --                  | 0<br>(0 - 0)         | 2<br>(1 - 2)             | 10<br>(7 - 13)              |
| Endocarditis                                  | 14<br>(8 - 18)              | 0<br>(0 - 0)       | 0<br>(0 - 0)        | 2<br>(1 - 3)         | 5<br>(3 - 8)             | 6<br>(3 - 8)                |
| Other cardiovascular and circulatory diseases | 729<br>(534 - 875)          | 1<br>(0 - 1)       | 1<br>(0 - 1)        | 25<br>(18 - 33)      | 225<br>(172 - 294)       | 478<br>(304 - 598)          |
| Chronic respiratory diseases                  | 1,562<br>(1,341 - 1,833)    | 0<br>(0 - 1)       | 1<br>(0 - 1)        | 23<br>(19 - 28)      | 232<br>(179 - 271)       | 1,306<br>(1,105 - 1,557)    |
| Chronic obstructive pulmonary disease         | 1,311<br>(1,079 - 1,547)    | 0<br>(0 - 0)       | 0<br>(0 - 0)        | 15<br>(11 - 18)      | 193<br>(147 - 226)       | 1,103<br>(890 - 1,323)      |
| Pneumoconiosis                                | 2<br>(1 - 3)                | 0<br>(0 - 0)       | 0<br>(0 - 0)        | 0<br>(0 - 0)         | 0<br>(0 - 1)             | 1<br>(1 - 2)                |
| Silicosis                                     | 0<br>(0 - 0)                | 0<br>(0 - 0)       | 0<br>(0 - 0)        | 0<br>(0 - 0)         | 0<br>(0 - 0)             | 0<br>(0 - 0)                |
| Asbestosis                                    | 0<br>(0 - 0)                | 0<br>(0 - 0)       | 0<br>(0 - 0)        | 0<br>(0 - 0)         | 0<br>(0 - 0)             | 0<br>(0 - 0)                |
| Coal workers pneumoconiosis                   | 0<br>(0 - 0)                | 0<br>(0 - 0)       | 0<br>(0 - 0)        | 0<br>(0 - 0)         | 0<br>(0 - 0)             | 0<br>(0 - 0)                |
| Other pneumoconiosis                          | 1<br>(1 - 2)                | 0<br>(0 - 0)       | 0<br>(0 - 0)        | 0<br>(0 - 0)         | 0<br>(0 - 1)             | 1<br>(1 - 2)                |

Web Table 31- Serbia deaths with 95% UI by age, sex, and cause in 2013

| Cause                                               | Females, All Ages        | Females, 0-4 Years | Females, 5-14 Years | Females, 15-49 Years | Females, 50-69 Years | Females, 70-80 Years     |
|-----------------------------------------------------|--------------------------|--------------------|---------------------|----------------------|----------------------|--------------------------|
| Asthma                                              | 120<br>(76 - 185)        | 0<br>(0 - 0)       | 0<br>(0 - 0)        | 5<br>(3 - 7)         | 26<br>(15 - 40)      | 89<br>(53 - 142)         |
| Interstitial lung disease and pulmonary sarcoidosis | 100<br>(54 - 185)        | 0<br>(0 - 0)       | 0<br>(0 - 0)        | 2<br>(1 - 3)         | 11<br>(6 - 20)       | 87<br>(46 - 169)         |
| Other chronic respiratory diseases                  | 30<br>(18 - 48)          | 0<br>(0 - 0)       | 0<br>(0 - 0)        | 1<br>(1 - 2)         | 2<br>(1 - 4)         | 26<br>(15 - 43)          |
| Cirrhosis                                           | 221<br>(197 - 244)       | 0<br>(0 - 0)       | 0<br>(0 - 1)        | 24<br>(20 - 28)      | 105<br>(90 - 121)    | 91<br>(79 - 105)         |
| Cirrhosis due to hepatitis B                        | 85<br>(53 - 114)         | 0<br>(0 - 0)       | 0<br>(0 - 0)        | 9<br>(6 - 12)        | 40<br>(25 - 56)      | 36<br>(21 - 50)          |
| Cirrhosis due to hepatitis C                        | 63<br>(38 - 91)          | 0<br>(0 - 0)       | 0<br>(0 - 0)        | 6<br>(4 - 9)         | 33<br>(20 - 49)      | 24<br>(12 - 38)          |
| Cirrhosis due to alcohol use                        | 38<br>(24 - 58)          | --<br>(0 - 0)      | --<br>(0 - 0)       | 2<br>(1 - 4)         | 16<br>(10 - 26)      | 20<br>(12 - 30)          |
| Cirrhosis due to other causes                       | 34<br>(17 - 51)          | 0<br>(0 - 0)       | 0<br>(0 - 0)        | 6<br>(4 - 9)         | 17<br>(8 - 27)       | 10<br>(5 - 17)           |
| Digestive diseases                                  | 967<br>(668 - 1,103)     | 0<br>(0 - 1)       | 1<br>(1 - 1)        | 31<br>(23 - 37)      | 200<br>(141 - 236)   | 735<br>(501 - 852)       |
| Peptic ulcer disease                                | 212<br>(126 - 279)       | 0<br>(0 - 0)       | 0<br>(0 - 0)        | 5<br>(3 - 7)         | 39<br>(23 - 54)      | 168<br>(98 - 227)        |
| Gastritis and duodenitis                            | 13<br>(4 - 21)           | 0<br>(0 - 0)       | 0<br>(0 - 0)        | 1<br>(0 - 1)         | 2<br>(1 - 3)         | 11<br>(3 - 18)           |
| Appendicitis                                        | 12<br>(6 - 19)           | 0<br>(0 - 0)       | 0<br>(0 - 0)        | 1<br>(1 - 2)         | 3<br>(1 - 4)         | 8<br>(4 - 14)            |
| Paralytic ileus and intestinal obstruction          | 207<br>(107 - 315)       | 0<br>(0 - 0)       | 0<br>(0 - 0)        | 5<br>(3 - 8)         | 37<br>(17 - 57)      | 164<br>(82 - 257)        |
| Inguinal, femoral, and abdominal hernia             | 32<br>(14 - 53)          | 0<br>(0 - 0)       | 0<br>(0 - 0)        | 0<br>(0 - 1)         | 5<br>(2 - 7)         | 27<br>(11 - 47)          |
| Inflammatory bowel disease                          | 40<br>(17 - 56)          | 0<br>(0 - 0)       | 0<br>(0 - 0)        | 4<br>(2 - 5)         | 9<br>(4 - 13)        | 26<br>(10 - 40)          |
| Vascular intestinal disorders                       | 197<br>(100 - 310)       | 0<br>(0 - 0)       | 0<br>(0 - 0)        | 3<br>(2 - 5)         | 40<br>(22 - 65)      | 154<br>(77 - 248)        |
| Gallbladder and biliary diseases                    | 84<br>(50 - 115)         | 0<br>(0 - 0)       | 0<br>(0 - 0)        | 1<br>(1 - 2)         | 16<br>(10 - 23)      | 67<br>(39 - 94)          |
| Pancreatitis                                        | 118<br>(70 - 169)        | 0<br>(0 - 0)       | 0<br>(0 - 0)        | 8<br>(5 - 11)        | 38<br>(24 - 54)      | 72<br>(40 - 105)         |
| Other digestive diseases                            | 51<br>(34 - 68)          | 0<br>(0 - 0)       | 0<br>(0 - 0)        | 2<br>(2 - 3)         | 11<br>(7 - 14)       | 38<br>(25 - 53)          |
| Neurological disorders                              | 3,030<br>(2,532 - 3,629) | 3<br>(2 - 4)       | 3<br>(2 - 4)        | 42<br>(34 - 52)      | 200<br>(160 - 242)   | 2,783<br>(2,289 - 3,381) |
| Alzheimer disease and other dementias               | 2,675<br>(2,198 - 3,275) | --<br>(0 - 0)      | --<br>(0 - 1)       | 0<br>(0 - 1)         | 113<br>(81 - 149)    | 2,562<br>(2,091 - 3,150) |
| Parkinson disease                                   | 205<br>(130 - 264)       | --<br>(0 - 0)      | --<br>(0 - 1)       | 1<br>(0 - 1)         | 22<br>(15 - 30)      | 182<br>(111 - 239)       |
| Epilepsy                                            | 45<br>(30 - 55)          | 1<br>(1 - 2)       | 2<br>(1 - 3)        | 14<br>(9 - 17)       | 12<br>(8 - 16)       | 16<br>(10 - 22)          |
| Multiple sclerosis                                  | 54<br>(33 - 83)          | --<br>(0 - 0)      | --<br>(0 - 0)       | 18<br>(12 - 29)      | 27<br>(15 - 40)      | 9<br>(5 - 14)            |
| Other neurological disorders                        | 52<br>(45 - 58)          | 2<br>(1 - 3)       | 1<br>(1 - 1)        | 9<br>(8 - 11)        | 26<br>(22 - 31)      | 13<br>(11 - 16)          |
| Mental and substance use disorders                  | 62<br>(42 - 78)          | 0<br>(0 - 0)       | 0<br>(0 - 0)        | 17<br>(13 - 21)      | 26<br>(16 - 35)      | 19<br>(12 - 25)          |
| Schizophrenia                                       | 17<br>(9 - 23)           | --<br>(0 - 0)      | --<br>(0 - 0)       | 3<br>(1 - 4)         | 8<br>(4 - 12)        | 6<br>(3 - 9)             |
| Alcohol use disorders                               | 25<br>(11 - 43)          | --<br>(0 - 0)      | --<br>(0 - 0)       | 4<br>(2 - 8)         | 12<br>(5 - 21)       | 8<br>(4 - 15)            |
| Drug use disorders                                  | 20<br>(17 - 23)          | 0<br>(0 - 0)       | --<br>(0 - 0)       | 9<br>(7 - 11)        | 6<br>(4 - 7)         | 5<br>(3 - 6)             |
| Opioid use disorders                                | 7<br>(6 - 9)             | 0<br>(0 - 0)       | --<br>(0 - 0)       | 3<br>(3 - 4)         | 2<br>(1 - 2)         | 2<br>(1 - 3)             |
| Cocaine use disorders                               | 1<br>(1 - 2)             | 0<br>(0 - 0)       | --<br>(0 - 0)       | 1<br>(1 - 1)         | 0<br>(0 - 0)         | 0<br>(0 - 0)             |
| Amphetamine use disorders                           | 1<br>(1 - 2)             | 0<br>(0 - 0)       | --<br>(0 - 0)       | 1<br>(1 - 1)         | 0<br>(0 - 1)         | 0<br>(0 - 0)             |
| Other drug use disorders                            | 10<br>(8 - 12)           | 0<br>(0 - 0)       | --<br>(0 - 0)       | 4<br>(3 - 5)         | 3<br>(2 - 4)         | 2<br>(2 - 3)             |
| Eating disorders                                    | 0<br>(0 - 0)             | --<br>(0 - 0)      | 0<br>(0 - 0)        | 0<br>(0 - 0)         | --<br>(0 - 0)        | --<br>(0 - 0)            |
| Anorexia nervosa                                    | 0<br>(0 - 0)             | --<br>(0 - 0)      | 0<br>(0 - 0)        | 0<br>(0 - 0)         | --<br>(0 - 0)        | --<br>(0 - 0)            |
| Diabetes, urogenital, blood, and endocrine diseases | 2,473<br>(2,119 - 2,749) | 3<br>(2 - 5)       | 2<br>(2 - 3)        | 74<br>(65 - 84)      | 550<br>(468 - 632)   | 1,843<br>(1,554 - 2,081) |
| Diabetes mellitus                                   | 1,566<br>(1,360 - 1,786) | 0<br>(0 - 0)       | 0<br>(0 - 0)        | 26<br>(22 - 31)      | 336<br>(279 - 401)   | 1,203<br>(996 - 1,401)   |
| Acute glomerulonephritis                            | 1<br>(1 - 1)             | 0<br>(0 - 0)       | 0<br>(0 - 0)        | 0<br>(0 - 0)         | 0<br>(0 - 0)         | 0<br>(0 - 0)             |
| Chronic kidney disease                              | 732<br>(520 - 846)       | 0<br>(0 - 0)       | 0<br>(0 - 0)        | 25<br>(20 - 30)      | 167<br>(134 - 203)   | 539<br>(352 - 641)       |
| Chronic kidney disease due to diabetes mellitus     | 1<br>(1 - 1)             | 0<br>(0 - 0)       | 0<br>(0 - 0)        | 0<br>(0 - 1)         | 0<br>(0 - 0)         | 0<br>(0 - 0)             |

Web Table 31- Serbia deaths with 95% UI by age, sex, and cause in 2013

| Cause                                               | Females, All Ages        | Females, 0-4 Years | Females, 5-14 Years | Females, 15-49 Years | Females, 50-69 Years | Females, 70-80 Years |
|-----------------------------------------------------|--------------------------|--------------------|---------------------|----------------------|----------------------|----------------------|
| Chronic kidney disease due to hypertension          | 117<br>(64 - 180)        | 0<br>(0 - 0)       | 0<br>(0 - 0)        | 4<br>(2 - 6)         | 17<br>(9 - 29)       | 96<br>(52 - 149)     |
| Chronic kidney disease due to glomerulonephritis    | 46<br>(28 - 63)          | 0<br>(0 - 0)       | 0<br>(0 - 0)        | 3<br>(2 - 4)         | 16<br>(10 - 24)      | 27<br>(15 - 41)      |
| Chronic kidney disease due to other causes          | 568<br>(364 - 691)       | 0<br>(0 - 0)       | 0<br>(0 - 0)        | 18<br>(13 - 23)      | 133<br>(100 - 168)   | 417<br>(238 - 530)   |
| Urinary diseases and male infertility               | 75<br>(60 - 104)         | 0<br>(0 - 0)       | 0<br>(0 - 0)        | 4<br>(3 - 5)         | 19<br>(14 - 26)      | 52<br>(39 - 77)      |
| Interstitial nephritis and urinary tract infections | 49<br>(37 - 75)          | 0<br>(0 - 0)       | 0<br>(0 - 0)        | 2<br>(2 - 4)         | 14<br>(10 - 20)      | 33<br>(23 - 55)      |
| Urolithiasis                                        | 4<br>(2 - 6)             | --                 | 0<br>(0 - 0)        | 0<br>(0 - 1)         | 1<br>(1 - 2)         | 2<br>(1 - 4)         |
| Other urinary diseases                              | 21<br>(11 - 30)          | 0<br>(0 - 0)       | 0<br>(0 - 0)        | 1<br>(0 - 1)         | 4<br>(2 - 6)         | 17<br>(7 - 24)       |
| Gynecological diseases                              | 1<br>(1 - 2)             | --                 | --                  | 0<br>(0 - 0)         | 0<br>(0 - 1)         | 1<br>(0 - 1)         |
| Uterine fibroids                                    | 0<br>(0 - 0)             | --                 | --                  | 0<br>(0 - 0)         | 0<br>(0 - 0)         | 0<br>(0 - 0)         |
| Polycystic ovarian syndrome                         | 0<br>(0 - 0)             | --                 | --                  | 0<br>(0 - 0)         | 0<br>(0 - 0)         | --                   |
| Endometriosis                                       | 0<br>(0 - 0)             | --                 | --                  | 0<br>(0 - 0)         | 0<br>(0 - 0)         | --                   |
| Genital prolapse                                    | 0<br>(0 - 0)             | --                 | --                  | 0<br>(0 - 0)         | 0<br>(0 - 0)         | 0<br>(0 - 0)         |
| Other gynecological diseases                        | 1<br>(0 - 1)             | --                 | --                  | 0<br>(0 - 0)         | 0<br>(0 - 0)         | 0<br>(0 - 0)         |
| Hemoglobinopathies and hemolytic anemias            | 22<br>(15 - 32)          | 1<br>(0 - 1)       | 0<br>(0 - 0)        | 5<br>(3 - 8)         | 5<br>(3 - 7)         | 12<br>(7 - 18)       |
| Thalassemias                                        | 2<br>(1 - 3)             | 0<br>(0 - 1)       | 0<br>(0 - 0)        | 1<br>(1 - 2)         | 0<br>(0 - 0)         | 0<br>(0 - 0)         |
| Sickle cell disorders                               | 1<br>(1 - 2)             | 0<br>(0 - 0)       | 0<br>(0 - 0)        | 1<br>(0 - 1)         | 0<br>(0 - 1)         | 0<br>(0 - 0)         |
| G6PD deficiency                                     | 0<br>(0 - 0)             | 0<br>(0 - 0)       | 0<br>(0 - 0)        | 0<br>(0 - 0)         | 0<br>(0 - 0)         | 0<br>(0 - 0)         |
| Other hemoglobinopathies and hemolytic anemias      | 19<br>(12 - 28)          | 0<br>(0 - 0)       | 0<br>(0 - 0)        | 3<br>(2 - 5)         | 4<br>(3 - 6)         | 12<br>(7 - 18)       |
| Endocrine, metabolic, blood, and immune disorders   | 75<br>(53 - 95)          | 2<br>(1 - 3)       | 1<br>(1 - 2)        | 13<br>(9 - 17)       | 23<br>(16 - 31)      | 36<br>(24 - 49)      |
| Musculoskeletal disorders                           | 77<br>(65 - 92)          | --                 | 1<br>(0 - 1)        | 16<br>(13 - 20)      | 31<br>(24 - 38)      | 30<br>(23 - 37)      |
| Rheumatoid arthritis                                | 24<br>(18 - 29)          | --                 | 0<br>(0 - 0)        | 1<br>(1 - 2)         | 7<br>(5 - 10)        | 15<br>(10 - 20)      |
| Other musculoskeletal disorders                     | 54<br>(44 - 64)          | --                 | 1<br>(0 - 1)        | 15<br>(12 - 18)      | 23<br>(18 - 29)      | 15<br>(11 - 20)      |
| Other non-communicable diseases                     | 116<br>(99 - 139)        | 49<br>(37 - 63)    | 6<br>(4 - 7)        | 16<br>(13 - 19)      | 12<br>(10 - 14)      | 34<br>(26 - 44)      |
| Congenital anomalies                                | 79<br>(65 - 98)          | 46<br>(35 - 60)    | 5<br>(4 - 7)        | 13<br>(10 - 16)      | 4<br>(3 - 6)         | 10<br>(8 - 15)       |
| Neural tube defects                                 | 1<br>(1 - 2)             | 1<br>(0 - 1)       | 0<br>(0 - 0)        | 0<br>(0 - 0)         | 0<br>(0 - 0)         | 0<br>(0 - 0)         |
| Congenital heart anomalies                          | 40<br>(32 - 50)          | 22<br>(16 - 29)    | 2<br>(2 - 3)        | 6<br>(5 - 8)         | 2<br>(1 - 2)         | 7<br>(5 - 11)        |
| Cleft lip and cleft palate                          | 1<br>(0 - 2)             | 1<br>(0 - 2)       | --                  | --                   | --                   | --                   |
| Down syndrome                                       | 7<br>(5 - 10)            | 3<br>(1 - 4)       | 1<br>(0 - 1)        | 3<br>(2 - 4)         | 1<br>(0 - 1)         | 0<br>(0 - 0)         |
| Chromosomal unbalanced rearrangements               | 2<br>(1 - 3)             | 1<br>(1 - 2)       | 0<br>(0 - 0)        | 1<br>(0 - 1)         | 0<br>(0 - 0)         | 0<br>(0 - 0)         |
| Other congenital anomalies                          | 29<br>(22 - 36)          | 19<br>(14 - 26)    | 2<br>(1 - 3)        | 3<br>(2 - 4)         | 2<br>(1 - 2)         | 3<br>(2 - 4)         |
| Skin and subcutaneous diseases                      | 35<br>(26 - 44)          | 0<br>(0 - 1)       | 0<br>(0 - 0)        | 3<br>(2 - 3)         | 7<br>(5 - 10)        | 24<br>(16 - 33)      |
| Cellulitis                                          | 8<br>(5 - 12)            | 0<br>(0 - 0)       | 0<br>(0 - 0)        | 1<br>(1 - 1)         | 3<br>(2 - 4)         | 4<br>(2 - 7)         |
| Pyoderma                                            | 6<br>(4 - 8)             | 0<br>(0 - 0)       | 0<br>(0 - 0)        | 0<br>(0 - 1)         | 1<br>(1 - 2)         | 4<br>(2 - 6)         |
| Decubitus ulcer                                     | 17<br>(11 - 24)          | 0<br>(0 - 0)       | 0<br>(0 - 0)        | 1<br>(0 - 1)         | 2<br>(1 - 3)         | 14<br>(8 - 20)       |
| Other skin and subcutaneous diseases                | 4<br>(2 - 7)             | 0<br>(0 - 0)       | 0<br>(0 - 0)        | 1<br>(0 - 1)         | 1<br>(0 - 1)         | 2<br>(1 - 5)         |
| Sudden infant death syndrome                        | 2<br>(1 - 5)             | 2<br>(1 - 5)       | --                  | --                   | --                   | --                   |
| Injuries                                            | 1,153<br>(1,037 - 1,323) | 11<br>(8 - 14)     | 18<br>(15 - 21)     | 269<br>(245 - 304)   | 302<br>(264 - 354)   | 553<br>(474 - 657)   |
| Transport injuries                                  | 239<br>(189 - 280)       | 3<br>(2 - 5)       | 10<br>(7 - 13)      | 89<br>(73 - 104)     | 63<br>(47 - 79)      | 75<br>(54 - 94)      |
| Road injuries                                       | 222<br>(173 - 264)       | 3<br>(2 - 4)       | 9<br>(7 - 12)       | 81<br>(66 - 97)      | 58<br>(43 - 72)      | 71<br>(51 - 89)      |
| Pedestrian road injuries                            | 92<br>(61 - 118)         | 1<br>(1 - 2)       | 4<br>(3 - 6)        | 18<br>(11 - 26)      | 24<br>(15 - 34)      | 44<br>(27 - 58)      |

Web Table 31- Serbia deaths with 95% UI by age, sex, and cause in 2013

| Cause                                           | Females, All Ages  | Females, 0-4 Years | Females, 5-14 Years | Females, 15-49 Years | Females, 50-69 Years | Females, 70-80 Years |
|-------------------------------------------------|--------------------|--------------------|---------------------|----------------------|----------------------|----------------------|
| Cyclist road injuries                           | 14<br>(10 - 20)    | 0<br>(0 - 0)       | 1<br>(0 - 1)        | 5<br>(4 - 8)         | 6<br>(4 - 9)         | 2<br>(1 - 4)         |
| Motorcyclist road injuries                      | 6<br>(3 - 12)      | 0<br>(0 - 0)       | 0<br>(0 - 0)        | 4<br>(2 - 9)         | 1<br>(0 - 2)         | 1<br>(0 - 1)         |
| Motor vehicle road injuries                     | 108<br>(78 - 138)  | 1<br>(1 - 2)       | 4<br>(3 - 6)        | 53<br>(40 - 66)      | 26<br>(17 - 36)      | 24<br>(14 - 37)      |
| Other road injuries                             | 1<br>(1 - 2)       | 0<br>(0 - 0)       | 0<br>(0 - 0)        | 0<br>(0 - 0)         | 0<br>(0 - 0)         | 0<br>(0 - 1)         |
| Other transport injuries                        | 18<br>(11 - 27)    | 0<br>(0 - 0)       | 1<br>(0 - 1)        | 8<br>(5 - 12)        | 5<br>(3 - 8)         | 4<br>(2 - 7)         |
| Unintentional injuries                          | 468<br>(389 - 559) | 6<br>(5 - 8)       | 6<br>(5 - 8)        | 39<br>(35 - 46)      | 86<br>(70 - 104)     | 330<br>(262 - 404)   |
| Falls                                           | 135<br>(96 - 174)  | 1<br>(0 - 1)       | 0<br>(0 - 0)        | 4<br>(3 - 5)         | 19<br>(13 - 24)      | 111<br>(77 - 148)    |
| Drowning                                        | 31<br>(24 - 44)    | 1<br>(1 - 2)       | 3<br>(2 - 5)        | 8<br>(6 - 12)        | 8<br>(6 - 11)        | 10<br>(7 - 14)       |
| Fire, heat, and hot substances                  | 43<br>(31 - 59)    | 1<br>(1 - 1)       | 0<br>(0 - 1)        | 4<br>(3 - 5)         | 7<br>(5 - 10)        | 31<br>(22 - 43)      |
| Poisonings                                      | 15<br>(9 - 21)     | 0<br>(0 - 1)       | 0<br>(0 - 0)        | 3<br>(2 - 4)         | 3<br>(2 - 4)         | 9<br>(5 - 13)        |
| Exposure to mechanical forces                   | 16<br>(14 - 19)    | 1<br>(1 - 1)       | 1<br>(1 - 1)        | 5<br>(4 - 6)         | 4<br>(3 - 5)         | 5<br>(4 - 7)         |
| Unintentional firearm injuries                  | 3<br>(3 - 4)       | 0<br>(0 - 0)       | 0<br>(0 - 0)        | 1<br>(1 - 2)         | 1<br>(1 - 1)         | 1<br>(0 - 1)         |
| Unintentional suffocation                       | 2<br>(1 - 3)       | 0<br>(0 - 0)       | 0<br>(0 - 0)        | 0<br>(0 - 1)         | 0<br>(0 - 1)         | 0<br>(0 - 1)         |
| Other exposure to mechanical forces             | 11<br>(9 - 14)     | 1<br>(0 - 1)       | 1<br>(0 - 1)        | 3<br>(2 - 4)         | 3<br>(2 - 4)         | 4<br>(3 - 6)         |
| Adverse effects of medical treatment            | 193<br>(128 - 269) | 0<br>(0 - 1)       | 0<br>(0 - 1)        | 7<br>(5 - 9)         | 35<br>(24 - 51)      | 150<br>(94 - 212)    |
| Animal contact                                  | 4<br>(2 - 9)       | 0<br>(0 - 0)       | 0<br>(0 - 0)        | 0<br>(0 - 1)         | 2<br>(1 - 4)         | 2<br>(1 - 4)         |
| Venomous animal contact                         | 1<br>(1 - 3)       | 0<br>(0 - 0)       | 0<br>(0 - 0)        | 0<br>(0 - 0)         | 1<br>(0 - 2)         | 0<br>(0 - 1)         |
| Non-venomous animal contact                     | 3<br>(1 - 6)       | 0<br>(0 - 0)       | 0<br>(0 - 0)        | 0<br>(0 - 1)         | 1<br>(0 - 2)         | 1<br>(1 - 3)         |
| Foreign body                                    | 17<br>(10 - 24)    | 1<br>(1 - 2)       | 0<br>(0 - 0)        | 4<br>(2 - 6)         | 5<br>(3 - 8)         | 6<br>(4 - 10)        |
| Pulmonary aspiration and foreign body in airway | 17<br>(10 - 23)    | 1<br>(1 - 2)       | 0<br>(0 - 0)        | 4<br>(2 - 6)         | 5<br>(3 - 8)         | 6<br>(4 - 9)         |
| Foreign body in other body part                 | 1<br>(0 - 1)       | 0<br>(0 - 0)       | 0<br>(0 - 0)        | 0<br>(0 - 0)         | 0<br>(0 - 0)         | 0<br>(0 - 0)         |
| Other unintentional injuries                    | 14<br>(11 - 19)    | 0<br>(0 - 0)       | 0<br>(0 - 1)        | 4<br>(3 - 6)         | 3<br>(2 - 4)         | 7<br>(4 - 12)        |
| Self-harm and interpersonal violence            | 446<br>(395 - 550) | 1<br>(1 - 2)       | 2<br>(1 - 3)        | 141<br>(124 - 172)   | 154<br>(129 - 195)   | 148<br>(122 - 198)   |
| Self-harm                                       | 382<br>(332 - 484) | --                 | 1<br>(1 - 1)        | 111<br>(94 - 135)    | 139<br>(114 - 180)   | 132<br>(107 - 180)   |
| Interpersonal violence                          | 64<br>(50 - 89)    | 1<br>(1 - 2)       | 1<br>(1 - 2)        | 31<br>(23 - 44)      | 15<br>(11 - 21)      | 16<br>(12 - 24)      |
| Assault by firearm                              | 20<br>(12 - 31)    | 0<br>(0 - 0)       | 0<br>(0 - 1)        | 13<br>(8 - 20)       | 5<br>(3 - 7)         | 2<br>(1 - 4)         |
| Assault by sharp object                         | 17<br>(11 - 27)    | 0<br>(0 - 0)       | 0<br>(0 - 0)        | 9<br>(6 - 14)        | 4<br>(3 - 7)         | 3<br>(2 - 6)         |
| Assault by other means                          | 27<br>(19 - 38)    | 1<br>(1 - 1)       | 0<br>(0 - 1)        | 9<br>(6 - 14)        | 6<br>(4 - 9)         | 10<br>(7 - 15)       |

Web Table 31- Seychelles deaths with 95% UI by age, sex, and cause in 2013

| Cause                                                             | Both Sexes, All Ages | Both Sexes, 0-4 Years | Both Sexes, 5-14 Years | Both Sexes, 15-49 Years | Both Sexes, 50-69 Years | Both Sexes, 70-80 Years |
|-------------------------------------------------------------------|----------------------|-----------------------|------------------------|-------------------------|-------------------------|-------------------------|
| All causes                                                        | 738<br>(682 - 784)   | 18<br>(16 - 21)       | 4<br>(3 - 4)           | 105<br>(93 - 119)       | 204<br>(184 - 222)      | 408<br>(377 - 423)      |
| Communicable, maternal, neonatal, and nutritional diseases        | 106<br>(93 - 119)    | 13<br>(11 - 15)       | 1<br>(1 - 1)           | 14<br>(12 - 16)         | 22<br>(18 - 26)         | 56<br>(48 - 66)         |
| HIV/AIDS and tuberculosis                                         | 5<br>(3 - 6)         | 0<br>(0 - 0)          | 0<br>(0 - 0)           | 3<br>(2 - 3)            | 2<br>(1 - 2)            | 0<br>(0 - 1)            |
| Tuberculosis                                                      | 2<br>(1 - 2)         | 0<br>(0 - 0)          | 0<br>(0 - 0)           | 0<br>(0 - 0)            | 1<br>(0 - 1)            | 0<br>(0 - 0)            |
| HIV/AIDS                                                          | 3<br>(2 - 4)         | 0<br>(0 - 0)          | 0<br>(0 - 0)           | 2<br>(2 - 3)            | 1<br>(0 - 1)            | 0<br>(0 - 0)            |
| HIV/AIDS resulting in mycobacterial infection                     | 0<br>(0 - 0)         | 0<br>(0 - 0)          | 0<br>(0 - 0)           | 0<br>(0 - 0)            | 0<br>(0 - 0)            | 0<br>(0 - 0)            |
| HIV/AIDS resulting in other diseases                              | 3<br>(2 - 4)         | 0<br>(0 - 0)          | 0<br>(0 - 0)           | 2<br>(2 - 3)            | 1<br>(0 - 1)            | 0<br>(0 - 0)            |
| Diarrhea, lower respiratory, and other common infectious diseases | 80<br>(68 - 91)      | 5<br>(4 - 6)          | 1<br>(1 - 1)           | 8<br>(7 - 10)           | 17<br>(14 - 21)         | 48<br>(39 - 58)         |
| Diarrheal diseases                                                | 2<br>(2 - 3)         | 0<br>(0 - 0)          | 0<br>(0 - 0)           | 0<br>(0 - 1)            | 1<br>(0 - 1)            | 1<br>(1 - 2)            |
| Intestinal infectious diseases                                    | 1<br>(1 - 3)         | 0<br>(0 - 1)          | 0<br>(0 - 1)           | 0<br>(0 - 1)            | 0<br>(0 - 0)            | 0<br>(0 - 0)            |
| Typhoid fever                                                     | 1<br>(0 - 2)         | 0<br>(0 - 1)          | 0<br>(0 - 1)           | 0<br>(0 - 1)            | 0<br>(0 - 0)            | 0<br>(0 - 0)            |
| Paratyphoid fever                                                 | 0<br>(0 - 1)         | 0<br>(0 - 0)          | 0<br>(0 - 0)           | 0<br>(0 - 0)            | 0<br>(0 - 0)            | 0<br>(0 - 0)            |
| Other intestinal infectious diseases                              | 0<br>(0 - 0)         | 0<br>(0 - 0)          | 0<br>(0 - 0)           | 0<br>(0 - 0)            | 0<br>(0 - 0)            | 0<br>(0 - 0)            |
| Lower respiratory infections                                      | 71<br>(60 - 82)      | 4<br>(3 - 5)          | 0<br>(0 - 1)           | 6<br>(5 - 8)            | 15<br>(12 - 18)         | 45<br>(37 - 55)         |
| Upper respiratory infections                                      | 0<br>(0 - 0)         | 0<br>(0 - 0)          | 0<br>(0 - 0)           | 0<br>(0 - 0)            | 0<br>(0 - 0)            | 0<br>(0 - 0)            |
| Otitis media                                                      | 0<br>(0 - 0)         | 0<br>(0 - 0)          | 0<br>(0 - 0)           | 0<br>(0 - 0)            | 0<br>(0 - 0)            | 0<br>(0 - 0)            |
| Meningitis                                                        | 4<br>(3 - 4)         | 1<br>(0 - 1)          | 0<br>(0 - 0)           | 1<br>(1 - 1)            | 1<br>(1 - 1)            | 1<br>(1 - 1)            |
| Pneumococcal meningitis                                           | 1<br>(1 - 2)         | 0<br>(0 - 0)          | 0<br>(0 - 0)           | 0<br>(0 - 0)            | 0<br>(0 - 1)            | 0<br>(0 - 0)            |
| H influenzae type B meningitis                                    | 1<br>(0 - 1)         | 0<br>(0 - 0)          | 0<br>(0 - 0)           | 0<br>(0 - 0)            | 0<br>(0 - 0)            | 0<br>(0 - 0)            |
| Meningococcal meningitis                                          | 1<br>(0 - 1)         | 0<br>(0 - 0)          | 0<br>(0 - 0)           | 0<br>(0 - 0)            | 0<br>(0 - 0)            | 0<br>(0 - 0)            |
| Other meningitis                                                  | 1<br>(1 - 2)         | 0<br>(0 - 0)          | 0<br>(0 - 0)           | 0<br>(0 - 0)            | 0<br>(0 - 1)            | 0<br>(0 - 1)            |
| Encephalitis                                                      | 1<br>(0 - 1)         | 0<br>(0 - 0)          | 0<br>(0 - 0)           | 0<br>(0 - 1)            | 0<br>(0 - 0)            | 0<br>(0 - 0)            |
| Diphtheria                                                        | 0<br>(0 - 0)         | 0<br>(0 - 0)          | 0<br>(0 - 0)           | 0<br>(0 - 0)            | 0<br>(0 - 0)            | --                      |
| Whooping cough                                                    | 0<br>(0 - 0)         | 0<br>(0 - 0)          | 0<br>(0 - 0)           | 0<br>(0 - 0)            | 0<br>(0 - 0)            | --                      |
| Tetanus                                                           | 0<br>(0 - 0)         | 0<br>(0 - 0)          | 0<br>(0 - 0)           | 0<br>(0 - 0)            | 0<br>(0 - 0)            | 0<br>(0 - 0)            |
| Measles                                                           | 0<br>(0 - 1)         | 0<br>(0 - 1)          | 0<br>(0 - 0)           | 0<br>(0 - 0)            | 0<br>(0 - 0)            | --                      |
| Varicella and herpes zoster                                       | 0<br>(0 - 0)         | 0<br>(0 - 0)          | 0<br>(0 - 0)           | 0<br>(0 - 0)            | 0<br>(0 - 0)            | 0<br>(0 - 0)            |
| Neglected tropical diseases and malaria                           | 1<br>(1 - 1)         | 0<br>(0 - 0)          | 0<br>(0 - 0)           | 0<br>(0 - 0)            | 0<br>(0 - 0)            | 0<br>(0 - 0)            |
| Leishmaniasis                                                     | 0<br>(0 - 0)         | 0<br>(0 - 0)          | 0<br>(0 - 0)           | 0<br>(0 - 0)            | 0<br>(0 - 0)            | 0<br>(0 - 0)            |
| Visceral leishmaniasis                                            | 0<br>(0 - 0)         | 0<br>(0 - 0)          | 0<br>(0 - 0)           | 0<br>(0 - 0)            | 0<br>(0 - 0)            | 0<br>(0 - 0)            |
| Cysticercosis                                                     | 0<br>(0 - 0)         | 0<br>(0 - 0)          | 0<br>(0 - 0)           | 0<br>(0 - 0)            | 0<br>(0 - 0)            | 0<br>(0 - 0)            |
| Cystic echinococcosis                                             | 0<br>(0 - 0)         | 0<br>(0 - 0)          | 0<br>(0 - 0)           | 0<br>(0 - 0)            | 0<br>(0 - 0)            | 0<br>(0 - 0)            |
| Dengue                                                            | 0<br>(0 - 0)         | 0<br>(0 - 0)          | 0<br>(0 - 0)           | 0<br>(0 - 0)            | 0<br>(0 - 0)            | 0<br>(0 - 0)            |
| Rabies                                                            | 0<br>(0 - 0)         | 0<br>(0 - 0)          | 0<br>(0 - 0)           | 0<br>(0 - 0)            | 0<br>(0 - 0)            | 0<br>(0 - 0)            |
| Intestinal nematode infections                                    | 0<br>(0 - 1)         | 0<br>(0 - 0)          | 0<br>(0 - 0)           | 0<br>(0 - 0)            | 0<br>(0 - 0)            | 0<br>(0 - 0)            |
| Ascariasis                                                        | 0<br>(0 - 1)         | 0<br>(0 - 0)          | 0<br>(0 - 0)           | 0<br>(0 - 0)            | 0<br>(0 - 0)            | 0<br>(0 - 0)            |
| Other neglected tropical diseases                                 | 0<br>(0 - 1)         | 0<br>(0 - 0)          | 0<br>(0 - 0)           | 0<br>(0 - 0)            | 0<br>(0 - 0)            | 0<br>(0 - 0)            |
| Maternal disorders                                                | 0<br>(0 - 0)         | --                    | 0<br>(0 - 0)           | 0<br>(0 - 0)            | --                      | --                      |
| Maternal hemorrhage                                               | 0<br>(0 - 0)         | --                    | 0<br>(0 - 0)           | 0<br>(0 - 0)            | --                      | --                      |
| Maternal sepsis and other maternal infections                     | 0<br>(0 - 0)         | --                    | 0<br>(0 - 0)           | 0<br>(0 - 0)            | --                      | --                      |

Web Table 31- Seychelles deaths with 95% UI by age, sex, and cause in 2013

| Cause                                                            | Both Sexes, All Ages | Both Sexes, 0-4 Years | Both Sexes, 5-14 Years | Both Sexes, 15-49 Years | Both Sexes, 50-69 Years | Both Sexes, 70-80 Years |
|------------------------------------------------------------------|----------------------|-----------------------|------------------------|-------------------------|-------------------------|-------------------------|
| Maternal hypertensive disorders                                  | 0<br>(0 - 0)         | --                    | 0<br>(0 - 0)           | 0<br>(0 - 0)            | --                      | --                      |
| Maternal obstructed labor                                        | 0<br>(0 - 0)         | --                    | 0<br>(0 - 0)           | 0<br>(0 - 0)            | --                      | --                      |
| Maternal abortive outcome                                        | 0<br>(0 - 0)         | --                    | 0<br>(0 - 0)           | 0<br>(0 - 0)            | --                      | --                      |
| Indirect maternal deaths                                         | 0<br>(0 - 0)         | --                    | 0<br>(0 - 0)           | 0<br>(0 - 0)            | --                      | --                      |
| Late maternal deaths                                             | 0<br>(0 - 0)         | --                    | 0<br>(0 - 0)           | 0<br>(0 - 0)            | --                      | --                      |
| Maternal deaths aggravated by HIV/AIDS                           | 0<br>(0 - 0)         | --                    | --                     | 0<br>(0 - 0)            | --                      | --                      |
| Other maternal disorders                                         | 0<br>(0 - 0)         | --                    | 0<br>(0 - 0)           | 0<br>(0 - 0)            | --                      | --                      |
| Neonatal disorders                                               | 7<br>(6 - 9)         | 7<br>(6 - 9)          | --                     | --                      | --                      | --                      |
| Neonatal preterm birth complications                             | 3<br>(1 - 5)         | 3<br>(1 - 5)          | --                     | --                      | --                      | --                      |
| Neonatal encephalopathy due to birth asphyxia and trauma         | 2<br>(1 - 4)         | 2<br>(1 - 4)          | --                     | --                      | --                      | --                      |
| Neonatal sepsis and other neonatal infections                    | 1<br>(0 - 2)         | 1<br>(0 - 2)          | --                     | --                      | --                      | --                      |
| Hemolytic disease and other neonatal jaundice                    | 0<br>(0 - 0)         | 0<br>(0 - 0)          | --                     | --                      | --                      | --                      |
| Other neonatal disorders                                         | 1<br>(1 - 2)         | 1<br>(1 - 2)          | --                     | --                      | --                      | --                      |
| Nutritional deficiencies                                         | 6<br>(5 - 8)         | 0<br>(0 - 0)          | 0<br>(0 - 0)           | 1<br>(0 - 1)            | 1<br>(0 - 1)            | 5<br>(4 - 7)            |
| Protein-energy malnutrition                                      | 2<br>(0 - 3)         | 0<br>(0 - 0)          | 0<br>(0 - 0)           | 0<br>(0 - 0)            | 0<br>(0 - 0)            | 1<br>(0 - 2)            |
| Iodine deficiency                                                | 0<br>(0 - 1)         | 0<br>(0 - 0)          | 0<br>(0 - 0)           | 0<br>(0 - 0)            | 0<br>(0 - 0)            | 0<br>(0 - 1)            |
| Iron-deficiency anemia                                           | 4<br>(3 - 6)         | 0<br>(0 - 0)          | 0<br>(0 - 0)           | 0<br>(0 - 0)            | 0<br>(0 - 1)            | 3<br>(2 - 5)            |
| Other nutritional deficiencies                                   | 0<br>(0 - 1)         | 0<br>(0 - 0)          | 0<br>(0 - 0)           | 0<br>(0 - 0)            | 0<br>(0 - 0)            | 0<br>(0 - 1)            |
| Other communicable, maternal, neonatal, and nutritional diseases | 7<br>(4 - 9)         | 0<br>(0 - 0)          | 0<br>(0 - 0)           | 2<br>(1 - 3)            | 2<br>(1 - 3)            | 3<br>(2 - 4)            |
| Sexually transmitted diseases excluding HIV                      | 0<br>(0 - 0)         | 0<br>(0 - 0)          | 0<br>(0 - 0)           | 0<br>(0 - 0)            | 0<br>(0 - 0)            | 0<br>(0 - 0)            |
| Syphilis                                                         | 0<br>(0 - 0)         | 0<br>(0 - 0)          | 0<br>(0 - 0)           | 0<br>(0 - 0)            | 0<br>(0 - 0)            | 0<br>(0 - 0)            |
| Chlamydial infection                                             | 0<br>(0 - 0)         | --                    | 0<br>(0 - 0)           | 0<br>(0 - 0)            | 0<br>(0 - 0)            | 0<br>(0 - 0)            |
| Gonococcal infection                                             | 0<br>(0 - 0)         | --                    | 0<br>(0 - 0)           | 0<br>(0 - 0)            | 0<br>(0 - 0)            | 0<br>(0 - 0)            |
| Other sexually transmitted diseases                              | 0<br>(0 - 0)         | --                    | 0<br>(0 - 0)           | 0<br>(0 - 0)            | 0<br>(0 - 0)            | 0<br>(0 - 0)            |
| Hepatitis                                                        | 1<br>(1 - 1)         | 0<br>(0 - 0)          | 0<br>(0 - 0)           | 0<br>(0 - 0)            | 0<br>(0 - 0)            | 1<br>(1 - 1)            |
| Acute hepatitis A                                                | 0<br>(0 - 0)         | 0<br>(0 - 0)          | 0<br>(0 - 0)           | 0<br>(0 - 0)            | 0<br>(0 - 0)            | 0<br>(0 - 0)            |
| Acute hepatitis B                                                | 1<br>(1 - 1)         | 0<br>(0 - 0)          | 0<br>(0 - 0)           | 0<br>(0 - 0)            | 0<br>(0 - 0)            | 1<br>(0 - 1)            |
| Acute hepatitis C                                                | 0<br>(0 - 0)         | --                    | 0<br>(0 - 0)           | 0<br>(0 - 0)            | 0<br>(0 - 0)            | 0<br>(0 - 0)            |
| Acute hepatitis E                                                | 0<br>(0 - 0)         | 0<br>(0 - 0)          | 0<br>(0 - 0)           | 0<br>(0 - 0)            | 0<br>(0 - 0)            | 0<br>(0 - 0)            |
| Other infectious diseases                                        | 6<br>(3 - 8)         | 0<br>(0 - 0)          | 0<br>(0 - 0)           | 2<br>(1 - 2)            | 2<br>(1 - 3)            | 2<br>(1 - 3)            |
| Non-communicable diseases                                        | 581<br>(535 - 616)   | 5<br>(4 - 6)          | 1<br>(1 - 1)           | 62<br>(54 - 71)         | 170<br>(153 - 185)      | 343<br>(317 - 359)      |
| Neoplasms                                                        | 125<br>(113 - 136)   | 0<br>(0 - 0)          | 0<br>(0 - 0)           | 15<br>(13 - 17)         | 50<br>(45 - 56)         | 60<br>(52 - 66)         |
| Esophageal cancer                                                | 3<br>(3 - 5)         | --                    | --                     | 0<br>(0 - 1)            | 2<br>(1 - 3)            | 1<br>(1 - 2)            |
| Stomach cancer                                                   | 4<br>(4 - 5)         | --                    | --                     | 1<br>(0 - 1)            | 2<br>(2 - 2)            | 2<br>(2 - 2)            |
| Liver cancer                                                     | 3<br>(2 - 3)         | --                    | 0<br>(0 - 0)           | 0<br>(0 - 1)            | 1<br>(1 - 2)            | 1<br>(1 - 1)            |
| Liver cancer due to hepatitis B                                  | 1<br>(1 - 1)         | --                    | 0<br>(0 - 0)           | 0<br>(0 - 0)            | 0<br>(0 - 1)            | 0<br>(0 - 0)            |
| Liver cancer due to hepatitis C                                  | 1<br>(1 - 2)         | --                    | 0<br>(0 - 0)           | 0<br>(0 - 0)            | 1<br>(0 - 1)            | 1<br>(0 - 1)            |
| Liver cancer due to alcohol use                                  | 0<br>(0 - 0)         | --                    | --                     | 0<br>(0 - 0)            | 0<br>(0 - 0)            | 0<br>(0 - 0)            |
| Liver cancer due to other causes                                 | 0<br>(0 - 1)         | --                    | 0<br>(0 - 0)           | 0<br>(0 - 0)            | 0<br>(0 - 0)            | 0<br>(0 - 0)            |
| Larynx cancer                                                    | 2<br>(1 - 3)         | --                    | --                     | 0<br>(0 - 0)            | 1<br>(1 - 2)            | 1<br>(0 - 1)            |

Web Table 31- Seychelles deaths with 95% UI by age, sex, and cause in 2013

| Cause                                         | Both Sexes, All Ages | Both Sexes, 0-4 Years | Both Sexes, 5-14 Years | Both Sexes, 15-49 Years | Both Sexes, 50-69 Years | Both Sexes, 70-80 Years |
|-----------------------------------------------|----------------------|-----------------------|------------------------|-------------------------|-------------------------|-------------------------|
| Tracheal, bronchus and lung cancer            | 15<br>(13 - 18)      | --                    | --                     | 1<br>(1 - 2)            | 7<br>(6 - 9)            | 7<br>(6 - 8)            |
| Breast cancer                                 | 13<br>(10 - 15)      | --                    | --                     | 3<br>(2 - 4)            | 5<br>(4 - 6)            | 5<br>(4 - 6)            |
| Cervical cancer                               | 9<br>(7 - 12)        | --                    | --                     | 2<br>(2 - 3)            | 4<br>(3 - 5)            | 3<br>(2 - 5)            |
| Uterine cancer                                | 1<br>(0 - 1)         | --                    | --                     | 0<br>(0 - 0)            | 0<br>(0 - 0)            | 0<br>(0 - 1)            |
| Prostate cancer                               | 20<br>(11 - 26)      | --                    | --                     | 0<br>(0 - 0)            | 4<br>(2 - 5)            | 16<br>(8 - 21)          |
| Colon and rectum cancer                       | 15<br>(13 - 17)      | --                    | --                     | 1<br>(1 - 2)            | 5<br>(5 - 6)            | 8<br>(7 - 10)           |
| Lip and oral cavity cancer                    | 8<br>(5 - 10)        | --                    | --                     | 1<br>(1 - 1)            | 5<br>(3 - 6)            | 3<br>(2 - 4)            |
| Nasopharynx cancer                            | 1<br>(1 - 1)         | --                    | 0<br>(0 - 0)           | 0<br>(0 - 0)            | 0<br>(0 - 1)            | 0<br>(0 - 0)            |
| Other pharynx cancer                          | 3<br>(3 - 4)         | --                    | --                     | 0<br>(0 - 1)            | 2<br>(2 - 3)            | 1<br>(1 - 1)            |
| Gallbladder and biliary tract cancer          | 2<br>(1 - 2)         | --                    | --                     | 0<br>(0 - 0)            | 1<br>(0 - 1)            | 1<br>(0 - 1)            |
| Pancreatic cancer                             | 6<br>(5 - 7)         | --                    | --                     | 0<br>(0 - 0)            | 3<br>(2 - 3)            | 3<br>(2 - 3)            |
| Malignant skin melanoma                       | 0<br>(0 - 1)         | --                    | --                     | 0<br>(0 - 0)            | 0<br>(0 - 0)            | 0<br>(0 - 0)            |
| Non-melanoma skin cancer                      | 0<br>(0 - 0)         | --                    | --                     | 0<br>(0 - 0)            | 0<br>(0 - 0)            | 0<br>(0 - 0)            |
| Ovarian cancer                                | 3<br>(3 - 4)         | --                    | --                     | 0<br>(0 - 1)            | 2<br>(1 - 2)            | 1<br>(1 - 2)            |
| Testicular cancer                             | 0<br>(0 - 0)         | --                    | --                     | 0<br>(0 - 0)            | 0<br>(0 - 0)            | 0<br>(0 - 0)            |
| Kidney cancer                                 | 4<br>(3 - 4)         | 0<br>(0 - 0)          | 0<br>(0 - 0)           | 0<br>(0 - 0)            | 2<br>(2 - 2)            | 1<br>(1 - 2)            |
| Bladder cancer                                | 2<br>(2 - 3)         | --                    | --                     | 0<br>(0 - 0)            | 1<br>(1 - 1)            | 2<br>(1 - 2)            |
| Brain and nervous system cancer               | 2<br>(1 - 3)         | 0<br>(0 - 0)          | 0<br>(0 - 0)           | 0<br>(0 - 1)            | 1<br>(1 - 2)            | 0<br>(0 - 1)            |
| Thyroid cancer                                | 0<br>(0 - 1)         | --                    | 0<br>(0 - 0)           | 0<br>(0 - 0)            | 0<br>(0 - 0)            | 0<br>(0 - 0)            |
| Mesothelioma                                  | 0<br>(0 - 0)         | --                    | --                     | 0<br>(0 - 0)            | 0<br>(0 - 0)            | 0<br>(0 - 0)            |
| Hodgkin lymphoma                              | 0<br>(0 - 0)         | 0<br>(0 - 0)          | 0<br>(0 - 0)           | 0<br>(0 - 0)            | 0<br>(0 - 0)            | 0<br>(0 - 0)            |
| Non-Hodgkin lymphoma                          | 3<br>(2 - 4)         | 0<br>(0 - 0)          | 0<br>(0 - 0)           | 1<br>(1 - 1)            | 1<br>(1 - 1)            | 1<br>(1 - 2)            |
| Multiple myeloma                              | 0<br>(0 - 0)         | --                    | --                     | 0<br>(0 - 0)            | 0<br>(0 - 0)            | 0<br>(0 - 0)            |
| Leukemia                                      | 2<br>(2 - 2)         | 0<br>(0 - 0)          | 0<br>(0 - 0)           | 0<br>(0 - 1)            | 1<br>(1 - 1)            | 1<br>(1 - 1)            |
| Other neoplasms                               | 2<br>(2 - 3)         | 0<br>(0 - 0)          | 0<br>(0 - 0)           | 0<br>(0 - 0)            | 1<br>(1 - 1)            | 1<br>(1 - 1)            |
| Cardiovascular diseases                       | 296<br>(270 - 321)   | 0<br>(0 - 0)          | 0<br>(0 - 0)           | 23<br>(19 - 26)         | 75<br>(67 - 82)         | 198<br>(180 - 215)      |
| Rheumatic heart disease                       | 0<br>(0 - 0)         | 0<br>(0 - 0)          | 0<br>(0 - 0)           | 0<br>(0 - 0)            | 0<br>(0 - 0)            | 0<br>(0 - 0)            |
| Ischemic heart disease                        | 117<br>(101 - 138)   | 0<br>(0 - 0)          | 0<br>(0 - 0)           | 10<br>(8 - 12)          | 34<br>(29 - 40)         | 74<br>(62 - 89)         |
| Cerebrovascular disease                       | 93<br>(80 - 108)     | 0<br>(0 - 0)          | 0<br>(0 - 0)           | 7<br>(5 - 8)            | 22<br>(18 - 26)         | 64<br>(54 - 77)         |
| Ischemic stroke                               | 50<br>(30 - 65)      | 0<br>(0 - 0)          | 0<br>(0 - 0)           | 2<br>(1 - 2)            | 10<br>(6 - 14)          | 38<br>(23 - 51)         |
| Hemorrhagic stroke                            | 43<br>(29 - 67)      | 0<br>(0 - 0)          | 0<br>(0 - 0)           | 5<br>(4 - 6)            | 12<br>(8 - 17)          | 26<br>(16 - 44)         |
| Hypertensive heart disease                    | 65<br>(44 - 82)      | 0<br>(0 - 0)          | 0<br>(0 - 0)           | 3<br>(2 - 4)            | 13<br>(9 - 17)          | 49<br>(31 - 63)         |
| Cardiomyopathy and myocarditis                | 4<br>(3 - 6)         | 0<br>(0 - 0)          | 0<br>(0 - 0)           | 1<br>(1 - 1)            | 1<br>(1 - 2)            | 2<br>(1 - 3)            |
| Atrial fibrillation and flutter               | 0<br>(0 - 0)         | --                    | --                     | 0<br>(0 - 0)            | 0<br>(0 - 0)            | 0<br>(0 - 0)            |
| Aortic aneurysm                               | 1<br>(1 - 2)         | --                    | --                     | 0<br>(0 - 0)            | 0<br>(0 - 0)            | 1<br>(1 - 1)            |
| Peripheral vascular disease                   | 0<br>(0 - 0)         | --                    | --                     | 0<br>(0 - 0)            | 0<br>(0 - 0)            | 0<br>(0 - 0)            |
| Endocarditis                                  | 1<br>(1 - 1)         | 0<br>(0 - 0)          | 0<br>(0 - 0)           | 0<br>(0 - 0)            | 0<br>(0 - 0)            | 0<br>(0 - 0)            |
| Other cardiovascular and circulatory diseases | 14<br>(11 - 18)      | 0<br>(0 - 0)          | 0<br>(0 - 0)           | 2<br>(2 - 3)            | 4<br>(3 - 5)            | 8<br>(5 - 11)           |
| Chronic respiratory diseases                  | 29<br>(25 - 35)      | 0<br>(0 - 0)          | 0<br>(0 - 0)           | 2<br>(1 - 2)            | 7<br>(5 - 8)            | 20<br>(17 - 25)         |
| Chronic obstructive pulmonary disease         | 19<br>(15 - 26)      | 0<br>(0 - 0)          | 0<br>(0 - 0)           | 1<br>(1 - 1)            | 4<br>(3 - 5)            | 14<br>(11 - 19)         |



Web Table 31- Seychelles deaths with 95% UI by age, sex, and cause in 2013

| Cause                                               | Both Sexes, All Ages | Both Sexes, 0-4 Years | Both Sexes, 5-14 Years | Both Sexes, 15-49 Years | Both Sexes, 50-69 Years | Both Sexes, 70-80 Years |
|-----------------------------------------------------|----------------------|-----------------------|------------------------|-------------------------|-------------------------|-------------------------|
| Pneumoconiosis                                      | 1<br>(1 - 1)         | 0<br>(0 - 0)          | 0<br>(0 - 0)           | 0<br>(0 - 0)            | 0<br>(0 - 1)            | 0<br>(0 - 1)            |
| Silicosis                                           | 0<br>(0 - 1)         | 0<br>(0 - 0)          | 0<br>(0 - 0)           | 0<br>(0 - 0)            | 0<br>(0 - 0)            | 0<br>(0 - 1)            |
| Asbestosis                                          | 0<br>(0 - 0)         | 0<br>(0 - 0)          | 0<br>(0 - 0)           | 0<br>(0 - 0)            | 0<br>(0 - 0)            | 0<br>(0 - 0)            |
| Coal workers pneumoconiosis                         | 0<br>(0 - 0)         | 0<br>(0 - 0)          | 0<br>(0 - 0)           | 0<br>(0 - 0)            | 0<br>(0 - 0)            | 0<br>(0 - 0)            |
| Other pneumoconiosis                                | 0<br>(0 - 0)         | 0<br>(0 - 0)          | 0<br>(0 - 0)           | 0<br>(0 - 0)            | 0<br>(0 - 0)            | 0<br>(0 - 0)            |
| Asthma                                              | 6<br>(4 - 8)         | 0<br>(0 - 0)          | 0<br>(0 - 0)           | 1<br>(1 - 1)            | 2<br>(1 - 2)            | 4<br>(2 - 5)            |
| Interstitial lung disease and pulmonary sarcoidosis | 2<br>(0 - 4)         | 0<br>(0 - 0)          | 0<br>(0 - 0)           | 0<br>(0 - 0)            | 0<br>(0 - 1)            | 1<br>(0 - 3)            |
| Other chronic respiratory diseases                  | 1<br>(1 - 2)         | 0<br>(0 - 0)          | 0<br>(0 - 0)           | 0<br>(0 - 0)            | 0<br>(0 - 0)            | 1<br>(0 - 1)            |
| Cirrhosis                                           | 19<br>(16 - 22)      | 0<br>(0 - 0)          | 0<br>(0 - 0)           | 7<br>(6 - 9)            | 9<br>(8 - 11)           | 3<br>(2 - 3)            |
| Cirrhosis due to hepatitis B                        | 6<br>(4 - 9)         | 0<br>(0 - 0)          | 0<br>(0 - 0)           | 2<br>(1 - 4)            | 3<br>(2 - 4)            | 1<br>(1 - 1)            |
| Cirrhosis due to hepatitis C                        | 5<br>(3 - 7)         | 0<br>(0 - 0)          | 0<br>(0 - 0)           | 2<br>(1 - 3)            | 2<br>(1 - 4)            | 1<br>(0 - 1)            |
| Cirrhosis due to alcohol use                        | 7<br>(4 - 9)         | --                    | --                     | 2<br>(1 - 3)            | 3<br>(2 - 5)            | 1<br>(1 - 2)            |
| Cirrhosis due to other causes                       | 2<br>(1 - 2)         | 0<br>(0 - 0)          | 0<br>(0 - 0)           | 1<br>(1 - 1)            | 1<br>(0 - 1)            | 0<br>(0 - 0)            |
| Digestive diseases                                  | 28<br>(18 - 33)      | 0<br>(0 - 0)          | 0<br>(0 - 0)           | 6<br>(4 - 7)            | 9<br>(5 - 10)           | 14<br>(9 - 17)          |
| Peptic ulcer disease                                | 6<br>(4 - 8)         | 0<br>(0 - 0)          | 0<br>(0 - 0)           | 1<br>(1 - 2)            | 2<br>(1 - 3)            | 2<br>(1 - 4)            |
| Gastritis and duodenitis                            | 1<br>(0 - 2)         | 0<br>(0 - 0)          | 0<br>(0 - 0)           | 0<br>(0 - 0)            | 0<br>(0 - 0)            | 1<br>(0 - 1)            |
| Appendicitis                                        | 2<br>(0 - 4)         | 0<br>(0 - 0)          | 0<br>(0 - 0)           | 0<br>(0 - 1)            | 1<br>(0 - 2)            | 1<br>(0 - 2)            |
| Paralytic ileus and intestinal obstruction          | 13<br>(8 - 17)       | 0<br>(0 - 0)          | 0<br>(0 - 0)           | 2<br>(1 - 2)            | 4<br>(2 - 5)            | 8<br>(5 - 11)           |
| Inguinal, femoral, and abdominal hernia             | 0<br>(0 - 0)         | 0<br>(0 - 0)          | 0<br>(0 - 0)           | 0<br>(0 - 0)            | 0<br>(0 - 0)            | 0<br>(0 - 0)            |
| Inflammatory bowel disease                          | 1<br>(1 - 1)         | 0<br>(0 - 0)          | 0<br>(0 - 0)           | 0<br>(0 - 0)            | 0<br>(0 - 0)            | 0<br>(0 - 1)            |
| Vascular intestinal disorders                       | 0<br>(0 - 1)         | 0<br>(0 - 0)          | 0<br>(0 - 0)           | 0<br>(0 - 0)            | 0<br>(0 - 0)            | 0<br>(0 - 1)            |
| Gallbladder and biliary diseases                    | 0<br>(0 - 0)         | 0<br>(0 - 0)          | 0<br>(0 - 0)           | 0<br>(0 - 0)            | 0<br>(0 - 0)            | 0<br>(0 - 0)            |
| Pancreatitis                                        | 4<br>(2 - 8)         | 0<br>(0 - 0)          | 0<br>(0 - 0)           | 2<br>(1 - 3)            | 1<br>(0 - 3)            | 1<br>(0 - 3)            |
| Other digestive diseases                            | 0<br>(0 - 1)         | 0<br>(0 - 0)          | 0<br>(0 - 0)           | 0<br>(0 - 0)            | 0<br>(0 - 0)            | 0<br>(0 - 0)            |
| Neurological disorders                              | 24<br>(20 - 30)      | 0<br>(0 - 0)          | 0<br>(0 - 0)           | 1<br>(1 - 1)            | 2<br>(2 - 3)            | 21<br>(17 - 27)         |
| Alzheimer disease and other dementias               | 22<br>(18 - 28)      | --                    | --                     | 0<br>(0 - 0)            | 2<br>(1 - 2)            | 20<br>(16 - 26)         |
| Parkinson disease                                   | 0<br>(0 - 1)         | --                    | --                     | 0<br>(0 - 0)            | 0<br>(0 - 0)            | 0<br>(0 - 1)            |
| Epilepsy                                            | 1<br>(0 - 1)         | 0<br>(0 - 0)          | 0<br>(0 - 0)           | 0<br>(0 - 1)            | 0<br>(0 - 0)            | 0<br>(0 - 0)            |
| Multiple sclerosis                                  | 0<br>(0 - 1)         | --                    | --                     | 0<br>(0 - 0)            | 0<br>(0 - 0)            | 0<br>(0 - 0)            |
| Other neurological disorders                        | 1<br>(1 - 1)         | 0<br>(0 - 0)          | 0<br>(0 - 0)           | 0<br>(0 - 0)            | 0<br>(0 - 0)            | 0<br>(0 - 0)            |
| Mental and substance use disorders                  | 6<br>(4 - 7)         | 0<br>(0 - 0)          | 0<br>(0 - 0)           | 4<br>(2 - 5)            | 2<br>(1 - 2)            | 0<br>(0 - 0)            |
| Schizophrenia                                       | 0<br>(0 - 0)         | --                    | --                     | 0<br>(0 - 0)            | 0<br>(0 - 0)            | 0<br>(0 - 0)            |
| Alcohol use disorders                               | 2<br>(1 - 2)         | --                    | --                     | 1<br>(0 - 1)            | 1<br>(0 - 1)            | 0<br>(0 - 0)            |
| Drug use disorders                                  | 4<br>(2 - 5)         | 0<br>(0 - 0)          | --                     | 3<br>(2 - 4)            | 1<br>(1 - 1)            | 0<br>(0 - 0)            |
| Opioid use disorders                                | 3<br>(1 - 3)         | 0<br>(0 - 0)          | --                     | 2<br>(1 - 3)            | 1<br>(0 - 1)            | 0<br>(0 - 0)            |
| Cocaine use disorders                               | 0<br>(0 - 0)         | 0<br>(0 - 0)          | --                     | 0<br>(0 - 0)            | 0<br>(0 - 0)            | 0<br>(0 - 0)            |
| Amphetamine use disorders                           | 0<br>(0 - 0)         | 0<br>(0 - 0)          | --                     | 0<br>(0 - 0)            | 0<br>(0 - 0)            | 0<br>(0 - 0)            |
| Other drug use disorders                            | 1<br>(1 - 2)         | 0<br>(0 - 0)          | --                     | 1<br>(0 - 1)            | 0<br>(0 - 1)            | 0<br>(0 - 0)            |
| Eating disorders                                    | 0<br>(0 - 0)         | --                    | 0<br>(0 - 0)           | 0<br>(0 - 0)            | --                      | --                      |
| Anorexia nervosa                                    | 0<br>(0 - 0)         | --                    | 0<br>(0 - 0)           | 0<br>(0 - 0)            | --                      | --                      |

Web Table 31- Seychelles deaths with 95% UI by age, sex, and cause in 2013

| Cause                                               | Both Sexes, All Ages | Both Sexes, 0-4 Years | Both Sexes, 5-14 Years | Both Sexes, 15-49 Years | Both Sexes, 50-69 Years | Both Sexes, 70-80 Years |
|-----------------------------------------------------|----------------------|-----------------------|------------------------|-------------------------|-------------------------|-------------------------|
| Diabetes, urogenital, blood, and endocrine diseases | 48<br>(42 - 53)      | 0<br>(0 - 0)          | 0<br>(0 - 0)           | 5<br>(4 - 6)            | 16<br>(14 - 19)         | 27<br>(23 - 30)         |
| Diabetes mellitus                                   | 20<br>(17 - 24)      | 0<br>(0 - 0)          | 0<br>(0 - 0)           | 1<br>(1 - 1)            | 6<br>(5 - 7)            | 14<br>(11 - 16)         |
| Acute glomerulonephritis                            | 0<br>(0 - 0)         | 0<br>(0 - 0)          | 0<br>(0 - 0)           | 0<br>(0 - 0)            | 0<br>(0 - 0)            | 0<br>(0 - 0)            |
| Chronic kidney disease                              | 15<br>(13 - 19)      | 0<br>(0 - 0)          | 0<br>(0 - 0)           | 2<br>(2 - 3)            | 6<br>(5 - 8)            | 6<br>(5 - 8)            |
| Chronic kidney disease due to diabetes mellitus     | 3<br>(1 - 4)         | 0<br>(0 - 0)          | 0<br>(0 - 0)           | 0<br>(0 - 1)            | 1<br>(1 - 2)            | 1<br>(1 - 2)            |
| Chronic kidney disease due to hypertension          | 5<br>(4 - 8)         | 0<br>(0 - 0)          | 0<br>(0 - 0)           | 1<br>(0 - 1)            | 2<br>(1 - 3)            | 3<br>(2 - 4)            |
| Chronic kidney disease due to glomerulonephritis    | 0<br>(0 - 1)         | 0<br>(0 - 0)          | 0<br>(0 - 0)           | 0<br>(0 - 0)            | 0<br>(0 - 0)            | 0<br>(0 - 0)            |
| Chronic kidney disease due to other causes          | 6<br>(4 - 9)         | 0<br>(0 - 0)          | 0<br>(0 - 0)           | 1<br>(1 - 2)            | 3<br>(2 - 4)            | 2<br>(1 - 4)            |
| Urinary diseases and male infertility               | 6<br>(5 - 8)         | 0<br>(0 - 0)          | 0<br>(0 - 0)           | 1<br>(0 - 1)            | 2<br>(2 - 3)            | 4<br>(3 - 5)            |
| Interstitial nephritis and urinary tract infections | 3<br>(2 - 4)         | 0<br>(0 - 0)          | 0<br>(0 - 0)           | 0<br>(0 - 0)            | 1<br>(1 - 1)            | 2<br>(1 - 3)            |
| Urolithiasis                                        | 1<br>(0 - 1)         | --                    | 0<br>(0 - 0)           | 0<br>(0 - 0)            | 0<br>(0 - 0)            | 1<br>(0 - 1)            |
| Other urinary diseases                              | 3<br>(2 - 4)         | 0<br>(0 - 0)          | 0<br>(0 - 0)           | 0<br>(0 - 0)            | 1<br>(1 - 1)            | 1<br>(1 - 2)            |
| Gynecological diseases                              | 0<br>(0 - 0)         | --                    | --                     | 0<br>(0 - 0)            | 0<br>(0 - 0)            | 0<br>(0 - 0)            |
| Uterine fibroids                                    | 0<br>(0 - 0)         | --                    | --                     | 0<br>(0 - 0)            | 0<br>(0 - 0)            | 0<br>(0 - 0)            |
| Polycystic ovarian syndrome                         | 0<br>(0 - 0)         | --                    | --                     | 0<br>(0 - 0)            | 0<br>(0 - 0)            | --                      |
| Endometriosis                                       | 0<br>(0 - 0)         | --                    | --                     | 0<br>(0 - 0)            | 0<br>(0 - 0)            | --                      |
| Genital prolapse                                    | 0<br>(0 - 0)         | --                    | --                     | 0<br>(0 - 0)            | 0<br>(0 - 0)            | 0<br>(0 - 0)            |
| Other gynecological diseases                        | 0<br>(0 - 0)         | --                    | --                     | 0<br>(0 - 0)            | 0<br>(0 - 0)            | 0<br>(0 - 0)            |
| Hemoglobinopathies and hemolytic anemias            | 2<br>(1 - 2)         | 0<br>(0 - 0)          | 0<br>(0 - 0)           | 0<br>(0 - 0)            | 0<br>(0 - 0)            | 1<br>(1 - 2)            |
| Thalassemias                                        | 0<br>(0 - 1)         | 0<br>(0 - 0)          | 0<br>(0 - 0)           | 0<br>(0 - 0)            | 0<br>(0 - 0)            | 0<br>(0 - 0)            |
| Sickle cell disorders                               | 0<br>(0 - 0)         | 0<br>(0 - 0)          | 0<br>(0 - 0)           | 0<br>(0 - 0)            | 0<br>(0 - 0)            | 0<br>(0 - 0)            |
| G6PD deficiency                                     | 0<br>(0 - 0)         | 0<br>(0 - 0)          | 0<br>(0 - 0)           | 0<br>(0 - 0)            | 0<br>(0 - 0)            | 0<br>(0 - 0)            |
| Other hemoglobinopathies and hemolytic anemias      | 1<br>(1 - 2)         | 0<br>(0 - 0)          | 0<br>(0 - 0)           | 0<br>(0 - 0)            | 0<br>(0 - 0)            | 1<br>(1 - 2)            |
| Endocrine, metabolic, blood, and immune disorders   | 4<br>(2 - 5)         | 0<br>(0 - 0)          | 0<br>(0 - 0)           | 1<br>(0 - 1)            | 2<br>(1 - 2)            | 2<br>(1 - 2)            |
| Musculoskeletal disorders                           | 0<br>(0 - 0)         | --                    | 0<br>(0 - 0)           | 0<br>(0 - 0)            | 0<br>(0 - 0)            | 0<br>(0 - 0)            |
| Rheumatoid arthritis                                | 0<br>(0 - 0)         | --                    | 0<br>(0 - 0)           | 0<br>(0 - 0)            | 0<br>(0 - 0)            | 0<br>(0 - 0)            |
| Other musculoskeletal disorders                     | 0<br>(0 - 0)         | --                    | 0<br>(0 - 0)           | 0<br>(0 - 0)            | 0<br>(0 - 0)            | 0<br>(0 - 0)            |
| Other non-communicable diseases                     | 6<br>(5 - 7)         | 3<br>(3 - 4)          | 0<br>(0 - 0)           | 1<br>(1 - 1)            | 0<br>(0 - 1)            | 0<br>(0 - 1)            |
| Congenital anomalies                                | 5<br>(4 - 6)         | 3<br>(3 - 4)          | 0<br>(0 - 0)           | 1<br>(1 - 1)            | 0<br>(0 - 0)            | 0<br>(0 - 0)            |
| Neural tube defects                                 | 0<br>(0 - 1)         | 0<br>(0 - 1)          | 0<br>(0 - 0)           | 0<br>(0 - 0)            | 0<br>(0 - 0)            | 0<br>(0 - 0)            |
| Congenital heart anomalies                          | 1<br>(1 - 2)         | 1<br>(1 - 1)          | 0<br>(0 - 0)           | 0<br>(0 - 0)            | 0<br>(0 - 0)            | 0<br>(0 - 0)            |
| Cleft lip and cleft palate                          | 0<br>(0 - 0)         | 0<br>(0 - 0)          | --                     | --                      | --                      | --                      |
| Down syndrome                                       | 0<br>(0 - 0)         | 0<br>(0 - 0)          | 0<br>(0 - 0)           | 0<br>(0 - 0)            | 0<br>(0 - 0)            | 0<br>(0 - 0)            |
| Chromosomal unbalanced rearrangements               | 0<br>(0 - 1)         | 0<br>(0 - 1)          | 0<br>(0 - 0)           | 0<br>(0 - 0)            | 0<br>(0 - 0)            | 0<br>(0 - 0)            |
| Other congenital anomalies                          | 2<br>(2 - 3)         | 2<br>(1 - 2)          | 0<br>(0 - 0)           | 0<br>(0 - 1)            | 0<br>(0 - 0)            | 0<br>(0 - 0)            |
| Skin and subcutaneous diseases                      | 1<br>(1 - 1)         | 0<br>(0 - 0)          | 0<br>(0 - 0)           | 0<br>(0 - 0)            | 0<br>(0 - 0)            | 0<br>(0 - 1)            |
| Cellulitis                                          | 0<br>(0 - 0)         | 0<br>(0 - 0)          | 0<br>(0 - 0)           | 0<br>(0 - 0)            | 0<br>(0 - 0)            | 0<br>(0 - 0)            |
| Pyoderma                                            | 1<br>(0 - 1)         | 0<br>(0 - 0)          | 0<br>(0 - 0)           | 0<br>(0 - 0)            | 0<br>(0 - 0)            | 0<br>(0 - 0)            |
| Decubitus ulcer                                     | 0<br>(0 - 0)         | 0<br>(0 - 0)          | 0<br>(0 - 0)           | 0<br>(0 - 0)            | 0<br>(0 - 0)            | 0<br>(0 - 0)            |
| Other skin and subcutaneous diseases                | 0<br>(0 - 0)         | 0<br>(0 - 0)          | 0<br>(0 - 0)           | 0<br>(0 - 0)            | 0<br>(0 - 0)            | 0<br>(0 - 0)            |

Web Table 31- Seychelles deaths with 95% UI by age, sex, and cause in 2013

| Cause                                           | Both Sexes, All Ages | Both Sexes, 0-4 Years | Both Sexes, 5-14 Years | Both Sexes, 15-49 Years | Both Sexes, 50-69 Years | Both Sexes, 70-80 Years |
|-------------------------------------------------|----------------------|-----------------------|------------------------|-------------------------|-------------------------|-------------------------|
| Sudden infant death syndrome                    | 0<br>(0 - 0)         | 0<br>(0 - 0)          | --                     | --                      | --                      | --                      |
| Injuries                                        | 52<br>(45 - 60)      | 1<br>(1 - 2)          | 1<br>(1 - 2)           | 28<br>(25 - 33)         | 13<br>(10 - 15)         | 8<br>(6 - 10)           |
| Transport injuries                              | 12<br>(10 - 15)      | 0<br>(0 - 0)          | 0<br>(0 - 1)           | 7<br>(6 - 9)            | 3<br>(2 - 4)            | 2<br>(1 - 2)            |
| Road injuries                                   | 11<br>(9 - 13)       | 0<br>(0 - 0)          | 0<br>(0 - 1)           | 6<br>(5 - 8)            | 2<br>(2 - 3)            | 1<br>(1 - 2)            |
| Pedestrian road injuries                        | 3<br>(1 - 4)         | 0<br>(0 - 0)          | 0<br>(0 - 0)           | 1<br>(0 - 2)            | 1<br>(0 - 1)            | 0<br>(0 - 1)            |
| Cyclist road injuries                           | 1<br>(0 - 1)         | 0<br>(0 - 0)          | 0<br>(0 - 0)           | 0<br>(0 - 1)            | 0<br>(0 - 0)            | 0<br>(0 - 0)            |
| Motorcyclist road injuries                      | 2<br>(1 - 4)         | 0<br>(0 - 0)          | 0<br>(0 - 0)           | 2<br>(1 - 3)            | 0<br>(0 - 1)            | 0<br>(0 - 0)            |
| Motor vehicle road injuries                     | 5<br>(4 - 8)         | 0<br>(0 - 0)          | 0<br>(0 - 0)           | 3<br>(2 - 5)            | 1<br>(1 - 2)            | 0<br>(0 - 1)            |
| Other road injuries                             | 0<br>(0 - 0)         | 0<br>(0 - 0)          | 0<br>(0 - 0)           | 0<br>(0 - 0)            | 0<br>(0 - 0)            | 0<br>(0 - 0)            |
| Other transport injuries                        | 1<br>(1 - 2)         | 0<br>(0 - 0)          | 0<br>(0 - 0)           | 0<br>(0 - 1)            | 0<br>(0 - 1)            | 1<br>(0 - 1)            |
| Unintentional injuries                          | 22<br>(18 - 27)      | 1<br>(1 - 1)          | 1<br>(1 - 1)           | 10<br>(9 - 14)          | 6<br>(5 - 8)            | 4<br>(3 - 5)            |
| Falls                                           | 5<br>(3 - 6)         | 0<br>(0 - 0)          | 0<br>(0 - 0)           | 2<br>(1 - 2)            | 2<br>(1 - 2)            | 1<br>(1 - 2)            |
| Drowning                                        | 11<br>(9 - 17)       | 0<br>(0 - 1)          | 0<br>(0 - 1)           | 7<br>(5 - 10)           | 3<br>(2 - 4)            | 1<br>(1 - 1)            |
| Fire, heat, and hot substances                  | 1<br>(1 - 2)         | 0<br>(0 - 0)          | 0<br>(0 - 0)           | 1<br>(0 - 1)            | 0<br>(0 - 0)            | 0<br>(0 - 1)            |
| Poisonings                                      | 0<br>(0 - 1)         | 0<br>(0 - 0)          | 0<br>(0 - 0)           | 0<br>(0 - 0)            | 0<br>(0 - 0)            | 0<br>(0 - 0)            |
| Exposure to mechanical forces                   | 1<br>(1 - 2)         | 0<br>(0 - 0)          | 0<br>(0 - 0)           | 1<br>(1 - 1)            | 0<br>(0 - 1)            | 0<br>(0 - 0)            |
| Unintentional firearm injuries                  | 0<br>(0 - 0)         | 0<br>(0 - 0)          | 0<br>(0 - 0)           | 0<br>(0 - 0)            | 0<br>(0 - 0)            | 0<br>(0 - 0)            |
| Unintentional suffocation                       | 0<br>(0 - 0)         | 0<br>(0 - 0)          | 0<br>(0 - 0)           | 0<br>(0 - 0)            | 0<br>(0 - 0)            | 0<br>(0 - 0)            |
| Other exposure to mechanical forces             | 1<br>(1 - 2)         | 0<br>(0 - 0)          | 0<br>(0 - 0)           | 1<br>(0 - 1)            | 0<br>(0 - 1)            | 0<br>(0 - 0)            |
| Adverse effects of medical treatment            | 0<br>(0 - 0)         | 0<br>(0 - 0)          | 0<br>(0 - 0)           | 0<br>(0 - 0)            | 0<br>(0 - 0)            | 0<br>(0 - 0)            |
| Animal contact                                  | 0<br>(0 - 0)         | 0<br>(0 - 0)          | 0<br>(0 - 0)           | 0<br>(0 - 0)            | 0<br>(0 - 0)            | 0<br>(0 - 0)            |
| Venomous animal contact                         | 0<br>(0 - 0)         | 0<br>(0 - 0)          | 0<br>(0 - 0)           | 0<br>(0 - 0)            | 0<br>(0 - 0)            | 0<br>(0 - 0)            |
| Non-venomous animal contact                     | 0<br>(0 - 0)         | 0<br>(0 - 0)          | 0<br>(0 - 0)           | 0<br>(0 - 0)            | 0<br>(0 - 0)            | 0<br>(0 - 0)            |
| Foreign body                                    | 2<br>(1 - 3)         | 0<br>(0 - 1)          | 0<br>(0 - 0)           | 0<br>(0 - 1)            | 0<br>(0 - 1)            | 1<br>(0 - 2)            |
| Pulmonary aspiration and foreign body in airway | 2<br>(1 - 3)         | 0<br>(0 - 1)          | 0<br>(0 - 0)           | 0<br>(0 - 1)            | 0<br>(0 - 1)            | 1<br>(0 - 2)            |
| Foreign body in other body part                 | 0<br>(0 - 0)         | 0<br>(0 - 0)          | 0<br>(0 - 0)           | 0<br>(0 - 0)            | 0<br>(0 - 0)            | 0<br>(0 - 0)            |
| Other unintentional injuries                    | 0<br>(0 - 0)         | 0<br>(0 - 0)          | 0<br>(0 - 0)           | 0<br>(0 - 0)            | 0<br>(0 - 0)            | 0<br>(0 - 0)            |
| Self-harm and interpersonal violence            | 17<br>(13 - 22)      | 0<br>(0 - 0)          | 0<br>(0 - 0)           | 11<br>(8 - 14)          | 4<br>(2 - 5)            | 3<br>(2 - 4)            |
| Self-harm                                       | 9<br>(4 - 14)        | --                    | 0<br>(0 - 0)           | 6<br>(3 - 8)            | 2<br>(1 - 3)            | 2<br>(1 - 4)            |
| Interpersonal violence                          | 8<br>(5 - 11)        | 0<br>(0 - 0)          | 0<br>(0 - 0)           | 5<br>(3 - 7)            | 2<br>(1 - 3)            | 1<br>(0 - 2)            |
| Assault by firearm                              | 2<br>(1 - 4)         | 0<br>(0 - 0)          | 0<br>(0 - 0)           | 2<br>(1 - 3)            | 1<br>(0 - 1)            | 0<br>(0 - 0)            |
| Assault by sharp object                         | 3<br>(1 - 4)         | 0<br>(0 - 0)          | 0<br>(0 - 0)           | 2<br>(1 - 3)            | 0<br>(0 - 1)            | 0<br>(0 - 1)            |
| Assault by other means                          | 3<br>(1 - 4)         | 0<br>(0 - 0)          | 0<br>(0 - 0)           | 2<br>(1 - 3)            | 1<br>(0 - 1)            | 1<br>(0 - 1)            |

Web Table 31- Seychelles deaths with 95% UI by age, sex, and cause in 2013

| Cause                                                             | Males, All Ages    | Males, 0-4 Years | Males, 5-14 Years | Males, 15-49 Years | Males, 50-69 Years | Males, 70-80 Years |
|-------------------------------------------------------------------|--------------------|------------------|-------------------|--------------------|--------------------|--------------------|
| All causes                                                        | 392<br>(362 - 428) | 10<br>(9 - 12)   | 2<br>(2 - 2)      | 76<br>(66 - 89)    | 136<br>(122 - 153) | 167<br>(160 - 175) |
| Communicable, maternal, neonatal, and nutritional diseases        | 58<br>(49 - 67)    | 7<br>(6 - 9)     | 1<br>(1 - 1)      | 10<br>(8 - 12)     | 16<br>(12 - 19)    | 25<br>(20 - 30)    |
| HIV/AIDS and tuberculosis                                         | 3<br>(2 - 4)       | 0<br>(0 - 0)     | 0<br>(0 - 0)      | 2<br>(1 - 2)       | 1<br>(1 - 2)       | 0<br>(0 - 0)       |
| Tuberculosis                                                      | 1<br>(1 - 2)       | 0<br>(0 - 0)     | 0<br>(0 - 0)      | 0<br>(0 - 0)       | 1<br>(0 - 1)       | 0<br>(0 - 0)       |
| HIV/AIDS                                                          | 2<br>(1 - 2)       | 0<br>(0 - 0)     | 0<br>(0 - 0)      | 1<br>(1 - 2)       | 0<br>(0 - 1)       | 0<br>(0 - 0)       |
| HIV/AIDS resulting in mycobacterial infection                     | 0<br>(0 - 0)       | 0<br>(0 - 0)     | 0<br>(0 - 0)      | 0<br>(0 - 0)       | 0<br>(0 - 0)       | 0<br>(0 - 0)       |
| HIV/AIDS resulting in other diseases                              | 2<br>(1 - 2)       | 0<br>(0 - 0)     | 0<br>(0 - 0)      | 1<br>(1 - 2)       | 0<br>(0 - 1)       | 0<br>(0 - 0)       |
| Diarrhea, lower respiratory, and other common infectious diseases | 43<br>(35 - 51)    | 3<br>(2 - 4)     | 1<br>(0 - 1)      | 6<br>(5 - 8)       | 13<br>(10 - 16)    | 21<br>(16 - 26)    |
| Diarrheal diseases                                                | 1<br>(1 - 2)       | 0<br>(0 - 0)     | 0<br>(0 - 0)      | 0<br>(0 - 1)       | 0<br>(0 - 1)       | 0<br>(0 - 1)       |
| Intestinal infectious diseases                                    | 1<br>(0 - 2)       | 0<br>(0 - 1)     | 0<br>(0 - 0)      | 0<br>(0 - 0)       | 0<br>(0 - 0)       | 0<br>(0 - 0)       |
| Typhoid fever                                                     | 1<br>(0 - 1)       | 0<br>(0 - 0)     | 0<br>(0 - 0)      | 0<br>(0 - 0)       | 0<br>(0 - 0)       | 0<br>(0 - 0)       |
| Paratyphoid fever                                                 | 0<br>(0 - 0)       | 0<br>(0 - 0)     | 0<br>(0 - 0)      | 0<br>(0 - 0)       | 0<br>(0 - 0)       | 0<br>(0 - 0)       |
| Other intestinal infectious diseases                              | 0<br>(0 - 0)       | 0<br>(0 - 0)     | 0<br>(0 - 0)      | 0<br>(0 - 0)       | 0<br>(0 - 0)       | 0<br>(0 - 0)       |
| Lower respiratory infections                                      | 39<br>(31 - 46)    | 2<br>(2 - 3)     | 0<br>(0 - 0)      | 5<br>(3 - 6)       | 11<br>(8 - 15)     | 20<br>(15 - 25)    |
| Upper respiratory infections                                      | 0<br>(0 - 0)       | 0<br>(0 - 0)     | 0<br>(0 - 0)      | 0<br>(0 - 0)       | 0<br>(0 - 0)       | 0<br>(0 - 0)       |
| Otitis media                                                      | 0<br>(0 - 0)       | 0<br>(0 - 0)     | 0<br>(0 - 0)      | 0<br>(0 - 0)       | 0<br>(0 - 0)       | 0<br>(0 - 0)       |
| Meningitis                                                        | 2<br>(1 - 2)       | 0<br>(0 - 0)     | 0<br>(0 - 0)      | 1<br>(0 - 1)       | 1<br>(0 - 1)       | 0<br>(0 - 0)       |
| Pneumococcal meningitis                                           | 1<br>(0 - 1)       | 0<br>(0 - 0)     | 0<br>(0 - 0)      | 0<br>(0 - 0)       | 0<br>(0 - 0)       | 0<br>(0 - 0)       |
| H influenzae type B meningitis                                    | 0<br>(0 - 0)       | 0<br>(0 - 0)     | 0<br>(0 - 0)      | 0<br>(0 - 0)       | 0<br>(0 - 0)       | 0<br>(0 - 0)       |
| Meningococcal meningitis                                          | 0<br>(0 - 0)       | 0<br>(0 - 0)     | 0<br>(0 - 0)      | 0<br>(0 - 0)       | 0<br>(0 - 0)       | 0<br>(0 - 0)       |
| Other meningitis                                                  | 1<br>(1 - 1)       | 0<br>(0 - 0)     | 0<br>(0 - 0)      | 0<br>(0 - 0)       | 0<br>(0 - 0)       | 0<br>(0 - 0)       |
| Encephalitis                                                      | 1<br>(0 - 1)       | 0<br>(0 - 0)     | 0<br>(0 - 0)      | 0<br>(0 - 0)       | 0<br>(0 - 0)       | 0<br>(0 - 0)       |
| Diphtheria                                                        | 0<br>(0 - 0)       | 0<br>(0 - 0)     | 0<br>(0 - 0)      | 0<br>(0 - 0)       | 0<br>(0 - 0)       | --                 |
| Whooping cough                                                    | 0<br>(0 - 0)       | 0<br>(0 - 0)     | 0<br>(0 - 0)      | 0<br>(0 - 0)       | 0<br>(0 - 0)       | --                 |
| Tetanus                                                           | 0<br>(0 - 0)       | 0<br>(0 - 0)     | 0<br>(0 - 0)      | 0<br>(0 - 0)       | 0<br>(0 - 0)       | 0<br>(0 - 0)       |
| Measles                                                           | 0<br>(0 - 0)       | 0<br>(0 - 0)     | 0<br>(0 - 0)      | 0<br>(0 - 0)       | 0<br>(0 - 0)       | --                 |
| Varicella and herpes zoster                                       | 0<br>(0 - 0)       | 0<br>(0 - 0)     | 0<br>(0 - 0)      | 0<br>(0 - 0)       | 0<br>(0 - 0)       | 0<br>(0 - 0)       |
| Neglected tropical diseases and malaria                           | 0<br>(0 - 1)       | 0<br>(0 - 0)     | 0<br>(0 - 0)      | 0<br>(0 - 0)       | 0<br>(0 - 0)       | 0<br>(0 - 0)       |
| Leishmaniasis                                                     | 0<br>(0 - 0)       | 0<br>(0 - 0)     | 0<br>(0 - 0)      | 0<br>(0 - 0)       | 0<br>(0 - 0)       | 0<br>(0 - 0)       |
| Visceral leishmaniasis                                            | 0<br>(0 - 0)       | 0<br>(0 - 0)     | 0<br>(0 - 0)      | 0<br>(0 - 0)       | 0<br>(0 - 0)       | 0<br>(0 - 0)       |
| Cysticercosis                                                     | 0<br>(0 - 0)       | 0<br>(0 - 0)     | 0<br>(0 - 0)      | 0<br>(0 - 0)       | 0<br>(0 - 0)       | 0<br>(0 - 0)       |
| Cystic echinococcosis                                             | 0<br>(0 - 0)       | 0<br>(0 - 0)     | 0<br>(0 - 0)      | 0<br>(0 - 0)       | 0<br>(0 - 0)       | 0<br>(0 - 0)       |
| Dengue                                                            | 0<br>(0 - 0)       | 0<br>(0 - 0)     | 0<br>(0 - 0)      | 0<br>(0 - 0)       | 0<br>(0 - 0)       | 0<br>(0 - 0)       |
| Rabies                                                            | 0<br>(0 - 0)       | 0<br>(0 - 0)     | 0<br>(0 - 0)      | 0<br>(0 - 0)       | 0<br>(0 - 0)       | 0<br>(0 - 0)       |
| Intestinal nematode infections                                    | 0<br>(0 - 0)       | 0<br>(0 - 0)     | 0<br>(0 - 0)      | 0<br>(0 - 0)       | 0<br>(0 - 0)       | 0<br>(0 - 0)       |
| Ascariasis                                                        | 0<br>(0 - 0)       | 0<br>(0 - 0)     | 0<br>(0 - 0)      | 0<br>(0 - 0)       | 0<br>(0 - 0)       | 0<br>(0 - 0)       |
| Other neglected tropical diseases                                 | 0<br>(0 - 0)       | 0<br>(0 - 0)     | 0<br>(0 - 0)      | 0<br>(0 - 0)       | 0<br>(0 - 0)       | 0<br>(0 - 0)       |
| Maternal disorders                                                | --                 | --               | --                | --                 | --                 | --                 |
| Maternal hemorrhage                                               | --                 | --               | --                | --                 | --                 | --                 |
| Maternal sepsis and other maternal infections                     | --                 | --               | --                | --                 | --                 | --                 |

Web Table 31- Seychelles deaths with 95% UI by age, sex, and cause in 2013

| Cause                                                            | Males, All Ages    | Males, 0-4 Years | Males, 5-14 Years | Males, 15-49 Years | Males, 50-69 Years | Males, 70-80 Years |
|------------------------------------------------------------------|--------------------|------------------|-------------------|--------------------|--------------------|--------------------|
| Maternal hypertensive disorders                                  | --                 | --               | --                | --                 | --                 | --                 |
| Maternal obstructed labor                                        | --                 | --               | --                | --                 | --                 | --                 |
| Maternal abortive outcome                                        | --                 | --               | --                | --                 | --                 | --                 |
| Indirect maternal deaths                                         | --                 | --               | --                | --                 | --                 | --                 |
| Late maternal deaths                                             | --                 | --               | --                | --                 | --                 | --                 |
| Maternal deaths aggravated by HIV/AIDS                           | --                 | --               | --                | --                 | --                 | --                 |
| Other maternal disorders                                         | --                 | --               | --                | --                 | --                 | --                 |
| Neonatal disorders                                               | 4<br>(3 - 5)       | 4<br>(3 - 5)     | --                | --                 | --                 | --                 |
| Neonatal preterm birth complications                             | 2<br>(1 - 3)       | 2<br>(1 - 3)     | --                | --                 | --                 | --                 |
| Neonatal encephalopathy due to birth asphyxia and trauma         | 1<br>(1 - 3)       | 1<br>(1 - 3)     | --                | --                 | --                 | --                 |
| Neonatal sepsis and other neonatal infections                    | 1<br>(0 - 1)       | 1<br>(0 - 1)     | --                | --                 | --                 | --                 |
| Hemolytic disease and other neonatal jaundice                    | 0<br>(0 - 0)       | 0<br>(0 - 0)     | --                | --                 | --                 | --                 |
| Other neonatal disorders                                         | 1<br>(0 - 1)       | 1<br>(0 - 1)     | --                | --                 | --                 | --                 |
| Nutritional deficiencies                                         | 3<br>(2 - 4)       | 0<br>(0 - 0)     | 0<br>(0 - 0)      | 0<br>(0 - 1)       | 0<br>(0 - 1)       | 2<br>(1 - 3)       |
| Protein-energy malnutrition                                      | 2<br>(0 - 3)       | 0<br>(0 - 0)     | 0<br>(0 - 0)      | 0<br>(0 - 0)       | 0<br>(0 - 0)       | 1<br>(0 - 2)       |
| Iodine deficiency                                                | 0<br>(0 - 0)       | 0<br>(0 - 0)     | 0<br>(0 - 0)      | 0<br>(0 - 0)       | 0<br>(0 - 0)       | 0<br>(0 - 0)       |
| Iron-deficiency anemia                                           | 1<br>(0 - 3)       | 0<br>(0 - 0)     | 0<br>(0 - 0)      | 0<br>(0 - 0)       | 0<br>(0 - 0)       | 1<br>(0 - 2)       |
| Other nutritional deficiencies                                   | 0<br>(0 - 0)       | 0<br>(0 - 0)     | 0<br>(0 - 0)      | 0<br>(0 - 0)       | 0<br>(0 - 0)       | 0<br>(0 - 0)       |
| Other communicable, maternal, neonatal, and nutritional diseases | 4<br>(2 - 5)       | 0<br>(0 - 0)     | 0<br>(0 - 0)      | 2<br>(1 - 2)       | 1<br>(1 - 2)       | 1<br>(1 - 1)       |
| Sexually transmitted diseases excluding HIV                      | 0<br>(0 - 0)       | 0<br>(0 - 0)     | 0<br>(0 - 0)      | 0<br>(0 - 0)       | 0<br>(0 - 0)       | 0<br>(0 - 0)       |
| Syphilis                                                         | 0<br>(0 - 0)       | 0<br>(0 - 0)     | 0<br>(0 - 0)      | 0<br>(0 - 0)       | 0<br>(0 - 0)       | 0<br>(0 - 0)       |
| Chlamydial infection                                             | --                 | --               | --                | --                 | --                 | --                 |
| Gonococcal infection                                             | 0<br>(0 - 0)       | --               | 0<br>(0 - 0)      | 0<br>(0 - 0)       | 0<br>(0 - 0)       | 0<br>(0 - 0)       |
| Other sexually transmitted diseases                              | 0<br>(0 - 0)       | --               | 0<br>(0 - 0)      | 0<br>(0 - 0)       | 0<br>(0 - 0)       | 0<br>(0 - 0)       |
| Hepatitis                                                        | 0<br>(0 - 0)       | 0<br>(0 - 0)     | 0<br>(0 - 0)      | 0<br>(0 - 0)       | 0<br>(0 - 0)       | 0<br>(0 - 0)       |
| Acute hepatitis A                                                | 0<br>(0 - 0)       | 0<br>(0 - 0)     | 0<br>(0 - 0)      | 0<br>(0 - 0)       | 0<br>(0 - 0)       | 0<br>(0 - 0)       |
| Acute hepatitis B                                                | 0<br>(0 - 0)       | 0<br>(0 - 0)     | 0<br>(0 - 0)      | 0<br>(0 - 0)       | 0<br>(0 - 0)       | 0<br>(0 - 0)       |
| Acute hepatitis C                                                | 0<br>(0 - 0)       | --               | 0<br>(0 - 0)      | 0<br>(0 - 0)       | 0<br>(0 - 0)       | 0<br>(0 - 0)       |
| Acute hepatitis E                                                | 0<br>(0 - 0)       | 0<br>(0 - 0)     | 0<br>(0 - 0)      | 0<br>(0 - 0)       | 0<br>(0 - 0)       | 0<br>(0 - 0)       |
| Other infectious diseases                                        | 4<br>(2 - 5)       | 0<br>(0 - 0)     | 0<br>(0 - 0)      | 2<br>(1 - 2)       | 1<br>(1 - 2)       | 1<br>(0 - 1)       |
| Non-communicable diseases                                        | 292<br>(267 - 320) | 2<br>(2 - 3)     | 1<br>(0 - 1)      | 41<br>(34 - 49)    | 109<br>(98 - 123)  | 139<br>(131 - 147) |
| Neoplasms                                                        | 77<br>(66 - 85)    | 0<br>(0 - 0)     | 0<br>(0 - 0)      | 7<br>(6 - 9)       | 32<br>(28 - 37)    | 37<br>(30 - 43)    |
| Esophageal cancer                                                | 3<br>(3 - 5)       | --               | --                | 0<br>(0 - 1)       | 2<br>(1 - 2)       | 1<br>(1 - 2)       |
| Stomach cancer                                                   | 3<br>(2 - 3)       | --               | --                | 0<br>(0 - 0)       | 1<br>(1 - 2)       | 1<br>(1 - 1)       |
| Liver cancer                                                     | 1<br>(1 - 2)       | --               | 0<br>(0 - 0)      | 0<br>(0 - 0)       | 1<br>(1 - 1)       | 0<br>(0 - 1)       |
| Liver cancer due to hepatitis B                                  | 1<br>(0 - 1)       | --               | 0<br>(0 - 0)      | 0<br>(0 - 0)       | 0<br>(0 - 1)       | 0<br>(0 - 0)       |
| Liver cancer due to hepatitis C                                  | 1<br>(0 - 1)       | --               | 0<br>(0 - 0)      | 0<br>(0 - 0)       | 0<br>(0 - 1)       | 0<br>(0 - 0)       |
| Liver cancer due to alcohol use                                  | 0<br>(0 - 0)       | --               | --                | 0<br>(0 - 0)       | 0<br>(0 - 0)       | 0<br>(0 - 0)       |
| Liver cancer due to other causes                                 | 0<br>(0 - 0)       | --               | 0<br>(0 - 0)      | 0<br>(0 - 0)       | 0<br>(0 - 0)       | 0<br>(0 - 0)       |
| Larynx cancer                                                    | 2<br>(1 - 3)       | --               | --                | 0<br>(0 - 0)       | 1<br>(1 - 2)       | 1<br>(0 - 1)       |

Web Table 31- Seychelles deaths with 95% UI by age, sex, and cause in 2013

| Cause                                         | Males, All Ages    | Males, 0-4 Years | Males, 5-14 Years | Males, 15-49 Years | Males, 50-69 Years | Males, 70-80 Years |
|-----------------------------------------------|--------------------|------------------|-------------------|--------------------|--------------------|--------------------|
| Tracheal, bronchus and lung cancer            | 12<br>(10 - 15)    | --               | --                | 1<br>(1 - 1)       | 6<br>(5 - 7)       | 5<br>(4 - 6)       |
| Breast cancer                                 | 0<br>(0 - 0)       | --               | --                | 0<br>(0 - 0)       | 0<br>(0 - 0)       | 0<br>(0 - 0)       |
| Cervical cancer                               | --                 | --               | --                | --                 | --                 | --                 |
| Uterine cancer                                | --                 | --               | --                | --                 | --                 | --                 |
| Prostate cancer                               | 20<br>(11 - 26)    | --               | --                | 0<br>(0 - 0)       | 4<br>(2 - 5)       | 16<br>(8 - 21)     |
| Colon and rectum cancer                       | 8<br>(7 - 9)       | --               | --                | 1<br>(1 - 1)       | 4<br>(3 - 4)       | 4<br>(3 - 4)       |
| Lip and oral cavity cancer                    | 7<br>(5 - 9)       | --               | --                | 1<br>(1 - 1)       | 4<br>(3 - 5)       | 2<br>(1 - 3)       |
| Nasopharynx cancer                            | 1<br>(0 - 1)       | --               | 0<br>(0 - 0)      | 0<br>(0 - 0)       | 0<br>(0 - 0)       | 0<br>(0 - 0)       |
| Other pharynx cancer                          | 3<br>(2 - 4)       | --               | --                | 0<br>(0 - 1)       | 2<br>(2 - 3)       | 1<br>(1 - 1)       |
| Gallbladder and biliary tract cancer          | 1<br>(0 - 1)       | --               | --                | 0<br>(0 - 0)       | 0<br>(0 - 0)       | 0<br>(0 - 0)       |
| Pancreatic cancer                             | 4<br>(3 - 5)       | --               | --                | 0<br>(0 - 0)       | 2<br>(2 - 2)       | 2<br>(1 - 2)       |
| Malignant skin melanoma                       | 0<br>(0 - 0)       | --               | --                | 0<br>(0 - 0)       | 0<br>(0 - 0)       | 0<br>(0 - 0)       |
| Non-melanoma skin cancer                      | 0<br>(0 - 0)       | --               | --                | 0<br>(0 - 0)       | 0<br>(0 - 0)       | 0<br>(0 - 0)       |
| Ovarian cancer                                | --                 | --               | --                | --                 | --                 | --                 |
| Testicular cancer                             | 0<br>(0 - 0)       | --               | --                | 0<br>(0 - 0)       | 0<br>(0 - 0)       | 0<br>(0 - 0)       |
| Kidney cancer                                 | 3<br>(2 - 3)       | 0<br>(0 - 0)     | 0<br>(0 - 0)      | 0<br>(0 - 0)       | 1<br>(1 - 2)       | 1<br>(1 - 1)       |
| Bladder cancer                                | 2<br>(1 - 3)       | --               | --                | 0<br>(0 - 0)       | 1<br>(0 - 1)       | 1<br>(1 - 2)       |
| Brain and nervous system cancer               | 1<br>(1 - 3)       | 0<br>(0 - 0)     | 0<br>(0 - 0)      | 0<br>(0 - 1)       | 1<br>(0 - 2)       | 0<br>(0 - 1)       |
| Thyroid cancer                                | 0<br>(0 - 0)       | --               | 0<br>(0 - 0)      | 0<br>(0 - 0)       | 0<br>(0 - 0)       | 0<br>(0 - 0)       |
| Mesothelioma                                  | 0<br>(0 - 0)       | --               | --                | 0<br>(0 - 0)       | 0<br>(0 - 0)       | 0<br>(0 - 0)       |
| Hodgkin lymphoma                              | 0<br>(0 - 0)       | 0<br>(0 - 0)     | 0<br>(0 - 0)      | 0<br>(0 - 0)       | 0<br>(0 - 0)       | 0<br>(0 - 0)       |
| Non-Hodgkin lymphoma                          | 2<br>(1 - 3)       | 0<br>(0 - 0)     | 0<br>(0 - 0)      | 1<br>(0 - 1)       | 1<br>(0 - 1)       | 1<br>(0 - 1)       |
| Multiple myeloma                              | 0<br>(0 - 0)       | --               | --                | 0<br>(0 - 0)       | 0<br>(0 - 0)       | 0<br>(0 - 0)       |
| Leukemia                                      | 1<br>(1 - 2)       | 0<br>(0 - 0)     | 0<br>(0 - 0)      | 0<br>(0 - 0)       | 1<br>(0 - 1)       | 0<br>(0 - 1)       |
| Other neoplasms                               | 1<br>(1 - 1)       | 0<br>(0 - 0)     | 0<br>(0 - 0)      | 0<br>(0 - 0)       | 1<br>(0 - 1)       | 0<br>(0 - 0)       |
| Cardiovascular diseases                       | 130<br>(117 - 145) | 0<br>(0 - 0)     | 0<br>(0 - 0)      | 16<br>(13 - 19)    | 48<br>(42 - 55)    | 66<br>(60 - 73)    |
| Rheumatic heart disease                       | 0<br>(0 - 0)       | 0<br>(0 - 0)     | 0<br>(0 - 0)      | 0<br>(0 - 0)       | 0<br>(0 - 0)       | 0<br>(0 - 0)       |
| Ischemic heart disease                        | 54<br>(46 - 67)    | 0<br>(0 - 0)     | 0<br>(0 - 0)      | 7<br>(5 - 9)       | 23<br>(19 - 28)    | 25<br>(20 - 31)    |
| Cerebrovascular disease                       | 43<br>(35 - 52)    | 0<br>(0 - 0)     | 0<br>(0 - 0)      | 4<br>(3 - 6)       | 15<br>(12 - 18)    | 24<br>(20 - 30)    |
| Ischemic stroke                               | 24<br>(15 - 32)    | 0<br>(0 - 0)     | 0<br>(0 - 0)      | 1<br>(1 - 2)       | 7<br>(4 - 10)      | 15<br>(10 - 20)    |
| Hemorrhagic stroke                            | 20<br>(11 - 31)    | 0<br>(0 - 0)     | 0<br>(0 - 0)      | 3<br>(2 - 4)       | 7<br>(4 - 12)      | 9<br>(4 - 16)      |
| Hypertensive heart disease                    | 21<br>(13 - 30)    | 0<br>(0 - 0)     | 0<br>(0 - 0)      | 2<br>(1 - 3)       | 7<br>(4 - 10)      | 12<br>(7 - 18)     |
| Cardiomyopathy and myocarditis                | 2<br>(1 - 3)       | 0<br>(0 - 0)     | 0<br>(0 - 0)      | 1<br>(0 - 1)       | 1<br>(0 - 1)       | 1<br>(0 - 1)       |
| Atrial fibrillation and flutter               | 0<br>(0 - 0)       | --               | --                | 0<br>(0 - 0)       | 0<br>(0 - 0)       | 0<br>(0 - 0)       |
| Aortic aneurysm                               | 1<br>(1 - 1)       | --               | --                | 0<br>(0 - 0)       | 0<br>(0 - 0)       | 1<br>(0 - 1)       |
| Peripheral vascular disease                   | 0<br>(0 - 0)       | --               | --                | 0<br>(0 - 0)       | 0<br>(0 - 0)       | 0<br>(0 - 0)       |
| Endocarditis                                  | 0<br>(0 - 1)       | 0<br>(0 - 0)     | 0<br>(0 - 0)      | 0<br>(0 - 0)       | 0<br>(0 - 0)       | 0<br>(0 - 0)       |
| Other cardiovascular and circulatory diseases | 8<br>(5 - 10)      | 0<br>(0 - 0)     | 0<br>(0 - 0)      | 2<br>(1 - 2)       | 3<br>(2 - 4)       | 3<br>(2 - 4)       |
| Chronic respiratory diseases                  | 17<br>(15 - 23)    | 0<br>(0 - 0)     | 0<br>(0 - 0)      | 1<br>(1 - 2)       | 5<br>(4 - 6)       | 11<br>(9 - 15)     |
| Chronic obstructive pulmonary disease         | 12<br>(9 - 17)     | 0<br>(0 - 0)     | 0<br>(0 - 0)      | 1<br>(0 - 1)       | 3<br>(2 - 4)       | 8<br>(6 - 12)      |

Web Table 31- Seychelles deaths with 95% UI by age, sex, and cause in 2013

| Cause                                               | Males, All Ages | Males, 0-4 Years | Males, 5-14 Years | Males, 15-49 Years | Males, 50-69 Years | Males, 70-80 Years |
|-----------------------------------------------------|-----------------|------------------|-------------------|--------------------|--------------------|--------------------|
| Pneumoconiosis                                      | 1<br>(1 - 1)    | 0<br>(0 - 0)     | 0<br>(0 - 0)      | 0<br>(0 - 0)       | 0<br>(0 - 1)       | 0<br>(0 - 1)       |
| Silicosis                                           | 0<br>(0 - 1)    | 0<br>(0 - 0)     | 0<br>(0 - 0)      | 0<br>(0 - 0)       | 0<br>(0 - 0)       | 0<br>(0 - 1)       |
| Asbestosis                                          | 0<br>(0 - 0)    | 0<br>(0 - 0)     | 0<br>(0 - 0)      | 0<br>(0 - 0)       | 0<br>(0 - 0)       | 0<br>(0 - 0)       |
| Coal workers pneumoconiosis                         | 0<br>(0 - 0)    | 0<br>(0 - 0)     | 0<br>(0 - 0)      | 0<br>(0 - 0)       | 0<br>(0 - 0)       | 0<br>(0 - 0)       |
| Other pneumoconiosis                                | 0<br>(0 - 0)    | 0<br>(0 - 0)     | 0<br>(0 - 0)      | 0<br>(0 - 0)       | 0<br>(0 - 0)       | 0<br>(0 - 0)       |
| Asthma                                              | 3<br>(2 - 5)    | 0<br>(0 - 0)     | 0<br>(0 - 0)      | 0<br>(0 - 1)       | 1<br>(1 - 2)       | 2<br>(1 - 3)       |
| Interstitial lung disease and pulmonary sarcoidosis | 1<br>(0 - 2)    | 0<br>(0 - 0)     | 0<br>(0 - 0)      | 0<br>(0 - 0)       | 0<br>(0 - 1)       | 1<br>(0 - 1)       |
| Other chronic respiratory diseases                  | 0<br>(0 - 1)    | 0<br>(0 - 0)     | 0<br>(0 - 0)      | 0<br>(0 - 0)       | 0<br>(0 - 0)       | 0<br>(0 - 1)       |
| Cirrhosis                                           | 15<br>(12 - 18) | 0<br>(0 - 0)     | 0<br>(0 - 0)      | 6<br>(4 - 7)       | 7<br>(6 - 9)       | 2<br>(1 - 2)       |
| Cirrhosis due to hepatitis B                        | 5<br>(2 - 7)    | 0<br>(0 - 0)     | 0<br>(0 - 0)      | 2<br>(1 - 3)       | 2<br>(1 - 4)       | 0<br>(0 - 1)       |
| Cirrhosis due to hepatitis C                        | 3<br>(1 - 6)    | 0<br>(0 - 0)     | 0<br>(0 - 0)      | 1<br>(0 - 2)       | 2<br>(1 - 3)       | 0<br>(0 - 1)       |
| Cirrhosis due to alcohol use                        | 6<br>(3 - 9)    | --               | --                | 2<br>(1 - 3)       | 3<br>(2 - 5)       | 1<br>(0 - 1)       |
| Cirrhosis due to other causes                       | 1<br>(1 - 2)    | 0<br>(0 - 0)     | 0<br>(0 - 0)      | 1<br>(0 - 1)       | 0<br>(0 - 1)       | 0<br>(0 - 0)       |
| Digestive diseases                                  | 16<br>(11 - 19) | 0<br>(0 - 0)     | 0<br>(0 - 0)      | 5<br>(3 - 6)       | 5<br>(3 - 7)       | 6<br>(4 - 8)       |
| Peptic ulcer disease                                | 5<br>(3 - 7)    | 0<br>(0 - 0)     | 0<br>(0 - 0)      | 1<br>(1 - 2)       | 2<br>(1 - 3)       | 2<br>(1 - 2)       |
| Gastritis and duodenitis                            | 0<br>(0 - 1)    | 0<br>(0 - 0)     | 0<br>(0 - 0)      | 0<br>(0 - 0)       | 0<br>(0 - 0)       | 0<br>(0 - 0)       |
| Appendicitis                                        | 1<br>(0 - 2)    | 0<br>(0 - 0)     | 0<br>(0 - 0)      | 0<br>(0 - 1)       | 0<br>(0 - 1)       | 0<br>(0 - 1)       |
| Paralytic ileus and intestinal obstruction          | 7<br>(5 - 10)   | 0<br>(0 - 0)     | 0<br>(0 - 0)      | 1<br>(1 - 2)       | 2<br>(1 - 3)       | 3<br>(2 - 5)       |
| Inguinal, femoral, and abdominal hernia             | 0<br>(0 - 0)    | 0<br>(0 - 0)     | 0<br>(0 - 0)      | 0<br>(0 - 0)       | 0<br>(0 - 0)       | 0<br>(0 - 0)       |
| Inflammatory bowel disease                          | 0<br>(0 - 1)    | 0<br>(0 - 0)     | 0<br>(0 - 0)      | 0<br>(0 - 0)       | 0<br>(0 - 0)       | 0<br>(0 - 0)       |
| Vascular intestinal disorders                       | 0<br>(0 - 0)    | 0<br>(0 - 0)     | 0<br>(0 - 0)      | 0<br>(0 - 0)       | 0<br>(0 - 0)       | 0<br>(0 - 0)       |
| Gallbladder and biliary diseases                    | 0<br>(0 - 0)    | 0<br>(0 - 0)     | 0<br>(0 - 0)      | 0<br>(0 - 0)       | 0<br>(0 - 0)       | 0<br>(0 - 0)       |
| Pancreatitis                                        | 3<br>(1 - 5)    | 0<br>(0 - 0)     | 0<br>(0 - 0)      | 1<br>(1 - 2)       | 1<br>(0 - 2)       | 0<br>(0 - 1)       |
| Other digestive diseases                            | 0<br>(0 - 1)    | 0<br>(0 - 0)     | 0<br>(0 - 0)      | 0<br>(0 - 0)       | 0<br>(0 - 0)       | 0<br>(0 - 0)       |
| Neurological disorders                              | 10<br>(8 - 12)  | 0<br>(0 - 0)     | 0<br>(0 - 0)      | 1<br>(0 - 1)       | 1<br>(1 - 2)       | 8<br>(6 - 10)      |
| Alzheimer disease and other dementias               | 8<br>(6 - 11)   | --               | --                | 0<br>(0 - 0)       | 1<br>(1 - 1)       | 7<br>(5 - 10)      |
| Parkinson disease                                   | 0<br>(0 - 1)    | --               | --                | 0<br>(0 - 0)       | 0<br>(0 - 0)       | 0<br>(0 - 1)       |
| Epilepsy                                            | 1<br>(0 - 1)    | 0<br>(0 - 0)     | 0<br>(0 - 0)      | 0<br>(0 - 1)       | 0<br>(0 - 0)       | 0<br>(0 - 0)       |
| Multiple sclerosis                                  | 0<br>(0 - 0)    | --               | --                | 0<br>(0 - 0)       | 0<br>(0 - 0)       | 0<br>(0 - 0)       |
| Other neurological disorders                        | 0<br>(0 - 1)    | 0<br>(0 - 0)     | 0<br>(0 - 0)      | 0<br>(0 - 0)       | 0<br>(0 - 0)       | 0<br>(0 - 0)       |
| Mental and substance use disorders                  | 5<br>(3 - 6)    | 0<br>(0 - 0)     | 0<br>(0 - 0)      | 3<br>(2 - 4)       | 2<br>(1 - 2)       | 0<br>(0 - 0)       |
| Schizophrenia                                       | 0<br>(0 - 0)    | --               | --                | 0<br>(0 - 0)       | 0<br>(0 - 0)       | 0<br>(0 - 0)       |
| Alcohol use disorders                               | 1<br>(1 - 2)    | --               | --                | 1<br>(0 - 1)       | 1<br>(0 - 1)       | 0<br>(0 - 0)       |
| Drug use disorders                                  | 3<br>(2 - 5)    | 0<br>(0 - 0)     | --                | 2<br>(1 - 3)       | 1<br>(0 - 1)       | 0<br>(0 - 0)       |
| Opioid use disorders                                | 2<br>(1 - 3)    | 0<br>(0 - 0)     | --                | 2<br>(1 - 2)       | 1<br>(0 - 1)       | 0<br>(0 - 0)       |
| Cocaine use disorders                               | 0<br>(0 - 0)    | 0<br>(0 - 0)     | --                | 0<br>(0 - 0)       | 0<br>(0 - 0)       | 0<br>(0 - 0)       |
| Amphetamine use disorders                           | 0<br>(0 - 0)    | 0<br>(0 - 0)     | --                | 0<br>(0 - 0)       | 0<br>(0 - 0)       | 0<br>(0 - 0)       |
| Other drug use disorders                            | 1<br>(1 - 2)    | 0<br>(0 - 0)     | --                | 1<br>(0 - 1)       | 0<br>(0 - 0)       | 0<br>(0 - 0)       |
| Eating disorders                                    | 0<br>(0 - 0)    | --               | 0<br>(0 - 0)      | 0<br>(0 - 0)       | --                 | --                 |
| Anorexia nervosa                                    | 0<br>(0 - 0)    | --               | 0<br>(0 - 0)      | 0<br>(0 - 0)       | --                 | --                 |

Web Table 31- Seychelles deaths with 95% UI by age, sex, and cause in 2013

| Cause                                               | Males, All Ages | Males, 0-4 Years | Males, 5-14 Years | Males, 15-49 Years | Males, 50-69 Years | Males, 70-80 Years |
|-----------------------------------------------------|-----------------|------------------|-------------------|--------------------|--------------------|--------------------|
| Diabetes, urogenital, blood, and endocrine diseases | 20<br>(18 - 24) | 0<br>(0 - 0)     | 0<br>(0 - 0)      | 3<br>(2 - 4)       | 9<br>(7 - 11)      | 8<br>(7 - 10)      |
| Diabetes mellitus                                   | 6<br>(5 - 7)    | 0<br>(0 - 0)     | 0<br>(0 - 0)      | 1<br>(0 - 1)       | 3<br>(2 - 3)       | 2<br>(2 - 3)       |
| Acute glomerulonephritis                            | 0<br>(0 - 0)    | 0<br>(0 - 0)     | 0<br>(0 - 0)      | 0<br>(0 - 0)       | 0<br>(0 - 0)       | 0<br>(0 - 0)       |
| Chronic kidney disease                              | 8<br>(6 - 12)   | 0<br>(0 - 0)     | 0<br>(0 - 0)      | 1<br>(1 - 2)       | 4<br>(3 - 6)       | 3<br>(2 - 4)       |
| Chronic kidney disease due to diabetes mellitus     | 1<br>(1 - 3)    | 0<br>(0 - 0)     | 0<br>(0 - 0)      | 0<br>(0 - 0)       | 1<br>(0 - 1)       | 1<br>(0 - 1)       |
| Chronic kidney disease due to hypertension          | 3<br>(2 - 5)    | 0<br>(0 - 0)     | 0<br>(0 - 0)      | 0<br>(0 - 1)       | 1<br>(1 - 2)       | 1<br>(1 - 2)       |
| Chronic kidney disease due to glomerulonephritis    | 0<br>(0 - 0)    | 0<br>(0 - 0)     | 0<br>(0 - 0)      | 0<br>(0 - 0)       | 0<br>(0 - 0)       | 0<br>(0 - 0)       |
| Chronic kidney disease due to other causes          | 4<br>(2 - 6)    | 0<br>(0 - 0)     | 0<br>(0 - 0)      | 1<br>(0 - 1)       | 2<br>(1 - 3)       | 1<br>(0 - 2)       |
| Urinary diseases and male infertility               | 3<br>(2 - 5)    | 0<br>(0 - 0)     | 0<br>(0 - 0)      | 0<br>(0 - 0)       | 1<br>(1 - 2)       | 2<br>(1 - 3)       |
| Interstitial nephritis and urinary tract infections | 1<br>(1 - 2)    | 0<br>(0 - 0)     | 0<br>(0 - 0)      | 0<br>(0 - 0)       | 0<br>(0 - 1)       | 0<br>(0 - 1)       |
| Urolithiasis                                        | 0<br>(0 - 1)    | --               | 0<br>(0 - 0)      | 0<br>(0 - 0)       | 0<br>(0 - 0)       | 0<br>(0 - 1)       |
| Other urinary diseases                              | 1<br>(1 - 3)    | 0<br>(0 - 0)     | 0<br>(0 - 0)      | 0<br>(0 - 0)       | 1<br>(0 - 1)       | 1<br>(0 - 2)       |
| Gynecological diseases                              | --              | --               | --                | --                 | --                 | --                 |
| Uterine fibroids                                    | --              | --               | --                | --                 | --                 | --                 |
| Polycystic ovarian syndrome                         | --              | --               | --                | --                 | --                 | --                 |
| Endometriosis                                       | --              | --               | --                | --                 | --                 | --                 |
| Genital prolapse                                    | --              | --               | --                | --                 | --                 | --                 |
| Other gynecological diseases                        | --              | --               | --                | --                 | --                 | --                 |
| Hemoglobinopathies and hemolytic anemias            | 1<br>(1 - 2)    | 0<br>(0 - 0)     | 0<br>(0 - 0)      | 0<br>(0 - 0)       | 0<br>(0 - 0)       | 1<br>(0 - 1)       |
| Thalassemias                                        | 0<br>(0 - 0)    | 0<br>(0 - 0)     | 0<br>(0 - 0)      | 0<br>(0 - 0)       | 0<br>(0 - 0)       | 0<br>(0 - 0)       |
| Sickle cell disorders                               | 0<br>(0 - 0)    | 0<br>(0 - 0)     | 0<br>(0 - 0)      | 0<br>(0 - 0)       | 0<br>(0 - 0)       | 0<br>(0 - 0)       |
| G6PD deficiency                                     | 0<br>(0 - 0)    | 0<br>(0 - 0)     | 0<br>(0 - 0)      | 0<br>(0 - 0)       | 0<br>(0 - 0)       | 0<br>(0 - 0)       |
| Other hemoglobinopathies and hemolytic anemias      | 1<br>(0 - 1)    | 0<br>(0 - 0)     | 0<br>(0 - 0)      | 0<br>(0 - 0)       | 0<br>(0 - 0)       | 1<br>(0 - 1)       |
| Endocrine, metabolic, blood, and immune disorders   | 2<br>(1 - 3)    | 0<br>(0 - 0)     | 0<br>(0 - 0)      | 1<br>(0 - 1)       | 1<br>(0 - 1)       | 1<br>(0 - 1)       |
| Musculoskeletal disorders                           | 0<br>(0 - 0)    | --               | 0<br>(0 - 0)      | 0<br>(0 - 0)       | 0<br>(0 - 0)       | 0<br>(0 - 0)       |
| Rheumatoid arthritis                                | 0<br>(0 - 0)    | --               | 0<br>(0 - 0)      | 0<br>(0 - 0)       | 0<br>(0 - 0)       | 0<br>(0 - 0)       |
| Other musculoskeletal disorders                     | 0<br>(0 - 0)    | --               | 0<br>(0 - 0)      | 0<br>(0 - 0)       | 0<br>(0 - 0)       | 0<br>(0 - 0)       |
| Other non-communicable diseases                     | 3<br>(2 - 3)    | 2<br>(1 - 2)     | 0<br>(0 - 0)      | 0<br>(0 - 0)       | 0<br>(0 - 1)       | 0<br>(0 - 0)       |
| Congenital anomalies                                | 2<br>(2 - 3)    | 2<br>(1 - 2)     | 0<br>(0 - 0)      | 0<br>(0 - 0)       | 0<br>(0 - 0)       | 0<br>(0 - 0)       |
| Neural tube defects                                 | 0<br>(0 - 0)    | 0<br>(0 - 0)     | 0<br>(0 - 0)      | 0<br>(0 - 0)       | 0<br>(0 - 0)       | 0<br>(0 - 0)       |
| Congenital heart anomalies                          | 1<br>(1 - 2)    | 1<br>(1 - 1)     | 0<br>(0 - 0)      | 0<br>(0 - 0)       | 0<br>(0 - 0)       | 0<br>(0 - 0)       |
| Cleft lip and cleft palate                          | 0<br>(0 - 0)    | 0<br>(0 - 0)     | --                | --                 | --                 | --                 |
| Down syndrome                                       | 0<br>(0 - 0)    | 0<br>(0 - 0)     | 0<br>(0 - 0)      | 0<br>(0 - 0)       | 0<br>(0 - 0)       | 0<br>(0 - 0)       |
| Chromosomal unbalanced rearrangements               | 0<br>(0 - 0)    | 0<br>(0 - 0)     | 0<br>(0 - 0)      | 0<br>(0 - 0)       | 0<br>(0 - 0)       | 0<br>(0 - 0)       |
| Other congenital anomalies                          | 1<br>(0 - 1)    | 1<br>(0 - 1)     | 0<br>(0 - 0)      | 0<br>(0 - 0)       | 0<br>(0 - 0)       | 0<br>(0 - 0)       |
| Skin and subcutaneous diseases                      | 0<br>(0 - 1)    | 0<br>(0 - 0)     | 0<br>(0 - 0)      | 0<br>(0 - 0)       | 0<br>(0 - 0)       | 0<br>(0 - 0)       |
| Cellulitis                                          | 0<br>(0 - 0)    | 0<br>(0 - 0)     | 0<br>(0 - 0)      | 0<br>(0 - 0)       | 0<br>(0 - 0)       | 0<br>(0 - 0)       |
| Pyoderma                                            | 0<br>(0 - 1)    | 0<br>(0 - 0)     | 0<br>(0 - 0)      | 0<br>(0 - 0)       | 0<br>(0 - 0)       | 0<br>(0 - 0)       |
| Decubitus ulcer                                     | 0<br>(0 - 0)    | 0<br>(0 - 0)     | 0<br>(0 - 0)      | 0<br>(0 - 0)       | 0<br>(0 - 0)       | 0<br>(0 - 0)       |
| Other skin and subcutaneous diseases                | 0<br>(0 - 0)    | 0<br>(0 - 0)     | 0<br>(0 - 0)      | 0<br>(0 - 0)       | 0<br>(0 - 0)       | 0<br>(0 - 0)       |



Web Table 31- Seychelles deaths with 95% UI by age, sex, and cause in 2013

| Cause                                           | Males, All Ages | Males, 0-4 Years | Males, 5-14 Years | Males, 15-49 Years | Males, 50-69 Years | Males, 70-80 Years |
|-------------------------------------------------|-----------------|------------------|-------------------|--------------------|--------------------|--------------------|
| Sudden infant death syndrome                    | 0<br>(0 - 0)    | 0<br>(0 - 0)     | --                | --                 | --                 | --                 |
| Injuries                                        | 42<br>(36 - 49) | 1<br>(0 - 1)     | 1<br>(1 - 1)      | 25<br>(22 - 30)    | 11<br>(9 - 13)     | 4<br>(3 - 5)       |
| Transport injuries                              | 9               | 0                | 0                 | 6                  | 2                  | 1                  |
| Road injuries                                   | 8<br>(6 - 11)   | 0<br>(0 - 0)     | 0<br>(0 - 0)      | 5<br>(4 - 7)       | 2<br>(1 - 3)       | 0<br>(0 - 1)       |
| Pedestrian road injuries                        | 2<br>(1 - 3)    | 0<br>(0 - 0)     | 0<br>(0 - 0)      | 1<br>(0 - 2)       | 1<br>(0 - 1)       | 0<br>(0 - 0)       |
| Cyclist road injuries                           | 1<br>(0 - 1)    | 0<br>(0 - 0)     | 0<br>(0 - 0)      | 0<br>(0 - 1)       | 0<br>(0 - 0)       | 0<br>(0 - 0)       |
| Motorcyclist road injuries                      | 2<br>(1 - 3)    | 0<br>(0 - 0)     | 0<br>(0 - 0)      | 2<br>(1 - 3)       | 0<br>(0 - 1)       | 0<br>(0 - 0)       |
| Motor vehicle road injuries                     | 3<br>(2 - 6)    | 0<br>(0 - 0)     | 0<br>(0 - 0)      | 2<br>(1 - 4)       | 1<br>(0 - 2)       | 0<br>(0 - 0)       |
| Other road injuries                             | 0<br>(0 - 0)    | 0<br>(0 - 0)     | 0<br>(0 - 0)      | 0<br>(0 - 0)       | 0<br>(0 - 0)       | 0<br>(0 - 0)       |
| Other transport injuries                        | 1<br>(0 - 2)    | 0<br>(0 - 0)     | 0<br>(0 - 0)      | 0<br>(0 - 1)       | 0<br>(0 - 1)       | 0<br>(0 - 0)       |
| Unintentional injuries                          | 18<br>(15 - 23) | 1<br>(0 - 1)     | 0<br>(0 - 1)      | 10<br>(8 - 13)     | 5<br>(4 - 7)       | 2<br>(2 - 3)       |
| Falls                                           | 4<br>(3 - 5)    | 0<br>(0 - 0)     | 0<br>(0 - 0)      | 2<br>(1 - 2)       | 2<br>(1 - 2)       | 1<br>(1 - 1)       |
| Drowning                                        | 10<br>(8 - 16)  | 0<br>(0 - 1)     | 0<br>(0 - 0)      | 6<br>(5 - 10)      | 3<br>(2 - 4)       | 1<br>(0 - 1)       |
| Fire, heat, and hot substances                  | 1<br>(1 - 1)    | 0<br>(0 - 0)     | 0<br>(0 - 0)      | 0<br>(0 - 1)       | 0<br>(0 - 0)       | 0<br>(0 - 0)       |
| Poisonings                                      | 0<br>(0 - 0)    | 0<br>(0 - 0)     | 0<br>(0 - 0)      | 0<br>(0 - 0)       | 0<br>(0 - 0)       | 0<br>(0 - 0)       |
| Exposure to mechanical forces                   | 1<br>(1 - 2)    | 0<br>(0 - 0)     | 0<br>(0 - 0)      | 1<br>(1 - 1)       | 0<br>(0 - 1)       | 0<br>(0 - 0)       |
| Unintentional firearm injuries                  | 0<br>(0 - 0)    | 0<br>(0 - 0)     | 0<br>(0 - 0)      | 0<br>(0 - 0)       | 0<br>(0 - 0)       | 0<br>(0 - 0)       |
| Unintentional suffocation                       | 0<br>(0 - 0)    | 0<br>(0 - 0)     | 0<br>(0 - 0)      | 0<br>(0 - 0)       | 0<br>(0 - 0)       | 0<br>(0 - 0)       |
| Other exposure to mechanical forces             | 1<br>(1 - 2)    | 0<br>(0 - 0)     | 0<br>(0 - 0)      | 1<br>(0 - 1)       | 0<br>(0 - 1)       | 0<br>(0 - 0)       |
| Adverse effects of medical treatment            | 0<br>(0 - 0)    | 0<br>(0 - 0)     | 0<br>(0 - 0)      | 0<br>(0 - 0)       | 0<br>(0 - 0)       | 0<br>(0 - 0)       |
| Animal contact                                  | 0<br>(0 - 0)    | 0<br>(0 - 0)     | 0<br>(0 - 0)      | 0<br>(0 - 0)       | 0<br>(0 - 0)       | 0<br>(0 - 0)       |
| Venomous animal contact                         | 0<br>(0 - 0)    | 0<br>(0 - 0)     | 0<br>(0 - 0)      | 0<br>(0 - 0)       | 0<br>(0 - 0)       | 0<br>(0 - 0)       |
| Non-venomous animal contact                     | 0<br>(0 - 0)    | 0<br>(0 - 0)     | 0<br>(0 - 0)      | 0<br>(0 - 0)       | 0<br>(0 - 0)       | 0<br>(0 - 0)       |
| Foreign body                                    | 1<br>(0 - 2)    | 0<br>(0 - 0)     | 0<br>(0 - 0)      | 0<br>(0 - 0)       | 0<br>(0 - 1)       | 0<br>(0 - 1)       |
| Pulmonary aspiration and foreign body in airway | 1<br>(0 - 2)    | 0<br>(0 - 0)     | 0<br>(0 - 0)      | 0<br>(0 - 0)       | 0<br>(0 - 1)       | 0<br>(0 - 1)       |
| Foreign body in other body part                 | 0<br>(0 - 0)    | 0<br>(0 - 0)     | 0<br>(0 - 0)      | 0<br>(0 - 0)       | 0<br>(0 - 0)       | 0<br>(0 - 0)       |
| Other unintentional injuries                    | 0<br>(0 - 0)    | 0<br>(0 - 0)     | 0<br>(0 - 0)      | 0<br>(0 - 0)       | 0<br>(0 - 0)       | 0<br>(0 - 0)       |
| Self-harm and interpersonal violence            | 14<br>(11 - 18) | 0<br>(0 - 0)     | 0<br>(0 - 0)      | 10<br>(7 - 12)     | 3<br>(2 - 4)       | 1<br>(1 - 2)       |
| Self-harm                                       | 8<br>(3 - 11)   | --               | 0<br>(0 - 0)      | 5<br>(2 - 7)       | 2<br>(1 - 2)       | 1<br>(0 - 1)       |
| Interpersonal violence                          | 6<br>(4 - 9)    | 0<br>(0 - 0)     | 0<br>(0 - 0)      | 4<br>(3 - 6)       | 1<br>(1 - 2)       | 0<br>(0 - 1)       |
| Assault by firearm                              | 2<br>(1 - 4)    | 0<br>(0 - 0)     | 0<br>(0 - 0)      | 2<br>(1 - 3)       | 0<br>(0 - 1)       | 0<br>(0 - 0)       |
| Assault by sharp object                         | 2<br>(1 - 4)    | 0<br>(0 - 0)     | 0<br>(0 - 0)      | 2<br>(1 - 3)       | 0<br>(0 - 1)       | 0<br>(0 - 0)       |
| Assault by other means                          | 2<br>(1 - 4)    | 0<br>(0 - 0)     | 0<br>(0 - 0)      | 1<br>(1 - 2)       | 1<br>(0 - 1)       | 0<br>(0 - 0)       |

Web Table 31- Seychelles deaths with 95% UI by age, sex, and cause in 2013

| Cause                                                             | Females, All Ages  | Females, 0-4 Years | Females, 5-14 Years | Females, 15-49 Years | Females, 50-69 Years | Females, 70-80 Years |
|-------------------------------------------------------------------|--------------------|--------------------|---------------------|----------------------|----------------------|----------------------|
| All causes                                                        | 346<br>(300 - 370) | 8<br>(7 - 9)       | 1<br>(1 - 2)        | 28<br>(24 - 35)      | 68<br>(55 - 77)      | 240<br>(210 - 251)   |
| Communicable, maternal, neonatal, and nutritional diseases        | 47<br>(39 - 56)    | 5<br>(4 - 6)       | 0<br>(0 - 1)        | 4<br>(3 - 5)         | 6<br>(5 - 7)         | 32<br>(25 - 40)      |
| HIV/AIDS and tuberculosis                                         | 1<br>(1 - 2)       | 0<br>(0 - 0)       | 0<br>(0 - 0)        | 1<br>(1 - 1)         | 0<br>(0 - 1)         | 0<br>(0 - 0)         |
| Tuberculosis                                                      | 0<br>(0 - 0)       | 0<br>(0 - 0)       | 0<br>(0 - 0)        | 0<br>(0 - 0)         | 0<br>(0 - 0)         | 0<br>(0 - 0)         |
| HIV/AIDS                                                          | 1<br>(1 - 1)       | 0<br>(0 - 0)       | 0<br>(0 - 0)        | 1<br>(1 - 1)         | 0<br>(0 - 0)         | 0<br>(0 - 0)         |
| HIV/AIDS resulting in mycobacterial infection                     | 0<br>(0 - 0)       | 0<br>(0 - 0)       | 0<br>(0 - 0)        | 0<br>(0 - 0)         | 0<br>(0 - 0)         | 0<br>(0 - 0)         |
| HIV/AIDS resulting in other diseases                              | 1<br>(1 - 1)       | 0<br>(0 - 0)       | 0<br>(0 - 0)        | 1<br>(1 - 1)         | 0<br>(0 - 0)         | 0<br>(0 - 0)         |
| Diarrhea, lower respiratory, and other common infectious diseases | 36<br>(28 - 45)    | 2<br>(2 - 3)       | 0<br>(0 - 1)        | 2<br>(2 - 3)         | 5<br>(3 - 6)         | 27<br>(20 - 35)      |
| Diarrheal diseases                                                | 1<br>(1 - 2)       | 0<br>(0 - 0)       | 0<br>(0 - 0)        | 0<br>(0 - 0)         | 0<br>(0 - 0)         | 1<br>(0 - 1)         |
| Intestinal infectious diseases                                    | 1<br>(0 - 1)       | 0<br>(0 - 0)       | 0<br>(0 - 0)        | 0<br>(0 - 0)         | 0<br>(0 - 0)         | 0<br>(0 - 0)         |
| Typhoid fever                                                     | 1<br>(0 - 1)       | 0<br>(0 - 0)       | 0<br>(0 - 0)        | 0<br>(0 - 0)         | 0<br>(0 - 0)         | 0<br>(0 - 0)         |
| Paratyphoid fever                                                 | 0<br>(0 - 0)       | 0<br>(0 - 0)       | 0<br>(0 - 0)        | 0<br>(0 - 0)         | 0<br>(0 - 0)         | 0<br>(0 - 0)         |
| Other intestinal infectious diseases                              | 0<br>(0 - 0)       | 0<br>(0 - 0)       | 0<br>(0 - 0)        | 0<br>(0 - 0)         | 0<br>(0 - 0)         | 0<br>(0 - 0)         |
| Lower respiratory infections                                      | 32<br>(25 - 41)    | 1<br>(1 - 2)       | 0<br>(0 - 0)        | 2<br>(1 - 2)         | 4<br>(3 - 5)         | 25<br>(19 - 34)      |
| Upper respiratory infections                                      | 0<br>(0 - 0)       | 0<br>(0 - 0)       | 0<br>(0 - 0)        | 0<br>(0 - 0)         | 0<br>(0 - 0)         | 0<br>(0 - 0)         |
| Otitis media                                                      | 0<br>(0 - 0)       | 0<br>(0 - 0)       | 0<br>(0 - 0)        | 0<br>(0 - 0)         | 0<br>(0 - 0)         | 0<br>(0 - 0)         |
| Meningitis                                                        | 2<br>(1 - 2)       | 0<br>(0 - 0)       | 0<br>(0 - 0)        | 0<br>(0 - 0)         | 0<br>(0 - 1)         | 1<br>(0 - 1)         |
| Pneumococcal meningitis                                           | 1<br>(0 - 1)       | 0<br>(0 - 0)       | 0<br>(0 - 0)        | 0<br>(0 - 0)         | 0<br>(0 - 0)         | 0<br>(0 - 0)         |
| H influenzae type B meningitis                                    | 0<br>(0 - 0)       | 0<br>(0 - 0)       | 0<br>(0 - 0)        | 0<br>(0 - 0)         | 0<br>(0 - 0)         | 0<br>(0 - 0)         |
| Meningococcal meningitis                                          | 0<br>(0 - 0)       | 0<br>(0 - 0)       | 0<br>(0 - 0)        | 0<br>(0 - 0)         | 0<br>(0 - 0)         | 0<br>(0 - 0)         |
| Other meningitis                                                  | 1<br>(0 - 1)       | 0<br>(0 - 0)       | 0<br>(0 - 0)        | 0<br>(0 - 0)         | 0<br>(0 - 0)         | 0<br>(0 - 0)         |
| Encephalitis                                                      | 0<br>(0 - 0)       | 0<br>(0 - 0)       | 0<br>(0 - 0)        | 0<br>(0 - 0)         | 0<br>(0 - 0)         | 0<br>(0 - 0)         |
| Diphtheria                                                        | 0<br>(0 - 0)       | 0<br>(0 - 0)       | 0<br>(0 - 0)        | 0<br>(0 - 0)         | 0<br>(0 - 0)         | --                   |
| Whooping cough                                                    | 0<br>(0 - 0)       | 0<br>(0 - 0)       | 0<br>(0 - 0)        | 0<br>(0 - 0)         | 0<br>(0 - 0)         | --                   |
| Tetanus                                                           | 0<br>(0 - 0)       | 0<br>(0 - 0)       | 0<br>(0 - 0)        | 0<br>(0 - 0)         | 0<br>(0 - 0)         | 0<br>(0 - 0)         |
| Measles                                                           | 0<br>(0 - 0)       | 0<br>(0 - 0)       | 0<br>(0 - 0)        | 0<br>(0 - 0)         | 0<br>(0 - 0)         | --                   |
| Varicella and herpes zoster                                       | 0<br>(0 - 0)       | 0<br>(0 - 0)       | 0<br>(0 - 0)        | 0<br>(0 - 0)         | 0<br>(0 - 0)         | 0<br>(0 - 0)         |
| Neglected tropical diseases and malaria                           | 0<br>(0 - 1)       | 0<br>(0 - 0)       | 0<br>(0 - 0)        | 0<br>(0 - 0)         | 0<br>(0 - 0)         | 0<br>(0 - 0)         |
| Leishmaniasis                                                     | 0<br>(0 - 0)       | 0<br>(0 - 0)       | 0<br>(0 - 0)        | 0<br>(0 - 0)         | 0<br>(0 - 0)         | 0<br>(0 - 0)         |
| Visceral leishmaniasis                                            | 0<br>(0 - 0)       | 0<br>(0 - 0)       | 0<br>(0 - 0)        | 0<br>(0 - 0)         | 0<br>(0 - 0)         | 0<br>(0 - 0)         |
| Cysticercosis                                                     | 0<br>(0 - 0)       | 0<br>(0 - 0)       | 0<br>(0 - 0)        | 0<br>(0 - 0)         | 0<br>(0 - 0)         | 0<br>(0 - 0)         |
| Cystic echinococcosis                                             | 0<br>(0 - 0)       | 0<br>(0 - 0)       | 0<br>(0 - 0)        | 0<br>(0 - 0)         | 0<br>(0 - 0)         | 0<br>(0 - 0)         |
| Dengue                                                            | 0<br>(0 - 0)       | 0<br>(0 - 0)       | 0<br>(0 - 0)        | 0<br>(0 - 0)         | 0<br>(0 - 0)         | 0<br>(0 - 0)         |
| Rabies                                                            | 0<br>(0 - 0)       | 0<br>(0 - 0)       | 0<br>(0 - 0)        | 0<br>(0 - 0)         | 0<br>(0 - 0)         | 0<br>(0 - 0)         |
| Intestinal nematode infections                                    | 0<br>(0 - 0)       | 0<br>(0 - 0)       | 0<br>(0 - 0)        | 0<br>(0 - 0)         | 0<br>(0 - 0)         | 0<br>(0 - 0)         |
| Ascariasis                                                        | 0<br>(0 - 0)       | 0<br>(0 - 0)       | 0<br>(0 - 0)        | 0<br>(0 - 0)         | 0<br>(0 - 0)         | 0<br>(0 - 0)         |
| Other neglected tropical diseases                                 | 0<br>(0 - 0)       | 0<br>(0 - 0)       | 0<br>(0 - 0)        | 0<br>(0 - 0)         | 0<br>(0 - 0)         | 0<br>(0 - 0)         |
| Maternal disorders                                                | 0<br>(0 - 0)       | --                 | 0<br>(0 - 0)        | 0<br>(0 - 0)         | --                   | --                   |
| Maternal hemorrhage                                               | 0<br>(0 - 0)       | --                 | 0<br>(0 - 0)        | 0<br>(0 - 0)         | --                   | --                   |
| Maternal sepsis and other maternal infections                     | 0<br>(0 - 0)       | --                 | 0<br>(0 - 0)        | 0<br>(0 - 0)         | --                   | --                   |

Web Table 31- Seychelles deaths with 95% UI by age, sex, and cause in 2013

| Cause                                                            | Females, All Ages  | Females, 0-4 Years | Females, 5-14 Years | Females, 15-49 Years | Females, 50-69 Years | Females, 70-80 Years |
|------------------------------------------------------------------|--------------------|--------------------|---------------------|----------------------|----------------------|----------------------|
| Maternal hypertensive disorders                                  | 0<br>(0 - 0)       | --                 | 0<br>(0 - 0)        | 0<br>(0 - 0)         | --                   | --                   |
| Maternal obstructed labor                                        | 0<br>(0 - 0)       | --                 | 0<br>(0 - 0)        | 0<br>(0 - 0)         | --                   | --                   |
| Maternal abortive outcome                                        | 0<br>(0 - 0)       | --                 | 0<br>(0 - 0)        | 0<br>(0 - 0)         | --                   | --                   |
| Indirect maternal deaths                                         | 0<br>(0 - 0)       | --                 | 0<br>(0 - 0)        | 0<br>(0 - 0)         | --                   | --                   |
| Late maternal deaths                                             | 0<br>(0 - 0)       | --                 | 0<br>(0 - 0)        | 0<br>(0 - 0)         | --                   | --                   |
| Maternal deaths aggravated by HIV/AIDS                           | 0<br>(0 - 0)       | --                 | --                  | 0<br>(0 - 0)         | --                   | --                   |
| Other maternal disorders                                         | 0<br>(0 - 0)       | --                 | 0<br>(0 - 0)        | 0<br>(0 - 0)         | --                   | --                   |
| Neonatal disorders                                               | 3<br>(2 - 4)       | 3<br>(2 - 4)       | --                  | --                   | --                   | --                   |
| Neonatal preterm birth complications                             | 1<br>(0 - 2)       | 1<br>(0 - 2)       | --                  | --                   | --                   | --                   |
| Neonatal encephalopathy due to birth asphyxia and trauma         | 1<br>(0 - 2)       | 1<br>(0 - 2)       | --                  | --                   | --                   | --                   |
| Neonatal sepsis and other neonatal infections                    | 0<br>(0 - 1)       | 0<br>(0 - 1)       | --                  | --                   | --                   | --                   |
| Hemolytic disease and other neonatal jaundice                    | 0<br>(0 - 0)       | 0<br>(0 - 0)       | --                  | --                   | --                   | --                   |
| Other neonatal disorders                                         | 1<br>(0 - 1)       | 1<br>(0 - 1)       | --                  | --                   | --                   | --                   |
| Nutritional deficiencies                                         | 3<br>(2 - 5)       | 0<br>(0 - 0)       | 0<br>(0 - 0)        | 0<br>(0 - 0)         | 0<br>(0 - 0)         | 3<br>(2 - 4)         |
| Protein-energy malnutrition                                      | 0<br>(0 - 0)       | 0<br>(0 - 0)       | 0<br>(0 - 0)        | 0<br>(0 - 0)         | 0<br>(0 - 0)         | 0<br>(0 - 0)         |
| Iodine deficiency                                                | 0<br>(0 - 0)       | 0<br>(0 - 0)       | 0<br>(0 - 0)        | 0<br>(0 - 0)         | 0<br>(0 - 0)         | 0<br>(0 - 0)         |
| Iron-deficiency anemia                                           | 3<br>(2 - 4)       | 0<br>(0 - 0)       | 0<br>(0 - 0)        | 0<br>(0 - 0)         | 0<br>(0 - 0)         | 3<br>(2 - 4)         |
| Other nutritional deficiencies                                   | 0<br>(0 - 1)       | 0<br>(0 - 0)       | 0<br>(0 - 0)        | 0<br>(0 - 0)         | 0<br>(0 - 0)         | 0<br>(0 - 1)         |
| Other communicable, maternal, neonatal, and nutritional diseases | 3<br>(2 - 4)       | 0<br>(0 - 0)       | 0<br>(0 - 0)        | 0<br>(0 - 0)         | 1<br>(0 - 1)         | 2<br>(1 - 3)         |
| Sexually transmitted diseases excluding HIV                      | 0<br>(0 - 0)       | 0<br>(0 - 0)       | 0<br>(0 - 0)        | 0<br>(0 - 0)         | 0<br>(0 - 0)         | 0<br>(0 - 0)         |
| Syphilis                                                         | 0<br>(0 - 0)       | 0<br>(0 - 0)       | 0<br>(0 - 0)        | 0<br>(0 - 0)         | 0<br>(0 - 0)         | 0<br>(0 - 0)         |
| Chlamydial infection                                             | 0<br>(0 - 0)       | --                 | 0<br>(0 - 0)        | 0<br>(0 - 0)         | 0<br>(0 - 0)         | 0<br>(0 - 0)         |
| Gonococcal infection                                             | 0<br>(0 - 0)       | --                 | 0<br>(0 - 0)        | 0<br>(0 - 0)         | 0<br>(0 - 0)         | 0<br>(0 - 0)         |
| Other sexually transmitted diseases                              | 0<br>(0 - 0)       | --                 | 0<br>(0 - 0)        | 0<br>(0 - 0)         | 0<br>(0 - 0)         | 0<br>(0 - 0)         |
| Hepatitis                                                        | 1<br>(1 - 1)       | 0<br>(0 - 0)       | 0<br>(0 - 0)        | 0<br>(0 - 0)         | 0<br>(0 - 0)         | 1<br>(0 - 1)         |
| Acute hepatitis A                                                | 0<br>(0 - 0)       | 0<br>(0 - 0)       | 0<br>(0 - 0)        | 0<br>(0 - 0)         | 0<br>(0 - 0)         | 0<br>(0 - 0)         |
| Acute hepatitis B                                                | 1<br>(0 - 1)       | 0<br>(0 - 0)       | 0<br>(0 - 0)        | 0<br>(0 - 0)         | 0<br>(0 - 0)         | 0<br>(0 - 1)         |
| Acute hepatitis C                                                | 0<br>(0 - 0)       | --                 | 0<br>(0 - 0)        | 0<br>(0 - 0)         | 0<br>(0 - 0)         | 0<br>(0 - 0)         |
| Acute hepatitis E                                                | 0<br>(0 - 0)       | 0<br>(0 - 0)       | 0<br>(0 - 0)        | 0<br>(0 - 0)         | 0<br>(0 - 0)         | 0<br>(0 - 0)         |
| Other infectious diseases                                        | 2<br>(1 - 3)       | 0<br>(0 - 0)       | 0<br>(0 - 0)        | 0<br>(0 - 0)         | 1<br>(0 - 1)         | 1<br>(1 - 2)         |
| Non-communicable diseases                                        | 289<br>(248 - 310) | 2<br>(2 - 3)       | 0<br>(0 - 1)        | 21<br>(18 - 26)      | 60<br>(49 - 68)      | 205<br>(178 - 217)   |
| Neoplasms                                                        | 49<br>(40 - 56)    | 0<br>(0 - 0)       | 0<br>(0 - 0)        | 8<br>(7 - 10)        | 18<br>(14 - 22)      | 23<br>(19 - 26)      |
| Esophageal cancer                                                | 0<br>(0 - 0)       | --                 | --                  | 0<br>(0 - 0)         | 0<br>(0 - 0)         | 0<br>(0 - 0)         |
| Stomach cancer                                                   | 2<br>(1 - 2)       | --                 | --                  | 0<br>(0 - 0)         | 1<br>(0 - 1)         | 1<br>(1 - 1)         |
| Liver cancer                                                     | 1<br>(1 - 2)       | --                 | 0<br>(0 - 0)        | 0<br>(0 - 0)         | 0<br>(0 - 1)         | 1<br>(0 - 1)         |
| Liver cancer due to hepatitis B                                  | 0<br>(0 - 1)       | --                 | 0<br>(0 - 0)        | 0<br>(0 - 0)         | 0<br>(0 - 0)         | 0<br>(0 - 0)         |
| Liver cancer due to hepatitis C                                  | 1<br>(0 - 1)       | --                 | 0<br>(0 - 0)        | 0<br>(0 - 0)         | 0<br>(0 - 0)         | 0<br>(0 - 0)         |
| Liver cancer due to alcohol use                                  | 0<br>(0 - 0)       | --                 | --                  | 0<br>(0 - 0)         | 0<br>(0 - 0)         | 0<br>(0 - 0)         |
| Liver cancer due to other causes                                 | 0<br>(0 - 0)       | --                 | 0<br>(0 - 0)        | 0<br>(0 - 0)         | 0<br>(0 - 0)         | 0<br>(0 - 0)         |
| Larynx cancer                                                    | 0<br>(0 - 0)       | --                 | --                  | 0<br>(0 - 0)         | 0<br>(0 - 0)         | 0<br>(0 - 0)         |

Web Table 31- Seychelles deaths with 95% UI by age, sex, and cause in 2013

| Cause                                         | Females, All Ages  | Females, 0-4 Years | Females, 5-14 Years | Females, 15-49 Years | Females, 50-69 Years | Females, 70-80 Years |
|-----------------------------------------------|--------------------|--------------------|---------------------|----------------------|----------------------|----------------------|
| Tracheal, bronchus and lung cancer            | 3<br>(3 - 4)       | --                 | --                  | 0<br>(0 - 0)         | 1<br>(1 - 2)         | 1<br>(1 - 2)         |
| Breast cancer                                 | 13<br>(10 - 15)    | --                 | --                  | 3<br>(2 - 4)         | 5<br>(4 - 6)         | 5<br>(4 - 6)         |
| Cervical cancer                               | 9<br>(7 - 12)      | --                 | --                  | 2<br>(2 - 3)         | 4<br>(3 - 5)         | 3<br>(2 - 5)         |
| Uterine cancer                                | 1<br>(0 - 1)       | --                 | --                  | 0<br>(0 - 0)         | 0<br>(0 - 0)         | 0<br>(0 - 1)         |
| Prostate cancer                               | --                 | --                 | --                  | --                   | --                   | --                   |
| Colon and rectum cancer                       | 7<br>(6 - 8)       | --                 | --                  | 0<br>(0 - 1)         | 2<br>(1 - 2)         | 5<br>(4 - 6)         |
| Lip and oral cavity cancer                    | 1<br>(0 - 2)       | --                 | --                  | 0<br>(0 - 0)         | 1<br>(0 - 1)         | 1<br>(0 - 1)         |
| Nasopharynx cancer                            | 0<br>(0 - 0)       | --                 | 0<br>(0 - 0)        | 0<br>(0 - 0)         | 0<br>(0 - 0)         | 0<br>(0 - 0)         |
| Other pharynx cancer                          | 0<br>(0 - 0)       | --                 | --                  | 0<br>(0 - 0)         | 0<br>(0 - 0)         | 0<br>(0 - 0)         |
| Gallbladder and biliary tract cancer          | 1<br>(0 - 1)       | --                 | --                  | 0<br>(0 - 0)         | 0<br>(0 - 1)         | 1<br>(0 - 1)         |
| Pancreatic cancer                             | 2<br>(2 - 2)       | --                 | --                  | 0<br>(0 - 0)         | 1<br>(1 - 1)         | 1<br>(1 - 1)         |
| Malignant skin melanoma                       | 0<br>(0 - 0)       | --                 | --                  | 0<br>(0 - 0)         | 0<br>(0 - 0)         | 0<br>(0 - 0)         |
| Non-melanoma skin cancer                      | 0<br>(0 - 0)       | --                 | --                  | 0<br>(0 - 0)         | 0<br>(0 - 0)         | 0<br>(0 - 0)         |
| Ovarian cancer                                | 3<br>(3 - 4)       | --                 | --                  | 0<br>(0 - 1)         | 2<br>(1 - 2)         | 1<br>(1 - 2)         |
| Testicular cancer                             | --                 | --                 | --                  | --                   | --                   | --                   |
| Kidney cancer                                 | 1<br>(1 - 1)       | 0<br>(0 - 0)       | 0<br>(0 - 0)        | 0<br>(0 - 0)         | 1<br>(0 - 1)         | 1<br>(0 - 1)         |
| Bladder cancer                                | 1<br>(0 - 1)       | --                 | --                  | 0<br>(0 - 0)         | 0<br>(0 - 0)         | 1<br>(0 - 1)         |
| Brain and nervous system cancer               | 0<br>(0 - 1)       | 0<br>(0 - 0)       | 0<br>(0 - 0)        | 0<br>(0 - 0)         | 0<br>(0 - 0)         | 0<br>(0 - 0)         |
| Thyroid cancer                                | 0<br>(0 - 0)       | --                 | 0<br>(0 - 0)        | 0<br>(0 - 0)         | 0<br>(0 - 0)         | 0<br>(0 - 0)         |
| Mesothelioma                                  | 0<br>(0 - 0)       | --                 | --                  | 0<br>(0 - 0)         | 0<br>(0 - 0)         | 0<br>(0 - 0)         |
| Hodgkin lymphoma                              | 0<br>(0 - 0)       | 0<br>(0 - 0)       | 0<br>(0 - 0)        | 0<br>(0 - 0)         | 0<br>(0 - 0)         | 0<br>(0 - 0)         |
| Non-Hodgkin lymphoma                          | 1<br>(1 - 1)       | 0<br>(0 - 0)       | 0<br>(0 - 0)        | 0<br>(0 - 0)         | 0<br>(0 - 0)         | 0<br>(0 - 1)         |
| Multiple myeloma                              | 0<br>(0 - 0)       | --                 | --                  | 0<br>(0 - 0)         | 0<br>(0 - 0)         | 0<br>(0 - 0)         |
| Leukemia                                      | 1<br>(1 - 1)       | 0<br>(0 - 0)       | 0<br>(0 - 0)        | 0<br>(0 - 0)         | 0<br>(0 - 0)         | 0<br>(0 - 0)         |
| Other neoplasms                               | 1<br>(1 - 2)       | 0<br>(0 - 0)       | 0<br>(0 - 0)        | 0<br>(0 - 0)         | 0<br>(0 - 0)         | 1<br>(0 - 1)         |
| Cardiovascular diseases                       | 166<br>(141 - 186) | 0<br>(0 - 0)       | 0<br>(0 - 0)        | 7<br>(6 - 9)         | 26<br>(21 - 31)      | 132<br>(114 - 146)   |
| Rheumatic heart disease                       | 0<br>(0 - 0)       | 0<br>(0 - 0)       | 0<br>(0 - 0)        | 0<br>(0 - 0)         | 0<br>(0 - 0)         | 0<br>(0 - 0)         |
| Ischemic heart disease                        | 62<br>(48 - 79)    | 0<br>(0 - 0)       | 0<br>(0 - 0)        | 3<br>(2 - 4)         | 11<br>(8 - 14)       | 49<br>(37 - 63)      |
| Cerebrovascular disease                       | 50<br>(38 - 62)    | 0<br>(0 - 0)       | 0<br>(0 - 0)        | 2<br>(2 - 3)         | 7<br>(5 - 10)        | 40<br>(31 - 51)      |
| Ischemic stroke                               | 26<br>(12 - 39)    | 0<br>(0 - 0)       | 0<br>(0 - 0)        | 0<br>(0 - 1)         | 3<br>(1 - 5)         | 23<br>(10 - 34)      |
| Hemorrhagic stroke                            | 24<br>(14 - 40)    | 0<br>(0 - 0)       | 0<br>(0 - 0)        | 2<br>(1 - 2)         | 4<br>(3 - 7)         | 17<br>(9 - 31)       |
| Hypertensive heart disease                    | 44<br>(26 - 59)    | 0<br>(0 - 0)       | 0<br>(0 - 0)        | 1<br>(1 - 2)         | 6<br>(4 - 9)         | 37<br>(21 - 50)      |
| Cardiomyopathy and myocarditis                | 2<br>(1 - 4)       | 0<br>(0 - 0)       | 0<br>(0 - 0)        | 0<br>(0 - 1)         | 0<br>(0 - 1)         | 1<br>(0 - 2)         |
| Atrial fibrillation and flutter               | 0<br>(0 - 0)       | --                 | --                  | 0<br>(0 - 0)         | 0<br>(0 - 0)         | 0<br>(0 - 0)         |
| Aortic aneurysm                               | 1<br>(0 - 1)       | --                 | --                  | 0<br>(0 - 0)         | 0<br>(0 - 0)         | 0<br>(0 - 1)         |
| Peripheral vascular disease                   | 0<br>(0 - 0)       | --                 | --                  | 0<br>(0 - 0)         | 0<br>(0 - 0)         | 0<br>(0 - 0)         |
| Endocarditis                                  | 0<br>(0 - 1)       | 0<br>(0 - 0)       | 0<br>(0 - 0)        | 0<br>(0 - 0)         | 0<br>(0 - 0)         | 0<br>(0 - 0)         |
| Other cardiovascular and circulatory diseases | 7<br>(4 - 10)      | 0<br>(0 - 0)       | 0<br>(0 - 0)        | 1<br>(1 - 1)         | 1<br>(1 - 2)         | 5<br>(3 - 7)         |
| Chronic respiratory diseases                  | 11<br>(9 - 14)     | 0<br>(0 - 0)       | 0<br>(0 - 0)        | 1<br>(0 - 1)         | 2<br>(2 - 3)         | 9<br>(7 - 11)        |
| Chronic obstructive pulmonary disease         | 7<br>(5 - 10)      | 0<br>(0 - 0)       | 0<br>(0 - 0)        | 0<br>(0 - 0)         | 1<br>(1 - 2)         | 6<br>(4 - 8)         |

Web Table 31- Seychelles deaths with 95% UI by age, sex, and cause in 2013

| Cause                                               | Females, All Ages | Females, 0-4 Years | Females, 5-14 Years | Females, 15-49 Years | Females, 50-69 Years | Females, 70-80 Years |
|-----------------------------------------------------|-------------------|--------------------|---------------------|----------------------|----------------------|----------------------|
| Pneumoconiosis                                      | 0<br>(0 - 0)      | 0<br>(0 - 0)       | 0<br>(0 - 0)        | 0<br>(0 - 0)         | 0<br>(0 - 0)         | 0<br>(0 - 0)         |
| Silicosis                                           | 0<br>(0 - 0)      | 0<br>(0 - 0)       | 0<br>(0 - 0)        | 0<br>(0 - 0)         | 0<br>(0 - 0)         | 0<br>(0 - 0)         |
| Asbestosis                                          | 0<br>(0 - 0)      | 0<br>(0 - 0)       | 0<br>(0 - 0)        | 0<br>(0 - 0)         | 0<br>(0 - 0)         | 0<br>(0 - 0)         |
| Coal workers pneumoconiosis                         | 0<br>(0 - 0)      | 0<br>(0 - 0)       | 0<br>(0 - 0)        | 0<br>(0 - 0)         | 0<br>(0 - 0)         | 0<br>(0 - 0)         |
| Other pneumoconiosis                                | 0<br>(0 - 0)      | 0<br>(0 - 0)       | 0<br>(0 - 0)        | 0<br>(0 - 0)         | 0<br>(0 - 0)         | 0<br>(0 - 0)         |
| Asthma                                              | 3<br>(1 - 5)      | 0<br>(0 - 0)       | 0<br>(0 - 0)        | 0<br>(0 - 0)         | 1<br>(0 - 1)         | 2<br>(0 - 3)         |
| Interstitial lung disease and pulmonary sarcoidosis | 1<br>(0 - 2)      | 0<br>(0 - 0)       | 0<br>(0 - 0)        | 0<br>(0 - 0)         | 0<br>(0 - 0)         | 1<br>(0 - 2)         |
| Other chronic respiratory diseases                  | 1<br>(0 - 1)      | 0<br>(0 - 0)       | 0<br>(0 - 0)        | 0<br>(0 - 0)         | 0<br>(0 - 0)         | 1<br>(0 - 1)         |
| Cirrhosis                                           | 4<br>(4 - 5)      | 0<br>(0 - 0)       | 0<br>(0 - 0)        | 2<br>(1 - 2)         | 2<br>(1 - 2)         | 1<br>(1 - 1)         |
| Cirrhosis due to hepatitis B                        | 2<br>(1 - 3)      | 0<br>(0 - 0)       | 0<br>(0 - 0)        | 1<br>(0 - 1)         | 1<br>(0 - 1)         | 0<br>(0 - 1)         |
| Cirrhosis due to hepatitis C                        | 2<br>(1 - 3)      | 0<br>(0 - 0)       | 0<br>(0 - 0)        | 1<br>(0 - 1)         | 1<br>(0 - 1)         | 0<br>(0 - 1)         |
| Cirrhosis due to alcohol use                        | 1<br>(0 - 1)      | --                 | --                  | 0<br>(0 - 0)         | 0<br>(0 - 0)         | 0<br>(0 - 0)         |
| Cirrhosis due to other causes                       | 1<br>(0 - 1)      | 0<br>(0 - 0)       | 0<br>(0 - 0)        | 0<br>(0 - 0)         | 0<br>(0 - 0)         | 0<br>(0 - 0)         |
| Digestive diseases                                  | 12<br>(7 - 15)    | 0<br>(0 - 0)       | 0<br>(0 - 0)        | 1<br>(1 - 1)         | 3<br>(2 - 4)         | 8<br>(4 - 10)        |
| Peptic ulcer disease                                | 1<br>(1 - 2)      | 0<br>(0 - 0)       | 0<br>(0 - 0)        | 0<br>(0 - 0)         | 0<br>(0 - 1)         | 1<br>(0 - 2)         |
| Gastritis and duodenitis                            | 1<br>(0 - 1)      | 0<br>(0 - 0)       | 0<br>(0 - 0)        | 0<br>(0 - 0)         | 0<br>(0 - 0)         | 0<br>(0 - 1)         |
| Appendicitis                                        | 1<br>(0 - 2)      | 0<br>(0 - 0)       | 0<br>(0 - 0)        | 0<br>(0 - 0)         | 0<br>(0 - 0)         | 1<br>(0 - 1)         |
| Paralytic ileus and intestinal obstruction          | 7<br>(3 - 9)      | 0<br>(0 - 0)       | 0<br>(0 - 0)        | 0<br>(0 - 1)         | 2<br>(1 - 2)         | 5<br>(2 - 7)         |
| Inguinal, femoral, and abdominal hernia             | 0<br>(0 - 0)      | 0<br>(0 - 0)       | 0<br>(0 - 0)        | 0<br>(0 - 0)         | 0<br>(0 - 0)         | 0<br>(0 - 0)         |
| Inflammatory bowel disease                          | 1<br>(0 - 1)      | 0<br>(0 - 0)       | 0<br>(0 - 0)        | 0<br>(0 - 0)         | 0<br>(0 - 0)         | 0<br>(0 - 1)         |
| Vascular intestinal disorders                       | 0<br>(0 - 1)      | 0<br>(0 - 0)       | 0<br>(0 - 0)        | 0<br>(0 - 0)         | 0<br>(0 - 0)         | 0<br>(0 - 0)         |
| Gallbladder and biliary diseases                    | 0<br>(0 - 0)      | 0<br>(0 - 0)       | 0<br>(0 - 0)        | 0<br>(0 - 0)         | 0<br>(0 - 0)         | 0<br>(0 - 0)         |
| Pancreatitis                                        | 2<br>(1 - 4)      | 0<br>(0 - 0)       | 0<br>(0 - 0)        | 0<br>(0 - 1)         | 0<br>(0 - 1)         | 1<br>(0 - 2)         |
| Other digestive diseases                            | 0<br>(0 - 0)      | 0<br>(0 - 0)       | 0<br>(0 - 0)        | 0<br>(0 - 0)         | 0<br>(0 - 0)         | 0<br>(0 - 0)         |
| Neurological disorders                              | 15<br>(11 - 19)   | 0<br>(0 - 0)       | 0<br>(0 - 0)        | 0<br>(0 - 0)         | 1<br>(1 - 1)         | 13<br>(10 - 18)      |
| Alzheimer disease and other dementias               | 14<br>(10 - 18)   | --                 | --                  | 0<br>(0 - 0)         | 1<br>(0 - 1)         | 13<br>(9 - 18)       |
| Parkinson disease                                   | 0<br>(0 - 0)      | --                 | --                  | 0<br>(0 - 0)         | 0<br>(0 - 0)         | 0<br>(0 - 0)         |
| Epilepsy                                            | 0<br>(0 - 0)      | 0<br>(0 - 0)       | 0<br>(0 - 0)        | 0<br>(0 - 0)         | 0<br>(0 - 0)         | 0<br>(0 - 0)         |
| Multiple sclerosis                                  | 0<br>(0 - 1)      | --                 | --                  | 0<br>(0 - 0)         | 0<br>(0 - 0)         | 0<br>(0 - 0)         |
| Other neurological disorders                        | 0<br>(0 - 0)      | 0<br>(0 - 0)       | 0<br>(0 - 0)        | 0<br>(0 - 0)         | 0<br>(0 - 0)         | 0<br>(0 - 0)         |
| Mental and substance use disorders                  | 1<br>(1 - 1)      | 0<br>(0 - 0)       | 0<br>(0 - 0)        | 1<br>(0 - 1)         | 0<br>(0 - 0)         | 0<br>(0 - 0)         |
| Schizophrenia                                       | 0<br>(0 - 0)      | --                 | --                  | 0<br>(0 - 0)         | 0<br>(0 - 0)         | 0<br>(0 - 0)         |
| Alcohol use disorders                               | 0<br>(0 - 0)      | --                 | --                  | 0<br>(0 - 0)         | 0<br>(0 - 0)         | 0<br>(0 - 0)         |
| Drug use disorders                                  | 1<br>(0 - 1)      | 0<br>(0 - 0)       | --                  | 1<br>(0 - 1)         | 0<br>(0 - 0)         | 0<br>(0 - 0)         |
| Opioid use disorders                                | 0<br>(0 - 1)      | 0<br>(0 - 0)       | --                  | 0<br>(0 - 1)         | 0<br>(0 - 0)         | 0<br>(0 - 0)         |
| Cocaine use disorders                               | 0<br>(0 - 0)      | 0<br>(0 - 0)       | --                  | 0<br>(0 - 0)         | 0<br>(0 - 0)         | 0<br>(0 - 0)         |
| Amphetamine use disorders                           | 0<br>(0 - 0)      | 0<br>(0 - 0)       | --                  | 0<br>(0 - 0)         | 0<br>(0 - 0)         | 0<br>(0 - 0)         |
| Other drug use disorders                            | 0<br>(0 - 0)      | 0<br>(0 - 0)       | --                  | 0<br>(0 - 0)         | 0<br>(0 - 0)         | 0<br>(0 - 0)         |
| Eating disorders                                    | 0<br>(0 - 0)      | --                 | 0<br>(0 - 0)        | 0<br>(0 - 0)         | --                   | --                   |
| Anorexia nervosa                                    | 0<br>(0 - 0)      | --                 | 0<br>(0 - 0)        | 0<br>(0 - 0)         | --                   | --                   |

Web Table 31- Seychelles deaths with 95% UI by age, sex, and cause in 2013

| Cause                                               | Females, All Ages | Females, 0-4 Years | Females, 5-14 Years | Females, 15-49 Years | Females, 50-69 Years | Females, 70-80 Years |
|-----------------------------------------------------|-------------------|--------------------|---------------------|----------------------|----------------------|----------------------|
| Diabetes, urogenital, blood, and endocrine diseases | 28<br>(22 - 32)   | 0<br>(0 - 0)       | 0<br>(0 - 0)        | 2<br>(1 - 2)         | 7<br>(6 - 9)         | 18<br>(15 - 22)      |
| Diabetes mellitus                                   | 15<br>(11 - 18)   | 0<br>(0 - 0)       | 0<br>(0 - 0)        | 0<br>(0 - 0)         | 3<br>(2 - 4)         | 11<br>(9 - 14)       |
| Acute glomerulonephritis                            | 0<br>(0 - 0)      | 0<br>(0 - 0)       | 0<br>(0 - 0)        | 0<br>(0 - 0)         | 0<br>(0 - 0)         | 0<br>(0 - 0)         |
| Chronic kidney disease                              | 7<br>(5 - 9)      | 0<br>(0 - 0)       | 0<br>(0 - 0)        | 1<br>(1 - 1)         | 2<br>(2 - 3)         | 4<br>(3 - 5)         |
| Chronic kidney disease due to diabetes mellitus     | 1<br>(1 - 2)      | 0<br>(0 - 0)       | 0<br>(0 - 0)        | 0<br>(0 - 0)         | 0<br>(0 - 1)         | 1<br>(0 - 2)         |
| Chronic kidney disease due to hypertension          | 3<br>(1 - 4)      | 0<br>(0 - 0)       | 0<br>(0 - 0)        | 0<br>(0 - 0)         | 1<br>(0 - 1)         | 2<br>(1 - 3)         |
| Chronic kidney disease due to glomerulonephritis    | 0<br>(0 - 0)      | 0<br>(0 - 0)       | 0<br>(0 - 0)        | 0<br>(0 - 0)         | 0<br>(0 - 0)         | 0<br>(0 - 0)         |
| Chronic kidney disease due to other causes          | 3<br>(2 - 4)      | 0<br>(0 - 0)       | 0<br>(0 - 0)        | 0<br>(0 - 1)         | 1<br>(1 - 2)         | 1<br>(1 - 2)         |
| Urinary diseases and male infertility               | 3<br>(2 - 4)      | 0<br>(0 - 0)       | 0<br>(0 - 0)        | 0<br>(0 - 0)         | 1<br>(1 - 1)         | 2<br>(1 - 3)         |
| Interstitial nephritis and urinary tract infections | 2<br>(1 - 3)      | 0<br>(0 - 0)       | 0<br>(0 - 0)        | 0<br>(0 - 0)         | 1<br>(0 - 1)         | 1<br>(1 - 2)         |
| Urolithiasis                                        | 0<br>(0 - 0)      | --                 | 0<br>(0 - 0)        | 0<br>(0 - 0)         | 0<br>(0 - 0)         | 0<br>(0 - 0)         |
| Other urinary diseases                              | 1<br>(1 - 2)      | 0<br>(0 - 0)       | 0<br>(0 - 0)        | 0<br>(0 - 0)         | 0<br>(0 - 0)         | 1<br>(0 - 1)         |
| Gynecological diseases                              | 0<br>(0 - 0)      | --                 | --                  | 0<br>(0 - 0)         | 0<br>(0 - 0)         | 0<br>(0 - 0)         |
| Uterine fibroids                                    | 0<br>(0 - 0)      | --                 | --                  | 0<br>(0 - 0)         | 0<br>(0 - 0)         | 0<br>(0 - 0)         |
| Polycystic ovarian syndrome                         | 0<br>(0 - 0)      | --                 | --                  | 0<br>(0 - 0)         | 0<br>(0 - 0)         | --                   |
| Endometriosis                                       | 0<br>(0 - 0)      | --                 | --                  | 0<br>(0 - 0)         | 0<br>(0 - 0)         | --                   |
| Genital prolapse                                    | 0<br>(0 - 0)      | --                 | --                  | 0<br>(0 - 0)         | 0<br>(0 - 0)         | 0<br>(0 - 0)         |
| Other gynecological diseases                        | 0<br>(0 - 0)      | --                 | --                  | 0<br>(0 - 0)         | 0<br>(0 - 0)         | 0<br>(0 - 0)         |
| Hemoglobinopathies and hemolytic anemias            | 1<br>(0 - 1)      | 0<br>(0 - 0)       | 0<br>(0 - 0)        | 0<br>(0 - 0)         | 0<br>(0 - 0)         | 1<br>(0 - 1)         |
| Thalassemias                                        | 0<br>(0 - 0)      | 0<br>(0 - 0)       | 0<br>(0 - 0)        | 0<br>(0 - 0)         | 0<br>(0 - 0)         | 0<br>(0 - 0)         |
| Sickle cell disorders                               | 0<br>(0 - 0)      | 0<br>(0 - 0)       | 0<br>(0 - 0)        | 0<br>(0 - 0)         | 0<br>(0 - 0)         | 0<br>(0 - 0)         |
| G6PD deficiency                                     | 0<br>(0 - 0)      | 0<br>(0 - 0)       | 0<br>(0 - 0)        | 0<br>(0 - 0)         | 0<br>(0 - 0)         | 0<br>(0 - 0)         |
| Other hemoglobinopathies and hemolytic anemias      | 1<br>(0 - 1)      | 0<br>(0 - 0)       | 0<br>(0 - 0)        | 0<br>(0 - 0)         | 0<br>(0 - 0)         | 0<br>(0 - 1)         |
| Endocrine, metabolic, blood, and immune disorders   | 2<br>(1 - 2)      | 0<br>(0 - 0)       | 0<br>(0 - 0)        | 0<br>(0 - 0)         | 1<br>(0 - 1)         | 1<br>(0 - 1)         |
| Musculoskeletal disorders                           | 0<br>(0 - 0)      | --                 | 0<br>(0 - 0)        | 0<br>(0 - 0)         | 0<br>(0 - 0)         | 0<br>(0 - 0)         |
| Rheumatoid arthritis                                | 0<br>(0 - 0)      | --                 | 0<br>(0 - 0)        | 0<br>(0 - 0)         | 0<br>(0 - 0)         | 0<br>(0 - 0)         |
| Other musculoskeletal disorders                     | 0<br>(0 - 0)      | --                 | 0<br>(0 - 0)        | 0<br>(0 - 0)         | 0<br>(0 - 0)         | 0<br>(0 - 0)         |
| Other non-communicable diseases                     | 3<br>(2 - 4)      | 2<br>(1 - 2)       | 0<br>(0 - 0)        | 0<br>(0 - 1)         | 0<br>(0 - 0)         | 0<br>(0 - 0)         |
| Congenital anomalies                                | 3<br>(2 - 3)      | 2<br>(1 - 2)       | 0<br>(0 - 0)        | 0<br>(0 - 1)         | 0<br>(0 - 0)         | 0<br>(0 - 0)         |
| Neural tube defects                                 | 0<br>(0 - 1)      | 0<br>(0 - 1)       | 0<br>(0 - 0)        | 0<br>(0 - 0)         | 0<br>(0 - 0)         | 0<br>(0 - 0)         |
| Congenital heart anomalies                          | 0<br>(0 - 0)      | 0<br>(0 - 0)       | 0<br>(0 - 0)        | 0<br>(0 - 0)         | 0<br>(0 - 0)         | 0<br>(0 - 0)         |
| Cleft lip and cleft palate                          | 0<br>(0 - 0)      | 0<br>(0 - 0)       | --                  | --                   | --                   | --                   |
| Down syndrome                                       | 0<br>(0 - 0)      | 0<br>(0 - 0)       | 0<br>(0 - 0)        | 0<br>(0 - 0)         | 0<br>(0 - 0)         | 0<br>(0 - 0)         |
| Chromosomal unbalanced rearrangements               | 0<br>(0 - 1)      | 0<br>(0 - 1)       | 0<br>(0 - 0)        | 0<br>(0 - 0)         | 0<br>(0 - 0)         | 0<br>(0 - 0)         |
| Other congenital anomalies                          | 2<br>(1 - 2)      | 1<br>(1 - 2)       | 0<br>(0 - 0)        | 0<br>(0 - 1)         | 0<br>(0 - 0)         | 0<br>(0 - 0)         |
| Skin and subcutaneous diseases                      | 0<br>(0 - 0)      | 0<br>(0 - 0)       | 0<br>(0 - 0)        | 0<br>(0 - 0)         | 0<br>(0 - 0)         | 0<br>(0 - 0)         |
| Cellulitis                                          | 0<br>(0 - 0)      | 0<br>(0 - 0)       | 0<br>(0 - 0)        | 0<br>(0 - 0)         | 0<br>(0 - 0)         | 0<br>(0 - 0)         |
| Pyoderma                                            | 0<br>(0 - 0)      | 0<br>(0 - 0)       | 0<br>(0 - 0)        | 0<br>(0 - 0)         | 0<br>(0 - 0)         | 0<br>(0 - 0)         |
| Decubitus ulcer                                     | 0<br>(0 - 0)      | 0<br>(0 - 0)       | 0<br>(0 - 0)        | 0<br>(0 - 0)         | 0<br>(0 - 0)         | 0<br>(0 - 0)         |
| Other skin and subcutaneous diseases                | 0<br>(0 - 0)      | 0<br>(0 - 0)       | 0<br>(0 - 0)        | 0<br>(0 - 0)         | 0<br>(0 - 0)         | 0<br>(0 - 0)         |

Web Table 31- Seychelles deaths with 95% UI by age, sex, and cause in 2013

| Cause                                           | Females, All Ages | Females, 0-4 Years | Females, 5-14 Years | Females, 15-49 Years | Females, 50-69 Years | Females, 70-80 Years |
|-------------------------------------------------|-------------------|--------------------|---------------------|----------------------|----------------------|----------------------|
| Sudden infant death syndrome                    | 0<br>(0 - 0)      | 0<br>(0 - 0)       | --                  | --                   | --                   | --                   |
| Injuries                                        | 10<br>(8 - 13)    | 0<br>(0 - 1)       | 0<br>(0 - 1)        | 3<br>(3 - 4)         | 2<br>(1 - 3)         | 4<br>(3 - 5)         |
| Transport injuries                              | 3<br>(2 - 4)      | 0<br>(0 - 0)       | 0<br>(0 - 0)        | 1<br>(1 - 1)         | 1<br>(1 - 1)         | 1<br>(1 - 1)         |
| Road injuries                                   | 3<br>(2 - 3)      | 0<br>(0 - 0)       | 0<br>(0 - 0)        | 1<br>(1 - 1)         | 1<br>(0 - 1)         | 1<br>(0 - 1)         |
| Pedestrian road injuries                        | 1<br>(0 - 1)      | 0<br>(0 - 0)       | 0<br>(0 - 0)        | 0<br>(0 - 0)         | 0<br>(0 - 0)         | 0<br>(0 - 0)         |
| Cyclist road injuries                           | 0<br>(0 - 0)      | 0<br>(0 - 0)       | 0<br>(0 - 0)        | 0<br>(0 - 0)         | 0<br>(0 - 0)         | 0<br>(0 - 0)         |
| Motorcyclist road injuries                      | 0<br>(0 - 0)      | 0<br>(0 - 0)       | 0<br>(0 - 0)        | 0<br>(0 - 0)         | 0<br>(0 - 0)         | 0<br>(0 - 0)         |
| Motor vehicle road injuries                     | 1<br>(1 - 2)      | 0<br>(0 - 0)       | 0<br>(0 - 0)        | 1<br>(0 - 1)         | 0<br>(0 - 1)         | 0<br>(0 - 1)         |
| Other road injuries                             | 0<br>(0 - 0)      | 0<br>(0 - 0)       | 0<br>(0 - 0)        | 0<br>(0 - 0)         | 0<br>(0 - 0)         | 0<br>(0 - 0)         |
| Other transport injuries                        | 1<br>(0 - 1)      | 0<br>(0 - 0)       | 0<br>(0 - 0)        | 0<br>(0 - 0)         | 0<br>(0 - 0)         | 0<br>(0 - 1)         |
| Unintentional injuries                          | 4<br>(3 - 5)      | 0<br>(0 - 0)       | 0<br>(0 - 0)        | 1<br>(1 - 1)         | 1<br>(0 - 1)         | 2<br>(1 - 3)         |
| Falls                                           | 1<br>(0 - 1)      | 0<br>(0 - 0)       | 0<br>(0 - 0)        | 0<br>(0 - 0)         | 0<br>(0 - 0)         | 0<br>(0 - 1)         |
| Drowning                                        | 1<br>(1 - 2)      | 0<br>(0 - 0)       | 0<br>(0 - 0)        | 0<br>(0 - 1)         | 0<br>(0 - 1)         | 0<br>(0 - 0)         |
| Fire, heat, and hot substances                  | 1<br>(0 - 1)      | 0<br>(0 - 0)       | 0<br>(0 - 0)        | 0<br>(0 - 0)         | 0<br>(0 - 0)         | 0<br>(0 - 1)         |
| Poisonings                                      | 0<br>(0 - 0)      | 0<br>(0 - 0)       | 0<br>(0 - 0)        | 0<br>(0 - 0)         | 0<br>(0 - 0)         | 0<br>(0 - 0)         |
| Exposure to mechanical forces                   | 0<br>(0 - 0)      | 0<br>(0 - 0)       | 0<br>(0 - 0)        | 0<br>(0 - 0)         | 0<br>(0 - 0)         | 0<br>(0 - 0)         |
| Unintentional firearm injuries                  | 0<br>(0 - 0)      | 0<br>(0 - 0)       | 0<br>(0 - 0)        | 0<br>(0 - 0)         | 0<br>(0 - 0)         | 0<br>(0 - 0)         |
| Unintentional suffocation                       | 0<br>(0 - 0)      | 0<br>(0 - 0)       | 0<br>(0 - 0)        | 0<br>(0 - 0)         | 0<br>(0 - 0)         | 0<br>(0 - 0)         |
| Other exposure to mechanical forces             | 0<br>(0 - 0)      | 0<br>(0 - 0)       | 0<br>(0 - 0)        | 0<br>(0 - 0)         | 0<br>(0 - 0)         | 0<br>(0 - 0)         |
| Adverse effects of medical treatment            | 0<br>(0 - 0)      | 0<br>(0 - 0)       | 0<br>(0 - 0)        | 0<br>(0 - 0)         | 0<br>(0 - 0)         | 0<br>(0 - 0)         |
| Animal contact                                  | 0<br>(0 - 0)      | 0<br>(0 - 0)       | 0<br>(0 - 0)        | 0<br>(0 - 0)         | 0<br>(0 - 0)         | 0<br>(0 - 0)         |
| Venomous animal contact                         | 0<br>(0 - 0)      | 0<br>(0 - 0)       | 0<br>(0 - 0)        | 0<br>(0 - 0)         | 0<br>(0 - 0)         | 0<br>(0 - 0)         |
| Non-venomous animal contact                     | 0<br>(0 - 0)      | 0<br>(0 - 0)       | 0<br>(0 - 0)        | 0<br>(0 - 0)         | 0<br>(0 - 0)         | 0<br>(0 - 0)         |
| Foreign body                                    | 1<br>(0 - 2)      | 0<br>(0 - 0)       | 0<br>(0 - 0)        | 0<br>(0 - 0)         | 0<br>(0 - 0)         | 1<br>(0 - 2)         |
| Pulmonary aspiration and foreign body in airway | 1<br>(0 - 2)      | 0<br>(0 - 0)       | 0<br>(0 - 0)        | 0<br>(0 - 0)         | 0<br>(0 - 0)         | 1<br>(0 - 2)         |
| Foreign body in other body part                 | 0<br>(0 - 0)      | 0<br>(0 - 0)       | 0<br>(0 - 0)        | 0<br>(0 - 0)         | 0<br>(0 - 0)         | 0<br>(0 - 0)         |
| Other unintentional injuries                    | 0<br>(0 - 0)      | 0<br>(0 - 0)       | 0<br>(0 - 0)        | 0<br>(0 - 0)         | 0<br>(0 - 0)         | 0<br>(0 - 0)         |
| Self-harm and interpersonal violence            | 3<br>(2 - 6)      | 0<br>(0 - 0)       | 0<br>(0 - 0)        | 1<br>(1 - 2)         | 0<br>(0 - 1)         | 1<br>(1 - 3)         |
| Self-harm                                       | 1<br>(1 - 5)      | --                 | 0<br>(0 - 0)        | 0<br>(0 - 2)         | 0<br>(0 - 1)         | 1<br>(0 - 2)         |
| Interpersonal violence                          | 2<br>(1 - 3)      | 0<br>(0 - 0)       | 0<br>(0 - 0)        | 1<br>(0 - 1)         | 0<br>(0 - 0)         | 1<br>(0 - 1)         |
| Assault by firearm                              | 0<br>(0 - 1)      | 0<br>(0 - 0)       | 0<br>(0 - 0)        | 0<br>(0 - 0)         | 0<br>(0 - 0)         | 0<br>(0 - 0)         |
| Assault by sharp object                         | 1<br>(0 - 1)      | 0<br>(0 - 0)       | 0<br>(0 - 0)        | 0<br>(0 - 1)         | 0<br>(0 - 0)         | 0<br>(0 - 1)         |
| Assault by other means                          | 1<br>(0 - 1)      | 0<br>(0 - 0)       | 0<br>(0 - 0)        | 0<br>(0 - 1)         | 0<br>(0 - 0)         | 0<br>(0 - 1)         |

Web Table 31- Sierra Leone deaths with 95% UI by age, sex, and cause in 2013

| Cause                                                             | Both Sexes, All Ages        | Both Sexes, 0-4 Years       | Both Sexes, 5-14 Years   | Both Sexes, 15-49 Years     | Both Sexes, 50-69 Years    | Both Sexes, 70-80 Years  |
|-------------------------------------------------------------------|-----------------------------|-----------------------------|--------------------------|-----------------------------|----------------------------|--------------------------|
| All causes                                                        | 61,508<br>(56,717 - 67,362) | 28,116<br>(24,743 - 32,028) | 2,911<br>(2,532 - 3,336) | 14,097<br>(12,711 - 15,470) | 10,457<br>(9,164 - 12,013) | 5,927<br>(5,379 - 6,564) |
| Communicable, maternal, neonatal, and nutritional diseases        | 38,361<br>(33,658 - 43,043) | 23,858<br>(19,493 - 28,102) | 1,723<br>(1,366 - 2,064) | 8,015<br>(7,012 - 9,470)    | 3,129<br>(2,674 - 3,614)   | 1,636<br>(1,298 - 1,967) |
| HIV/AIDS and tuberculosis                                         | 6,055<br>(4,381 - 8,565)    | 286<br>(147 - 511)          | 215<br>(152 - 302)       | 4,073<br>(2,818 - 6,127)    | 1,186<br>(918 - 1,509)     | 294<br>(227 - 374)       |
| Tuberculosis                                                      | 1,986<br>(1,522 - 2,579)    | 100<br>(58 - 157)           | 46<br>(30 - 69)          | 931<br>(679 - 1,255)        | 666<br>(482 - 882)         | 245<br>(180 - 325)       |
| HIV/AIDS                                                          | 4,069<br>(2,504 - 6,569)    | 186<br>(55 - 385)           | 170<br>(117 - 243)       | 3,142<br>(1,791 - 5,240)    | 521<br>(327 - 789)         | 50<br>(28 - 83)          |
| HIV/AIDS resulting in mycobacterial infection                     | 252<br>(146 - 404)          | 11<br>(3 - 23)              | 9<br>(6 - 14)            | 195<br>(109 - 323)          | 34<br>(21 - 52)            | 3<br>(2 - 6)             |
| HIV/AIDS resulting in other diseases                              | 3,816<br>(2,341 - 6,166)    | 175<br>(52 - 364)           | 160<br>(110 - 230)       | 2,948<br>(1,690 - 4,903)    | 487<br>(307 - 741)         | 46<br>(26 - 77)          |
| Diarrhea, lower respiratory, and other common infectious diseases | 11,807<br>(8,992 - 14,635)  | 7,785<br>(5,494 - 10,258)   | 612<br>(414 - 840)       | 1,338<br>(990 - 1,695)      | 1,153<br>(833 - 1,499)     | 919<br>(654 - 1,168)     |
| Diarrheal diseases                                                | 2,528<br>(1,498 - 3,936)    | 1,720<br>(769 - 3,137)      | 119<br>(59 - 220)        | 312<br>(207 - 486)          | 227<br>(143 - 371)         | 151<br>(97 - 243)        |
| Intestinal infectious diseases                                    | 311<br>(159 - 555)          | 106<br>(51 - 189)           | 89<br>(41 - 173)         | 98<br>(44 - 191)            | 13<br>(6 - 25)             | 3<br>(1 - 7)             |
| Typhoid fever                                                     | 201<br>(98 - 368)           | 65<br>(29 - 121)            | 60<br>(27 - 119)         | 66<br>(29 - 130)            | 9<br>(4 - 17)              | 2<br>(1 - 4)             |
| Paratyphoid fever                                                 | 91<br>(43 - 171)            | 31<br>(11 - 60)             | 28<br>(11 - 55)          | 29<br>(12 - 57)             | 3<br>(1 - 8)               | 1<br>(0 - 2)             |
| Other intestinal infectious diseases                              | 18<br>(9 - 33)              | 11<br>(4 - 22)              | 2<br>(0 - 7)             | 4<br>(1 - 10)               | 1<br>(0 - 7)               | 0<br>(0 - 3)             |
| Lower respiratory infections                                      | 7,035<br>(5,184 - 9,093)    | 4,798<br>(3,183 - 6,661)    | 225<br>(139 - 327)       | 544<br>(380 - 731)          | 759<br>(515 - 1,013)       | 709<br>(467 - 934)       |
| Upper respiratory infections                                      | 11<br>(5 - 22)              | 6<br>(1 - 16)               | 1<br>(0 - 2)             | 3<br>(1 - 5)                | 2<br>(0 - 4)               | 1<br>(0 - 2)             |
| Otitis media                                                      | 4<br>(3 - 5)                | 1<br>(1 - 2)                | 0<br>(0 - 0)             | 1<br>(1 - 1)                | 1<br>(1 - 1)               | 1<br>(0 - 1)             |
| Meningitis                                                        | 1,607<br>(1,132 - 2,264)    | 924<br>(527 - 1,495)        | 158<br>(79 - 262)        | 342<br>(231 - 471)          | 135<br>(86 - 194)          | 48<br>(28 - 71)          |
| Pneumococcal meningitis                                           | 397<br>(274 - 569)          | 200<br>(105 - 338)          | 46<br>(22 - 78)          | 102<br>(63 - 160)           | 37<br>(20 - 61)            | 13<br>(7 - 22)           |
| H influenzae type B meningitis                                    | 281<br>(168 - 444)          | 202<br>(99 - 358)           | 25<br>(11 - 48)          | 38<br>(22 - 61)             | 12<br>(6 - 20)             | 3<br>(2 - 6)             |
| Meningococcal meningitis                                          | 735<br>(505 - 1,053)        | 442<br>(250 - 736)          | 71<br>(34 - 129)         | 141<br>(88 - 216)           | 59<br>(29 - 95)            | 22<br>(12 - 36)          |
| Other meningitis                                                  | 193<br>(127 - 268)          | 80<br>(41 - 142)            | 17<br>(8 - 28)           | 60<br>(36 - 91)             | 27<br>(12 - 46)            | 10<br>(5 - 16)           |
| Encephalitis                                                      | 73<br>(53 - 107)            | 32<br>(19 - 54)             | 9<br>(5 - 23)            | 18<br>(12 - 29)             | 9<br>(6 - 13)              | 4<br>(2 - 6)             |
| Diphtheria                                                        | 6<br>(0 - 30)               | 5<br>(0 - 29)               | 1<br>(0 - 5)             | 0<br>(0 - 1)                | 0<br>(0 - 0)               | --                       |
| Whooping cough                                                    | 30<br>(0 - 149)             | 28<br>(0 - 140)             | 1<br>(0 - 7)             | 0<br>(0 - 1)                | 0<br>(0 - 0)               | --                       |
| Tetanus                                                           | 173<br>(67 - 289)           | 142<br>(43 - 257)           | 6<br>(3 - 10)            | 18<br>(9 - 28)              | 7<br>(4 - 11)              | 1<br>(1 - 2)             |
| Measles                                                           | 24<br>(5 - 71)              | 21<br>(4 - 62)              | 3<br>(0 - 7)             | 0<br>(0 - 1)                | 0<br>(0 - 0)               | --                       |
| Varicella and herpes zoster                                       | 5<br>(2 - 10)               | 2<br>(0 - 7)                | 0<br>(0 - 2)             | 1<br>(0 - 3)                | 0<br>(0 - 1)               | 1<br>(0 - 2)             |
| Neglected tropical diseases and malaria                           | 9,015<br>(5,841 - 12,803)   | 7,048<br>(3,876 - 10,899)   | 672<br>(376 - 1,041)     | 741<br>(395 - 1,451)        | 389<br>(175 - 835)         | 165<br>(68 - 364)        |
| Malaria                                                           | 8,882<br>(5,691 - 12,669)   | 7,011<br>(3,835 - 10,862)   | 647<br>(351 - 1,012)     | 697<br>(353 - 1,404)        | 369<br>(157 - 814)         | 159<br>(62 - 358)        |
| Leishmaniasis                                                     | 0<br>(0 - 0)                | 0<br>(0 - 0)                | 0<br>(0 - 0)             | 0<br>(0 - 0)                | 0<br>(0 - 0)               | 0<br>(0 - 0)             |
| Visceral leishmaniasis                                            | 0<br>(0 - 0)                | 0<br>(0 - 0)                | 0<br>(0 - 0)             | 0<br>(0 - 0)                | 0<br>(0 - 0)               | 0<br>(0 - 0)             |
| Schistosomiasis                                                   | 28<br>(21 - 39)             | 1<br>(0 - 1)                | 1<br>(1 - 2)             | 12<br>(8 - 18)              | 10<br>(7 - 16)             | 3<br>(2 - 5)             |
| Cysticercosis                                                     | 2<br>(0 - 5)                | 0<br>(0 - 0)                | 0<br>(0 - 0)             | 1<br>(0 - 3)                | 0<br>(0 - 1)               | 0<br>(0 - 0)             |
| Cystic echinococcosis                                             | 3<br>(3 - 4)                | 1<br>(0 - 1)                | 1<br>(0 - 1)             | 1<br>(1 - 2)                | 0<br>(0 - 1)               | 0<br>(0 - 0)             |
| Dengue                                                            | 6<br>(4 - 10)               | 3<br>(1 - 6)                | 2<br>(1 - 2)             | 2<br>(1 - 3)                | 0<br>(0 - 1)               | 0<br>(0 - 0)             |
| Yellow fever                                                      | 13<br>(9 - 19)              | 1<br>(0 - 3)                | 3<br>(1 - 6)             | 7<br>(4 - 12)               | 1<br>(1 - 3)               | 1<br>(0 - 1)             |
| Rabies                                                            | 49<br>(23 - 71)             | 11<br>(4 - 24)              | 15<br>(6 - 26)           | 17<br>(9 - 23)              | 5<br>(2 - 8)               | 1<br>(0 - 2)             |
| Intestinal nematode infections                                    | 21<br>(9 - 40)              | 17<br>(6 - 33)              | 3<br>(0 - 10)            | 1<br>(0 - 5)                | 0<br>(0 - 4)               | 0<br>(0 - 2)             |
| Ascariasis                                                        | 21<br>(9 - 40)              | 17<br>(6 - 33)              | 3<br>(0 - 10)            | 1<br>(0 - 5)                | 0<br>(0 - 4)               | 0<br>(0 - 2)             |
| Other neglected tropical diseases                                 | 9<br>(6 - 15)               | 4<br>(2 - 8)                | 1<br>(0 - 2)             | 3<br>(2 - 4)                | 1<br>(1 - 2)               | 1<br>(1 - 1)             |



Web Table 31- Sierra Leone deaths with 95% UI by age, sex, and cause in 2013

| Cause                                                            | Both Sexes, All Ages        | Both Sexes, 0-4 Years    | Both Sexes, 5-14 Years | Both Sexes, 15-49 Years  | Both Sexes, 50-69 Years  | Both Sexes, 70-80 Years  |
|------------------------------------------------------------------|-----------------------------|--------------------------|------------------------|--------------------------|--------------------------|--------------------------|
| Maternal disorders                                               | 1,399<br>(1,006 - 1,776)    | --                       | 17<br>(6 - 37)         | 1,382<br>(991 - 1,755)   | --                       | --                       |
| Maternal hemorrhage                                              | 256<br>(157 - 361)          | --                       | 2<br>(1 - 4)           | 254<br>(155 - 360)       | --                       | --                       |
| Maternal sepsis and other maternal infections                    | 81<br>(51 - 119)            | --                       | 1<br>(0 - 2)           | 80<br>(50 - 118)         | --                       | --                       |
| Maternal hypertensive disorders                                  | 107<br>(64 - 162)           | --                       | 1<br>(0 - 3)           | 105<br>(63 - 160)        | --                       | --                       |
| Maternal obstructed labor                                        | 70<br>(38 - 106)            | --                       | 1<br>(0 - 2)           | 69<br>(38 - 105)         | --                       | --                       |
| Maternal abortive outcome                                        | 253<br>(169 - 347)          | --                       | 3<br>(1 - 7)           | 250<br>(167 - 344)       | --                       | --                       |
| Indirect maternal deaths                                         | 144<br>(85 - 209)           | --                       | 1<br>(0 - 3)           | 143<br>(84 - 207)        | --                       | --                       |
| Late maternal deaths                                             | 213<br>(121 - 315)          | --                       | 5<br>(1 - 11)          | 208<br>(117 - 311)       | --                       | --                       |
| Maternal deaths aggravated by HIV/AIDS                           | 8<br>(4 - 13)               | --                       | --                     | 8<br>(4 - 13)            | --                       | --                       |
| Other maternal disorders                                         | 266<br>(179 - 371)          | --                       | 3<br>(1 - 7)           | 262<br>(176 - 366)       | --                       | --                       |
| Neonatal disorders                                               | 6,109<br>(5,100 - 7,218)    | 6,109<br>(5,100 - 7,218) | --                     | --                       | --                       | --                       |
| Neonatal preterm birth complications                             | 2,242<br>(1,306 - 3,442)    | 2,242<br>(1,306 - 3,442) | --                     | --                       | --                       | --                       |
| Neonatal encephalopathy due to birth asphyxia and trauma         | 1,796<br>(1,056 - 2,781)    | 1,796<br>(1,056 - 2,781) | --                     | --                       | --                       | --                       |
| Neonatal sepsis and other neonatal infections                    | 1,572<br>(815 - 2,609)      | 1,572<br>(815 - 2,609)   | --                     | --                       | --                       | --                       |
| Hemolytic disease and other neonatal jaundice                    | 39<br>(15 - 81)             | 39<br>(15 - 81)          | --                     | --                       | --                       | --                       |
| Other neonatal disorders                                         | 459<br>(250 - 754)          | 459<br>(250 - 754)       | --                     | --                       | --                       | --                       |
| Nutritional deficiencies                                         | 3,194<br>(2,235 - 4,438)    | 2,120<br>(1,299 - 3,169) | 161<br>(98 - 243)      | 383<br>(266 - 516)       | 316<br>(222 - 433)       | 215<br>(152 - 307)       |
| Protein-energy malnutrition                                      | 2,534<br>(1,697 - 3,715)    | 1,967<br>(1,190 - 2,951) | 120<br>(70 - 184)      | 156<br>(90 - 266)        | 173<br>(106 - 266)       | 117<br>(68 - 194)        |
| Iodine deficiency                                                | 6<br>(1 - 20)               | 3<br>(0 - 14)            | 1<br>(0 - 3)           | 1<br>(0 - 5)             | 1<br>(0 - 4)             | 0<br>(0 - 2)             |
| Iron-deficiency anemia                                           | 644<br>(351 - 959)          | 148<br>(32 - 366)        | 40<br>(18 - 80)        | 222<br>(126 - 309)       | 139<br>(74 - 211)        | 96<br>(53 - 153)         |
| Other nutritional deficiencies                                   | 10<br>(4 - 16)              | 2<br>(0 - 5)             | 1<br>(0 - 1)           | 3<br>(1 - 5)             | 3<br>(1 - 5)             | 1<br>(1 - 2)             |
| Other communicable, maternal, neonatal, and nutritional diseases | 784<br>(525 - 1,139)        | 510<br>(284 - 848)       | 46<br>(26 - 76)        | 99<br>(65 - 143)         | 85<br>(55 - 125)         | 44<br>(27 - 64)          |
| Sexually transmitted diseases excluding HIV                      | 451<br>(229 - 784)          | 392<br>(187 - 704)       | 30<br>(13 - 56)        | 16<br>(9 - 27)           | 9<br>(5 - 17)            | 4<br>(2 - 10)            |
| Syphilis                                                         | 438<br>(216 - 770)          | 392<br>(187 - 704)       | 29<br>(13 - 54)        | 8<br>(4 - 14)            | 6<br>(3 - 12)            | 3<br>(2 - 8)             |
| Chlamydial infection                                             | 2<br>(1 - 3)                | --                       | 0<br>(0 - 0)           | 1<br>(1 - 2)             | 0<br>(0 - 1)             | 0<br>(0 - 0)             |
| Gonococcal infection                                             | 6<br>(4 - 11)               | --                       | 0<br>(0 - 1)           | 4<br>(2 - 7)             | 2<br>(1 - 3)             | 1<br>(0 - 1)             |
| Other sexually transmitted diseases                              | 5<br>(3 - 9)                | --                       | 0<br>(0 - 1)           | 3<br>(2 - 6)             | 1<br>(0 - 2)             | 0<br>(0 - 1)             |
| Hepatitis                                                        | 153<br>(71 - 212)           | 29<br>(10 - 53)          | 7<br>(3 - 12)          | 52<br>(24 - 77)          | 43<br>(23 - 66)          | 21<br>(11 - 31)          |
| Acute hepatitis A                                                | 12<br>(2 - 27)              | 8<br>(1 - 19)            | 2<br>(0 - 3)           | 2<br>(0 - 5)             | 0<br>(0 - 1)             | 0<br>(0 - 0)             |
| Acute hepatitis B                                                | 100<br>(50 - 150)           | 20<br>(6 - 39)           | 3<br>(1 - 5)           | 23<br>(10 - 40)          | 36<br>(19 - 56)          | 19<br>(10 - 29)          |
| Acute hepatitis C                                                | 4<br>(1 - 12)               | --                       | 0<br>(0 - 1)           | 1<br>(0 - 4)             | 2<br>(0 - 5)             | 1<br>(0 - 3)             |
| Acute hepatitis E                                                | 36<br>(16 - 57)             | 1<br>(0 - 3)             | 3<br>(1 - 5)           | 26<br>(12 - 41)          | 5<br>(2 - 10)            | 1<br>(0 - 2)             |
| Other infectious diseases                                        | 180<br>(107 - 294)          | 89<br>(38 - 189)         | 9<br>(3 - 18)          | 31<br>(16 - 59)          | 33<br>(16 - 63)          | 18<br>(8 - 36)           |
| Non-communicable diseases                                        | 19,093<br>(15,675 - 23,082) | 3,426<br>(1,676 - 6,170) | 750<br>(458 - 1,236)   | 4,142<br>(3,336 - 5,037) | 6,735<br>(5,640 - 8,014) | 4,039<br>(3,524 - 4,661) |
| Neoplasms                                                        | 2,665<br>(2,268 - 3,138)    | 67<br>(42 - 103)         | 58<br>(38 - 84)        | 830<br>(660 - 1,028)     | 1,262<br>(1,047 - 1,551) | 448<br>(380 - 543)       |
| Esophageal cancer                                                | 72<br>(49 - 112)            | --                       | --                     | 15<br>(10 - 22)          | 43<br>(28 - 67)          | 14<br>(9 - 26)           |
| Stomach cancer                                                   | 286<br>(234 - 351)          | --                       | --                     | 75<br>(56 - 97)          | 164<br>(127 - 207)       | 47<br>(36 - 61)          |
| Liver cancer                                                     | 751<br>(576 - 993)          | --                       | 3<br>(2 - 6)           | 289<br>(196 - 414)       | 350<br>(260 - 482)       | 109<br>(80 - 143)        |
| Liver cancer due to hepatitis B                                  | 352<br>(194 - 541)          | --                       | 1<br>(1 - 3)           | 164<br>(94 - 257)        | 152<br>(73 - 246)        | 36<br>(20 - 59)          |
| Liver cancer due to hepatitis C                                  | 212<br>(135 - 323)          | --                       | 0<br>(0 - 0)           | 54<br>(28 - 92)          | 114<br>(69 - 179)        | 44<br>(28 - 66)          |

Web Table 31- Sierra Leone deaths with 95% UI by age, sex, and cause in 2013

| Cause                                | Both Sexes, All Ages     | Both Sexes, 0-4 Years | Both Sexes, 5-14 Years | Both Sexes, 15-49 Years | Both Sexes, 50-69 Years  | Both Sexes, 70-80 Years  |
|--------------------------------------|--------------------------|-----------------------|------------------------|-------------------------|--------------------------|--------------------------|
| Liver cancer due to alcohol use      | 77<br>(43 - 121)         | --                    | --                     | 20<br>(9 - 38)          | 39<br>(21 - 63)          | 18<br>(9 - 28)           |
| Liver cancer due to other causes     | 110<br>(74 - 168)        | --                    | 1<br>(1 - 3)           | 51<br>(33 - 84)         | 45<br>(27 - 73)          | 12<br>(7 - 19)           |
| Larynx cancer                        | 11<br>(7 - 25)           | --                    | --                     | 2<br>(2 - 5)            | 6<br>(3 - 16)            | 2<br>(1 - 6)             |
| Tracheal, bronchus and lung cancer   | 119<br>(94 - 145)        | --                    | --                     | 17<br>(12 - 22)         | 74<br>(57 - 93)          | 28<br>(22 - 35)          |
| Breast cancer                        | 150<br>(112 - 213)       | --                    | --                     | 62<br>(45 - 90)         | 71<br>(50 - 108)         | 16<br>(12 - 25)          |
| Cervical cancer                      | 373<br>(268 - 525)       | --                    | --                     | 120<br>(82 - 169)       | 210<br>(143 - 310)       | 43<br>(28 - 66)          |
| Uterine cancer                       | 29<br>(17 - 44)          | --                    | --                     | 6<br>(3 - 10)           | 17<br>(9 - 26)           | 6<br>(4 - 10)            |
| Prostate cancer                      | 79<br>(52 - 130)         | --                    | --                     | 2<br>(1 - 4)            | 30<br>(18 - 50)          | 47<br>(31 - 79)          |
| Colon and rectum cancer              | 109<br>(92 - 128)        | --                    | --                     | 35<br>(28 - 43)         | 46<br>(37 - 58)          | 27<br>(22 - 33)          |
| Lip and oral cavity cancer           | 16<br>(13 - 22)          | --                    | --                     | 5<br>(4 - 8)            | 8<br>(6 - 11)            | 3<br>(2 - 5)             |
| Nasopharynx cancer                   | 6<br>(4 - 8)             | --                    | 0<br>(0 - 1)           | 3<br>(2 - 4)            | 2<br>(1 - 3)             | 0<br>(0 - 1)             |
| Other pharynx cancer                 | 6<br>(5 - 9)             | --                    | --                     | 2<br>(2 - 3)            | 3<br>(2 - 5)             | 1<br>(1 - 2)             |
| Gallbladder and biliary tract cancer | 29<br>(20 - 39)          | --                    | --                     | 6<br>(4 - 8)            | 17<br>(11 - 24)          | 6<br>(4 - 10)            |
| Pancreatic cancer                    | 54<br>(44 - 66)          | --                    | --                     | 12<br>(9 - 16)          | 32<br>(25 - 41)          | 9<br>(7 - 12)            |
| Malignant skin melanoma              | 7<br>(5 - 11)            | --                    | --                     | 2<br>(2 - 4)            | 4<br>(3 - 5)             | 1<br>(1 - 2)             |
| Non-melanoma skin cancer             | 6<br>(4 - 8)             | --                    | --                     | 2<br>(1 - 2)            | 2<br>(1 - 3)             | 2<br>(1 - 3)             |
| Ovarian cancer                       | 45<br>(30 - 65)          | --                    | --                     | 13<br>(8 - 19)          | 27<br>(17 - 41)          | 5<br>(3 - 7)             |
| Testicular cancer                    | 3<br>(2 - 4)             | --                    | --                     | 2<br>(1 - 3)            | 0<br>(0 - 1)             | 0<br>(0 - 0)             |
| Kidney cancer                        | 23<br>(17 - 30)          | 3<br>(2 - 7)          | 2<br>(1 - 3)           | 5<br>(3 - 6)            | 10<br>(7 - 14)           | 3<br>(2 - 4)             |
| Bladder cancer                       | 55<br>(44 - 73)          | --                    | --                     | 14<br>(8 - 20)          | 24<br>(17 - 35)          | 18<br>(13 - 26)          |
| Brain and nervous system cancer      | 29<br>(17 - 37)          | 2<br>(1 - 3)          | 3<br>(2 - 5)           | 14<br>(7 - 19)          | 8<br>(5 - 11)            | 3<br>(2 - 4)             |
| Thyroid cancer                       | 6<br>(5 - 9)             | --                    | 0<br>(0 - 0)           | 1<br>(1 - 2)            | 4<br>(2 - 6)             | 2<br>(1 - 3)             |
| Mesothelioma                         | 3<br>(2 - 4)             | --                    | --                     | 1<br>(1 - 1)            | 2<br>(1 - 2)             | 1<br>(1 - 1)             |
| Hodgkin lymphoma                     | 15<br>(9 - 19)           | 2<br>(1 - 3)          | 2<br>(1 - 3)           | 6<br>(4 - 8)            | 3<br>(2 - 4)             | 2<br>(1 - 4)             |
| Non-Hodgkin lymphoma                 | 119<br>(92 - 155)        | 16<br>(8 - 28)        | 19<br>(11 - 30)        | 44<br>(32 - 59)         | 29<br>(20 - 44)          | 11<br>(7 - 17)           |
| Multiple myeloma                     | 12<br>(9 - 17)           | --                    | --                     | 3<br>(2 - 3)            | 7<br>(5 - 10)            | 3<br>(2 - 4)             |
| Leukemia                             | 47<br>(39 - 57)          | 4<br>(2 - 8)          | 7<br>(5 - 11)          | 21<br>(16 - 26)         | 9<br>(7 - 12)            | 5<br>(4 - 7)             |
| Other neoplasms                      | 207<br>(161 - 282)       | 40<br>(24 - 70)       | 22<br>(14 - 36)        | 52<br>(40 - 70)         | 60<br>(41 - 90)          | 32<br>(22 - 48)          |
| Cardiovascular diseases              | 6,649<br>(5,502 - 7,978) | 249<br>(161 - 376)    | 71<br>(43 - 109)       | 1,102<br>(848 - 1,382)  | 3,066<br>(2,474 - 3,753) | 2,161<br>(1,796 - 2,598) |
| Rheumatic heart disease              | 87<br>(48 - 210)         | 5<br>(2 - 10)         | 5<br>(2 - 11)          | 28<br>(13 - 76)         | 30<br>(14 - 82)          | 20<br>(12 - 42)          |
| Ischemic heart disease               | 1,869<br>(1,465 - 2,499) | 10<br>(4 - 23)        | 9<br>(5 - 15)          | 302<br>(219 - 417)      | 920<br>(694 - 1,213)     | 627<br>(481 - 863)       |
| Cerebrovascular disease              | 2,911<br>(2,387 - 3,539) | 69<br>(40 - 113)      | 20<br>(11 - 32)        | 401<br>(304 - 517)      | 1,353<br>(1,081 - 1,693) | 1,068<br>(873 - 1,287)   |
| Ischemic stroke                      | 1,546<br>(733 - 2,135)   | 8<br>(2 - 18)         | 2<br>(1 - 5)           | 81<br>(31 - 122)        | 711<br>(294 - 1,021)     | 744<br>(402 - 981)       |
| Hemorrhagic stroke                   | 1,365<br>(907 - 2,202)   | 61<br>(36 - 99)       | 18<br>(10 - 29)        | 319<br>(243 - 413)      | 643<br>(392 - 1,094)     | 323<br>(167 - 690)       |
| Hypertensive heart disease           | 406<br>(202 - 634)       | 3<br>(1 - 6)          | 1<br>(0 - 2)           | 59<br>(22 - 105)        | 186<br>(87 - 307)        | 157<br>(80 - 239)        |
| Cardiomyopathy and myocarditis       | 416<br>(289 - 537)       | 55<br>(24 - 106)      | 14<br>(7 - 23)         | 107<br>(67 - 146)       | 154<br>(97 - 224)        | 87<br>(52 - 122)         |
| Atrial fibrillation and flutter      | 0<br>(0 - 0)             | --                    | --                     | 0<br>(0 - 0)            | 0<br>(0 - 0)             | 0<br>(0 - 0)             |
| Aortic aneurysm                      | 68<br>(44 - 102)         | --                    | --                     | 11<br>(6 - 18)          | 36<br>(22 - 54)          | 21<br>(14 - 33)          |
| Peripheral vascular disease          | 1<br>(1 - 2)             | --                    | --                     | 0<br>(0 - 0)            | 1<br>(0 - 1)             | 1<br>(0 - 1)             |
| Endocarditis                         | 130<br>(91 - 180)        | 27<br>(10 - 52)       | 4<br>(2 - 6)           | 32<br>(22 - 48)         | 40<br>(25 - 64)          | 28<br>(19 - 44)          |

Web Table 31- Sierra Leone deaths with 95% UI by age, sex, and cause in 2013

| Cause                                               | Both Sexes, All Ages   | Both Sexes, 0-4 Years | Both Sexes, 5-14 Years | Both Sexes, 15-49 Years | Both Sexes, 50-69 Years | Both Sexes, 70-80 Years |
|-----------------------------------------------------|------------------------|-----------------------|------------------------|-------------------------|-------------------------|-------------------------|
| Other cardiovascular and circulatory diseases       | 761<br>(564 - 1,188)   | 80<br>(42 - 146)      | 19<br>(11 - 30)        | 162<br>(116 - 249)      | 346<br>(238 - 547)      | 153<br>(99 - 290)       |
| Chronic respiratory diseases                        | 1,249<br>(979 - 1,890) | 90<br>(51 - 161)      | 20<br>(13 - 30)        | 190<br>(141 - 268)      | 525<br>(388 - 797)      | 424<br>(331 - 637)      |
| Chronic obstructive pulmonary disease               | 750<br>(565 - 1,195)   | 47<br>(24 - 87)       | 9<br>(5 - 13)          | 63<br>(45 - 95)         | 326<br>(233 - 532)      | 306<br>(226 - 473)      |
| Pneumoconiosis                                      | 71<br>(41 - 121)       | 1<br>(0 - 2)          | 1<br>(0 - 1)           | 17<br>(10 - 29)         | 41<br>(22 - 70)         | 11<br>(6 - 23)          |
| Silicosis                                           | 13<br>(7 - 23)         | 0<br>(0 - 1)          | 0<br>(0 - 0)           | 4<br>(2 - 9)            | 4<br>(2 - 9)            | 4<br>(2 - 8)            |
| Asbestosis                                          | 5<br>(3 - 8)           | 0<br>(0 - 0)          | 0<br>(0 - 0)           | 1<br>(1 - 2)            | 3<br>(2 - 5)            | 0<br>(0 - 1)            |
| Coal workers pneumoconiosis                         | 19<br>(10 - 33)        | 0<br>(0 - 0)          | 0<br>(0 - 0)           | 1<br>(1 - 2)            | 16<br>(8 - 29)          | 1<br>(1 - 3)            |
| Other pneumoconiosis                                | 34<br>(19 - 64)        | 0<br>(0 - 1)          | 0<br>(0 - 0)           | 11<br>(6 - 21)          | 17<br>(9 - 32)          | 5<br>(3 - 12)           |
| Asthma                                              | 249<br>(185 - 343)     | 24<br>(10 - 47)       | 6<br>(4 - 10)          | 68<br>(49 - 96)         | 99<br>(69 - 142)        | 51<br>(35 - 75)         |
| Interstitial lung disease and pulmonary sarcoidosis | 85<br>(39 - 132)       | 1<br>(0 - 3)          | 1<br>(0 - 1)           | 6<br>(4 - 8)            | 38<br>(17 - 64)         | 40<br>(14 - 68)         |
| Other chronic respiratory diseases                  | 95<br>(69 - 157)       | 18<br>(9 - 36)        | 4<br>(2 - 7)           | 35<br>(24 - 55)         | 22<br>(15 - 38)         | 16<br>(10 - 27)         |
| Cirrhosis                                           | 1,070<br>(866 - 1,323) | 30<br>(14 - 57)       | 16<br>(11 - 23)        | 365<br>(275 - 475)      | 506<br>(395 - 651)      | 153<br>(118 - 194)      |
| Cirrhosis due to hepatitis B                        | 311<br>(147 - 455)     | 2<br>(1 - 5)          | 4<br>(1 - 7)           | 113<br>(45 - 178)       | 149<br>(76 - 226)       | 44<br>(21 - 69)         |
| Cirrhosis due to hepatitis C                        | 244<br>(131 - 370)     | 1<br>(0 - 3)          | 2<br>(0 - 4)           | 75<br>(37 - 122)        | 127<br>(68 - 201)       | 39<br>(21 - 62)         |
| Cirrhosis due to alcohol use                        | 352<br>(225 - 500)     | --                    | --                     | 109<br>(65 - 172)       | 184<br>(116 - 270)      | 59<br>(38 - 84)         |
| Cirrhosis due to other causes                       | 163<br>(110 - 216)     | 27<br>(13 - 52)       | 11<br>(7 - 16)         | 68<br>(42 - 97)         | 46<br>(27 - 70)         | 11<br>(6 - 15)          |
| Digestive diseases                                  | 1,103<br>(885 - 1,335) | 76<br>(39 - 145)      | 52<br>(34 - 75)        | 360<br>(258 - 467)      | 396<br>(298 - 507)      | 220<br>(174 - 272)      |
| Peptic ulcer disease                                | 282<br>(208 - 381)     | 8<br>(3 - 19)         | 7<br>(4 - 13)          | 93<br>(63 - 129)        | 113<br>(78 - 163)       | 60<br>(42 - 85)         |
| Gastritis and duodenitis                            | 43<br>(27 - 76)        | 5<br>(1 - 10)         | 3<br>(2 - 6)           | 13<br>(8 - 22)          | 14<br>(7 - 29)          | 9<br>(4 - 21)           |
| Appendicitis                                        | 90<br>(65 - 120)       | 11<br>(4 - 26)        | 11<br>(5 - 18)         | 31<br>(22 - 46)         | 24<br>(13 - 37)         | 13<br>(5 - 23)          |
| Paralytic ileus and intestinal obstruction          | 291<br>(176 - 400)     | 17<br>(7 - 35)        | 13<br>(7 - 21)         | 78<br>(39 - 118)        | 116<br>(65 - 168)       | 68<br>(44 - 101)        |
| Inguinal, femoral, and abdominal hernia             | 27<br>(17 - 45)        | 1<br>(0 - 2)          | 1<br>(0 - 2)           | 8<br>(4 - 14)           | 10<br>(6 - 18)          | 8<br>(4 - 12)           |
| Inflammatory bowel disease                          | 64<br>(29 - 90)        | 14<br>(6 - 30)        | 3<br>(1 - 5)           | 20<br>(8 - 31)          | 17<br>(5 - 27)          | 9<br>(3 - 15)           |
| Vascular intestinal disorders                       | 5<br>(2 - 9)           | 1<br>(0 - 2)          | 0<br>(0 - 1)           | 1<br>(1 - 2)            | 2<br>(1 - 3)            | 1<br>(0 - 3)            |
| Gallbladder and biliary diseases                    | 76<br>(51 - 98)        | 3<br>(1 - 5)          | 4<br>(1 - 7)           | 22<br>(12 - 31)         | 27<br>(18 - 40)         | 20<br>(13 - 29)         |
| Pancreatitis                                        | 74<br>(42 - 108)       | 1<br>(0 - 2)          | 1<br>(1 - 2)           | 39<br>(19 - 62)         | 24<br>(14 - 38)         | 9<br>(4 - 15)           |
| Other digestive diseases                            | 150<br>(112 - 206)     | 16<br>(7 - 36)        | 9<br>(5 - 14)          | 55<br>(36 - 77)         | 48<br>(32 - 69)         | 23<br>(14 - 34)         |
| Neurological disorders                              | 384<br>(315 - 461)     | 64<br>(34 - 113)      | 26<br>(14 - 43)        | 107<br>(78 - 143)       | 52<br>(41 - 67)         | 134<br>(112 - 162)      |
| Alzheimer disease and other dementias               | 146<br>(121 - 177)     | --                    | --                     | 0<br>(0 - 0)            | 26<br>(19 - 33)         | 120<br>(98 - 146)       |
| Parkinson disease                                   | 2<br>(1 - 4)           | --                    | --                     | 0<br>(0 - 0)            | 0<br>(0 - 1)            | 2<br>(1 - 3)            |
| Epilepsy                                            | 186<br>(136 - 252)     | 53<br>(26 - 99)       | 22<br>(10 - 39)        | 90<br>(63 - 123)        | 13<br>(8 - 19)          | 8<br>(5 - 12)           |
| Multiple sclerosis                                  | 1<br>(0 - 2)           | --                    | --                     | 0<br>(0 - 1)            | 0<br>(0 - 1)            | 0<br>(0 - 0)            |
| Other neurological disorders                        | 50<br>(38 - 68)        | 11<br>(6 - 29)        | 4<br>(2 - 5)           | 16<br>(12 - 21)         | 13<br>(10 - 17)         | 5<br>(4 - 7)            |
| Mental and substance use disorders                  | 308<br>(165 - 420)     | 13<br>(4 - 24)        | 0<br>(0 - 0)           | 225<br>(111 - 317)      | 57<br>(33 - 86)         | 13<br>(7 - 20)          |
| Schizophrenia                                       | 1<br>(1 - 2)           | --                    | --                     | 1<br>(0 - 1)            | 1<br>(0 - 1)            | 0<br>(0 - 0)            |
| Alcohol use disorders                               | 94<br>(36 - 179)       | --                    | --                     | 51<br>(20 - 99)         | 35<br>(13 - 66)         | 7<br>(2 - 14)           |
| Drug use disorders                                  | 212<br>(110 - 295)     | 13<br>(4 - 24)        | --                     | 172<br>(82 - 248)       | 21<br>(15 - 28)         | 6<br>(4 - 7)            |
| Opioid use disorders                                | 23<br>(11 - 32)        | 1<br>(0 - 3)          | --                     | 19<br>(8 - 27)          | 2<br>(1 - 3)            | 1<br>(0 - 1)            |
| Cocaine use disorders                               | 1<br>(0 - 1)           | 0<br>(0 - 0)          | --                     | 1<br>(0 - 1)            | 0<br>(0 - 0)            | 0<br>(0 - 0)            |
| Amphetamine use disorders                           | 1<br>(0 - 1)           | 0<br>(0 - 0)          | --                     | 0<br>(0 - 1)            | 0<br>(0 - 0)            | 0<br>(0 - 0)            |

Web Table 31- Sierra Leone deaths with 95% UI by age, sex, and cause in 2013

| Cause                                               | Both Sexes, All Ages     | Both Sexes, 0-4 Years  | Both Sexes, 5-14 Years | Both Sexes, 15-49 Years | Both Sexes, 50-69 Years | Both Sexes, 70-80 Years |
|-----------------------------------------------------|--------------------------|------------------------|------------------------|-------------------------|-------------------------|-------------------------|
| Other drug use disorders                            | 188<br>(98 - 261)        | 12<br>(3 - 22)         | --                     | 153<br>(72 - 221)       | 19<br>(13 - 25)         | 5<br>(4 - 7)            |
| Eating disorders                                    | 0<br>(0 - 0)             | --                     | 0<br>(0 - 0)           | 0<br>(0 - 0)            | --                      | --                      |
| Anorexia nervosa                                    | 0<br>(0 - 0)             | --                     | 0<br>(0 - 0)           | 0<br>(0 - 0)            | --                      | --                      |
| Diabetes, urogenital, blood, and endocrine diseases | 3,628<br>(2,274 - 5,721) | 1,123<br>(392 - 2,487) | 428<br>(148 - 964)     | 844<br>(521 - 1,409)    | 796<br>(640 - 978)      | 436<br>(363 - 532)      |
| Diabetes mellitus                                   | 789<br>(633 - 972)       | 13<br>(7 - 21)         | 5<br>(3 - 7)           | 123<br>(91 - 156)       | 414<br>(317 - 523)      | 234<br>(182 - 298)      |
| Acute glomerulonephritis                            | 9<br>(7 - 16)            | 1<br>(1 - 4)           | 1<br>(0 - 3)           | 3<br>(2 - 5)            | 3<br>(2 - 4)            | 1<br>(0 - 1)            |
| Chronic kidney disease                              | 425<br>(336 - 519)       | 49<br>(29 - 78)        | 22<br>(13 - 33)        | 151<br>(103 - 193)      | 127<br>(97 - 170)       | 76<br>(58 - 102)        |
| Chronic kidney disease due to diabetes mellitus     | 5<br>(2 - 7)             | 0<br>(0 - 0)           | 0<br>(0 - 0)           | 0<br>(0 - 1)            | 4<br>(1 - 6)            | 0<br>(0 - 0)            |
| Chronic kidney disease due to hypertension          | 132<br>(92 - 194)        | 6<br>(2 - 12)          | 2<br>(1 - 4)           | 36<br>(22 - 54)         | 54<br>(35 - 85)         | 34<br>(21 - 58)         |
| Chronic kidney disease due to glomerulonephritis    | 188<br>(135 - 237)       | 29<br>(18 - 44)        | 14<br>(9 - 21)         | 82<br>(54 - 107)        | 40<br>(26 - 58)         | 23<br>(13 - 33)         |
| Chronic kidney disease due to other causes          | 101<br>(57 - 140)        | 14<br>(5 - 29)         | 6<br>(2 - 10)          | 33<br>(16 - 52)         | 30<br>(14 - 48)         | 19<br>(8 - 31)          |
| Urinary diseases and male infertility               | 358<br>(237 - 461)       | 57<br>(26 - 112)       | 8<br>(5 - 13)          | 96<br>(52 - 130)        | 119<br>(78 - 159)       | 78<br>(56 - 104)        |
| Interstitial nephritis and urinary tract infections | 305<br>(191 - 401)       | 51<br>(19 - 106)       | 6<br>(3 - 10)          | 79<br>(41 - 108)        | 101<br>(64 - 135)       | 68<br>(49 - 92)         |
| Urolithiasis                                        | 5<br>(2 - 14)            | --                     | 1<br>(0 - 1)           | 2<br>(1 - 6)            | 2<br>(1 - 5)            | 1<br>(0 - 2)            |
| Other urinary diseases                              | 48<br>(30 - 68)          | 6<br>(2 - 13)          | 2<br>(1 - 3)           | 16<br>(8 - 24)          | 16<br>(8 - 26)          | 9<br>(4 - 15)           |
| Gynecological diseases                              | 4<br>(2 - 7)             | --                     | --                     | 3<br>(1 - 5)            | 1<br>(1 - 2)            | 0<br>(0 - 1)            |
| Uterine fibroids                                    | 1<br>(0 - 1)             | --                     | --                     | 0<br>(0 - 1)            | 0<br>(0 - 1)            | 0<br>(0 - 0)            |
| Polycystic ovarian syndrome                         | 0<br>(0 - 0)             | --                     | --                     | 0<br>(0 - 0)            | 0<br>(0 - 0)            | --                      |
| Endometriosis                                       | 0<br>(0 - 1)             | --                     | --                     | 0<br>(0 - 1)            | 0<br>(0 - 0)            | --                      |
| Genital prolapse                                    | 1<br>(0 - 1)             | --                     | --                     | 0<br>(0 - 1)            | 0<br>(0 - 0)            | 0<br>(0 - 0)            |
| Other gynecological diseases                        | 2<br>(1 - 3)             | --                     | --                     | 1<br>(1 - 2)            | 1<br>(0 - 1)            | 0<br>(0 - 0)            |
| Hemoglobinopathies and hemolytic anemias            | 1,789<br>(500 - 3,808)   | 923<br>(225 - 2,258)   | 379<br>(95 - 926)      | 404<br>(107 - 1,026)    | 70<br>(23 - 185)        | 12<br>(6 - 25)          |
| Thalassemias                                        | 8<br>(2 - 20)            | 6<br>(1 - 16)          | 1<br>(0 - 3)           | 1<br>(0 - 3)            | 0<br>(0 - 0)            | 0<br>(0 - 0)            |
| Sickle cell disorders                               | 1,750<br>(486 - 3,729)   | 903<br>(219 - 2,214)   | 376<br>(94 - 917)      | 399<br>(106 - 1,013)    | 68<br>(22 - 180)        | 5<br>(2 - 10)           |
| G6PD deficiency                                     | 9<br>(2 - 19)            | 5<br>(1 - 12)          | 1<br>(0 - 3)           | 2<br>(0 - 4)            | 0<br>(0 - 1)            | 0<br>(0 - 1)            |
| Other hemoglobinopathies and hemolytic anemias      | 22<br>(8 - 43)           | 10<br>(3 - 19)         | 1<br>(0 - 3)           | 2<br>(1 - 7)            | 2<br>(1 - 4)            | 7<br>(3 - 14)           |
| Endocrine, metabolic, blood, and immune disorders   | 254<br>(164 - 334)       | 80<br>(41 - 143)       | 12<br>(7 - 21)         | 65<br>(39 - 84)         | 62<br>(36 - 88)         | 35<br>(18 - 50)         |
| Musculoskeletal disorders                           | 64<br>(42 - 82)          | --                     | 7<br>(3 - 11)          | 25<br>(16 - 34)         | 21<br>(13 - 28)         | 10<br>(7 - 15)          |
| Rheumatoid arthritis                                | 7<br>(4 - 10)            | --                     | 1<br>(0 - 1)           | 2<br>(1 - 3)            | 2<br>(1 - 4)            | 2<br>(1 - 4)            |
| Other musculoskeletal disorders                     | 56<br>(36 - 75)          | --                     | 7<br>(3 - 10)          | 24<br>(14 - 32)         | 18<br>(11 - 25)         | 8<br>(5 - 11)           |
| Other non-communicable diseases                     | 1,973<br>(931 - 3,677)   | 1,712<br>(711 - 3,380) | 72<br>(37 - 134)       | 93<br>(65 - 124)        | 56<br>(38 - 74)         | 40<br>(27 - 54)         |
| Congenital anomalies                                | 1,778<br>(743 - 3,500)   | 1,643<br>(648 - 3,302) | 67<br>(32 - 129)       | 52<br>(32 - 80)         | 11<br>(8 - 15)          | 5<br>(4 - 7)            |
| Neural tube defects                                 | 500<br>(135 - 1,392)     | 475<br>(127 - 1,323)   | 14<br>(4 - 37)         | 10<br>(3 - 22)          | 1<br>(0 - 2)            | 0<br>(0 - 1)            |
| Congenital heart anomalies                          | 618<br>(247 - 1,240)     | 562<br>(212 - 1,159)   | 27<br>(12 - 58)        | 21<br>(11 - 35)         | 5<br>(3 - 8)            | 2<br>(1 - 3)            |
| Cleft lip and cleft palate                          | 8<br>(1 - 25)            | 8<br>(1 - 25)          | --                     | --                      | --                      | --                      |
| Down syndrome                                       | 234<br>(58 - 576)        | 211<br>(44 - 548)      | 11<br>(4 - 24)         | 9<br>(5 - 16)           | 2<br>(1 - 3)            | 0<br>(0 - 0)            |
| Chromosomal unbalanced rearrangements               | 60<br>(12 - 186)         | 56<br>(11 - 178)       | 2<br>(0 - 4)           | 2<br>(1 - 3)            | 0<br>(0 - 0)            | 0<br>(0 - 0)            |
| Other congenital anomalies                          | 357<br>(75 - 1,487)      | 330<br>(62 - 1,432)    | 12<br>(3 - 43)         | 10<br>(4 - 23)          | 3<br>(2 - 5)            | 2<br>(2 - 4)            |
| Skin and subcutaneous diseases                      | 176<br>(115 - 226)       | 51<br>(26 - 85)        | 5<br>(3 - 8)           | 41<br>(22 - 54)         | 45<br>(28 - 62)         | 35<br>(23 - 48)         |
| Cellulitis                                          | 55<br>(26 - 89)          | 14<br>(5 - 29)         | 2<br>(1 - 4)           | 12<br>(5 - 20)          | 15<br>(6 - 26)          | 12<br>(5 - 20)          |

Web Table 31- Sierra Leone deaths with 95% UI by age, sex, and cause in 2013

| Cause                                           | Both Sexes, All Ages     | Both Sexes, 0-4 Years | Both Sexes, 5-14 Years | Both Sexes, 15-49 Years  | Both Sexes, 50-69 Years | Both Sexes, 70-80 Years |
|-------------------------------------------------|--------------------------|-----------------------|------------------------|--------------------------|-------------------------|-------------------------|
| Pyoderma                                        | 115<br>(78 - 158)        | 36<br>(17 - 64)       | 3<br>(1 - 4)           | 27<br>(16 - 37)          | 29<br>(17 - 44)         | 21<br>(11 - 34)         |
| Decubitus ulcer                                 | 2<br>(1 - 3)             | 0<br>(0 - 0)          | 0<br>(0 - 0)           | 1<br>(0 - 1)             | 0<br>(0 - 0)            | 1<br>(1 - 2)            |
| Other skin and subcutaneous diseases            | 3<br>(1 - 7)             | 1<br>(0 - 4)          | 0<br>(0 - 0)           | 1<br>(1 - 2)             | 0<br>(0 - 1)            | 0<br>(0 - 1)            |
| Sudden infant death syndrome                    | 19<br>(6 - 44)           | 19<br>(6 - 44)        | --                     | --                       | --                      | --                      |
| Injuries                                        | 4,055<br>(3,216 - 4,847) | 832<br>(513 - 1,207)  | 438<br>(283 - 618)     | 1,939<br>(1,519 - 2,412) | 592<br>(467 - 728)      | 252<br>(183 - 313)      |
| Transport injuries                              | 2,029<br>(1,609 - 2,485) | 215<br>(121 - 351)    | 218<br>(136 - 315)     | 1,186<br>(886 - 1,497)   | 314<br>(245 - 399)      | 97<br>(73 - 123)        |
| Road injuries                                   | 1,958<br>(1,556 - 2,399) | 193<br>(109 - 317)    | 207<br>(129 - 300)     | 1,164<br>(870 - 1,475)   | 302<br>(236 - 383)      | 91<br>(69 - 116)        |
| Pedestrian road injuries                        | 305<br>(220 - 423)       | 32<br>(15 - 60)       | 36<br>(20 - 58)        | 173<br>(116 - 249)       | 48<br>(33 - 70)         | 15<br>(10 - 23)         |
| Cyclist road injuries                           | 93<br>(68 - 126)         | 15<br>(6 - 29)        | 18<br>(9 - 30)         | 38<br>(26 - 54)          | 18<br>(11 - 25)         | 5<br>(3 - 7)            |
| Motorcyclist road injuries                      | 329<br>(220 - 434)       | 28<br>(14 - 52)       | 28<br>(16 - 44)        | 212<br>(133 - 294)       | 48<br>(31 - 66)         | 13<br>(8 - 19)          |
| Motor vehicle road injuries                     | 1,202<br>(935 - 1,488)   | 111<br>(62 - 184)     | 119<br>(73 - 180)      | 732<br>(532 - 939)       | 183<br>(138 - 236)      | 56<br>(42 - 73)         |
| Other road injuries                             | 29<br>(17 - 47)          | 7<br>(2 - 16)         | 6<br>(2 - 11)          | 9<br>(5 - 20)            | 4<br>(2 - 7)            | 2<br>(1 - 3)            |
| Other transport injuries                        | 71<br>(45 - 98)          | 22<br>(10 - 41)       | 11<br>(5 - 19)         | 21<br>(15 - 32)          | 12<br>(6 - 18)          | 6<br>(2 - 9)            |
| Unintentional injuries                          | 1,648<br>(1,123 - 2,071) | 605<br>(299 - 896)    | 209<br>(121 - 311)     | 483<br>(359 - 638)       | 216<br>(156 - 281)      | 135<br>(87 - 178)       |
| Falls                                           | 327<br>(237 - 472)       | 66<br>(28 - 121)      | 26<br>(13 - 42)        | 108<br>(73 - 179)        | 66<br>(46 - 100)        | 61<br>(38 - 84)         |
| Drowning                                        | 406<br>(232 - 664)       | 172<br>(65 - 328)     | 84<br>(40 - 155)       | 116<br>(68 - 209)        | 25<br>(18 - 36)         | 8<br>(5 - 11)           |
| Fire, heat, and hot substances                  | 175<br>(75 - 258)        | 81<br>(24 - 146)      | 18<br>(7 - 29)         | 43<br>(23 - 59)          | 21<br>(12 - 34)         | 12<br>(6 - 19)          |
| Poisonings                                      | 85<br>(54 - 137)         | 30<br>(14 - 59)       | 8<br>(4 - 14)          | 33<br>(21 - 63)          | 12<br>(7 - 18)          | 3<br>(2 - 4)            |
| Exposure to mechanical forces                   | 242<br>(171 - 323)       | 79<br>(40 - 152)      | 31<br>(17 - 50)        | 92<br>(63 - 129)         | 31<br>(18 - 43)         | 9<br>(4 - 12)           |
| Unintentional firearm injuries                  | 89<br>(59 - 126)         | 21<br>(10 - 43)       | 7<br>(4 - 13)          | 48<br>(29 - 76)          | 10<br>(6 - 15)          | 3<br>(2 - 4)            |
| Unintentional suffocation                       | 30<br>(14 - 80)          | 18<br>(6 - 59)        | 4<br>(2 - 8)           | 5<br>(3 - 14)            | 2<br>(1 - 4)            | 1<br>(0 - 1)            |
| Other exposure to mechanical forces             | 123<br>(68 - 169)        | 40<br>(16 - 79)       | 20<br>(9 - 36)         | 39<br>(25 - 56)          | 19<br>(7 - 28)          | 5<br>(1 - 8)            |
| Adverse effects of medical treatment            | 133<br>(44 - 228)        | 45<br>(9 - 100)       | 7<br>(2 - 13)          | 30<br>(11 - 49)          | 30<br>(10 - 55)         | 21<br>(6 - 40)          |
| Animal contact                                  | 48<br>(26 - 71)          | 13<br>(6 - 24)        | 9<br>(4 - 17)          | 13<br>(6 - 20)           | 9<br>(4 - 13)           | 5<br>(2 - 7)            |
| Venomous animal contact                         | 25<br>(12 - 42)          | 8<br>(3 - 16)         | 5<br>(2 - 11)          | 7<br>(3 - 11)            | 4<br>(2 - 7)            | 2<br>(1 - 4)            |
| Non-venomous animal contact                     | 23<br>(11 - 35)          | 5<br>(2 - 10)         | 4<br>(2 - 9)           | 6<br>(3 - 9)             | 5<br>(2 - 8)            | 3<br>(1 - 4)            |
| Foreign body                                    | 136<br>(76 - 239)        | 94<br>(43 - 189)      | 10<br>(5 - 17)         | 13<br>(9 - 20)           | 9<br>(6 - 13)           | 10<br>(6 - 15)          |
| Pulmonary aspiration and foreign body in airway | 131<br>(72 - 235)        | 92<br>(42 - 188)      | 9<br>(4 - 16)          | 12<br>(7 - 19)           | 8<br>(5 - 12)           | 10<br>(5 - 14)          |
| Foreign body in other body part                 | 5<br>(3 - 9)             | 2<br>(1 - 4)          | 1<br>(0 - 2)           | 1<br>(1 - 2)             | 1<br>(1 - 2)            | 0<br>(0 - 1)            |
| Other unintentional injuries                    | 95<br>(66 - 126)         | 24<br>(14 - 39)       | 16<br>(9 - 25)         | 35<br>(24 - 49)          | 13<br>(9 - 18)          | 7<br>(5 - 10)           |
| Self-harm and interpersonal violence            | 377<br>(269 - 525)       | 13<br>(7 - 23)        | 12<br>(7 - 19)         | 270<br>(184 - 396)       | 62<br>(41 - 96)         | 21<br>(11 - 33)         |
| Self-harm                                       | 234<br>(153 - 377)       | --                    | 5<br>(2 - 11)          | 153<br>(93 - 270)        | 55<br>(35 - 89)         | 20<br>(11 - 32)         |
| Interpersonal violence                          | 143<br>(95 - 207)        | 13<br>(7 - 23)        | 6<br>(3 - 11)          | 117<br>(74 - 174)        | 6<br>(4 - 11)           | 1<br>(0 - 1)            |
| Assault by firearm                              | 75<br>(40 - 116)         | 3<br>(1 - 7)          | 2<br>(1 - 4)           | 67<br>(35 - 104)         | 3<br>(2 - 5)            | 0<br>(0 - 0)            |
| Assault by sharp object                         | 26<br>(15 - 47)          | 2<br>(1 - 4)          | 1<br>(0 - 2)           | 21<br>(12 - 39)          | 2<br>(1 - 3)            | 0<br>(0 - 0)            |
| Assault by other means                          | 42<br>(27 - 72)          | 7<br>(4 - 14)         | 3<br>(2 - 6)           | 29<br>(17 - 53)          | 2<br>(1 - 4)            | 0<br>(0 - 0)            |

Web Table 31- Sierra Leone deaths with 95% UI by age, sex, and cause in 2013

| Cause                                                             | Males, All Ages             | Males, 0-4 Years            | Males, 5-14 Years        | Males, 15-49 Years       | Males, 50-69 Years       | Males, 70-80 Years       |
|-------------------------------------------------------------------|-----------------------------|-----------------------------|--------------------------|--------------------------|--------------------------|--------------------------|
| All causes                                                        | 33,089<br>(30,021 - 36,922) | 14,703<br>(12,499 - 17,060) | 1,478<br>(1,234 - 1,757) | 7,693<br>(6,591 - 8,817) | 5,998<br>(5,083 - 7,356) | 3,217<br>(2,899 - 3,754) |
| Communicable, maternal, neonatal, and nutritional diseases        | 19,531<br>(16,540 - 22,515) | 12,437<br>(9,729 - 14,983)  | 806<br>(566 - 1,066)     | 3,572<br>(2,974 - 4,404) | 1,799<br>(1,492 - 2,158) | 917<br>(714 - 1,127)     |
| HIV/AIDS and tuberculosis                                         | 3,443<br>(2,487 - 4,755)    | 168<br>(87 - 288)           | 119<br>(83 - 170)        | 2,181<br>(1,472 - 3,186) | 766<br>(559 - 1,019)     | 209<br>(152 - 284)       |
| Tuberculosis                                                      | 1,393<br>(964 - 1,976)      | 66<br>(35 - 109)            | 27<br>(15 - 46)          | 630<br>(399 - 943)       | 492<br>(326 - 708)       | 178<br>(123 - 253)       |
| HIV/AIDS                                                          | 2,050<br>(1,217 - 3,303)    | 102<br>(30 - 210)           | 92<br>(63 - 132)         | 1,551<br>(865 - 2,581)   | 274<br>(167 - 422)       | 31<br>(16 - 54)          |
| HIV/AIDS resulting in mycobacterial infection                     | 144<br>(82 - 234)           | 7<br>(2 - 14)               | 6<br>(4 - 9)             | 109<br>(59 - 182)        | 20<br>(12 - 32)          | 2<br>(1 - 4)             |
| HIV/AIDS resulting in other diseases                              | 1,907<br>(1,130 - 3,076)    | 95<br>(28 - 198)            | 86<br>(60 - 124)         | 1,442<br>(810 - 2,393)   | 254<br>(155 - 392)       | 29<br>(15 - 50)          |
| Diarrhea, lower respiratory, and other common infectious diseases | 6,448<br>(4,773 - 8,374)    | 4,137<br>(2,745 - 5,877)    | 334<br>(190 - 508)       | 781<br>(539 - 1,054)     | 675<br>(470 - 921)       | 521<br>(353 - 704)       |
| Diarrheal diseases                                                | 1,348<br>(713 - 2,497)      | 894<br>(314 - 2,038)        | 67<br>(24 - 151)         | 174<br>(100 - 326)       | 130<br>(71 - 261)        | 82<br>(44 - 159)         |
| Intestinal infectious diseases                                    | 168<br>(81 - 309)           | 54<br>(23 - 106)            | 48<br>(18 - 98)          | 58<br>(24 - 115)         | 6<br>(3 - 13)            | 2<br>(1 - 4)             |
| Typhoid fever                                                     | 106<br>(48 - 206)           | 32<br>(12 - 66)             | 32<br>(11 - 66)          | 38<br>(14 - 80)          | 4<br>(2 - 8)             | 1<br>(0 - 2)             |
| Paratyphoid fever                                                 | 51<br>(21 - 102)            | 16<br>(5 - 34)              | 16<br>(5 - 35)           | 17<br>(6 - 36)           | 2<br>(0 - 4)             | 0<br>(0 - 1)             |
| Other intestinal infectious diseases                              | 11<br>(4 - 23)              | 7<br>(1 - 16)               | 1<br>(0 - 5)             | 3<br>(0 - 8)             | 1<br>(0 - 4)             | 0<br>(0 - 2)             |
| Lower respiratory infections                                      | 3,886<br>(2,732 - 5,280)    | 2,563<br>(1,516 - 3,838)    | 123<br>(59 - 211)        | 334<br>(212 - 476)       | 455<br>(289 - 650)       | 412<br>(289 - 586)       |
| Upper respiratory infections                                      | 6<br>(2 - 16)               | 3<br>(0 - 12)               | 0<br>(0 - 2)             | 2<br>(0 - 4)             | 1<br>(0 - 3)             | 0<br>(0 - 1)             |
| Otitis media                                                      | 2<br>(1 - 3)                | 1<br>(0 - 1)                | 0<br>(0 - 0)             | 0<br>(0 - 1)             | 0<br>(0 - 1)             | 0<br>(0 - 0)             |
| Meningitis                                                        | 861<br>(519 - 1,413)        | 493<br>(208 - 972)          | 84<br>(34 - 168)         | 190<br>(112 - 299)       | 74<br>(44 - 124)         | 22<br>(12 - 38)          |
| Pneumococcal meningitis                                           | 214<br>(128 - 353)          | 108<br>(45 - 226)           | 23<br>(8 - 50)           | 57<br>(27 - 102)         | 20<br>(9 - 40)           | 6<br>(3 - 12)            |
| H influenzae type B meningitis                                    | 153<br>(73 - 275)           | 107<br>(37 - 221)           | 13<br>(4 - 34)           | 23<br>(11 - 42)          | 8<br>(3 - 15)            | 2<br>(1 - 4)             |
| Meningococcal meningitis                                          | 387<br>(204 - 668)          | 233<br>(95 - 470)           | 38<br>(13 - 82)          | 75<br>(36 - 134)         | 31<br>(10 - 62)          | 10<br>(4 - 18)           |
| Other meningitis                                                  | 107<br>(60 - 170)           | 44<br>(17 - 96)             | 9<br>(3 - 21)            | 35<br>(16 - 62)          | 15<br>(6 - 31)           | 4<br>(2 - 9)             |
| Encephalitis                                                      | 44<br>(29 - 72)             | 20<br>(10 - 40)             | 6<br>(3 - 15)            | 12<br>(7 - 21)           | 5<br>(3 - 7)             | 2<br>(1 - 3)             |
| Diphtheria                                                        | 3<br>(0 - 22)               | 3<br>(0 - 22)               | 0<br>(0 - 3)             | 0<br>(0 - 1)             | 0<br>(0 - 0)             | --<br>(0 - 0)            |
| Whooping cough                                                    | 14<br>(0 - 74)              | 13<br>(0 - 71)              | 1<br>(0 - 3)             | 0<br>(0 - 1)             | 0<br>(0 - 0)             | --<br>(0 - 0)            |
| Tetanus                                                           | 99<br>(33 - 182)            | 81<br>(21 - 163)            | 3<br>(1 - 6)             | 11<br>(5 - 20)           | 4<br>(2 - 8)             | 1<br>(0 - 1)             |
| Measles                                                           | 12<br>(2 - 36)              | 11<br>(2 - 32)              | 1<br>(0 - 4)             | 0<br>(0 - 1)             | 0<br>(0 - 0)             | --<br>(0 - 0)            |
| Varicella and herpes zoster                                       | 3<br>(1 - 7)                | 1<br>(0 - 5)                | 0<br>(0 - 1)             | 1<br>(0 - 2)             | 0<br>(0 - 1)             | 0<br>(0 - 1)             |
| Neglected tropical diseases and malaria                           | 4,182<br>(2,325 - 6,783)    | 3,409<br>(1,656 - 5,737)    | 243<br>(95 - 534)        | 328<br>(121 - 946)       | 146<br>(48 - 419)        | 55<br>(15 - 162)         |
| Malaria                                                           | 4,106<br>(2,244 - 6,714)    | 3,388<br>(1,632 - 5,719)    | 227<br>(81 - 519)        | 303<br>(95 - 918)        | 136<br>(38 - 409)        | 53<br>(12 - 159)         |
| Leishmaniasis                                                     | 0<br>(0 - 0)                | 0<br>(0 - 0)                | 0<br>(0 - 0)             | 0<br>(0 - 0)             | 0<br>(0 - 0)             | 0<br>(0 - 0)             |
| Visceral leishmaniasis                                            | 0<br>(0 - 0)                | 0<br>(0 - 0)                | 0<br>(0 - 0)             | 0<br>(0 - 0)             | 0<br>(0 - 0)             | 0<br>(0 - 0)             |
| Schistosomiasis                                                   | 17<br>(11 - 24)             | 0<br>(0 - 1)                | 1<br>(0 - 1)             | 8<br>(4 - 12)            | 6<br>(3 - 10)            | 2<br>(1 - 3)             |
| Cysticercosis                                                     | 1<br>(0 - 2)                | 0<br>(0 - 0)                | 0<br>(0 - 0)             | 0<br>(0 - 1)             | 0<br>(0 - 0)             | 0<br>(0 - 0)             |
| Cystic echinococcosis                                             | 2<br>(1 - 2)                | 0<br>(0 - 0)                | 0<br>(0 - 0)             | 1<br>(1 - 1)             | 0<br>(0 - 0)             | 0<br>(0 - 0)             |
| Dengue                                                            | 4<br>(2 - 7)                | 2<br>(0 - 5)                | 1<br>(0 - 2)             | 1<br>(1 - 2)             | 0<br>(0 - 0)             | 0<br>(0 - 0)             |
| Yellow fever                                                      | 10<br>(6 - 15)              | 1<br>(0 - 2)                | 2<br>(1 - 5)             | 5<br>(3 - 10)            | 1<br>(0 - 2)             | 0<br>(0 - 1)             |
| Rabies                                                            | 27<br>(9 - 46)              | 7<br>(1 - 18)               | 10<br>(2 - 20)           | 8<br>(3 - 12)            | 2<br>(1 - 4)             | 0<br>(0 - 0)             |
| Intestinal nematode infections                                    | 11<br>(3 - 26)              | 9<br>(2 - 23)               | 1<br>(0 - 7)             | 1<br>(0 - 5)             | 0<br>(0 - 2)             | 0<br>(0 - 1)             |
| Ascariasis                                                        | 11<br>(3 - 26)              | 9<br>(2 - 23)               | 1<br>(0 - 7)             | 1<br>(0 - 5)             | 0<br>(0 - 2)             | 0<br>(0 - 1)             |
| Other neglected tropical diseases                                 | 5<br>(3 - 8)                | 2<br>(1 - 4)                | 0<br>(0 - 1)             | 2<br>(1 - 3)             | 1<br>(0 - 1)             | 0<br>(0 - 1)             |

Web Table 31- Sierra Leone deaths with 95% UI by age, sex, and cause in 2013

| Cause                                                            | Males, All Ages            | Males, 0-4 Years         | Males, 5-14 Years  | Males, 15-49 Years       | Males, 50-69 Years       | Males, 70-80 Years       |
|------------------------------------------------------------------|----------------------------|--------------------------|--------------------|--------------------------|--------------------------|--------------------------|
| Maternal disorders                                               | --                         | --                       | --                 | --                       | --                       | --                       |
| Maternal hemorrhage                                              | --                         | --                       | --                 | --                       | --                       | --                       |
| Maternal sepsis and other maternal infections                    | --                         | --                       | --                 | --                       | --                       | --                       |
| Maternal hypertensive disorders                                  | --                         | --                       | --                 | --                       | --                       | --                       |
| Maternal obstructed labor                                        | --                         | --                       | --                 | --                       | --                       | --                       |
| Maternal abortive outcome                                        | --                         | --                       | --                 | --                       | --                       | --                       |
| Indirect maternal deaths                                         | --                         | --                       | --                 | --                       | --                       | --                       |
| Late maternal deaths                                             | --                         | --                       | --                 | --                       | --                       | --                       |
| Maternal deaths aggravated by HIV/AIDS                           | --                         | --                       | --                 | --                       | --                       | --                       |
| Other maternal disorders                                         | --                         | --                       | --                 | --                       | --                       | --                       |
| Neonatal disorders                                               | 3,298<br>(2,715 - 3,976)   | 3,298<br>(2,715 - 3,976) | --                 | --                       | --                       | --                       |
| Neonatal preterm birth complications                             | 1,211<br>(540 - 2,036)     | 1,211<br>(540 - 2,036)   | --                 | --                       | --                       | --                       |
| Neonatal encephalopathy due to birth asphyxia and trauma         | 893<br>(406 - 1,523)       | 893<br>(406 - 1,523)     | --                 | --                       | --                       | --                       |
| Neonatal sepsis and other neonatal infections                    | 906<br>(380 - 1,726)       | 906<br>(380 - 1,726)     | --                 | --                       | --                       | --                       |
| Hemolytic disease and other neonatal jaundice                    | 25<br>(7 - 68)             | 25<br>(7 - 68)           | --                 | --                       | --                       | --                       |
| Other neonatal disorders                                         | 263<br>(116 - 493)         | 263<br>(116 - 493)       | --                 | --                       | --                       | --                       |
| Nutritional deficiencies                                         | 1,751<br>(1,040 - 2,755)   | 1,167<br>(614 - 2,023)   | 86<br>(41 - 154)   | 217<br>(127 - 330)       | 169<br>(97 - 277)        | 112<br>(66 - 189)        |
| Protein-energy malnutrition                                      | 1,439<br>(817 - 2,387)     | 1,096<br>(561 - 1,934)   | 64<br>(27 - 122)   | 115<br>(59 - 223)        | 101<br>(50 - 190)        | 63<br>(29 - 129)         |
| Iodine deficiency                                                | 2<br>(0 - 10)              | 1<br>(0 - 7)             | 0<br>(0 - 2)       | 1<br>(0 - 3)             | 0<br>(0 - 2)             | 0<br>(0 - 1)             |
| Iron-deficiency anemia                                           | 305<br>(100 - 549)         | 70<br>(5 - 242)          | 21<br>(5 - 48)     | 99<br>(35 - 166)         | 66<br>(21 - 116)         | 48<br>(17 - 89)          |
| Other nutritional deficiencies                                   | 5<br>(2 - 9)               | 0<br>(0 - 2)             | 0<br>(0 - 1)       | 3<br>(1 - 5)             | 1<br>(0 - 2)             | 1<br>(0 - 1)             |
| Other communicable, maternal, neonatal, and nutritional diseases | 408<br>(262 - 612)         | 257<br>(141 - 435)       | 25<br>(13 - 43)    | 64<br>(39 - 105)         | 43<br>(25 - 76)          | 19<br>(11 - 34)          |
| Sexually transmitted diseases excluding HIV                      | 227<br>(119 - 398)         | 194<br>(94 - 350)        | 15<br>(6 - 30)     | 10<br>(6 - 21)           | 6<br>(2 - 14)            | 3<br>(1 - 7)             |
| Syphilis                                                         | 220<br>(112 - 390)         | 194<br>(94 - 350)        | 14<br>(6 - 29)     | 5<br>(3 - 11)            | 4<br>(2 - 10)            | 2<br>(1 - 6)             |
| Chlamydial infection                                             | --                         | --                       | --                 | --                       | --                       | --                       |
| Gonococcal infection                                             | 4<br>(2 - 9)               | --                       | 0<br>(0 - 1)       | 3<br>(1 - 5)             | 1<br>(0 - 2)             | 0<br>(0 - 1)             |
| Other sexually transmitted diseases                              | 3<br>(2 - 7)               | --                       | 0<br>(0 - 1)       | 2<br>(1 - 4)             | 1<br>(0 - 1)             | 0<br>(0 - 0)             |
| Hepatitis                                                        | 76<br>(33 - 114)           | 16<br>(5 - 37)           | 5<br>(2 - 8)       | 32<br>(14 - 51)          | 17<br>(8 - 28)           | 6<br>(3 - 11)            |
| Acute hepatitis A                                                | 6<br>(1 - 15)              | 4<br>(1 - 10)            | 1<br>(0 - 2)       | 1<br>(0 - 3)             | 0<br>(0 - 0)             | 0<br>(0 - 0)             |
| Acute hepatitis B                                                | 48<br>(23 - 78)            | 12<br>(3 - 27)           | 2<br>(1 - 4)       | 15<br>(6 - 27)           | 14<br>(7 - 23)           | 5<br>(3 - 10)            |
| Acute hepatitis C                                                | 2<br>(0 - 6)               | --                       | 0<br>(0 - 1)       | 1<br>(0 - 3)             | 1<br>(0 - 2)             | 0<br>(0 - 1)             |
| Acute hepatitis E                                                | 20<br>(8 - 35)             | 1<br>(0 - 2)             | 2<br>(1 - 3)       | 15<br>(6 - 26)           | 3<br>(1 - 6)             | 0<br>(0 - 1)             |
| Other infectious diseases                                        | 105<br>(52 - 212)          | 47<br>(14 - 114)         | 5<br>(1 - 13)      | 22<br>(9 - 51)           | 20<br>(8 - 48)           | 11<br>(4 - 25)           |
| Non-communicable diseases                                        | 10,754<br>(8,322 - 14,029) | 1,764<br>(766 - 3,915)   | 397<br>(192 - 797) | 2,608<br>(1,902 - 3,373) | 3,819<br>(3,114 - 4,807) | 2,166<br>(1,864 - 2,564) |
| Neoplasms                                                        | 1,357<br>(1,091 - 1,685)   | 43<br>(23 - 73)          | 32<br>(19 - 50)    | 449<br>(321 - 604)       | 580<br>(454 - 754)       | 252<br>(205 - 313)       |
| Esophageal cancer                                                | 56<br>(36 - 95)            | --                       | --                 | 13<br>(8 - 20)           | 33<br>(19 - 56)          | 11<br>(6 - 20)           |
| Stomach cancer                                                   | 173<br>(132 - 224)         | --                       | --                 | 51<br>(35 - 71)          | 92<br>(67 - 124)         | 30<br>(21 - 40)          |
| Liver cancer                                                     | 542<br>(381 - 781)         | --                       | 2<br>(1 - 5)       | 234<br>(147 - 354)       | 232<br>(156 - 346)       | 73<br>(49 - 105)         |
| Liver cancer due to hepatitis B                                  | 279<br>(117 - 456)         | --                       | 1<br>(0 - 2)       | 141<br>(73 - 234)        | 110<br>(31 - 195)        | 25<br>(11 - 46)          |
| Liver cancer due to hepatitis C                                  | 143<br>(65 - 239)          | --                       | 0<br>(0 - 0)       | 41<br>(13 - 77)          | 73<br>(31 - 131)         | 29<br>(15 - 50)          |

Web Table 31- Sierra Leone deaths with 95% UI by age, sex, and cause in 2013

| Cause                                | Males, All Ages          | Males, 0-4 Years  | Males, 5-14 Years | Males, 15-49 Years | Males, 50-69 Years       | Males, 70-80 Years     |
|--------------------------------------|--------------------------|-------------------|-------------------|--------------------|--------------------------|------------------------|
| Liver cancer due to alcohol use      | 61<br>(30 - 108)         | --                | --                | 18<br>(7 - 35)     | 30<br>(13 - 56)          | 14<br>(6 - 24)         |
| Liver cancer due to other causes     | 59<br>(32 - 103)         | --                | 1<br>(0 - 2)      | 35<br>(17 - 67)    | 19<br>(8 - 34)           | 5<br>(2 - 8)           |
| Larynx cancer                        | 10<br>(6 - 24)           | --                | --                | 2<br>(1 - 4)       | 5<br>(3 - 15)            | 2<br>(1 - 6)           |
| Tracheal, bronchus and lung cancer   | 82<br>(60 - 106)         | --                | --                | 11<br>(7 - 16)     | 52<br>(36 - 69)          | 20<br>(15 - 26)        |
| Breast cancer                        | 3<br>(2 - 4)             | --                | --                | 1<br>(1 - 2)       | 1<br>(1 - 3)             | 0<br>(0 - 1)           |
| Cervical cancer                      | --                       | --                | --                | --                 | --                       | --                     |
| Uterine cancer                       | --                       | --                | --                | --                 | --                       | --                     |
| Prostate cancer                      | 79<br>(52 - 130)         | --                | --                | 2<br>(1 - 4)       | 30<br>(18 - 50)          | 47<br>(31 - 79)        |
| Colon and rectum cancer              | 57<br>(45 - 71)          | --                | --                | 20<br>(14 - 27)    | 23<br>(18 - 31)          | 14<br>(11 - 18)        |
| Lip and oral cavity cancer           | 9<br>(6 - 13)            | --                | --                | 3<br>(2 - 4)       | 4<br>(3 - 7)             | 2<br>(1 - 3)           |
| Nasopharynx cancer                   | 3<br>(2 - 4)             | --                | 0<br>(0 - 0)      | 2<br>(1 - 2)       | 1<br>(1 - 2)             | 0<br>(0 - 0)           |
| Other pharynx cancer                 | 4<br>(3 - 7)             | --                | --                | 1<br>(1 - 2)       | 2<br>(1 - 4)             | 1<br>(1 - 1)           |
| Gallbladder and biliary tract cancer | 6<br>(4 - 10)            | --                | --                | 2<br>(1 - 3)       | 3<br>(2 - 5)             | 2<br>(1 - 3)           |
| Pancreatic cancer                    | 30<br>(23 - 39)          | --                | --                | 9<br>(6 - 12)      | 17<br>(13 - 23)          | 4<br>(3 - 5)           |
| Malignant skin melanoma              | 4<br>(2 - 7)             | --                | --                | 1<br>(1 - 3)       | 1<br>(1 - 3)             | 1<br>(0 - 1)           |
| Non-melanoma skin cancer             | 3<br>(2 - 6)             | --                | --                | 1<br>(0 - 1)       | 1<br>(1 - 3)             | 1<br>(1 - 2)           |
| Ovarian cancer                       | --                       | --                | --                | --                 | --                       | --                     |
| Testicular cancer                    | 3<br>(2 - 4)             | --                | --                | 2<br>(1 - 3)       | 0<br>(0 - 1)             | 0<br>(0 - 0)           |
| Kidney cancer                        | 12<br>(8 - 17)           | 2<br>(1 - 4)      | 1<br>(0 - 1)      | 2<br>(1 - 3)       | 5<br>(3 - 8)             | 2<br>(1 - 3)           |
| Bladder cancer                       | 36<br>(28 - 52)          | --                | --                | 9<br>(5 - 14)      | 15<br>(10 - 24)          | 13<br>(9 - 20)         |
| Brain and nervous system cancer      | 14<br>(6 - 20)           | 0<br>(0 - 1)      | 2<br>(1 - 4)      | 7<br>(2 - 10)      | 4<br>(1 - 6)             | 1<br>(0 - 2)           |
| Thyroid cancer                       | 1<br>(1 - 2)             | --                | 0<br>(0 - 0)      | 0<br>(0 - 1)       | 0<br>(0 - 1)             | 0<br>(0 - 0)           |
| Mesothelioma                         | 2<br>(1 - 3)             | --                | --                | 0<br>(0 - 1)       | 1<br>(1 - 2)             | 1<br>(0 - 1)           |
| Hodgkin lymphoma                     | 8<br>(5 - 12)            | 1<br>(0 - 2)      | 1<br>(0 - 3)      | 4<br>(2 - 6)       | 2<br>(1 - 3)             | 1<br>(0 - 1)           |
| Non-Hodgkin lymphoma                 | 75<br>(54 - 103)         | 9<br>(4 - 20)     | 11<br>(6 - 21)    | 29<br>(19 - 41)    | 18<br>(11 - 29)          | 8<br>(5 - 12)          |
| Multiple myeloma                     | 4<br>(3 - 7)             | --                | --                | 1<br>(1 - 2)       | 2<br>(2 - 4)             | 1<br>(0 - 1)           |
| Leukemia                             | 27<br>(20 - 34)          | 3<br>(1 - 7)      | 4<br>(2 - 7)      | 13<br>(9 - 18)     | 4<br>(3 - 5)             | 3<br>(2 - 4)           |
| Other neoplasms                      | 114<br>(80 - 160)        | 27<br>(14 - 50)   | 11<br>(5 - 18)    | 29<br>(20 - 42)    | 30<br>(18 - 50)          | 17<br>(11 - 28)        |
| Cardiovascular diseases              | 3,648<br>(2,971 - 4,483) | 129<br>(71 - 220) | 40<br>(21 - 69)   | 673<br>(497 - 878) | 1,730<br>(1,363 - 2,242) | 1,076<br>(903 - 1,293) |
| Rheumatic heart disease              | 40<br>(20 - 106)         | 3<br>(1 - 7)      | 2<br>(1 - 6)      | 13<br>(5 - 38)     | 14<br>(6 - 41)           | 8<br>(4 - 18)          |
| Ischemic heart disease               | 1,152<br>(873 - 1,525)   | 8<br>(2 - 18)     | 6<br>(3 - 12)     | 209<br>(143 - 291) | 603<br>(437 - 822)       | 327<br>(249 - 437)     |
| Cerebrovascular disease              | 1,590<br>(1,229 - 2,046) | 40<br>(20 - 74)   | 12<br>(6 - 22)    | 239<br>(163 - 331) | 751<br>(558 - 999)       | 548<br>(437 - 685)     |
| Ischemic stroke                      | 854<br>(359 - 1,219)     | 3<br>(1 - 9)      | 1<br>(0 - 3)      | 55<br>(16 - 89)    | 411<br>(156 - 612)       | 383<br>(187 - 530)     |
| Hemorrhagic stroke                   | 737<br>(433 - 1,244)     | 37<br>(18 - 67)   | 11<br>(5 - 20)    | 184<br>(123 - 261) | 340<br>(180 - 627)       | 165<br>(73 - 352)      |
| Hypertensive heart disease           | 140<br>(57 - 250)        | 1<br>(0 - 4)      | 0<br>(0 - 1)      | 28<br>(7 - 59)     | 65<br>(26 - 120)         | 45<br>(19 - 82)        |
| Cardiomyopathy and myocarditis       | 235<br>(136 - 340)       | 22<br>(5 - 56)    | 7<br>(2 - 14)     | 61<br>(32 - 91)    | 104<br>(52 - 164)        | 41<br>(20 - 68)        |
| Atrial fibrillation and flutter      | 0<br>(0 - 0)             | --                | --                | 0<br>(0 - 0)       | 0<br>(0 - 0)             | 0<br>(0 - 0)           |
| Aortic aneurysm                      | 41<br>(23 - 62)          | --                | --                | 6<br>(3 - 10)      | 23<br>(12 - 37)          | 11<br>(6 - 18)         |
| Peripheral vascular disease          | 1<br>(0 - 1)             | --                | --                | 0<br>(0 - 0)       | 0<br>(0 - 0)             | 0<br>(0 - 1)           |
| Endocarditis                         | 83<br>(51 - 127)         | 13<br>(4 - 29)    | 2<br>(1 - 4)      | 20<br>(12 - 34)    | 30<br>(17 - 50)          | 18<br>(11 - 29)        |



Web Table 31- Sierra Leone deaths with 95% UI by age, sex, and cause in 2013

| Cause                                               | Males, All Ages      | Males, 0-4 Years | Males, 5-14 Years | Males, 15-49 Years | Males, 50-69 Years | Males, 70-80 Years |
|-----------------------------------------------------|----------------------|------------------|-------------------|--------------------|--------------------|--------------------|
| Other cardiovascular and circulatory diseases       | 365<br>(245 - 607)   | 42<br>(18 - 88)  | 10<br>(5 - 19)    | 96<br>(61 - 152)   | 140<br>(88 - 258)  | 77<br>(48 - 153)   |
| Chronic respiratory diseases                        | 810<br>(613 - 1,322) | 51<br>(24 - 105) | 10<br>(5 - 20)    | 122<br>(85 - 194)  | 344<br>(244 - 555) | 283<br>(211 - 459) |
| Chronic obstructive pulmonary disease               | 498<br>(365 - 845)   | 27<br>(11 - 59)  | 4<br>(2 - 9)      | 41<br>(27 - 68)    | 211<br>(143 - 353) | 214<br>(155 - 360) |
| Pneumoconiosis                                      | 70<br>(40 - 119)     | 1<br>(0 - 2)     | 0<br>(0 - 1)      | 17<br>(9 - 28)     | 40<br>(21 - 70)    | 11<br>(6 - 23)     |
| Silicosis                                           | 13<br>(6 - 23)       | 0<br>(0 - 1)     | 0<br>(0 - 0)      | 4<br>(1 - 9)       | 4<br>(2 - 9)       | 4<br>(2 - 8)       |
| Asbestosis                                          | 5<br>(3 - 8)         | 0<br>(0 - 0)     | 0<br>(0 - 0)      | 1<br>(1 - 2)       | 3<br>(2 - 5)       | 0<br>(0 - 1)       |
| Coal workers pneumoconiosis                         | 19<br>(10 - 33)      | 0<br>(0 - 0)     | 0<br>(0 - 0)      | 1<br>(1 - 2)       | 16<br>(8 - 29)     | 1<br>(1 - 3)       |
| Other pneumoconiosis                                | 33<br>(19 - 64)      | 0<br>(0 - 1)     | 0<br>(0 - 0)      | 11<br>(6 - 21)     | 16<br>(9 - 31)     | 5<br>(3 - 11)      |
| Asthma                                              | 131<br>(87 - 225)    | 12<br>(4 - 29)   | 2<br>(1 - 5)      | 41<br>(26 - 67)    | 51<br>(31 - 87)    | 25<br>(15 - 45)    |
| Interstitial lung disease and pulmonary sarcoidosis | 57<br>(21 - 96)      | 0<br>(0 - 2)     | 0<br>(0 - 1)      | 3<br>(1 - 5)       | 28<br>(10 - 51)    | 26<br>(7 - 49)     |
| Other chronic respiratory diseases                  | 54<br>(36 - 93)      | 10<br>(4 - 24)   | 3<br>(1 - 5)      | 21<br>(12 - 33)    | 14<br>(8 - 25)     | 7<br>(4 - 14)      |
| Cirrhosis                                           | 751<br>(574 - 983)   | 18<br>(7 - 40)   | 9<br>(5 - 15)     | 276<br>(190 - 383) | 356<br>(265 - 491) | 92<br>(67 - 125)   |
| Cirrhosis due to hepatitis B                        | 221<br>(78 - 381)    | 1<br>(0 - 3)     | 2<br>(0 - 5)      | 85<br>(26 - 149)   | 105<br>(39 - 186)  | 28<br>(9 - 49)     |
| Cirrhosis due to hepatitis C                        | 130<br>(52 - 252)    | 0<br>(0 - 2)     | 0<br>(0 - 2)      | 43<br>(16 - 92)    | 69<br>(26 - 137)   | 17<br>(6 - 34)     |
| Cirrhosis due to alcohol use                        | 291<br>(174 - 436)   | --               | --                | 98<br>(54 - 161)   | 152<br>(88 - 232)  | 42<br>(24 - 64)    |
| Cirrhosis due to other causes                       | 110<br>(63 - 165)    | 16<br>(6 - 37)   | 7<br>(3 - 11)     | 50<br>(25 - 81)    | 31<br>(14 - 51)    | 6<br>(3 - 10)      |
| Digestive diseases                                  | 713<br>(545 - 922)   | 44<br>(19 - 96)  | 30<br>(16 - 49)   | 256<br>(169 - 354) | 258<br>(184 - 352) | 125<br>(96 - 162)  |
| Peptic ulcer disease                                | 207<br>(147 - 294)   | 6<br>(2 - 15)    | 5<br>(2 - 11)     | 74<br>(46 - 110)   | 84<br>(54 - 130)   | 39<br>(25 - 57)    |
| Gastritis and duodenitis                            | 23<br>(11 - 46)      | 2<br>(0 - 7)     | 1<br>(0 - 3)      | 7<br>(4 - 15)      | 8<br>(4 - 18)      | 4<br>(2 - 11)      |
| Appendicitis                                        | 40<br>(24 - 60)      | 4<br>(1 - 13)    | 4<br>(2 - 9)      | 14<br>(8 - 24)     | 11<br>(5 - 20)     | 6<br>(2 - 11)      |
| Paralytic ileus and intestinal obstruction          | 189<br>(94 - 274)    | 10<br>(3 - 26)   | 9<br>(4 - 16)     | 59<br>(24 - 97)    | 75<br>(35 - 117)   | 37<br>(21 - 58)    |
| Inguinal, femoral, and abdominal hernia             | 23<br>(14 - 42)      | 0<br>(0 - 2)     | 1<br>(0 - 2)      | 6<br>(3 - 13)      | 9<br>(5 - 17)      | 6<br>(3 - 11)      |
| Inflammatory bowel disease                          | 37<br>(11 - 57)      | 9<br>(2 - 21)    | 1<br>(1 - 3)      | 11<br>(3 - 19)     | 11<br>(2 - 18)     | 5<br>(1 - 9)       |
| Vascular intestinal disorders                       | 3<br>(1 - 7)         | 1<br>(0 - 2)     | 0<br>(0 - 1)      | 1<br>(0 - 2)       | 1<br>(0 - 2)       | 1<br>(0 - 2)       |
| Gallbladder and biliary diseases                    | 39<br>(20 - 55)      | 1<br>(0 - 3)     | 2<br>(0 - 4)      | 13<br>(5 - 21)     | 12<br>(7 - 21)     | 10<br>(5 - 17)     |
| Pancreatitis                                        | 55<br>(27 - 85)      | 0<br>(0 - 2)     | 1<br>(0 - 1)      | 34<br>(14 - 57)    | 15<br>(8 - 23)     | 5<br>(2 - 9)       |
| Other digestive diseases                            | 97<br>(65 - 143)     | 10<br>(3 - 27)   | 6<br>(3 - 10)     | 37<br>(20 - 58)    | 32<br>(19 - 50)    | 11<br>(6 - 20)     |
| Neurological disorders                              | 215<br>(164 - 277)   | 34<br>(14 - 71)  | 14<br>(6 - 26)    | 63<br>(43 - 90)    | 28<br>(21 - 38)    | 75<br>(59 - 95)    |
| Alzheimer disease and other dementias               | 82<br>(64 - 105)     | --               | --                | 0<br>(0 - 0)       | 15<br>(10 - 21)    | 68<br>(52 - 87)    |
| Parkinson disease                                   | 2<br>(1 - 3)         | --               | --                | 0<br>(0 - 0)       | 0<br>(0 - 0)       | 1<br>(1 - 3)       |
| Epilepsy                                            | 101<br>(64 - 152)    | 28<br>(10 - 63)  | 11<br>(4 - 23)    | 51<br>(32 - 76)    | 7<br>(4 - 11)      | 4<br>(2 - 6)       |
| Multiple sclerosis                                  | 0<br>(0 - 0)         | --               | --                | 0<br>(0 - 0)       | 0<br>(0 - 0)       | 0<br>(0 - 0)       |
| Other neurological disorders                        | 30<br>(19 - 49)      | 6<br>(3 - 24)    | 2<br>(1 - 4)      | 12<br>(8 - 17)     | 7<br>(5 - 10)      | 3<br>(2 - 4)       |
| Mental and substance use disorders                  | 271<br>(138 - 381)   | 11<br>(2 - 21)   | 0<br>(0 - 0)      | 207<br>(100 - 296) | 44<br>(23 - 71)    | 10<br>(4 - 16)     |
| Schizophrenia                                       | 0<br>(0 - 1)         | --               | --                | 0<br>(0 - 0)       | 0<br>(0 - 0)       | 0<br>(0 - 0)       |
| Alcohol use disorders                               | 79<br>(31 - 149)     | --               | --                | 43<br>(18 - 87)    | 30<br>(11 - 56)    | 7<br>(2 - 13)      |
| Drug use disorders                                  | 191<br>(89 - 274)    | 11<br>(2 - 21)   | --                | 163<br>(71 - 237)  | 14<br>(8 - 20)     | 3<br>(2 - 5)       |
| Opioid use disorders                                | 20<br>(9 - 30)       | 1<br>(0 - 3)     | --                | 18<br>(8 - 26)     | 1<br>(1 - 2)       | 0<br>(0 - 1)       |
| Cocaine use disorders                               | 1<br>(0 - 1)         | 0<br>(0 - 0)     | --                | 1<br>(0 - 1)       | 0<br>(0 - 0)       | 0<br>(0 - 0)       |
| Amphetamine use disorders                           | 0<br>(0 - 1)         | 0<br>(0 - 0)     | --                | 0<br>(0 - 1)       | 0<br>(0 - 0)       | 0<br>(0 - 0)       |

Web Table 31- Sierra Leone deaths with 95% UI by age, sex, and cause in 2013

| Cause                                               | Males, All Ages          | Males, 0-4 Years     | Males, 5-14 Years | Males, 15-49 Years   | Males, 50-69 Years | Males, 70-80 Years |
|-----------------------------------------------------|--------------------------|----------------------|-------------------|----------------------|--------------------|--------------------|
| Other drug use disorders                            | 169<br>(79 - 242)        | 9<br>(2 - 19)        | --                | 145<br>(63 - 212)    | 12<br>(7 - 18)     | 3<br>(2 - 4)       |
| Eating disorders                                    | 0<br>(0 - 0)             | --                   | 0<br>(0 - 0)      | 0<br>(0 - 0)         | --                 | --                 |
| Anorexia nervosa                                    | 0<br>(0 - 0)             | --                   | 0<br>(0 - 0)      | 0<br>(0 - 0)         | --                 | --                 |
| Diabetes, urogenital, blood, and endocrine diseases | 2,079<br>(1,030 - 4,068) | 668<br>(132 - 2,004) | 226<br>(42 - 663) | 506<br>(239 - 1,044) | 447<br>(336 - 597) | 233<br>(187 - 290) |
| Diabetes mellitus                                   | 427<br>(334 - 540)       | 11<br>(5 - 19)       | 3<br>(1 - 5)      | 70<br>(49 - 95)      | 229<br>(168 - 303) | 115<br>(87 - 151)  |
| Acute glomerulonephritis                            | 4<br>(2 - 10)            | 1<br>(0 - 3)         | 1<br>(0 - 2)      | 1<br>(1 - 3)         | 1<br>(1 - 2)       | 0<br>(0 - 1)       |
| Chronic kidney disease                              | 256<br>(194 - 331)       | 26<br>(14 - 48)      | 13<br>(6 - 21)    | 100<br>(61 - 138)    | 72<br>(51 - 100)   | 45<br>(32 - 63)    |
| Chronic kidney disease due to diabetes mellitus     | 3<br>(0 - 4)             | 0<br>(0 - 0)         | 0<br>(0 - 0)      | 0<br>(0 - 0)         | 2<br>(0 - 4)       | 0<br>(0 - 0)       |
| Chronic kidney disease due to hypertension          | 59<br>(37 - 109)         | 3<br>(0 - 7)         | 1<br>(0 - 2)      | 18<br>(9 - 33)       | 23<br>(12 - 44)    | 15<br>(7 - 30)     |
| Chronic kidney disease due to glomerulonephritis    | 134<br>(91 - 178)        | 15<br>(7 - 29)       | 10<br>(5 - 15)    | 59<br>(37 - 83)      | 31<br>(18 - 48)    | 20<br>(10 - 29)    |
| Chronic kidney disease due to other causes          | 61<br>(31 - 93)          | 8<br>(2 - 19)        | 2<br>(1 - 5)      | 23<br>(10 - 40)      | 16<br>(7 - 28)     | 11<br>(4 - 20)     |
| Urinary diseases and male infertility               | 236<br>(144 - 328)       | 39<br>(15 - 92)      | 4<br>(2 - 7)      | 66<br>(31 - 96)      | 75<br>(46 - 105)   | 52<br>(34 - 76)    |
| Interstitial nephritis and urinary tract infections | 200<br>(117 - 281)       | 36<br>(12 - 87)      | 3<br>(2 - 6)      | 53<br>(25 - 81)      | 63<br>(37 - 91)    | 45<br>(29 - 67)    |
| Urolithiasis                                        | 1<br>(1 - 2)             | --                   | 0<br>(0 - 0)      | 1<br>(0 - 1)         | 0<br>(0 - 1)       | 0<br>(0 - 0)       |
| Other urinary diseases                              | 34<br>(18 - 54)          | 3<br>(1 - 9)         | 1<br>(0 - 2)      | 12<br>(5 - 21)       | 11<br>(5 - 20)     | 7<br>(3 - 13)      |
| Gynecological diseases                              | --                       | --                   | --                | --                   | --                 | --                 |
| Uterine fibroids                                    | --                       | --                   | --                | --                   | --                 | --                 |
| Polycystic ovarian syndrome                         | --                       | --                   | --                | --                   | --                 | --                 |
| Endometriosis                                       | --                       | --                   | --                | --                   | --                 | --                 |
| Genital prolapse                                    | --                       | --                   | --                | --                   | --                 | --                 |
| Other gynecological diseases                        | --                       | --                   | --                | --                   | --                 | --                 |
| Hemoglobinopathies and hemolytic anemias            | 1,030<br>(72 - 3,021)    | 557<br>(39 - 1,897)  | 199<br>(10 - 642) | 231<br>(12 - 844)    | 37<br>(4 - 154)    | 6<br>(2 - 19)      |
| Thalassemias                                        | 6<br>(0 - 18)            | 4<br>(0 - 14)        | 1<br>(0 - 2)      | 1<br>(0 - 2)         | 0<br>(0 - 0)       | 0<br>(0 - 0)       |
| Sickle cell disorders                               | 1,008<br>(69 - 2,965)    | 545<br>(38 - 1,860)  | 197<br>(10 - 636) | 228<br>(12 - 832)    | 36<br>(4 - 150)    | 2<br>(1 - 7)       |
| G6PD deficiency                                     | 5<br>(0 - 16)            | 3<br>(0 - 11)        | 1<br>(0 - 2)      | 1<br>(0 - 3)         | 0<br>(0 - 1)       | 0<br>(0 - 1)       |
| Other hemoglobinopathies and hemolytic anemias      | 10<br>(2 - 32)           | 4<br>(0 - 13)        | 1<br>(0 - 2)      | 2<br>(0 - 6)         | 1<br>(0 - 3)       | 3<br>(1 - 11)      |
| Endocrine, metabolic, blood, and immune disorders   | 127<br>(75 - 176)        | 34<br>(17 - 74)      | 7<br>(3 - 13)     | 38<br>(19 - 53)      | 33<br>(17 - 50)    | 15<br>(7 - 23)     |
| Musculoskeletal disorders                           | 36<br>(21 - 49)          | --                   | 4<br>(2 - 9)      | 15<br>(8 - 21)       | 11<br>(7 - 16)     | 5<br>(3 - 8)       |
| Rheumatoid arthritis                                | 3<br>(1 - 5)             | --                   | 0<br>(0 - 1)      | 1<br>(0 - 2)         | 1<br>(0 - 2)       | 1<br>(0 - 1)       |
| Other musculoskeletal disorders                     | 33<br>(20 - 46)          | --                   | 4<br>(1 - 8)      | 14<br>(8 - 20)       | 11<br>(6 - 15)     | 5<br>(3 - 7)       |
| Other non-communicable diseases                     | 875<br>(412 - 2,027)     | 766<br>(323 - 1,896) | 31<br>(14 - 63)   | 41<br>(26 - 58)      | 21<br>(11 - 29)    | 15<br>(6 - 21)     |
| Congenital anomalies                                | 799<br>(345 - 1,938)     | 735<br>(300 - 1,851) | 29<br>(13 - 62)   | 27<br>(16 - 42)      | 5<br>(3 - 8)       | 3<br>(2 - 4)       |
| Neural tube defects                                 | 214<br>(36 - 545)        | 202<br>(33 - 530)    | 6<br>(1 - 15)     | 6<br>(1 - 13)        | 0<br>(0 - 1)       | 0<br>(0 - 1)       |
| Congenital heart anomalies                          | 280<br>(108 - 684)       | 251<br>(88 - 630)    | 14<br>(6 - 30)    | 12<br>(6 - 21)       | 2<br>(1 - 4)       | 1<br>(1 - 2)       |
| Cleft lip and cleft palate                          | 4<br>(1 - 18)            | 4<br>(1 - 18)        | --                | --                   | --                 | --                 |
| Down syndrome                                       | 71<br>(11 - 242)         | 65<br>(8 - 236)      | 2<br>(1 - 5)      | 3<br>(1 - 5)         | 1<br>(0 - 1)       | 0<br>(0 - 0)       |
| Chromosomal unbalanced rearrangements               | 23<br>(3 - 82)           | 21<br>(3 - 79)       | 1<br>(0 - 2)      | 1<br>(0 - 2)         | 0<br>(0 - 0)       | 0<br>(0 - 0)       |
| Other congenital anomalies                          | 207<br>(28 - 931)        | 192<br>(21 - 895)    | 6<br>(1 - 25)     | 6<br>(2 - 13)        | 1<br>(1 - 3)       | 1<br>(1 - 2)       |
| Skin and subcutaneous diseases                      | 63<br>(25 - 85)          | 19<br>(7 - 35)       | 2<br>(1 - 4)      | 14<br>(6 - 20)       | 16<br>(6 - 23)     | 13<br>(4 - 18)     |
| Cellulitis                                          | 23<br>(7 - 41)           | 7<br>(2 - 16)        | 1<br>(0 - 2)      | 4<br>(1 - 8)         | 7<br>(2 - 13)      | 4<br>(1 - 8)       |

Web Table 31- Sierra Leone deaths with 95% UI by age, sex, and cause in 2013

| Cause                                           | Males, All Ages          | Males, 0-4 Years   | Males, 5-14 Years  | Males, 15-49 Years       | Males, 50-69 Years | Males, 70-80 Years |
|-------------------------------------------------|--------------------------|--------------------|--------------------|--------------------------|--------------------|--------------------|
| Pyoderma                                        | 39<br>(15 - 57)          | 12<br>(4 - 25)     | 1<br>(0 - 2)       | 10<br>(4 - 14)           | 8<br>(3 - 14)      | 8<br>(3 - 12)      |
| Decubitus ulcer                                 | 1<br>(0 - 2)             | 0<br>(0 - 0)       | 0<br>(0 - 0)       | 0<br>(0 - 0)             | 0<br>(0 - 0)       | 1<br>(0 - 2)       |
| Other skin and subcutaneous diseases            | 0<br>(0 - 0)             | 0<br>(0 - 0)       | 0<br>(0 - 0)       | 0<br>(0 - 0)             | 0<br>(0 - 0)       | 0<br>(0 - 0)       |
| Sudden infant death syndrome                    | 13<br>(4 - 36)           | 13<br>(4 - 36)     | --                 | --                       | --                 | --                 |
| Injuries                                        | 2,804<br>(2,165 - 3,473) | 501<br>(270 - 822) | 275<br>(155 - 418) | 1,513<br>(1,131 - 1,935) | 380<br>(282 - 498) | 135<br>(100 - 174) |
| Transport injuries                              | 1,445<br>(1,090 - 1,838) | 130<br>(61 - 243)  | 132<br>(71 - 209)  | 924<br>(667 - 1,210)     | 201<br>(147 - 268) | 58<br>(41 - 77)    |
| Road injuries                                   | 1,399<br>(1,057 - 1,776) | 116<br>(54 - 217)  | 125<br>(67 - 198)  | 909<br>(654 - 1,192)     | 194<br>(142 - 258) | 54<br>(39 - 72)    |
| Pedestrian road injuries                        | 214<br>(136 - 326)       | 20<br>(7 - 45)     | 21<br>(10 - 40)    | 134<br>(80 - 209)        | 30<br>(18 - 48)    | 9<br>(5 - 15)      |
| Cyclist road injuries                           | 70<br>(48 - 102)         | 10<br>(3 - 24)     | 13<br>(5 - 24)     | 32<br>(21 - 47)          | 11<br>(7 - 17)     | 3<br>(2 - 6)       |
| Motorcyclist road injuries                      | 244<br>(158 - 337)       | 18<br>(7 - 35)     | 18<br>(8 - 32)     | 168<br>(100 - 246)       | 32<br>(19 - 47)    | 8<br>(4 - 13)      |
| Motor vehicle road injuries                     | 850<br>(631 - 1,109)     | 63<br>(29 - 120)   | 69<br>(37 - 114)   | 568<br>(396 - 771)       | 117<br>(85 - 163)  | 33<br>(23 - 46)    |
| Other road injuries                             | 20<br>(9 - 40)           | 5<br>(1 - 13)      | 4<br>(1 - 9)       | 7<br>(3 - 17)            | 3<br>(1 - 6)       | 1<br>(0 - 2)       |
| Other transport injuries                        | 46<br>(31 - 67)          | 13<br>(5 - 29)     | 7<br>(3 - 14)      | 15<br>(9 - 28)           | 7<br>(4 - 11)      | 3<br>(1 - 6)       |
| Unintentional injuries                          | 1,076<br>(767 - 1,435)   | 364<br>(165 - 603) | 135<br>(69 - 222)  | 375<br>(265 - 522)       | 137<br>(97 - 187)  | 64<br>(44 - 88)    |
| Falls                                           | 226<br>(155 - 373)       | 44<br>(17 - 91)    | 17<br>(8 - 34)     | 90<br>(56 - 159)         | 48<br>(29 - 81)    | 27<br>(16 - 47)    |
| Drowning                                        | 298<br>(156 - 533)       | 118<br>(36 - 264)  | 60<br>(25 - 122)   | 98<br>(52 - 185)         | 18<br>(11 - 27)    | 5<br>(3 - 8)       |
| Fire, heat, and hot substances                  | 94<br>(38 - 151)         | 42<br>(11 - 86)    | 9<br>(3 - 16)      | 26<br>(13 - 39)          | 11<br>(6 - 20)     | 6<br>(3 - 10)      |
| Poisonings                                      | 64<br>(40 - 123)         | 20<br>(7 - 48)     | 6<br>(2 - 11)      | 28<br>(17 - 59)          | 9<br>(5 - 14)      | 2<br>(1 - 3)       |
| Exposure to mechanical forces                   | 176<br>(124 - 248)       | 51<br>(24 - 103)   | 22<br>(11 - 38)    | 78<br>(51 - 114)         | 22<br>(13 - 31)    | 5<br>(2 - 7)       |
| Unintentional firearm injuries                  | 71<br>(43 - 108)         | 15<br>(5 - 37)     | 5<br>(2 - 11)      | 41<br>(23 - 68)          | 8<br>(4 - 13)      | 2<br>(1 - 3)       |
| Unintentional suffocation                       | 22<br>(10 - 69)          | 13<br>(2 - 49)     | 3<br>(1 - 7)       | 5<br>(3 - 13)            | 2<br>(1 - 4)       | 0<br>(0 - 1)       |
| Other exposure to mechanical forces             | 84<br>(47 - 120)         | 23<br>(8 - 48)     | 14<br>(6 - 26)     | 32<br>(20 - 47)          | 12<br>(5 - 19)     | 3<br>(1 - 4)       |
| Adverse effects of medical treatment            | 70<br>(20 - 129)         | 27<br>(4 - 70)     | 4<br>(1 - 7)       | 16<br>(6 - 28)           | 14<br>(4 - 28)     | 10<br>(2 - 22)     |
| Animal contact                                  | 21<br>(9 - 32)           | 6<br>(2 - 12)      | 4<br>(2 - 8)       | 6<br>(2 - 8)             | 4<br>(1 - 6)       | 2<br>(1 - 4)       |
| Venomous animal contact                         | 8<br>(3 - 13)            | 2<br>(1 - 4)       | 1<br>(0 - 3)       | 3<br>(1 - 4)             | 1<br>(1 - 3)       | 1<br>(0 - 2)       |
| Non-venomous animal contact                     | 13<br>(6 - 22)           | 4<br>(1 - 8)       | 3<br>(1 - 6)       | 3<br>(1 - 5)             | 2<br>(1 - 4)       | 1<br>(0 - 2)       |
| Foreign body                                    | 64<br>(31 - 118)         | 43<br>(16 - 91)    | 4<br>(2 - 8)       | 8<br>(4 - 13)            | 4<br>(2 - 7)       | 3<br>(2 - 5)       |
| Pulmonary aspiration and foreign body in airway | 60<br>(28 - 114)         | 42<br>(15 - 90)    | 4<br>(2 - 8)       | 8<br>(4 - 12)            | 4<br>(2 - 6)       | 3<br>(1 - 5)       |
| Foreign body in other body part                 | 3<br>(2 - 7)             | 1<br>(0 - 3)       | 1<br>(0 - 1)       | 1<br>(0 - 1)             | 1<br>(0 - 1)       | 0<br>(0 - 0)       |
| Other unintentional injuries                    | 62<br>(41 - 87)          | 14<br>(7 - 26)     | 9<br>(4 - 16)      | 27<br>(17 - 41)          | 8<br>(5 - 12)      | 4<br>(2 - 6)       |
| Self-harm and interpersonal violence            | 283<br>(178 - 419)       | 7<br>(3 - 16)      | 8<br>(3 - 14)      | 214<br>(132 - 334)       | 42<br>(24 - 71)    | 13<br>(7 - 24)     |
| Self-harm                                       | 171<br>(98 - 309)        | --                 | 4<br>(1 - 10)      | 117<br>(63 - 223)        | 37<br>(20 - 65)    | 13<br>(6 - 24)     |
| Interpersonal violence                          | 113<br>(67 - 176)        | 7<br>(3 - 16)      | 4<br>(2 - 7)       | 96<br>(55 - 152)         | 5<br>(3 - 9)       | 0<br>(0 - 1)       |
| Assault by firearm                              | 66<br>(32 - 106)         | 2<br>(0 - 4)       | 1<br>(0 - 2)       | 61<br>(29 - 98)          | 2<br>(1 - 4)       | 0<br>(0 - 0)       |
| Assault by sharp object                         | 18<br>(8 - 38)           | 1<br>(0 - 3)       | 1<br>(0 - 1)       | 14<br>(6 - 32)           | 1<br>(1 - 3)       | 0<br>(0 - 0)       |
| Assault by other means                          | 29<br>(16 - 58)          | 4<br>(2 - 11)      | 2<br>(1 - 5)       | 21<br>(10 - 44)          | 1<br>(1 - 3)       | 0<br>(0 - 0)       |

Web Table 31- Sierra Leone deaths with 95% UI by age, sex, and cause in 2013

| Cause                                                             | Females, All Ages           | Females, 0-4 Years          | Females, 5-14 Years      | Females, 15-49 Years     | Females, 50-69 Years     | Females, 70-80 Years     |
|-------------------------------------------------------------------|-----------------------------|-----------------------------|--------------------------|--------------------------|--------------------------|--------------------------|
| All causes                                                        | 28,419<br>(25,632 - 31,837) | 13,413<br>(11,286 - 15,738) | 1,434<br>(1,218 - 1,666) | 6,403<br>(5,629 - 7,098) | 4,459<br>(3,613 - 5,673) | 2,710<br>(2,297 - 3,241) |
| Communicable, maternal, neonatal, and nutritional diseases        | 18,830<br>(16,469 - 21,400) | 11,420<br>(9,259 - 13,624)  | 917<br>(690 - 1,140)     | 4,444<br>(3,818 - 5,208) | 1,330<br>(1,045 - 1,701) | 720<br>(500 - 940)       |
| HIV/AIDS and tuberculosis                                         | 2,611<br>(1,781 - 3,878)    | 118<br>(57 - 223)           | 96<br>(68 - 136)         | 1,892<br>(1,220 - 2,900) | 420<br>(305 - 570)       | 85<br>(61 - 118)         |
| Tuberculosis                                                      | 593<br>(435 - 778)          | 33<br>(18 - 62)             | 18<br>(11 - 30)          | 301<br>(202 - 415)       | 174<br>(117 - 249)       | 66<br>(43 - 97)          |
| HIV/AIDS                                                          | 2,018<br>(1,199 - 3,301)    | 84<br>(25 - 174)            | 77<br>(53 - 111)         | 1,591<br>(917 - 2,643)   | 247<br>(143 - 400)       | 19<br>(8 - 33)           |
| HIV/AIDS resulting in mycobacterial infection                     | 109<br>(61 - 182)           | 4<br>(1 - 9)                | 4<br>(2 - 6)             | 86<br>(47 - 146)         | 14<br>(8 - 23)           | 1<br>(0 - 2)             |
| HIV/AIDS resulting in other diseases                              | 1,910<br>(1,135 - 3,131)    | 80<br>(24 - 166)            | 74<br>(51 - 106)         | 1,505<br>(870 - 2,494)   | 233<br>(134 - 377)       | 18<br>(7 - 32)           |
| Diarrhea, lower respiratory, and other common infectious diseases | 5,359<br>(3,821 - 6,805)    | 3,648<br>(2,418 - 5,015)    | 278<br>(171 - 407)       | 557<br>(383 - 742)       | 478<br>(297 - 684)       | 398<br>(243 - 566)       |
| Diarrheal diseases                                                | 1,180<br>(574 - 2,330)      | 826<br>(272 - 1,920)        | 52<br>(21 - 110)         | 138<br>(82 - 231)        | 97<br>(51 - 178)         | 68<br>(37 - 128)         |
| Intestinal infectious diseases                                    | 142<br>(73 - 267)           | 52<br>(23 - 97)             | 41<br>(19 - 82)          | 41<br>(18 - 84)          | 7<br>(3 - 15)            | 2<br>(1 - 4)             |
| Typhoid fever                                                     | 95<br>(45 - 184)            | 33<br>(14 - 65)             | 28<br>(12 - 60)          | 28<br>(12 - 60)          | 5<br>(2 - 10)            | 1<br>(0 - 3)             |
| Paratyphoid fever                                                 | 40<br>(17 - 79)             | 15<br>(5 - 32)              | 12<br>(4 - 26)           | 12<br>(4 - 25)           | 2<br>(0 - 5)             | 0<br>(0 - 1)             |
| Other intestinal infectious diseases                              | 7<br>(2 - 16)               | 4<br>(1 - 11)               | 1<br>(0 - 4)             | 1<br>(0 - 5)             | 1<br>(0 - 4)             | 0<br>(0 - 2)             |
| Lower respiratory infections                                      | 3,149<br>(2,069 - 4,402)    | 2,235<br>(1,295 - 3,396)    | 102<br>(51 - 169)        | 211<br>(126 - 311)       | 304<br>(169 - 462)       | 298<br>(166 - 440)       |
| Upper respiratory infections                                      | 5<br>(2 - 12)               | 3<br>(0 - 10)               | 0<br>(0 - 1)             | 1<br>(0 - 2)             | 1<br>(0 - 2)             | 0<br>(0 - 1)             |
| Otitis media                                                      | 2<br>(1 - 3)                | 1<br>(0 - 1)                | 0<br>(0 - 0)             | 0<br>(0 - 0)             | 0<br>(0 - 1)             | 0<br>(0 - 1)             |
| Meningitis                                                        | 745<br>(487 - 1,074)        | 431<br>(212 - 752)          | 75<br>(35 - 138)         | 152<br>(91 - 228)        | 61<br>(31 - 103)         | 26<br>(12 - 47)          |
| Pneumococcal meningitis                                           | 183<br>(112 - 280)          | 92<br>(37 - 174)            | 23<br>(9 - 43)           | 45<br>(24 - 75)          | 17<br>(7 - 34)           | 7<br>(3 - 14)            |
| H influenzae type B meningitis                                    | 128<br>(63 - 234)           | 95<br>(41 - 194)            | 11<br>(4 - 24)           | 16<br>(7 - 27)           | 4<br>(2 - 9)             | 1<br>(1 - 3)             |
| Meningococcal meningitis                                          | 348<br>(216 - 509)          | 208<br>(104 - 380)          | 34<br>(15 - 66)          | 66<br>(35 - 107)         | 28<br>(12 - 51)          | 12<br>(5 - 22)           |
| Other meningitis                                                  | 86<br>(52 - 131)            | 36<br>(13 - 72)             | 7<br>(2 - 16)            | 26<br>(13 - 44)          | 11<br>(5 - 22)           | 5<br>(2 - 11)            |
| Encephalitis                                                      | 29<br>(20 - 42)             | 12<br>(6 - 23)              | 4<br>(2 - 9)             | 6<br>(4 - 10)            | 5<br>(2 - 7)             | 2<br>(1 - 3)             |
| Diphtheria                                                        | 3<br>(0 - 17)               | 2<br>(0 - 17)               | 0<br>(0 - 3)             | 0<br>(0 - 0)             | 0<br>(0 - 0)             | --<br>(0 - 0)            |
| Whooping cough                                                    | 16<br>(0 - 76)              | 15<br>(0 - 72)              | 1<br>(0 - 4)             | 0<br>(0 - 1)             | 0<br>(0 - 0)             | --<br>(0 - 0)            |
| Tetanus                                                           | 74<br>(22 - 158)            | 61<br>(13 - 145)            | 3<br>(1 - 6)             | 7<br>(3 - 12)            | 3<br>(1 - 5)             | 1<br>(0 - 2)             |
| Measles                                                           | 12<br>(2 - 34)              | 10<br>(2 - 30)              | 1<br>(0 - 4)             | 0<br>(0 - 1)             | 0<br>(0 - 0)             | --<br>(0 - 0)            |
| Varicella and herpes zoster                                       | 2<br>(1 - 6)                | 1<br>(0 - 5)                | 0<br>(0 - 1)             | 1<br>(0 - 1)             | 0<br>(0 - 1)             | 0<br>(0 - 1)             |
| Neglected tropical diseases and malaria                           | 4,833<br>(2,976 - 6,831)    | 3,639<br>(1,830 - 5,566)    | 429<br>(121 - 684)       | 413<br>(86 - 764)        | 243<br>(44 - 558)        | 109<br>(18 - 267)        |
| Malaria                                                           | 4,775<br>(2,912 - 6,784)    | 3,622<br>(1,809 - 5,553)    | 419<br>(104 - 675)       | 394<br>(65 - 743)        | 233<br>(32 - 547)        | 106<br>(14 - 264)        |
| Leishmaniasis                                                     | 0<br>(0 - 0)                | 0<br>(0 - 0)                | 0<br>(0 - 0)             | 0<br>(0 - 0)             | 0<br>(0 - 0)             | 0<br>(0 - 0)             |
| Visceral leishmaniasis                                            | 0<br>(0 - 0)                | 0<br>(0 - 0)                | 0<br>(0 - 0)             | 0<br>(0 - 0)             | 0<br>(0 - 0)             | 0<br>(0 - 0)             |
| Schistosomiasis                                                   | 12<br>(8 - 16)              | 0<br>(0 - 1)                | 1<br>(0 - 1)             | 5<br>(3 - 7)             | 4<br>(2 - 8)             | 2<br>(1 - 3)             |
| Cysticercosis                                                     | 1<br>(0 - 2)                | 0<br>(0 - 0)                | 0<br>(0 - 0)             | 0<br>(0 - 1)             | 0<br>(0 - 1)             | 0<br>(0 - 0)             |
| Cystic echinococcosis                                             | 2<br>(1 - 2)                | 0<br>(0 - 1)                | 0<br>(0 - 1)             | 1<br>(1 - 1)             | 0<br>(0 - 0)             | 0<br>(0 - 0)             |
| Dengue                                                            | 2<br>(1 - 4)                | 1<br>(0 - 2)                | 1<br>(0 - 1)             | 1<br>(0 - 1)             | 0<br>(0 - 0)             | 0<br>(0 - 0)             |
| Yellow fever                                                      | 4<br>(2 - 6)                | 0<br>(0 - 1)                | 1<br>(0 - 2)             | 2<br>(1 - 4)             | 0<br>(0 - 1)             | 0<br>(0 - 1)             |
| Rabies                                                            | 22<br>(11 - 33)             | 4<br>(2 - 10)               | 5<br>(3 - 10)            | 9<br>(4 - 12)            | 3<br>(1 - 5)             | 1<br>(0 - 2)             |
| Intestinal nematode infections                                    | 10<br>(3 - 23)              | 8<br>(2 - 20)               | 2<br>(0 - 7)             | 0<br>(0 - 3)             | 0<br>(0 - 2)             | 0<br>(0 - 1)             |
| Ascariasis                                                        | 10<br>(3 - 23)              | 8<br>(2 - 20)               | 2<br>(0 - 7)             | 0<br>(0 - 3)             | 0<br>(0 - 2)             | 0<br>(0 - 1)             |
| Other neglected tropical diseases                                 | 5<br>(2 - 10)               | 2<br>(1 - 5)                | 0<br>(0 - 1)             | 1<br>(1 - 2)             | 1<br>(0 - 1)             | 0<br>(0 - 1)             |

Web Table 31- Sierra Leone deaths with 95% UI by age, sex, and cause in 2013

| Cause                                                            | Females, All Ages         | Females, 0-4 Years       | Females, 5-14 Years | Females, 15-49 Years     | Females, 50-69 Years     | Females, 70-80 Years     |
|------------------------------------------------------------------|---------------------------|--------------------------|---------------------|--------------------------|--------------------------|--------------------------|
| Maternal disorders                                               | 1,399<br>(1,006 - 1,776)  | --                       | 17<br>(6 - 37)      | 1,382<br>(991 - 1,755)   | --                       | --                       |
| Maternal hemorrhage                                              | 256<br>(157 - 361)        | --                       | 2<br>(1 - 4)        | 254<br>(155 - 360)       | --                       | --                       |
| Maternal sepsis and other maternal infections                    | 81<br>(51 - 119)          | --                       | 1<br>(0 - 2)        | 80<br>(50 - 118)         | --                       | --                       |
| Maternal hypertensive disorders                                  | 107<br>(64 - 162)         | --                       | 1<br>(0 - 3)        | 105<br>(63 - 160)        | --                       | --                       |
| Maternal obstructed labor                                        | 70<br>(38 - 106)          | --                       | 1<br>(0 - 2)        | 69<br>(38 - 105)         | --                       | --                       |
| Maternal abortive outcome                                        | 253<br>(169 - 347)        | --                       | 3<br>(1 - 7)        | 250<br>(167 - 344)       | --                       | --                       |
| Indirect maternal deaths                                         | 144<br>(85 - 209)         | --                       | 1<br>(0 - 3)        | 143<br>(84 - 207)        | --                       | --                       |
| Late maternal deaths                                             | 213<br>(121 - 315)        | --                       | 5<br>(1 - 11)       | 208<br>(117 - 311)       | --                       | --                       |
| Maternal deaths aggravated by HIV/AIDS                           | 8<br>(4 - 13)             | --                       | --                  | 8<br>(4 - 13)            | --                       | --                       |
| Other maternal disorders                                         | 266<br>(179 - 371)        | --                       | 3<br>(1 - 7)        | 262<br>(176 - 366)       | --                       | --                       |
| Neonatal disorders                                               | 2,810<br>(2,192 - 3,544)  | 2,810<br>(2,192 - 3,544) | --                  | --                       | --                       | --                       |
| Neonatal preterm birth complications                             | 1,031<br>(469 - 1,693)    | 1,031<br>(469 - 1,693)   | --                  | --                       | --                       | --                       |
| Neonatal encephalopathy due to birth asphyxia and trauma         | 903<br>(444 - 1,592)      | 903<br>(444 - 1,592)     | --                  | --                       | --                       | --                       |
| Neonatal sepsis and other neonatal infections                    | 666<br>(277 - 1,284)      | 666<br>(277 - 1,284)     | --                  | --                       | --                       | --                       |
| Hemolytic disease and other neonatal jaundice                    | 14<br>(4 - 36)            | 14<br>(4 - 36)           | --                  | --                       | --                       | --                       |
| Other neonatal disorders                                         | 196<br>(87 - 359)         | 196<br>(87 - 359)        | --                  | --                       | --                       | --                       |
| Nutritional deficiencies                                         | 1,443<br>(958 - 2,040)    | 952<br>(496 - 1,495)     | 75<br>(42 - 125)    | 165<br>(111 - 237)       | 147<br>(92 - 220)        | 103<br>(67 - 157)        |
| Protein-energy malnutrition                                      | 1,095<br>(622 - 1,662)    | 871<br>(448 - 1,428)     | 56<br>(27 - 100)    | 41<br>(16 - 86)          | 72<br>(32 - 133)         | 54<br>(22 - 100)         |
| Iodine deficiency                                                | 3<br>(0 - 14)             | 2<br>(0 - 12)            | 0<br>(0 - 2)        | 0<br>(0 - 2)             | 0<br>(0 - 3)             | 0<br>(0 - 2)             |
| Iron-deficiency anemia                                           | 340<br>(178 - 576)        | 78<br>(14 - 253)         | 19<br>(7 - 47)      | 123<br>(68 - 182)        | 73<br>(31 - 125)         | 48<br>(21 - 85)          |
| Other nutritional deficiencies                                   | 5<br>(2 - 9)              | 2<br>(0 - 5)             | 0<br>(0 - 1)        | 1<br>(0 - 2)             | 2<br>(0 - 4)             | 0<br>(0 - 1)             |
| Other communicable, maternal, neonatal, and nutritional diseases | 375<br>(233 - 583)        | 253<br>(130 - 450)       | 21<br>(11 - 37)     | 35<br>(19 - 50)          | 42<br>(22 - 68)          | 24<br>(12 - 42)          |
| Sexually transmitted diseases excluding HIV                      | 224<br>(106 - 412)        | 198<br>(90 - 373)        | 15<br>(6 - 30)      | 6<br>(3 - 9)             | 3<br>(1 - 8)             | 2<br>(0 - 4)             |
| Syphilis                                                         | 218<br>(100 - 405)        | 198<br>(90 - 373)        | 15<br>(6 - 30)      | 2<br>(1 - 4)             | 2<br>(1 - 5)             | 1<br>(0 - 3)             |
| Chlamydial infection                                             | 2<br>(1 - 3)              | --                       | 0<br>(0 - 0)        | 1<br>(1 - 2)             | 0<br>(0 - 1)             | 0<br>(0 - 0)             |
| Gonococcal infection                                             | 2<br>(1 - 3)              | --                       | 0<br>(0 - 0)        | 1<br>(1 - 2)             | 1<br>(0 - 1)             | 0<br>(0 - 1)             |
| Other sexually transmitted diseases                              | 2<br>(1 - 3)              | --                       | 0<br>(0 - 0)        | 1<br>(0 - 2)             | 0<br>(0 - 1)             | 0<br>(0 - 0)             |
| Hepatitis                                                        | 77<br>(35 - 115)          | 13<br>(4 - 26)           | 3<br>(1 - 5)        | 20<br>(9 - 33)           | 26<br>(12 - 45)          | 15<br>(7 - 25)           |
| Acute hepatitis A                                                | 6<br>(1 - 14)             | 4<br>(1 - 10)            | 1<br>(0 - 2)        | 1<br>(0 - 2)             | 0<br>(0 - 1)             | 0<br>(0 - 0)             |
| Acute hepatitis B                                                | 52<br>(24 - 84)           | 8<br>(2 - 17)            | 1<br>(0 - 2)        | 8<br>(3 - 16)            | 22<br>(10 - 39)          | 14<br>(6 - 23)           |
| Acute hepatitis C                                                | 3<br>(0 - 7)              | --                       | 0<br>(0 - 0)        | 1<br>(0 - 2)             | 1<br>(0 - 4)             | 1<br>(0 - 2)             |
| Acute hepatitis E                                                | 16<br>(7 - 28)            | 1<br>(0 - 2)             | 1<br>(0 - 2)        | 11<br>(5 - 19)           | 3<br>(1 - 6)             | 1<br>(0 - 2)             |
| Other infectious diseases                                        | 75<br>(39 - 157)          | 42<br>(15 - 115)         | 4<br>(1 - 9)        | 9<br>(5 - 15)            | 13<br>(5 - 28)           | 8<br>(2 - 20)            |
| Non-communicable diseases                                        | 8,338<br>(6,426 - 10,412) | 1,662<br>(783 - 2,870)   | 353<br>(209 - 576)  | 1,534<br>(1,168 - 1,900) | 2,916<br>(2,242 - 3,831) | 1,873<br>(1,516 - 2,308) |
| Neoplasms                                                        | 1,308<br>(1,009 - 1,696)  | 24<br>(14 - 41)          | 26<br>(15 - 42)     | 380<br>(278 - 479)       | 681<br>(509 - 934)       | 196<br>(149 - 276)       |
| Esophageal cancer                                                | 16<br>(9 - 29)            | --                       | --                  | 2<br>(1 - 4)             | 10<br>(6 - 18)           | 4<br>(2 - 8)             |
| Stomach cancer                                                   | 113<br>(82 - 154)         | --                       | --                  | 24<br>(16 - 33)          | 72<br>(50 - 104)         | 18<br>(12 - 28)          |
| Liver cancer                                                     | 209<br>(147 - 287)        | --                       | 1<br>(0 - 1)        | 54<br>(36 - 78)          | 118<br>(76 - 177)        | 36<br>(23 - 56)          |
| Liver cancer due to hepatitis B                                  | 74<br>(28 - 125)          | --                       | 0<br>(0 - 0)        | 22<br>(11 - 37)          | 41<br>(9 - 76)           | 10<br>(3 - 20)           |
| Liver cancer due to hepatitis C                                  | 69<br>(34 - 118)          | --                       | 0<br>(0 - 0)        | 13<br>(5 - 24)           | 41<br>(18 - 76)          | 15<br>(6 - 26)           |

Web Table 31- Sierra Leone deaths with 95% UI by age, sex, and cause in 2013

| Cause                                | Females, All Ages        | Females, 0-4 Years | Females, 5-14 Years | Females, 15-49 Years | Females, 50-69 Years   | Females, 70-80 Years   |
|--------------------------------------|--------------------------|--------------------|---------------------|----------------------|------------------------|------------------------|
| Liver cancer due to alcohol use      | 15<br>(7 - 30)           | --                 | --                  | 2<br>(1 - 5)         | 9<br>(4 - 19)          | 4<br>(2 - 7)           |
| Liver cancer due to other causes     | 51<br>(27 - 84)          | --                 | 0<br>(0 - 1)        | 17<br>(10 - 28)      | 27<br>(12 - 47)        | 7<br>(3 - 14)          |
| Larynx cancer                        | 1<br>(1 - 2)             | --                 | --                  | 0<br>(0 - 1)         | 1<br>(0 - 1)           | 0<br>(0 - 0)           |
| Tracheal, bronchus and lung cancer   | 36<br>(26 - 51)          | --                 | --                  | 6<br>(4 - 8)         | 22<br>(15 - 33)        | 8<br>(6 - 12)          |
| Breast cancer                        | 147<br>(109 - 211)       | --                 | --                  | 61<br>(44 - 89)      | 70<br>(49 - 106)       | 16<br>(11 - 24)        |
| Cervical cancer                      | 373<br>(268 - 525)       | --                 | --                  | 120<br>(82 - 169)    | 210<br>(143 - 310)     | 43<br>(28 - 66)        |
| Uterine cancer                       | 29<br>(17 - 44)          | --                 | --                  | 6<br>(3 - 10)        | 17<br>(9 - 26)         | 6<br>(4 - 10)          |
| Prostate cancer                      | --                       | --                 | --                  | --                   | --                     | --                     |
| Colon and rectum cancer              | 52<br>(39 - 67)          | --                 | --                  | 15<br>(11 - 20)      | 23<br>(16 - 32)        | 14<br>(10 - 19)        |
| Lip and oral cavity cancer           | 8<br>(5 - 11)            | --                 | --                  | 3<br>(1 - 5)         | 3<br>(2 - 5)           | 1<br>(1 - 3)           |
| Nasopharynx cancer                   | 2<br>(1 - 4)             | --                 | 0<br>(0 - 0)        | 1<br>(1 - 2)         | 1<br>(1 - 2)           | 0<br>(0 - 0)           |
| Other pharynx cancer                 | 2<br>(2 - 4)             | --                 | --                  | 1<br>(0 - 1)         | 1<br>(1 - 2)           | 0<br>(0 - 0)           |
| Gallbladder and biliary tract cancer | 23<br>(14 - 32)          | --                 | --                  | 4<br>(2 - 6)         | 14<br>(9 - 21)         | 5<br>(3 - 8)           |
| Pancreatic cancer                    | 24<br>(18 - 33)          | --                 | --                  | 4<br>(3 - 5)         | 15<br>(10 - 22)        | 5<br>(3 - 7)           |
| Malignant skin melanoma              | 3<br>(3 - 5)             | --                 | --                  | 1<br>(1 - 1)         | 2<br>(1 - 3)           | 0<br>(0 - 1)           |
| Non-melanoma skin cancer             | 2<br>(1 - 4)             | --                 | --                  | 1<br>(0 - 1)         | 1<br>(0 - 1)           | 1<br>(0 - 2)           |
| Ovarian cancer                       | 45<br>(30 - 65)          | --                 | --                  | 13<br>(8 - 19)       | 27<br>(17 - 41)        | 5<br>(3 - 7)           |
| Testicular cancer                    | --                       | --                 | --                  | --                   | --                     | --                     |
| Kidney cancer                        | 11<br>(7 - 16)           | 2<br>(1 - 3)       | 1<br>(0 - 2)        | 2<br>(1 - 3)         | 5<br>(3 - 8)           | 1<br>(1 - 2)           |
| Bladder cancer                       | 19<br>(12 - 29)          | --                 | --                  | 5<br>(2 - 8)         | 9<br>(5 - 16)          | 5<br>(3 - 10)          |
| Brain and nervous system cancer      | 15<br>(9 - 19)           | 1<br>(0 - 2)       | 1<br>(1 - 2)        | 7<br>(3 - 10)        | 4<br>(2 - 6)           | 1<br>(1 - 2)           |
| Thyroid cancer                       | 5<br>(4 - 8)             | --                 | 0<br>(0 - 0)        | 1<br>(0 - 1)         | 3<br>(2 - 5)           | 1<br>(1 - 3)           |
| Mesothelioma                         | 1<br>(1 - 2)             | --                 | --                  | 0<br>(0 - 1)         | 1<br>(0 - 1)           | 0<br>(0 - 0)           |
| Hodgkin lymphoma                     | 6<br>(4 - 9)             | 1<br>(0 - 2)       | 1<br>(0 - 2)        | 2<br>(1 - 3)         | 1<br>(1 - 2)           | 2<br>(1 - 4)           |
| Non-Hodgkin lymphoma                 | 44<br>(30 - 63)          | 7<br>(3 - 13)      | 8<br>(3 - 14)       | 16<br>(10 - 23)      | 11<br>(7 - 19)         | 3<br>(2 - 7)           |
| Multiple myeloma                     | 8<br>(5 - 12)            | --                 | --                  | 1<br>(1 - 2)         | 5<br>(3 - 8)           | 2<br>(1 - 4)           |
| Leukemia                             | 20<br>(16 - 27)          | 1<br>(0 - 2)       | 3<br>(2 - 5)        | 8<br>(5 - 10)        | 5<br>(4 - 8)           | 3<br>(2 - 4)           |
| Other neoplasms                      | 93<br>(69 - 148)         | 13<br>(7 - 27)     | 12<br>(6 - 21)      | 23<br>(15 - 37)      | 30<br>(19 - 51)        | 15<br>(10 - 24)        |
| Cardiovascular diseases              | 3,001<br>(2,181 - 4,062) | 120<br>(60 - 211)  | 31<br>(18 - 56)     | 430<br>(281 - 627)   | 1,336<br>(942 - 1,843) | 1,085<br>(809 - 1,454) |
| Rheumatic heart disease              | 47<br>(25 - 132)         | 2<br>(1 - 4)       | 3<br>(1 - 7)        | 15<br>(6 - 47)       | 16<br>(6 - 51)         | 12<br>(7 - 29)         |
| Ischemic heart disease               | 717<br>(437 - 1,171)     | 3<br>(1 - 10)      | 3<br>(1 - 6)        | 93<br>(50 - 159)     | 318<br>(182 - 529)     | 300<br>(188 - 494)     |
| Cerebrovascular disease              | 1,321<br>(966 - 1,791)   | 29<br>(13 - 63)    | 8<br>(4 - 16)       | 161<br>(102 - 222)   | 602<br>(417 - 839)     | 520<br>(381 - 697)     |
| Ischemic stroke                      | 693<br>(251 - 991)       | 5<br>(1 - 13)      | 1<br>(0 - 3)        | 26<br>(7 - 48)       | 300<br>(76 - 455)      | 361<br>(154 - 510)     |
| Hemorrhagic stroke                   | 628<br>(417 - 1,145)     | 25<br>(11 - 52)    | 7<br>(3 - 14)       | 135<br>(88 - 190)    | 302<br>(187 - 560)     | 158<br>(80 - 380)      |
| Hypertensive heart disease           | 266<br>(116 - 437)       | 1<br>(0 - 3)       | 1<br>(0 - 1)        | 31<br>(11 - 56)      | 121<br>(48 - 218)      | 112<br>(51 - 181)      |
| Cardiomyopathy and myocarditis       | 180<br>(117 - 294)       | 33<br>(9 - 79)     | 7<br>(3 - 13)       | 46<br>(27 - 80)      | 50<br>(30 - 88)        | 45<br>(24 - 74)        |
| Atrial fibrillation and flutter      | 0<br>(0 - 0)             | --                 | --                  | 0<br>(0 - 0)         | 0<br>(0 - 0)           | 0<br>(0 - 0)           |
| Aortic aneurysm                      | 27<br>(14 - 52)          | --                 | --                  | 5<br>(2 - 10)        | 12<br>(6 - 24)         | 10<br>(5 - 20)         |
| Peripheral vascular disease          | 1<br>(0 - 1)             | --                 | --                  | 0<br>(0 - 0)         | 0<br>(0 - 1)           | 0<br>(0 - 0)           |
| Endocarditis                         | 47<br>(27 - 77)          | 14<br>(3 - 32)     | 2<br>(1 - 4)        | 12<br>(6 - 19)       | 10<br>(5 - 20)         | 10<br>(5 - 21)         |

Web Table 31- Sierra Leone deaths with 95% UI by age, sex, and cause in 2013

| Cause                                               | Females, All Ages  | Females, 0-4 Years | Females, 5-14 Years | Females, 15-49 Years | Females, 50-69 Years | Females, 70-80 Years |
|-----------------------------------------------------|--------------------|--------------------|---------------------|----------------------|----------------------|----------------------|
| Other cardiovascular and circulatory diseases       | 396<br>(260 - 662) | 38<br>(17 - 79)    | 9<br>(4 - 17)       | 67<br>(42 - 115)     | 206<br>(128 - 345)   | 76<br>(44 - 156)     |
| Chronic respiratory diseases                        | 439<br>(316 - 720) | 40<br>(19 - 79)    | 10<br>(6 - 16)      | 68<br>(47 - 105)     | 182<br>(120 - 310)   | 140<br>(97 - 228)    |
| Chronic obstructive pulmonary disease               | 252<br>(171 - 439) | 20<br>(9 - 41)     | 4<br>(2 - 7)        | 22<br>(13 - 36)      | 114<br>(71 - 209)    | 91<br>(60 - 163)     |
| Pneumoconiosis                                      | 1<br>(1 - 2)       | 0<br>(0 - 0)       | 0<br>(0 - 0)        | 0<br>(0 - 1)         | 0<br>(0 - 1)         | 0<br>(0 - 0)         |
| Silicosis                                           | 0<br>(0 - 0)       | 0<br>(0 - 0)       | 0<br>(0 - 0)        | 0<br>(0 - 0)         | 0<br>(0 - 0)         | 0<br>(0 - 0)         |
| Asbestosis                                          | 0<br>(0 - 0)       | 0<br>(0 - 0)       | 0<br>(0 - 0)        | 0<br>(0 - 0)         | 0<br>(0 - 0)         | 0<br>(0 - 0)         |
| Coal workers pneumoconiosis                         | 0<br>(0 - 0)       | 0<br>(0 - 0)       | 0<br>(0 - 0)        | 0<br>(0 - 0)         | 0<br>(0 - 0)         | 0<br>(0 - 0)         |
| Other pneumoconiosis                                | 1<br>(1 - 2)       | 0<br>(0 - 0)       | 0<br>(0 - 0)        | 0<br>(0 - 1)         | 0<br>(0 - 1)         | 0<br>(0 - 0)         |
| Asthma                                              | 117<br>(70 - 178)  | 12<br>(4 - 26)     | 3<br>(2 - 7)        | 27<br>(17 - 42)      | 48<br>(24 - 81)      | 27<br>(14 - 45)      |
| Interstitial lung disease and pulmonary sarcoidosis | 28<br>(12 - 49)    | 0<br>(0 - 1)       | 0<br>(0 - 1)        | 3<br>(2 - 5)         | 10<br>(4 - 20)       | 14<br>(4 - 27)       |
| Other chronic respiratory diseases                  | 41<br>(27 - 77)    | 7<br>(3 - 16)      | 1<br>(1 - 3)        | 15<br>(9 - 25)       | 9<br>(5 - 17)        | 9<br>(5 - 17)        |
| Cirrhosis                                           | 318<br>(220 - 443) | 12<br>(4 - 27)     | 7<br>(4 - 12)       | 89<br>(58 - 127)     | 150<br>(97 - 224)    | 61<br>(38 - 91)      |
| Cirrhosis due to hepatitis B                        | 90<br>(38 - 162)   | 1<br>(0 - 2)       | 1<br>(0 - 3)        | 28<br>(11 - 52)      | 44<br>(16 - 83)      | 17<br>(6 - 32)       |
| Cirrhosis due to hepatitis C                        | 114<br>(58 - 193)  | 1<br>(0 - 3)       | 1<br>(0 - 3)        | 32<br>(13 - 55)      | 58<br>(26 - 103)     | 22<br>(12 - 42)      |
| Cirrhosis due to alcohol use                        | 61<br>(28 - 97)    | --                 | --                  | 11<br>(5 - 21)       | 33<br>(15 - 55)      | 17<br>(7 - 29)       |
| Cirrhosis due to other causes                       | 53<br>(33 - 84)    | 11<br>(3 - 24)     | 4<br>(2 - 8)        | 18<br>(10 - 31)      | 16<br>(8 - 26)       | 5<br>(3 - 8)         |
| Digestive diseases                                  | 390<br>(291 - 503) | 32<br>(14 - 61)    | 22<br>(13 - 34)     | 104<br>(73 - 137)    | 138<br>(96 - 196)    | 95<br>(66 - 137)     |
| Peptic ulcer disease                                | 74<br>(44 - 108)   | 2<br>(1 - 6)       | 2<br>(1 - 5)        | 19<br>(10 - 31)      | 30<br>(16 - 49)      | 21<br>(11 - 36)      |
| Gastritis and duodenitis                            | 21<br>(9 - 46)     | 2<br>(0 - 5)       | 6<br>(1 - 4)        | 6<br>(3 - 12)        | 6<br>(2 - 16)        | 5<br>(1 - 15)        |
| Appendicitis                                        | 50<br>(33 - 73)    | 7<br>(2 - 17)      | 6<br>(3 - 11)       | 17<br>(11 - 27)      | 12<br>(6 - 21)       | 7<br>(3 - 15)        |
| Paralytic ileus and intestinal obstruction          | 102<br>(56 - 159)  | 7<br>(2 - 16)      | 4<br>(2 - 8)        | 19<br>(9 - 31)       | 41<br>(21 - 67)      | 31<br>(17 - 54)      |
| Inguinal, femoral, and abdominal hernia             | 4<br>(2 - 7)       | 1<br>(0 - 1)       | 0<br>(0 - 0)        | 1<br>(0 - 2)         | 1<br>(0 - 2)         | 1<br>(0 - 3)         |
| Inflammatory bowel disease                          | 27<br>(8 - 42)     | 6<br>(2 - 14)      | 1<br>(0 - 3)        | 9<br>(2 - 15)        | 7<br>(1 - 12)        | 4<br>(1 - 8)         |
| Vascular intestinal disorders                       | 2<br>(1 - 5)       | 0<br>(0 - 0)       | 0<br>(0 - 0)        | 1<br>(0 - 1)         | 1<br>(0 - 2)         | 0<br>(0 - 2)         |
| Gallbladder and biliary diseases                    | 37<br>(25 - 55)    | 2<br>(1 - 3)       | 2<br>(1 - 4)        | 9<br>(5 - 13)        | 15<br>(8 - 26)       | 10<br>(5 - 17)       |
| Pancreatitis                                        | 19<br>(9 - 32)     | 1<br>(0 - 1)       | 1<br>(0 - 1)        | 5<br>(3 - 9)         | 9<br>(3 - 19)        | 4<br>(1 - 8)         |
| Other digestive diseases                            | 54<br>(38 - 77)    | 5<br>(2 - 12)      | 3<br>(2 - 6)        | 18<br>(12 - 26)      | 16<br>(10 - 27)      | 11<br>(6 - 19)       |
| Neurological disorders                              | 170<br>(128 - 224) | 30<br>(13 - 60)    | 12<br>(6 - 23)      | 44<br>(29 - 67)      | 24<br>(17 - 35)      | 59<br>(42 - 78)      |
| Alzheimer disease and other dementias               | 64<br>(46 - 84)    | --                 | --                  | 0<br>(0 - 0)         | 11<br>(7 - 17)       | 52<br>(37 - 70)      |
| Parkinson disease                                   | 1<br>(0 - 2)       | --                 | --                  | 0<br>(0 - 0)         | 0<br>(0 - 1)         | 0<br>(0 - 1)         |
| Epilepsy                                            | 85<br>(56 - 126)   | 26<br>(10 - 54)    | 11<br>(4 - 21)      | 39<br>(25 - 61)      | 6<br>(3 - 11)        | 4<br>(2 - 7)         |
| Multiple sclerosis                                  | 0<br>(0 - 2)       | --                 | --                  | 0<br>(0 - 1)         | 0<br>(0 - 1)         | 0<br>(0 - 0)         |
| Other neurological disorders                        | 20<br>(15 - 26)    | 5<br>(3 - 7)       | 1<br>(1 - 2)        | 4<br>(3 - 6)         | 7<br>(4 - 10)        | 3<br>(2 - 4)         |
| Mental and substance use disorders                  | 37<br>(22 - 55)    | 3<br>(1 - 5)       | 0<br>(0 - 0)        | 18<br>(9 - 29)       | 13<br>(7 - 21)       | 3<br>(2 - 5)         |
| Schizophrenia                                       | 1<br>(1 - 2)       | --                 | --                  | 1<br>(0 - 1)         | 0<br>(0 - 1)         | 0<br>(0 - 0)         |
| Alcohol use disorders                               | 14<br>(2 - 33)     | --                 | --                  | 8<br>(1 - 19)        | 5<br>(1 - 13)        | 1<br>(0 - 1)         |
| Drug use disorders                                  | 21<br>(14 - 29)    | 3<br>(1 - 5)       | --                  | 9<br>(6 - 14)        | 7<br>(4 - 10)        | 3<br>(2 - 4)         |
| Opioid use disorders                                | 2<br>(1 - 3)       | 0<br>(0 - 1)       | --                  | 1<br>(1 - 1)         | 1<br>(0 - 1)         | 0<br>(0 - 0)         |
| Cocaine use disorders                               | 0<br>(0 - 0)       | 0<br>(0 - 0)       | --                  | 0<br>(0 - 0)         | 0<br>(0 - 0)         | 0<br>(0 - 0)         |
| Amphetamine use disorders                           | 0<br>(0 - 0)       | 0<br>(0 - 0)       | --                  | 0<br>(0 - 0)         | 0<br>(0 - 0)         | 0<br>(0 - 0)         |

Web Table 31- Sierra Leone deaths with 95% UI by age, sex, and cause in 2013

| Cause                                               | Females, All Ages        | Females, 0-4 Years   | Females, 5-14 Years | Females, 15-49 Years | Females, 50-69 Years | Females, 70-80 Years |
|-----------------------------------------------------|--------------------------|----------------------|---------------------|----------------------|----------------------|----------------------|
| Other drug use disorders                            | 19<br>(13 - 26)          | 2<br>(1 - 4)         | --                  | 8<br>(5 - 12)        | 6<br>(4 - 9)         | 2<br>(1 - 3)         |
| Eating disorders                                    | 0<br>(0 - 0)             | --                   | 0<br>(0 - 0)        | 0<br>(0 - 0)         | --                   | --                   |
| Anorexia nervosa                                    | 0<br>(0 - 0)             | --                   | 0<br>(0 - 0)        | 0<br>(0 - 0)         | --                   | --                   |
| Diabetes, urogenital, blood, and endocrine diseases | 1,549<br>(1,055 - 2,307) | 455<br>(218 - 856)   | 202<br>(86 - 411)   | 339<br>(216 - 501)   | 350<br>(250 - 482)   | 203<br>(146 - 276)   |
| Diabetes mellitus                                   | 362<br>(246 - 497)       | 2<br>(1 - 4)         | 2<br>(1 - 4)        | 54<br>(35 - 72)      | 185<br>(120 - 274)   | 119<br>(76 - 173)    |
| Acute glomerulonephritis                            | 5<br>(3 - 7)             | 1<br>(0 - 1)         | 0<br>(0 - 1)        | 2<br>(1 - 3)         | 1<br>(1 - 2)         | 0<br>(0 - 1)         |
| Chronic kidney disease                              | 169<br>(119 - 227)       | 23<br>(10 - 41)      | 10<br>(5 - 15)      | 50<br>(33 - 69)      | 55<br>(34 - 85)      | 31<br>(20 - 50)      |
| Chronic kidney disease due to diabetes mellitus     | 2<br>(1 - 4)             | 0<br>(0 - 0)         | 0<br>(0 - 0)        | 0<br>(0 - 0)         | 2<br>(1 - 3)         | 0<br>(0 - 0)         |
| Chronic kidney disease due to hypertension          | 73<br>(44 - 117)         | 3<br>(1 - 7)         | 1<br>(0 - 3)        | 18<br>(9 - 30)       | 31<br>(18 - 53)      | 20<br>(11 - 33)      |
| Chronic kidney disease due to glomerulonephritis    | 54<br>(32 - 76)          | 14<br>(6 - 25)       | 5<br>(3 - 8)        | 23<br>(13 - 34)      | 9<br>(5 - 16)        | 4<br>(2 - 7)         |
| Chronic kidney disease due to other causes          | 40<br>(18 - 67)          | 6<br>(2 - 15)        | 3<br>(1 - 7)        | 9<br>(4 - 17)        | 13<br>(4 - 26)       | 8<br>(2 - 18)        |
| Urinary diseases and male infertility               | 122<br>(78 - 171)        | 18<br>(6 - 42)       | 4<br>(2 - 8)        | 30<br>(17 - 45)      | 44<br>(26 - 69)      | 26<br>(16 - 39)      |
| Interstitial nephritis and urinary tract infections | 105<br>(61 - 152)        | 15<br>(4 - 40)       | 3<br>(1 - 6)        | 26<br>(12 - 41)      | 38<br>(22 - 59)      | 23<br>(14 - 36)      |
| Urolithiasis                                        | 4<br>(1 - 12)            | --                   | 0<br>(0 - 1)        | 1<br>(0 - 5)         | 2<br>(0 - 5)         | 0<br>(0 - 2)         |
| Other urinary diseases                              | 13<br>(8 - 21)           | 2<br>(0 - 6)         | 1<br>(0 - 2)        | 3<br>(1 - 7)         | 5<br>(2 - 9)         | 2<br>(1 - 5)         |
| Gynecological diseases                              | 4<br>(2 - 7)             | --                   | --                  | 3<br>(1 - 5)         | 1<br>(1 - 2)         | 0<br>(0 - 1)         |
| Uterine fibroids                                    | 1<br>(0 - 1)             | --                   | --                  | 0<br>(0 - 1)         | 0<br>(0 - 1)         | 0<br>(0 - 0)         |
| Polycystic ovarian syndrome                         | 0<br>(0 - 0)             | --                   | --                  | 0<br>(0 - 0)         | 0<br>(0 - 0)         | --                   |
| Endometriosis                                       | 0<br>(0 - 1)             | --                   | --                  | 0<br>(0 - 1)         | 0<br>(0 - 0)         | --                   |
| Genital prolapse                                    | 1<br>(0 - 1)             | --                   | --                  | 0<br>(0 - 1)         | 0<br>(0 - 0)         | 0<br>(0 - 0)         |
| Other gynecological diseases                        | 2<br>(1 - 3)             | --                   | --                  | 1<br>(1 - 2)         | 1<br>(0 - 1)         | 0<br>(0 - 0)         |
| Hemoglobinopathies and hemolytic anemias            | 759<br>(329 - 1,501)     | 367<br>(152 - 754)   | 180<br>(66 - 394)   | 173<br>(79 - 343)    | 34<br>(16 - 59)      | 6<br>(2 - 13)        |
| Thalassemias                                        | 3<br>(1 - 5)             | 2<br>(1 - 4)         | 0<br>(0 - 1)        | 0<br>(0 - 1)         | 0<br>(0 - 0)         | 0<br>(0 - 0)         |
| Sickle cell disorders                               | 742<br>(320 - 1,471)     | 357<br>(148 - 735)   | 178<br>(65 - 391)   | 171<br>(78 - 339)    | 32<br>(15 - 57)      | 3<br>(1 - 6)         |
| G6PD deficiency                                     | 3<br>(2 - 7)             | 2<br>(1 - 4)         | 1<br>(0 - 1)        | 1<br>(0 - 1)         | 0<br>(0 - 0)         | 0<br>(0 - 0)         |
| Other hemoglobinopathies and hemolytic anemias      | 11<br>(6 - 19)           | 6<br>(3 - 13)        | 1<br>(0 - 1)        | 1<br>(0 - 2)         | 1<br>(1 - 2)         | 3<br>(1 - 7)         |
| Endocrine, metabolic, blood, and immune disorders   | 127<br>(77 - 186)        | 46<br>(18 - 89)      | 6<br>(3 - 12)       | 27<br>(16 - 40)      | 29<br>(16 - 47)      | 20<br>(8 - 33)       |
| Musculoskeletal disorders                           | 28<br>(17 - 41)          | --                   | 3<br>(1 - 5)        | 11<br>(6 - 17)       | 9<br>(5 - 15)        | 5<br>(2 - 8)         |
| Rheumatoid arthritis                                | 5<br>(3 - 7)             | --                   | 0<br>(0 - 1)        | 1<br>(0 - 2)         | 1<br>(1 - 3)         | 2<br>(1 - 3)         |
| Other musculoskeletal disorders                     | 23<br>(12 - 34)          | --                   | 3<br>(1 - 4)        | 10<br>(5 - 15)       | 8<br>(4 - 12)        | 3<br>(1 - 5)         |
| Other non-communicable diseases                     | 1,098<br>(414 - 2,199)   | 946<br>(290 - 2,020) | 41<br>(15 - 93)     | 52<br>(32 - 79)      | 35<br>(23 - 51)      | 25<br>(16 - 39)      |
| Congenital anomalies                                | 979<br>(310 - 2,073)     | 908<br>(271 - 1,975) | 37<br>(12 - 90)     | 25<br>(11 - 48)      | 6<br>(4 - 9)         | 3<br>(2 - 4)         |
| Neural tube defects                                 | 286<br>(53 - 950)        | 273<br>(46 - 902)    | 8<br>(2 - 27)       | 5<br>(1 - 13)        | 0<br>(0 - 1)         | 0<br>(0 - 0)         |
| Congenital heart anomalies                          | 338<br>(95 - 790)        | 312<br>(80 - 751)    | 13<br>(4 - 36)      | 9<br>(3 - 20)        | 3<br>(1 - 4)         | 1<br>(1 - 2)         |
| Cleft lip and cleft palate                          | 4<br>(0 - 14)            | 4<br>(0 - 14)        | --                  | --                   | --                   | --                   |
| Down syndrome                                       | 163<br>(33 - 439)        | 146<br>(24 - 416)    | 9<br>(3 - 22)       | 7<br>(3 - 13)        | 1<br>(1 - 3)         | 0<br>(0 - 0)         |
| Chromosomal unbalanced rearrangements               | 38<br>(5 - 132)          | 35<br>(4 - 128)      | 1<br>(0 - 3)        | 1<br>(0 - 2)         | 0<br>(0 - 0)         | 0<br>(0 - 0)         |
| Other congenital anomalies                          | 150<br>(29 - 667)        | 138<br>(23 - 626)    | 6<br>(1 - 22)       | 4<br>(1 - 12)        | 1<br>(1 - 3)         | 1<br>(1 - 2)         |
| Skin and subcutaneous diseases                      | 113<br>(79 - 153)        | 32<br>(13 - 60)      | 3<br>(2 - 5)        | 27<br>(16 - 39)      | 29<br>(18 - 44)      | 22<br>(14 - 35)      |
| Cellulitis                                          | 32<br>(13 - 55)          | 7<br>(1 - 18)        | 1<br>(0 - 2)        | 8<br>(3 - 14)        | 8<br>(2 - 15)        | 8<br>(3 - 15)        |



Web Table 31- Sierra Leone deaths with 95% UI by age, sex, and cause in 2013

| Cause                                           | Females, All Ages      | Females, 0-4 Years | Females, 5-14 Years | Females, 15-49 Years | Females, 50-69 Years | Females, 70-80 Years |
|-------------------------------------------------|------------------------|--------------------|---------------------|----------------------|----------------------|----------------------|
| Pyoderma                                        | 77<br>(50 - 111)       | 24<br>(9 - 48)     | 2<br>(1 - 3)        | 17<br>(11 - 26)      | 21<br>(12 - 34)      | 13<br>(6 - 24)       |
| Decubitus ulcer                                 | 1<br>(1 - 2)           | 0<br>(0 - 0)       | 0<br>(0 - 0)        | 0<br>(0 - 1)         | 0<br>(0 - 0)         | 0<br>(0 - 1)         |
| Other skin and subcutaneous diseases            | 3<br>(1 - 7)           | 1<br>(0 - 4)       | 0<br>(0 - 0)        | 1<br>(0 - 2)         | 0<br>(0 - 1)         | 0<br>(0 - 1)         |
| Sudden infant death syndrome                    | 7<br>(1 - 22)          | 7<br>(1 - 22)      | --                  | --                   | --                   | --                   |
| Injuries                                        | 1,251<br>(923 - 1,562) | 331<br>(197 - 514) | 164<br>(105 - 244)  | 426<br>(306 - 549)   | 212<br>(145 - 296)   | 117<br>(69 - 161)    |
| Transport injuries                              | 584<br>(445 - 763)     | 86<br>(43 - 157)   | 85<br>(49 - 138)    | 261<br>(181 - 353)   | 113<br>(78 - 166)    | 39<br>(25 - 58)      |
| Road injuries                                   | 559<br>(428 - 734)     | 77<br>(38 - 144)   | 82<br>(46 - 131)    | 255<br>(177 - 344)   | 109<br>(74 - 159)    | 37<br>(23 - 55)      |
| Pedestrian road injuries                        | 91<br>(63 - 135)       | 12<br>(5 - 25)     | 15<br>(7 - 27)      | 39<br>(25 - 59)      | 18<br>(11 - 31)      | 7<br>(4 - 12)        |
| Cyclist road injuries                           | 24<br>(14 - 36)        | 4<br>(1 - 11)      | 5<br>(2 - 9)        | 6<br>(3 - 10)        | 7<br>(3 - 12)        | 1<br>(0 - 2)         |
| Motorcyclist road injuries                      | 84<br>(45 - 124)       | 10<br>(4 - 22)     | 10<br>(5 - 18)      | 43<br>(21 - 69)      | 16<br>(7 - 27)       | 5<br>(2 - 9)         |
| Motor vehicle road injuries                     | 352<br>(262 - 463)     | 48<br>(23 - 93)    | 50<br>(28 - 83)     | 164<br>(109 - 226)   | 66<br>(44 - 100)     | 23<br>(14 - 35)      |
| Other road injuries                             | 8<br>(5 - 15)          | 2<br>(1 - 5)       | 1<br>(1 - 3)        | 2<br>(1 - 5)         | 2<br>(1 - 3)         | 1<br>(0 - 1)         |
| Other transport injuries                        | 25<br>(8 - 38)         | 8<br>(2 - 17)      | 4<br>(1 - 7)        | 6<br>(2 - 10)        | 5<br>(1 - 8)         | 2<br>(0 - 4)         |
| Unintentional injuries                          | 573<br>(323 - 752)     | 240<br>(120 - 380) | 74<br>(39 - 114)    | 108<br>(66 - 142)    | 79<br>(44 - 117)     | 71<br>(35 - 104)     |
| Falls                                           | 101<br>(53 - 142)      | 22<br>(8 - 42)     | 8<br>(3 - 15)       | 19<br>(9 - 27)       | 18<br>(11 - 28)      | 34<br>(14 - 54)      |
| Drowning                                        | 108<br>(53 - 167)      | 55<br>(22 - 103)   | 24<br>(10 - 46)     | 18<br>(10 - 29)      | 8<br>(4 - 12)        | 3<br>(1 - 4)         |
| Fire, heat, and hot substances                  | 81<br>(32 - 131)       | 39<br>(11 - 81)    | 9<br>(3 - 18)       | 17<br>(8 - 25)       | 10<br>(5 - 17)       | 6<br>(3 - 11)        |
| Poisonings                                      | 21<br>(7 - 38)         | 9<br>(2 - 24)      | 2<br>(1 - 5)        | 5<br>(2 - 8)         | 3<br>(1 - 6)         | 1<br>(0 - 2)         |
| Exposure to mechanical forces                   | 66<br>(37 - 93)        | 29<br>(14 - 52)    | 9<br>(5 - 16)       | 14<br>(9 - 20)       | 10<br>(4 - 14)       | 4<br>(1 - 6)         |
| Unintentional firearm injuries                  | 18<br>(12 - 26)        | 6<br>(2 - 11)      | 2<br>(1 - 4)        | 7<br>(4 - 11)        | 3<br>(1 - 5)         | 1<br>(0 - 2)         |
| Unintentional suffocation                       | 8<br>(3 - 24)          | 6<br>(1 - 20)      | 1<br>(0 - 2)        | 0<br>(0 - 2)         | 0<br>(0 - 1)         | 0<br>(0 - 0)         |
| Other exposure to mechanical forces             | 40<br>(18 - 59)        | 17<br>(7 - 35)     | 6<br>(3 - 12)       | 7<br>(4 - 10)        | 6<br>(2 - 10)        | 3<br>(1 - 4)         |
| Adverse effects of medical treatment            | 63<br>(18 - 111)       | 19<br>(4 - 46)     | 4<br>(1 - 7)        | 14<br>(4 - 24)       | 16<br>(5 - 32)       | 11<br>(3 - 24)       |
| Animal contact                                  | 27<br>(9 - 44)         | 7<br>(3 - 17)      | 5<br>(2 - 12)       | 8<br>(2 - 13)        | 5<br>(1 - 9)         | 2<br>(0 - 4)         |
| Venomous animal contact                         | 17<br>(6 - 32)         | 6<br>(2 - 14)      | 3<br>(1 - 9)        | 5<br>(1 - 8)         | 2<br>(0 - 5)         | 1<br>(0 - 2)         |
| Non-venomous animal contact                     | 10<br>(2 - 17)         | 1<br>(0 - 4)       | 2<br>(0 - 4)        | 3<br>(1 - 6)         | 2<br>(0 - 5)         | 1<br>(0 - 3)         |
| Foreign body                                    | 72<br>(36 - 159)       | 51<br>(19 - 125)   | 5<br>(2 - 12)       | 5<br>(3 - 10)        | 5<br>(3 - 8)         | 7<br>(3 - 11)        |
| Pulmonary aspiration and foreign body in airway | 71<br>(35 - 158)       | 50<br>(18 - 124)   | 5<br>(2 - 12)       | 5<br>(2 - 9)         | 5<br>(2 - 8)         | 7<br>(3 - 11)        |
| Foreign body in other body part                 | 1<br>(1 - 3)           | 0<br>(0 - 1)       | 0<br>(0 - 0)        | 0<br>(0 - 1)         | 0<br>(0 - 1)         | 0<br>(0 - 1)         |
| Other unintentional injuries                    | 33<br>(21 - 45)        | 10<br>(5 - 18)     | 7<br>(3 - 11)       | 8<br>(5 - 11)        | 5<br>(3 - 8)         | 3<br>(1 - 6)         |
| Self-harm and interpersonal violence            | 94<br>(66 - 128)       | 6<br>(2 - 11)      | 4<br>(2 - 7)        | 57<br>(38 - 85)      | 20<br>(11 - 31)      | 8<br>(3 - 13)        |
| Self-harm                                       | 64<br>(42 - 95)        | --                 | 2<br>(1 - 4)        | 36<br>(22 - 63)      | 19<br>(10 - 30)      | 7<br>(3 - 13)        |
| Interpersonal violence                          | 30<br>(19 - 45)        | 6<br>(2 - 11)      | 3<br>(1 - 5)        | 21<br>(12 - 32)      | 1<br>(1 - 2)         | 0<br>(0 - 0)         |
| Assault by firearm                              | 9<br>(5 - 15)          | 2<br>(1 - 4)       | 1<br>(0 - 2)        | 6<br>(3 - 11)        | 1<br>(0 - 1)         | 0<br>(0 - 0)         |
| Assault by sharp object                         | 9<br>(4 - 14)          | 1<br>(0 - 2)       | 0<br>(0 - 1)        | 7<br>(3 - 12)        | 0<br>(0 - 1)         | 0<br>(0 - 0)         |
| Assault by other means                          | 12<br>(8 - 20)         | 3<br>(1 - 6)       | 1<br>(1 - 3)        | 7<br>(4 - 13)        | 1<br>(0 - 1)         | 0<br>(0 - 0)         |

Web Table 31- Singapore deaths with 95% UI by age, sex, and cause in 2013

| Cause                                                             | Both Sexes, All Ages        | Both Sexes, 0-4 Years | Both Sexes, 5-14 Years | Both Sexes, 15-49 Years  | Both Sexes, 50-69 Years  | Both Sexes, 70-80 Years     |
|-------------------------------------------------------------------|-----------------------------|-----------------------|------------------------|--------------------------|--------------------------|-----------------------------|
| All causes                                                        | 23,470<br>(22,612 - 24,433) | 88<br>(69 - 113)      | 39<br>(34 - 45)        | 1,306<br>(1,221 - 1,402) | 5,141<br>(4,834 - 5,482) | 16,896<br>(16,429 - 17,426) |
| Communicable, maternal, neonatal, and nutritional diseases        | 4,398<br>(3,726 - 4,990)    | 39<br>(30 - 52)       | 6<br>(5 - 8)           | 95<br>(78 - 111)         | 391<br>(296 - 455)       | 3,866<br>(3,253 - 4,444)    |
| HIV/AIDS and tuberculosis                                         | 121<br>(100 - 148)          | 0<br>(0 - 1)          | 0<br>(0 - 0)           | 20<br>(15 - 31)          | 30<br>(24 - 39)          | 70<br>(56 - 93)             |
| Tuberculosis                                                      | 98<br>(82 - 124)            | 0<br>(0 - 0)          | 0<br>(0 - 0)           | 5<br>(4 - 6)             | 23<br>(20 - 29)          | 70<br>(56 - 93)             |
| HIV/AIDS                                                          | 23<br>(14 - 42)             | 0<br>(0 - 1)          | 0<br>(0 - 0)           | 16<br>(10 - 27)          | 6<br>(3 - 14)            | 1<br>(0 - 2)                |
| HIV/AIDS resulting in mycobacterial infection                     | 1<br>(1 - 2)                | 0<br>(0 - 0)          | 0<br>(0 - 0)           | 1<br>(0 - 1)             | 0<br>(0 - 1)             | 0<br>(0 - 0)                |
| HIV/AIDS resulting in other diseases                              | 22<br>(13 - 40)             | 0<br>(0 - 1)          | 0<br>(0 - 0)           | 15<br>(9 - 25)           | 6<br>(2 - 13)            | 0<br>(0 - 1)                |
| Diarrhea, lower respiratory, and other common infectious diseases | 4,194<br>(3,502 - 4,774)    | 12<br>(9 - 16)        | 5<br>(4 - 7)           | 65<br>(52 - 78)          | 347<br>(252 - 412)       | 3,764<br>(3,150 - 4,336)    |
| Diarrheal diseases                                                | 40<br>(28 - 57)             | 1<br>(0 - 1)          | 0<br>(0 - 0)           | 1<br>(1 - 2)             | 4<br>(3 - 5)             | 34<br>(22 - 51)             |
| Intestinal infectious diseases                                    | 3<br>(1 - 7)                | 0<br>(0 - 1)          | 1<br>(0 - 1)           | 1<br>(0 - 3)             | 0<br>(0 - 2)             | 0<br>(0 - 1)                |
| Typhoid fever                                                     | 2<br>(1 - 4)                | 0<br>(0 - 1)          | 0<br>(0 - 1)           | 1<br>(0 - 2)             | 0<br>(0 - 1)             | 0<br>(0 - 0)                |
| Paratyphoid fever                                                 | 1<br>(0 - 2)                | 0<br>(0 - 0)          | 0<br>(0 - 0)           | 0<br>(0 - 1)             | 0<br>(0 - 0)             | 0<br>(0 - 0)                |
| Other intestinal infectious diseases                              | 0<br>(0 - 2)                | 0<br>(0 - 1)          | 0<br>(0 - 0)           | 0<br>(0 - 1)             | 0<br>(0 - 1)             | 0<br>(0 - 1)                |
| Lower respiratory infections                                      | 4,123<br>(3,424 - 4,709)    | 10<br>(7 - 13)        | 4<br>(3 - 5)           | 57<br>(44 - 69)          | 335<br>(239 - 400)       | 3,717<br>(3,100 - 4,290)    |
| Upper respiratory infections                                      | 0<br>(0 - 1)                | 0<br>(0 - 0)          | 0<br>(0 - 0)           | 0<br>(0 - 0)             | 0<br>(0 - 0)             | 0<br>(0 - 1)                |
| Otitis media                                                      | 1<br>(1 - 2)                | 0<br>(0 - 0)          | 0<br>(0 - 0)           | 0<br>(0 - 0)             | 0<br>(0 - 0)             | 1<br>(1 - 1)                |
| Meningitis                                                        | 15<br>(13 - 18)             | 1<br>(0 - 1)          | 0<br>(0 - 0)           | 3<br>(2 - 3)             | 4<br>(4 - 5)             | 8<br>(6 - 9)                |
| Pneumococcal meningitis                                           | 4<br>(3 - 5)                | 0<br>(0 - 0)          | 0<br>(0 - 0)           | 1<br>(0 - 1)             | 1<br>(1 - 1)             | 2<br>(1 - 3)                |
| H influenzae type B meningitis                                    | 2<br>(1 - 2)                | 0<br>(0 - 0)          | 0<br>(0 - 0)           | 0<br>(0 - 0)             | 0<br>(0 - 1)             | 1<br>(0 - 1)                |
| Meningococcal meningitis                                          | 4<br>(3 - 5)                | 0<br>(0 - 0)          | 0<br>(0 - 0)           | 1<br>(0 - 1)             | 1<br>(1 - 1)             | 2<br>(1 - 3)                |
| Other meningitis                                                  | 6<br>(5 - 8)                | 0<br>(0 - 1)          | 0<br>(0 - 0)           | 1<br>(1 - 1)             | 2<br>(1 - 2)             | 3<br>(2 - 4)                |
| Encephalitis                                                      | 7<br>(6 - 13)               | 0<br>(0 - 1)          | 1<br>(0 - 1)           | 2<br>(1 - 3)             | 2<br>(1 - 4)             | 3<br>(2 - 5)                |
| Diphtheria                                                        | 0<br>(0 - 0)                | 0<br>(0 - 0)          | 0<br>(0 - 0)           | 0<br>(0 - 0)             | 0<br>(0 - 0)             | --<br>(0 - 0)               |
| Whooping cough                                                    | 0<br>(0 - 0)                | 0<br>(0 - 0)          | 0<br>(0 - 0)           | 0<br>(0 - 0)             | 0<br>(0 - 0)             | --<br>(0 - 0)               |
| Tetanus                                                           | 0<br>(0 - 0)                | 0<br>(0 - 0)          | 0<br>(0 - 0)           | 0<br>(0 - 0)             | 0<br>(0 - 0)             | 0<br>(0 - 0)                |
| Measles                                                           | 0<br>(0 - 0)                | 0<br>(0 - 0)          | 0<br>(0 - 0)           | 0<br>(0 - 0)             | 0<br>(0 - 0)             | --<br>(0 - 0)               |
| Varicella and herpes zoster                                       | 3<br>(1 - 8)                | 0<br>(0 - 0)          | 0<br>(0 - 0)           | 0<br>(0 - 1)             | 0<br>(0 - 1)             | 2<br>(0 - 7)                |
| Neglected tropical diseases and malaria                           | 6<br>(5 - 8)                | 0<br>(0 - 0)          | 0<br>(0 - 0)           | 1<br>(1 - 1)             | 2<br>(1 - 2)             | 3<br>(2 - 5)                |
| Cysticercosis                                                     | 0<br>(0 - 0)                | 0<br>(0 - 0)          | 0<br>(0 - 0)           | 0<br>(0 - 0)             | 0<br>(0 - 0)             | 0<br>(0 - 0)                |
| Cystic echinococcosis                                             | 0<br>(0 - 0)                | 0<br>(0 - 0)          | 0<br>(0 - 0)           | 0<br>(0 - 0)             | 0<br>(0 - 0)             | 0<br>(0 - 0)                |
| Dengue                                                            | 1<br>(1 - 1)                | 0<br>(0 - 0)          | 0<br>(0 - 0)           | 0<br>(0 - 0)             | 0<br>(0 - 0)             | 0<br>(0 - 1)                |
| Rabies                                                            | 0<br>(0 - 1)                | 0<br>(0 - 0)          | 0<br>(0 - 0)           | 0<br>(0 - 0)             | 0<br>(0 - 0)             | 0<br>(0 - 0)                |
| Other neglected tropical diseases                                 | 5<br>(3 - 6)                | 0<br>(0 - 0)          | 0<br>(0 - 0)           | 1<br>(0 - 1)             | 1<br>(1 - 1)             | 3<br>(2 - 4)                |
| Maternal disorders                                                | 2<br>(2 - 3)                | --                    | 0<br>(0 - 0)           | 2<br>(2 - 3)             | --                       | --                          |
| Maternal hemorrhage                                               | 0<br>(0 - 1)                | --                    | 0<br>(0 - 0)           | 0<br>(0 - 1)             | --                       | --                          |
| Maternal sepsis and other maternal infections                     | 0<br>(0 - 0)                | --                    | 0<br>(0 - 0)           | 0<br>(0 - 0)             | --                       | --                          |
| Maternal hypertensive disorders                                   | 0<br>(0 - 0)                | --                    | 0<br>(0 - 0)           | 0<br>(0 - 0)             | --                       | --                          |
| Maternal obstructed labor                                         | 0<br>(0 - 0)                | --                    | 0<br>(0 - 0)           | 0<br>(0 - 0)             | --                       | --                          |
| Maternal abortive outcome                                         | 0<br>(0 - 1)                | --                    | 0<br>(0 - 0)           | 0<br>(0 - 1)             | --                       | --                          |
| Indirect maternal deaths                                          | 0<br>(0 - 0)                | --                    | 0<br>(0 - 0)           | 0<br>(0 - 0)             | --                       | --                          |

Web Table 31- Singapore deaths with 95% UI by age, sex, and cause in 2013

| Cause                                                            | Both Sexes, All Ages        | Both Sexes, 0-4 Years | Both Sexes, 5-14 Years | Both Sexes, 15-49 Years | Both Sexes, 50-69 Years  | Both Sexes, 70-80 Years     |
|------------------------------------------------------------------|-----------------------------|-----------------------|------------------------|-------------------------|--------------------------|-----------------------------|
| Late maternal deaths                                             | 0<br>(0 - 0)                | --                    | 0<br>(0 - 0)           | 0<br>(0 - 0)            | --                       | --                          |
| Maternal deaths aggravated by HIV/AIDS                           | 0<br>(0 - 0)                | --                    | --                     | 0<br>(0 - 0)            | --                       | --                          |
| Other maternal disorders                                         | 0<br>(0 - 1)                | --                    | 0<br>(0 - 0)           | 0<br>(0 - 1)            | --                       | --                          |
| Neonatal disorders                                               | 25<br>(19 - 34)             | 25<br>(19 - 34)       | --                     | --                      | --                       | --                          |
| Neonatal preterm birth complications                             | 18<br>(12 - 24)             | 18<br>(12 - 24)       | --                     | --                      | --                       | --                          |
| Neonatal encephalopathy due to birth asphyxia and trauma         | 4<br>(2 - 6)                | 4<br>(2 - 6)          | --                     | --                      | --                       | --                          |
| Neonatal sepsis and other neonatal infections                    | 0<br>(0 - 0)                | 0<br>(0 - 0)          | --                     | --                      | --                       | --                          |
| Hemolytic disease and other neonatal jaundice                    | 0<br>(0 - 0)                | 0<br>(0 - 0)          | --                     | --                      | --                       | --                          |
| Other neonatal disorders                                         | 4<br>(2 - 6)                | 4<br>(2 - 6)          | --                     | --                      | --                       | --                          |
| Nutritional deficiencies                                         | 13<br>(10 - 18)             | 0<br>(0 - 0)          | 0<br>(0 - 0)           | 1<br>(0 - 1)            | 2<br>(1 - 2)             | 11<br>(8 - 15)              |
| Protein-energy malnutrition                                      | 3<br>(2 - 7)                | 0<br>(0 - 0)          | 0<br>(0 - 0)           | 0<br>(0 - 0)            | 1<br>(0 - 1)             | 2<br>(1 - 6)                |
| Iodine deficiency                                                | 0<br>(0 - 2)                | 0<br>(0 - 0)          | 0<br>(0 - 0)           | 0<br>(0 - 0)            | 0<br>(0 - 0)             | 0<br>(0 - 2)                |
| Iron-deficiency anemia                                           | 9<br>(6 - 12)               | 0<br>(0 - 0)          | 0<br>(0 - 0)           | 0<br>(0 - 0)            | 1<br>(0 - 1)             | 8<br>(5 - 11)               |
| Other nutritional deficiencies                                   | 1<br>(0 - 1)                | 0<br>(0 - 0)          | 0<br>(0 - 0)           | 0<br>(0 - 0)            | 0<br>(0 - 0)             | 0<br>(0 - 1)                |
| Other communicable, maternal, neonatal, and nutritional diseases | 36<br>(30 - 45)             | 1<br>(0 - 6)          | 0<br>(0 - 1)           | 5<br>(4 - 7)            | 11<br>(9 - 15)           | 17<br>(14 - 24)             |
| Sexually transmitted diseases excluding HIV                      | 4<br>(2 - 10)               | 1<br>(0 - 6)          | 0<br>(0 - 1)           | 0<br>(0 - 1)            | 1<br>(1 - 2)             | 2<br>(1 - 3)                |
| Syphilis                                                         | 3<br>(2 - 9)                | 1<br>(0 - 6)          | 0<br>(0 - 1)           | 0<br>(0 - 0)            | 1<br>(0 - 1)             | 2<br>(1 - 3)                |
| Chlamydial infection                                             | 0<br>(0 - 0)                | --                    | 0<br>(0 - 0)           | 0<br>(0 - 0)            | 0<br>(0 - 0)             | 0<br>(0 - 0)                |
| Gonococcal infection                                             | 0<br>(0 - 1)                | --                    | 0<br>(0 - 0)           | 0<br>(0 - 0)            | 0<br>(0 - 0)             | 0<br>(0 - 0)                |
| Other sexually transmitted diseases                              | 0<br>(0 - 0)                | --                    | 0<br>(0 - 0)           | 0<br>(0 - 0)            | 0<br>(0 - 0)             | 0<br>(0 - 0)                |
| Hepatitis                                                        | 11<br>(9 - 13)              | 0<br>(0 - 0)          | 0<br>(0 - 0)           | 2<br>(2 - 3)            | 5<br>(3 - 6)             | 4<br>(3 - 6)                |
| Acute hepatitis A                                                | 1<br>(0 - 3)                | 0<br>(0 - 0)          | 0<br>(0 - 0)           | 0<br>(0 - 1)            | 0<br>(0 - 1)             | 0<br>(0 - 1)                |
| Acute hepatitis B                                                | 10<br>(7 - 12)              | 0<br>(0 - 0)          | 0<br>(0 - 0)           | 2<br>(1 - 2)            | 4<br>(3 - 5)             | 4<br>(3 - 5)                |
| Acute hepatitis C                                                | 0<br>(0 - 1)                | --                    | 0<br>(0 - 0)           | 0<br>(0 - 0)            | 0<br>(0 - 0)             | 0<br>(0 - 0)                |
| Other infectious diseases                                        | 20<br>(16 - 29)             | 0<br>(0 - 0)          | 0<br>(0 - 0)           | 3<br>(2 - 4)            | 6<br>(4 - 8)             | 11<br>(8 - 17)              |
| Non-communicable diseases                                        | 18,115<br>(17,213 - 19,078) | 44<br>(34 - 57)       | 24<br>(21 - 28)        | 876<br>(815 - 948)      | 4,493<br>(4,217 - 4,809) | 12,677<br>(12,024 - 13,369) |
| Neoplasms                                                        | 6,214<br>(5,792 - 6,732)    | 5<br>(3 - 7)          | 12<br>(10 - 15)        | 445<br>(406 - 496)      | 2,149<br>(1,982 - 2,344) | 3,604<br>(3,299 - 3,946)    |
| Esophageal cancer                                                | 137<br>(111 - 199)          | --                    | --                     | 4<br>(3 - 7)            | 54<br>(42 - 81)          | 79<br>(62 - 114)            |
| Stomach cancer                                                   | 488<br>(413 - 573)          | --                    | --                     | 22<br>(18 - 26)         | 126<br>(109 - 146)       | 340<br>(275 - 413)          |
| Liver cancer                                                     | 488<br>(364 - 604)          | --                    | 0<br>(0 - 0)           | 31<br>(22 - 44)         | 201<br>(147 - 263)       | 255<br>(181 - 327)          |
| Liver cancer due to hepatitis B                                  | 203<br>(94 - 291)           | --                    | 0<br>(0 - 0)           | 19<br>(11 - 30)         | 101<br>(42 - 149)        | 83<br>(38 - 123)            |
| Liver cancer due to hepatitis C                                  | 193<br>(133 - 279)          | --                    | 0<br>(0 - 0)           | 8<br>(4 - 15)           | 67<br>(38 - 122)         | 118<br>(82 - 163)           |
| Liver cancer due to alcohol use                                  | 82<br>(43 - 128)            | --                    | --                     | 3<br>(1 - 7)            | 29<br>(13 - 53)          | 50<br>(25 - 79)             |
| Liver cancer due to other causes                                 | 10<br>(5 - 16)              | --                    | 0<br>(0 - 0)           | 1<br>(0 - 1)            | 4<br>(2 - 7)             | 5<br>(3 - 9)                |
| Larynx cancer                                                    | 49<br>(39 - 69)             | --                    | --                     | 2<br>(1 - 3)            | 16<br>(12 - 23)          | 32<br>(24 - 44)             |
| Tracheal, bronchus and lung cancer                               | 1,503<br>(1,350 - 1,718)    | --                    | --                     | 55<br>(46 - 66)         | 487<br>(433 - 561)       | 960<br>(847 - 1,114)        |
| Breast cancer                                                    | 431<br>(259 - 510)          | --                    | --                     | 70<br>(48 - 86)         | 206<br>(116 - 249)       | 154<br>(94 - 191)           |
| Cervical cancer                                                  | 130<br>(98 - 161)           | --                    | --                     | 15<br>(12 - 20)         | 52<br>(39 - 65)          | 63<br>(45 - 85)             |
| Uterine cancer                                                   | 45<br>(27 - 58)             | --                    | --                     | 3<br>(1 - 4)            | 23<br>(13 - 31)          | 20<br>(12 - 28)             |
| Prostate cancer                                                  | 193<br>(138 - 255)          | --                    | --                     | 0<br>(0 - 1)            | 31<br>(22 - 43)          | 161<br>(110 - 219)          |

Web Table 31- Singapore deaths with 95% UI by age, sex, and cause in 2013

| Cause                                         | Both Sexes, All Ages     | Both Sexes, 0-4 Years | Both Sexes, 5-14 Years | Both Sexes, 15-49 Years | Both Sexes, 50-69 Years  | Both Sexes, 70-80 Years  |
|-----------------------------------------------|--------------------------|-----------------------|------------------------|-------------------------|--------------------------|--------------------------|
| Colon and rectum cancer                       | 989<br>(883 - 1,118)     | -                     | -                      | 45<br>(39 - 52)         | 302<br>(270 - 332)       | 643<br>(551 - 759)       |
| Lip and oral cavity cancer                    | 116<br>(92 - 134)        | -                     | -                      | 14<br>(11 - 17)         | 53<br>(37 - 63)          | 49<br>(40 - 60)          |
| Nasopharynx cancer                            | 84<br>(66 - 115)         | -                     | 0<br>(0 - 0)           | 23<br>(17 - 34)         | 43<br>(32 - 58)          | 18<br>(12 - 26)          |
| Other pharynx cancer                          | 56<br>(43 - 71)          | -                     | -                      | 8<br>(6 - 10)           | 30<br>(22 - 41)          | 18<br>(14 - 23)          |
| Gallbladder and biliary tract cancer          | 141<br>(97 - 173)        | -                     | -                      | 5<br>(4 - 6)            | 42<br>(31 - 53)          | 94<br>(61 - 121)         |
| Pancreatic cancer                             | 343<br>(307 - 382)       | -                     | -                      | 15<br>(13 - 18)         | 123<br>(109 - 138)       | 205<br>(178 - 238)       |
| Malignant skin melanoma                       | 19<br>(14 - 29)          | -                     | -                      | 3<br>(2 - 4)            | 6<br>(4 - 10)            | 10<br>(7 - 16)           |
| Non-melanoma skin cancer                      | 22<br>(16 - 30)          | -                     | -                      | 1<br>(1 - 1)            | 4<br>(3 - 6)             | 17<br>(13 - 24)          |
| Ovarian cancer                                | 140<br>(115 - 168)       | -                     | -                      | 20<br>(15 - 25)         | 62<br>(49 - 75)          | 59<br>(43 - 78)          |
| Testicular cancer                             | 2<br>(2 - 3)             | -                     | -                      | 1<br>(1 - 1)            | 1<br>(0 - 1)             | 1<br>(0 - 1)             |
| Kidney cancer                                 | 91<br>(74 - 110)         | 0<br>(0 - 0)          | 0<br>(0 - 0)           | 6<br>(4 - 8)            | 40<br>(31 - 50)          | 45<br>(35 - 59)          |
| Bladder cancer                                | 99<br>(79 - 117)         | -                     | -                      | 2<br>(1 - 2)            | 20<br>(16 - 23)          | 77<br>(60 - 94)          |
| Brain and nervous system cancer               | 74<br>(62 - 88)          | 1<br>(1 - 2)          | 3<br>(2 - 4)           | 18<br>(15 - 22)         | 30<br>(25 - 36)          | 22<br>(17 - 28)          |
| Thyroid cancer                                | 22<br>(17 - 28)          | -                     | 0<br>(0 - 0)           | 1<br>(1 - 2)            | 7<br>(6 - 10)            | 13<br>(10 - 18)          |
| Mesothelioma                                  | 10<br>(8 - 15)           | -                     | -                      | 1<br>(1 - 2)            | 4<br>(3 - 7)             | 4<br>(3 - 7)             |
| Hodgkin lymphoma                              | 4<br>(3 - 6)             | 0<br>(0 - 0)          | 0<br>(0 - 0)           | 1<br>(1 - 2)            | 2<br>(1 - 2)             | 1<br>(1 - 2)             |
| Non-Hodgkin lymphoma                          | 149<br>(100 - 196)       | 0<br>(0 - 1)          | 1<br>(1 - 2)           | 18<br>(12 - 25)         | 52<br>(32 - 72)          | 78<br>(51 - 103)         |
| Multiple myeloma                              | 57<br>(40 - 81)          | -                     | -                      | 3<br>(2 - 5)            | 22<br>(15 - 32)          | 32<br>(21 - 45)          |
| Leukemia                                      | 139<br>(121 - 156)       | 2<br>(1 - 3)          | 5<br>(4 - 6)           | 29<br>(24 - 33)         | 43<br>(36 - 50)          | 61<br>(51 - 72)          |
| Other neoplasms                               | 193<br>(163 - 250)       | 1<br>(1 - 2)          | 3<br>(2 - 4)           | 29<br>(23 - 39)         | 68<br>(54 - 94)          | 92<br>(71 - 122)         |
| Cardiovascular diseases                       | 8,002<br>(6,902 - 8,862) | 1<br>(1 - 2)          | 2<br>(1 - 3)           | 276<br>(237 - 310)      | 1,629<br>(1,464 - 1,818) | 6,093<br>(5,136 - 6,794) |
| Rheumatic heart disease                       | 28<br>(20 - 38)          | 0<br>(0 - 0)          | 0<br>(0 - 0)           | 5<br>(3 - 6)            | 9<br>(7 - 13)            | 14<br>(9 - 19)           |
| Ischemic heart disease                        | 4,552<br>(3,641 - 5,071) | 0<br>(0 - 0)          | 0<br>(0 - 0)           | 162<br>(128 - 186)      | 1,004<br>(873 - 1,134)   | 3,386<br>(2,612 - 3,810) |
| Cerebrovascular disease                       | 2,494<br>(2,026 - 3,133) | 0<br>(0 - 0)          | 0<br>(0 - 1)           | 55<br>(44 - 68)         | 396<br>(329 - 495)       | 2,042<br>(1,627 - 2,601) |
| Ischemic stroke                               | 1,488<br>(1,227 - 1,984) | 0<br>(0 - 0)          | 0<br>(0 - 0)           | 7<br>(5 - 11)           | 129<br>(96 - 180)        | 1,351<br>(1,098 - 1,823) |
| Hemorrhagic stroke                            | 1,006<br>(745 - 1,227)   | 0<br>(0 - 0)          | 0<br>(0 - 0)           | 48<br>(37 - 59)         | 267<br>(218 - 335)       | 691<br>(465 - 860)       |
| Hypertensive heart disease                    | 471<br>(350 - 641)       | 0<br>(0 - 0)          | 0<br>(0 - 0)           | 14<br>(9 - 21)          | 112<br>(78 - 157)        | 345<br>(245 - 485)       |
| Cardiomyopathy and myocarditis                | 136<br>(96 - 180)        | 1<br>(1 - 1)          | 1<br>(1 - 1)           | 24<br>(18 - 32)         | 42<br>(30 - 58)          | 69<br>(44 - 93)          |
| Atrial fibrillation and flutter               | 26<br>(17 - 42)          | -                     | -                      | 0<br>(0 - 1)            | 3<br>(2 - 6)             | 23<br>(14 - 37)          |
| Aortic aneurysm                               | 122<br>(91 - 161)        | -                     | -                      | 3<br>(2 - 5)            | 24<br>(19 - 33)          | 94<br>(68 - 127)         |
| Peripheral vascular disease                   | 16<br>(10 - 23)          | -                     | -                      | 0<br>(0 - 0)            | 1<br>(1 - 2)             | 14<br>(9 - 21)           |
| Endocarditis                                  | 37<br>(25 - 51)          | 0<br>(0 - 0)          | 0<br>(0 - 0)           | 5<br>(3 - 7)            | 12<br>(8 - 17)           | 20<br>(12 - 28)          |
| Other cardiovascular and circulatory diseases | 120<br>(91 - 155)        | 0<br>(0 - 0)          | 0<br>(0 - 0)           | 8<br>(6 - 10)           | 26<br>(19 - 34)          | 86<br>(63 - 117)         |
| Chronic respiratory diseases                  | 1,094<br>(932 - 1,663)   | 1<br>(0 - 1)          | 1<br>(0 - 1)           | 22<br>(18 - 29)         | 162<br>(138 - 233)       | 910<br>(761 - 1,414)     |
| Chronic obstructive pulmonary disease         | 909<br>(768 - 1,379)     | 0<br>(0 - 0)          | 0<br>(0 - 0)           | 7<br>(5 - 10)           | 120<br>(101 - 172)       | 782<br>(651 - 1,215)     |
| Pneumoconiosis                                | 2<br>(1 - 3)             | 0<br>(0 - 0)          | 0<br>(0 - 0)           | 0<br>(0 - 0)            | 0<br>(0 - 0)             | 1<br>(1 - 2)             |
| Silicosis                                     | 0<br>(0 - 1)             | 0<br>(0 - 0)          | 0<br>(0 - 0)           | 0<br>(0 - 0)            | 0<br>(0 - 0)             | 0<br>(0 - 1)             |
| Asbestosis                                    | 0<br>(0 - 0)             | 0<br>(0 - 0)          | 0<br>(0 - 0)           | 0<br>(0 - 0)            | 0<br>(0 - 0)             | 0<br>(0 - 0)             |
| Coal workers pneumoconiosis                   | 0<br>(0 - 0)             | 0<br>(0 - 0)          | 0<br>(0 - 0)           | 0<br>(0 - 0)            | 0<br>(0 - 0)             | 0<br>(0 - 0)             |
| Other pneumoconiosis                          | 1<br>(1 - 1)             | 0<br>(0 - 0)          | 0<br>(0 - 0)           | 0<br>(0 - 0)            | 0<br>(0 - 0)             | 1<br>(0 - 1)             |

Web Table 31- Singapore deaths with 95% UI by age, sex, and cause in 2013

| Cause                                               | Both Sexes, All Ages     | Both Sexes, 0-4 Years | Both Sexes, 5-14 Years | Both Sexes, 15-49 Years | Both Sexes, 50-69 Years | Both Sexes, 70-80 Years |
|-----------------------------------------------------|--------------------------|-----------------------|------------------------|-------------------------|-------------------------|-------------------------|
| Asthma                                              | 99<br>(79 - 144)         | 0<br>(0 - 0)          | 0<br>(0 - 0)           | 12<br>(10 - 15)         | 28<br>(22 - 38)         | 59<br>(42 - 95)         |
| Interstitial lung disease and pulmonary sarcoidosis | 59<br>(37 - 114)         | 0<br>(0 - 0)          | 0<br>(0 - 0)           | 2<br>(1 - 4)            | 12<br>(7 - 20)          | 45<br>(27 - 92)         |
| Other chronic respiratory diseases                  | 25<br>(16 - 42)          | 0<br>(0 - 0)          | 0<br>(0 - 0)           | 0<br>(0 - 1)            | 2<br>(2 - 3)            | 22<br>(13 - 38)         |
| Cirrhosis                                           | 168<br>(151 - 187)       | 0<br>(0 - 0)          | 0<br>(0 - 0)           | 17<br>(15 - 20)         | 69<br>(60 - 79)         | 82<br>(70 - 96)         |
| Cirrhosis due to hepatitis B                        | 59<br>(35 - 96)          | 0<br>(0 - 0)          | 0<br>(0 - 0)           | 6<br>(4 - 9)            | 24<br>(14 - 37)         | 29<br>(15 - 52)         |
| Cirrhosis due to hepatitis C                        | 57<br>(17 - 91)          | 0<br>(0 - 0)          | 0<br>(0 - 0)           | 5<br>(2 - 8)            | 21<br>(7 - 34)          | 31<br>(8 - 52)          |
| Cirrhosis due to alcohol use                        | 34<br>(21 - 52)          | -                     | -                      | 3<br>(1 - 5)            | 15<br>(9 - 24)          | 16<br>(10 - 24)         |
| Cirrhosis due to other causes                       | 18<br>(11 - 26)          | 0<br>(0 - 0)          | 0<br>(0 - 0)           | 3<br>(2 - 5)            | 8<br>(5 - 13)           | 6<br>(3 - 10)           |
| Digestive diseases                                  | 402<br>(342 - 458)       | 0<br>(0 - 0)          | 0<br>(0 - 0)           | 13<br>(11 - 16)         | 68<br>(59 - 79)         | 320<br>(265 - 367)      |
| Peptic ulcer disease                                | 126<br>(100 - 161)       | 0<br>(0 - 0)          | 0<br>(0 - 0)           | 3<br>(2 - 4)            | 20<br>(16 - 25)         | 103<br>(80 - 134)       |
| Gastritis and duodenitis                            | 4<br>(2 - 6)             | 0<br>(0 - 0)          | 0<br>(0 - 0)           | 0<br>(0 - 0)            | 1<br>(0 - 1)            | 3<br>(2 - 5)            |
| Appendicitis                                        | 12<br>(8 - 17)           | 0<br>(0 - 0)          | 0<br>(0 - 0)           | 1<br>(1 - 2)            | 3<br>(2 - 5)            | 7<br>(4 - 10)           |
| Paralytic ileus and intestinal obstruction          | 87<br>(52 - 115)         | 0<br>(0 - 0)          | 0<br>(0 - 0)           | 3<br>(2 - 4)            | 13<br>(9 - 19)          | 70<br>(40 - 96)         |
| Inguinal, femoral, and abdominal hernia             | 8<br>(5 - 12)            | 0<br>(0 - 0)          | 0<br>(0 - 0)           | 0<br>(0 - 0)            | 1<br>(1 - 2)            | 6<br>(4 - 10)           |
| Inflammatory bowel disease                          | 6<br>(4 - 9)             | 0<br>(0 - 0)          | 0<br>(0 - 0)           | 0<br>(0 - 0)            | 2<br>(1 - 2)            | 4<br>(3 - 6)            |
| Vascular intestinal disorders                       | 26<br>(13 - 44)          | 0<br>(0 - 0)          | 0<br>(0 - 0)           | 1<br>(0 - 1)            | 4<br>(2 - 7)            | 21<br>(10 - 37)         |
| Gallbladder and biliary diseases                    | 60<br>(46 - 77)          | 0<br>(0 - 0)          | 0<br>(0 - 0)           | 1<br>(1 - 1)            | 8<br>(6 - 10)           | 51<br>(38 - 67)         |
| Pancreatitis                                        | 34<br>(25 - 47)          | 0<br>(0 - 0)          | 0<br>(0 - 0)           | 3<br>(2 - 4)            | 9<br>(7 - 13)           | 22<br>(16 - 31)         |
| Other digestive diseases                            | 39<br>(28 - 51)          | 0<br>(0 - 0)          | 0<br>(0 - 0)           | 1<br>(1 - 2)            | 7<br>(5 - 9)            | 31<br>(21 - 43)         |
| Neurological disorders                              | 295<br>(236 - 362)       | 2<br>(1 - 2)          | 2<br>(1 - 3)           | 14<br>(11 - 17)         | 25<br>(22 - 31)         | 252<br>(194 - 317)      |
| Alzheimer disease and other dementias               | 224<br>(168 - 283)       | -                     | -                      | 0<br>(0 - 0)            | 6<br>(5 - 8)            | 217<br>(162 - 277)      |
| Parkinson disease                                   | 22<br>(16 - 47)          | -                     | -                      | 0<br>(0 - 0)            | 3<br>(2 - 6)            | 19<br>(13 - 42)         |
| Epilepsy                                            | 12<br>(8 - 15)           | 0<br>(0 - 0)          | 1<br>(0 - 1)           | 6<br>(4 - 8)            | 3<br>(2 - 4)            | 2<br>(1 - 4)            |
| Multiple sclerosis                                  | 2<br>(1 - 3)             | -                     | -                      | 0<br>(0 - 1)            | 1<br>(0 - 1)            | 1<br>(0 - 1)            |
| Other neurological disorders                        | 35<br>(30 - 43)          | 1<br>(1 - 2)          | 1<br>(1 - 2)           | 7<br>(6 - 9)            | 13<br>(10 - 15)         | 12<br>(10 - 16)         |
| Mental and substance use disorders                  | 12<br>(10 - 14)          | 0<br>(0 - 0)          | 0<br>(0 - 0)           | 8<br>(6 - 9)            | 2<br>(2 - 3)            | 2<br>(1 - 2)            |
| Schizophrenia                                       | 0<br>(0 - 1)             | -                     | -                      | 0<br>(0 - 0)            | 0<br>(0 - 0)            | 0<br>(0 - 0)            |
| Alcohol use disorders                               | 3<br>(2 - 4)             | -                     | -                      | 1<br>(1 - 2)            | 1<br>(1 - 2)            | 0<br>(0 - 1)            |
| Drug use disorders                                  | 8<br>(6 - 10)            | 0<br>(0 - 0)          | -                      | 6<br>(4 - 7)            | 1<br>(1 - 1)            | 1<br>(1 - 2)            |
| Opioid use disorders                                | 2<br>(2 - 3)             | 0<br>(0 - 0)          | -                      | 2<br>(1 - 2)            | 0<br>(0 - 0)            | 0<br>(0 - 0)            |
| Cocaine use disorders                               | 1<br>(1 - 1)             | 0<br>(0 - 0)          | -                      | 1<br>(0 - 1)            | 0<br>(0 - 0)            | 0<br>(0 - 0)            |
| Amphetamine use disorders                           | 1<br>(0 - 1)             | 0<br>(0 - 0)          | -                      | 0<br>(0 - 1)            | 0<br>(0 - 0)            | 0<br>(0 - 0)            |
| Other drug use disorders                            | 4<br>(4 - 5)             | 0<br>(0 - 0)          | -                      | 3<br>(2 - 4)            | 1<br>(0 - 1)            | 1<br>(0 - 1)            |
| Eating disorders                                    | 1<br>(1 - 1)             | -                     | 0<br>(0 - 0)           | 1<br>(0 - 1)            | -                       | -                       |
| Anorexia nervosa                                    | 1<br>(1 - 1)             | -                     | 0<br>(0 - 0)           | 1<br>(0 - 1)            | -                       | -                       |
| Diabetes, urogenital, blood, and endocrine diseases | 1,747<br>(1,228 - 2,055) | 2<br>(2 - 3)          | 2<br>(2 - 3)           | 64<br>(54 - 73)         | 362<br>(284 - 409)      | 1,317<br>(878 - 1,595)  |
| Diabetes mellitus                                   | 509<br>(442 - 676)       | 0<br>(0 - 0)          | 0<br>(0 - 0)           | 18<br>(15 - 22)         | 146<br>(126 - 185)      | 345<br>(288 - 464)      |
| Acute glomerulonephritis                            | 0<br>(0 - 1)             | 0<br>(0 - 0)          | 0<br>(0 - 0)           | 0<br>(0 - 0)            | 0<br>(0 - 0)            | 0<br>(0 - 0)            |
| Chronic kidney disease                              | 1,051<br>(409 - 1,291)   | 0<br>(0 - 0)          | 1<br>(0 - 1)           | 29<br>(19 - 36)         | 168<br>(80 - 205)       | 853<br>(311 - 1,070)    |
| Chronic kidney disease due to diabetes mellitus     | 132<br>(69 - 241)        | 0<br>(0 - 0)          | 0<br>(0 - 0)           | 7<br>(4 - 13)           | 37<br>(19 - 68)         | 88<br>(44 - 167)        |

Web Table 31- Singapore deaths with 95% UI by age, sex, and cause in 2013

| Cause                                               | Both Sexes, All Ages | Both Sexes, 0-4 Years | Both Sexes, 5-14 Years | Both Sexes, 15-49 Years | Both Sexes, 50-69 Years | Both Sexes, 70-80 Years |
|-----------------------------------------------------|----------------------|-----------------------|------------------------|-------------------------|-------------------------|-------------------------|
| Chronic kidney disease due to hypertension          | 206<br>(116 - 297)   | 0<br>(0 - 0)          | 0<br>(0 - 0)           | 7<br>(4 - 9)            | 47<br>(27 - 65)         | 153<br>(82 - 232)       |
| Chronic kidney disease due to glomerulonephritis    | 10<br>(6 - 18)       | 0<br>(0 - 0)          | 0<br>(0 - 0)           | 1<br>(1 - 2)            | 2<br>(1 - 4)            | 6<br>(4 - 12)           |
| Chronic kidney disease due to other causes          | 702<br>(152 - 939)   | 0<br>(0 - 0)          | 0<br>(0 - 1)           | 14<br>(6 - 20)          | 82<br>(19 - 121)        | 606<br>(129 - 820)      |
| Urinary diseases and male infertility               | 82<br>(48 - 194)     | 0<br>(0 - 0)          | 0<br>(0 - 0)           | 2<br>(1 - 4)            | 11<br>(8 - 22)          | 69<br>(38 - 170)        |
| Interstitial nephritis and urinary tract infections | 76<br>(42 - 186)     | 0<br>(0 - 0)          | 0<br>(0 - 0)           | 1<br>(1 - 3)            | 10<br>(6 - 20)          | 65<br>(34 - 165)        |
| Urolithiasis                                        | 3<br>(1 - 4)         | --                    | 0<br>(0 - 0)           | 0<br>(0 - 0)            | 1<br>(0 - 1)            | 2<br>(1 - 3)            |
| Other urinary diseases                              | 3<br>(1 - 6)         | 0<br>(0 - 0)          | 0<br>(0 - 0)           | 0<br>(0 - 0)            | 1<br>(0 - 1)            | 2<br>(1 - 5)            |
| Gynecological diseases                              | 0<br>(0 - 0)         | --                    | --                     | 0<br>(0 - 0)            | 0<br>(0 - 0)            | 0<br>(0 - 0)            |
| Uterine fibroids                                    | 0<br>(0 - 0)         | --                    | --                     | 0<br>(0 - 0)            | 0<br>(0 - 0)            | 0<br>(0 - 0)            |
| Polycystic ovarian syndrome                         | 0<br>(0 - 0)         | --                    | --                     | 0<br>(0 - 0)            | 0<br>(0 - 0)            | --                      |
| Endometriosis                                       | 0<br>(0 - 0)         | --                    | --                     | 0<br>(0 - 0)            | 0<br>(0 - 0)            | --                      |
| Genital prolapse                                    | 0<br>(0 - 0)         | --                    | --                     | 0<br>(0 - 0)            | 0<br>(0 - 0)            | 0<br>(0 - 0)            |
| Other gynecological diseases                        | 0<br>(0 - 0)         | --                    | --                     | 0<br>(0 - 0)            | 0<br>(0 - 0)            | 0<br>(0 - 0)            |
| Hemoglobinopathies and hemolytic anemias            | 7<br>(5 - 11)        | 0<br>(0 - 1)          | 0<br>(0 - 1)           | 2<br>(1 - 3)            | 1<br>(1 - 2)            | 3<br>(2 - 5)            |
| Thalassemias                                        | 2<br>(1 - 4)         | 0<br>(0 - 0)          | 0<br>(0 - 1)           | 1<br>(1 - 2)            | 0<br>(0 - 0)            | 0<br>(0 - 0)            |
| Sickle cell disorders                               | 0<br>(0 - 0)         | 0<br>(0 - 0)          | 0<br>(0 - 0)           | 0<br>(0 - 0)            | 0<br>(0 - 0)            | 0<br>(0 - 0)            |
| G6PD deficiency                                     | 0<br>(0 - 0)         | 0<br>(0 - 0)          | 0<br>(0 - 0)           | 0<br>(0 - 0)            | 0<br>(0 - 0)            | 0<br>(0 - 0)            |
| Other hemoglobinopathies and hemolytic anemias      | 5<br>(3 - 8)         | 0<br>(0 - 0)          | 0<br>(0 - 0)           | 1<br>(0 - 1)            | 1<br>(1 - 2)            | 3<br>(2 - 5)            |
| Endocrine, metabolic, blood, and immune disorders   | 97<br>(68 - 117)     | 1<br>(1 - 2)          | 1<br>(0 - 1)           | 12<br>(8 - 15)          | 36<br>(22 - 46)         | 47<br>(32 - 62)         |
| Musculoskeletal disorders                           | 42<br>(33 - 68)      | --                    | 0<br>(0 - 0)           | 5<br>(4 - 9)            | 10<br>(8 - 16)          | 27<br>(20 - 42)         |
| Rheumatoid arthritis                                | 2<br>(1 - 4)         | --                    | 0<br>(0 - 0)           | 0<br>(0 - 0)            | 1<br>(0 - 1)            | 1<br>(1 - 3)            |
| Other musculoskeletal disorders                     | 40<br>(32 - 63)      | --                    | 0<br>(0 - 0)           | 5<br>(4 - 9)            | 9<br>(7 - 15)           | 26<br>(19 - 39)         |
| Other non-communicable diseases                     | 140<br>(116 - 170)   | 34<br>(25 - 44)       | 5<br>(4 - 6)           | 13<br>(11 - 16)         | 16<br>(14 - 20)         | 72<br>(51 - 99)         |
| Congenital anomalies                                | 55<br>(46 - 71)      | 30<br>(22 - 41)       | 4<br>(4 - 6)           | 11<br>(9 - 14)          | 6<br>(5 - 8)            | 4<br>(3 - 5)            |
| Neural tube defects                                 | 2<br>(1 - 3)         | 1<br>(1 - 3)          | 0<br>(0 - 0)           | 0<br>(0 - 1)            | 0<br>(0 - 0)            | 0<br>(0 - 0)            |
| Congenital heart anomalies                          | 35<br>(29 - 43)      | 15<br>(11 - 21)       | 4<br>(3 - 5)           | 9<br>(7 - 11)           | 4<br>(4 - 6)            | 3<br>(2 - 4)            |
| Cleft lip and cleft palate                          | 0<br>(0 - 0)         | 0<br>(0 - 0)          | --                     | --                      | --                      | --                      |
| Down syndrome                                       | 2<br>(1 - 3)         | 0<br>(0 - 1)          | 0<br>(0 - 0)           | 1<br>(0 - 1)            | 0<br>(0 - 1)            | 0<br>(0 - 0)            |
| Chromosomal unbalanced rearrangements               | 9<br>(5 - 13)        | 8<br>(5 - 12)         | 0<br>(0 - 0)           | 0<br>(0 - 1)            | 0<br>(0 - 0)            | 0<br>(0 - 0)            |
| Other congenital anomalies                          | 8<br>(6 - 12)        | 5<br>(3 - 8)          | 0<br>(0 - 1)           | 1<br>(1 - 1)            | 1<br>(1 - 1)            | 1<br>(1 - 2)            |
| Skin and subcutaneous diseases                      | 81<br>(58 - 109)     | 0<br>(0 - 0)          | 0<br>(0 - 0)           | 2<br>(2 - 3)            | 10<br>(8 - 13)          | 68<br>(47 - 95)         |
| Cellulitis                                          | 26<br>(16 - 42)      | 0<br>(0 - 0)          | 0<br>(0 - 0)           | 1<br>(0 - 1)            | 4<br>(3 - 6)            | 21<br>(11 - 37)         |
| Pyoderma                                            | 36<br>(24 - 52)      | 0<br>(0 - 0)          | 0<br>(0 - 0)           | 1<br>(1 - 1)            | 5<br>(3 - 6)            | 31<br>(18 - 45)         |
| Decubitus ulcer                                     | 14<br>(7 - 23)       | 0<br>(0 - 0)          | 0<br>(0 - 0)           | 0<br>(0 - 0)            | 1<br>(1 - 1)            | 13<br>(6 - 22)          |
| Other skin and subcutaneous diseases                | 5<br>(2 - 10)        | 0<br>(0 - 0)          | 0<br>(0 - 0)           | 0<br>(0 - 0)            | 1<br>(0 - 1)            | 4<br>(1 - 9)            |
| Sudden infant death syndrome                        | 3<br>(1 - 6)         | 3<br>(1 - 6)          | --                     | --                      | --                      | --                      |
| Injuries                                            | 957<br>(869 - 1,087) | 5<br>(3 - 6)          | 9<br>(7 - 10)          | 334<br>(302 - 367)      | 257<br>(224 - 292)      | 352<br>(307 - 436)      |
| Transport injuries                                  | 204<br>(182 - 229)   | 1<br>(0 - 1)          | 3<br>(2 - 4)           | 85<br>(73 - 97)         | 56<br>(48 - 65)         | 59<br>(49 - 73)         |
| Road injuries                                       | 201<br>(179 - 226)   | 1<br>(0 - 1)          | 3<br>(2 - 4)           | 84<br>(72 - 95)         | 56<br>(48 - 64)         | 58<br>(48 - 73)         |
| Pedestrian road injuries                            | 77<br>(59 - 100)     | 0<br>(0 - 0)          | 2<br>(1 - 2)           | 12<br>(7 - 17)          | 21<br>(14 - 27)         | 42<br>(33 - 57)         |

Web Table 31- Singapore deaths with 95% UI by age, sex, and cause in 2013

| Cause                                           | Both Sexes, All Ages | Both Sexes, 0-4 Years | Both Sexes, 5-14 Years | Both Sexes, 15-49 Years | Both Sexes, 50-69 Years | Both Sexes, 70-80 Years |
|-------------------------------------------------|----------------------|-----------------------|------------------------|-------------------------|-------------------------|-------------------------|
| Cyclist road injuries                           | 19<br>(13 - 28)      | 0<br>(0 - 0)          | 0<br>(0 - 1)           | 4<br>(2 - 5)            | 8<br>(5 - 12)           | 7<br>(4 - 12)           |
| Motorcyclist road injuries                      | 65<br>(49 - 79)      | 0<br>(0 - 0)          | 0<br>(0 - 0)           | 46<br>(36 - 56)         | 16<br>(10 - 22)         | 3<br>(1 - 5)            |
| Motor vehicle road injuries                     | 38<br>(25 - 50)      | 0<br>(0 - 0)          | 0<br>(0 - 1)           | 22<br>(14 - 29)         | 11<br>(6 - 14)          | 6<br>(3 - 9)            |
| Other road injuries                             | 1<br>(0 - 1)         | 0<br>(0 - 0)          | 0<br>(0 - 0)           | 0<br>(0 - 0)            | 0<br>(0 - 0)            | 0<br>(0 - 0)            |
| Other transport injuries                        | 3<br>(2 - 4)         | 0<br>(0 - 0)          | 0<br>(0 - 0)           | 1<br>(1 - 2)            | 1<br>(0 - 1)            | 1<br>(0 - 1)            |
| Unintentional injuries                          | 258<br>(206 - 298)   | 3<br>(2 - 4)          | 3<br>(2 - 4)           | 45<br>(37 - 54)         | 51<br>(40 - 62)         | 156<br>(119 - 186)      |
| Falls                                           | 153<br>(103 - 186)   | 1<br>(1 - 2)          | 1<br>(1 - 1)           | 21<br>(15 - 26)         | 29<br>(19 - 36)         | 102<br>(66 - 128)       |
| Drowning                                        | 13<br>(6 - 20)       | 1<br>(0 - 1)          | 1<br>(1 - 2)           | 7<br>(3 - 11)           | 3<br>(1 - 4)            | 2<br>(1 - 3)            |
| Fire, heat, and hot substances                  | 17<br>(13 - 22)      | 0<br>(0 - 0)          | 0<br>(0 - 0)           | 3<br>(2 - 4)            | 4<br>(3 - 6)            | 9<br>(7 - 12)           |
| Poisonings                                      | 4<br>(3 - 5)         | 0<br>(0 - 0)          | 0<br>(0 - 0)           | 2<br>(1 - 2)            | 1<br>(1 - 1)            | 1<br>(1 - 1)            |
| Exposure to mechanical forces                   | 13<br>(11 - 20)      | 0<br>(0 - 1)          | 0<br>(0 - 0)           | 7<br>(6 - 11)           | 4<br>(3 - 6)            | 1<br>(1 - 2)            |
| Unintentional firearm injuries                  | 1<br>(1 - 1)         | 0<br>(0 - 0)          | 0<br>(0 - 0)           | 0<br>(0 - 1)            | 0<br>(0 - 0)            | 0<br>(0 - 0)            |
| Unintentional suffocation                       | 1<br>(1 - 2)         | 0<br>(0 - 1)          | 0<br>(0 - 0)           | 0<br>(0 - 0)            | 0<br>(0 - 0)            | 0<br>(0 - 0)            |
| Other exposure to mechanical forces             | 11<br>(9 - 18)       | 0<br>(0 - 0)          | 0<br>(0 - 0)           | 7<br>(5 - 10)           | 4<br>(3 - 5)            | 1<br>(1 - 2)            |
| Adverse effects of medical treatment            | 10<br>(8 - 17)       | 0<br>(0 - 0)          | 0<br>(0 - 0)           | 1<br>(1 - 2)            | 2<br>(1 - 4)            | 7<br>(5 - 11)           |
| Animal contact                                  | 1<br>(0 - 1)         | 0<br>(0 - 0)          | 0<br>(0 - 0)           | 0<br>(0 - 0)            | 0<br>(0 - 0)            | 0<br>(0 - 0)            |
| Venomous animal contact                         | 0<br>(0 - 1)         | 0<br>(0 - 0)          | 0<br>(0 - 0)           | 0<br>(0 - 0)            | 0<br>(0 - 0)            | 0<br>(0 - 0)            |
| Non-venomous animal contact                     | 0<br>(0 - 1)         | 0<br>(0 - 0)          | 0<br>(0 - 0)           | 0<br>(0 - 0)            | 0<br>(0 - 0)            | 0<br>(0 - 0)            |
| Foreign body                                    | 46<br>(30 - 66)      | 1<br>(0 - 1)          | 0<br>(0 - 0)           | 4<br>(3 - 6)            | 8<br>(5 - 12)           | 33<br>(20 - 50)         |
| Pulmonary aspiration and foreign body in airway | 45<br>(30 - 65)      | 1<br>(0 - 1)          | 0<br>(0 - 0)           | 4<br>(2 - 6)            | 8<br>(5 - 12)           | 33<br>(20 - 50)         |
| Foreign body in other body part                 | 0<br>(0 - 1)         | 0<br>(0 - 0)          | 0<br>(0 - 0)           | 0<br>(0 - 0)            | 0<br>(0 - 0)            | 0<br>(0 - 0)            |
| Other unintentional injuries                    | 1<br>(1 - 2)         | 0<br>(0 - 0)          | 0<br>(0 - 0)           | 0<br>(0 - 1)            | 0<br>(0 - 0)            | 1<br>(0 - 1)            |
| Self-harm and interpersonal violence            | 495<br>(442 - 606)   | 1<br>(1 - 2)          | 2<br>(2 - 3)           | 204<br>(177 - 235)      | 150<br>(121 - 175)      | 137<br>(112 - 209)      |
| Self-harm                                       | 446<br>(393 - 546)   | -                     | 1<br>(1 - 2)           | 175<br>(146 - 199)      | 137<br>(108 - 161)      | 132<br>(108 - 203)      |
| Interpersonal violence                          | 48<br>(39 - 74)      | 1<br>(1 - 2)          | 1<br>(1 - 1)           | 29<br>(23 - 45)         | 12<br>(9 - 19)          | 5<br>(4 - 8)            |
| Assault by firearm                              | 2<br>(1 - 5)         | 0<br>(0 - 0)          | 0<br>(0 - 0)           | 1<br>(1 - 3)            | 1<br>(0 - 2)            | 0<br>(0 - 0)            |
| Assault by sharp object                         | 13<br>(8 - 23)       | 0<br>(0 - 0)          | 0<br>(0 - 0)           | 8<br>(5 - 15)           | 4<br>(2 - 7)            | 1<br>(0 - 2)            |
| Assault by other means                          | 34<br>(26 - 50)      | 1<br>(1 - 2)          | 1<br>(1 - 1)           | 20<br>(15 - 30)         | 8<br>(5 - 12)           | 4<br>(3 - 6)            |

Web Table 31- Singapore deaths with 95% UI by age, sex, and cause in 2013

| Cause                                                             | Males, All Ages             | Males, 0-4 Years | Males, 5-14 Years | Males, 15-49 Years | Males, 50-69 Years       | Males, 70-80 Years       |
|-------------------------------------------------------------------|-----------------------------|------------------|-------------------|--------------------|--------------------------|--------------------------|
| All causes                                                        | 11,838<br>(11,179 - 12,538) | 48<br>(38 - 63)  | 22<br>(19 - 26)   | 836<br>(764 - 916) | 3,282<br>(3,018 - 3,568) | 7,649<br>(7,327 - 7,985) |
| Communicable, maternal, neonatal, and nutritional diseases        | 2,063<br>(1,604 - 2,392)    | 23<br>(17 - 30)  | 3<br>(3 - 5)      | 62<br>(49 - 75)    | 263<br>(190 - 319)       | 1,712<br>(1,345 - 2,022) |
| HIV/AIDS and tuberculosis                                         | 87<br>(70 - 110)            | 0<br>(0 - 1)     | 0<br>(0 - 0)      | 14<br>(10 - 22)    | 23<br>(18 - 30)          | 50<br>(38 - 70)          |
| Tuberculosis                                                      | 71<br>(57 - 96)             | 0<br>(0 - 0)     | 0<br>(0 - 0)      | 3<br>(2 - 4)       | 18<br>(15 - 24)          | 49<br>(37 - 70)          |
| HIV/AIDS                                                          | 16<br>(9 - 30)              | 0<br>(0 - 1)     | 0<br>(0 - 0)      | 11<br>(7 - 19)     | 5<br>(2 - 11)            | 0<br>(0 - 1)             |
| HIV/AIDS resulting in mycobacterial infection                     | 1<br>(1 - 2)                | 0<br>(0 - 0)     | 0<br>(0 - 0)      | 1<br>(0 - 1)       | 0<br>(0 - 1)             | 0<br>(0 - 0)             |
| HIV/AIDS resulting in other diseases                              | 15<br>(9 - 28)              | 0<br>(0 - 1)     | 0<br>(0 - 0)      | 10<br>(6 - 18)     | 4<br>(2 - 10)            | 0<br>(0 - 1)             |
| Diarrhea, lower respiratory, and other common infectious diseases | 1,934<br>(1,485 - 2,258)    | 7<br>(4 - 9)     | 3<br>(2 - 4)      | 44<br>(33 - 55)    | 231<br>(159 - 285)       | 1,650<br>(1,279 - 1,957) |
| Diarrheal diseases                                                | 14<br>(10 - 20)             | 0<br>(0 - 1)     | 0<br>(0 - 0)      | 1<br>(1 - 1)       | 2<br>(2 - 3)             | 10<br>(6 - 16)           |
| Intestinal infectious diseases                                    | 2<br>(1 - 4)                | 0<br>(0 - 1)     | 0<br>(0 - 1)      | 1<br>(0 - 2)       | 0<br>(0 - 1)             | 0<br>(0 - 1)             |
| Typhoid fever                                                     | 1<br>(0 - 3)                | 0<br>(0 - 0)     | 0<br>(0 - 1)      | 0<br>(0 - 1)       | 0<br>(0 - 0)             | 0<br>(0 - 0)             |
| Paratyphoid fever                                                 | 0<br>(0 - 1)                | 0<br>(0 - 0)     | 0<br>(0 - 0)      | 0<br>(0 - 1)       | 0<br>(0 - 0)             | 0<br>(0 - 0)             |
| Other intestinal infectious diseases                              | 0<br>(0 - 2)                | 0<br>(0 - 0)     | 0<br>(0 - 0)      | 0<br>(0 - 1)       | 0<br>(0 - 1)             | 0<br>(0 - 0)             |
| Lower respiratory infections                                      | 1,904<br>(1,485 - 2,230)    | 5<br>(3 - 8)     | 2<br>(1 - 3)      | 39<br>(28 - 50)    | 224<br>(152 - 278)       | 1,634<br>(1,262 - 1,941) |
| Upper respiratory infections                                      | 0<br>(0 - 1)                | 0<br>(0 - 0)     | 0<br>(0 - 0)      | 0<br>(0 - 0)       | 0<br>(0 - 0)             | 0<br>(0 - 0)             |
| Otitis media                                                      | 0<br>(0 - 1)                | 0<br>(0 - 0)     | 0<br>(0 - 0)      | 0<br>(0 - 0)       | 0<br>(0 - 0)             | 0<br>(0 - 0)             |
| Meningitis                                                        | 8<br>(7 - 10)               | 0<br>(0 - 1)     | 0<br>(0 - 0)      | 1<br>(1 - 2)       | 2<br>(2 - 3)             | 4<br>(3 - 5)             |
| Pneumococcal meningitis                                           | 2<br>(1 - 3)                | 0<br>(0 - 0)     | 0<br>(0 - 0)      | 0<br>(0 - 1)       | 1<br>(0 - 1)             | 1<br>(1 - 1)             |
| H influenzae type B meningitis                                    | 1<br>(1 - 1)                | 0<br>(0 - 0)     | 0<br>(0 - 0)      | 0<br>(0 - 0)       | 0<br>(0 - 0)             | 0<br>(0 - 1)             |
| Meningococcal meningitis                                          | 2<br>(1 - 3)                | 0<br>(0 - 0)     | 0<br>(0 - 0)      | 0<br>(0 - 0)       | 1<br>(0 - 1)             | 1<br>(1 - 2)             |
| Other meningitis                                                  | 3<br>(3 - 4)                | 0<br>(0 - 0)     | 0<br>(0 - 0)      | 1<br>(0 - 1)       | 1<br>(1 - 1)             | 1<br>(1 - 2)             |
| Encephalitis                                                      | 4<br>(3 - 7)                | 0<br>(0 - 0)     | 0<br>(0 - 1)      | 1<br>(1 - 2)       | 1<br>(1 - 2)             | 1<br>(1 - 2)             |
| Diphtheria                                                        | 0<br>(0 - 0)                | 0<br>(0 - 0)     | 0<br>(0 - 0)      | 0<br>(0 - 0)       | 0<br>(0 - 0)             | --<br>(0 - 0)            |
| Whooping cough                                                    | 0<br>(0 - 0)                | 0<br>(0 - 0)     | 0<br>(0 - 0)      | 0<br>(0 - 0)       | 0<br>(0 - 0)             | --<br>(0 - 0)            |
| Tetanus                                                           | 0<br>(0 - 0)                | 0<br>(0 - 0)     | 0<br>(0 - 0)      | 0<br>(0 - 0)       | 0<br>(0 - 0)             | 0<br>(0 - 0)             |
| Measles                                                           | 0<br>(0 - 0)                | 0<br>(0 - 0)     | 0<br>(0 - 0)      | 0<br>(0 - 0)       | 0<br>(0 - 0)             | --<br>(0 - 0)            |
| Varicella and herpes zoster                                       | 1<br>(0 - 3)                | 0<br>(0 - 0)     | 0<br>(0 - 0)      | 0<br>(0 - 0)       | 0<br>(0 - 0)             | 1<br>(0 - 3)             |
| Neglected tropical diseases and malaria                           | 3<br>(2 - 4)                | 0<br>(0 - 0)     | 0<br>(0 - 0)      | 1<br>(1 - 1)       | 1<br>(1 - 1)             | 1<br>(1 - 2)             |
| Cysticercosis                                                     | 0<br>(0 - 0)                | 0<br>(0 - 0)     | 0<br>(0 - 0)      | 0<br>(0 - 0)       | 0<br>(0 - 0)             | 0<br>(0 - 0)             |
| Cystic echinococcosis                                             | 0<br>(0 - 0)                | 0<br>(0 - 0)     | 0<br>(0 - 0)      | 0<br>(0 - 0)       | 0<br>(0 - 0)             | 0<br>(0 - 0)             |
| Dengue                                                            | 1<br>(0 - 1)                | 0<br>(0 - 0)     | 0<br>(0 - 0)      | 0<br>(0 - 0)       | 0<br>(0 - 0)             | 0<br>(0 - 0)             |
| Rabies                                                            | 0<br>(0 - 0)                | 0<br>(0 - 0)     | 0<br>(0 - 0)      | 0<br>(0 - 0)       | 0<br>(0 - 0)             | 0<br>(0 - 0)             |
| Other neglected tropical diseases                                 | 2<br>(2 - 3)                | 0<br>(0 - 0)     | 0<br>(0 - 0)      | 0<br>(0 - 0)       | 1<br>(0 - 1)             | 1<br>(1 - 2)             |
| Maternal disorders                                                | --                          | --               | --                | --                 | --                       | --                       |
| Maternal hemorrhage                                               | --                          | --               | --                | --                 | --                       | --                       |
| Maternal sepsis and other maternal infections                     | --                          | --               | --                | --                 | --                       | --                       |
| Maternal hypertensive disorders                                   | --                          | --               | --                | --                 | --                       | --                       |
| Maternal obstructed labor                                         | --                          | --               | --                | --                 | --                       | --                       |
| Maternal abortive outcome                                         | --                          | --               | --                | --                 | --                       | --                       |
| Indirect maternal deaths                                          | --                          | --               | --                | --                 | --                       | --                       |



Web Table 31- Singapore deaths with 95% UI by age, sex, and cause in 2013

| Cause                                                            | Males, All Ages          | Males, 0-4 Years | Males, 5-14 Years | Males, 15-49 Years | Males, 50-69 Years       | Males, 70-80 Years       |
|------------------------------------------------------------------|--------------------------|------------------|-------------------|--------------------|--------------------------|--------------------------|
| Late maternal deaths                                             | --                       | --               | --                | --                 | --                       | --                       |
| Maternal deaths aggravated by HIV/AIDS                           | --                       | --               | --                | --                 | --                       | --                       |
| Other maternal disorders                                         | --                       | --               | --                | --                 | --                       | --                       |
| Neonatal disorders                                               | 15<br>(11 - 20)          | 15<br>(11 - 20)  | --                | --                 | --                       | --                       |
| Neonatal preterm birth complications                             | 11<br>(7 - 16)           | 11<br>(7 - 16)   | --                | --                 | --                       | --                       |
| Neonatal encephalopathy due to birth asphyxia and trauma         | 2<br>(1 - 3)             | 2<br>(1 - 3)     | --                | --                 | --                       | --                       |
| Neonatal sepsis and other neonatal infections                    | 0<br>(0 - 0)             | 0<br>(0 - 0)     | --                | --                 | --                       | --                       |
| Hemolytic disease and other neonatal jaundice                    | 0<br>(0 - 0)             | 0<br>(0 - 0)     | --                | --                 | --                       | --                       |
| Other neonatal disorders                                         | 2<br>(1 - 4)             | 2<br>(1 - 4)     | --                | --                 | --                       | --                       |
| Nutritional deficiencies                                         | 5<br>(3 - 8)             | 0<br>(0 - 0)     | 0<br>(0 - 0)      | 0<br>(0 - 0)       | 1<br>(0 - 1)             | 4<br>(2 - 7)             |
| Protein-energy malnutrition                                      | 1<br>(1 - 3)             | 0<br>(0 - 0)     | 0<br>(0 - 0)      | 0<br>(0 - 0)       | 0<br>(0 - 1)             | 1<br>(0 - 2)             |
| Iodine deficiency                                                | 0<br>(0 - 1)             | 0<br>(0 - 0)     | 0<br>(0 - 0)      | 0<br>(0 - 0)       | 0<br>(0 - 0)             | 0<br>(0 - 1)             |
| Iron-deficiency anemia                                           | 3<br>(2 - 5)             | 0<br>(0 - 0)     | 0<br>(0 - 0)      | 0<br>(0 - 0)       | 0<br>(0 - 1)             | 3<br>(1 - 5)             |
| Other nutritional deficiencies                                   | 0<br>(0 - 1)             | 0<br>(0 - 0)     | 0<br>(0 - 0)      | 0<br>(0 - 0)       | 0<br>(0 - 0)             | 0<br>(0 - 0)             |
| Other communicable, maternal, neonatal, and nutritional diseases | 19<br>(16 - 26)          | 1<br>(0 - 3)     | 0<br>(0 - 0)      | 3<br>(3 - 5)       | 7<br>(6 - 10)            | 8<br>(6 - 11)            |
| Sexually transmitted diseases excluding HIV                      | 1<br>(1 - 4)             | 1<br>(0 - 3)     | 0<br>(0 - 0)      | 0<br>(0 - 0)       | 0<br>(0 - 1)             | 0<br>(0 - 1)             |
| Syphilis                                                         | 1<br>(0 - 4)             | 1<br>(0 - 3)     | 0<br>(0 - 0)      | 0<br>(0 - 0)       | 0<br>(0 - 1)             | 0<br>(0 - 1)             |
| Chlamydial infection                                             | --                       | --               | --                | --                 | --                       | --                       |
| Gonococcal infection                                             | 0<br>(0 - 0)             | --               | 0<br>(0 - 0)      | 0<br>(0 - 0)       | 0<br>(0 - 0)             | 0<br>(0 - 0)             |
| Other sexually transmitted diseases                              | 0<br>(0 - 0)             | --               | 0<br>(0 - 0)      | 0<br>(0 - 0)       | 0<br>(0 - 0)             | 0<br>(0 - 0)             |
| Hepatitis                                                        | 7<br>(5 - 9)             | 0<br>(0 - 0)     | 0<br>(0 - 0)      | 2<br>(1 - 2)       | 3<br>(2 - 5)             | 2<br>(1 - 3)             |
| Acute hepatitis A                                                | 1<br>(0 - 2)             | 0<br>(0 - 0)     | 0<br>(0 - 0)      | 0<br>(0 - 1)       | 0<br>(0 - 1)             | 0<br>(0 - 0)             |
| Acute hepatitis B                                                | 6<br>(5 - 8)             | 0<br>(0 - 0)     | 0<br>(0 - 0)      | 1<br>(1 - 2)       | 3<br>(2 - 4)             | 2<br>(1 - 3)             |
| Acute hepatitis C                                                | 0<br>(0 - 1)             | --               | 0<br>(0 - 0)      | 0<br>(0 - 0)       | 0<br>(0 - 0)             | 0<br>(0 - 0)             |
| Other infectious diseases                                        | 11<br>(7 - 16)           | 0<br>(0 - 0)     | 0<br>(0 - 0)      | 2<br>(1 - 3)       | 4<br>(3 - 6)             | 5<br>(3 - 8)             |
| Non-communicable diseases                                        | 9,130<br>(8,494 - 9,841) | 23<br>(17 - 31)  | 13<br>(11 - 16)   | 521<br>(469 - 577) | 2,834<br>(2,592 - 3,099) | 5,740<br>(5,351 - 6,176) |
| Neoplasms                                                        | 3,358<br>(3,092 - 3,654) | 2<br>(1 - 3)     | 7<br>(5 - 8)      | 214<br>(188 - 249) | 1,253<br>(1,129 - 1,390) | 1,882<br>(1,726 - 2,058) |
| Esophageal cancer                                                | 106<br>(83 - 165)        | --               | --                | 4<br>(3 - 6)       | 48<br>(37 - 75)          | 54<br>(41 - 85)          |
| Stomach cancer                                                   | 273<br>(235 - 319)       | --               | --                | 11<br>(9 - 13)     | 81<br>(70 - 94)          | 181<br>(147 - 223)       |
| Liver cancer                                                     | 351<br>(236 - 460)       | --               | 0<br>(0 - 0)      | 26<br>(17 - 39)    | 170<br>(118 - 231)       | 154<br>(93 - 213)        |
| Liver cancer due to hepatitis B                                  | 161<br>(60 - 250)        | --               | 0<br>(0 - 0)      | 17<br>(9 - 27)     | 87<br>(29 - 136)         | 57<br>(21 - 98)          |
| Liver cancer due to hepatitis C                                  | 118<br>(52 - 209)        | --               | 0<br>(0 - 0)      | 6<br>(2 - 13)      | 53<br>(21 - 109)         | 58<br>(24 - 102)         |
| Liver cancer due to alcohol use                                  | 67<br>(27 - 115)         | --               | --                | 3<br>(1 - 7)       | 27<br>(11 - 51)          | 37<br>(14 - 65)          |
| Liver cancer due to other causes                                 | 5<br>(1 - 11)            | --               | 0<br>(0 - 0)      | 1<br>(0 - 1)       | 2<br>(1 - 6)             | 2<br>(0 - 5)             |
| Larynx cancer                                                    | 43<br>(33 - 62)          | --               | --                | 2<br>(1 - 2)       | 14<br>(11 - 21)          | 27<br>(20 - 39)          |
| Tracheal, bronchus and lung cancer                               | 953<br>(853 - 1,068)     | --               | --                | 33<br>(26 - 41)    | 332<br>(292 - 378)       | 587<br>(518 - 676)       |
| Breast cancer                                                    | 8<br>(1 - 12)            | --               | --                | 1<br>(0 - 1)       | 3<br>(0 - 5)             | 4<br>(1 - 7)             |
| Cervical cancer                                                  | --                       | --               | --                | --                 | --                       | --                       |
| Uterine cancer                                                   | --                       | --               | --                | --                 | --                       | --                       |
| Prostate cancer                                                  | 193<br>(138 - 255)       | --               | --                | 0<br>(0 - 1)       | 31<br>(22 - 43)          | 161<br>(110 - 219)       |

Web Table 31- Singapore deaths with 95% UI by age, sex, and cause in 2013

| Cause                                         | Males, All Ages          | Males, 0-4 Years | Males, 5-14 Years | Males, 15-49 Years | Males, 50-69 Years       | Males, 70-80 Years       |
|-----------------------------------------------|--------------------------|------------------|-------------------|--------------------|--------------------------|--------------------------|
| Colon and rectum cancer                       | 524<br>(470 - 594)       | --               | --                | 27<br>(22 - 32)    | 194<br>(171 - 219)       | 303<br>(259 - 360)       |
| Lip and oral cavity cancer                    | 79<br>(53 - 94)          | --               | --                | 9<br>(6 - 12)      | 39<br>(24 - 49)          | 31<br>(22 - 40)          |
| Nasopharynx cancer                            | 61<br>(48 - 86)          | --               | 0<br>(0 - 0)      | 17<br>(12 - 27)    | 33<br>(23 - 47)          | 11<br>(7 - 16)           |
| Other pharynx cancer                          | 44<br>(32 - 60)          | --               | --                | 6<br>(4 - 9)       | 25<br>(17 - 36)          | 13<br>(9 - 18)           |
| Gallbladder and biliary tract cancer          | 59<br>(40 - 81)          | --               | --                | 2<br>(2 - 4)       | 21<br>(14 - 30)          | 36<br>(24 - 50)          |
| Pancreatic cancer                             | 175<br>(155 - 197)       | --               | --                | 10<br>(8 - 12)     | 77<br>(66 - 89)          | 88<br>(75 - 102)         |
| Malignant skin melanoma                       | 9<br>(5 - 19)            | --               | --                | 1<br>(1 - 3)       | 3<br>(2 - 7)             | 4<br>(3 - 9)             |
| Non-melanoma skin cancer                      | 10<br>(7 - 17)           | --               | --                | 1<br>(0 - 1)       | 3<br>(2 - 4)             | 7<br>(4 - 12)            |
| Ovarian cancer                                | --                       | --               | --                | --                 | --                       | --                       |
| Testicular cancer                             | 2<br>(2 - 3)             | --               | --                | 1<br>(1 - 1)       | 1<br>(0 - 1)             | 1<br>(0 - 1)             |
| Kidney cancer                                 | 60<br>(48 - 73)          | 0<br>(0 - 0)     | 0<br>(0 - 0)      | 4<br>(3 - 6)       | 30<br>(22 - 38)          | 26<br>(19 - 35)          |
| Bladder cancer                                | 70<br>(54 - 85)          | --               | --                | 1<br>(1 - 1)       | 15<br>(12 - 19)          | 54<br>(41 - 67)          |
| Brain and nervous system cancer               | 41<br>(32 - 51)          | 1<br>(0 - 1)     | 2<br>(1 - 2)      | 11<br>(8 - 14)     | 19<br>(15 - 24)          | 9<br>(6 - 13)            |
| Thyroid cancer                                | 7<br>(5 - 10)            | --               | 0<br>(0 - 0)      | 1<br>(0 - 1)       | 3<br>(2 - 5)             | 3<br>(2 - 4)             |
| Mesothelioma                                  | 5<br>(4 - 10)            | --               | --                | 1<br>(0 - 1)       | 2<br>(2 - 5)             | 2<br>(1 - 5)             |
| Hodgkin lymphoma                              | 2<br>(1 - 3)             | 0<br>(0 - 0)     | 0<br>(0 - 0)      | 1<br>(0 - 1)       | 1<br>(1 - 1)             | 1<br>(0 - 1)             |
| Non-Hodgkin lymphoma                          | 89<br>(46 - 120)         | 0<br>(0 - 0)     | 1<br>(0 - 1)      | 11<br>(6 - 16)     | 34<br>(18 - 48)          | 43<br>(22 - 59)          |
| Multiple myeloma                              | 31<br>(18 - 50)          | --               | --                | 2<br>(1 - 4)       | 13<br>(7 - 21)           | 16<br>(9 - 27)           |
| Leukemia                                      | 78<br>(67 - 88)          | 1<br>(0 - 2)     | 3<br>(2 - 4)      | 17<br>(14 - 21)    | 25<br>(21 - 31)          | 31<br>(25 - 39)          |
| Other neoplasms                               | 85<br>(63 - 126)         | 1<br>(0 - 1)     | 1<br>(1 - 2)      | 15<br>(10 - 22)    | 34<br>(23 - 55)          | 34<br>(24 - 53)          |
| Cardiovascular diseases                       | 3,863<br>(3,541 - 4,185) | 1<br>(1 - 1)     | 1<br>(1 - 1)      | 211<br>(183 - 240) | 1,139<br>(1,026 - 1,262) | 2,511<br>(2,293 - 2,738) |
| Rheumatic heart disease                       | 10<br>(6 - 14)           | 0<br>(0 - 0)     | 0<br>(0 - 0)      | 2<br>(1 - 3)       | 4<br>(2 - 5)             | 4<br>(2 - 6)             |
| Ischemic heart disease                        | 2,356<br>(2,030 - 2,651) | 0<br>(0 - 0)     | 0<br>(0 - 0)      | 135<br>(107 - 157) | 739<br>(634 - 839)       | 1,482<br>(1,262 - 1,701) |
| Cerebrovascular disease                       | 1,044<br>(839 - 1,289)   | 0<br>(0 - 0)     | 0<br>(0 - 0)      | 35<br>(26 - 46)    | 249<br>(195 - 307)       | 761<br>(598 - 959)       |
| Ischemic stroke                               | 590<br>(460 - 793)       | 0<br>(0 - 0)     | 0<br>(0 - 0)      | 4<br>(3 - 7)       | 85<br>(61 - 113)         | 501<br>(385 - 679)       |
| Hemorrhagic stroke                            | 454<br>(315 - 573)       | 0<br>(0 - 0)     | 0<br>(0 - 0)      | 30<br>(22 - 40)    | 164<br>(121 - 208)       | 260<br>(159 - 348)       |
| Hypertensive heart disease                    | 214<br>(134 - 322)       | 0<br>(0 - 0)     | 0<br>(0 - 0)      | 11<br>(6 - 18)     | 76<br>(44 - 117)         | 127<br>(76 - 198)        |
| Cardiomyopathy and myocarditis                | 79<br>(53 - 113)         | 0<br>(0 - 1)     | 1<br>(0 - 1)      | 17<br>(12 - 25)    | 28<br>(19 - 45)          | 32<br>(19 - 49)          |
| Atrial fibrillation and flutter               | 8<br>(5 - 15)            | --               | --                | 0<br>(0 - 1)       | 2<br>(1 - 3)             | 6<br>(4 - 12)            |
| Aortic aneurysm                               | 78<br>(60 - 110)         | --               | --                | 3<br>(2 - 4)       | 19<br>(15 - 29)          | 56<br>(42 - 80)          |
| Peripheral vascular disease                   | 7<br>(4 - 11)            | --               | --                | 0<br>(0 - 0)       | 1<br>(1 - 1)             | 6<br>(4 - 10)            |
| Endocarditis                                  | 21<br>(13 - 32)          | 0<br>(0 - 0)     | 0<br>(0 - 0)      | 3<br>(2 - 5)       | 8<br>(5 - 13)            | 9<br>(5 - 15)            |
| Other cardiovascular and circulatory diseases | 46<br>(36 - 58)          | 0<br>(0 - 0)     | 0<br>(0 - 0)      | 4<br>(3 - 6)       | 13<br>(10 - 17)          | 28<br>(21 - 38)          |
| Chronic respiratory diseases                  | 735<br>(613 - 1,119)     | 0<br>(0 - 0)     | 0<br>(0 - 0)      | 14<br>(11 - 19)    | 126<br>(105 - 181)       | 595<br>(487 - 925)       |
| Chronic obstructive pulmonary disease         | 638<br>(528 - 983)       | 0<br>(0 - 0)     | 0<br>(0 - 0)      | 6<br>(4 - 8)       | 98<br>(80 - 142)         | 535<br>(437 - 836)       |
| Pneumoconiosis                                | 2<br>(1 - 3)             | 0<br>(0 - 0)     | 0<br>(0 - 0)      | 0<br>(0 - 0)       | 0<br>(0 - 0)             | 1<br>(1 - 2)             |
| Silicosis                                     | 0<br>(0 - 1)             | 0<br>(0 - 0)     | 0<br>(0 - 0)      | 0<br>(0 - 0)       | 0<br>(0 - 0)             | 0<br>(0 - 1)             |
| Asbestosis                                    | 0<br>(0 - 0)             | 0<br>(0 - 0)     | 0<br>(0 - 0)      | 0<br>(0 - 0)       | 0<br>(0 - 0)             | 0<br>(0 - 0)             |
| Coal workers pneumoconiosis                   | 0<br>(0 - 0)             | 0<br>(0 - 0)     | 0<br>(0 - 0)      | 0<br>(0 - 0)       | 0<br>(0 - 0)             | 0<br>(0 - 0)             |
| Other pneumoconiosis                          | 1<br>(1 - 1)             | 0<br>(0 - 0)     | 0<br>(0 - 0)      | 0<br>(0 - 0)       | 0<br>(0 - 0)             | 1<br>(0 - 1)             |

Web Table 31- Singapore deaths with 95% UI by age, sex, and cause in 2013

| Cause                                               | Males, All Ages    | Males, 0-4 Years | Males, 5-14 Years | Males, 15-49 Years | Males, 50-69 Years | Males, 70-80 Years |
|-----------------------------------------------------|--------------------|------------------|-------------------|--------------------|--------------------|--------------------|
| Asthma                                              | 55<br>(42 - 80)    | 0<br>(0 - 0)     | 0<br>(0 - 0)      | 7<br>(5 - 9)       | 18<br>(13 - 26)    | 31<br>(20 - 49)    |
| Interstitial lung disease and pulmonary sarcoidosis | 29<br>(17 - 53)    | 0<br>(0 - 0)     | 0<br>(0 - 0)      | 1<br>(1 - 2)       | 9<br>(5 - 15)      | 19<br>(11 - 35)    |
| Other chronic respiratory diseases                  | 11<br>(7 - 19)     | 0<br>(0 - 0)     | 0<br>(0 - 0)      | 0<br>(0 - 0)       | 2<br>(1 - 2)       | 9<br>(5 - 16)      |
| Cirrhosis                                           | 100<br>(89 - 114)  | 0<br>(0 - 0)     | 0<br>(0 - 0)      | 14<br>(11 - 17)    | 51<br>(43 - 60)    | 35<br>(30 - 43)    |
| Cirrhosis due to hepatitis B                        | 33<br>(17 - 54)    | 0<br>(0 - 0)     | 0<br>(0 - 0)      | 5<br>(2 - 7)       | 17<br>(9 - 29)     | 11<br>(5 - 20)     |
| Cirrhosis due to hepatitis C                        | 28<br>(6 - 52)     | 0<br>(0 - 0)     | 0<br>(0 - 0)      | 3<br>(1 - 7)       | 13<br>(3 - 26)     | 11<br>(2 - 21)     |
| Cirrhosis due to alcohol use                        | 28<br>(17 - 46)    | -                | -                 | 3<br>(1 - 5)       | 14<br>(8 - 22)     | 11<br>(6 - 19)     |
| Cirrhosis due to other causes                       | 11<br>(6 - 19)     | 0<br>(0 - 0)     | 0<br>(0 - 0)      | 3<br>(1 - 4)       | 6<br>(3 - 11)      | 2<br>(1 - 4)       |
| Digestive diseases                                  | 184<br>(156 - 216) | 0<br>(0 - 0)     | 0<br>(0 - 0)      | 9<br>(7 - 11)      | 43<br>(36 - 53)    | 132<br>(107 - 156) |
| Peptic ulcer disease                                | 64<br>(49 - 83)    | 0<br>(0 - 0)     | 0<br>(0 - 0)      | 2<br>(1 - 3)       | 14<br>(10 - 19)    | 47<br>(35 - 64)    |
| Gastritis and duodenitis                            | 2<br>(1 - 3)       | 0<br>(0 - 0)     | 0<br>(0 - 0)      | 0<br>(0 - 0)       | 0<br>(0 - 1)       | 1<br>(1 - 3)       |
| Appendicitis                                        | 7<br>(4 - 10)      | 0<br>(0 - 0)     | 0<br>(0 - 0)      | 1<br>(0 - 1)       | 2<br>(1 - 4)       | 3<br>(2 - 5)       |
| Paralytic ileus and intestinal obstruction          | 40<br>(20 - 55)    | 0<br>(0 - 0)     | 0<br>(0 - 0)      | 1<br>(1 - 2)       | 8<br>(5 - 13)      | 30<br>(14 - 43)    |
| Inguinal, femoral, and abdominal hernia             | 4<br>(2 - 7)       | 0<br>(0 - 0)     | 0<br>(0 - 0)      | 0<br>(0 - 0)       | 1<br>(0 - 1)       | 3<br>(2 - 6)       |
| Inflammatory bowel disease                          | 2<br>(1 - 5)       | 0<br>(0 - 0)     | 0<br>(0 - 0)      | 0<br>(0 - 0)       | 1<br>(1 - 2)       | 1<br>(1 - 3)       |
| Vascular intestinal disorders                       | 8<br>(3 - 18)      | 0<br>(0 - 0)     | 0<br>(0 - 0)      | 0<br>(0 - 1)       | 2<br>(1 - 5)       | 5<br>(2 - 12)      |
| Gallbladder and biliary diseases                    | 24<br>(17 - 33)    | 0<br>(0 - 0)     | 0<br>(0 - 0)      | 1<br>(0 - 1)       | 5<br>(3 - 7)       | 18<br>(12 - 27)    |
| Pancreatitis                                        | 17<br>(11 - 25)    | 0<br>(0 - 0)     | 0<br>(0 - 0)      | 2<br>(1 - 3)       | 5<br>(3 - 8)       | 10<br>(6 - 15)     |
| Other digestive diseases                            | 16<br>(11 - 22)    | 0<br>(0 - 0)     | 0<br>(0 - 0)      | 1<br>(0 - 1)       | 4<br>(3 - 6)       | 11<br>(7 - 16)     |
| Neurological disorders                              | 150<br>(118 - 186) | 1<br>(1 - 1)     | 1<br>(1 - 2)      | 9<br>(7 - 12)      | 16<br>(13 - 20)    | 123<br>(93 - 159)  |
| Alzheimer disease and other dementias               | 111<br>(80 - 145)  | -                | -                 | 0<br>(0 - 0)       | 4<br>(3 - 6)       | 107<br>(76 - 140)  |
| Parkinson disease                                   | 10<br>(7 - 17)     | -                | -                 | 0<br>(0 - 0)       | 1<br>(1 - 3)       | 8<br>(6 - 14)      |
| Epilepsy                                            | 7<br>(5 - 10)      | 0<br>(0 - 0)     | 0<br>(0 - 0)      | 4<br>(2 - 5)       | 2<br>(1 - 3)       | 1<br>(1 - 3)       |
| Multiple sclerosis                                  | 1<br>(0 - 1)       | -                | -                 | 0<br>(0 - 0)       | 0<br>(0 - 1)       | 0<br>(0 - 0)       |
| Other neurological disorders                        | 21<br>(16 - 30)    | 1<br>(0 - 1)     | 1<br>(1 - 2)      | 5<br>(4 - 7)       | 8<br>(6 - 11)      | 7<br>(5 - 10)      |
| Mental and substance use disorders                  | 8<br>(6 - 10)      | 0<br>(0 - 0)     | 0<br>(0 - 0)      | 6<br>(4 - 7)       | 2<br>(1 - 2)       | 1<br>(1 - 1)       |
| Schizophrenia                                       | 0<br>(0 - 0)       | -                | -                 | 0<br>(0 - 0)       | 0<br>(0 - 0)       | 0<br>(0 - 0)       |
| Alcohol use disorders                               | 2<br>(1 - 3)       | -                | -                 | 1<br>(1 - 2)       | 1<br>(1 - 2)       | 0<br>(0 - 0)       |
| Drug use disorders                                  | 6<br>(4 - 7)       | 0<br>(0 - 0)     | -                 | 4<br>(3 - 6)       | 1<br>(0 - 1)       | 1<br>(0 - 1)       |
| Opioid use disorders                                | 2<br>(1 - 2)       | 0<br>(0 - 0)     | -                 | 1<br>(1 - 2)       | 0<br>(0 - 0)       | 0<br>(0 - 0)       |
| Cocaine use disorders                               | 0<br>(0 - 1)       | 0<br>(0 - 0)     | -                 | 0<br>(0 - 1)       | 0<br>(0 - 0)       | 0<br>(0 - 0)       |
| Amphetamine use disorders                           | 0<br>(0 - 0)       | 0<br>(0 - 0)     | -                 | 0<br>(0 - 0)       | 0<br>(0 - 0)       | 0<br>(0 - 0)       |
| Other drug use disorders                            | 3<br>(2 - 4)       | 0<br>(0 - 0)     | -                 | 3<br>(2 - 3)       | 0<br>(0 - 1)       | 0<br>(0 - 0)       |
| Eating disorders                                    | 0<br>(0 - 0)       | -                | 0<br>(0 - 0)      | 0<br>(0 - 0)       | -                  | -                  |
| Anorexia nervosa                                    | 0<br>(0 - 0)       | -                | 0<br>(0 - 0)      | 0<br>(0 - 0)       | -                  | -                  |
| Diabetes, urogenital, blood, and endocrine diseases | 660<br>(474 - 758) | 1<br>(1 - 2)     | 1<br>(1 - 2)      | 37<br>(30 - 43)    | 192<br>(148 - 223) | 428<br>(287 - 506) |
| Diabetes mellitus                                   | 205<br>(175 - 235) | 0<br>(0 - 0)     | 0<br>(0 - 0)      | 11<br>(8 - 14)     | 77<br>(64 - 91)    | 117<br>(97 - 141)  |
| Acute glomerulonephritis                            | 0<br>(0 - 0)       | 0<br>(0 - 0)     | 0<br>(0 - 0)      | 0<br>(0 - 0)       | 0<br>(0 - 0)       | 0<br>(0 - 0)       |
| Chronic kidney disease                              | 363<br>(173 - 447) | 0<br>(0 - 0)     | 0<br>(0 - 0)      | 16<br>(11 - 20)    | 83<br>(43 - 105)   | 265<br>(117 - 338) |
| Chronic kidney disease due to diabetes mellitus     | 63<br>(22 - 123)   | 0<br>(0 - 0)     | 0<br>(0 - 0)      | 4<br>(2 - 8)       | 20<br>(7 - 39)     | 38<br>(13 - 79)    |

Web Table 31- Singapore deaths with 95% UI by age, sex, and cause in 2013

| Cause                                               | Males, All Ages    | Males, 0-4 Years | Males, 5-14 Years | Males, 15-49 Years | Males, 50-69 Years | Males, 70-80 Years |
|-----------------------------------------------------|--------------------|------------------|-------------------|--------------------|--------------------|--------------------|
| Chronic kidney disease due to hypertension          | 80<br>(42 - 115)   | 0<br>(0 - 0)     | 0<br>(0 - 0)      | 4<br>(2 - 6)       | 23<br>(12 - 36)    | 54<br>(26 - 80)    |
| Chronic kidney disease due to glomerulonephritis    | 4                  | 0                | 0                 | 1                  | 1                  | 2                  |
| Chronic kidney disease due to other causes          | 216<br>(70 - 312)  | 0<br>(0 - 0)     | 0<br>(0 - 0)      | 7<br>(4 - 11)      | 38<br>(12 - 63)    | 171<br>(52 - 247)  |
| Urinary diseases and male infertility               | 25<br>(17 - 53)    | 0<br>(0 - 0)     | 0<br>(0 - 0)      | 1<br>(1 - 1)       | 4<br>(3 - 9)       | 20<br>(13 - 44)    |
| Interstitial nephritis and urinary tract infections | 21<br>(13 - 46)    | 0<br>(0 - 0)     | 0<br>(0 - 0)      | 1<br>(0 - 1)       | 3<br>(2 - 8)       | 17<br>(10 - 38)    |
| Urolithiasis                                        | 1<br>(0 - 2)       | --               | 0<br>(0 - 0)      | 0<br>(0 - 0)       | 0<br>(0 - 1)       | 1<br>(0 - 1)       |
| Other urinary diseases                              | 3<br>(1 - 6)       | 0<br>(0 - 0)     | 0<br>(0 - 0)      | 0<br>(0 - 0)       | 1<br>(0 - 1)       | 2<br>(1 - 4)       |
| Gynecological diseases                              | --                 | --               | --                | --                 | --                 | --                 |
| Uterine fibroids                                    | --                 | --               | --                | --                 | --                 | --                 |
| Polycystic ovarian syndrome                         | --                 | --               | --                | --                 | --                 | --                 |
| Endometriosis                                       | --                 | --               | --                | --                 | --                 | --                 |
| Genital prolapse                                    | --                 | --               | --                | --                 | --                 | --                 |
| Other gynecological diseases                        | --                 | --               | --                | --                 | --                 | --                 |
| Hemoglobinopathies and hemolytic anemias            | 3<br>(2 - 6)       | 0<br>(0 - 0)     | 0<br>(0 - 0)      | 1<br>(1 - 2)       | 1<br>(0 - 1)       | 1<br>(1 - 2)       |
| Thalassemias                                        | 1<br>(1 - 2)       | 0<br>(0 - 0)     | 0<br>(0 - 0)      | 1<br>(0 - 1)       | 0<br>(0 - 0)       | 0<br>(0 - 0)       |
| Sickle cell disorders                               | 0<br>(0 - 0)       | 0<br>(0 - 0)     | 0<br>(0 - 0)      | 0<br>(0 - 0)       | 0<br>(0 - 0)       | 0<br>(0 - 0)       |
| G6PD deficiency                                     | 0<br>(0 - 0)       | 0<br>(0 - 0)     | 0<br>(0 - 0)      | 0<br>(0 - 0)       | 0<br>(0 - 0)       | 0<br>(0 - 0)       |
| Other hemoglobinopathies and hemolytic anemias      | 2<br>(1 - 4)       | 0<br>(0 - 0)     | 0<br>(0 - 0)      | 0<br>(0 - 1)       | 1<br>(0 - 1)       | 1<br>(1 - 2)       |
| Endocrine, metabolic, blood, and immune disorders   | 63<br>(32 - 78)    | 1<br>(1 - 2)     | 1<br>(0 - 1)      | 9<br>(5 - 11)      | 28<br>(13 - 38)    | 25<br>(11 - 35)    |
| Musculoskeletal disorders                           | 15<br>(11 - 24)    | --               | 0<br>(0 - 0)      | 1<br>(1 - 2)       | 4<br>(3 - 6)       | 10<br>(7 - 16)     |
| Rheumatoid arthritis                                | 1<br>(0 - 1)       | --               | 0<br>(0 - 0)      | 0<br>(0 - 0)       | 0<br>(0 - 0)       | 0<br>(0 - 1)       |
| Other musculoskeletal disorders                     | 14<br>(11 - 23)    | --               | 0<br>(0 - 0)      | 1<br>(1 - 2)       | 4<br>(3 - 6)       | 10<br>(7 - 15)     |
| Other non-communicable diseases                     | 58<br>(49 - 69)    | 17<br>(13 - 23)  | 2<br>(2 - 3)      | 7<br>(6 - 8)       | 8<br>(7 - 10)      | 23<br>(16 - 32)    |
| Congenital anomalies                                | 27<br>(22 - 36)    | 15<br>(11 - 22)  | 2<br>(2 - 3)      | 5<br>(4 - 7)       | 3<br>(2 - 4)       | 1<br>(1 - 2)       |
| Neural tube defects                                 | 1<br>(0 - 1)       | 0<br>(0 - 1)     | 0<br>(0 - 0)      | 0<br>(0 - 0)       | 0<br>(0 - 0)       | 0<br>(0 - 0)       |
| Congenital heart anomalies                          | 18<br>(15 - 23)    | 9<br>(6 - 13)    | 2<br>(1 - 3)      | 4<br>(3 - 5)       | 2<br>(2 - 3)       | 1<br>(1 - 2)       |
| Cleft lip and cleft palate                          | 0<br>(0 - 0)       | 0<br>(0 - 0)     | --                | --                 | --                 | --                 |
| Down syndrome                                       | 1<br>(1 - 2)       | 0<br>(0 - 1)     | 0<br>(0 - 0)      | 0<br>(0 - 1)       | 0<br>(0 - 0)       | 0<br>(0 - 0)       |
| Chromosomal unbalanced rearrangements               | 5<br>(3 - 8)       | 5<br>(2 - 7)     | 0<br>(0 - 0)      | 0<br>(0 - 0)       | 0<br>(0 - 0)       | 0<br>(0 - 0)       |
| Other congenital anomalies                          | 2<br>(2 - 4)       | 1<br>(1 - 2)     | 0<br>(0 - 0)      | 0<br>(0 - 1)       | 0<br>(0 - 1)       | 0<br>(0 - 0)       |
| Skin and subcutaneous diseases                      | 29<br>(21 - 37)    | 0<br>(0 - 0)     | 0<br>(0 - 0)      | 1<br>(1 - 2)       | 6<br>(4 - 7)       | 22<br>(14 - 30)    |
| Cellulitis                                          | 10<br>(6 - 16)     | 0<br>(0 - 0)     | 0<br>(0 - 0)      | 0<br>(0 - 1)       | 2<br>(1 - 3)       | 7<br>(3 - 13)      |
| Pyoderma                                            | 14<br>(9 - 20)     | 0<br>(0 - 0)     | 0<br>(0 - 0)      | 1<br>(0 - 1)       | 3<br>(2 - 4)       | 11<br>(6 - 17)     |
| Decubitus ulcer                                     | 3<br>(2 - 5)       | 0<br>(0 - 0)     | 0<br>(0 - 0)      | 0<br>(0 - 0)       | 1<br>(0 - 1)       | 3<br>(1 - 5)       |
| Other skin and subcutaneous diseases                | 2<br>(1 - 4)       | 0<br>(0 - 0)     | 0<br>(0 - 0)      | 0<br>(0 - 0)       | 0<br>(0 - 1)       | 1<br>(0 - 3)       |
| Sudden infant death syndrome                        | 2<br>(0 - 4)       | 2<br>(0 - 4)     | --                | --                 | --                 | --                 |
| Injuries                                            | 644<br>(569 - 727) | 3<br>(2 - 4)     | 6<br>(4 - 7)      | 254<br>(225 - 285) | 186<br>(153 - 217) | 196<br>(166 - 235) |
| Transport injuries                                  | 157<br>(138 - 177) | 0<br>(0 - 1)     | 2<br>(1 - 3)      | 74<br>(63 - 86)    | 44<br>(37 - 52)    | 37<br>(29 - 47)    |
| Road injuries                                       | 155<br>(136 - 174) | 0<br>(0 - 1)     | 2<br>(1 - 3)      | 73<br>(62 - 84)    | 43<br>(36 - 51)    | 36<br>(29 - 46)    |
| Pedestrian road injuries                            | 45<br>(27 - 60)    | 0<br>(0 - 0)     | 1<br>(1 - 2)      | 9<br>(4 - 13)      | 12<br>(6 - 18)     | 23<br>(16 - 32)    |

Web Table 31- Singapore deaths with 95% UI by age, sex, and cause in 2013

| Cause                                           | Males, All Ages    | Males, 0-4 Years | Males, 5-14 Years | Males, 15-49 Years | Males, 50-69 Years | Males, 70-80 Years |
|-------------------------------------------------|--------------------|------------------|-------------------|--------------------|--------------------|--------------------|
| Cyclist road injuries                           | 18<br>(12 - 27)    | 0<br>(0 - 0)     | 0<br>(0 - 1)      | 3<br>(2 - 5)       | 7<br>(4 - 11)      | 7<br>(4 - 12)      |
| Motorcyclist road injuries                      | 61<br>(45 - 75)    | 0<br>(0 - 0)     | 0<br>(0 - 0)      | 43<br>(33 - 53)    | 16<br>(10 - 22)    | 3<br>(1 - 5)       |
| Motor vehicle road injuries                     | 30<br>(17 - 41)    | 0<br>(0 - 0)     | 0<br>(0 - 0)      | 18<br>(11 - 25)    | 8<br>(4 - 12)      | 3<br>(1 - 6)       |
| Other road injuries                             | 0<br>(0 - 1)       | 0<br>(0 - 0)     | 0<br>(0 - 0)      | 0<br>(0 - 0)       | 0<br>(0 - 0)       | 0<br>(0 - 0)       |
| Other transport injuries                        | 2<br>(2 - 3)       | 0<br>(0 - 0)     | 0<br>(0 - 0)      | 1<br>(1 - 2)       | 1<br>(0 - 1)       | 0<br>(0 - 1)       |
| Unintentional injuries                          | 162<br>(124 - 191) | 2<br>(1 - 3)     | 2<br>(2 - 3)      | 37<br>(30 - 45)    | 39<br>(31 - 49)    | 81<br>(57 - 102)   |
| Falls                                           | 97<br>(62 - 120)   | 1<br>(0 - 1)     | 1<br>(0 - 1)      | 18<br>(12 - 23)    | 23<br>(15 - 30)    | 56<br>(32 - 73)    |
| Drowning                                        | 11<br>(5 - 17)     | 0<br>(0 - 1)     | 1<br>(0 - 2)      | 6<br>(3 - 10)      | 2<br>(1 - 4)       | 1<br>(0 - 2)       |
| Fire, heat, and hot substances                  | 10<br>(7 - 14)     | 0<br>(0 - 0)     | 0<br>(0 - 0)      | 2<br>(2 - 3)       | 3<br>(2 - 4)       | 4<br>(3 - 6)       |
| Poisonings                                      | 2<br>(2 - 3)       | 0<br>(0 - 0)     | 0<br>(0 - 0)      | 1<br>(1 - 2)       | 1<br>(0 - 1)       | 0<br>(0 - 1)       |
| Exposure to mechanical forces                   | 12<br>(10 - 18)    | 0<br>(0 - 1)     | 0<br>(0 - 0)      | 7<br>(5 - 10)      | 4<br>(3 - 5)       | 1<br>(1 - 1)       |
| Unintentional firearm injuries                  | 0<br>(0 - 1)       | 0<br>(0 - 0)     | 0<br>(0 - 0)      | 0<br>(0 - 0)       | 0<br>(0 - 0)       | 0<br>(0 - 0)       |
| Unintentional suffocation                       | 1<br>(0 - 1)       | 0<br>(0 - 1)     | 0<br>(0 - 0)      | 0<br>(0 - 0)       | 0<br>(0 - 0)       | 0<br>(0 - 0)       |
| Other exposure to mechanical forces             | 11<br>(9 - 16)     | 0<br>(0 - 0)     | 0<br>(0 - 0)      | 6<br>(5 - 10)      | 3<br>(2 - 5)       | 1<br>(1 - 1)       |
| Adverse effects of medical treatment            | 4<br>(3 - 8)       | 0<br>(0 - 0)     | 0<br>(0 - 1)      | 1<br>(0 - 1)       | 1<br>(1 - 3)       | 2<br>(2 - 4)       |
| Animal contact                                  | 0<br>(0 - 1)       | 0<br>(0 - 0)     | 0<br>(0 - 0)      | 0<br>(0 - 0)       | 0<br>(0 - 0)       | 0<br>(0 - 0)       |
| Venomous animal contact                         | 0<br>(0 - 0)       | 0<br>(0 - 0)     | 0<br>(0 - 0)      | 0<br>(0 - 0)       | 0<br>(0 - 0)       | 0<br>(0 - 0)       |
| Non-venomous animal contact                     | 0<br>(0 - 0)       | 0<br>(0 - 0)     | 0<br>(0 - 0)      | 0<br>(0 - 0)       | 0<br>(0 - 0)       | 0<br>(0 - 0)       |
| Foreign body                                    | 25<br>(13 - 41)    | 0<br>(0 - 1)     | 0<br>(0 - 0)      | 2<br>(1 - 4)       | 6<br>(3 - 9)       | 16<br>(8 - 28)     |
| Pulmonary aspiration and foreign body in airway | 25<br>(13 - 40)    | 0<br>(0 - 1)     | 0<br>(0 - 0)      | 2<br>(1 - 4)       | 6<br>(3 - 9)       | 16<br>(8 - 28)     |
| Foreign body in other body part                 | 0<br>(0 - 0)       | 0<br>(0 - 0)     | 0<br>(0 - 0)      | 0<br>(0 - 0)       | 0<br>(0 - 0)       | 0<br>(0 - 0)       |
| Other unintentional injuries                    | 0<br>(0 - 1)       | 0<br>(0 - 0)     | 0<br>(0 - 0)      | 0<br>(0 - 0)       | 0<br>(0 - 0)       | 0<br>(0 - 0)       |
| Self-harm and interpersonal violence            | 325<br>(267 - 394) | 0<br>(0 - 1)     | 1<br>(1 - 2)      | 142<br>(114 - 168) | 103<br>(75 - 128)  | 78<br>(61 - 122)   |
| Self-harm                                       | 290<br>(229 - 357) | -                | 1<br>(0 - 1)      | 120<br>(90 - 145)  | 94<br>(65 - 117)   | 76<br>(58 - 120)   |
| Interpersonal violence                          | 35<br>(27 - 57)    | 0<br>(0 - 1)     | 1<br>(0 - 1)      | 22<br>(16 - 36)    | 9<br>(6 - 16)      | 2<br>(2 - 4)       |
| Assault by firearm                              | 2<br>(1 - 4)       | 0<br>(0 - 0)     | 0<br>(0 - 0)      | 1<br>(0 - 3)       | 1<br>(0 - 1)       | 0<br>(0 - 0)       |
| Assault by sharp object                         | 9<br>(5 - 18)      | 0<br>(0 - 0)     | 0<br>(0 - 0)      | 6<br>(3 - 12)      | 3<br>(1 - 5)       | 0<br>(0 - 1)       |
| Assault by other means                          | 24<br>(17 - 39)    | 0<br>(0 - 1)     | 1<br>(0 - 1)      | 15<br>(11 - 25)    | 6<br>(4 - 10)      | 2<br>(1 - 3)       |

Web Table 31- Singapore deaths with 95% UI by age, sex, and cause in 2013

| Cause                                                             | Females, All Ages           | Females, 0-4 Years | Females, 5-14 Years | Females, 15-49 Years | Females, 50-69 Years     | Females, 70-80 Years     |
|-------------------------------------------------------------------|-----------------------------|--------------------|---------------------|----------------------|--------------------------|--------------------------|
| All causes                                                        | 11,632<br>(10,962 - 12,305) | 40<br>(31 - 52)    | 17<br>(15 - 20)     | 469<br>(417 - 522)   | 1,859<br>(1,676 - 2,045) | 9,247<br>(8,817 - 9,683) |
| Communicable, maternal, neonatal, and nutritional diseases        | 2,334<br>(1,891 - 2,864)    | 17<br>(12 - 23)    | 3<br>(2 - 4)        | 33<br>(28 - 39)      | 128<br>(93 - 155)        | 2,154<br>(1,722 - 2,688) |
| HIV/AIDS and tuberculosis                                         | 34<br>(26 - 45)             | 0<br>(0 - 1)       | 0<br>(0 - 0)        | 6<br>(5 - 10)        | 7<br>(5 - 9)             | 20<br>(14 - 30)          |
| Tuberculosis                                                      | 27<br>(20 - 37)             | 0<br>(0 - 0)       | 0<br>(0 - 0)        | 2<br>(1 - 2)         | 5<br>(4 - 7)             | 20<br>(13 - 30)          |
| HIV/AIDS                                                          | 7<br>(4 - 12)               | 0<br>(0 - 1)       | 0<br>(0 - 0)        | 5<br>(3 - 8)         | 2<br>(1 - 3)             | 0<br>(0 - 0)             |
| HIV/AIDS resulting in mycobacterial infection                     | 0<br>(0 - 1)                | 0<br>(0 - 0)       | 0<br>(0 - 0)        | 0<br>(0 - 0)         | 0<br>(0 - 0)             | 0<br>(0 - 0)             |
| HIV/AIDS resulting in other diseases                              | 7<br>(4 - 11)               | 0<br>(0 - 1)       | 0<br>(0 - 0)        | 5<br>(3 - 8)         | 1<br>(1 - 3)             | 0<br>(0 - 0)             |
| Diarrhea, lower respiratory, and other common infectious diseases | 2,260<br>(1,818 - 2,779)    | 5<br>(4 - 8)       | 2<br>(2 - 3)        | 21<br>(17 - 26)      | 116<br>(81 - 143)        | 2,115<br>(1,680 - 2,640) |
| Diarrheal diseases                                                | 26<br>(16 - 43)             | 0<br>(0 - 1)       | 0<br>(0 - 0)        | 1<br>(0 - 1)         | 2<br>(1 - 3)             | 24<br>(14 - 40)          |
| Intestinal infectious diseases                                    | 1<br>(0 - 3)                | 0<br>(0 - 1)       | 0<br>(0 - 1)        | 1<br>(0 - 2)         | 0<br>(0 - 1)             | 0<br>(0 - 0)             |
| Typhoid fever                                                     | 1<br>(0 - 2)                | 0<br>(0 - 0)       | 0<br>(0 - 0)        | 0<br>(0 - 1)         | 0<br>(0 - 0)             | 0<br>(0 - 0)             |
| Paratyphoid fever                                                 | 0<br>(0 - 1)                | 0<br>(0 - 0)       | 0<br>(0 - 0)        | 0<br>(0 - 0)         | 0<br>(0 - 0)             | 0<br>(0 - 0)             |
| Other intestinal infectious diseases                              | 0<br>(0 - 2)                | 0<br>(0 - 0)       | 0<br>(0 - 0)        | 0<br>(0 - 1)         | 0<br>(0 - 0)             | 0<br>(0 - 0)             |
| Lower respiratory infections                                      | 2,219<br>(1,780 - 2,738)    | 4<br>(3 - 6)       | 2<br>(1 - 2)        | 18<br>(14 - 22)      | 111<br>(76 - 137)        | 2,084<br>(1,640 - 2,605) |
| Upper respiratory infections                                      | 0<br>(0 - 1)                | 0<br>(0 - 0)       | 0<br>(0 - 0)        | 0<br>(0 - 0)         | 0<br>(0 - 0)             | 0<br>(0 - 1)             |
| Otitis media                                                      | 1<br>(1 - 1)                | 0<br>(0 - 0)       | 0<br>(0 - 0)        | 0<br>(0 - 0)         | 0<br>(0 - 0)             | 1<br>(0 - 1)             |
| Meningitis                                                        | 7<br>(6 - 9)                | 0<br>(0 - 0)       | 0<br>(0 - 0)        | 1<br>(1 - 1)         | 2<br>(1 - 2)             | 4<br>(3 - 5)             |
| Pneumococcal meningitis                                           | 2<br>(1 - 2)                | 0<br>(0 - 0)       | 0<br>(0 - 0)        | 0<br>(0 - 0)         | 0<br>(0 - 1)             | 1<br>(1 - 2)             |
| H influenzae type B meningitis                                    | 1<br>(1 - 1)                | 0<br>(0 - 0)       | 0<br>(0 - 0)        | 0<br>(0 - 0)         | 0<br>(0 - 0)             | 0<br>(0 - 1)             |
| Meningococcal meningitis                                          | 2<br>(1 - 2)                | 0<br>(0 - 0)       | 0<br>(0 - 0)        | 0<br>(0 - 0)         | 0<br>(0 - 1)             | 1<br>(1 - 2)             |
| Other meningitis                                                  | 3<br>(2 - 4)                | 0<br>(0 - 0)       | 0<br>(0 - 0)        | 0<br>(0 - 1)         | 1<br>(1 - 1)             | 2<br>(1 - 2)             |
| Encephalitis                                                      | 3<br>(2 - 7)                | 0<br>(0 - 0)       | 0<br>(0 - 0)        | 1<br>(0 - 1)         | 1<br>(1 - 2)             | 2<br>(1 - 3)             |
| Diphtheria                                                        | 0<br>(0 - 0)                | 0<br>(0 - 0)       | 0<br>(0 - 0)        | 0<br>(0 - 0)         | 0<br>(0 - 0)             | --<br>(0 - 0)            |
| Whooping cough                                                    | 0<br>(0 - 0)                | 0<br>(0 - 0)       | 0<br>(0 - 0)        | 0<br>(0 - 0)         | 0<br>(0 - 0)             | --<br>(0 - 0)            |
| Tetanus                                                           | 0<br>(0 - 0)                | 0<br>(0 - 0)       | 0<br>(0 - 0)        | 0<br>(0 - 0)         | 0<br>(0 - 0)             | 0<br>(0 - 0)             |
| Measles                                                           | 0<br>(0 - 0)                | 0<br>(0 - 0)       | 0<br>(0 - 0)        | 0<br>(0 - 0)         | 0<br>(0 - 0)             | --<br>(0 - 0)            |
| Varicella and herpes zoster                                       | 2<br>(0 - 6)                | 0<br>(0 - 0)       | 0<br>(0 - 0)        | 0<br>(0 - 0)         | 0<br>(0 - 1)             | 1<br>(0 - 6)             |
| Neglected tropical diseases and malaria                           | 3<br>(2 - 5)                | 0<br>(0 - 0)       | 0<br>(0 - 0)        | 0<br>(0 - 1)         | 1<br>(1 - 1)             | 2<br>(1 - 3)             |
| Cysticercosis                                                     | 0<br>(0 - 0)                | 0<br>(0 - 0)       | 0<br>(0 - 0)        | 0<br>(0 - 0)         | 0<br>(0 - 0)             | 0<br>(0 - 0)             |
| Cystic echinococcosis                                             | 0<br>(0 - 0)                | 0<br>(0 - 0)       | 0<br>(0 - 0)        | 0<br>(0 - 0)         | 0<br>(0 - 0)             | 0<br>(0 - 0)             |
| Dengue                                                            | 1<br>(0 - 1)                | 0<br>(0 - 0)       | 0<br>(0 - 0)        | 0<br>(0 - 0)         | 0<br>(0 - 0)             | 0<br>(0 - 0)             |
| Rabies                                                            | 0<br>(0 - 0)                | 0<br>(0 - 0)       | 0<br>(0 - 0)        | 0<br>(0 - 0)         | 0<br>(0 - 0)             | 0<br>(0 - 0)             |
| Other neglected tropical diseases                                 | 2<br>(2 - 4)                | 0<br>(0 - 0)       | 0<br>(0 - 0)        | 0<br>(0 - 0)         | 1<br>(0 - 1)             | 2<br>(1 - 3)             |
| Maternal disorders                                                | 2<br>(2 - 3)                | --                 | 0<br>(0 - 0)        | 2<br>(2 - 3)         | --                       | --                       |
| Maternal hemorrhage                                               | 0<br>(0 - 1)                | --                 | 0<br>(0 - 0)        | 0<br>(0 - 1)         | --                       | --                       |
| Maternal sepsis and other maternal infections                     | 0<br>(0 - 0)                | --                 | 0<br>(0 - 0)        | 0<br>(0 - 0)         | --                       | --                       |
| Maternal hypertensive disorders                                   | 0<br>(0 - 0)                | --                 | 0<br>(0 - 0)        | 0<br>(0 - 0)         | --                       | --                       |
| Maternal obstructed labor                                         | 0<br>(0 - 0)                | --                 | 0<br>(0 - 0)        | 0<br>(0 - 0)         | --                       | --                       |
| Maternal abortive outcome                                         | 0<br>(0 - 1)                | --                 | 0<br>(0 - 0)        | 0<br>(0 - 1)         | --                       | --                       |
| Indirect maternal deaths                                          | 0<br>(0 - 0)                | --                 | 0<br>(0 - 0)        | 0<br>(0 - 0)         | --                       | --                       |

Web Table 31- Singapore deaths with 95% UI by age, sex, and cause in 2013

| Cause                                                            | Females, All Ages        | Females, 0-4 Years | Females, 5-14 Years | Females, 15-49 Years | Females, 50-69 Years     | Females, 70-80 Years     |
|------------------------------------------------------------------|--------------------------|--------------------|---------------------|----------------------|--------------------------|--------------------------|
| Late maternal deaths                                             | 0<br>(0 - 0)             | --                 | 0<br>(0 - 0)        | 0<br>(0 - 0)         | --                       | --                       |
| Maternal deaths aggravated by HIV/AIDS                           | 0<br>(0 - 0)             | --                 | --                  | 0<br>(0 - 0)         | --                       | --                       |
| Other maternal disorders                                         | 0<br>(0 - 1)             | --                 | 0<br>(0 - 0)        | 0<br>(0 - 1)         | --                       | --                       |
| Neonatal disorders                                               | 10<br>(7 - 14)           | 10<br>(7 - 14)     | --                  | --                   | --                       | --                       |
| Neonatal preterm birth complications                             | 7<br>(4 - 9)             | 7<br>(4 - 9)       | --                  | --                   | --                       | --                       |
| Neonatal encephalopathy due to birth asphyxia and trauma         | 2<br>(1 - 3)             | 2<br>(1 - 3)       | --                  | --                   | --                       | --                       |
| Neonatal sepsis and other neonatal infections                    | 0<br>(0 - 0)             | 0<br>(0 - 0)       | --                  | --                   | --                       | --                       |
| Hemolytic disease and other neonatal jaundice                    | 0<br>(0 - 0)             | 0<br>(0 - 0)       | --                  | --                   | --                       | --                       |
| Other neonatal disorders                                         | 2<br>(1 - 3)             | 2<br>(1 - 3)       | --                  | --                   | --                       | --                       |
| Nutritional deficiencies                                         | 8<br>(6 - 12)            | 0<br>(0 - 0)       | 0<br>(0 - 0)        | 0<br>(0 - 0)         | 1<br>(1 - 1)             | 7<br>(5 - 11)            |
| Protein-energy malnutrition                                      | 2<br>(1 - 5)             | 0<br>(0 - 0)       | 0<br>(0 - 0)        | 0<br>(0 - 0)         | 0<br>(0 - 0)             | 2<br>(1 - 5)             |
| Iodine deficiency                                                | 0<br>(0 - 2)             | 0<br>(0 - 0)       | 0<br>(0 - 0)        | 0<br>(0 - 0)         | 0<br>(0 - 0)             | 0<br>(0 - 2)             |
| Iron-deficiency anemia                                           | 5<br>(3 - 8)             | 0<br>(0 - 0)       | 0<br>(0 - 0)        | 0<br>(0 - 0)         | 0<br>(0 - 0)             | 5<br>(3 - 8)             |
| Other nutritional deficiencies                                   | 0<br>(0 - 0)             | 0<br>(0 - 0)       | 0<br>(0 - 0)        | 0<br>(0 - 0)         | 0<br>(0 - 0)             | 0<br>(0 - 0)             |
| Other communicable, maternal, neonatal, and nutritional diseases | 17<br>(13 - 23)          | 1<br>(0 - 3)       | 0<br>(0 - 0)        | 2<br>(1 - 2)         | 4<br>(3 - 5)             | 10<br>(7 - 15)           |
| Sexually transmitted diseases excluding HIV                      | 3<br>(2 - 6)             | 1<br>(0 - 3)       | 0<br>(0 - 0)        | 0<br>(0 - 1)         | 1<br>(0 - 1)             | 2<br>(1 - 3)             |
| Syphilis                                                         | 2<br>(1 - 5)             | 1<br>(0 - 3)       | 0<br>(0 - 0)        | 0<br>(0 - 0)         | 0<br>(0 - 1)             | 1<br>(1 - 2)             |
| Chlamydial infection                                             | 0<br>(0 - 0)             | --                 | 0<br>(0 - 0)        | 0<br>(0 - 0)         | 0<br>(0 - 0)             | 0<br>(0 - 0)             |
| Gonococcal infection                                             | 0<br>(0 - 1)             | --                 | 0<br>(0 - 0)        | 0<br>(0 - 0)         | 0<br>(0 - 0)             | 0<br>(0 - 0)             |
| Other sexually transmitted diseases                              | 0<br>(0 - 0)             | --                 | 0<br>(0 - 0)        | 0<br>(0 - 0)         | 0<br>(0 - 0)             | 0<br>(0 - 0)             |
| Hepatitis                                                        | 4<br>(3 - 6)             | 0<br>(0 - 0)       | 0<br>(0 - 0)        | 1<br>(0 - 1)         | 1<br>(1 - 2)             | 2<br>(1 - 4)             |
| Acute hepatitis A                                                | 1<br>(0 - 1)             | 0<br>(0 - 0)       | 0<br>(0 - 0)        | 0<br>(0 - 0)         | 0<br>(0 - 0)             | 0<br>(0 - 1)             |
| Acute hepatitis B                                                | 3<br>(2 - 5)             | 0<br>(0 - 0)       | 0<br>(0 - 0)        | 0<br>(0 - 1)         | 1<br>(1 - 2)             | 2<br>(1 - 2)             |
| Acute hepatitis C                                                | 0<br>(0 - 0)             | --                 | 0<br>(0 - 0)        | 0<br>(0 - 0)         | 0<br>(0 - 0)             | 0<br>(0 - 0)             |
| Other infectious diseases                                        | 9<br>(7 - 15)            | 0<br>(0 - 0)       | 0<br>(0 - 0)        | 1<br>(1 - 1)         | 2<br>(1 - 3)             | 6<br>(4 - 11)            |
| Non-communicable diseases                                        | 8,985<br>(8,209 - 9,685) | 21<br>(16 - 28)    | 11<br>(9 - 13)      | 356<br>(314 - 399)   | 1,659<br>(1,498 - 1,820) | 6,938<br>(6,323 - 7,490) |
| Neoplasms                                                        | 2,856<br>(2,478 - 3,247) | 2<br>(2 - 3)       | 6<br>(5 - 7)        | 230<br>(201 - 263)   | 896<br>(767 - 1,015)     | 1,722<br>(1,470 - 2,017) |
| Esophageal cancer                                                | 31<br>(24 - 40)          | --                 | --                  | 1<br>(0 - 1)         | 6<br>(4 - 7)             | 25<br>(18 - 33)          |
| Stomach cancer                                                   | 215<br>(154 - 294)       | --                 | --                  | 11<br>(8 - 14)       | 45<br>(33 - 60)          | 160<br>(107 - 226)       |
| Liver cancer                                                     | 137<br>(88 - 179)        | --                 | 0<br>(0 - 0)        | 5<br>(3 - 7)         | 31<br>(21 - 41)          | 101<br>(58 - 140)        |
| Liver cancer due to hepatitis B                                  | 43<br>(21 - 63)          | --                 | 0<br>(0 - 0)        | 3<br>(2 - 4)         | 14<br>(7 - 21)           | 26<br>(12 - 42)          |
| Liver cancer due to hepatitis C                                  | 75<br>(44 - 108)         | --                 | 0<br>(0 - 0)        | 2<br>(1 - 3)         | 14<br>(8 - 22)           | 59<br>(32 - 89)          |
| Liver cancer due to alcohol use                                  | 15<br>(6 - 27)           | --                 | --                  | 0<br>(0 - 0)         | 2<br>(1 - 4)             | 13<br>(5 - 24)           |
| Liver cancer due to other causes                                 | 5<br>(2 - 8)             | --                 | 0<br>(0 - 0)        | 0<br>(0 - 0)         | 1<br>(0 - 2)             | 3<br>(1 - 6)             |
| Larynx cancer                                                    | 7<br>(4 - 11)            | --                 | --                  | 0<br>(0 - 0)         | 2<br>(1 - 3)             | 5<br>(3 - 8)             |
| Tracheal, bronchus and lung cancer                               | 550<br>(443 - 749)       | --                 | --                  | 22<br>(17 - 30)      | 155<br>(122 - 214)       | 373<br>(285 - 514)       |
| Breast cancer                                                    | 423<br>(255 - 504)       | --                 | --                  | 70<br>(47 - 85)      | 203<br>(113 - 246)       | 150<br>(91 - 188)        |
| Cervical cancer                                                  | 130<br>(98 - 161)        | --                 | --                  | 15<br>(12 - 20)      | 52<br>(39 - 65)          | 63<br>(45 - 85)          |
| Uterine cancer                                                   | 45<br>(27 - 58)          | --                 | --                  | 3<br>(1 - 4)         | 23<br>(13 - 31)          | 20<br>(12 - 28)          |
| Prostate cancer                                                  | --                       | --                 | --                  | --                   | --                       | --                       |

Web Table 31- Singapore deaths with 95% UI by age, sex, and cause in 2013

| Cause                                         | Females, All Ages        | Females, 0-4 Years | Females, 5-14 Years | Females, 15-49 Years | Females, 50-69 Years | Females, 70-80 Years     |
|-----------------------------------------------|--------------------------|--------------------|---------------------|----------------------|----------------------|--------------------------|
| Colon and rectum cancer                       | 465<br>(381 - 575)       | -                  | -                   | 18<br>(14 - 22)      | 108<br>(88 - 128)    | 340<br>(265 - 437)       |
| Lip and oral cavity cancer                    | 37<br>(27 - 46)          | -                  | -                   | 5<br>(3 - 6)         | 14<br>(9 - 17)       | 19<br>(14 - 25)          |
| Nasopharynx cancer                            | 23<br>(11 - 44)          | -                  | 0<br>(0 - 0)        | 6<br>(3 - 12)        | 10<br>(5 - 19)       | 7<br>(3 - 14)            |
| Other pharynx cancer                          | 12<br>(9 - 15)           | -                  | -                   | 2<br>(1 - 3)         | 5<br>(4 - 7)         | 5<br>(3 - 7)             |
| Gallbladder and biliary tract cancer          | 82<br>(46 - 110)         | -                  | -                   | 2<br>(1 - 3)         | 21<br>(13 - 28)      | 58<br>(30 - 83)          |
| Pancreatic cancer                             | 168<br>(140 - 203)       | -                  | -                   | 6<br>(4 - 7)         | 46<br>(37 - 54)      | 117<br>(94 - 148)        |
| Malignant skin melanoma                       | 10<br>(6 - 14)           | -                  | -                   | 1<br>(1 - 2)         | 3<br>(2 - 4)         | 6<br>(4 - 9)             |
| Non-melanoma skin cancer                      | 12<br>(8 - 17)           | -                  | -                   | 0<br>(0 - 0)         | 1<br>(1 - 2)         | 11<br>(7 - 15)           |
| Ovarian cancer                                | 140<br>(115 - 168)       | -                  | -                   | 20<br>(15 - 25)      | 62<br>(49 - 75)      | 59<br>(43 - 78)          |
| Testicular cancer                             | -                        | -                  | -                   | -                    | -                    | -                        |
| Kidney cancer                                 | 32<br>(22 - 45)          | 0<br>(0 - 0)       | 0<br>(0 - 0)        | 2<br>(1 - 3)         | 10<br>(6 - 15)       | 20<br>(12 - 29)          |
| Bladder cancer                                | 28<br>(18 - 41)          | -                  | -                   | 1<br>(0 - 1)         | 4<br>(3 - 6)         | 23<br>(15 - 34)          |
| Brain and nervous system cancer               | 33<br>(25 - 42)          | 0<br>(0 - 1)       | 2<br>(1 - 2)        | 7<br>(5 - 9)         | 11<br>(8 - 15)       | 12<br>(8 - 18)           |
| Thyroid cancer                                | 15<br>(10 - 20)          | -                  | 0<br>(0 - 0)        | 1<br>(0 - 1)         | 4<br>(3 - 6)         | 10<br>(6 - 14)           |
| Mesothelioma                                  | 4<br>(3 - 7)             | -                  | -                   | 1<br>(0 - 1)         | 2<br>(1 - 3)         | 2<br>(1 - 3)             |
| Hodgkin lymphoma                              | 2<br>(1 - 3)             | 0<br>(0 - 0)       | 0<br>(0 - 0)        | 1<br>(0 - 1)         | 1<br>(0 - 1)         | 1<br>(0 - 1)             |
| Non-Hodgkin lymphoma                          | 60<br>(25 - 87)          | 0<br>(0 - 0)       | 0<br>(0 - 1)        | 7<br>(3 - 11)        | 18<br>(7 - 27)       | 35<br>(15 - 53)          |
| Multiple myeloma                              | 26<br>(16 - 41)          | -                  | -                   | 1<br>(1 - 2)         | 10<br>(6 - 15)       | 15<br>(9 - 24)           |
| Leukemia                                      | 61<br>(48 - 75)          | 1<br>(0 - 1)       | 2<br>(1 - 3)        | 12<br>(9 - 14)       | 17<br>(12 - 22)      | 29<br>(22 - 38)          |
| Other neoplasms                               | 108<br>(84 - 139)        | 1<br>(0 - 1)       | 2<br>(1 - 2)        | 14<br>(11 - 19)      | 34<br>(26 - 45)      | 57<br>(37 - 80)          |
| Cardiovascular diseases                       | 4,139<br>(3,095 - 4,931) | 1<br>(0 - 1)       | 1<br>(0 - 1)        | 65<br>(42 - 84)      | 491<br>(391 - 652)   | 3,581<br>(2,676 - 4,213) |
| Rheumatic heart disease                       | 18<br>(10 - 28)          | 0<br>(0 - 0)       | 0<br>(0 - 0)        | 3<br>(2 - 4)         | 6<br>(3 - 9)         | 10<br>(5 - 15)           |
| Ischemic heart disease                        | 2,197<br>(1,391 - 2,641) | 0<br>(0 - 0)       | 0<br>(0 - 0)        | 26<br>(13 - 35)      | 266<br>(183 - 358)   | 1,904<br>(1,191 - 2,270) |
| Cerebrovascular disease                       | 1,449<br>(1,041 - 2,022) | 0<br>(0 - 0)       | 0<br>(0 - 0)        | 21<br>(13 - 28)      | 147<br>(109 - 231)   | 1,281<br>(926 - 1,774)   |
| Ischemic stroke                               | 898<br>(649 - 1,317)     | 0<br>(0 - 0)       | 0<br>(0 - 0)        | 3<br>(2 - 5)         | 44<br>(28 - 76)      | 850<br>(615 - 1,225)     |
| Hemorrhagic stroke                            | 552<br>(366 - 784)       | 0<br>(0 - 0)       | 0<br>(0 - 0)        | 18<br>(11 - 24)      | 103<br>(75 - 166)    | 431<br>(263 - 609)       |
| Hypertensive heart disease                    | 257<br>(159 - 384)       | 0<br>(0 - 0)       | 0<br>(0 - 0)        | 3<br>(2 - 5)         | 36<br>(23 - 52)      | 218<br>(134 - 337)       |
| Cardiomyopathy and myocarditis                | 57<br>(30 - 90)          | 0<br>(0 - 1)       | 0<br>(0 - 1)        | 7<br>(4 - 11)        | 13<br>(8 - 22)       | 36<br>(19 - 56)          |
| Atrial fibrillation and flutter               | 18<br>(9 - 32)           | -                  | -                   | 0<br>(0 - 0)         | 2<br>(1 - 3)         | 17<br>(8 - 29)           |
| Aortic aneurysm                               | 44<br>(22 - 75)          | -                  | -                   | 0<br>(0 - 1)         | 5<br>(2 - 9)         | 39<br>(20 - 65)          |
| Peripheral vascular disease                   | 8<br>(4 - 14)            | -                  | -                   | 0<br>(0 - 0)         | 0<br>(0 - 1)         | 8<br>(4 - 14)            |
| Endocarditis                                  | 16<br>(8 - 25)           | 0<br>(0 - 0)       | 0<br>(0 - 0)        | 1<br>(1 - 2)         | 4<br>(2 - 6)         | 10<br>(5 - 17)           |
| Other cardiovascular and circulatory diseases | 75<br>(47 - 103)         | 0<br>(0 - 0)       | 0<br>(0 - 0)        | 3<br>(2 - 5)         | 13<br>(8 - 18)       | 58<br>(36 - 84)          |
| Chronic respiratory diseases                  | 359<br>(281 - 649)       | 0<br>(0 - 0)       | 0<br>(0 - 0)        | 8<br>(6 - 12)        | 36<br>(29 - 55)      | 315<br>(241 - 585)       |
| Chronic obstructive pulmonary disease         | 271<br>(204 - 484)       | 0<br>(0 - 0)       | 0<br>(0 - 0)        | 2<br>(1 - 3)         | 22<br>(16 - 33)      | 247<br>(185 - 448)       |
| Pneumoconiosis                                | 0<br>(0 - 0)             | 0<br>(0 - 0)       | 0<br>(0 - 0)        | 0<br>(0 - 0)         | 0<br>(0 - 0)         | 0<br>(0 - 0)             |
| Silicosis                                     | 0<br>(0 - 0)             | 0<br>(0 - 0)       | 0<br>(0 - 0)        | 0<br>(0 - 0)         | 0<br>(0 - 0)         | 0<br>(0 - 0)             |
| Asbestosis                                    | 0<br>(0 - 0)             | 0<br>(0 - 0)       | 0<br>(0 - 0)        | 0<br>(0 - 0)         | 0<br>(0 - 0)         | 0<br>(0 - 0)             |
| Coal workers pneumoconiosis                   | 0<br>(0 - 0)             | 0<br>(0 - 0)       | 0<br>(0 - 0)        | 0<br>(0 - 0)         | 0<br>(0 - 0)         | 0<br>(0 - 0)             |
| Other pneumoconiosis                          | 0<br>(0 - 0)             | 0<br>(0 - 0)       | 0<br>(0 - 0)        | 0<br>(0 - 0)         | 0<br>(0 - 0)         | 0<br>(0 - 0)             |



Web Table 31- Singapore deaths with 95% UI by age, sex, and cause in 2013

| Cause                                               | Females, All Ages      | Females, 0-4 Years | Females, 5-14 Years | Females, 15-49 Years | Females, 50-69 Years | Females, 70-80 Years |
|-----------------------------------------------------|------------------------|--------------------|---------------------|----------------------|----------------------|----------------------|
| Asthma                                              | 44<br>(27 - 77)        | 0<br>(0 - 0)       | 0<br>(0 - 0)        | 5<br>(4 - 8)         | 10<br>(6 - 16)       | 28<br>(15 - 55)      |
| Interstitial lung disease and pulmonary sarcoidosis | 30<br>(14 - 75)        | 0<br>(0 - 0)       | 0<br>(0 - 0)        | 1<br>(0 - 2)         | 3<br>(1 - 6)         | 26<br>(12 - 65)      |
| Other chronic respiratory diseases                  | 14<br>(7 - 28)         | 0<br>(0 - 0)       | 0<br>(0 - 0)        | 0<br>(0 - 0)         | 1<br>(0 - 1)         | 13<br>(6 - 26)       |
| Cirrhosis                                           | 67<br>(55 - 83)        | 0<br>(0 - 0)       | 0<br>(0 - 0)        | 3<br>(3 - 4)         | 18<br>(14 - 21)      | 46<br>(36 - 60)      |
| Cirrhosis due to hepatitis B                        | 26<br>(10 - 47)        | 0<br>(0 - 0)       | 0<br>(0 - 0)        | 1<br>(0 - 2)         | 6<br>(3 - 11)        | 18<br>(6 - 36)       |
| Cirrhosis due to hepatitis C                        | 29<br>(11 - 50)        | 0<br>(0 - 0)       | 0<br>(0 - 0)        | 1<br>(1 - 2)         | 8<br>(4 - 13)        | 20<br>(5 - 36)       |
| Cirrhosis due to alcohol use                        | 6<br>(3 - 11)          | -                  | -                   | 0<br>(0 - 0)         | 1<br>(1 - 2)         | 5<br>(2 - 9)         |
| Cirrhosis due to other causes                       | 6<br>(2 - 13)          | 0<br>(0 - 0)       | 0<br>(0 - 0)        | 1<br>(0 - 1)         | 2<br>(1 - 5)         | 3<br>(1 - 8)         |
| Digestive diseases                                  | 218<br>(166 - 267)     | 0<br>(0 - 0)       | 0<br>(0 - 0)        | 5<br>(4 - 6)         | 25<br>(19 - 30)      | 188<br>(144 - 234)   |
| Peptic ulcer disease                                | 62<br>(44 - 89)        | 0<br>(0 - 0)       | 0<br>(0 - 0)        | 1<br>(0 - 1)         | 6<br>(4 - 8)         | 56<br>(38 - 82)      |
| Gastritis and duodenitis                            | 2<br>(1 - 4)           | 0<br>(0 - 0)       | 0<br>(0 - 0)        | 0<br>(0 - 0)         | 0<br>(0 - 0)         | 2<br>(1 - 3)         |
| Appendicitis                                        | 5<br>(3 - 8)           | 0<br>(0 - 0)       | 0<br>(0 - 0)        | 0<br>(0 - 1)         | 1<br>(1 - 2)         | 4<br>(2 - 6)         |
| Paralytic ileus and intestinal obstruction          | 47<br>(23 - 70)        | 0<br>(0 - 0)       | 0<br>(0 - 0)        | 1<br>(1 - 2)         | 5<br>(3 - 9)         | 40<br>(19 - 61)      |
| Inguinal, femoral, and abdominal hernia             | 4<br>(2 - 6)           | 0<br>(0 - 0)       | 0<br>(0 - 0)        | 0<br>(0 - 0)         | 1<br>(0 - 1)         | 3<br>(1 - 5)         |
| Inflammatory bowel disease                          | 4<br>(2 - 6)           | 0<br>(0 - 0)       | 0<br>(0 - 0)        | 0<br>(0 - 0)         | 1<br>(0 - 1)         | 3<br>(1 - 4)         |
| Vascular intestinal disorders                       | 18<br>(6 - 33)         | 0<br>(0 - 0)       | 0<br>(0 - 0)        | 0<br>(0 - 0)         | 2<br>(1 - 3)         | 16<br>(5 - 30)       |
| Gallbladder and biliary diseases                    | 36<br>(23 - 52)        | 0<br>(0 - 0)       | 0<br>(0 - 0)        | 1<br>(0 - 1)         | 3<br>(2 - 5)         | 32<br>(20 - 47)      |
| Pancreatitis                                        | 17<br>(10 - 27)        | 0<br>(0 - 0)       | 0<br>(0 - 0)        | 1<br>(1 - 1)         | 4<br>(2 - 6)         | 12<br>(7 - 20)       |
| Other digestive diseases                            | 24<br>(15 - 34)        | 0<br>(0 - 0)       | 0<br>(0 - 0)        | 1<br>(0 - 1)         | 3<br>(2 - 4)         | 20<br>(13 - 30)      |
| Neurological disorders                              | 145<br>(104 - 210)     | 1<br>(0 - 1)       | 1<br>(1 - 1)        | 5<br>(4 - 6)         | 10<br>(8 - 13)       | 129<br>(88 - 192)    |
| Alzheimer disease and other dementias               | 113<br>(75 - 164)      | -                  | -                   | 0<br>(0 - 0)         | 2<br>(2 - 3)         | 111<br>(73 - 162)    |
| Parkinson disease                                   | 12<br>(7 - 34)         | -                  | -                   | 0<br>(0 - 0)         | 1<br>(1 - 3)         | 11<br>(6 - 30)       |
| Epilepsy                                            | 5<br>(3 - 6)           | 0<br>(0 - 0)       | 0<br>(0 - 0)        | 2<br>(1 - 3)         | 1<br>(1 - 2)         | 1<br>(1 - 2)         |
| Multiple sclerosis                                  | 1<br>(0 - 1)           | -                  | -                   | 0<br>(0 - 0)         | 0<br>(0 - 1)         | 0<br>(0 - 1)         |
| Other neurological disorders                        | 14<br>(12 - 17)        | 1<br>(0 - 1)       | 0<br>(0 - 1)        | 2<br>(2 - 3)         | 5<br>(4 - 6)         | 6<br>(4 - 8)         |
| Mental and substance use disorders                  | 4<br>(3 - 4)           | 0<br>(0 - 0)       | 0<br>(0 - 0)        | 2<br>(2 - 3)         | 1<br>(0 - 1)         | 1<br>(0 - 1)         |
| Schizophrenia                                       | 0<br>(0 - 0)           | -                  | -                   | 0<br>(0 - 0)         | 0<br>(0 - 0)         | 0<br>(0 - 0)         |
| Alcohol use disorders                               | 0<br>(0 - 1)           | -                  | -                   | 0<br>(0 - 0)         | 0<br>(0 - 0)         | 0<br>(0 - 0)         |
| Drug use disorders                                  | 2<br>(2 - 3)           | 0<br>(0 - 0)       | -                   | 1<br>(1 - 2)         | 0<br>(0 - 0)         | 1<br>(0 - 1)         |
| Opioid use disorders                                | 1<br>(0 - 1)           | 0<br>(0 - 0)       | -                   | 0<br>(0 - 1)         | 0<br>(0 - 0)         | 0<br>(0 - 0)         |
| Cocaine use disorders                               | 0<br>(0 - 0)           | 0<br>(0 - 0)       | -                   | 0<br>(0 - 0)         | 0<br>(0 - 0)         | 0<br>(0 - 0)         |
| Amphetamine use disorders                           | 0<br>(0 - 0)           | 0<br>(0 - 0)       | -                   | 0<br>(0 - 0)         | 0<br>(0 - 0)         | 0<br>(0 - 0)         |
| Other drug use disorders                            | 1<br>(1 - 2)           | 0<br>(0 - 0)       | -                   | 1<br>(1 - 1)         | 0<br>(0 - 0)         | 0<br>(0 - 1)         |
| Eating disorders                                    | 1<br>(0 - 1)           | -                  | 0<br>(0 - 0)        | 1<br>(0 - 1)         | -                    | -                    |
| Anorexia nervosa                                    | 1<br>(0 - 1)           | -                  | 0<br>(0 - 0)        | 1<br>(0 - 1)         | -                    | -                    |
| Diabetes, urogenital, blood, and endocrine diseases | 1,087<br>(695 - 1,354) | 1<br>(0 - 1)       | 1<br>(1 - 1)        | 27<br>(22 - 33)      | 170<br>(126 - 208)   | 889<br>(544 - 1,127) |
| Diabetes mellitus                                   | 304<br>(242 - 479)     | 0<br>(0 - 0)       | 0<br>(0 - 0)        | 7<br>(5 - 10)        | 69<br>(54 - 108)     | 228<br>(175 - 357)   |
| Acute glomerulonephritis                            | 0<br>(0 - 0)           | 0<br>(0 - 0)       | 0<br>(0 - 0)        | 0<br>(0 - 0)         | 0<br>(0 - 0)         | 0<br>(0 - 0)         |
| Chronic kidney disease                              | 687<br>(212 - 898)     | 0<br>(0 - 0)       | 0<br>(0 - 0)        | 14<br>(7 - 18)       | 85<br>(32 - 109)     | 588<br>(173 - 785)   |
| Chronic kidney disease due to diabetes mellitus     | 70<br>(29 - 143)       | 0<br>(0 - 0)       | 0<br>(0 - 0)        | 3<br>(2 - 6)         | 16<br>(7 - 34)       | 50<br>(18 - 107)     |

Web Table 31- Singapore deaths with 95% UI by age, sex, and cause in 2013

| Cause                                               | Females, All Ages  | Females, 0-4 Years | Females, 5-14 Years | Females, 15-49 Years | Females, 50-69 Years | Females, 70-80 Years |
|-----------------------------------------------------|--------------------|--------------------|---------------------|----------------------|----------------------|----------------------|
| Chronic kidney disease due to hypertension          | 126<br>(53 - 212)  | 0<br>(0 - 0)       | 0<br>(0 - 0)        | 3<br>(1 - 5)         | 24<br>(10 - 38)      | 99<br>(40 - 174)     |
| Chronic kidney disease due to glomerulonephritis    | 6<br>(3 - 12)      | 0<br>(0 - 0)       | 0<br>(0 - 0)        | 1<br>(0 - 1)         | 1<br>(1 - 2)         | 4<br>(2 - 8)         |
| Chronic kidney disease due to other causes          | 486<br>(70 - 680)  | 0<br>(0 - 0)       | 0<br>(0 - 0)        | 7<br>(2 - 10)        | 44<br>(5 - 67)       | 435<br>(62 - 617)    |
| Urinary diseases and male infertility               | 57<br>(28 - 153)   | 0<br>(0 - 0)       | 0<br>(0 - 0)        | 1<br>(1 - 2)         | 7<br>(4 - 15)        | 49<br>(23 - 138)     |
| Interstitial nephritis and urinary tract infections | 55<br>(27 - 149)   | 0<br>(0 - 0)       | 0<br>(0 - 0)        | 1<br>(1 - 2)         | 6<br>(4 - 14)        | 48<br>(22 - 135)     |
| Urolithiasis                                        | 2<br>(0 - 3)       | --                 | 0<br>(0 - 0)        | 0<br>(0 - 0)         | 0<br>(0 - 0)         | 1<br>(0 - 3)         |
| Other urinary diseases                              | 0<br>(0 - 1)       | 0<br>(0 - 0)       | 0<br>(0 - 0)        | 0<br>(0 - 0)         | 0<br>(0 - 0)         | 0<br>(0 - 1)         |
| Gynecological diseases                              | 0<br>(0 - 0)       | --                 | --                  | 0<br>(0 - 0)         | 0<br>(0 - 0)         | 0<br>(0 - 0)         |
| Uterine fibroids                                    | 0<br>(0 - 0)       | --                 | --                  | 0<br>(0 - 0)         | 0<br>(0 - 0)         | 0<br>(0 - 0)         |
| Polycystic ovarian syndrome                         | 0<br>(0 - 0)       | --                 | --                  | 0<br>(0 - 0)         | 0<br>(0 - 0)         | --                   |
| Endometriosis                                       | 0<br>(0 - 0)       | --                 | --                  | 0<br>(0 - 0)         | 0<br>(0 - 0)         | --                   |
| Genital prolapse                                    | 0<br>(0 - 0)       | --                 | --                  | 0<br>(0 - 0)         | 0<br>(0 - 0)         | 0<br>(0 - 0)         |
| Other gynecological diseases                        | 0<br>(0 - 0)       | --                 | --                  | 0<br>(0 - 0)         | 0<br>(0 - 0)         | 0<br>(0 - 0)         |
| Hemoglobinopathies and hemolytic anemias            | 4<br>(2 - 7)       | 0<br>(0 - 0)       | 0<br>(0 - 0)        | 1<br>(1 - 2)         | 1<br>(0 - 1)         | 2<br>(1 - 3)         |
| Thalassemias                                        | 1<br>(1 - 2)       | 0<br>(0 - 0)       | 0<br>(0 - 0)        | 1<br>(0 - 1)         | 0<br>(0 - 0)         | 0<br>(0 - 0)         |
| Sickle cell disorders                               | 0<br>(0 - 0)       | 0<br>(0 - 0)       | 0<br>(0 - 0)        | 0<br>(0 - 0)         | 0<br>(0 - 0)         | 0<br>(0 - 0)         |
| G6PD deficiency                                     | 0<br>(0 - 0)       | 0<br>(0 - 0)       | 0<br>(0 - 0)        | 0<br>(0 - 0)         | 0<br>(0 - 0)         | 0<br>(0 - 0)         |
| Other hemoglobinopathies and hemolytic anemias      | 3<br>(1 - 5)       | 0<br>(0 - 0)       | 0<br>(0 - 0)        | 0<br>(0 - 0)         | 1<br>(0 - 1)         | 2<br>(1 - 3)         |
| Endocrine, metabolic, blood, and immune disorders   | 35<br>(25 - 54)    | 0<br>(0 - 1)       | 0<br>(0 - 0)        | 4<br>(3 - 6)         | 8<br>(6 - 12)        | 22<br>(15 - 36)      |
| Musculoskeletal disorders                           | 27<br>(19 - 48)    | --                 | 0<br>(0 - 0)        | 4<br>(3 - 8)         | 6<br>(4 - 10)        | 17<br>(11 - 29)      |
| Rheumatoid arthritis                                | 1<br>(1 - 4)       | --                 | 0<br>(0 - 0)        | 0<br>(0 - 0)         | 0<br>(0 - 1)         | 1<br>(0 - 1)         |
| Other musculoskeletal disorders                     | 26<br>(19 - 44)    | --                 | 0<br>(0 - 0)        | 4<br>(3 - 7)         | 6<br>(4 - 10)        | 16<br>(10 - 27)      |
| Other non-communicable diseases                     | 82<br>(63 - 107)   | 16<br>(12 - 22)    | 2<br>(2 - 3)        | 6<br>(5 - 8)         | 8<br>(6 - 11)        | 49<br>(31 - 72)      |
| Congenital anomalies                                | 28<br>(22 - 36)    | 15<br>(10 - 21)    | 2<br>(2 - 3)        | 6<br>(4 - 7)         | 3<br>(2 - 4)         | 3<br>(2 - 4)         |
| Neural tube defects                                 | 2<br>(1 - 3)       | 1<br>(1 - 2)       | 0<br>(0 - 0)        | 0<br>(0 - 0)         | 0<br>(0 - 0)         | 0<br>(0 - 0)         |
| Congenital heart anomalies                          | 16<br>(13 - 21)    | 6<br>(4 - 9)       | 2<br>(1 - 2)        | 4<br>(3 - 6)         | 2<br>(2 - 3)         | 2<br>(1 - 2)         |
| Cleft lip and cleft palate                          | 0<br>(0 - 0)       | 0<br>(0 - 0)       | --                  | --                   | --                   | --                   |
| Down syndrome                                       | 1<br>(0 - 1)       | 0<br>(0 - 0)       | 0<br>(0 - 0)        | 0<br>(0 - 1)         | 0<br>(0 - 0)         | 0<br>(0 - 0)         |
| Chromosomal unbalanced rearrangements               | 4<br>(2 - 6)       | 3<br>(2 - 5)       | 0<br>(0 - 0)        | 0<br>(0 - 0)         | 0<br>(0 - 0)         | 0<br>(0 - 0)         |
| Other congenital anomalies                          | 6<br>(4 - 9)       | 4<br>(2 - 6)       | 0<br>(0 - 0)        | 0<br>(0 - 1)         | 1<br>(0 - 1)         | 1<br>(1 - 2)         |
| Skin and subcutaneous diseases                      | 52<br>(34 - 76)    | 0<br>(0 - 0)       | 0<br>(0 - 0)        | 1<br>(1 - 1)         | 5<br>(4 - 7)         | 47<br>(29 - 70)      |
| Cellulitis                                          | 16<br>(8 - 30)     | 0<br>(0 - 0)       | 0<br>(0 - 0)        | 0<br>(0 - 0)         | 2<br>(1 - 3)         | 14<br>(6 - 27)       |
| Pyoderma                                            | 22<br>(13 - 35)    | 0<br>(0 - 0)       | 0<br>(0 - 0)        | 0<br>(0 - 0)         | 2<br>(1 - 3)         | 20<br>(10 - 32)      |
| Decubitus ulcer                                     | 11<br>(5 - 19)     | 0<br>(0 - 0)       | 0<br>(0 - 0)        | 0<br>(0 - 0)         | 0<br>(0 - 1)         | 10<br>(4 - 18)       |
| Other skin and subcutaneous diseases                | 3<br>(1 - 8)       | 0<br>(0 - 0)       | 0<br>(0 - 0)        | 0<br>(0 - 0)         | 0<br>(0 - 1)         | 2<br>(1 - 7)         |
| Sudden infant death syndrome                        | 2<br>(0 - 4)       | 2<br>(0 - 4)       | --                  | --                   | --                   | --                   |
| Injuries                                            | 313<br>(265 - 402) | 2<br>(2 - 3)       | 3<br>(3 - 4)        | 81<br>(69 - 96)      | 71<br>(57 - 87)      | 156<br>(125 - 222)   |
| Transport injuries                                  | 47<br>(36 - 67)    | 0<br>(0 - 0)       | 1<br>(1 - 1)        | 11<br>(8 - 14)       | 13<br>(9 - 17)       | 22<br>(16 - 36)      |
| Road injuries                                       | 46<br>(36 - 67)    | 0<br>(0 - 0)       | 1<br>(1 - 1)        | 11<br>(8 - 13)       | 12<br>(9 - 17)       | 22<br>(15 - 36)      |
| Pedestrian road injuries                            | 32<br>(24 - 50)    | 0<br>(0 - 0)       | 1<br>(0 - 1)        | 4<br>(3 - 5)         | 9<br>(6 - 12)        | 19<br>(13 - 32)      |

Web Table 31- Singapore deaths with 95% UI by age, sex, and cause in 2013

| Cause                                           | Females, All Ages  | Females, 0-4 Years | Females, 5-14 Years | Females, 15-49 Years | Females, 50-69 Years | Females, 70-80 Years |
|-------------------------------------------------|--------------------|--------------------|---------------------|----------------------|----------------------|----------------------|
| Cyclist road injuries                           | 1<br>(1 - 2)       | 0<br>(0 - 0)       | 0<br>(0 - 0)        | 0<br>(0 - 1)         | 1<br>(0 - 1)         | 0<br>(0 - 0)         |
| Motorcyclist road injuries                      | 4<br>(2 - 6)       | 0<br>(0 - 0)       | 0<br>(0 - 0)        | 3<br>(1 - 5)         | 1<br>(0 - 1)         | 0<br>(0 - 0)         |
| Motor vehicle road injuries                     | 8<br>(5 - 12)      | 0<br>(0 - 0)       | 0<br>(0 - 0)        | 3<br>(2 - 5)         | 2<br>(1 - 4)         | 2<br>(1 - 4)         |
| Other road injuries                             | 0<br>(0 - 0)       | 0<br>(0 - 0)       | 0<br>(0 - 0)        | 0<br>(0 - 0)         | 0<br>(0 - 0)         | 0<br>(0 - 0)         |
| Other transport injuries                        | 1<br>(0 - 1)       | 0<br>(0 - 0)       | 0<br>(0 - 0)        | 0<br>(0 - 0)         | 0<br>(0 - 0)         | 0<br>(0 - 1)         |
| Unintentional injuries                          | 97<br>(69 - 124)   | 1<br>(1 - 2)       | 1<br>(1 - 1)        | 8<br>(6 - 10)        | 12<br>(9 - 15)       | 74<br>(51 - 99)      |
| Falls                                           | 56<br>(33 - 75)    | 0<br>(0 - 1)       | 0<br>(0 - 0)        | 3<br>(2 - 4)         | 6<br>(4 - 8)         | 46<br>(27 - 65)      |
| Drowning                                        | 3<br>(1 - 4)       | 0<br>(0 - 0)       | 0<br>(0 - 1)        | 1<br>(0 - 1)         | 0<br>(0 - 1)         | 1<br>(0 - 1)         |
| Fire, heat, and hot substances                  | 7<br>(5 - 10)      | 0<br>(0 - 0)       | 0<br>(0 - 0)        | 1<br>(1 - 1)         | 1<br>(1 - 2)         | 5<br>(3 - 7)         |
| Poisonings                                      | 2<br>(1 - 2)       | 0<br>(0 - 0)       | 0<br>(0 - 0)        | 0<br>(0 - 1)         | 0<br>(0 - 1)         | 1<br>(0 - 1)         |
| Exposure to mechanical forces                   | 2<br>(1 - 2)       | 0<br>(0 - 0)       | 0<br>(0 - 0)        | 1<br>(0 - 1)         | 0<br>(0 - 1)         | 0<br>(0 - 1)         |
| Unintentional firearm injuries                  | 0<br>(0 - 0)       | 0<br>(0 - 0)       | 0<br>(0 - 0)        | 0<br>(0 - 0)         | 0<br>(0 - 0)         | 0<br>(0 - 0)         |
| Unintentional suffocation                       | 0<br>(0 - 1)       | 0<br>(0 - 0)       | 0<br>(0 - 0)        | 0<br>(0 - 0)         | 0<br>(0 - 0)         | 0<br>(0 - 0)         |
| Other exposure to mechanical forces             | 1<br>(1 - 1)       | 0<br>(0 - 0)       | 0<br>(0 - 0)        | 0<br>(0 - 0)         | 0<br>(0 - 0)         | 0<br>(0 - 1)         |
| Adverse effects of medical treatment            | 6<br>(4 - 10)      | 0<br>(0 - 0)       | 0<br>(0 - 0)        | 0<br>(0 - 1)         | 1<br>(1 - 2)         | 5<br>(3 - 8)         |
| Animal contact                                  | 0<br>(0 - 0)       | 0<br>(0 - 0)       | 0<br>(0 - 0)        | 0<br>(0 - 0)         | 0<br>(0 - 0)         | 0<br>(0 - 0)         |
| Venomous animal contact                         | 0<br>(0 - 0)       | 0<br>(0 - 0)       | 0<br>(0 - 0)        | 0<br>(0 - 0)         | 0<br>(0 - 0)         | 0<br>(0 - 0)         |
| Non-venomous animal contact                     | 0<br>(0 - 0)       | 0<br>(0 - 0)       | 0<br>(0 - 0)        | 0<br>(0 - 0)         | 0<br>(0 - 0)         | 0<br>(0 - 0)         |
| Foreign body                                    | 21<br>(11 - 34)    | 0<br>(0 - 1)       | 0<br>(0 - 0)        | 1<br>(1 - 3)         | 3<br>(1 - 4)         | 16<br>(8 - 28)       |
| Pulmonary aspiration and foreign body in airway | 20<br>(10 - 34)    | 0<br>(0 - 1)       | 0<br>(0 - 0)        | 1<br>(1 - 2)         | 2<br>(1 - 4)         | 16<br>(8 - 28)       |
| Foreign body in other body part                 | 0<br>(0 - 0)       | 0<br>(0 - 0)       | 0<br>(0 - 0)        | 0<br>(0 - 0)         | 0<br>(0 - 0)         | 0<br>(0 - 0)         |
| Other unintentional injuries                    | 1<br>(0 - 1)       | 0<br>(0 - 0)       | 0<br>(0 - 0)        | 0<br>(0 - 0)         | 0<br>(0 - 0)         | 0<br>(0 - 1)         |
| Self-harm and interpersonal violence            | 170<br>(143 - 229) | 1<br>(0 - 1)       | 1<br>(1 - 1)        | 62<br>(52 - 75)      | 47<br>(35 - 59)      | 59<br>(44 - 106)     |
| Self-harm                                       | 156<br>(130 - 212) | -                  | 1<br>(0 - 1)        | 55<br>(45 - 67)      | 44<br>(31 - 56)      | 57<br>(42 - 102)     |
| Interpersonal violence                          | 13<br>(10 - 22)    | 1<br>(0 - 1)       | 0<br>(0 - 1)        | 7<br>(5 - 11)        | 3<br>(2 - 5)         | 3<br>(2 - 5)         |
| Assault by firearm                              | 0<br>(0 - 0)       | 0<br>(0 - 0)       | 0<br>(0 - 0)        | 0<br>(0 - 0)         | 0<br>(0 - 0)         | 0<br>(0 - 0)         |
| Assault by sharp object                         | 3<br>(2 - 7)       | 0<br>(0 - 0)       | 0<br>(0 - 0)        | 2<br>(1 - 4)         | 1<br>(1 - 2)         | 0<br>(0 - 1)         |
| Assault by other means                          | 10<br>(7 - 15)     | 1<br>(0 - 1)       | 0<br>(0 - 1)        | 5<br>(3 - 8)         | 2<br>(1 - 3)         | 2<br>(2 - 4)         |

Web Table 31- Slovakia deaths with 95% UI by age, sex, and cause in 2013

| Cause                                                             | Both Sexes, All Ages        | Both Sexes, 0-4 Years | Both Sexes, 5-14 Years | Both Sexes, 15-49 Years  | Both Sexes, 50-69 Years     | Both Sexes, 70-80 Years     |
|-------------------------------------------------------------------|-----------------------------|-----------------------|------------------------|--------------------------|-----------------------------|-----------------------------|
| All causes                                                        | 53,559<br>(51,326 - 55,863) | 387<br>(231 - 630)    | 78<br>(57 - 107)       | 3,607<br>(3,385 - 3,854) | 15,782<br>(14,945 - 16,679) | 33,706<br>(32,380 - 35,051) |
| Communicable, maternal, neonatal, and nutritional diseases        | 2,256<br>(1,944 - 2,639)    | 187<br>(111 - 300)    | 7<br>(5 - 11)          | 136<br>(113 - 160)       | 447<br>(368 - 525)          | 1,479<br>(1,220 - 1,830)    |
| HIV/AIDS and tuberculosis                                         | 49<br>(43 - 57)             | 0<br>(0 - 0)          | 0<br>(0 - 0)           | 10<br>(8 - 12)           | 19<br>(16 - 23)             | 20<br>(16 - 26)             |
| Tuberculosis                                                      | 45<br>(38 - 52)             | 0<br>(0 - 0)          | 0<br>(0 - 0)           | 7<br>(5 - 8)             | 18<br>(15 - 22)             | 20<br>(16 - 26)             |
| HIV/AIDS                                                          | 5<br>(3 - 6)                | 0<br>(0 - 0)          | 0<br>(0 - 0)           | 3<br>(2 - 4)             | 1<br>(1 - 2)                | 0<br>(0 - 0)                |
| HIV/AIDS resulting in mycobacterial infection                     | 0<br>(0 - 0)                | 0<br>(0 - 0)          | 0<br>(0 - 0)           | 0<br>(0 - 0)             | 0<br>(0 - 0)                | 0<br>(0 - 0)                |
| HIV/AIDS resulting in other diseases                              | 4<br>(3 - 6)                | 0<br>(0 - 0)          | 0<br>(0 - 0)           | 3<br>(2 - 4)             | 1<br>(1 - 2)                | 0<br>(0 - 0)                |
| Diarrhea, lower respiratory, and other common infectious diseases | 2,013<br>(1,722 - 2,401)    | 40<br>(23 - 67)       | 7<br>(5 - 10)          | 115<br>(93 - 138)        | 413<br>(335 - 491)          | 1,438<br>(1,183 - 1,788)    |
| Diarrheal diseases                                                | 15<br>(12 - 18)             | 2<br>(1 - 4)          | 0<br>(0 - 0)           | 2<br>(1 - 2)             | 3<br>(3 - 4)                | 8<br>(6 - 11)               |
| Intestinal infectious diseases                                    | 6<br>(2 - 14)               | 1<br>(0 - 3)          | 1<br>(0 - 2)           | 2<br>(1 - 5)             | 2<br>(0 - 5)                | 1<br>(0 - 3)                |
| Typhoid fever                                                     | 4<br>(1 - 11)               | 1<br>(0 - 1)          | 0<br>(0 - 1)           | 1<br>(0 - 4)             | 1<br>(0 - 4)                | 1<br>(0 - 2)                |
| Paratyphoid fever                                                 | 1<br>(0 - 3)                | 0<br>(0 - 0)          | 0<br>(0 - 0)           | 0<br>(0 - 1)             | 0<br>(0 - 1)                | 0<br>(0 - 0)                |
| Other intestinal infectious diseases                              | 1<br>(0 - 4)                | 0<br>(0 - 1)          | 0<br>(0 - 0)           | 0<br>(0 - 2)             | 0<br>(0 - 1)                | 0<br>(0 - 1)                |
| Lower respiratory infections                                      | 1,951<br>(1,663 - 2,337)    | 30<br>(16 - 51)       | 5<br>(3 - 7)           | 103<br>(81 - 125)        | 394<br>(316 - 471)          | 1,420<br>(1,166 - 1,763)    |
| Upper respiratory infections                                      | 1<br>(1 - 3)                | 0<br>(0 - 0)          | 0<br>(0 - 0)           | 0<br>(0 - 0)             | 0<br>(0 - 1)                | 1<br>(0 - 2)                |
| Otitis media                                                      | 1<br>(1 - 1)                | 0<br>(0 - 0)          | 0<br>(0 - 0)           | 0<br>(0 - 0)             | 0<br>(0 - 0)                | 0<br>(0 - 0)                |
| Meningitis                                                        | 25<br>(19 - 30)             | 6<br>(3 - 11)         | 1<br>(0 - 1)           | 5<br>(4 - 5)             | 9<br>(6 - 11)               | 5<br>(4 - 5)                |
| Pneumococcal meningitis                                           | 7<br>(5 - 9)                | 1<br>(0 - 3)          | 0<br>(0 - 0)           | 1<br>(1 - 2)             | 3<br>(2 - 4)                | 1<br>(1 - 2)                |
| H influenzae type B meningitis                                    | 4<br>(3 - 5)                | 2<br>(1 - 3)          | 0<br>(0 - 0)           | 0<br>(0 - 1)             | 1<br>(1 - 1)                | 0<br>(0 - 1)                |
| Meningococcal meningitis                                          | 5<br>(4 - 7)                | 1<br>(1 - 3)          | 0<br>(0 - 0)           | 1<br>(1 - 1)             | 2<br>(1 - 3)                | 1<br>(0 - 1)                |
| Other meningitis                                                  | 9<br>(7 - 12)               | 2<br>(1 - 3)          | 0<br>(0 - 0)           | 2<br>(1 - 3)             | 4<br>(2 - 5)                | 2<br>(1 - 2)                |
| Encephalitis                                                      | 8<br>(7 - 11)               | 1<br>(1 - 2)          | 0<br>(0 - 1)           | 3<br>(2 - 4)             | 3<br>(2 - 5)                | 1<br>(1 - 2)                |
| Diphtheria                                                        | 0<br>(0 - 0)                | 0<br>(0 - 0)          | 0<br>(0 - 0)           | 0<br>(0 - 0)             | 0<br>(0 - 0)                | --                          |
| Whooping cough                                                    | 1<br>(0 - 1)                | 0<br>(0 - 0)          | 0<br>(0 - 0)           | 0<br>(0 - 0)             | 0<br>(0 - 0)                | --                          |
| Tetanus                                                           | 1<br>(0 - 1)                | 0<br>(0 - 0)          | 0<br>(0 - 0)           | 0<br>(0 - 0)             | 0<br>(0 - 0)                | 0<br>(0 - 0)                |
| Measles                                                           | 0<br>(0 - 0)                | 0<br>(0 - 0)          | 0<br>(0 - 0)           | 0<br>(0 - 0)             | 0<br>(0 - 0)                | --                          |
| Varicella and herpes zoster                                       | 4<br>(1 - 10)               | 0<br>(0 - 1)          | 0<br>(0 - 0)           | 0<br>(0 - 1)             | 0<br>(0 - 1)                | 2<br>(0 - 9)                |
| Neglected tropical diseases and malaria                           | 3<br>(2 - 3)                | 0<br>(0 - 0)          | 0<br>(0 - 0)           | 1<br>(1 - 1)             | 1<br>(1 - 1)                | 0<br>(0 - 1)                |
| Cysticercosis                                                     | 0<br>(0 - 0)                | 0<br>(0 - 0)          | 0<br>(0 - 0)           | 0<br>(0 - 0)             | 0<br>(0 - 0)                | 0<br>(0 - 0)                |
| Cystic echinococcosis                                             | 1<br>(0 - 1)                | 0<br>(0 - 0)          | 0<br>(0 - 0)           | 0<br>(0 - 0)             | 0<br>(0 - 0)                | 0<br>(0 - 0)                |
| Dengue                                                            | 1<br>(0 - 1)                | 0<br>(0 - 0)          | 0<br>(0 - 0)           | 0<br>(0 - 0)             | 0<br>(0 - 0)                | 0<br>(0 - 0)                |
| Rabies                                                            | 1<br>(0 - 1)                | 0<br>(0 - 0)          | 0<br>(0 - 0)           | 0<br>(0 - 0)             | 0<br>(0 - 0)                | 0<br>(0 - 0)                |
| Other neglected tropical diseases                                 | 1<br>(1 - 1)                | 0<br>(0 - 0)          | 0<br>(0 - 0)           | 0<br>(0 - 0)             | 0<br>(0 - 1)                | 0<br>(0 - 0)                |
| Maternal disorders                                                | 4<br>(3 - 5)                | --                    | 0<br>(0 - 0)           | 4<br>(3 - 5)             | --                          | --                          |
| Maternal hemorrhage                                               | 0<br>(0 - 1)                | --                    | 0<br>(0 - 0)           | 0<br>(0 - 1)             | --                          | --                          |
| Maternal sepsis and other maternal infections                     | 0<br>(0 - 0)                | --                    | 0<br>(0 - 0)           | 0<br>(0 - 0)             | --                          | --                          |
| Maternal hypertensive disorders                                   | 0<br>(0 - 1)                | --                    | 0<br>(0 - 0)           | 0<br>(0 - 1)             | --                          | --                          |
| Maternal obstructed labor                                         | 0<br>(0 - 1)                | --                    | 0<br>(0 - 0)           | 0<br>(0 - 1)             | --                          | --                          |
| Maternal abortive outcome                                         | 1<br>(1 - 1)                | --                    | 0<br>(0 - 0)           | 1<br>(1 - 1)             | --                          | --                          |
| Indirect maternal deaths                                          | 0<br>(0 - 1)                | --                    | 0<br>(0 - 0)           | 0<br>(0 - 1)             | --                          | --                          |

Web Table 31- Slovakia deaths with 95% UI by age, sex, and cause in 2013

| Cause                                                            | Both Sexes, All Ages        | Both Sexes, 0-4 Years | Both Sexes, 5-14 Years | Both Sexes, 15-49 Years  | Both Sexes, 50-69 Years     | Both Sexes, 70-80 Years     |
|------------------------------------------------------------------|-----------------------------|-----------------------|------------------------|--------------------------|-----------------------------|-----------------------------|
| Late maternal deaths                                             | 0<br>(0 - 1)                | --                    | 0<br>(0 - 0)           | 0<br>(0 - 1)             | --                          | --                          |
| Maternal deaths aggravated by HIV/AIDS                           | 0<br>(0 - 0)                | --                    | --                     | 0<br>(0 - 0)             | --                          | --                          |
| Other maternal disorders                                         | 1<br>(0 - 1)                | --                    | 0<br>(0 - 0)           | 1<br>(0 - 1)             | --                          | --                          |
| Neonatal disorders                                               | 143<br>(84 - 231)           | 143<br>(84 - 231)     | --                     | --                       | --                          | --                          |
| Neonatal preterm birth complications                             | 106<br>(61 - 172)           | 106<br>(61 - 172)     | --                     | --                       | --                          | --                          |
| Neonatal encephalopathy due to birth asphyxia and trauma         | 21<br>(11 - 35)             | 21<br>(11 - 35)       | --                     | --                       | --                          | --                          |
| Neonatal sepsis and other neonatal infections                    | 1<br>(1 - 3)                | 1<br>(1 - 3)          | --                     | --                       | --                          | --                          |
| Hemolytic disease and other neonatal jaundice                    | 0<br>(0 - 0)                | 0<br>(0 - 0)          | --                     | --                       | --                          | --                          |
| Other neonatal disorders                                         | 16<br>(8 - 32)              | 16<br>(8 - 32)        | --                     | --                       | --                          | --                          |
| Nutritional deficiencies                                         | 21<br>(17 - 26)             | 0<br>(0 - 1)          | 0<br>(0 - 0)           | 3<br>(2 - 3)             | 4<br>(3 - 6)                | 14<br>(10 - 18)             |
| Protein-energy malnutrition                                      | 3<br>(2 - 6)                | 0<br>(0 - 0)          | 0<br>(0 - 0)           | 0<br>(0 - 1)             | 1<br>(0 - 1)                | 2<br>(1 - 4)                |
| Iodine deficiency                                                | 0<br>(0 - 1)                | 0<br>(0 - 0)          | 0<br>(0 - 0)           | 0<br>(0 - 0)             | 0<br>(0 - 0)                | 0<br>(0 - 1)                |
| Iron-deficiency anemia                                           | 16<br>(12 - 21)             | 0<br>(0 - 0)          | 0<br>(0 - 0)           | 2<br>(1 - 2)             | 3<br>(2 - 4)                | 11<br>(8 - 15)              |
| Other nutritional deficiencies                                   | 1<br>(1 - 2)                | 0<br>(0 - 0)          | 0<br>(0 - 0)           | 0<br>(0 - 0)             | 0<br>(0 - 1)                | 0<br>(0 - 1)                |
| Other communicable, maternal, neonatal, and nutritional diseases | 23<br>(17 - 28)             | 2<br>(1 - 5)          | 0<br>(0 - 1)           | 4<br>(3 - 5)             | 7<br>(7 - 11)               | 10<br>(5 - 9)               |
| Sexually transmitted diseases excluding HIV                      | 3<br>(2 - 5)                | 1<br>(0 - 3)          | 0<br>(0 - 0)           | 1<br>(0 - 1)             | 1<br>(0 - 1)                | 1<br>(0 - 1)                |
| Syphilis                                                         | 2<br>(1 - 4)                | 1<br>(0 - 3)          | 0<br>(0 - 0)           | 0<br>(0 - 0)             | 0<br>(0 - 0)                | 0<br>(0 - 1)                |
| Chlamydial infection                                             | 0<br>(0 - 0)                | --                    | 0<br>(0 - 0)           | 0<br>(0 - 0)             | 0<br>(0 - 0)                | 0<br>(0 - 0)                |
| Gonococcal infection                                             | 0<br>(0 - 0)                | --                    | 0<br>(0 - 0)           | 0<br>(0 - 0)             | 0<br>(0 - 0)                | 0<br>(0 - 0)                |
| Other sexually transmitted diseases                              | 0<br>(0 - 0)                | --                    | 0<br>(0 - 0)           | 0<br>(0 - 0)             | 0<br>(0 - 0)                | 0<br>(0 - 0)                |
| Hepatitis                                                        | 5<br>(4 - 5)                | 0<br>(0 - 0)          | 0<br>(0 - 0)           | 1<br>(1 - 1)             | 2<br>(2 - 3)                | 1<br>(1 - 2)                |
| Acute hepatitis A                                                | 1<br>(0 - 2)                | 0<br>(0 - 0)          | 0<br>(0 - 0)           | 0<br>(0 - 1)             | 0<br>(0 - 1)                | 0<br>(0 - 0)                |
| Acute hepatitis B                                                | 3<br>(2 - 4)                | 0<br>(0 - 0)          | 0<br>(0 - 0)           | 1<br>(0 - 1)             | 2<br>(1 - 2)                | 1<br>(1 - 1)                |
| Acute hepatitis C                                                | 0<br>(0 - 1)                | --                    | 0<br>(0 - 0)           | 0<br>(0 - 0)             | 0<br>(0 - 0)                | 0<br>(0 - 0)                |
| Other infectious diseases                                        | 16<br>(10 - 19)             | 1<br>(1 - 2)          | 0<br>(0 - 0)           | 2<br>(1 - 3)             | 7<br>(4 - 9)                | 5<br>(3 - 7)                |
| Non-communicable diseases                                        | 48,640<br>(46,570 - 50,819) | 172<br>(103 - 280)    | 37<br>(27 - 50)        | 2,428<br>(2,261 - 2,604) | 14,390<br>(13,645 - 15,199) | 31,613<br>(30,292 - 32,935) |
| Neoplasms                                                        | 12,436<br>(11,648 - 13,241) | 11<br>(6 - 18)        | 18<br>(13 - 25)        | 920<br>(849 - 1,001)     | 5,941<br>(5,548 - 6,371)    | 5,547<br>(5,136 - 5,978)    |
| Esophageal cancer                                                | 293<br>(246 - 348)          | --                    | --                     | 30<br>(21 - 45)          | 191<br>(152 - 231)          | 73<br>(61 - 86)             |
| Stomach cancer                                                   | 815<br>(707 - 950)          | --                    | --                     | 46<br>(38 - 55)          | 332<br>(292 - 382)          | 437<br>(361 - 532)          |
| Liver cancer                                                     | 435<br>(353 - 543)          | --                    | 0<br>(0 - 0)           | 25<br>(18 - 34)          | 209<br>(161 - 273)          | 201<br>(156 - 257)          |
| Liver cancer due to hepatitis B                                  | 87<br>(39 - 137)            | --                    | 0<br>(0 - 0)           | 7<br>(3 - 12)            | 49<br>(18 - 82)             | 31<br>(16 - 47)             |
| Liver cancer due to hepatitis C                                  | 198<br>(140 - 279)          | --                    | 0<br>(0 - 0)           | 10<br>(6 - 16)           | 94<br>(63 - 141)            | 93<br>(62 - 129)            |
| Liver cancer due to alcohol use                                  | 108<br>(73 - 163)           | --                    | --                     | 4<br>(2 - 7)             | 46<br>(29 - 78)             | 57<br>(38 - 85)             |
| Liver cancer due to other causes                                 | 43<br>(27 - 62)             | --                    | 0<br>(0 - 0)           | 4<br>(2 - 5)             | 19<br>(12 - 29)             | 20<br>(11 - 31)             |
| Larynx cancer                                                    | 179<br>(136 - 235)          | --                    | --                     | 18<br>(13 - 28)          | 120<br>(91 - 158)           | 41<br>(29 - 54)             |
| Tracheal, bronchus and lung cancer                               | 2,305<br>(2,082 - 2,550)    | --                    | --                     | 101<br>(84 - 123)        | 1,335<br>(1,194 - 1,492)    | 868<br>(774 - 969)          |
| Breast cancer                                                    | 800<br>(586 - 951)          | --                    | --                     | 83<br>(66 - 110)         | 372<br>(269 - 454)          | 344<br>(227 - 425)          |
| Cervical cancer                                                  | 232<br>(166 - 287)          | --                    | --                     | 52<br>(37 - 67)          | 106<br>(72 - 138)           | 75<br>(54 - 98)             |
| Uterine cancer                                                   | 219<br>(177 - 276)          | --                    | --                     | 10<br>(7 - 13)           | 95<br>(72 - 127)            | 114<br>(86 - 150)           |
| Prostate cancer                                                  | 567<br>(433 - 774)          | --                    | --                     | 2<br>(1 - 4)             | 137<br>(91 - 181)           | 428<br>(321 - 613)          |

Web Table 31- Slovakia deaths with 95% UI by age, sex, and cause in 2013

| Cause                                         | Both Sexes, All Ages        | Both Sexes, 0-4 Years | Both Sexes, 5-14 Years | Both Sexes, 15-49 Years | Both Sexes, 50-69 Years  | Both Sexes, 70-80 Years     |
|-----------------------------------------------|-----------------------------|-----------------------|------------------------|-------------------------|--------------------------|-----------------------------|
| Colon and rectum cancer                       | 1,929<br>(1,766 - 2,119)    | --                    | --                     | 85<br>(74 - 97)         | 793<br>(723 - 867)       | 1,051<br>(929 - 1,204)      |
| Lip and oral cavity cancer                    | 312<br>(237 - 364)          | --                    | --                     | 44<br>(34 - 56)         | 205<br>(141 - 251)       | 63<br>(51 - 75)             |
| Nasopharynx cancer                            | 42<br>(32 - 68)             | --                    | 0<br>(0 - 0)           | 8<br>(5 - 17)           | 26<br>(18 - 40)          | 8<br>(6 - 13)               |
| Other pharynx cancer                          | 284<br>(195 - 353)          | --                    | --                     | 38<br>(27 - 53)         | 205<br>(135 - 261)       | 41<br>(30 - 53)             |
| Gallbladder and biliary tract cancer          | 339<br>(260 - 435)          | --                    | --                     | 10<br>(7 - 13)          | 132<br>(105 - 170)       | 197<br>(143 - 263)          |
| Pancreatic cancer                             | 813<br>(747 - 885)          | --                    | --                     | 40<br>(34 - 48)         | 398<br>(354 - 442)       | 375<br>(331 - 426)          |
| Malignant skin melanoma                       | 176<br>(119 - 244)          | --                    | --                     | 32<br>(22 - 46)         | 80<br>(53 - 116)         | 65<br>(42 - 85)             |
| Non-melanoma skin cancer                      | 52<br>(39 - 76)             | --                    | --                     | 2<br>(1 - 2)            | 9<br>(7 - 14)            | 41<br>(29 - 60)             |
| Ovarian cancer                                | 306<br>(255 - 360)          | --                    | --                     | 34<br>(27 - 42)         | 158<br>(129 - 191)       | 113<br>(85 - 144)           |
| Testicular cancer                             | 20<br>(12 - 28)             | --                    | --                     | 13<br>(8 - 20)          | 4<br>(2 - 6)             | 3<br>(2 - 4)                |
| Kidney cancer                                 | 354<br>(303 - 411)          | 0<br>(0 - 1)          | 0<br>(0 - 0)           | 21<br>(16 - 27)         | 184<br>(155 - 219)       | 148<br>(117 - 188)          |
| Bladder cancer                                | 267<br>(225 - 310)          | --                    | --                     | 5<br>(4 - 6)            | 89<br>(75 - 108)         | 173<br>(140 - 206)          |
| Brain and nervous system cancer               | 363<br>(295 - 420)          | 2<br>(1 - 5)          | 6<br>(4 - 9)           | 69<br>(57 - 82)         | 198<br>(162 - 240)       | 88<br>(56 - 112)            |
| Thyroid cancer                                | 43<br>(34 - 56)             | --                    | 0<br>(0 - 0)           | 2<br>(2 - 3)            | 16<br>(13 - 20)          | 25<br>(19 - 35)             |
| Mesothelioma                                  | 12<br>(7 - 15)              | --                    | --                     | 1<br>(1 - 2)            | 7<br>(4 - 10)            | 4<br>(2 - 5)                |
| Hodgkin lymphoma                              | 38<br>(30 - 53)             | 0<br>(0 - 0)          | 0<br>(0 - 1)           | 12<br>(9 - 16)          | 15<br>(11 - 21)          | 10<br>(8 - 14)              |
| Non-Hodgkin lymphoma                          | 292<br>(173 - 369)          | 1<br>(0 - 2)          | 2<br>(1 - 2)           | 32<br>(20 - 41)         | 131<br>(77 - 171)        | 126<br>(68 - 168)           |
| Multiple myeloma                              | 164<br>(118 - 229)          | --                    | --                     | 8<br>(5 - 12)           | 73<br>(51 - 105)         | 84<br>(59 - 118)            |
| Leukemia                                      | 348<br>(303 - 389)          | 2<br>(1 - 4)          | 5<br>(3 - 8)           | 45<br>(37 - 52)         | 137<br>(116 - 158)       | 159<br>(136 - 183)          |
| Other neoplasms                               | 438<br>(371 - 510)          | 4<br>(2 - 7)          | 4<br>(3 - 6)           | 54<br>(42 - 65)         | 184<br>(153 - 214)       | 191<br>(150 - 241)          |
| Cardiovascular diseases                       | 27,343<br>(25,819 - 28,703) | 5<br>(3 - 8)          | 3<br>(2 - 4)           | 693<br>(617 - 772)      | 5,911<br>(5,506 - 6,330) | 20,732<br>(19,488 - 21,780) |
| Rheumatic heart disease                       | 96<br>(55 - 119)            | 0<br>(0 - 0)          | 0<br>(0 - 0)           | 8<br>(4 - 10)           | 37<br>(24 - 46)          | 52<br>(26 - 69)             |
| Ischemic heart disease                        | 17,205<br>(15,478 - 18,402) | 0<br>(0 - 0)          | 0<br>(0 - 0)           | 380<br>(325 - 437)      | 3,750<br>(3,407 - 4,150) | 13,074<br>(11,576 - 14,081) |
| Cerebrovascular disease                       | 7,157<br>(6,369 - 8,345)    | 1<br>(0 - 1)          | 1<br>(1 - 1)           | 136<br>(111 - 167)      | 1,369<br>(1,178 - 1,601) | 5,651<br>(4,982 - 6,723)    |
| Ischemic stroke                               | 5,761<br>(5,095 - 6,824)    | 0<br>(0 - 0)          | 0<br>(0 - 0)           | 43<br>(33 - 57)         | 807<br>(674 - 985)       | 4,911<br>(4,310 - 5,874)    |
| Hemorrhagic stroke                            | 1,396<br>(1,120 - 1,705)    | 0<br>(0 - 1)          | 1<br>(1 - 1)           | 93<br>(73 - 117)        | 561<br>(449 - 688)       | 740<br>(563 - 980)          |
| Hypertensive heart disease                    | 1,156<br>(852 - 1,579)      | 0<br>(0 - 0)          | 0<br>(0 - 0)           | 32<br>(23 - 46)         | 199<br>(145 - 257)       | 926<br>(653 - 1,328)        |
| Cardiomyopathy and myocarditis                | 202<br>(142 - 247)          | 3<br>(2 - 5)          | 1<br>(1 - 2)           | 55<br>(38 - 70)         | 98<br>(66 - 123)         | 44<br>(30 - 55)             |
| Atrial fibrillation and flutter               | 225<br>(175 - 282)          | --                    | --                     | 1<br>(1 - 2)            | 32<br>(24 - 40)          | 192<br>(143 - 247)          |
| Aortic aneurysm                               | 149<br>(122 - 179)          | --                    | --                     | 13<br>(10 - 17)         | 62<br>(50 - 74)          | 74<br>(57 - 93)             |
| Peripheral vascular disease                   | 19<br>(16 - 24)             | --                    | --                     | 1<br>(0 - 1)            | 6<br>(4 - 8)             | 13<br>(10 - 17)             |
| Endocarditis                                  | 44<br>(32 - 60)             | 0<br>(0 - 0)          | 0<br>(0 - 0)           | 6<br>(4 - 8)            | 17<br>(12 - 24)          | 21<br>(15 - 29)             |
| Other cardiovascular and circulatory diseases | 1,088<br>(893 - 1,330)      | 1<br>(0 - 1)          | 0<br>(0 - 1)           | 61<br>(44 - 76)         | 342<br>(267 - 419)       | 685<br>(526 - 888)          |
| Chronic respiratory diseases                  | 1,321<br>(947 - 1,488)      | 2<br>(1 - 3)          | 1<br>(1 - 1)           | 37<br>(27 - 43)         | 352<br>(238 - 406)       | 930<br>(665 - 1,063)        |
| Chronic obstructive pulmonary disease         | 1,113<br>(782 - 1,265)      | 1<br>(0 - 2)          | 0<br>(0 - 0)           | 23<br>(16 - 28)         | 276<br>(182 - 322)       | 812<br>(577 - 936)          |
| Pneumoconiosis                                | 30<br>(18 - 42)             | 0<br>(0 - 0)          | 0<br>(0 - 0)           | 2<br>(1 - 3)            | 14<br>(8 - 21)           | 13<br>(8 - 20)              |
| Silicosis                                     | 12<br>(7 - 17)              | 0<br>(0 - 0)          | 0<br>(0 - 0)           | 0<br>(0 - 1)            | 4<br>(2 - 6)             | 7<br>(4 - 11)               |
| Asbestosis                                    | 2<br>(2 - 3)                | 0<br>(0 - 0)          | 0<br>(0 - 0)           | 0<br>(0 - 0)            | 1<br>(1 - 2)             | 1<br>(0 - 1)                |
| Coal workers pneumoconiosis                   | 5<br>(3 - 7)                | 0<br>(0 - 0)          | 0<br>(0 - 0)           | 0<br>(0 - 0)            | 3<br>(2 - 4)             | 2<br>(1 - 2)                |
| Other pneumoconiosis                          | 11<br>(7 - 16)              | 0<br>(0 - 0)          | 0<br>(0 - 0)           | 1<br>(1 - 1)            | 7<br>(4 - 10)            | 4<br>(2 - 6)                |

Web Table 31- Slovakia deaths with 95% UI by age, sex, and cause in 2013

| Cause                                               | Both Sexes, All Ages     | Both Sexes, 0-4 Years | Both Sexes, 5-14 Years | Both Sexes, 15-49 Years | Both Sexes, 50-69 Years | Both Sexes, 70-80 Years  |
|-----------------------------------------------------|--------------------------|-----------------------|------------------------|-------------------------|-------------------------|--------------------------|
| Asthma                                              | 62<br>(41 - 82)          | 0<br>(0 - 0)          | 0<br>(0 - 0)           | 4<br>(3 - 5)            | 19<br>(13 - 25)         | 39<br>(25 - 54)          |
| Interstitial lung disease and pulmonary sarcoidosis | 95<br>(55 - 134)         | 0<br>(0 - 0)          | 0<br>(0 - 0)           | 5<br>(3 - 7)            | 37<br>(21 - 51)         | 53<br>(27 - 81)          |
| Other chronic respiratory diseases                  | 21<br>(15 - 29)          | 1<br>(0 - 1)          | 0<br>(0 - 0)           | 3<br>(2 - 4)            | 5<br>(3 - 6)            | 13<br>(8 - 20)           |
| Cirrhosis                                           | 1,522<br>(1,383 - 1,660) | 1<br>(0 - 1)          | 0<br>(0 - 1)           | 317<br>(277 - 360)      | 967<br>(868 - 1,072)    | 238<br>(213 - 266)       |
| Cirrhosis due to hepatitis B                        | 383<br>(250 - 533)       | 0<br>(0 - 0)          | 0<br>(0 - 0)           | 83<br>(55 - 121)        | 242<br>(156 - 342)      | 58<br>(33 - 81)          |
| Cirrhosis due to hepatitis C                        | 329<br>(142 - 486)       | 0<br>(0 - 0)          | 0<br>(0 - 0)           | 58<br>(27 - 96)         | 211<br>(78 - 320)       | 60<br>(29 - 95)          |
| Cirrhosis due to alcohol use                        | 551<br>(376 - 815)       | --                    | --                     | 91<br>(46 - 146)        | 365<br>(244 - 548)      | 96<br>(67 - 130)         |
| Cirrhosis due to other causes                       | 259<br>(175 - 367)       | 0<br>(0 - 1)          | 0<br>(0 - 0)           | 86<br>(60 - 121)        | 149<br>(92 - 223)       | 23<br>(14 - 34)          |
| Digestive diseases                                  | 1,034<br>(840 - 1,145)   | 1<br>(1 - 2)          | 1<br>(1 - 1)           | 98<br>(78 - 113)        | 324<br>(253 - 369)      | 611<br>(492 - 694)       |
| Peptic ulcer disease                                | 225<br>(167 - 275)       | 0<br>(0 - 0)          | 0<br>(0 - 0)           | 16<br>(11 - 22)         | 79<br>(55 - 98)         | 131<br>(97 - 166)        |
| Gastritis and duodenitis                            | 18<br>(9 - 24)           | 0<br>(0 - 0)          | 0<br>(0 - 0)           | 2<br>(1 - 2)            | 5<br>(3 - 7)            | 11<br>(5 - 15)           |
| Appendicitis                                        | 12<br>(8 - 16)           | 0<br>(0 - 0)          | 0<br>(0 - 0)           | 1<br>(1 - 1)            | 4<br>(2 - 5)            | 7<br>(4 - 11)            |
| Paralytic ileus and intestinal obstruction          | 198<br>(124 - 268)       | 0<br>(0 - 1)          | 0<br>(0 - 0)           | 9<br>(5 - 12)           | 50<br>(29 - 68)         | 139<br>(83 - 188)        |
| Inguinal, femoral, and abdominal hernia             | 28<br>(15 - 40)          | 0<br>(0 - 0)          | 0<br>(0 - 0)           | 1<br>(0 - 1)            | 7<br>(4 - 9)            | 20<br>(11 - 31)          |
| Inflammatory bowel disease                          | 44<br>(27 - 56)          | 0<br>(0 - 1)          | 0<br>(0 - 0)           | 5<br>(3 - 6)            | 15<br>(10 - 20)         | 23<br>(13 - 32)          |
| Vascular intestinal disorders                       | 74<br>(43 - 113)         | 0<br>(0 - 0)          | 0<br>(0 - 0)           | 2<br>(1 - 4)            | 17<br>(10 - 29)         | 54<br>(31 - 82)          |
| Gallbladder and biliary diseases                    | 116<br>(91 - 145)        | 0<br>(0 - 0)          | 0<br>(0 - 0)           | 4<br>(3 - 4)            | 26<br>(19 - 33)         | 86<br>(65 - 111)         |
| Pancreatitis                                        | 226<br>(171 - 287)       | 0<br>(0 - 0)          | 0<br>(0 - 0)           | 50<br>(39 - 61)         | 87<br>(62 - 111)        | 89<br>(63 - 122)         |
| Other digestive diseases                            | 95<br>(66 - 116)         | 0<br>(0 - 0)          | 0<br>(0 - 0)           | 10<br>(6 - 12)          | 34<br>(20 - 43)         | 51<br>(37 - 66)          |
| Neurological disorders                              | 2,817<br>(2,361 - 3,313) | 5<br>(3 - 9)          | 3<br>(2 - 5)           | 86<br>(70 - 102)        | 244<br>(208 - 280)      | 2,478<br>(2,035 - 2,968) |
| Alzheimer disease and other dementias               | 2,531<br>(2,083 - 3,037) | --                    | --                     | 0<br>(0 - 1)            | 135<br>(109 - 162)      | 2,395<br>(1,954 - 2,885) |
| Parkinson disease                                   | 66<br>(41 - 80)          | --                    | --                     | 1<br>(0 - 1)            | 13<br>(9 - 16)          | 53<br>(31 - 65)          |
| Epilepsy                                            | 118<br>(91 - 137)        | 1<br>(1 - 2)          | 2<br>(1 - 3)           | 58<br>(45 - 72)         | 45<br>(33 - 56)         | 11<br>(8 - 14)           |
| Multiple sclerosis                                  | 47<br>(29 - 64)          | --                    | --                     | 13<br>(8 - 19)          | 26<br>(16 - 37)         | 8<br>(5 - 11)            |
| Other neurological disorders                        | 55<br>(41 - 64)          | 4<br>(2 - 7)          | 2<br>(1 - 2)           | 13<br>(9 - 16)          | 25<br>(18 - 29)         | 11<br>(9 - 13)           |
| Mental and substance use disorders                  | 295<br>(232 - 344)       | 0<br>(0 - 1)          | 0<br>(0 - 0)           | 164<br>(119 - 198)      | 112<br>(84 - 138)       | 19<br>(15 - 23)          |
| Schizophrenia                                       | 2<br>(2 - 3)             | --                    | --                     | 1<br>(1 - 1)            | 1<br>(1 - 2)            | 0<br>(0 - 1)             |
| Alcohol use disorders                               | 112<br>(70 - 151)        | --                    | --                     | 49<br>(31 - 67)         | 57<br>(36 - 77)         | 6<br>(4 - 8)             |
| Drug use disorders                                  | 180<br>(119 - 214)       | 0<br>(0 - 1)          | --                     | 113<br>(70 - 141)       | 55<br>(38 - 70)         | 13<br>(9 - 16)           |
| Opioid use disorders                                | 68<br>(45 - 82)          | 0<br>(0 - 0)          | --                     | 44<br>(27 - 55)         | 19<br>(13 - 26)         | 5<br>(4 - 6)             |
| Cocaine use disorders                               | 10<br>(6 - 12)           | 0<br>(0 - 0)          | --                     | 7<br>(4 - 8)            | 2<br>(2 - 3)            | 1<br>(0 - 1)             |
| Amphetamine use disorders                           | 8<br>(6 - 10)            | 0<br>(0 - 0)          | --                     | 5<br>(3 - 7)            | 3<br>(2 - 4)            | 1<br>(0 - 1)             |
| Other drug use disorders                            | 94<br>(62 - 111)         | 0<br>(0 - 0)          | --                     | 57<br>(36 - 71)         | 30<br>(20 - 39)         | 6<br>(5 - 8)             |
| Eating disorders                                    | 1<br>(0 - 1)             | --                    | 0<br>(0 - 0)           | 1<br>(0 - 1)            | --                      | --                       |
| Anorexia nervosa                                    | 1<br>(0 - 1)             | --                    | 0<br>(0 - 0)           | 1<br>(0 - 1)            | --                      | --                       |
| Diabetes, urogenital, blood, and endocrine diseases | 1,635<br>(1,492 - 1,903) | 7<br>(4 - 11)         | 3<br>(2 - 4)           | 88<br>(79 - 103)        | 509<br>(457 - 618)      | 1,028<br>(920 - 1,180)   |
| Diabetes mellitus                                   | 692<br>(618 - 792)       | 0<br>(0 - 0)          | 0<br>(0 - 0)           | 28<br>(24 - 32)         | 226<br>(197 - 260)      | 438<br>(377 - 515)       |
| Acute glomerulonephritis                            | 1<br>(1 - 1)             | 0<br>(0 - 0)          | 0<br>(0 - 0)           | 0<br>(0 - 0)            | 0<br>(0 - 0)            | 0<br>(0 - 0)             |
| Chronic kidney disease                              | 664<br>(581 - 811)       | 0<br>(0 - 1)          | 0<br>(0 - 1)           | 33<br>(28 - 45)         | 201<br>(171 - 276)      | 428<br>(362 - 519)       |
| Chronic kidney disease due to diabetes mellitus     | 2<br>(1 - 2)             | 0<br>(0 - 0)          | 0<br>(0 - 0)           | 1<br>(0 - 1)            | 0<br>(0 - 1)            | 0<br>(0 - 1)             |

Web Table 31- Slovakia deaths with 95% UI by age, sex, and cause in 2013

| Cause                                               | Both Sexes, All Ages     | Both Sexes, 0-4 Years | Both Sexes, 5-14 Years | Both Sexes, 15-49 Years | Both Sexes, 50-69 Years | Both Sexes, 70-80 Years |
|-----------------------------------------------------|--------------------------|-----------------------|------------------------|-------------------------|-------------------------|-------------------------|
| Chronic kidney disease due to hypertension          | 218<br>(164 - 291)       | 0<br>(0 - 0)          | 0<br>(0 - 0)           | 10<br>(7 - 14)          | 63<br>(47 - 93)         | 145<br>(104 - 195)      |
| Chronic kidney disease due to glomerulonephritis    | 12<br>(9 - 18)           | 0<br>(0 - 0)          | 0<br>(0 - 0)           | 2<br>(1 - 2)            | 5<br>(3 - 8)            | 5<br>(4 - 8)            |
| Chronic kidney disease due to other causes          | 432<br>(340 - 554)       | 0<br>(0 - 1)          | 0<br>(0 - 0)           | 22<br>(16 - 31)         | 133<br>(96 - 192)       | 278<br>(215 - 360)      |
| Urinary diseases and male infertility               | 193<br>(158 - 233)       | 1<br>(0 - 1)          | 0<br>(0 - 0)           | 10<br>(8 - 12)          | 55<br>(45 - 68)         | 127<br>(94 - 159)       |
| Interstitial nephritis and urinary tract infections | 163<br>(132 - 196)       | 0<br>(0 - 1)          | 0<br>(0 - 0)           | 8<br>(7 - 10)           | 47<br>(39 - 58)         | 107<br>(79 - 133)       |
| Urolithiasis                                        | 6<br>(5 - 10)            | --                    | 0<br>(0 - 0)           | 1<br>(0 - 1)            | 2<br>(1 - 3)            | 4<br>(2 - 7)            |
| Other urinary diseases                              | 24<br>(15 - 34)          | 0<br>(0 - 0)          | 0<br>(0 - 0)           | 1<br>(1 - 1)            | 6<br>(4 - 8)            | 16<br>(9 - 25)          |
| Gynecological diseases                              | 0<br>(0 - 0)             | --                    | --                     | 0<br>(0 - 0)            | 0<br>(0 - 0)            | 0<br>(0 - 0)            |
| Uterine fibroids                                    | 0<br>(0 - 0)             | --                    | --                     | 0<br>(0 - 0)            | 0<br>(0 - 0)            | 0<br>(0 - 0)            |
| Polycystic ovarian syndrome                         | 0<br>(0 - 0)             | --                    | --                     | 0<br>(0 - 0)            | 0<br>(0 - 0)            | --                      |
| Endometriosis                                       | 0<br>(0 - 0)             | --                    | --                     | 0<br>(0 - 0)            | 0<br>(0 - 0)            | --                      |
| Genital prolapse                                    | 0<br>(0 - 0)             | --                    | --                     | 0<br>(0 - 0)            | 0<br>(0 - 0)            | 0<br>(0 - 0)            |
| Other gynecological diseases                        | 0<br>(0 - 0)             | --                    | --                     | 0<br>(0 - 0)            | 0<br>(0 - 0)            | 0<br>(0 - 0)            |
| Hemoglobinopathies and hemolytic anemias            | 18<br>(13 - 25)          | 1<br>(1 - 2)          | 1<br>(0 - 1)           | 6<br>(4 - 8)            | 3<br>(2 - 4)            | 7<br>(5 - 10)           |
| Thalassemias                                        | 3<br>(2 - 4)             | 1<br>(0 - 2)          | 1<br>(0 - 1)           | 2<br>(1 - 2)            | 0<br>(0 - 0)            | 0<br>(0 - 0)            |
| Sickle cell disorders                               | 1<br>(1 - 2)             | 0<br>(0 - 0)          | 0<br>(0 - 0)           | 1<br>(1 - 1)            | 0<br>(0 - 0)            | 0<br>(0 - 0)            |
| G6PD deficiency                                     | 0<br>(0 - 0)             | 0<br>(0 - 0)          | 0<br>(0 - 0)           | 0<br>(0 - 0)            | 0<br>(0 - 0)            | 0<br>(0 - 0)            |
| Other hemoglobinopathies and hemolytic anemias      | 13<br>(9 - 18)           | 0<br>(0 - 0)          | 0<br>(0 - 0)           | 3<br>(2 - 5)            | 3<br>(2 - 4)            | 7<br>(5 - 10)           |
| Endocrine, metabolic, blood, and immune disorders   | 68<br>(52 - 82)          | 4<br>(2 - 7)          | 1<br>(1 - 2)           | 11<br>(8 - 14)          | 24<br>(17 - 30)         | 28<br>(20 - 37)         |
| Musculoskeletal disorders                           | 50<br>(37 - 59)          | --                    | 1<br>(0 - 1)           | 7<br>(5 - 9)            | 20<br>(15 - 25)         | 21<br>(15 - 27)         |
| Rheumatoid arthritis                                | 16<br>(8 - 21)           | --                    | 0<br>(0 - 0)           | 1<br>(0 - 1)            | 6<br>(3 - 8)            | 9<br>(4 - 13)           |
| Other musculoskeletal disorders                     | 34<br>(25 - 41)          | --                    | 1<br>(0 - 1)           | 7<br>(4 - 8)            | 15<br>(11 - 18)         | 12<br>(8 - 16)          |
| Other non-communicable diseases                     | 187<br>(126 - 278)       | 141<br>(83 - 228)     | 7<br>(5 - 10)          | 19<br>(16 - 22)         | 10<br>(9 - 12)          | 10<br>(8 - 12)          |
| Congenital anomalies                                | 162<br>(108 - 246)       | 123<br>(72 - 200)     | 7<br>(5 - 10)          | 18<br>(15 - 22)         | 8<br>(7 - 10)           | 5<br>(4 - 7)            |
| Neural tube defects                                 | 1<br>(1 - 2)             | 1<br>(0 - 2)          | 0<br>(0 - 0)           | 0<br>(0 - 0)            | 0<br>(0 - 0)            | 0<br>(0 - 0)            |
| Congenital heart anomalies                          | 67<br>(45 - 98)          | 48<br>(28 - 78)       | 3<br>(2 - 5)           | 10<br>(8 - 12)          | 3<br>(2 - 4)            | 3<br>(2 - 4)            |
| Cleft lip and cleft palate                          | 1<br>(0 - 2)             | 1<br>(0 - 2)          | --                     | --                      | --                      | --                      |
| Down syndrome                                       | 7<br>(5 - 10)            | 3<br>(1 - 5)          | 1<br>(0 - 1)           | 2<br>(1 - 3)            | 2<br>(1 - 2)            | 0<br>(0 - 0)            |
| Chromosomal unbalanced rearrangements               | 7<br>(4 - 12)            | 6<br>(3 - 11)         | 0<br>(0 - 0)           | 0<br>(0 - 1)            | 0<br>(0 - 0)            | 0<br>(0 - 0)            |
| Other congenital anomalies                          | 78<br>(50 - 124)         | 64<br>(37 - 108)      | 3<br>(2 - 5)           | 5<br>(4 - 7)            | 3<br>(2 - 4)            | 2<br>(2 - 3)            |
| Skin and subcutaneous diseases                      | 7<br>(6 - 9)             | 0<br>(0 - 0)          | 0<br>(0 - 0)           | 1<br>(1 - 1)            | 2<br>(2 - 3)            | 4<br>(3 - 5)            |
| Cellulitis                                          | 1<br>(1 - 2)             | 0<br>(0 - 0)          | 0<br>(0 - 0)           | 0<br>(0 - 0)            | 0<br>(0 - 1)            | 1<br>(0 - 1)            |
| Pyoderma                                            | 5<br>(4 - 6)             | 0<br>(0 - 0)          | 0<br>(0 - 0)           | 0<br>(0 - 0)            | 1<br>(1 - 2)            | 3<br>(2 - 4)            |
| Decubitus ulcer                                     | 1<br>(0 - 1)             | 0<br>(0 - 0)          | 0<br>(0 - 0)           | 0<br>(0 - 0)            | 0<br>(0 - 0)            | 0<br>(0 - 0)            |
| Other skin and subcutaneous diseases                | 0<br>(0 - 1)             | 0<br>(0 - 0)          | 0<br>(0 - 0)           | 0<br>(0 - 0)            | 0<br>(0 - 0)            | 0<br>(0 - 0)            |
| Sudden infant death syndrome                        | 18<br>(8 - 34)           | 18<br>(8 - 34)        | --                     | --                      | --                      | --                      |
| Injuries                                            | 2,663<br>(2,439 - 2,976) | 28<br>(16 - 48)       | 34<br>(24 - 46)        | 1,042<br>(950 - 1,174)  | 945<br>(847 - 1,063)    | 614<br>(548 - 730)      |
| Transport injuries                                  | 643<br>(575 - 712)       | 7<br>(4 - 12)         | 15<br>(11 - 22)        | 317<br>(279 - 358)      | 189<br>(164 - 215)      | 115<br>(95 - 137)       |
| Road injuries                                       | 576<br>(512 - 638)       | 6<br>(4 - 11)         | 14<br>(10 - 21)        | 282<br>(247 - 319)      | 167<br>(145 - 190)      | 106<br>(87 - 127)       |
| Pedestrian road injuries                            | 212<br>(147 - 264)       | 3<br>(2 - 6)          | 7<br>(4 - 11)          | 67<br>(39 - 94)         | 71<br>(47 - 91)         | 65<br>(50 - 84)         |



Web Table 31- Slovakia deaths with 95% UI by age, sex, and cause in 2013

| Cause                                           | Both Sexes, All Ages   | Both Sexes, 0-4 Years | Both Sexes, 5-14 Years | Both Sexes, 15-49 Years | Both Sexes, 50-69 Years | Both Sexes, 70-80 Years |
|-------------------------------------------------|------------------------|-----------------------|------------------------|-------------------------|-------------------------|-------------------------|
| Cyclist road injuries                           | 58<br>(43 - 87)        | 0<br>(0 - 1)          | 2<br>(1 - 3)           | 20<br>(14 - 31)         | 25<br>(17 - 38)         | 11<br>(7 - 18)          |
| Motorcyclist road injuries                      | 42<br>(27 - 61)        | 0<br>(0 - 1)          | 1<br>(0 - 1)           | 29<br>(18 - 43)         | 8<br>(5 - 13)           | 4<br>(2 - 6)            |
| Motor vehicle road injuries                     | 262<br>(201 - 315)     | 3<br>(1 - 5)          | 5<br>(3 - 7)           | 165<br>(127 - 197)      | 63<br>(44 - 82)         | 27<br>(16 - 38)         |
| Other road injuries                             | 2<br>(1 - 4)           | 0<br>(0 - 0)          | 0<br>(0 - 0)           | 1<br>(0 - 2)            | 1<br>(0 - 1)            | 0<br>(0 - 1)            |
| Other transport injuries                        | 67<br>(52 - 87)        | 1<br>(0 - 1)          | 1<br>(1 - 2)           | 35<br>(25 - 45)         | 22<br>(16 - 30)         | 9<br>(6 - 13)           |
| Unintentional injuries                          | 1,067<br>(955 - 1,287) | 19<br>(11 - 32)       | 15<br>(10 - 21)        | 293<br>(255 - 353)      | 379<br>(330 - 449)      | 362<br>(310 - 475)      |
| Falls                                           | 460<br>(382 - 636)     | 1<br>(1 - 3)          | 1<br>(1 - 2)           | 90<br>(71 - 120)        | 167<br>(133 - 217)      | 201<br>(155 - 316)      |
| Drowning                                        | 141<br>(102 - 202)     | 4<br>(2 - 8)          | 7<br>(4 - 11)          | 66<br>(44 - 100)        | 48<br>(35 - 69)         | 17<br>(13 - 23)         |
| Fire, heat, and hot substances                  | 59<br>(47 - 75)        | 2<br>(1 - 4)          | 1<br>(0 - 1)           | 13<br>(10 - 18)         | 18<br>(13 - 24)         | 25<br>(19 - 33)         |
| Poisonings                                      | 33<br>(25 - 42)        | 1<br>(0 - 1)          | 1<br>(0 - 1)           | 11<br>(9 - 15)          | 12<br>(9 - 16)          | 8<br>(6 - 11)           |
| Exposure to mechanical forces                   | 92<br>(80 - 117)       | 2<br>(1 - 3)          | 2<br>(1 - 3)           | 43<br>(35 - 56)         | 33<br>(27 - 42)         | 12<br>(10 - 16)         |
| Unintentional firearm injuries                  | 26<br>(20 - 32)        | 0<br>(0 - 0)          | 0<br>(0 - 1)           | 13<br>(9 - 17)          | 9<br>(6 - 13)           | 3<br>(2 - 5)            |
| Unintentional suffocation                       | 9<br>(7 - 17)          | 1<br>(0 - 2)          | 0<br>(0 - 1)           | 3<br>(2 - 7)            | 3<br>(2 - 7)            | 1<br>(1 - 3)            |
| Other exposure to mechanical forces             | 57<br>(49 - 75)        | 1<br>(0 - 2)          | 1<br>(1 - 2)           | 27<br>(21 - 36)         | 21<br>(16 - 27)         | 8<br>(6 - 11)           |
| Adverse effects of medical treatment            | 116<br>(79 - 142)      | 1<br>(1 - 2)          | 0<br>(0 - 0)           | 11<br>(8 - 15)          | 36<br>(23 - 45)         | 67<br>(43 - 86)         |
| Animal contact                                  | 9<br>(7 - 16)          | 0<br>(0 - 0)          | 0<br>(0 - 1)           | 3<br>(2 - 4)            | 4<br>(3 - 7)            | 2<br>(1 - 4)            |
| Venomous animal contact                         | 4<br>(3 - 6)           | 0<br>(0 - 0)          | 0<br>(0 - 0)           | 1<br>(1 - 2)            | 1<br>(1 - 2)            | 1<br>(0 - 2)            |
| Non-venomous animal contact                     | 6<br>(4 - 10)          | 0<br>(0 - 0)          | 0<br>(0 - 0)           | 1<br>(1 - 3)            | 2<br>(2 - 5)            | 2<br>(1 - 3)            |
| Foreign body                                    | 100<br>(64 - 144)      | 7<br>(3 - 12)         | 1<br>(1 - 2)           | 34<br>(21 - 51)         | 41<br>(26 - 62)         | 17<br>(11 - 24)         |
| Pulmonary aspiration and foreign body in airway | 99<br>(63 - 143)       | 7<br>(3 - 12)         | 1<br>(1 - 2)           | 34<br>(21 - 50)         | 41<br>(25 - 61)         | 17<br>(10 - 23)         |
| Foreign body in other body part                 | 1<br>(1 - 2)           | 0<br>(0 - 0)          | 0<br>(0 - 0)           | 1<br>(0 - 1)            | 1<br>(0 - 1)            | 0<br>(0 - 0)            |
| Other unintentional injuries                    | 56<br>(44 - 72)        | 1<br>(0 - 2)          | 1<br>(1 - 2)           | 21<br>(15 - 30)         | 21<br>(13 - 33)         | 12<br>(8 - 18)          |
| Self-harm and interpersonal violence            | 953<br>(765 - 1,100)   | 2<br>(1 - 4)          | 4<br>(3 - 5)           | 433<br>(351 - 518)      | 377<br>(289 - 450)      | 137<br>(107 - 160)      |
| Self-harm                                       | 819<br>(650 - 952)     | --                    | 2<br>(1 - 3)           | 360<br>(283 - 432)      | 336<br>(248 - 408)      | 121<br>(91 - 144)       |
| Interpersonal violence                          | 134<br>(99 - 184)      | 2<br>(1 - 4)          | 2<br>(1 - 3)           | 73<br>(53 - 103)        | 41<br>(29 - 57)         | 16<br>(12 - 23)         |
| Assault by firearm                              | 34<br>(20 - 58)        | 0<br>(0 - 0)          | 0<br>(0 - 1)           | 22<br>(13 - 37)         | 10<br>(6 - 18)          | 2<br>(1 - 4)            |
| Assault by sharp object                         | 41<br>(27 - 61)        | 0<br>(0 - 0)          | 0<br>(0 - 1)           | 22<br>(14 - 33)         | 14<br>(9 - 22)          | 4<br>(2 - 6)            |
| Assault by other means                          | 59<br>(40 - 81)        | 2<br>(1 - 3)          | 1<br>(1 - 2)           | 29<br>(19 - 42)         | 17<br>(11 - 24)         | 10<br>(8 - 14)          |
| Forces of nature, war, and legal intervention   | 0<br>(0 - 0)           | 0<br>(0 - 0)          | --                     | --                      | --                      | 0<br>(0 - 0)            |
| Exposure to forces of nature                    | 0<br>(0 - 0)           | 0<br>(0 - 0)          | --                     | --                      | --                      | 0<br>(0 - 0)            |

Web Table 31- Slovakia deaths with 95% UI by age, sex, and cause in 2013

| Cause                                                             | Males, All Ages             | Males, 0-4 Years   | Males, 5-14 Years | Males, 15-49 Years       | Males, 50-69 Years          | Males, 70-80 Years          |
|-------------------------------------------------------------------|-----------------------------|--------------------|-------------------|--------------------------|-----------------------------|-----------------------------|
| All causes                                                        | 27,135<br>(25,658 - 29,011) | 219<br>(129 - 368) | 47<br>(34 - 67)   | 2,657<br>(2,462 - 2,910) | 10,720<br>(10,004 - 11,609) | 13,491<br>(12,888 - 14,207) |
| Communicable, maternal, neonatal, and nutritional diseases        | 1,166<br>(989 - 1,363)      | 108<br>(63 - 176)  | 4<br>(3 - 6)      | 97<br>(75 - 119)         | 323<br>(253 - 395)          | 634<br>(495 - 795)          |
| HIV/AIDS and tuberculosis                                         | 34<br>(29 - 41)             | 0<br>(0 - 0)       | 0<br>(0 - 0)      | 8<br>(6 - 10)            | 16<br>(13 - 20)             | 10<br>(8 - 14)              |
| Tuberculosis                                                      | 31<br>(25 - 37)             | 0<br>(0 - 0)       | 0<br>(0 - 0)      | 6<br>(4 - 7)             | 15<br>(12 - 19)             | 10<br>(8 - 14)              |
| HIV/AIDS                                                          | 4<br>(2 - 5)                | 0<br>(0 - 0)       | 0<br>(0 - 0)      | 2<br>(2 - 3)             | 1<br>(1 - 2)                | 0<br>(0 - 0)                |
| HIV/AIDS resulting in mycobacterial infection                     | 0<br>(0 - 0)                | 0<br>(0 - 0)       | 0<br>(0 - 0)      | 0<br>(0 - 0)             | 0<br>(0 - 0)                | 0<br>(0 - 0)                |
| HIV/AIDS resulting in other diseases                              | 3<br>(2 - 5)                | 0<br>(0 - 0)       | 0<br>(0 - 0)      | 2<br>(2 - 3)             | 1<br>(0 - 1)                | 0<br>(0 - 0)                |
| Diarrhea, lower respiratory, and other common infectious diseases | 1,028<br>(858 - 1,212)      | 23<br>(13 - 40)    | 4<br>(2 - 6)      | 85<br>(64 - 106)         | 299<br>(231 - 370)          | 617<br>(478 - 778)          |
| Diarrheal diseases                                                | 6<br>(5 - 8)                | 1<br>(0 - 2)       | 0<br>(0 - 0)      | 1<br>(1 - 1)             | 2<br>(1 - 3)                | 2<br>(2 - 4)                |
| Intestinal infectious diseases                                    | 4<br>(1 - 9)                | 0<br>(0 - 1)       | 0<br>(0 - 1)      | 1<br>(0 - 4)             | 1<br>(0 - 3)                | 0<br>(0 - 1)                |
| Typhoid fever                                                     | 2<br>(1 - 7)                | 0<br>(0 - 1)       | 0<br>(0 - 1)      | 1<br>(0 - 3)             | 1<br>(0 - 3)                | 0<br>(0 - 1)                |
| Paratyphoid fever                                                 | 1<br>(0 - 2)                | 0<br>(0 - 0)       | 0<br>(0 - 0)      | 0<br>(0 - 1)             | 0<br>(0 - 1)                | 0<br>(0 - 0)                |
| Other intestinal infectious diseases                              | 0<br>(0 - 3)                | 0<br>(0 - 1)       | 0<br>(0 - 0)      | 0<br>(0 - 1)             | 0<br>(0 - 1)                | 0<br>(0 - 1)                |
| Lower respiratory infections                                      | 995<br>(826 - 1,181)        | 17<br>(9 - 29)     | 2<br>(1 - 4)      | 77<br>(56 - 99)          | 287<br>(219 - 359)          | 611<br>(472 - 772)          |
| Upper respiratory infections                                      | 1<br>(0 - 2)                | 0<br>(0 - 0)       | 0<br>(0 - 0)      | 0<br>(0 - 0)             | 0<br>(0 - 1)                | 0<br>(0 - 1)                |
| Otitis media                                                      | 0<br>(0 - 1)                | 0<br>(0 - 0)       | 0<br>(0 - 0)      | 0<br>(0 - 0)             | 0<br>(0 - 0)                | 0<br>(0 - 0)                |
| Meningitis                                                        | 15<br>(12 - 20)             | 4<br>(2 - 8)       | 0<br>(0 - 1)      | 3<br>(2 - 4)             | 6<br>(4 - 8)                | 2<br>(1 - 3)                |
| Pneumococcal meningitis                                           | 4<br>(3 - 6)                | 1<br>(0 - 2)       | 0<br>(0 - 0)      | 1<br>(0 - 1)             | 2<br>(1 - 3)                | 1<br>(0 - 1)                |
| H influenzae type B meningitis                                    | 2<br>(1 - 4)                | 1<br>(0 - 3)       | 0<br>(0 - 0)      | 0<br>(0 - 0)             | 1<br>(0 - 1)                | 0<br>(0 - 0)                |
| Meningococcal meningitis                                          | 3<br>(2 - 5)                | 1<br>(0 - 2)       | 0<br>(0 - 0)      | 1<br>(0 - 1)             | 1<br>(1 - 2)                | 0<br>(0 - 1)                |
| Other meningitis                                                  | 6<br>(4 - 8)                | 1<br>(0 - 2)       | 0<br>(0 - 0)      | 1<br>(1 - 2)             | 2<br>(1 - 4)                | 1<br>(1 - 1)                |
| Encephalitis                                                      | 5<br>(3 - 6)                | 1<br>(0 - 2)       | 0<br>(0 - 0)      | 2<br>(1 - 2)             | 2<br>(1 - 2)                | 1<br>(0 - 1)                |
| Diphtheria                                                        | 0<br>(0 - 0)                | 0<br>(0 - 0)       | 0<br>(0 - 0)      | 0<br>(0 - 0)             | 0<br>(0 - 0)                | --<br>(0 - 0)               |
| Whooping cough                                                    | 0<br>(0 - 1)                | 0<br>(0 - 0)       | 0<br>(0 - 0)      | 0<br>(0 - 0)             | 0<br>(0 - 0)                | --<br>(0 - 0)               |
| Tetanus                                                           | 0<br>(0 - 0)                | 0<br>(0 - 0)       | 0<br>(0 - 0)      | 0<br>(0 - 0)             | 0<br>(0 - 0)                | 0<br>(0 - 0)                |
| Measles                                                           | 0<br>(0 - 0)                | 0<br>(0 - 0)       | 0<br>(0 - 0)      | 0<br>(0 - 0)             | 0<br>(0 - 0)                | --<br>(0 - 0)               |
| Varicella and herpes zoster                                       | 1<br>(0 - 4)                | 0<br>(0 - 1)       | 0<br>(0 - 0)      | 0<br>(0 - 1)             | 0<br>(0 - 1)                | 1<br>(0 - 3)                |
| Neglected tropical diseases and malaria                           | 1<br>(1 - 2)                | 0<br>(0 - 0)       | 0<br>(0 - 0)      | 1<br>(0 - 1)             | 1<br>(0 - 1)                | 0<br>(0 - 0)                |
| Cysticercosis                                                     | 0<br>(0 - 0)                | 0<br>(0 - 0)       | 0<br>(0 - 0)      | 0<br>(0 - 0)             | 0<br>(0 - 0)                | 0<br>(0 - 0)                |
| Cystic echinococcosis                                             | 0<br>(0 - 0)                | 0<br>(0 - 0)       | 0<br>(0 - 0)      | 0<br>(0 - 0)             | 0<br>(0 - 0)                | 0<br>(0 - 0)                |
| Dengue                                                            | 0<br>(0 - 0)                | 0<br>(0 - 0)       | 0<br>(0 - 0)      | 0<br>(0 - 0)             | 0<br>(0 - 0)                | 0<br>(0 - 0)                |
| Rabies                                                            | 0<br>(0 - 0)                | 0<br>(0 - 0)       | 0<br>(0 - 0)      | 0<br>(0 - 0)             | 0<br>(0 - 0)                | 0<br>(0 - 0)                |
| Other neglected tropical diseases                                 | 1<br>(1 - 1)                | 0<br>(0 - 0)       | 0<br>(0 - 0)      | 0<br>(0 - 0)             | 0<br>(0 - 0)                | 0<br>(0 - 0)                |
| Maternal disorders                                                | --                          | --                 | --                | --                       | --                          | --                          |
| Maternal hemorrhage                                               | --                          | --                 | --                | --                       | --                          | --                          |
| Maternal sepsis and other maternal infections                     | --                          | --                 | --                | --                       | --                          | --                          |
| Maternal hypertensive disorders                                   | --                          | --                 | --                | --                       | --                          | --                          |
| Maternal obstructed labor                                         | --                          | --                 | --                | --                       | --                          | --                          |
| Maternal abortive outcome                                         | --                          | --                 | --                | --                       | --                          | --                          |
| Indirect maternal deaths                                          | --                          | --                 | --                | --                       | --                          | --                          |

Web Table 31- Slovakia deaths with 95% UI by age, sex, and cause in 2013

| Cause                                                            | Males, All Ages             | Males, 0-4 Years | Males, 5-14 Years | Males, 15-49 Years       | Males, 50-69 Years        | Males, 70-80 Years          |
|------------------------------------------------------------------|-----------------------------|------------------|-------------------|--------------------------|---------------------------|-----------------------------|
| Late maternal deaths                                             | --                          | --               | --                | --                       | --                        | --                          |
| Maternal deaths aggravated by HIV/AIDS                           | --                          | --               | --                | --                       | --                        | --                          |
| Other maternal disorders                                         | --                          | --               | --                | --                       | --                        | --                          |
| Neonatal disorders                                               | 83<br>(48 - 135)            | 83<br>(48 - 135) | --                | --                       | --                        | --                          |
| Neonatal preterm birth complications                             | 61<br>(34 - 100)            | 61<br>(34 - 100) | --                | --                       | --                        | --                          |
| Neonatal encephalopathy due to birth asphyxia and trauma         | 12<br>(5 - 22)              | 12<br>(5 - 22)   | --                | --                       | --                        | --                          |
| Neonatal sepsis and other neonatal infections                    | 1<br>(0 - 2)                | 1<br>(0 - 2)     | --                | --                       | --                        | --                          |
| Hemolytic disease and other neonatal jaundice                    | 0<br>(0 - 0)                | 0<br>(0 - 0)     | --                | --                       | --                        | --                          |
| Other neonatal disorders                                         | 9<br>(4 - 20)               | 9<br>(4 - 20)    | --                | --                       | --                        | --                          |
| Nutritional deficiencies                                         | 9<br>(5 - 13)               | 0<br>(0 - 0)     | 0<br>(0 - 0)      | 1<br>(1 - 2)             | 3<br>(2 - 4)              | 4<br>(3 - 7)                |
| Protein-energy malnutrition                                      | 2<br>(1 - 4)                | 0<br>(0 - 0)     | 0<br>(0 - 0)      | 0<br>(0 - 1)             | 1<br>(0 - 1)              | 1<br>(0 - 2)                |
| Iodine deficiency                                                | 0<br>(0 - 0)                | 0<br>(0 - 0)     | 0<br>(0 - 0)      | 0<br>(0 - 0)             | 0<br>(0 - 0)              | 0<br>(0 - 0)                |
| Iron-deficiency anemia                                           | 6<br>(3 - 9)                | 0<br>(0 - 0)     | 0<br>(0 - 0)      | 1<br>(0 - 1)             | 2<br>(1 - 3)              | 3<br>(2 - 5)                |
| Other nutritional deficiencies                                   | 0<br>(0 - 1)                | 0<br>(0 - 0)     | 0<br>(0 - 0)      | 0<br>(0 - 0)             | 0<br>(0 - 0)              | 0<br>(0 - 0)                |
| Other communicable, maternal, neonatal, and nutritional diseases | 12<br>(8 - 14)              | 1<br>(1 - 3)     | 0<br>(0 - 0)      | 2<br>(2 - 3)             | 5<br>(4 - 7)              | 3<br>(2 - 3)                |
| Sexually transmitted diseases excluding HIV                      | 1<br>(0 - 2)                | 1<br>(0 - 1)     | 0<br>(0 - 0)      | 0<br>(0 - 0)             | 0<br>(0 - 0)              | 0<br>(0 - 0)                |
| Syphilis                                                         | 1<br>(0 - 2)                | 1<br>(0 - 1)     | 0<br>(0 - 0)      | 0<br>(0 - 0)             | 0<br>(0 - 0)              | 0<br>(0 - 0)                |
| Chlamydial infection                                             | --                          | --               | --                | --                       | --                        | --                          |
| Gonococcal infection                                             | 0<br>(0 - 0)                | --               | 0<br>(0 - 0)      | 0<br>(0 - 0)             | 0<br>(0 - 0)              | 0<br>(0 - 0)                |
| Other sexually transmitted diseases                              | 0<br>(0 - 0)                | --               | 0<br>(0 - 0)      | 0<br>(0 - 0)             | 0<br>(0 - 0)              | 0<br>(0 - 0)                |
| Hepatitis                                                        | 3<br>(2 - 4)                | 0<br>(0 - 0)     | 0<br>(0 - 0)      | 1<br>(1 - 1)             | 1<br>(1 - 2)              | 1<br>(0 - 1)                |
| Acute hepatitis A                                                | 1<br>(0 - 1)                | 0<br>(0 - 0)     | 0<br>(0 - 0)      | 0<br>(0 - 1)             | 0<br>(0 - 0)              | 0<br>(0 - 0)                |
| Acute hepatitis B                                                | 2<br>(1 - 3)                | 0<br>(0 - 0)     | 0<br>(0 - 0)      | 0<br>(0 - 1)             | 1<br>(1 - 2)              | 0<br>(0 - 1)                |
| Acute hepatitis C                                                | 0<br>(0 - 1)                | --               | 0<br>(0 - 0)      | 0<br>(0 - 0)             | 0<br>(0 - 0)              | 0<br>(0 - 0)                |
| Other infectious diseases                                        | 8<br>(5 - 10)               | 1<br>(0 - 1)     | 0<br>(0 - 0)      | 1<br>(1 - 2)             | 4<br>(2 - 5)              | 2<br>(1 - 3)                |
| Non-communicable diseases                                        | 23,973<br>(22,596 - 25,621) | 95<br>(56 - 161) | 21<br>(15 - 30)   | 1,680<br>(1,540 - 1,846) | 9,629<br>(8,985 - 10,422) | 12,548<br>(11,933 - 13,247) |
| Neoplasms                                                        | 7,279<br>(6,778 - 7,867)    | 6<br>(3 - 10)    | 10<br>(7 - 15)    | 524<br>(471 - 591)       | 3,863<br>(3,555 - 4,225)  | 2,877<br>(2,661 - 3,122)    |
| Esophageal cancer                                                | 253<br>(205 - 307)          | --               | --                | 28<br>(19 - 43)          | 177<br>(139 - 218)        | 49<br>(38 - 60)             |
| Stomach cancer                                                   | 503<br>(442 - 574)          | --               | --                | 30<br>(24 - 37)          | 242<br>(209 - 283)        | 231<br>(191 - 279)          |
| Liver cancer                                                     | 258<br>(181 - 354)          | --               | 0<br>(0 - 0)      | 17<br>(11 - 25)          | 146<br>(101 - 208)        | 95<br>(62 - 138)            |
| Liver cancer due to hepatitis B                                  | 57<br>(11 - 104)            | --               | 0<br>(0 - 0)      | 5<br>(2 - 10)            | 35<br>(5 - 66)            | 17<br>(4 - 31)              |
| Liver cancer due to hepatitis C                                  | 118<br>(78 - 183)           | --               | 0<br>(0 - 0)      | 7<br>(4 - 12)            | 67<br>(41 - 110)          | 44<br>(27 - 66)             |
| Liver cancer due to alcohol use                                  | 70<br>(39 - 125)            | --               | --                | 3<br>(1 - 6)             | 36<br>(19 - 68)           | 31<br>(17 - 54)             |
| Liver cancer due to other causes                                 | 13<br>(7 - 22)              | --               | 0<br>(0 - 0)      | 1<br>(1 - 3)             | 8<br>(3 - 14)             | 4<br>(2 - 7)                |
| Larynx cancer                                                    | 169<br>(125 - 226)          | --               | --                | 17<br>(12 - 27)          | 37<br>(85 - 152)          | 30<br>(26 - 50)             |
| Tracheal, bronchus and lung cancer                               | 1,807<br>(1,589 - 2,040)    | --               | --                | 72<br>(57 - 93)          | 639<br>(954 - 1,257)      | 639<br>(558 - 730)          |
| Breast cancer                                                    | 8<br>(2 - 11)               | --               | --                | 1<br>(0 - 1)             | 3<br>(1 - 5)              | 4<br>(1 - 6)                |
| Cervical cancer                                                  | --                          | --               | --                | --                       | --                        | --                          |
| Uterine cancer                                                   | --                          | --               | --                | --                       | --                        | --                          |
| Prostate cancer                                                  | 567<br>(433 - 774)          | --               | --                | 2<br>(1 - 4)             | 137<br>(91 - 181)         | 428<br>(321 - 613)          |

Web Table 31- Slovakia deaths with 95% UI by age, sex, and cause in 2013

| Cause                                         | Males, All Ages             | Males, 0-4 Years | Males, 5-14 Years | Males, 15-49 Years | Males, 50-69 Years       | Males, 70-80 Years       |
|-----------------------------------------------|-----------------------------|------------------|-------------------|--------------------|--------------------------|--------------------------|
| Colon and rectum cancer                       | 1,161<br>(1,046 - 1,289)    | --               | --                | 53<br>(45 - 65)    | 545<br>(483 - 610)       | 562<br>(491 - 649)       |
| Lip and oral cavity cancer                    | 272<br>(198 - 324)          | --               | --                | 40<br>(31 - 52)    | 190<br>(128 - 236)       | 41<br>(32 - 52)          |
| Nasopharynx cancer                            | 35<br>(25 - 60)             | --               | 0<br>(0 - 0)      | 7<br>(4 - 16)      | 23<br>(15 - 38)          | 5<br>(4 - 8)             |
| Other pharynx cancer                          | 264<br>(177 - 333)          | --               | --                | 35<br>(24 - 50)    | 195<br>(124 - 251)       | 34<br>(23 - 46)          |
| Gallbladder and biliary tract cancer          | 106<br>(65 - 140)           | --               | --                | 3<br>(2 - 5)       | 49<br>(31 - 70)          | 53<br>(32 - 73)          |
| Pancreatic cancer                             | 433<br>(389 - 480)          | --               | --                | 29<br>(23 - 36)    | 251<br>(218 - 287)       | 153<br>(132 - 176)       |
| Malignant skin melanoma                       | 92<br>(46 - 149)            | --               | --                | 18<br>(9 - 31)     | 46<br>(23 - 77)          | 28<br>(13 - 44)          |
| Non-melanoma skin cancer                      | 26<br>(18 - 44)             | --               | --                | 1<br>(1 - 2)       | 7<br>(4 - 12)            | 18<br>(12 - 32)          |
| Ovarian cancer                                | --                          | --               | --                | --                 | --                       | --                       |
| Testicular cancer                             | 20<br>(12 - 28)             | --               | --                | 13<br>(8 - 20)     | 4<br>(2 - 6)             | 3<br>(2 - 4)             |
| Kidney cancer                                 | 237<br>(192 - 281)          | 0<br>(0 - 1)     | 0<br>(0 - 0)      | 16<br>(11 - 22)    | 133<br>(105 - 164)       | 87<br>(66 - 112)         |
| Bladder cancer                                | 197<br>(160 - 230)          | --               | --                | 3<br>(2 - 5)       | 72<br>(59 - 88)          | 122<br>(94 - 148)        |
| Brain and nervous system cancer               | 195<br>(149 - 237)          | 1<br>(1 - 3)     | 3<br>(2 - 5)      | 43<br>(33 - 55)    | 112<br>(87 - 147)        | 35<br>(21 - 49)          |
| Thyroid cancer                                | 14<br>(11 - 18)             | --               | 0<br>(0 - 0)      | 1<br>(1 - 1)       | 7<br>(5 - 9)             | 6<br>(4 - 8)             |
| Mesothelioma                                  | 8<br>(4 - 11)               | --               | --                | 1<br>(0 - 2)       | 5<br>(3 - 8)             | 2<br>(0 - 3)             |
| Hodgkin lymphoma                              | 21<br>(15 - 32)             | 0<br>(0 - 0)     | 0<br>(0 - 0)      | 7<br>(5 - 11)      | 9<br>(6 - 15)            | 5<br>(3 - 8)             |
| Non-Hodgkin lymphoma                          | 160<br>(74 - 211)           | 0<br>(0 - 1)     | 1<br>(1 - 2)      | 20<br>(10 - 26)    | 80<br>(37 - 111)         | 59<br>(27 - 84)          |
| Multiple myeloma                              | 75<br>(43 - 124)            | --               | --                | 4<br>(2 - 7)       | 37<br>(21 - 66)          | 34<br>(18 - 53)          |
| Leukemia                                      | 195<br>(166 - 221)          | 2<br>(1 - 3)     | 3<br>(2 - 5)      | 28<br>(22 - 34)    | 82<br>(66 - 98)          | 80<br>(67 - 95)          |
| Other neoplasms                               | 204<br>(152 - 256)          | 2<br>(1 - 4)     | 2<br>(1 - 3)      | 32<br>(21 - 41)    | 101<br>(72 - 129)        | 66<br>(49 - 93)          |
| Cardiovascular diseases                       | 12,031<br>(11,292 - 12,883) | 3<br>(2 - 5)     | 2<br>(1 - 2)      | 541<br>(479 - 614) | 4,052<br>(3,722 - 4,421) | 7,434<br>(6,999 - 7,908) |
| Rheumatic heart disease                       | 36<br>(20 - 47)             | 0<br>(0 - 0)     | 0<br>(0 - 0)      | 5<br>(2 - 7)       | 19<br>(11 - 26)          | 13<br>(6 - 18)           |
| Ischemic heart disease                        | 7,640<br>(6,928 - 8,450)    | 0<br>(0 - 0)     | 0<br>(0 - 0)      | 316<br>(264 - 368) | 2,678<br>(2,391 - 3,000) | 4,646<br>(4,170 - 5,105) |
| Cerebrovascular disease                       | 3,217<br>(2,719 - 3,882)    | 0<br>(0 - 1)     | 1<br>(0 - 1)      | 97<br>(74 - 126)   | 886<br>(716 - 1,084)     | 2,233<br>(1,873 - 2,706) |
| Ischemic stroke                               | 2,531<br>(2,118 - 3,101)    | 0<br>(0 - 0)     | 0<br>(0 - 0)      | 34<br>(24 - 48)    | 544<br>(431 - 693)       | 1,952<br>(1,625 - 2,400) |
| Hemorrhagic stroke                            | 687<br>(470 - 862)          | 0<br>(0 - 1)     | 1<br>(0 - 1)      | 63<br>(44 - 84)    | 342<br>(236 - 436)       | 281<br>(169 - 376)       |
| Hypertensive heart disease                    | 327<br>(213 - 448)          | 0<br>(0 - 0)     | 0<br>(0 - 0)      | 25<br>(16 - 39)    | 127<br>(82 - 183)        | 175<br>(104 - 252)       |
| Cardiomyopathy and myocarditis                | 144<br>(89 - 187)           | 2<br>(1 - 3)     | 1<br>(0 - 1)      | 45<br>(27 - 60)    | 76<br>(46 - 101)         | 21<br>(11 - 29)          |
| Atrial fibrillation and flutter               | 88<br>(64 - 114)            | --               | --                | 1<br>(1 - 2)       | 20<br>(14 - 27)          | 67<br>(46 - 91)          |
| Aortic aneurysm                               | 103<br>(81 - 122)           | --               | --                | 10<br>(7 - 13)     | 50<br>(39 - 61)          | 44<br>(35 - 54)          |
| Peripheral vascular disease                   | 11<br>(9 - 15)              | --               | --                | 0<br>(0 - 1)       | 5<br>(4 - 7)             | 6<br>(4 - 8)             |
| Endocarditis                                  | 25<br>(16 - 38)             | 0<br>(0 - 0)     | 0<br>(0 - 0)      | 5<br>(3 - 7)       | 12<br>(7 - 18)           | 8<br>(5 - 13)            |
| Other cardiovascular and circulatory diseases | 440<br>(359 - 553)          | 0<br>(0 - 1)     | 0<br>(0 - 0)      | 38<br>(25 - 48)    | 180<br>(136 - 230)       | 221<br>(170 - 301)       |
| Chronic respiratory diseases                  | 857<br>(557 - 990)          | 1<br>(1 - 2)     | 1<br>(0 - 1)      | 24<br>(16 - 29)    | 266<br>(173 - 316)       | 565<br>(367 - 663)       |
| Chronic obstructive pulmonary disease         | 743<br>(477 - 864)          | 1<br>(0 - 1)     | 0<br>(0 - 0)      | 16<br>(11 - 21)    | 213<br>(136 - 257)       | 512<br>(323 - 603)       |
| Pneumoconiosis                                | 28<br>(17 - 41)             | 0<br>(0 - 0)     | 0<br>(0 - 0)      | 2<br>(1 - 3)       | 14<br>(8 - 20)           | 13<br>(7 - 19)           |
| Silicosis                                     | 11<br>(7 - 17)              | 0<br>(0 - 0)     | 0<br>(0 - 0)      | 0<br>(0 - 1)       | 4<br>(2 - 6)             | 7<br>(4 - 11)            |
| Asbestosis                                    | 2<br>(1 - 3)                | 0<br>(0 - 0)     | 0<br>(0 - 0)      | 0<br>(0 - 0)       | 1<br>(1 - 2)             | 1<br>(0 - 1)             |
| Coal workers pneumoconiosis                   | 5<br>(3 - 7)                | 0<br>(0 - 0)     | 0<br>(0 - 0)      | 0<br>(0 - 0)       | 3<br>(2 - 4)             | 2<br>(1 - 2)             |
| Other pneumoconiosis                          | 10<br>(6 - 15)              | 0<br>(0 - 0)     | 0<br>(0 - 0)      | 1<br>(1 - 1)       | 6<br>(3 - 9)             | 3<br>(2 - 5)             |

Web Table 31- Slovakia deaths with 95% UI by age, sex, and cause in 2013

| Cause                                               | Males, All Ages        | Males, 0-4 Years | Males, 5-14 Years | Males, 15-49 Years | Males, 50-69 Years | Males, 70-80 Years   |
|-----------------------------------------------------|------------------------|------------------|-------------------|--------------------|--------------------|----------------------|
| Asthma                                              | 28<br>(19 - 35)        | 0<br>(0 - 0)     | 0<br>(0 - 0)      | 2<br>(1 - 3)       | 10<br>(7 - 14)     | 16<br>(10 - 22)      |
| Interstitial lung disease and pulmonary sarcoidosis | 50<br>(27 - 70)        | 0<br>(0 - 0)     | 0<br>(0 - 0)      | 2<br>(1 - 3)       | 26<br>(13 - 37)    | 22<br>(11 - 34)      |
| Other chronic respiratory diseases                  | 7<br>(5 - 10)          | 0<br>(0 - 1)     | 0<br>(0 - 0)      | 2<br>(1 - 2)       | 3<br>(2 - 4)       | 3<br>(2 - 4)         |
| Cirrhosis                                           | 1,083<br>(967 - 1,204) | 0<br>(0 - 0)     | 0<br>(0 - 0)      | 238<br>(204 - 276) | 703<br>(613 - 802) | 142<br>(122 - 165)   |
| Cirrhosis due to hepatitis B                        | 225<br>(130 - 364)     | 0<br>(0 - 0)     | 0<br>(0 - 0)      | 54<br>(30 - 90)    | 147<br>(82 - 240)  | 24<br>(11 - 40)      |
| Cirrhosis due to hepatitis C                        | 208<br>(48 - 346)      | 0<br>(0 - 0)     | 0<br>(0 - 0)      | 37<br>(14 - 75)    | 135<br>(20 - 234)  | 36<br>(7 - 62)       |
| Cirrhosis due to alcohol use                        | 466<br>(298 - 725)     | --               | --                | 81<br>(37 - 136)   | 315<br>(200 - 498) | 70<br>(45 - 105)     |
| Cirrhosis due to other causes                       | 184<br>(110 - 281)     | 0<br>(0 - 0)     | 0<br>(0 - 0)      | 66<br>(41 - 96)    | 106<br>(56 - 173)  | 12<br>(6 - 20)       |
| Digestive diseases                                  | 517<br>(403 - 586)     | 1<br>(0 - 1)     | 0<br>(0 - 1)      | 75<br>(57 - 89)    | 217<br>(163 - 255) | 223<br>(177 - 259)   |
| Peptic ulcer disease                                | 127<br>(88 - 160)      | 0<br>(0 - 0)     | 0<br>(0 - 0)      | 13<br>(8 - 18)     | 60<br>(41 - 79)    | 54<br>(38 - 71)      |
| Gastritis and duodenitis                            | 9<br>(4 - 13)          | 0<br>(0 - 0)     | 0<br>(0 - 0)      | 1<br>(0 - 2)       | 4<br>(2 - 6)       | 4<br>(2 - 6)         |
| Appendicitis                                        | 5<br>(3 - 7)           | 0<br>(0 - 0)     | 0<br>(0 - 0)      | 1<br>(0 - 1)       | 2<br>(1 - 3)       | 2<br>(1 - 3)         |
| Paralytic ileus and intestinal obstruction          | 83<br>(44 - 119)       | 0<br>(0 - 0)     | 0<br>(0 - 0)      | 6<br>(3 - 8)       | 30<br>(16 - 46)    | 47<br>(25 - 68)      |
| Inguinal, femoral, and abdominal hernia             | 12<br>(6 - 18)         | 0<br>(0 - 0)     | 0<br>(0 - 0)      | 1<br>(0 - 1)       | 4<br>(2 - 6)       | 8<br>(3 - 13)        |
| Inflammatory bowel disease                          | 19<br>(11 - 25)        | 0<br>(0 - 0)     | 0<br>(0 - 0)      | 3<br>(1 - 4)       | 9<br>(5 - 12)      | 7<br>(4 - 10)        |
| Vascular intestinal disorders                       | 28<br>(11 - 55)        | 0<br>(0 - 0)     | 0<br>(0 - 0)      | 2<br>(1 - 3)       | 16<br>(4 - 21)     | 16<br>(6 - 32)       |
| Gallbladder and biliary diseases                    | 49<br>(34 - 63)        | 0<br>(0 - 0)     | 0<br>(0 - 0)      | 2<br>(1 - 3)       | 15<br>(10 - 20)    | 32<br>(22 - 44)      |
| Pancreatitis                                        | 137<br>(96 - 183)      | 0<br>(0 - 0)     | 0<br>(0 - 0)      | 41<br>(31 - 52)    | 61<br>(40 - 84)    | 35<br>(22 - 52)      |
| Other digestive diseases                            | 48<br>(25 - 62)        | 0<br>(0 - 0)     | 0<br>(0 - 0)      | 7<br>(3 - 9)       | 23<br>(11 - 31)    | 18<br>(10 - 25)      |
| Neurological disorders                              | 1,120<br>(929 - 1,326) | 3<br>(1 - 5)     | 2<br>(1 - 3)      | 62<br>(48 - 77)    | 138<br>(113 - 164) | 916<br>(733 - 1,118) |
| Alzheimer disease and other dementias               | 945<br>(756 - 1,142)   | --               | --                | 0<br>(0 - 1)       | 70<br>(52 - 89)    | 874<br>(690 - 1,072) |
| Parkinson disease                                   | 36<br>(21 - 45)        | --               | --                | 0<br>(0 - 0)       | 8<br>(5 - 10)      | 28<br>(15 - 36)      |
| Epilepsy                                            | 93<br>(69 - 112)       | 1<br>(0 - 1)     | 1<br>(1 - 2)      | 47<br>(35 - 61)    | 37<br>(26 - 48)    | 7<br>(5 - 9)         |
| Multiple sclerosis                                  | 17<br>(8 - 29)         | --               | --                | 5<br>(2 - 9)       | 9<br>(4 - 16)      | 3<br>(1 - 5)         |
| Other neurological disorders                        | 30<br>(18 - 36)        | 2<br>(1 - 4)     | 1<br>(0 - 1)      | 9<br>(5 - 12)      | 13<br>(7 - 17)     | 5<br>(3 - 6)         |
| Mental and substance use disorders                  | 245<br>(185 - 293)     | 0<br>(0 - 0)     | 0<br>(0 - 0)      | 144<br>(102 - 177) | 89<br>(64 - 112)   | 12<br>(8 - 15)       |
| Schizophrenia                                       | 1<br>(1 - 2)           | --               | --                | 1<br>(0 - 1)       | 1<br>(0 - 1)       | 0<br>(0 - 0)         |
| Alcohol use disorders                               | 92<br>(54 - 127)       | --               | --                | 42<br>(24 - 58)    | 46<br>(27 - 66)    | 4<br>(2 - 6)         |
| Drug use disorders                                  | 151<br>(91 - 184)      | 0<br>(0 - 0)     | --                | 101<br>(59 - 129)  | 42<br>(27 - 57)    | 7<br>(4 - 10)        |
| Opioid use disorders                                | 58<br>(34 - 71)        | 0<br>(0 - 0)     | --                | 40<br>(23 - 50)    | 15<br>(10 - 21)    | 3<br>(2 - 4)         |
| Cocaine use disorders                               | 8<br>(4 - 10)          | 0<br>(0 - 0)     | --                | 6<br>(3 - 7)       | 2<br>(1 - 2)       | 0<br>(0 - 0)         |
| Amphetamine use disorders                           | 6<br>(4 - 8)           | 0<br>(0 - 0)     | --                | 4<br>(2 - 6)       | 2<br>(1 - 3)       | 0<br>(0 - 0)         |
| Other drug use disorders                            | 79<br>(48 - 96)        | 0<br>(0 - 0)     | --                | 52<br>(30 - 66)    | 24<br>(15 - 32)    | 4<br>(2 - 5)         |
| Eating disorders                                    | 0<br>(0 - 0)           | --               | 0<br>(0 - 0)      | 0<br>(0 - 0)       | --                 | --                   |
| Anorexia nervosa                                    | 0<br>(0 - 0)           | --               | 0<br>(0 - 0)      | 0<br>(0 - 0)       | --                 | --                   |
| Diabetes, urogenital, blood, and endocrine diseases | 726<br>(656 - 840)     | 4<br>(2 - 7)     | 2<br>(1 - 2)      | 58<br>(51 - 71)    | 290<br>(256 - 348) | 372<br>(330 - 425)   |
| Diabetes mellitus                                   | 295<br>(263 - 330)     | 0<br>(0 - 0)     | 0<br>(0 - 0)      | 20<br>(17 - 24)    | 130<br>(110 - 152) | 145<br>(123 - 169)   |
| Acute glomerulonephritis                            | 0<br>(0 - 1)           | 0<br>(0 - 0)     | 0<br>(0 - 0)      | 0<br>(0 - 0)       | 0<br>(0 - 0)       | 0<br>(0 - 0)         |
| Chronic kidney disease                              | 308<br>(261 - 400)     | 0<br>(0 - 0)     | 0<br>(0 - 0)      | 23<br>(18 - 33)    | 117<br>(94 - 170)  | 167<br>(138 - 211)   |
| Chronic kidney disease due to diabetes mellitus     | 1<br>(0 - 1)           | 0<br>(0 - 0)     | 0<br>(0 - 0)      | 0<br>(0 - 1)       | 0<br>(0 - 0)       | 0<br>(0 - 0)         |

Web Table 31- Slovakia deaths with 95% UI by age, sex, and cause in 2013

| Cause                                               | Males, All Ages          | Males, 0-4 Years | Males, 5-14 Years | Males, 15-49 Years   | Males, 50-69 Years | Males, 70-80 Years |
|-----------------------------------------------------|--------------------------|------------------|-------------------|----------------------|--------------------|--------------------|
| Chronic kidney disease due to hypertension          | 97<br>(72 - 152)         | 0<br>(0 - 0)     | 0<br>(0 - 0)      | 6<br>(4 - 10)        | 38<br>(27 - 64)    | 53<br>(36 - 79)    |
| Chronic kidney disease due to glomerulonephritis    | 6<br>(4 - 11)            | 0<br>(0 - 0)     | 0<br>(0 - 0)      | 1<br>(1 - 2)         | 3<br>(2 - 5)       | 2<br>(1 - 4)       |
| Chronic kidney disease due to other causes          | 204<br>(156 - 292)       | 0<br>(0 - 0)     | 0<br>(0 - 0)      | 15<br>(10 - 23)      | 76<br>(51 - 122)   | 112<br>(80 - 150)  |
| Urinary diseases and male infertility               | 81<br>(65 - 100)         | 0<br>(0 - 1)     | 0<br>(0 - 0)      | 5<br>(4 - 7)         | 28<br>(22 - 37)    | 47<br>(35 - 61)    |
| Interstitial nephritis and urinary tract infections | 67<br>(53 - 82)          | 0<br>(0 - 0)     | 0<br>(0 - 0)      | 4<br>(3 - 6)         | 24<br>(19 - 32)    | 38<br>(27 - 49)    |
| Urolithiasis                                        | 2<br>(1 - 4)             | --               | 0<br>(0 - 0)      | 0<br>(0 - 0)         | 1<br>(0 - 1)       | 1<br>(1 - 2)       |
| Other urinary diseases                              | 12<br>(7 - 20)           | 0<br>(0 - 0)     | 0<br>(0 - 0)      | 1<br>(0 - 1)         | 3<br>(2 - 5)       | 8<br>(4 - 14)      |
| Gynecological diseases                              | --                       | --               | --                | --                   | --                 | --                 |
| Uterine fibroids                                    | --                       | --               | --                | --                   | --                 | --                 |
| Polycystic ovarian syndrome                         | --                       | --               | --                | --                   | --                 | --                 |
| Endometriosis                                       | --                       | --               | --                | --                   | --                 | --                 |
| Genital prolapse                                    | --                       | --               | --                | --                   | --                 | --                 |
| Other gynecological diseases                        | --                       | --               | --                | --                   | --                 | --                 |
| Hemoglobinopathies and hemolytic anemias            | 8<br>(5 - 12)            | 1<br>(0 - 1)     | 0<br>(0 - 1)      | 3<br>(2 - 5)         | 2<br>(1 - 2)       | 2<br>(1 - 4)       |
| Thalassemias                                        | 2<br>(1 - 3)             | 1<br>(0 - 1)     | 0<br>(0 - 1)      | 1<br>(1 - 1)         | 0<br>(0 - 0)       | 0<br>(0 - 0)       |
| Sickle cell disorders                               | 1<br>(0 - 1)             | 0<br>(0 - 0)     | 0<br>(0 - 0)      | 0<br>(0 - 1)         | 0<br>(0 - 0)       | 0<br>(0 - 0)       |
| G6PD deficiency                                     | 0<br>(0 - 0)             | 0<br>(0 - 0)     | 0<br>(0 - 0)      | 0<br>(0 - 0)         | 0<br>(0 - 0)       | 0<br>(0 - 0)       |
| Other hemoglobinopathies and hemolytic anemias      | 6<br>(3 - 8)             | 0<br>(0 - 0)     | 0<br>(0 - 0)      | 2<br>(1 - 3)         | 1<br>(1 - 2)       | 2<br>(1 - 4)       |
| Endocrine, metabolic, blood, and immune disorders   | 33<br>(23 - 45)          | 2<br>(1 - 4)     | 1<br>(0 - 1)      | 6<br>(4 - 9)         | 13<br>(9 - 19)     | 10<br>(6 - 15)     |
| Musculoskeletal disorders                           | 13<br>(7 - 17)           | --               | 0<br>(0 - 1)      | 3<br>(2 - 4)         | 6<br>(3 - 7)       | 4<br>(2 - 5)       |
| Rheumatoid arthritis                                | 2<br>(1 - 3)             | --               | 0<br>(0 - 0)      | 0<br>(0 - 0)         | 1<br>(0 - 1)       | 1<br>(0 - 1)       |
| Other musculoskeletal disorders                     | 11<br>(6 - 15)           | --               | 0<br>(0 - 0)      | 3<br>(1 - 4)         | 5<br>(2 - 6)       | 3<br>(2 - 5)       |
| Other non-communicable diseases                     | 102<br>(68 - 158)        | 78<br>(45 - 132) | 4<br>(3 - 6)      | 11<br>(9 - 13)       | 5<br>(4 - 6)       | 3<br>(2 - 4)       |
| Congenital anomalies                                | 89<br>(58 - 138)         | 68<br>(39 - 115) | 4<br>(3 - 6)      | 11<br>(8 - 13)       | 4<br>(3 - 5)       | 2<br>(1 - 2)       |
| Neural tube defects                                 | 1<br>(0 - 1)             | 0<br>(0 - 1)     | 0<br>(0 - 0)      | 0<br>(0 - 0)         | 0<br>(0 - 0)       | 0<br>(0 - 0)       |
| Congenital heart anomalies                          | 39<br>(25 - 61)          | 29<br>(16 - 50)  | 2<br>(1 - 3)      | 6<br>(4 - 8)         | 2<br>(1 - 2)       | 0<br>(0 - 1)       |
| Cleft lip and cleft palate                          | 0<br>(0 - 1)             | 0<br>(0 - 1)     | --                | --                   | --                 | --                 |
| Down syndrome                                       | 3<br>(2 - 5)             | 1<br>(0 - 2)     | 0<br>(0 - 1)      | 1<br>(1 - 2)         | 1<br>(0 - 1)       | 0<br>(0 - 0)       |
| Chromosomal unbalanced rearrangements               | 3<br>(1 - 5)             | 2<br>(1 - 5)     | 0<br>(0 - 0)      | 0<br>(0 - 0)         | 0<br>(0 - 0)       | 0<br>(0 - 0)       |
| Other congenital anomalies                          | 42<br>(26 - 68)          | 35<br>(19 - 60)  | 2<br>(1 - 3)      | 3<br>(2 - 4)         | 2<br>(1 - 2)       | 1<br>(1 - 1)       |
| Skin and subcutaneous diseases                      | 3<br>(3 - 4)             | 0<br>(0 - 0)     | 0<br>(0 - 0)      | 1<br>(0 - 1)         | 1<br>(1 - 2)       | 1<br>(1 - 2)       |
| Cellulitis                                          | 1<br>(0 - 1)             | 0<br>(0 - 0)     | 0<br>(0 - 0)      | 0<br>(0 - 0)         | 0<br>(0 - 0)       | 0<br>(0 - 1)       |
| Pyoderma                                            | 2<br>(1 - 3)             | 0<br>(0 - 0)     | 0<br>(0 - 0)      | 0<br>(0 - 0)         | 1<br>(1 - 1)       | 1<br>(1 - 1)       |
| Decubitus ulcer                                     | 0<br>(0 - 0)             | 0<br>(0 - 0)     | 0<br>(0 - 0)      | 0<br>(0 - 0)         | 0<br>(0 - 0)       | 0<br>(0 - 0)       |
| Other skin and subcutaneous diseases                | 0<br>(0 - 0)             | 0<br>(0 - 0)     | 0<br>(0 - 0)      | 0<br>(0 - 0)         | 0<br>(0 - 0)       | 0<br>(0 - 0)       |
| Sudden infant death syndrome                        | 10<br>(4 - 19)           | 10<br>(4 - 19)   | --                | --                   | --                 | --                 |
| Injuries                                            | 1,995<br>(1,792 - 2,256) | 16<br>(9 - 29)   | 23<br>(16 - 32)   | 881<br>(791 - 1,011) | 768<br>(672 - 879) | 308<br>(270 - 363) |
| Transport injuries                                  | 459<br>(409 - 517)       | 4<br>(2 - 7)     | 10<br>(6 - 14)    | 256<br>(222 - 294)   | 139<br>(120 - 162) | 51<br>(42 - 63)    |
| Road injuries                                       | 408<br>(361 - 460)       | 3<br>(2 - 6)     | 9<br>(6 - 13)     | 227<br>(196 - 262)   | 121<br>(104 - 141) | 47<br>(38 - 57)    |
| Pedestrian road injuries                            | 135<br>(74 - 186)        | 2<br>(1 - 3)     | 4<br>(2 - 7)      | 52<br>(25 - 79)      | 50<br>(28 - 70)    | 27<br>(17 - 36)    |

Web Table 31- Slovakia deaths with 95% UI by age, sex, and cause in 2013

| Cause                                           | Males, All Ages    | Males, 0-4 Years | Males, 5-14 Years | Males, 15-49 Years | Males, 50-69 Years | Males, 70-80 Years |
|-------------------------------------------------|--------------------|------------------|-------------------|--------------------|--------------------|--------------------|
| Cyclist road injuries                           | 46<br>(32 - 73)    | 0<br>(0 - 0)     | 1<br>(1 - 3)      | 17<br>(11 - 27)    | 20<br>(13 - 32)    | 8<br>(5 - 14)      |
| Motorcyclist road injuries                      | 38<br>(23 - 55)    | 0<br>(0 - 0)     | 0<br>(0 - 1)      | 27<br>(16 - 40)    | 7<br>(4 - 13)      | 3<br>(1 - 5)       |
| Motor vehicle road injuries                     | 187<br>(130 - 236) | 1<br>(1 - 3)     | 3<br>(1 - 4)      | 130<br>(95 - 162)  | 44<br>(27 - 63)    | 9<br>(5 - 15)      |
| Other road injuries                             | 1<br>(1 - 3)       | 0<br>(0 - 0)     | 0<br>(0 - 0)      | 1<br>(0 - 1)       | 0<br>(0 - 1)       | 0<br>(0 - 0)       |
| Other transport injuries                        | 52<br>(38 - 67)    | 0<br>(0 - 1)     | 1<br>(0 - 1)      | 29<br>(20 - 38)    | 17<br>(11 - 24)    | 5<br>(3 - 8)       |
| Unintentional injuries                          | 756<br>(659 - 900) | 11<br>(6 - 20)   | 11<br>(7 - 16)    | 257<br>(219 - 310) | 312<br>(265 - 377) | 165<br>(139 - 214) |
| Falls                                           | 327<br>(265 - 433) | 1<br>(0 - 2)     | 1<br>(1 - 2)      | 83<br>(65 - 110)   | 147<br>(114 - 192) | 95<br>(73 - 144)   |
| Drowning                                        | 114<br>(75 - 168)  | 3<br>(1 - 5)     | 5<br>(3 - 8)      | 58<br>(38 - 90)    | 38<br>(25 - 57)    | 9<br>(6 - 13)      |
| Fire, heat, and hot substances                  | 38<br>(27 - 50)    | 1<br>(1 - 2)     | 0<br>(0 - 1)      | 11<br>(7 - 16)     | 14<br>(10 - 19)    | 11<br>(8 - 16)     |
| Poisonings                                      | 22<br>(15 - 30)    | 0<br>(0 - 1)     | 0<br>(0 - 0)      | 9<br>(6 - 12)      | 9<br>(6 - 13)      | 4<br>(2 - 5)       |
| Exposure to mechanical forces                   | 80<br>(68 - 102)   | 1<br>(1 - 2)     | 2<br>(1 - 3)      | 39<br>(32 - 51)    | 29<br>(24 - 38)    | 8<br>(6 - 11)      |
| Unintentional firearm injuries                  | 23<br>(17 - 29)    | 0<br>(0 - 0)     | 0<br>(0 - 1)      | 11<br>(8 - 16)     | 8<br>(5 - 12)      | 3<br>(2 - 4)       |
| Unintentional suffocation                       | 7<br>(5 - 15)      | 1<br>(0 - 1)     | 0<br>(0 - 1)      | 3<br>(2 - 6)       | 3<br>(2 - 6)       | 1<br>(1 - 2)       |
| Other exposure to mechanical forces             | 50<br>(42 - 65)    | 1<br>(0 - 1)     | 1<br>(1 - 2)      | 25<br>(20 - 35)    | 18<br>(15 - 25)    | 5<br>(3 - 6)       |
| Adverse effects of medical treatment            | 54<br>(36 - 70)    | 1<br>(0 - 2)     | 0<br>(0 - 0)      | 8<br>(5 - 11)      | 22<br>(13 - 30)    | 24<br>(14 - 32)    |
| Animal contact                                  | 6<br>(5 - 12)      | 0<br>(0 - 0)     | 0<br>(0 - 0)      | 2<br>(2 - 4)       | 3<br>(2 - 6)       | 1<br>(1 - 2)       |
| Venomous animal contact                         | 2<br>(2 - 4)       | 0<br>(0 - 0)     | 0<br>(0 - 0)      | 1<br>(1 - 2)       | 1<br>(1 - 2)       | 0<br>(0 - 1)       |
| Non-venomous animal contact                     | 4<br>(3 - 8)       | 0<br>(0 - 0)     | 0<br>(0 - 0)      | 1<br>(1 - 2)       | 2<br>(1 - 4)       | 1<br>(0 - 1)       |
| Foreign body                                    | 73<br>(38 - 114)   | 4<br>(1 - 7)     | 1<br>(0 - 1)      | 28<br>(15 - 43)    | 33<br>(17 - 53)    | 9<br>(4 - 15)      |
| Pulmonary aspiration and foreign body in airway | 72<br>(37 - 113)   | 4<br>(1 - 7)     | 1<br>(0 - 1)      | 27<br>(14 - 42)    | 32<br>(16 - 53)    | 9<br>(4 - 14)      |
| Foreign body in other body part                 | 1<br>(1 - 1)       | 0<br>(0 - 0)     | 0<br>(0 - 0)      | 0<br>(0 - 1)       | 0<br>(0 - 1)       | 0<br>(0 - 0)       |
| Other unintentional injuries                    | 43<br>(31 - 58)    | 0<br>(0 - 1)     | 1<br>(0 - 2)      | 19<br>(13 - 27)    | 18<br>(10 - 30)    | 4<br>(3 - 7)       |
| Self-harm and interpersonal violence            | 780<br>(597 - 929) | 1<br>(1 - 2)     | 2<br>(2 - 4)      | 368<br>(287 - 449) | 316<br>(223 - 388) | 92<br>(66 - 113)   |
| Self-harm                                       | 680<br>(509 - 812) | --               | 1<br>(1 - 2)      | 311<br>(235 - 384) | 284<br>(196 - 354) | 84<br>(58 - 106)   |
| Interpersonal violence                          | 99<br>(66 - 144)   | 1<br>(1 - 2)     | 1<br>(1 - 2)      | 57<br>(37 - 84)    | 32<br>(20 - 47)    | 8<br>(5 - 12)      |
| Assault by firearm                              | 28<br>(15 - 52)    | 0<br>(0 - 0)     | 0<br>(0 - 0)      | 19<br>(10 - 34)    | 8<br>(4 - 15)      | 1<br>(1 - 2)       |
| Assault by sharp object                         | 29<br>(16 - 48)    | 0<br>(0 - 0)     | 0<br>(0 - 1)      | 16<br>(9 - 27)     | 12<br>(6 - 19)     | 2<br>(1 - 3)       |
| Assault by other means                          | 42<br>(24 - 61)    | 1<br>(1 - 2)     | 1<br>(0 - 1)      | 22<br>(12 - 34)    | 12<br>(7 - 18)     | 5<br>(3 - 8)       |
| Forces of nature, war, and legal intervention   | 0<br>(0 - 0)       | 0<br>(0 - 0)     | --                | --                 | --                 | 0<br>(0 - 0)       |
| Exposure to forces of nature                    | 0<br>(0 - 0)       | 0<br>(0 - 0)     | --                | --                 | --                 | 0<br>(0 - 0)       |

Web Table 31- Slovakia deaths with 95% UI by age, sex, and cause in 2013

| Cause                                                             | Females, All Ages           | Females, 0-4 Years | Females, 5-14 Years | Females, 15-49 Years | Females, 50-69 Years     | Females, 70-80 Years        |
|-------------------------------------------------------------------|-----------------------------|--------------------|---------------------|----------------------|--------------------------|-----------------------------|
| All causes                                                        | 26,425<br>(24,720 - 28,077) | 168<br>(100 - 266) | 31<br>(23 - 40)     | 949<br>(854 - 1,045) | 5,062<br>(4,651 - 5,469) | 20,216<br>(18,979 - 21,394) |
| Communicable, maternal, neonatal, and nutritional diseases        | 1,090<br>(874 - 1,400)      | 79<br>(47 - 128)   | 4<br>(2 - 5)        | 39<br>(33 - 46)      | 124<br>(97 - 152)        | 844<br>(641 - 1,150)        |
| HIV/AIDS and tuberculosis                                         | 15<br>(11 - 20)             | 0<br>(0 - 0)       | 0<br>(0 - 0)        | 2<br>(1 - 2)         | 3<br>(2 - 4)             | 10<br>(7 - 14)              |
| Tuberculosis                                                      | 14<br>(10 - 19)             | 0<br>(0 - 0)       | 0<br>(0 - 0)        | 1<br>(1 - 1)         | 3<br>(2 - 4)             | 10<br>(7 - 14)              |
| HIV/AIDS                                                          | 1<br>(1 - 1)                | 0<br>(0 - 0)       | 0<br>(0 - 0)        | 1<br>(1 - 1)         | 0<br>(0 - 0)             | 0<br>(0 - 0)                |
| HIV/AIDS resulting in mycobacterial infection                     | 0<br>(0 - 0)                | 0<br>(0 - 0)       | 0<br>(0 - 0)        | 0<br>(0 - 0)         | 0<br>(0 - 0)             | 0<br>(0 - 0)                |
| HIV/AIDS resulting in other diseases                              | 1<br>(1 - 1)                | 0<br>(0 - 0)       | 0<br>(0 - 0)        | 1<br>(0 - 1)         | 0<br>(0 - 0)             | 0<br>(0 - 0)                |
| Diarrhea, lower respiratory, and other common infectious diseases | 985<br>(775 - 1,298)        | 17<br>(9 - 29)     | 3<br>(2 - 5)        | 30<br>(25 - 37)      | 114<br>(88 - 142)        | 820<br>(617 - 1,125)        |
| Diarrheal diseases                                                | 9<br>(6 - 12)               | 1<br>(0 - 2)       | 0<br>(0 - 0)        | 1<br>(0 - 1)         | 2<br>(1 - 2)             | 5<br>(3 - 9)                |
| Intestinal infectious diseases                                    | 3<br>(1 - 7)                | 0<br>(0 - 1)       | 0<br>(0 - 1)        | 1<br>(0 - 2)         | 1<br>(0 - 2)             | 1<br>(0 - 1)                |
| Typhoid fever                                                     | 2<br>(1 - 5)                | 0<br>(0 - 1)       | 0<br>(0 - 0)        | 1<br>(0 - 2)         | 1<br>(0 - 2)             | 0<br>(0 - 1)                |
| Paratyphoid fever                                                 | 1<br>(0 - 1)                | 0<br>(0 - 0)       | 0<br>(0 - 0)        | 0<br>(0 - 0)         | 0<br>(0 - 0)             | 0<br>(0 - 0)                |
| Other intestinal infectious diseases                              | 0<br>(0 - 2)                | 0<br>(0 - 1)       | 0<br>(0 - 0)        | 0<br>(0 - 1)         | 0<br>(0 - 1)             | 0<br>(0 - 1)                |
| Lower respiratory infections                                      | 956<br>(743 - 1,269)        | 13<br>(7 - 23)     | 2<br>(1 - 3)        | 25<br>(20 - 32)      | 107<br>(81 - 134)        | 809<br>(608 - 1,115)        |
| Upper respiratory infections                                      | 1<br>(0 - 2)                | 0<br>(0 - 0)       | 0<br>(0 - 0)        | 0<br>(0 - 0)         | 0<br>(0 - 0)             | 0<br>(0 - 2)                |
| Otitis media                                                      | 0<br>(0 - 1)                | 0<br>(0 - 0)       | 0<br>(0 - 0)        | 0<br>(0 - 0)         | 0<br>(0 - 0)             | 0<br>(0 - 0)                |
| Meningitis                                                        | 9<br>(7 - 12)               | 2<br>(1 - 4)       | 0<br>(0 - 1)        | 2<br>(1 - 2)         | 3<br>(2 - 4)             | 3<br>(2 - 3)                |
| Pneumococcal meningitis                                           | 2<br>(2 - 3)                | 0<br>(0 - 1)       | 0<br>(0 - 0)        | 0<br>(0 - 1)         | 1<br>(0 - 1)             | 1<br>(0 - 1)                |
| H influenzae type B meningitis                                    | 1<br>(1 - 2)                | 1<br>(0 - 1)       | 0<br>(0 - 0)        | 0<br>(0 - 0)         | 0<br>(0 - 0)             | 0<br>(0 - 0)                |
| Meningococcal meningitis                                          | 2<br>(1 - 3)                | 0<br>(0 - 1)       | 0<br>(0 - 0)        | 0<br>(0 - 1)         | 1<br>(0 - 1)             | 0<br>(0 - 1)                |
| Other meningitis                                                  | 4<br>(3 - 5)                | 1<br>(0 - 1)       | 0<br>(0 - 0)        | 1<br>(0 - 1)         | 1<br>(1 - 2)             | 1<br>(1 - 2)                |
| Encephalitis                                                      | 4<br>(3 - 6)                | 0<br>(0 - 1)       | 0<br>(0 - 0)        | 1<br>(1 - 2)         | 1<br>(1 - 3)             | 1<br>(0 - 1)                |
| Diphtheria                                                        | 0<br>(0 - 0)                | 0<br>(0 - 0)       | 0<br>(0 - 0)        | 0<br>(0 - 0)         | 0<br>(0 - 0)             | --                          |
| Whooping cough                                                    | 0<br>(0 - 0)                | 0<br>(0 - 0)       | 0<br>(0 - 0)        | 0<br>(0 - 0)         | 0<br>(0 - 0)             | --                          |
| Tetanus                                                           | 0<br>(0 - 0)                | 0<br>(0 - 0)       | 0<br>(0 - 0)        | 0<br>(0 - 0)         | 0<br>(0 - 0)             | 0<br>(0 - 0)                |
| Measles                                                           | 0<br>(0 - 0)                | 0<br>(0 - 0)       | 0<br>(0 - 0)        | 0<br>(0 - 0)         | 0<br>(0 - 0)             | --                          |
| Varicella and herpes zoster                                       | 2<br>(0 - 9)                | 0<br>(0 - 0)       | 0<br>(0 - 0)        | 0<br>(0 - 1)         | 0<br>(0 - 1)             | 2<br>(0 - 9)                |
| Neglected tropical diseases and malaria                           | 1<br>(1 - 1)                | 0<br>(0 - 0)       | 0<br>(0 - 0)        | 0<br>(0 - 1)         | 0<br>(0 - 0)             | 0<br>(0 - 0)                |
| Cysticercosis                                                     | 0<br>(0 - 0)                | 0<br>(0 - 0)       | 0<br>(0 - 0)        | 0<br>(0 - 0)         | 0<br>(0 - 0)             | 0<br>(0 - 0)                |
| Cystic echinococcosis                                             | 0<br>(0 - 0)                | 0<br>(0 - 0)       | 0<br>(0 - 0)        | 0<br>(0 - 0)         | 0<br>(0 - 0)             | 0<br>(0 - 0)                |
| Dengue                                                            | 0<br>(0 - 0)                | 0<br>(0 - 0)       | 0<br>(0 - 0)        | 0<br>(0 - 0)         | 0<br>(0 - 0)             | 0<br>(0 - 0)                |
| Rabies                                                            | 0<br>(0 - 0)                | 0<br>(0 - 0)       | 0<br>(0 - 0)        | 0<br>(0 - 0)         | 0<br>(0 - 0)             | 0<br>(0 - 0)                |
| Other neglected tropical diseases                                 | 0<br>(0 - 1)                | 0<br>(0 - 0)       | 0<br>(0 - 0)        | 0<br>(0 - 0)         | 0<br>(0 - 0)             | 0<br>(0 - 0)                |
| Maternal disorders                                                | 4<br>(3 - 5)                | --                 | 0<br>(0 - 0)        | 4<br>(3 - 5)         | --                       | --                          |
| Maternal hemorrhage                                               | 0<br>(0 - 1)                | --                 | 0<br>(0 - 0)        | 0<br>(0 - 1)         | --                       | --                          |
| Maternal sepsis and other maternal infections                     | 0<br>(0 - 0)                | --                 | 0<br>(0 - 0)        | 0<br>(0 - 0)         | --                       | --                          |
| Maternal hypertensive disorders                                   | 0<br>(0 - 1)                | --                 | 0<br>(0 - 0)        | 0<br>(0 - 1)         | --                       | --                          |
| Maternal obstructed labor                                         | 0<br>(0 - 1)                | --                 | 0<br>(0 - 0)        | 0<br>(0 - 1)         | --                       | --                          |
| Maternal abortive outcome                                         | 1<br>(1 - 1)                | --                 | 0<br>(0 - 0)        | 1<br>(1 - 1)         | --                       | --                          |
| Indirect maternal deaths                                          | 0<br>(0 - 1)                | --                 | 0<br>(0 - 0)        | 0<br>(0 - 1)         | --                       | --                          |



Web Table 31- Slovakia deaths with 95% UI by age, sex, and cause in 2013

| Cause                                                            | Females, All Ages           | Females, 0-4 Years | Females, 5-14 Years | Females, 15-49 Years | Females, 50-69 Years     | Females, 70-80 Years        |
|------------------------------------------------------------------|-----------------------------|--------------------|---------------------|----------------------|--------------------------|-----------------------------|
| Late maternal deaths                                             | 0<br>(0 - 1)                | --                 | 0<br>(0 - 0)        | 0<br>(0 - 1)         | --                       | --                          |
| Maternal deaths aggravated by HIV/AIDS                           | 0<br>(0 - 0)                | --                 | --                  | 0<br>(0 - 0)         | --                       | --                          |
| Other maternal disorders                                         | 1<br>(0 - 1)                | --                 | 0<br>(0 - 0)        | 1<br>(0 - 1)         | --                       | --                          |
| Neonatal disorders                                               | 61<br>(36 - 98)             | 61<br>(36 - 98)    | --                  | --                   | --                       | --                          |
| Neonatal preterm birth complications                             | 45<br>(26 - 73)             | 45<br>(26 - 73)    | --                  | --                   | --                       | --                          |
| Neonatal encephalopathy due to birth asphyxia and trauma         | 9<br>(4 - 15)               | 9<br>(4 - 15)      | --                  | --                   | --                       | --                          |
| Neonatal sepsis and other neonatal infections                    | 0<br>(0 - 1)                | 0<br>(0 - 1)       | --                  | --                   | --                       | --                          |
| Hemolytic disease and other neonatal jaundice                    | 0<br>(0 - 0)                | 0<br>(0 - 0)       | --                  | --                   | --                       | --                          |
| Other neonatal disorders                                         | 7<br>(3 - 15)               | 7<br>(3 - 15)      | --                  | --                   | --                       | --                          |
| Nutritional deficiencies                                         | 13<br>(9 - 16)              | 0<br>(0 - 0)       | 0<br>(0 - 0)        | 1<br>(1 - 2)         | 2<br>(1 - 2)             | 9<br>(7 - 13)               |
| Protein-energy malnutrition                                      | 1<br>(1 - 3)                | 0<br>(0 - 0)       | 0<br>(0 - 0)        | 0<br>(0 - 0)         | 0<br>(0 - 0)             | 1<br>(0 - 2)                |
| Iodine deficiency                                                | 0<br>(0 - 1)                | 0<br>(0 - 0)       | 0<br>(0 - 0)        | 0<br>(0 - 0)         | 0<br>(0 - 0)             | 0<br>(0 - 1)                |
| Iron-deficiency anemia                                           | 10<br>(7 - 14)              | 0<br>(0 - 0)       | 0<br>(0 - 0)        | 1<br>(1 - 1)         | 1<br>(1 - 2)             | 8<br>(5 - 11)               |
| Other nutritional deficiencies                                   | 1<br>(0 - 1)                | 0<br>(0 - 0)       | 0<br>(0 - 0)        | 0<br>(0 - 0)         | 0<br>(0 - 0)             | 0<br>(0 - 1)                |
| Other communicable, maternal, neonatal, and nutritional diseases | 11<br>(8 - 14)              | 1<br>(0 - 2)       | 0<br>(0 - 0)        | 1<br>(1 - 2)         | 4<br>(3 - 5)             | 5<br>(3 - 6)                |
| Sexually transmitted diseases excluding HIV                      | 2<br>(1 - 3)                | 1<br>(0 - 1)       | 0<br>(0 - 0)        | 1<br>(0 - 1)         | 0<br>(0 - 1)             | 1<br>(0 - 1)                |
| Syphilis                                                         | 2<br>(1 - 2)                | 1<br>(0 - 1)       | 0<br>(0 - 0)        | 0<br>(0 - 0)         | 0<br>(0 - 0)             | 0<br>(0 - 1)                |
| Chlamydial infection                                             | 0<br>(0 - 0)                | --                 | 0<br>(0 - 0)        | 0<br>(0 - 0)         | 0<br>(0 - 0)             | 0<br>(0 - 0)                |
| Gonococcal infection                                             | 0<br>(0 - 0)                | --                 | 0<br>(0 - 0)        | 0<br>(0 - 0)         | 0<br>(0 - 0)             | 0<br>(0 - 0)                |
| Other sexually transmitted diseases                              | 0<br>(0 - 0)                | --                 | 0<br>(0 - 0)        | 0<br>(0 - 0)         | 0<br>(0 - 0)             | 0<br>(0 - 0)                |
| Hepatitis                                                        | 2<br>(1 - 2)                | 0<br>(0 - 0)       | 0<br>(0 - 0)        | 0<br>(0 - 0)         | 1<br>(0 - 1)             | 1<br>(0 - 1)                |
| Acute hepatitis A                                                | 0<br>(0 - 1)                | 0<br>(0 - 0)       | 0<br>(0 - 0)        | 0<br>(0 - 0)         | 0<br>(0 - 0)             | 0<br>(0 - 0)                |
| Acute hepatitis B                                                | 1<br>(1 - 2)                | 0<br>(0 - 0)       | 0<br>(0 - 0)        | 0<br>(0 - 0)         | 1<br>(0 - 1)             | 1<br>(0 - 1)                |
| Acute hepatitis C                                                | 0<br>(0 - 0)                | --                 | 0<br>(0 - 0)        | 0<br>(0 - 0)         | 0<br>(0 - 0)             | 0<br>(0 - 0)                |
| Other infectious diseases                                        | 8<br>(4 - 10)               | 0<br>(0 - 1)       | 0<br>(0 - 0)        | 1<br>(0 - 1)         | 3<br>(2 - 4)             | 3<br>(2 - 5)                |
| Non-communicable diseases                                        | 24,667<br>(23,025 - 26,273) | 77<br>(45 - 122)   | 16<br>(12 - 21)     | 749<br>(670 - 829)   | 4,760<br>(4,366 - 5,146) | 19,065<br>(17,869 - 20,211) |
| Neoplasms                                                        | 5,157<br>(4,599 - 5,697)    | 5<br>(3 - 8)       | 8<br>(5 - 10)       | 396<br>(350 - 445)   | 2,078<br>(1,820 - 2,290) | 2,670<br>(2,351 - 2,995)    |
| Esophageal cancer                                                | 40<br>(33 - 48)             | --                 | --                  | 2<br>(1 - 3)         | 14<br>(11 - 18)          | 24<br>(19 - 30)             |
| Stomach cancer                                                   | 312<br>(230 - 421)          | --                 | --                  | 16<br>(12 - 21)      | 90<br>(67 - 118)         | 206<br>(149 - 289)          |
| Liver cancer                                                     | 177<br>(136 - 229)          | --                 | 0<br>(0 - 0)        | 8<br>(6 - 11)        | 63<br>(47 - 81)          | 106<br>(76 - 146)           |
| Liver cancer due to hepatitis B                                  | 30<br>(15 - 48)             | --                 | 0<br>(0 - 0)        | 2<br>(1 - 3)         | 14<br>(7 - 24)           | 14<br>(7 - 23)              |
| Liver cancer due to hepatitis C                                  | 80<br>(47 - 115)            | --                 | 0<br>(0 - 0)        | 3<br>(1 - 5)         | 27<br>(14 - 41)          | 49<br>(27 - 76)             |
| Liver cancer due to alcohol use                                  | 38<br>(22 - 59)             | --                 | --                  | 1<br>(0 - 1)         | 10<br>(6 - 17)           | 27<br>(14 - 44)             |
| Liver cancer due to other causes                                 | 30<br>(16 - 46)             | --                 | 0<br>(0 - 0)        | 2<br>(1 - 3)         | 11<br>(6 - 19)           | 16<br>(8 - 26)              |
| Larynx cancer                                                    | 10<br>(7 - 14)              | --                 | --                  | 1<br>(1 - 1)         | 5<br>(4 - 8)             | 3<br>(2 - 5)                |
| Tracheal, bronchus and lung cancer                               | 498<br>(390 - 579)          | --                 | --                  | 29<br>(23 - 37)      | 239<br>(167 - 288)       | 229<br>(178 - 283)          |
| Breast cancer                                                    | 792<br>(581 - 946)          | --                 | --                  | 82<br>(65 - 109)     | 369<br>(267 - 451)       | 341<br>(225 - 420)          |
| Cervical cancer                                                  | 232<br>(166 - 287)          | --                 | --                  | 52<br>(37 - 67)      | 106<br>(72 - 138)        | 75<br>(54 - 98)             |
| Uterine cancer                                                   | 219<br>(177 - 276)          | --                 | --                  | 10<br>(7 - 13)       | 95<br>(72 - 127)         | 114<br>(86 - 150)           |
| Prostate cancer                                                  | --                          | --                 | --                  | --                   | --                       | --                          |

Web Table 31- Slovakia deaths with 95% UI by age, sex, and cause in 2013

| Cause                                         | Females, All Ages           | Females, 0-4 Years | Females, 5-14 Years | Females, 15-49 Years | Females, 50-69 Years     | Females, 70-80 Years        |
|-----------------------------------------------|-----------------------------|--------------------|---------------------|----------------------|--------------------------|-----------------------------|
| Colon and rectum cancer                       | 768<br>(658 - 899)          | --                 | --                  | 31<br>(26 - 38)      | 248<br>(216 - 283)       | 489<br>(395 - 611)          |
| Lip and oral cavity cancer                    | 40<br>(32 - 48)             | --                 | --                  | 3<br>(3 - 4)         | 15<br>(12 - 18)          | 21<br>(16 - 27)             |
| Nasopharynx cancer                            | 7<br>(3 - 14)               | --                 | 0<br>(0 - 0)        | 1<br>(0 - 2)         | 3<br>(1 - 6)             | 3<br>(1 - 6)                |
| Other pharynx cancer                          | 19<br>(15 - 25)             | --                 | --                  | 2<br>(1 - 3)         | 10<br>(7 - 13)           | 7<br>(5 - 10)               |
| Gallbladder and biliary tract cancer          | 233<br>(172 - 330)          | --                 | --                  | 6<br>(5 - 10)        | 83<br>(62 - 115)         | 144<br>(98 - 212)           |
| Pancreatic cancer                             | 381<br>(331 - 435)          | --                 | --                  | 11<br>(9 - 14)       | 147<br>(125 - 172)       | 222<br>(185 - 266)          |
| Malignant skin melanoma                       | 84<br>(53 - 106)            | --                 | --                  | 14<br>(9 - 19)       | 34<br>(22 - 45)          | 36<br>(21 - 49)             |
| Non-melanoma skin cancer                      | 26<br>(18 - 38)             | --                 | --                  | 1<br>(0 - 1)         | 3<br>(2 - 3)             | 23<br>(15 - 34)             |
| Ovarian cancer                                | 306<br>(255 - 360)          | --                 | --                  | 34<br>(27 - 42)      | 158<br>(129 - 191)       | 113<br>(85 - 144)           |
| Testicular cancer                             | --                          | --                 | --                  | --                   | --                       | --                          |
| Kidney cancer                                 | 118<br>(79 - 168)           | 0<br>(0 - 0)       | 0<br>(0 - 0)        | 5<br>(3 - 7)         | 51<br>(35 - 72)          | 61<br>(37 - 99)             |
| Bladder cancer                                | 71<br>(47 - 96)             | --                 | --                  | 2<br>(1 - 2)         | 18<br>(12 - 25)          | 51<br>(33 - 73)             |
| Brain and nervous system cancer               | 168<br>(122 - 200)          | 1<br>(0 - 2)       | 3<br>(2 - 4)        | 26<br>(20 - 33)      | 86<br>(65 - 106)         | 54<br>(29 - 71)             |
| Thyroid cancer                                | 29<br>(22 - 40)             | --                 | 0<br>(0 - 0)        | 1<br>(1 - 1)         | 9<br>(6 - 12)            | 19<br>(13 - 28)             |
| Mesothelioma                                  | 4<br>(2 - 5)                | --                 | --                  | 0<br>(0 - 1)         | 1<br>(1 - 2)             | 2<br>(1 - 3)                |
| Hodgkin lymphoma                              | 16<br>(12 - 23)             | 0<br>(0 - 0)       | 0<br>(0 - 0)        | 5<br>(3 - 7)         | 6<br>(4 - 9)             | 5<br>(4 - 8)                |
| Non-Hodgkin lymphoma                          | 132<br>(52 - 178)           | 0<br>(0 - 1)       | 0<br>(0 - 1)        | 12<br>(5 - 17)       | 52<br>(19 - 71)          | 68<br>(26 - 95)             |
| Multiple myeloma                              | 90<br>(56 - 139)            | --                 | --                  | 4<br>(2 - 6)         | 36<br>(22 - 56)          | 50<br>(30 - 80)             |
| Leukemia                                      | 153<br>(126 - 184)          | 1<br>(0 - 2)       | 2<br>(1 - 3)        | 17<br>(13 - 22)      | 55<br>(42 - 69)          | 79<br>(62 - 98)             |
| Other neoplasms                               | 233<br>(181 - 285)          | 2<br>(1 - 4)       | 2<br>(1 - 3)        | 22<br>(17 - 27)      | 83<br>(64 - 101)         | 125<br>(89 - 165)           |
| Cardiovascular diseases                       | 15,312<br>(14,012 - 16,418) | 2<br>(1 - 4)       | 1<br>(1 - 2)        | 152<br>(121 - 180)   | 1,858<br>(1,650 - 2,147) | 13,298<br>(12,196 - 14,206) |
| Rheumatic heart disease                       | 60<br>(28 - 79)             | 0<br>(0 - 0)       | 0<br>(0 - 0)        | 3<br>(1 - 4)         | 18<br>(10 - 24)          | 39<br>(17 - 55)             |
| Ischemic heart disease                        | 9,565<br>(8,129 - 10,549)   | 0<br>(0 - 0)       | 0<br>(0 - 0)        | 64<br>(46 - 80)      | 1,072<br>(910 - 1,295)   | 8,429<br>(7,115 - 9,289)    |
| Cerebrovascular disease                       | 3,940<br>(3,366 - 4,963)    | 0<br>(0 - 0)       | 0<br>(0 - 1)        | 39<br>(29 - 50)      | 482<br>(393 - 618)       | 3,418<br>(2,902 - 4,331)    |
| Ischemic stroke                               | 3,230<br>(2,742 - 4,081)    | 0<br>(0 - 0)       | 0<br>(0 - 0)        | 9<br>(5 - 12)        | 263<br>(204 - 352)       | 2,959<br>(2,501 - 3,759)    |
| Hemorrhagic stroke                            | 709<br>(522 - 995)          | 0<br>(0 - 0)       | 0<br>(0 - 1)        | 31<br>(23 - 39)      | 219<br>(167 - 299)       | 459<br>(327 - 690)          |
| Hypertensive heart disease                    | 830<br>(573 - 1,241)        | 0<br>(0 - 0)       | 0<br>(0 - 0)        | 7<br>(5 - 10)        | 72<br>(48 - 97)          | 751<br>(506 - 1,148)        |
| Cardiomyopathy and myocarditis                | 58<br>(41 - 73)             | 2<br>(1 - 3)       | 1<br>(0 - 1)        | 11<br>(8 - 15)       | 22<br>(15 - 28)          | 23<br>(15 - 31)             |
| Atrial fibrillation and flutter               | 137<br>(98 - 190)           | --                 | --                  | 0<br>(0 - 0)         | 12<br>(8 - 16)           | 125<br>(87 - 178)           |
| Aortic aneurysm                               | 46<br>(28 - 69)             | --                 | --                  | 4<br>(2 - 5)         | 12<br>(7 - 18)           | 30<br>(19 - 46)             |
| Peripheral vascular disease                   | 8<br>(6 - 12)               | --                 | --                  | 0<br>(0 - 0)         | 1<br>(1 - 1)             | 7<br>(5 - 11)               |
| Endocarditis                                  | 19<br>(12 - 29)             | 0<br>(0 - 0)       | 0<br>(0 - 0)        | 1<br>(1 - 2)         | 5<br>(3 - 8)             | 12<br>(7 - 19)              |
| Other cardiovascular and circulatory diseases | 649<br>(480 - 845)          | 0<br>(0 - 1)       | 0<br>(0 - 0)        | 23<br>(15 - 31)      | 162<br>(114 - 212)       | 463<br>(327 - 641)          |
| Chronic respiratory diseases                  | 464<br>(311 - 554)          | 1<br>(0 - 1)       | 0<br>(0 - 0)        | 13<br>(10 - 16)      | 86<br>(50 - 104)         | 365<br>(248 - 445)          |
| Chronic obstructive pulmonary disease         | 370<br>(253 - 457)          | 0<br>(0 - 1)       | 0<br>(0 - 0)        | 7<br>(4 - 9)         | 63<br>(37 - 79)          | 300<br>(204 - 379)          |
| Pneumoconiosis                                | 1<br>(1 - 2)                | 0<br>(0 - 0)       | 0<br>(0 - 0)        | 0<br>(0 - 0)         | 0<br>(0 - 1)             | 1<br>(0 - 1)                |
| Silicosis                                     | 0<br>(0 - 0)                | 0<br>(0 - 0)       | 0<br>(0 - 0)        | 0<br>(0 - 0)         | 0<br>(0 - 0)             | 0<br>(0 - 0)                |
| Asbestosis                                    | 0<br>(0 - 0)                | 0<br>(0 - 0)       | 0<br>(0 - 0)        | 0<br>(0 - 0)         | 0<br>(0 - 0)             | 0<br>(0 - 0)                |
| Coal workers pneumoconiosis                   | 0<br>(0 - 0)                | 0<br>(0 - 0)       | 0<br>(0 - 0)        | 0<br>(0 - 0)         | 0<br>(0 - 0)             | 0<br>(0 - 0)                |
| Other pneumoconiosis                          | 1<br>(1 - 2)                | 0<br>(0 - 0)       | 0<br>(0 - 0)        | 0<br>(0 - 0)         | 0<br>(0 - 1)             | 1<br>(0 - 1)                |

Web Table 31- Slovakia deaths with 95% UI by age, sex, and cause in 2013

| Cause                                               | Females, All Ages        | Females, 0-4 Years | Females, 5-14 Years | Females, 15-49 Years | Females, 50-69 Years | Females, 70-80 Years     |
|-----------------------------------------------------|--------------------------|--------------------|---------------------|----------------------|----------------------|--------------------------|
| Asthma                                              | 34<br>(16 - 53)          | 0<br>(0 - 0)       | 0<br>(0 - 0)        | 2<br>(1 - 3)         | 9<br>(4 - 14)        | 23<br>(10 - 38)          |
| Interstitial lung disease and pulmonary sarcoidosis | 45<br>(20 - 74)          | 0<br>(0 - 0)       | 0<br>(0 - 0)        | 3<br>(1 - 4)         | 11<br>(5 - 19)       | 31<br>(12 - 54)          |
| Other chronic respiratory diseases                  | 13<br>(8 - 21)           | 0<br>(0 - 0)       | 0<br>(0 - 0)        | 1<br>(1 - 2)         | 2<br>(1 - 3)         | 10<br>(5 - 17)           |
| Cirrhosis                                           | 439<br>(380 - 496)       | 0<br>(0 - 1)       | 0<br>(0 - 0)        | 79<br>(66 - 93)      | 264<br>(224 - 307)   | 96<br>(80 - 114)         |
| Cirrhosis due to hepatitis B                        | 158<br>(99 - 231)        | 0<br>(0 - 0)       | 0<br>(0 - 0)        | 28<br>(15 - 42)      | 95<br>(59 - 140)     | 35<br>(20 - 50)          |
| Cirrhosis due to hepatitis C                        | 121<br>(49 - 178)        | 0<br>(0 - 0)       | 0<br>(0 - 0)        | 21<br>(8 - 31)       | 76<br>(29 - 115)     | 24<br>(11 - 39)          |
| Cirrhosis due to alcohol use                        | 85<br>(51 - 136)         | --<br>(0 - 0)      | --<br>(0 - 0)       | 10<br>(4 - 18)       | 49<br>(28 - 80)      | 26<br>(16 - 40)          |
| Cirrhosis due to other causes                       | 75<br>(39 - 121)         | 0<br>(0 - 1)       | 0<br>(0 - 0)        | 21<br>(12 - 33)      | 43<br>(20 - 72)      | 11<br>(5 - 17)           |
| Digestive diseases                                  | 517<br>(396 - 599)       | 0<br>(0 - 1)       | 0<br>(0 - 1)        | 23<br>(17 - 27)      | 106<br>(75 - 128)    | 387<br>(299 - 462)       |
| Peptic ulcer disease                                | 98<br>(65 - 134)         | 0<br>(0 - 0)       | 0<br>(0 - 0)        | 3<br>(2 - 5)         | 18<br>(11 - 26)      | 77<br>(49 - 107)         |
| Gastritis and duodenitis                            | 9<br>(3 - 14)            | 0<br>(0 - 0)       | 0<br>(0 - 0)        | 0<br>(0 - 1)         | 2<br>(1 - 2)         | 7<br>(2 - 11)            |
| Appendicitis                                        | 7<br>(4 - 11)            | 0<br>(0 - 0)       | 0<br>(0 - 0)        | 0<br>(0 - 1)         | 2<br>(1 - 3)         | 5<br>(2 - 8)             |
| Paralytic ileus and intestinal obstruction          | 116<br>(59 - 169)        | 0<br>(0 - 0)       | 0<br>(0 - 0)        | 4<br>(2 - 5)         | 20<br>(9 - 30)       | 92<br>(46 - 137)         |
| Inguinal, femoral, and abdominal hernia             | 16<br>(7 - 27)           | 0<br>(0 - 0)       | 0<br>(0 - 0)        | 0<br>(0 - 0)         | 3<br>(1 - 5)         | 13<br>(6 - 22)           |
| Inflammatory bowel disease                          | 25<br>(12 - 35)          | 0<br>(0 - 0)       | 0<br>(0 - 0)        | 2<br>(1 - 2)         | 7<br>(3 - 10)        | 16<br>(8 - 24)           |
| Vascular intestinal disorders                       | 46<br>(20 - 73)          | 0<br>(0 - 0)       | 0<br>(0 - 0)        | 0<br>(0 - 1)         | 7<br>(3 - 12)        | 38<br>(16 - 61)          |
| Gallbladder and biliary diseases                    | 66<br>(48 - 93)          | 0<br>(0 - 0)       | 0<br>(0 - 0)        | 1<br>(1 - 2)         | 11<br>(7 - 15)       | 54<br>(38 - 77)          |
| Pancreatitis                                        | 88<br>(57 - 129)         | 0<br>(0 - 0)       | 0<br>(0 - 0)        | 8<br>(6 - 11)        | 26<br>(17 - 37)      | 54<br>(33 - 83)          |
| Other digestive diseases                            | 46<br>(34 - 62)          | 0<br>(0 - 0)       | 0<br>(0 - 0)        | 3<br>(2 - 4)         | 11<br>(7 - 14)       | 33<br>(23 - 46)          |
| Neurological disorders                              | 1,696<br>(1,335 - 2,108) | 3<br>(1 - 4)       | 2<br>(1 - 2)        | 24<br>(19 - 29)      | 106<br>(84 - 130)    | 1,562<br>(1,201 - 1,978) |
| Alzheimer disease and other dementias               | 1,586<br>(1,231 - 2,008) | --<br>(0 - 0)      | --<br>(0 - 0)       | 0<br>(0 - 0)         | 65<br>(46 - 85)      | 1,521<br>(1,167 - 1,944) |
| Parkinson disease                                   | 30<br>(13 - 39)          | --<br>(0 - 0)      | --<br>(0 - 0)       | 0<br>(0 - 0)         | 5<br>(3 - 7)         | 24<br>(10 - 33)          |
| Epilepsy                                            | 25<br>(18 - 31)          | 1<br>(0 - 1)       | 1<br>(1 - 1)        | 12<br>(8 - 15)       | 8<br>(5 - 10)        | 5<br>(3 - 6)             |
| Multiple sclerosis                                  | 30<br>(15 - 42)          | --<br>(0 - 0)      | --<br>(0 - 0)       | 8<br>(4 - 12)        | 17<br>(8 - 25)       | 5<br>(2 - 8)             |
| Other neurological disorders                        | 25<br>(21 - 29)          | 2<br>(1 - 3)       | 1<br>(0 - 1)        | 4<br>(3 - 5)         | 11<br>(9 - 14)       | 6<br>(5 - 8)             |
| Mental and substance use disorders                  | 50<br>(38 - 65)          | 0<br>(0 - 0)       | 0<br>(0 - 0)        | 19<br>(15 - 26)      | 24<br>(16 - 32)      | 7<br>(5 - 9)             |
| Schizophrenia                                       | 1<br>(1 - 1)             | --<br>(0 - 0)      | --<br>(0 - 0)       | 0<br>(0 - 0)         | 0<br>(0 - 1)         | 0<br>(0 - 0)             |
| Alcohol use disorders                               | 20<br>(8 - 34)           | --<br>(0 - 0)      | --<br>(0 - 0)       | 7<br>(3 - 13)        | 11<br>(4 - 19)       | 1<br>(1 - 3)             |
| Drug use disorders                                  | 29<br>(24 - 36)          | 0<br>(0 - 0)       | --<br>(0 - 0)       | 11<br>(9 - 14)       | 12<br>(9 - 16)       | 5<br>(4 - 7)             |
| Opioid use disorders                                | 10<br>(8 - 13)           | 0<br>(0 - 0)       | --<br>(0 - 0)       | 4<br>(3 - 5)         | 4<br>(3 - 6)         | 2<br>(1 - 3)             |
| Cocaine use disorders                               | 2<br>(2 - 3)             | 0<br>(0 - 0)       | --<br>(0 - 0)       | 1<br>(1 - 1)         | 1<br>(1 - 1)         | 0<br>(0 - 0)             |
| Amphetamine use disorders                           | 2<br>(2 - 2)             | 0<br>(0 - 0)       | --<br>(0 - 0)       | 1<br>(1 - 1)         | 1<br>(1 - 1)         | 0<br>(0 - 0)             |
| Other drug use disorders                            | 15<br>(12 - 18)          | 0<br>(0 - 0)       | --<br>(0 - 0)       | 6<br>(4 - 7)         | 7<br>(5 - 9)         | 3<br>(2 - 4)             |
| Eating disorders                                    | 0<br>(0 - 1)             | --<br>(0 - 0)      | 0<br>(0 - 0)        | 0<br>(0 - 1)         | --<br>(0 - 0)        | --<br>(0 - 0)            |
| Anorexia nervosa                                    | 0<br>(0 - 1)             | --<br>(0 - 0)      | 0<br>(0 - 0)        | 0<br>(0 - 1)         | --<br>(0 - 0)        | --<br>(0 - 0)            |
| Diabetes, urogenital, blood, and endocrine diseases | 909<br>(796 - 1,071)     | 3<br>(2 - 5)       | 1<br>(1 - 2)        | 30<br>(25 - 36)      | 218<br>(184 - 273)   | 656<br>(562 - 781)       |
| Diabetes mellitus                                   | 397<br>(333 - 484)       | 0<br>(0 - 0)       | 0<br>(0 - 0)        | 8<br>(6 - 9)         | 96<br>(77 - 124)     | 293<br>(239 - 369)       |
| Acute glomerulonephritis                            | 0<br>(0 - 1)             | 0<br>(0 - 0)       | 0<br>(0 - 0)        | 0<br>(0 - 0)         | 0<br>(0 - 0)         | 0<br>(0 - 0)             |
| Chronic kidney disease                              | 356<br>(291 - 439)       | 0<br>(0 - 0)       | 0<br>(0 - 0)        | 10<br>(8 - 13)       | 84<br>(66 - 115)     | 261<br>(201 - 331)       |
| Chronic kidney disease due to diabetes mellitus     | 1<br>(1 - 1)             | 0<br>(0 - 0)       | 0<br>(0 - 0)        | 0<br>(0 - 0)         | 0<br>(0 - 0)         | 0<br>(0 - 0)             |

Web Table 31- Slovakia deaths with 95% UI by age, sex, and cause in 2013

| Cause                                               | Females, All Ages  | Females, 0-4 Years | Females, 5-14 Years | Females, 15-49 Years | Females, 50-69 Years | Females, 70-80 Years |
|-----------------------------------------------------|--------------------|--------------------|---------------------|----------------------|----------------------|----------------------|
| Chronic kidney disease due to hypertension          | 121<br>(75 - 179)  | 0<br>(0 - 0)       | 0<br>(0 - 0)        | 3<br>(2 - 5)         | 25<br>(15 - 43)      | 92<br>(54 - 136)     |
| Chronic kidney disease due to glomerulonephritis    | 6<br>(4 - 9)       | 0<br>(0 - 0)       | 0<br>(0 - 0)        | 0<br>(0 - 1)         | 2<br>(1 - 4)         | 3<br>(2 - 5)         |
| Chronic kidney disease due to other causes          | 229<br>(150 - 308) | 0<br>(0 - 0)       | 0<br>(0 - 0)        | 6<br>(4 - 9)         | 57<br>(34 - 84)      | 165<br>(104 - 233)   |
| Urinary diseases and male infertility               | 112<br>(79 - 145)  | 0<br>(0 - 1)       | 0<br>(0 - 0)        | 5<br>(3 - 6)         | 27<br>(20 - 36)      | 80<br>(52 - 109)     |
| Interstitial nephritis and urinary tract infections | 96<br>(68 - 125)   | 0<br>(0 - 0)       | 0<br>(0 - 0)        | 4<br>(3 - 5)         | 23<br>(17 - 30)      | 69<br>(44 - 94)      |
| Urolithiasis                                        | 4<br>(3 - 8)       | --                 | 0<br>(0 - 0)        | 0<br>(0 - 0)         | 1<br>(1 - 2)         | 3<br>(1 - 5)         |
| Other urinary diseases                              | 11<br>(5 - 20)     | 0<br>(0 - 0)       | 0<br>(0 - 0)        | 0<br>(0 - 1)         | 3<br>(1 - 4)         | 8<br>(3 - 15)        |
| Gynecological diseases                              | 0<br>(0 - 0)       | --                 | --                  | 0<br>(0 - 0)         | 0<br>(0 - 0)         | 0<br>(0 - 0)         |
| Uterine fibroids                                    | 0<br>(0 - 0)       | --                 | --                  | 0<br>(0 - 0)         | 0<br>(0 - 0)         | 0<br>(0 - 0)         |
| Polycystic ovarian syndrome                         | 0<br>(0 - 0)       | --                 | --                  | 0<br>(0 - 0)         | 0<br>(0 - 0)         | --                   |
| Endometriosis                                       | 0<br>(0 - 0)       | --                 | --                  | 0<br>(0 - 0)         | 0<br>(0 - 0)         | --                   |
| Genital prolapse                                    | 0<br>(0 - 0)       | --                 | --                  | 0<br>(0 - 0)         | 0<br>(0 - 0)         | 0<br>(0 - 0)         |
| Other gynecological diseases                        | 0<br>(0 - 0)       | --                 | --                  | 0<br>(0 - 0)         | 0<br>(0 - 0)         | 0<br>(0 - 0)         |
| Hemoglobinopathies and hemolytic anemias            | 10<br>(6 - 15)     | 0<br>(0 - 1)       | 0<br>(0 - 0)        | 3<br>(2 - 4)         | 1<br>(1 - 2)         | 5<br>(3 - 7)         |
| Thalassemias                                        | 1<br>(1 - 2)       | 0<br>(0 - 1)       | 0<br>(0 - 0)        | 1<br>(0 - 1)         | 0<br>(0 - 0)         | 0<br>(0 - 0)         |
| Sickle cell disorders                               | 1<br>(0 - 1)       | 0<br>(0 - 0)       | 0<br>(0 - 0)        | 0<br>(0 - 1)         | 0<br>(0 - 0)         | 0<br>(0 - 0)         |
| G6PD deficiency                                     | 0<br>(0 - 0)       | 0<br>(0 - 0)       | 0<br>(0 - 0)        | 0<br>(0 - 0)         | 0<br>(0 - 0)         | 0<br>(0 - 0)         |
| Other hemoglobinopathies and hemolytic anemias      | 8<br>(5 - 12)      | 0<br>(0 - 0)       | 0<br>(0 - 0)        | 2<br>(1 - 2)         | 1<br>(1 - 2)         | 5<br>(3 - 7)         |
| Endocrine, metabolic, blood, and immune disorders   | 35<br>(23 - 45)    | 2<br>(1 - 3)       | 1<br>(0 - 1)        | 5<br>(3 - 6)         | 10<br>(6 - 14)       | 17<br>(11 - 25)      |
| Musculoskeletal disorders                           | 37<br>(26 - 45)    | --                 | 0<br>(0 - 0)        | 4<br>(3 - 5)         | 15<br>(10 - 19)      | 17<br>(11 - 23)      |
| Rheumatoid arthritis                                | 14<br>(7 - 19)     | --                 | 0<br>(0 - 0)        | 0<br>(0 - 1)         | 5<br>(2 - 7)         | 9<br>(4 - 13)        |
| Other musculoskeletal disorders                     | 23<br>(17 - 29)    | --                 | 0<br>(0 - 0)        | 4<br>(2 - 5)         | 10<br>(7 - 13)       | 9<br>(6 - 13)        |
| Other non-communicable diseases                     | 85<br>(58 - 125)   | 62<br>(37 - 101)   | 3<br>(2 - 4)        | 8<br>(6 - 10)        | 5<br>(4 - 7)         | 7<br>(5 - 9)         |
| Congenital anomalies                                | 73<br>(48 - 109)   | 54<br>(31 - 88)    | 3<br>(2 - 4)        | 8<br>(6 - 10)        | 4<br>(3 - 6)         | 4<br>(3 - 5)         |
| Neural tube defects                                 | 1<br>(0 - 1)       | 0<br>(0 - 1)       | 0<br>(0 - 0)        | 0<br>(0 - 0)         | 0<br>(0 - 0)         | 0<br>(0 - 0)         |
| Congenital heart anomalies                          | 28<br>(18 - 41)    | 19<br>(10 - 32)    | 1<br>(1 - 2)        | 4<br>(3 - 5)         | 1<br>(1 - 2)         | 2<br>(1 - 3)         |
| Cleft lip and cleft palate                          | 0<br>(0 - 1)       | 0<br>(0 - 1)       | --                  | --                   | --                   | --                   |
| Down syndrome                                       | 4<br>(2 - 6)       | 1<br>(1 - 3)       | 0<br>(0 - 0)        | 1<br>(1 - 2)         | 1<br>(1 - 2)         | 0<br>(0 - 0)         |
| Chromosomal unbalanced rearrangements               | 4<br>(2 - 7)       | 4<br>(2 - 7)       | 0<br>(0 - 0)        | 0<br>(0 - 0)         | 0<br>(0 - 0)         | 0<br>(0 - 0)         |
| Other congenital anomalies                          | 36<br>(22 - 56)    | 30<br>(17 - 49)    | 1<br>(1 - 2)        | 2<br>(2 - 3)         | 2<br>(1 - 2)         | 1<br>(1 - 2)         |
| Skin and subcutaneous diseases                      | 4<br>(3 - 5)       | 0<br>(0 - 0)       | 0<br>(0 - 0)        | 0<br>(0 - 0)         | 1<br>(1 - 1)         | 3<br>(2 - 4)         |
| Cellulitis                                          | 1<br>(0 - 1)       | 0<br>(0 - 0)       | 0<br>(0 - 0)        | 0<br>(0 - 0)         | 0<br>(0 - 0)         | 1<br>(0 - 1)         |
| Pyoderma                                            | 3<br>(2 - 4)       | 0<br>(0 - 0)       | 0<br>(0 - 0)        | 0<br>(0 - 0)         | 1<br>(0 - 1)         | 2<br>(1 - 3)         |
| Decubitus ulcer                                     | 0<br>(0 - 1)       | 0<br>(0 - 0)       | 0<br>(0 - 0)        | 0<br>(0 - 0)         | 0<br>(0 - 0)         | 0<br>(0 - 0)         |
| Other skin and subcutaneous diseases                | 0<br>(0 - 0)       | 0<br>(0 - 0)       | 0<br>(0 - 0)        | 0<br>(0 - 0)         | 0<br>(0 - 0)         | 0<br>(0 - 0)         |
| Sudden infant death syndrome                        | 8<br>(2 - 18)      | 8<br>(2 - 18)      | --                  | --                   | --                   | --                   |
| Injuries                                            | 668<br>(587 - 800) | 12<br>(7 - 20)     | 11<br>(8 - 15)      | 162<br>(141 - 188)   | 177<br>(154 - 212)   | 306<br>(257 - 402)   |
| Transport injuries                                  | 184<br>(139 - 221) | 3<br>(2 - 6)       | 6<br>(4 - 8)        | 61<br>(48 - 73)      | 50<br>(37 - 65)      | 64<br>(44 - 83)      |
| Road injuries                                       | 169<br>(128 - 204) | 3<br>(2 - 5)       | 5<br>(4 - 8)        | 55<br>(44 - 67)      | 45<br>(34 - 60)      | 60<br>(42 - 78)      |
| Pedestrian road injuries                            | 77<br>(54 - 106)   | 1<br>(1 - 3)       | 3<br>(2 - 4)        | 14<br>(9 - 22)       | 20<br>(14 - 30)      | 38<br>(25 - 55)      |

Web Table 31- Slovakia deaths with 95% UI by age, sex, and cause in 2013

| Cause                                           | Females, All Ages  | Females, 0-4 Years | Females, 5-14 Years | Females, 15-49 Years | Females, 50-69 Years | Females, 70-84 Years |
|-------------------------------------------------|--------------------|--------------------|---------------------|----------------------|----------------------|----------------------|
| Cyclist road injuries                           | 11<br>(8 - 19)     | 0<br>(0 - 0)       | 0<br>(0 - 1)        | 3<br>(2 - 5)         | 5<br>(3 - 8)         | 3<br>(2 - 5)         |
| Motorcyclist road injuries                      | 4<br>(2 - 9)       | 0<br>(0 - 0)       | 0<br>(0 - 0)        | 2<br>(1 - 4)         | 1<br>(0 - 2)         | 1<br>(0 - 2)         |
| Motor vehicle road injuries                     | 76<br>(49 - 95)    | 1<br>(1 - 3)       | 2<br>(1 - 3)        | 35<br>(25 - 44)      | 19<br>(11 - 27)      | 18<br>(8 - 27)       |
| Other road injuries                             | 1<br>(0 - 1)       | 0<br>(0 - 0)       | 0<br>(0 - 0)        | 0<br>(0 - 0)         | 0<br>(0 - 0)         | 0<br>(0 - 1)         |
| Other transport injuries                        | 15<br>(10 - 24)    | 0<br>(0 - 1)       | 0<br>(0 - 1)        | 6<br>(4 - 9)         | 5<br>(3 - 8)         | 4<br>(2 - 8)         |
| Unintentional injuries                          | 311<br>(259 - 414) | 8<br>(4 - 13)      | 4<br>(3 - 6)        | 36<br>(30 - 45)      | 66<br>(55 - 83)      | 197<br>(154 - 284)   |
| Falls                                           | 133<br>(93 - 232)  | 0<br>(0 - 1)       | 0<br>(0 - 1)        | 7<br>(5 - 12)        | 19<br>(14 - 31)      | 106<br>(70 - 193)    |
| Drowning                                        | 28<br>(22 - 43)    | 1<br>(1 - 3)       | 2<br>(1 - 3)        | 7<br>(6 - 11)        | 10<br>(8 - 16)       | 7<br>(5 - 11)        |
| Fire, heat, and hot substances                  | 22<br>(15 - 31)    | 1<br>(0 - 1)       | 0<br>(0 - 0)        | 2<br>(2 - 3)         | 4<br>(3 - 6)         | 14<br>(9 - 21)       |
| Poisonings                                      | 11<br>(6 - 15)     | 0<br>(0 - 1)       | 0<br>(0 - 1)        | 3<br>(2 - 4)         | 3<br>(2 - 4)         | 5<br>(2 - 7)         |
| Exposure to mechanical forces                   | 13<br>(10 - 17)    | 1<br>(0 - 2)       | 0<br>(0 - 1)        | 4<br>(3 - 5)         | 3<br>(3 - 5)         | 4<br>(3 - 6)         |
| Unintentional firearm injuries                  | 3<br>(2 - 4)       | 0<br>(0 - 0)       | 0<br>(0 - 0)        | 1<br>(1 - 2)         | 1<br>(1 - 1)         | 1<br>(0 - 1)         |
| Unintentional suffocation                       | 2<br>(1 - 4)       | 0<br>(0 - 1)       | 0<br>(0 - 0)        | 1<br>(0 - 1)         | 0<br>(0 - 1)         | 0<br>(0 - 1)         |
| Other exposure to mechanical forces             | 8<br>(6 - 11)      | 0<br>(0 - 1)       | 0<br>(0 - 1)        | 2<br>(1 - 2)         | 2<br>(2 - 3)         | 3<br>(2 - 5)         |
| Adverse effects of medical treatment            | 62<br>(37 - 82)    | 0<br>(0 - 1)       | 0<br>(0 - 0)        | 3<br>(2 - 5)         | 14<br>(8 - 20)       | 43<br>(23 - 59)      |
| Animal contact                                  | 3<br>(1 - 6)       | 0<br>(0 - 0)       | 0<br>(0 - 0)        | 0<br>(0 - 1)         | 1<br>(0 - 2)         | 1<br>(1 - 3)         |
| Venomous animal contact                         | 1<br>(0 - 2)       | 0<br>(0 - 0)       | 0<br>(0 - 0)        | 0<br>(0 - 0)         | 0<br>(0 - 1)         | 0<br>(0 - 1)         |
| Non-venomous animal contact                     | 2<br>(1 - 4)       | 0<br>(0 - 0)       | 0<br>(0 - 0)        | 0<br>(0 - 0)         | 1<br>(0 - 1)         | 1<br>(0 - 2)         |
| Foreign body                                    | 27<br>(15 - 40)    | 3<br>(1 - 6)       | 0<br>(0 - 1)        | 7<br>(4 - 10)        | 9<br>(5 - 13)        | 8<br>(4 - 13)        |
| Pulmonary aspiration and foreign body in airway | 26<br>(14 - 39)    | 3<br>(1 - 6)       | 0<br>(0 - 1)        | 6<br>(3 - 10)        | 9<br>(5 - 13)        | 8<br>(4 - 13)        |
| Foreign body in other body part                 | 0<br>(0 - 1)       | 0<br>(0 - 0)       | 0<br>(0 - 0)        | 0<br>(0 - 0)         | 0<br>(0 - 0)         | 0<br>(0 - 0)         |
| Other unintentional injuries                    | 14<br>(7 - 19)     | 0<br>(0 - 1)       | 0<br>(0 - 1)        | 2<br>(1 - 4)         | 3<br>(1 - 4)         | 8<br>(4 - 13)        |
| Self-harm and interpersonal violence            | 173<br>(149 - 203) | 1<br>(1 - 2)       | 1<br>(1 - 2)        | 65<br>(54 - 78)      | 61<br>(50 - 75)      | 45<br>(34 - 57)      |
| Self-harm                                       | 138<br>(116 - 164) | --                 | 0<br>(0 - 1)        | 49<br>(39 - 61)      | 52<br>(42 - 65)      | 37<br>(26 - 48)      |
| Interpersonal violence                          | 35<br>(26 - 49)    | 1<br>(1 - 2)       | 1<br>(1 - 1)        | 16<br>(12 - 22)      | 9<br>(6 - 13)        | 8<br>(6 - 12)        |
| Assault by firearm                              | 6<br>(3 - 10)      | 0<br>(0 - 0)       | 0<br>(0 - 0)        | 3<br>(2 - 5)         | 2<br>(1 - 3)         | 1<br>(0 - 2)         |
| Assault by sharp object                         | 11<br>(7 - 18)     | 0<br>(0 - 0)       | 0<br>(0 - 0)        | 6<br>(4 - 9)         | 3<br>(2 - 4)         | 2<br>(1 - 4)         |
| Assault by other means                          | 18<br>(12 - 25)    | 1<br>(0 - 2)       | 0<br>(0 - 1)        | 7<br>(4 - 10)        | 5<br>(3 - 7)         | 5<br>(3 - 8)         |
| Forces of nature, war, and legal intervention   | 0<br>(0 - 0)       | 0<br>(0 - 0)       | --                  | --                   | --                   | 0<br>(0 - 0)         |
| Exposure to forces of nature                    | 0<br>(0 - 0)       | 0<br>(0 - 0)       | --                  | --                   | --                   | 0<br>(0 - 0)         |

Web Table 31- Slovenia deaths with 95% UI by age, sex, and cause in 2013

| Cause                                                             | Both Sexes, All Ages        | Both Sexes, 0-4 Years | Both Sexes, 5-14 Years | Both Sexes, 15-49 Years | Both Sexes, 50-69 Years  | Both Sexes, 70-80 Years     |
|-------------------------------------------------------------------|-----------------------------|-----------------------|------------------------|-------------------------|--------------------------|-----------------------------|
| All causes                                                        | 21,019<br>(19,977 - 22,104) | 75<br>(44 - 124)      | 18<br>(14 - 25)        | 1,009<br>(929 - 1,094)  | 4,193<br>(3,876 - 4,547) | 15,724<br>(15,074 - 16,462) |
| Communicable, maternal, neonatal, and nutritional diseases        | 851<br>(708 - 1,046)        | 35<br>(20 - 60)       | 1<br>(1 - 2)           | 26<br>(22 - 30)         | 73<br>(61 - 87)          | 716<br>(580 - 900)          |
| HIV/AIDS and tuberculosis                                         | 26<br>(21 - 33)             | 0<br>(0 - 0)          | 0<br>(0 - 0)           | 5<br>(3 - 7)            | 6<br>(5 - 8)             | 15<br>(12 - 20)             |
| Tuberculosis                                                      | 23<br>(18 - 28)             | 0<br>(0 - 0)          | 0<br>(0 - 0)           | 3<br>(2 - 3)            | 5<br>(4 - 6)             | 15<br>(11 - 20)             |
| HIV/AIDS                                                          | 3<br>(1 - 6)                | 0<br>(0 - 0)          | 0<br>(0 - 0)           | 2<br>(1 - 4)            | 1<br>(0 - 2)             | 0<br>(0 - 0)                |
| HIV/AIDS resulting in mycobacterial infection                     | 0<br>(0 - 0)                | 0<br>(0 - 0)          | 0<br>(0 - 0)           | 0<br>(0 - 0)            | 0<br>(0 - 0)             | 0<br>(0 - 0)                |
| HIV/AIDS resulting in other diseases                              | 3<br>(1 - 6)                | 0<br>(0 - 0)          | 0<br>(0 - 0)           | 2<br>(1 - 4)            | 1<br>(0 - 2)             | 0<br>(0 - 0)                |
| Diarrhea, lower respiratory, and other common infectious diseases | 758<br>(617 - 952)          | 4<br>(2 - 7)          | 1<br>(1 - 2)           | 17<br>(14 - 21)         | 62<br>(50 - 76)          | 674<br>(539 - 857)          |
| Diarrheal diseases                                                | 4<br>(3 - 6)                | 0<br>(0 - 0)          | 0<br>(0 - 0)           | 0<br>(0 - 0)            | 0<br>(0 - 1)             | 3<br>(2 - 5)                |
| Intestinal infectious diseases                                    | 5<br>(2 - 12)               | 1<br>(0 - 2)          | 1<br>(0 - 1)           | 2<br>(1 - 4)            | 1<br>(0 - 3)             | 1<br>(0 - 2)                |
| Typhoid fever                                                     | 4<br>(1 - 9)                | 0<br>(0 - 1)          | 0<br>(0 - 1)           | 1<br>(0 - 3)            | 1<br>(0 - 2)             | 1<br>(0 - 2)                |
| Paratyphoid fever                                                 | 1<br>(0 - 3)                | 0<br>(0 - 0)          | 0<br>(0 - 0)           | 0<br>(0 - 1)            | 0<br>(0 - 1)             | 0<br>(0 - 0)                |
| Other intestinal infectious diseases                              | 0<br>(0 - 1)                | 0<br>(0 - 0)          | 0<br>(0 - 0)           | 0<br>(0 - 1)            | 0<br>(0 - 1)             | 0<br>(0 - 1)                |
| Lower respiratory infections                                      | 732<br>(593 - 923)          | 3<br>(1 - 5)          | 0<br>(0 - 0)           | 12<br>(10 - 15)         | 55<br>(44 - 69)          | 662<br>(528 - 845)          |
| Upper respiratory infections                                      | 0<br>(0 - 1)                | 0<br>(0 - 0)          | 0<br>(0 - 0)           | 0<br>(0 - 0)            | 0<br>(0 - 0)             | 0<br>(0 - 1)                |
| Otitis media                                                      | 0<br>(0 - 0)                | 0<br>(0 - 0)          | 0<br>(0 - 0)           | 0<br>(0 - 0)            | 0<br>(0 - 0)             | 0<br>(0 - 0)                |
| Meningitis                                                        | 8<br>(7 - 9)                | 0<br>(0 - 1)          | 0<br>(0 - 0)           | 1<br>(1 - 2)            | 3<br>(2 - 3)             | 4<br>(3 - 5)                |
| Pneumococcal meningitis                                           | 2<br>(2 - 3)                | 0<br>(0 - 0)          | 0<br>(0 - 0)           | 0<br>(0 - 1)            | 1<br>(1 - 1)             | 1<br>(1 - 2)                |
| H influenzae type B meningitis                                    | 1<br>(1 - 1)                | 0<br>(0 - 0)          | 0<br>(0 - 0)           | 0<br>(0 - 0)            | 0<br>(0 - 0)             | 0<br>(0 - 1)                |
| Meningococcal meningitis                                          | 2<br>(1 - 2)                | 0<br>(0 - 0)          | 0<br>(0 - 0)           | 0<br>(0 - 0)            | 1<br>(0 - 1)             | 1<br>(1 - 1)                |
| Other meningitis                                                  | 3<br>(3 - 4)                | 0<br>(0 - 0)          | 0<br>(0 - 0)           | 1<br>(0 - 1)            | 1<br>(1 - 2)             | 2<br>(1 - 2)                |
| Encephalitis                                                      | 5<br>(3 - 7)                | 0<br>(0 - 0)          | 0<br>(0 - 0)           | 1<br>(1 - 1)            | 2<br>(1 - 3)             | 2<br>(1 - 3)                |
| Diphtheria                                                        | 0<br>(0 - 0)                | 0<br>(0 - 0)          | 0<br>(0 - 0)           | 0<br>(0 - 0)            | 0<br>(0 - 0)             | --                          |
| Whooping cough                                                    | 0<br>(0 - 0)                | 0<br>(0 - 0)          | 0<br>(0 - 0)           | 0<br>(0 - 0)            | 0<br>(0 - 0)             | --                          |
| Tetanus                                                           | 0<br>(0 - 0)                | 0<br>(0 - 0)          | 0<br>(0 - 0)           | 0<br>(0 - 0)            | 0<br>(0 - 0)             | 0<br>(0 - 0)                |
| Measles                                                           | 0<br>(0 - 0)                | 0<br>(0 - 0)          | 0<br>(0 - 0)           | 0<br>(0 - 0)            | 0<br>(0 - 0)             | --                          |
| Varicella and herpes zoster                                       | 2<br>(0 - 7)                | 0<br>(0 - 0)          | 0<br>(0 - 0)           | 0<br>(0 - 0)            | 0<br>(0 - 0)             | 1<br>(0 - 6)                |
| Neglected tropical diseases and malaria                           | 1<br>(1 - 2)                | 0<br>(0 - 0)          | 0<br>(0 - 0)           | 0<br>(0 - 1)            | 0<br>(0 - 1)             | 0<br>(0 - 1)                |
| Leishmaniasis                                                     | 0<br>(0 - 1)                | 0<br>(0 - 0)          | 0<br>(0 - 0)           | 0<br>(0 - 0)            | 0<br>(0 - 0)             | 0<br>(0 - 0)                |
| Visceral leishmaniasis                                            | 0<br>(0 - 1)                | 0<br>(0 - 0)          | 0<br>(0 - 0)           | 0<br>(0 - 0)            | 0<br>(0 - 0)             | 0<br>(0 - 0)                |
| Cysticercosis                                                     | 0<br>(0 - 0)                | 0<br>(0 - 0)          | 0<br>(0 - 0)           | 0<br>(0 - 0)            | 0<br>(0 - 0)             | 0<br>(0 - 0)                |
| Cystic echinococcosis                                             | 0<br>(0 - 0)                | 0<br>(0 - 0)          | 0<br>(0 - 0)           | 0<br>(0 - 0)            | 0<br>(0 - 0)             | 0<br>(0 - 0)                |
| Dengue                                                            | 0<br>(0 - 0)                | 0<br>(0 - 0)          | 0<br>(0 - 0)           | 0<br>(0 - 0)            | 0<br>(0 - 0)             | 0<br>(0 - 0)                |
| Rabies                                                            | 0<br>(0 - 0)                | 0<br>(0 - 0)          | 0<br>(0 - 0)           | 0<br>(0 - 0)            | 0<br>(0 - 0)             | 0<br>(0 - 0)                |
| Other neglected tropical diseases                                 | 0<br>(0 - 1)                | 0<br>(0 - 0)          | 0<br>(0 - 0)           | 0<br>(0 - 0)            | 0<br>(0 - 0)             | 0<br>(0 - 0)                |
| Maternal disorders                                                | 2<br>(1 - 2)                | --                    | 0<br>(0 - 0)           | 2<br>(1 - 2)            | --                       | --                          |
| Maternal hemorrhage                                               | 0<br>(0 - 0)                | --                    | 0<br>(0 - 0)           | 0<br>(0 - 0)            | --                       | --                          |
| Maternal sepsis and other maternal infections                     | 0<br>(0 - 0)                | --                    | 0<br>(0 - 0)           | 0<br>(0 - 0)            | --                       | --                          |
| Maternal hypertensive disorders                                   | 0<br>(0 - 0)                | --                    | 0<br>(0 - 0)           | 0<br>(0 - 0)            | --                       | --                          |
| Maternal obstructed labor                                         | 0<br>(0 - 0)                | --                    | 0<br>(0 - 0)           | 0<br>(0 - 0)            | --                       | --                          |

Web Table 31- Slovenia deaths with 95% UI by age, sex, and cause in 2013

| Cause                                                            | Both Sexes, All Ages        | Both Sexes, 0-4 Years | Both Sexes, 5-14 Years | Both Sexes, 15-49 Years | Both Sexes, 50-69 Years  | Both Sexes, 70-80 Years     |
|------------------------------------------------------------------|-----------------------------|-----------------------|------------------------|-------------------------|--------------------------|-----------------------------|
| Maternal abortive outcome                                        | 0<br>(0 - 0)                | --                    | 0<br>(0 - 0)           | 0<br>(0 - 0)            | --                       | --                          |
| Indirect maternal deaths                                         | 0<br>(0 - 0)                | --                    | 0<br>(0 - 0)           | 0<br>(0 - 0)            | --                       | --                          |
| Late maternal deaths                                             | 0<br>(0 - 0)                | --                    | 0<br>(0 - 0)           | 0<br>(0 - 0)            | --                       | --                          |
| Maternal deaths aggravated by HIV/AIDS                           | 0<br>(0 - 0)                | --                    | --                     | 0<br>(0 - 0)            | --                       | --                          |
| Other maternal disorders                                         | 0<br>(0 - 0)                | --                    | 0<br>(0 - 0)           | 0<br>(0 - 0)            | --                       | --                          |
| Neonatal disorders                                               | 30<br>(17 - 51)             | 30<br>(17 - 51)       | --                     | --                      | --                       | --                          |
| Neonatal preterm birth complications                             | 21<br>(12 - 36)             | 21<br>(12 - 36)       | --                     | --                      | --                       | --                          |
| Neonatal encephalopathy due to birth asphyxia and trauma         | 4<br>(2 - 8)                | 4<br>(2 - 8)          | --                     | --                      | --                       | --                          |
| Neonatal sepsis and other neonatal infections                    | 1<br>(0 - 1)                | 1<br>(0 - 1)          | --                     | --                      | --                       | --                          |
| Hemolytic disease and other neonatal jaundice                    | 0<br>(0 - 0)                | 0<br>(0 - 0)          | --                     | --                      | --                       | --                          |
| Other neonatal disorders                                         | 5<br>(2 - 9)                | 5<br>(2 - 9)          | --                     | --                      | --                       | --                          |
| Nutritional deficiencies                                         | 20<br>(14 - 27)             | 0<br>(0 - 0)          | 0<br>(0 - 0)           | 0<br>(0 - 0)            | 1<br>(1 - 1)             | 18<br>(13 - 26)             |
| Protein-energy malnutrition                                      | 0<br>(0 - 1)                | 0<br>(0 - 0)          | 0<br>(0 - 0)           | 0<br>(0 - 0)            | 0<br>(0 - 0)             | 0<br>(0 - 1)                |
| Iodine deficiency                                                | 0<br>(0 - 1)                | 0<br>(0 - 0)          | 0<br>(0 - 0)           | 0<br>(0 - 0)            | 0<br>(0 - 0)             | 0<br>(0 - 1)                |
| Iron-deficiency anemia                                           | 18<br>(13 - 25)             | 0<br>(0 - 0)          | 0<br>(0 - 0)           | 0<br>(0 - 0)            | 1<br>(1 - 1)             | 17<br>(12 - 24)             |
| Other nutritional deficiencies                                   | 1<br>(1 - 4)                | 0<br>(0 - 0)          | 0<br>(0 - 0)           | 0<br>(0 - 0)            | 0<br>(0 - 0)             | 1<br>(0 - 3)                |
| Other communicable, maternal, neonatal, and nutritional diseases | 14<br>(9 - 18)              | 1<br>(0 - 2)          | 0<br>(0 - 0)           | 2<br>(1 - 2)            | 4<br>(2 - 5)             | 8<br>(5 - 11)               |
| Sexually transmitted diseases excluding HIV                      | 1<br>(1 - 2)                | 0<br>(0 - 1)          | 0<br>(0 - 0)           | 0<br>(0 - 0)            | 0<br>(0 - 0)             | 0<br>(0 - 1)                |
| Syphilis                                                         | 1<br>(1 - 2)                | 0<br>(0 - 1)          | 0<br>(0 - 0)           | 0<br>(0 - 0)            | 0<br>(0 - 0)             | 0<br>(0 - 1)                |
| Chlamydial infection                                             | 0<br>(0 - 0)                | --                    | 0<br>(0 - 0)           | 0<br>(0 - 0)            | 0<br>(0 - 0)             | 0<br>(0 - 0)                |
| Gonococcal infection                                             | 0<br>(0 - 0)                | --                    | 0<br>(0 - 0)           | 0<br>(0 - 0)            | 0<br>(0 - 0)             | 0<br>(0 - 0)                |
| Other sexually transmitted diseases                              | 0<br>(0 - 0)                | --                    | 0<br>(0 - 0)           | 0<br>(0 - 0)            | 0<br>(0 - 0)             | 0<br>(0 - 0)                |
| Hepatitis                                                        | 1<br>(1 - 1)                | 0<br>(0 - 0)          | 0<br>(0 - 0)           | 0<br>(0 - 0)            | 0<br>(0 - 0)             | 0<br>(0 - 1)                |
| Acute hepatitis A                                                | 0<br>(0 - 0)                | 0<br>(0 - 0)          | 0<br>(0 - 0)           | 0<br>(0 - 0)            | 0<br>(0 - 0)             | 0<br>(0 - 0)                |
| Acute hepatitis B                                                | 1<br>(1 - 1)                | 0<br>(0 - 0)          | 0<br>(0 - 0)           | 0<br>(0 - 0)            | 0<br>(0 - 0)             | 0<br>(0 - 0)                |
| Acute hepatitis C                                                | 0<br>(0 - 0)                | --                    | 0<br>(0 - 0)           | 0<br>(0 - 0)            | 0<br>(0 - 0)             | 0<br>(0 - 0)                |
| Other infectious diseases                                        | 12<br>(7 - 16)              | 0<br>(0 - 1)          | 0<br>(0 - 0)           | 1<br>(1 - 2)            | 3<br>(2 - 5)             | 7<br>(4 - 10)               |
| Non-communicable diseases                                        | 18,617<br>(17,710 - 19,636) | 34<br>(20 - 55)       | 9<br>(7 - 13)          | 606<br>(553 - 660)      | 3,727<br>(3,447 - 4,037) | 14,241<br>(13,639 - 14,976) |
| Neoplasms                                                        | 5,593<br>(5,103 - 6,020)    | 2<br>(1 - 3)          | 4<br>(3 - 6)           | 283<br>(258 - 311)      | 1,935<br>(1,768 - 2,108) | 3,368<br>(3,009 - 3,649)    |
| Esophageal cancer                                                | 96<br>(78 - 119)            | --                    | --                     | 6<br>(4 - 9)            | 46<br>(35 - 60)          | 44<br>(36 - 53)             |
| Stomach cancer                                                   | 411<br>(355 - 481)          | --                    | --                     | 15<br>(13 - 19)         | 116<br>(99 - 139)        | 279<br>(234 - 338)          |
| Liver cancer                                                     | 181<br>(129 - 226)          | --                    | 0<br>(0 - 0)           | 6<br>(4 - 8)            | 67<br>(42 - 86)          | 108<br>(78 - 137)           |
| Liver cancer due to hepatitis B                                  | 33<br>(18 - 50)             | --                    | 0<br>(0 - 0)           | 2<br>(1 - 3)            | 15<br>(7 - 25)           | 16<br>(9 - 24)              |
| Liver cancer due to hepatitis C                                  | 83<br>(54 - 115)            | --                    | 0<br>(0 - 0)           | 2<br>(1 - 4)            | 31<br>(17 - 46)          | 50<br>(32 - 69)             |
| Liver cancer due to alcohol use                                  | 47<br>(28 - 67)             | --                    | --                     | 1<br>(0 - 2)            | 15<br>(8 - 23)           | 31<br>(19 - 45)             |
| Liver cancer due to other causes                                 | 17<br>(10 - 26)             | --                    | 0<br>(0 - 0)           | 1<br>(0 - 1)            | 6<br>(3 - 9)             | 11<br>(6 - 18)              |
| Larynx cancer                                                    | 51<br>(36 - 64)             | --                    | --                     | 4<br>(3 - 5)            | 25<br>(18 - 33)          | 22<br>(15 - 29)             |
| Tracheal, bronchus and lung cancer                               | 1,106<br>(983 - 1,249)      | --                    | --                     | 49<br>(40 - 59)         | 512<br>(443 - 588)       | 546<br>(476 - 622)          |
| Breast cancer                                                    | 404<br>(264 - 494)          | --                    | --                     | 35<br>(27 - 45)         | 139<br>(96 - 173)        | 230<br>(137 - 290)          |
| Cervical cancer                                                  | 77<br>(55 - 100)            | --                    | --                     | 12<br>(9 - 17)          | 26<br>(18 - 35)          | 39<br>(28 - 54)             |

Web Table 31- Slovenia deaths with 95% UI by age, sex, and cause in 2013

| Cause                                         | Both Sexes, All Ages     | Both Sexes, 0-4 Years | Both Sexes, 5-14 Years | Both Sexes, 15-49 Years | Both Sexes, 50-69 Years | Both Sexes, 70-80 Years  |
|-----------------------------------------------|--------------------------|-----------------------|------------------------|-------------------------|-------------------------|--------------------------|
| Uterine cancer                                | 60<br>(45 - 78)          | --                    | --                     | 1<br>(1 - 2)            | 18<br>(13 - 24)         | 41<br>(29 - 56)          |
| Prostate cancer                               | 405<br>(288 - 520)       | --                    | --                     | 1<br>(0 - 1)            | 60<br>(38 - 81)         | 344<br>(240 - 443)       |
| Colon and rectum cancer                       | 840<br>(750 - 932)       | --                    | --                     | 22<br>(19 - 26)         | 246<br>(217 - 277)      | 572<br>(500 - 653)       |
| Lip and oral cavity cancer                    | 66<br>(53 - 76)          | --                    | --                     | 7<br>(5 - 9)            | 35<br>(25 - 43)         | 24<br>(19 - 30)          |
| Nasopharynx cancer                            | 9<br>(7 - 12)            | --                    | 0<br>(0 - 0)           | 2<br>(1 - 2)            | 5<br>(4 - 7)            | 3<br>(2 - 4)             |
| Other pharynx cancer                          | 85<br>(66 - 111)         | --                    | --                     | 9<br>(6 - 13)           | 56<br>(42 - 76)         | 20<br>(14 - 26)          |
| Gallbladder and biliary tract cancer          | 136<br>(92 - 172)        | --                    | --                     | 3<br>(2 - 4)            | 35<br>(25 - 45)         | 99<br>(64 - 128)         |
| Pancreatic cancer                             | 354<br>(317 - 393)       | --                    | --                     | 12<br>(10 - 15)         | 124<br>(109 - 141)      | 218<br>(189 - 250)       |
| Malignant skin melanoma                       | 98<br>(65 - 136)         | --                    | --                     | 15<br>(10 - 22)         | 36<br>(23 - 54)         | 47<br>(30 - 63)          |
| Non-melanoma skin cancer                      | 29<br>(19 - 43)          | --                    | --                     | 0<br>(0 - 0)            | 3<br>(2 - 4)            | 26<br>(16 - 38)          |
| Ovarian cancer                                | 137<br>(109 - 164)       | --                    | --                     | 10<br>(7 - 12)          | 56<br>(44 - 70)         | 71<br>(51 - 92)          |
| Testicular cancer                             | 5<br>(3 - 7)             | --                    | --                     | 3<br>(2 - 5)            | 1<br>(0 - 1)            | 1<br>(0 - 1)             |
| Kidney cancer                                 | 126<br>(102 - 152)       | 0<br>(0 - 0)          | 0<br>(0 - 0)           | 5<br>(4 - 7)            | 49<br>(37 - 62)         | 72<br>(57 - 90)          |
| Bladder cancer                                | 144<br>(99 - 175)        | --                    | --                     | 2<br>(1 - 2)            | 29<br>(21 - 37)         | 113<br>(76 - 141)        |
| Brain and nervous system cancer               | 120<br>(94 - 141)        | 1<br>(0 - 1)          | 1<br>(1 - 2)           | 20<br>(16 - 24)         | 59<br>(47 - 70)         | 39<br>(24 - 50)          |
| Thyroid cancer                                | 21<br>(16 - 30)          | --                    | 0<br>(0 - 0)           | 1<br>(0 - 1)            | 6<br>(4 - 8)            | 15<br>(11 - 22)          |
| Mesothelioma                                  | 18<br>(13 - 24)          | --                    | --                     | 1<br>(1 - 2)            | 9<br>(6 - 13)           | 8<br>(5 - 11)            |
| Hodgkin lymphoma                              | 12<br>(9 - 17)           | 0<br>(0 - 0)          | 0<br>(0 - 0)           | 3<br>(2 - 4)            | 4<br>(3 - 6)            | 5<br>(3 - 7)             |
| Non-Hodgkin lymphoma                          | 142<br>(80 - 185)        | 0<br>(0 - 0)          | 0<br>(0 - 1)           | 9<br>(5 - 12)           | 40<br>(21 - 53)         | 92<br>(47 - 124)         |
| Multiple myeloma                              | 82<br>(55 - 111)         | --                    | --                     | 2<br>(2 - 4)            | 28<br>(18 - 39)         | 52<br>(33 - 71)          |
| Leukemia                                      | 155<br>(132 - 178)       | 0<br>(0 - 1)          | 1<br>(1 - 2)           | 12<br>(10 - 14)         | 41<br>(33 - 49)         | 100<br>(84 - 118)        |
| Other neoplasms                               | 222<br>(176 - 262)       | 1<br>(0 - 1)          | 1<br>(1 - 2)           | 17<br>(13 - 20)         | 62<br>(49 - 74)         | 142<br>(103 - 174)       |
| Cardiovascular diseases                       | 8,215<br>(7,716 - 8,887) | 1<br>(0 - 1)          | 0<br>(0 - 1)           | 122<br>(106 - 140)      | 993<br>(897 - 1,104)    | 7,098<br>(6,649 - 7,718) |
| Rheumatic heart disease                       | 94<br>(45 - 127)         | 0<br>(0 - 0)          | 0<br>(0 - 0)           | 3<br>(2 - 4)            | 14<br>(9 - 18)          | 77<br>(33 - 108)         |
| Ischemic heart disease                        | 3,119<br>(2,694 - 3,602) | 0<br>(0 - 0)          | 0<br>(0 - 0)           | 57<br>(46 - 69)         | 461<br>(397 - 534)      | 2,600<br>(2,220 - 3,043) |
| Cerebrovascular disease                       | 2,542<br>(2,165 - 2,906) | 0<br>(0 - 0)          | 0<br>(0 - 0)           | 32<br>(25 - 39)         | 274<br>(223 - 324)      | 2,236<br>(1,897 - 2,581) |
| Ischemic stroke                               | 1,988<br>(1,654 - 2,311) | 0<br>(0 - 0)          | 0<br>(0 - 0)           | 4<br>(3 - 6)            | 115<br>(86 - 146)       | 1,868<br>(1,558 - 2,187) |
| Hemorrhagic stroke                            | 554<br>(407 - 674)       | 0<br>(0 - 0)          | 0<br>(0 - 0)           | 27<br>(21 - 33)         | 159<br>(127 - 191)      | 368<br>(248 - 468)       |
| Hypertensive heart disease                    | 853<br>(574 - 1,115)     | 0<br>(0 - 0)          | 0<br>(0 - 0)           | 4<br>(3 - 6)            | 57<br>(42 - 77)         | 792<br>(518 - 1,049)     |
| Cardiomyopathy and myocarditis                | 902<br>(645 - 1,779)     | 0<br>(0 - 0)          | 0<br>(0 - 0)           | 12<br>(9 - 18)          | 88<br>(67 - 147)        | 802<br>(557 - 1,627)     |
| Atrial fibrillation and flutter               | 117<br>(84 - 152)        | --                    | --                     | 0<br>(0 - 0)            | 7<br>(5 - 9)            | 110<br>(79 - 145)        |
| Aortic aneurysm                               | 93<br>(72 - 113)         | --                    | --                     | 4<br>(3 - 6)            | 26<br>(19 - 32)         | 63<br>(47 - 79)          |
| Peripheral vascular disease                   | 6<br>(5 - 8)             | --                    | --                     | 0<br>(0 - 0)            | 1<br>(1 - 1)            | 5<br>(4 - 7)             |
| Endocarditis                                  | 13<br>(10 - 20)          | 0<br>(0 - 0)          | 0<br>(0 - 0)           | 1<br>(1 - 2)            | 4<br>(3 - 7)            | 8<br>(5 - 11)            |
| Other cardiovascular and circulatory diseases | 475<br>(319 - 606)       | 0<br>(0 - 0)          | 0<br>(0 - 0)           | 9<br>(6 - 11)           | 60<br>(45 - 77)         | 406<br>(258 - 533)       |
| Chronic respiratory diseases                  | 1,062<br>(749 - 1,205)   | 0<br>(0 - 0)          | 0<br>(0 - 0)           | 6<br>(5 - 8)            | 94<br>(77 - 112)        | 961<br>(664 - 1,101)     |
| Chronic obstructive pulmonary disease         | 925<br>(661 - 1,073)     | 0<br>(0 - 0)          | 0<br>(0 - 0)           | 4<br>(3 - 5)            | 77<br>(63 - 93)         | 844<br>(593 - 986)       |
| Pneumoconiosis                                | 12<br>(7 - 18)           | 0<br>(0 - 0)          | 0<br>(0 - 0)           | 0<br>(0 - 0)            | 3<br>(2 - 4)            | 9<br>(5 - 14)            |
| Silicosis                                     | 5<br>(3 - 7)             | 0<br>(0 - 0)          | 0<br>(0 - 0)           | 0<br>(0 - 0)            | 1<br>(0 - 1)            | 4<br>(2 - 6)             |
| Asbestosis                                    | 3<br>(2 - 4)             | 0<br>(0 - 0)          | 0<br>(0 - 0)           | 0<br>(0 - 0)            | 1<br>(0 - 1)            | 2<br>(1 - 3)             |



Web Table 31- Slovenia deaths with 95% UI by age, sex, and cause in 2013

| Cause                                               | Both Sexes, All Ages     | Both Sexes, 0-4 Years | Both Sexes, 5-14 Years | Both Sexes, 15-49 Years | Both Sexes, 50-69 Years | Both Sexes, 70-80 Years  |
|-----------------------------------------------------|--------------------------|-----------------------|------------------------|-------------------------|-------------------------|--------------------------|
| Coal workers pneumoconiosis                         | 1<br>(1 - 2)             | 0<br>(0 - 0)          | 0<br>(0 - 0)           | 0<br>(0 - 0)            | 0<br>(0 - 1)            | 1<br>(0 - 1)             |
| Other pneumoconiosis                                | 3<br>(2 - 5)             | 0<br>(0 - 0)          | 0<br>(0 - 0)           | 0<br>(0 - 0)            | 1<br>(0 - 1)            | 3<br>(1 - 4)             |
| Asthma                                              | 26<br>(12 - 39)          | 0<br>(0 - 0)          | 0<br>(0 - 0)           | 1<br>(1 - 1)            | 5<br>(3 - 6)            | 20<br>(8 - 32)           |
| Interstitial lung disease and pulmonary sarcoidosis | 85<br>(37 - 138)         | 0<br>(0 - 0)          | 0<br>(0 - 0)           | 1<br>(0 - 1)            | 9<br>(4 - 14)           | 75<br>(31 - 124)         |
| Other chronic respiratory diseases                  | 14<br>(7 - 23)           | 0<br>(0 - 0)          | 0<br>(0 - 0)           | 0<br>(0 - 1)            | 1<br>(1 - 1)            | 12<br>(6 - 22)           |
| Cirrhosis                                           | 579<br>(521 - 649)       | 0<br>(0 - 0)          | 0<br>(0 - 0)           | 84<br>(72 - 98)         | 324<br>(284 - 369)      | 172<br>(152 - 193)       |
| Cirrhosis due to hepatitis B                        | 150<br>(103 - 217)       | 0<br>(0 - 0)          | 0<br>(0 - 0)           | 22<br>(14 - 31)         | 83<br>(56 - 121)        | 45<br>(30 - 68)          |
| Cirrhosis due to hepatitis C                        | 140<br>(63 - 212)        | 0<br>(0 - 0)          | 0<br>(0 - 0)           | 19<br>(11 - 30)         | 78<br>(32 - 121)        | 42<br>(15 - 69)          |
| Cirrhosis due to alcohol use                        | 198<br>(135 - 272)       | --                    | --                     | 21<br>(12 - 31)         | 111<br>(74 - 154)       | 67<br>(44 - 92)          |
| Cirrhosis due to other causes                       | 92<br>(61 - 137)         | 0<br>(0 - 0)          | 0<br>(0 - 0)           | 22<br>(15 - 31)         | 51<br>(32 - 80)         | 18<br>(12 - 28)          |
| Digestive diseases                                  | 513<br>(402 - 588)       | 0<br>(0 - 0)          | 0<br>(0 - 0)           | 15<br>(12 - 18)         | 74<br>(58 - 87)         | 424<br>(326 - 491)       |
| Peptic ulcer disease                                | 89<br>(60 - 114)         | 0<br>(0 - 0)          | 0<br>(0 - 0)           | 3<br>(2 - 3)            | 14<br>(9 - 19)          | 72<br>(47 - 95)          |
| Gastritis and duodenitis                            | 6<br>(3 - 9)             | 0<br>(0 - 0)          | 0<br>(0 - 0)           | 0<br>(0 - 0)            | 1<br>(1 - 2)            | 5<br>(2 - 7)             |
| Appendicitis                                        | 4<br>(3 - 6)             | 0<br>(0 - 0)          | 0<br>(0 - 0)           | 0<br>(0 - 0)            | 1<br>(0 - 1)            | 3<br>(2 - 5)             |
| Paralytic ileus and intestinal obstruction          | 78<br>(43 - 109)         | 0<br>(0 - 0)          | 0<br>(0 - 0)           | 1<br>(1 - 2)            | 10<br>(5 - 14)          | 67<br>(36 - 95)          |
| Inguinal, femoral, and abdominal hernia             | 17<br>(7 - 26)           | 0<br>(0 - 0)          | 0<br>(0 - 0)           | 0<br>(0 - 0)            | 2<br>(1 - 3)            | 14<br>(6 - 22)           |
| Inflammatory bowel disease                          | 16<br>(7 - 23)           | 0<br>(0 - 0)          | 0<br>(0 - 0)           | 1<br>(1 - 1)            | 3<br>(1 - 4)            | 13<br>(5 - 19)           |
| Vascular intestinal disorders                       | 126<br>(81 - 181)        | 0<br>(0 - 0)          | 0<br>(0 - 0)           | 1<br>(1 - 2)            | 14<br>(8 - 23)          | 110<br>(69 - 160)        |
| Gallbladder and biliary diseases                    | 71<br>(46 - 91)          | 0<br>(0 - 0)          | 0<br>(0 - 0)           | 1<br>(0 - 1)            | 6<br>(4 - 8)            | 64<br>(41 - 84)          |
| Pancreatitis                                        | 62<br>(47 - 84)          | 0<br>(0 - 0)          | 0<br>(0 - 0)           | 7<br>(5 - 9)            | 17<br>(12 - 22)         | 39<br>(27 - 57)          |
| Other digestive diseases                            | 44<br>(30 - 58)          | 0<br>(0 - 0)          | 0<br>(0 - 0)           | 1<br>(1 - 1)            | 6<br>(4 - 8)            | 37<br>(25 - 50)          |
| Neurological disorders                              | 1,643<br>(1,328 - 1,920) | 2<br>(1 - 3)          | 1<br>(1 - 1)           | 22<br>(18 - 28)         | 104<br>(87 - 122)       | 1,514<br>(1,199 - 1,791) |
| Alzheimer disease and other dementias               | 1,463<br>(1,145 - 1,744) | --                    | --                     | 0<br>(0 - 0)            | 54<br>(39 - 68)         | 1,409<br>(1,092 - 1,689) |
| Parkinson disease                                   | 75<br>(57 - 101)         | --                    | --                     | 0<br>(0 - 0)            | 6<br>(5 - 9)            | 68<br>(51 - 94)          |
| Epilepsy                                            | 24<br>(19 - 31)          | 0<br>(0 - 0)          | 0<br>(0 - 0)           | 9<br>(7 - 12)           | 8<br>(6 - 12)           | 6<br>(5 - 8)             |
| Multiple sclerosis                                  | 24<br>(17 - 41)          | --                    | --                     | 5<br>(3 - 9)            | 11<br>(7 - 20)          | 8<br>(5 - 14)            |
| Other neurological disorders                        | 58<br>(45 - 66)          | 2<br>(1 - 3)          | 1<br>(0 - 1)           | 8<br>(6 - 9)            | 24<br>(19 - 29)         | 23<br>(17 - 28)          |
| Mental and substance use disorders                  | 138<br>(89 - 166)        | 0<br>(0 - 0)          | 0<br>(0 - 0)           | 44<br>(30 - 54)         | 64<br>(37 - 82)         | 30<br>(19 - 39)          |
| Schizophrenia                                       | 1<br>(1 - 2)             | --                    | --                     | 0<br>(0 - 0)            | 0<br>(0 - 1)            | 0<br>(0 - 1)             |
| Alcohol use disorders                               | 104<br>(56 - 131)        | --                    | --                     | 22<br>(11 - 30)         | 56<br>(30 - 75)         | 25<br>(13 - 33)          |
| Drug use disorders                                  | 33<br>(23 - 40)          | 0<br>(0 - 0)          | --                     | 21<br>(14 - 27)         | 7<br>(5 - 9)            | 5<br>(4 - 7)             |
| Opioid use disorders                                | 13<br>(9 - 16)           | 0<br>(0 - 0)          | --                     | 8<br>(5 - 11)           | 2<br>(2 - 3)            | 2<br>(1 - 3)             |
| Cocaine use disorders                               | 2<br>(1 - 2)             | 0<br>(0 - 0)          | --                     | 1<br>(1 - 2)            | 0<br>(0 - 0)            | 0<br>(0 - 0)             |
| Amphetamine use disorders                           | 2<br>(1 - 2)             | 0<br>(0 - 0)          | --                     | 1<br>(1 - 1)            | 0<br>(0 - 0)            | 0<br>(0 - 0)             |
| Other drug use disorders                            | 17<br>(12 - 21)          | 0<br>(0 - 0)          | --                     | 11<br>(7 - 14)          | 4<br>(3 - 5)            | 3<br>(2 - 3)             |
| Eating disorders                                    | 0<br>(0 - 0)             | --                    | 0<br>(0 - 0)           | 0<br>(0 - 0)            | --                      | --                       |
| Anorexia nervosa                                    | 0<br>(0 - 0)             | --                    | 0<br>(0 - 0)           | 0<br>(0 - 0)            | --                      | --                       |
| Diabetes, urogenital, blood, and endocrine diseases | 722<br>(641 - 877)       | 2<br>(1 - 3)          | 1<br>(1 - 1)           | 16<br>(14 - 19)         | 114<br>(100 - 131)      | 589<br>(517 - 737)       |
| Diabetes mellitus                                   | 355<br>(308 - 490)       | 0<br>(0 - 0)          | 0<br>(0 - 0)           | 5<br>(4 - 6)            | 64<br>(54 - 76)         | 286<br>(242 - 416)       |
| Acute glomerulonephritis                            | 0<br>(0 - 0)             | 0<br>(0 - 0)          | 0<br>(0 - 0)           | 0<br>(0 - 0)            | 0<br>(0 - 0)            | 0<br>(0 - 0)             |

Web Table 31- Slovenia deaths with 95% UI by age, sex, and cause in 2013

| Cause                                               | Both Sexes, All Ages     | Both Sexes, 0-4 Years | Both Sexes, 5-14 Years | Both Sexes, 15-49 Years | Both Sexes, 50-69 Years | Both Sexes, 70-80 Years |
|-----------------------------------------------------|--------------------------|-----------------------|------------------------|-------------------------|-------------------------|-------------------------|
| Chronic kidney disease                              | 203<br>(172 - 243)       | 0<br>(0 - 0)          | 0<br>(0 - 0)           | 3<br>(3 - 4)            | 25<br>(20 - 33)         | 174<br>(144 - 212)      |
| Chronic kidney disease due to diabetes mellitus     | 1<br>(0 - 1)             | 0<br>(0 - 0)          | 0<br>(0 - 0)           | 0<br>(0 - 0)            | 0<br>(0 - 0)            | 0<br>(0 - 1)            |
| Chronic kidney disease due to hypertension          | 76<br>(55 - 110)         | 0<br>(0 - 0)          | 0<br>(0 - 0)           | 1<br>(1 - 2)            | 9<br>(7 - 14)           | 65<br>(47 - 96)         |
| Chronic kidney disease due to glomerulonephritis    | 5<br>(3 - 8)             | 0<br>(0 - 0)          | 0<br>(0 - 0)           | 0<br>(0 - 0)            | 1<br>(1 - 2)            | 3<br>(2 - 6)            |
| Chronic kidney disease due to other causes          | 122<br>(85 - 161)        | 0<br>(0 - 0)          | 0<br>(0 - 0)           | 2<br>(1 - 3)            | 14<br>(9 - 20)          | 105<br>(71 - 142)       |
| Urinary diseases and male infertility               | 107<br>(78 - 142)        | 0<br>(0 - 0)          | 0<br>(0 - 0)           | 1<br>(1 - 2)            | 11<br>(9 - 14)          | 95<br>(67 - 127)        |
| Interstitial nephritis and urinary tract infections | 60<br>(37 - 105)         | 0<br>(0 - 0)          | 0<br>(0 - 0)           | 1<br>(1 - 1)            | 8<br>(5 - 12)           | 51<br>(30 - 94)         |
| Urolithiasis                                        | 2<br>(1 - 3)             | --                    | 0<br>(0 - 0)           | 0<br>(0 - 0)            | 0<br>(0 - 1)            | 1<br>(1 - 3)            |
| Other urinary diseases                              | 45<br>(15 - 74)          | 0<br>(0 - 0)          | 0<br>(0 - 0)           | 0<br>(0 - 0)            | 3<br>(1 - 4)            | 42<br>(13 - 70)         |
| Gynecological diseases                              | 0<br>(0 - 0)             | --                    | --                     | 0<br>(0 - 0)            | 0<br>(0 - 0)            | 0<br>(0 - 0)            |
| Uterine fibroids                                    | 0<br>(0 - 0)             | --                    | --                     | 0<br>(0 - 0)            | 0<br>(0 - 0)            | 0<br>(0 - 0)            |
| Polycystic ovarian syndrome                         | 0<br>(0 - 0)             | --                    | --                     | 0<br>(0 - 0)            | 0<br>(0 - 0)            | --                      |
| Endometriosis                                       | 0<br>(0 - 0)             | --                    | --                     | 0<br>(0 - 0)            | 0<br>(0 - 0)            | --                      |
| Genital prolapse                                    | 0<br>(0 - 0)             | --                    | --                     | 0<br>(0 - 0)            | 0<br>(0 - 0)            | 0<br>(0 - 0)            |
| Other gynecological diseases                        | 0<br>(0 - 0)             | --                    | --                     | 0<br>(0 - 0)            | 0<br>(0 - 0)            | 0<br>(0 - 0)            |
| Hemoglobinopathies and hemolytic anemias            | 8<br>(6 - 12)            | 0<br>(0 - 0)          | 0<br>(0 - 0)           | 1<br>(1 - 1)            | 1<br>(1 - 2)            | 6<br>(4 - 10)           |
| Thalassemias                                        | 0<br>(0 - 1)             | 0<br>(0 - 0)          | 0<br>(0 - 0)           | 0<br>(0 - 0)            | 0<br>(0 - 0)            | 0<br>(0 - 0)            |
| Sickle cell disorders                               | 0<br>(0 - 0)             | 0<br>(0 - 0)          | 0<br>(0 - 0)           | 0<br>(0 - 0)            | 0<br>(0 - 0)            | 0<br>(0 - 0)            |
| G6PD deficiency                                     | 0<br>(0 - 0)             | 0<br>(0 - 0)          | 0<br>(0 - 0)           | 0<br>(0 - 0)            | 0<br>(0 - 0)            | 0<br>(0 - 0)            |
| Other hemoglobinopathies and hemolytic anemias      | 7<br>(5 - 11)            | 0<br>(0 - 0)          | 0<br>(0 - 0)           | 0<br>(0 - 1)            | 1<br>(1 - 1)            | 6<br>(4 - 9)            |
| Endocrine, metabolic, blood, and immune disorders   | 49<br>(36 - 61)          | 2<br>(1 - 3)          | 1<br>(1 - 1)           | 6<br>(4 - 7)            | 13<br>(8 - 16)          | 28<br>(20 - 38)         |
| Musculoskeletal disorders                           | 64<br>(49 - 102)         | --                    | 0<br>(0 - 0)           | 4<br>(3 - 5)            | 17<br>(13 - 25)         | 43<br>(31 - 70)         |
| Rheumatoid arthritis                                | 25<br>(16 - 36)          | --                    | 0<br>(0 - 0)           | 0<br>(0 - 1)            | 5<br>(3 - 7)            | 20<br>(12 - 29)         |
| Other musculoskeletal disorders                     | 39<br>(30 - 75)          | --                    | 0<br>(0 - 0)           | 4<br>(3 - 5)            | 12<br>(9 - 20)          | 23<br>(16 - 47)         |
| Other non-communicable diseases                     | 89<br>(70 - 111)         | 27<br>(16 - 45)       | 2<br>(1 - 3)           | 9<br>(8 - 11)           | 9<br>(8 - 11)           | 41<br>(24 - 55)         |
| Congenital anomalies                                | 48<br>(35 - 65)          | 24<br>(14 - 39)       | 2<br>(1 - 3)           | 8<br>(7 - 10)           | 6<br>(5 - 7)            | 7<br>(5 - 9)            |
| Neural tube defects                                 | 0<br>(0 - 0)             | 0<br>(0 - 0)          | 0<br>(0 - 0)           | 0<br>(0 - 0)            | 0<br>(0 - 0)            | 0<br>(0 - 0)            |
| Congenital heart anomalies                          | 21<br>(16 - 30)          | 11<br>(6 - 19)        | 1<br>(0 - 1)           | 4<br>(3 - 5)            | 2<br>(2 - 3)            | 3<br>(2 - 5)            |
| Cleft lip and cleft palate                          | 0<br>(0 - 0)             | 0<br>(0 - 0)          | --                     | --                      | --                      | --                      |
| Down syndrome                                       | 6<br>(4 - 8)             | 2<br>(1 - 3)          | 0<br>(0 - 0)           | 2<br>(1 - 3)            | 2<br>(1 - 2)            | 0<br>(0 - 0)            |
| Chromosomal unbalanced rearrangements               | 1<br>(1 - 2)             | 1<br>(0 - 2)          | 0<br>(0 - 0)           | 0<br>(0 - 0)            | 0<br>(0 - 0)            | 0<br>(0 - 0)            |
| Other congenital anomalies                          | 19<br>(14 - 27)          | 10<br>(6 - 17)        | 1<br>(1 - 1)           | 2<br>(2 - 3)            | 2<br>(1 - 3)            | 3<br>(3 - 5)            |
| Skin and subcutaneous diseases                      | 38<br>(20 - 52)          | 0<br>(0 - 0)          | 0<br>(0 - 0)           | 1<br>(0 - 1)            | 3<br>(2 - 4)            | 34<br>(17 - 47)         |
| Cellulitis                                          | 4<br>(2 - 8)             | 0<br>(0 - 0)          | 0<br>(0 - 0)           | 0<br>(0 - 0)            | 1<br>(0 - 1)            | 3<br>(2 - 7)            |
| Pyoderma                                            | 8<br>(6 - 13)            | 0<br>(0 - 0)          | 0<br>(0 - 0)           | 0<br>(0 - 0)            | 1<br>(1 - 2)            | 7<br>(5 - 12)           |
| Decubitus ulcer                                     | 25<br>(2 - 37)           | 0<br>(0 - 0)          | 0<br>(0 - 0)           | 0<br>(0 - 0)            | 1<br>(0 - 2)            | 23<br>(2 - 35)          |
| Other skin and subcutaneous diseases                | 1<br>(0 - 2)             | 0<br>(0 - 0)          | 0<br>(0 - 0)           | 0<br>(0 - 0)            | 0<br>(0 - 0)            | 0<br>(0 - 1)            |
| Sudden infant death syndrome                        | 3<br>(1 - 7)             | 3<br>(1 - 7)          | --                     | --                      | --                      | --                      |
| Injuries                                            | 1,551<br>(1,394 - 1,770) | 6<br>(3 - 11)         | 8<br>(6 - 11)          | 377<br>(335 - 424)      | 392<br>(341 - 461)      | 768<br>(656 - 899)      |
| Transport injuries                                  | 226<br>(199 - 256)       | 2<br>(1 - 3)          | 4<br>(3 - 5)           | 110<br>(94 - 126)       | 56<br>(48 - 65)         | 54<br>(45 - 66)         |

Web Table 31- Slovenia deaths with 95% UI by age, sex, and cause in 2013

| Cause                                           | Both Sexes, All Ages | Both Sexes, 0-4 Years | Both Sexes, 5-14 Years | Both Sexes, 15-49 Years | Both Sexes, 50-69 Years | Both Sexes, 70-80 Years |
|-------------------------------------------------|----------------------|-----------------------|------------------------|-------------------------|-------------------------|-------------------------|
| Road injuries                                   | 199<br>(175 - 226)   | 2<br>(1 - 3)          | 4<br>(2 - 5)           | 99<br>(85 - 114)        | 47<br>(40 - 54)         | 48<br>(39 - 59)         |
| Pedestrian road injuries                        | 46<br>(33 - 64)      | 1<br>(0 - 1)          | 1<br>(1 - 2)           | 10<br>(6 - 16)          | 13<br>(9 - 20)          | 21<br>(15 - 29)         |
| Cyclist road injuries                           | 16<br>(11 - 22)      | 0<br>(0 - 0)          | 0<br>(0 - 1)           | 4<br>(3 - 6)            | 6<br>(4 - 8)            | 6<br>(4 - 9)            |
| Motorcyclist road injuries                      | 27<br>(14 - 37)      | 0<br>(0 - 0)          | 0<br>(0 - 1)           | 19<br>(9 - 26)          | 5<br>(2 - 7)            | 3<br>(2 - 5)            |
| Motor vehicle road injuries                     | 110<br>(88 - 131)    | 1<br>(0 - 2)          | 2<br>(1 - 2)           | 67<br>(54 - 79)         | 23<br>(16 - 29)         | 18<br>(12 - 25)         |
| Other road injuries                             | 1<br>(0 - 2)         | 0<br>(0 - 0)          | 0<br>(0 - 0)           | 0<br>(0 - 1)            | 0<br>(0 - 0)            | 0<br>(0 - 1)            |
| Other transport injuries                        | 27<br>(19 - 35)      | 0<br>(0 - 1)          | 0<br>(0 - 1)           | 10<br>(7 - 14)          | 9<br>(6 - 13)           | 7<br>(4 - 9)            |
| Unintentional injuries                          | 809<br>(676 - 937)   | 4<br>(2 - 7)          | 3<br>(2 - 4)           | 69<br>(59 - 81)         | 147<br>(123 - 176)      | 586<br>(469 - 700)      |
| Falls                                           | 558<br>(433 - 692)   | 0<br>(0 - 1)          | 1<br>(0 - 1)           | 28<br>(19 - 36)         | 82<br>(58 - 105)        | 447<br>(340 - 567)      |
| Drowning                                        | 28<br>(20 - 45)      | 1<br>(0 - 2)          | 1<br>(1 - 2)           | 10<br>(7 - 15)          | 9<br>(6 - 15)           | 7<br>(5 - 12)           |
| Fire, heat, and hot substances                  | 15<br>(12 - 20)      | 0<br>(0 - 0)          | 0<br>(0 - 0)           | 2<br>(2 - 3)            | 4<br>(3 - 5)            | 9<br>(7 - 12)           |
| Poisonings                                      | 9<br>(7 - 11)        | 0<br>(0 - 0)          | 0<br>(0 - 0)           | 3<br>(2 - 4)            | 3<br>(2 - 4)            | 3<br>(2 - 4)            |
| Exposure to mechanical forces                   | 24<br>(21 - 30)      | 0<br>(0 - 1)          | 0<br>(0 - 1)           | 10<br>(8 - 13)          | 8<br>(7 - 11)           | 5<br>(4 - 6)            |
| Unintentional firearm injuries                  | 1<br>(1 - 2)         | 0<br>(0 - 0)          | 0<br>(0 - 0)           | 0<br>(0 - 1)            | 0<br>(0 - 0)            | 0<br>(0 - 1)            |
| Unintentional suffocation                       | 1<br>(1 - 2)         | 0<br>(0 - 0)          | 0<br>(0 - 0)           | 0<br>(0 - 0)            | 0<br>(0 - 0)            | 0<br>(0 - 1)            |
| Other exposure to mechanical forces             | 22<br>(18 - 27)      | 0<br>(0 - 1)          | 0<br>(0 - 1)           | 9<br>(7 - 12)           | 8<br>(6 - 11)           | 4<br>(3 - 5)            |
| Adverse effects of medical treatment            | 117<br>(66 - 157)    | 1<br>(0 - 1)          | 0<br>(0 - 0)           | 5<br>(3 - 7)            | 25<br>(15 - 34)         | 86<br>(46 - 120)        |
| Animal contact                                  | 4<br>(3 - 7)         | 0<br>(0 - 0)          | 0<br>(0 - 0)           | 1<br>(0 - 1)            | 1<br>(1 - 2)            | 2<br>(1 - 4)            |
| Venomous animal contact                         | 1<br>(1 - 2)         | 0<br>(0 - 0)          | 0<br>(0 - 0)           | 0<br>(0 - 0)            | 0<br>(0 - 1)            | 0<br>(0 - 0)            |
| Non-venomous animal contact                     | 3<br>(2 - 6)         | 0<br>(0 - 0)          | 0<br>(0 - 0)           | 0<br>(0 - 1)            | 1<br>(1 - 2)            | 2<br>(1 - 3)            |
| Foreign body                                    | 44<br>(26 - 57)      | 1<br>(1 - 2)          | 0<br>(0 - 0)           | 7<br>(4 - 9)            | 12<br>(7 - 16)          | 24<br>(13 - 34)         |
| Pulmonary aspiration and foreign body in airway | 44<br>(26 - 57)      | 1<br>(1 - 2)          | 0<br>(0 - 0)           | 7<br>(4 - 9)            | 12<br>(6 - 16)          | 24<br>(13 - 34)         |
| Foreign body in other body part                 | 0<br>(0 - 1)         | 0<br>(0 - 0)          | 0<br>(0 - 0)           | 0<br>(0 - 0)            | 0<br>(0 - 0)            | 0<br>(0 - 0)            |
| Other unintentional injuries                    | 9<br>(7 - 12)        | 0<br>(0 - 0)          | 0<br>(0 - 0)           | 4<br>(3 - 5)            | 3<br>(2 - 4)            | 2<br>(1 - 3)            |
| Self-harm and interpersonal violence            | 516<br>(431 - 653)   | 1<br>(0 - 1)          | 1<br>(1 - 2)           | 198<br>(163 - 239)      | 188<br>(150 - 248)      | 127<br>(104 - 165)      |
| Self-harm                                       | 489<br>(408 - 621)   | -                     | 1<br>(1 - 2)           | 185<br>(151 - 225)      | 181<br>(144 - 240)      | 122<br>(99 - 159)       |
| Interpersonal violence                          | 26<br>(21 - 39)      | 1<br>(0 - 1)          | 0<br>(0 - 0)           | 13<br>(10 - 19)         | 7<br>(6 - 12)           | 5<br>(4 - 8)            |
| Assault by firearm                              | 6<br>(4 - 11)        | 0<br>(0 - 0)          | 0<br>(0 - 0)           | 4<br>(2 - 6)            | 2<br>(1 - 3)            | 1<br>(0 - 2)            |
| Assault by sharp object                         | 8<br>(5 - 13)        | 0<br>(0 - 0)          | 0<br>(0 - 0)           | 4<br>(3 - 7)            | 2<br>(1 - 4)            | 1<br>(1 - 3)            |
| Assault by other means                          | 12<br>(9 - 18)       | 0<br>(0 - 1)          | 0<br>(0 - 0)           | 5<br>(3 - 7)            | 4<br>(2 - 5)            | 3<br>(2 - 4)            |

Web Table 31- Slovenia deaths with 95% UI by age, sex, and cause in 2013

| Cause                                                             | Males, All Ages            | Males, 0-4 Years | Males, 5-14 Years | Males, 15-49 Years | Males, 50-69 Years       | Males, 70-80 Years       |
|-------------------------------------------------------------------|----------------------------|------------------|-------------------|--------------------|--------------------------|--------------------------|
| All causes                                                        | 10,144<br>(9,425 - 10,885) | 41<br>(24 - 70)  | 11<br>(8 - 15)    | 722<br>(651 - 802) | 2,847<br>(2,561 - 3,141) | 6,523<br>(6,160 - 6,903) |
| Communicable, maternal, neonatal, and nutritional diseases        | 376<br>(302 - 480)         | 20<br>(12 - 36)  | 1<br>(0 - 1)      | 17<br>(14 - 21)    | 51<br>(40 - 64)          | 287<br>(218 - 382)       |
| HIV/AIDS and tuberculosis                                         | 15<br>(12 - 19)            | 0<br>(0 - 0)     | 0<br>(0 - 0)      | 4<br>(3 - 6)       | 5<br>(4 - 6)             | 6<br>(4 - 8)             |
| Tuberculosis                                                      | 12<br>(10 - 15)            | 0<br>(0 - 0)     | 0<br>(0 - 0)      | 2<br>(2 - 3)       | 4<br>(3 - 5)             | 6<br>(4 - 8)             |
| HIV/AIDS                                                          | 3<br>(1 - 6)               | 0<br>(0 - 0)     | 0<br>(0 - 0)      | 2<br>(1 - 4)       | 1<br>(0 - 2)             | 0<br>(0 - 0)             |
| HIV/AIDS resulting in mycobacterial infection                     | 0<br>(0 - 0)               | 0<br>(0 - 0)     | 0<br>(0 - 0)      | 0<br>(0 - 0)       | 0<br>(0 - 0)             | 0<br>(0 - 0)             |
| HIV/AIDS resulting in other diseases                              | 3<br>(1 - 5)               | 0<br>(0 - 0)     | 0<br>(0 - 0)      | 2<br>(1 - 3)       | 1<br>(0 - 2)             | 0<br>(0 - 0)             |
| Diarrhea, lower respiratory, and other common infectious diseases | 332<br>(259 - 435)         | 2<br>(1 - 4)     | 1<br>(0 - 1)      | 12<br>(9 - 15)     | 43<br>(33 - 55)          | 274<br>(205 - 369)       |
| Diarrheal diseases                                                | 1<br>(1 - 2)               | 0<br>(0 - 0)     | 0<br>(0 - 0)      | 0<br>(0 - 0)       | 0<br>(0 - 0)             | 1<br>(0 - 1)             |
| Intestinal infectious diseases                                    | 3<br>(1 - 7)               | 0<br>(0 - 1)     | 0<br>(0 - 1)      | 1<br>(0 - 3)       | 1<br>(0 - 2)             | 0<br>(0 - 1)             |
| Typhoid fever                                                     | 2<br>(1 - 5)               | 0<br>(0 - 1)     | 0<br>(0 - 1)      | 1<br>(0 - 2)       | 0<br>(0 - 1)             | 0<br>(0 - 1)             |
| Paratyphoid fever                                                 | 1<br>(0 - 1)               | 0<br>(0 - 0)     | 0<br>(0 - 0)      | 0<br>(0 - 1)       | 0<br>(0 - 0)             | 0<br>(0 - 0)             |
| Other intestinal infectious diseases                              | 0<br>(0 - 1)               | 0<br>(0 - 0)     | 0<br>(0 - 0)      | 0<br>(0 - 0)       | 0<br>(0 - 0)             | 0<br>(0 - 0)             |
| Lower respiratory infections                                      | 320<br>(247 - 422)         | 2<br>(1 - 3)     | 0<br>(0 - 0)      | 9<br>(7 - 12)      | 38<br>(29 - 51)          | 270<br>(201 - 365)       |
| Upper respiratory infections                                      | 0<br>(0 - 1)               | 0<br>(0 - 0)     | 0<br>(0 - 0)      | 0<br>(0 - 0)       | 0<br>(0 - 0)             | 0<br>(0 - 0)             |
| Otitis media                                                      | 0<br>(0 - 0)               | 0<br>(0 - 0)     | 0<br>(0 - 0)      | 0<br>(0 - 0)       | 0<br>(0 - 0)             | 0<br>(0 - 0)             |
| Meningitis                                                        | 4<br>(3 - 5)               | 0<br>(0 - 0)     | 0<br>(0 - 0)      | 1<br>(1 - 1)       | 2<br>(1 - 2)             | 1<br>(1 - 2)             |
| Pneumococcal meningitis                                           | 1<br>(1 - 2)               | 0<br>(0 - 0)     | 0<br>(0 - 0)      | 0<br>(0 - 0)       | 1<br>(0 - 1)             | 0<br>(0 - 1)             |
| H influenzae type B meningitis                                    | 0<br>(0 - 1)               | 0<br>(0 - 0)     | 0<br>(0 - 0)      | 0<br>(0 - 0)       | 0<br>(0 - 0)             | 0<br>(0 - 0)             |
| Meningococcal meningitis                                          | 1<br>(0 - 1)               | 0<br>(0 - 0)     | 0<br>(0 - 0)      | 0<br>(0 - 0)       | 0<br>(0 - 1)             | 0<br>(0 - 0)             |
| Other meningitis                                                  | 2<br>(1 - 2)               | 0<br>(0 - 0)     | 0<br>(0 - 0)      | 0<br>(0 - 0)       | 1<br>(0 - 1)             | 1<br>(0 - 1)             |
| Encephalitis                                                      | 3<br>(2 - 4)               | 0<br>(0 - 0)     | 0<br>(0 - 0)      | 0<br>(0 - 1)       | 1<br>(1 - 2)             | 1<br>(0 - 1)             |
| Diphtheria                                                        | 0<br>(0 - 0)               | 0<br>(0 - 0)     | 0<br>(0 - 0)      | 0<br>(0 - 0)       | 0<br>(0 - 0)             | --                       |
| Whooping cough                                                    | 0<br>(0 - 0)               | 0<br>(0 - 0)     | 0<br>(0 - 0)      | 0<br>(0 - 0)       | 0<br>(0 - 0)             | --                       |
| Tetanus                                                           | 0<br>(0 - 0)               | 0<br>(0 - 0)     | 0<br>(0 - 0)      | 0<br>(0 - 0)       | 0<br>(0 - 0)             | 0<br>(0 - 0)             |
| Measles                                                           | 0<br>(0 - 0)               | 0<br>(0 - 0)     | 0<br>(0 - 0)      | 0<br>(0 - 0)       | 0<br>(0 - 0)             | --                       |
| Varicella and herpes zoster                                       | 1<br>(0 - 2)               | 0<br>(0 - 0)     | 0<br>(0 - 0)      | 0<br>(0 - 0)       | 0<br>(0 - 0)             | 0<br>(0 - 2)             |
| Neglected tropical diseases and malaria                           | 1<br>(1 - 1)               | 0<br>(0 - 0)     | 0<br>(0 - 0)      | 0<br>(0 - 0)       | 0<br>(0 - 0)             | 0<br>(0 - 0)             |
| Leishmaniasis                                                     | 0<br>(0 - 0)               | 0<br>(0 - 0)     | 0<br>(0 - 0)      | 0<br>(0 - 0)       | 0<br>(0 - 0)             | 0<br>(0 - 0)             |
| Visceral leishmaniasis                                            | 0<br>(0 - 0)               | 0<br>(0 - 0)     | 0<br>(0 - 0)      | 0<br>(0 - 0)       | 0<br>(0 - 0)             | 0<br>(0 - 0)             |
| Cysticercosis                                                     | 0<br>(0 - 0)               | 0<br>(0 - 0)     | 0<br>(0 - 0)      | 0<br>(0 - 0)       | 0<br>(0 - 0)             | 0<br>(0 - 0)             |
| Cystic echinococcosis                                             | 0<br>(0 - 0)               | 0<br>(0 - 0)     | 0<br>(0 - 0)      | 0<br>(0 - 0)       | 0<br>(0 - 0)             | 0<br>(0 - 0)             |
| Dengue                                                            | 0<br>(0 - 0)               | 0<br>(0 - 0)     | 0<br>(0 - 0)      | 0<br>(0 - 0)       | 0<br>(0 - 0)             | 0<br>(0 - 0)             |
| Rabies                                                            | 0<br>(0 - 0)               | 0<br>(0 - 0)     | 0<br>(0 - 0)      | 0<br>(0 - 0)       | 0<br>(0 - 0)             | 0<br>(0 - 0)             |
| Other neglected tropical diseases                                 | 0<br>(0 - 0)               | 0<br>(0 - 0)     | 0<br>(0 - 0)      | 0<br>(0 - 0)       | 0<br>(0 - 0)             | 0<br>(0 - 0)             |
| Maternal disorders                                                | --                         | --               | --                | --                 | --                       | --                       |
| Maternal hemorrhage                                               | --                         | --               | --                | --                 | --                       | --                       |
| Maternal sepsis and other maternal infections                     | --                         | --               | --                | --                 | --                       | --                       |
| Maternal hypertensive disorders                                   | --                         | --               | --                | --                 | --                       | --                       |
| Maternal obstructed labor                                         | --                         | --               | --                | --                 | --                       | --                       |

Web Table 31- Slovenia deaths with 95% UI by age, sex, and cause in 2013

| Cause                                                            | Males, All Ages          | Males, 0-4 Years | Males, 5-14 Years | Males, 15-49 Years | Males, 50-69 Years       | Males, 70-80 Years       |
|------------------------------------------------------------------|--------------------------|------------------|-------------------|--------------------|--------------------------|--------------------------|
| Maternal abortive outcome                                        | --                       | --               | --                | --                 | --                       | --                       |
| Indirect maternal deaths                                         | --                       | --               | --                | --                 | --                       | --                       |
| Late maternal deaths                                             | --                       | --               | --                | --                 | --                       | --                       |
| Maternal deaths aggravated by HIV/AIDS                           | --                       | --               | --                | --                 | --                       | --                       |
| Other maternal disorders                                         | --                       | --               | --                | --                 | --                       | --                       |
| Neonatal disorders                                               | 18<br>(10 - 31)          | 18<br>(10 - 31)  | --                | --                 | --                       | --                       |
| Neonatal preterm birth complications                             | 13<br>(7 - 23)           | 13<br>(7 - 23)   | --                | --                 | --                       | --                       |
| Neonatal encephalopathy due to birth asphyxia and trauma         | 2<br>(1 - 5)             | 2<br>(1 - 5)     | --                | --                 | --                       | --                       |
| Neonatal sepsis and other neonatal infections                    | 0<br>(0 - 1)             | 0<br>(0 - 1)     | --                | --                 | --                       | --                       |
| Hemolytic disease and other neonatal jaundice                    | 0<br>(0 - 0)             | 0<br>(0 - 0)     | --                | --                 | --                       | --                       |
| Other neonatal disorders                                         | 3<br>(1 - 6)             | 3<br>(1 - 6)     | --                | --                 | --                       | --                       |
| Nutritional deficiencies                                         | 4<br>(3 - 8)             | 0<br>(0 - 0)     | 0<br>(0 - 0)      | 0<br>(0 - 0)       | 1<br>(0 - 1)             | 4<br>(2 - 6)             |
| Protein-energy malnutrition                                      | 0<br>(0 - 0)             | 0<br>(0 - 0)     | 0<br>(0 - 0)      | 0<br>(0 - 0)       | 0<br>(0 - 0)             | 0<br>(0 - 0)             |
| Iodine deficiency                                                | 0<br>(0 - 0)             | 0<br>(0 - 0)     | 0<br>(0 - 0)      | 0<br>(0 - 0)       | 0<br>(0 - 0)             | 0<br>(0 - 0)             |
| Iron-deficiency anemia                                           | 4<br>(2 - 6)             | 0<br>(0 - 0)     | 0<br>(0 - 0)      | 0<br>(0 - 0)       | 0<br>(0 - 1)             | 3<br>(2 - 5)             |
| Other nutritional deficiencies                                   | 1<br>(0 - 2)             | 0<br>(0 - 0)     | 0<br>(0 - 0)      | 0<br>(0 - 0)       | 0<br>(0 - 0)             | 0<br>(0 - 1)             |
| Other communicable, maternal, neonatal, and nutritional diseases | 7<br>(4 - 9)             | 0<br>(0 - 1)     | 0<br>(0 - 0)      | 1<br>(1 - 1)       | 2<br>(1 - 3)             | 3<br>(2 - 4)             |
| Sexually transmitted diseases excluding HIV                      | 0<br>(0 - 1)             | 0<br>(0 - 1)     | 0<br>(0 - 0)      | 0<br>(0 - 0)       | 0<br>(0 - 0)             | 0<br>(0 - 0)             |
| Syphilis                                                         | 0<br>(0 - 1)             | 0<br>(0 - 1)     | 0<br>(0 - 0)      | 0<br>(0 - 0)       | 0<br>(0 - 0)             | 0<br>(0 - 0)             |
| Chlamydial infection                                             | --                       | --               | --                | --                 | --                       | --                       |
| Gonococcal infection                                             | 0<br>(0 - 0)             | --               | 0<br>(0 - 0)      | 0<br>(0 - 0)       | 0<br>(0 - 0)             | 0<br>(0 - 0)             |
| Other sexually transmitted diseases                              | 0<br>(0 - 0)             | --               | 0<br>(0 - 0)      | 0<br>(0 - 0)       | 0<br>(0 - 0)             | 0<br>(0 - 0)             |
| Hepatitis                                                        | 1<br>(1 - 1)             | 0<br>(0 - 0)     | 0<br>(0 - 0)      | 0<br>(0 - 0)       | 0<br>(0 - 0)             | 0<br>(0 - 0)             |
| Acute hepatitis A                                                | 0<br>(0 - 0)             | 0<br>(0 - 0)     | 0<br>(0 - 0)      | 0<br>(0 - 0)       | 0<br>(0 - 0)             | 0<br>(0 - 0)             |
| Acute hepatitis B                                                | 1<br>(0 - 1)             | 0<br>(0 - 0)     | 0<br>(0 - 0)      | 0<br>(0 - 0)       | 0<br>(0 - 0)             | 0<br>(0 - 0)             |
| Acute hepatitis C                                                | 0<br>(0 - 0)             | --               | 0<br>(0 - 0)      | 0<br>(0 - 0)       | 0<br>(0 - 0)             | 0<br>(0 - 0)             |
| Other infectious diseases                                        | 6<br>(3 - 8)             | 0<br>(0 - 0)     | 0<br>(0 - 0)      | 1<br>(0 - 1)       | 2<br>(1 - 3)             | 3<br>(1 - 4)             |
| Non-communicable diseases                                        | 8,798<br>(8,174 - 9,445) | 17<br>(10 - 28)  | 5<br>(3 - 7)      | 390<br>(344 - 440) | 2,495<br>(2,248 - 2,747) | 5,891<br>(5,552 - 6,260) |
| Neoplasms                                                        | 3,215<br>(2,936 - 3,519) | 1<br>(0 - 2)     | 2<br>(2 - 4)      | 152<br>(134 - 175) | 1,251<br>(1,120 - 1,397) | 1,808<br>(1,637 - 1,996) |
| Esophageal cancer                                                | 76<br>(59 - 96)          | --               | --                | 5<br>(4 - 8)       | 41<br>(31 - 55)          | 29<br>(22 - 37)          |
| Stomach cancer                                                   | 258<br>(219 - 307)       | --               | --                | 10<br>(8 - 13)     | 87<br>(72 - 106)         | 161<br>(132 - 197)       |
| Liver cancer                                                     | 108<br>(60 - 142)        | --               | 0<br>(0 - 0)      | 4<br>(2 - 6)       | 51<br>(26 - 68)          | 53<br>(30 - 73)          |
| Liver cancer due to hepatitis B                                  | 21<br>(9 - 39)           | --               | 0<br>(0 - 0)      | 1<br>(0 - 2)       | 11<br>(4 - 22)           | 9<br>(4 - 16)            |
| Liver cancer due to hepatitis C                                  | 52<br>(28 - 80)          | --               | 0<br>(0 - 0)      | 2<br>(1 - 3)       | 25<br>(11 - 38)          | 26<br>(13 - 41)          |
| Liver cancer due to alcohol use                                  | 29<br>(14 - 47)          | --               | --                | 1<br>(0 - 1)       | 12<br>(5 - 20)           | 17<br>(8 - 27)           |
| Liver cancer due to other causes                                 | 5<br>(2 - 9)             | --               | 0<br>(0 - 0)      | 0<br>(0 - 1)       | 3<br>(1 - 5)             | 2<br>(1 - 4)             |
| Larynx cancer                                                    | 46<br>(31 - 59)          | --               | --                | 3<br>(2 - 5)       | 23<br>(16 - 31)          | 19<br>(12 - 26)          |
| Tracheal, bronchus and lung cancer                               | 824<br>(706 - 950)       | --               | --                | 34<br>(26 - 43)    | 404<br>(335 - 473)       | 387<br>(332 - 445)       |
| Breast cancer                                                    | 2<br>(1 - 4)             | --               | --                | 0<br>(0 - 0)       | 1<br>(0 - 1)             | 1<br>(0 - 3)             |
| Cervical cancer                                                  | --                       | --               | --                | --                 | --                       | --                       |

Web Table 31- Slovenia deaths with 95% UI by age, sex, and cause in 2013

| Cause                                         | Males, All Ages          | Males, 0-4 Years | Males, 5-14 Years | Males, 15-49 Years | Males, 50-69 Years | Males, 70-80 Years       |
|-----------------------------------------------|--------------------------|------------------|-------------------|--------------------|--------------------|--------------------------|
| Uterine cancer                                | --                       | --               | --                | --                 | --                 | --                       |
| Prostate cancer                               | 405<br>(288 - 520)       | --               | --                | 1<br>(0 - 1)       | 60<br>(38 - 81)    | 344<br>(240 - 443)       |
| Colon and rectum cancer                       | 491<br>(433 - 552)       | --               | --                | 14<br>(11 - 17)    | 169<br>(144 - 194) | 308<br>(265 - 357)       |
| Lip and oral cavity cancer                    | 53<br>(40 - 64)          | --               | --                | 6<br>(4 - 8)       | 31<br>(21 - 39)    | 16<br>(12 - 21)          |
| Nasopharynx cancer                            | 7<br>(5 - 10)            | --               | 0<br>(0 - 0)      | 1<br>(1 - 2)       | 4<br>(3 - 6)       | 2<br>(1 - 2)             |
| Other pharynx cancer                          | 76<br>(57 - 103)         | --               | --                | 8<br>(5 - 12)      | 52<br>(38 - 72)    | 16<br>(11 - 23)          |
| Gallbladder and biliary tract cancer          | 48<br>(26 - 66)          | --               | --                | 1<br>(1 - 2)       | 15<br>(8 - 22)     | 31<br>(17 - 43)          |
| Pancreatic cancer                             | 172<br>(153 - 194)       | --               | --                | 8<br>(6 - 11)      | 79<br>(68 - 92)    | 84<br>(72 - 100)         |
| Malignant skin melanoma                       | 52<br>(25 - 86)          | --               | --                | 9<br>(4 - 15)      | 23<br>(10 - 39)    | 21<br>(10 - 35)          |
| Non-melanoma skin cancer                      | 11<br>(5 - 16)           | --               | --                | 0<br>(0 - 0)       | 2<br>(1 - 3)       | 8<br>(4 - 13)            |
| Ovarian cancer                                | --                       | --               | --                | --                 | --                 | --                       |
| Testicular cancer                             | 5<br>(3 - 7)             | --               | --                | 3<br>(2 - 5)       | 1<br>(0 - 1)       | 1<br>(0 - 1)             |
| Kidney cancer                                 | 83<br>(64 - 105)         | 0<br>(0 - 0)     | 0<br>(0 - 0)      | 4<br>(3 - 5)       | 37<br>(26 - 49)    | 43<br>(31 - 56)          |
| Bladder cancer                                | 106<br>(68 - 132)        | --               | --                | 1<br>(1 - 2)       | 24<br>(16 - 32)    | 81<br>(51 - 104)         |
| Brain and nervous system cancer               | 66<br>(47 - 81)          | 0<br>(0 - 1)     | 1<br>(1 - 1)      | 13<br>(10 - 17)    | 35<br>(25 - 44)    | 17<br>(10 - 23)          |
| Thyroid cancer                                | 7<br>(5 - 10)            | --               | 0<br>(0 - 0)      | 0<br>(0 - 1)       | 3<br>(2 - 4)       | 4<br>(3 - 5)             |
| Mesothelioma                                  | 14<br>(8 - 20)           | --               | --                | 1<br>(1 - 2)       | 8<br>(4 - 12)      | 5<br>(2 - 8)             |
| Hodgkin lymphoma                              | 7<br>(5 - 10)            | 0<br>(0 - 0)     | 0<br>(0 - 0)      | 2<br>(1 - 3)       | 3<br>(2 - 4)       | 2<br>(1 - 3)             |
| Non-Hodgkin lymphoma                          | 76<br>(28 - 101)         | 0<br>(0 - 0)     | 0<br>(0 - 1)      | 6<br>(2 - 8)       | 25<br>(9 - 35)     | 44<br>(17 - 63)          |
| Multiple myeloma                              | 41<br>(20 - 58)          | --               | --                | 1<br>(1 - 2)       | 15<br>(7 - 23)     | 24<br>(12 - 35)          |
| Leukemia                                      | 89<br>(74 - 104)         | 0<br>(0 - 0)     | 1<br>(0 - 1)      | 7<br>(5 - 9)       | 27<br>(20 - 33)    | 55<br>(45 - 67)          |
| Other neoplasms                               | 92<br>(66 - 117)         | 0<br>(0 - 0)     | 0<br>(0 - 1)      | 10<br>(7 - 12)     | 33<br>(21 - 44)    | 49<br>(35 - 65)          |
| Cardiovascular diseases                       | 3,249<br>(2,993 - 3,538) | 0<br>(0 - 1)     | 0<br>(0 - 0)      | 93<br>(78 - 109)   | 705<br>(622 - 803) | 2,451<br>(2,258 - 2,675) |
| Rheumatic heart disease                       | 26<br>(12 - 38)          | 0<br>(0 - 0)     | 0<br>(0 - 0)      | 2<br>(1 - 2)       | 7<br>(4 - 11)      | 18<br>(7 - 28)           |
| Ischemic heart disease                        | 1,338<br>(1,106 - 1,558) | 0<br>(0 - 0)     | 0<br>(0 - 0)      | 49<br>(38 - 60)    | 356<br>(285 - 422) | 933<br>(766 - 1,100)     |
| Cerebrovascular disease                       | 1,029<br>(812 - 1,233)   | 0<br>(0 - 0)     | 0<br>(0 - 0)      | 20<br>(14 - 26)    | 180<br>(137 - 225) | 829<br>(656 - 1,004)     |
| Ischemic stroke                               | 780<br>(610 - 943)       | 0<br>(0 - 0)     | 0<br>(0 - 0)      | 3<br>(2 - 5)       | 83<br>(56 - 109)   | 694<br>(540 - 843)       |
| Hemorrhagic stroke                            | 249<br>(166 - 317)       | 0<br>(0 - 0)     | 0<br>(0 - 0)      | 17<br>(12 - 22)    | 97<br>(68 - 124)   | 135<br>(77 - 182)        |
| Hypertensive heart disease                    | 206<br>(130 - 283)       | 0<br>(0 - 0)     | 0<br>(0 - 0)      | 3<br>(2 - 5)       | 37<br>(24 - 54)    | 167<br>(99 - 236)        |
| Cardiomyopathy and myocarditis                | 382<br>(246 - 677)       | 0<br>(0 - 0)     | 0<br>(0 - 0)      | 10<br>(7 - 15)     | 66<br>(48 - 106)   | 306<br>(182 - 577)       |
| Atrial fibrillation and flutter               | 41<br>(25 - 56)          | --               | --                | 0<br>(0 - 0)       | 4<br>(3 - 6)       | 36<br>(21 - 51)          |
| Aortic aneurysm                               | 63<br>(47 - 77)          | --               | --                | 3<br>(2 - 5)       | 21<br>(14 - 26)    | 39<br>(30 - 50)          |
| Peripheral vascular disease                   | 3<br>(2 - 4)             | --               | --                | 0<br>(0 - 0)       | 1<br>(0 - 1)       | 2<br>(1 - 3)             |
| Endocarditis                                  | 7<br>(5 - 13)            | 0<br>(0 - 0)     | 0<br>(0 - 0)      | 1<br>(1 - 2)       | 3<br>(2 - 5)       | 3<br>(2 - 6)             |
| Other cardiovascular and circulatory diseases | 153<br>(99 - 190)        | 0<br>(0 - 0)     | 0<br>(0 - 0)      | 5<br>(3 - 6)       | 31<br>(20 - 40)    | 117<br>(71 - 150)        |
| Chronic respiratory diseases                  | 613<br>(453 - 712)       | 0<br>(0 - 0)     | 0<br>(0 - 0)      | 4<br>(3 - 5)       | 70<br>(56 - 87)    | 539<br>(388 - 631)       |
| Chronic obstructive pulmonary disease         | 557<br>(414 - 652)       | 0<br>(0 - 0)     | 0<br>(0 - 0)      | 3<br>(2 - 3)       | 59<br>(48 - 74)    | 496<br>(359 - 587)       |
| Pneumoconiosis                                | 12<br>(7 - 18)           | 0<br>(0 - 0)     | 0<br>(0 - 0)      | 0<br>(0 - 0)       | 3<br>(2 - 4)       | 9<br>(5 - 14)            |
| Silicosis                                     | 5<br>(3 - 7)             | 0<br>(0 - 0)     | 0<br>(0 - 0)      | 0<br>(0 - 0)       | 1<br>(0 - 1)       | 4<br>(2 - 6)             |
| Asbestosis                                    | 3<br>(2 - 4)             | 0<br>(0 - 0)     | 0<br>(0 - 0)      | 0<br>(0 - 0)       | 1<br>(0 - 1)       | 2<br>(1 - 3)             |

Web Table 31- Slovenia deaths with 95% UI by age, sex, and cause in 2013

| Cause                                               | Males, All Ages    | Males, 0-4 Years | Males, 5-14 Years | Males, 15-49 Years | Males, 50-69 Years | Males, 70-80 Years |
|-----------------------------------------------------|--------------------|------------------|-------------------|--------------------|--------------------|--------------------|
| Coal workers pneumoconiosis                         | 1<br>(1 - 2)       | 0<br>(0 - 0)     | 0<br>(0 - 0)      | 0<br>(0 - 0)       | 0<br>(0 - 1)       | 1<br>(0 - 1)       |
| Other pneumoconiosis                                | 3<br>(2 - 5)       | 0<br>(0 - 0)     | 0<br>(0 - 0)      | 0<br>(0 - 0)       | 1<br>(0 - 1)       | 2<br>(1 - 4)       |
| Asthma                                              | 5<br>(4 - 6)       | 0<br>(0 - 0)     | 0<br>(0 - 0)      | 0<br>(0 - 0)       | 1<br>(1 - 2)       | 3<br>(2 - 5)       |
| Interstitial lung disease and pulmonary sarcoidosis | 37<br>(16 - 57)    | 0<br>(0 - 0)     | 0<br>(0 - 0)      | 1<br>(0 - 1)       | 7<br>(3 - 11)      | 29<br>(12 - 47)    |
| Other chronic respiratory diseases                  | 3<br>(2 - 4)       | 0<br>(0 - 0)     | 0<br>(0 - 0)      | 0<br>(0 - 0)       | 1<br>(0 - 1)       | 2<br>(1 - 3)       |
| Cirrhosis                                           | 402<br>(353 - 460) | 0<br>(0 - 0)     | 0<br>(0 - 0)      | 63<br>(51 - 76)    | 234<br>(199 - 276) | 105<br>(89 - 123)  |
| Cirrhosis due to hepatitis B                        | 85<br>(44 - 146)   | 0<br>(0 - 0)     | 0<br>(0 - 0)      | 14<br>(7 - 24)     | 51<br>(26 - 88)    | 20<br>(10 - 37)    |
| Cirrhosis due to hepatitis C                        | 91<br>(23 - 159)   | 0<br>(0 - 0)     | 0<br>(0 - 0)      | 14<br>(6 - 24)     | 52<br>(11 - 92)    | 25<br>(3 - 48)     |
| Cirrhosis due to alcohol use                        | 163<br>(103 - 237) | --               | --                | 18<br>(10 - 29)    | 95<br>(59 - 138)   | 50<br>(30 - 74)    |
| Cirrhosis due to other causes                       | 62<br>(30 - 102)   | 0<br>(0 - 0)     | 0<br>(0 - 0)      | 16<br>(10 - 26)    | 36<br>(16 - 63)    | 10<br>(4 - 18)     |
| Digestive diseases                                  | 207<br>(155 - 247) | 0<br>(0 - 0)     | 0<br>(0 - 0)      | 11<br>(8 - 13)     | 48<br>(37 - 59)    | 147<br>(106 - 177) |
| Peptic ulcer disease                                | 36<br>(23 - 50)    | 0<br>(0 - 0)     | 0<br>(0 - 0)      | 2<br>(1 - 2)       | 10<br>(6 - 14)     | 25<br>(15 - 36)    |
| Gastritis and duodenitis                            | 3<br>(1 - 4)       | 0<br>(0 - 0)     | 0<br>(0 - 0)      | 0<br>(0 - 0)       | 1<br>(0 - 1)       | 2<br>(1 - 3)       |
| Appendicitis                                        | 2<br>(1 - 3)       | 0<br>(0 - 0)     | 0<br>(0 - 0)      | 0<br>(0 - 0)       | 0<br>(0 - 1)       | 2<br>(1 - 2)       |
| Paralytic ileus and intestinal obstruction          | 32<br>(17 - 49)    | 0<br>(0 - 0)     | 0<br>(0 - 0)      | 1<br>(0 - 1)       | 6<br>(3 - 10)      | 25<br>(12 - 39)    |
| Inguinal, femoral, and abdominal hernia             | 7<br>(3 - 11)      | 0<br>(0 - 0)     | 0<br>(0 - 0)      | 0<br>(0 - 0)       | 1<br>(1 - 2)       | 5<br>(2 - 9)       |
| Inflammatory bowel disease                          | 6<br>(2 - 8)       | 0<br>(0 - 0)     | 0<br>(0 - 0)      | 0<br>(0 - 1)       | 1<br>(1 - 2)       | 4<br>(2 - 6)       |
| Vascular intestinal disorders                       | 45<br>(20 - 82)    | 0<br>(0 - 0)     | 0<br>(0 - 0)      | 1<br>(0 - 1)       | 9<br>(4 - 17)      | 35<br>(16 - 65)    |
| Gallbladder and biliary diseases                    | 26<br>(16 - 36)    | 0<br>(0 - 0)     | 0<br>(0 - 0)      | 0<br>(0 - 0)       | 4<br>(2 - 5)       | 22<br>(13 - 31)    |
| Pancreatitis                                        | 34<br>(23 - 48)    | 0<br>(0 - 0)     | 0<br>(0 - 0)      | 6<br>(4 - 8)       | 12<br>(7 - 17)     | 17<br>(10 - 26)    |
| Other digestive diseases                            | 17<br>(7 - 24)     | 0<br>(0 - 0)     | 0<br>(0 - 0)      | 1<br>(0 - 1)       | 4<br>(2 - 5)       | 12<br>(5 - 19)     |
| Neurological disorders                              | 662<br>(546 - 769) | 1<br>(0 - 1)     | 0<br>(0 - 1)      | 14<br>(11 - 18)    | 57<br>(47 - 68)    | 590<br>(478 - 694) |
| Alzheimer disease and other dementias               | 572<br>(455 - 679) | --               | --                | 0<br>(0 - 0)       | 30<br>(22 - 38)    | 542<br>(429 - 648) |
| Parkinson disease                                   | 35<br>(26 - 45)    | --               | --                | 0<br>(0 - 0)       | 4<br>(3 - 5)       | 31<br>(23 - 41)    |
| Epilepsy                                            | 17<br>(13 - 24)    | 0<br>(0 - 0)     | 0<br>(0 - 0)      | 7<br>(5 - 10)      | 6<br>(5 - 9)       | 4<br>(3 - 5)       |
| Multiple sclerosis                                  | 9<br>(4 - 17)      | --               | --                | 2<br>(1 - 4)       | 4<br>(2 - 9)       | 3<br>(1 - 5)       |
| Other neurological disorders                        | 30<br>(19 - 36)    | 1<br>(0 - 1)     | 0<br>(0 - 0)      | 5<br>(3 - 6)       | 13<br>(8 - 17)     | 11<br>(6 - 14)     |
| Mental and substance use disorders                  | 114<br>(67 - 141)  | 0<br>(0 - 0)     | 0<br>(0 - 0)      | 38<br>(24 - 47)    | 54<br>(29 - 71)    | 22<br>(12 - 29)    |
| Schizophrenia                                       | 1<br>(0 - 1)       | --               | --                | 0<br>(0 - 0)       | 0<br>(0 - 0)       | 0<br>(0 - 0)       |
| Alcohol use disorders                               | 88<br>(45 - 115)   | --               | --                | 19<br>(9 - 26)     | 49<br>(24 - 66)    | 20<br>(9 - 27)     |
| Drug use disorders                                  | 26<br>(17 - 32)    | 0<br>(0 - 0)     | --                | 18<br>(11 - 24)    | 5<br>(3 - 7)       | 2<br>(2 - 4)       |
| Opioid use disorders                                | 10<br>(7 - 13)     | 0<br>(0 - 0)     | --                | 7<br>(4 - 9)       | 2<br>(1 - 2)       | 1<br>(1 - 1)       |
| Cocaine use disorders                               | 1<br>(1 - 2)       | 0<br>(0 - 0)     | --                | 1<br>(1 - 1)       | 0<br>(0 - 0)       | 0<br>(0 - 0)       |
| Amphetamine use disorders                           | 1<br>(1 - 1)       | 0<br>(0 - 0)     | --                | 1<br>(0 - 1)       | 0<br>(0 - 0)       | 0<br>(0 - 0)       |
| Other drug use disorders                            | 13<br>(8 - 16)     | 0<br>(0 - 0)     | --                | 9<br>(6 - 12)      | 3<br>(2 - 4)       | 1<br>(1 - 2)       |
| Eating disorders                                    | 0<br>(0 - 0)       | --               | 0<br>(0 - 0)      | 0<br>(0 - 0)       | --                 | --                 |
| Anorexia nervosa                                    | 0<br>(0 - 0)       | --               | 0<br>(0 - 0)      | 0<br>(0 - 0)       | --                 | --                 |
| Diabetes, urogenital, blood, and endocrine diseases | 289<br>(258 - 331) | 1<br>(0 - 2)     | 1<br>(0 - 1)      | 10<br>(8 - 12)     | 66<br>(56 - 78)    | 211<br>(185 - 244) |
| Diabetes mellitus                                   | 150<br>(129 - 174) | 0<br>(0 - 0)     | 0<br>(0 - 0)      | 4<br>(3 - 5)       | 41<br>(33 - 50)    | 105<br>(89 - 126)  |
| Acute glomerulonephritis                            | 0<br>(0 - 0)       | 0<br>(0 - 0)     | 0<br>(0 - 0)      | 0<br>(0 - 0)       | 0<br>(0 - 0)       | 0<br>(0 - 0)       |

Web Table 31- Slovenia deaths with 95% UI by age, sex, and cause in 2013

| Cause                                               | Males, All Ages      | Males, 0-4 Years | Males, 5-14 Years | Males, 15-49 Years | Males, 50-69 Years | Males, 70-80 Years |
|-----------------------------------------------------|----------------------|------------------|-------------------|--------------------|--------------------|--------------------|
| Chronic kidney disease                              | 86<br>(70 - 109)     | 0<br>(0 - 0)     | 0<br>(0 - 0)      | 2<br>(1 - 3)       | 13<br>(10 - 20)    | 70<br>(56 - 90)    |
| Chronic kidney disease due to diabetes mellitus     | 0<br>(0 - 1)         | 0<br>(0 - 0)     | 0<br>(0 - 0)      | 0<br>(0 - 0)       | 0<br>(0 - 0)       | 0<br>(0 - 0)       |
| Chronic kidney disease due to hypertension          | 29<br>(21 - 51)      | 0<br>(0 - 0)     | 0<br>(0 - 0)      | 0<br>(0 - 1)       | 5<br>(3 - 9)       | 23<br>(17 - 41)    |
| Chronic kidney disease due to glomerulonephritis    | 3<br>(2 - 5)         | 0<br>(0 - 0)     | 0<br>(0 - 0)      | 0<br>(0 - 0)       | 1<br>(0 - 1)       | 2<br>(1 - 4)       |
| Chronic kidney disease due to other causes          | 54<br>(32 - 73)      | 0<br>(0 - 0)     | 0<br>(0 - 0)      | 1<br>(1 - 2)       | 7<br>(4 - 11)      | 45<br>(27 - 63)    |
| Urinary diseases and male infertility               | 28<br>(21 - 40)      | 0<br>(0 - 0)     | 0<br>(0 - 0)      | 1<br>(0 - 1)       | 4<br>(3 - 6)       | 23<br>(17 - 35)    |
| Interstitial nephritis and urinary tract infections | 14<br>(9 - 26)       | 0<br>(0 - 0)     | 0<br>(0 - 0)      | 0<br>(0 - 1)       | 2<br>(2 - 4)       | 12<br>(7 - 21)     |
| Urolithiasis                                        | 0<br>(0 - 1)         | --               | 0<br>(0 - 0)      | 0<br>(0 - 0)       | 0<br>(0 - 0)       | 0<br>(0 - 1)       |
| Other urinary diseases                              | 13<br>(6 - 20)       | 0<br>(0 - 0)     | 0<br>(0 - 0)      | 0<br>(0 - 0)       | 1<br>(1 - 2)       | 11<br>(5 - 18)     |
| Gynecological diseases                              | --                   | --               | --                | --                 | --                 | --                 |
| Uterine fibroids                                    | --                   | --               | --                | --                 | --                 | --                 |
| Polycystic ovarian syndrome                         | --                   | --               | --                | --                 | --                 | --                 |
| Endometriosis                                       | --                   | --               | --                | --                 | --                 | --                 |
| Genital prolapse                                    | --                   | --               | --                | --                 | --                 | --                 |
| Other gynecological diseases                        | --                   | --               | --                | --                 | --                 | --                 |
| Hemoglobinopathies and hemolytic anemias            | 3<br>(2 - 5)         | 0<br>(0 - 0)     | 0<br>(0 - 0)      | 0<br>(0 - 0)       | 0<br>(0 - 1)       | 2<br>(1 - 4)       |
| Thalassemias                                        | 0<br>(0 - 0)         | 0<br>(0 - 0)     | 0<br>(0 - 0)      | 0<br>(0 - 0)       | 0<br>(0 - 0)       | 0<br>(0 - 0)       |
| Sickle cell disorders                               | 0<br>(0 - 0)         | 0<br>(0 - 0)     | 0<br>(0 - 0)      | 0<br>(0 - 0)       | 0<br>(0 - 0)       | 0<br>(0 - 0)       |
| G6PD deficiency                                     | 0<br>(0 - 0)         | 0<br>(0 - 0)     | 0<br>(0 - 0)      | 0<br>(0 - 0)       | 0<br>(0 - 0)       | 0<br>(0 - 0)       |
| Other hemoglobinopathies and hemolytic anemias      | 3<br>(2 - 4)         | 0<br>(0 - 0)     | 0<br>(0 - 0)      | 0<br>(0 - 0)       | 0<br>(0 - 1)       | 2<br>(1 - 4)       |
| Endocrine, metabolic, blood, and immune disorders   | 22<br>(14 - 30)      | 1<br>(0 - 2)     | 0<br>(0 - 1)      | 4<br>(2 - 5)       | 8<br>(4 - 11)      | 10<br>(6 - 14)     |
| Musculoskeletal disorders                           | 14<br>(10 - 22)      | --               | 0<br>(0 - 0)      | 1<br>(1 - 2)       | 5<br>(3 - 7)       | 9<br>(6 - 13)      |
| Rheumatoid arthritis                                | 4<br>(2 - 6)         | --               | 0<br>(0 - 0)      | 0<br>(0 - 0)       | 1<br>(0 - 2)       | 3<br>(2 - 5)       |
| Other musculoskeletal disorders                     | 10<br>(7 - 16)       | --               | 0<br>(0 - 0)      | 1<br>(1 - 2)       | 4<br>(2 - 6)       | 6<br>(4 - 9)       |
| Other non-communicable diseases                     | 33<br>(25 - 44)      | 14<br>(8 - 23)   | 1<br>(1 - 1)      | 5<br>(4 - 6)       | 5<br>(4 - 6)       | 9<br>(6 - 12)      |
| Congenital anomalies                                | 23<br>(17 - 33)      | 13<br>(7 - 21)   | 1<br>(1 - 1)      | 5<br>(4 - 6)       | 3<br>(2 - 4)       | 2<br>(1 - 2)       |
| Neural tube defects                                 | 0<br>(0 - 0)         | 0<br>(0 - 0)     | 0<br>(0 - 0)      | 0<br>(0 - 0)       | 0<br>(0 - 0)       | 0<br>(0 - 0)       |
| Congenital heart anomalies                          | 11<br>(7 - 15)       | 6<br>(3 - 11)    | 0<br>(0 - 1)      | 2<br>(2 - 3)       | 1<br>(1 - 2)       | 1<br>(0 - 1)       |
| Cleft lip and cleft palate                          | 0<br>(0 - 0)         | 0<br>(0 - 0)     | --                | --                 | --                 | --                 |
| Down syndrome                                       | 3<br>(2 - 5)         | 1<br>(0 - 2)     | 0<br>(0 - 0)      | 1<br>(1 - 2)       | 1<br>(1 - 2)       | 0<br>(0 - 0)       |
| Chromosomal unbalanced rearrangements               | 0<br>(0 - 1)         | 0<br>(0 - 0)     | 0<br>(0 - 0)      | 0<br>(0 - 0)       | 0<br>(0 - 0)       | 0<br>(0 - 0)       |
| Other congenital anomalies                          | 9<br>(6 - 14)        | 5<br>(3 - 9)     | 0<br>(0 - 1)      | 1<br>(1 - 2)       | 1<br>(1 - 1)       | 1<br>(1 - 1)       |
| Skin and subcutaneous diseases                      | 9<br>(6 - 13)        | 0<br>(0 - 0)     | 0<br>(0 - 0)      | 0<br>(0 - 1)       | 1<br>(1 - 2)       | 7<br>(4 - 11)      |
| Cellulitis                                          | 1<br>(1 - 3)         | 0<br>(0 - 0)     | 0<br>(0 - 0)      | 0<br>(0 - 0)       | 0<br>(0 - 1)       | 1<br>(0 - 3)       |
| Pyoderma                                            | 3<br>(2 - 5)         | 0<br>(0 - 0)     | 0<br>(0 - 0)      | 0<br>(0 - 0)       | 1<br>(0 - 1)       | 3<br>(1 - 4)       |
| Decubitus ulcer                                     | 4<br>(0 - 7)         | 0<br>(0 - 0)     | 0<br>(0 - 0)      | 0<br>(0 - 0)       | 0<br>(0 - 1)       | 4<br>(0 - 6)       |
| Other skin and subcutaneous diseases                | 0<br>(0 - 1)         | 0<br>(0 - 0)     | 0<br>(0 - 0)      | 0<br>(0 - 0)       | 0<br>(0 - 0)       | 0<br>(0 - 0)       |
| Sudden infant death syndrome                        | 1<br>(0 - 3)         | 1<br>(0 - 3)     | --                | --                 | --                 | --                 |
| Injuries                                            | 970<br>(844 - 1,110) | 4<br>(2 - 7)     | 5<br>(4 - 7)      | 315<br>(276 - 359) | 302<br>(251 - 364) | 344<br>(290 - 400) |
| Transport injuries                                  | 172<br>(150 - 197)   | 1<br>(1 - 2)     | 2<br>(2 - 4)      | 92<br>(78 - 107)   | 44<br>(37 - 52)    | 32<br>(26 - 40)    |



Web Table 31- Slovenia deaths with 95% UI by age, sex, and cause in 2013

| Cause                                           | Males, All Ages    | Males, 0-4 Years | Males, 5-14 Years | Males, 15-49 Years | Males, 50-69 Years | Males, 70-80 Years |
|-------------------------------------------------|--------------------|------------------|-------------------|--------------------|--------------------|--------------------|
| Road injuries                                   | 149<br>(130 - 171) | 1<br>(0 - 2)     | 2<br>(1 - 3)      | 83<br>(69 - 96)    | 36<br>(30 - 43)    | 28<br>(22 - 34)    |
| Pedestrian road injuries                        | 29<br>(17 - 46)    | 0<br>(0 - 1)     | 1<br>(0 - 1)      | 8<br>(4 - 14)      | 10<br>(6 - 16)     | 10<br>(6 - 16)     |
| Cyclist road injuries                           | 13<br>(8 - 19)     | 0<br>(0 - 0)     | 0<br>(0 - 1)      | 3<br>(2 - 5)       | 4<br>(2 - 7)       | 4<br>(2 - 7)       |
| Motorcyclist road injuries                      | 26<br>(13 - 35)    | 0<br>(0 - 0)     | 0<br>(0 - 1)      | 18<br>(9 - 25)     | 5<br>(2 - 7)       | 3<br>(1 - 5)       |
| Motor vehicle road injuries                     | 82<br>(62 - 100)   | 0<br>(0 - 1)     | 1<br>(0 - 1)      | 54<br>(42 - 65)    | 17<br>(11 - 23)    | 10<br>(6 - 15)     |
| Other road injuries                             | 0<br>(0 - 1)       | 0<br>(0 - 0)     | 0<br>(0 - 0)      | 0<br>(0 - 0)       | 0<br>(0 - 0)       | 0<br>(0 - 1)       |
| Other transport injuries                        | 22<br>(14 - 30)    | 0<br>(0 - 0)     | 0<br>(0 - 0)      | 9<br>(5 - 13)      | 8<br>(5 - 11)      | 5<br>(3 - 7)       |
| Unintentional injuries                          | 400<br>(317 - 470) | 2<br>(1 - 4)     | 2<br>(1 - 3)      | 59<br>(49 - 70)    | 113<br>(88 - 139)  | 224<br>(172 - 271) |
| Falls                                           | 259<br>(179 - 320) | 0<br>(0 - 0)     | 0<br>(0 - 1)      | 25<br>(16 - 33)    | 66<br>(43 - 88)    | 167<br>(118 - 211) |
| Drowning                                        | 21<br>(14 - 34)    | 0<br>(0 - 1)     | 1<br>(0 - 1)      | 9<br>(6 - 13)      | 7<br>(4 - 12)      | 4<br>(2 - 6)       |
| Fire, heat, and hot substances                  | 9<br>(7 - 14)      | 0<br>(0 - 0)     | 0<br>(0 - 0)      | 2<br>(1 - 3)       | 3<br>(2 - 4)       | 4<br>(3 - 7)       |
| Poisonings                                      | 6<br>(4 - 8)       | 0<br>(0 - 0)     | 0<br>(0 - 0)      | 2<br>(1 - 3)       | 2<br>(1 - 3)       | 2<br>(1 - 2)       |
| Exposure to mechanical forces                   | 21<br>(18 - 26)    | 0<br>(0 - 1)     | 0<br>(0 - 1)      | 9<br>(7 - 12)      | 8<br>(6 - 10)      | 3<br>(3 - 4)       |
| Unintentional firearm injuries                  | 1<br>(1 - 1)       | 0<br>(0 - 0)     | 0<br>(0 - 0)      | 0<br>(0 - 1)       | 0<br>(0 - 0)       | 0<br>(0 - 0)       |
| Unintentional suffocation                       | 1<br>(0 - 1)       | 0<br>(0 - 0)     | 0<br>(0 - 0)      | 0<br>(0 - 0)       | 0<br>(0 - 0)       | 0<br>(0 - 0)       |
| Other exposure to mechanical forces             | 20<br>(16 - 24)    | 0<br>(0 - 0)     | 0<br>(0 - 0)      | 9<br>(7 - 12)      | 7<br>(5 - 10)      | 3<br>(2 - 4)       |
| Adverse effects of medical treatment            | 50<br>(28 - 69)    | 0<br>(0 - 1)     | 0<br>(0 - 0)      | 3<br>(1 - 4)       | 15<br>(8 - 22)     | 32<br>(17 - 45)    |
| Animal contact                                  | 3<br>(2 - 5)       | 0<br>(0 - 0)     | 0<br>(0 - 0)      | 0<br>(0 - 1)       | 1<br>(1 - 2)       | 1<br>(1 - 2)       |
| Venomous animal contact                         | 1<br>(0 - 1)       | 0<br>(0 - 0)     | 0<br>(0 - 0)      | 0<br>(0 - 0)       | 0<br>(0 - 1)       | 0<br>(0 - 0)       |
| Non-venomous animal contact                     | 2<br>(1 - 3)       | 0<br>(0 - 0)     | 0<br>(0 - 0)      | 0<br>(0 - 1)       | 1<br>(0 - 1)       | 1<br>(1 - 2)       |
| Foreign body                                    | 24<br>(12 - 33)    | 0<br>(0 - 1)     | 0<br>(0 - 0)      | 5<br>(3 - 7)       | 8<br>(4 - 12)      | 9<br>(4 - 14)      |
| Pulmonary aspiration and foreign body in airway | 23<br>(12 - 33)    | 0<br>(0 - 1)     | 0<br>(0 - 0)      | 5<br>(2 - 7)       | 8<br>(4 - 12)      | 9<br>(4 - 14)      |
| Foreign body in other body part                 | 0<br>(0 - 0)       | 0<br>(0 - 0)     | 0<br>(0 - 0)      | 0<br>(0 - 0)       | 0<br>(0 - 0)       | 0<br>(0 - 0)       |
| Other unintentional injuries                    | 7<br>(5 - 9)       | 0<br>(0 - 0)     | 0<br>(0 - 0)      | 3<br>(2 - 5)       | 2<br>(1 - 4)       | 1<br>(1 - 1)       |
| Self-harm and interpersonal violence            | 399<br>(320 - 517) | 0<br>(0 - 1)     | 1<br>(1 - 1)      | 165<br>(131 - 203) | 144<br>(109 - 197) | 88<br>(66 - 121)   |
| Self-harm                                       | 382<br>(303 - 495) | 0<br>--          | 1<br>(0 - 1)      | 156<br>(122 - 194) | 140<br>(104 - 191) | 86<br>(64 - 118)   |
| Interpersonal violence                          | 17<br>(12 - 28)    | 0<br>(0 - 1)     | 0<br>(0 - 0)      | 9<br>(6 - 14)      | 5<br>(3 - 9)       | 2<br>(2 - 5)       |
| Assault by firearm                              | 4<br>(2 - 8)       | 0<br>(0 - 0)     | 0<br>(0 - 0)      | 3<br>(1 - 5)       | 1<br>(1 - 2)       | 0<br>(0 - 1)       |
| Assault by sharp object                         | 5<br>(3 - 10)      | 0<br>(0 - 0)     | 0<br>(0 - 0)      | 3<br>(1 - 5)       | 1<br>(1 - 3)       | 1<br>(0 - 2)       |
| Assault by other means                          | 8<br>(5 - 12)      | 0<br>(0 - 1)     | 0<br>(0 - 0)      | 4<br>(2 - 6)       | 2<br>(1 - 4)       | 1<br>(1 - 2)       |

Web Table 31- Slovenia deaths with 95% UI by age, sex, and cause in 2013

| Cause                                                             | Females, All Ages           | Females, 0-4 Years | Females, 5-14 Years | Females, 15-49 Years | Females, 50-69 Years     | Females, 70-80 Years     |
|-------------------------------------------------------------------|-----------------------------|--------------------|---------------------|----------------------|--------------------------|--------------------------|
| All causes                                                        | 10,875<br>(10,256 - 11,730) | 34<br>(20 - 55)    | 8<br>(6 - 10)       | 287<br>(258 - 322)   | 1,345<br>(1,210 - 1,519) | 9,201<br>(8,735 - 9,871) |
| Communicable, maternal, neonatal, and nutritional diseases        | 475<br>(361 - 625)          | 15<br>(9 - 25)     | 1<br>(0 - 1)        | 8<br>(7 - 10)        | 23<br>(18 - 28)          | 428<br>(313 - 573)       |
| HIV/AIDS and tuberculosis                                         | 11<br>(8 - 16)              | 0<br>(0 - 0)       | 0<br>(0 - 0)        | 1<br>(0 - 1)         | 1<br>(1 - 2)             | 9<br>(6 - 14)            |
| Tuberculosis                                                      | 11<br>(8 - 16)              | 0<br>(0 - 0)       | 0<br>(0 - 0)        | 0<br>(0 - 1)         | 1<br>(1 - 2)             | 9<br>(6 - 14)            |
| HIV/AIDS                                                          | 0<br>(0 - 1)                | 0<br>(0 - 0)       | 0<br>(0 - 0)        | 0<br>(0 - 1)         | 0<br>(0 - 0)             | 0<br>(0 - 0)             |
| HIV/AIDS resulting in mycobacterial infection                     | 0<br>(0 - 0)                | 0<br>(0 - 0)       | 0<br>(0 - 0)        | 0<br>(0 - 0)         | 0<br>(0 - 0)             | 0<br>(0 - 0)             |
| HIV/AIDS resulting in other diseases                              | 0<br>(0 - 1)                | 0<br>(0 - 0)       | 0<br>(0 - 0)        | 0<br>(0 - 1)         | 0<br>(0 - 0)             | 0<br>(0 - 0)             |
| Diarrhea, lower respiratory, and other common infectious diseases | 426<br>(313 - 575)          | 2<br>(1 - 3)       | 1<br>(0 - 1)        | 5<br>(4 - 7)         | 19<br>(15 - 24)          | 399<br>(286 - 545)       |
| Diarrheal diseases                                                | 3<br>(2 - 4)                | 0<br>(0 - 0)       | 0<br>(0 - 0)        | 0<br>(0 - 0)         | 0<br>(0 - 0)             | 2<br>(1 - 4)             |
| Intestinal infectious diseases                                    | 3<br>(1 - 6)                | 0<br>(0 - 1)       | 0<br>(0 - 1)        | 1<br>(0 - 2)         | 1<br>(0 - 1)             | 1<br>(0 - 2)             |
| Typhoid fever                                                     | 2<br>(1 - 4)                | 0<br>(0 - 1)       | 0<br>(0 - 1)        | 1<br>(0 - 1)         | 0<br>(0 - 1)             | 0<br>(0 - 1)             |
| Paratyphoid fever                                                 | 1<br>(0 - 1)                | 0<br>(0 - 0)       | 0<br>(0 - 0)        | 0<br>(0 - 0)         | 0<br>(0 - 0)             | 0<br>(0 - 0)             |
| Other intestinal infectious diseases                              | 0<br>(0 - 1)                | 0<br>(0 - 0)       | 0<br>(0 - 0)        | 0<br>(0 - 0)         | 0<br>(0 - 0)             | 0<br>(0 - 0)             |
| Lower respiratory infections                                      | 412<br>(299 - 561)          | 1<br>(0 - 2)       | 0<br>(0 - 0)        | 3<br>(2 - 4)         | 16<br>(12 - 21)          | 392<br>(279 - 537)       |
| Upper respiratory infections                                      | 0<br>(0 - 1)                | 0<br>(0 - 0)       | 0<br>(0 - 0)        | 0<br>(0 - 0)         | 0<br>(0 - 0)             | 0<br>(0 - 1)             |
| Otitis media                                                      | 0<br>(0 - 0)                | 0<br>(0 - 0)       | 0<br>(0 - 0)        | 0<br>(0 - 0)         | 0<br>(0 - 0)             | 0<br>(0 - 0)             |
| Meningitis                                                        | 4<br>(3 - 5)                | 0<br>(0 - 0)       | 0<br>(0 - 0)        | 1<br>(0 - 1)         | 1<br>(1 - 1)             | 2<br>(2 - 3)             |
| Pneumococcal meningitis                                           | 1<br>(1 - 2)                | 0<br>(0 - 0)       | 0<br>(0 - 0)        | 0<br>(0 - 0)         | 0<br>(0 - 0)             | 1<br>(0 - 1)             |
| H influenzae type B meningitis                                    | 0<br>(0 - 1)                | 0<br>(0 - 0)       | 0<br>(0 - 0)        | 0<br>(0 - 0)         | 0<br>(0 - 0)             | 0<br>(0 - 0)             |
| Meningococcal meningitis                                          | 1<br>(1 - 1)                | 0<br>(0 - 0)       | 0<br>(0 - 0)        | 0<br>(0 - 0)         | 0<br>(0 - 0)             | 0<br>(0 - 1)             |
| Other meningitis                                                  | 2<br>(1 - 2)                | 0<br>(0 - 0)       | 0<br>(0 - 0)        | 0<br>(0 - 0)         | 0<br>(0 - 1)             | 1<br>(1 - 1)             |
| Encephalitis                                                      | 2<br>(1 - 3)                | 0<br>(0 - 0)       | 0<br>(0 - 0)        | 1<br>(0 - 1)         | 1<br>(0 - 1)             | 1<br>(1 - 2)             |
| Diphtheria                                                        | 0<br>(0 - 0)                | 0<br>(0 - 0)       | 0<br>(0 - 0)        | 0<br>(0 - 0)         | 0<br>(0 - 0)             | --                       |
| Whooping cough                                                    | 0<br>(0 - 0)                | 0<br>(0 - 0)       | 0<br>(0 - 0)        | 0<br>(0 - 0)         | 0<br>(0 - 0)             | --                       |
| Tetanus                                                           | 0<br>(0 - 0)                | 0<br>(0 - 0)       | 0<br>(0 - 0)        | 0<br>(0 - 0)         | 0<br>(0 - 0)             | 0<br>(0 - 0)             |
| Measles                                                           | 0<br>(0 - 0)                | 0<br>(0 - 0)       | 0<br>(0 - 0)        | 0<br>(0 - 0)         | 0<br>(0 - 0)             | --                       |
| Varicella and herpes zoster                                       | 1<br>(0 - 5)                | 0<br>(0 - 0)       | 0<br>(0 - 0)        | 0<br>(0 - 0)         | 0<br>(0 - 0)             | 1<br>(0 - 5)             |
| Neglected tropical diseases and malaria                           | 1<br>(0 - 1)                | 0<br>(0 - 0)       | 0<br>(0 - 0)        | 0<br>(0 - 0)         | 0<br>(0 - 0)             | 0<br>(0 - 0)             |
| Leishmaniasis                                                     | 0<br>(0 - 0)                | 0<br>(0 - 0)       | 0<br>(0 - 0)        | 0<br>(0 - 0)         | 0<br>(0 - 0)             | 0<br>(0 - 0)             |
| Visceral leishmaniasis                                            | 0<br>(0 - 0)                | 0<br>(0 - 0)       | 0<br>(0 - 0)        | 0<br>(0 - 0)         | 0<br>(0 - 0)             | 0<br>(0 - 0)             |
| Cysticercosis                                                     | 0<br>(0 - 0)                | 0<br>(0 - 0)       | 0<br>(0 - 0)        | 0<br>(0 - 0)         | 0<br>(0 - 0)             | 0<br>(0 - 0)             |
| Cystic echinococcosis                                             | 0<br>(0 - 0)                | 0<br>(0 - 0)       | 0<br>(0 - 0)        | 0<br>(0 - 0)         | 0<br>(0 - 0)             | 0<br>(0 - 0)             |
| Dengue                                                            | 0<br>(0 - 0)                | 0<br>(0 - 0)       | 0<br>(0 - 0)        | 0<br>(0 - 0)         | 0<br>(0 - 0)             | 0<br>(0 - 0)             |
| Rabies                                                            | 0<br>(0 - 0)                | 0<br>(0 - 0)       | 0<br>(0 - 0)        | 0<br>(0 - 0)         | 0<br>(0 - 0)             | 0<br>(0 - 0)             |
| Other neglected tropical diseases                                 | 0<br>(0 - 0)                | 0<br>(0 - 0)       | 0<br>(0 - 0)        | 0<br>(0 - 0)         | 0<br>(0 - 0)             | 0<br>(0 - 0)             |
| Maternal disorders                                                | 2<br>(1 - 2)                | --                 | 0<br>(0 - 0)        | 2<br>(1 - 2)         | --                       | --                       |
| Maternal hemorrhage                                               | 0<br>(0 - 0)                | --                 | 0<br>(0 - 0)        | 0<br>(0 - 0)         | --                       | --                       |
| Maternal sepsis and other maternal infections                     | 0<br>(0 - 0)                | --                 | 0<br>(0 - 0)        | 0<br>(0 - 0)         | --                       | --                       |
| Maternal hypertensive disorders                                   | 0<br>(0 - 0)                | --                 | 0<br>(0 - 0)        | 0<br>(0 - 0)         | --                       | --                       |
| Maternal obstructed labor                                         | 0<br>(0 - 0)                | --                 | 0<br>(0 - 0)        | 0<br>(0 - 0)         | --                       | --                       |

Web Table 31- Slovenia deaths with 95% UI by age, sex, and cause in 2013

| Cause                                                            | Females, All Ages         | Females, 0-4 Years | Females, 5-14 Years | Females, 15-49 Years | Females, 50-69 Years     | Females, 70-80 Years     |
|------------------------------------------------------------------|---------------------------|--------------------|---------------------|----------------------|--------------------------|--------------------------|
| Maternal abortive outcome                                        | 0<br>(0 - 0)              | --                 | 0<br>(0 - 0)        | 0<br>(0 - 0)         | --                       | --                       |
| Indirect maternal deaths                                         | 0<br>(0 - 0)              | --                 | 0<br>(0 - 0)        | 0<br>(0 - 0)         | --                       | --                       |
| Late maternal deaths                                             | 0<br>(0 - 0)              | --                 | 0<br>(0 - 0)        | 0<br>(0 - 0)         | --                       | --                       |
| Maternal deaths aggravated by HIV/AIDS                           | 0<br>(0 - 0)              | --                 | --                  | 0<br>(0 - 0)         | --                       | --                       |
| Other maternal disorders                                         | 0<br>(0 - 0)              | --                 | 0<br>(0 - 0)        | 0<br>(0 - 0)         | --                       | --                       |
| Neonatal disorders                                               | 13<br>(7 - 21)            | 13<br>(7 - 21)     | --                  | --                   | --                       | --                       |
| Neonatal preterm birth complications                             | 8<br>(4 - 14)             | 8<br>(4 - 14)      | --                  | --                   | --                       | --                       |
| Neonatal encephalopathy due to birth asphyxia and trauma         | 2<br>(1 - 4)              | 2<br>(1 - 4)       | --                  | --                   | --                       | --                       |
| Neonatal sepsis and other neonatal infections                    | 0<br>(0 - 1)              | 0<br>(0 - 1)       | --                  | --                   | --                       | --                       |
| Hemolytic disease and other neonatal jaundice                    | 0<br>(0 - 0)              | 0<br>(0 - 0)       | --                  | --                   | --                       | --                       |
| Other neonatal disorders                                         | 2<br>(1 - 4)              | 2<br>(1 - 4)       | --                  | --                   | --                       | --                       |
| Nutritional deficiencies                                         | 15<br>(10 - 22)           | 0<br>(0 - 0)       | 0<br>(0 - 0)        | 0<br>(0 - 0)         | 0<br>(0 - 1)             | 15<br>(10 - 21)          |
| Protein-energy malnutrition                                      | 0<br>(0 - 1)              | 0<br>(0 - 0)       | 0<br>(0 - 0)        | 0<br>(0 - 0)         | 0<br>(0 - 0)             | 0<br>(0 - 1)             |
| Iodine deficiency                                                | 0<br>(0 - 1)              | 0<br>(0 - 0)       | 0<br>(0 - 0)        | 0<br>(0 - 0)         | 0<br>(0 - 0)             | 0<br>(0 - 1)             |
| Iron-deficiency anemia                                           | 14<br>(10 - 20)           | 0<br>(0 - 0)       | 0<br>(0 - 0)        | 0<br>(0 - 0)         | 0<br>(0 - 0)             | 14<br>(9 - 20)           |
| Other nutritional deficiencies                                   | 1<br>(0 - 3)              | 0<br>(0 - 0)       | 0<br>(0 - 0)        | 0<br>(0 - 0)         | 0<br>(0 - 0)             | 1<br>(0 - 3)             |
| Other communicable, maternal, neonatal, and nutritional diseases | 8<br>(4 - 10)             | 0<br>(0 - 1)       | 0<br>(0 - 0)        | 1<br>(0 - 1)         | 2<br>(1 - 2)             | 5<br>(3 - 7)             |
| Sexually transmitted diseases excluding HIV                      | 1<br>(1 - 1)              | 0<br>(0 - 1)       | 0<br>(0 - 0)        | 0<br>(0 - 0)         | 0<br>(0 - 0)             | 0<br>(0 - 1)             |
| Syphilis                                                         | 1<br>(0 - 1)              | 0<br>(0 - 1)       | 0<br>(0 - 0)        | 0<br>(0 - 0)         | 0<br>(0 - 0)             | 0<br>(0 - 0)             |
| Chlamydial infection                                             | 0<br>(0 - 0)              | --                 | 0<br>(0 - 0)        | 0<br>(0 - 0)         | 0<br>(0 - 0)             | 0<br>(0 - 0)             |
| Gonococcal infection                                             | 0<br>(0 - 0)              | --                 | 0<br>(0 - 0)        | 0<br>(0 - 0)         | 0<br>(0 - 0)             | 0<br>(0 - 0)             |
| Other sexually transmitted diseases                              | 0<br>(0 - 0)              | --                 | 0<br>(0 - 0)        | 0<br>(0 - 0)         | 0<br>(0 - 0)             | 0<br>(0 - 0)             |
| Hepatitis                                                        | 0<br>(0 - 0)              | 0<br>(0 - 0)       | 0<br>(0 - 0)        | 0<br>(0 - 0)         | 0<br>(0 - 0)             | 0<br>(0 - 0)             |
| Acute hepatitis A                                                | 0<br>(0 - 0)              | 0<br>(0 - 0)       | 0<br>(0 - 0)        | 0<br>(0 - 0)         | 0<br>(0 - 0)             | 0<br>(0 - 0)             |
| Acute hepatitis B                                                | 0<br>(0 - 0)              | 0<br>(0 - 0)       | 0<br>(0 - 0)        | 0<br>(0 - 0)         | 0<br>(0 - 0)             | 0<br>(0 - 0)             |
| Acute hepatitis C                                                | 0<br>(0 - 0)              | --                 | 0<br>(0 - 0)        | 0<br>(0 - 0)         | 0<br>(0 - 0)             | 0<br>(0 - 0)             |
| Other infectious diseases                                        | 6<br>(3 - 9)              | 0<br>(0 - 0)       | 0<br>(0 - 0)        | 0<br>(0 - 0)         | 2<br>(1 - 2)             | 4<br>(2 - 6)             |
| Non-communicable diseases                                        | 9,819<br>(9,223 - 10,641) | 17<br>(10 - 28)    | 4<br>(3 - 6)        | 217<br>(194 - 245)   | 1,232<br>(1,105 - 1,395) | 8,349<br>(7,889 - 8,993) |
| Neoplasms                                                        | 2,378<br>(2,028 - 2,672)  | 1<br>(1 - 2)       | 2<br>(1 - 3)        | 131<br>(116 - 149)   | 684<br>(588 - 787)       | 1,560<br>(1,307 - 1,757) |
| Esophageal cancer                                                | 20<br>(16 - 25)           | --                 | --                  | 0<br>(0 - 1)         | 5<br>(3 - 6)             | 15<br>(11 - 20)          |
| Stomach cancer                                                   | 153<br>(109 - 205)        | --                 | --                  | 6<br>(4 - 8)         | 29<br>(21 - 40)          | 118<br>(81 - 166)        |
| Liver cancer                                                     | 73<br>(52 - 96)           | --                 | 0<br>(0 - 0)        | 2<br>(1 - 3)         | 16<br>(11 - 22)          | 54<br>(37 - 75)          |
| Liver cancer due to hepatitis B                                  | 12<br>(6 - 20)            | --                 | 0<br>(0 - 0)        | 1<br>(0 - 1)         | 4<br>(2 - 7)             | 7<br>(4 - 12)            |
| Liver cancer due to hepatitis C                                  | 31<br>(19 - 46)           | --                 | 0<br>(0 - 0)        | 1<br>(0 - 1)         | 7<br>(3 - 10)            | 24<br>(14 - 37)          |
| Liver cancer due to alcohol use                                  | 18<br>(9 - 27)            | --                 | --                  | 0<br>(0 - 0)         | 3<br>(1 - 5)             | 14<br>(7 - 23)           |
| Liver cancer due to other causes                                 | 12<br>(6 - 21)            | --                 | 0<br>(0 - 0)        | 0<br>(0 - 1)         | 3<br>(1 - 5)             | 8<br>(4 - 16)            |
| Larynx cancer                                                    | 5<br>(3 - 7)              | --                 | --                  | 0<br>(0 - 1)         | 2<br>(1 - 3)             | 2<br>(1 - 4)             |
| Tracheal, bronchus and lung cancer                               | 282<br>(188 - 346)        | --                 | --                  | 15<br>(11 - 19)      | 108<br>(72 - 134)        | 159<br>(97 - 204)        |
| Breast cancer                                                    | 402<br>(261 - 493)        | --                 | --                  | 35<br>(27 - 45)      | 138<br>(95 - 172)        | 229<br>(137 - 289)       |
| Cervical cancer                                                  | 77<br>(55 - 100)          | --                 | --                  | 12<br>(9 - 17)       | 26<br>(18 - 35)          | 39<br>(28 - 54)          |

Web Table 31- Slovenia deaths with 95% UI by age, sex, and cause in 2013

| Cause                                         | Females, All Ages        | Females, 0-4 Years | Females, 5-14 Years | Females, 15-49 Years | Females, 50-69 Years | Females, 70-80 Years     |
|-----------------------------------------------|--------------------------|--------------------|---------------------|----------------------|----------------------|--------------------------|
| Uterine cancer                                | 60<br>(45 - 78)          | --                 | --                  | 1<br>(1 - 2)         | 18<br>(13 - 24)      | 41<br>(29 - 56)          |
| Prostate cancer                               | --                       | --                 | --                  | --                   | --                   | --                       |
| Colon and rectum cancer                       | 349<br>(292 - 422)       | --                 | --                  | 8<br>(7 - 10)        | 78<br>(65 - 91)      | 263<br>(214 - 328)       |
| Lip and oral cavity cancer                    | 13<br>(10 - 16)          | --                 | --                  | 1<br>(1 - 1)         | 4<br>(3 - 5)         | 8<br>(6 - 10)            |
| Nasopharynx cancer                            | 2<br>(1 - 4)             | --                 | 0<br>(0 - 0)        | 0<br>(0 - 1)         | 1<br>(0 - 1)         | 1<br>(0 - 2)             |
| Other pharynx cancer                          | 9<br>(6 - 12)            | --                 | --                  | 1<br>(0 - 1)         | 4<br>(3 - 6)         | 3<br>(2 - 5)             |
| Gallbladder and biliary tract cancer          | 88<br>(56 - 119)         | --                 | --                  | 2<br>(1 - 2)         | 19<br>(13 - 26)      | 67<br>(41 - 94)          |
| Pancreatic cancer                             | 182<br>(153 - 215)       | --                 | --                  | 4<br>(3 - 5)         | 45<br>(37 - 54)      | 133<br>(109 - 161)       |
| Malignant skin melanoma                       | 45<br>(27 - 58)          | --                 | --                  | 6<br>(4 - 8)         | 14<br>(8 - 18)       | 26<br>(15 - 35)          |
| Non-melanoma skin cancer                      | 18<br>(12 - 29)          | --                 | --                  | 0<br>(0 - 0)         | 1<br>(1 - 1)         | 17<br>(11 - 27)          |
| Ovarian cancer                                | 137<br>(109 - 164)       | --                 | --                  | 10<br>(7 - 12)       | 56<br>(44 - 70)      | 71<br>(51 - 92)          |
| Testicular cancer                             | --                       | --                 | --                  | --                   | --                   | --                       |
| Kidney cancer                                 | 43<br>(30 - 61)          | 0<br>(0 - 0)       | 0<br>(0 - 0)        | 1<br>(1 - 2)         | 12<br>(9 - 16)       | 29<br>(18 - 45)          |
| Bladder cancer                                | 38<br>(22 - 55)          | --                 | --                  | 0<br>(0 - 1)         | 6<br>(3 - 9)         | 32<br>(18 - 47)          |
| Brain and nervous system cancer               | 54<br>(37 - 67)          | 0<br>(0 - 0)       | 1<br>(0 - 1)        | 7<br>(5 - 9)         | 24<br>(18 - 31)      | 22<br>(12 - 31)          |
| Thyroid cancer                                | 14<br>(9 - 22)           | --                 | 0<br>(0 - 0)        | 0<br>(0 - 0)         | 3<br>(2 - 4)         | 11<br>(7 - 17)           |
| Mesothelioma                                  | 4<br>(3 - 7)             | --                 | --                  | 0<br>(0 - 0)         | 2<br>(1 - 2)         | 3<br>(2 - 4)             |
| Hodgkin lymphoma                              | 5<br>(3 - 7)             | 0<br>(0 - 0)       | 0<br>(0 - 0)        | 1<br>(1 - 2)         | 1<br>(1 - 2)         | 2<br>(2 - 4)             |
| Non-Hodgkin lymphoma                          | 66<br>(24 - 93)          | 0<br>(0 - 0)       | 0<br>(0 - 0)        | 4<br>(2 - 5)         | 15<br>(6 - 22)       | 48<br>(17 - 70)          |
| Multiple myeloma                              | 41<br>(25 - 63)          | --                 | --                  | 1<br>(1 - 2)         | 12<br>(7 - 20)       | 28<br>(17 - 43)          |
| Leukemia                                      | 66<br>(47 - 83)          | 0<br>(0 - 1)       | 0<br>(0 - 1)        | 5<br>(4 - 6)         | 15<br>(10 - 19)      | 45<br>(32 - 58)          |
| Other neoplasms                               | 130<br>(88 - 163)        | 0<br>(0 - 1)       | 1<br>(0 - 1)        | 7<br>(5 - 9)         | 29<br>(22 - 37)      | 93<br>(58 - 121)         |
| Cardiovascular diseases                       | 4,965<br>(4,531 - 5,625) | 0<br>(0 - 1)       | 0<br>(0 - 0)        | 30<br>(23 - 37)      | 288<br>(241 - 379)   | 4,647<br>(4,245 - 5,215) |
| Rheumatic heart disease                       | 68<br>(28 - 96)          | 0<br>(0 - 0)       | 0<br>(0 - 0)        | 1<br>(1 - 2)         | 7<br>(4 - 10)        | 60<br>(23 - 87)          |
| Ischemic heart disease                        | 1,780<br>(1,435 - 2,282) | 0<br>(0 - 0)       | 0<br>(0 - 0)        | 8<br>(6 - 11)        | 105<br>(83 - 159)    | 1,667<br>(1,326 - 2,123) |
| Cerebrovascular disease                       | 1,513<br>(1,229 - 1,869) | 0<br>(0 - 0)       | 0<br>(0 - 0)        | 12<br>(8 - 15)       | 94<br>(74 - 124)     | 1,407<br>(1,136 - 1,730) |
| Ischemic stroke                               | 1,208<br>(929 - 1,528)   | 0<br>(0 - 0)       | 0<br>(0 - 0)        | 1<br>(1 - 2)         | 32<br>(21 - 48)      | 1,174<br>(907 - 1,478)   |
| Hemorrhagic stroke                            | 305<br>(202 - 406)       | 0<br>(0 - 0)       | 0<br>(0 - 0)        | 10<br>(8 - 13)       | 62<br>(47 - 85)      | 233<br>(138 - 315)       |
| Hypertensive heart disease                    | 647<br>(397 - 888)       | 0<br>(0 - 0)       | 0<br>(0 - 0)        | 1<br>(1 - 2)         | 21<br>(14 - 30)      | 625<br>(377 - 865)       |
| Cardiomyopathy and myocarditis                | 520<br>(350 - 1,217)     | 0<br>(0 - 0)       | 0<br>(0 - 0)        | 2<br>(1 - 4)         | 22<br>(16 - 47)      | 496<br>(329 - 1,166)     |
| Atrial fibrillation and flutter               | 76<br>(51 - 109)         | --                 | --                  | 0<br>(0 - 0)         | 3<br>(2 - 4)         | 74<br>(48 - 106)         |
| Aortic aneurysm                               | 29<br>(16 - 43)          | --                 | --                  | 1<br>(1 - 1)         | 5<br>(3 - 8)         | 23<br>(13 - 35)          |
| Peripheral vascular disease                   | 3<br>(2 - 5)             | --                 | --                  | 0<br>(0 - 0)         | 0<br>(0 - 0)         | 3<br>(2 - 5)             |
| Endocarditis                                  | 6<br>(4 - 10)            | 0<br>(0 - 0)       | 0<br>(0 - 0)        | 0<br>(0 - 0)         | 1<br>(1 - 3)         | 4<br>(2 - 7)             |
| Other cardiovascular and circulatory diseases | 322<br>(188 - 441)       | 0<br>(0 - 0)       | 0<br>(0 - 0)        | 4<br>(2 - 6)         | 30<br>(21 - 42)      | 289<br>(165 - 402)       |
| Chronic respiratory diseases                  | 448<br>(245 - 561)       | 0<br>(0 - 0)       | 0<br>(0 - 0)        | 2<br>(2 - 3)         | 24<br>(15 - 30)      | 422<br>(228 - 531)       |
| Chronic obstructive pulmonary disease         | 368<br>(212 - 474)       | 0<br>(0 - 0)       | 0<br>(0 - 0)        | 1<br>(1 - 2)         | 18<br>(12 - 24)      | 349<br>(198 - 453)       |
| Pneumoconiosis                                | 1<br>(0 - 1)             | 0<br>(0 - 0)       | 0<br>(0 - 0)        | 0<br>(0 - 0)         | 0<br>(0 - 0)         | 0<br>(0 - 1)             |
| Silicosis                                     | 0<br>(0 - 0)             | 0<br>(0 - 0)       | 0<br>(0 - 0)        | 0<br>(0 - 0)         | 0<br>(0 - 0)         | 0<br>(0 - 0)             |
| Asbestosis                                    | 0<br>(0 - 0)             | 0<br>(0 - 0)       | 0<br>(0 - 0)        | 0<br>(0 - 0)         | 0<br>(0 - 0)         | 0<br>(0 - 0)             |

Web Table 31- Slovenia deaths with 95% UI by age, sex, and cause in 2013

| Cause                                               | Females, All Ages    | Females, 0-4 Years | Females, 5-14 Years | Females, 15-49 Years | Females, 50-69 Years | Females, 70-80 Years |
|-----------------------------------------------------|----------------------|--------------------|---------------------|----------------------|----------------------|----------------------|
| Coal workers pneumoconiosis                         | 0<br>(0 - 0)         | 0<br>(0 - 0)       | 0<br>(0 - 0)        | 0<br>(0 - 0)         | 0<br>(0 - 0)         | 0<br>(0 - 0)         |
| Other pneumoconiosis                                | 1<br>(0 - 1)         | 0<br>(0 - 0)       | 0<br>(0 - 0)        | 0<br>(0 - 0)         | 0<br>(0 - 0)         | 0<br>(0 - 1)         |
| Asthma                                              | 21<br>(7 - 33)       | 0<br>(0 - 0)       | 0<br>(0 - 0)        | 1<br>(0 - 1)         | 3<br>(2 - 5)         | 17<br>(5 - 28)       |
| Interstitial lung disease and pulmonary sarcoidosis | 48<br>(13 - 94)      | 0<br>(0 - 0)       | 0<br>(0 - 0)        | 0<br>(0 - 0)         | 2<br>(1 - 4)         | 46<br>(12 - 90)      |
| Other chronic respiratory diseases                  | 11<br>(5 - 20)       | 0<br>(0 - 0)       | 0<br>(0 - 0)        | 0<br>(0 - 0)         | 0<br>(0 - 0)         | 10<br>(4 - 19)       |
| Cirrhosis                                           | 177<br>(153 - 206)   | 0<br>(0 - 0)       | 0<br>(0 - 0)        | 21<br>(17 - 25)      | 89<br>(74 - 108)     | 67<br>(55 - 80)      |
| Cirrhosis due to hepatitis B                        | 65<br>(42 - 89)      | 0<br>(0 - 0)       | 0<br>(0 - 0)        | 8<br>(5 - 11)        | 32<br>(21 - 45)      | 25<br>(15 - 36)      |
| Cirrhosis due to hepatitis C                        | 48<br>(25 - 75)      | 0<br>(0 - 0)       | 0<br>(0 - 0)        | 6<br>(3 - 9)         | 26<br>(14 - 40)      | 17<br>(8 - 27)       |
| Cirrhosis due to alcohol use                        | 35<br>(19 - 52)      | --                 | --                  | 2<br>(1 - 4)         | 16<br>(8 - 24)       | 17<br>(10 - 27)      |
| Cirrhosis due to other causes                       | 29<br>(16 - 45)      | 0<br>(0 - 0)       | 0<br>(0 - 0)        | 5<br>(3 - 8)         | 15<br>(8 - 25)       | 8<br>(4 - 14)        |
| Digestive diseases                                  | 306<br>(223 - 372)   | 0<br>(0 - 0)       | 0<br>(0 - 0)        | 4<br>(3 - 5)         | 25<br>(19 - 32)      | 276<br>(199 - 339)   |
| Peptic ulcer disease                                | 52<br>(31 - 74)      | 0<br>(0 - 0)       | 0<br>(0 - 0)        | 1<br>(1 - 1)         | 5<br>(3 - 6)         | 47<br>(28 - 67)      |
| Gastritis and duodenitis                            | 3<br>(1 - 6)         | 0<br>(0 - 0)       | 0<br>(0 - 0)        | 0<br>(0 - 0)         | 0<br>(0 - 0)         | 3<br>(1 - 5)         |
| Appendicitis                                        | 2<br>(1 - 4)         | 0<br>(0 - 0)       | 0<br>(0 - 0)        | 0<br>(0 - 0)         | 0<br>(0 - 0)         | 2<br>(1 - 4)         |
| Paralytic ileus and intestinal obstruction          | 46<br>(20 - 73)      | 0<br>(0 - 0)       | 0<br>(0 - 0)        | 0<br>(0 - 1)         | 3<br>(1 - 5)         | 42<br>(18 - 68)      |
| Inguinal, femoral, and abdominal hernia             | 10<br>(3 - 18)       | 0<br>(0 - 0)       | 0<br>(0 - 0)        | 0<br>(0 - 0)         | 1<br>(0 - 2)         | 9<br>(2 - 16)        |
| Inflammatory bowel disease                          | 10<br>(4 - 17)       | 0<br>(0 - 0)       | 0<br>(0 - 0)        | 1<br>(0 - 1)         | 1<br>(0 - 2)         | 9<br>(3 - 15)        |
| Vascular intestinal disorders                       | 81<br>(41 - 128)     | 0<br>(0 - 0)       | 0<br>(0 - 0)        | 0<br>(0 - 1)         | 5<br>(3 - 8)         | 75<br>(38 - 119)     |
| Gallbladder and biliary diseases                    | 45<br>(26 - 65)      | 0<br>(0 - 0)       | 0<br>(0 - 0)        | 0<br>(0 - 0)         | 3<br>(2 - 4)         | 42<br>(24 - 61)      |
| Pancreatitis                                        | 28<br>(18 - 45)      | 0<br>(0 - 0)       | 0<br>(0 - 0)        | 1<br>(1 - 2)         | 5<br>(3 - 7)         | 22<br>(13 - 37)      |
| Other digestive diseases                            | 27<br>(18 - 38)      | 0<br>(0 - 0)       | 0<br>(0 - 0)        | 0<br>(0 - 1)         | 2<br>(1 - 3)         | 25<br>(16 - 36)      |
| Neurological disorders                              | 982<br>(776 - 1,181) | 1<br>(1 - 2)       | 1<br>(0 - 1)        | 9<br>(7 - 11)        | 47<br>(38 - 59)      | 924<br>(722 - 1,126) |
| Alzheimer disease and other dementias               | 891<br>(687 - 1,092) | --                 | --                  | 0<br>(0 - 0)         | 24<br>(17 - 32)      | 867<br>(664 - 1,068) |
| Parkinson disease                                   | 39<br>(25 - 62)      | --                 | --                  | 0<br>(0 - 0)         | 3<br>(2 - 4)         | 37<br>(23 - 58)      |
| Epilepsy                                            | 7<br>(5 - 9)         | 0<br>(0 - 0)       | 0<br>(0 - 0)        | 2<br>(1 - 3)         | 2<br>(1 - 3)         | 3<br>(2 - 4)         |
| Multiple sclerosis                                  | 16<br>(10 - 26)      | --                 | --                  | 3<br>(2 - 6)         | 7<br>(4 - 12)        | 5<br>(3 - 10)        |
| Other neurological disorders                        | 28<br>(24 - 33)      | 1<br>(0 - 2)       | 0<br>(0 - 1)        | 3<br>(2 - 4)         | 11<br>(9 - 14)       | 13<br>(10 - 16)      |
| Mental and substance use disorders                  | 24<br>(14 - 34)      | 0<br>(0 - 0)       | 0<br>(0 - 0)        | 6<br>(4 - 9)         | 10<br>(5 - 15)       | 8<br>(5 - 12)        |
| Schizophrenia                                       | 0<br>(0 - 1)         | --                 | --                  | 0<br>(0 - 0)         | 0<br>(0 - 0)         | 0<br>(0 - 1)         |
| Alcohol use disorders                               | 16<br>(6 - 26)       | --                 | --                  | 3<br>(1 - 5)         | 8<br>(3 - 13)        | 5<br>(2 - 9)         |
| Drug use disorders                                  | 7<br>(6 - 9)         | 0<br>(0 - 0)       | --                  | 3<br>(2 - 4)         | 2<br>(1 - 3)         | 3<br>(2 - 4)         |
| Opioid use disorders                                | 3<br>(2 - 3)         | 0<br>(0 - 0)       | --                  | 1<br>(1 - 1)         | 1<br>(0 - 1)         | 1<br>(1 - 2)         |
| Cocaine use disorders                               | 1<br>(0 - 1)         | 0<br>(0 - 0)       | --                  | 0<br>(0 - 0)         | 0<br>(0 - 0)         | 0<br>(0 - 0)         |
| Amphetamine use disorders                           | 0<br>(0 - 1)         | 0<br>(0 - 0)       | --                  | 0<br>(0 - 0)         | 0<br>(0 - 0)         | 0<br>(0 - 0)         |
| Other drug use disorders                            | 4<br>(3 - 5)         | 0<br>(0 - 0)       | --                  | 1<br>(1 - 2)         | 1<br>(1 - 1)         | 1<br>(1 - 2)         |
| Eating disorders                                    | 0<br>(0 - 0)         | --                 | 0<br>(0 - 0)        | 0<br>(0 - 0)         | --                   | --                   |
| Anorexia nervosa                                    | 0<br>(0 - 0)         | --                 | 0<br>(0 - 0)        | 0<br>(0 - 0)         | --                   | --                   |
| Diabetes, urogenital, blood, and endocrine diseases | 433<br>(362 - 572)   | 1<br>(1 - 2)       | 0<br>(0 - 1)        | 6<br>(5 - 8)         | 48<br>(40 - 59)      | 378<br>(312 - 509)   |
| Diabetes mellitus                                   | 205<br>(163 - 339)   | 0<br>(0 - 0)       | 0<br>(0 - 0)        | 2<br>(1 - 2)         | 23<br>(18 - 31)      | 181<br>(140 - 309)   |
| Acute glomerulonephritis                            | 0<br>(0 - 0)         | 0<br>(0 - 0)       | 0<br>(0 - 0)        | 0<br>(0 - 0)         | 0<br>(0 - 0)         | 0<br>(0 - 0)         |

Web Table 31- Slovenia deaths with 95% UI by age, sex, and cause in 2013

| Cause                                               | Females, All Ages  | Females, 0-4 Years | Females, 5-14 Years | Females, 15-49 Years | Females, 50-69 Years | Females, 70-80 Years |
|-----------------------------------------------------|--------------------|--------------------|---------------------|----------------------|----------------------|----------------------|
| Chronic kidney disease                              | 117<br>(90 - 152)  | 0<br>(0 - 0)       | 0<br>(0 - 0)        | 2<br>(1 - 2)         | 12<br>(9 - 16)       | 103<br>(78 - 137)    |
| Chronic kidney disease due to diabetes mellitus     | 0<br>(0 - 0)       | 0<br>(0 - 0)       | 0<br>(0 - 0)        | 0<br>(0 - 0)         | 0<br>(0 - 0)         | 0<br>(0 - 0)         |
| Chronic kidney disease due to hypertension          | 47<br>(30 - 74)    | 0<br>(0 - 0)       | 0<br>(0 - 0)        | 1<br>(0 - 1)         | 4<br>(3 - 7)         | 42<br>(26 - 67)      |
| Chronic kidney disease due to glomerulonephritis    | 2<br>(1 - 5)       | 0<br>(0 - 0)       | 0<br>(0 - 0)        | 0<br>(0 - 0)         | 1<br>(0 - 1)         | 1<br>(1 - 3)         |
| Chronic kidney disease due to other causes          | 68<br>(37 - 102)   | 0<br>(0 - 0)       | 0<br>(0 - 0)        | 1<br>(0 - 1)         | 7<br>(4 - 11)        | 60<br>(32 - 91)      |
| Urinary diseases and male infertility               | 79<br>(50 - 112)   | 0<br>(0 - 0)       | 0<br>(0 - 0)        | 1<br>(0 - 1)         | 7<br>(5 - 10)        | 71<br>(43 - 103)     |
| Interstitial nephritis and urinary tract infections | 45<br>(25 - 87)    | 0<br>(0 - 0)       | 0<br>(0 - 0)        | 1<br>(0 - 1)         | 5<br>(3 - 8)         | 40<br>(21 - 78)      |
| Urolithiasis                                        | 2<br>(1 - 3)       | --                 | 0<br>(0 - 0)        | 0<br>(0 - 0)         | 0<br>(0 - 0)         | 1<br>(1 - 2)         |
| Other urinary diseases                              | 32<br>(6 - 59)     | 0<br>(0 - 0)       | 0<br>(0 - 0)        | 0<br>(0 - 0)         | 1<br>(0 - 3)         | 31<br>(5 - 57)       |
| Gynecological diseases                              | 0<br>(0 - 0)       | --                 | --                  | 0<br>(0 - 0)         | 0<br>(0 - 0)         | 0<br>(0 - 0)         |
| Uterine fibroids                                    | 0<br>(0 - 0)       | --                 | --                  | 0<br>(0 - 0)         | 0<br>(0 - 0)         | 0<br>(0 - 0)         |
| Polycystic ovarian syndrome                         | 0<br>(0 - 0)       | --                 | --                  | 0<br>(0 - 0)         | 0<br>(0 - 0)         | --                   |
| Endometriosis                                       | 0<br>(0 - 0)       | --                 | --                  | 0<br>(0 - 0)         | 0<br>(0 - 0)         | --                   |
| Genital prolapse                                    | 0<br>(0 - 0)       | --                 | --                  | 0<br>(0 - 0)         | 0<br>(0 - 0)         | 0<br>(0 - 0)         |
| Other gynecological diseases                        | 0<br>(0 - 0)       | --                 | --                  | 0<br>(0 - 0)         | 0<br>(0 - 0)         | 0<br>(0 - 0)         |
| Hemoglobinopathies and hemolytic anemias            | 5<br>(3 - 8)       | 0<br>(0 - 0)       | 0<br>(0 - 0)        | 0<br>(0 - 1)         | 1<br>(0 - 1)         | 4<br>(2 - 7)         |
| Thalassemias                                        | 0<br>(0 - 0)       | 0<br>(0 - 0)       | 0<br>(0 - 0)        | 0<br>(0 - 0)         | 0<br>(0 - 0)         | 0<br>(0 - 0)         |
| Sickle cell disorders                               | 0<br>(0 - 0)       | 0<br>(0 - 0)       | 0<br>(0 - 0)        | 0<br>(0 - 0)         | 0<br>(0 - 0)         | 0<br>(0 - 0)         |
| G6PD deficiency                                     | 0<br>(0 - 0)       | 0<br>(0 - 0)       | 0<br>(0 - 0)        | 0<br>(0 - 0)         | 0<br>(0 - 0)         | 0<br>(0 - 0)         |
| Other hemoglobinopathies and hemolytic anemias      | 5<br>(3 - 8)       | 0<br>(0 - 0)       | 0<br>(0 - 0)        | 0<br>(0 - 0)         | 1<br>(0 - 1)         | 4<br>(2 - 7)         |
| Endocrine, metabolic, blood, and immune disorders   | 26<br>(17 - 36)    | 1<br>(0 - 1)       | 0<br>(0 - 1)        | 2<br>(1 - 2)         | 5<br>(3 - 7)         | 18<br>(11 - 27)      |
| Musculoskeletal disorders                           | 50<br>(36 - 85)    | --                 | 0<br>(0 - 0)        | 3<br>(2 - 4)         | 12<br>(9 - 18)       | 35<br>(23 - 60)      |
| Rheumatoid arthritis                                | 21<br>(13 - 32)    | --                 | 0<br>(0 - 0)        | 0<br>(0 - 0)         | 4<br>(2 - 6)         | 17<br>(9 - 26)       |
| Other musculoskeletal disorders                     | 29<br>(20 - 61)    | --                 | 0<br>(0 - 0)        | 3<br>(2 - 4)         | 8<br>(6 - 15)        | 18<br>(11 - 41)      |
| Other non-communicable diseases                     | 55<br>(40 - 71)    | 13<br>(8 - 22)     | 1<br>(1 - 1)        | 4<br>(3 - 5)         | 5<br>(4 - 6)         | 32<br>(16 - 45)      |
| Congenital anomalies                                | 24<br>(18 - 34)    | 11<br>(6 - 19)     | 1<br>(1 - 1)        | 4<br>(3 - 5)         | 3<br>(2 - 4)         | 5<br>(4 - 7)         |
| Neural tube defects                                 | 0<br>(0 - 0)       | 0<br>(0 - 0)       | 0<br>(0 - 0)        | 0<br>(0 - 0)         | 0<br>(0 - 0)         | 0<br>(0 - 0)         |
| Congenital heart anomalies                          | 11<br>(8 - 15)     | 5<br>(3 - 9)       | 0<br>(0 - 0)        | 2<br>(1 - 2)         | 1<br>(1 - 1)         | 3<br>(2 - 4)         |
| Cleft lip and cleft palate                          | 0<br>(0 - 0)       | 0<br>(0 - 0)       | --                  | --                   | --                   | --                   |
| Down syndrome                                       | 3<br>(1 - 4)       | 1<br>(0 - 2)       | 0<br>(0 - 0)        | 1<br>(0 - 1)         | 1<br>(0 - 1)         | 0<br>(0 - 0)         |
| Chromosomal unbalanced rearrangements               | 1<br>(0 - 2)       | 1<br>(0 - 1)       | 0<br>(0 - 0)        | 0<br>(0 - 0)         | 0<br>(0 - 0)         | 0<br>(0 - 0)         |
| Other congenital anomalies                          | 10<br>(7 - 14)     | 5<br>(3 - 8)       | 0<br>(0 - 1)        | 1<br>(1 - 2)         | 1<br>(1 - 1)         | 2<br>(2 - 4)         |
| Skin and subcutaneous diseases                      | 29<br>(13 - 42)    | 0<br>(0 - 0)       | 0<br>(0 - 0)        | 0<br>(0 - 0)         | 2<br>(1 - 3)         | 27<br>(11 - 39)      |
| Cellulitis                                          | 3<br>(1 - 5)       | 0<br>(0 - 0)       | 0<br>(0 - 0)        | 0<br>(0 - 0)         | 0<br>(0 - 1)         | 2<br>(1 - 5)         |
| Pyoderma                                            | 5<br>(3 - 9)       | 0<br>(0 - 0)       | 0<br>(0 - 0)        | 0<br>(0 - 0)         | 1<br>(0 - 1)         | 4<br>(2 - 9)         |
| Decubitus ulcer                                     | 20<br>(1 - 32)     | 0<br>(0 - 0)       | 0<br>(0 - 0)        | 0<br>(0 - 0)         | 1<br>(0 - 1)         | 19<br>(1 - 31)       |
| Other skin and subcutaneous diseases                | 0<br>(0 - 1)       | 0<br>(0 - 0)       | 0<br>(0 - 0)        | 0<br>(0 - 0)         | 0<br>(0 - 0)         | 0<br>(0 - 1)         |
| Sudden infant death syndrome                        | 2<br>(1 - 5)       | --                 | --                  | --                   | --                   | --                   |
| Injuries                                            | 581<br>(472 - 713) | 2<br>(1 - 4)       | 3<br>(2 - 4)        | 62<br>(54 - 74)      | 90<br>(76 - 115)     | 423<br>(324 - 534)   |
| Transport injuries                                  | 55<br>(44 - 70)    | 1<br>(0 - 1)       | 1<br>(1 - 2)        | 18<br>(14 - 22)      | 12<br>(9 - 16)       | 22<br>(16 - 32)      |

Web Table 31- Slovenia deaths with 95% UI by age, sex, and cause in 2013

| Cause                                           | Females, All Ages  | Females, 0-4 Years | Females, 5-14 Years | Females, 15-49 Years | Females, 50-69 Years | Females, 70-80 Years |
|-------------------------------------------------|--------------------|--------------------|---------------------|----------------------|----------------------|----------------------|
| Road injuries                                   | 50<br>(40 - 64)    | 1<br>(0 - 1)       | 1<br>(1 - 2)        | 17<br>(13 - 21)      | 11<br>(8 - 15)       | 20<br>(14 - 29)      |
| Pedestrian road injuries                        | 17<br>(12 - 26)    | 0<br>(0 - 0)       | 0<br>(0 - 1)        | 2<br>(1 - 4)         | 3<br>(2 - 5)         | 10<br>(7 - 17)       |
| Cyclist road injuries                           | 4<br>(2 - 6)       | 0<br>(0 - 0)       | 0<br>(0 - 0)        | 1<br>(1 - 1)         | 2<br>(1 - 2)         | 1<br>(1 - 2)         |
| Motorcyclist road injuries                      | 1<br>(0 - 2)       | 0<br>(0 - 0)       | 0<br>(0 - 0)        | 1<br>(0 - 1)         | 0<br>(0 - 0)         | 0<br>(0 - 1)         |
| Motor vehicle road injuries                     | 28<br>(19 - 36)    | 0<br>(0 - 1)       | 1<br>(0 - 1)        | 13<br>(10 - 16)      | 6<br>(3 - 8)         | 8<br>(4 - 13)        |
| Other road injuries                             | 0<br>(0 - 1)       | 0<br>(0 - 0)       | 0<br>(0 - 0)        | 0<br>(0 - 0)         | 0<br>(0 - 0)         | 0<br>(0 - 0)         |
| Other transport injuries                        | 5<br>(3 - 8)       | 0<br>(0 - 0)       | 0<br>(0 - 0)        | 1<br>(1 - 2)         | 1<br>(1 - 2)         | 2<br>(1 - 4)         |
| Unintentional injuries                          | 409<br>(305 - 522) | 2<br>(1 - 3)       | 1<br>(1 - 1)        | 11<br>(8 - 13)       | 34<br>(27 - 43)      | 362<br>(264 - 470)   |
| Falls                                           | 299<br>(208 - 420) | 0<br>(0 - 0)       | 0<br>(0 - 0)        | 3<br>(2 - 4)         | 16<br>(11 - 22)      | 280<br>(192 - 395)   |
| Drowning                                        | 7<br>(5 - 12)      | 0<br>(0 - 1)       | 0<br>(0 - 0)        | 1<br>(1 - 2)         | 2<br>(1 - 4)         | 3<br>(2 - 5)         |
| Fire, heat, and hot substances                  | 6<br>(4 - 8)       | 0<br>(0 - 0)       | 0<br>(0 - 0)        | 0<br>(0 - 1)         | 1<br>(0 - 1)         | 5<br>(3 - 7)         |
| Poisonings                                      | 3<br>(2 - 4)       | 0<br>(0 - 0)       | 0<br>(0 - 0)        | 1<br>(0 - 1)         | 1<br>(0 - 1)         | 2<br>(1 - 3)         |
| Exposure to mechanical forces                   | 3<br>(3 - 5)       | 0<br>(0 - 0)       | 0<br>(0 - 0)        | 1<br>(1 - 1)         | 1<br>(1 - 1)         | 1<br>(1 - 2)         |
| Unintentional firearm injuries                  | 0<br>(0 - 0)       | 0<br>(0 - 0)       | 0<br>(0 - 0)        | 0<br>(0 - 0)         | 0<br>(0 - 0)         | 0<br>(0 - 0)         |
| Unintentional suffocation                       | 0<br>(0 - 1)       | 0<br>(0 - 0)       | 0<br>(0 - 0)        | 0<br>(0 - 0)         | 0<br>(0 - 0)         | 0<br>(0 - 1)         |
| Other exposure to mechanical forces             | 3<br>(2 - 4)       | 0<br>(0 - 0)       | 0<br>(0 - 0)        | 1<br>(0 - 1)         | 1<br>(1 - 1)         | 1<br>(1 - 1)         |
| Adverse effects of medical treatment            | 67<br>(32 - 96)    | 0<br>(0 - 0)       | 0<br>(0 - 0)        | 2<br>(1 - 3)         | 10<br>(5 - 15)       | 55<br>(24 - 82)      |
| Animal contact                                  | 1<br>(1 - 4)       | 0<br>(0 - 0)       | 0<br>(0 - 0)        | 0<br>(0 - 0)         | 0<br>(0 - 1)         | 1<br>(0 - 2)         |
| Venomous animal contact                         | 0<br>(0 - 1)       | 0<br>(0 - 0)       | 0<br>(0 - 0)        | 0<br>(0 - 0)         | 0<br>(0 - 0)         | 0<br>(0 - 0)         |
| Non-venomous animal contact                     | 1<br>(1 - 3)       | 0<br>(0 - 0)       | 0<br>(0 - 0)        | 0<br>(0 - 0)         | 0<br>(0 - 1)         | 1<br>(0 - 2)         |
| Foreign body                                    | 20<br>(10 - 31)    | 1<br>(0 - 1)       | 0<br>(0 - 0)        | 1<br>(1 - 2)         | 4<br>(2 - 6)         | 14<br>(6 - 23)       |
| Pulmonary aspiration and foreign body in airway | 20<br>(9 - 31)     | 1<br>(0 - 1)       | 0<br>(0 - 0)        | 1<br>(1 - 2)         | 4<br>(2 - 6)         | 14<br>(6 - 23)       |
| Foreign body in other body part                 | 0<br>(0 - 0)       | 0<br>(0 - 0)       | 0<br>(0 - 0)        | 0<br>(0 - 0)         | 0<br>(0 - 0)         | 0<br>(0 - 0)         |
| Other unintentional injuries                    | 2<br>(1 - 4)       | 0<br>(0 - 0)       | 0<br>(0 - 0)        | 0<br>(0 - 1)         | 0<br>(0 - 1)         | 1<br>(1 - 2)         |
| Self-harm and interpersonal violence            | 117<br>(97 - 152)  | 0<br>(0 - 0)       | 0<br>(0 - 1)        | 33<br>(28 - 42)      | 44<br>(34 - 61)      | 39<br>(29 - 55)      |
| Self-harm                                       | 107<br>(89 - 143)  | 0<br>-             | 0<br>(0 - 0)        | 30<br>(24 - 38)      | 41<br>(32 - 58)      | 36<br>(27 - 52)      |
| Interpersonal violence                          | 10<br>(7 - 14)     | 0<br>(0 - 0)       | 0<br>(0 - 0)        | 4<br>(3 - 5)         | 3<br>(2 - 4)         | 3<br>(2 - 4)         |
| Assault by firearm                              | 2<br>(1 - 4)       | 0<br>(0 - 0)       | 0<br>(0 - 0)        | 1<br>(1 - 2)         | 0<br>(0 - 1)         | 0<br>(0 - 1)         |
| Assault by sharp object                         | 3<br>(2 - 5)       | 0<br>(0 - 0)       | 0<br>(0 - 0)        | 1<br>(1 - 2)         | 1<br>(0 - 1)         | 1<br>(0 - 1)         |
| Assault by other means                          | 5<br>(3 - 6)       | 0<br>(0 - 0)       | 0<br>(0 - 0)        | 1<br>(1 - 2)         | 1<br>(1 - 2)         | 2<br>(1 - 3)         |

Web Table 31- Solomon Islands deaths with 95% UI by age, sex, and cause in 2013

| Cause                                                             | Both Sexes, All Ages     | Both Sexes, 0-4 Years | Both Sexes, 5-14 Years | Both Sexes, 15-49 Years | Both Sexes, 50-69 Years | Both Sexes, 70-80 Years |
|-------------------------------------------------------------------|--------------------------|-----------------------|------------------------|-------------------------|-------------------------|-------------------------|
| All causes                                                        | 4,138<br>(2,924 - 5,891) | 377<br>(227 - 606)    | 81<br>(58 - 109)       | 1,197<br>(685 - 1,999)  | 1,325<br>(860 - 2,007)  | 1,157<br>(939 - 1,445)  |
| Communicable, maternal, neonatal, and nutritional diseases        | 1,026<br>(748 - 1,402)   | 300<br>(181 - 484)    | 38<br>(26 - 56)        | 272<br>(151 - 454)      | 187<br>(117 - 282)      | 228<br>(166 - 297)      |
| HIV/AIDS and tuberculosis                                         | 123<br>(75 - 185)        | 1<br>(0 - 2)          | 2<br>(1 - 3)           | 53<br>(32 - 86)         | 40<br>(24 - 60)         | 28<br>(13 - 40)         |
| Tuberculosis                                                      | 115<br>(67 - 176)        | 1<br>(0 - 2)          | 2<br>(1 - 3)           | 47<br>(25 - 79)         | 38<br>(22 - 59)         | 27<br>(13 - 40)         |
| HIV/AIDS                                                          | 8<br>(6 - 11)            | 0<br>(0 - 0)          | 1<br>(0 - 1)           | 6<br>(5 - 8)            | 1<br>(1 - 2)            | 0<br>(0 - 0)            |
| HIV/AIDS resulting in mycobacterial infection                     | 0<br>(0 - 1)             | 0<br>(0 - 0)          | 0<br>(0 - 0)           | 0<br>(0 - 1)            | 0<br>(0 - 0)            | 0<br>(0 - 0)            |
| HIV/AIDS resulting in other diseases                              | 8<br>(6 - 10)            | 0<br>(0 - 0)          | 1<br>(0 - 1)           | 6<br>(5 - 8)            | 1<br>(1 - 2)            | 0<br>(0 - 0)            |
| Diarrhea, lower respiratory, and other common infectious diseases | 500<br>(355 - 698)       | 99<br>(52 - 184)      | 23<br>(15 - 39)        | 108<br>(60 - 186)       | 108<br>(66 - 167)       | 162<br>(114 - 219)      |
| Diarrheal diseases                                                | 177<br>(102 - 262)       | 24<br>(10 - 46)       | 6<br>(3 - 11)          | 30<br>(18 - 56)         | 40<br>(18 - 75)         | 76<br>(40 - 120)        |
| Intestinal infectious diseases                                    | 11<br>(5 - 21)           | 4<br>(1 - 9)          | 3<br>(1 - 6)           | 3<br>(1 - 7)            | 0<br>(0 - 1)            | 0<br>(0 - 1)            |
| Typhoid fever                                                     | 8<br>(3 - 15)            | 3<br>(1 - 7)          | 2<br>(1 - 5)           | 2<br>(1 - 5)            | 0<br>(0 - 1)            | 0<br>(0 - 0)            |
| Paratyphoid fever                                                 | 2<br>(1 - 4)             | 1<br>(0 - 2)          | 1<br>(0 - 1)           | 0<br>(0 - 1)            | 0<br>(0 - 0)            | 0<br>(0 - 0)            |
| Other intestinal infectious diseases                              | 1<br>(0 - 5)             | 0<br>(0 - 2)          | 0<br>(0 - 1)           | 0<br>(0 - 3)            | 0<br>(0 - 1)            | 0<br>(0 - 1)            |
| Lower respiratory infections                                      | 240<br>(166 - 334)       | 39<br>(19 - 79)       | 5<br>(3 - 8)           | 54<br>(30 - 92)         | 60<br>(37 - 95)         | 81<br>(59 - 110)        |
| Upper respiratory infections                                      | 0<br>(0 - 1)             | 0<br>(0 - 0)          | 0<br>(0 - 1)           | 0<br>(0 - 0)            | 0<br>(0 - 0)            | 0<br>(0 - 0)            |
| Otitis media                                                      | 1<br>(0 - 1)             | 0<br>(0 - 0)          | 0<br>(0 - 0)           | 0<br>(0 - 1)            | 0<br>(0 - 0)            | 0<br>(0 - 0)            |
| Meningitis                                                        | 39<br>(25 - 62)          | 8<br>(3 - 24)         | 4<br>(2 - 7)           | 17<br>(10 - 30)         | 6<br>(4 - 11)           | 3<br>(2 - 5)            |
| Pneumococcal meningitis                                           | 15<br>(9 - 24)           | 3<br>(1 - 9)          | 2<br>(1 - 3)           | 7<br>(4 - 12)           | 2<br>(1 - 4)            | 1<br>(1 - 2)            |
| H influenzae type B meningitis                                    | 4<br>(3 - 7)             | 2<br>(1 - 4)          | 1<br>(0 - 1)           | 1<br>(1 - 2)            | 0<br>(0 - 1)            | 0<br>(0 - 0)            |
| Meningococcal meningitis                                          | 7<br>(5 - 12)            | 1<br>(0 - 4)          | 1<br>(0 - 1)           | 3<br>(2 - 6)            | 1<br>(1 - 2)            | 1<br>(0 - 1)            |
| Other meningitis                                                  | 13<br>(8 - 20)           | 3<br>(1 - 7)          | 1<br>(1 - 2)           | 6<br>(3 - 10)           | 2<br>(1 - 4)            | 1<br>(1 - 2)            |
| Encephalitis                                                      | 4<br>(2 - 6)             | 1<br>(0 - 1)          | 0<br>(0 - 1)           | 2<br>(1 - 3)            | 1<br>(0 - 1)            | 0<br>(0 - 1)            |
| Diphtheria                                                        | 0<br>(0 - 0)             | 0<br>(0 - 0)          | 0<br>(0 - 0)           | 0<br>(0 - 0)            | 0<br>(0 - 0)            | --                      |
| Whooping cough                                                    | 3<br>(0 - 15)            | 3<br>(0 - 14)         | 0<br>(0 - 1)           | 0<br>(0 - 0)            | 0<br>(0 - 0)            | --                      |
| Tetanus                                                           | 1<br>(0 - 1)             | 0<br>(0 - 0)          | 0<br>(0 - 0)           | 0<br>(0 - 1)            | 0<br>(0 - 0)            | 0<br>(0 - 0)            |
| Measles                                                           | 24<br>(1 - 123)          | 19<br>(0 - 93)        | 4<br>(0 - 24)          | 1<br>(0 - 6)            | 0<br>(0 - 0)            | --                      |
| Varicella and herpes zoster                                       | 0<br>(0 - 1)             | 0<br>(0 - 0)          | 0<br>(0 - 0)           | 0<br>(0 - 0)            | 0<br>(0 - 0)            | 0<br>(0 - 0)            |
| Neglected tropical diseases and malaria                           | 44<br>(21 - 80)          | 10<br>(2 - 30)        | 4<br>(2 - 9)           | 20<br>(8 - 42)          | 6<br>(3 - 12)           | 4<br>(2 - 6)            |
| Malaria                                                           | 33<br>(11 - 66)          | 8<br>(1 - 29)         | 3<br>(1 - 7)           | 16<br>(5 - 36)          | 4<br>(1 - 9)            | 1<br>(0 - 2)            |
| Leishmaniasis                                                     | 0<br>(0 - 0)             | 0<br>(0 - 0)          | 0<br>(0 - 0)           | 0<br>(0 - 0)            | 0<br>(0 - 0)            | 0<br>(0 - 0)            |
| Visceral leishmaniasis                                            | 0<br>(0 - 0)             | 0<br>(0 - 0)          | 0<br>(0 - 0)           | 0<br>(0 - 0)            | 0<br>(0 - 0)            | 0<br>(0 - 0)            |
| Cysticercosis                                                     | 0<br>(0 - 0)             | 0<br>(0 - 0)          | 0<br>(0 - 0)           | 0<br>(0 - 0)            | 0<br>(0 - 0)            | 0<br>(0 - 0)            |
| Cystic echinococcosis                                             | 0<br>(0 - 0)             | 0<br>(0 - 0)          | 0<br>(0 - 0)           | 0<br>(0 - 0)            | 0<br>(0 - 0)            | 0<br>(0 - 0)            |
| Dengue                                                            | 7<br>(4 - 10)            | 1<br>(0 - 2)          | 1<br>(0 - 1)           | 3<br>(1 - 5)            | 1<br>(1 - 2)            | 2<br>(1 - 2)            |
| Rabies                                                            | 1<br>(0 - 1)             | 0<br>(0 - 0)          | 0<br>(0 - 0)           | 0<br>(0 - 1)            | 0<br>(0 - 0)            | 0<br>(0 - 0)            |
| Intestinal nematode infections                                    | 0<br>(0 - 2)             | 0<br>(0 - 1)          | 0<br>(0 - 0)           | 0<br>(0 - 1)            | 0<br>(0 - 0)            | 0<br>(0 - 0)            |
| Ascariasis                                                        | 0<br>(0 - 2)             | 0<br>(0 - 1)          | 0<br>(0 - 0)           | 0<br>(0 - 1)            | 0<br>(0 - 0)            | 0<br>(0 - 0)            |
| Other neglected tropical diseases                                 | 4<br>(2 - 8)             | 0<br>(0 - 1)          | 0<br>(0 - 1)           | 1<br>(0 - 2)            | 1<br>(0 - 2)            | 2<br>(1 - 3)            |
| Maternal disorders                                                | 32<br>(17 - 59)          | --                    | 0<br>(0 - 0)           | 31<br>(16 - 58)         | --                      | --                      |
| Maternal hemorrhage                                               | 6<br>(3 - 11)            | --                    | 0<br>(0 - 0)           | 6<br>(3 - 11)           | --                      | --                      |



Web Table 31- Solomon Islands deaths with 95% UI by age, sex, and cause in 2013

| Cause                                                            | Both Sexes, All Ages     | Both Sexes, 0-4 Years | Both Sexes, 5-14 Years | Both Sexes, 15-49 Years | Both Sexes, 50-69 Years | Both Sexes, 70-80 Years |
|------------------------------------------------------------------|--------------------------|-----------------------|------------------------|-------------------------|-------------------------|-------------------------|
| Maternal sepsis and other maternal infections                    | 2<br>(1 - 5)             | --                    | 0<br>(0 - 0)           | 2<br>(1 - 5)            | --                      | --                      |
| Maternal hypertensive disorders                                  | 3<br>(1 - 6)             | --                    | 0<br>(0 - 0)           | 3<br>(1 - 6)            | --                      | --                      |
| Maternal obstructed labor                                        | 3<br>(1 - 5)             | --                    | 0<br>(0 - 0)           | 3<br>(1 - 5)            | --                      | --                      |
| Maternal abortive outcome                                        | 5<br>(3 - 10)            | --                    | 0<br>(0 - 0)           | 5<br>(3 - 10)           | --                      | --                      |
| Indirect maternal deaths                                         | 3<br>(1 - 5)             | --                    | 0<br>(0 - 0)           | 3<br>(1 - 5)            | --                      | --                      |
| Late maternal deaths                                             | 4<br>(2 - 8)             | --                    | 0<br>(0 - 0)           | 4<br>(2 - 8)            | --                      | --                      |
| Maternal deaths aggravated by HIV/AIDS                           | 0<br>(0 - 0)             | --                    | --                     | 0<br>(0 - 0)            | --                      | --                      |
| Other maternal disorders                                         | 5<br>(2 - 9)             | --                    | 0<br>(0 - 0)           | 5<br>(2 - 9)            | --                      | --                      |
| Neonatal disorders                                               | 156<br>(88 - 250)        | 156<br>(88 - 250)     | --                     | --                      | --                      | --                      |
| Neonatal preterm birth complications                             | 61<br>(29 - 106)         | 61<br>(29 - 106)      | --                     | --                      | --                      | --                      |
| Neonatal encephalopathy due to birth asphyxia and trauma         | 27<br>(8 - 58)           | 27<br>(8 - 58)        | --                     | --                      | --                      | --                      |
| Neonatal sepsis and other neonatal infections                    | 20<br>(7 - 43)           | 20<br>(7 - 43)        | --                     | --                      | --                      | --                      |
| Hemolytic disease and other neonatal jaundice                    | 1<br>(0 - 3)             | 1<br>(0 - 3)          | --                     | --                      | --                      | --                      |
| Other neonatal disorders                                         | 47<br>(19 - 95)          | 47<br>(19 - 95)       | --                     | --                      | --                      | --                      |
| Nutritional deficiencies                                         | 75<br>(48 - 116)         | 8<br>(3 - 17)         | 3<br>(2 - 5)           | 25<br>(13 - 43)         | 15<br>(8 - 24)          | 24<br>(15 - 35)         |
| Protein-energy malnutrition                                      | 32<br>(18 - 49)          | 8<br>(3 - 16)         | 2<br>(1 - 3)           | 6<br>(2 - 11)           | 6<br>(2 - 11)           | 11<br>(4 - 18)          |
| Iodine deficiency                                                | 0<br>(0 - 1)             | 0<br>(0 - 0)          | 0<br>(0 - 0)           | 0<br>(0 - 1)            | 0<br>(0 - 0)            | 0<br>(0 - 0)            |
| Iron-deficiency anemia                                           | 39<br>(21 - 63)          | 0<br>(0 - 1)          | 1<br>(0 - 2)           | 18<br>(9 - 29)          | 8<br>(4 - 14)           | 12<br>(6 - 20)          |
| Other nutritional deficiencies                                   | 4<br>(2 - 8)             | 0<br>(0 - 0)          | 0<br>(0 - 0)           | 2<br>(1 - 4)            | 1<br>(0 - 2)            | 1<br>(1 - 3)            |
| Other communicable, maternal, neonatal, and nutritional diseases | 94<br>(56 - 145)         | 26<br>(7 - 53)        | 5<br>(3 - 9)           | 34<br>(18 - 61)         | 19<br>(11 - 30)         | 10<br>(6 - 17)          |
| Sexually transmitted diseases excluding HIV                      | 29<br>(10 - 57)          | 21<br>(4 - 45)        | 2<br>(1 - 4)           | 4<br>(2 - 7)            | 1<br>(1 - 4)            | 1<br>(0 - 2)            |
| Syphilis                                                         | 26<br>(7 - 53)           | 21<br>(4 - 45)        | 2<br>(0 - 4)           | 2<br>(1 - 3)            | 1<br>(0 - 2)            | 1<br>(0 - 1)            |
| Chlamydial infection                                             | 1<br>(0 - 2)             | --                    | 0<br>(0 - 0)           | 1<br>(0 - 1)            | 0<br>(0 - 0)            | 0<br>(0 - 0)            |
| Gonococcal infection                                             | 1<br>(1 - 2)             | --                    | 0<br>(0 - 0)           | 1<br>(0 - 1)            | 0<br>(0 - 1)            | 0<br>(0 - 0)            |
| Other sexually transmitted diseases                              | 1<br>(0 - 2)             | --                    | 0<br>(0 - 0)           | 1<br>(0 - 1)            | 0<br>(0 - 0)            | 0<br>(0 - 0)            |
| Hepatitis                                                        | 30<br>(18 - 48)          | 1<br>(0 - 3)          | 1<br>(1 - 3)           | 14<br>(8 - 24)          | 10<br>(6 - 15)          | 4<br>(3 - 6)            |
| Acute hepatitis A                                                | 1<br>(0 - 3)             | 0<br>(0 - 1)          | 0<br>(0 - 1)           | 0<br>(0 - 1)            | 0<br>(0 - 0)            | 0<br>(0 - 0)            |
| Acute hepatitis B                                                | 21<br>(13 - 33)          | 1<br>(0 - 2)          | 1<br>(0 - 2)           | 8<br>(4 - 14)           | 8<br>(5 - 13)           | 3<br>(2 - 5)            |
| Acute hepatitis C                                                | 0<br>(0 - 1)             | --                    | 0<br>(0 - 0)           | 0<br>(0 - 0)            | 0<br>(0 - 0)            | 0<br>(0 - 0)            |
| Acute hepatitis E                                                | 8<br>(4 - 15)            | 0<br>(0 - 0)          | 0<br>(0 - 1)           | 6<br>(2 - 10)           | 2<br>(1 - 3)            | 0<br>(0 - 1)            |
| Other infectious diseases                                        | 35<br>(16 - 69)          | 4<br>(1 - 12)         | 1<br>(1 - 4)           | 17<br>(6 - 37)          | 8<br>(3 - 15)           | 5<br>(2 - 11)           |
| Non-communicable diseases                                        | 2,839<br>(1,945 - 4,165) | 65<br>(34 - 120)      | 29<br>(18 - 40)        | 740<br>(429 - 1,242)    | 1,100<br>(713 - 1,667)  | 905<br>(730 - 1,140)    |
| Neoplasms                                                        | 214<br>(139 - 334)       | 2<br>(1 - 4)          | 3<br>(2 - 4)           | 80<br>(45 - 140)        | 81<br>(52 - 125)        | 47<br>(36 - 61)         |
| Esophageal cancer                                                | 3<br>(2 - 7)             | --                    | --                     | 1<br>(0 - 2)            | 1<br>(1 - 3)            | 1<br>(1 - 2)            |
| Stomach cancer                                                   | 18<br>(12 - 28)          | --                    | --                     | 5<br>(3 - 9)            | 6<br>(5 - 12)           | 6<br>(4 - 7)            |
| Liver cancer                                                     | 6<br>(4 - 10)            | --                    | 0<br>(0 - 0)           | 2<br>(1 - 3)            | 3<br>(2 - 5)            | 1<br>(1 - 2)            |
| Liver cancer due to hepatitis B                                  | 3<br>(2 - 5)             | --                    | 0<br>(0 - 0)           | 1<br>(0 - 2)            | 1<br>(1 - 3)            | 0<br>(0 - 1)            |
| Liver cancer due to hepatitis C                                  | 2<br>(1 - 3)             | --                    | 0<br>(0 - 0)           | 0<br>(0 - 1)            | 1<br>(1 - 2)            | 1<br>(0 - 1)            |
| Liver cancer due to alcohol use                                  | 0<br>(0 - 1)             | --                    | --                     | 0<br>(0 - 0)            | 0<br>(0 - 0)            | 0<br>(0 - 0)            |
| Liver cancer due to other causes                                 | 1<br>(1 - 2)             | --                    | 0<br>(0 - 0)           | 0<br>(0 - 1)            | 1<br>(0 - 1)            | 0<br>(0 - 0)            |

Web Table 31- Solomon Islands deaths with 95% UI by age, sex, and cause in 2013

| Cause                                         | Both Sexes, All Ages   | Both Sexes, 0-4 Years | Both Sexes, 5-14 Years | Both Sexes, 15-49 Years | Both Sexes, 50-69 Years | Both Sexes, 70-80 Years |
|-----------------------------------------------|------------------------|-----------------------|------------------------|-------------------------|-------------------------|-------------------------|
| Larynx cancer                                 | 0<br>(0 - 1)           | --                    | --                     | 0<br>(0 - 0)            | 0<br>(0 - 0)            | 0<br>(0 - 0)            |
| Tracheal, bronchus and lung cancer            | 34<br>(22 - 51)        | --                    | --                     | 10<br>(5 - 17)          | 15<br>(9 - 22)          | 10<br>(7 - 13)          |
| Breast cancer                                 | 51<br>(30 - 85)        | --                    | --                     | 24<br>(12 - 44)         | 20<br>(12 - 32)         | 7<br>(5 - 11)           |
| Cervical cancer                               | 32<br>(18 - 52)        | --                    | --                     | 14<br>(7 - 25)          | 11<br>(7 - 19)          | 7<br>(4 - 10)           |
| Uterine cancer                                | 4<br>(2 - 6)           | --                    | --                     | 1<br>(0 - 2)            | 2<br>(1 - 4)            | 1<br>(0 - 1)            |
| Prostate cancer                               | 4<br>(2 - 8)           | --                    | --                     | 0<br>(0 - 0)            | 1<br>(1 - 3)            | 2<br>(1 - 5)            |
| Colon and rectum cancer                       | 12<br>(8 - 17)         | --                    | --                     | 3<br>(2 - 5)            | 5<br>(3 - 7)            | 4<br>(3 - 5)            |
| Lip and oral cavity cancer                    | 3<br>(2 - 4)           | --                    | --                     | 1<br>(0 - 2)            | 1<br>(0 - 2)            | 1<br>(0 - 1)            |
| Nasopharynx cancer                            | 3<br>(2 - 5)           | --                    | 0<br>(0 - 0)           | 1<br>(1 - 3)            | 1<br>(1 - 2)            | 0<br>(0 - 0)            |
| Other pharynx cancer                          | 2<br>(1 - 3)           | --                    | --                     | 0<br>(0 - 1)            | 1<br>(0 - 1)            | 0<br>(0 - 1)            |
| Gallbladder and biliary tract cancer          | 2<br>(1 - 3)           | --                    | --                     | 0<br>(0 - 1)            | 1<br>(1 - 2)            | 0<br>(0 - 1)            |
| Pancreatic cancer                             | 2<br>(1 - 2)           | --                    | --                     | 0<br>(0 - 1)            | 1<br>(0 - 1)            | 1<br>(0 - 1)            |
| Malignant skin melanoma                       | 1<br>(1 - 2)           | --                    | --                     | 1<br>(0 - 1)            | 0<br>(0 - 1)            | 0<br>(0 - 1)            |
| Non-melanoma skin cancer                      | 2<br>(1 - 3)           | --                    | --                     | 1<br>(0 - 1)            | 1<br>(0 - 1)            | 1<br>(1 - 1)            |
| Ovarian cancer                                | 1<br>(0 - 1)           | --                    | --                     | 0<br>(0 - 1)            | 0<br>(0 - 0)            | 0<br>(0 - 0)            |
| Testicular cancer                             | 0<br>(0 - 1)           | --                    | --                     | 0<br>(0 - 0)            | 0<br>(0 - 0)            | 0<br>(0 - 0)            |
| Kidney cancer                                 | 1<br>(1 - 2)           | 0<br>(0 - 0)          | 0<br>(0 - 0)           | 0<br>(0 - 1)            | 0<br>(0 - 1)            | 0<br>(0 - 0)            |
| Bladder cancer                                | 1<br>(1 - 2)           | --                    | --                     | 0<br>(0 - 0)            | 0<br>(0 - 1)            | 0<br>(0 - 1)            |
| Brain and nervous system cancer               | 1<br>(1 - 2)           | 0<br>(0 - 0)          | 0<br>(0 - 0)           | 1<br>(0 - 1)            | 0<br>(0 - 1)            | 0<br>(0 - 0)            |
| Thyroid cancer                                | 0<br>(0 - 1)           | --                    | 0<br>(0 - 0)           | 0<br>(0 - 0)            | 0<br>(0 - 0)            | 0<br>(0 - 0)            |
| Mesothelioma                                  | 0<br>(0 - 0)           | --                    | --                     | 0<br>(0 - 0)            | 0<br>(0 - 0)            | 0<br>(0 - 0)            |
| Hodgkin lymphoma                              | 1<br>(0 - 1)           | 0<br>(0 - 0)          | 0<br>(0 - 0)           | 0<br>(0 - 1)            | 0<br>(0 - 0)            | 0<br>(0 - 0)            |
| Non-Hodgkin lymphoma                          | 3<br>(2 - 6)           | 0<br>(0 - 0)          | 0<br>(0 - 0)           | 2<br>(1 - 3)            | 1<br>(0 - 2)            | 1<br>(1 - 1)            |
| Multiple myeloma                              | 2<br>(1 - 3)           | --                    | --                     | 0<br>(0 - 1)            | 1<br>(0 - 1)            | 0<br>(0 - 1)            |
| Leukemia                                      | 10<br>(7 - 15)         | 1<br>(0 - 1)          | 1<br>(1 - 2)           | 5<br>(3 - 9)            | 2<br>(1 - 3)            | 1<br>(1 - 2)            |
| Other neoplasms                               | 14<br>(9 - 21)         | 1<br>(0 - 3)          | 1<br>(1 - 2)           | 6<br>(4 - 10)           | 4<br>(2 - 6)            | 2<br>(1 - 3)            |
| Cardiovascular diseases                       | 1,209<br>(805 - 1,807) | 6<br>(2 - 11)         | 7<br>(4 - 12)          | 326<br>(178 - 544)      | 484<br>(307 - 751)      | 386<br>(305 - 501)      |
| Rheumatic heart disease                       | 38<br>(23 - 62)        | 0<br>(0 - 0)          | 2<br>(1 - 4)           | 21<br>(12 - 37)         | 9<br>(5 - 15)           | 5<br>(4 - 8)            |
| Ischemic heart disease                        | 599<br>(403 - 917)     | 1<br>(0 - 3)          | 1<br>(1 - 2)           | 165<br>(90 - 283)       | 258<br>(166 - 412)      | 174<br>(131 - 248)      |
| Cerebrovascular disease                       | 420<br>(276 - 607)     | 2<br>(1 - 3)          | 2<br>(1 - 4)           | 84<br>(44 - 139)        | 162<br>(96 - 246)       | 170<br>(126 - 217)      |
| Ischemic stroke                               | 130<br>(63 - 196)      | 0<br>(0 - 1)          | 0<br>(0 - 1)           | 14<br>(4 - 26)          | 39<br>(17 - 64)         | 78<br>(41 - 109)        |
| Hemorrhagic stroke                            | 289<br>(184 - 434)     | 2<br>(1 - 3)          | 2<br>(1 - 3)           | 71<br>(38 - 119)        | 123<br>(75 - 190)       | 92<br>(60 - 127)        |
| Hypertensive heart disease                    | 26<br>(16 - 42)        | 0<br>(0 - 0)          | 0<br>(0 - 0)           | 5<br>(3 - 10)           | 10<br>(6 - 17)          | 10<br>(6 - 18)          |
| Cardiomyopathy and myocarditis                | 33<br>(17 - 53)        | 1<br>(0 - 3)          | 1<br>(0 - 2)           | 17<br>(7 - 31)          | 10<br>(5 - 17)          | 4<br>(2 - 6)            |
| Atrial fibrillation and flutter               | 1<br>(1 - 2)           | --                    | --                     | 0<br>(0 - 0)            | 0<br>(0 - 1)            | 1<br>(1 - 1)            |
| Aortic aneurysm                               | 6<br>(4 - 10)          | --                    | --                     | 2<br>(1 - 3)            | 2<br>(1 - 4)            | 2<br>(1 - 3)            |
| Peripheral vascular disease                   | 1<br>(1 - 3)           | --                    | --                     | 0<br>(0 - 0)            | 0<br>(0 - 1)            | 1<br>(1 - 2)            |
| Endocarditis                                  | 14<br>(9 - 23)         | 1<br>(0 - 2)          | 0<br>(0 - 0)           | 7<br>(4 - 13)           | 3<br>(2 - 5)            | 3<br>(2 - 5)            |
| Other cardiovascular and circulatory diseases | 69<br>(42 - 112)       | 1<br>(0 - 2)          | 1<br>(0 - 1)           | 24<br>(12 - 42)         | 28<br>(16 - 47)         | 16<br>(11 - 25)         |
| Chronic respiratory diseases                  | 358<br>(255 - 512)     | 3<br>(1 - 5)          | 2<br>(1 - 3)           | 57<br>(31 - 98)         | 126<br>(81 - 192)       | 171<br>(133 - 218)      |

Web Table 31- Solomon Islands deaths with 95% UI by age, sex, and cause in 2013

| Cause                                               | Both Sexes, All Ages | Both Sexes, 0-4 Years | Both Sexes, 5-14 Years | Both Sexes, 15-49 Years | Both Sexes, 50-69 Years | Both Sexes, 70-80 Years |
|-----------------------------------------------------|----------------------|-----------------------|------------------------|-------------------------|-------------------------|-------------------------|
| Chronic obstructive pulmonary disease               | 128<br>(91 - 182)    | 1<br>(0 - 3)          | 0<br>(0 - 1)           | 12<br>(7 - 22)          | 38<br>(23 - 63)         | 76<br>(56 - 100)        |
| Pneumoconiosis                                      | 25<br>(14 - 39)      | 0<br>(0 - 0)          | 0<br>(0 - 0)           | 4<br>(2 - 7)            | 11<br>(6 - 18)          | 10<br>(6 - 16)          |
| Silicosis                                           | 8<br>(4 - 13)        | 0<br>(0 - 0)          | 0<br>(0 - 0)           | 1<br>(0 - 2)            | 3<br>(1 - 6)            | 3<br>(2 - 6)            |
| Asbestosis                                          | 3<br>(1 - 5)         | 0<br>(0 - 0)          | 0<br>(0 - 0)           | 0<br>(0 - 1)            | 1<br>(1 - 3)            | 1<br>(1 - 2)            |
| Coal workers pneumoconiosis                         | 3<br>(2 - 5)         | 0<br>(0 - 0)          | 0<br>(0 - 0)           | 0<br>(0 - 1)            | 1<br>(1 - 3)            | 1<br>(1 - 2)            |
| Other pneumoconiosis                                | 11<br>(6 - 18)       | 0<br>(0 - 0)          | 0<br>(0 - 0)           | 2<br>(1 - 3)            | 5<br>(2 - 8)            | 5<br>(3 - 8)            |
| Asthma                                              | 158<br>(104 - 233)   | 1<br>(0 - 2)          | 1<br>(1 - 2)           | 31<br>(17 - 53)         | 63<br>(38 - 100)        | 61<br>(42 - 86)         |
| Interstitial lung disease and pulmonary sarcoidosis | 21<br>(10 - 43)      | 0<br>(0 - 0)          | 0<br>(0 - 0)           | 3<br>(1 - 5)            | 7<br>(3 - 17)           | 11<br>(5 - 21)          |
| Other chronic respiratory diseases                  | 26<br>(16 - 38)      | 1<br>(0 - 1)          | 0<br>(0 - 1)           | 7<br>(3 - 12)           | 6<br>(3 - 10)           | 12<br>(7 - 19)          |
| Cirrhosis                                           | 70<br>(43 - 110)     | 0<br>(0 - 0)          | 1<br>(1 - 2)           | 37<br>(20 - 61)         | 23<br>(14 - 35)         | 9<br>(6 - 12)           |
| Cirrhosis due to hepatitis B                        | 39<br>(23 - 62)      | 0<br>(0 - 0)          | 1<br>(0 - 1)           | 21<br>(12 - 36)         | 12<br>(7 - 19)          | 4<br>(3 - 6)            |
| Cirrhosis due to hepatitis C                        | 13<br>(7 - 23)       | 0<br>(0 - 0)          | 0<br>(0 - 0)           | 6<br>(3 - 11)           | 5<br>(2 - 8)            | 2<br>(1 - 3)            |
| Cirrhosis due to alcohol use                        | 12<br>(7 - 20)       | -                     | -                      | 5<br>(3 - 10)           | 5<br>(3 - 8)            | 2<br>(1 - 3)            |
| Cirrhosis due to other causes                       | 6<br>(4 - 11)        | 0<br>(0 - 0)          | 1<br>(0 - 1)           | 4<br>(2 - 7)            | 1<br>(1 - 2)            | 0<br>(0 - 1)            |
| Digestive diseases                                  | 230<br>(149 - 361)   | 1<br>(0 - 3)          | 4<br>(3 - 7)           | 82<br>(47 - 143)        | 79<br>(49 - 128)        | 64<br>(46 - 90)         |
| Peptic ulcer disease                                | 58<br>(35 - 100)     | 0<br>(0 - 0)          | 1<br>(0 - 1)           | 19<br>(10 - 34)         | 22<br>(12 - 40)         | 17<br>(11 - 28)         |
| Gastritis and duodenitis                            | 3<br>(1 - 7)         | 0<br>(0 - 0)          | 0<br>(0 - 0)           | 1<br>(0 - 2)            | 1<br>(0 - 3)            | 1<br>(0 - 2)            |
| Appendicitis                                        | 27<br>(15 - 47)      | 0<br>(0 - 0)          | 1<br>(0 - 2)           | 13<br>(6 - 24)          | 8<br>(4 - 14)           | 5<br>(3 - 8)            |
| Paralytic ileus and intestinal obstruction          | 41<br>(22 - 68)      | 1<br>(0 - 2)          | 1<br>(0 - 2)           | 13<br>(6 - 25)          | 13<br>(6 - 22)          | 14<br>(8 - 21)          |
| Inguinal, femoral, and abdominal hernia             | 6<br>(3 - 13)        | 0<br>(0 - 0)          | 0<br>(0 - 0)           | 1<br>(1 - 3)            | 2<br>(1 - 4)            | 2<br>(1 - 5)            |
| Inflammatory bowel disease                          | 5<br>(3 - 9)         | 0<br>(0 - 0)          | 0<br>(0 - 0)           | 2<br>(1 - 4)            | 1<br>(1 - 3)            | 2<br>(1 - 4)            |
| Vascular intestinal disorders                       | 1<br>(0 - 2)         | 0<br>(0 - 0)          | 0<br>(0 - 0)           | 0<br>(0 - 1)            | 0<br>(0 - 0)            | 0<br>(0 - 1)            |
| Gallbladder and biliary diseases                    | 31<br>(20 - 49)      | 0<br>(0 - 0)          | 1<br>(0 - 1)           | 10<br>(5 - 17)          | 10<br>(6 - 18)          | 11<br>(7 - 16)          |
| Pancreatitis                                        | 7<br>(3 - 11)        | 0<br>(0 - 0)          | 0<br>(0 - 0)           | 3<br>(2 - 6)            | 2<br>(1 - 3)            | 1<br>(1 - 2)            |
| Other digestive diseases                            | 51<br>(31 - 84)      | 0<br>(0 - 1)          | 1<br>(1 - 2)           | 19<br>(10 - 35)         | 20<br>(11 - 33)         | 11<br>(7 - 17)          |
| Neurological disorders                              | 52<br>(40 - 69)      | 1<br>(0 - 1)          | 1<br>(0 - 1)           | 6<br>(3 - 11)           | 6<br>(4 - 10)           | 38<br>(30 - 48)         |
| Alzheimer disease and other dementias               | 42<br>(33 - 53)      | -                     | -                      | 0<br>(0 - 0)            | 5<br>(3 - 7)            | 37<br>(29 - 46)         |
| Parkinson disease                                   | 0<br>(0 - 0)         | -                     | -                      | 0<br>(0 - 0)            | 0<br>(0 - 0)            | 0<br>(0 - 0)            |
| Epilepsy                                            | 6<br>(3 - 10)        | 0<br>(0 - 1)          | 1<br>(0 - 1)           | 5<br>(2 - 8)            | 0<br>(0 - 1)            | 0<br>(0 - 0)            |
| Multiple sclerosis                                  | 0<br>(0 - 0)         | -                     | -                      | 0<br>(0 - 0)            | 0<br>(0 - 0)            | 0<br>(0 - 0)            |
| Other neurological disorders                        | 4<br>(3 - 6)         | 0<br>(0 - 1)          | 0<br>(0 - 0)           | 1<br>(1 - 2)            | 1<br>(1 - 2)            | 1<br>(1 - 2)            |
| Mental and substance use disorders                  | 8<br>(4 - 13)        | 0<br>(0 - 0)          | 0<br>(0 - 0)           | 6<br>(3 - 10)           | 2<br>(1 - 3)            | 0<br>(0 - 1)            |
| Schizophrenia                                       | 0<br>(0 - 0)         | -                     | -                      | 0<br>(0 - 0)            | 0<br>(0 - 0)            | 0<br>(0 - 0)            |
| Alcohol use disorders                               | 7<br>(3 - 11)        | -                     | -                      | 5<br>(2 - 8)            | 1<br>(1 - 3)            | 0<br>(0 - 1)            |
| Drug use disorders                                  | 1<br>(1 - 2)         | 0<br>(0 - 0)          | -                      | 1<br>(0 - 1)            | 0<br>(0 - 0)            | 0<br>(0 - 0)            |
| Opioid use disorders                                | 0<br>(0 - 0)         | 0<br>(0 - 0)          | -                      | 0<br>(0 - 0)            | 0<br>(0 - 0)            | 0<br>(0 - 0)            |
| Cocaine use disorders                               | 0<br>(0 - 0)         | 0<br>(0 - 0)          | -                      | 0<br>(0 - 0)            | 0<br>(0 - 0)            | 0<br>(0 - 0)            |
| Amphetamine use disorders                           | 0<br>(0 - 0)         | 0<br>(0 - 0)          | -                      | 0<br>(0 - 0)            | 0<br>(0 - 0)            | 0<br>(0 - 0)            |
| Other drug use disorders                            | 1<br>(0 - 1)         | 0<br>(0 - 0)          | -                      | 0<br>(0 - 1)            | 0<br>(0 - 0)            | 0<br>(0 - 0)            |
| Eating disorders                                    | 0<br>(0 - 0)         | -                     | 0<br>(0 - 0)           | 0<br>(0 - 0)            | -                       | -                       |

Web Table 31- Solomon Islands deaths with 95% UI by age, sex, and cause in 2013

| Cause                                               | Both Sexes, All Ages | Both Sexes, 0-4 Years | Both Sexes, 5-14 Years | Both Sexes, 15-49 Years | Both Sexes, 50-69 Years | Both Sexes, 70-80 Years |
|-----------------------------------------------------|----------------------|-----------------------|------------------------|-------------------------|-------------------------|-------------------------|
| Anorexia nervosa                                    | 0<br>(0 - 0)         | --                    | 0<br>(0 - 0)           | 0<br>(0 - 0)            | --                      | --                      |
| Diabetes, urogenital, blood, and endocrine diseases | 619<br>(420 - 908)   | 5<br>(2 - 11)         | 3<br>(2 - 6)           | 132<br>(76 - 223)       | 295<br>(191 - 440)      | 184<br>(140 - 240)      |
| Diabetes mellitus                                   | 489<br>(327 - 722)   | 1<br>(0 - 1)          | 0<br>(0 - 1)           | 84<br>(47 - 146)        | 250<br>(160 - 372)      | 154<br>(114 - 201)      |
| Acute glomerulonephritis                            | 1<br>(0 - 1)         | 0<br>(0 - 0)          | 0<br>(0 - 0)           | 0<br>(0 - 0)            | 0<br>(0 - 0)            | 0<br>(0 - 0)            |
| Chronic kidney disease                              | 87<br>(53 - 147)     | 1<br>(0 - 2)          | 1<br>(0 - 2)           | 32<br>(18 - 57)         | 33<br>(19 - 58)         | 21<br>(14 - 34)         |
| Chronic kidney disease due to diabetes mellitus     | 11<br>(6 - 19)       | 0<br>(0 - 0)          | 0<br>(0 - 0)           | 3<br>(2 - 7)            | 5<br>(3 - 9)            | 2<br>(1 - 3)            |
| Chronic kidney disease due to hypertension          | 21<br>(12 - 35)      | 0<br>(0 - 0)          | 0<br>(0 - 0)           | 7<br>(3 - 12)           | 8<br>(4 - 14)           | 6<br>(3 - 10)           |
| Chronic kidney disease due to glomerulonephritis    | 8<br>(4 - 13)        | 0<br>(0 - 0)          | 0<br>(0 - 0)           | 3<br>(2 - 6)            | 2<br>(1 - 4)            | 3<br>(1 - 4)            |
| Chronic kidney disease due to other causes          | 47<br>(24 - 95)      | 0<br>(0 - 1)          | 1<br>(0 - 1)           | 18<br>(9 - 37)          | 18<br>(8 - 38)          | 10<br>(6 - 21)          |
| Urinary diseases and male infertility               | 11<br>(7 - 17)       | 0<br>(0 - 1)          | 0<br>(0 - 0)           | 4<br>(2 - 7)            | 3<br>(2 - 6)            | 4<br>(2 - 5)            |
| Interstitial nephritis and urinary tract infections | 5<br>(4 - 9)         | 0<br>(0 - 1)          | 0<br>(0 - 0)           | 2<br>(1 - 3)            | 2<br>(1 - 3)            | 2<br>(1 - 3)            |
| Urolithiasis                                        | 1<br>(0 - 1)         | --                    | 0<br>(0 - 0)           | 0<br>(0 - 1)            | 0<br>(0 - 0)            | 0<br>(0 - 0)            |
| Other urinary diseases                              | 5<br>(3 - 8)         | 0<br>(0 - 0)          | 0<br>(0 - 0)           | 2<br>(1 - 3)            | 2<br>(1 - 3)            | 2<br>(1 - 2)            |
| Gynecological diseases                              | 1<br>(0 - 5)         | --                    | --                     | 1<br>(0 - 4)            | 0<br>(0 - 1)            | 0<br>(0 - 0)            |
| Uterine fibroids                                    | 0<br>(0 - 1)         | --                    | --                     | 0<br>(0 - 1)            | 0<br>(0 - 0)            | 0<br>(0 - 0)            |
| Polycystic ovarian syndrome                         | 0<br>(0 - 0)         | --                    | --                     | 0<br>(0 - 0)            | 0<br>(0 - 0)            | --                      |
| Endometriosis                                       | 0<br>(0 - 1)         | --                    | --                     | 0<br>(0 - 1)            | 0<br>(0 - 0)            | --                      |
| Genital prolapse                                    | 0<br>(0 - 1)         | --                    | --                     | 0<br>(0 - 0)            | 0<br>(0 - 0)            | 0<br>(0 - 0)            |
| Other gynecological diseases                        | 1<br>(0 - 2)         | --                    | --                     | 0<br>(0 - 2)            | 0<br>(0 - 0)            | 0<br>(0 - 0)            |
| Hemoglobinopathies and hemolytic anemias            | 11<br>(7 - 19)       | 2<br>(0 - 5)          | 2<br>(1 - 3)           | 5<br>(3 - 10)           | 1<br>(1 - 2)            | 1<br>(1 - 2)            |
| Thalassemias                                        | 6<br>(3 - 12)        | 1<br>(0 - 4)          | 1<br>(1 - 3)           | 3<br>(2 - 6)            | 0<br>(0 - 0)            | 0<br>(0 - 0)            |
| Sickle cell disorders                               | 0<br>(0 - 0)         | 0<br>(0 - 0)          | 0<br>(0 - 0)           | 0<br>(0 - 0)            | 0<br>(0 - 0)            | 0<br>(0 - 0)            |
| G6PD deficiency                                     | 0<br>(0 - 1)         | 0<br>(0 - 0)          | 0<br>(0 - 0)           | 0<br>(0 - 1)            | 0<br>(0 - 0)            | 0<br>(0 - 0)            |
| Other hemoglobinopathies and hemolytic anemias      | 5<br>(3 - 7)         | 0<br>(0 - 1)          | 0<br>(0 - 0)           | 2<br>(1 - 3)            | 1<br>(1 - 2)            | 1<br>(1 - 2)            |
| Endocrine, metabolic, blood, and immune disorders   | 19<br>(12 - 28)      | 2<br>(1 - 5)          | 0<br>(0 - 1)           | 5<br>(3 - 10)           | 6<br>(4 - 10)           | 5<br>(3 - 6)            |
| Musculoskeletal disorders                           | 4<br>(2 - 6)         | --                    | 0<br>(0 - 0)           | 2<br>(1 - 3)            | 1<br>(1 - 2)            | 1<br>(1 - 1)            |
| Rheumatoid arthritis                                | 1<br>(0 - 1)         | --                    | 0<br>(0 - 0)           | 0<br>(0 - 0)            | 0<br>(0 - 0)            | 0<br>(0 - 0)            |
| Other musculoskeletal disorders                     | 3<br>(2 - 5)         | --                    | 0<br>(0 - 0)           | 1<br>(1 - 2)            | 1<br>(0 - 1)            | 1<br>(0 - 1)            |
| Other non-communicable diseases                     | 76<br>(49 - 119)     | 47<br>(24 - 88)       | 7<br>(4 - 11)          | 13<br>(7 - 22)          | 4<br>(3 - 7)            | 5<br>(3 - 6)            |
| Congenital anomalies                                | 67<br>(42 - 108)     | 46<br>(23 - 87)       | 7<br>(4 - 10)          | 11<br>(6 - 18)          | 2<br>(1 - 3)            | 2<br>(1 - 2)            |
| Neural tube defects                                 | 2<br>(1 - 6)         | 1<br>(0 - 5)          | 0<br>(0 - 0)           | 1<br>(0 - 1)            | 0<br>(0 - 0)            | 0<br>(0 - 0)            |
| Congenital heart anomalies                          | 14<br>(8 - 24)       | 9<br>(4 - 19)         | 2<br>(1 - 3)           | 2<br>(1 - 4)            | 0<br>(0 - 0)            | 0<br>(0 - 0)            |
| Cleft lip and cleft palate                          | 0<br>(0 - 0)         | 0<br>(0 - 0)          | --                     | --                      | --                      | --                      |
| Down syndrome                                       | 4<br>(2 - 8)         | 3<br>(1 - 6)          | 1<br>(0 - 1)           | 1<br>(0 - 2)            | 0<br>(0 - 0)            | 0<br>(0 - 0)            |
| Chromosomal unbalanced rearrangements               | 3<br>(1 - 6)         | 2<br>(1 - 5)          | 0<br>(0 - 0)           | 0<br>(0 - 1)            | 0<br>(0 - 0)            | 0<br>(0 - 0)            |
| Other congenital anomalies                          | 45<br>(27 - 72)      | 31<br>(16 - 59)       | 4<br>(2 - 6)           | 7<br>(4 - 11)           | 2<br>(1 - 3)            | 1<br>(1 - 2)            |
| Skin and subcutaneous diseases                      | 8<br>(5 - 13)        | 0<br>(0 - 1)          | 0<br>(0 - 0)           | 3<br>(1 - 5)            | 2<br>(1 - 4)            | 3<br>(2 - 4)            |
| Cellulitis                                          | 2<br>(1 - 3)         | 0<br>(0 - 0)          | 0<br>(0 - 0)           | 1<br>(0 - 1)            | 0<br>(0 - 1)            | 1<br>(0 - 1)            |
| Pyoderma                                            | 4<br>(3 - 7)         | 0<br>(0 - 0)          | 0<br>(0 - 0)           | 2<br>(1 - 3)            | 1<br>(1 - 2)            | 1<br>(1 - 2)            |
| Decubitus ulcer                                     | 2<br>(1 - 3)         | 0<br>(0 - 0)          | 0<br>(0 - 0)           | 0<br>(0 - 1)            | 0<br>(0 - 1)            | 1<br>(1 - 2)            |

Web Table 31- Solomon Islands deaths with 95% UI by age, sex, and cause in 2013

| Cause                                           | Both Sexes, All Ages | Both Sexes, 0-4 Years | Both Sexes, 5-14 Years | Both Sexes, 15-49 Years | Both Sexes, 50-69 Years | Both Sexes, 70-80 Years |
|-------------------------------------------------|----------------------|-----------------------|------------------------|-------------------------|-------------------------|-------------------------|
| Other skin and subcutaneous diseases            | 0<br>(0 - 0)         | 0<br>(0 - 0)          | 0<br>(0 - 0)           | 0<br>(0 - 0)            | 0<br>(0 - 0)            | 0<br>(0 - 0)            |
| Sudden infant death syndrome                    | 1<br>(0 - 2)         | 1<br>(0 - 2)          | --                     | --                      | --                      | --                      |
| Injuries                                        | 273<br>(179 - 424)   | 12<br>(5 - 22)        | 14<br>(9 - 20)         | 185<br>(112 - 304)      | 38<br>(24 - 58)         | 24<br>(16 - 32)         |
| Transport injuries                              | 82<br>(53 - 129)     | 2<br>(1 - 4)          | 5<br>(3 - 8)           | 57<br>(35 - 94)         | 12<br>(8 - 19)          | 6<br>(5 - 8)            |
| Road injuries                                   | 74<br>(47 - 116)     | 2<br>(1 - 3)          | 5<br>(3 - 7)           | 51<br>(31 - 86)         | 11<br>(7 - 17)          | 5<br>(4 - 7)            |
| Pedestrian road injuries                        | 14<br>(8 - 23)       | 0<br>(0 - 1)          | 1<br>(1 - 2)           | 9<br>(5 - 15)           | 2<br>(1 - 4)            | 1<br>(1 - 2)            |
| Cyclist road injuries                           | 3<br>(2 - 5)         | 0<br>(0 - 0)          | 0<br>(0 - 0)           | 2<br>(1 - 3)            | 1<br>(0 - 1)            | 0<br>(0 - 0)            |
| Motorcyclist road injuries                      | 14<br>(8 - 23)       | 0<br>(0 - 0)          | 1<br>(0 - 1)           | 11<br>(6 - 19)          | 1<br>(1 - 2)            | 1<br>(0 - 1)            |
| Motor vehicle road injuries                     | 41<br>(26 - 67)      | 1<br>(0 - 2)          | 3<br>(1 - 4)           | 29<br>(17 - 50)         | 6<br>(4 - 10)           | 3<br>(2 - 4)            |
| Other road injuries                             | 2<br>(1 - 3)         | 0<br>(0 - 0)          | 0<br>(0 - 1)           | 1<br>(1 - 2)            | 0<br>(0 - 1)            | 0<br>(0 - 0)            |
| Other transport injuries                        | 9<br>(4 - 15)        | 0<br>(0 - 1)          | 0<br>(0 - 1)           | 6<br>(3 - 10)           | 2<br>(1 - 3)            | 1<br>(0 - 1)            |
| Unintentional injuries                          | 90<br>(57 - 139)     | 8<br>(3 - 17)         | 6<br>(4 - 9)           | 48<br>(26 - 82)         | 14<br>(8 - 22)          | 13<br>(8 - 19)          |
| Falls                                           | 7<br>(3 - 12)        | 0<br>(0 - 1)          | 0<br>(0 - 1)           | 3<br>(1 - 6)            | 1<br>(1 - 2)            | 2<br>(1 - 4)            |
| Drowning                                        | 21<br>(12 - 34)      | 3<br>(1 - 7)          | 3<br>(1 - 5)           | 12<br>(6 - 21)          | 2<br>(1 - 4)            | 1<br>(1 - 2)            |
| Fire, heat, and hot substances                  | 7<br>(4 - 12)        | 1<br>(0 - 2)          | 1<br>(0 - 1)           | 4<br>(2 - 7)            | 1<br>(1 - 2)            | 1<br>(1 - 1)            |
| Poisonings                                      | 4<br>(2 - 6)         | 0<br>(0 - 0)          | 0<br>(0 - 0)           | 2<br>(1 - 4)            | 1<br>(0 - 1)            | 1<br>(0 - 2)            |
| Exposure to mechanical forces                   | 9<br>(6 - 15)        | 1<br>(0 - 2)          | 1<br>(0 - 1)           | 6<br>(3 - 9)            | 2<br>(1 - 3)            | 1<br>(0 - 1)            |
| Unintentional firearm injuries                  | 1<br>(1 - 1)         | 0<br>(0 - 0)          | 0<br>(0 - 0)           | 0<br>(0 - 1)            | 0<br>(0 - 0)            | 0<br>(0 - 0)            |
| Unintentional suffocation                       | 2<br>(1 - 4)         | 0<br>(0 - 1)          | 0<br>(0 - 0)           | 2<br>(0 - 3)            | 0<br>(0 - 0)            | 0<br>(0 - 0)            |
| Other exposure to mechanical forces             | 6<br>(4 - 11)        | 1<br>(0 - 2)          | 0<br>(0 - 1)           | 4<br>(2 - 6)            | 1<br>(1 - 2)            | 1<br>(0 - 1)            |
| Adverse effects of medical treatment            | 19<br>(9 - 34)       | 2<br>(0 - 5)          | 0<br>(0 - 1)           | 8<br>(3 - 18)           | 4<br>(2 - 7)            | 5<br>(2 - 8)            |
| Animal contact                                  | 3<br>(1 - 4)         | 0<br>(0 - 1)          | 0<br>(0 - 0)           | 1<br>(1 - 2)            | 0<br>(0 - 1)            | 1<br>(0 - 1)            |
| Venomous animal contact                         | 1<br>(0 - 2)         | 0<br>(0 - 0)          | 0<br>(0 - 0)           | 0<br>(0 - 1)            | 0<br>(0 - 0)            | 0<br>(0 - 0)            |
| Non-venomous animal contact                     | 2<br>(1 - 3)         | 0<br>(0 - 0)          | 0<br>(0 - 0)           | 1<br>(0 - 2)            | 0<br>(0 - 0)            | 0<br>(0 - 1)            |
| Foreign body                                    | 6<br>(3 - 10)        | 1<br>(1 - 3)          | 0<br>(0 - 1)           | 2<br>(1 - 3)            | 1<br>(1 - 2)            | 1<br>(1 - 2)            |
| Pulmonary aspiration and foreign body in airway | 5<br>(3 - 9)         | 1<br>(0 - 3)          | 0<br>(0 - 1)           | 1<br>(1 - 3)            | 1<br>(0 - 2)            | 1<br>(1 - 2)            |
| Foreign body in other body part                 | 1<br>(0 - 1)         | 0<br>(0 - 0)          | 0<br>(0 - 0)           | 0<br>(0 - 0)            | 0<br>(0 - 0)            | 0<br>(0 - 0)            |
| Other unintentional injuries                    | 13<br>(8 - 21)       | 0<br>(0 - 1)          | 1<br>(0 - 1)           | 10<br>(6 - 16)          | 2<br>(1 - 3)            | 1<br>(1 - 1)            |
| Self-harm and interpersonal violence            | 94<br>(55 - 150)     | 0<br>(0 - 1)          | 2<br>(1 - 4)           | 77<br>(45 - 126)        | 10<br>(6 - 16)          | 4<br>(2 - 6)            |
| Self-harm                                       | 56<br>(33 - 91)      | --                    | 1<br>(1 - 3)           | 44<br>(25 - 74)         | 7<br>(4 - 12)           | 4<br>(2 - 6)            |
| Interpersonal violence                          | 37<br>(21 - 63)      | 0<br>(0 - 1)          | 1<br>(0 - 1)           | 33<br>(18 - 57)         | 3<br>(1 - 5)            | 0<br>(0 - 1)            |
| Assault by firearm                              | 14<br>(7 - 27)       | 0<br>(0 - 0)          | 0<br>(0 - 0)           | 13<br>(6 - 25)          | 1<br>(0 - 2)            | 0<br>(0 - 0)            |
| Assault by sharp object                         | 14<br>(7 - 24)       | 0<br>(0 - 0)          | 0<br>(0 - 0)           | 13<br>(6 - 23)          | 1<br>(0 - 1)            | 0<br>(0 - 0)            |
| Assault by other means                          | 9<br>(5 - 16)        | 0<br>(0 - 0)          | 0<br>(0 - 1)           | 8<br>(4 - 14)           | 1<br>(0 - 2)            | 0<br>(0 - 0)            |
| Forces of nature, war, and legal intervention   | 7<br>(5 - 11)        | 1<br>(1 - 1)          | 0<br>(0 - 1)           | 3<br>(2 - 6)            | 2<br>(1 - 3)            | 0<br>(0 - 1)            |
| Exposure to forces of nature                    | 7<br>(5 - 11)        | 1<br>(1 - 1)          | 0<br>(0 - 1)           | 3<br>(2 - 6)            | 2<br>(1 - 3)            | 0<br>(0 - 1)            |

Web Table 31- Solomon Islands deaths with 95% UI by age, sex, and cause in 2013

| Cause                                                             | Males, All Ages          | Males, 0-4 Years   | Males, 5-14 Years | Males, 15-49 Years   | Males, 50-69 Years   | Males, 70-80 Years |
|-------------------------------------------------------------------|--------------------------|--------------------|-------------------|----------------------|----------------------|--------------------|
| All causes                                                        | 2,288<br>(1,657 - 3,199) | 213<br>(129 - 338) | 46<br>(33 - 61)   | 699<br>(413 - 1,131) | 738<br>(493 - 1,114) | 593<br>(506 - 714) |
| Communicable, maternal, neonatal, and nutritional diseases        | 498<br>(362 - 665)       | 165<br>(99 - 261)  | 20<br>(13 - 30)   | 123<br>(69 - 202)    | 92<br>(58 - 141)     | 98<br>(75 - 128)   |
| HIV/AIDS and tuberculosis                                         | 55<br>(36 - 81)          | 1<br>(0 - 1)       | 1<br>(1 - 1)      | 23<br>(14 - 36)      | 18<br>(11 - 28)      | 12<br>(7 - 18)     |
| Tuberculosis                                                      | 51<br>(32 - 77)          | 0<br>(0 - 1)       | 1<br>(0 - 1)      | 20<br>(11 - 34)      | 18<br>(11 - 28)      | 12<br>(7 - 18)     |
| HIV/AIDS                                                          | 4<br>(3 - 5)             | 0<br>(0 - 0)       | 0<br>(0 - 0)      | 3<br>(2 - 4)         | 1<br>(0 - 1)         | 0<br>(0 - 0)       |
| HIV/AIDS resulting in mycobacterial infection                     | 0<br>(0 - 0)             | 0<br>(0 - 0)       | 0<br>(0 - 0)      | 0<br>(0 - 0)         | 0<br>(0 - 0)         | 0<br>(0 - 0)       |
| HIV/AIDS resulting in other diseases                              | 4<br>(3 - 5)             | 0<br>(0 - 0)       | 0<br>(0 - 0)      | 3<br>(2 - 3)         | 1<br>(0 - 1)         | 0<br>(0 - 0)       |
| Diarrhea, lower respiratory, and other common infectious diseases | 247<br>(181 - 338)       | 54<br>(27 - 100)   | 12<br>(7 - 21)    | 56<br>(33 - 96)      | 53<br>(33 - 84)      | 71<br>(51 - 97)    |
| Diarrheal diseases                                                | 76<br>(41 - 121)         | 14<br>(5 - 29)     | 3<br>(1 - 6)      | 13<br>(5 - 26)       | 16<br>(7 - 33)       | 30<br>(14 - 53)    |
| Intestinal infectious diseases                                    | 6<br>(2 - 11)            | 2<br>(1 - 5)       | 2<br>(1 - 3)      | 1<br>(0 - 4)         | 0<br>(0 - 1)         | 0<br>(0 - 0)       |
| Typhoid fever                                                     | 4<br>(2 - 8)             | 1<br>(0 - 3)       | 1<br>(1 - 3)      | 1<br>(0 - 2)         | 0<br>(0 - 0)         | 0<br>(0 - 0)       |
| Paratyphoid fever                                                 | 1<br>(0 - 2)             | 0<br>(0 - 1)       | 0<br>(0 - 1)      | 0<br>(0 - 0)         | 0<br>(0 - 0)         | 0<br>(0 - 0)       |
| Other intestinal infectious diseases                              | 1<br>(0 - 4)             | 0<br>(0 - 2)       | 0<br>(0 - 1)      | 0<br>(0 - 2)         | 0<br>(0 - 1)         | 0<br>(0 - 0)       |
| Lower respiratory infections                                      | 127<br>(88 - 182)        | 22<br>(10 - 46)    | 3<br>(1 - 5)      | 30<br>(17 - 53)      | 33<br>(20 - 53)      | 39<br>(27 - 56)    |
| Upper respiratory infections                                      | 0<br>(0 - 0)             | 0<br>(0 - 0)       | 0<br>(0 - 0)      | 0<br>(0 - 0)         | 0<br>(0 - 0)         | 0<br>(0 - 0)       |
| Otitis media                                                      | 0<br>(0 - 1)             | 0<br>(0 - 0)       | 0<br>(0 - 0)      | 0<br>(0 - 0)         | 0<br>(0 - 0)         | 0<br>(0 - 0)       |
| Meningitis                                                        | 20<br>(13 - 31)          | 4<br>(1 - 8)       | 2<br>(1 - 3)      | 9<br>(5 - 17)        | 3<br>(2 - 6)         | 1<br>(1 - 2)       |
| Pneumococcal meningitis                                           | 8<br>(4 - 12)            | 1<br>(0 - 3)       | 1<br>(0 - 1)      | 4<br>(2 - 7)         | 1<br>(1 - 2)         | 1<br>(0 - 1)       |
| H influenzae type B meningitis                                    | 2<br>(1 - 3)             | 1<br>(0 - 2)       | 0<br>(0 - 1)      | 1<br>(0 - 1)         | 0<br>(0 - 0)         | 0<br>(0 - 0)       |
| Meningococcal meningitis                                          | 4<br>(2 - 6)             | 1<br>(0 - 2)       | 0<br>(0 - 1)      | 2<br>(1 - 4)         | 1<br>(0 - 1)         | 0<br>(0 - 1)       |
| Other meningitis                                                  | 6<br>(4 - 10)            | 1<br>(0 - 3)       | 1<br>(0 - 1)      | 3<br>(1 - 6)         | 1<br>(0 - 2)         | 0<br>(0 - 1)       |
| Encephalitis                                                      | 2<br>(1 - 3)             | 0<br>(0 - 1)       | 0<br>(0 - 0)      | 1<br>(0 - 2)         | 0<br>(0 - 1)         | 0<br>(0 - 0)       |
| Diphtheria                                                        | 0<br>(0 - 0)             | 0<br>(0 - 0)       | 0<br>(0 - 0)      | 0<br>(0 - 0)         | 0<br>(0 - 0)         | --                 |
| Whooping cough                                                    | 2<br>(0 - 7)             | 1<br>(0 - 7)       | 0<br>(0 - 1)      | 0<br>(0 - 0)         | 0<br>(0 - 0)         | --                 |
| Tetanus                                                           | 0<br>(0 - 1)             | 0<br>(0 - 0)       | 0<br>(0 - 0)      | 0<br>(0 - 0)         | 0<br>(0 - 0)         | 0<br>(0 - 0)       |
| Measles                                                           | 13<br>(0 - 67)           | 10<br>(0 - 53)     | 2<br>(0 - 13)     | 0<br>(0 - 2)         | 0<br>(0 - 0)         | --                 |
| Varicella and herpes zoster                                       | 0<br>(0 - 0)             | 0<br>(0 - 0)       | 0<br>(0 - 0)      | 0<br>(0 - 0)         | 0<br>(0 - 0)         | 0<br>(0 - 0)       |
| Neglected tropical diseases and malaria                           | 24<br>(9 - 48)           | 4<br>(0 - 13)      | 2<br>(1 - 6)      | 12<br>(4 - 29)       | 4<br>(1 - 8)         | 2<br>(1 - 3)       |
| Malaria                                                           | 19<br>(4 - 42)           | 3<br>(0 - 12)      | 2<br>(0 - 5)      | 10<br>(2 - 26)       | 3<br>(1 - 7)         | 1<br>(0 - 1)       |
| Leishmaniasis                                                     | 0<br>(0 - 0)             | 0<br>(0 - 0)       | 0<br>(0 - 0)      | 0<br>(0 - 0)         | 0<br>(0 - 0)         | 0<br>(0 - 0)       |
| Visceral leishmaniasis                                            | 0<br>(0 - 0)             | 0<br>(0 - 0)       | 0<br>(0 - 0)      | 0<br>(0 - 0)         | 0<br>(0 - 0)         | 0<br>(0 - 0)       |
| Cysticercosis                                                     | 0<br>(0 - 0)             | 0<br>(0 - 0)       | 0<br>(0 - 0)      | 0<br>(0 - 0)         | 0<br>(0 - 0)         | 0<br>(0 - 0)       |
| Cystic echinococcosis                                             | 0<br>(0 - 0)             | 0<br>(0 - 0)       | 0<br>(0 - 0)      | 0<br>(0 - 0)         | 0<br>(0 - 0)         | 0<br>(0 - 0)       |
| Dengue                                                            | 3<br>(2 - 6)             | 0<br>(0 - 1)       | 0<br>(0 - 1)      | 1<br>(1 - 3)         | 1<br>(0 - 1)         | 1<br>(0 - 1)       |
| Rabies                                                            | 0<br>(0 - 0)             | 0<br>(0 - 0)       | 0<br>(0 - 0)      | 0<br>(0 - 0)         | 0<br>(0 - 0)         | 0<br>(0 - 0)       |
| Intestinal nematode infections                                    | 0<br>(0 - 1)             | 0<br>(0 - 1)       | 0<br>(0 - 0)      | 0<br>(0 - 0)         | 0<br>(0 - 0)         | 0<br>(0 - 0)       |
| Ascariasis                                                        | 0<br>(0 - 1)             | 0<br>(0 - 1)       | 0<br>(0 - 0)      | 0<br>(0 - 0)         | 0<br>(0 - 0)         | 0<br>(0 - 0)       |
| Other neglected tropical diseases                                 | 2<br>(1 - 4)             | 0<br>(0 - 0)       | 0<br>(0 - 1)      | 1<br>(0 - 1)         | 0<br>(0 - 1)         | 1<br>(0 - 1)       |
| Maternal disorders                                                | --                       | --                 | --                | --                   | --                   | --                 |
| Maternal hemorrhage                                               | --                       | --                 | --                | --                   | --                   | --                 |

Web Table 31- Solomon Islands deaths with 95% UI by age, sex, and cause in 2013

| Cause                                                            | Males, All Ages          | Males, 0-4 Years | Males, 5-14 Years | Males, 15-49 Years | Males, 50-69 Years | Males, 70-80 Years |
|------------------------------------------------------------------|--------------------------|------------------|-------------------|--------------------|--------------------|--------------------|
| Maternal sepsis and other maternal infections                    | --                       | --               | --                | --                 | --                 | --                 |
| Maternal hypertensive disorders                                  | --                       | --               | --                | --                 | --                 | --                 |
| Maternal obstructed labor                                        | --                       | --               | --                | --                 | --                 | --                 |
| Maternal abortive outcome                                        | --                       | --               | --                | --                 | --                 | --                 |
| Indirect maternal deaths                                         | --                       | --               | --                | --                 | --                 | --                 |
| Late maternal deaths                                             | --                       | --               | --                | --                 | --                 | --                 |
| Maternal deaths aggravated by HIV/AIDS                           | --                       | --               | --                | --                 | --                 | --                 |
| Other maternal disorders                                         | --                       | --               | --                | --                 | --                 | --                 |
| Neonatal disorders                                               | 89<br>(49 - 141)         | 89<br>(49 - 141) | --                | --                 | --                 | --                 |
| Neonatal preterm birth complications                             | 31<br>(12 - 58)          | 31<br>(12 - 58)  | --                | --                 | --                 | --                 |
| Neonatal encephalopathy due to birth asphyxia and trauma         | 18<br>(5 - 44)           | 18<br>(5 - 44)   | --                | --                 | --                 | --                 |
| Neonatal sepsis and other neonatal infections                    | 12<br>(3 - 32)           | 12<br>(3 - 32)   | --                | --                 | --                 | --                 |
| Hemolytic disease and other neonatal jaundice                    | 1<br>(0 - 2)             | 1<br>(0 - 2)     | --                | --                 | --                 | --                 |
| Other neonatal disorders                                         | 26<br>(9 - 58)           | 26<br>(9 - 58)   | --                | --                 | --                 | --                 |
| Nutritional deficiencies                                         | 33<br>(19 - 58)          | 5<br>(2 - 11)    | 2<br>(1 - 3)      | 10<br>(5 - 19)     | 8<br>(4 - 15)      | 8<br>(5 - 16)      |
| Protein-energy malnutrition                                      | 17<br>(9 - 31)           | 5<br>(2 - 11)    | 1<br>(0 - 2)      | 4<br>(1 - 8)       | 4<br>(1 - 8)       | 3<br>(1 - 7)       |
| Iodine deficiency                                                | 0<br>(0 - 1)             | 0<br>(0 - 0)     | 0<br>(0 - 0)      | 0<br>(0 - 0)       | 0<br>(0 - 0)       | 0<br>(0 - 0)       |
| Iron-deficiency anemia                                           | 13<br>(6 - 28)           | 0<br>(0 - 1)     | 0<br>(0 - 1)      | 5<br>(2 - 10)      | 3<br>(1 - 8)       | 4<br>(2 - 9)       |
| Other nutritional deficiencies                                   | 3<br>(1 - 6)             | 0<br>(0 - 0)     | 0<br>(0 - 0)      | 1<br>(0 - 2)       | 0<br>(0 - 1)       | 1<br>(0 - 2)       |
| Other communicable, maternal, neonatal, and nutritional diseases | 51<br>(30 - 79)          | 13<br>(4 - 27)   | 3<br>(2 - 5)      | 21<br>(11 - 38)    | 9<br>(5 - 15)      | 5<br>(3 - 8)       |
| Sexually transmitted diseases excluding HIV                      | 12<br>(3 - 26)           | 11<br>(2 - 24)   | 1<br>(0 - 2)      | 0<br>(0 - 1)       | 0<br>(0 - 0)       | 0<br>(0 - 1)       |
| Syphilis                                                         | 12<br>(3 - 26)           | 11<br>(2 - 24)   | 1<br>(0 - 2)      | 0<br>(0 - 0)       | 0<br>(0 - 0)       | 0<br>(0 - 0)       |
| Chlamydial infection                                             | --                       | --               | --                | --                 | --                 | --                 |
| Gonococcal infection                                             | 0<br>(0 - 0)             | --               | 0<br>(0 - 0)      | 0<br>(0 - 0)       | 0<br>(0 - 0)       | 0<br>(0 - 0)       |
| Other sexually transmitted diseases                              | 0<br>(0 - 0)             | --               | 0<br>(0 - 0)      | 0<br>(0 - 0)       | 0<br>(0 - 0)       | 0<br>(0 - 0)       |
| Hepatitis                                                        | 20<br>(12 - 32)          | 1<br>(0 - 2)     | 1<br>(1 - 2)      | 11<br>(6 - 19)     | 5<br>(3 - 9)       | 2<br>(1 - 4)       |
| Acute hepatitis A                                                | 1<br>(0 - 2)             | 0<br>(0 - 0)     | 0<br>(0 - 1)      | 0<br>(0 - 1)       | 0<br>(0 - 0)       | 0<br>(0 - 0)       |
| Acute hepatitis B                                                | 14<br>(8 - 23)           | 0<br>(0 - 1)     | 1<br>(0 - 1)      | 7<br>(3 - 12)      | 4<br>(2 - 7)       | 2<br>(1 - 3)       |
| Acute hepatitis C                                                | 0<br>(0 - 1)             | --               | 0<br>(0 - 0)      | 0<br>(0 - 0)       | 0<br>(0 - 0)       | 0<br>(0 - 0)       |
| Acute hepatitis E                                                | 5<br>(2 - 9)             | 0<br>(0 - 0)     | 0<br>(0 - 1)      | 4<br>(1 - 7)       | 1<br>(0 - 2)       | 0<br>(0 - 0)       |
| Other infectious diseases                                        | 19<br>(8 - 40)           | 2<br>(0 - 8)     | 1<br>(0 - 2)      | 10<br>(4 - 23)     | 3<br>(1 - 8)       | 2<br>(1 - 6)       |
| Non-communicable diseases                                        | 1,595<br>(1,126 - 2,281) | 41<br>(21 - 77)  | 16<br>(10 - 23)   | 435<br>(256 - 707) | 622<br>(414 - 933) | 481<br>(407 - 583) |
| Neoplasms                                                        | 80<br>(55 - 117)         | 2<br>(0 - 3)     | 2<br>(1 - 3)      | 27<br>(16 - 44)    | 30<br>(20 - 46)    | 19<br>(15 - 25)    |
| Esophageal cancer                                                | 2<br>(1 - 5)             | --               | --                | 0<br>(0 - 1)       | 1<br>(0 - 2)       | 1<br>(0 - 1)       |
| Stomach cancer                                                   | 11<br>(7 - 16)           | --               | --                | 3<br>(2 - 5)       | 5<br>(3 - 7)       | 3<br>(2 - 4)       |
| Liver cancer                                                     | 1<br>(1 - 2)             | --               | 0<br>(0 - 0)      | 1<br>(0 - 1)       | 1<br>(0 - 1)       | 0<br>(0 - 0)       |
| Liver cancer due to hepatitis B                                  | 1<br>(0 - 1)             | --               | 0<br>(0 - 0)      | 0<br>(0 - 1)       | 0<br>(0 - 1)       | 0<br>(0 - 0)       |
| Liver cancer due to hepatitis C                                  | 0<br>(0 - 1)             | --               | 0<br>(0 - 0)      | 0<br>(0 - 0)       | 0<br>(0 - 0)       | 0<br>(0 - 0)       |
| Liver cancer due to alcohol use                                  | 0<br>(0 - 0)             | --               | --                | 0<br>(0 - 0)       | 0<br>(0 - 0)       | 0<br>(0 - 0)       |
| Liver cancer due to other causes                                 | 0<br>(0 - 0)             | --               | 0<br>(0 - 0)      | 0<br>(0 - 0)       | 0<br>(0 - 0)       | 0<br>(0 - 0)       |

Web Table 31- Solomon Islands deaths with 95% UI by age, sex, and cause in 2013

| Cause                                         | Males, All Ages      | Males, 0-4 Years | Males, 5-14 Years | Males, 15-49 Years | Males, 50-69 Years | Males, 70-80 Years |
|-----------------------------------------------|----------------------|------------------|-------------------|--------------------|--------------------|--------------------|
| Larynx cancer                                 | 0<br>(0 - 1)         | --               | --                | 0<br>(0 - 0)       | 0<br>(0 - 0)       | 0<br>(0 - 0)       |
| Tracheal, bronchus and lung cancer            | 24<br>(16 - 35)      | --               | --                | 8<br>(4 - 13)      | 11<br>(7 - 17)     | 5<br>(4 - 7)       |
| Breast cancer                                 | 0<br>(0 - 1)         | --               | --                | 0<br>(0 - 0)       | 0<br>(0 - 0)       | 0<br>(0 - 0)       |
| Cervical cancer                               | --                   | --               | --                | --                 | --                 | --                 |
| Uterine cancer                                | --                   | --               | --                | --                 | --                 | --                 |
| Prostate cancer                               | 4<br>(2 - 8)         | --               | --                | 0<br>(0 - 0)       | 1<br>(1 - 3)       | 2<br>(1 - 5)       |
| Colon and rectum cancer                       | 7<br>(5 - 11)        | --               | --                | 2<br>(1 - 3)       | 3<br>(2 - 5)       | 2<br>(2 - 3)       |
| Lip and oral cavity cancer                    | 2<br>(1 - 4)         | --               | --                | 1<br>(0 - 2)       | 1<br>(0 - 2)       | 1<br>(0 - 1)       |
| Nasopharynx cancer                            | 2<br>(1 - 3)         | --               | 0<br>(0 - 0)      | 1<br>(0 - 1)       | 1<br>(0 - 1)       | 0<br>(0 - 0)       |
| Other pharynx cancer                          | 1<br>(1 - 2)         | --               | --                | 0<br>(0 - 1)       | 1<br>(0 - 1)       | 0<br>(0 - 1)       |
| Gallbladder and biliary tract cancer          | 1<br>(1 - 2)         | --               | --                | 0<br>(0 - 0)       | 1<br>(0 - 1)       | 0<br>(0 - 0)       |
| Pancreatic cancer                             | 1<br>(1 - 1)         | --               | --                | 0<br>(0 - 0)       | 0<br>(0 - 1)       | 0<br>(0 - 0)       |
| Malignant skin melanoma                       | 1<br>(0 - 2)         | --               | --                | 0<br>(0 - 1)       | 0<br>(0 - 1)       | 0<br>(0 - 0)       |
| Non-melanoma skin cancer                      | 1<br>(1 - 2)         | --               | --                | 0<br>(0 - 0)       | 0<br>(0 - 1)       | 0<br>(0 - 1)       |
| Ovarian cancer                                | --                   | --               | --                | --                 | --                 | --                 |
| Testicular cancer                             | 0<br>(0 - 1)         | --               | --                | 0<br>(0 - 0)       | 0<br>(0 - 0)       | 0<br>(0 - 0)       |
| Kidney cancer                                 | 1<br>(1 - 1)         | 0<br>(0 - 0)     | 0<br>(0 - 0)      | 0<br>(0 - 1)       | 0<br>(0 - 0)       | 0<br>(0 - 0)       |
| Bladder cancer                                | 1<br>(0 - 1)         | --               | --                | 0<br>(0 - 0)       | 0<br>(0 - 1)       | 0<br>(0 - 1)       |
| Brain and nervous system cancer               | 1<br>(1 - 2)         | 0<br>(0 - 0)     | 0<br>(0 - 0)      | 1<br>(0 - 1)       | 0<br>(0 - 1)       | 0<br>(0 - 0)       |
| Thyroid cancer                                | 0<br>(0 - 0)         | --               | 0<br>(0 - 0)      | 0<br>(0 - 0)       | 0<br>(0 - 0)       | 0<br>(0 - 0)       |
| Mesothelioma                                  | 0<br>(0 - 0)         | --               | --                | 0<br>(0 - 0)       | 0<br>(0 - 0)       | 0<br>(0 - 0)       |
| Hodgkin lymphoma                              | 0<br>(0 - 0)         | 0<br>(0 - 0)     | 0<br>(0 - 0)      | 0<br>(0 - 0)       | 0<br>(0 - 0)       | 0<br>(0 - 0)       |
| Non-Hodgkin lymphoma                          | 1<br>(1 - 2)         | 0<br>(0 - 0)     | 0<br>(0 - 0)      | 0<br>(0 - 1)       | 0<br>(0 - 1)       | 0<br>(0 - 0)       |
| Multiple myeloma                              | 1<br>(0 - 2)         | --               | --                | 0<br>(0 - 1)       | 0<br>(0 - 1)       | 0<br>(0 - 0)       |
| Leukemia                                      | 5<br>(4 - 8)         | 0<br>(0 - 1)     | 1<br>(0 - 1)      | 3<br>(2 - 5)       | 1<br>(1 - 2)       | 0<br>(0 - 1)       |
| Other neoplasms                               | 10<br>(6 - 14)       | 1<br>(0 - 2)     | 1<br>(0 - 1)      | 4<br>(3 - 7)       | 2<br>(1 - 4)       | 1<br>(1 - 2)       |
| Cardiovascular diseases                       | 733<br>(486 - 1,086) | 3<br>(2 - 7)     | 3<br>(2 - 5)      | 222<br>(128 - 362) | 307<br>(192 - 469) | 198<br>(161 - 245) |
| Rheumatic heart disease                       | 17<br>(10 - 28)      | 0<br>(0 - 0)     | 1<br>(0 - 2)      | 8<br>(5 - 15)      | 5<br>(3 - 8)       | 3<br>(2 - 4)       |
| Ischemic heart disease                        | 391<br>(257 - 592)   | 1<br>(0 - 2)     | 0<br>(0 - 0)      | 127<br>(71 - 212)  | 178<br>(110 - 276) | 85<br>(65 - 110)   |
| Cerebrovascular disease                       | 244<br>(163 - 355)   | 1<br>(0 - 2)     | 1<br>(1 - 2)      | 53<br>(29 - 87)    | 97<br>(60 - 152)   | 92<br>(65 - 118)   |
| Ischemic stroke                               | 74<br>(33 - 117)     | 0<br>(0 - 0)     | 0<br>(0 - 1)      | 7<br>(2 - 15)      | 23<br>(10 - 41)    | 43<br>(20 - 62)    |
| Hemorrhagic stroke                            | 170<br>(109 - 259)   | 1<br>(0 - 2)     | 1<br>(0 - 2)      | 46<br>(25 - 78)    | 74<br>(44 - 117)   | 49<br>(31 - 70)    |
| Hypertensive heart disease                    | 12<br>(7 - 20)       | 0<br>(0 - 0)     | 0<br>(0 - 0)      | 2<br>(1 - 5)       | 5<br>(3 - 9)       | 4<br>(2 - 7)       |
| Cardiomyopathy and myocarditis                | 19<br>(8 - 31)       | 0<br>(0 - 1)     | 0<br>(0 - 0)      | 11<br>(4 - 20)     | 6<br>(3 - 10)      | 2<br>(1 - 3)       |
| Atrial fibrillation and flutter               | 1<br>(0 - 1)         | --               | --                | 0<br>(0 - 0)       | 0<br>(0 - 0)       | 1<br>(0 - 1)       |
| Aortic aneurysm                               | 4<br>(2 - 6)         | --               | --                | 1<br>(1 - 2)       | 1<br>(1 - 2)       | 1<br>(1 - 2)       |
| Peripheral vascular disease                   | 0<br>(0 - 1)         | --               | --                | 0<br>(0 - 0)       | 0<br>(0 - 0)       | 0<br>(0 - 1)       |
| Endocarditis                                  | 9<br>(5 - 16)        | 1<br>(0 - 1)     | 0<br>(0 - 0)      | 5<br>(2 - 9)       | 2<br>(1 - 4)       | 1<br>(1 - 2)       |
| Other cardiovascular and circulatory diseases | 36<br>(22 - 58)      | 1<br>(0 - 1)     | 0<br>(0 - 1)      | 14<br>(8 - 24)     | 12<br>(7 - 21)     | 9<br>(6 - 14)      |
| Chronic respiratory diseases                  | 241<br>(172 - 334)   | 2<br>(1 - 3)     | 1<br>(1 - 2)      | 31<br>(17 - 50)    | 89<br>(57 - 135)   | 118<br>(93 - 148)  |



Web Table 31- Solomon Islands deaths with 95% UI by age, sex, and cause in 2013

| Cause                                               | Males, All Ages   | Males, 0-4 Years | Males, 5-14 Years | Males, 15-49 Years | Males, 50-69 Years | Males, 70-80 Years |
|-----------------------------------------------------|-------------------|------------------|-------------------|--------------------|--------------------|--------------------|
| Chronic obstructive pulmonary disease               | 81<br>(55 - 115)  | 1<br>(0 - 2)     | 0<br>(0 - 0)      | 7<br>(4 - 12)      | 23<br>(13 - 39)    | 50<br>(35 - 69)    |
| Pneumoconiosis                                      | 24<br>(13 - 38)   | 0<br>(0 - 0)     | 0<br>(0 - 0)      | 4<br>(2 - 7)       | 11<br>(5 - 18)     | 10<br>(6 - 15)     |
| Silicosis                                           | 8<br>(4 - 13)     | 0<br>(0 - 0)     | 0<br>(0 - 0)      | 1<br>(0 - 2)       | 3<br>(1 - 6)       | 3<br>(2 - 6)       |
| Asbestosis                                          | 3<br>(1 - 5)      | 0<br>(0 - 0)     | 0<br>(0 - 0)      | 0<br>(0 - 1)       | 1<br>(1 - 3)       | 1<br>(1 - 1)       |
| Coal workers pneumoconiosis                         | 3<br>(2 - 5)      | 0<br>(0 - 0)     | 0<br>(0 - 0)      | 0<br>(0 - 1)       | 1<br>(1 - 3)       | 1<br>(1 - 2)       |
| Other pneumoconiosis                                | 10<br>(6 - 17)    | 0<br>(0 - 0)     | 0<br>(0 - 0)      | 2<br>(1 - 3)       | 4<br>(2 - 8)       | 4<br>(2 - 7)       |
| Asthma                                              | 105<br>(68 - 154) | 0<br>(0 - 1)     | 1<br>(0 - 1)      | 15<br>(8 - 26)     | 45<br>(27 - 71)    | 43<br>(28 - 61)    |
| Interstitial lung disease and pulmonary sarcoidosis | 15<br>(7 - 34)    | 0<br>(0 - 0)     | 0<br>(0 - 0)      | 2<br>(1 - 4)       | 6<br>(3 - 15)      | 7<br>(2 - 16)      |
| Other chronic respiratory diseases                  | 16<br>(10 - 26)   | 0<br>(0 - 1)     | 0<br>(0 - 0)      | 3<br>(1 - 5)       | 5<br>(2 - 8)       | 9<br>(5 - 14)      |
| Cirrhosis                                           | 44<br>(27 - 67)   | 0<br>(0 - 0)     | 1<br>(1 - 1)      | 24<br>(13 - 40)    | 14<br>(8 - 22)     | 5<br>(3 - 6)       |
| Cirrhosis due to hepatitis B                        | 23<br>(14 - 38)   | 0<br>(0 - 0)     | 0<br>(0 - 1)      | 14<br>(7 - 24)     | 7<br>(4 - 11)      | 2<br>(1 - 3)       |
| Cirrhosis due to hepatitis C                        | 8<br>(3 - 14)     | 0<br>(0 - 0)     | 0<br>(0 - 0)      | 4<br>(1 - 7)       | 3<br>(1 - 5)       | 1<br>(0 - 2)       |
| Cirrhosis due to alcohol use                        | 9<br>(5 - 16)     | -                | -                 | 4<br>(2 - 8)       | 4<br>(2 - 6)       | 1<br>(1 - 2)       |
| Cirrhosis due to other causes                       | 3<br>(2 - 6)      | 0<br>(0 - 0)     | 0<br>(0 - 1)      | 2<br>(1 - 4)       | 1<br>(0 - 1)       | 0<br>(0 - 0)       |
| Digestive diseases                                  | 137<br>(89 - 212) | 1<br>(0 - 2)     | 3<br>(1 - 4)      | 50<br>(29 - 86)    | 46<br>(28 - 77)    | 37<br>(26 - 54)    |
| Peptic ulcer disease                                | 42<br>(25 - 76)   | 0<br>(0 - 0)     | 1<br>(0 - 1)      | 14<br>(7 - 27)     | 15<br>(8 - 30)     | 12<br>(7 - 20)     |
| Gastritis and duodenitis                            | 2<br>(1 - 6)      | 0<br>(0 - 0)     | 0<br>(0 - 0)      | 1<br>(0 - 2)       | 1<br>(0 - 3)       | 1<br>(0 - 2)       |
| Appendicitis                                        | 11<br>(6 - 20)    | 0<br>(0 - 0)     | 0<br>(0 - 1)      | 6<br>(3 - 11)      | 3<br>(1 - 5)       | 2<br>(1 - 4)       |
| Paralytic ileus and intestinal obstruction          | 24<br>(11 - 42)   | 1<br>(0 - 1)     | 1<br>(0 - 1)      | 9<br>(3 - 19)      | 6<br>(2 - 12)      | 8<br>(3 - 13)      |
| Inguinal, femoral, and abdominal hernia             | 5<br>(2 - 11)     | 0<br>(0 - 0)     | 0<br>(0 - 0)      | 1<br>(0 - 3)       | 1<br>(1 - 3)       | 2<br>(1 - 5)       |
| Inflammatory bowel disease                          | 3<br>(2 - 5)      | 0<br>(0 - 0)     | 0<br>(0 - 0)      | 1<br>(1 - 2)       | 1<br>(0 - 2)       | 1<br>(0 - 2)       |
| Vascular intestinal disorders                       | 1<br>(0 - 1)      | 0<br>(0 - 0)     | 0<br>(0 - 0)      | 0<br>(0 - 1)       | 0<br>(0 - 0)       | 0<br>(0 - 0)       |
| Gallbladder and biliary diseases                    | 17<br>(10 - 30)   | 0<br>(0 - 0)     | 0<br>(0 - 1)      | 5<br>(3 - 10)      | 6<br>(3 - 12)      | 5<br>(3 - 11)      |
| Pancreatitis                                        | 3<br>(1 - 5)      | 0<br>(0 - 0)     | 0<br>(0 - 0)      | 2<br>(1 - 3)       | 1<br>(0 - 2)       | 0<br>(0 - 1)       |
| Other digestive diseases                            | 29<br>(15 - 48)   | 0<br>(0 - 1)     | 1<br>(0 - 1)      | 11<br>(5 - 20)     | 12<br>(6 - 20)     | 5<br>(3 - 8)       |
| Neurological disorders                              | 29<br>(22 - 38)   | 0<br>(0 - 1)     | 0<br>(0 - 1)      | 4<br>(2 - 8)       | 3<br>(2 - 5)       | 20<br>(16 - 26)    |
| Alzheimer disease and other dementias               | 22<br>(17 - 28)   | -                | -                 | 0<br>(0 - 0)       | 3<br>(2 - 4)       | 19<br>(15 - 25)    |
| Parkinson disease                                   | 0<br>(0 - 0)      | -                | -                 | 0<br>(0 - 0)       | 0<br>(0 - 0)       | 0<br>(0 - 0)       |
| Epilepsy                                            | 4<br>(2 - 7)      | 0<br>(0 - 1)     | 0<br>(0 - 1)      | 3<br>(1 - 6)       | 0<br>(0 - 0)       | 0<br>(0 - 0)       |
| Multiple sclerosis                                  | 0<br>(0 - 0)      | -                | -                 | 0<br>(0 - 0)       | 0<br>(0 - 0)       | 0<br>(0 - 0)       |
| Other neurological disorders                        | 3<br>(1 - 4)      | 0<br>(0 - 0)     | 0<br>(0 - 0)      | 1<br>(1 - 2)       | 0<br>(0 - 1)       | 1<br>(0 - 1)       |
| Mental and substance use disorders                  | 6<br>(3 - 11)     | 0<br>(0 - 0)     | 0<br>(0 - 0)      | 5<br>(2 - 9)       | 1<br>(1 - 3)       | 0<br>(0 - 0)       |
| Schizophrenia                                       | 0<br>(0 - 0)      | -                | -                 | 0<br>(0 - 0)       | 0<br>(0 - 0)       | 0<br>(0 - 0)       |
| Alcohol use disorders                               | 6<br>(3 - 10)     | -                | -                 | 4<br>(2 - 8)       | 1<br>(1 - 2)       | 0<br>(0 - 0)       |
| Drug use disorders                                  | 0<br>(0 - 1)      | 0<br>(0 - 0)     | -                 | 0<br>(0 - 1)       | 0<br>(0 - 0)       | 0<br>(0 - 0)       |
| Opioid use disorders                                | 0<br>(0 - 0)      | 0<br>(0 - 0)     | -                 | 0<br>(0 - 0)       | 0<br>(0 - 0)       | 0<br>(0 - 0)       |
| Cocaine use disorders                               | 0<br>(0 - 0)      | 0<br>(0 - 0)     | -                 | 0<br>(0 - 0)       | 0<br>(0 - 0)       | 0<br>(0 - 0)       |
| Amphetamine use disorders                           | 0<br>(0 - 0)      | 0<br>(0 - 0)     | -                 | 0<br>(0 - 0)       | 0<br>(0 - 0)       | 0<br>(0 - 0)       |
| Other drug use disorders                            | 0<br>(0 - 1)      | 0<br>(0 - 0)     | -                 | 0<br>(0 - 0)       | 0<br>(0 - 0)       | 0<br>(0 - 0)       |
| Eating disorders                                    | 0<br>(0 - 0)      | -                | -                 | 0<br>(0 - 0)       | -                  | -                  |

Web Table 31- Solomon Islands deaths with 95% UI by age, sex, and cause in 2013

| Cause                                               | Males, All Ages    | Males, 0-4 Years | Males, 5-14 Years | Males, 15-49 Years | Males, 50-69 Years | Males, 70-80 Years |
|-----------------------------------------------------|--------------------|------------------|-------------------|--------------------|--------------------|--------------------|
| Anorexia nervosa                                    | 0<br>(0 - 0)       | --               | 0<br>(0 - 0)      | 0<br>(0 - 0)       | --                 | --                 |
| Diabetes, urogenital, blood, and endocrine diseases | 276<br>(191 - 394) | 3<br>(1 - 7)     | 2<br>(1 - 3)      | 62<br>(36 - 102)   | 129<br>(83 - 191)  | 81<br>(63 - 101)   |
| Diabetes mellitus                                   | 217<br>(149 - 311) | 0<br>(0 - 1)     | 0<br>(0 - 0)      | 40<br>(22 - 68)    | 109<br>(69 - 164)  | 67<br>(51 - 86)    |
| Acute glomerulonephritis                            | 0<br>(0 - 1)       | 0<br>(0 - 0)     | 0<br>(0 - 0)      | 0<br>(0 - 0)       | 0<br>(0 - 0)       | 0<br>(0 - 0)       |
| Chronic kidney disease                              | 34<br>(20 - 54)    | 0<br>(0 - 1)     | 0<br>(0 - 1)      | 13<br>(7 - 23)     | 12<br>(6 - 20)     | 8<br>(5 - 12)      |
| Chronic kidney disease due to diabetes mellitus     | 5<br>(2 - 9)       | 0<br>(0 - 0)     | 0<br>(0 - 0)      | 2<br>(1 - 3)       | 2<br>(1 - 4)       | 1<br>(0 - 2)       |
| Chronic kidney disease due to hypertension          | 10<br>(4 - 18)     | 0<br>(0 - 0)     | 0<br>(0 - 0)      | 3<br>(1 - 7)       | 4<br>(1 - 8)       | 3<br>(1 - 5)       |
| Chronic kidney disease due to glomerulonephritis    | 2<br>(1 - 4)       | 0<br>(0 - 0)     | 0<br>(0 - 0)      | 1<br>(0 - 2)       | 0<br>(0 - 1)       | 1<br>(0 - 1)       |
| Chronic kidney disease due to other causes          | 17<br>(8 - 30)     | 0<br>(0 - 1)     | 0<br>(0 - 0)      | 7<br>(3 - 14)      | 6<br>(2 - 12)      | 4<br>(1 - 6)       |
| Urinary diseases and male infertility               | 7<br>(4 - 10)      | 0<br>(0 - 0)     | 0<br>(0 - 0)      | 2<br>(1 - 4)       | 2<br>(1 - 3)       | 2<br>(2 - 3)       |
| Interstitial nephritis and urinary tract infections | 2<br>(1 - 4)       | 0<br>(0 - 0)     | 0<br>(0 - 0)      | 1<br>(0 - 1)       | 1<br>(0 - 1)       | 1<br>(1 - 2)       |
| Urolithiasis                                        | 0<br>(0 - 1)       | --               | 0<br>(0 - 0)      | 0<br>(0 - 0)       | 0<br>(0 - 0)       | 0<br>(0 - 0)       |
| Other urinary diseases                              | 4<br>(3 - 6)       | 0<br>(0 - 0)     | 0<br>(0 - 0)      | 1<br>(1 - 2)       | 1<br>(1 - 2)       | 1<br>(1 - 2)       |
| Gynecological diseases                              | --                 | --               | --                | --                 | --                 | --                 |
| Uterine fibroids                                    | --                 | --               | --                | --                 | --                 | --                 |
| Polycystic ovarian syndrome                         | --                 | --               | --                | --                 | --                 | --                 |
| Endometriosis                                       | --                 | --               | --                | --                 | --                 | --                 |
| Genital prolapse                                    | --                 | --               | --                | --                 | --                 | --                 |
| Other gynecological diseases                        | --                 | --               | --                | --                 | --                 | --                 |
| Hemoglobinopathies and hemolytic anemias            | 6<br>(3 - 10)      | 1<br>(0 - 2)     | 1<br>(0 - 2)      | 3<br>(1 - 5)       | 1<br>(0 - 1)       | 1<br>(0 - 1)       |
| Thalassemias                                        | 3<br>(1 - 6)       | 1<br>(0 - 2)     | 1<br>(0 - 2)      | 2<br>(1 - 3)       | 0<br>(0 - 0)       | 0<br>(0 - 0)       |
| Sickle cell disorders                               | 0<br>(0 - 0)       | 0<br>(0 - 0)     | 0<br>(0 - 0)      | 0<br>(0 - 0)       | 0<br>(0 - 0)       | 0<br>(0 - 0)       |
| G6PD deficiency                                     | 0<br>(0 - 0)       | 0<br>(0 - 0)     | 0<br>(0 - 0)      | 0<br>(0 - 0)       | 0<br>(0 - 0)       | 0<br>(0 - 0)       |
| Other hemoglobinopathies and hemolytic anemias      | 2<br>(1 - 4)       | 0<br>(0 - 0)     | 0<br>(0 - 0)      | 1<br>(0 - 2)       | 1<br>(0 - 1)       | 1<br>(0 - 1)       |
| Endocrine, metabolic, blood, and immune disorders   | 13<br>(8 - 21)     | 1<br>(1 - 4)     | 0<br>(0 - 1)      | 4<br>(2 - 7)       | 4<br>(2 - 7)       | 3<br>(2 - 4)       |
| Musculoskeletal disorders                           | 2<br>(1 - 3)       | --               | 0<br>(0 - 0)      | 1<br>(0 - 1)       | 1<br>(0 - 1)       | 0<br>(0 - 1)       |
| Rheumatoid arthritis                                | 0<br>(0 - 1)       | --               | 0<br>(0 - 0)      | 0<br>(0 - 0)       | 0<br>(0 - 0)       | 0<br>(0 - 0)       |
| Other musculoskeletal disorders                     | 1<br>(1 - 2)       | --               | 0<br>(0 - 0)      | 1<br>(0 - 1)       | 0<br>(0 - 1)       | 0<br>(0 - 0)       |
| Other non-communicable diseases                     | 48<br>(30 - 77)    | 30<br>(15 - 57)  | 5<br>(2 - 8)      | 8<br>(5 - 13)      | 2<br>(1 - 4)       | 2<br>(2 - 3)       |
| Congenital anomalies                                | 43<br>(26 - 72)    | 30<br>(15 - 56)  | 4<br>(2 - 7)      | 7<br>(4 - 11)      | 1<br>(1 - 2)       | 1<br>(1 - 1)       |
| Neural tube defects                                 | 1<br>(0 - 4)       | 1<br>(0 - 3)     | 0<br>(0 - 0)      | 0<br>(0 - 1)       | 0<br>(0 - 0)       | 0<br>(0 - 0)       |
| Congenital heart anomalies                          | 9<br>(4 - 17)      | 6<br>(2 - 13)    | 2<br>(1 - 3)      | 1<br>(1 - 2)       | 0<br>(0 - 0)       | 0<br>(0 - 0)       |
| Cleft lip and cleft palate                          | 0<br>(0 - 0)       | 0<br>(0 - 0)     | --                | --                 | --                 | --                 |
| Down syndrome                                       | 2<br>(1 - 5)       | 1<br>(0 - 4)     | 0<br>(0 - 1)      | 0<br>(0 - 1)       | 0<br>(0 - 0)       | 0<br>(0 - 0)       |
| Chromosomal unbalanced rearrangements               | 2<br>(1 - 5)       | 2<br>(0 - 4)     | 0<br>(0 - 0)      | 0<br>(0 - 0)       | 0<br>(0 - 0)       | 0<br>(0 - 0)       |
| Other congenital anomalies                          | 28<br>(16 - 49)    | 20<br>(9 - 40)   | 2<br>(1 - 4)      | 5<br>(2 - 8)       | 1<br>(0 - 2)       | 1<br>(0 - 1)       |
| Skin and subcutaneous diseases                      | 4<br>(3 - 7)       | 0<br>(0 - 0)     | 0<br>(0 - 0)      | 1<br>(1 - 3)       | 1<br>(1 - 2)       | 1<br>(1 - 2)       |
| Cellulitis                                          | 1<br>(0 - 1)       | 0<br>(0 - 0)     | 0<br>(0 - 0)      | 0<br>(0 - 1)       | 0<br>(0 - 0)       | 0<br>(0 - 1)       |
| Pyoderma                                            | 3<br>(2 - 5)       | 0<br>(0 - 0)     | 0<br>(0 - 0)      | 1<br>(1 - 2)       | 1<br>(0 - 2)       | 1<br>(0 - 1)       |
| Decubitus ulcer                                     | 1<br>(0 - 1)       | 0<br>(0 - 0)     | 0<br>(0 - 0)      | 0<br>(0 - 0)       | 0<br>(0 - 0)       | 0<br>(0 - 0)       |

Web Table 31- Solomon Islands deaths with 95% UI by age, sex, and cause in 2013

| Cause                                           | Males, All Ages    | Males, 0-4 Years | Males, 5-14 Years | Males, 15-49 Years | Males, 50-69 Years | Males, 70-80 Years |
|-------------------------------------------------|--------------------|------------------|-------------------|--------------------|--------------------|--------------------|
| Other skin and subcutaneous diseases            | 0<br>(0 - 0)       | 0<br>(0 - 0)     | 0<br>(0 - 0)      | 0<br>(0 - 0)       | 0<br>(0 - 0)       | 0<br>(0 - 0)       |
| Sudden infant death syndrome                    | 0<br>(0 - 2)       | 0<br>(0 - 2)     | --                | --                 | --                 | --                 |
| Injuries                                        | 195<br>(130 - 305) | 6<br>(3 - 13)    | 9<br>(6 - 13)     | 141<br>(88 - 233)  | 25<br>(16 - 39)    | 14<br>(10 - 18)    |
| Transport injuries                              | 61<br>(39 - 95)    | 1<br>(0 - 3)     | 4<br>(2 - 6)      | 44<br>(27 - 73)    | 8<br>(5 - 13)      | 4<br>(3 - 5)       |
| Road injuries                                   | 55<br>(36 - 88)    | 1<br>(0 - 2)     | 4<br>(2 - 5)      | 40<br>(25 - 68)    | 7<br>(4 - 12)      | 3<br>(3 - 5)       |
| Pedestrian road injuries                        | 10<br>(6 - 17)     | 0<br>(0 - 1)     | 1<br>(0 - 2)      | 7<br>(3 - 12)      | 2<br>(1 - 3)       | 1<br>(1 - 1)       |
| Cyclist road injuries                           | 2<br>(1 - 3)       | 0<br>(0 - 0)     | 0<br>(0 - 0)      | 1<br>(1 - 2)       | 0<br>(0 - 1)       | 0<br>(0 - 0)       |
| Motorcyclist road injuries                      | 11<br>(6 - 18)     | 0<br>(0 - 0)     | 0<br>(0 - 1)      | 9<br>(4 - 16)      | 1<br>(0 - 2)       | 0<br>(0 - 1)       |
| Motor vehicle road injuries                     | 31<br>(20 - 50)    | 1<br>(0 - 1)     | 2<br>(1 - 3)      | 23<br>(13 - 39)    | 4<br>(2 - 7)       | 2<br>(1 - 3)       |
| Other road injuries                             | 1<br>(1 - 3)       | 0<br>(0 - 0)     | 0<br>(0 - 0)      | 1<br>(0 - 2)       | 0<br>(0 - 0)       | 0<br>(0 - 0)       |
| Other transport injuries                        | 5<br>(2 - 9)       | 0<br>(0 - 0)     | 0<br>(0 - 0)      | 4<br>(1 - 7)       | 1<br>(0 - 2)       | 0<br>(0 - 1)       |
| Unintentional injuries                          | 57<br>(38 - 86)    | 5<br>(2 - 10)    | 4<br>(2 - 6)      | 34<br>(20 - 55)    | 8<br>(5 - 13)      | 7<br>(5 - 9)       |
| Falls                                           | 4<br>(2 - 7)       | 0<br>(0 - 0)     | 0<br>(0 - 0)      | 2<br>(1 - 5)       | 1<br>(0 - 1)       | 1<br>(0 - 1)       |
| Drowning                                        | 15<br>(9 - 25)     | 2<br>(0 - 4)     | 2<br>(1 - 4)      | 9<br>(5 - 17)      | 1<br>(1 - 2)       | 0<br>(0 - 1)       |
| Fire, heat, and hot substances                  | 3<br>(2 - 6)       | 0<br>(0 - 1)     | 0<br>(0 - 1)      | 2<br>(1 - 3)       | 1<br>(0 - 1)       | 0<br>(0 - 1)       |
| Poisonings                                      | 2<br>(1 - 4)       | 0<br>(0 - 0)     | 0<br>(0 - 0)      | 1<br>(1 - 2)       | 0<br>(0 - 1)       | 0<br>(0 - 1)       |
| Exposure to mechanical forces                   | 5<br>(3 - 9)       | 0<br>(0 - 1)     | 0<br>(0 - 0)      | 3<br>(2 - 6)       | 1<br>(1 - 2)       | 0<br>(0 - 1)       |
| Unintentional firearm injuries                  | 0<br>(0 - 1)       | 0<br>(0 - 0)     | 0<br>(0 - 0)      | 0<br>(0 - 0)       | 0<br>(0 - 0)       | 0<br>(0 - 0)       |
| Unintentional suffocation                       | 0<br>(0 - 1)       | 0<br>(0 - 0)     | 0<br>(0 - 0)      | 0<br>(0 - 0)       | 0<br>(0 - 0)       | 0<br>(0 - 0)       |
| Other exposure to mechanical forces             | 4<br>(3 - 8)       | 0<br>(0 - 1)     | 0<br>(0 - 0)      | 3<br>(2 - 5)       | 1<br>(0 - 2)       | 0<br>(0 - 1)       |
| Adverse effects of medical treatment            | 11<br>(5 - 21)     | 1<br>(0 - 3)     | 0<br>(0 - 0)      | 5<br>(2 - 12)      | 2<br>(1 - 4)       | 2<br>(1 - 5)       |
| Animal contact                                  | 2<br>(1 - 3)       | 0<br>(0 - 0)     | 0<br>(0 - 0)      | 1<br>(0 - 2)       | 0<br>(0 - 1)       | 0<br>(0 - 1)       |
| Venomous animal contact                         | 1<br>(0 - 1)       | 0<br>(0 - 0)     | 0<br>(0 - 0)      | 0<br>(0 - 1)       | 0<br>(0 - 0)       | 0<br>(0 - 0)       |
| Non-venomous animal contact                     | 1<br>(1 - 2)       | 0<br>(0 - 0)     | 0<br>(0 - 0)      | 1<br>(0 - 1)       | 0<br>(0 - 0)       | 0<br>(0 - 1)       |
| Foreign body                                    | 4<br>(2 - 8)       | 1<br>(0 - 2)     | 0<br>(0 - 0)      | 1<br>(1 - 3)       | 1<br>(0 - 1)       | 1<br>(0 - 1)       |
| Pulmonary aspiration and foreign body in airway | 3<br>(2 - 7)       | 1<br>(0 - 2)     | 0<br>(0 - 0)      | 1<br>(1 - 3)       | 1<br>(0 - 1)       | 1<br>(0 - 1)       |
| Foreign body in other body part                 | 0<br>(0 - 1)       | 0<br>(0 - 0)     | 0<br>(0 - 0)      | 0<br>(0 - 0)       | 0<br>(0 - 0)       | 0<br>(0 - 0)       |
| Other unintentional injuries                    | 10<br>(6 - 16)     | 0<br>(0 - 0)     | 0<br>(0 - 1)      | 8<br>(5 - 13)      | 1<br>(1 - 2)       | 1<br>(0 - 1)       |
| Self-harm and interpersonal violence            | 73<br>(43 - 117)   | 0<br>(0 - 0)     | 1<br>(1 - 3)      | 61<br>(36 - 100)   | 7<br>(4 - 12)      | 3<br>(1 - 4)       |
| Self-harm                                       | 43<br>(23 - 71)    | --               | 1<br>(0 - 2)      | 35<br>(17 - 59)    | 5<br>(3 - 9)       | 3<br>(1 - 4)       |
| Interpersonal violence                          | 30<br>(16 - 52)    | 0<br>(0 - 0)     | 0<br>(0 - 1)      | 27<br>(14 - 48)    | 2<br>(1 - 4)       | 0<br>(0 - 0)       |
| Assault by firearm                              | 12<br>(5 - 24)     | 0<br>(0 - 0)     | 0<br>(0 - 0)      | 11<br>(5 - 22)     | 1<br>(0 - 2)       | 0<br>(0 - 0)       |
| Assault by sharp object                         | 12<br>(6 - 22)     | 0<br>(0 - 0)     | 0<br>(0 - 0)      | 11<br>(5 - 20)     | 1<br>(0 - 1)       | 0<br>(0 - 0)       |
| Assault by other means                          | 6<br>(3 - 11)      | 0<br>(0 - 0)     | 0<br>(0 - 1)      | 5<br>(2 - 10)      | 1<br>(0 - 1)       | 0<br>(0 - 0)       |
| Forces of nature, war, and legal intervention   | 4<br>(3 - 9)       | 1<br>(0 - 1)     | 0<br>(0 - 0)      | 2<br>(1 - 5)       | 1<br>(1 - 2)       | 0<br>(0 - 0)       |
| Exposure to forces of nature                    | 4<br>(3 - 9)       | 1<br>(0 - 1)     | 0<br>(0 - 0)      | 2<br>(1 - 5)       | 1<br>(1 - 2)       | 0<br>(0 - 0)       |

Web Table 31- Solomon Islands deaths with 95% UI by age, sex, and cause in 2013

| Cause                                                             | Females, All Ages        | Females, 0-4 Years | Females, 5-14 Years | Females, 15-49 Years | Females, 50-69 Years | Females, 70-80 Years |
|-------------------------------------------------------------------|--------------------------|--------------------|---------------------|----------------------|----------------------|----------------------|
| All causes                                                        | 1,850<br>(1,267 - 2,691) | 164<br>(99 - 273)  | 36<br>(25 - 50)     | 499<br>(273 - 868)   | 587<br>(367 - 893)   | 565<br>(422 - 732)   |
| Communicable, maternal, neonatal, and nutritional diseases        | 527<br>(365 - 735)       | 135<br>(79 - 228)  | 18<br>(12 - 27)     | 149<br>(81 - 254)    | 96<br>(56 - 148)     | 130<br>(83 - 183)    |
| HIV/AIDS and tuberculosis                                         | 68<br>(36 - 111)         | 0<br>(0 - 1)       | 1<br>(1 - 2)        | 30<br>(16 - 52)      | 21<br>(10 - 35)      | 15<br>(5 - 25)       |
| Tuberculosis                                                      | 64<br>(31 - 106)         | 0<br>(0 - 1)       | 1<br>(0 - 2)        | 27<br>(13 - 48)      | 21<br>(10 - 34)      | 15<br>(5 - 24)       |
| HIV/AIDS                                                          | 5<br>(3 - 6)             | 0<br>(0 - 0)       | 0<br>(0 - 0)        | 4<br>(3 - 5)         | 1<br>(0 - 1)         | 0<br>(0 - 0)         |
| HIV/AIDS resulting in mycobacterial infection                     | 0<br>(0 - 0)             | 0<br>(0 - 0)       | 0<br>(0 - 0)        | 0<br>(0 - 0)         | 0<br>(0 - 0)         | 0<br>(0 - 0)         |
| HIV/AIDS resulting in other diseases                              | 4<br>(3 - 6)             | 0<br>(0 - 0)       | 0<br>(0 - 0)        | 3<br>(3 - 4)         | 0<br>(0 - 1)         | 0<br>(0 - 0)         |
| Diarrhea, lower respiratory, and other common infectious diseases | 254<br>(168 - 367)       | 45<br>(22 - 87)    | 11<br>(7 - 19)      | 52<br>(26 - 92)      | 55<br>(30 - 90)      | 91<br>(54 - 135)     |
| Diarrheal diseases                                                | 101<br>(53 - 166)        | 11<br>(3 - 25)     | 2<br>(1 - 5)        | 17<br>(6 - 34)       | 24<br>(9 - 48)       | 46<br>(20 - 84)      |
| Intestinal infectious diseases                                    | 5<br>(2 - 11)            | 2<br>(1 - 5)       | 2<br>(1 - 3)        | 1<br>(0 - 4)         | 0<br>(0 - 1)         | 0<br>(0 - 0)         |
| Typhoid fever                                                     | 4<br>(2 - 8)             | 1<br>(0 - 3)       | 1<br>(0 - 2)        | 1<br>(0 - 2)         | 0<br>(0 - 0)         | 0<br>(0 - 0)         |
| Paratyphoid fever                                                 | 1<br>(0 - 2)             | 0<br>(0 - 1)       | 0<br>(0 - 1)        | 0<br>(0 - 1)         | 0<br>(0 - 0)         | 0<br>(0 - 0)         |
| Other intestinal infectious diseases                              | 0<br>(0 - 3)             | 0<br>(0 - 1)       | 0<br>(0 - 0)        | 0<br>(0 - 2)         | 0<br>(0 - 0)         | 0<br>(0 - 0)         |
| Lower respiratory infections                                      | 112<br>(71 - 165)        | 17<br>(7 - 37)     | 2<br>(1 - 4)        | 23<br>(12 - 43)      | 27<br>(15 - 44)      | 42<br>(26 - 64)      |
| Upper respiratory infections                                      | 0<br>(0 - 0)             | 0<br>(0 - 0)       | 0<br>(0 - 0)        | 0<br>(0 - 0)         | 0<br>(0 - 0)         | 0<br>(0 - 0)         |
| Otitis media                                                      | 0<br>(0 - 0)             | 0<br>(0 - 0)       | 0<br>(0 - 0)        | 0<br>(0 - 0)         | 0<br>(0 - 0)         | 0<br>(0 - 0)         |
| Meningitis                                                        | 20<br>(12 - 37)          | 5<br>(2 - 20)      | 2<br>(1 - 4)        | 8<br>(4 - 15)        | 3<br>(2 - 6)         | 2<br>(1 - 3)         |
| Pneumococcal meningitis                                           | 7<br>(4 - 14)            | 2<br>(0 - 7)       | 1<br>(0 - 2)        | 3<br>(1 - 6)         | 1<br>(1 - 2)         | 1<br>(0 - 1)         |
| H influenzae type B meningitis                                    | 2<br>(1 - 5)             | 1<br>(0 - 3)       | 0<br>(0 - 1)        | 1<br>(0 - 1)         | 0<br>(0 - 0)         | 0<br>(0 - 0)         |
| Meningococcal meningitis                                          | 4<br>(2 - 7)             | 1<br>(0 - 3)       | 0<br>(0 - 1)        | 1<br>(1 - 3)         | 1<br>(0 - 1)         | 0<br>(0 - 1)         |
| Other meningitis                                                  | 7<br>(4 - 12)            | 2<br>(1 - 6)       | 1<br>(0 - 1)        | 3<br>(1 - 5)         | 1<br>(1 - 2)         | 1<br>(0 - 1)         |
| Encephalitis                                                      | 2<br>(1 - 3)             | 0<br>(0 - 1)       | 0<br>(0 - 0)        | 1<br>(0 - 2)         | 0<br>(0 - 1)         | 0<br>(0 - 0)         |
| Diphtheria                                                        | 0<br>(0 - 0)             | 0<br>(0 - 0)       | 0<br>(0 - 0)        | 0<br>(0 - 0)         | 0<br>(0 - 0)         | --                   |
| Whooping cough                                                    | 2<br>(0 - 8)             | 1<br>(0 - 7)       | 0<br>(0 - 1)        | 0<br>(0 - 0)         | 0<br>(0 - 0)         | --                   |
| Tetanus                                                           | 0<br>(0 - 1)             | 0<br>(0 - 0)       | 0<br>(0 - 0)        | 0<br>(0 - 0)         | 0<br>(0 - 0)         | 0<br>(0 - 0)         |
| Measles                                                           | 11<br>(0 - 54)           | 9<br>(0 - 40)      | 2<br>(0 - 11)       | 1<br>(0 - 4)         | 0<br>(0 - 0)         | --                   |
| Varicella and herpes zoster                                       | 0<br>(0 - 0)             | 0<br>(0 - 0)       | 0<br>(0 - 0)        | 0<br>(0 - 0)         | 0<br>(0 - 0)         | 0<br>(0 - 0)         |
| Neglected tropical diseases and malaria                           | 20<br>(9 - 39)           | 6<br>(1 - 24)      | 2<br>(1 - 4)        | 8<br>(3 - 16)        | 3<br>(1 - 5)         | 2<br>(1 - 3)         |
| Malaria                                                           | 14<br>(5 - 33)           | 5<br>(0 - 24)      | 1<br>(0 - 3)        | 6<br>(2 - 13)        | 2<br>(0 - 4)         | 0<br>(0 - 1)         |
| Leishmaniasis                                                     | 0<br>(0 - 0)             | 0<br>(0 - 0)       | 0<br>(0 - 0)        | 0<br>(0 - 0)         | 0<br>(0 - 0)         | 0<br>(0 - 0)         |
| Visceral leishmaniasis                                            | 0<br>(0 - 0)             | 0<br>(0 - 0)       | 0<br>(0 - 0)        | 0<br>(0 - 0)         | 0<br>(0 - 0)         | 0<br>(0 - 0)         |
| Cysticercosis                                                     | 0<br>(0 - 0)             | 0<br>(0 - 0)       | 0<br>(0 - 0)        | 0<br>(0 - 0)         | 0<br>(0 - 0)         | 0<br>(0 - 0)         |
| Cystic echinococcosis                                             | 0<br>(0 - 0)             | 0<br>(0 - 0)       | 0<br>(0 - 0)        | 0<br>(0 - 0)         | 0<br>(0 - 0)         | 0<br>(0 - 0)         |
| Dengue                                                            | 3<br>(2 - 6)             | 0<br>(0 - 1)       | 0<br>(0 - 1)        | 1<br>(1 - 2)         | 1<br>(0 - 1)         | 1<br>(0 - 1)         |
| Rabies                                                            | 0<br>(0 - 1)             | 0<br>(0 - 0)       | 0<br>(0 - 0)        | 0<br>(0 - 1)         | 0<br>(0 - 0)         | 0<br>(0 - 0)         |
| Intestinal nematode infections                                    | 0<br>(0 - 1)             | 0<br>(0 - 0)       | 0<br>(0 - 0)        | 0<br>(0 - 0)         | 0<br>(0 - 0)         | 0<br>(0 - 0)         |
| Ascariasis                                                        | 0<br>(0 - 1)             | 0<br>(0 - 0)       | 0<br>(0 - 0)        | 0<br>(0 - 0)         | 0<br>(0 - 0)         | 0<br>(0 - 0)         |
| Other neglected tropical diseases                                 | 2<br>(1 - 4)             | 0<br>(0 - 1)       | 0<br>(0 - 0)        | 0<br>(0 - 1)         | 0<br>(0 - 1)         | 1<br>(0 - 2)         |
| Maternal disorders                                                | 32<br>(17 - 59)          | --                 | 0<br>(0 - 0)        | 31<br>(16 - 58)      | --                   | --                   |
| Maternal hemorrhage                                               | 6<br>(3 - 11)            | --                 | 0<br>(0 - 0)        | 6<br>(3 - 11)        | --                   | --                   |

Web Table 31- Solomon Islands deaths with 95% UI by age, sex, and cause in 2013

| Cause                                                            | Females, All Ages      | Females, 0-4 Years | Females, 5-14 Years | Females, 15-49 Years | Females, 50-69 Years | Females, 70-80 Years |
|------------------------------------------------------------------|------------------------|--------------------|---------------------|----------------------|----------------------|----------------------|
| Maternal sepsis and other maternal infections                    | 2<br>(1 - 5)           | --                 | 0<br>(0 - 0)        | 2<br>(1 - 5)         | --                   | --                   |
| Maternal hypertensive disorders                                  | 3<br>(1 - 6)           | --                 | 0<br>(0 - 0)        | 3<br>(1 - 6)         | --                   | --                   |
| Maternal obstructed labor                                        | 3<br>(1 - 5)           | --                 | 0<br>(0 - 0)        | 3<br>(1 - 5)         | --                   | --                   |
| Maternal abortive outcome                                        | 5<br>(3 - 10)          | --                 | 0<br>(0 - 0)        | 5<br>(3 - 10)        | --                   | --                   |
| Indirect maternal deaths                                         | 3<br>(1 - 5)           | --                 | 0<br>(0 - 0)        | 3<br>(1 - 5)         | --                   | --                   |
| Late maternal deaths                                             | 4<br>(2 - 8)           | --                 | 0<br>(0 - 0)        | 4<br>(2 - 8)         | --                   | --                   |
| Maternal deaths aggravated by HIV/AIDS                           | 0<br>(0 - 0)           | --                 | --                  | 0<br>(0 - 0)         | --                   | --                   |
| Other maternal disorders                                         | 5<br>(2 - 9)           | --                 | 0<br>(0 - 0)        | 5<br>(2 - 9)         | --                   | --                   |
| Neonatal disorders                                               | 68<br>(38 - 111)       | 68<br>(38 - 111)   | --                  | --                   | --                   | --                   |
| Neonatal preterm birth complications                             | 30<br>(13 - 54)        | 30<br>(13 - 54)    | --                  | --                   | --                   | --                   |
| Neonatal encephalopathy due to birth asphyxia and trauma         | 9<br>(2 - 21)          | 9<br>(2 - 21)      | --                  | --                   | --                   | --                   |
| Neonatal sepsis and other neonatal infections                    | 7<br>(2 - 17)          | 7<br>(2 - 17)      | --                  | --                   | --                   | --                   |
| Hemolytic disease and other neonatal jaundice                    | 0<br>(0 - 1)           | 0<br>(0 - 1)       | --                  | --                   | --                   | --                   |
| Other neonatal disorders                                         | 21<br>(5 - 46)         | 21<br>(5 - 46)     | --                  | --                   | --                   | --                   |
| Nutritional deficiencies                                         | 43<br>(26 - 64)        | 3<br>(1 - 7)       | 2<br>(1 - 3)        | 15<br>(8 - 26)       | 7<br>(4 - 11)        | 16<br>(9 - 26)       |
| Protein-energy malnutrition                                      | 15<br>(6 - 26)         | 3<br>(1 - 6)       | 1<br>(0 - 2)        | 2<br>(0 - 5)         | 2<br>(1 - 4)         | 8<br>(2 - 14)        |
| Iodine deficiency                                                | 0<br>(0 - 1)           | 0<br>(0 - 0)       | 0<br>(0 - 0)        | 0<br>(0 - 0)         | 0<br>(0 - 0)         | 0<br>(0 - 0)         |
| Iron-deficiency anemia                                           | 26<br>(13 - 41)        | 0<br>(0 - 1)       | 1<br>(0 - 1)        | 13<br>(6 - 22)       | 5<br>(2 - 8)         | 8<br>(3 - 15)        |
| Other nutritional deficiencies                                   | 1<br>(0 - 4)           | 0<br>(0 - 0)       | 0<br>(0 - 0)        | 1<br>(0 - 2)         | 0<br>(0 - 1)         | 0<br>(0 - 1)         |
| Other communicable, maternal, neonatal, and nutritional diseases | 43<br>(24 - 71)        | 13<br>(3 - 27)     | 2<br>(1 - 4)        | 13<br>(6 - 25)       | 10<br>(5 - 17)       | 5<br>(2 - 11)        |
| Sexually transmitted diseases excluding HIV                      | 17<br>(7 - 33)         | 11<br>(2 - 24)     | 1<br>(0 - 2)        | 3<br>(1 - 7)         | 1<br>(0 - 3)         | 1<br>(0 - 2)         |
| Syphilis                                                         | 14<br>(5 - 29)         | 11<br>(2 - 24)     | 1<br>(0 - 2)        | 1<br>(1 - 3)         | 1<br>(0 - 2)         | 1<br>(0 - 1)         |
| Chlamydial infection                                             | 1<br>(0 - 2)           | --                 | 0<br>(0 - 0)        | 1<br>(0 - 1)         | 0<br>(0 - 0)         | 0<br>(0 - 0)         |
| Gonococcal infection                                             | 1<br>(0 - 2)           | --                 | 0<br>(0 - 0)        | 1<br>(0 - 1)         | 0<br>(0 - 1)         | 0<br>(0 - 0)         |
| Other sexually transmitted diseases                              | 1<br>(0 - 2)           | --                 | 0<br>(0 - 0)        | 1<br>(0 - 1)         | 0<br>(0 - 0)         | 0<br>(0 - 0)         |
| Hepatitis                                                        | 10<br>(6 - 16)         | 0<br>(0 - 1)       | 0<br>(0 - 0)        | 3<br>(2 - 6)         | 5<br>(2 - 8)         | 2<br>(1 - 3)         |
| Acute hepatitis A                                                | 0<br>(0 - 1)           | 0<br>(0 - 0)       | 0<br>(0 - 0)        | 0<br>(0 - 0)         | 0<br>(0 - 0)         | 0<br>(0 - 0)         |
| Acute hepatitis B                                                | 6<br>(4 - 11)          | 0<br>(0 - 1)       | 0<br>(0 - 0)        | 1<br>(0 - 2)         | 4<br>(2 - 6)         | 1<br>(1 - 2)         |
| Acute hepatitis C                                                | 0<br>(0 - 0)           | --                 | 0<br>(0 - 0)        | 0<br>(0 - 0)         | 0<br>(0 - 0)         | 0<br>(0 - 0)         |
| Acute hepatitis E                                                | 3<br>(1 - 6)           | 0<br>(0 - 0)       | 0<br>(0 - 0)        | 2<br>(1 - 4)         | 1<br>(0 - 2)         | 0<br>(0 - 1)         |
| Other infectious diseases                                        | 16<br>(6 - 34)         | 2<br>(0 - 7)       | 1<br>(0 - 2)        | 7<br>(2 - 15)        | 4<br>(1 - 10)        | 3<br>(1 - 8)         |
| Non-communicable diseases                                        | 1,245<br>(821 - 1,889) | 24<br>(11 - 45)    | 13<br>(8 - 19)      | 306<br>(168 - 538)   | 478<br>(304 - 736)   | 424<br>(319 - 561)   |
| Neoplasms                                                        | 134<br>(83 - 217)      | 1<br>(0 - 1)       | 1<br>(1 - 2)        | 54<br>(29 - 98)      | 50<br>(31 - 78)      | 28<br>(19 - 38)      |
| Esophageal cancer                                                | 1<br>(1 - 2)           | --                 | --                  | 0<br>(0 - 0)         | 0<br>(0 - 1)         | 1<br>(0 - 1)         |
| Stomach cancer                                                   | 8<br>(5 - 12)          | --                 | --                  | 2<br>(1 - 4)         | 3<br>(2 - 6)         | 2<br>(1 - 3)         |
| Liver cancer                                                     | 5<br>(3 - 8)           | --                 | 0<br>(0 - 0)        | 1<br>(1 - 3)         | 3<br>(1 - 4)         | 1<br>(1 - 2)         |
| Liver cancer due to hepatitis B                                  | 2<br>(1 - 4)           | --                 | 0<br>(0 - 0)        | 1<br>(0 - 1)         | 1<br>(0 - 2)         | 0<br>(0 - 1)         |
| Liver cancer due to hepatitis C                                  | 2<br>(1 - 3)           | --                 | 0<br>(0 - 0)        | 0<br>(0 - 1)         | 1<br>(0 - 2)         | 0<br>(0 - 1)         |
| Liver cancer due to alcohol use                                  | 0<br>(0 - 0)           | --                 | --                  | 0<br>(0 - 0)         | 0<br>(0 - 0)         | 0<br>(0 - 0)         |
| Liver cancer due to other causes                                 | 1<br>(1 - 2)           | --                 | 0<br>(0 - 0)        | 0<br>(0 - 1)         | 0<br>(0 - 1)         | 0<br>(0 - 0)         |

Web Table 31- Solomon Islands deaths with 95% UI by age, sex, and cause in 2013

| Cause                                         | Females, All Ages  | Females, 0-4 Years | Females, 5-14 Years | Females, 15-49 Years | Females, 50-69 Years | Females, 70-80 Years |
|-----------------------------------------------|--------------------|--------------------|---------------------|----------------------|----------------------|----------------------|
| Larynx cancer                                 | 0<br>(0 - 0)       | --                 | --                  | 0<br>(0 - 0)         | 0<br>(0 - 0)         | 0<br>(0 - 0)         |
| Tracheal, bronchus and lung cancer            | 10<br>(6 - 17)     | --                 | --                  | 2<br>(1 - 5)         | 4<br>(2 - 7)         | 4<br>(2 - 6)         |
| Breast cancer                                 | 51<br>(29 - 85)    | --                 | --                  | 24<br>(12 - 43)      | 20<br>(11 - 32)      | 7<br>(5 - 11)        |
| Cervical cancer                               | 32<br>(18 - 52)    | --                 | --                  | 14<br>(7 - 25)       | 11<br>(7 - 19)       | 7<br>(4 - 10)        |
| Uterine cancer                                | 4<br>(2 - 6)       | --                 | --                  | 1<br>(0 - 2)         | 2<br>(1 - 4)         | 1<br>(0 - 1)         |
| Prostate cancer                               | --                 | --                 | --                  | --                   | --                   | --                   |
| Colon and rectum cancer                       | 4<br>(3 - 7)       | --                 | --                  | 1<br>(1 - 2)         | 2<br>(1 - 3)         | 1<br>(1 - 2)         |
| Lip and oral cavity cancer                    | 0<br>(0 - 0)       | --                 | --                  | 0<br>(0 - 0)         | 0<br>(0 - 0)         | 0<br>(0 - 0)         |
| Nasopharynx cancer                            | 1<br>(1 - 2)       | --                 | 0<br>(0 - 0)        | 1<br>(0 - 1)         | 0<br>(0 - 1)         | 0<br>(0 - 0)         |
| Other pharynx cancer                          | 0<br>(0 - 0)       | --                 | --                  | 0<br>(0 - 0)         | 0<br>(0 - 0)         | 0<br>(0 - 0)         |
| Gallbladder and biliary tract cancer          | 1<br>(0 - 1)       | --                 | --                  | 0<br>(0 - 0)         | 0<br>(0 - 0)         | 0<br>(0 - 0)         |
| Pancreatic cancer                             | 1<br>(0 - 1)       | --                 | --                  | 0<br>(0 - 0)         | 0<br>(0 - 0)         | 0<br>(0 - 0)         |
| Malignant skin melanoma                       | 1<br>(0 - 1)       | --                 | --                  | 0<br>(0 - 1)         | 0<br>(0 - 0)         | 0<br>(0 - 0)         |
| Non-melanoma skin cancer                      | 1<br>(0 - 2)       | --                 | --                  | 0<br>(0 - 1)         | 0<br>(0 - 0)         | 0<br>(0 - 1)         |
| Ovarian cancer                                | 1<br>(0 - 1)       | --                 | --                  | 0<br>(0 - 1)         | 0<br>(0 - 0)         | 0<br>(0 - 0)         |
| Testicular cancer                             | --                 | --                 | --                  | --                   | --                   | --                   |
| Kidney cancer                                 | 0<br>(0 - 1)       | 0<br>(0 - 0)       | 0<br>(0 - 0)        | 0<br>(0 - 0)         | 0<br>(0 - 0)         | 0<br>(0 - 0)         |
| Bladder cancer                                | 0<br>(0 - 1)       | --                 | --                  | 0<br>(0 - 0)         | 0<br>(0 - 0)         | 0<br>(0 - 0)         |
| Brain and nervous system cancer               | 0<br>(0 - 0)       | 0<br>(0 - 0)       | 0<br>(0 - 0)        | 0<br>(0 - 0)         | 0<br>(0 - 0)         | 0<br>(0 - 0)         |
| Thyroid cancer                                | 0<br>(0 - 1)       | --                 | 0<br>(0 - 0)        | 0<br>(0 - 0)         | 0<br>(0 - 0)         | 0<br>(0 - 0)         |
| Mesothelioma                                  | 0<br>(0 - 0)       | --                 | --                  | 0<br>(0 - 0)         | 0<br>(0 - 0)         | 0<br>(0 - 0)         |
| Hodgkin lymphoma                              | 0<br>(0 - 1)       | 0<br>(0 - 0)       | 0<br>(0 - 0)        | 0<br>(0 - 0)         | 0<br>(0 - 0)         | 0<br>(0 - 0)         |
| Non-Hodgkin lymphoma                          | 2<br>(1 - 4)       | 0<br>(0 - 0)       | 0<br>(0 - 0)        | 1<br>(1 - 2)         | 1<br>(0 - 1)         | 1<br>(0 - 1)         |
| Multiple myeloma                              | 1<br>(0 - 1)       | --                 | --                  | 0<br>(0 - 0)         | 0<br>(0 - 1)         | 0<br>(0 - 0)         |
| Leukemia                                      | 5<br>(3 - 7)       | 0<br>(0 - 1)       | 1<br>(0 - 1)        | 2<br>(1 - 4)         | 1<br>(0 - 1)         | 1<br>(0 - 1)         |
| Other neoplasms                               | 5<br>(3 - 8)       | 0<br>(0 - 0)       | 0<br>(0 - 1)        | 2<br>(1 - 4)         | 1<br>(1 - 3)         | 1<br>(0 - 1)         |
| Cardiovascular diseases                       | 476<br>(312 - 730) | 2<br>(1 - 7)       | 4<br>(2 - 8)        | 104<br>(54 - 185)    | 177<br>(109 - 282)   | 188<br>(134 - 270)   |
| Rheumatic heart disease                       | 20<br>(10 - 35)    | 0<br>(0 - 0)       | 1<br>(0 - 3)        | 13<br>(6 - 23)       | 4<br>(2 - 7)         | 2<br>(1 - 4)         |
| Ischemic heart disease                        | 208<br>(130 - 355) | 0<br>(0 - 1)       | 1<br>(0 - 2)        | 37<br>(19 - 70)      | 81<br>(48 - 139)     | 89<br>(58 - 152)     |
| Cerebrovascular disease                       | 175<br>(107 - 262) | 1<br>(0 - 2)       | 1<br>(0 - 2)        | 31<br>(14 - 55)      | 64<br>(35 - 101)     | 78<br>(51 - 107)     |
| Ischemic stroke                               | 56<br>(25 - 87)    | 0<br>(0 - 1)       | 0<br>(0 - 0)        | 6<br>(1 - 12)        | 15<br>(6 - 25)       | 35<br>(17 - 52)      |
| Hemorrhagic stroke                            | 119<br>(69 - 189)  | 1<br>(0 - 1)       | 1<br>(0 - 2)        | 25<br>(12 - 45)      | 49<br>(27 - 78)      | 43<br>(26 - 65)      |
| Hypertensive heart disease                    | 15<br>(9 - 26)     | 0<br>(0 - 0)       | 0<br>(0 - 0)        | 3<br>(1 - 6)         | 5<br>(3 - 9)         | 6<br>(4 - 13)        |
| Cardiomyopathy and myocarditis                | 14<br>(8 - 23)     | 1<br>(0 - 2)       | 1<br>(0 - 2)        | 7<br>(3 - 12)        | 4<br>(2 - 8)         | 2<br>(1 - 3)         |
| Atrial fibrillation and flutter               | 1<br>(0 - 1)       | --                 | --                  | 0<br>(0 - 0)         | 0<br>(0 - 0)         | 0<br>(0 - 1)         |
| Aortic aneurysm                               | 3<br>(1 - 5)       | --                 | --                  | 1<br>(0 - 1)         | 1<br>(0 - 2)         | 1<br>(1 - 2)         |
| Peripheral vascular disease                   | 1<br>(0 - 2)       | --                 | --                  | 0<br>(0 - 0)         | 0<br>(0 - 1)         | 1<br>(0 - 2)         |
| Endocarditis                                  | 5<br>(3 - 10)      | 0<br>(0 - 1)       | 0<br>(0 - 0)        | 2<br>(1 - 4)         | 1<br>(0 - 2)         | 2<br>(1 - 3)         |
| Other cardiovascular and circulatory diseases | 33<br>(19 - 57)    | 0<br>(0 - 1)       | 0<br>(0 - 1)        | 10<br>(4 - 18)       | 16<br>(9 - 28)       | 7<br>(4 - 13)        |
| Chronic respiratory diseases                  | 117<br>(76 - 180)  | 1<br>(0 - 2)       | 1<br>(0 - 1)        | 26<br>(14 - 47)      | 37<br>(21 - 60)      | 52<br>(37 - 75)      |

Web Table 31- Solomon Islands deaths with 95% UI by age, sex, and cause in 2013

| Cause                                               | Females, All Ages | Females, 0-4 Years | Females, 5-14 Years | Females, 15-49 Years | Females, 50-69 Years | Females, 70-80 Years |
|-----------------------------------------------------|-------------------|--------------------|---------------------|----------------------|----------------------|----------------------|
| Chronic obstructive pulmonary disease               | 47<br>(29 - 76)   | 0<br>(0 - 1)       | 0<br>(0 - 0)        | 6<br>(2 - 11)        | 15<br>(8 - 27)       | 26<br>(16 - 39)      |
| Pneumoconiosis                                      | 1<br>(1 - 2)      | 0<br>(0 - 0)       | 0<br>(0 - 0)        | 0<br>(0 - 0)         | 0<br>(0 - 0)         | 1<br>(0 - 1)         |
| Silicosis                                           | 0<br>(0 - 0)      | 0<br>(0 - 0)       | 0<br>(0 - 0)        | 0<br>(0 - 0)         | 0<br>(0 - 0)         | 0<br>(0 - 0)         |
| Asbestosis                                          | 0<br>(0 - 0)      | 0<br>(0 - 0)       | 0<br>(0 - 0)        | 0<br>(0 - 0)         | 0<br>(0 - 0)         | 0<br>(0 - 0)         |
| Coal workers pneumoconiosis                         | 0<br>(0 - 0)      | 0<br>(0 - 0)       | 0<br>(0 - 0)        | 0<br>(0 - 0)         | 0<br>(0 - 0)         | 0<br>(0 - 0)         |
| Other pneumoconiosis                                | 1<br>(0 - 1)      | 0<br>(0 - 0)       | 0<br>(0 - 0)        | 0<br>(0 - 0)         | 0<br>(0 - 0)         | 0<br>(0 - 1)         |
| Asthma                                              | 53<br>(29 - 93)   | 0<br>(0 - 1)       | 0<br>(0 - 1)        | 16<br>(8 - 30)       | 18<br>(10 - 33)      | 18<br>(10 - 31)      |
| Interstitial lung disease and pulmonary sarcoidosis | 6<br>(3 - 13)     | 0<br>(0 - 0)       | 0<br>(0 - 0)        | 1<br>(0 - 2)         | 1<br>(0 - 4)         | 4<br>(2 - 8)         |
| Other chronic respiratory diseases                  | 9<br>(5 - 16)     | 0<br>(0 - 0)       | 0<br>(0 - 0)        | 4<br>(2 - 7)         | 1<br>(1 - 3)         | 4<br>(2 - 6)         |
| Cirrhosis                                           | 26<br>(15 - 43)   | 0<br>(0 - 0)       | 1<br>(0 - 1)        | 13<br>(7 - 22)       | 9<br>(5 - 14)        | 4<br>(3 - 6)         |
| Cirrhosis due to hepatitis B                        | 15<br>(8 - 25)    | 0<br>(0 - 0)       | 0<br>(0 - 0)        | 7<br>(4 - 13)        | 5<br>(3 - 9)         | 2<br>(1 - 4)         |
| Cirrhosis due to hepatitis C                        | 5<br>(2 - 10)     | 0<br>(0 - 0)       | 0<br>(0 - 0)        | 2<br>(1 - 5)         | 2<br>(1 - 4)         | 1<br>(0 - 2)         |
| Cirrhosis due to alcohol use                        | 3<br>(1 - 4)      | -                  | -                   | 1<br>(0 - 2)         | 1<br>(1 - 2)         | 1<br>(0 - 1)         |
| Cirrhosis due to other causes                       | 3<br>(1 - 5)      | 0<br>(0 - 0)       | 0<br>(0 - 0)        | 2<br>(1 - 4)         | 1<br>(0 - 1)         | 0<br>(0 - 0)         |
| Digestive diseases                                  | 94<br>(56 - 151)  | 0<br>(0 - 1)       | 2<br>(1 - 3)        | 31<br>(16 - 58)      | 33<br>(19 - 54)      | 27<br>(17 - 40)      |
| Peptic ulcer disease                                | 16<br>(8 - 28)    | 0<br>(0 - 0)       | 0<br>(0 - 0)        | 5<br>(2 - 9)         | 6<br>(3 - 12)        | 5<br>(3 - 9)         |
| Gastritis and duodenitis                            | 1<br>(0 - 2)      | 0<br>(0 - 0)       | 0<br>(0 - 0)        | 0<br>(0 - 1)         | 0<br>(0 - 1)         | 0<br>(0 - 1)         |
| Appendicitis                                        | 15<br>(7 - 29)    | 0<br>(0 - 0)       | 1<br>(0 - 1)        | 7<br>(3 - 14)        | 5<br>(2 - 10)        | 3<br>(1 - 6)         |
| Paralytic ileus and intestinal obstruction          | 17<br>(8 - 30)    | 0<br>(0 - 0)       | 0<br>(0 - 1)        | 4<br>(2 - 8)         | 7<br>(3 - 13)        | 6<br>(3 - 10)        |
| Inguinal, femoral, and abdominal hernia             | 1<br>(0 - 3)      | 0<br>(0 - 0)       | 0<br>(0 - 0)        | 0<br>(0 - 1)         | 0<br>(0 - 1)         | 0<br>(0 - 1)         |
| Inflammatory bowel disease                          | 2<br>(1 - 4)      | 0<br>(0 - 0)       | 0<br>(0 - 0)        | 1<br>(0 - 1)         | 1<br>(0 - 1)         | 1<br>(0 - 2)         |
| Vascular intestinal disorders                       | 0<br>(0 - 1)      | 0<br>(0 - 0)       | 0<br>(0 - 0)        | 0<br>(0 - 0)         | 0<br>(0 - 0)         | 0<br>(0 - 0)         |
| Gallbladder and biliary diseases                    | 14<br>(7 - 24)    | 0<br>(0 - 0)       | 0<br>(0 - 0)        | 4<br>(2 - 8)         | 5<br>(2 - 9)         | 5<br>(3 - 8)         |
| Pancreatitis                                        | 4<br>(2 - 7)      | 0<br>(0 - 0)       | 0<br>(0 - 0)        | 2<br>(1 - 3)         | 1<br>(1 - 2)         | 1<br>(0 - 2)         |
| Other digestive diseases                            | 22<br>(13 - 40)   | 0<br>(0 - 0)       | 0<br>(0 - 1)        | 8<br>(4 - 16)        | 8<br>(4 - 14)        | 6<br>(3 - 10)        |
| Neurological disorders                              | 24<br>(16 - 32)   | 0<br>(0 - 1)       | 0<br>(0 - 0)        | 2<br>(1 - 4)         | 3<br>(2 - 5)         | 18<br>(12 - 24)      |
| Alzheimer disease and other dementias               | 20<br>(13 - 27)   | -                  | -                   | 0<br>(0 - 0)         | 2<br>(1 - 4)         | 17<br>(12 - 24)      |
| Parkinson disease                                   | 0<br>(0 - 0)      | -                  | -                   | 0<br>(0 - 0)         | 0<br>(0 - 0)         | 0<br>(0 - 0)         |
| Epilepsy                                            | 2<br>(1 - 4)      | 0<br>(0 - 0)       | 0<br>(0 - 0)        | 2<br>(1 - 3)         | 0<br>(0 - 1)         | 0<br>(0 - 0)         |
| Multiple sclerosis                                  | 0<br>(0 - 0)      | -                  | -                   | 0<br>(0 - 0)         | 0<br>(0 - 0)         | 0<br>(0 - 0)         |
| Other neurological disorders                        | 2<br>(1 - 3)      | 0<br>(0 - 1)       | 0<br>(0 - 0)        | 0<br>(0 - 0)         | 1<br>(0 - 1)         | 0<br>(0 - 1)         |
| Mental and substance use disorders                  | 1<br>(1 - 2)      | 0<br>(0 - 0)       | 0<br>(0 - 0)        | 1<br>(0 - 2)         | 0<br>(0 - 1)         | 0<br>(0 - 0)         |
| Schizophrenia                                       | 0<br>(0 - 0)      | -                  | -                   | 0<br>(0 - 0)         | 0<br>(0 - 0)         | 0<br>(0 - 0)         |
| Alcohol use disorders                               | 1<br>(0 - 1)      | -                  | -                   | 0<br>(0 - 1)         | 0<br>(0 - 1)         | 0<br>(0 - 0)         |
| Drug use disorders                                  | 0<br>(0 - 1)      | 0<br>(0 - 0)       | -                   | 0<br>(0 - 1)         | 0<br>(0 - 0)         | 0<br>(0 - 0)         |
| Opioid use disorders                                | 0<br>(0 - 0)      | 0<br>(0 - 0)       | -                   | 0<br>(0 - 0)         | 0<br>(0 - 0)         | 0<br>(0 - 0)         |
| Cocaine use disorders                               | 0<br>(0 - 0)      | 0<br>(0 - 0)       | -                   | 0<br>(0 - 0)         | 0<br>(0 - 0)         | 0<br>(0 - 0)         |
| Amphetamine use disorders                           | 0<br>(0 - 0)      | 0<br>(0 - 0)       | -                   | 0<br>(0 - 0)         | 0<br>(0 - 0)         | 0<br>(0 - 0)         |
| Other drug use disorders                            | 0<br>(0 - 1)      | 0<br>(0 - 0)       | -                   | 0<br>(0 - 0)         | 0<br>(0 - 0)         | 0<br>(0 - 0)         |
| Eating disorders                                    | 0<br>(0 - 0)      | -                  | -                   | 0<br>(0 - 0)         | -                    | -                    |

Web Table 31- Solomon Islands deaths with 95% UI by age, sex, and cause in 2013

| Cause                                               | Females, All Ages  | Females, 0-4 Years | Females, 5-14 Years | Females, 15-49 Years | Females, 50-69 Years | Females, 70-80 Years |
|-----------------------------------------------------|--------------------|--------------------|---------------------|----------------------|----------------------|----------------------|
| Anorexia nervosa                                    | 0<br>(0 - 0)       | --                 | 0<br>(0 - 0)        | 0<br>(0 - 0)         | --                   | --                   |
| Diabetes, urogenital, blood, and endocrine diseases | 343<br>(219 - 523) | 2<br>(1 - 4)       | 2<br>(1 - 3)        | 70<br>(39 - 123)     | 166<br>(100 - 258)   | 104<br>(69 - 143)    |
| Diabetes mellitus                                   | 272<br>(164 - 417) | 0<br>(0 - 1)       | 0<br>(0 - 0)        | 44<br>(22 - 80)      | 140<br>(82 - 218)    | 87<br>(56 - 122)     |
| Acute glomerulonephritis                            | 0<br>(0 - 0)       | 0<br>(0 - 0)       | 0<br>(0 - 0)        | 0<br>(0 - 0)         | 0<br>(0 - 0)         | 0<br>(0 - 0)         |
| Chronic kidney disease                              | 53<br>(30 - 100)   | 0<br>(0 - 1)       | 1<br>(0 - 1)        | 18<br>(9 - 37)       | 21<br>(11 - 41)      | 13<br>(8 - 24)       |
| Chronic kidney disease due to diabetes mellitus     | 6<br>(3 - 11)      | 0<br>(0 - 0)       | 0<br>(0 - 0)        | 2<br>(1 - 4)         | 3<br>(1 - 6)         | 1<br>(0 - 2)         |
| Chronic kidney disease due to hypertension          | 11<br>(5 - 20)     | 0<br>(0 - 0)       | 0<br>(0 - 0)        | 3<br>(1 - 7)         | 4<br>(2 - 8)         | 3<br>(1 - 6)         |
| Chronic kidney disease due to glomerulonephritis    | 6<br>(3 - 10)      | 0<br>(0 - 0)       | 0<br>(0 - 0)        | 2<br>(1 - 4)         | 2<br>(1 - 3)         | 2<br>(1 - 3)         |
| Chronic kidney disease due to other causes          | 30<br>(14 - 68)    | 0<br>(0 - 1)       | 0<br>(0 - 1)        | 11<br>(4 - 25)       | 12<br>(5 - 29)       | 7<br>(3 - 16)        |
| Urinary diseases and male infertility               | 5<br>(3 - 8)       | 0<br>(0 - 1)       | 0<br>(0 - 0)        | 2<br>(1 - 3)         | 1<br>(1 - 2)         | 1<br>(1 - 2)         |
| Interstitial nephritis and urinary tract infections | 3<br>(2 - 5)       | 0<br>(0 - 1)       | 0<br>(0 - 0)        | 1<br>(1 - 2)         | 1<br>(0 - 2)         | 1<br>(0 - 1)         |
| Urolithiasis                                        | 0<br>(0 - 0)       | --                 | 0<br>(0 - 0)        | 0<br>(0 - 0)         | 0<br>(0 - 0)         | 0<br>(0 - 0)         |
| Other urinary diseases                              | 1<br>(1 - 2)       | 0<br>(0 - 0)       | 0<br>(0 - 0)        | 1<br>(0 - 1)         | 0<br>(0 - 1)         | 0<br>(0 - 1)         |
| Gynecological diseases                              | 1<br>(0 - 5)       | --                 | --                  | 1<br>(0 - 4)         | 0<br>(0 - 1)         | 0<br>(0 - 0)         |
| Uterine fibroids                                    | 0<br>(0 - 1)       | --                 | --                  | 0<br>(0 - 1)         | 0<br>(0 - 0)         | 0<br>(0 - 0)         |
| Polycystic ovarian syndrome                         | 0<br>(0 - 0)       | --                 | --                  | 0<br>(0 - 0)         | 0<br>(0 - 0)         | --                   |
| Endometriosis                                       | 0<br>(0 - 1)       | --                 | --                  | 0<br>(0 - 1)         | 0<br>(0 - 0)         | --                   |
| Genital prolapse                                    | 0<br>(0 - 1)       | --                 | --                  | 0<br>(0 - 0)         | 0<br>(0 - 0)         | 0<br>(0 - 0)         |
| Other gynecological diseases                        | 1<br>(0 - 2)       | --                 | --                  | 0<br>(0 - 2)         | 0<br>(0 - 0)         | 0<br>(0 - 0)         |
| Hemoglobinopathies and hemolytic anemias            | 6<br>(3 - 10)      | 1<br>(0 - 3)       | 1<br>(0 - 2)        | 3<br>(1 - 6)         | 1<br>(0 - 1)         | 1<br>(0 - 1)         |
| Thalassemias                                        | 3<br>(2 - 6)       | 1<br>(0 - 2)       | 1<br>(0 - 2)        | 2<br>(1 - 4)         | 0<br>(0 - 0)         | 0<br>(0 - 0)         |
| Sickle cell disorders                               | 0<br>(0 - 0)       | 0<br>(0 - 0)       | 0<br>(0 - 0)        | 0<br>(0 - 0)         | 0<br>(0 - 0)         | 0<br>(0 - 0)         |
| G6PD deficiency                                     | 0<br>(0 - 0)       | 0<br>(0 - 0)       | 0<br>(0 - 0)        | 0<br>(0 - 0)         | 0<br>(0 - 0)         | 0<br>(0 - 0)         |
| Other hemoglobinopathies and hemolytic anemias      | 2<br>(1 - 4)       | 0<br>(0 - 0)       | 0<br>(0 - 0)        | 1<br>(0 - 2)         | 0<br>(0 - 1)         | 1<br>(0 - 1)         |
| Endocrine, metabolic, blood, and immune disorders   | 6<br>(3 - 10)      | 0<br>(0 - 1)       | 0<br>(0 - 0)        | 2<br>(1 - 3)         | 2<br>(1 - 4)         | 2<br>(1 - 3)         |
| Musculoskeletal disorders                           | 2<br>(1 - 3)       | --                 | 0<br>(0 - 0)        | 1<br>(0 - 1)         | 0<br>(0 - 1)         | 0<br>(0 - 1)         |
| Rheumatoid arthritis                                | 0<br>(0 - 0)       | --                 | 0<br>(0 - 0)        | 0<br>(0 - 0)         | 0<br>(0 - 0)         | 0<br>(0 - 0)         |
| Other musculoskeletal disorders                     | 1<br>(1 - 2)       | --                 | 0<br>(0 - 0)        | 1<br>(0 - 1)         | 0<br>(0 - 1)         | 0<br>(0 - 0)         |
| Other non-communicable diseases                     | 29<br>(17 - 45)    | 17<br>(8 - 34)     | 2<br>(1 - 4)        | 5<br>(3 - 9)         | 2<br>(1 - 3)         | 2<br>(1 - 3)         |
| Congenital anomalies                                | 25<br>(14 - 41)    | 17<br>(8 - 34)     | 2<br>(1 - 4)        | 4<br>(2 - 7)         | 1<br>(0 - 2)         | 1<br>(0 - 1)         |
| Neural tube defects                                 | 1<br>(0 - 3)       | 1<br>(0 - 3)       | 0<br>(0 - 0)        | 0<br>(0 - 0)         | 0<br>(0 - 0)         | 0<br>(0 - 0)         |
| Congenital heart anomalies                          | 5<br>(2 - 8)       | 3<br>(1 - 7)       | 0<br>(0 - 1)        | 1<br>(0 - 2)         | 0<br>(0 - 0)         | 0<br>(0 - 0)         |
| Cleft lip and cleft palate                          | 0<br>(0 - 0)       | 0<br>(0 - 0)       | --                  | --                   | --                   | --                   |
| Down syndrome                                       | 2<br>(1 - 4)       | 1<br>(0 - 3)       | 0<br>(0 - 1)        | 1<br>(0 - 1)         | 0<br>(0 - 0)         | 0<br>(0 - 0)         |
| Chromosomal unbalanced rearrangements               | 1<br>(0 - 2)       | 1<br>(0 - 1)       | 0<br>(0 - 0)        | 0<br>(0 - 0)         | 0<br>(0 - 0)         | 0<br>(0 - 0)         |
| Other congenital anomalies                          | 16<br>(9 - 28)     | 11<br>(5 - 23)     | 1<br>(1 - 2)        | 2<br>(1 - 4)         | 1<br>(0 - 1)         | 1<br>(0 - 1)         |
| Skin and subcutaneous diseases                      | 4<br>(2 - 6)       | 0<br>(0 - 0)       | 0<br>(0 - 0)        | 1<br>(1 - 2)         | 1<br>(1 - 2)         | 1<br>(1 - 3)         |
| Cellulitis                                          | 1<br>(1 - 2)       | 0<br>(0 - 0)       | 0<br>(0 - 0)        | 0<br>(0 - 1)         | 0<br>(0 - 0)         | 0<br>(0 - 1)         |
| Pyoderma                                            | 2<br>(1 - 3)       | 0<br>(0 - 0)       | 0<br>(0 - 0)        | 0<br>(0 - 1)         | 1<br>(0 - 1)         | 0<br>(0 - 1)         |
| Decubitus ulcer                                     | 1<br>(1 - 2)       | 0<br>(0 - 0)       | 0<br>(0 - 0)        | 0<br>(0 - 0)         | 0<br>(0 - 0)         | 1<br>(0 - 1)         |



Web Table 31- Solomon Islands deaths with 95% UI by age, sex, and cause in 2013

| Cause                                           | Females, All Ages | Females, 0-4 Years | Females, 5-14 Years | Females, 15-49 Years | Females, 50-69 Years | Females, 70-80 Years |
|-------------------------------------------------|-------------------|--------------------|---------------------|----------------------|----------------------|----------------------|
| Other skin and subcutaneous diseases            | 0<br>(0 - 0)      | 0<br>(0 - 0)       | 0<br>(0 - 0)        | 0<br>(0 - 0)         | 0<br>(0 - 0)         | 0<br>(0 - 0)         |
| Sudden infant death syndrome                    | 0<br>(0 - 1)      | 0<br>(0 - 1)       | --                  | --                   | --                   | --                   |
| Injuries                                        | 78<br>(47 - 123)  | 5<br>(2 - 10)      | 5<br>(3 - 7)        | 44<br>(24 - 76)      | 13<br>(8 - 21)       | 11<br>(6 - 16)       |
| Transport injuries                              | 22<br>(13 - 35)   | 1<br>(0 - 2)       | 2<br>(1 - 3)        | 13<br>(7 - 23)       | 4<br>(2 - 7)         | 2<br>(1 - 3)         |
| Road injuries                                   | 18<br>(11 - 30)   | 1<br>(0 - 1)       | 1<br>(1 - 2)        | 11<br>(6 - 20)       | 3<br>(2 - 6)         | 2<br>(1 - 3)         |
| Pedestrian road injuries                        | 4<br>(2 - 6)      | 0<br>(0 - 0)       | 0<br>(0 - 1)        | 2<br>(1 - 4)         | 1<br>(0 - 1)         | 0<br>(0 - 1)         |
| Cyclist road injuries                           | 1<br>(0 - 1)      | 0<br>(0 - 0)       | 0<br>(0 - 0)        | 0<br>(0 - 1)         | 0<br>(0 - 0)         | 0<br>(0 - 0)         |
| Motorcyclist road injuries                      | 3<br>(2 - 6)      | 0<br>(0 - 0)       | 0<br>(0 - 0)        | 2<br>(1 - 4)         | 0<br>(0 - 1)         | 0<br>(0 - 0)         |
| Motor vehicle road injuries                     | 10<br>(6 - 17)    | 0<br>(0 - 1)       | 1<br>(0 - 1)        | 6<br>(3 - 11)        | 2<br>(1 - 3)         | 1<br>(1 - 2)         |
| Other road injuries                             | 1<br>(0 - 1)      | 0<br>(0 - 0)       | 0<br>(0 - 0)        | 0<br>(0 - 1)         | 0<br>(0 - 0)         | 0<br>(0 - 0)         |
| Other transport injuries                        | 3<br>(2 - 6)      | 0<br>(0 - 0)       | 0<br>(0 - 0)        | 2<br>(1 - 4)         | 1<br>(0 - 1)         | 0<br>(0 - 1)         |
| Unintentional injuries                          | 33<br>(18 - 53)   | 4<br>(1 - 8)       | 2<br>(1 - 4)        | 14<br>(6 - 27)       | 6<br>(3 - 9)         | 7<br>(3 - 11)        |
| Falls                                           | 3<br>(1 - 5)      | 0<br>(0 - 0)       | 0<br>(0 - 0)        | 1<br>(0 - 2)         | 0<br>(0 - 1)         | 1<br>(1 - 2)         |
| Drowning                                        | 6<br>(3 - 11)     | 1<br>(0 - 4)       | 1<br>(0 - 2)        | 3<br>(1 - 5)         | 1<br>(0 - 2)         | 1<br>(0 - 1)         |
| Fire, heat, and hot substances                  | 4<br>(2 - 7)      | 0<br>(0 - 1)       | 0<br>(0 - 1)        | 2<br>(1 - 5)         | 0<br>(0 - 1)         | 1<br>(0 - 1)         |
| Poisonings                                      | 2<br>(1 - 3)      | 0<br>(0 - 0)       | 0<br>(0 - 0)        | 1<br>(0 - 2)         | 0<br>(0 - 1)         | 1<br>(0 - 1)         |
| Exposure to mechanical forces                   | 4<br>(2 - 7)      | 1<br>(0 - 2)       | 0<br>(0 - 1)        | 2<br>(1 - 5)         | 1<br>(0 - 1)         | 0<br>(0 - 1)         |
| Unintentional firearm injuries                  | 1<br>(0 - 1)      | 0<br>(0 - 0)       | 0<br>(0 - 0)        | 0<br>(0 - 0)         | 0<br>(0 - 0)         | 0<br>(0 - 0)         |
| Unintentional suffocation                       | 2<br>(0 - 4)      | 0<br>(0 - 1)       | 0<br>(0 - 0)        | 1<br>(0 - 3)         | 0<br>(0 - 0)         | 0<br>(0 - 0)         |
| Other exposure to mechanical forces             | 2<br>(1 - 3)      | 0<br>(0 - 1)       | 0<br>(0 - 0)        | 1<br>(0 - 1)         | 0<br>(0 - 1)         | 0<br>(0 - 1)         |
| Adverse effects of medical treatment            | 8<br>(3 - 14)     | 1<br>(0 - 2)       | 0<br>(0 - 0)        | 3<br>(1 - 7)         | 2<br>(1 - 4)         | 2<br>(1 - 4)         |
| Animal contact                                  | 1<br>(0 - 1)      | 0<br>(0 - 0)       | 0<br>(0 - 0)        | 0<br>(0 - 1)         | 0<br>(0 - 0)         | 0<br>(0 - 0)         |
| Venomous animal contact                         | 0<br>(0 - 1)      | 0<br>(0 - 0)       | 0<br>(0 - 0)        | 0<br>(0 - 0)         | 0<br>(0 - 0)         | 0<br>(0 - 0)         |
| Non-venomous animal contact                     | 0<br>(0 - 1)      | 0<br>(0 - 0)       | 0<br>(0 - 0)        | 0<br>(0 - 0)         | 0<br>(0 - 0)         | 0<br>(0 - 0)         |
| Foreign body                                    | 2<br>(1 - 3)      | 1<br>(0 - 2)       | 0<br>(0 - 1)        | 0<br>(0 - 1)         | 0<br>(0 - 1)         | 1<br>(0 - 1)         |
| Pulmonary aspiration and foreign body in airway | 2<br>(1 - 3)      | 1<br>(0 - 2)       | 0<br>(0 - 1)        | 0<br>(0 - 0)         | 0<br>(0 - 1)         | 1<br>(0 - 1)         |
| Foreign body in other body part                 | 0<br>(0 - 0)      | 0<br>(0 - 0)       | 0<br>(0 - 0)        | 0<br>(0 - 0)         | 0<br>(0 - 0)         | 0<br>(0 - 0)         |
| Other unintentional injuries                    | 3<br>(1 - 5)      | 0<br>(0 - 1)       | 0<br>(0 - 0)        | 2<br>(1 - 3)         | 1<br>(0 - 1)         | 0<br>(0 - 1)         |
| Self-harm and interpersonal violence            | 21<br>(12 - 35)   | 0<br>(0 - 0)       | 1<br>(0 - 2)        | 15<br>(8 - 27)       | 3<br>(2 - 5)         | 1<br>(1 - 2)         |
| Self-harm                                       | 14<br>(8 - 24)    | --                 | 1<br>(0 - 1)        | 9<br>(5 - 17)        | 2<br>(1 - 4)         | 1<br>(1 - 2)         |
| Interpersonal violence                          | 7<br>(4 - 13)     | 0<br>(0 - 0)       | 0<br>(0 - 1)        | 6<br>(3 - 12)        | 1<br>(0 - 1)         | 0<br>(0 - 0)         |
| Assault by firearm                              | 2<br>(1 - 4)      | 0<br>(0 - 0)       | 0<br>(0 - 0)        | 2<br>(1 - 4)         | 0<br>(0 - 0)         | 0<br>(0 - 0)         |
| Assault by sharp object                         | 2<br>(1 - 3)      | 0<br>(0 - 0)       | 0<br>(0 - 0)        | 2<br>(1 - 3)         | 0<br>(0 - 0)         | 0<br>(0 - 0)         |
| Assault by other means                          | 3<br>(2 - 7)      | 0<br>(0 - 0)       | 0<br>(0 - 0)        | 3<br>(1 - 6)         | 0<br>(0 - 1)         | 0<br>(0 - 0)         |
| Forces of nature, war, and legal intervention   | 3<br>(2 - 5)      | 0<br>(0 - 1)       | 0<br>(0 - 0)        | 1<br>(1 - 3)         | 1<br>(0 - 2)         | 0<br>(0 - 0)         |
| Exposure to forces of nature                    | 3<br>(2 - 5)      | 0<br>(0 - 1)       | 0<br>(0 - 0)        | 1<br>(1 - 3)         | 1<br>(0 - 2)         | 0<br>(0 - 0)         |

Web Table 31- Somalia deaths with 95% UI by age, sex, and cause in 2013

| Cause                                                             | Both Sexes, All Ages          | Both Sexes, 0-4 Years       | Both Sexes, 5-14 Years   | Both Sexes, 15-49 Years     | Both Sexes, 50-69 Years     | Both Sexes, 70-80 Years     |
|-------------------------------------------------------------------|-------------------------------|-----------------------------|--------------------------|-----------------------------|-----------------------------|-----------------------------|
| All causes                                                        | 112,351<br>(89,197 - 143,406) | 51,308<br>(40,124 - 65,308) | 5,090<br>(3,901 - 6,579) | 20,017<br>(13,085 - 30,512) | 19,560<br>(11,739 - 30,701) | 16,376<br>(11,917 - 21,901) |
| Communicable, maternal, neonatal, and nutritional diseases        | 81,242<br>(65,598 - 102,322)  | 47,009<br>(36,283 - 59,664) | 3,839<br>(2,894 - 4,987) | 13,540<br>(8,989 - 20,102)  | 9,461<br>(5,763 - 14,760)   | 7,393<br>(5,379 - 9,892)    |
| HIV/AIDS and tuberculosis                                         | 11,022<br>(7,702 - 15,711)    | 1,104<br>(650 - 1,676)      | 406<br>(287 - 540)       | 5,033<br>(3,431 - 7,320)    | 3,159<br>(1,918 - 4,999)    | 1,319<br>(844 - 1,897)      |
| Tuberculosis                                                      | 8,667<br>(5,501 - 13,266)     | 869<br>(453 - 1,445)        | 237<br>(139 - 366)       | 3,441<br>(2,039 - 5,611)    | 2,837<br>(1,611 - 4,664)    | 1,284<br>(811 - 1,866)      |
| HIV/AIDS                                                          | 2,356<br>(1,492 - 3,432)      | 236<br>(158 - 340)          | 170<br>(112 - 232)       | 1,593<br>(923 - 2,469)      | 322<br>(221 - 437)          | 35<br>(21 - 54)             |
| HIV/AIDS resulting in mycobacterial infection                     | 152<br>(95 - 231)             | 15<br>(9 - 22)              | 10<br>(6 - 14)           | 102<br>(58 - 165)           | 22<br>(14 - 32)             | 3<br>(2 - 4)                |
| HIV/AIDS resulting in other diseases                              | 2,204<br>(1,400 - 3,183)      | 221<br>(147 - 319)          | 160<br>(106 - 218)       | 1,491<br>(861 - 2,298)      | 300<br>(206 - 405)          | 33<br>(20 - 50)             |
| Diarrhea, lower respiratory, and other common infectious diseases | 44,400<br>(34,647 - 56,898)   | 26,133<br>(18,578 - 35,149) | 2,389<br>(1,664 - 3,278) | 5,188<br>(3,260 - 8,062)    | 5,390<br>(3,073 - 8,687)    | 5,302<br>(3,704 - 7,280)    |
| Diarrheal diseases                                                | 19,673<br>(13,581 - 27,003)   | 9,386<br>(4,889 - 15,194)   | 1,124<br>(662 - 1,735)   | 2,952<br>(1,682 - 4,785)    | 3,198<br>(1,717 - 5,329)    | 3,014<br>(1,927 - 4,399)    |
| Intestinal infectious diseases                                    | 481<br>(239 - 844)            | 192<br>(90 - 366)           | 132<br>(61 - 244)        | 133<br>(58 - 261)           | 18<br>(8 - 35)              | 6<br>(3 - 11)               |
| Typhoid fever                                                     | 338<br>(156 - 627)            | 121<br>(49 - 246)           | 102<br>(45 - 193)        | 99<br>(40 - 200)            | 12<br>(5 - 25)              | 3<br>(1 - 7)                |
| Paratyphoid fever                                                 | 84<br>(36 - 156)              | 34<br>(13 - 72)             | 24<br>(10 - 48)          | 22<br>(9 - 47)              | 3<br>(1 - 6)                | 1<br>(0 - 1)                |
| Other intestinal infectious diseases                              | 59<br>(33 - 95)               | 36<br>(17 - 65)             | 6<br>(2 - 13)            | 12<br>(4 - 25)              | 3<br>(0 - 9)                | 2<br>(0 - 6)                |
| Lower respiratory infections                                      | 14,934<br>(10,367 - 20,833)   | 9,702<br>(6,105 - 14,592)   | 497<br>(298 - 760)       | 989<br>(576 - 1,642)        | 1,643<br>(897 - 2,727)      | 2,103<br>(1,406 - 3,070)    |
| Upper respiratory infections                                      | 18<br>(8 - 36)                | 9<br>(1 - 25)               | 1<br>(0 - 3)             | 4<br>(1 - 9)                | 3<br>(1 - 7)                | 2<br>(0 - 5)                |
| Otitis media                                                      | 15<br>(10 - 22)               | 8<br>(4 - 14)               | 1<br>(1 - 2)             | 2<br>(1 - 2)                | 2<br>(1 - 3)                | 2<br>(1 - 3)                |
| Meningitis                                                        | 3,726<br>(2,336 - 5,903)      | 2,319<br>(1,169 - 4,240)    | 354<br>(203 - 568)       | 597<br>(338 - 971)          | 329<br>(167 - 551)          | 127<br>(69 - 205)           |
| Pneumococcal meningitis                                           | 834<br>(507 - 1,336)          | 421<br>(215 - 810)          | 102<br>(51 - 172)        | 174<br>(78 - 301)           | 98<br>(46 - 184)            | 39<br>(19 - 69)             |
| H influenzae type B meningitis                                    | 889<br>(511 - 1,549)          | 683<br>(332 - 1,276)        | 80<br>(39 - 137)         | 80<br>(41 - 147)            | 33<br>(15 - 62)             | 12<br>(6 - 22)              |
| Meningococcal meningitis                                          | 493<br>(302 - 802)            | 244<br>(120 - 483)          | 37<br>(18 - 65)          | 107<br>(51 - 195)           | 75<br>(36 - 134)            | 30<br>(16 - 52)             |
| Other meningitis                                                  | 1,510<br>(929 - 2,468)        | 971<br>(473 - 1,820)        | 135<br>(73 - 221)        | 236<br>(130 - 396)          | 123<br>(57 - 215)           | 47<br>(24 - 78)             |
| Encephalitis                                                      | 69<br>(47 - 103)              | 42<br>(23 - 75)             | 5<br>(3 - 10)            | 12<br>(7 - 19)              | 6<br>(3 - 11)               | 3<br>(1 - 6)                |
| Diphtheria                                                        | 61<br>(3 - 296)               | 51<br>(0 - 278)             | 7<br>(0 - 40)            | 3<br>(0 - 8)                | 1<br>(0 - 3)                | --                          |
| Whooping cough                                                    | 2,477<br>(3 - 11,104)         | 2,332<br>(2 - 10,430)       | 121<br>(0 - 600)         | 21<br>(0 - 107)             | 2<br>(0 - 13)               | --                          |
| Tetanus                                                           | 2,770<br>(1,496 - 4,825)      | 1,956<br>(783 - 3,673)      | 130<br>(55 - 267)        | 464<br>(191 - 968)          | 184<br>(63 - 429)           | 36<br>(12 - 82)             |
| Measles                                                           | 128<br>(12 - 570)             | 113<br>(11 - 507)           | 13<br>(1 - 57)           | 2<br>(0 - 8)                | 0<br>(0 - 0)                | --                          |
| Varicella and herpes zoster                                       | 51<br>(21 - 107)              | 22<br>(3 - 70)              | 5<br>(0 - 17)            | 11<br>(3 - 26)              | 4<br>(1 - 10)               | 9<br>(1 - 32)               |
| Neglected tropical diseases and malaria                           | 7,257<br>(4,007 - 11,996)     | 5,413<br>(2,531 - 9,904)    | 671<br>(411 - 1,089)     | 801<br>(437 - 1,281)        | 256<br>(119 - 467)          | 117<br>(58 - 220)           |
| Malaria                                                           | 6,120<br>(3,066 - 10,592)     | 5,055<br>(2,221 - 9,486)    | 390<br>(177 - 771)       | 409<br>(196 - 732)          | 180<br>(65 - 373)           | 86<br>(30 - 184)            |
| Leishmaniasis                                                     | 835<br>(536 - 1,187)          | 256<br>(115 - 438)          | 228<br>(124 - 344)       | 306<br>(167 - 491)          | 35<br>(18 - 64)             | 9<br>(5 - 14)               |
| Visceral leishmaniasis                                            | 835<br>(536 - 1,187)          | 256<br>(115 - 438)          | 228<br>(124 - 344)       | 306<br>(167 - 491)          | 35<br>(18 - 64)             | 9<br>(5 - 14)               |
| Schistosomiasis                                                   | 38<br>(23 - 60)               | 1<br>(0 - 2)                | 2<br>(1 - 3)             | 16<br>(9 - 27)              | 14<br>(7 - 25)              | 5<br>(3 - 9)                |
| Cysticercosis                                                     | 4<br>(1 - 11)                 | 0<br>(0 - 1)                | 0<br>(0 - 1)             | 2<br>(0 - 6)                | 1<br>(0 - 2)                | 0<br>(0 - 0)                |
| Cystic echinococcosis                                             | 7<br>(5 - 10)                 | 2<br>(1 - 2)                | 2<br>(1 - 2)             | 3<br>(2 - 4)                | 1<br>(1 - 2)                | 0<br>(0 - 0)                |
| Dengue                                                            | 2<br>(1 - 3)                  | 0<br>(0 - 1)                | 0<br>(0 - 1)             | 1<br>(0 - 1)                | 0<br>(0 - 1)                | 0<br>(0 - 0)                |
| Yellow fever                                                      | 1<br>(0 - 3)                  | 0<br>(0 - 0)                | 0<br>(0 - 1)             | 0<br>(0 - 2)                | 0<br>(0 - 0)                | 0<br>(0 - 0)                |
| Rabies                                                            | 135<br>(69 - 221)             | 33<br>(13 - 68)             | 40<br>(20 - 72)          | 48<br>(19 - 92)             | 11<br>(4 - 23)              | 2<br>(1 - 5)                |
| Intestinal nematode infections                                    | 38<br>(19 - 69)               | 32<br>(14 - 61)             | 4<br>(1 - 12)            | 1<br>(0 - 7)                | 1<br>(0 - 4)                | 0<br>(0 - 2)                |
| Ascariasis                                                        | 38<br>(19 - 69)               | 32<br>(14 - 61)             | 4<br>(1 - 12)            | 1<br>(0 - 7)                | 1<br>(0 - 4)                | 0<br>(0 - 2)                |
| Other neglected tropical diseases                                 | 76<br>(38 - 139)              | 33<br>(12 - 71)             | 4<br>(2 - 8)             | 14<br>(6 - 29)              | 13<br>(6 - 22)              | 13<br>(6 - 23)              |

Web Table 31- Somalia deaths with 95% UI by age, sex, and cause in 2013

| Cause                                                            | Both Sexes, All Ages        | Both Sexes, 0-4 Years      | Both Sexes, 5-14 Years | Both Sexes, 15-49 Years  | Both Sexes, 50-69 Years   | Both Sexes, 70-80 Years   |
|------------------------------------------------------------------|-----------------------------|----------------------------|------------------------|--------------------------|---------------------------|---------------------------|
| Maternal disorders                                               | 1,903<br>(1,155 - 3,194)    | --                         | 16<br>(5 - 39)         | 1,887<br>(1,146 - 3,172) | --                        | --                        |
| Maternal hemorrhage                                              | 236<br>(129 - 430)          | --                         | 1<br>(0 - 3)           | 235<br>(128 - 429)       | --                        | --                        |
| Maternal sepsis and other maternal infections                    | 183<br>(105 - 302)          | --                         | 2<br>(1 - 5)           | 181<br>(103 - 299)       | --                        | --                        |
| Maternal hypertensive disorders                                  | 192<br>(109 - 324)          | --                         | 2<br>(1 - 5)           | 190<br>(107 - 321)       | --                        | --                        |
| Maternal obstructed labor                                        | 97<br>(55 - 172)            | --                         | 1<br>(0 - 2)           | 97<br>(55 - 171)         | --                        | --                        |
| Maternal abortive outcome                                        | 372<br>(210 - 610)          | --                         | 3<br>(1 - 7)           | 369<br>(208 - 607)       | --                        | --                        |
| Indirect maternal deaths                                         | 141<br>(73 - 254)           | --                         | 1<br>(0 - 3)           | 140<br>(72 - 253)        | --                        | --                        |
| Late maternal deaths                                             | 170<br>(90 - 299)           | --                         | 3<br>(1 - 6)           | 167<br>(89 - 294)        | --                        | --                        |
| Maternal deaths aggravated by HIV/AIDS                           | 4<br>(2 - 7)                | --                         | --                     | 4<br>(2 - 7)             | --                        | --                        |
| Other maternal disorders                                         | 503<br>(284 - 896)          | --                         | 4<br>(1 - 9)           | 499<br>(282 - 887)       | --                        | --                        |
| Neonatal disorders                                               | 10,003<br>(7,573 - 13,405)  | 10,003<br>(7,573 - 13,405) | --                     | --                       | --                        | --                        |
| Neonatal preterm birth complications                             | 3,154<br>(1,672 - 5,048)    | 3,154<br>(1,672 - 5,048)   | --                     | --                       | --                        | --                        |
| Neonatal encephalopathy due to birth asphyxia and trauma         | 2,610<br>(1,188 - 4,536)    | 2,610<br>(1,188 - 4,536)   | --                     | --                       | --                        | --                        |
| Neonatal sepsis and other neonatal infections                    | 1,804<br>(878 - 3,328)      | 1,804<br>(878 - 3,328)     | --                     | --                       | --                        | --                        |
| Hemolytic disease and other neonatal jaundice                    | 86<br>(34 - 202)            | 86<br>(34 - 202)           | --                     | --                       | --                        | --                        |
| Other neonatal disorders                                         | 2,350<br>(1,084 - 4,124)    | 2,350<br>(1,084 - 4,124)   | --                     | --                       | --                        | --                        |
| Nutritional deficiencies                                         | 5,470<br>(3,213 - 8,176)    | 3,616<br>(1,788 - 5,962)   | 281<br>(170 - 447)     | 476<br>(255 - 788)       | 527<br>(280 - 877)        | 572<br>(350 - 839)        |
| Protein-energy malnutrition                                      | 4,213<br>(2,318 - 6,596)    | 3,141<br>(1,539 - 5,193)   | 216<br>(120 - 353)     | 193<br>(72 - 376)        | 309<br>(138 - 551)        | 355<br>(191 - 566)        |
| Iodine deficiency                                                | 28<br>(3 - 126)             | 16<br>(0 - 115)            | 2<br>(0 - 12)          | 4<br>(0 - 13)            | 3<br>(0 - 14)             | 2<br>(0 - 12)             |
| Iron-deficiency anemia                                           | 1,202<br>(544 - 2,159)      | 451<br>(100 - 1,186)       | 62<br>(23 - 123)       | 274<br>(126 - 478)       | 209<br>(85 - 392)         | 206<br>(97 - 366)         |
| Other nutritional deficiencies                                   | 28<br>(11 - 52)             | 8<br>(2 - 25)              | 1<br>(0 - 2)           | 5<br>(1 - 11)            | 5<br>(2 - 12)             | 9<br>(2 - 19)             |
| Other communicable, maternal, neonatal, and nutritional diseases | 1,186<br>(732 - 2,348)      | 741<br>(388 - 1,502)       | 76<br>(41 - 149)       | 156<br>(86 - 333)        | 130<br>(58 - 278)         | 83<br>(36 - 191)          |
| Sexually transmitted diseases excluding HIV                      | 536<br>(272 - 1,020)        | 443<br>(201 - 898)         | 38<br>(18 - 74)        | 27<br>(12 - 50)          | 18<br>(6 - 43)            | 10<br>(3 - 23)            |
| Syphilis                                                         | 511<br>(251 - 996)          | 443<br>(201 - 898)         | 36<br>(17 - 72)        | 12<br>(5 - 22)           | 11<br>(4 - 26)            | 8<br>(3 - 18)             |
| Chlamydial infection                                             | 5<br>(2 - 11)               | --                         | 0<br>(0 - 1)           | 3<br>(1 - 7)             | 1<br>(0 - 4)              | 0<br>(0 - 1)              |
| Gonococcal infection                                             | 11<br>(5 - 20)              | --                         | 1<br>(0 - 1)           | 6<br>(3 - 11)            | 3<br>(1 - 8)              | 1<br>(0 - 3)              |
| Other sexually transmitted diseases                              | 9<br>(4 - 16)               | --                         | 1<br>(0 - 1)           | 5<br>(2 - 10)            | 2<br>(1 - 5)              | 1<br>(0 - 1)              |
| Hepatitis                                                        | 108<br>(73 - 166)           | 24<br>(13 - 41)            | 8<br>(5 - 12)          | 44<br>(24 - 81)          | 25<br>(14 - 42)           | 7<br>(5 - 11)             |
| Acute hepatitis A                                                | 16<br>(5 - 32)              | 10<br>(3 - 21)             | 3<br>(1 - 6)           | 3<br>(1 - 6)             | 0<br>(0 - 1)              | 0<br>(0 - 0)              |
| Acute hepatitis B                                                | 66<br>(41 - 104)            | 14<br>(6 - 27)             | 4<br>(2 - 7)           | 21<br>(9 - 40)           | 21<br>(11 - 36)           | 7<br>(4 - 10)             |
| Acute hepatitis C                                                | 2<br>(0 - 5)                | --                         | 0<br>(0 - 1)           | 1<br>(0 - 3)             | 1<br>(0 - 1)              | 0<br>(0 - 0)              |
| Acute hepatitis E                                                | 25<br>(12 - 46)             | 0<br>(0 - 0)               | 1<br>(0 - 2)           | 20<br>(10 - 39)          | 3<br>(1 - 7)              | 0<br>(0 - 1)              |
| Other infectious diseases                                        | 542<br>(278 - 1,583)        | 274<br>(110 - 928)         | 30<br>(12 - 97)        | 85<br>(39 - 245)         | 87<br>(33 - 221)          | 66<br>(24 - 172)          |
| Non-communicable diseases                                        | 25,643<br>(17,183 - 36,385) | 2,942<br>(1,697 - 5,325)   | 619<br>(446 - 834)     | 4,268<br>(2,557 - 6,917) | 9,294<br>(5,408 - 14,753) | 8,521<br>(6,107 - 11,592) |
| Neoplasms                                                        | 4,326<br>(2,726 - 6,536)    | 166<br>(95 - 256)          | 119<br>(82 - 167)      | 961<br>(577 - 1,613)     | 2,132<br>(1,207 - 3,407)  | 948<br>(653 - 1,320)      |
| Esophageal cancer                                                | 496<br>(284 - 797)          | --                         | --                     | 71<br>(39 - 123)         | 297<br>(162 - 493)        | 128<br>(80 - 190)         |
| Stomach cancer                                                   | 321<br>(197 - 494)          | --                         | --                     | 48<br>(27 - 80)          | 184<br>(104 - 297)        | 90<br>(59 - 131)          |
| Liver cancer                                                     | 362<br>(222 - 575)          | --                         | 6<br>(3 - 9)           | 114<br>(54 - 200)        | 173<br>(98 - 292)         | 70<br>(44 - 105)          |
| Liver cancer due to hepatitis B                                  | 87<br>(41 - 166)            | --                         | 1<br>(0 - 3)           | 35<br>(12 - 78)          | 39<br>(14 - 76)           | 12<br>(5 - 23)            |
| Liver cancer due to hepatitis C                                  | 162<br>(83 - 277)           | --                         | 1<br>(0 - 3)           | 45<br>(16 - 85)          | 82<br>(38 - 147)          | 34<br>(19 - 55)           |

Web Table 31- Somalia deaths with 95% UI by age, sex, and cause in 2013

| Cause                                | Both Sexes, All Ages       | Both Sexes, 0-4 Years | Both Sexes, 5-14 Years | Both Sexes, 15-49 Years | Both Sexes, 50-69 Years  | Both Sexes, 70-80 Years  |
|--------------------------------------|----------------------------|-----------------------|------------------------|-------------------------|--------------------------|--------------------------|
| Liver cancer due to alcohol use      | 49<br>(24 - 93)            | --                    | --                     | 10<br>(3 - 23)          | 25<br>(11 - 53)          | 14<br>(7 - 26)           |
| Liver cancer due to other causes     | 64<br>(32 - 114)           | --                    | 3<br>(2 - 5)           | 24<br>(10 - 50)         | 27<br>(12 - 49)          | 10<br>(5 - 18)           |
| Larynx cancer                        | 29<br>(16 - 45)            | --                    | --                     | 4<br>(2 - 7)            | 16<br>(9 - 27)           | 8<br>(5 - 13)            |
| Tracheal, bronchus and lung cancer   | 233<br>(140 - 366)         | --                    | --                     | 20<br>(11 - 36)         | 156<br>(88 - 252)        | 58<br>(39 - 83)          |
| Breast cancer                        | 305<br>(171 - 496)         | --                    | --                     | 118<br>(62 - 204)       | 144<br>(74 - 240)        | 42<br>(26 - 64)          |
| Cervical cancer                      | 711<br>(373 - 1,180)       | --                    | --                     | 147<br>(74 - 266)       | 462<br>(231 - 773)       | 102<br>(54 - 171)        |
| Uterine cancer                       | 31<br>(15 - 52)            | --                    | --                     | 3<br>(1 - 8)            | 19<br>(9 - 33)           | 9<br>(4 - 15)            |
| Prostate cancer                      | 137<br>(74 - 219)          | --                    | --                     | 3<br>(1 - 7)            | 46<br>(22 - 81)          | 88<br>(49 - 137)         |
| Colon and rectum cancer              | 269<br>(165 - 415)         | --                    | --                     | 73<br>(42 - 120)        | 124<br>(72 - 198)        | 72<br>(49 - 102)         |
| Lip and oral cavity cancer           | 59<br>(33 - 93)            | --                    | --                     | 14<br>(7 - 24)          | 32<br>(16 - 54)          | 13<br>(8 - 19)           |
| Nasopharynx cancer                   | 19<br>(11 - 31)            | --                    | 1<br>(0 - 2)           | 10<br>(5 - 17)          | 7<br>(3 - 12)            | 2<br>(1 - 3)             |
| Other pharynx cancer                 | 25<br>(15 - 40)            | --                    | --                     | 6<br>(3 - 11)           | 15<br>(8 - 24)           | 4<br>(3 - 6)             |
| Gallbladder and biliary tract cancer | 51<br>(31 - 84)            | --                    | --                     | 16<br>(9 - 27)          | 26<br>(14 - 44)          | 10<br>(6 - 17)           |
| Pancreatic cancer                    | 86<br>(52 - 134)           | --                    | --                     | 19<br>(11 - 31)         | 49<br>(28 - 80)          | 17<br>(12 - 25)          |
| Malignant skin melanoma              | 20<br>(11 - 32)            | --                    | --                     | 5<br>(3 - 9)            | 10<br>(5 - 17)           | 5<br>(3 - 8)             |
| Non-melanoma skin cancer             | 20<br>(11 - 38)            | --                    | --                     | 4<br>(2 - 7)            | 7<br>(4 - 14)            | 9<br>(5 - 20)            |
| Ovarian cancer                       | 65<br>(36 - 106)           | --                    | --                     | 16<br>(7 - 31)          | 40<br>(21 - 65)          | 10<br>(6 - 16)           |
| Testicular cancer                    | 10<br>(5 - 17)             | --                    | --                     | 6<br>(3 - 9)            | 3<br>(1 - 7)             | 1<br>(1 - 2)             |
| Kidney cancer                        | 68<br>(47 - 99)            | 15<br>(7 - 29)        | 5<br>(3 - 9)           | 9<br>(5 - 16)           | 28<br>(16 - 47)          | 10<br>(7 - 15)           |
| Bladder cancer                       | 74<br>(47 - 116)           | --                    | --                     | 10<br>(5 - 17)          | 34<br>(19 - 56)          | 31<br>(20 - 47)          |
| Brain and nervous system cancer      | 59<br>(36 - 92)            | 3<br>(1 - 7)          | 7<br>(4 - 11)          | 26<br>(15 - 43)         | 16<br>(9 - 27)           | 7<br>(4 - 11)            |
| Thyroid cancer                       | 15<br>(8 - 25)             | --                    | 0<br>(0 - 0)           | 2<br>(1 - 3)            | 9<br>(5 - 17)            | 4<br>(2 - 6)             |
| Mesothelioma                         | 5<br>(3 - 9)               | --                    | --                     | 1<br>(0 - 2)            | 3<br>(1 - 6)             | 1<br>(1 - 3)             |
| Hodgkin lymphoma                     | 35<br>(20 - 56)            | 2<br>(1 - 5)          | 3<br>(1 - 6)           | 10<br>(5 - 22)          | 12<br>(6 - 20)           | 8<br>(4 - 13)            |
| Non-Hodgkin lymphoma                 | 231<br>(158 - 342)         | 45<br>(22 - 81)       | 35<br>(21 - 56)        | 63<br>(30 - 111)        | 57<br>(32 - 99)          | 30<br>(20 - 46)          |
| Multiple myeloma                     | 35<br>(21 - 56)            | --                    | --                     | 8<br>(4 - 13)           | 17<br>(9 - 29)           | 10<br>(7 - 15)           |
| Leukemia                             | 85<br>(57 - 121)           | 7<br>(3 - 13)         | 13<br>(8 - 19)         | 36<br>(21 - 55)         | 17<br>(10 - 28)          | 12<br>(8 - 18)           |
| Other neoplasms                      | 470<br>(317 - 653)         | 92<br>(52 - 150)      | 49<br>(30 - 76)        | 101<br>(59 - 165)       | 131<br>(74 - 218)        | 97<br>(60 - 146)         |
| Cardiovascular diseases              | 10,928<br>(7,117 - 15,984) | 225<br>(134 - 358)    | 90<br>(61 - 129)       | 1,356<br>(778 - 2,222)  | 4,327<br>(2,511 - 6,883) | 4,929<br>(3,472 - 6,702) |
| Rheumatic heart disease              | 586<br>(326 - 1,016)       | 15<br>(5 - 34)        | 26<br>(15 - 45)        | 196<br>(105 - 355)      | 217<br>(108 - 414)       | 131<br>(74 - 231)        |
| Ischemic heart disease               | 2,630<br>(1,631 - 3,939)   | 1<br>(0 - 3)          | 3<br>(2 - 5)           | 251<br>(131 - 428)      | 1,117<br>(640 - 1,784)   | 1,257<br>(849 - 1,771)   |
| Cerebrovascular disease              | 4,430<br>(2,714 - 6,570)   | 27<br>(15 - 44)       | 11<br>(7 - 17)         | 381<br>(201 - 624)      | 1,763<br>(953 - 2,801)   | 2,248<br>(1,486 - 3,113) |
| Ischemic stroke                      | 1,776<br>(772 - 2,834)     | 3<br>(1 - 6)          | 1<br>(0 - 2)           | 51<br>(16 - 103)        | 526<br>(200 - 908)       | 1,195<br>(544 - 1,832)   |
| Hemorrhagic stroke                   | 2,653<br>(1,503 - 4,202)   | 24<br>(13 - 41)       | 10<br>(6 - 15)         | 329<br>(175 - 550)      | 1,237<br>(642 - 2,045)   | 1,053<br>(580 - 1,752)   |
| Hypertensive heart disease           | 1,003<br>(535 - 1,666)     | 4<br>(1 - 8)          | 2<br>(1 - 3)           | 88<br>(43 - 163)        | 363<br>(178 - 647)       | 546<br>(282 - 947)       |
| Cardiomyopathy and myocarditis       | 541<br>(320 - 866)         | 86<br>(31 - 156)      | 20<br>(10 - 33)        | 129<br>(66 - 226)       | 174<br>(89 - 305)        | 131<br>(71 - 269)        |
| Atrial fibrillation and flutter      | 4<br>(2 - 7)               | --                    | --                     | 0<br>(0 - 0)            | 1<br>(0 - 2)             | 3<br>(1 - 5)             |
| Aortic aneurysm                      | 132<br>(67 - 227)          | --                    | --                     | 18<br>(7 - 34)          | 56<br>(25 - 103)         | 59<br>(32 - 97)          |
| Peripheral vascular disease          | 4<br>(2 - 7)               | --                    | --                     | 0<br>(0 - 0)            | 1<br>(1 - 3)             | 3<br>(2 - 5)             |
| Endocarditis                         | 200<br>(98 - 392)          | 14<br>(5 - 31)        | 5<br>(2 - 9)           | 48<br>(23 - 95)         | 64<br>(28 - 132)         | 69<br>(31 - 154)         |

Web Table 31- Somalia deaths with 95% UI by age, sex, and cause in 2013

| Cause                                               | Both Sexes, All Ages     | Both Sexes, 0-4 Years | Both Sexes, 5-14 Years | Both Sexes, 15-49 Years | Both Sexes, 50-69 Years | Both Sexes, 70-80 Years |
|-----------------------------------------------------|--------------------------|-----------------------|------------------------|-------------------------|-------------------------|-------------------------|
| Other cardiovascular and circulatory diseases       | 1,398<br>(800 - 2,416)   | 78<br>(32 - 144)      | 23<br>(11 - 39)        | 245<br>(127 - 448)      | 570<br>(296 - 1,039)    | 482<br>(287 - 864)      |
| Chronic respiratory diseases                        | 1,788<br>(1,223 - 2,617) | 159<br>(82 - 279)     | 36<br>(23 - 53)        | 218<br>(132 - 365)      | 635<br>(372 - 1,038)    | 741<br>(511 - 1,054)    |
| Chronic obstructive pulmonary disease               | 945<br>(603 - 1,404)     | 35<br>(14 - 68)       | 12<br>(7 - 19)         | 76<br>(43 - 127)        | 362<br>(208 - 590)      | 461<br>(305 - 671)      |
| Pneumoconiosis                                      | 150<br>(76 - 258)        | 5<br>(2 - 14)         | 2<br>(1 - 4)           | 33<br>(17 - 60)         | 63<br>(29 - 119)        | 47<br>(22 - 78)         |
| Silicosis                                           | 40<br>(12 - 102)         | 2<br>(0 - 5)          | 1<br>(0 - 2)           | 8<br>(2 - 22)           | 16<br>(4 - 44)          | 14<br>(4 - 35)          |
| Asbestosis                                          | 14<br>(6 - 29)           | 1<br>(0 - 2)          | 0<br>(0 - 1)           | 3<br>(1 - 6)            | 7<br>(2 - 15)           | 3<br>(1 - 8)            |
| Coal workers pneumoconiosis                         | 25<br>(6 - 58)           | 0<br>(0 - 1)          | 0<br>(0 - 1)           | 5<br>(1 - 12)           | 12<br>(2 - 28)          | 8<br>(1 - 19)           |
| Other pneumoconiosis                                | 71<br>(32 - 135)         | 3<br>(1 - 7)          | 1<br>(1 - 2)           | 17<br>(8 - 32)          | 29<br>(11 - 59)         | 22<br>(9 - 42)          |
| Asthma                                              | 395<br>(236 - 681)       | 40<br>(14 - 87)       | 11<br>(6 - 21)         | 58<br>(30 - 120)        | 140<br>(72 - 266)       | 145<br>(84 - 255)       |
| Interstitial lung disease and pulmonary sarcoidosis | 132<br>(47 - 251)        | 4<br>(0 - 15)         | 1<br>(0 - 4)           | 16<br>(5 - 38)          | 48<br>(16 - 103)        | 63<br>(22 - 114)        |
| Other chronic respiratory diseases                  | 166<br>(91 - 260)        | 74<br>(40 - 130)      | 8<br>(4 - 14)          | 35<br>(15 - 64)         | 23<br>(8 - 48)          | 26<br>(11 - 48)         |
| Cirrhosis                                           | 1,089<br>(666 - 1,687)   | 30<br>(12 - 58)       | 21<br>(13 - 33)        | 285<br>(161 - 474)      | 526<br>(293 - 849)      | 226<br>(151 - 332)      |
| Cirrhosis due to hepatitis B                        | 312<br>(174 - 540)       | 1<br>(0 - 3)          | 4<br>(1 - 7)           | 77<br>(41 - 138)        | 160<br>(84 - 288)       | 71<br>(38 - 120)        |
| Cirrhosis due to hepatitis C                        | 184<br>(92 - 332)        | 1<br>(0 - 5)          | 2<br>(0 - 5)           | 41<br>(14 - 82)         | 96<br>(43 - 179)        | 44<br>(23 - 74)         |
| Cirrhosis due to alcohol use                        | 413<br>(232 - 658)       | --                    | --                     | 104<br>(53 - 178)       | 215<br>(113 - 357)      | 95<br>(58 - 145)        |
| Cirrhosis due to other causes                       | 179<br>(112 - 278)       | 27<br>(11 - 54)       | 16<br>(10 - 26)        | 63<br>(34 - 109)        | 56<br>(29 - 97)         | 17<br>(10 - 29)         |
| Digestive diseases                                  | 1,521<br>(984 - 2,265)   | 117<br>(55 - 243)     | 76<br>(51 - 110)       | 401<br>(228 - 647)      | 502<br>(285 - 800)      | 426<br>(286 - 608)      |
| Peptic ulcer disease                                | 436<br>(251 - 694)       | 13<br>(4 - 34)        | 9<br>(5 - 16)          | 102<br>(52 - 194)       | 169<br>(88 - 285)       | 143<br>(88 - 222)       |
| Gastritis and duodenitis                            | 66<br>(33 - 157)         | 7<br>(2 - 16)         | 5<br>(3 - 9)           | 16<br>(8 - 39)          | 19<br>(7 - 50)          | 19<br>(7 - 56)          |
| Appendicitis                                        | 145<br>(89 - 219)        | 17<br>(5 - 43)        | 18<br>(10 - 30)        | 43<br>(25 - 74)         | 39<br>(17 - 71)         | 29<br>(11 - 56)         |
| Paralytic ileus and intestinal obstruction          | 419<br>(243 - 653)       | 19<br>(7 - 46)        | 22<br>(12 - 37)        | 123<br>(57 - 205)       | 139<br>(70 - 237)       | 117<br>(70 - 188)       |
| Inguinal, femoral, and abdominal hernia             | 33<br>(17 - 55)          | 3<br>(1 - 7)          | 1<br>(1 - 2)           | 11<br>(5 - 22)          | 7<br>(3 - 13)           | 11<br>(5 - 18)          |
| Inflammatory bowel disease                          | 101<br>(54 - 158)        | 29<br>(10 - 63)       | 7<br>(3 - 11)          | 24<br>(11 - 43)         | 22<br>(9 - 40)          | 19<br>(8 - 33)          |
| Vascular intestinal disorders                       | 12<br>(6 - 26)           | 1<br>(0 - 2)          | 0<br>(0 - 1)           | 2<br>(1 - 5)            | 4<br>(2 - 9)            | 5<br>(2 - 10)           |
| Gallbladder and biliary diseases                    | 92<br>(54 - 146)         | 4<br>(1 - 8)          | 2<br>(1 - 4)           | 17<br>(9 - 30)          | 34<br>(18 - 59)         | 35<br>(18 - 55)         |
| Pancreatitis                                        | 65<br>(25 - 121)         | 2<br>(0 - 4)          | 1<br>(1 - 3)           | 27<br>(10 - 53)         | 22<br>(8 - 43)          | 12<br>(4 - 23)          |
| Other digestive diseases                            | 152<br>(92 - 260)        | 24<br>(9 - 52)        | 9<br>(5 - 16)          | 34<br>(17 - 63)         | 47<br>(23 - 84)         | 38<br>(21 - 70)         |
| Neurological disorders                              | 812<br>(568 - 1,104)     | 117<br>(55 - 217)     | 73<br>(43 - 117)       | 205<br>(113 - 363)      | 83<br>(47 - 136)        | 333<br>(243 - 445)      |
| Alzheimer disease and other dementias               | 325<br>(234 - 439)       | --                    | --                     | 0<br>(0 - 1)            | 36<br>(21 - 57)         | 289<br>(210 - 385)      |
| Parkinson disease                                   | 5<br>(2 - 8)             | --                    | --                     | 0<br>(0 - 1)            | 1<br>(0 - 2)            | 3<br>(1 - 7)            |
| Epilepsy                                            | 417<br>(268 - 620)       | 102<br>(45 - 197)     | 68<br>(39 - 110)       | 183<br>(98 - 336)       | 31<br>(16 - 54)         | 34<br>(17 - 56)         |
| Multiple sclerosis                                  | 2<br>(1 - 5)             | --                    | --                     | 1<br>(0 - 3)            | 1<br>(0 - 2)            | 0<br>(0 - 1)            |
| Other neurological disorders                        | 63<br>(41 - 96)          | 15<br>(8 - 35)        | 5<br>(3 - 9)           | 20<br>(11 - 31)         | 15<br>(8 - 24)          | 8<br>(5 - 11)           |
| Mental and substance use disorders                  | 193<br>(109 - 337)       | 11<br>(2 - 31)        | 0<br>(0 - 0)           | 122<br>(65 - 217)       | 51<br>(26 - 96)         | 9<br>(5 - 16)           |
| Schizophrenia                                       | 4<br>(2 - 8)             | --                    | --                     | 2<br>(1 - 4)            | 1<br>(1 - 3)            | 1<br>(0 - 1)            |
| Alcohol use disorders                               | 132<br>(63 - 257)        | --                    | --                     | 82<br>(37 - 167)        | 44<br>(21 - 88)         | 6<br>(3 - 13)           |
| Drug use disorders                                  | 57<br>(22 - 113)         | 11<br>(2 - 31)        | --                     | 37<br>(15 - 87)         | 6<br>(2 - 15)           | 2<br>(1 - 5)            |
| Opioid use disorders                                | 6<br>(2 - 12)            | 1<br>(0 - 4)          | --                     | 4<br>(2 - 9)            | 1<br>(0 - 1)            | 0<br>(0 - 1)            |
| Cocaine use disorders                               | 0<br>(0 - 1)             | 0<br>(0 - 0)          | --                     | 0<br>(0 - 0)            | 0<br>(0 - 0)            | 0<br>(0 - 0)            |
| Amphetamine use disorders                           | 0<br>(0 - 0)             | 0<br>(0 - 0)          | --                     | 0<br>(0 - 0)            | 0<br>(0 - 0)            | 0<br>(0 - 0)            |

Web Table 31- Somalia deaths with 95% UI by age, sex, and cause in 2013

| Cause                                               | Both Sexes, All Ages     | Both Sexes, 0-4 Years  | Both Sexes, 5-14 Years | Both Sexes, 15-49 Years | Both Sexes, 50-69 Years | Both Sexes, 70-80 Years |
|-----------------------------------------------------|--------------------------|------------------------|------------------------|-------------------------|-------------------------|-------------------------|
| Other drug use disorders                            | 50<br>(19 - 101)         | 10<br>(1 - 28)         | --                     | 33<br>(14 - 77)         | 5<br>(2 - 13)           | 2<br>(1 - 4)            |
| Eating disorders                                    | 0<br>(0 - 0)             | --                     | 0<br>(0 - 0)           | 0<br>(0 - 0)            | --                      | --                      |
| Anorexia nervosa                                    | 0<br>(0 - 0)             | --                     | 0<br>(0 - 0)           | 0<br>(0 - 0)            | --                      | --                      |
| Diabetes, urogenital, blood, and endocrine diseases | 2,820<br>(1,908 - 4,038) | 373<br>(198 - 604)     | 110<br>(73 - 161)      | 581<br>(360 - 925)      | 948<br>(556 - 1,510)    | 809<br>(574 - 1,099)    |
| Diabetes mellitus                                   | 1,189<br>(767 - 1,784)   | 13<br>(8 - 20)         | 7<br>(4 - 10)          | 146<br>(84 - 239)       | 553<br>(328 - 884)      | 470<br>(325 - 656)      |
| Acute glomerulonephritis                            | 69<br>(41 - 114)         | 10<br>(5 - 20)         | 4<br>(2 - 10)          | 18<br>(9 - 37)          | 24<br>(10 - 43)         | 12<br>(5 - 20)          |
| Chronic kidney disease                              | 493<br>(335 - 704)       | 54<br>(29 - 91)        | 24<br>(16 - 35)        | 141<br>(84 - 222)       | 132<br>(74 - 217)       | 141<br>(91 - 199)       |
| Chronic kidney disease due to diabetes mellitus     | 2<br>(1 - 3)             | 0<br>(0 - 0)           | 0<br>(0 - 0)           | 1<br>(0 - 1)            | 1<br>(0 - 1)            | 1<br>(0 - 1)            |
| Chronic kidney disease due to hypertension          | 150<br>(89 - 242)        | 4<br>(1 - 9)           | 2<br>(1 - 4)           | 27<br>(14 - 50)         | 53<br>(28 - 95)         | 64<br>(36 - 99)         |
| Chronic kidney disease due to glomerulonephritis    | 230<br>(152 - 334)       | 41<br>(21 - 70)        | 18<br>(11 - 26)        | 75<br>(42 - 123)        | 53<br>(27 - 93)         | 43<br>(23 - 69)         |
| Chronic kidney disease due to other causes          | 111<br>(54 - 172)        | 9<br>(3 - 18)          | 5<br>(2 - 9)           | 39<br>(15 - 68)         | 25<br>(11 - 47)         | 34<br>(14 - 61)         |
| Urinary diseases and male infertility               | 409<br>(260 - 627)       | 44<br>(22 - 80)        | 12<br>(7 - 19)         | 112<br>(57 - 188)       | 140<br>(78 - 236)       | 102<br>(66 - 153)       |
| Interstitial nephritis and urinary tract infections | 323<br>(203 - 498)       | 33<br>(16 - 64)        | 8<br>(4 - 13)          | 86<br>(43 - 149)        | 111<br>(59 - 191)       | 85<br>(54 - 128)        |
| Urolithiasis                                        | 15<br>(7 - 31)           | --                     | 1<br>(0 - 2)           | 5<br>(2 - 12)           | 6<br>(2 - 13)           | 3<br>(1 - 7)            |
| Other urinary diseases                              | 71<br>(35 - 137)         | 11<br>(4 - 23)         | 3<br>(1 - 5)           | 21<br>(8 - 42)          | 23<br>(9 - 51)          | 14<br>(5 - 33)          |
| Gynecological diseases                              | 11<br>(5 - 19)           | --                     | --                     | 4<br>(2 - 10)           | 5<br>(2 - 9)            | 2<br>(1 - 4)            |
| Uterine fibroids                                    | 3<br>(1 - 5)             | --                     | --                     | 1<br>(0 - 2)            | 1<br>(1 - 3)            | 1<br>(0 - 1)            |
| Polycystic ovarian syndrome                         | 0<br>(0 - 1)             | --                     | --                     | 0<br>(0 - 1)            | 0<br>(0 - 0)            | --                      |
| Endometriosis                                       | 1<br>(0 - 2)             | --                     | --                     | 1<br>(0 - 2)            | 0<br>(0 - 0)            | --                      |
| Genital prolapse                                    | 2<br>(1 - 3)             | --                     | --                     | 0<br>(0 - 1)            | 1<br>(0 - 2)            | 1<br>(0 - 1)            |
| Other gynecological diseases                        | 5<br>(2 - 10)            | --                     | --                     | 2<br>(1 - 5)            | 2<br>(1 - 5)            | 1<br>(0 - 2)            |
| Hemoglobinopathies and hemolytic anemias            | 338<br>(166 - 583)       | 174<br>(48 - 352)      | 49<br>(24 - 85)        | 74<br>(34 - 141)        | 25<br>(11 - 55)         | 17<br>(7 - 43)          |
| Thalassemias                                        | 86<br>(33 - 164)         | 61<br>(15 - 130)       | 14<br>(7 - 24)         | 12<br>(6 - 23)          | 0<br>(0 - 0)            | 0<br>(0 - 0)            |
| Sickle cell disorders                               | 13<br>(6 - 25)           | 8<br>(2 - 17)          | 2<br>(1 - 4)           | 3<br>(1 - 5)            | 0<br>(0 - 1)            | 0<br>(0 - 0)            |
| G6PD deficiency                                     | 63<br>(28 - 113)         | 34<br>(8 - 74)         | 11<br>(5 - 20)         | 15<br>(7 - 27)          | 3<br>(1 - 7)            | 0<br>(0 - 1)            |
| Other hemoglobinopathies and hemolytic anemias      | 175<br>(89 - 289)        | 71<br>(23 - 141)       | 22<br>(11 - 37)        | 45<br>(21 - 87)         | 21<br>(9 - 47)          | 16<br>(7 - 42)          |
| Endocrine, metabolic, blood, and immune disorders   | 311<br>(202 - 454)       | 77<br>(45 - 147)       | 13<br>(8 - 26)         | 86<br>(47 - 142)        | 69<br>(36 - 116)        | 65<br>(35 - 103)        |
| Musculoskeletal disorders                           | 80<br>(44 - 137)         | --                     | 10<br>(4 - 17)         | 33<br>(17 - 61)         | 23<br>(12 - 42)         | 14<br>(8 - 23)          |
| Rheumatoid arthritis                                | 24<br>(10 - 41)          | --                     | 2<br>(1 - 5)           | 6<br>(2 - 12)           | 9<br>(4 - 16)           | 6<br>(3 - 12)           |
| Other musculoskeletal disorders                     | 56<br>(31 - 100)         | --                     | 8<br>(3 - 13)          | 27<br>(13 - 52)         | 14<br>(7 - 26)          | 7<br>(4 - 13)           |
| Other non-communicable diseases                     | 2,086<br>(1,184 - 4,131) | 1,745<br>(866 - 3,795) | 85<br>(47 - 159)       | 105<br>(64 - 171)       | 67<br>(37 - 109)        | 84<br>(55 - 125)        |
| Congenital anomalies                                | 1,809<br>(929 - 3,875)   | 1,649<br>(805 - 3,663) | 79<br>(41 - 152)       | 59<br>(36 - 94)         | 12<br>(7 - 20)          | 10<br>(7 - 15)          |
| Neural tube defects                                 | 548<br>(192 - 1,277)     | 517<br>(179 - 1,214)   | 18<br>(4 - 46)         | 12<br>(3 - 27)          | 1<br>(0 - 4)            | 1<br>(0 - 2)            |
| Congenital heart anomalies                          | 637<br>(246 - 1,676)     | 569<br>(202 - 1,583)   | 35<br>(14 - 76)        | 25<br>(13 - 42)         | 4<br>(2 - 7)            | 4<br>(2 - 7)            |
| Cleft lip and cleft palate                          | 11<br>(2 - 32)           | 11<br>(2 - 32)         | --                     | --                      | --                      | --                      |
| Down syndrome                                       | 159<br>(34 - 414)        | 136<br>(22 - 384)      | 11<br>(3 - 24)         | 9<br>(4 - 18)           | 2<br>(1 - 4)            | 0<br>(0 - 1)            |
| Chromosomal unbalanced rearrangements               | 63<br>(14 - 211)         | 59<br>(13 - 202)       | 2<br>(0 - 6)           | 2<br>(1 - 4)            | 0<br>(0 - 1)            | 0<br>(0 - 0)            |
| Other congenital anomalies                          | 390<br>(110 - 1,498)     | 356<br>(91 - 1,426)    | 14<br>(4 - 46)         | 11<br>(5 - 24)          | 4<br>(2 - 8)            | 5<br>(3 - 9)            |
| Skin and subcutaneous diseases                      | 256<br>(176 - 359)       | 74<br>(39 - 130)       | 6<br>(4 - 10)          | 47<br>(27 - 79)         | 54<br>(30 - 89)         | 74<br>(48 - 113)        |
| Cellulitis                                          | 216<br>(135 - 335)       | 63<br>(30 - 117)       | 5<br>(3 - 9)           | 40<br>(20 - 72)         | 47<br>(25 - 78)         | 60<br>(34 - 94)         |

Web Table 31- Somalia deaths with 95% UI by age, sex, and cause in 2013

| Cause                                           | Both Sexes, All Ages     | Both Sexes, 0-4 Years  | Both Sexes, 5-14 Years | Both Sexes, 15-49 Years  | Both Sexes, 50-69 Years | Both Sexes, 70-80 Years |
|-------------------------------------------------|--------------------------|------------------------|------------------------|--------------------------|-------------------------|-------------------------|
| Pyoderma                                        | 26<br>(4 - 70)           | 10<br>(1 - 29)         | 1<br>(0 - 1)           | 4<br>(1 - 12)            | 5<br>(1 - 15)           | 7<br>(1 - 20)           |
| Decubitus ulcer                                 | 11<br>(2 - 26)           | 1<br>(0 - 2)           | 0<br>(0 - 1)           | 2<br>(0 - 4)             | 2<br>(0 - 5)            | 7<br>(1 - 17)           |
| Other skin and subcutaneous diseases            | 3<br>(0 - 10)            | 1<br>(0 - 4)           | 0<br>(0 - 1)           | 1<br>(0 - 3)             | 1<br>(0 - 2)            | 1<br>(0 - 2)            |
| Sudden infant death syndrome                    | 22<br>(6 - 60)           | 22<br>(6 - 60)         | --                     | --                       | --                      | --                      |
| Injuries                                        | 5,466<br>(3,865 - 7,517) | 1,356<br>(761 - 2,107) | 631<br>(441 - 849)     | 2,209<br>(1,346 - 3,390) | 806<br>(437 - 1,318)    | 463<br>(301 - 661)      |
| Transport injuries                              | 2,149<br>(1,425 - 3,025) | 329<br>(171 - 571)     | 285<br>(189 - 409)     | 951<br>(556 - 1,482)     | 396<br>(219 - 633)      | 188<br>(115 - 276)      |
| Road injuries                                   | 2,029<br>(1,343 - 2,871) | 294<br>(153 - 517)     | 263<br>(175 - 379)     | 922<br>(542 - 1,438)     | 377<br>(209 - 605)      | 174<br>(108 - 256)      |
| Pedestrian road injuries                        | 1,028<br>(662 - 1,490)   | 160<br>(80 - 289)      | 146<br>(92 - 217)      | 431<br>(234 - 707)       | 194<br>(102 - 328)      | 97<br>(56 - 154)        |
| Cyclist road injuries                           | 100<br>(60 - 156)        | 14<br>(5 - 29)         | 16<br>(9 - 28)         | 36<br>(18 - 62)          | 24<br>(13 - 42)         | 10<br>(5 - 16)          |
| Motorcyclist road injuries                      | 150<br>(81 - 259)        | 15<br>(7 - 30)         | 11<br>(5 - 20)         | 93<br>(45 - 168)         | 22<br>(10 - 41)         | 9<br>(5 - 16)           |
| Motor vehicle road injuries                     | 684<br>(415 - 1,024)     | 85<br>(41 - 157)       | 77<br>(47 - 123)       | 349<br>(190 - 575)       | 122<br>(65 - 210)       | 50<br>(28 - 77)         |
| Other road injuries                             | 67<br>(30 - 146)         | 20<br>(7 - 42)         | 12<br>(5 - 26)         | 14<br>(4 - 53)           | 14<br>(6 - 30)          | 7<br>(3 - 15)           |
| Other transport injuries                        | 120<br>(77 - 173)        | 36<br>(17 - 65)        | 22<br>(13 - 35)        | 29<br>(15 - 55)          | 19<br>(9 - 33)          | 14<br>(5 - 23)          |
| Unintentional injuries                          | 2,464<br>(1,761 - 3,453) | 981<br>(535 - 1,587)   | 313<br>(203 - 443)     | 635<br>(365 - 1,099)     | 300<br>(167 - 498)      | 235<br>(144 - 348)      |
| Falls                                           | 233<br>(118 - 364)       | 34<br>(18 - 58)        | 24<br>(12 - 41)        | 69<br>(30 - 135)         | 43<br>(18 - 76)         | 63<br>(25 - 103)        |
| Drowning                                        | 582<br>(354 - 888)       | 233<br>(96 - 469)      | 122<br>(68 - 187)      | 176<br>(98 - 291)        | 37<br>(19 - 63)         | 14<br>(7 - 22)          |
| Fire, heat, and hot substances                  | 602<br>(343 - 1,028)     | 320<br>(145 - 604)     | 64<br>(32 - 118)       | 107<br>(48 - 265)        | 64<br>(31 - 144)        | 47<br>(25 - 100)        |
| Poisonings                                      | 157<br>(95 - 281)        | 59<br>(26 - 125)       | 11<br>(6 - 22)         | 59<br>(31 - 130)         | 22<br>(10 - 39)         | 6<br>(3 - 10)           |
| Exposure to mechanical forces                   | 361<br>(253 - 535)       | 133<br>(70 - 242)      | 43<br>(25 - 71)        | 116<br>(68 - 200)        | 52<br>(28 - 89)         | 17<br>(10 - 26)         |
| Unintentional firearm injuries                  | 84<br>(55 - 128)         | 16<br>(8 - 29)         | 6<br>(3 - 11)          | 50<br>(27 - 83)          | 8<br>(4 - 15)           | 4<br>(2 - 6)            |
| Unintentional suffocation                       | 67<br>(33 - 133)         | 43<br>(15 - 105)       | 7<br>(3 - 13)          | 9<br>(4 - 16)            | 7<br>(3 - 13)           | 2<br>(1 - 3)            |
| Other exposure to mechanical forces             | 210<br>(141 - 327)       | 74<br>(33 - 143)       | 30<br>(15 - 53)        | 57<br>(31 - 116)         | 37<br>(19 - 65)         | 12<br>(6 - 19)          |
| Adverse effects of medical treatment            | 235<br>(135 - 391)       | 77<br>(39 - 142)       | 10<br>(5 - 18)         | 43<br>(18 - 94)          | 47<br>(21 - 97)         | 57<br>(19 - 106)        |
| Animal contact                                  | 128<br>(70 - 232)        | 37<br>(15 - 92)        | 22<br>(12 - 45)        | 35<br>(17 - 65)          | 22<br>(8 - 40)          | 12<br>(5 - 21)          |
| Venomous animal contact                         | 80<br>(42 - 167)         | 28<br>(10 - 77)        | 13<br>(6 - 29)         | 20<br>(9 - 40)           | 12<br>(5 - 23)          | 8<br>(3 - 14)           |
| Non-venomous animal contact                     | 48<br>(24 - 79)          | 9<br>(3 - 21)          | 10<br>(5 - 18)         | 15<br>(7 - 26)           | 10<br>(3 - 20)          | 4<br>(2 - 8)            |
| Foreign body                                    | 108<br>(62 - 186)        | 72<br>(34 - 144)       | 7<br>(4 - 12)          | 8<br>(4 - 15)            | 6<br>(3 - 10)           | 15<br>(8 - 27)          |
| Pulmonary aspiration and foreign body in airway | 103<br>(58 - 180)        | 71<br>(33 - 142)       | 6<br>(4 - 11)          | 7<br>(4 - 13)            | 4<br>(2 - 8)            | 15<br>(7 - 25)          |
| Foreign body in other body part                 | 5<br>(3 - 8)             | 2<br>(1 - 3)           | 1<br>(0 - 1)           | 1<br>(0 - 2)             | 1<br>(1 - 2)            | 1<br>(0 - 1)            |
| Other unintentional injuries                    | 57<br>(22 - 101)         | 16<br>(5 - 32)         | 10<br>(4 - 20)         | 21<br>(7 - 42)           | 6<br>(2 - 13)           | 4<br>(2 - 8)            |
| Self-harm and interpersonal violence            | 853<br>(456 - 1,368)     | 46<br>(22 - 85)        | 34<br>(17 - 54)        | 623<br>(317 - 1,040)     | 111<br>(48 - 211)       | 40<br>(16 - 75)         |
| Self-harm                                       | 332<br>(144 - 616)       | --                     | 9<br>(3 - 22)          | 220<br>(92 - 414)        | 69<br>(26 - 145)        | 34<br>(10 - 66)         |
| Interpersonal violence                          | 521<br>(253 - 917)       | 46<br>(22 - 85)        | 24<br>(11 - 41)        | 404<br>(175 - 762)       | 41<br>(16 - 77)         | 6<br>(2 - 11)           |
| Assault by firearm                              | 172<br>(59 - 330)        | 10<br>(3 - 20)         | 5<br>(2 - 9)           | 144<br>(47 - 285)        | 12<br>(4 - 25)          | 1<br>(0 - 2)            |
| Assault by sharp object                         | 126<br>(58 - 269)        | 8<br>(2 - 17)          | 4<br>(1 - 7)           | 101<br>(44 - 233)        | 12<br>(4 - 22)          | 2<br>(1 - 3)            |
| Assault by other means                          | 223<br>(101 - 397)       | 29<br>(14 - 53)        | 15<br>(7 - 26)         | 159<br>(60 - 307)        | 17<br>(6 - 35)          | 3<br>(1 - 6)            |
| Forces of nature, war, and legal intervention   | 0<br>(0 - 0)             | 0<br>(0 - 0)           | --                     | --                       | --                      | --                      |
| Exposure to forces of nature                    | 0<br>(0 - 0)             | 0<br>(0 - 0)           | --                     | --                       | --                      | --                      |

Web Table 31- Somalia deaths with 95% UI by age, sex, and cause in 2013

| Cause                                                             | Males, All Ages             | Males, 0-4 Years            | Males, 5-14 Years        | Males, 15-49 Years         | Males, 50-69 Years        | Males, 70-80 Years       |
|-------------------------------------------------------------------|-----------------------------|-----------------------------|--------------------------|----------------------------|---------------------------|--------------------------|
| All causes                                                        | 56,858<br>(45,119 - 73,213) | 27,552<br>(21,259 - 35,494) | 2,631<br>(1,968 - 3,434) | 10,243<br>(6,428 - 15,200) | 9,412<br>(5,812 - 15,185) | 7,019<br>(5,381 - 9,499) |
| Communicable, maternal, neonatal, and nutritional diseases        | 40,517<br>(32,276 - 51,001) | 25,215<br>(19,492 - 32,644) | 1,936<br>(1,429 - 2,562) | 6,069<br>(3,831 - 8,878)   | 4,295<br>(2,648 - 6,822)  | 3,002<br>(2,238 - 4,125) |
| HIV/AIDS and tuberculosis                                         | 4,881<br>(3,368 - 7,363)    | 483<br>(273 - 817)          | 168<br>(114 - 239)       | 2,392<br>(1,572 - 3,660)   | 1,345<br>(824 - 2,233)    | 492<br>(301 - 824)       |
| Tuberculosis                                                      | 3,702<br>(2,227 - 6,112)    | 354<br>(161 - 671)          | 76<br>(39 - 136)         | 1,625<br>(898 - 2,756)     | 1,176<br>(654 - 2,042)    | 471<br>(283 - 805)       |
| HIV/AIDS                                                          | 1,179<br>(782 - 1,671)      | 129<br>(86 - 186)           | 92<br>(61 - 126)         | 768<br>(463 - 1,183)       | 170<br>(112 - 236)        | 20<br>(12 - 31)          |
| HIV/AIDS resulting in mycobacterial infection                     | 85<br>(54 - 127)            | 9<br>(6 - 14)               | 6<br>(4 - 9)             | 55<br>(32 - 89)            | 13<br>(8 - 19)            | 2<br>(1 - 3)             |
| HIV/AIDS resulting in other diseases                              | 1,094<br>(729 - 1,556)      | 120<br>(80 - 173)           | 86<br>(57 - 118)         | 712<br>(428 - 1,100)       | 157<br>(104 - 217)        | 19<br>(11 - 29)          |
| Diarrhea, lower respiratory, and other common infectious diseases | 22,580<br>(17,032 - 29,349) | 13,950<br>(9,911 - 19,438)  | 1,193<br>(798 - 1,659)   | 2,803<br>(1,618 - 4,332)   | 2,469<br>(1,406 - 4,062)  | 2,165<br>(1,526 - 3,027) |
| Diarrheal diseases                                                | 9,722<br>(6,191 - 14,160)   | 5,011<br>(2,200 - 8,616)    | 563<br>(285 - 917)       | 1,530<br>(771 - 2,569)     | 1,421<br>(699 - 2,517)    | 1,197<br>(689 - 1,816)   |
| Intestinal infectious diseases                                    | 247<br>(114 - 451)          | 91<br>(40 - 174)            | 64<br>(27 - 127)         | 81<br>(33 - 174)           | 9<br>(3 - 18)             | 3<br>(1 - 6)             |
| Typhoid fever                                                     | 168<br>(69 - 328)           | 54<br>(20 - 112)            | 48<br>(18 - 96)          | 59<br>(22 - 134)           | 6<br>(2 - 13)             | 1<br>(0 - 3)             |
| Paratyphoid fever                                                 | 45<br>(18 - 90)             | 16<br>(6 - 37)              | 13<br>(4 - 27)           | 14<br>(5 - 34)             | 1<br>(0 - 3)              | 0<br>(0 - 1)             |
| Other intestinal infectious diseases                              | 35<br>(17 - 58)             | 22<br>(9 - 42)              | 3<br>(1 - 8)             | 7<br>(2 - 17)              | 2<br>(0 - 7)              | 1<br>(0 - 4)             |
| Lower respiratory infections                                      | 7,586<br>(4,964 - 11,042)   | 5,169<br>(2,922 - 8,229)    | 236<br>(119 - 402)       | 531<br>(276 - 892)         | 761<br>(409 - 1,322)      | 888<br>(579 - 1,332)     |
| Upper respiratory infections                                      | 9<br>(3 - 24)               | 5<br>(0 - 18)               | 0<br>(0 - 2)             | 2<br>(0 - 6)               | 1<br>(0 - 4)              | 1<br>(0 - 2)             |
| Otitis media                                                      | 7<br>(4 - 12)               | 4<br>(2 - 9)                | 1<br>(0 - 1)             | 1<br>(1 - 2)               | 1<br>(0 - 1)              | 1<br>(0 - 1)             |
| Meningitis                                                        | 2,073<br>(1,203 - 3,634)    | 1,323<br>(549 - 2,771)      | 187<br>(92 - 345)        | 342<br>(178 - 583)         | 165<br>(78 - 296)         | 56<br>(27 - 100)         |
| Pneumococcal meningitis                                           | 442<br>(242 - 786)          | 229<br>(87 - 528)           | 53<br>(19 - 104)         | 97<br>(37 - 177)           | 46<br>(19 - 91)           | 17<br>(8 - 34)           |
| H influenzae type B meningitis                                    | 509<br>(255 - 1,003)        | 400<br>(160 - 876)          | 43<br>(17 - 86)          | 45<br>(18 - 93)            | 17<br>(6 - 38)            | 6<br>(2 - 12)            |
| Meningococcal meningitis                                          | 256<br>(138 - 454)          | 129<br>(50 - 300)           | 20<br>(7 - 42)           | 61<br>(24 - 117)           | 35<br>(14 - 66)           | 11<br>(4 - 22)           |
| Other meningitis                                                  | 866<br>(487 - 1,507)        | 565<br>(224 - 1,190)        | 71<br>(32 - 136)         | 140<br>(66 - 244)          | 67<br>(27 - 131)          | 22<br>(9 - 41)           |
| Encephalitis                                                      | 41<br>(25 - 68)             | 27<br>(13 - 53)             | 2<br>(1 - 6)             | 8<br>(4 - 13)              | 3<br>(1 - 5)              | 1<br>(1 - 2)             |
| Diphtheria                                                        | 31<br>(0 - 222)             | 26<br>(0 - 220)             | 4<br>(0 - 30)            | 1<br>(0 - 6)               | 0<br>(0 - 2)              | --                       |
| Whooping cough                                                    | 1,150<br>(1 - 5,348)        | 1,087<br>(1 - 5,026)        | 50<br>(0 - 267)          | 11<br>(0 - 58)             | 1<br>(0 - 6)              | --                       |
| Tetanus                                                           | 1,624<br>(788 - 3,414)      | 1,139<br>(398 - 2,506)      | 77<br>(24 - 191)         | 288<br>(88 - 734)          | 104<br>(26 - 300)         | 16<br>(4 - 42)           |
| Measles                                                           | 63<br>(6 - 293)             | 57<br>(5 - 265)             | 6<br>(1 - 28)            | 1<br>(0 - 4)               | 0<br>(0 - 0)              | --                       |
| Varicella and herpes zoster                                       | 26<br>(7 - 66)              | 11<br>(0 - 47)              | 2<br>(0 - 12)            | 6<br>(1 - 18)              | 2<br>(0 - 7)              | 4<br>(0 - 17)            |
| Neglected tropical diseases and malaria                           | 3,940<br>(2,116 - 6,922)    | 2,774<br>(1,054 - 5,670)    | 403<br>(240 - 652)       | 534<br>(276 - 889)         | 160<br>(71 - 290)         | 68<br>(31 - 131)         |
| Malaria                                                           | 3,314<br>(1,561 - 6,276)    | 2,567<br>(869 - 5,468)      | 253<br>(115 - 466)       | 319<br>(142 - 597)         | 122<br>(46 - 238)         | 54<br>(18 - 117)         |
| Leishmaniasis                                                     | 477<br>(277 - 721)          | 156<br>(57 - 297)           | 123<br>(59 - 210)        | 174<br>(79 - 302)          | 19<br>(8 - 35)            | 6<br>(3 - 10)            |
| Visceral leishmaniasis                                            | 477<br>(277 - 721)          | 156<br>(57 - 297)           | 123<br>(59 - 210)        | 174<br>(79 - 302)          | 19<br>(8 - 35)            | 6<br>(3 - 10)            |
| Schistosomiasis                                                   | 21<br>(12 - 34)             | 1<br>(0 - 1)                | 1<br>(0 - 2)             | 10<br>(5 - 17)             | 7<br>(3 - 14)             | 2<br>(1 - 4)             |
| Cysticercosis                                                     | 2<br>(0 - 5)                | 0<br>(0 - 0)                | 0<br>(0 - 0)             | 1<br>(0 - 3)               | 0<br>(0 - 1)              | 0<br>(0 - 0)             |
| Cystic echinococcosis                                             | 3<br>(2 - 4)                | 1<br>(0 - 1)                | 1<br>(0 - 1)             | 1<br>(1 - 2)               | 0<br>(0 - 1)              | 0<br>(0 - 0)             |
| Dengue                                                            | 1<br>(1 - 2)                | 0<br>(0 - 1)                | 0<br>(0 - 0)             | 1<br>(0 - 1)               | 0<br>(0 - 1)              | 0<br>(0 - 0)             |
| Yellow fever                                                      | 1<br>(0 - 2)                | 0<br>(0 - 0)                | 0<br>(0 - 1)             | 0<br>(0 - 2)               | 0<br>(0 - 0)              | 0<br>(0 - 0)             |
| Rabies                                                            | 68<br>(31 - 123)            | 19<br>(5 - 46)              | 22<br>(9 - 45)           | 21<br>(8 - 50)             | 5<br>(1 - 12)             | 1<br>(0 - 2)             |
| Intestinal nematode infections                                    | 19<br>(7 - 39)              | 16<br>(5 - 35)              | 2<br>(0 - 7)             | 1<br>(0 - 5)               | 0<br>(0 - 2)              | 0<br>(0 - 1)             |
| Ascariasis                                                        | 19<br>(7 - 39)              | 16<br>(5 - 35)              | 2<br>(0 - 7)             | 1<br>(0 - 5)               | 0<br>(0 - 2)              | 0<br>(0 - 1)             |
| Other neglected tropical diseases                                 | 35<br>(15 - 70)             | 16<br>(5 - 38)              | 2<br>(1 - 4)             | 7<br>(3 - 16)              | 6<br>(2 - 13)             | 4<br>(2 - 9)             |



Web Table 31- Somalia deaths with 95% UI by age, sex, and cause in 2013

| Cause                                                            | Males, All Ages            | Males, 0-4 Years         | Males, 5-14 Years  | Males, 15-49 Years       | Males, 50-69 Years       | Males, 70-80 Years       |
|------------------------------------------------------------------|----------------------------|--------------------------|--------------------|--------------------------|--------------------------|--------------------------|
| Maternal disorders                                               | --                         | --                       | --                 | --                       | --                       | --                       |
| Maternal hemorrhage                                              | --                         | --                       | --                 | --                       | --                       | --                       |
| Maternal sepsis and other maternal infections                    | --                         | --                       | --                 | --                       | --                       | --                       |
| Maternal hypertensive disorders                                  | --                         | --                       | --                 | --                       | --                       | --                       |
| Maternal obstructed labor                                        | --                         | --                       | --                 | --                       | --                       | --                       |
| Maternal abortive outcome                                        | --                         | --                       | --                 | --                       | --                       | --                       |
| Indirect maternal deaths                                         | --                         | --                       | --                 | --                       | --                       | --                       |
| Late maternal deaths                                             | --                         | --                       | --                 | --                       | --                       | --                       |
| Maternal deaths aggravated by HIV/AIDS                           | --                         | --                       | --                 | --                       | --                       | --                       |
| Other maternal disorders                                         | --                         | --                       | --                 | --                       | --                       | --                       |
| Neonatal disorders                                               | 5,746<br>(4,142 - 8,030)   | 5,746<br>(4,142 - 8,030) | --                 | --                       | --                       | --                       |
| Neonatal preterm birth complications                             | 1,786<br>(721 - 3,187)     | 1,786<br>(721 - 3,187)   | --                 | --                       | --                       | --                       |
| Neonatal encephalopathy due to birth asphyxia and trauma         | 1,435<br>(579 - 2,689)     | 1,435<br>(579 - 2,689)   | --                 | --                       | --                       | --                       |
| Neonatal sepsis and other neonatal infections                    | 1,110<br>(404 - 2,376)     | 1,110<br>(404 - 2,376)   | --                 | --                       | --                       | --                       |
| Hemolytic disease and other neonatal jaundice                    | 55<br>(17 - 143)           | 55<br>(17 - 143)         | --                 | --                       | --                       | --                       |
| Other neonatal disorders                                         | 1,359<br>(535 - 2,730)     | 1,359<br>(535 - 2,730)   | --                 | --                       | --                       | --                       |
| Nutritional deficiencies                                         | 2,781<br>(1,394 - 4,587)   | 1,904<br>(799 - 3,455)   | 137<br>(71 - 247)  | 248<br>(116 - 439)       | 249<br>(112 - 452)       | 244<br>(123 - 401)       |
| Protein-energy malnutrition                                      | 2,260<br>(1,051 - 3,879)   | 1,680<br>(685 - 3,079)   | 109<br>(45 - 206)  | 137<br>(37 - 291)        | 170<br>(56 - 349)        | 163<br>(55 - 306)        |
| Iodine deficiency                                                | 11<br>(1 - 60)             | 7<br>(0 - 56)            | 1<br>(0 - 6)       | 2<br>(0 - 9)             | 1<br>(0 - 7)             | 1<br>(0 - 5)             |
| Iron-deficiency anemia                                           | 500<br>(105 - 1,342)       | 216<br>(16 - 833)        | 27<br>(4 - 75)     | 105<br>(22 - 240)        | 76<br>(15 - 192)         | 77<br>(16 - 186)         |
| Other nutritional deficiencies                                   | 10<br>(3 - 24)             | 1<br>(0 - 6)             | 1<br>(0 - 2)       | 3<br>(1 - 9)             | 2<br>(0 - 5)             | 2<br>(1 - 6)             |
| Other communicable, maternal, neonatal, and nutritional diseases | 589<br>(345 - 1,177)       | 358<br>(176 - 721)       | 34<br>(19 - 68)    | 92<br>(45 - 220)         | 71<br>(29 - 156)         | 34<br>(13 - 80)          |
| Sexually transmitted diseases excluding HIV                      | 258<br>(128 - 485)         | 219<br>(97 - 435)        | 17<br>(8 - 33)     | 10<br>(2 - 23)           | 9<br>(2 - 24)            | 4<br>(1 - 10)            |
| Syphilis                                                         | 250<br>(117 - 478)         | 219<br>(97 - 435)        | 16<br>(7 - 33)     | 5<br>(1 - 12)            | 6<br>(1 - 17)            | 3<br>(1 - 8)             |
| Chlamydial infection                                             | --                         | --                       | --                 | --                       | --                       | --                       |
| Gonococcal infection                                             | 5<br>(1 - 10)              | --                       | 0<br>(0 - 1)       | 3<br>(1 - 6)             | 2<br>(0 - 4)             | 0<br>(0 - 1)             |
| Other sexually transmitted diseases                              | 3<br>(1 - 7)               | --                       | 0<br>(0 - 1)       | 2<br>(1 - 5)             | 1<br>(0 - 3)             | 0<br>(0 - 0)             |
| Hepatitis                                                        | 67<br>(43 - 105)           | 13<br>(6 - 26)           | 5<br>(3 - 7)       | 28<br>(14 - 54)          | 16<br>(9 - 29)           | 4<br>(3 - 7)             |
| Acute hepatitis A                                                | 8<br>(2 - 18)              | 5<br>(1 - 12)            | 2<br>(1 - 3)       | 1<br>(0 - 4)             | 0<br>(0 - 0)             | 0<br>(0 - 0)             |
| Acute hepatitis B                                                | 44<br>(26 - 70)            | 8<br>(3 - 17)            | 2<br>(1 - 4)       | 16<br>(7 - 30)           | 14<br>(7 - 25)           | 4<br>(2 - 6)             |
| Acute hepatitis C                                                | 1<br>(0 - 3)               | --                       | 0<br>(0 - 0)       | 1<br>(0 - 2)             | 0<br>(0 - 1)             | 0<br>(0 - 0)             |
| Acute hepatitis E                                                | 13<br>(5 - 28)             | 0<br>(0 - 0)             | 1<br>(0 - 1)       | 10<br>(4 - 23)           | 2<br>(1 - 5)             | 0<br>(0 - 1)             |
| Other infectious diseases                                        | 264<br>(119 - 875)         | 125<br>(44 - 461)        | 13<br>(5 - 42)     | 54<br>(21 - 174)         | 46<br>(14 - 125)         | 26<br>(8 - 70)           |
| Non-communicable diseases                                        | 12,777<br>(8,801 - 18,415) | 1,586<br>(830 - 3,231)   | 320<br>(225 - 447) | 2,450<br>(1,438 - 3,825) | 4,630<br>(2,799 - 7,639) | 3,791<br>(2,841 - 5,186) |
| Neoplasms                                                        | 1,775<br>(1,179 - 2,720)   | 81<br>(46 - 135)         | 59<br>(40 - 83)    | 395<br>(233 - 637)       | 795<br>(468 - 1,318)     | 445<br>(318 - 619)       |
| Esophageal cancer                                                | 229<br>(130 - 385)         | --                       | --                 | 27<br>(13 - 51)          | 141<br>(74 - 246)        | 61<br>(38 - 97)          |
| Stomach cancer                                                   | 167<br>(105 - 268)         | --                       | --                 | 32<br>(17 - 55)          | 84<br>(49 - 141)         | 50<br>(34 - 74)          |
| Liver cancer                                                     | 210<br>(129 - 341)         | --                       | 4<br>(2 - 7)       | 78<br>(34 - 136)         | 95<br>(54 - 159)         | 34<br>(21 - 52)          |
| Liver cancer due to hepatitis B                                  | 57<br>(24 - 130)           | --                       | 1<br>(0 - 3)       | 27<br>(7 - 68)           | 23<br>(6 - 54)           | 6<br>(2 - 13)            |
| Liver cancer due to hepatitis C                                  | 93<br>(38 - 172)           | --                       | 1<br>(0 - 2)       | 30<br>(7 - 66)           | 45<br>(17 - 86)          | 17<br>(8 - 29)           |

Web Table 31- Somalia deaths with 95% UI by age, sex, and cause in 2013

| Cause                                | Males, All Ages          | Males, 0-4 Years  | Males, 5-14 Years | Males, 15-49 Years   | Males, 50-69 Years       | Males, 70-80 Years       |
|--------------------------------------|--------------------------|-------------------|-------------------|----------------------|--------------------------|--------------------------|
| Liver cancer due to alcohol use      | 33<br>(14 - 74)          | --                | --                | 8<br>(2 - 21)        | 17<br>(6 - 42)           | 8<br>(3 - 16)            |
| Liver cancer due to other causes     | 27<br>(13 - 59)          | --                | 2<br>(1 - 4)      | 13<br>(5 - 28)       | 10<br>(4 - 25)           | 3<br>(1 - 6)             |
| Larynx cancer                        | 24<br>(14 - 38)          | --                | --                | 4<br>(2 - 6)         | 12<br>(7 - 21)           | 8<br>(5 - 12)            |
| Tracheal, bronchus and lung cancer   | 157<br>(96 - 251)        | --                | --                | 14<br>(7 - 26)       | 107<br>(62 - 179)        | 36<br>(24 - 52)          |
| Breast cancer                        | 12<br>(6 - 21)           | --                | --                | 2<br>(1 - 5)         | 7<br>(3 - 13)            | 3<br>(1 - 5)             |
| Cervical cancer                      | --                       | --                | --                | --                   | --                       | --                       |
| Uterine cancer                       | --                       | --                | --                | --                   | --                       | --                       |
| Prostate cancer                      | 137<br>(74 - 219)        | --                | --                | 3<br>(1 - 7)         | 46<br>(22 - 81)          | 88<br>(49 - 137)         |
| Colon and rectum cancer              | 134<br>(82 - 211)        | --                | --                | 42<br>(23 - 69)      | 60<br>(35 - 102)         | 31<br>(22 - 45)          |
| Lip and oral cavity cancer           | 30<br>(16 - 50)          | --                | --                | 6<br>(3 - 12)        | 16<br>(8 - 29)           | 7<br>(4 - 12)            |
| Nasopharynx cancer                   | 10<br>(6 - 17)           | --                | 1<br>(0 - 1)      | 6<br>(3 - 10)        | 4<br>(2 - 6)             | 1<br>(0 - 1)             |
| Other pharynx cancer                 | 16<br>(9 - 26)           | --                | --                | 4<br>(2 - 7)         | 9<br>(5 - 16)            | 3<br>(2 - 5)             |
| Gallbladder and biliary tract cancer | 19<br>(11 - 30)          | --                | --                | 7<br>(3 - 11)        | 8<br>(4 - 14)            | 4<br>(2 - 6)             |
| Pancreatic cancer                    | 47<br>(29 - 73)          | --                | --                | 12<br>(7 - 20)       | 26<br>(15 - 43)          | 8<br>(5 - 12)            |
| Malignant skin melanoma              | 9<br>(5 - 18)            | --                | --                | 4<br>(2 - 7)         | 4<br>(2 - 7)             | 2<br>(1 - 4)             |
| Non-melanoma skin cancer             | 8<br>(4 - 13)            | --                | --                | 1<br>(1 - 2)         | 3<br>(1 - 7)             | 3<br>(2 - 6)             |
| Ovarian cancer                       | --                       | --                | --                | --                   | --                       | --                       |
| Testicular cancer                    | 10<br>(5 - 17)           | --                | --                | 6<br>(3 - 9)         | 3<br>(1 - 7)             | 1<br>(1 - 2)             |
| Kidney cancer                        | 38<br>(25 - 58)          | 8<br>(3 - 18)     | 2<br>(1 - 5)      | 5<br>(2 - 8)         | 17<br>(9 - 30)           | 6<br>(4 - 9)             |
| Bladder cancer                       | 54<br>(34 - 84)          | --                | --                | 6<br>(3 - 11)        | 24<br>(14 - 42)          | 23<br>(15 - 36)          |
| Brain and nervous system cancer      | 34<br>(18 - 53)          | 0<br>(0 - 1)      | 5<br>(3 - 8)      | 14<br>(6 - 23)       | 11<br>(5 - 20)           | 4<br>(2 - 7)             |
| Thyroid cancer                       | 4<br>(2 - 6)             | --                | 0<br>(0 - 0)      | 1<br>(0 - 1)         | 2<br>(1 - 3)             | 1<br>(1 - 2)             |
| Mesothelioma                         | 3<br>(2 - 6)             | --                | --                | 0<br>(0 - 1)         | 2<br>(1 - 4)             | 1<br>(0 - 2)             |
| Hodgkin lymphoma                     | 17<br>(8 - 32)           | 2<br>(1 - 4)      | 2<br>(1 - 4)      | 6<br>(2 - 16)        | 5<br>(2 - 9)             | 3<br>(1 - 5)             |
| Non-Hodgkin lymphoma                 | 133<br>(84 - 206)        | 24<br>(10 - 47)   | 21<br>(11 - 35)   | 41<br>(18 - 73)      | 32<br>(18 - 59)          | 15<br>(10 - 24)          |
| Multiple myeloma                     | 17<br>(10 - 27)          | --                | --                | 4<br>(2 - 7)         | 8<br>(4 - 14)            | 5<br>(3 - 8)             |
| Leukemia                             | 45<br>(28 - 65)          | 3<br>(1 - 7)      | 5<br>(3 - 9)      | 23<br>(13 - 36)      | 8<br>(4 - 13)            | 6<br>(4 - 9)             |
| Other neoplasms                      | 213<br>(148 - 301)       | 44<br>(24 - 78)   | 19<br>(11 - 30)   | 47<br>(27 - 77)      | 62<br>(35 - 105)         | 40<br>(23 - 61)          |
| Cardiovascular diseases              | 5,285<br>(3,537 - 7,972) | 117<br>(62 - 205) | 48<br>(30 - 76)   | 803<br>(452 - 1,306) | 2,276<br>(1,367 - 3,706) | 2,041<br>(1,513 - 2,786) |
| Rheumatic heart disease              | 277<br>(138 - 514)       | 9<br>(2 - 25)     | 14<br>(7 - 26)    | 99<br>(47 - 190)     | 100<br>(45 - 191)        | 55<br>(26 - 102)         |
| Ischemic heart disease               | 1,457<br>(908 - 2,254)   | 1<br>(0 - 3)      | 2<br>(1 - 4)      | 179<br>(91 - 310)    | 709<br>(401 - 1,187)     | 567<br>(382 - 789)       |
| Cerebrovascular disease              | 1,968<br>(1,243 - 2,999) | 13<br>(7 - 25)    | 7<br>(3 - 11)     | 211<br>(109 - 354)   | 853<br>(479 - 1,406)     | 884<br>(605 - 1,243)     |
| Ischemic stroke                      | 790<br>(232 - 1,442)     | 1<br>(0 - 4)      | 1<br>(0 - 2)      | 30<br>(6 - 69)       | 279<br>(67 - 579)        | 479<br>(145 - 823)       |
| Hemorrhagic stroke                   | 1,178<br>(610 - 2,028)   | 12<br>(6 - 23)    | 6<br>(3 - 10)     | 181<br>(92 - 310)    | 574<br>(293 - 1,005)     | 405<br>(163 - 777)       |
| Hypertensive heart disease           | 423<br>(199 - 830)       | 2<br>(0 - 5)      | 1<br>(0 - 2)      | 50<br>(19 - 105)     | 176<br>(79 - 359)        | 194<br>(84 - 414)        |
| Cardiomyopathy and myocarditis       | 283<br>(134 - 451)       | 43<br>(7 - 87)    | 10<br>(2 - 18)    | 78<br>(32 - 139)     | 99<br>(44 - 183)         | 54<br>(27 - 96)          |
| Atrial fibrillation and flutter      | 2<br>(1 - 3)             | --                | --                | 0<br>(0 - 0)         | 1<br>(0 - 1)             | 1<br>(0 - 2)             |
| Aortic aneurysm                      | 82<br>(38 - 148)         | --                | --                | 11<br>(5 - 21)       | 37<br>(16 - 71)          | 34<br>(16 - 59)          |
| Peripheral vascular disease          | 2<br>(1 - 4)             | --                | --                | 0<br>(0 - 0)         | 1<br>(0 - 2)             | 1<br>(1 - 2)             |
| Endocarditis                         | 107<br>(42 - 223)        | 6<br>(2 - 14)     | 2<br>(1 - 4)      | 30<br>(11 - 64)      | 39<br>(14 - 88)          | 30<br>(12 - 59)          |

Web Table 31- Somalia deaths with 95% UI by age, sex, and cause in 2013

| Cause                                               | Males, All Ages      | Males, 0-4 Years | Males, 5-14 Years | Males, 15-49 Years | Males, 50-69 Years | Males, 70-80 Years |
|-----------------------------------------------------|----------------------|------------------|-------------------|--------------------|--------------------|--------------------|
| Other cardiovascular and circulatory diseases       | 684<br>(365 - 1,226) | 44<br>(16 - 94)  | 12<br>(5 - 23)    | 145<br>(71 - 265)  | 261<br>(124 - 505) | 221<br>(121 - 426) |
| Chronic respiratory diseases                        | 909<br>(611 - 1,359) | 67<br>(29 - 129) | 14<br>(9 - 21)    | 115<br>(66 - 184)  | 330<br>(189 - 560) | 382<br>(266 - 552) |
| Chronic obstructive pulmonary disease               | 465<br>(298 - 696)   | 15<br>(4 - 35)   | 5<br>(3 - 10)     | 38<br>(19 - 67)    | 177<br>(102 - 300) | 229<br>(155 - 331) |
| Pneumoconiosis                                      | 144<br>(70 - 250)    | 4<br>(1 - 12)    | 2<br>(1 - 3)      | 31<br>(15 - 56)    | 62<br>(28 - 116)   | 46<br>(21 - 77)    |
| Silicosis                                           | 39<br>(11 - 102)     | 1<br>(0 - 5)     | 1<br>(0 - 2)      | 8<br>(2 - 22)      | 16<br>(4 - 44)     | 14<br>(4 - 35)     |
| Asbestosis                                          | 14<br>(6 - 29)       | 1<br>(0 - 2)     | 0<br>(0 - 1)      | 3<br>(1 - 6)       | 7<br>(2 - 15)      | 3<br>(1 - 8)       |
| Coal workers pneumoconiosis                         | 25<br>(6 - 58)       | 0<br>(0 - 1)     | 0<br>(0 - 1)      | 5<br>(1 - 12)      | 12<br>(2 - 28)     | 8<br>(1 - 19)      |
| Other pneumoconiosis                                | 66<br>(27 - 130)     | 2<br>(0 - 6)     | 1<br>(0 - 1)      | 15<br>(6 - 31)     | 27<br>(10 - 58)    | 21<br>(8 - 41)     |
| Asthma                                              | 141<br>(86 - 272)    | 4<br>(1 - 12)    | 2<br>(1 - 4)      | 21<br>(10 - 42)    | 51<br>(26 - 102)   | 64<br>(36 - 126)   |
| Interstitial lung disease and pulmonary sarcoidosis | 64<br>(19 - 139)     | 1<br>(0 - 7)     | 0<br>(0 - 2)      | 7<br>(2 - 17)      | 26<br>(7 - 61)     | 30<br>(9 - 60)     |
| Other chronic respiratory diseases                  | 94<br>(40 - 172)     | 43<br>(17 - 84)  | 4<br>(2 - 9)      | 19<br>(6 - 42)     | 14<br>(4 - 36)     | 14<br>(4 - 33)     |
| Cirrhosis                                           | 642<br>(383 - 1,000) | 17<br>(6 - 39)   | 10<br>(6 - 16)    | 198<br>(104 - 331) | 309<br>(175 - 509) | 109<br>(70 - 168)  |
| Cirrhosis due to hepatitis B                        | 137<br>(67 - 256)    | 1<br>(0 - 2)     | 1<br>(0 - 3)      | 42<br>(20 - 77)    | 69<br>(30 - 138)   | 24<br>(9 - 46)     |
| Cirrhosis due to hepatitis C                        | 140<br>(60 - 257)    | 1<br>(0 - 5)     | 1<br>(0 - 4)      | 33<br>(8 - 69)     | 72<br>(26 - 140)   | 32<br>(14 - 55)    |
| Cirrhosis due to alcohol use                        | 273<br>(151 - 452)   | --               | --                | 84<br>(39 - 150)   | 142<br>(74 - 237)  | 47<br>(29 - 74)    |
| Cirrhosis due to other causes                       | 93<br>(56 - 155)     | 15<br>(5 - 34)   | 8<br>(4 - 13)     | 38<br>(19 - 71)    | 26<br>(12 - 49)    | 6<br>(3 - 10)      |
| Digestive diseases                                  | 847<br>(549 - 1,287) | 63<br>(25 - 151) | 43<br>(26 - 66)   | 271<br>(145 - 436) | 279<br>(154 - 452) | 191<br>(129 - 275) |
| Peptic ulcer disease                                | 263<br>(147 - 448)   | 8<br>(2 - 25)    | 6<br>(2 - 12)     | 75<br>(35 - 150)   | 103<br>(52 - 182)  | 72<br>(42 - 114)   |
| Gastritis and duodenitis                            | 31<br>(14 - 78)      | 4<br>(1 - 10)    | 2<br>(1 - 5)      | 9<br>(4 - 24)      | 9<br>(3 - 26)      | 7<br>(2 - 21)      |
| Appendicitis                                        | 68<br>(39 - 109)     | 7<br>(1 - 22)    | 9<br>(4 - 17)     | 26<br>(12 - 45)    | 17<br>(7 - 34)     | 9<br>(4 - 18)      |
| Paralytic ileus and intestinal obstruction          | 252<br>(121 - 420)   | 10<br>(2 - 29)   | 13<br>(6 - 24)    | 92<br>(36 - 159)   | 83<br>(37 - 151)   | 54<br>(29 - 93)    |
| Inguinal, femoral, and abdominal hernia             | 16<br>(7 - 29)       | 0<br>(0 - 1)     | 1<br>(0 - 2)      | 5<br>(2 - 10)      | 5<br>(2 - 11)      | 5<br>(2 - 8)       |
| Inflammatory bowel disease                          | 48<br>(18 - 82)      | 16<br>(4 - 38)   | 3<br>(1 - 6)      | 12<br>(4 - 25)     | 9<br>(2 - 20)      | 7<br>(2 - 18)      |
| Vascular intestinal disorders                       | 6<br>(2 - 15)        | 1<br>(0 - 2)     | 0<br>(0 - 1)      | 1<br>(0 - 3)       | 2<br>(1 - 5)       | 2<br>(1 - 5)       |
| Gallbladder and biliary diseases                    | 34<br>(19 - 57)      | 2<br>(0 - 5)     | 1<br>(1 - 2)      | 7<br>(3 - 13)      | 12<br>(5 - 23)     | 12<br>(6 - 21)     |
| Pancreatitis                                        | 39<br>(11 - 81)      | 1<br>(0 - 3)     | 1<br>(0 - 2)      | 20<br>(5 - 43)     | 12<br>(3 - 29)     | 5<br>(1 - 12)      |
| Other digestive diseases                            | 89<br>(49 - 170)     | 16<br>(5 - 41)   | 6<br>(3 - 11)     | 23<br>(11 - 47)    | 26<br>(12 - 53)    | 18<br>(8 - 36)     |
| Neurological disorders                              | 433<br>(297 - 607)   | 51<br>(20 - 106) | 42<br>(22 - 78)   | 133<br>(70 - 234)  | 41<br>(23 - 69)    | 167<br>(120 - 234) |
| Alzheimer disease and other dementias               | 160<br>(113 - 227)   | --               | --                | 0<br>(0 - 0)       | 19<br>(11 - 31)    | 140<br>(100 - 195) |
| Parkinson disease                                   | 3<br>(1 - 6)         | --               | --                | 0<br>(0 - 0)       | 0<br>(0 - 0)       | 3<br>(1 - 6)       |
| Epilepsy                                            | 234<br>(143 - 357)   | 42<br>(15 - 98)  | 40<br>(19 - 75)   | 118<br>(60 - 214)  | 13<br>(7 - 26)     | 20<br>(10 - 36)    |
| Multiple sclerosis                                  | 1<br>(0 - 1)         | --               | --                | 0<br>(0 - 1)       | 0<br>(0 - 1)       | 0<br>(0 - 0)       |
| Other neurological disorders                        | 36<br>(22 - 62)      | 8<br>(4 - 27)    | 3<br>(2 - 6)      | 14<br>(7 - 23)     | 7<br>(4 - 13)      | 3<br>(2 - 5)       |
| Mental and substance use disorders                  | 136<br>(70 - 275)    | 8<br>(1 - 28)    | 0<br>(0 - 0)      | 88<br>(40 - 174)   | 34<br>(16 - 77)    | 5<br>(3 - 11)      |
| Schizophrenia                                       | 2<br>(0 - 4)         | --               | --                | 1<br>(0 - 2)       | 1<br>(0 - 2)       | 0<br>(0 - 1)       |
| Alcohol use disorders                               | 97<br>(42 - 221)     | --               | --                | 62<br>(25 - 145)   | 31<br>(13 - 73)    | 4<br>(2 - 10)      |
| Drug use disorders                                  | 37<br>(12 - 93)      | 8<br>(1 - 28)    | --                | 25<br>(9 - 78)     | 3<br>(1 - 8)       | 1<br>(0 - 2)       |
| Opioid use disorders                                | 4<br>(1 - 10)        | 1<br>(0 - 3)     | --                | 3<br>(1 - 8)       | 0<br>(0 - 1)       | 0<br>(0 - 0)       |
| Cocaine use disorders                               | 0<br>(0 - 0)         | 0<br>(0 - 0)     | --                | 0<br>(0 - 0)       | 0<br>(0 - 0)       | 0<br>(0 - 0)       |
| Amphetamine use disorders                           | 0<br>(0 - 0)         | 0<br>(0 - 0)     | --                | 0<br>(0 - 0)       | 0<br>(0 - 0)       | 0<br>(0 - 0)       |

Web Table 31- Somalia deaths with 95% UI by age, sex, and cause in 2013

| Cause                                               | Males, All Ages          | Males, 0-4 Years     | Males, 5-14 Years | Males, 15-49 Years | Males, 50-69 Years | Males, 70-80 Years |
|-----------------------------------------------------|--------------------------|----------------------|-------------------|--------------------|--------------------|--------------------|
| Other drug use disorders                            | 33<br>(11 - 82)          | 7<br>(1 - 24)        | --                | 22<br>(8 - 69)     | 3<br>(1 - 7)       | 1<br>(0 - 2)       |
| Eating disorders                                    | 0<br>(0 - 0)             | --                   | 0<br>(0 - 0)      | 0<br>(0 - 0)       | --                 | --                 |
| Anorexia nervosa                                    | 0<br>(0 - 0)             | --                   | 0<br>(0 - 0)      | 0<br>(0 - 0)       | --                 | --                 |
| Diabetes, urogenital, blood, and endocrine diseases | 1,570<br>(1,089 - 2,296) | 213<br>(110 - 374)   | 57<br>(36 - 89)   | 366<br>(212 - 567) | 521<br>(322 - 873) | 413<br>(300 - 583) |
| Diabetes mellitus                                   | 670<br>(449 - 1,033)     | 11<br>(7 - 18)       | 4<br>(2 - 7)      | 98<br>(54 - 162)   | 313<br>(190 - 520) | 244<br>(166 - 359) |
| Acute glomerulonephritis                            | 29<br>(13 - 48)          | 6<br>(2 - 11)        | 2<br>(1 - 4)      | 2<br>(1 - 8)       | 13<br>(3 - 27)     | 6<br>(2 - 11)      |
| Chronic kidney disease                              | 267<br>(180 - 397)       | 34<br>(16 - 62)      | 10<br>(6 - 16)    | 96<br>(54 - 151)   | 63<br>(36 - 113)   | 63<br>(41 - 96)    |
| Chronic kidney disease due to diabetes mellitus     | 1<br>(0 - 2)             | 0<br>(0 - 0)         | 0<br>(0 - 0)      | 0<br>(0 - 1)       | 0<br>(0 - 1)       | 0<br>(0 - 1)       |
| Chronic kidney disease due to hypertension          | 79<br>(41 - 134)         | 3<br>(0 - 6)         | 1<br>(0 - 2)      | 18<br>(8 - 34)     | 28<br>(13 - 54)    | 30<br>(15 - 53)    |
| Chronic kidney disease due to glomerulonephritis    | 116<br>(74 - 177)        | 25<br>(12 - 47)      | 8<br>(5 - 12)     | 45<br>(25 - 74)    | 22<br>(10 - 41)    | 17<br>(8 - 31)     |
| Chronic kidney disease due to other causes          | 70<br>(33 - 114)         | 6<br>(2 - 15)        | 2<br>(1 - 4)      | 34<br>(12 - 61)    | 13<br>(4 - 30)     | 16<br>(5 - 32)     |
| Urinary diseases and male infertility               | 270<br>(168 - 418)       | 28<br>(11 - 61)      | 7<br>(4 - 12)     | 78<br>(37 - 140)   | 89<br>(48 - 159)   | 68<br>(43 - 106)   |
| Interstitial nephritis and urinary tract infections | 204<br>(125 - 336)       | 21<br>(8 - 47)       | 5<br>(3 - 8)      | 57<br>(27 - 110)   | 67<br>(34 - 122)   | 53<br>(32 - 89)    |
| Urolithiasis                                        | 6<br>(2 - 19)            | --                   | 0<br>(0 - 1)      | 2<br>(1 - 6)       | 2<br>(1 - 8)       | 1<br>(0 - 4)       |
| Other urinary diseases                              | 60<br>(27 - 124)         | 7<br>(2 - 18)        | 2<br>(1 - 4)      | 18<br>(7 - 38)     | 20<br>(7 - 47)     | 13<br>(4 - 32)     |
| Gynecological diseases                              | --                       | --                   | --                | --                 | --                 | --                 |
| Uterine fibroids                                    | --                       | --                   | --                | --                 | --                 | --                 |
| Polycystic ovarian syndrome                         | --                       | --                   | --                | --                 | --                 | --                 |
| Endometriosis                                       | --                       | --                   | --                | --                 | --                 | --                 |
| Genital prolapse                                    | --                       | --                   | --                | --                 | --                 | --                 |
| Other gynecological diseases                        | --                       | --                   | --                | --                 | --                 | --                 |
| Hemoglobinopathies and hemolytic anemias            | 188<br>(83 - 369)        | 100<br>(25 - 231)    | 27<br>(12 - 50)   | 41<br>(15 - 113)   | 12<br>(4 - 40)     | 9<br>(3 - 32)      |
| Thalassemias                                        | 53<br>(18 - 113)         | 39<br>(9 - 92)       | 8<br>(3 - 14)     | 7<br>(2 - 19)      | 0<br>(0 - 0)       | 0<br>(0 - 0)       |
| Sickle cell disorders                               | 8<br>(3 - 16)            | 5<br>(1 - 12)        | 1<br>(1 - 3)      | 1<br>(0 - 4)       | 0<br>(0 - 1)       | 0<br>(0 - 0)       |
| G6PD deficiency                                     | 37<br>(15 - 76)          | 22<br>(5 - 51)       | 6<br>(3 - 12)     | 7<br>(3 - 20)      | 2<br>(1 - 6)       | 0<br>(0 - 1)       |
| Other hemoglobinopathies and hemolytic anemias      | 91<br>(42 - 192)         | 35<br>(10 - 75)      | 11<br>(5 - 22)    | 26<br>(9 - 70)     | 10<br>(4 - 34)     | 8<br>(3 - 31)      |
| Endocrine, metabolic, blood, and immune disorders   | 146<br>(92 - 231)        | 34<br>(17 - 84)      | 7<br>(4 - 15)     | 51<br>(25 - 88)    | 30<br>(15 - 54)    | 23<br>(12 - 39)    |
| Musculoskeletal disorders                           | 53<br>(24 - 84)          | --                   | 8<br>(3 - 13)     | 22<br>(9 - 36)     | 15<br>(6 - 27)     | 9<br>(4 - 16)      |
| Rheumatoid arthritis                                | 12<br>(4 - 21)           | --                   | 1<br>(0 - 4)      | 3<br>(1 - 7)       | 4<br>(1 - 8)       | 3<br>(1 - 6)       |
| Other musculoskeletal disorders                     | 41<br>(19 - 68)          | --                   | 6<br>(2 - 10)     | 18<br>(8 - 31)     | 11<br>(5 - 20)     | 6<br>(3 - 10)      |
| Other non-communicable diseases                     | 1,127<br>(553 - 2,732)   | 969<br>(419 - 2,528) | 40<br>(21 - 85)   | 59<br>(34 - 94)    | 30<br>(17 - 51)    | 30<br>(19 - 47)    |
| Congenital anomalies                                | 999<br>(443 - 2,585)     | 919<br>(378 - 2,461) | 37<br>(18 - 82)   | 34<br>(19 - 53)    | 5<br>(3 - 10)      | 4<br>(2 - 6)       |
| Neural tube defects                                 | 289<br>(65 - 621)        | 273<br>(60 - 598)    | 8<br>(1 - 20)     | 7<br>(1 - 19)      | 1<br>(0 - 2)       | 0<br>(0 - 1)       |
| Congenital heart anomalies                          | 347<br>(105 - 1,128)     | 313<br>(78 - 1,065)  | 16<br>(6 - 44)    | 15<br>(7 - 25)     | 2<br>(1 - 4)       | 1<br>(1 - 2)       |
| Cleft lip and cleft palate                          | 6<br>(1 - 20)            | 6<br>(1 - 20)        | --                | --                 | --                 | --                 |
| Down syndrome                                       | 84<br>(11 - 273)         | 74<br>(7 - 252)      | 4<br>(1 - 11)     | 5<br>(2 - 10)      | 1<br>(0 - 2)       | 0<br>(0 - 0)       |
| Chromosomal unbalanced rearrangements               | 22<br>(3 - 110)          | 21<br>(2 - 106)      | 1<br>(0 - 3)      | 1<br>(0 - 2)       | 0<br>(0 - 0)       | 0<br>(0 - 0)       |
| Other congenital anomalies                          | 252<br>(39 - 1,154)      | 233<br>(28 - 1,113)  | 8<br>(1 - 29)     | 7<br>(2 - 14)      | 2<br>(1 - 4)       | 2<br>(1 - 4)       |
| Skin and subcutaneous diseases                      | 113<br>(77 - 168)        | 34<br>(16 - 63)      | 3<br>(2 - 5)      | 25<br>(13 - 45)    | 24<br>(13 - 42)    | 26<br>(16 - 42)    |
| Cellulitis                                          | 95<br>(55 - 159)         | 28<br>(12 - 59)      | 3<br>(1 - 5)      | 21<br>(10 - 41)    | 21<br>(11 - 38)    | 21<br>(11 - 37)    |

Web Table 31- Somalia deaths with 95% UI by age, sex, and cause in 2013

| Cause                                           | Males, All Ages          | Males, 0-4 Years     | Males, 5-14 Years  | Males, 15-49 Years       | Males, 50-69 Years | Males, 70-80 Years |
|-------------------------------------------------|--------------------------|----------------------|--------------------|--------------------------|--------------------|--------------------|
| Pyoderma                                        | 12<br>(1 - 37)           | 5<br>(0 - 16)        | 0<br>(0 - 1)       | 2<br>(0 - 8)             | 2<br>(0 - 8)       | 3<br>(0 - 8)       |
| Decubitus ulcer                                 | 4<br>(0 - 12)            | 0<br>(0 - 2)         | 0<br>(0 - 0)       | 1<br>(0 - 3)             | 1<br>(0 - 3)       | 2<br>(0 - 5)       |
| Other skin and subcutaneous diseases            | 1<br>(0 - 5)             | 1<br>(0 - 2)         | 0<br>(0 - 0)       | 0<br>(0 - 1)             | 0<br>(0 - 1)       | 0<br>(0 - 0)       |
| Sudden infant death syndrome                    | 16<br>(4 - 49)           | 16<br>(4 - 49)       | --                 | --                       | --                 | --                 |
| Injuries                                        | 3,564<br>(2,449 - 5,041) | 751<br>(406 - 1,288) | 375<br>(251 - 530) | 1,725<br>(1,003 - 2,667) | 486<br>(268 - 815) | 226<br>(152 - 334) |
| Transport injuries                              | 1,498<br>(969 - 2,180)   | 204<br>(91 - 394)    | 176<br>(106 - 269) | 767<br>(436 - 1,218)     | 242<br>(136 - 403) | 108<br>(67 - 165)  |
| Road injuries                                   | 1,430<br>(919 - 2,080)   | 184<br>(82 - 361)    | 164<br>(99 - 249)  | 748<br>(425 - 1,179)     | 232<br>(131 - 385) | 101<br>(63 - 153)  |
| Pedestrian road injuries                        | 747<br>(456 - 1,135)     | 110<br>(46 - 230)    | 95<br>(54 - 155)   | 364<br>(184 - 608)       | 121<br>(63 - 209)  | 56<br>(31 - 91)    |
| Cyclist road injuries                           | 70<br>(38 - 109)         | 9<br>(2 - 22)        | 10<br>(5 - 19)     | 31<br>(15 - 53)          | 14<br>(7 - 25)     | 7<br>(3 - 12)      |
| Motorcyclist road injuries                      | 106<br>(53 - 199)        | 8<br>(3 - 18)        | 6<br>(3 - 13)      | 72<br>(33 - 140)         | 14<br>(6 - 26)     | 6<br>(3 - 10)      |
| Motor vehicle road injuries                     | 468<br>(253 - 765)       | 46<br>(17 - 104)     | 45<br>(21 - 83)    | 271<br>(131 - 474)       | 77<br>(38 - 138)   | 29<br>(15 - 50)    |
| Other road injuries                             | 39<br>(12 - 102)         | 12<br>(2 - 31)       | 7<br>(2 - 16)      | 10<br>(2 - 42)           | 6<br>(2 - 17)      | 4<br>(1 - 10)      |
| Other transport injuries                        | 68<br>(42 - 108)         | 20<br>(8 - 44)       | 12<br>(6 - 22)     | 19<br>(9 - 39)           | 10<br>(5 - 18)     | 7<br>(2 - 12)      |
| Unintentional injuries                          | 1,398<br>(947 - 2,040)   | 521<br>(265 - 930)   | 179<br>(112 - 262) | 445<br>(250 - 759)       | 161<br>(91 - 287)  | 92<br>(59 - 144)   |
| Falls                                           | 136<br>(63 - 229)        | 18<br>(8 - 40)       | 16<br>(7 - 30)     | 55<br>(22 - 107)         | 26<br>(9 - 49)     | 21<br>(7 - 36)     |
| Drowning                                        | 390<br>(215 - 644)       | 137<br>(40 - 329)    | 81<br>(39 - 135)   | 143<br>(76 - 240)        | 22<br>(11 - 39)    | 8<br>(4 - 14)      |
| Fire, heat, and hot substances                  | 296<br>(153 - 550)       | 159<br>(56 - 348)    | 27<br>(14 - 51)    | 58<br>(25 - 143)         | 32<br>(15 - 77)    | 20<br>(10 - 42)    |
| Poisonings                                      | 93<br>(51 - 201)         | 31<br>(11 - 79)      | 5<br>(2 - 13)      | 44<br>(22 - 102)         | 10<br>(5 - 22)     | 3<br>(1 - 5)       |
| Exposure to mechanical forces                   | 236<br>(157 - 379)       | 76<br>(36 - 157)     | 28<br>(15 - 46)    | 88<br>(50 - 158)         | 37<br>(20 - 66)    | 8<br>(5 - 12)      |
| Unintentional firearm injuries                  | 55<br>(32 - 89)          | 9<br>(3 - 19)        | 3<br>(1 - 7)       | 37<br>(18 - 66)          | 4<br>(2 - 8)       | 2<br>(1 - 3)       |
| Unintentional suffocation                       | 43<br>(19 - 95)          | 25<br>(7 - 73)       | 4<br>(2 - 8)       | 7<br>(3 - 14)            | 6<br>(2 - 11)      | 1<br>(0 - 2)       |
| Other exposure to mechanical forces             | 139<br>(88 - 235)        | 43<br>(17 - 87)      | 20<br>(10 - 37)    | 44<br>(23 - 96)          | 27<br>(13 - 49)    | 5<br>(3 - 8)       |
| Adverse effects of medical treatment            | 112<br>(63 - 198)        | 44<br>(19 - 97)      | 4<br>(2 - 8)       | 21<br>(9 - 49)           | 20<br>(8 - 45)     | 22<br>(7 - 44)     |
| Animal contact                                  | 47<br>(26 - 86)          | 11<br>(4 - 32)       | 8<br>(4 - 17)      | 14<br>(7 - 26)           | 8<br>(3 - 17)      | 5<br>(2 - 10)      |
| Venomous animal contact                         | 19<br>(10 - 36)          | 4<br>(1 - 14)        | 2<br>(1 - 5)       | 6<br>(2 - 12)            | 4<br>(1 - 9)       | 4<br>(1 - 7)       |
| Non-venomous animal contact                     | 28<br>(15 - 51)          | 8<br>(2 - 19)        | 6<br>(3 - 13)      | 8<br>(4 - 15)            | 4<br>(1 - 8)       | 2<br>(1 - 4)       |
| Foreign body                                    | 50<br>(26 - 102)         | 34<br>(15 - 77)      | 3<br>(2 - 6)       | 5<br>(3 - 10)            | 3<br>(2 - 6)       | 4<br>(2 - 7)       |
| Pulmonary aspiration and foreign body in airway | 46<br>(24 - 98)          | 33<br>(14 - 75)      | 3<br>(1 - 6)       | 5<br>(2 - 9)             | 2<br>(1 - 5)       | 4<br>(2 - 6)       |
| Foreign body in other body part                 | 3<br>(2 - 6)             | 1<br>(0 - 2)         | 1<br>(0 - 1)       | 1<br>(0 - 1)             | 1<br>(0 - 2)       | 0<br>(0 - 0)       |
| Other unintentional injuries                    | 38<br>(12 - 72)          | 10<br>(2 - 22)       | 7<br>(2 - 14)      | 16<br>(5 - 35)           | 4<br>(1 - 9)       | 2<br>(1 - 4)       |
| Self-harm and interpersonal violence            | 669<br>(344 - 1,083)     | 26<br>(10 - 57)      | 20<br>(9 - 36)     | 513<br>(258 - 852)       | 83<br>(35 - 166)   | 26<br>(9 - 52)     |
| Self-harm                                       | 267<br>(98 - 518)        | --                   | 7<br>(2 - 19)      | 186<br>(70 - 369)        | 52<br>(17 - 114)   | 22<br>(6 - 47)     |
| Interpersonal violence                          | 401<br>(178 - 758)       | 26<br>(10 - 57)      | 13<br>(5 - 24)     | 328<br>(135 - 635)       | 31<br>(12 - 62)    | 4<br>(1 - 8)       |
| Assault by firearm                              | 141<br>(41 - 281)        | 5<br>(1 - 12)        | 3<br>(1 - 7)       | 123<br>(35 - 254)        | 9<br>(2 - 20)      | 1<br>(0 - 2)       |
| Assault by sharp object                         | 99<br>(41 - 229)         | 4<br>(1 - 10)        | 2<br>(1 - 5)       | 82<br>(33 - 201)         | 10<br>(3 - 20)     | 1<br>(0 - 2)       |
| Assault by other means                          | 162<br>(63 - 302)        | 17<br>(7 - 37)       | 8<br>(3 - 15)      | 122<br>(40 - 244)        | 12<br>(4 - 26)     | 2<br>(1 - 4)       |
| Forces of nature, war, and legal intervention   | 0<br>(0 - 0)             | 0<br>(0 - 0)         | --                 | --                       | --                 | --                 |
| Exposure to forces of nature                    | 0<br>(0 - 0)             | 0<br>(0 - 0)         | --                 | --                       | --                 | --                 |

Web Table 31- Somalia deaths with 95% UI by age, sex, and cause in 2013

| Cause                                                             | Females, All Ages           | Females, 0-4 Years          | Females, 5-14 Years      | Females, 15-49 Years      | Females, 50-69 Years       | Females, 70-80 Years      |
|-------------------------------------------------------------------|-----------------------------|-----------------------------|--------------------------|---------------------------|----------------------------|---------------------------|
| All causes                                                        | 55,494<br>(42,903 - 70,703) | 23,756<br>(17,798 - 31,068) | 2,459<br>(1,858 - 3,250) | 9,774<br>(6,598 - 15,206) | 10,149<br>(5,915 - 15,539) | 9,357<br>(6,531 - 12,397) |
| Communicable, maternal, neonatal, and nutritional diseases        | 40,726<br>(32,200 - 52,044) | 21,795<br>(16,203 - 28,425) | 1,903<br>(1,418 - 2,555) | 7,472<br>(5,121 - 11,370) | 5,166<br>(3,001 - 8,078)   | 4,391<br>(3,025 - 5,974)  |
| HIV/AIDS and tuberculosis                                         | 6,142<br>(3,965 - 8,854)    | 621<br>(312 - 1,041)        | 238<br>(159 - 353)       | 2,641<br>(1,759 - 3,834)  | 1,814<br>(986 - 2,904)     | 828<br>(456 - 1,336)      |
| Tuberculosis                                                      | 4,964<br>(2,942 - 7,757)    | 514<br>(218 - 927)          | 160<br>(88 - 272)        | 1,816<br>(1,044 - 2,996)  | 1,661<br>(844 - 2,756)     | 812<br>(440 - 1,323)      |
| HIV/AIDS                                                          | 1,177<br>(688 - 1,801)      | 107<br>(71 - 155)           | 77<br>(51 - 106)         | 825<br>(445 - 1,348)      | 153<br>(97 - 225)          | 15<br>(7 - 26)            |
| HIV/AIDS resulting in mycobacterial infection                     | 67<br>(39 - 104)            | 6<br>(4 - 9)                | 4<br>(2 - 6)             | 47<br>(24 - 79)           | 9<br>(6 - 14)              | 1<br>(0 - 2)              |
| HIV/AIDS resulting in other diseases                              | 1,111<br>(653 - 1,695)      | 101<br>(67 - 146)           | 74<br>(49 - 100)         | 778<br>(422 - 1,267)      | 143<br>(91 - 210)          | 14<br>(7 - 24)            |
| Diarrhea, lower respiratory, and other common infectious diseases | 21,821<br>(16,311 - 28,437) | 12,183<br>(8,300 - 16,803)  | 1,196<br>(771 - 1,705)   | 2,385<br>(1,462 - 3,940)  | 2,920<br>(1,640 - 4,782)   | 3,137<br>(2,022 - 4,444)  |
| Diarrheal diseases                                                | 9,951<br>(6,347 - 14,180)   | 4,375<br>(1,834 - 7,633)    | 560<br>(266 - 942)       | 1,422<br>(687 - 2,506)    | 1,777<br>(857 - 3,146)     | 1,817<br>(945 - 2,822)    |
| Intestinal infectious diseases                                    | 233<br>(112 - 441)          | 101<br>(41 - 206)           | 69<br>(30 - 132)         | 52<br>(21 - 101)          | 9<br>(3 - 19)              | 3<br>(1 - 7)              |
| Typhoid fever                                                     | 170<br>(77 - 330)           | 68<br>(25 - 145)            | 54<br>(23 - 103)         | 40<br>(15 - 82)           | 6<br>(2 - 13)              | 2<br>(1 - 4)              |
| Paratyphoid fever                                                 | 40<br>(16 - 79)             | 18<br>(6 - 42)              | 12<br>(4 - 26)           | 8<br>(3 - 17)             | 1<br>(0 - 3)               | 0<br>(0 - 1)              |
| Other intestinal infectious diseases                              | 24<br>(11 - 41)             | 15<br>(5 - 31)              | 3<br>(0 - 8)             | 4<br>(1 - 11)             | 1<br>(0 - 5)               | 1<br>(0 - 5)              |
| Lower respiratory infections                                      | 7,348<br>(5,019 - 10,502)   | 4,533<br>(2,514 - 7,324)    | 261<br>(142 - 428)       | 458<br>(259 - 806)        | 882<br>(452 - 1,512)       | 1,215<br>(726 - 1,860)    |
| Upper respiratory infections                                      | 8<br>(3 - 21)               | 4<br>(0 - 17)               | 0<br>(0 - 5)             | 2<br>(0 - 5)              | 1<br>(0 - 4)               | 1<br>(0 - 3)              |
| Otitis media                                                      | 7<br>(5 - 12)               | 4<br>(2 - 8)                | 0<br>(0 - 1)             | 0<br>(0 - 1)              | 1<br>(1 - 2)               | 1<br>(1 - 2)              |
| Meningitis                                                        | 1,653<br>(973 - 2,867)      | 996<br>(455 - 2,050)        | 167<br>(87 - 283)        | 255<br>(134 - 458)        | 164<br>(78 - 287)          | 72<br>(35 - 131)          |
| Pneumococcal meningitis                                           | 392<br>(226 - 658)          | 191<br>(82 - 410)           | 49<br>(22 - 90)          | 77<br>(36 - 152)          | 52<br>(18 - 113)           | 21<br>(8 - 46)            |
| H influenzae type B meningitis                                    | 379<br>(195 - 720)          | 284<br>(120 - 631)          | 37<br>(16 - 71)          | 36<br>(15 - 75)           | 16<br>(6 - 32)             | 7<br>(3 - 14)             |
| Meningococcal meningitis                                          | 237<br>(132 - 406)          | 115<br>(44 - 268)           | 17<br>(8 - 33)           | 46<br>(20 - 95)           | 40<br>(15 - 83)            | 19<br>(9 - 38)            |
| Other meningitis                                                  | 645<br>(347 - 1,225)        | 405<br>(153 - 933)          | 63<br>(30 - 119)         | 96<br>(48 - 180)          | 56<br>(19 - 106)           | 25<br>(11 - 48)           |
| Encephalitis                                                      | 28<br>(17 - 44)             | 15<br>(7 - 31)              | 3<br>(1 - 5)             | 4<br>(2 - 7)              | 3<br>(1 - 7)               | 2<br>(1 - 4)              |
| Diphtheria                                                        | 30<br>(0 - 187)             | 25<br>(0 - 179)             | 3<br>(0 - 27)            | 1<br>(0 - 5)              | 0<br>(0 - 2)               | --                        |
| Whooping cough                                                    | 1,327<br>(2 - 5,898)        | 1,245<br>(1 - 5,476)        | 70<br>(0 - 355)          | 10<br>(0 - 52)            | 1<br>(0 - 6)               | --                        |
| Tetanus                                                           | 1,146<br>(527 - 2,725)      | 818<br>(254 - 2,132)        | 52<br>(12 - 133)         | 176<br>(42 - 407)         | 79<br>(17 - 194)           | 20<br>(4 - 52)            |
| Measles                                                           | 65<br>(6 - 277)             | 57<br>(5 - 252)             | 7<br>(1 - 31)            | 1<br>(0 - 4)              | 0<br>(0 - 0)               | --                        |
| Varicella and herpes zoster                                       | 25<br>(7 - 65)              | 11<br>(0 - 43)              | 2<br>(0 - 12)            | 5<br>(1 - 14)             | 2<br>(0 - 7)               | 5<br>(0 - 23)             |
| Neglected tropical diseases and malaria                           | 3,316<br>(1,778 - 5,780)    | 2,638<br>(1,128 - 4,982)    | 267<br>(131 - 542)       | 267<br>(148 - 454)        | 95<br>(37 - 218)           | 49<br>(20 - 121)          |
| Malaria                                                           | 2,806<br>(1,284 - 5,202)    | 2,488<br>(981 - 4,854)      | 137<br>(32 - 405)        | 91<br>(28 - 237)          | 57<br>(12 - 173)           | 33<br>(6 - 106)           |
| Leishmaniasis                                                     | 358<br>(214 - 539)          | 101<br>(32 - 210)           | 105<br>(52 - 172)        | 132<br>(71 - 219)         | 17<br>(6 - 32)             | 3<br>(1 - 6)              |
| Visceral leishmaniasis                                            | 358<br>(214 - 539)          | 101<br>(32 - 210)           | 105<br>(52 - 172)        | 132<br>(71 - 219)         | 17<br>(6 - 32)             | 3<br>(1 - 6)              |
| Schistosomiasis                                                   | 17<br>(10 - 28)             | 0<br>(0 - 1)                | 1<br>(0 - 2)             | 6<br>(3 - 12)             | 7<br>(3 - 12)              | 3<br>(1 - 5)              |
| Cysticercosis                                                     | 2<br>(0 - 6)                | 0<br>(0 - 1)                | 0<br>(0 - 1)             | 1<br>(0 - 3)              | 0<br>(0 - 1)               | 0<br>(0 - 0)              |
| Cystic echinococcosis                                             | 4<br>(3 - 6)                | 1<br>(0 - 2)                | 1<br>(1 - 1)             | 1<br>(1 - 2)              | 1<br>(0 - 1)               | 0<br>(0 - 0)              |
| Dengue                                                            | 0<br>(0 - 1)                | 0<br>(0 - 0)                | 0<br>(0 - 0)             | 0<br>(0 - 0)              | 0<br>(0 - 0)               | 0<br>(0 - 0)              |
| Yellow fever                                                      | 0<br>(0 - 1)                | 0<br>(0 - 0)                | 0<br>(0 - 0)             | 0<br>(0 - 1)              | 0<br>(0 - 0)               | 0<br>(0 - 0)              |
| Rabies                                                            | 67<br>(30 - 122)            | 15<br>(5 - 33)              | 18<br>(7 - 38)           | 27<br>(10 - 54)           | 6<br>(2 - 13)              | 2<br>(0 - 4)              |
| Intestinal nematode infections                                    | 20<br>(8 - 41)              | 16<br>(5 - 37)              | 2<br>(0 - 8)             | 1<br>(0 - 4)              | 0<br>(0 - 3)               | 0<br>(0 - 2)              |
| Ascariasis                                                        | 20<br>(8 - 41)              | 16<br>(5 - 37)              | 2<br>(0 - 8)             | 1<br>(0 - 4)              | 0<br>(0 - 3)               | 0<br>(0 - 2)              |
| Other neglected tropical diseases                                 | 41<br>(18 - 79)             | 17<br>(5 - 41)              | 2<br>(1 - 5)             | 7<br>(3 - 16)             | 7<br>(3 - 13)              | 8<br>(3 - 16)             |

Web Table 31- Somalia deaths with 95% UI by age, sex, and cause in 2013

| Cause                                                            | Females, All Ages          | Females, 0-4 Years       | Females, 5-14 Years | Females, 15-49 Years     | Females, 50-69 Years     | Females, 70-80 Years     |
|------------------------------------------------------------------|----------------------------|--------------------------|---------------------|--------------------------|--------------------------|--------------------------|
| Maternal disorders                                               | 1,903<br>(1,155 - 3,194)   | --                       | 16<br>(5 - 39)      | 1,887<br>(1,146 - 3,172) | --                       | --                       |
| Maternal hemorrhage                                              | 236<br>(129 - 430)         | --                       | 1<br>(0 - 3)        | 235<br>(128 - 429)       | --                       | --                       |
| Maternal sepsis and other maternal infections                    | 183<br>(105 - 302)         | --                       | 2<br>(1 - 5)        | 181<br>(103 - 299)       | --                       | --                       |
| Maternal hypertensive disorders                                  | 192<br>(109 - 324)         | --                       | 2<br>(1 - 5)        | 190<br>(107 - 321)       | --                       | --                       |
| Maternal obstructed labor                                        | 97<br>(55 - 172)           | --                       | 1<br>(0 - 2)        | 97<br>(55 - 171)         | --                       | --                       |
| Maternal abortive outcome                                        | 372<br>(210 - 610)         | --                       | 3<br>(1 - 7)        | 369<br>(208 - 607)       | --                       | --                       |
| Indirect maternal deaths                                         | 141<br>(73 - 254)          | --                       | 1<br>(0 - 3)        | 140<br>(72 - 253)        | --                       | --                       |
| Late maternal deaths                                             | 170<br>(90 - 299)          | --                       | 3<br>(1 - 6)        | 167<br>(89 - 294)        | --                       | --                       |
| Maternal deaths aggravated by HIV/AIDS                           | 4<br>(2 - 7)               | --                       | --                  | 4<br>(2 - 7)             | --                       | --                       |
| Other maternal disorders                                         | 503<br>(284 - 896)         | --                       | 4<br>(1 - 9)        | 499<br>(282 - 887)       | --                       | --                       |
| Neonatal disorders                                               | 4,257<br>(3,086 - 5,957)   | 4,257<br>(3,086 - 5,957) | --                  | --                       | --                       | --                       |
| Neonatal preterm birth complications                             | 1,367<br>(534 - 2,411)     | 1,367<br>(534 - 2,411)   | --                  | --                       | --                       | --                       |
| Neonatal encephalopathy due to birth asphyxia and trauma         | 1,174<br>(437 - 2,291)     | 1,174<br>(437 - 2,291)   | --                  | --                       | --                       | --                       |
| Neonatal sepsis and other neonatal infections                    | 694<br>(269 - 1,403)       | 694<br>(269 - 1,403)     | --                  | --                       | --                       | --                       |
| Hemolytic disease and other neonatal jaundice                    | 31<br>(8 - 95)             | 31<br>(8 - 95)           | --                  | --                       | --                       | --                       |
| Other neonatal disorders                                         | 991<br>(346 - 1,947)       | 991<br>(346 - 1,947)     | --                  | --                       | --                       | --                       |
| Nutritional deficiencies                                         | 2,689<br>(1,538 - 4,199)   | 1,712<br>(741 - 3,132)   | 144<br>(76 - 258)   | 228<br>(129 - 374)       | 278<br>(140 - 481)       | 328<br>(191 - 512)       |
| Protein-energy malnutrition                                      | 1,954<br>(934 - 3,359)     | 1,460<br>(580 - 2,755)   | 107<br>(48 - 201)   | 56<br>(21 - 141)         | 139<br>(59 - 308)        | 191<br>(89 - 341)        |
| Iodine deficiency                                                | 16<br>(1 - 86)             | 10<br>(0 - 74)           | 1<br>(0 - 9)        | 2<br>(0 - 8)             | 2<br>(0 - 11)            | 2<br>(0 - 10)            |
| Iron-deficiency anemia                                           | 702<br>(333 - 1,283)       | 235<br>(42 - 670)        | 35<br>(12 - 71)     | 169<br>(81 - 301)        | 134<br>(52 - 248)        | 129<br>(55 - 255)        |
| Other nutritional deficiencies                                   | 18<br>(6 - 39)             | 6<br>(1 - 23)            | 0<br>(0 - 1)        | 1<br>(0 - 3)             | 3<br>(1 - 9)             | 7<br>(1 - 16)            |
| Other communicable, maternal, neonatal, and nutritional diseases | 597<br>(339 - 1,173)       | 383<br>(183 - 807)       | 42<br>(20 - 97)     | 64<br>(34 - 125)         | 59<br>(23 - 132)         | 49<br>(17 - 124)         |
| Sexually transmitted diseases excluding HIV                      | 277<br>(139 - 541)         | 224<br>(100 - 467)       | 21<br>(9 - 42)      | 17<br>(7 - 36)           | 10<br>(2 - 29)           | 6<br>(1 - 18)            |
| Syphilis                                                         | 261<br>(125 - 522)         | 224<br>(100 - 467)       | 20<br>(9 - 41)      | 7<br>(3 - 15)            | 5<br>(1 - 16)            | 4<br>(1 - 13)            |
| Chlamydial infection                                             | 5<br>(2 - 11)              | --                       | 0<br>(0 - 1)        | 3<br>(1 - 7)             | 1<br>(0 - 4)             | 0<br>(0 - 1)             |
| Gonococcal infection                                             | 6<br>(2 - 13)              | --                       | 0<br>(0 - 0)        | 3<br>(1 - 8)             | 2<br>(0 - 5)             | 1<br>(0 - 2)             |
| Other sexually transmitted diseases                              | 5<br>(2 - 11)              | --                       | 0<br>(0 - 0)        | 3<br>(1 - 7)             | 1<br>(0 - 4)             | 0<br>(0 - 1)             |
| Hepatitis                                                        | 42<br>(28 - 65)            | 11<br>(5 - 21)           | 4<br>(2 - 6)        | 16<br>(9 - 30)           | 8<br>(4 - 15)            | 3<br>(2 - 5)             |
| Acute hepatitis A                                                | 8<br>(3 - 16)              | 5<br>(2 - 11)            | 2<br>(1 - 3)        | 1<br>(0 - 3)             | 0<br>(0 - 0)             | 0<br>(0 - 0)             |
| Acute hepatitis B                                                | 22<br>(13 - 35)            | 6<br>(2 - 13)            | 1<br>(1 - 3)        | 5<br>(2 - 11)            | 7<br>(3 - 12)            | 3<br>(1 - 4)             |
| Acute hepatitis C                                                | 1<br>(0 - 2)               | --                       | 0<br>(0 - 0)        | 0<br>(0 - 1)             | 0<br>(0 - 1)             | 0<br>(0 - 0)             |
| Acute hepatitis E                                                | 12<br>(6 - 22)             | 0<br>(0 - 0)             | 0<br>(0 - 1)        | 10<br>(5 - 19)           | 1<br>(0 - 3)             | 0<br>(0 - 1)             |
| Other infectious diseases                                        | 278<br>(125 - 850)         | 148<br>(46 - 510)        | 18<br>(5 - 69)      | 31<br>(13 - 92)          | 41<br>(13 - 115)         | 41<br>(11 - 115)         |
| Non-communicable diseases                                        | 12,866<br>(8,470 - 18,293) | 1,356<br>(783 - 2,300)   | 299<br>(202 - 413)  | 1,818<br>(1,105 - 3,036) | 4,663<br>(2,592 - 7,285) | 4,730<br>(3,184 - 6,440) |
| Neoplasms                                                        | 2,551<br>(1,544 - 3,870)   | 85<br>(43 - 142)         | 60<br>(37 - 92)     | 566<br>(339 - 968)       | 1,337<br>(729 - 2,060)   | 503<br>(321 - 711)       |
| Esophageal cancer                                                | 267<br>(144 - 422)         | --                       | --                  | 44<br>(22 - 80)          | 156<br>(79 - 257)        | 67<br>(38 - 108)         |
| Stomach cancer                                                   | 154<br>(88 - 235)          | --                       | --                  | 15<br>(8 - 28)           | 99<br>(51 - 155)         | 39<br>(23 - 61)          |
| Liver cancer                                                     | 152<br>(89 - 242)          | --                       | 2<br>(1 - 4)        | 35<br>(16 - 70)          | 78<br>(40 - 133)         | 36<br>(19 - 60)          |
| Liver cancer due to hepatitis B                                  | 30<br>(12 - 62)            | --                       | 0<br>(0 - 1)        | 8<br>(3 - 18)            | 16<br>(5 - 35)           | 6<br>(2 - 14)            |
| Liver cancer due to hepatitis C                                  | 69<br>(29 - 121)           | --                       | 0<br>(0 - 1)        | 14<br>(6 - 30)           | 38<br>(14 - 71)          | 17<br>(5 - 32)           |

Web Table 31- Somalia deaths with 95% UI by age, sex, and cause in 2013

| Cause                                | Females, All Ages        | Females, 0-4 Years | Females, 5-14 Years | Females, 15-49 Years | Females, 50-69 Years     | Females, 70-80 Years     |
|--------------------------------------|--------------------------|--------------------|---------------------|----------------------|--------------------------|--------------------------|
| Liver cancer due to alcohol use      | 16<br>(7 - 31)           | --                 | --                  | 2<br>(1 - 4)         | 8<br>(3 - 16)            | 6<br>(2 - 13)            |
| Liver cancer due to other causes     | 37<br>(17 - 67)          | --                 | 1<br>(1 - 3)        | 11<br>(4 - 25)       | 17<br>(7 - 33)           | 7<br>(3 - 14)            |
| Larynx cancer                        | 5<br>(2 - 9)             | --                 | --                  | 0<br>(0 - 1)         | 4<br>(1 - 7)             | 1<br>(0 - 1)             |
| Tracheal, bronchus and lung cancer   | 76<br>(44 - 117)         | --                 | --                  | 6<br>(3 - 11)        | 49<br>(26 - 78)          | 22<br>(13 - 34)          |
| Breast cancer                        | 293<br>(164 - 479)       | --                 | --                  | 116<br>(61 - 201)    | 138<br>(71 - 229)        | 39<br>(23 - 60)          |
| Cervical cancer                      | 711<br>(373 - 1,180)     | --                 | --                  | 147<br>(74 - 266)    | 462<br>(231 - 773)       | 102<br>(54 - 171)        |
| Uterine cancer                       | 31<br>(15 - 52)          | --                 | --                  | 3<br>(1 - 8)         | 19<br>(9 - 33)           | 9<br>(4 - 15)            |
| Prostate cancer                      | --                       | --                 | --                  | --                   | --                       | --                       |
| Colon and rectum cancer              | 135<br>(81 - 214)        | --                 | --                  | 31<br>(18 - 54)      | 64<br>(34 - 103)         | 41<br>(25 - 61)          |
| Lip and oral cavity cancer           | 29<br>(15 - 48)          | --                 | --                  | 8<br>(4 - 15)        | 16<br>(7 - 28)           | 5<br>(3 - 9)             |
| Nasopharynx cancer                   | 9<br>(4 - 15)            | --                 | 0<br>(0 - 1)        | 4<br>(2 - 8)         | 3<br>(1 - 6)             | 1<br>(0 - 2)             |
| Other pharynx cancer                 | 9<br>(5 - 15)            | --                 | --                  | 2<br>(1 - 5)         | 6<br>(3 - 10)            | 1<br>(1 - 2)             |
| Gallbladder and biliary tract cancer | 33<br>(18 - 55)          | --                 | --                  | 9<br>(5 - 16)        | 18<br>(9 - 31)           | 6<br>(3 - 11)            |
| Pancreatic cancer                    | 39<br>(23 - 61)          | --                 | --                  | 7<br>(4 - 12)        | 23<br>(12 - 37)          | 9<br>(6 - 14)            |
| Malignant skin melanoma              | 10<br>(6 - 16)           | --                 | --                  | 1<br>(1 - 2)         | 6<br>(3 - 11)            | 3<br>(2 - 4)             |
| Non-melanoma skin cancer             | 13<br>(5 - 29)           | --                 | --                  | 3<br>(1 - 6)         | 4<br>(1 - 9)             | 6<br>(2 - 16)            |
| Ovarian cancer                       | 65<br>(36 - 106)         | --                 | --                  | 16<br>(7 - 31)       | 40<br>(21 - 65)          | 10<br>(6 - 16)           |
| Testicular cancer                    | --                       | --                 | --                  | --                   | --                       | --                       |
| Kidney cancer                        | 30<br>(19 - 45)          | 7<br>(3 - 17)      | 3<br>(1 - 6)        | 5<br>(2 - 8)         | 11<br>(5 - 18)           | 5<br>(3 - 8)             |
| Bladder cancer                       | 20<br>(11 - 34)          | --                 | --                  | 4<br>(2 - 7)         | 9<br>(4 - 16)            | 7<br>(4 - 13)            |
| Brain and nervous system cancer      | 25<br>(15 - 38)          | 3<br>(1 - 6)       | 2<br>(1 - 3)        | 12<br>(6 - 21)       | 5<br>(3 - 9)             | 3<br>(2 - 5)             |
| Thyroid cancer                       | 11<br>(6 - 20)           | --                 | 0<br>(0 - 0)        | 1<br>(0 - 2)         | 8<br>(3 - 14)            | 3<br>(1 - 5)             |
| Mesothelioma                         | 2<br>(1 - 4)             | --                 | --                  | 1<br>(0 - 1)         | 1<br>(0 - 2)             | 0<br>(0 - 1)             |
| Hodgkin lymphoma                     | 18<br>(11 - 29)          | 1<br>(0 - 1)       | 1<br>(0 - 2)        | 4<br>(2 - 8)         | 7<br>(3 - 13)            | 5<br>(2 - 9)             |
| Non-Hodgkin lymphoma                 | 98<br>(63 - 152)         | 21<br>(9 - 44)     | 15<br>(7 - 27)      | 22<br>(10 - 44)      | 25<br>(13 - 46)          | 15<br>(8 - 25)           |
| Multiple myeloma                     | 18<br>(10 - 30)          | --                 | --                  | 4<br>(2 - 7)         | 9<br>(5 - 16)            | 5<br>(3 - 8)             |
| Leukemia                             | 41<br>(27 - 58)          | 4<br>(2 - 8)       | 7<br>(4 - 12)       | 13<br>(7 - 20)       | 10<br>(5 - 16)           | 7<br>(4 - 10)            |
| Other neoplasms                      | 257<br>(159 - 380)       | 49<br>(23 - 92)    | 30<br>(16 - 52)     | 53<br>(27 - 93)      | 69<br>(33 - 121)         | 57<br>(30 - 93)          |
| Cardiovascular diseases              | 5,643<br>(3,541 - 8,202) | 108<br>(57 - 190)  | 42<br>(26 - 65)     | 553<br>(308 - 963)   | 2,051<br>(1,104 - 3,231) | 2,889<br>(1,909 - 4,009) |
| Rheumatic heart disease              | 308<br>(141 - 653)       | 6<br>(1 - 17)      | 12<br>(5 - 23)      | 97<br>(42 - 214)     | 117<br>(44 - 263)        | 76<br>(33 - 158)         |
| Ischemic heart disease               | 1,172<br>(672 - 1,795)   | 0<br>(0 - 1)       | 1<br>(0 - 2)        | 72<br>(33 - 140)     | 408<br>(203 - 680)       | 691<br>(407 - 1,022)     |
| Cerebrovascular disease              | 2,461<br>(1,444 - 3,614) | 14<br>(6 - 27)     | 4<br>(2 - 8)        | 170<br>(79 - 299)    | 909<br>(447 - 1,469)     | 1,364<br>(858 - 1,896)   |
| Ischemic stroke                      | 986<br>(414 - 1,545)     | 1<br>(0 - 4)       | 0<br>(0 - 1)        | 21<br>(6 - 46)       | 247<br>(86 - 434)        | 716<br>(310 - 1,102)     |
| Hemorrhagic stroke                   | 1,475<br>(800 - 2,385)   | 12<br>(6 - 23)     | 4<br>(2 - 7)        | 149<br>(71 - 267)    | 662<br>(321 - 1,094)     | 648<br>(333 - 1,126)     |
| Hypertensive heart disease           | 580<br>(279 - 1,121)     | 2<br>(0 - 5)       | 1<br>(1 - 2)        | 38<br>(17 - 73)      | 187<br>(82 - 351)        | 353<br>(168 - 738)       |
| Cardiomyopathy and myocarditis       | 258<br>(126 - 535)       | 43<br>(15 - 87)    | 11<br>(4 - 19)      | 51<br>(21 - 117)     | 76<br>(30 - 169)         | 77<br>(28 - 207)         |
| Atrial fibrillation and flutter      | 2<br>(1 - 4)             | --                 | --                  | 0<br>(0 - 0)         | 0<br>(0 - 1)             | 2<br>(1 - 3)             |
| Aortic aneurysm                      | 51<br>(21 - 100)         | --                 | --                  | 6<br>(2 - 14)        | 19<br>(7 - 39)           | 25<br>(12 - 50)          |
| Peripheral vascular disease          | 2<br>(1 - 4)             | --                 | --                  | 0<br>(0 - 0)         | 1<br>(0 - 1)             | 1<br>(1 - 3)             |
| Endocarditis                         | 94<br>(35 - 294)         | 9<br>(2 - 24)      | 3<br>(1 - 7)        | 18<br>(6 - 59)       | 25<br>(7 - 84)           | 39<br>(9 - 132)          |



Web Table 31- Somalia deaths with 95% UI by age, sex, and cause in 2013

| Cause                                               | Females, All Ages    | Females, 0-4 Years | Females, 5-14 Years | Females, 15-49 Years | Females, 50-69 Years | Females, 70-80 Years |
|-----------------------------------------------------|----------------------|--------------------|---------------------|----------------------|----------------------|----------------------|
| Other cardiovascular and circulatory diseases       | 714<br>(388 - 1,364) | 34<br>(13 - 68)    | 10<br>(5 - 19)      | 100<br>(47 - 206)    | 309<br>(151 - 581)   | 261<br>(135 - 578)   |
| Chronic respiratory diseases                        | 880<br>(559 - 1,324) | 91<br>(43 - 182)   | 22<br>(13 - 36)     | 103<br>(62 - 178)    | 305<br>(163 - 496)   | 359<br>(224 - 540)   |
| Chronic obstructive pulmonary disease               | 480<br>(284 - 783)   | 20<br>(7 - 45)     | 7<br>(4 - 12)       | 38<br>(19 - 68)      | 184<br>(95 - 322)    | 232<br>(137 - 378)   |
| Pneumoconiosis                                      | 6<br>(3 - 11)        | 1<br>(0 - 3)       | 1<br>(0 - 1)        | 2<br>(1 - 4)         | 1<br>(1 - 2)         | 1<br>(0 - 2)         |
| Silicosis                                           | 0<br>(0 - 1)         | 0<br>(0 - 0)       | 0<br>(0 - 0)        | 0<br>(0 - 0)         | 0<br>(0 - 0)         | 0<br>(0 - 0)         |
| Asbestosis                                          | 0<br>(0 - 0)         | 0<br>(0 - 0)       | 0<br>(0 - 0)        | 0<br>(0 - 0)         | 0<br>(0 - 0)         | 0<br>(0 - 0)         |
| Coal workers pneumoconiosis                         | 0<br>(0 - 1)         | 0<br>(0 - 0)       | 0<br>(0 - 0)        | 0<br>(0 - 0)         | 0<br>(0 - 0)         | 0<br>(0 - 0)         |
| Other pneumoconiosis                                | 5<br>(3 - 9)         | 1<br>(0 - 3)       | 0<br>(0 - 1)        | 2<br>(1 - 3)         | 1<br>(0 - 2)         | 1<br>(0 - 2)         |
| Asthma                                              | 254<br>(132 - 491)   | 36<br>(12 - 82)    | 10<br>(5 - 19)      | 37<br>(17 - 90)      | 89<br>(38 - 189)     | 81<br>(38 - 167)     |
| Interstitial lung disease and pulmonary sarcoidosis | 68<br>(22 - 129)     | 3<br>(0 - 10)      | 1<br>(0 - 2)        | 10<br>(3 - 22)       | 22<br>(6 - 46)       | 33<br>(9 - 65)       |
| Other chronic respiratory diseases                  | 72<br>(41 - 123)     | 31<br>(14 - 65)    | 4<br>(2 - 8)        | 16<br>(8 - 30)       | 9<br>(3 - 18)        | 13<br>(6 - 25)       |
| Cirrhosis                                           | 447<br>(253 - 751)   | 13<br>(4 - 30)     | 11<br>(6 - 19)      | 87<br>(47 - 158)     | 217<br>(108 - 374)   | 118<br>(69 - 190)    |
| Cirrhosis due to hepatitis B                        | 176<br>(83 - 335)    | 1<br>(0 - 2)       | 2<br>(0 - 5)        | 35<br>(15 - 74)      | 91<br>(40 - 177)     | 47<br>(21 - 86)      |
| Cirrhosis due to hepatitis C                        | 44<br>(18 - 94)      | 0<br>(0 - 1)       | 0<br>(0 - 1)        | 8<br>(3 - 19)        | 23<br>(8 - 51)       | 12<br>(5 - 25)       |
| Cirrhosis due to alcohol use                        | 140<br>(69 - 252)    | --                 | --                  | 19<br>(9 - 39)       | 74<br>(34 - 137)     | 47<br>(24 - 85)      |
| Cirrhosis due to other causes                       | 87<br>(48 - 148)     | 12<br>(4 - 28)     | 9<br>(4 - 15)       | 25<br>(12 - 45)      | 30<br>(13 - 59)      | 11<br>(5 - 21)       |
| Digestive diseases                                  | 674<br>(431 - 1,015) | 53<br>(22 - 109)   | 33<br>(20 - 51)     | 130<br>(78 - 225)    | 223<br>(118 - 367)   | 236<br>(149 - 348)   |
| Peptic ulcer disease                                | 173<br>(91 - 283)    | 5<br>(1 - 12)      | 3<br>(2 - 7)        | 27<br>(13 - 50)      | 66<br>(31 - 116)     | 71<br>(36 - 122)     |
| Gastritis and duodenitis                            | 35<br>(12 - 107)     | 4<br>(1 - 9)       | 3<br>(1 - 6)        | 7<br>(2 - 22)        | 10<br>(3 - 34)       | 12<br>(3 - 42)       |
| Appendicitis                                        | 78<br>(43 - 125)     | 10<br>(2 - 26)     | 9<br>(4 - 16)       | 17<br>(9 - 32)       | 22<br>(9 - 41)       | 19<br>(6 - 42)       |
| Paralytic ileus and intestinal obstruction          | 168<br>(92 - 275)    | 9<br>(2 - 22)      | 9<br>(4 - 17)       | 32<br>(15 - 57)      | 55<br>(26 - 98)      | 63<br>(30 - 112)     |
| Inguinal, femoral, and abdominal hernia             | 16<br>(7 - 30)       | 3<br>(1 - 7)       | 0<br>(0 - 1)        | 6<br>(2 - 13)        | 1<br>(1 - 3)         | 6<br>(2 - 12)        |
| Inflammatory bowel disease                          | 53<br>(22 - 93)      | 13<br>(4 - 32)     | 3<br>(1 - 6)        | 12<br>(5 - 23)       | 13<br>(4 - 26)       | 12<br>(4 - 22)       |
| Vascular intestinal disorders                       | 6<br>(2 - 14)        | 0<br>(0 - 0)       | 0<br>(0 - 0)        | 1<br>(0 - 2)         | 2<br>(1 - 5)         | 3<br>(1 - 7)         |
| Gallbladder and biliary diseases                    | 58<br>(30 - 98)      | 2<br>(1 - 4)       | 1<br>(1 - 2)        | 10<br>(5 - 19)       | 22<br>(10 - 41)      | 22<br>(10 - 38)      |
| Pancreatitis                                        | 26<br>(10 - 51)      | 1<br>(0 - 2)       | 1<br>(0 - 2)        | 7<br>(3 - 15)        | 10<br>(4 - 21)       | 7<br>(2 - 14)        |
| Other digestive diseases                            | 63<br>(34 - 110)     | 8<br>(2 - 19)      | 4<br>(2 - 7)        | 11<br>(5 - 20)       | 21<br>(9 - 39)       | 20<br>(9 - 41)       |
| Neurological disorders                              | 379<br>(258 - 531)   | 67<br>(28 - 144)   | 30<br>(16 - 52)     | 73<br>(36 - 147)     | 42<br>(23 - 70)      | 167<br>(108 - 233)   |
| Alzheimer disease and other dementias               | 165<br>(106 - 233)   | --                 | --                  | 0<br>(0 - 0)         | 17<br>(9 - 27)       | 148<br>(95 - 210)    |
| Parkinson disease                                   | 2<br>(1 - 3)         | --                 | --                  | 0<br>(0 - 0)         | 1<br>(0 - 2)         | 1<br>(0 - 2)         |
| Epilepsy                                            | 183<br>(112 - 289)   | 60<br>(22 - 135)   | 28<br>(14 - 49)     | 66<br>(32 - 138)     | 17<br>(8 - 33)       | 13<br>(6 - 26)       |
| Multiple sclerosis                                  | 2<br>(0 - 4)         | --                 | --                  | 1<br>(0 - 2)         | 1<br>(0 - 2)         | 0<br>(0 - 0)         |
| Other neurological disorders                        | 26<br>(17 - 38)      | 7<br>(4 - 13)      | 2<br>(1 - 4)        | 6<br>(3 - 10)        | 7<br>(4 - 12)        | 4<br>(2 - 6)         |
| Mental and substance use disorders                  | 57<br>(25 - 134)     | 3<br>(0 - 7)       | 0<br>(0 - 0)        | 33<br>(14 - 78)      | 17<br>(6 - 42)       | 4<br>(1 - 9)         |
| Schizophrenia                                       | 2<br>(1 - 5)         | --                 | --                  | 1<br>(0 - 2)         | 1<br>(0 - 2)         | 0<br>(0 - 1)         |
| Alcohol use disorders                               | 35<br>(14 - 89)      | --                 | --                  | 20<br>(8 - 48)       | 13<br>(5 - 34)       | 2<br>(1 - 6)         |
| Drug use disorders                                  | 19<br>(5 - 57)       | 3<br>(0 - 7)       | --                  | 12<br>(3 - 39)       | 3<br>(1 - 11)        | 1<br>(0 - 4)         |
| Opioid use disorders                                | 2<br>(1 - 6)         | 0<br>(0 - 1)       | --                  | 1<br>(0 - 4)         | 0<br>(0 - 1)         | 0<br>(0 - 0)         |
| Cocaine use disorders                               | 0<br>(0 - 0)         | 0<br>(0 - 0)       | --                  | 0<br>(0 - 0)         | 0<br>(0 - 0)         | 0<br>(0 - 0)         |
| Amphetamine use disorders                           | 0<br>(0 - 0)         | 0<br>(0 - 0)       | --                  | 0<br>(0 - 0)         | 0<br>(0 - 0)         | 0<br>(0 - 0)         |

Web Table 31- Somalia deaths with 95% UI by age, sex, and cause in 2013

| Cause                                               | Females, All Ages      | Females, 0-4 Years   | Females, 5-14 Years | Females, 15-49 Years | Females, 50-69 Years | Females, 70-80 Years |
|-----------------------------------------------------|------------------------|----------------------|---------------------|----------------------|----------------------|----------------------|
| Other drug use disorders                            | 17<br>(5 - 51)         | 3<br>(0 - 6)         | --                  | 11<br>(3 - 35)       | 3<br>(0 - 10)        | 1<br>(0 - 4)         |
| Eating disorders                                    | 0<br>(0 - 0)           | --                   | 0<br>(0 - 0)        | 0<br>(0 - 0)         | --                   | --                   |
| Anorexia nervosa                                    | 0<br>(0 - 0)           | --                   | 0<br>(0 - 0)        | 0<br>(0 - 0)         | --                   | --                   |
| Diabetes, urogenital, blood, and endocrine diseases | 1,250<br>(809 - 1,772) | 160<br>(72 - 298)    | 52<br>(32 - 82)     | 215<br>(134 - 362)   | 426<br>(240 - 658)   | 397<br>(256 - 556)   |
| Diabetes mellitus                                   | 519<br>(312 - 771)     | 2<br>(1 - 4)         | 2<br>(1 - 5)        | 48<br>(27 - 84)      | 240<br>(131 - 381)   | 226<br>(137 - 334)   |
| Acute glomerulonephritis                            | 41<br>(22 - 75)        | 5<br>(2 - 11)        | 3<br>(1 - 7)        | 16<br>(8 - 32)       | 11<br>(5 - 20)       | 6<br>(3 - 12)        |
| Chronic kidney disease                              | 225<br>(145 - 328)     | 20<br>(10 - 37)      | 14<br>(8 - 23)      | 45<br>(25 - 77)      | 69<br>(35 - 113)     | 77<br>(45 - 116)     |
| Chronic kidney disease due to diabetes mellitus     | 1<br>(0 - 2)           | 0<br>(0 - 0)         | 0<br>(0 - 0)        | 0<br>(0 - 0)         | 0<br>(0 - 1)         | 0<br>(0 - 1)         |
| Chronic kidney disease due to hypertension          | 71<br>(31 - 127)       | 1<br>(0 - 4)         | 1<br>(0 - 3)        | 10<br>(3 - 21)       | 25<br>(10 - 49)      | 34<br>(15 - 60)      |
| Chronic kidney disease due to glomerulonephritis    | 114<br>(61 - 178)      | 16<br>(7 - 30)       | 10<br>(5 - 17)      | 30<br>(15 - 53)      | 32<br>(13 - 56)      | 26<br>(10 - 47)      |
| Chronic kidney disease due to other causes          | 40<br>(16 - 72)        | 3<br>(1 - 7)         | 3<br>(1 - 7)        | 5<br>(2 - 11)        | 12<br>(3 - 25)       | 18<br>(5 - 37)       |
| Urinary diseases and male infertility               | 139<br>(79 - 220)      | 16<br>(7 - 31)       | 4<br>(2 - 9)        | 34<br>(17 - 64)      | 51<br>(23 - 87)      | 34<br>(18 - 57)      |
| Interstitial nephritis and urinary tract infections | 119<br>(66 - 190)      | 12<br>(5 - 25)       | 3<br>(1 - 6)        | 29<br>(14 - 54)      | 44<br>(20 - 76)      | 32<br>(17 - 53)      |
| Urolithiasis                                        | 9<br>(4 - 17)          | --                   | 1<br>(0 - 2)        | 3<br>(1 - 7)         | 4<br>(1 - 8)         | 1<br>(0 - 3)         |
| Other urinary diseases                              | 11<br>(6 - 23)         | 4<br>(1 - 9)         | 1<br>(0 - 2)        | 3<br>(1 - 7)         | 3<br>(1 - 7)         | 1<br>(0 - 4)         |
| Gynecological diseases                              | 11<br>(5 - 19)         | --                   | --                  | 4<br>(2 - 10)        | 5<br>(2 - 9)         | 2<br>(1 - 4)         |
| Uterine fibroids                                    | 3<br>(1 - 5)           | --                   | --                  | 1<br>(0 - 2)         | 1<br>(1 - 3)         | 1<br>(0 - 1)         |
| Polycystic ovarian syndrome                         | 0<br>(0 - 1)           | --                   | --                  | 0<br>(0 - 1)         | 0<br>(0 - 0)         | --                   |
| Endometriosis                                       | 1<br>(0 - 2)           | --                   | --                  | 1<br>(0 - 2)         | 0<br>(0 - 0)         | --                   |
| Genital prolapse                                    | 2<br>(1 - 3)           | --                   | --                  | 0<br>(0 - 1)         | 1<br>(0 - 2)         | 1<br>(0 - 1)         |
| Other gynecological diseases                        | 5<br>(2 - 10)          | --                   | --                  | 2<br>(1 - 5)         | 2<br>(1 - 5)         | 1<br>(0 - 2)         |
| Hemoglobinopathies and hemolytic anemias            | 150<br>(50 - 309)      | 74<br>(13 - 186)     | 23<br>(7 - 46)      | 33<br>(13 - 69)      | 12<br>(5 - 24)       | 8<br>(4 - 16)        |
| Thalassemias                                        | 34<br>(8 - 75)         | 22<br>(3 - 57)       | 6<br>(2 - 13)       | 5<br>(2 - 11)        | 0<br>(0 - 0)         | 0<br>(0 - 0)         |
| Sickle cell disorders                               | 6<br>(2 - 12)          | 3<br>(0 - 8)         | 1<br>(0 - 2)        | 1<br>(1 - 3)         | 0<br>(0 - 0)         | 0<br>(0 - 0)         |
| G6PD deficiency                                     | 26<br>(8 - 57)         | 12<br>(2 - 33)       | 5<br>(2 - 11)       | 7<br>(3 - 15)        | 1<br>(1 - 3)         | 0<br>(0 - 0)         |
| Other hemoglobinopathies and hemolytic anemias      | 84<br>(32 - 165)       | 37<br>(7 - 88)       | 10<br>(3 - 21)      | 19<br>(8 - 40)       | 11<br>(5 - 21)       | 8<br>(3 - 16)        |
| Endocrine, metabolic, blood, and immune disorders   | 165<br>(101 - 246)     | 43<br>(21 - 79)      | 6<br>(3 - 13)       | 35<br>(19 - 65)      | 38<br>(19 - 69)      | 42<br>(19 - 71)      |
| Musculoskeletal disorders                           | 27<br>(11 - 63)        | --                   | 2<br>(1 - 6)        | 12<br>(4 - 30)       | 8<br>(3 - 18)        | 5<br>(2 - 12)        |
| Rheumatoid arthritis                                | 12<br>(5 - 27)         | --                   | 1<br>(0 - 2)        | 3<br>(1 - 9)         | 5<br>(2 - 11)        | 3<br>(1 - 8)         |
| Other musculoskeletal disorders                     | 15<br>(6 - 35)         | --                   | 2<br>(1 - 4)        | 8<br>(3 - 22)        | 3<br>(1 - 8)         | 2<br>(1 - 4)         |
| Other non-communicable diseases                     | 959<br>(543 - 1,728)   | 776<br>(380 - 1,524) | 45<br>(21 - 90)     | 46<br>(27 - 78)      | 37<br>(19 - 61)      | 55<br>(32 - 86)      |
| Congenital anomalies                                | 810<br>(408 - 1,570)   | 730<br>(340 - 1,472) | 42<br>(18 - 87)     | 25<br>(14 - 44)      | 7<br>(3 - 12)        | 6<br>(4 - 10)        |
| Neural tube defects                                 | 260<br>(63 - 719)      | 244<br>(57 - 681)    | 10<br>(2 - 30)      | 5<br>(1 - 12)        | 1<br>(0 - 2)         | 0<br>(0 - 1)         |
| Congenital heart anomalies                          | 290<br>(99 - 728)      | 257<br>(79 - 685)    | 18<br>(6 - 43)      | 10<br>(5 - 19)       | 2<br>(1 - 4)         | 3<br>(1 - 5)         |
| Cleft lip and cleft palate                          | 6<br>(1 - 19)          | 6<br>(1 - 19)        | --                  | --                   | --                   | --                   |
| Down syndrome                                       | 75<br>(15 - 208)       | 62<br>(10 - 189)     | 7<br>(2 - 17)       | 4<br>(1 - 10)        | 1<br>(1 - 3)         | 0<br>(0 - 0)         |
| Chromosomal unbalanced rearrangements               | 41<br>(8 - 121)        | 38<br>(7 - 114)      | 1<br>(0 - 4)        | 1<br>(0 - 3)         | 0<br>(0 - 1)         | 0<br>(0 - 0)         |
| Other congenital anomalies                          | 138<br>(43 - 441)      | 123<br>(35 - 389)    | 6<br>(2 - 22)       | 4<br>(1 - 12)        | 2<br>(1 - 5)         | 3<br>(1 - 6)         |
| Skin and subcutaneous diseases                      | 143<br>(92 - 211)      | 40<br>(17 - 83)      | 3<br>(2 - 5)        | 21<br>(11 - 38)      | 30<br>(15 - 51)      | 48<br>(28 - 78)      |
| Cellulitis                                          | 121<br>(73 - 192)      | 34<br>(14 - 74)      | 3<br>(1 - 5)        | 19<br>(9 - 34)       | 26<br>(13 - 44)      | 39<br>(19 - 65)      |

Web Table 31- Somalia deaths with 95% UI by age, sex, and cause in 2013

| Cause                                           | Females, All Ages        | Females, 0-4 Years   | Females, 5-14 Years | Females, 15-49 Years | Females, 50-69 Years | Females, 70-80 Years |
|-------------------------------------------------|--------------------------|----------------------|---------------------|----------------------|----------------------|----------------------|
| Pyoderma                                        | 14<br>(2 - 36)           | 5<br>(0 - 17)        | 0<br>(0 - 1)        | 2<br>(0 - 5)         | 3<br>(0 - 8)         | 4<br>(1 - 13)        |
| Decubitus ulcer                                 | 6<br>(1 - 18)            | 0<br>(0 - 1)         | 0<br>(0 - 0)        | 1<br>(0 - 2)         | 1<br>(0 - 3)         | 5<br>(1 - 14)        |
| Other skin and subcutaneous diseases            | 2<br>(0 - 5)             | 0<br>(0 - 2)         | 0<br>(0 - 0)        | 0<br>(0 - 1)         | 0<br>(0 - 1)         | 0<br>(0 - 1)         |
| Sudden infant death syndrome                    | 6<br>(1 - 20)            | 6<br>(1 - 20)        | --                  | --                   | --                   | --                   |
| Injuries                                        | 1,902<br>(1,327 - 2,580) | 605<br>(311 - 1,013) | 256<br>(163 - 371)  | 484<br>(302 - 807)   | 320<br>(172 - 516)   | 236<br>(139 - 348)   |
| Transport injuries                              | 651<br>(423 - 927)       | 125<br>(57 - 222)    | 109<br>(62 - 182)   | 184<br>(105 - 308)   | 154<br>(77 - 255)    | 80<br>(40 - 130)     |
| Road injuries                                   | 600<br>(391 - 854)       | 109<br>(49 - 196)    | 99<br>(56 - 165)    | 174<br>(100 - 293)   | 144<br>(73 - 240)    | 73<br>(37 - 118)     |
| Pedestrian road injuries                        | 282<br>(156 - 433)       | 50<br>(20 - 98)      | 51<br>(27 - 92)     | 67<br>(34 - 119)     | 72<br>(32 - 128)     | 41<br>(18 - 72)      |
| Cyclist road injuries                           | 30<br>(16 - 55)          | 5<br>(1 - 12)        | 6<br>(3 - 12)       | 5<br>(2 - 14)        | 11<br>(4 - 21)       | 3<br>(1 - 6)         |
| Motorcyclist road injuries                      | 44<br>(19 - 104)         | 7<br>(2 - 17)        | 4<br>(1 - 12)       | 20<br>(7 - 53)       | 8<br>(3 - 20)        | 4<br>(1 - 8)         |
| Motor vehicle road injuries                     | 216<br>(126 - 324)       | 39<br>(16 - 74)      | 32<br>(16 - 59)     | 78<br>(41 - 134)     | 45<br>(21 - 79)      | 21<br>(10 - 36)      |
| Other road injuries                             | 29<br>(7 - 62)           | 8<br>(1 - 19)        | 5<br>(1 - 14)       | 4<br>(1 - 16)        | 8<br>(2 - 18)        | 3<br>(1 - 8)         |
| Other transport injuries                        | 52<br>(31 - 77)          | 16<br>(6 - 31)       | 10<br>(4 - 18)      | 10<br>(5 - 19)       | 9<br>(4 - 17)        | 7<br>(2 - 13)        |
| Unintentional injuries                          | 1,066<br>(723 - 1,518)   | 460<br>(230 - 797)   | 134<br>(82 - 208)   | 190<br>(105 - 352)   | 139<br>(72 - 231)    | 143<br>(80 - 214)    |
| Falls                                           | 97<br>(45 - 153)         | 15<br>(7 - 28)       | 8<br>(3 - 15)       | 14<br>(6 - 30)       | 17<br>(7 - 30)       | 42<br>(16 - 73)      |
| Drowning                                        | 192<br>(111 - 309)       | 97<br>(39 - 200)     | 42<br>(22 - 70)     | 32<br>(17 - 60)      | 16<br>(7 - 29)       | 6<br>(3 - 10)        |
| Fire, heat, and hot substances                  | 306<br>(158 - 586)       | 160<br>(58 - 344)    | 37<br>(16 - 74)     | 50<br>(20 - 128)     | 32<br>(15 - 70)      | 27<br>(13 - 64)      |
| Poisonings                                      | 64<br>(36 - 108)         | 28<br>(10 - 64)      | 5<br>(2 - 11)       | 15<br>(8 - 33)       | 12<br>(4 - 23)       | 3<br>(2 - 6)         |
| Exposure to mechanical forces                   | 125<br>(80 - 187)        | 57<br>(26 - 110)     | 15<br>(8 - 26)      | 28<br>(16 - 52)      | 15<br>(8 - 26)       | 9<br>(5 - 14)        |
| Unintentional firearm injuries                  | 29<br>(17 - 50)          | 7<br>(3 - 16)        | 3<br>(1 - 5)        | 13<br>(6 - 28)       | 4<br>(2 - 8)         | 2<br>(1 - 3)         |
| Unintentional suffocation                       | 25<br>(8 - 61)           | 18<br>(4 - 51)       | 3<br>(1 - 6)        | 1<br>(1 - 3)         | 1<br>(0 - 3)         | 1<br>(0 - 1)         |
| Other exposure to mechanical forces             | 71<br>(45 - 115)         | 32<br>(13 - 68)      | 9<br>(5 - 19)       | 13<br>(7 - 25)       | 10<br>(5 - 17)       | 7<br>(3 - 11)        |
| Adverse effects of medical treatment            | 123<br>(61 - 230)        | 33<br>(12 - 80)      | 6<br>(3 - 12)       | 22<br>(9 - 52)       | 27<br>(10 - 57)      | 35<br>(11 - 70)      |
| Animal contact                                  | 81<br>(32 - 174)         | 26<br>(8 - 76)       | 14<br>(6 - 33)      | 21<br>(7 - 42)       | 14<br>(3 - 28)       | 7<br>(2 - 12)        |
| Venomous animal contact                         | 61<br>(27 - 144)         | 24<br>(7 - 71)       | 11<br>(4 - 27)      | 15<br>(5 - 32)       | 7<br>(2 - 16)        | 4<br>(1 - 8)         |
| Non-venomous animal contact                     | 20<br>(5 - 41)           | 2<br>(0 - 5)         | 4<br>(1 - 8)        | 6<br>(1 - 13)        | 6<br>(1 - 14)        | 2<br>(1 - 5)         |
| Foreign body                                    | 58<br>(32 - 111)         | 38<br>(16 - 82)      | 3<br>(2 - 7)        | 3<br>(1 - 6)         | 3<br>(1 - 5)         | 12<br>(5 - 21)       |
| Pulmonary aspiration and foreign body in airway | 57<br>(31 - 110)         | 37<br>(16 - 82)      | 3<br>(2 - 7)        | 3<br>(1 - 5)         | 2<br>(1 - 5)         | 11<br>(4 - 20)       |
| Foreign body in other body part                 | 2<br>(1 - 3)             | 0<br>(0 - 1)         | 0<br>(0 - 0)        | 0<br>(0 - 0)         | 0<br>(0 - 1)         | 0<br>(0 - 1)         |
| Other unintentional injuries                    | 20<br>(8 - 36)           | 6<br>(2 - 14)        | 4<br>(1 - 8)        | 5<br>(2 - 10)        | 3<br>(1 - 6)         | 2<br>(1 - 5)         |
| Self-harm and interpersonal violence            | 184<br>(95 - 301)        | 20<br>(7 - 42)       | 13<br>(6 - 24)      | 110<br>(51 - 202)    | 27<br>(11 - 50)      | 14<br>(5 - 26)       |
| Self-harm                                       | 65<br>(24 - 118)         | --                   | 2<br>(1 - 5)        | 34<br>(13 - 68)      | 17<br>(5 - 33)       | 11<br>(3 - 22)       |
| Interpersonal violence                          | 119<br>(52 - 214)        | 20<br>(7 - 42)       | 11<br>(4 - 21)      | 76<br>(29 - 158)     | 10<br>(3 - 19)       | 2<br>(1 - 5)         |
| Assault by firearm                              | 31<br>(10 - 62)          | 5<br>(1 - 12)        | 2<br>(1 - 4)        | 21<br>(6 - 47)       | 3<br>(1 - 6)         | 0<br>(0 - 0)         |
| Assault by sharp object                         | 27<br>(10 - 53)          | 4<br>(1 - 9)         | 2<br>(0 - 3)        | 19<br>(7 - 43)       | 2<br>(0 - 4)         | 1<br>(0 - 2)         |
| Assault by other means                          | 62<br>(27 - 110)         | 11<br>(4 - 24)       | 8<br>(3 - 14)       | 36<br>(13 - 78)      | 5<br>(2 - 10)        | 1<br>(0 - 3)         |
| Forces of nature, war, and legal intervention   | 0<br>(0 - 0)             | 0<br>(0 - 0)         | --                  | --                   | --                   | --                   |
| Exposure to forces of nature                    | 0<br>(0 - 0)             | 0<br>(0 - 0)         | --                  | --                   | --                   | --                   |

Web Table 31- South Africa deaths with 95% UI by age, sex, and cause in 2013

| Cause                                                             | Both Sexes, All Ages           | Both Sexes, 0-4 Years       | Both Sexes, 5-14 Years     | Both Sexes, 15-49 Years        | Both Sexes, 50-69 Years        | Both Sexes, 70-80 Years        |
|-------------------------------------------------------------------|--------------------------------|-----------------------------|----------------------------|--------------------------------|--------------------------------|--------------------------------|
| All causes                                                        | 620,595<br>(584,691 - 655,537) | 40,647<br>(30,572 - 52,556) | 10,089<br>(8,678 - 11,818) | 255,004<br>(237,342 - 274,510) | 146,051<br>(132,480 - 158,721) | 168,804<br>(156,966 - 179,460) |
| Communicable, maternal, neonatal, and nutritional diseases        | 346,487<br>(321,369 - 373,957) | 34,285<br>(26,100 - 43,977) | 8,347<br>(6,848 - 10,143)  | 203,066<br>(186,708 - 222,485) | 69,935<br>(58,634 - 81,979)    | 30,854<br>(26,618 - 35,315)    |
| HIV/AIDS and tuberculosis                                         | 271,830<br>(249,298 - 298,244) | 2,882<br>(2,049 - 4,180)    | 7,367<br>(5,803 - 9,292)   | 191,256<br>(174,275 - 211,809) | 59,941<br>(48,303 - 72,010)    | 10,384<br>(8,231 - 12,715)     |
| Tuberculosis                                                      | 19,918<br>(16,269 - 23,639)    | 408<br>(205 - 663)          | 162<br>(78 - 256)          | 9,584<br>(7,318 - 12,257)      | 5,893<br>(4,390 - 7,482)       | 3,870<br>(3,094 - 4,714)       |
| HIV/AIDS                                                          | 251,912<br>(229,223 - 280,072) | 2,474<br>(1,658 - 3,789)    | 7,205<br>(5,602 - 9,151)   | 181,672<br>(163,579 - 203,099) | 54,047<br>(41,275 - 66,269)    | 6,514<br>(4,540 - 8,803)       |
| HIV/AIDS resulting in mycobacterial infection                     | 15,871<br>(12,776 - 19,747)    | 143<br>(91 - 225)           | 403<br>(301 - 543)         | 11,381<br>(9,061 - 14,404)     | 3,509<br>(2,629 - 4,604)       | 436<br>(287 - 604)             |
| HIV/AIDS resulting in other diseases                              | 236,041<br>(214,128 - 261,916) | 2,331<br>(1,558 - 3,565)    | 6,803<br>(5,299 - 8,682)   | 170,291<br>(153,375 - 190,057) | 50,539<br>(38,672 - 62,035)    | 6,078<br>(4,221 - 8,273)       |
| Diarrhea, lower respiratory, and other common infectious diseases | 51,277<br>(42,766 - 60,260)    | 14,233<br>(8,952 - 20,801)  | 856<br>(610 - 1,187)       | 8,248<br>(6,324 - 10,428)      | 8,953<br>(6,910 - 11,031)      | 18,987<br>(15,432 - 23,130)    |
| Diarrheal diseases                                                | 15,671<br>(12,196 - 19,906)    | 6,510<br>(3,758 - 10,117)   | 253<br>(157 - 390)         | 1,986<br>(1,489 - 2,632)       | 1,920<br>(1,399 - 2,537)       | 5,002<br>(3,468 - 7,093)       |
| Intestinal infectious diseases                                    | 941<br>(440 - 1,786)           | 295<br>(119 - 616)          | 161<br>(70 - 306)          | 386<br>(172 - 785)             | 65<br>(28 - 128)               | 34<br>(16 - 64)                |
| Typhoid fever                                                     | 700<br>(316 - 1,365)           | 211<br>(82 - 444)           | 121<br>(51 - 235)          | 293<br>(131 - 592)             | 50<br>(21 - 102)               | 25<br>(11 - 51)                |
| Paratyphoid fever                                                 | 225<br>(104 - 427)             | 77<br>(27 - 169)            | 40<br>(16 - 77)            | 89<br>(37 - 189)               | 13<br>(5 - 27)                 | 7<br>(2 - 14)                  |
| Other intestinal infectious diseases                              | 16<br>(8 - 27)                 | 8<br>(2 - 17)               | 1<br>(0 - 3)               | 4<br>(1 - 10)                  | 2<br>(0 - 5)                   | 2<br>(0 - 5)                   |
| Lower respiratory infections                                      | 31,672<br>(25,567 - 37,418)    | 6,061<br>(3,567 - 9,052)    | 292<br>(187 - 421)         | 5,069<br>(3,711 - 6,703)       | 6,644<br>(4,793 - 8,426)       | 13,606<br>(10,582 - 17,389)    |
| Upper respiratory infections                                      | 21<br>(11 - 38)                | 2<br>(0 - 6)                | 0<br>(0 - 1)               | 10<br>(3 - 24)                 | 4<br>(1 - 10)                  | 5<br>(1 - 15)                  |
| Otitis media                                                      | 22<br>(19 - 25)                | 2<br>(1 - 3)                | 1<br>(1 - 1)               | 6<br>(4 - 7)                   | 5<br>(4 - 7)                   | 8<br>(6 - 10)                  |
| Meningitis                                                        | 1,912<br>(1,460 - 2,372)       | 574<br>(295 - 954)          | 102<br>(67 - 148)          | 684<br>(522 - 869)             | 269<br>(190 - 336)             | 283<br>(182 - 378)             |
| Pneumococcal meningitis                                           | 275<br>(192 - 356)             | 56<br>(26 - 101)            | 14<br>(8 - 23)             | 111<br>(72 - 165)              | 46<br>(28 - 66)                | 47<br>(26 - 68)                |
| H influenzae type B meningitis                                    | 390<br>(259 - 557)             | 217<br>(102 - 368)          | 26<br>(17 - 40)            | 93<br>(61 - 135)               | 26<br>(17 - 38)                | 28<br>(17 - 40)                |
| Meningococcal meningitis                                          | 672<br>(496 - 865)             | 187<br>(89 - 330)           | 41<br>(26 - 58)            | 245<br>(172 - 336)             | 91<br>(59 - 125)               | 109<br>(68 - 157)              |
| Other meningitis                                                  | 575<br>(439 - 720)             | 113<br>(56 - 211)           | 21<br>(10 - 35)            | 235<br>(157 - 322)             | 107<br>(72 - 144)              | 100<br>(62 - 145)              |
| Encephalitis                                                      | 194<br>(135 - 266)             | 47<br>(22 - 89)             | 12<br>(5 - 21)             | 74<br>(49 - 105)               | 33<br>(21 - 47)                | 28<br>(20 - 39)                |
| Diphtheria                                                        | 24<br>(3 - 79)                 | 13<br>(0 - 69)              | 2<br>(0 - 13)              | 8<br>(1 - 26)                  | 1<br>(0 - 7)                   | --                             |
| Whooping cough                                                    | 580<br>(1 - 2,860)             | 553<br>(1 - 2,719)          | 18<br>(0 - 89)             | 8<br>(0 - 39)                  | 1<br>(0 - 5)                   | --                             |
| Tetanus                                                           | 27<br>(19 - 41)                | 3<br>(2 - 6)                | 1<br>(1 - 2)               | 7<br>(5 - 12)                  | 9<br>(6 - 15)                  | 6<br>(4 - 10)                  |
| Measles                                                           | 181<br>(59 - 428)              | 164<br>(51 - 395)           | 13<br>(4 - 31)             | 4<br>(1 - 10)                  | 0<br>(0 - 0)                   | --                             |
| Varicella and herpes zoster                                       | 34<br>(12 - 82)                | 7<br>(1 - 23)               | 1<br>(0 - 4)               | 6<br>(2 - 14)                  | 3<br>(1 - 8)                   | 17<br>(1 - 61)                 |
| Neglected tropical diseases and malaria                           | 891<br>(655 - 1,252)           | 128<br>(66 - 251)           | 20<br>(13 - 33)            | 458<br>(311 - 688)             | 154<br>(107 - 229)             | 131<br>(96 - 189)              |
| Malaria                                                           | 374<br>(213 - 699)             | 21<br>(8 - 51)              | 6<br>(2 - 16)              | 226<br>(118 - 434)             | 63<br>(29 - 132)               | 58<br>(33 - 112)               |
| Leishmaniasis                                                     | 23<br>(17 - 31)                | 6<br>(2 - 10)               | 1<br>(1 - 2)               | 8<br>(5 - 13)                  | 4<br>(2 - 7)                   | 4<br>(3 - 6)                   |
| Visceral leishmaniasis                                            | 23<br>(17 - 31)                | 6<br>(2 - 10)               | 1<br>(1 - 2)               | 8<br>(5 - 13)                  | 4<br>(2 - 7)                   | 4<br>(3 - 6)                   |
| Schistosomiasis                                                   | 211<br>(157 - 279)             | 1<br>(0 - 1)                | 1<br>(1 - 2)               | 118<br>(82 - 169)              | 54<br>(36 - 80)                | 37<br>(23 - 55)                |
| Cysticercosis                                                     | 17<br>(14 - 21)                | 0<br>(0 - 0)                | 0<br>(0 - 0)               | 14<br>(11 - 18)                | 2<br>(2 - 3)                   | 1<br>(1 - 1)                   |
| Cystic echinococcosis                                             | 16<br>(13 - 19)                | 0<br>(0 - 1)                | 0<br>(0 - 1)               | 12<br>(9 - 15)                 | 2<br>(2 - 2)                   | 1<br>(1 - 1)                   |
| Dengue                                                            | 4<br>(4 - 7)                   | 0<br>(0 - 1)                | 1<br>(0 - 1)               | 2<br>(2 - 4)                   | 1<br>(1 - 1)                   | 0<br>(0 - 1)                   |
| Rabies                                                            | 15<br>(10 - 22)                | 2<br>(1 - 5)                | 5<br>(2 - 8)               | 4<br>(3 - 6)                   | 2<br>(1 - 3)                   | 2<br>(1 - 2)                   |
| Intestinal nematode infections                                    | 12<br>(5 - 26)                 | 6<br>(1 - 16)               | 1<br>(0 - 4)               | 4<br>(1 - 11)                  | 1<br>(0 - 4)                   | 1<br>(0 - 5)                   |
| Ascariasis                                                        | 12<br>(5 - 26)                 | 6<br>(1 - 16)               | 1<br>(0 - 4)               | 4<br>(1 - 11)                  | 1<br>(0 - 4)                   | 1<br>(0 - 5)                   |
| Other neglected tropical diseases                                 | 218<br>(141 - 344)             | 92<br>(40 - 193)            | 5<br>(2 - 10)              | 69<br>(47 - 100)               | 25<br>(16 - 36)                | 27<br>(16 - 41)                |
| Maternal disorders                                                | 1,925<br>(1,065 - 3,041)       | --                          | 1<br>(0 - 2)               | 1,925<br>(1,064 - 3,040)       | --                             | --                             |

Web Table 31- South Africa deaths with 95% UI by age, sex, and cause in 2013

| Cause                                                            | Both Sexes, All Ages           | Both Sexes, 0-4 Years       | Both Sexes, 5-14 Years | Both Sexes, 15-49 Years     | Both Sexes, 50-69 Years     | Both Sexes, 70-80 Years        |
|------------------------------------------------------------------|--------------------------------|-----------------------------|------------------------|-----------------------------|-----------------------------|--------------------------------|
| Maternal hemorrhage                                              | 158<br>(86 - 251)              | --                          | 0<br>(0 - 0)           | 158<br>(86 - 251)           | --                          | --                             |
| Maternal sepsis and other maternal infections                    | 156<br>(85 - 254)              | --                          | 0<br>(0 - 0)           | 155<br>(85 - 254)           | --                          | --                             |
| Maternal hypertensive disorders                                  | 290<br>(157 - 476)             | --                          | 0<br>(0 - 1)           | 290<br>(156 - 476)          | --                          | --                             |
| Maternal obstructed labor                                        | 111<br>(55 - 190)              | --                          | 0<br>(0 - 0)           | 111<br>(55 - 190)           | --                          | --                             |
| Maternal abortive outcome                                        | 178<br>(99 - 290)              | --                          | 0<br>(0 - 0)           | 178<br>(99 - 290)           | --                          | --                             |
| Indirect maternal deaths                                         | 351<br>(186 - 571)             | --                          | 0<br>(0 - 0)           | 351<br>(186 - 571)          | --                          | --                             |
| Late maternal deaths                                             | 263<br>(133 - 483)             | --                          | 0<br>(0 - 0)           | 263<br>(133 - 483)          | --                          | --                             |
| Maternal deaths aggravated by HIV/AIDS                           | 195<br>(90 - 333)              | --                          | --                     | 195<br>(90 - 333)           | --                          | --                             |
| Other maternal disorders                                         | 220<br>(117 - 364)             | --                          | 0<br>(0 - 0)           | 220<br>(117 - 363)          | --                          | --                             |
| Neonatal disorders                                               | 14,636<br>(11,695 - 18,217)    | 14,636<br>(11,695 - 18,217) | --                     | --                          | --                          | --                             |
| Neonatal preterm birth complications                             | 4,371<br>(2,644 - 6,527)       | 4,371<br>(2,644 - 6,527)    | --                     | --                          | --                          | --                             |
| Neonatal encephalopathy due to birth asphyxia and trauma         | 3,251<br>(1,950 - 4,906)       | 3,251<br>(1,950 - 4,906)    | --                     | --                          | --                          | --                             |
| Neonatal sepsis and other neonatal infections                    | 1,772<br>(908 - 3,044)         | 1,772<br>(908 - 3,044)      | --                     | --                          | --                          | --                             |
| Hemolytic disease and other neonatal jaundice                    | 130<br>(52 - 290)              | 130<br>(52 - 290)           | --                     | --                          | --                          | --                             |
| Other neonatal disorders                                         | 5,112<br>(3,313 - 7,354)       | 5,112<br>(3,313 - 7,354)    | --                     | --                          | --                          | --                             |
| Nutritional deficiencies                                         | 3,317<br>(2,520 - 4,348)       | 1,384<br>(776 - 2,187)      | 39<br>(26 - 59)        | 419<br>(310 - 634)          | 473<br>(353 - 664)          | 1,002<br>(741 - 1,362)         |
| Protein-energy malnutrition                                      | 2,233<br>(1,546 - 3,158)       | 1,352<br>(761 - 2,125)      | 30<br>(19 - 47)        | 190<br>(124 - 336)          | 214<br>(139 - 358)          | 447<br>(270 - 719)             |
| Iodine deficiency                                                | 12<br>(2 - 34)                 | 2<br>(0 - 12)               | 0<br>(0 - 1)           | 5<br>(0 - 19)               | 2<br>(0 - 7)                | 3<br>(0 - 17)                  |
| Iron-deficiency anemia                                           | 968<br>(601 - 1,358)           | 27<br>(7 - 68)              | 8<br>(3 - 15)          | 203<br>(126 - 304)          | 234<br>(143 - 339)          | 496<br>(285 - 754)             |
| Other nutritional deficiencies                                   | 104<br>(64 - 206)              | 4<br>(1 - 10)               | 1<br>(0 - 1)           | 21<br>(12 - 40)             | 24<br>(14 - 48)             | 55<br>(29 - 112)               |
| Other communicable, maternal, neonatal, and nutritional diseases | 2,610<br>(1,783 - 3,711)       | 1,022<br>(351 - 1,988)      | 64<br>(32 - 110)       | 761<br>(443 - 1,031)        | 414<br>(304 - 550)          | 350<br>(250 - 512)             |
| Sexually transmitted diseases excluding HIV                      | 905<br>(254 - 1,919)           | 750<br>(131 - 1,714)        | 32<br>(6 - 71)         | 70<br>(40 - 110)            | 26<br>(14 - 48)             | 26<br>(12 - 53)                |
| Syphilis                                                         | 850<br>(203 - 1,855)           | 750<br>(131 - 1,714)        | 32<br>(6 - 71)         | 31<br>(18 - 47)             | 16<br>(9 - 29)              | 21<br>(10 - 41)                |
| Chlamydial infection                                             | 14<br>(7 - 22)                 | --                          | 0<br>(0 - 0)           | 10<br>(5 - 18)              | 2<br>(1 - 5)                | 1<br>(0 - 3)                   |
| Gonococcal infection                                             | 23<br>(14 - 34)                | --                          | 0<br>(0 - 0)           | 15<br>(9 - 23)              | 5<br>(2 - 8)                | 3<br>(1 - 6)                   |
| Other sexually transmitted diseases                              | 18<br>(11 - 27)                | --                          | 0<br>(0 - 0)           | 14<br>(8 - 21)              | 3<br>(2 - 6)                | 1<br>(1 - 3)                   |
| Hepatitis                                                        | 997<br>(793 - 1,215)           | 73<br>(35 - 140)            | 20<br>(13 - 31)        | 472<br>(233 - 648)          | 251<br>(188 - 333)          | 181<br>(135 - 248)             |
| Acute hepatitis A                                                | 102<br>(32 - 201)              | 27<br>(8 - 62)              | 7<br>(2 - 14)          | 52<br>(14 - 114)            | 11<br>(3 - 27)              | 4<br>(1 - 11)                  |
| Acute hepatitis B                                                | 591<br>(426 - 767)             | 44<br>(18 - 93)             | 7<br>(3 - 14)          | 184<br>(88 - 290)           | 199<br>(141 - 280)          | 156<br>(115 - 216)             |
| Acute hepatitis C                                                | 22<br>(4 - 58)                 | --                          | 1<br>(0 - 2)           | 9<br>(2 - 24)               | 7<br>(1 - 19)               | 6<br>(1 - 19)                  |
| Acute hepatitis E                                                | 282<br>(142 - 433)             | 2<br>(0 - 5)                | 5<br>(2 - 10)          | 227<br>(101 - 345)          | 34<br>(14 - 67)             | 14<br>(5 - 32)                 |
| Other infectious diseases                                        | 709<br>(405 - 1,091)           | 199<br>(84 - 434)           | 12<br>(5 - 29)         | 219<br>(127 - 351)          | 136<br>(65 - 228)           | 143<br>(57 - 288)              |
| Non-communicable diseases                                        | 230,962<br>(208,366 - 255,102) | 4,407<br>(2,653 - 6,606)    | 752<br>(531 - 1,055)   | 23,353<br>(19,080 - 28,809) | 69,995<br>(60,246 - 81,076) | 132,455<br>(121,988 - 142,703) |
| Neoplasms                                                        | 41,739<br>(36,516 - 48,421)    | 227<br>(105 - 396)          | 179<br>(99 - 253)      | 3,737<br>(3,043 - 4,571)    | 16,896<br>(14,229 - 20,118) | 20,701<br>(18,611 - 23,844)    |
| Esophageal cancer                                                | 4,749<br>(3,826 - 6,317)       | --                          | --                     | 282<br>(198 - 423)          | 2,378<br>(1,827 - 3,337)    | 2,088<br>(1,686 - 2,615)       |
| Stomach cancer                                                   | 1,627<br>(1,387 - 1,897)       | --                          | --                     | 120<br>(95 - 150)           | 584<br>(485 - 702)          | 923<br>(747 - 1,140)           |
| Liver cancer                                                     | 1,914<br>(1,524 - 2,308)       | --                          | 4<br>(2 - 7)           | 296<br>(205 - 405)          | 814<br>(612 - 1,036)        | 800<br>(627 - 1,014)           |
| Liver cancer due to hepatitis B                                  | 636<br>(439 - 858)             | --                          | 2<br>(1 - 4)           | 147<br>(98 - 210)           | 304<br>(178 - 439)          | 184<br>(123 - 252)             |
| Liver cancer due to hepatitis C                                  | 679<br>(373 - 1,093)           | --                          | 1<br>(0 - 1)           | 66<br>(17 - 148)            | 264<br>(117 - 503)          | 349<br>(224 - 503)             |
| Liver cancer due to alcohol use                                  | 357<br>(243 - 512)             | --                          | --                     | 31<br>(18 - 51)             | 149<br>(90 - 235)           | 177<br>(115 - 258)             |

Web Table 31- South Africa deaths with 95% UI by age, sex, and cause in 2013

| Cause                                         | Both Sexes, All Ages         | Both Sexes, 0-4 Years | Both Sexes, 5-14 Years | Both Sexes, 15-49 Years  | Both Sexes, 50-69 Years     | Both Sexes, 70-80 Years     |
|-----------------------------------------------|------------------------------|-----------------------|------------------------|--------------------------|-----------------------------|-----------------------------|
| Liver cancer due to other causes              | 242<br>(170 - 343)           | --                    | 2<br>(1 - 3)           | 52<br>(37 - 75)          | 98<br>(61 - 147)            | 90<br>(57 - 136)            |
| Larynx cancer                                 | 408<br>(308 - 574)           | --                    | --                     | 32<br>(22 - 52)          | 247<br>(177 - 349)          | 129<br>(97 - 177)           |
| Tracheal, bronchus and lung cancer            | 5,604<br>(4,779 - 6,997)     | --                    | --                     | 275<br>(207 - 388)       | 2,679<br>(2,171 - 3,464)    | 2,651<br>(2,248 - 3,179)    |
| Breast cancer                                 | 3,237<br>(2,460 - 4,012)     | --                    | --                     | 401<br>(264 - 550)       | 1,288<br>(899 - 1,702)      | 1,548<br>(1,173 - 1,998)    |
| Cervical cancer                               | 2,717<br>(2,072 - 3,477)     | --                    | --                     | 397<br>(274 - 557)       | 1,249<br>(901 - 1,708)      | 1,072<br>(757 - 1,436)      |
| Uterine cancer                                | 431<br>(254 - 636)           | --                    | --                     | 13<br>(8 - 23)           | 144<br>(79 - 225)           | 274<br>(163 - 417)          |
| Prostate cancer                               | 3,833<br>(2,628 - 5,928)     | --                    | --                     | 22<br>(13 - 37)          | 886<br>(517 - 1,352)        | 2,924<br>(2,034 - 4,608)    |
| Colon and rectum cancer                       | 4,274<br>(3,712 - 4,867)     | --                    | --                     | 238<br>(194 - 288)       | 1,476<br>(1,234 - 1,742)    | 2,560<br>(2,154 - 2,983)    |
| Lip and oral cavity cancer                    | 802<br>(630 - 1,053)         | --                    | --                     | 87<br>(60 - 125)         | 413<br>(300 - 571)          | 302<br>(231 - 400)          |
| Nasopharynx cancer                            | 114<br>(89 - 149)            | --                    | 1<br>(0 - 2)           | 25<br>(18 - 35)          | 58<br>(42 - 80)             | 29<br>(21 - 43)             |
| Other pharynx cancer                          | 340<br>(244 - 454)           | --                    | --                     | 23<br>(16 - 34)          | 273<br>(189 - 376)          | 44<br>(33 - 58)             |
| Gallbladder and biliary tract cancer          | 352<br>(278 - 461)           | --                    | --                     | 23<br>(17 - 30)          | 151<br>(114 - 208)          | 178<br>(131 - 244)          |
| Pancreatic cancer                             | 2,147<br>(1,838 - 2,474)     | --                    | --                     | 108<br>(85 - 136)        | 861<br>(706 - 1,030)        | 1,177<br>(987 - 1,401)      |
| Malignant skin melanoma                       | 433<br>(323 - 611)           | --                    | --                     | 56<br>(38 - 84)          | 171<br>(116 - 259)          | 206<br>(156 - 278)          |
| Non-melanoma skin cancer                      | 283<br>(200 - 382)           | --                    | --                     | 36<br>(24 - 50)          | 98<br>(65 - 134)            | 149<br>(100 - 218)          |
| Ovarian cancer                                | 878<br>(641 - 1,153)         | --                    | --                     | 75<br>(47 - 113)         | 371<br>(250 - 528)          | 432<br>(309 - 588)          |
| Testicular cancer                             | 57<br>(38 - 80)              | --                    | --                     | 22<br>(13 - 32)          | 22<br>(14 - 33)             | 14<br>(8 - 21)              |
| Kidney cancer                                 | 460<br>(376 - 579)           | 12<br>(4 - 27)        | 5<br>(2 - 10)          | 42<br>(31 - 57)          | 211<br>(162 - 271)          | 191<br>(149 - 251)          |
| Bladder cancer                                | 611<br>(499 - 748)           | --                    | --                     | 31<br>(24 - 42)          | 189<br>(144 - 247)          | 391<br>(310 - 489)          |
| Brain and nervous system cancer               | 454<br>(348 - 602)           | 13<br>(5 - 25)        | 18<br>(10 - 27)        | 96<br>(69 - 133)         | 202<br>(148 - 287)          | 126<br>(95 - 163)           |
| Thyroid cancer                                | 145<br>(104 - 189)           | --                    | 0<br>(0 - 0)           | 13<br>(9 - 18)           | 53<br>(37 - 74)             | 78<br>(53 - 109)            |
| Mesothelioma                                  | 252<br>(192 - 319)           | --                    | --                     | 19<br>(12 - 29)          | 124<br>(88 - 176)           | 108<br>(77 - 149)           |
| Hodgkin lymphoma                              | 96<br>(73 - 135)             | 2<br>(1 - 6)          | 3<br>(1 - 7)           | 41<br>(29 - 58)          | 29<br>(19 - 44)             | 21<br>(15 - 32)             |
| Non-Hodgkin lymphoma                          | 1,618<br>(1,256 - 2,390)     | 18<br>(6 - 33)        | 14<br>(7 - 24)         | 207<br>(149 - 274)       | 558<br>(399 - 850)          | 822<br>(628 - 1,327)        |
| Multiple myeloma                              | 547<br>(437 - 682)           | --                    | --                     | 39<br>(28 - 50)          | 257<br>(193 - 339)          | 251<br>(195 - 324)          |
| Leukemia                                      | 947<br>(793 - 1,090)         | 37<br>(18 - 67)       | 46<br>(28 - 64)        | 216<br>(168 - 271)       | 275<br>(220 - 336)          | 373<br>(305 - 457)          |
| Other neoplasms                               | 2,408<br>(1,765 - 3,173)     | 146<br>(55 - 261)     | 88<br>(38 - 137)       | 499<br>(356 - 647)       | 835<br>(588 - 1,223)        | 840<br>(639 - 1,145)        |
| Cardiovascular diseases                       | 93,252<br>(83,209 - 106,906) | 201<br>(114 - 341)    | 99<br>(67 - 162)       | 4,771<br>(3,751 - 6,242) | 24,952<br>(21,130 - 29,849) | 63,229<br>(56,419 - 71,316) |
| Rheumatic heart disease                       | 1,265<br>(845 - 1,621)       | 3<br>(1 - 6)          | 14<br>(9 - 22)         | 223<br>(160 - 338)       | 180<br>(131 - 237)          | 845<br>(472 - 1,145)        |
| Ischemic heart disease                        | 30,939<br>(26,150 - 39,298)  | 15<br>(6 - 34)        | 7<br>(4 - 15)          | 1,334<br>(995 - 1,942)   | 8,222<br>(6,638 - 10,614)   | 21,362<br>(17,763 - 26,762) |
| Cerebrovascular disease                       | 34,795<br>(29,650 - 40,165)  | 24<br>(12 - 41)       | 25<br>(16 - 39)        | 1,310<br>(997 - 1,755)   | 9,387<br>(7,692 - 11,297)   | 24,049<br>(20,292 - 27,859) |
| Ischemic stroke                               | 17,596<br>(13,779 - 20,932)  | 3<br>(1 - 8)          | 2<br>(1 - 6)           | 228<br>(138 - 325)       | 3,701<br>(2,729 - 4,700)    | 13,662<br>(10,565 - 16,432) |
| Hemorrhagic stroke                            | 17,199<br>(14,370 - 20,979)  | 22<br>(11 - 37)       | 23<br>(15 - 34)        | 1,082<br>(827 - 1,464)   | 5,686<br>(4,558 - 7,078)    | 10,387<br>(8,318 - 12,888)  |
| Hypertensive heart disease                    | 11,919<br>(8,877 - 14,876)   | 5<br>(2 - 10)         | 2<br>(1 - 4)           | 449<br>(325 - 624)       | 3,034<br>(2,294 - 3,936)    | 8,428<br>(5,894 - 10,817)   |
| Cardiomyopathy and myocarditis                | 6,000<br>(4,889 - 8,392)     | 98<br>(51 - 191)      | 30<br>(17 - 62)        | 887<br>(644 - 1,349)     | 1,891<br>(1,459 - 2,840)    | 3,094<br>(2,432 - 4,369)    |
| Atrial fibrillation and flutter               | 955<br>(719 - 1,256)         | --                    | --                     | 15<br>(10 - 20)          | 145<br>(106 - 194)          | 795<br>(581 - 1,074)        |
| Aortic aneurysm                               | 1,376<br>(1,073 - 1,871)     | --                    | --                     | 66<br>(49 - 94)          | 376<br>(291 - 518)          | 935<br>(712 - 1,314)        |
| Peripheral vascular disease                   | 874<br>(705 - 1,104)         | --                    | --                     | 23<br>(16 - 33)          | 260<br>(195 - 337)          | 590<br>(459 - 758)          |
| Endocarditis                                  | 370<br>(265 - 489)           | 29<br>(12 - 55)       | 8<br>(4 - 13)          | 70<br>(46 - 100)         | 101<br>(67 - 150)           | 162<br>(114 - 223)          |
| Other cardiovascular and circulatory diseases | 4,759<br>(3,742 - 6,120)     | 27<br>(13 - 48)       | 14<br>(8 - 23)         | 394<br>(295 - 565)       | 1,357<br>(1,010 - 1,762)    | 2,967<br>(2,190 - 3,970)    |

Web Table 31- South Africa deaths with 95% UI by age, sex, and cause in 2013

| Cause                                               | Both Sexes, All Ages        | Both Sexes, 0-4 Years | Both Sexes, 5-14 Years | Both Sexes, 15-49 Years  | Both Sexes, 50-69 Years  | Both Sexes, 70-80 Years     |
|-----------------------------------------------------|-----------------------------|-----------------------|------------------------|--------------------------|--------------------------|-----------------------------|
| Chronic respiratory diseases                        | 25,510<br>(21,444 - 29,148) | 227<br>(109 - 384)    | 67<br>(45 - 95)        | 2,317<br>(1,832 - 2,900) | 8,166<br>(6,543 - 9,927) | 14,733<br>(12,280 - 16,802) |
| Chronic obstructive pulmonary disease               | 15,759<br>(12,732 - 18,316) | 67<br>(26 - 122)      | 12<br>(7 - 20)         | 960<br>(727 - 1,259)     | 5,053<br>(3,881 - 6,195) | 9,666<br>(7,840 - 11,413)   |
| Pneumoconiosis                                      | 819<br>(562 - 1,141)        | 1<br>(0 - 1)          | 0<br>(0 - 1)           | 62<br>(41 - 95)          | 302<br>(198 - 465)       | 454<br>(300 - 647)          |
| Silicosis                                           | 116<br>(76 - 166)           | 0<br>(0 - 0)          | 0<br>(0 - 0)           | 8<br>(5 - 13)            | 38<br>(24 - 61)          | 71<br>(43 - 105)            |
| Asbestosis                                          | 261<br>(174 - 374)          | 0<br>(0 - 0)          | 0<br>(0 - 0)           | 17<br>(11 - 27)          | 94<br>(60 - 149)         | 150<br>(95 - 217)           |
| Coal workers pneumoconiosis                         | 142<br>(94 - 209)           | 0<br>(0 - 0)          | 0<br>(0 - 0)           | 12<br>(7 - 18)           | 59<br>(37 - 98)          | 71<br>(43 - 103)            |
| Other pneumoconiosis                                | 300<br>(208 - 408)          | 0<br>(0 - 0)          | 0<br>(0 - 0)           | 25<br>(17 - 38)          | 111<br>(71 - 169)        | 162<br>(109 - 231)          |
| Asthma                                              | 6,780<br>(5,084 - 8,381)    | 68<br>(29 - 129)      | 40<br>(23 - 57)        | 1,119<br>(848 - 1,417)   | 3,224<br>(1,742 - 2,948) | 3,229<br>(2,210 - 4,282)    |
| Interstitial lung disease and pulmonary sarcoidosis | 1,655<br>(1,175 - 2,618)    | 25<br>(9 - 52)        | 7<br>(3 - 13)          | 115<br>(77 - 176)        | 405<br>(265 - 654)       | 1,103<br>(751 - 1,854)      |
| Other chronic respiratory diseases                  | 498<br>(369 - 641)          | 66<br>(27 - 118)      | 8<br>(4 - 12)          | 62<br>(44 - 85)          | 82<br>(59 - 112)         | 281<br>(196 - 403)          |
| Cirrhosis                                           | 3,886<br>(3,344 - 4,520)    | 24<br>(11 - 47)       | 16<br>(11 - 23)        | 893<br>(713 - 1,130)     | 1,783<br>(1,456 - 2,148) | 1,170<br>(965 - 1,382)      |
| Cirrhosis due to hepatitis B                        | 675<br>(446 - 909)          | 1<br>(0 - 2)          | 2<br>(1 - 3)           | 157<br>(99 - 231)        | 312<br>(201 - 439)       | 204<br>(128 - 292)          |
| Cirrhosis due to hepatitis C                        | 623<br>(403 - 886)          | 1<br>(0 - 3)          | 2<br>(1 - 3)           | 104<br>(56 - 162)        | 252<br>(140 - 385)       | 264<br>(168 - 375)          |
| Cirrhosis due to alcohol use                        | 2,072<br>(1,706 - 2,516)    | -                     | -                      | 424<br>(307 - 574)       | 1,025<br>(804 - 1,280)   | 624<br>(483 - 768)          |
| Cirrhosis due to other causes                       | 515<br>(363 - 681)          | 23<br>(11 - 43)       | 12<br>(8 - 18)         | 208<br>(141 - 285)       | 193<br>(117 - 285)       | 79<br>(48 - 112)            |
| Digestive diseases                                  | 5,882<br>(4,997 - 6,760)    | 68<br>(33 - 126)      | 37<br>(26 - 52)        | 955<br>(760 - 1,188)     | 1,541<br>(1,271 - 1,854) | 3,281<br>(2,711 - 3,929)    |
| Peptic ulcer disease                                | 1,132<br>(847 - 1,402)      | 3<br>(1 - 5)          | 1<br>(1 - 2)           | 117<br>(87 - 150)        | 276<br>(201 - 355)       | 735<br>(539 - 950)          |
| Gastritis and duodenitis                            | 387<br>(239 - 583)          | 4<br>(1 - 8)          | 2<br>(1 - 3)           | 58<br>(37 - 88)          | 89<br>(53 - 135)         | 236<br>(127 - 385)          |
| Appendicitis                                        | 143<br>(97 - 190)           | 4<br>(2 - 9)          | 8<br>(4 - 13)          | 53<br>(36 - 75)          | 39<br>(24 - 57)          | 39<br>(24 - 56)             |
| Paralytic ileus and intestinal obstruction          | 1,524<br>(1,147 - 2,270)    | 25<br>(11 - 49)       | 16<br>(10 - 23)        | 259<br>(176 - 373)       | 412<br>(300 - 621)       | 813<br>(549 - 1,288)        |
| Inguinal, femoral, and abdominal hernia             | 152<br>(78 - 212)           | 1<br>(0 - 3)          | 1<br>(0 - 1)           | 20<br>(11 - 29)          | 40<br>(20 - 59)          | 90<br>(43 - 137)            |
| Inflammatory bowel disease                          | 527<br>(341 - 674)          | 17<br>(6 - 34)        | 3<br>(2 - 6)           | 104<br>(70 - 140)        | 133<br>(80 - 177)        | 269<br>(159 - 385)          |
| Vascular intestinal disorders                       | 238<br>(136 - 386)          | 1<br>(0 - 2)          | 1<br>(0 - 2)           | 25<br>(12 - 46)          | 61<br>(35 - 106)         | 150<br>(81 - 262)           |
| Gallbladder and biliary diseases                    | 642<br>(380 - 812)          | 2<br>(1 - 3)          | 1<br>(1 - 2)           | 63<br>(44 - 82)          | 178<br>(100 - 234)       | 399<br>(220 - 533)          |
| Pancreatitis                                        | 310<br>(219 - 424)          | 1<br>(0 - 2)          | 1<br>(0 - 1)           | 104<br>(70 - 151)        | 108<br>(73 - 150)        | 95<br>(66 - 136)            |
| Other digestive diseases                            | 827<br>(619 - 1,036)        | 11<br>(5 - 21)        | 4<br>(2 - 6)           | 152<br>(114 - 205)       | 205<br>(146 - 266)       | 455<br>(324 - 613)          |
| Neurological disorders                              | 9,679<br>(7,966 - 11,458)   | 155<br>(74 - 312)     | 96<br>(60 - 169)       | 1,737<br>(1,284 - 2,350) | 1,405<br>(1,087 - 1,785) | 6,285<br>(4,949 - 7,567)    |
| Alzheimer disease and other dementias               | 5,389<br>(4,203 - 6,596)    | -                     | -                      | 1<br>(0 - 1)             | 327<br>(235 - 434)       | 5,062<br>(3,889 - 6,226)    |
| Parkinson disease                                   | 455<br>(323 - 634)          | -                     | -                      | 8<br>(6 - 11)            | 74<br>(50 - 109)         | 373<br>(253 - 541)          |
| Epilepsy                                            | 3,244<br>(2,420 - 4,195)    | 121<br>(48 - 262)     | 85<br>(50 - 153)       | 1,576<br>(1,139 - 2,148) | 796<br>(544 - 1,120)     | 666<br>(461 - 938)          |
| Multiple sclerosis                                  | 45<br>(30 - 75)             | -                     | -                      | 11<br>(7 - 18)           | 23<br>(14 - 40)          | 11<br>(6 - 19)              |
| Other neurological disorders                        | 545<br>(459 - 659)          | 34<br>(18 - 53)       | 12<br>(8 - 17)         | 142<br>(112 - 181)       | 185<br>(148 - 234)       | 173<br>(144 - 216)          |
| Mental and substance use disorders                  | 5,410<br>(3,631 - 7,104)    | 105<br>(59 - 170)     | 0<br>(0 - 1)           | 3,857<br>(2,360 - 5,424) | 1,017<br>(698 - 1,355)   | 432<br>(347 - 550)          |
| Schizophrenia                                       | 168<br>(125 - 254)          | -                     | -                      | 47<br>(31 - 78)          | 57<br>(38 - 93)          | 64<br>(44 - 100)            |
| Alcohol use disorders                               | 3,000<br>(1,051 - 4,172)    | -                     | -                      | 2,207<br>(635 - 3,295)   | 690<br>(340 - 975)       | 103<br>(68 - 154)           |
| Drug use disorders                                  | 2,215<br>(1,603 - 4,408)    | 105<br>(59 - 170)     | -                      | 1,575<br>(1,048 - 3,593) | 269<br>(197 - 375)       | 265<br>(198 - 346)          |
| Opioid use disorders                                | 231<br>(164 - 444)          | 12<br>(6 - 19)        | -                      | 166<br>(108 - 370)       | 24<br>(17 - 34)          | 29<br>(20 - 39)             |
| Cocaine use disorders                               | 10<br>(7 - 18)              | 0<br>(0 - 1)          | -                      | 8<br>(5 - 16)            | 1<br>(1 - 1)             | 1<br>(1 - 1)                |
| Amphetamine use disorders                           | 7<br>(5 - 12)               | 0<br>(0 - 1)          | -                      | 5<br>(3 - 10)            | 1<br>(1 - 1)             | 1<br>(0 - 1)                |
| Other drug use disorders                            | 1,967<br>(1,419 - 3,917)    | 93<br>(51 - 149)      | -                      | 1,396<br>(930 - 3,204)   | 243<br>(178 - 338)       | 235<br>(176 - 305)          |

Web Table 31- South Africa deaths with 95% UI by age, sex, and cause in 2013

| Cause                                               | Both Sexes, All Ages        | Both Sexes, 0-4 Years    | Both Sexes, 5-14 Years | Both Sexes, 15-49 Years  | Both Sexes, 50-69 Years     | Both Sexes, 70-80 Years     |
|-----------------------------------------------------|-----------------------------|--------------------------|------------------------|--------------------------|-----------------------------|-----------------------------|
| Eating disorders                                    | 27<br>(14 - 49)             | --                       | 0<br>(0 - 1)           | 27<br>(14 - 48)          | --                          | --                          |
| Anorexia nervosa                                    | 27<br>(14 - 49)             | --                       | 0<br>(0 - 1)           | 27<br>(14 - 48)          | --                          | --                          |
| Diabetes, urogenital, blood, and endocrine diseases | 39,504<br>(34,234 - 45,122) | 785<br>(398 - 1,422)     | 156<br>(102 - 243)     | 4,373<br>(3,515 - 5,465) | 13,453<br>(11,209 - 15,993) | 20,737<br>(17,767 - 23,975) |
| Diabetes mellitus                                   | 24,634<br>(21,089 - 28,312) | 18<br>(10 - 30)          | 15<br>(9 - 23)         | 1,594<br>(1,285 - 1,962) | 9,477<br>(7,779 - 11,372)   | 13,530<br>(11,203 - 15,965) |
| Acute glomerulonephritis                            | 27<br>(19 - 42)             | 4<br>(2 - 9)             | 2<br>(1 - 4)           | 9<br>(7 - 14)            | 5<br>(3 - 8)                | 5<br>(4 - 9)                |
| Chronic kidney disease                              | 7,526<br>(6,096 - 10,027)   | 53<br>(27 - 99)          | 28<br>(18 - 49)        | 991<br>(727 - 1,638)     | 2,164<br>(1,707 - 2,828)    | 4,290<br>(3,386 - 5,692)    |
| Chronic kidney disease due to diabetes mellitus     | 7<br>(4 - 14)               | 1<br>(0 - 1)             | 1<br>(0 - 1)           | 4<br>(2 - 10)            | 1<br>(1 - 2)                | 0<br>(0 - 1)                |
| Chronic kidney disease due to hypertension          | 5,092<br>(4,148 - 6,675)    | 4<br>(1 - 8)             | 4<br>(2 - 8)           | 458<br>(318 - 707)       | 1,595<br>(1,265 - 2,136)    | 3,032<br>(2,409 - 3,987)    |
| Chronic kidney disease due to glomerulonephritis    | 542<br>(353 - 729)          | 25<br>(14 - 41)          | 13<br>(9 - 20)         | 194<br>(129 - 281)       | 120<br>(69 - 173)           | 190<br>(111 - 291)          |
| Chronic kidney disease due to other causes          | 1,885<br>(1,215 - 3,079)    | 24<br>(10 - 57)          | 11<br>(5 - 23)         | 335<br>(205 - 740)       | 448<br>(265 - 753)          | 1,067<br>(598 - 1,771)      |
| Urinary diseases and male infertility               | 1,646<br>(1,308 - 2,055)    | 35<br>(16 - 74)          | 7<br>(4 - 12)          | 273<br>(201 - 369)       | 412<br>(314 - 521)          | 919<br>(694 - 1,236)        |
| Interstitial nephritis and urinary tract infections | 705<br>(535 - 951)          | 24<br>(11 - 48)          | 5<br>(3 - 8)           | 128<br>(88 - 175)        | 175<br>(126 - 245)          | 374<br>(249 - 557)          |
| Urolithiasis                                        | 24<br>(16 - 35)             | --                       | 0<br>(0 - 1)           | 6<br>(4 - 9)             | 9<br>(5 - 13)               | 9<br>(5 - 14)               |
| Other urinary diseases                              | 918<br>(682 - 1,187)        | 11<br>(4 - 27)           | 2<br>(1 - 3)           | 139<br>(100 - 202)       | 229<br>(155 - 300)          | 537<br>(362 - 738)          |
| Gynecological diseases                              | 25<br>(16 - 34)             | --                       | --                     | 11<br>(7 - 17)           | 5<br>(3 - 7)                | 9<br>(5 - 14)               |
| Uterine fibroids                                    | 5<br>(4 - 8)                | --                       | --                     | 2<br>(1 - 2)             | 1<br>(1 - 2)                | 3<br>(1 - 4)                |
| Polycystic ovarian syndrome                         | 1<br>(1 - 1)                | --                       | --                     | 1<br>(1 - 1)             | 0<br>(0 - 0)                | --                          |
| Endometriosis                                       | 2<br>(1 - 3)                | --                       | --                     | 2<br>(1 - 3)             | 0<br>(0 - 0)                | --                          |
| Genital prolapse                                    | 5<br>(3 - 7)                | --                       | --                     | 2<br>(1 - 2)             | 1<br>(0 - 1)                | 2<br>(1 - 4)                |
| Other gynecological diseases                        | 12<br>(8 - 16)              | --                       | --                     | 5<br>(3 - 8)             | 3<br>(1 - 4)                | 4<br>(2 - 6)                |
| Hemoglobinopathies and hemolytic anemias            | 737<br>(513 - 1,085)        | 70<br>(31 - 164)         | 23<br>(13 - 46)        | 189<br>(132 - 279)       | 140<br>(96 - 217)           | 314<br>(213 - 464)          |
| Thalassemias                                        | 46<br>(25 - 93)             | 28<br>(12 - 65)          | 7<br>(4 - 14)          | 11<br>(7 - 17)           | 0<br>(0 - 0)                | 0<br>(0 - 0)                |
| Sickle cell disorders                               | 11<br>(8 - 18)              | 3<br>(1 - 6)             | 1<br>(1 - 2)           | 6<br>(4 - 9)             | 2<br>(1 - 2)                | 0<br>(0 - 0)                |
| G6PD deficiency                                     | 33<br>(23 - 49)             | 5<br>(2 - 11)            | 2<br>(1 - 4)           | 18<br>(13 - 27)          | 6<br>(4 - 9)                | 2<br>(1 - 3)                |
| Other hemoglobinopathies and hemolytic anemias      | 647<br>(453 - 961)          | 35<br>(16 - 81)          | 13<br>(7 - 26)         | 154<br>(107 - 225)       | 133<br>(90 - 206)           | 312<br>(212 - 462)          |
| Endocrine, metabolic, blood, and immune disorders   | 4,910<br>(3,200 - 6,419)    | 604<br>(249 - 1,172)     | 80<br>(33 - 156)       | 1,306<br>(782 - 1,831)   | 1,249<br>(842 - 1,709)      | 1,670<br>(1,097 - 2,423)    |
| Musculoskeletal disorders                           | 978<br>(763 - 1,290)        | --                       | 10<br>(7 - 19)         | 213<br>(157 - 321)       | 267<br>(203 - 384)          | 488<br>(340 - 715)          |
| Rheumatoid arthritis                                | 307<br>(212 - 447)          | --                       | 2<br>(1 - 4)           | 27<br>(19 - 43)          | 82<br>(55 - 122)            | 196<br>(121 - 306)          |
| Other musculoskeletal disorders                     | 671<br>(521 - 911)          | --                       | 9<br>(6 - 16)          | 186<br>(136 - 280)       | 185<br>(139 - 273)          | 292<br>(200 - 437)          |
| Other non-communicable diseases                     | 5,122<br>(3,702 - 6,804)    | 2,614<br>(1,479 - 4,077) | 91<br>(47 - 145)       | 500<br>(378 - 681)       | 517<br>(399 - 669)          | 1,400<br>(1,037 - 1,832)    |
| Congenital anomalies                                | 2,936<br>(1,900 - 4,130)    | 2,201<br>(1,229 - 3,355) | 81<br>(41 - 130)       | 199<br>(144 - 271)       | 150<br>(111 - 194)          | 304<br>(194 - 390)          |
| Neural tube defects                                 | 101<br>(59 - 174)           | 85<br>(46 - 154)         | 2<br>(1 - 4)           | 8<br>(5 - 12)            | 3<br>(2 - 5)                | 2<br>(1 - 4)                |
| Congenital heart anomalies                          | 1,066<br>(672 - 1,573)      | 690<br>(338 - 1,171)     | 46<br>(21 - 78)        | 92<br>(65 - 129)         | 56<br>(39 - 77)             | 182<br>(107 - 244)          |
| Cleft lip and cleft palate                          | 15<br>(3 - 51)              | 15<br>(3 - 51)           | --                     | --                       | --                          | --                          |
| Down syndrome                                       | 168<br>(89 - 305)           | 121<br>(53 - 244)        | 8<br>(3 - 16)          | 19<br>(12 - 30)          | 15<br>(9 - 24)              | 4<br>(2 - 7)                |
| Chromosomal unbalanced rearrangements               | 120<br>(66 - 205)           | 107<br>(55 - 189)        | 1<br>(1 - 3)           | 7<br>(4 - 11)            | 2<br>(1 - 3)                | 3<br>(2 - 5)                |
| Other congenital anomalies                          | 1,466<br>(876 - 2,099)      | 1,183<br>(645 - 1,819)   | 25<br>(11 - 43)        | 73<br>(50 - 104)         | 74<br>(52 - 98)             | 112<br>(73 - 151)           |
| Skin and subcutaneous diseases                      | 1,833<br>(1,369 - 2,368)    | 60<br>(26 - 129)         | 10<br>(5 - 17)         | 301<br>(214 - 428)       | 366<br>(271 - 493)          | 1,096<br>(768 - 1,531)      |
| Cellulitis                                          | 352<br>(220 - 548)          | 8<br>(3 - 18)            | 2<br>(1 - 4)           | 56<br>(34 - 85)          | 86<br>(53 - 133)            | 200<br>(98 - 364)           |
| Pyoderma                                            | 508<br>(377 - 687)          | 40<br>(17 - 86)          | 4<br>(2 - 7)           | 128<br>(89 - 184)        | 115<br>(82 - 165)           | 222<br>(148 - 335)          |



Web Table 31- South Africa deaths with 95% UI by age, sex, and cause in 2013

| Cause                                           | Both Sexes, All Ages        | Both Sexes, 0-4 Years    | Both Sexes, 5-14 Years | Both Sexes, 15-49 Years     | Both Sexes, 50-69 Years  | Both Sexes, 70-80 Years  |
|-------------------------------------------------|-----------------------------|--------------------------|------------------------|-----------------------------|--------------------------|--------------------------|
| Decubitus ulcer                                 | 838<br>(582 - 1,153)        | 3<br>(1 - 10)            | 2<br>(1 - 4)           | 77<br>(49 - 117)            | 132<br>(89 - 192)        | 623<br>(409 - 899)       |
| Other skin and subcutaneous diseases            | 135<br>(78 - 208)           | 10<br>(2 - 23)           | 2<br>(1 - 3)           | 41<br>(24 - 63)             | 32<br>(17 - 56)          | 51<br>(21 - 105)         |
| Sudden infant death syndrome                    | 353<br>(119 - 847)          | 353<br>(119 - 847)       | --                     | --                          | --                       | --                       |
| Injuries                                        | 43,145<br>(33,800 - 53,134) | 1,954<br>(1,116 - 3,252) | 990<br>(728 - 1,399)   | 28,585<br>(21,460 - 37,142) | 6,121<br>(4,813 - 7,557) | 5,495<br>(3,740 - 7,002) |
| Transport injuries                              | 9,791<br>(6,216 - 12,394)   | 430<br>(213 - 747)       | 319<br>(184 - 464)     | 6,924<br>(4,357 - 9,185)    | 1,469<br>(927 - 1,853)   | 649<br>(377 - 819)       |
| Road injuries                                   | 9,431<br>(5,984 - 11,945)   | 407<br>(201 - 707)       | 302<br>(173 - 439)     | 6,718<br>(4,229 - 8,900)    | 1,387<br>(862 - 1,751)   | 617<br>(355 - 781)       |
| Pedestrian road injuries                        | 1,978<br>(1,127 - 2,659)    | 204<br>(90 - 371)        | 144<br>(76 - 223)      | 857<br>(456 - 1,298)        | 428<br>(251 - 587)       | 345<br>(184 - 456)       |
| Cyclist road injuries                           | 930<br>(520 - 1,214)        | 33<br>(11 - 72)          | 38<br>(19 - 62)        | 509<br>(275 - 726)          | 257<br>(148 - 347)       | 93<br>(48 - 130)         |
| Motorcyclist road injuries                      | 1,543<br>(919 - 2,418)      | 11<br>(5 - 22)           | 7<br>(4 - 12)          | 1,408<br>(836 - 2,218)      | 98<br>(52 - 159)         | 19<br>(10 - 30)          |
| Motor vehicle road injuries                     | 4,868<br>(3,136 - 6,326)    | 151<br>(75 - 258)        | 108<br>(62 - 161)      | 3,892<br>(2,510 - 5,292)    | 569<br>(344 - 748)       | 148<br>(87 - 200)        |
| Other road injuries                             | 112<br>(70 - 187)           | 7<br>(3 - 16)            | 4<br>(2 - 9)           | 53<br>(29 - 92)             | 34<br>(19 - 69)          | 13<br>(7 - 25)           |
| Other transport injuries                        | 360<br>(221 - 471)          | 23<br>(11 - 43)          | 18<br>(10 - 28)        | 206<br>(115 - 292)          | 82<br>(52 - 110)         | 31<br>(21 - 44)          |
| Unintentional injuries                          | 15,178<br>(11,078 - 19,360) | 1,306<br>(655 - 2,424)   | 532<br>(354 - 858)     | 6,482<br>(4,336 - 8,724)    | 2,768<br>(2,021 - 3,612) | 4,090<br>(2,583 - 5,499) |
| Falls                                           | 1,789<br>(920 - 2,579)      | 44<br>(18 - 100)         | 22<br>(11 - 41)        | 370<br>(249 - 546)          | 228<br>(150 - 326)       | 1,126<br>(366 - 1,827)   |
| Drowning                                        | 1,566<br>(1,093 - 2,546)    | 335<br>(134 - 750)       | 239<br>(130 - 478)     | 626<br>(423 - 983)          | 190<br>(133 - 316)       | 176<br>(120 - 252)       |
| Fire, heat, and hot substances                  | 2,094<br>(1,155 - 3,288)    | 218<br>(71 - 591)        | 48<br>(21 - 111)       | 693<br>(366 - 1,127)        | 333<br>(187 - 522)       | 802<br>(399 - 1,320)     |
| Poisonings                                      | 406<br>(301 - 650)          | 31<br>(15 - 61)          | 8<br>(5 - 13)          | 191<br>(126 - 332)          | 96<br>(69 - 158)         | 80<br>(56 - 118)         |
| Exposure to mechanical forces                   | 4,127<br>(1,718 - 5,626)    | 154<br>(72 - 284)        | 113<br>(67 - 179)      | 3,027<br>(1,157 - 4,369)    | 609<br>(264 - 803)       | 224<br>(103 - 285)       |
| Unintentional firearm injuries                  | 2,377<br>(779 - 3,428)      | 23<br>(10 - 44)          | 20<br>(11 - 34)        | 1,902<br>(574 - 2,909)      | 321<br>(126 - 449)       | 111<br>(44 - 158)        |
| Unintentional suffocation                       | 1,140<br>(319 - 1,629)      | 46<br>(14 - 120)         | 33<br>(14 - 62)        | 812<br>(182 - 1,254)        | 176<br>(47 - 266)        | 72<br>(27 - 104)         |
| Other exposure to mechanical forces             | 611<br>(381 - 851)          | 85<br>(32 - 176)         | 61<br>(27 - 107)       | 313<br>(214 - 450)          | 112<br>(67 - 161)        | 40<br>(21 - 56)          |
| Adverse effects of medical treatment            | 2,600<br>(1,389 - 3,866)    | 121<br>(35 - 293)        | 24<br>(10 - 47)        | 458<br>(259 - 711)          | 845<br>(395 - 1,378)     | 1,152<br>(597 - 1,842)   |
| Animal contact                                  | 219<br>(146 - 465)          | 29<br>(12 - 73)          | 18<br>(8 - 42)         | 82<br>(50 - 178)            | 54<br>(33 - 118)         | 36<br>(22 - 79)          |
| Venomous animal contact                         | 147<br>(95 - 318)           | 23<br>(9 - 57)           | 14<br>(6 - 33)         | 50<br>(30 - 113)            | 38<br>(23 - 84)          | 23<br>(13 - 53)          |
| Non-venomous animal contact                     | 72<br>(47 - 152)            | 7<br>(2 - 20)            | 4<br>(2 - 10)          | 32<br>(19 - 68)             | 17<br>(9 - 41)           | 13<br>(7 - 26)           |
| Foreign body                                    | 1,883<br>(1,009 - 2,741)    | 354<br>(135 - 755)       | 50<br>(25 - 91)        | 807<br>(350 - 1,331)        | 282<br>(175 - 398)       | 390<br>(260 - 539)       |
| Pulmonary aspiration and foreign body in airway | 1,844<br>(960 - 2,703)      | 347<br>(129 - 744)       | 48<br>(24 - 89)        | 791<br>(330 - 1,314)        | 273<br>(163 - 386)       | 385<br>(255 - 532)       |
| Foreign body in other body part                 | 39<br>(24 - 66)             | 7<br>(2 - 14)            | 1<br>(1 - 3)           | 16<br>(10 - 30)             | 8<br>(5 - 16)            | 5<br>(3 - 9)             |
| Other unintentional injuries                    | 494<br>(393 - 699)          | 19<br>(10 - 44)          | 12<br>(7 - 22)         | 228<br>(164 - 344)          | 130<br>(97 - 180)        | 106<br>(78 - 154)        |
| Self-harm and interpersonal violence            | 18,176<br>(13,650 - 24,452) | 219<br>(95 - 502)        | 139<br>(78 - 264)      | 15,179<br>(11,029 - 20,646) | 1,883<br>(1,401 - 2,550) | 756<br>(573 - 968)       |
| Self-harm                                       | 6,733<br>(4,874 - 9,060)    | --                       | 21<br>(10 - 41)        | 5,060<br>(3,422 - 7,161)    | 1,092<br>(780 - 1,499)   | 560<br>(414 - 751)       |
| Interpersonal violence                          | 11,443<br>(7,670 - 16,561)  | 219<br>(95 - 502)        | 119<br>(60 - 239)      | 10,120<br>(6,728 - 14,682)  | 791<br>(481 - 1,196)     | 196<br>(119 - 303)       |
| Assault by firearm                              | 1,971<br>(753 - 4,869)      | 25<br>(7 - 75)           | 16<br>(5 - 42)         | 1,731<br>(614 - 4,393)      | 175<br>(77 - 391)        | 24<br>(11 - 51)          |
| Assault by sharp object                         | 6,092<br>(3,533 - 8,920)    | 52<br>(20 - 135)         | 30<br>(12 - 66)        | 5,581<br>(3,155 - 8,333)    | 361<br>(190 - 573)       | 68<br>(37 - 109)         |
| Assault by other means                          | 3,380<br>(2,121 - 5,176)    | 142<br>(55 - 331)        | 72<br>(33 - 144)       | 2,809<br>(1,734 - 4,518)    | 255<br>(138 - 399)       | 103<br>(59 - 165)        |
| Forces of nature, war, and legal intervention   | 0<br>(0 - 0)                | 0<br>(0 - 0)             | --                     | --                          | --                       | --                       |
| Exposure to forces of nature                    | 0<br>(0 - 0)                | 0<br>(0 - 0)             | --                     | --                          | --                       | --                       |

Web Table 31- South Africa deaths with 95% UI by age, sex, and cause in 2013

| Cause                                                             | Males, All Ages                | Males, 0-4 Years            | Males, 5-14 Years        | Males, 15-49 Years             | Males, 50-69 Years          | Males, 70-80 Years          |
|-------------------------------------------------------------------|--------------------------------|-----------------------------|--------------------------|--------------------------------|-----------------------------|-----------------------------|
| All causes                                                        | 312,089<br>(284,017 - 340,941) | 22,813<br>(17,017 - 29,376) | 5,249<br>(4,538 - 6,179) | 138,123<br>(123,532 - 155,197) | 82,159<br>(72,187 - 92,922) | 63,744<br>(58,355 - 69,854) |
| Communicable, maternal, neonatal, and nutritional diseases        | 175,397<br>(156,428 - 195,572) | 19,252<br>(14,739 - 24,801) | 4,242<br>(3,500 - 5,113) | 100,578<br>(86,764 - 116,652)  | 38,139<br>(32,334 - 44,664) | 13,186<br>(11,166 - 15,271) |
| HIV/AIDS and tuberculosis                                         | 137,567<br>(120,456 - 157,230) | 1,493<br>(1,056 - 2,150)    | 3,708<br>(2,927 - 4,669) | 94,773<br>(80,900 - 111,097)   | 32,049<br>(26,383 - 38,337) | 5,545<br>(4,293 - 6,914)    |
| Tuberculosis                                                      | 13,138<br>(10,056 - 16,480)    | 246<br>(116 - 422)          | 98<br>(46 - 162)         | 5,765<br>(3,972 - 7,879)       | 4,720<br>(3,346 - 6,226)    | 2,310<br>(1,771 - 2,934)    |
| HIV/AIDS                                                          | 124,429<br>(107,696 - 143,955) | 1,247<br>(835 - 1,897)      | 3,610<br>(2,810 - 4,588) | 89,008<br>(74,918 - 105,671)   | 27,329<br>(21,368 - 34,115) | 3,235<br>(2,153 - 4,365)    |
| HIV/AIDS resulting in mycobacterial infection                     | 8,978<br>(6,968 - 11,441)      | 81<br>(52 - 128)            | 227<br>(169 - 306)       | 6,381<br>(4,878 - 8,310)       | 2,040<br>(1,464 - 2,740)    | 249<br>(153 - 365)          |
| HIV/AIDS resulting in other diseases                              | 115,451<br>(99,653 - 134,440)  | 1,166<br>(777 - 1,782)      | 3,383<br>(2,636 - 4,324) | 82,628<br>(69,438 - 98,404)    | 25,289<br>(19,874 - 31,630) | 2,986<br>(1,981 - 4,048)    |
| Diarrhea, lower respiratory, and other common infectious diseases | 26,185<br>(21,046 - 31,838)    | 8,261<br>(5,123 - 12,064)   | 466<br>(322 - 675)       | 4,911<br>(3,521 - 6,515)       | 5,468<br>(3,931 - 7,207)    | 7,079<br>(5,528 - 8,921)    |
| Diarrheal diseases                                                | 7,855<br>(5,652 - 10,743)      | 4,022<br>(2,122 - 6,549)    | 138<br>(71 - 243)        | 1,068<br>(750 - 1,487)         | 1,016<br>(641 - 1,497)      | 1,611<br>(1,071 - 2,438)    |
| Intestinal infectious diseases                                    | 476<br>(212 - 939)             | 148<br>(57 - 309)           | 83<br>(33 - 165)         | 201<br>(74 - 437)              | 32<br>(13 - 70)             | 13<br>(5 - 26)              |
| Typhoid fever                                                     | 347<br>(148 - 684)             | 102<br>(38 - 219)           | 61<br>(23 - 121)         | 150<br>(56 - 331)              | 24<br>(9 - 55)              | 9<br>(3 - 20)               |
| Paratyphoid fever                                                 | 120<br>(51 - 236)              | 41<br>(13 - 93)             | 22<br>(8 - 46)           | 48<br>(17 - 112)               | 7<br>(2 - 16)               | 3<br>(1 - 6)                |
| Other intestinal infectious diseases                              | 9<br>(4 - 19)                  | 5<br>(1 - 12)               | 1<br>(0 - 2)             | 3<br>(0 - 7)                   | 1<br>(0 - 4)                | 1<br>(0 - 3)                |
| Lower respiratory infections                                      | 16,211<br>(12,468 - 20,057)    | 3,371<br>(1,873 - 5,328)    | 161<br>(97 - 257)        | 3,149<br>(2,146 - 4,365)       | 4,219<br>(2,844 - 5,656)    | 5,310<br>(3,888 - 6,939)    |
| Upper respiratory infections                                      | 12<br>(4 - 24)                 | 1<br>(0 - 4)                | 0<br>(0 - 0)             | 6<br>(1 - 15)                  | 3<br>(0 - 8)                | 2<br>(0 - 8)                |
| Otitis media                                                      | 12<br>(10 - 15)                | 1<br>(0 - 2)                | 1<br>(0 - 1)             | 3<br>(3 - 5)                   | 4<br>(3 - 5)                | 4<br>(3 - 5)                |
| Meningitis                                                        | 1,088<br>(791 - 1,430)         | 322<br>(137 - 602)          | 58<br>(38 - 87)          | 422<br>(302 - 562)             | 167<br>(112 - 220)          | 120<br>(76 - 153)           |
| Pneumococcal meningitis                                           | 157<br>(96 - 221)              | 31<br>(12 - 64)             | 8<br>(4 - 14)            | 70<br>(39 - 109)               | 28<br>(15 - 46)             | 20<br>(9 - 32)              |
| H influenzae type B meningitis                                    | 226<br>(131 - 353)             | 126<br>(48 - 245)           | 15<br>(8 - 23)           | 57<br>(30 - 89)                | 16<br>(9 - 27)              | 12<br>(6 - 18)              |
| Meningococcal meningitis                                          | 367<br>(246 - 493)             | 99<br>(40 - 199)            | 23<br>(13 - 34)          | 146<br>(97 - 214)              | 54<br>(31 - 85)             | 45<br>(24 - 71)             |
| Other meningitis                                                  | 338<br>(238 - 451)             | 65<br>(27 - 136)            | 13<br>(5 - 23)           | 149<br>(88 - 227)              | 68<br>(39 - 98)             | 44<br>(24 - 65)             |
| Encephalitis                                                      | 113<br>(72 - 163)              | 28<br>(11 - 58)             | 7<br>(3 - 14)            | 45<br>(26 - 65)                | 20<br>(12 - 31)             | 13<br>(8 - 18)              |
| Diphtheria                                                        | 14<br>(1 - 66)                 | 8<br>(0 - 61)               | 1<br>(0 - 10)            | 4<br>(0 - 19)                  | 1<br>(0 - 6)                | --                          |
| Whooping cough                                                    | 280<br>(1 - 1,406)             | 268<br>(1 - 1,352)          | 8<br>(0 - 41)            | 4<br>(0 - 18)                  | 1<br>(0 - 3)                | --                          |
| Tetanus                                                           | 15<br>(10 - 26)                | 2<br>(1 - 4)                | 1<br>(0 - 2)             | 5<br>(3 - 9)                   | 5<br>(3 - 9)                | 2<br>(1 - 4)                |
| Measles                                                           | 95<br>(29 - 231)               | 86<br>(27 - 209)            | 6<br>(2 - 15)            | 2<br>(1 - 4)                   | 0<br>(0 - 0)                | --                          |
| Varicella and herpes zoster                                       | 14<br>(4 - 35)                 | 4<br>(0 - 17)               | 1<br>(0 - 3)             | 3<br>(0 - 8)                   | 1<br>(0 - 5)                | 5<br>(0 - 24)               |
| Neglected tropical diseases and malaria                           | 544<br>(357 - 857)             | 77<br>(35 - 162)            | 12<br>(7 - 23)           | 277<br>(163 - 468)             | 112<br>(67 - 184)           | 66<br>(40 - 109)            |
| Malaria                                                           | 245<br>(105 - 537)             | 14<br>(5 - 37)              | 4<br>(1 - 13)            | 143<br>(51 - 324)              | 51<br>(19 - 119)            | 33<br>(12 - 71)             |
| Leishmaniasis                                                     | 11<br>(7 - 15)                 | 3<br>(1 - 5)                | 0<br>(0 - 1)             | 4<br>(2 - 7)                   | 2<br>(1 - 3)                | 2<br>(1 - 3)                |
| Visceral leishmaniasis                                            | 11<br>(7 - 15)                 | 3<br>(1 - 5)                | 0<br>(0 - 1)             | 4<br>(2 - 7)                   | 2<br>(1 - 3)                | 2<br>(1 - 3)                |
| Schistosomiasis                                                   | 128<br>(89 - 183)              | 0<br>(0 - 1)                | 1<br>(0 - 1)             | 70<br>(43 - 111)               | 39<br>(22 - 61)             | 17<br>(9 - 29)              |
| Cysticercosis                                                     | 8<br>(6 - 10)                  | 0<br>(0 - 0)                | 0<br>(0 - 0)             | 6<br>(5 - 8)                   | 1<br>(1 - 2)                | 0<br>(0 - 0)                |
| Cystic echinococcosis                                             | 7<br>(6 - 9)                   | 0<br>(0 - 0)                | 0<br>(0 - 0)             | 5<br>(4 - 7)                   | 1<br>(1 - 1)                | 0<br>(0 - 1)                |
| Dengue                                                            | 2<br>(2 - 3)                   | 0<br>(0 - 1)                | 0<br>(0 - 0)             | 1<br>(1 - 2)                   | 0<br>(0 - 0)                | 0<br>(0 - 0)                |
| Rabies                                                            | 8<br>(4 - 13)                  | 1<br>(0 - 3)                | 3<br>(1 - 6)             | 3<br>(2 - 4)                   | 1<br>(0 - 1)                | 0<br>(0 - 1)                |
| Intestinal nematode infections                                    | 7<br>(2 - 17)                  | 3<br>(0 - 12)               | 1<br>(0 - 3)             | 2<br>(0 - 7)                   | 0<br>(0 - 3)                | 0<br>(0 - 3)                |
| Ascariasis                                                        | 7<br>(2 - 17)                  | 3<br>(0 - 12)               | 1<br>(0 - 3)             | 2<br>(0 - 7)                   | 0<br>(0 - 3)                | 0<br>(0 - 3)                |
| Other neglected tropical diseases                                 | 129<br>(77 - 216)              | 55<br>(19 - 128)            | 3<br>(1 - 6)             | 42<br>(26 - 65)                | 17<br>(10 - 26)             | 12<br>(7 - 19)              |
| Maternal disorders                                                | --                             | --                          | --                       | --                             | --                          | --                          |

Web Table 31- South Africa deaths with 95% UI by age, sex, and cause in 2013

| Cause                                                            | Males, All Ages               | Males, 0-4 Years          | Males, 5-14 Years  | Males, 15-49 Years          | Males, 50-69 Years          | Males, 70-80 Years          |
|------------------------------------------------------------------|-------------------------------|---------------------------|--------------------|-----------------------------|-----------------------------|-----------------------------|
| Maternal hemorrhage                                              | --                            | --                        | --                 | --                          | --                          | --                          |
| Maternal sepsis and other maternal infections                    | --                            | --                        | --                 | --                          | --                          | --                          |
| Maternal hypertensive disorders                                  | --                            | --                        | --                 | --                          | --                          | --                          |
| Maternal obstructed labor                                        | --                            | --                        | --                 | --                          | --                          | --                          |
| Maternal abortive outcome                                        | --                            | --                        | --                 | --                          | --                          | --                          |
| Indirect maternal deaths                                         | --                            | --                        | --                 | --                          | --                          | --                          |
| Late maternal deaths                                             | --                            | --                        | --                 | --                          | --                          | --                          |
| Maternal deaths aggravated by HIV/AIDS                           | --                            | --                        | --                 | --                          | --                          | --                          |
| Other maternal disorders                                         | --                            | --                        | --                 | --                          | --                          | --                          |
| Neonatal disorders                                               | 8,057<br>(6,511 - 10,037)     | 8,057<br>(6,511 - 10,037) | --                 | --                          | --                          | --                          |
| Neonatal preterm birth complications                             | 2,401<br>(1,257 - 3,824)      | 2,401<br>(1,257 - 3,824)  | --                 | --                          | --                          | --                          |
| Neonatal encephalopathy due to birth asphyxia and trauma         | 1,803<br>(900 - 3,037)        | 1,803<br>(900 - 3,037)    | --                 | --                          | --                          | --                          |
| Neonatal sepsis and other neonatal infections                    | 993<br>(351 - 2,067)          | 993<br>(351 - 2,067)      | --                 | --                          | --                          | --                          |
| Hemolytic disease and other neonatal jaundice                    | 82<br>(22 - 216)              | 82<br>(22 - 216)          | --                 | --                          | --                          | --                          |
| Other neonatal disorders                                         | 2,779<br>(1,613 - 4,402)      | 2,779<br>(1,613 - 4,402)  | --                 | --                          | --                          | --                          |
| Nutritional deficiencies                                         | 1,692<br>(1,101 - 2,575)      | 828<br>(400 - 1,463)      | 22<br>(13 - 38)    | 224<br>(145 - 389)          | 262<br>(171 - 441)          | 356<br>(205 - 549)          |
| Protein-energy malnutrition                                      | 1,251<br>(773 - 1,998)        | 808<br>(387 - 1,433)      | 18<br>(10 - 31)    | 112<br>(64 - 225)           | 134<br>(73 - 255)           | 179<br>(87 - 317)           |
| Iodine deficiency                                                | 5<br>(1 - 18)                 | 1<br>(0 - 9)              | 0<br>(0 - 1)       | 2<br>(0 - 10)               | 1<br>(0 - 5)                | 1<br>(0 - 7)                |
| Iron-deficiency anemia                                           | 390<br>(182 - 663)            | 16<br>(3 - 49)            | 4<br>(1 - 9)       | 98<br>(46 - 174)            | 114<br>(51 - 197)           | 157<br>(67 - 277)           |
| Other nutritional deficiencies                                   | 46<br>(22 - 108)              | 2<br>(1 - 8)              | 0<br>(0 - 1)       | 11<br>(5 - 28)              | 13<br>(6 - 32)              | 19<br>(8 - 47)              |
| Other communicable, maternal, neonatal, and nutritional diseases | 1,351<br>(881 - 1,949)        | 537<br>(171 - 1,057)      | 34<br>(17 - 59)    | 394<br>(227 - 565)          | 247<br>(162 - 360)          | 139<br>(88 - 214)           |
| Sexually transmitted diseases excluding HIV                      | 434<br>(99 - 938)             | 381<br>(66 - 865)         | 16<br>(3 - 35)     | 18<br>(11 - 30)             | 12<br>(6 - 23)              | 8<br>(3 - 15)               |
| Syphilis                                                         | 422<br>(90 - 926)             | 381<br>(66 - 865)         | 16<br>(3 - 35)     | 10<br>(6 - 17)              | 9<br>(5 - 17)               | 6<br>(3 - 13)               |
| Chlamydial infection                                             | --                            | --                        | --                 | --                          | --                          | --                          |
| Gonococcal infection                                             | 7<br>(5 - 12)                 | --                        | 0<br>(0 - 0)       | 4<br>(3 - 7)                | 2<br>(1 - 4)                | 1<br>(0 - 2)                |
| Other sexually transmitted diseases                              | 5<br>(3 - 8)                  | --                        | 0<br>(0 - 0)       | 3<br>(2 - 6)                | 1<br>(1 - 2)                | 0<br>(0 - 1)                |
| Hepatitis                                                        | 506<br>(376 - 655)            | 43<br>(17 - 99)           | 11<br>(6 - 19)     | 236<br>(125 - 346)          | 144<br>(95 - 213)           | 71<br>(48 - 105)            |
| Acute hepatitis A                                                | 50<br>(15 - 105)              | 15<br>(3 - 37)            | 4<br>(1 - 8)       | 25<br>(6 - 58)              | 6<br>(1 - 15)               | 1<br>(0 - 4)                |
| Acute hepatitis B                                                | 328<br>(225 - 459)            | 28<br>(9 - 65)            | 4<br>(2 - 9)       | 117<br>(51 - 197)           | 115<br>(75 - 176)           | 63<br>(41 - 95)             |
| Acute hepatitis C                                                | 11<br>(2 - 29)                | --                        | 0<br>(0 - 1)       | 5<br>(1 - 14)               | 4<br>(1 - 11)               | 2<br>(0 - 6)                |
| Acute hepatitis E                                                | 117<br>(61 - 196)             | 1<br>(0 - 4)              | 3<br>(1 - 6)       | 89<br>(43 - 153)            | 19<br>(6 - 40)              | 5<br>(1 - 15)               |
| Other infectious diseases                                        | 411<br>(204 - 677)            | 113<br>(41 - 281)         | 7<br>(2 - 19)      | 140<br>(69 - 240)           | 91<br>(36 - 172)            | 60<br>(21 - 129)            |
| Non-communicable diseases                                        | 104,858<br>(90,078 - 121,741) | 2,379<br>(1,428 - 3,661)  | 384<br>(274 - 548) | 14,120<br>(10,768 - 18,420) | 39,654<br>(32,407 - 47,746) | 48,320<br>(43,391 - 53,380) |
| Neoplasms                                                        | 21,213<br>(17,666 - 25,823)   | 140<br>(63 - 256)         | 98<br>(57 - 141)   | 1,911<br>(1,414 - 2,488)    | 9,375<br>(7,418 - 11,933)   | 9,689<br>(8,303 - 11,762)   |
| Esophageal cancer                                                | 2,827<br>(2,031 - 4,242)      | --                        | --                 | 200<br>(121 - 330)          | 1,604<br>(1,080 - 2,489)    | 1,024<br>(745 - 1,553)      |
| Stomach cancer                                                   | 861<br>(712 - 1,040)          | --                        | --                 | 82<br>(59 - 110)            | 367<br>(282 - 464)          | 412<br>(325 - 521)          |
| Liver cancer                                                     | 1,149<br>(879 - 1,434)        | --                        | 3<br>(1 - 5)       | 219<br>(144 - 314)          | 560<br>(399 - 738)          | 368<br>(276 - 482)          |
| Liver cancer due to hepatitis B                                  | 469<br>(272 - 686)            | --                        | 2<br>(1 - 3)       | 119<br>(72 - 182)           | 237<br>(122 - 373)          | 111<br>(62 - 169)           |
| Liver cancer due to hepatitis C                                  | 333<br>(113 - 672)            | --                        | 0<br>(0 - 1)       | 43<br>(4 - 116)             | 157<br>(45 - 365)           | 133<br>(53 - 230)           |
| Liver cancer due to alcohol use                                  | 244<br>(141 - 395)            | --                        | --                 | 27<br>(14 - 47)             | 117<br>(60 - 207)           | 100<br>(53 - 168)           |

Web Table 31- South Africa deaths with 95% UI by age, sex, and cause in 2013

| Cause                                         | Males, All Ages             | Males, 0-4 Years  | Males, 5-14 Years | Males, 15-49 Years       | Males, 50-69 Years          | Males, 70-80 Years          |
|-----------------------------------------------|-----------------------------|-------------------|-------------------|--------------------------|-----------------------------|-----------------------------|
| Liver cancer due to other causes              | 103<br>(56 - 167)           | --                | 1<br>(0 - 2)      | 30<br>(17 - 52)          | 48<br>(23 - 83)             | 24<br>(11 - 41)             |
| Larynx cancer                                 | 342<br>(252 - 494)          | --                | --                | 27<br>(17 - 45)          | 211<br>(148 - 312)          | 104<br>(75 - 149)           |
| Tracheal, bronchus and lung cancer            | 3,682<br>(3,032 - 4,523)    | --                | --                | 214<br>(150 - 309)       | 1,951<br>(1,516 - 2,526)    | 1,517<br>(1,262 - 1,807)    |
| Breast cancer                                 | 78<br>(53 - 115)            | --                | --                | 10<br>(6 - 16)           | 36<br>(21 - 58)             | 32<br>(18 - 53)             |
| Cervical cancer                               | --                          | --                | --                | --                       | --                          | --                          |
| Uterine cancer                                | --                          | --                | --                | --                       | --                          | --                          |
| Prostate cancer                               | 3,833<br>(2,628 - 5,928)    | --                | --                | 22<br>(13 - 37)          | 886<br>(517 - 1,352)        | 2,924<br>(2,034 - 4,608)    |
| Colon and rectum cancer                       | 1,939<br>(1,631 - 2,306)    | --                | --                | 145<br>(108 - 185)       | 770<br>(612 - 963)          | 1,024<br>(844 - 1,231)      |
| Lip and oral cavity cancer                    | 513<br>(343 - 705)          | --                | --                | 67<br>(43 - 102)         | 296<br>(192 - 427)          | 150<br>(99 - 210)           |
| Nasopharynx cancer                            | 77<br>(58 - 101)            | --                | 1<br>(0 - 2)      | 19<br>(13 - 27)          | 43<br>(30 - 62)             | 15<br>(9 - 21)              |
| Other pharynx cancer                          | 306<br>(214 - 423)          | --                | --                | 20<br>(13 - 30)          | 251<br>(170 - 351)          | 35<br>(24 - 49)             |
| Gallbladder and biliary tract cancer          | 125<br>(92 - 170)           | --                | --                | 10<br>(7 - 14)           | 65<br>(44 - 96)             | 50<br>(35 - 69)             |
| Pancreatic cancer                             | 994<br>(813 - 1,200)        | --                | --                | 74<br>(53 - 99)          | 501<br>(385 - 636)          | 419<br>(340 - 514)          |
| Malignant skin melanoma                       | 235<br>(138 - 405)          | --                | --                | 37<br>(21 - 64)          | 104<br>(60 - 191)           | 94<br>(52 - 152)            |
| Non-melanoma skin cancer                      | 158<br>(98 - 220)           | --                | --                | 23<br>(13 - 33)          | 66<br>(38 - 101)            | 70<br>(43 - 105)            |
| Ovarian cancer                                | --                          | --                | --                | --                       | --                          | --                          |
| Testicular cancer                             | 57<br>(38 - 80)             | --                | --                | 22<br>(13 - 32)          | 22<br>(14 - 33)             | 14<br>(8 - 21)              |
| Kidney cancer                                 | 274<br>(211 - 347)          | 7<br>(2 - 19)     | 3<br>(1 - 6)      | 29<br>(19 - 41)          | 146<br>(105 - 195)          | 89<br>(65 - 119)            |
| Bladder cancer                                | 413<br>(325 - 528)          | --                | --                | 19<br>(13 - 28)          | 141<br>(101 - 195)          | 253<br>(190 - 335)          |
| Brain and nervous system cancer               | 250<br>(164 - 370)          | 7<br>(2 - 15)     | 10<br>(4 - 18)    | 58<br>(36 - 89)          | 121<br>(75 - 197)           | 53<br>(32 - 76)             |
| Thyroid cancer                                | 44<br>(32 - 60)             | --                | 0<br>(0 - 0)      | 7<br>(4 - 10)            | 23<br>(15 - 33)             | 14<br>(10 - 20)             |
| Mesothelioma                                  | 194<br>(142 - 263)          | --                | --                | 15<br>(9 - 26)           | 102<br>(68 - 153)           | 77<br>(50 - 115)            |
| Hodgkin lymphoma                              | 60<br>(43 - 90)             | 2<br>(1 - 4)      | 2<br>(1 - 6)      | 27<br>(18 - 41)          | 20<br>(12 - 32)             | 10<br>(6 - 16)              |
| Non-Hodgkin lymphoma                          | 933<br>(698 - 1,405)        | 13<br>(4 - 28)    | 10<br>(4 - 17)    | 147<br>(98 - 208)        | 368<br>(250 - 600)          | 396<br>(288 - 639)          |
| Multiple myeloma                              | 236<br>(161 - 313)          | --                | --                | 23<br>(15 - 34)          | 126<br>(81 - 182)           | 86<br>(56 - 117)            |
| Leukemia                                      | 481<br>(395 - 580)          | 23<br>(10 - 47)   | 25<br>(14 - 36)   | 132<br>(97 - 173)        | 151<br>(115 - 194)          | 151<br>(118 - 194)          |
| Other neoplasms                               | 1,151<br>(849 - 1,549)      | 88<br>(30 - 170)  | 45<br>(19 - 72)   | 264<br>(185 - 354)       | 445<br>(306 - 683)          | 308<br>(223 - 431)          |
| Cardiovascular diseases                       | 36,500<br>(31,576 - 42,285) | 115<br>(62 - 196) | 49<br>(32 - 74)   | 2,875<br>(2,160 - 3,707) | 14,122<br>(11,479 - 17,365) | 19,339<br>(17,168 - 21,609) |
| Rheumatic heart disease                       | 364<br>(239 - 508)          | 2<br>(0 - 4)      | 7<br>(3 - 12)     | 103<br>(66 - 158)        | 96<br>(60 - 140)            | 156<br>(92 - 235)           |
| Ischemic heart disease                        | 14,069<br>(11,520 - 17,160) | 8<br>(3 - 19)     | 3<br>(2 - 6)      | 968<br>(671 - 1,366)     | 5,623<br>(4,363 - 7,209)    | 7,467<br>(6,112 - 9,013)    |
| Cerebrovascular disease                       | 12,479<br>(9,909 - 15,247)  | 13<br>(6 - 24)    | 13<br>(8 - 22)    | 848<br>(584 - 1,150)     | 4,739<br>(3,582 - 6,093)    | 6,866<br>(5,484 - 8,388)    |
| Ischemic stroke                               | 5,887<br>(4,353 - 7,434)    | 1<br>(0 - 4)      | 1<br>(0 - 2)      | 149<br>(83 - 229)        | 1,934<br>(1,283 - 2,590)    | 3,801<br>(2,880 - 4,789)    |
| Hemorrhagic stroke                            | 6,592<br>(4,995 - 8,518)    | 11<br>(5 - 22)    | 12<br>(7 - 20)    | 699<br>(485 - 953)       | 2,805<br>(2,072 - 3,746)    | 3,065<br>(2,297 - 4,066)    |
| Hypertensive heart disease                    | 3,519<br>(2,399 - 4,886)    | 3<br>(1 - 6)      | 1<br>(1 - 2)      | 234<br>(144 - 350)       | 1,390<br>(932 - 2,069)      | 1,891<br>(1,197 - 2,728)    |
| Cardiomyopathy and myocarditis                | 2,715<br>(2,065 - 3,717)    | 56<br>(29 - 101)  | 14<br>(8 - 24)    | 422<br>(288 - 616)       | 1,150<br>(830 - 1,682)      | 1,073<br>(771 - 1,499)      |
| Atrial fibrillation and flutter               | 294<br>(216 - 398)          | --                | --                | 7<br>(4 - 10)            | 68<br>(46 - 98)             | 219<br>(150 - 313)          |
| Aortic aneurysm                               | 778<br>(619 - 1,036)        | --                | --                | 41<br>(29 - 60)          | 269<br>(199 - 364)          | 468<br>(369 - 647)          |
| Peripheral vascular disease                   | 471<br>(360 - 604)          | --                | --                | 18<br>(11 - 27)          | 191<br>(134 - 261)          | 262<br>(188 - 361)          |
| Endocarditis                                  | 205<br>(123 - 310)          | 18<br>(6 - 37)    | 4<br>(2 - 7)      | 46<br>(26 - 71)          | 77<br>(45 - 126)            | 60<br>(36 - 99)             |
| Other cardiovascular and circulatory diseases | 1,606<br>(1,207 - 2,005)    | 16<br>(7 - 31)    | 6<br>(3 - 11)     | 189<br>(131 - 258)       | 519<br>(359 - 691)          | 876<br>(618 - 1,124)        |

Web Table 31- South Africa deaths with 95% UI by age, sex, and cause in 2013

| Cause                                               | Males, All Ages             | Males, 0-4 Years  | Males, 5-14 Years | Males, 15-49 Years       | Males, 50-69 Years       | Males, 70-80 Years       |
|-----------------------------------------------------|-----------------------------|-------------------|-------------------|--------------------------|--------------------------|--------------------------|
| Chronic respiratory diseases                        | 14,588<br>(11,661 - 17,521) | 135<br>(57 - 246) | 37<br>(22 - 54)   | 1,380<br>(1,023 - 1,871) | 5,605<br>(4,242 - 7,176) | 7,431<br>(5,988 - 8,783) |
| Chronic obstructive pulmonary disease               | 9,517<br>(7,425 - 11,436)   | 42<br>(15 - 84)   | 7<br>(4 - 12)     | 646<br>(465 - 889)       | 3,602<br>(2,653 - 4,642) | 5,219<br>(4,089 - 6,223) |
| Pneumoconiosis                                      | 763<br>(503 - 1,090)        | 1<br>(0 - 1)      | 0<br>(0 - 0)      | 57<br>(36 - 90)          | 290<br>(184 - 452)       | 415<br>(258 - 604)       |
| Silicosis                                           | 115<br>(75 - 166)           | 0<br>(0 - 0)      | 0<br>(0 - 0)      | 7<br>(5 - 12)            | 37<br>(24 - 61)          | 70<br>(43 - 104)         |
| Asbestosis                                          | 253<br>(165 - 366)          | 0<br>(0 - 0)      | 0<br>(0 - 0)      | 16<br>(10 - 26)          | 91<br>(58 - 146)         | 145<br>(90 - 212)        |
| Coal workers pneumoconiosis                         | 141<br>(93 - 208)           | 0<br>(0 - 0)      | 0<br>(0 - 0)      | 11<br>(7 - 18)           | 59<br>(37 - 98)          | 70<br>(43 - 102)         |
| Other pneumoconiosis                                | 253<br>(163 - 366)          | 0<br>(0 - 0)      | 0<br>(0 - 0)      | 22<br>(14 - 35)          | 102<br>(61 - 158)        | 129<br>(77 - 199)        |
| Asthma                                              | 3,304<br>(2,536 - 4,167)    | 39<br>(14 - 84)   | 21<br>(12 - 32)   | 585<br>(419 - 802)       | 1,412<br>(1,018 - 1,896) | 1,246<br>(892 - 1,674)   |
| Interstitial lung disease and pulmonary sarcoidosis | 775<br>(524 - 1,243)        | 15<br>(4 - 34)    | 4<br>(2 - 7)      | 62<br>(37 - 98)          | 250<br>(153 - 422)       | 444<br>(282 - 722)       |
| Other chronic respiratory diseases                  | 230<br>(162 - 306)          | 38<br>(13 - 80)   | 5<br>(2 - 8)      | 30<br>(20 - 43)          | 51<br>(33 - 76)          | 106<br>(68 - 155)        |
| Cirrhosis                                           | 2,515<br>(2,026 - 3,067)    | 15<br>(6 - 33)    | 8<br>(5 - 13)     | 640<br>(474 - 853)       | 1,258<br>(971 - 1,590)   | 594<br>(471 - 743)       |
| Cirrhosis due to hepatitis B                        | 376<br>(225 - 563)          | 0<br>(0 - 1)      | 1<br>(0 - 2)      | 96<br>(53 - 158)         | 189<br>(106 - 289)       | 91<br>(50 - 144)         |
| Cirrhosis due to hepatitis C                        | 235<br>(137 - 365)          | 0<br>(0 - 1)      | 1<br>(0 - 1)      | 46<br>(22 - 79)          | 112<br>(58 - 185)        | 75<br>(36 - 122)         |
| Cirrhosis due to alcohol use                        | 1,580<br>(1,231 - 1,991)    | -                 | -                 | 363<br>(255 - 515)       | 828<br>(618 - 1,067)     | 389<br>(294 - 499)       |
| Cirrhosis due to other causes                       | 325<br>(201 - 471)          | 15<br>(6 - 31)    | 7<br>(4 - 11)     | 135<br>(79 - 207)        | 129<br>(67 - 204)        | 39<br>(20 - 60)          |
| Digestive diseases                                  | 2,675<br>(2,160 - 3,211)    | 40<br>(17 - 80)   | 21<br>(14 - 32)   | 638<br>(476 - 838)       | 913<br>(694 - 1,158)     | 1,062<br>(858 - 1,271)   |
| Peptic ulcer disease                                | 469<br>(335 - 608)          | 1<br>(0 - 3)      | 1<br>(0 - 1)      | 77<br>(51 - 107)         | 165<br>(108 - 227)       | 225<br>(157 - 300)       |
| Gastritis and duodenitis                            | 164<br>(86 - 260)           | 2<br>(1 - 5)      | 1<br>(0 - 2)      | 38<br>(19 - 63)          | 53<br>(26 - 87)          | 71<br>(34 - 117)         |
| Appendicitis                                        | 85<br>(52 - 118)            | 2<br>(1 - 5)      | 5<br>(2 - 9)      | 34<br>(20 - 51)          | 26<br>(15 - 42)          | 18<br>(10 - 28)          |
| Paralytic ileus and intestinal obstruction          | 719<br>(490 - 1,168)        | 16<br>(6 - 35)    | 9<br>(5 - 15)     | 177<br>(108 - 285)       | 243<br>(157 - 412)       | 274<br>(179 - 451)       |
| Inguinal, femoral, and abdominal hernia             | 61<br>(28 - 87)             | 1<br>(0 - 2)      | 0<br>(0 - 1)      | 14<br>(7 - 22)           | 19<br>(9 - 30)           | 27<br>(12 - 42)          |
| Inflammatory bowel disease                          | 252<br>(149 - 331)          | 11<br>(3 - 25)    | 2<br>(1 - 4)      | 68<br>(41 - 96)          | 83<br>(44 - 117)         | 89<br>(47 - 129)         |
| Vascular intestinal disorders                       | 98<br>(39 - 199)            | 0<br>(0 - 1)      | 1<br>(0 - 1)      | 18<br>(7 - 39)           | 34<br>(13 - 71)          | 45<br>(18 - 95)          |
| Gallbladder and biliary diseases                    | 250<br>(142 - 331)          | 1<br>(0 - 3)      | 1<br>(0 - 1)      | 33<br>(21 - 48)          | 89<br>(48 - 126)         | 126<br>(68 - 179)        |
| Pancreatitis                                        | 205<br>(129 - 308)          | 1<br>(0 - 2)      | 0<br>(0 - 1)      | 85<br>(53 - 134)         | 78<br>(46 - 117)         | 41<br>(26 - 62)          |
| Other digestive diseases                            | 370<br>(245 - 489)          | 6<br>(2 - 13)     | 2<br>(1 - 4)      | 94<br>(62 - 137)         | 124<br>(76 - 173)        | 145<br>(89 - 203)        |
| Neurological disorders                              | 5,075<br>(4,031 - 6,197)    | 97<br>(42 - 221)  | 56<br>(33 - 101)  | 1,146<br>(794 - 1,666)   | 931<br>(676 - 1,252)     | 2,845<br>(2,154 - 3,548) |
| Alzheimer disease and other dementias               | 2,482<br>(1,787 - 3,160)    | -                 | -                 | 0<br>(0 - 1)             | 209<br>(130 - 299)       | 2,272<br>(1,616 - 2,942) |
| Parkinson disease                                   | 220<br>(146 - 332)          | -                 | -                 | 6<br>(4 - 8)             | 41<br>(26 - 64)          | 174<br>(103 - 277)       |
| Epilepsy                                            | 2,063<br>(1,455 - 2,815)    | 76<br>(27 - 191)  | 49<br>(27 - 94)   | 1,052<br>(711 - 1,546)   | 568<br>(362 - 848)       | 317<br>(218 - 465)       |
| Multiple sclerosis                                  | 15<br>(8 - 30)              | -                 | -                 | 5<br>(2 - 9)             | 8<br>(4 - 16)            | 3<br>(1 - 5)             |
| Other neurological disorders                        | 295<br>(223 - 406)          | 21<br>(8 - 37)    | 7<br>(3 - 11)     | 83<br>(58 - 118)         | 105<br>(77 - 149)        | 78<br>(61 - 110)         |
| Mental and substance use disorders                  | 3,991<br>(2,093 - 5,553)    | 76<br>(37 - 136)  | 0<br>(0 - 0)      | 2,918<br>(1,336 - 4,310) | 714<br>(395 - 1,011)     | 283<br>(211 - 370)       |
| Schizophrenia                                       | 99<br>(63 - 174)            | -                 | -                 | 36<br>(20 - 64)          | 39<br>(22 - 71)          | 25<br>(15 - 48)          |
| Alcohol use disorders                               | 2,678<br>(808 - 3,897)      | -                 | -                 | 2,035<br>(518 - 3,139)   | 568<br>(233 - 834)       | 76<br>(42 - 110)         |
| Drug use disorders                                  | 1,210<br>(813 - 3,217)      | 76<br>(37 - 136)  | -                 | 845<br>(488 - 2,733)     | 108<br>(74 - 184)        | 182<br>(128 - 250)       |
| Opioid use disorders                                | 129<br>(85 - 339)           | 8<br>(4 - 16)     | -                 | 91<br>(51 - 290)         | 10<br>(6 - 16)           | 20<br>(13 - 29)          |
| Cocaine use disorders                               | 4<br>(3 - 11)               | 0<br>(0 - 1)      | -                 | 3<br>(2 - 10)            | 0<br>(0 - 0)             | 0<br>(0 - 1)             |
| Amphetamine use disorders                           | 3<br>(2 - 8)                | 0<br>(0 - 1)      | -                 | 2<br>(1 - 7)             | 0<br>(0 - 0)             | 0<br>(0 - 1)             |
| Other drug use disorders                            | 1,074<br>(722 - 2,881)      | 67<br>(32 - 121)  | -                 | 749<br>(433 - 2,435)     | 97<br>(67 - 168)         | 161<br>(113 - 224)       |

Web Table 31- South Africa deaths with 95% UI by age, sex, and cause in 2013

| Cause                                               | Males, All Ages             | Males, 0-4 Years       | Males, 5-14 Years | Males, 15-49 Years       | Males, 50-69 Years       | Males, 70-80 Years       |
|-----------------------------------------------------|-----------------------------|------------------------|-------------------|--------------------------|--------------------------|--------------------------|
| Eating disorders                                    | 3<br>(2 - 5)                | --                     | 0<br>(0 - 0)      | 3<br>(1 - 5)             | --                       | --                       |
| Anorexia nervosa                                    | 3<br>(2 - 5)                | --                     | 0<br>(0 - 0)      | 3<br>(1 - 5)             | --                       | --                       |
| Diabetes, urogenital, blood, and endocrine diseases | 15,519<br>(12,811 - 18,566) | 240<br>(126 - 416)     | 61<br>(39 - 95)   | 2,266<br>(1,725 - 2,969) | 6,353<br>(4,972 - 7,900) | 6,598<br>(5,574 - 7,761) |
| Diabetes mellitus                                   | 9,437<br>(7,690 - 11,332)   | 12<br>(6 - 21)         | 6<br>(4 - 8)      | 884<br>(645 - 1,180)     | 4,432<br>(3,408 - 5,607) | 4,104<br>(3,328 - 4,984) |
| Acute glomerulonephritis                            | 15<br>(10 - 26)             | 3<br>(1 - 7)           | 1<br>(1 - 2)      | 5<br>(3 - 8)             | 3<br>(2 - 6)             | 3<br>(2 - 6)             |
| Chronic kidney disease                              | 3,621<br>(2,862 - 4,705)    | 33<br>(16 - 68)        | 15<br>(9 - 27)    | 614<br>(424 - 967)       | 1,254<br>(936 - 1,683)   | 1,706<br>(1,315 - 2,239) |
| Chronic kidney disease due to diabetes mellitus     | 4<br>(2 - 10)               | 0<br>(0 - 1)           | 0<br>(0 - 1)      | 2<br>(1 - 7)             | 0<br>(0 - 1)             | 0<br>(0 - 0)             |
| Chronic kidney disease due to hypertension          | 2,344<br>(1,842 - 3,159)    | 3<br>(1 - 7)           | 2<br>(1 - 4)      | 299<br>(197 - 484)       | 895<br>(660 - 1,257)     | 1,146<br>(897 - 1,532)   |
| Chronic kidney disease due to glomerulonephritis    | 326<br>(199 - 472)          | 16<br>(9 - 30)         | 7<br>(4 - 12)     | 123<br>(73 - 188)        | 81<br>(40 - 129)         | 99<br>(50 - 165)         |
| Chronic kidney disease due to other causes          | 949<br>(559 - 1,612)        | 14<br>(5 - 38)         | 6<br>(3 - 13)     | 190<br>(102 - 432)       | 278<br>(139 - 471)       | 461<br>(217 - 789)       |
| Urinary diseases and male infertility               | 785<br>(574 - 1,011)        | 22<br>(9 - 51)         | 3<br>(2 - 6)      | 161<br>(107 - 232)       | 255<br>(172 - 346)       | 345<br>(249 - 467)       |
| Interstitial nephritis and urinary tract infections | 282<br>(183 - 405)          | 15<br>(5 - 34)         | 2<br>(1 - 5)      | 64<br>(35 - 95)          | 86<br>(55 - 138)         | 115<br>(68 - 183)        |
| Urolithiasis                                        | 14<br>(9 - 21)              | --                     | 0<br>(0 - 0)      | 3<br>(2 - 5)             | 6<br>(3 - 9)             | 5<br>(3 - 7)             |
| Other urinary diseases                              | 490<br>(334 - 641)          | 7<br>(2 - 20)          | 1<br>(0 - 2)      | 94<br>(59 - 140)         | 163<br>(98 - 225)        | 225<br>(147 - 315)       |
| Gynecological diseases                              | --                          | --                     | --                | --                       | --                       | --                       |
| Uterine fibroids                                    | --                          | --                     | --                | --                       | --                       | --                       |
| Polycystic ovarian syndrome                         | --                          | --                     | --                | --                       | --                       | --                       |
| Endometriosis                                       | --                          | --                     | --                | --                       | --                       | --                       |
| Genital prolapse                                    | --                          | --                     | --                | --                       | --                       | --                       |
| Other gynecological diseases                        | --                          | --                     | --                | --                       | --                       | --                       |
| Hemoglobinopathies and hemolytic anemias            | 290<br>(176 - 449)          | 35<br>(14 - 84)        | 11<br>(5 - 23)    | 89<br>(53 - 145)         | 65<br>(38 - 105)         | 90<br>(56 - 140)         |
| Thalassemias                                        | 29<br>(14 - 64)             | 19<br>(7 - 47)         | 4<br>(2 - 8)      | 7<br>(4 - 12)            | 0<br>(0 - 0)             | 0<br>(0 - 0)             |
| Sickle cell disorders                               | 5<br>(3 - 8)                | 1<br>(1 - 3)           | 1<br>(0 - 1)      | 2<br>(1 - 4)             | 1<br>(0 - 1)             | 0<br>(0 - 0)             |
| G6PD deficiency                                     | 19<br>(11 - 30)             | 3<br>(1 - 8)           | 1<br>(1 - 3)      | 9<br>(6 - 16)            | 4<br>(2 - 6)             | 1<br>(1 - 1)             |
| Other hemoglobinopathies and hemolytic anemias      | 238<br>(146 - 366)          | 12<br>(5 - 27)         | 5<br>(3 - 11)     | 70<br>(42 - 116)         | 60<br>(35 - 97)          | 89<br>(55 - 138)         |
| Endocrine, metabolic, blood, and immune disorders   | 1,370<br>(839 - 1,802)      | 136<br>(55 - 272)      | 25<br>(10 - 46)   | 514<br>(255 - 770)       | 345<br>(212 - 549)       | 350<br>(205 - 540)       |
| Musculoskeletal disorders                           | 331<br>(249 - 495)          | --                     | 4<br>(2 - 8)      | 80<br>(55 - 133)         | 119<br>(85 - 189)        | 128<br>(87 - 187)        |
| Rheumatoid arthritis                                | 85<br>(56 - 128)            | --                     | 1<br>(0 - 2)      | 11<br>(7 - 20)           | 32<br>(19 - 51)          | 41<br>(24 - 65)          |
| Other musculoskeletal disorders                     | 246<br>(179 - 377)          | --                     | 3<br>(2 - 6)      | 69<br>(47 - 116)         | 88<br>(60 - 143)         | 86<br>(56 - 126)         |
| Other non-communicable diseases                     | 2,452<br>(1,638 - 3,403)    | 1,519<br>(803 - 2,422) | 50<br>(24 - 83)   | 268<br>(195 - 377)       | 264<br>(193 - 349)       | 351<br>(260 - 469)       |
| Congenital anomalies                                | 1,650<br>(975 - 2,390)      | 1,309<br>(690 - 2,031) | 45<br>(20 - 76)   | 113<br>(79 - 160)        | 85<br>(60 - 112)         | 97<br>(62 - 132)         |
| Neural tube defects                                 | 58<br>(31 - 107)            | 49<br>(23 - 97)        | 1<br>(0 - 3)      | 5<br>(3 - 7)             | 2<br>(1 - 3)             | 1<br>(0 - 2)             |
| Congenital heart anomalies                          | 569<br>(306 - 922)          | 415<br>(182 - 751)     | 27<br>(11 - 47)   | 52<br>(35 - 76)          | 29<br>(19 - 43)          | 45<br>(25 - 68)          |
| Cleft lip and cleft palate                          | 5<br>(1 - 18)               | 5<br>(1 - 18)          | --                | --                       | --                       | --                       |
| Down syndrome                                       | 97<br>(45 - 188)            | 68<br>(24 - 156)       | 3<br>(1 - 6)      | 14<br>(8 - 23)           | 9<br>(5 - 16)            | 3<br>(1 - 5)             |
| Chromosomal unbalanced rearrangements               | 58<br>(26 - 101)            | 53<br>(23 - 95)        | 1<br>(0 - 1)      | 2<br>(1 - 3)             | 1<br>(0 - 1)             | 1<br>(1 - 3)             |
| Other congenital anomalies                          | 864<br>(479 - 1,301)        | 719<br>(359 - 1,132)   | 14<br>(5 - 27)    | 41<br>(26 - 61)          | 43<br>(27 - 62)          | 47<br>(29 - 68)          |
| Skin and subcutaneous diseases                      | 620<br>(471 - 824)          | 28<br>(11 - 76)        | 5<br>(2 - 10)     | 154<br>(105 - 228)       | 179<br>(120 - 252)       | 254<br>(176 - 365)       |
| Cellulitis                                          | 137<br>(72 - 205)           | 4<br>(1 - 11)          | 1<br>(0 - 2)      | 29<br>(14 - 47)          | 46<br>(22 - 78)          | 57<br>(24 - 100)         |
| Pyoderma                                            | 218<br>(161 - 316)          | 19<br>(7 - 49)         | 2<br>(1 - 4)      | 69<br>(45 - 107)         | 63<br>(41 - 95)          | 65<br>(41 - 101)         |

Web Table 31- South Africa deaths with 95% UI by age, sex, and cause in 2013

| Cause                                           | Males, All Ages             | Males, 0-4 Years       | Males, 5-14 Years  | Males, 15-49 Years          | Males, 50-69 Years       | Males, 70-80 Years       |
|-------------------------------------------------|-----------------------------|------------------------|--------------------|-----------------------------|--------------------------|--------------------------|
| Decubitus ulcer                                 | 218<br>(148 - 315)          | 1<br>(0 - 5)           | 1<br>(0 - 3)       | 39<br>(24 - 68)             | 58<br>(34 - 92)          | 120<br>(73 - 184)        |
| Other skin and subcutaneous diseases            | 47<br>(27 - 71)             | 4<br>(1 - 13)          | 1<br>(0 - 2)       | 17<br>(10 - 27)             | 12<br>(6 - 20)           | 13<br>(5 - 29)           |
| Sudden infant death syndrome                    | 182<br>(48 - 416)           | 182<br>(48 - 416)      | --                 | --                          | --                       | --                       |
| Injuries                                        | 31,834<br>(24,077 - 40,644) | 1,182<br>(634 - 2,061) | 623<br>(453 - 911) | 23,425<br>(17,278 - 31,430) | 4,366<br>(3,241 - 5,645) | 2,238<br>(1,553 - 2,784) |
| Transport injuries                              | 7,500<br>(4,467 - 9,850)    | 289<br>(130 - 531)     | 208<br>(113 - 316) | 5,559<br>(3,308 - 7,618)    | 1,029<br>(582 - 1,361)   | 415<br>(220 - 543)       |
| Road injuries                                   | 7,232<br>(4,318 - 9,509)    | 273<br>(119 - 504)     | 196<br>(107 - 298) | 5,390<br>(3,222 - 7,392)    | 980<br>(558 - 1,297)     | 393<br>(205 - 516)       |
| Pedestrian road injuries                        | 1,429<br>(719 - 2,062)      | 149<br>(61 - 281)      | 99<br>(47 - 157)   | 670<br>(297 - 1,083)        | 301<br>(152 - 443)       | 209<br>(99 - 297)        |
| Cyclist road injuries                           | 749<br>(410 - 1,017)        | 28<br>(9 - 65)         | 32<br>(15 - 54)    | 409<br>(217 - 610)          | 205<br>(108 - 294)       | 76<br>(36 - 110)         |
| Motorcyclist road injuries                      | 1,459<br>(849 - 2,314)      | 10<br>(4 - 20)         | 7<br>(3 - 12)      | 1,331<br>(767 - 2,140)      | 94<br>(48 - 155)         | 17<br>(8 - 29)           |
| Motor vehicle road injuries                     | 3,495<br>(2,059 - 4,913)    | 82<br>(34 - 157)       | 57<br>(30 - 96)    | 2,929<br>(1,770 - 4,205)    | 347<br>(187 - 488)       | 80<br>(40 - 118)         |
| Other road injuries                             | 99<br>(60 - 178)            | 3<br>(1 - 8)           | 1<br>(1 - 3)       | 51<br>(28 - 91)             | 33<br>(18 - 68)          | 11<br>(5 - 23)           |
| Other transport injuries                        | 269<br>(132 - 374)          | 16<br>(7 - 34)         | 12<br>(6 - 21)     | 169<br>(75 - 254)           | 49<br>(24 - 73)          | 22<br>(12 - 33)          |
| Unintentional injuries                          | 9,644<br>(6,759 - 12,765)   | 768<br>(352 - 1,490)   | 334<br>(219 - 552) | 5,286<br>(3,294 - 7,368)    | 1,827<br>(1,252 - 2,510) | 1,428<br>(913 - 1,877)   |
| Falls                                           | 823<br>(512 - 1,120)        | 31<br>(10 - 78)        | 16<br>(7 - 32)     | 313<br>(198 - 473)          | 158<br>(104 - 239)       | 306<br>(98 - 486)        |
| Drowning                                        | 1,116<br>(750 - 1,826)      | 210<br>(77 - 495)      | 163<br>(81 - 342)  | 541<br>(347 - 868)          | 131<br>(83 - 214)        | 71<br>(47 - 108)         |
| Fire, heat, and hot substances                  | 1,038<br>(505 - 1,713)      | 133<br>(39 - 375)      | 26<br>(10 - 59)    | 459<br>(203 - 798)          | 192<br>(100 - 307)       | 228<br>(103 - 370)       |
| Poisonings                                      | 195<br>(137 - 400)          | 19<br>(7 - 42)         | 5<br>(3 - 9)       | 87<br>(52 - 212)            | 52<br>(32 - 95)          | 33<br>(20 - 58)          |
| Exposure to mechanical forces                   | 3,441<br>(1,254 - 4,844)    | 86<br>(37 - 174)       | 70<br>(40 - 113)   | 2,672<br>(898 - 3,961)      | 476<br>(166 - 660)       | 138<br>(51 - 189)        |
| Unintentional firearm injuries                  | 2,039<br>(522 - 3,051)      | 13<br>(5 - 26)         | 13<br>(6 - 22)     | 1,691<br>(430 - 2,693)      | 243<br>(57 - 373)        | 78<br>(22 - 119)         |
| Unintentional suffocation                       | 940<br>(205 - 1,405)        | 28<br>(6 - 90)         | 21<br>(7 - 45)     | 703<br>(131 - 1,122)        | 150<br>(35 - 239)        | 37<br>(11 - 60)          |
| Other exposure to mechanical forces             | 463<br>(295 - 654)          | 45<br>(17 - 100)       | 36<br>(16 - 64)    | 277<br>(183 - 408)          | 82<br>(47 - 120)         | 22<br>(10 - 31)          |
| Adverse effects of medical treatment            | 1,226<br>(577 - 1,950)      | 61<br>(15 - 162)       | 10<br>(4 - 20)     | 272<br>(136 - 431)          | 495<br>(197 - 879)       | 388<br>(185 - 650)       |
| Animal contact                                  | 124<br>(83 - 253)           | 16<br>(6 - 44)         | 10<br>(5 - 22)     | 55<br>(34 - 130)            | 26<br>(15 - 50)          | 18<br>(11 - 39)          |
| Venomous animal contact                         | 76<br>(52 - 166)            | 12<br>(4 - 30)         | 7<br>(4 - 16)      | 29<br>(17 - 70)             | 18<br>(11 - 38)          | 10<br>(6 - 25)           |
| Non-venomous animal contact                     | 48<br>(30 - 94)             | 4<br>(1 - 15)          | 3<br>(1 - 7)       | 26<br>(15 - 57)             | 7<br>(4 - 14)            | 7<br>(4 - 15)            |
| Foreign body                                    | 1,350<br>(542 - 2,138)      | 202<br>(57 - 514)      | 29<br>(12 - 63)    | 718<br>(263 - 1,229)        | 199<br>(95 - 300)        | 201<br>(100 - 301)       |
| Pulmonary aspiration and foreign body in airway | 1,321<br>(512 - 2,108)      | 198<br>(52 - 507)      | 29<br>(11 - 62)    | 703<br>(246 - 1,213)        | 192<br>(86 - 290)        | 199<br>(97 - 300)        |
| Foreign body in other body part                 | 29<br>(17 - 56)             | 4<br>(1 - 10)          | 1<br>(0 - 2)       | 15<br>(9 - 28)              | 7<br>(4 - 15)            | 2<br>(1 - 4)             |
| Other unintentional injuries                    | 329<br>(251 - 433)          | 8<br>(4 - 18)          | 6<br>(4 - 12)      | 169<br>(115 - 237)          | 99<br>(69 - 139)         | 46<br>(34 - 62)          |
| Self-harm and interpersonal violence            | 14,690<br>(10,346 - 20,082) | 124<br>(47 - 322)      | 81<br>(39 - 158)   | 12,580<br>(8,584 - 17,690)  | 1,510<br>(1,041 - 2,144) | 394<br>(271 - 545)       |
| Self-harm                                       | 5,480<br>(3,626 - 7,671)    | --                     | 12<br>(4 - 29)     | 4,300<br>(2,681 - 6,330)    | 875<br>(561 - 1,254)     | 292<br>(190 - 435)       |
| Interpersonal violence                          | 9,210<br>(5,684 - 13,533)   | 124<br>(47 - 322)      | 68<br>(29 - 142)   | 8,280<br>(5,040 - 12,287)   | 635<br>(356 - 1,014)     | 103<br>(51 - 182)        |
| Assault by firearm                              | 1,460<br>(471 - 3,926)      | 13<br>(3 - 43)         | 9<br>(3 - 27)      | 1,304<br>(375 - 3,519)      | 124<br>(48 - 316)        | 11<br>(4 - 29)           |
| Assault by sharp object                         | 5,140<br>(2,617 - 7,847)    | 35<br>(10 - 100)       | 22<br>(8 - 52)     | 4,735<br>(2,407 - 7,334)    | 310<br>(152 - 524)       | 38<br>(17 - 70)          |
| Assault by other means                          | 2,609<br>(1,412 - 4,392)    | 76<br>(25 - 195)       | 37<br>(13 - 81)    | 2,242<br>(1,199 - 3,842)    | 201<br>(95 - 342)        | 54<br>(24 - 99)          |
| Forces of nature, war, and legal intervention   | 0<br>(0 - 0)                | 0<br>(0 - 0)           | --                 | --                          | --                       | --                       |
| Exposure to forces of nature                    | 0<br>(0 - 0)                | 0<br>(0 - 0)           | --                 | --                          | --                       | --                       |

Web Table 31- South Africa deaths with 95% UI by age, sex, and cause in 2013

| Cause                                                             | Females, All Ages              | Females, 0-4 Years          | Females, 5-14 Years      | Females, 15-49 Years           | Females, 50-69 Years        | Females, 70-80 Years          |
|-------------------------------------------------------------------|--------------------------------|-----------------------------|--------------------------|--------------------------------|-----------------------------|-------------------------------|
| All causes                                                        | 308,506<br>(280,708 - 335,113) | 17,833<br>(12,618 - 23,515) | 4,840<br>(4,127 - 5,707) | 116,881<br>(101,643 - 132,095) | 63,892<br>(55,165 - 72,358) | 105,060<br>(94,577 - 114,973) |
| Communicable, maternal, neonatal, and nutritional diseases        | 171,090<br>(146,459 - 194,305) | 15,033<br>(10,955 - 19,894) | 4,105<br>(3,361 - 5,022) | 102,488<br>(86,579 - 118,601)  | 31,796<br>(22,849 - 42,304) | 17,668<br>(14,071 - 21,740)   |
| HIV/AIDS and tuberculosis                                         | 134,263<br>(108,687 - 156,892) | 1,390<br>(969 - 2,046)      | 3,659<br>(2,879 - 4,619) | 96,483<br>(80,119 - 113,052)   | 27,892<br>(18,759 - 38,477) | 4,839<br>(3,153 - 6,896)      |
| Tuberculosis                                                      | 6,779<br>(4,934 - 9,016)       | 162<br>(76 - 295)           | 64<br>(28 - 108)         | 3,820<br>(2,407 - 5,635)       | 1,173<br>(765 - 1,701)      | 1,560<br>(1,073 - 2,146)      |
| HIV/AIDS                                                          | 127,483<br>(101,377 - 150,172) | 1,227<br>(824 - 1,895)      | 3,595<br>(2,792 - 4,569) | 92,663<br>(76,584 - 109,302)   | 26,719<br>(17,465 - 37,521) | 3,279<br>(1,711 - 5,354)      |
| HIV/AIDS resulting in mycobacterial infection                     | 6,893<br>(5,121 - 9,149)       | 62<br>(39 - 96)             | 176<br>(131 - 238)       | 5,000<br>(3,769 - 6,523)       | 1,469<br>(941 - 2,117)      | 187<br>(99 - 314)             |
| HIV/AIDS resulting in other diseases                              | 120,590<br>(96,096 - 142,490)  | 1,165<br>(780 - 1,796)      | 3,420<br>(2,662 - 4,358) | 87,663<br>(71,929 - 103,877)   | 25,250<br>(16,385 - 35,476) | 3,092<br>(1,618 - 5,054)      |
| Diarrhea, lower respiratory, and other common infectious diseases | 25,092<br>(20,050 - 30,304)    | 5,972<br>(3,471 - 8,894)    | 390<br>(254 - 547)       | 3,337<br>(2,319 - 4,675)       | 3,485<br>(2,437 - 4,600)    | 11,908<br>(8,883 - 15,476)    |
| Diarrheal diseases                                                | 7,816<br>(5,721 - 10,494)      | 2,488<br>(1,198 - 4,295)    | 115<br>(61 - 189)        | 918<br>(587 - 1,374)           | 904<br>(562 - 1,361)        | 3,391<br>(2,046 - 5,312)      |
| Intestinal infectious diseases                                    | 465<br>(209 - 893)             | 148<br>(58 - 310)           | 78<br>(32 - 155)         | 185<br>(71 - 401)              | 33<br>(13 - 70)             | 21<br>(7 - 41)                |
| Typhoid fever                                                     | 354<br>(153 - 707)             | 109<br>(41 - 232)           | 60<br>(24 - 122)         | 142<br>(55 - 312)              | 26<br>(10 - 57)             | 16<br>(5 - 34)                |
| Paratyphoid fever                                                 | 104<br>(45 - 212)              | 36<br>(11 - 86)             | 18<br>(6 - 38)           | 41<br>(14 - 94)                | 6<br>(2 - 15)               | 4<br>(1 - 9)                  |
| Other intestinal infectious diseases                              | 7<br>(2 - 14)                  | 3<br>(0 - 8)                | 0<br>(0 - 2)             | 2<br>(0 - 6)                   | 1<br>(0 - 3)                | 1<br>(0 - 4)                  |
| Lower respiratory infections                                      | 15,461<br>(11,543 - 19,438)    | 2,690<br>(1,436 - 4,419)    | 131<br>(77 - 204)        | 1,920<br>(1,258 - 2,751)       | 2,425<br>(1,592 - 3,377)    | 8,296<br>(5,759 - 11,317)     |
| Upper respiratory infections                                      | 10<br>(3 - 21)                 | 1<br>(0 - 3)                | 0<br>(0 - 0)             | 5<br>(1 - 14)                  | 1<br>(0 - 4)                | 3<br>(0 - 11)                 |
| Otitis media                                                      | 10<br>(8 - 12)                 | 1<br>(0 - 1)                | 0<br>(0 - 1)             | 2<br>(2 - 3)                   | 2<br>(1 - 3)                | 4<br>(3 - 6)                  |
| Meningitis                                                        | 823<br>(600 - 1,143)           | 252<br>(120 - 530)          | 44<br>(26 - 68)          | 262<br>(171 - 388)             | 103<br>(62 - 154)           | 163<br>(96 - 247)             |
| Pneumococcal meningitis                                           | 117<br>(79 - 165)              | 25<br>(10 - 57)             | 6<br>(3 - 12)            | 41<br>(21 - 73)                | 18<br>(10 - 29)             | 27<br>(13 - 44)               |
| H influenzae type B meningitis                                    | 164<br>(108 - 288)             | 91<br>(42 - 204)            | 11<br>(6 - 20)           | 37<br>(21 - 60)                | 9<br>(4 - 17)               | 16<br>(8 - 27)                |
| Meningococcal meningitis                                          | 305<br>(222 - 443)             | 88<br>(41 - 198)            | 18<br>(10 - 29)          | 99<br>(58 - 157)               | 37<br>(21 - 58)             | 64<br>(37 - 104)              |
| Other meningitis                                                  | 237<br>(151 - 330)             | 48<br>(17 - 96)             | 8<br>(3 - 16)            | 86<br>(50 - 141)               | 39<br>(21 - 64)             | 56<br>(25 - 93)               |
| Encephalitis                                                      | 81<br>(53 - 113)               | 19<br>(7 - 39)              | 5<br>(2 - 9)             | 29<br>(16 - 48)                | 12<br>(7 - 20)              | 15<br>(10 - 25)               |
| Diphtheria                                                        | 9<br>(0 - 46)                  | 5<br>(0 - 38)               | 1<br>(0 - 6)             | 3<br>(0 - 15)                  | 0<br>(0 - 2)                | --                            |
| Whooping cough                                                    | 300<br>(1 - 1,444)             | 285<br>(1 - 1,383)          | 10<br>(0 - 48)           | 4<br>(0 - 21)                  | 0<br>(0 - 2)                | --                            |
| Tetanus                                                           | 11<br>(7 - 18)                 | 1<br>(1 - 3)                | 0<br>(0 - 1)             | 2<br>(1 - 4)                   | 4<br>(2 - 7)                | 4<br>(2 - 7)                  |
| Measles                                                           | 86<br>(27 - 210)               | 78<br>(24 - 191)            | 6<br>(2 - 15)            | 2<br>(1 - 6)                   | 0<br>(0 - 0)                | --                            |
| Varicella and herpes zoster                                       | 20<br>(4 - 66)                 | 3<br>(0 - 14)               | 0<br>(0 - 2)             | 3<br>(0 - 9)                   | 2<br>(0 - 5)                | 12<br>(0 - 54)                |
| Neglected tropical diseases and malaria                           | 346<br>(264 - 481)             | 51<br>(25 - 111)            | 7<br>(4 - 13)            | 181<br>(121 - 261)             | 42<br>(30 - 60)             | 65<br>(48 - 99)               |
| Malaria                                                           | 128<br>(86 - 249)              | 7<br>(2 - 16)               | 2<br>(1 - 4)             | 82<br>(47 - 156)               | 12<br>(7 - 22)              | 25<br>(16 - 51)               |
| Leishmaniasis                                                     | 13<br>(7 - 19)                 | 3<br>(1 - 6)                | 1<br>(0 - 1)             | 5<br>(2 - 8)                   | 3<br>(1 - 5)                | 2<br>(1 - 3)                  |
| Visceral leishmaniasis                                            | 13<br>(7 - 19)                 | 3<br>(1 - 6)                | 1<br>(0 - 1)             | 5<br>(2 - 8)                   | 3<br>(1 - 5)                | 2<br>(1 - 3)                  |
| Schistosomiasis                                                   | 83<br>(54 - 118)               | 0<br>(0 - 0)                | 0<br>(0 - 1)             | 48<br>(27 - 77)                | 15<br>(9 - 25)              | 19<br>(9 - 32)                |
| Cysticercosis                                                     | 9<br>(6 - 12)                  | 0<br>(0 - 0)                | 0<br>(0 - 0)             | 8<br>(5 - 10)                  | 1<br>(1 - 1)                | 1<br>(0 - 1)                  |
| Cystic echinococcosis                                             | 9<br>(6 - 12)                  | 0<br>(0 - 0)                | 0<br>(0 - 0)             | 7<br>(5 - 9)                   | 1<br>(1 - 1)                | 1<br>(1 - 1)                  |
| Dengue                                                            | 2<br>(2 - 4)                   | 0<br>(0 - 0)                | 0<br>(0 - 1)             | 1<br>(1 - 2)                   | 0<br>(0 - 1)                | 0<br>(0 - 0)                  |
| Rabies                                                            | 7<br>(4 - 10)                  | 1<br>(0 - 2)                | 2<br>(1 - 3)             | 2<br>(1 - 3)                   | 1<br>(1 - 2)                | 1<br>(1 - 2)                  |
| Intestinal nematode infections                                    | 6<br>(1 - 15)                  | 2<br>(0 - 8)                | 0<br>(0 - 2)             | 2<br>(0 - 7)                   | 0<br>(0 - 2)                | 1<br>(0 - 4)                  |
| Ascariasis                                                        | 6<br>(1 - 15)                  | 2<br>(0 - 8)                | 0<br>(0 - 2)             | 2<br>(0 - 7)                   | 0<br>(0 - 2)                | 1<br>(0 - 4)                  |
| Other neglected tropical diseases                                 | 90<br>(47 - 167)               | 37<br>(12 - 95)             | 2<br>(1 - 5)             | 27<br>(15 - 46)                | 9<br>(4 - 15)               | 15<br>(7 - 27)                |
| Maternal disorders                                                | 1,925<br>(1,065 - 3,041)       | --                          | 1<br>(0 - 2)             | 1,925<br>(1,064 - 3,040)       | --                          | --                            |



Web Table 31- South Africa deaths with 95% UI by age, sex, and cause in 2013

| Cause                                                            | Females, All Ages              | Females, 0-4 Years       | Females, 5-14 Years | Females, 15-49 Years      | Females, 50-69 Years        | Females, 70-80 Years        |
|------------------------------------------------------------------|--------------------------------|--------------------------|---------------------|---------------------------|-----------------------------|-----------------------------|
| Maternal hemorrhage                                              | 158<br>(86 - 251)              | --                       | 0<br>(0 - 0)        | 158<br>(86 - 251)         | --                          | --                          |
| Maternal sepsis and other maternal infections                    | 156<br>(85 - 254)              | --                       | 0<br>(0 - 0)        | 155<br>(85 - 254)         | --                          | --                          |
| Maternal hypertensive disorders                                  | 290<br>(157 - 476)             | --                       | 0<br>(0 - 1)        | 290<br>(156 - 476)        | --                          | --                          |
| Maternal obstructed labor                                        | 111<br>(55 - 190)              | --                       | 0<br>(0 - 0)        | 111<br>(55 - 190)         | --                          | --                          |
| Maternal abortive outcome                                        | 178<br>(99 - 290)              | --                       | 0<br>(0 - 0)        | 178<br>(99 - 290)         | --                          | --                          |
| Indirect maternal deaths                                         | 351<br>(186 - 571)             | --                       | 0<br>(0 - 0)        | 351<br>(186 - 571)        | --                          | --                          |
| Late maternal deaths                                             | 263<br>(133 - 483)             | --                       | 0<br>(0 - 0)        | 263<br>(133 - 483)        | --                          | --                          |
| Maternal deaths aggravated by HIV/AIDS                           | 195<br>(90 - 333)              | --                       | --                  | 195<br>(90 - 333)         | --                          | --                          |
| Other maternal disorders                                         | 220<br>(117 - 364)             | --                       | 0<br>(0 - 0)        | 220<br>(117 - 363)        | --                          | --                          |
| Neonatal disorders                                               | 6,579<br>(4,992 - 8,618)       | 6,579<br>(4,992 - 8,618) | --                  | --                        | --                          | --                          |
| Neonatal preterm birth complications                             | 1,971<br>(1,000 - 3,233)       | 1,971<br>(1,000 - 3,233) | --                  | --                        | --                          | --                          |
| Neonatal encephalopathy due to birth asphyxia and trauma         | 1,448<br>(734 - 2,410)         | 1,448<br>(734 - 2,410)   | --                  | --                        | --                          | --                          |
| Neonatal sepsis and other neonatal infections                    | 779<br>(343 - 1,434)           | 779<br>(343 - 1,434)     | --                  | --                        | --                          | --                          |
| Hemolytic disease and other neonatal jaundice                    | 48<br>(15 - 133)               | 48<br>(15 - 133)         | --                  | --                        | --                          | --                          |
| Other neonatal disorders                                         | 2,333<br>(1,375 - 3,704)       | 2,333<br>(1,375 - 3,704) | --                  | --                        | --                          | --                          |
| Nutritional deficiencies                                         | 1,625<br>(1,213 - 2,143)       | 557<br>(284 - 943)       | 17<br>(10 - 27)     | 195<br>(133 - 297)        | 211<br>(145 - 296)          | 646<br>(427 - 941)          |
| Protein-energy malnutrition                                      | 982<br>(634 - 1,495)           | 544<br>(277 - 933)       | 13<br>(7 - 21)      | 77<br>(38 - 138)          | 80<br>(39 - 147)            | 268<br>(120 - 500)          |
| Iodine deficiency                                                | 7<br>(1 - 26)                  | 1<br>(0 - 7)             | 0<br>(0 - 1)        | 3<br>(0 - 13)             | 1<br>(0 - 5)                | 2<br>(0 - 15)               |
| Iron-deficiency anemia                                           | 578<br>(298 - 877)             | 10<br>(2 - 31)           | 4<br>(1 - 7)        | 105<br>(56 - 166)         | 120<br>(61 - 182)           | 339<br>(158 - 566)          |
| Other nutritional deficiencies                                   | 58<br>(28 - 121)               | 1<br>(0 - 4)             | 0<br>(0 - 0)        | 9<br>(4 - 19)             | 11<br>(5 - 23)              | 36<br>(15 - 83)             |
| Other communicable, maternal, neonatal, and nutritional diseases | 1,260<br>(832 - 1,842)         | 485<br>(158 - 975)       | 30<br>(14 - 53)     | 367<br>(194 - 541)        | 166<br>(109 - 242)          | 211<br>(133 - 353)          |
| Sexually transmitted diseases excluding HIV                      | 471<br>(149 - 991)             | 370<br>(63 - 858)        | 16<br>(3 - 36)      | 53<br>(26 - 90)           | 14<br>(5 - 34)              | 19<br>(7 - 46)              |
| Syphilis                                                         | 428<br>(112 - 945)             | 370<br>(63 - 858)        | 16<br>(3 - 36)      | 21<br>(10 - 36)           | 8<br>(2 - 18)               | 14<br>(5 - 36)              |
| Chlamydial infection                                             | 14<br>(7 - 22)                 | --                       | 0<br>(0 - 0)        | 10<br>(5 - 18)            | 2<br>(1 - 5)                | 1<br>(0 - 3)                |
| Gonococcal infection                                             | 15<br>(8 - 25)                 | --                       | 0<br>(0 - 0)        | 11<br>(5 - 19)            | 2<br>(1 - 6)                | 2<br>(1 - 5)                |
| Other sexually transmitted diseases                              | 13<br>(7 - 22)                 | --                       | 0<br>(0 - 0)        | 10<br>(5 - 17)            | 2<br>(1 - 5)                | 1<br>(0 - 2)                |
| Hepatitis                                                        | 491<br>(342 - 642)             | 29<br>(14 - 56)          | 9<br>(5 - 15)       | 236<br>(84 - 356)         | 108<br>(71 - 163)           | 109<br>(70 - 162)           |
| Acute hepatitis A                                                | 52<br>(16 - 102)               | 13<br>(3 - 29)           | 4<br>(1 - 7)        | 27<br>(6 - 62)            | 5<br>(1 - 14)               | 3<br>(0 - 8)                |
| Acute hepatitis B                                                | 263<br>(180 - 364)             | 16<br>(6 - 35)           | 3<br>(1 - 6)        | 67<br>(24 - 119)          | 84<br>(52 - 133)            | 93<br>(58 - 142)            |
| Acute hepatitis C                                                | 11<br>(2 - 31)                 | --                       | 0<br>(0 - 1)        | 4<br>(1 - 11)             | 3<br>(0 - 9)                | 4<br>(0 - 17)               |
| Acute hepatitis E                                                | 165<br>(63 - 267)              | 0<br>(0 - 2)             | 2<br>(1 - 5)        | 138<br>(45 - 228)         | 15<br>(5 - 32)              | 9<br>(2 - 23)               |
| Other infectious diseases                                        | 298<br>(149 - 527)             | 87<br>(34 - 225)         | 5<br>(2 - 14)       | 79<br>(41 - 140)          | 45<br>(17 - 84)             | 83<br>(24 - 203)            |
| Non-communicable diseases                                        | 126,104<br>(108,770 - 145,372) | 2,028<br>(1,161 - 3,355) | 368<br>(248 - 532)  | 9,232<br>(6,700 - 12,411) | 30,341<br>(24,023 - 37,943) | 84,135<br>(74,825 - 93,078) |
| Neoplasms                                                        | 20,526<br>(16,993 - 24,720)    | 87<br>(35 - 152)         | 81<br>(42 - 123)    | 1,826<br>(1,336 - 2,416)  | 7,521<br>(5,849 - 9,493)    | 11,012<br>(9,292 - 13,074)  |
| Esophageal cancer                                                | 1,921<br>(1,436 - 2,439)       | --                       | --                  | 82<br>(54 - 120)          | 774<br>(527 - 1,067)        | 1,065<br>(790 - 1,406)      |
| Stomach cancer                                                   | 765<br>(570 - 996)             | --                       | --                  | 38<br>(27 - 53)           | 217<br>(158 - 290)          | 511<br>(359 - 705)          |
| Liver cancer                                                     | 765<br>(551 - 1,055)           | --                       | 1<br>(1 - 3)        | 78<br>(48 - 119)          | 255<br>(164 - 377)          | 432<br>(296 - 631)          |
| Liver cancer due to hepatitis B                                  | 167<br>(93 - 264)              | --                       | 0<br>(0 - 1)        | 27<br>(15 - 43)           | 67<br>(32 - 114)            | 73<br>(39 - 116)            |
| Liver cancer due to hepatitis C                                  | 346<br>(214 - 516)             | --                       | 0<br>(0 - 1)        | 23<br>(11 - 41)           | 106<br>(56 - 182)           | 216<br>(127 - 339)          |
| Liver cancer due to alcohol use                                  | 113<br>(59 - 182)              | --                       | --                  | 5<br>(2 - 9)              | 31<br>(16 - 56)             | 77<br>(37 - 131)            |

Web Table 31- South Africa deaths with 95% UI by age, sex, and cause in 2013

| Cause                                         | Females, All Ages           | Females, 0-4 Years | Females, 5-14 Years | Females, 15-49 Years     | Females, 50-69 Years       | Females, 70-80 Years        |
|-----------------------------------------------|-----------------------------|--------------------|---------------------|--------------------------|----------------------------|-----------------------------|
| Liver cancer due to other causes              | 139<br>(79 - 220)           | --                 | 1<br>(0 - 2)        | 22<br>(11 - 37)          | 50<br>(24 - 86)            | 66<br>(34 - 113)            |
| Larynx cancer                                 | 66<br>(33 - 119)            | --                 | --                  | 5<br>(3 - 10)            | 36<br>(17 - 68)            | 25<br>(12 - 45)             |
| Tracheal, bronchus and lung cancer            | 1,922<br>(1,483 - 2,659)    | --                 | --                  | 61<br>(40 - 99)          | 728<br>(511 - 1,100)       | 1,133<br>(868 - 1,540)      |
| Breast cancer                                 | 3,159<br>(2,389 - 3,943)    | --                 | --                  | 391<br>(255 - 542)       | 1,252<br>(868 - 1,666)     | 1,516<br>(1,146 - 1,963)    |
| Cervical cancer                               | 2,717<br>(2,072 - 3,477)    | --                 | --                  | 397<br>(274 - 557)       | 1,249<br>(901 - 1,708)     | 1,072<br>(757 - 1,436)      |
| Uterine cancer                                | 431<br>(254 - 636)          | --                 | --                  | 13<br>(8 - 23)           | 144<br>(79 - 225)          | 274<br>(163 - 417)          |
| Prostate cancer                               | --                          | --                 | --                  | --                       | --                         | --                          |
| Colon and rectum cancer                       | 2,335<br>(1,871 - 2,840)    | --                 | --                  | 93<br>(67 - 125)         | 706<br>(525 - 913)         | 1,536<br>(1,208 - 1,890)    |
| Lip and oral cavity cancer                    | 289<br>(192 - 429)          | --                 | --                  | 20<br>(12 - 33)          | 117<br>(68 - 187)          | 152<br>(98 - 226)           |
| Nasopharynx cancer                            | 37<br>(25 - 66)             | --                 | 0<br>(0 - 1)        | 7<br>(4 - 12)            | 15<br>(9 - 29)             | 15<br>(9 - 26)              |
| Other pharynx cancer                          | 35<br>(24 - 51)             | --                 | --                  | 4<br>(2 - 6)             | 22<br>(14 - 34)            | 9<br>(6 - 13)               |
| Gallbladder and biliary tract cancer          | 227<br>(162 - 322)          | --                 | --                  | 13<br>(8 - 19)           | 86<br>(58 - 128)           | 128<br>(81 - 192)           |
| Pancreatic cancer                             | 1,154<br>(915 - 1,428)      | --                 | --                  | 35<br>(24 - 47)          | 361<br>(266 - 476)         | 758<br>(595 - 965)          |
| Malignant skin melanoma                       | 197<br>(138 - 257)          | --                 | --                  | 19<br>(11 - 27)          | 66<br>(41 - 93)            | 112<br>(77 - 158)           |
| Non-melanoma skin cancer                      | 125<br>(73 - 203)           | --                 | --                  | 13<br>(8 - 21)           | 33<br>(18 - 54)            | 79<br>(43 - 143)            |
| Ovarian cancer                                | 878<br>(641 - 1,153)        | --                 | --                  | 75<br>(47 - 113)         | 371<br>(250 - 528)         | 432<br>(309 - 588)          |
| Testicular cancer                             | --                          | --                 | --                  | --                       | --                         | --                          |
| Kidney cancer                                 | 186<br>(133 - 265)          | 4<br>(2 - 12)      | 2<br>(1 - 5)        | 13<br>(9 - 20)           | 64<br>(42 - 97)            | 102<br>(67 - 157)           |
| Bladder cancer                                | 199<br>(129 - 294)          | --                 | --                  | 13<br>(8 - 21)           | 48<br>(29 - 76)            | 138<br>(88 - 205)           |
| Brain and nervous system cancer               | 204<br>(150 - 260)          | 6<br>(2 - 12)      | 8<br>(4 - 13)       | 37<br>(26 - 51)          | 80<br>(53 - 111)           | 73<br>(51 - 100)            |
| Thyroid cancer                                | 101<br>(62 - 142)           | --                 | 0<br>(0 - 0)        | 6<br>(4 - 10)            | 31<br>(17 - 47)            | 64<br>(40 - 94)             |
| Mesothelioma                                  | 57<br>(39 - 82)             | --                 | --                  | 4<br>(3 - 7)             | 22<br>(13 - 35)            | 31<br>(19 - 49)             |
| Hodgkin lymphoma                              | 36<br>(25 - 55)             | 1<br>(0 - 2)       | 1<br>(0 - 3)        | 14<br>(9 - 24)           | 9<br>(5 - 16)              | 11<br>(7 - 18)              |
| Non-Hodgkin lymphoma                          | 685<br>(458 - 1,147)        | 4<br>(1 - 10)      | 4<br>(2 - 8)        | 59<br>(35 - 94)          | 191<br>(117 - 309)         | 426<br>(281 - 771)          |
| Multiple myeloma                              | 311<br>(227 - 410)          | --                 | --                  | 15<br>(10 - 22)          | 130<br>(88 - 183)          | 165<br>(116 - 226)          |
| Leukemia                                      | 466<br>(345 - 581)          | 14<br>(4 - 27)     | 20<br>(8 - 31)      | 85<br>(56 - 117)         | 124<br>(88 - 164)          | 222<br>(160 - 297)          |
| Other neoplasms                               | 1,257<br>(818 - 1,786)      | 57<br>(17 - 112)   | 43<br>(16 - 74)     | 235<br>(143 - 354)       | 390<br>(223 - 624)         | 532<br>(358 - 772)          |
| Cardiovascular diseases                       | 56,752<br>(47,621 - 69,448) | 86<br>(42 - 202)   | 51<br>(30 - 106)    | 1,896<br>(1,249 - 3,182) | 10,830<br>(8,113 - 14,922) | 43,890<br>(37,609 - 51,858) |
| Rheumatic heart disease                       | 901<br>(503 - 1,226)        | 1<br>(0 - 3)       | 7<br>(4 - 13)       | 120<br>(76 - 209)        | 84<br>(55 - 128)           | 689<br>(334 - 978)          |
| Ischemic heart disease                        | 16,870<br>(13,080 - 23,814) | 7<br>(2 - 22)      | 4<br>(2 - 11)       | 366<br>(224 - 721)       | 2,599<br>(1,778 - 4,448)   | 13,895<br>(10,847 - 19,022) |
| Cerebrovascular disease                       | 22,316<br>(17,630 - 27,284) | 11<br>(3 - 23)     | 12<br>(6 - 22)      | 462<br>(286 - 839)       | 4,648<br>(3,421 - 6,187)   | 17,183<br>(13,528 - 21,042) |
| Ischemic stroke                               | 11,709<br>(8,385 - 14,885)  | 1<br>(0 - 4)       | 1<br>(0 - 4)        | 79<br>(41 - 156)         | 1,767<br>(1,158 - 2,490)   | 9,861<br>(7,002 - 12,413)   |
| Hemorrhagic stroke                            | 10,607<br>(8,054 - 14,113)  | 10<br>(3 - 20)     | 11<br>(5 - 18)      | 383<br>(234 - 696)       | 2,881<br>(2,046 - 4,036)   | 7,322<br>(5,307 - 9,676)    |
| Hypertensive heart disease                    | 8,399<br>(5,536 - 11,268)   | 3<br>(1 - 7)       | 1<br>(1 - 3)        | 216<br>(135 - 352)       | 1,643<br>(1,079 - 2,364)   | 6,536<br>(4,148 - 8,997)    |
| Cardiomyopathy and myocarditis                | 3,285<br>(2,393 - 5,163)    | 42<br>(18 - 127)   | 16<br>(7 - 46)      | 465<br>(291 - 821)       | 741<br>(489 - 1,430)       | 2,021<br>(1,416 - 3,119)    |
| Atrial fibrillation and flutter               | 661<br>(449 - 944)          | --                 | --                  | 8<br>(5 - 13)            | 77<br>(49 - 116)           | 576<br>(378 - 851)          |
| Aortic aneurysm                               | 598<br>(367 - 1,019)        | --                 | --                  | 24<br>(14 - 44)          | 107<br>(60 - 193)          | 467<br>(286 - 792)          |
| Peripheral vascular disease                   | 403<br>(290 - 570)          | --                 | --                  | 5<br>(3 - 9)             | 69<br>(46 - 107)           | 328<br>(227 - 477)          |
| Endocarditis                                  | 165<br>(101 - 237)          | 11<br>(3 - 25)     | 4<br>(2 - 8)        | 24<br>(13 - 38)          | 24<br>(14 - 39)            | 102<br>(59 - 152)           |
| Other cardiovascular and circulatory diseases | 3,153<br>(2,237 - 4,341)    | 11<br>(5 - 22)     | 8<br>(4 - 15)       | 206<br>(133 - 341)       | 838<br>(549 - 1,219)       | 2,091<br>(1,410 - 3,008)    |

Web Table 31- South Africa deaths with 95% UI by age, sex, and cause in 2013

| Cause                                               | Females, All Ages          | Females, 0-4 Years | Females, 5-14 Years | Females, 15-49 Years | Females, 50-69 Years     | Females, 70-80 Years     |
|-----------------------------------------------------|----------------------------|--------------------|---------------------|----------------------|--------------------------|--------------------------|
| Chronic respiratory diseases                        | 10,922<br>(8,656 - 13,257) | 92<br>(40 - 165)   | 30<br>(20 - 45)     | 938<br>(664 - 1,324) | 2,561<br>(1,862 - 3,368) | 7,302<br>(5,682 - 9,008) |
| Chronic obstructive pulmonary disease               | 6,242<br>(4,454 - 8,089)   | 25<br>(9 - 57)     | 5<br>(2 - 9)        | 314<br>(195 - 512)   | 1,451<br>(988 - 2,005)   | 4,447<br>(3,213 - 5,894) |
| Pneumoconiosis                                      | 56<br>(34 - 89)            | 0<br>(0 - 0)       | 0<br>(0 - 0)        | 4<br>(3 - 7)         | 13<br>(7 - 22)           | 39<br>(20 - 67)          |
| Silicosis                                           | 1<br>(1 - 1)               | 0<br>(0 - 0)       | 0<br>(0 - 0)        | 0<br>(0 - 1)         | 0<br>(0 - 1)             | 0<br>(0 - 0)             |
| Asbestosis                                          | 8<br>(4 - 13)              | 0<br>(0 - 0)       | 0<br>(0 - 0)        | 1<br>(0 - 1)         | 2<br>(1 - 4)             | 5<br>(2 - 9)             |
| Coal workers pneumoconiosis                         | 1<br>(1 - 1)               | 0<br>(0 - 0)       | 0<br>(0 - 0)        | 0<br>(0 - 1)         | 0<br>(0 - 0)             | 0<br>(0 - 1)             |
| Other pneumoconiosis                                | 46<br>(27 - 76)            | 0<br>(0 - 0)       | 0<br>(0 - 0)        | 3<br>(2 - 5)         | 10<br>(5 - 17)           | 33<br>(17 - 59)          |
| Asthma                                              | 3,476<br>(1,932 - 4,825)   | 29<br>(9 - 59)     | 19<br>(9 - 29)      | 533<br>(346 - 763)   | 912<br>(500 - 1,343)     | 1,983<br>(958 - 2,918)   |
| Interstitial lung disease and pulmonary sarcoidosis | 880<br>(494 - 1,702)       | 11<br>(3 - 26)     | 3<br>(1 - 7)        | 53<br>(28 - 97)      | 155<br>(81 - 327)        | 659<br>(346 - 1,349)     |
| Other chronic respiratory diseases                  | 269<br>(171 - 412)         | 27<br>(10 - 59)    | 3<br>(1 - 5)        | 33<br>(20 - 54)      | 31<br>(19 - 52)          | 175<br>(97 - 291)        |
| Cirrhosis                                           | 1,370<br>(1,075 - 1,681)   | 9<br>(4 - 18)      | 8<br>(5 - 12)       | 253<br>(182 - 339)   | 525<br>(386 - 687)       | 576<br>(430 - 746)       |
| Cirrhosis due to hepatitis B                        | 299<br>(149 - 494)         | 0<br>(0 - 1)       | 1<br>(0 - 2)        | 61<br>(24 - 107)     | 123<br>(60 - 211)        | 113<br>(55 - 201)        |
| Cirrhosis due to hepatitis C                        | 389<br>(230 - 635)         | 1<br>(0 - 2)       | 1<br>(0 - 3)        | 58<br>(27 - 109)     | 140<br>(62 - 264)        | 189<br>(113 - 296)       |
| Cirrhosis due to alcohol use                        | 493<br>(327 - 676)         | --                 | --                  | 61<br>(35 - 95)      | 197<br>(121 - 290)       | 235<br>(147 - 337)       |
| Cirrhosis due to other causes                       | 190<br>(127 - 268)         | 8<br>(3 - 16)      | 5<br>(3 - 8)        | 72<br>(44 - 112)     | 65<br>(35 - 104)         | 40<br>(21 - 65)          |
| Digestive diseases                                  | 3,207<br>(2,553 - 3,938)   | 28<br>(13 - 50)    | 16<br>(11 - 22)     | 317<br>(224 - 429)   | 628<br>(453 - 817)       | 2,219<br>(1,698 - 2,847) |
| Peptic ulcer disease                                | 664<br>(430 - 910)         | 1<br>(0 - 3)       | 1<br>(0 - 1)        | 40<br>(26 - 57)      | 111<br>(67 - 162)        | 510<br>(326 - 728)       |
| Gastritis and duodenitis                            | 223<br>(92 - 402)          | 2<br>(1 - 5)       | 1<br>(0 - 2)        | 19<br>(9 - 38)       | 36<br>(15 - 68)          | 165<br>(65 - 313)        |
| Appendicitis                                        | 58<br>(35 - 84)            | 2<br>(1 - 6)       | 3<br>(2 - 6)        | 19<br>(12 - 31)      | 13<br>(6 - 22)           | 20<br>(11 - 35)          |
| Paralytic ileus and intestinal obstruction          | 805<br>(501 - 1,339)       | 9<br>(3 - 20)      | 6<br>(3 - 10)       | 81<br>(44 - 127)     | 168<br>(100 - 284)       | 540<br>(314 - 950)       |
| Inguinal, femoral, and abdominal hernia             | 90<br>(37 - 141)           | 1<br>(0 - 2)       | 0<br>(0 - 1)        | 6<br>(3 - 10)        | 21<br>(8 - 36)           | 62<br>(24 - 105)         |
| Inflammatory bowel disease                          | 275<br>(150 - 398)         | 7<br>(2 - 14)      | 1<br>(1 - 2)        | 36<br>(22 - 55)      | 50<br>(25 - 77)          | 180<br>(91 - 281)        |
| Vascular intestinal disorders                       | 139<br>(62 - 279)          | 0<br>(0 - 1)       | 0<br>(0 - 1)        | 7<br>(3 - 15)        | 28<br>(13 - 59)          | 104<br>(45 - 207)        |
| Gallbladder and biliary diseases                    | 392<br>(190 - 537)         | 1<br>(0 - 1)       | 1<br>(0 - 1)        | 29<br>(17 - 41)      | 89<br>(42 - 131)         | 272<br>(129 - 396)       |
| Pancreatitis                                        | 104<br>(63 - 157)          | 0<br>(0 - 0)       | 0<br>(0 - 0)        | 19<br>(11 - 31)      | 31<br>(18 - 50)          | 54<br>(32 - 84)          |
| Other digestive diseases                            | 457<br>(300 - 623)         | 5<br>(2 - 10)      | 2<br>(1 - 3)        | 59<br>(39 - 88)      | 81<br>(50 - 117)         | 310<br>(196 - 452)       |
| Neurological disorders                              | 4,604<br>(3,452 - 6,023)   | 58<br>(24 - 127)   | 41<br>(21 - 81)     | 591<br>(371 - 907)   | 474<br>(331 - 647)       | 3,440<br>(2,480 - 4,607) |
| Alzheimer disease and other dementias               | 2,908<br>(1,995 - 3,996)   | --                 | --                  | 0<br>(0 - 1)         | 118<br>(75 - 166)        | 2,790<br>(1,892 - 3,855) |
| Parkinson disease                                   | 235<br>(148 - 382)         | --                 | --                  | 2<br>(2 - 4)         | 34<br>(19 - 57)          | 199<br>(118 - 339)       |
| Epilepsy                                            | 1,181<br>(771 - 1,710)     | 45<br>(16 - 113)   | 36<br>(17 - 76)     | 524<br>(316 - 835)   | 228<br>(137 - 362)       | 349<br>(200 - 583)       |
| Multiple sclerosis                                  | 29<br>(17 - 57)            | --                 | --                  | 6<br>(4 - 11)        | 15<br>(8 - 29)           | 8<br>(4 - 17)            |
| Other neurological disorders                        | 250<br>(203 - 304)         | 13<br>(7 - 21)     | 5<br>(3 - 7)        | 58<br>(42 - 77)      | 80<br>(59 - 104)         | 95<br>(72 - 122)         |
| Mental and substance use disorders                  | 1,420<br>(997 - 2,070)     | 30<br>(17 - 46)    | 0<br>(0 - 1)        | 939<br>(600 - 1,420) | 302<br>(208 - 441)       | 149<br>(106 - 211)       |
| Schizophrenia                                       | 69<br>(46 - 106)           | --                 | --                  | 12<br>(7 - 20)       | 18<br>(11 - 31)          | 39<br>(23 - 66)          |
| Alcohol use disorders                               | 321<br>(118 - 556)         | --                 | --                  | 172<br>(52 - 305)    | 122<br>(49 - 231)        | 27<br>(13 - 58)          |
| Drug use disorders                                  | 1,005<br>(654 - 1,545)     | 30<br>(17 - 46)    | --                  | 731<br>(433 - 1,190) | 161<br>(102 - 243)       | 83<br>(51 - 127)         |
| Opioid use disorders                                | 102<br>(64 - 162)          | 3<br>(2 - 5)       | --                  | 75<br>(44 - 129)     | 14<br>(9 - 22)           | 9<br>(5 - 14)            |
| Cocaine use disorders                               | 6<br>(4 - 9)               | 0<br>(0 - 0)       | --                  | 5<br>(3 - 8)         | 1<br>(0 - 1)             | 0<br>(0 - 1)             |
| Amphetamine use disorders                           | 4<br>(3 - 7)               | 0<br>(0 - 0)       | --                  | 3<br>(2 - 5)         | 1<br>(0 - 1)             | 0<br>(0 - 1)             |
| Other drug use disorders                            | 893<br>(578 - 1,373)       | 26<br>(14 - 41)    | --                  | 648<br>(384 - 1,051) | 146<br>(92 - 219)        | 74<br>(45 - 113)         |

Web Table 31- South Africa deaths with 95% UI by age, sex, and cause in 2013

| Cause                                               | Females, All Ages           | Females, 0-4 Years     | Females, 5-14 Years | Females, 15-49 Years     | Females, 50-69 Years     | Females, 70-80 Years        |
|-----------------------------------------------------|-----------------------------|------------------------|---------------------|--------------------------|--------------------------|-----------------------------|
| Eating disorders                                    | 24<br>(11 - 46)             | --                     | 0<br>(0 - 1)        | 24<br>(11 - 45)          | --                       | --                          |
| Anorexia nervosa                                    | 24<br>(11 - 46)             | --                     | 0<br>(0 - 1)        | 24<br>(11 - 45)          | --                       | --                          |
| Diabetes, urogenital, blood, and endocrine diseases | 23,985<br>(19,381 - 28,759) | 544<br>(233 - 1,096)   | 95<br>(54 - 168)    | 2,108<br>(1,496 - 2,899) | 7,100<br>(5,375 - 9,126) | 14,138<br>(11,459 - 16,998) |
| Diabetes mellitus                                   | 15,197<br>(11,948 - 18,493) | 6<br>(3 - 11)          | 9<br>(5 - 16)       | 710<br>(511 - 964)       | 5,045<br>(3,679 - 6,559) | 9,426<br>(7,207 - 11,795)   |
| Acute glomerulonephritis                            | 11<br>(7 - 17)              | 1<br>(1 - 4)           | 1<br>(0 - 2)        | 4<br>(3 - 7)             | 2<br>(1 - 3)             | 2<br>(1 - 4)                |
| Chronic kidney disease                              | 3,905<br>(2,892 - 5,678)    | 20<br>(9 - 48)         | 13<br>(8 - 26)      | 377<br>(243 - 700)       | 910<br>(609 - 1,362)     | 2,584<br>(1,880 - 3,767)    |
| Chronic kidney disease due to diabetes mellitus     | 3<br>(2 - 6)                | 0<br>(0 - 1)           | 0<br>(0 - 1)        | 2<br>(1 - 3)             | 1<br>(0 - 1)             | 0<br>(0 - 0)                |
| Chronic kidney disease due to hypertension          | 2,749<br>(2,020 - 3,825)    | 1<br>(0 - 3)           | 2<br>(1 - 5)        | 159<br>(93 - 287)        | 700<br>(469 - 1,029)     | 1,886<br>(1,373 - 2,589)    |
| Chronic kidney disease due to glomerulonephritis    | 217<br>(119 - 341)          | 9<br>(4 - 15)          | 6<br>(4 - 10)       | 71<br>(39 - 117)         | 39<br>(18 - 69)          | 92<br>(43 - 170)            |
| Chronic kidney disease due to other causes          | 936<br>(486 - 1,757)        | 10<br>(3 - 34)         | 5<br>(2 - 14)       | 146<br>(67 - 344)        | 170<br>(70 - 361)        | 606<br>(273 - 1,208)        |
| Urinary diseases and male infertility               | 861<br>(597 - 1,228)        | 13<br>(5 - 34)         | 3<br>(2 - 8)        | 112<br>(71 - 174)        | 157<br>(105 - 235)       | 574<br>(352 - 858)          |
| Interstitial nephritis and urinary tract infections | 423<br>(281 - 654)          | 9<br>(3 - 25)          | 2<br>(1 - 5)        | 64<br>(39 - 98)          | 89<br>(56 - 139)         | 259<br>(142 - 438)          |
| Urolithiasis                                        | 10<br>(5 - 16)              | --                     | 0<br>(0 - 1)        | 3<br>(1 - 5)             | 3<br>(1 - 5)             | 4<br>(2 - 8)                |
| Other urinary diseases                              | 428<br>(263 - 648)          | 4<br>(1 - 12)          | 1<br>(0 - 2)        | 46<br>(25 - 83)          | 66<br>(40 - 105)         | 311<br>(170 - 501)          |
| Gynecological diseases                              | 25<br>(16 - 34)             | --                     | --                  | 11<br>(7 - 17)           | 5<br>(3 - 7)             | 9<br>(5 - 14)               |
| Uterine fibroids                                    | 5<br>(4 - 8)                | --                     | --                  | 2<br>(1 - 2)             | 1<br>(1 - 2)             | 3<br>(1 - 4)                |
| Polycystic ovarian syndrome                         | 1<br>(1 - 1)                | --                     | --                  | 1<br>(1 - 1)             | 0<br>(0 - 0)             | --                          |
| Endometriosis                                       | 2<br>(1 - 3)                | --                     | --                  | 2<br>(1 - 3)             | 0<br>(0 - 0)             | --                          |
| Genital prolapse                                    | 5<br>(3 - 7)                | --                     | --                  | 2<br>(1 - 2)             | 1<br>(0 - 1)             | 2<br>(1 - 4)                |
| Other gynecological diseases                        | 12<br>(8 - 16)              | --                     | --                  | 5<br>(3 - 8)             | 3<br>(1 - 4)             | 4<br>(2 - 6)                |
| Hemoglobinopathies and hemolytic anemias            | 447<br>(280 - 737)          | 35<br>(13 - 89)        | 12<br>(6 - 27)      | 100<br>(59 - 168)        | 76<br>(44 - 138)         | 223<br>(136 - 366)          |
| Thalassemias                                        | 16<br>(8 - 35)              | 9<br>(3 - 23)          | 3<br>(1 - 7)        | 4<br>(2 - 8)             | 0<br>(0 - 0)             | 0<br>(0 - 0)                |
| Sickle cell disorders                               | 7<br>(4 - 11)               | 1<br>(0 - 3)           | 1<br>(0 - 1)        | 4<br>(2 - 6)             | 1<br>(0 - 1)             | 0<br>(0 - 0)                |
| G6PD deficiency                                     | 15<br>(9 - 24)              | 2<br>(1 - 4)           | 1<br>(0 - 2)        | 9<br>(5 - 14)            | 2<br>(1 - 4)             | 1<br>(1 - 2)                |
| Other hemoglobinopathies and hemolytic anemias      | 409<br>(257 - 670)          | 24<br>(9 - 60)         | 8<br>(4 - 17)       | 83<br>(49 - 140)         | 72<br>(42 - 132)         | 222<br>(135 - 364)          |
| Endocrine, metabolic, blood, and immune disorders   | 3,540<br>(2,108 - 4,965)    | 468<br>(173 - 1,004)   | 55<br>(20 - 124)    | 792<br>(441 - 1,230)     | 905<br>(509 - 1,347)     | 1,320<br>(770 - 2,032)      |
| Musculoskeletal disorders                           | 647<br>(454 - 918)          | --                     | 6<br>(4 - 12)       | 133<br>(88 - 208)        | 148<br>(98 - 221)        | 361<br>(221 - 588)          |
| Rheumatoid arthritis                                | 222<br>(127 - 354)          | --                     | 1<br>(0 - 2)        | 16<br>(9 - 29)           | 50<br>(28 - 83)          | 155<br>(81 - 262)           |
| Other musculoskeletal disorders                     | 425<br>(295 - 606)          | --                     | 5<br>(3 - 11)       | 117<br>(78 - 179)        | 97<br>(66 - 147)         | 206<br>(124 - 338)          |
| Other non-communicable diseases                     | 2,670<br>(1,889 - 3,727)    | 1,095<br>(593 - 1,919) | 41<br>(20 - 75)     | 232<br>(144 - 360)       | 253<br>(163 - 376)       | 1,049<br>(716 - 1,461)      |
| Congenital anomalies                                | 1,286<br>(794 - 1,943)      | 891<br>(465 - 1,515)   | 36<br>(16 - 67)     | 86<br>(51 - 133)         | 66<br>(41 - 97)          | 207<br>(118 - 286)          |
| Neural tube defects                                 | 43<br>(20 - 82)             | 36<br>(15 - 72)        | 1<br>(0 - 2)        | 4<br>(2 - 6)             | 1<br>(1 - 2)             | 1<br>(1 - 3)                |
| Congenital heart anomalies                          | 498<br>(300 - 773)          | 275<br>(117 - 525)     | 19<br>(7 - 37)      | 39<br>(22 - 64)          | 27<br>(16 - 41)          | 137<br>(77 - 194)           |
| Cleft lip and cleft palate                          | 10<br>(1 - 39)              | 10<br>(1 - 39)         | --                  | --                       | --                       | --                          |
| Down syndrome                                       | 71<br>(31 - 147)            | 53<br>(19 - 122)       | 5<br>(2 - 12)       | 5<br>(3 - 9)             | 6<br>(3 - 11)            | 2<br>(1 - 3)                |
| Chromosomal unbalanced rearrangements               | 62<br>(26 - 126)            | 54<br>(20 - 115)       | 1<br>(0 - 2)        | 5<br>(3 - 9)             | 1<br>(0 - 2)             | 2<br>(1 - 4)                |
| Other congenital anomalies                          | 602<br>(356 - 941)          | 464<br>(239 - 783)     | 11<br>(4 - 21)      | 32<br>(19 - 52)          | 31<br>(19 - 46)          | 65<br>(37 - 96)             |
| Skin and subcutaneous diseases                      | 1,213<br>(818 - 1,713)      | 32<br>(10 - 72)        | 5<br>(2 - 10)       | 147<br>(83 - 239)        | 187<br>(113 - 290)       | 842<br>(537 - 1,261)        |
| Cellulitis                                          | 215<br>(110 - 394)          | 4<br>(1 - 11)          | 1<br>(0 - 3)        | 27<br>(13 - 50)          | 40<br>(20 - 75)          | 143<br>(58 - 306)           |
| Pyoderma                                            | 291<br>(184 - 420)          | 21<br>(7 - 50)         | 2<br>(1 - 4)        | 59<br>(33 - 99)          | 52<br>(30 - 88)          | 157<br>(87 - 265)           |

Web Table 31- South Africa deaths with 95% UI by age, sex, and cause in 2013

| Cause                                           | Females, All Ages          | Females, 0-4 Years   | Females, 5-14 Years | Females, 15-49 Years     | Females, 50-69 Years     | Females, 70-80 Years     |
|-------------------------------------------------|----------------------------|----------------------|---------------------|--------------------------|--------------------------|--------------------------|
| Decubitus ulcer                                 | 619<br>(375 - 915)         | 2<br>(0 - 6)         | 1<br>(0 - 2)        | 38<br>(20 - 64)          | 75<br>(41 - 124)         | 503<br>(300 - 772)       |
| Other skin and subcutaneous diseases            | 89<br>(39 - 160)           | 5<br>(1 - 16)        | 1<br>(0 - 2)        | 23<br>(10 - 42)          | 20<br>(7 - 43)           | 39<br>(12 - 94)          |
| Sudden infant death syndrome                    | 171<br>(23 - 532)          | 171<br>(23 - 532)    | --                  | --                       | --                       | --                       |
| Injuries                                        | 11,312<br>(8,573 - 14,213) | 772<br>(425 - 1,324) | 367<br>(256 - 527)  | 5,161<br>(3,456 - 7,398) | 1,755<br>(1,277 - 2,305) | 3,257<br>(2,055 - 4,449) |
| Transport injuries                              | 2,291<br>(1,535 - 3,065)   | 141<br>(68 - 266)    | 111<br>(60 - 178)   | 1,365<br>(867 - 1,960)   | 440<br>(265 - 617)       | 234<br>(136 - 319)       |
| Road injuries                                   | 2,199<br>(1,448 - 2,951)   | 134<br>(64 - 254)    | 106<br>(56 - 170)   | 1,328<br>(838 - 1,911)   | 407<br>(240 - 576)       | 225<br>(127 - 306)       |
| Pedestrian road injuries                        | 549<br>(341 - 757)         | 55<br>(21 - 111)     | 45<br>(21 - 77)     | 187<br>(103 - 299)       | 127<br>(77 - 186)        | 135<br>(73 - 194)        |
| Cyclist road injuries                           | 181<br>(86 - 282)          | 4<br>(1 - 10)        | 6<br>(3 - 11)       | 100<br>(38 - 184)        | 53<br>(27 - 81)          | 18<br>(8 - 29)           |
| Motorcyclist road injuries                      | 84<br>(44 - 143)           | 1<br>(0 - 3)         | 1<br>(0 - 2)        | 77<br>(39 - 131)         | 4<br>(2 - 7)             | 2<br>(1 - 3)             |
| Motor vehicle road injuries                     | 1,373<br>(894 - 1,895)     | 69<br>(31 - 131)     | 51<br>(24 - 83)     | 963<br>(599 - 1,415)     | 222<br>(118 - 331)       | 68<br>(37 - 103)         |
| Other road injuries                             | 12<br>(5 - 24)             | 4<br>(1 - 11)        | 3<br>(1 - 7)        | 2<br>(1 - 4)             | 1<br>(1 - 2)             | 2<br>(1 - 4)             |
| Other transport injuries                        | 91<br>(65 - 127)           | 7<br>(3 - 14)        | 5<br>(3 - 9)        | 37<br>(23 - 62)          | 33<br>(20 - 49)          | 9<br>(5 - 16)            |
| Unintentional injuries                          | 5,535<br>(3,878 - 7,363)   | 537<br>(266 - 1,000) | 198<br>(120 - 339)  | 1,196<br>(813 - 1,678)   | 941<br>(635 - 1,316)     | 2,662<br>(1,544 - 3,788) |
| Falls                                           | 966<br>(327 - 1,649)       | 12<br>(5 - 31)       | 6<br>(3 - 13)       | 56<br>(34 - 92)          | 71<br>(31 - 120)         | 820<br>(223 - 1,475)     |
| Drowning                                        | 450<br>(291 - 831)         | 125<br>(48 - 292)    | 75<br>(36 - 167)    | 85<br>(48 - 159)         | 60<br>(34 - 121)         | 105<br>(64 - 171)        |
| Fire, heat, and hot substances                  | 1,056<br>(537 - 1,716)     | 85<br>(26 - 225)     | 22<br>(8 - 53)      | 234<br>(124 - 399)       | 141<br>(69 - 243)        | 573<br>(249 - 1,031)     |
| Poisonings                                      | 211<br>(141 - 321)         | 12<br>(5 - 24)       | 3<br>(2 - 5)        | 104<br>(59 - 166)        | 44<br>(26 - 77)          | 47<br>(29 - 74)          |
| Exposure to mechanical forces                   | 686<br>(444 - 922)         | 68<br>(29 - 135)     | 43<br>(23 - 76)     | 355<br>(204 - 524)       | 134<br>(81 - 186)        | 86<br>(52 - 117)         |
| Unintentional firearm injuries                  | 338<br>(200 - 499)         | 10<br>(3 - 27)       | 7<br>(3 - 16)       | 210<br>(111 - 346)       | 78<br>(42 - 128)         | 33<br>(17 - 50)          |
| Unintentional suffocation                       | 200<br>(65 - 306)          | 18<br>(4 - 56)       | 12<br>(4 - 24)      | 109<br>(32 - 182)        | 26<br>(8 - 42)           | 35<br>(11 - 58)          |
| Other exposure to mechanical forces             | 148<br>(79 - 236)          | 40<br>(12 - 94)      | 25<br>(9 - 52)      | 36<br>(21 - 60)          | 30<br>(16 - 47)          | 18<br>(10 - 27)          |
| Adverse effects of medical treatment            | 1,374<br>(671 - 2,216)     | 59<br>(14 - 170)     | 15<br>(6 - 31)      | 186<br>(90 - 345)        | 350<br>(148 - 617)       | 764<br>(349 - 1,336)     |
| Animal contact                                  | 95<br>(51 - 269)           | 13<br>(4 - 40)       | 7<br>(3 - 24)       | 27<br>(12 - 76)          | 29<br>(14 - 82)          | 19<br>(9 - 54)           |
| Venomous animal contact                         | 71<br>(35 - 194)           | 11<br>(3 - 33)       | 6<br>(2 - 20)       | 21<br>(9 - 61)           | 19<br>(9 - 57)           | 13<br>(6 - 39)           |
| Non-venomous animal contact                     | 24<br>(10 - 70)            | 2<br>(1 - 8)         | 1<br>(0 - 4)        | 6<br>(2 - 16)            | 9<br>(4 - 30)            | 5<br>(2 - 16)            |
| Foreign body                                    | 532<br>(315 - 895)         | 152<br>(53 - 405)    | 20<br>(9 - 44)      | 89<br>(52 - 158)         | 82<br>(47 - 138)         | 189<br>(115 - 314)       |
| Pulmonary aspiration and foreign body in airway | 523<br>(304 - 885)         | 149<br>(50 - 400)    | 20<br>(9 - 44)      | 88<br>(51 - 156)         | 81<br>(46 - 137)         | 185<br>(112 - 309)       |
| Foreign body in other body part                 | 10<br>(5 - 16)             | 3<br>(1 - 7)         | 1<br>(0 - 1)        | 1<br>(1 - 2)             | 1<br>(1 - 2)             | 3<br>(2 - 6)             |
| Other unintentional injuries                    | 166<br>(115 - 298)         | 11<br>(5 - 30)       | 5<br>(3 - 13)       | 59<br>(35 - 115)         | 31<br>(19 - 54)          | 59<br>(37 - 104)         |
| Self-harm and interpersonal violence            | 3,486<br>(2,344 - 5,295)   | 94<br>(35 - 245)     | 59<br>(28 - 125)    | 2,599<br>(1,550 - 4,237) | 373<br>(255 - 541)       | 361<br>(250 - 515)       |
| Self-harm                                       | 1,252<br>(871 - 1,821)     | --                   | 8<br>(3 - 20)       | 759<br>(478 - 1,216)     | 217<br>(140 - 341)       | 268<br>(172 - 409)       |
| Interpersonal violence                          | 2,234<br>(1,277 - 3,741)   | 94<br>(35 - 245)     | 50<br>(21 - 116)    | 1,840<br>(980 - 3,201)   | 156<br>(85 - 275)        | 93<br>(48 - 176)         |
| Assault by firearm                              | 511<br>(213 - 1,161)       | 12<br>(3 - 44)       | 7<br>(2 - 22)       | 427<br>(168 - 1,003)     | 51<br>(21 - 113)         | 13<br>(5 - 31)           |
| Assault by sharp object                         | 952<br>(493 - 1,596)       | 16<br>(5 - 47)       | 9<br>(3 - 19)       | 846<br>(411 - 1,464)     | 51<br>(24 - 90)          | 30<br>(14 - 56)          |
| Assault by other means                          | 771<br>(415 - 1,329)       | 65<br>(22 - 167)     | 35<br>(13 - 76)     | 567<br>(278 - 1,045)     | 55<br>(25 - 97)          | 49<br>(23 - 97)          |
| Forces of nature, war, and legal intervention   | 0<br>(0 - 0)               | 0<br>(0 - 0)         | --                  | --                       | --                       | --                       |
| Exposure to forces of nature                    | 0<br>(0 - 0)               | 0<br>(0 - 0)         | --                  | --                       | --                       | --                       |

Web Table 31- South Korea deaths with 95% UI by age, sex, and cause in 2013

| Cause                                                             | Both Sexes, All Ages           | Both Sexes, 0-4 Years    | Both Sexes, 5-14 Years | Both Sexes, 15-49 Years     | Both Sexes, 50-69 Years     | Both Sexes, 70-80 Years        |
|-------------------------------------------------------------------|--------------------------------|--------------------------|------------------------|-----------------------------|-----------------------------|--------------------------------|
| All causes                                                        | 320,855<br>(306,757 - 336,105) | 1,764<br>(1,604 - 1,937) | 554<br>(521 - 588)     | 27,077<br>(24,867 - 29,241) | 75,987<br>(70,492 - 81,411) | 215,473<br>(208,067 - 223,122) |
| Communicable, maternal, neonatal, and nutritional diseases        | 19,867<br>(15,458 - 22,913)    | 808<br>(531 - 962)       | 39<br>(31 - 50)        | 853<br>(770 - 945)          | 2,166<br>(1,790 - 2,462)    | 16,001<br>(11,998 - 18,883)    |
| HIV/AIDS and tuberculosis                                         | 4,152<br>(3,596 - 4,972)       | 3<br>(2 - 4)             | 3<br>(2 - 3)           | 378<br>(327 - 456)          | 768<br>(654 - 967)          | 3,000<br>(2,488 - 3,681)       |
| Tuberculosis                                                      | 4,064<br>(3,512 - 4,889)       | 3<br>(2 - 4)             | 3<br>(2 - 3)           | 311<br>(264 - 383)          | 749<br>(637 - 951)          | 2,998<br>(2,487 - 3,679)       |
| HIV/AIDS                                                          | 88<br>(57 - 148)               | 0<br>(0 - 0)             | 0<br>(0 - 0)           | 67<br>(45 - 110)            | 19<br>(9 - 36)              | 2<br>(0 - 4)                   |
| HIV/AIDS resulting in mycobacterial infection                     | 5<br>(3 - 8)                   | 0<br>(0 - 0)             | 0<br>(0 - 0)           | 4<br>(2 - 6)                | 1<br>(0 - 2)                | 0<br>(0 - 0)                   |
| HIV/AIDS resulting in other diseases                              | 83<br>(54 - 140)               | 0<br>(0 - 0)             | 0<br>(0 - 0)           | 64<br>(43 - 103)            | 18<br>(8 - 34)              | 1<br>(0 - 4)                   |
| Diarrhea, lower respiratory, and other common infectious diseases | 14,038<br>(9,479 - 16,994)     | 100<br>(79 - 123)        | 30<br>(23 - 40)        | 329<br>(267 - 389)          | 1,247<br>(877 - 1,533)      | 12,332<br>(8,126 - 15,178)     |
| Diarrheal diseases                                                | 773<br>(573 - 1,048)           | 7<br>(5 - 10)            | 1<br>(1 - 1)           | 17<br>(13 - 22)             | 61<br>(48 - 76)             | 686<br>(488 - 967)             |
| Intestinal infectious diseases                                    | 41<br>(16 - 85)                | 7<br>(2 - 15)            | 7<br>(2 - 15)          | 17<br>(6 - 38)              | 6<br>(2 - 13)               | 4<br>(1 - 9)                   |
| Typhoid fever                                                     | 25<br>(8 - 56)                 | 4<br>(1 - 9)             | 4<br>(1 - 10)          | 11<br>(4 - 26)              | 4<br>(1 - 9)                | 2<br>(1 - 5)                   |
| Paratyphoid fever                                                 | 11<br>(3 - 25)                 | 2<br>(1 - 5)             | 2<br>(1 - 5)           | 5<br>(1 - 11)               | 1<br>(0 - 4)                | 1<br>(0 - 2)                   |
| Other intestinal infectious diseases                              | 5<br>(1 - 11)                  | 1<br>(0 - 4)             | 0<br>(0 - 2)           | 1<br>(0 - 5)                | 1<br>(0 - 4)                | 1<br>(0 - 5)                   |
| Lower respiratory infections                                      | 12,864<br>(8,338 - 15,828)     | 55<br>(42 - 73)          | 13<br>(10 - 16)        | 230<br>(174 - 283)          | 1,096<br>(727 - 1,373)      | 11,470<br>(7,255 - 14,325)     |
| Upper respiratory infections                                      | 8<br>(3 - 20)                  | 0<br>(0 - 0)             | 0<br>(0 - 0)           | 1<br>(0 - 2)                | 2<br>(0 - 5)                | 5<br>(1 - 17)                  |
| Otitis media                                                      | 9<br>(8 - 11)                  | 0<br>(0 - 0)             | 0<br>(0 - 1)           | 2<br>(2 - 2)                | 1<br>(1 - 2)                | 5<br>(4 - 7)                   |
| Meningitis                                                        | 115<br>(98 - 181)              | 10<br>(7 - 16)           | 2<br>(2 - 3)           | 17<br>(14 - 26)             | 25<br>(21 - 35)             | 61<br>(48 - 106)               |
| Pneumococcal meningitis                                           | 30<br>(23 - 49)                | 2<br>(1 - 3)             | 1<br>(0 - 1)           | 4<br>(3 - 7)                | 6<br>(4 - 9)                | 17<br>(11 - 29)                |
| H influenzae type B meningitis                                    | 9<br>(7 - 15)                  | 2<br>(1 - 4)             | 0<br>(0 - 0)           | 1<br>(1 - 2)                | 2<br>(1 - 2)                | 4<br>(2 - 8)                   |
| Meningococcal meningitis                                          | 33<br>(25 - 47)                | 1<br>(0 - 1)             | 0<br>(0 - 1)           | 5<br>(4 - 8)                | 8<br>(5 - 11)               | 19<br>(13 - 30)                |
| Other meningitis                                                  | 43<br>(32 - 74)                | 5<br>(3 - 8)             | 1<br>(1 - 1)           | 6<br>(4 - 10)               | 10<br>(7 - 16)              | 21<br>(13 - 40)                |
| Encephalitis                                                      | 180<br>(99 - 227)              | 16<br>(8 - 25)           | 6<br>(3 - 9)           | 36<br>(20 - 46)             | 50<br>(25 - 66)             | 72<br>(35 - 98)                |
| Diphtheria                                                        | 1<br>(0 - 3)                   | 0<br>(0 - 1)             | 0<br>(0 - 1)           | 0<br>(0 - 2)                | 0<br>(0 - 1)                | --                             |
| Whooping cough                                                    | 4<br>(3 - 5)                   | 1<br>(0 - 2)             | 0<br>(0 - 1)           | 2<br>(2 - 3)                | 1<br>(0 - 1)                | --                             |
| Tetanus                                                           | 11<br>(8 - 19)                 | 1<br>(0 - 1)             | 0<br>(0 - 1)           | 2<br>(1 - 3)                | 2<br>(1 - 4)                | 6<br>(3 - 12)                  |
| Measles                                                           | 0<br>(0 - 1)                   | 0<br>(0 - 1)             | 0<br>(0 - 0)           | 0<br>(0 - 0)                | 0<br>(0 - 0)                | --                             |
| Varicella and herpes zoster                                       | 32<br>(10 - 101)               | 2<br>(0 - 6)             | 1<br>(0 - 2)           | 4<br>(1 - 9)                | 4<br>(1 - 9)                | 22<br>(1 - 89)                 |
| Neglected tropical diseases and malaria                           | 100<br>(79 - 126)              | 1<br>(1 - 1)             | 1<br>(1 - 2)           | 13<br>(11 - 15)             | 25<br>(19 - 32)             | 61<br>(41 - 84)                |
| Malaria                                                           | 0<br>(0 - 2)                   | 0<br>(0 - 0)             | 0<br>(0 - 0)           | 0<br>(0 - 0)                | 0<br>(0 - 0)                | 0<br>(0 - 1)                   |
| Cysticercosis                                                     | 1<br>(1 - 1)                   | 0<br>(0 - 0)             | 0<br>(0 - 0)           | 0<br>(0 - 0)                | 0<br>(0 - 0)                | 0<br>(0 - 0)                   |
| Cystic echinococcosis                                             | 3<br>(3 - 3)                   | 0<br>(0 - 0)             | 0<br>(0 - 0)           | 1<br>(1 - 1)                | 1<br>(1 - 1)                | 1<br>(1 - 1)                   |
| Dengue                                                            | 5<br>(4 - 6)                   | 0<br>(0 - 0)             | 0<br>(0 - 1)           | 2<br>(2 - 3)                | 1<br>(1 - 2)                | 1<br>(0 - 1)                   |
| Rabies                                                            | 4<br>(3 - 5)                   | 0<br>(0 - 0)             | 0<br>(0 - 1)           | 2<br>(1 - 3)                | 1<br>(1 - 1)                | 0<br>(0 - 1)                   |
| Intestinal nematode infections                                    | 0                              | 0                        | 0                      | 0                           | 0                           | 0                              |
| Ascariasis                                                        | 0<br>(0 - 3)                   | 0<br>(0 - 0)             | 0<br>(0 - 0)           | 0<br>(0 - 1)                | 0<br>(0 - 1)                | 0<br>(0 - 2)                   |
| Other neglected tropical diseases                                 | 87<br>(65 - 111)               | 0<br>(0 - 1)             | 0<br>(0 - 1)           | 7<br>(5 - 9)                | 21<br>(16 - 28)             | 58<br>(39 - 81)                |
| Maternal disorders                                                | 58<br>(42 - 81)                | --                       | 0                      | 58<br>(42 - 81)             | --                          | --                             |
| Maternal hemorrhage                                               | 9<br>(6 - 13)                  | --                       | 0                      | 9<br>(6 - 13)               | --                          | --                             |
| Maternal sepsis and other maternal infections                     | 8<br>(5 - 12)                  | --                       | 0                      | 8<br>(5 - 12)               | --                          | --                             |
| Maternal hypertensive disorders                                   | 7<br>(4 - 10)                  | --                       | 0                      | 7<br>(4 - 10)               | --                          | --                             |

Web Table 31- South Korea deaths with 95% UI by age, sex, and cause in 2013

| Cause                                                            | Both Sexes, All Ages           | Both Sexes, 0-4 Years | Both Sexes, 5-14 Years | Both Sexes, 15-49 Years     | Both Sexes, 50-69 Years     | Both Sexes, 70-80 Years        |
|------------------------------------------------------------------|--------------------------------|-----------------------|------------------------|-----------------------------|-----------------------------|--------------------------------|
| Maternal obstructed labor                                        | 4<br>(2 - 6)                   | --                    | 0<br>(0 - 0)           | 4<br>(2 - 6)                | --                          | --                             |
| Maternal abortive outcome                                        | 5<br>(3 - 8)                   | --                    | 0<br>(0 - 0)           | 5<br>(3 - 7)                | --                          | --                             |
| Indirect maternal deaths                                         | 9<br>(6 - 13)                  | --                    | 0<br>(0 - 0)           | 9<br>(6 - 13)               | --                          | --                             |
| Late maternal deaths                                             | 3<br>(2 - 5)                   | --                    | 0<br>(0 - 0)           | 3<br>(2 - 5)                | --                          | --                             |
| Maternal deaths aggravated by HIV/AIDS                           | 0<br>(0 - 0)                   | --                    | --                     | 0<br>(0 - 0)                | --                          | --                             |
| Other maternal disorders                                         | 14<br>(9 - 20)                 | --                    | 0<br>(0 - 0)           | 14<br>(9 - 20)              | --                          | --                             |
| Neonatal disorders                                               | 683<br>(423 - 822)             | 683<br>(423 - 822)    | --                     | --                          | --                          | --                             |
| Neonatal preterm birth complications                             | 371<br>(207 - 474)             | 371<br>(207 - 474)    | --                     | --                          | --                          | --                             |
| Neonatal encephalopathy due to birth asphyxia and trauma         | 90<br>(54 - 122)               | 90<br>(54 - 122)      | --                     | --                          | --                          | --                             |
| Neonatal sepsis and other neonatal infections                    | 74<br>(38 - 134)               | 74<br>(38 - 134)      | --                     | --                          | --                          | --                             |
| Hemolytic disease and other neonatal jaundice                    | 2<br>(1 - 5)                   | 2<br>(1 - 5)          | --                     | --                          | --                          | --                             |
| Other neonatal disorders                                         | 145<br>(78 - 198)              | 145<br>(78 - 198)     | --                     | --                          | --                          | --                             |
| Nutritional deficiencies                                         | 513<br>(404 - 791)             | 1<br>(1 - 2)          | 1<br>(1 - 1)           | 27<br>(21 - 43)             | 49<br>(37 - 76)             | 435<br>(334 - 648)             |
| Protein-energy malnutrition                                      | 145<br>(86 - 330)              | 0<br>(0 - 1)          | 0<br>(0 - 0)           | 7<br>(4 - 15)               | 13<br>(8 - 30)              | 125<br>(71 - 285)              |
| Iodine deficiency                                                | 3<br>(0 - 11)                  | 0<br>(0 - 0)          | 0<br>(0 - 0)           | 0<br>(0 - 1)                | 0<br>(0 - 2)                | 2<br>(0 - 10)                  |
| Iron-deficiency anemia                                           | 171<br>(91 - 252)              | 0<br>(0 - 1)          | 0<br>(0 - 0)           | 11<br>(7 - 17)              | 13<br>(8 - 22)              | 147<br>(72 - 222)              |
| Other nutritional deficiencies                                   | 194<br>(127 - 321)             | 0<br>(0 - 1)          | 0<br>(0 - 0)           | 10<br>(6 - 16)              | 22<br>(13 - 38)             | 162<br>(103 - 271)             |
| Other communicable, maternal, neonatal, and nutritional diseases | 323<br>(216 - 414)             | 21<br>(5 - 78)        | 4<br>(2 - 8)           | 47<br>(36 - 57)             | 77<br>(52 - 96)             | 174<br>(107 - 228)             |
| Sexually transmitted diseases excluding HIV                      | 38<br>(16 - 99)                | 14<br>(0 - 70)        | 1<br>(0 - 6)           | 3<br>(2 - 4)                | 3<br>(2 - 5)                | 18<br>(10 - 29)                |
| Syphilis                                                         | 32<br>(11 - 92)                | 14<br>(0 - 70)        | 1<br>(0 - 6)           | 1<br>(1 - 2)                | 2<br>(1 - 3)                | 14<br>(8 - 23)                 |
| Chlamydial infection                                             | 1<br>(1 - 2)                   | --                    | 0<br>(0 - 0)           | 0<br>(0 - 1)                | 0<br>(0 - 0)                | 1<br>(0 - 1)                   |
| Gonococcal infection                                             | 3<br>(2 - 5)                   | --                    | 0<br>(0 - 0)           | 1<br>(0 - 1)                | 1<br>(0 - 1)                | 2<br>(1 - 3)                   |
| Other sexually transmitted diseases                              | 2<br>(1 - 3)                   | --                    | 0<br>(0 - 0)           | 1<br>(0 - 1)                | 0<br>(0 - 1)                | 1<br>(0 - 1)                   |
| Hepatitis                                                        | 95<br>(78 - 115)               | 1<br>(1 - 2)          | 1<br>(0 - 1)           | 26<br>(20 - 34)             | 26<br>(20 - 33)             | 42<br>(29 - 60)                |
| Acute hepatitis A                                                | 11<br>(3 - 23)                 | 1<br>(0 - 1)          | 0<br>(0 - 0)           | 5<br>(1 - 10)               | 3<br>(1 - 6)                | 3<br>(1 - 7)                   |
| Acute hepatitis B                                                | 81<br>(62 - 102)               | 1<br>(0 - 1)          | 0<br>(0 - 0)           | 20<br>(14 - 28)             | 22<br>(16 - 29)             | 38<br>(26 - 56)                |
| Acute hepatitis C                                                | 3<br>(1 - 8)                   | --                    | 0<br>(0 - 0)           | 1<br>(0 - 3)                | 1<br>(0 - 3)                | 1<br>(0 - 2)                   |
| Other infectious diseases                                        | 189<br>(99 - 252)              | 6<br>(3 - 9)          | 2<br>(1 - 3)           | 18<br>(10 - 23)             | 49<br>(26 - 65)             | 115<br>(53 - 163)              |
| Non-communicable diseases                                        | 265,951<br>(252,181 - 282,054) | 692<br>(587 - 915)    | 255<br>(227 - 279)     | 15,398<br>(13,932 - 17,489) | 63,575<br>(58,992 - 68,362) | 186,030<br>(178,272 - 195,937) |
| Neoplasms                                                        | 101,260<br>(93,901 - 109,011)  | 84<br>(63 - 109)      | 141<br>(121 - 164)     | 8,150<br>(7,185 - 9,367)    | 36,217<br>(33,184 - 39,485) | 56,668<br>(51,707 - 60,603)    |
| Esophageal cancer                                                | 2,352<br>(2,035 - 3,048)       | --                    | --                     | 75<br>(56 - 116)            | 1,037<br>(848 - 1,537)      | 1,241<br>(1,062 - 1,480)       |
| Stomach cancer                                                   | 15,962<br>(13,968 - 18,215)    | --                    | --                     | 1,377<br>(1,156 - 1,609)    | 5,557<br>(4,842 - 6,293)    | 9,028<br>(7,629 - 10,700)      |
| Liver cancer                                                     | 16,832<br>(13,799 - 22,728)    | --                    | 3<br>(2 - 5)           | 1,999<br>(1,378 - 3,001)    | 8,045<br>(6,415 - 10,925)   | 6,784<br>(5,347 - 8,919)       |
| Liver cancer due to hepatitis B                                  | 4,922<br>(3,240 - 6,873)       | --                    | 3<br>(2 - 4)           | 974<br>(620 - 1,529)        | 2,623<br>(1,630 - 3,810)    | 1,323<br>(875 - 1,844)         |
| Liver cancer due to hepatitis C                                  | 8,141<br>(6,201 - 11,118)      | --                    | 0<br>(0 - 1)           | 686<br>(395 - 1,176)        | 3,714<br>(2,598 - 5,507)    | 3,740<br>(2,840 - 4,959)       |
| Liver cancer due to alcohol use                                  | 3,555<br>(2,471 - 5,129)       | --                    | --                     | 314<br>(169 - 566)          | 1,615<br>(1,049 - 2,538)    | 1,626<br>(1,148 - 2,308)       |
| Liver cancer due to other causes                                 | 214<br>(125 - 332)             | --                    | 0<br>(0 - 0)           | 25<br>(15 - 40)             | 93<br>(55 - 144)            | 96<br>(46 - 165)               |
| Larynx cancer                                                    | 735<br>(605 - 1,030)           | --                    | --                     | 25<br>(19 - 39)             | 260<br>(203 - 419)          | 449<br>(358 - 582)             |
| Tracheal, bronchus and lung cancer                               | 21,827<br>(19,821 - 23,736)    | --                    | --                     | 710<br>(604 - 864)          | 7,140<br>(6,417 - 7,886)    | 13,978<br>(12,312 - 15,507)    |
| Breast cancer                                                    | 2,109<br>(1,153 - 2,494)       | --                    | --                     | 607<br>(374 - 730)          | 955<br>(470 - 1,155)        | 547<br>(305 - 677)             |

Web Table 31- South Korea deaths with 95% UI by age, sex, and cause in 2013

| Cause                                         | Both Sexes, All Ages         | Both Sexes, 0-4 Years | Both Sexes, 5-14 Years | Both Sexes, 15-49 Years  | Both Sexes, 50-69 Years     | Both Sexes, 70-80 Years     |
|-----------------------------------------------|------------------------------|-----------------------|------------------------|--------------------------|-----------------------------|-----------------------------|
| Cervical cancer                               | 1,513<br>(1,058 - 1,867)     | --                    | --                     | 246<br>(194 - 310)       | 484<br>(357 - 599)          | 783<br>(476 - 1,086)        |
| Uterine cancer                                | 298<br>(246 - 400)           | --                    | --                     | 31<br>(24 - 44)          | 140<br>(109 - 187)          | 127<br>(98 - 176)           |
| Prostate cancer                               | 2,070<br>(1,380 - 2,590)     | --                    | --                     | 7<br>(4 - 9)             | 297<br>(177 - 398)          | 1,766<br>(1,165 - 2,240)    |
| Colon and rectum cancer                       | 10,671<br>(9,688 - 11,669)   | --                    | --                     | 627<br>(551 - 713)       | 3,395<br>(3,048 - 3,737)    | 6,649<br>(5,909 - 7,531)    |
| Lip and oral cavity cancer                    | 611<br>(532 - 681)           | --                    | --                     | 64<br>(52 - 78)          | 244<br>(203 - 283)          | 303<br>(254 - 352)          |
| Nasopharynx cancer                            | 229<br>(138 - 282)           | --                    | 1<br>(0 - 1)           | 46<br>(27 - 62)          | 117<br>(68 - 153)           | 66<br>(38 - 87)             |
| Other pharynx cancer                          | 408<br>(282 - 497)           | --                    | --                     | 28<br>(21 - 40)          | 194<br>(139 - 251)          | 186<br>(111 - 239)          |
| Gallbladder and biliary tract cancer          | 4,433<br>(3,014 - 5,361)     | --                    | --                     | 132<br>(101 - 171)       | 1,210<br>(870 - 1,482)      | 3,091<br>(2,001 - 3,939)    |
| Pancreatic cancer                             | 6,061<br>(5,516 - 6,589)     | --                    | --                     | 282<br>(242 - 326)       | 2,117<br>(1,889 - 2,335)    | 3,663<br>(3,263 - 4,110)    |
| Malignant skin melanoma                       | 262<br>(184 - 384)           | --                    | --                     | 38<br>(26 - 65)          | 96<br>(64 - 148)            | 128<br>(83 - 177)           |
| Non-melanoma skin cancer                      | 463<br>(331 - 660)           | --                    | --                     | 13<br>(9 - 18)           | 54<br>(38 - 85)             | 397<br>(276 - 573)          |
| Ovarian cancer                                | 1,203<br>(896 - 1,393)       | --                    | --                     | 174<br>(136 - 213)       | 481<br>(340 - 567)          | 548<br>(383 - 688)          |
| Testicular cancer                             | 19<br>(12 - 25)              | --                    | --                     | 8<br>(4 - 11)            | 5<br>(3 - 7)                | 6<br>(4 - 9)                |
| Kidney cancer                                 | 1,323<br>(1,122 - 1,527)     | 2<br>(1 - 3)          | 1<br>(1 - 2)           | 108<br>(88 - 131)        | 537<br>(450 - 633)          | 674<br>(531 - 838)          |
| Bladder cancer                                | 1,558<br>(1,297 - 1,818)     | --                    | --                     | 27<br>(21 - 34)          | 307<br>(257 - 360)          | 1,225<br>(994 - 1,453)      |
| Brain and nervous system cancer               | 1,507<br>(1,304 - 1,877)     | 13<br>(8 - 20)        | 33<br>(26 - 43)        | 306<br>(256 - 392)       | 556<br>(473 - 723)          | 598<br>(478 - 766)          |
| Thyroid cancer                                | 656<br>(336 - 867)           | --                    | 0<br>(0 - 0)           | 47<br>(23 - 66)          | 231<br>(112 - 312)          | 378<br>(191 - 519)          |
| Mesothelioma                                  | 125<br>(95 - 175)            | --                    | --                     | 12<br>(8 - 18)           | 50<br>(35 - 73)             | 63<br>(43 - 96)             |
| Hodgkin lymphoma                              | 54<br>(29 - 65)              | 0<br>(0 - 1)          | 1<br>(0 - 1)           | 14<br>(8 - 18)           | 19<br>(10 - 26)             | 19<br>(10 - 25)             |
| Non-Hodgkin lymphoma                          | 2,046<br>(1,215 - 2,519)     | 6<br>(3 - 9)          | 12<br>(7 - 18)         | 255<br>(156 - 346)       | 712<br>(424 - 881)          | 1,061<br>(560 - 1,411)      |
| Multiple myeloma                              | 750<br>(457 - 994)           | --                    | --                     | 45<br>(30 - 68)          | 319<br>(201 - 433)          | 387<br>(221 - 554)          |
| Leukemia                                      | 1,888<br>(1,697 - 2,058)     | 30<br>(20 - 44)       | 58<br>(42 - 70)        | 429<br>(377 - 487)       | 599<br>(521 - 672)          | 772<br>(676 - 875)          |
| Other neoplasms                               | 3,295<br>(2,767 - 3,992)     | 32<br>(24 - 43)       | 32<br>(24 - 43)        | 419<br>(326 - 605)       | 1,061<br>(809 - 1,539)      | 1,752<br>(1,213 - 2,121)    |
| Cardiovascular diseases                       | 90,604<br>(83,629 - 102,275) | 34<br>(28 - 43)       | 27<br>(21 - 32)        | 2,851<br>(2,455 - 3,399) | 13,256<br>(11,780 - 15,278) | 74,437<br>(68,526 - 84,348) |
| Rheumatic heart disease                       | 360<br>(144 - 482)           | 0<br>(0 - 0)          | 1<br>(0 - 1)           | 21<br>(11 - 27)          | 72<br>(32 - 95)             | 267<br>(95 - 373)           |
| Ischemic heart disease                        | 28,198<br>(23,655 - 33,390)  | 4<br>(3 - 6)          | 5<br>(4 - 9)           | 1,053<br>(845 - 1,396)   | 4,079<br>(3,421 - 4,996)    | 23,056<br>(18,799 - 27,630) |
| Cerebrovascular disease                       | 50,362<br>(44,666 - 60,650)  | 9<br>(7 - 13)         | 9<br>(6 - 11)          | 1,454<br>(1,219 - 1,801) | 7,875<br>(6,781 - 9,481)    | 41,016<br>(36,155 - 49,638) |
| Ischemic stroke                               | 30,523<br>(24,705 - 35,732)  | 2<br>(1 - 2)          | 1<br>(1 - 2)           | 162<br>(107 - 241)       | 2,521<br>(1,705 - 3,289)    | 27,838<br>(22,702 - 32,424) |
| Hemorrhagic stroke                            | 19,839<br>(16,073 - 27,054)  | 7<br>(6 - 10)         | 8<br>(5 - 10)          | 1,292<br>(1,094 - 1,570) | 5,354<br>(4,574 - 6,547)    | 13,178<br>(9,981 - 19,483)  |
| Hypertensive heart disease                    | 5,682<br>(4,215 - 7,881)     | 1<br>(1 - 2)          | 2<br>(1 - 3)           | 74<br>(52 - 128)         | 368<br>(256 - 613)          | 5,237<br>(3,690 - 7,184)    |
| Cardiomyopathy and myocarditis                | 920<br>(714 - 1,140)         | 14<br>(10 - 18)       | 7<br>(4 - 9)           | 90<br>(62 - 112)         | 171<br>(125 - 212)          | 637<br>(492 - 820)          |
| Atrial fibrillation and flutter               | 1,204<br>(905 - 1,594)       | --                    | --                     | 8<br>(6 - 10)            | 82<br>(66 - 100)            | 1,114<br>(821 - 1,501)      |
| Aortic aneurysm                               | 1,288<br>(958 - 1,654)       | --                    | --                     | 42<br>(33 - 52)          | 213<br>(162 - 271)          | 1,033<br>(743 - 1,370)      |
| Peripheral vascular disease                   | 174<br>(138 - 215)           | --                    | --                     | 2<br>(1 - 2)             | 16<br>(12 - 22)             | 156<br>(122 - 196)          |
| Endocarditis                                  | 206<br>(118 - 279)           | 2<br>(1 - 2)          | 1<br>(1 - 1)           | 22<br>(14 - 30)          | 52<br>(33 - 70)             | 129<br>(64 - 189)           |
| Other cardiovascular and circulatory diseases | 2,211<br>(1,707 - 3,069)     | 4<br>(3 - 6)          | 2<br>(1 - 3)           | 86<br>(66 - 136)         | 326<br>(247 - 463)          | 1,793<br>(1,348 - 2,478)    |
| Chronic respiratory diseases                  | 20,873<br>(18,278 - 29,796)  | 10<br>(7 - 13)        | 3<br>(3 - 4)           | 188<br>(157 - 269)       | 1,861<br>(1,595 - 2,394)    | 18,812<br>(16,338 - 27,458) |
| Chronic obstructive pulmonary disease         | 13,849<br>(11,765 - 19,071)  | 3<br>(2 - 5)          | 1<br>(1 - 1)           | 93<br>(75 - 134)         | 1,035<br>(858 - 1,338)      | 12,717<br>(10,713 - 17,845) |
| Pneumoconiosis                                | 484<br>(337 - 665)           | 0<br>(0 - 0)          | 0<br>(0 - 0)           | 11<br>(7 - 17)           | 181<br>(125 - 284)          | 292<br>(183 - 405)          |
| Silicosis                                     | 26<br>(17 - 40)              | 0<br>(0 - 0)          | 0<br>(0 - 0)           | 1<br>(1 - 2)             | 12<br>(7 - 20)              | 12<br>(7 - 19)              |



Web Table 31- South Korea deaths with 95% UI by age, sex, and cause in 2013

| Cause                                               | Both Sexes, All Ages        | Both Sexes, 0-4 Years | Both Sexes, 5-14 Years | Both Sexes, 15-49 Years  | Both Sexes, 50-69 Years  | Both Sexes, 70-80 Years     |
|-----------------------------------------------------|-----------------------------|-----------------------|------------------------|--------------------------|--------------------------|-----------------------------|
| Asbestosis                                          | 9<br>(7 - 13)               | 0<br>(0 - 0)          | 0<br>(0 - 0)           | 1<br>(1 - 2)             | 3<br>(2 - 6)             | 5<br>(3 - 7)                |
| Coal workers pneumoconiosis                         | 342<br>(235 - 474)          | 0<br>(0 - 0)          | 0<br>(0 - 0)           | 4<br>(3 - 7)             | 127<br>(86 - 203)        | 211<br>(129 - 295)          |
| Other pneumoconiosis                                | 107<br>(75 - 145)           | 0<br>(0 - 0)          | 0<br>(0 - 0)           | 4<br>(3 - 7)             | 39<br>(26 - 60)          | 64<br>(41 - 90)             |
| Asthma                                              | 3,901<br>(2,817 - 7,410)    | 1<br>(1 - 2)          | 1<br>(1 - 2)           | 43<br>(34 - 63)          | 258<br>(203 - 351)       | 3,596<br>(2,549 - 7,056)    |
| Interstitial lung disease and pulmonary sarcoidosis | 2,496<br>(1,688 - 3,776)    | 3<br>(1 - 4)          | 1<br>(0 - 1)           | 33<br>(24 - 51)          | 377<br>(272 - 515)       | 2,084<br>(1,344 - 3,291)    |
| Other chronic respiratory diseases                  | 144<br>(102 - 221)          | 3<br>(2 - 4)          | 0<br>(0 - 1)           | 8<br>(6 - 11)            | 10<br>(7 - 13)           | 123<br>(83 - 199)           |
| Cirrhosis                                           | 9,521<br>(8,624 - 10,431)   | 1<br>(1 - 2)          | 2<br>(1 - 2)           | 2,029<br>(1,746 - 2,360) | 4,395<br>(3,889 - 4,953) | 3,094<br>(2,766 - 3,475)    |
| Cirrhosis due to hepatitis B                        | 5,022<br>(4,298 - 5,697)    | 0<br>(0 - 0)          | 1<br>(0 - 1)           | 1,071<br>(840 - 1,310)   | 2,244<br>(1,861 - 2,611) | 1,707<br>(1,403 - 2,026)    |
| Cirrhosis due to hepatitis C                        | 1,432<br>(896 - 2,023)      | 0<br>(0 - 0)          | 0<br>(0 - 0)           | 291<br>(161 - 449)       | 654<br>(386 - 948)       | 487<br>(245 - 752)          |
| Cirrhosis due to alcohol use                        | 2,570<br>(1,964 - 3,241)    | --                    | --                     | 509<br>(337 - 691)       | 1,272<br>(933 - 1,634)   | 790<br>(592 - 1,008)        |
| Cirrhosis due to other causes                       | 497<br>(314 - 682)          | 1<br>(1 - 1)          | 1<br>(0 - 1)           | 158<br>(91 - 225)        | 226<br>(125 - 327)       | 111<br>(69 - 164)           |
| Digestive diseases                                  | 6,628<br>(5,601 - 9,841)    | 3<br>(2 - 5)          | 4<br>(4 - 5)           | 240<br>(192 - 384)       | 822<br>(689 - 1,180)     | 5,558<br>(4,635 - 8,282)    |
| Peptic ulcer disease                                | 1,457<br>(924 - 2,654)      | 0<br>(0 - 0)          | 0<br>(0 - 0)           | 33<br>(23 - 60)          | 169<br>(121 - 282)       | 1,254<br>(754 - 2,363)      |
| Gastritis and duodenitis                            | 243<br>(84 - 756)           | 0<br>(0 - 0)          | 0<br>(0 - 1)           | 4<br>(2 - 8)             | 12<br>(6 - 31)           | 228<br>(75 - 721)           |
| Appendicitis                                        | 117<br>(72 - 172)           | 0<br>(0 - 1)          | 1<br>(1 - 1)           | 11<br>(8 - 17)           | 16<br>(11 - 23)          | 88<br>(50 - 137)            |
| Paralytic ileus and intestinal obstruction          | 1,195<br>(707 - 1,787)      | 1<br>(1 - 2)          | 1<br>(1 - 2)           | 45<br>(30 - 81)          | 158<br>(105 - 249)       | 989<br>(551 - 1,494)        |
| Inguinal, femoral, and abdominal hernia             | 72<br>(36 - 104)            | 0<br>(0 - 0)          | 0<br>(0 - 0)           | 2<br>(1 - 4)             | 7<br>(4 - 11)            | 63<br>(29 - 93)             |
| Inflammatory bowel disease                          | 324<br>(203 - 708)          | 0<br>(0 - 1)          | 0<br>(0 - 0)           | 9<br>(6 - 15)            | 32<br>(23 - 49)          | 282<br>(168 - 649)          |
| Vascular intestinal disorders                       | 380<br>(156 - 593)          | 0<br>(0 - 0)          | 0<br>(0 - 1)           | 9<br>(4 - 18)            | 55<br>(25 - 94)          | 316<br>(124 - 496)          |
| Gallbladder and biliary diseases                    | 1,746<br>(1,338 - 2,445)    | 0<br>(0 - 0)          | 0<br>(0 - 0)           | 18<br>(12 - 31)          | 135<br>(99 - 203)        | 1,592<br>(1,212 - 2,237)    |
| Pancreatitis                                        | 561<br>(409 - 856)          | 0<br>(0 - 0)          | 0<br>(0 - 1)           | 84<br>(59 - 143)         | 147<br>(99 - 228)        | 329<br>(235 - 505)          |
| Other digestive diseases                            | 532<br>(405 - 755)          | 0<br>(0 - 0)          | 0<br>(0 - 0)           | 23<br>(16 - 35)          | 92<br>(66 - 129)         | 417<br>(313 - 603)          |
| Neurological disorders                              | 7,041<br>(5,514 - 8,232)    | 31<br>(23 - 40)       | 24<br>(17 - 30)        | 340<br>(277 - 421)       | 930<br>(732 - 1,054)     | 5,716<br>(4,424 - 6,841)    |
| Alzheimer disease and other dementias               | 3,386<br>(2,712 - 4,264)    | --                    | --                     | 0<br>(0 - 1)             | 127<br>(98 - 164)        | 3,259<br>(2,581 - 4,126)    |
| Parkinson disease                                   | 2,420<br>(1,156 - 2,912)    | --                    | --                     | 15<br>(10 - 19)          | 362<br>(240 - 435)       | 2,043<br>(892 - 2,510)      |
| Epilepsy                                            | 493<br>(335 - 596)          | 16<br>(10 - 22)       | 15<br>(9 - 21)         | 188<br>(136 - 260)       | 115<br>(74 - 145)        | 159<br>(97 - 216)           |
| Multiple sclerosis                                  | 28<br>(15 - 38)             | --                    | --                     | 10<br>(5 - 13)           | 12<br>(6 - 17)           | 7<br>(4 - 10)               |
| Other neurological disorders                        | 715<br>(563 - 797)          | 15<br>(11 - 19)       | 9<br>(6 - 12)          | 127<br>(98 - 152)        | 314<br>(240 - 361)       | 249<br>(194 - 287)          |
| Mental and substance use disorders                  | 1,407<br>(1,159 - 2,017)    | 1<br>(0 - 1)          | 0<br>(0 - 0)           | 459<br>(360 - 778)       | 595<br>(415 - 835)       | 353<br>(290 - 479)          |
| Schizophrenia                                       | 148<br>(104 - 270)          | --                    | --                     | 50<br>(32 - 104)         | 57<br>(39 - 104)         | 41<br>(24 - 85)             |
| Alcohol use disorders                               | 1,004<br>(690 - 1,548)      | --                    | --                     | 323<br>(233 - 574)       | 493<br>(297 - 704)       | 188<br>(128 - 279)          |
| Drug use disorders                                  | 249<br>(209 - 308)          | 1<br>(0 - 1)          | --                     | 79<br>(63 - 102)         | 44<br>(35 - 66)          | 125<br>(96 - 165)           |
| Opioid use disorders                                | 70<br>(57 - 88)             | 0<br>(0 - 0)          | --                     | 22<br>(17 - 29)          | 11<br>(8 - 17)           | 36<br>(27 - 50)             |
| Cocaine use disorders                               | 19<br>(15 - 25)             | 0<br>(0 - 0)          | --                     | 7<br>(5 - 9)             | 3<br>(2 - 4)             | 9<br>(6 - 13)               |
| Amphetamine use disorders                           | 19<br>(15 - 24)             | 0<br>(0 - 0)          | --                     | 6<br>(4 - 7)             | 3<br>(3 - 5)             | 10<br>(7 - 14)              |
| Other drug use disorders                            | 141<br>(118 - 174)          | 0<br>(0 - 0)          | --                     | 45<br>(35 - 60)          | 27<br>(21 - 41)          | 70<br>(53 - 92)             |
| Eating disorders                                    | 6<br>(4 - 9)                | --                    | 0<br>(0 - 0)           | 6<br>(4 - 9)             | --                       | --                          |
| Anorexia nervosa                                    | 6<br>(4 - 9)                | --                    | 0<br>(0 - 0)           | 6<br>(4 - 9)             | --                       | --                          |
| Diabetes, urogenital, blood, and endocrine diseases | 26,186<br>(22,760 - 28,748) | 42<br>(33 - 60)       | 22<br>(18 - 27)        | 977<br>(844 - 1,144)     | 5,206<br>(4,621 - 5,794) | 19,939<br>(16,698 - 22,188) |
| Diabetes mellitus                                   | 17,034<br>(14,915 - 19,057) | 1<br>(1 - 2)          | 2<br>(1 - 3)           | 558<br>(471 - 647)       | 3,510<br>(3,080 - 3,984) | 12,962<br>(10,863 - 14,928) |

Web Table 31- South Korea deaths with 95% UI by age, sex, and cause in 2013

| Cause                                               | Both Sexes, All Ages        | Both Sexes, 0-4 Years | Both Sexes, 5-14 Years | Both Sexes, 15-49 Years    | Both Sexes, 50-69 Years    | Both Sexes, 70-80 Years    |
|-----------------------------------------------------|-----------------------------|-----------------------|------------------------|----------------------------|----------------------------|----------------------------|
| Acute glomerulonephritis                            | 18<br>(11 - 25)             | 0<br>(0 - 0)          | 0<br>(0 - 1)           | 2<br>(2 - 3)               | 3<br>(2 - 4)               | 12<br>(7 - 19)             |
| Chronic kidney disease                              | 6,555<br>(4,460 - 7,489)    | 4<br>(3 - 5)          | 4<br>(3 - 5)           | 255<br>(211 - 331)         | 1,344<br>(1,021 - 1,555)   | 4,949<br>(3,051 - 5,798)   |
| Chronic kidney disease due to diabetes mellitus     | 13<br>(9 - 42)              | 0<br>(0 - 0)          | 1<br>(0 - 1)           | 6<br>(4 - 16)              | 4<br>(2 - 15)              | 2<br>(1 - 8)               |
| Chronic kidney disease due to hypertension          | 2,720<br>(1,819 - 3,411)    | 0<br>(0 - 1)          | 1<br>(0 - 1)           | 104<br>(72 - 136)          | 562<br>(374 - 746)         | 2,053<br>(1,302 - 2,645)   |
| Chronic kidney disease due to glomerulonephritis    | 384<br>(256 - 627)          | 1<br>(1 - 1)          | 1<br>(1 - 1)           | 17<br>(13 - 25)            | 63<br>(43 - 94)            | 302<br>(189 - 517)         |
| Chronic kidney disease due to other causes          | 3,438<br>(1,953 - 4,428)    | 2<br>(1 - 3)          | 2<br>(2 - 3)           | 127<br>(92 - 185)          | 715<br>(437 - 942)         | 2,592<br>(1,328 - 3,457)   |
| Urinary diseases and male infertility               | 1,395<br>(831 - 1,800)      | 1<br>(1 - 1)          | 1<br>(0 - 1)           | 27<br>(19 - 33)            | 121<br>(73 - 151)          | 1,246<br>(719 - 1,632)     |
| Interstitial nephritis and urinary tract infections | 539<br>(316 - 777)          | 1<br>(0 - 1)          | 0<br>(0 - 0)           | 12<br>(8 - 16)             | 51<br>(32 - 70)            | 475<br>(266 - 703)         |
| Urolithiasis                                        | 44<br>(23 - 69)             | --                    | 0<br>(0 - 0)           | 2<br>(1 - 3)               | 5<br>(2 - 7)               | 37<br>(18 - 60)            |
| Other urinary diseases                              | 812<br>(419 - 1,119)        | 0<br>(0 - 1)          | 0<br>(0 - 0)           | 13<br>(8 - 16)             | 65<br>(36 - 85)            | 734<br>(367 - 1,034)       |
| Gynecological diseases                              | 8<br>(5 - 15)               | --                    | --                     | 1<br>(1 - 2)               | 1<br>(1 - 1)               | 6<br>(3 - 12)              |
| Uterine fibroids                                    | 2<br>(1 - 4)                | --                    | --                     | 0<br>(0 - 0)               | 0<br>(0 - 0)               | 2<br>(1 - 4)               |
| Polycystic ovarian syndrome                         | 0<br>(0 - 0)                | --                    | --                     | 0<br>(0 - 0)               | 0<br>(0 - 0)               | --                         |
| Endometriosis                                       | 0<br>(0 - 0)                | --                    | --                     | 0<br>(0 - 0)               | 0<br>(0 - 0)               | --                         |
| Genital prolapse                                    | 2<br>(1 - 4)                | --                    | --                     | 0<br>(0 - 0)               | 0<br>(0 - 0)               | 2<br>(1 - 3)               |
| Other gynecological diseases                        | 4<br>(2 - 7)                | --                    | --                     | 1<br>(0 - 1)               | 0<br>(0 - 1)               | 3<br>(1 - 5)               |
| Hemoglobinopathies and hemolytic anemias            | 239<br>(135 - 352)          | 6<br>(4 - 10)         | 6<br>(4 - 9)           | 43<br>(26 - 60)            | 50<br>(31 - 71)            | 134<br>(66 - 217)          |
| Thalassemias                                        | 29<br>(18 - 41)             | 4<br>(2 - 6)          | 4<br>(3 - 6)           | 17<br>(10 - 24)            | 4<br>(2 - 6)               | 1<br>(0 - 1)               |
| Sickle cell disorders                               | 2<br>(1 - 3)                | 0<br>(0 - 1)          | 0<br>(0 - 0)           | 1<br>(1 - 1)               | 1<br>(0 - 1)               | 0<br>(0 - 0)               |
| G6PD deficiency                                     | 2<br>(1 - 3)                | 0<br>(0 - 0)          | 0<br>(0 - 0)           | 1<br>(0 - 1)               | 1<br>(0 - 1)               | 0<br>(0 - 0)               |
| Other hemoglobinopathies and hemolytic anemias      | 206<br>(112 - 310)          | 2<br>(1 - 4)          | 2<br>(1 - 2)           | 24<br>(15 - 34)            | 45<br>(27 - 64)            | 133<br>(65 - 215)          |
| Endocrine, metabolic, blood, and immune disorders   | 936<br>(760 - 1,381)        | 28<br>(21 - 46)       | 8<br>(6 - 12)          | 91<br>(73 - 152)           | 178<br>(143 - 284)         | 630<br>(491 - 905)         |
| Musculoskeletal disorders                           | 832<br>(693 - 1,092)        | --                    | 3<br>(2 - 4)           | 79<br>(65 - 110)           | 189<br>(156 - 270)         | 561<br>(448 - 741)         |
| Rheumatoid arthritis                                | 267<br>(202 - 359)          | --                    | 0<br>(0 - 1)           | 7<br>(5 - 11)              | 57<br>(41 - 87)            | 203<br>(150 - 279)         |
| Other musculoskeletal disorders                     | 564<br>(464 - 757)          | --                    | 2<br>(2 - 3)           | 72<br>(60 - 99)            | 131<br>(107 - 187)         | 358<br>(279 - 479)         |
| Other non-communicable diseases                     | 1,598<br>(1,313 - 1,910)    | 487<br>(397 - 715)    | 29<br>(22 - 41)        | 85<br>(72 - 101)           | 105<br>(75 - 122)          | 892<br>(461 - 1,184)       |
| Congenital anomalies                                | 599<br>(514 - 867)          | 397<br>(322 - 624)    | 29<br>(21 - 41)        | 68<br>(56 - 86)            | 39<br>(32 - 46)            | 67<br>(53 - 86)            |
| Neural tube defects                                 | 10<br>(7 - 13)              | 5<br>(3 - 8)          | 1<br>(0 - 1)           | 2<br>(2 - 3)               | 1<br>(1 - 1)               | 1<br>(0 - 1)               |
| Congenital heart anomalies                          | 264<br>(214 - 417)          | 189<br>(146 - 317)    | 15<br>(11 - 21)        | 30<br>(23 - 38)            | 13<br>(10 - 17)            | 17<br>(12 - 24)            |
| Cleft lip and cleft palate                          | 3<br>(1 - 10)               | 3<br>(1 - 10)         | --                     | --                         | --                         | --                         |
| Down syndrome                                       | 37<br>(22 - 69)             | 22<br>(11 - 46)       | 2<br>(1 - 4)           | 10<br>(6 - 17)             | 2<br>(1 - 3)               | 1<br>(0 - 1)               |
| Chromosomal unbalanced rearrangements               | 24<br>(16 - 34)             | 19<br>(12 - 27)       | 1<br>(1 - 2)           | 3<br>(2 - 4)               | 1<br>(1 - 1)               | 0<br>(0 - 1)               |
| Other congenital anomalies                          | 262<br>(214 - 347)          | 160<br>(121 - 229)    | 9<br>(6 - 14)          | 23<br>(17 - 32)            | 21<br>(16 - 27)            | 48<br>(37 - 63)            |
| Skin and subcutaneous diseases                      | 910<br>(434 - 1,206)        | 1<br>(1 - 2)          | 1<br>(0 - 1)           | 17<br>(11 - 22)            | 66<br>(38 - 81)            | 825<br>(394 - 1,116)       |
| Cellulitis                                          | 96<br>(39 - 158)            | 0<br>(0 - 0)          | 0<br>(0 - 0)           | 4<br>(2 - 5)               | 13<br>(7 - 19)             | 79<br>(28 - 140)           |
| Pyoderma                                            | 78<br>(35 - 112)            | 1<br>(0 - 1)          | 0<br>(0 - 0)           | 4<br>(2 - 5)               | 13<br>(7 - 17)             | 60<br>(26 - 93)            |
| Decubitus ulcer                                     | 679<br>(343 - 911)          | 0<br>(0 - 0)          | 0<br>(0 - 0)           | 7<br>(4 - 9)               | 29<br>(19 - 38)            | 643<br>(320 - 878)         |
| Other skin and subcutaneous diseases                | 57<br>(20 - 100)            | 0<br>(0 - 0)          | 0<br>(0 - 0)           | 3<br>(2 - 4)               | 11<br>(4 - 16)             | 43<br>(12 - 86)            |
| Sudden infant death syndrome                        | 89<br>(51 - 173)            | 89<br>(51 - 173)      | --                     | --                         | --                         | --                         |
| Injuries                                            | 35,037<br>(25,775 - 39,338) | 264<br>(208 - 335)    | 260<br>(237 - 293)     | 10,826<br>(8,631 - 12,043) | 10,246<br>(7,385 - 11,650) | 13,442<br>(8,704 - 15,694) |

Web Table 31- South Korea deaths with 95% UI by age, sex, and cause in 2013

| Cause                                           | Both Sexes, All Ages       | Both Sexes, 0-4 Years | Both Sexes, 5-14 Years | Both Sexes, 15-49 Years  | Both Sexes, 50-69 Years  | Both Sexes, 70-80 Years  |
|-------------------------------------------------|----------------------------|-----------------------|------------------------|--------------------------|--------------------------|--------------------------|
| Transport injuries                              | 8,433<br>(7,542 - 9,466)   | 85<br>(62 - 112)      | 103<br>(77 - 123)      | 2,613<br>(2,248 - 3,050) | 2,855<br>(2,469 - 3,275) | 2,776<br>(2,391 - 3,245) |
| Road injuries                                   | 7,817<br>(6,992 - 8,772)   | 80<br>(58 - 107)      | 98<br>(72 - 117)       | 2,445<br>(2,102 - 2,848) | 2,607<br>(2,256 - 2,965) | 2,586<br>(2,220 - 3,057) |
| Pedestrian road injuries                        | 3,325<br>(2,443 - 4,127)   | 51<br>(34 - 69)       | 59<br>(39 - 74)        | 599<br>(363 - 853)       | 1,075<br>(736 - 1,392)   | 1,541<br>(1,182 - 1,880) |
| Cyclist road injuries                           | 600<br>(438 - 865)         | 4<br>(2 - 8)          | 11<br>(6 - 17)         | 70<br>(46 - 110)         | 220<br>(158 - 319)       | 295<br>(204 - 445)       |
| Motorcyclist road injuries                      | 1,356<br>(868 - 1,754)     | 2<br>(1 - 3)          | 4<br>(2 - 7)           | 538<br>(353 - 738)       | 439<br>(262 - 587)       | 372<br>(211 - 506)       |
| Motor vehicle road injuries                     | 2,524<br>(1,950 - 3,353)   | 24<br>(16 - 36)       | 23<br>(16 - 32)        | 1,236<br>(955 - 1,590)   | 868<br>(632 - 1,188)     | 373<br>(260 - 607)       |
| Other road injuries                             | 12<br>(8 - 24)             | 0<br>(0 - 1)          | 0<br>(0 - 1)           | 3<br>(1 - 4)             | 4<br>(2 - 10)            | 4<br>(2 - 10)            |
| Other transport injuries                        | 616<br>(434 - 797)         | 5<br>(3 - 8)          | 5<br>(3 - 7)           | 168<br>(123 - 255)       | 248<br>(155 - 339)       | 190<br>(112 - 271)       |
| Unintentional injuries                          | 10,065<br>(7,330 - 11,790) | 160<br>(125 - 219)    | 103<br>(83 - 170)      | 1,766<br>(1,468 - 2,558) | 2,239<br>(1,815 - 2,545) | 5,798<br>(3,512 - 7,417) |
| Falls                                           | 4,377<br>(2,458 - 5,410)   | 34<br>(24 - 50)       | 15<br>(9 - 20)         | 553<br>(425 - 814)       | 940<br>(617 - 1,115)     | 2,836<br>(1,314 - 3,816) |
| Drowning                                        | 1,179<br>(884 - 2,094)     | 33<br>(19 - 64)       | 59<br>(40 - 135)       | 433<br>(317 - 923)       | 292<br>(211 - 476)       | 362<br>(235 - 490)       |
| Fire, heat, and hot substances                  | 651<br>(451 - 797)         | 11<br>(7 - 18)        | 9<br>(6 - 14)          | 169<br>(127 - 251)       | 153<br>(101 - 202)       | 308<br>(196 - 403)       |
| Poisonings                                      | 387<br>(305 - 611)         | 3<br>(2 - 5)          | 3<br>(2 - 6)           | 72<br>(52 - 142)         | 92<br>(71 - 166)         | 216<br>(156 - 327)       |
| Exposure to mechanical forces                   | 668<br>(573 - 892)         | 26<br>(17 - 52)       | 7<br>(5 - 10)          | 283<br>(227 - 429)       | 265<br>(213 - 328)       | 86<br>(70 - 125)         |
| Unintentional firearm injuries                  | 28<br>(18 - 33)            | 0<br>(0 - 0)          | 0<br>(0 - 1)           | 9<br>(6 - 11)            | 8<br>(5 - 11)            | 10<br>(7 - 15)           |
| Unintentional suffocation                       | 48<br>(34 - 93)            | 21<br>(12 - 45)       | 1<br>(1 - 2)           | 5<br>(3 - 9)             | 6<br>(4 - 11)            | 15<br>(9 - 33)           |
| Other exposure to mechanical forces             | 592<br>(500 - 782)         | 5<br>(3 - 8)          | 5<br>(4 - 8)           | 269<br>(214 - 412)       | 252<br>(200 - 311)       | 61<br>(48 - 85)          |
| Adverse effects of medical treatment            | 1,019<br>(398 - 1,575)     | 6<br>(3 - 9)          | 2<br>(1 - 3)           | 59<br>(27 - 84)          | 156<br>(68 - 226)        | 795<br>(283 - 1,277)     |
| Animal contact                                  | 67<br>(46 - 93)            | 1<br>(1 - 1)          | 1<br>(0 - 1)           | 11<br>(7 - 15)           | 25<br>(17 - 34)          | 29<br>(18 - 45)          |
| Venomous animal contact                         | 41<br>(27 - 56)            | 0<br>(0 - 0)          | 0<br>(0 - 1)           | 8<br>(5 - 11)            | 19<br>(12 - 25)          | 14<br>(8 - 22)           |
| Non-venomous animal contact                     | 26<br>(17 - 40)            | 1<br>(0 - 1)          | 1<br>(0 - 1)           | 3<br>(2 - 5)             | 7<br>(4 - 10)            | 15<br>(9 - 25)           |
| Foreign body                                    | 1,500<br>(840 - 2,008)     | 43<br>(29 - 64)       | 5<br>(3 - 7)           | 107<br>(70 - 166)        | 243<br>(140 - 327)       | 1,102<br>(575 - 1,569)   |
| Pulmonary aspiration and foreign body in airway | 1,492<br>(833 - 2,000)     | 43<br>(29 - 63)       | 4<br>(3 - 6)           | 105<br>(68 - 164)        | 241<br>(137 - 325)       | 1,100<br>(572 - 1,567)   |
| Foreign body in other body part                 | 8<br>(6 - 11)              | 0<br>(0 - 1)          | 0<br>(0 - 1)           | 2<br>(2 - 3)             | 2<br>(1 - 3)             | 3<br>(2 - 5)             |
| Other unintentional injuries                    | 218<br>(170 - 270)         | 2<br>(1 - 4)          | 1<br>(1 - 3)           | 79<br>(56 - 111)         | 73<br>(48 - 109)         | 63<br>(33 - 91)          |
| Self-harm and interpersonal violence            | 16,540<br>(8,105 - 19,181) | 18<br>(8 - 29)        | 54<br>(28 - 67)        | 6,447<br>(3,454 - 7,455) | 5,151<br>(2,328 - 6,165) | 4,869<br>(2,133 - 5,827) |
| Self-harm                                       | 15,539<br>(7,352 - 18,088) | -                     | 36<br>(17 - 47)        | 5,998<br>(3,033 - 6,972) | 4,889<br>(2,109 - 5,878) | 4,616<br>(2,023 - 5,567) |
| Interpersonal violence                          | 1,001<br>(557 - 1,282)     | 18<br>(8 - 29)        | 17<br>(7 - 26)         | 449<br>(279 - 585)       | 263<br>(128 - 369)       | 253<br>(90 - 410)        |
| Assault by firearm                              | 64<br>(31 - 110)           | 1<br>(0 - 1)          | 1<br>(0 - 1)           | 30<br>(14 - 58)          | 22<br>(9 - 40)           | 11<br>(4 - 20)           |
| Assault by sharp object                         | 243<br>(157 - 365)         | 2<br>(1 - 4)          | 2<br>(1 - 4)           | 142<br>(96 - 220)        | 70<br>(40 - 105)         | 27<br>(12 - 52)          |
| Assault by other means                          | 694<br>(331 - 927)         | 15<br>(6 - 25)        | 15<br>(6 - 23)         | 278<br>(151 - 375)       | 171<br>(69 - 251)        | 215<br>(70 - 353)        |

Web Table 31- South Korea deaths with 95% UI by age, sex, and cause in 2013

| Cause                                                             | Males, All Ages                | Males, 0-4 Years     | Males, 5-14 Years  | Males, 15-49 Years          | Males, 50-69 Years          | Males, 70-80 Years          |
|-------------------------------------------------------------------|--------------------------------|----------------------|--------------------|-----------------------------|-----------------------------|-----------------------------|
| All causes                                                        | 168,261<br>(156,205 - 180,210) | 974<br>(857 - 1,102) | 332<br>(305 - 361) | 19,224<br>(17,256 - 21,204) | 54,547<br>(49,520 - 59,602) | 93,185<br>(88,141 - 98,134) |
| Communicable, maternal, neonatal, and nutritional diseases        | 9,614<br>(7,528 - 11,231)      | 456<br>(299 - 533)   | 21<br>(16 - 29)    | 574<br>(501 - 659)          | 1,664<br>(1,361 - 1,922)    | 6,898<br>(5,191 - 8,368)    |
| HIV/AIDS and tuberculosis                                         | 2,515<br>(2,146 - 3,283)       | 1<br>(1 - 2)         | 1<br>(1 - 2)       | 287<br>(239 - 354)          | 635<br>(524 - 840)          | 1,590<br>(1,287 - 2,135)    |
| Tuberculosis                                                      | 2,458<br>(2,089 - 3,220)       | 1<br>(1 - 2)         | 1<br>(1 - 2)       | 244<br>(198 - 308)          | 623<br>(512 - 829)          | 1,589<br>(1,285 - 2,134)    |
| HIV/AIDS                                                          | 56<br>(37 - 82)                | 0<br>(0 - 0)         | 0<br>(0 - 0)       | 43<br>(29 - 60)             | 13<br>(6 - 21)              | 1<br>(0 - 2)                |
| HIV/AIDS resulting in mycobacterial infection                     | 3<br>(2 - 5)                   | 0<br>(0 - 0)         | 0<br>(0 - 0)       | 3<br>(2 - 4)                | 1<br>(0 - 1)                | 0<br>(0 - 0)                |
| HIV/AIDS resulting in other diseases                              | 53<br>(35 - 77)                | 0<br>(0 - 0)         | 0<br>(0 - 0)       | 40<br>(27 - 57)             | 12<br>(6 - 20)              | 1<br>(0 - 2)                |
| Diarrhea, lower respiratory, and other common infectious diseases | 6,310<br>(4,270 - 7,854)       | 55<br>(40 - 73)      | 17<br>(12 - 24)    | 230<br>(179 - 287)          | 930<br>(642 - 1,177)        | 5,078<br>(3,340 - 6,570)    |
| Diarrheal diseases                                                | 245<br>(185 - 330)             | 4<br>(3 - 7)         | 1<br>(0 - 1)       | 12<br>(9 - 17)              | 42<br>(31 - 55)             | 186<br>(128 - 269)          |
| Intestinal infectious diseases                                    | 25<br>(9 - 54)                 | 4<br>(1 - 10)        | 4<br>(1 - 10)      | 11<br>(3 - 25)              | 4<br>(1 - 8)                | 2<br>(1 - 5)                |
| Typhoid fever                                                     | 15<br>(5 - 36)                 | 2<br>(1 - 6)         | 3<br>(1 - 7)       | 7<br>(2 - 17)               | 2<br>(1 - 5)                | 1<br>(0 - 3)                |
| Paratyphoid fever                                                 | 7<br>(2 - 17)                  | 1<br>(0 - 3)         | 1<br>(0 - 3)       | 3<br>(1 - 8)                | 1<br>(0 - 3)                | 0<br>(0 - 1)                |
| Other intestinal infectious diseases                              | 3<br>(0 - 8)                   | 1<br>(0 - 3)         | 0<br>(0 - 1)       | 1<br>(0 - 4)                | 1<br>(0 - 3)                | 0<br>(0 - 3)                |
| Lower respiratory infections                                      | 5,855<br>(3,820 - 7,384)       | 30<br>(20 - 42)      | 6<br>(4 - 10)      | 169<br>(122 - 221)          | 830<br>(542 - 1,070)        | 4,819<br>(3,090 - 6,290)    |
| Upper respiratory infections                                      | 4<br>(1 - 10)                  | 0<br>(0 - 0)         | 0<br>(0 - 0)       | 1<br>(0 - 2)                | 1<br>(0 - 4)                | 2<br>(0 - 7)                |
| Otitis media                                                      | 4<br>(3 - 5)                   | 0<br>(0 - 0)         | 0<br>(0 - 0)       | 1<br>(1 - 1)                | 1<br>(1 - 1)                | 2<br>(1 - 3)                |
| Meningitis                                                        | 61<br>(51 - 88)                | 6<br>(4 - 12)        | 1<br>(1 - 2)       | 11<br>(9 - 16)              | 17<br>(14 - 24)             | 25<br>(19 - 38)             |
| Pneumococcal meningitis                                           | 16<br>(11 - 25)                | 1<br>(1 - 2)         | 0<br>(0 - 1)       | 3<br>(2 - 5)                | 4<br>(2 - 7)                | 7<br>(4 - 12)               |
| H influenzae type B meningitis                                    | 5<br>(4 - 7)                   | 1<br>(1 - 3)         | 0<br>(0 - 0)       | 1<br>(0 - 1)                | 1<br>(1 - 2)                | 2<br>(1 - 3)                |
| Meningococcal meningitis                                          | 17<br>(11 - 23)                | 0<br>(0 - 1)         | 0<br>(0 - 0)       | 3<br>(2 - 5)                | 5<br>(3 - 8)                | 7<br>(4 - 11)               |
| Other meningitis                                                  | 23<br>(17 - 39)                | 3<br>(2 - 6)         | 0<br>(0 - 1)       | 4<br>(2 - 6)                | 7<br>(4 - 12)               | 9<br>(5 - 18)               |
| Encephalitis                                                      | 96<br>(50 - 125)               | 8<br>(4 - 14)        | 4<br>(2 - 6)       | 20<br>(10 - 29)             | 32<br>(15 - 44)             | 32<br>(14 - 45)             |
| Diphtheria                                                        | 1<br>(0 - 2)                   | 0<br>(0 - 1)         | 0<br>(0 - 0)       | 0<br>(0 - 1)                | 0<br>(0 - 1)                | --<br>(0 - 1)               |
| Whooping cough                                                    | 2<br>(1 - 3)                   | 0<br>(0 - 1)         | 0<br>(0 - 0)       | 1<br>(1 - 1)                | 0<br>(0 - 0)                | --<br>(0 - 0)               |
| Tetanus                                                           | 6<br>(4 - 11)                  | 0<br>(0 - 0)         | 0<br>(0 - 0)       | 1<br>(1 - 2)                | 1<br>(1 - 3)                | 3<br>(1 - 7)                |
| Measles                                                           | 0<br>(0 - 0)                   | 0<br>(0 - 0)         | 0<br>(0 - 0)       | 0<br>(0 - 0)                | 0<br>(0 - 0)                | --<br>(0 - 0)               |
| Varicella and herpes zoster                                       | 12<br>(3 - 35)                 | 1<br>(0 - 4)         | 0<br>(0 - 1)       | 2<br>(0 - 6)                | 2<br>(0 - 6)                | 7<br>(0 - 30)               |
| Neglected tropical diseases and malaria                           | 49<br>(39 - 62)                | 0<br>(0 - 1)         | 1<br>(0 - 1)       | 8<br>(6 - 10)               | 15<br>(11 - 21)             | 25<br>(17 - 36)             |
| Malaria                                                           | 0<br>(0 - 1)                   | 0<br>(0 - 0)         | 0<br>(0 - 0)       | 0<br>(0 - 0)                | 0<br>(0 - 0)                | 0<br>(0 - 0)                |
| Cysticercosis                                                     | 0<br>(0 - 0)                   | 0<br>(0 - 0)         | 0<br>(0 - 0)       | 0<br>(0 - 0)                | 0<br>(0 - 0)                | 0<br>(0 - 0)                |
| Cystic echinococcosis                                             | 2<br>(1 - 2)                   | 0<br>(0 - 0)         | 0<br>(0 - 0)       | 0<br>(0 - 1)                | 1<br>(1 - 1)                | 0<br>(0 - 0)                |
| Dengue                                                            | 2<br>(2 - 3)                   | 0<br>(0 - 0)         | 0<br>(0 - 0)       | 1<br>(1 - 2)                | 1<br>(0 - 1)                | 0<br>(0 - 0)                |
| Rabies                                                            | 2<br>(1 - 3)                   | 0<br>(0 - 0)         | 0<br>(0 - 0)       | 1<br>(0 - 2)                | 1<br>(0 - 1)                | 0<br>(0 - 0)                |
| Intestinal nematode infections                                    | 0<br>(0 - 2)                   | 0<br>(0 - 0)         | 0<br>(0 - 0)       | 0<br>(0 - 0)                | 0<br>(0 - 1)                | 0<br>(0 - 1)                |
| Ascariasis                                                        | 0<br>(0 - 2)                   | 0<br>(0 - 0)         | 0<br>(0 - 0)       | 0<br>(0 - 0)                | 0<br>(0 - 1)                | 0<br>(0 - 1)                |
| Other neglected tropical diseases                                 | 42<br>(33 - 55)                | 0<br>(0 - 0)         | 0<br>(0 - 0)       | 5<br>(4 - 7)                | 13<br>(9 - 18)              | 24<br>(15 - 35)             |
| Maternal disorders                                                | --                             | --                   | --                 | --                          | --                          | --                          |
| Maternal hemorrhage                                               | --                             | --                   | --                 | --                          | --                          | --                          |
| Maternal sepsis and other maternal infections                     | --                             | --                   | --                 | --                          | --                          | --                          |
| Maternal hypertensive disorders                                   | --                             | --                   | --                 | --                          | --                          | --                          |

Web Table 31- South Korea deaths with 95% UI by age, sex, and cause in 2013

| Cause                                                            | Males, All Ages                | Males, 0-4 Years   | Males, 5-14 Years  | Males, 15-49 Years         | Males, 50-69 Years          | Males, 70-80 Years          |
|------------------------------------------------------------------|--------------------------------|--------------------|--------------------|----------------------------|-----------------------------|-----------------------------|
| Maternal obstructed labor                                        | --                             | --                 | --                 | --                         | --                          | --                          |
| Maternal abortive outcome                                        | --                             | --                 | --                 | --                         | --                          | --                          |
| Indirect maternal deaths                                         | --                             | --                 | --                 | --                         | --                          | --                          |
| Late maternal deaths                                             | --                             | --                 | --                 | --                         | --                          | --                          |
| Maternal deaths aggravated by HIV/AIDS                           | --                             | --                 | --                 | --                         | --                          | --                          |
| Other maternal disorders                                         | --                             | --                 | --                 | --                         | --                          | --                          |
| Neonatal disorders                                               | 389<br>(240 - 456)             | 389<br>(240 - 456) | --                 | --                         | --                          | --                          |
| Neonatal preterm birth complications                             | 215<br>(113 - 274)             | 215<br>(113 - 274) | --                 | --                         | --                          | --                          |
| Neonatal encephalopathy due to birth asphyxia and trauma         | 48<br>(27 - 70)                | 48<br>(27 - 70)    | --                 | --                         | --                          | --                          |
| Neonatal sepsis and other neonatal infections                    | 43<br>(18 - 92)                | 43<br>(18 - 92)    | --                 | --                         | --                          | --                          |
| Hemolytic disease and other neonatal jaundice                    | 1<br>(0 - 3)                   | 1<br>(0 - 3)       | --                 | --                         | --                          | --                          |
| Other neonatal disorders                                         | 81<br>(40 - 116)               | 81<br>(40 - 116)   | --                 | --                         | --                          | --                          |
| Nutritional deficiencies                                         | 191<br>(136 - 370)             | 1<br>(0 - 1)       | 0<br>(0 - 1)       | 16<br>(11 - 31)            | 35<br>(25 - 62)             | 138<br>(93 - 277)           |
| Protein-energy malnutrition                                      | 56<br>(29 - 168)               | 0<br>(0 - 1)       | 0<br>(0 - 0)       | 5<br>(3 - 13)              | 10<br>(5 - 26)              | 40<br>(18 - 132)            |
| Iodine deficiency                                                | 1<br>(0 - 5)                   | 0<br>(0 - 0)       | 0<br>(0 - 0)       | 0<br>(0 - 1)               | 0<br>(0 - 2)                | 1<br>(0 - 4)                |
| Iron-deficiency anemia                                           | 51<br>(23 - 101)               | 0<br>(0 - 0)       | 0<br>(0 - 0)       | 4<br>(2 - 10)              | 7<br>(3 - 16)               | 39<br>(16 - 74)             |
| Other nutritional deficiencies                                   | 83<br>(45 - 170)               | 0<br>(0 - 1)       | 0<br>(0 - 0)       | 7<br>(3 - 13)              | 18<br>(9 - 32)              | 59<br>(29 - 127)            |
| Other communicable, maternal, neonatal, and nutritional diseases | 161<br>(105 - 210)             | 11<br>(2 - 38)     | 2<br>(1 - 4)       | 32<br>(24 - 42)            | 48<br>(30 - 62)             | 68<br>(39 - 91)             |
| Sexually transmitted diseases excluding HIV                      | 11<br>(2 - 42)                 | 7<br>(0 - 36)      | 1<br>(0 - 3)       | 1<br>(1 - 2)               | 1<br>(0 - 2)                | 2<br>(1 - 4)                |
| Syphilis                                                         | 10<br>(2 - 41)                 | 7<br>(0 - 36)      | 1<br>(0 - 3)       | 1<br>(0 - 1)               | 1<br>(0 - 1)                | 1<br>(1 - 3)                |
| Chlamydial infection                                             | --                             | --                 | --                 | --                         | --                          | --                          |
| Gonococcal infection                                             | 1<br>(0 - 1)                   | --                 | 0<br>(0 - 0)       | 0<br>(0 - 0)               | 0<br>(0 - 0)                | 0<br>(0 - 0)                |
| Other sexually transmitted diseases                              | 0<br>(0 - 1)                   | --                 | 0<br>(0 - 0)       | 0<br>(0 - 0)               | 0<br>(0 - 0)                | 0<br>(0 - 0)                |
| Hepatitis                                                        | 51<br>(41 - 63)                | 1<br>(0 - 1)       | 0<br>(0 - 0)       | 20<br>(14 - 27)            | 16<br>(11 - 21)             | 15<br>(10 - 21)             |
| Acute hepatitis A                                                | 6<br>(2 - 13)                  | 0<br>(0 - 1)       | 0<br>(0 - 0)       | 3<br>(1 - 7)               | 1<br>(0 - 4)                | 1<br>(0 - 2)                |
| Acute hepatitis B                                                | 43<br>(32 - 55)                | 0<br>(0 - 1)       | 0<br>(0 - 0)       | 15<br>(10 - 22)            | 14<br>(9 - 19)              | 14<br>(9 - 19)              |
| Acute hepatitis C                                                | 2<br>(0 - 5)                   | --                 | 0<br>(0 - 0)       | 1<br>(0 - 3)               | 1<br>(0 - 2)                | 0<br>(0 - 1)                |
| Other infectious diseases                                        | 99<br>(48 - 132)               | 3<br>(2 - 5)       | 1<br>(0 - 2)       | 11<br>(6 - 16)             | 31<br>(15 - 43)             | 52<br>(22 - 75)             |
| Non-communicable diseases                                        | 135,668<br>(125,657 - 146,282) | 370<br>(295 - 506) | 145<br>(121 - 165) | 10,505<br>(9,260 - 12,120) | 44,924<br>(40,693 - 49,395) | 79,725<br>(75,195 - 84,772) |
| Neoplasms                                                        | 62,676<br>(56,951 - 68,814)    | 44<br>(29 - 63)    | 82<br>(66 - 99)    | 4,940<br>(4,118 - 6,044)   | 25,618<br>(22,802 - 28,818) | 31,992<br>(29,459 - 34,610) |
| Esophageal cancer                                                | 2,075<br>(1,759 - 2,792)       | --                 | --                 | 65<br>(47 - 106)           | 984<br>(794 - 1,497)        | 1,026<br>(854 - 1,269)      |
| Stomach cancer                                                   | 10,316<br>(9,021 - 11,603)     | --                 | --                 | 813<br>(670 - 970)         | 4,187<br>(3,563 - 4,790)    | 5,317<br>(4,467 - 6,266)    |
| Liver cancer                                                     | 12,320<br>(9,525 - 17,905)     | --                 | 2<br>(1 - 4)       | 1,760<br>(1,174 - 2,762)   | 6,582<br>(4,970 - 9,485)    | 3,976<br>(2,767 - 5,776)    |
| Liver cancer due to hepatitis B                                  | 3,800<br>(2,189 - 5,738)       | --                 | 2<br>(1 - 3)       | 857<br>(517 - 1,414)       | 2,146<br>(1,175 - 3,253)    | 795<br>(392 - 1,268)        |
| Liver cancer due to hepatitis C                                  | 5,671<br>(3,866 - 8,610)       | --                 | 0<br>(0 - 0)       | 597<br>(304 - 1,078)       | 2,982<br>(1,855 - 4,747)    | 2,092<br>(1,380 - 3,224)    |
| Liver cancer due to alcohol use                                  | 2,770<br>(1,788 - 4,351)       | --                 | --                 | 291<br>(151 - 543)         | 1,410<br>(869 - 2,353)      | 1,069<br>(668 - 1,752)      |
| Liver cancer due to other causes                                 | 79<br>(34 - 146)               | --                 | 0<br>(0 - 0)       | 15<br>(7 - 28)             | 44<br>(18 - 84)             | 21<br>(8 - 38)              |
| Larynx cancer                                                    | 611<br>(488 - 909)             | --                 | --                 | 21<br>(15 - 34)            | 236<br>(179 - 395)          | 354<br>(266 - 491)          |
| Tracheal, bronchus and lung cancer                               | 15,347<br>(13,875 - 16,808)    | --                 | --                 | 427<br>(355 - 516)         | 5,552<br>(4,888 - 6,237)    | 9,368<br>(8,390 - 10,349)   |
| Breast cancer                                                    | 25<br>(13 - 69)                | --                 | --                 | 3<br>(1 - 8)               | 9<br>(4 - 24)               | 13<br>(6 - 36)              |

Web Table 31- South Korea deaths with 95% UI by age, sex, and cause in 2013

| Cause                                         | Males, All Ages             | Males, 0-4 Years | Males, 5-14 Years | Males, 15-49 Years       | Males, 50-69 Years        | Males, 70-80 Years          |
|-----------------------------------------------|-----------------------------|------------------|-------------------|--------------------------|---------------------------|-----------------------------|
| Cervical cancer                               | --                          | --               | --                | --                       | --                        | --                          |
| Uterine cancer                                | --                          | --               | --                | --                       | --                        | --                          |
| Prostate cancer                               | 2,070<br>(1,380 - 2,590)    | --               | --                | 7<br>(4 - 9)             | 297<br>(177 - 398)        | 1,766<br>(1,165 - 2,240)    |
| Colon and rectum cancer                       | 5,906<br>(5,320 - 6,502)    | --               | --                | 388<br>(327 - 461)       | 2,296<br>(2,014 - 2,569)  | 3,223<br>(2,853 - 3,622)    |
| Lip and oral cavity cancer                    | 417<br>(350 - 473)          | --               | --                | 47<br>(36 - 59)          | 192<br>(153 - 229)        | 178<br>(141 - 216)          |
| Nasopharynx cancer                            | 180<br>(104 - 226)          | --               | 0<br>(0 - 1)      | 36<br>(21 - 51)          | 97<br>(55 - 129)          | 47<br>(26 - 64)             |
| Other pharynx cancer                          | 368<br>(244 - 454)          | --               | --                | 24<br>(18 - 36)          | 180<br>(126 - 237)        | 163<br>(91 - 215)           |
| Gallbladder and biliary tract cancer          | 2,034<br>(1,249 - 2,579)    | --               | --                | 73<br>(49 - 106)         | 715<br>(440 - 953)        | 1,245<br>(736 - 1,594)      |
| Pancreatic cancer                             | 3,086<br>(2,756 - 3,429)    | --               | --                | 194<br>(158 - 234)       | 1,349<br>(1,166 - 1,541)  | 1,543<br>(1,343 - 1,753)    |
| Malignant skin melanoma                       | 140<br>(76 - 259)           | --               | --                | 25<br>(15 - 51)          | 60<br>(32 - 110)          | 55<br>(28 - 97)             |
| Non-melanoma skin cancer                      | 177<br>(115 - 316)          | --               | --                | 8<br>(5 - 13)            | 39<br>(25 - 70)           | 129<br>(79 - 239)           |
| Ovarian cancer                                | --                          | --               | --                | --                       | --                        | --                          |
| Testicular cancer                             | 19<br>(12 - 25)             | --               | --                | 8<br>(4 - 11)            | 5<br>(3 - 7)              | 6<br>(4 - 9)                |
| Kidney cancer                                 | 923<br>(788 - 1,074)        | 1<br>(1 - 2)     | 1<br>(0 - 1)      | 83<br>(64 - 104)         | 420<br>(337 - 507)        | 419<br>(333 - 522)          |
| Bladder cancer                                | 1,118<br>(917 - 1,335)      | --               | --                | 20<br>(16 - 27)          | 260<br>(213 - 312)        | 838<br>(682 - 1,018)        |
| Brain and nervous system cancer               | 821<br>(669 - 1,123)        | 7<br>(4 - 13)    | 19<br>(13 - 26)   | 195<br>(153 - 266)       | 336<br>(263 - 471)        | 265<br>(200 - 379)          |
| Thyroid cancer                                | 190<br>(124 - 247)          | --               | 0<br>(0 - 0)      | 21<br>(12 - 31)          | 88<br>(52 - 123)          | 81<br>(57 - 107)            |
| Mesothelioma                                  | 90<br>(63 - 137)            | --               | --                | 8<br>(5 - 14)            | 38<br>(23 - 60)           | 44<br>(27 - 75)             |
| Hodgkin lymphoma                              | 37<br>(19 - 47)             | 0<br>(0 - 0)     | 0<br>(0 - 1)      | 10<br>(5 - 13)           | 15<br>(7 - 21)            | 11<br>(5 - 16)              |
| Non-Hodgkin lymphoma                          | 1,174<br>(499 - 1,466)      | 3<br>(1 - 6)     | 8<br>(3 - 12)     | 161<br>(76 - 234)        | 455<br>(196 - 580)        | 547<br>(218 - 742)          |
| Multiple myeloma                              | 416<br>(203 - 591)          | --               | --                | 29<br>(16 - 48)          | 185<br>(91 - 289)         | 202<br>(91 - 287)           |
| Leukemia                                      | 1,082<br>(974 - 1,205)      | 18<br>(10 - 29)  | 37<br>(27 - 47)   | 261<br>(221 - 305)       | 370<br>(318 - 428)        | 396<br>(344 - 456)          |
| Other neoplasms                               | 1,733<br>(1,400 - 2,398)    | 14<br>(8 - 22)   | 15<br>(7 - 23)    | 254<br>(179 - 399)       | 674<br>(466 - 1,119)      | 777<br>(515 - 994)          |
| Cardiovascular diseases                       | 35,712<br>(32,511 - 38,780) | 17<br>(13 - 22)  | 14<br>(10 - 17)   | 2,114<br>(1,806 - 2,453) | 8,873<br>(7,821 - 10,011) | 24,694<br>(22,585 - 26,925) |
| Rheumatic heart disease                       | 86<br>(33 - 125)            | 0<br>(0 - 0)     | 0<br>(0 - 1)      | 9<br>(4 - 14)            | 26<br>(10 - 38)           | 50<br>(17 - 80)             |
| Ischemic heart disease                        | 10,622<br>(8,881 - 13,528)  | 2<br>(1 - 3)     | 3<br>(2 - 4)      | 877<br>(691 - 1,128)     | 2,899<br>(2,356 - 3,602)  | 6,841<br>(5,524 - 9,078)    |
| Cerebrovascular disease                       | 21,552<br>(18,827 - 24,330) | 5<br>(4 - 8)     | 5<br>(3 - 6)      | 1,005<br>(802 - 1,233)   | 5,262<br>(4,431 - 6,123)  | 15,275<br>(13,240 - 17,303) |
| Ischemic stroke                               | 12,537<br>(9,432 - 15,166)  | 1<br>(1 - 2)     | 0<br>(0 - 1)      | 111<br>(70 - 160)        | 1,824<br>(1,210 - 2,411)  | 10,600<br>(8,008 - 12,803)  |
| Hemorrhagic stroke                            | 9,015<br>(7,175 - 11,788)   | 4<br>(3 - 6)     | 4<br>(2 - 6)      | 894<br>(721 - 1,095)     | 3,438<br>(2,740 - 4,190)  | 4,675<br>(3,364 - 6,768)    |
| Hypertensive heart disease                    | 1,275<br>(846 - 2,164)      | 1<br>(0 - 1)     | 1<br>(1 - 2)      | 53<br>(34 - 101)         | 208<br>(133 - 392)        | 1,013<br>(655 - 1,755)      |
| Cardiomyopathy and myocarditis                | 394<br>(270 - 507)          | 7<br>(5 - 9)     | 4<br>(2 - 5)      | 66<br>(39 - 87)          | 107<br>(69 - 140)         | 211<br>(148 - 296)          |
| Atrial fibrillation and flutter               | 326<br>(239 - 434)          | --               | --                | 5<br>(4 - 7)             | 44<br>(32 - 57)           | 277<br>(195 - 377)          |
| Aortic aneurysm                               | 613<br>(502 - 762)          | --               | --                | 33<br>(24 - 43)          | 145<br>(112 - 188)        | 436<br>(348 - 550)          |
| Peripheral vascular disease                   | 97<br>(73 - 129)            | --               | --                | 1<br>(1 - 2)             | 15<br>(11 - 20)           | 81<br>(58 - 111)            |
| Endocarditis                                  | 97<br>(54 - 137)            | 1<br>(0 - 1)     | 0<br>(0 - 1)      | 16<br>(10 - 25)          | 34<br>(18 - 59)           | 46<br>(23 - 69)             |
| Other cardiovascular and circulatory diseases | 650<br>(501 - 1,016)        | 2<br>(1 - 3)     | 1<br>(1 - 1)      | 48<br>(37 - 76)          | 135<br>(102 - 216)        | 464<br>(345 - 738)          |
| Chronic respiratory diseases                  | 11,011<br>(9,704 - 14,507)  | 6<br>(4 - 8)     | 2<br>(1 - 3)      | 127<br>(102 - 189)       | 1,474<br>(1,233 - 1,962)  | 9,401<br>(8,220 - 12,428)   |
| Chronic obstructive pulmonary disease         | 7,815<br>(6,725 - 10,448)   | 2<br>(1 - 3)     | 1<br>(0 - 1)      | 67<br>(51 - 100)         | 822<br>(663 - 1,096)      | 6,924<br>(5,939 - 9,279)    |
| Pneumoconiosis                                | 464<br>(315 - 644)          | 0<br>(0 - 0)     | 0<br>(0 - 0)      | 9<br>(6 - 16)            | 178<br>(122 - 281)        | 276<br>(169 - 388)          |
| Silicosis                                     | 25<br>(16 - 38)             | 0<br>(0 - 0)     | 0<br>(0 - 0)      | 1<br>(1 - 2)             | 11<br>(7 - 20)            | 12<br>(7 - 19)              |

Web Table 31- South Korea deaths with 95% UI by age, sex, and cause in 2013

| Cause                                               | Males, All Ages             | Males, 0-4 Years | Males, 5-14 Years | Males, 15-49 Years       | Males, 50-69 Years       | Males, 70-80 Years       |
|-----------------------------------------------------|-----------------------------|------------------|-------------------|--------------------------|--------------------------|--------------------------|
| Asbestosis                                          | 8<br>(6 - 12)               | 0<br>(0 - 0)     | 0<br>(0 - 0)      | 1<br>(0 - 1)             | 3<br>(2 - 5)             | 4<br>(3 - 7)             |
| Coal workers pneumoconiosis                         | 337<br>(230 - 469)          | 0<br>(0 - 0)     | 0<br>(0 - 0)      | 4<br>(2 - 6)             | 126<br>(85 - 202)        | 207<br>(126 - 291)       |
| Other pneumoconiosis                                | 94<br>(62 - 132)            | 0<br>(0 - 0)     | 0<br>(0 - 0)      | 4<br>(2 - 7)             | 37<br>(25 - 59)          | 53<br>(31 - 79)          |
| Asthma                                              | 1,495<br>(1,187 - 2,134)    | 1<br>(0 - 1)     | 1<br>(0 - 1)      | 28<br>(21 - 40)          | 181<br>(138 - 254)       | 1,285<br>(984 - 1,886)   |
| Interstitial lung disease and pulmonary sarcoidosis | 1,189<br>(784 - 1,779)      | 1<br>(1 - 2)     | 0<br>(0 - 1)      | 19<br>(12 - 31)          | 288<br>(185 - 420)       | 880<br>(547 - 1,367)     |
| Other chronic respiratory diseases                  | 48<br>(35 - 67)             | 2<br>(1 - 3)     | 0<br>(0 - 0)      | 4<br>(3 - 6)             | 6<br>(4 - 8)             | 36<br>(24 - 53)          |
| Cirrhosis                                           | 6,960<br>(6,172 - 7,784)    | 1<br>(0 - 1)     | 1<br>(1 - 1)      | 1,771<br>(1,492 - 2,091) | 3,714<br>(3,218 - 4,251) | 1,473<br>(1,295 - 1,672) |
| Cirrhosis due to hepatitis B                        | 3,371<br>(2,688 - 3,993)    | 0<br>(0 - 0)     | 0<br>(0 - 1)      | 912<br>(688 - 1,135)     | 1,806<br>(1,421 - 2,177) | 652<br>(495 - 816)       |
| Cirrhosis due to hepatitis C                        | 986<br>(496 - 1,434)        | 0<br>(0 - 0)     | 0<br>(0 - 0)      | 237<br>(113 - 386)       | 527<br>(267 - 781)       | 223<br>(74 - 347)        |
| Cirrhosis due to alcohol use                        | 2,235<br>(1,626 - 2,867)    | --               | --                | 488<br>(320 - 669)       | 1,195<br>(860 - 1,555)   | 552<br>(392 - 735)       |
| Cirrhosis due to other causes                       | 368<br>(185 - 547)          | 0<br>(0 - 1)     | 0<br>(0 - 0)      | 134<br>(69 - 203)        | 186<br>(83 - 286)        | 46<br>(22 - 72)          |
| Digestive diseases                                  | 2,629<br>(2,185 - 4,064)    | 2<br>(1 - 3)     | 2<br>(2 - 3)      | 181<br>(141 - 301)       | 598<br>(481 - 925)       | 1,847<br>(1,502 - 2,897) |
| Peptic ulcer disease                                | 584<br>(393 - 1,107)        | 0<br>(0 - 0)     | 0<br>(0 - 0)      | 25<br>(16 - 48)          | 129<br>(90 - 227)        | 429<br>(268 - 852)       |
| Gastritis and duodenitis                            | 63<br>(25 - 209)            | 0<br>(0 - 0)     | 0<br>(0 - 0)      | 2<br>(1 - 5)             | 8<br>(4 - 24)            | 53<br>(19 - 178)         |
| Appendicitis                                        | 45<br>(24 - 65)             | 0<br>(0 - 0)     | 0<br>(0 - 1)      | 7<br>(4 - 10)            | 11<br>(6 - 16)           | 27<br>(13 - 43)          |
| Paralytic ileus and intestinal obstruction          | 472<br>(248 - 773)          | 1<br>(0 - 1)     | 0<br>(0 - 1)      | 31<br>(17 - 62)          | 111<br>(66 - 201)        | 328<br>(160 - 512)       |
| Inguinal, femoral, and abdominal hernia             | 33<br>(18 - 68)             | 0<br>(0 - 0)     | 0<br>(0 - 0)      | 1<br>(1 - 3)             | 4<br>(2 - 8)             | 27<br>(14 - 58)          |
| Inflammatory bowel disease                          | 107<br>(67 - 228)           | 0<br>(0 - 0)     | 0<br>(0 - 0)      | 6<br>(4 - 10)            | 20<br>(13 - 34)          | 80<br>(46 - 189)         |
| Vascular intestinal disorders                       | 130<br>(46 - 280)           | 0<br>(0 - 0)     | 0<br>(0 - 0)      | 7<br>(2 - 15)            | 33<br>(12 - 69)          | 90<br>(31 - 193)         |
| Gallbladder and biliary diseases                    | 628<br>(448 - 945)          | 0<br>(0 - 0)     | 0<br>(0 - 0)      | 12<br>(7 - 22)           | 91<br>(62 - 148)         | 525<br>(365 - 780)       |
| Pancreatitis                                        | 338<br>(227 - 552)          | 0<br>(0 - 0)     | 0<br>(0 - 0)      | 74<br>(51 - 132)         | 127<br>(82 - 200)        | 136<br>(90 - 224)        |
| Other digestive diseases                            | 229<br>(157 - 342)          | 0<br>(0 - 0)     | 0<br>(0 - 0)      | 17<br>(10 - 28)          | 63<br>(40 - 94)          | 149<br>(102 - 225)       |
| Neurological disorders                              | 3,305<br>(2,644 - 3,934)    | 18<br>(12 - 25)  | 15<br>(10 - 20)   | 234<br>(180 - 297)       | 565<br>(433 - 664)       | 2,473<br>(1,912 - 3,005) |
| Alzheimer disease and other dementias               | 1,482<br>(1,117 - 1,949)    | --               | --                | 0<br>(0 - 1)             | 84<br>(60 - 112)         | 1,397<br>(1,041 - 1,857) |
| Parkinson disease                                   | 1,107<br>(547 - 1,354)      | --               | --                | 9<br>(6 - 12)            | 209<br>(127 - 261)       | 889<br>(385 - 1,108)     |
| Epilepsy                                            | 300<br>(191 - 374)          | 9<br>(5 - 14)    | 9<br>(5 - 13)     | 126<br>(84 - 183)        | 83<br>(50 - 110)         | 73<br>(41 - 101)         |
| Multiple sclerosis                                  | 11<br>(4 - 18)              | --               | --                | 4<br>(1 - 6)             | 5<br>(2 - 9)             | 2<br>(1 - 4)             |
| Other neurological disorders                        | 405<br>(269 - 469)          | 9<br>(6 - 13)    | 6<br>(3 - 8)      | 96<br>(69 - 119)         | 183<br>(121 - 220)       | 111<br>(67 - 136)        |
| Mental and substance use disorders                  | 1,120<br>(861 - 1,694)      | 0<br>(0 - 0)     | 0<br>(0 - 0)      | 384<br>(288 - 666)       | 524<br>(339 - 735)       | 212<br>(162 - 305)       |
| Schizophrenia                                       | 87<br>(58 - 175)            | --               | --                | 32<br>(18 - 72)          | 37<br>(23 - 77)          | 18<br>(11 - 41)          |
| Alcohol use disorders                               | 894<br>(562 - 1,422)        | --               | --                | 288<br>(193 - 540)       | 458<br>(260 - 657)       | 149<br>(92 - 229)        |
| Drug use disorders                                  | 138<br>(112 - 184)          | 0<br>(0 - 0)     | --                | 63<br>(48 - 86)          | 30<br>(22 - 52)          | 45<br>(32 - 62)          |
| Opioid use disorders                                | 39<br>(31 - 50)             | 0<br>(0 - 0)     | --                | 18<br>(13 - 25)          | 8<br>(5 - 14)            | 13<br>(9 - 19)           |
| Cocaine use disorders                               | 9<br>(7 - 13)               | 0<br>(0 - 0)     | --                | 5<br>(4 - 7)             | 2<br>(1 - 3)             | 3<br>(2 - 4)             |
| Amphetamine use disorders                           | 8<br>(7 - 11)               | 0<br>(0 - 0)     | --                | 4<br>(3 - 6)             | 2<br>(1 - 3)             | 3<br>(2 - 4)             |
| Other drug use disorders                            | 81<br>(64 - 111)            | 0<br>(0 - 0)     | --                | 36<br>(27 - 50)          | 18<br>(13 - 33)          | 26<br>(18 - 36)          |
| Eating disorders                                    | 1<br>(1 - 2)                | --               | 0<br>(0 - 0)      | 1<br>(1 - 2)             | --                       | --                       |
| Anorexia nervosa                                    | 1<br>(1 - 2)                | --               | 0<br>(0 - 0)      | 1<br>(1 - 2)             | --                       | --                       |
| Diabetes, urogenital, blood, and endocrine diseases | 11,377<br>(10,197 - 12,544) | 24<br>(18 - 41)  | 12<br>(9 - 16)    | 679<br>(566 - 822)       | 3,414<br>(2,933 - 3,908) | 7,247<br>(6,426 - 8,097) |
| Diabetes mellitus                                   | 7,538<br>(6,720 - 8,427)    | 1<br>(1 - 1)     | 1<br>(1 - 1)      | 426<br>(343 - 515)       | 2,409<br>(2,036 - 2,796) | 4,702<br>(4,062 - 5,395) |

Web Table 31- South Korea deaths with 95% UI by age, sex, and cause in 2013

| Cause                                               | Males, All Ages             | Males, 0-4 Years   | Males, 5-14 Years  | Males, 15-49 Years       | Males, 50-69 Years       | Males, 70-80 Years       |
|-----------------------------------------------------|-----------------------------|--------------------|--------------------|--------------------------|--------------------------|--------------------------|
| Acute glomerulonephritis                            | 7<br>(5 - 11)               | 0<br>(0 - 0)       | 0<br>(0 - 0)       | 1<br>(1 - 2)             | 1<br>(1 - 2)             | 4<br>(2 - 7)             |
| Chronic kidney disease                              | 2,951<br>(2,066 - 3,413)    | 2<br>(1 - 3)       | 2<br>(2 - 3)       | 165<br>(129 - 215)       | 814<br>(608 - 979)       | 1,967<br>(1,266 - 2,339) |
| Chronic kidney disease due to diabetes mellitus     | 7<br>(4 - 30)               | 0<br>(0 - 0)       | 0<br>(0 - 1)       | 3<br>(2 - 10)            | 2<br>(1 - 11)            | 1<br>(0 - 6)             |
| Chronic kidney disease due to hypertension          | 1,241<br>(713 - 1,543)      | 0<br>(0 - 0)       | 0<br>(0 - 0)       | 73<br>(45 - 101)         | 344<br>(206 - 471)       | 823<br>(429 - 1,059)     |
| Chronic kidney disease due to glomerulonephritis    | 159<br>(106 - 285)          | 0<br>(0 - 1)       | 0<br>(0 - 1)       | 10<br>(7 - 16)           | 37<br>(23 - 63)          | 111<br>(68 - 215)        |
| Chronic kidney disease due to other causes          | 1,544<br>(875 - 2,119)      | 1<br>(1 - 2)       | 1<br>(1 - 2)       | 79<br>(51 - 118)         | 431<br>(249 - 635)       | 1,031<br>(534 - 1,451)   |
| Urinary diseases and male infertility               | 413<br>(300 - 522)          | 1<br>(0 - 1)       | 0<br>(0 - 0)       | 13<br>(9 - 17)           | 59<br>(37 - 73)          | 340<br>(242 - 444)       |
| Interstitial nephritis and urinary tract infections | 135<br>(90 - 220)           | 0<br>(0 - 0)       | 0<br>(0 - 0)       | 4<br>(3 - 7)             | 19<br>(12 - 30)          | 111<br>(70 - 194)        |
| Urolithiasis                                        | 20<br>(10 - 29)             | --                 | 0<br>(0 - 0)       | 1<br>(1 - 2)             | 2<br>(1 - 4)             | 16<br>(8 - 25)           |
| Other urinary diseases                              | 259<br>(156 - 342)          | 0<br>(0 - 0)       | 0<br>(0 - 0)       | 8<br>(5 - 10)            | 38<br>(20 - 49)          | 213<br>(123 - 292)       |
| Gynecological diseases                              | --                          | --                 | --                 | --                       | --                       | --                       |
| Uterine fibroids                                    | --                          | --                 | --                 | --                       | --                       | --                       |
| Polycystic ovarian syndrome                         | --                          | --                 | --                 | --                       | --                       | --                       |
| Endometriosis                                       | --                          | --                 | --                 | --                       | --                       | --                       |
| Genital prolapse                                    | --                          | --                 | --                 | --                       | --                       | --                       |
| Other gynecological diseases                        | --                          | --                 | --                 | --                       | --                       | --                       |
| Hemoglobinopathies and hemolytic anemias            | 112<br>(57 - 163)           | 3<br>(2 - 5)       | 3<br>(2 - 5)       | 22<br>(12 - 34)          | 27<br>(14 - 41)          | 56<br>(27 - 87)          |
| Thalassemias                                        | 14<br>(7 - 21)              | 2<br>(1 - 3)       | 2<br>(1 - 3)       | 7<br>(4 - 11)            | 2<br>(1 - 3)             | 0<br>(0 - 1)             |
| Sickle cell disorders                               | 2<br>(1 - 2)                | 0<br>(0 - 0)       | 0<br>(0 - 0)       | 1<br>(0 - 1)             | 0<br>(0 - 1)             | 0<br>(0 - 0)             |
| G6PD deficiency                                     | 1<br>(1 - 2)                | 0<br>(0 - 0)       | 0<br>(0 - 0)       | 0<br>(0 - 1)             | 0<br>(0 - 1)             | 0<br>(0 - 0)             |
| Other hemoglobinopathies and hemolytic anemias      | 95<br>(49 - 139)            | 1<br>(1 - 2)       | 1<br>(0 - 1)       | 14<br>(7 - 21)           | 24<br>(12 - 37)          | 55<br>(26 - 86)          |
| Endocrine, metabolic, blood, and immune disorders   | 355<br>(276 - 634)          | 17<br>(12 - 35)    | 5<br>(4 - 9)       | 52<br>(38 - 103)         | 103<br>(76 - 192)        | 178<br>(123 - 330)       |
| Musculoskeletal disorders                           | 273<br>(216 - 440)          | --                 | 1<br>(1 - 1)       | 25<br>(19 - 43)          | 81<br>(62 - 139)         | 166<br>(124 - 264)       |
| Rheumatoid arthritis                                | 67<br>(43 - 121)            | --                 | 0<br>(0 - 0)       | 3<br>(2 - 5)             | 21<br>(12 - 42)          | 44<br>(26 - 75)          |
| Other musculoskeletal disorders                     | 206<br>(155 - 327)          | --                 | 1<br>(0 - 1)       | 22<br>(17 - 38)          | 61<br>(45 - 102)         | 122<br>(86 - 200)        |
| Other non-communicable diseases                     | 605<br>(524 - 735)          | 258<br>(201 - 398) | 16<br>(11 - 22)    | 48<br>(39 - 58)          | 62<br>(46 - 76)          | 221<br>(130 - 290)       |
| Congenital anomalies                                | 308<br>(253 - 465)          | 210<br>(163 - 349) | 16<br>(11 - 22)    | 37<br>(29 - 47)          | 22<br>(18 - 28)          | 23<br>(18 - 32)          |
| Neural tube defects                                 | 5<br>(3 - 8)                | 3<br>(2 - 5)       | 0<br>(0 - 1)       | 1<br>(1 - 2)             | 1<br>(0 - 1)             | 0<br>(0 - 0)             |
| Congenital heart anomalies                          | 139<br>(108 - 231)          | 102<br>(75 - 185)  | 8<br>(5 - 12)      | 15<br>(11 - 20)          | 8<br>(5 - 11)            | 5<br>(3 - 9)             |
| Cleft lip and cleft palate                          | 2<br>(0 - 7)                | 2<br>(0 - 7)       | --                 | --                       | --                       | --                       |
| Down syndrome                                       | 20<br>(10 - 43)             | 12<br>(5 - 30)     | 1<br>(0 - 2)       | 6<br>(3 - 11)            | 1<br>(0 - 2)             | 0<br>(0 - 0)             |
| Chromosomal unbalanced rearrangements               | 10<br>(6 - 15)              | 8<br>(4 - 12)      | 1<br>(0 - 1)       | 1<br>(1 - 2)             | 1<br>(0 - 1)             | 0<br>(0 - 0)             |
| Other congenital anomalies                          | 132<br>(100 - 180)          | 83<br>(58 - 122)   | 6<br>(3 - 9)       | 13<br>(9 - 19)           | 12<br>(9 - 16)           | 17<br>(13 - 23)          |
| Skin and subcutaneous diseases                      | 250<br>(133 - 325)          | 1<br>(0 - 1)       | 0<br>(0 - 0)       | 11<br>(7 - 15)           | 40<br>(22 - 52)          | 198<br>(103 - 267)       |
| Cellulitis                                          | 37<br>(15 - 65)             | 0<br>(0 - 0)       | 0<br>(0 - 0)       | 3<br>(1 - 4)             | 8<br>(4 - 13)            | 26<br>(9 - 51)           |
| Pyoderma                                            | 30<br>(14 - 41)             | 0<br>(0 - 0)       | 0<br>(0 - 0)       | 3<br>(1 - 4)             | 8<br>(4 - 12)            | 19<br>(8 - 29)           |
| Decubitus ulcer                                     | 161<br>(92 - 221)           | 0<br>(0 - 0)       | 0<br>(0 - 0)       | 5<br>(3 - 7)             | 18<br>(10 - 26)          | 138<br>(79 - 193)        |
| Other skin and subcutaneous diseases                | 21<br>(7 - 37)              | 0<br>(0 - 0)       | 0<br>(0 - 0)       | 1<br>(1 - 2)             | 6<br>(2 - 9)             | 14<br>(4 - 29)           |
| Sudden infant death syndrome                        | 47<br>(22 - 105)            | 47<br>(22 - 105)   | --                 | --                       | --                       | --                       |
| Injuries                                            | 22,979<br>(16,761 - 26,046) | 148<br>(107 - 197) | 165<br>(146 - 193) | 8,145<br>(6,380 - 9,271) | 7,959<br>(5,588 - 9,271) | 6,561<br>(4,297 - 7,672) |



Web Table 31- South Korea deaths with 95% UI by age, sex, and cause in 2013

| Cause                                           | Males, All Ages            | Males, 0-4 Years | Males, 5-14 Years | Males, 15-49 Years       | Males, 50-69 Years       | Males, 70-80 Years       |
|-------------------------------------------------|----------------------------|------------------|-------------------|--------------------------|--------------------------|--------------------------|
| Transport injuries                              | 5,944<br>(5,221 - 6,613)   | 48<br>(31 - 68)  | 66<br>(47 - 81)   | 2,170<br>(1,838 - 2,498) | 2,144<br>(1,816 - 2,489) | 1,517<br>(1,284 - 1,749) |
| Road injuries                                   | 5,437<br>(4,770 - 6,040)   | 46<br>(29 - 64)  | 62<br>(43 - 77)   | 2,024<br>(1,707 - 2,344) | 1,925<br>(1,630 - 2,231) | 1,381<br>(1,146 - 1,613) |
| Pedestrian road injuries                        | 1,741<br>(1,003 - 2,553)   | 29<br>(16 - 43)  | 36<br>(21 - 49)   | 459<br>(226 - 704)       | 676<br>(372 - 1,009)     | 539<br>(328 - 798)       |
| Cyclist road injuries                           | 505<br>(345 - 755)         | 3<br>(1 - 7)     | 10<br>(5 - 15)    | 56<br>(34 - 93)          | 171<br>(111 - 269)       | 265<br>(174 - 414)       |
| Motorcyclist road injuries                      | 1,232<br>(732 - 1,616)     | 1<br>(1 - 3)     | 4<br>(2 - 6)      | 499<br>(307 - 684)       | 384<br>(215 - 524)       | 344<br>(191 - 482)       |
| Motor vehicle road injuries                     | 1,951<br>(1,395 - 2,694)   | 12<br>(6 - 21)   | 12<br>(7 - 21)    | 1,009<br>(749 - 1,301)   | 689<br>(467 - 981)       | 229<br>(145 - 415)       |
| Other road injuries                             | 9<br>(5 - 19)              | 0<br>(0 - 0)     | 0<br>(0 - 0)      | 2<br>(1 - 3)             | 4<br>(2 - 9)             | 3<br>(1 - 8)             |
| Other transport injuries                        | 507<br>(333 - 657)         | 3<br>(1 - 5)     | 3<br>(2 - 5)      | 145<br>(103 - 227)       | 219<br>(129 - 305)       | 137<br>(66 - 208)        |
| Unintentional injuries                          | 5,954<br>(4,694 - 6,779)   | 91<br>(65 - 132) | 73<br>(56 - 127)  | 1,516<br>(1,244 - 2,229) | 1,869<br>(1,480 - 2,177) | 2,404<br>(1,500 - 2,943) |
| Falls                                           | 2,428<br>(1,457 - 2,844)   | 20<br>(12 - 31)  | 10<br>(6 - 14)    | 490<br>(370 - 745)       | 806<br>(515 - 973)       | 1,101<br>(507 - 1,433)   |
| Drowning                                        | 835<br>(610 - 1,557)       | 21<br>(11 - 45)  | 46<br>(30 - 108)  | 376<br>(268 - 812)       | 237<br>(161 - 374)       | 155<br>(102 - 218)       |
| Fire, heat, and hot substances                  | 391<br>(268 - 515)         | 6<br>(3 - 11)    | 5<br>(3 - 9)      | 127<br>(89 - 193)        | 121<br>(75 - 164)        | 131<br>(83 - 178)        |
| Poisonings                                      | 215<br>(169 - 360)         | 2<br>(1 - 3)     | 2<br>(1 - 3)      | 52<br>(38 - 100)         | 67<br>(49 - 124)         | 92<br>(65 - 146)         |
| Exposure to mechanical forces                   | 578<br>(487 - 739)         | 14<br>(8 - 29)   | 4<br>(3 - 6)      | 262<br>(209 - 382)       | 248<br>(196 - 303)       | 50<br>(40 - 62)          |
| Unintentional firearm injuries                  | 18<br>(12 - 22)            | 0<br>(0 - 0)     | 0<br>(0 - 0)      | 7<br>(4 - 10)            | 7<br>(4 - 9)             | 4<br>(2 - 6)             |
| Unintentional suffocation                       | 28<br>(19 - 60)            | 12<br>(6 - 26)   | 1<br>(0 - 1)      | 3<br>(2 - 7)             | 5<br>(3 - 10)            | 7<br>(4 - 15)            |
| Other exposure to mechanical forces             | 532<br>(444 - 681)         | 3<br>(2 - 4)     | 3<br>(2 - 5)      | 252<br>(199 - 369)       | 236<br>(184 - 292)       | 38<br>(30 - 48)          |
| Adverse effects of medical treatment            | 419<br>(177 - 620)         | 3<br>(1 - 5)     | 1<br>(0 - 2)      | 43<br>(18 - 63)          | 112<br>(46 - 166)        | 259<br>(98 - 406)        |
| Animal contact                                  | 47<br>(31 - 67)            | 1<br>(0 - 1)     | 0<br>(0 - 1)      | 9<br>(6 - 13)            | 21<br>(13 - 28)          | 17<br>(11 - 27)          |
| Venomous animal contact                         | 32<br>(18 - 42)            | 0<br>(0 - 0)     | 0<br>(0 - 0)      | 7<br>(4 - 10)            | 16<br>(9 - 21)           | 9<br>(5 - 13)            |
| Non-venomous animal contact                     | 15<br>(11 - 26)            | 0<br>(0 - 1)     | 0<br>(0 - 0)      | 2<br>(1 - 3)             | 5<br>(3 - 8)             | 8<br>(5 - 14)            |
| Foreign body                                    | 873<br>(400 - 1,199)       | 23<br>(13 - 37)  | 3<br>(1 - 4)      | 83<br>(47 - 139)         | 190<br>(91 - 271)        | 574<br>(231 - 842)       |
| Pulmonary aspiration and foreign body in airway | 869<br>(396 - 1,196)       | 22<br>(12 - 37)  | 2<br>(1 - 4)      | 82<br>(46 - 138)         | 189<br>(90 - 269)        | 573<br>(231 - 841)       |
| Foreign body in other body part                 | 4<br>(3 - 7)               | 0<br>(0 - 0)     | 0<br>(0 - 0)      | 1<br>(1 - 2)             | 1<br>(1 - 2)             | 1<br>(1 - 2)             |
| Other unintentional injuries                    | 168<br>(126 - 213)         | 1<br>(1 - 2)     | 1<br>(1 - 2)      | 73<br>(50 - 107)         | 67<br>(42 - 104)         | 26<br>(16 - 37)          |
| Self-harm and interpersonal violence            | 11,081<br>(4,838 - 13,216) | 9<br>(3 - 16)    | 27<br>(11 - 37)   | 4,459<br>(2,136 - 5,296) | 3,946<br>(1,600 - 4,845) | 2,640<br>(1,016 - 3,312) |
| Self-harm                                       | 10,446<br>(4,370 - 12,502) | -                | 18<br>(7 - 26)    | 4,157<br>(1,861 - 4,994) | 3,758<br>(1,466 - 4,647) | 2,513<br>(943 - 3,182)   |
| Interpersonal violence                          | 635<br>(320 - 850)         | 9<br>(3 - 16)    | 9<br>(3 - 16)     | 302<br>(169 - 414)       | 188<br>(79 - 282)        | 127<br>(36 - 238)        |
| Assault by firearm                              | 53<br>(21 - 97)            | 0<br>(0 - 1)     | 0<br>(0 - 1)      | 26<br>(10 - 52)          | 19<br>(7 - 35)           | 7<br>(2 - 14)            |
| Assault by sharp object                         | 150<br>(88 - 244)          | 1<br>(0 - 3)     | 1<br>(1 - 3)      | 92<br>(55 - 158)         | 45<br>(21 - 76)          | 11<br>(4 - 22)           |
| Assault by other means                          | 432<br>(179 - 606)         | 7<br>(2 - 14)    | 8<br>(2 - 14)     | 185<br>(86 - 261)        | 124<br>(43 - 193)        | 109<br>(27 - 208)        |

Web Table 31- South Korea deaths with 95% UI by age, sex, and cause in 2013

| Cause                                                             | Females, All Ages              | Females, 0-4 Years | Females, 5-14 Years | Females, 15-49 Years     | Females, 50-69 Years        | Females, 70-80 Years           |
|-------------------------------------------------------------------|--------------------------------|--------------------|---------------------|--------------------------|-----------------------------|--------------------------------|
| All causes                                                        | 152,594<br>(144,157 - 161,923) | 790<br>(691 - 909) | 223<br>(205 - 241)  | 7,853<br>(7,017 - 8,820) | 21,440<br>(19,516 - 23,585) | 122,289<br>(116,676 - 128,372) |
| Communicable, maternal, neonatal, and nutritional diseases        | 10,253<br>(7,129 - 12,678)     | 352<br>(221 - 451) | 18<br>(13 - 22)     | 278<br>(244 - 325)       | 502<br>(364 - 595)          | 9,103<br>(6,179 - 11,511)      |
| HIV/AIDS and tuberculosis                                         | 1,637<br>(1,193 - 2,141)       | 2<br>(1 - 2)       | 1<br>(1 - 2)        | 91<br>(72 - 131)         | 133<br>(103 - 170)          | 1,410<br>(973 - 1,916)         |
| Tuberculosis                                                      | 1,606<br>(1,164 - 2,115)       | 2<br>(1 - 2)       | 1<br>(1 - 2)        | 67<br>(51 - 98)          | 126<br>(98 - 163)           | 1,410<br>(973 - 1,914)         |
| HIV/AIDS                                                          | 32<br>(19 - 77)                | 0<br>(0 - 0)       | 0<br>(0 - 0)        | 25<br>(15 - 58)          | 6<br>(3 - 18)               | 1<br>(0 - 2)                   |
| HIV/AIDS resulting in mycobacterial infection                     | 1<br>(1 - 4)                   | 0<br>(0 - 0)       | 0<br>(0 - 0)        | 1<br>(1 - 3)             | 0<br>(0 - 1)                | 0<br>(0 - 0)                   |
| HIV/AIDS resulting in other diseases                              | 30<br>(18 - 73)                | 0<br>(0 - 0)       | 0<br>(0 - 0)        | 24<br>(14 - 55)          | 6<br>(3 - 17)               | 1<br>(0 - 2)                   |
| Diarrhea, lower respiratory, and other common infectious diseases | 7,728<br>(4,631 - 10,091)      | 45<br>(33 - 57)    | 13<br>(10 - 17)     | 99<br>(77 - 119)         | 318<br>(190 - 404)          | 7,254<br>(4,307 - 9,609)       |
| Diarrheal diseases                                                | 528<br>(333 - 789)             | 3<br>(2 - 5)       | 0<br>(0 - 1)        | 5<br>(3 - 6)             | 19<br>(13 - 27)             | 500<br>(308 - 759)             |
| Intestinal infectious diseases                                    | 16<br>(6 - 34)                 | 3<br>(1 - 6)       | 2<br>(1 - 6)        | 7<br>(2 - 16)            | 2<br>(1 - 6)                | 2<br>(0 - 5)                   |
| Typhoid fever                                                     | 10<br>(3 - 23)                 | 1<br>(0 - 4)       | 2<br>(0 - 4)        | 5<br>(1 - 11)            | 1<br>(0 - 4)                | 1<br>(0 - 2)                   |
| Paratyphoid fever                                                 | 4<br>(1 - 9)                   | 1<br>(0 - 2)       | 1<br>(0 - 2)        | 2<br>(0 - 4)             | 0<br>(0 - 1)                | 0<br>(0 - 1)                   |
| Other intestinal infectious diseases                              | 2<br>(0 - 6)                   | 0<br>(0 - 3)       | 0<br>(0 - 1)        | 1<br>(0 - 3)             | 0<br>(0 - 2)                | 1<br>(0 - 3)                   |
| Lower respiratory infections                                      | 7,009<br>(3,949 - 9,348)       | 26<br>(18 - 36)    | 6<br>(4 - 8)        | 61<br>(44 - 76)          | 266<br>(138 - 346)          | 6,651<br>(3,709 - 8,995)       |
| Upper respiratory infections                                      | 4<br>(1 - 14)                  | 0<br>(0 - 0)       | 0<br>(0 - 0)        | 0<br>(0 - 1)             | 1<br>(0 - 2)                | 3<br>(0 - 14)                  |
| Otitis media                                                      | 5<br>(4 - 7)                   | 0<br>(0 - 0)       | 0<br>(0 - 0)        | 1<br>(1 - 1)             | 1<br>(0 - 1)                | 3<br>(2 - 5)                   |
| Meningitis                                                        | 54<br>(42 - 101)               | 4<br>(3 - 6)       | 1<br>(1 - 1)        | 6<br>(5 - 10)            | 8<br>(6 - 12)               | 36<br>(25 - 71)                |
| Pneumococcal meningitis                                           | 14<br>(9 - 25)                 | 1<br>(0 - 1)       | 0<br>(0 - 0)        | 1<br>(1 - 2)             | 2<br>(1 - 3)                | 10<br>(5 - 17)                 |
| H influenzae type B meningitis                                    | 4<br>(3 - 8)                   | 1<br>(1 - 1)       | 0<br>(0 - 0)        | 0<br>(0 - 1)             | 0<br>(0 - 1)                | 2<br>(1 - 5)                   |
| Meningococcal meningitis                                          | 16<br>(10 - 31)                | 0<br>(0 - 0)       | 0<br>(0 - 0)        | 2<br>(1 - 3)             | 2<br>(1 - 4)                | 11<br>(6 - 23)                 |
| Other meningitis                                                  | 20<br>(12 - 35)                | 2<br>(1 - 3)       | 0<br>(0 - 1)        | 2<br>(1 - 5)             | 3<br>(2 - 5)                | 12<br>(5 - 23)                 |
| Encephalitis                                                      | 84<br>(41 - 113)               | 8<br>(3 - 13)      | 2<br>(1 - 4)        | 15<br>(8 - 21)           | 18<br>(8 - 26)              | 41<br>(16 - 60)                |
| Diphtheria                                                        | 0<br>(0 - 1)                   | 0<br>(0 - 1)       | 0<br>(0 - 0)        | 0<br>(0 - 0)             | 0<br>(0 - 0)                | --                             |
| Whooping cough                                                    | 2<br>(1 - 3)                   | 0<br>(0 - 1)       | 0<br>(0 - 0)        | 1<br>(1 - 1)             | 0<br>(0 - 0)                | --                             |
| Tetanus                                                           | 5<br>(3 - 8)                   | 0<br>(0 - 1)       | 0<br>(0 - 0)        | 1<br>(0 - 1)             | 1<br>(1 - 2)                | 3<br>(1 - 5)                   |
| Measles                                                           | 0<br>(0 - 0)                   | 0<br>(0 - 0)       | 0<br>(0 - 0)        | 0<br>(0 - 0)             | 0<br>(0 - 0)                | --                             |
| Varicella and herpes zoster                                       | 20<br>(3 - 89)                 | 1<br>(0 - 4)       | 0<br>(0 - 1)        | 2<br>(0 - 5)             | 2<br>(0 - 6)                | 15<br>(0 - 85)                 |
| Neglected tropical diseases and malaria                           | 51<br>(32 - 73)                | 0<br>(0 - 1)       | 1<br>(0 - 1)        | 4<br>(3 - 5)             | 9<br>(6 - 13)               | 36<br>(20 - 58)                |
| Malaria                                                           | 0<br>(0 - 1)                   | 0<br>(0 - 0)       | 0<br>(0 - 0)        | 0<br>(0 - 0)             | 0<br>(0 - 0)                | 0<br>(0 - 1)                   |
| Cysticercosis                                                     | 0<br>(0 - 0)                   | 0<br>(0 - 0)       | 0<br>(0 - 0)        | 0<br>(0 - 0)             | 0<br>(0 - 0)                | 0<br>(0 - 0)                   |
| Cystic echinococcosis                                             | 1<br>(1 - 2)                   | 0<br>(0 - 0)       | 0<br>(0 - 0)        | 0<br>(0 - 0)             | 0<br>(0 - 0)                | 1<br>(1 - 1)                   |
| Dengue                                                            | 2<br>(2 - 4)                   | 0<br>(0 - 0)       | 0<br>(0 - 0)        | 1<br>(1 - 1)             | 1<br>(0 - 1)                | 0<br>(0 - 1)                   |
| Rabies                                                            | 2<br>(1 - 3)                   | 0<br>(0 - 0)       | 0<br>(0 - 0)        | 1<br>(1 - 1)             | 1<br>(0 - 1)                | 0<br>(0 - 0)                   |
| Intestinal nematode infections                                    | 0                              | 0                  | 0                   | 0                        | 0                           | 0                              |
| Ascariasis                                                        | 0<br>(0 - 2)                   | 0<br>(0 - 0)       | 0<br>(0 - 0)        | 0<br>(0 - 0)             | 0<br>(0 - 0)                | 0<br>(0 - 1)                   |
| Other neglected tropical diseases                                 | 44<br>(25 - 66)                | 0<br>(0 - 0)       | 0<br>(0 - 0)        | 2<br>(1 - 2)             | 8<br>(4 - 11)               | 34<br>(18 - 56)                |
| Maternal disorders                                                | 58<br>(42 - 81)                | --                 | 0<br>(0 - 0)        | 58<br>(42 - 81)          | --                          | --                             |
| Maternal hemorrhage                                               | 9<br>(6 - 13)                  | --                 | 0<br>(0 - 0)        | 9<br>(6 - 13)            | --                          | --                             |
| Maternal sepsis and other maternal infections                     | 8<br>(5 - 12)                  | --                 | 0<br>(0 - 0)        | 8<br>(5 - 12)            | --                          | --                             |
| Maternal hypertensive disorders                                   | 7<br>(4 - 10)                  | --                 | 0<br>(0 - 0)        | 7<br>(4 - 10)            | --                          | --                             |

Web Table 31- South Korea deaths with 95% UI by age, sex, and cause in 2013

| Cause                                                            | Females, All Ages              | Females, 0-4 Years | Females, 5-14 Years | Females, 15-49 Years     | Females, 50-69 Years        | Females, 70-80 Years           |
|------------------------------------------------------------------|--------------------------------|--------------------|---------------------|--------------------------|-----------------------------|--------------------------------|
| Maternal obstructed labor                                        | 4<br>(2 - 6)                   | --                 | 0<br>(0 - 0)        | 4<br>(2 - 6)             | --                          | --                             |
| Maternal abortive outcome                                        | 5<br>(3 - 8)                   | --                 | 0<br>(0 - 0)        | 5<br>(3 - 7)             | --                          | --                             |
| Indirect maternal deaths                                         | 9<br>(6 - 13)                  | --                 | 0<br>(0 - 0)        | 9<br>(6 - 13)            | --                          | --                             |
| Late maternal deaths                                             | 3<br>(2 - 5)                   | --                 | 0<br>(0 - 0)        | 3<br>(2 - 5)             | --                          | --                             |
| Maternal deaths aggravated by HIV/AIDS                           | 0<br>(0 - 0)                   | --                 | --                  | 0<br>(0 - 0)             | --                          | --                             |
| Other maternal disorders                                         | 14<br>(9 - 20)                 | --                 | 0<br>(0 - 0)        | 14<br>(9 - 20)           | --                          | --                             |
| Neonatal disorders                                               | 294<br>(170 - 386)             | 294<br>(170 - 386) | --                  | --                       | --                          | --                             |
| Neonatal preterm birth complications                             | 156<br>(78 - 217)              | 156<br>(78 - 217)  | --                  | --                       | --                          | --                             |
| Neonatal encephalopathy due to birth asphyxia and trauma         | 42<br>(24 - 62)                | 42<br>(24 - 62)    | --                  | --                       | --                          | --                             |
| Neonatal sepsis and other neonatal infections                    | 31<br>(15 - 62)                | 31<br>(15 - 62)    | --                  | --                       | --                          | --                             |
| Hemolytic disease and other neonatal jaundice                    | 1<br>(0 - 3)                   | 1<br>(0 - 3)       | --                  | --                       | --                          | --                             |
| Other neonatal disorders                                         | 64<br>(30 - 95)                | 64<br>(30 - 95)    | --                  | --                       | --                          | --                             |
| Nutritional deficiencies                                         | 322<br>(240 - 476)             | 1<br>(0 - 1)       | 0<br>(0 - 1)        | 11<br>(9 - 16)           | 13<br>(10 - 18)             | 297<br>(216 - 444)             |
| Protein-energy malnutrition                                      | 89<br>(45 - 215)               | 0<br>(0 - 0)       | 0<br>(0 - 0)        | 2<br>(1 - 3)             | 3<br>(1 - 6)                | 85<br>(42 - 208)               |
| Iodine deficiency                                                | 2<br>(0 - 10)                  | 0<br>(0 - 0)       | 0<br>(0 - 0)        | 0<br>(0 - 0)             | 0<br>(0 - 1)                | 1<br>(0 - 9)                   |
| Iron-deficiency anemia                                           | 120<br>(49 - 193)              | 0<br>(0 - 0)       | 0<br>(0 - 0)        | 6<br>(3 - 9)             | 5<br>(3 - 9)                | 108<br>(42 - 178)              |
| Other nutritional deficiencies                                   | 111<br>(58 - 202)              | 0<br>(0 - 0)       | 0<br>(0 - 0)        | 3<br>(1 - 5)             | 5<br>(2 - 7)                | 103<br>(53 - 193)              |
| Other communicable, maternal, neonatal, and nutritional diseases | 162<br>(98 - 216)              | 10<br>(2 - 39)     | 2<br>(1 - 4)        | 15<br>(10 - 19)          | 29<br>(19 - 39)             | 106<br>(59 - 148)              |
| Sexually transmitted diseases excluding HIV                      | 27<br>(12 - 60)                | 7<br>(0 - 36)      | 1<br>(0 - 3)        | 2<br>(1 - 3)             | 2<br>(1 - 4)                | 16<br>(8 - 28)                 |
| Syphilis                                                         | 22<br>(9 - 53)                 | 7<br>(0 - 36)      | 1<br>(0 - 3)        | 1<br>(0 - 1)             | 1<br>(1 - 2)                | 13<br>(7 - 22)                 |
| Chlamydial infection                                             | 1<br>(1 - 2)                   | --                 | 0<br>(0 - 0)        | 0<br>(0 - 1)             | 0<br>(0 - 0)                | 1<br>(0 - 1)                   |
| Gonococcal infection                                             | 3<br>(2 - 4)                   | --                 | 0<br>(0 - 0)        | 0<br>(0 - 1)             | 0<br>(0 - 1)                | 2<br>(1 - 3)                   |
| Other sexually transmitted diseases                              | 1<br>(1 - 2)                   | --                 | 0<br>(0 - 0)        | 0<br>(0 - 1)             | 0<br>(0 - 0)                | 1<br>(0 - 1)                   |
| Hepatitis                                                        | 45<br>(31 - 63)                | 0<br>(0 - 1)       | 0<br>(0 - 0)        | 7<br>(5 - 10)            | 10<br>(7 - 15)              | 27<br>(15 - 44)                |
| Acute hepatitis A                                                | 5<br>(2 - 11)                  | 0<br>(0 - 0)       | 0<br>(0 - 0)        | 2<br>(0 - 3)             | 1<br>(0 - 3)                | 2<br>(0 - 5)                   |
| Acute hepatitis B                                                | 38<br>(26 - 55)                | 0<br>(0 - 0)       | 0<br>(0 - 0)        | 5<br>(3 - 7)             | 9<br>(5 - 13)               | 25<br>(14 - 41)                |
| Acute hepatitis C                                                | 1<br>(0 - 3)                   | --                 | 0<br>(0 - 0)        | 0<br>(0 - 1)             | 0<br>(0 - 1)                | 1<br>(0 - 2)                   |
| Other infectious diseases                                        | 90<br>(41 - 128)               | 3<br>(1 - 5)       | 1<br>(0 - 1)        | 6<br>(3 - 9)             | 17<br>(9 - 25)              | 63<br>(25 - 95)                |
| Non-communicable diseases                                        | 130,283<br>(122,565 - 140,293) | 323<br>(266 - 433) | 111<br>(98 - 124)   | 4,894<br>(4,308 - 5,739) | 18,651<br>(16,989 - 20,740) | 106,305<br>(100,691 - 113,757) |
| Neoplasms                                                        | 38,584<br>(32,631 - 42,682)    | 40<br>(31 - 51)    | 59<br>(49 - 70)     | 3,210<br>(2,771 - 3,702) | 10,599<br>(9,060 - 11,906)  | 24,676<br>(20,321 - 27,602)    |
| Esophageal cancer                                                | 277<br>(230 - 331)             | --                 | --                  | 10<br>(7 - 12)           | 53<br>(41 - 66)             | 214<br>(173 - 264)             |
| Stomach cancer                                                   | 5,646<br>(4,220 - 7,380)       | --                 | --                  | 565<br>(414 - 736)       | 1,370<br>(1,041 - 1,795)    | 3,712<br>(2,673 - 5,121)       |
| Liver cancer                                                     | 4,512<br>(3,586 - 5,716)       | --                 | 1<br>(1 - 2)        | 238<br>(174 - 393)       | 1,464<br>(1,104 - 2,019)    | 2,808<br>(2,080 - 3,610)       |
| Liver cancer due to hepatitis B                                  | 1,122<br>(712 - 1,694)         | --                 | 1<br>(0 - 1)        | 117<br>(76 - 206)        | 477<br>(281 - 756)          | 528<br>(316 - 799)             |
| Liver cancer due to hepatitis C                                  | 2,470<br>(1,769 - 3,212)       | --                 | 0<br>(0 - 0)        | 89<br>(55 - 147)         | 732<br>(521 - 1,008)        | 1,648<br>(1,124 - 2,266)       |
| Liver cancer due to alcohol use                                  | 785<br>(484 - 1,181)           | --                 | --                  | 22<br>(9 - 41)           | 205<br>(121 - 311)          | 557<br>(307 - 888)             |
| Liver cancer due to other causes                                 | 135<br>(62 - 246)              | --                 | 0<br>(0 - 0)        | 10<br>(5 - 17)           | 49<br>(22 - 87)             | 76<br>(30 - 140)               |
| Larynx cancer                                                    | 124<br>(77 - 180)              | --                 | --                  | 4<br>(3 - 7)             | 24<br>(15 - 36)             | 95<br>(57 - 144)               |
| Tracheal, bronchus and lung cancer                               | 6,481<br>(4,598 - 7,745)       | --                 | --                  | 283<br>(219 - 387)       | 1,588<br>(1,240 - 1,863)    | 4,610<br>(2,932 - 5,778)       |
| Breast cancer                                                    | 2,083<br>(1,130 - 2,468)       | --                 | --                  | 604<br>(369 - 728)       | 946<br>(455 - 1,144)        | 534<br>(291 - 664)             |

Web Table 31- South Korea deaths with 95% UI by age, sex, and cause in 2013

| Cause                                         | Females, All Ages           | Females, 0-4 Years | Females, 5-14 Years | Females, 15-49 Years | Females, 50-69 Years     | Females, 70-80 Years        |
|-----------------------------------------------|-----------------------------|--------------------|---------------------|----------------------|--------------------------|-----------------------------|
| Cervical cancer                               | 1,513<br>(1,058 - 1,867)    | --                 | --                  | 246<br>(194 - 310)   | 484<br>(357 - 599)       | 783<br>(476 - 1,086)        |
| Uterine cancer                                | 298<br>(246 - 400)          | --                 | --                  | 31<br>(24 - 44)      | 140<br>(109 - 187)       | 127<br>(98 - 176)           |
| Prostate cancer                               | --                          | --                 | --                  | --                   | --                       | --                          |
| Colon and rectum cancer                       | 4,764<br>(4,038 - 5,653)    | --                 | --                  | 239<br>(195 - 283)   | 1,099<br>(924 - 1,263)   | 3,426<br>(2,804 - 4,205)    |
| Lip and oral cavity cancer                    | 194<br>(153 - 239)          | --                 | --                  | 17<br>(13 - 22)      | 52<br>(40 - 64)          | 125<br>(95 - 162)           |
| Nasopharynx cancer                            | 49<br>(16 - 72)             | --                 | 0<br>(0 - 0)        | 10<br>(3 - 16)       | 20<br>(6 - 32)           | 19<br>(6 - 30)              |
| Other pharynx cancer                          | 40<br>(30 - 52)             | --                 | --                  | 4<br>(2 - 5)         | 14<br>(10 - 18)          | 22<br>(16 - 31)             |
| Gallbladder and biliary tract cancer          | 2,399<br>(1,418 - 3,185)    | --                 | --                  | 59<br>(41 - 80)      | 495<br>(327 - 628)       | 1,846<br>(1,025 - 2,597)    |
| Pancreatic cancer                             | 2,975<br>(2,549 - 3,442)    | --                 | --                  | 88<br>(70 - 107)     | 768<br>(640 - 886)       | 2,119<br>(1,771 - 2,506)    |
| Malignant skin melanoma                       | 122<br>(71 - 154)           | --                 | --                  | 13<br>(8 - 17)       | 36<br>(23 - 47)          | 73<br>(40 - 98)             |
| Non-melanoma skin cancer                      | 287<br>(197 - 431)          | --                 | --                  | 5<br>(3 - 6)         | 14<br>(10 - 20)          | 268<br>(180 - 405)          |
| Ovarian cancer                                | 1,203<br>(896 - 1,393)      | --                 | --                  | 174<br>(136 - 213)   | 481<br>(340 - 567)       | 548<br>(383 - 688)          |
| Testicular cancer                             | --                          | --                 | --                  | --                   | --                       | --                          |
| Kidney cancer                                 | 399<br>(269 - 553)          | 1<br>(1 - 2)       | 1<br>(0 - 1)        | 26<br>(19 - 35)      | 118<br>(86 - 157)        | 254<br>(154 - 391)          |
| Bladder cancer                                | 440<br>(285 - 618)          | --                 | --                  | 6<br>(4 - 9)         | 47<br>(30 - 67)          | 387<br>(246 - 547)          |
| Brain and nervous system cancer               | 686<br>(530 - 874)          | 6<br>(4 - 10)      | 14<br>(10 - 20)     | 112<br>(89 - 157)    | 221<br>(173 - 283)       | 333<br>(224 - 445)          |
| Thyroid cancer                                | 466<br>(196 - 641)          | --                 | 0<br>(0 - 0)        | 26<br>(9 - 40)       | 143<br>(53 - 202)        | 297<br>(130 - 430)          |
| Mesothelioma                                  | 35<br>(21 - 47)             | --                 | --                  | 3<br>(2 - 5)         | 12<br>(7 - 17)           | 19<br>(10 - 28)             |
| Hodgkin lymphoma                              | 16<br>(8 - 22)              | 0<br>(0 - 0)       | 0<br>(0 - 1)        | 5<br>(2 - 6)         | 4<br>(2 - 6)             | 7<br>(4 - 11)               |
| Non-Hodgkin lymphoma                          | 872<br>(301 - 1,172)        | 2<br>(1 - 4)       | 5<br>(2 - 7)        | 94<br>(40 - 136)     | 257<br>(95 - 346)        | 514<br>(163 - 729)          |
| Multiple myeloma                              | 334<br>(183 - 499)          | --                 | --                  | 16<br>(9 - 26)       | 133<br>(73 - 199)        | 185<br>(94 - 309)           |
| Leukemia                                      | 806<br>(617 - 939)          | 12<br>(7 - 18)     | 21<br>(14 - 27)     | 168<br>(135 - 208)   | 229<br>(156 - 277)       | 376<br>(296 - 454)          |
| Other neoplasms                               | 1,562<br>(1,138 - 1,887)    | 18<br>(13 - 25)    | 17<br>(13 - 23)     | 165<br>(128 - 227)   | 387<br>(309 - 525)       | 975<br>(595 - 1,267)        |
| Cardiovascular diseases                       | 54,892<br>(49,084 - 66,462) | 17<br>(12 - 25)    | 13<br>(10 - 18)     | 736<br>(569 - 1,193) | 4,383<br>(3,626 - 6,231) | 49,743<br>(44,628 - 59,209) |
| Rheumatic heart disease                       | 274<br>(94 - 377)           | 0<br>(0 - 0)       | 0<br>(0 - 1)        | 11<br>(6 - 15)       | 47<br>(19 - 64)          | 216<br>(69 - 308)           |
| Ischemic heart disease                        | 17,576<br>(13,233 - 22,067) | 2<br>(1 - 4)       | 2<br>(1 - 5)        | 176<br>(119 - 374)   | 1,181<br>(870 - 1,793)   | 16,214<br>(12,008 - 20,185) |
| Cerebrovascular disease                       | 28,810<br>(24,347 - 38,787) | 4<br>(2 - 7)       | 4<br>(3 - 6)        | 449<br>(340 - 745)   | 2,612<br>(2,031 - 4,095) | 25,741<br>(21,757 - 34,381) |
| Ischemic stroke                               | 17,986<br>(13,947 - 23,126) | 1<br>(0 - 1)       | 1<br>(0 - 1)        | 51<br>(28 - 97)      | 697<br>(393 - 1,199)     | 17,238<br>(13,231 - 21,973) |
| Hemorrhagic stroke                            | 10,824<br>(8,095 - 17,287)  | 3<br>(2 - 5)       | 4<br>(2 - 5)        | 398<br>(303 - 656)   | 1,916<br>(1,495 - 2,999) | 8,503<br>(6,150 - 14,042)   |
| Hypertensive heart disease                    | 4,407<br>(2,847 - 6,361)    | 1<br>(0 - 1)       | 1<br>(1 - 1)        | 21<br>(14 - 36)      | 161<br>(109 - 288)       | 4,224<br>(2,654 - 6,078)    |
| Cardiomyopathy and myocarditis                | 526<br>(372 - 725)          | 8<br>(5 - 11)      | 4<br>(2 - 5)        | 23<br>(16 - 34)      | 65<br>(43 - 88)          | 427<br>(297 - 595)          |
| Atrial fibrillation and flutter               | 878<br>(602 - 1,221)        | --                 | --                  | 3<br>(2 - 4)         | 38<br>(27 - 52)          | 837<br>(572 - 1,185)        |
| Aortic aneurysm                               | 675<br>(385 - 1,018)        | --                 | --                  | 9<br>(5 - 15)        | 69<br>(38 - 107)         | 597<br>(340 - 908)          |
| Peripheral vascular disease                   | 77<br>(52 - 110)            | --                 | --                  | 0<br>(0 - 1)         | 2<br>(1 - 3)             | 75<br>(50 - 107)            |
| Endocarditis                                  | 108<br>(46 - 163)           | 1<br>(0 - 1)       | 0<br>(0 - 1)        | 6<br>(3 - 9)         | 18<br>(9 - 27)           | 83<br>(32 - 131)            |
| Other cardiovascular and circulatory diseases | 1,561<br>(1,130 - 2,193)    | 2<br>(1 - 3)       | 1<br>(1 - 2)        | 37<br>(25 - 63)      | 191<br>(132 - 286)       | 1,329<br>(921 - 1,883)      |
| Chronic respiratory diseases                  | 9,863<br>(7,735 - 16,675)   | 4<br>(3 - 6)       | 1<br>(1 - 2)        | 60<br>(48 - 91)      | 387<br>(313 - 521)       | 9,411<br>(7,305 - 16,163)   |
| Chronic obstructive pulmonary disease         | 6,035<br>(4,405 - 9,672)    | 1<br>(1 - 2)       | 0<br>(0 - 0)        | 27<br>(18 - 39)      | 213<br>(154 - 299)       | 5,793<br>(4,199 - 9,399)    |
| Pneumoconiosis                                | 20<br>(12 - 33)             | 0<br>(0 - 0)       | 0<br>(0 - 0)        | 1<br>(1 - 2)         | 3<br>(1 - 4)             | 16<br>(9 - 28)              |
| Silicosis                                     | 1<br>(1 - 2)                | 0<br>(0 - 0)       | 0<br>(0 - 0)        | 0<br>(0 - 0)         | 0<br>(0 - 1)             | 0<br>(0 - 1)                |

Web Table 31- South Korea deaths with 95% UI by age, sex, and cause in 2013

| Cause                                               | Females, All Ages           | Females, 0-4 Years | Females, 5-14 Years | Females, 15-49 Years | Females, 50-69 Years     | Females, 70-80 Years       |
|-----------------------------------------------------|-----------------------------|--------------------|---------------------|----------------------|--------------------------|----------------------------|
| Asbestosis                                          | 1<br>(0 - 2)                | 0<br>(0 - 0)       | 0<br>(0 - 0)        | 0<br>(0 - 0)         | 0<br>(0 - 1)             | 0<br>(0 - 1)               |
| Coal workers pneumoconiosis                         | 5<br>(3 - 9)                | 0<br>(0 - 0)       | 0<br>(0 - 0)        | 0<br>(0 - 0)         | 1<br>(0 - 1)             | 4<br>(2 - 8)               |
| Other pneumoconiosis                                | 13<br>2,405                 | 0<br>1             | 0<br>0              | 0<br>15              | 1<br>78                  | 11<br>2,311                |
| Asthma                                              | (1,391 - 5,955)             | (0 - 1)            | (0 - 1)             | (10 - 28)            | (49 - 138)               | (1,318 - 5,793)            |
| Interstitial lung disease and pulmonary sarcoidosis | 1,308<br>(649 - 2,398)      | 1<br>(1 - 2)       | 0<br>(0 - 0)        | 14<br>(9 - 25)       | 89<br>(51 - 138)         | 1,203<br>(575 - 2,254)     |
| Other chronic respiratory diseases                  | 96<br>(56 - 165)            | 1<br>(1 - 2)       | 0<br>(0 - 0)        | 3<br>(2 - 5)         | 4<br>(2 - 6)             | 87<br>(49 - 153)           |
| Cirrhosis                                           | 2,561<br>(2,213 - 2,950)    | 1<br>(0 - 1)       | 1<br>(1 - 1)        | 258<br>(210 - 311)   | 681<br>(565 - 791)       | 1,621<br>(1,346 - 1,939)   |
| Cirrhosis due to hepatitis B                        | 1,651<br>(1,312 - 2,001)    | 0<br>(0 - 0)       | 0<br>(0 - 1)        | 159<br>(115 - 200)   | 438<br>(332 - 534)       | 1,054<br>(779 - 1,334)     |
| Cirrhosis due to hepatitis C                        | 446<br>(148 - 788)          | 0<br>(0 - 0)       | 0<br>(0 - 0)        | 55<br>(30 - 90)      | 127<br>(40 - 231)        | 263<br>(65 - 496)          |
| Cirrhosis due to alcohol use                        | 335<br>(222 - 488)          | --                 | --                  | 20<br>(11 - 31)      | 76<br>(52 - 106)         | 238<br>(147 - 367)         |
| Cirrhosis due to other causes                       | 129<br>(60 - 207)           | 0<br>(0 - 1)       | 0<br>(0 - 1)        | 24<br>(12 - 38)      | 39<br>(15 - 65)          | 65<br>(28 - 115)           |
| Digestive diseases                                  | 3,998<br>(3,222 - 6,048)    | 2<br>(1 - 2)       | 2<br>(2 - 3)        | 58<br>(46 - 89)      | 225<br>(186 - 308)       | 3,712<br>(2,942 - 5,629)   |
| Peptic ulcer disease                                | 873<br>(467 - 1,710)        | 0<br>(0 - 0)       | 0<br>(0 - 0)        | 8<br>(5 - 15)        | 40<br>(26 - 68)          | 825<br>(433 - 1,627)       |
| Gastritis and duodenitis                            | 180<br>(53 - 615)           | 0<br>(0 - 0)       | 0<br>(0 - 0)        | 2<br>(1 - 4)         | 4<br>(2 - 12)            | 174<br>(50 - 603)          |
| Appendicitis                                        | 72<br>(39 - 122)            | 0<br>(0 - 0)       | 0<br>(0 - 1)        | 5<br>(3 - 7)         | 6<br>(3 - 8)             | 61<br>(31 - 107)           |
| Paralytic ileus and intestinal obstruction          | 723<br>(354 - 1,179)        | 1<br>(0 - 1)       | 1<br>(0 - 1)        | 14<br>(9 - 25)       | 47<br>(29 - 79)          | 660<br>(316 - 1,084)       |
| Inguinal, femoral, and abdominal hernia             | 39<br>(13 - 63)             | 0<br>(0 - 0)       | 0<br>(0 - 0)        | 1<br>(0 - 1)         | 3<br>(1 - 4)             | 36<br>(11 - 59)            |
| Inflammatory bowel disease                          | 217<br>(120 - 530)          | 0<br>(0 - 0)       | 0<br>(0 - 0)        | 3<br>(2 - 6)         | 11<br>(7 - 19)           | 202<br>(108 - 501)         |
| Vascular intestinal disorders                       | 251<br>(70 - 394)           | 0<br>(0 - 0)       | 0<br>(0 - 0)        | 2<br>(1 - 5)         | 22<br>(7 - 34)           | 226<br>(61 - 362)          |
| Gallbladder and biliary diseases                    | 1,118<br>(796 - 1,689)      | 0<br>(0 - 0)       | 0<br>(0 - 0)        | 7<br>(5 - 11)        | 44<br>(31 - 66)          | 1,067<br>(753 - 1,618)     |
| Pancreatitis                                        | 223<br>(140 - 363)          | 0<br>(0 - 0)       | 0<br>(0 - 0)        | 10<br>(6 - 17)       | 20<br>(12 - 31)          | 193<br>(118 - 317)         |
| Other digestive diseases                            | 302<br>(213 - 470)          | 0<br>(0 - 0)       | 0<br>(0 - 0)        | 6<br>(4 - 9)         | 29<br>(21 - 40)          | 267<br>(183 - 424)         |
| Neurological disorders                              | 3,736<br>(2,529 - 4,707)    | 13<br>(10 - 17)    | 9<br>(6 - 12)       | 106<br>(82 - 133)    | 365<br>(265 - 435)       | 3,243<br>(2,064 - 4,208)   |
| Alzheimer disease and other dementias               | 1,905<br>(1,345 - 2,670)    | --                 | --                  | 0<br>(0 - 0)         | 43<br>(29 - 59)          | 1,862<br>(1,298 - 2,626)   |
| Parkinson disease                                   | 1,313<br>(422 - 1,741)      | --                 | --                  | 6<br>(3 - 9)         | 153<br>(74 - 201)        | 1,154<br>(330 - 1,581)     |
| Epilepsy                                            | 192<br>(123 - 253)          | 7<br>(4 - 11)      | 6<br>(3 - 9)        | 62<br>(43 - 88)      | 32<br>(20 - 43)          | 85<br>(45 - 126)           |
| Multiple sclerosis                                  | 17<br>(7 - 23)              | --                 | --                  | 6<br>(2 - 9)         | 6<br>(3 - 10)            | 4<br>(2 - 6)               |
| Other neurological disorders                        | 310<br>(264 - 355)          | 6<br>(4 - 8)       | 3<br>(2 - 4)        | 32<br>(25 - 38)      | 131<br>(107 - 156)       | 138<br>(113 - 167)         |
| Mental and substance use disorders                  | 287<br>(215 - 428)          | 0<br>(0 - 1)       | 0<br>(0 - 0)        | 75<br>(54 - 126)     | 71<br>(50 - 115)         | 141<br>(102 - 202)         |
| Schizophrenia                                       | 61<br>(40 - 124)            | --                 | --                  | 19<br>(11 - 39)      | 20<br>(13 - 39)          | 22<br>(11 - 53)            |
| Alcohol use disorders                               | 110<br>(49 - 221)           | --                 | --                  | 36<br>(16 - 78)      | 36<br>(15 - 74)          | 38<br>(16 - 78)            |
| Drug use disorders                                  | 111<br>(84 - 146)           | 0<br>(0 - 1)       | --                  | 16<br>(12 - 21)      | 15<br>(11 - 19)          | 80<br>(55 - 115)           |
| Opioid use disorders                                | 31<br>(22 - 43)             | 0<br>(0 - 0)       | --                  | 4<br>(3 - 6)         | 3<br>(2 - 5)             | 23<br>(15 - 35)            |
| Cocaine use disorders                               | 10<br>(7 - 14)              | 0<br>(0 - 0)       | --                  | 2<br>(1 - 3)         | 1<br>(1 - 2)             | 7<br>(4 - 11)              |
| Amphetamine use disorders                           | 10<br>(7 - 14)              | 0<br>(0 - 0)       | --                  | 2<br>(1 - 2)         | 1<br>(1 - 2)             | 7<br>(4 - 11)              |
| Other drug use disorders                            | 61<br>(45 - 79)             | 0<br>(0 - 0)       | --                  | 8<br>(6 - 11)        | 8<br>(6 - 11)            | 43<br>(29 - 61)            |
| Eating disorders                                    | 5<br>(3 - 8)                | --                 | 0<br>(0 - 0)        | 5<br>(3 - 8)         | --                       | --                         |
| Anorexia nervosa                                    | 5<br>(3 - 8)                | --                 | 0<br>(0 - 0)        | 5<br>(3 - 8)         | --                       | --                         |
| Diabetes, urogenital, blood, and endocrine diseases | 14,809<br>(11,634 - 17,079) | 17<br>(13 - 24)    | 10<br>(8 - 13)      | 298<br>(248 - 366)   | 1,792<br>(1,470 - 2,098) | 12,692<br>(9,663 - 14,796) |
| Diabetes mellitus                                   | 9,495<br>(7,388 - 11,311)   | 1<br>(0 - 1)       | 1<br>(1 - 2)        | 132<br>(104 - 164)   | 1,101<br>(881 - 1,345)   | 8,261<br>(6,255 - 10,061)  |

Web Table 31- South Korea deaths with 95% UI by age, sex, and cause in 2013

| Cause                                               | Females, All Ages          | Females, 0-4 Years | Females, 5-14 Years | Females, 15-49 Years     | Females, 50-69 Years     | Females, 70-80 Years     |
|-----------------------------------------------------|----------------------------|--------------------|---------------------|--------------------------|--------------------------|--------------------------|
| Acute glomerulonephritis                            | 11<br>(5 - 17)             | 0<br>(0 - 0)       | 0<br>(0 - 0)        | 1<br>(1 - 1)             | 1<br>(1 - 2)             | 8<br>(3 - 14)            |
| Chronic kidney disease                              | 3,604<br>(2,198 - 4,383)   | 2<br>(1 - 3)       | 2<br>(1 - 3)        | 89<br>(70 - 135)         | 529<br>(351 - 654)       | 2,982<br>(1,731 - 3,703) |
| Chronic kidney disease due to diabetes mellitus     | 6<br>(4 - 10)              | 0<br>(0 - 0)       | 0<br>(0 - 0)        | 3<br>(2 - 4)             | 2<br>(1 - 4)             | 1<br>(1 - 2)             |
| Chronic kidney disease due to hypertension          | 1,479<br>(826 - 2,082)     | 0<br>(0 - 0)       | 0<br>(0 - 0)        | 32<br>(18 - 48)          | 217<br>(117 - 329)       | 1,229<br>(665 - 1,753)   |
| Chronic kidney disease due to glomerulonephritis    | 225<br>(127 - 401)         | 0<br>(0 - 1)       | 0<br>(0 - 0)        | 7<br>(5 - 11)            | 26<br>(14 - 47)          | 191<br>(102 - 358)       |
| Chronic kidney disease due to other causes          | 1,894<br>(847 - 2,778)     | 1<br>(1 - 2)       | 1<br>(1 - 2)        | 48<br>(30 - 89)          | 284<br>(122 - 430)       | 1,560<br>(624 - 2,347)   |
| Urinary diseases and male infertility               | 982<br>(442 - 1,376)       | 1<br>(0 - 1)       | 0<br>(0 - 0)        | 14<br>(8 - 18)           | 62<br>(29 - 85)          | 906<br>(399 - 1,291)     |
| Interstitial nephritis and urinary tract infections | 404<br>(178 - 626)         | 0<br>(0 - 1)       | 0<br>(0 - 0)        | 8<br>(5 - 11)            | 32<br>(15 - 48)          | 364<br>(154 - 577)       |
| Urolithiasis                                        | 24<br>(9 - 45)             | --                 | 0<br>(0 - 0)        | 1<br>(0 - 2)             | 2<br>(1 - 4)             | 21<br>(7 - 41)           |
| Other urinary diseases                              | 554<br>(209 - 853)         | 0<br>(0 - 0)       | 0<br>(0 - 0)        | 5<br>(2 - 7)             | 27<br>(11 - 41)          | 521<br>(191 - 814)       |
| Gynecological diseases                              | 8<br>(5 - 15)              | --                 | --                  | 1<br>(1 - 2)             | 1<br>(1 - 1)             | 6<br>(3 - 12)            |
| Uterine fibroids                                    | 2<br>(1 - 4)               | --                 | --                  | 0<br>(0 - 0)             | 0<br>(0 - 0)             | 2<br>(1 - 4)             |
| Polycystic ovarian syndrome                         | 0<br>(0 - 0)               | --                 | --                  | 0<br>(0 - 0)             | 0<br>(0 - 0)             | --                       |
| Endometriosis                                       | 0<br>(0 - 0)               | --                 | --                  | 0<br>(0 - 0)             | 0<br>(0 - 0)             | --                       |
| Genital prolapse                                    | 2<br>(1 - 4)               | --                 | --                  | 0<br>(0 - 0)             | 0<br>(0 - 0)             | 2<br>(1 - 3)             |
| Other gynecological diseases                        | 4<br>(2 - 7)               | --                 | --                  | 1<br>(0 - 1)             | 0<br>(0 - 1)             | 3<br>(1 - 5)             |
| Hemoglobinopathies and hemolytic anemias            | 128<br>(59 - 201)          | 3<br>(2 - 5)       | 3<br>(2 - 5)        | 21<br>(11 - 30)          | 23<br>(12 - 34)          | 78<br>(31 - 142)         |
| Thalassemias                                        | 16<br>(9 - 23)             | 2<br>(1 - 3)       | 2<br>(1 - 4)        | 10<br>(5 - 14)           | 2<br>(1 - 3)             | 0<br>(0 - 1)             |
| Sickle cell disorders                               | 1<br>(0 - 1)               | 0<br>(0 - 0)       | 0<br>(0 - 0)        | 0<br>(0 - 0)             | 0<br>(0 - 0)             | 0<br>(0 - 0)             |
| G6PD deficiency                                     | 1<br>(0 - 1)               | 0<br>(0 - 0)       | 0<br>(0 - 0)        | 0<br>(0 - 0)             | 0<br>(0 - 0)             | 0<br>(0 - 0)             |
| Other hemoglobinopathies and hemolytic anemias      | 110<br>(50 - 180)          | 1<br>(1 - 2)       | 1<br>(0 - 1)        | 10<br>(5 - 16)           | 21<br>(11 - 31)          | 77<br>(31 - 141)         |
| Endocrine, metabolic, blood, and immune disorders   | 581<br>(420 - 855)         | 11<br>(8 - 17)     | 3<br>(2 - 5)        | 40<br>(31 - 62)          | 75<br>(55 - 119)         | 452<br>(313 - 671)       |
| Musculoskeletal disorders                           | 559<br>(445 - 720)         | --                 | 2<br>(1 - 3)        | 55<br>(43 - 71)          | 107<br>(84 - 135)        | 395<br>(297 - 548)       |
| Rheumatoid arthritis                                | 200<br>(147 - 272)         | --                 | 0<br>(0 - 0)        | 4<br>(3 - 6)             | 37<br>(26 - 51)          | 159<br>(112 - 227)       |
| Other musculoskeletal disorders                     | 359<br>(274 - 476)         | --                 | 2<br>(1 - 3)        | 50<br>(39 - 65)          | 71<br>(54 - 92)          | 236<br>(164 - 333)       |
| Other non-communicable diseases                     | 993<br>(697 - 1,275)       | 229<br>(174 - 342) | 13<br>(9 - 19)      | 37<br>(27 - 47)          | 42<br>(28 - 51)          | 672<br>(302 - 938)       |
| Congenital anomalies                                | 291<br>(237 - 407)         | 186<br>(142 - 281) | 13<br>(9 - 19)      | 31<br>(23 - 41)          | 17<br>(11 - 21)          | 44<br>(31 - 60)          |
| Neural tube defects                                 | 4<br>(3 - 6)               | 2<br>(1 - 4)       | 0<br>(0 - 0)        | 1<br>(1 - 2)             | 0<br>(0 - 1)             | 0<br>(0 - 1)             |
| Congenital heart anomalies                          | 125<br>(94 - 176)          | 86<br>(60 - 132)   | 7<br>(5 - 10)       | 14<br>(10 - 20)          | 6<br>(3 - 8)             | 12<br>(7 - 18)           |
| Cleft lip and cleft palate                          | 1<br>(0 - 6)               | 1<br>(0 - 6)       | --                  | --                       | --                       | --                       |
| Down syndrome                                       | 16<br>(8 - 32)             | 9<br>(4 - 20)      | 1<br>(1 - 3)        | 5<br>(2 - 8)             | 1<br>(0 - 1)             | 0<br>(0 - 1)             |
| Chromosomal unbalanced rearrangements               | 14<br>(7 - 22)             | 11<br>(6 - 19)     | 1<br>(0 - 1)        | 1<br>(1 - 2)             | 1<br>(0 - 1)             | 0<br>(0 - 0)             |
| Other congenital anomalies                          | 130<br>(100 - 176)         | 76<br>(53 - 115)   | 4<br>(2 - 6)        | 10<br>(7 - 15)           | 9<br>(6 - 12)            | 31<br>(21 - 45)          |
| Skin and subcutaneous diseases                      | 660<br>(275 - 935)         | 1<br>(0 - 1)       | 0<br>(0 - 0)        | 6<br>(4 - 7)             | 26<br>(14 - 33)          | 628<br>(257 - 897)       |
| Cellulitis                                          | 59<br>(18 - 112)           | 0<br>(0 - 0)       | 0<br>(0 - 0)        | 1<br>(1 - 2)             | 5<br>(2 - 8)             | 53<br>(15 - 106)         |
| Pyoderma                                            | 48<br>(18 - 79)            | 0<br>(0 - 1)       | 0<br>(0 - 0)        | 1<br>(1 - 2)             | 5<br>(2 - 7)             | 42<br>(16 - 72)          |
| Decubitus ulcer                                     | 518<br>(216 - 753)         | 0<br>(0 - 0)       | 0<br>(0 - 0)        | 2<br>(1 - 3)             | 11<br>(7 - 15)           | 505<br>(210 - 739)       |
| Other skin and subcutaneous diseases                | 36<br>(9 - 73)             | 0<br>(0 - 0)       | 0<br>(0 - 0)        | 1<br>(1 - 2)             | 6<br>(1 - 9)             | 29<br>(5 - 65)           |
| Sudden infant death syndrome                        | 42<br>(17 - 105)           | 42<br>(17 - 105)   | --                  | --                       | --                       | --                       |
| Injuries                                            | 12,059<br>(7,913 - 14,095) | 115<br>(94 - 154)  | 94<br>(82 - 108)    | 2,681<br>(1,917 - 3,093) | 2,287<br>(1,479 - 2,652) | 6,881<br>(4,173 - 8,424) |

Web Table 31- South Korea deaths with 95% UI by age, sex, and cause in 2013

| Cause                                           | Females, All Ages        | Females, 0-4 Years | Females, 5-14 Years | Females, 15-49 Years     | Females, 50-69 Years   | Females, 70-80 Years     |
|-------------------------------------------------|--------------------------|--------------------|---------------------|--------------------------|------------------------|--------------------------|
| Transport injuries                              | 2,488<br>(1,952 - 3,262) | 37<br>(27 - 56)    | 38<br>(27 - 47)     | 444<br>(348 - 711)       | 712<br>(504 - 913)     | 1,259<br>(937 - 1,650)   |
| Road injuries                                   | 2,380<br>(1,877 - 3,085) | 35<br>(25 - 53)    | 36<br>(25 - 45)     | 421<br>(331 - 676)       | 683<br>(480 - 867)     | 1,205<br>(895 - 1,566)   |
| Pedestrian road injuries                        | 1,584<br>(1,120 - 1,994) | 21<br>(14 - 33)    | 23<br>(14 - 31)     | 139<br>(81 - 220)        | 399<br>(241 - 506)     | 1,002<br>(719 - 1,288)   |
| Cyclist road injuries                           | 96<br>(62 - 181)         | 1<br>(0 - 2)       | 2<br>(1 - 3)        | 14<br>(7 - 28)           | 49<br>(30 - 87)        | 30<br>(18 - 61)          |
| Motorcyclist road injuries                      | 124<br>(52 - 253)        | 1<br>(0 - 1)       | 1<br>(0 - 1)        | 39<br>(16 - 79)          | 56<br>(22 - 105)       | 28<br>(11 - 61)          |
| Motor vehicle road injuries                     | 573<br>(417 - 936)       | 12<br>(7 - 21)     | 10<br>(6 - 16)      | 228<br>(167 - 399)       | 179<br>(117 - 292)     | 144<br>(86 - 261)        |
| Other road injuries                             | 3<br>(2 - 6)             | 0<br>(0 - 1)       | 0<br>(0 - 1)        | 1<br>(0 - 2)             | 1<br>(0 - 1)           | 1<br>(0 - 3)             |
| Other transport injuries                        | 109<br>(67 - 194)        | 2<br>(1 - 5)       | 2<br>(1 - 3)        | 22<br>(14 - 42)          | 29<br>(17 - 52)        | 54<br>(28 - 101)         |
| Unintentional injuries                          | 4,112<br>(2,427 - 5,353) | 69<br>(54 - 99)    | 30<br>(24 - 46)     | 250<br>(205 - 361)       | 369<br>(286 - 443)     | 3,394<br>(1,785 - 4,625) |
| Falls                                           | 1,949<br>(824 - 2,836)   | 14<br>(9 - 21)     | 5<br>(3 - 7)        | 62<br>(46 - 87)          | 134<br>(83 - 174)      | 1,734<br>(653 - 2,596)   |
| Drowning                                        | 344<br>(233 - 545)       | 12<br>(7 - 24)     | 13<br>(8 - 29)      | 58<br>(42 - 117)         | 55<br>(39 - 100)       | 207<br>(115 - 295)       |
| Fire, heat, and hot substances                  | 260<br>(153 - 351)       | 5<br>(3 - 8)       | 4<br>(2 - 6)        | 42<br>(29 - 66)          | 32<br>(20 - 44)        | 177<br>(93 - 258)        |
| Poisonings                                      | 171<br>(119 - 299)       | 1<br>(1 - 3)       | 2<br>(1 - 4)        | 20<br>(11 - 48)          | 25<br>(16 - 55)        | 123<br>(76 - 205)        |
| Exposure to mechanical forces                   | 90<br>(70 - 168)         | 12<br>(7 - 29)     | 2<br>(2 - 4)        | 21<br>(15 - 48)          | 18<br>(13 - 37)        | 37<br>(26 - 66)          |
| Unintentional firearm injuries                  | 10<br>(6 - 14)           | 0<br>(0 - 0)       | 0<br>(0 - 0)        | 2<br>(1 - 2)             | 1<br>(1 - 2)           | 6<br>(3 - 11)            |
| Unintentional suffocation                       | 20<br>(12 - 49)          | 9<br>(4 - 26)      | 0<br>(0 - 1)        | 1<br>(1 - 3)             | 1<br>(1 - 2)           | 8<br>(4 - 22)            |
| Other exposure to mechanical forces             | 60<br>(47 - 133)         | 2<br>(2 - 5)       | 2<br>(1 - 4)        | 18<br>(12 - 44)          | 15<br>(11 - 35)        | 22<br>(15 - 48)          |
| Adverse effects of medical treatment            | 600<br>(186 - 1,002)     | 3<br>(1 - 5)       | 1<br>(0 - 2)        | 16<br>(6 - 25)           | 44<br>(16 - 68)        | 537<br>(157 - 922)       |
| Animal contact                                  | 20<br>(7 - 38)           | 0<br>(0 - 1)       | 0<br>(0 - 1)        | 2<br>(1 - 4)             | 5<br>(2 - 9)           | 12<br>(4 - 25)           |
| Venomous animal contact                         | 9<br>(3 - 18)            | 0<br>(0 - 0)       | 0<br>(0 - 0)        | 1<br>(0 - 2)             | 3<br>(1 - 6)           | 5<br>(2 - 10)            |
| Non-venomous animal contact                     | 10<br>(4 - 21)           | 0<br>(0 - 0)       | 0<br>(0 - 1)        | 1<br>(0 - 3)             | 2<br>(1 - 4)           | 7<br>(2 - 15)            |
| Foreign body                                    | 628<br>(287 - 953)       | 21<br>(12 - 35)    | 2<br>(1 - 3)        | 24<br>(14 - 37)          | 52<br>(29 - 77)        | 529<br>(224 - 845)       |
| Pulmonary aspiration and foreign body in airway | 624<br>(283 - 949)       | 20<br>(12 - 35)    | 2<br>(1 - 3)        | 23<br>(13 - 35)          | 52<br>(28 - 76)        | 527<br>(223 - 843)       |
| Foreign body in other body part                 | 4<br>(2 - 6)             | 0<br>(0 - 0)       | 0<br>(0 - 0)        | 1<br>(1 - 2)             | 1<br>(0 - 1)           | 2<br>(1 - 3)             |
| Other unintentional injuries                    | 50<br>(14 - 75)          | 1<br>(0 - 2)       | 0<br>(0 - 1)        | 5<br>(2 - 8)             | 6<br>(2 - 10)          | 38<br>(8 - 61)           |
| Self-harm and interpersonal violence            | 5,459<br>(2,433 - 6,487) | 9<br>(4 - 17)      | 26<br>(13 - 34)     | 1,988<br>(1,025 - 2,369) | 2,206<br>(480 - 1,471) | 2,229<br>(833 - 2,840)   |
| Self-harm                                       | 5,093<br>(2,134 - 6,113) | -                  | 18<br>(7 - 24)      | 1,841<br>(858 - 2,197)   | 1,130<br>(419 - 1,390) | 2,103<br>(760 - 2,706)   |
| Interpersonal violence                          | 366<br>(185 - 511)       | 9<br>(4 - 17)      | 8<br>(3 - 13)       | 147<br>(84 - 213)        | 75<br>(32 - 117)       | 126<br>(40 - 237)        |
| Assault by firearm                              | 11<br>(5 - 24)           | 0<br>(0 - 1)       | 0<br>(0 - 1)        | 4<br>(2 - 8)             | 3<br>(1 - 7)           | 4<br>(1 - 10)            |
| Assault by sharp object                         | 93<br>(51 - 149)         | 1<br>(0 - 2)       | 1<br>(0 - 2)        | 50<br>(27 - 85)          | 25<br>(12 - 44)        | 16<br>(6 - 36)           |
| Assault by other means                          | 262<br>(114 - 380)       | 8<br>(3 - 15)      | 7<br>(2 - 11)       | 94<br>(47 - 135)         | 47<br>(17 - 76)        | 106<br>(31 - 202)        |

Web Table 31- South Sudan deaths with 95% UI by age, sex, and cause in 2013

| Cause                                                             | Both Sexes, All Ages           | Both Sexes, 0-4 Years       | Both Sexes, 5-14 Years   | Both Sexes, 15-49 Years     | Both Sexes, 50-69 Years     | Both Sexes, 70-80 Years     |
|-------------------------------------------------------------------|--------------------------------|-----------------------------|--------------------------|-----------------------------|-----------------------------|-----------------------------|
| All causes                                                        | 120,384<br>(105,785 - 134,206) | 41,790<br>(33,164 - 53,474) | 5,381<br>(3,908 - 8,373) | 30,740<br>(27,197 - 34,084) | 22,444<br>(18,990 - 26,483) | 20,029<br>(17,837 - 22,794) |
| Communicable, maternal, neonatal, and nutritional diseases        | 79,797<br>(69,503 - 91,626)    | 37,504<br>(29,750 - 47,800) | 3,879<br>(2,796 - 6,103) | 21,619<br>(18,909 - 24,337) | 9,562<br>(8,120 - 11,330)   | 7,233<br>(6,142 - 8,545)    |
| HIV/AIDS and tuberculosis                                         | 18,981<br>(15,293 - 22,335)    | 1,443<br>(971 - 2,063)      | 658<br>(455 - 892)       | 11,073<br>(8,515 - 13,402)  | 4,314<br>(3,428 - 5,351)    | 1,493<br>(1,172 - 1,879)    |
| Tuberculosis                                                      | 8,378<br>(6,420 - 10,484)      | 610<br>(303 - 996)          | 193<br>(107 - 328)       | 3,785<br>(2,753 - 4,908)    | 2,525<br>(1,816 - 3,382)    | 1,266<br>(957 - 1,617)      |
| HIV/AIDS                                                          | 10,603<br>(6,488 - 14,068)     | 833<br>(503 - 1,345)        | 466<br>(282 - 666)       | 7,289<br>(4,488 - 9,697)    | 1,789<br>(1,078 - 2,550)    | 226<br>(137 - 361)          |
| HIV/AIDS resulting in mycobacterial infection                     | 692<br>(421 - 962)             | 52<br>(29 - 86)             | 27<br>(16 - 41)          | 475<br>(287 - 666)          | 122<br>(72 - 183)           | 16<br>(9 - 26)              |
| HIV/AIDS resulting in other diseases                              | 9,911<br>(6,216 - 13,170)      | 781<br>(466 - 1,272)        | 438<br>(266 - 632)       | 6,814<br>(4,223 - 9,121)    | 1,667<br>(1,008 - 2,378)    | 210<br>(126 - 336)          |
| Diarrhea, lower respiratory, and other common infectious diseases | 33,941<br>(27,096 - 42,426)    | 18,827<br>(13,669 - 25,534) | 1,911<br>(1,189 - 3,389) | 4,310<br>(3,230 - 5,636)    | 4,132<br>(3,066 - 5,500)    | 4,762<br>(3,782 - 6,066)    |
| Diarrheal diseases                                                | 13,466<br>(9,806 - 17,890)     | 6,357<br>(3,301 - 9,965)    | 712<br>(355 - 1,313)     | 2,124<br>(1,414 - 3,032)    | 2,070<br>(1,305 - 3,074)    | 2,202<br>(1,487 - 3,033)    |
| Intestinal infectious diseases                                    | 480<br>(238 - 842)             | 178<br>(79 - 334)           | 133<br>(59 - 263)        | 142<br>(70 - 261)           | 20<br>(9 - 36)              | 8<br>(4 - 14)               |
| Typhoid fever                                                     | 353<br>(164 - 636)             | 121<br>(49 - 249)           | 103<br>(44 - 207)        | 109<br>(51 - 212)           | 14<br>(6 - 29)              | 5<br>(2 - 9)                |
| Paratyphoid fever                                                 | 90<br>(42 - 165)               | 35<br>(13 - 69)             | 26<br>(10 - 54)          | 25<br>(11 - 51)             | 3<br>(1 - 6)                | 1<br>(0 - 2)                |
| Other intestinal infectious diseases                              | 37<br>(20 - 59)                | 22<br>(9 - 40)              | 4<br>(1 - 10)            | 8<br>(2 - 17)               | 2<br>(0 - 8)                | 1<br>(0 - 6)                |
| Lower respiratory infections                                      | 13,544<br>(10,254 - 17,529)    | 7,933<br>(4,898 - 11,463)   | 463<br>(257 - 856)       | 1,125<br>(801 - 1,541)      | 1,638<br>(1,165 - 2,259)    | 2,385<br>(1,733 - 3,149)    |
| Upper respiratory infections                                      | 14<br>(7 - 25)                 | 5<br>(1 - 16)               | 1<br>(0 - 2)             | 4<br>(1 - 8)                | 2<br>(1 - 5)                | 2<br>(0 - 4)                |
| Otitis media                                                      | 15<br>(10 - 21)                | 7<br>(4 - 13)               | 1<br>(1 - 2)             | 2<br>(1 - 3)                | 2<br>(1 - 2)                | 2<br>(2 - 3)                |
| Meningitis                                                        | 3,206<br>(2,143 - 4,912)       | 1,817<br>(903 - 3,339)      | 316<br>(168 - 578)       | 635<br>(451 - 922)          | 304<br>(205 - 432)          | 133<br>(91 - 190)           |
| Pneumococcal meningitis                                           | 753<br>(498 - 1,181)           | 354<br>(167 - 694)          | 98<br>(45 - 195)         | 175<br>(102 - 282)          | 88<br>(48 - 139)            | 37<br>(22 - 58)             |
| H influenzae type B meningitis                                    | 747<br>(436 - 1,323)           | 562<br>(263 - 1,074)        | 71<br>(35 - 137)         | 73<br>(43 - 117)            | 28<br>(15 - 47)             | 13<br>(7 - 22)              |
| Meningococcal meningitis                                          | 437<br>(295 - 690)             | 180<br>(85 - 372)           | 37<br>(13 - 79)          | 125<br>(70 - 202)           | 64<br>(36 - 103)            | 31<br>(17 - 52)             |
| Other meningitis                                                  | 1,269<br>(795 - 1,966)         | 721<br>(305 - 1,358)        | 110<br>(55 - 205)        | 262<br>(177 - 386)          | 124<br>(79 - 189)           | 52<br>(33 - 79)             |
| Encephalitis                                                      | 67<br>(48 - 98)                | 37<br>(19 - 69)             | 5<br>(3 - 10)            | 13<br>(8 - 19)              | 7<br>(3 - 12)               | 5<br>(2 - 7)                |
| Diphtheria                                                        | 6<br>(0 - 27)                  | 5<br>(0 - 26)               | 1<br>(0 - 6)             | 0<br>(0 - 1)                | 0<br>(0 - 1)                | --<br>(0 - 1)               |
| Whooping cough                                                    | 1<br>(0 - 6)                   | 1<br>(0 - 5)                | 0<br>(0 - 0)             | 0<br>(0 - 0)                | 0<br>(0 - 0)                | --<br>(0 - 0)               |
| Tetanus                                                           | 1,138<br>(555 - 1,966)         | 757<br>(218 - 1,600)        | 54<br>(18 - 112)         | 223<br>(69 - 342)           | 85<br>(24 - 143)            | 18<br>(6 - 34)              |
| Measles                                                           | 1,976<br>(61 - 10,206)         | 1,718<br>(52 - 8,737)       | 222<br>(6 - 1,247)       | 35<br>(1 - 216)             | 1<br>(0 - 6)                | --<br>(0 - 6)               |
| Varicella and herpes zoster                                       | 29<br>(13 - 58)                | 12<br>(1 - 36)              | 2<br>(0 - 8)             | 6<br>(2 - 14)               | 2<br>(0 - 6)                | 7<br>(1 - 21)               |
| Neglected tropical diseases and malaria                           | 5,820<br>(3,967 - 8,752)       | 2,961<br>(1,476 - 5,442)    | 754<br>(424 - 1,386)     | 1,558<br>(1,094 - 2,070)    | 380<br>(268 - 557)          | 167<br>(111 - 274)          |
| Malaria                                                           | 3,102<br>(1,547 - 5,794)       | 2,233<br>(845 - 4,693)      | 265<br>(102 - 656)       | 373<br>(211 - 677)          | 154<br>(70 - 335)           | 77<br>(33 - 179)            |
| Leishmaniasis                                                     | 2,128<br>(1,386 - 3,052)       | 625<br>(300 - 1,102)        | 406<br>(198 - 768)       | 901<br>(489 - 1,281)        | 141<br>(95 - 201)           | 55<br>(36 - 77)             |
| Visceral leishmaniasis                                            | 2,128<br>(1,386 - 3,052)       | 625<br>(300 - 1,102)        | 406<br>(198 - 768)       | 901<br>(489 - 1,281)        | 141<br>(95 - 201)           | 55<br>(36 - 77)             |
| African trypanosomiasis                                           | 271<br>(141 - 425)             | 18<br>(7 - 34)              | 33<br>(14 - 62)          | 173<br>(89 - 275)           | 39<br>(20 - 61)             | 9<br>(5 - 14)               |
| Schistosomiasis                                                   | 52<br>(38 - 71)                | 1<br>(0 - 2)                | 2<br>(1 - 4)             | 24<br>(16 - 34)             | 18<br>(11 - 27)             | 8<br>(4 - 12)               |
| Cysticercosis                                                     | 5<br>(1 - 15)                  | 0<br>(0 - 1)                | 0<br>(0 - 1)             | 3<br>(1 - 9)                | 1<br>(0 - 3)                | 0<br>(0 - 1)                |
| Cystic echinococcosis                                             | 58<br>(46 - 72)                | 9<br>(4 - 15)               | 11<br>(7 - 19)           | 26<br>(20 - 32)             | 8<br>(6 - 10)               | 3<br>(3 - 4)                |
| Dengue                                                            | 2<br>(1 - 2)                   | 0<br>(0 - 1)                | 0<br>(0 - 1)             | 1<br>(1 - 1)                | 0<br>(0 - 0)                | 0<br>(0 - 0)                |
| Yellow fever                                                      | 31<br>(15 - 63)                | 3<br>(1 - 10)               | 6<br>(1 - 21)            | 18<br>(6 - 45)              | 3<br>(1 - 10)               | 1<br>(0 - 5)                |
| Rabies                                                            | 74<br>(49 - 124)               | 17<br>(7 - 35)              | 27<br>(12 - 43)          | 27<br>(19 - 46)             | 7<br>(5 - 12)               | 2<br>(1 - 4)                |
| Intestinal nematode infections                                    | 45<br>(21 - 82)                | 36<br>(14 - 70)             | 6<br>(1 - 15)            | 2<br>(0 - 9)                | 1<br>(0 - 5)                | 1<br>(0 - 4)                |
| Ascariasis                                                        | 45<br>(21 - 82)                | 36<br>(14 - 70)             | 6<br>(1 - 15)            | 2<br>(0 - 9)                | 1<br>(0 - 5)                | 1<br>(0 - 4)                |



Web Table 31- South Sudan deaths with 95% UI by age, sex, and cause in 2013

| Cause                                                            | Both Sexes, All Ages        | Both Sexes, 0-4 Years     | Both Sexes, 5-14 Years | Both Sexes, 15-49 Years  | Both Sexes, 50-69 Years    | Both Sexes, 70-80 Years     |
|------------------------------------------------------------------|-----------------------------|---------------------------|------------------------|--------------------------|----------------------------|-----------------------------|
| Other neglected tropical diseases                                | 53<br>(40 - 72)             | 19<br>(11 - 34)           | 3<br>(1 - 6)           | 10<br>(7 - 15)           | 10<br>(6 - 14)             | 11<br>(7 - 16)              |
| Maternal disorders                                               | 3,912<br>(2,801 - 5,163)    | --                        | 32<br>(11 - 80)        | 3,880<br>(2,776 - 5,136) | --                         | --                          |
| Maternal hemorrhage                                              | 468<br>(298 - 657)          | --                        | 2<br>(1 - 6)           | 465<br>(296 - 655)       | --                         | --                          |
| Maternal sepsis and other maternal infections                    | 374<br>(236 - 537)          | --                        | 4<br>(1 - 12)          | 370<br>(233 - 533)       | --                         | --                          |
| Maternal hypertensive disorders                                  | 382<br>(233 - 564)          | --                        | 4<br>(1 - 10)          | 379<br>(231 - 560)       | --                         | --                          |
| Maternal obstructed labor                                        | 197<br>(129 - 291)          | --                        | 1<br>(0 - 3)           | 196<br>(128 - 290)       | --                         | --                          |
| Maternal abortive outcome                                        | 758<br>(503 - 1,097)        | --                        | 6<br>(2 - 14)          | 752<br>(499 - 1,094)     | --                         | --                          |
| Indirect maternal deaths                                         | 290<br>(167 - 454)          | --                        | 2<br>(0 - 5)           | 289<br>(165 - 452)       | --                         | --                          |
| Late maternal deaths                                             | 358<br>(211 - 545)          | --                        | 5<br>(1 - 13)          | 353<br>(208 - 541)       | --                         | --                          |
| Maternal deaths aggravated by HIV/AIDS                           | 34<br>(17 - 55)             | --                        | --                     | 34<br>(17 - 55)          | --                         | --                          |
| Other maternal disorders                                         | 1,041<br>(704 - 1,422)      | --                        | 7<br>(2 - 18)          | 1,034<br>(700 - 1,417)   | --                         | --                          |
| Neonatal disorders                                               | 8,387<br>(6,640 - 10,599)   | 8,387<br>(6,640 - 10,599) | --                     | --                       | --                         | --                          |
| Neonatal preterm birth complications                             | 2,571<br>(1,459 - 4,140)    | 2,571<br>(1,459 - 4,140)  | --                     | --                       | --                         | --                          |
| Neonatal encephalopathy due to birth asphyxia and trauma         | 2,295<br>(1,342 - 3,689)    | 2,295<br>(1,342 - 3,689)  | --                     | --                       | --                         | --                          |
| Neonatal sepsis and other neonatal infections                    | 1,653<br>(844 - 2,817)      | 1,653<br>(844 - 2,817)    | --                     | --                       | --                         | --                          |
| Hemolytic disease and other neonatal jaundice                    | 64<br>(23 - 150)            | 64<br>(23 - 150)          | --                     | --                       | --                         | --                          |
| Other neonatal disorders                                         | 1,804<br>(1,054 - 2,887)    | 1,804<br>(1,054 - 2,887)  | --                     | --                       | --                         | --                          |
| Nutritional deficiencies                                         | 5,318<br>(3,435 - 7,686)    | 3,131<br>(1,671 - 5,165)  | 290<br>(161 - 510)     | 603<br>(426 - 861)       | 584<br>(378 - 848)         | 710<br>(495 - 1,012)        |
| Protein-energy malnutrition                                      | 4,038<br>(2,355 - 6,092)    | 2,797<br>(1,490 - 4,655)  | 217<br>(109 - 396)     | 245<br>(124 - 445)       | 346<br>(177 - 547)         | 433<br>(221 - 663)          |
| Iodine deficiency                                                | 24<br>(4 - 80)              | 10<br>(0 - 61)            | 2<br>(0 - 12)          | 5<br>(0 - 17)            | 4<br>(0 - 17)              | 3<br>(0 - 13)               |
| Iron-deficiency anemia                                           | 1,227<br>(707 - 2,038)      | 318<br>(78 - 871)         | 69<br>(30 - 143)       | 347<br>(212 - 522)       | 229<br>(122 - 390)         | 264<br>(143 - 462)          |
| Other nutritional deficiencies                                   | 29<br>(14 - 50)             | 6<br>(1 - 17)             | 1<br>(0 - 3)           | 6<br>(2 - 12)            | 5<br>(3 - 9)               | 11<br>(4 - 22)              |
| Other communicable, maternal, neonatal, and nutritional diseases | 3,439<br>(2,035 - 5,336)    | 2,756<br>(1,477 - 4,487)  | 235<br>(113 - 461)     | 194<br>(136 - 266)       | 152<br>(90 - 235)          | 102<br>(53 - 178)           |
| Sexually transmitted diseases excluding HIV                      | 2,785<br>(1,425 - 4,644)    | 2,516<br>(1,255 - 4,222)  | 196<br>(83 - 413)      | 35<br>(21 - 52)          | 23<br>(10 - 47)            | 14<br>(6 - 31)              |
| Syphilis                                                         | 2,753<br>(1,393 - 4,608)    | 2,516<br>(1,255 - 4,222)  | 195<br>(82 - 411)      | 16<br>(10 - 23)          | 15<br>(6 - 31)             | 11<br>(5 - 24)              |
| Chlamydial infection                                             | 6<br>(3 - 11)               | --                        | 0<br>(0 - 1)           | 4<br>(2 - 7)             | 1<br>(0 - 4)               | 1<br>(0 - 1)                |
| Gonococcal infection                                             | 14<br>(8 - 22)              | --                        | 1<br>(0 - 1)           | 8<br>(5 - 11)            | 4<br>(2 - 8)               | 2<br>(1 - 4)                |
| Other sexually transmitted diseases                              | 11<br>(7 - 17)              | --                        | 1<br>(0 - 1)           | 7<br>(4 - 10)            | 3<br>(1 - 6)               | 1<br>(0 - 2)                |
| Hepatitis                                                        | 137<br>(104 - 174)          | 23<br>(11 - 39)           | 9<br>(5 - 16)          | 62<br>(44 - 85)          | 32<br>(21 - 45)            | 10<br>(7 - 15)              |
| Acute hepatitis A                                                | 17<br>(6 - 31)              | 8<br>(3 - 17)             | 3<br>(1 - 7)           | 4<br>(1 - 9)             | 0<br>(0 - 1)               | 0<br>(0 - 0)                |
| Acute hepatitis B                                                | 86<br>(57 - 118)            | 14<br>(6 - 28)            | 4<br>(2 - 9)           | 31<br>(17 - 48)          | 27<br>(17 - 39)            | 10<br>(6 - 14)              |
| Acute hepatitis C                                                | 2<br>(0 - 4)                | --                        | 0<br>(0 - 1)           | 1<br>(0 - 3)             | 0<br>(0 - 1)               | 0<br>(0 - 0)                |
| Acute hepatitis E                                                | 33<br>(17 - 58)             | 0<br>(0 - 1)              | 1<br>(0 - 3)           | 26<br>(14 - 46)          | 4<br>(2 - 9)               | 1<br>(0 - 2)                |
| Other infectious diseases                                        | 517<br>(311 - 1,048)        | 23<br>(89 - 619)          | 29<br>(11 - 71)        | 97<br>(55 - 166)         | 96<br>(47 - 180)           | 77<br>(32 - 153)            |
| Non-communicable diseases                                        | 33,233<br>(28,124 - 38,593) | 2,903<br>(1,805 - 4,687)  | 727<br>(468 - 1,236)   | 5,757<br>(4,629 - 7,026) | 11,775<br>(9,528 - 14,544) | 12,072<br>(10,368 - 14,129) |
| Neoplasms                                                        | 5,449<br>(4,511 - 6,572)    | 179<br>(98 - 280)         | 140<br>(84 - 261)      | 1,092<br>(873 - 1,343)   | 2,604<br>(2,085 - 3,298)   | 1,434<br>(1,191 - 1,715)    |
| Esophageal cancer                                                | 779<br>(542 - 1,065)        | --                        | --                     | 96<br>(60 - 144)         | 458<br>(306 - 649)         | 225<br>(152 - 318)          |
| Stomach cancer                                                   | 391<br>(311 - 492)          | --                        | --                     | 61<br>(45 - 82)          | 206<br>(158 - 273)         | 123<br>(93 - 163)           |
| Liver cancer                                                     | 476<br>(371 - 615)          | --                        | 6<br>(3 - 12)          | 139<br>(90 - 196)        | 226<br>(161 - 319)         | 105<br>(75 - 146)           |
| Liver cancer due to hepatitis B                                  | 127<br>(75 - 200)           | --                        | 2<br>(1 - 4)           | 50<br>(29 - 78)          | 56<br>(28 - 101)           | 19<br>(9 - 32)              |

Web Table 31- South Sudan deaths with 95% UI by age, sex, and cause in 2013

| Cause                                | Both Sexes, All Ages        | Both Sexes, 0-4 Years | Both Sexes, 5-14 Years | Both Sexes, 15-49 Years  | Both Sexes, 50-69 Years  | Both Sexes, 70-80 Years  |
|--------------------------------------|-----------------------------|-----------------------|------------------------|--------------------------|--------------------------|--------------------------|
| Liver cancer due to hepatitis C      | 217<br>(137 - 315)          | --                    | 1<br>(0 - 3)           | 53<br>(25 - 90)          | 110<br>(67 - 166)        | 54<br>(31 - 78)          |
| Liver cancer due to alcohol use      | 57<br>(37 - 87)             | --                    | --                     | 10<br>(6 - 17)           | 28<br>(16 - 46)          | 19<br>(11 - 31)          |
| Liver cancer due to other causes     | 74<br>(50 - 107)            | --                    | 3<br>(2 - 6)           | 25<br>(16 - 38)          | 32<br>(18 - 52)          | 14<br>(8 - 23)           |
| Larynx cancer                        | 41<br>(30 - 58)             | --                    | --                     | 6<br>(4 - 9)             | 22<br>(15 - 32)          | 13<br>(9 - 19)           |
| Tracheal, bronchus and lung cancer   | 291<br>(227 - 370)          | --                    | --                     | 24<br>(17 - 32)          | 185<br>(138 - 243)       | 82<br>(64 - 103)         |
| Breast cancer                        | 365<br>(261 - 516)          | --                    | --                     | 119<br>(83 - 164)        | 180<br>(120 - 272)       | 66<br>(45 - 101)         |
| Cervical cancer                      | 636<br>(382 - 911)          | --                    | --                     | 127<br>(77 - 191)        | 396<br>(222 - 605)       | 113<br>(64 - 170)        |
| Uterine cancer                       | 32<br>(19 - 47)             | --                    | --                     | 3<br>(2 - 5)             | 18<br>(10 - 30)          | 11<br>(6 - 16)           |
| Prostate cancer                      | 235<br>(137 - 373)          | --                    | --                     | 4<br>(2 - 8)             | 76<br>(42 - 129)         | 155<br>(88 - 242)        |
| Colon and rectum cancer              | 367<br>(300 - 449)          | --                    | --                     | 86<br>(67 - 108)         | 167<br>(132 - 212)       | 114<br>(90 - 143)        |
| Lip and oral cavity cancer           | 76<br>(57 - 99)             | --                    | --                     | 16<br>(12 - 23)          | 40<br>(28 - 57)          | 19<br>(14 - 26)          |
| Nasopharynx cancer                   | 22<br>(16 - 29)             | --                    | 1<br>(0 - 2)           | 11<br>(7 - 15)           | 7<br>(5 - 11)            | 2<br>(2 - 4)             |
| Other pharynx cancer                 | 34<br>(25 - 45)             | --                    | --                     | 8<br>(5 - 11)            | 20<br>(14 - 28)          | 7<br>(5 - 10)            |
| Gallbladder and biliary tract cancer | 63<br>(48 - 83)             | --                    | --                     | 17<br>(10 - 22)          | 32<br>(23 - 46)          | 14<br>(10 - 21)          |
| Pancreatic cancer                    | 114<br>(91 - 143)           | --                    | --                     | 22<br>(17 - 28)          | 65<br>(50 - 85)          | 27<br>(21 - 35)          |
| Malignant skin melanoma              | 23<br>(17 - 37)             | --                    | --                     | 6<br>(3 - 10)            | 11<br>(8 - 17)           | 6<br>(5 - 10)            |
| Non-melanoma skin cancer             | 23<br>(14 - 35)             | --                    | --                     | 4<br>(2 - 7)             | 8<br>(5 - 13)            | 11<br>(6 - 19)           |
| Ovarian cancer                       | 95<br>(63 - 138)            | --                    | --                     | 21<br>(14 - 28)          | 56<br>(35 - 88)          | 19<br>(11 - 30)          |
| Testicular cancer                    | 13<br>(8 - 18)              | --                    | --                     | 7<br>(4 - 11)            | 4<br>(2 - 8)             | 2<br>(1 - 2)             |
| Kidney cancer                        | 108<br>(74 - 148)           | 20<br>(9 - 37)        | 8<br>(4 - 16)          | 14<br>(10 - 19)          | 47<br>(28 - 74)          | 20<br>(13 - 29)          |
| Bladder cancer                       | 105<br>(80 - 140)           | --                    | --                     | 12<br>(8 - 18)           | 45<br>(32 - 64)          | 47<br>(35 - 66)          |
| Brain and nervous system cancer      | 72<br>(54 - 104)            | 3<br>(1 - 7)          | 8<br>(4 - 15)          | 30<br>(22 - 43)          | 21<br>(14 - 37)          | 10<br>(7 - 15)           |
| Thyroid cancer                       | 17<br>(12 - 25)             | --                    | 0<br>(0 - 1)           | 2<br>(1 - 3)             | 10<br>(6 - 16)           | 6<br>(4 - 8)             |
| Mesothelioma                         | 6<br>(4 - 9)                | --                    | --                     | 1<br>(1 - 1)             | 3<br>(1 - 5)             | 2<br>(1 - 3)             |
| Hodgkin lymphoma                     | 45<br>(29 - 61)             | 2<br>(1 - 5)          | 3<br>(1 - 7)           | 13<br>(8 - 22)           | 14<br>(9 - 22)           | 11<br>(6 - 17)           |
| Non-Hodgkin lymphoma                 | 332<br>(239 - 455)          | 57<br>(24 - 104)      | 48<br>(24 - 92)        | 89<br>(65 - 121)         | 86<br>(56 - 128)         | 53<br>(36 - 77)          |
| Multiple myeloma                     | 51<br>(37 - 77)             | --                    | --                     | 10<br>(7 - 14)           | 25<br>(16 - 41)          | 17<br>(11 - 25)          |
| Leukemia                             | 95<br>(77 - 119)            | 7<br>(3 - 13)         | 13<br>(7 - 22)         | 38<br>(29 - 49)          | 20<br>(15 - 27)          | 18<br>(13 - 24)          |
| Other neoplasms                      | 542<br>(424 - 700)          | 89<br>(52 - 146)      | 53<br>(28 - 101)       | 108<br>(75 - 159)        | 156<br>(109 - 221)       | 135<br>(99 - 175)        |
| Cardiovascular diseases              | 14,011<br>(11,703 - 16,672) | 205<br>(124 - 304)    | 100<br>(59 - 171)      | 1,759<br>(1,384 - 2,182) | 5,313<br>(4,223 - 6,632) | 6,634<br>(5,630 - 7,867) |
| Rheumatic heart disease              | 582<br>(410 - 909)          | 11<br>(4 - 25)        | 25<br>(13 - 46)        | 212<br>(143 - 345)       | 197<br>(129 - 332)       | 137<br>(89 - 221)        |
| Ischemic heart disease               | 3,459<br>(2,678 - 4,288)    | 1<br>(0 - 3)          | 4<br>(2 - 7)           | 350<br>(251 - 469)       | 1,429<br>(1,066 - 1,857) | 1,675<br>(1,280 - 2,090) |
| Cerebrovascular disease              | 6,038<br>(4,851 - 7,328)    | 27<br>(16 - 43)       | 15<br>(8 - 25)         | 531<br>(388 - 691)       | 2,288<br>(1,745 - 2,906) | 3,178<br>(2,549 - 3,856) |
| Ischemic stroke                      | 2,741<br>(1,836 - 3,551)    | 3<br>(1 - 7)          | 2<br>(1 - 4)           | 85<br>(43 - 125)         | 797<br>(471 - 1,117)     | 1,854<br>(1,280 - 2,390) |
| Hemorrhagic stroke                   | 3,297<br>(2,488 - 4,354)    | 24<br>(14 - 38)       | 13<br>(7 - 22)         | 446<br>(328 - 592)       | 1,491<br>(1,123 - 1,968) | 1,324<br>(872 - 1,951)   |
| Hypertensive heart disease           | 1,249<br>(852 - 1,864)      | 4<br>(1 - 7)          | 2<br>(1 - 4)           | 106<br>(65 - 155)        | 425<br>(280 - 627)       | 712<br>(464 - 1,131)     |
| Cardiomyopathy and myocarditis       | 748<br>(473 - 1,048)        | 88<br>(38 - 155)      | 26<br>(13 - 47)        | 195<br>(107 - 277)       | 242<br>(149 - 354)       | 196<br>(121 - 345)       |
| Atrial fibrillation and flutter      | 6<br>(4 - 10)               | --                    | --                     | 0<br>(0 - 1)             | 1<br>(1 - 3)             | 4<br>(2 - 7)             |
| Aortic aneurysm                      | 176<br>(112 - 252)          | --                    | --                     | 24<br>(14 - 36)          | 72<br>(43 - 108)         | 80<br>(52 - 116)         |
| Peripheral vascular disease          | 10<br>(6 - 15)              | --                    | --                     | 0<br>(0 - 1)             | 3<br>(2 - 5)             | 6<br>(4 - 10)            |

Web Table 31- South Sudan deaths with 95% UI by age, sex, and cause in 2013

| Cause                                               | Both Sexes, All Ages     | Both Sexes, 0-4 Years | Both Sexes, 5-14 Years | Both Sexes, 15-49 Years | Both Sexes, 50-69 Years | Both Sexes, 70-80 Years |
|-----------------------------------------------------|--------------------------|-----------------------|------------------------|-------------------------|-------------------------|-------------------------|
| Endocarditis                                        | 179<br>(129 - 251)       | 11<br>(4 - 22)        | 4<br>(2 - 8)           | 40<br>(27 - 58)         | 57<br>(37 - 87)         | 67<br>(40 - 104)        |
| Other cardiovascular and circulatory diseases       | 1,565<br>(1,103 - 2,300) | 64<br>(30 - 109)      | 24<br>(12 - 46)        | 300<br>(196 - 444)      | 599<br>(393 - 901)      | 579<br>(387 - 922)      |
| Chronic respiratory diseases                        | 2,308<br>(1,796 - 3,115) | 150<br>(79 - 261)     | 42<br>(23 - 75)        | 292<br>(212 - 413)      | 786<br>(585 - 1,096)    | 1,038<br>(789 - 1,396)  |
| Chronic obstructive pulmonary disease               | 1,321<br>(953 - 1,887)   | 33<br>(14 - 64)       | 14<br>(8 - 27)         | 111<br>(72 - 165)       | 482<br>(334 - 711)      | 681<br>(481 - 959)      |
| Pneumoconiosis                                      | 194<br>(93 - 326)        | 5<br>(1 - 11)         | 3<br>(1 - 5)           | 47<br>(22 - 77)         | 79<br>(32 - 140)        | 61<br>(29 - 110)        |
| Silicosis                                           | 52<br>(13 - 130)         | 1<br>(0 - 4)          | 1<br>(0 - 2)           | 12<br>(3 - 30)          | 20<br>(4 - 54)          | 18<br>(5 - 46)          |
| Asbestosis                                          | 21<br>(8 - 43)           | 1<br>(0 - 2)          | 0<br>(0 - 1)           | 5<br>(2 - 10)           | 10<br>(4 - 21)          | 5<br>(2 - 11)           |
| Coal workers pneumoconiosis                         | 26<br>(9 - 55)           | 0<br>(0 - 1)          | 0<br>(0 - 1)           | 5<br>(2 - 11)           | 12<br>(3 - 26)          | 8<br>(2 - 19)           |
| Other pneumoconiosis                                | 94<br>(45 - 173)         | 3<br>(1 - 6)          | 1<br>(1 - 2)           | 24<br>(12 - 42)         | 37<br>(16 - 73)         | 30<br>(13 - 57)         |
| Asthma                                              | 424<br>(267 - 703)       | 35<br>(13 - 75)       | 13<br>(6 - 26)         | 66<br>(38 - 133)        | 139<br>(82 - 235)       | 172<br>(99 - 291)       |
| Interstitial lung disease and pulmonary sarcoidosis | 171<br>(38 - 315)        | 4<br>(0 - 15)         | 2<br>(0 - 5)           | 19<br>(5 - 48)          | 58<br>(13 - 119)        | 88<br>(16 - 167)        |
| Other chronic respiratory diseases                  | 198<br>(118 - 302)       | 74<br>(38 - 131)      | 11<br>(5 - 20)         | 49<br>(27 - 78)         | 28<br>(13 - 52)         | 37<br>(19 - 66)         |
| Cirrhosis                                           | 1,461<br>(1,004 - 1,952) | 28<br>(10 - 54)       | 24<br>(13 - 44)        | 601<br>(275 - 601)      | 672<br>(443 - 935)      | 317<br>(221 - 427)      |
| Cirrhosis due to hepatitis B                        | 360<br>(195 - 564)       | 1<br>(0 - 3)          | 4<br>(2 - 9)           | 104<br>(54 - 167)       | 170<br>(87 - 276)       | 81<br>(40 - 135)        |
| Cirrhosis due to hepatitis C                        | 329<br>(202 - 504)       | 2<br>(1 - 7)          | 3<br>(1 - 6)           | 77<br>(39 - 133)        | 162<br>(94 - 258)       | 85<br>(48 - 130)        |
| Cirrhosis due to alcohol use                        | 561<br>(347 - 779)       | --                    | --                     | 154<br>(86 - 239)       | 277<br>(163 - 394)      | 130<br>(84 - 184)       |
| Cirrhosis due to other causes                       | 211<br>(131 - 310)       | 24<br>(9 - 47)        | 17<br>(9 - 31)         | 85<br>(49 - 131)        | 63<br>(34 - 102)        | 22<br>(12 - 35)         |
| Digestive diseases                                  | 2,135<br>(1,751 - 2,559) | 113<br>(48 - 230)     | 91<br>(56 - 155)       | 629<br>(472 - 810)      | 679<br>(524 - 873)      | 622<br>(499 - 770)      |
| Peptic ulcer disease                                | 634<br>(448 - 892)       | 12<br>(4 - 32)        | 11<br>(6 - 21)         | 174<br>(102 - 293)      | 229<br>(153 - 333)      | 207<br>(145 - 287)      |
| Gastritis and duodenitis                            | 84<br>(45 - 160)         | 6<br>(2 - 13)         | 6<br>(3 - 11)          | 24<br>(14 - 43)         | 23<br>(11 - 48)         | 25<br>(10 - 63)         |
| Appendicitis                                        | 187<br>(129 - 248)       | 14<br>(4 - 39)        | 21<br>(10 - 42)        | 68<br>(43 - 100)        | 46<br>(27 - 75)         | 36<br>(17 - 66)         |
| Paralytic ileus and intestinal obstruction          | 544<br>(357 - 731)       | 18<br>(6 - 44)        | 23<br>(12 - 42)        | 152<br>(79 - 228)       | 182<br>(110 - 258)      | 169<br>(112 - 253)      |
| Inguinal, femoral, and abdominal hernia             | 44<br>(28 - 63)          | 3<br>(1 - 7)          | 2<br>(1 - 3)           | 14<br>(9 - 21)          | 10<br>(6 - 18)          | 15<br>(9 - 24)          |
| Inflammatory bowel disease                          | 128<br>(76 - 173)        | 27<br>(9 - 61)        | 8<br>(4 - 15)          | 38<br>(22 - 54)         | 28<br>(13 - 42)         | 26<br>(12 - 43)         |
| Vascular intestinal disorders                       | 17<br>(8 - 31)           | 1<br>(0 - 2)          | 1<br>(0 - 1)           | 3<br>(1 - 7)            | 5<br>(2 - 11)           | 7<br>(3 - 14)           |
| Gallbladder and biliary diseases                    | 128<br>(92 - 168)        | 4<br>(1 - 9)          | 3<br>(2 - 6)           | 27<br>(18 - 39)         | 43<br>(29 - 63)         | 50<br>(31 - 74)         |
| Pancreatitis                                        | 117<br>(70 - 175)        | 2<br>(1 - 5)          | 2<br>(1 - 4)           | 57<br>(31 - 90)         | 36<br>(20 - 57)         | 21<br>(10 - 33)         |
| Other digestive diseases                            | 253<br>(175 - 355)       | 26<br>(10 - 53)       | 14<br>(7 - 25)         | 71<br>(44 - 111)        | 77<br>(48 - 118)        | 65<br>(42 - 99)         |
| Neurological disorders                              | 1,048<br>(852 - 1,261)   | 113<br>(57 - 208)     | 81<br>(43 - 145)       | 264<br>(180 - 381)      | 105<br>(80 - 136)       | 486<br>(403 - 586)      |
| Alzheimer disease and other dementias               | 468<br>(382 - 572)       | --                    | --                     | 0<br>(0 - 1)            | 48<br>(36 - 62)         | 420<br>(339 - 517)      |
| Parkinson disease                                   | 8<br>(4 - 13)            | --                    | --                     | 1<br>(0 - 1)            | 1<br>(0 - 2)            | 6<br>(3 - 11)           |
| Epilepsy                                            | 489<br>(337 - 681)       | 96<br>(43 - 186)      | 74<br>(39 - 138)       | 236<br>(155 - 349)      | 35<br>(21 - 54)         | 48<br>(27 - 77)         |
| Multiple sclerosis                                  | 4<br>(1 - 6)             | --                    | --                     | 2<br>(1 - 3)            | 1<br>(1 - 2)            | 0<br>(0 - 1)            |
| Other neurological disorders                        | 79<br>(60 - 125)         | 17<br>(9 - 47)        | 6<br>(4 - 12)          | 25<br>(18 - 37)         | 19<br>(14 - 26)         | 12<br>(9 - 15)          |
| Mental and substance use disorders                  | 296<br>(200 - 449)       | 12<br>(2 - 31)        | 0<br>(0 - 0)           | 199<br>(130 - 309)      | 71<br>(45 - 122)        | 14<br>(9 - 22)          |
| Schizophrenia                                       | 6<br>(4 - 10)            | --                    | --                     | 3<br>(2 - 5)            | 2<br>(1 - 3)            | 1<br>(1 - 2)            |
| Alcohol use disorders                               | 199<br>(99 - 347)        | --                    | --                     | 131<br>(61 - 229)       | 59<br>(32 - 109)        | 9<br>(5 - 18)           |
| Drug use disorders                                  | 90<br>(47 - 152)         | 12<br>(2 - 31)        | --                     | 65<br>(38 - 120)        | 10<br>(4 - 19)          | 4<br>(1 - 8)            |
| Opioid use disorders                                | 10<br>(5 - 16)           | 1<br>(0 - 4)          | --                     | 7<br>(4 - 13)           | 1<br>(0 - 2)            | 0<br>(0 - 1)            |
| Cocaine use disorders                               | 0<br>(0 - 1)             | 0<br>(0 - 0)          | --                     | 0<br>(0 - 1)            | 0<br>(0 - 0)            | 0<br>(0 - 0)            |

Web Table 31- South Sudan deaths with 95% UI by age, sex, and cause in 2013

| Cause                                               | Both Sexes, All Ages     | Both Sexes, 0-4 Years  | Both Sexes, 5-14 Years | Both Sexes, 15-49 Years | Both Sexes, 50-69 Years  | Both Sexes, 70-80 Years  |
|-----------------------------------------------------|--------------------------|------------------------|------------------------|-------------------------|--------------------------|--------------------------|
| Amphetamine use disorders                           | 0<br>(0 - 0)             | 0<br>(0 - 0)           | --                     | 0<br>(0 - 0)            | 0<br>(0 - 0)             | 0<br>(0 - 0)             |
| Other drug use disorders                            | 80<br>(42 - 135)         | 11<br>(2 - 28)         | --                     | 57<br>(33 - 107)        | 9<br>(4 - 18)            | 3<br>(1 - 7)             |
| Eating disorders                                    | 1<br>(0 - 1)             | --                     | 0<br>(0 - 0)           | 1<br>(0 - 1)            | --                       | --                       |
| Anorexia nervosa                                    | 1<br>(0 - 1)             | --                     | 0<br>(0 - 0)           | 1<br>(0 - 1)            | --                       | --                       |
| Diabetes, urogenital, blood, and endocrine diseases | 4,220<br>(3,489 - 5,027) | 401<br>(216 - 637)     | 138<br>(81 - 236)      | 901<br>(716 - 1,132)    | 1,412<br>(1,080 - 1,794) | 1,367<br>(1,093 - 1,649) |
| Diabetes mellitus                                   | 1,939<br>(1,457 - 2,402) | 17<br>(10 - 26)        | 10<br>(6 - 17)         | 252<br>(179 - 331)      | 854<br>(613 - 1,125)     | 807<br>(595 - 1,018)     |
| Acute glomerulonephritis                            | 44<br>(24 - 63)          | 5<br>(2 - 11)          | 2<br>(1 - 6)           | 10<br>(7 - 15)          | 16<br>(6 - 29)           | 10<br>(4 - 16)           |
| Chronic kidney disease                              | 772<br>(579 - 1,015)     | 62<br>(33 - 103)       | 34<br>(19 - 59)        | 237<br>(171 - 325)      | 197<br>(136 - 303)       | 241<br>(173 - 336)       |
| Chronic kidney disease due to diabetes mellitus     | 4<br>(3 - 8)             | 0<br>(0 - 0)           | 0<br>(0 - 0)           | 1<br>(1 - 2)            | 2<br>(1 - 3)             | 1<br>(1 - 3)             |
| Chronic kidney disease due to hypertension          | 292<br>(199 - 420)       | 7<br>(2 - 17)          | 4<br>(1 - 8)           | 56<br>(32 - 86)         | 98<br>(64 - 149)         | 127<br>(86 - 194)        |
| Chronic kidney disease due to glomerulonephritis    | 257<br>(178 - 356)       | 40<br>(20 - 68)        | 20<br>(11 - 37)        | 98<br>(65 - 147)        | 53<br>(31 - 80)          | 46<br>(26 - 70)          |
| Chronic kidney disease due to other causes          | 219<br>(117 - 334)       | 15<br>(5 - 32)         | 9<br>(3 - 20)          | 83<br>(44 - 131)        | 45<br>(19 - 88)          | 66<br>(28 - 115)         |
| Urinary diseases and male infertility               | 629<br>(468 - 801)       | 49<br>(23 - 89)        | 15<br>(8 - 28)         | 178<br>(120 - 245)      | 212<br>(140 - 298)       | 174<br>(125 - 234)       |
| Interstitial nephritis and urinary tract infections | 470<br>(345 - 607)       | 35<br>(16 - 66)        | 9<br>(5 - 18)          | 125<br>(79 - 173)       | 160<br>(106 - 233)       | 140<br>(98 - 192)        |
| Urolithiasis                                        | 19<br>(12 - 31)          | --                     | 1<br>(0 - 4)           | 7<br>(4 - 11)           | 7<br>(4 - 13)            | 4<br>(2 - 8)             |
| Other urinary diseases                              | 140<br>(86 - 233)        | 14<br>(6 - 29)         | 5<br>(2 - 9)           | 46<br>(26 - 75)         | 45<br>(22 - 83)          | 30<br>(12 - 63)          |
| Gynecological diseases                              | 5<br>(2 - 8)             | --                     | --                     | 2<br>(1 - 3)            | 2<br>(0 - 4)             | 1<br>(0 - 2)             |
| Uterine fibroids                                    | 1<br>(0 - 2)             | --                     | --                     | 0<br>(0 - 0)            | 1<br>(0 - 1)             | 0<br>(0 - 1)             |
| Polycystic ovarian syndrome                         | 0<br>(0 - 0)             | --                     | --                     | 0<br>(0 - 0)            | 0<br>(0 - 0)             | --                       |
| Endometriosis                                       | 0<br>(0 - 0)             | --                     | --                     | 0<br>(0 - 0)            | 0<br>(0 - 0)             | --                       |
| Genital prolapse                                    | 1<br>(0 - 1)             | --                     | --                     | 0<br>(0 - 0)            | 0<br>(0 - 1)             | 0<br>(0 - 1)             |
| Other gynecological diseases                        | 2<br>(1 - 4)             | --                     | --                     | 1<br>(0 - 1)            | 1<br>(0 - 2)             | 1<br>(0 - 1)             |
| Hemoglobinopathies and hemolytic anemias            | 376<br>(190 - 602)       | 170<br>(46 - 330)      | 58<br>(23 - 113)       | 98<br>(58 - 144)        | 30<br>(18 - 51)          | 21<br>(12 - 45)          |
| Thalassemias                                        | 17<br>(6 - 31)           | 12<br>(3 - 24)         | 2<br>(1 - 5)           | 3<br>(1 - 4)            | 0<br>(0 - 0)             | 0<br>(0 - 0)             |
| Sickle cell disorders                               | 286<br>(136 - 473)       | 132<br>(34 - 261)      | 50<br>(20 - 98)        | 83<br>(49 - 122)        | 20<br>(12 - 34)          | 1<br>(1 - 2)             |
| G6PD deficiency                                     | 11<br>(5 - 18)           | 5<br>(1 - 10)          | 2<br>(1 - 3)           | 3<br>(2 - 4)            | 1<br>(0 - 1)             | 0<br>(0 - 1)             |
| Other hemoglobinopathies and hemolytic anemias      | 62<br>(40 - 90)          | 20<br>(7 - 39)         | 4<br>(1 - 7)           | 10<br>(6 - 14)          | 9<br>(5 - 16)            | 20<br>(11 - 41)          |
| Endocrine, metabolic, blood, and immune disorders   | 455<br>(329 - 786)       | 98<br>(53 - 247)       | 19<br>(9 - 52)         | 125<br>(85 - 214)       | 101<br>(63 - 163)        | 112<br>(73 - 163)        |
| Musculoskeletal disorders                           | 143<br>(74 - 203)        | --                     | 15<br>(5 - 28)         | 62<br>(27 - 94)         | 40<br>(21 - 57)          | 27<br>(17 - 40)          |
| Rheumatoid arthritis                                | 32<br>(15 - 49)          | --                     | 3<br>(1 - 6)           | 8<br>(3 - 14)           | 11<br>(5 - 18)           | 10<br>(5 - 17)           |
| Other musculoskeletal disorders                     | 111<br>(56 - 163)        | --                     | 12<br>(4 - 23)         | 54<br>(23 - 82)         | 28<br>(15 - 42)          | 17<br>(11 - 26)          |
| Other non-communicable diseases                     | 2,162<br>(1,327 - 3,857) | 1,702<br>(932 - 3,332) | 95<br>(46 - 195)       | 138<br>(104 - 175)      | 93<br>(68 - 127)         | 134<br>(97 - 183)        |
| Congenital anomalies                                | 1,774<br>(989 - 3,431)   | 1,587<br>(854 - 3,175) | 87<br>(40 - 184)       | 71<br>(50 - 100)        | 14<br>(11 - 20)          | 14<br>(11 - 19)          |
| Neural tube defects                                 | 460<br>(142 - 1,077)     | 430<br>(129 - 1,020)   | 16<br>(4 - 47)         | 12<br>(3 - 25)          | 1<br>(0 - 3)             | 1<br>(0 - 2)             |
| Congenital heart anomalies                          | 728<br>(316 - 1,641)     | 639<br>(253 - 1,491)   | 44<br>(16 - 102)       | 34<br>(21 - 52)         | 6<br>(4 - 8)             | 6<br>(4 - 8)             |
| Cleft lip and cleft palate                          | 12<br>(3 - 27)           | 12<br>(3 - 27)         | --                     | --                      | --                       | --                       |
| Down syndrome                                       | 129<br>(34 - 294)        | 107<br>(23 - 258)      | 10<br>(3 - 22)         | 10<br>(4 - 18)          | 2<br>(1 - 3)             | 0<br>(0 - 1)             |
| Chromosomal unbalanced rearrangements               | 57<br>(17 - 146)         | 53<br>(15 - 138)       | 2<br>(1 - 5)           | 2<br>(1 - 4)            | 0<br>(0 - 1)             | 0<br>(0 - 0)             |
| Other congenital anomalies                          | 388<br>(140 - 1,158)     | 347<br>(114 - 1,083)   | 15<br>(5 - 46)         | 13<br>(7 - 25)          | 5<br>(3 - 8)             | 7<br>(5 - 10)            |
| Skin and subcutaneous diseases                      | 357<br>(280 - 445)       | 84<br>(46 - 137)       | 8<br>(4 - 15)          | 67<br>(49 - 86)         | 79<br>(55 - 109)         | 120<br>(84 - 169)        |

Web Table 31- South Sudan deaths with 95% UI by age, sex, and cause in 2013

| Cause                                           | Both Sexes, All Ages     | Both Sexes, 0-4 Years  | Both Sexes, 5-14 Years | Both Sexes, 15-49 Years  | Both Sexes, 50-69 Years | Both Sexes, 70-80 Years |
|-------------------------------------------------|--------------------------|------------------------|------------------------|--------------------------|-------------------------|-------------------------|
| Cellulitis                                      | 238<br>(159 - 329)       | 56<br>(26 - 101)       | 5<br>(3 - 11)          | 46<br>(29 - 67)          | 55<br>(37 - 82)         | 74<br>(43 - 111)        |
| Pyoderma                                        | 83<br>(37 - 138)         | 25<br>(8 - 53)         | 2<br>(0 - 3)           | 15<br>(6 - 26)           | 17<br>(7 - 33)          | 25<br>(10 - 47)         |
| Decubitus ulcer                                 | 29<br>(12 - 51)          | 1<br>(0 - 3)           | 0<br>(0 - 1)           | 4<br>(1 - 7)             | 5<br>(2 - 9)            | 19<br>(8 - 34)          |
| Other skin and subcutaneous diseases            | 7<br>(2 - 14)            | 2<br>(0 - 5)           | 0<br>(0 - 1)           | 2<br>(1 - 4)             | 1<br>(0 - 3)            | 2<br>(1 - 3)            |
| Sudden infant death syndrome                    | 32<br>(10 - 85)          | 32<br>(10 - 85)        | --                     | --                       | --                      | --                      |
| Injuries                                        | 7,354<br>(5,868 - 8,949) | 1,383<br>(791 - 2,155) | 775<br>(485 - 1,298)   | 3,365<br>(2,484 - 4,295) | 1,107<br>(790 - 1,473)  | 724<br>(534 - 945)      |
| Transport injuries                              | 3,179<br>(2,269 - 4,268) | 356<br>(176 - 659)     | 368<br>(207 - 647)     | 1,577<br>(1,057 - 2,314) | 569<br>(388 - 772)      | 310<br>(227 - 413)      |
| Road injuries                                   | 3,049<br>(2,182 - 4,076) | 325<br>(159 - 602)     | 345<br>(193 - 611)     | 1,539<br>(1,022 - 2,233) | 547<br>(377 - 744)      | 293<br>(214 - 389)      |
| Pedestrian road injuries                        | 1,586<br>(1,048 - 2,319) | 185<br>(83 - 356)      | 199<br>(102 - 369)     | 737<br>(438 - 1,136)     | 294<br>(188 - 419)      | 171<br>(114 - 237)      |
| Cyclist road injuries                           | 155<br>(88 - 239)        | 15<br>(5 - 35)         | 22<br>(10 - 45)        | 66<br>(34 - 112)         | 35<br>(20 - 54)         | 17<br>(9 - 29)          |
| Motorcyclist road injuries                      | 222<br>(132 - 371)       | 16<br>(7 - 31)         | 14<br>(6 - 28)         | 148<br>(81 - 263)        | 30<br>(17 - 49)         | 14<br>(8 - 23)          |
| Motor vehicle road injuries                     | 1,051<br>(699 - 1,524)   | 99<br>(47 - 184)       | 104<br>(55 - 196)      | 581<br>(348 - 911)       | 181<br>(113 - 263)      | 86<br>(55 - 124)        |
| Other road injuries                             | 35<br>(19 - 71)          | 9<br>(3 - 19)          | 6<br>(2 - 15)          | 7<br>(3 - 24)            | 8<br>(4 - 14)           | 5<br>(2 - 9)            |
| Other transport injuries                        | 130<br>(83 - 223)        | 31<br>(13 - 65)        | 23<br>(11 - 46)        | 37<br>(20 - 87)          | 21<br>(13 - 33)         | 17<br>(9 - 27)          |
| Unintentional injuries                          | 2,993<br>(2,334 - 3,927) | 985<br>(553 - 1,548)   | 369<br>(225 - 646)     | 897<br>(672 - 1,290)     | 390<br>(290 - 522)      | 352<br>(246 - 473)      |
| Falls                                           | 311<br>(205 - 413)       | 36<br>(19 - 61)        | 29<br>(15 - 58)        | 97<br>(65 - 141)         | 58<br>(34 - 91)         | 91<br>(47 - 137)        |
| Drowning                                        | 696<br>(464 - 1,043)     | 232<br>(100 - 443)     | 141<br>(75 - 262)      | 254<br>(173 - 375)       | 48<br>(31 - 69)         | 21<br>(12 - 33)         |
| Fire, heat, and hot substances                  | 579<br>(388 - 847)       | 270<br>(117 - 492)     | 62<br>(33 - 110)       | 121<br>(80 - 181)        | 68<br>(43 - 99)         | 57<br>(34 - 85)         |
| Poisonings                                      | 196<br>(126 - 401)       | 57<br>(24 - 128)       | 13<br>(6 - 30)         | 92<br>(54 - 203)         | 26<br>(17 - 44)         | 8<br>(5 - 15)           |
| Exposure to mechanical forces                   | 455<br>(318 - 925)       | 128<br>(62 - 256)      | 53<br>(25 - 147)       | 171<br>(113 - 360)       | 77<br>(44 - 122)        | 27<br>(16 - 39)         |
| Unintentional firearm injuries                  | 96<br>(64 - 142)         | 13<br>(6 - 24)         | 6<br>(3 - 12)          | 63<br>(37 - 103)         | 9<br>(6 - 14)           | 5<br>(3 - 7)            |
| Unintentional suffocation                       | 52<br>(11 - 114)         | 30<br>(5 - 80)         | 5<br>(1 - 13)          | 8<br>(1 - 16)            | 7<br>(1 - 15)           | 2<br>(0 - 3)            |
| Other exposure to mechanical forces             | 307<br>(198 - 772)       | 84<br>(35 - 207)       | 41<br>(17 - 127)       | 100<br>(58 - 279)        | 61<br>(33 - 104)        | 20<br>(11 - 32)         |
| Adverse effects of medical treatment            | 297<br>(208 - 415)       | 81<br>(41 - 141)       | 12<br>(6 - 22)         | 55<br>(37 - 87)          | 63<br>(36 - 102)        | 86<br>(35 - 147)        |
| Animal contact                                  | 185<br>(112 - 437)       | 49<br>(16 - 162)       | 33<br>(14 - 92)        | 53<br>(32 - 106)         | 30<br>(17 - 54)         | 20<br>(11 - 37)         |
| Venomous animal contact                         | 124<br>(67 - 352)        | 38<br>(10 - 148)       | 21<br>(7 - 73)         | 33<br>(18 - 77)          | 18<br>(10 - 38)         | 14<br>(6 - 25)          |
| Non-venomous animal contact                     | 62<br>(35 - 103)         | 10<br>(4 - 26)         | 13<br>(5 - 26)         | 20<br>(11 - 35)          | 12<br>(5 - 22)          | 6<br>(3 - 13)           |
| Foreign body                                    | 188<br>(98 - 329)        | 115<br>(51 - 231)      | 12<br>(6 - 25)         | 16<br>(9 - 26)           | 10<br>(6 - 15)          | 34<br>(17 - 57)         |
| Pulmonary aspiration and foreign body in airway | 183<br>(94 - 325)        | 114<br>(50 - 230)      | 11<br>(5 - 24)         | 16<br>(9 - 25)           | 9<br>(5 - 14)           | 33<br>(16 - 55)         |
| Foreign body in other body part                 | 5<br>(3 - 8)             | 1<br>(1 - 2)           | 1<br>(0 - 1)           | 1<br>(0 - 1)             | 1<br>(1 - 2)            | 1<br>(0 - 2)            |
| Other unintentional injuries                    | 86<br>(36 - 127)         | 18<br>(6 - 33)         | 14<br>(5 - 26)         | 38<br>(15 - 60)          | 10<br>(4 - 16)          | 7<br>(3 - 11)           |
| Self-harm and interpersonal violence            | 1,181<br>(575 - 1,736)   | 42<br>(19 - 76)        | 38<br>(17 - 77)        | 892<br>(433 - 1,306)     | 148<br>(55 - 264)       | 61<br>(14 - 114)        |
| Self-harm                                       | 474<br>(111 - 861)       | --                     | 12<br>(2 - 33)         | 316<br>(72 - 586)        | 95<br>(20 - 190)        | 52<br>(9 - 103)         |
| Interpersonal violence                          | 707<br>(330 - 997)       | 42<br>(19 - 76)        | 27<br>(11 - 49)        | 576<br>(261 - 847)       | 54<br>(22 - 89)         | 9<br>(3 - 16)           |
| Assault by firearm                              | 232<br>(82 - 385)        | 9<br>(3 - 18)          | 5<br>(2 - 11)          | 201<br>(67 - 346)        | 15<br>(5 - 28)          | 1<br>(0 - 3)            |
| Assault by sharp object                         | 144<br>(60 - 251)        | 7<br>(2 - 15)          | 4<br>(1 - 8)           | 117<br>(50 - 217)        | 14<br>(4 - 26)          | 2<br>(1 - 5)            |
| Assault by other means                          | 332<br>(151 - 482)       | 27<br>(13 - 47)        | 18<br>(8 - 32)         | 257<br>(105 - 392)       | 25<br>(9 - 43)          | 5<br>(2 - 10)           |

Web Table 31- South Sudan deaths with 95% UI by age, sex, and cause in 2013

| Cause                                                             | Males, All Ages             | Males, 0-4 Years            | Males, 5-14 Years        | Males, 15-49 Years          | Males, 50-69 Years          | Males, 70-80 Years         |
|-------------------------------------------------------------------|-----------------------------|-----------------------------|--------------------------|-----------------------------|-----------------------------|----------------------------|
| All causes                                                        | 66,790<br>(57,587 - 75,757) | 22,568<br>(17,670 - 28,698) | 2,801<br>(2,015 - 4,145) | 17,406<br>(14,872 - 19,572) | 13,696<br>(10,938 - 16,725) | 10,319<br>(8,758 - 11,965) |
| Communicable, maternal, neonatal, and nutritional diseases        | 42,411<br>(36,253 - 49,429) | 20,255<br>(15,796 - 26,029) | 1,999<br>(1,433 - 2,926) | 10,701<br>(8,999 - 12,272)  | 5,753<br>(4,593 - 7,082)    | 3,704<br>(2,973 - 4,534)   |
| HIV/AIDS and tuberculosis                                         | 10,757<br>(8,335 - 13,076)  | 780<br>(508 - 1,146)        | 348<br>(234 - 482)       | 6,272<br>(4,648 - 7,766)    | 2,559<br>(1,828 - 3,370)    | 799<br>(576 - 1,092)       |
| Tuberculosis                                                      | 5,002<br>(3,165 - 6,780)    | 299<br>(129 - 549)          | 80<br>(37 - 154)         | 2,424<br>(1,437 - 3,358)    | 1,536<br>(923 - 2,201)      | 662<br>(439 - 945)         |
| HIV/AIDS                                                          | 5,755<br>(3,527 - 7,575)    | 480<br>(286 - 790)          | 268<br>(162 - 383)       | 3,847<br>(2,337 - 5,333)    | 1,023<br>(583 - 1,525)      | 137<br>(71 - 235)          |
| HIV/AIDS resulting in mycobacterial infection                     | 421<br>(248 - 594)          | 33<br>(19 - 54)             | 17<br>(10 - 26)          | 282<br>(165 - 402)          | 78<br>(43 - 122)            | 11<br>(6 - 18)             |
| HIV/AIDS resulting in other diseases                              | 5,334<br>(3,270 - 7,071)    | 447<br>(265 - 742)          | 251<br>(152 - 361)       | 3,565<br>(2,164 - 4,919)    | 945<br>(539 - 1,411)        | 126<br>(65 - 216)          |
| Diarrhea, lower respiratory, and other common infectious diseases | 18,432<br>(13,863 - 23,497) | 9,888<br>(6,581 - 13,885)   | 928<br>(552 - 1,573)     | 2,786<br>(1,984 - 3,760)    | 2,461<br>(1,647 - 3,515)    | 2,369<br>(1,744 - 3,124)   |
| Diarrheal diseases                                                | 7,103<br>(4,405 - 10,688)   | 3,152<br>(1,224 - 5,968)    | 352<br>(146 - 666)       | 1,340<br>(793 - 2,078)      | 1,203<br>(645 - 1,959)      | 1,057<br>(604 - 1,638)     |
| Intestinal infectious diseases                                    | 255<br>(127 - 450)          | 86<br>(35 - 171)            | 63<br>(27 - 129)         | 92<br>(41 - 173)            | 10<br>(4 - 19)              | 4<br>(1 - 7)               |
| Typhoid fever                                                     | 182<br>(84 - 331)           | 55<br>(20 - 115)            | 48<br>(19 - 97)          | 69<br>(29 - 139)            | 7<br>(2 - 14)               | 2<br>(1 - 5)               |
| Paratyphoid fever                                                 | 50<br>(23 - 94)             | 18<br>(6 - 39)              | 13<br>(5 - 30)           | 17<br>(7 - 36)              | 2<br>(0 - 3)                | 1<br>(0 - 1)               |
| Other intestinal infectious diseases                              | 23<br>(11 - 39)             | 13<br>(5 - 26)              | 2<br>(0 - 7)             | 5<br>(1 - 13)               | 1<br>(0 - 6)                | 1<br>(0 - 4)               |
| Lower respiratory infections                                      | 7,368<br>(5,239 - 9,806)    | 4,188<br>(2,351 - 6,339)    | 213<br>(109 - 401)       | 745<br>(472 - 1,098)        | 996<br>(649 - 1,481)        | 1,225<br>(827 - 1,721)     |
| Upper respiratory infections                                      | 8<br>(3 - 17)               | 3<br>(0 - 11)               | 0<br>(0 - 1)             | 3<br>(1 - 6)                | 1<br>(0 - 4)                | 1<br>(0 - 3)               |
| Otitis media                                                      | 8<br>(5 - 12)               | 4<br>(2 - 8)                | 1<br>(0 - 1)             | 2<br>(1 - 3)                | 1<br>(0 - 1)                | 1<br>(0 - 1)               |
| Meningitis                                                        | 1,948<br>(1,207 - 3,316)    | 1,116<br>(468 - 2,352)      | 159<br>(75 - 311)        | 417<br>(277 - 645)          | 189<br>(110 - 302)          | 68<br>(39 - 116)           |
| Pneumococcal meningitis                                           | 447<br>(258 - 768)          | 209<br>(76 - 493)           | 51<br>(20 - 112)         | 110<br>(49 - 197)           | 57<br>(29 - 103)            | 20<br>(10 - 37)            |
| H influenzae type B meningitis                                    | 450<br>(223 - 917)          | 342<br>(128 - 780)          | 37<br>(14 - 80)          | 48<br>(22 - 87)             | 16<br>(7 - 34)              | 7<br>(3 - 14)              |
| Meningococcal meningitis                                          | 259<br>(155 - 470)          | 111<br>(36 - 264)           | 19<br>(6 - 44)           | 79<br>(40 - 143)            | 36<br>(17 - 71)             | 15<br>(7 - 30)             |
| Other meningitis                                                  | 792<br>(454 - 1,391)        | 454<br>(172 - 1,028)        | 53<br>(19 - 106)         | 180<br>(111 - 290)          | 79<br>(39 - 135)            | 26<br>(13 - 49)            |
| Encephalitis                                                      | 42<br>(27 - 68)             | 25<br>(11 - 53)             | 2<br>(1 - 5)             | 9<br>(5 - 14)               | 4<br>(2 - 6)                | 2<br>(1 - 3)               |
| Diphtheria                                                        | 4<br>(0 - 22)               | 3<br>(0 - 21)               | 0<br>(0 - 3)             | 0<br>(0 - 1)                | 0<br>(0 - 1)                | --                         |
| Whooping cough                                                    | 1<br>(0 - 3)                | 0<br>(0 - 2)                | 0<br>(0 - 0)             | 0<br>(0 - 0)                | 0<br>(0 - 0)                | --                         |
| Tetanus                                                           | 677<br>(223 - 1,309)        | 421<br>(109 - 1,058)        | 33<br>(4 - 76)           | 158<br>(30 - 270)           | 56<br>(9 - 104)             | 9<br>(1 - 19)              |
| Measles                                                           | 1,004<br>(29 - 5,139)       | 884<br>(26 - 4,419)         | 102<br>(3 - 593)         | 18<br>(0 - 117)             | 1<br>(0 - 4)                | --                         |
| Varicella and herpes zoster                                       | 15<br>(5 - 35)              | 6<br>(0 - 25)               | 1<br>(0 - 5)             | 4<br>(1 - 10)               | 1<br>(0 - 4)                | 3<br>(0 - 12)              |
| Neglected tropical diseases and malaria                           | 3,495<br>(2,375 - 5,402)    | 1,513<br>(661 - 3,155)      | 479<br>(269 - 836)       | 1,122<br>(746 - 1,540)      | 267<br>(176 - 408)          | 115<br>(70 - 178)          |
| Malaria                                                           | 1,703<br>(841 - 3,414)      | 1,027<br>(255 - 2,596)      | 179<br>(73 - 400)        | 318<br>(165 - 558)          | 123<br>(50 - 260)           | 56<br>(21 - 119)           |
| Leishmaniasis                                                     | 1,452<br>(794 - 2,125)      | 432<br>(183 - 802)          | 257<br>(118 - 498)       | 626<br>(241 - 928)          | 95<br>(58 - 149)            | 42<br>(25 - 61)            |
| Visceral leishmaniasis                                            | 1,452<br>(794 - 2,125)      | 432<br>(183 - 802)          | 257<br>(118 - 498)       | 626<br>(241 - 928)          | 95<br>(58 - 149)            | 42<br>(25 - 61)            |
| African trypanosomiasis                                           | 156<br>(80 - 246)           | 9<br>(3 - 19)               | 16<br>(7 - 30)           | 107<br>(54 - 171)           | 20<br>(10 - 32)             | 4<br>(2 - 7)               |
| Schistosomiasis                                                   | 34<br>(23 - 50)             | 1<br>(0 - 1)                | 1<br>(0 - 2)             | 17<br>(10 - 27)             | 12<br>(6 - 20)              | 4<br>(2 - 7)               |
| Cysticercosis                                                     | 3<br>(1 - 8)                | 0<br>(0 - 0)                | 0<br>(0 - 0)             | 2<br>(0 - 5)                | 0<br>(0 - 1)                | 0<br>(0 - 0)               |
| Cystic echinococcosis                                             | 30<br>(23 - 36)             | 4<br>(2 - 7)                | 4<br>(3 - 7)             | 15<br>(11 - 19)             | 4<br>(3 - 6)                | 1<br>(1 - 2)               |
| Dengue                                                            | 2<br>(1 - 2)                | 0<br>(0 - 1)                | 0<br>(0 - 0)             | 1<br>(0 - 1)                | 0<br>(0 - 0)                | 0<br>(0 - 0)               |
| Yellow fever                                                      | 23<br>(10 - 53)             | 2<br>(0 - 9)                | 4<br>(0 - 16)            | 14<br>(4 - 41)              | 2<br>(0 - 8)                | 1<br>(0 - 4)               |
| Rabies                                                            | 40<br>(23 - 79)             | 9<br>(3 - 24)               | 15<br>(5 - 26)           | 15<br>(9 - 32)              | 4<br>(2 - 7)                | 1<br>(0 - 1)               |
| Intestinal nematode infections                                    | 23<br>(8 - 47)              | 18<br>(5 - 40)              | 3<br>(0 - 10)            | 1<br>(0 - 6)                | 0<br>(0 - 3)                | 0<br>(0 - 3)               |
| Ascariasis                                                        | 23<br>(8 - 47)              | 18<br>(5 - 40)              | 3<br>(0 - 10)            | 1<br>(0 - 6)                | 0<br>(0 - 3)                | 0<br>(0 - 3)               |

Web Table 31- South Sudan deaths with 95% UI by age, sex, and cause in 2013

| Cause                                                            | Males, All Ages             | Males, 0-4 Years         | Males, 5-14 Years  | Males, 15-49 Years       | Males, 50-69 Years       | Males, 70-80 Years       |
|------------------------------------------------------------------|-----------------------------|--------------------------|--------------------|--------------------------|--------------------------|--------------------------|
| Other neglected tropical diseases                                | 29<br>(20 - 41)             | 10<br>(5 - 21)           | 1<br>(1 - 3)       | 7<br>(4 - 11)            | 6<br>(3 - 10)            | 5<br>(3 - 8)             |
| Maternal disorders                                               | --                          | --                       | --                 | --                       | --                       | --                       |
| Maternal hemorrhage                                              | --                          | --                       | --                 | --                       | --                       | --                       |
| Maternal sepsis and other maternal infections                    | --                          | --                       | --                 | --                       | --                       | --                       |
| Maternal hypertensive disorders                                  | --                          | --                       | --                 | --                       | --                       | --                       |
| Maternal obstructed labor                                        | --                          | --                       | --                 | --                       | --                       | --                       |
| Maternal abortive outcome                                        | --                          | --                       | --                 | --                       | --                       | --                       |
| Indirect maternal deaths                                         | --                          | --                       | --                 | --                       | --                       | --                       |
| Late maternal deaths                                             | --                          | --                       | --                 | --                       | --                       | --                       |
| Maternal deaths aggravated by HIV/AIDS                           | --                          | --                       | --                 | --                       | --                       | --                       |
| Other maternal disorders                                         | --                          | --                       | --                 | --                       | --                       | --                       |
| Neonatal disorders                                               | 4,977<br>(3,899 - 6,380)    | 4,977<br>(3,899 - 6,380) | --                 | --                       | --                       | --                       |
| Neonatal preterm birth complications                             | 1,536<br>(690 - 2,753)      | 1,536<br>(690 - 2,753)   | --                 | --                       | --                       | --                       |
| Neonatal encephalopathy due to birth asphyxia and trauma         | 1,292<br>(559 - 2,325)      | 1,292<br>(559 - 2,325)   | --                 | --                       | --                       | --                       |
| Neonatal sepsis and other neonatal infections                    | 1,022<br>(408 - 2,010)      | 1,022<br>(408 - 2,010)   | --                 | --                       | --                       | --                       |
| Hemolytic disease and other neonatal jaundice                    | 44<br>(10 - 128)            | 44<br>(10 - 128)         | --                 | --                       | --                       | --                       |
| Other neonatal disorders                                         | 1,082<br>(493 - 1,955)      | 1,082<br>(493 - 1,955)   | --                 | --                       | --                       | --                       |
| Nutritional deficiencies                                         | 2,974<br>(1,655 - 5,002)    | 1,707<br>(733 - 3,217)   | 141<br>(68 - 282)  | 389<br>(226 - 638)       | 365<br>(193 - 604)       | 371<br>(199 - 605)       |
| Protein-energy malnutrition                                      | 2,338<br>(1,177 - 4,044)    | 1,560<br>(657 - 2,946)   | 109<br>(45 - 231)  | 197<br>(85 - 385)        | 236<br>(90 - 430)        | 235<br>(88 - 428)        |
| Iodine deficiency                                                | 10<br>(1 - 37)              | 3<br>(0 - 23)            | 1<br>(0 - 6)       | 3<br>(0 - 14)            | 2<br>(0 - 9)             | 1<br>(0 - 6)             |
| Iron-deficiency anemia                                           | 614<br>(241 - 1,187)        | 143<br>(18 - 469)        | 31<br>(8 - 80)     | 184<br>(74 - 341)        | 124<br>(43 - 263)        | 132<br>(47 - 277)        |
| Other nutritional deficiencies                                   | 12<br>(4 - 25)              | 1<br>(0 - 3)             | 1<br>(0 - 2)       | 5<br>(1 - 10)            | 3<br>(1 - 6)             | 3<br>(1 - 7)             |
| Other communicable, maternal, neonatal, and nutritional diseases | 1,777<br>(1,036 - 2,807)    | 1,391<br>(727 - 2,341)   | 103<br>(49 - 210)  | 131<br>(82 - 193)        | 101<br>(53 - 180)        | 50<br>(23 - 105)         |
| Sexually transmitted diseases excluding HIV                      | 1,393<br>(702 - 2,360)      | 1,274<br>(627 - 2,192)   | 85<br>(37 - 188)   | 15<br>(7 - 23)           | 13<br>(5 - 30)           | 6<br>(2 - 15)            |
| Syphilis                                                         | 1,381<br>(691 - 2,347)      | 1,274<br>(627 - 2,192)   | 85<br>(36 - 186)   | 8<br>(4 - 13)            | 9<br>(3 - 21)            | 5<br>(2 - 13)            |
| Chlamydial infection                                             | --                          | --                       | --                 | --                       | --                       | --                       |
| Gonococcal infection                                             | 7<br>(3 - 11)               | --                       | 0<br>(0 - 1)       | 4<br>(2 - 6)             | 2<br>(1 - 5)             | 1<br>(0 - 2)             |
| Other sexually transmitted diseases                              | 5<br>(2 - 8)                | --                       | 0<br>(0 - 1)       | 3<br>(2 - 5)             | 1<br>(0 - 3)             | 0<br>(0 - 1)             |
| Hepatitis                                                        | 95<br>(65 - 126)            | 13<br>(5 - 24)           | 5<br>(3 - 10)      | 45<br>(30 - 65)          | 25<br>(14 - 37)          | 7<br>(4 - 11)            |
| Acute hepatitis A                                                | 9<br>(3 - 19)               | 4<br>(1 - 10)            | 2<br>(1 - 4)       | 3<br>(1 - 7)             | 0<br>(0 - 1)             | 0<br>(0 - 0)             |
| Acute hepatitis B                                                | 65<br>(41 - 93)             | 8<br>(3 - 18)            | 3<br>(1 - 6)       | 26<br>(13 - 43)          | 21<br>(11 - 32)          | 7<br>(4 - 10)            |
| Acute hepatitis C                                                | 1<br>(0 - 4)                | --                       | 0<br>(0 - 0)       | 1<br>(0 - 2)             | 0<br>(0 - 1)             | 0<br>(0 - 0)             |
| Acute hepatitis E                                                | 19<br>(7 - 40)              | 0<br>(0 - 0)             | 1<br>(0 - 2)       | 15<br>(6 - 33)           | 3<br>(1 - 8)             | 0<br>(0 - 1)             |
| Other infectious diseases                                        | 289<br>(153 - 603)          | 104<br>(35 - 339)        | 13<br>(4 - 37)     | 71<br>(34 - 131)         | 63<br>(23 - 135)         | 37<br>(12 - 87)          |
| Non-communicable diseases                                        | 19,275<br>(15,273 - 23,477) | 1,572<br>(881 - 2,982)   | 370<br>(233 - 620) | 3,926<br>(2,927 - 4,967) | 7,182<br>(5,323 - 9,217) | 6,225<br>(5,057 - 7,470) |
| Neoplasms                                                        | 2,682<br>(2,089 - 3,365)    | 89<br>(45 - 151)         | 69<br>(41 - 127)   | 548<br>(401 - 719)       | 1,214<br>(901 - 1,592)   | 761<br>(588 - 959)       |
| Esophageal cancer                                                | 442<br>(299 - 622)          | --                       | --                 | 53<br>(31 - 86)          | 264<br>(169 - 391)       | 125<br>(80 - 179)        |
| Stomach cancer                                                   | 250<br>(183 - 339)          | --                       | --                 | 48<br>(33 - 68)          | 122<br>(84 - 174)        | 80<br>(56 - 113)         |
| Liver cancer                                                     | 303<br>(213 - 415)          | --                       | 4<br>(2 - 9)       | 105<br>(66 - 154)        | 138<br>(87 - 213)        | 56<br>(36 - 87)          |
| Liver cancer due to hepatitis B                                  | 94<br>(49 - 157)            | --                       | 2<br>(1 - 4)       | 43<br>(22 - 69)          | 38<br>(16 - 78)          | 12<br>(5 - 22)           |

Web Table 31- South Sudan deaths with 95% UI by age, sex, and cause in 2013

| Cause                                | Males, All Ages          | Males, 0-4 Years  | Males, 5-14 Years | Males, 15-49 Years     | Males, 50-69 Years       | Males, 70-80 Years       |
|--------------------------------------|--------------------------|-------------------|-------------------|------------------------|--------------------------|--------------------------|
| Liver cancer due to hepatitis C      | 140<br>(75 - 216)        | --                | 1<br>(0 - 3)      | 40<br>(13 - 73)        | 69<br>(32 - 117)         | 30<br>(14 - 50)          |
| Liver cancer due to alcohol use      | 39<br>(21 - 66)          | --                | --                | 9<br>(4 - 15)          | 19<br>(9 - 37)           | 11<br>(5 - 20)           |
| Liver cancer due to other causes     | 31<br>(18 - 53)          | --                | 2<br>(1 - 4)      | 14<br>(7 - 23)         | 11<br>(5 - 23)           | 4<br>(2 - 7)             |
| Larynx cancer                        | 36<br>(26 - 52)          | --                | --                | 5<br>(3 - 8)           | 18<br>(12 - 28)          | 13<br>(8 - 18)           |
| Tracheal, bronchus and lung cancer   | 221<br>(162 - 295)       | --                | --                | 19<br>(12 - 26)        | 144<br>(101 - 201)       | 58<br>(43 - 78)          |
| Breast cancer                        | 16<br>(9 - 27)           | --                | --                | 3<br>(2 - 5)           | 9<br>(4 - 17)            | 4<br>(2 - 8)             |
| Cervical cancer                      | --                       | --                | --                | --                     | --                       | --                       |
| Uterine cancer                       | --                       | --                | --                | --                     | --                       | --                       |
| Prostate cancer                      | 235<br>(137 - 373)       | --                | --                | 4<br>(2 - 8)           | 76<br>(42 - 129)         | 155<br>(88 - 242)        |
| Colon and rectum cancer              | 195<br>(146 - 248)       | --                | --                | 55<br>(39 - 73)        | 87<br>(62 - 118)         | 52<br>(39 - 67)          |
| Lip and oral cavity cancer           | 45<br>(29 - 64)          | --                | --                | 9<br>(6 - 14)          | 24<br>(14 - 37)          | 12<br>(8 - 18)           |
| Nasopharynx cancer                   | 13<br>(9 - 18)           | --                | 1<br>(0 - 1)      | 7<br>(4 - 10)          | 5<br>(3 - 7)             | 1<br>(1 - 2)             |
| Other pharynx cancer                 | 24<br>(17 - 35)          | --                | --                | 5<br>(3 - 8)           | 14<br>(9 - 22)           | 5<br>(3 - 8)             |
| Gallbladder and biliary tract cancer | 23<br>(16 - 32)          | --                | --                | 8<br>(4 - 12)          | 10<br>(6 - 16)           | 6<br>(4 - 8)             |
| Pancreatic cancer                    | 64<br>(47 - 86)          | --                | --                | 15<br>(10 - 21)        | 36<br>(25 - 51)          | 13<br>(9 - 19)           |
| Malignant skin melanoma              | 12<br>(6 - 25)           | --                | --                | 4<br>(2 - 9)           | 5<br>(2 - 10)            | 3<br>(2 - 6)             |
| Non-melanoma skin cancer             | 12<br>(6 - 18)           | --                | --                | 2<br>(1 - 3)           | 5<br>(2 - 9)             | 5<br>(2 - 8)             |
| Ovarian cancer                       | --                       | --                | --                | --                     | --                       | --                       |
| Testicular cancer                    | 13<br>(8 - 18)           | --                | --                | 7<br>(4 - 11)          | 4<br>(2 - 8)             | 2<br>(1 - 2)             |
| Kidney cancer                        | 68<br>(40 - 105)         | 11<br>(4 - 24)    | 4<br>(2 - 8)      | 8<br>(5 - 12)          | 34<br>(17 - 58)          | 12<br>(6 - 20)           |
| Bladder cancer                       | 85<br>(61 - 119)         | --                | --                | 9<br>(5 - 14)          | 37<br>(25 - 55)          | 39<br>(27 - 58)          |
| Brain and nervous system cancer      | 46<br>(31 - 77)          | 0<br>(0 - 1)      | 6<br>(3 - 12)     | 18<br>(12 - 31)        | 15<br>(9 - 30)           | 6<br>(4 - 10)            |
| Thyroid cancer                       | 6<br>(4 - 8)             | --                | 0<br>(0 - 0)      | 1<br>(1 - 2)           | 2<br>(1 - 4)             | 2<br>(1 - 3)             |
| Mesothelioma                         | 4<br>(2 - 8)             | --                | --                | 0<br>(0 - 1)           | 2<br>(1 - 5)             | 1<br>(1 - 3)             |
| Hodgkin lymphoma                     | 25<br>(12 - 37)          | 2<br>(1 - 4)      | 2<br>(1 - 5)      | 9<br>(5 - 17)          | 7<br>(3 - 12)            | 4<br>(2 - 8)             |
| Non-Hodgkin lymphoma                 | 199<br>(132 - 291)       | 30<br>(11 - 64)   | 27<br>(13 - 55)   | 62<br>(42 - 87)        | 52<br>(31 - 90)          | 28<br>(18 - 49)          |
| Multiple myeloma                     | 26<br>(16 - 52)          | --                | --                | 6<br>(3 - 9)           | 12<br>(7 - 26)           | 8<br>(5 - 15)            |
| Leukemia                             | 53<br>(39 - 71)          | 3<br>(1 - 6)      | 5<br>(3 - 10)     | 26<br>(19 - 36)        | 9<br>(6 - 14)            | 9<br>(6 - 13)            |
| Other neoplasms                      | 265<br>(194 - 374)       | 43<br>(24 - 74)   | 21<br>(10 - 41)   | 59<br>(38 - 100)       | 83<br>(52 - 130)         | 60<br>(40 - 86)          |
| Cardiovascular diseases              | 8,014<br>(6,277 - 9,944) | 104<br>(58 - 173) | 52<br>(29 - 92)   | 1,236<br>(910 - 1,596) | 3,398<br>(2,516 - 4,390) | 3,225<br>(2,574 - 3,921) |
| Rheumatic heart disease              | 317<br>(196 - 531)       | 6<br>(2 - 18)     | 13<br>(6 - 27)    | 125<br>(72 - 215)      | 109<br>(61 - 192)        | 64<br>(36 - 108)         |
| Ischemic heart disease               | 2,204<br>(1,585 - 2,878) | 1<br>(0 - 2)      | 3<br>(1 - 5)      | 282<br>(189 - 394)     | 1,047<br>(724 - 1,434)   | 871<br>(621 - 1,132)     |
| Cerebrovascular disease              | 3,347<br>(2,460 - 4,334) | 13<br>(7 - 24)    | 9<br>(4 - 17)     | 368<br>(244 - 517)     | 1,417<br>(983 - 1,922)   | 1,540<br>(1,160 - 1,968) |
| Ischemic stroke                      | 1,490<br>(807 - 2,126)   | 2<br>(0 - 4)      | 1<br>(0 - 2)      | 61<br>(25 - 100)       | 522<br>(256 - 803)       | 904<br>(508 - 1,278)     |
| Hemorrhagic stroke                   | 1,857<br>(1,225 - 2,604) | 12<br>(6 - 22)    | 8<br>(4 - 15)     | 307<br>(199 - 442)     | 895<br>(579 - 1,271)     | 636<br>(343 - 976)       |
| Hypertensive heart disease           | 588<br>(369 - 926)       | 2<br>(0 - 4)      | 1<br>(0 - 2)      | 70<br>(36 - 111)       | 239<br>(137 - 382)       | 277<br>(155 - 505)       |
| Cardiomyopathy and myocarditis       | 451<br>(225 - 654)       | 44<br>(10 - 88)   | 13<br>(3 - 25)    | 140<br>(55 - 218)      | 161<br>(82 - 254)        | 93<br>(53 - 148)         |
| Atrial fibrillation and flutter      | 2<br>(1 - 5)             | --                | --                | 0<br>(0 - 0)           | 1<br>(0 - 2)             | 1<br>(1 - 3)             |
| Aortic aneurysm                      | 126<br>(75 - 195)        | --                | --                | 18<br>(8 - 29)         | 55<br>(30 - 91)          | 53<br>(31 - 82)          |
| Peripheral vascular disease          | 6<br>(3 - 10)            | --                | --                | 0<br>(0 - 1)           | 2<br>(1 - 4)             | 4<br>(2 - 6)             |



Web Table 31- South Sudan deaths with 95% UI by age, sex, and cause in 2013

| Cause                                               | Males, All Ages          | Males, 0-4 Years | Males, 5-14 Years | Males, 15-49 Years | Males, 50-69 Years | Males, 70-80 Years |
|-----------------------------------------------------|--------------------------|------------------|-------------------|--------------------|--------------------|--------------------|
| Endocarditis                                        | 106<br>(64 - 165)        | 4<br>(2 - 10)    | 2<br>(1 - 4)      | 28<br>(16 - 44)    | 39<br>(22 - 66)    | 33<br>(19 - 53)    |
| Other cardiovascular and circulatory diseases       | 867<br>(568 - 1,346)     | 33<br>(14 - 69)  | 12<br>(5 - 25)    | 204<br>(125 - 306) | 328<br>(199 - 518) | 289<br>(186 - 461) |
| Chronic respiratory diseases                        | 1,349<br>(989 - 1,912)   | 62<br>(27 - 117) | 15<br>(8 - 27)    | 181<br>(122 - 265) | 493<br>(331 - 736) | 600<br>(436 - 846) |
| Chronic obstructive pulmonary disease               | 796<br>(547 - 1,170)     | 15<br>(4 - 34)   | 7<br>(3 - 13)     | 72<br>(40 - 120)   | 304<br>(190 - 480) | 399<br>(278 - 582) |
| Pneumoconiosis                                      | 186<br>(85 - 319)        | 3<br>(1 - 9)     | 2<br>(1 - 4)      | 43<br>(19 - 74)    | 77<br>(31 - 139)   | 60<br>(28 - 108)   |
| Silicosis                                           | 52<br>(13 - 130)         | 1<br>(0 - 4)     | 1<br>(0 - 1)      | 11<br>(2 - 30)     | 20<br>(4 - 54)     | 18<br>(5 - 46)     |
| Asbestosis                                          | 21<br>(8 - 42)           | 0<br>(0 - 1)     | 0<br>(0 - 1)      | 5<br>(2 - 10)      | 10<br>(4 - 21)     | 5<br>(2 - 11)      |
| Coal workers pneumoconiosis                         | 26<br>(9 - 54)           | 0<br>(0 - 1)     | 0<br>(0 - 1)      | 5<br>(2 - 11)      | 11<br>(3 - 26)     | 8<br>(2 - 19)      |
| Other pneumoconiosis                                | 87<br>(39 - 165)         | 1<br>(0 - 4)     | 1<br>(0 - 1)      | 22<br>(10 - 40)    | 35<br>(14 - 72)    | 28<br>(11 - 56)    |
| Asthma                                              | 174<br>(93 - 314)        | 3<br>(1 - 10)    | 1<br>(0 - 3)      | 28<br>(14 - 54)    | 61<br>(29 - 116)   | 81<br>(41 - 143)   |
| Interstitial lung disease and pulmonary sarcoidosis | 82<br>(18 - 179)         | 1<br>(0 - 7)     | 0<br>(0 - 1)      | 8<br>(2 - 27)      | 32<br>(7 - 77)     | 40<br>(8 - 89)     |
| Other chronic respiratory diseases                  | 111<br>(50 - 203)        | 39<br>(17 - 73)  | 5<br>(2 - 10)     | 29<br>(11 - 54)    | 19<br>(6 - 43)     | 20<br>(7 - 47)     |
| Cirrhosis                                           | 1,033<br>(644 - 1,473)   | 16<br>(5 - 37)   | 12<br>(6 - 21)    | 337<br>(204 - 509) | 483<br>(282 - 726) | 186<br>(114 - 279) |
| Cirrhosis due to hepatitis B                        | 236<br>(96 - 412)        | 1<br>(0 - 2)     | 2<br>(1 - 4)      | 79<br>(35 - 141)   | 113<br>(39 - 208)  | 42<br>(12 - 81)    |
| Cirrhosis due to hepatitis C                        | 226<br>(118 - 376)       | 2<br>(0 - 7)     | 2<br>(0 - 5)      | 58<br>(24 - 114)   | 112<br>(56 - 193)  | 52<br>(25 - 87)    |
| Cirrhosis due to alcohol use                        | 440<br>(239 - 655)       | --               | --                | 138<br>(72 - 222)  | 220<br>(109 - 329) | 82<br>(42 - 130)   |
| Cirrhosis due to other causes                       | 131<br>(70 - 204)        | 13<br>(4 - 32)   | 8<br>(4 - 14)     | 62<br>(32 - 100)   | 38<br>(17 - 69)    | 10<br>(4 - 18)     |
| Digestive diseases                                  | 1,406<br>(1,058 - 1,800) | 63<br>(23 - 140) | 52<br>(29 - 91)   | 488<br>(340 - 654) | 469<br>(325 - 642) | 334<br>(249 - 435) |
| Peptic ulcer disease                                | 459<br>(293 - 701)       | 7<br>(1 - 23)    | 7<br>(3 - 14)     | 145<br>(79 - 256)  | 173<br>(105 - 278) | 126<br>(79 - 188)  |
| Gastritis and duodenitis                            | 50<br>(23 - 116)         | 3<br>(1 - 9)     | 3<br>(1 - 6)      | 17<br>(9 - 35)     | 15<br>(6 - 40)     | 12<br>(4 - 40)     |
| Appendicitis                                        | 114<br>(68 - 170)        | 6<br>(1 - 21)    | 11<br>(4 - 24)    | 50<br>(28 - 78)    | 29<br>(14 - 53)    | 16<br>(7 - 31)     |
| Paralytic ileus and intestinal obstruction          | 339<br>(176 - 498)       | 9<br>(2 - 25)    | 13<br>(6 - 27)    | 120<br>(52 - 193)  | 117<br>(55 - 183)  | 80<br>(44 - 139)   |
| Inguinal, femoral, and abdominal hernia             | 27<br>(14 - 44)          | 0<br>(0 - 1)     | 1<br>(0 - 3)      | 9<br>(5 - 14)      | 9<br>(4 - 17)      | 8<br>(4 - 14)      |
| Inflammatory bowel disease                          | 73<br>(32 - 117)         | 15<br>(3 - 42)   | 4<br>(1 - 8)      | 24<br>(11 - 40)    | 17<br>(6 - 30)     | 13<br>(4 - 28)     |
| Vascular intestinal disorders                       | 10<br>(4 - 23)           | 1<br>(0 - 2)     | 0<br>(0 - 1)      | 2<br>(1 - 6)       | 4<br>(1 - 9)       | 4<br>(1 - 8)       |
| Gallbladder and biliary diseases                    | 68<br>(43 - 99)          | 2<br>(0 - 6)     | 2<br>(1 - 3)      | 16<br>(9 - 27)     | 24<br>(13 - 42)    | 24<br>(13 - 40)    |
| Pancreatitis                                        | 87<br>(45 - 139)         | 1<br>(0 - 3)     | 1<br>(0 - 3)      | 48<br>(24 - 80)    | 26<br>(12 - 46)    | 11<br>(5 - 20)     |
| Other digestive diseases                            | 179<br>(105 - 276)       | 18<br>(5 - 43)   | 8<br>(4 - 17)     | 57<br>(30 - 96)    | 57<br>(29 - 95)    | 39<br>(20 - 70)    |
| Neurological disorders                              | 593<br>(438 - 768)       | 50<br>(21 - 102) | 47<br>(21 - 95)   | 192<br>(119 - 297) | 57<br>(39 - 82)    | 246<br>(185 - 309) |
| Alzheimer disease and other dementias               | 230<br>(172 - 294)       | --               | --                | 0<br>(0 - 0)       | 27<br>(18 - 37)    | 204<br>(151 - 263) |
| Parkinson disease                                   | 5<br>(2 - 11)            | --               | --                | 0<br>(0 - 0)       | 0<br>(0 - 0)       | 5<br>(2 - 10)      |
| Epilepsy                                            | 306<br>(190 - 462)       | 40<br>(13 - 90)  | 44<br>(18 - 90)   | 171<br>(99 - 276)  | 19<br>(9 - 33)     | 32<br>(15 - 55)    |
| Multiple sclerosis                                  | 1<br>(0 - 3)             | --               | --                | 1<br>(0 - 2)       | 0<br>(0 - 1)       | 0<br>(0 - 0)       |
| Other neurological disorders                        | 50<br>(33 - 94)          | 10<br>(4 - 39)   | 4<br>(2 - 9)      | 19<br>(13 - 32)    | 11<br>(7 - 17)     | 6<br>(4 - 9)       |
| Mental and substance use disorders                  | 237<br>(135 - 391)       | 9<br>(1 - 28)    | 0<br>(0 - 0)      | 163<br>(87 - 271)  | 55<br>(30 - 103)   | 9<br>(5 - 17)      |
| Schizophrenia                                       | 3<br>(1 - 6)             | --               | --                | 2<br>(1 - 3)       | 1<br>(0 - 2)       | 0<br>(0 - 1)       |
| Alcohol use disorders                               | 169<br>(77 - 319)        | --               | --                | 113<br>(50 - 209)  | 49<br>(24 - 97)    | 7<br>(3 - 15)      |
| Drug use disorders                                  | 65<br>(33 - 126)         | 9<br>(1 - 28)    | --                | 48<br>(26 - 106)   | 5<br>(2 - 11)      | 2<br>(1 - 3)       |
| Opioid use disorders                                | 7<br>(3 - 13)            | 1<br>(0 - 3)     | --                | 5<br>(3 - 11)      | 1<br>(0 - 1)       | 0<br>(0 - 0)       |
| Cocaine use disorders                               | 0<br>(0 - 0)             | 0<br>(0 - 0)     | --                | 0<br>(0 - 0)       | 0<br>(0 - 0)       | 0<br>(0 - 0)       |

Web Table 31- South Sudan deaths with 95% UI by age, sex, and cause in 2013

| Cause                                               | Males, All Ages          | Males, 0-4 Years     | Males, 5-14 Years | Males, 15-49 Years | Males, 50-69 Years   | Males, 70-80 Years   |
|-----------------------------------------------------|--------------------------|----------------------|-------------------|--------------------|----------------------|----------------------|
| Amphetamine use disorders                           | 0<br>(0 - 0)             | 0<br>(0 - 0)         | --                | 0<br>(0 - 0)       | 0<br>(0 - 0)         | 0<br>(0 - 0)         |
| Other drug use disorders                            | 57<br>(29 - 111)         | 8<br>(1 - 24)        | --                | 43<br>(23 - 94)    | 5<br>(2 - 10)        | 1<br>(0 - 3)         |
| Eating disorders                                    | 0<br>(0 - 0)             | --                   | 0<br>(0 - 0)      | 0<br>(0 - 0)       | --                   | --                   |
| Anorexia nervosa                                    | 0<br>(0 - 0)             | --                   | 0<br>(0 - 0)      | 0<br>(0 - 0)       | --                   | --                   |
| Diabetes, urogenital, blood, and endocrine diseases | 2,674<br>(2,014 - 3,390) | 224<br>(120 - 381)   | 69<br>(40 - 118)  | 652<br>(477 - 846) | 935<br>(634 - 1,303) | 794<br>(578 - 1,029) |
| Diabetes mellitus                                   | 1,299<br>(863 - 1,749)   | 15<br>(9 - 23)       | 6<br>(3 - 11)     | 196<br>(128 - 269) | 590<br>(371 - 852)   | 491<br>(310 - 664)   |
| Acute glomerulonephritis                            | 21<br>(8 - 37)           | 3<br>(1 - 6)         | 1<br>(0 - 2)      | 2<br>(1 - 4)       | 10<br>(2 - 21)       | 5<br>(2 - 10)        |
| Chronic kidney disease                              | 467<br>(312 - 672)       | 38<br>(17 - 69)      | 13<br>(7 - 26)    | 178<br>(119 - 253) | 116<br>(64 - 198)    | 122<br>(75 - 184)    |
| Chronic kidney disease due to diabetes mellitus     | 3<br>(1 - 6)             | 0<br>(0 - 0)         | 0<br>(0 - 0)      | 1<br>(0 - 2)       | 1<br>(0 - 2)         | 1<br>(0 - 2)         |
| Chronic kidney disease due to hypertension          | 165<br>(103 - 254)       | 4<br>(1 - 11)        | 1<br>(0 - 3)      | 38<br>(20 - 63)    | 59<br>(32 - 98)      | 63<br>(37 - 98)      |
| Chronic kidney disease due to glomerulonephritis    | 151<br>(93 - 231)        | 23<br>(10 - 45)      | 8<br>(5 - 16)     | 67<br>(41 - 104)   | 29<br>(14 - 50)      | 24<br>(10 - 42)      |
| Chronic kidney disease due to other causes          | 147<br>(73 - 253)        | 10<br>(3 - 25)       | 4<br>(1 - 9)      | 72<br>(36 - 120)   | 27<br>(8 - 66)       | 34<br>(12 - 67)      |
| Urinary diseases and male infertility               | 448<br>(299 - 621)       | 30<br>(11 - 66)      | 9<br>(5 - 17)     | 137<br>(83 - 200)  | 151<br>(85 - 233)    | 121<br>(75 - 180)    |
| Interstitial nephritis and urinary tract infections | 320<br>(207 - 459)       | 22<br>(8 - 51)       | 6<br>(3 - 11)     | 93<br>(53 - 137)   | 107<br>(61 - 172)    | 92<br>(54 - 144)     |
| Urolithiasis                                        | 9<br>(4 - 21)            | --                   | 0<br>(0 - 1)      | 3<br>(2 - 7)       | 4<br>(1 - 9)         | 2<br>(1 - 6)         |
| Other urinary diseases                              | 119<br>(63 - 210)        | 8<br>(2 - 19)        | 3<br>(1 - 6)      | 40<br>(21 - 68)    | 41<br>(17 - 79)      | 27<br>(10 - 60)      |
| Gynecological diseases                              | --                       | --                   | --                | --                 | --                   | --                   |
| Uterine fibroids                                    | --                       | --                   | --                | --                 | --                   | --                   |
| Polycystic ovarian syndrome                         | --                       | --                   | --                | --                 | --                   | --                   |
| Endometriosis                                       | --                       | --                   | --                | --                 | --                   | --                   |
| Genital prolapse                                    | --                       | --                   | --                | --                 | --                   | --                   |
| Other gynecological diseases                        | --                       | --                   | --                | --                 | --                   | --                   |
| Hemoglobinopathies and hemolytic anemias            | 213<br>(107 - 354)       | 95<br>(26 - 193)     | 29<br>(12 - 56)   | 59<br>(31 - 102)   | 17<br>(8 - 38)       | 12<br>(5 - 32)       |
| Thalassemias                                        | 9<br>(4 - 16)            | 6<br>(2 - 13)        | 1<br>(0 - 2)      | 2<br>(1 - 3)       | 0<br>(0 - 0)         | 0<br>(0 - 0)         |
| Sickle cell disorders                               | 167<br>(79 - 281)        | 78<br>(20 - 160)     | 26<br>(11 - 50)   | 51<br>(26 - 87)    | 12<br>(6 - 26)       | 1<br>(0 - 2)         |
| G6PD deficiency                                     | 5<br>(3 - 9)             | 3<br>(1 - 5)         | 1<br>(0 - 1)      | 1<br>(1 - 2)       | 0<br>(0 - 1)         | 0<br>(0 - 1)         |
| Other hemoglobinopathies and hemolytic anemias      | 31<br>(17 - 58)          | 8<br>(3 - 15)        | 1<br>(1 - 3)      | 6<br>(3 - 10)      | 5<br>(2 - 11)        | 11<br>(5 - 30)       |
| Endocrine, metabolic, blood, and immune disorders   | 226<br>(152 - 480)       | 44<br>(22 - 143)     | 10<br>(4 - 29)    | 79<br>(49 - 148)   | 50<br>(28 - 98)      | 43<br>(25 - 70)      |
| Musculoskeletal disorders                           | 99<br>(44 - 135)         | --                   | 10<br>(3 - 20)    | 43<br>(17 - 63)    | 28<br>(13 - 42)      | 17<br>(8 - 26)       |
| Rheumatoid arthritis                                | 16<br>(6 - 28)           | --                   | 2<br>(0 - 4)      | 5<br>(1 - 10)      | 6<br>(2 - 10)        | 5<br>(2 - 8)         |
| Other musculoskeletal disorders                     | 83<br>(38 - 115)         | --                   | 9<br>(3 - 17)     | 39<br>(16 - 57)    | 22<br>(10 - 34)      | 13<br>(6 - 20)       |
| Other non-communicable diseases                     | 1,188<br>(663 - 2,581)   | 956<br>(463 - 2,273) | 44<br>(21 - 101)  | 87<br>(62 - 115)   | 49<br>(30 - 71)      | 53<br>(34 - 77)      |
| Congenital anomalies                                | 993<br>(504 - 2,346)     | 895<br>(423 - 2,197) | 40<br>(18 - 96)   | 44<br>(30 - 63)    | 7<br>(5 - 11)        | 6<br>(4 - 8)         |
| Neural tube defects                                 | 243<br>(51 - 596)        | 228<br>(46 - 576)    | 7<br>(1 - 18)     | 8<br>(2 - 17)      | 1<br>(0 - 2)         | 0<br>(0 - 1)         |
| Congenital heart anomalies                          | 411<br>(146 - 1,152)     | 364<br>(108 - 1,082) | 21<br>(8 - 59)    | 22<br>(13 - 34)    | 3<br>(2 - 5)         | 2<br>(1 - 3)         |
| Cleft lip and cleft palate                          | 6<br>(1 - 16)            | 6<br>(1 - 16)        | --                | --                 | --                   | --                   |
| Down syndrome                                       | 69<br>(13 - 193)         | 58<br>(7 - 179)      | 4<br>(1 - 11)     | 6<br>(2 - 11)      | 1<br>(0 - 2)         | 0<br>(0 - 0)         |
| Chromosomal unbalanced rearrangements               | 20<br>(4 - 81)           | 18<br>(3 - 76)       | 1<br>(0 - 3)      | 1<br>(0 - 2)       | 0<br>(0 - 0)         | 0<br>(0 - 0)         |
| Other congenital anomalies                          | 244<br>(60 - 851)        | 221<br>(46 - 809)    | 8<br>(2 - 30)     | 9<br>(4 - 17)      | 3<br>(1 - 5)         | 3<br>(2 - 5)         |
| Skin and subcutaneous diseases                      | 172<br>(123 - 227)       | 38<br>(18 - 66)      | 4<br>(2 - 7)      | 43<br>(28 - 58)    | 41<br>(25 - 62)      | 47<br>(29 - 71)      |

Web Table 31- South Sudan deaths with 95% UI by age, sex, and cause in 2013

| Cause                                           | Males, All Ages          | Males, 0-4 Years     | Males, 5-14 Years  | Males, 15-49 Years       | Males, 50-69 Years   | Males, 70-80 Years |
|-------------------------------------------------|--------------------------|----------------------|--------------------|--------------------------|----------------------|--------------------|
| Cellulitis                                      | 115<br>(72 - 170)        | 25<br>(10 - 50)      | 3<br>(1 - 6)       | 29<br>(17 - 44)          | 29<br>(17 - 47)      | 30<br>(16 - 49)    |
| Pyoderma                                        | 42<br>(15 - 78)          | 11<br>(3 - 26)       | 1<br>(0 - 2)       | 10<br>(3 - 19)           | 10<br>(3 - 20)       | 11<br>(3 - 23)     |
| Decubitus ulcer                                 | 13<br>(3 - 26)           | 1<br>(0 - 3)         | 0<br>(0 - 1)       | 3<br>(1 - 6)             | 3<br>(1 - 6)         | 6<br>(2 - 13)      |
| Other skin and subcutaneous diseases            | 3<br>(0 - 8)             | 1<br>(0 - 3)         | 0<br>(0 - 0)       | 1<br>(0 - 3)             | 0<br>(0 - 1)         | 0<br>(0 - 1)       |
| Sudden infant death syndrome                    | 23<br>(5 - 73)           | 23<br>(5 - 73)       | --                 | --                       | --                   | --                 |
| Injuries                                        | 5,104<br>(3,835 - 6,437) | 740<br>(382 - 1,224) | 432<br>(268 - 724) | 2,779<br>(1,951 - 3,619) | 761<br>(493 - 1,073) | 391<br>(264 - 553) |
| Transport injuries                              | 2,299<br>(1,525 - 3,244) | 201<br>(77 - 431)    | 201<br>(104 - 364) | 1,315<br>(825 - 1,964)   | 390<br>(236 - 575)   | 191<br>(119 - 278) |
| Road injuries                                   | 2,221<br>(1,472 - 3,133) | 185<br>(70 - 399)    | 189<br>(98 - 343)  | 1,289<br>(810 - 1,923)   | 377<br>(226 - 557)   | 182<br>(115 - 264) |
| Pedestrian road injuries                        | 1,166<br>(694 - 1,827)   | 114<br>(37 - 261)    | 112<br>(53 - 218)  | 634<br>(343 - 1,015)     | 202<br>(113 - 320)   | 104<br>(59 - 168)  |
| Cyclist road injuries                           | 120<br>(60 - 186)        | 9<br>(2 - 25)        | 13<br>(5 - 28)     | 59<br>(29 - 98)          | 24<br>(11 - 42)      | 13<br>(6 - 26)     |
| Motorcyclist road injuries                      | 165<br>(87 - 299)        | 8<br>(3 - 18)        | 7<br>(3 - 16)      | 120<br>(61 - 229)        | 21<br>(10 - 38)      | 10<br>(4 - 17)     |
| Motor vehicle road injuries                     | 749<br>(419 - 1,178)     | 48<br>(17 - 113)     | 53<br>(22 - 107)   | 470<br>(248 - 758)       | 126<br>(65 - 201)    | 53<br>(27 - 86)    |
| Other road injuries                             | 21<br>(8 - 45)           | 5<br>(1 - 13)        | 4<br>(1 - 9)       | 6<br>(2 - 19)            | 4<br>(1 - 9)         | 3<br>(1 - 6)       |
| Other transport injuries                        | 78<br>(49 - 137)         | 16<br>(6 - 41)       | 12<br>(5 - 23)     | 27<br>(14 - 64)          | 14<br>(7 - 24)       | 9<br>(3 - 17)      |
| Unintentional injuries                          | 1,826<br>(1,381 - 2,342) | 516<br>(264 - 875)   | 208<br>(122 - 372) | 695<br>(502 - 1,005)     | 250<br>(168 - 352)   | 157<br>(103 - 220) |
| Falls                                           | 195<br>(122 - 287)       | 19<br>(8 - 40)       | 20<br>(8 - 43)     | 82<br>(51 - 125)         | 40<br>(19 - 71)      | 34<br>(16 - 57)    |
| Drowning                                        | 489<br>(301 - 765)       | 135<br>(42 - 300)    | 91<br>(44 - 173)   | 218<br>(141 - 330)       | 32<br>(19 - 50)      | 13<br>(7 - 23)     |
| Fire, heat, and hot substances                  | 316<br>(197 - 494)       | 140<br>(52 - 300)    | 27<br>(13 - 51)    | 78<br>(47 - 130)         | 42<br>(25 - 66)      | 29<br>(16 - 45)    |
| Poisonings                                      | 128<br>(78 - 304)        | 29<br>(10 - 77)      | 6<br>(2 - 17)      | 74<br>(41 - 178)         | 15<br>(8 - 30)       | 5<br>(2 - 10)      |
| Exposure to mechanical forces                   | 323<br>(213 - 559)       | 73<br>(32 - 150)     | 34<br>(16 - 77)    | 141<br>(88 - 275)        | 61<br>(31 - 99)      | 14<br>(8 - 21)     |
| Unintentional firearm injuries                  | 68<br>(39 - 112)         | 7<br>(3 - 15)        | 3<br>(1 - 7)       | 50<br>(26 - 86)          | 6<br>(3 - 10)        | 3<br>(1 - 4)       |
| Unintentional suffocation                       | 34<br>(1 - 83)           | 18<br>(1 - 56)       | 3<br>(0 - 9)       | 7<br>(0 - 15)            | 5<br>(0 - 14)        | 1<br>(0 - 3)       |
| Other exposure to mechanical forces             | 221<br>(137 - 403)       | 49<br>(19 - 105)     | 28<br>(12 - 69)    | 84<br>(47 - 212)         | 50<br>(25 - 85)      | 10<br>(5 - 16)     |
| Adverse effects of medical treatment            | 156<br>(103 - 235)       | 48<br>(19 - 98)      | 5<br>(2 - 11)      | 32<br>(19 - 54)          | 32<br>(17 - 56)      | 38<br>(15 - 69)    |
| Animal contact                                  | 76<br>(44 - 144)         | 14<br>(4 - 41)       | 11<br>(5 - 26)     | 26<br>(14 - 51)          | 15<br>(7 - 29)       | 11<br>(4 - 20)     |
| Venomous animal contact                         | 36<br>(18 - 74)          | 5<br>(1 - 23)        | 3<br>(1 - 10)      | 12<br>(6 - 26)           | 9<br>(4 - 18)        | 7<br>(2 - 15)      |
| Non-venomous animal contact                     | 40<br>(21 - 76)          | 9<br>(3 - 23)        | 8<br>(3 - 19)      | 14<br>(6 - 27)           | 6<br>(2 - 13)        | 3<br>(1 - 6)       |
| Foreign body                                    | 78<br>(35 - 135)         | 47<br>(18 - 91)      | 5<br>(2 - 9)       | 11<br>(5 - 18)           | 6<br>(3 - 9)         | 9<br>(3 - 16)      |
| Pulmonary aspiration and foreign body in airway | 74<br>(32 - 131)         | 46<br>(17 - 90)      | 5<br>(2 - 9)       | 10<br>(4 - 17)           | 5<br>(2 - 8)         | 9<br>(3 - 16)      |
| Foreign body in other body part                 | 3<br>(2 - 5)             | 1<br>(0 - 2)         | 0<br>(0 - 1)       | 1<br>(0 - 1)             | 1<br>(0 - 2)         | 0<br>(0 - 1)       |
| Other unintentional injuries                    | 65<br>(21 - 101)         | 12<br>(3 - 25)       | 9<br>(2 - 20)      | 33<br>(11 - 53)          | 7<br>(2 - 13)        | 4<br>(1 - 6)       |
| Self-harm and interpersonal violence            | 979<br>(441 - 1,500)     | 23<br>(8 - 49)       | 23<br>(8 - 52)     | 770<br>(347 - 1,169)     | 121<br>(40 - 228)    | 43<br>(9 - 89)     |
| Self-harm                                       | 398<br>(67 - 764)        | --                   | 9<br>(1 - 29)      | 275<br>(49 - 534)        | 77<br>(12 - 166)     | 37<br>(5 - 82)     |
| Interpersonal violence                          | 581<br>(237 - 845)       | 23<br>(8 - 49)       | 14<br>(4 - 28)     | 494<br>(201 - 738)       | 44<br>(15 - 76)      | 6<br>(2 - 12)      |
| Assault by firearm                              | 200<br>(59 - 344)        | 4<br>(1 - 10)        | 3<br>(1 - 7)       | 179<br>(54 - 319)        | 12<br>(3 - 24)       | 1<br>(0 - 3)       |
| Assault by sharp object                         | 115<br>(42 - 212)        | 3<br>(1 - 9)         | 2<br>(0 - 5)       | 97<br>(36 - 183)         | 12<br>(3 - 23)       | 1<br>(0 - 3)       |
| Assault by other means                          | 266<br>(103 - 408)       | 16<br>(6 - 32)       | 9<br>(3 - 18)      | 218<br>(80 - 349)        | 20<br>(6 - 36)       | 3<br>(1 - 7)       |

Web Table 31- South Sudan deaths with 95% UI by age, sex, and cause in 2013

| Cause                                                             | Females, All Ages           | Females, 0-4 Years          | Females, 5-14 Years      | Females, 15-49 Years        | Females, 50-69 Years      | Females, 70-80 Years      |
|-------------------------------------------------------------------|-----------------------------|-----------------------------|--------------------------|-----------------------------|---------------------------|---------------------------|
| All causes                                                        | 53,594<br>(46,898 - 60,794) | 19,222<br>(15,061 - 24,548) | 2,580<br>(1,839 - 4,468) | 13,334<br>(11,354 - 15,271) | 8,747<br>(6,917 - 11,289) | 9,710<br>(8,209 - 11,946) |
| Communicable, maternal, neonatal, and nutritional diseases        | 37,385<br>(32,013 - 43,335) | 17,249<br>(13,508 - 22,134) | 1,880<br>(1,319 - 3,318) | 10,918<br>(9,205 - 12,613)  | 3,809<br>(2,999 - 4,886)  | 3,529<br>(2,710 - 4,491)  |
| HIV/AIDS and tuberculosis                                         | 8,224<br>(6,321 - 10,016)   | 663<br>(420 - 988)          | 310<br>(209 - 443)       | 4,802<br>(3,549 - 5,998)    | 1,755<br>(1,330 - 2,302)  | 694<br>(493 - 967)        |
| Tuberculosis                                                      | 3,376<br>(2,373 - 4,474)    | 310<br>(136 - 570)          | 112<br>(55 - 213)        | 1,360<br>(851 - 1,869)      | 989<br>(649 - 1,476)      | 605<br>(416 - 855)        |
| HIV/AIDS                                                          | 4,848<br>(3,142 - 6,518)    | 353<br>(213 - 568)          | 198<br>(120 - 283)       | 3,441<br>(2,238 - 4,550)    | 766<br>(473 - 1,111)      | 89<br>(42 - 146)          |
| HIV/AIDS resulting in mycobacterial infection                     | 271<br>(167 - 383)          | 19<br>(11 - 31)             | 10<br>(6 - 15)           | 193<br>(118 - 273)          | 44<br>(26 - 68)           | 5<br>(3 - 9)              |
| HIV/AIDS resulting in other diseases                              | 4,577<br>(2,973 - 6,124)    | 334<br>(200 - 540)          | 188<br>(114 - 271)       | 3,249<br>(2,118 - 4,316)    | 722<br>(445 - 1,051)      | 84<br>(40 - 137)          |
| Diarrhea, lower respiratory, and other common infectious diseases | 15,509<br>(12,229 - 19,628) | 8,939<br>(6,226 - 12,422)   | 983<br>(577 - 1,990)     | 1,524<br>(1,005 - 2,113)    | 1,670<br>(1,070 - 2,548)  | 2,393<br>(1,651 - 3,242)  |
| Diarrheal diseases                                                | 6,363<br>(4,178 - 9,211)    | 3,205<br>(1,308 - 5,711)    | 360<br>(148 - 780)       | 785<br>(454 - 1,239)        | 867<br>(446 - 1,461)      | 1,146<br>(618 - 1,799)    |
| Intestinal infectious diseases                                    | 226<br>(107 - 420)          | 92<br>(37 - 180)            | 70<br>(30 - 143)         | 50<br>(22 - 106)            | 10<br>(3 - 20)            | 4<br>(1 - 9)              |
| Typhoid fever                                                     | 171<br>(77 - 332)           | 65<br>(24 - 136)            | 55<br>(23 - 120)         | 40<br>(16 - 83)             | 7<br>(2 - 17)             | 3<br>(1 - 6)              |
| Paratyphoid fever                                                 | 40<br>(17 - 77)             | 18<br>(6 - 37)              | 13<br>(5 - 29)           | 8<br>(3 - 17)               | 1<br>(0 - 3)              | 1<br>(0 - 1)              |
| Other intestinal infectious diseases                              | 15<br>(6 - 28)              | 9<br>(3 - 20)               | 2<br>(0 - 6)             | 2<br>(0 - 7)                | 1<br>(0 - 4)              | 1<br>(0 - 3)              |
| Lower respiratory infections                                      | 6,176<br>(4,294 - 8,539)    | 3,744<br>(2,088 - 5,887)    | 250<br>(118 - 482)       | 380<br>(240 - 555)          | 642<br>(383 - 1,027)      | 1,160<br>(736 - 1,686)    |
| Upper respiratory infections                                      | 6<br>(2 - 13)               | 3<br>(0 - 10)               | 0<br>(0 - 2)             | 1<br>(0 - 3)                | 1<br>(0 - 3)              | 1<br>(0 - 3)              |
| Otitis media                                                      | 7<br>(5 - 10)               | 4<br>(2 - 6)                | 0<br>(0 - 1)             | 0<br>(0 - 1)                | 1<br>(1 - 1)              | 2<br>(1 - 2)              |
| Meningitis                                                        | 1,258<br>(810 - 1,958)      | 701<br>(328 - 1,254)        | 157<br>(73 - 323)        | 219<br>(136 - 353)          | 115<br>(66 - 184)         | 65<br>(37 - 108)          |
| Pneumococcal meningitis                                           | 306<br>(190 - 483)          | 145<br>(62 - 290)           | 47<br>(19 - 108)         | 65<br>(32 - 111)            | 31<br>(13 - 61)           | 17<br>(8 - 31)            |
| H influenzae type B meningitis                                    | 297<br>(165 - 522)          | 220<br>(100 - 422)          | 35<br>(12 - 79)          | 25<br>(10 - 49)             | 11<br>(5 - 24)            | 6<br>(3 - 11)             |
| Meningococcal meningitis                                          | 178<br>(110 - 292)          | 69<br>(26 - 160)            | 18<br>(6 - 44)           | 46<br>(22 - 90)             | 28<br>(10 - 53)           | 17<br>(6 - 35)            |
| Other meningitis                                                  | 478<br>(286 - 755)          | 267<br>(102 - 496)          | 57<br>(22 - 125)         | 83<br>(42 - 140)            | 45<br>(21 - 80)           | 26<br>(12 - 47)           |
| Encephalitis                                                      | 25<br>(16 - 37)             | 12<br>(6 - 25)              | 3<br>(1 - 5)             | 4<br>(2 - 6)                | 4<br>(1 - 7)              | 3<br>(1 - 5)              |
| Diphtheria                                                        | 3<br>(0 - 17)               | 2<br>(0 - 17)               | 0<br>(0 - 3)             | 0<br>(0 - 1)                | 0<br>(0 - 0)              | --<br>(0 - 0)             |
| Whooping cough                                                    | 1<br>(0 - 3)                | 1<br>(0 - 3)                | 0<br>(0 - 0)             | 0<br>(0 - 0)                | 0<br>(0 - 0)              | --<br>(0 - 0)             |
| Tetanus                                                           | 461<br>(185 - 1,001)        | 335<br>(74 - 876)           | 21<br>(4 - 49)           | 66<br>(13 - 116)            | 30<br>(6 - 54)            | 9<br>(2 - 19)             |
| Measles                                                           | 971<br>(28 - 5,106)         | 834<br>(24 - 4,211)         | 120<br>(3 - 667)         | 17<br>(0 - 100)             | 0<br>(0 - 3)              | --<br>(0 - 3)             |
| Varicella and herpes zoster                                       | 14<br>(4 - 34)              | 6<br>(0 - 24)               | 1<br>(0 - 6)             | 2<br>(0 - 6)                | 1<br>(0 - 4)              | 4<br>(0 - 14)             |
| Neglected tropical diseases and malaria                           | 2,325<br>(1,302 - 4,228)    | 1,448<br>(532 - 3,300)      | 276<br>(125 - 630)       | 435<br>(282 - 652)          | 114<br>(68 - 222)         | 52<br>(29 - 123)          |
| Malaria                                                           | 1,399<br>(430 - 3,252)      | 1,206<br>(326 - 3,100)      | 85<br>(13 - 348)         | 55<br>(13 - 221)            | 31<br>(7 - 120)           | 22<br>(5 - 91)            |
| Leishmaniasis                                                     | 675<br>(405 - 1,053)        | 193<br>(65 - 357)           | 149<br>(60 - 309)        | 275<br>(163 - 422)          | 46<br>(24 - 80)           | 13<br>(6 - 23)            |
| Visceral leishmaniasis                                            | 675<br>(405 - 1,053)        | 193<br>(65 - 357)           | 149<br>(60 - 309)        | 275<br>(163 - 422)          | 46<br>(24 - 80)           | 13<br>(6 - 23)            |
| African trypanosomiasis                                           | 115<br>(59 - 187)           | 9<br>(3 - 16)               | 17<br>(8 - 33)           | 66<br>(33 - 113)            | 19<br>(10 - 31)           | 5<br>(3 - 8)              |
| Schistosomiasis                                                   | 18<br>(12 - 25)             | 0<br>(0 - 1)                | 1<br>(0 - 2)             | 7<br>(4 - 11)               | 6<br>(3 - 10)             | 3<br>(2 - 6)              |
| Cysticercosis                                                     | 2<br>(0 - 6)                | 0<br>(0 - 1)                | 0<br>(0 - 1)             | 1<br>(0 - 3)                | 0<br>(0 - 1)              | 0<br>(0 - 0)              |
| Cystic echinococcosis                                             | 28<br>(21 - 37)             | 5<br>(2 - 9)                | 7<br>(4 - 12)            | 11<br>(8 - 14)              | 4<br>(3 - 5)              | 2<br>(1 - 2)              |
| Dengue                                                            | 0<br>(0 - 1)                | 0<br>(0 - 0)                | 0<br>(0 - 0)             | 0<br>(0 - 0)                | 0<br>(0 - 0)              | 0<br>(0 - 0)              |
| Yellow fever                                                      | 8<br>(3 - 19)               | 1<br>(0 - 4)                | 2<br>(0 - 9)             | 4<br>(1 - 11)               | 1<br>(0 - 4)              | 0<br>(0 - 2)              |
| Rabies                                                            | 34<br>(20 - 61)             | 7<br>(3 - 16)               | 10<br>(4 - 22)           | 13<br>(7 - 21)              | 3<br>(2 - 6)              | 1<br>(0 - 2)              |
| Intestinal nematode infections                                    | 22<br>(8 - 45)              | 18<br>(6 - 38)              | 3<br>(0 - 10)            | 1<br>(0 - 4)                | 0<br>(0 - 3)              | 0<br>(0 - 3)              |
| Ascariasis                                                        | 22<br>(8 - 45)              | 18<br>(6 - 38)              | 3<br>(0 - 10)            | 1<br>(0 - 4)                | 0<br>(0 - 3)              | 0<br>(0 - 3)              |

Web Table 31- South Sudan deaths with 95% UI by age, sex, and cause in 2013

| Cause                                                            | Females, All Ages           | Females, 0-4 Years       | Females, 5-14 Years | Females, 15-49 Years     | Females, 50-69 Years     | Females, 70-80 Years     |
|------------------------------------------------------------------|-----------------------------|--------------------------|---------------------|--------------------------|--------------------------|--------------------------|
| Other neglected tropical diseases                                | 24<br>(16 - 37)             | 9<br>(4 - 18)            | 1<br>(1 - 3)        | 4<br>(2 - 6)             | 4<br>(2 - 7)             | 6<br>(3 - 10)            |
| Maternal disorders                                               | 3,912<br>(2,801 - 5,163)    | --                       | 32<br>(11 - 80)     | 3,880<br>(2,776 - 5,136) | --                       | --                       |
| Maternal hemorrhage                                              | 468<br>(298 - 657)          | --                       | 2<br>(1 - 6)        | 465<br>(296 - 655)       | --                       | --                       |
| Maternal sepsis and other maternal infections                    | 374<br>(236 - 537)          | --                       | 4<br>(1 - 12)       | 370<br>(233 - 533)       | --                       | --                       |
| Maternal hypertensive disorders                                  | 382<br>(233 - 564)          | --                       | 4<br>(1 - 10)       | 379<br>(231 - 560)       | --                       | --                       |
| Maternal obstructed labor                                        | 197<br>(129 - 291)          | --                       | 1<br>(0 - 3)        | 196<br>(128 - 290)       | --                       | --                       |
| Maternal abortive outcome                                        | 758<br>(503 - 1,097)        | --                       | 6<br>(2 - 14)       | 752<br>(499 - 1,094)     | --                       | --                       |
| Indirect maternal deaths                                         | 290<br>(167 - 454)          | --                       | 2<br>(0 - 5)        | 289<br>(165 - 452)       | --                       | --                       |
| Late maternal deaths                                             | 358<br>(211 - 545)          | --                       | 5<br>(1 - 13)       | 353<br>(208 - 541)       | --                       | --                       |
| Maternal deaths aggravated by HIV/AIDS                           | 34<br>(17 - 55)             | --                       | --                  | 34<br>(17 - 55)          | --                       | --                       |
| Other maternal disorders                                         | 1,041<br>(704 - 1,422)      | --                       | 7<br>(2 - 18)       | 1,034<br>(700 - 1,417)   | --                       | --                       |
| Neonatal disorders                                               | 3,410<br>(2,504 - 4,665)    | 3,410<br>(2,504 - 4,665) | --                  | --                       | --                       | --                       |
| Neonatal preterm birth complications                             | 1,035<br>(468 - 1,811)      | 1,035<br>(468 - 1,811)   | --                  | --                       | --                       | --                       |
| Neonatal encephalopathy due to birth asphyxia and trauma         | 1,003<br>(497 - 1,767)      | 1,003<br>(497 - 1,767)   | --                  | --                       | --                       | --                       |
| Neonatal sepsis and other neonatal infections                    | 630<br>(253 - 1,227)        | 630<br>(253 - 1,227)     | --                  | --                       | --                       | --                       |
| Hemolytic disease and other neonatal jaundice                    | 21<br>(5 - 56)              | 21<br>(5 - 56)           | --                  | --                       | --                       | --                       |
| Other neonatal disorders                                         | 722<br>(359 - 1,359)        | 722<br>(359 - 1,359)     | --                  | --                       | --                       | --                       |
| Nutritional deficiencies                                         | 2,344<br>(1,504 - 3,472)    | 1,424<br>(694 - 2,479)   | 149<br>(75 - 284)   | 214<br>(146 - 303)       | 219<br>(136 - 344)       | 339<br>(217 - 501)       |
| Protein-energy malnutrition                                      | 1,700<br>(926 - 2,726)      | 1,237<br>(563 - 2,209)   | 109<br>(49 - 218)   | 48<br>(20 - 97)          | 109<br>(51 - 191)        | 197<br>(81 - 323)        |
| Iodine deficiency                                                | 14<br>(1 - 65)              | 7<br>(0 - 55)            | 1<br>(0 - 10)       | 2<br>(0 - 8)             | 2<br>(0 - 12)            | 2<br>(0 - 11)            |
| Iron-deficiency anemia                                           | 613<br>(315 - 1,117)        | 175<br>(35 - 494)        | 38<br>(13 - 89)     | 163<br>(92 - 240)        | 105<br>(45 - 183)        | 132<br>(58 - 265)        |
| Other nutritional deficiencies                                   | 17<br>(6 - 32)              | 5<br>(1 - 15)            | 0<br>(0 - 1)        | 1<br>(0 - 2)             | 3<br>(1 - 6)             | 8<br>(1 - 18)            |
| Other communicable, maternal, neonatal, and nutritional diseases | 1,662<br>(933 - 2,666)      | 1,365<br>(695 - 2,322)   | 131<br>(60 - 262)   | 63<br>(41 - 94)          | 51<br>(24 - 100)         | 51<br>(21 - 111)         |
| Sexually transmitted diseases excluding HIV                      | 1,392<br>(696 - 2,385)      | 1,243<br>(606 - 2,143)   | 111<br>(46 - 231)   | 20<br>(10 - 35)          | 10<br>(3 - 29)           | 8<br>(2 - 22)            |
| Syphilis                                                         | 1,372<br>(679 - 2,370)      | 1,243<br>(606 - 2,143)   | 110<br>(45 - 230)   | 8<br>(4 - 14)            | 6<br>(2 - 16)            | 6<br>(2 - 17)            |
| Chlamydial infection                                             | 6<br>(3 - 11)               | --                       | 0<br>(0 - 1)        | 4<br>(2 - 7)             | 1<br>(0 - 4)             | 1<br>(0 - 1)             |
| Gonococcal infection                                             | 7<br>(4 - 12)               | --                       | 0<br>(0 - 1)        | 4<br>(2 - 7)             | 2<br>(1 - 5)             | 1<br>(0 - 3)             |
| Other sexually transmitted diseases                              | 6<br>(3 - 10)               | --                       | 0<br>(0 - 1)        | 4<br>(2 - 7)             | 1<br>(0 - 4)             | 0<br>(0 - 1)             |
| Hepatitis                                                        | 42<br>(31 - 60)             | 10<br>(5 - 19)           | 4<br>(2 - 8)        | 17<br>(11 - 29)          | 7<br>(4 - 12)            | 3<br>(2 - 5)             |
| Acute hepatitis A                                                | 8<br>(3 - 15)               | 4<br>(1 - 9)             | 2<br>(0 - 3)        | 1<br>(0 - 3)             | 0<br>(0 - 0)             | 0<br>(0 - 0)             |
| Acute hepatitis B                                                | 21<br>(13 - 32)             | 6<br>(2 - 12)            | 2<br>(1 - 4)        | 5<br>(2 - 9)             | 6<br>(3 - 10)            | 3<br>(2 - 5)             |
| Acute hepatitis C                                                | 0<br>(0 - 1)                | --                       | 0<br>(0 - 0)        | 0<br>(0 - 0)             | 0<br>(0 - 0)             | 0<br>(0 - 0)             |
| Acute hepatitis E                                                | 13<br>(7 - 22)              | 0<br>(0 - 1)             | 1<br>(0 - 2)        | 11<br>(6 - 19)           | 1<br>(0 - 3)             | 0<br>(0 - 1)             |
| Other infectious diseases                                        | 228<br>(110 - 547)          | 112<br>(37 - 350)        | 16<br>(4 - 52)      | 26<br>(13 - 48)          | 33<br>(12 - 79)          | 40<br>(13 - 98)          |
| Non-communicable diseases                                        | 13,958<br>(11,143 - 17,376) | 1,331<br>(803 - 2,066)   | 357<br>(217 - 652)  | 1,831<br>(1,336 - 2,345) | 4,592<br>(3,370 - 6,212) | 5,847<br>(4,723 - 7,313) |
| Neoplasms                                                        | 2,766<br>(2,101 - 3,618)    | 89<br>(46 - 152)         | 71<br>(39 - 135)    | 544<br>(396 - 710)       | 1,390<br>(987 - 1,961)   | 673<br>(514 - 907)       |
| Esophageal cancer                                                | 337<br>(175 - 592)          | --                       | --                  | 43<br>(20 - 81)          | 194<br>(91 - 368)        | 100<br>(51 - 185)        |
| Stomach cancer                                                   | 141<br>(99 - 198)           | --                       | --                  | 13<br>(9 - 19)           | 84<br>(54 - 124)         | 43<br>(29 - 65)          |
| Liver cancer                                                     | 172<br>(119 - 247)          | --                       | 2<br>(1 - 4)        | 34<br>(18 - 54)          | 87<br>(53 - 134)         | 49<br>(30 - 77)          |
| Liver cancer due to hepatitis B                                  | 33<br>(13 - 60)             | --                       | 0<br>(0 - 1)        | 7<br>(2 - 14)            | 17<br>(5 - 35)           | 7<br>(3 - 15)            |

Web Table 31- South Sudan deaths with 95% UI by age, sex, and cause in 2013

| Cause                                | Females, All Ages        | Females, 0-4 Years | Females, 5-14 Years | Females, 15-49 Years | Females, 50-69 Years     | Females, 70-80 Years     |
|--------------------------------------|--------------------------|--------------------|---------------------|----------------------|--------------------------|--------------------------|
| Liver cancer due to hepatitis C      | 78<br>(32 - 131)         | --                 | 0<br>(0 - 1)        | 13<br>(4 - 25)       | 41<br>(14 - 73)          | 24<br>(10 - 42)          |
| Liver cancer due to alcohol use      | 19<br>(10 - 31)          | --                 | --                  | 2<br>(1 - 4)         | 9<br>(4 - 17)            | 8<br>(4 - 14)            |
| Liver cancer due to other causes     | 44<br>(23 - 74)          | --                 | 2<br>(1 - 3)        | 12<br>(5 - 22)       | 20<br>(9 - 39)           | 10<br>(4 - 18)           |
| Larynx cancer                        | 5<br>(2 - 10)            | --                 | --                  | 1<br>(0 - 1)         | 4<br>(1 - 7)             | 1<br>(0 - 2)             |
| Tracheal, bronchus and lung cancer   | 70<br>(50 - 97)          | --                 | --                  | 5<br>(3 - 8)         | 41<br>(28 - 58)          | 24<br>(17 - 35)          |
| Breast cancer                        | 349<br>(245 - 499)       | --                 | --                  | 116<br>(80 - 160)    | 171<br>(112 - 262)       | 62<br>(42 - 96)          |
| Cervical cancer                      | 636<br>(382 - 911)       | --                 | --                  | 127<br>(77 - 191)    | 396<br>(222 - 605)       | 113<br>(64 - 170)        |
| Uterine cancer                       | 32<br>(19 - 47)          | --                 | --                  | 3<br>(2 - 5)         | 18<br>(10 - 30)          | 11<br>(6 - 16)           |
| Prostate cancer                      | --                       | --                 | --                  | --                   | --                       | --                       |
| Colon and rectum cancer              | 172<br>(127 - 228)       | --                 | --                  | 31<br>(22 - 42)      | 80<br>(55 - 116)         | 62<br>(44 - 85)          |
| Lip and oral cavity cancer           | 31<br>(20 - 45)          | --                 | --                  | 7<br>(4 - 12)        | 17<br>(10 - 26)          | 7<br>(4 - 12)            |
| Nasopharynx cancer                   | 8<br>(4 - 13)            | --                 | 0<br>(0 - 1)        | 4<br>(2 - 7)         | 3<br>(1 - 5)             | 1<br>(1 - 2)             |
| Other pharynx cancer                 | 10<br>(6 - 14)           | --                 | --                  | 2<br>(1 - 4)         | 6<br>(3 - 9)             | 2<br>(1 - 2)             |
| Gallbladder and biliary tract cancer | 40<br>(27 - 58)          | --                 | --                  | 9<br>(5 - 12)        | 23<br>(14 - 35)          | 9<br>(5 - 15)            |
| Pancreatic cancer                    | 50<br>(37 - 68)          | --                 | --                  | 7<br>(5 - 9)         | 29<br>(20 - 42)          | 14<br>(9 - 20)           |
| Malignant skin melanoma              | 11<br>(8 - 16)           | --                 | --                  | 1<br>(1 - 2)         | 6<br>(4 - 10)            | 3<br>(2 - 5)             |
| Non-melanoma skin cancer             | 12<br>(6 - 23)           | --                 | --                  | 2<br>(1 - 4)         | 3<br>(1 - 7)             | 6<br>(2 - 14)            |
| Ovarian cancer                       | 95<br>(63 - 138)         | --                 | --                  | 21<br>(14 - 28)      | 56<br>(35 - 88)          | 19<br>(11 - 30)          |
| Testicular cancer                    | --                       | --                 | --                  | --                   | --                       | --                       |
| Kidney cancer                        | 40<br>(27 - 56)          | 9<br>(3 - 19)      | 4<br>(2 - 9)        | 6<br>(4 - 8)         | 13<br>(8 - 21)           | 8<br>(4 - 12)            |
| Bladder cancer                       | 19<br>(13 - 31)          | --                 | --                  | 3<br>(2 - 6)         | 8<br>(4 - 13)            | 8<br>(5 - 14)            |
| Brain and nervous system cancer      | 26<br>(19 - 34)          | 3<br>(1 - 6)       | 2<br>(1 - 4)        | 12<br>(7 - 16)       | 6<br>(4 - 9)             | 4<br>(2 - 6)             |
| Thyroid cancer                       | 12<br>(7 - 18)           | --                 | 0<br>(0 - 0)        | 1<br>(0 - 1)         | 7<br>(4 - 13)            | 3<br>(2 - 6)             |
| Mesothelioma                         | 1<br>(1 - 3)             | --                 | --                  | 1<br>(0 - 1)         | 1<br>(0 - 1)             | 0<br>(0 - 1)             |
| Hodgkin lymphoma                     | 20<br>(10 - 31)          | 1<br>(0 - 1)       | 1<br>(0 - 3)        | 4<br>(2 - 7)         | 7<br>(3 - 13)            | 7<br>(3 - 12)            |
| Non-Hodgkin lymphoma                 | 133<br>(79 - 202)        | 27<br>(10 - 55)    | 21<br>(8 - 45)      | 27<br>(16 - 41)      | 34<br>(19 - 57)          | 24<br>(14 - 38)          |
| Multiple myeloma                     | 25<br>(16 - 38)          | --                 | --                  | 4<br>(2 - 6)         | 13<br>(7 - 21)           | 8<br>(5 - 13)            |
| Leukemia                             | 42<br>(31 - 57)          | 4<br>(1 - 8)       | 7<br>(4 - 15)       | 12<br>(8 - 16)       | 10<br>(7 - 16)           | 9<br>(6 - 13)            |
| Other neoplasms                      | 277<br>(195 - 381)       | 46<br>(23 - 88)    | 32<br>(15 - 65)     | 50<br>(28 - 74)      | 74<br>(45 - 121)         | 75<br>(45 - 110)         |
| Cardiovascular diseases              | 5,997<br>(4,652 - 7,744) | 101<br>(55 - 168)  | 48<br>(26 - 90)     | 523<br>(364 - 722)   | 1,915<br>(1,377 - 2,672) | 3,409<br>(2,689 - 4,344) |
| Rheumatic heart disease              | 265<br>(148 - 495)       | 5<br>(1 - 15)      | 12<br>(5 - 27)      | 87<br>(47 - 170)     | 88<br>(46 - 170)         | 73<br>(37 - 146)         |
| Ischemic heart disease               | 1,255<br>(842 - 1,755)   | 0<br>(0 - 1)       | 1<br>(0 - 3)        | 68<br>(41 - 106)     | 382<br>(234 - 576)       | 804<br>(532 - 1,112)     |
| Cerebrovascular disease              | 2,691<br>(1,971 - 3,557) | 14<br>(6 - 25)     | 6<br>(2 - 12)       | 163<br>(109 - 240)   | 871<br>(605 - 1,257)     | 1,638<br>(1,184 - 2,173) |
| Ischemic stroke                      | 1,252<br>(793 - 1,797)   | 1<br>(0 - 5)       | 1<br>(0 - 2)        | 24<br>(12 - 45)      | 276<br>(149 - 438)       | 949<br>(618 - 1,339)     |
| Hemorrhagic stroke                   | 1,439<br>(985 - 2,092)   | 12<br>(6 - 23)     | 5<br>(2 - 11)       | 139<br>(91 - 209)    | 595<br>(391 - 891)       | 688<br>(424 - 1,076)     |
| Hypertensive heart disease           | 661<br>(393 - 1,254)     | 2<br>(1 - 5)       | 1<br>(1 - 3)        | 37<br>(22 - 61)      | 186<br>(101 - 348)       | 435<br>(243 - 864)       |
| Cardiomyopathy and myocarditis       | 297<br>(185 - 521)       | 45<br>(17 - 89)    | 14<br>(5 - 28)      | 55<br>(30 - 90)      | 81<br>(41 - 166)         | 103<br>(46 - 247)        |
| Atrial fibrillation and flutter      | 4<br>(2 - 7)             | --                 | --                  | 0<br>(0 - 0)         | 1<br>(0 - 1)             | 3<br>(1 - 5)             |
| Aortic aneurysm                      | 50<br>(27 - 81)          | --                 | --                  | 6<br>(2 - 10)        | 17<br>(8 - 30)           | 28<br>(15 - 45)          |
| Peripheral vascular disease          | 4<br>(2 - 7)             | --                 | --                  | 0<br>(0 - 0)         | 1<br>(1 - 2)             | 3<br>(1 - 5)             |

Web Table 31- South Sudan deaths with 95% UI by age, sex, and cause in 2013

| Cause                                               | Females, All Ages    | Females, 0-4 Years | Females, 5-14 Years | Females, 15-49 Years | Females, 50-69 Years | Females, 70-80 Years |
|-----------------------------------------------------|----------------------|--------------------|---------------------|----------------------|----------------------|----------------------|
| Endocarditis                                        | 72<br>(39 - 134)     | 6<br>(2 - 16)      | 2<br>(1 - 5)        | 12<br>(7 - 22)       | 18<br>(8 - 38)       | 33<br>(11 - 71)      |
| Other cardiovascular and circulatory diseases       | 698<br>(457 - 1,214) | 30<br>(13 - 60)    | 12<br>(5 - 24)      | 95<br>(55 - 151)     | 271<br>(164 - 473)   | 290<br>(178 - 577)   |
| Chronic respiratory diseases                        | 959<br>(647 - 1,430) | 88<br>(42 - 162)   | 27<br>(14 - 54)     | 111<br>(71 - 186)    | 293<br>(178 - 457)   | 438<br>(287 - 658)   |
| Chronic obstructive pulmonary disease               | 525<br>(309 - 813)   | 18<br>(7 - 41)     | 8<br>(3 - 17)       | 39<br>(20 - 63)      | 178<br>(97 - 297)    | 282<br>(161 - 446)   |
| Pneumoconiosis                                      | 9<br>(5 - 15)        | 2<br>(0 - 4)       | 1<br>(0 - 2)        | 3<br>(2 - 5)         | 1<br>(1 - 3)         | 1<br>(1 - 3)         |
| Silicosis                                           | 0<br>(0 - 1)         | 0<br>(0 - 0)       | 0<br>(0 - 0)        | 0<br>(0 - 0)         | 0<br>(0 - 0)         | 0<br>(0 - 0)         |
| Asbestosis                                          | 0<br>(0 - 1)         | 0<br>(0 - 0)       | 0<br>(0 - 0)        | 0<br>(0 - 0)         | 0<br>(0 - 0)         | 0<br>(0 - 0)         |
| Coal workers pneumoconiosis                         | 1<br>(0 - 1)         | 0<br>(0 - 0)       | 0<br>(0 - 0)        | 0<br>(0 - 0)         | 0<br>(0 - 0)         | 0<br>(0 - 0)         |
| Other pneumoconiosis                                | 7<br>(4 - 12)        | 1<br>(0 - 3)       | 1<br>(0 - 2)        | 3<br>(1 - 4)         | 1<br>(1 - 2)         | 1<br>(1 - 2)         |
| Asthma                                              | 250<br>(129 - 484)   | 32<br>(11 - 71)    | 11<br>(5 - 24)      | 37<br>(19 - 89)      | 78<br>(34 - 159)     | 91<br>(37 - 199)     |
| Interstitial lung disease and pulmonary sarcoidosis | 89<br>(14 - 176)     | 2<br>(0 - 10)      | 1<br>(0 - 3)        | 11<br>(2 - 26)       | 26<br>(4 - 60)       | 48<br>(6 - 104)      |
| Other chronic respiratory diseases                  | 86<br>(52 - 165)     | 34<br>(15 - 71)    | 6<br>(2 - 13)       | 20<br>(12 - 39)      | 9<br>(4 - 18)        | 17<br>(8 - 35)       |
| Cirrhosis                                           | 428<br>(280 - 646)   | 12<br>(4 - 26)     | 12<br>(6 - 24)      | 84<br>(51 - 135)     | 189<br>(115 - 304)   | 131<br>(82 - 207)    |
| Cirrhosis due to hepatitis B                        | 124<br>(52 - 221)    | 1<br>(0 - 2)       | 2<br>(1 - 5)        | 25<br>(12 - 45)      | 58<br>(24 - 107)     | 39<br>(14 - 77)      |
| Cirrhosis due to hepatitis C                        | 103<br>(37 - 196)    | 0<br>(0 - 1)       | 1<br>(0 - 3)        | 19<br>(6 - 38)       | 50<br>(16 - 100)     | 33<br>(12 - 64)      |
| Cirrhosis due to alcohol use                        | 121<br>(60 - 201)    | --                 | --                  | 16<br>(8 - 29)       | 57<br>(27 - 99)      | 48<br>(21 - 82)      |
| Cirrhosis due to other causes                       | 80<br>(44 - 133)     | 11<br>(3 - 25)     | 9<br>(4 - 18)       | 23<br>(12 - 42)      | 24<br>(11 - 47)      | 12<br>(5 - 23)       |
| Digestive diseases                                  | 730<br>(557 - 927)   | 50<br>(20 - 102)   | 40<br>(22 - 74)     | 141<br>(99 - 193)    | 210<br>(144 - 300)   | 289<br>(209 - 397)   |
| Peptic ulcer disease                                | 175<br>(111 - 252)   | 4<br>(1 - 11)      | 5<br>(2 - 9)        | 29<br>(17 - 46)      | 56<br>(32 - 91)      | 81<br>(46 - 127)     |
| Gastritis and duodenitis                            | 33<br>(12 - 80)      | 3<br>(1 - 8)       | 3<br>(1 - 7)        | 7<br>(3 - 14)        | 8<br>(3 - 22)        | 13<br>(3 - 39)       |
| Appendicitis                                        | 73<br>(46 - 107)     | 8<br>(2 - 22)      | 10<br>(4 - 21)      | 19<br>(10 - 32)      | 17<br>(8 - 31)       | 20<br>(7 - 41)       |
| Paralytic ileus and intestinal obstruction          | 205<br>(124 - 326)   | 9<br>(2 - 23)      | 10<br>(4 - 20)      | 32<br>(16 - 51)      | 65<br>(33 - 108)     | 89<br>(48 - 160)     |
| Inguinal, femoral, and abdominal hernia             | 17<br>(7 - 29)       | 2<br>(1 - 7)       | 0<br>(0 - 1)        | 6<br>(2 - 11)        | 1<br>(1 - 3)         | 7<br>(3 - 14)        |
| Inflammatory bowel disease                          | 55<br>(26 - 89)      | 12<br>(4 - 29)     | 4<br>(2 - 9)        | 14<br>(6 - 24)       | 11<br>(5 - 20)       | 13<br>(5 - 24)       |
| Vascular intestinal disorders                       | 6<br>(3 - 16)        | 0<br>(0 - 0)       | 0<br>(0 - 0)        | 1<br>(0 - 2)         | 2<br>(1 - 4)         | 4<br>(1 - 9)         |
| Gallbladder and biliary diseases                    | 60<br>(35 - 88)      | 2<br>(1 - 4)       | 1<br>(1 - 3)        | 11<br>(7 - 17)       | 20<br>(10 - 32)      | 26<br>(13 - 46)      |
| Pancreatitis                                        | 31<br>(17 - 48)      | 1<br>(0 - 2)       | 1<br>(0 - 2)        | 9<br>(4 - 16)        | 10<br>(5 - 18)       | 10<br>(4 - 18)       |
| Other digestive diseases                            | 74<br>(49 - 110)     | 8<br>(3 - 18)      | 5<br>(2 - 10)       | 14<br>(8 - 21)       | 20<br>(11 - 35)      | 26<br>(14 - 47)      |
| Neurological disorders                              | 455<br>(346 - 592)   | 63<br>(28 - 128)   | 33<br>(16 - 69)     | 72<br>(43 - 120)     | 47<br>(33 - 69)      | 240<br>(176 - 322)   |
| Alzheimer disease and other dementias               | 238<br>(174 - 322)   | --                 | --                  | 0<br>(0 - 0)         | 21<br>(14 - 32)      | 216<br>(158 - 296)   |
| Parkinson disease                                   | 2<br>(1 - 4)         | --                 | --                  | 0<br>(0 - 0)         | 1<br>(0 - 2)         | 1<br>(1 - 2)         |
| Epilepsy                                            | 184<br>(117 - 293)   | 56<br>(21 - 121)   | 31<br>(14 - 65)     | 65<br>(37 - 113)     | 16<br>(9 - 27)       | 16<br>(8 - 33)       |
| Multiple sclerosis                                  | 2<br>(1 - 4)         | --                 | --                  | 1<br>(0 - 2)         | 1<br>(0 - 2)         | 0<br>(0 - 1)         |
| Other neurological disorders                        | 29<br>(21 - 38)      | 7<br>(4 - 12)      | 3<br>(1 - 5)        | 5<br>(4 - 7)         | 8<br>(5 - 12)        | 6<br>(4 - 8)         |
| Mental and substance use disorders                  | 59<br>(37 - 110)     | 3<br>(1 - 6)       | 0<br>(0 - 0)        | 36<br>(22 - 69)      | 15<br>(8 - 28)       | 5<br>(2 - 10)        |
| Schizophrenia                                       | 3<br>(2 - 5)         | --                 | --                  | 2<br>(1 - 3)         | 1<br>(0 - 2)         | 1<br>(0 - 1)         |
| Alcohol use disorders                               | 30<br>(12 - 55)      | --                 | --                  | 18<br>(6 - 33)       | 10<br>(4 - 20)       | 2<br>(1 - 4)         |
| Drug use disorders                                  | 26<br>(10 - 71)      | 3<br>(1 - 6)       | --                  | 16<br>(6 - 50)       | 4<br>(1 - 14)        | 2<br>(0 - 7)         |
| Opioid use disorders                                | 3<br>(1 - 7)         | 0<br>(0 - 1)       | --                  | 2<br>(1 - 5)         | 0<br>(0 - 1)         | 0<br>(0 - 1)         |
| Cocaine use disorders                               | 0<br>(0 - 0)         | 0<br>(0 - 0)       | --                  | 0<br>(0 - 0)         | 0<br>(0 - 0)         | 0<br>(0 - 0)         |

Web Table 31- South Sudan deaths with 95% UI by age, sex, and cause in 2013

| Cause                                               | Females, All Ages        | Females, 0-4 Years   | Females, 5-14 Years | Females, 15-49 Years | Females, 50-69 Years | Females, 70-80 Years |
|-----------------------------------------------------|--------------------------|----------------------|---------------------|----------------------|----------------------|----------------------|
| Amphetamine use disorders                           | 0<br>(0 - 0)             | 0<br>(0 - 0)         | --                  | 0<br>(0 - 0)         | 0<br>(0 - 0)         | 0<br>(0 - 0)         |
| Other drug use disorders                            | 23<br>(9 - 63)           | 3<br>(0 - 5)         | --                  | 14<br>(5 - 44)       | 4<br>(1 - 12)        | 2<br>(0 - 6)         |
| Eating disorders                                    | 1<br>(0 - 1)             | --                   | 0<br>(0 - 0)        | 0<br>(0 - 1)         | --                   | --                   |
| Anorexia nervosa                                    | 1<br>(0 - 1)             | --                   | 0<br>(0 - 0)        | 0<br>(0 - 1)         | --                   | --                   |
| Diabetes, urogenital, blood, and endocrine diseases | 1,546<br>(1,159 - 1,986) | 177<br>(81 - 303)    | 69<br>(37 - 128)    | 249<br>(168 - 328)   | 477<br>(329 - 678)   | 573<br>(417 - 758)   |
| Diabetes mellitus                                   | 641<br>(445 - 880)       | 2<br>(1 - 4)         | 4<br>(2 - 7)        | 55<br>(36 - 78)      | 264<br>(168 - 388)   | 316<br>(210 - 446)   |
| Acute glomerulonephritis                            | 23<br>(14 - 33)          | 2<br>(1 - 6)         | 1<br>(1 - 4)        | 9<br>(5 - 13)        | 6<br>(3 - 10)        | 4<br>(2 - 7)         |
| Chronic kidney disease                              | 305<br>(196 - 460)       | 25<br>(12 - 45)      | 20<br>(10 - 38)     | 59<br>(36 - 104)     | 81<br>(48 - 136)     | 120<br>(70 - 181)    |
| Chronic kidney disease due to diabetes mellitus     | 2<br>(1 - 3)             | 0<br>(0 - 0)         | 0<br>(0 - 0)        | 0<br>(0 - 0)         | 1<br>(0 - 1)         | 1<br>(0 - 1)         |
| Chronic kidney disease due to hypertension          | 127<br>(59 - 212)        | 3<br>(1 - 9)         | 2<br>(1 - 6)        | 17<br>(6 - 36)       | 40<br>(16 - 74)      | 64<br>(31 - 105)     |
| Chronic kidney disease due to glomerulonephritis    | 105<br>(61 - 157)        | 16<br>(8 - 28)       | 12<br>(6 - 24)      | 31<br>(16 - 51)      | 23<br>(11 - 42)      | 23<br>(9 - 42)       |
| Chronic kidney disease due to other causes          | 72<br>(25 - 134)         | 5<br>(1 - 13)        | 6<br>(1 - 14)       | 10<br>(3 - 24)       | 18<br>(5 - 39)       | 32<br>(9 - 68)       |
| Urinary diseases and male infertility               | 181<br>(123 - 243)       | 19<br>(8 - 37)       | 6<br>(3 - 16)       | 41<br>(26 - 59)      | 61<br>(36 - 97)      | 53<br>(32 - 82)      |
| Interstitial nephritis and urinary tract infections | 150<br>(103 - 207)       | 13<br>(5 - 26)       | 3<br>(1 - 9)        | 32<br>(20 - 47)      | 53<br>(32 - 85)      | 49<br>(29 - 74)      |
| Urolithiasis                                        | 10<br>(5 - 18)           | --                   | 1<br>(0 - 3)        | 3<br>(1 - 7)         | 3<br>(1 - 7)         | 2<br>(1 - 4)         |
| Other urinary diseases                              | 21<br>(11 - 39)          | 7<br>(2 - 14)        | 2<br>(1 - 4)        | 6<br>(2 - 11)        | 4<br>(2 - 10)        | 3<br>(1 - 7)         |
| Gynecological diseases                              | 5<br>(2 - 8)             | --                   | --                  | 2<br>(1 - 3)         | 2<br>(0 - 4)         | 1<br>(0 - 2)         |
| Uterine fibroids                                    | 1<br>(0 - 2)             | --                   | --                  | 0<br>(0 - 0)         | 1<br>(0 - 1)         | 0<br>(0 - 1)         |
| Polycystic ovarian syndrome                         | 0<br>(0 - 0)             | --                   | --                  | 0<br>(0 - 0)         | 0<br>(0 - 0)         | --                   |
| Endometriosis                                       | 0<br>(0 - 0)             | --                   | --                  | 0<br>(0 - 0)         | 0<br>(0 - 0)         | --                   |
| Genital prolapse                                    | 1<br>(0 - 1)             | --                   | --                  | 0<br>(0 - 0)         | 0<br>(0 - 1)         | 0<br>(0 - 1)         |
| Other gynecological diseases                        | 2<br>(1 - 4)             | --                   | --                  | 1<br>(0 - 1)         | 1<br>(0 - 2)         | 1<br>(0 - 1)         |
| Hemoglobinopathies and hemolytic anemias            | 163<br>(52 - 329)        | 75<br>(14 - 177)     | 28<br>(7 - 67)      | 38<br>(13 - 74)      | 12<br>(7 - 21)       | 9<br>(5 - 17)        |
| Thalassemias                                        | 8<br>(2 - 18)            | 6<br>(1 - 14)        | 1<br>(0 - 3)        | 1<br>(0 - 2)         | 0<br>(0 - 0)         | 0<br>(0 - 0)         |
| Sickle cell disorders                               | 119<br>(34 - 248)        | 54<br>(10 - 130)     | 24<br>(6 - 57)      | 32<br>(11 - 62)      | 8<br>(4 - 14)        | 0<br>(0 - 1)         |
| G6PD deficiency                                     | 5<br>(2 - 11)            | 3<br>(0 - 6)         | 1<br>(0 - 2)        | 1<br>(0 - 2)         | 0<br>(0 - 1)         | 0<br>(0 - 0)         |
| Other hemoglobinopathies and hemolytic anemias      | 31<br>(15 - 55)          | 12<br>(3 - 27)       | 2<br>(1 - 5)        | 4<br>(1 - 7)         | 4<br>(2 - 7)         | 9<br>(5 - 16)        |
| Endocrine, metabolic, blood, and immune disorders   | 229<br>(149 - 360)       | 54<br>(26 - 125)     | 9<br>(3 - 24)       | 46<br>(26 - 77)      | 51<br>(27 - 85)      | 69<br>(36 - 115)     |
| Musculoskeletal disorders                           | 44<br>(20 - 86)          | --                   | 4<br>(1 - 11)       | 19<br>(7 - 42)       | 11<br>(5 - 24)       | 9<br>(4 - 21)        |
| Rheumatoid arthritis                                | 15<br>(6 - 31)           | --                   | 1<br>(0 - 3)        | 3<br>(1 - 8)         | 6<br>(2 - 12)        | 5<br>(2 - 13)        |
| Other musculoskeletal disorders                     | 29<br>(12 - 59)          | --                   | 3<br>(1 - 8)        | 15<br>(6 - 35)       | 6<br>(2 - 14)        | 4<br>(2 - 10)        |
| Other non-communicable diseases                     | 974<br>(595 - 1,666)     | 746<br>(383 - 1,383) | 51<br>(21 - 114)    | 51<br>(34 - 73)      | 44<br>(28 - 67)      | 81<br>(52 - 121)     |
| Congenital anomalies                                | 781<br>(414 - 1,446)     | 692<br>(346 - 1,310) | 47<br>(19 - 108)    | 27<br>(15 - 43)      | 7<br>(5 - 11)        | 8<br>(6 - 12)        |
| Neural tube defects                                 | 217<br>(44 - 600)        | 202<br>(40 - 570)    | 10<br>(2 - 31)      | 5<br>(1 - 12)        | 1<br>(0 - 1)         | 0<br>(0 - 1)         |
| Congenital heart anomalies                          | 317<br>(122 - 698)       | 275<br>(95 - 635)    | 23<br>(7 - 57)      | 12<br>(6 - 22)       | 3<br>(2 - 4)         | 4<br>(2 - 6)         |
| Cleft lip and cleft palate                          | 6<br>(1 - 17)            | 6<br>(1 - 17)        | --                  | --                   | --                   | --                   |
| Down syndrome                                       | 60<br>(15 - 147)         | 49<br>(10 - 130)     | 6<br>(1 - 15)       | 4<br>(1 - 8)         | 1<br>(1 - 2)         | 0<br>(0 - 0)         |
| Chromosomal unbalanced rearrangements               | 37<br>(9 - 98)           | 34<br>(8 - 93)       | 1<br>(0 - 3)        | 1<br>(0 - 3)         | 0<br>(0 - 0)         | 0<br>(0 - 0)         |
| Other congenital anomalies                          | 144<br>(58 - 403)        | 126<br>(45 - 362)    | 7<br>(2 - 23)       | 5<br>(2 - 10)        | 3<br>(1 - 4)         | 4<br>(2 - 6)         |
| Skin and subcutaneous diseases                      | 184<br>(132 - 248)       | 46<br>(21 - 84)      | 4<br>(2 - 8)        | 24<br>(15 - 35)      | 37<br>(23 - 58)      | 73<br>(45 - 112)     |



Web Table 31- South Sudan deaths with 95% UI by age, sex, and cause in 2013

| Cause                                           | Females, All Ages        | Females, 0-4 Years   | Females, 5-14 Years | Females, 15-49 Years | Females, 50-69 Years | Females, 70-80 Years |
|-------------------------------------------------|--------------------------|----------------------|---------------------|----------------------|----------------------|----------------------|
| Cellulitis                                      | 122<br>(76 - 187)        | 31<br>(11 - 63)      | 3<br>(1 - 6)        | 17<br>(10 - 28)      | 27<br>(15 - 44)      | 45<br>(23 - 75)      |
| Pyoderma                                        | 41<br>(16 - 74)          | 14<br>(3 - 38)       | 1<br>(0 - 2)        | 5<br>(2 - 10)        | 8<br>(3 - 15)        | 14<br>(5 - 28)       |
| Decubitus ulcer                                 | 17<br>(7 - 33)           | 0<br>(0 - 1)         | 0<br>(0 - 0)        | 1<br>(0 - 2)         | 2<br>(1 - 5)         | 13<br>(5 - 26)       |
| Other skin and subcutaneous diseases            | 4<br>(1 - 7)             | 1<br>(0 - 3)         | 0<br>(0 - 0)        | 1<br>(0 - 2)         | 1<br>(0 - 2)         | 1<br>(0 - 2)         |
| Sudden infant death syndrome                    | 9<br>(1 - 31)            | 9<br>(1 - 31)        | --                  | --                   | --                   | --                   |
| Injuries                                        | 2,250<br>(1,685 - 3,084) | 642<br>(347 - 1,090) | 343<br>(193 - 638)  | 586<br>(399 - 860)   | 346<br>(235 - 498)   | 333<br>(233 - 457)   |
| Transport injuries                              | 881<br>(573 - 1,361)     | 155<br>(68 - 303)    | 167<br>(79 - 338)   | 261<br>(153 - 450)   | 179<br>(110 - 275)   | 119<br>(74 - 174)    |
| Road injuries                                   | 828<br>(542 - 1,284)     | 140<br>(60 - 274)    | 156<br>(73 - 323)   | 251<br>(148 - 421)   | 171<br>(105 - 265)   | 112<br>(70 - 164)    |
| Pedestrian road injuries                        | 421<br>(257 - 671)       | 71<br>(27 - 148)     | 87<br>(38 - 173)    | 103<br>(55 - 191)    | 93<br>(52 - 149)     | 67<br>(39 - 103)     |
| Cyclist road injuries                           | 35<br>(18 - 78)          | 5<br>(1 - 16)        | 8<br>(3 - 21)       | 7<br>(3 - 21)        | 11<br>(5 - 19)       | 4<br>(2 - 7)         |
| Motorcyclist road injuries                      | 56<br>(29 - 123)         | 8<br>(3 - 20)        | 6<br>(2 - 17)       | 28<br>(12 - 69)      | 9<br>(4 - 18)        | 5<br>(2 - 9)         |
| Motor vehicle road injuries                     | 302<br>(184 - 496)       | 52<br>(20 - 107)     | 51<br>(21 - 111)    | 111<br>(66 - 180)    | 55<br>(30 - 97)      | 34<br>(18 - 56)      |
| Other road injuries                             | 14<br>(5 - 31)           | 4<br>(1 - 9)         | 3<br>(1 - 7)        | 2<br>(0 - 7)         | 4<br>(1 - 8)         | 2<br>(1 - 5)         |
| Other transport injuries                        | 52<br>(28 - 114)         | 15<br>(5 - 39)       | 11<br>(4 - 29)      | 11<br>(4 - 33)       | 8<br>(4 - 15)        | 7<br>(3 - 13)        |
| Unintentional injuries                          | 1,168<br>(852 - 1,668)   | 468<br>(246 - 808)   | 161<br>(88 - 308)   | 202<br>(134 - 323)   | 140<br>(93 - 209)    | 196<br>(125 - 280)   |
| Falls                                           | 117<br>(64 - 171)        | 16<br>(8 - 30)       | 9<br>(4 - 19)       | 15<br>(9 - 24)       | 19<br>(10 - 32)      | 57<br>(26 - 98)      |
| Drowning                                        | 206<br>(125 - 342)       | 97<br>(41 - 200)     | 50<br>(23 - 104)    | 36<br>(22 - 60)      | 16<br>(9 - 26)       | 8<br>(4 - 13)        |
| Fire, heat, and hot substances                  | 263<br>(159 - 433)       | 130<br>(51 - 262)    | 36<br>(16 - 72)     | 42<br>(24 - 75)      | 26<br>(13 - 45)      | 28<br>(13 - 52)      |
| Poisonings                                      | 67<br>(37 - 146)         | 28<br>(9 - 71)       | 7<br>(3 - 18)       | 18<br>(8 - 50)       | 11<br>(5 - 18)       | 4<br>(2 - 7)         |
| Exposure to mechanical forces                   | 132<br>(79 - 378)        | 54<br>(25 - 128)     | 19<br>(7 - 70)      | 30<br>(17 - 79)      | 16<br>(8 - 32)       | 13<br>(7 - 21)       |
| Unintentional firearm injuries                  | 28<br>(17 - 45)          | 6<br>(2 - 14)        | 3<br>(1 - 7)        | 14<br>(7 - 25)       | 4<br>(2 - 6)         | 2<br>(1 - 4)         |
| Unintentional suffocation                       | 17<br>(1 - 45)           | 12<br>(1 - 40)       | 2<br>(0 - 6)        | 1<br>(0 - 2)         | 1<br>(0 - 2)         | 1<br>(0 - 1)         |
| Other exposure to mechanical forces             | 86<br>(47 - 344)         | 36<br>(12 - 115)     | 14<br>(4 - 64)      | 16<br>(8 - 67)       | 11<br>(5 - 28)       | 10<br>(5 - 18)       |
| Adverse effects of medical treatment            | 141<br>(82 - 233)        | 34<br>(13 - 70)      | 7<br>(3 - 13)       | 23<br>(13 - 42)      | 30<br>(13 - 60)      | 48<br>(16 - 96)      |
| Animal contact                                  | 109<br>(54 - 362)        | 35<br>(9 - 144)      | 22<br>(7 - 79)      | 27<br>(12 - 75)      | 16<br>(7 - 40)       | 10<br>(4 - 26)       |
| Venomous animal contact                         | 88<br>(41 - 316)         | 33<br>(8 - 138)      | 18<br>(5 - 69)      | 21<br>(10 - 62)      | 10<br>(4 - 28)       | 7<br>(2 - 18)        |
| Non-venomous animal contact                     | 21<br>(6 - 55)           | 2<br>(0 - 7)         | 4<br>(1 - 13)       | 6<br>(2 - 15)        | 6<br>(1 - 14)        | 3<br>(1 - 9)         |
| Foreign body                                    | 111<br>(50 - 240)        | 69<br>(24 - 173)     | 7<br>(2 - 19)       | 6<br>(3 - 12)        | 4<br>(2 - 9)         | 25<br>(10 - 46)      |
| Pulmonary aspiration and foreign body in airway | 109<br>(48 - 238)        | 68<br>(24 - 172)     | 7<br>(2 - 18)       | 5<br>(2 - 12)        | 4<br>(2 - 8)         | 4<br>(10 - 45)       |
| Foreign body in other body part                 | 2<br>(1 - 3)             | 0<br>(0 - 1)         | 0<br>(0 - 0)        | 0<br>(0 - 0)         | 0<br>(0 - 1)         | 1<br>(0 - 1)         |
| Other unintentional injuries                    | 21<br>(8 - 36)           | 6<br>(2 - 13)        | 4<br>(1 - 9)        | 5<br>(2 - 10)        | 3<br>(1 - 5)         | 3<br>(1 - 6)         |
| Self-harm and interpersonal violence            | 202<br>(105 - 290)       | 19<br>(7 - 39)       | 15<br>(6 - 31)      | 122<br>(59 - 192)    | 27<br>(9 - 46)       | 18<br>(4 - 33)       |
| Self-harm                                       | 76<br>(12 - 123)         | --                   | 3<br>(0 - 7)        | 40<br>(7 - 70)       | 18<br>(2 - 32)       | 15<br>(1 - 29)       |
| Interpersonal violence                          | 126<br>(60 - 207)        | 19<br>(7 - 39)       | 13<br>(5 - 27)      | 81<br>(35 - 149)     | 10<br>(4 - 17)       | 3<br>(1 - 6)         |
| Assault by firearm                              | 32<br>(13 - 60)          | 5<br>(1 - 11)        | 2<br>(1 - 6)        | 22<br>(8 - 45)       | 3<br>(1 - 5)         | 0<br>(0 - 1)         |
| Assault by sharp object                         | 29<br>(12 - 55)          | 4<br>(1 - 9)         | 2<br>(1 - 4)        | 21<br>(8 - 44)       | 2<br>(1 - 4)         | 1<br>(0 - 2)         |
| Assault by other means                          | 65<br>(28 - 114)         | 11<br>(4 - 23)       | 9<br>(3 - 19)       | 39<br>(14 - 73)      | 5<br>(2 - 9)         | 2<br>(1 - 4)         |

Web Table 31- Spain deaths with 95% UI by age, sex, and cause in 2013

| Cause                                                             | Both Sexes, All Ages           | Both Sexes, 0-4 Years    | Both Sexes, 5-14 Years | Both Sexes, 15-49 Years     | Both Sexes, 50-69 Years     | Both Sexes, 70-80 Years        |
|-------------------------------------------------------------------|--------------------------------|--------------------------|------------------------|-----------------------------|-----------------------------|--------------------------------|
| All causes                                                        | 428,065<br>(412,722 - 443,166) | 1,752<br>(1,424 - 2,165) | 471<br>(417 - 540)     | 20,762<br>(19,624 - 21,944) | 65,466<br>(62,278 - 68,855) | 339,613<br>(328,583 - 350,213) |
| Communicable, maternal, neonatal, and nutritional diseases        | 24,490<br>(19,558 - 28,721)    | 817<br>(632 - 1,024)     | 39<br>(32 - 48)        | 1,399<br>(1,181 - 1,642)    | 2,056<br>(1,700 - 2,529)    | 20,179<br>(15,696 - 24,138)    |
| HIV/AIDS and tuberculosis                                         | 1,856<br>(1,321 - 2,513)       | 1<br>(1 - 2)             | 1<br>(0 - 1)           | 793<br>(578 - 1,030)        | 609<br>(324 - 997)          | 452<br>(352 - 592)             |
| Tuberculosis                                                      | 529<br>(451 - 680)             | 1<br>(0 - 1)             | 1<br>(0 - 1)           | 55<br>(46 - 69)             | 96<br>(80 - 146)            | 377<br>(307 - 469)             |
| HIV/AIDS                                                          | 1,327<br>(792 - 1,976)         | 0<br>(0 - 1)             | 0<br>(0 - 0)           | 738<br>(528 - 976)          | 513<br>(228 - 902)          | 75<br>(12 - 170)               |
| HIV/AIDS resulting in mycobacterial infection                     | 73<br>(42 - 117)               | 0<br>(0 - 0)             | 0<br>(0 - 0)           | 40<br>(27 - 56)             | 29<br>(13 - 53)             | 5<br>(1 - 10)                  |
| HIV/AIDS resulting in other diseases                              | 1,254<br>(746 - 1,876)         | 0<br>(0 - 1)             | 0<br>(0 - 0)           | 699<br>(499 - 922)          | 484<br>(214 - 851)          | 70<br>(11 - 160)               |
| Diarrhea, lower respiratory, and other common infectious diseases | 19,906<br>(15,149 - 23,890)    | 98<br>(72 - 126)         | 31<br>(25 - 39)        | 445<br>(366 - 518)          | 1,216<br>(972 - 1,439)      | 18,115<br>(13,665 - 22,036)    |
| Diarrheal diseases                                                | 785<br>(580 - 1,105)           | 11<br>(7 - 16)           | 2<br>(1 - 2)           | 18<br>(15 - 23)             | 43<br>(35 - 54)             | 711<br>(506 - 1,031)           |
| Intestinal infectious diseases                                    | 21<br>(9 - 43)                 | 4<br>(1 - 8)             | 3<br>(1 - 7)           | 8<br>(3 - 17)               | 3<br>(1 - 7)                | 3<br>(1 - 7)                   |
| Typhoid fever                                                     | 14<br>(5 - 32)                 | 2<br>(1 - 5)             | 2<br>(1 - 5)           | 6<br>(2 - 14)               | 2<br>(1 - 4)                | 2<br>(1 - 4)                   |
| Paratyphoid fever                                                 | 3<br>(1 - 6)                   | 1<br>(0 - 1)             | 1<br>(0 - 1)           | 1<br>(0 - 2)                | 0<br>(0 - 1)                | 0<br>(0 - 1)                   |
| Other intestinal infectious diseases                              | 4<br>(1 - 10)                  | 1<br>(0 - 4)             | 0<br>(0 - 1)           | 1<br>(0 - 4)                | 1<br>(0 - 4)                | 1<br>(0 - 5)                   |
| Lower respiratory infections                                      | 18,601<br>(13,884 - 22,534)    | 40<br>(28 - 55)          | 12<br>(9 - 16)         | 336<br>(259 - 408)          | 1,074<br>(832 - 1,290)      | 17,138<br>(12,706 - 22,989)    |
| Upper respiratory infections                                      | 9<br>(2 - 25)                  | 0<br>(0 - 0)             | 0<br>(0 - 0)           | 1<br>(0 - 2)                | 2<br>(0 - 4)                | 7<br>(1 - 22)                  |
| Otitis media                                                      | 11<br>(9 - 13)                 | 2<br>(1 - 3)             | 0<br>(0 - 1)           | 2<br>(2 - 2)                | 1<br>(1 - 2)                | 5<br>(3 - 7)                   |
| Meningitis                                                        | 266<br>(223 - 299)             | 28<br>(19 - 39)          | 8<br>(6 - 10)          | 40<br>(32 - 46)             | 53<br>(44 - 62)             | 137<br>(110 - 161)             |
| Pneumococcal meningitis                                           | 37<br>(27 - 46)                | 2<br>(1 - 4)             | 1<br>(0 - 1)           | 5<br>(3 - 7)                | 7<br>(3 - 11)               | 22<br>(14 - 30)                |
| H influenzae type B meningitis                                    | 24<br>(18 - 31)                | 6<br>(4 - 9)             | 1<br>(1 - 2)           | 3<br>(2 - 5)                | 4<br>(2 - 6)                | 10<br>(6 - 14)                 |
| Meningococcal meningitis                                          | 103<br>(77 - 133)              | 12<br>(8 - 17)           | 4<br>(3 - 5)           | 17<br>(12 - 21)             | 20<br>(14 - 26)             | 51<br>(32 - 76)                |
| Other meningitis                                                  | 102<br>(80 - 125)              | 7<br>(4 - 11)            | 2<br>(2 - 3)           | 15<br>(11 - 20)             | 22<br>(17 - 28)             | 55<br>(37 - 72)                |
| Encephalitis                                                      | 156<br>(114 - 211)             | 9<br>(6 - 14)            | 5<br>(3 - 9)           | 30<br>(21 - 46)             | 34<br>(24 - 48)             | 79<br>(52 - 109)               |
| Diphtheria                                                        | 1<br>(0 - 2)                   | 0<br>(0 - 1)             | 0<br>(0 - 0)           | 0<br>(0 - 1)                | 0<br>(0 - 1)                | --                             |
| Whooping cough                                                    | 5<br>(3 - 12)                  | 2<br>(0 - 8)             | 0<br>(0 - 1)           | 2<br>(2 - 3)                | 1<br>(0 - 1)                | --                             |
| Tetanus                                                           | 7<br>(5 - 13)                  | 0<br>(0 - 0)             | 0<br>(0 - 1)           | 2<br>(2 - 3)                | 2<br>(1 - 3)                | 2<br>(1 - 3)                   |
| Measles                                                           | 0<br>(0 - 0)                   | 0<br>(0 - 0)             | 0<br>(0 - 0)           | 0<br>(0 - 0)                | 0<br>(0 - 0)                | --                             |
| Varicella and herpes zoster                                       | 43<br>(11 - 130)               | 2<br>(0 - 6)             | 1<br>(0 - 2)           | 4<br>(1 - 9)                | 4<br>(1 - 10)               | 33<br>(2 - 118)                |
| Neglected tropical diseases and malaria                           | 52<br>(45 - 56)                | 1<br>(1 - 2)             | 2<br>(1 - 2)           | 14<br>(12 - 16)             | 14<br>(12 - 15)             | 20<br>(18 - 23)                |
| Leishmaniasis                                                     | 7<br>(5 - 9)                   | 0<br>(0 - 1)             | 0<br>(0 - 0)           | 2<br>(1 - 3)                | 2<br>(2 - 3)                | 2<br>(1 - 3)                   |
| Visceral leishmaniasis                                            | 7<br>(5 - 9)                   | 0<br>(0 - 1)             | 0<br>(0 - 0)           | 2<br>(1 - 3)                | 2<br>(2 - 3)                | 2<br>(1 - 3)                   |
| Cysticercosis                                                     | 1<br>(1 - 1)                   | 0<br>(0 - 0)             | 0<br>(0 - 0)           | 0<br>(0 - 0)                | 0<br>(0 - 0)                | 0<br>(0 - 0)                   |
| Cystic echinococcosis                                             | 26<br>(24 - 28)                | 0<br>(0 - 0)             | 0<br>(0 - 0)           | 5<br>(5 - 6)                | 7<br>(7 - 8)                | 13<br>(12 - 14)                |
| Dengue                                                            | 5<br>(3 - 5)                   | 0<br>(0 - 0)             | 0<br>(0 - 1)           | 2<br>(2 - 3)                | 1<br>(1 - 1)                | 1<br>(0 - 1)                   |
| Rabies                                                            | 4<br>(2 - 5)                   | 0<br>(0 - 0)             | 0<br>(0 - 1)           | 2<br>(1 - 2)                | 1<br>(0 - 1)                | 1<br>(0 - 1)                   |
| Other neglected tropical diseases                                 | 10<br>(8 - 12)                 | 0<br>(0 - 0)             | 0<br>(0 - 1)           | 3<br>(2 - 4)                | 2<br>(2 - 3)                | 4<br>(3 - 6)                   |
| Maternal disorders                                                | 31<br>(24 - 38)                | --                       | 0<br>(0 - 0)           | 31<br>(24 - 38)             | --                          | --                             |
| Maternal hemorrhage                                               | 4<br>(3 - 6)                   | --                       | 0<br>(0 - 0)           | 4<br>(3 - 6)                | --                          | --                             |
| Maternal sepsis and other maternal infections                     | 3<br>(1 - 5)                   | --                       | 0<br>(0 - 0)           | 3<br>(1 - 5)                | --                          | --                             |
| Maternal hypertensive disorders                                   | 3<br>(2 - 5)                   | --                       | 0<br>(0 - 0)           | 3<br>(2 - 5)                | --                          | --                             |
| Maternal obstructed labor                                         | 3<br>(2 - 4)                   | --                       | 0<br>(0 - 0)           | 3<br>(2 - 4)                | --                          | --                             |

Web Table 31- Spain deaths with 95% UI by age, sex, and cause in 2013

| Cause                                                            | Both Sexes, All Ages           | Both Sexes, 0-4 Years | Both Sexes, 5-14 Years | Both Sexes, 15-49 Years     | Both Sexes, 50-69 Years     | Both Sexes, 70-80 Years        |
|------------------------------------------------------------------|--------------------------------|-----------------------|------------------------|-----------------------------|-----------------------------|--------------------------------|
| Maternal abortive outcome                                        | 7<br>(5 - 9)                   | --                    | 0<br>(0 - 0)           | 7<br>(5 - 9)                | --                          | --                             |
| Indirect maternal deaths                                         | 2<br>(1 - 4)                   | --                    | 0<br>(0 - 0)           | 2<br>(1 - 4)                | --                          | --                             |
| Late maternal deaths                                             | 2<br>(1 - 3)                   | --                    | 0<br>(0 - 0)           | 2<br>(1 - 3)                | --                          | --                             |
| Maternal deaths aggravated by HIV/AIDS                           | 0<br>(0 - 0)                   | --                    | --                     | 0<br>(0 - 0)                | --                          | --                             |
| Other maternal disorders                                         | 6<br>(4 - 8)                   | --                    | 0<br>(0 - 0)           | 6<br>(4 - 8)                | --                          | --                             |
| Neonatal disorders                                               | 699<br>(538 - 885)             | 699<br>(538 - 885)    | --                     | --                          | --                          | --                             |
| Neonatal preterm birth complications                             | 284<br>(197 - 385)             | 284<br>(197 - 385)    | --                     | --                          | --                          | --                             |
| Neonatal encephalopathy due to birth asphyxia and trauma         | 136<br>(87 - 185)              | 136<br>(87 - 185)     | --                     | --                          | --                          | --                             |
| Neonatal sepsis and other neonatal infections                    | 106<br>(63 - 180)              | 106<br>(63 - 180)     | --                     | --                          | --                          | --                             |
| Hemolytic disease and other neonatal jaundice                    | 3<br>(1 - 6)                   | 3<br>(1 - 6)          | --                     | --                          | --                          | --                             |
| Other neonatal disorders                                         | 170<br>(100 - 237)             | 170<br>(100 - 237)    | --                     | --                          | --                          | --                             |
| Nutritional deficiencies                                         | 1,383<br>(1,048 - 1,739)       | 3<br>(2 - 5)          | 1<br>(1 - 2)           | 48<br>(37 - 61)             | 71<br>(50 - 92)             | 1,259<br>(928 - 1,612)         |
| Protein-energy malnutrition                                      | 203<br>(105 - 343)             | 1<br>(1 - 2)          | 0<br>(0 - 1)           | 4<br>(2 - 6)                | 10<br>(5 - 16)              | 188<br>(95 - 322)              |
| Iodine deficiency                                                | 3<br>(0 - 14)                  | 0<br>(0 - 0)          | 0<br>(0 - 0)           | 0<br>(0 - 1)                | 0<br>(0 - 2)                | 2<br>(0 - 13)                  |
| Iron-deficiency anemia                                           | 1,001<br>(719 - 1,314)         | 1<br>(0 - 2)          | 0<br>(0 - 1)           | 40<br>(30 - 52)             | 49<br>(35 - 65)             | 911<br>(645 - 1,207)           |
| Other nutritional deficiencies                                   | 176<br>(68 - 295)              | 1<br>(0 - 2)          | 0<br>(0 - 1)           | 5<br>(2 - 8)                | 12<br>(5 - 19)              | 158<br>(58 - 272)              |
| Other communicable, maternal, neonatal, and nutritional diseases | 564<br>(417 - 663)             | 15<br>(7 - 27)        | 4<br>(3 - 6)           | 68<br>(53 - 82)             | 146<br>(108 - 173)          | 332<br>(227 - 409)             |
| Sexually transmitted diseases excluding HIV                      | 34<br>(22 - 53)                | 7<br>(0 - 18)         | 1<br>(0 - 2)           | 3<br>(3 - 5)                | 5<br>(3 - 10)               | 18<br>(11 - 29)                |
| Syphilis                                                         | 27<br>(16 - 44)                | 7<br>(0 - 18)         | 1<br>(0 - 1)           | 2<br>(1 - 2)                | 3<br>(2 - 7)                | 15<br>(9 - 23)                 |
| Chlamydial infection                                             | 1<br>(1 - 2)                   | --                    | 0<br>(0 - 0)           | 0<br>(0 - 1)                | 0<br>(0 - 1)                | 1<br>(0 - 1)                   |
| Gonococcal infection                                             | 4<br>(3 - 6)                   | --                    | 0<br>(0 - 0)           | 1<br>(1 - 1)                | 1<br>(1 - 2)                | 2<br>(1 - 3)                   |
| Other sexually transmitted diseases                              | 2<br>(2 - 3)                   | --                    | 0<br>(0 - 0)           | 1<br>(0 - 1)                | 1<br>(0 - 1)                | 1<br>(1 - 1)                   |
| Hepatitis                                                        | 165<br>(137 - 199)             | 1<br>(1 - 2)          | 1<br>(1 - 1)           | 27<br>(21 - 35)             | 46<br>(36 - 59)             | 89<br>(65 - 123)               |
| Acute hepatitis A                                                | 36<br>(12 - 70)                | 1<br>(0 - 1)          | 1<br>(0 - 1)           | 10<br>(4 - 17)              | 10<br>(3 - 20)              | 15<br>(4 - 34)                 |
| Acute hepatitis B                                                | 118<br>(80 - 156)              | 0<br>(0 - 1)          | 0<br>(0 - 0)           | 16<br>(9 - 25)              | 34<br>(23 - 46)             | 68<br>(43 - 98)                |
| Acute hepatitis C                                                | 11<br>(2 - 29)                 | --                    | 0<br>(0 - 0)           | 2<br>(0 - 5)                | 3<br>(0 - 7)                | 6<br>(1 - 19)                  |
| Other infectious diseases                                        | 365<br>(225 - 450)             | 6<br>(4 - 9)          | 3<br>(2 - 4)           | 37<br>(23 - 47)             | 94<br>(58 - 119)            | 225<br>(128 - 290)             |
| Non-communicable diseases                                        | 386,145<br>(372,653 - 400,010) | 817<br>(646 - 1,035)  | 302<br>(263 - 347)     | 14,560<br>(13,668 - 15,499) | 60,089<br>(57,136 - 63,239) | 310,377<br>(300,075 - 320,581) |
| Neoplasms                                                        | 114,160<br>(107,323 - 120,750) | 69<br>(50 - 94)       | 160<br>(135 - 188)     | 7,023<br>(6,553 - 7,557)    | 33,655<br>(31,743 - 35,592) | 73,253<br>(67,334 - 78,359)    |
| Esophageal cancer                                                | 2,015<br>(1,744 - 2,562)       | --                    | --                     | 156<br>(119 - 248)          | 914<br>(760 - 1,249)        | 944<br>(809 - 1,123)           |
| Stomach cancer                                                   | 7,765<br>(6,645 - 9,136)       | --                    | --                     | 365<br>(310 - 429)          | 1,782<br>(1,580 - 2,040)    | 5,618<br>(4,650 - 6,833)       |
| Liver cancer                                                     | 5,568<br>(4,486 - 7,734)       | --                    | 2<br>(1 - 3)           | 255<br>(191 - 356)          | 1,710<br>(1,317 - 2,440)    | 3,601<br>(2,805 - 5,028)       |
| Liver cancer due to hepatitis B                                  | 992<br>(573 - 1,457)           | --                    | 1<br>(0 - 2)           | 88<br>(51 - 128)            | 415<br>(225 - 628)          | 488<br>(279 - 756)             |
| Liver cancer due to hepatitis C                                  | 3,772<br>(2,884 - 5,321)       | --                    | 1<br>(0 - 1)           | 142<br>(94 - 204)           | 1,092<br>(766 - 1,626)      | 2,537<br>(1,910 - 3,612)       |
| Liver cancer due to alcohol use                                  | 697<br>(443 - 1,130)           | --                    | --                     | 18<br>(10 - 31)             | 174<br>(104 - 286)          | 505<br>(316 - 820)             |
| Liver cancer due to other causes                                 | 106<br>(57 - 185)              | --                    | 0<br>(0 - 0)           | 6<br>(4 - 10)               | 29<br>(16 - 48)             | 70<br>(35 - 134)               |
| Larynx cancer                                                    | 1,555<br>(1,223 - 2,106)       | --                    | --                     | 103<br>(72 - 193)           | 698<br>(560 - 991)          | 754<br>(541 - 951)             |
| Tracheal, bronchus and lung cancer                               | 21,778<br>(19,591 - 23,606)    | --                    | --                     | 1,205<br>(992 - 1,383)      | 8,976<br>(7,894 - 9,915)    | 11,597<br>(10,406 - 12,753)    |
| Breast cancer                                                    | 7,219<br>(5,157 - 8,392)       | --                    | --                     | 996<br>(847 - 1,269)        | 2,326<br>(1,884 - 2,746)    | 3,897<br>(2,413 - 4,737)       |
| Cervical cancer                                                  | 1,066<br>(807 - 1,271)         | --                    | --                     | 200<br>(150 - 244)          | 340<br>(262 - 410)          | 527<br>(377 - 699)             |

Web Table 31- Spain deaths with 95% UI by age, sex, and cause in 2013

| Cause                                         | Both Sexes, All Ages           | Both Sexes, 0-4 Years | Both Sexes, 5-14 Years | Both Sexes, 15-49 Years  | Both Sexes, 50-69 Years     | Both Sexes, 70-80 Years        |
|-----------------------------------------------|--------------------------------|-----------------------|------------------------|--------------------------|-----------------------------|--------------------------------|
| Uterine cancer                                | 1,382<br>(904 - 1,722)         | --                    | --                     | 32<br>(24 - 43)          | 384<br>(279 - 477)          | 966<br>(580 - 1,289)           |
| Prostate cancer                               | 7,633<br>(5,848 - 11,336)      | --                    | --                     | 16<br>(11 - 24)          | 842<br>(636 - 1,226)        | 6,775<br>(5,104 - 10,201)      |
| Colon and rectum cancer                       | 18,100<br>(16,383 - 20,059)    | --                    | --                     | 617<br>(549 - 694)       | 4,232<br>(3,872 - 4,591)    | 13,251<br>(11,639 - 15,147)    |
| Lip and oral cavity cancer                    | 1,402<br>(1,242 - 1,600)       | --                    | --                     | 132<br>(108 - 164)       | 586<br>(485 - 685)          | 684<br>(573 - 818)             |
| Nasopharynx cancer                            | 274<br>(220 - 401)             | --                    | 1<br>(0 - 1)           | 54<br>(38 - 88)          | 125<br>(92 - 195)           | 94<br>(70 - 132)               |
| Other pharynx cancer                          | 841<br>(684 - 1,050)           | --                    | --                     | 98<br>(74 - 150)         | 486<br>(375 - 622)          | 257<br>(196 - 323)             |
| Gallbladder and biliary tract cancer          | 1,726<br>(1,370 - 2,460)       | --                    | --                     | 32<br>(24 - 44)          | 346<br>(274 - 520)          | 1,348<br>(1,030 - 1,919)       |
| Pancreatic cancer                             | 6,581<br>(5,989 - 7,215)       | --                    | --                     | 305<br>(264 - 351)       | 2,089<br>(1,883 - 2,293)    | 4,187<br>(3,727 - 4,703)       |
| Malignant skin melanoma                       | 1,071<br>(680 - 1,499)         | --                    | --                     | 195<br>(130 - 286)       | 332<br>(202 - 476)          | 544<br>(341 - 762)             |
| Non-melanoma skin cancer                      | 851<br>(626 - 1,304)           | --                    | --                     | 23<br>(16 - 36)          | 90<br>(62 - 149)            | 738<br>(539 - 1,123)           |
| Ovarian cancer                                | 2,326<br>(1,763 - 2,720)       | --                    | --                     | 221<br>(181 - 268)       | 862<br>(710 - 1,004)        | 1,244<br>(800 - 1,589)         |
| Testicular cancer                             | 49<br>(30 - 68)                | --                    | --                     | 26<br>(15 - 39)          | 9<br>(5 - 13)               | 14<br>(8 - 21)                 |
| Kidney cancer                                 | 2,325<br>(1,925 - 2,856)       | 2<br>(1 - 4)          | 3<br>(2 - 5)           | 131<br>(109 - 157)       | 747<br>(631 - 886)          | 1,441<br>(1,094 - 1,903)       |
| Bladder cancer                                | 5,112<br>(3,676 - 6,073)       | --                    | --                     | 76<br>(62 - 95)          | 1,038<br>(807 - 1,206)      | 3,998<br>(2,798 - 4,877)       |
| Brain and nervous system cancer               | 2,873<br>(2,295 - 3,288)       | 12<br>(7 - 19)        | 34<br>(26 - 45)        | 479<br>(399 - 569)       | 1,185<br>(993 - 1,443)      | 1,164<br>(807 - 1,424)         |
| Thyroid cancer                                | 346<br>(279 - 418)             | --                    | 0<br>(0 - 0)           | 21<br>(16 - 26)          | 92<br>(76 - 114)            | 233<br>(177 - 297)             |
| Mesothelioma                                  | 484<br>(366 - 727)             | --                    | --                     | 31<br>(21 - 54)          | 184<br>(134 - 284)          | 269<br>(185 - 424)             |
| Hodgkin lymphoma                              | 289<br>(212 - 381)             | 0<br>(0 - 0)          | 2<br>(1 - 3)           | 81<br>(63 - 115)         | 76<br>(58 - 114)            | 130<br>(80 - 164)              |
| Non-Hodgkin lymphoma                          | 2,997<br>(1,761 - 3,715)       | 4<br>(2 - 7)          | 14<br>(7 - 21)         | 275<br>(172 - 380)       | 1,886<br>(496 - 994)        | 1,886<br>(993 - 2,520)         |
| Multiple myeloma                              | 1,802<br>(1,206 - 2,441)       | --                    | --                     | 54<br>(37 - 80)          | 496<br>(351 - 712)          | 1,253<br>(784 - 1,716)         |
| Leukemia                                      | 3,494<br>(3,051 - 3,873)       | 19<br>(12 - 29)       | 48<br>(37 - 61)        | 318<br>(279 - 353)       | 709<br>(619 - 786)          | 2,400<br>(2,018 - 2,747)       |
| Other neoplasms                               | 5,233<br>(3,936 - 5,980)       | 31<br>(21 - 44)       | 56<br>(41 - 69)        | 526<br>(418 - 631)       | 1,182<br>(970 - 1,428)      | 3,438<br>(2,379 - 4,150)       |
| Cardiovascular diseases                       | 139,004<br>(128,567 - 155,490) | 30<br>(23 - 39)       | 25<br>(20 - 30)        | 3,316<br>(3,000 - 3,666) | 14,363<br>(13,253 - 15,824) | 121,271<br>(111,297 - 136,164) |
| Rheumatic heart disease                       | 1,834<br>(970 - 2,311)         | 0<br>(0 - 1)          | 1<br>(1 - 2)           | 60<br>(44 - 85)          | 310<br>(223 - 394)          | 1,462<br>(669 - 1,929)         |
| Ischemic heart disease                        | 66,539<br>(59,046 - 80,064)    | 2<br>(1 - 3)          | 4<br>(3 - 6)           | 1,945<br>(1,712 - 2,201) | 8,128<br>(7,352 - 9,522)    | 56,459<br>(49,418 - 68,247)    |
| Cerebrovascular disease                       | 42,858<br>(36,882 - 53,319)    | 9<br>(7 - 13)         | 10<br>(8 - 12)         | 669<br>(559 - 815)       | 3,208<br>(2,723 - 3,820)    | 38,962<br>(33,297 - 48,827)    |
| Ischemic stroke                               | 25,177<br>(20,608 - 34,969)    | 0<br>(0 - 1)          | 1<br>(1 - 1)           | 72<br>(52 - 106)         | 937<br>(697 - 1,349)        | 24,166<br>(19,770 - 33,725)    |
| Hemorrhagic stroke                            | 17,681<br>(12,948 - 21,556)    | 9<br>(7 - 12)         | 9<br>(7 - 11)          | 597<br>(499 - 726)       | 2,271<br>(1,851 - 2,686)    | 14,795<br>(10,418 - 18,298)    |
| Hypertensive heart disease                    | 3,479<br>(1,846 - 4,985)       | 0<br>(0 - 0)          | 0<br>(0 - 1)           | 25<br>(15 - 33)          | 173<br>(114 - 223)          | 3,280<br>(1,673 - 4,783)       |
| Cardiomyopathy and myocarditis                | 4,927<br>(3,883 - 6,953)       | 12<br>(9 - 17)        | 5<br>(4 - 7)           | 205<br>(136 - 252)       | 682<br>(466 - 826)          | 4,023<br>(3,154 - 6,004)       |
| Atrial fibrillation and flutter               | 6,372<br>(4,814 - 8,435)       | --                    | --                     | 14<br>(10 - 18)          | 184<br>(142 - 231)          | 6,175<br>(4,628 - 8,232)       |
| Aortic aneurysm                               | 2,111<br>(1,425 - 2,495)       | --                    | --                     | 78<br>(55 - 95)          | 477<br>(329 - 569)          | 1,557<br>(1,018 - 1,885)       |
| Peripheral vascular disease                   | 1,427<br>(1,107 - 1,832)       | --                    | --                     | 5<br>(4 - 7)             | 88<br>(69 - 111)            | 1,334<br>(1,023 - 1,730)       |
| Endocarditis                                  | 692<br>(519 - 1,022)           | 1<br>(1 - 2)          | 1<br>(1 - 1)           | 58<br>(38 - 92)          | 143<br>(100 - 235)          | 490<br>(358 - 727)             |
| Other cardiovascular and circulatory diseases | 8,764<br>(5,054 - 11,124)      | 5<br>(3 - 7)          | 3<br>(2 - 4)           | 259<br>(160 - 316)       | 969<br>(606 - 1,177)        | 7,529<br>(4,195 - 9,735)       |
| Chronic respiratory diseases                  | 29,428<br>(26,267 - 33,351)    | 11<br>(7 - 16)        | 6<br>(4 - 8)           | 342<br>(261 - 391)       | 2,643<br>(2,252 - 3,013)    | 26,426<br>(23,566 - 30,227)    |
| Chronic obstructive pulmonary disease         | 24,719<br>(21,793 - 28,131)    | 7<br>(4 - 11)         | 3<br>(2 - 3)           | 215<br>(153 - 256)       | 2,055<br>(1,728 - 2,379)    | 22,438<br>(19,657 - 25,634)    |
| Pneumoconiosis                                | 674<br>(457 - 1,004)           | 0<br>(0 - 0)          | 0<br>(0 - 1)           | 19<br>(12 - 27)          | 96<br>(62 - 156)            | 559<br>(359 - 852)             |
| Silicosis                                     | 225<br>(152 - 338)             | 0<br>(0 - 0)          | 0<br>(0 - 0)           | 7<br>(4 - 9)             | 31<br>(18 - 53)             | 188<br>(120 - 289)             |
| Asbestosis                                    | 169<br>(110 - 259)             | 0<br>(0 - 0)          | 0<br>(0 - 0)           | 4<br>(3 - 6)             | 25<br>(15 - 42)             | 139<br>(87 - 214)              |

Web Table 31- Spain deaths with 95% UI by age, sex, and cause in 2013

| Cause                                               | Both Sexes, All Ages        | Both Sexes, 0-4 Years | Both Sexes, 5-14 Years | Both Sexes, 15-49 Years | Both Sexes, 50-69 Years  | Both Sexes, 70-80 Years     |
|-----------------------------------------------------|-----------------------------|-----------------------|------------------------|-------------------------|--------------------------|-----------------------------|
| Coal workers pneumoconiosis                         | 38<br>(25 - 57)             | 0<br>(0 - 0)          | 0<br>(0 - 0)           | 2<br>(1 - 2)            | 3<br>(2 - 4)             | 33<br>(21 - 52)             |
| Other pneumoconiosis                                | 242<br>(161 - 365)          | 0<br>(0 - 0)          | 0<br>(0 - 0)           | 6<br>(4 - 9)            | 38<br>(25 - 60)          | 198<br>(127 - 306)          |
| Asthma                                              | 1,170<br>(719 - 1,702)      | 1<br>(0 - 1)          | 2<br>(1 - 2)           | 51<br>(33 - 63)         | 135<br>(94 - 178)        | 982<br>(577 - 1,469)        |
| Interstitial lung disease and pulmonary sarcoidosis | 2,645<br>(1,746 - 3,655)    | 1<br>(1 - 2)          | 1<br>(1 - 2)           | 50<br>(35 - 67)         | 330<br>(219 - 448)       | 2,263<br>(1,444 - 3,180)    |
| Other chronic respiratory diseases                  | 219<br>(163 - 296)          | 2<br>(1 - 3)          | 0<br>(0 - 1)           | 7<br>(5 - 9)            | 26<br>(19 - 33)          | 184<br>(132 - 258)          |
| Cirrhosis                                           | 8,405<br>(7,707 - 9,158)    | 2<br>(1 - 3)          | 3<br>(2 - 3)           | 1,101<br>(963 - 1,229)  | 3,016<br>(2,709 - 3,340) | 4,283<br>(3,805 - 4,810)    |
| Cirrhosis due to hepatitis B                        | 844<br>(539 - 1,161)        | 0<br>(0 - 0)          | 0<br>(0 - 0)           | 103<br>(62 - 162)       | 284<br>(172 - 422)       | 458<br>(281 - 687)          |
| Cirrhosis due to hepatitis C                        | 3,982<br>(2,895 - 4,963)    | 0<br>(0 - 1)          | 1<br>(0 - 1)           | 504<br>(324 - 710)      | 1,413<br>(924 - 1,888)   | 2,064<br>(1,536 - 2,599)    |
| Cirrhosis due to alcohol use                        | 2,872<br>(2,074 - 3,849)    | --                    | --                     | 326<br>(180 - 488)      | 1,045<br>(651 - 1,486)   | 1,501<br>(1,095 - 2,045)    |
| Cirrhosis due to other causes                       | 707<br>(372 - 1,094)        | 2<br>(1 - 2)          | 2<br>(1 - 3)           | 169<br>(94 - 244)       | 275<br>(128 - 439)       | 260<br>(131 - 442)          |
| Digestive diseases                                  | 12,651<br>(10,392 - 14,176) | 3<br>(2 - 5)          | 5<br>(3 - 6)           | 314<br>(240 - 360)      | 1,199<br>(1,022 - 1,338) | 11,130<br>(9,007 - 12,596)  |
| Peptic ulcer disease                                | 1,074<br>(787 - 1,537)      | 0<br>(0 - 0)          | 0<br>(0 - 0)           | 34<br>(23 - 45)         | 125<br>(90 - 160)        | 914<br>(660 - 1,349)        |
| Gastritis and duodenitis                            | 65<br>(38 - 105)            | 0<br>(0 - 0)          | 0<br>(0 - 1)           | 3<br>(2 - 5)            | 6<br>(4 - 10)            | 55<br>(31 - 91)             |
| Appendicitis                                        | 148<br>(98 - 204)           | 0<br>(0 - 1)          | 1<br>(1 - 1)           | 13<br>(8 - 18)          | 24<br>(16 - 33)          | 110<br>(69 - 162)           |
| Paralytic ileus and intestinal obstruction          | 2,211<br>(1,384 - 3,197)    | 1<br>(0 - 2)          | 1<br>(1 - 1)           | 34<br>(21 - 49)         | 145<br>(87 - 210)        | 2,031<br>(1,258 - 2,950)    |
| Inguinal, femoral, and abdominal hernia             | 474<br>(255 - 698)          | 0<br>(0 - 0)          | 0<br>(0 - 1)           | 5<br>(2 - 7)            | 39<br>(23 - 55)          | 429<br>(220 - 643)          |
| Inflammatory bowel disease                          | 377<br>(264 - 619)          | 0<br>(0 - 0)          | 0<br>(0 - 0)           | 20<br>(14 - 27)         | 51<br>(37 - 76)          | 305<br>(205 - 529)          |
| Vascular intestinal disorders                       | 3,514<br>(2,174 - 5,172)    | 0<br>(0 - 1)          | 0<br>(0 - 1)           | 39<br>(21 - 66)         | 314<br>(191 - 481)       | 3,161<br>(1,935 - 4,709)    |
| Gallbladder and biliary diseases                    | 2,138<br>(1,293 - 2,788)    | 0<br>(0 - 0)          | 0<br>(0 - 1)           | 25<br>(15 - 31)         | 123<br>(85 - 159)        | 1,989<br>(1,180 - 2,625)    |
| Pancreatitis                                        | 1,393<br>(999 - 1,847)      | 0<br>(0 - 0)          | 0<br>(0 - 1)           | 110<br>(83 - 137)       | 245<br>(181 - 322)       | 1,037<br>(713 - 1,429)      |
| Other digestive diseases                            | 1,258<br>(870 - 1,601)      | 1<br>(0 - 1)          | 1<br>(0 - 1)           | 31<br>(20 - 39)         | 126<br>(88 - 158)        | 1,100<br>(744 - 1,434)      |
| Neurological disorders                              | 48,735<br>(38,676 - 59,017) | 41<br>(30 - 55)       | 19<br>(15 - 25)        | 418<br>(343 - 478)      | 1,969<br>(1,717 - 2,221) | 46,287<br>(36,078 - 56,605) |
| Alzheimer disease and other dementias               | 42,590<br>(32,722 - 52,880) | --                    | --                     | 8<br>(4 - 12)           | 872<br>(686 - 1,069)     | 41,711<br>(31,859 - 52,009) |
| Parkinson disease                                   | 3,530<br>(2,318 - 4,381)    | --                    | --                     | 8<br>(5 - 10)           | 212<br>(167 - 258)       | 3,309<br>(2,142 - 4,140)    |
| Epilepsy                                            | 425<br>(276 - 545)          | 5<br>(3 - 7)          | 6<br>(4 - 8)           | 99<br>(66 - 124)        | 79<br>(55 - 99)          | 236<br>(139 - 331)          |
| Multiple sclerosis                                  | 301<br>(187 - 402)          | --                    | --                     | 90<br>(54 - 131)        | 140<br>(80 - 187)        | 70<br>(44 - 98)             |
| Other neurological disorders                        | 1,889<br>(1,638 - 2,107)    | 37<br>(26 - 50)       | 13<br>(10 - 18)        | 214<br>(176 - 250)      | 665<br>(555 - 756)       | 961<br>(818 - 1,104)        |
| Mental and substance use disorders                  | 1,718<br>(1,473 - 2,351)    | 0<br>(0 - 0)          | 0<br>(0 - 0)           | 1,163<br>(971 - 1,772)  | 306<br>(219 - 373)       | 249<br>(183 - 301)          |
| Schizophrenia                                       | 128<br>(65 - 173)           | --                    | --                     | 15<br>(8 - 22)          | 37<br>(18 - 52)          | 76<br>(35 - 112)            |
| Alcohol use disorders                               | 355<br>(235 - 484)          | --                    | --                     | 106<br>(74 - 165)       | 162<br>(98 - 225)        | 87<br>(52 - 117)            |
| Drug use disorders                                  | 1,229<br>(1,039 - 1,819)    | 0<br>(0 - 0)          | --                     | 1,036<br>(851 - 1,646)  | 107<br>(85 - 128)        | 86<br>(67 - 108)            |
| Opioid use disorders                                | 451<br>(374 - 664)          | 0<br>(0 - 0)          | --                     | 384<br>(307 - 607)      | 35<br>(28 - 43)          | 32<br>(24 - 42)             |
| Cocaine use disorders                               | 35<br>(28 - 48)             | 0<br>(0 - 0)          | --                     | 30<br>(24 - 43)         | 3<br>(2 - 4)             | 2<br>(1 - 3)                |
| Amphetamine use disorders                           | 33<br>(27 - 47)             | 0<br>(0 - 0)          | --                     | 27<br>(21 - 42)         | 4<br>(3 - 5)             | 2<br>(2 - 3)                |
| Other drug use disorders                            | 710<br>(597 - 1,051)        | 0<br>(0 - 0)          | --                     | 595<br>(488 - 938)      | 65<br>(52 - 78)          | 50<br>(39 - 63)             |
| Eating disorders                                    | 5<br>(3 - 8)                | --                    | 0<br>(0 - 0)           | 5<br>(3 - 8)            | --                       | --                          |
| Anorexia nervosa                                    | 5<br>(3 - 8)                | --                    | 0<br>(0 - 0)           | 5<br>(3 - 8)            | --                       | --                          |
| Diabetes, urogenital, blood, and endocrine diseases | 28,484<br>(23,733 - 37,537) | 65<br>(48 - 88)       | 34<br>(26 - 44)        | 596<br>(500 - 816)      | 2,544<br>(2,193 - 3,659) | 25,245<br>(20,780 - 33,132) |
| Diabetes mellitus                                   | 10,433<br>(8,992 - 12,304)  | 3<br>(2 - 5)          | 2<br>(1 - 2)           | 126<br>(109 - 148)      | 977<br>(867 - 1,189)     | 9,324<br>(7,931 - 11,105)   |
| Acute glomerulonephritis                            | 9<br>(7 - 15)               | 0<br>(0 - 0)          | 0<br>(0 - 1)           | 2<br>(1 - 3)            | 1<br>(1 - 2)             | 5<br>(3 - 10)               |

Web Table 31- Spain deaths with 95% UI by age, sex, and cause in 2013

| Cause                                               | Both Sexes, All Ages        | Both Sexes, 0-4 Years | Both Sexes, 5-14 Years | Both Sexes, 15-49 Years  | Both Sexes, 50-69 Years  | Both Sexes, 70-80 Years    |
|-----------------------------------------------------|-----------------------------|-----------------------|------------------------|--------------------------|--------------------------|----------------------------|
| Chronic kidney disease                              | 11,454<br>(8,961 - 20,596)  | 3<br>(2 - 6)          | 3<br>(2 - 6)           | 178<br>(132 - 411)       | 847<br>(640 - 1,902)     | 10,423<br>(8,120 - 18,366) |
| Chronic kidney disease due to diabetes mellitus     | 2,330<br>(1,518 - 5,469)    | 0<br>(0 - 1)          | 1<br>(0 - 1)           | 44<br>(27 - 109)         | 236<br>(156 - 554)       | 2,050<br>(1,313 - 4,831)   |
| Chronic kidney disease due to hypertension          | 2,760<br>(1,814 - 4,177)    | 0<br>(0 - 0)          | 0<br>(0 - 1)           | 28<br>(18 - 56)          | 148<br>(100 - 306)       | 2,583<br>(1,649 - 3,864)   |
| Chronic kidney disease due to glomerulonephritis    | 167<br>(96 - 227)           | 1<br>(0 - 1)          | 0<br>(0 - 0)           | 8<br>(4 - 11)            | 20<br>(10 - 27)          | 139<br>(78 - 197)          |
| Chronic kidney disease due to other causes          | 6,196<br>(3,940 - 13,202)   | 2<br>(1 - 5)          | 2<br>(1 - 5)           | 98<br>(61 - 268)         | 444<br>(268 - 1,212)     | 5,650<br>(3,596 - 11,671)  |
| Urinary diseases and male infertility               | 3,898<br>(2,149 - 5,130)    | 3<br>(2 - 4)          | 1<br>(1 - 1)           | 46<br>(28 - 55)          | 224<br>(142 - 269)       | 3,624<br>(1,950 - 4,834)   |
| Interstitial nephritis and urinary tract infections | 3,524<br>(1,881 - 4,709)    | 2<br>(1 - 3)          | 1<br>(0 - 1)           | 32<br>(19 - 40)          | 166<br>(101 - 202)       | 3,323<br>(1,746 - 4,488)   |
| Urolithiasis                                        | 78<br>(48 - 148)            | --                    | 0<br>(0 - 0)           | 4<br>(2 - 6)             | 11<br>(7 - 17)           | 64<br>(36 - 128)           |
| Other urinary diseases                              | 296<br>(169 - 502)          | 1<br>(1 - 1)          | 0<br>(0 - 0)           | 10<br>(6 - 14)           | 47<br>(25 - 64)          | 237<br>(128 - 431)         |
| Gynecological diseases                              | 14<br>(8 - 22)              | --                    | --                     | 1<br>(1 - 2)             | 1<br>(1 - 2)             | 12<br>(6 - 19)             |
| Uterine fibroids                                    | 4<br>(2 - 6)                | --                    | --                     | 0<br>(0 - 0)             | 0<br>(0 - 1)             | 3<br>(2 - 6)               |
| Polycystic ovarian syndrome                         | 0<br>(0 - 0)                | --                    | --                     | 0<br>(0 - 0)             | 0<br>(0 - 0)             | --                         |
| Endometriosis                                       | 0<br>(0 - 0)                | --                    | --                     | 0<br>(0 - 0)             | 0<br>(0 - 0)             | --                         |
| Genital prolapse                                    | 3<br>(2 - 5)                | --                    | --                     | 0<br>(0 - 0)             | 0<br>(0 - 0)             | 3<br>(2 - 5)               |
| Other gynecological diseases                        | 6<br>(4 - 10)               | --                    | --                     | 1<br>(0 - 1)             | 1<br>(0 - 1)             | 5<br>(3 - 9)               |
| Hemoglobinopathies and hemolytic anemias            | 395<br>(297 - 566)          | 5<br>(3 - 9)          | 4<br>(3 - 7)           | 26<br>(19 - 40)          | 60<br>(44 - 90)          | 299<br>(216 - 432)         |
| Thalassemias                                        | 1<br>(1 - 2)                | 0<br>(0 - 0)          | 0<br>(0 - 0)           | 1<br>(0 - 1)             | 0<br>(0 - 0)             | 0<br>(0 - 0)               |
| Sickle cell disorders                               | 54<br>(41 - 78)             | 3<br>(2 - 5)          | 3<br>(2 - 5)           | 13<br>(10 - 20)          | 23<br>(17 - 35)          | 11<br>(8 - 16)             |
| G6PD deficiency                                     | 1<br>(1 - 1)                | 0<br>(0 - 0)          | 0<br>(0 - 0)           | 0<br>(0 - 0)             | 0<br>(0 - 0)             | 0<br>(0 - 0)               |
| Other hemoglobinopathies and hemolytic anemias      | 339<br>(250 - 489)          | 2<br>(1 - 3)          | 1<br>(1 - 2)           | 12<br>(9 - 18)           | 36<br>(27 - 55)          | 288<br>(207 - 416)         |
| Endocrine, metabolic, blood, and immune disorders   | 2,280<br>(1,279 - 2,772)    | 50<br>(31 - 69)       | 23<br>(14 - 31)        | 217<br>(143 - 257)       | 432<br>(260 - 513)       | 1,558<br>(805 - 2,019)     |
| Musculoskeletal disorders                           | 1,072<br>(836 - 1,287)      | --                    | 2<br>(2 - 3)           | 78<br>(64 - 104)         | 196<br>(161 - 255)       | 795<br>(573 - 993)         |
| Rheumatoid arthritis                                | 296<br>(206 - 390)          | --                    | 0<br>(0 - 1)           | 7<br>(5 - 10)            | 57<br>(43 - 75)          | 232<br>(150 - 320)         |
| Other musculoskeletal disorders                     | 775<br>(596 - 972)          | --                    | 2<br>(1 - 2)           | 71<br>(58 - 97)          | 139<br>(111 - 178)       | 563<br>(404 - 714)         |
| Other non-communicable diseases                     | 2,490<br>(2,097 - 2,964)    | 596<br>(464 - 786)    | 48<br>(38 - 60)        | 208<br>(174 - 236)       | 200<br>(156 - 228)       | 1,439<br>(1,051 - 1,883)   |
| Congenital anomalies                                | 1,072<br>(924 - 1,237)      | 530<br>(418 - 694)    | 47<br>(37 - 59)        | 190<br>(157 - 217)       | 131<br>(100 - 155)       | 175<br>(122 - 224)         |
| Neural tube defects                                 | 15<br>(11 - 22)             | 10<br>(6 - 18)        | 1<br>(1 - 1)           | 2<br>(2 - 3)             | 1<br>(1 - 1)             | 1<br>(0 - 1)               |
| Congenital heart anomalies                          | 397<br>(322 - 492)          | 222<br>(169 - 295)    | 21<br>(15 - 29)        | 79<br>(61 - 97)          | 41<br>(30 - 52)          | 34<br>(23 - 50)            |
| Cleft lip and cleft palate                          | 0<br>(0 - 1)                | 0<br>(0 - 1)          | --                     | --                       | --                       | --                         |
| Down syndrome                                       | 132<br>(91 - 185)           | 26<br>(12 - 59)       | 5<br>(3 - 9)           | 50<br>(34 - 69)          | 44<br>(26 - 60)          | 6<br>(3 - 12)              |
| Chromosomal unbalanced rearrangements               | 45<br>(32 - 68)             | 38<br>(25 - 59)       | 2<br>(1 - 3)           | 3<br>(2 - 4)             | 2<br>(1 - 2)             | 1<br>(1 - 1)               |
| Other congenital anomalies                          | 482<br>(399 - 583)          | 234<br>(178 - 312)    | 18<br>(13 - 24)        | 55<br>(41 - 71)          | 43<br>(30 - 54)          | 133<br>(92 - 173)          |
| Skin and subcutaneous diseases                      | 1,355<br>(980 - 1,808)      | 3<br>(2 - 4)          | 1<br>(1 - 1)           | 18<br>(14 - 23)          | 70<br>(54 - 83)          | 1,264<br>(897 - 1,716)     |
| Cellulitis                                          | 198<br>(110 - 319)          | 1<br>(0 - 2)          | 0<br>(0 - 0)           | 7<br>(4 - 10)            | 23<br>(16 - 33)          | 167<br>(83 - 285)          |
| Pyoderma                                            | 426<br>(289 - 614)          | 1<br>(1 - 2)          | 0<br>(0 - 0)           | 6<br>(5 - 8)             | 25<br>(18 - 33)          | 393<br>(257 - 578)         |
| Decubitus ulcer                                     | 691<br>(460 - 978)          | 0<br>(0 - 0)          | 0<br>(0 - 0)           | 2<br>(2 - 3)             | 17<br>(11 - 23)          | 671<br>(443 - 958)         |
| Other skin and subcutaneous diseases                | 40<br>(22 - 82)             | 1<br>(0 - 1)          | 0<br>(0 - 0)           | 2<br>(2 - 3)             | 4<br>(3 - 7)             | 32<br>(15 - 74)            |
| Sudden infant death syndrome                        | 63<br>(35 - 128)            | 63<br>(35 - 128)      | --                     | --                       | --                       | --                         |
| Injuries                                            | 17,430<br>(15,542 - 18,904) | 118<br>(89 - 163)     | 130<br>(111 - 153)     | 4,803<br>(4,212 - 5,193) | 3,320<br>(3,024 - 3,632) | 9,058<br>(7,508 - 10,332)  |
| Transport injuries                                  | 4,103<br>(3,742 - 4,574)    | 37<br>(27 - 51)       | 73<br>(59 - 89)        | 1,901<br>(1,698 - 2,129) | 1,009<br>(884 - 1,168)   | 1,083<br>(938 - 1,274)     |

Web Table 31- Spain deaths with 95% UI by age, sex, and cause in 2013

| Cause                                           | Both Sexes, All Ages      | Both Sexes, 0-4 Years | Both Sexes, 5-14 Years | Both Sexes, 15-49 Years  | Both Sexes, 50-69 Years | Both Sexes, 70-80 Years  |
|-------------------------------------------------|---------------------------|-----------------------|------------------------|--------------------------|-------------------------|--------------------------|
| Road injuries                                   | 3,800<br>(3,473 - 4,273)  | 36<br>(26 - 49)       | 69<br>(56 - 84)        | 1,788<br>(1,600 - 2,009) | 904<br>(794 - 1,052)    | 1,003<br>(866 - 1,199)   |
| Pedestrian road injuries                        | 914<br>(599 - 1,182)      | 9<br>(5 - 15)         | 18<br>(11 - 26)        | 189<br>(109 - 283)       | 193<br>(119 - 276)      | 505<br>(343 - 647)       |
| Cyclist road injuries                           | 136<br>(71 - 178)         | 2<br>(1 - 3)          | 8<br>(4 - 12)          | 49<br>(25 - 65)          | 38<br>(18 - 55)         | 40<br>(20 - 59)          |
| Motorcyclist road injuries                      | 485<br>(298 - 650)        | 1<br>(0 - 1)          | 3<br>(1 - 4)           | 375<br>(232 - 498)       | 69<br>(38 - 106)        | 37<br>(23 - 63)          |
| Motor vehicle road injuries                     | 2,249<br>(1,923 - 2,769)  | 24<br>(17 - 34)       | 40<br>(30 - 54)        | 1,171<br>(998 - 1,417)   | 599<br>(496 - 752)      | 415<br>(310 - 611)       |
| Other road injuries                             | 15<br>(10 - 31)           | 0<br>(0 - 1)          | 0<br>(0 - 1)           | 4<br>(3 - 8)             | 5<br>(3 - 10)           | 5<br>(3 - 13)            |
| Other transport injuries                        | 303<br>(205 - 379)        | 1<br>(1 - 3)          | 4<br>(2 - 6)           | 113<br>(75 - 149)        | 105<br>(67 - 139)       | 80<br>(49 - 111)         |
| Unintentional injuries                          | 9,061<br>(7,385 - 10,346) | 76<br>(55 - 114)      | 48<br>(39 - 64)        | 964<br>(835 - 1,131)     | 1,140<br>(994 - 1,281)  | 6,832<br>(5,337 - 8,089) |
| Falls                                           | 3,668<br>(2,519 - 4,460)  | 9<br>(6 - 14)         | 9<br>(6 - 12)          | 287<br>(191 - 344)       | 430<br>(321 - 504)      | 2,933<br>(1,920 - 3,700) |
| Drowning                                        | 538<br>(414 - 889)        | 17<br>(11 - 35)       | 18<br>(13 - 35)        | 210<br>(151 - 362)       | 144<br>(105 - 229)      | 149<br>(119 - 218)       |
| Fire, heat, and hot substances                  | 310<br>(253 - 417)        | 6<br>(4 - 11)         | 3<br>(2 - 4)           | 47<br>(37 - 61)          | 62<br>(50 - 81)         | 193<br>(145 - 279)       |
| Poisonings                                      | 202<br>(150 - 251)        | 2<br>(1 - 3)          | 2<br>(1 - 3)           | 56<br>(45 - 87)          | 36<br>(26 - 47)         | 105<br>(65 - 138)        |
| Exposure to mechanical forces                   | 288<br>(210 - 325)        | 7<br>(4 - 10)         | 6<br>(5 - 9)           | 124<br>(94 - 145)        | 72<br>(59 - 87)         | 79<br>(43 - 98)          |
| Unintentional firearm injuries                  | 33<br>(27 - 41)           | 0<br>(0 - 0)          | 1<br>(0 - 1)           | 18<br>(14 - 24)          | 9<br>(7 - 13)           | 5<br>(3 - 7)             |
| Unintentional suffocation                       | 29<br>(14 - 39)           | 3<br>(2 - 5)          | 1<br>(1 - 2)           | 5<br>(3 - 6)             | 3<br>(2 - 4)            | 17<br>(6 - 27)           |
| Other exposure to mechanical forces             | 225<br>(158 - 260)        | 3<br>(2 - 5)          | 5<br>(3 - 7)           | 101<br>(70 - 120)        | 60<br>(47 - 74)         | 57<br>(31 - 73)          |
| Adverse effects of medical treatment            | 1,157<br>(903 - 1,701)    | 5<br>(3 - 10)         | 2<br>(2 - 4)           | 67<br>(51 - 108)         | 173<br>(132 - 271)      | 911<br>(678 - 1,415)     |
| Animal contact                                  | 40<br>(30 - 67)           | 0<br>(0 - 1)          | 1<br>(0 - 1)           | 8<br>(6 - 13)            | 16<br>(11 - 30)         | 15<br>(9 - 25)           |
| Venomous animal contact                         | 10<br>(7 - 22)            | 0<br>(0 - 0)          | 0<br>(0 - 0)           | 2<br>(1 - 3)             | 6<br>(4 - 16)           | 1<br>(1 - 2)             |
| Non-venomous animal contact                     | 30<br>(22 - 47)           | 0<br>(0 - 1)          | 0<br>(0 - 1)           | 6<br>(4 - 10)            | 9<br>(6 - 16)           | 13<br>(8 - 23)           |
| Foreign body                                    | 2,769<br>(1,680 - 3,765)  | 28<br>(17 - 53)       | 6<br>(4 - 8)           | 119<br>(70 - 159)        | 187<br>(104 - 238)      | 2,429<br>(1,425 - 3,372) |
| Pulmonary aspiration and foreign body in airway | 2,760<br>(1,673 - 3,756)  | 28<br>(17 - 53)       | 5<br>(3 - 8)           | 117<br>(68 - 157)        | 185<br>(103 - 236)      | 2,425<br>(1,421 - 3,366) |
| Foreign body in other body part                 | 9<br>(6 - 14)             | 0<br>(0 - 0)          | 0<br>(0 - 1)           | 2<br>(2 - 3)             | 1<br>(1 - 2)            | 4<br>(2 - 9)             |
| Other unintentional injuries                    | 89<br>(71 - 113)          | 1<br>(1 - 2)          | 1<br>(1 - 2)           | 46<br>(33 - 63)          | 21<br>(13 - 31)         | 20<br>(13 - 31)          |
| Self-harm and interpersonal violence            | 4,266<br>(3,415 - 4,729)  | 5<br>(3 - 7)          | 10<br>(7 - 13)         | 1,937<br>(1,281 - 2,218) | 1,172<br>(969 - 1,344)  | 1,143<br>(968 - 1,501)   |
| Self-harm                                       | 3,840<br>(3,001 - 4,288)  | -                     | 5<br>(4 - 8)           | 1,694<br>(1,061 - 1,961) | 1,078<br>(862 - 1,245)  | 1,064<br>(893 - 1,429)   |
| Interpersonal violence                          | 426<br>(289 - 527)        | 5<br>(3 - 7)          | 4<br>(2 - 5)           | 244<br>(163 - 316)       | 94<br>(66 - 130)        | 79<br>(46 - 98)          |
| Assault by firearm                              | 114<br>(66 - 178)         | 0<br>(0 - 1)          | 1<br>(0 - 1)           | 80<br>(44 - 125)         | 24<br>(13 - 39)         | 9<br>(5 - 14)            |
| Assault by sharp object                         | 173<br>(107 - 237)        | 1<br>(0 - 2)          | 1<br>(1 - 2)           | 106<br>(64 - 153)        | 37<br>(23 - 52)         | 28<br>(15 - 39)          |
| Assault by other means                          | 139<br>(84 - 190)         | 3<br>(2 - 5)          | 2<br>(1 - 3)           | 58<br>(33 - 86)          | 33<br>(20 - 49)         | 42<br>(23 - 57)          |

Web Table 31- Spain deaths with 95% UI by age, sex, and cause in 2013

| Cause                                                              | Males, All Ages                | Males, 0-4 Years     | Males, 5-14 Years  | Males, 15-49 Years          | Males, 50-69 Years          | Males, 70-80 Years             |
|--------------------------------------------------------------------|--------------------------------|----------------------|--------------------|-----------------------------|-----------------------------|--------------------------------|
| All causes                                                         | 214,648<br>(203,958 - 224,966) | 977<br>(786 - 1,211) | 277<br>(242 - 319) | 14,088<br>(13,086 - 15,054) | 44,744<br>(41,822 - 47,603) | 154,561<br>(147,869 - 161,054) |
| Communicable, maternal, neonatal, and nutritional diseases         | 11,340<br>(9,178 - 13,647)     | 460<br>(360 - 577)   | 21<br>(16 - 26)    | 1,000<br>(813 - 1,214)      | 1,467<br>(1,162 - 1,859)    | 8,393<br>(6,472 - 10,551)      |
| HIV/AIDS and tuberculosis                                          | 1,399<br>(952 - 1,942)         | 0<br>(0 - 1)         | 0<br>(0 - 0)       | 630<br>(449 - 841)          | 498<br>(260 - 821)          | 271<br>(200 - 382)             |
| Tuberculosis                                                       | 324<br>(270 - 475)             | 0<br>(0 - 0)         | 0<br>(0 - 0)       | 40<br>(33 - 55)             | 73<br>(59 - 116)            | 211<br>(164 - 299)             |
| HIV/AIDS                                                           | 1,075<br>(627 - 1,618)         | 0<br>(0 - 1)         | 0<br>(0 - 0)       | 589<br>(412 - 803)          | 425<br>(188 - 755)          | 60<br>(8 - 141)                |
| HIV/AIDS resulting in mycobacterial infection                      | 63<br>(36 - 100)               | 0<br>(0 - 0)         | 0<br>(0 - 0)       | 34<br>(23 - 49)             | 25<br>(11 - 46)             | 4<br>(1 - 9)                   |
| HIV/AIDS resulting in other diseases                               | 1,012<br>(588 - 1,529)         | 0<br>(0 - 1)         | 0<br>(0 - 0)       | 556<br>(388 - 753)          | 400<br>(177 - 712)          | 56<br>(8 - 132)                |
| Diarrrhea, lower respiratory, and other common infectious diseases | 8,791<br>(6,749 - 11,042)      | 53<br>(37 - 72)      | 16<br>(13 - 22)    | 287<br>(229 - 352)          | 829<br>(634 - 1,023)        | 7,605<br>(5,714 - 9,473)       |
| Diarrheal diseases                                                 | 274<br>(187 - 397)             | 6<br>(3 - 9)         | 1<br>(0 - 1)       | 11<br>(8 - 14)              | 24<br>(17 - 33)             | 233<br>(149 - 358)             |
| Intestinal infectious diseases                                     | 12<br>(5 - 25)                 | 2<br>(1 - 5)         | 2<br>(1 - 4)       | 5<br>(2 - 11)               | 2<br>(0 - 4)                | 2<br>(1 - 4)                   |
| Typhoid fever                                                      | 8<br>(3 - 18)                  | 1<br>(0 - 3)         | 1<br>(0 - 3)       | 3<br>(1 - 8)                | 1<br>(0 - 2)                | 1<br>(0 - 2)                   |
| Paratyphoid fever                                                  | 2<br>(0 - 4)                   | 0<br>(0 - 1)         | 0<br>(0 - 1)       | 1<br>(0 - 2)                | 0<br>(0 - 0)                | 0<br>(0 - 0)                   |
| Other intestinal infectious diseases                               | 3<br>(0 - 7)                   | 1<br>(0 - 3)         | 0<br>(0 - 1)       | 1<br>(0 - 4)                | 0<br>(0 - 3)                | 1<br>(0 - 3)                   |
| Lower respiratory infections                                       | 8,255<br>(6,194 - 10,493)      | 23<br>(14 - 33)      | 6<br>(4 - 9)       | 225<br>(165 - 289)          | 748<br>(556 - 941)          | 7,253<br>(5,325 - 9,430)       |
| Upper respiratory infections                                       | 5<br>(1 - 13)                  | 0<br>(0 - 0)         | 0<br>(0 - 0)       | 0<br>(0 - 1)                | 1<br>(0 - 3)                | 3<br>(0 - 12)                  |
| Otitis media                                                       | 4<br>(3 - 5)                   | 1<br>(0 - 1)         | 0<br>(0 - 0)       | 1<br>(1 - 1)                | 1<br>(1 - 1)                | 1<br>(1 - 2)                   |
| Meningitis                                                         | 132<br>(112 - 154)             | 15<br>(8 - 23)       | 4<br>(3 - 5)       | 23<br>(18 - 28)             | 30<br>(24 - 36)             | 60<br>(47 - 75)                |
| Pneumococcal meningitis                                            | 17<br>(10 - 25)                | 1<br>(1 - 2)         | 0<br>(0 - 1)       | 3<br>(1 - 5)                | 4<br>(1 - 7)                | 9<br>(4 - 14)                  |
| H influenzae type B meningitis                                     | 13<br>(9 - 19)                 | 3<br>(1 - 6)         | 1<br>(0 - 1)       | 2<br>(1 - 3)                | 3<br>(1 - 4)                | 5<br>(3 - 9)                   |
| Meningococcal meningitis                                           | 51<br>(35 - 66)                | 6<br>(4 - 10)        | 2<br>(1 - 3)       | 9<br>(6 - 13)               | 11<br>(7 - 16)              | 23<br>(11 - 34)                |
| Other meningitis                                                   | 50<br>(35 - 65)                | 4<br>(2 - 8)         | 1<br>(1 - 2)       | 9<br>(6 - 13)               | 12<br>(8 - 17)              | 24<br>(14 - 35)                |
| Encephalitis                                                       | 84<br>(56 - 124)               | 5<br>(3 - 8)         | 3<br>(2 - 5)       | 18<br>(11 - 30)             | 21<br>(13 - 33)             | 38<br>(21 - 57)                |
| Diphtheria                                                         | 0<br>(0 - 1)                   | 0<br>(0 - 0)         | 0<br>(0 - 0)       | 0<br>(0 - 1)                | 0<br>(0 - 1)                | --                             |
| Whooping cough                                                     | 3<br>(1 - 8)                   | 1<br>(0 - 6)         | 0<br>(0 - 0)       | 1<br>(1 - 1)                | 0<br>(0 - 0)                | --                             |
| Tetanus                                                            | 3<br>(2 - 7)                   | 0<br>(0 - 0)         | 0<br>(0 - 0)       | 1<br>(1 - 2)                | 1<br>(0 - 2)                | 1<br>(0 - 4)                   |
| Measles                                                            | 0<br>(0 - 0)                   | 0<br>(0 - 0)         | 0<br>(0 - 0)       | 0<br>(0 - 0)                | 0<br>(0 - 0)                | --                             |
| Varicella and herpes zoster                                        | 19<br>(3 - 70)                 | 1<br>(0 - 4)         | 0<br>(0 - 1)       | 2<br>(0 - 5)                | 2<br>(0 - 6)                | 14<br>(0 - 67)                 |
| Neglected tropical diseases and malaria                            | 28<br>(23 - 31)                | 1<br>(0 - 1)         | 1<br>(1 - 1)       | 9<br>(7 - 10)               | 9<br>(7 - 10)               | 9<br>(8 - 10)                  |
| Leishmaniasis                                                      | 5<br>(3 - 6)                   | 0<br>(0 - 1)         | 0<br>(0 - 0)       | 1<br>(1 - 2)                | 2<br>(1 - 2)                | 1<br>(1 - 2)                   |
| Visceral leishmaniasis                                             | 5<br>(3 - 6)                   | 0<br>(0 - 1)         | 0<br>(0 - 0)       | 1<br>(1 - 2)                | 2<br>(1 - 2)                | 1<br>(1 - 2)                   |
| Cysticercosis                                                      | 0<br>(0 - 0)                   | 0<br>(0 - 0)         | 0<br>(0 - 0)       | 0<br>(0 - 0)                | 0<br>(0 - 0)                | 0<br>(0 - 0)                   |
| Cystic echinococcosis                                              | 12<br>(11 - 13)                | 0<br>(0 - 0)         | 0<br>(0 - 0)       | 3<br>(3 - 3)                | 4<br>(4 - 5)                | 5<br>(5 - 5)                   |
| Dengue                                                             | 2<br>(1 - 3)                   | 0<br>(0 - 0)         | 0<br>(0 - 0)       | 1<br>(1 - 1)                | 1<br>(0 - 1)                | 0<br>(0 - 0)                   |
| Rabies                                                             | 2<br>(1 - 2)                   | 0<br>(0 - 0)         | 0<br>(0 - 0)       | 1<br>(0 - 1)                | 0<br>(0 - 1)                | 0<br>(0 - 0)                   |
| Other neglected tropical diseases                                  | 6<br>(5 - 8)                   | 0<br>(0 - 0)         | 0<br>(0 - 0)       | 2<br>(1 - 2)                | 2<br>(1 - 2)                | 2<br>(2 - 4)                   |
| Maternal disorders                                                 | --                             | --                   | --                 | --                          | --                          | --                             |
| Maternal hemorrhage                                                | --                             | --                   | --                 | --                          | --                          | --                             |
| Maternal sepsis and other maternal infections                      | --                             | --                   | --                 | --                          | --                          | --                             |
| Maternal hypertensive disorders                                    | --                             | --                   | --                 | --                          | --                          | --                             |
| Maternal obstructed labor                                          | --                             | --                   | --                 | --                          | --                          | --                             |



Web Table 31- Spain deaths with 95% UI by age, sex, and cause in 2013

| Cause                                                            | Males, All Ages                | Males, 0-4 Years   | Males, 5-14 Years  | Males, 15-49 Years        | Males, 50-69 Years          | Males, 70-80 Years             |
|------------------------------------------------------------------|--------------------------------|--------------------|--------------------|---------------------------|-----------------------------|--------------------------------|
| Maternal abortive outcome                                        | --                             | --                 | --                 | --                        | --                          | --                             |
| Indirect maternal deaths                                         | --                             | --                 | --                 | --                        | --                          | --                             |
| Late maternal deaths                                             | --                             | --                 | --                 | --                        | --                          | --                             |
| Maternal deaths aggravated by HIV/AIDS                           | --                             | --                 | --                 | --                        | --                          | --                             |
| Other maternal disorders                                         | --                             | --                 | --                 | --                        | --                          | --                             |
| Neonatal disorders                                               | 396<br>(310 - 503)             | 396<br>(310 - 503) | --                 | --                        | --                          | --                             |
| Neonatal preterm birth complications                             | 167<br>(105 - 240)             | 167<br>(105 - 240) | --                 | --                        | --                          | --                             |
| Neonatal encephalopathy due to birth asphyxia and trauma         | 71<br>(39 - 102)               | 71<br>(39 - 102)   | --                 | --                        | --                          | --                             |
| Neonatal sepsis and other neonatal infections                    | 59<br>(25 - 117)               | 59<br>(25 - 117)   | --                 | --                        | --                          | --                             |
| Hemolytic disease and other neonatal jaundice                    | 1<br>(0 - 3)                   | 1<br>(0 - 3)       | --                 | --                        | --                          | --                             |
| Other neonatal disorders                                         | 98<br>(56 - 140)               | 98<br>(56 - 140)   | --                 | --                        | --                          | --                             |
| Nutritional deficiencies                                         | 431<br>(252 - 641)             | 2<br>(1 - 3)       | 1<br>(0 - 1)       | 28<br>(17 - 39)           | 42<br>(24 - 63)             | 358<br>(203 - 548)             |
| Protein-energy malnutrition                                      | 80<br>(35 - 152)               | 1<br>(0 - 1)       | 0<br>(0 - 0)       | 2<br>(1 - 4)              | 7<br>(2 - 12)               | 70<br>(31 - 136)               |
| Iodine deficiency                                                | 1<br>(0 - 5)                   | 0<br>(0 - 0)       | 0<br>(0 - 0)       | 0<br>(0 - 0)              | 0<br>(0 - 1)                | 1<br>(0 - 5)                   |
| Iron-deficiency anemia                                           | 286<br>(155 - 455)             | 0<br>(0 - 1)       | 0<br>(0 - 0)       | 23<br>(13 - 32)           | 27<br>(15 - 41)             | 236<br>(119 - 383)             |
| Other nutritional deficiencies                                   | 64<br>(19 - 120)               | 1<br>(0 - 1)       | 0<br>(0 - 0)       | 3<br>(1 - 6)              | 9<br>(3 - 15)               | 51<br>(13 - 100)               |
| Other communicable, maternal, neonatal, and nutritional diseases | 296<br>(204 - 354)             | 8<br>(4 - 14)      | 2<br>(1 - 3)       | 46<br>(33 - 57)           | 89<br>(62 - 113)            | 151<br>(91 - 196)              |
| Sexually transmitted diseases excluding HIV                      | 12<br>(6 - 24)                 | 3<br>(0 - 9)       | 0<br>(0 - 1)       | 1<br>(1 - 3)              | 2<br>(1 - 6)                | 4<br>(2 - 11)                  |
| Syphilis                                                         | 10<br>(5 - 20)                 | 3<br>(0 - 9)       | 0<br>(0 - 1)       | 1<br>(1 - 2)              | 2<br>(1 - 4)                | 4<br>(1 - 10)                  |
| Chlamydial infection                                             | --                             | --                 | --                 | --                        | --                          | --                             |
| Gonococcal infection                                             | 1<br>(1 - 3)                   | --                 | 0<br>(0 - 0)       | 0<br>(0 - 1)              | 0<br>(0 - 1)                | 1<br>(0 - 1)                   |
| Other sexually transmitted diseases                              | 1<br>(0 - 2)                   | --                 | 0<br>(0 - 0)       | 0<br>(0 - 1)              | 0<br>(0 - 1)                | 0<br>(0 - 0)                   |
| Hepatitis                                                        | 85<br>(69 - 104)               | 1<br>(0 - 1)       | 0<br>(0 - 1)       | 20<br>(14 - 27)           | 30<br>(22 - 40)             | 34<br>(23 - 47)                |
| Acute hepatitis A                                                | 18<br>(6 - 36)                 | 0<br>(0 - 1)       | 0<br>(0 - 0)       | 6<br>(2 - 12)             | 6<br>(2 - 13)               | 5<br>(1 - 12)                  |
| Acute hepatitis B                                                | 62<br>(42 - 82)                | 0<br>(0 - 0)       | 0<br>(0 - 0)       | 12<br>(7 - 20)            | 22<br>(14 - 32)             | 27<br>(16 - 39)                |
| Acute hepatitis C                                                | 5<br>(1 - 14)                  | --                 | 0<br>(0 - 0)       | 1<br>(0 - 4)              | 2<br>(0 - 4)                | 3<br>(0 - 8)                   |
| Other infectious diseases                                        | 199<br>(109 - 255)             | 4<br>(2 - 6)       | 2<br>(1 - 3)       | 25<br>(14 - 33)           | 57<br>(31 - 77)             | 112<br>(52 - 153)              |
| Non-communicable diseases                                        | 192,520<br>(182,959 - 202,214) | 447<br>(350 - 580) | 171<br>(146 - 201) | 9,252<br>(8,530 - 10,123) | 40,790<br>(38,093 - 43,523) | 141,858<br>(135,558 - 148,228) |
| Neoplasms                                                        | 68,659<br>(64,115 - 73,666)    | 37<br>(24 - 54)    | 93<br>(75 - 115)   | 3,701<br>(3,327 - 4,138)  | 22,336<br>(20,619 - 24,075) | 42,493<br>(39,178 - 46,248)    |
| Esophageal cancer                                                | 1,721<br>(1,473 - 2,272)       | --                 | --                 | 143<br>(106 - 233)        | 838<br>(685 - 1,166)        | 740<br>(608 - 913)             |
| Stomach cancer                                                   | 4,309<br>(3,778 - 4,942)       | --                 | --                 | 211<br>(177 - 253)        | 1,226<br>(1,071 - 1,387)    | 2,871<br>(2,407 - 3,461)       |
| Liver cancer                                                     | 3,673<br>(2,799 - 5,600)       | --                 | 2<br>(1 - 3)       | 204<br>(141 - 295)        | 1,376<br>(1,008 - 2,091)    | 2,092<br>(1,476 - 3,355)       |
| Liver cancer due to hepatitis B                                  | 764<br>(394 - 1,236)           | --                 | 1<br>(0 - 2)       | 74<br>(39 - 114)          | 351<br>(171 - 563)          | 338<br>(166 - 607)             |
| Liver cancer due to hepatitis C                                  | 2,407<br>(1,600 - 3,796)       | --                 | 1<br>(0 - 1)       | 111<br>(70 - 172)         | 866<br>(557 - 1,380)        | 1,429<br>(920 - 2,311)         |
| Liver cancer due to alcohol use                                  | 468<br>(249 - 796)             | --                 | --                 | 15<br>(8 - 28)            | 145<br>(78 - 245)           | 308<br>(154 - 548)             |
| Liver cancer due to other causes                                 | 34<br>(14 - 63)                | --                 | 0<br>(0 - 0)       | 3<br>(1 - 5)              | 14<br>(5 - 27)              | 17<br>(6 - 33)                 |
| Larynx cancer                                                    | 1,481<br>(1,153 - 2,043)       | --                 | --                 | 97<br>(65 - 185)          | 676<br>(540 - 971)          | 709<br>(495 - 909)             |
| Tracheal, bronchus and lung cancer                               | 18,229<br>(16,843 - 19,918)    | --                 | --                 | 845<br>(718 - 994)        | 7,657<br>(6,954 - 8,522)    | 9,728<br>(8,793 - 10,782)      |
| Breast cancer                                                    | 74<br>(22 - 124)               | --                 | --                 | 4<br>(1 - 8)              | 22<br>(7 - 40)              | 47<br>(14 - 80)                |
| Cervical cancer                                                  | --                             | --                 | --                 | --                        | --                          | --                             |

Web Table 31- Spain deaths with 95% UI by age, sex, and cause in 2013

| Cause                                         | Males, All Ages             | Males, 0-4 Years | Males, 5-14 Years | Males, 15-49 Years       | Males, 50-69 Years         | Males, 70-80 Years          |
|-----------------------------------------------|-----------------------------|------------------|-------------------|--------------------------|----------------------------|-----------------------------|
| Uterine cancer                                | --                          | --               | --                | --                       | --                         | --                          |
| Prostate cancer                               | 7,633<br>(5,848 - 11,336)   | --               | --                | 16<br>(11 - 24)          | 842<br>(636 - 1,226)       | 6,775<br>(5,104 - 10,201)   |
| Colon and rectum cancer                       | 9,695<br>(8,693 - 10,856)   | --               | --                | 334<br>(284 - 395)       | 2,647<br>(2,361 - 2,930)   | 6,714<br>(5,841 - 7,752)    |
| Lip and oral cavity cancer                    | 1,041<br>(887 - 1,207)      | --               | --                | 105<br>(83 - 136)        | 503<br>(405 - 602)         | 433<br>(341 - 544)          |
| Nasopharynx cancer                            | 208<br>(164 - 322)          | --               | 0<br>(0 - 1)      | 42<br>(27 - 72)          | 104<br>(74 - 175)          | 62<br>(45 - 87)             |
| Other pharynx cancer                          | 754<br>(606 - 967)          | --               | --                | 86<br>(63 - 137)         | 453<br>(343 - 592)         | 215<br>(158 - 280)          |
| Gallbladder and biliary tract cancer          | 568<br>(408 - 868)          | --               | --                | 15<br>(10 - 23)          | 149<br>(105 - 230)         | 404<br>(281 - 624)          |
| Pancreatic cancer                             | 3,243<br>(2,896 - 3,587)    | --               | --                | 196<br>(164 - 237)       | 1,284<br>(1,120 - 1,452)   | 1,763<br>(1,522 - 2,019)    |
| Malignant skin melanoma                       | 593<br>(274 - 972)          | --               | --                | 114<br>(58 - 200)        | 202<br>(93 - 341)          | 277<br>(123 - 451)          |
| Non-melanoma skin cancer                      | 446<br>(301 - 788)          | --               | --                | 16<br>(11 - 28)          | 71<br>(45 - 129)           | 359<br>(233 - 633)          |
| Ovarian cancer                                | --                          | --               | --                | --                       | --                         | --                          |
| Testicular cancer                             | 49<br>(30 - 68)             | --               | --                | 26<br>(15 - 39)          | 9<br>(5 - 13)              | 14<br>(8 - 21)              |
| Kidney cancer                                 | 1,613<br>(1,343 - 1,937)    | 1<br>(1 - 2)     | 2<br>(1 - 3)      | 98<br>(77 - 123)         | 567<br>(458 - 686)         | 946<br>(723 - 1,232)        |
| Bladder cancer                                | 4,149<br>(2,841 - 4,979)    | --               | --                | 59<br>(47 - 75)          | 922<br>(696 - 1,090)       | 3,167<br>(2,099 - 3,948)    |
| Brain and nervous system cancer               | 1,598<br>(1,211 - 1,953)    | 7<br>(4 - 12)    | 20<br>(14 - 29)   | 306<br>(235 - 388)       | 703<br>(553 - 917)         | 562<br>(365 - 747)          |
| Thyroid cancer                                | 118<br>(98 - 141)           | --               | 0<br>(0 - 0)      | 11<br>(8 - 14)           | 42<br>(33 - 52)            | 65<br>(49 - 83)             |
| Mesothelioma                                  | 351<br>(240 - 573)          | --               | --                | 22<br>(13 - 41)          | 138<br>(88 - 231)          | 191<br>(111 - 320)          |
| Hodgkin lymphoma                              | 156<br>(105 - 228)          | 0<br>(0 - 0)     | 1<br>(0 - 2)      | 49<br>(34 - 76)          | 49<br>(34 - 79)            | 57<br>(32 - 79)             |
| Non-Hodgkin lymphoma                          | 1,637<br>(677 - 2,174)      | 3<br>(1 - 5)     | 10<br>(4 - 16)    | 505<br>(84 - 254)        | 939<br>(219 - 636)         | 939<br>(334 - 1,379)        |
| Multiple myeloma                              | 910<br>(478 - 1,329)        | --               | --                | 32<br>(18 - 55)          | 266<br>(148 - 434)         | 612<br>(314 - 875)          |
| Leukemia                                      | 1,917<br>(1,684 - 2,166)    | 10<br>(6 - 17)   | 30<br>(22 - 40)   | 184<br>(155 - 212)       | 428<br>(367 - 491)         | 1,265<br>(1,061 - 1,492)    |
| Other neoplasms                               | 2,495<br>(1,581 - 3,042)    | 16<br>(8 - 25)   | 28<br>(16 - 39)   | 307<br>(205 - 396)       | 657<br>(470 - 849)         | 1,488<br>(852 - 1,907)      |
| Cardiovascular diseases                       | 57,692<br>(53,205 - 62,353) | 15<br>(11 - 20)  | 13<br>(11 - 17)   | 2,473<br>(2,199 - 2,796) | 10,240<br>(9,280 - 11,176) | 44,950<br>(41,098 - 49,005) |
| Rheumatic heart disease                       | 449<br>(207 - 633)          | 0<br>(0 - 0)     | 0<br>(0 - 1)      | 29<br>(17 - 43)          | 107<br>(60 - 146)          | 313<br>(123 - 477)          |
| Ischemic heart disease                        | 28,619<br>(25,118 - 33,692) | 1<br>(1 - 2)     | 2<br>(2 - 3)      | 1,592<br>(1,380 - 1,822) | 6,174<br>(5,451 - 6,938)   | 20,849<br>(17,889 - 25,230) |
| Cerebrovascular disease                       | 17,321<br>(13,803 - 20,700) | 5<br>(3 - 7)     | 5<br>(3 - 7)      | 400<br>(303 - 518)       | 2,057<br>(1,584 - 2,509)   | 14,855<br>(11,767 - 17,937) |
| Ischemic stroke                               | 9,442<br>(7,227 - 12,395)   | 0<br>(0 - 0)     | 0<br>(0 - 1)      | 44<br>(28 - 67)          | 627<br>(439 - 861)         | 8,770<br>(6,667 - 11,483)   |
| Hemorrhagic stroke                            | 7,880<br>(4,917 - 9,895)    | 5<br>(3 - 6)     | 4<br>(3 - 6)      | 356<br>(268 - 459)       | 1,429<br>(1,012 - 1,779)   | 6,085<br>(3,557 - 7,821)    |
| Hypertensive heart disease                    | 865<br>(420 - 1,350)        | 0<br>(0 - 0)     | 0<br>(0 - 0)      | 13<br>(7 - 21)           | 101<br>(55 - 144)          | 751<br>(348 - 1,207)        |
| Cardiomyopathy and myocarditis                | 2,438<br>(1,641 - 3,478)    | 6<br>(4 - 9)     | 3<br>(2 - 5)      | 161<br>(94 - 206)        | 519<br>(313 - 654)         | 1,748<br>(1,185 - 2,710)    |
| Atrial fibrillation and flutter               | 1,974<br>(1,311 - 2,751)    | --               | --                | 9<br>(6 - 12)            | 111<br>(76 - 146)          | 1,854<br>(1,208 - 2,637)    |
| Aortic aneurysm                               | 1,663<br>(1,033 - 1,952)    | --               | --                | 63<br>(39 - 78)          | 416<br>(269 - 497)         | 1,184<br>(707 - 1,438)      |
| Peripheral vascular disease                   | 621<br>(446 - 850)          | --               | --                | 4<br>(3 - 6)             | 72<br>(53 - 93)            | 545<br>(379 - 762)          |
| Endocarditis                                  | 349<br>(225 - 580)          | 1<br>(0 - 1)     | 1<br>(0 - 1)      | 43<br>(27 - 76)          | 88<br>(55 - 152)           | 216<br>(134 - 369)          |
| Other cardiovascular and circulatory diseases | 3,393<br>(1,882 - 4,206)    | 2<br>(1 - 3)     | 1<br>(1 - 2)      | 159<br>(89 - 196)        | 596<br>(335 - 730)         | 2,635<br>(1,429 - 3,398)    |
| Chronic respiratory diseases                  | 19,112<br>(16,387 - 22,439) | 7<br>(4 - 10)    | 3<br>(2 - 4)      | 232<br>(160 - 275)       | 2,051<br>(1,734 - 2,449)   | 16,820<br>(14,333 - 19,984) |
| Chronic obstructive pulmonary disease         | 16,458<br>(13,816 - 19,174) | 5<br>(2 - 7)     | 2<br>(1 - 2)      | 162<br>(104 - 195)       | 1,694<br>(1,408 - 2,023)   | 14,596<br>(12,218 - 17,003) |
| Pneumoconiosis                                | 632<br>(406 - 958)          | 0<br>(0 - 0)     | 0<br>(0 - 0)      | 18<br>(11 - 25)          | 92<br>(57 - 151)           | 521<br>(318 - 812)          |
| Silicosis                                     | 223<br>(149 - 337)          | 0<br>(0 - 0)     | 0<br>(0 - 0)      | 6<br>(4 - 9)             | 30<br>(18 - 53)            | 186<br>(118 - 287)          |
| Asbestosis                                    | 166<br>(107 - 255)          | 0<br>(0 - 0)     | 0<br>(0 - 0)      | 4<br>(2 - 6)             | 25<br>(15 - 42)            | 137<br>(84 - 211)           |

Web Table 31- Spain deaths with 95% UI by age, sex, and cause in 2013

| Cause                                               | Males, All Ages             | Males, 0-4 Years | Males, 5-14 Years | Males, 15-49 Years   | Males, 50-69 Years       | Males, 70-80 Years          |
|-----------------------------------------------------|-----------------------------|------------------|-------------------|----------------------|--------------------------|-----------------------------|
| Coal workers pneumoconiosis                         | 36<br>(23 - 55)             | 0<br>(0 - 0)     | 0<br>(0 - 0)      | 1<br>(1 - 2)         | 2<br>(1 - 4)             | 32<br>(20 - 50)             |
| Other pneumoconiosis                                | 207<br>(127 - 324)          | 0<br>(0 - 0)     | 0<br>(0 - 0)      | 6<br>(3 - 8)         | 34<br>(21 - 57)          | 166<br>(94 - 271)           |
| Asthma                                              | 224<br>(170 - 286)          | 0<br>(0 - 0)     | 1<br>(0 - 1)      | 18<br>(12 - 22)      | 41<br>(30 - 52)          | 165<br>(119 - 220)          |
| Interstitial lung disease and pulmonary sarcoidosis | 1,679<br>(1,036 - 2,562)    | 0<br>(0 - 1)     | 1<br>(0 - 1)      | 30<br>(18 - 45)      | 206<br>(116 - 313)       | 1,442<br>(870 - 2,301)      |
| Other chronic respiratory diseases                  | 120<br>(86 - 167)           | 1<br>(1 - 2)     | 0<br>(0 - 0)      | 5<br>(3 - 7)         | 19<br>(13 - 26)          | 95<br>(64 - 139)            |
| Cirrhosis                                           | 5,347<br>(4,838 - 5,875)    | 1<br>(1 - 1)     | 1<br>(1 - 2)      | 860<br>(738 - 982)   | 2,325<br>(2,047 - 2,627) | 2,160<br>(1,880 - 2,469)    |
| Cirrhosis due to hepatitis B                        | 455<br>(245 - 704)          | 0<br>(0 - 0)     | 0<br>(0 - 0)      | 75<br>(38 - 131)     | 199<br>(103 - 321)       | 181<br>(96 - 281)           |
| Cirrhosis due to hepatitis C                        | 2,318<br>(1,476 - 3,196)    | 0<br>(0 - 0)     | 0<br>(0 - 1)      | 373<br>(187 - 572)   | 1,023<br>(591 - 1,463)   | 921<br>(593 - 1,282)        |
| Cirrhosis due to alcohol use                        | 2,150<br>(1,366 - 2,954)    | --               | --                | 294<br>(149 - 458)   | 912<br>(526 - 1,327)     | 944<br>(629 - 1,269)        |
| Cirrhosis due to other causes                       | 424<br>(147 - 689)          | 1<br>(1 - 1)     | 1<br>(1 - 1)      | 118<br>(51 - 187)    | 191<br>(49 - 329)        | 114<br>(27 - 202)           |
| Digestive diseases                                  | 5,369<br>(4,368 - 6,198)    | 2<br>(1 - 3)     | 3<br>(2 - 3)      | 212<br>(159 - 249)   | 781<br>(645 - 901)       | 4,371<br>(3,524 - 5,185)    |
| Peptic ulcer disease                                | 537<br>(340 - 825)          | 0<br>(0 - 0)     | 0<br>(0 - 0)      | 26<br>(16 - 36)      | 92<br>(62 - 127)         | 419<br>(246 - 692)          |
| Gastritis and duodenitis                            | 28<br>(15 - 56)             | 0<br>(0 - 0)     | 0<br>(0 - 0)      | 2<br>(1 - 3)         | 4<br>(2 - 7)             | 22<br>(11 - 46)             |
| Appendicitis                                        | 72<br>(42 - 109)            | 0<br>(0 - 0)     | 0<br>(0 - 1)      | 8<br>(4 - 11)        | 14<br>(9 - 23)           | 50<br>(27 - 82)             |
| Paralytic ileus and intestinal obstruction          | 898<br>(477 - 1,369)        | 1<br>(0 - 1)     | 1<br>(0 - 1)      | 21<br>(11 - 33)      | 93<br>(46 - 143)         | 782<br>(401 - 1,186)        |
| Inguinal, femoral, and abdominal hernia             | 205<br>(99 - 328)           | 0<br>(0 - 0)     | 0<br>(0 - 0)      | 3<br>(1 - 5)         | 23<br>(11 - 37)          | 179<br>(82 - 294)           |
| Inflammatory bowel disease                          | 159<br>(100 - 273)          | 0<br>(0 - 0)     | 0<br>(0 - 0)      | 11<br>(7 - 16)       | 31<br>(20 - 50)          | 117<br>(67 - 220)           |
| Vascular intestinal disorders                       | 1,480<br>(664 - 2,613)      | 0<br>(0 - 0)     | 0<br>(0 - 0)      | 25<br>(9 - 52)       | 214<br>(98 - 379)        | 1,241<br>(541 - 2,237)      |
| Gallbladder and biliary diseases                    | 819<br>(448 - 1,171)        | 0<br>(0 - 0)     | 0<br>(0 - 0)      | 12<br>(6 - 16)       | 73<br>(41 - 104)         | 734<br>(401 - 1,075)        |
| Pancreatitis                                        | 671<br>(421 - 957)          | 0<br>(0 - 0)     | 0<br>(0 - 0)      | 85<br>(60 - 110)     | 160<br>(103 - 226)       | 426<br>(243 - 647)          |
| Other digestive diseases                            | 498<br>(296 - 688)          | 0<br>(0 - 1)     | 0<br>(0 - 1)      | 20<br>(11 - 27)      | 76<br>(45 - 105)         | 401<br>(232 - 581)          |
| Neurological disorders                              | 21,545<br>(16,745 - 26,444) | 22<br>(15 - 35)  | 12<br>(9 - 16)    | 259<br>(199 - 313)   | 1,122<br>(935 - 1,351)   | 20,129<br>(15,430 - 24,971) |
| Alzheimer disease and other dementias               | 18,390<br>(13,777 - 23,221) | --               | --                | 4<br>(1 - 8)         | 502<br>(345 - 682)       | 17,883<br>(13,297 - 22,702) |
| Parkinson disease                                   | 1,792<br>(1,159 - 2,295)    | --               | --                | 6<br>(3 - 7)         | 131<br>(98 - 165)        | 1,655<br>(1,020 - 2,147)    |
| Epilepsy                                            | 219<br>(145 - 273)          | 2<br>(1 - 4)     | 3<br>(2 - 5)      | 63<br>(40 - 84)      | 52<br>(34 - 68)          | 98<br>(62 - 133)            |
| Multiple sclerosis                                  | 142<br>(59 - 233)           | --               | --                | 46<br>(19 - 80)      | 66<br>(26 - 106)         | 30<br>(13 - 51)             |
| Other neurological disorders                        | 1,002<br>(753 - 1,198)      | 20<br>(13 - 31)  | 9<br>(6 - 13)     | 140<br>(104 - 177)   | 370<br>(274 - 452)       | 463<br>(349 - 581)          |
| Mental and substance use disorders                  | 1,341<br>(1,114 - 2,001)    | 0<br>(0 - 0)     | 0<br>(0 - 0)      | 998<br>(813 - 1,603) | 201<br>(127 - 267)       | 141<br>(100 - 175)          |
| Schizophrenia                                       | 61<br>(26 - 86)             | --               | --                | 11<br>(5 - 18)       | 22<br>(8 - 35)           | 27<br>(10 - 42)             |
| Alcohol use disorders                               | 295<br>(178 - 407)          | --               | --                | 77<br>(48 - 130)     | 145<br>(84 - 207)        | 74<br>(42 - 103)            |
| Drug use disorders                                  | 984<br>(799 - 1,600)        | 0<br>(0 - 0)     | --                | 909<br>(726 - 1,528) | 35<br>(23 - 46)          | 40<br>(29 - 55)             |
| Opioid use disorders                                | 366<br>(288 - 588)          | 0<br>(0 - 0)     | --                | 339<br>(261 - 564)   | 12<br>(8 - 16)           | 15<br>(10 - 21)             |
| Cocaine use disorders                               | 26<br>(20 - 40)             | 0<br>(0 - 0)     | --                | 25<br>(18 - 38)      | 1<br>(0 - 1)             | 1<br>(0 - 1)                |
| Amphetamine use disorders                           | 24<br>(18 - 38)             | 0<br>(0 - 0)     | --                | 22<br>(17 - 37)      | 1<br>(1 - 1)             | 1<br>(1 - 1)                |
| Other drug use disorders                            | 568<br>(457 - 921)          | 0<br>(0 - 0)     | --                | 524<br>(417 - 871)   | 21<br>(14 - 29)          | 24<br>(17 - 32)             |
| Eating disorders                                    | 1<br>(1 - 2)                | --               | 0<br>(0 - 0)      | 1<br>(1 - 2)         | --                       | --                          |
| Anorexia nervosa                                    | 1<br>(1 - 2)                | --               | 0<br>(0 - 0)      | 1<br>(1 - 2)         | --                       | --                          |
| Diabetes, urogenital, blood, and endocrine diseases | 12,119<br>(10,237 - 17,534) | 36<br>(24 - 53)  | 19<br>(14 - 26)   | 379<br>(303 - 566)   | 1,554<br>(1,301 - 2,263) | 10,130<br>(8,397 - 14,699)  |
| Diabetes mellitus                                   | 4,010<br>(3,412 - 4,685)    | 2<br>(1 - 2)     | 1<br>(1 - 1)      | 84<br>(69 - 102)     | 620<br>(532 - 716)       | 3,304<br>(2,746 - 3,936)    |
| Acute glomerulonephritis                            | 4<br>(3 - 7)                | 0<br>(0 - 0)     | 0<br>(0 - 0)      | 1<br>(1 - 1)         | 1<br>(0 - 1)             | 2<br>(1 - 5)                |

Web Table 31- Spain deaths with 95% UI by age, sex, and cause in 2013

| Cause                                               | Males, All Ages            | Males, 0-4 Years   | Males, 5-14 Years | Males, 15-49 Years       | Males, 50-69 Years       | Males, 70-80 Years       |
|-----------------------------------------------------|----------------------------|--------------------|-------------------|--------------------------|--------------------------|--------------------------|
| Chronic kidney disease                              | 5,442<br>(3,979 - 11,025)  | 2<br>(1 - 4)       | 2<br>(1 - 4)      | 117<br>(80 - 287)        | 545<br>(384 - 1,259)     | 4,777<br>(3,476 - 9,570) |
| Chronic kidney disease due to diabetes mellitus     | 1,232<br>(661 - 3,967)     | 0<br>(0 - 0)       | 0<br>(0 - 1)      | 28<br>(13 - 87)          | 157<br>(92 - 438)        | 1,047<br>(544 - 3,455)   |
| Chronic kidney disease due to hypertension          | 1,204<br>(528 - 2,132)     | 0<br>(0 - 0)       | 0<br>(0 - 0)      | 20<br>(9 - 43)           | 92<br>(43 - 220)         | 1,092<br>(479 - 1,904)   |
| Chronic kidney disease due to glomerulonephritis    | 82<br>(32 - 118)           | 0<br>(0 - 1)       | 0<br>(0 - 0)      | 6<br>(2 - 8)             | 13<br>(4 - 19)           | 63<br>(25 - 97)          |
| Chronic kidney disease due to other causes          | 2,924<br>(1,244 - 6,295)   | 1<br>(1 - 3)       | 1<br>(1 - 3)      | 64<br>(27 - 178)         | 282<br>(107 - 760)       | 2,575<br>(1,071 - 5,308) |
| Urinary diseases and male infertility               | 1,572<br>(887 - 2,059)     | 2<br>(1 - 2)       | 0<br>(0 - 1)      | 22<br>(12 - 28)          | 126<br>(69 - 156)        | 1,423<br>(777 - 1,902)   |
| Interstitial nephritis and urinary tract infections | 1,337<br>(711 - 1,788)     | 1<br>(1 - 2)       | 0<br>(0 - 0)      | 13<br>(6 - 18)           | 85<br>(43 - 111)         | 1,237<br>(654 - 1,684)   |
| Urolithiasis                                        | 29<br>(17 - 55)            | --                 | 0<br>(0 - 0)      | 2<br>(1 - 3)             | 5<br>(3 - 9)             | 22<br>(12 - 46)          |
| Other urinary diseases                              | 206<br>(121 - 383)         | 1<br>(0 - 1)       | 0<br>(0 - 0)      | 7<br>(3 - 10)            | 36<br>(17 - 51)          | 163<br>(89 - 328)        |
| Gynecological diseases                              | --                         | --                 | --                | --                       | --                       | --                       |
| Uterine fibroids                                    | --                         | --                 | --                | --                       | --                       | --                       |
| Polycystic ovarian syndrome                         | --                         | --                 | --                | --                       | --                       | --                       |
| Endometriosis                                       | --                         | --                 | --                | --                       | --                       | --                       |
| Genital prolapse                                    | --                         | --                 | --                | --                       | --                       | --                       |
| Other gynecological diseases                        | --                         | --                 | --                | --                       | --                       | --                       |
| Hemoglobinopathies and hemolytic anemias            | 180<br>(116 - 296)         | 3<br>(2 - 5)       | 2<br>(1 - 4)      | 16<br>(10 - 27)          | 28<br>(19 - 47)          | 131<br>(82 - 216)        |
| Thalassemias                                        | 1<br>(0 - 1)               | 0<br>(0 - 0)       | 0<br>(0 - 0)      | 0<br>(0 - 1)             | 0<br>(0 - 0)             | 0<br>(0 - 0)             |
| Sickle cell disorders                               | 27<br>(17 - 44)            | 2<br>(1 - 3)       | 1<br>(1 - 2)      | 8<br>(5 - 13)            | 11<br>(7 - 18)           | 5<br>(3 - 8)             |
| G6PD deficiency                                     | 0<br>(0 - 1)               | 0<br>(0 - 0)       | 0<br>(0 - 0)      | 0<br>(0 - 0)             | 0<br>(0 - 0)             | 0<br>(0 - 0)             |
| Other hemoglobinopathies and hemolytic anemias      | 152<br>(97 - 250)          | 1<br>(0 - 2)       | 1<br>(0 - 1)      | 8<br>(5 - 13)            | 17<br>(11 - 29)          | 126<br>(79 - 210)        |
| Endocrine, metabolic, blood, and immune disorders   | 910<br>(583 - 1,136)       | 28<br>(17 - 42)    | 14<br>(8 - 20)    | 140<br>(89 - 184)        | 235<br>(133 - 299)       | 493<br>(303 - 680)       |
| Musculoskeletal disorders                           | 316<br>(193 - 394)         | --                 | 1<br>(0 - 1)      | 23<br>(14 - 31)          | 72<br>(46 - 93)          | 220<br>(127 - 289)       |
| Rheumatoid arthritis                                | 70<br>(37 - 103)           | --                 | 0<br>(0 - 0)      | 3<br>(1 - 4)             | 19<br>(10 - 31)          | 48<br>(22 - 75)          |
| Other musculoskeletal disorders                     | 245<br>(145 - 315)         | --                 | 1<br>(0 - 1)      | 21<br>(13 - 28)          | 53<br>(32 - 71)          | 171<br>(98 - 231)        |
| Other non-communicable diseases                     | 1,021<br>(874 - 1,192)     | 328<br>(254 - 441) | 25<br>(19 - 33)   | 114<br>(93 - 131)        | 108<br>(85 - 126)        | 446<br>(329 - 571)       |
| Congenital anomalies                                | 560<br>(480 - 664)         | 290<br>(224 - 389) | 25<br>(19 - 33)   | 103<br>(83 - 120)        | 70<br>(55 - 84)          | 72<br>(54 - 92)          |
| Neural tube defects                                 | 7<br>(5 - 12)              | 5<br>(3 - 9)       | 0<br>(0 - 0)      | 1<br>(1 - 2)             | 0<br>(0 - 1)             | 0<br>(0 - 0)             |
| Congenital heart anomalies                          | 222<br>(171 - 284)         | 127<br>(91 - 176)  | 12<br>(8 - 18)    | 46<br>(34 - 58)          | 24<br>(16 - 33)          | 13<br>(8 - 20)           |
| Cleft lip and cleft palate                          | 0<br>(0 - 1)               | 0<br>(0 - 1)       | --                | --                       | --                       | --                       |
| Down syndrome                                       | 65<br>(32 - 104)           | 13<br>(5 - 34)     | 2<br>(1 - 5)      | 24<br>(11 - 36)          | 22<br>(9 - 32)           | 3<br>(1 - 7)             |
| Chromosomal unbalanced rearrangements               | 17<br>(11 - 26)            | 13<br>(8 - 23)     | 1<br>(0 - 1)      | 1<br>(1 - 2)             | 1<br>(0 - 1)             | 0<br>(0 - 1)             |
| Other congenital anomalies                          | 250<br>(197 - 321)         | 131<br>(92 - 188)  | 9<br>(5 - 14)     | 30<br>(20 - 42)          | 23<br>(15 - 33)          | 56<br>(40 - 73)          |
| Skin and subcutaneous diseases                      | 424<br>(308 - 552)         | 1<br>(1 - 2)       | 0<br>(0 - 1)      | 11<br>(7 - 14)           | 38<br>(28 - 48)          | 373<br>(262 - 499)       |
| Cellulitis                                          | 80<br>(46 - 138)           | 0<br>(0 - 1)       | 0<br>(0 - 0)      | 4<br>(3 - 7)             | 13<br>(8 - 21)           | 62<br>(31 - 114)         |
| Pyoderma                                            | 139<br>(93 - 201)          | 1<br>(0 - 1)       | 0<br>(0 - 0)      | 4<br>(2 - 6)             | 14<br>(9 - 19)           | 121<br>(77 - 181)        |
| Decubitus ulcer                                     | 190<br>(114 - 270)         | 0<br>(0 - 0)       | 0<br>(0 - 0)      | 1<br>(1 - 2)             | 9<br>(5 - 14)            | 179<br>(107 - 258)       |
| Other skin and subcutaneous diseases                | 15<br>(8 - 27)             | 0<br>(0 - 1)       | 0<br>(0 - 0)      | 1<br>(1 - 2)             | 2<br>(1 - 3)             | 11<br>(5 - 23)           |
| Sudden infant death syndrome                        | 36<br>(16 - 71)            | 36<br>(16 - 71)    | --                | --                       | --                       | --                       |
| Injuries                                            | 10,788<br>(9,528 - 11,811) | 70<br>(49 - 99)    | 85<br>(71 - 102)  | 3,836<br>(3,202 - 4,232) | 2,487<br>(2,195 - 2,776) | 4,310<br>(3,636 - 5,029) |
| Transport injuries                                  | 3,018<br>(2,701 - 3,332)   | 22<br>(14 - 32)    | 46<br>(35 - 58)   | 1,530<br>(1,326 - 1,709) | 789<br>(675 - 921)       | 632<br>(533 - 749)       |

Web Table 31- Spain deaths with 95% UI by age, sex, and cause in 2013

| Cause                                           | Males, All Ages          | Males, 0-4 Years | Males, 5-14 Years | Males, 15-49 Years       | Males, 50-69 Years   | Males, 70-80 Years       |
|-------------------------------------------------|--------------------------|------------------|-------------------|--------------------------|----------------------|--------------------------|
| Road injuries                                   | 2,762<br>(2,474 - 3,043) | 21<br>(13 - 30)  | 43<br>(33 - 54)   | 1,434<br>(1,247 - 1,603) | 698<br>(598 - 813)   | 566<br>(477 - 678)       |
| Pedestrian road injuries                        | 534<br>(281 - 787)       | 5<br>(2 - 10)    | 12<br>(6 - 18)    | 140<br>(63 - 243)        | 126<br>(54 - 205)    | 250<br>(142 - 352)       |
| Cyclist road injuries                           | 108<br>(45 - 148)        | 1<br>(1 - 3)     | 7<br>(3 - 11)     | 37<br>(14 - 52)          | 31<br>(12 - 47)      | 32<br>(13 - 51)          |
| Motorcyclist road injuries                      | 450<br>(265 - 617)       | 1<br>(0 - 1)     | 2<br>(1 - 3)      | 349<br>(205 - 476)       | 65<br>(33 - 102)     | 33<br>(19 - 57)          |
| Motor vehicle road injuries                     | 1,662<br>(1,361 - 2,074) | 13<br>(8 - 20)   | 22<br>(15 - 33)   | 906<br>(736 - 1,119)     | 473<br>(374 - 590)   | 247<br>(164 - 377)       |
| Other road injuries                             | 9<br>(4 - 17)            | 0<br>(0 - 0)     | 0<br>(0 - 0)      | 2<br>(1 - 3)             | 3<br>(1 - 6)         | 3<br>(1 - 8)             |
| Other transport injuries                        | 256<br>(163 - 330)       | 1<br>(0 - 2)     | 3<br>(1 - 4)      | 96<br>(58 - 133)         | 91<br>(54 - 126)     | 65<br>(36 - 97)          |
| Unintentional injuries                          | 4,569<br>(3,746 - 5,348) | 45<br>(30 - 70)  | 33<br>(27 - 47)   | 792<br>(670 - 945)       | 839<br>(708 - 966)   | 2,858<br>(2,153 - 3,520) |
| Falls                                           | 1,810<br>(1,224 - 2,175) | 6<br>(3 - 10)    | 7<br>(5 - 9)      | 249<br>(156 - 304)       | 348<br>(258 - 424)   | 1,200<br>(772 - 1,505)   |
| Drowning                                        | 431<br>(314 - 730)       | 12<br>(7 - 23)   | 14<br>(9 - 28)    | 184<br>(126 - 321)       | 116<br>(81 - 184)    | 104<br>(77 - 162)        |
| Fire, heat, and hot substances                  | 153<br>(119 - 211)       | 4<br>(2 - 7)     | 2<br>(1 - 2)      | 35<br>(26 - 48)          | 31<br>(21 - 42)      | 82<br>(58 - 123)         |
| Poisonings                                      | 107<br>(74 - 145)        | 1<br>(1 - 2)     | 1<br>(1 - 1)      | 39<br>(29 - 66)          | 24<br>(15 - 31)      | 42<br>(23 - 57)          |
| Exposure to mechanical forces                   | 219<br>(167 - 250)       | 3<br>(2 - 5)     | 4<br>(3 - 6)      | 108<br>(80 - 128)        | 61<br>(49 - 74)      | 42<br>(25 - 53)          |
| Unintentional firearm injuries                  | 29<br>(22 - 36)          | 0<br>(0 - 0)     | 0<br>(0 - 1)      | 16<br>(12 - 22)          | 8<br>(5 - 11)        | 4<br>(3 - 6)             |
| Unintentional suffocation                       | 15<br>(6 - 22)           | 2<br>(1 - 3)     | 1<br>(0 - 1)      | 3<br>(1 - 4)             | 2<br>(1 - 3)         | 8<br>(2 - 13)            |
| Other exposure to mechanical forces             | 175<br>(126 - 202)       | 1<br>(1 - 2)     | 3<br>(2 - 4)      | 89<br>(60 - 106)         | 51<br>(40 - 63)      | 30<br>(18 - 38)          |
| Adverse effects of medical treatment            | 476<br>(354 - 772)       | 3<br>(2 - 6)     | 1<br>(1 - 2)      | 40<br>(28 - 73)          | 106<br>(75 - 179)    | 326<br>(228 - 552)       |
| Animal contact                                  | 24<br>(18 - 41)          | 0<br>(0 - 0)     | 0<br>(0 - 1)      | 7<br>(5 - 11)            | 9<br>(6 - 15)        | 8<br>(5 - 14)            |
| Venomous animal contact                         | 4<br>(3 - 7)             | 0<br>(0 - 0)     | 0<br>(0 - 0)      | 2<br>(1 - 2)             | 2<br>(1 - 3)         | 1<br>(0 - 2)             |
| Non-venomous animal contact                     | 20<br>(15 - 35)          | 0<br>(0 - 0)     | 0<br>(0 - 0)      | 5<br>(4 - 9)             | 7<br>(5 - 13)        | 7<br>(5 - 13)            |
| Foreign body                                    | 1,275<br>(619 - 1,900)   | 16<br>(9 - 34)   | 3<br>(2 - 5)      | 87<br>(43 - 122)         | 127<br>(58 - 171)    | 1,042<br>(486 - 1,587)   |
| Pulmonary aspiration and foreign body in airway | 1,271<br>(616 - 1,897)   | 16<br>(8 - 34)   | 3<br>(2 - 5)      | 86<br>(42 - 121)         | 126<br>(57 - 170)    | 1,040<br>(485 - 1,585)   |
| Foreign body in other body part                 | 5<br>(2 - 8)             | 0<br>(0 - 0)     | 0<br>(0 - 0)      | 1<br>(1 - 2)             | 1<br>(0 - 1)         | 2<br>(1 - 5)             |
| Other unintentional injuries                    | 74<br>(57 - 94)          | 1<br>(0 - 2)     | 1<br>(1 - 2)      | 43<br>(30 - 60)          | 18<br>(11 - 29)      | 11<br>(7 - 17)           |
| Self-harm and interpersonal violence            | 3,201<br>(2,367 - 3,659) | 2<br>(1 - 4)     | 6<br>(4 - 9)      | 1,514<br>(902 - 1,780)   | 859<br>(654 - 1,030) | 820<br>(660 - 1,116)     |
| Self-harm                                       | 2,913<br>(2,070 - 3,351) | -                | 4<br>(2 - 7)      | 1,336<br>(738 - 1,595)   | 792<br>(577 - 956)   | 781<br>(621 - 1,075)     |
| Interpersonal violence                          | 288<br>(184 - 422)       | 2<br>(1 - 4)     | 2<br>(1 - 3)      | 177<br>(110 - 261)       | 67<br>(44 - 107)     | 39<br>(20 - 55)          |
| Assault by firearm                              | 91<br>(46 - 157)         | 0<br>(0 - 0)     | 0<br>(0 - 1)      | 65<br>(31 - 112)         | 19<br>(10 - 36)      | 6<br>(3 - 11)            |
| Assault by sharp object                         | 114<br>(66 - 182)        | 1<br>(0 - 1)     | 1<br>(0 - 1)      | 75<br>(41 - 124)         | 25<br>(14 - 41)      | 12<br>(6 - 20)           |
| Assault by other means                          | 84<br>(43 - 129)         | 2<br>(1 - 3)     | 1<br>(0 - 2)      | 38<br>(18 - 63)          | 23<br>(13 - 39)      | 21<br>(9 - 30)           |

Web Table 31- Spain deaths with 95% UI by age, sex, and cause in 2013

| Cause                                                             | Females, All Ages              | Females, 0-4 Years | Females, 5-14 Years | Females, 15-49 Years     | Females, 50-69 Years        | Females, 70-80 Years           |
|-------------------------------------------------------------------|--------------------------------|--------------------|---------------------|--------------------------|-----------------------------|--------------------------------|
| All causes                                                        | 213,417<br>(203,314 - 223,445) | 775<br>(619 - 966) | 194<br>(172 - 221)  | 6,674<br>(6,156 - 7,198) | 20,722<br>(19,382 - 22,073) | 185,052<br>(176,738 - 193,212) |
| Communicable, maternal, neonatal, and nutritional diseases        | 13,150<br>(9,446 - 16,749)     | 357<br>(269 - 469) | 19<br>(15 - 23)     | 400<br>(335 - 479)       | 590<br>(476 - 706)          | 11,785<br>(8,260 - 15,299)     |
| HIV/AIDS and tuberculosis                                         | 457<br>(333 - 626)             | 1<br>(0 - 1)       | 0<br>(0 - 1)        | 163<br>(109 - 241)       | 112<br>(60 - 189)           | 181<br>(128 - 241)             |
| Tuberculosis                                                      | 205<br>(155 - 270)             | 0<br>(0 - 1)       | 0<br>(0 - 1)        | 14<br>(11 - 18)          | 23<br>(17 - 34)             | 166<br>(118 - 228)             |
| HIV/AIDS                                                          | 252<br>(140 - 416)             | 0<br>(0 - 1)       | 0<br>(0 - 0)        | 149<br>(94 - 226)        | 88<br>(39 - 165)            | 14<br>(2 - 34)                 |
| HIV/AIDS resulting in mycobacterial infection                     | 11<br>(6 - 18)                 | 0<br>(0 - 0)       | 0<br>(0 - 0)        | 6<br>(4 - 10)            | 4<br>(2 - 7)                | 1<br>(0 - 2)                   |
| HIV/AIDS resulting in other diseases                              | 241<br>(134 - 399)             | 0<br>(0 - 1)       | 0<br>(0 - 0)        | 143<br>(90 - 217)        | 85<br>(37 - 158)            | 14<br>(2 - 33)                 |
| Diarrhea, lower respiratory, and other common infectious diseases | 11,115<br>(7,612 - 14,537)     | 45<br>(32 - 59)    | 15<br>(12 - 19)     | 157<br>(124 - 185)       | 388<br>(296 - 469)          | 10,510<br>(7,152 - 13,909)     |
| Diarrheal diseases                                                | 511<br>(321 - 805)             | 5<br>(3 - 8)       | 1<br>(1 - 1)        | 8<br>(6 - 10)            | 20<br>(14 - 27)             | 477<br>(287 - 768)             |
| Intestinal infectious diseases                                    | 9<br>(4 - 19)                  | 2<br>(0 - 4)       | 1<br>(0 - 3)        | 4<br>(1 - 8)             | 1<br>(0 - 4)                | 2<br>(0 - 5)                   |
| Typhoid fever                                                     | 6<br>(2 - 14)                  | 1<br>(0 - 2)       | 1<br>(0 - 2)        | 3<br>(1 - 6)             | 1<br>(0 - 2)                | 1<br>(0 - 2)                   |
| Paratyphoid fever                                                 | 1<br>(0 - 3)                   | 0<br>(0 - 1)       | 0<br>(0 - 0)        | 0<br>(0 - 1)             | 0<br>(0 - 0)                | 0<br>(0 - 0)                   |
| Other intestinal infectious diseases                              | 2<br>(0 - 6)                   | 0<br>(0 - 2)       | 0<br>(0 - 1)        | 0<br>(0 - 3)             | 0<br>(0 - 2)                | 1<br>(0 - 3)                   |
| Lower respiratory infections                                      | 10,345<br>(6,807 - 13,739)     | 18<br>(11 - 26)    | 5<br>(4 - 7)        | 111<br>(80 - 137)        | 326<br>(235 - 403)          | 9,885<br>(6,422 - 13,287)      |
| Upper respiratory infections                                      | 5<br>(1 - 19)                  | 0<br>(0 - 0)       | 0<br>(0 - 0)        | 0<br>(0 - 1)             | 0<br>(0 - 2)                | 4<br>(0 - 18)                  |
| Otitis media                                                      | 7<br>(5 - 9)                   | 1<br>(1 - 2)       | 0<br>(0 - 0)        | 1<br>(1 - 1)             | 1<br>(1 - 1)                | 4<br>(2 - 6)                   |
| Meningitis                                                        | 134<br>(105 - 160)             | 13<br>(9 - 19)     | 4<br>(3 - 5)        | 17<br>(13 - 20)          | 23<br>(18 - 29)             | 77<br>(57 - 97)                |
| Pneumococcal meningitis                                           | 20<br>(12 - 28)                | 1<br>(1 - 2)       | 0<br>(0 - 1)        | 2<br>(1 - 3)             | 3<br>(2 - 6)                | 13<br>(7 - 20)                 |
| H influenzae type B meningitis                                    | 11<br>(7 - 16)                 | 3<br>(2 - 5)       | 1<br>(0 - 1)        | 1<br>(1 - 2)             | 1<br>(1 - 2)                | 5<br>(2 - 8)                   |
| Meningococcal meningitis                                          | 52<br>(32 - 74)                | 6<br>(4 - 9)       | 2<br>(1 - 3)        | 7<br>(5 - 10)            | 9<br>(5 - 13)               | 28<br>(14 - 47)                |
| Other meningitis                                                  | 52<br>(40 - 68)                | 3<br>(1 - 5)       | 1<br>(1 - 2)        | 6<br>(4 - 9)             | 10<br>(6 - 14)              | 31<br>(20 - 46)                |
| Encephalitis                                                      | 72<br>(48 - 107)               | 4<br>(2 - 7)       | 3<br>(1 - 4)        | 12<br>(8 - 19)           | 13<br>(8 - 20)              | 41<br>(22 - 65)                |
| Diphtheria                                                        | 0<br>(0 - 1)                   | 0<br>(0 - 0)       | 0<br>(0 - 0)        | 0<br>(0 - 0)             | 0<br>(0 - 0)                | --<br>(0 - 0)                  |
| Whooping cough                                                    | 2<br>(1 - 5)                   | 1<br>(0 - 4)       | 0<br>(0 - 0)        | 1<br>(1 - 1)             | 0<br>(0 - 0)                | --<br>(0 - 0)                  |
| Tetanus                                                           | 4<br>(3 - 7)                   | 0<br>(0 - 0)       | 0<br>(0 - 0)        | 1<br>(1 - 2)             | 1<br>(1 - 2)                | 2<br>(1 - 4)                   |
| Measles                                                           | 0<br>(0 - 0)                   | 0<br>(0 - 0)       | 0<br>(0 - 0)        | 0<br>(0 - 0)             | 0<br>(0 - 0)                | --<br>(0 - 0)                  |
| Varicella and herpes zoster                                       | 24<br>(4 - 99)                 | 1<br>(0 - 4)       | 0<br>(0 - 1)        | 2<br>(0 - 6)             | 2<br>(0 - 6)                | 19<br>(0 - 95)                 |
| Neglected tropical diseases and malaria                           | 24<br>(20 - 27)                | 1<br>(0 - 1)       | 1<br>(1 - 1)        | 6<br>(5 - 7)             | 5<br>(4 - 6)                | 11<br>(10 - 13)                |
| Leishmaniasis                                                     | 2<br>(1 - 3)                   | 0<br>(0 - 0)       | 0<br>(0 - 0)        | 0<br>(0 - 1)             | 1<br>(0 - 1)                | 1<br>(1 - 1)                   |
| Visceral leishmaniasis                                            | 2<br>(1 - 3)                   | 0<br>(0 - 0)       | 0<br>(0 - 0)        | 0<br>(0 - 1)             | 1<br>(0 - 1)                | 1<br>(1 - 1)                   |
| Cysticercosis                                                     | 0<br>(0 - 0)                   | 0<br>(0 - 0)       | 0<br>(0 - 0)        | 0<br>(0 - 0)             | 0<br>(0 - 0)                | 0<br>(0 - 0)                   |
| Cystic echinococcosis                                             | 13<br>(12 - 15)                | 0<br>(0 - 0)       | 0<br>(0 - 0)        | 2<br>(2 - 2)             | 3<br>(3 - 3)                | 8<br>(7 - 9)                   |
| Dengue                                                            | 2<br>(1 - 3)                   | 0<br>(0 - 0)       | 0<br>(0 - 0)        | 1<br>(1 - 1)             | 1<br>(0 - 1)                | 0<br>(0 - 1)                   |
| Rabies                                                            | 2<br>(1 - 3)                   | 0<br>(0 - 0)       | 0<br>(0 - 0)        | 1<br>(0 - 1)             | 0<br>(0 - 1)                | 0<br>(0 - 0)                   |
| Other neglected tropical diseases                                 | 4<br>(2 - 5)                   | 0<br>(0 - 0)       | 0<br>(0 - 0)        | 1<br>(1 - 1)             | 1<br>(0 - 1)                | 2<br>(1 - 2)                   |
| Maternal disorders                                                | 31<br>(24 - 38)                | --                 | 0<br>(0 - 0)        | 31<br>(24 - 38)          | --                          | --                             |
| Maternal hemorrhage                                               | 4<br>(3 - 6)                   | --                 | 0<br>(0 - 0)        | 4<br>(3 - 6)             | --                          | --                             |
| Maternal sepsis and other maternal infections                     | 3<br>(1 - 5)                   | --                 | 0<br>(0 - 0)        | 3<br>(1 - 5)             | --                          | --                             |
| Maternal hypertensive disorders                                   | 3<br>(2 - 5)                   | --                 | 0<br>(0 - 0)        | 3<br>(2 - 5)             | --                          | --                             |
| Maternal obstructed labor                                         | 3<br>(2 - 4)                   | --                 | 0<br>(0 - 0)        | 3<br>(2 - 4)             | --                          | --                             |

Web Table 31- Spain deaths with 95% UI by age, sex, and cause in 2013

| Cause                                                            | Females, All Ages              | Females, 0-4 Years | Females, 5-14 Years | Females, 15-49 Years     | Females, 50-69 Years        | Females, 70-80 Years           |
|------------------------------------------------------------------|--------------------------------|--------------------|---------------------|--------------------------|-----------------------------|--------------------------------|
| Maternal abortive outcome                                        | 7<br>(5 - 9)                   | --                 | 0<br>(0 - 0)        | 7<br>(5 - 9)             | --                          | --                             |
| Indirect maternal deaths                                         | 2<br>(1 - 4)                   | --                 | 0<br>(0 - 0)        | 2<br>(1 - 4)             | --                          | --                             |
| Late maternal deaths                                             | 2<br>(1 - 3)                   | --                 | 0<br>(0 - 0)        | 2<br>(1 - 3)             | --                          | --                             |
| Maternal deaths aggravated by HIV/AIDS                           | 0<br>(0 - 0)                   | --                 | --                  | 0<br>(0 - 0)             | --                          | --                             |
| Other maternal disorders                                         | 6<br>(4 - 8)                   | --                 | 0<br>(0 - 0)        | 6<br>(4 - 8)             | --                          | --                             |
| Neonatal disorders                                               | 302<br>(227 - 408)             | 302<br>(227 - 408) | --                  | --                       | --                          | --                             |
| Neonatal preterm birth complications                             | 116<br>(74 - 170)              | 116<br>(74 - 170)  | --                  | --                       | --                          | --                             |
| Neonatal encephalopathy due to birth asphyxia and trauma         | 64<br>(35 - 94)                | 64<br>(35 - 94)    | --                  | --                       | --                          | --                             |
| Neonatal sepsis and other neonatal infections                    | 48<br>(22 - 88)                | 48<br>(22 - 88)    | --                  | --                       | --                          | --                             |
| Hemolytic disease and other neonatal jaundice                    | 1<br>(0 - 4)                   | 1<br>(0 - 4)       | --                  | --                       | --                          | --                             |
| Other neonatal disorders                                         | 73<br>(32 - 111)               | 73<br>(32 - 111)   | --                  | --                       | --                          | --                             |
| Nutritional deficiencies                                         | 952<br>(692 - 1,264)           | 2<br>(1 - 2)       | 1<br>(0 - 1)        | 20<br>(16 - 25)          | 29<br>(23 - 35)             | 901<br>(647 - 1,213)           |
| Protein-energy malnutrition                                      | 123<br>(46 - 244)              | 1<br>(0 - 1)       | 0<br>(0 - 0)        | 2<br>(1 - 3)             | 3<br>(1 - 6)                | 118<br>(44 - 236)              |
| Iodine deficiency                                                | 2<br>(0 - 12)                  | 0<br>(0 - 0)       | 0<br>(0 - 0)        | 0<br>(0 - 0)             | 0<br>(0 - 1)                | 1<br>(0 - 12)                  |
| Iron-deficiency anemia                                           | 714<br>(456 - 1,005)           | 1<br>(0 - 1)       | 0<br>(0 - 0)        | 17<br>(13 - 22)          | 22<br>(16 - 28)             | 674<br>(425 - 960)             |
| Other nutritional deficiencies                                   | 113<br>(31 - 223)              | 0<br>(0 - 1)       | 0<br>(0 - 0)        | 1<br>(0 - 2)             | 3<br>(1 - 6)                | 107<br>(30 - 216)              |
| Other communicable, maternal, neonatal, and nutritional diseases | 269<br>(187 - 333)             | 7<br>(3 - 13)      | 2<br>(1 - 3)        | 22<br>(17 - 27)          | 56<br>(39 - 72)             | 182<br>(115 - 240)             |
| Sexually transmitted diseases excluding HIV                      | 22<br>(14 - 33)                | 4<br>(0 - 9)       | 0<br>(0 - 1)        | 2<br>(1 - 3)             | 3<br>(2 - 4)                | 14<br>(8 - 22)                 |
| Syphilis                                                         | 17<br>(10 - 26)                | 4<br>(0 - 9)       | 0<br>(0 - 1)        | 1<br>(1 - 1)             | 2<br>(1 - 3)                | 11<br>(6 - 17)                 |
| Chlamydial infection                                             | 1<br>(1 - 2)                   | --                 | 0<br>(0 - 0)        | 0<br>(0 - 1)             | 0<br>(0 - 1)                | 1<br>(0 - 1)                   |
| Gonococcal infection                                             | 2<br>(2 - 4)                   | --                 | 0<br>(0 - 0)        | 0<br>(0 - 1)             | 1<br>(0 - 1)                | 2<br>(1 - 2)                   |
| Other sexually transmitted diseases                              | 1<br>(1 - 2)                   | --                 | 0<br>(0 - 0)        | 0<br>(0 - 1)             | 0<br>(0 - 1)                | 1<br>(0 - 1)                   |
| Hepatitis                                                        | 80<br>(56 - 113)               | 0<br>(0 - 1)       | 0<br>(0 - 1)        | 8<br>(5 - 11)            | 16<br>(11 - 24)             | 55<br>(34 - 86)                |
| Acute hepatitis A                                                | 19<br>(6 - 38)                 | 0<br>(0 - 1)       | 0<br>(0 - 0)        | 3<br>(1 - 6)             | 4<br>(1 - 8)                | 11<br>(2 - 26)                 |
| Acute hepatitis B                                                | 56<br>(32 - 86)                | 0<br>(0 - 0)       | 0<br>(0 - 0)        | 4<br>(2 - 6)             | 11<br>(6 - 18)              | 41<br>(21 - 69)                |
| Acute hepatitis C                                                | 5<br>(1 - 17)                  | --                 | 0<br>(0 - 0)        | 0<br>(0 - 1)             | 1<br>(0 - 3)                | 4<br>(0 - 14)                  |
| Other infectious diseases                                        | 166<br>(91 - 219)              | 3<br>(1 - 4)       | 1<br>(1 - 2)        | 13<br>(8 - 16)           | 37<br>(20 - 49)             | 113<br>(55 - 156)              |
| Non-communicable diseases                                        | 193,625<br>(183,642 - 203,765) | 370<br>(289 - 470) | 130<br>(113 - 149)  | 5,308<br>(4,864 - 5,760) | 19,299<br>(18,043 - 20,548) | 168,519<br>(159,971 - 176,890) |
| Neoplasms                                                        | 45,500<br>(39,579 - 49,803)    | 32<br>(23 - 43)    | 66<br>(55 - 79)     | 3,322<br>(3,009 - 3,625) | 11,319<br>(10,033 - 12,252) | 30,760<br>(26,009 - 34,286)    |
| Esophageal cancer                                                | 294<br>(252 - 342)             | --                 | --                  | 14<br>(11 - 18)          | 76<br>(63 - 93)             | 204<br>(167 - 247)             |
| Stomach cancer                                                   | 3,457<br>(2,476 - 4,640)       | --                 | --                  | 154<br>(112 - 203)       | 556<br>(414 - 734)          | 2,747<br>(1,905 - 3,808)       |
| Liver cancer                                                     | 1,894<br>(1,454 - 2,655)       | --                 | 0<br>(0 - 1)        | 51<br>(39 - 81)          | 334<br>(258 - 516)          | 1,509<br>(1,090 - 2,094)       |
| Liver cancer due to hepatitis B                                  | 228<br>(63 - 426)              | --                 | 0<br>(0 - 0)        | 14<br>(6 - 29)           | 64<br>(17 - 134)            | 150<br>(37 - 287)              |
| Liver cancer due to hepatitis C                                  | 1,365<br>(980 - 2,068)         | --                 | 0<br>(0 - 0)        | 31<br>(14 - 57)          | 226<br>(140 - 405)          | 1,108<br>(752 - 1,631)         |
| Liver cancer due to alcohol use                                  | 229<br>(105 - 419)             | --                 | --                  | 3<br>(1 - 6)             | 29<br>(15 - 59)             | 198<br>(87 - 371)              |
| Liver cancer due to other causes                                 | 72<br>(31 - 146)               | --                 | 0<br>(0 - 0)        | 3<br>(2 - 6)             | 15<br>(6 - 29)              | 53<br>(21 - 118)               |
| Larynx cancer                                                    | 74<br>(47 - 106)               | --                 | --                  | 7<br>(4 - 10)            | 21<br>(14 - 32)             | 46<br>(28 - 69)                |
| Tracheal, bronchus and lung cancer                               | 3,549<br>(2,026 - 4,297)       | --                 | --                  | 360<br>(217 - 455)       | 1,320<br>(647 - 1,651)      | 1,870<br>(1,123 - 2,363)       |
| Breast cancer                                                    | 7,145<br>(5,104 - 8,323)       | --                 | --                  | 992<br>(843 - 1,264)     | 2,304<br>(1,861 - 2,726)    | 3,850<br>(2,371 - 4,691)       |
| Cervical cancer                                                  | 1,066<br>(807 - 1,271)         | --                 | --                  | 200<br>(150 - 244)       | 340<br>(262 - 410)          | 527<br>(377 - 699)             |

Web Table 31- Spain deaths with 95% UI by age, sex, and cause in 2013

| Cause                                         | Females, All Ages           | Females, 0-4 Years | Females, 5-14 Years | Females, 15-49 Years | Females, 50-69 Years     | Females, 70-80 Years        |
|-----------------------------------------------|-----------------------------|--------------------|---------------------|----------------------|--------------------------|-----------------------------|
| Uterine cancer                                | 1,382<br>(904 - 1,722)      | --                 | --                  | 32<br>(24 - 43)      | 384<br>(279 - 477)       | 966<br>(580 - 1,289)        |
| Prostate cancer                               | --                          | --                 | --                  | --                   | --                       | --                          |
| Colon and rectum cancer                       | 8,405<br>(7,097 - 10,021)   | --                 | --                  | 283<br>(239 - 332)   | 1,585<br>(1,369 - 1,771) | 6,537<br>(5,308 - 8,093)    |
| Lip and oral cavity cancer                    | 361<br>(284 - 456)          | --                 | --                  | 27<br>(21 - 33)      | 84<br>(65 - 103)         | 251<br>(188 - 338)          |
| Nasopharynx cancer                            | 66<br>(30 - 124)            | --                 | 0<br>(0 - 0)        | 12<br>(6 - 23)       | 21<br>(11 - 42)          | 33<br>(13 - 61)             |
| Other pharynx cancer                          | 87<br>(68 - 110)            | --                 | --                  | 12<br>(8 - 17)       | 33<br>(24 - 44)          | 42<br>(28 - 59)             |
| Gallbladder and biliary tract cancer          | 1,158<br>(841 - 1,785)      | --                 | --                  | 16<br>(12 - 26)      | 197<br>(142 - 336)       | 945<br>(656 - 1,465)        |
| Pancreatic cancer                             | 3,338<br>(2,872 - 3,865)    | --                 | --                  | 109<br>(89 - 131)    | 805<br>(684 - 917)       | 2,424<br>(2,026 - 2,903)    |
| Malignant skin melanoma                       | 479<br>(293 - 609)          | --                 | --                  | 81<br>(53 - 105)     | 130<br>(79 - 160)        | 268<br>(156 - 366)          |
| Non-melanoma skin cancer                      | 405<br>(265 - 621)          | --                 | --                  | 7<br>(5 - 9)         | 19<br>(14 - 25)          | 379<br>(242 - 591)          |
| Ovarian cancer                                | 2,326<br>(1,763 - 2,720)    | --                 | --                  | 221<br>(181 - 268)   | 862<br>(710 - 1,004)     | 1,244<br>(800 - 1,589)      |
| Testicular cancer                             | --                          | --                 | --                  | --                   | --                       | --                          |
| Kidney cancer                                 | 712<br>(445 - 1,103)        | 1<br>(1 - 2)       | 2<br>(1 - 3)        | 33<br>(24 - 46)      | 180<br>(129 - 235)       | 496<br>(264 - 869)          |
| Bladder cancer                                | 963<br>(584 - 1,349)        | --                 | --                  | 17<br>(11 - 23)      | 116<br>(76 - 156)        | 830<br>(488 - 1,202)        |
| Brain and nervous system cancer               | 1,275<br>(911 - 1,500)      | 5<br>(3 - 8)       | 14<br>(10 - 19)     | 173<br>(137 - 219)   | 482<br>(368 - 607)       | 602<br>(342 - 773)          |
| Thyroid cancer                                | 228<br>(168 - 299)          | --                 | 0<br>(0 - 0)        | 10<br>(7 - 14)       | 50<br>(37 - 70)          | 168<br>(118 - 227)          |
| Mesothelioma                                  | 133<br>(98 - 241)           | --                 | --                  | 9<br>(6 - 17)        | 45<br>(32 - 79)          | 78<br>(51 - 149)            |
| Hodgkin lymphoma                              | 133<br>(86 - 173)           | 0<br>(0 - 0)       | 1<br>(0 - 1)        | 32<br>(24 - 46)      | 27<br>(19 - 40)          | 73<br>(40 - 101)            |
| Non-Hodgkin lymphoma                          | 1,360<br>(593 - 1,809)      | 1<br>(1 - 2)       | 4<br>(2 - 7)        | 95<br>(53 - 156)     | 313<br>(146 - 448)       | 947<br>(378 - 1,341)        |
| Multiple myeloma                              | 893<br>(546 - 1,342)        | --                 | --                  | 22<br>(13 - 35)      | 230<br>(145 - 370)       | 641<br>(358 - 984)          |
| Leukemia                                      | 1,578<br>(1,138 - 1,850)    | 9<br>(5 - 16)      | 18<br>(13 - 25)     | 134<br>(113 - 159)   | 281<br>(227 - 329)       | 1,135<br>(771 - 1,389)      |
| Other neoplasms                               | 2,738<br>(1,925 - 3,365)    | 15<br>(11 - 21)    | 27<br>(21 - 34)     | 220<br>(181 - 269)   | 526<br>(417 - 653)       | 1,951<br>(1,199 - 2,523)    |
| Cardiovascular diseases                       | 81,312<br>(72,361 - 96,841) | 15<br>(11 - 22)    | 11<br>(9 - 15)      | 843<br>(701 - 1,057) | 4,122<br>(3,558 - 5,498) | 76,321<br>(67,829 - 90,383) |
| Rheumatic heart disease                       | 1,385<br>(669 - 1,797)      | 0<br>(0 - 0)       | 1<br>(0 - 1)        | 31<br>(23 - 49)      | 203<br>(139 - 298)       | 1,149<br>(503 - 1,547)      |
| Ischemic heart disease                        | 37,920<br>(32,097 - 49,258) | 1<br>(1 - 2)       | 2<br>(1 - 3)        | 352<br>(283 - 497)   | 1,954<br>(1,600 - 2,883) | 35,611<br>(29,984 - 46,083) |
| Cerebrovascular disease                       | 25,537<br>(20,770 - 35,745) | 5<br>(3 - 7)       | 5<br>(3 - 7)        | 270<br>(208 - 357)   | 1,152<br>(928 - 1,739)   | 24,106<br>(19,439 - 34,039) |
| Ischemic stroke                               | 15,735<br>(12,030 - 24,658) | 0<br>(0 - 0)       | 0<br>(0 - 1)        | 28<br>(18 - 51)      | 310<br>(204 - 583)       | 15,396<br>(11,734 - 24,099) |
| Hemorrhagic stroke                            | 9,802<br>(6,748 - 13,760)   | 4<br>(3 - 7)       | 4<br>(3 - 7)        | 241<br>(185 - 318)   | 842<br>(662 - 1,212)     | 8,710<br>(5,807 - 12,449)   |
| Hypertensive heart disease                    | 2,614<br>(1,239 - 3,998)    | 0<br>(0 - 0)       | 0<br>(0 - 0)        | 11<br>(6 - 15)       | 72<br>(45 - 98)          | 2,530<br>(1,183 - 3,889)    |
| Cardiomyopathy and myocarditis                | 2,490<br>(1,754 - 4,312)    | 5<br>(4 - 9)       | 2<br>(1 - 3)        | 44<br>(32 - 60)      | 164<br>(120 - 235)       | 2,275<br>(1,552 - 4,044)    |
| Atrial fibrillation and flutter               | 4,399<br>(2,937 - 6,257)    | --                 | --                  | 5<br>(3 - 7)         | 73<br>(50 - 101)         | 4,321<br>(2,876 - 6,157)    |
| Aortic aneurysm                               | 448<br>(236 - 663)          | --                 | --                  | 15<br>(9 - 23)       | 61<br>(33 - 90)          | 373<br>(191 - 561)          |
| Peripheral vascular disease                   | 806<br>(542 - 1,156)        | --                 | --                  | 1<br>(1 - 2)         | 16<br>(11 - 22)          | 789<br>(525 - 1,136)        |
| Endocarditis                                  | 344<br>(228 - 608)          | 0<br>(0 - 1)       | 0<br>(0 - 1)        | 15<br>(9 - 29)       | 54<br>(32 - 114)         | 274<br>(179 - 488)          |
| Other cardiovascular and circulatory diseases | 5,370<br>(2,781 - 7,150)    | 3<br>(1 - 4)       | 1<br>(1 - 2)        | 100<br>(57 - 132)    | 373<br>(242 - 489)       | 4,894<br>(2,486 - 6,652)    |
| Chronic respiratory diseases                  | 10,316<br>(8,428 - 12,907)  | 5<br>(3 - 7)       | 3<br>(2 - 4)        | 110<br>(85 - 131)    | 592<br>(427 - 688)       | 9,606<br>(7,790 - 12,148)   |
| Chronic obstructive pulmonary disease         | 8,261<br>(6,525 - 10,472)   | 3<br>(2 - 5)       | 1<br>(1 - 1)        | 54<br>(37 - 72)      | 362<br>(243 - 451)       | 7,842<br>(6,147 - 10,034)   |
| Pneumoconiosis                                | 43<br>(23 - 75)             | 0<br>(0 - 0)       | 0<br>(0 - 0)        | 1<br>(1 - 2)         | 4<br>(2 - 6)             | 37<br>(19 - 68)             |
| Silicosis                                     | 2<br>(1 - 5)                | 0<br>(0 - 0)       | 0<br>(0 - 0)        | 0<br>(0 - 0)         | 0<br>(0 - 0)             | 2<br>(1 - 4)                |
| Asbestosis                                    | 3<br>(2 - 6)                | 0<br>(0 - 0)       | 0<br>(0 - 0)        | 0<br>(0 - 0)         | 0<br>(0 - 0)             | 3<br>(1 - 6)                |



Web Table 31- Spain deaths with 95% UI by age, sex, and cause in 2013

| Cause                                               | Females, All Ages           | Females, 0-4 Years | Females, 5-14 Years | Females, 15-49 Years | Females, 50-69 Years | Females, 70-80 Years        |
|-----------------------------------------------------|-----------------------------|--------------------|---------------------|----------------------|----------------------|-----------------------------|
| Coal workers pneumoconiosis                         | 2<br>(1 - 3)                | 0<br>(0 - 0)       | 0<br>(0 - 0)        | 0<br>(0 - 0)         | 0<br>(0 - 0)         | 1<br>(0 - 2)                |
| Other pneumoconiosis                                | 36<br>(19 - 63)             | 0<br>(0 - 0)       | 0<br>(0 - 0)        | 1<br>(0 - 1)         | 3<br>(2 - 5)         | 32<br>(16 - 59)             |
| Asthma                                              | 946<br>(501 - 1,478)        | 0<br>(0 - 1)       | 1<br>(0 - 1)        | 33<br>(17 - 44)      | 94<br>(55 - 132)     | 817<br>(420 - 1,314)        |
| Interstitial lung disease and pulmonary sarcoidosis | 967<br>(430 - 1,552)        | 1<br>(0 - 1)       | 1<br>(0 - 1)        | 20<br>(11 - 30)      | 124<br>(66 - 190)    | 821<br>(340 - 1,371)        |
| Other chronic respiratory diseases                  | 99<br>(59 - 160)            | 1<br>(1 - 1)       | 0<br>(0 - 0)        | 2<br>(1 - 3)         | 7<br>(4 - 11)        | 89<br>(51 - 150)            |
| Cirrhosis                                           | 3,057<br>(2,638 - 3,569)    | 1<br>(1 - 1)       | 1<br>(1 - 2)        | 241<br>(203 - 281)   | 691<br>(593 - 785)   | 2,123<br>(1,761 - 2,563)    |
| Cirrhosis due to hepatitis B                        | 389<br>(202 - 661)          | 0<br>(0 - 0)       | 0<br>(0 - 0)        | 28<br>(15 - 45)      | 85<br>(43 - 140)     | 277<br>(133 - 492)          |
| Cirrhosis due to hepatitis C                        | 1,664<br>(1,130 - 2,165)    | 0<br>(0 - 0)       | 0<br>(0 - 1)        | 130<br>(71 - 181)    | 389<br>(244 - 516)   | 1,144<br>(733 - 1,564)      |
| Cirrhosis due to alcohol use                        | 721<br>(361 - 1,152)        | --                 | --                  | 32<br>(13 - 62)      | 132<br>(64 - 226)    | 557<br>(265 - 935)          |
| Cirrhosis due to other causes                       | 283<br>(132 - 511)          | 1<br>(1 - 1)       | 1<br>(1 - 1)        | 51<br>(27 - 88)      | 84<br>(40 - 157)     | 146<br>(48 - 286)           |
| Digestive diseases                                  | 7,283<br>(5,479 - 8,629)    | 2<br>(1 - 2)       | 2<br>(2 - 3)        | 102<br>(74 - 120)    | 417<br>(335 - 487)   | 6,759<br>(5,047 - 8,086)    |
| Peptic ulcer disease                                | 536<br>(358 - 824)          | 0<br>(0 - 0)       | 0<br>(0 - 0)        | 8<br>(5 - 11)        | 33<br>(22 - 46)      | 495<br>(322 - 776)          |
| Gastritis and duodenitis                            | 36<br>(15 - 65)             | 0<br>(0 - 0)       | 0<br>(0 - 0)        | 1<br>(1 - 2)         | 2<br>(1 - 4)         | 32<br>(13 - 60)             |
| Appendicitis                                        | 75<br>(42 - 124)            | 0<br>(0 - 0)       | 1<br>(0 - 1)        | 5<br>(3 - 8)         | 9<br>(5 - 14)        | 60<br>(30 - 107)            |
| Paralytic ileus and intestinal obstruction          | 1,314<br>(628 - 2,129)      | 0<br>(0 - 1)       | 0<br>(0 - 1)        | 13<br>(6 - 21)       | 52<br>(27 - 90)      | 1,248<br>(591 - 2,039)      |
| Inguinal, femoral, and abdominal hernia             | 269<br>(95 - 465)           | 0<br>(0 - 0)       | 0<br>(0 - 0)        | 2<br>(1 - 3)         | 16<br>(8 - 26)       | 251<br>(84 - 442)           |
| Inflammatory bowel disease                          | 217<br>(135 - 417)          | 0<br>(0 - 0)       | 0<br>(0 - 0)        | 9<br>(6 - 13)        | 20<br>(12 - 32)      | 188<br>(110 - 373)          |
| Vascular intestinal disorders                       | 2,034<br>(1,059 - 3,211)    | 0<br>(0 - 0)       | 0<br>(0 - 0)        | 14<br>(7 - 23)       | 99<br>(53 - 158)     | 1,920<br>(985 - 3,048)      |
| Gallbladder and biliary diseases                    | 1,319<br>(710 - 1,798)      | 0<br>(0 - 0)       | 0<br>(0 - 0)        | 12<br>(7 - 16)       | 51<br>(31 - 67)      | 1,255<br>(663 - 1,722)      |
| Pancreatitis                                        | 722<br>(438 - 1,087)        | 0<br>(0 - 0)       | 0<br>(0 - 0)        | 25<br>(15 - 35)      | 85<br>(58 - 127)     | 611<br>(351 - 935)          |
| Other digestive diseases                            | 761<br>(490 - 1,033)        | 0<br>(0 - 1)       | 0<br>(0 - 1)        | 11<br>(7 - 15)       | 50<br>(33 - 66)      | 698<br>(440 - 964)          |
| Neurological disorders                              | 27,190<br>(19,137 - 36,254) | 19<br>(13 - 26)    | 8<br>(6 - 10)       | 159<br>(127 - 186)   | 847<br>(694 - 999)   | 26,157<br>(18,198 - 35,167) |
| Alzheimer disease and other dementias               | 24,201<br>(16,553 - 33,132) | --                 | --                  | 4<br>(2 - 6)         | 369<br>(256 - 492)   | 23,828<br>(16,168 - 32,763) |
| Parkinson disease                                   | 1,737<br>(865 - 2,371)      | --                 | --                  | 2<br>(1 - 3)         | 81<br>(53 - 111)     | 1,654<br>(789 - 2,275)      |
| Epilepsy                                            | 206<br>(110 - 299)          | 2<br>(1 - 4)       | 3<br>(1 - 4)        | 36<br>(21 - 48)      | 28<br>(17 - 37)      | 137<br>(67 - 221)           |
| Multiple sclerosis                                  | 159<br>(84 - 214)           | --                 | --                  | 44<br>(24 - 65)      | 74<br>(34 - 101)     | 41<br>(21 - 62)             |
| Other neurological disorders                        | 887<br>(757 - 1,007)        | 17<br>(11 - 23)    | 5<br>(4 - 6)        | 73<br>(61 - 87)      | 295<br>(248 - 339)   | 498<br>(405 - 596)          |
| Mental and substance use disorders                  | 377<br>(302 - 441)          | 0<br>(0 - 0)       | 0<br>(0 - 0)        | 164<br>(135 - 198)   | 105<br>(81 - 127)    | 108<br>(71 - 145)           |
| Schizophrenia                                       | 67<br>(30 - 101)            | --                 | --                  | 4<br>(2 - 6)         | 15<br>(7 - 22)       | 49<br>(20 - 78)             |
| Alcohol use disorders                               | 61<br>(26 - 107)            | --                 | --                  | 30<br>(13 - 55)      | 18<br>(7 - 30)       | 13<br>(6 - 24)              |
| Drug use disorders                                  | 245<br>(208 - 286)          | 0<br>(0 - 0)       | --                  | 127<br>(102 - 152)   | 72<br>(56 - 89)      | 46<br>(33 - 63)             |
| Opioid use disorders                                | 85<br>(72 - 100)            | 0<br>(0 - 0)       | --                  | 45<br>(36 - 56)      | 23<br>(18 - 30)      | 17<br>(12 - 23)             |
| Cocaine use disorders                               | 9<br>(7 - 11)               | 0<br>(0 - 0)       | --                  | 5<br>(4 - 7)         | 2<br>(2 - 3)         | 1<br>(1 - 2)                |
| Amphetamine use disorders                           | 10<br>(8 - 12)              | 0<br>(0 - 0)       | --                  | 5<br>(4 - 6)         | 3<br>(2 - 4)         | 2<br>(1 - 2)                |
| Other drug use disorders                            | 141<br>(119 - 167)          | 0<br>(0 - 0)       | --                  | 71<br>(56 - 86)      | 44<br>(34 - 55)      | 26<br>(19 - 36)             |
| Eating disorders                                    | 4<br>(2 - 7)                | --                 | 0<br>(0 - 0)        | 4<br>(2 - 7)         | --                   | --                          |
| Anorexia nervosa                                    | 4<br>(2 - 7)                | --                 | 0<br>(0 - 0)        | 4<br>(2 - 7)         | --                   | --                          |
| Diabetes, urogenital, blood, and endocrine diseases | 16,365<br>(12,903 - 21,048) | 29<br>(19 - 40)    | 15<br>(11 - 20)     | 217<br>(180 - 282)   | 989<br>(822 - 1,448) | 15,115<br>(11,800 - 19,325) |
| Diabetes mellitus                                   | 6,423<br>(5,156 - 8,168)    | 2<br>(1 - 3)       | 1<br>(1 - 2)        | 43<br>(34 - 57)      | 358<br>(290 - 594)   | 6,020<br>(4,755 - 7,710)    |
| Acute glomerulonephritis                            | 5<br>(3 - 9)                | 0<br>(0 - 0)       | 0<br>(0 - 0)        | 1<br>(1 - 1)         | 1<br>(0 - 1)         | 3<br>(1 - 7)                |

Web Table 31- Spain deaths with 95% UI by age, sex, and cause in 2013

| Cause                                               | Females, All Ages         | Females, 0-4 Years | Females, 5-14 Years | Females, 15-49 Years | Females, 50-69 Years | Females, 70-80 Years     |
|-----------------------------------------------------|---------------------------|--------------------|---------------------|----------------------|----------------------|--------------------------|
| Chronic kidney disease                              | 6,012<br>(4,417 - 10,307) | 1<br>(1 - 2)       | 2<br>(1 - 3)        | 61<br>(45 - 137)     | 302<br>(223 - 668)   | 5,646<br>(4,068 - 9,582) |
| Chronic kidney disease due to diabetes mellitus     | 1,098<br>(688 - 1,806)    | 0<br>(0 - 0)       | 0<br>(0 - 0)        | 16<br>(11 - 30)      | 78<br>(51 - 146)     | 1,004<br>(613 - 1,627)   |
| Chronic kidney disease due to hypertension          | 1,557<br>(804 - 2,563)    | 0<br>(0 - 0)       | 0<br>(0 - 0)        | 9<br>(5 - 17)        | 56<br>(32 - 112)     | 1,492<br>(758 - 2,453)   |
| Chronic kidney disease due to glomerulonephritis    | 85<br>(45 - 136)          | 0<br>(0 - 0)       | 0<br>(0 - 0)        | 3<br>(2 - 4)         | 7<br>(4 - 10)        | 75<br>(38 - 126)         |
| Chronic kidney disease due to other causes          | 3,272<br>(1,987 - 7,114)  | 1<br>(1 - 2)       | 1<br>(1 - 2)        | 34<br>(21 - 95)      | 161<br>(97 - 478)    | 3,075<br>(1,823 - 6,462) |
| Urinary diseases and male infertility               | 2,326<br>(942 - 3,348)    | 1<br>(1 - 2)       | 1<br>(0 - 1)        | 24<br>(14 - 31)      | 98<br>(55 - 125)     | 2,202<br>(865 - 3,211)   |
| Interstitial nephritis and urinary tract infections | 2,186<br>(864 - 3,183)    | 1<br>(1 - 2)       | 0<br>(0 - 1)        | 18<br>(10 - 24)      | 81<br>(45 - 105)     | 2,086<br>(795 - 3,073)   |
| Urolithiasis                                        | 49<br>(21 - 108)          | --                 | 0<br>(0 - 0)        | 2<br>(1 - 3)         | 6<br>(3 - 10)        | 42<br>(17 - 99)          |
| Other urinary diseases                              | 90<br>(29 - 179)          | 0<br>(0 - 1)       | 0<br>(0 - 0)        | 4<br>(2 - 6)         | 12<br>(5 - 18)       | 74<br>(20 - 161)         |
| Gynecological diseases                              | 14<br>(8 - 22)            | --                 | --                  | 1<br>(1 - 2)         | 1<br>(1 - 2)         | 12<br>(6 - 19)           |
| Uterine fibroids                                    | 4<br>(2 - 6)              | --                 | --                  | 0<br>(0 - 0)         | 0<br>(0 - 1)         | 3<br>(2 - 6)             |
| Polycystic ovarian syndrome                         | 0<br>(0 - 0)              | --                 | --                  | 0<br>(0 - 0)         | 0<br>(0 - 0)         | --                       |
| Endometriosis                                       | 0<br>(0 - 0)              | --                 | --                  | 0<br>(0 - 0)         | 0<br>(0 - 0)         | --                       |
| Genital prolapse                                    | 3<br>(2 - 5)              | --                 | --                  | 0<br>(0 - 0)         | 0<br>(0 - 0)         | 3<br>(2 - 5)             |
| Other gynecological diseases                        | 6<br>(4 - 10)             | --                 | --                  | 1<br>(0 - 1)         | 1<br>(0 - 1)         | 5<br>(3 - 9)             |
| Hemoglobinopathies and hemolytic anemias            | 215<br>(135 - 338)        | 3<br>(2 - 5)       | 2<br>(1 - 4)        | 10<br>(7 - 16)       | 32<br>(21 - 51)      | 168<br>(101 - 269)       |
| Thalassemias                                        | 1<br>(0 - 1)              | 0<br>(0 - 0)       | 0<br>(0 - 0)        | 0<br>(0 - 0)         | 0<br>(0 - 0)         | 0<br>(0 - 0)             |
| Sickle cell disorders                               | 27<br>(18 - 43)           | 1<br>(1 - 2)       | 1<br>(1 - 2)        | 6<br>(4 - 9)         | 27<br>(8 - 20)       | 7<br>(4 - 11)            |
| G6PD deficiency                                     | 0<br>(0 - 1)              | 0<br>(0 - 0)       | 0<br>(0 - 0)        | 0<br>(0 - 0)         | 0<br>(0 - 0)         | 0<br>(0 - 0)             |
| Other hemoglobinopathies and hemolytic anemias      | 187<br>(115 - 299)        | 1<br>(1 - 2)       | 1<br>(0 - 1)        | 4<br>(3 - 7)         | 19<br>(13 - 31)      | 161<br>(96 - 258)        |
| Endocrine, metabolic, blood, and immune disorders   | 1,370<br>(594 - 1,805)    | 22<br>(11 - 31)    | 9<br>(5 - 13)       | 77<br>(41 - 96)      | 197<br>(98 - 249)    | 1,065<br>(422 - 1,475)   |
| Musculoskeletal disorders                           | 756<br>(592 - 946)        | --                 | 1<br>(1 - 2)        | 55<br>(43 - 77)      | 124<br>(99 - 166)    | 576<br>(405 - 758)       |
| Rheumatoid arthritis                                | 226<br>(151 - 309)        | --                 | 0<br>(0 - 0)        | 5<br>(3 - 7)         | 37<br>(27 - 51)      | 184<br>(111 - 262)       |
| Other musculoskeletal disorders                     | 530<br>(398 - 691)        | --                 | 1<br>(1 - 1)        | 50<br>(39 - 71)      | 87<br>(68 - 116)     | 392<br>(269 - 531)       |
| Other non-communicable diseases                     | 1,469<br>(1,126 - 1,844)  | 268<br>(201 - 360) | 22<br>(16 - 29)     | 94<br>(74 - 115)     | 92<br>(69 - 109)     | 993<br>(654 - 1,371)     |
| Congenital anomalies                                | 511<br>(420 - 611)        | 240<br>(182 - 320) | 22<br>(16 - 29)     | 87<br>(67 - 108)     | 61<br>(40 - 77)      | 102<br>(60 - 143)        |
| Neural tube defects                                 | 8<br>(5 - 12)             | 5<br>(3 - 10)      | 0<br>(0 - 1)        | 1<br>(1 - 2)         | 1<br>(0 - 1)         | 0<br>(0 - 1)             |
| Congenital heart anomalies                          | 175<br>(135 - 228)        | 95<br>(69 - 129)   | 9<br>(6 - 13)       | 33<br>(21 - 46)      | 18<br>(11 - 25)      | 21<br>(11 - 35)          |
| Cleft lip and cleft palate                          | 0<br>(0 - 0)              | 0<br>(0 - 0)       | --                  | --                   | --                   | --                       |
| Down syndrome                                       | 67<br>(35 - 104)          | 13<br>(5 - 31)     | 2<br>(1 - 5)        | 27<br>(15 - 40)      | 22<br>(10 - 32)      | 3<br>(1 - 6)             |
| Chromosomal unbalanced rearrangements               | 29<br>(18 - 47)           | 24<br>(14 - 42)    | 1<br>(1 - 2)        | 2<br>(1 - 3)         | 1<br>(0 - 1)         | 0<br>(0 - 1)             |
| Other congenital anomalies                          | 232<br>(176 - 294)        | 102<br>(73 - 145)  | 9<br>(5 - 13)       | 24<br>(16 - 35)      | 19<br>(13 - 28)      | 78<br>(45 - 111)         |
| Skin and subcutaneous diseases                      | 930<br>(607 - 1,308)      | 1<br>(1 - 2)       | 0<br>(0 - 1)        | 7<br>(5 - 9)         | 31<br>(23 - 39)      | 890<br>(576 - 1,265)     |
| Cellulitis                                          | 118<br>(46 - 229)         | 0<br>(0 - 1)       | 0<br>(0 - 0)        | 2<br>(1 - 4)         | 10<br>(6 - 16)       | 105<br>(36 - 212)        |
| Pyoderma                                            | 287<br>(167 - 446)        | 1<br>(0 - 1)       | 0<br>(0 - 0)        | 2<br>(2 - 3)         | 12<br>(7 - 16)       | 272<br>(154 - 430)       |
| Decubitus ulcer                                     | 501<br>(289 - 753)        | 0<br>(0 - 0)       | 0<br>(0 - 0)        | 1<br>(1 - 2)         | 7<br>(5 - 11)        | 492<br>(281 - 745)       |
| Other skin and subcutaneous diseases                | 25<br>(10 - 66)           | 0<br>(0 - 1)       | 0<br>(0 - 0)        | 1<br>(1 - 2)         | 2<br>(1 - 4)         | 21<br>(7 - 63)           |
| Sudden infant death syndrome                        | 27<br>(10 - 71)           | 27<br>(10 - 71)    | --                  | --                   | --                   | --                       |
| Injuries                                            | 6,642<br>(5,246 - 7,845)  | 49<br>(37 - 69)    | 45<br>(37 - 57)     | 967<br>(851 - 1,101) | 833<br>(725 - 1,004) | 4,748<br>(3,470 - 5,890) |
| Transport injuries                                  | 1,084<br>(913 - 1,571)    | 16<br>(11 - 23)    | 27<br>(20 - 38)     | 371<br>(313 - 529)   | 220<br>(175 - 358)   | 451<br>(343 - 642)       |

Web Table 31- Spain deaths with 95% UI by age, sex, and cause in 2013

| Cause                                           | Females, All Ages        | Females, 0-4 Years | Females, 5-14 Years | Females, 15-49 Years | Females, 50-69 Years | Females, 70-80 Years     |
|-------------------------------------------------|--------------------------|--------------------|---------------------|----------------------|----------------------|--------------------------|
| Road injuries                                   | 1,038<br>(875 - 1,526)   | 15<br>(10 - 22)    | 26<br>(20 - 36)     | 354<br>(299 - 505)   | 206<br>(164 - 343)   | 436<br>(332 - 611)       |
| Pedestrian road injuries                        | 381<br>(225 - 527)       | 4<br>(2 - 7)       | 7<br>(4 - 10)       | 49<br>(26 - 69)      | 67<br>(37 - 103)     | 254<br>(143 - 365)       |
| Cyclist road injuries                           | 28<br>(16 - 40)          | 0<br>(0 - 0)       | 1<br>(0 - 1)        | 12<br>(7 - 18)       | 7<br>(4 - 11)        | 8<br>(5 - 13)            |
| Motorcyclist road injuries                      | 35<br>(16 - 72)          | 0<br>(0 - 0)       | 1<br>(0 - 2)        | 26<br>(12 - 51)      | 5<br>(2 - 10)        | 4<br>(2 - 10)            |
| Motor vehicle road injuries                     | 587<br>(470 - 927)       | 10<br>(7 - 16)     | 18<br>(12 - 26)     | 265<br>(216 - 401)   | 126<br>(94 - 218)    | 168<br>(115 - 288)       |
| Other road injuries                             | 6<br>(3 - 16)            | 0<br>(0 - 0)       | 0<br>(0 - 0)        | 2<br>(1 - 5)         | 2<br>(1 - 5)         | 2<br>(1 - 7)             |
| Other transport injuries                        | 47<br>(29 - 77)          | 0<br>(0 - 1)       | 1<br>(1 - 2)        | 17<br>(10 - 27)      | 14<br>(7 - 23)       | 15<br>(8 - 28)           |
| Unintentional injuries                          | 4,493<br>(3,236 - 5,632) | 31<br>(22 - 48)    | 15<br>(12 - 19)     | 172<br>(147 - 204)   | 301<br>(246 - 358)   | 3,974<br>(2,761 - 5,101) |
| Falls                                           | 1,858<br>(1,037 - 2,531) | 3<br>(2 - 5)       | 2<br>(2 - 3)        | 38<br>(26 - 48)      | 81<br>(48 - 103)     | 1,733<br>(949 - 2,401)   |
| Drowning                                        | 108<br>(84 - 171)        | 6<br>(3 - 11)      | 4<br>(3 - 7)        | 25<br>(19 - 41)      | 28<br>(20 - 43)      | 45<br>(33 - 70)          |
| Fire, heat, and hot substances                  | 157<br>(116 - 244)       | 3<br>(2 - 5)       | 1<br>(1 - 2)        | 12<br>(9 - 16)       | 31<br>(23 - 46)      | 111<br>(75 - 186)        |
| Poisonings                                      | 94<br>(53 - 130)         | 1<br>(1 - 2)       | 1<br>(1 - 1)        | 18<br>(12 - 27)      | 13<br>(7 - 18)       | 62<br>(30 - 90)          |
| Exposure to mechanical forces                   | 69<br>(40 - 83)          | 3<br>(2 - 5)       | 2<br>(1 - 3)        | 16<br>(12 - 19)      | 11<br>(7 - 14)       | 36<br>(17 - 49)          |
| Unintentional firearm injuries                  | 5<br>(4 - 6)             | 0<br>(0 - 0)       | 0<br>(0 - 0)        | 2<br>(2 - 3)         | 1<br>(1 - 2)         | 1<br>(0 - 1)             |
| Unintentional suffocation                       | 14<br>(4 - 22)           | 1<br>(0 - 3)       | 0<br>(0 - 0)        | 2<br>(1 - 2)         | 1<br>(0 - 1)         | 9<br>(2 - 17)            |
| Other exposure to mechanical forces             | 50<br>(27 - 61)          | 2<br>(1 - 3)       | 1<br>(1 - 3)        | 12<br>(8 - 14)       | 9<br>(5 - 11)        | 26<br>(11 - 35)          |
| Adverse effects of medical treatment            | 682<br>(471 - 1,108)     | 2<br>(1 - 5)       | 1<br>(1 - 2)        | 26<br>(19 - 43)      | 68<br>(49 - 112)     | 585<br>(377 - 972)       |
| Animal contact                                  | 16<br>(8 - 38)           | 0<br>(0 - 0)       | 0<br>(0 - 0)        | 2<br>(1 - 3)         | 7<br>(4 - 18)        | 7<br>(2 - 16)            |
| Venomous animal contact                         | 6<br>(3 - 16)            | 0<br>(0 - 0)       | 0<br>(0 - 0)        | 1<br>(0 - 1)         | 5<br>(2 - 14)        | 0<br>(0 - 1)             |
| Non-venomous animal contact                     | 10<br>(4 - 22)           | 0<br>(0 - 0)       | 0<br>(0 - 0)        | 1<br>(0 - 2)         | 2<br>(1 - 6)         | 6<br>(2 - 15)            |
| Foreign body                                    | 1,494<br>(722 - 2,351)   | 12<br>(7 - 25)     | 2<br>(1 - 3)        | 33<br>(17 - 47)      | 60<br>(29 - 85)      | 1,387<br>(644 - 2,225)   |
| Pulmonary aspiration and foreign body in airway | 1,489<br>(717 - 2,346)   | 12<br>(7 - 25)     | 2<br>(1 - 3)        | 31<br>(16 - 46)      | 59<br>(28 - 84)      | 1,384<br>(641 - 2,221)   |
| Foreign body in other body part                 | 5<br>(3 - 7)             | 0<br>(0 - 0)       | 0<br>(0 - 0)        | 1<br>(1 - 2)         | 1<br>(0 - 1)         | 2<br>(1 - 5)             |
| Other unintentional injuries                    | 15<br>(10 - 27)          | 0<br>(0 - 1)       | 0<br>(0 - 0)        | 3<br>(2 - 6)         | 3<br>(1 - 5)         | 9<br>(5 - 18)            |
| Self-harm and interpersonal violence            | 1,065<br>(857 - 1,231)   | 2<br>(1 - 3)       | 3<br>(2 - 4)        | 424<br>(298 - 488)   | 313<br>(250 - 373)   | 323<br>(252 - 441)       |
| Self-harm                                       | 928<br>(746 - 1,108)     | -                  | 1<br>(1 - 2)        | 357<br>(240 - 418)   | 286<br>(228 - 352)   | 283<br>(219 - 405)       |
| Interpersonal violence                          | 137<br>(73 - 170)        | 2<br>(1 - 3)       | 2<br>(1 - 3)        | 67<br>(35 - 87)      | 27<br>(15 - 34)      | 40<br>(20 - 54)          |
| Assault by firearm                              | 23<br>(10 - 39)          | 0<br>(0 - 1)       | 0<br>(0 - 1)        | 15<br>(6 - 26)       | 5<br>(2 - 8)         | 3<br>(1 - 5)             |
| Assault by sharp object                         | 59<br>(28 - 81)          | 0<br>(0 - 0)       | 0<br>(0 - 1)        | 31<br>(14 - 43)      | 12<br>(6 - 17)       | 15<br>(6 - 24)           |
| Assault by other means                          | 55<br>(27 - 82)          | 2<br>(1 - 3)       | 1<br>(1 - 2)        | 21<br>(10 - 33)      | 10<br>(5 - 15)       | 22<br>(10 - 32)          |

Web Table 31- Sri Lanka deaths with 95% UI by age, sex, and cause in 2013

| Cause                                                             | Both Sexes, All Ages           | Both Sexes, 0-4 Years    | Both Sexes, 5-14 Years   | Both Sexes, 15-49 Years     | Both Sexes, 50-69 Years     | Both Sexes, 70-80 Years     |
|-------------------------------------------------------------------|--------------------------------|--------------------------|--------------------------|-----------------------------|-----------------------------|-----------------------------|
| All causes                                                        | 130,704<br>(118,482 - 144,551) | 3,358<br>(2,841 - 3,988) | 1,358<br>(1,213 - 1,509) | 19,732<br>(16,930 - 23,073) | 39,702<br>(34,820 - 45,540) | 66,554<br>(61,881 - 71,944) |
| Communicable, maternal, neonatal, and nutritional diseases        | 10,437<br>(8,936 - 11,687)     | 2,037<br>(1,663 - 2,502) | 355<br>(273 - 452)       | 1,490<br>(1,179 - 1,788)    | 2,399<br>(1,815 - 2,868)    | 4,156<br>(3,431 - 4,860)    |
| HIV/AIDS and tuberculosis                                         | 1,324<br>(1,096 - 1,677)       | 5<br>(4 - 7)             | 5<br>(4 - 7)             | 299<br>(245 - 366)          | 557<br>(440 - 721)          | 458<br>(352 - 652)          |
| Tuberculosis                                                      | 1,261<br>(1,036 - 1,624)       | 3<br>(2 - 5)             | 4<br>(3 - 6)             | 256<br>(200 - 323)          | 542<br>(425 - 706)          | 456<br>(350 - 650)          |
| HIV/AIDS                                                          | 63<br>(46 - 83)                | 2<br>(1 - 4)             | 1<br>(0 - 1)             | 43<br>(33 - 55)             | 15<br>(9 - 23)              | 2<br>(1 - 3)                |
| HIV/AIDS resulting in mycobacterial infection                     | 4<br>(3 - 5)                   | 0<br>(0 - 0)             | 0<br>(0 - 0)             | 2<br>(2 - 3)                | 1<br>(1 - 1)                | 0<br>(0 - 0)                |
| HIV/AIDS resulting in other diseases                              | 59<br>(43 - 79)                | 2<br>(1 - 3)             | 1<br>(0 - 1)             | 41<br>(31 - 52)             | 14<br>(8 - 22)              | 2<br>(1 - 3)                |
| Diarrhea, lower respiratory, and other common infectious diseases | 6,165<br>(4,245 - 7,310)       | 563<br>(414 - 769)       | 272<br>(196 - 369)       | 793<br>(497 - 1,039)        | 1,448<br>(790 - 1,886)      | 3,089<br>(2,141 - 3,798)    |
| Diarrheal diseases                                                | 894<br>(674 - 1,201)           | 47<br>(30 - 71)          | 17<br>(11 - 26)          | 69<br>(51 - 92)             | 162<br>(118 - 224)          | 598<br>(400 - 908)          |
| Intestinal infectious diseases                                    | 530<br>(278 - 893)             | 189<br>(85 - 357)        | 150<br>(79 - 253)        | 135<br>(62 - 251)           | 39<br>(15 - 81)             | 17<br>(8 - 32)              |
| Typhoid fever                                                     | 396<br>(199 - 677)             | 133<br>(57 - 250)        | 113<br>(60 - 194)        | 105<br>(46 - 200)           | 31<br>(11 - 67)             | 13<br>(6 - 26)              |
| Paratyphoid fever                                                 | 117<br>(57 - 213)              | 48<br>(21 - 100)         | 35<br>(17 - 61)          | 26<br>(10 - 52)             | 6<br>(2 - 13)               | 2<br>(1 - 5)                |
| Other intestinal infectious diseases                              | 18<br>(8 - 31)                 | 8<br>(2 - 18)            | 2<br>(0 - 6)             | 4<br>(1 - 11)               | 2<br>(0 - 7)                | 2<br>(0 - 6)                |
| Lower respiratory infections                                      | 3,945<br>(2,081 - 5,020)       | 203<br>(126 - 302)       | 58<br>(31 - 82)          | 441<br>(171 - 634)          | 1,034<br>(411 - 1,438)      | 2,208<br>(1,238 - 3,793)    |
| Upper respiratory infections                                      | 9<br>(4 - 16)                  | 0<br>(0 - 1)             | 0<br>(0 - 0)             | 2<br>(1 - 4)                | 3<br>(1 - 7)                | 4<br>(0 - 11)               |
| Otitis media                                                      | 4<br>(3 - 5)                   | 0<br>(0 - 0)             | 0<br>(0 - 0)             | 1<br>(1 - 1)                | 1<br>(1 - 1)                | 1<br>(1 - 2)                |
| Meningitis                                                        | 366<br>(253 - 430)             | 36<br>(23 - 52)          | 13<br>(9 - 17)           | 72<br>(47 - 90)             | 106<br>(68 - 134)           | 139<br>(100 - 172)          |
| Pneumococcal meningitis                                           | 122<br>(89 - 156)              | 10<br>(6 - 15)           | 5<br>(3 - 7)             | 26<br>(16 - 36)             | 36<br>(19 - 54)             | 45<br>(28 - 65)             |
| H influenzae type B meningitis                                    | 58<br>(41 - 73)                | 14<br>(9 - 20)           | 3<br>(2 - 5)             | 10<br>(5 - 16)              | 13<br>(8 - 21)              | 17<br>(11 - 24)             |
| Meningococcal meningitis                                          | 70<br>(46 - 92)                | 3<br>(1 - 5)             | 2<br>(1 - 2)             | 13<br>(8 - 19)              | 21<br>(12 - 32)             | 30<br>(17 - 45)             |
| Other meningitis                                                  | 118<br>(70 - 152)              | 10<br>(6 - 15)           | 3<br>(2 - 5)             | 23<br>(14 - 34)             | 36<br>(16 - 56)             | 46<br>(28 - 67)             |
| Encephalitis                                                      | 354<br>(226 - 635)             | 58<br>(26 - 119)         | 28<br>(12 - 66)          | 65<br>(41 - 122)            | 94<br>(61 - 165)            | 109<br>(61 - 218)           |
| Diphtheria                                                        | 1<br>(0 - 4)                   | 0<br>(0 - 2)             | 0<br>(0 - 2)             | 0<br>(0 - 1)                | 0<br>(0 - 1)                | --<br>(0 - 1)               |
| Whooping cough                                                    | 8<br>(0 - 38)                  | 8<br>(0 - 36)            | 0<br>(0 - 2)             | 0<br>(0 - 0)                | 0<br>(0 - 0)                | --<br>(0 - 0)               |
| Tetanus                                                           | 23<br>(16 - 34)                | 2<br>(1 - 2)             | 1<br>(1 - 2)             | 6<br>(4 - 9)                | 7<br>(4 - 12)               | 7<br>(4 - 11)               |
| Measles                                                           | 20<br>(5 - 52)                 | 17<br>(5 - 45)           | 2<br>(1 - 6)             | 0<br>(0 - 1)                | 0<br>(0 - 0)                | --<br>(0 - 0)               |
| Varicella and herpes zoster                                       | 12<br>(5 - 26)                 | 2<br>(0 - 7)             | 1<br>(0 - 2)             | 2<br>(1 - 5)                | 2<br>(0 - 4)                | 6<br>(0 - 19)               |
| Neglected tropical diseases and malaria                           | 235<br>(171 - 296)             | 32<br>(20 - 50)          | 45<br>(33 - 61)          | 66<br>(43 - 84)             | 53<br>(39 - 70)             | 40<br>(26 - 55)             |
| Malaria                                                           | 21<br>(14 - 34)                | 3<br>(1 - 6)             | 1<br>(0 - 2)             | 5<br>(3 - 10)               | 6<br>(3 - 11)               | 6<br>(2 - 13)               |
| Leishmaniasis                                                     | 0                              | 0                        | 0                        | 0                           | 0                           | 0                           |
| Visceral leishmaniasis                                            | 0                              | 0                        | 0                        | 0                           | 0                           | 0                           |
| Cysticercosis                                                     | 0                              | 0                        | 0                        | 0                           | 0                           | 0                           |
| Cystic echinococcosis                                             | 2                              | 0                        | 0                        | 1                           | 1                           | 0                           |
| Dengue                                                            | 120<br>(50 - 154)              | 19<br>(8 - 32)           | 30<br>(13 - 41)          | 31<br>(10 - 40)             | 21<br>(8 - 28)              | 18<br>(7 - 30)              |
| Rabies                                                            | 57<br>(44 - 94)                | 1<br>(1 - 3)             | 8<br>(5 - 18)            | 21<br>(16 - 32)             | 19<br>(14 - 32)             | 8<br>(6 - 13)               |
| Intestinal nematode infections                                    | 4                              | 1                        | 1                        | 1                           | 1                           | 1                           |
| Ascariasis                                                        | 4                              | 1                        | 1                        | 1                           | 1                           | 1                           |
| Other neglected tropical diseases                                 | 31<br>(24 - 42)                | 7<br>(4 - 14)            | 4<br>(3 - 8)             | 7<br>(5 - 10)               | 6<br>(4 - 8)                | 7<br>(4 - 10)               |
| Maternal disorders                                                | 116<br>(77 - 162)              | --                       | 0<br>(0 - 0)             | 115<br>(77 - 162)           | --                          | --                          |
| Maternal hemorrhage                                               | 20<br>(12 - 31)                | --                       | 0<br>(0 - 0)             | 20<br>(12 - 31)             | --                          | --                          |

Web Table 31- Sri Lanka deaths with 95% UI by age, sex, and cause in 2013

| Cause                                                            | Both Sexes, All Ages          | Both Sexes, 0-4 Years    | Both Sexes, 5-14 Years | Both Sexes, 15-49 Years   | Both Sexes, 50-69 Years     | Both Sexes, 70-80 Years     |
|------------------------------------------------------------------|-------------------------------|--------------------------|------------------------|---------------------------|-----------------------------|-----------------------------|
| Maternal sepsis and other maternal infections                    | 12<br>(7 - 18)                | --                       | 0<br>(0 - 0)           | 12<br>(7 - 18)            | --                          | --                          |
| Maternal hypertensive disorders                                  | 11<br>(6 - 18)                | --                       | 0<br>(0 - 0)           | 11<br>(6 - 18)            | --                          | --                          |
| Maternal obstructed labor                                        | 9<br>(5 - 15)                 | --                       | 0<br>(0 - 0)           | 9<br>(5 - 15)             | --                          | --                          |
| Maternal abortive outcome                                        | 21<br>(12 - 32)               | --                       | 0<br>(0 - 0)           | 20<br>(12 - 32)           | --                          | --                          |
| Indirect maternal deaths                                         | 8<br>(4 - 14)                 | --                       | 0<br>(0 - 0)           | 8<br>(4 - 14)             | --                          | --                          |
| Late maternal deaths                                             | 13<br>(7 - 21)                | --                       | 0<br>(0 - 0)           | 13<br>(7 - 21)            | --                          | --                          |
| Maternal deaths aggravated by HIV/AIDS                           | 0<br>(0 - 0)                  | --                       | --                     | 0<br>(0 - 0)              | --                          | --                          |
| Other maternal disorders                                         | 22<br>(14 - 33)               | --                       | 0<br>(0 - 0)           | 22<br>(14 - 33)           | --                          | --                          |
| Neonatal disorders                                               | 1,386<br>(1,131 - 1,713)      | 1,386<br>(1,131 - 1,713) | --                     | --                        | --                          | --                          |
| Neonatal preterm birth complications                             | 518<br>(330 - 722)            | 518<br>(330 - 722)       | --                     | --                        | --                          | --                          |
| Neonatal encephalopathy due to birth asphyxia and trauma         | 356<br>(224 - 527)            | 356<br>(224 - 527)       | --                     | --                        | --                          | --                          |
| Neonatal sepsis and other neonatal infections                    | 192<br>(102 - 334)            | 192<br>(102 - 334)       | --                     | --                        | --                          | --                          |
| Hemolytic disease and other neonatal jaundice                    | 2<br>(1 - 3)                  | 2<br>(1 - 3)             | --                     | --                        | --                          | --                          |
| Other neonatal disorders                                         | 319<br>(171 - 558)            | 319<br>(171 - 558)       | --                     | --                        | --                          | --                          |
| Nutritional deficiencies                                         | 776<br>(558 - 1,430)          | 27<br>(15 - 63)          | 13<br>(9 - 28)         | 105<br>(74 - 200)         | 206<br>(140 - 413)          | 424<br>(291 - 750)          |
| Protein-energy malnutrition                                      | 172<br>(72 - 470)             | 20<br>(10 - 53)          | 5<br>(2 - 16)          | 19<br>(7 - 62)            | 35<br>(11 - 107)            | 93<br>(36 - 257)            |
| Iodine deficiency                                                | 2<br>(0 - 5)                  | 0<br>(0 - 1)             | 0<br>(0 - 1)           | 0<br>(0 - 1)              | 0<br>(0 - 2)                | 1<br>(0 - 3)                |
| Iron-deficiency anemia                                           | 590<br>(414 - 1,043)          | 6<br>(2 - 12)            | 7<br>(4 - 13)          | 83<br>(58 - 152)          | 168<br>(113 - 322)          | 327<br>(218 - 540)          |
| Other nutritional deficiencies                                   | 12<br>(5 - 28)                | 1<br>(0 - 1)             | 1<br>(1 - 3)           | 3<br>(1 - 7)              | 3<br>(1 - 8)                | 4<br>(1 - 11)               |
| Other communicable, maternal, neonatal, and nutritional diseases | 434<br>(329 - 625)            | 25<br>(15 - 38)          | 20<br>(11 - 36)        | 111<br>(73 - 144)         | 135<br>(96 - 201)           | 144<br>(97 - 235)           |
| Sexually transmitted diseases excluding HIV                      | 27<br>(17 - 39)               | 5<br>(0 - 13)            | 1<br>(0 - 2)           | 6<br>(4 - 8)              | 7<br>(4 - 10)               | 9<br>(6 - 14)               |
| Syphilis                                                         | 19<br>(11 - 30)               | 5<br>(0 - 13)            | 1<br>(0 - 1)           | 3<br>(2 - 4)              | 4<br>(3 - 7)                | 7<br>(5 - 12)               |
| Chlamydial infection                                             | 2<br>(1 - 2)                  | --                       | 0<br>(0 - 0)           | 1<br>(0 - 1)              | 0<br>(0 - 1)                | 0<br>(0 - 1)                |
| Gonococcal infection                                             | 3<br>(3 - 5)                  | --                       | 0<br>(0 - 0)           | 1<br>(1 - 2)              | 1<br>(1 - 2)                | 1<br>(1 - 2)                |
| Other sexually transmitted diseases                              | 2<br>(2 - 3)                  | --                       | 0<br>(0 - 0)           | 1<br>(1 - 2)              | 1<br>(1 - 1)                | 0<br>(0 - 1)                |
| Hepatitis                                                        | 16<br>(14 - 20)               | 1<br>(0 - 1)             | 1<br>(1 - 2)           | 5<br>(4 - 7)              | 4<br>(3 - 6)                | 5<br>(3 - 7)                |
| Acute hepatitis A                                                | 2<br>(1 - 3)                  | 0<br>(0 - 1)             | 1<br>(0 - 1)           | 1<br>(0 - 1)              | 0<br>(0 - 0)                | 0<br>(0 - 0)                |
| Acute hepatitis B                                                | 10<br>(7 - 13)                | 0<br>(0 - 1)             | 0<br>(0 - 1)           | 2<br>(1 - 3)              | 3<br>(2 - 5)                | 4<br>(3 - 6)                |
| Acute hepatitis C                                                | 0<br>(0 - 0)                  | --                       | 0<br>(0 - 0)           | 0<br>(0 - 0)              | 0<br>(0 - 0)                | 0<br>(0 - 0)                |
| Acute hepatitis E                                                | 5<br>(3 - 7)                  | 0<br>(0 - 0)             | 0<br>(0 - 1)           | 3<br>(2 - 4)              | 1<br>(0 - 2)                | 1<br>(0 - 1)                |
| Other infectious diseases                                        | 391<br>(289 - 578)            | 19<br>(12 - 31)          | 18<br>(9 - 34)         | 100<br>(62 - 132)         | 124<br>(85 - 189)           | 131<br>(84 - 220)           |
| Non-communicable diseases                                        | 101,469<br>(91,487 - 112,298) | 1,075<br>(725 - 1,414)   | 457<br>(377 - 565)     | 8,865<br>(7,457 - 10,469) | 32,438<br>(28,366 - 37,024) | 58,633<br>(54,334 - 63,430) |
| Neoplasms                                                        | 9,380<br>(8,246 - 10,591)     | 54<br>(34 - 76)          | 88<br>(70 - 108)       | 1,324<br>(1,115 - 1,544)  | 4,446<br>(3,840 - 5,116)    | 3,469<br>(3,088 - 3,898)    |
| Esophageal cancer                                                | 681<br>(372 - 893)            | --                       | --                     | 68<br>(42 - 99)           | 342<br>(197 - 469)          | 271<br>(119 - 361)          |
| Stomach cancer                                                   | 706<br>(596 - 837)            | --                       | --                     | 83<br>(64 - 105)          | 307<br>(251 - 372)          | 317<br>(254 - 402)          |
| Liver cancer                                                     | 267<br>(220 - 322)            | --                       | 1<br>(1 - 2)           | 29<br>(21 - 38)           | 139<br>(107 - 174)          | 99<br>(76 - 127)            |
| Liver cancer due to hepatitis B                                  | 115<br>(70 - 171)             | --                       | 0<br>(0 - 1)           | 14<br>(10 - 20)           | 63<br>(36 - 98)             | 37<br>(20 - 58)             |
| Liver cancer due to hepatitis C                                  | 102<br>(39 - 165)             | --                       | 0<br>(0 - 0)           | 9<br>(4 - 15)             | 52<br>(19 - 88)             | 40<br>(15 - 70)             |
| Liver cancer due to alcohol use                                  | 19<br>(10 - 36)               | --                       | --                     | 1<br>(1 - 2)              | 8<br>(4 - 16)               | 10<br>(5 - 20)              |
| Liver cancer due to other causes                                 | 32<br>(19 - 53)               | --                       | 1<br>(0 - 1)           | 4<br>(3 - 7)              | 15<br>(9 - 27)              | 12<br>(6 - 20)              |

Web Table 31- Sri Lanka deaths with 95% UI by age, sex, and cause in 2013

| Cause                                         | Both Sexes, All Ages        | Both Sexes, 0-4 Years | Both Sexes, 5-14 Years | Both Sexes, 15-49 Years  | Both Sexes, 50-69 Years     | Both Sexes, 70-80 Years     |
|-----------------------------------------------|-----------------------------|-----------------------|------------------------|--------------------------|-----------------------------|-----------------------------|
| Larynx cancer                                 | 59<br>(43 - 78)             | -                     | -                      | 10<br>(7 - 15)           | 31<br>(22 - 45)             | 18<br>(11 - 24)             |
| Tracheal, bronchus and lung cancer            | 1,253<br>(1,070 - 1,464)    | -                     | -                      | 136<br>(107 - 171)       | 726<br>(606 - 868)          | 390<br>(324 - 466)          |
| Breast cancer                                 | 968<br>(726 - 1,194)        | -                     | -                      | 226<br>(154 - 297)       | 473<br>(341 - 601)          | 269<br>(203 - 349)          |
| Cervical cancer                               | 253<br>(191 - 331)          | -                     | -                      | 45<br>(30 - 64)          | 132<br>(93 - 181)           | 76<br>(53 - 107)            |
| Uterine cancer                                | 64<br>(33 - 91)             | -                     | -                      | 4<br>(2 - 8)             | 34<br>(16 - 53)             | 26<br>(13 - 38)             |
| Prostate cancer                               | 209<br>(96 - 293)           | -                     | -                      | 2<br>(1 - 4)             | 34<br>(18 - 50)             | 173<br>(75 - 250)           |
| Colon and rectum cancer                       | 744<br>(647 - 872)          | -                     | -                      | 70<br>(57 - 85)          | 324<br>(277 - 386)          | 350<br>(292 - 425)          |
| Lip and oral cavity cancer                    | 820<br>(621 - 1,137)        | -                     | -                      | 87<br>(57 - 134)         | 370<br>(260 - 534)          | 362<br>(272 - 495)          |
| Nasopharynx cancer                            | 65<br>(43 - 131)            | -                     | 1<br>(0 - 1)           | 16<br>(10 - 32)          | 34<br>(21 - 67)             | 14<br>(8 - 34)              |
| Other pharynx cancer                          | 266<br>(210 - 354)          | -                     | -                      | 35<br>(24 - 52)          | 155<br>(118 - 212)          | 76<br>(56 - 104)            |
| Gallbladder and biliary tract cancer          | 270<br>(176 - 368)          | -                     | -                      | 20<br>(11 - 29)          | 130<br>(84 - 177)           | 121<br>(76 - 172)           |
| Pancreatic cancer                             | 238<br>(203 - 281)          | -                     | -                      | 31<br>(25 - 39)          | 130<br>(107 - 158)          | 77<br>(63 - 94)             |
| Malignant skin melanoma                       | 39<br>(29 - 62)             | -                     | -                      | 10<br>(7 - 15)           | 17<br>(13 - 26)             | 12<br>(8 - 24)              |
| Non-melanoma skin cancer                      | 56<br>(40 - 78)             | -                     | -                      | 5<br>(3 - 7)             | 19<br>(14 - 28)             | 32<br>(22 - 45)             |
| Ovarian cancer                                | 206<br>(149 - 281)          | -                     | -                      | 39<br>(26 - 58)          | 123<br>(86 - 169)           | 44<br>(30 - 64)             |
| Testicular cancer                             | 10<br>(5 - 15)              | -                     | -                      | 6<br>(3 - 10)            | 2<br>(1 - 3)                | 2<br>(1 - 3)                |
| Kidney cancer                                 | 367<br>(304 - 438)          | 1<br>(1 - 3)          | 2<br>(1 - 3)           | 41<br>(30 - 53)          | 199<br>(158 - 249)          | 123<br>(97 - 159)           |
| Bladder cancer                                | 123<br>(100 - 154)          | -                     | -                      | 6<br>(5 - 8)             | 47<br>(36 - 62)             | 69<br>(54 - 89)             |
| Brain and nervous system cancer               | 298<br>(217 - 362)          | 4<br>(2 - 7)          | 12<br>(8 - 16)         | 95<br>(67 - 121)         | 122<br>(85 - 153)           | 65<br>(46 - 86)             |
| Thyroid cancer                                | 155<br>(109 - 270)          | -                     | 0<br>(0 - 0)           | 17<br>(11 - 32)          | 73<br>(47 - 136)            | 65<br>(44 - 109)            |
| Mesothelioma                                  | 16<br>(13 - 22)             | -                     | -                      | 3<br>(2 - 4)             | 9<br>(6 - 13)               | 5<br>(3 - 8)                |
| Hodgkin lymphoma                              | 35<br>(24 - 44)             | 1<br>(0 - 1)          | 2<br>(1 - 4)           | 9<br>(6 - 12)            | 13<br>(8 - 17)              | 10<br>(6 - 14)              |
| Non-Hodgkin lymphoma                          | 234<br>(164 - 287)          | 4<br>(2 - 7)          | 8<br>(5 - 11)          | 36<br>(24 - 47)          | 102<br>(70 - 130)           | 84<br>(60 - 108)            |
| Multiple myeloma                              | 70<br>(46 - 103)            | -                     | -                      | 6<br>(5 - 9)             | 37<br>(25 - 55)             | 27<br>(15 - 43)             |
| Leukemia                                      | 237<br>(198 - 273)          | 29<br>(17 - 43)       | 45<br>(34 - 58)        | 70<br>(53 - 85)          | 50<br>(39 - 60)             | 43<br>(34 - 53)             |
| Other neoplasms                               | 670<br>(512 - 1,013)        | 15<br>(6 - 28)        | 17<br>(11 - 29)        | 119<br>(85 - 179)        | 273<br>(201 - 419)          | 246<br>(187 - 386)          |
| Cardiovascular diseases                       | 48,860<br>(43,854 - 54,452) | 82<br>(60 - 117)      | 86<br>(69 - 113)       | 3,572<br>(2,961 - 4,280) | 15,588<br>(13,511 - 17,909) | 29,533<br>(26,777 - 32,411) |
| Rheumatic heart disease                       | 243<br>(125 - 316)          | 0<br>(0 - 1)          | 4<br>(2 - 6)           | 46<br>(27 - 61)          | 81<br>(48 - 109)            | 111<br>(42 - 161)           |
| Ischemic heart disease                        | 31,302<br>(27,105 - 36,709) | 13<br>(9 - 25)        | 19<br>(15 - 28)        | 2,259<br>(1,814 - 2,794) | 10,639<br>(8,972 - 12,440)  | 18,371<br>(15,827 - 22,224) |
| Cerebrovascular disease                       | 12,338<br>(8,659 - 15,122)  | 28<br>(20 - 39)       | 22<br>(17 - 29)        | 650<br>(493 - 823)       | 3,345<br>(2,594 - 4,135)    | 8,294<br>(5,388 - 10,292)   |
| Ischemic stroke                               | 9,044<br>(4,657 - 11,763)   | 7<br>(3 - 13)         | 7<br>(3 - 10)          | 190<br>(115 - 269)       | 1,910<br>(1,080 - 2,515)    | 6,930<br>(3,371 - 9,117)    |
| Hemorrhagic stroke                            | 3,295<br>(2,408 - 5,500)    | 21<br>(16 - 29)       | 16<br>(12 - 21)        | 459<br>(341 - 591)       | 1,435<br>(1,071 - 2,017)    | 1,363<br>(827 - 2,885)      |
| Hypertensive heart disease                    | 1,138<br>(155 - 2,357)      | 2<br>(0 - 4)          | 6<br>(2 - 10)          | 101<br>(19 - 212)        | 354<br>(46 - 772)           | 675<br>(83 - 1,440)         |
| Cardiomyopathy and myocarditis                | 1,051<br>(798 - 1,343)      | 9<br>(5 - 16)         | 16<br>(10 - 25)        | 209<br>(150 - 278)       | 308<br>(230 - 414)          | 510<br>(360 - 710)          |
| Atrial fibrillation and flutter               | 55<br>(42 - 74)             | -                     | -                      | 6<br>(4 - 8)             | 13<br>(9 - 18)              | 37<br>(26 - 54)             |
| Aortic aneurysm                               | 283<br>(213 - 379)          | -                     | -                      | 20<br>(15 - 28)          | 25<br>(18 - 38)             | 238<br>(175 - 326)          |
| Peripheral vascular disease                   | 44<br>(33 - 57)             | -                     | -                      | 1<br>(0 - 1)             | 11<br>(8 - 15)              | 32<br>(23 - 43)             |
| Endocarditis                                  | 180<br>(135 - 256)          | 16<br>(11 - 24)       | 8<br>(5 - 16)          | 42<br>(29 - 59)          | 63<br>(44 - 95)             | 50<br>(35 - 74)             |
| Other cardiovascular and circulatory diseases | 2,226<br>(1,596 - 5,191)    | 13<br>(8 - 29)        | 10<br>(6 - 21)         | 239<br>(172 - 463)       | 749<br>(548 - 1,472)        | 1,215<br>(792 - 3,245)      |
| Chronic respiratory diseases                  | 16,147<br>(12,999 - 18,389) | 50<br>(34 - 74)       | 33<br>(25 - 47)        | 716<br>(581 - 865)       | 4,173<br>(3,413 - 4,912)    | 11,176<br>(8,892 - 12,752)  |

Web Table 31- Sri Lanka deaths with 95% UI by age, sex, and cause in 2013

| Cause                                               | Both Sexes, All Ages      | Both Sexes, 0-4 Years | Both Sexes, 5-14 Years | Both Sexes, 15-49 Years  | Both Sexes, 50-69 Years  | Both Sexes, 70-80 Years  |
|-----------------------------------------------------|---------------------------|-----------------------|------------------------|--------------------------|--------------------------|--------------------------|
| Chronic obstructive pulmonary disease               | 9,546<br>(7,633 - 11,563) | 11<br>(6 - 18)        | 6<br>(4 - 13)          | 295<br>(209 - 414)       | 2,148<br>(1,636 - 2,765) | 7,085<br>(5,552 - 8,570) |
| Pneumoconiosis                                      | 420<br>(269 - 595)        | 0<br>(0 - 1)          | 0<br>(0 - 1)           | 28<br>(17 - 42)          | 202<br>(126 - 295)       | 190<br>(115 - 293)       |
| Silicosis                                           | 214<br>(133 - 313)        | 0<br>(0 - 0)          | 0<br>(0 - 0)           | 1<br>(1 - 2)             | 53<br>(33 - 78)          | 159<br>(96 - 247)        |
| Asbestosis                                          | 38<br>(24 - 55)           | 0<br>(0 - 0)          | 0<br>(0 - 0)           | 4<br>(3 - 6)             | 34<br>(21 - 49)          | 0<br>(0 - 0)             |
| Coal workers pneumoconiosis                         | 102<br>(63 - 146)         | 0<br>(0 - 0)          | 0<br>(0 - 0)           | 15<br>(8 - 23)           | 82<br>(51 - 121)         | 5<br>(3 - 7)             |
| Other pneumoconiosis                                | 66<br>(42 - 96)           | 0<br>(0 - 0)          | 0<br>(0 - 0)           | 7<br>(4 - 11)            | 33<br>(19 - 50)          | 26<br>(16 - 41)          |
| Asthma                                              | 4,349<br>(2,432 - 5,991)  | 28<br>(17 - 41)       | 23<br>(18 - 31)        | 347<br>(239 - 461)       | 1,340<br>(752 - 1,864)   | 2,611<br>(1,297 - 3,776) |
| Interstitial lung disease and pulmonary sarcoidosis | 1,387<br>(937 - 1,919)    | 2<br>(0 - 11)         | 1<br>(0 - 1)           | 19<br>(11 - 39)          | 406<br>(270 - 583)       | 960<br>(617 - 1,372)     |
| Other chronic respiratory diseases                  | 445<br>(316 - 615)        | 9<br>(6 - 14)         | 2<br>(1 - 4)           | 27<br>(17 - 39)          | 77<br>(53 - 104)         | 330<br>(216 - 484)       |
| Cirrhosis                                           | 4,240<br>(3,532 - 5,064)  | 4<br>(3 - 6)          | 8<br>(7 - 10)          | 1,326<br>(1,037 - 1,648) | 2,011<br>(1,608 - 2,466) | 890<br>(756 - 1,049)     |
| Cirrhosis due to hepatitis B                        | 1,545<br>(815 - 2,162)    | 0<br>(0 - 1)          | 2<br>(1 - 3)           | 495<br>(219 - 749)       | 727<br>(369 - 1,065)     | 321<br>(210 - 470)       |
| Cirrhosis due to hepatitis C                        | 942<br>(513 - 1,499)      | 0<br>(0 - 1)          | 1<br>(0 - 2)           | 281<br>(117 - 501)       | 448<br>(216 - 753)       | 212<br>(104 - 355)       |
| Cirrhosis due to alcohol use                        | 1,360<br>(845 - 2,159)    | -                     | -                      | 362<br>(177 - 642)       | 686<br>(410 - 1,127)     | 312<br>(196 - 453)       |
| Cirrhosis due to other causes                       | 393<br>(227 - 613)        | 4<br>(2 - 6)          | 6<br>(4 - 8)           | 189<br>(103 - 316)       | 150<br>(78 - 245)        | 45<br>(22 - 72)          |
| Digestive diseases                                  | 1,313<br>(1,105 - 1,867)  | 12<br>(7 - 22)        | 17<br>(11 - 35)        | 217<br>(165 - 378)       | 433<br>(334 - 712)       | 635<br>(535 - 761)       |
| Peptic ulcer disease                                | 108<br>(75 - 163)         | 0<br>(0 - 1)          | 1<br>(0 - 1)           | 19<br>(12 - 36)          | 45<br>(31 - 80)          | 43<br>(26 - 65)          |
| Gastritis and duodenitis                            | 167<br>(107 - 258)        | 1<br>(0 - 3)          | 1<br>(1 - 3)           | 20<br>(13 - 41)          | 44<br>(26 - 76)          | 101<br>(62 - 153)        |
| Appendicitis                                        | 55<br>(36 - 89)           | 0<br>(0 - 1)          | 2<br>(1 - 5)           | 18<br>(12 - 32)          | 20<br>(13 - 35)          | 14<br>(8 - 20)           |
| Paralytic ileus and intestinal obstruction          | 222<br>(144 - 371)        | 6<br>(3 - 12)         | 6<br>(3 - 15)          | 39<br>(26 - 75)          | 84<br>(54 - 156)         | 87<br>(49 - 121)         |
| Inguinal, femoral, and abdominal hernia             | 67<br>(43 - 101)          | 0<br>(0 - 1)          | 1<br>(0 - 1)           | 8<br>(5 - 15)            | 21<br>(13 - 35)          | 37<br>(20 - 59)          |
| Inflammatory bowel disease                          | 38<br>(27 - 68)           | 0<br>(0 - 1)          | 1<br>(0 - 2)           | 4<br>(3 - 8)             | 10<br>(6 - 20)           | 23<br>(15 - 40)          |
| Vascular intestinal disorders                       | 41<br>(17 - 87)           | 0<br>(0 - 1)          | 0<br>(0 - 1)           | 8<br>(3 - 17)            | 9<br>(3 - 22)            | 24<br>(10 - 50)          |
| Gallbladder and biliary diseases                    | 44<br>(28 - 116)          | 0<br>(0 - 1)          | 1<br>(0 - 2)           | 7<br>(4 - 21)            | 17<br>(9 - 51)           | 19<br>(12 - 44)          |
| Pancreatitis                                        | 109<br>(76 - 195)         | 0<br>(0 - 1)          | 1<br>(0 - 1)           | 38<br>(25 - 73)          | 39<br>(25 - 74)          | 31<br>(20 - 52)          |
| Other digestive diseases                            | 463<br>(369 - 637)        | 2<br>(1 - 4)          | 4<br>(2 - 7)           | 55<br>(39 - 95)          | 145<br>(108 - 235)       | 258<br>(182 - 327)       |
| Neurological disorders                              | 5,331<br>(4,574 - 6,282)  | 13<br>(8 - 20)        | 30<br>(22 - 40)        | 229<br>(178 - 297)       | 612<br>(492 - 735)       | 4,447<br>(3,737 - 5,349) |
| Alzheimer disease and other dementias               | 4,281<br>(3,601 - 5,207)  | -                     | -                      | 2<br>(1 - 4)             | 386<br>(291 - 480)       | 3,893<br>(3,239 - 4,821) |
| Parkinson disease                                   | 542<br>(349 - 793)        | -                     | -                      | 2<br>(2 - 3)             | 89<br>(54 - 132)         | 450<br>(278 - 700)       |
| Epilepsy                                            | 379<br>(294 - 468)        | 7<br>(4 - 13)         | 19<br>(13 - 29)        | 192<br>(146 - 255)       | 92<br>(68 - 122)         | 67<br>(39 - 92)          |
| Multiple sclerosis                                  | 6<br>(3 - 9)              | -                     | -                      | 2<br>(1 - 2)             | 2<br>(1 - 4)             | 2<br>(1 - 4)             |
| Other neurological disorders                        | 123<br>(103 - 151)        | 6<br>(4 - 8)          | 10<br>(8 - 15)         | 31<br>(25 - 39)          | 42<br>(32 - 53)          | 34<br>(27 - 44)          |
| Mental and substance use disorders                  | 451<br>(294 - 585)        | 0<br>(0 - 2)          | 0<br>(0 - 0)           | 181<br>(130 - 253)       | 209<br>(114 - 285)       | 60<br>(34 - 82)          |
| Schizophrenia                                       | 8<br>(4 - 17)             | -                     | -                      | 3<br>(2 - 7)             | 3<br>(2 - 7)             | 1<br>(1 - 3)             |
| Alcohol use disorders                               | 380<br>(219 - 506)        | -                     | -                      | 134<br>(87 - 200)        | 190<br>(92 - 266)        | 56<br>(29 - 78)          |
| Drug use disorders                                  | 63<br>(48 - 88)           | 0<br>(0 - 2)          | -                      | 43<br>(32 - 59)          | 16<br>(11 - 27)          | 2<br>(1 - 4)             |
| Opioid use disorders                                | 40<br>(30 - 56)           | 0<br>(0 - 1)          | -                      | 28<br>(20 - 39)          | 10<br>(7 - 16)           | 2<br>(1 - 3)             |
| Cocaine use disorders                               | 1<br>(1 - 1)              | 0<br>(0 - 0)          | -                      | 1<br>(1 - 1)             | 0<br>(0 - 0)             | 0<br>(0 - 0)             |
| Amphetamine use disorders                           | 1<br>(1 - 1)              | 0<br>(0 - 0)          | -                      | 1<br>(0 - 1)             | 0<br>(0 - 0)             | 0<br>(0 - 0)             |
| Other drug use disorders                            | 21<br>(16 - 30)           | 0<br>(0 - 0)          | -                      | 14<br>(10 - 20)          | 6<br>(4 - 10)            | 1<br>(0 - 1)             |
| Eating disorders                                    | 1<br>(1 - 1)              | -                     | 0<br>(0 - 0)           | 1<br>(1 - 1)             | -                        | -                        |

Web Table 31- Sri Lanka deaths with 95% UI by age, sex, and cause in 2013

| Cause                                               | Both Sexes, All Ages        | Both Sexes, 0-4 Years | Both Sexes, 5-14 Years | Both Sexes, 15-49 Years | Both Sexes, 50-69 Years  | Both Sexes, 70-89 Years  |
|-----------------------------------------------------|-----------------------------|-----------------------|------------------------|-------------------------|--------------------------|--------------------------|
| Anorexia nervosa                                    | 1<br>(1 - 1)                | -                     | 0<br>(0 - 0)           | 1<br>(1 - 1)            | -                        | -                        |
| Diabetes, urogenital, blood, and endocrine diseases | 14,345<br>(12,576 - 16,523) | 66<br>(45 - 114)      | 54<br>(39 - 84)        | 1,094<br>(904 - 1,322)  | 4,847<br>(4,093 - 5,708) | 8,285<br>(7,221 - 9,756) |
| Diabetes mellitus                                   | 10,673<br>(9,103 - 12,269)  | 2<br>(2 - 3)          | 5<br>(3 - 7)           | 509<br>(404 - 627)      | 3,449<br>(2,819 - 4,064) | 6,709<br>(5,483 - 7,954) |
| Acute glomerulonephritis                            | 3<br>(2 - 4)                | 0<br>(0 - 0)          | 0<br>(0 - 0)           | 1<br>(1 - 2)            | 1<br>(0 - 1)             | 1<br>(0 - 1)             |
| Chronic kidney disease                              | 2,588<br>(2,107 - 4,586)    | 13<br>(8 - 23)        | 19<br>(14 - 35)        | 407<br>(326 - 569)      | 1,035<br>(807 - 1,721)   | 1,115<br>(869 - 2,216)   |
| Chronic kidney disease due to diabetes mellitus     | 465<br>(339 - 772)          | 1<br>(0 - 1)          | 1<br>(1 - 2)           | 45<br>(30 - 81)         | 155<br>(104 - 240)       | 263<br>(188 - 456)       |
| Chronic kidney disease due to hypertension          | 758<br>(554 - 1,179)        | 3<br>(1 - 5)          | 3<br>(2 - 5)           | 120<br>(83 - 168)       | 351<br>(237 - 515)       | 282<br>(186 - 519)       |
| Chronic kidney disease due to glomerulonephritis    | 79<br>(59 - 114)            | 3<br>(2 - 5)          | 2<br>(2 - 3)           | 17<br>(11 - 27)         | 26<br>(18 - 39)          | 30<br>(20 - 46)          |
| Chronic kidney disease due to other causes          | 1,285<br>(938 - 2,772)      | 7<br>(4 - 14)         | 12<br>(8 - 26)         | 225<br>(166 - 352)      | 502<br>(337 - 1,083)     | 539<br>(350 - 1,305)     |
| Urinary diseases and male infertility               | 569<br>(153 - 774)          | 6<br>(2 - 10)         | 3<br>(1 - 5)           | 68<br>(17 - 98)         | 188<br>(44 - 269)        | 303<br>(84 - 432)        |
| Interstitial nephritis and urinary tract infections | 49<br>(15 - 85)             | 3<br>(1 - 4)          | 1<br>(0 - 1)           | 10<br>(3 - 18)          | 16<br>(5 - 31)           | 21<br>(5 - 35)           |
| Urolithiasis                                        | 5<br>(1 - 12)               | -                     | 0<br>(0 - 1)           | 1<br>(0 - 3)            | 2<br>(0 - 4)             | 2<br>(1 - 5)             |
| Other urinary diseases                              | 515<br>(136 - 708)          | 4<br>(1 - 7)          | 3<br>(1 - 4)           | 57<br>(13 - 83)         | 171<br>(38 - 245)        | 281<br>(76 - 400)        |
| Gynecological diseases                              | 6<br>(4 - 15)               | -                     | -                      | 2<br>(1 - 3)            | 2<br>(1 - 4)             | 3<br>(2 - 7)             |
| Uterine fibroids                                    | 2<br>(1 - 4)                | -                     | -                      | 0<br>(0 - 1)            | 0<br>(0 - 1)             | 1<br>(0 - 2)             |
| Polycystic ovarian syndrome                         | 0<br>(0 - 0)                | -                     | -                      | 0<br>(0 - 0)            | 0<br>(0 - 0)             | -                        |
| Endometriosis                                       | 0<br>(0 - 1)                | -                     | -                      | 0<br>(0 - 1)            | 0<br>(0 - 0)             | -                        |
| Genital prolapse                                    | 1<br>(1 - 3)                | -                     | -                      | 0<br>(0 - 0)            | 0<br>(0 - 1)             | 1<br>(0 - 2)             |
| Other gynecological diseases                        | 3<br>(2 - 7)                | -                     | -                      | 1<br>(0 - 2)            | 1<br>(1 - 2)             | 1<br>(1 - 3)             |
| Hemoglobinopathies and hemolytic anemias            | 233<br>(163 - 368)          | 33<br>(18 - 74)       | 20<br>(11 - 36)        | 64<br>(40 - 109)        | 78<br>(49 - 126)         | 37<br>(25 - 57)          |
| Thalassemias                                        | 78<br>(51 - 134)            | 25<br>(14 - 57)       | 17<br>(10 - 30)        | 28<br>(18 - 47)         | 8<br>(5 - 12)            | 1<br>(0 - 1)             |
| Sickle cell disorders                               | 0<br>(0 - 0)                | 0<br>(0 - 0)          | 0<br>(0 - 0)           | 0<br>(0 - 0)            | 0<br>(0 - 0)             | 0<br>(0 - 0)             |
| G6PD deficiency                                     | 25<br>(17 - 40)             | 2<br>(1 - 5)          | 1<br>(1 - 2)           | 9<br>(5 - 14)           | 11<br>(7 - 18)           | 1<br>(1 - 2)             |
| Other hemoglobinopathies and hemolytic anemias      | 129<br>(88 - 204)           | 6<br>(3 - 12)         | 2<br>(1 - 3)           | 28<br>(17 - 47)         | 59<br>(37 - 94)          | 35<br>(24 - 54)          |
| Endocrine, metabolic, blood, and immune disorders   | 273<br>(216 - 422)          | 11<br>(6 - 17)        | 6<br>(4 - 10)          | 44<br>(32 - 72)         | 94<br>(70 - 151)         | 117<br>(87 - 179)        |
| Musculoskeletal disorders                           | 36<br>(20 - 146)            | -                     | 1<br>(1 - 5)           | 8<br>(5 - 25)           | 12<br>(6 - 49)           | 15<br>(8 - 62)           |
| Rheumatoid arthritis                                | 5<br>(3 - 11)               | -                     | 0<br>(0 - 0)           | 1<br>(0 - 1)            | 1<br>(1 - 4)             | 3<br>(1 - 6)             |
| Other musculoskeletal disorders                     | 31<br>(16 - 128)            | -                     | 1<br>(1 - 5)           | 7<br>(4 - 23)           | 10<br>(5 - 45)           | 12<br>(6 - 52)           |
| Other non-communicable diseases                     | 1,366<br>(951 - 1,686)      | 795<br>(454 - 1,089)  | 141<br>(100 - 179)     | 197<br>(127 - 251)      | 108<br>(88 - 136)        | 125<br>(101 - 156)       |
| Congenital anomalies                                | 1,259<br>(845 - 1,576)      | 781<br>(443 - 1,079)  | 140<br>(100 - 178)     | 186<br>(112 - 240)      | 81<br>(64 - 108)         | 72<br>(55 - 97)          |
| Neural tube defects                                 | 68<br>(31 - 136)            | 61<br>(23 - 128)      | 2<br>(1 - 5)           | 4<br>(2 - 7)            | 1<br>(1 - 2)             | 1<br>(0 - 1)             |
| Congenital heart anomalies                          | 669<br>(385 - 908)          | 455<br>(211 - 682)    | 58<br>(38 - 81)        | 67<br>(44 - 89)         | 40<br>(31 - 58)          | 49<br>(37 - 68)          |
| Cleft lip and cleft palate                          | 1<br>(0 - 2)                | 1<br>(0 - 2)          | -                      | -                       | -                        | -                        |
| Down syndrome                                       | 36<br>(21 - 58)             | 19<br>(9 - 39)        | 10<br>(5 - 17)         | 4<br>(2 - 5)            | 2<br>(1 - 3)             | 0<br>(0 - 0)             |
| Chromosomal unbalanced rearrangements               | 50<br>(26 - 85)             | 36<br>(15 - 68)       | 3<br>(2 - 5)           | 8<br>(4 - 12)           | 2<br>(1 - 3)             | 1<br>(1 - 3)             |
| Other congenital anomalies                          | 435<br>(291 - 586)          | 210<br>(115 - 328)    | 66<br>(43 - 92)        | 104<br>(57 - 137)       | 36<br>(25 - 50)          | 20<br>(14 - 30)          |
| Skin and subcutaneous diseases                      | 95<br>(77 - 119)            | 2<br>(1 - 4)          | 1<br>(1 - 2)           | 11<br>(9 - 15)          | 27<br>(21 - 37)          | 53<br>(39 - 71)          |
| Cellulitis                                          | 49<br>(35 - 65)             | 1<br>(0 - 1)          | 0<br>(0 - 0)           | 4<br>(2 - 7)            | 15<br>(11 - 21)          | 29<br>(19 - 40)          |
| Pyoderma                                            | 35<br>(26 - 46)             | 1<br>(1 - 2)          | 0<br>(0 - 1)           | 6<br>(4 - 8)            | 11<br>(7 - 16)           | 17<br>(11 - 24)          |
| Decubitus ulcer                                     | 7<br>(5 - 14)               | 0<br>(0 - 0)          | 0<br>(0 - 0)           | 1<br>(1 - 1)            | 0<br>(0 - 1)             | 6<br>(3 - 11)            |



Web Table 31- Sri Lanka deaths with 95% UI by age, sex, and cause in 2013

| Cause                                           | Both Sexes, All Ages        | Both Sexes, 0-4 Years | Both Sexes, 5-14 Years | Both Sexes, 15-49 Years   | Both Sexes, 50-69 Years  | Both Sexes, 70-80 Years  |
|-------------------------------------------------|-----------------------------|-----------------------|------------------------|---------------------------|--------------------------|--------------------------|
| Other skin and subcutaneous diseases            | 4<br>(3 - 7)                | 0<br>(0 - 0)          | 0<br>(0 - 0)           | 1<br>(1 - 2)              | 1<br>(1 - 2)             | 2<br>(1 - 3)             |
| Sudden infant death syndrome                    | 12<br>(4 - 30)              | 12<br>(4 - 30)        | --                     | --                        | --                       | --                       |
| Injuries                                        | 18,798<br>(16,134 - 21,873) | 246<br>(164 - 355)    | 545<br>(449 - 651)     | 9,377<br>(7,915 - 11,045) | 4,865<br>(4,110 - 5,911) | 3,764<br>(3,182 - 4,366) |
| Transport injuries                              | 4,567<br>(3,567 - 5,466)    | 51<br>(31 - 75)       | 148<br>(106 - 187)     | 1,860<br>(1,290 - 2,317)  | 1,343<br>(1,034 - 1,665) | 1,165<br>(935 - 1,393)   |
| Road injuries                                   | 3,643<br>(2,645 - 4,421)    | 39<br>(23 - 58)       | 115<br>(72 - 149)      | 1,413<br>(840 - 1,801)    | 1,082<br>(766 - 1,361)   | 994<br>(788 - 1,196)     |
| Pedestrian road injuries                        | 1,322<br>(933 - 1,689)      | 17<br>(9 - 27)        | 56<br>(34 - 75)        | 278<br>(152 - 403)        | 439<br>(290 - 591)       | 532<br>(404 - 684)       |
| Cyclist road injuries                           | 240<br>(164 - 312)          | 3<br>(1 - 5)          | 9<br>(5 - 14)          | 70<br>(40 - 95)           | 96<br>(61 - 133)         | 63<br>(43 - 87)          |
| Motorcyclist road injuries                      | 519<br>(335 - 707)          | 3<br>(1 - 5)          | 5<br>(3 - 8)           | 319<br>(186 - 456)        | 103<br>(66 - 152)        | 88<br>(56 - 127)         |
| Motor vehicle road injuries                     | 1,531<br>(1,006 - 1,915)    | 16<br>(9 - 26)        | 43<br>(24 - 61)        | 737<br>(409 - 952)        | 437<br>(282 - 580)       | 297<br>(215 - 391)       |
| Other road injuries                             | 31<br>(18 - 43)             | 1<br>(0 - 1)          | 2<br>(1 - 3)           | 9<br>(4 - 14)             | 6<br>(3 - 10)            | 13<br>(7 - 22)           |
| Other transport injuries                        | 924<br>(730 - 1,282)        | 11<br>(7 - 18)        | 33<br>(23 - 48)        | 446<br>(330 - 627)        | 262<br>(192 - 403)       | 171<br>(119 - 239)       |
| Unintentional injuries                          | 4,694<br>(3,265 - 5,915)    | 179<br>(110 - 275)    | 283<br>(200 - 364)     | 1,656<br>(1,122 - 2,180)  | 1,259<br>(911 - 1,606)   | 1,317<br>(804 - 1,676)   |
| Falls                                           | 1,811<br>(1,092 - 2,257)    | 19<br>(8 - 33)        | 36<br>(22 - 48)        | 462<br>(279 - 604)        | 555<br>(366 - 717)       | 739<br>(373 - 988)       |
| Drowning                                        | 526<br>(116 - 986)          | 27<br>(5 - 65)        | 46<br>(13 - 89)        | 270<br>(53 - 532)         | 107<br>(21 - 206)        | 75<br>(14 - 140)         |
| Fire, heat, and hot substances                  | 488<br>(299 - 673)          | 29<br>(12 - 60)       | 30<br>(18 - 45)        | 180<br>(95 - 282)         | 99<br>(56 - 146)         | 150<br>(96 - 190)        |
| Poisonings                                      | 105<br>(74 - 217)           | 3<br>(1 - 5)          | 4<br>(3 - 8)           | 49<br>(33 - 105)          | 27<br>(18 - 56)          | 22<br>(14 - 49)          |
| Exposure to mechanical forces                   | 630<br>(511 - 766)          | 17<br>(10 - 28)       | 47<br>(33 - 64)        | 297<br>(228 - 420)        | 161<br>(122 - 212)       | 108<br>(61 - 143)        |
| Unintentional firearm injuries                  | 72<br>(20 - 99)             | 1<br>(0 - 1)          | 2<br>(1 - 3)           | 47<br>(10 - 69)           | 13<br>(5 - 18)           | 10<br>(3 - 15)           |
| Unintentional suffocation                       | 9<br>(6 - 16)               | 1<br>(0 - 1)          | 1<br>(1 - 4)           | 3<br>(2 - 5)              | 2<br>(1 - 3)             | 3<br>(2 - 4)             |
| Other exposure to mechanical forces             | 549<br>(440 - 693)          | 16<br>(9 - 27)        | 43<br>(30 - 60)        | 247<br>(186 - 377)        | 146<br>(109 - 197)       | 96<br>(51 - 130)         |
| Adverse effects of medical treatment            | 276<br>(157 - 389)          | 22<br>(7 - 44)        | 15<br>(6 - 25)         | 59<br>(32 - 88)           | 91<br>(48 - 132)         | 90<br>(47 - 127)         |
| Animal contact                                  | 239<br>(149 - 313)          | 16<br>(9 - 30)        | 32<br>(21 - 51)        | 67<br>(38 - 89)           | 71<br>(39 - 96)          | 52<br>(28 - 74)          |
| Venomous animal contact                         | 93<br>(51 - 136)            | 14<br>(7 - 27)        | 23<br>(12 - 36)        | 25<br>(13 - 36)           | 21<br>(9 - 33)           | 10<br>(5 - 21)           |
| Non-venomous animal contact                     | 145<br>(87 - 190)           | 2<br>(1 - 3)          | 10<br>(5 - 18)         | 42<br>(22 - 58)           | 50<br>(26 - 70)          | 42<br>(21 - 59)          |
| Foreign body                                    | 61<br>(17 - 112)            | 13<br>(4 - 27)        | 4<br>(1 - 7)           | 14<br>(4 - 25)            | 12<br>(4 - 22)           | 18<br>(3 - 39)           |
| Pulmonary aspiration and foreign body in airway | 49<br>(5 - 100)             | 8<br>(1 - 22)         | 3<br>(1 - 6)           | 11<br>(2 - 22)            | 10<br>(1 - 20)           | 16<br>(1 - 37)           |
| Foreign body in other body part                 | 13<br>(9 - 22)              | 5<br>(3 - 8)          | 1<br>(0 - 1)           | 3<br>(2 - 5)              | 2<br>(1 - 5)             | 2<br>(1 - 4)             |
| Other unintentional injuries                    | 558<br>(403 - 738)          | 32<br>(15 - 63)       | 69<br>(34 - 109)       | 258<br>(169 - 373)        | 136<br>(80 - 229)        | 63<br>(40 - 95)          |
| Self-harm and interpersonal violence            | 9,398<br>(7,703 - 13,242)   | 16<br>(8 - 35)        | 112<br>(81 - 173)      | 5,816<br>(4,780 - 7,454)  | 2,206<br>(1,716 - 3,523) | 1,247<br>(967 - 2,104)   |
| Self-harm                                       | 7,733<br>(6,356 - 11,095)   | --                    | 78<br>(52 - 130)       | 4,515<br>(3,674 - 5,824)  | 1,958<br>(1,518 - 3,139) | 1,182<br>(910 - 2,017)   |
| Interpersonal violence                          | 1,665<br>(1,220 - 2,801)    | 16<br>(8 - 35)        | 34<br>(21 - 62)        | 1,301<br>(938 - 2,112)    | 247<br>(148 - 514)       | 66<br>(37 - 136)         |
| Assault by firearm                              | 593<br>(361 - 1,134)        | 5<br>(2 - 11)         | 5<br>(3 - 11)          | 508<br>(298 - 961)        | 67<br>(33 - 172)         | 8<br>(3 - 22)            |
| Assault by sharp object                         | 602<br>(387 - 1,084)        | 2<br>(1 - 6)          | 3<br>(2 - 6)           | 494<br>(309 - 896)        | 82<br>(46 - 177)         | 21<br>(11 - 46)          |
| Assault by other means                          | 470<br>(322 - 784)          | 9<br>(5 - 19)         | 26<br>(16 - 49)        | 300<br>(185 - 471)        | 98<br>(58 - 202)         | 37<br>(21 - 70)          |
| Forces of nature, war, and legal intervention   | 139<br>(70 - 289)           | 0<br>(0 - 0)          | 2<br>(1 - 4)           | 45<br>(23 - 95)           | 57<br>(29 - 119)         | 35<br>(17 - 70)          |
| Exposure to forces of nature                    | 139<br>(70 - 289)           | 0<br>(0 - 0)          | 2<br>(1 - 4)           | 45<br>(23 - 95)           | 57<br>(29 - 119)         | 35<br>(17 - 70)          |

Web Table 31- Sri Lanka deaths with 95% UI by age, sex, and cause in 2013

| Cause                                                             | Males, All Ages             | Males, 0-4 Years         | Males, 5-14 Years  | Males, 15-49 Years          | Males, 50-69 Years          | Males, 70-80 Years          |
|-------------------------------------------------------------------|-----------------------------|--------------------------|--------------------|-----------------------------|-----------------------------|-----------------------------|
| All causes                                                        | 79,311<br>(69,729 - 90,783) | 1,826<br>(1,486 - 2,210) | 687<br>(600 - 792) | 14,967<br>(12,503 - 17,982) | 27,111<br>(23,036 - 31,995) | 34,720<br>(31,610 - 38,295) |
| Communicable, maternal, neonatal, and nutritional diseases        | 6,201<br>(5,068 - 7,225)    | 1,117<br>(889 - 1,395)   | 182<br>(132 - 241) | 982<br>(729 - 1,247)        | 1,700<br>(1,243 - 2,137)    | 2,219<br>(1,750 - 2,733)    |
| HIV/AIDS and tuberculosis                                         | 985<br>(774 - 1,376)        | 3<br>(2 - 4)             | 2<br>(2 - 3)       | 224<br>(175 - 286)          | 438<br>(334 - 593)          | 318<br>(234 - 500)          |
| Tuberculosis                                                      | 942<br>(734 - 1,334)        | 2<br>(1 - 3)             | 2<br>(1 - 3)       | 195<br>(144 - 255)          | 427<br>(321 - 584)          | 316<br>(232 - 499)          |
| HIV/AIDS                                                          | 43<br>(32 - 57)             | 1<br>(1 - 2)             | 0<br>(0 - 1)       | 30<br>(22 - 38)             | 11<br>(7 - 17)              | 2<br>(1 - 2)                |
| HIV/AIDS resulting in mycobacterial infection                     | 3<br>(2 - 4)                | 0<br>(0 - 0)             | 0<br>(0 - 0)       | 2<br>(1 - 3)                | 1<br>(0 - 1)                | 0<br>(0 - 0)                |
| HIV/AIDS resulting in other diseases                              | 41<br>(30 - 53)             | 1<br>(1 - 2)             | 0<br>(0 - 1)       | 28<br>(21 - 35)             | 10<br>(6 - 16)              | 1<br>(1 - 2)                |
| Diarrhea, lower respiratory, and other common infectious diseases | 3,657<br>(2,368 - 4,567)    | 314<br>(214 - 443)       | 144<br>(98 - 199)  | 569<br>(321 - 785)          | 1,018<br>(539 - 1,412)      | 1,612<br>(1,020 - 2,127)    |
| Diarrheal diseases                                                | 469<br>(332 - 674)          | 26<br>(14 - 44)          | 8<br>(5 - 14)      | 48<br>(33 - 70)             | 100<br>(65 - 154)           | 286<br>(171 - 480)          |
| Intestinal infectious diseases                                    | 294<br>(149 - 505)          | 108<br>(48 - 201)        | 80<br>(40 - 137)   | 74<br>(30 - 150)            | 21<br>(7 - 51)              | 10<br>(3 - 22)              |
| Typhoid fever                                                     | 219<br>(109 - 389)          | 76<br>(32 - 143)         | 61<br>(30 - 105)   | 58<br>(23 - 122)            | 17<br>(5 - 42)              | 8<br>(2 - 17)               |
| Paratyphoid fever                                                 | 65<br>(31 - 118)            | 28<br>(11 - 56)          | 18<br>(8 - 36)     | 14<br>(5 - 31)              | 3<br>(1 - 8)                | 1<br>(0 - 4)                |
| Other intestinal infectious diseases                              | 10<br>(4 - 20)              | 5<br>(1 - 12)            | 1<br>(0 - 5)       | 3<br>(0 - 7)                | 1<br>(0 - 5)                | 1<br>(0 - 4)                |
| Lower respiratory infections                                      | 2,401<br>(1,149 - 3,207)    | 117<br>(68 - 187)        | 29<br>(14 - 47)    | 338<br>(121 - 515)          | 743<br>(276 - 1,109)        | 1,175<br>(618 - 1,674)      |
| Upper respiratory infections                                      | 5<br>(2 - 11)               | 0<br>(0 - 1)             | 0<br>(0 - 0)       | 1<br>(0 - 3)                | 2<br>(0 - 5)                | 2<br>(0 - 7)                |
| Otitis media                                                      | 2<br>(2 - 3)                | 0<br>(0 - 0)             | 0<br>(0 - 0)       | 1<br>(0 - 1)                | 1<br>(0 - 1)                | 1<br>(0 - 1)                |
| Meningitis                                                        | 225<br>(149 - 276)          | 18<br>(9 - 30)           | 6<br>(4 - 9)       | 52<br>(32 - 68)             | 75<br>(46 - 98)             | 74<br>(50 - 98)             |
| Pneumococcal meningitis                                           | 75<br>(49 - 102)            | 5<br>(2 - 8)             | 2<br>(1 - 4)       | 18<br>(11 - 29)             | 26<br>(8 - 42)              | 25<br>(15 - 39)             |
| H influenzae type B meningitis                                    | 34<br>(23 - 47)             | 7<br>(4 - 12)            | 2<br>(1 - 3)       | 7<br>(4 - 14)               | 9<br>(5 - 16)               | 9<br>(5 - 14)               |
| Meningococcal meningitis                                          | 43<br>(25 - 63)             | 1<br>(1 - 3)             | 1<br>(0 - 1)       | 10<br>(5 - 15)              | 15<br>(8 - 26)              | 16<br>(7 - 27)              |
| Other meningitis                                                  | 71<br>(40 - 98)             | 5<br>(2 - 9)             | 2<br>(1 - 3)       | 17<br>(9 - 27)              | 24<br>(10 - 42)             | 24<br>(13 - 37)             |
| Encephalitis                                                      | 225<br>(141 - 426)          | 32<br>(12 - 72)          | 17<br>(7 - 46)     | 49<br>(30 - 96)             | 70<br>(41 - 138)            | 58<br>(33 - 122)            |
| Diphtheria                                                        | 1<br>(0 - 3)                | 0<br>(0 - 2)             | 0<br>(0 - 1)       | 0<br>(0 - 1)                | 0<br>(0 - 1)                | --<br>(0 - 1)               |
| Whooping cough                                                    | 4<br>(0 - 17)               | 3<br>(0 - 16)            | 0<br>(0 - 1)       | 0<br>(0 - 0)                | 0<br>(0 - 0)                | --<br>(0 - 0)               |
| Tetanus                                                           | 16<br>(9 - 26)              | 1<br>(0 - 2)             | 1<br>(0 - 2)       | 5<br>(3 - 8)                | 5<br>(3 - 10)               | 4<br>(2 - 8)                |
| Measles                                                           | 10<br>(3 - 26)              | 8<br>(2 - 22)            | 1<br>(0 - 3)       | 0<br>(0 - 0)                | 0<br>(0 - 0)                | --<br>(0 - 0)               |
| Varicella and herpes zoster                                       | 5<br>(2 - 15)               | 1<br>(0 - 5)             | 0<br>(0 - 1)       | 1<br>(0 - 3)                | 1<br>(0 - 2)                | 2<br>(0 - 10)               |
| Neglected tropical diseases and malaria                           | 135<br>(95 - 178)           | 16<br>(9 - 27)           | 22<br>(15 - 32)    | 45<br>(27 - 61)             | 34<br>(23 - 47)             | 18<br>(12 - 25)             |
| Malaria                                                           | 11<br>(7 - 21)              | 1<br>(0 - 4)             | 0<br>(0 - 1)       | 3<br>(2 - 7)                | 3<br>(1 - 7)                | 3<br>(1 - 8)                |
| Leishmaniasis                                                     | 0<br>(0 - 0)                | 0<br>(0 - 0)             | 0<br>(0 - 0)       | 0<br>(0 - 0)                | 0<br>(0 - 0)                | 0<br>(0 - 0)                |
| Visceral leishmaniasis                                            | 0<br>(0 - 0)                | 0<br>(0 - 0)             | 0<br>(0 - 0)       | 0<br>(0 - 0)                | 0<br>(0 - 0)                | 0<br>(0 - 0)                |
| Cysticercosis                                                     | 0<br>(0 - 0)                | 0<br>(0 - 0)             | 0<br>(0 - 0)       | 0<br>(0 - 0)                | 0<br>(0 - 0)                | 0<br>(0 - 0)                |
| Cystic echinococcosis                                             | 1<br>(1 - 2)                | 0<br>(0 - 0)             | 0<br>(0 - 0)       | 1<br>(0 - 1)                | 0<br>(0 - 1)                | 0<br>(0 - 1)                |
| Dengue                                                            | 64<br>(24 - 83)             | 9<br>(3 - 18)            | 14<br>(5 - 21)     | 21<br>(6 - 29)              | 13<br>(5 - 18)              | 6<br>(3 - 10)               |
| Rabies                                                            | 40<br>(28 - 71)             | 1<br>(0 - 2)             | 5<br>(3 - 12)      | 16<br>(10 - 26)             | 13<br>(9 - 25)              | 5<br>(3 - 9)                |
| Intestinal nematode infections                                    | 2<br>(0 - 8)                | 1<br>(0 - 5)             | 0<br>(0 - 3)       | 0<br>(0 - 3)                | 0<br>(0 - 3)                | 0<br>(0 - 3)                |
| Ascariasis                                                        | 2<br>(0 - 8)                | 1<br>(0 - 5)             | 0<br>(0 - 3)       | 0<br>(0 - 3)                | 0<br>(0 - 3)                | 0<br>(0 - 3)                |
| Other neglected tropical diseases                                 | 17<br>(12 - 24)             | 3<br>(1 - 8)             | 2<br>(1 - 3)       | 4<br>(3 - 6)                | 4<br>(2 - 6)                | 3<br>(2 - 6)                |
| Maternal disorders                                                | --                          | --                       | --                 | --                          | --                          | --                          |
| Maternal hemorrhage                                               | --                          | --                       | --                 | --                          | --                          | --                          |

Web Table 31- Sri Lanka deaths with 95% UI by age, sex, and cause in 2013

| Cause                                                            | Males, All Ages             | Males, 0-4 Years   | Males, 5-14 Years  | Males, 15-49 Years       | Males, 50-69 Years          | Males, 70-80 Years          |
|------------------------------------------------------------------|-----------------------------|--------------------|--------------------|--------------------------|-----------------------------|-----------------------------|
| Maternal sepsis and other maternal infections                    | --                          | --                 | --                 | --                       | --                          | --                          |
| Maternal hypertensive disorders                                  | --                          | --                 | --                 | --                       | --                          | --                          |
| Maternal obstructed labor                                        | --                          | --                 | --                 | --                       | --                          | --                          |
| Maternal abortive outcome                                        | --                          | --                 | --                 | --                       | --                          | --                          |
| Indirect maternal deaths                                         | --                          | --                 | --                 | --                       | --                          | --                          |
| Late maternal deaths                                             | --                          | --                 | --                 | --                       | --                          | --                          |
| Maternal deaths aggravated by HIV/AIDS                           | --                          | --                 | --                 | --                       | --                          | --                          |
| Other maternal disorders                                         | --                          | --                 | --                 | --                       | --                          | --                          |
| Neonatal disorders                                               | 758<br>(612 - 939)          | 758<br>(612 - 939) | --                 | --                       | --                          | --                          |
| Neonatal preterm birth complications                             | 276<br>(153 - 418)          | 276<br>(153 - 418) | --                 | --                       | --                          | --                          |
| Neonatal encephalopathy due to birth asphyxia and trauma         | 196<br>(104 - 322)          | 196<br>(104 - 322) | --                 | --                       | --                          | --                          |
| Neonatal sepsis and other neonatal infections                    | 104<br>(39 - 213)           | 104<br>(39 - 213)  | --                 | --                       | --                          | --                          |
| Hemolytic disease and other neonatal jaundice                    | 1<br>(0 - 2)                | 1<br>(0 - 2)       | --                 | --                       | --                          | --                          |
| Other neonatal disorders                                         | 181<br>(80 - 341)           | 181<br>(80 - 341)  | --                 | --                       | --                          | --                          |
| Nutritional deficiencies                                         | 399<br>(254 - 876)          | 14<br>(6 - 40)     | 6<br>(3 - 15)      | 62<br>(38 - 149)         | 121<br>(70 - 287)           | 196<br>(120 - 413)          |
| Protein-energy malnutrition                                      | 102<br>(35 - 332)           | 11<br>(4 - 34)     | 2<br>(1 - 8)       | 14<br>(4 - 52)           | 24<br>(6 - 82)              | 51<br>(17 - 172)            |
| Iodine deficiency                                                | 1<br>(0 - 3)                | 0<br>(0 - 0)       | 0<br>(0 - 0)       | 0<br>(0 - 1)             | 0<br>(0 - 1)                | 0<br>(0 - 2)                |
| Iron-deficiency anemia                                           | 288<br>(172 - 653)          | 3<br>(1 - 10)      | 3<br>(1 - 8)       | 46<br>(27 - 102)         | 95<br>(52 - 228)            | 141<br>(79 - 300)           |
| Other nutritional deficiencies                                   | 8<br>(3 - 22)               | 0<br>(0 - 0)       | 0<br>(0 - 1)       | 2<br>(1 - 6)             | 2<br>(1 - 5)                | 3<br>(1 - 10)               |
| Other communicable, maternal, neonatal, and nutritional diseases | 267<br>(142 - 387)          | 13<br>(7 - 21)     | 9<br>(5 - 18)      | 81<br>(40 - 111)         | 90<br>(45 - 148)            | 75<br>(37 - 136)            |
| Sexually transmitted diseases excluding HIV                      | 10<br>(5 - 18)              | 2<br>(0 - 6)       | 0<br>(0 - 1)       | 2<br>(1 - 3)             | 3<br>(1 - 6)                | 3<br>(1 - 7)                |
| Syphilis                                                         | 8<br>(4 - 15)               | 2<br>(0 - 6)       | 0<br>(0 - 1)       | 1<br>(1 - 2)             | 2<br>(1 - 5)                | 2<br>(1 - 6)                |
| Chlamydial infection                                             | --                          | --                 | --                 | --                       | --                          | --                          |
| Gonococcal infection                                             | 1<br>(1 - 2)                | --                 | 0<br>(0 - 0)       | 0<br>(0 - 1)             | 0<br>(0 - 1)                | 0<br>(0 - 1)                |
| Other sexually transmitted diseases                              | 1<br>(0 - 1)                | --                 | 0<br>(0 - 0)       | 0<br>(0 - 1)             | 0<br>(0 - 1)                | 0<br>(0 - 0)                |
| Hepatitis                                                        | 8<br>(6 - 11)               | 0<br>(0 - 1)       | 0<br>(0 - 1)       | 3<br>(2 - 5)             | 2<br>(1 - 3)                | 2<br>(1 - 3)                |
| Acute hepatitis A                                                | 1<br>(0 - 2)                | 0<br>(0 - 0)       | 0<br>(0 - 0)       | 0<br>(0 - 1)             | 0<br>(0 - 0)                | 0<br>(0 - 0)                |
| Acute hepatitis B                                                | 5<br>(4 - 7)                | 0<br>(0 - 0)       | 0<br>(0 - 0)       | 1<br>(1 - 2)             | 2<br>(1 - 3)                | 2<br>(1 - 3)                |
| Acute hepatitis C                                                | 0<br>(0 - 0)                | --                 | 0<br>(0 - 0)       | 0<br>(0 - 0)             | 0<br>(0 - 0)                | 0<br>(0 - 0)                |
| Acute hepatitis E                                                | 2<br>(1 - 4)                | 0<br>(0 - 0)       | 0<br>(0 - 0)       | 1<br>(1 - 2)             | 0<br>(0 - 1)                | 0<br>(0 - 1)                |
| Other infectious diseases                                        | 249<br>(125 - 372)          | 10<br>(6 - 18)     | 8<br>(4 - 18)      | 76<br>(36 - 105)         | 84<br>(41 - 142)            | 70<br>(33 - 130)            |
| Non-communicable diseases                                        | 58,986<br>(51,643 - 67,543) | 585<br>(361 - 793) | 221<br>(178 - 274) | 6,419<br>(5,194 - 7,824) | 21,619<br>(18,156 - 25,621) | 30,142<br>(27,344 - 33,338) |
| Neoplasms                                                        | 4,620<br>(3,886 - 5,443)    | 28<br>(17 - 43)    | 49<br>(36 - 62)    | 629<br>(502 - 779)       | 2,253<br>(1,860 - 2,725)    | 1,661<br>(1,393 - 1,923)    |
| Esophageal cancer                                                | 242<br>(91 - 412)           | --                 | --                 | 31<br>(12 - 57)          | 134<br>(51 - 236)           | 78<br>(27 - 136)            |
| Stomach cancer                                                   | 418<br>(342 - 509)          | --                 | --                 | 56<br>(41 - 76)          | 191<br>(148 - 242)          | 171<br>(131 - 225)          |
| Liver cancer                                                     | 175<br>(138 - 217)          | --                 | 1<br>(0 - 1)       | 18<br>(12 - 25)          | 95<br>(70 - 125)            | 62<br>(45 - 84)             |
| Liver cancer due to hepatitis B                                  | 83<br>(35 - 138)            | --                 | 0<br>(0 - 1)       | 10<br>(5 - 15)           | 47<br>(20 - 81)             | 26<br>(8 - 48)              |
| Liver cancer due to hepatitis C                                  | 64<br>(10 - 123)            | --                 | 0<br>(0 - 0)       | 5<br>(1 - 11)            | 34<br>(5 - 69)              | 24<br>(3 - 50)              |
| Liver cancer due to alcohol use                                  | 14<br>(6 - 30)              | --                 | --                 | 1<br>(0 - 1)             | 6<br>(3 - 13)               | 7<br>(3 - 16)               |
| Liver cancer due to other causes                                 | 14<br>(7 - 26)              | --                 | 0<br>(0 - 1)       | 2<br>(1 - 3)             | 7<br>(3 - 14)               | 5<br>(2 - 9)                |

Web Table 31- Sri Lanka deaths with 95% UI by age, sex, and cause in 2013

| Cause                                         | Males, All Ages             | Males, 0-4 Years | Males, 5-14 Years | Males, 15-49 Years       | Males, 50-69 Years         | Males, 70-80 Years          |
|-----------------------------------------------|-----------------------------|------------------|-------------------|--------------------------|----------------------------|-----------------------------|
| Larynx cancer                                 | 54<br>(40 - 74)             | --               | --                | 9<br>(6 - 14)            | 29<br>(21 - 43)            | 16<br>(10 - 23)             |
| Tracheal, bronchus and lung cancer            | 922<br>(763 - 1,119)        | --               | --                | 98<br>(73 - 131)         | 556<br>(447 - 698)         | 268<br>(216 - 332)          |
| Breast cancer                                 | 16<br>(9 - 22)              | --               | --                | 3<br>(2 - 5)             | 8<br>(3 - 13)              | 5<br>(3 - 9)                |
| Cervical cancer                               | --                          | --               | --                | --                       | --                         | --                          |
| Uterine cancer                                | --                          | --               | --                | --                       | --                         | --                          |
| Prostate cancer                               | 209<br>(96 - 293)           | --               | --                | 2<br>(1 - 4)             | 34<br>(18 - 50)            | 173<br>(75 - 250)           |
| Colon and rectum cancer                       | 304<br>(250 - 374)          | --               | --                | 40<br>(30 - 53)          | 139<br>(110 - 172)         | 125<br>(98 - 159)           |
| Lip and oral cavity cancer                    | 466<br>(333 - 610)          | --               | --                | 53<br>(33 - 77)          | 223<br>(158 - 319)         | 190<br>(123 - 269)          |
| Nasopharynx cancer                            | 38<br>(27 - 54)             | --               | 0<br>(0 - 1)      | 11<br>(7 - 18)           | 20<br>(13 - 32)            | 7<br>(4 - 11)               |
| Other pharynx cancer                          | 222<br>(166 - 301)          | --               | --                | 30<br>(20 - 44)          | 131<br>(93 - 186)          | 61<br>(41 - 87)             |
| Gallbladder and biliary tract cancer          | 109<br>(67 - 151)           | --               | --                | 7<br>(4 - 10)            | 53<br>(31 - 79)            | 49<br>(28 - 71)             |
| Pancreatic cancer                             | 140<br>(113 - 172)          | --               | --                | 22<br>(16 - 29)          | 80<br>(61 - 102)           | 39<br>(30 - 50)             |
| Malignant skin melanoma                       | 21<br>(14 - 43)             | --               | --                | 5<br>(3 - 10)            | 9<br>(5 - 16)              | 7<br>(4 - 18)               |
| Non-melanoma skin cancer                      | 34<br>(22 - 51)             | --               | --                | 3<br>(2 - 4)             | 12<br>(8 - 19)             | 19<br>(12 - 29)             |
| Ovarian cancer                                | --                          | --               | --                | --                       | --                         | --                          |
| Testicular cancer                             | 10<br>(5 - 15)              | --               | --                | 6<br>(3 - 10)            | 2<br>(1 - 3)               | 2<br>(1 - 3)                |
| Kidney cancer                                 | 256<br>(203 - 317)          | 1<br>(0 - 2)     | 1<br>(0 - 1)      | 30<br>(21 - 42)          | 147<br>(106 - 193)         | 77<br>(56 - 104)            |
| Bladder cancer                                | 99<br>(78 - 125)            | --               | --                | 4<br>(3 - 6)             | 38<br>(27 - 52)            | 56<br>(41 - 74)             |
| Brain and nervous system cancer               | 170<br>(91 - 225)           | 2<br>(1 - 5)     | 6<br>(3 - 10)     | 58<br>(32 - 81)          | 70<br>(36 - 95)            | 35<br>(18 - 52)             |
| Thyroid cancer                                | 58<br>(41 - 94)             | --               | 0<br>(0 - 0)      | 8<br>(5 - 14)            | 29<br>(19 - 51)            | 20<br>(14 - 33)             |
| Mesothelioma                                  | 11<br>(8 - 15)              | --               | --                | 1<br>(1 - 2)             | 6<br>(4 - 9)               | 4<br>(2 - 6)                |
| Hodgkin lymphoma                              | 16<br>(12 - 22)             | 0<br>(0 - 1)     | 1<br>(0 - 2)      | 6<br>(4 - 9)             | 5<br>(3 - 8)               | 4<br>(2 - 6)                |
| Non-Hodgkin lymphoma                          | 151<br>(93 - 197)           | 3<br>(1 - 5)     | 5<br>(2 - 7)      | 24<br>(15 - 34)          | 67<br>(41 - 92)            | 52<br>(31 - 74)             |
| Multiple myeloma                              | 36<br>(24 - 55)             | --               | --                | 3<br>(2 - 5)             | 20<br>(13 - 30)            | 12<br>(7 - 22)              |
| Leukemia                                      | 134<br>(108 - 161)          | 15<br>(8 - 25)   | 27<br>(19 - 37)   | 44<br>(33 - 58)          | 25<br>(18 - 32)            | 23<br>(17 - 29)             |
| Other neoplasms                               | 310<br>(237 - 424)          | 7<br>(3 - 13)    | 8<br>(5 - 13)     | 58<br>(43 - 81)          | 132<br>(96 - 191)          | 105<br>(78 - 150)           |
| Cardiovascular diseases                       | 28,841<br>(24,901 - 33,261) | 43<br>(31 - 59)  | 36<br>(28 - 46)   | 2,710<br>(2,142 - 3,356) | 10,839<br>(9,049 - 12,894) | 15,213<br>(13,478 - 17,350) |
| Rheumatic heart disease                       | 115<br>(46 - 166)           | 0<br>(0 - 0)     | 1<br>(1 - 3)      | 22<br>(11 - 33)          | 39<br>(15 - 61)            | 52<br>(16 - 86)             |
| Ischemic heart disease                        | 19,760<br>(16,627 - 23,220) | 6<br>(4 - 10)    | 9<br>(6 - 12)     | 1,836<br>(1,416 - 2,297) | 7,781<br>(6,319 - 9,375)   | 10,127<br>(8,703 - 11,960)  |
| Cerebrovascular disease                       | 6,252<br>(4,806 - 7,980)    | 16<br>(11 - 22)  | 11<br>(8 - 15)    | 453<br>(324 - 623)       | 2,130<br>(1,561 - 2,787)   | 3,642<br>(2,710 - 4,651)    |
| Ischemic stroke                               | 4,397<br>(2,692 - 5,862)    | 4<br>(1 - 8)     | 3<br>(1 - 5)      | 134<br>(80 - 192)        | 1,248<br>(750 - 1,701)     | 3,008<br>(1,827 - 3,972)    |
| Hemorrhagic stroke                            | 1,854<br>(1,241 - 3,351)    | 12<br>(8 - 17)   | 8<br>(5 - 11)     | 319<br>(221 - 438)       | 882<br>(593 - 1,366)       | 633<br>(330 - 1,554)        |
| Hypertensive heart disease                    | 516<br>(37 - 1,293)         | 1<br>(0 - 3)     | 2<br>(1 - 5)      | 56<br>(7 - 142)          | 188<br>(12 - 493)          | 268<br>(15 - 719)           |
| Cardiomyopathy and myocarditis                | 630<br>(413 - 840)          | 5<br>(3 - 10)    | 7<br>(4 - 10)     | 143<br>(85 - 205)        | 207<br>(129 - 300)         | 268<br>(162 - 412)          |
| Atrial fibrillation and flutter               | 30<br>(20 - 43)             | --               | --                | 3<br>(2 - 4)             | 9<br>(5 - 13)              | 18<br>(11 - 30)             |
| Aortic aneurysm                               | 198<br>(139 - 273)          | --               | --                | 11<br>(8 - 15)           | 11<br>(8 - 19)             | 176<br>(119 - 246)          |
| Peripheral vascular disease                   | 37<br>(26 - 49)             | --               | --                | 0<br>(0 - 0)             | 10<br>(7 - 14)             | 27<br>(18 - 38)             |
| Endocarditis                                  | 114<br>(71 - 180)           | 9<br>(5 - 14)    | 2<br>(1 - 4)      | 28<br>(17 - 44)          | 44<br>(26 - 75)            | 31<br>(18 - 50)             |
| Other cardiovascular and circulatory diseases | 1,189<br>(841 - 3,026)      | 5<br>(3 - 10)    | 3<br>(2 - 7)      | 157<br>(107 - 339)       | 420<br>(290 - 980)         | 604<br>(389 - 1,683)        |
| Chronic respiratory diseases                  | 9,295<br>(6,690 - 11,020)   | 26<br>(16 - 39)  | 16<br>(12 - 22)   | 457<br>(345 - 596)       | 2,861<br>(2,120 - 3,537)   | 5,934<br>(4,050 - 7,029)    |

Web Table 31- Sri Lanka deaths with 95% UI by age, sex, and cause in 2013

| Cause                                               | Males, All Ages          | Males, 0-4 Years | Males, 5-14 Years | Males, 15-49 Years     | Males, 50-69 Years       | Males, 70-80 Years       |
|-----------------------------------------------------|--------------------------|------------------|-------------------|------------------------|--------------------------|--------------------------|
| Chronic obstructive pulmonary disease               | 5,442<br>(4,005 - 6,802) | 6<br>(3 - 11)    | 4<br>(2 - 8)      | 204<br>(135 - 308)     | 1,488<br>(1,091 - 1,959) | 3,740<br>(2,662 - 4,616) |
| Pneumoconiosis                                      | 414<br>(261 - 588)       | 0<br>(0 - 0)     | 0<br>(0 - 0)      | 25<br>(14 - 39)        | 202<br>(125 - 294)       | 187<br>(113 - 290)       |
| Silicosis                                           | 213<br>(132 - 312)       | 0<br>(0 - 0)     | 0<br>(0 - 0)      | 1<br>(0 - 1)           | 53<br>(33 - 77)          | 159<br>(96 - 247)        |
| Asbestosis                                          | 38<br>(23 - 55)          | 0<br>(0 - 0)     | 0<br>(0 - 0)      | 4<br>(2 - 6)           | 34<br>(21 - 49)          | 0<br>(0 - 0)             |
| Coal workers pneumoconiosis                         | 101<br>(63 - 145)        | 0<br>(0 - 0)     | 0<br>(0 - 0)      | 15<br>(8 - 23)         | 82<br>(51 - 121)         | 4<br>(3 - 7)             |
| Other pneumoconiosis                                | 62<br>(38 - 91)          | 0<br>(0 - 0)     | 0<br>(0 - 0)      | 5<br>(3 - 9)           | 33<br>(19 - 49)          | 24<br>(14 - 39)          |
| Asthma                                              | 2,451<br>(1,140 - 3,543) | 14<br>(7 - 22)   | 10<br>(6 - 15)    | 203<br>(120 - 295)     | 838<br>(418 - 1,279)     | 1,386<br>(543 - 2,128)   |
| Interstitial lung disease and pulmonary sarcoidosis | 786<br>(484 - 1,155)     | 0<br>(0 - 1)     | 0<br>(0 - 1)      | 9<br>(5 - 16)          | 285<br>(171 - 424)       | 493<br>(281 - 768)       |
| Other chronic respiratory diseases                  | 200<br>(134 - 275)       | 6<br>(4 - 11)    | 2<br>(1 - 3)      | 16<br>(10 - 27)        | 48<br>(30 - 73)          | 128<br>(77 - 194)        |
| Cirrhosis                                           | 3,668<br>(2,988 - 4,446) | 3<br>(2 - 5)     | 4<br>(3 - 6)      | 1,241<br>(952 - 1,564) | 1,786<br>(1,403 - 2,228) | 634<br>(515 - 770)       |
| Cirrhosis due to hepatitis B                        | 1,304<br>(513 - 1,922)   | 0<br>(0 - 0)     | 1<br>(0 - 2)      | 461<br>(182 - 723)     | 632<br>(258 - 958)       | 210<br>(86 - 341)        |
| Cirrhosis due to hepatitis C                        | 748<br>(281 - 1,386)     | 0<br>(0 - 1)     | 1<br>(0 - 1)      | 254<br>(82 - 479)      | 369<br>(124 - 714)       | 125<br>(39 - 260)        |
| Cirrhosis due to alcohol use                        | 1,283<br>(749 - 2,088)   | -                | -                 | 354<br>(169 - 634)     | 658<br>(376 - 1,101)     | 271<br>(151 - 416)       |
| Cirrhosis due to other causes                       | 333<br>(173 - 562)       | 3<br>(2 - 4)     | 3<br>(2 - 4)      | 172<br>(87 - 296)      | 127<br>(56 - 221)        | 28<br>(12 - 51)          |
| Digestive diseases                                  | 832<br>(665 - 1,286)     | 6<br>(3 - 11)    | 7<br>(4 - 14)     | 167<br>(119 - 308)     | 302<br>(222 - 518)       | 351<br>(280 - 450)       |
| Peptic ulcer disease                                | 71<br>(48 - 128)         | 0<br>(0 - 0)     | 0<br>(0 - 0)      | 15<br>(9 - 31)         | 32<br>(20 - 63)          | 23<br>(14 - 38)          |
| Gastritis and duodenitis                            | 86<br>(49 - 155)         | 1<br>(0 - 1)     | 0<br>(0 - 1)      | 16<br>(9 - 36)         | 28<br>(15 - 52)          | 41<br>(21 - 74)          |
| Appendicitis                                        | 35<br>(22 - 65)          | 0<br>(0 - 0)     | 1<br>(0 - 1)      | 14<br>(8 - 27)         | 14<br>(8 - 26)           | 7<br>(4 - 12)            |
| Paralytic ileus and intestinal obstruction          | 130<br>(72 - 254)        | 3<br>(1 - 7)     | 3<br>(1 - 7)      | 27<br>(14 - 57)        | 53<br>(28 - 109)         | 45<br>(22 - 77)          |
| Inguinal, femoral, and abdominal hernia             | 55<br>(31 - 89)          | 0<br>(0 - 0)     | 0<br>(0 - 1)      | 7<br>(4 - 13)          | 17<br>(9 - 30)           | 30<br>(15 - 51)          |
| Inflammatory bowel disease                          | 20<br>(13 - 45)          | 0<br>(0 - 0)     | 0<br>(0 - 0)      | 3<br>(2 - 6)           | 7<br>(4 - 16)            | 11<br>(6 - 22)           |
| Vascular intestinal disorders                       | 27<br>(9 - 62)           | 0<br>(0 - 0)     | 0<br>(0 - 1)      | 6<br>(2 - 14)          | 6<br>(2 - 16)            | 15<br>(4 - 36)           |
| Gallbladder and biliary diseases                    | 29<br>(15 - 91)          | 0<br>(0 - 0)     | 0<br>(0 - 1)      | 5<br>(3 - 18)          | 13<br>(6 - 43)           | 11<br>(5 - 32)           |
| Pancreatitis                                        | 69<br>(44 - 140)         | 0<br>(0 - 0)     | 0<br>(0 - 1)      | 28<br>(17 - 60)        | 28<br>(17 - 58)          | 12<br>(6 - 26)           |
| Other digestive diseases                            | 310<br>(222 - 458)       | 1<br>(1 - 3)     | 1<br>(1 - 3)      | 46<br>(30 - 82)        | 105<br>(74 - 181)        | 156<br>(80 - 213)        |
| Neurological disorders                              | 2,704<br>(2,165 - 3,319) | 6<br>(3 - 10)    | 14<br>(9 - 23)    | 155<br>(111 - 213)     | 353<br>(260 - 461)       | 2,177<br>(1,709 - 2,742) |
| Alzheimer disease and other dementias               | 2,074<br>(1,611 - 2,633) | -                | -                 | 1<br>(0 - 3)           | 209<br>(136 - 290)       | 1,863<br>(1,457 - 2,406) |
| Parkinson disease                                   | 294<br>(175 - 503)       | -                | -                 | 1<br>(1 - 2)           | 50<br>(26 - 87)          | 243<br>(126 - 449)       |
| Epilepsy                                            | 246<br>(178 - 327)       | 4<br>(2 - 8)     | 10<br>(6 - 18)    | 133<br>(92 - 187)      | 60<br>(40 - 84)          | 39<br>(21 - 56)          |
| Multiple sclerosis                                  | 3<br>(1 - 4)             | -                | -                 | 1<br>(0 - 1)           | 1<br>(0 - 2)             | 1<br>(0 - 2)             |
| Other neurological disorders                        | 87<br>(68 - 113)         | 2<br>(1 - 3)     | 4<br>(3 - 8)      | 18<br>(13 - 26)        | 33<br>(23 - 42)          | 31<br>(23 - 40)          |
| Mental and substance use disorders                  | 412<br>(257 - 541)       | 0<br>(0 - 1)     | 0<br>(0 - 0)      | 165<br>(115 - 235)     | 194<br>(100 - 269)       | 53<br>(27 - 74)          |
| Schizophrenia                                       | 5<br>(2 - 12)            | -                | -                 | 2<br>(1 - 6)           | 2<br>(1 - 5)             | 1<br>(0 - 2)             |
| Alcohol use disorders                               | 356<br>(191 - 477)       | -                | -                 | 125<br>(76 - 186)      | 179<br>(82 - 253)        | 51<br>(24 - 73)          |
| Drug use disorders                                  | 51<br>(37 - 79)          | 0<br>(0 - 1)     | -                 | 37<br>(26 - 53)        | 13<br>(8 - 24)           | 1<br>(0 - 3)             |
| Opioid use disorders                                | 32<br>(23 - 50)          | 0<br>(0 - 1)     | -                 | 24<br>(17 - 34)        | 8<br>(5 - 14)            | 0<br>(0 - 2)             |
| Cocaine use disorders                               | 1<br>(0 - 1)             | 0<br>(0 - 0)     | -                 | 1<br>(0 - 1)           | 0<br>(0 - 1)             | 0<br>(0 - 0)             |
| Amphetamine use disorders                           | 1<br>(0 - 1)             | 0<br>(0 - 0)     | -                 | 1<br>(0 - 1)           | 0<br>(0 - 0)             | 0<br>(0 - 0)             |
| Other drug use disorders                            | 17<br>(12 - 27)          | 0<br>(0 - 0)     | -                 | 12<br>(8 - 17)         | 5<br>(3 - 9)             | 0<br>(0 - 1)             |
| Eating disorders                                    | 0<br>(0 - 0)             | -                | 0<br>(0 - 0)      | 0<br>(0 - 0)           | -                        | -                        |

Web Table 31- Sri Lanka deaths with 95% UI by age, sex, and cause in 2013

| Cause                                               | Males, All Ages          | Males, 0-4 Years   | Males, 5-14 Years | Males, 15-49 Years | Males, 50-69 Years       | Males, 70-80 Years       |
|-----------------------------------------------------|--------------------------|--------------------|-------------------|--------------------|--------------------------|--------------------------|
| Anorexia nervosa                                    | 0<br>(0 - 0)             | --                 | 0<br>(0 - 0)      | 0<br>(0 - 0)       | --                       | --                       |
| Diabetes, urogenital, blood, and endocrine diseases | 7,837<br>(6,611 - 9,493) | 34<br>(22 - 59)    | 27<br>(19 - 43)   | 774<br>(606 - 989) | 2,955<br>(2,343 - 3,687) | 4,047<br>(3,371 - 5,012) |
| Diabetes mellitus                                   | 5,484<br>(4,598 - 6,512) | 2<br>(1 - 2)       | 2<br>(2 - 3)      | 359<br>(273 - 470) | 2,011<br>(1,592 - 2,510) | 3,110<br>(2,532 - 3,782) |
| Acute glomerulonephritis                            | 2<br>(1 - 3)             | 0<br>(0 - 0)       | 0<br>(0 - 0)      | 1<br>(0 - 1)       | 1<br>(0 - 1)             | 1<br>(0 - 1)             |
| Chronic kidney disease                              | 1,719<br>(1,326 - 3,205) | 7<br>(4 - 13)      | 10<br>(7 - 19)    | 297<br>(223 - 438) | 724<br>(530 - 1,243)     | 681<br>(489 - 1,470)     |
| Chronic kidney disease due to diabetes mellitus     | 307<br>(164 - 542)       | 0<br>(0 - 1)       | 0<br>(0 - 1)      | 37<br>(20 - 71)    | 103<br>(48 - 169)        | 166<br>(87 - 302)        |
| Chronic kidney disease due to hypertension          | 510<br>(334 - 830)       | 0<br>(0 - 1)       | 1<br>(0 - 2)      | 81<br>(49 - 122)   | 257<br>(155 - 389)       | 171<br>(97 - 323)        |
| Chronic kidney disease due to glomerulonephritis    | 48<br>(33 - 74)          | 2<br>(1 - 3)       | 2<br>(1 - 2)      | 11<br>(6 - 19)     | 16<br>(10 - 26)          | 17<br>(10 - 27)          |
| Chronic kidney disease due to other causes          | 855<br>(569 - 2,004)     | 4<br>(2 - 9)       | 7<br>(4 - 14)     | 168<br>(117 - 294) | 349<br>(204 - 794)       | 327<br>(180 - 917)       |
| Urinary diseases and male infertility               | 355<br>(74 - 494)        | 3<br>(1 - 6)       | 2<br>(0 - 2)      | 44<br>(8 - 66)     | 123<br>(21 - 180)        | 184<br>(39 - 272)        |
| Interstitial nephritis and urinary tract infections | 22<br>(4 - 42)           | 1<br>(0 - 3)       | 0<br>(0 - 1)      | 5<br>(1 - 10)      | 7<br>(1 - 16)            | 8<br>(1 - 16)            |
| Urolithiasis                                        | 2<br>(1 - 4)             | --                 | 0<br>(0 - 0)      | 1<br>(0 - 1)       | 1<br>(0 - 1)             | 1<br>(0 - 2)             |
| Other urinary diseases                              | 331<br>(69 - 463)        | 2<br>(0 - 4)       | 1<br>(0 - 2)      | 38<br>(7 - 58)     | 115<br>(20 - 170)        | 175<br>(38 - 259)        |
| Gynecological diseases                              | --                       | --                 | --                | --                 | --                       | --                       |
| Uterine fibroids                                    | --                       | --                 | --                | --                 | --                       | --                       |
| Polycystic ovarian syndrome                         | --                       | --                 | --                | --                 | --                       | --                       |
| Endometriosis                                       | --                       | --                 | --                | --                 | --                       | --                       |
| Genital prolapse                                    | --                       | --                 | --                | --                 | --                       | --                       |
| Other gynecological diseases                        | --                       | --                 | --                | --                 | --                       | --                       |
| Hemoglobinopathies and hemolytic anemias            | 131<br>(82 - 227)        | 16<br>(8 - 38)     | 10<br>(5 - 19)    | 44<br>(24 - 83)    | 40<br>(23 - 70)          | 20<br>(12 - 36)          |
| Thalassemias                                        | 43<br>(27 - 78)          | 13<br>(7 - 30)     | 8<br>(4 - 16)     | 18<br>(10 - 34)    | 4<br>(2 - 7)             | 0<br>(0 - 0)             |
| Sickle cell disorders                               | 0<br>(0 - 0)             | 0<br>(0 - 0)       | 0<br>(0 - 0)      | 0<br>(0 - 0)       | 0<br>(0 - 0)             | 0<br>(0 - 0)             |
| G6PD deficiency                                     | 15<br>(9 - 27)           | 1<br>(1 - 2)       | 1<br>(0 - 1)      | 6<br>(3 - 11)      | 7<br>(4 - 12)            | 1<br>(0 - 2)             |
| Other hemoglobinopathies and hemolytic anemias      | 73<br>(44 - 127)         | 2<br>(1 - 5)       | 1<br>(0 - 2)      | 20<br>(11 - 39)    | 30<br>(17 - 52)          | 19<br>(11 - 34)          |
| Endocrine, metabolic, blood, and immune disorders   | 146<br>(107 - 256)       | 6<br>(3 - 10)      | 3<br>(2 - 7)      | 29<br>(20 - 50)    | 56<br>(38 - 100)         | 51<br>(33 - 94)          |
| Musculoskeletal disorders                           | 21<br>(11 - 75)          | --                 | 1<br>(0 - 3)      | 5<br>(3 - 17)      | 8<br>(3 - 29)            | 8<br>(4 - 29)            |
| Rheumatoid arthritis                                | 2<br>(1 - 6)             | --                 | 0<br>(0 - 0)      | 0<br>(0 - 1)       | 1<br>(0 - 2)             | 1<br>(0 - 3)             |
| Other musculoskeletal disorders                     | 19<br>(9 - 69)           | --                 | 1<br>(0 - 3)      | 5<br>(2 - 16)      | 7<br>(3 - 26)            | 7<br>(3 - 26)            |
| Other non-communicable diseases                     | 756<br>(491 - 958)       | 440<br>(219 - 625) | 67<br>(43 - 94)   | 117<br>(74 - 158)  | 67<br>(51 - 89)          | 64<br>(49 - 86)          |
| Congenital anomalies                                | 690<br>(430 - 892)       | 433<br>(213 - 615) | 67<br>(42 - 94)   | 109<br>(66 - 149)  | 47<br>(35 - 69)          | 34<br>(25 - 51)          |
| Neural tube defects                                 | 48<br>(14 - 105)         | 45<br>(11 - 101)   | 0<br>(0 - 1)      | 2<br>(1 - 4)       | 0<br>(0 - 1)             | 0<br>(0 - 1)             |
| Congenital heart anomalies                          | 397<br>(218 - 550)       | 265<br>(113 - 405) | 35<br>(20 - 54)   | 45<br>(29 - 63)    | 28<br>(20 - 44)          | 24<br>(18 - 38)          |
| Cleft lip and cleft palate                          | 0<br>(0 - 1)             | 0<br>(0 - 1)       | --                | --                 | --                       | --                       |
| Down syndrome                                       | 11<br>(5 - 25)           | 8<br>(2 - 21)      | 1<br>(0 - 2)      | 2<br>(1 - 3)       | 0<br>(0 - 1)             | 0<br>(0 - 0)             |
| Chromosomal unbalanced rearrangements               | 26<br>(10 - 50)          | 19<br>(5 - 42)     | 2<br>(1 - 4)      | 3<br>(2 - 5)       | 1<br>(0 - 1)             | 0<br>(0 - 1)             |
| Other congenital anomalies                          | 207<br>(129 - 296)       | 96<br>(40 - 168)   | 28<br>(16 - 44)   | 57<br>(29 - 81)    | 17<br>(11 - 26)          | 9<br>(5 - 13)            |
| Skin and subcutaneous diseases                      | 60<br>(46 - 76)          | 1<br>(1 - 2)       | 1<br>(0 - 1)      | 8<br>(6 - 11)      | 20<br>(14 - 27)          | 30<br>(21 - 42)          |
| Cellulitis                                          | 33<br>(23 - 44)          | 0<br>(0 - 1)       | 0<br>(0 - 0)      | 3<br>(2 - 5)       | 11<br>(7 - 16)           | 19<br>(11 - 27)          |
| Pyoderma                                            | 22<br>(15 - 31)          | 1<br>(0 - 1)       | 0<br>(0 - 0)      | 4<br>(3 - 6)       | 8<br>(5 - 12)            | 9<br>(5 - 14)            |
| Decubitus ulcer                                     | 3<br>(2 - 7)             | 0<br>(0 - 0)       | 0<br>(0 - 0)      | 1<br>(0 - 1)       | 0<br>(0 - 0)             | 3<br>(1 - 5)             |

Web Table 31- Sri Lanka deaths with 95% UI by age, sex, and cause in 2013

| Cause                                           | Males, All Ages             | Males, 0-4 Years  | Males, 5-14 Years  | Males, 15-49 Years       | Males, 50-69 Years       | Males, 70-80 Years       |
|-------------------------------------------------|-----------------------------|-------------------|--------------------|--------------------------|--------------------------|--------------------------|
| Other skin and subcutaneous diseases            | 2<br>(1 - 4)                | 0<br>(0 - 0)      | 0<br>(0 - 0)       | 1<br>(0 - 1)             | 1<br>(0 - 1)             | 1<br>(0 - 1)             |
| Sudden infant death syndrome                    | 6<br>(1 - 17)               | 6<br>(1 - 17)     | --                 | --                       | --                       | --                       |
| Injuries                                        | 14,124<br>(11,789 - 16,947) | 124<br>(77 - 188) | 284<br>(226 - 351) | 7,565<br>(6,191 - 9,143) | 3,792<br>(3,093 - 4,736) | 2,359<br>(1,941 - 2,944) |
| Transport injuries                              | 3,482<br>(2,619 - 4,274)    | 29<br>(16 - 45)   | 86<br>(56 - 114)   | 1,617<br>(1,109 - 2,061) | 1,022<br>(767 - 1,319)   | 729<br>(551 - 923)       |
| Road injuries                                   | 2,767<br>(1,900 - 3,469)    | 23<br>(12 - 37)   | 66<br>(36 - 90)    | 1,230<br>(709 - 1,610)   | 821<br>(568 - 1,070)     | 627<br>(468 - 794)       |
| Pedestrian road injuries                        | 936<br>(628 - 1,277)        | 10<br>(4 - 17)    | 34<br>(19 - 49)    | 236<br>(125 - 354)       | 328<br>(208 - 473)       | 328<br>(230 - 447)       |
| Cyclist road injuries                           | 195<br>(127 - 265)          | 2<br>(1 - 4)      | 6<br>(3 - 10)      | 58<br>(32 - 83)          | 79<br>(48 - 114)         | 50<br>(32 - 74)          |
| Motorcyclist road injuries                      | 464<br>(293 - 655)          | 2<br>(1 - 4)      | 4<br>(2 - 7)       | 305<br>(170 - 442)       | 88<br>(51 - 134)         | 65<br>(37 - 102)         |
| Motor vehicle road injuries                     | 1,148<br>(693 - 1,502)      | 9<br>(4 - 16)     | 22<br>(10 - 33)    | 623<br>(330 - 833)       | 321<br>(195 - 459)       | 174<br>(104 - 250)       |
| Other road injuries                             | 25<br>(13 - 36)             | 0<br>(0 - 1)      | 1<br>(0 - 2)       | 8<br>(4 - 13)            | 5<br>(2 - 9)             | 10<br>(4 - 18)           |
| Other transport injuries                        | 716<br>(535 - 1,052)        | 6<br>(3 - 11)     | 19<br>(12 - 30)    | 388<br>(274 - 573)       | 201<br>(134 - 341)       | 102<br>(66 - 168)        |
| Unintentional injuries                          | 3,183<br>(2,289 - 4,065)    | 87<br>(49 - 142)  | 145<br>(99 - 198)  | 1,312<br>(887 - 1,789)   | 944<br>(675 - 1,221)     | 695<br>(443 - 869)       |
| Falls                                           | 1,333<br>(875 - 1,674)      | 12<br>(5 - 22)    | 26<br>(15 - 37)    | 421<br>(256 - 561)       | 466<br>(314 - 620)       | 408<br>(234 - 533)       |
| Drowning                                        | 411<br>(74 - 817)           | 17<br>(2 - 47)    | 30<br>(6 - 66)     | 237<br>(38 - 490)        | 84<br>(14 - 172)         | 44<br>(8 - 87)           |
| Fire, heat, and hot substances                  | 191<br>(112 - 262)          | 12<br>(5 - 27)    | 7<br>(3 - 12)      | 66<br>(35 - 99)          | 48<br>(26 - 72)          | 59<br>(36 - 84)          |
| Poisonings                                      | 75<br>(50 - 170)            | 1<br>(1 - 3)      | 2<br>(1 - 5)       | 38<br>(24 - 89)          | 21<br>(13 - 46)          | 12<br>(7 - 31)           |
| Exposure to mechanical forces                   | 452<br>(350 - 613)          | 6<br>(3 - 10)     | 21<br>(15 - 30)    | 250<br>(186 - 370)       | 122<br>(88 - 169)        | 52<br>(31 - 69)          |
| Unintentional firearm injuries                  | 56<br>(10 - 80)             | 0<br>(0 - 0)      | 1<br>(0 - 1)       | 41<br>(7 - 63)           | 9<br>(2 - 14)            | 4<br>(1 - 7)             |
| Unintentional suffocation                       | 5<br>(4 - 10)               | 0<br>(0 - 1)      | 0<br>(0 - 0)       | 2<br>(1 - 5)             | 1<br>(1 - 2)             | 2<br>(1 - 3)             |
| Other exposure to mechanical forces             | 391<br>(297 - 583)          | 6<br>(3 - 9)      | 20<br>(14 - 29)    | 207<br>(150 - 356)       | 112<br>(79 - 159)        | 46<br>(27 - 62)          |
| Adverse effects of medical treatment            | 126<br>(77 - 166)           | 9<br>(3 - 18)     | 5<br>(2 - 8)       | 26<br>(16 - 36)          | 44<br>(25 - 62)          | 43<br>(22 - 60)          |
| Animal contact                                  | 152<br>(81 - 195)           | 7<br>(3 - 15)     | 16<br>(9 - 26)     | 51<br>(26 - 70)          | 48<br>(23 - 68)          | 31<br>(13 - 46)          |
| Venomous animal contact                         | 38<br>(16 - 54)             | 6<br>(3 - 14)     | 9<br>(3 - 16)      | 13<br>(5 - 19)           | 7<br>(2 - 13)            | 3<br>(1 - 6)             |
| Non-venomous animal contact                     | 114<br>(61 - 149)           | 1<br>(0 - 3)      | 7<br>(3 - 13)      | 38<br>(19 - 53)          | 41<br>(19 - 57)          | 27<br>(12 - 42)          |
| Foreign body                                    | 39<br>(10 - 70)             | 7<br>(2 - 13)     | 2<br>(0 - 3)       | 10<br>(3 - 19)           | 9<br>(2 - 16)            | 12<br>(2 - 25)           |
| Pulmonary aspiration and foreign body in airway | 30<br>(2 - 62)              | 4<br>(0 - 10)     | 1<br>(0 - 3)       | 8<br>(1 - 17)            | 7<br>(0 - 14)            | 10<br>(0 - 24)           |
| Foreign body in other body part                 | 9<br>(5 - 16)               | 3<br>(1 - 5)      | 0<br>(0 - 1)       | 2<br>(1 - 4)             | 2<br>(1 - 4)             | 1<br>(1 - 3)             |
| Other unintentional injuries                    | 404<br>(288 - 562)          | 17<br>(7 - 37)    | 37<br>(17 - 72)    | 213<br>(137 - 326)       | 102<br>(51 - 191)        | 35<br>(20 - 63)          |
| Self-harm and interpersonal violence            | 7,385<br>(5,896 - 10,358)   | 8<br>(3 - 18)     | 52<br>(32 - 91)    | 4,607<br>(3,640 - 6,037) | 1,795<br>(1,344 - 2,792) | 922<br>(685 - 1,530)     |
| Self-harm                                       | 5,936<br>(4,673 - 8,553)    | --                | 33<br>(19 - 63)    | 3,440<br>(2,678 - 4,577) | 1,585<br>(1,176 - 2,564) | 878<br>(651 - 1,481)     |
| Interpersonal violence                          | 1,448<br>(1,017 - 2,493)    | 8<br>(3 - 18)     | 19<br>(10 - 39)    | 1,167<br>(804 - 1,967)   | 210<br>(115 - 453)       | 44<br>(21 - 103)         |
| Assault by firearm                              | 554<br>(315 - 1,068)        | 2<br>(1 - 6)      | 3<br>(1 - 7)       | 480<br>(268 - 927)       | 62<br>(28 - 167)         | 7<br>(3 - 21)            |
| Assault by sharp object                         | 508<br>(304 - 962)          | 1<br>(0 - 4)      | 1<br>(0 - 2)       | 426<br>(248 - 814)       | 64<br>(32 - 151)         | 15<br>(6 - 37)           |
| Assault by other means                          | 387<br>(243 - 687)          | 4<br>(2 - 10)     | 15<br>(8 - 34)     | 261<br>(150 - 435)       | 84<br>(45 - 188)         | 22<br>(10 - 50)          |
| Forces of nature, war, and legal intervention   | 74<br>(33 - 180)            | 0<br>(0 - 0)      | 1<br>(0 - 2)       | 29<br>(13 - 71)          | 31<br>(14 - 77)          | 12<br>(5 - 30)           |
| Exposure to forces of nature                    | 74<br>(33 - 180)            | 0<br>(0 - 0)      | 1<br>(0 - 2)       | 29<br>(13 - 71)          | 31<br>(14 - 77)          | 12<br>(5 - 30)           |

Web Table 31- Sri Lanka deaths with 95% UI by age, sex, and cause in 2013

| Cause                                                             | Females, All Ages           | Females, 0-4 Years       | Females, 5-14 Years | Females, 15-49 Years     | Females, 50-69 Years        | Females, 70-80 Years        |
|-------------------------------------------------------------------|-----------------------------|--------------------------|---------------------|--------------------------|-----------------------------|-----------------------------|
| All causes                                                        | 51,393<br>(45,167 - 59,103) | 1,532<br>(1,298 - 1,800) | 671<br>(598 - 752)  | 4,765<br>(3,866 - 5,938) | 12,591<br>(10,494 - 15,196) | 31,834<br>(28,598 - 35,711) |
| Communicable, maternal, neonatal, and nutritional diseases        | 4,236<br>(3,533 - 4,929)    | 920<br>(734 - 1,166)     | 173<br>(130 - 229)  | 508<br>(396 - 621)       | 698<br>(511 - 866)          | 1,937<br>(1,498 - 2,468)    |
| HIV/AIDS and tuberculosis                                         | 339<br>(250 - 451)          | 2<br>(2 - 4)             | 3<br>(2 - 4)        | 75<br>(54 - 100)         | 119<br>(82 - 167)           | 140<br>(94 - 204)           |
| Tuberculosis                                                      | 319<br>(231 - 430)          | 1<br>(1 - 2)             | 2<br>(2 - 4)        | 61<br>(42 - 85)          | 115<br>(79 - 163)           | 140<br>(94 - 204)           |
| HIV/AIDS                                                          | 20<br>(12 - 29)             | 1<br>(1 - 2)             | 0<br>(0 - 1)        | 14<br>(9 - 20)           | 4<br>(2 - 7)                | 0<br>(0 - 1)                |
| HIV/AIDS resulting in mycobacterial infection                     | 1<br>(1 - 1)                | 0<br>(0 - 0)             | 0<br>(0 - 0)        | 1<br>(0 - 1)             | 0<br>(0 - 0)                | 0<br>(0 - 0)                |
| HIV/AIDS resulting in other diseases                              | 19<br>(11 - 28)             | 1<br>(1 - 2)             | 0<br>(0 - 1)        | 13<br>(8 - 19)           | 4<br>(2 - 6)                | 0<br>(0 - 1)                |
| Diarrhea, lower respiratory, and other common infectious diseases | 2,509<br>(1,772 - 3,166)    | 249<br>(175 - 344)       | 128<br>(87 - 184)   | 224<br>(140 - 312)       | 430<br>(229 - 585)          | 1,477<br>(1,014 - 1,971)    |
| Diarrheal diseases                                                | 425<br>(279 - 670)          | 21<br>(12 - 36)          | 9<br>(5 - 15)       | 21<br>(14 - 29)          | 62<br>(38 - 96)             | 312<br>(176 - 551)          |
| Intestinal infectious diseases                                    | 236<br>(114 - 426)          | 81<br>(33 - 167)         | 69<br>(33 - 126)    | 61<br>(24 - 131)         | 17<br>(5 - 44)              | 8<br>(3 - 17)               |
| Typhoid fever                                                     | 176<br>(81 - 318)           | 57<br>(22 - 120)         | 52<br>(23 - 97)     | 47<br>(17 - 101)         | 14<br>(4 - 35)              | 6<br>(2 - 13)               |
| Paratyphoid fever                                                 | 52<br>(23 - 100)            | 21<br>(7 - 47)           | 16<br>(6 - 33)      | 12<br>(4 - 27)           | 3<br>(1 - 7)                | 1<br>(0 - 2)                |
| Other intestinal infectious diseases                              | 8<br>(2 - 17)               | 3<br>(0 - 10)            | 1<br>(0 - 4)        | 2<br>(0 - 7)             | 1<br>(0 - 5)                | 1<br>(0 - 4)                |
| Lower respiratory infections                                      | 1,543<br>(792 - 2,069)      | 87<br>(50 - 133)         | 29<br>(14 - 43)     | 103<br>(38 - 150)        | 292<br>(109 - 423)          | 1,033<br>(545 - 1,470)      |
| Upper respiratory infections                                      | 3<br>(1 - 9)                | 0<br>(0 - 1)             | 0<br>(0 - 0)        | 0<br>(0 - 1)             | 1<br>(0 - 2)                | 2<br>(0 - 7)                |
| Otitis media                                                      | 2<br>(1 - 2)                | 0<br>(0 - 0)             | 0<br>(0 - 0)        | 1<br>(0 - 1)             | 0<br>(0 - 1)                | 1<br>(0 - 1)                |
| Meningitis                                                        | 142<br>(90 - 179)           | 18<br>(11 - 27)          | 7<br>(4 - 10)       | 20<br>(11 - 27)          | 32<br>(16 - 44)             | 65<br>(39 - 89)             |
| Pneumococcal meningitis                                           | 46<br>(28 - 67)             | 5<br>(3 - 9)             | 3<br>(1 - 4)        | 7<br>(4 - 11)            | 11<br>(5 - 17)              | 20<br>(8 - 34)              |
| H influenzae type B meningitis                                    | 23<br>(16 - 32)             | 7<br>(4 - 11)            | 2<br>(1 - 3)        | 3<br>(1 - 4)             | 4<br>(1 - 7)                | 8<br>(4 - 13)               |
| Meningococcal meningitis                                          | 26<br>(15 - 43)             | 1<br>(1 - 3)             | 1<br>(0 - 1)        | 4<br>(2 - 6)             | 6<br>(2 - 12)               | 14<br>(6 - 28)              |
| Other meningitis                                                  | 46<br>(24 - 65)             | 5<br>(2 - 8)             | 2<br>(1 - 3)        | 6<br>(3 - 10)            | 11<br>(4 - 19)              | 23<br>(11 - 36)             |
| Encephalitis                                                      | 129<br>(77 - 246)           | 26<br>(11 - 61)          | 11<br>(5 - 28)      | 16<br>(9 - 36)           | 24<br>(15 - 36)             | 51<br>(25 - 118)            |
| Diphtheria                                                        | 1<br>(0 - 2)                | 0<br>(0 - 2)             | 0<br>(0 - 1)        | 0<br>(0 - 0)             | 0<br>(0 - 0)                | --<br>(0 - 0)               |
| Whooping cough                                                    | 5<br>(0 - 22)               | 4<br>(0 - 20)            | 0<br>(0 - 1)        | 0<br>(0 - 0)             | 0<br>(0 - 0)                | --<br>(0 - 0)               |
| Tetanus                                                           | 7<br>(4 - 11)               | 1<br>(0 - 1)             | 0<br>(0 - 1)        | 2<br>(1 - 2)             | 2<br>(1 - 3)                | 2<br>(1 - 5)                |
| Measles                                                           | 10<br>(3 - 27)              | 9<br>(2 - 23)            | 1<br>(0 - 3)        | 0<br>(0 - 1)             | 0<br>(0 - 0)                | --<br>(0 - 0)               |
| Varicella and herpes zoster                                       | 7<br>(2 - 19)               | 1<br>(0 - 5)             | 0<br>(0 - 1)        | 1<br>(0 - 3)             | 1<br>(0 - 3)                | 3<br>(0 - 15)               |
| Neglected tropical diseases and malaria                           | 99<br>(67 - 128)            | 16<br>(9 - 26)           | 23<br>(14 - 32)     | 20<br>(13 - 27)          | 19<br>(13 - 26)             | 22<br>(12 - 35)             |
| Malaria                                                           | 9<br>(6 - 16)               | 1<br>(0 - 4)             | 1<br>(0 - 2)        | 2<br>(1 - 4)             | 2<br>(1 - 5)                | 3<br>(1 - 8)                |
| Leishmaniasis                                                     | 0<br>(0 - 0)                | 0<br>(0 - 0)             | 0<br>(0 - 0)        | 0<br>(0 - 0)             | 0<br>(0 - 0)                | 0<br>(0 - 0)                |
| Visceral leishmaniasis                                            | 0<br>(0 - 0)                | 0<br>(0 - 0)             | 0<br>(0 - 0)        | 0<br>(0 - 0)             | 0<br>(0 - 0)                | 0<br>(0 - 0)                |
| Cysticercosis                                                     | 0<br>(0 - 0)                | 0<br>(0 - 0)             | 0<br>(0 - 0)        | 0<br>(0 - 0)             | 0<br>(0 - 0)                | 0<br>(0 - 0)                |
| Cystic echinococcosis                                             | 1<br>(1 - 1)                | 0<br>(0 - 0)             | 0<br>(0 - 0)        | 0<br>(0 - 0)             | 0<br>(0 - 0)                | 0<br>(0 - 0)                |
| Dengue                                                            | 55<br>(19 - 77)             | 10<br>(3 - 18)           | 16<br>(6 - 24)      | 10<br>(2 - 14)           | 8<br>(2 - 12)               | 11<br>(3 - 24)              |
| Rabies                                                            | 18<br>(13 - 33)             | 0<br>(0 - 1)             | 3<br>(2 - 7)        | 5<br>(3 - 9)             | 6<br>(4 - 11)               | 3<br>(2 - 6)                |
| Intestinal nematode infections                                    | 2<br>(0 - 8)                | 1<br>(0 - 5)             | 0<br>(0 - 4)        | 0<br>(0 - 2)             | 0<br>(0 - 2)                | 0<br>(0 - 3)                |
| Ascariasis                                                        | 2<br>(0 - 8)                | 1<br>(0 - 5)             | 0<br>(0 - 4)        | 0<br>(0 - 2)             | 0<br>(0 - 2)                | 0<br>(0 - 3)                |
| Other neglected tropical diseases                                 | 14<br>(10 - 22)             | 3<br>(2 - 8)             | 2<br>(1 - 4)        | 3<br>(2 - 4)             | 2<br>(1 - 4)                | 3<br>(1 - 6)                |
| Maternal disorders                                                | 116<br>(77 - 162)           | --                       | 0<br>(0 - 0)        | 115<br>(77 - 162)        | --                          | --                          |
| Maternal hemorrhage                                               | 20<br>(12 - 31)             | --                       | 0<br>(0 - 0)        | 20<br>(12 - 31)          | --                          | --                          |



Web Table 31- Sri Lanka deaths with 95% UI by age, sex, and cause in 2013

| Cause                                                            | Females, All Ages           | Females, 0-4 Years | Females, 5-14 Years | Females, 15-49 Years     | Females, 50-69 Years       | Females, 70-80 Years        |
|------------------------------------------------------------------|-----------------------------|--------------------|---------------------|--------------------------|----------------------------|-----------------------------|
| Maternal sepsis and other maternal infections                    | 12<br>(7 - 18)              | --                 | 0<br>(0 - 0)        | 12<br>(7 - 18)           | --                         | --                          |
| Maternal hypertensive disorders                                  | 11<br>(6 - 18)              | --                 | 0<br>(0 - 0)        | 11<br>(6 - 18)           | --                         | --                          |
| Maternal obstructed labor                                        | 9<br>(5 - 15)               | --                 | 0<br>(0 - 0)        | 9<br>(5 - 15)            | --                         | --                          |
| Maternal abortive outcome                                        | 21<br>(12 - 32)             | --                 | 0<br>(0 - 0)        | 20<br>(12 - 32)          | --                         | --                          |
| Indirect maternal deaths                                         | 8<br>(4 - 14)               | --                 | 0<br>(0 - 0)        | 8<br>(4 - 14)            | --                         | --                          |
| Late maternal deaths                                             | 13<br>(7 - 21)              | --                 | 0<br>(0 - 0)        | 13<br>(7 - 21)           | --                         | --                          |
| Maternal deaths aggravated by HIV/AIDS                           | 0<br>(0 - 0)                | --                 | --                  | 0<br>(0 - 0)             | --                         | --                          |
| Other maternal disorders                                         | 22<br>(14 - 33)             | --                 | 0<br>(0 - 0)        | 22<br>(14 - 33)          | --                         | --                          |
| Neonatal disorders                                               | 629<br>(486 - 816)          | 629<br>(486 - 816) | --                  | --                       | --                         | --                          |
| Neonatal preterm birth complications                             | 242<br>(137 - 368)          | 242<br>(137 - 368) | --                  | --                       | --                         | --                          |
| Neonatal encephalopathy due to birth asphyxia and trauma         | 160<br>(88 - 264)           | 160<br>(88 - 264)  | --                  | --                       | --                         | --                          |
| Neonatal sepsis and other neonatal infections                    | 88<br>(37 - 165)            | 88<br>(37 - 165)   | --                  | --                       | --                         | --                          |
| Hemolytic disease and other neonatal jaundice                    | 1<br>(0 - 2)                | 1<br>(0 - 2)       | --                  | --                       | --                         | --                          |
| Other neonatal disorders                                         | 138<br>(67 - 264)           | 138<br>(67 - 264)  | --                  | --                       | --                         | --                          |
| Nutritional deficiencies                                         | 377<br>(256 - 712)          | 13<br>(7 - 30)     | 8<br>(5 - 17)       | 43<br>(30 - 69)          | 85<br>(57 - 159)           | 229<br>(144 - 423)          |
| Protein-energy malnutrition                                      | 70<br>(23 - 192)            | 10<br>(5 - 28)     | 3<br>(1 - 9)        | 5<br>(1 - 16)            | 10<br>(2 - 31)             | 41<br>(10 - 122)            |
| Iodine deficiency                                                | 1<br>(0 - 3)                | 0<br>(0 - 0)       | 0<br>(0 - 1)        | 0<br>(0 - 1)             | 0<br>(0 - 1)               | 0<br>(0 - 3)                |
| Iron-deficiency anemia                                           | 302<br>(201 - 493)          | 2<br>(0 - 6)       | 4<br>(1 - 7)        | 37<br>(25 - 55)          | 73<br>(49 - 131)           | 186<br>(114 - 315)          |
| Other nutritional deficiencies                                   | 4<br>(1 - 9)                | 0<br>(0 - 1)       | 1<br>(0 - 2)        | 1<br>(0 - 2)             | 1<br>(0 - 4)               | 0<br>(0 - 1)                |
| Other communicable, maternal, neonatal, and nutritional diseases | 168<br>(115 - 274)          | 12<br>(7 - 20)     | 11<br>(6 - 22)      | 30<br>(22 - 46)          | 45<br>(30 - 76)            | 69<br>(41 - 129)            |
| Sexually transmitted diseases excluding HIV                      | 17<br>(11 - 24)             | 2<br>(0 - 7)       | 0<br>(0 - 1)        | 4<br>(3 - 6)             | 4<br>(2 - 6)               | 6<br>(4 - 10)               |
| Syphilis                                                         | 11<br>(7 - 17)              | 2<br>(0 - 7)       | 0<br>(0 - 1)        | 2<br>(1 - 2)             | 2<br>(1 - 3)               | 5<br>(3 - 8)                |
| Chlamydial infection                                             | 2<br>(1 - 2)                | --                 | 0<br>(0 - 0)        | 1<br>(0 - 1)             | 0<br>(0 - 1)               | 0<br>(0 - 1)                |
| Gonococcal infection                                             | 2<br>(2 - 3)                | --                 | 0<br>(0 - 0)        | 1<br>(1 - 1)             | 1<br>(0 - 1)               | 1<br>(0 - 1)                |
| Other sexually transmitted diseases                              | 2<br>(1 - 2)                | --                 | 0<br>(0 - 0)        | 1<br>(0 - 1)             | 0<br>(0 - 1)               | 0<br>(0 - 1)                |
| Hepatitis                                                        | 8<br>(6 - 11)               | 0<br>(0 - 1)       | 1<br>(1 - 2)        | 2<br>(1 - 3)             | 2<br>(1 - 3)               | 3<br>(1 - 5)                |
| Acute hepatitis A                                                | 1<br>(0 - 2)                | 0<br>(0 - 0)       | 0<br>(0 - 1)        | 0<br>(0 - 0)             | 0<br>(0 - 0)               | 0<br>(0 - 0)                |
| Acute hepatitis B                                                | 5<br>(3 - 7)                | 0<br>(0 - 0)       | 0<br>(0 - 0)        | 1<br>(0 - 1)             | 1<br>(1 - 3)               | 2<br>(1 - 4)                |
| Acute hepatitis C                                                | 0<br>(0 - 0)                | --                 | 0<br>(0 - 0)        | 0<br>(0 - 0)             | 0<br>(0 - 0)               | 0<br>(0 - 0)                |
| Acute hepatitis E                                                | 3<br>(1 - 4)                | 0<br>(0 - 0)       | 0<br>(0 - 1)        | 1<br>(1 - 2)             | 1<br>(0 - 1)               | 0<br>(0 - 1)                |
| Other infectious diseases                                        | 143<br>(92 - 252)           | 9<br>(6 - 16)      | 9<br>(4 - 20)       | 24<br>(17 - 39)          | 40<br>(24 - 70)            | 60<br>(33 - 120)            |
| Non-communicable diseases                                        | 42,483<br>(37,164 - 48,769) | 490<br>(336 - 652) | 237<br>(190 - 297)  | 2,446<br>(1,937 - 3,041) | 10,820<br>(9,019 - 13,108) | 28,491<br>(25,513 - 31,913) |
| Neoplasms                                                        | 4,760<br>(3,854 - 5,892)    | 25<br>(15 - 40)    | 40<br>(30 - 51)     | 694<br>(523 - 884)       | 2,192<br>(1,742 - 2,767)   | 1,808<br>(1,504 - 2,278)    |
| Esophageal cancer                                                | 439<br>(254 - 561)          | --                 | --                  | 37<br>(25 - 52)          | 208<br>(131 - 284)         | 194<br>(84 - 261)           |
| Stomach cancer                                                   | 288<br>(221 - 382)          | --                 | --                  | 27<br>(18 - 38)          | 116<br>(85 - 155)          | 146<br>(100 - 213)          |
| Liver cancer                                                     | 92<br>(67 - 122)            | --                 | 1<br>(0 - 1)        | 11<br>(7 - 16)           | 44<br>(30 - 62)            | 37<br>(24 - 54)             |
| Liver cancer due to hepatitis B                                  | 31<br>(13 - 52)             | --                 | 0<br>(0 - 0)        | 5<br>(2 - 8)             | 16<br>(6 - 29)             | 11<br>(4 - 20)              |
| Liver cancer due to hepatitis C                                  | 38<br>(11 - 62)             | --                 | 0<br>(0 - 0)        | 4<br>(1 - 7)             | 18<br>(4 - 32)             | 16<br>(6 - 29)              |
| Liver cancer due to alcohol use                                  | 4<br>(2 - 9)                | --                 | --                  | 0<br>(0 - 1)             | 2<br>(1 - 4)               | 2<br>(1 - 5)                |
| Liver cancer due to other causes                                 | 18<br>(10 - 35)             | --                 | 0<br>(0 - 0)        | 3<br>(1 - 5)             | 8<br>(4 - 17)              | 7<br>(3 - 15)               |

Web Table 31- Sri Lanka deaths with 95% UI by age, sex, and cause in 2013

| Cause                                         | Females, All Ages           | Females, 0-4 Years | Females, 5-14 Years | Females, 15-49 Years | Females, 50-69 Years     | Females, 70-80 Years        |
|-----------------------------------------------|-----------------------------|--------------------|---------------------|----------------------|--------------------------|-----------------------------|
| Larynx cancer                                 | 5<br>(1 - 10)               | -                  | -                   | 1<br>(0 - 2)         | 2<br>(1 - 5)             | 2<br>(0 - 4)                |
| Tracheal, bronchus and lung cancer            | 330<br>(250 - 439)          | -                  | -                   | 38<br>(27 - 56)      | 170<br>(124 - 231)       | 122<br>(86 - 170)           |
| Breast cancer                                 | 952<br>(713 - 1,181)        | -                  | -                   | 223<br>(152 - 295)   | 465<br>(333 - 595)       | 264<br>(198 - 343)          |
| Cervical cancer                               | 253<br>(191 - 331)          | -                  | -                   | 45<br>(30 - 64)      | 132<br>(93 - 181)        | 76<br>(53 - 107)            |
| Uterine cancer                                | 64<br>(33 - 91)             | -                  | -                   | 4<br>(2 - 8)         | 34<br>(16 - 53)          | 26<br>(13 - 38)             |
| Prostate cancer                               | -                           | -                  | -                   | -                    | -                        | -                           |
| Colon and rectum cancer                       | 441<br>(358 - 545)          | -                  | -                   | 30<br>(22 - 40)      | 185<br>(147 - 235)       | 226<br>(177 - 295)          |
| Lip and oral cavity cancer                    | 354<br>(207 - 613)          | -                  | -                   | 35<br>(15 - 75)      | 147<br>(74 - 274)        | 172<br>(106 - 294)          |
| Nasopharynx cancer                            | 27<br>(12 - 83)             | -                  | 0<br>(0 - 1)        | 5<br>(2 - 16)        | 14<br>(5 - 44)           | 8<br>(3 - 25)               |
| Other pharynx cancer                          | 44<br>(32 - 64)             | -                  | -                   | 5<br>(3 - 9)         | 24<br>(16 - 37)          | 15<br>(10 - 25)             |
| Gallbladder and biliary tract cancer          | 161<br>(86 - 240)           | -                  | -                   | 13<br>(6 - 22)       | 76<br>(41 - 117)         | 72<br>(35 - 115)            |
| Pancreatic cancer                             | 98<br>(78 - 124)            | -                  | -                   | 10<br>(7 - 13)       | 50<br>(38 - 66)          | 38<br>(28 - 52)             |
| Malignant skin melanoma                       | 18<br>(13 - 23)             | -                  | -                   | 4<br>(3 - 6)         | 9<br>(6 - 12)            | 5<br>(3 - 7)                |
| Non-melanoma skin cancer                      | 22<br>(14 - 33)             | -                  | -                   | 2<br>(1 - 3)         | 7<br>(4 - 11)            | 13<br>(7 - 21)              |
| Ovarian cancer                                | 206<br>(149 - 281)          | -                  | -                   | 39<br>(26 - 58)      | 123<br>(86 - 169)        | 44<br>(30 - 64)             |
| Testicular cancer                             | -                           | -                  | -                   | -                    | -                        | -                           |
| Kidney cancer                                 | 111<br>(80 - 150)           | 1<br>(0 - 2)       | 1<br>(0 - 1)        | 11<br>(7 - 16)       | 52<br>(35 - 77)          | 46<br>(30 - 70)             |
| Bladder cancer                                | 24<br>(16 - 39)             | -                  | -                   | 2<br>(1 - 3)         | 9<br>(5 - 16)            | 13<br>(9 - 21)              |
| Brain and nervous system cancer               | 128<br>(96 - 163)           | 2<br>(1 - 4)       | 6<br>(4 - 9)        | 37<br>(26 - 51)      | 52<br>(37 - 71)          | 31<br>(21 - 44)             |
| Thyroid cancer                                | 98<br>(61 - 195)            | -                  | 0<br>(0 - 0)        | 9<br>(5 - 19)        | 44<br>(24 - 95)          | 44<br>(27 - 82)             |
| Mesothelioma                                  | 5<br>(4 - 8)                | -                  | -                   | 1<br>(1 - 2)         | 3<br>(2 - 6)             | 1<br>(1 - 2)                |
| Hodgkin lymphoma                              | 19<br>(10 - 26)             | 0<br>(0 - 1)       | 1<br>(0 - 2)        | 3<br>(2 - 5)         | 8<br>(4 - 11)            | 7<br>(3 - 10)               |
| Non-Hodgkin lymphoma                          | 83<br>(52 - 113)            | 1<br>(0 - 3)       | 3<br>(1 - 5)        | 12<br>(6 - 18)       | 35<br>(21 - 50)          | 32<br>(21 - 47)             |
| Multiple myeloma                              | 35<br>(19 - 59)             | -                  | -                   | 3<br>(2 - 5)         | 18<br>(9 - 30)           | 14<br>(7 - 25)              |
| Leukemia                                      | 103<br>(80 - 127)           | 13<br>(6 - 21)     | 19<br>(13 - 25)     | 25<br>(17 - 34)      | 25<br>(18 - 33)          | 21<br>(14 - 29)             |
| Other neoplasms                               | 361<br>(243 - 637)          | 8<br>(3 - 17)      | 9<br>(6 - 17)       | 60<br>(35 - 109)     | 142<br>(90 - 256)        | 141<br>(94 - 268)           |
| Cardiovascular diseases                       | 20,020<br>(16,374 - 23,417) | 39<br>(26 - 73)    | 50<br>(37 - 76)     | 862<br>(632 - 1,144) | 4,749<br>(3,713 - 5,911) | 14,319<br>(11,803 - 16,376) |
| Rheumatic heart disease                       | 127<br>(65 - 176)           | 0<br>(0 - 0)       | 3<br>(2 - 4)        | 24<br>(13 - 35)      | 42<br>(27 - 62)          | 59<br>(22 - 87)             |
| Ischemic heart disease                        | 11,542<br>(9,387 - 15,044)  | 7<br>(4 - 19)      | 10<br>(7 - 18)      | 424<br>(308 - 602)   | 2,857<br>(2,238 - 3,696) | 8,244<br>(6,625 - 11,099)   |
| Cerebrovascular disease                       | 6,087<br>(2,986 - 8,083)    | 12<br>(8 - 21)     | 12<br>(8 - 16)      | 196<br>(111 - 279)   | 1,215<br>(719 - 1,622)   | 4,652<br>(2,070 - 6,317)    |
| Ischemic stroke                               | 4,646<br>(1,513 - 6,615)    | 3<br>(1 - 6)       | 3<br>(1 - 6)        | 56<br>(22 - 108)     | 662<br>(261 - 1,007)     | 3,922<br>(1,210 - 5,610)    |
| Hemorrhagic stroke                            | 1,440<br>(856 - 2,414)      | 9<br>(6 - 16)      | 8<br>(6 - 12)       | 140<br>(81 - 198)    | 553<br>(336 - 785)       | 730<br>(385 - 1,527)        |
| Hypertensive heart disease                    | 622<br>(102 - 1,207)        | 1<br>(0 - 2)       | 3<br>(1 - 6)        | 45<br>(10 - 89)      | 166<br>(28 - 341)        | 407<br>(60 - 825)           |
| Cardiomyopathy and myocarditis                | 421<br>(286 - 629)          | 3<br>(1 - 8)       | 9<br>(5 - 18)       | 66<br>(43 - 108)     | 101<br>(66 - 154)        | 241<br>(138 - 403)          |
| Atrial fibrillation and flutter               | 25<br>(17 - 40)             | -                  | -                   | 3<br>(2 - 4)         | 4<br>(2 - 6)             | 19<br>(11 - 32)             |
| Aortic aneurysm                               | 85<br>(52 - 141)            | -                  | -                   | 9<br>(5 - 15)        | 14<br>(8 - 24)           | 62<br>(37 - 108)            |
| Peripheral vascular disease                   | 7<br>(5 - 10)               | -                  | -                   | 0<br>(0 - 0)         | 1<br>(1 - 2)             | 5<br>(3 - 8)                |
| Endocarditis                                  | 66<br>(43 - 106)            | 7<br>(4 - 13)      | 6<br>(3 - 13)       | 14<br>(8 - 22)       | 19<br>(12 - 34)          | 19<br>(11 - 34)             |
| Other cardiovascular and circulatory diseases | 1,037<br>(681 - 2,407)      | 8<br>(4 - 20)      | 7<br>(4 - 15)       | 82<br>(53 - 152)     | 329<br>(215 - 575)       | 611<br>(354 - 1,607)        |
| Chronic respiratory diseases                  | 6,853<br>(5,498 - 8,574)    | 24<br>(15 - 40)    | 16<br>(12 - 29)     | 259<br>(191 - 346)   | 1,312<br>(997 - 1,665)   | 5,242<br>(4,152 - 6,635)    |

Web Table 31- Sri Lanka deaths with 95% UI by age, sex, and cause in 2013

| Cause                                               | Females, All Ages        | Females, 0-4 Years | Females, 5-14 Years | Females, 15-49 Years | Females, 50-69 Years | Females, 70-80 Years     |
|-----------------------------------------------------|--------------------------|--------------------|---------------------|----------------------|----------------------|--------------------------|
| Chronic obstructive pulmonary disease               | 4,103<br>(2,680 - 5,729) | 5<br>(2 - 10)      | 3<br>(1 - 6)        | 91<br>(50 - 150)     | 660<br>(411 - 1,014) | 3,345<br>(2,206 - 4,618) |
| Pneumoconiosis                                      | 6<br>(4 - 10)            | 0<br>(0 - 0)       | 0<br>(0 - 0)        | 3<br>(1 - 5)         | 1<br>(0 - 2)         | 2<br>(1 - 4)             |
| Silicosis                                           | 1<br>(0 - 2)             | 0<br>(0 - 0)       | 0<br>(0 - 0)        | 1<br>(0 - 1)         | 0<br>(0 - 0)         | 0<br>(0 - 0)             |
| Asbestosis                                          | 0<br>(0 - 1)             | 0<br>(0 - 0)       | 0<br>(0 - 0)        | 0<br>(0 - 1)         | 0<br>(0 - 0)         | 0<br>(0 - 0)             |
| Coal workers pneumoconiosis                         | 0<br>(0 - 1)             | 0<br>(0 - 0)       | 0<br>(0 - 0)        | 0<br>(0 - 0)         | 0<br>(0 - 0)         | 0<br>(0 - 0)             |
| Other pneumoconiosis                                | 4<br>(3 - 7)             | 0<br>(0 - 0)       | 0<br>(0 - 0)        | 1<br>(1 - 3)         | 1<br>(0 - 1)         | 2<br>(1 - 4)             |
| Asthma                                              | 1,898<br>(921 - 3,043)   | 14<br>(7 - 23)     | 13<br>(9 - 22)      | 145<br>(83 - 215)    | 501<br>(248 - 790)   | 1,225<br>(541 - 2,108)   |
| Interstitial lung disease and pulmonary sarcoidosis | 601<br>(304 - 1,013)     | 2<br>(0 - 10)      | 0<br>(0 - 1)        | 11<br>(4 - 28)       | 121<br>(58 - 224)    | 467<br>(233 - 809)       |
| Other chronic respiratory diseases                  | 244<br>(140 - 389)       | 3<br>(2 - 4)       | 1<br>(0 - 2)        | 10<br>(5 - 18)       | 28<br>(14 - 49)      | 203<br>(110 - 335)       |
| Cirrhosis                                           | 571<br>(464 - 712)       | 1<br>(1 - 2)       | 4<br>(3 - 5)        | 86<br>(64 - 115)     | 225<br>(177 - 286)   | 255<br>(200 - 333)       |
| Cirrhosis due to hepatitis B                        | 241<br>(82 - 387)        | 0<br>(0 - 0)       | 1<br>(0 - 1)        | 33<br>(14 - 58)      | 95<br>(32 - 158)     | 111<br>(34 - 190)        |
| Cirrhosis due to hepatitis C                        | 194<br>(63 - 351)        | 0<br>(0 - 0)       | 1<br>(0 - 1)        | 28<br>(9 - 51)       | 78<br>(22 - 149)     | 87<br>(24 - 162)         |
| Cirrhosis due to alcohol use                        | 77<br>(36 - 129)         | -                  | -                   | 8<br>(3 - 15)        | 28<br>(13 - 50)      | 41<br>(18 - 80)          |
| Cirrhosis due to other causes                       | 60<br>(34 - 107)         | 1<br>(1 - 2)       | 3<br>(2 - 4)        | 17<br>(10 - 28)      | 23<br>(10 - 44)      | 16<br>(6 - 36)           |
| Digestive diseases                                  | 481<br>(386 - 642)       | 6<br>(3 - 12)      | 10<br>(6 - 22)      | 51<br>(36 - 80)      | 130<br>(94 - 207)    | 284<br>(220 - 358)       |
| Peptic ulcer disease                                | 37<br>(21 - 56)          | 0<br>(0 - 0)       | 0<br>(0 - 1)        | 4<br>(2 - 6)         | 13<br>(8 - 20)       | 20<br>(9 - 37)           |
| Gastritis and duodenitis                            | 81<br>(41 - 142)         | 0<br>(0 - 2)       | 1<br>(0 - 3)        | 4<br>(2 - 10)        | 16<br>(7 - 31)       | 60<br>(30 - 102)         |
| Appendicitis                                        | 19<br>(11 - 29)          | 0<br>(0 - 1)       | 2<br>(1 - 4)        | 4<br>(2 - 7)         | 7<br>(4 - 11)        | 6<br>(3 - 12)            |
| Paralytic ileus and intestinal obstruction          | 93<br>(48 - 142)         | 3<br>(2 - 6)       | 3<br>(2 - 9)        | 13<br>(7 - 23)       | 31<br>(17 - 56)      | 42<br>(17 - 65)          |
| Inguinal, femoral, and abdominal hernia             | 12<br>(5 - 19)           | 0<br>(0 - 1)       | 0<br>(0 - 1)        | 1<br>(1 - 3)         | 3<br>(2 - 7)         | 7<br>(2 - 11)            |
| Inflammatory bowel disease                          | 17<br>(11 - 31)          | 0<br>(0 - 1)       | 0<br>(0 - 1)        | 1<br>(1 - 2)         | 3<br>(2 - 6)         | 12<br>(7 - 22)           |
| Vascular intestinal disorders                       | 13<br>(5 - 37)           | 0<br>(0 - 0)       | 0<br>(0 - 1)        | 2<br>(1 - 6)         | 2<br>(1 - 9)         | 9<br>(4 - 22)            |
| Gallbladder and biliary diseases                    | 15<br>(10 - 31)          | 0<br>(0 - 0)       | 0<br>(0 - 1)        | 2<br>(1 - 3)         | 4<br>(3 - 11)        | 8<br>(5 - 15)            |
| Pancreatitis                                        | 40<br>(26 - 65)          | 0<br>(0 - 0)       | 0<br>(0 - 1)        | 10<br>(6 - 17)       | 10<br>(6 - 18)       | 19<br>(12 - 33)          |
| Other digestive diseases                            | 154<br>(111 - 215)       | 1<br>(0 - 2)       | 2<br>(1 - 5)        | 9<br>(6 - 15)        | 40<br>(27 - 68)      | 101<br>(70 - 143)        |
| Neurological disorders                              | 2,627<br>(2,101 - 3,374) | 7<br>(5 - 12)      | 15<br>(11 - 22)     | 75<br>(53 - 108)     | 259<br>(192 - 342)   | 2,270<br>(1,778 - 2,982) |
| Alzheimer disease and other dementias               | 2,208<br>(1,707 - 2,953) | -                  | -                   | 1<br>(0 - 2)         | 177<br>(120 - 243)   | 2,030<br>(1,559 - 2,740) |
| Parkinson disease                                   | 247<br>(114 - 398)       | -                  | -                   | 1<br>(1 - 1)         | 39<br>(19 - 66)      | 207<br>(93 - 353)        |
| Epilepsy                                            | 133<br>(94 - 179)        | 3<br>(2 - 7)       | 9<br>(5 - 15)       | 59<br>(40 - 90)      | 32<br>(23 - 46)      | 28<br>(15 - 44)          |
| Multiple sclerosis                                  | 4<br>(1 - 6)             | -                  | -                   | 1<br>(0 - 1)         | 1<br>(1 - 3)         | 1<br>(1 - 3)             |
| Other neurological disorders                        | 36<br>(30 - 44)          | 4<br>(3 - 6)       | 6<br>(5 - 8)        | 13<br>(10 - 17)      | 9<br>(7 - 12)        | 4<br>(3 - 5)             |
| Mental and substance use disorders                  | 39<br>(26 - 69)          | 0<br>(0 - 0)       | 0<br>(0 - 0)        | 17<br>(11 - 28)      | 15<br>(9 - 27)       | 7<br>(4 - 13)            |
| Schizophrenia                                       | 3<br>(2 - 7)             | -                  | -                   | 1<br>(0 - 2)         | 1<br>(1 - 3)         | 1<br>(0 - 2)             |
| Alcohol use disorders                               | 24<br>(11 - 51)          | -                  | -                   | 9<br>(4 - 18)        | 10<br>(4 - 23)       | 5<br>(2 - 11)            |
| Drug use disorders                                  | 12<br>(8 - 16)           | 0<br>(0 - 0)       | -                   | 6<br>(4 - 9)         | 3<br>(2 - 5)         | 2<br>(1 - 3)             |
| Opioid use disorders                                | 7<br>(5 - 10)            | 0<br>(0 - 0)       | -                   | 4<br>(3 - 6)         | 2<br>(1 - 3)         | 1<br>(1 - 2)             |
| Cocaine use disorders                               | 0<br>(0 - 0)             | 0<br>(0 - 0)       | -                   | 0<br>(0 - 0)         | 0<br>(0 - 0)         | 0<br>(0 - 0)             |
| Amphetamine use disorders                           | 0<br>(0 - 0)             | 0<br>(0 - 0)       | -                   | 0<br>(0 - 0)         | 0<br>(0 - 0)         | 0<br>(0 - 0)             |
| Other drug use disorders                            | 4<br>(3 - 5)             | 0<br>(0 - 0)       | -                   | 2<br>(1 - 3)         | 1<br>(1 - 2)         | 1<br>(0 - 1)             |
| Eating disorders                                    | 1<br>(0 - 1)             | -                  | 0<br>(0 - 0)        | 1<br>(0 - 1)         | -                    | -                        |

Web Table 31- Sri Lanka deaths with 95% UI by age, sex, and cause in 2013

| Cause                                               | Females, All Ages        | Females, 0-4 Years | Females, 5-14 Years | Females, 15-49 Years | Females, 50-69 Years     | Females, 70-80 Years     |
|-----------------------------------------------------|--------------------------|--------------------|---------------------|----------------------|--------------------------|--------------------------|
| Anorexia nervosa                                    | 1<br>(0 - 1)             | –                  | 0<br>(0 - 0)        | 1<br>(0 - 1)         | –                        | –                        |
| Diabetes, urogenital, blood, and endocrine diseases | 6,508<br>(5,219 - 7,998) | 32<br>(20 - 56)    | 27<br>(19 - 42)     | 320<br>(246 - 413)   | 1,891<br>(1,477 - 2,385) | 4,237<br>(3,232 - 5,347) |
| Diabetes mellitus                                   | 5,189<br>(3,647 - 6,436) | 1<br>(0 - 1)       | 3<br>(1 - 4)        | 150<br>(101 - 202)   | 1,438<br>(1,078 - 1,838) | 3,599<br>(2,341 - 4,599) |
| Acute glomerulonephritis                            | 1<br>(1 - 2)             | 0<br>(0 - 0)       | 0<br>(0 - 0)        | 0<br>(0 - 1)         | 0<br>(0 - 0)             | 0<br>(0 - 0)             |
| Chronic kidney disease                              | 869<br>(670 - 1,441)     | 6<br>(4 - 11)      | 9<br>(6 - 18)       | 110<br>(81 - 153)    | 310<br>(221 - 507)       | 434<br>(309 - 834)       |
| Chronic kidney disease due to diabetes mellitus     | 158<br>(105 - 246)       | 0<br>(0 - 1)       | 1<br>(0 - 1)        | 8<br>(5 - 13)        | 53<br>(31 - 86)          | 97<br>(58 - 164)         |
| Chronic kidney disease due to hypertension          | 249<br>(151 - 402)       | 2<br>(1 - 4)       | 2<br>(1 - 4)        | 39<br>(24 - 58)      | 94<br>(51 - 154)         | 111<br>(57 - 213)        |
| Chronic kidney disease due to glomerulonephritis    | 32<br>(21 - 54)          | 1<br>(0 - 2)       | 1<br>(1 - 1)        | 6<br>(3 - 11)        | 10<br>(6 - 18)           | 14<br>(7 - 23)           |
| Chronic kidney disease due to other causes          | 430<br>(270 - 862)       | 3<br>(1 - 6)       | 5<br>(3 - 13)       | 56<br>(33 - 92)      | 153<br>(83 - 307)        | 212<br>(122 - 512)       |
| Urinary diseases and male infertility               | 214<br>(63 - 326)        | 3<br>(1 - 6)       | 2<br>(1 - 3)        | 24<br>(7 - 41)       | 65<br>(17 - 105)         | 120<br>(34 - 195)        |
| Interstitial nephritis and urinary tract infections | 27<br>(8 - 50)           | 1<br>(0 - 3)       | 0<br>(0 - 1)        | 5<br>(1 - 10)        | 8<br>(2 - 18)            | 13<br>(3 - 24)           |
| Urolithiasis                                        | 3<br>(1 - 9)             | –                  | 0<br>(0 - 0)        | 1<br>(0 - 2)         | 1<br>(0 - 3)             | 1<br>(0 - 4)             |
| Other urinary diseases                              | 184<br>(51 - 283)        | 2<br>(1 - 4)       | 1<br>(0 - 2)        | 19<br>(5 - 32)       | 56<br>(14 - 92)          | 106<br>(30 - 173)        |
| Gynecological diseases                              | 6<br>(4 - 15)            | –                  | –                   | 2<br>(1 - 3)         | 2<br>(1 - 4)             | 3<br>(2 - 7)             |
| Uterine fibroids                                    | 2<br>(1 - 4)             | –                  | –                   | 0<br>(0 - 1)         | 0<br>(0 - 1)             | 1<br>(0 - 2)             |
| Polycystic ovarian syndrome                         | 0<br>(0 - 0)             | –                  | –                   | 0<br>(0 - 0)         | 0<br>(0 - 0)             | –                        |
| Endometriosis                                       | 0<br>(0 - 1)             | –                  | –                   | 0<br>(0 - 1)         | 0<br>(0 - 0)             | –                        |
| Genital prolapse                                    | 1<br>(1 - 3)             | –                  | –                   | 0<br>(0 - 0)         | 0<br>(0 - 1)             | 1<br>(0 - 2)             |
| Other gynecological diseases                        | 3<br>(2 - 7)             | –                  | –                   | 1<br>(0 - 2)         | 1<br>(1 - 2)             | 1<br>(1 - 3)             |
| Hemoglobinopathies and hemolytic anemias            | 101<br>(67 - 183)        | 16<br>(8 - 39)     | 11<br>(6 - 21)      | 20<br>(12 - 36)      | 38<br>(22 - 70)          | 17<br>(10 - 28)          |
| Thalassemias                                        | 35<br>(21 - 67)          | 12<br>(5 - 29)     | 9<br>(5 - 17)       | 10<br>(6 - 19)       | 4<br>(2 - 7)             | 0<br>(0 - 0)             |
| Sickle cell disorders                               | 0<br>(0 - 0)             | 0<br>(0 - 0)       | 0<br>(0 - 0)        | 0<br>(0 - 0)         | 0<br>(0 - 0)             | 0<br>(0 - 0)             |
| G6PD deficiency                                     | 10<br>(6 - 18)           | 1<br>(1 - 3)       | 1<br>(0 - 1)        | 3<br>(2 - 5)         | 5<br>(3 - 9)             | 1<br>(0 - 1)             |
| Other hemoglobinopathies and hemolytic anemias      | 57<br>(37 - 100)         | 3<br>(2 - 8)       | 1<br>(1 - 2)        | 7<br>(4 - 13)        | 29<br>(17 - 54)          | 16<br>(10 - 27)          |
| Endocrine, metabolic, blood, and immune disorders   | 127<br>(93 - 202)        | 5<br>(3 - 10)      | 3<br>(2 - 5)        | 15<br>(10 - 27)      | 38<br>(26 - 66)          | 66<br>(45 - 105)         |
| Musculoskeletal disorders                           | 14<br>(8 - 72)           | –                  | 1<br>(0 - 3)        | 3<br>(2 - 10)        | 4<br>(2 - 23)            | 7<br>(3 - 35)            |
| Rheumatoid arthritis                                | 3<br>(1 - 6)             | –                  | 0<br>(0 - 0)        | 0<br>(0 - 0)         | 1<br>(0 - 2)             | 2<br>(1 - 3)             |
| Other musculoskeletal disorders                     | 12<br>(6 - 65)           | –                  | 1<br>(0 - 3)        | 2<br>(1 - 10)        | 3<br>(2 - 21)            | 5<br>(3 - 29)            |
| Other non-communicable diseases                     | 610<br>(399 - 776)       | 355<br>(197 - 513) | 73<br>(48 - 102)    | 80<br>(45 - 108)     | 41<br>(29 - 56)          | 60<br>(45 - 84)          |
| Congenital anomalies                                | 570<br>(357 - 736)       | 348<br>(188 - 507) | 73<br>(48 - 101)    | 77<br>(42 - 104)     | 34<br>(22 - 47)          | 38<br>(26 - 57)          |
| Neural tube defects                                 | 20<br>(7 - 49)           | 16<br>(4 - 44)     | 1<br>(1 - 4)        | 2<br>(0 - 3)         | 0<br>(0 - 1)             | 0<br>(0 - 1)             |
| Congenital heart anomalies                          | 272<br>(134 - 406)       | 190<br>(73 - 316)  | 23<br>(12 - 36)     | 21<br>(12 - 31)      | 12<br>(8 - 18)           | 25<br>(16 - 38)          |
| Cleft lip and cleft palate                          | 0<br>(0 - 1)             | 0<br>(0 - 1)       | –                   | –                    | –                        | –                        |
| Down syndrome                                       | 25<br>(13 - 44)          | 12<br>(4 - 27)     | 9<br>(5 - 15)       | 2<br>(1 - 3)         | 2<br>(1 - 3)             | 0<br>(0 - 0)             |
| Chromosomal unbalanced rearrangements               | 24<br>(10 - 44)          | 16<br>(5 - 33)     | 1<br>(0 - 2)        | 5<br>(2 - 9)         | 1<br>(0 - 1)             | 1<br>(0 - 2)             |
| Other congenital anomalies                          | 228<br>(132 - 331)       | 113<br>(49 - 185)  | 38<br>(23 - 57)     | 47<br>(24 - 66)      | 18<br>(12 - 27)          | 12<br>(7 - 19)           |
| Skin and subcutaneous diseases                      | 35<br>(26 - 50)          | 1<br>(1 - 2)       | 1<br>(0 - 1)        | 3<br>(2 - 5)         | 7<br>(5 - 11)            | 22<br>(15 - 33)          |
| Cellulitis                                          | 16<br>(10 - 24)          | 0<br>(0 - 1)       | 0<br>(0 - 0)        | 1<br>(1 - 2)         | 4<br>(3 - 7)             | 10<br>(6 - 16)           |
| Pyoderma                                            | 13<br>(8 - 19)           | 1<br>(0 - 1)       | 0<br>(0 - 0)        | 1<br>(1 - 2)         | 3<br>(1 - 4)             | 8<br>(4 - 13)            |
| Decubitus ulcer                                     | 4<br>(2 - 9)             | 0<br>(0 - 0)       | 0<br>(0 - 0)        | 0<br>(0 - 1)         | 0<br>(0 - 1)             | 3<br>(1 - 8)             |

Web Table 31- Sri Lanka deaths with 95% UI by age, sex, and cause in 2013

| Cause                                           | Females, All Ages        | Females, 0-4 Years | Females, 5-14 Years | Females, 15-49 Years     | Females, 50-69 Years   | Females, 70-80 Years     |
|-------------------------------------------------|--------------------------|--------------------|---------------------|--------------------------|------------------------|--------------------------|
| Other skin and subcutaneous diseases            | 2<br>(1 - 4)             | 0<br>(0 - 0)       | 0<br>(0 - 0)        | 0<br>(0 - 1)             | 0<br>(0 - 1)           | 1<br>(1 - 2)             |
| Sudden infant death syndrome                    | 6<br>(1 - 19)            | 6<br>(1 - 19)      | --                  | --                       | --                     | --                       |
| Injuries                                        | 4,674<br>(3,708 - 5,765) | 122<br>(78 - 179)  | 262<br>(206 - 320)  | 1,811<br>(1,459 - 2,302) | 1,073<br>(815 - 1,396) | 1,406<br>(1,004 - 1,771) |
| Transport injuries                              | 1,085<br>(746 - 1,379)   | 22<br>(12 - 34)    | 62<br>(43 - 83)     | 242<br>(149 - 328)       | 322<br>(211 - 434)     | 436<br>(305 - 566)       |
| Road injuries                                   | 876<br>(579 - 1,107)     | 17<br>(9 - 26)     | 48<br>(28 - 68)     | 184<br>(99 - 254)        | 261<br>(162 - 355)     | 367<br>(255 - 474)       |
| Pedestrian road injuries                        | 387<br>(246 - 499)       | 7<br>(3 - 13)      | 22<br>(12 - 33)     | 42<br>(21 - 64)          | 111<br>(65 - 157)      | 204<br>(133 - 277)       |
| Cyclist road injuries                           | 45<br>(26 - 64)          | 1<br>(0 - 1)       | 3<br>(2 - 5)        | 12<br>(6 - 18)           | 17<br>(9 - 26)         | 13<br>(7 - 21)           |
| Motorcyclist road injuries                      | 56<br>(28 - 85)          | 1<br>(0 - 1)       | 2<br>(1 - 3)        | 15<br>(8 - 23)           | 16<br>(7 - 26)         | 23<br>(10 - 40)          |
| Motor vehicle road injuries                     | 383<br>(231 - 507)       | 8<br>(4 - 13)      | 21<br>(11 - 33)     | 114<br>(61 - 162)        | 116<br>(69 - 170)      | 124<br>(75 - 180)        |
| Other road injuries                             | 6<br>(3 - 10)            | 0<br>(0 - 1)       | 1<br>(0 - 1)        | 1<br>(0 - 1)             | 1<br>(0 - 2)           | 3<br>(1 - 7)             |
| Other transport injuries                        | 208<br>(130 - 282)       | 5<br>(3 - 10)      | 14<br>(8 - 23)      | 59<br>(38 - 84)          | 61<br>(38 - 89)        | 69<br>(34 - 109)         |
| Unintentional injuries                          | 1,511<br>(863 - 2,053)   | 91<br>(55 - 143)   | 138<br>(85 - 183)   | 344<br>(196 - 507)       | 316<br>(165 - 453)     | 622<br>(321 - 878)       |
| Falls                                           | 478<br>(170 - 738)       | 7<br>(2 - 14)      | 10<br>(5 - 14)      | 40<br>(15 - 63)          | 89<br>(32 - 137)       | 332<br>(107 - 537)       |
| Drowning                                        | 115<br>(37 - 210)        | 10<br>(2 - 26)     | 16<br>(6 - 28)      | 33<br>(12 - 60)          | 24<br>(6 - 46)         | 32<br>(6 - 60)           |
| Fire, heat, and hot substances                  | 297<br>(161 - 443)       | 18<br>(6 - 38)     | 24<br>(13 - 35)     | 114<br>(51 - 200)        | 51<br>(24 - 81)        | 90<br>(53 - 127)         |
| Poisonings                                      | 31<br>(20 - 63)          | 1<br>(1 - 3)       | 2<br>(1 - 5)        | 11<br>(7 - 23)           | 6<br>(4 - 14)          | 9<br>(5 - 21)            |
| Exposure to mechanical forces                   | 178<br>(99 - 225)        | 11<br>(6 - 20)     | 26<br>(17 - 37)     | 47<br>(26 - 64)          | 38<br>(22 - 53)        | 56<br>(24 - 80)          |
| Unintentional firearm injuries                  | 17<br>(7 - 24)           | 0<br>(0 - 1)       | 1<br>(1 - 2)        | 6<br>(2 - 9)             | 4<br>(2 - 6)           | 5<br>(2 - 10)            |
| Unintentional suffocation                       | 4<br>(2 - 8)             | 0<br>(0 - 1)       | 1<br>(0 - 4)        | 1<br>(0 - 1)             | 1<br>(0 - 1)           | 1<br>(0 - 2)             |
| Other exposure to mechanical forces             | 158<br>(83 - 204)        | 11<br>(5 - 19)     | 23<br>(14 - 34)     | 40<br>(21 - 56)          | 34<br>(18 - 49)        | 50<br>(19 - 73)          |
| Adverse effects of medical treatment            | 150<br>(59 - 241)        | 13<br>(3 - 29)     | 10<br>(3 - 19)      | 33<br>(11 - 60)          | 46<br>(16 - 80)        | 47<br>(19 - 75)          |
| Animal contact                                  | 86<br>(32 - 135)         | 9<br>(3 - 20)      | 17<br>(7 - 31)      | 17<br>(6 - 29)           | 23<br>(7 - 39)         | 21<br>(7 - 38)           |
| Venomous animal contact                         | 55<br>(21 - 91)          | 8<br>(2 - 18)      | 14<br>(5 - 25)      | 13<br>(4 - 21)           | 14<br>(4 - 24)         | 7<br>(3 - 17)            |
| Non-venomous animal contact                     | 31<br>(9 - 52)           | 1<br>(0 - 2)       | 3<br>(1 - 8)        | 4<br>(1 - 8)             | 9<br>(2 - 18)          | 14<br>(4 - 24)           |
| Foreign body                                    | 23<br>(5 - 48)           | 7<br>(1 - 18)      | 2<br>(1 - 4)        | 4<br>(1 - 7)             | 3<br>(1 - 8)           | 7<br>(1 - 17)            |
| Pulmonary aspiration and foreign body in airway | 18<br>(2 - 43)           | 4<br>(0 - 15)      | 2<br>(0 - 4)        | 3<br>(1 - 6)             | 3<br>(0 - 7)           | 6<br>(0 - 17)            |
| Foreign body in other body part                 | 4<br>(3 - 7)             | 2<br>(1 - 4)       | 0<br>(0 - 1)        | 1<br>(0 - 1)             | 0<br>(0 - 1)           | 1<br>(0 - 1)             |
| Other unintentional injuries                    | 154<br>(42 - 226)        | 15<br>(2 - 39)     | 32<br>(4 - 59)      | 45<br>(8 - 80)           | 34<br>(9 - 60)         | 28<br>(12 - 48)          |
| Self-harm and interpersonal violence            | 2,014<br>(1,573 - 3,067) | 9<br>(4 - 20)      | 60<br>(42 - 89)     | 1,209<br>(947 - 1,589)   | 411<br>(293 - 754)     | 325<br>(228 - 679)       |
| Self-harm                                       | 1,797<br>(1,401 - 2,750) | --                 | 45<br>(29 - 68)     | 1,075<br>(843 - 1,426)   | 373<br>(264 - 700)     | 304<br>(209 - 648)       |
| Interpersonal violence                          | 216<br>(147 - 363)       | 9<br>(4 - 20)      | 15<br>(8 - 29)      | 134<br>(85 - 225)        | 37<br>(22 - 68)        | 21<br>(11 - 45)          |
| Assault by firearm                              | 39<br>(21 - 79)          | 3<br>(1 - 6)       | 3<br>(1 - 6)        | 28<br>(14 - 56)          | 6<br>(2 - 14)          | 1<br>(0 - 2)             |
| Assault by sharp object                         | 94<br>(59 - 171)         | 1<br>(0 - 4)       | 2<br>(1 - 5)        | 67<br>(41 - 122)         | 17<br>(9 - 34)         | 6<br>(3 - 15)            |
| Assault by other means                          | 83<br>(54 - 133)         | 5<br>(2 - 12)      | 11<br>(6 - 20)      | 39<br>(23 - 64)          | 14<br>(8 - 26)         | 14<br>(7 - 32)           |
| Forces of nature, war, and legal intervention   | 65<br>(28 - 157)         | 0<br>(0 - 0)       | 1<br>(1 - 3)        | 16<br>(7 - 37)           | 25<br>(11 - 60)        | 23<br>(10 - 55)          |
| Exposure to forces of nature                    | 65<br>(28 - 157)         | 0<br>(0 - 0)       | 1<br>(1 - 3)        | 16<br>(7 - 37)           | 25<br>(11 - 60)        | 23<br>(10 - 55)          |

Web Table 31- Sudan deaths with 95% UI by age, sex, and cause in 2013

| Cause                                                             | Both Sexes, All Ages           | Both Sexes, 0-4 Years       | Both Sexes, 5-14 Years   | Both Sexes, 15-49 Years     | Both Sexes, 50-69 Years     | Both Sexes, 70-80 Years     |
|-------------------------------------------------------------------|--------------------------------|-----------------------------|--------------------------|-----------------------------|-----------------------------|-----------------------------|
| All causes                                                        | 208,671<br>(184,573 - 233,240) | 59,503<br>(52,694 - 67,515) | 6,919<br>(6,052 - 8,047) | 42,163<br>(34,968 - 51,978) | 46,485<br>(36,906 - 56,363) | 53,601<br>(46,964 - 59,943) |
| Communicable, maternal, neonatal, and nutritional diseases        | 70,736<br>(59,749 - 81,154)    | 44,230<br>(35,014 - 52,725) | 3,598<br>(2,934 - 4,391) | 13,606<br>(11,320 - 16,455) | 4,373<br>(3,516 - 5,417)    | 4,928<br>(3,913 - 6,188)    |
| HIV/AIDS and tuberculosis                                         | 7,989<br>(6,109 - 10,379)      | 379<br>(287 - 503)          | 221<br>(163 - 286)       | 5,235<br>(3,719 - 7,358)    | 1,487<br>(1,170 - 1,894)    | 667<br>(480 - 920)          |
| Tuberculosis                                                      | 2,301<br>(1,596 - 3,312)       | 148<br>(92 - 231)           | 92<br>(57 - 141)         | 915<br>(585 - 1,401)        | 588<br>(379 - 934)          | 558<br>(385 - 807)          |
| HIV/AIDS                                                          | 5,687<br>(4,109 - 8,024)       | 231<br>(163 - 311)          | 129<br>(92 - 174)        | 4,320<br>(2,854 - 6,397)    | 899<br>(709 - 1,132)        | 109<br>(73 - 156)           |
| HIV/AIDS resulting in mycobacterial infection                     | 349<br>(241 - 511)             | 13<br>(9 - 18)              | 7<br>(5 - 10)            | 265<br>(169 - 407)          | 57<br>(41 - 76)             | 8<br>(5 - 11)               |
| HIV/AIDS resulting in other diseases                              | 5,338<br>(3,870 - 7,525)       | 218<br>(154 - 294)          | 122<br>(87 - 166)        | 4,055<br>(2,667 - 6,004)    | 841<br>(662 - 1,057)        | 101<br>(68 - 145)           |
| Diarrhea, lower respiratory, and other common infectious diseases | 25,513<br>(20,396 - 30,503)    | 15,986<br>(11,604 - 20,523) | 1,730<br>(1,279 - 2,261) | 2,541<br>(1,851 - 3,442)    | 1,866<br>(1,329 - 2,549)    | 3,390<br>(2,503 - 4,480)    |
| Diarrheal diseases                                                | 9,235<br>(5,529 - 13,763)      | 7,173<br>(3,669 - 11,311)   | 349<br>(145 - 649)       | 574<br>(260 - 981)          | 372<br>(162 - 683)          | 768<br>(352 - 1,323)        |
| Intestinal infectious diseases                                    | 1,471<br>(798 - 2,527)         | 486<br>(245 - 861)          | 480<br>(247 - 832)       | 423<br>(204 - 816)          | 58<br>(28 - 112)            | 23<br>(12 - 42)             |
| Typhoid fever                                                     | 1,041<br>(526 - 1,870)         | 313<br>(142 - 582)          | 361<br>(180 - 632)       | 310<br>(142 - 610)          | 41<br>(18 - 88)             | 15<br>(7 - 28)              |
| Paratyphoid fever                                                 | 313<br>(149 - 576)             | 109<br>(46 - 214)           | 105<br>(46 - 202)        | 87<br>(35 - 175)            | 10<br>(4 - 21)              | 3<br>(1 - 7)                |
| Other intestinal infectious diseases                              | 117<br>(81 - 160)              | 64<br>(39 - 99)             | 15<br>(6 - 27)           | 27<br>(14 - 43)             | 7<br>(2 - 15)               | 4<br>(1 - 10)               |
| Lower respiratory infections                                      | 11,430<br>(8,855 - 14,499)     | 6,046<br>(3,842 - 8,956)    | 546<br>(366 - 779)       | 1,107<br>(795 - 1,543)      | 1,264<br>(898 - 1,774)      | 2,465<br>(1,796 - 3,338)    |
| Upper respiratory infections                                      | 18<br>(10 - 30)                | 6<br>(1 - 16)               | 1<br>(0 - 3)             | 5<br>(2 - 10)               | 4<br>(1 - 9)                | 3<br>(1 - 8)                |
| Otitis media                                                      | 21<br>(16 - 26)                | 4<br>(3 - 6)                | 3<br>(2 - 4)             | 5<br>(4 - 7)                | 4<br>(2 - 5)                | 5<br>(4 - 7)                |
| Meningitis                                                        | 1,610<br>(1,074 - 2,543)       | 1,007<br>(551 - 1,914)      | 143<br>(79 - 236)        | 257<br>(164 - 400)          | 113<br>(70 - 171)           | 90<br>(55 - 138)            |
| Pneumococcal meningitis                                           | 343<br>(224 - 543)             | 185<br>(94 - 353)           | 38<br>(20 - 69)          | 71<br>(38 - 118)            | 27<br>(15 - 44)             | 22<br>(12 - 36)             |
| H influenzae type B meningitis                                    | 459<br>(282 - 751)             | 370<br>(205 - 662)          | 37<br>(19 - 63)          | 32<br>(17 - 56)             | 11<br>(5 - 19)              | 9<br>(4 - 16)               |
| Meningococcal meningitis                                          | 456<br>(298 - 727)             | 292<br>(157 - 566)          | 42<br>(22 - 74)          | 71<br>(41 - 119)            | 26<br>(15 - 45)             | 25<br>(15 - 41)             |
| Other meningitis                                                  | 352<br>(223 - 617)             | 160<br>(70 - 365)           | 26<br>(13 - 51)          | 83<br>(42 - 144)            | 49<br>(26 - 81)             | 34<br>(20 - 54)             |
| Encephalitis                                                      | 384<br>(245 - 645)             | 241<br>(106 - 507)          | 38<br>(24 - 56)          | 65<br>(43 - 95)             | 22<br>(15 - 32)             | 18<br>(11 - 25)             |
| Diphtheria                                                        | 9<br>(1 - 42)                  | 6<br>(0 - 39)               | 2<br>(0 - 10)            | 1<br>(0 - 2)                | 0<br>(0 - 1)                | -                           |
| Whooping cough                                                    | 186<br>(0 - 885)               | 173<br>(0 - 823)            | 11<br>(0 - 55)           | 2<br>(0 - 9)                | 0<br>(0 - 1)                | -                           |
| Tetanus                                                           | 209<br>(67 - 632)              | 60<br>(29 - 153)            | 34<br>(6 - 127)          | 78<br>(16 - 261)            | 26<br>(6 - 72)              | 10<br>(2 - 27)              |
| Measles                                                           | 905<br>(373 - 1,864)           | 770<br>(311 - 1,606)        | 119<br>(51 - 241)        | 16<br>(7 - 31)              | 0<br>(0 - 1)                | -                           |
| Varicella and herpes zoster                                       | 35<br>(16 - 67)                | 13<br>(2 - 38)              | 4<br>(0 - 12)            | 8<br>(2 - 17)               | 3<br>(1 - 8)                | 8<br>(1 - 26)               |
| Neglected tropical diseases and malaria                           | 9,153<br>(5,680 - 14,885)      | 5,136<br>(2,300 - 10,498)   | 1,353<br>(911 - 1,988)   | 1,788<br>(1,175 - 2,742)    | 580<br>(383 - 958)          | 296<br>(163 - 644)          |
| Malaria                                                           | 5,363<br>(2,274 - 11,118)      | 3,446<br>(896 - 8,868)      | 633<br>(255 - 1,262)     | 743<br>(307 - 1,628)        | 324<br>(150 - 722)          | 217<br>(83 - 566)           |
| Leishmaniasis                                                     | 3,383<br>(2,508 - 4,510)       | 1,607<br>(969 - 2,459)      | 658<br>(447 - 927)       | 896<br>(612 - 1,281)        | 186<br>(125 - 271)          | 35<br>(24 - 48)             |
| Visceral leishmaniasis                                            | 3,383<br>(2,508 - 4,510)       | 1,607<br>(969 - 2,459)      | 658<br>(447 - 927)       | 896<br>(612 - 1,281)        | 186<br>(125 - 271)          | 35<br>(24 - 48)             |
| Schistosomiasis                                                   | 84<br>(58 - 113)               | 1<br>(0 - 2)                | 3<br>(2 - 5)             | 31<br>(20 - 47)             | 32<br>(19 - 48)             | 17<br>(10 - 25)             |
| Cysticercosis                                                     | 1<br>(0 - 1)                   | 0<br>(0 - 0)                | 0<br>(0 - 0)             | 0<br>(0 - 1)                | 0<br>(0 - 0)                | 0<br>(0 - 0)                |
| Cystic echinococcosis                                             | 92<br>(74 - 112)               | 9<br>(6 - 13)               | 18<br>(14 - 23)          | 40<br>(31 - 51)             | 17<br>(13 - 22)             | 8<br>(6 - 10)               |
| Dengue                                                            | 12<br>(8 - 17)                 | 3<br>(1 - 5)                | 3<br>(2 - 4)             | 5<br>(3 - 8)                | 1<br>(1 - 1)                | 0<br>(0 - 0)                |
| Yellow fever                                                      | 16<br>(7 - 37)                 | 1<br>(0 - 6)                | 4<br>(0 - 16)            | 9<br>(3 - 26)               | 2<br>(0 - 6)                | 0<br>(0 - 2)                |
| Rabies                                                            | 37<br>(19 - 88)                | 7<br>(2 - 22)               | 10<br>(5 - 25)           | 15<br>(8 - 35)              | 3<br>(1 - 7)                | 1<br>(0 - 2)                |
| Intestinal nematode infections                                    | 35<br>(18 - 59)                | 25<br>(11 - 45)             | 6<br>(1 - 15)            | 2<br>(0 - 9)                | 1<br>(0 - 5)                | 1<br>(0 - 6)                |
| Ascariasis                                                        | 35<br>(18 - 59)                | 25<br>(11 - 45)             | 6<br>(1 - 15)            | 2<br>(0 - 9)                | 1<br>(0 - 5)                | 1<br>(0 - 6)                |
| Other neglected tropical diseases                                 | 130<br>(50 - 250)              | 36<br>(10 - 78)             | 17<br>(6 - 36)           | 46<br>(17 - 93)             | 14<br>(5 - 32)              | 17<br>(5 - 44)              |

Web Table 31- Sudan deaths with 95% UI by age, sex, and cause in 2013

| Cause                                                            | Both Sexes, All Ages           | Both Sexes, 0-4 Years       | Both Sexes, 5-14 Years   | Both Sexes, 15-49 Years     | Both Sexes, 50-69 Years     | Both Sexes, 70-80 Years     |
|------------------------------------------------------------------|--------------------------------|-----------------------------|--------------------------|-----------------------------|-----------------------------|-----------------------------|
| Maternal disorders                                               | 3,528<br>(2,322 - 4,840)       | --                          | 17<br>(5 - 37)           | 3,512<br>(2,312 - 4,819)    | --                          | --                          |
| Maternal hemorrhage                                              | 671<br>(395 - 1,035)           | --                          | 2<br>(1 - 5)             | 668<br>(394 - 1,033)        | --                          | --                          |
| Maternal sepsis and other maternal infections                    | 313<br>(164 - 517)             | --                          | 2<br>(0 - 5)             | 312<br>(163 - 513)          | --                          | --                          |
| Maternal hypertensive disorders                                  | 506<br>(307 - 772)             | --                          | 3<br>(1 - 8)             | 503<br>(306 - 769)          | --                          | --                          |
| Maternal obstructed labor                                        | 328<br>(193 - 508)             | --                          | 1<br>(0 - 3)             | 327<br>(192 - 506)          | --                          | --                          |
| Maternal abortive outcome                                        | 470<br>(278 - 727)             | --                          | 2<br>(1 - 5)             | 468<br>(276 - 724)          | --                          | --                          |
| Indirect maternal deaths                                         | 356<br>(169 - 601)             | --                          | 1<br>(0 - 3)             | 355<br>(169 - 600)          | --                          | --                          |
| Late maternal deaths                                             | 351<br>(152 - 615)             | --                          | 3<br>(1 - 8)             | 349<br>(150 - 610)          | --                          | --                          |
| Maternal deaths aggravated by HIV/AIDS                           | 2<br>(1 - 4)                   | --                          | --                       | 2<br>(1 - 4)                | --                          | --                          |
| Other maternal disorders                                         | 523<br>(303 - 813)             | --                          | 2<br>(1 - 6)             | 521<br>(302 - 811)          | --                          | --                          |
| Neonatal disorders                                               | 20,694<br>(15,738 - 25,525)    | 20,694<br>(15,738 - 25,525) | --                       | --                          | --                          | --                          |
| Neonatal preterm birth complications                             | 15,800<br>(11,999 - 19,453)    | 15,800<br>(11,999 - 19,453) | --                       | --                          | --                          | --                          |
| Neonatal encephalopathy due to birth asphyxia and trauma         | 1,628<br>(607 - 3,158)         | 1,628<br>(607 - 3,158)      | --                       | --                          | --                          | --                          |
| Neonatal sepsis and other neonatal infections                    | 643<br>(232 - 1,349)           | 643<br>(232 - 1,349)        | --                       | --                          | --                          | --                          |
| Hemolytic disease and other neonatal jaundice                    | 64<br>(24 - 158)               | 64<br>(24 - 158)            | --                       | --                          | --                          | --                          |
| Other neonatal disorders                                         | 2,559<br>(781 - 5,057)         | 2,559<br>(781 - 5,057)      | --                       | --                          | --                          | --                          |
| Nutritional deficiencies                                         | 1,425<br>(864 - 2,628)         | 492<br>(256 - 988)          | 102<br>(59 - 178)        | 280<br>(169 - 492)          | 183<br>(99 - 350)           | 368<br>(198 - 668)          |
| Protein-energy malnutrition                                      | 339<br>(138 - 858)             | 237<br>(81 - 664)           | 20<br>(7 - 43)           | 23<br>(8 - 65)              | 15<br>(4 - 45)              | 43<br>(12 - 119)            |
| Iodine deficiency                                                | 18<br>(3 - 55)                 | 7<br>(0 - 40)               | 2<br>(0 - 10)            | 4<br>(0 - 13)               | 3<br>(0 - 12)               | 3<br>(0 - 17)               |
| Iron-deficiency anemia                                           | 978<br>(592 - 1,661)           | 216<br>(87 - 425)           | 69<br>(36 - 122)         | 231<br>(136 - 394)          | 156<br>(83 - 297)           | 306<br>(166 - 559)          |
| Other nutritional deficiencies                                   | 90<br>(37 - 219)               | 32<br>(9 - 86)              | 11<br>(5 - 25)           | 22<br>(8 - 55)              | 9<br>(3 - 25)               | 16<br>(5 - 44)              |
| Other communicable, maternal, neonatal, and nutritional diseases | 2,434<br>(1,255 - 4,001)       | 1,544<br>(490 - 2,930)      | 176<br>(77 - 308)        | 251<br>(162 - 393)          | 257<br>(145 - 427)          | 207<br>(117 - 408)          |
| Sexually transmitted diseases excluding HIV                      | 1,525<br>(389 - 3,059)         | 1,299<br>(250 - 2,716)      | 117<br>(28 - 244)        | 54<br>(32 - 128)            | 25<br>(11 - 67)             | 31<br>(14 - 70)             |
| Syphilis                                                         | 1,478<br>(337 - 2,998)         | 1,299<br>(250 - 2,716)      | 113<br>(23 - 240)        | 26<br>(15 - 64)             | 16<br>(7 - 42)              | 25<br>(11 - 58)             |
| Chlamydial infection                                             | 7<br>(4 - 14)                  | --                          | 1<br>(0 - 1)             | 4<br>(2 - 9)                | 2<br>(0 - 4)                | 1<br>(0 - 2)                |
| Gonococcal infection                                             | 23<br>(14 - 53)                | --                          | 2<br>(1 - 5)             | 13<br>(8 - 32)              | 4<br>(2 - 12)               | 4<br>(2 - 8)                |
| Other sexually transmitted diseases                              | 17<br>(11 - 40)                | --                          | 2<br>(1 - 5)             | 11<br>(7 - 27)              | 3<br>(1 - 7)                | 2<br>(1 - 4)                |
| Hepatitis                                                        | 372<br>(225 - 580)             | 54<br>(27 - 93)             | 14<br>(8 - 25)           | 92<br>(52 - 150)            | 143<br>(79 - 242)           | 68<br>(37 - 131)            |
| Acute hepatitis A                                                | 43<br>(13 - 84)                | 28<br>(10 - 56)             | 6<br>(2 - 12)            | 5<br>(1 - 13)               | 3<br>(1 - 8)                | 0<br>(0 - 1)                |
| Acute hepatitis B                                                | 205<br>(110 - 340)             | 25<br>(8 - 52)              | 4<br>(1 - 9)             | 30<br>(13 - 59)             | 94<br>(47 - 164)            | 52<br>(28 - 97)             |
| Acute hepatitis C                                                | 22<br>(4 - 57)                 | --                          | 1<br>(0 - 4)             | 5<br>(1 - 15)               | 10<br>(1 - 29)              | 6<br>(1 - 18)               |
| Acute hepatitis E                                                | 102<br>(48 - 203)              | 1<br>(0 - 2)                | 3<br>(1 - 7)             | 53<br>(27 - 90)             | 37<br>(13 - 83)             | 9<br>(3 - 27)               |
| Other infectious diseases                                        | 537<br>(315 - 1,032)           | 191<br>(86 - 414)           | 44<br>(20 - 96)          | 104<br>(59 - 206)           | 89<br>(41 - 201)            | 108<br>(41 - 298)           |
| Non-communicable diseases                                        | 119,078<br>(100,283 - 140,612) | 13,159<br>(8,293 - 21,119)  | 2,180<br>(1,742 - 2,699) | 18,729<br>(14,752 - 24,162) | 38,388<br>(30,063 - 47,148) | 46,622<br>(40,909 - 52,328) |
| Neoplasms                                                        | 13,785<br>(11,094 - 17,062)    | 224<br>(129 - 422)          | 400<br>(310 - 524)       | 3,281<br>(2,501 - 4,312)    | 5,898<br>(4,561 - 7,515)    | 3,982<br>(3,337 - 4,641)    |
| Esophageal cancer                                                | 345<br>(233 - 482)             | --                          | --                       | 61<br>(39 - 88)             | 156<br>(100 - 231)          | 128<br>(88 - 180)           |
| Stomach cancer                                                   | 1,855<br>(1,359 - 2,365)       | --                          | --                       | 413<br>(290 - 565)          | 837<br>(598 - 1,109)        | 605<br>(450 - 790)          |
| Liver cancer                                                     | 886<br>(650 - 1,201)           | --                          | 8<br>(5 - 14)            | 132<br>(82 - 208)           | 458<br>(317 - 657)          | 288<br>(209 - 398)          |
| Liver cancer due to hepatitis B                                  | 265<br>(166 - 401)             | --                          | 3<br>(1 - 7)             | 56<br>(34 - 89)             | 144<br>(78 - 230)           | 62<br>(33 - 97)             |
| Liver cancer due to hepatitis C                                  | 304<br>(186 - 488)             | --                          | 0<br>(0 - 1)             | 32<br>(15 - 61)             | 161<br>(89 - 275)           | 111<br>(71 - 165)           |

Web Table 31- Sudan deaths with 95% UI by age, sex, and cause in 2013

| Cause                                | Both Sexes, All Ages        | Both Sexes, 0-4 Years  | Both Sexes, 5-14 Years | Both Sexes, 15-49 Years   | Both Sexes, 50-69 Years     | Both Sexes, 70-80 Years     |
|--------------------------------------|-----------------------------|------------------------|------------------------|---------------------------|-----------------------------|-----------------------------|
| Liver cancer due to alcohol use      | 195<br>(115 - 299)          | --                     | --                     | 16<br>(7 - 30)            | 94<br>(53 - 153)            | 85<br>(51 - 132)            |
| Liver cancer due to other causes     | 122<br>(70 - 196)           | --                     | 5<br>(2 - 8)           | 28<br>(15 - 47)           | 59<br>(31 - 104)            | 31<br>(16 - 51)             |
| Larynx cancer                        | 224<br>(146 - 359)          | --                     | --                     | 40<br>(23 - 70)           | 111<br>(69 - 190)           | 72<br>(50 - 114)            |
| Tracheal, bronchus and lung cancer   | 2,113<br>(1,322 - 2,725)    | --                     | --                     | 315<br>(154 - 448)        | 1,100<br>(666 - 1,453)      | 698<br>(483 - 877)          |
| Breast cancer                        | 1,247<br>(801 - 1,884)      | --                     | --                     | 475<br>(295 - 798)        | 575<br>(352 - 904)          | 197<br>(131 - 283)          |
| Cervical cancer                      | 328<br>(215 - 502)          | --                     | --                     | 108<br>(68 - 168)         | 161<br>(98 - 264)           | 59<br>(39 - 89)             |
| Uterine cancer                       | 82<br>(46 - 134)            | --                     | --                     | 12<br>(6 - 21)            | 46<br>(24 - 80)             | 23<br>(13 - 40)             |
| Prostate cancer                      | 389<br>(235 - 585)          | --                     | --                     | 6<br>(3 - 10)             | 98<br>(54 - 158)            | 285<br>(168 - 446)          |
| Colon and rectum cancer              | 1,058<br>(829 - 1,309)      | --                     | --                     | 228<br>(172 - 299)        | 476<br>(357 - 611)          | 354<br>(282 - 442)          |
| Lip and oral cavity cancer           | 125<br>(83 - 178)           | --                     | --                     | 34<br>(18 - 54)           | 56<br>(37 - 82)             | 35<br>(24 - 48)             |
| Nasopharynx cancer                   | 99<br>(69 - 151)            | --                     | 6<br>(3 - 14)          | 42<br>(28 - 65)           | 38<br>(24 - 61)             | 13<br>(8 - 20)              |
| Other pharynx cancer                 | 53<br>(38 - 76)             | --                     | --                     | 17<br>(11 - 26)           | 26<br>(17 - 39)             | 11<br>(7 - 15)              |
| Gallbladder and biliary tract cancer | 221<br>(156 - 311)          | --                     | --                     | 31<br>(21 - 46)           | 114<br>(76 - 168)           | 76<br>(53 - 108)            |
| Pancreatic cancer                    | 347<br>(264 - 443)          | --                     | --                     | 45<br>(33 - 61)           | 175<br>(127 - 234)          | 127<br>(97 - 163)           |
| Malignant skin melanoma              | 41<br>(27 - 59)             | --                     | --                     | 13<br>(8 - 22)            | 16<br>(10 - 24)             | 11<br>(7 - 16)              |
| Non-melanoma skin cancer             | 52<br>(34 - 82)             | --                     | --                     | 14<br>(8 - 21)            | 16<br>(9 - 27)              | 22<br>(13 - 38)             |
| Ovarian cancer                       | 200<br>(122 - 291)          | --                     | --                     | 58<br>(31 - 94)           | 98<br>(57 - 151)            | 43<br>(27 - 66)             |
| Testicular cancer                    | 20<br>(12 - 31)             | --                     | --                     | 15<br>(9 - 25)            | 3<br>(2 - 4)                | 2<br>(1 - 3)                |
| Kidney cancer                        | 178<br>(132 - 242)          | 12<br>(4 - 24)         | 10<br>(5 - 17)         | 33<br>(21 - 51)           | 82<br>(58 - 117)            | 40<br>(29 - 54)             |
| Bladder cancer                       | 556<br>(410 - 733)          | --                     | --                     | 53<br>(35 - 78)           | 257<br>(175 - 355)          | 246<br>(183 - 331)          |
| Brain and nervous system cancer      | 656<br>(443 - 1,191)        | 36<br>(14 - 102)       | 79<br>(46 - 127)       | 226<br>(140 - 518)        | 226<br>(147 - 439)          | 89<br>(57 - 132)            |
| Thyroid cancer                       | 91<br>(60 - 144)            | --                     | 1<br>(1 - 2)           | 17<br>(11 - 30)           | 41<br>(25 - 72)             | 31<br>(20 - 47)             |
| Mesothelioma                         | 16<br>(11 - 24)             | --                     | --                     | 6<br>(4 - 9)              | 6<br>(4 - 10)               | 4<br>(3 - 7)                |
| Hodgkin lymphoma                     | 87<br>(40 - 152)            | 5<br>(1 - 12)          | 12<br>(4 - 26)         | 44<br>(19 - 84)           | 18<br>(8 - 31)              | 7<br>(4 - 13)               |
| Non-Hodgkin lymphoma                 | 530<br>(395 - 754)          | 19<br>(8 - 40)         | 31<br>(20 - 48)        | 181<br>(124 - 275)        | 183<br>(129 - 259)          | 116<br>(85 - 160)           |
| Multiple myeloma                     | 84<br>(54 - 122)            | --                     | --                     | 15<br>(9 - 25)            | 43<br>(26 - 63)             | 27<br>(17 - 38)             |
| Leukemia                             | 995<br>(785 - 1,246)        | 58<br>(30 - 108)       | 157<br>(113 - 213)     | 377<br>(274 - 518)        | 227<br>(166 - 294)          | 176<br>(134 - 220)          |
| Other neoplasms                      | 909<br>(624 - 1,829)        | 95<br>(45 - 224)       | 95<br>(59 - 164)       | 270<br>(170 - 592)        | 254<br>(159 - 537)          | 196<br>(140 - 327)          |
| Cardiovascular diseases              | 63,169<br>(51,875 - 75,671) | 1,528<br>(922 - 2,184) | 574<br>(404 - 768)     | 9,857<br>(7,415 - 13,116) | 22,797<br>(17,744 - 28,395) | 28,413<br>(24,551 - 32,247) |
| Rheumatic heart disease              | 908<br>(633 - 1,442)        | 45<br>(17 - 92)        | 52<br>(30 - 86)        | 342<br>(220 - 545)        | 224<br>(146 - 376)          | 246<br>(165 - 412)          |
| Ischemic heart disease               | 33,769<br>(26,649 - 41,880) | 239<br>(99 - 441)      | 88<br>(53 - 138)       | 5,366<br>(3,789 - 7,481)  | 13,623<br>(10,282 - 17,369) | 14,453<br>(11,861 - 17,115) |
| Cerebrovascular disease              | 19,441<br>(15,417 - 23,965) | 524<br>(269 - 789)     | 241<br>(162 - 345)     | 2,366<br>(1,713 - 3,238)  | 5,988<br>(4,511 - 7,940)    | 10,321<br>(8,246 - 12,305)  |
| Ischemic stroke                      | 9,076<br>(6,005 - 11,545)   | 49<br>(12 - 106)       | 27<br>(12 - 47)        | 463<br>(228 - 780)        | 2,354<br>(1,413 - 3,342)    | 6,183<br>(4,089 - 7,590)    |
| Hemorrhagic stroke                   | 10,365<br>(7,821 - 13,718)  | 476<br>(253 - 720)     | 215<br>(145 - 310)     | 1,903<br>(1,371 - 2,647)  | 3,633<br>(2,567 - 5,199)    | 4,138<br>(3,072 - 5,555)    |
| Hypertensive heart disease           | 2,660<br>(1,899 - 4,027)    | 9<br>(4 - 18)          | 6<br>(3 - 10)          | 305<br>(192 - 479)        | 876<br>(569 - 1,294)        | 1,464<br>(1,017 - 2,313)    |
| Cardiomyopathy and myocarditis       | 1,247<br>(837 - 1,637)      | 250<br>(92 - 439)      | 64<br>(35 - 101)       | 325<br>(199 - 474)        | 302<br>(203 - 423)          | 306<br>(200 - 434)          |
| Atrial fibrillation and flutter      | 18<br>(11 - 28)             | --                     | --                     | 1<br>(1 - 2)              | 5<br>(3 - 7)                | 12<br>(7 - 19)              |
| Aortic aneurysm                      | 269<br>(181 - 372)          | --                     | --                     | 39<br>(23 - 58)           | 127<br>(79 - 188)           | 103<br>(71 - 144)           |
| Peripheral vascular disease          | 13<br>(8 - 19)              | --                     | --                     | 2<br>(1 - 3)              | 4<br>(2 - 6)                | 8<br>(5 - 11)               |
| Endocarditis                         | 320<br>(209 - 484)          | 47<br>(22 - 91)        | 11<br>(6 - 20)         | 66<br>(40 - 106)          | 74<br>(45 - 119)            | 122<br>(67 - 199)           |



Web Table 31- Sudan deaths with 95% UI by age, sex, and cause in 2013

| Cause                                               | Both Sexes, All Ages      | Both Sexes, 0-4 Years | Both Sexes, 5-14 Years | Both Sexes, 15-49 Years | Both Sexes, 50-69 Years  | Both Sexes, 70-80 Years  |
|-----------------------------------------------------|---------------------------|-----------------------|------------------------|-------------------------|--------------------------|--------------------------|
| Other cardiovascular and circulatory diseases       | 4,523<br>(1,974 - 7,713)  | 413<br>(175 - 709)    | 111<br>(41 - 202)      | 1,046<br>(410 - 1,862)  | 1,575<br>(643 - 2,902)   | 1,377<br>(575 - 2,504)   |
| Chronic respiratory diseases                        | 9,565<br>(7,314 - 13,290) | 423<br>(260 - 677)    | 128<br>(91 - 184)      | 1,222<br>(856 - 1,745)  | 2,920<br>(2,043 - 4,206) | 4,872<br>(3,790 - 6,808) |
| Chronic obstructive pulmonary disease               | 7,329<br>(5,428 - 10,034) | 250<br>(147 - 416)    | 48<br>(32 - 71)        | 664<br>(437 - 960)      | 2,282<br>(1,562 - 3,182) | 4,086<br>(3,101 - 5,669) |
| Pneumoconiosis                                      | 170<br>(92 - 294)         | 5<br>(2 - 12)         | 4<br>(3 - 7)           | 69<br>(37 - 124)        | 48<br>(22 - 88)          | 44<br>(21 - 81)          |
| Silicosis                                           | 41<br>(17 - 93)           | 1<br>(1 - 4)          | 1<br>(1 - 2)           | 5<br>(2 - 12)           | 9<br>(2 - 25)            | 24<br>(9 - 53)           |
| Asbestosis                                          | 16<br>(8 - 27)            | 1<br>(0 - 2)          | 1<br>(0 - 1)           | 11<br>(5 - 19)          | 3<br>(1 - 5)             | 1<br>(0 - 1)             |
| Coal workers pneumoconiosis                         | 8<br>(5 - 13)             | 1<br>(0 - 2)          | 1<br>(1 - 2)           | 4<br>(2 - 8)            | 1<br>(0 - 2)             | 1<br>(0 - 1)             |
| Other pneumoconiosis                                | 106<br>(56 - 182)         | 2<br>(1 - 5)          | 1<br>(1 - 2)           | 49<br>(25 - 90)         | 35<br>(17 - 63)          | 18<br>(8 - 36)           |
| Asthma                                              | 1,568<br>(772 - 3,224)    | 112<br>(48 - 221)     | 61<br>(33 - 100)       | 402<br>(203 - 768)      | 462<br>(210 - 1,066)     | 531<br>(236 - 1,221)     |
| Interstitial lung disease and pulmonary sarcoidosis | 297<br>(69 - 605)         | 2<br>(0 - 8)          | 2<br>(1 - 6)           | 31<br>(7 - 76)          | 102<br>(23 - 218)        | 160<br>(35 - 329)        |
| Other chronic respiratory diseases                  | 200<br>(117 - 310)        | 54<br>(28 - 95)       | 12<br>(7 - 21)         | 57<br>(32 - 89)         | 26<br>(12 - 46)          | 51<br>(27 - 87)          |
| Cirrhosis                                           | 4,505<br>(2,599 - 7,486)  | 207<br>(89 - 404)     | 97<br>(53 - 162)       | 1,100<br>(613 - 1,921)  | 1,850<br>(1,055 - 3,157) | 1,252<br>(689 - 3,067)   |
| Cirrhosis due to hepatitis B                        | 1,372<br>(658 - 2,288)    | 11<br>(3 - 28)        | 17<br>(6 - 36)         | 319<br>(140 - 590)      | 578<br>(257 - 980)       | 447<br>(224 - 751)       |
| Cirrhosis due to hepatitis C                        | 2,101<br>(1,109 - 3,778)  | 18<br>(5 - 43)        | 23<br>(10 - 49)        | 542<br>(275 - 1,041)    | 957<br>(482 - 1,769)     | 561<br>(292 - 1,001)     |
| Cirrhosis due to alcohol use                        | 424<br>(221 - 847)        | --                    | --                     | 67<br>(35 - 130)        | 181<br>(94 - 362)        | 176<br>(77 - 384)        |
| Cirrhosis due to other causes                       | 608<br>(359 - 953)        | 177<br>(78 - 344)     | 57<br>(31 - 90)        | 172<br>(92 - 290)       | 133<br>(72 - 231)        | 69<br>(35 - 124)         |
| Digestive diseases                                  | 3,217<br>(2,406 - 4,444)  | 245<br>(141 - 395)    | 120<br>(84 - 173)      | 741<br>(506 - 1,121)    | 898<br>(631 - 1,312)     | 1,213<br>(889 - 1,628)   |
| Peptic ulcer disease                                | 1,293<br>(883 - 1,950)    | 30<br>(11 - 62)       | 26<br>(15 - 42)        | 271<br>(160 - 498)      | 412<br>(265 - 664)       | 554<br>(369 - 799)       |
| Gastritis and duodenitis                            | 59<br>(25 - 134)          | 10<br>(3 - 24)        | 7<br>(3 - 17)          | 22<br>(9 - 49)          | 10<br>(4 - 24)           | 11<br>(4 - 27)           |
| Appendicitis                                        | 256<br>(162 - 395)        | 49<br>(24 - 89)       | 22<br>(11 - 37)        | 85<br>(51 - 142)        | 53<br>(29 - 90)          | 47<br>(27 - 79)          |
| Paralytic ileus and intestinal obstruction          | 384<br>(218 - 710)        | 21<br>(7 - 55)        | 13<br>(6 - 27)         | 70<br>(34 - 144)        | 101<br>(50 - 194)        | 178<br>(98 - 316)        |
| Inguinal, femoral, and abdominal hernia             | 87<br>(53 - 149)          | 11<br>(4 - 24)        | 7<br>(4 - 12)          | 21<br>(11 - 37)         | 17<br>(9 - 33)           | 32<br>(18 - 55)          |
| Inflammatory bowel disease                          | 175<br>(118 - 270)        | 32<br>(14 - 68)       | 12<br>(7 - 19)         | 51<br>(31 - 82)         | 35<br>(21 - 58)          | 45<br>(25 - 76)          |
| Vascular intestinal disorders                       | 62<br>(30 - 123)          | 4<br>(1 - 10)         | 3<br>(1 - 8)           | 20<br>(9 - 41)          | 17<br>(8 - 36)           | 19<br>(9 - 37)           |
| Gallbladder and biliary diseases                    | 401<br>(264 - 585)        | 33<br>(17 - 57)       | 10<br>(6 - 16)         | 71<br>(45 - 108)        | 113<br>(67 - 176)        | 174<br>(104 - 269)       |
| Pancreatitis                                        | 147<br>(65 - 257)         | 5<br>(2 - 12)         | 5<br>(2 - 10)          | 50<br>(24 - 92)         | 48<br>(20 - 86)          | 38<br>(15 - 75)          |
| Other digestive diseases                            | 354<br>(230 - 503)        | 50<br>(25 - 86)       | 15<br>(9 - 24)         | 81<br>(50 - 124)        | 92<br>(54 - 141)         | 115<br>(68 - 176)        |
| Neurological disorders                              | 4,034<br>(3,164 - 4,868)  | 172<br>(82 - 367)     | 102<br>(54 - 177)      | 353<br>(196 - 578)      | 465<br>(340 - 623)       | 2,942<br>(2,359 - 3,522) |
| Alzheimer disease and other dementias               | 3,275<br>(2,622 - 3,926)  | --                    | --                     | 3<br>(1 - 5)            | 390<br>(277 - 530)       | 2,882<br>(2,303 - 3,455) |
| Parkinson disease                                   | 22<br>(13 - 37)           | --                    | --                     | 2<br>(1 - 3)            | 5<br>(3 - 9)             | 15<br>(8 - 26)           |
| Epilepsy                                            | 608<br>(316 - 976)        | 126<br>(46 - 299)     | 90<br>(43 - 166)       | 311<br>(160 - 522)      | 53<br>(27 - 85)          | 28<br>(14 - 49)          |
| Multiple sclerosis                                  | 16<br>(5 - 29)            | --                    | --                     | 8<br>(2 - 15)           | 5<br>(2 - 10)            | 3<br>(1 - 5)             |
| Other neurological disorders                        | 114<br>(90 - 153)         | 46<br>(31 - 78)       | 12<br>(9 - 16)         | 30<br>(22 - 42)         | 11<br>(8 - 16)           | 15<br>(11 - 19)          |
| Mental and substance use disorders                  | 415<br>(299 - 611)        | 12<br>(7 - 21)        | 0<br>(0 - 0)           | 294<br>(206 - 456)      | 86<br>(58 - 138)         | 22<br>(16 - 34)          |
| Schizophrenia                                       | 11<br>(5 - 20)            | --                    | --                     | 6<br>(3 - 11)           | 3<br>(1 - 6)             | 2<br>(1 - 4)             |
| Alcohol use disorders                               | 101<br>(55 - 206)         | --                    | --                     | 55<br>(30 - 112)        | 37<br>(19 - 82)          | 9<br>(5 - 18)            |
| Drug use disorders                                  | 302<br>(205 - 496)        | 12<br>(7 - 21)        | --                     | 232<br>(151 - 400)      | 47<br>(29 - 72)          | 11<br>(7 - 17)           |
| Opioid use disorders                                | 166<br>(111 - 274)        | 7<br>(4 - 12)         | --                     | 129<br>(83 - 224)       | 24<br>(15 - 37)          | 6<br>(4 - 9)             |
| Cocaine use disorders                               | 4<br>(3 - 7)              | 0<br>(0 - 0)          | --                     | 4<br>(2 - 6)            | 0<br>(0 - 1)             | 0<br>(0 - 0)             |
| Amphetamine use disorders                           | 4<br>(3 - 6)              | 0<br>(0 - 0)          | --                     | 3<br>(2 - 5)            | 1<br>(0 - 1)             | 0<br>(0 - 0)             |

Web Table 31- Sudan deaths with 95% UI by age, sex, and cause in 2013

| Cause                                               | Both Sexes, All Ages       | Both Sexes, 0-4 Years     | Both Sexes, 5-14 Years | Both Sexes, 15-49 Years  | Both Sexes, 50-69 Years  | Both Sexes, 70-80 Years  |
|-----------------------------------------------------|----------------------------|---------------------------|------------------------|--------------------------|--------------------------|--------------------------|
| Other drug use disorders                            | 128<br>(87 - 208)          | 5<br>(2 - 8)              | --                     | 96<br>(63 - 164)         | 22<br>(14 - 34)          | 5<br>(3 - 7)             |
| Eating disorders                                    | 1<br>(1 - 2)               | --                        | 0<br>(0 - 0)           | 1<br>(0 - 1)             | --                       | --                       |
| Anorexia nervosa                                    | 1<br>(1 - 2)               | --                        | 0<br>(0 - 0)           | 1<br>(0 - 1)             | --                       | --                       |
| Diabetes, urogenital, blood, and endocrine diseases | 9,514<br>(7,203 - 12,594)  | 695<br>(441 - 1,050)      | 270<br>(185 - 358)     | 1,522<br>(1,090 - 2,096) | 3,334<br>(2,409 - 4,555) | 3,693<br>(2,790 - 4,893) |
| Diabetes mellitus                                   | 4,774<br>(3,655 - 6,522)   | 61<br>(40 - 90)           | 24<br>(14 - 39)        | 479<br>(345 - 657)       | 2,009<br>(1,443 - 2,828) | 2,201<br>(1,670 - 2,998) |
| Acute glomerulonephritis                            | 69                         | 9                         | 8                      | 19                       | 15                       | 17                       |
| Chronic kidney disease                              | 2,990<br>(1,586 - 4,598)   | 125<br>(56 - 219)         | 63<br>(30 - 102)       | 555<br>(318 - 888)       | 1,082<br>(583 - 1,737)   | 1,165<br>(566 - 1,820)   |
| Chronic kidney disease due to diabetes mellitus     | 57<br>(15 - 96)            | 3<br>(1 - 6)              | 2<br>(1 - 4)           | 14<br>(4 - 27)           | 20<br>(5 - 38)           | 17<br>(4 - 32)           |
| Chronic kidney disease due to hypertension          | 1,238<br>(650 - 1,894)     | 12<br>(4 - 28)            | 8<br>(3 - 13)          | 195<br>(98 - 306)        | 502<br>(253 - 799)       | 522<br>(286 - 806)       |
| Chronic kidney disease due to glomerulonephritis    | 332<br>(215 - 453)         | 42<br>(27 - 62)           | 19<br>(12 - 28)        | 91<br>(59 - 132)         | 88<br>(49 - 133)         | 92<br>(48 - 136)         |
| Chronic kidney disease due to other causes          | 1,363<br>(496 - 2,447)     | 68<br>(19 - 140)          | 34<br>(12 - 66)        | 255<br>(117 - 473)       | 472<br>(174 - 899)       | 534<br>(157 - 960)       |
| Urinary diseases and male infertility               | 408<br>(312 - 521)         | 45<br>(24 - 79)           | 13<br>(9 - 18)         | 77<br>(55 - 106)         | 101<br>(70 - 142)        | 171<br>(121 - 238)       |
| Interstitial nephritis and urinary tract infections | 221<br>(158 - 291)         | 29<br>(15 - 53)           | 6<br>(4 - 9)           | 42<br>(28 - 60)          | 51<br>(33 - 75)          | 93<br>(59 - 139)         |
| Urolithiasis                                        | 26<br>(17 - 39)            | --                        | 2<br>(1 - 3)           | 8<br>(4 - 12)            | 8<br>(4 - 13)            | 9<br>(5 - 18)            |
| Other urinary diseases                              | 161<br>(111 - 233)         | 17<br>(8 - 32)            | 4<br>(3 - 7)           | 28<br>(18 - 42)          | 43<br>(27 - 69)          | 69<br>(43 - 108)         |
| Gynecological diseases                              | 15<br>(7 - 29)             | --                        | --                     | 10<br>(5 - 20)           | 3<br>(1 - 6)             | 2<br>(1 - 4)             |
| Uterine fibroids                                    | 3<br>(1 - 6)               | --                        | --                     | 2<br>(1 - 3)             | 1<br>(0 - 2)             | 1<br>(0 - 1)             |
| Polycystic ovarian syndrome                         | 1<br>(0 - 1)               | --                        | --                     | 1<br>(0 - 1)             | 0<br>(0 - 0)             | --                       |
| Endometriosis                                       | 2<br>(1 - 4)               | --                        | --                     | 2<br>(1 - 3)             | 0<br>(0 - 0)             | --                       |
| Genital prolapse                                    | 2<br>(1 - 5)               | --                        | --                     | 1<br>(1 - 3)             | 0<br>(0 - 1)             | 1<br>(0 - 1)             |
| Other gynecological diseases                        | 7<br>(3 - 14)              | --                        | --                     | 5<br>(2 - 10)            | 1<br>(1 - 3)             | 1<br>(0 - 2)             |
| Hemoglobinopathies and hemolytic anemias            | 840<br>(460 - 1,201)       | 291<br>(140 - 487)        | 124<br>(68 - 183)      | 301<br>(161 - 457)       | 60<br>(34 - 102)         | 64<br>(37 - 112)         |
| Thalassemias                                        | 463<br>(241 - 686)         | 213<br>(101 - 360)        | 89<br>(49 - 131)       | 162<br>(87 - 247)        | 0<br>(0 - 0)             | 0<br>(0 - 0)             |
| Sickle cell disorders                               | 259<br>(142 - 381)         | 54<br>(26 - 93)           | 31<br>(17 - 45)        | 123<br>(65 - 186)        | 48<br>(27 - 81)          | 3<br>(2 - 6)             |
| G6PD deficiency                                     | 5<br>(3 - 7)               | 2<br>(1 - 3)              | 1<br>(0 - 1)           | 2<br>(1 - 3)             | 0<br>(0 - 1)             | 0<br>(0 - 1)             |
| Other hemoglobinopathies and hemolytic anemias      | 113<br>(66 - 171)          | 23<br>(12 - 35)           | 4<br>(2 - 6)           | 14<br>(8 - 21)           | 12<br>(7 - 20)           | 60<br>(34 - 106)         |
| Endocrine, metabolic, blood, and immune disorders   | 419<br>(261 - 601)         | 164<br>(88 - 306)         | 38<br>(20 - 60)        | 81<br>(52 - 117)         | 64<br>(38 - 91)          | 72<br>(36 - 105)         |
| Musculoskeletal disorders                           | 204<br>(120 - 286)         | --                        | 21<br>(11 - 30)        | 88<br>(46 - 134)         | 43<br>(27 - 62)          | 52<br>(33 - 73)          |
| Rheumatoid arthritis                                | 49<br>(30 - 69)            | --                        | 7<br>(3 - 11)          | 17<br>(9 - 27)           | 12<br>(7 - 19)           | 14<br>(8 - 23)           |
| Other musculoskeletal disorders                     | 155<br>(87 - 228)          | --                        | 14<br>(7 - 21)         | 71<br>(36 - 111)         | 32<br>(19 - 49)          | 38<br>(22 - 56)          |
| Other non-communicable diseases                     | 10,669<br>(6,233 - 18,170) | 9,654<br>(5,338 - 16,938) | 468<br>(293 - 749)     | 271<br>(179 - 415)       | 97<br>(70 - 131)         | 180<br>(134 - 237)       |
| Congenital anomalies                                | 10,331<br>(5,944 - 17,785) | 9,553<br>(5,278 - 16,751) | 456<br>(284 - 736)     | 224<br>(142 - 357)       | 45<br>(32 - 65)          | 53<br>(39 - 69)          |
| Neural tube defects                                 | 1,660<br>(431 - 4,288)     | 1,568<br>(402 - 4,015)    | 45<br>(8 - 162)        | 37<br>(8 - 112)          | 6<br>(1 - 22)            | 3<br>(1 - 12)            |
| Congenital heart anomalies                          | 4,632<br>(2,005 - 9,168)   | 4,331<br>(1,789 - 8,724)  | 213<br>(100 - 378)     | 68<br>(35 - 119)         | 9<br>(5 - 15)            | 11<br>(7 - 17)           |
| Cleft lip and cleft palate                          | 20<br>(5 - 44)             | 20<br>(5 - 44)            | --                     | --                       | --                       | --                       |
| Down syndrome                                       | 366<br>(93 - 891)          | 301<br>(69 - 776)         | 36<br>(11 - 75)        | 26<br>(8 - 60)           | 2<br>(1 - 3)             | 1<br>(0 - 1)             |
| Chromosomal unbalanced rearrangements               | 130<br>(19 - 388)          | 116<br>(16 - 360)         | 5<br>(1 - 12)          | 6<br>(1 - 15)            | 1<br>(0 - 3)             | 1<br>(0 - 2)             |
| Other congenital anomalies                          | 3,523<br>(1,314 - 7,947)   | 3,217<br>(1,144 - 7,482)  | 156<br>(69 - 291)      | 87<br>(46 - 157)         | 27<br>(17 - 41)          | 37<br>(25 - 51)          |
| Skin and subcutaneous diseases                      | 272<br>(196 - 347)         | 34<br>(16 - 59)           | 12<br>(7 - 18)         | 46<br>(27 - 66)          | 52<br>(35 - 73)          | 128<br>(87 - 180)        |
| Cellulitis                                          | 116<br>(49 - 199)          | 18<br>(7 - 34)            | 6<br>(3 - 10)          | 20<br>(9 - 35)           | 24<br>(10 - 42)          | 48<br>(17 - 91)          |

Web Table 31- Sudan deaths with 95% UI by age, sex, and cause in 2013

| Cause                                           | Both Sexes, All Ages        | Both Sexes, 0-4 Years    | Both Sexes, 5-14 Years | Both Sexes, 15-49 Years   | Both Sexes, 50-69 Years  | Both Sexes, 70-80 Years  |
|-------------------------------------------------|-----------------------------|--------------------------|------------------------|---------------------------|--------------------------|--------------------------|
| Pyoderma                                        | 99<br>(52 - 161)            | 15<br>(4 - 31)           | 4<br>(1 - 7)           | 17<br>(8 - 32)            | 20<br>(10 - 36)          | 43<br>(22 - 71)          |
| Decubitus ulcer                                 | 52<br>(22 - 84)             | 1<br>(0 - 3)             | 1<br>(1 - 3)           | 7<br>(2 - 13)             | 8<br>(3 - 14)            | 35<br>(15 - 62)          |
| Other skin and subcutaneous diseases            | 5<br>(1 - 13)               | 1<br>(0 - 3)             | 1<br>(0 - 2)           | 2<br>(0 - 6)              | 1<br>(0 - 2)             | 1<br>(0 - 1)             |
| Sudden infant death syndrome                    | 66<br>(16 - 209)            | 66<br>(16 - 209)         | --                     | --                        | --                       | --                       |
| Injuries                                        | 18,857<br>(14,459 - 23,875) | 2,113<br>(1,434 - 2,994) | 1,141<br>(846 - 1,475) | 9,827<br>(7,356 - 13,376) | 3,723<br>(2,714 - 4,756) | 2,052<br>(1,455 - 2,546) |
| Transport injuries                              | 8,668<br>(6,868 - 10,968)   | 601<br>(353 - 953)       | 506<br>(367 - 689)     | 4,470<br>(3,394 - 6,058)  | 2,161<br>(1,625 - 2,769) | 929<br>(714 - 1,163)     |
| Road injuries                                   | 8,209<br>(6,543 - 10,409)   | 534<br>(310 - 851)       | 454<br>(332 - 618)     | 4,219<br>(3,187 - 5,763)  | 2,098<br>(1,577 - 2,703) | 905<br>(697 - 1,135)     |
| Pedestrian road injuries                        | 2,533<br>(1,866 - 3,354)    | 196<br>(99 - 350)        | 136<br>(88 - 204)      | 1,069<br>(734 - 1,519)    | 738<br>(509 - 1,014)     | 396<br>(286 - 533)       |
| Cyclist road injuries                           | 686<br>(458 - 990)          | 70<br>(32 - 141)         | 78<br>(50 - 120)       | 327<br>(204 - 506)        | 158<br>(101 - 238)       | 52<br>(32 - 79)          |
| Motorcyclist road injuries                      | 1,275<br>(861 - 1,847)      | 56<br>(30 - 99)          | 51<br>(31 - 79)        | 989<br>(647 - 1,490)      | 141<br>(88 - 213)        | 38<br>(23 - 59)          |
| Motor vehicle road injuries                     | 3,564<br>(2,728 - 4,660)    | 173<br>(86 - 302)        | 152<br>(100 - 220)     | 1,798<br>(1,293 - 2,518)  | 1,037<br>(738 - 1,367)   | 405<br>(294 - 524)       |
| Other road injuries                             | 151<br>(56 - 231)           | 39<br>(11 - 84)          | 37<br>(10 - 70)        | 37<br>(16 - 67)           | 24<br>(9 - 44)           | 15<br>(5 - 29)           |
| Other transport injuries                        | 459<br>(256 - 640)          | 68<br>(32 - 118)         | 52<br>(25 - 87)        | 252<br>(137 - 379)        | 63<br>(30 - 98)          | 24<br>(12 - 36)          |
| Unintentional injuries                          | 6,210<br>(4,852 - 7,859)    | 1,359<br>(905 - 1,988)   | 546<br>(398 - 715)     | 2,832<br>(2,100 - 3,916)  | 733<br>(532 - 975)       | 740<br>(520 - 967)       |
| Falls                                           | 1,101<br>(690 - 1,719)      | 230<br>(87 - 498)        | 100<br>(55 - 171)      | 450<br>(242 - 812)        | 138<br>(86 - 202)        | 184<br>(118 - 269)       |
| Drowning                                        | 1,302<br>(935 - 1,826)      | 155<br>(93 - 268)        | 118<br>(73 - 185)      | 912<br>(613 - 1,357)      | 71<br>(47 - 103)         | 46<br>(32 - 63)          |
| Fire, heat, and hot substances                  | 729<br>(545 - 969)          | 237<br>(136 - 401)       | 51<br>(33 - 78)        | 254<br>(180 - 363)        | 97<br>(64 - 146)         | 91<br>(61 - 129)         |
| Poisonings                                      | 497<br>(304 - 788)          | 274<br>(127 - 541)       | 46<br>(22 - 80)        | 137<br>(92 - 231)         | 27<br>(17 - 43)          | 14<br>(9 - 22)           |
| Exposure to mechanical forces                   | 1,036<br>(753 - 1,617)      | 155<br>(85 - 282)        | 117<br>(72 - 187)      | 611<br>(397 - 1,007)      | 112<br>(73 - 177)        | 42<br>(29 - 67)          |
| Unintentional firearm injuries                  | 449<br>(281 - 769)          | 38<br>(18 - 80)          | 34<br>(18 - 66)        | 312<br>(173 - 578)        | 47<br>(26 - 91)          | 17<br>(10 - 32)          |
| Unintentional suffocation                       | 28<br>(4 - 62)              | 10<br>(1 - 36)           | 4<br>(1 - 10)          | 9<br>(1 - 17)             | 3<br>(0 - 6)             | 1<br>(0 - 2)             |
| Other exposure to mechanical forces             | 559<br>(393 - 877)          | 106<br>(52 - 203)        | 78<br>(43 - 133)       | 290<br>(178 - 504)        | 61<br>(37 - 106)         | 24<br>(15 - 37)          |
| Adverse effects of medical treatment            | 810<br>(496 - 1,141)        | 78<br>(40 - 137)         | 26<br>(14 - 41)        | 206<br>(123 - 306)        | 212<br>(117 - 336)       | 288<br>(146 - 473)       |
| Animal contact                                  | 104<br>(56 - 160)           | 35<br>(13 - 67)          | 21<br>(10 - 36)        | 28<br>(14 - 45)           | 9<br>(5 - 15)            | 11<br>(5 - 17)           |
| Venomous animal contact                         | 64<br>(30 - 103)            | 24<br>(8 - 50)           | 14<br>(6 - 24)         | 15<br>(7 - 25)            | 6<br>(3 - 9)             | 5<br>(2 - 9)             |
| Non-venomous animal contact                     | 41<br>(18 - 65)             | 11<br>(3 - 23)           | 7<br>(3 - 14)          | 13<br>(5 - 22)            | 4<br>(2 - 6)             | 6<br>(2 - 10)            |
| Foreign body                                    | 242<br>(87 - 396)           | 113<br>(35 - 212)        | 24<br>(8 - 42)         | 41<br>(23 - 61)           | 18<br>(5 - 37)           | 47<br>(11 - 104)         |
| Pulmonary aspiration and foreign body in airway | 235<br>(82 - 387)           | 111<br>(34 - 211)        | 23<br>(7 - 40)         | 39<br>(21 - 58)           | 17<br>(4 - 35)           | 46<br>(10 - 103)         |
| Foreign body in other body part                 | 7<br>(4 - 13)               | 1<br>(1 - 4)             | 1<br>(1 - 2)           | 3<br>(1 - 5)              | 1<br>(0 - 2)             | 1<br>(0 - 1)             |
| Other unintentional injuries                    | 388<br>(304 - 492)          | 84<br>(47 - 132)         | 45<br>(31 - 63)        | 193<br>(141 - 266)        | 50<br>(34 - 69)          | 17<br>(12 - 23)          |
| Self-harm and interpersonal violence            | 3,932<br>(1,682 - 5,521)    | 152<br>(19 - 311)        | 87<br>(33 - 152)       | 2,500<br>(1,269 - 3,669)  | 814<br>(253 - 1,204)     | 378<br>(53 - 572)        |
| Self-harm                                       | 2,590<br>(1,230 - 3,583)    | --                       | 53<br>(18 - 105)       | 1,516<br>(883 - 2,123)    | 697<br>(226 - 1,055)     | 324<br>(47 - 503)        |
| Interpersonal violence                          | 1,342<br>(338 - 2,207)      | 152<br>(19 - 311)        | 34<br>(10 - 60)        | 985<br>(271 - 1,696)      | 118<br>(22 - 208)        | 54<br>(4 - 109)          |
| Assault by firearm                              | 274<br>(62 - 514)           | 23<br>(2 - 66)           | 8<br>(2 - 17)          | 225<br>(54 - 439)         | 17<br>(3 - 36)           | 1<br>(0 - 4)             |
| Assault by sharp object                         | 561<br>(136 - 965)          | 44<br>(6 - 94)           | 6<br>(1 - 12)          | 459<br>(113 - 814)        | 41<br>(10 - 82)          | 10<br>(2 - 22)           |
| Assault by other means                          | 508<br>(100 - 899)          | 85<br>(10 - 203)         | 20<br>(5 - 44)         | 300<br>(71 - 555)         | 60<br>(6 - 120)          | 43<br>(2 - 90)           |
| Forces of nature, war, and legal intervention   | 46<br>(23 - 105)            | 1<br>(0 - 0)             | 2<br>(1 - 5)           | 24<br>(12 - 51)           | 14<br>(7 - 30)           | 5<br>(2 - 9)             |
| Exposure to forces of nature                    | 46<br>(23 - 105)            | 1<br>(0 - 0)             | 2<br>(1 - 5)           | 24<br>(12 - 51)           | 14<br>(7 - 30)           | 5<br>(2 - 9)             |

Web Table 31- Sudan deaths with 95% UI by age, sex, and cause in 2013

| Cause                                                             | Males, All Ages               | Males, 0-4 Years            | Males, 5-14 Years        | Males, 15-49 Years          | Males, 50-69 Years          | Males, 70-80 Years          |
|-------------------------------------------------------------------|-------------------------------|-----------------------------|--------------------------|-----------------------------|-----------------------------|-----------------------------|
| All causes                                                        | 113,991<br>(97,648 - 132,624) | 32,291<br>(28,182 - 36,876) | 3,913<br>(3,395 - 4,527) | 25,928<br>(20,287 - 34,829) | 25,676<br>(19,514 - 31,227) | 26,183<br>(22,600 - 28,376) |
| Communicable, maternal, neonatal, and nutritional diseases        | 37,966<br>(30,530 - 44,531)   | 24,187<br>(18,509 - 28,943) | 2,029<br>(1,583 - 2,568) | 6,734<br>(5,138 - 8,711)    | 2,544<br>(1,968 - 3,254)    | 2,472<br>(1,847 - 3,248)    |
| HIV/AIDS and tuberculosis                                         | 5,196<br>(3,823 - 6,914)      | 186<br>(136 - 253)          | 102<br>(74 - 132)        | 3,586<br>(2,460 - 5,107)    | 962<br>(727 - 1,216)        | 361<br>(245 - 519)          |
| Tuberculosis                                                      | 1,041<br>(619 - 1,638)        | 61<br>(32 - 111)            | 32<br>(18 - 55)          | 407<br>(215 - 687)          | 268<br>(148 - 458)          | 273<br>(161 - 422)          |
| HIV/AIDS                                                          | 4,154<br>(2,976 - 5,843)      | 124<br>(88 - 166)           | 69<br>(49 - 94)          | 3,179<br>(2,060 - 4,714)    | 694<br>(524 - 887)          | 88<br>(56 - 132)            |
| HIV/AIDS resulting in mycobacterial infection                     | 273<br>(186 - 398)            | 8<br>(5 - 11)               | 4<br>(3 - 6)             | 208<br>(130 - 317)          | 47<br>(33 - 63)             | 6<br>(4 - 10)               |
| HIV/AIDS resulting in other diseases                              | 3,882<br>(2,782 - 5,433)      | 116<br>(83 - 157)           | 65<br>(46 - 88)          | 2,971<br>(1,924 - 4,402)    | 647<br>(488 - 830)          | 81<br>(52 - 122)            |
| Diarrhea, lower respiratory, and other common infectious diseases | 13,698<br>(9,954 - 17,329)    | 8,759<br>(5,659 - 12,109)   | 883<br>(638 - 1,197)     | 1,488<br>(973 - 2,243)      | 937<br>(606 - 1,363)        | 1,630<br>(1,132 - 2,307)    |
| Diarrheal diseases                                                | 5,151<br>(2,081 - 8,702)      | 4,128<br>(1,519 - 7,396)    | 169<br>(47 - 373)        | 321<br>(106 - 646)          | 180<br>(58 - 373)           | 352<br>(116 - 715)          |
| Intestinal infectious diseases                                    | 843<br>(407 - 1,577)          | 272<br>(118 - 536)          | 270<br>(117 - 517)       | 263<br>(109 - 543)          | 28<br>(13 - 55)             | 10<br>(5 - 20)              |
| Typhoid fever                                                     | 593<br>(256 - 1,141)          | 173<br>(66 - 363)           | 202<br>(84 - 402)        | 192<br>(71 - 419)           | 19<br>(8 - 41)              | 7<br>(3 - 14)               |
| Paratyphoid fever                                                 | 178<br>(75 - 352)             | 59<br>(20 - 125)            | 59<br>(21 - 122)         | 54<br>(19 - 119)            | 4<br>(2 - 10)               | 1<br>(0 - 4)                |
| Other intestinal infectious diseases                              | 72<br>(46 - 105)              | 40<br>(21 - 65)             | 9<br>(3 - 18)            | 17<br>(8 - 32)              | 4<br>(1 - 9)                | 2<br>(0 - 7)                |
| Lower respiratory infections                                      | 5,846<br>(4,145 - 7,992)      | 3,112<br>(1,707 - 5,123)    | 258<br>(148 - 419)       | 634<br>(397 - 1,002)        | 641<br>(395 - 976)          | 1,201<br>(795 - 1,778)      |
| Upper respiratory infections                                      | 11<br>(4 - 21)                | 3<br>(0 - 11)               | 1<br>(0 - 2)             | 3<br>(1 - 8)                | 2<br>(0 - 6)                | 2<br>(0 - 5)                |
| Otitis media                                                      | 10<br>(6 - 15)                | 2<br>(1 - 4)                | 1<br>(1 - 2)             | 3<br>(2 - 5)                | 1<br>(1 - 2)                | 2<br>(1 - 3)                |
| Meningitis                                                        | 911<br>(536 - 1,611)          | 571<br>(240 - 1,210)        | 79<br>(35 - 150)         | 160<br>(82 - 288)           | 56<br>(29 - 101)            | 45<br>(22 - 81)             |
| Pneumococcal meningitis                                           | 192<br>(110 - 369)            | 104<br>(40 - 243)           | 20<br>(8 - 42)           | 44<br>(19 - 87)             | 14<br>(6 - 26)              | 11<br>(4 - 21)              |
| H influenzae type B meningitis                                    | 260<br>(134 - 479)            | 208<br>(82 - 439)           | 20<br>(8 - 42)           | 21<br>(8 - 44)              | 6<br>(2 - 12)               | 5<br>(2 - 10)               |
| Meningococcal meningitis                                          | 263<br>(145 - 488)            | 167<br>(62 - 384)           | 24<br>(10 - 48)          | 47<br>(22 - 86)             | 13<br>(5 - 27)              | 12<br>(5 - 24)              |
| Other meningitis                                                  | 196<br>(106 - 386)            | 92<br>(29 - 245)            | 14<br>(6 - 34)           | 48<br>(14 - 99)             | 24<br>(10 - 45)             | 18<br>(8 - 35)              |
| Encephalitis                                                      | 201<br>(105 - 407)            | 122<br>(35 - 333)           | 19<br>(10 - 31)          | 39<br>(23 - 63)             | 11<br>(7 - 18)              | 8<br>(5 - 12)               |
| Diphtheria                                                        | 5<br>(0 - 28)                 | 4<br>(0 - 26)               | 1<br>(0 - 8)             | 0<br>(0 - 2)                | 0<br>(0 - 1)                | -                           |
| Whooping cough                                                    | 90<br>(0 - 433)               | 84<br>(0 - 409)             | 5<br>(0 - 24)            | 1<br>(0 - 5)                | 0<br>(0 - 0)                | -                           |
| Tetanus                                                           | 135<br>(33 - 456)             | 43<br>(17 - 114)            | 21<br>(1 - 94)           | 50<br>(4 - 191)             | 16<br>(1 - 56)              | 6<br>(0 - 19)               |
| Measles                                                           | 476<br>(190 - 1,016)          | 409<br>(160 - 887)          | 58<br>(25 - 121)         | 8<br>(3 - 17)               | 0<br>(0 - 0)                | -                           |
| Varicella and herpes zoster                                       | 19<br>(6 - 45)                | 7<br>(0 - 28)               | 2<br>(0 - 9)             | 4<br>(1 - 12)               | 1<br>(0 - 5)                | 4<br>(0 - 17)               |
| Neglected tropical diseases and malaria                           | 5,598<br>(3,454 - 9,335)      | 2,666<br>(1,073 - 5,766)    | 919<br>(552 - 1,425)     | 1,389<br>(851 - 2,301)      | 417<br>(258 - 690)          | 207<br>(103 - 435)          |
| Malaria                                                           | 3,160<br>(1,326 - 6,839)      | 1,607<br>(290 - 4,799)      | 498<br>(195 - 1,032)     | 645<br>(234 - 1,463)        | 250<br>(105 - 515)          | 160<br>(59 - 388)           |
| Leishmaniasis                                                     | 2,198<br>(1,523 - 3,080)      | 1,010<br>(533 - 1,739)      | 386<br>(247 - 579)       | 647<br>(404 - 1,003)        | 130<br>(78 - 198)           | 25<br>(16 - 36)             |
| Visceral leishmaniasis                                            | 2,198<br>(1,523 - 3,080)      | 1,010<br>(533 - 1,739)      | 386<br>(247 - 579)       | 647<br>(404 - 1,003)        | 130<br>(78 - 198)           | 25<br>(16 - 36)             |
| Schistosomiasis                                                   | 50<br>(33 - 74)               | 1<br>(0 - 1)                | 2<br>(1 - 4)             | 21<br>(12 - 35)             | 18<br>(10 - 30)             | 9<br>(4 - 15)               |
| Cysticercosis                                                     | 0<br>(0 - 1)                  | 0<br>(0 - 0)                | 0<br>(0 - 0)             | 0<br>(0 - 0)                | 0<br>(0 - 0)                | 0<br>(0 - 0)                |
| Cystic echinococcosis                                             | 47<br>(37 - 61)               | 4<br>(2 - 7)                | 9<br>(7 - 11)            | 23<br>(17 - 33)             | 8<br>(6 - 10)               | 3<br>(3 - 4)                |
| Dengue                                                            | 7<br>(3 - 10)                 | 1<br>(0 - 3)                | 1<br>(1 - 2)             | 3<br>(2 - 5)                | 0<br>(0 - 1)                | 0<br>(0 - 0)                |
| Yellow fever                                                      | 12<br>(4 - 33)                | 1<br>(0 - 5)                | 3<br>(0 - 12)            | 7<br>(1 - 22)               | 1<br>(0 - 5)                | 0<br>(0 - 2)                |
| Rabies                                                            | 25<br>(12 - 71)               | 5<br>(1 - 17)               | 7<br>(3 - 19)            | 11<br>(5 - 29)              | 2<br>(1 - 5)                | 0<br>(0 - 1)                |
| Intestinal nematode infections                                    | 19<br>(7 - 37)                | 13<br>(4 - 29)              | 3<br>(0 - 10)            | 2<br>(0 - 7)                | 1<br>(0 - 4)                | 0<br>(0 - 3)                |
| Ascariasis                                                        | 19<br>(7 - 37)                | 13<br>(4 - 29)              | 3<br>(0 - 10)            | 2<br>(0 - 7)                | 1<br>(0 - 4)                | 0<br>(0 - 3)                |
| Other neglected tropical diseases                                 | 79<br>(20 - 168)              | 22<br>(3 - 62)              | 10<br>(2 - 25)           | 31<br>(7 - 76)              | 8<br>(2 - 19)               | 9<br>(2 - 24)               |

Web Table 31- Sudan deaths with 95% UI by age, sex, and cause in 2013

| Cause                                                            | Males, All Ages             | Males, 0-4 Years           | Males, 5-14 Years      | Males, 15-49 Years         | Males, 50-69 Years          | Males, 70-80 Years          |
|------------------------------------------------------------------|-----------------------------|----------------------------|------------------------|----------------------------|-----------------------------|-----------------------------|
| Maternal disorders                                               | --                          | --                         | --                     | --                         | --                          | --                          |
| Maternal hemorrhage                                              | --                          | --                         | --                     | --                         | --                          | --                          |
| Maternal sepsis and other maternal infections                    | --                          | --                         | --                     | --                         | --                          | --                          |
| Maternal hypertensive disorders                                  | --                          | --                         | --                     | --                         | --                          | --                          |
| Maternal obstructed labor                                        | --                          | --                         | --                     | --                         | --                          | --                          |
| Maternal abortive outcome                                        | --                          | --                         | --                     | --                         | --                          | --                          |
| Indirect maternal deaths                                         | --                          | --                         | --                     | --                         | --                          | --                          |
| Late maternal deaths                                             | --                          | --                         | --                     | --                         | --                          | --                          |
| Maternal deaths aggravated by HIV/AIDS                           | --                          | --                         | --                     | --                         | --                          | --                          |
| Other maternal disorders                                         | --                          | --                         | --                     | --                         | --                          | --                          |
| Neonatal disorders                                               | 11,542<br>(8,695 - 14,658)  | 11,542<br>(8,695 - 14,658) | --                     | --                         | --                          | --                          |
| Neonatal preterm birth complications                             | 8,923<br>(6,400 - 11,268)   | 8,923<br>(6,400 - 11,268)  | --                     | --                         | --                          | --                          |
| Neonatal encephalopathy due to birth asphyxia and trauma         | 923<br>(300 - 2,148)        | 923<br>(300 - 2,148)       | --                     | --                         | --                          | --                          |
| Neonatal sepsis and other neonatal infections                    | 359<br>(89 - 833)           | 359<br>(89 - 833)          | --                     | --                         | --                          | --                          |
| Hemolytic disease and other neonatal jaundice                    | 33<br>(9 - 103)             | 33<br>(9 - 103)            | --                     | --                         | --                          | --                          |
| Other neonatal disorders                                         | 1,303<br>(314 - 3,018)      | 1,303<br>(314 - 3,018)     | --                     | --                         | --                          | --                          |
| Nutritional deficiencies                                         | 658<br>(321 - 1,647)        | 228<br>(83 - 624)          | 41<br>(19 - 92)        | 119<br>(54 - 303)          | 91<br>(41 - 230)            | 179<br>(80 - 425)           |
| Protein-energy malnutrition                                      | 196<br>(59 - 606)           | 139<br>(26 - 440)          | 9<br>(2 - 27)          | 16<br>(4 - 55)             | 9<br>(2 - 35)               | 23<br>(4 - 81)              |
| Iodine deficiency                                                | 9<br>(1 - 35)               | 3<br>(0 - 24)              | 1<br>(0 - 7)           | 2<br>(0 - 10)              | 1<br>(0 - 8)                | 1<br>(0 - 11)               |
| Iron-deficiency anemia                                           | 401<br>(178 - 963)          | 72<br>(11 - 231)           | 26<br>(9 - 64)         | 85<br>(33 - 222)           | 75<br>(32 - 189)            | 143<br>(61 - 351)           |
| Other nutritional deficiencies                                   | 51<br>(14 - 169)            | 14<br>(1 - 60)             | 6<br>(1 - 18)          | 15<br>(4 - 45)             | 5<br>(1 - 18)               | 11<br>(2 - 37)              |
| Other communicable, maternal, neonatal, and nutritional diseases | 1,275<br>(676 - 2,121)      | 807<br>(251 - 1,600)       | 84<br>(37 - 146)       | 153<br>(90 - 272)          | 137<br>(71 - 242)           | 95<br>(48 - 203)            |
| Sexually transmitted diseases excluding HIV                      | 797<br>(198 - 1,623)        | 677<br>(125 - 1,444)       | 56<br>(14 - 114)       | 33<br>(15 - 104)           | 13<br>(5 - 45)              | 17<br>(6 - 51)              |
| Syphilis                                                         | 772<br>(177 - 1,606)        | 677<br>(125 - 1,444)       | 54<br>(12 - 111)       | 17<br>(8 - 54)             | 10<br>(4 - 33)              | 14<br>(5 - 43)              |
| Chlamydial infection                                             | --                          | --                         | --                     | --                         | --                          | --                          |
| Gonococcal infection                                             | 14<br>(7 - 44)              | --                         | 1<br>(1 - 4)           | 9<br>(4 - 27)              | 2<br>(1 - 8)                | 2<br>(1 - 6)                |
| Other sexually transmitted diseases                              | 11<br>(5 - 32)              | --                         | 1<br>(1 - 4)           | 7<br>(3 - 22)              | 1<br>(0 - 4)                | 1<br>(0 - 2)                |
| Hepatitis                                                        | 193<br>(108 - 332)          | 25<br>(8 - 53)             | 6<br>(3 - 11)          | 56<br>(28 - 101)           | 77<br>(40 - 145)            | 29<br>(16 - 57)             |
| Acute hepatitis A                                                | 19<br>(5 - 43)              | 12<br>(3 - 30)             | 2<br>(1 - 5)           | 3<br>(1 - 9)               | 1<br>(0 - 4)                | 0<br>(0 - 1)                |
| Acute hepatitis B                                                | 114<br>(56 - 198)           | 13<br>(3 - 30)             | 2<br>(1 - 5)           | 21<br>(8 - 45)             | 54<br>(25 - 100)            | 24<br>(12 - 47)             |
| Acute hepatitis C                                                | 11<br>(2 - 34)              | --                         | 1<br>(0 - 2)           | 3<br>(0 - 9)               | 5<br>(1 - 18)               | 2<br>(0 - 8)                |
| Acute hepatitis E                                                | 49<br>(21 - 107)            | 0<br>(0 - 1)               | 1<br>(0 - 3)           | 28<br>(12 - 56)            | 17<br>(6 - 41)              | 3<br>(1 - 9)                |
| Other infectious diseases                                        | 285<br>(146 - 641)          | 105<br>(32 - 283)          | 21<br>(8 - 50)         | 64<br>(29 - 151)           | 46<br>(16 - 131)            | 49<br>(13 - 149)            |
| Non-communicable diseases                                        | 62,799<br>(50,157 - 76,771) | 6,920<br>(4,279 - 12,173)  | 1,127<br>(856 - 1,509) | 11,252<br>(8,164 - 16,182) | 20,929<br>(15,773 - 25,832) | 22,571<br>(19,251 - 24,750) |
| Neoplasms                                                        | 7,433<br>(5,600 - 9,450)    | 124<br>(63 - 258)          | 223<br>(160 - 305)     | 1,556<br>(1,068 - 2,286)   | 3,151<br>(2,244 - 4,099)    | 2,380<br>(1,910 - 2,835)    |
| Esophageal cancer                                                | 155<br>(100 - 222)          | --                         | --                     | 29<br>(17 - 49)            | 71<br>(44 - 107)            | 54<br>(34 - 78)             |
| Stomach cancer                                                   | 1,150<br>(793 - 1,613)      | --                         | --                     | 230<br>(142 - 349)         | 534<br>(343 - 767)          | 386<br>(264 - 560)          |
| Liver cancer                                                     | 533<br>(346 - 775)          | --                         | 5<br>(2 - 10)          | 75<br>(41 - 136)           | 284<br>(177 - 430)          | 169<br>(107 - 256)          |
| Liver cancer due to hepatitis B                                  | 176<br>(82 - 299)           | --                         | 2<br>(1 - 5)           | 35<br>(18 - 62)            | 98<br>(30 - 177)            | 42<br>(16 - 75)             |
| Liver cancer due to hepatitis C                                  | 198<br>(93 - 357)           | --                         | 0<br>(0 - 1)           | 19<br>(6 - 42)             | 107<br>(44 - 205)           | 71<br>(38 - 122)            |

Web Table 31- Sudan deaths with 95% UI by age, sex, and cause in 2013

| Cause                                | Males, All Ages             | Males, 0-4 Years     | Males, 5-14 Years  | Males, 15-49 Years       | Males, 50-69 Years         | Males, 70-80 Years          |
|--------------------------------------|-----------------------------|----------------------|--------------------|--------------------------|----------------------------|-----------------------------|
| Liver cancer due to alcohol use      | 106<br>(58 - 178)           | --                   | --                 | 9<br>(3 - 19)            | 53<br>(27 - 93)            | 44<br>(22 - 78)             |
| Liver cancer due to other causes     | 53<br>(19 - 110)            | --                   | 2<br>(1 - 5)       | 12<br>(5 - 23)           | 27<br>(7 - 60)             | 13<br>(4 - 27)              |
| Larynx cancer                        | 168<br>(112 - 277)          | --                   | --                 | 23<br>(14 - 44)          | 84<br>(53 - 146)           | 60<br>(40 - 90)             |
| Tracheal, bronchus and lung cancer   | 1,514<br>(954 - 2,011)      | --                   | --                 | 198<br>(96 - 310)        | 796<br>(489 - 1,105)       | 520<br>(355 - 671)          |
| Breast cancer                        | 24<br>(14 - 38)             | --                   | --                 | 8<br>(4 - 14)            | 10<br>(5 - 19)             | 6<br>(3 - 11)               |
| Cervical cancer                      | --                          | --                   | --                 | --                       | --                         | --                          |
| Uterine cancer                       | --                          | --                   | --                 | --                       | --                         | --                          |
| Prostate cancer                      | 389<br>(235 - 585)          | --                   | --                 | 6<br>(3 - 10)            | 98<br>(54 - 158)           | 285<br>(168 - 446)          |
| Colon and rectum cancer              | 546<br>(404 - 704)          | --                   | --                 | 115<br>(77 - 168)        | 246<br>(173 - 327)         | 186<br>(140 - 237)          |
| Lip and oral cavity cancer           | 81<br>(47 - 131)            | --                   | --                 | 22<br>(10 - 39)          | 38<br>(21 - 61)            | 21<br>(13 - 32)             |
| Nasopharynx cancer                   | 56<br>(36 - 81)             | --                   | 3<br>(1 - 8)       | 22<br>(13 - 36)          | 22<br>(13 - 36)            | 8<br>(5 - 14)               |
| Other pharynx cancer                 | 33<br>(20 - 54)             | --                   | --                 | 9<br>(5 - 18)            | 18<br>(10 - 30)            | 6<br>(4 - 9)                |
| Gallbladder and biliary tract cancer | 64<br>(41 - 94)             | --                   | --                 | 8<br>(5 - 13)            | 31<br>(18 - 47)            | 26<br>(16 - 39)             |
| Pancreatic cancer                    | 178<br>(129 - 237)          | --                   | --                 | 25<br>(16 - 38)          | 91<br>(62 - 126)           | 62<br>(45 - 84)             |
| Malignant skin melanoma              | 22<br>(10 - 35)             | --                   | --                 | 7<br>(4 - 13)            | 8<br>(4 - 14)              | 6<br>(3 - 10)               |
| Non-melanoma skin cancer             | 27<br>(16 - 49)             | --                   | --                 | 8<br>(4 - 15)            | 8<br>(4 - 16)              | 11<br>(5 - 20)              |
| Ovarian cancer                       | --                          | --                   | --                 | --                       | --                         | --                          |
| Testicular cancer                    | 20<br>(12 - 31)             | --                   | --                 | 15<br>(9 - 25)           | 3<br>(2 - 4)               | 2<br>(1 - 3)                |
| Kidney cancer                        | 100<br>(71 - 137)           | 4<br>(1 - 9)         | 3<br>(1 - 5)       | 18<br>(10 - 29)          | 50<br>(31 - 71)            | 26<br>(17 - 39)             |
| Bladder cancer                       | 435<br>(310 - 610)          | --                   | --                 | 40<br>(24 - 63)          | 205<br>(133 - 309)         | 190<br>(132 - 266)          |
| Brain and nervous system cancer      | 403<br>(235 - 939)          | 24<br>(7 - 82)       | 47<br>(20 - 90)    | 144<br>(73 - 428)        | 138<br>(76 - 354)          | 50<br>(28 - 90)             |
| Thyroid cancer                       | 23<br>(15 - 37)             | --                   | 1<br>(0 - 1)       | 6<br>(3 - 12)            | 10<br>(6 - 17)             | 6<br>(4 - 9)                |
| Mesothelioma                         | 9<br>(5 - 14)               | --                   | --                 | 2<br>(1 - 5)             | 4<br>(2 - 7)               | 3<br>(1 - 5)                |
| Hodgkin lymphoma                     | 54<br>(20 - 124)            | 3<br>(1 - 9)         | 7<br>(2 - 20)      | 28<br>(9 - 68)           | 11<br>(4 - 26)             | 4<br>(2 - 10)               |
| Non-Hodgkin lymphoma                 | 302<br>(212 - 432)          | 10<br>(4 - 24)       | 18<br>(10 - 30)    | 110<br>(68 - 182)        | 100<br>(66 - 146)          | 65<br>(45 - 90)             |
| Multiple myeloma                     | 53<br>(28 - 91)             | --                   | --                 | 10<br>(5 - 20)           | 26<br>(14 - 45)            | 17<br>(9 - 28)              |
| Leukemia                             | 596<br>(432 - 785)          | 32<br>(13 - 69)      | 90<br>(58 - 131)   | 242<br>(164 - 359)       | 126<br>(85 - 177)          | 106<br>(76 - 139)           |
| Other neoplasms                      | 498<br>(313 - 1,114)        | 52<br>(23 - 127)     | 49<br>(28 - 86)    | 157<br>(87 - 412)        | 138<br>(75 - 332)          | 102<br>(62 - 181)           |
| Cardiovascular diseases              | 33,128<br>(26,044 - 40,561) | 826<br>(518 - 1,294) | 304<br>(202 - 441) | 6,482<br>(4,608 - 9,375) | 12,635<br>(9,351 - 15,879) | 12,882<br>(10,855 - 14,559) |
| Rheumatic heart disease              | 427<br>(258 - 780)          | 24<br>(8 - 57)       | 29<br>(15 - 51)    | 172<br>(97 - 319)        | 108<br>(59 - 203)          | 94<br>(56 - 180)            |
| Ischemic heart disease               | 19,149<br>(14,138 - 24,344) | 141<br>(52 - 289)    | 50<br>(27 - 80)    | 3,893<br>(2,620 - 5,831) | 8,285<br>(5,868 - 10,609)  | 6,781<br>(5,289 - 8,185)    |
| Cerebrovascular disease              | 9,271<br>(6,790 - 11,885)   | 262<br>(136 - 446)   | 128<br>(76 - 191)  | 1,321<br>(859 - 1,955)   | 2,916<br>(2,039 - 3,973)   | 4,644<br>(3,468 - 5,732)    |
| Ischemic stroke                      | 4,340<br>(2,384 - 6,287)    | 24<br>(6 - 68)       | 13<br>(5 - 28)     | 286<br>(107 - 600)       | 1,182<br>(575 - 1,933)     | 2,835<br>(1,624 - 3,758)    |
| Hemorrhagic stroke                   | 4,930<br>(3,400 - 6,806)    | 239<br>(122 - 403)   | 114<br>(69 - 172)  | 1,034<br>(651 - 1,588)   | 1,734<br>(1,145 - 2,530)   | 1,809<br>(1,231 - 2,563)    |
| Hypertensive heart disease           | 1,065<br>(601 - 1,880)      | 5<br>(1 - 11)        | 3<br>(1 - 6)       | 181<br>(78 - 317)        | 382<br>(201 - 682)         | 495<br>(276 - 927)          |
| Cardiomyopathy and myocarditis       | 738<br>(438 - 1,074)        | 134<br>(35 - 271)    | 36<br>(14 - 65)    | 223<br>(115 - 369)       | 193<br>(114 - 296)         | 152<br>(89 - 235)           |
| Atrial fibrillation and flutter      | 7<br>(4 - 14)               | --                   | --                 | 1<br>(0 - 2)             | 2<br>(1 - 4)               | 4<br>(2 - 8)                |
| Aortic aneurysm                      | 212<br>(131 - 307)          | --                   | --                 | 27<br>(14 - 44)          | 112<br>(65 - 171)          | 74<br>(46 - 110)            |
| Peripheral vascular disease          | 7<br>(4 - 11)               | --                   | --                 | 1<br>(0 - 2)             | 2<br>(1 - 4)               | 4<br>(2 - 7)                |
| Endocarditis                         | 151<br>(76 - 252)           | 23<br>(8 - 48)       | 5<br>(2 - 11)      | 35<br>(17 - 65)          | 44<br>(22 - 78)            | 44<br>(20 - 76)             |

Web Table 31- Sudan deaths with 95% UI by age, sex, and cause in 2013

| Cause                                               | Males, All Ages          | Males, 0-4 Years   | Males, 5-14 Years | Males, 15-49 Years   | Males, 50-69 Years       | Males, 70-80 Years       |
|-----------------------------------------------------|--------------------------|--------------------|-------------------|----------------------|--------------------------|--------------------------|
| Other cardiovascular and circulatory diseases       | 2,101<br>(803 - 4,795)   | 238<br>(85 - 468)  | 53<br>(18 - 101)  | 629<br>(214 - 1,319) | 590<br>(204 - 1,502)     | 590<br>(221 - 1,524)     |
| Chronic respiratory diseases                        | 5,424<br>(3,845 - 8,364) | 253<br>(125 - 458) | 69<br>(46 - 109)  | 654<br>(408 - 1,106) | 1,684<br>(1,096 - 2,758) | 2,763<br>(1,970 - 4,240) |
| Chronic obstructive pulmonary disease               | 4,235<br>(2,892 - 6,716) | 144<br>(64 - 285)  | 26<br>(15 - 43)   | 363<br>(203 - 600)   | 1,335<br>(842 - 2,203)   | 2,367<br>(1,667 - 3,726) |
| Pneumoconiosis                                      | 159<br>(80 - 284)        | 4<br>(1 - 11)      | 3<br>(2 - 6)      | 64<br>(32 - 120)     | 45<br>(19 - 85)          | 42<br>(19 - 79)          |
| Silicosis                                           | 39<br>(14 - 91)          | 1<br>(0 - 4)       | 1<br>(0 - 2)      | 5<br>(2 - 11)        | 9<br>(2 - 24)            | 24<br>(8 - 53)           |
| Asbestosis                                          | 14<br>(7 - 25)           | 1<br>(0 - 2)       | 1<br>(0 - 1)      | 10<br>(4 - 18)       | 2<br>(1 - 5)             | 0<br>(0 - 1)             |
| Coal workers pneumoconiosis                         | 6<br>(3 - 11)            | 1<br>(0 - 2)       | 1<br>(0 - 1)      | 3<br>(1 - 7)         | 1<br>(0 - 1)             | 0<br>(0 - 1)             |
| Other pneumoconiosis                                | 100<br>(51 - 176)        | 1<br>(0 - 4)       | 1<br>(0 - 2)      | 47<br>(23 - 87)      | 34<br>(16 - 62)          | 17<br>(7 - 35)           |
| Asthma                                              | 755<br>(314 - 1,316)     | 66<br>(20 - 150)   | 30<br>(14 - 52)   | 189<br>(77 - 357)    | 227<br>(78 - 433)        | 243<br>(86 - 449)        |
| Interstitial lung disease and pulmonary sarcoidosis | 162<br>(37 - 319)        | 1<br>(0 - 4)       | 1<br>(0 - 3)      | 12<br>(3 - 32)       | 59<br>(12 - 133)         | 89<br>(19 - 191)         |
| Other chronic respiratory diseases                  | 113<br>(52 - 207)        | 39<br>(17 - 77)    | 8<br>(4 - 16)     | 26<br>(11 - 51)      | 17<br>(6 - 36)           | 23<br>(8 - 48)           |
| Cirrhosis                                           | 2,395<br>(1,310 - 4,492) | 98<br>(31 - 231)   | 53<br>(27 - 103)  | 662<br>(328 - 1,323) | 1,004<br>(513 - 1,949)   | 577<br>(312 - 1,074)     |
| Cirrhosis due to hepatitis B                        | 543<br>(188 - 1,064)     | 5<br>(1 - 14)      | 8<br>(2 - 20)     | 148<br>(52 - 335)    | 237<br>(77 - 474)        | 146<br>(49 - 282)        |
| Cirrhosis due to hepatitis C                        | 1,225<br>(522 - 2,475)   | 10<br>(1 - 29)     | 17<br>(3 - 40)    | 368<br>(143 - 772)   | 555<br>(221 - 1,146)     | 274<br>(116 - 593)       |
| Cirrhosis due to alcohol use                        | 326<br>(149 - 722)       | --                 | --                | 55<br>(24 - 117)     | 143<br>(62 - 312)        | 128<br>(56 - 318)        |
| Cirrhosis due to other causes                       | 300<br>(141 - 557)       | 83<br>(26 - 201)   | 29<br>(14 - 56)   | 90<br>(38 - 181)     | 68<br>(26 - 137)         | 30<br>(12 - 60)          |
| Digestive diseases                                  | 1,776<br>(1,096 - 2,715) | 133<br>(58 - 262)  | 63<br>(37 - 101)  | 481<br>(269 - 833)   | 493<br>(288 - 823)       | 606<br>(372 - 877)       |
| Peptic ulcer disease                                | 750<br>(402 - 1,314)     | 14<br>(3 - 39)     | 15<br>(6 - 27)    | 188<br>(88 - 386)    | 246<br>(126 - 457)       | 288<br>(153 - 472)       |
| Gastritis and duodenitis                            | 34<br>(10 - 98)          | 5<br>(1 - 16)      | 4<br>(1 - 13)     | 14<br>(4 - 41)       | 5<br>(1 - 16)            | 6<br>(2 - 22)            |
| Appendicitis                                        | 140<br>(74 - 237)        | 26<br>(9 - 57)     | 11<br>(5 - 21)    | 53<br>(25 - 97)      | 26<br>(12 - 49)          | 23<br>(10 - 42)          |
| Paralytic ileus and intestinal obstruction          | 210<br>(88 - 429)        | 12<br>(3 - 39)     | 8<br>(3 - 18)     | 44<br>(17 - 104)     | 57<br>(22 - 130)         | 88<br>(35 - 178)         |
| Inguinal, femoral, and abdominal hernia             | 48<br>(24 - 94)          | 7<br>(2 - 18)      | 3<br>(1 - 7)      | 14<br>(6 - 28)       | 8<br>(3 - 18)            | 16<br>(7 - 34)           |
| Inflammatory bowel disease                          | 94<br>(52 - 160)         | 19<br>(5 - 47)     | 6<br>(3 - 10)     | 29<br>(15 - 54)      | 18<br>(9 - 32)           | 23<br>(10 - 44)          |
| Vascular intestinal disorders                       | 36<br>(12 - 89)          | 3<br>(0 - 10)      | 3<br>(1 - 7)      | 13<br>(4 - 33)       | 10<br>(3 - 26)           | 8<br>(2 - 20)            |
| Gallbladder and biliary diseases                    | 171<br>(92 - 280)        | 14<br>(4 - 30)     | 5<br>(3 - 9)      | 34<br>(16 - 61)      | 44<br>(20 - 83)          | 74<br>(36 - 133)         |
| Pancreatitis                                        | 76<br>(28 - 149)         | 2<br>(1 - 6)       | 2<br>(1 - 4)      | 34<br>(13 - 72)      | 22<br>(8 - 44)           | 16<br>(5 - 35)           |
| Other digestive diseases                            | 216<br>(118 - 338)       | 30<br>(11 - 63)    | 6<br>(3 - 12)     | 57<br>(29 - 94)      | 58<br>(28 - 100)         | 65<br>(28 - 115)         |
| Neurological disorders                              | 2,128<br>(1,616 - 2,695) | 91<br>(34 - 236)   | 51<br>(22 - 102)  | 212<br>(105 - 387)   | 242<br>(154 - 346)       | 1,533<br>(1,189 - 1,919) |
| Alzheimer disease and other dementias               | 1,702<br>(1,311 - 2,139) | --                 | --                | 1<br>(0 - 4)         | 202<br>(128 - 293)       | 1,499<br>(1,161 - 1,883) |
| Parkinson disease                                   | 16<br>(8 - 31)           | --                 | --                | 1<br>(1 - 2)         | 4<br>(2 - 8)             | 11<br>(5 - 22)           |
| Epilepsy                                            | 344<br>(162 - 620)       | 71<br>(22 - 209)   | 46<br>(18 - 97)   | 184<br>(84 - 343)    | 29<br>(13 - 50)          | 15<br>(7 - 27)           |
| Multiple sclerosis                                  | 8<br>(2 - 14)            | --                 | --                | 4<br>(1 - 9)         | 2<br>(1 - 4)             | 1<br>(0 - 2)             |
| Other neurological disorders                        | 58<br>(38 - 95)          | 20<br>(9 - 48)     | 5<br>(3 - 8)      | 21<br>(14 - 34)      | 5<br>(3 - 9)             | 7<br>(4 - 9)             |
| Mental and substance use disorders                  | 294<br>(189 - 485)       | 9<br>(4 - 16)      | 0<br>(0 - 0)      | 212<br>(129 - 370)   | 61<br>(38 - 102)         | 12<br>(8 - 19)           |
| Schizophrenia                                       | 5<br>(2 - 12)            | --                 | --                | 3<br>(1 - 7)         | 1<br>(0 - 3)             | 1<br>(0 - 2)             |
| Alcohol use disorders                               | 67<br>(37 - 145)         | --                 | --                | 39<br>(20 - 81)      | 22<br>(11 - 56)          | 6<br>(3 - 12)            |
| Drug use disorders                                  | 222<br>(135 - 404)       | 9<br>(4 - 16)      | --                | 170<br>(96 - 326)    | 38<br>(22 - 61)          | 5<br>(3 - 8)             |
| Opioid use disorders                                | 123<br>(74 - 224)        | 5<br>(3 - 10)      | --                | 95<br>(54 - 182)     | 19<br>(11 - 31)          | 3<br>(2 - 5)             |
| Cocaine use disorders                               | 3<br>(2 - 5)             | 0<br>(0 - 0)       | --                | 2<br>(1 - 4)         | 0<br>(0 - 1)             | 0<br>(0 - 0)             |
| Amphetamine use disorders                           | 2<br>(1 - 4)             | 0<br>(0 - 0)       | --                | 2<br>(1 - 3)         | 0<br>(0 - 1)             | 0<br>(0 - 0)             |

Web Table 31- Sudan deaths with 95% UI by age, sex, and cause in 2013

| Cause                                               | Males, All Ages           | Males, 0-4 Years         | Males, 5-14 Years  | Males, 15-49 Years   | Males, 50-69 Years       | Males, 70-80 Years       |
|-----------------------------------------------------|---------------------------|--------------------------|--------------------|----------------------|--------------------------|--------------------------|
| Other drug use disorders                            | 94<br>(58 - 166)          | 3<br>(2 - 7)             | --                 | 71<br>(40 - 131)     | 18<br>(10 - 29)          | 2<br>(1 - 4)             |
| Eating disorders                                    | 0<br>(0 - 0)              | --                       | 0<br>(0 - 0)       | 0<br>(0 - 0)         | --                       | --                       |
| Anorexia nervosa                                    | 0<br>(0 - 0)              | --                       | 0<br>(0 - 0)       | 0<br>(0 - 0)         | --                       | --                       |
| Diabetes, urogenital, blood, and endocrine diseases | 4,623<br>(3,350 - 6,150)  | 395<br>(228 - 626)       | 130<br>(79 - 181)  | 795<br>(530 - 1,174) | 1,590<br>(1,076 - 2,198) | 1,713<br>(1,240 - 2,246) |
| Diabetes mellitus                                   | 2,086<br>(1,503 - 2,992)  | 33<br>(19 - 53)          | 7<br>(4 - 11)      | 242<br>(155 - 380)   | 887<br>(583 - 1,335)     | 916<br>(643 - 1,329)     |
| Acute glomerulonephritis                            | 33<br>(15 - 67)           | 4<br>(1 - 8)             | 3<br>(1 - 8)       | 9<br>(4 - 18)        | 8<br>(3 - 19)            | 8<br>(3 - 20)            |
| Chronic kidney disease                              | 1,639<br>(928 - 2,474)    | 80<br>(34 - 139)         | 33<br>(17 - 50)    | 320<br>(181 - 519)   | 576<br>(314 - 899)       | 630<br>(336 - 977)       |
| Chronic kidney disease due to diabetes mellitus     | 31<br>(4 - 65)            | 2<br>(0 - 5)             | 1<br>(0 - 3)       | 10<br>(1 - 22)       | 9<br>(1 - 19)            | 10<br>(1 - 20)           |
| Chronic kidney disease due to hypertension          | 686<br>(318 - 1,063)      | 8<br>(2 - 21)            | 4<br>(1 - 8)       | 113<br>(50 - 203)    | 281<br>(124 - 450)       | 280<br>(136 - 443)       |
| Chronic kidney disease due to glomerulonephritis    | 169<br>(107 - 242)        | 24<br>(13 - 39)          | 10<br>(6 - 15)     | 50<br>(29 - 77)      | 40<br>(20 - 68)          | 45<br>(23 - 75)          |
| Chronic kidney disease due to other causes          | 754<br>(307 - 1,335)      | 45<br>(12 - 92)          | 17<br>(7 - 32)     | 148<br>(69 - 283)    | 247<br>(85 - 484)        | 296<br>(104 - 563)       |
| Urinary diseases and male infertility               | 236<br>(167 - 327)        | 31<br>(13 - 61)          | 7<br>(5 - 11)      | 40<br>(25 - 63)      | 61<br>(39 - 93)          | 97<br>(61 - 149)         |
| Interstitial nephritis and urinary tract infections | 95<br>(55 - 141)          | 19<br>(7 - 40)           | 4<br>(2 - 6)       | 15<br>(8 - 26)       | 22<br>(11 - 38)          | 36<br>(17 - 62)          |
| Urolithiasis                                        | 12<br>(7 - 20)            | --                       | 1<br>(1 - 2)       | 4<br>(2 - 6)         | 4<br>(2 - 7)             | 4<br>(2 - 9)             |
| Other urinary diseases                              | 129<br>(84 - 202)         | 13<br>(5 - 28)           | 3<br>(1 - 5)       | 22<br>(13 - 36)      | 35<br>(20 - 59)          | 57<br>(32 - 95)          |
| Gynecological diseases                              | --                        | --                       | --                 | --                   | --                       | --                       |
| Uterine fibroids                                    | --                        | --                       | --                 | --                   | --                       | --                       |
| Polycystic ovarian syndrome                         | --                        | --                       | --                 | --                   | --                       | --                       |
| Endometriosis                                       | --                        | --                       | --                 | --                   | --                       | --                       |
| Genital prolapse                                    | --                        | --                       | --                 | --                   | --                       | --                       |
| Other gynecological diseases                        | --                        | --                       | --                 | --                   | --                       | --                       |
| Hemoglobinopathies and hemolytic anemias            | 413<br>(196 - 667)        | 155<br>(65 - 289)        | 60<br>(26 - 100)   | 142<br>(64 - 246)    | 26<br>(13 - 53)          | 29<br>(13 - 55)          |
| Thalassemias                                        | 235<br>(108 - 396)        | 114<br>(47 - 214)        | 42<br>(18 - 70)    | 79<br>(35 - 140)     | 0<br>(0 - 0)             | 0<br>(0 - 0)             |
| Sickle cell disorders                               | 123<br>(56 - 195)         | 30<br>(12 - 57)          | 16<br>(7 - 26)     | 55<br>(24 - 95)      | 20<br>(10 - 41)          | 1<br>(1 - 3)             |
| G6PD deficiency                                     | 3<br>(1 - 5)              | 1<br>(0 - 2)             | 0<br>(0 - 1)       | 1<br>(0 - 2)         | 0<br>(0 - 0)             | 0<br>(0 - 1)             |
| Other hemoglobinopathies and hemolytic anemias      | 52<br>(25 - 87)           | 10<br>(4 - 20)           | 2<br>(1 - 3)       | 7<br>(3 - 12)        | 6<br>(3 - 11)            | 27<br>(13 - 52)          |
| Endocrine, metabolic, blood, and immune disorders   | 216<br>(109 - 354)        | 91<br>(39 - 199)         | 20<br>(8 - 35)     | 41<br>(22 - 69)      | 31<br>(15 - 47)          | 33<br>(14 - 52)          |
| Musculoskeletal disorders                           | 105<br>(50 - 153)         | --                       | 12<br>(5 - 18)     | 45<br>(21 - 75)      | 22<br>(12 - 32)          | 26<br>(12 - 38)          |
| Rheumatoid arthritis                                | 22<br>(11 - 34)           | --                       | 3<br>(1 - 6)       | 9<br>(3 - 16)        | 4<br>(2 - 8)             | 5<br>(2 - 9)             |
| Other musculoskeletal disorders                     | 83<br>(38 - 124)          | --                       | 8<br>(3 - 13)      | 36<br>(16 - 60)      | 17<br>(9 - 27)           | 21<br>(9 - 32)           |
| Other non-communicable diseases                     | 5,493<br>(3,155 - 10,503) | 4,991<br>(2,743 - 9,761) | 223<br>(125 - 416) | 152<br>(96 - 249)    | 48<br>(32 - 67)          | 79<br>(53 - 110)         |
| Congenital anomalies                                | 5,326<br>(3,019 - 10,295) | 4,938<br>(2,700 - 9,693) | 217<br>(121 - 411) | 122<br>(75 - 209)    | 23<br>(15 - 34)          | 26<br>(18 - 37)          |
| Neural tube defects                                 | 695<br>(97 - 2,373)       | 647<br>(87 - 2,253)      | 23<br>(3 - 80)     | 20<br>(3 - 66)       | 3<br>(0 - 12)            | 2<br>(0 - 8)             |
| Congenital heart anomalies                          | 2,350<br>(952 - 5,327)    | 2,209<br>(874 - 5,094)   | 95<br>(36 - 195)   | 36<br>(17 - 70)      | 5<br>(2 - 8)             | 5<br>(3 - 9)             |
| Cleft lip and cleft palate                          | 12<br>(3 - 30)            | 12<br>(3 - 30)           | --                 | --                   | --                       | --                       |
| Down syndrome                                       | 203<br>(43 - 559)         | 166<br>(28 - 485)        | 16<br>(3 - 42)     | 19<br>(5 - 47)       | 1<br>(0 - 1)             | 0<br>(0 - 1)             |
| Chromosomal unbalanced rearrangements               | 67<br>(9 - 215)           | 61<br>(8 - 202)          | 3<br>(1 - 7)       | 3<br>(1 - 6)         | 1<br>(0 - 1)             | 0<br>(0 - 1)             |
| Other congenital anomalies                          | 2,000<br>(635 - 4,998)    | 1,844<br>(546 - 4,742)   | 80<br>(27 - 180)   | 44<br>(18 - 92)      | 14<br>(7 - 23)           | 19<br>(11 - 27)          |
| Skin and subcutaneous diseases                      | 133<br>(75 - 183)         | 20<br>(6 - 37)           | 6<br>(2 - 9)       | 30<br>(14 - 47)      | 25<br>(15 - 37)          | 53<br>(31 - 84)          |
| Cellulitis                                          | 52<br>(21 - 114)          | 9<br>(3 - 23)            | 3<br>(1 - 6)       | 11<br>(4 - 26)       | 11<br>(4 - 24)           | 19<br>(6 - 44)           |



Web Table 31- Sudan deaths with 95% UI by age, sex, and cause in 2013

| Cause                                           | Males, All Ages            | Males, 0-4 Years       | Males, 5-14 Years    | Males, 15-49 Years        | Males, 50-69 Years       | Males, 70-80 Years     |
|-------------------------------------------------|----------------------------|------------------------|----------------------|---------------------------|--------------------------|------------------------|
| Pyoderma                                        | 59<br>(21 - 106)           | 10<br>(2 - 23)         | 2<br>(1 - 4)         | 13<br>(4 - 24)            | 11<br>(4 - 20)           | 24<br>(9 - 46)         |
| Decubitus ulcer                                 | 19<br>(6 - 41)             | 1<br>(0 - 2)           | 1<br>(0 - 2)         | 5<br>(1 - 12)             | 3<br>(1 - 8)             | 9<br>(3 - 21)          |
| Other skin and subcutaneous diseases            | 3<br>(0 - 10)              | 1<br>(0 - 3)           | 0<br>(0 - 1)         | 1<br>(0 - 4)              | 0<br>(0 - 1)             | 0<br>(0 - 1)           |
| Sudden infant death syndrome                    | 33<br>(5 - 138)            | 33<br>(5 - 138)        | --                   | --                        | --                       | --                     |
| Injuries                                        | 13,225<br>(9,984 - 17,656) | 1,184<br>(702 - 1,841) | 757<br>(558 - 1,004) | 7,942<br>(5,713 - 11,363) | 2,202<br>(1,547 - 2,910) | 1,140<br>(817 - 1,452) |
| Transport injuries                              | 6,399<br>(4,826 - 8,488)   | 360<br>(174 - 665)     | 350<br>(234 - 494)   | 3,677<br>(2,577 - 5,273)  | 1,425<br>(998 - 1,918)   | 587<br>(432 - 768)     |
| Road injuries                                   | 6,044<br>(4,512 - 8,019)   | 312<br>(145 - 590)     | 311<br>(207 - 441)   | 3,471<br>(2,418 - 5,001)  | 1,380<br>(970 - 1,862)   | 570<br>(420 - 746)     |
| Pedestrian road injuries                        | 1,562<br>(1,067 - 2,309)   | 104<br>(35 - 222)      | 66<br>(37 - 110)     | 735<br>(444 - 1,173)      | 378<br>(223 - 574)       | 279<br>(181 - 403)     |
| Cyclist road injuries                           | 549<br>(344 - 850)         | 49<br>(17 - 112)       | 66<br>(38 - 108)     | 280<br>(163 - 467)        | 116<br>(64 - 195)        | 38<br>(21 - 65)        |
| Motorcyclist road injuries                      | 1,088<br>(686 - 1,654)     | 34<br>(15 - 69)        | 38<br>(20 - 65)      | 875<br>(532 - 1,359)      | 113<br>(63 - 178)        | 29<br>(16 - 47)        |
| Motor vehicle road injuries                     | 2,724<br>(1,942 - 3,710)   | 94<br>(38 - 196)       | 108<br>(67 - 167)    | 1,552<br>(1,079 - 2,235)  | 755<br>(502 - 1,038)     | 216<br>(145 - 304)     |
| Other road injuries                             | 120<br>(30 - 196)          | 31<br>(5 - 72)         | 32<br>(6 - 65)       | 29<br>(8 - 60)            | 19<br>(4 - 38)           | 9<br>(2 - 20)          |
| Other transport injuries                        | 355<br>(205 - 526)         | 48<br>(20 - 95)        | 39<br>(19 - 70)      | 206<br>(112 - 327)        | 45<br>(21 - 76)          | 17<br>(8 - 27)         |
| Unintentional injuries                          | 4,296<br>(3,240 - 5,722)   | 726<br>(419 - 1,139)   | 352<br>(251 - 477)   | 2,332<br>(1,620 - 3,407)  | 459<br>(310 - 643)       | 427<br>(269 - 627)     |
| Falls                                           | 787<br>(443 - 1,361)       | 139<br>(39 - 356)      | 67<br>(32 - 126)     | 393<br>(196 - 737)        | 95<br>(50 - 157)         | 93<br>(50 - 153)       |
| Drowning                                        | 1,125<br>(774 - 1,631)     | 114<br>(57 - 214)      | 97<br>(56 - 162)     | 828<br>(536 - 1,282)      | 53<br>(32 - 82)          | 33<br>(22 - 48)        |
| Fire, heat, and hot substances                  | 409<br>(282 - 597)         | 146<br>(67 - 274)      | 22<br>(13 - 35)      | 184<br>(118 - 282)        | 32<br>(20 - 51)          | 25<br>(16 - 40)        |
| Poisonings                                      | 124<br>(69 - 345)          | 42<br>(12 - 158)       | 8<br>(4 - 17)        | 62<br>(33 - 155)          | 8<br>(5 - 17)            | 4<br>(2 - 8)           |
| Exposure to mechanical forces                   | 905<br>(631 - 1,486)       | 113<br>(57 - 216)      | 91<br>(53 - 155)     | 575<br>(361 - 968)        | 95<br>(58 - 160)         | 31<br>(21 - 57)        |
| Unintentional firearm injuries                  | 415<br>(253 - 730)         | 32<br>(13 - 74)        | 29<br>(14 - 60)      | 297<br>(158 - 565)        | 43<br>(22 - 87)          | 14<br>(7 - 28)         |
| Unintentional suffocation                       | 17<br>(1 - 42)             | 6<br>(0 - 23)          | 3<br>(0 - 8)         | 6<br>(0 - 14)             | 2<br>(0 - 3)             | 1<br>(0 - 1)           |
| Other exposure to mechanical forces             | 473<br>(315 - 758)         | 75<br>(33 - 152)       | 59<br>(31 - 105)     | 271<br>(161 - 482)        | 51<br>(29 - 96)          | 16<br>(10 - 28)        |
| Adverse effects of medical treatment            | 499<br>(267 - 769)         | 46<br>(19 - 101)       | 13<br>(6 - 23)       | 109<br>(61 - 173)         | 128<br>(58 - 223)        | 203<br>(81 - 376)      |
| Animal contact                                  | 66<br>(30 - 106)           | 21<br>(6 - 47)         | 14<br>(6 - 25)       | 20<br>(9 - 33)            | 5<br>(3 - 9)             | 6<br>(2 - 10)          |
| Venomous animal contact                         | 36<br>(16 - 67)            | 13<br>(4 - 32)         | 8<br>(3 - 16)        | 9<br>(4 - 17)             | 3<br>(1 - 5)             | 3<br>(1 - 6)           |
| Non-venomous animal contact                     | 29<br>(10 - 51)            | 8<br>(2 - 20)          | 6<br>(2 - 12)        | 10<br>(3 - 18)            | 2<br>(1 - 4)             | 3<br>(1 - 6)           |
| Foreign body                                    | 131<br>(50 - 215)          | 67<br>(22 - 130)       | 13<br>(5 - 23)       | 19<br>(10 - 31)           | 8<br>(3 - 13)            | 23<br>(6 - 46)         |
| Pulmonary aspiration and foreign body in airway | 127<br>(46 - 211)          | 67<br>(22 - 129)       | 12<br>(5 - 23)       | 18<br>(9 - 29)            | 7<br>(2 - 12)            | 23<br>(6 - 46)         |
| Foreign body in other body part                 | 4<br>(1 - 7)               | 1<br>(0 - 2)           | 1<br>(0 - 1)         | 1<br>(0 - 3)              | 1<br>(0 - 1)             | 0<br>(0 - 1)           |
| Other unintentional injuries                    | 250<br>(190 - 336)         | 38<br>(20 - 65)        | 27<br>(18 - 38)      | 144<br>(100 - 213)        | 34<br>(21 - 51)          | 8<br>(5 - 11)          |
| Self-harm and interpersonal violence            | 2,501<br>(1,145 - 3,826)   | 97<br>(9 - 223)        | 53<br>(18 - 108)     | 1,917<br>(926 - 3,021)    | 310<br>(120 - 473)       | 123<br>(30 - 196)      |
| Self-harm                                       | 1,408<br>(807 - 2,028)     | --                     | 35<br>(9 - 83)       | 1,043<br>(643 - 1,597)    | 227<br>(92 - 348)        | 104<br>(26 - 169)      |
| Interpersonal violence                          | 1,093<br>(266 - 1,858)     | 97<br>(9 - 223)        | 19<br>(5 - 35)       | 874<br>(226 - 1,566)      | 84<br>(16 - 157)         | 19<br>(2 - 40)         |
| Assault by firearm                              | 209<br>(48 - 425)          | 4<br>(0 - 12)          | 2<br>(1 - 6)         | 193<br>(44 - 396)         | 9<br>(2 - 20)            | 1<br>(0 - 2)           |
| Assault by sharp object                         | 519<br>(126 - 905)         | 32<br>(4 - 72)         | 4<br>(1 - 8)         | 434<br>(106 - 786)        | 40<br>(10 - 80)          | 9<br>(2 - 21)          |
| Assault by other means                          | 365<br>(55 - 667)          | 61<br>(4 - 161)        | 12<br>(2 - 24)       | 247<br>(43 - 470)         | 35<br>(2 - 74)           | 9<br>(0 - 21)          |
| Forces of nature, war, and legal intervention   | 29<br>(12 - 78)            | 0<br>(0 - 0)           | 2<br>(1 - 4)         | 16<br>(7 - 39)            | 9<br>(4 - 22)            | 2<br>(1 - 6)           |
| Exposure to forces of nature                    | 29<br>(12 - 78)            | 0<br>(0 - 0)           | 2<br>(1 - 4)         | 16<br>(7 - 39)            | 9<br>(4 - 22)            | 2<br>(1 - 6)           |

Web Table 31- Sudan deaths with 95% UI by age, sex, and cause in 2013

| Cause                                                              | Females, All Ages            | Females, 0-4 Years          | Females, 5-14 Years      | Females, 15-49 Years        | Females, 50-69 Years        | Females, 70-80 Years        |
|--------------------------------------------------------------------|------------------------------|-----------------------------|--------------------------|-----------------------------|-----------------------------|-----------------------------|
| All causes                                                         | 94,680<br>(79,448 - 112,890) | 27,212<br>(23,664 - 31,796) | 3,006<br>(2,446 - 3,695) | 16,235<br>(12,481 - 20,285) | 20,809<br>(14,803 - 28,899) | 27,418<br>(22,651 - 32,881) |
| Communicable, maternal, neonatal, and nutritional diseases         | 32,770<br>(27,298 - 38,982)  | 20,044<br>(15,480 - 24,898) | 1,570<br>(1,214 - 2,013) | 6,872<br>(5,549 - 8,580)    | 1,829<br>(1,283 - 2,564)    | 2,455<br>(1,752 - 3,437)    |
| HIV/AIDS and tuberculosis                                          | 2,793<br>(1,982 - 3,786)     | 193<br>(137 - 276)          | 119<br>(79 - 170)        | 1,649<br>(1,113 - 2,314)    | 525<br>(348 - 796)          | 306<br>(166 - 516)          |
| Tuberculosis                                                       | 1,260<br>(688 - 2,041)       | 87<br>(42 - 155)            | 59<br>(28 - 103)         | 508<br>(255 - 889)          | 320<br>(162 - 580)          | 285<br>(144 - 488)          |
| HIV/AIDS                                                           | 1,533<br>(1,040 - 2,244)     | 107<br>(75 - 144)           | 60<br>(43 - 81)          | 1,141<br>(709 - 1,730)      | 205<br>(142 - 284)          | 21<br>(11 - 33)             |
| HIV/AIDS resulting in mycobacterial infection                      | 76<br>(50 - 116)             | 5<br>(3 - 7)                | 3<br>(2 - 4)             | 57<br>(35 - 90)             | 11<br>(7 - 15)              | 1<br>(1 - 2)                |
| HIV/AIDS resulting in other diseases                               | 1,457<br>(986 - 2,137)       | 101<br>(71 - 136)           | 57<br>(41 - 77)          | 1,085<br>(674 - 1,647)      | 194<br>(135 - 270)          | 20<br>(10 - 31)             |
| Diarrrhea, lower respiratory, and other common infectious diseases | 11,815<br>(9,007 - 14,754)   | 7,227<br>(4,810 - 9,848)    | 847<br>(554 - 1,178)     | 1,053<br>(675 - 1,539)      | 929<br>(565 - 1,486)        | 1,760<br>(1,118 - 2,621)    |
| Diarrrheal diseases                                                | 4,084<br>(2,202 - 6,566)     | 3,044<br>(1,174 - 5,467)    | 181<br>(52 - 384)        | 252<br>(83 - 485)           | 191<br>(54 - 442)           | 415<br>(122 - 928)          |
| Intestinal infectious diseases                                     | 628<br>(295 - 1,177)         | 214<br>(97 - 416)           | 210<br>(87 - 394)        | 160<br>(66 - 332)           | 31<br>(11 - 68)             | 13<br>(5 - 24)              |
| Typhoid fever                                                      | 448<br>(197 - 888)           | 140<br>(56 - 299)           | 159<br>(64 - 309)        | 118<br>(46 - 249)           | 22<br>(7 - 53)              | 9<br>(3 - 19)               |
| Paratyphoid fever                                                  | 136<br>(55 - 271)            | 50<br>(17 - 111)            | 45<br>(15 - 99)          | 33<br>(12 - 73)             | 5<br>(2 - 13)               | 2<br>(1 - 4)                |
| Other intestinal infectious diseases                               | 45<br>(28 - 67)              | 24<br>(12 - 42)             | 6<br>(1 - 13)            | 9<br>(4 - 19)               | 3<br>(0 - 8)                | 2<br>(0 - 6)                |
| Lower respiratory infections                                       | 5,584<br>(3,801 - 7,754)     | 2,934<br>(1,517 - 5,037)    | 289<br>(169 - 473)       | 473<br>(293 - 718)          | 624<br>(367 - 1,019)        | 1,265<br>(773 - 1,926)      |
| Upper respiratory infections                                       | 8<br>(3 - 16)                | 2<br>(0 - 8)                | 0<br>(0 - 2)             | 2<br>(0 - 4)                | 2<br>(0 - 5)                | 2<br>(0 - 6)                |
| Otitis media                                                       | 11<br>(7 - 15)               | 2<br>(1 - 3)                | 1<br>(1 - 2)             | 2<br>(1 - 3)                | 2<br>(1 - 4)                | 3<br>(2 - 5)                |
| Meningitis                                                         | 699<br>(436 - 1,147)         | 436<br>(195 - 876)          | 65<br>(32 - 119)         | 97<br>(54 - 164)            | 56<br>(28 - 97)             | 44<br>(22 - 77)             |
| Pneumococcal meningitis                                            | 150<br>(87 - 252)            | 81<br>(34 - 173)            | 18<br>(6 - 37)           | 27<br>(12 - 48)             | 13<br>(6 - 26)              | 11<br>(5 - 22)              |
| H influenzae type B meningitis                                     | 199<br>(101 - 373)           | 162<br>(70 - 334)           | 16<br>(6 - 34)           | 11<br>(5 - 22)              | 5<br>(2 - 10)               | 4<br>(2 - 8)                |
| Meningococcal meningitis                                           | 193<br>(110 - 323)           | 124<br>(52 - 253)           | 19<br>(8 - 37)           | 24<br>(10 - 43)             | 13<br>(6 - 26)              | 13<br>(6 - 24)              |
| Other meningitis                                                   | 156<br>(93 - 271)            | 68<br>(23 - 161)            | 12<br>(5 - 26)           | 35<br>(16 - 64)             | 24<br>(10 - 47)             | 16<br>(7 - 32)              |
| Encephalitis                                                       | 184<br>(107 - 317)           | 119<br>(46 - 253)           | 18<br>(10 - 29)          | 26<br>(15 - 42)             | 11<br>(6 - 18)              | 9<br>(5 - 15)               |
| Diphtheria                                                         | 4<br>(0 - 22)                | 3<br>(0 - 20)               | 1<br>(0 - 6)             | 0<br>(0 - 1)                | 0<br>(0 - 1)                | -                           |
| Whooping cough                                                     | 95<br>(0 - 465)              | 88<br>(0 - 426)             | 6<br>(0 - 30)            | 1<br>(0 - 4)                | 0<br>(0 - 1)                | -                           |
| Tetanus                                                            | 74<br>(17 - 218)             | 18<br>(5 - 47)              | 13<br>(2 - 42)           | 28<br>(4 - 96)              | 10<br>(1 - 31)              | 5<br>(1 - 15)               |
| Measles                                                            | 429<br>(182 - 906)           | 361<br>(148 - 774)          | 61<br>(25 - 124)         | 8<br>(3 - 16)               | 0<br>(0 - 0)                | -                           |
| Varicella and herpes zoster                                        | 17<br>(5 - 41)               | 6<br>(0 - 22)               | 2<br>(0 - 8)             | 3<br>(0 - 9)                | 2<br>(0 - 5)                | 4<br>(0 - 20)               |
| Neglected tropical diseases and malaria                            | 3,555<br>(1,856 - 6,650)     | 2,470<br>(907 - 5,721)      | 434<br>(248 - 824)       | 399<br>(228 - 699)          | 163<br>(78 - 440)           | 89<br>(34 - 311)            |
| Malaria                                                            | 2,203<br>(605 - 5,384)       | 1,839<br>(354 - 5,191)      | 135<br>(18 - 545)        | 98<br>(14 - 390)            | 74<br>(11 - 368)            | 57<br>(8 - 284)             |
| Leishmaniasis                                                      | 1,184<br>(803 - 1,657)       | 597<br>(339 - 944)          | 272<br>(152 - 426)       | 249<br>(145 - 377)          | 56<br>(30 - 95)             | 10<br>(6 - 15)              |
| Visceral leishmaniasis                                             | 1,184<br>(803 - 1,657)       | 597<br>(339 - 944)          | 272<br>(152 - 426)       | 249<br>(145 - 377)          | 56<br>(30 - 95)             | 10<br>(6 - 15)              |
| Schistosomiasis                                                    | 33<br>(21 - 51)              | 0<br>(0 - 1)                | 1<br>(1 - 2)             | 10<br>(6 - 17)              | 14<br>(7 - 24)              | 8<br>(4 - 14)               |
| Cysticercosis                                                      | 0<br>(0 - 0)                 | 0<br>(0 - 0)                | 0<br>(0 - 0)             | 0<br>(0 - 0)                | 0<br>(0 - 0)                | 0<br>(0 - 0)                |
| Cystic echinococcosis                                              | 45<br>(34 - 59)              | 5<br>(3 - 8)                | 9<br>(7 - 13)            | 17<br>(11 - 23)             | 10<br>(6 - 15)              | 5<br>(3 - 6)                |
| Dengue                                                             | 6<br>(3 - 9)                 | 1<br>(1 - 3)                | 1<br>(1 - 2)             | 2<br>(1 - 3)                | 0<br>(0 - 1)                | 0<br>(0 - 0)                |
| Yellow fever                                                       | 4<br>(1 - 14)                | 0<br>(0 - 2)                | 1<br>(0 - 5)             | 2<br>(0 - 8)                | 1<br>(0 - 3)                | 0<br>(0 - 1)                |
| Rabies                                                             | 11<br>(6 - 28)               | 2<br>(1 - 6)                | 4<br>(2 - 9)             | 4<br>(2 - 10)               | 1<br>(0 - 3)                | 0<br>(0 - 1)                |
| Intestinal nematode infections                                     | 16<br>(7 - 32)               | 12<br>(4 - 24)              | 3<br>(0 - 9)             | 1<br>(0 - 5)                | 0<br>(0 - 3)                | 1<br>(0 - 4)                |
| Ascariasis                                                         | 16<br>(7 - 32)               | 12<br>(4 - 24)              | 3<br>(0 - 9)             | 1<br>(0 - 5)                | 0<br>(0 - 3)                | 1<br>(0 - 4)                |
| Other neglected tropical diseases                                  | 51<br>(19 - 128)             | 14<br>(3 - 40)              | 8<br>(2 - 21)            | 15<br>(5 - 38)              | 7<br>(2 - 21)               | 8<br>(2 - 26)               |

Web Table 31- Sudan deaths with 95% UI by age, sex, and cause in 2013

| Cause                                                            | Females, All Ages           | Females, 0-4 Years        | Females, 5-14 Years    | Females, 15-49 Years      | Females, 50-69 Years        | Females, 70-80 Years        |
|------------------------------------------------------------------|-----------------------------|---------------------------|------------------------|---------------------------|-----------------------------|-----------------------------|
| Maternal disorders                                               | 3,528<br>(2,322 - 4,840)    | --                        | 17<br>(5 - 37)         | 3,512<br>(2,312 - 4,819)  | --                          | --                          |
| Maternal hemorrhage                                              | 671<br>(395 - 1,035)        | --                        | 2<br>(1 - 5)           | 668<br>(394 - 1,033)      | --                          | --                          |
| Maternal sepsis and other maternal infections                    | 313<br>(164 - 517)          | --                        | 2<br>(0 - 5)           | 312<br>(163 - 513)        | --                          | --                          |
| Maternal hypertensive disorders                                  | 506<br>(307 - 772)          | --                        | 3<br>(1 - 8)           | 503<br>(306 - 769)        | --                          | --                          |
| Maternal obstructed labor                                        | 328<br>(193 - 508)          | --                        | 1<br>(0 - 3)           | 327<br>(192 - 506)        | --                          | --                          |
| Maternal abortive outcome                                        | 470<br>(278 - 727)          | --                        | 2<br>(1 - 5)           | 468<br>(276 - 724)        | --                          | --                          |
| Indirect maternal deaths                                         | 356<br>(169 - 601)          | --                        | 1<br>(0 - 3)           | 355<br>(169 - 600)        | --                          | --                          |
| Late maternal deaths                                             | 351<br>(152 - 615)          | --                        | 3<br>(1 - 8)           | 349<br>(150 - 610)        | --                          | --                          |
| Maternal deaths aggravated by HIV/AIDS                           | 2<br>(1 - 4)                | --                        | --                     | 2<br>(1 - 4)              | --                          | --                          |
| Other maternal disorders                                         | 523<br>(303 - 813)          | --                        | 2<br>(1 - 6)           | 521<br>(302 - 811)        | --                          | --                          |
| Neonatal disorders                                               | 9,152<br>(6,560 - 12,436)   | 9,152<br>(6,560 - 12,436) | --                     | --                        | --                          | --                          |
| Neonatal preterm birth complications                             | 6,877<br>(4,812 - 9,248)    | 6,877<br>(4,812 - 9,248)  | --                     | --                        | --                          | --                          |
| Neonatal encephalopathy due to birth asphyxia and trauma         | 705<br>(185 - 1,656)        | 705<br>(185 - 1,656)      | --                     | --                        | --                          | --                          |
| Neonatal sepsis and other neonatal infections                    | 284<br>(71 - 704)           | 284<br>(71 - 704)         | --                     | --                        | --                          | --                          |
| Hemolytic disease and other neonatal jaundice                    | 31<br>(8 - 89)              | 31<br>(8 - 89)            | --                     | --                        | --                          | --                          |
| Other neonatal disorders                                         | 1,255<br>(338 - 2,841)      | 1,255<br>(338 - 2,841)    | --                     | --                        | --                          | --                          |
| Nutritional deficiencies                                         | 767<br>(480 - 1,224)        | 264<br>(127 - 472)        | 61<br>(34 - 103)       | 161<br>(95 - 265)         | 93<br>(46 - 171)            | 189<br>(100 - 340)          |
| Protein-energy malnutrition                                      | 143<br>(43 - 390)           | 98<br>(21 - 297)          | 11<br>(3 - 29)         | 7<br>(2 - 23)             | 6<br>(1 - 24)               | 20<br>(4 - 72)              |
| Iodine deficiency                                                | 9<br>(1 - 37)               | 4<br>(0 - 27)             | 1<br>(0 - 7)           | 1<br>(0 - 6)              | 1<br>(0 - 8)                | 2<br>(0 - 11)               |
| Iron-deficiency anemia                                           | 577<br>(337 - 890)          | 144<br>(47 - 289)         | 44<br>(19 - 80)        | 146<br>(85 - 239)         | 81<br>(39 - 149)            | 162<br>(79 - 291)           |
| Other nutritional deficiencies                                   | 39<br>(11 - 103)            | 17<br>(4 - 51)            | 5<br>(1 - 14)          | 7<br>(2 - 22)             | 4<br>(1 - 13)               | 6<br>(1 - 18)               |
| Other communicable, maternal, neonatal, and nutritional diseases | 1,159<br>(530 - 1,941)      | 737<br>(206 - 1,446)      | 92<br>(36 - 177)       | 98<br>(52 - 177)          | 120<br>(56 - 245)           | 112<br>(51 - 252)           |
| Sexually transmitted diseases excluding HIV                      | 728<br>(168 - 1,490)        | 621<br>(115 - 1,320)      | 61<br>(12 - 128)       | 21<br>(9 - 43)            | 11<br>(3 - 33)              | 14<br>(4 - 35)              |
| Syphilis                                                         | 706<br>(148 - 1,468)        | 621<br>(115 - 1,320)      | 59<br>(11 - 127)       | 8<br>(3 - 18)             | 6<br>(2 - 18)               | 10<br>(3 - 27)              |
| Chlamydial infection                                             | 7<br>(4 - 14)               | --                        | 1<br>(0 - 1)           | 4<br>(2 - 9)              | 2<br>(0 - 4)                | 1<br>(0 - 2)                |
| Gonococcal infection                                             | 8<br>(4 - 17)               | --                        | 1<br>(0 - 1)           | 4<br>(2 - 9)              | 2<br>(1 - 6)                | 2<br>(1 - 4)                |
| Other sexually transmitted diseases                              | 7<br>(3 - 14)               | --                        | 1<br>(0 - 1)           | 4<br>(2 - 8)              | 2<br>(0 - 4)                | 1<br>(0 - 2)                |
| Hepatitis                                                        | 178<br>(89 - 357)           | 29<br>(12 - 59)           | 8<br>(4 - 18)          | 37<br>(16 - 75)           | 65<br>(28 - 151)            | 39<br>(17 - 92)             |
| Acute hepatitis A                                                | 24<br>(7 - 52)              | 17<br>(5 - 40)            | 3<br>(1 - 9)           | 2<br>(0 - 5)              | 1<br>(0 - 4)                | 0<br>(0 - 1)                |
| Acute hepatitis B                                                | 91<br>(41 - 198)            | 12<br>(3 - 30)            | 2<br>(1 - 6)           | 8<br>(2 - 21)             | 40<br>(16 - 95)             | 29<br>(12 - 67)             |
| Acute hepatitis C                                                | 11<br>(1 - 31)              | --                        | 1<br>(0 - 2)           | 2<br>(0 - 8)              | 4<br>(0 - 15)               | 3<br>(0 - 12)               |
| Acute hepatitis E                                                | 53<br>(19 - 128)            | 0<br>(0 - 1)              | 2<br>(1 - 5)           | 25<br>(10 - 52)           | 20<br>(5 - 55)              | 6<br>(1 - 22)               |
| Other infectious diseases                                        | 252<br>(123 - 523)          | 86<br>(27 - 227)          | 23<br>(7 - 62)         | 41<br>(19 - 87)           | 43<br>(15 - 104)            | 59<br>(15 - 182)            |
| Non-communicable diseases                                        | 56,279<br>(43,297 - 71,370) | 6,239<br>(3,360 - 9,944)  | 1,053<br>(784 - 1,357) | 7,477<br>(5,180 - 10,239) | 17,459<br>(12,221 - 24,285) | 24,051<br>(19,827 - 28,960) |
| Neoplasms                                                        | 6,352<br>(4,405 - 9,068)    | 100<br>(48 - 215)         | 177<br>(125 - 254)     | 1,725<br>(1,162 - 2,573)  | 2,747<br>(1,775 - 4,167)    | 1,603<br>(1,187 - 2,146)    |
| Esophageal cancer                                                | 190<br>(102 - 313)          | --                        | --                     | 31<br>(16 - 54)           | 84<br>(41 - 154)            | 74<br>(42 - 122)            |
| Stomach cancer                                                   | 705<br>(445 - 1,049)        | --                        | --                     | 183<br>(106 - 288)        | 304<br>(179 - 485)          | 218<br>(133 - 332)          |
| Liver cancer                                                     | 353<br>(217 - 559)          | --                        | 4<br>(2 - 7)           | 57<br>(30 - 103)          | 174<br>(96 - 293)           | 119<br>(74 - 190)           |
| Liver cancer due to hepatitis B                                  | 89<br>(43 - 158)            | --                        | 1<br>(0 - 2)           | 22<br>(10 - 39)           | 46<br>(21 - 90)             | 20<br>(10 - 38)             |
| Liver cancer due to hepatitis C                                  | 107<br>(50 - 178)           | --                        | 0<br>(0 - 0)           | 12<br>(5 - 26)            | 54<br>(23 - 100)            | 40<br>(20 - 71)             |

Web Table 31- Sudan deaths with 95% UI by age, sex, and cause in 2013

| Cause                                | Females, All Ages           | Females, 0-4 Years   | Females, 5-14 Years | Females, 15-49 Years     | Females, 50-69 Years       | Females, 70-80 Years        |
|--------------------------------------|-----------------------------|----------------------|---------------------|--------------------------|----------------------------|-----------------------------|
| Liver cancer due to alcohol use      | 89<br>(35 - 155)            | --                   | --                  | 7<br>(2 - 16)            | 41<br>(15 - 79)            | 41<br>(16 - 76)             |
| Liver cancer due to other causes     | 69<br>(32 - 124)            | --                   | 2<br>(1 - 5)        | 16<br>(7 - 32)           | 32<br>(13 - 67)            | 18<br>(8 - 34)              |
| Larynx cancer                        | 56<br>(18 - 138)            | --                   | --                  | 16<br>(5 - 40)           | 27<br>(9 - 70)             | 12<br>(5 - 32)              |
| Tracheal, bronchus and lung cancer   | 599<br>(285 - 920)          | --                   | --                  | 117<br>(47 - 185)        | 303<br>(133 - 491)         | 179<br>(100 - 263)          |
| Breast cancer                        | 1,223<br>(775 - 1,859)      | --                   | --                  | 467<br>(287 - 787)       | 565<br>(342 - 893)         | 192<br>(126 - 279)          |
| Cervical cancer                      | 328<br>(215 - 502)          | --                   | --                  | 108<br>(68 - 168)        | 161<br>(98 - 264)          | 59<br>(39 - 89)             |
| Uterine cancer                       | 82<br>(46 - 134)            | --                   | --                  | 12<br>(6 - 21)           | 46<br>(24 - 80)            | 23<br>(13 - 40)             |
| Prostate cancer                      | --                          | --                   | --                  | --                       | --                         | --                          |
| Colon and rectum cancer              | 512<br>(351 - 718)          | --                   | --                  | 114<br>(75 - 168)        | 231<br>(147 - 347)         | 168<br>(116 - 235)          |
| Lip and oral cavity cancer           | 44<br>(25 - 71)             | --                   | --                  | 12<br>(6 - 23)           | 18<br>(9 - 31)             | 14<br>(8 - 21)              |
| Nasopharynx cancer                   | 43<br>(24 - 77)             | --                   | 3<br>(1 - 7)        | 20<br>(10 - 37)          | 15<br>(8 - 31)             | 5<br>(2 - 9)                |
| Other pharynx cancer                 | 21<br>(12 - 31)             | --                   | --                  | 8<br>(4 - 12)            | 8<br>(4 - 14)              | 4<br>(3 - 7)                |
| Gallbladder and biliary tract cancer | 157<br>(99 - 241)           | --                   | --                  | 24<br>(14 - 37)          | 83<br>(49 - 135)           | 50<br>(30 - 79)             |
| Pancreatic cancer                    | 169<br>(110 - 241)          | --                   | --                  | 20<br>(12 - 30)          | 85<br>(51 - 128)           | 65<br>(43 - 94)             |
| Malignant skin melanoma              | 19<br>(11 - 32)             | --                   | --                  | 6<br>(3 - 12)            | 8<br>(4 - 13)              | 5<br>(3 - 8)                |
| Non-melanoma skin cancer             | 24<br>(12 - 47)             | --                   | --                  | 5<br>(2 - 9)             | 7<br>(3 - 15)              | 12<br>(5 - 23)              |
| Ovarian cancer                       | 200<br>(122 - 291)          | --                   | --                  | 58<br>(31 - 94)          | 98<br>(57 - 151)           | 43<br>(27 - 66)             |
| Testicular cancer                    | --                          | --                   | --                  | --                       | --                         | --                          |
| Kidney cancer                        | 77<br>(48 - 117)            | 8<br>(2 - 18)        | 7<br>(3 - 13)       | 16<br>(8 - 26)           | 33<br>(18 - 57)            | 14<br>(8 - 24)              |
| Bladder cancer                       | 122<br>(70 - 196)           | --                   | --                  | 14<br>(7 - 23)           | 52<br>(26 - 89)            | 56<br>(33 - 89)             |
| Brain and nervous system cancer      | 253<br>(167 - 379)          | 11<br>(4 - 27)       | 32<br>(19 - 52)     | 82<br>(51 - 135)         | 89<br>(52 - 139)           | 39<br>(23 - 62)             |
| Thyroid cancer                       | 68<br>(39 - 121)            | --                   | 1<br>(0 - 2)        | 11<br>(6 - 22)           | 31<br>(16 - 62)            | 25<br>(14 - 41)             |
| Mesothelioma                         | 8<br>(4 - 12)               | --                   | --                  | 4<br>(2 - 6)             | 3<br>(1 - 4)               | 1<br>(1 - 3)                |
| Hodgkin lymphoma                     | 33<br>(14 - 62)             | 2<br>(1 - 5)         | 5<br>(2 - 12)       | 17<br>(7 - 32)           | 6<br>(2 - 13)              | 3<br>(1 - 6)                |
| Non-Hodgkin lymphoma                 | 228<br>(130 - 420)          | 9<br>(3 - 25)        | 13<br>(6 - 27)      | 72<br>(39 - 140)         | 83<br>(45 - 155)           | 51<br>(28 - 91)             |
| Multiple myeloma                     | 31<br>(19 - 46)             | --                   | --                  | 5<br>(3 - 8)             | 17<br>(9 - 27)             | 9<br>(5 - 14)               |
| Leukemia                             | 399<br>(283 - 549)          | 26<br>(11 - 58)      | 66<br>(41 - 104)    | 136<br>(87 - 204)        | 101<br>(62 - 154)          | 70<br>(47 - 97)             |
| Other neoplasms                      | 411<br>(242 - 791)          | 43<br>(14 - 125)     | 46<br>(25 - 93)     | 113<br>(57 - 230)        | 116<br>(61 - 229)          | 93<br>(60 - 157)            |
| Cardiovascular diseases              | 30,040<br>(22,251 - 39,059) | 702<br>(262 - 1,126) | 270<br>(140 - 421)  | 3,375<br>(1,885 - 4,810) | 10,162<br>(6,701 - 14,443) | 15,531<br>(12,483 - 18,826) |
| Rheumatic heart disease              | 481<br>(251 - 914)          | 21<br>(4 - 56)       | 23<br>(9 - 50)      | 169<br>(77 - 322)        | 116<br>(56 - 232)          | 152<br>(79 - 298)           |
| Ischemic heart disease               | 14,620<br>(9,542 - 20,095)  | 99<br>(13 - 224)     | 39<br>(10 - 79)     | 1,473<br>(587 - 2,240)   | 5,337<br>(3,091 - 7,995)   | 7,673<br>(5,646 - 9,997)    |
| Cerebrovascular disease              | 10,170<br>(7,156 - 13,768)  | 262<br>(88 - 457)    | 114<br>(54 - 194)   | 1,046<br>(603 - 1,595)   | 3,072<br>(1,935 - 4,623)   | 5,677<br>(4,121 - 7,422)    |
| Ischemic stroke                      | 4,736<br>(2,871 - 6,746)    | 25<br>(3 - 67)       | 13<br>(4 - 29)      | 177<br>(73 - 339)        | 1,173<br>(605 - 1,914)     | 3,348<br>(2,101 - 4,579)    |
| Hemorrhagic stroke                   | 5,434<br>(3,602 - 7,998)    | 237<br>(83 - 412)    | 100<br>(49 - 176)   | 868<br>(506 - 1,355)     | 1,900<br>(1,129 - 3,014)   | 2,329<br>(1,499 - 3,415)    |
| Hypertensive heart disease           | 1,595<br>(990 - 2,460)      | 4<br>(1 - 11)        | 3<br>(1 - 6)        | 125<br>(62 - 213)        | 494<br>(269 - 832)         | 969<br>(599 - 1,585)        |
| Cardiomyopathy and myocarditis       | 510<br>(253 - 780)          | 116<br>(22 - 247)    | 28<br>(9 - 53)      | 102<br>(39 - 163)        | 109<br>(55 - 183)          | 155<br>(83 - 266)           |
| Atrial fibrillation and flutter      | 10<br>(5 - 19)              | --                   | --                  | 1<br>(0 - 1)             | 2<br>(1 - 4)               | 7<br>(3 - 14)               |
| Aortic aneurysm                      | 57<br>(30 - 94)             | --                   | --                  | 12<br>(5 - 22)           | 15<br>(7 - 27)             | 30<br>(16 - 50)             |
| Peripheral vascular disease          | 6<br>(3 - 10)               | --                   | --                  | 1<br>(0 - 1)             | 2<br>(1 - 3)               | 4<br>(2 - 7)                |
| Endocarditis                         | 169<br>(87 - 333)           | 24<br>(8 - 61)       | 5<br>(2 - 14)       | 31<br>(16 - 68)          | 30<br>(15 - 70)            | 78<br>(31 - 157)            |

Web Table 31- Sudan deaths with 95% UI by age, sex, and cause in 2013

| Cause                                               | Females, All Ages        | Females, 0-4 Years | Females, 5-14 Years | Females, 15-49 Years | Females, 50-69 Years   | Females, 70-80 Years     |
|-----------------------------------------------------|--------------------------|--------------------|---------------------|----------------------|------------------------|--------------------------|
| Other cardiovascular and circulatory diseases       | 2,422<br>(943 - 4,481)   | 175<br>(57 - 370)  | 58<br>(19 - 123)    | 417<br>(150 - 821)   | 985<br>(339 - 1,948)   | 787<br>(294 - 1,552)     |
| Chronic respiratory diseases                        | 4,141<br>(2,883 - 6,207) | 169<br>(90 - 284)  | 59<br>(37 - 91)     | 568<br>(362 - 858)   | 1,236<br>(734 - 1,987) | 2,109<br>(1,476 - 3,097) |
| Chronic obstructive pulmonary disease               | 3,094<br>(1,916 - 4,556) | 106<br>(50 - 191)  | 22<br>(8 - 38)      | 301<br>(129 - 491)   | 947<br>(531 - 1,510)   | 1,719<br>(1,095 - 2,518) |
| Pneumoconiosis                                      | 12<br>(5 - 19)           | 1<br>(0 - 3)       | 1<br>(0 - 3)        | 5<br>(2 - 8)         | 2<br>(1 - 5)           | 2<br>(1 - 4)             |
| Silicosis                                           | 2<br>(1 - 3)             | 0<br>(0 - 1)       | 0<br>(0 - 0)        | 1<br>(0 - 1)         | 0<br>(0 - 1)           | 0<br>(0 - 1)             |
| Asbestosis                                          | 2<br>(1 - 3)             | 0<br>(0 - 0)       | 0<br>(0 - 1)        | 1<br>(0 - 1)         | 0<br>(0 - 1)           | 0<br>(0 - 1)             |
| Coal workers pneumoconiosis                         | 2<br>(1 - 4)             | 0<br>(0 - 1)       | 0<br>(0 - 1)        | 1<br>(0 - 2)         | 0<br>(0 - 1)           | 0<br>(0 - 1)             |
| Other pneumoconiosis                                | 5<br>(2 - 9)             | 1<br>(0 - 2)       | 1<br>(0 - 1)        | 2<br>(1 - 4)         | 1<br>(0 - 2)           | 1<br>(0 - 2)             |
| Asthma                                              | 813<br>(372 - 2,298)     | 46<br>(17 - 106)   | 30<br>(14 - 60)     | 213<br>(101 - 507)   | 235<br>(92 - 716)      | 288<br>(115 - 934)       |
| Interstitial lung disease and pulmonary sarcoidosis | 135<br>(21 - 323)        | 1<br>(0 - 5)       | 1<br>(0 - 3)        | 18<br>(3 - 51)       | 43<br>(6 - 112)        | 71<br>(11 - 171)         |
| Other chronic respiratory diseases                  | 87<br>(43 - 148)         | 15<br>(7 - 29)     | 4<br>(1 - 8)        | 31<br>(12 - 53)      | 9<br>(4 - 18)          | 28<br>(12 - 54)          |
| Cirrhosis                                           | 2,111<br>(882 - 3,675)   | 109<br>(30 - 246)  | 44<br>(18 - 80)     | 438<br>(180 - 782)   | 846<br>(335 - 1,587)   | 674<br>(273 - 1,203)     |
| Cirrhosis due to hepatitis B                        | 828<br>(320 - 1,470)     | 7<br>(1 - 18)      | 10<br>(2 - 22)      | 171<br>(57 - 324)    | 341<br>(119 - 641)     | 301<br>(122 - 587)       |
| Cirrhosis due to hepatitis C                        | 876<br>(322 - 1,652)     | 8<br>(1 - 26)      | 6<br>(1 - 16)       | 174<br>(67 - 357)    | 402<br>(143 - 811)     | 287<br>(94 - 553)        |
| Cirrhosis due to alcohol use                        | 99<br>(27 - 215)         | --                 | --                  | 12<br>(3 - 30)       | 38<br>(11 - 88)        | 48<br>(11 - 117)         |
| Cirrhosis due to other causes                       | 308<br>(108 - 573)       | 95<br>(26 - 215)   | 28<br>(10 - 56)     | 81<br>(24 - 191)     | 65<br>(18 - 146)       | 38<br>(12 - 88)          |
| Digestive diseases                                  | 1,441<br>(888 - 2,079)   | 112<br>(53 - 191)  | 57<br>(36 - 86)     | 260<br>(151 - 407)   | 405<br>(223 - 662)     | 607<br>(357 - 888)       |
| Peptic ulcer disease                                | 543<br>(290 - 899)       | 16<br>(5 - 34)     | 12<br>(5 - 20)      | 82<br>(41 - 145)     | 166<br>(83 - 299)      | 266<br>(135 - 440)       |
| Gastritis and duodenitis                            | 25<br>(8 - 63)           | 5<br>(1 - 13)      | 3<br>(1 - 8)        | 8<br>(2 - 20)        | 5<br>(2 - 13)          | 5<br>(2 - 13)            |
| Appendicitis                                        | 116<br>(64 - 194)        | 23<br>(8 - 47)     | 10<br>(5 - 19)      | 32<br>(16 - 58)      | 26<br>(12 - 52)        | 24<br>(11 - 48)          |
| Paralytic ileus and intestinal obstruction          | 174<br>(81 - 362)        | 9<br>(2 - 26)      | 5<br>(2 - 12)       | 26<br>(12 - 59)      | 44<br>(17 - 106)       | 90<br>(37 - 183)         |
| Inguinal, femoral, and abdominal hernia             | 39<br>(18 - 73)          | 4<br>(1 - 11)      | 3<br>(1 - 6)        | 7<br>(3 - 14)        | 9<br>(3 - 21)          | 16<br>(6 - 32)           |
| Inflammatory bowel disease                          | 80<br>(43 - 136)         | 14<br>(5 - 32)     | 6<br>(3 - 11)       | 21<br>(11 - 38)      | 17<br>(7 - 32)         | 22<br>(9 - 41)           |
| Vascular intestinal disorders                       | 26<br>(11 - 60)          | 1<br>(0 - 4)       | 1<br>(0 - 3)        | 7<br>(3 - 16)        | 8<br>(3 - 18)          | 11<br>(4 - 23)           |
| Gallbladder and biliary diseases                    | 230<br>(125 - 374)       | 19<br>(8 - 37)     | 5<br>(3 - 8)        | 37<br>(20 - 64)      | 69<br>(32 - 124)       | 100<br>(46 - 176)        |
| Pancreatitis                                        | 71<br>(29 - 130)         | 3<br>(1 - 8)       | 3<br>(1 - 7)        | 16<br>(7 - 31)       | 26<br>(10 - 53)        | 22<br>(8 - 47)           |
| Other digestive diseases                            | 137<br>(76 - 225)        | 19<br>(7 - 38)     | 9<br>(5 - 17)       | 24<br>(12 - 41)      | 34<br>(15 - 64)        | 51<br>(24 - 95)          |
| Neurological disorders                              | 1,906<br>(1,390 - 2,474) | 81<br>(37 - 161)   | 51<br>(25 - 99)     | 141<br>(65 - 249)    | 223<br>(133 - 362)     | 1,409<br>(1,034 - 1,849) |
| Alzheimer disease and other dementias               | 1,573<br>(1,140 - 2,103) | --                 | --                  | 2<br>(0 - 4)         | 188<br>(106 - 312)     | 1,383<br>(1,007 - 1,822) |
| Parkinson disease                                   | 6<br>(3 - 11)            | --                 | --                  | 1<br>(0 - 1)         | 1<br>(0 - 3)           | 4<br>(2 - 7)             |
| Epilepsy                                            | 263<br>(113 - 436)       | 55<br>(15 - 134)   | 44<br>(18 - 92)     | 127<br>(53 - 232)    | 24<br>(11 - 46)        | 13<br>(6 - 29)           |
| Multiple sclerosis                                  | 8<br>(2 - 18)            | --                 | --                  | 4<br>(1 - 9)         | 3<br>(1 - 7)           | 2<br>(0 - 3)             |
| Other neurological disorders                        | 56<br>(40 - 77)          | 26<br>(16 - 41)    | 7<br>(5 - 11)       | 9<br>(6 - 12)        | 6<br>(4 - 9)           | 8<br>(5 - 12)            |
| Mental and substance use disorders                  | 121<br>(75 - 209)        | 3<br>(2 - 7)       | 0<br>(0 - 0)        | 81<br>(49 - 128)     | 25<br>(12 - 61)        | 11<br>(6 - 20)           |
| Schizophrenia                                       | 6<br>(2 - 11)            | --                 | --                  | 3<br>(1 - 6)         | 2<br>(0 - 4)           | 1<br>(0 - 3)             |
| Alcohol use disorders                               | 34<br>(10 - 109)         | --                 | --                  | 16<br>(5 - 50)       | 15<br>(4 - 49)         | 3<br>(1 - 11)            |
| Drug use disorders                                  | 80<br>(50 - 128)         | 3<br>(2 - 7)       | --                  | 62<br>(36 - 103)     | 9<br>(5 - 15)          | 6<br>(3 - 10)            |
| Opioid use disorders                                | 43<br>(27 - 69)          | 2<br>(1 - 4)       | --                  | 34<br>(20 - 56)      | 4<br>(2 - 8)           | 3<br>(2 - 6)             |
| Cocaine use disorders                               | 2<br>(1 - 3)             | 0<br>(0 - 0)       | --                  | 1<br>(1 - 2)         | 0<br>(0 - 0)           | 0<br>(0 - 0)             |
| Amphetamine use disorders                           | 1<br>(1 - 2)             | 0<br>(0 - 0)       | --                  | 1<br>(1 - 2)         | 0<br>(0 - 0)           | 0<br>(0 - 0)             |

Web Table 31- Sudan deaths with 95% UI by age, sex, and cause in 2013

| Cause                                               | Females, All Ages        | Females, 0-4 Years       | Females, 5-14 Years | Females, 15-49 Years | Females, 50-69 Years     | Females, 70-80 Years     |
|-----------------------------------------------------|--------------------------|--------------------------|---------------------|----------------------|--------------------------|--------------------------|
| Other drug use disorders                            | 33<br>(21 - 55)          | 1<br>(1 - 3)             | --                  | 25<br>(15 - 43)      | 4<br>(2 - 8)             | 3<br>(1 - 5)             |
| Eating disorders                                    | 1<br>(0 - 1)             | --                       | 0<br>(0 - 0)        | 1<br>(0 - 1)         | --                       | --                       |
| Anorexia nervosa                                    | 1<br>(0 - 1)             | --                       | 0<br>(0 - 0)        | 1<br>(0 - 1)         | --                       | --                       |
| Diabetes, urogenital, blood, and endocrine diseases | 4,891<br>(3,388 - 7,263) | 300<br>(169 - 485)       | 140<br>(91 - 207)   | 727<br>(464 - 1,109) | 1,744<br>(1,092 - 2,826) | 1,980<br>(1,364 - 2,885) |
| Diabetes mellitus                                   | 2,688<br>(1,831 - 4,019) | 27<br>(14 - 47)          | 17<br>(8 - 31)      | 237<br>(148 - 369)   | 1,122<br>(689 - 1,801)   | 1,285<br>(859 - 1,942)   |
| Acute glomerulonephritis                            | 36<br>(16 - 79)          | 5<br>(2 - 10)            | 5<br>(2 - 10)       | 10<br>(4 - 20)       | 7<br>(3 - 19)            | 9<br>(3 - 26)            |
| Chronic kidney disease                              | 1,351<br>(551 - 2,548)   | 46<br>(17 - 95)          | 30<br>(12 - 57)     | 235<br>(97 - 464)    | 506<br>(199 - 1,022)     | 535<br>(206 - 997)       |
| Chronic kidney disease due to diabetes mellitus     | 26<br>(6 - 58)           | 1<br>(0 - 2)             | 1<br>(0 - 2)        | 5<br>(1 - 10)        | 12<br>(2 - 29)           | 8<br>(1 - 19)            |
| Chronic kidney disease due to hypertension          | 553<br>(263 - 1,029)     | 4<br>(1 - 11)            | 3<br>(1 - 8)        | 82<br>(37 - 155)     | 221<br>(98 - 429)        | 242<br>(114 - 440)       |
| Chronic kidney disease due to glomerulonephritis    | 163<br>(82 - 267)        | 18<br>(9 - 30)           | 9<br>(5 - 16)       | 42<br>(20 - 70)      | 48<br>(20 - 87)          | 47<br>(19 - 85)          |
| Chronic kidney disease due to other causes          | 609<br>(133 - 1,362)     | 23<br>(4 - 63)           | 17<br>(4 - 39)      | 106<br>(27 - 254)    | 225<br>(50 - 525)        | 238<br>(41 - 554)        |
| Urinary diseases and male infertility               | 171<br>(116 - 249)       | 14<br>(5 - 27)           | 5<br>(3 - 8)        | 37<br>(22 - 56)      | 40<br>(23 - 69)          | 75<br>(44 - 130)         |
| Interstitial nephritis and urinary tract infections | 125<br>(82 - 192)        | 10<br>(4 - 20)           | 3<br>(1 - 4)        | 27<br>(16 - 42)      | 29<br>(16 - 50)          | 57<br>(32 - 103)         |
| Urolithiasis                                        | 14<br>(8 - 24)           | --                       | 1<br>(0 - 2)        | 4<br>(2 - 7)         | 4<br>(2 - 8)             | 5<br>(2 - 13)            |
| Other urinary diseases                              | 32<br>(17 - 53)          | 4<br>(1 - 9)             | 2<br>(1 - 3)        | 6<br>(3 - 10)        | 8<br>(3 - 15)            | 13<br>(5 - 26)           |
| Gynecological diseases                              | 15<br>(7 - 29)           | --                       | --                  | 10<br>(5 - 20)       | 3<br>(1 - 6)             | 2<br>(1 - 4)             |
| Uterine fibroids                                    | 3<br>(1 - 6)             | --                       | --                  | 2<br>(1 - 3)         | 1<br>(0 - 2)             | 1<br>(0 - 1)             |
| Polycystic ovarian syndrome                         | 1<br>(0 - 1)             | --                       | --                  | 1<br>(0 - 1)         | 0                        | --                       |
| Endometriosis                                       | 2<br>(1 - 4)             | --                       | --                  | 2<br>(1 - 3)         | 0                        | --                       |
| Genital prolapse                                    | 2<br>(1 - 5)             | --                       | --                  | 1<br>(1 - 3)         | 0                        | 1<br>(0 - 1)             |
| Other gynecological diseases                        | 7<br>(3 - 14)            | --                       | --                  | 5<br>(2 - 10)        | 1<br>(1 - 3)             | 1<br>(0 - 2)             |
| Hemoglobinopathies and hemolytic anemias            | 428<br>(201 - 701)       | 136<br>(49 - 255)        | 64<br>(30 - 113)    | 159<br>(70 - 269)    | 34<br>(15 - 65)          | 35<br>(15 - 67)          |
| Thalassemias                                        | 229<br>(102 - 381)       | 99<br>(35 - 187)         | 47<br>(22 - 82)     | 83<br>(37 - 141)     | 0                        | 0<br>(0 - 0)             |
| Sickle cell disorders                               | 136<br>(63 - 232)        | 24<br>(9 - 46)           | 15<br>(7 - 26)      | 68<br>(29 - 118)     | 27<br>(12 - 54)          | 2<br>(1 - 4)             |
| G6PD deficiency                                     | 2<br>(1 - 3)             | 1<br>(0 - 1)             | 0<br>(0 - 0)        | 1<br>(0 - 1)         | 0                        | 0<br>(0 - 0)             |
| Other hemoglobinopathies and hemolytic anemias      | 60<br>(29 - 101)         | 12<br>(5 - 21)           | 2<br>(1 - 4)        | 7<br>(3 - 12)        | 6<br>(3 - 11)            | 33<br>(14 - 63)          |
| Endocrine, metabolic, blood, and immune disorders   | 203<br>(119 - 300)       | 73<br>(32 - 145)         | 18<br>(9 - 33)      | 39<br>(21 - 62)      | 33<br>(18 - 57)          | 40<br>(19 - 67)          |
| Musculoskeletal disorders                           | 99<br>(61 - 152)         | --                       | 9<br>(5 - 14)       | 43<br>(23 - 70)      | 21<br>(12 - 36)          | 26<br>(14 - 43)          |
| Rheumatoid arthritis                                | 27<br>(15 - 44)          | --                       | 3<br>(1 - 6)        | 8<br>(4 - 14)        | 7<br>(4 - 13)            | 9<br>(4 - 16)            |
| Other musculoskeletal disorders                     | 72<br>(40 - 116)         | --                       | 6<br>(3 - 10)       | 35<br>(18 - 58)      | 14<br>(7 - 26)           | 17<br>(8 - 30)           |
| Other non-communicable diseases                     | 5,176<br>(2,588 - 8,519) | 4,663<br>(2,192 - 7,899) | 245<br>(131 - 409)  | 119<br>(63 - 190)    | 49<br>(30 - 76)          | 101<br>(64 - 148)        |
| Congenital anomalies                                | 5,005<br>(2,454 - 8,253) | 4,615<br>(2,168 - 7,849) | 239<br>(126 - 402)  | 103<br>(50 - 170)    | 22<br>(12 - 37)          | 26<br>(17 - 39)          |
| Neural tube defects                                 | 965<br>(216 - 2,647)     | 921<br>(194 - 2,501)     | 23<br>(4 - 91)      | 17<br>(4 - 53)       | 3<br>(1 - 11)            | 1<br>(0 - 5)             |
| Congenital heart anomalies                          | 2,283<br>(817 - 4,469)   | 2,122<br>(718 - 4,249)   | 118<br>(47 - 232)   | 32<br>(14 - 64)      | 5<br>(2 - 9)             | 6<br>(3 - 10)            |
| Cleft lip and cleft palate                          | 8<br>(1 - 22)            | 8<br>(1 - 22)            | --                  | --                   | --                       | --                       |
| Down syndrome                                       | 163<br>(41 - 393)        | 135<br>(30 - 338)        | 20<br>(6 - 41)      | 7<br>(2 - 16)        | 1<br>(0 - 2)             | 0<br>(0 - 0)             |
| Chromosomal unbalanced rearrangements               | 63<br>(6 - 214)          | 55<br>(5 - 192)          | 3<br>(0 - 6)        | 4<br>(0 - 10)        | 1<br>(0 - 2)             | 0<br>(0 - 1)             |
| Other congenital anomalies                          | 1,522<br>(551 - 3,537)   | 1,373<br>(464 - 3,321)   | 76<br>(31 - 149)    | 42<br>(18 - 81)      | 13<br>(7 - 24)           | 18<br>(11 - 29)          |
| Skin and subcutaneous diseases                      | 139<br>(92 - 196)        | 15<br>(6 - 29)           | 6<br>(4 - 10)       | 16<br>(9 - 26)       | 27<br>(15 - 44)          | 75<br>(42 - 119)         |
| Cellulitis                                          | 64<br>(20 - 115)         | 9<br>(2 - 20)            | 3<br>(1 - 6)        | 9<br>(3 - 16)        | 13<br>(4 - 27)           | 29<br>(7 - 63)           |

Web Table 31- Sudan deaths with 95% UI by age, sex, and cause in 2013

| Cause                                           | Females, All Ages        | Females, 0-4 Years   | Females, 5-14 Years | Females, 15-49 Years     | Females, 50-69 Years   | Females, 70-80 Years |
|-------------------------------------------------|--------------------------|----------------------|---------------------|--------------------------|------------------------|----------------------|
| Pyoderma                                        | 40<br>(17 - 73)          | 5<br>(1 - 14)        | 2<br>(0 - 4)        | 5<br>(1 - 11)            | 9<br>(3 - 19)          | 19<br>(8 - 36)       |
| Decubitus ulcer                                 | 33<br>(12 - 63)          | 0<br>(0 - 1)         | 1<br>(0 - 1)        | 2<br>(0 - 4)             | 4<br>(1 - 9)           | 26<br>(9 - 52)       |
| Other skin and subcutaneous diseases            | 2<br>(0 - 4)             | 0<br>(0 - 1)         | 0<br>(0 - 1)        | 1<br>(0 - 2)             | 0<br>(0 - 1)           | 0<br>(0 - 1)         |
| Sudden infant death syndrome                    | 33<br>(4 - 132)          | 33<br>(4 - 132)      | --                  | --                       | --                     | --                   |
| Injuries                                        | 5,631<br>(3,570 - 7,512) | 929<br>(552 - 1,429) | 384<br>(258 - 526)  | 1,885<br>(1,183 - 2,614) | 1,521<br>(881 - 2,342) | 912<br>(495 - 1,258) |
| Transport injuries                              | 2,269<br>(1,621 - 3,113) | 241<br>(121 - 427)   | 156<br>(94 - 240)   | 794<br>(516 - 1,119)     | 736<br>(466 - 1,124)   | 342<br>(226 - 495)   |
| Road injuries                                   | 2,166<br>(1,531 - 2,994) | 222<br>(111 - 400)   | 143<br>(86 - 223)   | 748<br>(485 - 1,052)     | 718<br>(453 - 1,102)   | 335<br>(221 - 486)   |
| Pedestrian road injuries                        | 972<br>(622 - 1,340)     | 91<br>(42 - 175)     | 69<br>(37 - 112)    | 333<br>(193 - 479)       | 360<br>(212 - 560)     | 117<br>(65 - 183)    |
| Cyclist road injuries                           | 137<br>(75 - 225)        | 21<br>(7 - 49)       | 12<br>(6 - 24)      | 47<br>(23 - 81)          | 43<br>(19 - 83)        | 14<br>(7 - 27)       |
| Motorcyclist road injuries                      | 187<br>(113 - 306)       | 22<br>(9 - 47)       | 12<br>(6 - 22)      | 114<br>(62 - 184)        | 28<br>(14 - 57)        | 10<br>(4 - 19)       |
| Motor vehicle road injuries                     | 840<br>(560 - 1,232)     | 79<br>(33 - 155)     | 44<br>(23 - 75)     | 246<br>(147 - 390)       | 282<br>(166 - 451)     | 189<br>(120 - 280)   |
| Other road injuries                             | 31<br>(7 - 54)           | 8<br>(1 - 20)        | 4<br>(1 - 9)        | 8<br>(2 - 15)            | 5<br>(1 - 10)          | 6<br>(1 - 14)        |
| Other transport injuries                        | 104<br>(36 - 159)        | 20<br>(7 - 42)       | 13<br>(4 - 26)      | 45<br>(13 - 74)          | 19<br>(5 - 34)         | 7<br>(2 - 12)        |
| Unintentional injuries                          | 1,915<br>(1,319 - 2,525) | 633<br>(354 - 1,022) | 194<br>(127 - 276)  | 500<br>(325 - 689)       | 275<br>(166 - 419)     | 312<br>(202 - 435)   |
| Falls                                           | 315<br>(175 - 505)       | 91<br>(29 - 209)     | 33<br>(16 - 59)     | 57<br>(28 - 97)          | 43<br>(22 - 76)        | 91<br>(46 - 157)     |
| Drowning                                        | 177<br>(123 - 261)       | 41<br>(18 - 78)      | 21<br>(11 - 38)     | 84<br>(52 - 128)         | 18<br>(10 - 32)        | 13<br>(8 - 20)       |
| Fire, heat, and hot substances                  | 320<br>(212 - 456)       | 91<br>(43 - 169)     | 29<br>(15 - 48)     | 70<br>(42 - 108)         | 64<br>(36 - 110)       | 66<br>(36 - 101)     |
| Poisonings                                      | 373<br>(172 - 676)       | 232<br>(81 - 516)    | 37<br>(13 - 72)     | 75<br>(42 - 118)         | 19<br>(10 - 34)        | 10<br>(6 - 16)       |
| Exposure to mechanical forces                   | 130<br>(83 - 191)        | 41<br>(17 - 85)      | 26<br>(14 - 42)     | 36<br>(21 - 57)          | 17<br>(9 - 27)         | 11<br>(6 - 17)       |
| Unintentional firearm injuries                  | 34<br>(21 - 53)          | 6<br>(2 - 12)        | 6<br>(2 - 11)       | 15<br>(8 - 25)           | 5<br>(2 - 8)           | 3<br>(1 - 6)         |
| Unintentional suffocation                       | 11<br>(1 - 27)           | 4<br>(0 - 17)        | 1<br>(0 - 4)        | 3<br>(0 - 5)             | 2<br>(0 - 4)           | 0<br>(0 - 1)         |
| Other exposure to mechanical forces             | 86<br>(48 - 141)         | 31<br>(11 - 68)      | 19<br>(9 - 33)      | 19<br>(9 - 30)           | 10<br>(5 - 17)         | 7<br>(3 - 12)        |
| Adverse effects of medical treatment            | 311<br>(170 - 465)       | 33<br>(14 - 67)      | 12<br>(6 - 22)      | 97<br>(45 - 162)         | 84<br>(39 - 145)       | 85<br>(42 - 148)     |
| Animal contact                                  | 39<br>(13 - 68)          | 14<br>(4 - 32)       | 7<br>(2 - 15)       | 9<br>(3 - 15)            | 4<br>(1 - 8)           | 5<br>(1 - 9)         |
| Venomous animal contact                         | 27<br>(9 - 54)           | 11<br>(2 - 27)       | 6<br>(2 - 11)       | 5<br>(2 - 10)            | 3<br>(1 - 6)           | 2<br>(0 - 4)         |
| Non-venomous animal contact                     | 12<br>(3 - 23)           | 3<br>(0 - 7)         | 2<br>(0 - 4)        | 3<br>(1 - 6)             | 1<br>(0 - 3)           | 3<br>(1 - 6)         |
| Foreign body                                    | 112<br>(25 - 236)        | 45<br>(7 - 114)      | 11<br>(2 - 27)      | 22<br>(9 - 39)           | 10<br>(1 - 27)         | 23<br>(2 - 72)       |
| Pulmonary aspiration and foreign body in airway | 108<br>(22 - 232)        | 45<br>(6 - 112)      | 10<br>(1 - 26)      | 21<br>(8 - 37)           | 10<br>(1 - 26)         | 23<br>(2 - 72)       |
| Foreign body in other body part                 | 3<br>(1 - 7)             | 1<br>(0 - 2)         | 1<br>(0 - 1)        | 1<br>(0 - 2)             | 0<br>(0 - 1)           | 1<br>(0 - 1)         |
| Other unintentional injuries                    | 139<br>(93 - 198)        | 46<br>(23 - 88)      | 18<br>(10 - 32)     | 49<br>(29 - 73)          | 16<br>(9 - 26)         | 9<br>(6 - 15)        |
| Self-harm and interpersonal violence            | 1,430<br>(371 - 2,140)   | 55<br>(8 - 124)      | 33<br>(11 - 62)     | 583<br>(219 - 880)       | 504<br>(108 - 837)     | 255<br>(14 - 426)    |
| Self-harm                                       | 1,182<br>(302 - 1,783)   | --                   | 18<br>(5 - 41)      | 473<br>(170 - 720)       | 470<br>(102 - 788)     | 221<br>(13 - 386)    |
| Interpersonal violence                          | 248<br>(49 - 428)        | 55<br>(8 - 124)      | 15<br>(4 - 33)      | 110<br>(30 - 192)        | 34<br>(3 - 73)         | 35<br>(1 - 80)       |
| Assault by firearm                              | 64<br>(7 - 146)          | 19<br>(1 - 58)       | 5<br>(0 - 14)       | 32<br>(5 - 73)           | 8<br>(0 - 22)          | 1<br>(0 - 2)         |
| Assault by sharp object                         | 42<br>(6 - 89)           | 12<br>(2 - 36)       | 2<br>(0 - 5)        | 25<br>(3 - 60)           | 2<br>(0 - 5)           | 0<br>(0 - 1)         |
| Assault by other means                          | 142<br>(31 - 299)        | 23<br>(4 - 62)       | 8<br>(2 - 23)       | 53<br>(18 - 124)         | 24<br>(3 - 57)         | 34<br>(1 - 78)       |
| Forces of nature, war, and legal intervention   | 17<br>(7 - 42)           | 0<br>(0 - 0)         | 1<br>(0 - 2)        | 8<br>(4 - 20)            | 6<br>(2 - 14)          | 2<br>(1 - 6)         |
| Exposure to forces of nature                    | 17<br>(7 - 42)           | 0<br>(0 - 0)         | 1<br>(0 - 2)        | 8<br>(4 - 20)            | 6<br>(2 - 14)          | 2<br>(1 - 6)         |

Web Table 31- Suriname deaths with 95% UI by age, sex, and cause in 2013

| Cause                                                             | Both Sexes, All Ages     | Both Sexes, 0-4 Years | Both Sexes, 5-14 Years | Both Sexes, 15-49 Years | Both Sexes, 50-69 Years | Both Sexes, 70-80 Years  |
|-------------------------------------------------------------------|--------------------------|-----------------------|------------------------|-------------------------|-------------------------|--------------------------|
| All causes                                                        | 4,052<br>(3,443 - 4,728) | 365<br>(305 - 438)    | 56<br>(48 - 66)        | 756<br>(620 - 938)      | 1,122<br>(895 - 1,400)  | 1,754<br>(1,515 - 2,006) |
| Communicable, maternal, neonatal, and nutritional diseases        | 586<br>(528 - 658)       | 242<br>(203 - 289)    | 10<br>(8 - 12)         | 134<br>(109 - 165)      | 73<br>(58 - 92)         | 127<br>(104 - 154)       |
| HIV/AIDS and tuberculosis                                         | 123<br>(93 - 165)        | 1<br>(0 - 1)          | 0<br>(0 - 0)           | 85<br>(63 - 117)        | 29<br>(20 - 45)         | 7<br>(6 - 10)            |
| Tuberculosis                                                      | 17<br>(11 - 23)          | 0<br>(0 - 0)          | 0<br>(0 - 0)           | 6<br>(4 - 9)            | 6<br>(4 - 8)            | 5<br>(3 - 6)             |
| HIV/AIDS                                                          | 105<br>(75 - 149)        | 0<br>(0 - 1)          | 0<br>(0 - 0)           | 79<br>(57 - 111)        | 23<br>(14 - 38)         | 3<br>(2 - 5)             |
| HIV/AIDS resulting in mycobacterial infection                     | 6<br>(4 - 10)            | 0<br>(0 - 0)          | 0<br>(0 - 0)           | 5<br>(3 - 7)            | 1<br>(1 - 3)            | 0<br>(0 - 0)             |
| HIV/AIDS resulting in other diseases                              | 99<br>(71 - 140)         | 0<br>(0 - 1)          | 0<br>(0 - 0)           | 74<br>(53 - 105)        | 22<br>(13 - 36)         | 3<br>(1 - 4)             |
| Diarrhea, lower respiratory, and other common infectious diseases | 217<br>(183 - 253)       | 56<br>(41 - 73)       | 7<br>(5 - 9)           | 28<br>(21 - 36)         | 31<br>(23 - 41)         | 96<br>(75 - 119)         |
| Diarrheal diseases                                                | 29<br>(22 - 36)          | 16<br>(11 - 24)       | 1<br>(1 - 1)           | 2<br>(2 - 3)            | 2<br>(2 - 3)            | 7<br>(5 - 10)            |
| Intestinal infectious diseases                                    | 4<br>(2 - 8)             | 1<br>(1 - 3)          | 1<br>(1 - 2)           | 1<br>(1 - 3)            | 0<br>(0 - 0)            | 0<br>(0 - 0)             |
| Typhoid fever                                                     | 3<br>(1 - 6)             | 1<br>(0 - 2)          | 1<br>(0 - 2)           | 1<br>(0 - 2)            | 0<br>(0 - 0)            | 0<br>(0 - 0)             |
| Paratyphoid fever                                                 | 1<br>(0 - 2)             | 0<br>(0 - 1)          | 0<br>(0 - 0)           | 0<br>(0 - 1)            | 0<br>(0 - 0)            | 0<br>(0 - 0)             |
| Other intestinal infectious diseases                              | 0<br>(0 - 1)             | 0<br>(0 - 0)          | 0<br>(0 - 0)           | 0<br>(0 - 0)            | 0<br>(0 - 0)            | 0<br>(0 - 0)             |
| Lower respiratory infections                                      | 166<br>(136 - 196)       | 32<br>(23 - 43)       | 3<br>(2 - 4)           | 19<br>(14 - 26)         | 26<br>(19 - 34)         | 86<br>(66 - 109)         |
| Upper respiratory infections                                      | 0<br>(0 - 0)             | 0<br>(0 - 0)          | 0<br>(0 - 0)           | 0<br>(0 - 0)            | 0<br>(0 - 0)            | 0<br>(0 - 0)             |
| Otitis media                                                      | 0<br>(0 - 0)             | 0<br>(0 - 0)          | 0<br>(0 - 0)           | 0<br>(0 - 0)            | 0<br>(0 - 0)            | 0<br>(0 - 0)             |
| Meningitis                                                        | 10<br>(8 - 12)           | 3<br>(2 - 5)          | 1<br>(0 - 1)           | 2<br>(2 - 3)            | 2<br>(1 - 2)            | 2<br>(1 - 2)             |
| Pneumococcal meningitis                                           | 3<br>(2 - 4)             | 1<br>(1 - 1)          | 0<br>(0 - 0)           | 1<br>(0 - 1)            | 1<br>(0 - 1)            | 1<br>(0 - 1)             |
| H influenzae type B meningitis                                    | 2<br>(1 - 3)             | 1<br>(1 - 2)          | 0<br>(0 - 0)           | 0<br>(0 - 0)            | 0<br>(0 - 0)            | 0<br>(0 - 0)             |
| Meningococcal meningitis                                          | 1<br>(1 - 2)             | 0<br>(0 - 0)          | 0<br>(0 - 0)           | 0<br>(0 - 1)            | 0<br>(0 - 0)            | 0<br>(0 - 0)             |
| Other meningitis                                                  | 4<br>(3 - 5)             | 1<br>(1 - 2)          | 0<br>(0 - 0)           | 1<br>(1 - 2)            | 1<br>(1 - 1)            | 1<br>(1 - 1)             |
| Encephalitis                                                      | 7<br>(6 - 10)            | 2<br>(1 - 4)          | 1<br>(1 - 2)           | 2<br>(2 - 4)            | 1<br>(1 - 2)            | 1<br>(1 - 1)             |
| Diphtheria                                                        | 0<br>(0 - 0)             | 0<br>(0 - 0)          | 0<br>(0 - 0)           | 0<br>(0 - 0)            | 0<br>(0 - 0)            | --<br>(0 - 0)            |
| Whooping cough                                                    | 0<br>(0 - 1)             | 0<br>(0 - 0)          | 0<br>(0 - 0)           | 0<br>(0 - 0)            | 0<br>(0 - 0)            | --<br>(0 - 0)            |
| Tetanus                                                           | 1<br>(0 - 1)             | 0<br>(0 - 0)          | 0<br>(0 - 0)           | 0<br>(0 - 0)            | 0<br>(0 - 0)            | 0<br>(0 - 0)             |
| Measles                                                           | 0<br>(0 - 0)             | 0<br>(0 - 0)          | 0<br>(0 - 0)           | 0<br>(0 - 0)            | 0<br>(0 - 0)            | --<br>(0 - 0)            |
| Varicella and herpes zoster                                       | 0<br>(0 - 1)             | 0<br>(0 - 0)          | 0<br>(0 - 0)           | 0<br>(0 - 0)            | 0<br>(0 - 0)            | 0<br>(0 - 0)             |
| Neglected tropical diseases and malaria                           | 8<br>(7 - 10)            | 1<br>(1 - 2)          | 1<br>(0 - 1)           | 3<br>(2 - 4)            | 2<br>(1 - 2)            | 1<br>(1 - 2)             |
| Malaria                                                           | 2<br>(2 - 4)             | 0<br>(0 - 1)          | 0<br>(0 - 0)           | 1<br>(1 - 2)            | 0<br>(0 - 1)            | 0<br>(0 - 0)             |
| Chagas disease                                                    | 0<br>(0 - 0)             | 0<br>(0 - 0)          | 0<br>(0 - 0)           | 0<br>(0 - 0)            | 0<br>(0 - 0)            | 0<br>(0 - 0)             |
| Leishmaniasis                                                     | 0<br>(0 - 0)             | 0<br>(0 - 0)          | 0<br>(0 - 0)           | 0<br>(0 - 0)            | 0<br>(0 - 0)            | 0<br>(0 - 0)             |
| Visceral leishmaniasis                                            | 0<br>(0 - 0)             | 0<br>(0 - 0)          | 0<br>(0 - 0)           | 0<br>(0 - 0)            | 0<br>(0 - 0)            | 0<br>(0 - 0)             |
| Schistosomiasis                                                   | 2<br>(1 - 2)             | 0<br>(0 - 0)          | 0<br>(0 - 0)           | 0<br>(0 - 1)            | 1<br>(0 - 1)            | 0<br>(0 - 1)             |
| Cysticercosis                                                     | 0<br>(0 - 0)             | 0<br>(0 - 0)          | 0<br>(0 - 0)           | 0<br>(0 - 0)            | 0<br>(0 - 0)            | 0<br>(0 - 0)             |
| Cystic echinococcosis                                             | 0<br>(0 - 0)             | 0<br>(0 - 0)          | 0<br>(0 - 0)           | 0<br>(0 - 0)            | 0<br>(0 - 0)            | 0<br>(0 - 0)             |
| Dengue                                                            | 2<br>(1 - 2)             | 0<br>(0 - 0)          | 0<br>(0 - 0)           | 1<br>(0 - 1)            | 0<br>(0 - 0)            | 0<br>(0 - 0)             |
| Yellow fever                                                      | 0<br>(0 - 0)             | 0<br>(0 - 0)          | 0<br>(0 - 0)           | 0<br>(0 - 0)            | 0<br>(0 - 0)            | 0<br>(0 - 0)             |
| Rabies                                                            | 0<br>(0 - 0)             | 0<br>(0 - 0)          | 0<br>(0 - 0)           | 0<br>(0 - 0)            | 0<br>(0 - 0)            | 0<br>(0 - 0)             |
| Intestinal nematode infections                                    | 0<br>(0 - 1)             | 0<br>(0 - 0)          | 0<br>(0 - 0)           | 0<br>(0 - 0)            | 0<br>(0 - 0)            | 0<br>(0 - 0)             |
| Ascariasis                                                        | 0<br>(0 - 1)             | 0<br>(0 - 0)          | 0<br>(0 - 0)           | 0<br>(0 - 0)            | 0<br>(0 - 0)            | 0<br>(0 - 0)             |



Web Table 31- Suriname deaths with 95% UI by age, sex, and cause in 2013

| Cause                                                            | Both Sexes, All Ages     | Both Sexes, 0-4 Years | Both Sexes, 5-14 Years | Both Sexes, 15-49 Years | Both Sexes, 50-69 Years | Both Sexes, 70-80 Years  |
|------------------------------------------------------------------|--------------------------|-----------------------|------------------------|-------------------------|-------------------------|--------------------------|
| Other neglected tropical diseases                                | 2<br>(1 - 2)             | 0<br>(0 - 1)          | 0<br>(0 - 0)           | 0<br>(0 - 1)            | 0<br>(0 - 0)            | 0<br>(0 - 1)             |
| Maternal disorders                                               | 6<br>(4 - 9)             | --                    | 0<br>(0 - 0)           | 6<br>(4 - 9)            | --                      | --                       |
| Maternal hemorrhage                                              | 1<br>(1 - 2)             | --                    | 0<br>(0 - 0)           | 1<br>(1 - 2)            | --                      | --                       |
| Maternal sepsis and other maternal infections                    | 1<br>(0 - 1)             | --                    | 0<br>(0 - 0)           | 1<br>(0 - 1)            | --                      | --                       |
| Maternal hypertensive disorders                                  | 1<br>(1 - 2)             | --                    | 0<br>(0 - 0)           | 1<br>(1 - 2)            | --                      | --                       |
| Maternal obstructed labor                                        | 0<br>(0 - 1)             | --                    | 0<br>(0 - 0)           | 0<br>(0 - 1)            | --                      | --                       |
| Maternal abortive outcome                                        | 1<br>(1 - 2)             | --                    | 0<br>(0 - 0)           | 1<br>(1 - 2)            | --                      | --                       |
| Indirect maternal deaths                                         | 1<br>(0 - 1)             | --                    | 0<br>(0 - 0)           | 1<br>(0 - 1)            | --                      | --                       |
| Late maternal deaths                                             | 1<br>(0 - 1)             | --                    | 0<br>(0 - 0)           | 1<br>(0 - 1)            | --                      | --                       |
| Maternal deaths aggravated by HIV/AIDS                           | 0<br>(0 - 0)             | --                    | --                     | 0<br>(0 - 0)            | --                      | --                       |
| Other maternal disorders                                         | 1<br>(0 - 1)             | --                    | 0<br>(0 - 0)           | 1<br>(0 - 1)            | --                      | --                       |
| Neonatal disorders                                               | 168<br>(144 - 194)       | 168<br>(144 - 194)    | --                     | --                      | --                      | --                       |
| Neonatal preterm birth complications                             | 85<br>(66 - 106)         | 85<br>(66 - 106)      | --                     | --                      | --                      | --                       |
| Neonatal encephalopathy due to birth asphyxia and trauma         | 39<br>(29 - 53)          | 39<br>(29 - 53)       | --                     | --                      | --                      | --                       |
| Neonatal sepsis and other neonatal infections                    | 26<br>(14 - 40)          | 26<br>(14 - 40)       | --                     | --                      | --                      | --                       |
| Hemolytic disease and other neonatal jaundice                    | 3<br>(1 - 5)             | 3<br>(1 - 5)          | --                     | --                      | --                      | --                       |
| Other neonatal disorders                                         | 15<br>(10 - 21)          | 15<br>(10 - 21)       | --                     | --                      | --                      | --                       |
| Nutritional deficiencies                                         | 51<br>(40 - 67)          | 15<br>(10 - 21)       | 1<br>(1 - 2)           | 7<br>(5 - 11)           | 8<br>(5 - 11)           | 20<br>(14 - 26)          |
| Protein-energy malnutrition                                      | 25<br>(19 - 37)          | 12<br>(8 - 18)        | 1<br>(1 - 1)           | 2<br>(1 - 4)            | 2<br>(1 - 5)            | 8<br>(5 - 12)            |
| Iodine deficiency                                                | 0<br>(0 - 0)             | 0<br>(0 - 0)          | 0<br>(0 - 0)           | 0<br>(0 - 0)            | 0<br>(0 - 0)            | 0<br>(0 - 0)             |
| Iron-deficiency anemia                                           | 23<br>(14 - 33)          | 2<br>(1 - 4)          | 0<br>(0 - 1)           | 5<br>(3 - 7)            | 5<br>(3 - 7)            | 11<br>(7 - 15)           |
| Other nutritional deficiencies                                   | 2<br>(1 - 4)             | 0<br>(0 - 1)          | 0<br>(0 - 0)           | 0<br>(0 - 1)            | 0<br>(0 - 1)            | 1<br>(0 - 2)             |
| Other communicable, maternal, neonatal, and nutritional diseases | 13<br>(9 - 18)           | 2<br>(1 - 4)          | 1<br>(0 - 1)           | 4<br>(3 - 6)            | 3<br>(2 - 5)            | 3<br>(2 - 4)             |
| Sexually transmitted diseases excluding HIV                      | 2<br>(1 - 4)             | 1<br>(0 - 3)          | 0<br>(0 - 0)           | 0<br>(0 - 0)            | 0<br>(0 - 0)            | 0<br>(0 - 0)             |
| Syphilis                                                         | 2<br>(0 - 4)             | 1<br>(0 - 3)          | 0<br>(0 - 0)           | 0<br>(0 - 0)            | 0<br>(0 - 0)            | 0<br>(0 - 0)             |
| Chlamydial infection                                             | 0<br>(0 - 0)             | --                    | 0<br>(0 - 0)           | 0<br>(0 - 0)            | 0<br>(0 - 0)            | 0<br>(0 - 0)             |
| Gonococcal infection                                             | 0<br>(0 - 0)             | --                    | 0<br>(0 - 0)           | 0<br>(0 - 0)            | 0<br>(0 - 0)            | 0<br>(0 - 0)             |
| Other sexually transmitted diseases                              | 0<br>(0 - 0)             | --                    | 0<br>(0 - 0)           | 0<br>(0 - 0)            | 0<br>(0 - 0)            | 0<br>(0 - 0)             |
| Hepatitis                                                        | 1<br>(1 - 1)             | 0<br>(0 - 0)          | 0<br>(0 - 0)           | 0<br>(0 - 1)            | 0<br>(0 - 0)            | 0<br>(0 - 0)             |
| Acute hepatitis A                                                | 0<br>(0 - 1)             | 0<br>(0 - 0)          | 0<br>(0 - 0)           | 0<br>(0 - 0)            | 0<br>(0 - 0)            | 0<br>(0 - 0)             |
| Acute hepatitis B                                                | 1<br>(0 - 1)             | 0<br>(0 - 0)          | 0<br>(0 - 0)           | 0<br>(0 - 0)            | 0<br>(0 - 0)            | 0<br>(0 - 0)             |
| Acute hepatitis C                                                | 0<br>(0 - 0)             | --                    | 0<br>(0 - 0)           | 0<br>(0 - 0)            | 0<br>(0 - 0)            | 0<br>(0 - 0)             |
| Other infectious diseases                                        | 10<br>(6 - 14)           | 1<br>(1 - 1)          | 0<br>(0 - 1)           | 4<br>(2 - 5)            | 3<br>(2 - 4)            | 2<br>(1 - 3)             |
| Non-communicable diseases                                        | 3,059<br>(2,567 - 3,624) | 95<br>(75 - 119)      | 25<br>(21 - 30)        | 390<br>(310 - 497)      | 977<br>(777 - 1,220)    | 1,573<br>(1,357 - 1,800) |
| Neoplasms                                                        | 602<br>(489 - 727)       | 5<br>(3 - 7)          | 7<br>(6 - 8)           | 100<br>(78 - 126)       | 226<br>(177 - 286)      | 264<br>(221 - 310)       |
| Esophageal cancer                                                | 14<br>(11 - 20)          | --                    | --                     | 1<br>(1 - 2)            | 7<br>(5 - 9)            | 6<br>(5 - 8)             |
| Stomach cancer                                                   | 36<br>(29 - 45)          | --                    | --                     | 4<br>(3 - 5)            | 14<br>(10 - 18)         | 18<br>(15 - 23)          |
| Liver cancer                                                     | 24<br>(19 - 30)          | --                    | 0<br>(0 - 0)           | 4<br>(3 - 5)            | 10<br>(8 - 13)          | 10<br>(8 - 12)           |
| Liver cancer due to hepatitis B                                  | 6<br>(4 - 9)             | --                    | 0<br>(0 - 0)           | 2<br>(1 - 2)            | 3<br>(1 - 4)            | 2<br>(1 - 2)             |
| Liver cancer due to hepatitis C                                  | 11<br>(8 - 14)           | --                    | 0<br>(0 - 0)           | 1<br>(1 - 2)            | 5<br>(3 - 6)            | 5<br>(4 - 6)             |

Web Table 31- Suriname deaths with 95% UI by age, sex, and cause in 2013

| Cause                                | Both Sexes, All Ages     | Both Sexes, 0-4 Years | Both Sexes, 5-14 Years | Both Sexes, 15-49 Years | Both Sexes, 50-69 Years | Both Sexes, 70-80 Years |
|--------------------------------------|--------------------------|-----------------------|------------------------|-------------------------|-------------------------|-------------------------|
| Liver cancer due to alcohol use      | 5<br>(3 - 7)             | --                    | --                     | 0<br>(0 - 1)            | 2<br>(1 - 3)            | 2<br>(1 - 4)            |
| Liver cancer due to other causes     | 2<br>(2 - 4)             | --                    | 0<br>(0 - 0)           | 1<br>(0 - 1)            | 1<br>(1 - 1)            | 1<br>(0 - 1)            |
| Larynx cancer                        | 6<br>(4 - 9)             | --                    | --                     | 1<br>(1 - 1)            | 3<br>(2 - 5)            | 2<br>(2 - 3)            |
| Tracheal, bronchus and lung cancer   | 65<br>(51 - 81)          | --                    | --                     | 9<br>(6 - 12)           | 31<br>(23 - 40)         | 26<br>(21 - 31)         |
| Breast cancer                        | 57<br>(41 - 75)          | --                    | --                     | 15<br>(10 - 20)         | 23<br>(16 - 33)         | 19<br>(14 - 24)         |
| Cervical cancer                      | 39<br>(28 - 55)          | --                    | --                     | 11<br>(7 - 16)          | 16<br>(10 - 23)         | 13<br>(9 - 18)          |
| Uterine cancer                       | 12<br>(6 - 18)           | --                    | --                     | 1<br>(0 - 1)            | 5<br>(3 - 8)            | 6<br>(3 - 9)            |
| Prostate cancer                      | 74<br>(44 - 105)         | --                    | --                     | 1<br>(1 - 1)            | 17<br>(10 - 26)         | 56<br>(33 - 78)         |
| Colon and rectum cancer              | 70<br>(56 - 84)          | --                    | --                     | 8<br>(6 - 10)           | 25<br>(20 - 32)         | 36<br>(29 - 44)         |
| Lip and oral cavity cancer           | 9<br>(7 - 12)            | --                    | --                     | 1<br>(1 - 2)            | 4<br>(3 - 5)            | 3<br>(3 - 4)            |
| Nasopharynx cancer                   | 3<br>(2 - 4)             | --                    | 0<br>(0 - 0)           | 1<br>(1 - 1)            | 1<br>(1 - 2)            | 1<br>(0 - 1)            |
| Other pharynx cancer                 | 4<br>(3 - 5)             | --                    | --                     | 1<br>(1 - 1)            | 2<br>(2 - 3)            | 1<br>(1 - 1)            |
| Gallbladder and biliary tract cancer | 9<br>(6 - 15)            | --                    | --                     | 1<br>(0 - 1)            | 3<br>(2 - 6)            | 5<br>(3 - 8)            |
| Pancreatic cancer                    | 27<br>(21 - 33)          | --                    | --                     | 3<br>(2 - 4)            | 11<br>(8 - 14)          | 13<br>(10 - 17)         |
| Malignant skin melanoma              | 3<br>(2 - 4)             | --                    | --                     | 1<br>(1 - 1)            | 1<br>(1 - 2)            | 1<br>(1 - 1)            |
| Non-melanoma skin cancer             | 3<br>(2 - 4)             | --                    | --                     | 0<br>(0 - 1)            | 1<br>(0 - 1)            | 2<br>(1 - 2)            |
| Ovarian cancer                       | 18<br>(13 - 23)          | --                    | --                     | 3<br>(2 - 4)            | 8<br>(5 - 11)           | 7<br>(5 - 9)            |
| Testicular cancer                    | 1<br>(0 - 1)             | --                    | --                     | 0<br>(0 - 1)            | 0<br>(0 - 0)            | 0<br>(0 - 0)            |
| Kidney cancer                        | 9<br>(7 - 11)            | 0<br>(0 - 0)          | 0<br>(0 - 0)           | 2<br>(1 - 2)            | 4<br>(3 - 6)            | 3<br>(3 - 4)            |
| Bladder cancer                       | 8<br>(6 - 12)            | --                    | --                     | 1<br>(0 - 1)            | 3<br>(2 - 4)            | 5<br>(4 - 8)            |
| Brain and nervous system cancer      | 10<br>(5 - 13)           | 0<br>(0 - 1)          | 1<br>(0 - 1)           | 3<br>(1 - 4)            | 3<br>(2 - 5)            | 2<br>(1 - 3)            |
| Thyroid cancer                       | 3<br>(2 - 4)             | --                    | 0<br>(0 - 0)           | 0<br>(0 - 1)            | 1<br>(1 - 2)            | 1<br>(1 - 2)            |
| Mesothelioma                         | 2<br>(2 - 2)             | --                    | --                     | 0<br>(0 - 0)            | 1<br>(1 - 1)            | 1<br>(1 - 1)            |
| Hodgkin lymphoma                     | 2<br>(1 - 3)             | 0<br>(0 - 0)          | 0<br>(0 - 0)           | 1<br>(0 - 2)            | 1<br>(0 - 1)            | 0<br>(0 - 0)            |
| Non-Hodgkin lymphoma                 | 26<br>(20 - 34)          | 0<br>(0 - 1)          | 1<br>(1 - 1)           | 9<br>(6 - 11)           | 9<br>(7 - 13)           | 7<br>(5 - 9)            |
| Multiple myeloma                     | 10<br>(7 - 13)           | --                    | --                     | 1<br>(1 - 2)            | 5<br>(3 - 7)            | 4<br>(3 - 5)            |
| Leukemia                             | 21<br>(18 - 26)          | 1<br>(1 - 2)          | 2<br>(2 - 3)           | 7<br>(6 - 9)            | 5<br>(4 - 7)            | 5<br>(4 - 6)            |
| Other neoplasms                      | 38<br>(30 - 48)          | 2<br>(2 - 3)          | 2<br>(2 - 3)           | 11<br>(8 - 14)          | 12<br>(9 - 16)          | 10<br>(8 - 13)          |
| Cardiovascular diseases              | 1,390<br>(1,164 - 1,648) | 7<br>(5 - 9)          | 4<br>(3 - 5)           | 126<br>(98 - 162)       | 454<br>(361 - 569)      | 800<br>(684 - 922)      |
| Rheumatic heart disease              | 7<br>(6 - 9)             | 0<br>(0 - 0)          | 0<br>(0 - 1)           | 3<br>(2 - 4)            | 2<br>(1 - 3)            | 2<br>(1 - 3)            |
| Ischemic heart disease               | 562<br>(453 - 714)       | 1<br>(1 - 1)          | 1<br>(0 - 1)           | 55<br>(42 - 73)         | 204<br>(156 - 266)      | 301<br>(245 - 392)      |
| Cerebrovascular disease              | 556<br>(444 - 675)       | 2<br>(2 - 3)          | 1<br>(1 - 2)           | 38<br>(29 - 51)         | 173<br>(133 - 221)      | 341<br>(274 - 404)      |
| Ischemic stroke                      | 348<br>(279 - 423)       | 1<br>(0 - 1)          | 0<br>(0 - 1)           | 10<br>(7 - 14)          | 94<br>(70 - 121)        | 244<br>(197 - 291)      |
| Hemorrhagic stroke                   | 208<br>(147 - 265)       | 2<br>(1 - 2)          | 1<br>(1 - 1)           | 28<br>(21 - 37)         | 80<br>(56 - 106)        | 97<br>(63 - 125)        |
| Hypertensive heart disease           | 129<br>(98 - 169)        | 0<br>(0 - 0)          | 0<br>(0 - 0)           | 9<br>(6 - 12)           | 34<br>(24 - 47)         | 86<br>(63 - 114)        |
| Cardiomyopathy and myocarditis       | 38<br>(30 - 51)          | 2<br>(1 - 3)          | 1<br>(0 - 1)           | 8<br>(6 - 11)           | 12<br>(9 - 17)          | 15<br>(12 - 20)         |
| Atrial fibrillation and flutter      | 17<br>(12 - 23)          | --                    | --                     | 1<br>(0 - 1)            | 3<br>(2 - 5)            | 13<br>(9 - 18)          |
| Aortic aneurysm                      | 16<br>(12 - 21)          | --                    | --                     | 1<br>(1 - 2)            | 6<br>(4 - 8)            | 9<br>(6 - 11)           |
| Peripheral vascular disease          | 8<br>(6 - 10)            | --                    | --                     | 0<br>(0 - 0)            | 1<br>(1 - 1)            | 7<br>(5 - 9)            |
| Endocarditis                         | 5<br>(3 - 7)             | 0<br>(0 - 0)          | 0<br>(0 - 0)           | 1<br>(1 - 2)            | 1<br>(1 - 2)            | 2<br>(1 - 3)            |

Web Table 31- Suriname deaths with 95% UI by age, sex, and cause in 2013

| Cause                                               | Both Sexes, All Ages | Both Sexes, 0-4 Years | Both Sexes, 5-14 Years | Both Sexes, 15-49 Years | Both Sexes, 50-69 Years | Both Sexes, 70-80 Years |
|-----------------------------------------------------|----------------------|-----------------------|------------------------|-------------------------|-------------------------|-------------------------|
| Other cardiovascular and circulatory diseases       | 52<br>(38 - 66)      | 1<br>(1 - 2)          | 1<br>(0 - 1)           | 9<br>(6 - 12)           | 17<br>(11 - 23)         | 24<br>(17 - 33)         |
| Chronic respiratory diseases                        | 116<br>(94 - 151)    | 4<br>(3 - 5)          | 1<br>(1 - 1)           | 14<br>(10 - 19)         | 29<br>(22 - 39)         | 68<br>(55 - 90)         |
| Chronic obstructive pulmonary disease               | 74<br>(60 - 99)      | 2<br>(1 - 2)          | 0<br>(0 - 0)           | 5<br>(4 - 7)            | 17<br>(12 - 23)         | 50<br>(41 - 67)         |
| Pneumoconiosis                                      | 4<br>(3 - 6)         | 0<br>(0 - 0)          | 0<br>(0 - 0)           | 1<br>(0 - 1)            | 2<br>(1 - 3)            | 2<br>(1 - 3)            |
| Silicosis                                           | 0<br>(0 - 0)         | 0<br>(0 - 0)          | 0<br>(0 - 0)           | 0<br>(0 - 0)            | 0<br>(0 - 0)            | 0<br>(0 - 0)            |
| Asbestosis                                          | 1<br>(0 - 1)         | 0<br>(0 - 0)          | 0<br>(0 - 0)           | 0<br>(0 - 0)            | 1<br>(0 - 1)            | 0<br>(0 - 0)            |
| Coal workers pneumoconiosis                         | 1<br>(1 - 2)         | 0<br>(0 - 0)          | 0<br>(0 - 0)           | 0<br>(0 - 0)            | 0<br>(0 - 1)            | 0<br>(0 - 0)            |
| Other pneumoconiosis                                | 2<br>(1 - 3)         | 0<br>(0 - 0)          | 0<br>(0 - 0)           | 0<br>(0 - 0)            | 1<br>(0 - 1)            | 1<br>(1 - 2)            |
| Asthma                                              | 22<br>(17 - 28)      | 1<br>(1 - 1)          | 1<br>(0 - 1)           | 5<br>(4 - 7)            | 6<br>(4 - 8)            | 9<br>(6 - 12)           |
| Interstitial lung disease and pulmonary sarcoidosis | 12<br>(8 - 19)       | 0<br>(0 - 0)          | 0<br>(0 - 0)           | 2<br>(1 - 3)            | 4<br>(2 - 6)            | 6<br>(4 - 11)           |
| Other chronic respiratory diseases                  | 5<br>(4 - 6)         | 1<br>(1 - 2)          | 0<br>(0 - 0)           | 1<br>(1 - 1)            | 1<br>(1 - 1)            | 1<br>(1 - 2)            |
| Cirrhosis                                           | 79<br>(63 - 100)     | 0<br>(0 - 0)          | 1<br>(0 - 1)           | 23<br>(18 - 31)         | 37<br>(28 - 49)         | 18<br>(15 - 22)         |
| Cirrhosis due to hepatitis B                        | 7<br>(3 - 11)        | 0<br>(0 - 0)          | 0<br>(0 - 0)           | 2<br>(1 - 3)            | 3<br>(1 - 5)            | 1<br>(1 - 2)            |
| Cirrhosis due to hepatitis C                        | 25<br>(13 - 35)      | 0<br>(0 - 0)          | 0<br>(0 - 0)           | 6<br>(2 - 10)           | 12<br>(6 - 17)          | 7<br>(5 - 9)            |
| Cirrhosis due to alcohol use                        | 34<br>(24 - 46)      | --                    | --                     | 9<br>(6 - 13)           | 17<br>(12 - 25)         | 8<br>(6 - 10)           |
| Cirrhosis due to other causes                       | 14<br>(9 - 20)       | 0<br>(0 - 0)          | 0<br>(0 - 1)           | 6<br>(4 - 9)            | 5<br>(3 - 8)            | 2<br>(1 - 2)            |
| Digestive diseases                                  | 98<br>(80 - 119)     | 1<br>(1 - 2)          | 1<br>(1 - 1)           | 20<br>(15 - 26)         | 28<br>(21 - 35)         | 48<br>(40 - 58)         |
| Peptic ulcer disease                                | 25<br>(19 - 35)      | 0<br>(0 - 0)          | 0<br>(0 - 0)           | 5<br>(3 - 8)            | 8<br>(6 - 12)           | 12<br>(9 - 16)          |
| Gastritis and duodenitis                            | 6<br>(4 - 8)         | 0<br>(0 - 0)          | 0<br>(0 - 0)           | 1<br>(1 - 2)            | 2<br>(1 - 3)            | 3<br>(2 - 4)            |
| Appendicitis                                        | 4<br>(3 - 6)         | 0<br>(0 - 0)          | 0<br>(0 - 0)           | 1<br>(1 - 2)            | 1<br>(1 - 2)            | 1<br>(1 - 2)            |
| Paralytic ileus and intestinal obstruction          | 13<br>(6 - 19)       | 0<br>(0 - 1)          | 0<br>(0 - 0)           | 2<br>(1 - 3)            | 3<br>(1 - 5)            | 7<br>(3 - 11)           |
| Inguinal, femoral, and abdominal hernia             | 5<br>(3 - 11)        | 0<br>(0 - 0)          | 0<br>(0 - 0)           | 1<br>(0 - 2)            | 1<br>(1 - 3)            | 3<br>(2 - 7)            |
| Inflammatory bowel disease                          | 11<br>(9 - 16)       | 1<br>(0 - 1)          | 0<br>(0 - 0)           | 2<br>(1 - 3)            | 2<br>(2 - 3)            | 6<br>(4 - 9)            |
| Vascular intestinal disorders                       | 4<br>(2 - 7)         | 0<br>(0 - 0)          | 0<br>(0 - 0)           | 1<br>(0 - 1)            | 1<br>(1 - 2)            | 2<br>(1 - 4)            |
| Gallbladder and biliary diseases                    | 7<br>(5 - 9)         | 0<br>(0 - 0)          | 0<br>(0 - 0)           | 1<br>(1 - 2)            | 2<br>(2 - 3)            | 3<br>(2 - 4)            |
| Pancreatitis                                        | 6<br>(4 - 9)         | 0<br>(0 - 0)          | 0<br>(0 - 0)           | 3<br>(2 - 4)            | 2<br>(1 - 3)            | 1<br>(1 - 2)            |
| Other digestive diseases                            | 16<br>(12 - 20)      | 0<br>(0 - 0)          | 0<br>(0 - 0)           | 3<br>(2 - 4)            | 4<br>(3 - 6)            | 9<br>(6 - 11)           |
| Neurological disorders                              | 153<br>(127 - 183)   | 1<br>(1 - 2)          | 2<br>(1 - 2)           | 12<br>(9 - 17)          | 18<br>(13 - 23)         | 120<br>(98 - 144)       |
| Alzheimer disease and other dementias               | 117<br>(95 - 142)    | --                    | --                     | 0<br>(0 - 0)            | 9<br>(7 - 12)           | 108<br>(87 - 130)       |
| Parkinson disease                                   | 10<br>(8 - 15)       | --                    | --                     | 0<br>(0 - 0)            | 2<br>(1 - 3)            | 8<br>(6 - 11)           |
| Epilepsy                                            | 16<br>(12 - 22)      | 1<br>(1 - 1)          | 1<br>(1 - 2)           | 9<br>(7 - 13)           | 3<br>(2 - 5)            | 2<br>(2 - 3)            |
| Multiple sclerosis                                  | 1<br>(1 - 1)         | --                    | --                     | 0<br>(0 - 1)            | 0<br>(0 - 0)            | 0<br>(0 - 0)            |
| Other neurological disorders                        | 9<br>(7 - 11)        | 1<br>(0 - 1)          | 0<br>(0 - 1)           | 3<br>(2 - 4)            | 3<br>(2 - 4)            | 2<br>(1 - 2)            |
| Mental and substance use disorders                  | 17<br>(12 - 24)      | 0<br>(0 - 0)          | 0<br>(0 - 0)           | 8<br>(5 - 11)           | 6<br>(4 - 9)            | 3<br>(2 - 4)            |
| Schizophrenia                                       | 1<br>(0 - 1)         | --                    | --                     | 0<br>(0 - 0)            | 0<br>(0 - 0)            | 0<br>(0 - 1)            |
| Alcohol use disorders                               | 10<br>(6 - 15)       | --                    | --                     | 4<br>(2 - 6)            | 5<br>(2 - 7)            | 1<br>(1 - 2)            |
| Drug use disorders                                  | 6<br>(4 - 8)         | 0<br>(0 - 0)          | --                     | 3<br>(2 - 5)            | 1<br>(1 - 2)            | 1<br>(1 - 2)            |
| Opioid use disorders                                | 2<br>(1 - 2)         | 0<br>(0 - 0)          | --                     | 1<br>(1 - 1)            | 0<br>(0 - 1)            | 0<br>(0 - 0)            |
| Cocaine use disorders                               | 0<br>(0 - 0)         | 0<br>(0 - 0)          | --                     | 0<br>(0 - 0)            | 0<br>(0 - 0)            | 0<br>(0 - 0)            |
| Amphetamine use disorders                           | 0<br>(0 - 0)         | 0<br>(0 - 0)          | --                     | 0<br>(0 - 0)            | 0<br>(0 - 0)            | 0<br>(0 - 0)            |

Web Table 31- Suriname deaths with 95% UI by age, sex, and cause in 2013

| Cause                                               | Both Sexes, All Ages | Both Sexes, 0-4 Years | Both Sexes, 5-14 Years | Both Sexes, 15-49 Years | Both Sexes, 50-69 Years | Both Sexes, 70-80 Years |
|-----------------------------------------------------|----------------------|-----------------------|------------------------|-------------------------|-------------------------|-------------------------|
| Other drug use disorders                            | 4<br>(3 - 5)         | 0<br>(0 - 0)          | --                     | 2<br>(1 - 3)            | 1<br>(1 - 1)            | 1<br>(1 - 1)            |
| Eating disorders                                    | 0<br>(0 - 0)         | --                    | 0<br>(0 - 0)           | 0<br>(0 - 0)            | --                      | --                      |
| Anorexia nervosa                                    | 0<br>(0 - 0)         | --                    | 0<br>(0 - 0)           | 0<br>(0 - 0)            | --                      | --                      |
| Diabetes, urogenital, blood, and endocrine diseases | 479<br>(391 - 585)   | 9<br>(7 - 13)         | 4<br>(3 - 5)           | 71<br>(55 - 92)         | 168<br>(131 - 211)      | 227<br>(190 - 270)      |
| Diabetes mellitus                                   | 258<br>(208 - 316)   | 1<br>(1 - 1)          | 0<br>(0 - 1)           | 28<br>(21 - 37)         | 101<br>(78 - 129)       | 128<br>(104 - 156)      |
| Acute glomerulonephritis                            | 0<br>(0 - 0)         | 0<br>(0 - 0)          | 0<br>(0 - 0)           | 0<br>(0 - 0)            | 0<br>(0 - 0)            | 0<br>(0 - 0)            |
| Chronic kidney disease                              | 147<br>(113 - 192)   | 2<br>(1 - 3)          | 1<br>(1 - 2)           | 26<br>(19 - 36)         | 49<br>(36 - 68)         | 69<br>(53 - 90)         |
| Chronic kidney disease due to diabetes mellitus     | 29<br>(18 - 46)      | 0<br>(0 - 0)          | 0<br>(0 - 0)           | 4<br>(3 - 7)            | 14<br>(8 - 22)          | 10<br>(6 - 16)          |
| Chronic kidney disease due to hypertension          | 68<br>(49 - 91)      | 0<br>(0 - 1)          | 0<br>(0 - 0)           | 11<br>(8 - 16)          | 22<br>(14 - 30)         | 35<br>(25 - 46)         |
| Chronic kidney disease due to glomerulonephritis    | 5<br>(3 - 6)         | 0<br>(0 - 0)          | 0<br>(0 - 0)           | 1<br>(1 - 2)            | 1<br>(1 - 1)            | 1<br>(1 - 2)            |
| Chronic kidney disease due to other causes          | 46<br>(31 - 70)      | 1<br>(1 - 2)          | 1<br>(0 - 1)           | 9<br>(5 - 14)           | 13<br>(7 - 21)          | 23<br>(14 - 36)         |
| Urinary diseases and male infertility               | 25<br>(17 - 33)      | 1<br>(0 - 1)          | 0<br>(0 - 0)           | 3<br>(2 - 4)            | 6<br>(4 - 9)            | 15<br>(10 - 20)         |
| Interstitial nephritis and urinary tract infections | 19<br>(12 - 25)      | 0<br>(0 - 1)          | 0<br>(0 - 0)           | 2<br>(1 - 3)            | 4<br>(3 - 6)            | 12<br>(7 - 16)          |
| Urolithiasis                                        | 1<br>(0 - 2)         | --                    | 0<br>(0 - 0)           | 0<br>(0 - 0)            | 0<br>(0 - 1)            | 0<br>(0 - 1)            |
| Other urinary diseases                              | 5<br>(4 - 8)         | 0<br>(0 - 0)          | 0<br>(0 - 0)           | 1<br>(1 - 1)            | 2<br>(1 - 3)            | 3<br>(2 - 5)            |
| Gynecological diseases                              | 0<br>(0 - 1)         | --                    | --                     | 0<br>(0 - 0)            | 0<br>(0 - 0)            | 0<br>(0 - 0)            |
| Uterine fibroids                                    | 0<br>(0 - 0)         | --                    | --                     | 0<br>(0 - 0)            | 0<br>(0 - 0)            | 0<br>(0 - 0)            |
| Polycystic ovarian syndrome                         | 0<br>(0 - 0)         | --                    | --                     | 0<br>(0 - 0)            | 0<br>(0 - 0)            | --                      |
| Endometriosis                                       | 0<br>(0 - 0)         | --                    | --                     | 0<br>(0 - 0)            | 0<br>(0 - 0)            | --                      |
| Genital prolapse                                    | 0<br>(0 - 0)         | --                    | --                     | 0<br>(0 - 0)            | 0<br>(0 - 0)            | 0<br>(0 - 0)            |
| Other gynecological diseases                        | 0<br>(0 - 0)         | --                    | --                     | 0<br>(0 - 0)            | 0<br>(0 - 0)            | 0<br>(0 - 0)            |
| Hemoglobinopathies and hemolytic anemias            | 12<br>(8 - 16)       | 2<br>(2 - 4)          | 2<br>(1 - 2)           | 5<br>(3 - 6)            | 2<br>(1 - 3)            | 1<br>(1 - 2)            |
| Thalassemias                                        | 0<br>(0 - 0)         | 0<br>(0 - 0)          | 0<br>(0 - 0)           | 0<br>(0 - 0)            | 0<br>(0 - 0)            | 0<br>(0 - 0)            |
| Sickle cell disorders                               | 9<br>(7 - 13)        | 2<br>(1 - 3)          | 1<br>(1 - 2)           | 4<br>(3 - 6)            | 1<br>(1 - 2)            | 0<br>(0 - 0)            |
| G6PD deficiency                                     | 0<br>(0 - 0)         | 0<br>(0 - 0)          | 0<br>(0 - 0)           | 0<br>(0 - 0)            | 0<br>(0 - 0)            | 0<br>(0 - 0)            |
| Other hemoglobinopathies and hemolytic anemias      | 2<br>(1 - 2)         | 0<br>(0 - 0)          | 0<br>(0 - 0)           | 0<br>(0 - 0)            | 0<br>(0 - 0)            | 1<br>(1 - 1)            |
| Endocrine, metabolic, blood, and immune disorders   | 37<br>(28 - 59)      | 3<br>(2 - 6)          | 1<br>(0 - 1)           | 10<br>(7 - 16)          | 10<br>(7 - 17)          | 13<br>(9 - 21)          |
| Musculoskeletal disorders                           | 17<br>(9 - 22)       | --                    | 1<br>(0 - 1)           | 8<br>(4 - 10)           | 4<br>(2 - 6)            | 5<br>(2 - 6)            |
| Rheumatoid arthritis                                | 2<br>(1 - 3)         | --                    | 0<br>(0 - 0)           | 0<br>(0 - 0)            | 1<br>(0 - 1)            | 1<br>(0 - 2)            |
| Other musculoskeletal disorders                     | 15<br>(8 - 19)       | --                    | 0<br>(0 - 1)           | 7<br>(4 - 9)            | 3<br>(2 - 5)            | 4<br>(2 - 5)            |
| Other non-communicable diseases                     | 107<br>(84 - 130)    | 66<br>(51 - 86)       | 5<br>(4 - 7)           | 8<br>(6 - 11)           | 7<br>(4 - 9)            | 20<br>(7 - 29)          |
| Congenital anomalies                                | 76<br>(61 - 95)      | 60<br>(47 - 78)       | 5<br>(4 - 6)           | 6<br>(5 - 8)            | 2<br>(2 - 3)            | 2<br>(2 - 3)            |
| Neural tube defects                                 | 3<br>(2 - 5)         | 3<br>(2 - 5)          | 0<br>(0 - 0)           | 0<br>(0 - 0)            | 0<br>(0 - 0)            | 0<br>(0 - 0)            |
| Congenital heart anomalies                          | 38<br>(28 - 50)      | 29<br>(21 - 39)       | 3<br>(2 - 4)           | 4<br>(3 - 5)            | 1<br>(1 - 1)            | 1<br>(1 - 1)            |
| Cleft lip and cleft palate                          | 0<br>(0 - 0)         | 0<br>(0 - 0)          | --                     | --                      | --                      | --                      |
| Down syndrome                                       | 3<br>(2 - 4)         | 2<br>(1 - 3)          | 0<br>(0 - 0)           | 1<br>(0 - 1)            | 0<br>(0 - 0)            | 0<br>(0 - 0)            |
| Chromosomal unbalanced rearrangements               | 1<br>(1 - 2)         | 1<br>(1 - 2)          | 0<br>(0 - 0)           | 0<br>(0 - 0)            | 0<br>(0 - 0)            | 0<br>(0 - 0)            |
| Other congenital anomalies                          | 31<br>(22 - 42)      | 25<br>(18 - 36)       | 1<br>(1 - 2)           | 2<br>(1 - 2)            | 1<br>(1 - 2)            | 1<br>(1 - 1)            |
| Skin and subcutaneous diseases                      | 26<br>(8 - 36)       | 1<br>(0 - 1)          | 0<br>(0 - 0)           | 2<br>(1 - 3)            | 5<br>(2 - 6)            | 18<br>(5 - 26)          |
| Cellulitis                                          | 2<br>(1 - 3)         | 0<br>(0 - 0)          | 0<br>(0 - 0)           | 0<br>(0 - 0)            | 1<br>(0 - 1)            | 1<br>(0 - 2)            |

Web Table 31- Suriname deaths with 95% UI by age, sex, and cause in 2013

| Cause                                           | Both Sexes, All Ages | Both Sexes, 0-4 Years | Both Sexes, 5-14 Years | Both Sexes, 15-49 Years | Both Sexes, 50-69 Years | Both Sexes, 70-80 Years |
|-------------------------------------------------|----------------------|-----------------------|------------------------|-------------------------|-------------------------|-------------------------|
| Pyoderma                                        | 6<br>(2 - 9)         | 1<br>(0 - 1)          | 0<br>(0 - 0)           | 1<br>(0 - 1)            | 1<br>(0 - 2)            | 4<br>(1 - 6)            |
| Decubitus ulcer                                 | 17<br>(5 - 25)       | 0<br>(0 - 0)          | 0<br>(0 - 0)           | 1<br>(0 - 2)            | 3<br>(1 - 4)            | 13<br>(3 - 20)          |
| Other skin and subcutaneous diseases            | 1<br>(0 - 1)         | 0<br>(0 - 0)          | 0<br>(0 - 0)           | 0<br>(0 - 0)            | 0<br>(0 - 0)            | 0<br>(0 - 1)            |
| Sudden infant death syndrome                    | 5<br>(3 - 10)        | 5<br>(3 - 10)         | --                     | --                      | --                      | --                      |
| Injuries                                        | 407<br>(323 - 512)   | 28<br>(21 - 38)       | 21<br>(18 - 25)        | 232<br>(175 - 306)      | 72<br>(54 - 94)         | 53<br>(43 - 64)         |
| Transport injuries                              | 115<br>(82 - 149)    | 4<br>(3 - 6)          | 9<br>(6 - 11)          | 68<br>(46 - 92)         | 22<br>(16 - 30)         | 12<br>(9 - 15)          |
| Road injuries                                   | 107<br>(77 - 138)    | 4<br>(3 - 6)          | 8<br>(6 - 10)          | 63<br>(44 - 86)         | 21<br>(15 - 27)         | 11<br>(8 - 14)          |
| Pedestrian road injuries                        | 26<br>(18 - 35)      | 1<br>(1 - 2)          | 3<br>(2 - 4)           | 11<br>(7 - 17)          | 6<br>(4 - 9)            | 4<br>(3 - 5)            |
| Cyclist road injuries                           | 6<br>(4 - 8)         | 0<br>(0 - 0)          | 1<br>(0 - 1)           | 3<br>(2 - 4)            | 1<br>(1 - 2)            | 1<br>(0 - 1)            |
| Motorcyclist road injuries                      | 9<br>(6 - 14)        | 0<br>(0 - 0)          | 0<br>(0 - 1)           | 7<br>(4 - 11)           | 1<br>(1 - 2)            | 1<br>(0 - 1)            |
| Motor vehicle road injuries                     | 65<br>(46 - 86)      | 2<br>(1 - 3)          | 4<br>(3 - 5)           | 41<br>(28 - 57)         | 12<br>(8 - 17)          | 6<br>(4 - 8)            |
| Other road injuries                             | 1<br>(1 - 2)         | 0<br>(0 - 0)          | 0<br>(0 - 0)           | 1<br>(0 - 1)            | 0<br>(0 - 0)            | 0<br>(0 - 0)            |
| Other transport injuries                        | 8<br>(4 - 11)        | 0<br>(0 - 1)          | 1<br>(0 - 1)           | 4<br>(2 - 6)            | 2<br>(1 - 3)            | 1<br>(1 - 2)            |
| Unintentional injuries                          | 143<br>(114 - 174)   | 21<br>(15 - 28)       | 9<br>(7 - 11)          | 55<br>(41 - 73)         | 25<br>(18 - 32)         | 33<br>(26 - 41)         |
| Falls                                           | 24<br>(19 - 30)      | 1<br>(1 - 1)          | 1<br>(0 - 1)           | 7<br>(5 - 9)            | 5<br>(3 - 7)            | 11<br>(8 - 15)          |
| Drowning                                        | 34<br>(24 - 46)      | 4<br>(2 - 6)          | 4<br>(3 - 6)           | 19<br>(13 - 28)         | 5<br>(3 - 7)            | 2<br>(1 - 3)            |
| Fire, heat, and hot substances                  | 14<br>(9 - 18)       | 2<br>(1 - 4)          | 1<br>(1 - 2)           | 4<br>(2 - 5)            | 2<br>(1 - 3)            | 4<br>(3 - 6)            |
| Poisonings                                      | 3<br>(2 - 5)         | 0<br>(0 - 1)          | 0<br>(0 - 0)           | 2<br>(1 - 2)            | 0<br>(0 - 1)            | 0<br>(0 - 1)            |
| Exposure to mechanical forces                   | 19<br>(14 - 26)      | 1<br>(1 - 1)          | 1<br>(1 - 2)           | 12<br>(9 - 18)          | 3<br>(2 - 4)            | 1<br>(1 - 2)            |
| Unintentional firearm injuries                  | 10<br>(6 - 14)       | 0<br>(0 - 0)          | 0<br>(0 - 0)           | 7<br>(4 - 11)           | 2<br>(1 - 2)            | 0<br>(0 - 1)            |
| Unintentional suffocation                       | 2<br>(1 - 4)         | 0<br>(0 - 1)          | 0<br>(0 - 0)           | 1<br>(1 - 2)            | 0<br>(0 - 1)            | 0<br>(0 - 1)            |
| Other exposure to mechanical forces             | 7<br>(6 - 11)        | 0<br>(0 - 1)          | 1<br>(1 - 1)           | 5<br>(3 - 7)            | 1<br>(1 - 2)            | 0<br>(0 - 1)            |
| Adverse effects of medical treatment            | 17<br>(11 - 23)      | 2<br>(1 - 3)          | 0<br>(0 - 1)           | 4<br>(2 - 5)            | 4<br>(2 - 5)            | 7<br>(4 - 9)            |
| Animal contact                                  | 3<br>(1 - 4)         | 0<br>(0 - 1)          | 0<br>(0 - 0)           | 1<br>(0 - 1)            | 1<br>(0 - 1)            | 1<br>(0 - 1)            |
| Venomous animal contact                         | 2<br>(1 - 3)         | 0<br>(0 - 0)          | 0<br>(0 - 0)           | 1<br>(0 - 1)            | 1<br>(0 - 1)            | 0<br>(0 - 0)            |
| Non-venomous animal contact                     | 1<br>(0 - 2)         | 0<br>(0 - 0)          | 0<br>(0 - 0)           | 0<br>(0 - 0)            | 0<br>(0 - 0)            | 0<br>(0 - 1)            |
| Foreign body                                    | 24<br>(16 - 32)      | 9<br>(6 - 14)         | 1<br>(1 - 1)           | 4<br>(3 - 7)            | 3<br>(2 - 5)            | 6<br>(4 - 8)            |
| Pulmonary aspiration and foreign body in airway | 23<br>(15 - 31)      | 9<br>(6 - 14)         | 1<br>(1 - 1)           | 4<br>(3 - 6)            | 3<br>(2 - 5)            | 6<br>(4 - 8)            |
| Foreign body in other body part                 | 1<br>(0 - 1)         | 0<br>(0 - 0)          | 0<br>(0 - 0)           | 0<br>(0 - 0)            | 0<br>(0 - 0)            | 0<br>(0 - 0)            |
| Other unintentional injuries                    | 5<br>(4 - 7)         | 0<br>(0 - 1)          | 0<br>(0 - 1)           | 2<br>(2 - 4)            | 1<br>(1 - 1)            | 1<br>(1 - 1)            |
| Self-harm and interpersonal violence            | 149<br>(112 - 197)   | 3<br>(2 - 6)          | 4<br>(3 - 5)           | 110<br>(81 - 150)       | 25<br>(17 - 34)         | 8<br>(6 - 10)           |
| Self-harm                                       | 83<br>(61 - 111)     | --                    | 1<br>(1 - 2)           | 62<br>(45 - 85)         | 15<br>(10 - 20)         | 5<br>(4 - 6)            |
| Interpersonal violence                          | 66<br>(45 - 95)      | 3<br>(2 - 6)          | 2<br>(1 - 3)           | 48<br>(32 - 73)         | 10<br>(6 - 15)          | 3<br>(2 - 4)            |
| Assault by firearm                              | 29<br>(16 - 46)      | 1<br>(0 - 1)          | 1<br>(0 - 1)           | 23<br>(13 - 38)         | 4<br>(2 - 6)            | 0<br>(0 - 1)            |
| Assault by sharp object                         | 19<br>(11 - 29)      | 0<br>(0 - 1)          | 1<br>(0 - 1)           | 15<br>(8 - 23)          | 3<br>(1 - 5)            | 1<br>(0 - 1)            |
| Assault by other means                          | 18<br>(12 - 27)      | 2<br>(1 - 4)          | 1<br>(1 - 1)           | 10<br>(6 - 16)          | 4<br>(2 - 6)            | 2<br>(1 - 3)            |

Web Table 31- Suriname deaths with 95% UI by age, sex, and cause in 2013

| Cause                                                             | Males, All Ages          | Males, 0-4 Years   | Males, 5-14 Years | Males, 15-49 Years | Males, 50-69 Years | Males, 70-80 Years |
|-------------------------------------------------------------------|--------------------------|--------------------|-------------------|--------------------|--------------------|--------------------|
| All causes                                                        | 2,224<br>(1,772 - 2,767) | 208<br>(174 - 250) | 34<br>(29 - 39)   | 517<br>(395 - 683) | 674<br>(485 - 899) | 791<br>(641 - 969) |
| Communicable, maternal, neonatal, and nutritional diseases        | 351<br>(306 - 405)       | 142<br>(119 - 168) | 6<br>(4 - 7)      | 90<br>(70 - 114)   | 52<br>(39 - 68)    | 62<br>(47 - 79)    |
| HIV/AIDS and tuberculosis                                         | 91<br>(66 - 127)         | 0<br>(0 - 1)       | 0<br>(0 - 0)      | 62<br>(44 - 86)    | 23<br>(15 - 37)    | 6<br>(4 - 8)       |
| Tuberculosis                                                      | 13<br>(8 - 19)           | 0<br>(0 - 0)       | 0<br>(0 - 0)      | 5<br>(3 - 8)       | 5<br>(3 - 7)       | 3<br>(2 - 4)       |
| HIV/AIDS                                                          | 77<br>(52 - 114)         | 0<br>(0 - 0)       | 0<br>(0 - 0)      | 57<br>(39 - 81)    | 18<br>(10 - 32)    | 2<br>(1 - 4)       |
| HIV/AIDS resulting in mycobacterial infection                     | 5<br>(3 - 8)             | 0<br>(0 - 0)       | 0<br>(0 - 0)      | 4<br>(2 - 5)       | 1<br>(1 - 2)       | 0<br>(0 - 0)       |
| HIV/AIDS resulting in other diseases                              | 72<br>(49 - 106)         | 0<br>(0 - 0)       | 0<br>(0 - 0)      | 53<br>(37 - 75)    | 17<br>(10 - 30)    | 2<br>(1 - 4)       |
| Diarrhea, lower respiratory, and other common infectious diseases | 119<br>(93 - 148)        | 31<br>(23 - 42)    | 4<br>(3 - 5)      | 19<br>(13 - 27)    | 20<br>(14 - 28)    | 45<br>(33 - 60)    |
| Diarrheal diseases                                                | 16<br>(11 - 22)          | 9<br>(5 - 15)      | 1<br>(0 - 1)      | 1<br>(1 - 2)       | 1<br>(1 - 2)       | 3<br>(2 - 5)       |
| Intestinal infectious diseases                                    | 2<br>(1 - 4)             | 1<br>(0 - 2)       | 1<br>(0 - 1)      | 1<br>(0 - 1)       | 0<br>(0 - 0)       | 0<br>(0 - 0)       |
| Typhoid fever                                                     | 2<br>(1 - 3)             | 1<br>(0 - 1)       | 0<br>(0 - 1)      | 0<br>(0 - 1)       | 0<br>(0 - 0)       | 0<br>(0 - 0)       |
| Paratyphoid fever                                                 | 0<br>(0 - 1)             | 0<br>(0 - 0)       | 0<br>(0 - 0)      | 0<br>(0 - 0)       | 0<br>(0 - 0)       | 0<br>(0 - 0)       |
| Other intestinal infectious diseases                              | 0<br>(0 - 1)             | 0<br>(0 - 0)       | 0<br>(0 - 0)      | 0<br>(0 - 0)       | 0<br>(0 - 0)       | 0<br>(0 - 0)       |
| Lower respiratory infections                                      | 90<br>(68 - 114)         | 18<br>(12 - 25)    | 2<br>(1 - 3)      | 13<br>(9 - 20)     | 17<br>(11 - 24)    | 40<br>(29 - 55)    |
| Upper respiratory infections                                      | 0<br>(0 - 0)             | 0<br>(0 - 0)       | 0<br>(0 - 0)      | 0<br>(0 - 0)       | 0<br>(0 - 0)       | 0<br>(0 - 0)       |
| Otitis media                                                      | 0<br>(0 - 0)             | 0<br>(0 - 0)       | 0<br>(0 - 0)      | 0<br>(0 - 0)       | 0<br>(0 - 0)       | 0<br>(0 - 0)       |
| Meningitis                                                        | 6<br>(4 - 8)             | 2<br>(1 - 3)       | 0<br>(0 - 1)      | 2<br>(1 - 2)       | 1<br>(1 - 2)       | 1<br>(1 - 1)       |
| Pneumococcal meningitis                                           | 2<br>(1 - 2)             | 0<br>(0 - 1)       | 0<br>(0 - 0)      | 0<br>(0 - 1)       | 0<br>(0 - 1)       | 0<br>(0 - 0)       |
| H influenzae type B meningitis                                    | 1<br>(1 - 2)             | 1<br>(0 - 1)       | 0<br>(0 - 0)      | 0<br>(0 - 0)       | 0<br>(0 - 0)       | 0<br>(0 - 0)       |
| Meningococcal meningitis                                          | 1<br>(0 - 1)             | 0<br>(0 - 0)       | 0<br>(0 - 0)      | 0<br>(0 - 0)       | 0<br>(0 - 0)       | 0<br>(0 - 0)       |
| Other meningitis                                                  | 2<br>(2 - 3)             | 1<br>(0 - 1)       | 0<br>(0 - 0)      | 1<br>(0 - 1)       | 1<br>(0 - 1)       | 0<br>(0 - 1)       |
| Encephalitis                                                      | 4<br>(3 - 7)             | 1<br>(1 - 2)       | 1<br>(0 - 1)      | 2<br>(1 - 3)       | 1<br>(0 - 1)       | 0<br>(0 - 1)       |
| Diphtheria                                                        | 0<br>(0 - 0)             | 0<br>(0 - 0)       | 0<br>(0 - 0)      | 0<br>(0 - 0)       | 0<br>(0 - 0)       | --                 |
| Whooping cough                                                    | 0<br>(0 - 0)             | 0<br>(0 - 0)       | 0<br>(0 - 0)      | 0<br>(0 - 0)       | 0<br>(0 - 0)       | --                 |
| Tetanus                                                           | 0<br>(0 - 1)             | 0<br>(0 - 0)       | 0<br>(0 - 0)      | 0<br>(0 - 0)       | 0<br>(0 - 0)       | 0<br>(0 - 0)       |
| Measles                                                           | 0<br>(0 - 0)             | 0<br>(0 - 0)       | 0<br>(0 - 0)      | 0<br>(0 - 0)       | 0<br>(0 - 0)       | --                 |
| Varicella and herpes zoster                                       | 0<br>(0 - 0)             | 0<br>(0 - 0)       | 0<br>(0 - 0)      | 0<br>(0 - 0)       | 0<br>(0 - 0)       | 0<br>(0 - 0)       |
| Neglected tropical diseases and malaria                           | 5<br>(4 - 7)             | 1<br>(0 - 1)       | 0<br>(0 - 1)      | 2<br>(2 - 4)       | 1<br>(1 - 2)       | 1<br>(0 - 1)       |
| Malaria                                                           | 2<br>(1 - 3)             | 0<br>(0 - 1)       | 0<br>(0 - 0)      | 1<br>(1 - 2)       | 0<br>(0 - 1)       | 0<br>(0 - 0)       |
| Chagas disease                                                    | 0<br>(0 - 0)             | 0<br>(0 - 0)       | 0<br>(0 - 0)      | 0<br>(0 - 0)       | 0<br>(0 - 0)       | 0<br>(0 - 0)       |
| Leishmaniasis                                                     | 0<br>(0 - 0)             | 0<br>(0 - 0)       | 0<br>(0 - 0)      | 0<br>(0 - 0)       | 0<br>(0 - 0)       | 0<br>(0 - 0)       |
| Visceral leishmaniasis                                            | 0<br>(0 - 0)             | 0<br>(0 - 0)       | 0<br>(0 - 0)      | 0<br>(0 - 0)       | 0<br>(0 - 0)       | 0<br>(0 - 0)       |
| Schistosomiasis                                                   | 1<br>(1 - 1)             | 0<br>(0 - 0)       | 0<br>(0 - 0)      | 0<br>(0 - 1)       | 0<br>(0 - 1)       | 0<br>(0 - 0)       |
| Cysticercosis                                                     | 0<br>(0 - 0)             | 0<br>(0 - 0)       | 0<br>(0 - 0)      | 0<br>(0 - 0)       | 0<br>(0 - 0)       | 0<br>(0 - 0)       |
| Cystic echinococcosis                                             | 0<br>(0 - 0)             | 0<br>(0 - 0)       | 0<br>(0 - 0)      | 0<br>(0 - 0)       | 0<br>(0 - 0)       | 0<br>(0 - 0)       |
| Dengue                                                            | 1<br>(1 - 1)             | 0<br>(0 - 0)       | 0<br>(0 - 0)      | 0<br>(0 - 1)       | 0<br>(0 - 0)       | 0<br>(0 - 0)       |
| Yellow fever                                                      | 0<br>(0 - 0)             | 0<br>(0 - 0)       | 0<br>(0 - 0)      | 0<br>(0 - 0)       | 0<br>(0 - 0)       | 0<br>(0 - 0)       |
| Rabies                                                            | 0<br>(0 - 0)             | 0<br>(0 - 0)       | 0<br>(0 - 0)      | 0<br>(0 - 0)       | 0<br>(0 - 0)       | 0<br>(0 - 0)       |
| Intestinal nematode infections                                    | 0<br>(0 - 0)             | 0<br>(0 - 0)       | 0<br>(0 - 0)      | 0<br>(0 - 0)       | 0<br>(0 - 0)       | 0<br>(0 - 0)       |
| Ascariasis                                                        | 0<br>(0 - 0)             | 0<br>(0 - 0)       | 0<br>(0 - 0)      | 0<br>(0 - 0)       | 0<br>(0 - 0)       | 0<br>(0 - 0)       |

Web Table 31- Suriname deaths with 95% UI by age, sex, and cause in 2013

| Cause                                                            | Males, All Ages          | Males, 0-4 Years  | Males, 5-14 Years | Males, 15-49 Years | Males, 50-69 Years | Males, 70-80 Years |
|------------------------------------------------------------------|--------------------------|-------------------|-------------------|--------------------|--------------------|--------------------|
| Other neglected tropical diseases                                | 1<br>(1 - 1)             | 0<br>(0 - 0)      | 0<br>(0 - 0)      | 0<br>(0 - 0)       | 0<br>(0 - 0)       | 0<br>(0 - 0)       |
| Maternal disorders                                               | --                       | --                | --                | --                 | --                 | --                 |
| Maternal hemorrhage                                              | --                       | --                | --                | --                 | --                 | --                 |
| Maternal sepsis and other maternal infections                    | --                       | --                | --                | --                 | --                 | --                 |
| Maternal hypertensive disorders                                  | --                       | --                | --                | --                 | --                 | --                 |
| Maternal obstructed labor                                        | --                       | --                | --                | --                 | --                 | --                 |
| Maternal abortive outcome                                        | --                       | --                | --                | --                 | --                 | --                 |
| Indirect maternal deaths                                         | --                       | --                | --                | --                 | --                 | --                 |
| Late maternal deaths                                             | --                       | --                | --                | --                 | --                 | --                 |
| Maternal deaths aggravated by HIV/AIDS                           | --                       | --                | --                | --                 | --                 | --                 |
| Other maternal disorders                                         | --                       | --                | --                | --                 | --                 | --                 |
| Neonatal disorders                                               | 100<br>(86 - 115)        | 100<br>(86 - 115) | --                | --                 | --                 | --                 |
| Neonatal preterm birth complications                             | 51<br>(35 - 66)          | 51<br>(35 - 66)   | --                | --                 | --                 | --                 |
| Neonatal encephalopathy due to birth asphyxia and trauma         | 24<br>(15 - 34)          | 24<br>(15 - 34)   | --                | --                 | --                 | --                 |
| Neonatal sepsis and other neonatal infections                    | 15<br>(6 - 28)           | 15<br>(6 - 28)    | --                | --                 | --                 | --                 |
| Hemolytic disease and other neonatal jaundice                    | 2<br>(1 - 4)             | 2<br>(1 - 4)      | --                | --                 | --                 | --                 |
| Other neonatal disorders                                         | 8<br>(5 - 13)            | 8<br>(5 - 13)     | --                | --                 | --                 | --                 |
| Nutritional deficiencies                                         | 28<br>(19 - 42)          | 8<br>(5 - 14)     | 1<br>(1 - 1)      | 4<br>(2 - 7)       | 5<br>(3 - 8)       | 9<br>(6 - 15)      |
| Protein-energy malnutrition                                      | 14<br>(9 - 24)           | 7<br>(4 - 12)     | 1<br>(0 - 1)      | 1<br>(1 - 3)       | 2<br>(1 - 4)       | 4<br>(2 - 6)       |
| Iodine deficiency                                                | 0<br>(0 - 0)             | 0<br>(0 - 0)      | 0<br>(0 - 0)      | 0<br>(0 - 0)       | 0<br>(0 - 0)       | 0<br>(0 - 0)       |
| Iron-deficiency anemia                                           | 12<br>(5 - 20)           | 1<br>(0 - 3)      | 0<br>(0 - 0)      | 2<br>(1 - 4)       | 3<br>(1 - 5)       | 5<br>(2 - 9)       |
| Other nutritional deficiencies                                   | 1<br>(1 - 2)             | 0<br>(0 - 1)      | 0<br>(0 - 0)      | 0<br>(0 - 0)       | 0<br>(0 - 1)       | 0<br>(0 - 1)       |
| Other communicable, maternal, neonatal, and nutritional diseases | 8<br>(5 - 12)            | 1<br>(0 - 2)      | 0<br>(0 - 0)      | 3<br>(2 - 5)       | 2<br>(1 - 3)       | 1<br>(1 - 2)       |
| Sexually transmitted diseases excluding HIV                      | 1                        | 1                 | 0                 | 0                  | 0                  | 0                  |
| Syphilis                                                         | 1<br>(0 - 2)             | 1<br>(0 - 2)      | 0<br>(0 - 0)      | 0<br>(0 - 0)       | 0<br>(0 - 0)       | 0<br>(0 - 0)       |
| Chlamydial infection                                             | --                       | --                | --                | --                 | --                 | --                 |
| Gonococcal infection                                             | 0<br>(0 - 0)             | --                | 0<br>(0 - 0)      | 0<br>(0 - 0)       | 0<br>(0 - 0)       | 0<br>(0 - 0)       |
| Other sexually transmitted diseases                              | 0<br>(0 - 0)             | --                | 0<br>(0 - 0)      | 0<br>(0 - 0)       | 0<br>(0 - 0)       | 0<br>(0 - 0)       |
| Hepatitis                                                        | 1<br>(1 - 1)             | 0<br>(0 - 0)      | 0<br>(0 - 0)      | 0<br>(0 - 1)       | 0<br>(0 - 0)       | 0<br>(0 - 0)       |
| Acute hepatitis A                                                | 0<br>(0 - 0)             | 0<br>(0 - 0)      | 0<br>(0 - 0)      | 0<br>(0 - 0)       | 0<br>(0 - 0)       | 0<br>(0 - 0)       |
| Acute hepatitis B                                                | 0<br>(0 - 1)             | 0<br>(0 - 0)      | 0<br>(0 - 0)      | 0<br>(0 - 0)       | 0<br>(0 - 0)       | 0<br>(0 - 0)       |
| Acute hepatitis C                                                | 0<br>(0 - 0)             | --                | 0<br>(0 - 0)      | 0<br>(0 - 0)       | 0<br>(0 - 0)       | 0<br>(0 - 0)       |
| Other infectious diseases                                        | 7<br>(3 - 9)             | 1<br>(0 - 1)      | 0<br>(0 - 0)      | 3<br>(1 - 4)       | 2<br>(1 - 3)       | 1<br>(1 - 2)       |
| Non-communicable diseases                                        | 1,564<br>(1,200 - 1,991) | 50<br>(37 - 64)   | 13<br>(11 - 17)   | 231<br>(165 - 320) | 567<br>(402 - 757) | 702<br>(569 - 860) |
| Neoplasms                                                        | 307<br>(233 - 397)       | 3<br>(2 - 4)      | 4<br>(3 - 5)      | 46<br>(32 - 62)    | 116<br>(82 - 157)  | 139<br>(108 - 176) |
| Esophageal cancer                                                | 10<br>(7 - 15)           | --                | --                | 1<br>(1 - 2)       | 5<br>(3 - 8)       | 4<br>(3 - 6)       |
| Stomach cancer                                                   | 21<br>(15 - 27)          | --                | --                | 3<br>(2 - 4)       | 9<br>(6 - 12)      | 9<br>(7 - 12)      |
| Liver cancer                                                     | 14<br>(10 - 18)          | --                | 0<br>(0 - 0)      | 3<br>(2 - 4)       | 6<br>(4 - 9)       | 5<br>(3 - 6)       |
| Liver cancer due to hepatitis B                                  | 4<br>(2 - 6)             | --                | 0<br>(0 - 0)      | 1<br>(1 - 2)       | 2<br>(1 - 3)       | 1<br>(0 - 1)       |
| Liver cancer due to hepatitis C                                  | 6<br>(4 - 9)             | --                | 0<br>(0 - 0)      | 1<br>(1 - 2)       | 3<br>(2 - 4)       | 2<br>(2 - 3)       |

Web Table 31- Suriname deaths with 95% UI by age, sex, and cause in 2013

| Cause                                | Males, All Ages    | Males, 0-4 Years | Males, 5-14 Years | Males, 15-49 Years | Males, 50-69 Years | Males, 70-80 Years |
|--------------------------------------|--------------------|------------------|-------------------|--------------------|--------------------|--------------------|
| Liver cancer due to alcohol use      | 2<br>(1 - 4)       | --               | --                | 0<br>(0 - 1)       | 1<br>(1 - 2)       | 1<br>(1 - 2)       |
| Liver cancer due to other causes     | 1<br>(0 - 1)       | --               | 0<br>(0 - 0)      | 0<br>(0 - 0)       | 0<br>(0 - 1)       | 0<br>(0 - 0)       |
| Larynx cancer                        | 6<br>(4 - 8)       | --               | --                | 1<br>(0 - 1)       | 3<br>(2 - 4)       | 2<br>(1 - 3)       |
| Tracheal, bronchus and lung cancer   | 47<br>(34 - 62)    | --               | --                | 6<br>(4 - 9)       | 23<br>(16 - 32)    | 17<br>(13 - 23)    |
| Breast cancer                        | 2<br>(1 - 3)       | --               | --                | 0<br>(0 - 1)       | 1<br>(0 - 1)       | 1<br>(0 - 1)       |
| Cervical cancer                      | --                 | --               | --                | --                 | --                 | --                 |
| Uterine cancer                       | --                 | --               | --                | --                 | --                 | --                 |
| Prostate cancer                      | 74<br>(44 - 105)   | --               | --                | 1<br>(1 - 1)       | 17<br>(10 - 26)    | 56<br>(33 - 78)    |
| Colon and rectum cancer              | 33<br>(24 - 43)    | --               | --                | 5<br>(3 - 7)       | 13<br>(9 - 18)     | 15<br>(11 - 20)    |
| Lip and oral cavity cancer           | 6<br>(4 - 9)       | --               | --                | 1<br>(1 - 2)       | 3<br>(2 - 4)       | 2<br>(1 - 3)       |
| Nasopharynx cancer                   | 2<br>(1 - 3)       | --               | 0<br>(0 - 0)      | 1<br>(1 - 1)       | 1<br>(1 - 1)       | 0<br>(0 - 0)       |
| Other pharynx cancer                 | 3<br>(2 - 5)       | --               | --                | 1<br>(0 - 1)       | 2<br>(1 - 3)       | 1<br>(1 - 1)       |
| Gallbladder and biliary tract cancer | 3<br>(2 - 6)       | --               | --                | 0<br>(0 - 1)       | 1<br>(1 - 3)       | 1<br>(1 - 3)       |
| Pancreatic cancer                    | 13<br>(9 - 17)     | --               | --                | 2<br>(1 - 3)       | 6<br>(4 - 8)       | 5<br>(3 - 6)       |
| Malignant skin melanoma              | 2<br>(1 - 3)       | --               | --                | 1<br>(0 - 1)       | 1<br>(0 - 1)       | 1<br>(0 - 1)       |
| Non-melanoma skin cancer             | 2<br>(1 - 3)       | --               | --                | 0<br>(0 - 0)       | 1<br>(0 - 1)       | 1<br>(0 - 1)       |
| Ovarian cancer                       | --                 | --               | --                | --                 | --                 | --                 |
| Testicular cancer                    | 1<br>(0 - 1)       | --               | --                | 0<br>(0 - 1)       | 0<br>(0 - 0)       | 0<br>(0 - 0)       |
| Kidney cancer                        | 5<br>(4 - 7)       | 0<br>(0 - 0)     | 0<br>(0 - 0)      | 1<br>(1 - 1)       | 3<br>(2 - 4)       | 2<br>(1 - 2)       |
| Bladder cancer                       | 5<br>(4 - 8)       | --               | --                | 0<br>(0 - 0)       | 2<br>(1 - 3)       | 3<br>(2 - 5)       |
| Brain and nervous system cancer      | 5<br>(2 - 7)       | 0<br>(0 - 1)     | 0<br>(0 - 1)      | 2<br>(1 - 3)       | 2<br>(1 - 3)       | 1<br>(0 - 1)       |
| Thyroid cancer                       | 1<br>(1 - 1)       | --               | 0<br>(0 - 0)      | 0<br>(0 - 0)       | 0<br>(0 - 1)       | 0<br>(0 - 0)       |
| Mesothelioma                         | 1<br>(1 - 2)       | --               | --                | 0<br>(0 - 0)       | 0<br>(0 - 1)       | 1<br>(0 - 1)       |
| Hodgkin lymphoma                     | 1<br>(0 - 2)       | 0<br>(0 - 0)     | 0<br>(0 - 0)      | 1<br>(0 - 1)       | 0<br>(0 - 1)       | 0<br>(0 - 0)       |
| Non-Hodgkin lymphoma                 | 15<br>(10 - 21)    | 0<br>(0 - 0)     | 0<br>(0 - 1)      | 5<br>(3 - 8)       | 5<br>(3 - 8)       | 3<br>(2 - 5)       |
| Multiple myeloma                     | 5<br>(4 - 8)       | --               | --                | 1<br>(0 - 1)       | 3<br>(2 - 4)       | 2<br>(1 - 3)       |
| Leukemia                             | 12<br>(9 - 15)     | 1<br>(0 - 1)     | 2<br>(1 - 2)      | 4<br>(3 - 6)       | 3<br>(2 - 4)       | 2<br>(2 - 3)       |
| Other neoplasms                      | 19<br>(14 - 24)    | 1<br>(1 - 2)     | 1<br>(1 - 2)      | 6<br>(4 - 8)       | 6<br>(4 - 8)       | 4<br>(3 - 6)       |
| Cardiovascular diseases              | 686<br>(519 - 885) | 4<br>(3 - 5)     | 2<br>(2 - 3)      | 83<br>(58 - 117)   | 273<br>(194 - 367) | 323<br>(258 - 397) |
| Rheumatic heart disease              | 3<br>(2 - 5)       | 0<br>(0 - 0)     | 0<br>(0 - 0)      | 1<br>(1 - 2)       | 1<br>(1 - 1)       | 1<br>(0 - 1)       |
| Ischemic heart disease               | 311<br>(229 - 421) | 0<br>(0 - 1)     | 0<br>(0 - 1)      | 40<br>(28 - 57)    | 135<br>(93 - 185)  | 135<br>(105 - 175) |
| Cerebrovascular disease              | 254<br>(185 - 331) | 1<br>(1 - 2)     | 1<br>(1 - 1)      | 24<br>(16 - 35)    | 97<br>(66 - 132)   | 131<br>(98 - 167)  |
| Ischemic stroke                      | 158<br>(115 - 208) | 0<br>(0 - 0)     | 0<br>(0 - 0)      | 7<br>(4 - 11)      | 55<br>(37 - 76)    | 96<br>(71 - 123)   |
| Hemorrhagic stroke                   | 96<br>(62 - 131)   | 1<br>(1 - 1)     | 1<br>(0 - 1)      | 17<br>(11 - 26)    | 42<br>(26 - 59)    | 35<br>(21 - 48)    |
| Hypertensive heart disease           | 48<br>(31 - 73)    | 0<br>(0 - 0)     | 0<br>(0 - 0)      | 5<br>(3 - 8)       | 17<br>(10 - 27)    | 26<br>(16 - 39)    |
| Cardiomyopathy and myocarditis       | 22<br>(16 - 32)    | 1<br>(1 - 1)     | 0<br>(0 - 1)      | 5<br>(4 - 8)       | 8<br>(5 - 13)      | 7<br>(5 - 11)      |
| Atrial fibrillation and flutter      | 7<br>(5 - 10)      | --               | --                | 0<br>(0 - 1)       | 2<br>(1 - 3)       | 5<br>(3 - 7)       |
| Aortic aneurysm                      | 10<br>(7 - 13)     | --               | --                | 1<br>(1 - 1)       | 4<br>(3 - 6)       | 5<br>(3 - 6)       |
| Peripheral vascular disease          | 4<br>(2 - 5)       | --               | --                | 0<br>(0 - 0)       | 1<br>(0 - 1)       | 3<br>(2 - 4)       |
| Endocarditis                         | 3<br>(2 - 4)       | 0<br>(0 - 0)     | 0<br>(0 - 0)      | 1<br>(0 - 1)       | 1<br>(0 - 1)       | 1<br>(1 - 1)       |



Web Table 31- Suriname deaths with 95% UI by age, sex, and cause in 2013

| Cause                                               | Males, All Ages  | Males, 0-4 Years | Males, 5-14 Years | Males, 15-49 Years | Males, 50-69 Years | Males, 70-80 Years |
|-----------------------------------------------------|------------------|------------------|-------------------|--------------------|--------------------|--------------------|
| Other cardiovascular and circulatory diseases       | 23<br>(17 - 32)  | 1<br>(0 - 1)     | 0<br>(0 - 0)      | 5<br>(3 - 8)       | 8<br>(5 - 12)      | 9<br>(6 - 13)      |
| Chronic respiratory diseases                        | 77<br>(58 - 105) | 2<br>(1 - 4)     | 1<br>(0 - 1)      | 9<br>(6 - 13)      | 21<br>(14 - 30)    | 45<br>(34 - 61)    |
| Chronic obstructive pulmonary disease               | 51<br>(38 - 69)  | 1<br>(1 - 2)     | 0<br>(0 - 0)      | 3<br>(2 - 5)       | 12<br>(8 - 18)     | 34<br>(26 - 47)    |
| Pneumoconiosis                                      | 4<br>(2 - 6)     | 0<br>(0 - 0)     | 0<br>(0 - 0)      | 1<br>(0 - 1)       | 2<br>(1 - 3)       | 1<br>(1 - 2)       |
| Silicosis                                           | 0<br>(0 - 0)     | 0<br>(0 - 0)     | 0<br>(0 - 0)      | 0<br>(0 - 0)       | 0<br>(0 - 0)       | 0<br>(0 - 0)       |
| Asbestosis                                          | 1<br>(0 - 1)     | 0<br>(0 - 0)     | 0<br>(0 - 0)      | 0<br>(0 - 0)       | 1<br>(0 - 1)       | 0<br>(0 - 0)       |
| Coal workers pneumoconiosis                         | 1<br>(1 - 1)     | 0<br>(0 - 0)     | 0<br>(0 - 0)      | 0<br>(0 - 0)       | 0<br>(0 - 1)       | 0<br>(0 - 0)       |
| Other pneumoconiosis                                | 2<br>(1 - 3)     | 0<br>(0 - 0)     | 0<br>(0 - 0)      | 0<br>(0 - 0)       | 1<br>(0 - 1)       | 1<br>(1 - 2)       |
| Asthma                                              | 12<br>(9 - 17)   | 1<br>(0 - 1)     | 0<br>(0 - 1)      | 3<br>(2 - 5)       | 4<br>(2 - 5)       | 5<br>(3 - 7)       |
| Interstitial lung disease and pulmonary sarcoidosis | 7<br>(4 - 13)    | 0<br>(0 - 0)     | 0<br>(0 - 0)      | 1<br>(1 - 2)       | 2<br>(1 - 4)       | 4<br>(2 - 8)       |
| Other chronic respiratory diseases                  | 3<br>(2 - 4)     | 1<br>(0 - 1)     | 0<br>(0 - 0)      | 1<br>(0 - 1)       | 1<br>(0 - 1)       | 1<br>(0 - 1)       |
| Cirrhosis                                           | 55<br>(39 - 74)  | 0<br>(0 - 0)     | 0<br>(0 - 0)      | 17<br>(12 - 25)    | 27<br>(19 - 38)    | 10<br>(8 - 14)     |
| Cirrhosis due to hepatitis B                        | 4<br>(1 - 8)     | 0<br>(0 - 0)     | 0<br>(0 - 0)      | 1<br>(0 - 3)       | 2<br>(1 - 4)       | 1<br>(0 - 1)       |
| Cirrhosis due to hepatitis C                        | 13<br>(6 - 22)   | 0<br>(0 - 0)     | 0<br>(0 - 0)      | 4<br>(1 - 7)       | 7<br>(2 - 11)      | 3<br>(2 - 5)       |
| Cirrhosis due to alcohol use                        | 29<br>(19 - 41)  | --               | --                | 8<br>(5 - 12)      | 15<br>(10 - 22)    | 6<br>(4 - 8)       |
| Cirrhosis due to other causes                       | 9<br>(5 - 14)    | 0<br>(0 - 0)     | 0<br>(0 - 0)      | 4<br>(2 - 7)       | 4<br>(2 - 6)       | 1<br>(0 - 1)       |
| Digestive diseases                                  | 54<br>(40 - 71)  | 1<br>(0 - 1)     | 1<br>(0 - 1)      | 14<br>(10 - 20)    | 18<br>(12 - 25)    | 20<br>(16 - 26)    |
| Peptic ulcer disease                                | 16<br>(11 - 24)  | 0<br>(0 - 0)     | 0<br>(0 - 0)      | 4<br>(3 - 7)       | 6<br>(4 - 9)       | 6<br>(4 - 9)       |
| Gastritis and duodenitis                            | 4<br>(2 - 6)     | 0<br>(0 - 0)     | 0<br>(0 - 0)      | 1<br>(1 - 2)       | 1<br>(1 - 2)       | 1<br>(1 - 2)       |
| Appendicitis                                        | 3<br>(2 - 4)     | 0<br>(0 - 0)     | 0<br>(0 - 0)      | 1<br>(1 - 2)       | 1<br>(0 - 1)       | 1<br>(0 - 1)       |
| Paralytic ileus and intestinal obstruction          | 6<br>(2 - 10)    | 0<br>(0 - 0)     | 0<br>(0 - 0)      | 1<br>(0 - 2)       | 2<br>(1 - 3)       | 3<br>(1 - 5)       |
| Inguinal, femoral, and abdominal hernia             | 3<br>(2 - 7)     | 0<br>(0 - 0)     | 0<br>(0 - 0)      | 1<br>(0 - 1)       | 1<br>(0 - 2)       | 1<br>(1 - 4)       |
| Inflammatory bowel disease                          | 5<br>(4 - 8)     | 0<br>(0 - 1)     | 0<br>(0 - 0)      | 1<br>(1 - 2)       | 1<br>(1 - 2)       | 3<br>(2 - 4)       |
| Vascular intestinal disorders                       | 2<br>(1 - 4)     | 0<br>(0 - 0)     | 0<br>(0 - 0)      | 0<br>(0 - 1)       | 1<br>(0 - 2)       | 1<br>(0 - 2)       |
| Gallbladder and biliary diseases                    | 3<br>(2 - 4)     | 0<br>(0 - 0)     | 0<br>(0 - 0)      | 1<br>(0 - 1)       | 1<br>(1 - 2)       | 1<br>(1 - 1)       |
| Pancreatitis                                        | 4<br>(3 - 7)     | 0<br>(0 - 0)     | 0<br>(0 - 0)      | 2<br>(1 - 4)       | 2<br>(1 - 3)       | 1<br>(0 - 1)       |
| Other digestive diseases                            | 7<br>(4 - 10)    | 0<br>(0 - 0)     | 0<br>(0 - 0)      | 2<br>(1 - 3)       | 2<br>(1 - 3)       | 3<br>(2 - 4)       |
| Neurological disorders                              | 79<br>(61 - 100) | 1<br>(0 - 1)     | 1<br>(1 - 1)      | 8<br>(6 - 12)      | 11<br>(7 - 16)     | 58<br>(44 - 74)    |
| Alzheimer disease and other dementias               | 58<br>(43 - 73)  | --               | --                | 0<br>(0 - 0)       | 6<br>(3 - 8)       | 52<br>(39 - 67)    |
| Parkinson disease                                   | 5<br>(4 - 8)     | --               | --                | 0<br>(0 - 0)       | 1<br>(1 - 2)       | 4<br>(3 - 6)       |
| Epilepsy                                            | 11<br>(8 - 16)   | 1<br>(0 - 1)     | 1<br>(0 - 1)      | 6<br>(4 - 10)      | 2<br>(1 - 4)       | 1<br>(1 - 2)       |
| Multiple sclerosis                                  | 0<br>(0 - 1)     | --               | --                | 0<br>(0 - 0)       | 0<br>(0 - 0)       | 0<br>(0 - 0)       |
| Other neurological disorders                        | 5<br>(3 - 7)     | 0<br>(0 - 0)     | 0<br>(0 - 0)      | 2<br>(1 - 2)       | 2<br>(1 - 3)       | 1<br>(1 - 1)       |
| Mental and substance use disorders                  | 14<br>(9 - 20)   | 0<br>(0 - 0)     | 0<br>(0 - 0)      | 7<br>(4 - 10)      | 6<br>(3 - 8)       | 2<br>(1 - 3)       |
| Schizophrenia                                       | 1<br>(0 - 1)     | --               | --                | 0<br>(0 - 0)       | 0<br>(0 - 0)       | 0<br>(0 - 0)       |
| Alcohol use disorders                               | 9<br>(5 - 13)    | --               | --                | 3<br>(2 - 5)       | 4<br>(2 - 6)       | 1<br>(1 - 2)       |
| Drug use disorders                                  | 5<br>(3 - 7)     | 0<br>(0 - 0)     | --                | 3<br>(2 - 4)       | 1<br>(1 - 2)       | 1<br>(0 - 1)       |
| Opioid use disorders                                | 1<br>(1 - 2)     | 0<br>(0 - 0)     | --                | 1<br>(0 - 1)       | 0<br>(0 - 0)       | 0<br>(0 - 0)       |
| Cocaine use disorders                               | 0<br>(0 - 0)     | 0<br>(0 - 0)     | --                | 0<br>(0 - 0)       | 0<br>(0 - 0)       | 0<br>(0 - 0)       |
| Amphetamine use disorders                           | 0<br>(0 - 0)     | 0<br>(0 - 0)     | --                | 0<br>(0 - 0)       | 0<br>(0 - 0)       | 0<br>(0 - 0)       |

Web Table 31- Suriname deaths with 95% UI by age, sex, and cause in 2013

| Cause                                               | Males, All Ages    | Males, 0-4 Years | Males, 5-14 Years | Males, 15-49 Years | Males, 50-69 Years | Males, 70-80 Years |
|-----------------------------------------------------|--------------------|------------------|-------------------|--------------------|--------------------|--------------------|
| Other drug use disorders                            | 3<br>(2 - 4)       | 0<br>(0 - 0)     | --                | 2<br>(1 - 3)       | 1<br>(0 - 1)       | 0<br>(0 - 1)       |
| Eating disorders                                    | 0<br>(0 - 0)       | --               | 0<br>(0 - 0)      | 0<br>(0 - 0)       | --                 | --                 |
| Anorexia nervosa                                    | 0<br>(0 - 0)       | --               | 0<br>(0 - 0)      | 0<br>(0 - 0)       | --                 | --                 |
| Diabetes, urogenital, blood, and endocrine diseases | 233<br>(175 - 309) | 5<br>(3 - 8)     | 2<br>(2 - 3)      | 40<br>(28 - 59)    | 90<br>(62 - 125)   | 96<br>(76 - 120)   |
| Diabetes mellitus                                   | 115<br>(85 - 153)  | 0<br>(0 - 1)     | 0<br>(0 - 0)      | 15<br>(10 - 22)    | 52<br>(35 - 73)    | 48<br>(36 - 61)    |
| Acute glomerulonephritis                            | 0<br>(0 - 0)       | 0<br>(0 - 0)     | 0<br>(0 - 0)      | 0<br>(0 - 0)       | 0<br>(0 - 0)       | 0<br>(0 - 0)       |
| Chronic kidney disease                              | 79<br>(57 - 109)   | 1<br>(1 - 2)     | 1<br>(0 - 1)      | 15<br>(10 - 24)    | 28<br>(19 - 40)    | 34<br>(25 - 46)    |
| Chronic kidney disease due to diabetes mellitus     | 14<br>(8 - 29)     | 0<br>(0 - 0)     | 0<br>(0 - 0)      | 3<br>(1 - 6)       | 7<br>(4 - 14)      | 4<br>(2 - 10)      |
| Chronic kidney disease due to hypertension          | 38<br>(24 - 52)    | 0<br>(0 - 0)     | 0<br>(0 - 0)      | 7<br>(4 - 11)      | 13<br>(7 - 20)     | 17<br>(11 - 23)    |
| Chronic kidney disease due to glomerulonephritis    | 3<br>(2 - 4)       | 0<br>(0 - 0)     | 0<br>(0 - 0)      | 1<br>(1 - 2)       | 1<br>(0 - 1)       | 1<br>(0 - 1)       |
| Chronic kidney disease due to other causes          | 25<br>(14 - 38)    | 1<br>(0 - 1)     | 0<br>(0 - 1)      | 5<br>(3 - 9)       | 7<br>(3 - 13)      | 12<br>(6 - 19)     |
| Urinary diseases and male infertility               | 15<br>(9 - 21)     | 0<br>(0 - 1)     | 0<br>(0 - 0)      | 2<br>(1 - 3)       | 4<br>(2 - 6)       | 9<br>(5 - 13)      |
| Interstitial nephritis and urinary tract infections | 11<br>(5 - 15)     | 0<br>(0 - 0)     | 0<br>(0 - 0)      | 1<br>(1 - 2)       | 3<br>(1 - 4)       | 7<br>(3 - 10)      |
| Urolithiasis                                        | 1<br>(0 - 1)       | --               | 0<br>(0 - 0)      | 0<br>(0 - 0)       | 0<br>(0 - 1)       | 0<br>(0 - 1)       |
| Other urinary diseases                              | 4<br>(3 - 7)       | 0<br>(0 - 0)     | 0<br>(0 - 0)      | 1<br>(0 - 1)       | 1<br>(1 - 2)       | 2<br>(1 - 4)       |
| Gynecological diseases                              | --                 | --               | --                | --                 | --                 | --                 |
| Uterine fibroids                                    | --                 | --               | --                | --                 | --                 | --                 |
| Polycystic ovarian syndrome                         | --                 | --               | --                | --                 | --                 | --                 |
| Endometriosis                                       | --                 | --               | --                | --                 | --                 | --                 |
| Genital prolapse                                    | --                 | --               | --                | --                 | --                 | --                 |
| Other gynecological diseases                        | --                 | --               | --                | --                 | --                 | --                 |
| Hemoglobinopathies and hemolytic anemias            | 6<br>(4 - 10)      | 1<br>(1 - 2)     | 1<br>(0 - 1)      | 3<br>(1 - 4)       | 1<br>(0 - 1)       | 1<br>(0 - 1)       |
| Thalassemias                                        | 0<br>(0 - 0)       | 0<br>(0 - 0)     | 0<br>(0 - 0)      | 0<br>(0 - 0)       | 0<br>(0 - 0)       | 0<br>(0 - 0)       |
| Sickle cell disorders                               | 5<br>(3 - 8)       | 1<br>(1 - 2)     | 1<br>(0 - 1)      | 2<br>(1 - 4)       | 1<br>(0 - 1)       | 0<br>(0 - 0)       |
| G6PD deficiency                                     | 0<br>(0 - 0)       | 0<br>(0 - 0)     | 0<br>(0 - 0)      | 0<br>(0 - 0)       | 0<br>(0 - 0)       | 0<br>(0 - 0)       |
| Other hemoglobinopathies and hemolytic anemias      | 1<br>(1 - 1)       | 0<br>(0 - 0)     | 0<br>(0 - 0)      | 0<br>(0 - 0)       | 0<br>(0 - 0)       | 0<br>(0 - 1)       |
| Endocrine, metabolic, blood, and immune disorders   | 17<br>(11 - 33)    | 2<br>(1 - 4)     | 0<br>(0 - 1)      | 6<br>(3 - 10)      | 5<br>(3 - 11)      | 4<br>(2 - 8)       |
| Musculoskeletal disorders                           | 5<br>(3 - 8)       | --               | 0<br>(0 - 0)      | 2<br>(1 - 4)       | 1<br>(1 - 2)       | 1<br>(1 - 2)       |
| Rheumatoid arthritis                                | 1<br>(0 - 1)       | --               | 0<br>(0 - 0)      | 0<br>(0 - 0)       | 0<br>(0 - 0)       | 0<br>(0 - 0)       |
| Other musculoskeletal disorders                     | 5<br>(3 - 7)       | --               | 0<br>(0 - 0)      | 2<br>(1 - 3)       | 1<br>(1 - 2)       | 1<br>(1 - 2)       |
| Other non-communicable diseases                     | 53<br>(42 - 65)    | 34<br>(25 - 45)  | 3<br>(2 - 4)      | 5<br>(3 - 7)       | 4<br>(2 - 5)       | 7<br>(3 - 10)      |
| Congenital anomalies                                | 39<br>(30 - 50)    | 31<br>(22 - 40)  | 3<br>(2 - 4)      | 3<br>(2 - 5)       | 1<br>(1 - 2)       | 1<br>(1 - 1)       |
| Neural tube defects                                 | 1<br>(1 - 2)       | 1<br>(1 - 2)     | 0<br>(0 - 0)      | 0<br>(0 - 0)       | 0<br>(0 - 0)       | 0<br>(0 - 0)       |
| Congenital heart anomalies                          | 19<br>(13 - 27)    | 14<br>(9 - 21)   | 2<br>(1 - 2)      | 2<br>(1 - 3)       | 1<br>(0 - 1)       | 0<br>(0 - 0)       |
| Cleft lip and cleft palate                          | 0<br>(0 - 0)       | 0<br>(0 - 0)     | --                | --                 | --                 | --                 |
| Down syndrome                                       | 2<br>(1 - 2)       | 1<br>(0 - 2)     | 0<br>(0 - 0)      | 0<br>(0 - 1)       | 0<br>(0 - 0)       | 0<br>(0 - 0)       |
| Chromosomal unbalanced rearrangements               | 1<br>(0 - 1)       | 1<br>(0 - 1)     | 0<br>(0 - 0)      | 0<br>(0 - 0)       | 0<br>(0 - 0)       | 0<br>(0 - 0)       |
| Other congenital anomalies                          | 16<br>(11 - 23)    | 13<br>(8 - 19)   | 1<br>(0 - 1)      | 1<br>(1 - 2)       | 1<br>(0 - 1)       | 1<br>(0 - 1)       |
| Skin and subcutaneous diseases                      | 11<br>(4 - 15)     | 0<br>(0 - 1)     | 0<br>(0 - 0)      | 1<br>(1 - 2)       | 2<br>(1 - 4)       | 6<br>(2 - 9)       |
| Cellulitis                                          | 1<br>(0 - 2)       | 0<br>(0 - 0)     | 0<br>(0 - 0)      | 0<br>(0 - 0)       | 0<br>(0 - 1)       | 1<br>(0 - 1)       |

Web Table 31- Suriname deaths with 95% UI by age, sex, and cause in 2013

| Cause                                           | Males, All Ages    | Males, 0-4 Years | Males, 5-14 Years | Males, 15-49 Years | Males, 50-69 Years | Males, 70-80 Years |
|-------------------------------------------------|--------------------|------------------|-------------------|--------------------|--------------------|--------------------|
| Pyoderma                                        | 3<br>(1 - 4)       | 0<br>(0 - 1)     | 0<br>(0 - 0)      | 0<br>(0 - 1)       | 1<br>(0 - 1)       | 2<br>(1 - 2)       |
| Decubitus ulcer                                 | 6<br>(2 - 9)       | 0<br>(0 - 0)     | 0<br>(0 - 0)      | 1<br>(0 - 1)       | 1<br>(0 - 2)       | 4<br>(1 - 6)       |
| Other skin and subcutaneous diseases            | 0<br>(0 - 1)       | 0<br>(0 - 0)     | 0<br>(0 - 0)      | 0<br>(0 - 0)       | 0<br>(0 - 0)       | 0<br>(0 - 0)       |
| Sudden infant death syndrome                    | 3<br>(1 - 7)       | 3<br>(1 - 7)     | --                | --                 | --                 | --                 |
| Injuries                                        | 309<br>(231 - 409) | 16<br>(11 - 23)  | 14<br>(12 - 17)   | 196<br>(140 - 269) | 56<br>(40 - 77)    | 26<br>(20 - 33)    |
| Transport injuries                              | 91<br>(64 - 122)   | 2<br>(1 - 4)     | 6<br>(4 - 8)      | 58<br>(39 - 81)    | 17<br>(12 - 24)    | 7<br>(5 - 10)      |
| Road injuries                                   | 84<br>(60 - 114)   | 2<br>(1 - 3)     | 5<br>(4 - 7)      | 54<br>(36 - 75)    | 16<br>(11 - 23)    | 7<br>(5 - 9)       |
| Pedestrian road injuries                        | 19<br>(12 - 28)    | 1<br>(0 - 1)     | 2<br>(1 - 3)      | 9<br>(5 - 14)      | 5<br>(3 - 7)       | 3<br>(2 - 4)       |
| Cyclist road injuries                           | 5<br>(3 - 7)       | 0<br>(0 - 0)     | 1<br>(0 - 1)      | 3<br>(2 - 4)       | 1<br>(1 - 2)       | 1<br>(0 - 1)       |
| Motorcyclist road injuries                      | 8<br>(5 - 13)      | 0<br>(0 - 0)     | 0<br>(0 - 0)      | 7<br>(4 - 11)      | 1<br>(0 - 1)       | 0<br>(0 - 1)       |
| Motor vehicle road injuries                     | 51<br>(35 - 72)    | 1<br>(1 - 2)     | 2<br>(2 - 3)      | 35<br>(23 - 50)    | 9<br>(6 - 14)      | 3<br>(2 - 4)       |
| Other road injuries                             | 1<br>(0 - 1)       | 0<br>(0 - 0)     | 0<br>(0 - 0)      | 0<br>(0 - 1)       | 0<br>(0 - 0)       | 0<br>(0 - 0)       |
| Other transport injuries                        | 6<br>(3 - 9)       | 0<br>(0 - 1)     | 0<br>(0 - 1)      | 4<br>(2 - 5)       | 1<br>(1 - 2)       | 1<br>(0 - 1)       |
| Unintentional injuries                          | 97<br>(74 - 125)   | 12<br>(8 - 17)   | 6<br>(5 - 8)      | 46<br>(32 - 64)    | 18<br>(13 - 25)    | 14<br>(10 - 18)    |
| Falls                                           | 15<br>(10 - 20)    | 0<br>(0 - 1)     | 0<br>(0 - 1)      | 6<br>(4 - 8)       | 4<br>(3 - 6)       | 4<br>(3 - 6)       |
| Drowning                                        | 29<br>(19 - 40)    | 2<br>(1 - 4)     | 3<br>(2 - 5)      | 18<br>(11 - 26)    | 4<br>(3 - 7)       | 1<br>(1 - 2)       |
| Fire, heat, and hot substances                  | 8<br>(5 - 10)      | 1<br>(1 - 2)     | 1<br>(0 - 1)      | 2<br>(1 - 4)       | 1<br>(1 - 2)       | 2<br>(1 - 3)       |
| Poisonings                                      | 2<br>(1 - 3)       | 0<br>(0 - 0)     | 0<br>(0 - 0)      | 1<br>(1 - 2)       | 0<br>(0 - 1)       | 0<br>(0 - 0)       |
| Exposure to mechanical forces                   | 16<br>(11 - 23)    | 1<br>(0 - 1)     | 1<br>(1 - 1)      | 11<br>(8 - 17)     | 3<br>(2 - 4)       | 1<br>(0 - 1)       |
| Unintentional firearm injuries                  | 8<br>(5 - 12)      | 0<br>(0 - 0)     | 0<br>(0 - 0)      | 6<br>(4 - 10)      | 1<br>(1 - 2)       | 0<br>(0 - 0)       |
| Unintentional suffocation                       | 2<br>(1 - 3)       | 0<br>(0 - 0)     | 0<br>(0 - 0)      | 1<br>(0 - 2)       | 0<br>(0 - 1)       | 0<br>(0 - 0)       |
| Other exposure to mechanical forces             | 6<br>(4 - 9)       | 0<br>(0 - 0)     | 0<br>(0 - 1)      | 4<br>(2 - 6)       | 1<br>(1 - 1)       | 0<br>(0 - 0)       |
| Adverse effects of medical treatment            | 8<br>(5 - 11)      | 1<br>(1 - 2)     | 0<br>(0 - 0)      | 2<br>(1 - 3)       | 2<br>(1 - 3)       | 3<br>(1 - 4)       |
| Animal contact                                  | 2<br>(1 - 3)       | 0<br>(0 - 0)     | 0<br>(0 - 0)      | 1<br>(0 - 1)       | 1<br>(0 - 1)       | 0<br>(0 - 1)       |
| Venomous animal contact                         | 2<br>(0 - 2)       | 0<br>(0 - 0)     | 0<br>(0 - 0)      | 1<br>(0 - 1)       | 0<br>(0 - 1)       | 0<br>(0 - 0)       |
| Non-venomous animal contact                     | 1<br>(0 - 1)       | 0<br>(0 - 0)     | 0<br>(0 - 0)      | 0<br>(0 - 0)       | 0<br>(0 - 0)       | 0<br>(0 - 0)       |
| Foreign body                                    | 14<br>(7 - 21)     | 5<br>(2 - 9)     | 1<br>(0 - 1)      | 3<br>(2 - 5)       | 2<br>(1 - 4)       | 3<br>(1 - 4)       |
| Pulmonary aspiration and foreign body in airway | 14<br>(7 - 20)     | 5<br>(2 - 8)     | 1<br>(0 - 1)      | 3<br>(2 - 5)       | 2<br>(1 - 4)       | 3<br>(1 - 4)       |
| Foreign body in other body part                 | 0<br>(0 - 0)       | 0<br>(0 - 0)     | 0<br>(0 - 0)      | 0<br>(0 - 0)       | 0<br>(0 - 0)       | 0<br>(0 - 0)       |
| Other unintentional injuries                    | 4<br>(3 - 6)       | 0<br>(0 - 1)     | 0<br>(0 - 0)      | 2<br>(1 - 4)       | 1<br>(0 - 1)       | 1<br>(0 - 1)       |
| Self-harm and interpersonal violence            | 122<br>(84 - 171)  | 2<br>(1 - 4)     | 2<br>(1 - 3)      | 92<br>(63 - 131)   | 20<br>(13 - 30)    | 5<br>(3 - 7)       |
| Self-harm                                       | 68<br>(47 - 96)    | --               | 1<br>(0 - 1)      | 52<br>(35 - 74)    | 12<br>(8 - 18)     | 3<br>(2 - 5)       |
| Interpersonal violence                          | 54<br>(34 - 81)    | 2<br>(1 - 4)     | 1<br>(1 - 2)      | 40<br>(25 - 63)    | 8<br>(4 - 14)      | 2<br>(1 - 3)       |
| Assault by firearm                              | 26<br>(14 - 42)    | 0<br>(0 - 1)     | 1<br>(0 - 1)      | 21<br>(11 - 36)    | 3<br>(1 - 6)       | 0<br>(0 - 1)       |
| Assault by sharp object                         | 15<br>(7 - 25)     | 0<br>(0 - 1)     | 0<br>(0 - 1)      | 12<br>(5 - 20)     | 2<br>(1 - 4)       | 1<br>(0 - 1)       |
| Assault by other means                          | 13<br>(7 - 21)     | 1<br>(1 - 3)     | 0<br>(0 - 1)      | 7<br>(3 - 13)      | 3<br>(1 - 5)       | 1<br>(0 - 2)       |

Web Table 31- Suriname deaths with 95% UI by age, sex, and cause in 2013

| Cause                                                             | Females, All Ages        | Females, 0-4 Years | Females, 5-14 Years | Females, 15-49 Years | Females, 50-69 Years | Females, 70-80 Years |
|-------------------------------------------------------------------|--------------------------|--------------------|---------------------|----------------------|----------------------|----------------------|
| All causes                                                        | 1,829<br>(1,465 - 2,233) | 157<br>(127 - 195) | 22<br>(18 - 28)     | 239<br>(177 - 306)   | 447<br>(318 - 609)   | 963<br>(786 - 1,129) |
| Communicable, maternal, neonatal, and nutritional diseases        | 236<br>(203 - 271)       | 100<br>(80 - 125)  | 4<br>(3 - 5)        | 44<br>(36 - 55)      | 21<br>(16 - 29)      | 66<br>(48 - 85)      |
| HIV/AIDS and tuberculosis                                         | 32<br>(23 - 46)          | 0<br>(0 - 0)       | 0<br>(0 - 0)        | 24<br>(17 - 35)      | 6<br>(4 - 10)        | 2<br>(1 - 3)         |
| Tuberculosis                                                      | 4<br>(3 - 5)             | 0<br>(0 - 0)       | 0<br>(0 - 0)        | 1<br>(1 - 2)         | 1<br>(1 - 2)         | 1<br>(1 - 2)         |
| HIV/AIDS                                                          | 28<br>(19 - 42)          | 0<br>(0 - 0)       | 0<br>(0 - 0)        | 22<br>(15 - 34)      | 5<br>(3 - 9)         | 0<br>(0 - 1)         |
| HIV/AIDS resulting in mycobacterial infection                     | 1<br>(1 - 2)             | 0<br>(0 - 0)       | 0<br>(0 - 0)        | 1<br>(1 - 2)         | 0<br>(0 - 0)         | 0<br>(0 - 0)         |
| HIV/AIDS resulting in other diseases                              | 27<br>(18 - 41)          | 0<br>(0 - 0)       | 0<br>(0 - 0)        | 21<br>(14 - 32)      | 5<br>(3 - 8)         | 0<br>(0 - 1)         |
| Diarrhea, lower respiratory, and other common infectious diseases | 98<br>(76 - 120)         | 24<br>(17 - 34)    | 3<br>(2 - 4)        | 9<br>(6 - 12)        | 11<br>(7 - 16)       | 51<br>(36 - 69)      |
| Diarrheal diseases                                                | 13<br>(9 - 18)           | 7<br>(4 - 12)      | 0<br>(0 - 1)        | 1<br>(1 - 1)         | 1<br>(1 - 2)         | 4<br>(2 - 6)         |
| Intestinal infectious diseases                                    | 2<br>(1 - 4)             | 1<br>(0 - 1)       | 1<br>(0 - 1)        | 1<br>(0 - 1)         | 0<br>(0 - 0)         | 0<br>(0 - 0)         |
| Typhoid fever                                                     | 2<br>(1 - 3)             | 0<br>(0 - 1)       | 0<br>(0 - 1)        | 1<br>(0 - 1)         | 0<br>(0 - 0)         | 0<br>(0 - 0)         |
| Paratyphoid fever                                                 | 0<br>(0 - 1)             | 0<br>(0 - 0)       | 0<br>(0 - 0)        | 0<br>(0 - 0)         | 0<br>(0 - 0)         | 0<br>(0 - 0)         |
| Other intestinal infectious diseases                              | 0<br>(0 - 0)             | 0<br>(0 - 0)       | 0<br>(0 - 0)        | 0<br>(0 - 0)         | 0<br>(0 - 0)         | 0<br>(0 - 0)         |
| Lower respiratory infections                                      | 76<br>(56 - 96)          | 14<br>(9 - 21)     | 1<br>(1 - 2)        | 6<br>(4 - 8)         | 9<br>(5 - 13)        | 46<br>(31 - 63)      |
| Upper respiratory infections                                      | 0<br>(0 - 0)             | 0<br>(0 - 0)       | 0<br>(0 - 0)        | 0<br>(0 - 0)         | 0<br>(0 - 0)         | 0<br>(0 - 0)         |
| Otitis media                                                      | 0<br>(0 - 0)             | 0<br>(0 - 0)       | 0<br>(0 - 0)        | 0<br>(0 - 0)         | 0<br>(0 - 0)         | 0<br>(0 - 0)         |
| Meningitis                                                        | 4<br>(3 - 5)             | 1<br>(1 - 2)       | 0<br>(0 - 0)        | 1<br>(0 - 1)         | 1<br>(0 - 1)         | 1<br>(1 - 1)         |
| Pneumococcal meningitis                                           | 1<br>(1 - 2)             | 0<br>(0 - 1)       | 0<br>(0 - 0)        | 0<br>(0 - 0)         | 0<br>(0 - 0)         | 0<br>(0 - 1)         |
| H influenzae type B meningitis                                    | 1<br>(1 - 1)             | 1<br>(0 - 1)       | 0<br>(0 - 0)        | 0<br>(0 - 0)         | 0<br>(0 - 0)         | 0<br>(0 - 0)         |
| Meningococcal meningitis                                          | 0<br>(0 - 1)             | 0<br>(0 - 0)       | 0<br>(0 - 0)        | 0<br>(0 - 0)         | 0<br>(0 - 0)         | 0<br>(0 - 0)         |
| Other meningitis                                                  | 1<br>(1 - 2)             | 0<br>(0 - 1)       | 0<br>(0 - 0)        | 0<br>(0 - 0)         | 0<br>(0 - 0)         | 0<br>(0 - 1)         |
| Encephalitis                                                      | 3<br>(2 - 5)             | 1<br>(1 - 2)       | 0<br>(0 - 1)        | 1<br>(1 - 1)         | 0<br>(0 - 1)         | 0<br>(0 - 1)         |
| Diphtheria                                                        | 0<br>(0 - 0)             | 0<br>(0 - 0)       | 0<br>(0 - 0)        | 0<br>(0 - 0)         | 0<br>(0 - 0)         | --                   |
| Whooping cough                                                    | 0<br>(0 - 0)             | 0<br>(0 - 0)       | 0<br>(0 - 0)        | 0<br>(0 - 0)         | 0<br>(0 - 0)         | --                   |
| Tetanus                                                           | 0<br>(0 - 0)             | 0<br>(0 - 0)       | 0<br>(0 - 0)        | 0<br>(0 - 0)         | 0<br>(0 - 0)         | 0<br>(0 - 0)         |
| Measles                                                           | 0<br>(0 - 0)             | 0<br>(0 - 0)       | 0<br>(0 - 0)        | 0<br>(0 - 0)         | 0<br>(0 - 0)         | --                   |
| Varicella and herpes zoster                                       | 0<br>(0 - 0)             | 0<br>(0 - 0)       | 0<br>(0 - 0)        | 0<br>(0 - 0)         | 0<br>(0 - 0)         | 0<br>(0 - 0)         |
| Neglected tropical diseases and malaria                           | 3<br>(2 - 3)             | 0<br>(0 - 1)       | 0<br>(0 - 0)        | 1<br>(1 - 1)         | 1<br>(0 - 1)         | 1<br>(0 - 1)         |
| Malaria                                                           | 1<br>(0 - 1)             | 0<br>(0 - 0)       | 0<br>(0 - 0)        | 0<br>(0 - 0)         | 0<br>(0 - 0)         | 0<br>(0 - 0)         |
| Chagas disease                                                    | 0<br>(0 - 0)             | 0<br>(0 - 0)       | 0<br>(0 - 0)        | 0<br>(0 - 0)         | 0<br>(0 - 0)         | 0<br>(0 - 0)         |
| Leishmaniasis                                                     | 0<br>(0 - 0)             | 0<br>(0 - 0)       | 0<br>(0 - 0)        | 0<br>(0 - 0)         | 0<br>(0 - 0)         | 0<br>(0 - 0)         |
| Visceral leishmaniasis                                            | 0<br>(0 - 0)             | 0<br>(0 - 0)       | 0<br>(0 - 0)        | 0<br>(0 - 0)         | 0<br>(0 - 0)         | 0<br>(0 - 0)         |
| Schistosomiasis                                                   | 1<br>(0 - 1)             | 0<br>(0 - 0)       | 0<br>(0 - 0)        | 0<br>(0 - 0)         | 0<br>(0 - 0)         | 0<br>(0 - 0)         |
| Cysticercosis                                                     | 0<br>(0 - 0)             | 0<br>(0 - 0)       | 0<br>(0 - 0)        | 0<br>(0 - 0)         | 0<br>(0 - 0)         | 0<br>(0 - 0)         |
| Cystic echinococcosis                                             | 0<br>(0 - 0)             | 0<br>(0 - 0)       | 0<br>(0 - 0)        | 0<br>(0 - 0)         | 0<br>(0 - 0)         | 0<br>(0 - 0)         |
| Dengue                                                            | 1<br>(0 - 1)             | 0<br>(0 - 0)       | 0<br>(0 - 0)        | 0<br>(0 - 0)         | 0<br>(0 - 0)         | 0<br>(0 - 0)         |
| Yellow fever                                                      | 0<br>(0 - 0)             | 0<br>(0 - 0)       | 0<br>(0 - 0)        | 0<br>(0 - 0)         | 0<br>(0 - 0)         | 0<br>(0 - 0)         |
| Rabies                                                            | 0<br>(0 - 0)             | 0<br>(0 - 0)       | 0<br>(0 - 0)        | 0<br>(0 - 0)         | 0<br>(0 - 0)         | 0<br>(0 - 0)         |
| Intestinal nematode infections                                    | 0<br>(0 - 0)             | 0<br>(0 - 0)       | 0<br>(0 - 0)        | 0<br>(0 - 0)         | 0<br>(0 - 0)         | 0<br>(0 - 0)         |
| Ascariasis                                                        | 0<br>(0 - 0)             | 0<br>(0 - 0)       | 0<br>(0 - 0)        | 0<br>(0 - 0)         | 0<br>(0 - 0)         | 0<br>(0 - 0)         |

Web Table 31- Suriname deaths with 95% UI by age, sex, and cause in 2013

| Cause                                                            | Females, All Ages        | Females, 0-4 Years | Females, 5-14 Years | Females, 15-49 Years | Females, 50-69 Years | Females, 70-80 Years |
|------------------------------------------------------------------|--------------------------|--------------------|---------------------|----------------------|----------------------|----------------------|
| Other neglected tropical diseases                                | 1<br>(0 - 1)             | 0<br>(0 - 0)       | 0<br>(0 - 0)        | 0<br>(0 - 0)         | 0<br>(0 - 0)         | 0<br>(0 - 0)         |
| Maternal disorders                                               | 6<br>(4 - 9)             | --                 | 0<br>(0 - 0)        | 6<br>(4 - 9)         | --                   | --                   |
| Maternal hemorrhage                                              | 1<br>(1 - 2)             | --                 | 0<br>(0 - 0)        | 1<br>(1 - 2)         | --                   | --                   |
| Maternal sepsis and other maternal infections                    | 1<br>(0 - 1)             | --                 | 0<br>(0 - 0)        | 1<br>(0 - 1)         | --                   | --                   |
| Maternal hypertensive disorders                                  | 1<br>(1 - 2)             | --                 | 0<br>(0 - 0)        | 1<br>(1 - 2)         | --                   | --                   |
| Maternal obstructed labor                                        | 0<br>(0 - 1)             | --                 | 0<br>(0 - 0)        | 0<br>(0 - 1)         | --                   | --                   |
| Maternal abortive outcome                                        | 1<br>(1 - 2)             | --                 | 0<br>(0 - 0)        | 1<br>(1 - 2)         | --                   | --                   |
| Indirect maternal deaths                                         | 1<br>(0 - 1)             | --                 | 0<br>(0 - 0)        | 1<br>(0 - 1)         | --                   | --                   |
| Late maternal deaths                                             | 1<br>(0 - 1)             | --                 | 0<br>(0 - 0)        | 1<br>(0 - 1)         | --                   | --                   |
| Maternal deaths aggravated by HIV/AIDS                           | 0<br>(0 - 0)             | --                 | --                  | 0<br>(0 - 0)         | --                   | --                   |
| Other maternal disorders                                         | 1<br>(0 - 1)             | --                 | 0<br>(0 - 0)        | 1<br>(0 - 1)         | --                   | --                   |
| Neonatal disorders                                               | 68<br>(56 - 82)          | 68<br>(56 - 82)    | --                  | --                   | --                   | --                   |
| Neonatal preterm birth complications                             | 35<br>(24 - 46)          | 35<br>(24 - 46)    | --                  | --                   | --                   | --                   |
| Neonatal encephalopathy due to birth asphyxia and trauma         | 16<br>(10 - 24)          | 16<br>(10 - 24)    | --                  | --                   | --                   | --                   |
| Neonatal sepsis and other neonatal infections                    | 10<br>(5 - 18)           | 10<br>(5 - 18)     | --                  | --                   | --                   | --                   |
| Hemolytic disease and other neonatal jaundice                    | 1<br>(0 - 2)             | 1<br>(0 - 2)       | --                  | --                   | --                   | --                   |
| Other neonatal disorders                                         | 7<br>(4 - 11)            | 7<br>(4 - 11)      | --                  | --                   | --                   | --                   |
| Nutritional deficiencies                                         | 23<br>(17 - 30)          | 6<br>(4 - 9)       | 1<br>(0 - 1)        | 3<br>(2 - 5)         | 3<br>(2 - 4)         | 10<br>(7 - 15)       |
| Protein-energy malnutrition                                      | 11<br>(7 - 16)           | 5<br>(3 - 8)       | 0<br>(0 - 0)        | 0<br>(0 - 1)         | 1<br>(0 - 1)         | 4<br>(2 - 7)         |
| Iodine deficiency                                                | 0<br>(0 - 0)             | 0<br>(0 - 0)       | 0<br>(0 - 0)        | 0<br>(0 - 0)         | 0<br>(0 - 0)         | 0<br>(0 - 0)         |
| Iron-deficiency anemia                                           | 11<br>(6 - 16)           | 1<br>(0 - 2)       | 0<br>(0 - 0)        | 2<br>(2 - 4)         | 2<br>(1 - 3)         | 6<br>(3 - 9)         |
| Other nutritional deficiencies                                   | 1<br>(0 - 2)             | 0<br>(0 - 0)       | 0<br>(0 - 0)        | 0<br>(0 - 0)         | 0<br>(0 - 0)         | 1<br>(0 - 1)         |
| Other communicable, maternal, neonatal, and nutritional diseases | 5<br>(3 - 7)             | 1<br>(0 - 2)       | 0<br>(0 - 0)        | 1<br>(1 - 2)         | 1<br>(1 - 2)         | 2<br>(1 - 2)         |
| Sexually transmitted diseases excluding HIV                      | 1<br>(0 - 2)             | 1<br>(0 - 1)       | 0<br>(0 - 0)        | 0<br>(0 - 0)         | 0<br>(0 - 0)         | 0<br>(0 - 0)         |
| Syphilis                                                         | 1<br>(0 - 2)             | 1<br>(0 - 1)       | 0<br>(0 - 0)        | 0<br>(0 - 0)         | 0<br>(0 - 0)         | 0<br>(0 - 0)         |
| Chlamydial infection                                             | 0<br>(0 - 0)             | --                 | 0<br>(0 - 0)        | 0<br>(0 - 0)         | 0<br>(0 - 0)         | 0<br>(0 - 0)         |
| Gonococcal infection                                             | 0<br>(0 - 0)             | --                 | 0<br>(0 - 0)        | 0<br>(0 - 0)         | 0<br>(0 - 0)         | 0<br>(0 - 0)         |
| Other sexually transmitted diseases                              | 0<br>(0 - 0)             | --                 | 0<br>(0 - 0)        | 0<br>(0 - 0)         | 0<br>(0 - 0)         | 0<br>(0 - 0)         |
| Hepatitis                                                        | 0<br>(0 - 0)             | 0<br>(0 - 0)       | 0<br>(0 - 0)        | 0<br>(0 - 0)         | 0<br>(0 - 0)         | 0<br>(0 - 0)         |
| Acute hepatitis A                                                | 0<br>(0 - 0)             | 0<br>(0 - 0)       | 0<br>(0 - 0)        | 0<br>(0 - 0)         | 0<br>(0 - 0)         | 0<br>(0 - 0)         |
| Acute hepatitis B                                                | 0<br>(0 - 0)             | 0<br>(0 - 0)       | 0<br>(0 - 0)        | 0<br>(0 - 0)         | 0<br>(0 - 0)         | 0<br>(0 - 0)         |
| Acute hepatitis C                                                | 0<br>(0 - 0)             | --                 | 0<br>(0 - 0)        | 0<br>(0 - 0)         | 0<br>(0 - 0)         | 0<br>(0 - 0)         |
| Other infectious diseases                                        | 4<br>(2 - 5)             | 0<br>(0 - 1)       | 0<br>(0 - 0)        | 1<br>(0 - 1)         | 1<br>(1 - 1)         | 1<br>(1 - 2)         |
| Non-communicable diseases                                        | 1,495<br>(1,170 - 1,863) | 45<br>(34 - 59)    | 11<br>(9 - 14)      | 158<br>(112 - 211)   | 410<br>(292 - 558)   | 870<br>(709 - 1,030) |
| Neoplasms                                                        | 295<br>(219 - 382)       | 2<br>(1 - 3)       | 3<br>(2 - 4)        | 54<br>(38 - 73)      | 110<br>(77 - 153)    | 125<br>(97 - 154)    |
| Esophageal cancer                                                | 4<br>(3 - 5)             | --                 | --                  | 0<br>(0 - 0)         | 1<br>(1 - 2)         | 2<br>(2 - 3)         |
| Stomach cancer                                                   | 15<br>(11 - 21)          | --                 | --                  | 1<br>(1 - 2)         | 5<br>(3 - 7)         | 9<br>(7 - 12)        |
| Liver cancer                                                     | 10<br>(7 - 14)           | --                 | 0<br>(0 - 0)        | 1<br>(1 - 2)         | 4<br>(2 - 6)         | 5<br>(4 - 7)         |
| Liver cancer due to hepatitis B                                  | 2<br>(1 - 4)             | --                 | 0<br>(0 - 0)        | 0<br>(0 - 1)         | 1<br>(0 - 2)         | 1<br>(0 - 1)         |
| Liver cancer due to hepatitis C                                  | 4<br>(2 - 7)             | --                 | 0<br>(0 - 0)        | 0<br>(0 - 1)         | 2<br>(1 - 3)         | 2<br>(1 - 4)         |

Web Table 31- Suriname deaths with 95% UI by age, sex, and cause in 2013

| Cause                                | Females, All Ages  | Females, 0-4 Years | Females, 5-14 Years | Females, 15-49 Years | Females, 50-69 Years | Females, 70-80 Years |
|--------------------------------------|--------------------|--------------------|---------------------|----------------------|----------------------|----------------------|
| Liver cancer due to alcohol use      | 2<br>(1 - 4)       | --                 | --                  | 0<br>(0 - 0)         | 1<br>(0 - 1)         | 1<br>(1 - 2)         |
| Liver cancer due to other causes     | 2<br>(1 - 3)       | --                 | 0<br>(0 - 0)        | 0<br>(0 - 1)         | 1<br>(0 - 1)         | 1<br>(0 - 1)         |
| Larynx cancer                        | 1<br>(0 - 1)       | --                 | --                  | 0<br>(0 - 0)         | 0<br>(0 - 0)         | 0<br>(0 - 1)         |
| Tracheal, bronchus and lung cancer   | 18<br>(13 - 24)    | --                 | --                  | 2<br>(2 - 3)         | 8<br>(5 - 11)        | 8<br>(6 - 11)        |
| Breast cancer                        | 55<br>(39 - 73)    | --                 | --                  | 14<br>(9 - 20)       | 23<br>(15 - 32)      | 18<br>(14 - 24)      |
| Cervical cancer                      | 39<br>(28 - 55)    | --                 | --                  | 11<br>(7 - 16)       | 16<br>(10 - 23)      | 13<br>(9 - 18)       |
| Uterine cancer                       | 12<br>(6 - 18)     | --                 | --                  | 1<br>(0 - 1)         | 5<br>(3 - 8)         | 6<br>(3 - 9)         |
| Prostate cancer                      | --                 | --                 | --                  | --                   | --                   | --                   |
| Colon and rectum cancer              | 37<br>(27 - 48)    | --                 | --                  | 3<br>(2 - 5)         | 12<br>(8 - 17)       | 21<br>(15 - 27)      |
| Lip and oral cavity cancer           | 3<br>(2 - 4)       | --                 | --                  | 0<br>(0 - 1)         | 1<br>(1 - 1)         | 1<br>(1 - 2)         |
| Nasopharynx cancer                   | 1<br>(1 - 1)       | --                 | 0<br>(0 - 0)        | 0<br>(0 - 0)         | 0<br>(0 - 1)         | 0<br>(0 - 0)         |
| Other pharynx cancer                 | 1<br>(1 - 1)       | --                 | --                  | 0<br>(0 - 0)         | 0<br>(0 - 0)         | 0<br>(0 - 0)         |
| Gallbladder and biliary tract cancer | 6<br>(3 - 10)      | --                 | --                  | 0<br>(0 - 1)         | 2<br>(1 - 4)         | 3<br>(2 - 6)         |
| Pancreatic cancer                    | 14<br>(10 - 19)    | --                 | --                  | 1<br>(1 - 1)         | 5<br>(3 - 7)         | 9<br>(6 - 11)        |
| Malignant skin melanoma              | 1<br>(1 - 1)       | --                 | --                  | 0<br>(0 - 0)         | 0<br>(0 - 1)         | 0<br>(0 - 1)         |
| Non-melanoma skin cancer             | 1<br>(1 - 1)       | --                 | --                  | 0<br>(0 - 0)         | 0<br>(0 - 0)         | 1<br>(0 - 1)         |
| Ovarian cancer                       | 18<br>(13 - 23)    | --                 | --                  | 3<br>(2 - 4)         | 8<br>(5 - 11)        | 7<br>(5 - 9)         |
| Testicular cancer                    | --                 | --                 | --                  | --                   | --                   | --                   |
| Kidney cancer                        | 4<br>(3 - 5)       | 0<br>(0 - 0)       | 0<br>(0 - 0)        | 1<br>(0 - 1)         | 1<br>(1 - 2)         | 2<br>(1 - 2)         |
| Bladder cancer                       | 3<br>(2 - 6)       | --                 | --                  | 0<br>(0 - 0)         | 1<br>(1 - 2)         | 2<br>(1 - 4)         |
| Brain and nervous system cancer      | 5<br>(2 - 6)       | 0<br>(0 - 0)       | 0<br>(0 - 1)        | 1<br>(1 - 2)         | 2<br>(1 - 2)         | 1<br>(1 - 2)         |
| Thyroid cancer                       | 2<br>(1 - 3)       | --                 | 0<br>(0 - 0)        | 0<br>(0 - 0)         | 1<br>(0 - 1)         | 1<br>(1 - 1)         |
| Mesothelioma                         | 1<br>(0 - 1)       | --                 | --                  | 0<br>(0 - 0)         | 0<br>(0 - 0)         | 0<br>(0 - 0)         |
| Hodgkin lymphoma                     | 1<br>(0 - 1)       | 0<br>(0 - 0)       | 0<br>(0 - 0)        | 0<br>(0 - 1)         | 0<br>(0 - 0)         | 0<br>(0 - 0)         |
| Non-Hodgkin lymphoma                 | 11<br>(7 - 16)     | 0<br>(0 - 0)       | 0<br>(0 - 1)        | 3<br>(2 - 5)         | 4<br>(2 - 6)         | 3<br>(2 - 5)         |
| Multiple myeloma                     | 5<br>(3 - 7)       | --                 | --                  | 0<br>(0 - 1)         | 2<br>(1 - 4)         | 2<br>(1 - 3)         |
| Leukemia                             | 10<br>(7 - 13)     | 1<br>(0 - 1)       | 1<br>(1 - 1)        | 3<br>(2 - 4)         | 3<br>(2 - 4)         | 3<br>(2 - 3)         |
| Other neoplasms                      | 19<br>(13 - 27)    | 1<br>(1 - 2)       | 1<br>(1 - 2)        | 5<br>(3 - 7)         | 6<br>(4 - 9)         | 6<br>(4 - 9)         |
| Cardiovascular diseases              | 705<br>(548 - 888) | 3<br>(2 - 5)       | 2<br>(1 - 3)        | 42<br>(29 - 59)      | 180<br>(126 - 252)   | 477<br>(382 - 574)   |
| Rheumatic heart disease              | 4<br>(3 - 6)       | 0<br>(0 - 0)       | 0<br>(0 - 0)        | 2<br>(1 - 2)         | 1<br>(1 - 1)         | 1<br>(1 - 2)         |
| Ischemic heart disease               | 251<br>(183 - 361) | 0<br>(0 - 1)       | 0<br>(0 - 0)        | 15<br>(10 - 22)      | 69<br>(46 - 102)     | 166<br>(123 - 239)   |
| Cerebrovascular disease              | 302<br>(218 - 388) | 1<br>(1 - 2)       | 1<br>(0 - 1)        | 14<br>(9 - 20)       | 76<br>(52 - 108)     | 210<br>(151 - 261)   |
| Ischemic stroke                      | 190<br>(140 - 244) | 0<br>(0 - 0)       | 0<br>(0 - 0)        | 3<br>(2 - 5)         | 38<br>(25 - 55)      | 148<br>(109 - 187)   |
| Hemorrhagic stroke                   | 112<br>(71 - 153)  | 1<br>(1 - 1)       | 0<br>(0 - 1)        | 11<br>(7 - 15)       | 38<br>(24 - 54)      | 62<br>(35 - 85)      |
| Hypertensive heart disease           | 81<br>(56 - 114)   | 0<br>(0 - 0)       | 0<br>(0 - 0)        | 4<br>(2 - 6)         | 17<br>(11 - 27)      | 60<br>(40 - 85)      |
| Cardiomyopathy and myocarditis       | 16<br>(11 - 23)    | 1<br>(1 - 1)       | 0<br>(0 - 0)        | 3<br>(2 - 4)         | 4<br>(2 - 6)         | 8<br>(5 - 12)        |
| Atrial fibrillation and flutter      | 10<br>(6 - 14)     | --                 | --                  | 0<br>(0 - 0)         | 2<br>(1 - 2)         | 8<br>(5 - 12)        |
| Aortic aneurysm                      | 6<br>(4 - 10)      | --                 | --                  | 0<br>(0 - 1)         | 2<br>(1 - 3)         | 4<br>(2 - 6)         |
| Peripheral vascular disease          | 4<br>(3 - 6)       | --                 | --                  | 0<br>(0 - 0)         | 0<br>(0 - 1)         | 4<br>(2 - 6)         |
| Endocarditis                         | 2<br>(1 - 4)       | 0<br>(0 - 0)       | 0<br>(0 - 0)        | 0<br>(0 - 1)         | 0<br>(0 - 1)         | 1<br>(1 - 2)         |

Web Table 31- Suriname deaths with 95% UI by age, sex, and cause in 2013

| Cause                                               | Females, All Ages | Females, 0-4 Years | Females, 5-14 Years | Females, 15-49 Years | Females, 50-69 Years | Females, 70-80 Years |
|-----------------------------------------------------|-------------------|--------------------|---------------------|----------------------|----------------------|----------------------|
| Other cardiovascular and circulatory diseases       | 29<br>(19 - 39)   | 1<br>(0 - 1)       | 0<br>(0 - 0)        | 4<br>(2 - 6)         | 9<br>(5 - 13)        | 15<br>(9 - 22)       |
| Chronic respiratory diseases                        | 39<br>(29 - 55)   | 2<br>(1 - 2)       | 0<br>(0 - 1)        | 5<br>(3 - 7)         | 9<br>(6 - 13)        | 23<br>(17 - 34)      |
| Chronic obstructive pulmonary disease               | 23<br>(16 - 34)   | 1<br>(0 - 1)       | 0<br>(0 - 0)        | 2<br>(1 - 3)         | 4<br>(3 - 7)         | 16<br>(11 - 24)      |
| Pneumoconiosis                                      | 0<br>(0 - 0)      | 0<br>(0 - 0)       | 0<br>(0 - 0)        | 0<br>(0 - 0)         | 0<br>(0 - 0)         | 0<br>(0 - 0)         |
| Silicosis                                           | 0<br>(0 - 0)      | 0<br>(0 - 0)       | 0<br>(0 - 0)        | 0<br>(0 - 0)         | 0<br>(0 - 0)         | 0<br>(0 - 0)         |
| Asbestosis                                          | 0<br>(0 - 0)      | 0<br>(0 - 0)       | 0<br>(0 - 0)        | 0<br>(0 - 0)         | 0<br>(0 - 0)         | 0<br>(0 - 0)         |
| Coal workers pneumoconiosis                         | 0<br>(0 - 0)      | 0<br>(0 - 0)       | 0<br>(0 - 0)        | 0<br>(0 - 0)         | 0<br>(0 - 0)         | 0<br>(0 - 0)         |
| Other pneumoconiosis                                | 0<br>(0 - 0)      | 0<br>(0 - 0)       | 0<br>(0 - 0)        | 0<br>(0 - 0)         | 0<br>(0 - 0)         | 0<br>(0 - 0)         |
| Asthma                                              | 9<br>(6 - 14)     | 0<br>(0 - 1)       | 0<br>(0 - 0)        | 2<br>(1 - 3)         | 3<br>(1 - 4)         | 4<br>(2 - 7)         |
| Interstitial lung disease and pulmonary sarcoidosis | 4<br>(2 - 8)      | 0<br>(0 - 0)       | 0<br>(0 - 0)        | 1<br>(0 - 1)         | 1<br>(1 - 3)         | 2<br>(1 - 4)         |
| Other chronic respiratory diseases                  | 2<br>(1 - 3)      | 0<br>(0 - 1)       | 0<br>(0 - 0)        | 0<br>(0 - 1)         | 0<br>(0 - 0)         | 1<br>(0 - 1)         |
| Cirrhosis                                           | 24<br>(17 - 32)   | 0<br>(0 - 0)       | 0<br>(0 - 0)        | 6<br>(4 - 9)         | 10<br>(7 - 14)       | 7<br>(5 - 10)        |
| Cirrhosis due to hepatitis B                        | 3<br>(1 - 4)      | 0<br>(0 - 0)       | 0<br>(0 - 0)        | 1<br>(0 - 1)         | 1<br>(0 - 2)         | 1<br>(0 - 1)         |
| Cirrhosis due to hepatitis C                        | 12<br>(6 - 17)    | 0<br>(0 - 0)       | 0<br>(0 - 0)        | 3<br>(1 - 4)         | 5<br>(3 - 8)         | 4<br>(2 - 5)         |
| Cirrhosis due to alcohol use                        | 5<br>(3 - 9)      | --                 | --                  | 1<br>(0 - 2)         | 2<br>(1 - 4)         | 2<br>(1 - 3)         |
| Cirrhosis due to other causes                       | 5<br>(3 - 7)      | 0<br>(0 - 0)       | 0<br>(0 - 0)        | 2<br>(1 - 3)         | 2<br>(1 - 3)         | 1<br>(0 - 1)         |
| Digestive diseases                                  | 44<br>(33 - 57)   | 1<br>(0 - 1)       | 1<br>(0 - 1)        | 6<br>(4 - 8)         | 10<br>(7 - 14)       | 28<br>(21 - 36)      |
| Peptic ulcer disease                                | 9<br>(6 - 14)     | 0<br>(0 - 0)       | 0<br>(0 - 0)        | 1<br>(1 - 1)         | 2<br>(1 - 4)         | 6<br>(4 - 9)         |
| Gastritis and duodenitis                            | 2<br>(1 - 3)      | 0<br>(0 - 0)       | 0<br>(0 - 0)        | 0<br>(0 - 0)         | 0<br>(0 - 1)         | 1<br>(1 - 2)         |
| Appendicitis                                        | 2<br>(1 - 3)      | 0<br>(0 - 0)       | 0<br>(0 - 0)        | 0<br>(0 - 1)         | 0<br>(0 - 1)         | 1<br>(0 - 1)         |
| Paralytic ileus and intestinal obstruction          | 7<br>(2 - 11)     | 0<br>(0 - 0)       | 0<br>(0 - 0)        | 1<br>(0 - 1)         | 1<br>(0 - 2)         | 4<br>(1 - 8)         |
| Inguinal, femoral, and abdominal hernia             | 2<br>(1 - 5)      | 0<br>(0 - 0)       | 0<br>(0 - 0)        | 0<br>(0 - 1)         | 0<br>(0 - 1)         | 1<br>(1 - 4)         |
| Inflammatory bowel disease                          | 6<br>(4 - 9)      | 0<br>(0 - 0)       | 0<br>(0 - 0)        | 1<br>(0 - 1)         | 1<br>(1 - 2)         | 4<br>(2 - 6)         |
| Vascular intestinal disorders                       | 2<br>(1 - 4)      | 0<br>(0 - 0)       | 0<br>(0 - 0)        | 0<br>(0 - 0)         | 0<br>(0 - 1)         | 1<br>(1 - 3)         |
| Gallbladder and biliary diseases                    | 4<br>(3 - 6)      | 0<br>(0 - 0)       | 0<br>(0 - 0)        | 1<br>(0 - 1)         | 1<br>(1 - 2)         | 2<br>(1 - 3)         |
| Pancreatitis                                        | 2<br>(1 - 3)      | 0<br>(0 - 0)       | 0<br>(0 - 0)        | 0<br>(0 - 1)         | 0<br>(0 - 1)         | 1<br>(0 - 1)         |
| Other digestive diseases                            | 9<br>(6 - 12)     | 0<br>(0 - 0)       | 0<br>(0 - 0)        | 1<br>(1 - 1)         | 2<br>(1 - 3)         | 6<br>(4 - 8)         |
| Neurological disorders                              | 74<br>(57 - 94)   | 1<br>(0 - 1)       | 1<br>(0 - 1)        | 4<br>(3 - 6)         | 7<br>(5 - 10)        | 62<br>(46 - 80)      |
| Alzheimer disease and other dementias               | 59<br>(44 - 78)   | --                 | --                  | 0<br>(0 - 0)         | 4<br>(2 - 6)         | 55<br>(41 - 73)      |
| Parkinson disease                                   | 5<br>(3 - 8)      | --                 | --                  | 0<br>(0 - 0)         | 1<br>(0 - 1)         | 4<br>(3 - 6)         |
| Epilepsy                                            | 6<br>(4 - 8)      | 0<br>(0 - 1)       | 0<br>(0 - 1)        | 3<br>(2 - 4)         | 1<br>(1 - 1)         | 1<br>(1 - 1)         |
| Multiple sclerosis                                  | 1<br>(0 - 1)      | --                 | --                  | 0<br>(0 - 0)         | 0<br>(0 - 0)         | 0<br>(0 - 0)         |
| Other neurological disorders                        | 4<br>(3 - 5)      | 0<br>(0 - 0)       | 0<br>(0 - 0)        | 1<br>(1 - 1)         | 1<br>(1 - 2)         | 1<br>(1 - 1)         |
| Mental and substance use disorders                  | 3<br>(2 - 4)      | 0<br>(0 - 0)       | 0<br>(0 - 0)        | 1<br>(1 - 2)         | 1<br>(1 - 2)         | 1<br>(1 - 1)         |
| Schizophrenia                                       | 0<br>(0 - 0)      | --                 | --                  | 0<br>(0 - 0)         | 0<br>(0 - 0)         | 0<br>(0 - 0)         |
| Alcohol use disorders                               | 1<br>(1 - 3)      | --                 | --                  | 0<br>(0 - 1)         | 1<br>(0 - 1)         | 0<br>(0 - 1)         |
| Drug use disorders                                  | 1<br>(1 - 2)      | 0<br>(0 - 0)       | --                  | 0<br>(0 - 1)         | 0<br>(0 - 0)         | 0<br>(0 - 1)         |
| Opioid use disorders                                | 0<br>(0 - 0)      | 0<br>(0 - 0)       | --                  | 0<br>(0 - 0)         | 0<br>(0 - 0)         | 0<br>(0 - 0)         |
| Cocaine use disorders                               | 0<br>(0 - 0)      | 0<br>(0 - 0)       | --                  | 0<br>(0 - 0)         | 0<br>(0 - 0)         | 0<br>(0 - 0)         |
| Amphetamine use disorders                           | 0<br>(0 - 0)      | 0<br>(0 - 0)       | --                  | 0<br>(0 - 0)         | 0<br>(0 - 0)         | 0<br>(0 - 0)         |

Web Table 31- Suriname deaths with 95% UI by age, sex, and cause in 2013

| Cause                                               | Females, All Ages  | Females, 0-4 Years | Females, 5-14 Years | Females, 15-49 Years | Females, 50-69 Years | Females, 70-80 Years |
|-----------------------------------------------------|--------------------|--------------------|---------------------|----------------------|----------------------|----------------------|
| Other drug use disorders                            | 1<br>(1 - 1)       | 0<br>(0 - 0)       | --                  | 0<br>(0 - 0)         | 0<br>(0 - 0)         | 0<br>(0 - 0)         |
| Eating disorders                                    | 0<br>(0 - 0)       | --                 | 0<br>(0 - 0)        | 0<br>(0 - 0)         | --                   | --                   |
| Anorexia nervosa                                    | 0<br>(0 - 0)       | --                 | 0<br>(0 - 0)        | 0<br>(0 - 0)         | --                   | --                   |
| Diabetes, urogenital, blood, and endocrine diseases | 246<br>(183 - 323) | 4<br>(3 - 6)       | 2<br>(1 - 3)        | 31<br>(21 - 42)      | 78<br>(53 - 110)     | 131<br>(99 - 166)    |
| Diabetes mellitus                                   | 142<br>(104 - 189) | 0<br>(0 - 0)       | 0<br>(0 - 0)        | 13<br>(8 - 17)       | 49<br>(33 - 71)      | 81<br>(58 - 105)     |
| Acute glomerulonephritis                            | 0<br>(0 - 0)       | 0<br>(0 - 0)       | 0<br>(0 - 0)        | 0<br>(0 - 0)         | 0<br>(0 - 0)         | 0<br>(0 - 0)         |
| Chronic kidney disease                              | 68<br>(45 - 98)    | 1<br>(1 - 2)       | 1<br>(0 - 1)        | 10<br>(7 - 16)       | 21<br>(13 - 32)      | 35<br>(23 - 52)      |
| Chronic kidney disease due to diabetes mellitus     | 14<br>(7 - 24)     | 0<br>(0 - 0)       | 0<br>(0 - 0)        | 2<br>(1 - 3)         | 7<br>(3 - 11)        | 6<br>(3 - 11)        |
| Chronic kidney disease due to hypertension          | 31<br>(19 - 46)    | 0<br>(0 - 0)       | 0<br>(0 - 0)        | 4<br>(3 - 7)         | 9<br>(5 - 15)        | 17<br>(10 - 26)      |
| Chronic kidney disease due to glomerulonephritis    | 2<br>(1 - 3)       | 0<br>(0 - 0)       | 0<br>(0 - 0)        | 1<br>(0 - 1)         | 0<br>(0 - 1)         | 1<br>(0 - 1)         |
| Chronic kidney disease due to other causes          | 21<br>(11 - 40)    | 1<br>(0 - 1)       | 0<br>(0 - 1)        | 4<br>(2 - 7)         | 6<br>(3 - 11)        | 11<br>(5 - 22)       |
| Urinary diseases and male infertility               | 10<br>(6 - 14)     | 0<br>(0 - 0)       | 0<br>(0 - 0)        | 1<br>(1 - 2)         | 2<br>(1 - 3)         | 6<br>(3 - 9)         |
| Interstitial nephritis and urinary tract infections | 9<br>(5 - 12)      | 0<br>(0 - 0)       | 0<br>(0 - 0)        | 1<br>(1 - 2)         | 2<br>(1 - 3)         | 5<br>(3 - 8)         |
| Urolithiasis                                        | 0<br>(0 - 1)       | --                 | 0<br>(0 - 0)        | 0<br>(0 - 0)         | 0<br>(0 - 0)         | 0<br>(0 - 0)         |
| Other urinary diseases                              | 1<br>(1 - 2)       | 0<br>(0 - 0)       | 0<br>(0 - 0)        | 0<br>(0 - 0)         | 0<br>(0 - 1)         | 1<br>(0 - 2)         |
| Gynecological diseases                              | 0<br>(0 - 1)       | --                 | --                  | 0<br>(0 - 0)         | 0<br>(0 - 0)         | 0<br>(0 - 0)         |
| Uterine fibroids                                    | 0<br>(0 - 0)       | --                 | --                  | 0<br>(0 - 0)         | 0<br>(0 - 0)         | 0<br>(0 - 0)         |
| Polycystic ovarian syndrome                         | 0<br>(0 - 0)       | --                 | --                  | 0<br>(0 - 0)         | 0<br>(0 - 0)         | --                   |
| Endometriosis                                       | 0<br>(0 - 0)       | --                 | --                  | 0<br>(0 - 0)         | 0<br>(0 - 0)         | --                   |
| Genital prolapse                                    | 0<br>(0 - 0)       | --                 | --                  | 0<br>(0 - 0)         | 0<br>(0 - 0)         | 0<br>(0 - 0)         |
| Other gynecological diseases                        | 0<br>(0 - 0)       | --                 | --                  | 0<br>(0 - 0)         | 0<br>(0 - 0)         | 0<br>(0 - 0)         |
| Hemoglobinopathies and hemolytic anemias            | 5<br>(3 - 8)       | 1<br>(1 - 2)       | 1<br>(0 - 1)        | 2<br>(1 - 3)         | 1<br>(0 - 1)         | 1<br>(0 - 1)         |
| Thalassemias                                        | 0<br>(0 - 0)       | 0<br>(0 - 0)       | 0<br>(0 - 0)        | 0<br>(0 - 0)         | 0<br>(0 - 0)         | 0<br>(0 - 0)         |
| Sickle cell disorders                               | 4<br>(2 - 6)       | 1<br>(0 - 1)       | 1<br>(0 - 1)        | 2<br>(1 - 3)         | 1<br>(0 - 1)         | 0<br>(0 - 0)         |
| G6PD deficiency                                     | 0<br>(0 - 0)       | 0<br>(0 - 0)       | 0<br>(0 - 0)        | 0<br>(0 - 0)         | 0<br>(0 - 0)         | 0<br>(0 - 0)         |
| Other hemoglobinopathies and hemolytic anemias      | 1<br>(1 - 1)       | 0<br>(0 - 0)       | 0<br>(0 - 0)        | 0<br>(0 - 0)         | 0<br>(0 - 0)         | 1<br>(0 - 1)         |
| Endocrine, metabolic, blood, and immune disorders   | 20<br>(14 - 31)    | 2<br>(1 - 3)       | 0<br>(0 - 1)        | 4<br>(3 - 7)         | 5<br>(3 - 8)         | 9<br>(6 - 14)        |
| Musculoskeletal disorders                           | 11<br>(5 - 16)     | --                 | 0<br>(0 - 0)        | 5<br>(2 - 7)         | 3<br>(1 - 4)         | 3<br>(1 - 5)         |
| Rheumatoid arthritis                                | 2<br>(0 - 2)       | --                 | 0<br>(0 - 0)        | 0<br>(0 - 0)         | 0<br>(0 - 1)         | 1<br>(0 - 2)         |
| Other musculoskeletal disorders                     | 10<br>(4 - 13)     | --                 | 0<br>(0 - 0)        | 5<br>(2 - 7)         | 2<br>(1 - 3)         | 2<br>(1 - 4)         |
| Other non-communicable diseases                     | 55<br>(38 - 70)    | 32<br>(23 - 43)    | 2<br>(2 - 3)        | 4<br>(2 - 5)         | 3<br>(1 - 5)         | 13<br>(3 - 20)       |
| Congenital anomalies                                | 37<br>(27 - 49)    | 30<br>(21 - 40)    | 2<br>(2 - 3)        | 3<br>(2 - 4)         | 1<br>(1 - 2)         | 1<br>(1 - 2)         |
| Neural tube defects                                 | 2<br>(1 - 3)       | 2<br>(1 - 3)       | 0<br>(0 - 0)        | 0<br>(0 - 0)         | 0<br>(0 - 0)         | 0<br>(0 - 0)         |
| Congenital heart anomalies                          | 19<br>(13 - 27)    | 14<br>(9 - 21)     | 2<br>(1 - 2)        | 2<br>(1 - 3)         | 0<br>(0 - 1)         | 1<br>(0 - 1)         |
| Cleft lip and cleft palate                          | 0<br>(0 - 0)       | 0<br>(0 - 0)       | --                  | --                   | --                   | --                   |
| Down syndrome                                       | 1<br>(1 - 2)       | 1<br>(0 - 1)       | 0<br>(0 - 0)        | 0<br>(0 - 0)         | 0<br>(0 - 0)         | 0<br>(0 - 0)         |
| Chromosomal unbalanced rearrangements               | 1<br>(0 - 1)       | 1<br>(0 - 1)       | 0<br>(0 - 0)        | 0<br>(0 - 0)         | 0<br>(0 - 0)         | 0<br>(0 - 0)         |
| Other congenital anomalies                          | 14<br>(9 - 22)     | 12<br>(7 - 19)     | 1<br>(0 - 1)        | 1<br>(0 - 1)         | 1<br>(0 - 1)         | 1<br>(0 - 1)         |
| Skin and subcutaneous diseases                      | 15<br>(3 - 23)     | 0<br>(0 - 1)       | 0<br>(0 - 0)        | 1<br>(0 - 1)         | 2<br>(1 - 3)         | 12<br>(2 - 19)       |
| Cellulitis                                          | 1<br>(0 - 2)       | 0<br>(0 - 0)       | 0<br>(0 - 0)        | 0<br>(0 - 0)         | 0<br>(0 - 0)         | 0<br>(0 - 1)         |



Web Table 31- Suriname deaths with 95% UI by age, sex, and cause in 2013

| Cause                                           | Females, All Ages | Females, 0-4 Years | Females, 5-14 Years | Females, 15-49 Years | Females, 50-69 Years | Females, 70-80 Years |
|-------------------------------------------------|-------------------|--------------------|---------------------|----------------------|----------------------|----------------------|
| Pyoderma                                        | 3<br>(1 - 5)      | 0<br>(0 - 1)       | 0<br>(0 - 0)        | 0<br>(0 - 0)         | 1<br>(0 - 1)         | 2<br>(0 - 4)         |
| Decubitus ulcer                                 | 11<br>(2 - 17)    | 0<br>(0 - 0)       | 0<br>(0 - 0)        | 0<br>(0 - 1)         | 1<br>(0 - 2)         | 9<br>(2 - 15)        |
| Other skin and subcutaneous diseases            | 0<br>(0 - 1)      | 0<br>(0 - 0)       | 0<br>(0 - 0)        | 0<br>(0 - 0)         | 0<br>(0 - 0)         | 0<br>(0 - 1)         |
| Sudden infant death syndrome                    | 2<br>(1 - 5)      | 2<br>(1 - 5)       | --                  | --                   | --                   | --                   |
| Injuries                                        | 98<br>(74 - 127)  | 12<br>(9 - 16)     | 7<br>(5 - 9)        | 37<br>(26 - 50)      | 15<br>(10 - 22)      | 27<br>(19 - 35)      |
| Transport injuries                              | 25<br>(15 - 34)   | 2<br>(1 - 3)       | 3<br>(2 - 4)        | 10<br>(6 - 15)       | 5<br>(3 - 7)         | 5<br>(3 - 7)         |
| Road injuries                                   | 23<br>(14 - 31)   | 2<br>(1 - 3)       | 3<br>(2 - 4)        | 9<br>(6 - 14)        | 4<br>(3 - 7)         | 5<br>(3 - 6)         |
| Pedestrian road injuries                        | 7<br>(4 - 10)     | 1<br>(0 - 1)       | 1<br>(1 - 1)        | 2<br>(1 - 4)         | 2<br>(1 - 2)         | 1<br>(1 - 2)         |
| Cyclist road injuries                           | 1<br>(1 - 1)      | 0<br>(0 - 0)       | 0<br>(0 - 0)        | 0<br>(0 - 0)         | 0<br>(0 - 0)         | 0<br>(0 - 0)         |
| Motorcyclist road injuries                      | 1<br>(1 - 2)      | 0<br>(0 - 0)       | 0<br>(0 - 0)        | 0<br>(0 - 1)         | 0<br>(0 - 0)         | 0<br>(0 - 1)         |
| Motor vehicle road injuries                     | 14<br>(8 - 19)    | 1<br>(1 - 2)       | 1<br>(1 - 2)        | 6<br>(3 - 9)         | 2<br>(1 - 4)         | 3<br>(2 - 4)         |
| Other road injuries                             | 0<br>(0 - 0)      | 0<br>(0 - 0)       | 0<br>(0 - 0)        | 0<br>(0 - 0)         | 0<br>(0 - 0)         | 0<br>(0 - 0)         |
| Other transport injuries                        | 2<br>(1 - 3)      | 0<br>(0 - 0)       | 0<br>(0 - 0)        | 1<br>(0 - 1)         | 1<br>(0 - 1)         | 0<br>(0 - 1)         |
| Unintentional injuries                          | 46<br>(33 - 59)   | 9<br>(6 - 12)      | 3<br>(2 - 4)        | 9<br>(6 - 12)        | 6<br>(4 - 9)         | 19<br>(13 - 25)      |
| Falls                                           | 10<br>(7 - 14)    | 0<br>(0 - 0)       | 0<br>(0 - 0)        | 1<br>(0 - 1)         | 1<br>(1 - 2)         | 8<br>(5 - 11)        |
| Drowning                                        | 6<br>(4 - 8)      | 1<br>(1 - 2)       | 1<br>(1 - 2)        | 2<br>(1 - 3)         | 1<br>(0 - 1)         | 1<br>(0 - 1)         |
| Fire, heat, and hot substances                  | 6<br>(4 - 9)      | 1<br>(1 - 2)       | 1<br>(0 - 1)        | 1<br>(1 - 2)         | 1<br>(1 - 2)         | 3<br>(1 - 4)         |
| Poisonings                                      | 1<br>(1 - 2)      | 0<br>(0 - 0)       | 0<br>(0 - 0)        | 0<br>(0 - 0)         | 0<br>(0 - 0)         | 0<br>(0 - 0)         |
| Exposure to mechanical forces                   | 3<br>(2 - 4)      | 0<br>(0 - 1)       | 0<br>(0 - 1)        | 1<br>(1 - 2)         | 0<br>(0 - 1)         | 1<br>(0 - 1)         |
| Unintentional firearm injuries                  | 1<br>(1 - 1)      | 0<br>(0 - 0)       | 0<br>(0 - 0)        | 1<br>(0 - 1)         | 0<br>(0 - 0)         | 0<br>(0 - 0)         |
| Unintentional suffocation                       | 0<br>(0 - 1)      | 0<br>(0 - 0)       | 0<br>(0 - 0)        | 0<br>(0 - 0)         | 0<br>(0 - 0)         | 0<br>(0 - 0)         |
| Other exposure to mechanical forces             | 2<br>(1 - 2)      | 0<br>(0 - 0)       | 0<br>(0 - 0)        | 1<br>(0 - 1)         | 0<br>(0 - 0)         | 0<br>(0 - 0)         |
| Adverse effects of medical treatment            | 9<br>(4 - 13)     | 1<br>(0 - 2)       | 0<br>(0 - 0)        | 2<br>(1 - 3)         | 2<br>(1 - 3)         | 4<br>(2 - 6)         |
| Animal contact                                  | 1<br>(0 - 2)      | 0<br>(0 - 0)       | 0<br>(0 - 0)        | 0<br>(0 - 0)         | 0<br>(0 - 0)         | 0<br>(0 - 1)         |
| Venomous animal contact                         | 0<br>(0 - 1)      | 0<br>(0 - 0)       | 0<br>(0 - 0)        | 0<br>(0 - 0)         | 0<br>(0 - 0)         | 0<br>(0 - 0)         |
| Non-venomous animal contact                     | 1<br>(0 - 1)      | 0<br>(0 - 0)       | 0<br>(0 - 0)        | 0<br>(0 - 0)         | 0<br>(0 - 0)         | 0<br>(0 - 1)         |
| Foreign body                                    | 10<br>(6 - 15)    | 4<br>(2 - 7)       | 0<br>(0 - 1)        | 1<br>(1 - 2)         | 1<br>(0 - 1)         | 3<br>(2 - 5)         |
| Pulmonary aspiration and foreign body in airway | 9<br>(6 - 14)     | 4<br>(2 - 7)       | 0<br>(0 - 1)        | 1<br>(1 - 2)         | 1<br>(0 - 1)         | 3<br>(2 - 5)         |
| Foreign body in other body part                 | 0<br>(0 - 0)      | 0<br>(0 - 0)       | 0<br>(0 - 0)        | 0<br>(0 - 0)         | 0<br>(0 - 0)         | 0<br>(0 - 0)         |
| Other unintentional injuries                    | 1<br>(0 - 1)      | 0<br>(0 - 0)       | 0<br>(0 - 0)        | 0<br>(0 - 0)         | 0<br>(0 - 0)         | 0<br>(0 - 1)         |
| Self-harm and interpersonal violence            | 27<br>(20 - 37)   | 1<br>(1 - 2)       | 1<br>(1 - 2)        | 18<br>(12 - 25)      | 4<br>(3 - 6)         | 3<br>(2 - 4)         |
| Self-harm                                       | 14<br>(10 - 20)   | --                 | 1<br>(0 - 1)        | 10<br>(7 - 14)       | 2<br>(2 - 4)         | 1<br>(1 - 2)         |
| Interpersonal violence                          | 13<br>(8 - 19)    | 1<br>(1 - 2)       | 1<br>(0 - 1)        | 8<br>(5 - 12)        | 2<br>(1 - 3)         | 1<br>(0 - 2)         |
| Assault by firearm                              | 3<br>(2 - 5)      | 0<br>(0 - 0)       | 0<br>(0 - 0)        | 2<br>(1 - 4)         | 0<br>(0 - 1)         | 0<br>(0 - 0)         |
| Assault by sharp object                         | 4<br>(2 - 6)      | 0<br>(0 - 0)       | 0<br>(0 - 0)        | 3<br>(2 - 5)         | 1<br>(0 - 1)         | 0<br>(0 - 0)         |
| Assault by other means                          | 6<br>(4 - 8)      | 1<br>(0 - 2)       | 0<br>(0 - 1)        | 3<br>(2 - 5)         | 1<br>(0 - 1)         | 1<br>(0 - 1)         |

Web Table 31- Swaziland deaths with 95% UI by age, sex, and cause in 2013

| Cause                                                             | Both Sexes, All Ages        | Both Sexes, 0-4 Years    | Both Sexes, 5-14 Years | Both Sexes, 15-49 Years  | Both Sexes, 50-69 Years  | Both Sexes, 70-80 Years  |
|-------------------------------------------------------------------|-----------------------------|--------------------------|------------------------|--------------------------|--------------------------|--------------------------|
| All causes                                                        | 16,945<br>(15,740 - 18,329) | 2,755<br>(2,148 - 3,549) | 479<br>(399 - 616)     | 8,136<br>(7,307 - 8,952) | 3,140<br>(2,750 - 3,577) | 2,437<br>(2,194 - 2,764) |
| Communicable, maternal, neonatal, and nutritional diseases        | 10,246<br>(9,402 - 11,112)  | 2,365<br>(1,862 - 3,011) | 369<br>(299 - 456)     | 5,663<br>(5,075 - 6,229) | 1,354<br>(1,158 - 1,556) | 494<br>(431 - 580)       |
| HIV/AIDS and tuberculosis                                         | 6,481<br>(5,790 - 7,207)    | 281<br>(194 - 392)       | 299<br>(228 - 370)     | 4,629<br>(4,048 - 5,214) | 1,077<br>(864 - 1,294)   | 196<br>(150 - 242)       |
| Tuberculosis                                                      | 1,215<br>(752 - 1,536)      | 34<br>(17 - 57)          | 13<br>(6 - 23)         | 858<br>(525 - 1,131)     | 220<br>(128 - 292)       | 91<br>(57 - 120)         |
| HIV/AIDS                                                          | 5,266<br>(4,702 - 5,938)    | 247<br>(163 - 361)       | 286<br>(214 - 358)     | 3,771<br>(3,281 - 4,397) | 858<br>(632 - 1,087)     | 104<br>(69 - 141)        |
| HIV/AIDS resulting in mycobacterial infection                     | 352<br>(280 - 437)          | 15<br>(9 - 22)           | 16<br>(11 - 22)        | 254<br>(197 - 320)       | 59<br>(42 - 80)          | 7<br>(5 - 11)            |
| HIV/AIDS resulting in other diseases                              | 4,915<br>(4,392 - 5,559)    | 232<br>(153 - 339)       | 270<br>(202 - 338)     | 3,517<br>(3,060 - 4,094) | 799<br>(591 - 1,014)     | 97<br>(65 - 131)         |
| Diarrhea, lower respiratory, and other common infectious diseases | 2,418<br>(2,009 - 2,926)    | 1,054<br>(732 - 1,427)   | 52<br>(33 - 91)        | 803<br>(606 - 1,041)     | 239<br>(181 - 308)       | 270<br>(213 - 341)       |
| Diarrheal diseases                                                | 887<br>(649 - 1,177)        | 526<br>(305 - 819)       | 16<br>(8 - 31)         | 211<br>(146 - 299)       | 60<br>(40 - 89)          | 74<br>(50 - 105)         |
| Intestinal infectious diseases                                    | 37<br>(19 - 66)             | 14<br>(6 - 28)           | 8<br>(3 - 16)          | 13<br>(6 - 23)           | 1<br>(1 - 3)             | 1<br>(0 - 1)             |
| Typhoid fever                                                     | 27<br>(13 - 49)             | 10<br>(4 - 20)           | 6<br>(3 - 12)          | 10<br>(4 - 18)           | 1<br>(0 - 2)             | 0<br>(0 - 1)             |
| Paratyphoid fever                                                 | 9<br>(4 - 17)               | 3<br>(1 - 7)             | 2<br>(1 - 4)           | 3<br>(1 - 6)             | 0<br>(0 - 1)             | 0<br>(0 - 0)             |
| Other intestinal infectious diseases                              | 1<br>(0 - 5)                | 1<br>(0 - 4)             | 0<br>(0 - 1)           | 0<br>(0 - 2)             | 0<br>(0 - 1)             | 0<br>(0 - 1)             |
| Lower respiratory infections                                      | 1,317<br>(1,055 - 1,630)    | 449<br>(270 - 656)       | 19<br>(11 - 34)        | 494<br>(354 - 675)       | 166<br>(120 - 218)       | 189<br>(140 - 252)       |
| Upper respiratory infections                                      | 1<br>(0 - 2)                | 0<br>(0 - 1)             | 0<br>(0 - 0)           | 0<br>(0 - 1)             | 0<br>(0 - 0)             | 0<br>(0 - 0)             |
| Otitis media                                                      | 1<br>(0 - 1)                | 0<br>(0 - 0)             | 0<br>(0 - 0)           | 0<br>(0 - 0)             | 0<br>(0 - 0)             | 0<br>(0 - 0)             |
| Meningitis                                                        | 150<br>(112 - 199)          | 49<br>(28 - 81)          | 7<br>(4 - 13)          | 79<br>(53 - 114)         | 10<br>(7 - 14)           | 5<br>(4 - 7)             |
| Pneumococcal meningitis                                           | 21<br>(14 - 31)             | 5<br>(2 - 8)             | 1<br>(0 - 2)           | 13<br>(7 - 22)           | 2<br>(1 - 3)             | 1<br>(1 - 1)             |
| H influenzae type B meningitis                                    | 32<br>(22 - 46)             | 18<br>(10 - 30)          | 2<br>(1 - 4)           | 11<br>(6 - 18)           | 1<br>(1 - 2)             | 1<br>(0 - 1)             |
| Meningococcal meningitis                                          | 53<br>(37 - 72)             | 16<br>(9 - 26)           | 3<br>(2 - 5)           | 29<br>(18 - 44)          | 3<br>(2 - 5)             | 2<br>(1 - 3)             |
| Other meningitis                                                  | 44<br>(31 - 60)             | 11<br>(5 - 19)           | 2<br>(1 - 3)           | 26<br>(15 - 40)          | 4<br>(2 - 6)             | 2<br>(1 - 3)             |
| Encephalitis                                                      | 11<br>(8 - 15)              | 3<br>(1 - 6)             | 1<br>(0 - 2)           | 5<br>(3 - 9)             | 1<br>(1 - 2)             | 1<br>(0 - 1)             |
| Diphtheria                                                        | 1<br>(0 - 3)                | 1<br>(0 - 3)             | 0<br>(0 - 0)           | 0<br>(0 - 0)             | 0<br>(0 - 0)             | 0<br>(0 - 0)             |
| Whooping cough                                                    | 7<br>(0 - 37)               | 7<br>(0 - 35)            | 0<br>(0 - 1)           | 0<br>(0 - 0)             | 0<br>(0 - 0)             | 0<br>(0 - 0)             |
| Tetanus                                                           | 1<br>(1 - 1)                | 0<br>(0 - 1)             | 0<br>(0 - 0)           | 0<br>(0 - 0)             | 0<br>(0 - 0)             | 0<br>(0 - 0)             |
| Measles                                                           | 5<br>(0 - 33)               | 4<br>(0 - 29)            | 0<br>(0 - 2)           | 0<br>(0 - 1)             | 0<br>(0 - 0)             | 0<br>(0 - 0)             |
| Varicella and herpes zoster                                       | 1<br>(0 - 1)                | 0<br>(0 - 1)             | 0<br>(0 - 0)           | 0<br>(0 - 0)             | 0<br>(0 - 0)             | 0<br>(0 - 0)             |
| Neglected tropical diseases and malaria                           | 201<br>(101 - 375)          | 104<br>(29 - 231)        | 11<br>(4 - 28)         | 69<br>(32 - 162)         | 12<br>(6 - 30)           | 5<br>(3 - 12)            |
| Malaria                                                           | 164<br>(68 - 335)           | 96<br>(22 - 220)         | 10<br>(3 - 26)         | 46<br>(15 - 137)         | 8<br>(3 - 27)            | 3<br>(1 - 10)            |
| Leishmaniasis                                                     | 2<br>(1 - 2)                | 1<br>(0 - 1)             | 0<br>(0 - 0)           | 1<br>(0 - 1)             | 0<br>(0 - 0)             | 0<br>(0 - 0)             |
| Visceral leishmaniasis                                            | 2<br>(1 - 2)                | 1<br>(0 - 1)             | 0<br>(0 - 0)           | 1<br>(0 - 1)             | 0<br>(0 - 0)             | 0<br>(0 - 0)             |
| Schistosomiasis                                                   | 7<br>(5 - 9)                | 0<br>(0 - 0)             | 0<br>(0 - 0)           | 4<br>(3 - 6)             | 2<br>(1 - 2)             | 1<br>(0 - 1)             |
| Cysticercosis                                                     | 0<br>(0 - 1)                | 0<br>(0 - 0)             | 0<br>(0 - 0)           | 0<br>(0 - 1)             | 0<br>(0 - 0)             | 0<br>(0 - 0)             |
| Cystic echinococcosis                                             | 1<br>(0 - 1)                | 0<br>(0 - 0)             | 0<br>(0 - 0)           | 0<br>(0 - 1)             | 0<br>(0 - 0)             | 0<br>(0 - 0)             |
| Dengue                                                            | 0<br>(0 - 0)                | 0<br>(0 - 0)             | 0<br>(0 - 0)           | 0<br>(0 - 0)             | 0<br>(0 - 0)             | 0<br>(0 - 0)             |
| Rabies                                                            | 0<br>(0 - 1)                | 0<br>(0 - 0)             | 0<br>(0 - 0)           | 0<br>(0 - 1)             | 0<br>(0 - 0)             | 0<br>(0 - 0)             |
| Intestinal nematode infections                                    | 3<br>(0 - 10)               | 2<br>(0 - 8)             | 0<br>(0 - 2)           | 1<br>(0 - 4)             | 0<br>(0 - 1)             | 0<br>(0 - 1)             |
| Ascariasis                                                        | 3<br>(0 - 10)               | 2<br>(0 - 8)             | 0<br>(0 - 2)           | 1<br>(0 - 4)             | 0<br>(0 - 1)             | 0<br>(0 - 1)             |
| Other neglected tropical diseases                                 | 24<br>(15 - 34)             | 5<br>(2 - 8)             | 1<br>(0 - 1)           | 16<br>(8 - 26)           | 2<br>(1 - 3)             | 1<br>(1 - 2)             |
| Maternal disorders                                                | 55<br>(34 - 85)             | 0                        | 0<br>(0 - 0)           | 55<br>(34 - 85)          | 0                        | 0                        |

Web Table 31- Swaziland deaths with 95% UI by age, sex, and cause in 2013

| Cause                                                            | Both Sexes, All Ages     | Both Sexes, 0-4 Years | Both Sexes, 5-14 Years | Both Sexes, 15-49 Years  | Both Sexes, 50-69 Years  | Both Sexes, 70-80 Years  |
|------------------------------------------------------------------|--------------------------|-----------------------|------------------------|--------------------------|--------------------------|--------------------------|
| Maternal hemorrhage                                              | 6<br>(4 - 10)            | --                    | 0<br>(0 - 0)           | 6<br>(4 - 10)            | --                       | --                       |
| Maternal sepsis and other maternal infections                    | 6<br>(3 - 10)            | --                    | 0<br>(0 - 0)           | 6<br>(3 - 10)            | --                       | --                       |
| Maternal hypertensive disorders                                  | 7<br>(4 - 12)            | --                    | 0<br>(0 - 0)           | 7<br>(4 - 12)            | --                       | --                       |
| Maternal obstructed labor                                        | 3<br>(2 - 5)             | --                    | 0<br>(0 - 0)           | 3<br>(2 - 5)             | --                       | --                       |
| Maternal abortive outcome                                        | 9<br>(5 - 14)            | --                    | 0<br>(0 - 0)           | 9<br>(5 - 14)            | --                       | --                       |
| Indirect maternal deaths                                         | 6<br>(3 - 10)            | --                    | 0<br>(0 - 0)           | 6<br>(3 - 10)            | --                       | --                       |
| Late maternal deaths                                             | 6<br>(3 - 11)            | --                    | 0<br>(0 - 0)           | 6<br>(3 - 11)            | --                       | --                       |
| Maternal deaths aggravated by HIV/AIDS                           | 6<br>(4 - 9)             | --                    | --                     | 6<br>(4 - 9)             | --                       | --                       |
| Other maternal disorders                                         | 6<br>(3 - 9)             | --                    | 0<br>(0 - 0)           | 6<br>(3 - 9)             | --                       | --                       |
| Neonatal disorders                                               | 756<br>(607 - 959)       | 756<br>(607 - 959)    | --                     | --                       | --                       | --                       |
| Neonatal preterm birth complications                             | 257<br>(161 - 376)       | 257<br>(161 - 376)    | --                     | --                       | --                       | --                       |
| Neonatal encephalopathy due to birth asphyxia and trauma         | 183<br>(106 - 295)       | 183<br>(106 - 295)    | --                     | --                       | --                       | --                       |
| Neonatal sepsis and other neonatal infections                    | 82<br>(36 - 145)         | 82<br>(36 - 145)      | --                     | --                       | --                       | --                       |
| Hemolytic disease and other neonatal jaundice                    | 4<br>(2 - 8)             | 4<br>(2 - 8)          | --                     | --                       | --                       | --                       |
| Other neonatal disorders                                         | 230<br>(103 - 374)       | 230<br>(103 - 374)    | --                     | --                       | --                       | --                       |
| Nutritional deficiencies                                         | 178<br>(119 - 256)       | 107<br>(58 - 173)     | 3<br>(2 - 6)           | 37<br>(26 - 54)          | 14<br>(9 - 20)           | 17<br>(11 - 25)          |
| Protein-energy malnutrition                                      | 132<br>(78 - 204)        | 103<br>(56 - 166)     | 2<br>(1 - 4)           | 12<br>(5 - 23)           | 6<br>(3 - 11)            | 8<br>(4 - 14)            |
| Iodine deficiency                                                | 1<br>(0 - 2)             | 0<br>(0 - 1)          | 0<br>(0 - 0)           | 0<br>(0 - 1)             | 0<br>(0 - 0)             | 0<br>(0 - 0)             |
| Iron-deficiency anemia                                           | 40<br>(25 - 59)          | 3<br>(1 - 9)          | 1<br>(0 - 2)           | 23<br>(14 - 34)          | 6<br>(3 - 9)             | 7<br>(4 - 12)            |
| Other nutritional deficiencies                                   | 6<br>(3 - 10)            | 1<br>(0 - 2)          | 0<br>(0 - 0)           | 2<br>(1 - 4)             | 1<br>(1 - 2)             | 2<br>(1 - 3)             |
| Other communicable, maternal, neonatal, and nutritional diseases | 156<br>(93 - 227)        | 63<br>(20 - 117)      | 5<br>(2 - 9)           | 70<br>(36 - 108)         | 11<br>(6 - 19)           | 7<br>(4 - 12)            |
| Sexually transmitted diseases excluding HIV                      | 55<br>(14 - 107)         | 44<br>(4 - 93)        | 2<br>(0 - 5)           | 7<br>(2 - 12)            | 1<br>(0 - 2)             | 1<br>(0 - 2)             |
| Syphilis                                                         | 50<br>(9 - 102)          | 44<br>(4 - 93)        | 2<br>(0 - 5)           | 3<br>(1 - 5)             | 1<br>(0 - 1)             | 1<br>(0 - 1)             |
| Chlamydial infection                                             | 1<br>(0 - 3)             | --                    | 0<br>(0 - 0)           | 1<br>(0 - 2)             | 0<br>(0 - 0)             | 0<br>(0 - 0)             |
| Gonococcal infection                                             | 2<br>(1 - 3)             | --                    | 0<br>(0 - 0)           | 2<br>(0 - 3)             | 0<br>(0 - 0)             | 0<br>(0 - 0)             |
| Other sexually transmitted diseases                              | 2<br>(1 - 3)             | --                    | 0<br>(0 - 0)           | 1<br>(0 - 2)             | 0<br>(0 - 0)             | 0<br>(0 - 0)             |
| Hepatitis                                                        | 11<br>(8 - 15)           | 2<br>(1 - 4)          | 0<br>(0 - 1)           | 5<br>(4 - 8)             | 2<br>(1 - 3)             | 1<br>(1 - 2)             |
| Acute hepatitis A                                                | 2<br>(1 - 3)             | 1<br>(0 - 2)          | 0<br>(0 - 0)           | 1<br>(0 - 1)             | 0<br>(0 - 0)             | 0<br>(0 - 0)             |
| Acute hepatitis B                                                | 6<br>(4 - 8)             | 1<br>(0 - 3)          | 0<br>(0 - 0)           | 2<br>(1 - 3)             | 2<br>(1 - 2)             | 1<br>(1 - 1)             |
| Acute hepatitis C                                                | 0<br>(0 - 0)             | --                    | 0<br>(0 - 0)           | 0<br>(0 - 0)             | 0<br>(0 - 0)             | 0<br>(0 - 0)             |
| Acute hepatitis E                                                | 4<br>(2 - 5)             | 0<br>(0 - 0)          | 0<br>(0 - 0)           | 3<br>(2 - 5)             | 0<br>(0 - 1)             | 0<br>(0 - 0)             |
| Other infectious diseases                                        | 89<br>(47 - 133)         | 17<br>(7 - 33)        | 2<br>(1 - 4)           | 57<br>(23 - 93)          | 8<br>(4 - 16)            | 5<br>(2 - 11)            |
| Non-communicable diseases                                        | 5,004<br>(4,358 - 5,770) | 252<br>(167 - 384)    | 45<br>(31 - 77)        | 1,237<br>(1,002 - 1,502) | 1,622<br>(1,310 - 2,005) | 1,847<br>(1,641 - 2,114) |
| Neoplasms                                                        | 673<br>(568 - 799)       | 9<br>(6 - 15)         | 7<br>(4 - 11)          | 115<br>(96 - 142)        | 287<br>(226 - 360)       | 255<br>(214 - 300)       |
| Esophageal cancer                                                | 84<br>(62 - 109)         | --                    | --                     | 11<br>(8 - 15)           | 46<br>(32 - 62)          | 28<br>(20 - 36)          |
| Stomach cancer                                                   | 43<br>(35 - 51)          | --                    | --                     | 6<br>(5 - 8)             | 17<br>(13 - 21)          | 19<br>(15 - 24)          |
| Liver cancer                                                     | 40<br>(30 - 55)          | --                    | 0<br>(0 - 0)           | 9<br>(6 - 14)            | 17<br>(12 - 25)          | 14<br>(10 - 19)          |
| Liver cancer due to hepatitis B                                  | 12<br>(8 - 19)           | --                    | 0<br>(0 - 0)           | 4<br>(2 - 6)             | 5<br>(3 - 9)             | 3<br>(2 - 5)             |
| Liver cancer due to hepatitis C                                  | 16<br>(9 - 25)           | --                    | 0<br>(0 - 0)           | 3<br>(1 - 5)             | 7<br>(3 - 12)            | 6<br>(4 - 9)             |
| Liver cancer due to alcohol use                                  | 7<br>(4 - 11)            | --                    | --                     | 1<br>(0 - 2)             | 3<br>(2 - 5)             | 3<br>(2 - 5)             |

Web Table 31- Swaziland deaths with 95% UI by age, sex, and cause in 2013

| Cause                                         | Both Sexes, All Ages     | Both Sexes, 0-4 Years | Both Sexes, 5-14 Years | Both Sexes, 15-49 Years | Both Sexes, 50-69 Years | Both Sexes, 70-80 Years |
|-----------------------------------------------|--------------------------|-----------------------|------------------------|-------------------------|-------------------------|-------------------------|
| Liver cancer due to other causes              | 5<br>(3 - 7)             | --                    | 0<br>(0 - 0)           | 2<br>(1 - 2)            | 2<br>(1 - 3)            | 1<br>(1 - 2)            |
| Larynx cancer                                 | 11<br>(8 - 17)           | --                    | --                     | 2<br>(1 - 3)            | 6<br>(4 - 10)           | 3<br>(2 - 5)            |
| Tracheal, bronchus and lung cancer            | 93<br>(71 - 115)         | --                    | --                     | 9<br>(5 - 12)           | 49<br>(35 - 63)         | 35<br>(28 - 44)         |
| Breast cancer                                 | 37<br>(27 - 56)          | --                    | --                     | 9<br>(6 - 15)           | 15<br>(10 - 24)         | 13<br>(9 - 19)          |
| Cervical cancer                               | 58<br>(39 - 80)          | --                    | --                     | 17<br>(12 - 23)         | 26<br>(15 - 40)         | 15<br>(9 - 22)          |
| Uterine cancer                                | 6<br>(3 - 10)            | --                    | --                     | 1<br>(0 - 1)            | 3<br>(1 - 4)            | 3<br>(2 - 5)            |
| Prostate cancer                               | 46<br>(28 - 64)          | --                    | --                     | 0<br>(0 - 1)            | 13<br>(8 - 20)          | 32<br>(19 - 44)         |
| Colon and rectum cancer                       | 48<br>(40 - 58)          | --                    | --                     | 5<br>(4 - 6)            | 18<br>(14 - 23)         | 26<br>(21 - 32)         |
| Lip and oral cavity cancer                    | 16<br>(11 - 22)          | --                    | --                     | 3<br>(2 - 5)            | 8<br>(5 - 12)           | 5<br>(3 - 7)            |
| Nasopharynx cancer                            | 2<br>(2 - 3)             | --                    | 0<br>(0 - 0)           | 1<br>(1 - 1)            | 1<br>(1 - 2)            | 0<br>(0 - 1)            |
| Other pharynx cancer                          | 7<br>(5 - 11)            | --                    | --                     | 1<br>(0 - 1)            | 5<br>(3 - 9)            | 1<br>(1 - 2)            |
| Gallbladder and biliary tract cancer          | 5<br>(3 - 7)             | --                    | --                     | 1<br>(0 - 1)            | 2<br>(1 - 3)            | 2<br>(1 - 4)            |
| Pancreatic cancer                             | 23<br>(18 - 28)          | --                    | --                     | 2<br>(1 - 2)            | 10<br>(7 - 13)          | 11<br>(9 - 14)          |
| Malignant skin melanoma                       | 5<br>(3 - 8)             | --                    | --                     | 1<br>(1 - 2)            | 2<br>(1 - 3)            | 2<br>(1 - 3)            |
| Non-melanoma skin cancer                      | 6<br>(4 - 8)             | --                    | --                     | 2<br>(1 - 3)            | 2<br>(1 - 3)            | 2<br>(1 - 3)            |
| Ovarian cancer                                | 10<br>(6 - 16)           | --                    | --                     | 2<br>(1 - 4)            | 5<br>(2 - 8)            | 4<br>(2 - 6)            |
| Testicular cancer                             | 1<br>(1 - 2)             | --                    | --                     | 1<br>(0 - 1)            | 0<br>(0 - 1)            | 0<br>(0 - 0)            |
| Kidney cancer                                 | 9<br>(6 - 11)            | 1<br>(0 - 1)          | 0<br>(0 - 1)           | 1<br>(1 - 2)            | 4<br>(2 - 5)            | 3<br>(2 - 4)            |
| Bladder cancer                                | 11<br>(9 - 15)           | --                    | --                     | 1<br>(1 - 2)            | 4<br>(3 - 6)            | 6<br>(4 - 8)            |
| Brain and nervous system cancer               | 7<br>(6 - 13)            | 0<br>(0 - 1)          | 1<br>(0 - 1)           | 2<br>(1 - 5)            | 3<br>(2 - 5)            | 2<br>(1 - 2)            |
| Thyroid cancer                                | 2<br>(2 - 3)             | --                    | 0<br>(0 - 0)           | 0<br>(0 - 1)            | 1<br>(1 - 1)            | 1<br>(1 - 1)            |
| Mesothelioma                                  | 2<br>(1 - 3)             | --                    | --                     | 0<br>(0 - 0)            | 1<br>(0 - 2)            | 1<br>(0 - 1)            |
| Hodgkin lymphoma                              | 3<br>(2 - 4)             | 0<br>(0 - 0)          | 0<br>(0 - 0)           | 2<br>(1 - 2)            | 1<br>(0 - 1)            | 0<br>(0 - 1)            |
| Non-Hodgkin lymphoma                          | 27<br>(21 - 36)          | 1<br>(0 - 2)          | 1<br>(0 - 1)           | 8<br>(5 - 11)           | 10<br>(7 - 13)          | 9<br>(6 - 12)           |
| Multiple myeloma                              | 7<br>(5 - 10)            | --                    | --                     | 1<br>(1 - 1)            | 3<br>(2 - 5)            | 3<br>(2 - 4)            |
| Leukemia                                      | 17<br>(14 - 20)          | 1<br>(1 - 3)          | 2<br>(1 - 3)           | 5<br>(4 - 7)            | 4<br>(3 - 5)            | 5<br>(4 - 6)            |
| Other neoplasms                               | 45<br>(35 - 79)          | 6<br>(3 - 10)         | 3<br>(2 - 6)           | 14<br>(9 - 34)          | 12<br>(8 - 21)          | 10<br>(7 - 14)          |
| Cardiovascular diseases                       | 1,865<br>(1,606 - 2,208) | 17<br>(10 - 27)       | 8<br>(5 - 13)          | 322<br>(249 - 403)      | 644<br>(520 - 802)      | 875<br>(760 - 1,034)    |
| Rheumatic heart disease                       | 43<br>(29 - 81)          | 0<br>(0 - 1)          | 1<br>(1 - 3)           | 20<br>(12 - 44)         | 7<br>(4 - 14)           | 15<br>(10 - 25)         |
| Ischemic heart disease                        | 615<br>(512 - 751)       | 1<br>(1 - 3)          | 1<br>(0 - 1)           | 81<br>(61 - 105)        | 218<br>(170 - 279)      | 314<br>(256 - 393)      |
| Cerebrovascular disease                       | 691<br>(568 - 845)       | 4<br>(2 - 7)          | 2<br>(1 - 4)           | 107<br>(82 - 138)       | 240<br>(184 - 307)      | 338<br>(277 - 418)      |
| Ischemic stroke                               | 323<br>(247 - 412)       | 0<br>(0 - 1)          | 0<br>(0 - 0)           | 17<br>(7 - 28)          | 103<br>(69 - 139)       | 203<br>(159 - 255)      |
| Hemorrhagic stroke                            | 368<br>(291 - 480)       | 4<br>(2 - 7)          | 2<br>(1 - 4)           | 90<br>(69 - 120)        | 137<br>(97 - 193)       | 135<br>(103 - 183)      |
| Hypertensive heart disease                    | 217<br>(149 - 287)       | 0<br>(0 - 1)          | 0<br>(0 - 0)           | 28<br>(16 - 39)         | 73<br>(47 - 107)        | 115<br>(76 - 157)       |
| Cardiomyopathy and myocarditis                | 138<br>(96 - 175)        | 7<br>(3 - 12)         | 2<br>(1 - 3)           | 50<br>(29 - 71)         | 43<br>(28 - 60)         | 37<br>(24 - 53)         |
| Atrial fibrillation and flutter               | 4<br>(3 - 7)             | --                    | --                     | 0<br>(0 - 0)            | 1<br>(1 - 2)            | 3<br>(2 - 5)            |
| Aortic aneurysm                               | 24<br>(17 - 35)          | --                    | --                     | 3<br>(2 - 5)            | 9<br>(6 - 13)           | 12<br>(8 - 17)          |
| Peripheral vascular disease                   | 5<br>(4 - 7)             | --                    | --                     | 0<br>(0 - 0)            | 2<br>(1 - 3)            | 3<br>(2 - 4)            |
| Endocarditis                                  | 9<br>(6 - 13)            | 1<br>(1 - 2)          | 0<br>(0 - 1)           | 3<br>(2 - 5)            | 2<br>(1 - 3)            | 2<br>(2 - 4)            |
| Other cardiovascular and circulatory diseases | 118<br>(92 - 159)        | 3<br>(1 - 5)          | 1<br>(1 - 2)           | 30<br>(20 - 46)         | 49<br>(34 - 72)         | 35<br>(26 - 49)         |

Web Table 31- Swaziland deaths with 95% UI by age, sex, and cause in 2013

| Cause                                               | Both Sexes, All Ages | Both Sexes, 0-4 Years | Both Sexes, 5-14 Years | Both Sexes, 15-49 Years | Both Sexes, 50-69 Years | Both Sexes, 70-80 Years |
|-----------------------------------------------------|----------------------|-----------------------|------------------------|-------------------------|-------------------------|-------------------------|
| Chronic respiratory diseases                        | 609<br>(495 - 808)   | 15<br>(8 - 27)        | 4<br>(3 - 7)           | 134<br>(102 - 193)      | 211<br>(156 - 288)      | 245<br>(199 - 322)      |
| Chronic obstructive pulmonary disease               | 366<br>(280 - 496)   | 6<br>(3 - 13)         | 1<br>(1 - 2)           | 53<br>(35 - 79)         | 134<br>(96 - 189)       | 172<br>(133 - 232)      |
| Pneumoconiosis                                      | 23<br>(14 - 37)      | 0<br>(0 - 0)          | 0<br>(0 - 0)           | 5<br>(2 - 9)            | 9<br>(5 - 15)           | 9<br>(6 - 15)           |
| Silicosis                                           | 4<br>(1 - 8)         | 0<br>(0 - 0)          | 0<br>(0 - 0)           | 1<br>(0 - 1)            | 1<br>(0 - 3)            | 2<br>(1 - 4)            |
| Asbestosis                                          | 5<br>(3 - 10)        | 0<br>(0 - 0)          | 0<br>(0 - 0)           | 1<br>(0 - 2)            | 2<br>(1 - 4)            | 2<br>(1 - 4)            |
| Coal workers pneumoconiosis                         | 5<br>(2 - 8)         | 0<br>(0 - 0)          | 0<br>(0 - 0)           | 1<br>(0 - 1)            | 2<br>(1 - 4)            | 2<br>(1 - 3)            |
| Other pneumoconiosis                                | 9<br>(6 - 15)        | 0<br>(0 - 0)          | 0<br>(0 - 0)           | 2<br>(1 - 5)            | 4<br>(2 - 6)            | 3<br>(2 - 5)            |
| Asthma                                              | 191<br>(137 - 279)   | 6<br>(3 - 12)         | 3<br>(2 - 5)           | 67<br>(46 - 111)        | 61<br>(40 - 90)         | 54<br>(38 - 82)         |
| Interstitial lung disease and pulmonary sarcoidosis | 19<br>(3 - 38)       | 1<br>(0 - 3)          | 0<br>(0 - 0)           | 6<br>(1 - 13)           | 5<br>(1 - 11)           | 7<br>(1 - 14)           |
| Other chronic respiratory diseases                  | 10<br>(6 - 20)       | 2<br>(1 - 5)          | 0<br>(0 - 1)           | 3<br>(2 - 6)            | 2<br>(1 - 4)            | 3<br>(2 - 6)            |
| Cirrhosis                                           | 216<br>(135 - 325)   | 4<br>(1 - 7)          | 2<br>(1 - 4)           | 88<br>(54 - 135)        | 82<br>(50 - 130)        | 40<br>(25 - 61)         |
| Cirrhosis due to hepatitis B                        | 37<br>(18 - 64)      | 0<br>(0 - 0)          | 0<br>(0 - 0)           | 15<br>(8 - 26)          | 14<br>(7 - 26)          | 7<br>(3 - 13)           |
| Cirrhosis due to hepatitis C                        | 36<br>(20 - 57)      | 0<br>(0 - 0)          | 0<br>(0 - 1)           | 13<br>(7 - 23)          | 13<br>(6 - 23)          | 9<br>(4 - 15)           |
| Cirrhosis due to alcohol use                        | 104<br>(68 - 159)    | --                    | --                     | 37<br>(22 - 61)         | 46<br>(28 - 74)         | 21<br>(14 - 32)         |
| Cirrhosis due to other causes                       | 39<br>(22 - 64)      | 3<br>(1 - 7)          | 2<br>(1 - 3)           | 22<br>(12 - 37)         | 9<br>(4 - 16)           | 3<br>(2 - 5)            |
| Digestive diseases                                  | 210<br>(174 - 261)   | 8<br>(4 - 14)         | 3<br>(2 - 6)           | 101<br>(77 - 132)       | 48<br>(37 - 65)         | 50<br>(40 - 64)         |
| Peptic ulcer disease                                | 42<br>(30 - 58)      | 1<br>(0 - 1)          | 0<br>(0 - 1)           | 17<br>(11 - 26)         | 12<br>(8 - 17)          | 13<br>(9 - 18)          |
| Gastritis and duodenitis                            | 11<br>(6 - 15)       | 0<br>(0 - 1)          | 0<br>(0 - 0)           | 5<br>(2 - 7)            | 3<br>(2 - 4)            | 3<br>(2 - 5)            |
| Appendicitis                                        | 8<br>(5 - 12)        | 0<br>(0 - 1)          | 1<br>(0 - 1)           | 4<br>(2 - 7)            | 2<br>(1 - 2)            | 1<br>(1 - 2)            |
| Paralytic ileus and intestinal obstruction          | 25<br>(17 - 38)      | 1<br>(0 - 2)          | 1<br>(0 - 1)           | 7<br>(4 - 11)           | 7<br>(4 - 11)           | 9<br>(6 - 15)           |
| Inguinal, femoral, and abdominal hernia             | 3<br>(2 - 5)         | 0<br>(0 - 0)          | 0<br>(0 - 0)           | 1<br>(0 - 1)            | 1<br>(0 - 2)            | 1<br>(1 - 2)            |
| Inflammatory bowel disease                          | 57<br>(42 - 80)      | 4<br>(2 - 7)          | 1<br>(0 - 1)           | 38<br>(26 - 55)         | 8<br>(5 - 12)           | 7<br>(4 - 10)           |
| Vascular intestinal disorders                       | 3<br>(2 - 5)         | 0<br>(0 - 0)          | 0<br>(0 - 0)           | 1<br>(0 - 2)            | 1<br>(0 - 2)            | 1<br>(1 - 2)            |
| Gallbladder and biliary diseases                    | 14<br>(11 - 19)      | 0<br>(0 - 0)          | 0<br>(0 - 0)           | 4<br>(3 - 6)            | 5<br>(3 - 7)            | 6<br>(4 - 8)            |
| Pancreatitis                                        | 17<br>(10 - 24)      | 0<br>(0 - 0)          | 0<br>(0 - 1)           | 10<br>(5 - 15)          | 4<br>(3 - 6)            | 2<br>(1 - 3)            |
| Other digestive diseases                            | 30<br>(22 - 40)      | 1<br>(1 - 2)          | 0<br>(0 - 1)           | 14<br>(10 - 21)         | 7<br>(4 - 10)           | 7<br>(5 - 10)           |
| Neurological disorders                              | 165<br>(117 - 207)   | 8<br>(4 - 14)         | 5<br>(3 - 9)           | 66<br>(34 - 98)         | 26<br>(17 - 37)         | 60<br>(49 - 72)         |
| Alzheimer disease and other dementias               | 49<br>(40 - 59)      | --                    | --                     | 0<br>(0 - 0)            | 4<br>(3 - 6)            | 44<br>(36 - 54)         |
| Parkinson disease                                   | 5<br>(3 - 6)         | --                    | --                     | 0<br>(0 - 0)            | 1<br>(1 - 1)            | 3<br>(2 - 5)            |
| Epilepsy                                            | 104<br>(60 - 141)    | 7<br>(4 - 13)         | 5<br>(2 - 8)           | 63<br>(32 - 96)         | 19<br>(10 - 29)         | 10<br>(6 - 15)          |
| Multiple sclerosis                                  | 0<br>(0 - 1)         | --                    | --                     | 0<br>(0 - 0)            | 0<br>(0 - 0)            | 0<br>(0 - 0)            |
| Other neurological disorders                        | 7<br>(6 - 10)        | 1<br>(1 - 2)          | 0<br>(0 - 1)           | 2<br>(2 - 4)            | 2<br>(1 - 3)            | 2<br>(1 - 2)            |
| Mental and substance use disorders                  | 141<br>(97 - 192)    | 5<br>(2 - 9)          | 0<br>(0 - 0)           | 112<br>(76 - 161)       | 17<br>(11 - 23)         | 7<br>(5 - 9)            |
| Schizophrenia                                       | 6<br>(4 - 9)         | --                    | --                     | 3<br>(2 - 5)            | 2<br>(1 - 3)            | 1<br>(1 - 2)            |
| Alcohol use disorders                               | 52<br>(29 - 76)      | --                    | --                     | 39<br>(21 - 57)         | 11<br>(6 - 18)          | 2<br>(1 - 3)            |
| Drug use disorders                                  | 82<br>(54 - 125)     | 5<br>(2 - 9)          | --                     | 70<br>(44 - 110)        | 3<br>(3 - 5)            | 3<br>(2 - 4)            |
| Opioid use disorders                                | 9<br>(6 - 13)        | 1<br>(0 - 1)          | --                     | 8<br>(5 - 12)           | 0<br>(0 - 0)            | 0<br>(0 - 1)            |
| Cocaine use disorders                               | 0<br>(0 - 1)         | 0<br>(0 - 0)          | --                     | 0<br>(0 - 0)            | 0<br>(0 - 0)            | 0<br>(0 - 0)            |
| Amphetamine use disorders                           | 0<br>(0 - 0)         | 0<br>(0 - 0)          | --                     | 0<br>(0 - 0)            | 0<br>(0 - 0)            | 0<br>(0 - 0)            |
| Other drug use disorders                            | 73<br>(48 - 110)     | 4<br>(2 - 8)          | --                     | 62<br>(39 - 98)         | 3<br>(2 - 5)            | 3<br>(2 - 4)            |

Web Table 31- Swaziland deaths with 95% UI by age, sex, and cause in 2013

| Cause                                               | Both Sexes, All Ages | Both Sexes, 0-4 Years | Both Sexes, 5-14 Years | Both Sexes, 15-49 Years | Both Sexes, 50-69 Years | Both Sexes, 70-80 Years |
|-----------------------------------------------------|----------------------|-----------------------|------------------------|-------------------------|-------------------------|-------------------------|
| Eating disorders                                    | 1<br>(0 - 1)         | --                    | 0<br>(0 - 0)           | 0<br>(0 - 1)            | --                      | --                      |
| Anorexia nervosa                                    | 1<br>(0 - 1)         | --                    | 0<br>(0 - 0)           | 0<br>(0 - 1)            | --                      | --                      |
| Diabetes, urogenital, blood, and endocrine diseases | 915<br>(762 - 1,098) | 58<br>(34 - 93)       | 11<br>(7 - 19)         | 269<br>(197 - 358)      | 290<br>(227 - 372)      | 288<br>(226 - 352)      |
| Diabetes mellitus                                   | 441<br>(336 - 540)   | 1<br>(1 - 2)          | 1<br>(0 - 1)           | 59<br>(47 - 73)         | 193<br>(140 - 252)      | 187<br>(136 - 233)      |
| Acute glomerulonephritis                            | 1<br>(1 - 1)         | 0<br>(0 - 0)          | 0<br>(0 - 0)           | 0<br>(0 - 1)            | 0<br>(0 - 0)            | 0<br>(0 - 0)            |
| Chronic kidney disease                              | 163<br>(125 - 216)   | 4<br>(2 - 7)          | 2<br>(1 - 3)           | 54<br>(37 - 81)         | 47<br>(34 - 64)         | 56<br>(41 - 72)         |
| Chronic kidney disease due to diabetes mellitus     | 1<br>(0 - 1)         | 0<br>(0 - 0)          | 0<br>(0 - 0)           | 0<br>(0 - 1)            | 0<br>(0 - 0)            | 0<br>(0 - 0)            |
| Chronic kidney disease due to hypertension          | 82<br>(60 - 109)     | 0<br>(0 - 1)          | 0<br>(0 - 0)           | 22<br>(14 - 32)         | 28<br>(19 - 38)         | 32<br>(23 - 43)         |
| Chronic kidney disease due to glomerulonephritis    | 25<br>(15 - 36)      | 2<br>(1 - 3)          | 1<br>(1 - 2)           | 13<br>(7 - 22)          | 4<br>(2 - 6)            | 4<br>(3 - 6)            |
| Chronic kidney disease due to other causes          | 56<br>(30 - 89)      | 2<br>(1 - 3)          | 1<br>(0 - 1)           | 19<br>(8 - 38)          | 15<br>(7 - 25)          | 19<br>(9 - 32)          |
| Urinary diseases and male infertility               | 43<br>(33 - 54)      | 3<br>(1 - 5)          | 0<br>(0 - 1)           | 15<br>(10 - 21)         | 10<br>(7 - 14)          | 15<br>(11 - 20)         |
| Interstitial nephritis and urinary tract infections | 17<br>(11 - 23)      | 1<br>(1 - 3)          | 0<br>(0 - 1)           | 6<br>(3 - 9)            | 4<br>(2 - 6)            | 5<br>(3 - 8)            |
| Urolithiasis                                        | 1<br>(0 - 1)         | --                    | 0<br>(0 - 0)           | 0<br>(0 - 1)            | 0<br>(0 - 0)            | 0<br>(0 - 0)            |
| Other urinary diseases                              | 25<br>(19 - 33)      | 1<br>(0 - 3)          | 0<br>(0 - 0)           | 8<br>(6 - 13)           | 6<br>(4 - 9)            | 9<br>(6 - 12)           |
| Gynecological diseases                              | 1<br>(1 - 2)         | --                    | --                     | 1<br>(0 - 2)            | 0<br>(0 - 0)            | 0<br>(0 - 0)            |
| Uterine fibroids                                    | 0<br>(0 - 0)         | --                    | --                     | 0<br>(0 - 0)            | 0<br>(0 - 0)            | 0<br>(0 - 0)            |
| Polycystic ovarian syndrome                         | 0<br>(0 - 0)         | --                    | --                     | 0<br>(0 - 0)            | 0<br>(0 - 0)            | --                      |
| Endometriosis                                       | 0<br>(0 - 0)         | --                    | --                     | 0<br>(0 - 0)            | 0<br>(0 - 0)            | --                      |
| Genital prolapse                                    | 0<br>(0 - 0)         | --                    | --                     | 0<br>(0 - 0)            | 0<br>(0 - 0)            | 0<br>(0 - 0)            |
| Other gynecological diseases                        | 1<br>(0 - 1)         | --                    | --                     | 0<br>(0 - 1)            | 0<br>(0 - 0)            | 0<br>(0 - 0)            |
| Hemoglobinopathies and hemolytic anemias            | 39<br>(20 - 61)      | 7<br>(3 - 13)         | 2<br>(1 - 4)           | 20<br>(9 - 35)          | 4<br>(2 - 6)            | 5<br>(3 - 9)            |
| Thalassemias                                        | 3<br>(2 - 6)         | 2<br>(1 - 4)          | 0<br>(0 - 1)           | 1<br>(0 - 2)            | 0<br>(0 - 0)            | 0<br>(0 - 0)            |
| Sickle cell disorders                               | 8<br>(4 - 14)        | 1<br>(1 - 2)          | 0<br>(0 - 1)           | 6<br>(2 - 11)           | 1<br>(0 - 1)            | 0<br>(0 - 0)            |
| G6PD deficiency                                     | 2<br>(1 - 4)         | 0<br>(0 - 1)          | 0<br>(0 - 0)           | 1<br>(1 - 3)            | 0<br>(0 - 0)            | 0<br>(0 - 0)            |
| Other hemoglobinopathies and hemolytic anemias      | 25<br>(13 - 37)      | 3<br>(1 - 6)          | 1<br>(0 - 2)           | 12<br>(5 - 20)          | 4<br>(2 - 5)            | 5<br>(3 - 9)            |
| Endocrine, metabolic, blood, and immune disorders   | 228<br>(149 - 342)   | 43<br>(24 - 72)       | 6<br>(3 - 12)          | 119<br>(63 - 199)       | 35<br>(22 - 57)         | 25<br>(16 - 37)         |
| Musculoskeletal disorders                           | 24<br>(14 - 33)      | --                    | 1<br>(0 - 1)           | 10<br>(6 - 14)          | 6<br>(4 - 9)            | 7<br>(3 - 10)           |
| Rheumatoid arthritis                                | 6<br>(4 - 9)         | --                    | 0<br>(0 - 0)           | 2<br>(1 - 2)            | 2<br>(1 - 3)            | 3<br>(1 - 5)            |
| Other musculoskeletal disorders                     | 18<br>(9 - 24)       | --                    | 1<br>(0 - 1)           | 8<br>(5 - 12)           | 5<br>(2 - 7)            | 4<br>(2 - 6)            |
| Other non-communicable diseases                     | 185<br>(128 - 288)   | 127<br>(79 - 225)     | 5<br>(3 - 9)           | 21<br>(11 - 32)         | 12<br>(7 - 17)          | 21<br>(13 - 30)         |
| Congenital anomalies                                | 136<br>(85 - 241)    | 116<br>(70 - 216)     | 4<br>(2 - 8)           | 9<br>(5 - 16)           | 3<br>(2 - 6)            | 5<br>(3 - 7)            |
| Neural tube defects                                 | 15<br>(6 - 33)       | 14<br>(5 - 32)        | 0<br>(0 - 1)           | 1<br>(0 - 1)            | 0<br>(0 - 0)            | 0<br>(0 - 0)            |
| Congenital heart anomalies                          | 46<br>(29 - 82)      | 36<br>(21 - 72)       | 2<br>(1 - 4)           | 4<br>(2 - 8)            | 1<br>(1 - 3)            | 3<br>(2 - 5)            |
| Cleft lip and cleft palate                          | 0<br>(0 - 1)         | 0<br>(0 - 1)          | --                     | --                      | --                      | --                      |
| Down syndrome                                       | 11<br>(6 - 21)       | 10<br>(5 - 18)        | 1<br>(0 - 1)           | 1<br>(0 - 2)            | 0<br>(0 - 1)            | 0<br>(0 - 0)            |
| Chromosomal unbalanced rearrangements               | 7<br>(4 - 14)        | 6<br>(3 - 13)         | 0<br>(0 - 0)           | 0<br>(0 - 1)            | 0<br>(0 - 0)            | 0<br>(0 - 0)            |
| Other congenital anomalies                          | 56<br>(33 - 106)     | 49<br>(28 - 97)       | 1<br>(1 - 2)           | 3<br>(1 - 6)            | 1<br>(1 - 2)            | 2<br>(1 - 3)            |
| Skin and subcutaneous diseases                      | 42<br>(27 - 56)      | 4<br>(2 - 7)          | 1<br>(0 - 1)           | 12<br>(6 - 19)          | 9<br>(5 - 13)           | 16<br>(10 - 24)         |
| Cellulitis                                          | 7<br>(3 - 11)        | 1<br>(0 - 1)          | 0<br>(0 - 0)           | 2<br>(1 - 3)            | 2<br>(1 - 3)            | 2<br>(1 - 4)            |
| Pyoderma                                            | 18<br>(12 - 25)      | 3<br>(2 - 5)          | 0<br>(0 - 1)           | 7<br>(4 - 11)           | 4<br>(2 - 6)            | 4<br>(2 - 7)            |

Web Table 31- Swaziland deaths with 95% UI by age, sex, and cause in 2013

| Cause                                           | Both Sexes, All Ages     | Both Sexes, 0-4 Years | Both Sexes, 5-14 Years | Both Sexes, 15-49 Years | Both Sexes, 50-69 Years | Both Sexes, 70-80 Years |
|-------------------------------------------------|--------------------------|-----------------------|------------------------|-------------------------|-------------------------|-------------------------|
| Decubitus ulcer                                 | 15<br>(8 - 21)           | 0<br>(0 - 0)          | 0<br>(0 - 0)           | 3<br>(1 - 4)            | 3<br>(1 - 4)            | 9<br>(5 - 13)           |
| Other skin and subcutaneous diseases            | 2<br>(1 - 3)             | 0<br>(0 - 0)          | 0<br>(0 - 0)           | 1<br>(0 - 2)            | 0<br>(0 - 1)            | 0<br>(0 - 1)            |
| Sudden infant death syndrome                    | 7<br>(2 - 20)            | 7<br>(2 - 20)         | --                     | --                      | --                      | --                      |
| Injuries                                        | 1,696<br>(1,342 - 2,270) | 137<br>(82 - 215)     | 64<br>(43 - 111)       | 1,235<br>(914 - 1,781)  | 164<br>(124 - 212)      | 95<br>(76 - 115)        |
| Transport injuries                              | 400<br>(316 - 502)       | 32<br>(19 - 52)       | 25<br>(15 - 44)        | 295<br>(222 - 391)      | 37<br>(28 - 48)         | 11<br>(9 - 14)          |
| Road injuries                                   | 386<br>(304 - 485)       | 30<br>(17 - 49)       | 23<br>(14 - 41)        | 288<br>(216 - 383)      | 34<br>(26 - 45)         | 10<br>(8 - 13)          |
| Pedestrian road injuries                        | 65<br>(47 - 91)          | 12<br>(7 - 22)        | 10<br>(6 - 17)         | 29<br>(19 - 47)         | 9<br>(6 - 13)           | 5<br>(3 - 6)            |
| Cyclist road injuries                           | 36<br>(27 - 50)          | 3<br>(1 - 5)          | 3<br>(2 - 6)           | 22<br>(15 - 33)         | 7<br>(5 - 10)           | 2<br>(1 - 3)            |
| Motorcyclist road injuries                      | 67<br>(45 - 100)         | 1<br>(1 - 2)          | 1<br>(0 - 2)           | 62<br>(40 - 93)         | 3<br>(2 - 5)            | 1<br>(0 - 1)            |
| Motor vehicle road injuries                     | 213<br>(161 - 272)       | 14<br>(8 - 23)        | 9<br>(6 - 17)          | 173<br>(126 - 232)      | 14<br>(10 - 19)         | 3<br>(2 - 4)            |
| Other road injuries                             | 5<br>(3 - 9)             | 0<br>(0 - 1)          | 0<br>(0 - 1)           | 3<br>(1 - 5)            | 1<br>(1 - 2)            | 0<br>(0 - 1)            |
| Other transport injuries                        | 14<br>(10 - 21)          | 2<br>(1 - 4)          | 1<br>(1 - 3)           | 7<br>(4 - 13)           | 2<br>(2 - 3)            | 1<br>(1 - 1)            |
| Unintentional injuries                          | 534<br>(423 - 683)       | 95<br>(55 - 153)      | 33<br>(21 - 59)        | 269<br>(192 - 371)      | 72<br>(55 - 95)         | 65<br>(51 - 83)         |
| Falls                                           | 66<br>(46 - 92)          | 3<br>(2 - 7)          | 2<br>(1 - 3)           | 34<br>(19 - 54)         | 10<br>(6 - 15)          | 17<br>(12 - 23)         |
| Drowning                                        | 68<br>(43 - 96)          | 22<br>(11 - 39)       | 14<br>(8 - 27)         | 25<br>(13 - 45)         | 4<br>(3 - 7)            | 3<br>(2 - 4)            |
| Fire, heat, and hot substances                  | 78<br>(50 - 117)         | 17<br>(8 - 33)        | 4<br>(2 - 8)           | 36<br>(18 - 60)         | 9<br>(5 - 14)           | 12<br>(7 - 18)          |
| Poisonings                                      | 32<br>(21 - 63)          | 5<br>(2 - 12)         | 1<br>(1 - 2)           | 18<br>(10 - 41)         | 5<br>(3 - 8)            | 3<br>(2 - 4)            |
| Exposure to mechanical forces                   | 125<br>(81 - 246)        | 9<br>(4 - 24)         | 6<br>(3 - 15)          | 93<br>(55 - 193)        | 13<br>(8 - 23)          | 4<br>(3 - 6)            |
| Unintentional firearm injuries                  | 80<br>(44 - 142)         | 2<br>(1 - 5)          | 2<br>(1 - 4)           | 66<br>(35 - 122)        | 7<br>(4 - 11)           | 3<br>(1 - 4)            |
| Unintentional suffocation                       | 4<br>(0 - 8)             | 1<br>(0 - 3)          | 0<br>(0 - 1)           | 2<br>(0 - 5)            | 0<br>(0 - 1)            | 0<br>(0 - 0)            |
| Other exposure to mechanical forces             | 42<br>(25 - 110)         | 6<br>(3 - 15)         | 4<br>(2 - 10)          | 24<br>(12 - 66)         | 6<br>(3 - 10)           | 1<br>(1 - 3)            |
| Adverse effects of medical treatment            | 78<br>(50 - 108)         | 12<br>(5 - 22)        | 2<br>(1 - 4)           | 26<br>(13 - 44)         | 19<br>(11 - 30)         | 19<br>(11 - 30)         |
| Animal contact                                  | 11<br>(7 - 20)           | 3<br>(1 - 6)          | 1<br>(1 - 3)           | 5<br>(2 - 9)            | 2<br>(1 - 3)            | 1<br>(1 - 2)            |
| Venomous animal contact                         | 9<br>(5 - 18)            | 2<br>(1 - 5)          | 1<br>(1 - 2)           | 4<br>(2 - 8)            | 1<br>(1 - 2)            | 1<br>(0 - 1)            |
| Non-venomous animal contact                     | 2<br>(1 - 4)             | 0<br>(0 - 1)          | 0<br>(0 - 1)           | 1<br>(0 - 2)            | 0<br>(0 - 1)            | 0<br>(0 - 0)            |
| Foreign body                                    | 54<br>(31 - 96)          | 22<br>(10 - 49)       | 2<br>(1 - 4)           | 19<br>(9 - 31)          | 5<br>(3 - 9)            | 5<br>(3 - 7)            |
| Pulmonary aspiration and foreign body in airway | 53<br>(31 - 95)          | 22<br>(9 - 49)        | 2<br>(1 - 4)           | 19<br>(9 - 31)          | 5<br>(3 - 9)            | 5<br>(3 - 7)            |
| Foreign body in other body part                 | 1<br>(0 - 1)             | 0<br>(0 - 0)          | 0<br>(0 - 0)           | 0<br>(0 - 1)            | 0<br>(0 - 0)            | 0<br>(0 - 0)            |
| Other unintentional injuries                    | 23<br>(10 - 33)          | 2<br>(1 - 3)          | 1<br>(0 - 2)           | 12<br>(5 - 19)          | 5<br>(2 - 9)            | 3<br>(1 - 4)            |
| Self-harm and interpersonal violence            | 761<br>(484 - 1,258)     | 10<br>(3 - 27)        | 6<br>(3 - 14)          | 671<br>(407 - 1,134)    | 55<br>(31 - 83)         | 19<br>(8 - 27)          |
| Self-harm                                       | 372<br>(119 - 557)       | --                    | 2<br>(1 - 5)           | 309<br>(97 - 476)       | 43<br>(13 - 69)         | 17<br>(5 - 25)          |
| Interpersonal violence                          | 389<br>(204 - 913)       | 10<br>(3 - 27)        | 4<br>(2 - 11)          | 362<br>(184 - 855)      | 12<br>(5 - 35)          | 1<br>(1 - 4)            |
| Assault by firearm                              | 106<br>(44 - 294)        | 1<br>(0 - 4)          | 1<br>(0 - 2)           | 100<br>(41 - 282)       | 3<br>(1 - 11)           | 0<br>(0 - 1)            |
| Assault by sharp object                         | 138<br>(63 - 318)        | 1<br>(1 - 3)          | 1<br>(0 - 2)           | 132<br>(60 - 306)       | 4<br>(1 - 10)           | 0<br>(0 - 1)            |
| Assault by other means                          | 146<br>(67 - 364)        | 7<br>(2 - 20)         | 3<br>(1 - 8)           | 130<br>(57 - 327)       | 5<br>(2 - 16)           | 1<br>(0 - 2)            |

Web Table 31- Swaziland deaths with 95% UI by age, sex, and cause in 2013

| Cause                                                             | Males, All Ages           | Males, 0-4 Years         | Males, 5-14 Years  | Males, 15-49 Years       | Males, 50-69 Years       | Males, 70-80 Years       |
|-------------------------------------------------------------------|---------------------------|--------------------------|--------------------|--------------------------|--------------------------|--------------------------|
| All causes                                                        | 9,249<br>(8,455 - 10,060) | 1,487<br>(1,175 - 1,860) | 262<br>(219 - 348) | 4,345<br>(3,822 - 4,888) | 1,953<br>(1,672 - 2,214) | 1,202<br>(1,098 - 1,283) |
| Communicable, maternal, neonatal, and nutritional diseases        | 5,361<br>(4,774 - 5,901)  | 1,278<br>(1,009 - 1,608) | 194<br>(158 - 242) | 2,776<br>(2,404 - 3,178) | 841<br>(696 - 1,001)     | 273<br>(231 - 317)       |
| HIV/AIDS and tuberculosis                                         | 3,453<br>(2,997 - 3,950)  | 145<br>(99 - 204)        | 153<br>(117 - 190) | 2,360<br>(1,996 - 2,772) | 665<br>(521 - 827)       | 129<br>(94 - 164)        |
| Tuberculosis                                                      | 652<br>(395 - 865)        | 17<br>(8 - 31)           | 7<br>(3 - 13)      | 404<br>(245 - 560)       | 163<br>(91 - 229)        | 61<br>(35 - 85)          |
| HIV/AIDS                                                          | 2,801<br>(2,370 - 3,265)  | 128<br>(84 - 188)        | 147<br>(110 - 184) | 1,956<br>(1,600 - 2,387) | 502<br>(374 - 670)       | 67<br>(42 - 94)          |
| HIV/AIDS resulting in mycobacterial infection                     | 210<br>(161 - 266)        | 9<br>(5 - 13)            | 9<br>(7 - 13)      | 148<br>(110 - 191)       | 39<br>(27 - 55)          | 5<br>(3 - 8)             |
| HIV/AIDS resulting in other diseases                              | 2,591<br>(2,197 - 3,029)  | 120<br>(79 - 175)        | 137<br>(103 - 172) | 1,808<br>(1,479 - 2,203) | 463<br>(344 - 624)       | 62<br>(39 - 86)          |
| Diarrhea, lower respiratory, and other common infectious diseases | 1,229<br>(992 - 1,491)    | 584<br>(398 - 803)       | 29<br>(18 - 52)    | 335<br>(240 - 451)       | 152<br>(107 - 206)       | 130<br>(99 - 165)        |
| Diarrheal diseases                                                | 450<br>(286 - 645)        | 301<br>(141 - 492)       | 9<br>(4 - 19)      | 76<br>(48 - 111)         | 34<br>(19 - 55)          | 31<br>(18 - 48)          |
| Intestinal infectious diseases                                    | 19<br>(9 - 35)            | 7<br>(3 - 14)            | 4<br>(2 - 9)       | 7<br>(3 - 13)            | 1<br>(0 - 1)             | 0<br>(0 - 1)             |
| Typhoid fever                                                     | 13<br>(6 - 25)            | 5<br>(2 - 10)            | 3<br>(1 - 7)       | 5<br>(2 - 9)             | 0<br>(0 - 1)             | 0<br>(0 - 0)             |
| Paratyphoid fever                                                 | 5<br>(2 - 9)              | 2<br>(1 - 4)             | 1<br>(0 - 3)       | 2<br>(1 - 4)             | 0<br>(0 - 0)             | 0<br>(0 - 0)             |
| Other intestinal infectious diseases                              | 1<br>(0 - 3)              | 0<br>(0 - 3)             | 0<br>(0 - 1)       | 0<br>(0 - 1)             | 0<br>(0 - 0)             | 0<br>(0 - 0)             |
| Lower respiratory infections                                      | 669<br>(503 - 856)        | 239<br>(125 - 391)       | 10<br>(6 - 19)     | 213<br>(141 - 302)       | 110<br>(74 - 154)        | 96<br>(69 - 130)         |
| Upper respiratory infections                                      | 1<br>(0 - 1)              | 0<br>(0 - 1)             | 0<br>(0 - 0)       | 0<br>(0 - 1)             | 0<br>(0 - 0)             | 0<br>(0 - 0)             |
| Otitis media                                                      | 0<br>(0 - 0)              | 0<br>(0 - 0)             | 0<br>(0 - 0)       | 0<br>(0 - 0)             | 0<br>(0 - 0)             | 0<br>(0 - 0)             |
| Meningitis                                                        | 78<br>(53 - 109)          | 28<br>(13 - 53)          | 4<br>(2 - 9)       | 37<br>(23 - 56)          | 6<br>(4 - 10)            | 3<br>(2 - 4)             |
| Pneumococcal meningitis                                           | 11<br>(7 - 17)            | 3<br>(1 - 5)             | 1<br>(0 - 1)       | 6<br>(3 - 12)            | 1<br>(1 - 2)             | 0<br>(0 - 1)             |
| H influenzae type B meningitis                                    | 18<br>(11 - 28)           | 10<br>(5 - 20)           | 1<br>(0 - 2)       | 5<br>(2 - 9)             | 1<br>(0 - 1)             | 0<br>(0 - 1)             |
| Meningococcal meningitis                                          | 26<br>(16 - 38)           | 8<br>(4 - 16)            | 2<br>(1 - 3)       | 13<br>(7 - 22)           | 2<br>(1 - 4)             | 1<br>(1 - 2)             |
| Other meningitis                                                  | 24<br>(16 - 35)           | 7<br>(3 - 13)            | 1<br>(0 - 2)       | 13<br>(7 - 22)           | 2<br>(1 - 4)             | 1<br>(1 - 2)             |
| Encephalitis                                                      | 6<br>(4 - 9)              | 2<br>(1 - 5)             | 1<br>(0 - 1)       | 3<br>(1 - 4)             | 1<br>(0 - 1)             | 0<br>(0 - 1)             |
| Diphtheria                                                        | 0<br>(0 - 2)              | 0<br>(0 - 2)             | 0<br>(0 - 0)       | 0<br>(0 - 0)             | 0<br>(0 - 0)             | 0<br>(0 - 0)             |
| Whooping cough                                                    | 3<br>(0 - 17)             | 3<br>(0 - 16)            | 0<br>(0 - 1)       | 0<br>(0 - 0)             | 0<br>(0 - 0)             | 0<br>(0 - 0)             |
| Tetanus                                                           | 1<br>(0 - 1)              | 0<br>(0 - 0)             | 0<br>(0 - 0)       | 0<br>(0 - 0)             | 0<br>(0 - 0)             | 0<br>(0 - 0)             |
| Measles                                                           | 2<br>(0 - 16)             | 2<br>(0 - 14)            | 0<br>(0 - 1)       | 0<br>(0 - 0)             | 0<br>(0 - 0)             | 0<br>(0 - 0)             |
| Varicella and herpes zoster                                       | 0<br>(0 - 1)              | 0<br>(0 - 0)             | 0<br>(0 - 0)       | 0<br>(0 - 0)             | 0<br>(0 - 0)             | 0<br>(0 - 0)             |
| Neglected tropical diseases and malaria                           | 127<br>(45 - 259)         | 67<br>(12 - 160)         | 8<br>(2 - 22)      | 40<br>(14 - 106)         | 9<br>(3 - 25)            | 3<br>(1 - 9)             |
| Malaria                                                           | 110<br>(29 - 241)         | 63<br>(9 - 155)          | 7<br>(2 - 21)      | 31<br>(7 - 95)           | 6<br>(1 - 23)            | 2<br>(0 - 8)             |
| Leishmaniasis                                                     | 1<br>(0 - 1)              | 0<br>(0 - 1)             | 0<br>(0 - 0)       | 0<br>(0 - 0)             | 0<br>(0 - 0)             | 0<br>(0 - 0)             |
| Visceral leishmaniasis                                            | 1<br>(0 - 1)              | 0<br>(0 - 1)             | 0<br>(0 - 0)       | 0<br>(0 - 0)             | 0<br>(0 - 0)             | 0<br>(0 - 0)             |
| Schistosomiasis                                                   | 4<br>(3 - 6)              | 0<br>(0 - 0)             | 0<br>(0 - 0)       | 2<br>(1 - 4)             | 1<br>(1 - 2)             | 0<br>(0 - 1)             |
| Cysticercosis                                                     | 0<br>(0 - 0)              | 0<br>(0 - 0)             | 0<br>(0 - 0)       | 0<br>(0 - 0)             | 0<br>(0 - 0)             | 0<br>(0 - 0)             |
| Cystic echinococcosis                                             | 0<br>(0 - 0)              | 0<br>(0 - 0)             | 0<br>(0 - 0)       | 0<br>(0 - 0)             | 0<br>(0 - 0)             | 0<br>(0 - 0)             |
| Dengue                                                            | 0<br>(0 - 0)              | 0<br>(0 - 0)             | 0<br>(0 - 0)       | 0<br>(0 - 0)             | 0<br>(0 - 0)             | 0<br>(0 - 0)             |
| Rabies                                                            | 0<br>(0 - 1)              | 0<br>(0 - 0)             | 0<br>(0 - 0)       | 0<br>(0 - 0)             | 0<br>(0 - 0)             | 0<br>(0 - 0)             |
| Intestinal nematode infections                                    | 2<br>(0 - 7)              | 1<br>(0 - 6)             | 0<br>(0 - 1)       | 0<br>(0 - 2)             | 0<br>(0 - 1)             | 0<br>(0 - 1)             |
| Ascariasis                                                        | 2<br>(0 - 7)              | 1<br>(0 - 6)             | 0<br>(0 - 1)       | 0<br>(0 - 2)             | 0<br>(0 - 1)             | 0<br>(0 - 1)             |
| Other neglected tropical diseases                                 | 10<br>(6 - 15)            | 2<br>(1 - 5)             | 0<br>(0 - 1)       | 6<br>(3 - 10)            | 1<br>(1 - 2)             | 1<br>(0 - 1)             |
| Maternal disorders                                                | -                         | -                        | -                  | -                        | -                        | -                        |



Web Table 31- Swaziland deaths with 95% UI by age, sex, and cause in 2013

| Cause                                                            | Males, All Ages          | Males, 0-4 Years   | Males, 5-14 Years | Males, 15-49 Years | Males, 50-69 Years   | Males, 70-80 Years |
|------------------------------------------------------------------|--------------------------|--------------------|-------------------|--------------------|----------------------|--------------------|
| Maternal hemorrhage                                              | --                       | --                 | --                | --                 | --                   | --                 |
| Maternal sepsis and other maternal infections                    | --                       | --                 | --                | --                 | --                   | --                 |
| Maternal hypertensive disorders                                  | --                       | --                 | --                | --                 | --                   | --                 |
| Maternal obstructed labor                                        | --                       | --                 | --                | --                 | --                   | --                 |
| Maternal abortive outcome                                        | --                       | --                 | --                | --                 | --                   | --                 |
| Indirect maternal deaths                                         | --                       | --                 | --                | --                 | --                   | --                 |
| Late maternal deaths                                             | --                       | --                 | --                | --                 | --                   | --                 |
| Maternal deaths aggravated by HIV/AIDS                           | --                       | --                 | --                | --                 | --                   | --                 |
| Other maternal disorders                                         | --                       | --                 | --                | --                 | --                   | --                 |
| Neonatal disorders                                               | 392<br>(317 - 512)       | 392<br>(317 - 512) | --                | --                 | --                   | --                 |
| Neonatal preterm birth complications                             | 136<br>(70 - 215)        | 136<br>(70 - 215)  | --                | --                 | --                   | --                 |
| Neonatal encephalopathy due to birth asphyxia and trauma         | 94<br>(44 - 165)         | 94<br>(44 - 165)   | --                | --                 | --                   | --                 |
| Neonatal sepsis and other neonatal infections                    | 44<br>(14 - 90)          | 44<br>(14 - 90)    | --                | --                 | --                   | --                 |
| Hemolytic disease and other neonatal jaundice                    | 2<br>(1 - 5)             | 2<br>(1 - 5)       | --                | --                 | --                   | --                 |
| Other neonatal disorders                                         | 116<br>(45 - 209)        | 116<br>(45 - 209)  | --                | --                 | --                   | --                 |
| Nutritional deficiencies                                         | 89<br>(46 - 146)         | 58<br>(25 - 109)   | 2<br>(1 - 4)      | 13<br>(8 - 21)     | 8<br>(5 - 13)        | 8<br>(5 - 13)      |
| Protein-energy malnutrition                                      | 72<br>(35 - 124)         | 56<br>(24 - 105)   | 1<br>(1 - 3)      | 6<br>(3 - 12)      | 4<br>(2 - 8)         | 4<br>(2 - 8)       |
| Iodine deficiency                                                | 0<br>(0 - 1)             | 0<br>(0 - 1)       | 0<br>(0 - 0)      | 0<br>(0 - 0)       | 0<br>(0 - 0)         | 0<br>(0 - 0)       |
| Iron-deficiency anemia                                           | 15<br>(6 - 26)           | 2<br>(0 - 5)       | 0<br>(0 - 1)      | 6<br>(3 - 12)      | 3<br>(1 - 6)         | 3<br>(1 - 6)       |
| Other nutritional deficiencies                                   | 3<br>(1 - 6)             | 0<br>(0 - 1)       | 0<br>(0 - 0)      | 1<br>(0 - 2)       | 1<br>(0 - 1)         | 1<br>(0 - 1)       |
| Other communicable, maternal, neonatal, and nutritional diseases | 71<br>(39 - 112)         | 31<br>(10 - 61)    | 2<br>(1 - 5)      | 27<br>(12 - 48)    | 7<br>(3 - 14)        | 3<br>(2 - 7)       |
| Sexually transmitted diseases excluding HIV                      | 24<br>(3 - 51)           | 22<br>(2 - 47)     | 1<br>(0 - 2)      | 1<br>(0 - 1)       | 0<br>(0 - 1)         | 0<br>(0 - 0)       |
| Syphilis                                                         | 23<br>(3 - 50)           | 22<br>(2 - 47)     | 1<br>(0 - 2)      | 0<br>(0 - 1)       | 0<br>(0 - 0)         | 0<br>(0 - 0)       |
| Chlamydial infection                                             | --                       | --                 | --                | --                 | --                   | --                 |
| Gonococcal infection                                             | 0<br>(0 - 0)             | --                 | 0<br>(0 - 0)      | 0<br>(0 - 0)       | 0<br>(0 - 0)         | 0<br>(0 - 0)       |
| Other sexually transmitted diseases                              | 0<br>(0 - 0)             | --                 | 0<br>(0 - 0)      | 0<br>(0 - 0)       | 0<br>(0 - 0)         | 0<br>(0 - 0)       |
| Hepatitis                                                        | 7<br>(4 - 9)             | 1<br>(1 - 3)       | 0<br>(0 - 0)      | 3<br>(1 - 4)       | 1<br>(1 - 2)         | 1<br>(0 - 1)       |
| Acute hepatitis A                                                | 1<br>(0 - 2)             | 1<br>(0 - 1)       | 0<br>(0 - 0)      | 0<br>(0 - 1)       | 0<br>(0 - 0)         | 0<br>(0 - 0)       |
| Acute hepatitis B                                                | 4<br>(2 - 6)             | 1<br>(0 - 2)       | 0<br>(0 - 0)      | 1<br>(0 - 2)       | 1<br>(1 - 2)         | 1<br>(0 - 1)       |
| Acute hepatitis C                                                | 0<br>(0 - 0)             | --                 | 0<br>(0 - 0)      | 0<br>(0 - 0)       | 0<br>(0 - 0)         | 0<br>(0 - 0)       |
| Acute hepatitis E                                                | 2<br>(1 - 3)             | 0<br>(0 - 0)       | 0<br>(0 - 0)      | 1<br>(1 - 2)       | 0<br>(0 - 0)         | 0<br>(0 - 0)       |
| Other infectious diseases                                        | 40<br>(18 - 68)          | 8<br>(3 - 20)      | 1<br>(0 - 3)      | 23<br>(8 - 44)     | 5<br>(2 - 12)        | 2<br>(1 - 6)       |
| Non-communicable diseases                                        | 2,679<br>(2,271 - 3,081) | 131<br>(81 - 212)  | 25<br>(17 - 42)   | 656<br>(499 - 823) | 989<br>(775 - 1,212) | 877<br>(783 - 962) |
| Neoplasms                                                        | 384<br>(313 - 455)       | 5<br>(3 - 10)      | 4<br>(3 - 7)      | 55<br>(41 - 73)    | 175<br>(133 - 219)   | 145<br>(121 - 168) |
| Esophageal cancer                                                | 66<br>(46 - 88)          | --                 | --                | 9<br>(6 - 13)      | 37<br>(24 - 53)      | 20<br>(13 - 27)    |
| Stomach cancer                                                   | 26<br>(20 - 31)          | --                 | --                | 4<br>(3 - 5)       | 11<br>(8 - 15)       | 11<br>(8 - 14)     |
| Liver cancer                                                     | 26<br>(19 - 37)          | --                 | 0<br>(0 - 0)      | 6<br>(4 - 10)      | 12<br>(8 - 19)       | 8<br>(5 - 12)      |
| Liver cancer due to hepatitis B                                  | 9<br>(5 - 16)            | --                 | 0<br>(0 - 0)      | 3<br>(1 - 5)       | 4<br>(2 - 8)         | 2<br>(1 - 4)       |
| Liver cancer due to hepatitis C                                  | 10<br>(5 - 18)           | --                 | 0<br>(0 - 0)      | 2<br>(1 - 4)       | 5<br>(2 - 9)         | 3<br>(2 - 6)       |
| Liver cancer due to alcohol use                                  | 5<br>(3 - 8)             | --                 | --                | 1<br>(0 - 1)       | 2<br>(1 - 4)         | 2<br>(1 - 3)       |

Web Table 31- Swaziland deaths with 95% UI by age, sex, and cause in 2013

| Cause                                         | Males, All Ages      | Males, 0-4 Years | Males, 5-14 Years | Males, 15-49 Years | Males, 50-69 Years | Males, 70-80 Years |
|-----------------------------------------------|----------------------|------------------|-------------------|--------------------|--------------------|--------------------|
| Liver cancer due to other causes              | 2<br>(1 - 4)         | --               | 0<br>(0 - 0)      | 1<br>(0 - 1)       | 1<br>(0 - 2)       | 0<br>(0 - 1)       |
| Larynx cancer                                 | 9<br>(7 - 14)        | --               | --                | 1<br>(1 - 2)       | 5<br>(4 - 8)       | 3<br>(2 - 4)       |
| Tracheal, bronchus and lung cancer            | 69<br>(52 - 86)      | --               | --                | 7<br>(4 - 9)       | 38<br>(27 - 50)    | 24<br>(19 - 31)    |
| Breast cancer                                 | 1<br>(1 - 2)         | --               | --                | 0<br>(0 - 1)       | 1<br>(0 - 1)       | 1<br>(0 - 1)       |
| Cervical cancer                               | --                   | --               | --                | --                 | --                 | --                 |
| Uterine cancer                                | --                   | --               | --                | --                 | --                 | --                 |
| Prostate cancer                               | 46<br>(28 - 64)      | --               | --                | 0<br>(0 - 1)       | 13<br>(8 - 20)     | 32<br>(19 - 44)    |
| Colon and rectum cancer                       | 25<br>(20 - 29)      | --               | --                | 3<br>(2 - 3)       | 10<br>(7 - 12)     | 13<br>(10 - 16)    |
| Lip and oral cavity cancer                    | 12<br>(8 - 18)       | --               | --                | 2<br>(1 - 4)       | 6<br>(4 - 10)      | 3<br>(2 - 5)       |
| Nasopharynx cancer                            | 1<br>(1 - 2)         | --               | 0<br>(0 - 0)      | 0<br>(0 - 1)       | 1<br>(0 - 1)       | 0<br>(0 - 0)       |
| Other pharynx cancer                          | 6<br>(4 - 10)        | --               | --                | 1<br>(0 - 1)       | 5<br>(3 - 8)       | 1<br>(1 - 1)       |
| Gallbladder and biliary tract cancer          | 2<br>(1 - 3)         | --               | --                | 0<br>(0 - 0)       | 1<br>(1 - 1)       | 1<br>(0 - 1)       |
| Pancreatic cancer                             | 12<br>(9 - 15)       | --               | --                | 1<br>(1 - 2)       | 6<br>(4 - 8)       | 5<br>(4 - 6)       |
| Malignant skin melanoma                       | 3<br>(1 - 5)         | --               | --                | 1<br>(0 - 2)       | 1<br>(1 - 2)       | 1<br>(1 - 2)       |
| Non-melanoma skin cancer                      | 4<br>(2 - 5)         | --               | --                | 1<br>(0 - 2)       | 1<br>(1 - 2)       | 1<br>(1 - 2)       |
| Ovarian cancer                                | --                   | --               | --                | --                 | --                 | --                 |
| Testicular cancer                             | 1<br>(1 - 2)         | --               | --                | 1<br>(0 - 1)       | 0<br>(0 - 1)       | 0<br>(0 - 0)       |
| Kidney cancer                                 | 5<br>(4 - 7)         | 0<br>(0 - 1)     | 0<br>(0 - 0)      | 1<br>(0 - 1)       | 3<br>(1 - 4)       | 1<br>(1 - 2)       |
| Bladder cancer                                | 8<br>(6 - 11)        | --               | --                | 1<br>(0 - 1)       | 3<br>(2 - 5)       | 4<br>(3 - 6)       |
| Brain and nervous system cancer               | 4<br>(3 - 10)        | 0<br>(0 - 1)     | 0<br>(0 - 1)      | 1<br>(1 - 4)       | 2<br>(1 - 4)       | 1<br>(1 - 2)       |
| Thyroid cancer                                | 1<br>(1 - 1)         | --               | 0<br>(0 - 0)      | 0<br>(0 - 0)       | 0<br>(0 - 1)       | 0<br>(0 - 0)       |
| Mesothelioma                                  | 1<br>(1 - 3)         | --               | --                | 0<br>(0 - 0)       | 1<br>(0 - 1)       | 0<br>(0 - 1)       |
| Hodgkin lymphoma                              | 2<br>(1 - 3)         | 0<br>(0 - 0)     | 0<br>(0 - 0)      | 1<br>(0 - 1)       | 0<br>(0 - 1)       | 0<br>(0 - 0)       |
| Non-Hodgkin lymphoma                          | 16<br>(11 - 23)      | 1<br>(0 - 1)     | 0<br>(0 - 1)      | 4<br>(3 - 7)       | 6<br>(4 - 9)       | 5<br>(3 - 7)       |
| Multiple myeloma                              | 4<br>(2 - 6)         | --               | --                | 0<br>(0 - 1)       | 2<br>(1 - 3)       | 1<br>(1 - 2)       |
| Leukemia                                      | 9<br>(8 - 12)        | 1<br>(0 - 2)     | 1<br>(1 - 2)      | 3<br>(2 - 4)       | 2<br>(2 - 3)       | 3<br>(2 - 3)       |
| Other neoplasms                               | 23<br>(16 - 49)      | 3<br>(2 - 6)     | 2<br>(1 - 3)      | 6<br>(4 - 20)      | 7<br>(4 - 15)      | 5<br>(3 - 9)       |
| Cardiovascular diseases                       | 928<br>(772 - 1,076) | 8<br>(4 - 15)    | 4<br>(2 - 7)      | 170<br>(127 - 214) | 384<br>(293 - 475) | 363<br>(315 - 402) |
| Rheumatic heart disease                       | 18<br>(12 - 36)      | 0<br>(0 - 1)     | 1<br>(0 - 2)      | 8<br>(5 - 17)      | 4<br>(2 - 9)       | 5<br>(3 - 8)       |
| Ischemic heart disease                        | 368<br>(291 - 446)   | 1<br>(0 - 1)     | 0<br>(0 - 1)      | 58<br>(41 - 76)    | 162<br>(120 - 207) | 148<br>(119 - 178) |
| Cerebrovascular disease                       | 318<br>(251 - 398)   | 2<br>(1 - 4)     | 1<br>(1 - 2)      | 57<br>(40 - 77)    | 128<br>(91 - 170)  | 129<br>(105 - 160) |
| Ischemic stroke                               | 142<br>(94 - 192)    | 0<br>(0 - 0)     | 0<br>(0 - 0)      | 10<br>(4 - 19)     | 56<br>(33 - 82)    | 75<br>(53 - 97)    |
| Hemorrhagic stroke                            | 176<br>(126 - 237)   | 2<br>(1 - 4)     | 1<br>(1 - 2)      | 47<br>(32 - 65)    | 71<br>(45 - 108)   | 54<br>(38 - 78)    |
| Hypertensive heart disease                    | 85<br>(46 - 126)     | 0<br>(0 - 0)     | 0<br>(0 - 0)      | 13<br>(4 - 21)     | 36<br>(18 - 58)    | 36<br>(20 - 54)    |
| Cardiomyopathy and myocarditis                | 67<br>(42 - 91)      | 3<br>(1 - 6)     | 1<br>(0 - 2)      | 17<br>(9 - 26)     | 28<br>(16 - 42)    | 17<br>(10 - 27)    |
| Atrial fibrillation and flutter               | 2<br>(1 - 3)         | --               | --                | 0<br>(0 - 0)       | 0<br>(0 - 1)       | 1<br>(0 - 2)       |
| Aortic aneurysm                               | 17<br>(10 - 26)      | --               | --                | 2<br>(1 - 3)       | 7<br>(4 - 11)      | 8<br>(5 - 12)      |
| Peripheral vascular disease                   | 4<br>(2 - 5)         | --               | --                | 0<br>(0 - 0)       | 2<br>(1 - 2)       | 2<br>(1 - 3)       |
| Endocarditis                                  | 5<br>(3 - 8)         | 1<br>(0 - 1)     | 0<br>(0 - 0)      | 2<br>(1 - 3)       | 2<br>(1 - 3)       | 1<br>(1 - 2)       |
| Other cardiovascular and circulatory diseases | 46<br>(34 - 67)      | 1<br>(1 - 3)     | 1<br>(0 - 1)      | 13<br>(8 - 21)     | 16<br>(10 - 26)    | 15<br>(11 - 21)    |

Web Table 31- Swaziland deaths with 95% UI by age, sex, and cause in 2013

| Cause                                               | Males, All Ages    | Males, 0-4 Years | Males, 5-14 Years | Males, 15-49 Years | Males, 50-69 Years | Males, 70-80 Years |
|-----------------------------------------------------|--------------------|------------------|-------------------|--------------------|--------------------|--------------------|
| Chronic respiratory diseases                        | 393<br>(295 - 582) | 9<br>(4 - 19)    | 2<br>(1 - 4)      | 67<br>(46 - 107)   | 155<br>(106 - 229) | 159<br>(124 - 227) |
| Chronic obstructive pulmonary disease               | 256<br>(187 - 378) | 4<br>(1 - 10)    | 1<br>(0 - 1)      | 31<br>(19 - 51)    | 103<br>(69 - 155)  | 118<br>(88 - 172)  |
| Pneumoconiosis                                      | 21<br>(13 - 36)    | 0<br>(0 - 0)     | 0<br>(0 - 0)      | 4<br>(2 - 8)       | 8<br>(5 - 14)      | 9<br>(5 - 14)      |
| Silicosis                                           | 4<br>(1 - 8)       | 0<br>(0 - 0)     | 0<br>(0 - 0)      | 1<br>(0 - 1)       | 1<br>(0 - 3)       | 2<br>(1 - 4)       |
| Asbestosis                                          | 5<br>(3 - 9)       | 0<br>(0 - 0)     | 0<br>(0 - 0)      | 1<br>(0 - 2)       | 2<br>(1 - 4)       | 2<br>(1 - 4)       |
| Coal workers pneumoconiosis                         | 4<br>(2 - 8)       | 0<br>(0 - 0)     | 0<br>(0 - 0)      | 1<br>(0 - 1)       | 2<br>(1 - 4)       | 2<br>(1 - 3)       |
| Other pneumoconiosis                                | 8<br>(4 - 14)      | 0<br>(0 - 0)     | 0<br>(0 - 0)      | 2<br>(1 - 4)       | 3<br>(2 - 6)       | 3<br>(1 - 5)       |
| Asthma                                              | 99<br>(65 - 146)   | 3<br>(1 - 7)     | 1<br>(1 - 3)      | 29<br>(17 - 45)    | 38<br>(22 - 60)    | 27<br>(17 - 41)    |
| Interstitial lung disease and pulmonary sarcoidosis | 11<br>(1 - 23)     | 0<br>(0 - 2)     | 0<br>(0 - 0)      | 2<br>(0 - 6)       | 4<br>(1 - 9)       | 4<br>(1 - 9)       |
| Other chronic respiratory diseases                  | 6<br>(2 - 14)      | 1<br>(0 - 4)     | 0<br>(0 - 1)      | 1<br>(0 - 3)       | 1<br>(0 - 3)       | 2<br>(1 - 4)       |
| Cirrhosis                                           | 134<br>(79 - 217)  | 2<br>(0 - 5)     | 1<br>(1 - 2)      | 52<br>(28 - 87)    | 56<br>(31 - 97)    | 23<br>(13 - 39)    |
| Cirrhosis due to hepatitis B                        | 19<br>(5 - 41)     | 0<br>(0 - 0)     | 0<br>(0 - 0)      | 7<br>(2 - 16)      | 8<br>(2 - 18)      | 4<br>(1 - 8)       |
| Cirrhosis due to hepatitis C                        | 11<br>(5 - 19)     | 0<br>(0 - 0)     | 0<br>(0 - 0)      | 3<br>(1 - 6)       | 5<br>(2 - 9)       | 3<br>(1 - 5)       |
| Cirrhosis due to alcohol use                        | 81<br>(46 - 132)   | --               | --                | 30<br>(16 - 51)    | 37<br>(19 - 62)    | 15<br>(8 - 24)     |
| Cirrhosis due to other causes                       | 22<br>(10 - 38)    | 2<br>(0 - 4)     | 1<br>(0 - 2)      | 11<br>(5 - 21)     | 6<br>(2 - 11)      | 2<br>(1 - 3)       |
| Digestive diseases                                  | 112<br>(87 - 144)  | 4<br>(2 - 8)     | 2<br>(1 - 4)      | 52<br>(37 - 70)    | 31<br>(22 - 43)    | 23<br>(17 - 32)    |
| Peptic ulcer disease                                | 24<br>(15 - 37)    | 0<br>(0 - 1)     | 0<br>(0 - 0)      | 10<br>(6 - 16)     | 8<br>(4 - 13)      | 6<br>(3 - 9)       |
| Gastritis and duodenitis                            | 6<br>(3 - 9)       | 0<br>(0 - 0)     | 0<br>(0 - 0)      | 2<br>(1 - 4)       | 2<br>(1 - 3)       | 2<br>(1 - 3)       |
| Appendicitis                                        | 5<br>(3 - 7)       | 0<br>(0 - 1)     | 0<br>(0 - 1)      | 2<br>(1 - 4)       | 1<br>(1 - 2)       | 1<br>(0 - 1)       |
| Paralytic ileus and intestinal obstruction          | 14<br>(8 - 23)     | 1<br>(0 - 2)     | 0<br>(0 - 1)      | 5<br>(2 - 8)       | 4<br>(2 - 8)       | 4<br>(2 - 7)       |
| Inguinal, femoral, and abdominal hernia             | 2<br>(1 - 4)       | 0<br>(0 - 0)     | 0<br>(0 - 0)      | 1<br>(0 - 1)       | 1<br>(0 - 1)       | 1<br>(0 - 1)       |
| Inflammatory bowel disease                          | 24<br>(15 - 35)    | 2<br>(1 - 4)     | 0<br>(0 - 1)      | 14<br>(8 - 22)     | 5<br>(3 - 7)       | 3<br>(2 - 5)       |
| Vascular intestinal disorders                       | 2<br>(1 - 4)       | 0<br>(0 - 0)     | 0<br>(0 - 0)      | 1<br>(0 - 1)       | 1<br>(0 - 1)       | 1<br>(0 - 1)       |
| Gallbladder and biliary diseases                    | 7<br>(5 - 10)      | 0<br>(0 - 0)     | 0<br>(0 - 0)      | 2<br>(1 - 3)       | 3<br>(1 - 4)       | 3<br>(1 - 4)       |
| Pancreatitis                                        | 13<br>(7 - 20)     | 0<br>(0 - 0)     | 0<br>(0 - 0)      | 8<br>(4 - 13)      | 3<br>(2 - 5)       | 1<br>(1 - 2)       |
| Other digestive diseases                            | 16<br>(9 - 22)     | 1<br>(0 - 1)     | 0<br>(0 - 1)      | 7<br>(4 - 12)      | 4<br>(2 - 7)       | 3<br>(2 - 5)       |
| Neurological disorders                              | 95<br>(64 - 122)   | 5<br>(2 - 11)    | 3<br>(1 - 6)      | 39<br>(19 - 59)    | 18<br>(11 - 28)    | 29<br>(24 - 35)    |
| Alzheimer disease and other dementias               | 22<br>(18 - 26)    | --               | --                | 0<br>(0 - 0)       | 2<br>(2 - 3)       | 20<br>(16 - 24)    |
| Parkinson disease                                   | 3<br>(2 - 4)       | --               | --                | 0<br>(0 - 0)       | 1<br>(0 - 1)       | 2<br>(1 - 4)       |
| Epilepsy                                            | 65<br>(36 - 92)    | 4<br>(2 - 10)    | 3<br>(1 - 6)      | 37<br>(18 - 58)    | 14<br>(7 - 23)     | 6<br>(4 - 10)      |
| Multiple sclerosis                                  | 0<br>(0 - 0)       | --               | --                | 0<br>(0 - 0)       | 0<br>(0 - 0)       | 0<br>(0 - 0)       |
| Other neurological disorders                        | 4<br>(3 - 7)       | 1<br>(0 - 1)     | 0<br>(0 - 0)      | 1<br>(1 - 3)       | 1<br>(1 - 2)       | 1<br>(1 - 1)       |
| Mental and substance use disorders                  | 114<br>(76 - 163)  | 4<br>(1 - 8)     | 0<br>(0 - 0)      | 93<br>(61 - 139)   | 12<br>(7 - 18)     | 5<br>(3 - 7)       |
| Schizophrenia                                       | 4<br>(2 - 6)       | --               | --                | 2<br>(1 - 4)       | 1<br>(1 - 2)       | 1<br>(0 - 1)       |
| Alcohol use disorders                               | 42<br>(22 - 65)    | --               | --                | 31<br>(16 - 49)    | 9<br>(5 - 15)      | 2<br>(1 - 3)       |
| Drug use disorders                                  | 69<br>(44 - 109)   | 4<br>(1 - 8)     | --                | 60<br>(37 - 98)    | 2<br>(1 - 3)       | 3<br>(2 - 4)       |
| Opioid use disorders                                | 7<br>(5 - 12)      | 0<br>(0 - 1)     | --                | 7<br>(4 - 11)      | 0<br>(0 - 0)       | 0<br>(0 - 0)       |
| Cocaine use disorders                               | 0<br>(0 - 0)       | 0<br>(0 - 0)     | --                | 0<br>(0 - 0)       | 0<br>(0 - 0)       | 0<br>(0 - 0)       |
| Amphetamine use disorders                           | 0<br>(0 - 0)       | 0<br>(0 - 0)     | --                | 0<br>(0 - 0)       | 0<br>(0 - 0)       | 0<br>(0 - 0)       |
| Other drug use disorders                            | 61<br>(39 - 97)    | 4<br>(1 - 7)     | --                | 53<br>(33 - 88)    | 2<br>(1 - 2)       | 2<br>(2 - 3)       |

Web Table 31- Swaziland deaths with 95% UI by age, sex, and cause in 2013

| Cause                                               | Males, All Ages    | Males, 0-4 Years | Males, 5-14 Years | Males, 15-49 Years | Males, 50-69 Years | Males, 70-80 Years |
|-----------------------------------------------------|--------------------|------------------|-------------------|--------------------|--------------------|--------------------|
| Eating disorders                                    | 0<br>(0 - 0)       | --               | 0<br>(0 - 0)      | 0<br>(0 - 0)       | --                 | --                 |
| Anorexia nervosa                                    | 0<br>(0 - 0)       | --               | 0<br>(0 - 0)      | 0<br>(0 - 0)       | --                 | --                 |
| Diabetes, urogenital, blood, and endocrine diseases | 414<br>(339 - 495) | 26<br>(13 - 51)  | 6<br>(4 - 11)     | 114<br>(78 - 161)  | 149<br>(111 - 193) | 118<br>(96 - 142)  |
| Diabetes mellitus                                   | 199<br>(146 - 250) | 1<br>(0 - 1)     | 0<br>(0 - 1)      | 31<br>(21 - 41)    | 94<br>(63 - 126)   | 73<br>(53 - 94)    |
| Acute glomerulonephritis                            | 1<br>(0 - 1)       | 0<br>(0 - 0)     | 0<br>(0 - 0)      | 0<br>(0 - 0)       | 0<br>(0 - 0)       | 0<br>(0 - 0)       |
| Chronic kidney disease                              | 84<br>(57 - 111)   | 2<br>(1 - 4)     | 1<br>(1 - 2)      | 27<br>(14 - 38)    | 27<br>(18 - 39)    | 27<br>(19 - 37)    |
| Chronic kidney disease due to diabetes mellitus     | 0<br>(0 - 1)       | 0<br>(0 - 0)     | 0<br>(0 - 0)      | 0<br>(0 - 0)       | 0<br>(0 - 0)       | 0<br>(0 - 0)       |
| Chronic kidney disease due to hypertension          | 42<br>(30 - 57)    | 0<br>(0 - 1)     | 0<br>(0 - 0)      | 11<br>(6 - 17)     | 16<br>(10 - 24)    | 15<br>(10 - 20)    |
| Chronic kidney disease due to glomerulonephritis    | 14<br>(7 - 21)     | 1<br>(1 - 2)     | 1<br>(0 - 1)      | 7<br>(3 - 11)      | 3<br>(1 - 5)       | 3<br>(1 - 4)       |
| Chronic kidney disease due to other causes          | 28<br>(12 - 43)    | 1<br>(0 - 2)     | 0<br>(0 - 1)      | 9<br>(2 - 16)      | 9<br>(3 - 15)      | 9<br>(4 - 16)      |
| Urinary diseases and male infertility               | 23<br>(16 - 30)    | 2<br>(1 - 3)     | 0<br>(0 - 1)      | 7<br>(4 - 10)      | 7<br>(4 - 10)      | 7<br>(5 - 10)      |
| Interstitial nephritis and urinary tract infections | 8<br>(4 - 12)      | 1<br>(0 - 2)     | 0<br>(0 - 0)      | 2<br>(1 - 4)       | 2<br>(1 - 4)       | 2<br>(1 - 4)       |
| Urolithiasis                                        | 0<br>(0 - 1)       | --               | 0<br>(0 - 0)      | 0<br>(0 - 0)       | 0<br>(0 - 0)       | 0<br>(0 - 0)       |
| Other urinary diseases                              | 15<br>(10 - 20)    | 1<br>(0 - 2)     | 0<br>(0 - 0)      | 5<br>(3 - 7)       | 5<br>(3 - 7)       | 5<br>(3 - 7)       |
| Gynecological diseases                              | --                 | --               | --                | --                 | --                 | --                 |
| Uterine fibroids                                    | --                 | --               | --                | --                 | --                 | --                 |
| Polycystic ovarian syndrome                         | --                 | --               | --                | --                 | --                 | --                 |
| Endometriosis                                       | --                 | --               | --                | --                 | --                 | --                 |
| Genital prolapse                                    | --                 | --               | --                | --                 | --                 | --                 |
| Other gynecological diseases                        | --                 | --               | --                | --                 | --                 | --                 |
| Hemoglobinopathies and hemolytic anemias            | 15<br>(8 - 25)     | 4<br>(1 - 8)     | 1<br>(0 - 2)      | 7<br>(3 - 11)      | 2<br>(1 - 3)       | 2<br>(1 - 3)       |
| Thalassemias                                        | 2<br>(1 - 3)       | 1<br>(0 - 2)     | 0<br>(0 - 0)      | 0<br>(0 - 0)       | 0<br>(0 - 0)       | 0<br>(0 - 0)       |
| Sickle cell disorders                               | 3<br>(1 - 5)       | 1<br>(0 - 1)     | 0<br>(0 - 1)      | 2<br>(1 - 3)       | 0<br>(0 - 0)       | 0<br>(0 - 0)       |
| G6PD deficiency                                     | 1<br>(1 - 2)       | 0<br>(0 - 1)     | 0<br>(0 - 0)      | 1<br>(0 - 1)       | 0<br>(0 - 0)       | 0<br>(0 - 0)       |
| Other hemoglobinopathies and hemolytic anemias      | 10<br>(5 - 16)     | 2<br>(1 - 3)     | 0<br>(0 - 1)      | 4<br>(2 - 7)       | 2<br>(1 - 3)       | 2<br>(1 - 3)       |
| Endocrine, metabolic, blood, and immune disorders   | 92<br>(55 - 151)   | 18<br>(8 - 39)   | 3<br>(2 - 7)      | 43<br>(21 - 82)    | 19<br>(10 - 32)    | 10<br>(6 - 16)     |
| Musculoskeletal disorders                           | 10<br>(6 - 14)     | --               | 0<br>(0 - 1)      | 4<br>(2 - 6)       | 3<br>(2 - 5)       | 3<br>(1 - 4)       |
| Rheumatoid arthritis                                | 3<br>(1 - 4)       | --               | 0<br>(0 - 0)      | 1<br>(0 - 1)       | 1<br>(0 - 2)       | 1<br>(0 - 2)       |
| Other musculoskeletal disorders                     | 8<br>(4 - 11)      | --               | 0<br>(0 - 1)      | 3<br>(1 - 5)       | 2<br>(1 - 4)       | 2<br>(1 - 3)       |
| Other non-communicable diseases                     | 96<br>(65 - 150)   | 68<br>(40 - 120) | 3<br>(1 - 5)      | 10<br>(5 - 16)     | 7<br>(4 - 10)      | 8<br>(5 - 12)      |
| Congenital anomalies                                | 70<br>(43 - 124)   | 61<br>(35 - 111) | 2<br>(1 - 4)      | 4<br>(2 - 8)       | 2<br>(1 - 3)       | 2<br>(1 - 3)       |
| Neural tube defects                                 | 8<br>(2 - 20)      | 7<br>(2 - 19)    | 0<br>(0 - 0)      | 0<br>(0 - 1)       | 0<br>(0 - 0)       | 0<br>(0 - 0)       |
| Congenital heart anomalies                          | 24<br>(13 - 46)    | 19<br>(10 - 40)  | 1<br>(1 - 3)      | 1<br>(1 - 3)       | 1<br>(0 - 1)       | 1<br>(1 - 2)       |
| Cleft lip and cleft palate                          | 0<br>(0 - 1)       | 0<br>(0 - 1)     | --                | --                 | --                 | --                 |
| Down syndrome                                       | 6<br>(3 - 15)      | 5<br>(2 - 13)    | 0<br>(0 - 0)      | 1<br>(0 - 1)       | 0<br>(0 - 1)       | 0<br>(0 - 0)       |
| Chromosomal unbalanced rearrangements               | 3<br>(1 - 6)       | 3<br>(1 - 6)     | 0<br>(0 - 0)      | 0<br>(0 - 0)       | 0<br>(0 - 0)       | 0<br>(0 - 0)       |
| Other congenital anomalies                          | 29<br>(16 - 54)    | 26<br>(13 - 50)  | 1<br>(0 - 1)      | 1<br>(1 - 2)       | 1<br>(0 - 1)       | 1<br>(0 - 1)       |
| Skin and subcutaneous diseases                      | 21<br>(12 - 28)    | 2<br>(1 - 4)     | 0<br>(0 - 1)      | 7<br>(3 - 10)      | 5<br>(3 - 8)       | 6<br>(4 - 10)      |
| Cellulitis                                          | 3<br>(1 - 6)       | 0<br>(0 - 1)     | 0<br>(0 - 0)      | 1<br>(0 - 2)       | 1<br>(0 - 2)       | 1<br>(0 - 2)       |
| Pyoderma                                            | 9<br>(6 - 13)      | 2<br>(1 - 3)     | 0<br>(0 - 0)      | 4<br>(2 - 6)       | 2<br>(1 - 3)       | 2<br>(1 - 3)       |

Web Table 31- Swaziland deaths with 95% UI by age, sex, and cause in 2013

| Cause                                           | Males, All Ages        | Males, 0-4 Years | Males, 5-14 Years | Males, 15-49 Years   | Males, 50-69 Years | Males, 70-80 Years |
|-------------------------------------------------|------------------------|------------------|-------------------|----------------------|--------------------|--------------------|
| Decubitus ulcer                                 | 7<br>(3 - 10)          | 0<br>(0 - 0)     | 0<br>(0 - 0)      | 2<br>(0 - 3)         | 2<br>(1 - 3)       | 3<br>(2 - 6)       |
| Other skin and subcutaneous diseases            | 1<br>(0 - 1)           | 0<br>(0 - 0)     | 0<br>(0 - 0)      | 0<br>(0 - 1)         | 0<br>(0 - 0)       | 0<br>(0 - 0)       |
| Sudden infant death syndrome                    | 5<br>(1 - 13)          | 5<br>(1 - 13)    | --                | --                   | --                 | --                 |
| Injuries                                        | 1,209<br>(921 - 1,632) | 78<br>(43 - 129) | 43<br>(28 - 76)   | 913<br>(660 - 1,307) | 123<br>(86 - 166)  | 52<br>(41 - 65)    |
| Transport injuries                              | 271<br>(207 - 351)     | 19<br>(10 - 35)  | 16<br>(10 - 29)   | 202<br>(147 - 282)   | 26<br>(18 - 35)    | 8<br>(6 - 10)      |
| Road injuries                                   | 262<br>(199 - 340)     | 18<br>(9 - 33)   | 15<br>(9 - 27)    | 198<br>(143 - 271)   | 25<br>(17 - 34)    | 7<br>(5 - 10)      |
| Pedestrian road injuries                        | 42<br>(27 - 65)        | 8<br>(3 - 16)    | 6<br>(4 - 12)     | 18<br>(10 - 33)      | 6<br>(4 - 10)      | 3<br>(2 - 4)       |
| Cyclist road injuries                           | 29<br>(20 - 41)        | 2<br>(1 - 4)     | 3<br>(1 - 5)      | 17<br>(11 - 26)      | 5<br>(3 - 8)       | 2<br>(1 - 2)       |
| Motorcyclist road injuries                      | 59<br>(38 - 91)        | 1<br>(0 - 2)     | 1<br>(0 - 1)      | 54<br>(34 - 84)      | 3<br>(2 - 4)       | 0<br>(0 - 1)       |
| Motor vehicle road injuries                     | 128<br>(90 - 175)      | 7<br>(3 - 13)    | 5<br>(3 - 10)     | 105<br>(70 - 148)    | 9<br>(6 - 13)      | 2<br>(1 - 3)       |
| Other road injuries                             | 5<br>(3 - 9)           | 0<br>(0 - 1)     | 0<br>(0 - 0)      | 3<br>(1 - 5)         | 1<br>(1 - 2)       | 0<br>(0 - 1)       |
| Other transport injuries                        | 9<br>(6 - 15)          | 1<br>(1 - 2)     | 1<br>(0 - 2)      | 5<br>(3 - 10)        | 1<br>(1 - 2)       | 1<br>(0 - 1)       |
| Unintentional injuries                          | 353<br>(268 - 450)     | 53<br>(29 - 91)  | 23<br>(15 - 40)   | 195<br>(134 - 276)   | 50<br>(35 - 68)    | 32<br>(25 - 41)    |
| Falls                                           | 47<br>(29 - 71)        | 2<br>(1 - 5)     | 1<br>(1 - 2)      | 29<br>(15 - 48)      | 8<br>(5 - 14)      | 7<br>(4 - 11)      |
| Drowning                                        | 49<br>(30 - 74)        | 14<br>(6 - 27)   | 10<br>(6 - 21)    | 21<br>(10 - 38)      | 3<br>(2 - 5)       | 2<br>(1 - 2)       |
| Fire, heat, and hot substances                  | 39<br>(24 - 57)        | 9<br>(4 - 18)    | 2<br>(1 - 4)      | 18<br>(9 - 30)       | 5<br>(3 - 8)       | 5<br>(3 - 7)       |
| Poisonings                                      | 16<br>(10 - 36)        | 3<br>(1 - 7)     | 1<br>(0 - 2)      | 9<br>(5 - 23)        | 3<br>(1 - 5)       | 1<br>(1 - 3)       |
| Exposure to mechanical forces                   | 106<br>(64 - 200)      | 6<br>(3 - 14)    | 5<br>(2 - 11)     | 81<br>(45 - 164)     | 10<br>(6 - 19)     | 3<br>(2 - 5)       |
| Unintentional firearm injuries                  | 67<br>(31 - 119)       | 1<br>(0 - 3)     | 1<br>(0 - 3)      | 57<br>(25 - 110)     | 5<br>(2 - 9)       | 2<br>(1 - 4)       |
| Unintentional suffocation                       | 2<br>(0 - 6)           | 0<br>(0 - 1)     | 0<br>(0 - 1)      | 1<br>(0 - 4)         | 0<br>(0 - 1)       | 0<br>(0 - 0)       |
| Other exposure to mechanical forces             | 36<br>(21 - 68)        | 4<br>(2 - 11)    | 3<br>(1 - 7)      | 23<br>(11 - 45)      | 5<br>(2 - 9)       | 1<br>(0 - 2)       |
| Adverse effects of medical treatment            | 42<br>(24 - 62)        | 6<br>(2 - 14)    | 1<br>(0 - 2)      | 14<br>(6 - 23)       | 12<br>(5 - 21)     | 9<br>(4 - 16)      |
| Animal contact                                  | 6<br>(3 - 10)          | 1<br>(1 - 3)     | 1<br>(0 - 2)      | 2<br>(1 - 5)         | 1<br>(0 - 2)       | 1<br>(0 - 1)       |
| Venomous animal contact                         | 4<br>(2 - 8)           | 1<br>(0 - 2)     | 1<br>(0 - 1)      | 2<br>(1 - 4)         | 1<br>(0 - 1)       | 0<br>(0 - 1)       |
| Non-venomous animal contact                     | 2<br>(0 - 3)           | 0<br>(0 - 1)     | 0<br>(0 - 0)      | 1<br>(0 - 2)         | 0<br>(0 - 0)       | 0<br>(0 - 0)       |
| Foreign body                                    | 33<br>(16 - 65)        | 12<br>(4 - 32)   | 1<br>(1 - 2)      | 14<br>(6 - 24)       | 4<br>(2 - 7)       | 3<br>(1 - 5)       |
| Pulmonary aspiration and foreign body in airway | 33<br>(15 - 65)        | 11<br>(4 - 32)   | 1<br>(1 - 2)      | 14<br>(6 - 23)       | 4<br>(2 - 7)       | 3<br>(1 - 4)       |
| Foreign body in other body part                 | 1<br>(0 - 1)           | 0<br>(0 - 0)     | 0<br>(0 - 0)      | 0<br>(0 - 1)         | 0<br>(0 - 0)       | 0<br>(0 - 0)       |
| Other unintentional injuries                    | 15<br>(6 - 25)         | 1<br>(0 - 1)     | 0<br>(0 - 1)      | 8<br>(3 - 13)        | 4<br>(2 - 8)       | 2<br>(1 - 3)       |
| Self-harm and interpersonal violence            | 585<br>(352 - 976)     | 6<br>(2 - 18)    | 4<br>(2 - 10)     | 516<br>(299 - 873)   | 47<br>(26 - 74)    | 12<br>(5 - 20)     |
| Self-harm                                       | 295<br>(84 - 474)      | --               | 1<br>(0 - 3)      | 246<br>(68 - 407)    | 37<br>(10 - 60)    | 11<br>(3 - 19)     |
| Interpersonal violence                          | 290<br>(145 - 711)     | 6<br>(2 - 18)    | 3<br>(1 - 9)      | 270<br>(131 - 671)   | 10<br>(4 - 33)     | 1<br>(0 - 3)       |
| Assault by firearm                              | 73<br>(27 - 219)       | 1<br>(0 - 2)     | 0<br>(0 - 2)      | 69<br>(25 - 207)     | 3<br>(1 - 10)      | 0<br>(0 - 0)       |
| Assault by sharp object                         | 107<br>(43 - 267)      | 1<br>(0 - 2)     | 1<br>(0 - 1)      | 102<br>(40 - 251)    | 3<br>(1 - 10)      | 0<br>(0 - 1)       |
| Assault by other means                          | 110<br>(45 - 290)      | 4<br>(1 - 14)    | 2<br>(1 - 6)      | 99<br>(39 - 262)     | 4<br>(2 - 15)      | 1<br>(0 - 2)       |

Web Table 31- Swaziland deaths with 95% UI by age, sex, and cause in 2013

| Cause                                                             | Females, All Ages        | Females, 0-4 Years     | Females, 5-14 Years | Females, 15-49 Years     | Females, 50-69 Years   | Females, 70-80 Years     |
|-------------------------------------------------------------------|--------------------------|------------------------|---------------------|--------------------------|------------------------|--------------------------|
| All causes                                                        | 7,696<br>(6,835 - 8,626) | 1,268<br>(952 - 1,645) | 217<br>(176 - 276)  | 3,791<br>(3,248 - 4,318) | 1,187<br>(955 - 1,484) | 1,234<br>(1,015 - 1,523) |
| Communicable, maternal, neonatal, and nutritional diseases        | 4,885<br>(4,322 - 5,475) | 1,088<br>(824 - 1,417) | 175<br>(141 - 219)  | 2,888<br>(2,495 - 3,298) | 513<br>(391 - 652)     | 221<br>(166 - 289)       |
| HIV/AIDS and tuberculosis                                         | 3,028<br>(2,583 - 3,543) | 135<br>(94 - 187)      | 145<br>(111 - 180)  | 2,269<br>(1,937 - 2,650) | 412<br>(294 - 557)     | 67<br>(43 - 95)          |
| Tuberculosis                                                      | 563<br>(304 - 828)       | 17<br>(7 - 33)         | 6<br>(2 - 12)       | 454<br>(244 - 688)       | 57<br>(29 - 91)        | 30<br>(16 - 48)          |
| HIV/AIDS                                                          | 2,465<br>(2,045 - 2,957) | 119<br>(79 - 172)      | 139<br>(104 - 174)  | 1,815<br>(1,514 - 2,214) | 355<br>(227 - 507)     | 37<br>(17 - 61)          |
| HIV/AIDS resulting in mycobacterial infection                     | 142<br>(106 - 188)       | 6<br>(4 - 9)           | 7<br>(5 - 9)        | 106<br>(80 - 138)        | 20<br>(12 - 30)        | 2<br>(1 - 4)             |
| HIV/AIDS resulting in other diseases                              | 2,324<br>(1,931 - 2,807) | 112<br>(75 - 163)      | 132<br>(99 - 166)   | 1,709<br>(1,427 - 2,086) | 335<br>(215 - 478)     | 35<br>(16 - 57)          |
| Diarrhea, lower respiratory, and other common infectious diseases | 1,188<br>(921 - 1,506)   | 470<br>(302 - 668)     | 23<br>(13 - 43)     | 468<br>(315 - 670)       | 87<br>(55 - 131)       | 140<br>(97 - 198)        |
| Diarrheal diseases                                                | 437<br>(298 - 610)       | 225<br>(107 - 385)     | 7<br>(3 - 16)       | 135<br>(81 - 209)        | 27<br>(13 - 46)        | 43<br>(23 - 72)          |
| Intestinal infectious diseases                                    | 18<br>(8 - 35)           | 7<br>(3 - 15)          | 4<br>(1 - 8)        | 7<br>(3 - 14)            | 1<br>(0 - 2)           | 0<br>(0 - 1)             |
| Typhoid fever                                                     | 14<br>(6 - 26)           | 5<br>(2 - 11)          | 3<br>(1 - 6)        | 5<br>(2 - 10)            | 1<br>(0 - 1)           | 0<br>(0 - 1)             |
| Paratyphoid fever                                                 | 4<br>(2 - 8)             | 2<br>(1 - 4)           | 1<br>(0 - 2)        | 1<br>(1 - 3)             | 0<br>(0 - 0)           | 0<br>(0 - 0)             |
| Other intestinal infectious diseases                              | 1<br>(0 - 2)             | 0<br>(0 - 2)           | 0<br>(0 - 0)        | 0<br>(0 - 1)             | 0<br>(0 - 0)           | 0<br>(0 - 0)             |
| Lower respiratory infections                                      | 648<br>(480 - 861)       | 210<br>(120 - 347)     | 8<br>(4 - 16)       | 281<br>(175 - 438)       | 56<br>(33 - 87)        | 93<br>(59 - 142)         |
| Upper respiratory infections                                      | 0<br>(0 - 1)             | 0<br>(0 - 0)           | 0<br>(0 - 0)        | 0<br>(0 - 1)             | 0<br>(0 - 0)           | 0<br>(0 - 0)             |
| Otitis media                                                      | 0<br>(0 - 0)             | 0<br>(0 - 0)           | 0<br>(0 - 0)        | 0<br>(0 - 0)             | 0<br>(0 - 0)           | 0<br>(0 - 0)             |
| Meningitis                                                        | 72<br>(48 - 107)         | 21<br>(10 - 39)        | 3<br>(1 - 6)        | 42<br>(23 - 70)          | 3<br>(2 - 6)           | 2<br>(1 - 4)             |
| Pneumococcal meningitis                                           | 10<br>(6 - 17)           | 2<br>(1 - 4)           | 0<br>(0 - 1)        | 7<br>(3 - 13)            | 1<br>(0 - 1)           | 0<br>(0 - 1)             |
| H influenzae type B meningitis                                    | 15<br>(9 - 24)           | 8<br>(4 - 15)          | 1<br>(0 - 2)        | 6<br>(3 - 11)            | 0<br>(0 - 1)           | 0<br>(0 - 0)             |
| Meningococcal meningitis                                          | 27<br>(17 - 40)          | 7<br>(4 - 14)          | 1<br>(1 - 2)        | 16<br>(8 - 28)           | 1<br>(1 - 2)           | 1<br>(0 - 2)             |
| Other meningitis                                                  | 20<br>(11 - 32)          | 4<br>(1 - 9)           | 1<br>(0 - 1)        | 13<br>(6 - 25)           | 1<br>(1 - 2)           | 1<br>(0 - 2)             |
| Encephalitis                                                      | 5<br>(3 - 7)             | 1<br>(0 - 2)           | 0<br>(0 - 1)        | 3<br>(1 - 5)             | 0<br>(0 - 1)           | 0<br>(0 - 1)             |
| Diphtheria                                                        | 0<br>(0 - 2)             | 0<br>(0 - 2)           | 0<br>(0 - 0)        | 0<br>(0 - 0)             | 0<br>(0 - 0)           | 0<br>(0 - 0)             |
| Whooping cough                                                    | 4<br>(0 - 20)            | 4<br>(0 - 19)          | 0<br>(0 - 1)        | 0<br>(0 - 0)             | 0<br>(0 - 0)           | 0<br>(0 - 0)             |
| Tetanus                                                           | 0<br>(0 - 1)             | 0<br>(0 - 0)           | 0<br>(0 - 0)        | 0<br>(0 - 0)             | 0<br>(0 - 0)           | 0<br>(0 - 0)             |
| Measles                                                           | 2<br>(0 - 16)            | 2<br>(0 - 15)          | 0<br>(0 - 1)        | 0<br>(0 - 0)             | 0<br>(0 - 0)           | 0<br>(0 - 0)             |
| Varicella and herpes zoster                                       | 0<br>(0 - 1)             | 0<br>(0 - 0)           | 0<br>(0 - 0)        | 0<br>(0 - 0)             | 0<br>(0 - 0)           | 0<br>(0 - 0)             |
| Neglected tropical diseases and malaria                           | 75<br>(30 - 149)         | 37<br>(7 - 107)        | 3<br>(1 - 12)       | 29<br>(10 - 75)          | 3<br>(1 - 10)          | 2<br>(1 - 6)             |
| Malaria                                                           | 54<br>(13 - 127)         | 34<br>(4 - 104)        | 3<br>(0 - 12)       | 15<br>(2 - 60)           | 2<br>(0 - 8)           | 1<br>(0 - 5)             |
| Leishmaniasis                                                     | 1<br>(0 - 1)             | 0<br>(0 - 1)           | 0<br>(0 - 0)        | 0<br>(0 - 1)             | 0<br>(0 - 0)           | 0<br>(0 - 0)             |
| Visceral leishmaniasis                                            | 1<br>(0 - 1)             | 0<br>(0 - 1)           | 0<br>(0 - 0)        | 0<br>(0 - 1)             | 0<br>(0 - 0)           | 0<br>(0 - 0)             |
| Schistosomiasis                                                   | 3<br>(2 - 4)             | 0<br>(0 - 0)           | 0<br>(0 - 0)        | 2<br>(1 - 3)             | 1<br>(0 - 1)           | 0<br>(0 - 1)             |
| Cysticercosis                                                     | 0<br>(0 - 0)             | 0<br>(0 - 0)           | 0<br>(0 - 0)        | 0<br>(0 - 0)             | 0<br>(0 - 0)           | 0<br>(0 - 0)             |
| Cystic echinococcosis                                             | 0<br>(0 - 0)             | 0<br>(0 - 0)           | 0<br>(0 - 0)        | 0<br>(0 - 0)             | 0<br>(0 - 0)           | 0<br>(0 - 0)             |
| Dengue                                                            | 0<br>(0 - 0)             | 0<br>(0 - 0)           | 0<br>(0 - 0)        | 0<br>(0 - 0)             | 0<br>(0 - 0)           | 0<br>(0 - 0)             |
| Rabies                                                            | 0<br>(0 - 0)             | 0<br>(0 - 0)           | 0<br>(0 - 0)        | 0<br>(0 - 0)             | 0<br>(0 - 0)           | 0<br>(0 - 0)             |
| Intestinal nematode infections                                    | 2<br>(0 - 7)             | 1<br>(0 - 6)           | 0<br>(0 - 2)        | 0<br>(0 - 3)             | 0<br>(0 - 1)           | 0<br>(0 - 0)             |
| Ascariasis                                                        | 2<br>(0 - 7)             | 1<br>(0 - 6)           | 0<br>(0 - 2)        | 0<br>(0 - 3)             | 0<br>(0 - 1)           | 0<br>(0 - 0)             |
| Other neglected tropical diseases                                 | 14<br>(7 - 22)           | 2<br>(1 - 4)           | 0<br>(0 - 1)        | 10<br>(4 - 18)           | 1<br>(0 - 1)           | 1<br>(0 - 1)             |
| Maternal disorders                                                | 55<br>(34 - 85)          | 0                      | 0<br>(0 - 0)        | 55<br>(34 - 85)          | 0                      | 0                        |

Web Table 31- Swaziland deaths with 95% UI by age, sex, and cause in 2013

| Cause                                                            | Females, All Ages        | Females, 0-4 Years | Females, 5-14 Years | Females, 15-49 Years | Females, 50-69 Years | Females, 70-80 Years |
|------------------------------------------------------------------|--------------------------|--------------------|---------------------|----------------------|----------------------|----------------------|
| Maternal hemorrhage                                              | 6<br>(4 - 10)            | --                 | 0<br>(0 - 0)        | 6<br>(4 - 10)        | --                   | --                   |
| Maternal sepsis and other maternal infections                    | 6<br>(3 - 10)            | --                 | 0<br>(0 - 0)        | 6<br>(3 - 10)        | --                   | --                   |
| Maternal hypertensive disorders                                  | 7<br>(4 - 12)            | --                 | 0<br>(0 - 0)        | 7<br>(4 - 12)        | --                   | --                   |
| Maternal obstructed labor                                        | 3<br>(2 - 5)             | --                 | 0<br>(0 - 0)        | 3<br>(2 - 5)         | --                   | --                   |
| Maternal abortive outcome                                        | 9<br>(5 - 14)            | --                 | 0<br>(0 - 0)        | 9<br>(5 - 14)        | --                   | --                   |
| Indirect maternal deaths                                         | 6<br>(3 - 10)            | --                 | 0<br>(0 - 0)        | 6<br>(3 - 10)        | --                   | --                   |
| Late maternal deaths                                             | 6<br>(3 - 11)            | --                 | 0<br>(0 - 0)        | 6<br>(3 - 11)        | --                   | --                   |
| Maternal deaths aggravated by HIV/AIDS                           | 6<br>(4 - 9)             | --                 | --                  | 6<br>(4 - 9)         | --                   | --                   |
| Other maternal disorders                                         | 6<br>(3 - 9)             | --                 | 0<br>(0 - 0)        | 6<br>(3 - 9)         | --                   | --                   |
| Neonatal disorders                                               | 364<br>(279 - 480)       | 364<br>(279 - 480) | --                  | --                   | --                   | --                   |
| Neonatal preterm birth complications                             | 122<br>(62 - 197)        | 122<br>(62 - 197)  | --                  | --                   | --                   | --                   |
| Neonatal encephalopathy due to birth asphyxia and trauma         | 90<br>(40 - 161)         | 90<br>(40 - 161)   | --                  | --                   | --                   | --                   |
| Neonatal sepsis and other neonatal infections                    | 38<br>(14 - 75)          | 38<br>(14 - 75)    | --                  | --                   | --                   | --                   |
| Hemolytic disease and other neonatal jaundice                    | 2<br>(1 - 5)             | 2<br>(1 - 5)       | --                  | --                   | --                   | --                   |
| Other neonatal disorders                                         | 113<br>(46 - 205)        | 113<br>(46 - 205)  | --                  | --                   | --                   | --                   |
| Nutritional deficiencies                                         | 89<br>(57 - 136)         | 49<br>(24 - 86)    | 1<br>(1 - 3)        | 24<br>(15 - 38)      | 6<br>(3 - 9)         | 9<br>(5 - 16)        |
| Protein-energy malnutrition                                      | 61<br>(33 - 100)         | 47<br>(22 - 84)    | 1<br>(0 - 2)        | 6<br>(2 - 14)        | 2<br>(1 - 4)         | 4<br>(1 - 8)         |
| Iodine deficiency                                                | 0<br>(0 - 2)             | 0<br>(0 - 1)       | 0<br>(0 - 0)        | 0<br>(0 - 1)         | 0<br>(0 - 0)         | 0<br>(0 - 0)         |
| Iron-deficiency anemia                                           | 25<br>(15 - 40)          | 2<br>(0 - 5)       | 0<br>(0 - 1)        | 16<br>(9 - 27)       | 3<br>(1 - 5)         | 4<br>(2 - 8)         |
| Other nutritional deficiencies                                   | 3<br>(1 - 6)             | 0<br>(0 - 1)       | 0<br>(0 - 0)        | 1<br>(0 - 3)         | 1<br>(0 - 1)         | 1<br>(0 - 2)         |
| Other communicable, maternal, neonatal, and nutritional diseases | 85<br>(47 - 128)         | 32<br>(9 - 61)     | 2<br>(1 - 5)        | 43<br>(21 - 75)      | 5<br>(2 - 9)         | 4<br>(2 - 8)         |
| Sexually transmitted diseases excluding HIV                      | 31<br>(11 - 59)          | 22<br>(2 - 48)     | 1<br>(0 - 3)        | 7<br>(2 - 12)        | 1<br>(0 - 2)         | 1<br>(0 - 1)         |
| Syphilis                                                         | 27<br>(6 - 54)           | 22<br>(2 - 48)     | 1<br>(0 - 3)        | 3<br>(1 - 5)         | 0<br>(0 - 1)         | 0<br>(0 - 1)         |
| Chlamydial infection                                             | 1<br>(0 - 3)             | --                 | 0<br>(0 - 0)        | 1<br>(0 - 2)         | 0<br>(0 - 0)         | 0<br>(0 - 0)         |
| Gonococcal infection                                             | 2<br>(1 - 3)             | --                 | 0<br>(0 - 0)        | 1<br>(0 - 2)         | 0<br>(0 - 0)         | 0<br>(0 - 0)         |
| Other sexually transmitted diseases                              | 1<br>(0 - 2)             | --                 | 0<br>(0 - 0)        | 1<br>(0 - 2)         | 0<br>(0 - 0)         | 0<br>(0 - 0)         |
| Hepatitis                                                        | 5<br>(3 - 7)             | 1<br>(0 - 2)       | 0<br>(0 - 0)        | 2<br>(1 - 4)         | 1<br>(0 - 1)         | 0<br>(0 - 1)         |
| Acute hepatitis A                                                | 1<br>(0 - 1)             | 0<br>(0 - 1)       | 0<br>(0 - 0)        | 0<br>(0 - 1)         | 0<br>(0 - 0)         | 0<br>(0 - 0)         |
| Acute hepatitis B                                                | 2<br>(1 - 3)             | 0<br>(0 - 1)       | 0<br>(0 - 0)        | 1<br>(0 - 1)         | 0<br>(0 - 1)         | 0<br>(0 - 1)         |
| Acute hepatitis C                                                | 0<br>(0 - 0)             | --                 | 0<br>(0 - 0)        | 0<br>(0 - 0)         | 0<br>(0 - 0)         | 0<br>(0 - 0)         |
| Acute hepatitis E                                                | 2<br>(1 - 3)             | 0<br>(0 - 0)       | 0<br>(0 - 0)        | 2<br>(1 - 3)         | 0<br>(0 - 0)         | 0<br>(0 - 0)         |
| Other infectious diseases                                        | 49<br>(22 - 81)          | 8<br>(3 - 19)      | 1<br>(0 - 2)        | 34<br>(12 - 63)      | 3<br>(1 - 8)         | 3<br>(1 - 6)         |
| Non-communicable diseases                                        | 2,324<br>(1,874 - 2,916) | 121<br>(72 - 197)  | 20<br>(12 - 33)     | 581<br>(424 - 749)   | 633<br>(451 - 882)   | 970<br>(783 - 1,219) |
| Neoplasms                                                        | 289<br>(219 - 378)       | 4<br>(2 - 7)       | 3<br>(2 - 5)        | 60<br>(47 - 76)      | 112<br>(77 - 158)    | 110<br>(83 - 144)    |
| Esophageal cancer                                                | 18<br>(12 - 25)          | --                 | --                  | 2<br>(1 - 3)         | 8<br>(5 - 13)        | 8<br>(5 - 12)        |
| Stomach cancer                                                   | 17<br>(12 - 23)          | --                 | --                  | 2<br>(2 - 3)         | 6<br>(4 - 9)         | 9<br>(6 - 13)        |
| Liver cancer                                                     | 14<br>(9 - 21)           | --                 | 0<br>(0 - 0)        | 3<br>(2 - 5)         | 5<br>(3 - 8)         | 6<br>(3 - 9)         |
| Liver cancer due to hepatitis B                                  | 3<br>(1 - 6)             | --                 | 0<br>(0 - 0)        | 1<br>(0 - 2)         | 1<br>(0 - 3)         | 1<br>(0 - 2)         |
| Liver cancer due to hepatitis C                                  | 6<br>(3 - 10)            | --                 | 0<br>(0 - 0)        | 1<br>(0 - 2)         | 2<br>(1 - 4)         | 3<br>(1 - 5)         |
| Liver cancer due to alcohol use                                  | 2<br>(1 - 3)             | --                 | --                  | 0<br>(0 - 0)         | 1<br>(0 - 1)         | 1<br>(0 - 2)         |

Web Table 31- Swaziland deaths with 95% UI by age, sex, and cause in 2013

| Cause                                         | Females, All Ages    | Females, 0-4 Years | Females, 5-14 Years | Females, 15-49 Years | Females, 50-69 Years | Females, 70-80 Years |
|-----------------------------------------------|----------------------|--------------------|---------------------|----------------------|----------------------|----------------------|
| Liver cancer due to other causes              | 3<br>(2 - 5)         | --                 | 0<br>(0 - 0)        | 1<br>(0 - 1)         | 1<br>(0 - 2)         | 1<br>(0 - 2)         |
| Larynx cancer                                 | 2<br>(1 - 5)         | --                 | --                  | 1<br>(0 - 1)         | 1<br>(0 - 2)         | 1<br>(0 - 1)         |
| Tracheal, bronchus and lung cancer            | 23<br>(15 - 33)      | --                 | --                  | 2<br>(1 - 3)         | 10<br>(6 - 16)       | 11<br>(7 - 16)       |
| Breast cancer                                 | 36<br>(25 - 54)      | --                 | --                  | 8<br>(6 - 14)        | 15<br>(9 - 23)       | 13<br>(9 - 19)       |
| Cervical cancer                               | 58<br>(39 - 80)      | --                 | --                  | 17<br>(12 - 23)      | 26<br>(15 - 40)      | 15<br>(9 - 22)       |
| Uterine cancer                                | 6<br>(3 - 10)        | --                 | --                  | 1<br>(0 - 1)         | 3<br>(1 - 4)         | 3<br>(2 - 5)         |
| Prostate cancer                               | --                   | --                 | --                  | --                   | --                   | --                   |
| Colon and rectum cancer                       | 23<br>(17 - 32)      | --                 | --                  | 2<br>(2 - 3)         | 8<br>(5 - 12)        | 13<br>(9 - 18)       |
| Lip and oral cavity cancer                    | 4<br>(3 - 6)         | --                 | --                  | 1<br>(0 - 1)         | 2<br>(1 - 3)         | 2<br>(1 - 3)         |
| Nasopharynx cancer                            | 1<br>(1 - 2)         | --                 | 0<br>(0 - 0)        | 0<br>(0 - 1)         | 0<br>(0 - 1)         | 0<br>(0 - 0)         |
| Other pharynx cancer                          | 1<br>(0 - 1)         | --                 | --                  | 0<br>(0 - 0)         | 1<br>(0 - 1)         | 0<br>(0 - 0)         |
| Gallbladder and biliary tract cancer          | 3<br>(2 - 5)         | --                 | --                  | 0<br>(0 - 1)         | 1<br>(1 - 2)         | 2<br>(1 - 3)         |
| Pancreatic cancer                             | 11<br>(8 - 15)       | --                 | --                  | 1<br>(0 - 1)         | 4<br>(3 - 6)         | 6<br>(4 - 9)         |
| Malignant skin melanoma                       | 2<br>(2 - 3)         | --                 | --                  | 0<br>(0 - 1)         | 1<br>(1 - 1)         | 1<br>(1 - 2)         |
| Non-melanoma skin cancer                      | 2<br>(1 - 4)         | --                 | --                  | 1<br>(0 - 1)         | 1<br>(0 - 1)         | 1<br>(0 - 1)         |
| Ovarian cancer                                | 10<br>(6 - 16)       | --                 | --                  | 2<br>(1 - 4)         | 5<br>(2 - 8)         | 4<br>(2 - 6)         |
| Testicular cancer                             | --                   | --                 | --                  | --                   | --                   | --                   |
| Kidney cancer                                 | 3<br>(2 - 5)         | 0<br>(0 - 1)       | 0<br>(0 - 0)        | 1<br>(0 - 1)         | 1<br>(1 - 2)         | 1<br>(1 - 2)         |
| Bladder cancer                                | 3<br>(2 - 5)         | --                 | --                  | 1<br>(0 - 1)         | 1<br>(1 - 2)         | 2<br>(1 - 3)         |
| Brain and nervous system cancer               | 3<br>(2 - 4)         | 0<br>(0 - 1)       | 0<br>(0 - 1)        | 1<br>(1 - 1)         | 1<br>(1 - 1)         | 1<br>(0 - 1)         |
| Thyroid cancer                                | 1<br>(1 - 2)         | --                 | 0<br>(0 - 0)        | 0<br>(0 - 0)         | 1<br>(0 - 1)         | 1<br>(0 - 1)         |
| Mesothelioma                                  | 1<br>(0 - 1)         | --                 | --                  | 0<br>(0 - 0)         | 0<br>(0 - 1)         | 0<br>(0 - 0)         |
| Hodgkin lymphoma                              | 1<br>(1 - 2)         | 0<br>(0 - 0)       | 0<br>(0 - 0)        | 1<br>(0 - 1)         | 0<br>(0 - 0)         | 0<br>(0 - 0)         |
| Non-Hodgkin lymphoma                          | 11<br>(8 - 17)       | 0<br>(0 - 1)       | 0<br>(0 - 0)        | 3<br>(2 - 6)         | 4<br>(2 - 6)         | 4<br>(2 - 6)         |
| Multiple myeloma                              | 3<br>(2 - 5)         | --                 | --                  | 0<br>(0 - 0)         | 1<br>(1 - 2)         | 1<br>(1 - 2)         |
| Leukemia                                      | 7<br>(5 - 9)         | 1<br>(0 - 1)       | 1<br>(0 - 1)        | 2<br>(2 - 4)         | 2<br>(1 - 2)         | 2<br>(1 - 3)         |
| Other neoplasms                               | 23<br>(16 - 34)      | 3<br>(1 - 5)       | 1<br>(1 - 3)        | 8<br>(5 - 16)        | 5<br>(3 - 9)         | 5<br>(3 - 8)         |
| Cardiovascular diseases                       | 937<br>(726 - 1,228) | 9<br>(4 - 17)      | 4<br>(2 - 7)        | 152<br>(94 - 231)    | 261<br>(181 - 372)   | 512<br>(407 - 659)   |
| Rheumatic heart disease                       | 25<br>(14 - 55)      | 0<br>(0 - 1)       | 1<br>(0 - 1)        | 12<br>(6 - 31)       | 2<br>(1 - 6)         | 10<br>(6 - 18)       |
| Ischemic heart disease                        | 247<br>(179 - 351)   | 1<br>(0 - 2)       | 0<br>(0 - 1)        | 23<br>(13 - 39)      | 57<br>(37 - 88)      | 166<br>(118 - 233)   |
| Cerebrovascular disease                       | 374<br>(277 - 508)   | 2<br>(1 - 5)       | 1<br>(1 - 2)        | 50<br>(32 - 81)      | 112<br>(76 - 167)    | 209<br>(155 - 281)   |
| Ischemic stroke                               | 182<br>(128 - 251)   | 0<br>(0 - 0)       | 0<br>(0 - 0)        | 7<br>(3 - 13)        | 47<br>(29 - 72)      | 128<br>(90 - 176)    |
| Hemorrhagic stroke                            | 192<br>(137 - 273)   | 2<br>(1 - 4)       | 1<br>(0 - 2)        | 43<br>(29 - 71)      | 65<br>(42 - 101)     | 81<br>(55 - 117)     |
| Hypertensive heart disease                    | 132<br>(83 - 191)    | 0<br>(0 - 1)       | 0<br>(0 - 0)        | 15<br>(8 - 24)       | 38<br>(22 - 59)      | 79<br>(47 - 117)     |
| Cardiomyopathy and myocarditis                | 72<br>(43 - 100)     | 4<br>(1 - 7)       | 1<br>(0 - 2)        | 33<br>(14 - 52)      | 15<br>(8 - 24)       | 20<br>(11 - 32)      |
| Atrial fibrillation and flutter               | 3<br>(1 - 5)         | --                 | --                  | 0<br>(0 - 0)         | 1<br>(0 - 1)         | 2<br>(1 - 4)         |
| Aortic aneurysm                               | 7<br>(4 - 13)        | --                 | --                  | 1<br>(1 - 3)         | 2<br>(1 - 4)         | 4<br>(2 - 7)         |
| Peripheral vascular disease                   | 2<br>(1 - 3)         | --                 | --                  | 0<br>(0 - 0)         | 0<br>(0 - 1)         | 1<br>(1 - 2)         |
| Endocarditis                                  | 4<br>(2 - 7)         | 1<br>(0 - 2)       | 0<br>(0 - 0)        | 2<br>(1 - 3)         | 0<br>(0 - 1)         | 1<br>(1 - 2)         |
| Other cardiovascular and circulatory diseases | 72<br>(51 - 103)     | 1<br>(1 - 3)       | 1<br>(0 - 1)        | 16<br>(9 - 27)       | 34<br>(21 - 52)      | 20<br>(14 - 31)      |



Web Table 31- Swaziland deaths with 95% UI by age, sex, and cause in 2013

| Cause                                               | Females, All Ages  | Females, 0-4 Years | Females, 5-14 Years | Females, 15-49 Years | Females, 50-69 Years | Females, 70-80 Years |
|-----------------------------------------------------|--------------------|--------------------|---------------------|----------------------|----------------------|----------------------|
| Chronic respiratory diseases                        | 217<br>(160 - 295) | 6<br>(3 - 12)      | 2<br>(1 - 3)        | 67<br>(45 - 99)      | 56<br>(36 - 87)      | 86<br>(62 - 121)     |
| Chronic obstructive pulmonary disease               | 111<br>(66 - 161)  | 2<br>(1 - 5)       | 0<br>(0 - 1)        | 22<br>(10 - 36)      | 31<br>(17 - 51)      | 54<br>(34 - 79)      |
| Pneumoconiosis                                      | 2<br>(1 - 3)       | 0<br>(0 - 0)       | 0<br>(0 - 0)        | 0<br>(0 - 1)         | 0<br>(0 - 1)         | 1<br>(0 - 1)         |
| Silicosis                                           | 0<br>(0 - 0)       | 0<br>(0 - 0)       | 0<br>(0 - 0)        | 0<br>(0 - 0)         | 0<br>(0 - 0)         | 0<br>(0 - 0)         |
| Asbestosis                                          | 0<br>(0 - 0)       | 0<br>(0 - 0)       | 0<br>(0 - 0)        | 0<br>(0 - 0)         | 0<br>(0 - 0)         | 0<br>(0 - 0)         |
| Coal workers pneumoconiosis                         | 0<br>(0 - 0)       | 0<br>(0 - 0)       | 0<br>(0 - 0)        | 0<br>(0 - 0)         | 0<br>(0 - 0)         | 0<br>(0 - 0)         |
| Other pneumoconiosis                                | 1<br>(1 - 2)       | 0<br>(0 - 0)       | 0<br>(0 - 0)        | 0<br>(0 - 1)         | 0<br>(0 - 1)         | 1<br>(0 - 1)         |
| Asthma                                              | 92<br>(59 - 159)   | 3<br>(1 - 6)       | 1<br>(1 - 2)        | 39<br>(24 - 71)      | 22<br>(12 - 39)      | 27<br>(15 - 53)      |
| Interstitial lung disease and pulmonary sarcoidosis | 8<br>(1 - 18)      | 0<br>(0 - 1)       | 0<br>(0 - 0)        | 3<br>(0 - 8)         | 1<br>(0 - 4)         | 3<br>(0 - 7)         |
| Other chronic respiratory diseases                  | 5<br>(2 - 10)      | 1<br>(0 - 1)       | 0<br>(0 - 0)        | 2<br>(1 - 4)         | 1<br>(0 - 1)         | 2<br>(1 - 4)         |
| Cirrhosis                                           | 82<br>(38 - 131)   | 2<br>(1 - 5)       | 1<br>(0 - 2)        | 36<br>(17 - 59)      | 26<br>(11 - 46)      | 17<br>(7 - 29)       |
| Cirrhosis due to hepatitis B                        | 17<br>(8 - 32)     | 0<br>(0 - 0)       | 0<br>(0 - 0)        | 8<br>(3 - 15)        | 6<br>(2 - 12)        | 3<br>(1 - 7)         |
| Cirrhosis due to hepatitis C                        | 25<br>(10 - 45)    | 0<br>(0 - 0)       | 0<br>(0 - 0)        | 10<br>(4 - 19)       | 9<br>(3 - 18)        | 6<br>(2 - 12)        |
| Cirrhosis due to alcohol use                        | 23<br>(10 - 39)    | --                 | --                  | 8<br>(3 - 13)        | 9<br>(3 - 17)        | 6<br>(3 - 12)        |
| Cirrhosis due to other causes                       | 17<br>(8 - 30)     | 2<br>(1 - 5)       | 1<br>(0 - 2)        | 11<br>(4 - 20)       | 3<br>(1 - 7)         | 1<br>(0 - 2)         |
| Digestive diseases                                  | 98<br>(72 - 129)   | 4<br>(2 - 7)       | 1<br>(1 - 2)        | 49<br>(32 - 70)      | 17<br>(11 - 26)      | 27<br>(19 - 38)      |
| Peptic ulcer disease                                | 18<br>(11 - 27)    | 0<br>(0 - 1)       | 0<br>(0 - 0)        | 7<br>(4 - 12)        | 4<br>(2 - 7)         | 7<br>(4 - 11)        |
| Gastritis and duodenitis                            | 5<br>(2 - 8)       | 0<br>(0 - 0)       | 0<br>(0 - 0)        | 2<br>(1 - 4)         | 1<br>(0 - 2)         | 2<br>(1 - 3)         |
| Appendicitis                                        | 3<br>(2 - 6)       | 0<br>(0 - 1)       | 0<br>(0 - 0)        | 2<br>(1 - 4)         | 0<br>(0 - 1)         | 0<br>(0 - 1)         |
| Paralytic ileus and intestinal obstruction          | 11<br>(6 - 18)     | 0<br>(0 - 1)       | 0<br>(0 - 1)        | 3<br>(1 - 5)         | 2<br>(1 - 5)         | 5<br>(2 - 9)         |
| Inguinal, femoral, and abdominal hernia             | 1<br>(1 - 2)       | 0<br>(0 - 0)       | 0<br>(0 - 0)        | 0<br>(0 - 0)         | 0<br>(0 - 1)         | 1<br>(0 - 1)         |
| Inflammatory bowel disease                          | 33<br>(22 - 50)    | 2<br>(1 - 4)       | 0<br>(0 - 1)        | 24<br>(14 - 37)      | 3<br>(2 - 6)         | 4<br>(2 - 6)         |
| Vascular intestinal disorders                       | 1<br>(1 - 2)       | 0<br>(0 - 0)       | 0<br>(0 - 0)        | 0<br>(0 - 1)         | 0<br>(0 - 1)         | 1<br>(0 - 1)         |
| Gallbladder and biliary diseases                    | 7<br>(5 - 11)      | 0<br>(0 - 0)       | 0<br>(0 - 0)        | 2<br>(1 - 3)         | 2<br>(1 - 3)         | 3<br>(2 - 5)         |
| Pancreatitis                                        | 4<br>(2 - 6)       | 0<br>(0 - 0)       | 0<br>(0 - 0)        | 2<br>(1 - 3)         | 1<br>(0 - 2)         | 1<br>(0 - 2)         |
| Other digestive diseases                            | 14<br>(9 - 21)     | 1<br>(0 - 1)       | 0<br>(0 - 0)        | 7<br>(4 - 12)        | 2<br>(1 - 4)         | 4<br>(2 - 7)         |
| Neurological disorders                              | 70<br>(46 - 98)    | 3<br>(1 - 7)       | 2<br>(1 - 3)        | 27<br>(10 - 49)      | 8<br>(5 - 12)        | 31<br>(23 - 41)      |
| Alzheimer disease and other dementias               | 27<br>(20 - 36)    | --                 | --                  | 0<br>(0 - 0)         | 2<br>(1 - 3)         | 25<br>(18 - 34)      |
| Parkinson disease                                   | 2<br>(1 - 3)       | --                 | --                  | 0<br>(0 - 0)         | 0<br>(0 - 1)         | 1<br>(1 - 2)         |
| Epilepsy                                            | 38<br>(17 - 63)    | 3<br>(1 - 6)       | 2<br>(1 - 3)        | 26<br>(9 - 47)       | 4<br>(2 - 8)         | 4<br>(2 - 7)         |
| Multiple sclerosis                                  | 0<br>(0 - 0)       | --                 | --                  | 0<br>(0 - 0)         | 0<br>(0 - 0)         | 0<br>(0 - 0)         |
| Other neurological disorders                        | 3<br>(2 - 4)       | 0<br>(0 - 1)       | 0<br>(0 - 0)        | 1<br>(1 - 1)         | 1<br>(0 - 1)         | 1<br>(1 - 1)         |
| Mental and substance use disorders                  | 26<br>(15 - 39)    | 1<br>(0 - 1)       | 0<br>(0 - 0)        | 19<br>(11 - 29)      | 5<br>(3 - 8)         | 2<br>(1 - 2)         |
| Schizophrenia                                       | 2<br>(1 - 4)       | --                 | --                  | 1<br>(1 - 2)         | 1<br>(0 - 1)         | 1<br>(0 - 1)         |
| Alcohol use disorders                               | 10<br>(4 - 20)     | --                 | --                  | 8<br>(2 - 16)        | 2<br>(1 - 5)         | 0<br>(0 - 1)         |
| Drug use disorders                                  | 13<br>(8 - 19)     | 1<br>(0 - 1)       | --                  | 10<br>(6 - 16)       | 2<br>(1 - 3)         | 1<br>(0 - 1)         |
| Opioid use disorders                                | 1<br>(1 - 2)       | 0<br>(0 - 0)       | --                  | 1<br>(1 - 2)         | 0<br>(0 - 0)         | 0<br>(0 - 0)         |
| Cocaine use disorders                               | 0<br>(0 - 0)       | 0<br>(0 - 0)       | --                  | 0<br>(0 - 0)         | 0<br>(0 - 0)         | 0<br>(0 - 0)         |
| Amphetamine use disorders                           | 0<br>(0 - 0)       | 0<br>(0 - 0)       | --                  | 0<br>(0 - 0)         | 0<br>(0 - 0)         | 0<br>(0 - 0)         |
| Other drug use disorders                            | 12<br>(7 - 17)     | 1<br>(0 - 1)       | --                  | 9<br>(5 - 14)        | 2<br>(1 - 2)         | 1<br>(0 - 1)         |

Web Table 31- Swaziland deaths with 95% UI by age, sex, and cause in 2013

| Cause                                               | Females, All Ages  | Females, 0-4 Years | Females, 5-14 Years | Females, 15-49 Years | Females, 50-69 Years | Females, 70-80 Years |
|-----------------------------------------------------|--------------------|--------------------|---------------------|----------------------|----------------------|----------------------|
| Eating disorders                                    | 0<br>(0 - 1)       | --                 | 0<br>(0 - 0)        | 0<br>(0 - 1)         | --                   | --                   |
| Anorexia nervosa                                    | 0<br>(0 - 1)       | --                 | 0<br>(0 - 0)        | 0<br>(0 - 1)         | --                   | --                   |
| Diabetes, urogenital, blood, and endocrine diseases | 502<br>(371 - 651) | 32<br>(17 - 55)    | 5<br>(3 - 9)        | 155<br>(102 - 226)   | 141<br>(95 - 203)    | 169<br>(116 - 230)   |
| Diabetes mellitus                                   | 242<br>(157 - 328) | 0<br>(0 - 1)       | 0<br>(0 - 1)        | 29<br>(21 - 38)      | 99<br>(59 - 147)     | 114<br>(64 - 158)    |
| Acute glomerulonephritis                            | 0<br>(0 - 1)       | 0<br>(0 - 0)       | 0<br>(0 - 0)        | 0<br>(0 - 0)         | 0<br>(0 - 0)         | 0<br>(0 - 0)         |
| Chronic kidney disease                              | 79<br>(47 - 124)   | 2<br>(1 - 4)       | 1<br>(0 - 1)        | 27<br>(13 - 53)      | 20<br>(11 - 33)      | 29<br>(17 - 45)      |
| Chronic kidney disease due to diabetes mellitus     | 0<br>(0 - 1)       | 0<br>(0 - 0)       | 0<br>(0 - 0)        | 0<br>(0 - 0)         | 0<br>(0 - 0)         | 0<br>(0 - 0)         |
| Chronic kidney disease due to hypertension          | 40<br>(24 - 67)    | 0<br>(0 - 1)       | 0<br>(0 - 0)        | 11<br>(5 - 21)       | 12<br>(6 - 19)       | 17<br>(10 - 28)      |
| Chronic kidney disease due to glomerulonephritis    | 11<br>(5 - 19)     | 1<br>(0 - 1)       | 0<br>(0 - 1)        | 7<br>(2 - 13)        | 1<br>(1 - 3)         | 2<br>(1 - 3)         |
| Chronic kidney disease due to other causes          | 28<br>(8 - 56)     | 1<br>(0 - 2)       | 0<br>(0 - 1)        | 10<br>(2 - 25)       | 7<br>(2 - 15)        | 11<br>(3 - 22)       |
| Urinary diseases and male infertility               | 20<br>(11 - 30)    | 1<br>(0 - 2)       | 0<br>(0 - 0)        | 8<br>(3 - 13)        | 4<br>(2 - 6)         | 7<br>(4 - 12)        |
| Interstitial nephritis and urinary tract infections | 10<br>(5 - 14)     | 1<br>(0 - 1)       | 0<br>(0 - 0)        | 4<br>(1 - 7)         | 2<br>(1 - 3)         | 3<br>(2 - 5)         |
| Urolithiasis                                        | 0<br>(0 - 1)       | --                 | 0<br>(0 - 0)        | 0<br>(0 - 0)         | 0<br>(0 - 0)         | 0<br>(0 - 0)         |
| Other urinary diseases                              | 10<br>(5 - 17)     | 0<br>(0 - 1)       | 0<br>(0 - 0)        | 4<br>(1 - 8)         | 2<br>(1 - 3)         | 4<br>(2 - 7)         |
| Gynecological diseases                              | 1<br>(1 - 2)       | --                 | --                  | 1<br>(0 - 2)         | 0<br>(0 - 0)         | 0<br>(0 - 0)         |
| Uterine fibroids                                    | 0<br>(0 - 0)       | --                 | --                  | 0<br>(0 - 0)         | 0<br>(0 - 0)         | 0<br>(0 - 0)         |
| Polycystic ovarian syndrome                         | 0<br>(0 - 0)       | --                 | --                  | 0<br>(0 - 0)         | 0<br>(0 - 0)         | --                   |
| Endometriosis                                       | 0<br>(0 - 0)       | --                 | --                  | 0<br>(0 - 0)         | 0<br>(0 - 0)         | --                   |
| Genital prolapse                                    | 0<br>(0 - 0)       | --                 | --                  | 0<br>(0 - 0)         | 0<br>(0 - 0)         | 0<br>(0 - 0)         |
| Other gynecological diseases                        | 1<br>(0 - 1)       | --                 | --                  | 0<br>(0 - 1)         | 0<br>(0 - 0)         | 0<br>(0 - 0)         |
| Hemoglobinopathies and hemolytic anemias            | 23<br>(11 - 40)    | 3<br>(1 - 7)       | 1<br>(0 - 2)        | 13<br>(5 - 26)       | 2<br>(1 - 4)         | 3<br>(1 - 6)         |
| Thalassemias                                        | 2<br>(1 - 3)       | 1<br>(0 - 2)       | 0<br>(0 - 0)        | 1<br>(0 - 1)         | 0<br>(0 - 0)         | 0<br>(0 - 0)         |
| Sickle cell disorders                               | 5<br>(2 - 10)      | 0<br>(0 - 1)       | 0<br>(0 - 0)        | 4<br>(2 - 9)         | 0<br>(0 - 0)         | 0<br>(0 - 0)         |
| G6PD deficiency                                     | 1<br>(1 - 2)       | 0<br>(0 - 0)       | 0<br>(0 - 0)        | 1<br>(0 - 2)         | 0<br>(0 - 0)         | 0<br>(0 - 0)         |
| Other hemoglobinopathies and hemolytic anemias      | 15<br>(7 - 25)     | 2<br>(1 - 4)       | 0<br>(0 - 1)        | 7<br>(3 - 14)        | 2<br>(1 - 3)         | 3<br>(1 - 6)         |
| Endocrine, metabolic, blood, and immune disorders   | 135<br>(82 - 213)  | 25<br>(12 - 45)    | 3<br>(1 - 6)        | 76<br>(35 - 135)     | 16<br>(9 - 29)       | 15<br>(8 - 25)       |
| Musculoskeletal disorders                           | 14<br>(7 - 21)     | --                 | 0<br>(0 - 1)        | 6<br>(3 - 10)        | 3<br>(1 - 5)         | 4<br>(1 - 7)         |
| Rheumatoid arthritis                                | 4<br>(2 - 6)       | --                 | 0<br>(0 - 0)        | 1<br>(0 - 2)         | 1<br>(0 - 2)         | 2<br>(1 - 3)         |
| Other musculoskeletal disorders                     | 10<br>(5 - 15)     | --                 | 0<br>(0 - 0)        | 5<br>(2 - 8)         | 2<br>(1 - 4)         | 2<br>(1 - 4)         |
| Other non-communicable diseases                     | 90<br>(55 - 156)   | 59<br>(30 - 118)   | 2<br>(1 - 5)        | 11<br>(5 - 19)       | 5<br>(3 - 8)         | 12<br>(7 - 19)       |
| Congenital anomalies                                | 66<br>(36 - 126)   | 55<br>(28 - 111)   | 2<br>(1 - 4)        | 5<br>(2 - 11)        | 2<br>(1 - 3)         | 3<br>(1 - 5)         |
| Neural tube defects                                 | 7<br>(2 - 21)      | 6<br>(1 - 20)      | 0<br>(0 - 0)        | 0<br>(0 - 1)         | 0<br>(0 - 0)         | 0<br>(0 - 0)         |
| Congenital heart anomalies                          | 23<br>(12 - 43)    | 17<br>(8 - 37)     | 1<br>(0 - 2)        | 2<br>(1 - 5)         | 1<br>(0 - 1)         | 2<br>(1 - 3)         |
| Cleft lip and cleft palate                          | 0<br>(0 - 1)       | 0<br>(0 - 1)       | --                  | --                   | --                   | --                   |
| Down syndrome                                       | 5<br>(2 - 10)      | 4<br>(1 - 9)       | 0<br>(0 - 1)        | 0<br>(0 - 1)         | 0<br>(0 - 0)         | 0<br>(0 - 0)         |
| Chromosomal unbalanced rearrangements               | 4<br>(2 - 10)      | 4<br>(2 - 9)       | 0<br>(0 - 0)        | 0<br>(0 - 1)         | 0<br>(0 - 0)         | 0<br>(0 - 0)         |
| Other congenital anomalies                          | 27<br>(12 - 58)    | 23<br>(10 - 52)    | 1<br>(0 - 1)        | 2<br>(1 - 4)         | 1<br>(0 - 1)         | 1<br>(0 - 2)         |
| Skin and subcutaneous diseases                      | 21<br>(13 - 31)    | 2<br>(1 - 4)       | 0<br>(0 - 0)        | 6<br>(3 - 10)        | 3<br>(2 - 6)         | 10<br>(5 - 15)       |
| Cellulitis                                          | 3<br>(1 - 6)       | 0<br>(0 - 1)       | 0<br>(0 - 0)        | 1<br>(0 - 2)         | 1<br>(0 - 1)         | 1<br>(0 - 3)         |
| Pyoderma                                            | 9<br>(5 - 14)      | 1<br>(1 - 3)       | 0<br>(0 - 0)        | 3<br>(2 - 6)         | 1<br>(1 - 3)         | 2<br>(1 - 4)         |

Web Table 31- Swaziland deaths with 95% UI by age, sex, and cause in 2013

| Cause                                           | Females, All Ages  | Females, 0-4 Years | Females, 5-14 Years | Females, 15-49 Years | Females, 50-69 Years | Females, 70-80 Years |
|-------------------------------------------------|--------------------|--------------------|---------------------|----------------------|----------------------|----------------------|
| Decubitus ulcer                                 | 8<br>(4 - 13)      | 0<br>(0 - 0)       | 0<br>(0 - 0)        | 1<br>(0 - 2)         | 1<br>(0 - 2)         | 6<br>(3 - 9)         |
| Other skin and subcutaneous diseases            | 1<br>(1 - 2)       | 0<br>(0 - 0)       | 0<br>(0 - 0)        | 1<br>(0 - 1)         | 0<br>(0 - 0)         | 0<br>(0 - 1)         |
| Sudden infant death syndrome                    | 3<br>(0 - 11)      | 3<br>(0 - 11)      | --                  | --                   | --                   | --                   |
| Injuries                                        | 487<br>(350 - 717) | 59<br>(33 - 102)   | 21<br>(13 - 37)     | 322<br>(205 - 530)   | 41<br>(27 - 61)      | 43<br>(30 - 58)      |
| Transport injuries                              | 129<br>(90 - 181)  | 13<br>(7 - 23)     | 9<br>(5 - 16)       | 93<br>(58 - 137)     | 11<br>(7 - 17)       | 3<br>(2 - 5)         |
| Road injuries                                   | 124<br>(86 - 174)  | 13<br>(7 - 22)     | 8<br>(4 - 15)       | 91<br>(56 - 134)     | 10<br>(6 - 15)       | 3<br>(2 - 5)         |
| Pedestrian road injuries                        | 23<br>(15 - 36)    | 5<br>(2 - 9)       | 3<br>(2 - 6)        | 10<br>(5 - 20)       | 3<br>(2 - 5)         | 2<br>(1 - 3)         |
| Cyclist road injuries                           | 8<br>(5 - 12)      | 1<br>(0 - 1)       | 1<br>(0 - 1)        | 5<br>(2 - 9)         | 2<br>(1 - 2)         | 0<br>(0 - 1)         |
| Motorcyclist road injuries                      | 8<br>(4 - 14)      | 0<br>(0 - 0)       | 0<br>(0 - 0)        | 8<br>(4 - 14)        | 0<br>(0 - 0)         | 0<br>(0 - 0)         |
| Motor vehicle road injuries                     | 85<br>(57 - 120)   | 7<br>(3 - 12)      | 4<br>(2 - 8)        | 68<br>(42 - 100)     | 5<br>(3 - 8)         | 1<br>(1 - 2)         |
| Other road injuries                             | 0<br>(0 - 1)       | 0<br>(0 - 0)       | 0<br>(0 - 0)        | 0<br>(0 - 0)         | 0<br>(0 - 0)         | 0<br>(0 - 0)         |
| Other transport injuries                        | 5<br>(3 - 8)       | 1<br>(0 - 2)       | 1<br>(0 - 1)        | 2<br>(1 - 4)         | 1<br>(1 - 2)         | 0<br>(0 - 0)         |
| Unintentional injuries                          | 181<br>(134 - 256) | 42<br>(22 - 77)    | 11<br>(6 - 20)      | 73<br>(46 - 121)     | 22<br>(14 - 33)      | 34<br>(23 - 47)      |
| Falls                                           | 19<br>(12 - 27)    | 1<br>(1 - 2)       | 0<br>(0 - 1)        | 6<br>(3 - 9)         | 2<br>(1 - 3)         | 10<br>(6 - 16)       |
| Drowning                                        | 18<br>(11 - 28)    | 8<br>(4 - 16)      | 4<br>(2 - 7)        | 4<br>(2 - 9)         | 1<br>(1 - 2)         | 1<br>(1 - 2)         |
| Fire, heat, and hot substances                  | 39<br>(22 - 73)    | 8<br>(3 - 20)      | 2<br>(1 - 4)        | 18<br>(7 - 37)       | 4<br>(2 - 8)         | 7<br>(4 - 12)        |
| Poisonings                                      | 15<br>(8 - 41)     | 2<br>(1 - 7)       | 0<br>(0 - 1)        | 10<br>(4 - 28)       | 2<br>(1 - 4)         | 1<br>(1 - 3)         |
| Exposure to mechanical forces                   | 20<br>(11 - 36)    | 3<br>(1 - 8)       | 2<br>(1 - 4)        | 12<br>(5 - 22)       | 2<br>(1 - 4)         | 1<br>(0 - 1)         |
| Unintentional firearm injuries                  | 13<br>(7 - 22)     | 1<br>(0 - 2)       | 0<br>(0 - 1)        | 9<br>(4 - 17)        | 2<br>(1 - 3)         | 1<br>(0 - 1)         |
| Unintentional suffocation                       | 1<br>(0 - 3)       | 0<br>(0 - 2)       | 0<br>(0 - 0)        | 1<br>(0 - 2)         | 0<br>(0 - 0)         | 0<br>(0 - 0)         |
| Other exposure to mechanical forces             | 5<br>(3 - 16)      | 2<br>(1 - 5)       | 1<br>(0 - 3)        | 2<br>(1 - 7)         | 1<br>(0 - 1)         | 0<br>(0 - 1)         |
| Adverse effects of medical treatment            | 36<br>(21 - 54)    | 6<br>(2 - 11)      | 1<br>(1 - 2)        | 13<br>(5 - 25)       | 7<br>(3 - 13)        | 10<br>(4 - 17)       |
| Animal contact                                  | 5<br>(3 - 14)      | 1<br>(0 - 4)       | 1<br>(0 - 2)        | 2<br>(1 - 7)         | 1<br>(0 - 2)         | 0<br>(0 - 1)         |
| Venomous animal contact                         | 5<br>(2 - 13)      | 1<br>(0 - 4)       | 0<br>(0 - 1)        | 2<br>(1 - 6)         | 1<br>(0 - 2)         | 0<br>(0 - 1)         |
| Non-venomous animal contact                     | 1<br>(0 - 1)       | 0<br>(0 - 0)       | 0<br>(0 - 0)        | 0<br>(0 - 1)         | 0<br>(0 - 0)         | 0<br>(0 - 0)         |
| Foreign body                                    | 20<br>(10 - 45)    | 11<br>(4 - 27)     | 1<br>(0 - 2)        | 5<br>(2 - 12)        | 2<br>(1 - 3)         | 2<br>(1 - 4)         |
| Pulmonary aspiration and foreign body in airway | 20<br>(10 - 45)    | 10<br>(4 - 27)     | 1<br>(0 - 2)        | 5<br>(2 - 12)        | 2<br>(1 - 3)         | 2<br>(1 - 4)         |
| Foreign body in other body part                 | 0<br>(0 - 0)       | 0<br>(0 - 0)       | 0<br>(0 - 0)        | 0<br>(0 - 0)         | 0<br>(0 - 0)         | 0<br>(0 - 0)         |
| Other unintentional injuries                    | 8<br>(3 - 14)      | 1<br>(0 - 2)       | 0<br>(0 - 1)        | 4<br>(1 - 9)         | 1<br>(0 - 2)         | 1<br>(0 - 2)         |
| Self-harm and interpersonal violence            | 177<br>(91 - 353)  | 4<br>(1 - 11)      | 2<br>(1 - 4)        | 156<br>(73 - 326)    | 8<br>(3 - 14)        | 6<br>(1 - 10)        |
| Self-harm                                       | 77<br>(17 - 127)   | --                 | 1<br>(0 - 2)        | 64<br>(15 - 109)     | 7<br>(1 - 12)        | 6<br>(1 - 10)        |
| Interpersonal violence                          | 100<br>(44 - 262)  | 4<br>(1 - 11)      | 1<br>(0 - 3)        | 92<br>(38 - 246)     | 2<br>(1 - 4)         | 0<br>(0 - 1)         |
| Assault by firearm                              | 33<br>(11 - 106)   | 1<br>(0 - 2)       | 0<br>(0 - 1)        | 31<br>(10 - 102)     | 1<br>(0 - 2)         | 0<br>(0 - 0)         |
| Assault by sharp object                         | 30<br>(13 - 81)    | 1<br>(0 - 2)       | 0<br>(0 - 1)        | 29<br>(13 - 78)      | 0<br>(0 - 1)         | 0<br>(0 - 0)         |
| Assault by other means                          | 36<br>(15 - 109)   | 3<br>(1 - 8)       | 1<br>(0 - 2)        | 32<br>(11 - 98)      | 1<br>(0 - 2)         | 0<br>(0 - 1)         |

Web Table 31- Sweden deaths with 95% UI by age, sex, and cause in 2013

| Cause                                                             | Both Sexes, All Ages        | Both Sexes, 0-4 Years | Both Sexes, 5-14 Years | Both Sexes, 15-49 Years  | Both Sexes, 50-69 Years     | Both Sexes, 70-80 Years     |
|-------------------------------------------------------------------|-----------------------------|-----------------------|------------------------|--------------------------|-----------------------------|-----------------------------|
| All causes                                                        | 93,668<br>(89,675 - 97,506) | 310<br>(245 - 392)    | 80<br>(69 - 92)        | 3,014<br>(2,810 - 3,213) | 15,363<br>(14,477 - 16,252) | 74,902<br>(71,835 - 77,792) |
| Communicable, maternal, neonatal, and nutritional diseases        | 4,449<br>(3,637 - 5,983)    | 127<br>(97 - 164)     | 6<br>(4 - 9)           | 82<br>(72 - 93)          | 282<br>(242 - 330)          | 3,953<br>(3,158 - 5,495)    |
| HIV/AIDS and tuberculosis                                         | 133<br>(109 - 164)          | 0<br>(0 - 0)          | 0<br>(0 - 0)           | 16<br>(11 - 22)          | 18<br>(14 - 23)             | 100<br>(79 - 127)           |
| Tuberculosis                                                      | 113<br>(91 - 143)           | 0<br>(0 - 0)          | 0<br>(0 - 0)           | 2<br>(2 - 2)             | 12<br>(10 - 17)             | 99<br>(77 - 126)            |
| HIV/AIDS                                                          | 20<br>(13 - 30)             | 0<br>(0 - 0)          | 0<br>(0 - 0)           | 14<br>(9 - 20)           | 6<br>(3 - 10)               | 1<br>(0 - 2)                |
| HIV/AIDS resulting in mycobacterial infection                     | 1<br>(1 - 2)                | 0<br>(0 - 0)          | 0<br>(0 - 0)           | 1<br>(0 - 1)             | 0<br>(0 - 1)                | 0<br>(0 - 0)                |
| HIV/AIDS resulting in other diseases                              | 19<br>(12 - 29)             | 0<br>(0 - 0)          | 0<br>(0 - 0)           | 13<br>(9 - 19)           | 5<br>(3 - 9)                | 1<br>(0 - 2)                |
| Diarrhea, lower respiratory, and other common infectious diseases | 3,713<br>(2,916 - 5,346)    | 15<br>(11 - 21)       | 5<br>(3 - 8)           | 49<br>(41 - 61)          | 220<br>(183 - 268)          | 3,424<br>(2,627 - 5,033)    |
| Diarrheal diseases                                                | 369<br>(244 - 524)          | 3<br>(2 - 4)          | 0<br>(0 - 1)           | 4<br>(3 - 5)             | 14<br>(10 - 19)             | 348<br>(224 - 502)          |
| Intestinal infectious diseases                                    | 11<br>(4 - 25)              | 2<br>(0 - 4)          | 2<br>(1 - 5)           | 5<br>(1 - 11)            | 2<br>(0 - 4)                | 2<br>(0 - 4)                |
| Typhoid fever                                                     | 8<br>(3 - 19)               | 1<br>(0 - 3)          | 1<br>(0 - 3)           | 4<br>(1 - 8)             | 1<br>(0 - 3)                | 1<br>(0 - 3)                |
| Paratyphoid fever                                                 | 2<br>(1 - 5)                | 0<br>(0 - 1)          | 0<br>(0 - 1)           | 1<br>(0 - 2)             | 0<br>(0 - 1)                | 0<br>(0 - 1)                |
| Other intestinal infectious diseases                              | 1<br>(0 - 4)                | 0<br>(0 - 2)          | 0<br>(0 - 0)           | 0<br>(0 - 2)             | 0<br>(0 - 2)                | 0<br>(0 - 2)                |
| Lower respiratory infections                                      | 3,265<br>(2,447 - 4,900)    | 6<br>(4 - 9)          | 1<br>(1 - 2)           | 32<br>(26 - 42)          | 189<br>(153 - 237)          | 3,036<br>(2,239 - 4,627)    |
| Upper respiratory infections                                      | 2<br>(0 - 5)                | 0<br>(0 - 0)          | 0<br>(0 - 0)           | 0<br>(0 - 0)             | 0<br>(0 - 1)                | 1<br>(0 - 5)                |
| Otitis media                                                      | 3<br>(2 - 3)                | 0<br>(0 - 0)          | 0<br>(0 - 0)           | 0<br>(0 - 1)             | 0<br>(0 - 1)                | 1<br>(1 - 2)                |
| Meningitis                                                        | 39<br>(34 - 47)             | 3<br>(2 - 4)          | 1<br>(0 - 1)           | 4<br>(3 - 5)             | 10<br>(8 - 12)              | 22<br>(18 - 28)             |
| Pneumococcal meningitis                                           | 7<br>(5 - 9)                | 0<br>(0 - 1)          | 0<br>(0 - 0)           | 1<br>(1 - 1)             | 2<br>(1 - 3)                | 4<br>(3 - 6)                |
| H influenzae type B meningitis                                    | 4<br>(3 - 6)                | 1<br>(0 - 1)          | 0<br>(0 - 0)           | 0<br>(0 - 1)             | 1<br>(0 - 1)                | 2<br>(1 - 3)                |
| Meningococcal meningitis                                          | 13<br>(9 - 17)              | 1<br>(1 - 1)          | 0<br>(0 - 0)           | 1<br>(1 - 2)             | 3<br>(2 - 4)                | 8<br>(5 - 11)               |
| Other meningitis                                                  | 15<br>(12 - 19)             | 1<br>(1 - 1)          | 0<br>(0 - 0)           | 2<br>(1 - 2)             | 4<br>(3 - 5)                | 8<br>(6 - 11)               |
| Encephalitis                                                      | 13<br>(6 - 18)              | 1<br>(0 - 1)          | 0<br>(0 - 1)           | 3<br>(1 - 3)             | 4<br>(2 - 5)                | 6<br>(2 - 9)                |
| Diphtheria                                                        | 0<br>(0 - 0)                | 0<br>(0 - 0)          | 0<br>(0 - 0)           | 0<br>(0 - 0)             | 0<br>(0 - 0)                | --                          |
| Whooping cough                                                    | 1<br>(1 - 1)                | 0<br>(0 - 0)          | 0<br>(0 - 0)           | 0<br>(0 - 0)             | 0<br>(0 - 0)                | --                          |
| Tetanus                                                           | 1<br>(1 - 1)                | 0<br>(0 - 0)          | 0<br>(0 - 0)           | 0<br>(0 - 1)             | 0<br>(0 - 0)                | 0<br>(0 - 0)                |
| Measles                                                           | 0<br>(0 - 0)                | 0<br>(0 - 0)          | 0<br>(0 - 0)           | 0<br>(0 - 0)             | 0<br>(0 - 0)                | --                          |
| Varicella and herpes zoster                                       | 9<br>(2 - 28)               | 0<br>(0 - 1)          | 0<br>(0 - 0)           | 1<br>(0 - 1)             | 1<br>(0 - 2)                | 7<br>(0 - 25)               |
| Neglected tropical diseases and malaria                           | 6<br>(4 - 7)                | 0<br>(0 - 0)          | 0<br>(0 - 0)           | 1<br>(1 - 2)             | 1<br>(1 - 2)                | 2<br>(2 - 3)                |
| Cysticercosis                                                     | 0<br>(0 - 0)                | 0<br>(0 - 0)          | 0<br>(0 - 0)           | 0<br>(0 - 0)             | 0<br>(0 - 0)                | 0<br>(0 - 0)                |
| Cystic echinococcosis                                             | 1<br>(1 - 1)                | 0<br>(0 - 0)          | 0<br>(0 - 0)           | 0<br>(0 - 0)             | 0<br>(0 - 0)                | 0<br>(0 - 0)                |
| Dengue                                                            | 1<br>(1 - 1)                | 0<br>(0 - 0)          | 0<br>(0 - 0)           | 0<br>(0 - 0)             | 0<br>(0 - 0)                | 0<br>(0 - 0)                |
| Rabies                                                            | 1<br>(1 - 1)                | 0<br>(0 - 0)          | 0<br>(0 - 0)           | 0<br>(0 - 0)             | 0<br>(0 - 0)                | 0<br>(0 - 0)                |
| Other neglected tropical diseases                                 | 3<br>(2 - 4)                | 0<br>(0 - 0)          | 0<br>(0 - 0)           | 1<br>(0 - 1)             | 1<br>(0 - 1)                | 2<br>(1 - 3)                |
| Maternal disorders                                                | 4<br>(3 - 6)                | --                    | 0<br>(0 - 0)           | 4<br>(3 - 6)             | --                          | --                          |
| Maternal hemorrhage                                               | 0<br>(0 - 1)                | --                    | 0<br>(0 - 0)           | 0<br>(0 - 1)             | --                          | --                          |
| Maternal sepsis and other maternal infections                     | 0<br>(0 - 1)                | --                    | 0<br>(0 - 0)           | 0<br>(0 - 1)             | --                          | --                          |
| Maternal hypertensive disorders                                   | 1<br>(0 - 1)                | --                    | 0<br>(0 - 0)           | 1<br>(0 - 1)             | --                          | --                          |
| Maternal obstructed labor                                         | 0<br>(0 - 1)                | --                    | 0<br>(0 - 0)           | 0<br>(0 - 1)             | --                          | --                          |
| Maternal abortive outcome                                         | 1<br>(1 - 1)                | --                    | 0<br>(0 - 0)           | 1<br>(1 - 1)             | --                          | --                          |
| Indirect maternal deaths                                          | 0<br>(0 - 1)                | --                    | 0<br>(0 - 0)           | 0<br>(0 - 1)             | --                          | --                          |

Web Table 31- Sweden deaths with 95% UI by age, sex, and cause in 2013

| Cause                                                            | Both Sexes, All Ages        | Both Sexes, 0-4 Years | Both Sexes, 5-14 Years | Both Sexes, 15-49 Years  | Both Sexes, 50-69 Years     | Both Sexes, 70-80 Years     |
|------------------------------------------------------------------|-----------------------------|-----------------------|------------------------|--------------------------|-----------------------------|-----------------------------|
| Late maternal deaths                                             | 0<br>(0 - 1)                | --                    | 0<br>(0 - 0)           | 0<br>(0 - 1)             | --                          | --                          |
| Maternal deaths aggravated by HIV/AIDS                           | 0<br>(0 - 0)                | --                    | --                     | 0<br>(0 - 0)             | --                          | --                          |
| Other maternal disorders                                         | 1<br>(1 - 1)                | --                    | 0<br>(0 - 0)           | 1<br>(1 - 1)             | --                          | --                          |
| Neonatal disorders                                               | 109<br>(84 - 142)           | 109<br>(84 - 142)     | --                     | --                       | --                          | --                          |
| Neonatal preterm birth complications                             | 41<br>(27 - 58)             | 41<br>(27 - 58)       | --                     | --                       | --                          | --                          |
| Neonatal encephalopathy due to birth asphyxia and trauma         | 34<br>(22 - 47)             | 34<br>(22 - 47)       | --                     | --                       | --                          | --                          |
| Neonatal sepsis and other neonatal infections                    | 6<br>(2 - 13)               | 6<br>(2 - 13)         | --                     | --                       | --                          | --                          |
| Hemolytic disease and other neonatal jaundice                    | 0<br>(0 - 0)                | 0<br>(0 - 0)          | --                     | --                       | --                          | --                          |
| Other neonatal disorders                                         | 28<br>(17 - 40)             | 28<br>(17 - 40)       | --                     | --                       | --                          | --                          |
| Nutritional deficiencies                                         | 288<br>(160 - 380)          | 0<br>(0 - 1)          | 0<br>(0 - 0)           | 3<br>(2 - 4)             | 12<br>(7 - 16)              | 272<br>(153 - 362)          |
| Protein-energy malnutrition                                      | 67<br>(31 - 115)            | 0<br>(0 - 0)          | 0<br>(0 - 0)           | 1<br>(0 - 1)             | 5<br>(3 - 7)                | 61<br>(27 - 107)            |
| Iodine deficiency                                                | 1<br>(0 - 4)                | 0<br>(0 - 0)          | 0<br>(0 - 0)           | 0<br>(0 - 0)             | 0<br>(0 - 1)                | 1<br>(0 - 4)                |
| Iron-deficiency anemia                                           | 202<br>(107 - 279)          | 0<br>(0 - 0)          | 0<br>(0 - 0)           | 2<br>(1 - 3)             | 6<br>(3 - 9)                | 194<br>(102 - 269)          |
| Other nutritional deficiencies                                   | 18<br>(7 - 35)              | 0<br>(0 - 0)          | 0<br>(0 - 0)           | 0<br>(0 - 1)             | 1<br>(0 - 1)                | 17<br>(6 - 33)              |
| Other communicable, maternal, neonatal, and nutritional diseases | 196<br>(152 - 261)          | 2<br>(1 - 3)          | 1<br>(1 - 1)           | 8<br>(6 - 11)            | 30<br>(22 - 37)             | 155<br>(116 - 221)          |
| Sexually transmitted diseases excluding HIV                      | 6<br>(4 - 11)               | 0<br>(0 - 1)          | 0<br>(0 - 0)           | 0<br>(0 - 1)             | 1<br>(0 - 1)                | 5<br>(2 - 8)                |
| Syphilis                                                         | 5<br>(3 - 8)                | 0<br>(0 - 1)          | 0<br>(0 - 0)           | 0<br>(0 - 0)             | 0<br>(0 - 1)                | 4<br>(2 - 7)                |
| Chlamydial infection                                             | 0<br>(0 - 1)                | --                    | 0<br>(0 - 0)           | 0<br>(0 - 0)             | 0<br>(0 - 0)                | 0<br>(0 - 0)                |
| Gonococcal infection                                             | 1<br>(0 - 1)                | --                    | 0<br>(0 - 0)           | 0<br>(0 - 0)             | 0<br>(0 - 1)                | 1<br>(0 - 1)                |
| Other sexually transmitted diseases                              | 0<br>(0 - 1)                | --                    | 0<br>(0 - 0)           | 0<br>(0 - 0)             | 0<br>(0 - 0)                | 0<br>(0 - 0)                |
| Hepatitis                                                        | 6<br>(5 - 8)                | 0<br>(0 - 0)          | 0<br>(0 - 0)           | 2<br>(1 - 2)             | 2<br>(1 - 3)                | 2<br>(2 - 3)                |
| Acute hepatitis A                                                | 1<br>(1 - 3)                | 0<br>(0 - 0)          | 0<br>(0 - 0)           | 1<br>(0 - 1)             | 0<br>(0 - 1)                | 0<br>(0 - 1)                |
| Acute hepatitis B                                                | 4<br>(3 - 6)                | 0<br>(0 - 0)          | 0<br>(0 - 0)           | 1<br>(0 - 1)             | 1<br>(1 - 2)                | 2<br>(1 - 3)                |
| Acute hepatitis C                                                | 1<br>(0 - 2)                | --                    | 0<br>(0 - 0)           | 0<br>(0 - 0)             | 0<br>(0 - 0)                | 0<br>(0 - 1)                |
| Other infectious diseases                                        | 183<br>(139 - 246)          | 2<br>(1 - 2)          | 1<br>(0 - 1)           | 6<br>(4 - 7)             | 27<br>(19 - 35)             | 147<br>(108 - 213)          |
| Non-communicable diseases                                        | 84,523<br>(80,596 - 88,304) | 165<br>(128 - 210)    | 49<br>(42 - 57)        | 1,879<br>(1,710 - 2,026) | 14,086<br>(13,259 - 14,892) | 68,345<br>(65,282 - 71,324) |
| Neoplasms                                                        | 23,123<br>(21,017 - 24,894) | 14<br>(10 - 19)       | 26<br>(21 - 31)        | 823<br>(751 - 894)       | 6,977<br>(6,463 - 7,488)    | 15,284<br>(13,672 - 16,620) |
| Esophageal cancer                                                | 419<br>(349 - 477)          | --                    | --                     | 10<br>(8 - 13)           | 167<br>(134 - 196)          | 242<br>(197 - 279)          |
| Stomach cancer                                                   | 968<br>(819 - 1,162)        | --                    | --                     | 28<br>(23 - 33)          | 232<br>(200 - 269)          | 709<br>(576 - 872)          |
| Liver cancer                                                     | 662<br>(515 - 855)          | --                    | 0<br>(0 - 0)           | 20<br>(15 - 26)          | 210<br>(157 - 268)          | 432<br>(325 - 576)          |
| Liver cancer due to hepatitis B                                  | 137<br>(77 - 223)           | --                    | 0<br>(0 - 0)           | 7<br>(4 - 11)            | 58<br>(32 - 93)             | 71<br>(39 - 122)            |
| Liver cancer due to hepatitis C                                  | 355<br>(239 - 483)          | --                    | 0<br>(0 - 0)           | 9<br>(5 - 14)            | 107<br>(59 - 156)           | 239<br>(155 - 334)          |
| Liver cancer due to alcohol use                                  | 139<br>(79 - 235)           | --                    | --                     | 2<br>(1 - 4)             | 35<br>(21 - 65)             | 101<br>(54 - 181)           |
| Liver cancer due to other causes                                 | 32<br>(12 - 52)             | --                    | 0<br>(0 - 0)           | 2<br>(1 - 2)             | 10<br>(4 - 17)              | 20<br>(7 - 36)              |
| Larynx cancer                                                    | 59<br>(43 - 74)             | --                    | --                     | 2<br>(1 - 2)             | 22<br>(16 - 27)             | 35<br>(26 - 45)             |
| Tracheal, bronchus and lung cancer                               | 3,782<br>(3,103 - 4,213)    | --                    | --                     | 89<br>(74 - 104)         | 1,524<br>(1,258 - 1,722)    | 2,169<br>(1,717 - 2,460)    |
| Breast cancer                                                    | 1,507<br>(1,126 - 1,772)    | --                    | --                     | 123<br>(90 - 150)        | 553<br>(430 - 659)          | 831<br>(591 - 1,023)        |
| Cervical cancer                                                  | 237<br>(172 - 294)          | --                    | --                     | 28<br>(17 - 37)          | 75<br>(56 - 94)             | 134<br>(93 - 182)           |
| Uterine cancer                                                   | 251<br>(155 - 315)          | --                    | --                     | 3<br>(2 - 5)             | 68<br>(47 - 89)             | 180<br>(101 - 236)          |
| Prostate cancer                                                  | 2,693<br>(2,036 - 3,656)    | --                    | --                     | 4<br>(2 - 6)             | 420<br>(313 - 612)          | 2,269<br>(1,683 - 3,117)    |

Web Table 31- Sweden deaths with 95% UI by age, sex, and cause in 2013

| Cause                                         | Both Sexes, All Ages        | Both Sexes, 0-4 Years | Both Sexes, 5-14 Years | Both Sexes, 15-49 Years | Both Sexes, 50-69 Years  | Both Sexes, 70-80 Years     |
|-----------------------------------------------|-----------------------------|-----------------------|------------------------|-------------------------|--------------------------|-----------------------------|
| Colon and rectum cancer                       | 3,715<br>(3,330 - 4,179)    | --                    | --                     | 75<br>(65 - 85)         | 906<br>(823 - 997)       | 2,734<br>(2,390 - 3,170)    |
| Lip and oral cavity cancer                    | 172<br>(139 - 200)          | --                    | --                     | 11<br>(8 - 13)          | 58<br>(45 - 69)          | 103<br>(83 - 126)           |
| Nasopharynx cancer                            | 27<br>(21 - 37)             | --                    | 0<br>(0 - 0)           | 3<br>(2 - 5)            | 12<br>(9 - 17)           | 11<br>(8 - 16)              |
| Other pharynx cancer                          | 94<br>(68 - 116)            | --                    | --                     | 5<br>(3 - 6)            | 49<br>(34 - 64)          | 40<br>(28 - 52)             |
| Gallbladder and biliary tract cancer          | 520<br>(405 - 706)          | --                    | --                     | 11<br>(8 - 14)          | 152<br>(121 - 205)       | 358<br>(266 - 493)          |
| Pancreatic cancer                             | 1,463<br>(1,332 - 1,602)    | --                    | --                     | 35<br>(29 - 41)         | 554<br>(497 - 616)       | 873<br>(772 - 983)          |
| Malignant skin melanoma                       | 456<br>(284 - 634)          | --                    | --                     | 51<br>(35 - 76)         | 170<br>(110 - 248)       | 235<br>(137 - 318)          |
| Non-melanoma skin cancer                      | 85<br>(60 - 115)            | --                    | --                     | 3<br>(2 - 4)            | 12<br>(8 - 17)           | 71<br>(49 - 96)             |
| Ovarian cancer                                | 621<br>(511 - 731)          | --                    | --                     | 33<br>(25 - 41)         | 261<br>(217 - 311)       | 327<br>(245 - 412)          |
| Testicular cancer                             | 12<br>(8 - 16)              | --                    | --                     | 6<br>(4 - 9)            | 3<br>(2 - 4)             | 3<br>(2 - 4)                |
| Kidney cancer                                 | 620<br>(525 - 718)          | 1<br>(0 - 1)          | 1<br>(0 - 1)           | 16<br>(12 - 20)         | 208<br>(174 - 250)       | 395<br>(313 - 483)          |
| Bladder cancer                                | 667<br>(486 - 798)          | --                    | --                     | 6<br>(5 - 8)            | 121<br>(93 - 143)        | 539<br>(383 - 663)          |
| Brain and nervous system cancer               | 608<br>(492 - 696)          | 3<br>(2 - 5)          | 8<br>(6 - 11)          | 93<br>(76 - 110)        | 296<br>(244 - 350)       | 208<br>(147 - 256)          |
| Thyroid cancer                                | 77<br>(63 - 95)             | --                    | 0<br>(0 - 0)           | 3<br>(2 - 4)            | 20<br>(16 - 25)          | 54<br>(42 - 69)             |
| Mesothelioma                                  | 166<br>(124 - 258)          | --                    | --                     | 4<br>(3 - 7)            | 68<br>(46 - 108)         | 94<br>(64 - 158)            |
| Hodgkin lymphoma                              | 44<br>(34 - 59)             | 0<br>(0 - 0)          | 0<br>(0 - 1)           | 9<br>(7 - 13)           | 12<br>(9 - 17)           | 22<br>(16 - 30)             |
| Non-Hodgkin lymphoma                          | 787<br>(518 - 983)          | 1<br>(0 - 1)          | 2<br>(1 - 2)           | 33<br>(21 - 46)         | 211<br>(131 - 279)       | 541<br>(333 - 695)          |
| Multiple myeloma                              | 523<br>(364 - 719)          | --                    | --                     | 10<br>(7 - 15)          | 146<br>(100 - 213)       | 367<br>(252 - 510)          |
| Leukemia                                      | 846<br>(752 - 940)          | 4<br>(2 - 6)          | 8<br>(6 - 11)          | 49<br>(42 - 55)         | 200<br>(172 - 227)       | 585<br>(499 - 668)          |
| Other neoplasms                               | 1,042<br>(746 - 1,255)      | 5<br>(3 - 7)          | 6<br>(4 - 8)           | 63<br>(49 - 73)         | 245<br>(181 - 294)       | 722<br>(482 - 919)          |
| Cardiovascular diseases                       | 40,136<br>(37,331 - 43,971) | 2<br>(2 - 3)          | 2<br>(2 - 3)           | 392<br>(336 - 444)      | 4,344<br>(3,980 - 4,842) | 35,396<br>(32,858 - 38,844) |
| Rheumatic heart disease                       | 164<br>(125 - 233)          | 0<br>(0 - 0)          | 0<br>(0 - 0)           | 3<br>(2 - 4)            | 25<br>(19 - 36)          | 135<br>(101 - 196)          |
| Ischemic heart disease                        | 23,117<br>(20,883 - 27,209) | 0<br>(0 - 0)          | 0<br>(0 - 0)           | 199<br>(168 - 233)      | 2,774<br>(2,485 - 3,273) | 20,144<br>(18,094 - 23,817) |
| Cerebrovascular disease                       | 9,429<br>(7,773 - 11,079)   | 0<br>(0 - 0)          | 1<br>(0 - 1)           | 83<br>(62 - 102)        | 787<br>(646 - 936)       | 8,558<br>(7,050 - 10,141)   |
| Ischemic stroke                               | 6,101<br>(4,865 - 7,272)    | 0<br>(0 - 0)          | 0<br>(0 - 0)           | 12<br>(8 - 16)          | 277<br>(210 - 355)       | 5,812<br>(4,607 - 6,969)    |
| Hemorrhagic stroke                            | 3,328<br>(2,642 - 4,241)    | 0<br>(0 - 0)          | 0<br>(0 - 1)           | 71<br>(53 - 87)         | 510<br>(393 - 615)       | 2,746<br>(2,131 - 3,599)    |
| Hypertensive heart disease                    | 639<br>(328 - 959)          | 0<br>(0 - 0)          | 0<br>(0 - 0)           | 3<br>(2 - 4)            | 39<br>(21 - 58)          | 597<br>(297 - 903)          |
| Cardiomyopathy and myocarditis                | 780<br>(522 - 953)          | 2<br>(1 - 2)          | 1<br>(1 - 2)           | 57<br>(43 - 69)         | 186<br>(136 - 228)       | 533<br>(337 - 684)          |
| Atrial fibrillation and flutter               | 2,515<br>(1,819 - 3,293)    | --                    | --                     | 1<br>(1 - 2)            | 69<br>(51 - 87)          | 2,444<br>(1,759 - 3,218)    |
| Aortic aneurysm                               | 1,226<br>(958 - 1,533)      | --                    | --                     | 16<br>(12 - 20)         | 234<br>(184 - 286)       | 976<br>(735 - 1,244)        |
| Peripheral vascular disease                   | 279<br>(210 - 366)          | --                    | --                     | 0<br>(0 - 0)            | 12<br>(9 - 16)           | 267<br>(198 - 353)          |
| Endocarditis                                  | 110<br>(75 - 157)           | 0<br>(0 - 0)          | 0<br>(0 - 0)           | 4<br>(2 - 5)            | 20<br>(13 - 29)          | 87<br>(58 - 125)            |
| Other cardiovascular and circulatory diseases | 1,878<br>(1,417 - 2,411)    | 0<br>(0 - 0)          | 0<br>(0 - 0)           | 26<br>(18 - 33)         | 198<br>(153 - 249)       | 1,654<br>(1,226 - 2,178)    |
| Chronic respiratory diseases                  | 4,296<br>(2,856 - 4,913)    | 1<br>(1 - 2)          | 1<br>(1 - 2)           | 35<br>(28 - 41)         | 555<br>(404 - 636)       | 3,703<br>(2,411 - 4,301)    |
| Chronic obstructive pulmonary disease         | 3,402<br>(2,172 - 3,958)    | 0<br>(0 - 1)          | 0<br>(0 - 0)           | 14<br>(10 - 18)         | 438<br>(302 - 511)       | 2,949<br>(1,855 - 3,465)    |
| Pneumoconiosis                                | 85<br>(46 - 129)            | 0<br>(0 - 0)          | 0<br>(0 - 0)           | 1<br>(1 - 2)            | 6<br>(3 - 9)             | 78<br>(41 - 120)            |
| Silicosis                                     | 8<br>(4 - 12)               | 0<br>(0 - 0)          | 0<br>(0 - 0)           | 0<br>(0 - 0)            | 1<br>(0 - 1)             | 7<br>(3 - 11)               |
| Asbestosis                                    | 33<br>(17 - 50)             | 0<br>(0 - 0)          | 0<br>(0 - 0)           | 0<br>(0 - 0)            | 2<br>(1 - 4)             | 30<br>(15 - 46)             |
| Coal workers pneumoconiosis                   | 7<br>(4 - 10)               | 0<br>(0 - 0)          | 0<br>(0 - 0)           | 0<br>(0 - 0)            | 0<br>(0 - 1)             | 6<br>(3 - 10)               |
| Other pneumoconiosis                          | 38<br>(20 - 60)             | 0<br>(0 - 0)          | 0<br>(0 - 0)           | 0<br>(0 - 1)            | 3<br>(1 - 4)             | 35<br>(18 - 56)             |

Web Table 31- Sweden deaths with 95% UI by age, sex, and cause in 2013

| Cause                                               | Both Sexes, All Ages     | Both Sexes, 0-4 Years | Both Sexes, 5-14 Years | Both Sexes, 15-49 Years | Both Sexes, 50-69 Years | Both Sexes, 70-80 Years  |
|-----------------------------------------------------|--------------------------|-----------------------|------------------------|-------------------------|-------------------------|--------------------------|
| Asthma                                              | 213<br>(126 - 304)       | 0<br>(0 - 0)          | 0<br>(0 - 1)           | 10<br>(7 - 12)          | 29<br>(20 - 40)         | 174<br>(96 - 261)        |
| Interstitial lung disease and pulmonary sarcoidosis | 561<br>(340 - 764)       | 0<br>(0 - 0)          | 0<br>(0 - 0)           | 9<br>(7 - 11)           | 79<br>(53 - 107)        | 473<br>(272 - 663)       |
| Other chronic respiratory diseases                  | 35<br>(23 - 49)          | 0<br>(0 - 0)          | 0<br>(0 - 0)           | 1<br>(1 - 2)            | 3<br>(2 - 5)            | 30<br>(19 - 44)          |
| Cirrhosis                                           | 991<br>(902 - 1,086)     | 0<br>(0 - 0)          | 0<br>(0 - 0)           | 79<br>(67 - 92)         | 451<br>(401 - 505)      | 461<br>(405 - 522)       |
| Cirrhosis due to hepatitis B                        | 100<br>(59 - 142)        | 0<br>(0 - 0)          | 0<br>(0 - 0)           | 7<br>(4 - 11)           | 44<br>(26 - 61)         | 49<br>(27 - 75)          |
| Cirrhosis due to hepatitis C                        | 509<br>(390 - 620)       | 0<br>(0 - 0)          | 0<br>(0 - 0)           | 40<br>(27 - 53)         | 231<br>(166 - 292)      | 238<br>(177 - 299)       |
| Cirrhosis due to alcohol use                        | 302<br>(187 - 406)       | --<br>(0 - 0)         | --<br>(0 - 0)          | 20<br>(11 - 33)         | 136<br>(82 - 197)       | 147<br>(86 - 207)        |
| Cirrhosis due to other causes                       | 79<br>(44 - 131)         | 0<br>(0 - 0)          | 0<br>(0 - 0)           | 11<br>(7 - 19)          | 40<br>(20 - 70)         | 27<br>(15 - 46)          |
| Digestive diseases                                  | 2,093<br>(1,778 - 2,368) | 1<br>(0 - 1)          | 1<br>(1 - 1)           | 37<br>(31 - 43)         | 281<br>(217 - 323)      | 1,773<br>(1,504 - 2,040) |
| Peptic ulcer disease                                | 419<br>(316 - 529)       | 0<br>(0 - 0)          | 0<br>(0 - 0)           | 5<br>(4 - 7)            | 60<br>(43 - 78)         | 354<br>(260 - 464)       |
| Gastritis and duodenitis                            | 24<br>(16 - 42)          | 0<br>(0 - 0)          | 0<br>(0 - 0)           | 1<br>(1 - 2)            | 4<br>(3 - 7)            | 18<br>(12 - 34)          |
| Appendicitis                                        | 25<br>(16 - 35)          | 0<br>(0 - 0)          | 0<br>(0 - 0)           | 2<br>(1 - 2)            | 5<br>(3 - 7)            | 19<br>(11 - 28)          |
| Paralytic ileus and intestinal obstruction          | 332<br>(216 - 472)       | 0<br>(0 - 0)          | 0<br>(0 - 0)           | 5<br>(3 - 7)            | 36<br>(22 - 52)         | 291<br>(189 - 421)       |
| Inguinal, femoral, and abdominal hernia             | 59<br>(30 - 86)          | 0<br>(0 - 0)          | 0<br>(0 - 0)           | 1<br>(0 - 1)            | 5<br>(3 - 7)            | 53<br>(26 - 79)          |
| Inflammatory bowel disease                          | 164<br>(121 - 254)       | 0<br>(0 - 0)          | 0<br>(0 - 0)           | 3<br>(2 - 4)            | 17<br>(12 - 23)         | 144<br>(102 - 230)       |
| Vascular intestinal disorders                       | 344<br>(214 - 525)       | 0<br>(0 - 0)          | 0<br>(0 - 0)           | 2<br>(1 - 4)            | 37<br>(21 - 59)         | 305<br>(187 - 475)       |
| Gallbladder and biliary diseases                    | 257<br>(191 - 342)       | 0<br>(0 - 0)          | 0<br>(0 - 0)           | 2<br>(1 - 2)            | 20<br>(14 - 25)         | 235<br>(170 - 318)       |
| Pancreatitis                                        | 154<br>(103 - 199)       | 0<br>(0 - 0)          | 0<br>(0 - 0)           | 12<br>(9 - 15)          | 45<br>(31 - 58)         | 97<br>(62 - 132)         |
| Other digestive diseases                            | 316<br>(226 - 396)       | 0<br>(0 - 0)          | 0<br>(0 - 0)           | 5<br>(4 - 7)            | 53<br>(34 - 65)         | 257<br>(184 - 334)       |
| Neurological disorders                              | 7,992<br>(6,134 - 9,658) | 8<br>(5 - 10)         | 4<br>(3 - 5)           | 101<br>(86 - 120)       | 493<br>(427 - 565)      | 7,386<br>(5,534 - 9,045) |
| Alzheimer disease and other dementias               | 6,628<br>(4,753 - 8,332) | --<br>(0 - 0)         | --<br>(0 - 0)          | 1<br>(0 - 1)            | 145<br>(107 - 185)      | 6,482<br>(4,625 - 8,159) |
| Parkinson disease                                   | 580<br>(438 - 708)       | --<br>(0 - 0)         | --<br>(0 - 0)          | 1<br>(0 - 1)            | 42<br>(30 - 54)         | 538<br>(401 - 663)       |
| Epilepsy                                            | 106<br>(77 - 128)        | 1<br>(0 - 1)          | 2<br>(1 - 2)           | 38<br>(30 - 48)         | 29<br>(21 - 37)         | 36<br>(21 - 50)          |
| Multiple sclerosis                                  | 150<br>(96 - 199)        | --<br>(0 - 0)         | --<br>(0 - 0)          | 23<br>(15 - 33)         | 73<br>(46 - 100)        | 54<br>(32 - 76)          |
| Other neurological disorders                        | 529<br>(452 - 598)       | 7<br>(5 - 10)         | 3<br>(2 - 3)           | 39<br>(32 - 46)         | 204<br>(171 - 239)      | 276<br>(227 - 324)       |
| Mental and substance use disorders                  | 695<br>(523 - 840)       | 0<br>(0 - 0)          | 0<br>(0 - 0)           | 256<br>(201 - 307)      | 310<br>(211 - 412)      | 128<br>(88 - 164)        |
| Schizophrenia                                       | 37<br>(22 - 54)          | --<br>(0 - 0)         | --<br>(0 - 0)          | 1<br>(0 - 1)            | 4<br>(3 - 6)            | 32<br>(18 - 49)          |
| Alcohol use disorders                               | 412<br>(259 - 551)       | --<br>(0 - 0)         | --<br>(0 - 0)          | 79<br>(54 - 116)        | 258<br>(166 - 361)      | 76<br>(44 - 100)         |
| Drug use disorders                                  | 244<br>(174 - 287)       | 0<br>(0 - 0)          | --<br>(0 - 0)          | 175<br>(125 - 213)      | 48<br>(35 - 59)         | 21<br>(16 - 26)          |
| Opioid use disorders                                | 89<br>(62 - 105)         | 0<br>(0 - 0)          | --<br>(0 - 0)          | 66<br>(45 - 79)         | 16<br>(11 - 20)         | 8<br>(6 - 10)            |
| Cocaine use disorders                               | 7<br>(5 - 8)             | 0<br>(0 - 0)          | --<br>(0 - 0)          | 5<br>(4 - 6)            | 1<br>(1 - 1)            | 0<br>(0 - 1)             |
| Amphetamine use disorders                           | 7<br>(5 - 8)             | 0<br>(0 - 0)          | --<br>(0 - 0)          | 5<br>(3 - 6)            | 1<br>(1 - 2)            | 1<br>(0 - 1)             |
| Other drug use disorders                            | 141<br>(102 - 166)       | 0<br>(0 - 0)          | --<br>(0 - 0)          | 100<br>(71 - 121)       | 30<br>(22 - 36)         | 12<br>(9 - 15)           |
| Eating disorders                                    | 1<br>(1 - 2)             | --<br>(0 - 0)         | 0<br>(0 - 0)           | 1<br>(1 - 2)            | --<br>(0 - 0)           | --<br>(0 - 0)            |
| Anorexia nervosa                                    | 1<br>(1 - 2)             | --<br>(0 - 0)         | 0<br>(0 - 0)           | 1<br>(1 - 2)            | --<br>(0 - 0)           | --<br>(0 - 0)            |
| Diabetes, urogenital, blood, and endocrine diseases | 4,282<br>(3,828 - 4,787) | 10<br>(5 - 15)        | 5<br>(3 - 7)           | 104<br>(83 - 118)       | 547<br>(479 - 613)      | 3,616<br>(3,215 - 4,117) |
| Diabetes mellitus                                   | 2,090<br>(1,815 - 2,437) | 0<br>(0 - 1)          | 0<br>(0 - 1)           | 53<br>(45 - 61)         | 312<br>(270 - 359)      | 1,724<br>(1,459 - 2,058) |
| Acute glomerulonephritis                            | 2<br>(1 - 4)             | 0<br>(0 - 0)          | 0<br>(0 - 0)           | 0<br>(0 - 1)            | 0<br>(0 - 1)            | 1<br>(1 - 3)             |
| Chronic kidney disease                              | 1,204<br>(974 - 1,443)   | 0<br>(0 - 0)          | 0<br>(0 - 0)           | 15<br>(12 - 18)         | 115<br>(94 - 142)       | 1,073<br>(848 - 1,300)   |
| Chronic kidney disease due to diabetes mellitus     | 172<br>(119 - 286)       | 0<br>(0 - 0)          | 0<br>(0 - 0)           | 4<br>(3 - 6)            | 33<br>(22 - 50)         | 135<br>(90 - 231)        |

Web Table 31- Sweden deaths with 95% UI by age, sex, and cause in 2013

| Cause                                               | Both Sexes, All Ages     | Both Sexes, 0-4 Years | Both Sexes, 5-14 Years | Both Sexes, 15-49 Years | Both Sexes, 50-69 Years | Both Sexes, 70-80 Years  |
|-----------------------------------------------------|--------------------------|-----------------------|------------------------|-------------------------|-------------------------|--------------------------|
| Chronic kidney disease due to hypertension          | 417<br>(261 - 527)       | 0<br>(0 - 0)          | 0<br>(0 - 0)           | 2<br>(1 - 2)            | 24<br>(14 - 35)         | 391<br>(243 - 499)       |
| Chronic kidney disease due to glomerulonephritis    | 40<br>(27 - 63)          | 0<br>(0 - 0)          | 0<br>(0 - 0)           | 1<br>(1 - 2)            | 7<br>(5 - 10)           | 32<br>(20 - 52)          |
| Chronic kidney disease due to other causes          | 575<br>(380 - 758)       | 0<br>(0 - 0)          | 0<br>(0 - 0)           | 8<br>(5 - 11)           | 51<br>(35 - 70)         | 515<br>(334 - 695)       |
| Urinary diseases and male infertility               | 598<br>(466 - 924)       | 0<br>(0 - 0)          | 0<br>(0 - 0)           | 4<br>(4 - 6)            | 37<br>(30 - 49)         | 556<br>(428 - 874)       |
| Interstitial nephritis and urinary tract infections | 541<br>(419 - 838)       | 0<br>(0 - 0)          | 0<br>(0 - 0)           | 3<br>(3 - 4)            | 29<br>(23 - 40)         | 508<br>(388 - 799)       |
| Urolithiasis                                        | 25<br>(15 - 41)          | --                    | 0<br>(0 - 0)           | 0<br>(0 - 1)            | 3<br>(2 - 4)            | 22<br>(12 - 38)          |
| Other urinary diseases                              | 32<br>(18 - 55)          | 0<br>(0 - 0)          | 0<br>(0 - 0)           | 1<br>(1 - 1)            | 5<br>(3 - 7)            | 26<br>(14 - 48)          |
| Gynecological diseases                              | 5<br>(3 - 8)             | --                    | --                     | 0<br>(0 - 0)            | 1<br>(0 - 1)            | 4<br>(2 - 7)             |
| Uterine fibroids                                    | 1<br>(1 - 2)             | --                    | --                     | 0<br>(0 - 0)            | 0<br>(0 - 0)            | 1<br>(1 - 2)             |
| Polycystic ovarian syndrome                         | 0<br>(0 - 0)             | --                    | --                     | 0<br>(0 - 0)            | 0<br>(0 - 0)            | --                       |
| Endometriosis                                       | 0<br>(0 - 0)             | --                    | --                     | 0<br>(0 - 0)            | 0<br>(0 - 0)            | --                       |
| Genital prolapse                                    | 1<br>(1 - 2)             | --                    | --                     | 0<br>(0 - 0)            | 0<br>(0 - 0)            | 1<br>(1 - 2)             |
| Other gynecological diseases                        | 2<br>(1 - 4)             | --                    | --                     | 0<br>(0 - 0)            | 0<br>(0 - 0)            | 2<br>(1 - 3)             |
| Hemoglobinopathies and hemolytic anemias            | 62<br>(41 - 100)         | 0<br>(0 - 0)          | 0<br>(0 - 1)           | 2<br>(2 - 3)            | 7<br>(5 - 11)           | 52<br>(34 - 86)          |
| Thalassemias                                        | 1<br>(1 - 1)             | 0<br>(0 - 0)          | 0<br>(0 - 0)           | 1<br>(0 - 1)            | 0<br>(0 - 0)            | 0<br>(0 - 0)             |
| Sickle cell disorders                               | 6<br>(4 - 9)             | 0<br>(0 - 0)          | 0<br>(0 - 0)           | 1<br>(1 - 1)            | 3<br>(2 - 4)            | 2<br>(1 - 3)             |
| G6PD deficiency                                     | 0<br>(0 - 0)             | 0<br>(0 - 0)          | 0<br>(0 - 0)           | 0<br>(0 - 0)            | 0<br>(0 - 0)            | 0<br>(0 - 0)             |
| Other hemoglobinopathies and hemolytic anemias      | 55<br>(36 - 90)          | 0<br>(0 - 0)          | 0<br>(0 - 0)           | 1<br>(1 - 1)            | 4<br>(3 - 7)            | 50<br>(32 - 83)          |
| Endocrine, metabolic, blood, and immune disorders   | 321<br>(146 - 406)       | 9<br>(4 - 13)         | 4<br>(2 - 5)           | 28<br>(12 - 36)         | 74<br>(33 - 96)         | 206<br>(93 - 281)        |
| Musculoskeletal disorders                           | 399<br>(309 - 521)       | --                    | 1<br>(0 - 1)           | 12<br>(10 - 14)         | 65<br>(53 - 88)         | 322<br>(236 - 432)       |
| Rheumatoid arthritis                                | 167<br>(120 - 231)       | --                    | 0<br>(0 - 0)           | 2<br>(1 - 2)            | 23<br>(16 - 32)         | 143<br>(97 - 205)        |
| Other musculoskeletal disorders                     | 232<br>(178 - 308)       | --                    | 0<br>(0 - 1)           | 10<br>(8 - 12)          | 42<br>(34 - 58)         | 179<br>(125 - 247)       |
| Other non-communicable diseases                     | 517<br>(437 - 608)       | 129<br>(98 - 169)     | 9<br>(7 - 12)          | 40<br>(34 - 48)         | 62<br>(53 - 74)         | 277<br>(196 - 353)       |
| Congenital anomalies                                | 252<br>(217 - 301)       | 106<br>(81 - 140)     | 9<br>(7 - 12)          | 38<br>(32 - 46)         | 49<br>(41 - 60)         | 50<br>(39 - 64)          |
| Neural tube defects                                 | 5<br>(3 - 7)             | 3<br>(2 - 5)          | 0<br>(0 - 0)           | 1<br>(1 - 1)            | 0<br>(0 - 0)            | 0<br>(0 - 0)             |
| Congenital heart anomalies                          | 68<br>(57 - 85)          | 30<br>(22 - 42)       | 3<br>(2 - 5)           | 15<br>(12 - 18)         | 11<br>(8 - 14)          | 10<br>(7 - 14)           |
| Cleft lip and cleft palate                          | 0<br>(0 - 0)             | 0<br>(0 - 0)          | --                     | --                      | --                      | --                       |
| Down syndrome                                       | 37<br>(26 - 46)          | 4<br>(2 - 7)          | 1<br>(0 - 1)           | 6<br>(4 - 8)            | 23<br>(16 - 30)         | 3<br>(2 - 4)             |
| Chromosomal unbalanced rearrangements               | 22<br>(15 - 34)          | 20<br>(13 - 31)       | 0<br>(0 - 1)           | 1<br>(1 - 2)            | 0<br>(0 - 0)            | 0<br>(0 - 0)             |
| Other congenital anomalies                          | 119<br>(99 - 146)        | 48<br>(36 - 67)       | 4<br>(3 - 6)           | 15<br>(12 - 19)         | 15<br>(11 - 20)         | 37<br>(29 - 48)          |
| Skin and subcutaneous diseases                      | 243<br>(149 - 319)       | 0<br>(0 - 0)          | 0<br>(0 - 0)           | 2<br>(1 - 3)            | 13<br>(8 - 17)          | 227<br>(137 - 303)       |
| Cellulitis                                          | 9<br>(4 - 16)            | 0<br>(0 - 0)          | 0<br>(0 - 0)           | 0<br>(0 - 0)            | 1<br>(1 - 2)            | 7<br>(3 - 14)            |
| Pyoderma                                            | 186<br>(97 - 250)        | 0<br>(0 - 0)          | 0<br>(0 - 0)           | 1<br>(1 - 2)            | 10<br>(5 - 13)          | 175<br>(88 - 238)        |
| Decubitus ulcer                                     | 33<br>(20 - 56)          | 0<br>(0 - 0)          | 0<br>(0 - 0)           | 0<br>(0 - 0)            | 1<br>(1 - 2)            | 32<br>(19 - 54)          |
| Other skin and subcutaneous diseases                | 15<br>(6 - 35)           | 0<br>(0 - 0)          | 0<br>(0 - 0)           | 0<br>(0 - 0)            | 1<br>(1 - 2)            | 14<br>(5 - 33)           |
| Sudden infant death syndrome                        | 22<br>(13 - 40)          | 22<br>(13 - 40)       | --                     | --                      | --                      | --                       |
| Injuries                                            | 4,695<br>(4,096 - 5,348) | 18<br>(13 - 24)       | 24<br>(20 - 30)        | 1,054<br>(959 - 1,232)  | 996<br>(890 - 1,184)    | 2,603<br>(2,063 - 3,171) |
| Transport injuries                                  | 530<br>(475 - 602)       | 5<br>(3 - 7)          | 11<br>(9 - 14)         | 222<br>(195 - 257)      | 147<br>(126 - 175)      | 145<br>(122 - 175)       |
| Road injuries                                       | 480<br>(429 - 549)       | 4<br>(3 - 6)          | 10<br>(8 - 13)         | 201<br>(176 - 235)      | 128<br>(109 - 153)      | 137<br>(116 - 167)       |
| Pedestrian road injuries                            | 83<br>(59 - 120)         | 1<br>(1 - 2)          | 3<br>(2 - 4)           | 15<br>(9 - 25)          | 19<br>(12 - 29)         | 45<br>(31 - 64)          |



Web Table 31- Sweden deaths with 95% UI by age, sex, and cause in 2013

| Cause                                           | Both Sexes, All Ages     | Both Sexes, 0-4 Years | Both Sexes, 5-14 Years | Both Sexes, 15-49 Years | Both Sexes, 50-69 Years | Both Sexes, 70-80 Years  |
|-------------------------------------------------|--------------------------|-----------------------|------------------------|-------------------------|-------------------------|--------------------------|
| Cyclist road injuries                           | 43<br>(31 - 62)          | 0<br>(0 - 0)          | 2<br>(1 - 2)           | 10<br>(7 - 14)          | 13<br>(9 - 19)          | 19<br>(13 - 28)          |
| Motorcyclist road injuries                      | 54<br>(32 - 71)          | 0<br>(0 - 0)          | 1<br>(0 - 1)           | 38<br>(23 - 52)         | 9<br>(5 - 13)           | 5<br>(3 - 8)             |
| Motor vehicle road injuries                     | 296<br>(247 - 359)       | 3<br>(2 - 4)          | 5<br>(3 - 6)           | 136<br>(114 - 166)      | 85<br>(69 - 104)        | 67<br>(51 - 87)          |
| Other road injuries                             | 4<br>(3 - 7)             | 0<br>(0 - 0)          | 0<br>(0 - 0)           | 1<br>(1 - 3)            | 1<br>(1 - 2)            | 1<br>(1 - 2)             |
| Other transport injuries                        | 50<br>(37 - 63)          | 0<br>(0 - 1)          | 1<br>(1 - 2)           | 22<br>(15 - 28)         | 19<br>(14 - 27)         | 8<br>(5 - 11)            |
| Unintentional injuries                          | 2,623<br>(2,078 - 3,156) | 11<br>(7 - 15)        | 9<br>(7 - 13)          | 148<br>(129 - 192)      | 302<br>(260 - 356)      | 2,153<br>(1,615 - 2,687) |
| Falls                                           | 1,888<br>(1,455 - 2,382) | 1<br>(0 - 1)          | 1<br>(1 - 1)           | 37<br>(29 - 48)         | 139<br>(111 - 174)      | 1,711<br>(1,294 - 2,204) |
| Drowning                                        | 125<br>(95 - 202)        | 3<br>(2 - 7)          | 4<br>(3 - 7)           | 40<br>(29 - 68)         | 46<br>(34 - 76)         | 33<br>(24 - 46)          |
| Fire, heat, and hot substances                  | 101<br>(77 - 124)        | 2<br>(1 - 3)          | 1<br>(1 - 2)           | 18<br>(14 - 23)         | 29<br>(21 - 40)         | 51<br>(37 - 65)          |
| Poisonings                                      | 24<br>(19 - 43)          | 0<br>(0 - 0)          | 0<br>(0 - 0)           | 9<br>(7 - 18)           | 10<br>(7 - 18)          | 5<br>(4 - 8)             |
| Exposure to mechanical forces                   | 62<br>(53 - 72)          | 2<br>(1 - 2)          | 2<br>(1 - 2)           | 24<br>(19 - 29)         | 20<br>(16 - 24)         | 15<br>(12 - 20)          |
| Unintentional firearm injuries                  | 3<br>(2 - 3)             | 0<br>(0 - 0)          | 0<br>(0 - 0)           | 1<br>(1 - 2)            | 1<br>(1 - 1)            | 0<br>(0 - 0)             |
| Unintentional suffocation                       | 7<br>(4 - 10)            | 1<br>(0 - 1)          | 0<br>(0 - 1)           | 2<br>(1 - 3)            | 1<br>(1 - 1)            | 3<br>(2 - 5)             |
| Other exposure to mechanical forces             | 52<br>(44 - 62)          | 1<br>(1 - 2)          | 1<br>(1 - 2)           | 20<br>(16 - 25)         | 18<br>(14 - 23)         | 12<br>(9 - 16)           |
| Adverse effects of medical treatment            | 212<br>(41 - 393)        | 1<br>(0 - 1)          | 0<br>(0 - 0)           | 4<br>(2 - 6)            | 15<br>(4 - 25)          | 193<br>(34 - 366)        |
| Animal contact                                  | 8<br>(5 - 14)            | 0<br>(0 - 0)          | 0<br>(0 - 0)           | 1<br>(1 - 2)            | 3<br>(2 - 5)            | 3<br>(2 - 6)             |
| Venomous animal contact                         | 2<br>(2 - 5)             | 0<br>(0 - 0)          | 0<br>(0 - 0)           | 1<br>(0 - 1)            | 1<br>(1 - 2)            | 1<br>(0 - 2)             |
| Non-venomous animal contact                     | 5<br>(3 - 10)            | 0<br>(0 - 0)          | 0<br>(0 - 0)           | 1<br>(1 - 2)            | 2<br>(1 - 3)            | 2<br>(1 - 5)             |
| Foreign body                                    | 183<br>(127 - 274)       | 2<br>(1 - 2)          | 1<br>(0 - 1)           | 11<br>(8 - 17)          | 36<br>(25 - 54)         | 133<br>(91 - 206)        |
| Pulmonary aspiration and foreign body in airway | 179<br>(124 - 269)       | 2<br>(1 - 2)          | 0<br>(0 - 1)           | 11<br>(7 - 16)          | 35<br>(24 - 53)         | 131<br>(89 - 203)        |
| Foreign body in other body part                 | 4<br>(2 - 7)             | 0<br>(0 - 0)          | 0<br>(0 - 0)           | 0<br>(0 - 1)            | 0<br>(0 - 1)            | 2<br>(1 - 5)             |
| Other unintentional injuries                    | 20<br>(15 - 26)          | 0<br>(0 - 1)          | 0<br>(0 - 1)           | 4<br>(3 - 7)            | 5<br>(3 - 8)            | 9<br>(6 - 14)            |
| Self-harm and interpersonal violence            | 1,542<br>(1,359 - 1,974) | 2<br>(2 - 4)          | 4<br>(3 - 5)           | 683<br>(604 - 815)      | 547<br>(467 - 692)      | 306<br>(253 - 450)       |
| Self-harm                                       | 1,436<br>(1,261 - 1,846) | --                    | 2<br>(1 - 3)           | 620<br>(543 - 745)      | 520<br>(443 - 663)      | 294<br>(242 - 440)       |
| Interpersonal violence                          | 107<br>(78 - 144)        | 2<br>(2 - 4)          | 2<br>(1 - 3)           | 63<br>(45 - 87)         | 27<br>(20 - 39)         | 12<br>(8 - 15)           |
| Assault by firearm                              | 20<br>(11 - 29)          | 0<br>(0 - 0)          | 0<br>(0 - 1)           | 14<br>(7 - 21)          | 3<br>(2 - 5)            | 2<br>(1 - 3)             |
| Assault by sharp object                         | 39<br>(27 - 59)          | 0<br>(0 - 1)          | 1<br>(0 - 1)           | 25<br>(17 - 39)         | 10<br>(7 - 15)          | 3<br>(2 - 4)             |
| Assault by other means                          | 48<br>(34 - 66)          | 2<br>(1 - 3)          | 1<br>(1 - 2)           | 24<br>(17 - 33)         | 14<br>(10 - 21)         | 7<br>(5 - 9)             |

Web Table 31- Sweden deaths with 95% UI by age, sex, and cause in 2013

| Cause                                                             | Males, All Ages             | Males, 0-4 Years   | Males, 5-14 Years | Males, 15-49 Years       | Males, 50-69 Years        | Males, 70-80 Years          |
|-------------------------------------------------------------------|-----------------------------|--------------------|-------------------|--------------------------|---------------------------|-----------------------------|
| All causes                                                        | 46,537<br>(43,814 - 49,288) | 174<br>(135 - 221) | 46<br>(39 - 54)   | 1,983<br>(1,814 - 2,160) | 9,480<br>(8,744 - 10,232) | 34,854<br>(33,048 - 36,675) |
| Communicable, maternal, neonatal, and nutritional diseases        | 2,158<br>(1,679 - 3,107)    | 73<br>(55 - 94)    | 3<br>(2 - 5)      | 51<br>(42 - 61)          | 179<br>(147 - 222)        | 1,852<br>(1,383 - 2,771)    |
| HIV/AIDS and tuberculosis                                         | 68<br>(54 - 86)             | 0<br>(0 - 0)       | 0<br>(0 - 0)      | 11<br>(7 - 16)           | 11<br>(8 - 15)            | 47<br>(35 - 62)             |
| Tuberculosis                                                      | 53<br>(41 - 68)             | 0<br>(0 - 0)       | 0<br>(0 - 0)      | 1<br>(1 - 1)             | 6<br>(5 - 9)              | 46<br>(35 - 61)             |
| HIV/AIDS                                                          | 15<br>(9 - 24)              | 0<br>(0 - 0)       | 0<br>(0 - 0)      | 10<br>(6 - 15)           | 4<br>(2 - 8)              | 1<br>(0 - 2)                |
| HIV/AIDS resulting in mycobacterial infection                     | 1<br>(0 - 1)                | 0<br>(0 - 0)       | 0<br>(0 - 0)      | 0<br>(0 - 1)             | 0<br>(0 - 0)              | 0<br>(0 - 0)                |
| HIV/AIDS resulting in other diseases                              | 14<br>(9 - 23)              | 0<br>(0 - 0)       | 0<br>(0 - 0)      | 9<br>(6 - 14)            | 4<br>(2 - 7)              | 1<br>(0 - 2)                |
| Diarrhea, lower respiratory, and other common infectious diseases | 1,830<br>(1,345 - 2,807)    | 9<br>(6 - 12)      | 3<br>(2 - 4)      | 33<br>(26 - 42)          | 144<br>(113 - 186)        | 1,642<br>(1,025 - 2,594)    |
| Diarrheal diseases                                                | 146<br>(89 - 233)           | 1<br>(1 - 2)       | 0<br>(0 - 0)      | 2<br>(2 - 3)             | 8<br>(5 - 11)             | 135<br>(77 - 223)           |
| Intestinal infectious diseases                                    | 6<br>(2 - 15)               | 1<br>(0 - 3)       | 1<br>(0 - 3)      | 3<br>(1 - 7)             | 1<br>(0 - 3)              | 1<br>(0 - 2)                |
| Typhoid fever                                                     | 5<br>(1 - 11)               | 1<br>(0 - 2)       | 1<br>(0 - 2)      | 2<br>(0 - 5)             | 1<br>(0 - 2)              | 1<br>(0 - 1)                |
| Paratyphoid fever                                                 | 1<br>(0 - 3)                | 0<br>(0 - 1)       | 0<br>(0 - 1)      | 1<br>(0 - 1)             | 0<br>(0 - 0)              | 0<br>(0 - 0)                |
| Other intestinal infectious diseases                              | 0<br>(0 - 3)                | 0<br>(0 - 1)       | 0<br>(0 - 0)      | 0<br>(0 - 1)             | 0<br>(0 - 1)              | 0<br>(0 - 1)                |
| Lower respiratory infections                                      | 1,642<br>(1,167 - 2,637)    | 4<br>(2 - 6)       | 1<br>(0 - 1)      | 22<br>(16 - 31)          | 127<br>(97 - 168)         | 1,488<br>(1,025 - 2,441)    |
| Upper respiratory infections                                      | 1<br>(0 - 3)                | 0<br>(0 - 0)       | 0<br>(0 - 0)      | 0<br>(0 - 0)             | 0<br>(0 - 1)              | 1<br>(0 - 3)                |
| Otitis media                                                      | 1<br>(1 - 2)                | 0<br>(0 - 0)       | 0<br>(0 - 0)      | 0<br>(0 - 0)             | 0<br>(0 - 0)              | 1<br>(0 - 1)                |
| Meningitis                                                        | 21<br>(18 - 26)             | 2<br>(1 - 3)       | 0<br>(0 - 0)      | 2<br>(2 - 3)             | 5<br>(4 - 7)              | 11<br>(8 - 15)              |
| Pneumococcal meningitis                                           | 4<br>(2 - 5)                | 0<br>(0 - 0)       | 0<br>(0 - 0)      | 0<br>(0 - 1)             | 1<br>(0 - 2)              | 2<br>(1 - 3)                |
| H influenzae type B meningitis                                    | 3<br>(2 - 4)                | 1<br>(0 - 1)       | 0<br>(0 - 0)      | 0<br>(0 - 0)             | 1<br>(0 - 1)              | 1<br>(0 - 2)                |
| Meningococcal meningitis                                          | 6<br>(4 - 9)                | 1<br>(0 - 1)       | 0<br>(0 - 0)      | 1<br>(0 - 1)             | 1<br>(1 - 2)              | 4<br>(1 - 6)                |
| Other meningitis                                                  | 9<br>(6 - 12)               | 1<br>(0 - 1)       | 0<br>(0 - 0)      | 1<br>(1 - 1)             | 2<br>(2 - 3)              | 5<br>(3 - 7)                |
| Encephalitis                                                      | 7<br>(3 - 10)               | 0<br>(0 - 1)       | 0<br>(0 - 0)      | 2<br>(1 - 2)             | 2<br>(1 - 3)              | 3<br>(1 - 5)                |
| Diphtheria                                                        | 0<br>(0 - 0)                | 0<br>(0 - 0)       | 0<br>(0 - 0)      | 0<br>(0 - 0)             | 0<br>(0 - 0)              | --                          |
| Whooping cough                                                    | 0<br>(0 - 1)                | 0<br>(0 - 0)       | 0<br>(0 - 0)      | 0<br>(0 - 0)             | 0<br>(0 - 0)              | --                          |
| Tetanus                                                           | 0<br>(0 - 1)                | 0<br>(0 - 0)       | 0<br>(0 - 0)      | 0<br>(0 - 0)             | 0<br>(0 - 0)              | 0<br>(0 - 0)                |
| Measles                                                           | 0<br>(0 - 0)                | 0<br>(0 - 0)       | 0<br>(0 - 0)      | 0<br>(0 - 0)             | 0<br>(0 - 0)              | --                          |
| Varicella and herpes zoster                                       | 4<br>(1 - 16)               | 0<br>(0 - 1)       | 0<br>(0 - 0)      | 0<br>(0 - 1)             | 0<br>(0 - 1)              | 3<br>(0 - 16)               |
| Neglected tropical diseases and malaria                           | 3<br>(2 - 4)                | 0<br>(0 - 0)       | 0<br>(0 - 0)      | 1<br>(1 - 1)             | 1<br>(1 - 1)              | 1<br>(1 - 2)                |
| Cysticercosis                                                     | 0<br>(0 - 0)                | 0<br>(0 - 0)       | 0<br>(0 - 0)      | 0<br>(0 - 0)             | 0<br>(0 - 0)              | 0<br>(0 - 0)                |
| Cystic echinococcosis                                             | 0<br>(0 - 0)                | 0<br>(0 - 0)       | 0<br>(0 - 0)      | 0<br>(0 - 0)             | 0<br>(0 - 0)              | 0<br>(0 - 0)                |
| Dengue                                                            | 0<br>(0 - 1)                | 0<br>(0 - 0)       | 0<br>(0 - 0)      | 0<br>(0 - 0)             | 0<br>(0 - 0)              | 0<br>(0 - 0)                |
| Rabies                                                            | 0<br>(0 - 1)                | 0<br>(0 - 0)       | 0<br>(0 - 0)      | 0<br>(0 - 0)             | 0<br>(0 - 0)              | 0<br>(0 - 0)                |
| Other neglected tropical diseases                                 | 2<br>(1 - 3)                | 0<br>(0 - 0)       | 0<br>(0 - 0)      | 0<br>(0 - 0)             | 0<br>(0 - 1)              | 1<br>(0 - 2)                |
| Maternal disorders                                                | --                          | --                 | --                | --                       | --                        | --                          |
| Maternal hemorrhage                                               | --                          | --                 | --                | --                       | --                        | --                          |
| Maternal sepsis and other maternal infections                     | --                          | --                 | --                | --                       | --                        | --                          |
| Maternal hypertensive disorders                                   | --                          | --                 | --                | --                       | --                        | --                          |
| Maternal obstructed labor                                         | --                          | --                 | --                | --                       | --                        | --                          |
| Maternal abortive outcome                                         | --                          | --                 | --                | --                       | --                        | --                          |
| Indirect maternal deaths                                          | --                          | --                 | --                | --                       | --                        | --                          |

Web Table 31- Sweden deaths with 95% UI by age, sex, and cause in 2013

| Cause                                                            | Males, All Ages             | Males, 0-4 Years | Males, 5-14 Years | Males, 15-49 Years     | Males, 50-69 Years       | Males, 70-80 Years          |
|------------------------------------------------------------------|-----------------------------|------------------|-------------------|------------------------|--------------------------|-----------------------------|
| Late maternal deaths                                             | --                          | --               | --                | --                     | --                       | --                          |
| Maternal deaths aggravated by HIV/AIDS                           | --                          | --               | --                | --                     | --                       | --                          |
| Other maternal disorders                                         | --                          | --               | --                | --                     | --                       | --                          |
| Neonatal disorders                                               | 63<br>(47 - 82)             | 63<br>(47 - 82)  | --                | --                     | --                       | --                          |
| Neonatal preterm birth complications                             | 25<br>(15 - 36)             | 25<br>(15 - 36)  | --                | --                     | --                       | --                          |
| Neonatal encephalopathy due to birth asphyxia and trauma         | 18<br>(10 - 26)             | 18<br>(10 - 26)  | --                | --                     | --                       | --                          |
| Neonatal sepsis and other neonatal infections                    | 4<br>(1 - 7)                | 4<br>(1 - 7)     | --                | --                     | --                       | --                          |
| Hemolytic disease and other neonatal jaundice                    | 0<br>(0 - 0)                | 0<br>(0 - 0)     | --                | --                     | --                       | --                          |
| Other neonatal disorders                                         | 16<br>(9 - 24)              | 16<br>(9 - 24)   | --                | --                     | --                       | --                          |
| Nutritional deficiencies                                         | 97<br>(37 - 143)            | 0<br>(0 - 0)     | 0<br>(0 - 0)      | 2<br>(1 - 2)           | 6<br>(3 - 9)             | 89<br>(34 - 133)            |
| Protein-energy malnutrition                                      | 26<br>(8 - 48)              | 0<br>(0 - 0)     | 0<br>(0 - 0)      | 0<br>(0 - 1)           | 3<br>(1 - 5)             | 22<br>(6 - 43)              |
| Iodine deficiency                                                | 0<br>(0 - 1)                | 0<br>(0 - 0)     | 0<br>(0 - 0)      | 0<br>(0 - 0)           | 0<br>(0 - 0)             | 0<br>(0 - 1)                |
| Iron-deficiency anemia                                           | 64<br>(21 - 100)            | 0<br>(0 - 0)     | 0<br>(0 - 0)      | 1<br>(0 - 2)           | 3<br>(1 - 5)             | 60<br>(19 - 94)             |
| Other nutritional deficiencies                                   | 7<br>(2 - 16)               | 0<br>(0 - 0)     | 0<br>(0 - 0)      | 0<br>(0 - 0)           | 0<br>(0 - 1)             | 6<br>(2 - 15)               |
| Other communicable, maternal, neonatal, and nutritional diseases | 96<br>(62 - 138)            | 1<br>(1 - 2)     | 0<br>(0 - 1)      | 5<br>(4 - 6)           | 17<br>(10 - 23)          | 72<br>(43 - 115)            |
| Sexually transmitted diseases excluding HIV                      | 1<br>(1 - 3)                | 0<br>(0 - 1)     | 0<br>(0 - 0)      | 0<br>(0 - 0)           | 0<br>(0 - 0)             | 1<br>(0 - 2)                |
| Syphilis                                                         | 1<br>(1 - 2)                | 0<br>(0 - 1)     | 0<br>(0 - 0)      | 0<br>(0 - 0)           | 0<br>(0 - 0)             | 1<br>(0 - 2)                |
| Chlamydial infection                                             | --                          | --               | --                | --                     | --                       | --                          |
| Gonococcal infection                                             | 0<br>(0 - 0)                | --               | 0<br>(0 - 0)      | 0<br>(0 - 0)           | 0<br>(0 - 0)             | 0<br>(0 - 0)                |
| Other sexually transmitted diseases                              | 0<br>(0 - 0)                | --               | 0<br>(0 - 0)      | 0<br>(0 - 0)           | 0<br>(0 - 0)             | 0<br>(0 - 0)                |
| Hepatitis                                                        | 4<br>(4 - 6)                | 0<br>(0 - 0)     | 0<br>(0 - 0)      | 1<br>(1 - 2)           | 2<br>(1 - 2)             | 2<br>(1 - 2)                |
| Acute hepatitis A                                                | 1<br>(0 - 2)                | 0<br>(0 - 0)     | 0<br>(0 - 0)      | 0<br>(0 - 1)           | 0<br>(0 - 1)             | 0<br>(0 - 0)                |
| Acute hepatitis B                                                | 3<br>(2 - 4)                | 0<br>(0 - 0)     | 0<br>(0 - 0)      | 1<br>(0 - 1)           | 1<br>(1 - 2)             | 1<br>(1 - 2)                |
| Acute hepatitis C                                                | 0<br>(0 - 1)                | --               | 0<br>(0 - 0)      | 0<br>(0 - 0)           | 0<br>(0 - 0)             | 0<br>(0 - 1)                |
| Other infectious diseases                                        | 90<br>(55 - 133)            | 1<br>(1 - 2)     | 0<br>(0 - 0)      | 4<br>(2 - 5)           | 15<br>(9 - 21)           | 70<br>(41 - 113)            |
| Non-communicable diseases                                        | 41,507<br>(39,067 - 44,073) | 90<br>(68 - 116) | 27<br>(22 - 32)   | 1,131<br>(995 - 1,254) | 8,575<br>(7,911 - 9,251) | 31,684<br>(29,974 - 33,485) |
| Neoplasms                                                        | 12,667<br>(11,617 - 13,875) | 7<br>(5 - 11)    | 14<br>(11 - 18)   | 369<br>(322 - 417)     | 3,768<br>(3,439 - 4,154) | 8,508<br>(7,722 - 9,415)    |
| Esophageal cancer                                                | 316<br>(244 - 367)          | --               | --                | 8<br>(6 - 11)          | 138<br>(106 - 166)       | 170<br>(128 - 204)          |
| Stomach cancer                                                   | 533<br>(456 - 629)          | --               | --                | 15<br>(12 - 19)        | 147<br>(126 - 173)       | 370<br>(301 - 458)          |
| Liver cancer                                                     | 405<br>(283 - 563)          | --               | 0<br>(0 - 0)      | 13<br>(8 - 18)         | 146<br>(97 - 203)        | 246<br>(167 - 370)          |
| Liver cancer due to hepatitis B                                  | 94<br>(42 - 172)            | --               | 0<br>(0 - 0)      | 5<br>(2 - 9)           | 44<br>(19 - 79)          | 46<br>(19 - 90)             |
| Liver cancer due to hepatitis C                                  | 212<br>(102 - 316)          | --               | 0<br>(0 - 0)      | 6<br>(2 - 10)          | 73<br>(24 - 118)         | 134<br>(68 - 212)           |
| Liver cancer due to alcohol use                                  | 90<br>(46 - 176)            | --               | --                | 2<br>(1 - 4)           | 26<br>(13 - 54)          | 62<br>(28 - 126)            |
| Liver cancer due to other causes                                 | 8<br>(3 - 18)               | --               | 0<br>(0 - 0)      | 0<br>(0 - 1)           | 3<br>(1 - 7)             | 4<br>(1 - 10)               |
| Larynx cancer                                                    | 50<br>(35 - 63)             | --               | --                | 1<br>(1 - 2)           | 18<br>(12 - 23)          | 30<br>(21 - 40)             |
| Tracheal, bronchus and lung cancer                               | 2,186<br>(1,963 - 2,413)    | --               | --                | 40<br>(32 - 49)        | 835<br>(731 - 954)       | 1,311<br>(1,158 - 1,474)    |
| Breast cancer                                                    | 16<br>(5 - 30)              | --               | --                | 1<br>(0 - 1)           | 5<br>(2 - 10)            | 10<br>(3 - 18)              |
| Cervical cancer                                                  | --                          | --               | --                | --                     | --                       | --                          |
| Uterine cancer                                                   | --                          | --               | --                | --                     | --                       | --                          |
| Prostate cancer                                                  | 2,693<br>(2,036 - 3,656)    | --               | --                | 4<br>(2 - 6)           | 420<br>(313 - 612)       | 2,269<br>(1,683 - 3,117)    |

Web Table 31- Sweden deaths with 95% UI by age, sex, and cause in 2013

| Cause                                         | Males, All Ages             | Males, 0-4 Years | Males, 5-14 Years | Males, 15-49 Years | Males, 50-69 Years       | Males, 70-80 Years          |
|-----------------------------------------------|-----------------------------|------------------|-------------------|--------------------|--------------------------|-----------------------------|
| Colon and rectum cancer                       | 1,921<br>(1,691 - 2,156)    | --               | --                | 41<br>(33 - 49)    | 539<br>(476 - 610)       | 1,341<br>(1,145 - 1,566)    |
| Lip and oral cavity cancer                    | 109<br>(75 - 131)           | --               | --                | 7<br>(4 - 9)       | 41<br>(27 - 51)          | 61<br>(42 - 79)             |
| Nasopharynx cancer                            | 18<br>(14 - 25)             | --               | 0<br>(0 - 0)      | 3<br>(2 - 4)       | 9<br>(6 - 13)            | 7<br>(5 - 10)               |
| Other pharynx cancer                          | 75<br>(50 - 97)             | --               | --                | 3<br>(2 - 5)       | 41<br>(26 - 55)          | 31<br>(20 - 42)             |
| Gallbladder and biliary tract cancer          | 185<br>(134 - 273)          | --               | --                | 5<br>(3 - 7)       | 58<br>(40 - 85)          | 123<br>(86 - 182)           |
| Pancreatic cancer                             | 715<br>(637 - 799)          | --               | --                | 19<br>(15 - 24)    | 301<br>(261 - 348)       | 395<br>(344 - 461)          |
| Malignant skin melanoma                       | 273<br>(131 - 442)          | --               | --                | 31<br>(16 - 56)    | 109<br>(54 - 183)        | 134<br>(59 - 207)           |
| Non-melanoma skin cancer                      | 50<br>(29 - 75)             | --               | --                | 2<br>(1 - 4)       | 8<br>(5 - 13)            | 39<br>(22 - 60)             |
| Ovarian cancer                                | --                          | --               | --                | --                 | --                       | --                          |
| Testicular cancer                             | 12<br>(8 - 16)              | --               | --                | 6<br>(4 - 9)       | 3<br>(2 - 4)             | 3<br>(2 - 4)                |
| Kidney cancer                                 | 388<br>(323 - 462)          | 0<br>(0 - 0)     | 0<br>(0 - 0)      | 11<br>(8 - 14)     | 139<br>(111 - 171)       | 238<br>(184 - 304)          |
| Bladder cancer                                | 483<br>(338 - 593)          | --               | --                | 4<br>(3 - 5)       | 93<br>(66 - 112)         | 387<br>(264 - 492)          |
| Brain and nervous system cancer               | 345<br>(255 - 416)          | 2<br>(1 - 3)     | 4<br>(3 - 6)      | 55<br>(42 - 70)    | 173<br>(131 - 219)       | 111<br>(71 - 148)           |
| Thyroid cancer                                | 31<br>(25 - 37)             | --               | 0<br>(0 - 0)      | 2<br>(1 - 2)       | 10<br>(8 - 13)           | 19<br>(15 - 25)             |
| Mesothelioma                                  | 137<br>(95 - 221)           | --               | --                | 3<br>(2 - 6)       | 58<br>(36 - 96)          | 76<br>(46 - 137)            |
| Hodgkin lymphoma                              | 24<br>(17 - 36)             | 0<br>(0 - 0)     | 0<br>(0 - 0)      | 5<br>(4 - 8)       | 7<br>(5 - 12)            | 11<br>(7 - 17)              |
| Non-Hodgkin lymphoma                          | 448<br>(213 - 577)          | 0<br>(0 - 1)     | 1<br>(1 - 2)      | 21<br>(10 - 30)    | 132<br>(65 - 177)        | 293<br>(138 - 401)          |
| Multiple myeloma                              | 286<br>(160 - 459)          | --               | --                | 6<br>(3 - 11)      | 86<br>(47 - 142)         | 193<br>(109 - 313)          |
| Leukemia                                      | 479<br>(420 - 547)          | 2<br>(1 - 3)     | 5<br>(3 - 7)      | 28<br>(23 - 33)    | 125<br>(105 - 148)       | 319<br>(269 - 379)          |
| Other neoplasms                               | 489<br>(340 - 614)          | 3<br>(1 - 4)     | 3<br>(2 - 5)      | 35<br>(26 - 43)    | 125<br>(79 - 156)        | 323<br>(204 - 436)          |
| Cardiovascular diseases                       | 19,222<br>(17,854 - 20,671) | 1<br>(1 - 2)     | 1<br>(1 - 2)      | 290<br>(245 - 335) | 3,105<br>(2,806 - 3,418) | 15,825<br>(14,700 - 17,001) |
| Rheumatic heart disease                       | 58<br>(38 - 96)             | 0<br>(0 - 0)     | 0<br>(0 - 0)      | 2<br>(1 - 3)       | 12<br>(7 - 19)           | 44<br>(27 - 76)             |
| Ischemic heart disease                        | 11,682<br>(10,417 - 13,626) | 0<br>(0 - 0)     | 0<br>(0 - 0)      | 162<br>(135 - 192) | 2,072<br>(1,833 - 2,388) | 9,448<br>(8,403 - 11,076)   |
| Cerebrovascular disease                       | 3,997<br>(2,981 - 4,947)    | 0<br>(0 - 0)     | 0<br>(0 - 0)      | 49<br>(33 - 64)    | 488<br>(344 - 617)       | 3,459<br>(2,571 - 4,324)    |
| Ischemic stroke                               | 2,508<br>(1,808 - 3,180)    | 0<br>(0 - 0)     | 0<br>(0 - 0)      | 8<br>(4 - 11)      | 186<br>(123 - 249)       | 2,315<br>(1,667 - 2,952)    |
| Hemorrhagic stroke                            | 1,489<br>(1,015 - 1,939)    | 0<br>(0 - 0)     | 0<br>(0 - 0)      | 41<br>(28 - 54)    | 303<br>(204 - 390)       | 1,145<br>(736 - 1,555)      |
| Hypertensive heart disease                    | 207<br>(95 - 336)           | 0<br>(0 - 0)     | 0<br>(0 - 0)      | 2<br>(1 - 3)       | 26<br>(13 - 42)          | 179<br>(77 - 299)           |
| Cardiomyopathy and myocarditis                | 443<br>(276 - 566)          | 1<br>(1 - 1)     | 1<br>(1 - 1)      | 43<br>(31 - 55)    | 141<br>(95 - 186)        | 257<br>(141 - 355)          |
| Atrial fibrillation and flutter               | 1,031<br>(694 - 1,454)      | --               | --                | 1<br>(1 - 1)       | 48<br>(32 - 65)          | 982<br>(655 - 1,403)        |
| Aortic aneurysm                               | 778<br>(604 - 933)          | --               | --                | 12<br>(9 - 15)     | 173<br>(133 - 213)       | 593<br>(459 - 725)          |
| Peripheral vascular disease                   | 114<br>(76 - 165)           | --               | --                | 0<br>(0 - 0)       | 8<br>(5 - 11)            | 106<br>(69 - 157)           |
| Endocarditis                                  | 61<br>(35 - 100)            | 0<br>(0 - 0)     | 0<br>(0 - 0)      | 3<br>(2 - 4)       | 13<br>(7 - 22)           | 45<br>(25 - 77)             |
| Other cardiovascular and circulatory diseases | 852<br>(614 - 1,097)        | 0<br>(0 - 0)     | 0<br>(0 - 0)      | 16<br>(11 - 21)    | 125<br>(86 - 160)        | 711<br>(507 - 948)          |
| Chronic respiratory diseases                  | 2,377<br>(1,552 - 2,787)    | 1<br>(0 - 1)     | 1<br>(0 - 1)      | 20<br>(14 - 25)    | 296<br>(200 - 351)       | 2,059<br>(1,336 - 2,446)    |
| Chronic obstructive pulmonary disease         | 1,858<br>(1,159 - 2,200)    | 0<br>(0 - 0)     | 0<br>(0 - 0)      | 9<br>(6 - 12)      | 228<br>(148 - 277)       | 1,621<br>(994 - 1,939)      |
| Pneumoconiosis                                | 83<br>(44 - 126)            | 0<br>(0 - 0)     | 0<br>(0 - 0)      | 1<br>(1 - 1)       | 6<br>(3 - 9)             | 76<br>(39 - 119)            |
| Silicosis                                     | 8<br>(4 - 12)               | 0<br>(0 - 0)     | 0<br>(0 - 0)      | 0<br>(0 - 0)       | 1<br>(0 - 1)             | 7<br>(3 - 11)               |
| Asbestosis                                    | 33<br>(16 - 50)             | 0<br>(0 - 0)     | 0<br>(0 - 0)      | 0<br>(0 - 0)       | 2<br>(1 - 3)             | 30<br>(15 - 46)             |
| Coal workers pneumoconiosis                   | 7<br>(3 - 10)               | 0<br>(0 - 0)     | 0<br>(0 - 0)      | 0<br>(0 - 0)       | 0<br>(0 - 1)             | 6<br>(3 - 10)               |
| Other pneumoconiosis                          | 36<br>(19 - 58)             | 0<br>(0 - 0)     | 0<br>(0 - 0)      | 0<br>(0 - 0)       | 3<br>(1 - 4)             | 33<br>(17 - 55)             |

Web Table 31- Sweden deaths with 95% UI by age, sex, and cause in 2013

| Cause                                               | Males, All Ages          | Males, 0-4 Years | Males, 5-14 Years | Males, 15-49 Years | Males, 50-69 Years | Males, 70-80 Years       |
|-----------------------------------------------------|--------------------------|------------------|-------------------|--------------------|--------------------|--------------------------|
| Asthma                                              | 58<br>(38 - 78)          | 0<br>(0 - 0)     | 0<br>(0 - 0)      | 4<br>(3 - 6)       | 11<br>(8 - 15)     | 43<br>(26 - 61)          |
| Interstitial lung disease and pulmonary sarcoidosis | 357<br>(200 - 506)       | 0<br>(0 - 0)     | 0<br>(0 - 0)      | 5<br>(3 - 7)       | 49<br>(31 - 70)    | 303<br>(160 - 443)       |
| Other chronic respiratory diseases                  | 20<br>(12 - 29)          | 0<br>(0 - 0)     | 0<br>(0 - 0)      | 1<br>(1 - 1)       | 2<br>(1 - 3)       | 16<br>(9 - 26)           |
| Cirrhosis                                           | 631<br>(564 - 702)       | 0<br>(0 - 0)     | 0<br>(0 - 0)      | 57<br>(47 - 69)    | 324<br>(279 - 370) | 251<br>(214 - 290)       |
| Cirrhosis due to hepatitis B                        | 58<br>(30 - 92)          | 0<br>(0 - 0)     | 0<br>(0 - 0)      | 5<br>(3 - 8)       | 29<br>(15 - 46)    | 24<br>(12 - 41)          |
| Cirrhosis due to hepatitis C                        | 287<br>(185 - 387)       | 0<br>(0 - 0)     | 0<br>(0 - 0)      | 27<br>(14 - 39)    | 153<br>(93 - 212)  | 106<br>(63 - 152)        |
| Cirrhosis due to alcohol use                        | 240<br>(138 - 341)       | --               | --                | 17<br>(9 - 30)     | 116<br>(67 - 179)  | 106<br>(58 - 149)        |
| Cirrhosis due to other causes                       | 47<br>(13 - 91)          | 0<br>(0 - 0)     | 0<br>(0 - 0)      | 7<br>(2 - 14)      | 25<br>(7 - 51)     | 14<br>(3 - 30)           |
| Digestive diseases                                  | 928<br>(785 - 1,083)     | 0<br>(0 - 0)     | 0<br>(0 - 0)      | 25<br>(20 - 30)    | 173<br>(129 - 207) | 730<br>(599 - 877)       |
| Peptic ulcer disease                                | 194<br>(139 - 263)       | 0<br>(0 - 0)     | 0<br>(0 - 0)      | 4<br>(2 - 5)       | 38<br>(25 - 53)    | 152<br>(106 - 215)       |
| Gastritis and duodenitis                            | 12<br>(7 - 23)           | 0<br>(0 - 0)     | 0<br>(0 - 0)      | 1<br>(0 - 1)       | 3<br>(2 - 6)       | 8<br>(4 - 16)            |
| Appendicitis                                        | 13<br>(8 - 19)           | 0<br>(0 - 0)     | 0<br>(0 - 0)      | 1<br>(1 - 1)       | 3<br>(2 - 5)       | 9<br>(5 - 14)            |
| Paralytic ileus and intestinal obstruction          | 144<br>(76 - 223)        | 0<br>(0 - 0)     | 0<br>(0 - 0)      | 3<br>(2 - 4)       | 20<br>(10 - 32)    | 121<br>(63 - 193)        |
| Inguinal, femoral, and abdominal hernia             | 31<br>(14 - 49)          | 0<br>(0 - 0)     | 0<br>(0 - 0)      | 0<br>(0 - 0)       | 3<br>(1 - 5)       | 27<br>(12 - 45)          |
| Inflammatory bowel disease                          | 65<br>(43 - 101)         | 0<br>(0 - 0)     | 0<br>(0 - 0)      | 1<br>(1 - 2)       | 9<br>(5 - 13)      | 55<br>(34 - 89)          |
| Vascular intestinal disorders                       | 139<br>(56 - 272)        | 0<br>(0 - 0)     | 0<br>(0 - 0)      | 1<br>(0 - 3)       | 20<br>(8 - 40)     | 118<br>(48 - 235)        |
| Gallbladder and biliary diseases                    | 112<br>(76 - 158)        | 0<br>(0 - 0)     | 0<br>(0 - 0)      | 1<br>(1 - 2)       | 11<br>(7 - 16)     | 100<br>(64 - 145)        |
| Pancreatitis                                        | 90<br>(56 - 121)         | 0<br>(0 - 0)     | 0<br>(0 - 0)      | 9<br>(6 - 13)      | 33<br>(21 - 45)    | 48<br>(27 - 70)          |
| Other digestive diseases                            | 129<br>(84 - 175)        | 0<br>(0 - 0)     | 0<br>(0 - 0)      | 4<br>(2 - 5)       | 33<br>(18 - 43)    | 93<br>(59 - 132)         |
| Neurological disorders                              | 2,562<br>(2,031 - 3,239) | 4<br>(3 - 6)     | 2<br>(2 - 3)      | 62<br>(50 - 76)    | 254<br>(207 - 308) | 2,240<br>(1,716 - 2,911) |
| Alzheimer disease and other dementias               | 1,811<br>(1,289 - 2,444) | --               | --                | 0<br>(0 - 0)       | 58<br>(34 - 87)    | 1,753<br>(1,231 - 2,389) |
| Parkinson disease                                   | 334<br>(249 - 426)       | --               | --                | 0<br>(0 - 0)       | 29<br>(19 - 39)    | 304<br>(223 - 397)       |
| Epilepsy                                            | 64<br>(45 - 81)          | 0<br>(0 - 1)     | 1<br>(1 - 1)      | 26<br>(19 - 34)    | 20<br>(13 - 26)    | 18<br>(10 - 26)          |
| Multiple sclerosis                                  | 62<br>(26 - 94)          | --               | --                | 10<br>(4 - 17)     | 30<br>(11 - 48)    | 21<br>(9 - 34)           |
| Other neurological disorders                        | 290<br>(220 - 347)       | 4<br>(2 - 5)     | 1<br>(1 - 2)      | 26<br>(19 - 33)    | 116<br>(88 - 149)  | 143<br>(103 - 176)       |
| Mental and substance use disorders                  | 537<br>(374 - 679)       | 0<br>(0 - 0)     | 0<br>(0 - 0)      | 214<br>(156 - 263) | 238<br>(152 - 315) | 85<br>(51 - 109)         |
| Schizophrenia                                       | 14<br>(8 - 23)           | --               | --                | 0<br>(0 - 1)       | 3<br>(1 - 4)       | 11<br>(6 - 19)           |
| Alcohol use disorders                               | 333<br>(199 - 467)       | --               | --                | 63<br>(41 - 95)    | 206<br>(121 - 284) | 64<br>(33 - 86)          |
| Drug use disorders                                  | 189<br>(118 - 229)       | 0<br>(0 - 0)     | --                | 150<br>(99 - 186)  | 30<br>(17 - 39)    | 10<br>(7 - 14)           |
| Opioid use disorders                                | 70<br>(43 - 85)          | 0<br>(0 - 0)     | --                | 57<br>(35 - 70)    | 10<br>(5 - 14)     | 4<br>(2 - 5)             |
| Cocaine use disorders                               | 5<br>(3 - 6)             | 0<br>(0 - 0)     | --                | 4<br>(3 - 5)       | 1<br>(0 - 1)       | 0<br>(0 - 0)             |
| Amphetamine use disorders                           | 5<br>(3 - 6)             | 0<br>(0 - 0)     | --                | 4<br>(2 - 5)       | 1<br>(0 - 1)       | 0<br>(0 - 0)             |
| Other drug use disorders                            | 110<br>(69 - 133)        | 0<br>(0 - 0)     | --                | 86<br>(56 - 107)   | 18<br>(10 - 24)    | 6<br>(4 - 8)             |
| Eating disorders                                    | 0<br>(0 - 0)             | --               | 0<br>(0 - 0)      | 0<br>(0 - 0)       | --                 | --                       |
| Anorexia nervosa                                    | 0<br>(0 - 0)             | --               | 0<br>(0 - 0)      | 0<br>(0 - 0)       | --                 | --                       |
| Diabetes, urogenital, blood, and endocrine diseases | 2,234<br>(1,955 - 2,549) | 6<br>(3 - 9)     | 3<br>(1 - 4)      | 68<br>(53 - 80)    | 362<br>(306 - 417) | 1,795<br>(1,541 - 2,084) |
| Diabetes mellitus                                   | 1,083<br>(924 - 1,269)   | 0<br>(0 - 0)     | 0<br>(0 - 0)      | 37<br>(30 - 45)    | 217<br>(180 - 253) | 829<br>(680 - 1,000)     |
| Acute glomerulonephritis                            | 1<br>(1 - 2)             | 0<br>(0 - 0)     | 0<br>(0 - 0)      | 0<br>(0 - 0)       | 0<br>(0 - 1)       | 1<br>(0 - 2)             |
| Chronic kidney disease                              | 684<br>(539 - 876)       | 0<br>(0 - 0)     | 0<br>(0 - 0)      | 9<br>(7 - 12)      | 76<br>(58 - 100)   | 598<br>(466 - 773)       |
| Chronic kidney disease due to diabetes mellitus     | 108<br>(65 - 227)        | 0<br>(0 - 0)     | 0<br>(0 - 0)      | 3<br>(2 - 4)       | 22<br>(13 - 41)    | 83<br>(48 - 184)         |

Web Table 31- Sweden deaths with 95% UI by age, sex, and cause in 2013

| Cause                                               | Males, All Ages          | Males, 0-4 Years | Males, 5-14 Years | Males, 15-49 Years | Males, 50-69 Years | Males, 70-80 Years       |
|-----------------------------------------------------|--------------------------|------------------|-------------------|--------------------|--------------------|--------------------------|
| Chronic kidney disease due to hypertension          | 229<br>(123 - 305)       | 0<br>(0 - 0)     | 0<br>(0 - 0)      | 1<br>(0 - 2)       | 17<br>(9 - 26)     | 211<br>(110 - 283)       |
| Chronic kidney disease due to glomerulonephritis    | 24<br>(15 - 44)          | 0<br>(0 - 0)     | 0<br>(0 - 0)      | 1<br>(1 - 1)       | 4<br>(3 - 7)       | 19<br>(11 - 36)          |
| Chronic kidney disease due to other causes          | 323<br>(205 - 475)       | 0<br>(0 - 0)     | 0<br>(0 - 0)      | 5<br>(3 - 7)       | 33<br>(19 - 49)    | 285<br>(173 - 435)       |
| Urinary diseases and male infertility               | 282<br>(208 - 433)       | 0<br>(0 - 0)     | 0<br>(0 - 0)      | 2<br>(1 - 2)       | 19<br>(14 - 26)    | 261<br>(187 - 409)       |
| Interstitial nephritis and urinary tract infections | 245<br>(180 - 380)       | 0<br>(0 - 0)     | 0<br>(0 - 0)      | 1<br>(1 - 2)       | 14<br>(10 - 20)    | 230<br>(164 - 361)       |
| Urolithiasis                                        | 14<br>(7 - 25)           | --               | 0<br>(0 - 0)      | 0<br>(0 - 0)       | 2<br>(1 - 3)       | 12<br>(6 - 23)           |
| Other urinary diseases                              | 23<br>(11 - 44)          | 0<br>(0 - 0)     | 0<br>(0 - 0)      | 0<br>(0 - 1)       | 4<br>(2 - 5)       | 19<br>(8 - 38)           |
| Gynecological diseases                              | --                       | --               | --                | --                 | --                 | --                       |
| Uterine fibroids                                    | --                       | --               | --                | --                 | --                 | --                       |
| Polycystic ovarian syndrome                         | --                       | --               | --                | --                 | --                 | --                       |
| Endometriosis                                       | --                       | --               | --                | --                 | --                 | --                       |
| Genital prolapse                                    | --                       | --               | --                | --                 | --                 | --                       |
| Other gynecological diseases                        | --                       | --               | --                | --                 | --                 | --                       |
| Hemoglobinopathies and hemolytic anemias            | 31<br>(19 - 53)          | 0<br>(0 - 0)     | 0<br>(0 - 1)      | 1<br>(1 - 2)       | 4<br>(2 - 6)       | 25<br>(15 - 45)          |
| Thalassemias                                        | 0<br>(0 - 1)             | 0<br>(0 - 0)     | 0<br>(0 - 0)      | 0<br>(0 - 0)       | 0<br>(0 - 0)       | 0<br>(0 - 0)             |
| Sickle cell disorders                               | 3<br>(2 - 5)             | 0<br>(0 - 0)     | 0<br>(0 - 0)      | 1<br>(0 - 1)       | 1<br>(1 - 2)       | 1<br>(0 - 2)             |
| G6PD deficiency                                     | 0<br>(0 - 0)             | 0<br>(0 - 0)     | 0<br>(0 - 0)      | 0<br>(0 - 0)       | 0<br>(0 - 0)       | 0<br>(0 - 0)             |
| Other hemoglobinopathies and hemolytic anemias      | 27<br>(16 - 48)          | 0<br>(0 - 0)     | 0<br>(0 - 0)      | 0<br>(0 - 1)       | 2<br>(1 - 4)       | 25<br>(14 - 44)          |
| Endocrine, metabolic, blood, and immune disorders   | 153<br>(57 - 199)        | 6<br>(2 - 8)     | 2<br>(1 - 3)      | 18<br>(7 - 24)     | 46<br>(17 - 64)    | 81<br>(27 - 117)         |
| Musculoskeletal disorders                           | 118<br>(81 - 161)        | --               | 0<br>(0 - 1)      | 4<br>(3 - 5)       | 23<br>(17 - 34)    | 90<br>(60 - 126)         |
| Rheumatoid arthritis                                | 34<br>(22 - 53)          | --               | 0<br>(0 - 0)      | 1<br>(0 - 1)       | 7<br>(4 - 13)      | 27<br>(16 - 44)          |
| Other musculoskeletal disorders                     | 83<br>(54 - 116)         | --               | 0<br>(0 - 0)      | 4<br>(2 - 5)       | 16<br>(10 - 23)    | 63<br>(39 - 92)          |
| Other non-communicable diseases                     | 231<br>(193 - 273)       | 71<br>(52 - 94)  | 4<br>(3 - 6)      | 23<br>(19 - 28)    | 32<br>(26 - 38)    | 101<br>(67 - 135)        |
| Congenital anomalies                                | 132<br>(112 - 159)       | 58<br>(43 - 79)  | 4<br>(3 - 6)      | 22<br>(18 - 27)    | 25<br>(20 - 31)    | 24<br>(18 - 32)          |
| Neural tube defects                                 | 2<br>(1 - 3)             | 1<br>(1 - 2)     | 0<br>(0 - 0)      | 0<br>(0 - 1)       | 0<br>(0 - 0)       | 0<br>(0 - 0)             |
| Congenital heart anomalies                          | 36<br>(29 - 48)          | 17<br>(11 - 24)  | 2<br>(1 - 3)      | 9<br>(7 - 12)      | 5<br>(4 - 8)       | 4<br>(2 - 7)             |
| Cleft lip and cleft palate                          | 0<br>(0 - 0)             | 0<br>(0 - 0)     | --                | --                 | --                 | --                       |
| Down syndrome                                       | 18<br>(11 - 24)          | 2<br>(1 - 4)     | 0<br>(0 - 1)      | 3<br>(2 - 5)       | 11<br>(6 - 15)     | 2<br>(1 - 3)             |
| Chromosomal unbalanced rearrangements               | 10<br>(6 - 15)           | 9<br>(5 - 14)    | 0<br>(0 - 0)      | 0<br>(0 - 1)       | 0<br>(0 - 0)       | 0<br>(0 - 0)             |
| Other congenital anomalies                          | 66<br>(53 - 84)          | 29<br>(20 - 42)  | 2<br>(1 - 3)      | 9<br>(6 - 12)      | 8<br>(5 - 12)      | 18<br>(13 - 25)          |
| Skin and subcutaneous diseases                      | 86<br>(45 - 119)         | 0<br>(0 - 0)     | 0<br>(0 - 0)      | 1<br>(1 - 2)       | 7<br>(4 - 10)      | 78<br>(41 - 110)         |
| Cellulitis                                          | 5<br>(2 - 9)             | 0<br>(0 - 0)     | 0<br>(0 - 0)      | 0<br>(0 - 0)       | 1<br>(0 - 1)       | 4<br>(1 - 8)             |
| Pyoderma                                            | 67<br>(30 - 94)          | 0<br>(0 - 0)     | 0<br>(0 - 0)      | 1<br>(0 - 1)       | 6<br>(2 - 7)       | 60<br>(26 - 87)          |
| Decubitus ulcer                                     | 11<br>(6 - 19)           | 0<br>(0 - 0)     | 0<br>(0 - 0)      | 0<br>(0 - 0)       | 1<br>(0 - 1)       | 10<br>(5 - 18)           |
| Other skin and subcutaneous diseases                | 4<br>(2 - 9)             | 0<br>(0 - 0)     | 0<br>(0 - 0)      | 0<br>(0 - 0)       | 0<br>(0 - 1)       | 4<br>(1 - 9)             |
| Sudden infant death syndrome                        | 12<br>(6 - 22)           | 12<br>(6 - 22)   | --                | --                 | --                 | --                       |
| Injuries                                            | 2,872<br>(2,490 - 3,259) | 11<br>(7 - 15)   | 16<br>(13 - 20)   | 801<br>(714 - 923) | 726<br>(631 - 863) | 1,318<br>(1,010 - 1,618) |
| Transport injuries                                  | 384<br>(338 - 432)       | 3<br>(2 - 4)     | 7<br>(5 - 9)      | 176<br>(149 - 204) | 109<br>(91 - 128)  | 89<br>(74 - 109)         |
| Road injuries                                       | 341<br>(309 - 385)       | 2<br>(2 - 4)     | 6<br>(4 - 8)      | 157<br>(134 - 183) | 92<br>(75 - 109)   | 84<br>(69 - 102)         |
| Pedestrian road injuries                            | 47<br>(22 - 75)          | 1<br>(0 - 1)     | 2<br>(1 - 3)      | 11<br>(5 - 20)     | 12<br>(5 - 20)     | 22<br>(11 - 35)          |

Web Table 31- Sweden deaths with 95% UI by age, sex, and cause in 2013

| Cause                                           | Males, All Ages          | Males, 0-4 Years | Males, 5-14 Years | Males, 15-49 Years | Males, 50-69 Years | Males, 70-80 Years     |
|-------------------------------------------------|--------------------------|------------------|-------------------|--------------------|--------------------|------------------------|
| Cyclist road injuries                           | 30<br>(20 - 46)          | 0<br>(0 - 0)     | 1<br>(1 - 2)      | 7<br>(4 - 11)      | 9<br>(5 - 13)      | 14<br>(8 - 23)         |
| Motorcyclist road injuries                      | 49<br>(27 - 65)          | 0<br>(0 - 0)     | 1<br>(0 - 1)      | 35<br>(19 - 48)    | 9<br>(4 - 13)      | 5<br>(3 - 8)           |
| Motor vehicle road injuries                     | 213<br>(172 - 262)       | 1<br>(1 - 2)     | 3<br>(2 - 4)      | 104<br>(84 - 129)  | 62<br>(49 - 78)    | 43<br>(30 - 59)        |
| Other road injuries                             | 2<br>(1 - 4)             | 0<br>(0 - 0)     | 0<br>(0 - 0)      | 0<br>(0 - 1)       | 1<br>(0 - 2)       | 1<br>(0 - 1)           |
| Other transport injuries                        | 43<br>(30 - 55)          | 0<br>(0 - 0)     | 1<br>(0 - 1)      | 18<br>(12 - 25)    | 17<br>(12 - 25)    | 6<br>(3 - 9)           |
| Unintentional injuries                          | 1,379<br>(1,055 - 1,686) | 7<br>(4 - 10)    | 7<br>(5 - 9)      | 122<br>(104 - 162) | 228<br>(191 - 279) | 1,016<br>(692 - 1,317) |
| Falls                                           | 929<br>(648 - 1,193)     | 0<br>(0 - 1)     | 1<br>(0 - 1)      | 32<br>(25 - 43)    | 107<br>(82 - 138)  | 790<br>(531 - 1,048)   |
| Drowning                                        | 104<br>(75 - 173)        | 2<br>(1 - 5)     | 3<br>(2 - 6)      | 34<br>(25 - 60)    | 38<br>(27 - 67)    | 26<br>(17 - 38)        |
| Fire, heat, and hot substances                  | 63<br>(46 - 85)          | 1<br>(1 - 2)     | 1<br>(0 - 1)      | 13<br>(9 - 18)     | 21<br>(14 - 30)    | 28<br>(19 - 39)        |
| Poisonings                                      | 16<br>(12 - 33)          | 0<br>(0 - 0)     | 0<br>(0 - 0)      | 7<br>(5 - 15)      | 6<br>(4 - 14)      | 2<br>(2 - 4)           |
| Exposure to mechanical forces                   | 51<br>(44 - 61)          | 1<br>(1 - 1)     | 1<br>(1 - 2)      | 21<br>(17 - 27)    | 18<br>(14 - 22)    | 10<br>(8 - 13)         |
| Unintentional firearm injuries                  | 2<br>(2 - 3)             | 0<br>(0 - 0)     | 0<br>(0 - 0)      | 1<br>(1 - 2)       | 1<br>(0 - 1)       | 0<br>(0 - 0)           |
| Unintentional suffocation                       | 5<br>(2 - 6)             | 0<br>(0 - 1)     | 0<br>(0 - 0)      | 2<br>(1 - 2)       | 1<br>(0 - 1)       | 1<br>(1 - 3)           |
| Other exposure to mechanical forces             | 45<br>(37 - 54)          | 0<br>(0 - 1)     | 1<br>(1 - 1)      | 19<br>(14 - 24)    | 16<br>(13 - 20)    | 9<br>(6 - 11)          |
| Adverse effects of medical treatment            | 98<br>(16 - 196)         | 1<br>(0 - 1)     | 0<br>(0 - 0)      | 2<br>(1 - 4)       | 9<br>(2 - 16)      | 87<br>(12 - 180)       |
| Animal contact                                  | 4<br>(3 - 9)             | 0<br>(0 - 0)     | 0<br>(0 - 0)      | 1<br>(0 - 1)       | 2<br>(1 - 3)       | 2<br>(1 - 3)           |
| Venomous animal contact                         | 2<br>(1 - 4)             | 0<br>(0 - 0)     | 0<br>(0 - 0)      | 0<br>(0 - 1)       | 1<br>(0 - 2)       | 0<br>(0 - 1)           |
| Non-venomous animal contact                     | 3<br>(2 - 5)             | 0<br>(0 - 0)     | 0<br>(0 - 0)      | 0<br>(0 - 1)       | 1<br>(1 - 2)       | 1<br>(1 - 2)           |
| Foreign body                                    | 98<br>(57 - 163)         | 1<br>(1 - 2)     | 0<br>(0 - 1)      | 8<br>(4 - 12)      | 23<br>(13 - 38)    | 66<br>(36 - 112)       |
| Pulmonary aspiration and foreign body in airway | 98<br>(56 - 162)         | 1<br>(0 - 2)     | 0<br>(0 - 1)      | 8<br>(4 - 12)      | 23<br>(13 - 38)    | 66<br>(36 - 112)       |
| Foreign body in other body part                 | 1<br>(1 - 1)             | 0<br>(0 - 0)     | 0<br>(0 - 0)      | 0<br>(0 - 0)       | 0<br>(0 - 0)       | 0<br>(0 - 1)           |
| Other unintentional injuries                    | 15<br>(11 - 20)          | 0<br>(0 - 1)     | 0<br>(0 - 1)      | 4<br>(3 - 6)       | 5<br>(3 - 7)       | 6<br>(3 - 9)           |
| Self-harm and interpersonal violence            | 1,109<br>(937 - 1,428)   | 1<br>(1 - 2)     | 2<br>(2 - 3)      | 504<br>(429 - 617) | 389<br>(311 - 499) | 213<br>(167 - 303)     |
| Self-harm                                       | 1,035<br>(865 - 1,352)   | --               | 1<br>(1 - 2)      | 457<br>(385 - 565) | 369<br>(294 - 477) | 208<br>(162 - 298)     |
| Interpersonal violence                          | 74<br>(48 - 107)         | 1<br>(1 - 2)     | 1<br>(1 - 2)      | 47<br>(29 - 69)    | 20<br>(13 - 30)    | 6<br>(3 - 8)           |
| Assault by firearm                              | 15<br>(6 - 24)           | 0<br>(0 - 0)     | 0<br>(0 - 0)      | 11<br>(5 - 18)     | 2<br>(1 - 4)       | 1<br>(0 - 2)           |
| Assault by sharp object                         | 27<br>(16 - 44)          | 0<br>(0 - 0)     | 0<br>(0 - 1)      | 18<br>(10 - 29)    | 7<br>(4 - 12)      | 1<br>(1 - 3)           |
| Assault by other means                          | 33<br>(20 - 49)          | 1<br>(0 - 1)     | 0<br>(0 - 1)      | 18<br>(10 - 27)    | 10<br>(6 - 17)     | 3<br>(2 - 5)           |

Web Table 31- Sweden deaths with 95% UI by age, sex, and cause in 2013

| Cause                                                             | Females, All Ages           | Females, 0-4 Years | Females, 5-14 Years | Females, 15-49 Years   | Females, 50-69 Years     | Females, 70-80 Years        |
|-------------------------------------------------------------------|-----------------------------|--------------------|---------------------|------------------------|--------------------------|-----------------------------|
| All causes                                                        | 47,131<br>(44,117 - 50,070) | 136<br>(108 - 174) | 34<br>(30 - 39)     | 1,031<br>(923 - 1,136) | 5,883<br>(5,371 - 6,388) | 40,047<br>(37,645 - 42,390) |
| Communicable, maternal, neonatal, and nutritional diseases        | 2,292<br>(1,705 - 3,262)    | 54<br>(40 - 73)    | 3<br>(2 - 4)        | 31<br>(26 - 36)        | 103<br>(85 - 126)        | 2,101<br>(1,527 - 3,066)    |
| HIV/AIDS and tuberculosis                                         | 65<br>(46 - 89)             | 0<br>(0 - 0)       | 0<br>(0 - 0)        | 5<br>(3 - 7)           | 7<br>(5 - 10)            | 53<br>(35 - 77)             |
| Tuberculosis                                                      | 60<br>(41 - 83)             | 0<br>(0 - 0)       | 0<br>(0 - 0)        | 1<br>(1 - 1)           | 6<br>(4 - 8)             | 53<br>(35 - 77)             |
| HIV/AIDS                                                          | 5<br>(3 - 9)                | 0<br>(0 - 0)       | 0<br>(0 - 0)        | 4<br>(2 - 6)           | 1<br>(1 - 3)             | 0<br>(0 - 1)                |
| HIV/AIDS resulting in mycobacterial infection                     | 0<br>(0 - 0)                | 0<br>(0 - 0)       | 0<br>(0 - 0)        | 0<br>(0 - 0)           | 0<br>(0 - 0)             | 0<br>(0 - 0)                |
| HIV/AIDS resulting in other diseases                              | 5<br>(3 - 9)                | 0<br>(0 - 0)       | 0<br>(0 - 0)        | 4<br>(2 - 6)           | 1<br>(1 - 3)             | 0<br>(0 - 1)                |
| Diarrhea, lower respiratory, and other common infectious diseases | 1,883<br>(1,330 - 2,885)    | 7<br>(4 - 9)       | 2<br>(1 - 3)        | 16<br>(13 - 21)        | 76<br>(60 - 97)          | 1,782<br>(1,242 - 2,771)    |
| Diarrheal diseases                                                | 223<br>(124 - 370)          | 1<br>(1 - 2)       | 0<br>(0 - 0)        | 1<br>(1 - 2)           | 7<br>(4 - 10)            | 214<br>(113 - 360)          |
| Intestinal infectious diseases                                    | 5<br>(1 - 11)               | 1<br>(0 - 2)       | 1<br>(0 - 2)        | 2<br>(0 - 5)           | 1<br>(0 - 2)             | 1<br>(0 - 3)                |
| Typhoid fever                                                     | 4<br>(1 - 9)                | 0<br>(0 - 1)       | 1<br>(0 - 2)        | 1<br>(0 - 4)           | 1<br>(0 - 1)             | 1<br>(0 - 2)                |
| Paratyphoid fever                                                 | 1<br>(0 - 2)                | 0<br>(0 - 0)       | 0<br>(0 - 0)        | 0<br>(0 - 1)           | 0<br>(0 - 0)             | 0<br>(0 - 0)                |
| Other intestinal infectious diseases                              | 0<br>(0 - 3)                | 0<br>(0 - 1)       | 0<br>(0 - 0)        | 0<br>(0 - 1)           | 0<br>(0 - 1)             | 0<br>(0 - 2)                |
| Lower respiratory infections                                      | 1,623<br>(1,090 - 2,609)    | 3<br>(2 - 4)       | 1<br>(0 - 1)        | 10<br>(8 - 13)         | 62<br>(48 - 83)          | 1,548<br>(1,019 - 2,507)    |
| Upper respiratory infections                                      | 1<br>(0 - 4)                | 0<br>(0 - 0)       | 0<br>(0 - 0)        | 0<br>(0 - 0)           | 0<br>(0 - 0)             | 1<br>(0 - 4)                |
| Otitis media                                                      | 1<br>(1 - 2)                | 0<br>(0 - 0)       | 0<br>(0 - 0)        | 0<br>(0 - 0)           | 0<br>(0 - 0)             | 1<br>(0 - 1)                |
| Meningitis                                                        | 18<br>(15 - 24)             | 1<br>(1 - 2)       | 0<br>(0 - 0)        | 1<br>(1 - 2)           | 4<br>(3 - 5)             | 11<br>(8 - 16)              |
| Pneumococcal meningitis                                           | 3<br>(2 - 5)                | 0<br>(0 - 0)       | 0<br>(0 - 0)        | 0<br>(0 - 0)           | 1<br>(0 - 1)             | 2<br>(1 - 4)                |
| H influenzae type B meningitis                                    | 2<br>(1 - 3)                | 0<br>(0 - 1)       | 0<br>(0 - 0)        | 0<br>(0 - 0)           | 0<br>(0 - 1)             | 1<br>(0 - 2)                |
| Meningococcal meningitis                                          | 6<br>(4 - 9)                | 0<br>(0 - 1)       | 0<br>(0 - 0)        | 1<br>(0 - 1)           | 1<br>(1 - 2)             | 4<br>(2 - 6)                |
| Other meningitis                                                  | 6<br>(4 - 9)                | 0<br>(0 - 1)       | 0<br>(0 - 0)        | 1<br>(0 - 1)           | 2<br>(1 - 3)             | 4<br>(2 - 6)                |
| Encephalitis                                                      | 6<br>(3 - 9)                | 0<br>(0 - 1)       | 0<br>(0 - 0)        | 1<br>(0 - 1)           | 2<br>(1 - 2)             | 3<br>(1 - 5)                |
| Diphtheria                                                        | 0<br>(0 - 0)                | 0<br>(0 - 0)       | 0<br>(0 - 0)        | 0<br>(0 - 0)           | 0<br>(0 - 0)             | --                          |
| Whooping cough                                                    | 0<br>(0 - 1)                | 0<br>(0 - 0)       | 0<br>(0 - 0)        | 0<br>(0 - 0)           | 0<br>(0 - 0)             | --                          |
| Tetanus                                                           | 1<br>(0 - 1)                | 0<br>(0 - 0)       | 0<br>(0 - 0)        | 0<br>(0 - 0)           | 0<br>(0 - 0)             | 0<br>(0 - 0)                |
| Measles                                                           | 0<br>(0 - 0)                | 0<br>(0 - 0)       | 0<br>(0 - 0)        | 0<br>(0 - 0)           | 0<br>(0 - 0)             | --                          |
| Varicella and herpes zoster                                       | 5<br>(1 - 22)               | 0<br>(0 - 1)       | 0<br>(0 - 0)        | 0<br>(0 - 1)           | 0<br>(0 - 1)             | 4<br>(0 - 21)               |
| Neglected tropical diseases and malaria                           | 2<br>(2 - 3)                | 0<br>(0 - 0)       | 0<br>(0 - 0)        | 1<br>(1 - 1)           | 1<br>(0 - 1)             | 1<br>(1 - 1)                |
| Cysticercosis                                                     | 0<br>(0 - 0)                | 0<br>(0 - 0)       | 0<br>(0 - 0)        | 0<br>(0 - 0)           | 0<br>(0 - 0)             | 0<br>(0 - 0)                |
| Cystic echinococcosis                                             | 0<br>(0 - 0)                | 0<br>(0 - 0)       | 0<br>(0 - 0)        | 0<br>(0 - 0)           | 0<br>(0 - 0)             | 0<br>(0 - 0)                |
| Dengue                                                            | 0<br>(0 - 1)                | 0<br>(0 - 0)       | 0<br>(0 - 0)        | 0<br>(0 - 0)           | 0<br>(0 - 0)             | 0<br>(0 - 0)                |
| Rabies                                                            | 0<br>(0 - 1)                | 0<br>(0 - 0)       | 0<br>(0 - 0)        | 0<br>(0 - 0)           | 0<br>(0 - 0)             | 0<br>(0 - 0)                |
| Other neglected tropical diseases                                 | 1<br>(1 - 1)                | 0<br>(0 - 0)       | 0<br>(0 - 0)        | 0<br>(0 - 0)           | 0<br>(0 - 0)             | 0<br>(0 - 1)                |
| Maternal disorders                                                | 4<br>(3 - 6)                | --                 | 0<br>(0 - 0)        | 4<br>(3 - 6)           | --                       | --                          |
| Maternal hemorrhage                                               | 0<br>(0 - 1)                | --                 | 0<br>(0 - 0)        | 0<br>(0 - 1)           | --                       | --                          |
| Maternal sepsis and other maternal infections                     | 0<br>(0 - 1)                | --                 | 0<br>(0 - 0)        | 0<br>(0 - 1)           | --                       | --                          |
| Maternal hypertensive disorders                                   | 1<br>(0 - 1)                | --                 | 0<br>(0 - 0)        | 1<br>(0 - 1)           | --                       | --                          |
| Maternal obstructed labor                                         | 0<br>(0 - 1)                | --                 | 0<br>(0 - 0)        | 0<br>(0 - 1)           | --                       | --                          |
| Maternal abortive outcome                                         | 1<br>(1 - 1)                | --                 | 0<br>(0 - 0)        | 1<br>(1 - 1)           | --                       | --                          |
| Indirect maternal deaths                                          | 0<br>(0 - 1)                | --                 | 0<br>(0 - 0)        | 0<br>(0 - 1)           | --                       | --                          |



Web Table 31- Sweden deaths with 95% UI by age, sex, and cause in 2013

| Cause                                                            | Females, All Ages           | Females, 0-4 Years | Females, 5-14 Years | Females, 15-49 Years | Females, 50-69 Years     | Females, 70-80 Years        |
|------------------------------------------------------------------|-----------------------------|--------------------|---------------------|----------------------|--------------------------|-----------------------------|
| Late maternal deaths                                             | 0<br>(0 - 1)                | --                 | 0<br>(0 - 0)        | 0<br>(0 - 1)         | --                       | --                          |
| Maternal deaths aggravated by HIV/AIDS                           | 0<br>(0 - 0)                | --                 | --                  | 0<br>(0 - 0)         | --                       | --                          |
| Other maternal disorders                                         | 1<br>(1 - 1)                | --                 | 0<br>(0 - 0)        | 1<br>(1 - 1)         | --                       | --                          |
| Neonatal disorders                                               | 47<br>(34 - 63)             | 47<br>(34 - 63)    | --                  | --                   | --                       | --                          |
| Neonatal preterm birth complications                             | 16<br>(9 - 25)              | 16<br>(9 - 25)     | --                  | --                   | --                       | --                          |
| Neonatal encephalopathy due to birth asphyxia and trauma         | 16<br>(9 - 23)              | 16<br>(9 - 23)     | --                  | --                   | --                       | --                          |
| Neonatal sepsis and other neonatal infections                    | 2<br>(0 - 7)                | 2<br>(0 - 7)       | --                  | --                   | --                       | --                          |
| Hemolytic disease and other neonatal jaundice                    | 0<br>(0 - 0)                | 0<br>(0 - 0)       | --                  | --                   | --                       | --                          |
| Other neonatal disorders                                         | 12<br>(6 - 18)              | 12<br>(6 - 18)     | --                  | --                   | --                       | --                          |
| Nutritional deficiencies                                         | 191<br>(110 - 266)          | 0<br>(0 - 0)       | 0<br>(0 - 0)        | 1<br>(1 - 2)         | 6<br>(3 - 8)             | 183<br>(103 - 258)          |
| Protein-energy malnutrition                                      | 41<br>(16 - 86)             | 0<br>(0 - 0)       | 0<br>(0 - 0)        | 0<br>(0 - 1)         | 2<br>(1 - 4)             | 39<br>(15 - 82)             |
| Iodine deficiency                                                | 0<br>(0 - 4)                | 0<br>(0 - 0)       | 0<br>(0 - 0)        | 0<br>(0 - 0)         | 0<br>(0 - 0)             | 0<br>(0 - 3)                |
| Iron-deficiency anemia                                           | 138<br>(67 - 199)           | 0<br>(0 - 0)       | 0<br>(0 - 0)        | 1<br>(0 - 1)         | 3<br>(1 - 5)             | 134<br>(65 - 194)           |
| Other nutritional deficiencies                                   | 11<br>(3 - 26)              | 0<br>(0 - 0)       | 0<br>(0 - 0)        | 0<br>(0 - 0)         | 0<br>(0 - 1)             | 10<br>(3 - 25)              |
| Other communicable, maternal, neonatal, and nutritional diseases | 99<br>(71 - 156)            | 1<br>(1 - 1)       | 0<br>(0 - 0)        | 3<br>(2 - 4)         | 13<br>(9 - 18)           | 82<br>(56 - 137)            |
| Sexually transmitted diseases excluding HIV                      | 5<br>(3 - 9)                | 0<br>(0 - 1)       | 0<br>(0 - 0)        | 0<br>(0 - 0)         | 0<br>(0 - 1)             | 4<br>(2 - 7)                |
| Syphilis                                                         | 4<br>(2 - 7)                | 0<br>(0 - 1)       | 0<br>(0 - 0)        | 0<br>(0 - 0)         | 0<br>(0 - 0)             | 3<br>(1 - 6)                |
| Chlamydial infection                                             | 0<br>(0 - 1)                | --                 | 0<br>(0 - 0)        | 0<br>(0 - 0)         | 0<br>(0 - 0)             | 0<br>(0 - 0)                |
| Gonococcal infection                                             | 1<br>(0 - 1)                | --                 | 0<br>(0 - 0)        | 0<br>(0 - 0)         | 0<br>(0 - 0)             | 0<br>(0 - 1)                |
| Other sexually transmitted diseases                              | 0<br>(0 - 0)                | --                 | 0<br>(0 - 0)        | 0<br>(0 - 0)         | 0<br>(0 - 0)             | 0<br>(0 - 0)                |
| Hepatitis                                                        | 2<br>(1 - 2)                | 0<br>(0 - 0)       | 0<br>(0 - 0)        | 0<br>(0 - 1)         | 0<br>(0 - 1)             | 1<br>(0 - 1)                |
| Acute hepatitis A                                                | 0<br>(0 - 1)                | 0<br>(0 - 0)       | 0<br>(0 - 0)        | 0<br>(0 - 0)         | 0<br>(0 - 0)             | 0<br>(0 - 0)                |
| Acute hepatitis B                                                | 1<br>(1 - 2)                | 0<br>(0 - 0)       | 0<br>(0 - 0)        | 0<br>(0 - 0)         | 0<br>(0 - 1)             | 1<br>(0 - 1)                |
| Acute hepatitis C                                                | 0<br>(0 - 1)                | --                 | 0<br>(0 - 0)        | 0<br>(0 - 0)         | 0<br>(0 - 0)             | 0<br>(0 - 0)                |
| Other infectious diseases                                        | 93<br>(65 - 148)            | 1<br>(0 - 1)       | 0<br>(0 - 0)        | 2<br>(2 - 3)         | 12<br>(8 - 17)           | 77<br>(51 - 130)            |
| Non-communicable diseases                                        | 43,016<br>(40,103 - 45,829) | 74<br>(57 - 96)    | 22<br>(19 - 26)     | 748<br>(664 - 831)   | 5,510<br>(5,019 - 5,998) | 36,661<br>(34,320 - 38,912) |
| Neoplasms                                                        | 10,456<br>(8,740 - 11,665)  | 6<br>(4 - 9)       | 11<br>(9 - 14)      | 455<br>(401 - 508)   | 3,208<br>(2,791 - 3,556) | 6,776<br>(5,497 - 7,677)    |
| Esophageal cancer                                                | 103<br>(86 - 122)           | --                 | --                  | 2<br>(1 - 2)         | 29<br>(23 - 37)          | 72<br>(57 - 89)             |
| Stomach cancer                                                   | 436<br>(318 - 606)          | --                 | --                  | 13<br>(9 - 17)       | 85<br>(63 - 112)         | 338<br>(234 - 488)          |
| Liver cancer                                                     | 257<br>(193 - 333)          | --                 | 0<br>(0 - 0)        | 7<br>(5 - 9)         | 64<br>(46 - 87)          | 187<br>(131 - 256)          |
| Liver cancer due to hepatitis B                                  | 42<br>(9 - 92)              | --                 | 0<br>(0 - 0)        | 2<br>(0 - 3)         | 15<br>(2 - 30)           | 26<br>(6 - 58)              |
| Liver cancer due to hepatitis C                                  | 143<br>(72 - 210)           | --                 | 0<br>(0 - 0)        | 3<br>(2 - 5)         | 34<br>(18 - 51)          | 105<br>(49 - 163)           |
| Liver cancer due to alcohol use                                  | 49<br>(18 - 96)             | --                 | --                  | 1<br>(0 - 1)         | 9<br>(4 - 17)            | 40<br>(13 - 82)             |
| Liver cancer due to other causes                                 | 23<br>(6 - 43)              | --                 | 0<br>(0 - 0)        | 1<br>(0 - 2)         | 7<br>(2 - 13)            | 16<br>(4 - 31)              |
| Larynx cancer                                                    | 9<br>(6 - 13)               | --                 | --                  | 0<br>(0 - 1)         | 4<br>(2 - 5)             | 5<br>(3 - 7)                |
| Tracheal, bronchus and lung cancer                               | 1,596<br>(946 - 1,952)      | --                 | --                  | 49<br>(38 - 63)      | 689<br>(436 - 842)       | 858<br>(439 - 1,104)        |
| Breast cancer                                                    | 1,491<br>(1,114 - 1,763)    | --                 | --                  | 122<br>(89 - 150)    | 548<br>(420 - 655)       | 821<br>(585 - 1,012)        |
| Cervical cancer                                                  | 237<br>(172 - 294)          | --                 | --                  | 28<br>(17 - 37)      | 75<br>(56 - 94)          | 134<br>(93 - 182)           |
| Uterine cancer                                                   | 251<br>(155 - 315)          | --                 | --                  | 3<br>(2 - 5)         | 68<br>(47 - 89)          | 180<br>(101 - 236)          |
| Prostate cancer                                                  | --                          | --                 | --                  | --                   | --                       | --                          |

Web Table 31- Sweden deaths with 95% UI by age, sex, and cause in 2013

| Cause                                         | Females, All Ages           | Females, 0-4 Years | Females, 5-14 Years | Females, 15-49 Years | Females, 50-69 Years     | Females, 70-80 Years        |
|-----------------------------------------------|-----------------------------|--------------------|---------------------|----------------------|--------------------------|-----------------------------|
| Colon and rectum cancer                       | 1,794<br>(1,482 - 2,180)    | --                 | --                  | 34<br>(28 - 40)      | 367<br>(318 - 424)       | 1,394<br>(1,110 - 1,755)    |
| Lip and oral cavity cancer                    | 63<br>(50 - 80)             | --                 | --                  | 4<br>(3 - 5)         | 17<br>(14 - 22)          | 42<br>(31 - 58)             |
| Nasopharynx cancer                            | 8<br>(4 - 17)               | --                 | 0<br>(0 - 0)        | 1<br>(0 - 2)         | 3<br>(2 - 7)             | 4<br>(2 - 8)                |
| Other pharynx cancer                          | 19<br>(14 - 25)             | --                 | --                  | 1<br>(1 - 2)         | 8<br>(6 - 12)            | 9<br>(6 - 13)               |
| Gallbladder and biliary tract cancer          | 336<br>(239 - 476)          | --                 | --                  | 6<br>(4 - 9)         | 94<br>(71 - 133)         | 235<br>(155 - 346)          |
| Pancreatic cancer                             | 747<br>(639 - 866)          | --                 | --                  | 16<br>(13 - 20)      | 253<br>(214 - 296)       | 478<br>(395 - 579)          |
| Malignant skin melanoma                       | 183<br>(109 - 233)          | --                 | --                  | 20<br>(14 - 27)      | 61<br>(40 - 79)          | 102<br>(54 - 139)           |
| Non-melanoma skin cancer                      | 36<br>(24 - 50)             | --                 | --                  | 1<br>(1 - 1)         | 3<br>(2 - 4)             | 32<br>(20 - 45)             |
| Ovarian cancer                                | 621<br>(517 - 731)          | --                 | --                  | 33<br>(25 - 41)      | 261<br>(217 - 311)       | 327<br>(245 - 412)          |
| Testicular cancer                             | --                          | --                 | --                  | --                   | --                       | --                          |
| Kidney cancer                                 | 232<br>(162 - 302)          | 0<br>(0 - 1)       | 0<br>(0 - 1)        | 5<br>(3 - 7)         | 69<br>(51 - 92)          | 157<br>(104 - 224)          |
| Bladder cancer                                | 183<br>(114 - 254)          | --                 | --                  | 2<br>(1 - 3)         | 28<br>(18 - 40)          | 153<br>(91 - 217)           |
| Brain and nervous system cancer               | 263<br>(186 - 315)          | 1<br>(1 - 2)       | 4<br>(3 - 6)        | 38<br>(28 - 47)      | 123<br>(93 - 152)        | 97<br>(60 - 126)            |
| Thyroid cancer                                | 46<br>(35 - 62)             | --                 | 0<br>(0 - 0)        | 1<br>(1 - 2)         | 10<br>(7 - 14)           | 35<br>(25 - 50)             |
| Mesothelioma                                  | 29<br>(20 - 50)             | --                 | --                  | 1<br>(1 - 2)         | 10<br>(6 - 16)           | 18<br>(11 - 32)             |
| Hodgkin lymphoma                              | 20<br>(13 - 27)             | 0<br>(0 - 0)       | 0<br>(0 - 0)        | 4<br>(3 - 5)         | 5<br>(3 - 7)             | 11<br>(7 - 17)              |
| Non-Hodgkin lymphoma                          | 339<br>(166 - 497)          | 0<br>(0 - 0)       | 0<br>(0 - 1)        | 12<br>(6 - 19)       | 79<br>(39 - 123)         | 248<br>(117 - 364)          |
| Multiple myeloma                              | 237<br>(147 - 380)          | --                 | --                  | 4<br>(2 - 7)         | 60<br>(36 - 97)          | 174<br>(105 - 288)          |
| Leukemia                                      | 367<br>(288 - 440)          | 2<br>(1 - 3)       | 4<br>(2 - 5)        | 21<br>(16 - 25)      | 75<br>(60 - 93)          | 267<br>(194 - 330)          |
| Other neoplasms                               | 552<br>(356 - 713)          | 2<br>(2 - 3)       | 3<br>(2 - 4)        | 27<br>(20 - 34)      | 121<br>(85 - 152)        | 400<br>(228 - 548)          |
| Cardiovascular diseases                       | 20,914<br>(18,608 - 24,185) | 1<br>(1 - 2)       | 1<br>(1 - 1)        | 102<br>(76 - 126)    | 1,239<br>(1,046 - 1,679) | 19,571<br>(17,313 - 22,492) |
| Rheumatic heart disease                       | 106<br>(74 - 164)           | 0<br>(0 - 0)       | 0<br>(0 - 0)        | 1<br>(1 - 2)         | 13<br>(9 - 21)           | 91<br>(61 - 145)            |
| Ischemic heart disease                        | 11,435<br>(9,643 - 14,916)  | 0<br>(0 - 0)       | 0<br>(0 - 0)        | 37<br>(26 - 49)      | 702<br>(568 - 1,036)     | 10,697<br>(9,015 - 13,845)  |
| Cerebrovascular disease                       | 5,432<br>(4,224 - 6,999)    | 0<br>(0 - 0)       | 0<br>(0 - 0)        | 34<br>(23 - 44)      | 299<br>(225 - 429)       | 5,099<br>(3,901 - 6,564)    |
| Ischemic stroke                               | 3,593<br>(2,691 - 4,675)    | 0<br>(0 - 0)       | 0<br>(0 - 0)        | 4<br>(2 - 6)         | 92<br>(63 - 151)         | 3,497<br>(2,594 - 4,567)    |
| Hemorrhagic stroke                            | 1,840<br>(1,316 - 2,638)    | 0<br>(0 - 0)       | 0<br>(0 - 0)        | 30<br>(20 - 39)      | 207<br>(157 - 290)       | 1,602<br>(1,106 - 2,319)    |
| Hypertensive heart disease                    | 432<br>(191 - 668)          | 0<br>(0 - 0)       | 0<br>(0 - 0)        | 1<br>(0 - 1)         | 14<br>(6 - 21)           | 417<br>(185 - 649)          |
| Cardiomyopathy and myocarditis                | 337<br>(203 - 454)          | 1<br>(1 - 1)       | 1<br>(0 - 1)        | 14<br>(9 - 19)       | 45<br>(31 - 64)          | 277<br>(145 - 387)          |
| Atrial fibrillation and flutter               | 1,484<br>(965 - 2,170)      | --                 | --                  | 0<br>(0 - 0)         | 21<br>(14 - 29)          | 1,463<br>(945 - 2,148)      |
| Aortic aneurysm                               | 448<br>(268 - 700)          | --                 | --                  | 4<br>(2 - 6)         | 61<br>(35 - 99)          | 383<br>(224 - 612)          |
| Peripheral vascular disease                   | 165<br>(109 - 240)          | --                 | --                  | 0<br>(0 - 0)         | 4<br>(3 - 7)             | 161<br>(105 - 234)          |
| Endocarditis                                  | 49<br>(29 - 80)             | 0<br>(0 - 0)       | 0<br>(0 - 0)        | 1<br>(1 - 2)         | 7<br>(4 - 11)            | 42<br>(24 - 69)             |
| Other cardiovascular and circulatory diseases | 1,026<br>(704 - 1,422)      | 0<br>(0 - 0)       | 0<br>(0 - 0)        | 9<br>(6 - 13)        | 73<br>(50 - 106)         | 943<br>(623 - 1,340)        |
| Chronic respiratory diseases                  | 1,919<br>(1,030 - 2,323)    | 1<br>(0 - 1)       | 1<br>(0 - 1)        | 15<br>(11 - 19)      | 259<br>(169 - 310)       | 1,644<br>(848 - 2,035)      |
| Chronic obstructive pulmonary disease         | 1,544<br>(818 - 1,898)      | 0<br>(0 - 0)       | 0<br>(0 - 0)        | 5<br>(3 - 8)         | 211<br>(132 - 260)       | 1,327<br>(670 - 1,666)      |
| Pneumoconiosis                                | 2<br>(1 - 4)                | 0<br>(0 - 0)       | 0<br>(0 - 0)        | 0<br>(0 - 0)         | 0<br>(0 - 0)             | 2<br>(1 - 3)                |
| Silicosis                                     | 0<br>(0 - 0)                | 0<br>(0 - 0)       | 0<br>(0 - 0)        | 0<br>(0 - 0)         | 0<br>(0 - 0)             | 0<br>(0 - 0)                |
| Asbestosis                                    | 0<br>(0 - 0)                | 0<br>(0 - 0)       | 0<br>(0 - 0)        | 0<br>(0 - 0)         | 0<br>(0 - 0)             | 0<br>(0 - 0)                |
| Coal workers pneumoconiosis                   | 0<br>(0 - 0)                | 0<br>(0 - 0)       | 0<br>(0 - 0)        | 0<br>(0 - 0)         | 0<br>(0 - 0)             | 0<br>(0 - 0)                |
| Other pneumoconiosis                          | 2<br>(1 - 3)                | 0<br>(0 - 0)       | 0<br>(0 - 0)        | 0<br>(0 - 0)         | 0<br>(0 - 0)             | 1<br>(1 - 3)                |

Web Table 31- Sweden deaths with 95% UI by age, sex, and cause in 2013

| Cause                                               | Females, All Ages        | Females, 0-4 Years | Females, 5-14 Years | Females, 15-49 Years | Females, 50-69 Years | Females, 70-80 Years     |
|-----------------------------------------------------|--------------------------|--------------------|---------------------|----------------------|----------------------|--------------------------|
| Asthma                                              | 154<br>(74 - 247)        | 0<br>(0 - 0)       | 0<br>(0 - 0)        | 5<br>(4 - 7)         | 18<br>(10 - 28)      | 131<br>(58 - 218)        |
| Interstitial lung disease and pulmonary sarcoidosis | 204<br>(90 - 347)        | 0<br>(0 - 0)       | 0<br>(0 - 0)        | 4<br>(2 - 6)         | 30<br>(15 - 52)      | 170<br>(68 - 296)        |
| Other chronic respiratory diseases                  | 15<br>(7 - 25)           | 0<br>(0 - 0)       | 0<br>(0 - 0)        | 0<br>(0 - 1)         | 1<br>(1 - 2)         | 14<br>(6 - 25)           |
| Cirrhosis                                           | 359<br>(301 - 420)       | 0<br>(0 - 0)       | 0<br>(0 - 0)        | 22<br>(17 - 27)      | 127<br>(106 - 149)   | 211<br>(166 - 261)       |
| Cirrhosis due to hepatitis B                        | 42<br>(13 - 73)          | 0<br>(0 - 0)       | 0<br>(0 - 0)        | 2<br>(1 - 5)         | 15<br>(5 - 27)       | 25<br>(7 - 47)           |
| Cirrhosis due to hepatitis C                        | 222<br>(161 - 283)       | 0<br>(0 - 0)       | 0<br>(0 - 0)        | 13<br>(8 - 18)       | 77<br>(51 - 100)     | 132<br>(94 - 178)        |
| Cirrhosis due to alcohol use                        | 63<br>(31 - 117)         | --                 | --                  | 2<br>(1 - 5)         | 20<br>(10 - 35)      | 41<br>(18 - 78)          |
| Cirrhosis due to other causes                       | 32<br>(15 - 58)          | 0<br>(0 - 0)       | 0<br>(0 - 0)        | 4<br>(2 - 7)         | 15<br>(7 - 27)       | 13<br>(6 - 26)           |
| Digestive diseases                                  | 1,165<br>(906 - 1,410)   | 0<br>(0 - 0)       | 0<br>(0 - 1)        | 12<br>(9 - 15)       | 109<br>(78 - 131)    | 1,043<br>(809 - 1,281)   |
| Peptic ulcer disease                                | 225<br>(147 - 315)       | 0<br>(0 - 0)       | 0<br>(0 - 0)        | 2<br>(1 - 3)         | 21<br>(13 - 30)      | 202<br>(128 - 288)       |
| Gastritis and duodenitis                            | 12<br>(5 - 25)           | 0<br>(0 - 0)       | 0<br>(0 - 0)        | 0<br>(0 - 1)         | 1<br>(1 - 2)         | 10<br>(4 - 23)           |
| Appendicitis                                        | 12<br>(6 - 21)           | 0<br>(0 - 0)       | 0<br>(0 - 0)        | 1<br>(0 - 1)         | 2<br>(1 - 3)         | 10<br>(5 - 18)           |
| Paralytic ileus and intestinal obstruction          | 188<br>(88 - 307)        | 0<br>(0 - 0)       | 0<br>(0 - 0)        | 2<br>(1 - 3)         | 16<br>(7 - 26)       | 170<br>(78 - 279)        |
| Inguinal, femoral, and abdominal hernia             | 28<br>(10 - 48)          | 0<br>(0 - 0)       | 0<br>(0 - 0)        | 0<br>(0 - 0)         | 2<br>(1 - 4)         | 26<br>(9 - 45)           |
| Inflammatory bowel disease                          | 99<br>(62 - 177)         | 0<br>(0 - 0)       | 0<br>(0 - 0)        | 1<br>(1 - 2)         | 8<br>(5 - 16)        | 90<br>(54 - 166)         |
| Vascular intestinal disorders                       | 204<br>(108 - 361)       | 0<br>(0 - 0)       | 0<br>(0 - 0)        | 1<br>(0 - 2)         | 17<br>(9 - 30)       | 187<br>(97 - 333)        |
| Gallbladder and biliary diseases                    | 145<br>(89 - 217)        | 0<br>(0 - 0)       | 0<br>(0 - 0)        | 1<br>(1 - 1)         | 8<br>(5 - 12)        | 136<br>(83 - 208)        |
| Pancreatitis                                        | 64<br>(36 - 94)          | 0<br>(0 - 0)       | 0<br>(0 - 0)        | 3<br>(2 - 4)         | 12<br>(7 - 18)       | 49<br>(25 - 76)          |
| Other digestive diseases                            | 186<br>(119 - 254)       | 0<br>(0 - 0)       | 0<br>(0 - 0)        | 2<br>(1 - 2)         | 20<br>(13 - 27)      | 164<br>(104 - 229)       |
| Neurological disorders                              | 5,431<br>(3,636 - 6,970) | 4<br>(2 - 5)       | 2<br>(1 - 2)        | 39<br>(31 - 48)      | 239<br>(198 - 284)   | 5,146<br>(3,354 - 6,662) |
| Alzheimer disease and other dementias               | 4,816<br>(2,983 - 6,365) | --                 | --                  | 0<br>(0 - 1)         | 87<br>(58 - 118)     | 4,729<br>(2,906 - 6,283) |
| Parkinson disease                                   | 247<br>(146 - 336)       | --                 | --                  | 0<br>(0 - 0)         | 13<br>(7 - 18)       | 234<br>(133 - 323)       |
| Epilepsy                                            | 41<br>(25 - 53)          | 0<br>(0 - 1)       | 1<br>(0 - 1)        | 13<br>(9 - 17)       | 10<br>(6 - 13)       | 18<br>(9 - 28)           |
| Multiple sclerosis                                  | 88<br>(48 - 123)         | --                 | --                  | 13<br>(8 - 21)       | 42<br>(24 - 63)      | 33<br>(15 - 49)          |
| Other neurological disorders                        | 239<br>(202 - 280)       | 3<br>(2 - 5)       | 1<br>(1 - 2)        | 13<br>(10 - 15)      | 88<br>(73 - 106)     | 133<br>(105 - 167)       |
| Mental and substance use disorders                  | 158<br>(107 - 209)       | 0<br>(0 - 0)       | 0<br>(0 - 0)        | 42<br>(32 - 57)      | 72<br>(41 - 111)     | 43<br>(27 - 61)          |
| Schizophrenia                                       | 23<br>(11 - 38)          | --                 | --                  | 0<br>(0 - 0)         | 2<br>(1 - 3)         | 21<br>(9 - 36)           |
| Alcohol use disorders                               | 79<br>(33 - 136)         | --                 | --                  | 16<br>(7 - 29)       | 52<br>(21 - 89)      | 12<br>(4 - 19)           |
| Drug use disorders                                  | 55<br>(45 - 66)          | 0<br>(0 - 0)       | --                  | 25<br>(20 - 33)      | 19<br>(14 - 24)      | 11<br>(8 - 15)           |
| Opioid use disorders                                | 19<br>(15 - 23)          | 0<br>(0 - 0)       | --                  | 9<br>(7 - 12)        | 6<br>(4 - 8)         | 4<br>(3 - 5)             |
| Cocaine use disorders                               | 2<br>(2 - 2)             | 0<br>(0 - 0)       | --                  | 1<br>(1 - 1)         | 1<br>(0 - 1)         | 0<br>(0 - 0)             |
| Amphetamine use disorders                           | 2<br>(2 - 3)             | 0<br>(0 - 0)       | --                  | 1<br>(1 - 1)         | 1<br>(1 - 1)         | 0<br>(0 - 1)             |
| Other drug use disorders                            | 32<br>(26 - 38)          | 0<br>(0 - 0)       | --                  | 14<br>(11 - 19)      | 11<br>(9 - 15)       | 6<br>(4 - 9)             |
| Eating disorders                                    | 1<br>(1 - 1)             | --                 | 0<br>(0 - 0)        | 1<br>(1 - 1)         | --                   | --                       |
| Anorexia nervosa                                    | 1<br>(1 - 1)             | --                 | 0<br>(0 - 0)        | 1<br>(1 - 1)         | --                   | --                       |
| Diabetes, urogenital, blood, and endocrine diseases | 2,047<br>(1,701 - 2,437) | 4<br>(2 - 6)       | 2<br>(1 - 3)        | 35<br>(27 - 42)      | 185<br>(153 - 220)   | 1,821<br>(1,496 - 2,198) |
| Diabetes mellitus                                   | 1,006<br>(784 - 1,280)   | 0<br>(0 - 0)       | 0<br>(0 - 0)        | 15<br>(12 - 19)      | 96<br>(78 - 123)     | 895<br>(671 - 1,165)     |
| Acute glomerulonephritis                            | 1<br>(1 - 2)             | 0<br>(0 - 0)       | 0<br>(0 - 0)        | 0<br>(0 - 0)         | 0<br>(0 - 0)         | 1<br>(0 - 1)             |
| Chronic kidney disease                              | 521<br>(330 - 675)       | 0<br>(0 - 0)       | 0<br>(0 - 0)        | 6<br>(4 - 7)         | 39<br>(29 - 50)      | 475<br>(292 - 628)       |
| Chronic kidney disease due to diabetes mellitus     | 64<br>(40 - 91)          | 0<br>(0 - 0)       | 0<br>(0 - 0)        | 1<br>(1 - 2)         | 11<br>(7 - 14)       | 52<br>(31 - 79)          |

Web Table 31- Sweden deaths with 95% UI by age, sex, and cause in 2013

| Cause                                               | Females, All Ages        | Females, 0-4 Years | Females, 5-14 Years | Females, 15-49 Years | Females, 50-69 Years | Females, 70-80 Years   |
|-----------------------------------------------------|--------------------------|--------------------|---------------------|----------------------|----------------------|------------------------|
| Chronic kidney disease due to hypertension          | 188<br>(96 - 272)        | 0<br>(0 - 0)       | 0<br>(0 - 0)        | 1<br>(0 - 1)         | 7<br>(3 - 11)        | 180<br>(92 - 262)      |
| Chronic kidney disease due to glomerulonephritis    | 16<br>(10 - 29)          | 0<br>(0 - 0)       | 0<br>(0 - 0)        | 1<br>(0 - 1)         | 2<br>(2 - 4)         | 13<br>(7 - 25)         |
| Chronic kidney disease due to other causes          | 252<br>(124 - 383)       | 0<br>(0 - 0)       | 0<br>(0 - 0)        | 3<br>(2 - 5)         | 19<br>(11 - 27)      | 230<br>(108 - 359)     |
| Urinary diseases and male infertility               | 316<br>(214 - 547)       | 0<br>(0 - 0)       | 0<br>(0 - 0)        | 3<br>(2 - 4)         | 18<br>(13 - 27)      | 295<br>(194 - 519)     |
| Interstitial nephritis and urinary tract infections | 296<br>(199 - 515)       | 0<br>(0 - 0)       | 0<br>(0 - 0)        | 2<br>(2 - 3)         | 16<br>(11 - 24)      | 278<br>(183 - 493)     |
| Urolithiasis                                        | 11<br>(5 - 22)           | --                 | 0<br>(0 - 0)        | 0<br>(0 - 0)         | 1<br>(1 - 2)         | 10<br>(4 - 20)         |
| Other urinary diseases                              | 9<br>(4 - 20)            | 0<br>(0 - 0)       | 0<br>(0 - 0)        | 0<br>(0 - 1)         | 1<br>(1 - 2)         | 7<br>(3 - 19)          |
| Gynecological diseases                              | 5<br>(3 - 8)             | --                 | --                  | 0<br>(0 - 0)         | 1<br>(0 - 1)         | 4<br>(2 - 7)           |
| Uterine fibroids                                    | 1<br>(1 - 2)             | --                 | --                  | 0<br>(0 - 0)         | 0<br>(0 - 0)         | 1<br>(1 - 2)           |
| Polycystic ovarian syndrome                         | 0<br>(0 - 0)             | --                 | --                  | 0<br>(0 - 0)         | 0<br>(0 - 0)         | --                     |
| Endometriosis                                       | 0<br>(0 - 0)             | --                 | --                  | 0<br>(0 - 0)         | 0<br>(0 - 0)         | --                     |
| Genital prolapse                                    | 1<br>(1 - 2)             | --                 | --                  | 0<br>(0 - 0)         | 0<br>(0 - 0)         | 1<br>(1 - 2)           |
| Other gynecological diseases                        | 2<br>(1 - 4)             | --                 | --                  | 0<br>(0 - 0)         | 0<br>(0 - 0)         | 2<br>(1 - 3)           |
| Hemoglobinopathies and hemolytic anemias            | 31<br>(19 - 57)          | 0<br>(0 - 0)       | 0<br>(0 - 0)        | 1<br>(1 - 2)         | 4<br>(2 - 6)         | 27<br>(16 - 50)        |
| Thalassemias                                        | 0<br>(0 - 1)             | 0<br>(0 - 0)       | 0<br>(0 - 0)        | 0<br>(0 - 0)         | 0<br>(0 - 0)         | 0<br>(0 - 0)           |
| Sickle cell disorders                               | 3<br>(2 - 5)             | 0<br>(0 - 0)       | 0<br>(0 - 0)        | 0<br>(0 - 1)         | 1<br>(1 - 2)         | 1<br>(1 - 2)           |
| G6PD deficiency                                     | 0<br>(0 - 0)             | 0<br>(0 - 0)       | 0<br>(0 - 0)        | 0<br>(0 - 0)         | 0<br>(0 - 0)         | 0<br>(0 - 0)           |
| Other hemoglobinopathies and hemolytic anemias      | 28<br>(17 - 52)          | 0<br>(0 - 0)       | 0<br>(0 - 0)        | 0<br>(0 - 1)         | 2<br>(1 - 4)         | 26<br>(15 - 48)        |
| Endocrine, metabolic, blood, and immune disorders   | 167<br>(70 - 228)        | 4<br>(1 - 6)       | 1<br>(1 - 2)        | 10<br>(4 - 14)       | 28<br>(12 - 38)      | 125<br>(50 - 182)      |
| Musculoskeletal disorders                           | 282<br>(206 - 400)       | --                 | 0<br>(0 - 0)        | 7<br>(6 - 9)         | 43<br>(33 - 61)      | 231<br>(159 - 344)     |
| Rheumatoid arthritis                                | 133<br>(87 - 194)        | --                 | 0<br>(0 - 0)        | 1<br>(1 - 1)         | 16<br>(11 - 24)      | 116<br>(72 - 176)      |
| Other musculoskeletal disorders                     | 149<br>(103 - 216)       | --                 | 0<br>(0 - 0)        | 6<br>(5 - 8)         | 26<br>(20 - 38)      | 116<br>(73 - 178)      |
| Other non-communicable diseases                     | 286<br>(223 - 365)       | 58<br>(43 - 80)    | 4<br>(3 - 6)        | 17<br>(13 - 22)      | 30<br>(24 - 39)      | 176<br>(110 - 251)     |
| Congenital anomalies                                | 119<br>(97 - 150)        | 48<br>(36 - 66)    | 4<br>(3 - 6)        | 17<br>(13 - 21)      | 24<br>(18 - 32)      | 26<br>(18 - 37)        |
| Neural tube defects                                 | 3<br>(2 - 4)             | 2<br>(1 - 3)       | 0<br>(0 - 0)        | 1<br>(0 - 1)         | 0<br>(0 - 0)         | 0<br>(0 - 0)           |
| Congenital heart anomalies                          | 32<br>(25 - 41)          | 14<br>(9 - 20)     | 2<br>(1 - 2)        | 6<br>(4 - 8)         | 5<br>(4 - 8)         | 6<br>(4 - 9)           |
| Cleft lip and cleft palate                          | 0<br>(0 - 0)             | 0<br>(0 - 0)       | --                  | --                   | --                   | --                     |
| Down syndrome                                       | 18<br>(11 - 25)          | 2<br>(1 - 4)       | 0<br>(0 - 0)        | 3<br>(1 - 4)         | 12<br>(7 - 17)       | 1<br>(1 - 2)           |
| Chromosomal unbalanced rearrangements               | 13<br>(8 - 20)           | 11<br>(7 - 19)     | 0<br>(0 - 0)        | 1<br>(0 - 1)         | 0<br>(0 - 0)         | 0<br>(0 - 0)           |
| Other congenital anomalies                          | 53<br>(41 - 69)          | 19<br>(13 - 28)    | 2<br>(1 - 3)        | 7<br>(5 - 9)         | 7<br>(4 - 10)        | 19<br>(13 - 28)        |
| Skin and subcutaneous diseases                      | 157<br>(92 - 231)        | 0<br>(0 - 0)       | 0<br>(0 - 0)        | 1<br>(1 - 1)         | 6<br>(4 - 8)         | 150<br>(85 - 224)      |
| Cellulitis                                          | 4<br>(2 - 9)             | 0<br>(0 - 0)       | 0<br>(0 - 0)        | 0<br>(0 - 0)         | 0<br>(0 - 1)         | 3<br>(1 - 8)           |
| Pyoderma                                            | 119<br>(53 - 180)        | 0<br>(0 - 0)       | 0<br>(0 - 0)        | 0<br>(0 - 1)         | 4<br>(2 - 6)         | 114<br>(49 - 175)      |
| Decubitus ulcer                                     | 23<br>(11 - 43)          | 0<br>(0 - 0)       | 0<br>(0 - 0)        | 0<br>(0 - 0)         | 1<br>(0 - 1)         | 22<br>(10 - 42)        |
| Other skin and subcutaneous diseases                | 11<br>(3 - 29)           | 0<br>(0 - 0)       | 0<br>(0 - 0)        | 0<br>(0 - 0)         | 1<br>(0 - 1)         | 10<br>(2 - 28)         |
| Sudden infant death syndrome                        | 10<br>(4 - 21)           | 0<br>(4 - 21)      | --                  | --                   | --                   | --                     |
| Injuries                                            | 1,823<br>(1,436 - 2,304) | 7<br>(5 - 10)      | 9<br>(7 - 11)       | 253<br>(220 - 306)   | 270<br>(230 - 362)   | 1,285<br>(910 - 1,734) |
| Transport injuries                                  | 146<br>(121 - 213)       | 2<br>(1 - 3)       | 4<br>(3 - 7)        | 47<br>(38 - 67)      | 38<br>(29 - 61)      | 55<br>(41 - 79)        |
| Road injuries                                       | 139<br>(115 - 204)       | 2<br>(1 - 3)       | 4<br>(3 - 6)        | 44<br>(35 - 63)      | 36<br>(28 - 59)      | 53<br>(40 - 78)        |
| Pedestrian road injuries                            | 36<br>(25 - 57)          | 1<br>(0 - 1)       | 1<br>(1 - 2)        | 4<br>(3 - 8)         | 7<br>(4 - 13)        | 23<br>(14 - 36)        |

Web Table 31- Sweden deaths with 95% UI by age, sex, and cause in 2013

| Cause                                           | Females, All Ages      | Females, 0-4 Years | Females, 5-14 Years | Females, 15-49 Years | Females, 50-69 Years | Females, 70-80 Years   |
|-------------------------------------------------|------------------------|--------------------|---------------------|----------------------|----------------------|------------------------|
| Cyclist road injuries                           | 13<br>(8 - 21)         | 0<br>(0 - 0)       | 0<br>(0 - 1)        | 3<br>(2 - 5)         | 4<br>(2 - 8)         | 5<br>(3 - 9)           |
| Motorcyclist road injuries                      | 5<br>(2 - 9)           | 0<br>(0 - 0)       | 0<br>(0 - 0)        | 4<br>(1 - 7)         | 1<br>(0 - 2)         | 0<br>(0 - 1)           |
| Motor vehicle road injuries                     | 83<br>(63 - 123)       | 1<br>(1 - 2)       | 2<br>(1 - 3)        | 32<br>(25 - 45)      | 23<br>(17 - 37)      | 25<br>(16 - 38)        |
| Other road injuries                             | 2<br>(1 - 4)           | 0<br>(0 - 0)       | 0<br>(0 - 0)        | 1<br>(0 - 2)         | 1<br>(0 - 1)         | 0<br>(0 - 1)           |
| Other transport injuries                        | 7<br>(5 - 12)          | 0<br>(0 - 0)       | 0<br>(0 - 1)        | 3<br>(2 - 6)         | 2<br>(1 - 3)         | 2<br>(1 - 3)           |
| Unintentional injuries                          | 1,244<br>(875 - 1,672) | 4<br>(3 - 6)       | 3<br>(2 - 4)        | 26<br>(22 - 33)      | 74<br>(59 - 89)      | 1,137<br>(777 - 1,566) |
| Falls                                           | 959<br>(660 - 1,381)   | 0<br>(0 - 0)       | 0<br>(0 - 0)        | 5<br>(4 - 7)         | 32<br>(22 - 43)      | 921<br>(628 - 1,347)   |
| Drowning                                        | 22<br>(16 - 33)        | 1<br>(1 - 2)       | 1<br>(1 - 1)        | 5<br>(4 - 9)         | 8<br>(5 - 11)        | 7<br>(5 - 10)          |
| Fire, heat, and hot substances                  | 38<br>(24 - 50)        | 1<br>(0 - 1)       | 1<br>(0 - 1)        | 5<br>(3 - 7)         | 8<br>(6 - 11)        | 23<br>(14 - 32)        |
| Poisonings                                      | 8<br>(6 - 14)          | 0<br>(0 - 0)       | 0<br>(0 - 0)        | 2<br>(2 - 4)         | 3<br>(2 - 6)         | 2<br>(1 - 4)           |
| Exposure to mechanical forces                   | 11<br>(8 - 13)         | 1<br>(0 - 1)       | 1<br>(0 - 1)        | 2<br>(2 - 3)         | 2<br>(2 - 3)         | 5<br>(3 - 7)           |
| Unintentional firearm injuries                  | 1<br>(1 - 1)           | 0<br>(0 - 0)       | 0<br>(0 - 0)        | 0<br>(0 - 0)         | 0<br>(0 - 0)         | 0<br>(0 - 0)           |
| Unintentional suffocation                       | 2<br>(1 - 4)           | 0<br>(0 - 0)       | 0<br>(0 - 0)        | 0<br>(0 - 1)         | 0<br>(0 - 0)         | 2<br>(1 - 3)           |
| Other exposure to mechanical forces             | 7<br>(6 - 9)           | 0<br>(0 - 1)       | 0<br>(0 - 1)        | 2<br>(1 - 2)         | 2<br>(1 - 2)         | 3<br>(2 - 5)           |
| Adverse effects of medical treatment            | 114<br>(20 - 219)      | 0<br>(0 - 1)       | 0<br>(0 - 0)        | 2<br>(1 - 3)         | 6<br>(2 - 11)        | 106<br>(16 - 207)      |
| Animal contact                                  | 3<br>(1 - 8)           | 0<br>(0 - 0)       | 0<br>(0 - 0)        | 1<br>(0 - 1)         | 1<br>(0 - 2)         | 1<br>(1 - 4)           |
| Venomous animal contact                         | 1<br>(0 - 2)           | 0<br>(0 - 0)       | 0<br>(0 - 0)        | 0<br>(0 - 0)         | 0<br>(0 - 1)         | 0<br>(0 - 1)           |
| Non-venomous animal contact                     | 2<br>(1 - 6)           | 0<br>(0 - 0)       | 0<br>(0 - 0)        | 0<br>(0 - 1)         | 1<br>(0 - 2)         | 1<br>(0 - 3)           |
| Foreign body                                    | 84<br>(52 - 148)       | 1<br>(0 - 1)       | 0<br>(0 - 0)        | 4<br>(2 - 6)         | 13<br>(8 - 21)       | 67<br>(39 - 124)       |
| Pulmonary aspiration and foreign body in airway | 82<br>(50 - 145)       | 1<br>(0 - 1)       | 0<br>(0 - 0)        | 3<br>(2 - 6)         | 12<br>(8 - 21)       | 65<br>(37 - 122)       |
| Foreign body in other body part                 | 3<br>(1 - 6)           | 0<br>(0 - 0)       | 0<br>(0 - 0)        | 0<br>(0 - 0)         | 0<br>(0 - 0)         | 2<br>(1 - 5)           |
| Other unintentional injuries                    | 5<br>(3 - 10)          | 0<br>(0 - 0)       | 0<br>(0 - 0)        | 0<br>(0 - 1)         | 1<br>(0 - 2)         | 3<br>(2 - 7)           |
| Self-harm and interpersonal violence            | 433<br>(372 - 590)     | 1<br>(1 - 2)       | 2<br>(1 - 2)        | 179<br>(152 - 221)   | 158<br>(128 - 224)   | 93<br>(71 - 159)       |
| Self-harm                                       | 401<br>(342 - 546)     | --                 | 1<br>(0 - 1)        | 163<br>(137 - 204)   | 151<br>(121 - 217)   | 87<br>(65 - 154)       |
| Interpersonal violence                          | 32<br>(23 - 45)        | 1<br>(1 - 2)       | 1<br>(1 - 2)        | 16<br>(12 - 23)      | 7<br>(5 - 11)        | 6<br>(4 - 9)           |
| Assault by firearm                              | 5<br>(3 - 8)           | 0<br>(0 - 0)       | 0<br>(0 - 0)        | 3<br>(1 - 5)         | 1<br>(1 - 2)         | 1<br>(0 - 2)           |
| Assault by sharp object                         | 12<br>(8 - 18)         | 0<br>(0 - 1)       | 0<br>(0 - 1)        | 7<br>(5 - 11)        | 3<br>(2 - 4)         | 2<br>(1 - 3)           |
| Assault by other means                          | 15<br>(10 - 22)        | 1<br>(1 - 1)       | 1<br>(0 - 1)        | 6<br>(4 - 9)         | 4<br>(2 - 5)         | 4<br>(2 - 5)           |

Web Table 31- Switzerland deaths with 95% UI by age, sex, and cause in 2013

| Cause                                                             | Both Sexes, All Ages        | Both Sexes, 0-4 Years | Both Sexes, 5-14 Years | Both Sexes, 15-49 Years  | Both Sexes, 50-69 Years     | Both Sexes, 70-80 Years     |
|-------------------------------------------------------------------|-----------------------------|-----------------------|------------------------|--------------------------|-----------------------------|-----------------------------|
| All causes                                                        | 65,389<br>(62,800 - 68,074) | 360<br>(315 - 414)    | 72<br>(66 - 79)        | 2,727<br>(2,564 - 2,907) | 10,662<br>(10,077 - 11,283) | 51,569<br>(49,651 - 53,615) |
| Communicable, maternal, neonatal, and nutritional diseases        | 2,710<br>(2,284 - 3,235)    | 160<br>(135 - 189)    | 5<br>(4 - 6)           | 140<br>(112 - 175)       | 226<br>(191 - 262)          | 2,178<br>(1,749 - 2,684)    |
| HIV/AIDS and tuberculosis                                         | 182<br>(135 - 242)          | 0<br>(0 - 0)          | 0<br>(0 - 0)           | 71<br>(45 - 104)         | 53<br>(32 - 80)             | 58<br>(46 - 80)             |
| Tuberculosis                                                      | 68<br>(55 - 95)             | 0<br>(0 - 0)          | 0<br>(0 - 0)           | 3<br>(2 - 4)             | 12<br>(9 - 17)              | 53<br>(42 - 74)             |
| HIV/AIDS                                                          | 115<br>(69 - 175)           | 0<br>(0 - 0)          | 0<br>(0 - 0)           | 68<br>(42 - 101)         | 41<br>(20 - 69)             | 6<br>(1 - 12)               |
| HIV/AIDS resulting in mycobacterial infection                     | 6<br>(3 - 9)                | 0<br>(0 - 0)          | 0<br>(0 - 0)           | 3<br>(2 - 5)             | 2<br>(1 - 4)                | 0<br>(0 - 1)                |
| HIV/AIDS resulting in other diseases                              | 109<br>(66 - 166)           | 0<br>(0 - 0)          | 0<br>(0 - 0)           | 64<br>(40 - 95)          | 39<br>(19 - 65)             | 5<br>(1 - 12)               |
| Diarrhea, lower respiratory, and other common infectious diseases | 2,118<br>(1,694 - 2,626)    | 20<br>(15 - 25)       | 4<br>(3 - 5)           | 38<br>(30 - 45)          | 132<br>(109 - 156)          | 1,924<br>(1,501 - 2,425)    |
| Diarrheal diseases                                                | 147<br>(102 - 206)          | 4<br>(3 - 6)          | 0<br>(0 - 0)           | 2<br>(2 - 3)             | 8<br>(6 - 11)               | 132<br>(88 - 190)           |
| Intestinal infectious diseases                                    | 4<br>(1 - 10)               | 1<br>(0 - 2)          | 1<br>(0 - 1)           | 2<br>(1 - 4)             | 1<br>(0 - 2)                | 1<br>(0 - 2)                |
| Typhoid fever                                                     | 3<br>(1 - 7)                | 0<br>(0 - 1)          | 0<br>(0 - 1)           | 1<br>(0 - 3)             | 0<br>(0 - 1)                | 0<br>(0 - 1)                |
| Paratyphoid fever                                                 | 1<br>(0 - 2)                | 0<br>(0 - 0)          | 0<br>(0 - 0)           | 0<br>(0 - 1)             | 0<br>(0 - 0)                | 0<br>(0 - 0)                |
| Other intestinal infectious diseases                              | 1<br>(0 - 3)                | 0<br>(0 - 1)          | 0<br>(0 - 0)           | 0<br>(0 - 1)             | 0<br>(0 - 1)                | 0<br>(0 - 2)                |
| Lower respiratory infections                                      | 1,888<br>(1,483 - 2,398)    | 8<br>(6 - 11)         | 1<br>(1 - 2)           | 23<br>(19 - 29)          | 107<br>(86 - 131)           | 1,747<br>(1,338 - 2,252)    |
| Upper respiratory infections                                      | 1<br>(0 - 4)                | 0<br>(0 - 0)          | 0<br>(0 - 0)           | 0<br>(0 - 0)             | 0<br>(0 - 1)                | 1<br>(0 - 3)                |
| Otitis media                                                      | 2<br>(1 - 2)                | 0<br>(0 - 0)          | 0<br>(0 - 0)           | 0<br>(0 - 1)             | 0<br>(0 - 0)                | 1<br>(0 - 1)                |
| Meningitis                                                        | 45<br>(38 - 67)             | 4<br>(3 - 6)          | 1<br>(0 - 1)           | 4<br>(3 - 5)             | 8<br>(7 - 11)               | 29<br>(22 - 46)             |
| Pneumococcal meningitis                                           | 8<br>(6 - 11)               | 0<br>(0 - 1)          | 0<br>(0 - 0)           | 1<br>(0 - 1)             | 2<br>(1 - 2)                | 5<br>(3 - 8)                |
| H influenzae type B meningitis                                    | 5<br>(4 - 7)                | 1<br>(1 - 2)          | 0<br>(0 - 0)           | 0<br>(0 - 1)             | 1<br>(0 - 1)                | 3<br>(2 - 4)                |
| Meningococcal meningitis                                          | 15<br>(11 - 24)             | 1<br>(1 - 2)          | 0<br>(0 - 0)           | 1<br>(1 - 2)             | 2<br>(2 - 4)                | 10<br>(6 - 17)              |
| Other meningitis                                                  | 17<br>(12 - 27)             | 1<br>(1 - 2)          | 0<br>(0 - 0)           | 1<br>(1 - 2)             | 3<br>(3 - 5)                | 11<br>(7 - 19)              |
| Encephalitis                                                      | 20<br>(6 - 31)              | 2<br>(1 - 4)          | 1<br>(0 - 2)           | 5<br>(1 - 7)             | 6<br>(2 - 10)               | 7<br>(2 - 11)               |
| Diphtheria                                                        | 0<br>(0 - 0)                | 0<br>(0 - 0)          | 0<br>(0 - 0)           | 0<br>(0 - 0)             | 0<br>(0 - 0)                | --                          |
| Whooping cough                                                    | 1<br>(0 - 1)                | 0<br>(0 - 0)          | 0<br>(0 - 0)           | 0<br>(0 - 0)             | 0<br>(0 - 0)                | --                          |
| Tetanus                                                           | 2<br>(1 - 3)                | 0<br>(0 - 0)          | 0<br>(0 - 0)           | 0<br>(0 - 0)             | 0<br>(0 - 1)                | 1<br>(0 - 3)                |
| Measles                                                           | 0<br>(0 - 0)                | 0<br>(0 - 0)          | 0<br>(0 - 0)           | 0<br>(0 - 0)             | 0<br>(0 - 0)                | --                          |
| Varicella and herpes zoster                                       | 8<br>(2 - 26)               | 0<br>(0 - 1)          | 0<br>(0 - 0)           | 1<br>(0 - 1)             | 1<br>(0 - 2)                | 6<br>(0 - 25)               |
| Neglected tropical diseases and malaria                           | 3<br>(2 - 3)                | 0<br>(0 - 0)          | 0<br>(0 - 0)           | 1<br>(1 - 1)             | 1<br>(1 - 1)                | 1<br>(1 - 1)                |
| Cysticercosis                                                     | 0<br>(0 - 0)                | 0<br>(0 - 0)          | 0<br>(0 - 0)           | 0<br>(0 - 0)             | 0<br>(0 - 0)                | 0<br>(0 - 0)                |
| Cystic echinococcosis                                             | 0<br>(0 - 1)                | 0<br>(0 - 0)          | 0<br>(0 - 0)           | 0<br>(0 - 0)             | 0<br>(0 - 0)                | 0<br>(0 - 0)                |
| Dengue                                                            | 1<br>(0 - 1)                | 0<br>(0 - 0)          | 0<br>(0 - 0)           | 0<br>(0 - 0)             | 0<br>(0 - 0)                | 0<br>(0 - 0)                |
| Rabies                                                            | 1<br>(0 - 1)                | 0<br>(0 - 0)          | 0<br>(0 - 0)           | 0<br>(0 - 0)             | 0<br>(0 - 0)                | 0<br>(0 - 0)                |
| Other neglected tropical diseases                                 | 1<br>(1 - 1)                | 0<br>(0 - 0)          | 0<br>(0 - 0)           | 0<br>(0 - 0)             | 0<br>(0 - 0)                | 0<br>(0 - 0)                |
| Maternal disorders                                                | 3<br>(2 - 4)                | --                    | 0<br>(0 - 0)           | 3<br>(2 - 4)             | --                          | --                          |
| Maternal hemorrhage                                               | 0<br>(0 - 1)                | --                    | 0<br>(0 - 0)           | 0<br>(0 - 1)             | --                          | --                          |
| Maternal sepsis and other maternal infections                     | 0<br>(0 - 1)                | --                    | 0<br>(0 - 0)           | 0<br>(0 - 1)             | --                          | --                          |
| Maternal hypertensive disorders                                   | 0<br>(0 - 1)                | --                    | 0<br>(0 - 0)           | 0<br>(0 - 1)             | --                          | --                          |
| Maternal obstructed labor                                         | 0<br>(0 - 0)                | --                    | 0<br>(0 - 0)           | 0<br>(0 - 0)             | --                          | --                          |
| Maternal abortive outcome                                         | 1<br>(0 - 1)                | --                    | 0<br>(0 - 0)           | 1<br>(0 - 1)             | --                          | --                          |
| Indirect maternal deaths                                          | 0<br>(0 - 1)                | --                    | 0<br>(0 - 0)           | 0<br>(0 - 1)             | --                          | --                          |

Web Table 31- Switzerland deaths with 95% UI by age, sex, and cause in 2013

| Cause                                                            | Both Sexes, All Ages        | Both Sexes, 0-4 Years | Both Sexes, 5-14 Years | Both Sexes, 15-49 Years  | Both Sexes, 50-69 Years   | Both Sexes, 70-80 Years     |
|------------------------------------------------------------------|-----------------------------|-----------------------|------------------------|--------------------------|---------------------------|-----------------------------|
| Late maternal deaths                                             | 0<br>(0 - 0)                | --                    | 0<br>(0 - 0)           | 0<br>(0 - 0)             | --                        | --                          |
| Maternal deaths aggravated by HIV/AIDS                           | 0<br>(0 - 0)                | --                    | --                     | 0<br>(0 - 0)             | --                        | --                          |
| Other maternal disorders                                         | 1<br>(0 - 1)                | --                    | 0<br>(0 - 0)           | 1<br>(0 - 1)             | --                        | --                          |
| Neonatal disorders                                               | 137<br>(114 - 161)          | 137<br>(114 - 161)    | --                     | --                       | --                        | --                          |
| Neonatal preterm birth complications                             | 88<br>(66 - 110)            | 88<br>(66 - 110)      | --                     | --                       | --                        | --                          |
| Neonatal encephalopathy due to birth asphyxia and trauma         | 30<br>(18 - 45)             | 30<br>(18 - 45)       | --                     | --                       | --                        | --                          |
| Neonatal sepsis and other neonatal infections                    | 2<br>(0 - 5)                | 2<br>(0 - 5)          | --                     | --                       | --                        | --                          |
| Hemolytic disease and other neonatal jaundice                    | 0<br>(0 - 0)                | 0<br>(0 - 0)          | --                     | --                       | --                        | --                          |
| Other neonatal disorders                                         | 17<br>(9 - 26)              | 17<br>(9 - 26)        | --                     | --                       | --                        | --                          |
| Nutritional deficiencies                                         | 142<br>(73 - 188)           | 1<br>(0 - 1)          | 0<br>(0 - 0)           | 5<br>(3 - 6)             | 11<br>(7 - 13)            | 125<br>(62 - 169)           |
| Protein-energy malnutrition                                      | 35<br>(13 - 57)             | 0<br>(0 - 1)          | 0<br>(0 - 0)           | 1<br>(0 - 2)             | 3<br>(1 - 4)              | 30<br>(11 - 52)             |
| Iodine deficiency                                                | 1<br>(0 - 3)                | 0<br>(0 - 0)          | 0<br>(0 - 0)           | 0<br>(0 - 0)             | 0<br>(0 - 1)              | 0<br>(0 - 2)                |
| Iron-deficiency anemia                                           | 97<br>(48 - 135)            | 0<br>(0 - 0)          | 0<br>(0 - 0)           | 3<br>(2 - 4)             | 7<br>(4 - 9)              | 87<br>(41 - 124)            |
| Other nutritional deficiencies                                   | 10<br>(4 - 18)              | 0<br>(0 - 0)          | 0<br>(0 - 0)           | 1<br>(0 - 1)             | 1<br>(1 - 2)              | 8<br>(3 - 15)               |
| Other communicable, maternal, neonatal, and nutritional diseases | 125<br>(105 - 166)          | 3<br>(1 - 5)          | 1<br>(0 - 1)           | 22<br>(18 - 32)          | 30<br>(25 - 38)           | 70<br>(55 - 98)             |
| Sexually transmitted diseases excluding HIV                      | 4<br>(2 - 8)                | 1<br>(0 - 2)          | 0<br>(0 - 0)           | 0<br>(0 - 1)             | 1<br>(0 - 2)              | 2<br>(1 - 4)                |
| Syphilis                                                         | 3<br>(1 - 6)                | 1<br>(0 - 2)          | 0<br>(0 - 0)           | 0<br>(0 - 0)             | 1<br>(0 - 1)              | 2<br>(1 - 4)                |
| Chlamydial infection                                             | 0<br>(0 - 0)                | --                    | 0<br>(0 - 0)           | 0<br>(0 - 0)             | 0<br>(0 - 0)              | 0<br>(0 - 0)                |
| Gonococcal infection                                             | 1<br>(0 - 1)                | --                    | 0<br>(0 - 0)           | 0<br>(0 - 0)             | 0<br>(0 - 0)              | 0<br>(0 - 0)                |
| Other sexually transmitted diseases                              | 0<br>(0 - 0)                | --                    | 0<br>(0 - 0)           | 0<br>(0 - 0)             | 0<br>(0 - 0)              | 0<br>(0 - 0)                |
| Hepatitis                                                        | 30<br>(24 - 37)             | 0<br>(0 - 0)          | 0<br>(0 - 0)           | 4<br>(3 - 6)             | 9<br>(7 - 13)             | 16<br>(11 - 22)             |
| Acute hepatitis A                                                | 6<br>(2 - 12)               | 0<br>(0 - 0)          | 0<br>(0 - 0)           | 2<br>(1 - 3)             | 2<br>(1 - 4)              | 2<br>(1 - 5)                |
| Acute hepatitis B                                                | 20<br>(13 - 28)             | 0<br>(0 - 0)          | 0<br>(0 - 0)           | 2<br>(1 - 4)             | 7<br>(4 - 10)             | 11<br>(6 - 17)              |
| Acute hepatitis C                                                | 4<br>(1 - 9)                | --                    | 0<br>(0 - 0)           | 0<br>(0 - 1)             | 1<br>(0 - 2)              | 2<br>(0 - 6)                |
| Other infectious diseases                                        | 91<br>(73 - 130)            | 2<br>(1 - 3)          | 0<br>(0 - 1)           | 18<br>(13 - 28)          | 20<br>(15 - 27)           | 52<br>(39 - 79)             |
| Non-communicable diseases                                        | 58,738<br>(56,250 - 61,267) | 172<br>(146 - 201)    | 41<br>(36 - 45)        | 1,659<br>(1,526 - 1,787) | 9,632<br>(9,104 - 10,198) | 47,234<br>(45,399 - 49,185) |
| Neoplasms                                                        | 18,538<br>(17,261 - 19,861) | 11<br>(8 - 15)        | 21<br>(18 - 24)        | 851<br>(782 - 926)       | 5,647<br>(5,285 - 6,035)  | 12,008<br>(11,029 - 13,016) |
| Esophageal cancer                                                | 486<br>(420 - 596)          | --                    | --                     | 21<br>(15 - 34)          | 201<br>(165 - 270)        | 264<br>(223 - 313)          |
| Stomach cancer                                                   | 679<br>(569 - 816)          | --                    | --                     | 27<br>(22 - 32)          | 166<br>(143 - 191)        | 486<br>(390 - 614)          |
| Liver cancer                                                     | 726<br>(585 - 953)          | --                    | 0<br>(0 - 1)           | 28<br>(20 - 37)          | 270<br>(211 - 365)        | 428<br>(334 - 572)          |
| Liver cancer due to hepatitis B                                  | 163<br>(91 - 279)           | --                    | 0<br>(0 - 0)           | 10<br>(6 - 17)           | 74<br>(37 - 129)          | 78<br>(42 - 136)            |
| Liver cancer due to hepatitis C                                  | 390<br>(238 - 555)          | --                    | 0<br>(0 - 0)           | 12<br>(6 - 20)           | 142<br>(75 - 218)         | 235<br>(141 - 331)          |
| Liver cancer due to alcohol use                                  | 142<br>(81 - 226)           | --                    | --                     | 3<br>(1 - 5)             | 43<br>(21 - 70)           | 96<br>(54 - 155)            |
| Liver cancer due to other causes                                 | 31<br>(14 - 56)             | --                    | 0<br>(0 - 0)           | 2<br>(1 - 3)             | 10<br>(4 - 18)            | 19<br>(8 - 37)              |
| Larynx cancer                                                    | 92<br>(72 - 117)            | --                    | --                     | 5<br>(4 - 8)             | 39<br>(30 - 53)           | 48<br>(35 - 61)             |
| Tracheal, bronchus and lung cancer                               | 3,475<br>(2,945 - 3,853)    | --                    | --                     | 142<br>(119 - 166)       | 1,419<br>(1,191 - 1,590)  | 1,913<br>(1,590 - 2,165)    |
| Breast cancer                                                    | 1,603<br>(1,301 - 1,929)    | --                    | --                     | 136<br>(106 - 168)       | 547<br>(442 - 661)        | 920<br>(703 - 1,181)        |
| Cervical cancer                                                  | 152<br>(112 - 192)          | --                    | --                     | 19<br>(14 - 25)          | 49<br>(36 - 63)           | 83<br>(58 - 115)            |
| Uterine cancer                                                   | 113<br>(45 - 152)           | --                    | --                     | 2<br>(1 - 2)             | 24<br>(13 - 32)           | 88<br>(29 - 124)            |
| Prostate cancer                                                  | 1,847<br>(1,377 - 2,749)    | --                    | --                     | 2<br>(1 - 4)             | 206<br>(136 - 310)        | 1,639<br>(1,209 - 2,470)    |

Web Table 31- Switzerland deaths with 95% UI by age, sex, and cause in 2013

| Cause                                         | Both Sexes, All Ages        | Both Sexes, 0-4 Years | Both Sexes, 5-14 Years | Both Sexes, 15-49 Years | Both Sexes, 50-69 Years  | Both Sexes, 70-80 Years     |
|-----------------------------------------------|-----------------------------|-----------------------|------------------------|-------------------------|--------------------------|-----------------------------|
| Colon and rectum cancer                       | 2,117<br>(1,879 - 2,390)    | --                    | --                     | 62<br>(53 - 72)         | 541<br>(486 - 602)       | 1,513<br>(1,307 - 1,758)    |
| Lip and oral cavity cancer                    | 287<br>(211 - 332)          | --                    | --                     | 22<br>(17 - 27)         | 139<br>(95 - 167)        | 127<br>(96 - 158)           |
| Nasopharynx cancer                            | 29<br>(22 - 53)             | --                    | 0<br>(0 - 0)           | 5<br>(3 - 8)            | 18<br>(12 - 33)          | 7<br>(5 - 12)               |
| Other pharynx cancer                          | 112<br>(91 - 157)           | --                    | --                     | 9<br>(6 - 13)           | 68<br>(53 - 96)          | 35<br>(27 - 49)             |
| Gallbladder and biliary tract cancer          | 332<br>(216 - 419)          | --                    | --                     | 7<br>(5 - 9)            | 74<br>(53 - 94)          | 251<br>(155 - 333)          |
| Pancreatic cancer                             | 1,310<br>(1,167 - 1,451)    | --                    | --                     | 41<br>(33 - 49)         | 420<br>(371 - 470)       | 849<br>(734 - 965)          |
| Malignant skin melanoma                       | 369<br>(250 - 561)          | --                    | --                     | 43<br>(29 - 66)         | 125<br>(84 - 197)        | 200<br>(135 - 301)          |
| Non-melanoma skin cancer                      | 32<br>(24 - 43)             | --                    | --                     | 1<br>(1 - 1)            | 4<br>(3 - 5)             | 27<br>(20 - 37)             |
| Ovarian cancer                                | 536<br>(443 - 639)          | --                    | --                     | 29<br>(23 - 36)         | 192<br>(157 - 230)       | 316<br>(239 - 407)          |
| Testicular cancer                             | 6<br>(4 - 10)               | --                    | --                     | 3<br>(2 - 5)            | 1<br>(1 - 3)             | 1<br>(1 - 3)                |
| Kidney cancer                                 | 597<br>(488 - 734)          | 1<br>(1 - 2)          | 1<br>(1 - 2)           | 24<br>(18 - 30)         | 188<br>(155 - 223)       | 383<br>(295 - 505)          |
| Bladder cancer                                | 577<br>(477 - 694)          | --                    | --                     | 7<br>(5 - 10)           | 117<br>(99 - 142)        | 453<br>(365 - 559)          |
| Brain and nervous system cancer               | 518<br>(422 - 600)          | 4<br>(2 - 5)          | 8<br>(6 - 10)          | 81<br>(66 - 97)         | 238<br>(196 - 285)       | 188<br>(142 - 230)          |
| Thyroid cancer                                | 108<br>(85 - 132)           | --                    | 0<br>(0 - 0)           | 4<br>(3 - 5)            | 24<br>(18 - 31)          | 80<br>(62 - 103)            |
| Mesothelioma                                  | 100<br>(66 - 143)           | --                    | --                     | 7<br>(4 - 11)           | 52<br>(31 - 84)          | 42<br>(25 - 66)             |
| Hodgkin lymphoma                              | 13<br>(10 - 29)             | 0<br>(0 - 0)          | 0<br>(0 - 0)           | 5<br>(3 - 9)            | 4<br>(2 - 8)             | 5<br>(3 - 12)               |
| Non-Hodgkin lymphoma                          | 737<br>(465 - 935)          | 0<br>(0 - 1)          | 1<br>(1 - 2)           | 37<br>(21 - 52)         | 178<br>(106 - 236)       | 520<br>(325 - 672)          |
| Multiple myeloma                              | 408<br>(299 - 587)          | --                    | --                     | 11<br>(7 - 17)          | 115<br>(82 - 172)        | 282<br>(200 - 408)          |
| Leukemia                                      | 616<br>(533 - 693)          | 4<br>(2 - 6)          | 6<br>(5 - 8)           | 43<br>(36 - 49)         | 138<br>(118 - 158)       | 425<br>(358 - 497)          |
| Other neoplasms                               | 559<br>(457 - 743)          | 3<br>(2 - 3)          | 3<br>(3 - 5)           | 28<br>(21 - 34)         | 89<br>(71 - 108)         | 436<br>(342 - 614)          |
| Cardiovascular diseases                       | 23,915<br>(21,956 - 26,448) | 1<br>(1 - 2)          | 1<br>(1 - 1)           | 306<br>(267 - 351)      | 2,221<br>(2,019 - 2,470) | 21,385<br>(19,480 - 23,718) |
| Rheumatic heart disease                       | 124<br>(86 - 236)           | 0<br>(0 - 0)          | 0<br>(0 - 0)           | 3<br>(2 - 5)            | 14<br>(11 - 25)          | 107<br>(71 - 212)           |
| Ischemic heart disease                        | 12,256<br>(10,720 - 14,075) | 0<br>(0 - 0)          | 0<br>(0 - 0)           | 170<br>(143 - 198)      | 1,298<br>(1,151 - 1,484) | 10,787<br>(9,277 - 12,519)  |
| Cerebrovascular disease                       | 6,731<br>(5,639 - 8,164)    | 0<br>(0 - 0)          | 0<br>(0 - 0)           | 55<br>(43 - 70)         | 426<br>(349 - 510)       | 6,249<br>(5,224 - 7,647)    |
| Ischemic stroke                               | 4,254<br>(3,398 - 5,381)    | 0<br>(0 - 0)          | 0<br>(0 - 0)           | 7<br>(4 - 10)           | 142<br>(96 - 192)        | 4,105<br>(3,280 - 5,206)    |
| Hemorrhagic stroke                            | 2,477<br>(1,797 - 3,327)    | 0<br>(0 - 0)          | 0<br>(0 - 0)           | 49<br>(37 - 61)         | 284<br>(214 - 346)       | 2,144<br>(1,508 - 2,968)    |
| Hypertensive heart disease                    | 391<br>(246 - 575)          | 0<br>(0 - 0)          | 0<br>(0 - 0)           | 5<br>(3 - 7)            | 40<br>(27 - 57)          | 346<br>(211 - 531)          |
| Cardiomyopathy and myocarditis                | 452<br>(301 - 651)          | 0<br>(1 - 1)          | 0<br>(0 - 1)           | 22<br>(16 - 30)         | 66<br>(50 - 92)          | 362<br>(222 - 556)          |
| Atrial fibrillation and flutter               | 369<br>(189 - 673)          | --                    | --                     | 1<br>(0 - 1)            | 15<br>(8 - 26)           | 353<br>(173 - 655)          |
| Aortic aneurysm                               | 511<br>(347 - 691)          | --                    | --                     | 7<br>(5 - 11)           | 79<br>(54 - 116)         | 424<br>(279 - 583)          |
| Peripheral vascular disease                   | 192<br>(138 - 264)          | --                    | --                     | 1<br>(0 - 1)            | 13<br>(9 - 21)           | 178<br>(126 - 245)          |
| Endocarditis                                  | 81<br>(52 - 116)            | 0<br>(0 - 0)          | 0<br>(0 - 0)           | 5<br>(3 - 7)            | 16<br>(10 - 25)          | 60<br>(37 - 90)             |
| Other cardiovascular and circulatory diseases | 2,809<br>(2,034 - 3,805)    | 0<br>(0 - 1)          | 0<br>(0 - 0)           | 38<br>(27 - 52)         | 253<br>(188 - 332)       | 2,518<br>(1,757 - 3,515)    |
| Chronic respiratory diseases                  | 2,635<br>(2,171 - 2,983)    | 1<br>(0 - 1)          | 1<br>(0 - 1)           | 27<br>(23 - 32)         | 353<br>(303 - 409)       | 2,254<br>(1,822 - 2,570)    |
| Chronic obstructive pulmonary disease         | 2,263<br>(1,881 - 2,574)    | 0<br>(0 - 0)          | 0<br>(0 - 0)           | 14<br>(11 - 17)         | 289<br>(247 - 336)       | 1,959<br>(1,605 - 2,257)    |
| Pneumoconiosis                                | 53<br>(31 - 83)             | 0<br>(0 - 0)          | 0<br>(0 - 0)           | 1<br>(1 - 1)            | 7<br>(4 - 10)            | 46<br>(25 - 74)             |
| Silicosis                                     | 2<br>(1 - 4)                | 0<br>(0 - 0)          | 0<br>(0 - 0)           | 0<br>(0 - 0)            | 0<br>(0 - 1)             | 2<br>(1 - 3)                |
| Asbestosis                                    | 22<br>(12 - 36)             | 0<br>(0 - 0)          | 0<br>(0 - 0)           | 0<br>(0 - 0)            | 3<br>(2 - 5)             | 19<br>(10 - 32)             |
| Coal workers pneumoconiosis                   | 9<br>(5 - 15)               | 0<br>(0 - 0)          | 0<br>(0 - 0)           | 0<br>(0 - 0)            | 1<br>(0 - 1)             | 8<br>(4 - 14)               |
| Other pneumoconiosis                          | 19<br>(11 - 31)             | 0<br>(0 - 0)          | 0<br>(0 - 0)           | 0<br>(0 - 0)            | 2<br>(1 - 4)             | 16<br>(9 - 28)              |



Web Table 31- Switzerland deaths with 95% UI by age, sex, and cause in 2013

| Cause                                               | Both Sexes, All Ages      | Both Sexes, 0-4 Years | Both Sexes, 5-14 Years | Both Sexes, 15-49 Years | Both Sexes, 50-69 Years | Both Sexes, 70-80 Years  |
|-----------------------------------------------------|---------------------------|-----------------------|------------------------|-------------------------|-------------------------|--------------------------|
| Asthma                                              | 100<br>(67 - 145)         | 0<br>(0 - 0)          | 0<br>(0 - 0)           | 8<br>(6 - 10)           | 20<br>(14 - 27)         | 72<br>(43 - 110)         |
| Interstitial lung disease and pulmonary sarcoidosis | 194<br>(85 - 326)         | 0<br>(0 - 0)          | 0<br>(0 - 0)           | 4<br>(1 - 7)            | 34<br>(13 - 58)         | 156<br>(69 - 274)        |
| Other chronic respiratory diseases                  | 25<br>(17 - 36)           | 0<br>(0 - 0)          | 0<br>(0 - 0)           | 1<br>(1 - 1)            | 3<br>(2 - 4)            | 21<br>(13 - 32)          |
| Cirrhosis                                           | 790<br>(717 - 874)        | 0<br>(0 - 0)          | 0<br>(0 - 0)           | 89<br>(76 - 105)        | 384<br>(339 - 432)      | 316<br>(279 - 359)       |
| Cirrhosis due to hepatitis B                        | 85<br>(52 - 122)          | 0<br>(0 - 0)          | 0<br>(0 - 0)           | 9<br>(6 - 14)           | 40<br>(25 - 59)         | 36<br>(20 - 55)          |
| Cirrhosis due to hepatitis C                        | 395<br>(266 - 509)        | 0<br>(0 - 0)          | 0<br>(0 - 0)           | 47<br>(32 - 60)         | 196<br>(127 - 258)      | 153<br>(97 - 203)        |
| Cirrhosis due to alcohol use                        | 238<br>(155 - 325)        | --                    | --                     | 20<br>(11 - 30)         | 111<br>(66 - 162)       | 106<br>(70 - 145)        |
| Cirrhosis due to other causes                       | 72<br>(38 - 135)          | 0<br>(0 - 0)          | 0<br>(0 - 0)           | 13<br>(7 - 23)          | 38<br>(18 - 73)         | 21<br>(11 - 40)          |
| Digestive diseases                                  | 1,560<br>(1,233 - 1,796)  | 1<br>(1 - 1)          | 1<br>(0 - 1)           | 28<br>(22 - 34)         | 151<br>(124 - 172)      | 1,379<br>(1,081 - 1,599) |
| Peptic ulcer disease                                | 237<br>(164 - 314)        | 0<br>(0 - 0)          | 0<br>(0 - 0)           | 3<br>(2 - 4)            | 21<br>(14 - 28)         | 213<br>(146 - 288)       |
| Gastritis and duodenitis                            | 20<br>(12 - 33)           | 0<br>(0 - 0)          | 0<br>(0 - 0)           | 1<br>(0 - 1)            | 2<br>(1 - 4)            | 17<br>(10 - 29)          |
| Appendicitis                                        | 49<br>(28 - 71)           | 0<br>(0 - 0)          | 0<br>(0 - 0)           | 2<br>(2 - 3)            | 7<br>(5 - 10)           | 39<br>(21 - 59)          |
| Paralytic ileus and intestinal obstruction          | 225<br>(131 - 335)        | 0<br>(0 - 0)          | 0<br>(0 - 0)           | 2<br>(1 - 2)            | 15<br>(8 - 21)          | 208<br>(121 - 310)       |
| Inguinal, femoral, and abdominal hernia             | 44<br>(21 - 71)           | 0<br>(0 - 0)          | 0<br>(0 - 0)           | 1<br>(0 - 1)            | 4<br>(2 - 5)            | 40<br>(18 - 66)          |
| Inflammatory bowel disease                          | 117<br>(62 - 179)         | 0<br>(0 - 0)          | 0<br>(0 - 0)           | 3<br>(2 - 4)            | 11<br>(6 - 14)          | 103<br>(53 - 164)        |
| Vascular intestinal disorders                       | 302<br>(183 - 443)        | 0<br>(0 - 0)          | 0<br>(0 - 0)           | 3<br>(2 - 5)            | 30<br>(18 - 46)         | 269<br>(159 - 398)       |
| Gallbladder and biliary diseases                    | 166<br>(118 - 224)        | 0<br>(0 - 0)          | 0<br>(0 - 0)           | 2<br>(1 - 2)            | 12<br>(9 - 15)          | 153<br>(107 - 210)       |
| Pancreatitis                                        | 123<br>(81 - 169)         | 0<br>(0 - 0)          | 0<br>(0 - 0)           | 8<br>(6 - 11)           | 25<br>(17 - 34)         | 90<br>(56 - 131)         |
| Other digestive diseases                            | 277<br>(170 - 398)        | 0<br>(0 - 0)          | 0<br>(0 - 0)           | 4<br>(2 - 5)            | 24<br>(16 - 31)         | 249<br>(151 - 368)       |
| Neurological disorders                              | 8,221<br>(6,356 - 10,154) | 8<br>(7 - 11)         | 4<br>(3 - 6)           | 85<br>(67 - 112)        | 411<br>(347 - 483)      | 7,712<br>(5,879 - 9,659) |
| Alzheimer disease and other dementias               | 7,031<br>(5,201 - 9,031)  | --                    | --                     | 0<br>(0 - 1)            | 159<br>(110 - 213)      | 6,871<br>(5,034 - 8,862) |
| Parkinson disease                                   | 589<br>(342 - 950)        | --                    | --                     | 1<br>(1 - 1)            | 37<br>(21 - 57)         | 551<br>(312 - 908)       |
| Epilepsy                                            | 105<br>(84 - 134)         | 2<br>(1 - 3)          | 2<br>(1 - 3)           | 26<br>(19 - 38)         | 24<br>(19 - 33)         | 52<br>(38 - 66)          |
| Multiple sclerosis                                  | 151<br>(98 - 251)         | --                    | --                     | 24<br>(13 - 39)         | 65<br>(38 - 115)        | 62<br>(38 - 111)         |
| Other neurological disorders                        | 345<br>(282 - 411)        | 7<br>(5 - 9)          | 2<br>(2 - 3)           | 35<br>(27 - 43)         | 126<br>(98 - 153)       | 176<br>(140 - 218)       |
| Mental and substance use disorders                  | 271<br>(211 - 325)        | 0<br>(0 - 0)          | 0<br>(0 - 0)           | 171<br>(114 - 208)      | 68<br>(47 - 89)         | 32<br>(24 - 41)          |
| Schizophrenia                                       | 7<br>(4 - 10)             | --                    | --                     | 1<br>(0 - 1)            | 2<br>(1 - 2)            | 5<br>(3 - 7)             |
| Alcohol use disorders                               | 92<br>(56 - 127)          | --                    | --                     | 30<br>(17 - 42)         | 46<br>(28 - 67)         | 16<br>(10 - 24)          |
| Drug use disorders                                  | 171<br>(115 - 207)        | 0<br>(0 - 0)          | --                     | 139<br>(90 - 172)       | 20<br>(14 - 25)         | 12<br>(8 - 16)           |
| Opioid use disorders                                | 63<br>(42 - 77)           | 0<br>(0 - 0)          | --                     | 52<br>(33 - 65)         | 7<br>(5 - 9)            | 4<br>(3 - 6)             |
| Cocaine use disorders                               | 5<br>(3 - 6)              | 0<br>(0 - 0)          | --                     | 4<br>(3 - 5)            | 0<br>(0 - 1)            | 0<br>(0 - 0)             |
| Amphetamine use disorders                           | 5<br>(3 - 6)              | 0<br>(0 - 0)          | --                     | 4<br>(3 - 5)            | 1<br>(0 - 1)            | 0<br>(0 - 0)             |
| Other drug use disorders                            | 98<br>(66 - 120)          | 0<br>(0 - 0)          | --                     | 79<br>(51 - 98)         | 12<br>(9 - 15)          | 7<br>(5 - 9)             |
| Eating disorders                                    | 1<br>(1 - 2)              | --                    | 0<br>(0 - 0)           | 1<br>(1 - 2)            | --                      | --                       |
| Anorexia nervosa                                    | 1<br>(1 - 2)              | --                    | 0<br>(0 - 0)           | 1<br>(1 - 2)            | --                      | --                       |
| Diabetes, urogenital, blood, and endocrine diseases | 2,302<br>(2,006 - 2,610)  | 5<br>(3 - 7)          | 3<br>(2 - 4)           | 53<br>(41 - 61)         | 308<br>(262 - 350)      | 1,933<br>(1,659 - 2,231) |
| Diabetes mellitus                                   | 1,614<br>(1,389 - 1,885)  | 0<br>(0 - 0)          | 0<br>(0 - 0)           | 25<br>(21 - 30)         | 198<br>(171 - 234)      | 1,390<br>(1,166 - 1,660) |
| Acute glomerulonephritis                            | 1<br>(1 - 1)              | 0<br>(0 - 0)          | 0<br>(0 - 0)           | 0<br>(0 - 0)            | 0<br>(0 - 0)            | 0<br>(0 - 1)             |
| Chronic kidney disease                              | 214<br>(163 - 387)        | 0<br>(0 - 0)          | 0<br>(0 - 0)           | 5<br>(4 - 9)            | 29<br>(22 - 57)         | 179<br>(134 - 329)       |
| Chronic kidney disease due to diabetes mellitus     | 59<br>(34 - 103)          | 0<br>(0 - 0)          | 0<br>(0 - 0)           | 2<br>(1 - 3)            | 10<br>(5 - 17)          | 47<br>(27 - 85)          |

Web Table 31- Switzerland deaths with 95% UI by age, sex, and cause in 2013

| Cause                                               | Both Sexes, All Ages     | Both Sexes, 0-4 Years | Both Sexes, 5-14 Years | Both Sexes, 15-49 Years | Both Sexes, 50-69 Years | Both Sexes, 70-80 Years  |
|-----------------------------------------------------|--------------------------|-----------------------|------------------------|-------------------------|-------------------------|--------------------------|
| Chronic kidney disease due to hypertension          | 99<br>(62 - 173)         | 0<br>(0 - 0)          | 0<br>(0 - 0)           | 1<br>(1 - 3)            | 10<br>(6 - 22)          | 87<br>(53 - 150)         |
| Chronic kidney disease due to glomerulonephritis    | 7<br>(4 - 11)            | 0<br>(0 - 0)          | 0<br>(0 - 0)           | 1<br>(0 - 1)            | 2<br>(1 - 2)            | 5<br>(3 - 8)             |
| Chronic kidney disease due to other causes          | 49<br>(27 - 137)         | 0<br>(0 - 0)          | 0<br>(0 - 0)           | 2<br>(1 - 4)            | 7<br>(4 - 21)           | 40<br>(21 - 114)         |
| Urinary diseases and male infertility               | 146<br>(114 - 211)       | 0<br>(0 - 0)          | 0<br>(0 - 0)           | 3<br>(2 - 4)            | 18<br>(14 - 26)         | 125<br>(94 - 187)        |
| Interstitial nephritis and urinary tract infections | 106<br>(79 - 166)        | 0<br>(0 - 0)          | 0<br>(0 - 0)           | 2<br>(1 - 3)            | 13<br>(10 - 20)         | 92<br>(65 - 145)         |
| Urolithiasis                                        | 12<br>(7 - 20)           | --                    | 0<br>(0 - 0)           | 0<br>(0 - 1)            | 2<br>(1 - 3)            | 10<br>(6 - 17)           |
| Other urinary diseases                              | 28<br>(15 - 40)          | 0<br>(0 - 0)          | 0<br>(0 - 0)           | 1<br>(0 - 1)            | 3<br>(2 - 4)            | 24<br>(13 - 36)          |
| Gynecological diseases                              | 1<br>(0 - 1)             | --                    | --                     | 0<br>(0 - 0)            | 0<br>(0 - 0)            | 0<br>(0 - 1)             |
| Uterine fibroids                                    | 0<br>(0 - 0)             | --                    | --                     | 0<br>(0 - 0)            | 0<br>(0 - 0)            | 0<br>(0 - 0)             |
| Polycystic ovarian syndrome                         | 0<br>(0 - 0)             | --                    | --                     | 0<br>(0 - 0)            | 0<br>(0 - 0)            | --                       |
| Endometriosis                                       | 0<br>(0 - 0)             | --                    | --                     | 0<br>(0 - 0)            | 0<br>(0 - 0)            | --                       |
| Genital prolapse                                    | 0<br>(0 - 0)             | --                    | --                     | 0<br>(0 - 0)            | 0<br>(0 - 0)            | 0<br>(0 - 0)             |
| Other gynecological diseases                        | 0<br>(0 - 0)             | --                    | --                     | 0<br>(0 - 0)            | 0<br>(0 - 0)            | 0<br>(0 - 0)             |
| Hemoglobinopathies and hemolytic anemias            | 26<br>(17 - 34)          | 2<br>(1 - 2)          | 1<br>(1 - 1)           | 2<br>(2 - 3)            | 4<br>(3 - 6)            | 17<br>(11 - 23)          |
| Thalassemias                                        | 1<br>(1 - 2)             | 1<br>(0 - 1)          | 0<br>(0 - 0)           | 1<br>(0 - 1)            | 0<br>(0 - 0)            | 0<br>(0 - 0)             |
| Sickle cell disorders                               | 5<br>(3 - 6)             | 1<br>(0 - 1)          | 0<br>(0 - 1)           | 1<br>(1 - 1)            | 2<br>(1 - 3)            | 1<br>(1 - 1)             |
| G6PD deficiency                                     | 0<br>(0 - 0)             | 0<br>(0 - 0)          | 0<br>(0 - 0)           | 0<br>(0 - 0)            | 0<br>(0 - 0)            | 0<br>(0 - 0)             |
| Other hemoglobinopathies and hemolytic anemias      | 19<br>(13 - 26)          | 0<br>(0 - 1)          | 0<br>(0 - 0)           | 1<br>(1 - 1)            | 2<br>(2 - 3)            | 16<br>(10 - 21)          |
| Endocrine, metabolic, blood, and immune disorders   | 302<br>(97 - 401)        | 3<br>(1 - 4)          | 2<br>(1 - 2)           | 17<br>(5 - 23)          | 58<br>(19 - 78)         | 222<br>(66 - 309)        |
| Musculoskeletal disorders                           | 195<br>(141 - 278)       | --                    | 0<br>(0 - 0)           | 9<br>(7 - 14)           | 38<br>(28 - 58)         | 147<br>(100 - 219)       |
| Rheumatoid arthritis                                | 77<br>(47 - 120)         | --                    | 0<br>(0 - 0)           | 1<br>(1 - 2)            | 14<br>(8 - 23)          | 62<br>(36 - 100)         |
| Other musculoskeletal disorders                     | 118<br>(83 - 174)        | --                    | 0<br>(0 - 0)           | 8<br>(6 - 12)           | 25<br>(18 - 38)         | 85<br>(53 - 134)         |
| Other non-communicable diseases                     | 311<br>(276 - 349)       | 144<br>(121 - 171)    | 10<br>(8 - 12)         | 38<br>(30 - 45)         | 50<br>(38 - 59)         | 69<br>(48 - 85)          |
| Congenital anomalies                                | 247<br>(215 - 282)       | 125<br>(103 - 154)    | 10<br>(8 - 12)         | 37<br>(29 - 44)         | 44<br>(32 - 53)         | 30<br>(19 - 39)          |
| Neural tube defects                                 | 2<br>(2 - 4)             | 1<br>(1 - 3)          | 0<br>(0 - 0)           | 0<br>(0 - 1)            | 0<br>(0 - 0)            | 0<br>(0 - 0)             |
| Congenital heart anomalies                          | 107<br>(85 - 128)        | 65<br>(50 - 84)       | 6<br>(4 - 7)           | 18<br>(13 - 22)         | 13<br>(9 - 17)          | 5<br>(3 - 8)             |
| Cleft lip and cleft palate                          | 0<br>(0 - 0)             | 0<br>(0 - 0)          | --                     | --                      | --                      | --                       |
| Down syndrome                                       | 27<br>(17 - 36)          | 3<br>(1 - 5)          | 0<br>(0 - 1)           | 6<br>(3 - 8)            | 17<br>(11 - 23)         | 1<br>(1 - 2)             |
| Chromosomal unbalanced rearrangements               | 8<br>(5 - 13)            | 6<br>(4 - 10)         | 0<br>(0 - 1)           | 1<br>(1 - 2)            | 1<br>(0 - 1)            | 0<br>(0 - 0)             |
| Other congenital anomalies                          | 103<br>(79 - 132)        | 50<br>(34 - 69)       | 3<br>(2 - 5)           | 13<br>(9 - 18)          | 13<br>(9 - 18)          | 23<br>(14 - 31)          |
| Skin and subcutaneous diseases                      | 46<br>(32 - 60)          | 0<br>(0 - 0)          | 0<br>(0 - 0)           | 1<br>(1 - 1)            | 6<br>(4 - 7)            | 39<br>(25 - 52)          |
| Cellulitis                                          | 11<br>(6 - 16)           | 0<br>(0 - 0)          | 0<br>(0 - 0)           | 0<br>(0 - 0)            | 2<br>(1 - 2)            | 9<br>(5 - 13)            |
| Pyoderma                                            | 8<br>(5 - 12)            | 0<br>(0 - 0)          | 0<br>(0 - 0)           | 0<br>(0 - 0)            | 1<br>(1 - 2)            | 7<br>(4 - 11)            |
| Decubitus ulcer                                     | 21<br>(14 - 30)          | 0<br>(0 - 0)          | 0<br>(0 - 0)           | 0<br>(0 - 0)            | 2<br>(1 - 2)            | 19<br>(12 - 28)          |
| Other skin and subcutaneous diseases                | 6<br>(3 - 11)            | 0<br>(0 - 0)          | 0<br>(0 - 0)           | 0<br>(0 - 0)            | 1<br>(1 - 2)            | 4<br>(2 - 9)             |
| Sudden infant death syndrome                        | 19<br>(8 - 33)           | 19<br>(8 - 33)        | --                     | --                      | --                      | --                       |
| Injuries                                            | 3,941<br>(3,529 - 4,632) | 28<br>(21 - 37)       | 26<br>(23 - 30)        | 927<br>(843 - 1,040)    | 804<br>(716 - 933)      | 2,156<br>(1,788 - 2,657) |
| Transport injuries                                  | 459<br>(409 - 526)       | 7<br>(5 - 10)         | 12<br>(10 - 14)        | 206<br>(177 - 239)      | 112<br>(97 - 130)       | 123<br>(100 - 154)       |
| Road injuries                                       | 441<br>(391 - 506)       | 7<br>(5 - 10)         | 11<br>(9 - 14)         | 196<br>(168 - 228)      | 107<br>(92 - 124)       | 120<br>(97 - 150)        |
| Pedestrian road injuries                            | 92<br>(63 - 141)         | 2<br>(1 - 3)          | 3<br>(2 - 4)           | 34<br>(21 - 53)         | 23<br>(15 - 36)         | 30<br>(20 - 47)          |

Web Table 31- Switzerland deaths with 95% UI by age, sex, and cause in 2013

| Cause                                           | Both Sexes, All Ages     | Both Sexes, 0-4 Years | Both Sexes, 5-14 Years | Both Sexes, 15-49 Years | Both Sexes, 50-69 Years | Both Sexes, 70-80 Years  |
|-------------------------------------------------|--------------------------|-----------------------|------------------------|-------------------------|-------------------------|--------------------------|
| Cyclist road injuries                           | 39<br>(26 - 53)          | 1<br>(0 - 1)          | 2<br>(1 - 3)           | 15<br>(9 - 21)          | 10<br>(7 - 14)          | 12<br>(8 - 18)           |
| Motorcyclist road injuries                      | 89<br>(48 - 117)         | 1<br>(0 - 2)          | 2<br>(1 - 3)           | 46<br>(26 - 62)         | 20<br>(10 - 29)         | 20<br>(9 - 31)           |
| Motor vehicle road injuries                     | 218<br>(168 - 269)       | 3<br>(2 - 5)          | 5<br>(4 - 7)           | 99<br>(75 - 122)        | 52<br>(39 - 67)         | 57<br>(41 - 78)          |
| Other road injuries                             | 3<br>(1 - 6)             | 0<br>(0 - 0)          | 0<br>(0 - 0)           | 1<br>(0 - 2)            | 1<br>(0 - 2)            | 1<br>(0 - 2)             |
| Other transport injuries                        | 18<br>(13 - 25)          | 0<br>(0 - 1)          | 0<br>(0 - 1)           | 9<br>(6 - 13)           | 5<br>(3 - 8)            | 3<br>(2 - 5)             |
| Unintentional injuries                          | 2,059<br>(1,702 - 2,572) | 17<br>(12 - 24)       | 10<br>(8 - 12)         | 147<br>(128 - 185)      | 216<br>(186 - 258)      | 1,669<br>(1,319 - 2,147) |
| Falls                                           | 1,728<br>(1,381 - 2,221) | 3<br>(2 - 4)          | 2<br>(2 - 3)           | 63<br>(51 - 79)         | 145<br>(118 - 179)      | 1,515<br>(1,171 - 1,991) |
| Drowning                                        | 51<br>(41 - 76)          | 6<br>(3 - 10)         | 3<br>(2 - 4)           | 17<br>(13 - 28)         | 12<br>(9 - 19)          | 13<br>(10 - 17)          |
| Fire, heat, and hot substances                  | 29<br>(22 - 36)          | 1<br>(1 - 2)          | 1<br>(0 - 1)           | 6<br>(4 - 8)            | 6<br>(5 - 8)            | 16<br>(11 - 20)          |
| Poisonings                                      | 14<br>(11 - 23)          | 0<br>(0 - 0)          | 0<br>(0 - 0)           | 9<br>(6 - 16)           | 2<br>(2 - 4)            | 2<br>(2 - 4)             |
| Exposure to mechanical forces                   | 77<br>(64 - 109)         | 3<br>(2 - 5)          | 3<br>(2 - 4)           | 35<br>(26 - 55)         | 21<br>(16 - 29)         | 16<br>(11 - 22)          |
| Unintentional firearm injuries                  | 4<br>(3 - 5)             | 0<br>(0 - 0)          | 0<br>(0 - 0)           | 2<br>(2 - 3)            | 1<br>(0 - 1)            | 0<br>(0 - 1)             |
| Unintentional suffocation                       | 7<br>(4 - 10)            | 1<br>(0 - 3)          | 0<br>(0 - 1)           | 2<br>(1 - 3)            | 1<br>(1 - 2)            | 2<br>(1 - 3)             |
| Other exposure to mechanical forces             | 66<br>(54 - 98)          | 1<br>(1 - 2)          | 2<br>(1 - 3)           | 30<br>(22 - 50)         | 19<br>(15 - 27)         | 14<br>(9 - 19)           |
| Adverse effects of medical treatment            | 12<br>(2 - 21)           | 0<br>(0 - 0)          | 0<br>(0 - 0)           | 1<br>(0 - 2)            | 3<br>(1 - 5)            | 7<br>(1 - 15)            |
| Animal contact                                  | 5<br>(3 - 7)             | 0<br>(0 - 0)          | 0<br>(0 - 0)           | 1<br>(1 - 1)            | 2<br>(1 - 3)            | 2<br>(1 - 3)             |
| Venomous animal contact                         | 1<br>(1 - 2)             | 0<br>(0 - 0)          | 0<br>(0 - 0)           | 0<br>(0 - 0)            | 1<br>(0 - 1)            | 0<br>(0 - 1)             |
| Non-venomous animal contact                     | 3<br>(2 - 5)             | 0<br>(0 - 0)          | 0<br>(0 - 0)           | 0<br>(0 - 1)            | 1<br>(1 - 2)            | 2<br>(1 - 3)             |
| Foreign body                                    | 133<br>(81 - 186)        | 3<br>(2 - 5)          | 1<br>(1 - 1)           | 13<br>(8 - 19)          | 22<br>(13 - 32)         | 93<br>(55 - 137)         |
| Pulmonary aspiration and foreign body in airway | 131<br>(79 - 184)        | 3<br>(2 - 5)          | 1<br>(0 - 1)           | 13<br>(7 - 19)          | 21<br>(13 - 32)         | 93<br>(54 - 136)         |
| Foreign body in other body part                 | 2<br>(1 - 2)             | 0<br>(0 - 0)          | 0<br>(0 - 0)           | 0<br>(0 - 1)            | 0<br>(0 - 1)            | 1<br>(0 - 1)             |
| Other unintentional injuries                    | 11<br>(8 - 20)           | 0<br>(0 - 1)          | 0<br>(0 - 0)           | 3<br>(2 - 4)            | 3<br>(2 - 5)            | 5<br>(3 - 11)            |
| Self-harm and interpersonal violence            | 1,423<br>(1,252 - 1,724) | 4<br>(3 - 5)          | 5<br>(4 - 6)           | 574<br>(488 - 683)      | 476<br>(405 - 569)      | 365<br>(303 - 486)       |
| Self-harm                                       | 1,360<br>(1,193 - 1,655) | 2<br>--               | 2<br>(2 - 3)           | 543<br>(461 - 648)      | 462<br>(391 - 554)      | 353<br>(291 - 474)       |
| Interpersonal violence                          | 63<br>(46 - 79)          | 4<br>(3 - 5)          | 2<br>(2 - 3)           | 31<br>(22 - 40)         | 14<br>(10 - 18)         | 12<br>(8 - 16)           |
| Assault by firearm                              | 14<br>(9 - 23)           | 0<br>(0 - 1)          | 0<br>(0 - 1)           | 9<br>(5 - 13)           | 3<br>(2 - 6)            | 2<br>(1 - 3)             |
| Assault by sharp object                         | 16<br>(11 - 23)          | 0<br>(0 - 1)          | 0<br>(0 - 1)           | 10<br>(6 - 14)          | 3<br>(2 - 6)            | 2<br>(1 - 3)             |
| Assault by other means                          | 33<br>(22 - 41)          | 3<br>(2 - 4)          | 1<br>(1 - 2)           | 13<br>(8 - 17)          | 7<br>(4 - 9)            | 8<br>(5 - 11)            |

Web Table 31- Switzerland deaths with 95% UI by age, sex, and cause in 2013

| Cause                                                             | Males, All Ages             | Males, 0-4 Years   | Males, 5-14 Years | Males, 15-49 Years       | Males, 50-69 Years       | Males, 70-80 Years          |
|-------------------------------------------------------------------|-----------------------------|--------------------|-------------------|--------------------------|--------------------------|-----------------------------|
| All causes                                                        | 31,439<br>(29,619 - 33,399) | 202<br>(173 - 236) | 42<br>(38 - 47)   | 1,760<br>(1,613 - 1,917) | 6,719<br>(6,207 - 7,280) | 22,716<br>(21,552 - 23,965) |
| Communicable, maternal, neonatal, and nutritional diseases        | 1,227<br>(1,001 - 1,527)    | 90<br>(74 - 107)   | 3<br>(2 - 3)      | 87<br>(66 - 115)         | 143<br>(115 - 175)       | 904<br>(693 - 1,194)        |
| HIV/AIDS and tuberculosis                                         | 121<br>(84 - 173)           | 0<br>(0 - 0)       | 0<br>(0 - 0)      | 47<br>(29 - 76)          | 38<br>(22 - 60)          | 36<br>(27 - 50)             |
| Tuberculosis                                                      | 42<br>(34 - 59)             | 0<br>(0 - 0)       | 0<br>(0 - 0)      | 2<br>(2 - 3)             | 8<br>(6 - 12)            | 31<br>(24 - 46)             |
| HIV/AIDS                                                          | 79<br>(43 - 131)            | 0<br>(0 - 0)       | 0<br>(0 - 0)      | 45<br>(26 - 74)          | 29<br>(13 - 52)          | 4<br>(1 - 9)                |
| HIV/AIDS resulting in mycobacterial infection                     | 4<br>(2 - 7)                | 0<br>(0 - 0)       | 0<br>(0 - 0)      | 2<br>(1 - 4)             | 2<br>(1 - 3)             | 0<br>(0 - 1)                |
| HIV/AIDS resulting in other diseases                              | 74<br>(41 - 124)            | 0<br>(0 - 0)       | 0<br>(0 - 0)      | 43<br>(25 - 70)          | 28<br>(13 - 49)          | 4<br>(1 - 9)                |
| Diarrhea, lower respiratory, and other common infectious diseases | 922<br>(709 - 1,221)        | 12<br>(8 - 16)     | 2<br>(1 - 3)      | 22<br>(16 - 28)          | 82<br>(64 - 105)         | 805<br>(597 - 1,099)        |
| Diarrheal diseases                                                | 49<br>(33 - 74)             | 3<br>(2 - 4)       | 0<br>(0 - 0)      | 1<br>(1 - 2)             | 4<br>(3 - 6)             | 41<br>(25 - 65)             |
| Intestinal infectious diseases                                    | 2<br>(1 - 5)                | 0<br>(0 - 1)       | 0<br>(0 - 1)      | 1<br>(0 - 2)             | 0<br>(0 - 1)             | 0<br>(0 - 1)                |
| Typhoid fever                                                     | 1<br>(0 - 3)                | 0<br>(0 - 1)       | 0<br>(0 - 1)      | 1<br>(0 - 1)             | 0<br>(0 - 0)             | 0<br>(0 - 0)                |
| Paratyphoid fever                                                 | 0<br>(0 - 1)                | 0<br>(0 - 0)       | 0<br>(0 - 0)      | 0<br>(0 - 0)             | 0<br>(0 - 0)             | 0<br>(0 - 0)                |
| Other intestinal infectious diseases                              | 0<br>(0 - 2)                | 0<br>(0 - 1)       | 0<br>(0 - 0)      | 0<br>(0 - 1)             | 0<br>(0 - 1)             | 0<br>(0 - 1)                |
| Lower respiratory infections                                      | 834<br>(621 - 1,132)        | 5<br>(3 - 7)       | 1<br>(0 - 1)      | 14<br>(10 - 19)          | 69<br>(52 - 90)          | 745<br>(533 - 1,033)        |
| Upper respiratory infections                                      | 1<br>(0 - 2)                | 0<br>(0 - 0)       | 0<br>(0 - 0)      | 0<br>(0 - 0)             | 0<br>(0 - 0)             | 0<br>(0 - 1)                |
| Otitis media                                                      | 1<br>(1 - 1)                | 0<br>(0 - 0)       | 0<br>(0 - 0)      | 0<br>(0 - 0)             | 0<br>(0 - 0)             | 0<br>(0 - 0)                |
| Meningitis                                                        | 21<br>(17 - 33)             | 3<br>(2 - 4)       | 0<br>(0 - 0)      | 2<br>(2 - 3)             | 4<br>(3 - 6)             | 12<br>(9 - 21)              |
| Pneumococcal meningitis                                           | 4<br>(3 - 6)                | 0<br>(0 - 1)       | 0<br>(0 - 0)      | 0<br>(0 - 1)             | 1<br>(0 - 1)             | 2<br>(1 - 4)                |
| H influenzae type B meningitis                                    | 3<br>(2 - 4)                | 1<br>(0 - 1)       | 0<br>(0 - 0)      | 0<br>(0 - 0)             | 0<br>(0 - 1)             | 1<br>(1 - 2)                |
| Meningococcal meningitis                                          | 7<br>(5 - 11)               | 1<br>(0 - 1)       | 0<br>(0 - 0)      | 1<br>(0 - 1)             | 1<br>(1 - 2)             | 4<br>(2 - 8)                |
| Other meningitis                                                  | 7<br>(5 - 13)               | 1<br>(0 - 1)       | 0<br>(0 - 0)      | 1<br>(0 - 1)             | 2<br>(1 - 3)             | 4<br>(2 - 9)                |
| Encephalitis                                                      | 11<br>(2 - 17)              | 1<br>(0 - 3)       | 0<br>(0 - 1)      | 3<br>(1 - 4)             | 3<br>(1 - 6)             | 3<br>(1 - 6)                |
| Diphtheria                                                        | 0<br>(0 - 0)                | 0<br>(0 - 0)       | 0<br>(0 - 0)      | 0<br>(0 - 0)             | 0<br>(0 - 0)             | --                          |
| Whooping cough                                                    | 0<br>(0 - 0)                | 0<br>(0 - 0)       | 0<br>(0 - 0)      | 0<br>(0 - 0)             | 0<br>(0 - 0)             | --                          |
| Tetanus                                                           | 0<br>(0 - 0)                | 0<br>(0 - 0)       | 0<br>(0 - 0)      | 0<br>(0 - 0)             | 0<br>(0 - 0)             | 0<br>(0 - 0)                |
| Measles                                                           | 0<br>(0 - 0)                | 0<br>(0 - 0)       | 0<br>(0 - 0)      | 0<br>(0 - 0)             | 0<br>(0 - 0)             | --                          |
| Varicella and herpes zoster                                       | 3<br>(1 - 11)               | 0<br>(0 - 1)       | 0<br>(0 - 0)      | 0<br>(0 - 1)             | 0<br>(0 - 1)             | 2<br>(0 - 10)               |
| Neglected tropical diseases and malaria                           | 2<br>(1 - 2)                | 0<br>(0 - 0)       | 0<br>(0 - 0)      | 1<br>(0 - 1)             | 0<br>(0 - 1)             | 0<br>(0 - 0)                |
| Cysticercosis                                                     | 0<br>(0 - 0)                | 0<br>(0 - 0)       | 0<br>(0 - 0)      | 0<br>(0 - 0)             | 0<br>(0 - 0)             | 0<br>(0 - 0)                |
| Cystic echinococcosis                                             | 0<br>(0 - 0)                | 0<br>(0 - 0)       | 0<br>(0 - 0)      | 0<br>(0 - 0)             | 0<br>(0 - 0)             | 0<br>(0 - 0)                |
| Dengue                                                            | 0<br>(0 - 0)                | 0<br>(0 - 0)       | 0<br>(0 - 0)      | 0<br>(0 - 0)             | 0<br>(0 - 0)             | 0<br>(0 - 0)                |
| Rabies                                                            | 0<br>(0 - 0)                | 0<br>(0 - 0)       | 0<br>(0 - 0)      | 0<br>(0 - 0)             | 0<br>(0 - 0)             | 0<br>(0 - 0)                |
| Other neglected tropical diseases                                 | 1<br>(0 - 1)                | 0<br>(0 - 0)       | 0<br>(0 - 0)      | 0<br>(0 - 0)             | 0<br>(0 - 0)             | 0<br>(0 - 0)                |
| Maternal disorders                                                | --                          | --                 | --                | --                       | --                       | --                          |
| Maternal hemorrhage                                               | --                          | --                 | --                | --                       | --                       | --                          |
| Maternal sepsis and other maternal infections                     | --                          | --                 | --                | --                       | --                       | --                          |
| Maternal hypertensive disorders                                   | --                          | --                 | --                | --                       | --                       | --                          |
| Maternal obstructed labor                                         | --                          | --                 | --                | --                       | --                       | --                          |
| Maternal abortive outcome                                         | --                          | --                 | --                | --                       | --                       | --                          |
| Indirect maternal deaths                                          | --                          | --                 | --                | --                       | --                       | --                          |

Web Table 31- Switzerland deaths with 95% UI by age, sex, and cause in 2013

| Cause                                                            | Males, All Ages             | Males, 0-4 Years | Males, 5-14 Years | Males, 15-49 Years   | Males, 50-69 Years       | Males, 70-80 Years          |
|------------------------------------------------------------------|-----------------------------|------------------|-------------------|----------------------|--------------------------|-----------------------------|
| Late maternal deaths                                             | --                          | --               | --                | --                   | --                       | --                          |
| Maternal deaths aggravated by HIV/AIDS                           | --                          | --               | --                | --                   | --                       | --                          |
| Other maternal disorders                                         | --                          | --               | --                | --                   | --                       | --                          |
| Neonatal disorders                                               | 76<br>(62 - 91)             | 76<br>(62 - 91)  | --                | --                   | --                       | --                          |
| Neonatal preterm birth complications                             | 50<br>(35 - 67)             | 50<br>(35 - 67)  | --                | --                   | --                       | --                          |
| Neonatal encephalopathy due to birth asphyxia and trauma         | 15<br>(7 - 28)              | 15<br>(7 - 28)   | --                | --                   | --                       | --                          |
| Neonatal sepsis and other neonatal infections                    | 1<br>(0 - 3)                | 1<br>(0 - 3)     | --                | --                   | --                       | --                          |
| Hemolytic disease and other neonatal jaundice                    | 0<br>(0 - 0)                | 0<br>(0 - 0)     | --                | --                   | --                       | --                          |
| Other neonatal disorders                                         | 10<br>(5 - 18)              | 10<br>(5 - 18)   | --                | --                   | --                       | --                          |
| Nutritional deficiencies                                         | 42<br>(16 - 58)             | 0<br>(0 - 1)     | 0<br>(0 - 0)      | 2<br>(1 - 3)         | 5<br>(2 - 7)             | 33<br>(12 - 49)             |
| Protein-energy malnutrition                                      | 11<br>(3 - 21)              | 0<br>(0 - 0)     | 0<br>(0 - 0)      | 1<br>(0 - 1)         | 1<br>(0 - 2)             | 9<br>(2 - 18)               |
| Iodine deficiency                                                | 0<br>(0 - 1)                | 0<br>(0 - 0)     | 0<br>(0 - 0)      | 0<br>(0 - 0)         | 0<br>(0 - 0)             | 0<br>(0 - 1)                |
| Iron-deficiency anemia                                           | 26<br>(9 - 40)              | 0<br>(0 - 0)     | 0<br>(0 - 0)      | 1<br>(1 - 2)         | 3<br>(1 - 5)             | 22<br>(7 - 35)              |
| Other nutritional deficiencies                                   | 4<br>(1 - 8)                | 0<br>(0 - 0)     | 0<br>(0 - 0)      | 0<br>(0 - 1)         | 1<br>(0 - 1)             | 3<br>(1 - 6)                |
| Other communicable, maternal, neonatal, and nutritional diseases | 65<br>(52 - 95)             | 1<br>(1 - 3)     | 0<br>(0 - 0)      | 15<br>(11 - 24)      | 18<br>(14 - 26)          | 31<br>(22 - 47)             |
| Sexually transmitted diseases excluding HIV                      | 2<br>(1 - 3)                | 0<br>(0 - 1)     | 0<br>(0 - 0)      | 0<br>(0 - 0)         | 0<br>(0 - 1)             | 1<br>(0 - 2)                |
| Syphilis                                                         | 1<br>(1 - 3)                | 0<br>(0 - 1)     | 0<br>(0 - 0)      | 0<br>(0 - 0)         | 0<br>(0 - 1)             | 0<br>(0 - 1)                |
| Chlamydial infection                                             | --                          | --               | --                | --                   | --                       | --                          |
| Gonococcal infection                                             | 0<br>(0 - 0)                | --               | 0<br>(0 - 0)      | 0<br>(0 - 0)         | 0<br>(0 - 0)             | 0<br>(0 - 0)                |
| Other sexually transmitted diseases                              | 0<br>(0 - 0)                | --               | 0<br>(0 - 0)      | 0<br>(0 - 0)         | 0<br>(0 - 0)             | 0<br>(0 - 0)                |
| Hepatitis                                                        | 17<br>(13 - 22)             | 0<br>(0 - 0)     | 0<br>(0 - 0)      | 3<br>(2 - 4)         | 6<br>(4 - 8)             | 8<br>(5 - 12)               |
| Acute hepatitis A                                                | 3<br>(1 - 6)                | 0<br>(0 - 0)     | 0<br>(0 - 0)      | 1<br>(0 - 2)         | 1<br>(0 - 2)             | 1<br>(0 - 3)                |
| Acute hepatitis B                                                | 12<br>(7 - 17)              | 0<br>(0 - 0)     | 0<br>(0 - 0)      | 2<br>(1 - 3)         | 4<br>(2 - 6)             | 6<br>(3 - 9)                |
| Acute hepatitis C                                                | 2<br>(0 - 5)                | --               | 0<br>(0 - 0)      | 0<br>(0 - 1)         | 0<br>(0 - 1)             | 1<br>(0 - 3)                |
| Other infectious diseases                                        | 47<br>(35 - 77)             | 1<br>(1 - 2)     | 0<br>(0 - 0)      | 12<br>(8 - 21)       | 12<br>(8 - 19)           | 22<br>(14 - 37)             |
| Non-communicable diseases                                        | 27,925<br>(26,235 - 29,616) | 95<br>(77 - 114) | 22<br>(19 - 25)   | 970<br>(851 - 1,079) | 6,000<br>(5,512 - 6,493) | 20,840<br>(19,694 - 21,965) |
| Neoplasms                                                        | 10,498<br>(9,576 - 11,559)  | 6<br>(4 - 10)    | 12<br>(9 - 14)    | 412<br>(364 - 468)   | 3,344<br>(3,032 - 3,643) | 6,722<br>(6,060 - 7,559)    |
| Esophageal cancer                                                | 378<br>(314 - 493)          | --               | --                | 18<br>(12 - 31)      | 169<br>(133 - 236)       | 191<br>(154 - 235)          |
| Stomach cancer                                                   | 375<br>(318 - 438)          | --               | --                | 16<br>(13 - 20)      | 114<br>(97 - 134)        | 245<br>(197 - 301)          |
| Liver cancer                                                     | 527<br>(396 - 750)          | --               | 0<br>(0 - 1)      | 20<br>(13 - 29)      | 218<br>(160 - 312)       | 288<br>(208 - 427)          |
| Liver cancer due to hepatitis B                                  | 122<br>(57 - 221)           | --               | 0<br>(0 - 0)      | 8<br>(4 - 14)        | 61<br>(24 - 112)         | 52<br>(26 - 101)            |
| Liver cancer due to hepatitis C                                  | 291<br>(152 - 459)          | --               | 0<br>(0 - 0)      | 9<br>(3 - 15)        | 115<br>(51 - 189)        | 167<br>(90 - 276)           |
| Liver cancer due to alcohol use                                  | 104<br>(41 - 178)           | --               | --                | 3<br>(1 - 5)         | 37<br>(16 - 64)          | 64<br>(24 - 117)            |
| Liver cancer due to other causes                                 | 10<br>(3 - 19)              | --               | 0<br>(0 - 0)      | 1<br>(0 - 1)         | 5<br>(1 - 9)             | 5<br>(1 - 9)                |
| Larynx cancer                                                    | 78<br>(59 - 102)            | --               | --                | 4<br>(3 - 7)         | 33<br>(25 - 46)          | 41<br>(28 - 54)             |
| Tracheal, bronchus and lung cancer                               | 2,365<br>(2,129 - 2,602)    | --               | --                | 80<br>(64 - 99)      | 964<br>(855 - 1,087)     | 1,321<br>(1,165 - 1,488)    |
| Breast cancer                                                    | 11<br>(5 - 22)              | --               | --                | 0<br>(0 - 1)         | 3<br>(1 - 7)             | 7<br>(3 - 14)               |
| Cervical cancer                                                  | --                          | --               | --                | --                   | --                       | --                          |
| Uterine cancer                                                   | --                          | --               | --                | --                   | --                       | --                          |
| Prostate cancer                                                  | 1,847<br>(1,377 - 2,749)    | --               | --                | 2<br>(1 - 4)         | 206<br>(136 - 310)       | 1,639<br>(1,209 - 2,470)    |

Web Table 31- Switzerland deaths with 95% UI by age, sex, and cause in 2013

| Cause                                         | Males, All Ages            | Males, 0-4 Years | Males, 5-14 Years | Males, 15-49 Years | Males, 50-69 Years       | Males, 70-80 Years       |
|-----------------------------------------------|----------------------------|------------------|-------------------|--------------------|--------------------------|--------------------------|
| Colon and rectum cancer                       | 1,168<br>(1,028 - 1,331)   | --               | --                | 36<br>(29 - 44)    | 345<br>(301 - 396)       | 787<br>(665 - 922)       |
| Lip and oral cavity cancer                    | 210<br>(138 - 251)         | --               | --                | 16<br>(11 - 21)    | 111<br>(68 - 138)        | 84<br>(56 - 110)         |
| Nasopharynx cancer                            | 21<br>(15 - 40)            | --               | 0<br>(0 - 0)      | 3<br>(2 - 6)       | 13<br>(9 - 26)           | 4<br>(3 - 8)             |
| Other pharynx cancer                          | 94<br>(73 - 137)           | --               | --                | 7<br>(5 - 11)      | 59<br>(44 - 85)          | 28<br>(20 - 42)          |
| Gallbladder and biliary tract cancer          | 111<br>(62 - 143)          | --               | --                | 3<br>(2 - 4)       | 30<br>(18 - 43)          | 78<br>(42 - 103)         |
| Pancreatic cancer                             | 628<br>(558 - 713)         | --               | --                | 25<br>(19 - 31)    | 253<br>(216 - 296)       | 351<br>(300 - 410)       |
| Malignant skin melanoma                       | 221<br>(112 - 396)         | --               | --                | 26<br>(13 - 47)    | 83<br>(42 - 151)         | 113<br>(56 - 197)        |
| Non-melanoma skin cancer                      | 15<br>(9 - 23)             | --               | --                | 1<br>(0 - 1)       | 3<br>(2 - 4)             | 12<br>(7 - 18)           |
| Ovarian cancer                                | --                         | --               | --                | --                 | --                       | --                       |
| Testicular cancer                             | 6<br>(4 - 10)              | --               | --                | 3<br>(2 - 5)       | 1<br>(1 - 3)             | 1<br>(1 - 3)             |
| Kidney cancer                                 | 408<br>(334 - 499)         | 1<br>(0 - 2)     | 1<br>(0 - 1)      | 18<br>(13 - 24)    | 141<br>(111 - 174)       | 248<br>(185 - 326)       |
| Bladder cancer                                | 391<br>(313 - 478)         | --               | --                | 4<br>(3 - 6)       | 87<br>(70 - 107)         | 300<br>(234 - 379)       |
| Brain and nervous system cancer               | 296<br>(223 - 359)         | 2<br>(1 - 4)     | 4<br>(3 - 6)      | 51<br>(38 - 65)    | 142<br>(106 - 179)       | 97<br>(66 - 127)         |
| Thyroid cancer                                | 41<br>(33 - 49)            | --               | 0<br>(0 - 0)      | 2<br>(1 - 3)       | 12<br>(9 - 16)           | 27<br>(21 - 34)          |
| Mesothelioma                                  | 87<br>(52 - 130)           | --               | --                | 6<br>(3 - 11)      | 46<br>(26 - 77)          | 34<br>(18 - 58)          |
| Hodgkin lymphoma                              | 8<br>(5 - 19)              | 0<br>(0 - 0)     | 0<br>(0 - 0)      | 3<br>(2 - 6)       | 2<br>(1 - 6)             | 3<br>(1 - 6)             |
| Non-Hodgkin lymphoma                          | 409<br>(173 - 537)         | 0<br>(0 - 1)     | 1<br>(0 - 2)      | 23<br>(10 - 33)    | 110<br>(46 - 147)        | 274<br>(119 - 377)       |
| Multiple myeloma                              | 213<br>(127 - 364)         | --               | --                | 7<br>(4 - 12)      | 66<br>(38 - 115)         | 140<br>(83 - 243)        |
| Leukemia                                      | 343<br>(290 - 398)         | 2<br>(1 - 4)     | 4<br>(3 - 5)      | 24<br>(19 - 29)    | 86<br>(70 - 103)         | 228<br>(186 - 273)       |
| Other neoplasms                               | 248<br>(172 - 356)         | 1<br>(1 - 2)     | 2<br>(1 - 2)      | 14<br>(8 - 19)     | 49<br>(30 - 64)          | 182<br>(126 - 281)       |
| Cardiovascular diseases                       | 10,233<br>(9,329 - 11,233) | 1<br>(1 - 1)     | 1<br>(0 - 1)      | 222<br>(186 - 260) | 1,588<br>(1,421 - 1,793) | 8,422<br>(7,636 - 9,229) |
| Rheumatic heart disease                       | 40<br>(24 - 89)            | 0<br>(0 - 0)     | 0<br>(0 - 0)      | 1<br>(1 - 3)       | 6<br>(4 - 12)            | 33<br>(18 - 75)          |
| Ischemic heart disease                        | 5,553<br>(4,776 - 6,367)   | 0<br>(0 - 0)     | 0<br>(0 - 0)      | 137<br>(112 - 165) | 989<br>(857 - 1,137)     | 4,427<br>(3,759 - 5,145) |
| Cerebrovascular disease                       | 2,654<br>(1,950 - 3,240)   | 0<br>(0 - 0)     | 0<br>(0 - 0)      | 31<br>(20 - 43)    | 268<br>(187 - 341)       | 2,355<br>(1,716 - 2,901) |
| Ischemic stroke                               | 1,600<br>(1,041 - 2,126)   | 0<br>(0 - 0)     | 0<br>(0 - 0)      | 4<br>(2 - 7)       | 95<br>(52 - 136)         | 1,501<br>(985 - 1,996)   |
| Hemorrhagic stroke                            | 1,054<br>(632 - 1,503)     | 0<br>(0 - 0)     | 0<br>(0 - 0)      | 27<br>(17 - 36)    | 173<br>(112 - 228)       | 854<br>(489 - 1,274)     |
| Hypertensive heart disease                    | 131<br>(70 - 212)          | 0<br>(0 - 0)     | 0<br>(0 - 0)      | 3<br>(2 - 5)       | 25<br>(14 - 42)          | 102<br>(51 - 172)        |
| Cardiomyopathy and myocarditis                | 210<br>(141 - 315)         | 0<br>(0 - 1)     | 0<br>(0 - 0)      | 17<br>(11 - 25)    | 50<br>(34 - 73)          | 143<br>(84 - 237)        |
| Atrial fibrillation and flutter               | 129<br>(64 - 263)          | --               | --                | 0<br>(0 - 1)       | 10<br>(5 - 19)           | 119<br>(56 - 244)        |
| Aortic aneurysm                               | 319<br>(208 - 480)         | --               | --                | 6<br>(4 - 9)       | 62<br>(40 - 96)          | 251<br>(158 - 384)       |
| Peripheral vascular disease                   | 82<br>(54 - 120)           | --               | --                | 0<br>(0 - 1)       | 10<br>(6 - 16)           | 72<br>(46 - 107)         |
| Endocarditis                                  | 40<br>(22 - 65)            | 0<br>(0 - 0)     | 0<br>(0 - 0)      | 3<br>(2 - 5)       | 10<br>(5 - 17)           | 26<br>(14 - 44)          |
| Other cardiovascular and circulatory diseases | 1,075<br>(774 - 1,481)     | 0<br>(0 - 0)     | 0<br>(0 - 0)      | 23<br>(16 - 32)    | 159<br>(115 - 214)       | 893<br>(622 - 1,270)     |
| Chronic respiratory diseases                  | 1,585<br>(1,282 - 1,826)   | 0<br>(0 - 1)     | 0<br>(0 - 0)      | 15<br>(12 - 19)    | 232<br>(192 - 284)       | 1,337<br>(1,063 - 1,548) |
| Chronic obstructive pulmonary disease         | 1,352<br>(1,088 - 1,580)   | 0<br>(0 - 0)     | 0<br>(0 - 0)      | 8<br>(6 - 10)      | 193<br>(159 - 236)       | 1,151<br>(915 - 1,358)   |
| Pneumoconiosis                                | 51<br>(29 - 81)            | 0<br>(0 - 0)     | 0<br>(0 - 0)      | 1<br>(0 - 1)       | 6<br>(4 - 10)            | 44<br>(24 - 72)          |
| Silicosis                                     | 2<br>(1 - 4)               | 0<br>(0 - 0)     | 0<br>(0 - 0)      | 0<br>(0 - 0)       | 0<br>(0 - 1)             | 2<br>(1 - 3)             |
| Asbestosis                                    | 22<br>(12 - 36)            | 0<br>(0 - 0)     | 0<br>(0 - 0)      | 0<br>(0 - 0)       | 3<br>(2 - 5)             | 19<br>(10 - 32)          |
| Coal workers pneumoconiosis                   | 9<br>(5 - 15)              | 0<br>(0 - 0)     | 0<br>(0 - 0)      | 0<br>(0 - 0)       | 1<br>(0 - 1)             | 8<br>(4 - 14)            |
| Other pneumoconiosis                          | 18<br>(10 - 30)            | 0<br>(0 - 0)     | 0<br>(0 - 0)      | 0<br>(0 - 0)       | 2<br>(1 - 4)             | 15<br>(8 - 26)           |

Web Table 31- Switzerland deaths with 95% UI by age, sex, and cause in 2013

| Cause                                               | Males, All Ages          | Males, 0-4 Years | Males, 5-14 Years | Males, 15-49 Years | Males, 50-69 Years | Males, 70-80 Years       |
|-----------------------------------------------------|--------------------------|------------------|-------------------|--------------------|--------------------|--------------------------|
| Asthma                                              | 34<br>(24 - 49)          | 0<br>(0 - 0)     | 0<br>(0 - 0)      | 4<br>(3 - 5)       | 9<br>(6 - 12)      | 22<br>(13 - 34)          |
| Interstitial lung disease and pulmonary sarcoidosis | 133<br>(52 - 244)        | 0<br>(0 - 0)     | 0<br>(0 - 0)      | 2<br>(1 - 4)       | 23<br>(8 - 41)     | 108<br>(43 - 208)        |
| Other chronic respiratory diseases                  | 14<br>(9 - 23)           | 0<br>(0 - 0)     | 0<br>(0 - 0)      | 1<br>(0 - 1)       | 2<br>(1 - 3)       | 12<br>(6 - 20)           |
| Cirrhosis                                           | 508<br>(449 - 576)       | 0<br>(0 - 0)     | 0<br>(0 - 0)      | 59<br>(48 - 73)    | 263<br>(224 - 304) | 186<br>(156 - 219)       |
| Cirrhosis due to hepatitis B                        | 51<br>(25 - 86)          | 0<br>(0 - 0)     | 0<br>(0 - 0)      | 6<br>(3 - 11)      | 26<br>(13 - 45)    | 19<br>(8 - 33)           |
| Cirrhosis due to hepatitis C                        | 222<br>(118 - 312)       | 0<br>(0 - 0)     | 0<br>(0 - 0)      | 27<br>(16 - 39)    | 117<br>(58 - 169)  | 78<br>(37 - 114)         |
| Cirrhosis due to alcohol use                        | 189<br>(110 - 273)       | --               | --                | 17<br>(9 - 27)     | 93<br>(53 - 142)   | 78<br>(45 - 112)         |
| Cirrhosis due to other causes                       | 47<br>(19 - 91)          | 0<br>(0 - 0)     | 0<br>(0 - 0)      | 9<br>(4 - 17)      | 26<br>(9 - 52)     | 12<br>(5 - 24)           |
| Digestive diseases                                  | 606<br>(460 - 719)       | 0<br>(0 - 1)     | 0<br>(0 - 0)      | 17<br>(13 - 22)    | 89<br>(70 - 106)   | 499<br>(371 - 599)       |
| Peptic ulcer disease                                | 99<br>(64 - 141)         | 0<br>(0 - 0)     | 0<br>(0 - 0)      | 2<br>(1 - 3)       | 13<br>(9 - 19)     | 84<br>(53 - 122)         |
| Gastritis and duodenitis                            | 9<br>(4 - 16)            | 0<br>(0 - 0)     | 0<br>(0 - 0)      | 0<br>(0 - 1)       | 1<br>(1 - 3)       | 7<br>(3 - 13)            |
| Appendicitis                                        | 22<br>(12 - 34)          | 0<br>(0 - 0)     | 0<br>(0 - 0)      | 1<br>(1 - 2)       | 4<br>(3 - 7)       | 16<br>(8 - 26)           |
| Paralytic ileus and intestinal obstruction          | 88<br>(44 - 133)         | 0<br>(0 - 0)     | 0<br>(0 - 0)      | 1<br>(0 - 2)       | 9<br>(4 - 14)      | 78<br>(39 - 121)         |
| Inguinal, femoral, and abdominal hernia             | 18<br>(7 - 31)           | 0<br>(0 - 0)     | 0<br>(0 - 0)      | 0<br>(0 - 0)       | 2<br>(1 - 3)       | 16<br>(5 - 28)           |
| Inflammatory bowel disease                          | 37<br>(19 - 60)          | 0<br>(0 - 0)     | 0<br>(0 - 0)      | 1<br>(1 - 2)       | 5<br>(3 - 8)       | 31<br>(15 - 52)          |
| Vascular intestinal disorders                       | 112<br>(47 - 207)        | 0<br>(0 - 0)     | 0<br>(0 - 0)      | 2<br>(1 - 3)       | 17<br>(7 - 32)     | 93<br>(38 - 176)         |
| Gallbladder and biliary diseases                    | 66<br>(42 - 98)          | 0<br>(0 - 0)     | 0<br>(0 - 0)      | 1<br>(0 - 1)       | 7<br>(4 - 9)       | 59<br>(36 - 89)          |
| Pancreatitis                                        | 61<br>(36 - 94)          | 0<br>(0 - 0)     | 0<br>(0 - 0)      | 6<br>(4 - 9)       | 17<br>(10 - 26)    | 38<br>(20 - 62)          |
| Other digestive diseases                            | 94<br>(51 - 147)         | 0<br>(0 - 0)     | 0<br>(0 - 0)      | 2<br>(1 - 3)       | 13<br>(8 - 19)     | 79<br>(40 - 130)         |
| Neurological disorders                              | 3,066<br>(2,313 - 3,952) | 5<br>(3 - 7)     | 2<br>(2 - 4)      | 48<br>(35 - 68)    | 209<br>(162 - 266) | 2,802<br>(2,066 - 3,684) |
| Alzheimer disease and other dementias               | 2,441<br>(1,761 - 3,262) | --               | --                | 0<br>(0 - 0)       | 76<br>(46 - 111)   | 2,365<br>(1,692 - 3,186) |
| Parkinson disease                                   | 335<br>(154 - 624)       | --               | --                | 0<br>(0 - 1)       | 24<br>(12 - 42)    | 310<br>(133 - 602)       |
| Epilepsy                                            | 55<br>(41 - 83)          | 1<br>(1 - 2)     | 1<br>(1 - 2)      | 16<br>(11 - 27)    | 14<br>(10 - 22)    | 23<br>(16 - 33)          |
| Multiple sclerosis                                  | 58<br>(28 - 120)         | --               | --                | 9<br>(3 - 19)      | 26<br>(11 - 54)    | 23<br>(11 - 50)          |
| Other neurological disorders                        | 177<br>(113 - 226)       | 4<br>(2 - 5)     | 1<br>(1 - 2)      | 22<br>(14 - 29)    | 69<br>(41 - 92)    | 81<br>(54 - 107)         |
| Mental and substance use disorders                  | 206<br>(141 - 255)       | 0<br>(0 - 0)     | 0<br>(0 - 0)      | 140<br>(85 - 174)  | 48<br>(29 - 65)    | 18<br>(12 - 26)          |
| Schizophrenia                                       | 3<br>(2 - 5)             | --               | --                | 0<br>(0 - 1)       | 1<br>(1 - 2)       | 2<br>(1 - 3)             |
| Alcohol use disorders                               | 69<br>(35 - 97)          | --               | --                | 22<br>(10 - 33)    | 35<br>(18 - 53)    | 11<br>(6 - 18)           |
| Drug use disorders                                  | 134<br>(81 - 169)        | 0<br>(0 - 0)     | --                | 117<br>(69 - 149)  | 12<br>(7 - 16)     | 5<br>(3 - 8)             |
| Opioid use disorders                                | 50<br>(30 - 63)          | 0<br>(0 - 0)     | --                | 44<br>(26 - 57)    | 4<br>(2 - 6)       | 2<br>(1 - 3)             |
| Cocaine use disorders                               | 4<br>(2 - 5)             | 0<br>(0 - 0)     | --                | 3<br>(2 - 4)       | 0<br>(0 - 0)       | 0<br>(0 - 0)             |
| Amphetamine use disorders                           | 3<br>(2 - 4)             | 0<br>(0 - 0)     | --                | 3<br>(2 - 4)       | 0<br>(0 - 0)       | 0<br>(0 - 0)             |
| Other drug use disorders                            | 77<br>(47 - 98)          | 0<br>(0 - 0)     | --                | 67<br>(39 - 86)    | 7<br>(4 - 10)      | 3<br>(2 - 5)             |
| Eating disorders                                    | 0<br>(0 - 0)             | --               | 0<br>(0 - 0)      | 0<br>(0 - 0)       | --                 | --                       |
| Anorexia nervosa                                    | 0<br>(0 - 0)             | --               | 0<br>(0 - 0)      | 0<br>(0 - 0)       | --                 | --                       |
| Diabetes, urogenital, blood, and endocrine diseases | 1,013<br>(857 - 1,172)   | 3<br>(1 - 4)     | 2<br>(1 - 2)      | 32<br>(23 - 39)    | 188<br>(151 - 220) | 789<br>(658 - 935)       |
| Diabetes mellitus                                   | 712<br>(603 - 844)       | 0<br>(0 - 0)     | 0<br>(0 - 0)      | 17<br>(13 - 21)    | 129<br>(107 - 155) | 566<br>(463 - 686)       |
| Acute glomerulonephritis                            | 0<br>(0 - 1)             | 0<br>(0 - 0)     | 0<br>(0 - 0)      | 0<br>(0 - 0)       | 0<br>(0 - 0)       | 0<br>(0 - 0)             |
| Chronic kidney disease                              | 106<br>(75 - 224)        | 0<br>(0 - 0)     | 0<br>(0 - 0)      | 3<br>(2 - 6)       | 16<br>(11 - 34)    | 87<br>(61 - 189)         |
| Chronic kidney disease due to diabetes mellitus     | 35<br>(14 - 77)          | 0<br>(0 - 0)     | 0<br>(0 - 0)      | 1<br>(0 - 2)       | 6<br>(2 - 12)      | 28<br>(11 - 62)          |

Web Table 31- Switzerland deaths with 95% UI by age, sex, and cause in 2013

| Cause                                               | Males, All Ages          | Males, 0-4 Years | Males, 5-14 Years | Males, 15-49 Years | Males, 50-69 Years | Males, 70-80 Years   |
|-----------------------------------------------------|--------------------------|------------------|-------------------|--------------------|--------------------|----------------------|
| Chronic kidney disease due to hypertension          | 44<br>(20 - 96)          | 0<br>(0 - 0)     | 0<br>(0 - 0)      | 1<br>(0 - 2)       | 6<br>(2 - 14)      | 38<br>(17 - 81)      |
| Chronic kidney disease due to glomerulonephritis    | 3<br>(1 - 6)             | 0<br>(0 - 0)     | 0<br>(0 - 0)      | 0<br>(0 - 0)       | 1<br>(0 - 1)       | 2<br>(1 - 4)         |
| Chronic kidney disease due to other causes          | 24<br>(10 - 85)          | 0<br>(0 - 0)     | 0<br>(0 - 0)      | 1<br>(0 - 2)       | 4<br>(1 - 11)      | 20<br>(8 - 72)       |
| Urinary diseases and male infertility               | 48<br>(36 - 68)          | 0<br>(0 - 0)     | 0<br>(0 - 0)      | 1<br>(1 - 1)       | 6<br>(5 - 6)       | 41<br>(30 - 60)      |
| Interstitial nephritis and urinary tract infections | 28<br>(19 - 42)          | 0<br>(0 - 0)     | 0<br>(0 - 0)      | 0<br>(0 - 1)       | 3<br>(2 - 5)       | 24<br>(16 - 37)      |
| Urolithiasis                                        | 4<br>(2 - 6)             | --               | 0<br>(0 - 0)      | 0<br>(0 - 0)       | 1<br>(0 - 1)       | 3<br>(1 - 5)         |
| Other urinary diseases                              | 17<br>(9 - 26)           | 0<br>(0 - 0)     | 0<br>(0 - 0)      | 0<br>(0 - 0)       | 2<br>(1 - 3)       | 14<br>(7 - 23)       |
| Gynecological diseases                              | --                       | --               | --                | --                 | --                 | --                   |
| Uterine fibroids                                    | --                       | --               | --                | --                 | --                 | --                   |
| Polycystic ovarian syndrome                         | --                       | --               | --                | --                 | --                 | --                   |
| Endometriosis                                       | --                       | --               | --                | --                 | --                 | --                   |
| Genital prolapse                                    | --                       | --               | --                | --                 | --                 | --                   |
| Other gynecological diseases                        | --                       | --               | --                | --                 | --                 | --                   |
| Hemoglobinopathies and hemolytic anemias            | 11<br>(7 - 17)           | 1<br>(0 - 1)     | 0<br>(0 - 1)      | 1<br>(1 - 2)       | 2<br>(1 - 3)       | 7<br>(4 - 10)        |
| Thalassemias                                        | 1<br>(0 - 1)             | 0<br>(0 - 0)     | 0<br>(0 - 0)      | 0<br>(0 - 0)       | 0<br>(0 - 0)       | 0<br>(0 - 0)         |
| Sickle cell disorders                               | 2<br>(1 - 3)             | 0<br>(0 - 0)     | 0<br>(0 - 0)      | 1<br>(0 - 1)       | 1<br>(0 - 1)       | 0<br>(0 - 1)         |
| G6PD deficiency                                     | 0<br>(0 - 0)             | 0<br>(0 - 0)     | 0<br>(0 - 0)      | 0<br>(0 - 0)       | 0<br>(0 - 0)       | 0<br>(0 - 0)         |
| Other hemoglobinopathies and hemolytic anemias      | 8<br>(5 - 12)            | 0<br>(0 - 0)     | 0<br>(0 - 0)      | 1<br>(0 - 1)       | 1<br>(1 - 2)       | 7<br>(4 - 10)        |
| Endocrine, metabolic, blood, and immune disorders   | 135<br>(32 - 192)        | 2<br>(0 - 3)     | 1<br>(0 - 2)      | 11<br>(2 - 15)     | 35<br>(8 - 49)     | 87<br>(19 - 133)     |
| Musculoskeletal disorders                           | 55<br>(27 - 93)          | --               | 0<br>(0 - 0)      | 3<br>(2 - 6)       | 13<br>(6 - 24)     | 39<br>(18 - 65)      |
| Rheumatoid arthritis                                | 16<br>(7 - 33)           | --               | 0<br>(0 - 0)      | 1<br>(0 - 1)       | 4<br>(2 - 9)       | 11<br>(5 - 24)       |
| Other musculoskeletal disorders                     | 40<br>(18 - 63)          | --               | 0<br>(0 - 0)      | 3<br>(1 - 5)       | 9<br>(4 - 16)      | 28<br>(13 - 45)      |
| Other non-communicable diseases                     | 155<br>(136 - 176)       | 79<br>(64 - 97)  | 5<br>(4 - 7)      | 20<br>(16 - 25)    | 25<br>(19 - 31)    | 25<br>(19 - 32)      |
| Congenital anomalies                                | 128<br>(111 - 148)       | 68<br>(54 - 86)  | 5<br>(4 - 6)      | 20<br>(15 - 24)    | 23<br>(17 - 28)    | 12<br>(9 - 16)       |
| Neural tube defects                                 | 1<br>(0 - 1)             | 0<br>(0 - 0)     | 0<br>(0 - 0)      | 0<br>(0 - 0)       | 0<br>(0 - 0)       | 0<br>(0 - 0)         |
| Congenital heart anomalies                          | 56<br>(41 - 71)          | 36<br>(25 - 49)  | 3<br>(2 - 4)      | 9<br>(6 - 12)      | 7<br>(4 - 10)      | 1<br>(1 - 2)         |
| Cleft lip and cleft palate                          | 0<br>(0 - 0)             | 0<br>(0 - 0)     | --                | --                 | --                 | --                   |
| Down syndrome                                       | 13<br>(5 - 18)           | 1<br>(0 - 3)     | 0<br>(0 - 0)      | 3<br>(1 - 4)       | 8<br>(4 - 12)      | 1<br>(0 - 1)         |
| Chromosomal unbalanced rearrangements               | 3<br>(2 - 5)             | 2<br>(1 - 4)     | 0<br>(0 - 0)      | 0<br>(0 - 1)       | 0<br>(0 - 1)       | 0<br>(0 - 0)         |
| Other congenital anomalies                          | 56<br>(41 - 74)          | 29<br>(17 - 42)  | 2<br>(1 - 3)      | 7<br>(5 - 11)      | 8<br>(5 - 11)      | 10<br>(7 - 14)       |
| Skin and subcutaneous diseases                      | 16<br>(11 - 22)          | 0<br>(0 - 0)     | 0<br>(0 - 0)      | 1<br>(0 - 1)       | 3<br>(2 - 4)       | 13<br>(8 - 18)       |
| Cellulitis                                          | 5<br>(3 - 7)             | 0<br>(0 - 0)     | 0<br>(0 - 0)      | 0<br>(0 - 0)       | 1<br>(1 - 1)       | 3<br>(2 - 6)         |
| Pyoderma                                            | 3<br>(1 - 4)             | 0<br>(0 - 0)     | 0<br>(0 - 0)      | 0<br>(0 - 0)       | 0<br>(0 - 1)       | 2<br>(1 - 3)         |
| Decubitus ulcer                                     | 6<br>(4 - 10)            | 0<br>(0 - 0)     | 0<br>(0 - 0)      | 0<br>(0 - 0)       | 1<br>(0 - 1)       | 6<br>(3 - 9)         |
| Other skin and subcutaneous diseases                | 3<br>(1 - 5)             | 0<br>(0 - 0)     | 0<br>(0 - 0)      | 0<br>(0 - 0)       | 1<br>(0 - 1)       | 2<br>(1 - 4)         |
| Sudden infant death syndrome                        | 11<br>(4 - 22)           | 11<br>(4 - 22)   | --                | --                 | --                 | --                   |
| Injuries                                            | 2,287<br>(2,013 - 2,608) | 18<br>(13 - 24)  | 18<br>(15 - 20)   | 704<br>(622 - 803) | 576<br>(486 - 678) | 972<br>(817 - 1,179) |
| Transport injuries                                  | 342<br>(299 - 392)       | 5<br>(3 - 7)     | 8<br>(6 - 10)     | 167<br>(137 - 200) | 85<br>(72 - 99)    | 76<br>(62 - 95)      |
| Road injuries                                       | 327<br>(285 - 375)       | 5<br>(3 - 7)     | 8<br>(6 - 10)     | 159<br>(130 - 190) | 81<br>(68 - 95)    | 75<br>(60 - 92)      |
| Pedestrian road injuries                            | 66<br>(37 - 109)         | 1<br>(1 - 2)     | 2<br>(1 - 3)      | 27<br>(14 - 46)    | 17<br>(9 - 29)     | 18<br>(10 - 31)      |



Web Table 31- Switzerland deaths with 95% UI by age, sex, and cause in 2013

| Cause                                           | Males, All Ages      | Males, 0-4 Years | Males, 5-14 Years | Males, 15-49 Years | Males, 50-69 Years | Males, 70-80 Years |
|-------------------------------------------------|----------------------|------------------|-------------------|--------------------|--------------------|--------------------|
| Cyclist road injuries                           | 28<br>(16 - 40)      | 0<br>(0 - 1)     | 1<br>(0 - 2)      | 12<br>(6 - 18)     | 8<br>(4 - 12)      | 7<br>(4 - 12)      |
| Motorcyclist road injuries                      | 70<br>(36 - 94)      | 1<br>(0 - 1)     | 1<br>(1 - 2)      | 39<br>(20 - 54)    | 16<br>(8 - 24)     | 14<br>(6 - 22)     |
| Motor vehicle road injuries                     | 161<br>(112 - 200)   | 2<br>(1 - 4)     | 3<br>(2 - 5)      | 80<br>(55 - 102)   | 40<br>(27 - 51)    | 35<br>(23 - 50)    |
| Other road injuries                             | 1<br>(1 - 3)         | 0<br>(0 - 0)     | 0<br>(0 - 0)      | 0<br>(0 - 1)       | 0<br>(0 - 1)       | 0<br>(0 - 1)       |
| Other transport injuries                        | 15<br>(10 - 21)      | 0<br>(0 - 1)     | 0<br>(0 - 1)      | 8<br>(5 - 12)      | 5<br>(3 - 7)       | 2<br>(1 - 4)       |
| Unintentional injuries                          | 951<br>(789 - 1,150) | 11<br>(7 - 16)   | 7<br>(5 - 9)      | 120<br>(102 - 152) | 160<br>(133 - 196) | 653<br>(504 - 835) |
| Falls                                           | 741<br>(583 - 941)   | 2<br>(1 - 3)     | 2<br>(1 - 3)      | 53<br>(41 - 68)    | 109<br>(82 - 138)  | 575<br>(435 - 764) |
| Drowning                                        | 37<br>(28 - 56)      | 3<br>(2 - 7)     | 2<br>(1 - 3)      | 14<br>(9 - 23)     | 9<br>(7 - 14)      | 8<br>(6 - 12)      |
| Fire, heat, and hot substances                  | 16<br>(12 - 21)      | 1<br>(0 - 1)     | 0<br>(0 - 0)      | 4<br>(3 - 6)       | 3<br>(2 - 5)       | 7<br>(5 - 10)      |
| Poisonings                                      | 8<br>(6 - 15)        | 0<br>(0 - 0)     | 0<br>(0 - 0)      | 6<br>(4 - 11)      | 1<br>(1 - 2)       | 1<br>(1 - 2)       |
| Exposure to mechanical forces                   | 60<br>(48 - 90)      | 2<br>(1 - 3)     | 2<br>(1 - 3)      | 31<br>(23 - 50)    | 18<br>(13 - 25)    | 8<br>(6 - 11)      |
| Unintentional firearm injuries                  | 3<br>(2 - 4)         | 0<br>(0 - 0)     | 0<br>(0 - 0)      | 2<br>(1 - 3)       | 1<br>(0 - 1)       | 0<br>(0 - 1)       |
| Unintentional suffocation                       | 4<br>(2 - 7)         | 1<br>(0 - 2)     | 0<br>(0 - 1)      | 2<br>(1 - 3)       | 1<br>(0 - 2)       | 1<br>(0 - 2)       |
| Other exposure to mechanical forces             | 53<br>(42 - 82)      | 1<br>(0 - 1)     | 1<br>(1 - 2)      | 27<br>(19 - 46)    | 16<br>(12 - 23)    | 7<br>(5 - 10)      |
| Adverse effects of medical treatment            | 6<br>(1 - 11)        | 0<br>(0 - 0)     | 0<br>(0 - 0)      | 1<br>(0 - 1)       | 2<br>(0 - 3)       | 3<br>(0 - 7)       |
| Animal contact                                  | 3<br>(2 - 5)         | 0<br>(0 - 0)     | 0<br>(0 - 0)      | 0<br>(0 - 1)       | 1<br>(1 - 2)       | 1<br>(1 - 2)       |
| Venomous animal contact                         | 1<br>(0 - 1)         | 0<br>(0 - 0)     | 0<br>(0 - 0)      | 0<br>(0 - 0)       | 0<br>(0 - 1)       | 0<br>(0 - 0)       |
| Non-venomous animal contact                     | 2<br>(2 - 3)         | 0<br>(0 - 0)     | 0<br>(0 - 0)      | 0<br>(0 - 0)       | 1<br>(1 - 1)       | 1<br>(1 - 2)       |
| Foreign body                                    | 71<br>(34 - 117)     | 2<br>(1 - 4)     | 1<br>(0 - 1)      | 9<br>(5 - 15)      | 14<br>(6 - 22)     | 45<br>(21 - 77)    |
| Pulmonary aspiration and foreign body in airway | 71<br>(33 - 116)     | 2<br>(1 - 4)     | 1<br>(0 - 1)      | 9<br>(4 - 15)      | 14<br>(6 - 22)     | 45<br>(21 - 77)    |
| Foreign body in other body part                 | 1<br>(0 - 1)         | 0<br>(0 - 0)     | 0<br>(0 - 0)      | 0<br>(0 - 0)       | 0<br>(0 - 0)       | 0<br>(0 - 0)       |
| Other unintentional injuries                    | 8<br>(6 - 11)        | 0<br>(0 - 1)     | 0<br>(0 - 0)      | 2<br>(1 - 3)       | 2<br>(1 - 4)       | 3<br>(2 - 5)       |
| Self-harm and interpersonal violence            | 995<br>(823 - 1,235) | 2<br>(1 - 3)     | 3<br>(2 - 4)      | 417<br>(333 - 518) | 330<br>(255 - 409) | 243<br>(190 - 334) |
| Self-harm                                       | 963<br>(786 - 1,199) | --               | 2<br>(1 - 3)      | 402<br>(318 - 503) | 322<br>(248 - 401) | 238<br>(185 - 329) |
| Interpersonal violence                          | 31<br>(20 - 46)      | 2<br>(1 - 3)     | 1<br>(1 - 2)      | 15<br>(9 - 22)     | 8<br>(5 - 12)      | 5<br>(3 - 8)       |
| Assault by firearm                              | 8<br>(4 - 16)        | 0<br>(0 - 0)     | 0<br>(0 - 0)      | 5<br>(3 - 9)       | 2<br>(1 - 4)       | 1<br>(0 - 2)       |
| Assault by sharp object                         | 8<br>(4 - 14)        | 0<br>(0 - 0)     | 0<br>(0 - 0)      | 4<br>(2 - 8)       | 2<br>(1 - 4)       | 1<br>(0 - 2)       |
| Assault by other means                          | 15<br>(8 - 22)       | 2<br>(1 - 3)     | 1<br>(0 - 1)      | 6<br>(3 - 9)       | 4<br>(2 - 6)       | 3<br>(2 - 5)       |

Web Table 31- Switzerland deaths with 95% UI by age, sex, and cause in 2013

| Cause                                                             | Females, All Ages           | Females, 0-4 Years | Females, 5-14 Years | Females, 15-49 Years | Females, 50-69 Years     | Females, 70-80 Years        |
|-------------------------------------------------------------------|-----------------------------|--------------------|---------------------|----------------------|--------------------------|-----------------------------|
| All causes                                                        | 33,950<br>(31,914 - 36,149) | 157<br>(135 - 182) | 30<br>(27 - 33)     | 966<br>(874 - 1,067) | 3,944<br>(3,620 - 4,297) | 28,853<br>(27,215 - 30,603) |
| Communicable, maternal, neonatal, and nutritional diseases        | 1,483<br>(1,130 - 1,933)    | 70<br>(56 - 86)    | 3<br>(2 - 3)        | 53<br>(42 - 68)      | 83<br>(69 - 99)          | 1,274<br>(935 - 1,722)      |
| HIV/AIDS and tuberculosis                                         | 61<br>(44 - 86)             | 0<br>(0 - 0)       | 0<br>(0 - 0)        | 23<br>(14 - 37)      | 15<br>(9 - 24)           | 23<br>(16 - 35)             |
| Tuberculosis                                                      | 25<br>(18 - 39)             | 0<br>(0 - 0)       | 0<br>(0 - 0)        | 1<br>(1 - 1)         | 3<br>(2 - 5)             | 21<br>(14 - 33)             |
| HIV/AIDS                                                          | 36<br>(20 - 59)             | 0<br>(0 - 0)       | 0<br>(0 - 0)        | 22<br>(13 - 36)      | 12<br>(6 - 21)           | 2<br>(0 - 4)                |
| HIV/AIDS resulting in mycobacterial infection                     | 1<br>(1 - 2)                | 0<br>(0 - 0)       | 0<br>(0 - 0)        | 1<br>(0 - 1)         | 0<br>(0 - 1)             | 0<br>(0 - 0)                |
| HIV/AIDS resulting in other diseases                              | 34<br>(20 - 56)             | 0<br>(0 - 0)       | 0<br>(0 - 0)        | 21<br>(13 - 35)      | 11<br>(5 - 20)           | 2<br>(0 - 4)                |
| Diarrhea, lower respiratory, and other common infectious diseases | 1,196<br>(861 - 1,647)      | 8<br>(6 - 11)      | 2<br>(1 - 3)        | 16<br>(12 - 19)      | 51<br>(40 - 63)          | 1,119<br>(783 - 1,559)      |
| Diarrheal diseases                                                | 97<br>(59 - 156)            | 2<br>(1 - 3)       | 0<br>(0 - 0)        | 1<br>(1 - 1)         | 4<br>(3 - 6)             | 90<br>(52 - 149)            |
| Intestinal infectious diseases                                    | 2<br>(1 - 5)                | 0<br>(0 - 1)       | 0<br>(0 - 1)        | 1<br>(0 - 2)         | 0<br>(0 - 1)             | 0<br>(0 - 1)                |
| Typhoid fever                                                     | 2<br>(1 - 4)                | 0<br>(0 - 0)       | 0<br>(0 - 1)        | 1<br>(0 - 2)         | 0<br>(0 - 1)             | 0<br>(0 - 0)                |
| Paratyphoid fever                                                 | 0<br>(0 - 1)                | 0<br>(0 - 0)       | 0<br>(0 - 0)        | 0<br>(0 - 0)         | 0<br>(0 - 0)             | 0<br>(0 - 0)                |
| Other intestinal infectious diseases                              | 0<br>(0 - 2)                | 0<br>(0 - 1)       | 0<br>(0 - 0)        | 0<br>(0 - 1)         | 0<br>(0 - 1)             | 0<br>(0 - 1)                |
| Lower respiratory infections                                      | 1,054<br>(729 - 1,496)      | 3<br>(2 - 5)       | 1<br>(0 - 1)        | 9<br>(7 - 12)        | 39<br>(29 - 49)          | 1,002<br>(684 - 1,440)      |
| Upper respiratory infections                                      | 1<br>(0 - 3)                | 0<br>(0 - 0)       | 0<br>(0 - 0)        | 0<br>(0 - 0)         | 0<br>(0 - 0)             | 1<br>(0 - 3)                |
| Otitis media                                                      | 1<br>(1 - 1)                | 0<br>(0 - 0)       | 0<br>(0 - 0)        | 0<br>(0 - 0)         | 0<br>(0 - 0)             | 0<br>(0 - 1)                |
| Meningitis                                                        | 24<br>(19 - 39)             | 1<br>(1 - 2)       | 0<br>(0 - 0)        | 2<br>(1 - 3)         | 4<br>(3 - 6)             | 17<br>(12 - 29)             |
| Pneumococcal meningitis                                           | 4<br>(2 - 7)                | 0<br>(0 - 0)       | 0<br>(0 - 0)        | 0<br>(0 - 0)         | 1<br>(0 - 1)             | 3<br>(1 - 5)                |
| H influenzae type B meningitis                                    | 3<br>(2 - 4)                | 0<br>(0 - 1)       | 0<br>(0 - 0)        | 0<br>(0 - 0)         | 0<br>(0 - 1)             | 0<br>(1 - 3)                |
| Meningococcal meningitis                                          | 8<br>(4 - 15)               | 0<br>(0 - 1)       | 0<br>(0 - 0)        | 1<br>(0 - 1)         | 1<br>(1 - 2)             | 6<br>(3 - 12)               |
| Other meningitis                                                  | 10<br>(6 - 15)              | 0<br>(0 - 1)       | 0<br>(0 - 0)        | 1<br>(0 - 1)         | 2<br>(1 - 2)             | 7<br>(3 - 12)               |
| Encephalitis                                                      | 9<br>(3 - 14)               | 1<br>(0 - 1)       | 0<br>(0 - 1)        | 2<br>(1 - 3)         | 3<br>(1 - 4)             | 4<br>(1 - 6)                |
| Diphtheria                                                        | 0<br>(0 - 0)                | 0<br>(0 - 0)       | 0<br>(0 - 0)        | 0<br>(0 - 0)         | 0<br>(0 - 0)             | --                          |
| Whooping cough                                                    | 0<br>(0 - 0)                | 0<br>(0 - 0)       | 0<br>(0 - 0)        | 0<br>(0 - 0)         | 0<br>(0 - 0)             | --                          |
| Tetanus                                                           | 2<br>(0 - 3)                | 0<br>(0 - 0)       | 0<br>(0 - 0)        | 0<br>(0 - 0)         | 0<br>(0 - 0)             | 1<br>(0 - 2)                |
| Measles                                                           | 0<br>(0 - 0)                | 0<br>(0 - 0)       | 0<br>(0 - 0)        | 0<br>(0 - 0)         | 0<br>(0 - 0)             | --                          |
| Varicella and herpes zoster                                       | 5<br>(1 - 22)               | 0<br>(0 - 1)       | 0<br>(0 - 0)        | 0<br>(0 - 1)         | 0<br>(0 - 1)             | 4<br>(0 - 21)               |
| Neglected tropical diseases and malaria                           | 1<br>(1 - 2)                | 0<br>(0 - 0)       | 0<br>(0 - 0)        | 1<br>(0 - 1)         | 0<br>(0 - 0)             | 0<br>(0 - 0)                |
| Cysticercosis                                                     | 0<br>(0 - 0)                | 0<br>(0 - 0)       | 0<br>(0 - 0)        | 0<br>(0 - 0)         | 0<br>(0 - 0)             | 0<br>(0 - 0)                |
| Cystic echinococcosis                                             | 0<br>(0 - 0)                | 0<br>(0 - 0)       | 0<br>(0 - 0)        | 0<br>(0 - 0)         | 0<br>(0 - 0)             | 0<br>(0 - 0)                |
| Dengue                                                            | 0<br>(0 - 0)                | 0<br>(0 - 0)       | 0<br>(0 - 0)        | 0<br>(0 - 0)         | 0<br>(0 - 0)             | 0<br>(0 - 0)                |
| Rabies                                                            | 0<br>(0 - 0)                | 0<br>(0 - 0)       | 0<br>(0 - 0)        | 0<br>(0 - 0)         | 0<br>(0 - 0)             | 0<br>(0 - 0)                |
| Other neglected tropical diseases                                 | 0<br>(0 - 0)                | 0<br>(0 - 0)       | 0<br>(0 - 0)        | 0<br>(0 - 0)         | 0<br>(0 - 0)             | 0<br>(0 - 0)                |
| Maternal disorders                                                | 3<br>(2 - 4)                | --                 | 0<br>(0 - 0)        | 3<br>(2 - 4)         | --                       | --                          |
| Maternal hemorrhage                                               | 0<br>(0 - 1)                | --                 | 0<br>(0 - 0)        | 0<br>(0 - 1)         | --                       | --                          |
| Maternal sepsis and other maternal infections                     | 0<br>(0 - 1)                | --                 | 0<br>(0 - 0)        | 0<br>(0 - 1)         | --                       | --                          |
| Maternal hypertensive disorders                                   | 0<br>(0 - 1)                | --                 | 0<br>(0 - 0)        | 0<br>(0 - 1)         | --                       | --                          |
| Maternal obstructed labor                                         | 0<br>(0 - 0)                | --                 | 0<br>(0 - 0)        | 0<br>(0 - 0)         | --                       | --                          |
| Maternal abortive outcome                                         | 1<br>(0 - 1)                | --                 | 0<br>(0 - 0)        | 1<br>(0 - 1)         | --                       | --                          |
| Indirect maternal deaths                                          | 0<br>(0 - 1)                | --                 | 0<br>(0 - 0)        | 0<br>(0 - 1)         | --                       | --                          |

Web Table 31- Switzerland deaths with 95% UI by age, sex, and cause in 2013

| Cause                                                            | Females, All Ages           | Females, 0-4 Years | Females, 5-14 Years | Females, 15-49 Years | Females, 50-69 Years     | Females, 70-80 Years        |
|------------------------------------------------------------------|-----------------------------|--------------------|---------------------|----------------------|--------------------------|-----------------------------|
| Late maternal deaths                                             | 0<br>(0 - 0)                | --                 | 0<br>(0 - 0)        | 0<br>(0 - 0)         | --                       | --                          |
| Maternal deaths aggravated by HIV/AIDS                           | 0<br>(0 - 0)                | --                 | --                  | 0<br>(0 - 0)         | --                       | --                          |
| Other maternal disorders                                         | 1<br>(0 - 1)                | --                 | 0<br>(0 - 0)        | 1<br>(0 - 1)         | --                       | --                          |
| Neonatal disorders                                               | 60<br>(47 - 75)             | 60<br>(47 - 75)    | --                  | --                   | --                       | --                          |
| Neonatal preterm birth complications                             | 38<br>(24 - 53)             | 38<br>(24 - 53)    | --                  | --                   | --                       | --                          |
| Neonatal encephalopathy due to birth asphyxia and trauma         | 14<br>(7 - 27)              | 14<br>(7 - 27)     | --                  | --                   | --                       | --                          |
| Neonatal sepsis and other neonatal infections                    | 1<br>(0 - 2)                | 1<br>(0 - 2)       | --                  | --                   | --                       | --                          |
| Hemolytic disease and other neonatal jaundice                    | 0<br>(0 - 0)                | 0<br>(0 - 0)       | --                  | --                   | --                       | --                          |
| Other neonatal disorders                                         | 7<br>(3 - 13)               | 7<br>(3 - 13)      | --                  | --                   | --                       | --                          |
| Nutritional deficiencies                                         | 101<br>(47 - 138)           | 0<br>(0 - 1)       | 0<br>(0 - 0)        | 3<br>(1 - 3)         | 5<br>(3 - 7)             | 92<br>(42 - 129)            |
| Protein-energy malnutrition                                      | 24<br>(7 - 45)              | 0<br>(0 - 0)       | 0<br>(0 - 0)        | 1<br>(0 - 1)         | 1<br>(0 - 2)             | 21<br>(7 - 41)              |
| Iodine deficiency                                                | 0<br>(0 - 2)                | 0<br>(0 - 0)       | 0<br>(0 - 0)        | 0<br>(0 - 0)         | 0<br>(0 - 0)             | 0<br>(0 - 2)                |
| Iron-deficiency anemia                                           | 70<br>(33 - 103)            | 0<br>(0 - 0)       | 0<br>(0 - 0)        | 2<br>(1 - 2)         | 4<br>(2 - 5)             | 65<br>(30 - 98)             |
| Other nutritional deficiencies                                   | 6<br>(2 - 13)               | 0<br>(0 - 0)       | 0<br>(0 - 0)        | 0<br>(0 - 1)         | 1<br>(0 - 1)             | 5<br>(1 - 12)               |
| Other communicable, maternal, neonatal, and nutritional diseases | 60<br>(46 - 86)             | 1<br>(0 - 2)       | 0<br>(0 - 0)        | 7<br>(6 - 10)        | 12<br>(9 - 16)           | 39<br>(28 - 62)             |
| Sexually transmitted diseases excluding HIV                      | 3<br>(1 - 5)                | 0<br>(0 - 1)       | 0<br>(0 - 0)        | 0<br>(0 - 0)         | 0<br>(0 - 1)             | 2<br>(0 - 4)                |
| Syphilis                                                         | 2<br>(1 - 4)                | 0<br>(0 - 1)       | 0<br>(0 - 0)        | 0<br>(0 - 0)         | 0<br>(0 - 0)             | 1<br>(0 - 3)                |
| Chlamydial infection                                             | 0<br>(0 - 0)                | --                 | 0<br>(0 - 0)        | 0<br>(0 - 0)         | 0<br>(0 - 0)             | 0<br>(0 - 0)                |
| Gonococcal infection                                             | 0<br>(0 - 1)                | --                 | 0<br>(0 - 0)        | 0<br>(0 - 0)         | 0<br>(0 - 0)             | 0<br>(0 - 0)                |
| Other sexually transmitted diseases                              | 0<br>(0 - 0)                | --                 | 0<br>(0 - 0)        | 0<br>(0 - 0)         | 0<br>(0 - 0)             | 0<br>(0 - 0)                |
| Hepatitis                                                        | 13<br>(9 - 19)              | 0<br>(0 - 0)       | 0<br>(0 - 0)        | 1<br>(1 - 2)         | 4<br>(2 - 6)             | 7<br>(4 - 13)               |
| Acute hepatitis A                                                | 3<br>(1 - 6)                | 0<br>(0 - 0)       | 0<br>(0 - 0)        | 1<br>(0 - 1)         | 1<br>(0 - 2)             | 1<br>(0 - 3)                |
| Acute hepatitis B                                                | 8<br>(5 - 13)               | 0<br>(0 - 0)       | 0<br>(0 - 0)        | 1<br>(0 - 1)         | 3<br>(1 - 5)             | 5<br>(2 - 9)                |
| Acute hepatitis C                                                | 2<br>(0 - 5)                | --                 | 0<br>(0 - 0)        | 0<br>(0 - 0)         | 0<br>(0 - 1)             | 1<br>(0 - 4)                |
| Other infectious diseases                                        | 44<br>(32 - 68)             | 1<br>(0 - 1)       | 0<br>(0 - 0)        | 6<br>(4 - 8)         | 8<br>(5 - 11)            | 30<br>(20 - 50)             |
| Non-communicable diseases                                        | 30,813<br>(28,942 - 32,711) | 77<br>(64 - 93)    | 19<br>(16 - 21)     | 690<br>(614 - 769)   | 3,632<br>(3,328 - 3,957) | 26,395<br>(24,842 - 27,922) |
| Neoplasms                                                        | 8,041<br>(6,870 - 8,984)    | 5<br>(4 - 7)       | 9<br>(7 - 11)       | 438<br>(388 - 489)   | 2,303<br>(2,009 - 2,554) | 5,286<br>(4,428 - 5,998)    |
| Esophageal cancer                                                | 109<br>(91 - 129)           | --                 | --                  | 3<br>(2 - 4)         | 33<br>(26 - 41)          | 73<br>(58 - 91)             |
| Stomach cancer                                                   | 304<br>(214 - 434)          | --                 | --                  | 10<br>(7 - 14)       | 52<br>(39 - 70)          | 242<br>(161 - 355)          |
| Liver cancer                                                     | 199<br>(142 - 253)          | --                 | 0<br>(0 - 0)        | 8<br>(5 - 11)        | 51<br>(38 - 67)          | 140<br>(92 - 189)           |
| Liver cancer due to hepatitis B                                  | 42<br>(15 - 84)             | --                 | 0<br>(0 - 0)        | 2<br>(1 - 4)         | 13<br>(4 - 26)           | 26<br>(9 - 56)              |
| Liver cancer due to hepatitis C                                  | 99<br>(32 - 155)            | --                 | 0<br>(0 - 0)        | 4<br>(2 - 7)         | 27<br>(11 - 40)          | 68<br>(17 - 117)            |
| Liver cancer due to alcohol use                                  | 38<br>(14 - 78)             | --                 | --                  | 0<br>(0 - 1)         | 6<br>(2 - 12)            | 32<br>(12 - 68)             |
| Liver cancer due to other causes                                 | 20<br>(7 - 46)              | --                 | 0<br>(0 - 0)        | 1<br>(0 - 2)         | 5<br>(2 - 13)            | 14<br>(4 - 32)              |
| Larynx cancer                                                    | 14<br>(9 - 20)              | --                 | --                  | 1<br>(1 - 2)         | 6<br>(4 - 9)             | 7<br>(4 - 11)               |
| Tracheal, bronchus and lung cancer                               | 1,110<br>(656 - 1,362)      | --                 | --                  | 62<br>(44 - 79)      | 455<br>(267 - 561)       | 592<br>(310 - 773)          |
| Breast cancer                                                    | 1,592<br>(1,286 - 1,921)    | --                 | --                  | 136<br>(105 - 167)   | 543<br>(439 - 655)       | 913<br>(697 - 1,176)        |
| Cervical cancer                                                  | 152<br>(112 - 192)          | --                 | --                  | 19<br>(14 - 25)      | 49<br>(36 - 63)          | 83<br>(58 - 115)            |
| Uterine cancer                                                   | 113<br>(45 - 152)           | --                 | --                  | 2<br>(1 - 2)         | 24<br>(13 - 32)          | 88<br>(29 - 124)            |
| Prostate cancer                                                  | --                          | --                 | --                  | --                   | --                       | --                          |

Web Table 31- Switzerland deaths with 95% UI by age, sex, and cause in 2013

| Cause                                         | Females, All Ages           | Females, 0-4 Years | Females, 5-14 Years | Females, 15-49 Years | Females, 50-69 Years | Females, 70-80 Years        |
|-----------------------------------------------|-----------------------------|--------------------|---------------------|----------------------|----------------------|-----------------------------|
| Colon and rectum cancer                       | 948<br>(780 - 1,152)        | --                 | --                  | 26<br>(21 - 32)      | 196<br>(169 - 225)   | 726<br>(568 - 922)          |
| Lip and oral cavity cancer                    | 77<br>(62 - 94)             | --                 | --                  | 6<br>(4 - 8)         | 28<br>(23 - 35)      | 43<br>(32 - 56)             |
| Nasopharynx cancer                            | 8<br>(5 - 20)               | --                 | 0<br>(0 - 0)        | 1<br>(1 - 3)         | 5<br>(2 - 11)        | 2<br>(1 - 6)                |
| Other pharynx cancer                          | 18<br>(13 - 24)             | --                 | --                  | 2<br>(1 - 2)         | 10<br>(7 - 13)       | 7<br>(4 - 10)               |
| Gallbladder and biliary tract cancer          | 222<br>(129 - 306)          | --                 | --                  | 4<br>(3 - 6)         | 44<br>(30 - 57)      | 174<br>(95 - 255)           |
| Pancreatic cancer                             | 682<br>(579 - 804)          | --                 | --                  | 16<br>(12 - 20)      | 167<br>(141 - 195)   | 498<br>(408 - 605)          |
| Malignant skin melanoma                       | 148<br>(98 - 197)           | --                 | --                  | 18<br>(12 - 24)      | 43<br>(29 - 58)      | 87<br>(55 - 126)            |
| Non-melanoma skin cancer                      | 17<br>(12 - 24)             | --                 | --                  | 0<br>(0 - 0)         | 1<br>(1 - 1)         | 16<br>(11 - 22)             |
| Ovarian cancer                                | 536<br>(443 - 639)          | --                 | --                  | 29<br>(23 - 36)      | 192<br>(157 - 230)   | 316<br>(239 - 407)          |
| Testicular cancer                             | --                          | --                 | --                  | --                   | --                   | --                          |
| Kidney cancer                                 | 189<br>(118 - 288)          | 0<br>(0 - 1)       | 1<br>(0 - 1)        | 6<br>(4 - 9)         | 47<br>(33 - 63)      | 135<br>(76 - 223)           |
| Bladder cancer                                | 186<br>(130 - 276)          | --                 | --                  | 3<br>(2 - 5)         | 30<br>(21 - 46)      | 153<br>(104 - 228)          |
| Brain and nervous system cancer               | 222<br>(165 - 267)          | 2<br>(1 - 3)       | 3<br>(2 - 5)        | 30<br>(23 - 38)      | 97<br>(74 - 124)     | 90<br>(59 - 119)            |
| Thyroid cancer                                | 67<br>(44 - 92)             | --                 | 0<br>(0 - 0)        | 2<br>(1 - 3)         | 12<br>(8 - 17)       | 53<br>(35 - 75)             |
| Mesothelioma                                  | 14<br>(9 - 21)              | --                 | --                  | 1<br>(1 - 2)         | 5<br>(3 - 8)         | 8<br>(4 - 13)               |
| Hodgkin lymphoma                              | 6<br>(4 - 12)               | 0<br>(0 - 0)       | 0<br>(0 - 0)        | 2<br>(1 - 3)         | 1<br>(1 - 3)         | 2<br>(1 - 6)                |
| Non-Hodgkin lymphoma                          | 328<br>(162 - 478)          | 0<br>(0 - 0)       | 0<br>(0 - 1)        | 14<br>(7 - 22)       | 68<br>(33 - 105)     | 246<br>(116 - 367)          |
| Multiple myeloma                              | 195<br>(126 - 308)          | --                 | --                  | 4<br>(3 - 7)         | 49<br>(30 - 81)      | 142<br>(86 - 231)           |
| Leukemia                                      | 273<br>(212 - 330)          | 2<br>(1 - 3)       | 3<br>(2 - 4)        | 19<br>(15 - 24)      | 53<br>(41 - 64)      | 197<br>(148 - 247)          |
| Other neoplasms                               | 311<br>(237 - 459)          | 1<br>(1 - 2)       | 2<br>(1 - 3)        | 14<br>(11 - 17)      | 41<br>(32 - 51)      | 254<br>(184 - 398)          |
| Cardiovascular diseases                       | 13,682<br>(11,855 - 16,362) | 1<br>(0 - 1)       | 1<br>(0 - 1)        | 85<br>(67 - 107)     | 633<br>(528 - 888)   | 12,963<br>(11,145 - 15,438) |
| Rheumatic heart disease                       | 84<br>(55 - 174)            | 0<br>(0 - 0)       | 0<br>(0 - 0)        | 1<br>(1 - 2)         | 8<br>(6 - 15)        | 74<br>(47 - 158)            |
| Ischemic heart disease                        | 6,703<br>(5,394 - 8,538)    | 0<br>(0 - 0)       | 0<br>(0 - 0)        | 33<br>(24 - 44)      | 310<br>(246 - 477)   | 6,360<br>(5,093 - 8,029)    |
| Cerebrovascular disease                       | 4,077<br>(3,268 - 5,525)    | 0<br>(0 - 0)       | 0<br>(0 - 0)        | 25<br>(18 - 33)      | 158<br>(124 - 224)   | 3,894<br>(3,106 - 5,282)    |
| Ischemic stroke                               | 2,654<br>(1,962 - 3,803)    | 0<br>(0 - 0)       | 0<br>(0 - 0)        | 3<br>(1 - 4)         | 47<br>(28 - 86)      | 2,604<br>(1,920 - 3,722)    |
| Hemorrhagic stroke                            | 1,423<br>(957 - 2,081)      | 0<br>(0 - 0)       | 0<br>(0 - 0)        | 22<br>(16 - 29)      | 110<br>(84 - 156)    | 1,290<br>(842 - 1,943)      |
| Hypertensive heart disease                    | 260<br>(140 - 433)          | 0<br>(0 - 0)       | 0<br>(0 - 0)        | 2<br>(1 - 3)         | 14<br>(9 - 25)       | 244<br>(131 - 407)          |
| Cardiomyopathy and myocarditis                | 241<br>(123 - 431)          | 0<br>(0 - 0)       | 0<br>(0 - 0)        | 5<br>(3 - 8)         | 16<br>(11 - 27)      | 219<br>(103 - 404)          |
| Atrial fibrillation and flutter               | 240<br>(83 - 513)           | --                 | --                  | 0<br>(0 - 0)         | 6<br>(2 - 12)        | 234<br>(79 - 501)           |
| Aortic aneurysm                               | 192<br>(99 - 319)           | --                 | --                  | 2<br>(1 - 3)         | 17<br>(9 - 31)       | 173<br>(89 - 291)           |
| Peripheral vascular disease                   | 110<br>(68 - 169)           | --                 | --                  | 0<br>(0 - 0)         | 4<br>(2 - 6)         | 106<br>(65 - 166)           |
| Endocarditis                                  | 41<br>(22 - 72)             | 0<br>(0 - 0)       | 0<br>(0 - 0)        | 1<br>(1 - 2)         | 6<br>(3 - 11)        | 34<br>(17 - 59)             |
| Other cardiovascular and circulatory diseases | 1,734<br>(1,117 - 2,550)    | 0<br>(0 - 0)       | 0<br>(0 - 0)        | 16<br>(10 - 24)      | 94<br>(65 - 142)     | 1,624<br>(1,027 - 2,419)    |
| Chronic respiratory diseases                  | 1,050<br>(782 - 1,296)      | 0<br>(0 - 0)       | 0<br>(0 - 0)        | 12<br>(10 - 15)      | 121<br>(89 - 144)    | 917<br>(676 - 1,152)        |
| Chronic obstructive pulmonary disease         | 911<br>(666 - 1,137)        | 0<br>(0 - 0)       | 0<br>(0 - 0)        | 6<br>(4 - 8)         | 96<br>(71 - 119)     | 808<br>(590 - 1,019)        |
| Pneumoconiosis                                | 2<br>(1 - 3)                | 0<br>(0 - 0)       | 0<br>(0 - 0)        | 0<br>(0 - 0)         | 0<br>(0 - 0)         | 1<br>(1 - 3)                |
| Silicosis                                     | 0<br>(0 - 0)                | 0<br>(0 - 0)       | 0<br>(0 - 0)        | 0<br>(0 - 0)         | 0<br>(0 - 0)         | 0<br>(0 - 0)                |
| Asbestosis                                    | 0<br>(0 - 0)                | 0<br>(0 - 0)       | 0<br>(0 - 0)        | 0<br>(0 - 0)         | 0<br>(0 - 0)         | 0<br>(0 - 0)                |
| Coal workers pneumoconiosis                   | 0<br>(0 - 0)                | 0<br>(0 - 0)       | 0<br>(0 - 0)        | 0<br>(0 - 0)         | 0<br>(0 - 0)         | 0<br>(0 - 0)                |
| Other pneumoconiosis                          | 1<br>(1 - 3)                | 0<br>(0 - 0)       | 0<br>(0 - 0)        | 0<br>(0 - 0)         | 0<br>(0 - 0)         | 1<br>(1 - 2)                |

Web Table 31- Switzerland deaths with 95% UI by age, sex, and cause in 2013

| Cause                                               | Females, All Ages        | Females, 0-4 Years | Females, 5-14 Years | Females, 15-49 Years | Females, 50-69 Years | Females, 70-80 Years     |
|-----------------------------------------------------|--------------------------|--------------------|---------------------|----------------------|----------------------|--------------------------|
| Asthma                                              | 66<br>(35 - 108)         | 0<br>(0 - 0)       | 0<br>(0 - 0)        | 4<br>(3 - 6)         | 12<br>(6 - 18)       | 50<br>(24 - 88)          |
| Interstitial lung disease and pulmonary sarcoidosis | 61<br>(18 - 122)         | 0<br>(0 - 0)       | 0<br>(0 - 0)        | 2<br>(0 - 3)         | 11<br>(3 - 23)       | 47<br>(14 - 102)         |
| Other chronic respiratory diseases                  | 11<br>(5 - 20)           | 0<br>(0 - 0)       | 0<br>(0 - 0)        | 0<br>(0 - 1)         | 1<br>(1 - 2)         | 9<br>(4 - 18)            |
| Cirrhosis                                           | 282<br>(243 - 322)       | 0<br>(0 - 0)       | 0<br>(0 - 0)        | 30<br>(24 - 37)      | 121<br>(102 - 142)   | 130<br>(104 - 156)       |
| Cirrhosis due to hepatitis B                        | 34<br>(19 - 57)          | 0<br>(0 - 0)       | 0<br>(0 - 0)        | 3<br>(2 - 6)         | 14<br>(8 - 23)       | 17<br>(8 - 30)           |
| Cirrhosis due to hepatitis C                        | 173<br>(106 - 221)       | 0<br>(0 - 0)       | 0<br>(0 - 0)        | 20<br>(13 - 26)      | 78<br>(46 - 101)     | 75<br>(42 - 105)         |
| Cirrhosis due to alcohol use                        | 49<br>(22 - 96)          | --                 | --                  | 3<br>(1 - 7)         | 18<br>(7 - 37)       | 29<br>(11 - 57)          |
| Cirrhosis due to other causes                       | 25<br>(9 - 49)           | 0<br>(0 - 0)       | 0<br>(0 - 0)        | 4<br>(2 - 8)         | 12<br>(4 - 24)       | 9<br>(2 - 19)            |
| Digestive diseases                                  | 953<br>(699 - 1,165)     | 0<br>(0 - 1)       | 0<br>(0 - 0)        | 11<br>(8 - 13)       | 62<br>(47 - 74)      | 880<br>(643 - 1,087)     |
| Peptic ulcer disease                                | 137<br>(83 - 205)        | 0<br>(0 - 0)       | 0<br>(0 - 0)        | 1<br>(1 - 2)         | 8<br>(4 - 11)        | 129<br>(77 - 195)        |
| Gastritis and duodenitis                            | 12<br>(5 - 22)           | 0<br>(0 - 0)       | 0<br>(0 - 0)        | 0<br>(0 - 1)         | 1<br>(0 - 2)         | 10<br>(4 - 21)           |
| Appendicitis                                        | 27<br>(12 - 47)          | 0<br>(0 - 0)       | 0<br>(0 - 0)        | 1<br>(1 - 2)         | 3<br>(2 - 5)         | 23<br>(9 - 42)           |
| Paralytic ileus and intestinal obstruction          | 137<br>(64 - 237)        | 0<br>(0 - 0)       | 0<br>(0 - 0)        | 1<br>(0 - 1)         | 6<br>(3 - 11)        | 130<br>(60 - 226)        |
| Inguinal, femoral, and abdominal hernia             | 27<br>(11 - 48)          | 0<br>(0 - 0)       | 0<br>(0 - 0)        | 0<br>(0 - 0)         | 2<br>(1 - 3)         | 24<br>(10 - 46)          |
| Inflammatory bowel disease                          | 79<br>(34 - 139)         | 0<br>(0 - 0)       | 0<br>(0 - 0)        | 2<br>(1 - 2)         | 6<br>(3 - 9)         | 72<br>(29 - 131)         |
| Vascular intestinal disorders                       | 190<br>(91 - 310)        | 0<br>(0 - 0)       | 0<br>(0 - 0)        | 1<br>(1 - 3)         | 13<br>(7 - 23)       | 175<br>(82 - 290)        |
| Gallbladder and biliary diseases                    | 100<br>(58 - 152)        | 0<br>(0 - 0)       | 0<br>(0 - 0)        | 1<br>(1 - 1)         | 5<br>(3 - 8)         | 94<br>(53 - 144)         |
| Pancreatitis                                        | 62<br>(35 - 100)         | 0<br>(0 - 0)       | 0<br>(0 - 0)        | 2<br>(1 - 3)         | 8<br>(5 - 12)        | 52<br>(27 - 87)          |
| Other digestive diseases                            | 183<br>(95 - 295)        | 0<br>(0 - 0)       | 0<br>(0 - 0)        | 1<br>(1 - 2)         | 11<br>(6 - 16)       | 170<br>(84 - 279)        |
| Neurological disorders                              | 5,155<br>(3,538 - 6,871) | 4<br>(3 - 5)       | 2<br>(1 - 3)        | 37<br>(28 - 50)      | 202<br>(161 - 252)   | 4,910<br>(3,325 - 6,631) |
| Alzheimer disease and other dementias               | 4,590<br>(3,003 - 6,342) | --                 | --                  | 0<br>(0 - 1)         | 83<br>(50 - 125)     | 4,506<br>(2,906 - 6,251) |
| Parkinson disease                                   | 254<br>(123 - 455)       | --                 | --                  | 0<br>(0 - 0)         | 12<br>(7 - 21)       | 241<br>(113 - 442)       |
| Epilepsy                                            | 50<br>(35 - 66)          | 1<br>(1 - 1)       | 1<br>(1 - 2)        | 10<br>(7 - 14)       | 10<br>(7 - 13)       | 29<br>(17 - 43)          |
| Multiple sclerosis                                  | 93<br>(56 - 161)         | --                 | --                  | 14<br>(7 - 24)       | 39<br>(22 - 72)      | 39<br>(20 - 74)          |
| Other neurological disorders                        | 168<br>(132 - 207)       | 3<br>(2 - 4)       | 1<br>(1 - 1)        | 12<br>(10 - 15)      | 57<br>(44 - 72)      | 95<br>(68 - 128)         |
| Mental and substance use disorders                  | 65<br>(50 - 95)          | 0<br>(0 - 0)       | 0<br>(0 - 0)        | 31<br>(25 - 43)      | 20<br>(13 - 34)      | 14<br>(9 - 20)           |
| Schizophrenia                                       | 4<br>(2 - 6)             | --                 | --                  | 0<br>(0 - 0)         | 1<br>(0 - 1)         | 3<br>(1 - 6)             |
| Alcohol use disorders                               | 24<br>(10 - 50)          | --                 | --                  | 8<br>(3 - 16)        | 11<br>(5 - 24)       | 4<br>(2 - 10)            |
| Drug use disorders                                  | 37<br>(26 - 48)          | 0<br>(0 - 0)       | --                  | 22<br>(17 - 30)      | 8<br>(5 - 11)        | 6<br>(4 - 9)             |
| Opioid use disorders                                | 13<br>(9 - 17)           | 0<br>(0 - 0)       | --                  | 8<br>(6 - 11)        | 3<br>(2 - 4)         | 2<br>(1 - 3)             |
| Cocaine use disorders                               | 1<br>(1 - 2)             | 0<br>(0 - 0)       | --                  | 1<br>(1 - 1)         | 0<br>(0 - 0)         | 0<br>(0 - 0)             |
| Amphetamine use disorders                           | 1<br>(1 - 2)             | 0<br>(0 - 0)       | --                  | 1<br>(1 - 1)         | 0<br>(0 - 0)         | 0<br>(0 - 0)             |
| Other drug use disorders                            | 21<br>(15 - 28)          | 0<br>(0 - 0)       | --                  | 12<br>(9 - 17)       | 5<br>(3 - 7)         | 4<br>(2 - 5)             |
| Eating disorders                                    | 1<br>(1 - 1)             | --                 | 0<br>(0 - 0)        | 1<br>(0 - 1)         | --                   | --                       |
| Anorexia nervosa                                    | 1<br>(1 - 1)             | --                 | 0<br>(0 - 0)        | 1<br>(0 - 1)         | --                   | --                       |
| Diabetes, urogenital, blood, and endocrine diseases | 1,289<br>(1,070 - 1,562) | 2<br>(1 - 3)       | 1<br>(1 - 2)        | 21<br>(16 - 25)      | 120<br>(101 - 145)   | 1,145<br>(934 - 1,398)   |
| Diabetes mellitus                                   | 901<br>(707 - 1,140)     | 0<br>(0 - 0)       | 0<br>(0 - 0)        | 8<br>(7 - 11)        | 69<br>(55 - 90)      | 823<br>(632 - 1,060)     |
| Acute glomerulonephritis                            | 1<br>(0 - 1)             | 0<br>(0 - 0)       | 0<br>(0 - 0)        | 0<br>(0 - 0)         | 0<br>(0 - 0)         | 0<br>(0 - 0)             |
| Chronic kidney disease                              | 108<br>(81 - 181)        | 0<br>(0 - 0)       | 0<br>(0 - 0)        | 3<br>(2 - 4)         | 13<br>(9 - 25)       | 92<br>(67 - 153)         |
| Chronic kidney disease due to diabetes mellitus     | 24<br>(12 - 42)          | 0<br>(0 - 0)       | 0<br>(0 - 0)        | 1<br>(1 - 1)         | 4<br>(2 - 6)         | 20<br>(9 - 36)           |

Web Table 31- Switzerland deaths with 95% UI by age, sex, and cause in 2013

| Cause                                               | Females, All Ages        | Females, 0-4 Years | Females, 5-14 Years | Females, 15-49 Years | Females, 50-69 Years | Females, 70-80 Years   |
|-----------------------------------------------------|--------------------------|--------------------|---------------------|----------------------|----------------------|------------------------|
| Chronic kidney disease due to hypertension          | 55<br>(33 - 87)          | 0<br>(0 - 0)       | 0<br>(0 - 0)        | 1<br>(0 - 1)         | 5<br>(3 - 9)         | 49<br>(29 - 79)        |
| Chronic kidney disease due to glomerulonephritis    | 4<br>(2 - 7)             | 0<br>(0 - 0)       | 0<br>(0 - 0)        | 0<br>(0 - 0)         | 1<br>(0 - 1)         | 3<br>(1 - 5)           |
| Chronic kidney disease due to other causes          | 25<br>(12 - 58)          | 0<br>(0 - 0)       | 0<br>(0 - 0)        | 1<br>(0 - 2)         | 4<br>(2 - 10)        | 20<br>(9 - 50)         |
| Urinary diseases and male infertility               | 98<br>(70 - 157)         | 0<br>(0 - 0)       | 0<br>(0 - 0)        | 2<br>(1 - 3)         | 12<br>(9 - 19)       | 84<br>(57 - 139)       |
| Interstitial nephritis and urinary tract infections | 78<br>(54 - 131)         | 0<br>(0 - 0)       | 0<br>(0 - 0)        | 1<br>(1 - 2)         | 10<br>(7 - 16)       | 68<br>(45 - 116)       |
| Urolithiasis                                        | 8<br>(4 - 16)            | --                 | 0<br>(0 - 0)        | 0<br>(0 - 0)         | 1<br>(1 - 2)         | 7<br>(3 - 14)          |
| Other urinary diseases                              | 11<br>(4 - 19)           | 0<br>(0 - 0)       | 0<br>(0 - 0)        | 0<br>(0 - 0)         | 1<br>(1 - 2)         | 10<br>(3 - 18)         |
| Gynecological diseases                              | 1<br>(0 - 1)             | --                 | --                  | 0<br>(0 - 0)         | 0<br>(0 - 0)         | 0<br>(0 - 1)           |
| Uterine fibroids                                    | 0<br>(0 - 0)             | --                 | --                  | 0<br>(0 - 0)         | 0<br>(0 - 0)         | 0<br>(0 - 0)           |
| Polycystic ovarian syndrome                         | 0<br>(0 - 0)             | --                 | --                  | 0<br>(0 - 0)         | 0<br>(0 - 0)         | --                     |
| Endometriosis                                       | 0<br>(0 - 0)             | --                 | --                  | 0<br>(0 - 0)         | 0<br>(0 - 0)         | --                     |
| Genital prolapse                                    | 0<br>(0 - 0)             | --                 | --                  | 0<br>(0 - 0)         | 0<br>(0 - 0)         | 0<br>(0 - 0)           |
| Other gynecological diseases                        | 0<br>(0 - 0)             | --                 | --                  | 0<br>(0 - 0)         | 0<br>(0 - 0)         | 0<br>(0 - 0)           |
| Hemoglobinopathies and hemolytic anemias            | 14<br>(9 - 21)           | 1<br>(1 - 1)       | 0<br>(0 - 1)        | 1<br>(1 - 1)         | 2<br>(1 - 3)         | 10<br>(6 - 15)         |
| Thalassemias                                        | 1<br>(0 - 1)             | 0<br>(0 - 0)       | 0<br>(0 - 0)        | 0<br>(0 - 0)         | 0<br>(0 - 0)         | 0<br>(0 - 0)           |
| Sickle cell disorders                               | 3<br>(2 - 4)             | 0<br>(0 - 1)       | 0<br>(0 - 0)        | 0<br>(0 - 1)         | 1<br>(1 - 2)         | 1<br>(0 - 1)           |
| G6PD deficiency                                     | 0<br>(0 - 0)             | 0<br>(0 - 0)       | 0<br>(0 - 0)        | 0<br>(0 - 0)         | 0<br>(0 - 0)         | 0<br>(0 - 0)           |
| Other hemoglobinopathies and hemolytic anemias      | 11<br>(6 - 17)           | 0<br>(0 - 0)       | 0<br>(0 - 0)        | 0<br>(0 - 0)         | 1<br>(1 - 2)         | 9<br>(5 - 14)          |
| Endocrine, metabolic, blood, and immune disorders   | 167<br>(54 - 237)        | 1<br>(0 - 1)       | 1<br>(0 - 1)        | 7<br>(2 - 9)         | 24<br>(8 - 32)       | 135<br>(42 - 199)      |
| Musculoskeletal disorders                           | 140<br>(89 - 217)        | --                 | 0<br>(0 - 0)        | 6<br>(4 - 10)        | 25<br>(16 - 42)      | 108<br>(64 - 176)      |
| Rheumatoid arthritis                                | 61<br>(32 - 105)         | --                 | 0<br>(0 - 0)        | 1<br>(0 - 2)         | 10<br>(5 - 18)       | 51<br>(25 - 89)        |
| Other musculoskeletal disorders                     | 78<br>(48 - 127)         | --                 | 0<br>(0 - 0)        | 5<br>(4 - 8)         | 16<br>(10 - 26)      | 57<br>(31 - 100)       |
| Other non-communicable diseases                     | 156<br>(129 - 182)       | 65<br>(52 - 81)    | 5<br>(3 - 6)        | 18<br>(13 - 23)      | 25<br>(17 - 31)      | 44<br>(27 - 57)        |
| Congenital anomalies                                | 119<br>(97 - 141)        | 57<br>(45 - 72)    | 5<br>(3 - 6)        | 18<br>(12 - 22)      | 22<br>(14 - 28)      | 18<br>(9 - 25)         |
| Neural tube defects                                 | 2<br>(1 - 3)             | 1<br>(1 - 2)       | 0<br>(0 - 0)        | 0<br>(0 - 0)         | 0<br>(0 - 0)         | 0<br>(0 - 0)           |
| Congenital heart anomalies                          | 51<br>(38 - 64)          | 29<br>(21 - 39)    | 3<br>(2 - 4)        | 9<br>(6 - 11)        | 7<br>(4 - 9)         | 4<br>(2 - 6)           |
| Cleft lip and cleft palate                          | 0<br>(0 - 0)             | 0<br>(0 - 0)       | --                  | --                   | --                   | --                     |
| Down syndrome                                       | 14<br>(6 - 20)           | 1<br>(0 - 3)       | 0<br>(0 - 0)        | 3<br>(1 - 5)         | 9<br>(4 - 13)        | 1<br>(0 - 1)           |
| Chromosomal unbalanced rearrangements               | 5<br>(3 - 8)             | 4<br>(2 - 7)       | 0<br>(0 - 0)        | 1<br>(0 - 1)         | 0<br>(0 - 0)         | 0<br>(0 - 0)           |
| Other congenital anomalies                          | 47<br>(31 - 64)          | 21<br>(13 - 32)    | 2<br>(1 - 3)        | 5<br>(3 - 8)         | 6<br>(3 - 9)         | 13<br>(6 - 19)         |
| Skin and subcutaneous diseases                      | 30<br>(19 - 42)          | 0<br>(0 - 0)       | 0<br>(0 - 0)        | 0<br>(0 - 1)         | 3<br>(2 - 4)         | 26<br>(16 - 38)        |
| Cellulitis                                          | 6<br>(3 - 10)            | 0<br>(0 - 0)       | 0<br>(0 - 0)        | 0<br>(0 - 0)         | 1<br>(0 - 1)         | 5<br>(2 - 9)           |
| Pyoderma                                            | 6<br>(3 - 10)            | 0<br>(0 - 0)       | 0<br>(0 - 0)        | 0<br>(0 - 0)         | 1<br>(1 - 1)         | 5<br>(2 - 8)           |
| Decubitus ulcer                                     | 15<br>(9 - 23)           | 0<br>(0 - 0)       | 0<br>(0 - 0)        | 0<br>(0 - 0)         | 1<br>(1 - 1)         | 14<br>(8 - 22)         |
| Other skin and subcutaneous diseases                | 3<br>(1 - 7)             | 0<br>(0 - 0)       | 0<br>(0 - 0)        | 0<br>(0 - 0)         | 0<br>(0 - 1)         | 2<br>(1 - 7)           |
| Sudden infant death syndrome                        | 8<br>(2 - 18)            | 8<br>(2 - 18)      | --                  | --                   | --                   | --                     |
| Injuries                                            | 1,654<br>(1,316 - 2,128) | 10<br>(8 - 14)     | 8<br>(7 - 10)       | 223<br>(195 - 263)   | 228<br>(196 - 288)   | 1,184<br>(876 - 1,646) |
| Transport injuries                                  | 118<br>(97 - 181)        | 2<br>(1 - 4)       | 4<br>(3 - 5)        | 39<br>(32 - 55)      | 27<br>(21 - 42)      | 46<br>(33 - 75)        |
| Road injuries                                       | 114<br>(94 - 172)        | 2<br>(1 - 4)       | 3<br>(2 - 5)        | 37<br>(30 - 52)      | 26<br>(20 - 40)      | 45<br>(32 - 73)        |
| Pedestrian road injuries                            | 26<br>(18 - 44)          | 1<br>(0 - 1)       | 1<br>(0 - 2)        | 7<br>(4 - 10)        | 6<br>(4 - 10)        | 12<br>(7 - 22)         |

Web Table 31- Switzerland deaths with 95% UI by age, sex, and cause in 2013

| Cause                                           | Females, All Ages      | Females, 0-4 Years | Females, 5-14 Years | Females, 15-49 Years | Females, 50-69 Years | Females, 70-80 Years   |
|-------------------------------------------------|------------------------|--------------------|---------------------|----------------------|----------------------|------------------------|
| Cyclist road injuries                           | 11<br>(7 - 19)         | 0<br>(0 - 0)       | 0<br>(0 - 1)        | 3<br>(2 - 5)         | 3<br>(2 - 5)         | 4<br>(2 - 9)           |
| Motorcyclist road injuries                      | 19<br>(6 - 31)         | 0<br>(0 - 1)       | 0<br>(0 - 1)        | 8<br>(3 - 12)        | 4<br>(1 - 7)         | 6<br>(1 - 15)          |
| Motor vehicle road injuries                     | 57<br>(43 - 90)        | 1<br>(1 - 2)       | 2<br>(1 - 2)        | 19<br>(14 - 30)      | 13<br>(9 - 20)       | 22<br>(14 - 37)        |
| Other road injuries                             | 1<br>(1 - 4)           | 0<br>(0 - 0)       | 0<br>(0 - 0)        | 0<br>(0 - 1)         | 0<br>(0 - 1)         | 0<br>(0 - 1)           |
| Other transport injuries                        | 4<br>(2 - 8)           | 0<br>(0 - 0)       | 0<br>(0 - 0)        | 1<br>(1 - 3)         | 1<br>(0 - 2)         | 1<br>(0 - 3)           |
| Unintentional injuries                          | 1,108<br>(799 - 1,564) | 6<br>(4 - 9)       | 3<br>(2 - 4)        | 27<br>(23 - 35)      | 56<br>(45 - 73)      | 1,016<br>(715 - 1,455) |
| Falls                                           | 986<br>(684 - 1,428)   | 1<br>(1 - 1)       | 1<br>(0 - 1)        | 10<br>(8 - 13)       | 35<br>(27 - 50)      | 940<br>(642 - 1,375)   |
| Drowning                                        | 14<br>(11 - 21)        | 2<br>(1 - 4)       | 1<br>(1 - 1)        | 3<br>(2 - 5)         | 3<br>(2 - 4)         | 5<br>(3 - 7)           |
| Fire, heat, and hot substances                  | 14<br>(9 - 18)         | 0<br>(0 - 1)       | 0<br>(0 - 0)        | 2<br>(1 - 3)         | 3<br>(2 - 4)         | 8<br>(5 - 12)          |
| Poisonings                                      | 6<br>(4 - 10)          | 0<br>(0 - 0)       | 0<br>(0 - 0)        | 3<br>(2 - 6)         | 1<br>(1 - 2)         | 1<br>(1 - 3)           |
| Exposure to mechanical forces                   | 17<br>(12 - 23)        | 1<br>(1 - 2)       | 1<br>(0 - 1)        | 4<br>(3 - 6)         | 3<br>(2 - 5)         | 7<br>(5 - 11)          |
| Unintentional firearm injuries                  | 1<br>(0 - 1)           | 0<br>(0 - 0)       | 0<br>(0 - 0)        | 0<br>(0 - 0)         | 0<br>(0 - 0)         | 0<br>(0 - 0)           |
| Unintentional suffocation                       | 2<br>(1 - 4)           | 1<br>(0 - 2)       | 0<br>(0 - 0)        | 0<br>(0 - 1)         | 0<br>(0 - 1)         | 1<br>(0 - 2)           |
| Other exposure to mechanical forces             | 14<br>(10 - 20)        | 1<br>(0 - 1)       | 1<br>(0 - 1)        | 3<br>(2 - 5)         | 3<br>(2 - 4)         | 6<br>(4 - 10)          |
| Adverse effects of medical treatment            | 6<br>(1 - 12)          | 0<br>(0 - 0)       | 0<br>(0 - 0)        | 1<br>(0 - 1)         | 1<br>(0 - 3)         | 4<br>(0 - 9)           |
| Animal contact                                  | 1<br>(1 - 3)           | 0<br>(0 - 0)       | 0<br>(0 - 0)        | 0<br>(0 - 0)         | 0<br>(0 - 1)         | 1<br>(0 - 1)           |
| Venomous animal contact                         | 0<br>(0 - 1)           | 0<br>(0 - 0)       | 0<br>(0 - 0)        | 0<br>(0 - 0)         | 0<br>(0 - 0)         | 0<br>(0 - 0)           |
| Non-venomous animal contact                     | 1<br>(0 - 2)           | 0<br>(0 - 0)       | 0<br>(0 - 0)        | 0<br>(0 - 0)         | 0<br>(0 - 1)         | 1<br>(0 - 1)           |
| Foreign body                                    | 61<br>(29 - 101)       | 1<br>(1 - 2)       | 0<br>(0 - 0)        | 4<br>(2 - 6)         | 8<br>(4 - 13)        | 48<br>(23 - 83)        |
| Pulmonary aspiration and foreign body in airway | 61<br>(29 - 100)       | 1<br>(1 - 2)       | 0<br>(0 - 0)        | 4<br>(2 - 6)         | 8<br>(4 - 13)        | 48<br>(22 - 83)        |
| Foreign body in other body part                 | 1<br>(0 - 2)           | 0<br>(0 - 0)       | 0<br>(0 - 0)        | 0<br>(0 - 0)         | 0<br>(0 - 0)         | 0<br>(0 - 1)           |
| Other unintentional injuries                    | 3<br>(1 - 12)          | 0<br>(0 - 0)       | 0<br>(0 - 0)        | 0<br>(0 - 2)         | 0<br>(0 - 2)         | 2<br>(1 - 8)           |
| Self-harm and interpersonal violence            | 429<br>(370 - 537)     | 2<br>(1 - 3)       | 2<br>(1 - 2)        | 157<br>(133 - 188)   | 146<br>(121 - 183)   | 122<br>(95 - 166)      |
| Self-harm                                       | 397<br>(337 - 510)     | --                 | 1<br>(0 - 1)        | 141<br>(119 - 172)   | 140<br>(115 - 178)   | 115<br>(89 - 161)      |
| Interpersonal violence                          | 32<br>(21 - 40)        | 2<br>(1 - 3)       | 1<br>(1 - 2)        | 16<br>(10 - 21)      | 6<br>(4 - 8)         | 7<br>(4 - 9)           |
| Assault by firearm                              | 6<br>(3 - 10)          | 0<br>(0 - 0)       | 0<br>(0 - 0)        | 3<br>(2 - 6)         | 1<br>(1 - 2)         | 1<br>(0 - 2)           |
| Assault by sharp object                         | 8<br>(5 - 12)          | 0<br>(0 - 0)       | 0<br>(0 - 0)        | 5<br>(3 - 8)         | 2<br>(1 - 3)         | 1<br>(1 - 2)           |
| Assault by other means                          | 18<br>(10 - 23)        | 1<br>(1 - 2)       | 1<br>(0 - 1)        | 7<br>(4 - 10)        | 3<br>(2 - 4)         | 5<br>(3 - 7)           |

Web Table 31- Syria deaths with 95% UI by age, sex, and cause in 2013

| Cause                                                             | Both Sexes, All Ages          | Both Sexes, 0-4 Years    | Both Sexes, 5-14 Years   | Both Sexes, 15-49 Years     | Both Sexes, 50-69 Years     | Both Sexes, 70-80 Years     |
|-------------------------------------------------------------------|-------------------------------|--------------------------|--------------------------|-----------------------------|-----------------------------|-----------------------------|
| All causes                                                        | 103,431<br>(88,476 - 127,059) | 8,981<br>(8,370 - 9,714) | 2,645<br>(2,171 - 3,784) | 23,455<br>(17,843 - 36,187) | 30,938<br>(25,395 - 38,837) | 37,411<br>(32,612 - 41,676) |
| Communicable, maternal, neonatal, and nutritional diseases        | 6,101 - 8,431                 | (2,458 - 3,932)          | (407 - 710)              | (963 - 1,466)               | (734 - 1,195)               | (1,097 - 1,734)             |
| HIV/AIDS and tuberculosis                                         | 56<br>(42 - 110)              | 1<br>(0 - 1)             | 1<br>(1 - 1)             | 22<br>(16 - 46)             | 16<br>(11 - 31)             | 16<br>(12 - 29)             |
| Tuberculosis                                                      | 56<br>(42 - 109)              | 1<br>(0 - 1)             | 1<br>(1 - 1)             | 22<br>(16 - 45)             | 16<br>(11 - 31)             | 16<br>(12 - 29)             |
| HIV/AIDS                                                          | 0<br>(0 - 1)                  | 0<br>(0 - 0)             | 0<br>(0 - 0)             | 0<br>(0 - 0)                | 0<br>(0 - 0)                | 0<br>(0 - 0)                |
| HIV/AIDS resulting in mycobacterial infection                     | 0<br>(0 - 0)                  | 0<br>(0 - 0)             | 0<br>(0 - 0)             | 0<br>(0 - 0)                | 0<br>(0 - 0)                | 0<br>(0 - 0)                |
| HIV/AIDS resulting in other diseases                              | 0<br>(0 - 0)                  | 0<br>(0 - 0)             | 0<br>(0 - 0)             | 0<br>(0 - 0)                | 0<br>(0 - 0)                | 0<br>(0 - 0)                |
| Diarrhea, lower respiratory, and other common infectious diseases | 3,981<br>(3,182 - 5,203)      | 1,186<br>(725 - 2,139)   | 483<br>(361 - 677)       | 709<br>(540 - 957)          | 590<br>(442 - 774)          | 1,012<br>(760 - 1,369)      |
| Diarrheal diseases                                                | 60<br>(40 - 87)               | 30<br>(13 - 55)          | 3<br>(2 - 5)             | 7<br>(5 - 9)                | 7<br>(4 - 9)                | 13<br>(9 - 19)              |
| Intestinal infectious diseases                                    | 734<br>(386 - 1,238)          | 227<br>(90 - 414)        | 231<br>(121 - 367)       | 226<br>(110 - 407)          | 36<br>(17 - 68)             | 14<br>(7 - 25)              |
| Typhoid fever                                                     | 553<br>(293 - 948)            | 163<br>(65 - 301)        | 177<br>(92 - 282)        | 174<br>(83 - 316)           | 28<br>(13 - 53)             | 11<br>(5 - 20)              |
| Paratyphoid fever                                                 | 165<br>(79 - 292)             | 56<br>(19 - 107)         | 52<br>(24 - 89)          | 48<br>(21 - 95)             | 7<br>(3 - 15)               | 3<br>(1 - 5)                |
| Other intestinal infectious diseases                              | 15<br>(7 - 27)                | 8<br>(2 - 17)            | 2<br>(0 - 6)             | 4<br>(1 - 9)                | 1<br>(0 - 4)                | 1<br>(0 - 4)                |
| Lower respiratory infections                                      | 1,932<br>(1,515 - 2,502)      | 234<br>(110 - 359)       | 103<br>(60 - 163)        | 274<br>(206 - 368)          | 428<br>(304 - 596)          | 893<br>(649 - 1,266)        |
| Upper respiratory infections                                      | 4<br>(2 - 8)                  | 0<br>(0 - 1)             | 0<br>(0 - 0)             | 1<br>(0 - 2)                | 1<br>(0 - 3)                | 2<br>(0 - 4)                |
| Otitis media                                                      | 1<br>(1 - 2)                  | 0<br>(0 - 0)             | 0<br>(0 - 0)             | 1<br>(1 - 1)                | 0<br>(0 - 0)                | 0<br>(0 - 0)                |
| Meningitis                                                        | 286<br>(165 - 363)            | 76<br>(34 - 124)         | 34<br>(15 - 50)          | 79<br>(43 - 108)            | 48<br>(25 - 69)             | 48<br>(27 - 70)             |
| Pneumococcal meningitis                                           | 65<br>(37 - 89)               | 14<br>(6 - 24)           | 8<br>(3 - 14)            | 21<br>(12 - 31)             | 11<br>(6 - 17)              | 11<br>(6 - 19)              |
| H influenzae type B meningitis                                    | 55<br>(31 - 78)               | 27<br>(12 - 45)          | 9<br>(4 - 14)            | 10<br>(5 - 14)              | 5<br>(1 - 8)                | 5<br>(2 - 8)                |
| Meningococcal meningitis                                          | 80<br>(45 - 108)              | 24<br>(10 - 42)          | 11<br>(5 - 17)           | 20<br>(11 - 33)             | 12<br>(7 - 19)              | 13<br>(7 - 21)              |
| Other meningitis                                                  | 86<br>(46 - 113)              | 12<br>(5 - 22)           | 6<br>(3 - 11)            | 28<br>(15 - 40)             | 20<br>(10 - 31)             | 19<br>(11 - 27)             |
| Encephalitis                                                      | 344<br>(174 - 515)            | 104<br>(43 - 198)        | 32<br>(8 - 63)           | 103<br>(44 - 170)           | 67<br>(31 - 103)            | 38<br>(18 - 56)             |
| Diphtheria                                                        | 1<br>(0 - 5)                  | 1<br>(0 - 4)             | 0<br>(0 - 2)             | 0<br>(0 - 1)                | 0<br>(0 - 3)                | --<br>(0 - 11)              |
| Whooping cough                                                    | 109<br>(0 - 522)              | 101<br>(0 - 488)         | 7<br>(0 - 35)            | 1<br>(0 - 7)                | 0<br>(0 - 1)                | --<br>(0 - 1)               |
| Tetanus                                                           | 4<br>(1 - 5)                  | 1<br>(0 - 2)             | 0<br>(0 - 1)             | 1<br>(0 - 1)                | 1<br>(0 - 1)                | 0<br>(0 - 1)                |
| Measles                                                           | 494<br>(20 - 2,041)           | 408<br>(17 - 1,595)      | 72<br>(2 - 351)          | 14<br>(0 - 80)              | 0<br>(0 - 2)                | --<br>(0 - 2)               |
| Varicella and herpes zoster                                       | 12<br>(5 - 22)                | 3<br>(0 - 10)            | 1<br>(0 - 3)             | 3<br>(1 - 6)                | 1<br>(0 - 3)                | 3<br>(0 - 11)               |
| Neglected tropical diseases and malaria                           | 91<br>(70 - 113)              | 13<br>(5 - 25)           | 10<br>(6 - 17)           | 29<br>(22 - 38)             | 21<br>(15 - 29)             | 17<br>(11 - 26)             |
| Malaria                                                           | 16<br>(8 - 28)                | 1<br>(0 - 4)             | 2<br>(1 - 4)             | 7<br>(3 - 13)               | 3<br>(1 - 7)                | 2<br>(1 - 6)                |
| Leishmaniasis                                                     | 9<br>(6 - 12)                 | 4<br>(2 - 6)             | 1<br>(1 - 2)             | 2<br>(2 - 4)                | 1<br>(1 - 1)                | 0<br>(0 - 0)                |
| Visceral leishmaniasis                                            | 9<br>(6 - 12)                 | 4<br>(2 - 6)             | 1<br>(1 - 2)             | 2<br>(2 - 4)                | 1<br>(1 - 1)                | 0<br>(0 - 0)                |
| Schistosomiasis                                                   | 24<br>(18 - 33)               | 0<br>(0 - 0)             | 0<br>(0 - 1)             | 6<br>(4 - 9)                | 10<br>(7 - 15)              | 7<br>(5 - 11)               |
| Cysticercosis                                                     | 0<br>(0 - 0)                  | 0<br>(0 - 0)             | 0<br>(0 - 0)             | 0<br>(0 - 0)                | 0<br>(0 - 0)                | 0<br>(0 - 0)                |
| Cystic echinococcosis                                             | 11<br>(9 - 13)                | 0<br>(0 - 1)             | 1<br>(1 - 2)             | 4<br>(4 - 5)                | 3<br>(2 - 4)                | 2<br>(2 - 2)                |
| Dengue                                                            | 4<br>(2 - 5)                  | 0<br>(0 - 1)             | 1<br>(0 - 1)             | 1<br>(1 - 2)                | 1<br>(0 - 1)                | 1<br>(0 - 1)                |
| Rabies                                                            | 15<br>(7 - 20)                | 2<br>(1 - 3)             | 3<br>(1 - 5)             | 6<br>(3 - 8)                | 2<br>(1 - 3)                | 3<br>(1 - 5)                |
| Intestinal nematode infections                                    | 10<br>(2 - 23)                | 5<br>(1 - 15)            | 2<br>(0 - 8)             | 1<br>(0 - 5)                | 1<br>(0 - 5)                | 1<br>(0 - 5)                |
| Ascariasis                                                        | 10<br>(2 - 23)                | 5<br>(1 - 15)            | 2<br>(0 - 8)             | 1<br>(0 - 5)                | 1<br>(0 - 5)                | 1<br>(0 - 5)                |
| Other neglected tropical diseases                                 | 2<br>(1 - 5)                  | 0<br>(0 - 1)             | 0<br>(0 - 0)             | 1<br>(0 - 2)                | 0<br>(0 - 1)                | 0<br>(0 - 1)                |
| Maternal disorders                                                | 229<br>(161 - 313)            | --                       | 1<br>(0 - 2)             | 228<br>(160 - 312)          | --                          | --                          |



Web Table 31- Syria deaths with 95% UI by age, sex, and cause in 2013

| Cause                                                            | Both Sexes, All Ages        | Both Sexes, 0-4 Years    | Both Sexes, 5-14 Years | Both Sexes, 15-49 Years  | Both Sexes, 50-69 Years     | Both Sexes, 70-89 Years     |
|------------------------------------------------------------------|-----------------------------|--------------------------|------------------------|--------------------------|-----------------------------|-----------------------------|
| Maternal hemorrhage                                              | 43<br>(25 - 64)             | --                       | 0<br>(0 - 0)           | 43<br>(25 - 64)          | --                          | --                          |
| Maternal sepsis and other maternal infections                    | 21<br>(12 - 34)             | --                       | 0<br>(0 - 0)           | 21<br>(12 - 34)          | --                          | --                          |
| Maternal hypertensive disorders                                  | 35<br>(21 - 52)             | --                       | 0<br>(0 - 0)           | 34<br>(21 - 52)          | --                          | --                          |
| Maternal obstructed labor                                        | 22<br>(14 - 34)             | --                       | 0<br>(0 - 0)           | 22<br>(14 - 34)          | --                          | --                          |
| Maternal abortive outcome                                        | 30<br>(17 - 48)             | --                       | 0<br>(0 - 0)           | 30<br>(17 - 48)          | --                          | --                          |
| Indirect maternal deaths                                         | 21<br>(11 - 37)             | --                       | 0<br>(0 - 0)           | 21<br>(11 - 37)          | --                          | --                          |
| Late maternal deaths                                             | 23<br>(13 - 36)             | --                       | 0<br>(0 - 0)           | 22<br>(13 - 36)          | --                          | --                          |
| Maternal deaths aggravated by HIV/AIDS                           | 0<br>(0 - 0)                | --                       | --                     | 0<br>(0 - 0)             | --                          | --                          |
| Other maternal disorders                                         | 35<br>(21 - 53)             | --                       | 0<br>(0 - 0)           | 35<br>(21 - 53)          | --                          | --                          |
| Neonatal disorders                                               | 1,736<br>(1,394 - 2,137)    | 1,736<br>(1,394 - 2,137) | --                     | --                       | --                          | --                          |
| Neonatal preterm birth complications                             | 810<br>(488 - 1,208)        | 810<br>(488 - 1,208)     | --                     | --                       | --                          | --                          |
| Neonatal encephalopathy due to birth asphyxia and trauma         | 208<br>(73 - 418)           | 208<br>(73 - 418)        | --                     | --                       | --                          | --                          |
| Neonatal sepsis and other neonatal infections                    | 487<br>(196 - 1,045)        | 487<br>(196 - 1,045)     | --                     | --                       | --                          | --                          |
| Hemolytic disease and other neonatal jaundice                    | 4<br>(1 - 11)               | 4<br>(1 - 11)            | --                     | --                       | --                          | --                          |
| Other neonatal disorders                                         | 226<br>(87 - 403)           | 226<br>(87 - 403)        | --                     | --                       | --                          | --                          |
| Nutritional deficiencies                                         | 456<br>(223 - 594)          | 50<br>(19 - 85)          | 13<br>(6 - 19)         | 67<br>(37 - 92)          | 102<br>(52 - 145)           | 223<br>(98 - 316)           |
| Protein-energy malnutrition                                      | 126<br>(34 - 190)           | 20<br>(5 - 42)           | 3<br>(1 - 6)           | 10<br>(3 - 16)           | 21<br>(5 - 36)              | 72<br>(14 - 122)            |
| Iodine deficiency                                                | 3<br>(0 - 10)               | 0<br>(0 - 1)             | 0<br>(0 - 1)           | 0<br>(0 - 1)             | 1<br>(0 - 3)                | 2<br>(0 - 7)                |
| Iron-deficiency anemia                                           | 300<br>(158 - 400)          | 28<br>(8 - 52)           | 8<br>(4 - 13)          | 53<br>(29 - 74)          | 77<br>(41 - 110)            | 134<br>(66 - 193)           |
| Other nutritional deficiencies                                   | 26<br>(12 - 45)             | 2<br>(1 - 4)             | 1<br>(1 - 2)           | 4<br>(2 - 6)             | 4<br>(2 - 7)                | 15<br>(7 - 29)              |
| Other communicable, maternal, neonatal, and nutritional diseases | 574<br>(435 - 800)          | 109<br>(61 - 176)        | 17<br>(10 - 29)        | 113<br>(80 - 184)        | 217<br>(148 - 317)          | 117<br>(82 - 169)           |
| Sexually transmitted diseases excluding HIV                      | 88<br>(46 - 152)            | 79<br>(41 - 139)         | 7<br>(3 - 12)          | 1<br>(1 - 2)             | 1<br>(0 - 1)                | 0<br>(0 - 1)                |
| Syphilis                                                         | 87<br>(45 - 151)            | 79<br>(41 - 139)         | 7<br>(3 - 12)          | 1<br>(0 - 1)             | 0<br>(0 - 1)                | 0<br>(0 - 1)                |
| Chlamydial infection                                             | 0<br>(0 - 0)                | --                       | 0<br>(0 - 0)           | 0<br>(0 - 0)             | 0<br>(0 - 0)                | 0<br>(0 - 0)                |
| Gonococcal infection                                             | 0<br>(0 - 1)                | --                       | 0<br>(0 - 0)           | 0<br>(0 - 0)             | 0<br>(0 - 0)                | 0<br>(0 - 0)                |
| Other sexually transmitted diseases                              | 0<br>(0 - 1)                | --                       | 0<br>(0 - 0)           | 0<br>(0 - 0)             | 0<br>(0 - 0)                | 0<br>(0 - 0)                |
| Hepatitis                                                        | 422<br>(309 - 621)          | 20<br>(7 - 58)           | 6<br>(3 - 16)          | 95<br>(66 - 161)         | 202<br>(140 - 294)          | 98<br>(68 - 137)            |
| Acute hepatitis A                                                | 29<br>(8 - 68)              | 9<br>(2 - 26)            | 3<br>(1 - 7)           | 9<br>(2 - 22)            | 6<br>(2 - 16)               | 2<br>(0 - 4)                |
| Acute hepatitis B                                                | 301<br>(208 - 439)          | 11<br>(3 - 34)           | 2<br>(1 - 7)           | 42<br>(23 - 72)          | 161<br>(105 - 245)          | 85<br>(58 - 120)            |
| Acute hepatitis C                                                | 9<br>(2 - 24)               | --                       | 0<br>(0 - 1)           | 2<br>(0 - 6)             | 4<br>(1 - 13)               | 3<br>(0 - 8)                |
| Acute hepatitis E                                                | 83<br>(34 - 151)            | 0<br>(0 - 1)             | 1<br>(0 - 3)           | 42<br>(18 - 77)          | 30<br>(10 - 63)             | 9<br>(3 - 21)               |
| Other infectious diseases                                        | 64<br>(38 - 117)            | 10<br>(3 - 22)           | 4<br>(2 - 7)           | 17<br>(10 - 31)          | 14<br>(7 - 30)              | 19<br>(7 - 44)              |
| Non-communicable diseases                                        | 61,688<br>(52,357 - 70,264) | 2,380<br>(1,700 - 2,995) | 423<br>(304 - 535)     | 8,026<br>(6,651 - 9,984) | 19,552<br>(15,747 - 23,219) | 31,307<br>(27,038 - 34,940) |
| Neoplasms                                                        | 6,466<br>(5,286 - 7,589)    | 65<br>(30 - 98)          | 100<br>(69 - 128)      | 1,257<br>(1,029 - 1,526) | 2,716<br>(2,151 - 3,273)    | 2,328<br>(1,891 - 2,701)    |
| Esophageal cancer                                                | 192<br>(149 - 247)          | --                       | --                     | 24<br>(17 - 32)          | 84<br>(61 - 115)            | 84<br>(62 - 109)            |
| Stomach cancer                                                   | 775<br>(611 - 938)          | --                       | --                     | 97<br>(75 - 129)         | 337<br>(258 - 422)          | 340<br>(258 - 430)          |
| Liver cancer                                                     | 276<br>(220 - 337)          | --                       | 2<br>(1 - 3)           | 35<br>(26 - 46)          | 127<br>(96 - 166)           | 112<br>(84 - 147)           |
| Liver cancer due to hepatitis B                                  | 64<br>(29 - 108)            | --                       | 1<br>(0 - 1)           | 13<br>(6 - 20)           | 31<br>(11 - 57)             | 20<br>(9 - 34)              |
| Liver cancer due to hepatitis C                                  | 146<br>(102 - 202)          | --                       | 0<br>(0 - 1)           | 14<br>(8 - 21)           | 67<br>(45 - 100)            | 64<br>(43 - 90)             |
| Liver cancer due to alcohol use                                  | 31<br>(17 - 61)             | --                       | --                     | 2<br>(1 - 3)             | 12<br>(6 - 25)              | 17<br>(9 - 33)              |

Web Table 31- Syria deaths with 95% UI by age, sex, and cause in 2013

| Cause                                         | Both Sexes, All Ages        | Both Sexes, 0-4 Years | Both Sexes, 5-14 Years | Both Sexes, 15-49 Years  | Both Sexes, 50-69 Years     | Both Sexes, 70-80 Years     |
|-----------------------------------------------|-----------------------------|-----------------------|------------------------|--------------------------|-----------------------------|-----------------------------|
| Liver cancer due to other causes              | 35<br>(16 - 57)             | --                    | 1<br>(0 - 2)           | 6<br>(3 - 10)            | 16<br>(7 - 28)              | 12<br>(5 - 21)              |
| Larynx cancer                                 | 54<br>(36 - 71)             | --                    | --                     | 7<br>(5 - 10)            | 27<br>(17 - 37)             | 19<br>(12 - 26)             |
| Tracheal, bronchus and lung cancer            | 746<br>(579 - 906)          | --                    | --                     | 88<br>(66 - 118)         | 386<br>(293 - 491)          | 273<br>(204 - 335)          |
| Breast cancer                                 | 285<br>(208 - 383)          | --                    | --                     | 91<br>(63 - 125)         | 135<br>(91 - 189)           | 59<br>(44 - 78)             |
| Cervical cancer                               | 115<br>(80 - 170)           | --                    | --                     | 28<br>(18 - 43)          | 54<br>(36 - 84)             | 32<br>(22 - 47)             |
| Uterine cancer                                | 33<br>(17 - 48)             | --                    | --                     | 8<br>(4 - 13)            | 16<br>(8 - 25)              | 9<br>(5 - 14)               |
| Prostate cancer                               | 335<br>(207 - 507)          | --                    | --                     | 3<br>(2 - 6)             | 78<br>(46 - 124)            | 254<br>(152 - 387)          |
| Colon and rectum cancer                       | 494<br>(393 - 610)          | --                    | --                     | 99<br>(74 - 127)         | 211<br>(159 - 268)          | 184<br>(147 - 234)          |
| Lip and oral cavity cancer                    | 28<br>(17 - 46)             | --                    | --                     | 7<br>(4 - 13)            | 13<br>(8 - 21)              | 8<br>(4 - 14)               |
| Nasopharynx cancer                            | 43<br>(32 - 62)             | --                    | 2<br>(1 - 5)           | 16<br>(11 - 24)          | 18<br>(12 - 27)             | 8<br>(5 - 12)               |
| Other pharynx cancer                          | 26<br>(19 - 37)             | --                    | --                     | 6<br>(4 - 8)             | 14<br>(9 - 20)              | 7<br>(5 - 9)                |
| Gallbladder and biliary tract cancer          | 79<br>(51 - 121)            | --                    | --                     | 7<br>(5 - 11)            | 39<br>(24 - 60)             | 34<br>(21 - 52)             |
| Pancreatic cancer                             | 184<br>(147 - 224)          | --                    | --                     | 29<br>(22 - 38)          | 88<br>(68 - 109)            | 67<br>(53 - 83)             |
| Malignant skin melanoma                       | 11<br>(7 - 22)              | --                    | --                     | 4<br>(2 - 8)             | 4<br>(2 - 7)                | 3<br>(2 - 6)                |
| Non-melanoma skin cancer                      | 31<br>(20 - 48)             | --                    | --                     | 5<br>(3 - 7)             | 9<br>(5 - 15)               | 17<br>(11 - 27)             |
| Ovarian cancer                                | 145<br>(93 - 229)           | --                    | --                     | 36<br>(21 - 59)          | 69<br>(41 - 113)            | 39<br>(25 - 63)             |
| Testicular cancer                             | 8<br>(5 - 14)               | --                    | --                     | 6<br>(4 - 10)            | 1<br>(1 - 2)                | 1<br>(0 - 2)                |
| Kidney cancer                                 | 141<br>(108 - 177)          | 3<br>(1 - 6)          | 3<br>(2 - 6)           | 19<br>(14 - 26)          | 71<br>(51 - 95)             | 45<br>(31 - 60)             |
| Bladder cancer                                | 117<br>(86 - 148)           | --                    | --                     | 8<br>(5 - 11)            | 49<br>(34 - 66)             | 60<br>(43 - 79)             |
| Brain and nervous system cancer               | 417<br>(248 - 525)          | 8<br>(3 - 16)         | 19<br>(10 - 27)        | 133<br>(84 - 175)        | 165<br>(94 - 218)           | 92<br>(48 - 128)            |
| Thyroid cancer                                | 45<br>(24 - 76)             | --                    | 0<br>(0 - 0)           | 10<br>(4 - 19)           | 21<br>(11 - 35)             | 13<br>(8 - 23)              |
| Mesothelioma                                  | 10<br>(7 - 14)              | --                    | --                     | 3<br>(1 - 4)             | 5<br>(3 - 7)                | 3<br>(2 - 4)                |
| Hodgkin lymphoma                              | 61<br>(42 - 92)             | 2<br>(1 - 3)          | 6<br>(2 - 13)          | 28<br>(18 - 43)          | 18<br>(11 - 29)             | 9<br>(5 - 13)               |
| Non-Hodgkin lymphoma                          | 334<br>(262 - 423)          | 6<br>(3 - 11)         | 13<br>(7 - 20)         | 94<br>(70 - 127)         | 124<br>(93 - 168)           | 97<br>(71 - 131)            |
| Multiple myeloma                              | 36<br>(27 - 46)             | --                    | --                     | 11<br>(8 - 14)           | 16<br>(11 - 22)             | 9<br>(7 - 13)               |
| Leukemia                                      | 330<br>(267 - 392)          | 11<br>(4 - 19)        | 26<br>(17 - 36)        | 101<br>(79 - 128)        | 102<br>(77 - 127)           | 90<br>(70 - 111)            |
| Other neoplasms                               | 1,114<br>(647 - 1,504)      | 34<br>(14 - 56)       | 30<br>(13 - 45)        | 254<br>(149 - 347)       | 437<br>(240 - 632)          | 359<br>(185 - 528)          |
| Cardiovascular diseases                       | 42,610<br>(35,774 - 49,104) | 110<br>(41 - 239)     | 133<br>(87 - 193)      | 5,426<br>(4,463 - 6,769) | 14,042<br>(11,309 - 16,775) | 22,899<br>(19,547 - 25,715) |
| Rheumatic heart disease                       | 61<br>(44 - 107)            | 1<br>(0 - 3)          | 2<br>(1 - 5)           | 18<br>(13 - 32)          | 18<br>(12 - 32)             | 22<br>(15 - 39)             |
| Ischemic heart disease                        | 26,472<br>(21,629 - 30,871) | 33<br>(11 - 72)       | 46<br>(30 - 68)        | 3,200<br>(2,593 - 4,012) | 9,181<br>(7,271 - 10,963)   | 14,013<br>(11,576 - 16,021) |
| Cerebrovascular disease                       | 13,182<br>(10,692 - 15,776) | 36<br>(13 - 76)       | 52<br>(34 - 75)        | 1,786<br>(1,435 - 2,319) | 3,913<br>(3,033 - 4,881)    | 7,396<br>(5,938 - 8,819)    |
| Ischemic stroke                               | 3,736<br>(2,133 - 5,107)    | 4<br>(1 - 12)         | 6<br>(2 - 12)          | 256<br>(131 - 386)       | 976<br>(536 - 1,417)        | 2,493<br>(1,418 - 3,484)    |
| Hemorrhagic stroke                            | 9,447<br>(7,134 - 11,925)   | 32<br>(11 - 67)       | 46<br>(29 - 67)        | 1,530<br>(1,193 - 2,034) | 2,937<br>(2,123 - 3,794)    | 4,902<br>(3,613 - 6,370)    |
| Hypertensive heart disease                    | 641<br>(466 - 899)          | 3<br>(1 - 8)          | 2<br>(1 - 4)           | 60<br>(43 - 85)          | 187<br>(126 - 265)          | 389<br>(273 - 572)          |
| Cardiomyopathy and myocarditis                | 1,300<br>(950 - 1,656)      | 11<br>(3 - 35)        | 14<br>(8 - 25)         | 206<br>(153 - 286)       | 439<br>(308 - 582)          | 629<br>(430 - 870)          |
| Atrial fibrillation and flutter               | 44<br>(28 - 65)             | --                    | --                     | 3<br>(2 - 4)             | 10<br>(6 - 16)              | 30<br>(18 - 48)             |
| Aortic aneurysm                               | 313<br>(209 - 604)          | --                    | --                     | 28<br>(19 - 52)          | 135<br>(83 - 252)           | 151<br>(98 - 304)           |
| Peripheral vascular disease                   | 30<br>(22 - 39)             | --                    | --                     | 2<br>(2 - 4)             | 7<br>(5 - 9)                | 20<br>(14 - 28)             |
| Endocarditis                                  | 210<br>(149 - 285)          | 13<br>(5 - 33)        | 8<br>(5 - 14)          | 45<br>(33 - 66)          | 50<br>(32 - 72)             | 93<br>(58 - 132)            |
| Other cardiovascular and circulatory diseases | 358<br>(239 - 1,065)        | 13<br>(4 - 44)        | 8<br>(4 - 25)          | 78<br>(51 - 221)         | 102<br>(63 - 297)           | 157<br>(93 - 477)           |

Web Table 31- Syria deaths with 95% UI by age, sex, and cause in 2013

| Cause                                               | Both Sexes, All Ages     | Both Sexes, 0-4 Years | Both Sexes, 5-14 Years | Both Sexes, 15-49 Years | Both Sexes, 50-69 Years | Both Sexes, 70-80 Years  |
|-----------------------------------------------------|--------------------------|-----------------------|------------------------|-------------------------|-------------------------|--------------------------|
| Chronic respiratory diseases                        | 4,157<br>(3,083 - 7,524) | 152<br>(65 - 244)     | 48<br>(24 - 65)        | 522<br>(395 - 884)      | 1,286<br>(880 - 2,432)  | 2,148<br>(1,545 - 4,200) |
| Chronic obstructive pulmonary disease               | 3,207<br>(2,347 - 6,057) | 82<br>(33 - 140)      | 19<br>(8 - 28)         | 282<br>(204 - 481)      | 1,012<br>(697 - 1,973)  | 1,813<br>(1,281 - 3,600) |
| Pneumoconiosis                                      | 95<br>(59 - 184)         | 3<br>(1 - 7)          | 2<br>(1 - 4)           | 41<br>(25 - 74)         | 26<br>(14 - 56)         | 23<br>(11 - 50)          |
| Silicosis                                           | 22<br>(12 - 48)          | 1<br>(0 - 2)          | 1<br>(0 - 1)           | 3<br>(2 - 7)            | 5<br>(2 - 10)           | 13<br>(6 - 30)           |
| Asbestosis                                          | 10<br>(6 - 17)           | 1<br>(0 - 1)          | 1<br>(0 - 1)           | 6<br>(4 - 13)           | 1<br>(1 - 3)            | 0<br>(0 - 1)             |
| Coal workers pneumoconiosis                         | 6<br>(4 - 9)             | 1<br>(0 - 2)          | 1<br>(0 - 1)           | 3<br>(2 - 6)            | 1<br>(0 - 1)            | 0<br>(0 - 1)             |
| Other pneumoconiosis                                | 58<br>(34 - 111)         | 1<br>(0 - 2)          | 1<br>(0 - 1)           | 28<br>(17 - 50)         | 20<br>(10 - 41)         | 9<br>(5 - 20)            |
| Asthma                                              | 552<br>(363 - 1,175)     | 43<br>(14 - 81)       | 18<br>(10 - 26)        | 141<br>(95 - 263)       | 163<br>(99 - 376)       | 186<br>(106 - 484)       |
| Interstitial lung disease and pulmonary sarcoidosis | 197<br>(29 - 359)        | 3<br>(0 - 7)          | 2<br>(0 - 5)           | 25<br>(3 - 45)          | 70<br>(9 - 133)         | 97<br>(14 - 185)         |
| Other chronic respiratory diseases                  | 105<br>(67 - 182)        | 22<br>(11 - 37)       | 6<br>(3 - 10)          | 34<br>(20 - 65)         | 15<br>(8 - 32)          | 29<br>(15 - 65)          |
| Cirrhosis                                           | 801<br>(649 - 975)       | 18<br>(6 - 32)        | 13<br>(8 - 17)         | 155<br>(122 - 201)      | 345<br>(267 - 435)      | 270<br>(212 - 334)       |
| Cirrhosis due to hepatitis B                        | 233<br>(110 - 374)       | 1<br>(0 - 2)          | 2<br>(0 - 4)           | 43<br>(18 - 74)         | 102<br>(45 - 170)       | 86<br>(31 - 148)         |
| Cirrhosis due to hepatitis C                        | 385<br>(235 - 561)       | 1<br>(0 - 3)          | 3<br>(2 - 5)           | 77<br>(42 - 113)        | 178<br>(95 - 262)       | 127<br>(73 - 197)        |
| Cirrhosis due to alcohol use                        | 89<br>(50 - 157)         | --                    | --                     | 10<br>(5 - 20)          | 38<br>(21 - 73)         | 40<br>(22 - 69)          |
| Cirrhosis due to other causes                       | 93<br>(63 - 141)         | 16<br>(5 - 29)        | 8<br>(5 - 12)          | 25<br>(15 - 38)         | 28<br>(15 - 48)         | 17<br>(9 - 29)           |
| Digestive diseases                                  | 757<br>(594 - 1,108)     | 20<br>(7 - 39)        | 13<br>(8 - 19)         | 124<br>(94 - 180)       | 205<br>(152 - 293)      | 396<br>(304 - 587)       |
| Peptic ulcer disease                                | 58<br>(37 - 89)          | 0<br>(0 - 0)          | 0<br>(0 - 0)           | 6<br>(4 - 10)           | 16<br>(9 - 26)          | 36<br>(21 - 59)          |
| Gastritis and duodenitis                            | 6<br>(4 - 13)            | 0<br>(0 - 0)          | 0<br>(0 - 1)           | 1<br>(1 - 3)            | 1<br>(1 - 3)            | 3<br>(2 - 7)             |
| Appendicitis                                        | 44<br>(20 - 75)          | 0<br>(0 - 1)          | 1<br>(0 - 2)           | 13<br>(5 - 25)          | 17<br>(5 - 27)          | 17<br>(8 - 30)           |
| Paralytic ileus and intestinal obstruction          | 430<br>(321 - 653)       | 19<br>(6 - 37)        | 9<br>(6 - 13)          | 78<br>(57 - 117)        | 115<br>(76 - 184)       | 209<br>(150 - 315)       |
| Inguinal, femoral, and abdominal hernia             | 30<br>(18 - 51)          | 0<br>(0 - 0)          | 0<br>(0 - 0)           | 2<br>(1 - 4)            | 3<br>(2 - 7)            | 25<br>(13 - 43)          |
| Inflammatory bowel disease                          | 29<br>(20 - 43)          | 0<br>(0 - 1)          | 0<br>(0 - 1)           | 4<br>(3 - 6)            | 7<br>(4 - 10)           | 18<br>(11 - 28)          |
| Vascular intestinal disorders                       | 16<br>(8 - 30)           | 0<br>(0 - 0)          | 0<br>(0 - 1)           | 2<br>(1 - 5)            | 4<br>(2 - 9)            | 9<br>(4 - 18)            |
| Gallbladder and biliary diseases                    | 36<br>(21 - 78)          | 0<br>(0 - 0)          | 0<br>(0 - 0)           | 2<br>(1 - 5)            | 8<br>(4 - 17)           | 26<br>(13 - 56)          |
| Pancreatitis                                        | 35<br>(20 - 56)          | 0<br>(0 - 0)          | 0<br>(0 - 1)           | 6<br>(3 - 11)           | 11<br>(6 - 18)          | 18<br>(9 - 30)           |
| Other digestive diseases                            | 73<br>(48 - 126)         | 0<br>(0 - 1)          | 1<br>(1 - 2)           | 10<br>(6 - 17)          | 26<br>(15 - 42)         | 36<br>(21 - 68)          |
| Neurological disorders                              | 2,824<br>(2,249 - 3,388) | 25<br>(13 - 35)       | 8<br>(5 - 12)          | 41<br>(29 - 63)         | 305<br>(229 - 398)      | 2,445<br>(1,930 - 2,960) |
| Alzheimer disease and other dementias               | 2,691<br>(2,138 - 3,243) | --                    | --                     | 2<br>(1 - 4)            | 282<br>(207 - 371)      | 2,407<br>(1,895 - 2,915) |
| Parkinson disease                                   | 26<br>(16 - 40)          | --                    | --                     | 1<br>(1 - 2)            | 6<br>(3 - 10)           | 19<br>(11 - 32)          |
| Epilepsy                                            | 29<br>(18 - 56)          | 2<br>(1 - 7)          | 2<br>(1 - 4)           | 16<br>(9 - 33)          | 5<br>(3 - 9)            | 3<br>(2 - 5)             |
| Multiple sclerosis                                  | 10<br>(6 - 16)           | --                    | --                     | 3<br>(2 - 6)            | 3<br>(2 - 6)            | 3<br>(2 - 5)             |
| Other neurological disorders                        | 69<br>(53 - 87)          | 23<br>(12 - 33)       | 6<br>(4 - 9)           | 19<br>(14 - 25)         | 8<br>(6 - 12)           | 13<br>(10 - 16)          |
| Mental and substance use disorders                  | 169<br>(115 - 263)       | 1<br>(1 - 2)          | 0<br>(0 - 0)           | 119<br>(79 - 193)       | 37<br>(25 - 54)         | 12<br>(8 - 17)           |
| Schizophrenia                                       | 37<br>(6 - 83)           | --                    | --                     | 28<br>(3 - 65)          | 5<br>(1 - 13)           | 4<br>(2 - 9)             |
| Alcohol use disorders                               | 58<br>(40 - 101)         | --                    | --                     | 35<br>(23 - 68)         | 17<br>(11 - 27)         | 6<br>(3 - 10)            |
| Drug use disorders                                  | 73<br>(25 - 154)         | 1<br>(1 - 2)          | --                     | 55<br>(17 - 115)        | 15<br>(5 - 31)          | 2<br>(1 - 3)             |
| Opioid use disorders                                | 40<br>(13 - 84)          | 1<br>(0 - 1)          | --                     | 31<br>(10 - 64)         | 8<br>(3 - 16)           | 1<br>(0 - 2)             |
| Cocaine use disorders                               | 1<br>(0 - 2)             | 0<br>(0 - 0)          | --                     | 1<br>(0 - 2)            | 0<br>(0 - 0)            | 0<br>(0 - 0)             |
| Amphetamine use disorders                           | 1<br>(0 - 2)             | 0<br>(0 - 0)          | --                     | 1<br>(0 - 1)            | 0<br>(0 - 0)            | 0<br>(0 - 0)             |
| Other drug use disorders                            | 31<br>(10 - 68)          | 0<br>(0 - 1)          | --                     | 23<br>(7 - 50)          | 7<br>(2 - 15)           | 1<br>(0 - 1)             |

Web Table 31- Syria deaths with 95% UI by age, sex, and cause in 2013

| Cause                                               | Both Sexes, All Ages     | Both Sexes, 0-4 Years    | Both Sexes, 5-14 Years | Both Sexes, 15-49 Years | Both Sexes, 50-69 Years | Both Sexes, 70-80 Years |
|-----------------------------------------------------|--------------------------|--------------------------|------------------------|-------------------------|-------------------------|-------------------------|
| Eating disorders                                    | 1<br>(0 - 1)             | --                       | 0<br>(0 - 0)           | 0<br>(0 - 1)            | --                      | --                      |
| Anorexia nervosa                                    | 1<br>(0 - 1)             | --                       | 0<br>(0 - 0)           | 0<br>(0 - 1)            | --                      | --                      |
| Diabetes, urogenital, blood, and endocrine diseases | 2,151<br>(1,560 - 2,731) | 442<br>(164 - 709)       | 71<br>(39 - 111)       | 334<br>(233 - 481)      | 567<br>(434 - 742)      | 736<br>(588 - 939)      |
| Diabetes mellitus                                   | 1,073<br>(862 - 1,293)   | 4<br>(2 - 6)             | 3<br>(2 - 4)           | 97<br>(75 - 124)        | 411<br>(317 - 514)      | 559<br>(426 - 685)      |
| Acute glomerulonephritis                            | 51<br>(11 - 84)          | 3<br>(1 - 7)             | 4<br>(1 - 7)           | 11<br>(3 - 18)          | 14<br>(3 - 28)          | 19<br>(4 - 36)          |
| Chronic kidney disease                              | 45<br>(5 - 413)          | 1<br>(0 - 9)             | 1<br>(0 - 7)           | 8<br>(1 - 75)           | 13<br>(1 - 120)         | 22<br>(2 - 212)         |
| Chronic kidney disease due to diabetes mellitus     | 2<br>(0 - 22)            | 0<br>(0 - 1)             | 0<br>(0 - 1)           | 1<br>(0 - 6)            | 1<br>(0 - 7)            | 1<br>(0 - 8)            |
| Chronic kidney disease due to hypertension          | 33<br>(4 - 299)          | 0<br>(0 - 2)             | 0<br>(0 - 2)           | 5<br>(1 - 48)           | 10<br>(1 - 93)          | 17<br>(2 - 161)         |
| Chronic kidney disease due to glomerulonephritis    | 3<br>(1 - 30)            | 0<br>(0 - 2)             | 0<br>(0 - 1)           | 1<br>(0 - 7)            | 1<br>(0 - 6)            | 1<br>(0 - 13)           |
| Chronic kidney disease due to other causes          | 6<br>(0 - 76)            | 0<br>(0 - 3)             | 0<br>(0 - 2)           | 1<br>(0 - 16)           | 1<br>(0 - 16)           | 3<br>(0 - 37)           |
| Urinary diseases and male infertility               | 14<br>(9 - 28)           | 1<br>(0 - 1)             | 0<br>(0 - 1)           | 2<br>(1 - 4)            | 4<br>(2 - 8)            | 8<br>(5 - 15)           |
| Interstitial nephritis and urinary tract infections | 1<br>(0 - 2)             | 0<br>(0 - 0)             | 0<br>(0 - 0)           | 0<br>(0 - 1)            | 0<br>(0 - 1)            | 0<br>(0 - 0)            |
| Urolithiasis                                        | 2<br>(1 - 5)             | --                       | 0<br>(0 - 0)           | 0<br>(0 - 1)            | 0<br>(0 - 1)            | 1<br>(0 - 3)            |
| Other urinary diseases                              | 12<br>(8 - 22)           | 0<br>(0 - 1)             | 0<br>(0 - 0)           | 1<br>(1 - 3)            | 3<br>(2 - 7)            | 7<br>(4 - 13)           |
| Gynecological diseases                              | 1<br>(0 - 2)             | --                       | --                     | 1<br>(0 - 1)            | 0<br>(0 - 1)            | 0<br>(0 - 1)            |
| Uterine fibroids                                    | 0<br>(0 - 1)             | --                       | --                     | 0<br>(0 - 0)            | 0<br>(0 - 0)            | 0<br>(0 - 0)            |
| Polycystic ovarian syndrome                         | 0<br>(0 - 0)             | --                       | --                     | 0<br>(0 - 0)            | 0<br>(0 - 0)            | --                      |
| Endometriosis                                       | 0<br>(0 - 0)             | --                       | --                     | 0<br>(0 - 0)            | 0<br>(0 - 0)            | --                      |
| Genital prolapse                                    | 0<br>(0 - 0)             | --                       | --                     | 0<br>(0 - 0)            | 0<br>(0 - 0)            | 0<br>(0 - 0)            |
| Other gynecological diseases                        | 0<br>(0 - 1)             | --                       | --                     | 0<br>(0 - 1)            | 0<br>(0 - 0)            | 0<br>(0 - 0)            |
| Hemoglobinopathies and hemolytic anemias            | 262<br>(150 - 491)       | 59<br>(24 - 139)         | 31<br>(16 - 64)        | 97<br>(53 - 185)        | 28<br>(15 - 47)         | 46<br>(27 - 80)         |
| Thalassemias                                        | 133<br>(69 - 272)        | 47<br>(19 - 110)         | 25<br>(13 - 52)        | 62<br>(33 - 119)        | 0<br>(0 - 0)            | 0<br>(0 - 0)            |
| Sickle cell disorders                               | 57<br>(34 - 101)         | 6<br>(3 - 15)            | 5<br>(2 - 10)          | 27<br>(15 - 52)         | 17<br>(9 - 29)          | 1<br>(1 - 2)            |
| G6PD deficiency                                     | 3<br>(2 - 4)             | 0<br>(0 - 1)             | 0<br>(0 - 0)           | 1<br>(1 - 2)            | 1<br>(0 - 1)            | 0<br>(0 - 1)            |
| Other hemoglobinopathies and hemolytic anemias      | 69<br>(42 - 118)         | 5<br>(2 - 13)            | 1<br>(1 - 2)           | 7<br>(4 - 13)           | 10<br>(6 - 17)          | 45<br>(26 - 77)         |
| Endocrine, metabolic, blood, and immune disorders   | 704<br>(329 - 1,055)     | 375<br>(114 - 646)       | 32<br>(12 - 57)        | 118<br>(61 - 186)       | 98<br>(61 - 152)        | 80<br>(53 - 138)        |
| Musculoskeletal disorders                           | 13<br>(9 - 25)           | --                       | 0<br>(0 - 1)           | 4<br>(2 - 8)            | 5<br>(3 - 11)           | 4<br>(3 - 7)            |
| Rheumatoid arthritis                                | 8<br>(5 - 13)            | --                       | 0<br>(0 - 1)           | 2<br>(1 - 4)            | 3<br>(1 - 5)            | 3<br>(2 - 4)            |
| Other musculoskeletal disorders                     | 6<br>(4 - 14)            | --                       | 0<br>(0 - 0)           | 2<br>(1 - 4)            | 2<br>(1 - 6)            | 1<br>(1 - 3)            |
| Other non-communicable diseases                     | 1,741<br>(1,320 - 2,132) | 1,546<br>(1,134 - 1,927) | 37<br>(21 - 83)        | 45<br>(34 - 58)         | 45<br>(34 - 59)         | 69<br>(50 - 90)         |
| Congenital anomalies                                | 1,695<br>(1,279 - 2,083) | 1,535<br>(1,122 - 1,914) | 36<br>(20 - 82)        | 39<br>(29 - 50)         | 36<br>(26 - 49)         | 50<br>(31 - 69)         |
| Neural tube defects                                 | 54<br>(17 - 151)         | 51<br>(14 - 147)         | 1<br>(0 - 2)           | 1<br>(1 - 2)            | 1<br>(0 - 1)            | 1<br>(0 - 1)            |
| Congenital heart anomalies                          | 373<br>(143 - 601)       | 357<br>(133 - 579)       | 6<br>(2 - 13)          | 4<br>(2 - 6)            | 4<br>(2 - 6)            | 2<br>(1 - 3)            |
| Cleft lip and cleft palate                          | 3<br>(1 - 9)             | 3<br>(1 - 9)             | --                     | --                      | --                      | --                      |
| Down syndrome                                       | 54<br>(25 - 99)          | 44<br>(18 - 87)          | 3<br>(1 - 7)           | 5<br>(3 - 8)            | 1<br>(1 - 2)            | 0<br>(0 - 1)            |
| Chromosomal unbalanced rearrangements               | 36<br>(19 - 62)          | 31<br>(15 - 57)          | 1<br>(0 - 2)           | 2<br>(1 - 3)            | 1<br>(1 - 2)            | 1<br>(0 - 2)            |
| Other congenital anomalies                          | 1,176<br>(879 - 1,504)   | 1,049<br>(755 - 1,368)   | 25<br>(14 - 58)        | 26<br>(20 - 34)         | 30<br>(21 - 39)         | 46<br>(29 - 62)         |
| Skin and subcutaneous diseases                      | 37<br>(24 - 54)          | 3<br>(1 - 7)             | 1<br>(0 - 2)           | 6<br>(3 - 10)           | 9<br>(6 - 13)           | 19<br>(12 - 27)         |
| Cellulitis                                          | 6<br>(4 - 9)             | 0<br>(0 - 1)             | 0<br>(0 - 0)           | 1<br>(0 - 1)            | 1<br>(1 - 2)            | 3<br>(2 - 5)            |
| Pyoderma                                            | 14<br>(8 - 22)           | 2<br>(1 - 6)             | 0<br>(0 - 0)           | 3<br>(2 - 5)            | 4<br>(2 - 6)            | 4<br>(2 - 7)            |

Web Table 31- Syria deaths with 95% UI by age, sex, and cause in 2013

| Cause                                           | Both Sexes, All Ages        | Both Sexes, 0-4 Years    | Both Sexes, 5-14 Years   | Both Sexes, 15-49 Years    | Both Sexes, 50-69 Years    | Both Sexes, 70-80 Years  |
|-------------------------------------------------|-----------------------------|--------------------------|--------------------------|----------------------------|----------------------------|--------------------------|
| Decubitus ulcer                                 | 16<br>(10 - 24)             | 0<br>(0 - 0)             | 0<br>(0 - 1)             | 2<br>(1 - 3)               | 3<br>(2 - 5)               | 11<br>(7 - 17)           |
| Other skin and subcutaneous diseases            | 1<br>(1 - 3)                | 0<br>(0 - 0)             | 0<br>(0 - 0)             | 1<br>(0 - 1)               | 0<br>(0 - 1)               | 0<br>(0 - 0)             |
| Sudden infant death syndrome                    | 9<br>(2 - 23)               | 9<br>(2 - 23)            | --                       | --                         | --                         | --                       |
| Injuries                                        | 34,621<br>(24,104 - 59,203) | 3,507<br>(3,347 - 3,652) | 1,697<br>(1,244 - 2,829) | 14,259<br>(9,096 - 27,459) | 10,439<br>(6,718 - 18,598) | 4,718<br>(3,165 - 6,980) |
| Transport injuries                              | 2,681<br>(1,152 - 3,497)    | 111<br>(32 - 203)        | 150<br>(57 - 214)        | 1,424<br>(661 - 1,966)     | 560<br>(220 - 755)         | 436<br>(155 - 594)       |
| Road injuries                                   | 2,620<br>(1,117 - 3,426)    | 103<br>(29 - 190)        | 144<br>(53 - 206)        | 1,405<br>(649 - 1,942)     | 556<br>(218 - 750)         | 412<br>(139 - 564)       |
| Pedestrian road injuries                        | 697<br>(305 - 1,028)        | 38<br>(10 - 77)          | 51<br>(20 - 81)          | 277<br>(134 - 447)         | 167<br>(71 - 253)          | 165<br>(62 - 252)        |
| Cyclist road injuries                           | 124<br>(52 - 172)           | 5<br>(1 - 10)            | 8<br>(3 - 13)            | 45<br>(22 - 67)            | 38<br>(14 - 58)            | 28<br>(9 - 43)           |
| Motorcyclist road injuries                      | 230<br>(107 - 340)          | 4<br>(1 - 8)             | 5<br>(2 - 9)             | 162<br>(80 - 253)          | 36<br>(14 - 56)            | 23<br>(8 - 36)           |
| Motor vehicle road injuries                     | 1,553<br>(585 - 2,123)      | 55<br>(13 - 103)         | 77<br>(24 - 118)         | 917<br>(378 - 1,293)       | 312<br>(108 - 450)         | 192<br>(56 - 285)        |
| Other road injuries                             | 16<br>(5 - 26)              | 2<br>(0 - 5)             | 3<br>(1 - 6)             | 4<br>(2 - 6)               | 3<br>(1 - 6)               | 4<br>(1 - 8)             |
| Other transport injuries                        | 61<br>(29 - 100)            | 8<br>(2 - 15)            | 6<br>(3 - 11)            | 19<br>(10 - 33)            | 5<br>(2 - 7)               | 24<br>(12 - 45)          |
| Unintentional injuries                          | 1,597<br>(1,314 - 1,953)    | 169<br>(80 - 252)        | 102<br>(69 - 140)        | 773<br>(622 - 1,034)       | 275<br>(206 - 341)         | 279<br>(202 - 342)       |
| Falls                                           | 240<br>(175 - 403)          | 19<br>(7 - 35)           | 13<br>(7 - 21)           | 102<br>(66 - 202)          | 44<br>(27 - 84)            | 62<br>(43 - 94)          |
| Drowning                                        | 203<br>(138 - 344)          | 28<br>(9 - 66)           | 29<br>(16 - 55)          | 110<br>(75 - 177)          | 21<br>(13 - 30)            | 16<br>(11 - 22)          |
| Fire, heat, and hot substances                  | 185<br>(128 - 240)          | 28<br>(11 - 54)          | 11<br>(6 - 18)           | 82<br>(57 - 112)           | 31<br>(21 - 44)            | 33<br>(20 - 47)          |
| Poisonings                                      | 203<br>(72 - 286)           | 16<br>(4 - 32)           | 10<br>(4 - 16)           | 92<br>(32 - 139)           | 44<br>(14 - 67)            | 41<br>(14 - 62)          |
| Exposure to mechanical forces                   | 407<br>(282 - 582)          | 21<br>(8 - 42)           | 23<br>(13 - 40)          | 281<br>(185 - 419)         | 60<br>(37 - 85)            | 22<br>(15 - 31)          |
| Unintentional firearm injuries                  | 157<br>(98 - 267)           | 5<br>(2 - 11)            | 5<br>(2 - 11)            | 117<br>(67 - 208)          | 18<br>(11 - 31)            | 12<br>(7 - 19)           |
| Unintentional suffocation                       | 17<br>(8 - 33)              | 4<br>(1 - 13)            | 2<br>(1 - 5)             | 6<br>(3 - 12)              | 3<br>(1 - 5)               | 1<br>(1 - 2)             |
| Other exposure to mechanical forces             | 233<br>(139 - 354)          | 12<br>(3 - 26)           | 16<br>(7 - 30)           | 158<br>(90 - 250)          | 38<br>(19 - 62)            | 9<br>(5 - 14)            |
| Adverse effects of medical treatment            | 163<br>(119 - 228)          | 24<br>(10 - 49)          | 3<br>(2 - 6)             | 38<br>(27 - 56)            | 43<br>(26 - 67)            | 54<br>(26 - 102)         |
| Animal contact                                  | 12<br>(7 - 17)              | 2<br>(1 - 3)             | 1<br>(0 - 2)             | 3<br>(2 - 7)               | 1<br>(1 - 3)               | 4<br>(2 - 6)             |
| Venomous animal contact                         | 6<br>(3 - 10)               | 1<br>(0 - 2)             | 0<br>(0 - 1)             | 2<br>(1 - 4)               | 1<br>(0 - 2)               | 2<br>(1 - 3)             |
| Non-venomous animal contact                     | 6<br>(4 - 9)                | 1<br>(0 - 1)             | 1<br>(0 - 1)             | 2<br>(1 - 3)               | 1<br>(0 - 1)               | 2<br>(1 - 4)             |
| Foreign body                                    | 67<br>(41 - 103)            | 18<br>(7 - 33)           | 6<br>(3 - 9)             | 10<br>(7 - 16)             | 7<br>(4 - 11)              | 26<br>(16 - 41)          |
| Pulmonary aspiration and foreign body in airway | 62<br>(37 - 98)             | 17<br>(7 - 32)           | 5<br>(2 - 8)             | 8<br>(5 - 14)              | 6<br>(4 - 10)              | 26<br>(15 - 40)          |
| Foreign body in other body part                 | 4<br>(3 - 7)                | 1<br>(0 - 1)             | 1<br>(0 - 1)             | 2<br>(1 - 2)               | 1<br>(0 - 1)               | 1<br>(0 - 1)             |
| Other unintentional injuries                    | 119<br>(91 - 151)           | 13<br>(7 - 20)           | 7<br>(4 - 10)            | 56<br>(41 - 76)            | 24<br>(16 - 34)            | 19<br>(9 - 26)           |
| Self-harm and interpersonal violence            | 395<br>(235 - 544)          | 7<br>(3 - 14)            | 11<br>(6 - 18)           | 298<br>(175 - 424)         | 54<br>(30 - 78)            | 26<br>(14 - 39)          |
| Self-harm                                       | 60<br>(44 - 98)             | --                       | 1<br>(0 - 2)             | 37<br>(26 - 63)            | 12<br>(8 - 20)             | 10<br>(7 - 17)           |
| Interpersonal violence                          | 336<br>(175 - 475)          | 7<br>(3 - 14)            | 10<br>(5 - 16)           | 261<br>(139 - 379)         | 42<br>(18 - 65)            | 16<br>(4 - 29)           |
| Assault by firearm                              | 161<br>(70 - 256)           | 1<br>(0 - 3)             | 3<br>(1 - 6)             | 133<br>(58 - 216)          | 19<br>(7 - 32)             | 4<br>(1 - 9)             |
| Assault by sharp object                         | 96<br>(42 - 166)            | 1<br>(0 - 2)             | 2<br>(1 - 4)             | 78<br>(35 - 139)           | 12<br>(4 - 21)             | 3<br>(1 - 5)             |
| Assault by other means                          | 79<br>(37 - 116)            | 5<br>(2 - 10)            | 5<br>(2 - 9)             | 50<br>(24 - 77)            | 11<br>(4 - 18)             | 8<br>(2 - 16)            |
| Forces of nature, war, and legal intervention   | 29,947<br>(19,392 - 54,903) | 3,220<br>(3,216 - 3,224) | 1,434<br>(992 - 2,577)   | 11,764<br>(6,628 - 25,158) | 9,551<br>(5,858 - 17,586)  | 3,978<br>(2,470 - 6,233) |
| Collective violence and legal intervention      | 29,947<br>(19,392 - 54,903) | 3,220<br>(3,216 - 3,224) | 1,434<br>(992 - 2,577)   | 11,764<br>(6,628 - 25,158) | 9,551<br>(5,858 - 17,586)  | 3,978<br>(2,470 - 6,233) |

Web Table 31- Syria deaths with 95% UI by age, sex, and cause in 2013

| Cause                                                             | Males, All Ages             | Males, 0-4 Years         | Males, 5-14 Years        | Males, 15-49 Years          | Males, 50-69 Years          | Males, 70-80 Years          |
|-------------------------------------------------------------------|-----------------------------|--------------------------|--------------------------|-----------------------------|-----------------------------|-----------------------------|
| All causes                                                        | 62,764<br>(49,650 - 85,610) | 5,021<br>(4,579 - 5,539) | 1,571<br>(1,215 - 2,650) | 15,817<br>(11,271 - 27,976) | 19,896<br>(15,007 - 27,214) | 20,459<br>(16,193 - 23,399) |
| Communicable, maternal, neonatal, and nutritional diseases        | 3,869<br>(3,183 - 4,722)    | 1,671<br>(1,272 - 2,180) | 274<br>(200 - 380)       | 562<br>(428 - 781)          | 604<br>(440 - 808)          | 759<br>(538 - 1,015)        |
| HIV/AIDS and tuberculosis                                         | 34<br>(23 - 76)             | 0<br>(0 - 1)             | 0<br>(0 - 0)             | 14<br>(9 - 33)              | 10<br>(6 - 23)              | 9<br>(6 - 18)               |
| Tuberculosis                                                      | 34<br>(22 - 76)             | 0<br>(0 - 1)             | 0<br>(0 - 0)             | 14<br>(9 - 33)              | 10<br>(6 - 23)              | 9<br>(6 - 18)               |
| HIV/AIDS                                                          | 0<br>(0 - 0)                | 0<br>(0 - 0)             | 0<br>(0 - 0)             | 0<br>(0 - 0)                | 0<br>(0 - 0)                | 0<br>(0 - 0)                |
| HIV/AIDS resulting in mycobacterial infection                     | 0<br>(0 - 0)                | 0<br>(0 - 0)             | 0<br>(0 - 0)             | 0<br>(0 - 0)                | 0<br>(0 - 0)                | 0<br>(0 - 0)                |
| HIV/AIDS resulting in other diseases                              | 0<br>(0 - 0)                | 0<br>(0 - 0)             | 0<br>(0 - 0)             | 0<br>(0 - 0)                | 0<br>(0 - 0)                | 0<br>(0 - 0)                |
| Diarrhea, lower respiratory, and other common infectious diseases | 2,226<br>(1,683 - 2,969)    | 608<br>(342 - 1,141)     | 253<br>(180 - 361)       | 431<br>(315 - 611)          | 357<br>(248 - 513)          | 577<br>(393 - 846)          |
| Diarrheal diseases                                                | 27<br>(18 - 45)             | 13<br>(5 - 29)           | 1<br>(1 - 2)             | 4<br>(2 - 5)                | 3<br>(2 - 6)                | 6<br>(3 - 10)               |
| Intestinal infectious diseases                                    | 383<br>(194 - 671)          | 120<br>(44 - 220)        | 121<br>(61 - 204)        | 118<br>(49 - 231)           | 18<br>(8 - 35)              | 6<br>(3 - 12)               |
| Typhoid fever                                                     | 288<br>(148 - 511)          | 86<br>(30 - 163)         | 93<br>(47 - 157)         | 90<br>(37 - 178)            | 14<br>(6 - 27)              | 5<br>(2 - 10)               |
| Paratyphoid fever                                                 | 86<br>(40 - 162)            | 29<br>(10 - 61)          | 28<br>(12 - 53)          | 25<br>(10 - 54)             | 3<br>(1 - 7)                | 1<br>(0 - 3)                |
| Other intestinal infectious diseases                              | 9<br>(3 - 19)               | 5<br>(1 - 12)            | 1<br>(0 - 5)             | 2<br>(0 - 7)                | 1<br>(0 - 3)                | 0<br>(0 - 0)                |
| Lower respiratory infections                                      | 1,157<br>(849 - 1,615)      | 122<br>(53 - 208)        | 57<br>(30 - 92)          | 182<br>(127 - 267)          | 276<br>(183 - 423)          | 520<br>(343 - 788)          |
| Upper respiratory infections                                      | 3<br>(1 - 5)                | 0<br>(0 - 1)             | 0<br>(0 - 0)             | 1<br>(0 - 2)                | 1<br>(0 - 3)                | 1<br>(0 - 3)                |
| Otitis media                                                      | 1<br>(1 - 1)                | 0<br>(0 - 0)             | 0<br>(0 - 0)             | 1<br>(0 - 1)                | 0<br>(0 - 0)                | 0<br>(0 - 0)                |
| Meningitis                                                        | 149<br>(92 - 203)           | 39<br>(15 - 73)          | 15<br>(7 - 27)           | 43<br>(27 - 65)             | 26<br>(13 - 42)             | 25<br>(13 - 41)             |
| Pneumococcal meningitis                                           | 33<br>(19 - 47)             | 7<br>(3 - 13)            | 4<br>(1 - 7)             | 11<br>(6 - 18)              | 6<br>(2 - 10)               | 6<br>(2 - 11)               |
| H influenzae type B meningitis                                    | 28<br>(15 - 44)             | 14<br>(5 - 28)           | 4<br>(2 - 8)             | 5<br>(3 - 9)                | 3<br>(1 - 5)                | 2<br>(1 - 5)                |
| Meningococcal meningitis                                          | 41<br>(25 - 60)             | 12<br>(4 - 23)           | 5<br>(2 - 9)             | 11<br>(6 - 20)              | 7<br>(3 - 11)               | 7<br>(3 - 13)               |
| Other meningitis                                                  | 46<br>(26 - 65)             | 7<br>(2 - 14)            | 3<br>(1 - 6)             | 15<br>(9 - 25)              | 12<br>(5 - 20)              | 10<br>(5 - 17)              |
| Encephalitis                                                      | 190<br>(85 - 302)           | 48<br>(15 - 104)         | 20<br>(3 - 45)           | 74<br>(31 - 130)            | 31<br>(16 - 49)             | 17<br>(8 - 26)              |
| Diphtheria                                                        | 1<br>(0 - 4)                | 0<br>(0 - 4)             | 0<br>(0 - 1)             | 0<br>(0 - 1)                | 0<br>(0 - 0)                | --<br>(0 - 0)               |
| Whooping cough                                                    | 51<br>(0 - 252)             | 47<br>(0 - 232)          | 3<br>(0 - 15)            | 1<br>(0 - 3)                | 0<br>(0 - 0)                | --<br>(0 - 0)               |
| Tetanus                                                           | 2<br>(0 - 3)                | 1<br>(0 - 1)             | 0<br>(0 - 0)             | 1<br>(0 - 1)                | 0<br>(0 - 1)                | 0<br>(0 - 0)                |
| Measles                                                           | 256<br>(10 - 1,100)         | 215<br>(8 - 895)         | 35<br>(1 - 175)          | 6<br>(0 - 35)               | 0<br>(0 - 1)                | --<br>(0 - 1)               |
| Varicella and herpes zoster                                       | 6<br>(2 - 13)               | 2<br>(0 - 7)             | 0<br>(0 - 2)             | 1<br>(0 - 4)                | 1<br>(0 - 2)                | 2<br>(0 - 7)                |
| Neglected tropical diseases and malaria                           | 58<br>(43 - 77)             | 8<br>(3 - 16)            | 6<br>(4 - 11)            | 20<br>(15 - 29)             | 15<br>(9 - 22)              | 10<br>(6 - 16)              |
| Malaria                                                           | 15<br>(8 - 27)              | 0<br>(0 - 2)             | 2<br>(1 - 4)             | 7<br>(3 - 13)               | 3<br>(1 - 6)                | 2<br>(1 - 6)                |
| Leishmaniasis                                                     | 6<br>(4 - 9)                | 3<br>(1 - 5)             | 1<br>(0 - 1)             | 2<br>(1 - 3)                | 1<br>(0 - 1)                | 0<br>(0 - 0)                |
| Visceral leishmaniasis                                            | 6<br>(4 - 9)                | 3<br>(1 - 5)             | 1<br>(0 - 1)             | 2<br>(1 - 3)                | 1<br>(0 - 1)                | 0<br>(0 - 0)                |
| Schistosomiasis                                                   | 16<br>(10 - 23)             | 0<br>(0 - 0)             | 0<br>(0 - 0)             | 4<br>(3 - 7)                | 7<br>(4 - 11)               | 4<br>(2 - 7)                |
| Cysticercosis                                                     | 0<br>(0 - 0)                | 0<br>(0 - 0)             | 0<br>(0 - 0)             | 0<br>(0 - 0)                | 0<br>(0 - 0)                | 0<br>(0 - 0)                |
| Cystic echinococcosis                                             | 6<br>(5 - 8)                | 0<br>(0 - 0)             | 1<br>(0 - 1)             | 3<br>(2 - 3)                | 2<br>(1 - 2)                | 1<br>(1 - 1)                |
| Dengue                                                            | 2<br>(1 - 3)                | 0<br>(0 - 1)             | 0<br>(0 - 0)             | 1<br>(1 - 1)                | 0<br>(0 - 1)                | 0<br>(0 - 1)                |
| Rabies                                                            | 6<br>(3 - 9)                | 1<br>(0 - 2)             | 1<br>(0 - 3)             | 3<br>(2 - 4)                | 1<br>(0 - 2)                | 1<br>(0 - 1)                |
| Intestinal nematode infections                                    | 6<br>(1 - 15)               | 3<br>(0 - 9)             | 1<br>(0 - 6)             | 1<br>(0 - 4)                | 1<br>(0 - 4)                | 1<br>(0 - 4)                |
| Ascariasis                                                        | 6<br>(1 - 15)               | 3<br>(0 - 9)             | 1<br>(0 - 6)             | 1<br>(0 - 4)                | 1<br>(0 - 4)                | 1<br>(0 - 4)                |
| Other neglected tropical diseases                                 | 1<br>(1 - 3)                | 0<br>(0 - 1)             | 0<br>(0 - 0)             | 1<br>(0 - 1)                | 0<br>(0 - 0)                | 0<br>(0 - 0)                |
| Maternal disorders                                                | --                          | --                       | --                       | --                          | --                          | --                          |

Web Table 31- Syria deaths with 95% UI by age, sex, and cause in 2013

| Cause                                                            | Males, All Ages             | Males, 0-4 Years       | Males, 5-14 Years  | Males, 15-49 Years       | Males, 50-69 Years         | Males, 70-80 Years          |
|------------------------------------------------------------------|-----------------------------|------------------------|--------------------|--------------------------|----------------------------|-----------------------------|
| Maternal hemorrhage                                              | --                          | --                     | --                 | --                       | --                         | --                          |
| Maternal sepsis and other maternal infections                    | --                          | --                     | --                 | --                       | --                         | --                          |
| Maternal hypertensive disorders                                  | --                          | --                     | --                 | --                       | --                         | --                          |
| Maternal obstructed labor                                        | --                          | --                     | --                 | --                       | --                         | --                          |
| Maternal abortive outcome                                        | --                          | --                     | --                 | --                       | --                         | --                          |
| Indirect maternal deaths                                         | --                          | --                     | --                 | --                       | --                         | --                          |
| Late maternal deaths                                             | --                          | --                     | --                 | --                       | --                         | --                          |
| Maternal deaths aggravated by HIV/AIDS                           | --                          | --                     | --                 | --                       | --                         | --                          |
| Other maternal disorders                                         | --                          | --                     | --                 | --                       | --                         | --                          |
| Neonatal disorders                                               | 973<br>(736 - 1,229)        | 973<br>(736 - 1,229)   | --                 | --                       | --                         | --                          |
| Neonatal preterm birth complications                             | 449<br>(225 - 709)          | 449<br>(225 - 709)     | --                 | --                       | --                         | --                          |
| Neonatal encephalopathy due to birth asphyxia and trauma         | 120<br>(36 - 274)           | 120<br>(36 - 274)      | --                 | --                       | --                         | --                          |
| Neonatal sepsis and other neonatal infections                    | 289<br>(81 - 671)           | 289<br>(81 - 671)      | --                 | --                       | --                         | --                          |
| Hemolytic disease and other neonatal jaundice                    | 2<br>(0 - 8)                | 2<br>(0 - 8)           | --                 | --                       | --                         | --                          |
| Other neonatal disorders                                         | 113<br>(36 - 222)           | 113<br>(36 - 222)      | --                 | --                       | --                         | --                          |
| Nutritional deficiencies                                         | 234<br>(75 - 351)           | 24<br>(7 - 50)         | 6<br>(2 - 10)      | 37<br>(13 - 60)          | 60<br>(19 - 96)            | 107<br>(30 - 174)           |
| Protein-energy malnutrition                                      | 55<br>(8 - 100)             | 8<br>(1 - 21)          | 1<br>(0 - 2)       | 5<br>(1 - 9)             | 11<br>(1 - 23)             | 30<br>(3 - 64)              |
| Iodine deficiency                                                | 1<br>(0 - 5)                | 0<br>(0 - 1)           | 0<br>(0 - 0)       | 0<br>(0 - 1)             | 0<br>(0 - 2)               | 1<br>(0 - 3)                |
| Iron-deficiency anemia                                           | 165<br>(56 - 248)           | 15<br>(4 - 32)         | 4<br>(1 - 8)       | 31<br>(11 - 49)          | 46<br>(15 - 75)            | 69<br>(22 - 118)            |
| Other nutritional deficiencies                                   | 13<br>(4 - 26)              | 1<br>(0 - 2)           | 1<br>(0 - 1)       | 2<br>(1 - 4)             | 2<br>(1 - 5)               | 7<br>(2 - 15)               |
| Other communicable, maternal, neonatal, and nutritional diseases | 344<br>(239 - 505)          | 57<br>(31 - 100)       | 9<br>(5 - 18)      | 59<br>(37 - 106)         | 163<br>(104 - 249)         | 56<br>(33 - 88)             |
| Sexually transmitted diseases excluding HIV                      | 43<br>(22 - 75)             | 39<br>(19 - 69)        | 3<br>(2 - 5)       | 1<br>(0 - 1)             | 0<br>(0 - 0)               | 0<br>(0 - 0)                |
| Syphilis                                                         | 42<br>(21 - 74)             | 39<br>(19 - 69)        | 3<br>(1 - 5)       | 0<br>(0 - 1)             | 0<br>(0 - 0)               | 0<br>(0 - 0)                |
| Chlamydial infection                                             | --                          | --                     | --                 | --                       | --                         | --                          |
| Gonococcal infection                                             | 0<br>(0 - 0)                | --                     | 0<br>(0 - 0)       | 0<br>(0 - 0)             | 0<br>(0 - 0)               | 0<br>(0 - 0)                |
| Other sexually transmitted diseases                              | 0<br>(0 - 0)                | --                     | 0<br>(0 - 0)       | 0<br>(0 - 0)             | 0<br>(0 - 0)               | 0<br>(0 - 0)                |
| Hepatitis                                                        | 263<br>(177 - 409)          | 12<br>(3 - 41)         | 3<br>(2 - 10)      | 47<br>(29 - 89)          | 155<br>(97 - 234)          | 45<br>(26 - 75)             |
| Acute hepatitis A                                                | 16<br>(4 - 46)              | 5<br>(1 - 19)          | 1<br>(0 - 5)       | 5<br>(1 - 13)            | 4<br>(1 - 11)              | 1<br>(0 - 2)                |
| Acute hepatitis B                                                | 200<br>(128 - 316)          | 7<br>(2 - 24)          | 1<br>(0 - 5)       | 24<br>(11 - 50)          | 128<br>(77 - 202)          | 40<br>(23 - 67)             |
| Acute hepatitis C                                                | 5<br>(1 - 15)               | --                     | 0<br>(0 - 0)       | 1<br>(0 - 3)             | 3<br>(0 - 10)              | 1<br>(0 - 3)                |
| Acute hepatitis E                                                | 41<br>(16 - 81)             | 0<br>(0 - 1)           | 1<br>(0 - 2)       | 18<br>(7 - 36)           | 20<br>(5 - 46)             | 3<br>(1 - 9)                |
| Other infectious diseases                                        | 39<br>(20 - 74)             | 7<br>(2 - 17)          | 2<br>(1 - 5)       | 11<br>(5 - 23)           | 8<br>(3 - 19)              | 10<br>(3 - 25)              |
| Non-communicable diseases                                        | 36,798<br>(28,590 - 43,791) | 1,354<br>(949 - 1,733) | 242<br>(173 - 312) | 5,148<br>(4,035 - 7,051) | 12,700<br>(9,410 - 15,913) | 17,355<br>(13,580 - 19,367) |
| Neoplasms                                                        | 3,771<br>(2,812 - 4,659)    | 40<br>(19 - 65)        | 59<br>(40 - 79)    | 639<br>(495 - 883)       | 1,594<br>(1,139 - 2,043)   | 1,439<br>(1,062 - 1,728)    |
| Esophageal cancer                                                | 110<br>(75 - 155)           | --                     | --                 | 11<br>(7 - 16)           | 50<br>(31 - 77)            | 49<br>(32 - 70)             |
| Stomach cancer                                                   | 534<br>(384 - 681)          | --                     | --                 | 57<br>(41 - 83)          | 245<br>(174 - 323)         | 232<br>(160 - 317)          |
| Liver cancer                                                     | 156<br>(112 - 206)          | --                     | 1<br>(1 - 2)       | 21<br>(14 - 31)          | 74<br>(49 - 104)           | 61<br>(40 - 88)             |
| Liver cancer due to hepatitis B                                  | 40<br>(17 - 75)             | --                     | 1<br>(0 - 1)       | 8<br>(4 - 14)            | 19<br>(6 - 39)             | 12<br>(5 - 25)              |
| Liver cancer due to hepatitis C                                  | 86<br>(52 - 129)            | --                     | 0<br>(0 - 0)       | 9<br>(4 - 15)            | 41<br>(22 - 67)            | 36<br>(21 - 57)             |
| Liver cancer due to alcohol use                                  | 19<br>(8 - 43)              | --                     | --                 | 1<br>(1 - 3)             | 8<br>(3 - 20)              | 9<br>(3 - 22)               |

Web Table 31- Syria deaths with 95% UI by age, sex, and cause in 2013

| Cause                                         | Males, All Ages             | Males, 0-4 Years | Males, 5-14 Years | Males, 15-49 Years       | Males, 50-69 Years        | Males, 70-80 Years         |
|-----------------------------------------------|-----------------------------|------------------|-------------------|--------------------------|---------------------------|----------------------------|
| Liver cancer due to other causes              | 12<br>(3 - 29)              | --               | 0<br>(0 - 1)      | 2<br>(1 - 5)             | 6<br>(1 - 14)             | 4<br>(1 - 9)               |
| Larynx cancer                                 | 46<br>(28 - 63)             | --               | --                | 6<br>(3 - 9)             | 24<br>(14 - 33)           | 17<br>(10 - 24)            |
| Tracheal, bronchus and lung cancer            | 596<br>(430 - 744)          | --               | --                | 64<br>(45 - 93)          | 321<br>(227 - 420)        | 212<br>(149 - 268)         |
| Breast cancer                                 | 2<br>(1 - 7)                | --               | --                | 1<br>(1 - 3)             | 1<br>(0 - 2)              | 0<br>(0 - 2)               |
| Cervical cancer                               | --                          | --               | --                | --                       | --                        | --                         |
| Uterine cancer                                | --                          | --               | --                | --                       | --                        | --                         |
| Prostate cancer                               | 335<br>(207 - 507)          | --               | --                | 3<br>(2 - 6)             | 78<br>(46 - 124)          | 254<br>(152 - 387)         |
| Colon and rectum cancer                       | 149<br>(110 - 185)          | --               | --                | 25<br>(18 - 35)          | 65<br>(46 - 84)           | 59<br>(43 - 75)            |
| Lip and oral cavity cancer                    | 21<br>(13 - 32)             | --               | --                | 5<br>(3 - 9)             | 10<br>(6 - 16)            | 6<br>(3 - 9)               |
| Nasopharynx cancer                            | 30<br>(21 - 42)             | --               | 1<br>(0 - 4)      | 11<br>(7 - 17)           | 13<br>(8 - 20)            | 5<br>(3 - 9)               |
| Other pharynx cancer                          | 19<br>(13 - 28)             | --               | --                | 4<br>(2 - 6)             | 11<br>(7 - 17)            | 4<br>(3 - 7)               |
| Gallbladder and biliary tract cancer          | 44<br>(28 - 65)             | --               | --                | 4<br>(3 - 7)             | 21<br>(12 - 31)           | 19<br>(12 - 30)            |
| Pancreatic cancer                             | 106<br>(77 - 135)           | --               | --                | 18<br>(13 - 26)          | 52<br>(37 - 69)           | 36<br>(25 - 48)            |
| Malignant skin melanoma                       | 8<br>(4 - 18)               | --               | --                | 3<br>(1 - 6)             | 3<br>(1 - 6)              | 2<br>(1 - 6)               |
| Non-melanoma skin cancer                      | 17<br>(11 - 31)             | --               | --                | 3<br>(2 - 5)             | 5<br>(3 - 10)             | 9<br>(5 - 17)              |
| Ovarian cancer                                | --                          | --               | --                | --                       | --                        | --                         |
| Testicular cancer                             | 8<br>(5 - 14)               | --               | --                | 6<br>(4 - 10)            | 1<br>(1 - 2)              | 1<br>(0 - 2)               |
| Kidney cancer                                 | 98<br>(70 - 132)            | 1<br>(0 - 3)     | 1<br>(1 - 3)      | 12<br>(8 - 18)           | 52<br>(34 - 74)           | 32<br>(20 - 47)            |
| Bladder cancer                                | 99<br>(68 - 129)            | --               | --                | 6<br>(4 - 10)            | 43<br>(28 - 60)           | 50<br>(33 - 67)            |
| Brain and nervous system cancer               | 236<br>(108 - 330)          | 6<br>(1 - 13)    | 9<br>(3 - 15)     | 77<br>(35 - 116)         | 92<br>(41 - 137)          | 52<br>(20 - 82)            |
| Thyroid cancer                                | 18<br>(10 - 28)             | --               | 0<br>(0 - 0)      | 5<br>(2 - 8)             | 9<br>(5 - 14)             | 4<br>(3 - 7)               |
| Mesothelioma                                  | 8<br>(5 - 12)               | --               | --                | 2<br>(1 - 4)             | 4<br>(2 - 6)              | 2<br>(1 - 4)               |
| Hodgkin lymphoma                              | 46<br>(27 - 76)             | 1<br>(0 - 3)     | 4<br>(1 - 11)     | 20<br>(12 - 35)          | 14<br>(7 - 25)            | 6<br>(3 - 11)              |
| Non-Hodgkin lymphoma                          | 208<br>(148 - 285)          | 4<br>(2 - 8)     | 8<br>(4 - 14)     | 59<br>(41 - 88)          | 78<br>(52 - 116)          | 58<br>(36 - 86)            |
| Multiple myeloma                              | 19<br>(12 - 27)             | --               | --                | 5<br>(3 - 8)             | 9<br>(5 - 13)             | 5<br>(3 - 8)               |
| Leukemia                                      | 198<br>(153 - 248)          | 6<br>(2 - 13)    | 16<br>(10 - 24)   | 62<br>(46 - 87)          | 61<br>(42 - 80)           | 53<br>(38 - 69)            |
| Other neoplasms                               | 658<br>(374 - 949)          | 21<br>(8 - 38)   | 18<br>(8 - 28)    | 150<br>(88 - 222)        | 261<br>(135 - 408)        | 209<br>(99 - 338)          |
| Cardiovascular diseases                       | 25,659<br>(19,765 - 30,733) | 43<br>(18 - 77)  | 75<br>(48 - 104)  | 3,648<br>(2,822 - 4,969) | 9,358<br>(6,980 - 11,687) | 12,535<br>(9,702 - 14,135) |
| Rheumatic heart disease                       | 37<br>(24 - 68)             | 0<br>(0 - 1)     | 2<br>(1 - 3)      | 12<br>(7 - 22)           | 11<br>(7 - 21)            | 11<br>(7 - 23)             |
| Ischemic heart disease                        | 16,547<br>(12,347 - 20,030) | 13<br>(4 - 28)   | 26<br>(15 - 40)   | 2,196<br>(1,646 - 3,016) | 6,313<br>(4,587 - 9,381)  | 8,000<br>(6,022 - 9,381)   |
| Cerebrovascular disease                       | 7,345<br>(5,393 - 9,519)    | 13<br>(5 - 26)   | 27<br>(16 - 40)   | 1,182<br>(881 - 1,710)   | 2,391<br>(1,612 - 3,220)  | 3,731<br>(2,697 - 4,711)   |
| Ischemic stroke                               | 1,858<br>(715 - 2,971)      | 1<br>(0 - 2)     | 2<br>(1 - 4)      | 109<br>(44 - 195)        | 536<br>(208 - 905)        | 1,210<br>(442 - 1,992)     |
| Hemorrhagic stroke                            | 5,488<br>(3,580 - 7,498)    | 13<br>(4 - 24)   | 25<br>(15 - 37)   | 1,073<br>(781 - 1,572)   | 1,855<br>(1,149 - 2,604)  | 2,521<br>(1,494 - 3,606)   |
| Hypertensive heart disease                    | 340<br>(195 - 525)          | 2<br>(0 - 4)     | 1<br>(1 - 2)      | 32<br>(20 - 51)          | 111<br>(60 - 179)         | 194<br>(102 - 323)         |
| Cardiomyopathy and myocarditis                | 797<br>(533 - 1,095)        | 4<br>(1 - 9)     | 9<br>(5 - 17)     | 136<br>(90 - 207)        | 308<br>(192 - 447)        | 340<br>(202 - 500)         |
| Atrial fibrillation and flutter               | 24<br>(14 - 42)             | --               | --                | 2<br>(1 - 3)             | 7<br>(4 - 12)             | 15<br>(8 - 29)             |
| Aortic aneurysm                               | 257<br>(159 - 544)          | --               | --                | 18<br>(11 - 44)          | 123<br>(74 - 242)         | 115<br>(68 - 262)          |
| Peripheral vascular disease                   | 17<br>(11 - 24)             | --               | --                | 2<br>(1 - 2)             | 4<br>(3 - 6)              | 11<br>(7 - 17)             |
| Endocarditis                                  | 115<br>(67 - 175)           | 6<br>(2 - 11)    | 5<br>(3 - 9)      | 26<br>(16 - 43)          | 35<br>(19 - 58)           | 43<br>(23 - 69)            |
| Other cardiovascular and circulatory diseases | 181<br>(114 - 529)          | 5<br>(2 - 11)    | 5<br>(2 - 14)     | 42<br>(26 - 115)         | 55<br>(31 - 166)          | 75<br>(43 - 226)           |



Web Table 31- Syria deaths with 95% UI by age, sex, and cause in 2013

| Cause                                               | Males, All Ages          | Males, 0-4 Years | Males, 5-14 Years | Males, 15-49 Years | Males, 50-69 Years   | Males, 70-80 Years     |
|-----------------------------------------------------|--------------------------|------------------|-------------------|--------------------|----------------------|------------------------|
| Chronic respiratory diseases                        | 2,575<br>(1,742 - 4,967) | 91<br>(35 - 157) | 29<br>(13 - 41)   | 330<br>(230 - 596) | 845<br>(535 - 1,698) | 1,280<br>(825 - 2,572) |
| Chronic obstructive pulmonary disease               | 2,053<br>(1,339 - 4,073) | 48<br>(16 - 90)  | 12<br>(5 - 19)    | 189<br>(126 - 341) | 685<br>(429 - 1,390) | 1,120<br>(702 - 2,290) |
| Pneumoconiosis                                      | 88<br>(52 - 173)         | 2<br>(1 - 5)     | 1<br>(1 - 2)      | 38<br>(22 - 71)    | 25<br>(13 - 54)      | 21<br>(10 - 48)        |
| Silicosis                                           | 20<br>(10 - 45)          | 1<br>(0 - 1)     | 0<br>(0 - 1)      | 3<br>(1 - 6)       | 4<br>(2 - 10)        | 12<br>(5 - 29)         |
| Asbestosis                                          | 8<br>(4 - 15)            | 0<br>(0 - 1)     | 0<br>(0 - 1)      | 6<br>(3 - 12)      | 1<br>(1 - 3)         | 0<br>(0 - 0)           |
| Coal workers pneumoconiosis                         | 4<br>(2 - 7)             | 1<br>(0 - 1)     | 0<br>(0 - 1)      | 3<br>(1 - 5)       | 0<br>(0 - 1)         | 0<br>(0 - 0)           |
| Other pneumoconiosis                                | 56<br>(32 - 107)         | 1<br>(0 - 2)     | 0<br>(0 - 1)      | 27<br>(16 - 49)    | 19<br>(10 - 40)      | 9<br>(4 - 19)          |
| Asthma                                              | 277<br>(173 - 513)       | 26<br>(8 - 56)   | 10<br>(4 - 16)    | 75<br>(45 - 155)   | 86<br>(45 - 186)     | 79<br>(42 - 173)       |
| Interstitial lung disease and pulmonary sarcoidosis | 101<br>(14 - 197)        | 1<br>(0 - 4)     | 1<br>(0 - 3)      | 11<br>(1 - 22)     | 40<br>(5 - 83)       | 48<br>(7 - 106)        |
| Other chronic respiratory diseases                  | 56<br>(32 - 108)         | 15<br>(7 - 28)   | 4<br>(2 - 8)      | 17<br>(8 - 38)     | 10<br>(4 - 23)       | 11<br>(5 - 29)         |
| Cirrhosis                                           | 505<br>(377 - 646)       | 9<br>(3 - 21)    | 6<br>(4 - 9)      | 105<br>(78 - 152)  | 232<br>(163 - 314)   | 152<br>(106 - 200)     |
| Cirrhosis due to hepatitis B                        | 143<br>(61 - 237)        | 0<br>(0 - 1)     | 1<br>(0 - 2)      | 29<br>(14 - 52)    | 68<br>(28 - 117)     | 44<br>(14 - 78)        |
| Cirrhosis due to hepatitis C                        | 237<br>(135 - 360)       | 1<br>(0 - 2)     | 2<br>(1 - 3)      | 52<br>(28 - 82)    | 113<br>(56 - 179)    | 69<br>(39 - 108)       |
| Cirrhosis due to alcohol use                        | 72<br>(38 - 139)         | --               | --                | 9<br>(4 - 18)      | 33<br>(16 - 68)      | 30<br>(15 - 55)        |
| Cirrhosis due to other causes                       | 54<br>(31 - 87)          | 8<br>(2 - 18)    | 3<br>(2 - 6)      | 16<br>(8 - 27)     | 18<br>(8 - 35)       | 9<br>(4 - 16)          |
| Digestive diseases                                  | 456<br>(336 - 646)       | 12<br>(4 - 26)   | 8<br>(5 - 13)     | 83<br>(60 - 125)   | 220<br>(90 - 197)    | 133<br>(156 - 315)     |
| Peptic ulcer disease                                | 33<br>(17 - 55)          | 0<br>(0 - 0)     | 0<br>(0 - 0)      | 5<br>(3 - 9)       | 12<br>(6 - 21)       | 16<br>(8 - 28)         |
| Gastritis and duodenitis                            | 3<br>(2 - 7)             | 0<br>(0 - 0)     | 0<br>(0 - 0)      | 1<br>(0 - 2)       | 1<br>(0 - 2)         | 1<br>(1 - 3)           |
| Appendicitis                                        | 32<br>(11 - 62)          | 0<br>(0 - 1)     | 1<br>(0 - 1)      | 11<br>(4 - 23)     | 10<br>(3 - 23)       | 10<br>(4 - 20)         |
| Paralytic ileus and intestinal obstruction          | 276<br>(189 - 433)       | 11<br>(4 - 24)   | 6<br>(4 - 10)     | 50<br>(33 - 82)    | 78<br>(48 - 130)     | 130<br>(86 - 204)      |
| Inguinal, femoral, and abdominal hernia             | 23<br>(10 - 40)          | 0<br>(0 - 0)     | 0<br>(0 - 0)      | 1<br>(0 - 2)       | 1<br>(1 - 4)         | 21<br>(9 - 37)         |
| Inflammatory bowel disease                          | 18<br>(10 - 27)          | 0<br>(0 - 0)     | 0<br>(0 - 1)      | 3<br>(2 - 5)       | 5<br>(2 - 8)         | 9<br>(5 - 16)          |
| Vascular intestinal disorders                       | 9<br>(3 - 19)            | 0<br>(0 - 0)     | 0<br>(0 - 0)      | 2<br>(1 - 4)       | 3<br>(1 - 8)         | 4<br>(1 - 8)           |
| Gallbladder and biliary diseases                    | 16<br>(8 - 35)           | 0<br>(0 - 0)     | 0<br>(0 - 0)      | 1<br>(1 - 3)       | 4<br>(2 - 11)        | 10<br>(4 - 24)         |
| Pancreatitis                                        | 21<br>(9 - 35)           | 0<br>(0 - 0)     | 0<br>(0 - 0)      | 5<br>(2 - 9)       | 7<br>(3 - 13)        | 9<br>(4 - 16)          |
| Other digestive diseases                            | 26<br>(15 - 47)          | 0<br>(0 - 1)     | 0<br>(0 - 1)      | 4<br>(2 - 9)       | 10<br>(5 - 19)       | 11<br>(5 - 22)         |
| Neurological disorders                              | 1,526<br>(1,145 - 1,867) | 11<br>(5 - 18)   | 4<br>(2 - 7)      | 29<br>(20 - 46)    | 167<br>(109 - 238)   | 1,314<br>(963 - 1,637) |
| Alzheimer disease and other dementias               | 1,441<br>(1,057 - 1,782) | --               | --                | 1<br>(0 - 2)       | 152<br>(96 - 220)    | 1,289<br>(942 - 1,605) |
| Parkinson disease                                   | 21<br>(11 - 35)          | --               | --                | 1<br>(0 - 1)       | 5<br>(3 - 8)         | 15<br>(7 - 28)         |
| Epilepsy                                            | 22<br>(13 - 43)          | 2<br>(0 - 6)     | 1<br>(1 - 3)      | 12<br>(7 - 26)     | 4<br>(2 - 7)         | 2<br>(1 - 4)           |
| Multiple sclerosis                                  | 5<br>(2 - 9)             | --               | --                | 2<br>(1 - 3)       | 2<br>(1 - 3)         | 1<br>(1 - 3)           |
| Other neurological disorders                        | 37<br>(26 - 50)          | 10<br>(4 - 15)   | 3<br>(2 - 4)      | 13<br>(9 - 20)     | 5<br>(3 - 8)         | 6<br>(4 - 9)           |
| Mental and substance use disorders                  | 141<br>(91 - 232)        | 1<br>(0 - 2)     | 0<br>(0 - 0)      | 102<br>(62 - 176)  | 29<br>(19 - 46)      | 9<br>(5 - 14)          |
| Schizophrenia                                       | 35<br>(4 - 81)           | --               | --                | 27<br>(2 - 64)     | 5<br>(1 - 12)        | 4<br>(1 - 9)           |
| Alcohol use disorders                               | 38<br>(25 - 70)          | --               | --                | 24<br>(15 - 46)    | 10<br>(6 - 18)       | 4<br>(2 - 8)           |
| Drug use disorders                                  | 67<br>(21 - 147)         | 1<br>(0 - 2)     | --                | 51<br>(15 - 110)   | 14<br>(4 - 31)       | 1<br>(0 - 3)           |
| Opioid use disorders                                | 37<br>(12 - 81)          | 0<br>(0 - 1)     | --                | 29<br>(8 - 61)     | 7<br>(2 - 16)        | 1<br>(0 - 2)           |
| Cocaine use disorders                               | 1<br>(0 - 2)             | 0<br>(0 - 0)     | --                | 1<br>(0 - 1)       | 0<br>(0 - 0)         | 0<br>(0 - 0)           |
| Amphetamine use disorders                           | 1<br>(0 - 2)             | 0<br>(0 - 0)     | --                | 1<br>(0 - 1)       | 0<br>(0 - 0)         | 0<br>(0 - 0)           |
| Other drug use disorders                            | 29<br>(9 - 66)           | 0<br>(0 - 1)     | --                | 21<br>(6 - 48)     | 7<br>(2 - 14)        | 1<br>(0 - 1)           |

Web Table 31- Syria deaths with 95% UI by age, sex, and cause in 2013

| Cause                                               | Males, All Ages        | Males, 0-4 Years     | Males, 5-14 Years | Males, 15-49 Years | Males, 50-69 Years | Males, 70-80 Years |
|-----------------------------------------------------|------------------------|----------------------|-------------------|--------------------|--------------------|--------------------|
| Eating disorders                                    | 0<br>(0 - 0)           | --                   | 0<br>(0 - 0)      | 0<br>(0 - 0)       | --                 | --                 |
| Anorexia nervosa                                    | 0<br>(0 - 0)           | --                   | 0<br>(0 - 0)      | 0<br>(0 - 0)       | --                 | --                 |
| Diabetes, urogenital, blood, and endocrine diseases | 1,201<br>(813 - 1,589) | 290<br>(91 - 488)    | 43<br>(21 - 70)   | 185<br>(121 - 293) | 313<br>(222 - 419) | 371<br>(268 - 477) |
| Diabetes mellitus                                   | 541<br>(399 - 672)     | 3<br>(1 - 4)         | 1<br>(1 - 2)      | 54<br>(40 - 77)    | 216<br>(151 - 292) | 267<br>(189 - 346) |
| Acute glomerulonephritis                            | 44<br>(6 - 77)         | 3<br>(0 - 6)         | 4<br>(1 - 7)      | 9<br>(1 - 16)      | 13<br>(2 - 26)     | 16<br>(2 - 34)     |
| Chronic kidney disease                              | 16<br>(2 - 168)        | 0<br>(0 - 3)         | 0<br>(0 - 3)      | 4<br>(1 - 36)      | 4<br>(1 - 48)      | 7<br>(1 - 75)      |
| Chronic kidney disease due to diabetes mellitus     | 1<br>(0 - 11)          | 0<br>(0 - 1)         | 0<br>(0 - 1)      | 0<br>(0 - 4)       | 0<br>(0 - 2)       | 0<br>(0 - 4)       |
| Chronic kidney disease due to hypertension          | 12<br>(2 - 121)        | 0<br>(0 - 1)         | 0<br>(0 - 1)      | 2<br>(0 - 22)      | 4<br>(0 - 39)      | 5<br>(1 - 59)      |
| Chronic kidney disease due to glomerulonephritis    | 1<br>(0 - 14)          | 0<br>(0 - 1)         | 0<br>(0 - 1)      | 0<br>(0 - 4)       | 0<br>(0 - 3)       | 0<br>(0 - 6)       |
| Chronic kidney disease due to other causes          | 2<br>(0 - 21)          | 0<br>(0 - 1)         | 0<br>(0 - 1)      | 0<br>(0 - 6)       | 0<br>(0 - 5)       | 1<br>(0 - 9)       |
| Urinary diseases and male infertility               | 10<br>(6 - 19)         | 0<br>(0 - 1)         | 0<br>(0 - 0)      | 1<br>(1 - 3)       | 3<br>(1 - 6)       | 5<br>(3 - 10)      |
| Interstitial nephritis and urinary tract infections | 1<br>(0 - 2)           | 0<br>(0 - 0)         | 0<br>(0 - 0)      | 0<br>(0 - 1)       | 0<br>(0 - 1)       | 0<br>(0 - 0)       |
| Urolithiasis                                        | 1<br>(0 - 2)           | --                   | 0<br>(0 - 0)      | 0<br>(0 - 1)       | 0<br>(0 - 1)       | 0<br>(0 - 1)       |
| Other urinary diseases                              | 9<br>(5 - 16)          | 0<br>(0 - 1)         | 0<br>(0 - 0)      | 1<br>(1 - 2)       | 2<br>(1 - 5)       | 5<br>(3 - 9)       |
| Gynecological diseases                              | --                     | --                   | --                | --                 | --                 | --                 |
| Uterine fibroids                                    | --                     | --                   | --                | --                 | --                 | --                 |
| Polycystic ovarian syndrome                         | --                     | --                   | --                | --                 | --                 | --                 |
| Endometriosis                                       | --                     | --                   | --                | --                 | --                 | --                 |
| Genital prolapse                                    | --                     | --                   | --                | --                 | --                 | --                 |
| Other gynecological diseases                        | --                     | --                   | --                | --                 | --                 | --                 |
| Hemoglobinopathies and hemolytic anemias            | 128<br>(70 - 230)      | 28<br>(11 - 66)      | 14<br>(7 - 33)    | 46<br>(24 - 89)    | 16<br>(7 - 30)     | 24<br>(13 - 41)    |
| Thalassemias                                        | 64<br>(33 - 130)       | 23<br>(9 - 53)       | 12<br>(6 - 26)    | 30<br>(16 - 58)    | 0<br>(0 - 0)       | 0<br>(0 - 0)       |
| Sickle cell disorders                               | 27<br>(15 - 49)        | 3<br>(1 - 7)         | 2<br>(1 - 5)      | 12<br>(6 - 23)     | 9<br>(4 - 18)      | 1<br>(0 - 1)       |
| G6PD deficiency                                     | 2<br>(1 - 3)           | 0<br>(0 - 1)         | 0<br>(0 - 0)      | 0<br>(0 - 1)       | 0<br>(0 - 1)       | 0<br>(0 - 0)       |
| Other hemoglobinopathies and hemolytic anemias      | 35<br>(20 - 61)        | 2<br>(1 - 5)         | 1<br>(0 - 1)      | 4<br>(2 - 7)       | 6<br>(3 - 12)      | 23<br>(12 - 40)    |
| Endocrine, metabolic, blood, and immune disorders   | 462<br>(197 - 697)     | 256<br>(66 - 454)    | 22<br>(7 - 41)    | 71<br>(35 - 124)   | 61<br>(34 - 94)    | 52<br>(32 - 88)    |
| Musculoskeletal disorders                           | 8<br>(4 - 15)          | --                   | 0<br>(0 - 1)      | 2<br>(1 - 5)       | 3<br>(2 - 7)       | 2<br>(1 - 3)       |
| Rheumatoid arthritis                                | 4<br>(2 - 9)           | --                   | 0<br>(0 - 1)      | 1<br>(0 - 3)       | 2<br>(1 - 4)       | 1<br>(1 - 2)       |
| Other musculoskeletal disorders                     | 4<br>(2 - 8)           | --                   | 0<br>(0 - 0)      | 1<br>(1 - 3)       | 2<br>(1 - 4)       | 1<br>(0 - 1)       |
| Other non-communicable diseases                     | 956<br>(706 - 1,213)   | 856<br>(610 - 1,110) | 19<br>(10 - 47)   | 25<br>(18 - 36)    | 24<br>(16 - 34)    | 32<br>(21 - 45)    |
| Congenital anomalies                                | 934<br>(688 - 1,188)   | 850<br>(607 - 1,104) | 18<br>(9 - 47)    | 22<br>(16 - 32)    | 20<br>(13 - 29)    | 24<br>(14 - 35)    |
| Neural tube defects                                 | 20<br>(5 - 66)         | 18<br>(3 - 63)       | 0<br>(0 - 1)      | 1<br>(0 - 1)       | 0<br>(0 - 1)       | 0<br>(0 - 1)       |
| Congenital heart anomalies                          | 242<br>(78 - 429)      | 231<br>(71 - 416)    | 4<br>(1 - 10)     | 3<br>(2 - 5)       | 2<br>(1 - 4)       | 1<br>(1 - 2)       |
| Cleft lip and cleft palate                          | 2<br>(0 - 6)           | 2<br>(0 - 6)         | --                | --                 | --                 | --                 |
| Down syndrome                                       | 30<br>(11 - 65)        | 24<br>(8 - 57)       | 1<br>(0 - 3)      | 4<br>(2 - 6)       | 1<br>(0 - 1)       | 0<br>(0 - 1)       |
| Chromosomal unbalanced rearrangements               | 17<br>(7 - 37)         | 16<br>(6 - 35)       | 0<br>(0 - 1)      | 1<br>(0 - 1)       | 0<br>(0 - 1)       | 0<br>(0 - 1)       |
| Other congenital anomalies                          | 623<br>(442 - 836)     | 559<br>(379 - 763)   | 12<br>(6 - 30)    | 14<br>(10 - 21)    | 16<br>(10 - 23)    | 22<br>(13 - 32)    |
| Skin and subcutaneous diseases                      | 18<br>(12 - 30)        | 1<br>(0 - 5)         | 0<br>(0 - 1)      | 3<br>(2 - 6)       | 5<br>(3 - 7)       | 9<br>(5 - 14)      |
| Cellulitis                                          | 4<br>(2 - 6)           | 0<br>(0 - 0)         | 0<br>(0 - 0)      | 0<br>(0 - 1)       | 1<br>(0 - 2)       | 2<br>(1 - 4)       |
| Pyoderma                                            | 7<br>(4 - 13)          | 1<br>(0 - 4)         | 0<br>(0 - 0)      | 2<br>(1 - 3)       | 2<br>(1 - 3)       | 2<br>(1 - 4)       |

Web Table 31- Syria deaths with 95% UI by age, sex, and cause in 2013

| Cause                                           | Males, All Ages             | Males, 0-4 Years         | Males, 5-14 Years      | Males, 15-49 Years         | Males, 50-69 Years        | Males, 70-80 Years       |
|-------------------------------------------------|-----------------------------|--------------------------|------------------------|----------------------------|---------------------------|--------------------------|
| Decubitus ulcer                                 | 7<br>(4 - 12)               | 0<br>(0 - 0)             | 0<br>(0 - 0)           | 1<br>(0 - 2)               | 2<br>(1 - 3)              | 4<br>(2 - 8)             |
| Other skin and subcutaneous diseases            | 1<br>(0 - 2)                | 0<br>(0 - 0)             | 0<br>(0 - 0)           | 0<br>(0 - 1)               | 0<br>(0 - 0)              | 0<br>(0 - 0)             |
| Sudden infant death syndrome                    | 4<br>(1 - 12)               | 4<br>(1 - 12)            | --                     | --                         | --                        | --                       |
| Injuries                                        | 22,096<br>(14,228 - 43,989) | 1,997<br>(1,834 - 2,156) | 1,055<br>(721 - 2,147) | 10,107<br>(6,011 - 22,178) | 6,592<br>(3,940 - 13,649) | 2,346<br>(1,460 - 4,196) |
| Transport injuries                              | 2,155<br>(948 - 2,897)      | 73<br>(21 - 144)         | 105<br>(43 - 154)      | 1,256<br>(596 - 1,789)     | 429<br>(168 - 610)        | 293<br>(98 - 409)        |
| Road injuries                                   | 2,103<br>(927 - 2,825)      | 66<br>(18 - 132)         | 100<br>(41 - 146)      | 1,240<br>(587 - 1,769)     | 425<br>(166 - 605)        | 272<br>(88 - 383)        |
| Pedestrian road injuries                        | 532<br>(232 - 850)          | 25<br>(6 - 58)           | 36<br>(15 - 61)        | 240<br>(115 - 404)         | 124<br>(50 - 205)         | 107<br>(38 - 174)        |
| Cyclist road injuries                           | 96<br>(42 - 147)            | 4<br>(1 - 9)             | 7<br>(3 - 12)          | 39<br>(19 - 61)            | 27<br>(10 - 44)           | 20<br>(6 - 34)           |
| Motorcyclist road injuries                      | 207<br>(98 - 318)           | 3<br>(1 - 7)             | 4<br>(2 - 8)           | 151<br>(76 - 244)          | 31<br>(12 - 49)           | 18<br>(6 - 30)           |
| Motor vehicle road injuries                     | 1,257<br>(495 - 1,781)      | 33<br>(7 - 66)           | 51<br>(17 - 83)        | 808<br>(341 - 1,166)       | 242<br>(85 - 369)         | 124<br>(34 - 195)        |
| Other road injuries                             | 11<br>(3 - 21)              | 2<br>(0 - 4)             | 2<br>(1 - 5)           | 3<br>(1 - 6)               | 2<br>(1 - 5)              | 2<br>(0 - 5)             |
| Other transport injuries                        | 52<br>(20 - 89)             | 7<br>(2 - 15)            | 5<br>(2 - 10)          | 16<br>(7 - 30)             | 3<br>(1 - 6)              | 21<br>(8 - 42)           |
| Unintentional injuries                          | 1,175<br>(926 - 1,542)      | 103<br>(47 - 166)        | 72<br>(47 - 106)       | 642<br>(497 - 899)         | 195<br>(134 - 261)        | 164<br>(109 - 219)       |
| Falls                                           | 170<br>(113 - 329)          | 11<br>(4 - 24)           | 9<br>(4 - 17)          | 86<br>(51 - 184)           | 32<br>(17 - 69)           | 31<br>(18 - 55)          |
| Drowning                                        | 169<br>(115 - 289)          | 20<br>(7 - 51)           | 23<br>(12 - 46)        | 100<br>(66 - 167)          | 15<br>(8 - 24)            | 11<br>(7 - 17)           |
| Fire, heat, and hot substances                  | 111<br>(72 - 160)           | 17<br>(6 - 38)           | 7<br>(3 - 11)          | 53<br>(32 - 83)            | 18<br>(10 - 26)           | 16<br>(9 - 25)           |
| Poisonings                                      | 125<br>(33 - 190)           | 9<br>(2 - 20)            | 5<br>(2 - 9)           | 62<br>(17 - 106)           | 27<br>(6 - 45)            | 21<br>(4 - 36)           |
| Exposure to mechanical forces                   | 356<br>(243 - 525)          | 12<br>(4 - 26)           | 17<br>(9 - 30)         | 260<br>(170 - 394)         | 51<br>(29 - 76)           | 16<br>(10 - 25)          |
| Unintentional firearm injuries                  | 134<br>(79 - 239)           | 3<br>(1 - 6)             | 4<br>(2 - 9)           | 106<br>(57 - 195)          | 14<br>(7 - 26)            | 8<br>(4 - 14)            |
| Unintentional suffocation                       | 11<br>(3 - 23)              | 3<br>(0 - 10)            | 2<br>(0 - 4)           | 4<br>(1 - 9)               | 2<br>(0 - 3)              | 1<br>(0 - 2)             |
| Other exposure to mechanical forces             | 212<br>(126 - 326)          | 6<br>(2 - 14)            | 12<br>(5 - 23)         | 150<br>(86 - 242)          | 35<br>(17 - 58)           | 8<br>(4 - 13)            |
| Adverse effects of medical treatment            | 108<br>(68 - 167)           | 12<br>(4 - 27)           | 2<br>(1 - 5)           | 26<br>(16 - 42)            | 29<br>(14 - 51)           | 39<br>(15 - 82)          |
| Animal contact                                  | 5<br>(3 - 8)                | 1<br>(0 - 1)             | 0<br>(0 - 1)           | 2<br>(1 - 4)               | 1<br>(0 - 1)              | 1<br>(1 - 2)             |
| Venomous animal contact                         | 2<br>(1 - 5)                | 0<br>(0 - 1)             | 0<br>(0 - 0)           | 1<br>(0 - 2)               | 0<br>(0 - 1)              | 1<br>(0 - 1)             |
| Non-venomous animal contact                     | 3<br>(1 - 4)                | 0<br>(0 - 1)             | 0<br>(0 - 1)           | 1<br>(0 - 2)               | 0<br>(0 - 1)              | 1<br>(0 - 1)             |
| Foreign body                                    | 40<br>(20 - 70)             | 11<br>(4 - 24)           | 3<br>(2 - 6)           | 6<br>(3 - 10)              | 4<br>(2 - 8)              | 16<br>(7 - 29)           |
| Pulmonary aspiration and foreign body in airway | 38<br>(18 - 67)             | 11<br>(4 - 24)           | 3<br>(1 - 6)           | 5<br>(2 - 10)              | 4<br>(2 - 7)              | 16<br>(7 - 28)           |
| Foreign body in other body part                 | 2<br>(1 - 4)                | 0<br>(0 - 1)             | 0<br>(0 - 1)           | 1<br>(0 - 1)               | 1<br>(0 - 1)              | 0<br>(0 - 0)             |
| Other unintentional injuries                    | 91<br>(70 - 119)            | 10<br>(5 - 16)           | 5<br>(3 - 8)           | 48<br>(34 - 68)            | 18<br>(12 - 26)           | 11<br>(7 - 15)           |
| Self-harm and interpersonal violence            | 336<br>(189 - 480)          | 5<br>(2 - 11)            | 8<br>(4 - 14)          | 262<br>(147 - 383)         | 44<br>(22 - 67)           | 17<br>(8 - 28)           |
| Self-harm                                       | 49<br>(34 - 88)             | --                       | 1<br>(0 - 2)           | 32<br>(21 - 58)            | 10<br>(6 - 18)            | 7<br>(4 - 13)            |
| Interpersonal violence                          | 287<br>(142 - 419)          | 5<br>(2 - 11)            | 7<br>(3 - 13)          | 231<br>(115 - 345)         | 34<br>(14 - 56)           | 10<br>(2 - 20)           |
| Assault by firearm                              | 151<br>(63 - 243)           | 1<br>(0 - 2)             | 2<br>(1 - 5)           | 128<br>(54 - 208)          | 17<br>(6 - 29)            | 4<br>(1 - 8)             |
| Assault by sharp object                         | 82<br>(32 - 149)            | 1<br>(0 - 2)             | 2<br>(1 - 3)           | 67<br>(27 - 126)           | 11<br>(3 - 20)            | 2<br>(0 - 4)             |
| Assault by other means                          | 54<br>(20 - 89)             | 3<br>(1 - 8)             | 3<br>(1 - 6)           | 36<br>(14 - 64)            | 7<br>(2 - 12)             | 5<br>(1 - 10)            |
| Forces of nature, war, and legal intervention   | 18,429<br>(10,613 - 40,790) | 1,816<br>(1,686 - 1,918) | 870<br>(548 - 1,950)   | 7,946<br>(3,894 - 20,198)  | 5,924<br>(3,192 - 13,021) | 1,872<br>(996 - 3,739)   |
| Collective violence and legal intervention      | 18,429<br>(10,613 - 40,790) | 1,816<br>(1,686 - 1,918) | 870<br>(548 - 1,950)   | 7,946<br>(3,894 - 20,198)  | 5,924<br>(3,192 - 13,021) | 1,872<br>(996 - 3,739)   |

Web Table 31- Syria deaths with 95% UI by age, sex, and cause in 2013

| Cause                                                             | Females, All Ages           | Females, 0-4 Years       | Females, 5-14 Years    | Females, 15-49 Years      | Females, 50-69 Years       | Females, 70-80 Years        |
|-------------------------------------------------------------------|-----------------------------|--------------------------|------------------------|---------------------------|----------------------------|-----------------------------|
| All causes                                                        | 40,667<br>(33,420 - 53,541) | 3,960<br>(3,617 - 4,334) | 1,074<br>(863 - 1,625) | 7,638<br>(5,447 - 13,292) | 11,043<br>(8,185 - 15,645) | 16,952<br>(14,841 - 20,014) |
| Communicable, maternal, neonatal, and nutritional diseases        | 3,252<br>(2,728 - 3,936)    | 1,424<br>(1,117 - 1,840) | 251<br>(192 - 339)     | 607<br>(472 - 756)        | 343<br>(234 - 480)         | 627<br>(457 - 844)          |
| HIV/AIDS and tuberculosis                                         | 22<br>(16 - 40)             | 0<br>(0 - 1)             | 1<br>(0 - 1)           | 8<br>(6 - 14)             | 6<br>(4 - 11)              | 7<br>(4 - 13)               |
| Tuberculosis                                                      | 22<br>(16 - 39)             | 0<br>(0 - 1)             | 1<br>(0 - 1)           | 8<br>(6 - 14)             | 6<br>(4 - 11)              | 7<br>(4 - 13)               |
| HIV/AIDS                                                          | 0<br>(0 - 0)                | 0<br>(0 - 0)             | 0<br>(0 - 0)           | 0<br>(0 - 0)              | 0<br>(0 - 0)               | 0<br>(0 - 0)                |
| HIV/AIDS resulting in mycobacterial infection                     | 0<br>(0 - 0)                | 0<br>(0 - 0)             | 0<br>(0 - 0)           | 0<br>(0 - 0)              | 0<br>(0 - 0)               | 0<br>(0 - 0)                |
| HIV/AIDS resulting in other diseases                              | 0<br>(0 - 0)                | 0<br>(0 - 0)             | 0<br>(0 - 0)           | 0<br>(0 - 0)              | 0<br>(0 - 0)               | 0<br>(0 - 0)                |
| Diarrhea, lower respiratory, and other common infectious diseases | 1,755<br>(1,362 - 2,371)    | 578<br>(349 - 970)       | 230<br>(168 - 323)     | 279<br>(189 - 399)        | 234<br>(151 - 337)         | 435<br>(290 - 645)          |
| Diarrheal diseases                                                | 32<br>(20 - 53)             | 17<br>(6 - 37)           | 2<br>(1 - 3)           | 3<br>(2 - 5)              | 3<br>(2 - 5)               | 7<br>(4 - 12)               |
| Intestinal infectious diseases                                    | 350<br>(178 - 592)          | 107<br>(39 - 201)        | 110<br>(55 - 180)      | 108<br>(49 - 202)         | 18<br>(8 - 38)             | 8<br>(3 - 16)               |
| Typhoid fever                                                     | 266<br>(134 - 465)          | 77<br>(28 - 148)         | 85<br>(42 - 145)       | 84<br>(38 - 161)          | 14<br>(5 - 29)             | 6<br>(2 - 12)               |
| Paratyphoid fever                                                 | 79<br>(37 - 140)            | 27<br>(8 - 53)           | 24<br>(10 - 43)        | 22<br>(9 - 45)            | 4<br>(1 - 9)               | 2<br>(1 - 4)                |
| Other intestinal infectious diseases                              | 6<br>(2 - 14)               | 3<br>(0 - 9)             | 1<br>(0 - 3)           | 1<br>(0 - 5)              | 0<br>(0 - 3)               | 0<br>(0 - 2)                |
| Lower respiratory infections                                      | 775<br>(564 - 1,076)        | 112<br>(48 - 182)        | 45<br>(25 - 78)        | 92<br>(62 - 132)          | 152<br>(92 - 246)          | 373<br>(231 - 580)          |
| Upper respiratory infections                                      | 2<br>(1 - 4)                | 0<br>(0 - 1)             | 0<br>(0 - 0)           | 0<br>(0 - 1)              | 0<br>(0 - 1)               | 1<br>(0 - 3)                |
| Otitis media                                                      | 0<br>(0 - 1)                | 0<br>(0 - 0)             | 0<br>(0 - 0)           | 0<br>(0 - 0)              | 0<br>(0 - 0)               | 0<br>(0 - 0)                |
| Meningitis                                                        | 137<br>(70 - 186)           | 37<br>(15 - 67)          | 19<br>(7 - 31)         | 36<br>(15 - 53)           | 22<br>(11 - 36)            | 23<br>(11 - 38)             |
| Pneumococcal meningitis                                           | 33<br>(16 - 46)             | 7<br>(3 - 13)            | 4<br>(1 - 9)           | 10<br>(4 - 17)            | 6<br>(2 - 10)              | 6<br>(2 - 11)               |
| H influenzae type B meningitis                                    | 26<br>(14 - 39)             | 13<br>(5 - 24)           | 5<br>(2 - 9)           | 4<br>(1 - 7)              | 2<br>(1 - 4)               | 2<br>(1 - 5)                |
| Meningococcal meningitis                                          | 39<br>(20 - 59)             | 12<br>(4 - 24)           | 6<br>(2 - 11)          | 9<br>(4 - 16)             | 6<br>(2 - 11)              | 6<br>(3 - 12)               |
| Other meningitis                                                  | 39<br>(19 - 56)             | 6<br>(2 - 12)            | 4<br>(1 - 7)           | 13<br>(5 - 22)            | 9<br>(4 - 16)              | 8<br>(4 - 15)               |
| Encephalitis                                                      | 154<br>(75 - 247)           | 57<br>(18 - 120)         | 12<br>(4 - 26)         | 29<br>(10 - 53)           | 36<br>(12 - 65)            | 21<br>(8 - 35)              |
| Diphtheria                                                        | 1<br>(0 - 4)                | 0<br>(0 - 3)             | 0<br>(0 - 1)           | 0<br>(0 - 0)              | 0<br>(0 - 0)               | --<br>(0 - 0)               |
| Whooping cough                                                    | 58<br>(0 - 273)             | 53<br>(0 - 252)          | 4<br>(0 - 20)          | 1<br>(0 - 3)              | 0<br>(0 - 0)               | --<br>(0 - 0)               |
| Tetanus                                                           | 2<br>(0 - 2)                | 0<br>(0 - 1)             | 0<br>(0 - 0)           | 0<br>(0 - 1)              | 0<br>(0 - 0)               | 0<br>(0 - 0)                |
| Measles                                                           | 237<br>(10 - 969)           | 193<br>(8 - 762)         | 37<br>(1 - 176)        | 8<br>(0 - 43)             | 0<br>(0 - 1)               | --<br>(0 - 1)               |
| Varicella and herpes zoster                                       | 6<br>(2 - 14)               | 2<br>(0 - 7)             | 0<br>(0 - 2)           | 1<br>(0 - 4)              | 1<br>(0 - 2)               | 2<br>(0 - 9)                |
| Neglected tropical diseases and malaria                           | 32<br>(22 - 46)             | 6<br>(2 - 14)            | 4<br>(2 - 9)           | 8<br>(5 - 12)             | 7<br>(4 - 11)              | 7<br>(4 - 12)               |
| Malaria                                                           | 1<br>(0 - 3)                | 0<br>(0 - 3)             | 0<br>(0 - 0)           | 0<br>(0 - 0)              | 0<br>(0 - 0)               | 0<br>(0 - 0)                |
| Leishmaniasis                                                     | 3<br>(2 - 4)                | 1<br>(1 - 2)             | 0<br>(0 - 1)           | 1<br>(0 - 1)              | 0<br>(0 - 0)               | 0<br>(0 - 0)                |
| Visceral leishmaniasis                                            | 3<br>(2 - 4)                | 1<br>(1 - 2)             | 0<br>(0 - 1)           | 1<br>(0 - 1)              | 0<br>(0 - 0)               | 0<br>(0 - 0)                |
| Schistosomiasis                                                   | 8<br>(5 - 12)               | 0<br>(0 - 0)             | 0<br>(0 - 0)           | 2<br>(1 - 3)              | 3<br>(2 - 5)               | 3<br>(2 - 5)                |
| Cysticercosis                                                     | 0<br>(0 - 0)                | 0<br>(0 - 0)             | 0<br>(0 - 0)           | 0<br>(0 - 0)              | 0<br>(0 - 0)               | 0<br>(0 - 0)                |
| Cystic echinococcosis                                             | 5<br>(4 - 6)                | 0<br>(0 - 0)             | 1<br>(0 - 1)           | 2<br>(1 - 2)              | 1<br>(1 - 2)               | 1<br>(1 - 1)                |
| Dengue                                                            | 1<br>(1 - 2)                | 0<br>(0 - 0)             | 0<br>(0 - 1)           | 1<br>(0 - 1)              | 0<br>(0 - 0)               | 0<br>(0 - 0)                |
| Rabies                                                            | 8<br>(2 - 13)               | 1<br>(0 - 2)             | 2<br>(0 - 3)           | 3<br>(1 - 5)              | 1<br>(0 - 1)               | 2<br>(0 - 4)                |
| Intestinal nematode infections                                    | 5<br>(0 - 14)               | 3<br>(0 - 10)            | 1<br>(0 - 6)           | 0<br>(0 - 2)              | 0<br>(0 - 3)               | 1<br>(0 - 5)                |
| Ascariasis                                                        | 5<br>(0 - 14)               | 3<br>(0 - 10)            | 1<br>(0 - 6)           | 0<br>(0 - 2)              | 0<br>(0 - 3)               | 1<br>(0 - 5)                |
| Other neglected tropical diseases                                 | 1<br>(0 - 2)                | 0<br>(0 - 0)             | 0<br>(0 - 0)           | 0<br>(0 - 0)              | 0<br>(0 - 1)               | 0<br>(0 - 1)                |
| Maternal disorders                                                | 229<br>(161 - 313)          | --                       | 1<br>(0 - 2)           | 228<br>(160 - 312)        | --                         | --                          |

Web Table 31- Syria deaths with 95% UI by age, sex, and cause in 2013

| Cause                                                            | Females, All Ages           | Females, 0-4 Years     | Females, 5-14 Years | Females, 15-49 Years     | Females, 50-69 Years     | Females, 70-80 Years        |
|------------------------------------------------------------------|-----------------------------|------------------------|---------------------|--------------------------|--------------------------|-----------------------------|
| Maternal hemorrhage                                              | 43<br>(25 - 64)             | --                     | 0<br>(0 - 0)        | 43<br>(25 - 64)          | --                       | --                          |
| Maternal sepsis and other maternal infections                    | 21<br>(12 - 34)             | --                     | 0<br>(0 - 0)        | 21<br>(12 - 34)          | --                       | --                          |
| Maternal hypertensive disorders                                  | 35<br>(21 - 52)             | --                     | 0<br>(0 - 0)        | 34<br>(21 - 52)          | --                       | --                          |
| Maternal obstructed labor                                        | 22<br>(14 - 34)             | --                     | 0<br>(0 - 0)        | 22<br>(14 - 34)          | --                       | --                          |
| Maternal abortive outcome                                        | 30<br>(17 - 48)             | --                     | 0<br>(0 - 0)        | 30<br>(17 - 48)          | --                       | --                          |
| Indirect maternal deaths                                         | 21<br>(11 - 37)             | --                     | 0<br>(0 - 0)        | 21<br>(11 - 37)          | --                       | --                          |
| Late maternal deaths                                             | 23<br>(13 - 36)             | --                     | 0<br>(0 - 0)        | 22<br>(13 - 36)          | --                       | --                          |
| Maternal deaths aggravated by HIV/AIDS                           | 0<br>(0 - 0)                | --                     | --                  | 0<br>(0 - 0)             | --                       | --                          |
| Other maternal disorders                                         | 35<br>(21 - 53)             | --                     | 0<br>(0 - 0)        | 35<br>(21 - 53)          | --                       | --                          |
| Neonatal disorders                                               | 763<br>(563 - 1,017)        | 763<br>(563 - 1,017)   | --                  | --                       | --                       | --                          |
| Neonatal preterm birth complications                             | 361<br>(201 - 580)          | 361<br>(201 - 580)     | --                  | --                       | --                       | --                          |
| Neonatal encephalopathy due to birth asphyxia and trauma         | 89<br>(24 - 209)            | 89<br>(24 - 209)       | --                  | --                       | --                       | --                          |
| Neonatal sepsis and other neonatal infections                    | 198<br>(57 - 453)           | 198<br>(57 - 453)      | --                  | --                       | --                       | --                          |
| Hemolytic disease and other neonatal jaundice                    | 2<br>(1 - 5)                | 2<br>(1 - 5)           | --                  | --                       | --                       | --                          |
| Other neonatal disorders                                         | 113<br>(35 - 233)           | 113<br>(35 - 233)      | --                  | --                       | --                       | --                          |
| Nutritional deficiencies                                         | 221<br>(97 - 299)           | 26<br>(9 - 45)         | 7<br>(3 - 11)       | 30<br>(14 - 43)          | 42<br>(19 - 63)          | 116<br>(48 - 176)           |
| Protein-energy malnutrition                                      | 71<br>(19 - 118)            | 12<br>(2 - 25)         | 2<br>(0 - 4)        | 5<br>(1 - 10)            | 10<br>(2 - 19)           | 42<br>(8 - 78)              |
| Iodine deficiency                                                | 2<br>(0 - 7)                | 0<br>(0 - 1)           | 0<br>(0 - 1)        | 0<br>(0 - 1)             | 0<br>(0 - 2)             | 1<br>(0 - 6)                |
| Iron-deficiency anemia                                           | 136<br>(64 - 203)           | 13<br>(3 - 27)         | 4<br>(2 - 7)        | 23<br>(11 - 34)          | 31<br>(15 - 47)          | 65<br>(28 - 110)            |
| Other nutritional deficiencies                                   | 13<br>(5 - 34)              | 1<br>(0 - 3)           | 1<br>(0 - 1)        | 2<br>(1 - 4)             | 2<br>(1 - 4)             | 8<br>(3 - 23)               |
| Other communicable, maternal, neonatal, and nutritional diseases | 230<br>(170 - 334)          | 52<br>(29 - 87)        | 8<br>(4 - 13)       | 54<br>(35 - 88)          | 54<br>(33 - 87)          | 62<br>(38 - 96)             |
| Sexually transmitted diseases excluding HIV                      | 45<br>(23 - 78)             | 40<br>(20 - 70)        | 4<br>(2 - 6)        | 1<br>(0 - 1)             | 0<br>(0 - 1)             | 0<br>(0 - 0)                |
| Syphilis                                                         | 44<br>(23 - 77)             | 40<br>(20 - 70)        | 4<br>(2 - 6)        | 0<br>(0 - 0)             | 0<br>(0 - 1)             | 0<br>(0 - 0)                |
| Chlamydial infection                                             | 0<br>(0 - 0)                | --                     | 0<br>(0 - 0)        | 0<br>(0 - 0)             | 0<br>(0 - 0)             | 0<br>(0 - 0)                |
| Gonococcal infection                                             | 0<br>(0 - 0)                | --                     | 0<br>(0 - 0)        | 0<br>(0 - 0)             | 0<br>(0 - 0)             | 0<br>(0 - 0)                |
| Other sexually transmitted diseases                              | 0<br>(0 - 0)                | --                     | 0<br>(0 - 0)        | 0<br>(0 - 0)             | 0<br>(0 - 0)             | 0<br>(0 - 0)                |
| Hepatitis                                                        | 159<br>(111 - 245)          | 8<br>(3 - 22)          | 3<br>(1 - 7)        | 47<br>(30 - 79)          | 47<br>(29 - 78)          | 53<br>(33 - 82)             |
| Acute hepatitis A                                                | 13<br>(4 - 27)              | 4<br>(1 - 10)          | 1<br>(0 - 3)        | 5<br>(1 - 10)            | 2<br>(0 - 5)             | 1<br>(0 - 3)                |
| Acute hepatitis B                                                | 101<br>(65 - 149)           | 4<br>(1 - 11)          | 1<br>(0 - 2)        | 18<br>(8 - 32)           | 34<br>(19 - 54)          | 45<br>(28 - 70)             |
| Acute hepatitis C                                                | 4<br>(1 - 10)               | --                     | 0<br>(0 - 0)        | 1<br>(0 - 3)             | 1<br>(0 - 4)             | 1<br>(0 - 5)                |
| Acute hepatitis E                                                | 42<br>(16 - 88)             | 0<br>(0 - 0)           | 1<br>(0 - 1)        | 24<br>(9 - 49)           | 10<br>(3 - 26)           | 6<br>(1 - 17)               |
| Other infectious diseases                                        | 26<br>(13 - 53)             | 3<br>(1 - 8)           | 2<br>(1 - 3)        | 6<br>(3 - 11)            | 6<br>(2 - 16)            | 8<br>(2 - 25)               |
| Non-communicable diseases                                        | 24,890<br>(20,774 - 30,404) | 1,026<br>(694 - 1,349) | 181<br>(118 - 247)  | 2,878<br>(2,186 - 3,586) | 6,852<br>(5,078 - 9,042) | 13,953<br>(12,283 - 16,615) |
| Neoplasms                                                        | 2,695<br>(1,975 - 3,462)    | 25<br>(11 - 40)        | 41<br>(26 - 56)     | 618<br>(441 - 805)       | 1,121<br>(774 - 1,510)   | 889<br>(706 - 1,123)        |
| Esophageal cancer                                                | 82<br>(55 - 118)            | --                     | --                  | 13<br>(7 - 19)           | 34<br>(21 - 52)          | 35<br>(23 - 53)             |
| Stomach cancer                                                   | 241<br>(171 - 329)          | --                     | --                  | 40<br>(25 - 57)          | 92<br>(60 - 131)         | 109<br>(73 - 157)           |
| Liver cancer                                                     | 119<br>(83 - 170)           | --                     | 1<br>(0 - 1)        | 14<br>(9 - 20)           | 53<br>(33 - 80)          | 51<br>(33 - 77)             |
| Liver cancer due to hepatitis B                                  | 25<br>(9 - 47)              | --                     | 0<br>(0 - 0)        | 4<br>(1 - 8)             | 12<br>(3 - 25)           | 8<br>(3 - 17)               |
| Liver cancer due to hepatitis C                                  | 59<br>(32 - 93)             | --                     | 0<br>(0 - 0)        | 5<br>(2 - 9)             | 26<br>(12 - 45)          | 28<br>(14 - 45)             |
| Liver cancer due to alcohol use                                  | 13<br>(6 - 25)              | --                     | --                  | 1<br>(0 - 1)             | 4<br>(2 - 9)             | 8<br>(3 - 17)               |

Web Table 31- Syria deaths with 95% UI by age, sex, and cause in 2013

| Cause                                         | Females, All Ages           | Females, 0-4 Years | Females, 5-14 Years | Females, 15-49 Years     | Females, 50-69 Years     | Females, 70-80 Years       |
|-----------------------------------------------|-----------------------------|--------------------|---------------------|--------------------------|--------------------------|----------------------------|
| Liver cancer due to other causes              | 23<br>(10 - 40)             | --                 | 0<br>(0 - 1)        | 4<br>(2 - 7)             | 10<br>(4 - 19)           | 8<br>(3 - 16)              |
| Larynx cancer                                 | 8<br>(3 - 13)               | --                 | --                  | 1<br>(1 - 3)             | 4<br>(1 - 7)             | 3<br>(1 - 5)               |
| Tracheal, bronchus and lung cancer            | 150<br>(109 - 203)          | --                 | --                  | 24<br>(16 - 34)          | 65<br>(43 - 93)          | 61<br>(43 - 84)            |
| Breast cancer                                 | 282<br>(205 - 379)          | --                 | --                  | 90<br>(62 - 124)         | 134<br>(91 - 188)        | 58<br>(44 - 77)            |
| Cervical cancer                               | 115<br>(80 - 170)           | --                 | --                  | 28<br>(18 - 43)          | 54<br>(36 - 84)          | 32<br>(22 - 47)            |
| Uterine cancer                                | 33<br>(17 - 48)             | --                 | --                  | 8<br>(4 - 13)            | 16<br>(8 - 25)           | 9<br>(5 - 14)              |
| Prostate cancer                               | --                          | --                 | --                  | --                       | --                       | --                         |
| Colon and rectum cancer                       | 345<br>(252 - 455)          | --                 | --                  | 74<br>(50 - 100)         | 146<br>(96 - 198)        | 125<br>(91 - 172)          |
| Lip and oral cavity cancer                    | 7<br>(2 - 18)               | --                 | --                  | 2<br>(1 - 6)             | 3<br>(1 - 7)             | 2<br>(0 - 6)               |
| Nasopharynx cancer                            | 13<br>(8 - 26)              | --                 | 1<br>(0 - 1)        | 5<br>(3 - 10)            | 5<br>(2 - 11)            | 2<br>(1 - 5)               |
| Other pharynx cancer                          | 7<br>(5 - 11)               | --                 | --                  | 2<br>(1 - 4)             | 3<br>(2 - 5)             | 2<br>(1 - 4)               |
| Gallbladder and biliary tract cancer          | 35<br>(17 - 63)             | --                 | --                  | 3<br>(1 - 6)             | 18<br>(9 - 33)           | 14<br>(6 - 26)             |
| Pancreatic cancer                             | 78<br>(56 - 103)            | --                 | --                  | 11<br>(7 - 15)           | 35<br>(23 - 50)          | 31<br>(22 - 43)            |
| Malignant skin melanoma                       | 3<br>(2 - 4)                | --                 | --                  | 1<br>(1 - 2)             | 1<br>(1 - 2)             | 1<br>(0 - 1)               |
| Non-melanoma skin cancer                      | 13<br>(7 - 24)              | --                 | --                  | 2<br>(1 - 4)             | 3<br>(2 - 7)             | 8<br>(4 - 15)              |
| Ovarian cancer                                | 145<br>(93 - 229)           | --                 | --                  | 36<br>(21 - 59)          | 69<br>(41 - 113)         | 39<br>(25 - 63)            |
| Testicular cancer                             | --                          | --                 | --                  | --                       | --                       | --                         |
| Kidney cancer                                 | 43<br>(29 - 62)             | 2<br>(1 - 4)       | 2<br>(1 - 5)        | 7<br>(4 - 12)            | 19<br>(11 - 31)          | 13<br>(7 - 21)             |
| Bladder cancer                                | 18<br>(11 - 27)             | --                 | --                  | 1<br>(1 - 2)             | 6<br>(4 - 10)            | 10<br>(6 - 16)             |
| Brain and nervous system cancer               | 181<br>(84 - 246)           | 3<br>(1 - 5)       | 9<br>(4 - 15)       | 57<br>(29 - 78)          | 73<br>(30 - 106)         | 40<br>(17 - 58)            |
| Thyroid cancer                                | 27<br>(12 - 52)             | --                 | 0<br>(0 - 0)        | 6<br>(2 - 12)            | 12<br>(5 - 24)           | 9<br>(5 - 17)              |
| Mesothelioma                                  | 2<br>(1 - 3)                | --                 | --                  | 0<br>(0 - 1)             | 1<br>(1 - 2)             | 0<br>(0 - 1)               |
| Hodgkin lymphoma                              | 15<br>(10 - 25)             | 1<br>(0 - 1)       | 2<br>(1 - 4)        | 7<br>(4 - 13)            | 3<br>(2 - 6)             | 2<br>(1 - 4)               |
| Non-Hodgkin lymphoma                          | 127<br>(87 - 179)           | 2<br>(1 - 5)       | 5<br>(2 - 8)        | 34<br>(21 - 52)          | 46<br>(29 - 69)          | 39<br>(26 - 59)            |
| Multiple myeloma                              | 17<br>(11 - 23)             | --                 | --                  | 5<br>(4 - 8)             | 7<br>(5 - 11)            | 4<br>(3 - 6)               |
| Leukemia                                      | 132<br>(92 - 170)           | 4<br>(1 - 10)      | 10<br>(5 - 15)      | 39<br>(25 - 52)          | 41<br>(25 - 57)          | 37<br>(26 - 51)            |
| Other neoplasms                               | 456<br>(197 - 658)          | 13<br>(5 - 23)     | 12<br>(4 - 21)      | 104<br>(46 - 155)        | 176<br>(71 - 283)        | 150<br>(66 - 235)          |
| Cardiovascular diseases                       | 16,951<br>(13,947 - 20,944) | 67<br>(20 - 186)   | 58<br>(32 - 103)    | 1,779<br>(1,323 - 2,274) | 4,683<br>(3,506 - 6,273) | 10,364<br>(8,729 - 12,439) |
| Rheumatic heart disease                       | 24<br>(16 - 49)             | 1<br>(0 - 2)       | 1<br>(0 - 2)        | 7<br>(4 - 13)            | 6<br>(4 - 13)            | 10<br>(6 - 21)             |
| Ischemic heart disease                        | 9,925<br>(7,792 - 12,502)   | 20<br>(5 - 55)     | 20<br>(10 - 37)     | 1,004<br>(718 - 1,319)   | 2,868<br>(2,029 - 3,884) | 6,013<br>(4,840 - 7,366)   |
| Cerebrovascular disease                       | 5,837<br>(4,239 - 7,519)    | 22<br>(7 - 60)     | 25<br>(14 - 41)     | 604<br>(414 - 784)       | 1,521<br>(1,027 - 2,146) | 3,665<br>(2,693 - 4,645)   |
| Ischemic stroke                               | 1,878<br>(976 - 2,622)      | 3<br>(0 - 10)      | 4<br>(1 - 9)        | 147<br>(55 - 243)        | 440<br>(207 - 678)       | 1,284<br>(646 - 1,810)     |
| Hemorrhagic stroke                            | 3,959<br>(2,683 - 5,209)    | 19<br>(6 - 52)     | 21<br>(11 - 36)     | 457<br>(292 - 622)       | 1,081<br>(676 - 1,561)   | 2,381<br>(1,569 - 3,154)   |
| Hypertensive heart disease                    | 301<br>(201 - 489)          | 1<br>(0 - 5)       | 1<br>(0 - 2)        | 28<br>(18 - 44)          | 77<br>(46 - 123)         | 194<br>(127 - 342)         |
| Cardiomyopathy and myocarditis                | 502<br>(337 - 712)          | 7<br>(1 - 27)      | 5<br>(2 - 11)       | 70<br>(47 - 103)         | 132<br>(82 - 194)        | 289<br>(167 - 448)         |
| Atrial fibrillation and flutter               | 20<br>(9 - 35)              | --                 | --                  | 1<br>(1 - 2)             | 4<br>(2 - 7)             | 15<br>(6 - 28)             |
| Aortic aneurysm                               | 57<br>(32 - 98)             | --                 | --                  | 9<br>(5 - 16)            | 11<br>(6 - 21)           | 36<br>(19 - 63)            |
| Peripheral vascular disease                   | 13<br>(7 - 19)              | --                 | --                  | 1<br>(0 - 2)             | 3<br>(1 - 4)             | 9<br>(5 - 14)              |
| Endocarditis                                  | 95<br>(57 - 150)            | 7<br>(2 - 25)      | 3<br>(1 - 8)        | 19<br>(11 - 32)          | 15<br>(8 - 25)           | 50<br>(25 - 85)            |
| Other cardiovascular and circulatory diseases | 177<br>(111 - 265)          | 8<br>(2 - 36)      | 4<br>(1 - 12)       | 36<br>(20 - 103)         | 47<br>(26 - 143)         | 83<br>(46 - 267)           |

Web Table 31- Syria deaths with 95% UI by age, sex, and cause in 2013

| Cause                                               | Females, All Ages        | Females, 0-4 Years | Females, 5-14 Years | Females, 15-49 Years | Females, 50-69 Years | Females, 70-80 Years   |
|-----------------------------------------------------|--------------------------|--------------------|---------------------|----------------------|----------------------|------------------------|
| Chronic respiratory diseases                        | 1,582<br>(1,152 - 3,167) | 61<br>(25 - 103)   | 19<br>(8 - 27)      | 192<br>(131 - 322)   | 441<br>(281 - 901)   | 869<br>(614 - 1,869)   |
| Chronic obstructive pulmonary disease               | 1,154<br>(800 - 2,380)   | 34<br>(13 - 60)    | 7<br>(2 - 11)       | 93<br>(56 - 167)     | 327<br>(202 - 664)   | 693<br>(470 - 1,546)   |
| Pneumoconiosis                                      | 8<br>(5 - 13)            | 1<br>(0 - 2)       | 1<br>(0 - 2)        | 3<br>(2 - 5)         | 1<br>(1 - 3)         | 2<br>(1 - 4)           |
| Silicosis                                           | 2<br>(1 - 4)             | 0<br>(0 - 1)       | 0<br>(0 - 0)        | 1<br>(0 - 1)         | 0<br>(0 - 1)         | 0<br>(0 - 1)           |
| Asbestosis                                          | 2<br>(1 - 3)             | 0<br>(0 - 1)       | 0<br>(0 - 0)        | 1<br>(0 - 1)         | 0<br>(0 - 1)         | 0<br>(0 - 1)           |
| Coal workers pneumoconiosis                         | 2<br>(1 - 3)             | 0<br>(0 - 1)       | 0<br>(0 - 0)        | 1<br>(0 - 1)         | 0<br>(0 - 1)         | 0<br>(0 - 1)           |
| Other pneumoconiosis                                | 2<br>(1 - 5)             | 0<br>(0 - 0)       | 0<br>(0 - 0)        | 1<br>(0 - 2)         | 0<br>(0 - 1)         | 1<br>(0 - 2)           |
| Asthma                                              | 275<br>(151 - 730)       | 18<br>(5 - 35)     | 8<br>(4 - 13)       | 66<br>(38 - 135)     | 77<br>(36 - 217)     | 107<br>(48 - 344)      |
| Interstitial lung disease and pulmonary sarcoidosis | 96<br>(9 - 197)          | 1<br>(0 - 4)       | 1<br>(0 - 2)        | 14<br>(1 - 29)       | 30<br>(3 - 67)       | 50<br>(5 - 110)        |
| Other chronic respiratory diseases                  | 49<br>(28 - 104)         | 7<br>(4 - 14)      | 2<br>(1 - 3)        | 17<br>(9 - 36)       | 5<br>(2 - 13)        | 18<br>(8 - 45)         |
| Cirrhosis                                           | 296<br>(216 - 390)       | 9<br>(3 - 17)      | 7<br>(4 - 10)       | 49<br>(34 - 67)      | 113<br>(75 - 157)    | 118<br>(84 - 165)      |
| Cirrhosis due to hepatitis B                        | 91<br>(18 - 177)         | 0<br>(0 - 1)       | 1<br>(0 - 3)        | 14<br>(2 - 31)       | 34<br>(5 - 71)       | 42<br>(9 - 88)         |
| Cirrhosis due to hepatitis C                        | 148<br>(67 - 250)        | 1<br>(0 - 2)       | 1<br>(0 - 2)        | 25<br>(9 - 43)       | 64<br>(28 - 110)     | 57<br>(20 - 102)       |
| Cirrhosis due to alcohol use                        | 17<br>(8 - 31)           | –                  | –                   | 1<br>(1 - 2)         | 5<br>(3 - 10)        | 10<br>(4 - 21)         |
| Cirrhosis due to other causes                       | 40<br>(22 - 64)          | 8<br>(2 - 16)      | 5<br>(2 - 7)        | 10<br>(4 - 17)       | 10<br>(4 - 18)       | 8<br>(3 - 17)          |
| Digestive diseases                                  | 301<br>(218 - 502)       | 8<br>(2 - 16)      | 5<br>(3 - 7)        | 41<br>(27 - 67)      | 72<br>(47 - 117)     | 176<br>(121 - 304)     |
| Peptic ulcer disease                                | 25<br>(12 - 47)          | 0<br>(0 - 0)       | 0<br>(0 - 0)        | 1<br>(1 - 2)         | 4<br>(2 - 8)         | 20<br>(9 - 40)         |
| Gastritis and duodenitis                            | 3<br>(1 - 8)             | 0<br>(0 - 0)       | 0<br>(0 - 0)        | 0<br>(0 - 1)         | 1<br>(0 - 1)         | 2<br>(1 - 5)           |
| Appendicitis                                        | 12<br>(6 - 24)           | 0<br>(0 - 0)       | 0<br>(0 - 1)        | 2<br>(1 - 4)         | 3<br>(1 - 6)         | 7<br>(3 - 16)          |
| Paralytic ileus and intestinal obstruction          | 154<br>(102 - 259)       | 7<br>(2 - 15)      | 3<br>(2 - 5)        | 28<br>(17 - 46)      | 37<br>(21 - 67)      | 79<br>(46 - 132)       |
| Inguinal, femoral, and abdominal hernia             | 7<br>(3 - 22)            | 0<br>(0 - 0)       | 0<br>(0 - 0)        | 1<br>(0 - 3)         | 2<br>(1 - 4)         | 4<br>(1 - 16)          |
| Inflammatory bowel disease                          | 12<br>(6 - 22)           | 0<br>(0 - 0)       | 0<br>(0 - 0)        | 1<br>(1 - 2)         | 2<br>(1 - 3)         | 8<br>(4 - 17)          |
| Vascular intestinal disorders                       | 7<br>(3 - 18)            | 0<br>(0 - 0)       | 0<br>(0 - 0)        | 1<br>(0 - 2)         | 1<br>(1 - 3)         | 5<br>(2 - 14)          |
| Gallbladder and biliary diseases                    | 20<br>(10 - 51)          | 0<br>(0 - 0)       | 0<br>(0 - 0)        | 1<br>(0 - 3)         | 4<br>(2 - 9)         | 16<br>(7 - 40)         |
| Pancreatitis                                        | 14<br>(6 - 26)           | 0<br>(0 - 0)       | 0<br>(0 - 0)        | 1<br>(1 - 3)         | 4<br>(2 - 7)         | 9<br>(4 - 18)          |
| Other digestive diseases                            | 47<br>(25 - 86)          | 0<br>(0 - 0)       | 1<br>(0 - 1)        | 5<br>(2 - 11)        | 16<br>(8 - 28)       | 25<br>(13 - 52)        |
| Neurological disorders                              | 1,299<br>(939 - 1,746)   | 13<br>(6 - 20)     | 4<br>(3 - 6)        | 12<br>(8 - 19)       | 138<br>(85 - 203)    | 1,131<br>(800 - 1,535) |
| Alzheimer disease and other dementias               | 1,249<br>(892 - 1,695)   | –                  | –                   | 1<br>(0 - 2)         | 130<br>(78 - 194)    | 1,118<br>(790 - 1,523) |
| Parkinson disease                                   | 5<br>(3 - 10)            | –                  | –                   | 1<br>(0 - 1)         | 1<br>(1 - 2)         | 4<br>(2 - 7)           |
| Epilepsy                                            | 7<br>(3 - 16)            | 1<br>(0 - 2)       | 1<br>(0 - 1)        | 4<br>(2 - 8)         | 1<br>(0 - 2)         | 1<br>(0 - 2)           |
| Multiple sclerosis                                  | 5<br>(2 - 9)             | –                  | –                   | 2<br>(1 - 3)         | 2<br>(1 - 3)         | 2<br>(1 - 3)           |
| Other neurological disorders                        | 32<br>(22 - 41)          | 13<br>(6 - 20)     | 4<br>(2 - 5)        | 5<br>(4 - 7)         | 4<br>(2 - 5)         | 6<br>(4 - 9)           |
| Mental and substance use disorders                  | 27<br>(16 - 54)          | 0<br>(0 - 1)       | 0<br>(0 - 0)        | 17<br>(9 - 34)       | 7<br>(4 - 14)        | 3<br>(2 - 5)           |
| Schizophrenia                                       | 2<br>(1 - 3)             | –                  | –                   | 1<br>(0 - 1)         | 0<br>(0 - 1)         | 1<br>(0 - 1)           |
| Alcohol use disorders                               | 19<br>(8 - 46)           | –                  | –                   | 11<br>(5 - 28)       | 6<br>(2 - 13)        | 2<br>(1 - 4)           |
| Drug use disorders                                  | 6<br>(2 - 10)            | 0<br>(0 - 1)       | –                   | 4<br>(1 - 8)         | 1<br>(0 - 1)         | 0<br>(0 - 0)           |
| Opioid use disorders                                | 3<br>(1 - 6)             | 0<br>(0 - 0)       | –                   | 2<br>(1 - 4)         | 0<br>(0 - 1)         | 0<br>(0 - 0)           |
| Cocaine use disorders                               | 0<br>(0 - 0)             | 0<br>(0 - 0)       | –                   | 0<br>(0 - 0)         | 0<br>(0 - 0)         | 0<br>(0 - 0)           |
| Amphetamine use disorders                           | 0<br>(0 - 0)             | 0<br>(0 - 0)       | –                   | 0<br>(0 - 0)         | 0<br>(0 - 0)         | 0<br>(0 - 0)           |
| Other drug use disorders                            | 2<br>(1 - 4)             | 0<br>(0 - 0)       | –                   | 2<br>(1 - 3)         | 0<br>(0 - 1)         | 0<br>(0 - 0)           |

Web Table 31- Syria deaths with 95% UI by age, sex, and cause in 2013

| Cause                                               | Females, All Ages    | Females, 0-4 Years | Females, 5-14 Years | Females, 15-49 Years | Females, 50-69 Years | Females, 70-80 Years |
|-----------------------------------------------------|----------------------|--------------------|---------------------|----------------------|----------------------|----------------------|
| Eating disorders                                    | 0<br>(0 - 1)         | --                 | 0<br>(0 - 0)        | 0<br>(0 - 1)         | --                   | --                   |
| Anorexia nervosa                                    | 0<br>(0 - 1)         | --                 | 0<br>(0 - 0)        | 0<br>(0 - 1)         | --                   | --                   |
| Diabetes, urogenital, blood, and endocrine diseases | 949<br>(674 - 1,345) | 152<br>(55 - 299)  | 29<br>(14 - 47)     | 149<br>(96 - 228)    | 254<br>(168 - 379)   | 365<br>(265 - 543)   |
| Diabetes mellitus                                   | 532<br>(368 - 707)   | 1<br>(0 - 2)       | 1<br>(1 - 3)        | 43<br>(28 - 59)      | 194<br>(128 - 271)   | 293<br>(186 - 402)   |
| Acute glomerulonephritis                            | 7<br>(4 - 12)        | 1<br>(0 - 1)       | 1<br>(0 - 1)        | 2<br>(1 - 3)         | 1<br>(1 - 3)         | 3<br>(1 - 5)         |
| Chronic kidney disease                              | 30<br>(2 - 267)      | 1<br>(0 - 6)       | 1<br>(0 - 4)        | 5<br>(1 - 44)        | 8<br>(0 - 76)        | 15<br>(1 - 143)      |
| Chronic kidney disease due to diabetes mellitus     | 1<br>(0 - 14)        | 0<br>(0 - 0)       | 0<br>(0 - 1)        | 0<br>(0 - 3)         | 0<br>(0 - 5)         | 0<br>(0 - 5)         |
| Chronic kidney disease due to hypertension          | 21<br>(2 - 191)      | 0<br>(0 - 1)       | 0<br>(0 - 1)        | 3<br>(0 - 28)        | 6<br>(0 - 58)        | 12<br>(1 - 107)      |
| Chronic kidney disease due to glomerulonephritis    | 2<br>(0 - 18)        | 0<br>(0 - 1)       | 0<br>(0 - 1)        | 0<br>(0 - 4)         | 0<br>(0 - 4)         | 1<br>(0 - 8)         |
| Chronic kidney disease due to other causes          | 5<br>(0 - 58)        | 0<br>(0 - 3)       | 0<br>(0 - 1)        | 1<br>(0 - 11)        | 1<br>(0 - 12)        | 3<br>(0 - 29)        |
| Urinary diseases and male infertility               | 5<br>(2 - 10)        | 0<br>(0 - 0)       | 0<br>(0 - 0)        | 1<br>(0 - 1)         | 1<br>(0 - 2)         | 3<br>(1 - 7)         |
| Interstitial nephritis and urinary tract infections | 0<br>(0 - 1)         | 0<br>(0 - 0)       | 0<br>(0 - 0)        | 0<br>(0 - 0)         | 0<br>(0 - 0)         | 0<br>(0 - 0)         |
| Urolithiasis                                        | 1<br>(0 - 3)         | --                 | 0<br>(0 - 0)        | 0<br>(0 - 0)         | 0<br>(0 - 1)         | 1<br>(0 - 2)         |
| Other urinary diseases                              | 3<br>(2 - 7)         | 0<br>(0 - 0)       | 0<br>(0 - 0)        | 0<br>(0 - 1)         | 1<br>(0 - 2)         | 2<br>(1 - 5)         |
| Gynecological diseases                              | 1<br>(0 - 2)         | --                 | --                  | 1<br>(0 - 1)         | 0<br>(0 - 1)         | 0<br>(0 - 1)         |
| Uterine fibroids                                    | 0<br>(0 - 1)         | --                 | --                  | 0<br>(0 - 0)         | 0<br>(0 - 0)         | 0<br>(0 - 0)         |
| Polycystic ovarian syndrome                         | 0<br>(0 - 0)         | --                 | --                  | 0<br>(0 - 0)         | 0<br>(0 - 0)         | --                   |
| Endometriosis                                       | 0<br>(0 - 0)         | --                 | --                  | 0<br>(0 - 0)         | 0<br>(0 - 0)         | --                   |
| Genital prolapse                                    | 0<br>(0 - 0)         | --                 | --                  | 0<br>(0 - 0)         | 0<br>(0 - 0)         | 0<br>(0 - 0)         |
| Other gynecological diseases                        | 0<br>(0 - 1)         | --                 | --                  | 0<br>(0 - 1)         | 0<br>(0 - 0)         | 0<br>(0 - 0)         |
| Hemoglobinopathies and hemolytic anemias            | 134<br>(62 - 298)    | 31<br>(11 - 84)    | 16<br>(7 - 38)      | 51<br>(22 - 119)     | 12<br>(6 - 27)       | 23<br>(10 - 51)      |
| Thalassemias                                        | 69<br>(30 - 163)     | 24<br>(8 - 65)     | 13<br>(6 - 31)      | 32<br>(13 - 75)      | 0<br>(0 - 0)         | 0<br>(0 - 0)         |
| Sickle cell disorders                               | 30<br>(14 - 64)      | 3<br>(1 - 9)       | 2<br>(1 - 6)        | 16<br>(7 - 36)       | 8<br>(4 - 17)        | 1<br>(0 - 1)         |
| G6PD deficiency                                     | 1<br>(0 - 2)         | 0<br>(0 - 0)       | 0<br>(0 - 0)        | 0<br>(0 - 1)         | 0<br>(0 - 0)         | 0<br>(0 - 0)         |
| Other hemoglobinopathies and hemolytic anemias      | 34<br>(16 - 74)      | 4<br>(1 - 10)      | 1<br>(0 - 1)        | 3<br>(2 - 8)         | 4<br>(2 - 10)        | 22<br>(10 - 50)      |
| Endocrine, metabolic, blood, and immune disorders   | 241<br>(105 - 452)   | 119<br>(34 - 274)  | 10<br>(3 - 25)      | 47<br>(21 - 85)      | 37<br>(18 - 71)      | 28<br>(15 - 61)      |
| Musculoskeletal disorders                           | 5<br>(3 - 11)        | --                 | 0<br>(0 - 0)        | 1<br>(1 - 3)         | 2<br>(1 - 4)         | 2<br>(1 - 4)         |
| Rheumatoid arthritis                                | 3<br>(2 - 6)         | --                 | 0<br>(0 - 0)        | 1<br>(0 - 2)         | 1<br>(0 - 2)         | 1<br>(1 - 2)         |
| Other musculoskeletal disorders                     | 2<br>(1 - 6)         | --                 | 0<br>(0 - 0)        | 1<br>(0 - 2)         | 1<br>(0 - 2)         | 1<br>(0 - 2)         |
| Other non-communicable diseases                     | 785<br>(550 - 1,028) | 691<br>(464 - 925) | 18<br>(9 - 39)      | 19<br>(12 - 27)      | 21<br>(13 - 30)      | 36<br>(24 - 50)      |
| Congenital anomalies                                | 761<br>(528 - 1,002) | 684<br>(458 - 916) | 18<br>(9 - 39)      | 17<br>(10 - 24)      | 16<br>(10 - 25)      | 26<br>(15 - 39)      |
| Neural tube defects                                 | 34<br>(8 - 115)      | 32<br>(7 - 113)    | 0<br>(0 - 1)        | 1<br>(0 - 1)         | 0<br>(0 - 1)         | 0<br>(0 - 1)         |
| Congenital heart anomalies                          | 131<br>(44 - 238)    | 125<br>(41 - 232)  | 2<br>(1 - 4)        | 1<br>(1 - 2)         | 1<br>(1 - 2)         | 1<br>(0 - 2)         |
| Cleft lip and cleft palate                          | 1<br>(0 - 4)         | 1<br>(0 - 4)       | --                  | --                   | --                   | --                   |
| Down syndrome                                       | 24<br>(9 - 49)       | 20<br>(7 - 43)     | 2<br>(1 - 4)        | 1<br>(1 - 2)         | 1<br>(0 - 1)         | 0<br>(0 - 0)         |
| Chromosomal unbalanced rearrangements               | 18<br>(7 - 37)       | 16<br>(6 - 33)     | 0<br>(0 - 1)        | 1<br>(1 - 2)         | 1<br>(0 - 1)         | 1<br>(0 - 1)         |
| Other congenital anomalies                          | 553<br>(362 - 752)   | 490<br>(306 - 683) | 13<br>(7 - 28)      | 12<br>(8 - 18)       | 14<br>(8 - 21)       | 24<br>(14 - 36)      |
| Skin and subcutaneous diseases                      | 19<br>(10 - 29)      | 1<br>(0 - 4)       | 0<br>(0 - 1)        | 3<br>(1 - 5)         | 4<br>(2 - 7)         | 10<br>(6 - 16)       |
| Cellulitis                                          | 2<br>(1 - 4)         | 0<br>(0 - 1)       | 0<br>(0 - 0)        | 0<br>(0 - 1)         | 0<br>(0 - 1)         | 1<br>(1 - 2)         |
| Pyoderma                                            | 7<br>(3 - 12)        | 1<br>(0 - 3)       | 0<br>(0 - 0)        | 1<br>(1 - 3)         | 2<br>(1 - 4)         | 2<br>(1 - 4)         |



Web Table 31- Syria deaths with 95% UI by age, sex, and cause in 2013

| Cause                                           | Females, All Ages          | Females, 0-4 Years       | Females, 5-14 Years  | Females, 15-49 Years     | Females, 50-69 Years     | Females, 70-80 Years     |
|-------------------------------------------------|----------------------------|--------------------------|----------------------|--------------------------|--------------------------|--------------------------|
| Decubitus ulcer                                 | 9<br>(5 - 14)              | 0<br>(0 - 0)             | 0<br>(0 - 0)         | 1<br>(0 - 1)             | 1<br>(1 - 2)             | 7<br>(4 - 11)            |
| Other skin and subcutaneous diseases            | 1<br>(0 - 1)               | 0<br>(0 - 0)             | 0<br>(0 - 0)         | 0<br>(0 - 0)             | 0<br>(0 - 0)             | 0<br>(0 - 0)             |
| Sudden infant death syndrome                    | 5<br>(1 - 16)              | 5<br>(1 - 16)            | --                   | --                       | --                       | --                       |
| Injuries                                        | 12,525<br>(7,827 - 24,344) | 1,510<br>(1,390 - 1,649) | 642<br>(438 - 1,196) | 4,153<br>(2,240 - 9,470) | 3,848<br>(2,195 - 8,097) | 2,372<br>(1,424 - 4,290) |
| Transport injuries                              | 526<br>(165 - 766)         | 38<br>(7 - 78)           | 45<br>(12 - 78)      | 169<br>(51 - 255)        | 132<br>(41 - 212)        | 143<br>(46 - 222)        |
| Road injuries                                   | 517<br>(158 - 754)         | 37<br>(7 - 77)           | 44<br>(11 - 77)      | 165<br>(49 - 251)        | 131<br>(40 - 210)        | 140<br>(42 - 219)        |
| Pedestrian road injuries                        | 165<br>(51 - 286)          | 13<br>(2 - 28)           | 15<br>(3 - 31)       | 38<br>(11 - 72)          | 42<br>(13 - 79)          | 57<br>(17 - 104)         |
| Cyclist road injuries                           | 28<br>(8 - 46)             | 1<br>(0 - 3)             | 2<br>(0 - 3)         | 7<br>(2 - 12)            | 11<br>(3 - 20)           | 8<br>(2 - 14)            |
| Motorcyclist road injuries                      | 23<br>(7 - 41)             | 1<br>(0 - 2)             | 1<br>(0 - 3)         | 11<br>(3 - 21)           | 5<br>(2 - 10)            | 5<br>(1 - 9)             |
| Motor vehicle road injuries                     | 296<br>(80 - 447)          | 22<br>(4 - 47)           | 26<br>(5 - 47)       | 109<br>(30 - 168)        | 71<br>(19 - 118)         | 68<br>(17 - 115)         |
| Other road injuries                             | 6<br>(1 - 11)              | 1<br>(0 - 1)             | 1<br>(0 - 1)         | 1<br>(0 - 2)             | 1<br>(0 - 3)             | 2<br>(0 - 3)             |
| Other transport injuries                        | 9<br>(6 - 14)              | 1<br>(0 - 2)             | 1<br>(0 - 2)         | 4<br>(1 - 6)             | 1<br>(0 - 2)             | 3<br>(1 - 8)             |
| Unintentional injuries                          | 422<br>(307 - 520)         | 66<br>(32 - 101)         | 31<br>(19 - 44)      | 131<br>(93 - 172)        | 80<br>(52 - 110)         | 115<br>(79 - 146)        |
| Falls                                           | 70<br>(50 - 101)           | 8<br>(3 - 16)            | 4<br>(2 - 6)         | 16<br>(10 - 25)          | 12<br>(7 - 19)           | 31<br>(19 - 48)          |
| Drowning                                        | 34<br>(18 - 54)            | 8<br>(2 - 18)            | 6<br>(2 - 12)        | 10<br>(5 - 16)           | 5<br>(3 - 9)             | 5<br>(3 - 9)             |
| Fire, heat, and hot substances                  | 74<br>(46 - 101)           | 11<br>(4 - 24)           | 5<br>(2 - 8)         | 28<br>(17 - 41)          | 13<br>(7 - 20)           | 17<br>(9 - 27)           |
| Poisonings                                      | 78<br>(28 - 116)           | 7<br>(2 - 18)            | 5<br>(1 - 9)         | 30<br>(11 - 50)          | 16<br>(5 - 29)           | 20<br>(7 - 33)           |
| Exposure to mechanical forces                   | 50<br>(32 - 81)            | 9<br>(3 - 20)            | 6<br>(3 - 13)        | 20<br>(12 - 36)          | 9<br>(5 - 14)            | 6<br>(4 - 10)            |
| Unintentional firearm injuries                  | 23<br>(14 - 42)            | 2<br>(1 - 5)             | 1<br>(0 - 3)         | 11<br>(6 - 23)           | 5<br>(2 - 9)             | 4<br>(2 - 8)             |
| Unintentional suffocation                       | 6<br>(0 - 14)              | 2<br>(0 - 6)             | 1<br>(0 - 2)         | 2<br>(0 - 4)             | 1<br>(0 - 3)             | 0<br>(0 - 1)             |
| Other exposure to mechanical forces             | 21<br>(10 - 41)            | 5<br>(1 - 14)            | 4<br>(1 - 10)        | 8<br>(4 - 15)            | 3<br>(2 - 5)             | 1<br>(1 - 2)             |
| Adverse effects of medical treatment            | 55<br>(34 - 79)            | 12<br>(4 - 29)           | 1<br>(0 - 2)         | 12<br>(8 - 20)           | 15<br>(7 - 25)           | 15<br>(7 - 29)           |
| Animal contact                                  | 7<br>(2 - 11)              | 1<br>(0 - 2)             | 1<br>(0 - 1)         | 2<br>(1 - 4)             | 1<br>(0 - 2)             | 3<br>(1 - 5)             |
| Venomous animal contact                         | 4<br>(1 - 6)               | 1<br>(0 - 2)             | 0<br>(0 - 1)         | 1<br>(0 - 2)             | 1<br>(0 - 1)             | 1<br>(0 - 2)             |
| Non-venomous animal contact                     | 3<br>(1 - 6)               | 0<br>(0 - 1)             | 0<br>(0 - 1)         | 1<br>(0 - 2)             | 0<br>(0 - 1)             | 2<br>(0 - 3)             |
| Foreign body                                    | 27<br>(14 - 46)            | 7<br>(2 - 15)            | 2<br>(1 - 5)         | 4<br>(2 - 8)             | 3<br>(1 - 5)             | 10<br>(5 - 18)           |
| Pulmonary aspiration and foreign body in airway | 25<br>(12 - 44)            | 6<br>(2 - 15)            | 2<br>(1 - 4)         | 3<br>(2 - 7)             | 3<br>(1 - 5)             | 10<br>(5 - 18)           |
| Foreign body in other body part                 | 2<br>(1 - 4)               | 0<br>(0 - 1)             | 0<br>(0 - 1)         | 1<br>(0 - 1)             | 0<br>(0 - 0)             | 0<br>(0 - 1)             |
| Other unintentional injuries                    | 28<br>(5 - 42)             | 4<br>(1 - 6)             | 2<br>(0 - 3)         | 8<br>(2 - 12)            | 7<br>(1 - 11)            | 8<br>(1 - 14)            |
| Self-harm and interpersonal violence            | 59<br>(32 - 84)            | 2<br>(1 - 5)             | 3<br>(1 - 6)         | 35<br>(19 - 52)          | 10<br>(5 - 16)           | 9<br>(4 - 16)            |
| Self-harm                                       | 11<br>(7 - 15)             | --                       | 0<br>(0 - 0)         | 5<br>(3 - 8)             | 2<br>(1 - 4)             | 3<br>(2 - 6)             |
| Interpersonal violence                          | 48<br>(21 - 72)            | 2<br>(1 - 5)             | 3<br>(1 - 5)         | 30<br>(14 - 47)          | 8<br>(3 - 14)            | 5<br>(1 - 12)            |
| Assault by firearm                              | 10<br>(3 - 17)             | 1<br>(0 - 1)             | 1<br>(0 - 1)         | 6<br>(2 - 10)            | 2<br>(1 - 4)             | 1<br>(0 - 2)             |
| Assault by sharp object                         | 14<br>(5 - 22)             | 0<br>(0 - 1)             | 0<br>(0 - 1)         | 11<br>(4 - 18)           | 1<br>(0 - 2)             | 1<br>(0 - 2)             |
| Assault by other means                          | 25<br>(10 - 41)            | 1<br>(0 - 3)             | 2<br>(1 - 3)         | 14<br>(6 - 23)           | 4<br>(1 - 8)             | 4<br>(1 - 8)             |
| Forces of nature, war, and legal intervention   | 11,518<br>(6,818 - 23,402) | 1,404<br>(1,304 - 1,535) | 564<br>(371 - 1,121) | 3,818<br>(1,911 - 9,194) | 3,626<br>(1,964 - 7,876) | 2,106<br>(1,167 - 4,021) |
| Collective violence and legal intervention      | 11,518<br>(6,818 - 23,402) | 1,404<br>(1,304 - 1,535) | 564<br>(371 - 1,121) | 3,818<br>(1,911 - 9,194) | 3,626<br>(1,964 - 7,876) | 2,106<br>(1,167 - 4,021) |

Web Table 31- Taiwan deaths with 95% UI by age, sex, and cause in 2013

| Cause                                                             | Both Sexes, All Ages           | Both Sexes, 0-4 Years | Both Sexes, 5-14 Years | Both Sexes, 15-49 Years     | Both Sexes, 50-69 Years     | Both Sexes, 70-80 Years        |
|-------------------------------------------------------------------|--------------------------------|-----------------------|------------------------|-----------------------------|-----------------------------|--------------------------------|
| All causes                                                        | 163,405<br>(160,318 - 166,383) | 980<br>(903 - 1,075)  | 389<br>(371 - 411)     | 16,833<br>(16,397 - 17,281) | 41,586<br>(40,626 - 42,574) | 103,616<br>(101,968 - 105,194) |
| Communicable, maternal, neonatal, and nutritional diseases        | 15,671<br>(13,051 - 17,741)    | 405<br>(355 - 465)    | 36<br>(30 - 44)        | 716<br>(626 - 797)          | 2,024<br>(1,687 - 2,268)    | 12,489<br>(10,228 - 14,527)    |
| HIV/AIDS and tuberculosis                                         | 1,167<br>(1,019 - 1,368)       | 1<br>(1 - 2)          | 2<br>(1 - 2)           | 185<br>(146 - 241)          | 204<br>(177 - 245)          | 775<br>(653 - 931)             |
| Tuberculosis                                                      | 964<br>(836 - 1,140)           | 1<br>(1 - 2)          | 1<br>(1 - 1)           | 47<br>(40 - 56)             | 149<br>(130 - 188)          | 765<br>(643 - 921)             |
| HIV/AIDS                                                          | 203<br>(148 - 283)             | 0<br>(0 - 0)          | 1<br>(0 - 1)           | 137<br>(100 - 193)          | 54<br>(36 - 80)             | 10<br>(6 - 16)                 |
| HIV/AIDS resulting in mycobacterial infection                     | 12<br>(8 - 18)                 | 0<br>(0 - 0)          | 0<br>(0 - 0)           | 8<br>(5 - 12)               | 3<br>(2 - 5)                | 1<br>(0 - 1)                   |
| HIV/AIDS resulting in other diseases                              | 191<br>(140 - 267)             | 0<br>(0 - 0)          | 1<br>(0 - 1)           | 130<br>(95 - 182)           | 51<br>(34 - 75)             | 9<br>(6 - 15)                  |
| Diarrhea, lower respiratory, and other common infectious diseases | 13,316<br>(10,577 - 15,401)    | 88<br>(62 - 145)      | 29<br>(23 - 37)        | 408<br>(330 - 473)          | 1,599<br>(1,263 - 1,844)    | 11,192<br>(8,858 - 13,223)     |
| Diarrheal diseases                                                | 149<br>(123 - 180)             | 3<br>(2 - 6)          | 1<br>(1 - 1)           | 17<br>(13 - 21)             | 28<br>(21 - 36)             | 100<br>(76 - 130)              |
| Intestinal infectious diseases                                    | 17<br>(9 - 31)                 | 4<br>(2 - 8)          | 4<br>(1 - 7)           | 6<br>(2 - 12)               | 3<br>(1 - 5)                | 2<br>(1 - 4)                   |
| Typhoid fever                                                     | 11<br>(5 - 22)                 | 2<br>(1 - 5)          | 3<br>(1 - 5)           | 4<br>(1 - 8)                | 2<br>(1 - 3)                | 1<br>(0 - 2)                   |
| Paratyphoid fever                                                 | 3<br>(1 - 7)                   | 1<br>(0 - 2)          | 1<br>(0 - 2)           | 1<br>(0 - 2)                | 0<br>(0 - 1)                | 0<br>(0 - 0)                   |
| Other intestinal infectious diseases                              | 3<br>(0 - 8)                   | 1<br>(0 - 3)          | 0<br>(0 - 2)           | 1<br>(0 - 4)                | 1<br>(0 - 3)                | 1<br>(0 - 3)                   |
| Lower respiratory infections                                      | 12,835<br>(10,131 - 14,908)    | 39<br>(29 - 51)       | 13<br>(10 - 16)        | 330<br>(251 - 394)          | 1,496<br>(1,163 - 1,743)    | 10,957<br>(8,858 - 13,007)     |
| Upper respiratory infections                                      | 4<br>(2 - 8)                   | 0<br>(0 - 0)          | 0<br>(0 - 0)           | 1<br>(0 - 1)                | 1<br>(0 - 3)                | 2<br>(0 - 6)                   |
| Otitis media                                                      | 12<br>(10 - 13)                | 0<br>(0 - 0)          | 0<br>(0 - 0)           | 1<br>(1 - 1)                | 2<br>(2 - 3)                | 8<br>(6 - 9)                   |
| Meningitis                                                        | 163<br>(136 - 189)             | 8<br>(5 - 12)         | 2<br>(1 - 2)           | 29<br>(23 - 36)             | 42<br>(33 - 51)             | 81<br>(62 - 103)               |
| Pneumococcal meningitis                                           | 45<br>(31 - 58)                | 1<br>(1 - 2)          | 0<br>(0 - 1)           | 8<br>(5 - 11)               | 11<br>(6 - 16)              | 25<br>(15 - 35)                |
| H influenzae type B meningitis                                    | 13<br>(10 - 16)                | 1<br>(0 - 2)          | 0<br>(0 - 0)           | 2<br>(1 - 4)                | 3<br>(2 - 4)                | 7<br>(4 - 10)                  |
| Meningococcal meningitis                                          | 28<br>(20 - 37)                | 1<br>(1 - 2)          | 0<br>(0 - 0)           | 5<br>(3 - 7)                | 7<br>(4 - 10)               | 15<br>(9 - 22)                 |
| Other meningitis                                                  | 77<br>(63 - 93)                | 5<br>(3 - 7)          | 1<br>(1 - 1)           | 15<br>(11 - 19)             | 22<br>(16 - 28)             | 35<br>(25 - 47)                |
| Encephalitis                                                      | 96<br>(76 - 114)               | 14<br>(8 - 22)        | 7<br>(5 - 9)           | 20<br>(15 - 25)             | 24<br>(18 - 31)             | 31<br>(23 - 40)                |
| Diphtheria                                                        | 1<br>(0 - 2)                   | 0<br>(0 - 1)          | 0<br>(0 - 1)           | 0<br>(0 - 1)                | 0<br>(0 - 1)                | --                             |
| Whooping cough                                                    | 14<br>(0 - 66)                 | 12<br>(0 - 57)        | 1<br>(0 - 5)           | 0<br>(0 - 2)                | 0<br>(0 - 1)                | --                             |
| Tetanus                                                           | 3<br>(2 - 4)                   | 0<br>(0 - 0)          | 0<br>(0 - 0)           | 1<br>(1 - 2)                | 1<br>(1 - 1)                | 1<br>(0 - 1)                   |
| Measles                                                           | 9<br>(0 - 49)                  | 7<br>(0 - 38)         | 2<br>(0 - 8)           | 0<br>(0 - 2)                | 0<br>(0 - 0)                | --                             |
| Varicella and herpes zoster                                       | 15<br>(5 - 43)                 | 1<br>(0 - 2)          | 0<br>(0 - 1)           | 2<br>(1 - 4)                | 2<br>(0 - 4)                | 10<br>(1 - 39)                 |
| Neglected tropical diseases and malaria                           | 18<br>(16 - 22)                | 1<br>(1 - 3)          | 1<br>(1 - 2)           | 7<br>(6 - 8)                | 6<br>(5 - 8)                | 4<br>(3 - 7)                   |
| Leishmaniasis                                                     | 0<br>(0 - 0)                   | 0<br>(0 - 0)          | 0<br>(0 - 0)           | 0<br>(0 - 0)                | 0<br>(0 - 0)                | 0<br>(0 - 0)                   |
| Visceral leishmaniasis                                            | 0<br>(0 - 0)                   | 0<br>(0 - 0)          | 0<br>(0 - 0)           | 0<br>(0 - 0)                | 0<br>(0 - 0)                | 0<br>(0 - 0)                   |
| Cysticercosis                                                     | 0<br>(0 - 0)                   | 0<br>(0 - 0)          | 0<br>(0 - 0)           | 0<br>(0 - 0)                | 0<br>(0 - 0)                | 0<br>(0 - 0)                   |
| Cystic echinococcosis                                             | 2<br>(2 - 2)                   | 0<br>(0 - 0)          | 0<br>(0 - 0)           | 1<br>(1 - 1)                | 1<br>(1 - 1)                | 1<br>(1 - 1)                   |
| Dengue                                                            | 4<br>(4 - 6)                   | 0<br>(0 - 0)          | 0<br>(0 - 0)           | 1<br>(1 - 2)                | 2<br>(1 - 2)                | 1<br>(1 - 1)                   |
| Rabies                                                            | 3<br>(2 - 3)                   | 0<br>(0 - 0)          | 0<br>(0 - 0)           | 1<br>(1 - 2)                | 1<br>(0 - 1)                | 0<br>(0 - 0)                   |
| Intestinal nematode infections                                    | 1<br>(0 - 5)                   | 0<br>(0 - 2)          | 0<br>(0 - 1)           | 0<br>(0 - 2)                | 0<br>(0 - 2)                | 0<br>(0 - 3)                   |
| Ascariasis                                                        | 1<br>(0 - 5)                   | 0<br>(0 - 2)          | 0<br>(0 - 1)           | 0<br>(0 - 2)                | 0<br>(0 - 2)                | 0<br>(0 - 3)                   |
| Other neglected tropical diseases                                 | 8<br>(7 - 9)                   | 0<br>(0 - 1)          | 0<br>(0 - 0)           | 3<br>(2 - 4)                | 3<br>(2 - 3)                | 2<br>(1 - 2)                   |
| Maternal disorders                                                | 26<br>(20 - 33)                | --                    | 0<br>(0 - 0)           | 26<br>(20 - 33)             | --                          | --                             |
| Maternal hemorrhage                                               | 3<br>(2 - 4)                   | --                    | 0<br>(0 - 0)           | 3<br>(2 - 4)                | --                          | --                             |
| Maternal sepsis and other maternal infections                     | 3<br>(2 - 5)                   | --                    | 0<br>(0 - 0)           | 3<br>(2 - 5)                | --                          | --                             |

Web Table 31- Taiwan deaths with 95% UI by age, sex, and cause in 2013

| Cause                                                            | Both Sexes, All Ages           | Both Sexes, 0-4 Years | Both Sexes, 5-14 Years | Both Sexes, 15-49 Years     | Both Sexes, 50-69 Years     | Both Sexes, 70-80 Years     |
|------------------------------------------------------------------|--------------------------------|-----------------------|------------------------|-----------------------------|-----------------------------|-----------------------------|
| Maternal hypertensive disorders                                  | 2<br>(1 - 3)                   | --                    | 0<br>(0 - 0)           | 2<br>(1 - 3)                | --                          | --                          |
| Maternal obstructed labor                                        | 3<br>(2 - 4)                   | --                    | 0<br>(0 - 0)           | 3<br>(2 - 4)                | --                          | --                          |
| Maternal abortive outcome                                        | 4<br>(3 - 6)                   | --                    | 0<br>(0 - 0)           | 4<br>(3 - 6)                | --                          | --                          |
| Indirect maternal deaths                                         | 3<br>(2 - 5)                   | --                    | 0<br>(0 - 0)           | 3<br>(2 - 5)                | --                          | --                          |
| Late maternal deaths                                             | 3<br>(1 - 4)                   | --                    | 0<br>(0 - 0)           | 3<br>(1 - 4)                | --                          | --                          |
| Maternal deaths aggravated by HIV/AIDS                           | 0<br>(0 - 0)                   | --                    | --                     | 0<br>(0 - 0)                | --                          | --                          |
| Other maternal disorders                                         | 5<br>(3 - 7)                   | --                    | 0<br>(0 - 0)           | 5<br>(3 - 7)                | --                          | --                          |
| Neonatal disorders                                               | 303<br>(265 - 344)             | 303<br>(265 - 344)    | --                     | --                          | --                          | --                          |
| Neonatal preterm birth complications                             | 127<br>(93 - 167)              | 127<br>(93 - 167)     | --                     | --                          | --                          | --                          |
| Neonatal encephalopathy due to birth asphyxia and trauma         | 41<br>(28 - 59)                | 41<br>(28 - 59)       | --                     | --                          | --                          | --                          |
| Neonatal sepsis and other neonatal infections                    | 15<br>(5 - 31)                 | 15<br>(5 - 31)        | --                     | --                          | --                          | --                          |
| Hemolytic disease and other neonatal jaundice                    | 0<br>(0 - 1)                   | 0<br>(0 - 1)          | --                     | --                          | --                          | --                          |
| Other neonatal disorders                                         | 120<br>(92 - 153)              | 120<br>(92 - 153)     | --                     | --                          | --                          | --                          |
| Nutritional deficiencies                                         | 340<br>(266 - 436)             | 2<br>(1 - 3)          | 1<br>(1 - 2)           | 24<br>(17 - 32)             | 54<br>(37 - 70)             | 259<br>(201 - 338)          |
| Protein-energy malnutrition                                      | 171<br>(109 - 235)             | 1<br>(1 - 2)          | 1<br>(0 - 1)           | 13<br>(7 - 19)              | 35<br>(21 - 48)             | 121<br>(74 - 173)           |
| Iodine deficiency                                                | 3<br>(0 - 12)                  | 0<br>(0 - 0)          | 0<br>(0 - 0)           | 0<br>(0 - 1)                | 1<br>(0 - 3)                | 2<br>(0 - 11)               |
| Iron-deficiency anemia                                           | 148<br>(98 - 219)              | 0<br>(0 - 1)          | 0<br>(0 - 0)           | 9<br>(5 - 14)               | 16<br>(9 - 26)              | 122<br>(80 - 186)           |
| Other nutritional deficiencies                                   | 18<br>(10 - 31)                | 0<br>(0 - 1)          | 0<br>(0 - 0)           | 1<br>(1 - 2)                | 2<br>(1 - 4)                | 15<br>(7 - 25)              |
| Other communicable, maternal, neonatal, and nutritional diseases | 500<br>(376 - 638)             | 10<br>(6 - 16)        | 3<br>(2 - 4)           | 66<br>(54 - 79)             | 162<br>(129 - 203)          | 259<br>(159 - 396)          |
| Sexually transmitted diseases excluding HIV                      | 18<br>(11 - 29)                | 1<br>(0 - 3)          | 0<br>(0 - 0)           | 4<br>(2 - 6)                | 3<br>(2 - 5)                | 9<br>(3 - 19)               |
| Syphilis                                                         | 13<br>(7 - 21)                 | 1<br>(0 - 3)          | 0<br>(0 - 0)           | 2<br>(1 - 3)                | 2<br>(1 - 3)                | 7<br>(3 - 15)               |
| Chlamydial infection                                             | 1<br>(1 - 2)                   | --                    | 0<br>(0 - 0)           | 1<br>(0 - 1)                | 0<br>(0 - 1)                | 0<br>(0 - 1)                |
| Gonococcal infection                                             | 2<br>(2 - 4)                   | --                    | 0<br>(0 - 0)           | 1<br>(1 - 1)                | 1<br>(0 - 1)                | 1<br>(0 - 2)                |
| Other sexually transmitted diseases                              | 2<br>(1 - 2)                   | --                    | 0<br>(0 - 0)           | 1<br>(0 - 1)                | 0<br>(0 - 1)                | 0<br>(0 - 1)                |
| Hepatitis                                                        | 210<br>(189 - 236)             | 1<br>(0 - 1)          | 0<br>(0 - 0)           | 39<br>(32 - 47)             | 93<br>(78 - 111)            | 77<br>(65 - 92)             |
| Acute hepatitis A                                                | 8<br>(2 - 20)                  | 0<br>(0 - 0)          | 0<br>(0 - 0)           | 3<br>(1 - 7)                | 4<br>(1 - 9)                | 2<br>(0 - 4)                |
| Acute hepatitis B                                                | 180<br>(155 - 206)             | 0<br>(0 - 1)          | 0<br>(0 - 0)           | 27<br>(20 - 36)             | 81<br>(66 - 98)             | 71<br>(59 - 86)             |
| Acute hepatitis C                                                | 7<br>(1 - 16)                  | --                    | 0<br>(0 - 0)           | 1<br>(0 - 4)                | 3<br>(1 - 8)                | 2<br>(0 - 6)                |
| Acute hepatitis E                                                | 15<br>(7 - 28)                 | 0<br>(0 - 0)          | 0<br>(0 - 0)           | 7<br>(3 - 13)               | 5<br>(2 - 12)               | 2<br>(1 - 5)                |
| Other infectious diseases                                        | 272<br>(155 - 412)             | 8<br>(4 - 13)         | 2<br>(1 - 4)           | 23<br>(14 - 33)             | 66<br>(34 - 98)             | 173<br>(71 - 310)           |
| Non-communicable diseases                                        | 132,880<br>(129,610 - 136,396) | 412<br>(359 - 463)    | 184<br>(169 - 199)     | 10,919<br>(10,379 - 11,342) | 35,430<br>(34,479 - 36,359) | 85,935<br>(83,504 - 88,607) |
| Neoplasms                                                        | 45,977<br>(42,817 - 48,031)    | 48<br>(36 - 64)       | 86<br>(75 - 96)        | 4,998<br>(4,547 - 5,330)    | 17,640<br>(16,631 - 18,441) | 23,205<br>(21,202 - 24,593) |
| Esophageal cancer                                                | 1,484<br>(940 - 1,871)         | --                    | --                     | 235<br>(110 - 360)          | 785<br>(475 - 1,030)        | 463<br>(328 - 566)          |
| Stomach cancer                                                   | 3,112<br>(2,768 - 3,482)       | --                    | --                     | 237<br>(209 - 269)          | 947<br>(854 - 1,050)        | 1,928<br>(1,639 - 2,269)    |
| Liver cancer                                                     | 9,331<br>(8,395 - 10,326)      | --                    | 3<br>(3 - 5)           | 989<br>(828 - 1,170)        | 4,097<br>(3,618 - 4,592)    | 4,242<br>(3,624 - 4,982)    |
| Liver cancer due to hepatitis B                                  | 3,551<br>(2,389 - 4,839)       | --                    | 1<br>(1 - 2)           | 499<br>(322 - 708)          | 1,722<br>(1,098 - 2,412)    | 1,328<br>(852 - 1,859)      |
| Liver cancer due to hepatitis C                                  | 4,272<br>(2,989 - 5,593)       | --                    | 0<br>(0 - 1)           | 347<br>(165 - 536)          | 1,771<br>(1,075 - 2,480)    | 2,153<br>(1,558 - 2,796)    |
| Liver cancer due to alcohol use                                  | 666<br>(430 - 953)             | --                    | --                     | 41<br>(18 - 95)             | 246<br>(135 - 413)          | 379<br>(245 - 569)          |
| Liver cancer due to other causes                                 | 843<br>(600 - 1,150)           | --                    | 2<br>(1 - 2)           | 102<br>(68 - 170)           | 358<br>(227 - 540)          | 382<br>(271 - 515)          |
| Larynx cancer                                                    | 221<br>(128 - 264)             | --                    | --                     | 21<br>(11 - 27)             | 93<br>(57 - 114)            | 107<br>(57 - 139)           |

Web Table 31- Taiwan deaths with 95% UI by age, sex, and cause in 2013

| Cause                                         | Both Sexes, All Ages        | Both Sexes, 0-4 Years | Both Sexes, 5-14 Years | Both Sexes, 15-49 Years  | Both Sexes, 50-69 Years  | Both Sexes, 70-80 Years     |
|-----------------------------------------------|-----------------------------|-----------------------|------------------------|--------------------------|--------------------------|-----------------------------|
| Tracheal, bronchus and lung cancer            | 9,539<br>(8,806 - 10,591)   | --                    | --                     | 555<br>(495 - 627)       | 3,397<br>(3,123 - 3,780) | 5,587<br>(4,949 - 6,317)    |
| Breast cancer                                 | 1,839<br>(1,118 - 2,032)    | --                    | --                     | 449<br>(332 - 507)       | 978<br>(581 - 1,105)     | 413<br>(209 - 489)          |
| Cervical cancer                               | 841<br>(717 - 1,193)        | --                    | --                     | 140<br>(112 - 215)       | 342<br>(274 - 595)       | 360<br>(266 - 452)          |
| Uterine cancer                                | 162<br>(52 - 223)           | --                    | --                     | 25<br>(9 - 36)           | 93<br>(27 - 136)         | 44<br>(15 - 63)             |
| Prostate cancer                               | 1,040<br>(449 - 1,466)      | --                    | --                     | 3<br>(2 - 6)             | 136<br>(58 - 202)        | 900<br>(385 - 1,290)        |
| Colon and rectum cancer                       | 5,891<br>(5,431 - 6,382)    | --                    | --                     | 473<br>(428 - 519)       | 1,971<br>(1,819 - 2,131) | 3,447<br>(3,037 - 3,907)    |
| Lip and oral cavity cancer                    | 1,000<br>(462 - 1,333)      | --                    | --                     | 304<br>(136 - 434)       | 507<br>(218 - 730)       | 190<br>(90 - 269)           |
| Nasopharynx cancer                            | 820<br>(718 - 989)          | --                    | 1<br>(0 - 1)           | 231<br>(188 - 292)       | 425<br>(347 - 536)       | 162<br>(127 - 202)          |
| Other pharynx cancer                          | 656<br>(265 - 796)          | --                    | --                     | 163<br>(62 - 212)        | 359<br>(138 - 452)       | 134<br>(64 - 174)           |
| Gallbladder and biliary tract cancer          | 605<br>(253 - 754)          | --                    | --                     | 39<br>(20 - 48)          | 219<br>(108 - 269)       | 347<br>(124 - 458)          |
| Pancreatic cancer                             | 1,903<br>(1,749 - 2,066)    | --                    | --                     | 133<br>(116 - 152)       | 745<br>(681 - 815)       | 1,025<br>(898 - 1,164)      |
| Malignant skin melanoma                       | 119<br>(83 - 143)           | --                    | --                     | 14<br>(9 - 18)           | 46<br>(32 - 57)          | 58<br>(39 - 74)             |
| Non-melanoma skin cancer                      | 134<br>(100 - 197)          | --                    | --                     | 10<br>(7 - 15)           | 25<br>(19 - 36)          | 98<br>(71 - 152)            |
| Ovarian cancer                                | 532<br>(471 - 607)          | --                    | --                     | 107<br>(88 - 127)        | 263<br>(219 - 313)       | 162<br>(134 - 200)          |
| Testicular cancer                             | 14<br>(7 - 19)              | --                    | --                     | 9<br>(4 - 14)            | 2<br>(2 - 3)             | 2<br>(1 - 3)                |
| Kidney cancer                                 | 762<br>(666 - 871)          | 1<br>(0 - 1)          | 1<br>(1 - 1)           | 47<br>(39 - 56)          | 262<br>(227 - 303)       | 451<br>(370 - 541)          |
| Bladder cancer                                | 832<br>(480 - 1,021)        | --                    | --                     | 23<br>(18 - 28)          | 199<br>(149 - 238)       | 610<br>(311 - 784)          |
| Brain and nervous system cancer               | 555<br>(425 - 658)          | 10<br>(6 - 16)        | 23<br>(16 - 29)        | 143<br>(108 - 180)       | 214<br>(170 - 277)       | 165<br>(109 - 202)          |
| Thyroid cancer                                | 158<br>(109 - 191)          | --                    | 0<br>(0 - 0)           | 12<br>(9 - 16)           | 56<br>(42 - 68)          | 90<br>(55 - 118)            |
| Mesothelioma                                  | 77<br>(63 - 94)             | --                    | --                     | 5<br>(4 - 7)             | 26<br>(20 - 33)          | 46<br>(34 - 62)             |
| Hodgkin lymphoma                              | 28<br>(23 - 37)             | 0<br>(0 - 1)          | 1<br>(0 - 1)           | 9<br>(7 - 11)            | 9<br>(7 - 15)            | 9<br>(6 - 13)               |
| Non-Hodgkin lymphoma                          | 1,372<br>(526 - 1,850)      | 2<br>(1 - 4)          | 5<br>(3 - 7)           | 158<br>(83 - 206)        | 499<br>(207 - 679)       | 707<br>(215 - 1,026)        |
| Multiple myeloma                              | 296<br>(185 - 383)          | --                    | --                     | 18<br>(14 - 23)          | 123<br>(83 - 153)        | 155<br>(85 - 220)           |
| Leukemia                                      | 977<br>(896 - 1,064)        | 15<br>(10 - 23)       | 26<br>(21 - 32)        | 200<br>(179 - 220)       | 296<br>(261 - 330)       | 441<br>(380 - 515)          |
| Other neoplasms                               | 1,678<br>(1,425 - 1,888)    | 20<br>(13 - 29)       | 26<br>(21 - 32)        | 247<br>(208 - 279)       | 526<br>(438 - 608)       | 859<br>(697 - 1,027)        |
| Cardiovascular diseases                       | 37,646<br>(35,576 - 41,113) | 24<br>(18 - 33)       | 25<br>(21 - 31)        | 2,234<br>(2,067 - 2,426) | 7,926<br>(7,453 - 8,615) | 27,436<br>(25,625 - 30,359) |
| Rheumatic heart disease                       | 234<br>(183 - 313)          | 0<br>(0 - 1)          | 1<br>(0 - 1)           | 18<br>(14 - 26)          | 65<br>(51 - 86)          | 149<br>(112 - 204)          |
| Ischemic heart disease                        | 15,901<br>(14,137 - 18,484) | 1<br>(1 - 2)          | 4<br>(3 - 5)           | 891<br>(761 - 1,045)     | 3,430<br>(3,032 - 3,925) | 11,575<br>(10,170 - 13,616) |
| Cerebrovascular disease                       | 14,201<br>(12,674 - 16,472) | 7<br>(5 - 11)         | 8<br>(6 - 10)          | 807<br>(687 - 966)       | 3,034<br>(2,681 - 3,452) | 10,345<br>(9,060 - 12,213)  |
| Ischemic stroke                               | 6,816<br>(5,852 - 8,124)    | 0<br>(0 - 0)          | 0<br>(0 - 1)           | 70<br>(52 - 95)          | 842<br>(694 - 1,049)     | 5,903<br>(5,053 - 7,131)    |
| Hemorrhagic stroke                            | 7,385<br>(6,423 - 8,848)    | 7<br>(5 - 11)         | 8<br>(6 - 10)          | 737<br>(626 - 880)       | 2,191<br>(1,893 - 2,546) | 4,443<br>(3,709 - 5,496)    |
| Hypertensive heart disease                    | 3,457<br>(2,588 - 4,480)    | 0<br>(0 - 0)          | 0<br>(0 - 0)           | 131<br>(89 - 170)        | 524<br>(393 - 668)       | 2,802<br>(2,043 - 3,674)    |
| Cardiomyopathy and myocarditis                | 544<br>(432 - 660)          | 10<br>(7 - 15)        | 10<br>(7 - 12)         | 158<br>(116 - 188)       | 152<br>(114 - 187)       | 214<br>(162 - 294)          |
| Atrial fibrillation and flutter               | 168<br>(127 - 217)          | --                    | --                     | 3<br>(2 - 3)             | 16<br>(12 - 20)          | 150<br>(110 - 198)          |
| Aortic aneurysm                               | 824<br>(678 - 1,011)        | --                    | --                     | 63<br>(51 - 76)          | 224<br>(186 - 269)       | 537<br>(422 - 690)          |
| Peripheral vascular disease                   | 12<br>(10 - 16)             | --                    | --                     | 1<br>(0 - 1)             | 2<br>(1 - 2)             | 10<br>(8 - 13)              |
| Endocarditis                                  | 449<br>(303 - 577)          | 1<br>(0 - 1)          | 1<br>(0 - 1)           | 46<br>(31 - 64)          | 103<br>(69 - 140)        | 298<br>(189 - 399)          |
| Other cardiovascular and circulatory diseases | 1,855<br>(1,529 - 2,309)    | 4<br>(2 - 6)          | 2<br>(2 - 3)           | 117<br>(93 - 143)        | 376<br>(311 - 471)       | 1,356<br>(1,072 - 1,747)    |
| Chronic respiratory diseases                  | 10,980<br>(9,816 - 12,676)  | 10<br>(7 - 14)        | 4<br>(4 - 5)           | 178<br>(155 - 207)       | 1,173<br>(1,049 - 1,360) | 9,614<br>(8,478 - 11,200)   |
| Chronic obstructive pulmonary disease         | 7,692<br>(6,712 - 8,977)    | 4<br>(3 - 7)          | 1<br>(1 - 2)           | 84<br>(69 - 100)         | 702<br>(604 - 839)       | 6,901<br>(5,980 - 8,107)    |

Web Table 31- Taiwan deaths with 95% UI by age, sex, and cause in 2013

| Cause                                               | Both Sexes, All Ages     | Both Sexes, 0-4 Years | Both Sexes, 5-14 Years | Both Sexes, 15-49 Years  | Both Sexes, 50-69 Years  | Both Sexes, 70-80 Years  |
|-----------------------------------------------------|--------------------------|-----------------------|------------------------|--------------------------|--------------------------|--------------------------|
| Pneumoconiosis                                      | 269<br>(184 - 387)       | 0<br>(0 - 0)          | 0<br>(0 - 0)           | 12<br>(9 - 18)           | 55<br>(38 - 82)          | 201<br>(133 - 294)       |
| Silicosis                                           | 83<br>(57 - 122)         | 0<br>(0 - 0)          | 0<br>(0 - 0)           | 2<br>(1 - 3)             | 15<br>(10 - 23)          | 66<br>(43 - 100)         |
| Asbestosis                                          | 28<br>(18 - 41)          | 0<br>(0 - 0)          | 0<br>(0 - 0)           | 2<br>(1 - 2)             | 4<br>(3 - 6)             | 22<br>(14 - 33)          |
| Coal workers pneumoconiosis                         | 44<br>(29 - 63)          | 0<br>(0 - 0)          | 0<br>(0 - 0)           | 1<br>(1 - 2)             | 9<br>(6 - 13)            | 33<br>(21 - 49)          |
| Other pneumoconiosis                                | 115<br>(79 - 165)        | 0<br>(0 - 0)          | 0<br>(0 - 0)           | 7<br>(5 - 11)            | 27<br>(19 - 40)          | 80<br>(52 - 120)         |
| Asthma                                              | 800<br>(628 - 983)       | 2<br>(1 - 3)          | 1<br>(1 - 2)           | 56<br>(46 - 66)          | 140<br>(113 - 171)       | 601<br>(453 - 768)       |
| Interstitial lung disease and pulmonary sarcoidosis | 1,610<br>(1,211 - 2,212) | 1<br>(0 - 1)          | 0<br>(0 - 1)           | 15<br>(11 - 20)          | 227<br>(176 - 298)       | 1,368<br>(997 - 1,905)   |
| Other chronic respiratory diseases                  | 608<br>(465 - 786)       | 3<br>(2 - 4)          | 1<br>(1 - 1)           | 11<br>(9 - 14)           | 50<br>(39 - 62)          | 544<br>(404 - 716)       |
| Cirrhosis                                           | 6,070<br>(5,664 - 6,535) | 2<br>(1 - 4)          | 2<br>(1 - 2)           | 1,672<br>(1,501 - 1,834) | 2,360<br>(2,151 - 2,599) | 2,035<br>(1,802 - 2,318) |
| Cirrhosis due to hepatitis B                        | 2,570<br>(1,915 - 3,270) | 0<br>(0 - 0)          | 1<br>(0 - 1)           | 700<br>(457 - 974)       | 969<br>(679 - 1,297)     | 901<br>(667 - 1,181)     |
| Cirrhosis due to hepatitis C                        | 1,449<br>(965 - 1,991)   | 0<br>(0 - 0)          | 0<br>(0 - 0)           | 378<br>(195 - 567)       | 576<br>(367 - 832)       | 495<br>(291 - 695)       |
| Cirrhosis due to alcohol use                        | 1,631<br>(1,035 - 2,154) | --                    | --                     | 412<br>(232 - 599)       | 661<br>(412 - 896)       | 557<br>(361 - 768)       |
| Cirrhosis due to other causes                       | 420<br>(273 - 599)       | 2<br>(1 - 3)          | 1<br>(1 - 1)           | 182<br>(110 - 279)       | 153<br>(90 - 227)        | 82<br>(49 - 122)         |
| Digestive diseases                                  | 3,689<br>(3,329 - 4,184) | 8<br>(5 - 12)         | 5<br>(4 - 6)           | 234<br>(204 - 263)       | 672<br>(603 - 768)       | 2,770<br>(2,414 - 3,188) |
| Peptic ulcer disease                                | 754<br>(609 - 935)       | 1<br>(0 - 1)          | 0<br>(0 - 1)           | 40<br>(30 - 52)          | 147<br>(119 - 184)       | 567<br>(438 - 729)       |
| Gastritis and duodenitis                            | 12<br>(8 - 22)           | 0<br>(0 - 0)          | 0<br>(0 - 0)           | 2<br>(1 - 3)             | 2<br>(1 - 4)             | 8<br>(5 - 16)            |
| Appendicitis                                        | 64<br>(42 - 86)          | 0<br>(0 - 1)          | 0<br>(0 - 0)           | 3<br>(2 - 4)             | 12<br>(9 - 16)           | 48<br>(29 - 68)          |
| Paralytic ileus and intestinal obstruction          | 541<br>(381 - 815)       | 1<br>(1 - 3)          | 0<br>(0 - 1)           | 20<br>(13 - 30)          | 76<br>(52 - 114)         | 443<br>(304 - 672)       |
| Inguinal, femoral, and abdominal hernia             | 61<br>(36 - 84)          | 0<br>(0 - 0)          | 0<br>(0 - 0)           | 3<br>(1 - 4)             | 10<br>(6 - 14)           | 47<br>(28 - 68)          |
| Inflammatory bowel disease                          | 103<br>(76 - 130)        | 2<br>(1 - 3)          | 1<br>(0 - 1)           | 9<br>(6 - 11)            | 23<br>(17 - 30)          | 68<br>(47 - 93)          |
| Vascular intestinal disorders                       | 549<br>(348 - 828)       | 0<br>(0 - 1)          | 0<br>(0 - 1)           | 14<br>(7 - 27)           | 89<br>(53 - 141)         | 445<br>(275 - 668)       |
| Gallbladder and biliary diseases                    | 851<br>(669 - 1,060)     | 1<br>(0 - 1)          | 0<br>(0 - 0)           | 24<br>(17 - 31)          | 123<br>(93 - 153)        | 703<br>(535 - 897)       |
| Pancreatitis                                        | 365<br>(284 - 476)       | 1<br>(0 - 1)          | 1<br>(0 - 1)           | 85<br>(65 - 107)         | 95<br>(72 - 125)         | 185<br>(135 - 258)       |
| Other digestive diseases                            | 389<br>(311 - 488)       | 2<br>(1 - 4)          | 1<br>(1 - 1)           | 35<br>(26 - 44)          | 95<br>(76 - 119)         | 256<br>(193 - 338)       |
| Neurological disorders                              | 6,028<br>(5,238 - 6,958) | 16<br>(12 - 22)       | 10<br>(7 - 12)         | 168<br>(140 - 196)       | 536<br>(479 - 599)       | 5,298<br>(4,531 - 6,203) |
| Alzheimer disease and other dementias               | 4,383<br>(3,628 - 5,183) | --                    | --                     | 2<br>(1 - 3)             | 216<br>(174 - 262)       | 4,165<br>(3,408 - 4,966) |
| Parkinson disease                                   | 1,032<br>(800 - 1,340)   | --                    | --                     | 5<br>(4 - 6)             | 118<br>(95 - 145)        | 909<br>(677 - 1,215)     |
| Epilepsy                                            | 373<br>(302 - 444)       | 11<br>(7 - 17)        | 5<br>(4 - 8)           | 113<br>(88 - 139)        | 93<br>(73 - 117)         | 150<br>(113 - 200)       |
| Multiple sclerosis                                  | 12<br>(9 - 20)           | --                    | --                     | 4<br>(3 - 6)             | 6<br>(4 - 11)            | 2<br>(1 - 3)             |
| Other neurological disorders                        | 227<br>(192 - 253)       | 5<br>(4 - 6)          | 4<br>(3 - 6)           | 44<br>(35 - 50)          | 102<br>(88 - 117)        | 72<br>(60 - 83)          |
| Mental and substance use disorders                  | 679<br>(546 - 779)       | 1<br>(0 - 1)          | 0<br>(0 - 0)           | 393<br>(318 - 456)       | 222<br>(164 - 265)       | 63<br>(53 - 75)          |
| Schizophrenia                                       | 64<br>(49 - 81)          | --                    | --                     | 17<br>(12 - 22)          | 32<br>(25 - 43)          | 15<br>(11 - 20)          |
| Alcohol use disorders                               | 303<br>(177 - 381)       | --                    | --                     | 154<br>(90 - 204)        | 133<br>(76 - 171)        | 16<br>(9 - 22)           |
| Drug use disorders                                  | 308<br>(274 - 341)       | 1<br>(0 - 1)          | --                     | 219<br>(190 - 250)       | 56<br>(47 - 66)          | 33<br>(27 - 40)          |
| Opioid use disorders                                | 124<br>(109 - 142)       | 0<br>(0 - 0)          | --                     | 89<br>(76 - 105)         | 21<br>(17 - 26)          | 14<br>(11 - 17)          |
| Cocaine use disorders                               | 25<br>(21 - 29)          | 0<br>(0 - 0)          | --                     | 19<br>(16 - 23)          | 4<br>(3 - 5)             | 2<br>(2 - 3)             |
| Amphetamine use disorders                           | 26<br>(22 - 30)          | 0<br>(0 - 0)          | --                     | 18<br>(15 - 22)          | 5<br>(4 - 6)             | 3<br>(2 - 4)             |
| Other drug use disorders                            | 133<br>(117 - 150)       | 0<br>(0 - 0)          | --                     | 92<br>(78 - 107)         | 26<br>(22 - 32)          | 14<br>(11 - 17)          |
| Eating disorders                                    | 5<br>(3 - 7)             | --                    | 0<br>(0 - 0)           | 5<br>(3 - 7)             | --                       | --                       |
| Anorexia nervosa                                    | 5<br>(3 - 7)             | --                    | 0<br>(0 - 0)           | 5<br>(3 - 7)             | --                       | --                       |

Web Table 31- Taiwan deaths with 95% UI by age, sex, and cause in 2013

| Cause                                               | Both Sexes, All Ages        | Both Sexes, 0-4 Years | Both Sexes, 5-14 Years | Both Sexes, 15-49 Years | Both Sexes, 50-69 Years  | Both Sexes, 70-80 Years     |
|-----------------------------------------------------|-----------------------------|-----------------------|------------------------|-------------------------|--------------------------|-----------------------------|
| Diabetes, urogenital, blood, and endocrine diseases | 19,869<br>(18,570 - 21,433) | 32<br>(24 - 41)       | 22<br>(18 - 26)        | 828<br>(761 - 900)      | 4,553<br>(4,235 - 4,931) | 14,434<br>(13,277 - 15,672) |
| Diabetes mellitus                                   | 10,614<br>(9,714 - 11,668)  | 1<br>(1 - 2)          | 3<br>(2 - 4)           | 427<br>(384 - 484)      | 2,804<br>(2,543 - 3,126) | 7,379<br>(6,578 - 8,267)    |
| Acute glomerulonephritis                            | 6<br>(5 - 8)                | 0<br>(0 - 0)          | 0<br>(0 - 0)           | 2<br>(1 - 2)            | 2<br>(1 - 3)             | 2<br>(2 - 3)                |
| Chronic kidney disease                              | 5,173<br>(4,529 - 5,907)    | 2<br>(2 - 3)          | 3<br>(2 - 3)           | 185<br>(161 - 217)      | 1,128<br>(1,007 - 1,282) | 3,856<br>(3,278 - 4,532)    |
| Chronic kidney disease due to diabetes mellitus     | 11<br>(7 - 19)              | 0<br>(0 - 0)          | 0<br>(0 - 0)           | 2<br>(2 - 5)            | 3<br>(2 - 4)             | 6<br>(3 - 10)               |
| Chronic kidney disease due to hypertension          | 2,478<br>(1,921 - 3,070)    | 0<br>(0 - 1)          | 1<br>(0 - 1)           | 81<br>(59 - 102)        | 553<br>(428 - 687)       | 1,844<br>(1,380 - 2,338)    |
| Chronic kidney disease due to glomerulonephritis    | 530<br>(348 - 691)          | 1<br>(0 - 1)          | 1<br>(1 - 1)           | 23<br>(15 - 30)         | 94<br>(61 - 122)         | 413<br>(263 - 554)          |
| Chronic kidney disease due to other causes          | 2,153<br>(1,554 - 2,811)    | 1<br>(1 - 2)          | 1<br>(1 - 2)           | 79<br>(57 - 109)        | 479<br>(355 - 645)       | 1,593<br>(1,085 - 2,188)    |
| Urinary diseases and male infertility               | 3,192<br>(2,563 - 3,869)    | 2<br>(1 - 3)          | 2<br>(1 - 2)           | 71<br>(58 - 85)         | 400<br>(324 - 468)       | 2,717<br>(2,128 - 3,378)    |
| Interstitial nephritis and urinary tract infections | 579<br>(396 - 877)          | 1<br>(1 - 2)          | 0<br>(0 - 1)           | 23<br>(17 - 32)         | 87<br>(61 - 121)         | 467<br>(299 - 754)          |
| Urolithiasis                                        | 79<br>(55 - 113)            | --                    | 0<br>(0 - 0)           | 3<br>(2 - 5)            | 18<br>(12 - 26)          | 58<br>(37 - 89)             |
| Other urinary diseases                              | 2,534<br>(1,968 - 3,120)    | 1<br>(0 - 1)          | 1<br>(1 - 1)           | 45<br>(32 - 55)         | 296<br>(225 - 351)       | 2,192<br>(1,642 - 2,758)    |
| Gynecological diseases                              | 4<br>(3 - 5)                | --                    | --                     | 1<br>(1 - 1)            | 1<br>(0 - 1)             | 2<br>(1 - 3)                |
| Uterine fibroids                                    | 1<br>(1 - 1)                | --                    | --                     | 0<br>(0 - 0)            | 0<br>(0 - 0)             | 1<br>(0 - 1)                |
| Polycystic ovarian syndrome                         | 0<br>(0 - 0)                | --                    | --                     | 0<br>(0 - 0)            | 0<br>(0 - 0)             | --                          |
| Endometriosis                                       | 0<br>(0 - 0)                | --                    | --                     | 0<br>(0 - 0)            | 0<br>(0 - 0)             | --                          |
| Genital prolapse                                    | 1<br>(1 - 1)                | --                    | --                     | 0<br>(0 - 0)            | 0<br>(0 - 0)             | 1<br>(0 - 1)                |
| Other gynecological diseases                        | 2<br>(1 - 2)                | --                    | --                     | 0<br>(0 - 1)            | 0<br>(0 - 1)             | 1<br>(1 - 1)                |
| Hemoglobinopathies and hemolytic anemias            | 212<br>(153 - 285)          | 6<br>(4 - 9)          | 4<br>(3 - 6)           | 30<br>(22 - 40)         | 47<br>(33 - 64)          | 124<br>(86 - 169)           |
| Thalassemias                                        | 26<br>(19 - 35)             | 6<br>(4 - 8)          | 4<br>(3 - 6)           | 14<br>(10 - 19)         | 2<br>(1 - 2)             | 0<br>(0 - 0)                |
| Sickle cell disorders                               | 0<br>(0 - 0)                | 0<br>(0 - 0)          | 0<br>(0 - 0)           | 0<br>(0 - 0)            | 0<br>(0 - 0)             | 0<br>(0 - 0)                |
| G6PD deficiency                                     | 6<br>(4 - 8)                | 0<br>(0 - 0)          | 0<br>(0 - 0)           | 1<br>(1 - 2)            | 3<br>(2 - 5)             | 1<br>(1 - 2)                |
| Other hemoglobinopathies and hemolytic anemias      | 180<br>(129 - 243)          | 1<br>(0 - 1)          | 0<br>(0 - 0)           | 14<br>(10 - 19)         | 42<br>(30 - 57)          | 123<br>(85 - 168)           |
| Endocrine, metabolic, blood, and immune disorders   | 668<br>(503 - 783)          | 20<br>(14 - 28)       | 10<br>(7 - 14)         | 112<br>(78 - 132)       | 172<br>(121 - 203)       | 354<br>(259 - 445)          |
| Musculoskeletal disorders                           | 668<br>(554 - 837)          | --                    | 5<br>(4 - 7)           | 113<br>(96 - 135)       | 186<br>(154 - 225)       | 363<br>(278 - 495)          |
| Rheumatoid arthritis                                | 103<br>(76 - 138)           | --                    | 0<br>(0 - 0)           | 4<br>(3 - 6)            | 30<br>(22 - 40)          | 68<br>(46 - 97)             |
| Other musculoskeletal disorders                     | 565<br>(475 - 710)          | --                    | 5<br>(4 - 7)           | 108<br>(92 - 130)       | 156<br>(128 - 189)       | 295<br>(226 - 403)          |
| Other non-communicable diseases                     | 1,276<br>(1,118 - 1,465)    | 270<br>(229 - 312)    | 26<br>(20 - 32)        | 101<br>(89 - 114)       | 162<br>(140 - 186)       | 717<br>(575 - 896)          |
| Congenital anomalies                                | 433<br>(388 - 480)          | 235<br>(200 - 274)    | 24<br>(19 - 30)        | 62<br>(53 - 72)         | 42<br>(36 - 49)          | 69<br>(56 - 81)             |
| Neural tube defects                                 | 5<br>(3 - 8)                | 3<br>(1 - 5)          | 0<br>(0 - 0)           | 1<br>(1 - 2)            | 1<br>(0 - 1)             | 0<br>(0 - 0)                |
| Congenital heart anomalies                          | 175<br>(149 - 201)          | 118<br>(94 - 141)     | 12<br>(9 - 16)         | 31<br>(26 - 37)         | 8<br>(6 - 10)            | 6<br>(4 - 8)                |
| Cleft lip and cleft palate                          | 0<br>(0 - 0)                | 0<br>(0 - 0)          | --                     | --                      | --                       | --                          |
| Down syndrome                                       | 13<br>(9 - 16)              | 4<br>(2 - 6)          | 1<br>(0 - 1)           | 5<br>(4 - 7)            | 3<br>(2 - 4)             | 0<br>(0 - 0)                |
| Chromosomal unbalanced rearrangements               | 21<br>(16 - 27)             | 16<br>(11 - 21)       | 2<br>(1 - 3)           | 2<br>(2 - 3)            | 1<br>(1 - 1)             | 0<br>(0 - 0)                |
| Other congenital anomalies                          | 219<br>(193 - 245)          | 95<br>(77 - 117)      | 9<br>(7 - 12)          | 22<br>(18 - 27)         | 30<br>(25 - 35)          | 62<br>(51 - 74)             |
| Skin and subcutaneous diseases                      | 809<br>(658 - 991)          | 1<br>(1 - 1)          | 1<br>(1 - 2)           | 39<br>(32 - 47)         | 120<br>(100 - 142)       | 648<br>(510 - 823)          |
| Cellulitis                                          | 176<br>(122 - 237)          | 0<br>(0 - 0)          | 0<br>(0 - 0)           | 11<br>(8 - 15)          | 33<br>(24 - 43)          | 131<br>(85 - 182)           |
| Pyoderma                                            | 159<br>(125 - 205)          | 0<br>(0 - 1)          | 0<br>(0 - 0)           | 10<br>(7 - 13)          | 32<br>(25 - 40)          | 117<br>(84 - 161)           |
| Decubitus ulcer                                     | 415<br>(321 - 542)          | 0<br>(0 - 0)          | 0<br>(0 - 0)           | 9<br>(7 - 12)           | 45<br>(36 - 57)          | 361<br>(271 - 486)          |
| Other skin and subcutaneous diseases                | 60<br>(37 - 78)             | 0<br>(0 - 0)          | 1<br>(0 - 1)           | 9<br>(6 - 12)           | 10<br>(6 - 14)           | 40<br>(22 - 57)             |

Web Table 31- Taiwan deaths with 95% UI by age, sex, and cause in 2013

| Cause                                           | Both Sexes, All Ages        | Both Sexes, 0-4 Years | Both Sexes, 5-14 Years | Both Sexes, 15-49 Years  | Both Sexes, 50-69 Years  | Both Sexes, 70-80 Years  |
|-------------------------------------------------|-----------------------------|-----------------------|------------------------|--------------------------|--------------------------|--------------------------|
| Sudden infant death syndrome                    | 34<br>(17 - 57)             | 34<br>(17 - 57)       | --                     | --                       | --                       | --                       |
| Injuries                                        | 14,853<br>(14,037 - 16,144) | 163<br>(132 - 199)    | 169<br>(155 - 185)     | 5,198<br>(4,900 - 5,804) | 4,132<br>(3,811 - 4,626) | 5,192<br>(4,536 - 5,797) |
| Transport injuries                              | 4,616<br>(4,287 - 5,122)    | 51<br>(37 - 70)       | 78<br>(66 - 90)        | 1,798<br>(1,649 - 1,966) | 1,388<br>(1,245 - 1,626) | 1,300<br>(1,123 - 1,530) |
| Road injuries                                   | 4,462<br>(4,132 - 4,942)    | 49<br>(35 - 66)       | 74<br>(63 - 85)        | 1,743<br>(1,599 - 1,903) | 1,340<br>(1,201 - 1,567) | 1,257<br>(1,085 - 1,478) |
| Pedestrian road injuries                        | 1,000<br>(817 - 1,234)      | 18<br>(12 - 27)       | 19<br>(14 - 25)        | 202<br>(154 - 280)       | 244<br>(192 - 320)       | 515<br>(405 - 639)       |
| Cyclist road injuries                           | 449<br>(370 - 561)          | 4<br>(2 - 7)          | 11<br>(8 - 15)         | 106<br>(86 - 130)        | 158<br>(126 - 202)       | 169<br>(129 - 221)       |
| Motorcyclist road injuries                      | 1,321<br>(1,029 - 1,594)    | 9<br>(6 - 15)         | 21<br>(15 - 27)        | 646<br>(508 - 776)       | 400<br>(304 - 499)       | 245<br>(166 - 326)       |
| Motor vehicle road injuries                     | 1,655<br>(1,430 - 1,948)    | 16<br>(11 - 23)       | 22<br>(18 - 27)        | 773<br>(660 - 895)       | 526<br>(438 - 642)       | 318<br>(249 - 404)       |
| Other road injuries                             | 37<br>(25 - 52)             | 0<br>(0 - 1)          | 1<br>(0 - 1)           | 15<br>(9 - 22)           | 12<br>(7 - 17)           | 9<br>(6 - 16)            |
| Other transport injuries                        | 153<br>(126 - 180)          | 3<br>(2 - 5)          | 4<br>(3 - 6)           | 56<br>(44 - 66)          | 47<br>(38 - 60)          | 43<br>(32 - 56)          |
| Unintentional injuries                          | 5,329<br>(4,516 - 5,916)    | 102<br>(81 - 126)     | 66<br>(56 - 77)        | 896<br>(804 - 1,035)     | 1,232<br>(1,057 - 1,399) | 3,033<br>(2,391 - 3,561) |
| Falls                                           | 2,117<br>(1,770 - 2,566)    | 15<br>(10 - 22)       | 9<br>(7 - 13)          | 344<br>(282 - 451)       | 559<br>(443 - 720)       | 1,189<br>(907 - 1,510)   |
| Drowning                                        | 488<br>(393 - 627)          | 27<br>(17 - 42)       | 36<br>(27 - 47)        | 176<br>(139 - 235)       | 145<br>(110 - 200)       | 105<br>(80 - 134)        |
| Fire, heat, and hot substances                  | 276<br>(201 - 340)          | 10<br>(6 - 15)        | 6<br>(4 - 7)           | 42<br>(32 - 52)          | 43<br>(31 - 54)          | 176<br>(117 - 230)       |
| Poisonings                                      | 131<br>(103 - 172)          | 2<br>(1 - 3)          | 3<br>(2 - 5)           | 46<br>(36 - 63)          | 30<br>(23 - 41)          | 49<br>(35 - 67)          |
| Exposure to mechanical forces                   | 230<br>(205 - 283)          | 15<br>(9 - 26)        | 4<br>(3 - 6)           | 81<br>(68 - 99)          | 70<br>(57 - 89)          | 60<br>(47 - 78)          |
| Unintentional firearm injuries                  | 5<br>(4 - 7)                | 0<br>(0 - 0)          | 0<br>(0 - 0)           | 2<br>(2 - 3)             | 1<br>(1 - 1)             | 1<br>(1 - 2)             |
| Unintentional suffocation                       | 33<br>(25 - 57)             | 10<br>(5 - 20)        | 1<br>(0 - 1)           | 5<br>(4 - 8)             | 6<br>(4 - 10)            | 12<br>(8 - 19)           |
| Other exposure to mechanical forces             | 192<br>(168 - 226)          | 6<br>(3 - 9)          | 3<br>(2 - 5)           | 73<br>(61 - 90)          | 63<br>(50 - 81)          | 46<br>(35 - 63)          |
| Adverse effects of medical treatment            | 1,288<br>(679 - 1,787)      | 6<br>(3 - 8)          | 2<br>(1 - 3)           | 84<br>(49 - 115)         | 234<br>(131 - 324)       | 962<br>(455 - 1,390)     |
| Animal contact                                  | 13<br>(10 - 21)             | 0<br>(0 - 0)          | 0<br>(0 - 1)           | 4<br>(3 - 7)             | 3<br>(2 - 4)             | 6<br>(4 - 10)            |
| Venomous animal contact                         | 5<br>(4 - 9)                | 0<br>(0 - 0)          | 0<br>(0 - 0)           | 3<br>(2 - 5)             | 1<br>(1 - 2)             | 1<br>(1 - 2)             |
| Non-venomous animal contact                     | 8<br>(6 - 13)               | 0<br>(0 - 0)          | 0<br>(0 - 0)           | 1<br>(1 - 2)             | 1<br>(1 - 2)             | 5<br>(3 - 8)             |
| Foreign body                                    | 664<br>(458 - 1,006)        | 25<br>(17 - 38)       | 4<br>(3 - 6)           | 59<br>(38 - 86)          | 116<br>(78 - 171)        | 460<br>(313 - 709)       |
| Pulmonary aspiration and foreign body in airway | 661<br>(455 - 1,002)        | 25<br>(17 - 38)       | 4<br>(2 - 6)           | 57<br>(37 - 85)          | 116<br>(78 - 171)        | 459<br>(312 - 709)       |
| Foreign body in other body part                 | 3<br>(2 - 5)                | 0<br>(0 - 0)          | 0<br>(0 - 0)           | 1<br>(1 - 2)             | 1<br>(1 - 1)             | 1<br>(0 - 1)             |
| Other unintentional injuries                    | 122<br>(103 - 170)          | 1<br>(1 - 3)          | 2<br>(1 - 3)           | 60<br>(50 - 77)          | 32<br>(25 - 46)          | 26<br>(20 - 48)          |
| Self-harm and interpersonal violence            | 4,909<br>(4,435 - 5,865)    | 10<br>(3 - 18)        | 25<br>(18 - 32)        | 2,504<br>(2,225 - 3,019) | 1,512<br>(1,292 - 1,838) | 859<br>(703 - 1,078)     |
| Self-harm                                       | 4,396<br>(3,918 - 5,174)    | --                    | 15<br>(10 - 21)        | 2,184<br>(1,899 - 2,497) | 1,402<br>(1,197 - 1,693) | 795<br>(643 - 1,015)     |
| Interpersonal violence                          | 513<br>(394 - 948)          | 10<br>(3 - 18)        | 11<br>(6 - 15)         | 319<br>(223 - 651)       | 109<br>(75 - 202)        | 64<br>(33 - 95)          |
| Assault by firearm                              | 86<br>(47 - 213)            | 1<br>(0 - 1)          | 1<br>(0 - 1)           | 65<br>(34 - 172)         | 15<br>(8 - 39)           | 5<br>(2 - 9)             |
| Assault by sharp object                         | 85<br>(56 - 172)            | 1<br>(0 - 2)          | 2<br>(1 - 3)           | 54<br>(32 - 118)         | 21<br>(13 - 42)          | 7<br>(3 - 12)            |
| Assault by other means                          | 341<br>(261 - 612)          | 8<br>(3 - 15)         | 9<br>(5 - 12)          | 200<br>(137 - 403)       | 73<br>(50 - 137)         | 52<br>(28 - 77)          |
| Forces of nature, war, and legal intervention   | 0<br>(0 - 0)                | 0<br>(0 - 0)          | --                     | --                       | --                       | 0<br>(0 - 0)             |
| Exposure to forces of nature                    | 0<br>(0 - 0)                | 0<br>(0 - 0)          | --                     | --                       | --                       | 0<br>(0 - 0)             |

Web Table 31- Taiwan deaths with 95% UI by age, sex, and cause in 2013

| Cause                                                              | Males, All Ages              | Males, 0-4 Years   | Males, 5-14 Years  | Males, 15-49 Years          | Males, 50-69 Years          | Males, 70-80 Years          |
|--------------------------------------------------------------------|------------------------------|--------------------|--------------------|-----------------------------|-----------------------------|-----------------------------|
| All causes                                                         | 97,930<br>(95,481 - 100,255) | 540<br>(473 - 604) | 231<br>(214 - 247) | 12,359<br>(11,932 - 12,778) | 27,804<br>(26,937 - 28,640) | 56,996<br>(55,843 - 58,099) |
| Communicable, maternal, neonatal, and nutritional diseases         | 9,526<br>(7,318 - 11,155)    | 223<br>(194 - 260) | 20<br>(16 - 26)    | 535<br>(452 - 611)          | 1,443<br>(1,135 - 1,671)    | 7,304<br>(5,496 - 8,925)    |
| HIV/AIDS and tuberculosis                                          | 894<br>(766 - 1,090)         | 0<br>(0 - 1)       | 1<br>(1 - 1)       | 155<br>(120 - 205)          | 170<br>(144 - 211)          | 568<br>(458 - 720)          |
| Tuberculosis                                                       | 717<br>(598 - 899)           | 0<br>(0 - 1)       | 1<br>(0 - 1)       | 36<br>(30 - 45)             | 122<br>(103 - 158)          | 558<br>(450 - 711)          |
| HIV/AIDS                                                           | 176<br>(129 - 246)           | 0<br>(0 - 0)       | 0<br>(0 - 1)       | 118<br>(85 - 166)           | 48<br>(32 - 71)             | 9<br>(5 - 15)               |
| HIV/AIDS resulting in mycobacterial infection                      | 11<br>(7 - 16)               | 0<br>(0 - 0)       | 0<br>(0 - 0)       | 7<br>(5 - 10)               | 3<br>(2 - 5)                | 1<br>(0 - 1)                |
| HIV/AIDS resulting in other diseases                               | 166<br>(121 - 231)           | 0<br>(0 - 0)       | 0<br>(0 - 1)       | 111<br>(80 - 156)           | 45<br>(30 - 67)             | 9<br>(5 - 14)               |
| Diarrrhea, lower respiratory, and other common infectious diseases | 7,958<br>(5,754 - 9,589)     | 47<br>(32 - 78)    | 16<br>(12 - 22)    | 310<br>(238 - 374)          | 1,119<br>(812 - 1,355)      | 6,465<br>(4,638 - 8,104)    |
| Diarrrheal diseases                                                | 81<br>(65 - 102)             | 2<br>(1 - 4)       | 1<br>(0 - 1)       | 12<br>(9 - 16)              | 17<br>(12 - 23)             | 50<br>(35 - 70)             |
| Intestinal infectious diseases                                     | 9<br>(4 - 18)                | 2<br>(1 - 5)       | 2<br>(1 - 4)       | 3<br>(1 - 7)                | 1<br>(0 - 4)                | 1<br>(0 - 3)                |
| Typhoid fever                                                      | 6<br>(3 - 13)                | 1<br>(1 - 3)       | 1<br>(0 - 3)       | 2<br>(1 - 5)                | 1<br>(0 - 2)                | 1<br>(0 - 1)                |
| Paratyphoid fever                                                  | 2<br>(1 - 4)                 | 1<br>(0 - 1)       | 0<br>(0 - 1)       | 1<br>(0 - 1)                | 0<br>(0 - 1)                | 0<br>(0 - 0)                |
| Other intestinal infectious diseases                               | 2<br>(0 - 6)                 | 0<br>(0 - 2)       | 0<br>(0 - 1)       | 1<br>(0 - 3)                | 0<br>(0 - 2)                | 0<br>(0 - 2)                |
| Lower respiratory infections                                       | 7,683<br>(5,500 - 9,316)     | 20<br>(13 - 29)    | 7<br>(5 - 10)      | 256<br>(185 - 318)          | 1,055<br>(743 - 1,290)      | 6,346<br>(4,497 - 7,987)    |
| Upper respiratory infections                                       | 2<br>(1 - 6)                 | 0<br>(0 - 0)       | 0<br>(0 - 0)       | 0<br>(0 - 1)                | 1<br>(0 - 2)                | 1<br>(0 - 5)                |
| Otitis media                                                       | 6<br>(5 - 7)                 | 0<br>(0 - 0)       | 0<br>(0 - 0)       | 1<br>(1 - 1)                | 1<br>(1 - 2)                | 4<br>(3 - 5)                |
| Meningitis                                                         | 100<br>(80 - 122)            | 5<br>(3 - 9)       | 1<br>(1 - 1)       | 22<br>(17 - 29)             | 28<br>(21 - 37)             | 43<br>(29 - 62)             |
| Pneumococcal meningitis                                            | 28<br>(16 - 39)              | 1<br>(0 - 2)       | 0<br>(0 - 0)       | 6<br>(3 - 9)                | 7<br>(3 - 12)               | 14<br>(7 - 22)              |
| H influenzae type B meningitis                                     | 7<br>(4 - 11)                | 1<br>(0 - 1)       | 0<br>(0 - 0)       | 2<br>(1 - 3)                | 2<br>(1 - 3)                | 3<br>(1 - 6)                |
| Meningococcal meningitis                                           | 18<br>(12 - 25)              | 1<br>(0 - 2)       | 0<br>(0 - 0)       | 4<br>(2 - 6)                | 5<br>(3 - 8)                | 8<br>(4 - 14)               |
| Other meningitis                                                   | 47<br>(36 - 62)              | 3<br>(2 - 5)       | 1<br>(0 - 1)       | 11<br>(7 - 16)              | 15<br>(10 - 20)             | 18<br>(10 - 28)             |
| Encephalitis                                                       | 55<br>(38 - 71)              | 8<br>(4 - 15)      | 4<br>(2 - 6)       | 13<br>(9 - 18)              | 14<br>(9 - 19)              | 16<br>(10 - 21)             |
| Diphtheria                                                         | 0<br>(0 - 2)                 | 0<br>(0 - 1)       | 0<br>(0 - 0)       | 0<br>(0 - 1)                | 0<br>(0 - 1)                | --<br>(0 - 1)               |
| Whooping cough                                                     | 6<br>(0 - 31)                | 6<br>(0 - 26)      | 1<br>(0 - 2)       | 0<br>(0 - 1)                | 0<br>(0 - 0)                | --<br>(0 - 0)               |
| Tetanus                                                            | 2<br>(1 - 3)                 | 0<br>(0 - 0)       | 0<br>(0 - 0)       | 1<br>(0 - 1)                | 1<br>(0 - 1)                | 1<br>(0 - 1)                |
| Measles                                                            | 5<br>(0 - 24)                | 4<br>(0 - 19)      | 1<br>(0 - 4)       | 0<br>(0 - 1)                | 0<br>(0 - 0)                | --<br>(0 - 0)               |
| Varicella and herpes zoster                                        | 7<br>(2 - 27)                | 0<br>(0 - 2)       | 0<br>(0 - 1)       | 1<br>(0 - 3)                | 1<br>(0 - 3)                | 5<br>(0 - 25)               |
| Neglected tropical diseases and malaria                            | 11<br>(9 - 15)               | 0<br>(0 - 2)       | 1<br>(0 - 1)       | 4<br>(3 - 5)                | 4<br>(3 - 5)                | 2<br>(2 - 4)                |
| Leishmaniasis                                                      | 0<br>(0 - 0)                 | 0<br>(0 - 0)       | 0<br>(0 - 0)       | 0<br>(0 - 0)                | 0<br>(0 - 0)                | 0<br>(0 - 0)                |
| Visceral leishmaniasis                                             | 0<br>(0 - 0)                 | 0<br>(0 - 0)       | 0<br>(0 - 0)       | 0<br>(0 - 0)                | 0<br>(0 - 0)                | 0<br>(0 - 0)                |
| Cysticercosis                                                      | 0<br>(0 - 0)                 | 0<br>(0 - 0)       | 0<br>(0 - 0)       | 0<br>(0 - 0)                | 0<br>(0 - 0)                | 0<br>(0 - 0)                |
| Cystic echinococcosis                                              | 1<br>(1 - 1)                 | 0<br>(0 - 0)       | 0<br>(0 - 0)       | 0<br>(0 - 0)                | 0<br>(0 - 0)                | 0<br>(0 - 0)                |
| Dengue                                                             | 2<br>(2 - 3)                 | 0<br>(0 - 0)       | 0<br>(0 - 0)       | 1<br>(1 - 1)                | 1<br>(1 - 1)                | 1<br>(0 - 1)                |
| Rabies                                                             | 1<br>(1 - 2)                 | 0<br>(0 - 0)       | 0<br>(0 - 0)       | 1<br>(0 - 1)                | 0<br>(0 - 0)                | 0<br>(0 - 0)                |
| Intestinal nematode infections                                     | 1<br>(0 - 4)                 | 0<br>(0 - 1)       | 0<br>(0 - 0)       | 0<br>(0 - 1)                | 0<br>(0 - 1)                | 0<br>(0 - 2)                |
| Ascariasis                                                         | 1<br>(0 - 4)                 | 0<br>(0 - 1)       | 0<br>(0 - 0)       | 0<br>(0 - 1)                | 0<br>(0 - 1)                | 0<br>(0 - 2)                |
| Other neglected tropical diseases                                  | 6<br>(4 - 7)                 | 0<br>(0 - 0)       | 0<br>(0 - 0)       | 2<br>(1 - 2)                | 2<br>(1 - 3)                | 1<br>(1 - 2)                |
| Maternal disorders                                                 | --                           | --                 | --                 | --                          | --                          | --                          |
| Maternal hemorrhage                                                | --                           | --                 | --                 | --                          | --                          | --                          |
| Maternal sepsis and other maternal infections                      | --                           | --                 | --                 | --                          | --                          | --                          |



Web Table 31- Taiwan deaths with 95% UI by age, sex, and cause in 2013

| Cause                                                            | Males, All Ages             | Males, 0-4 Years   | Males, 5-14 Years | Males, 15-49 Years       | Males, 50-69 Years          | Males, 70-80 Years          |
|------------------------------------------------------------------|-----------------------------|--------------------|-------------------|--------------------------|-----------------------------|-----------------------------|
| Maternal hypertensive disorders                                  | --                          | --                 | --                | --                       | --                          | --                          |
| Maternal obstructed labor                                        | --                          | --                 | --                | --                       | --                          | --                          |
| Maternal abortive outcome                                        | --                          | --                 | --                | --                       | --                          | --                          |
| Indirect maternal deaths                                         | --                          | --                 | --                | --                       | --                          | --                          |
| Late maternal deaths                                             | --                          | --                 | --                | --                       | --                          | --                          |
| Maternal deaths aggravated by HIV/AIDS                           | --                          | --                 | --                | --                       | --                          | --                          |
| Other maternal disorders                                         | --                          | --                 | --                | --                       | --                          | --                          |
| Neonatal disorders                                               | 168<br>(147 - 192)          | 168<br>(147 - 192) | --                | --                       | --                          | --                          |
| Neonatal preterm birth complications                             | 71<br>(47 - 99)             | 71<br>(47 - 99)    | --                | --                       | --                          | --                          |
| Neonatal encephalopathy due to birth asphyxia and trauma         | 23<br>(13 - 38)             | 23<br>(13 - 38)    | --                | --                       | --                          | --                          |
| Neonatal sepsis and other neonatal infections                    | 9<br>(2 - 21)               | 9<br>(2 - 21)      | --                | --                       | --                          | --                          |
| Hemolytic disease and other neonatal jaundice                    | 0<br>(0 - 1)                | 0<br>(0 - 1)       | --                | --                       | --                          | --                          |
| Other neonatal disorders                                         | 65<br>(44 - 89)             | 65<br>(44 - 89)    | --                | --                       | --                          | --                          |
| Nutritional deficiencies                                         | 183<br>(114 - 265)          | 1<br>(1 - 2)       | 1<br>(0 - 1)      | 18<br>(11 - 25)          | 39<br>(22 - 55)             | 124<br>(73 - 186)           |
| Protein-energy malnutrition                                      | 107<br>(54 - 162)           | 1<br>(0 - 1)       | 0<br>(0 - 1)      | 11<br>(5 - 16)           | 28<br>(15 - 40)             | 67<br>(31 - 107)            |
| Iodine deficiency                                                | 2<br>(0 - 7)                | 0<br>(0 - 0)       | 0<br>(0 - 0)      | 0<br>(0 - 1)             | 0<br>(0 - 2)                | 1<br>(0 - 7)                |
| Iron-deficiency anemia                                           | 66<br>(29 - 118)            | 0<br>(0 - 1)       | 0<br>(0 - 0)      | 6<br>(3 - 10)            | 9<br>(4 - 17)               | 50<br>(22 - 93)             |
| Other nutritional deficiencies                                   | 8<br>(3 - 18)               | 0<br>(0 - 0)       | 0<br>(0 - 0)      | 1<br>(0 - 1)             | 1<br>(1 - 3)                | 6<br>(2 - 13)               |
| Other communicable, maternal, neonatal, and nutritional diseases | 312<br>(225 - 430)          | 5<br>(3 - 10)      | 1<br>(1 - 2)      | 50<br>(39 - 62)          | 111<br>(84 - 148)           | 145<br>(79 - 253)           |
| Sexually transmitted diseases excluding HIV                      | 3<br>(2 - 4)                | 1<br>(0 - 2)       | 0<br>(0 - 0)      | 1<br>(0 - 1)             | 1<br>(0 - 1)                | 1<br>(0 - 2)                |
| Syphilis                                                         | 2<br>(1 - 3)                | 1<br>(0 - 2)       | 0<br>(0 - 0)      | 0<br>(0 - 0)             | 0<br>(0 - 1)                | 1<br>(0 - 1)                |
| Chlamydial infection                                             | --                          | --                 | --                | --                       | --                          | --                          |
| Gonococcal infection                                             | 0<br>(0 - 1)                | --                 | 0<br>(0 - 0)      | 0<br>(0 - 0)             | 0<br>(0 - 0)                | 0<br>(0 - 0)                |
| Other sexually transmitted diseases                              | 0<br>(0 - 0)                | --                 | 0<br>(0 - 0)      | 0<br>(0 - 0)             | 0<br>(0 - 0)                | 0<br>(0 - 0)                |
| Hepatitis                                                        | 147<br>(129 - 169)          | 0<br>(0 - 1)       | 0<br>(0 - 0)      | 33<br>(26 - 41)          | 69<br>(56 - 85)             | 45<br>(35 - 56)             |
| Acute hepatitis A                                                | 6<br>(2 - 14)               | 0<br>(0 - 0)       | 0<br>(0 - 0)      | 3<br>(1 - 6)             | 2<br>(1 - 6)                | 1<br>(0 - 2)                |
| Acute hepatitis B                                                | 126<br>(106 - 148)          | 0<br>(0 - 1)       | 0<br>(0 - 0)      | 23<br>(16 - 32)          | 61<br>(48 - 75)             | 42<br>(32 - 52)             |
| Acute hepatitis C                                                | 5<br>(1 - 12)               | --                 | 0<br>(0 - 0)      | 1<br>(0 - 4)             | 2<br>(0 - 6)                | 1<br>(0 - 3)                |
| Acute hepatitis E                                                | 11<br>(4 - 21)              | 0<br>(0 - 0)       | 0<br>(0 - 0)      | 6<br>(3 - 11)            | 4<br>(1 - 9)                | 1<br>(0 - 3)                |
| Other infectious diseases                                        | 163<br>(75 - 279)           | 4<br>(2 - 9)       | 1<br>(1 - 2)      | 16<br>(8 - 25)           | 41<br>(17 - 71)             | 100<br>(33 - 209)           |
| Non-communicable diseases                                        | 78,297<br>(75,822 - 80,809) | 220<br>(183 - 257) | 99<br>(87 - 110)  | 7,880<br>(7,387 - 8,275) | 23,462<br>(22,626 - 24,289) | 46,636<br>(44,877 - 48,561) |
| Neoplasms                                                        | 28,568<br>(26,595 - 30,220) | 27<br>(17 - 38)    | 49<br>(41 - 57)   | 3,147<br>(2,730 - 3,443) | 11,332<br>(10,519 - 12,036) | 14,014<br>(12,935 - 15,012) |
| Esophageal cancer                                                | 1,311<br>(782 - 1,691)      | --                 | --                | 226<br>(99 - 351)        | 740<br>(427 - 983)          | 345<br>(226 - 442)          |
| Stomach cancer                                                   | 2,091<br>(1,841 - 2,385)    | --                 | --                | 132<br>(111 - 156)       | 658<br>(575 - 752)          | 1,301<br>(1,083 - 1,550)    |
| Liver cancer                                                     | 6,505<br>(5,773 - 7,313)    | --                 | 2<br>(1 - 3)      | 873<br>(724 - 1,046)     | 3,141<br>(2,698 - 3,616)    | 2,489<br>(2,041 - 3,057)    |
| Liver cancer due to hepatitis B                                  | 2,659<br>(1,523 - 3,845)    | --                 | 1<br>(1 - 2)      | 448<br>(274 - 649)       | 1,368<br>(710 - 2,030)      | 843<br>(436 - 1,316)        |
| Liver cancer due to hepatitis C                                  | 2,955<br>(1,778 - 4,243)    | --                 | 0<br>(0 - 1)      | 313<br>(139 - 498)       | 1,378<br>(710 - 2,106)      | 1,264<br>(763 - 1,815)      |
| Liver cancer due to alcohol use                                  | 500<br>(288 - 768)          | --                 | --                | 37<br>(15 - 92)          | 203<br>(103 - 358)          | 260<br>(144 - 429)          |
| Liver cancer due to other causes                                 | 391<br>(224 - 697)          | --                 | 1<br>(0 - 1)      | 75<br>(43 - 142)         | 193<br>(100 - 373)          | 122<br>(66 - 211)           |
| Larynx cancer                                                    | 208<br>(117 - 251)          | --                 | --                | 20<br>(10 - 26)          | 88<br>(53 - 108)            | 100<br>(51 - 129)           |

Web Table 31- Taiwan deaths with 95% UI by age, sex, and cause in 2013

| Cause                                         | Males, All Ages             | Males, 0-4 Years | Males, 5-14 Years | Males, 15-49 Years       | Males, 50-69 Years       | Males, 70-80 Years          |
|-----------------------------------------------|-----------------------------|------------------|-------------------|--------------------------|--------------------------|-----------------------------|
| Tracheal, bronchus and lung cancer            | 6,341<br>(5,774 - 7,219)    | --               | --                | 324<br>(276 - 387)       | 2,244<br>(2,029 - 2,576) | 3,773<br>(3,307 - 4,374)    |
| Breast cancer                                 | 13<br>(9 - 19)              | --               | --                | 1<br>(1 - 2)             | 3<br>(2 - 5)             | 9<br>(5 - 15)               |
| Cervical cancer                               | --                          | --               | --                | --                       | --                       | --                          |
| Uterine cancer                                | --                          | --               | --                | --                       | --                       | --                          |
| Prostate cancer                               | 1,040<br>(449 - 1,466)      | --               | --                | 3<br>(2 - 6)             | 136<br>(58 - 202)        | 900<br>(385 - 1,290)        |
| Colon and rectum cancer                       | 3,336<br>(3,029 - 3,687)    | --               | --                | 263<br>(230 - 298)       | 1,199<br>(1,073 - 1,338) | 1,874<br>(1,603 - 2,177)    |
| Lip and oral cavity cancer                    | 857<br>(351 - 1,200)        | --               | --                | 281<br>(117 - 416)       | 452<br>(175 - 681)       | 124<br>(53 - 191)           |
| Nasopharynx cancer                            | 621<br>(532 - 717)          | --               | 0<br>(0 - 1)      | 178<br>(143 - 221)       | 322<br>(254 - 402)       | 121<br>(90 - 156)           |
| Other pharynx cancer                          | 630<br>(239 - 771)          | --               | --                | 158<br>(57 - 207)        | 349<br>(127 - 441)       | 123<br>(54 - 162)           |
| Gallbladder and biliary tract cancer          | 315<br>(128 - 390)          | --               | --                | 24<br>(10 - 32)          | 121<br>(55 - 154)        | 170<br>(59 - 222)           |
| Pancreatic cancer                             | 1,090<br>(980 - 1,210)      | --               | --                | 93<br>(79 - 109)         | 453<br>(396 - 513)       | 545<br>(456 - 644)          |
| Malignant skin melanoma                       | 59<br>(23 - 78)             | --               | --                | 8<br>(3 - 11)            | 23<br>(9 - 32)           | 28<br>(11 - 41)             |
| Non-melanoma skin cancer                      | 75<br>(52 - 112)            | --               | --                | 9<br>(6 - 13)            | 19<br>(13 - 29)          | 47<br>(31 - 74)             |
| Ovarian cancer                                | --                          | --               | --                | --                       | --                       | --                          |
| Testicular cancer                             | 14<br>(7 - 19)              | --               | --                | 9<br>(4 - 14)            | 2<br>(2 - 3)             | 2<br>(1 - 3)                |
| Kidney cancer                                 | 446<br>(384 - 525)          | 0<br>(0 - 0)     | 0<br>(0 - 1)      | 34<br>(27 - 42)          | 171<br>(141 - 203)       | 241<br>(192 - 306)          |
| Bladder cancer                                | 580<br>(341 - 705)          | --               | --                | 16<br>(12 - 21)          | 145<br>(106 - 177)       | 418<br>(217 - 530)          |
| Brain and nervous system cancer               | 316<br>(187 - 424)          | 5<br>(2 - 9)     | 12<br>(6 - 17)    | 88<br>(53 - 121)         | 125<br>(83 - 187)        | 87<br>(39 - 115)            |
| Thyroid cancer                                | 72<br>(55 - 88)             | --               | 0<br>(0 - 0)      | 7<br>(5 - 11)            | 29<br>(21 - 37)          | 36<br>(24 - 47)             |
| Mesothelioma                                  | 58<br>(46 - 74)             | --               | --                | 3<br>(2 - 5)             | 19<br>(14 - 26)          | 35<br>(25 - 50)             |
| Hodgkin lymphoma                              | 20<br>(15 - 28)             | 0<br>(0 - 0)     | 0<br>(0 - 1)      | 6<br>(4 - 8)             | 7<br>(4 - 11)            | 7<br>(4 - 11)               |
| Non-Hodgkin lymphoma                          | 889<br>(316 - 1,258)        | 1<br>(1 - 3)     | 3<br>(2 - 5)      | 109<br>(50 - 151)        | 335<br>(125 - 480)       | 440<br>(129 - 681)          |
| Multiple myeloma                              | 185<br>(98 - 244)           | --               | --                | 12<br>(8 - 16)           | 75<br>(41 - 98)          | 98<br>(46 - 145)            |
| Leukemia                                      | 596<br>(533 - 666)          | 8<br>(5 - 15)    | 15<br>(11 - 20)   | 121<br>(106 - 137)       | 176<br>(151 - 203)       | 275<br>(224 - 333)          |
| Other neoplasms                               | 901<br>(760 - 1,034)        | 12<br>(7 - 18)   | 15<br>(11 - 20)   | 149<br>(122 - 175)       | 300<br>(243 - 361)       | 424<br>(329 - 529)          |
| Cardiovascular diseases                       | 21,491<br>(20,176 - 23,219) | 12<br>(8 - 18)   | 13<br>(10 - 17)   | 1,770<br>(1,615 - 1,945) | 5,649<br>(5,285 - 6,065) | 14,047<br>(12,948 - 15,437) |
| Rheumatic heart disease                       | 95<br>(72 - 156)            | 0<br>(0 - 0)     | 0<br>(0 - 1)      | 10<br>(7 - 16)           | 28<br>(20 - 45)          | 56<br>(41 - 97)             |
| Ischemic heart disease                        | 9,452<br>(8,161 - 11,159)   | 1<br>(0 - 1)     | 2<br>(1 - 3)      | 756<br>(633 - 892)       | 2,580<br>(2,228 - 2,984) | 6,112<br>(5,110 - 7,322)    |
| Cerebrovascular disease                       | 8,158<br>(6,949 - 9,765)    | 4<br>(3 - 7)     | 4<br>(3 - 6)      | 608<br>(496 - 748)       | 2,148<br>(1,830 - 2,523) | 5,393<br>(4,505 - 6,567)    |
| Ischemic stroke                               | 3,771<br>(3,030 - 4,707)    | 0<br>(0 - 0)     | 0<br>(0 - 0)      | 54<br>(37 - 77)          | 631<br>(493 - 816)       | 3,086<br>(2,436 - 3,903)    |
| Hemorrhagic stroke                            | 4,387<br>(3,611 - 5,312)    | 4<br>(3 - 7)     | 4<br>(2 - 5)      | 554<br>(451 - 677)       | 1,517<br>(1,269 - 1,826) | 2,307<br>(1,758 - 2,995)    |
| Hypertensive heart disease                    | 1,680<br>(1,137 - 2,423)    | 0<br>(0 - 0)     | 0<br>(0 - 0)      | 105<br>(68 - 144)        | 352<br>(232 - 487)       | 1,223<br>(776 - 1,837)      |
| Cardiomyopathy and myocarditis                | 346<br>(252 - 425)          | 4<br>(2 - 7)     | 5<br>(3 - 7)      | 120<br>(78 - 149)        | 108<br>(74 - 141)        | 109<br>(75 - 158)           |
| Atrial fibrillation and flutter               | 71<br>(47 - 101)            | --               | --                | 2<br>(1 - 2)             | 9<br>(6 - 12)            | 61<br>(38 - 89)             |
| Aortic aneurysm                               | 567<br>(465 - 706)          | --               | --                | 53<br>(43 - 66)          | 169<br>(137 - 207)       | 345<br>(266 - 451)          |
| Peripheral vascular disease                   | 5<br>(4 - 7)                | --               | --                | 0<br>(0 - 0)             | 1<br>(1 - 1)             | 4<br>(3 - 6)                |
| Endocarditis                                  | 272<br>(158 - 381)          | 0<br>(0 - 1)     | 0<br>(0 - 1)      | 36<br>(22 - 52)          | 70<br>(42 - 101)         | 165<br>(90 - 242)           |
| Other cardiovascular and circulatory diseases | 846<br>(683 - 1,089)        | 2<br>(1 - 4)     | 1<br>(1 - 2)      | 79<br>(62 - 99)          | 183<br>(144 - 236)       | 580<br>(442 - 781)          |
| Chronic respiratory diseases                  | 7,481<br>(6,507 - 8,853)    | 6<br>(4 - 9)     | 2<br>(2 - 3)      | 132<br>(110 - 160)       | 866<br>(752 - 1,061)     | 6,475<br>(5,537 - 7,702)    |
| Chronic obstructive pulmonary disease         | 5,655<br>(4,818 - 6,737)    | 2<br>(1 - 4)     | 1<br>(0 - 1)      | 65<br>(53 - 82)          | 543<br>(458 - 668)       | 5,045<br>(4,260 - 6,020)    |

Web Table 31- Taiwan deaths with 95% UI by age, sex, and cause in 2013

| Cause                                               | Males, All Ages          | Males, 0-4 Years | Males, 5-14 Years | Males, 15-49 Years       | Males, 50-69 Years       | Males, 70-80 Years       |
|-----------------------------------------------------|--------------------------|------------------|-------------------|--------------------------|--------------------------|--------------------------|
| Pneumoconiosis                                      | 259<br>(174 - 375)       | 0<br>(0 - 0)     | 0<br>(0 - 0)      | 12<br>(8 - 17)           | 54<br>(37 - 80)          | 193<br>(124 - 284)       |
| Silicosis                                           | 81<br>(54 - 119)         | 0<br>(0 - 0)     | 0<br>(0 - 0)      | 2<br>(1 - 3)             | 15<br>(10 - 23)          | 64<br>(42 - 98)          |
| Asbestosis                                          | 26<br>(16 - 39)          | 0<br>(0 - 0)     | 0<br>(0 - 0)      | 1<br>(1 - 2)             | 4<br>(3 - 6)             | 21<br>(12 - 32)          |
| Coal workers pneumoconiosis                         | 42<br>(28 - 62)          | 0<br>(0 - 0)     | 0<br>(0 - 0)      | 1<br>(1 - 2)             | 9<br>(6 - 13)            | 32<br>(20 - 48)          |
| Other pneumoconiosis                                | 109<br>(73 - 159)        | 0<br>(0 - 0)     | 0<br>(0 - 0)      | 7<br>(5 - 10)            | 26<br>(18 - 39)          | 75<br>(47 - 115)         |
| Asthma                                              | 397<br>(318 - 501)       | 1<br>(0 - 2)     | 1<br>(1 - 1)      | 37<br>(30 - 46)          | 83<br>(65 - 106)         | 276<br>(204 - 369)       |
| Interstitial lung disease and pulmonary sarcoidosis | 884<br>(591 - 1,336)     | 1<br>(0 - 1)     | 0<br>(0 - 0)      | 10<br>(7 - 14)           | 159<br>(112 - 221)       | 714<br>(458 - 1,141)     |
| Other chronic respiratory diseases                  | 286<br>(209 - 394)       | 2<br>(1 - 3)     | 0<br>(0 - 0)      | 8<br>(6 - 11)            | 28<br>(21 - 36)          | 248<br>(173 - 352)       |
| Cirrhosis                                           | 4,260<br>(3,929 - 4,623) | 1<br>(1 - 2)     | 1<br>(0 - 1)      | 1,510<br>(1,340 - 1,677) | 1,779<br>(1,593 - 2,001) | 968<br>(820 - 1,136)     |
| Cirrhosis due to hepatitis B                        | 1,607<br>(958 - 2,280)   | 0<br>(0 - 0)     | 0<br>(0 - 0)      | 621<br>(377 - 898)       | 669<br>(378 - 975)       | 316<br>(151 - 497)       |
| Cirrhosis due to hepatitis C                        | 964<br>(490 - 1,472)     | 0<br>(0 - 0)     | 0<br>(0 - 0)      | 331<br>(143 - 527)       | 406<br>(188 - 655)       | 226<br>(81 - 367)        |
| Cirrhosis due to alcohol use                        | 1,382<br>(830 - 1,917)   | --               | --                | 398<br>(221 - 586)       | 593<br>(353 - 834)       | 391<br>(234 - 562)       |
| Cirrhosis due to other causes                       | 307<br>(168 - 471)       | 1<br>(0 - 2)     | 0<br>(0 - 1)      | 159<br>(88 - 254)        | 111<br>(53 - 180)        | 36<br>(17 - 58)          |
| Digestive diseases                                  | 2,073<br>(1,791 - 2,388) | 5<br>(3 - 8)     | 3<br>(2 - 4)      | 192<br>(163 - 221)       | 439<br>(376 - 517)       | 1,434<br>(1,189 - 1,736) |
| Peptic ulcer disease                                | 449<br>(338 - 581)       | 0<br>(0 - 1)     | 0<br>(0 - 0)      | 34<br>(24 - 45)          | 105<br>(80 - 139)        | 309<br>(213 - 421)       |
| Gastritis and duodenitis                            | 6<br>(4 - 11)            | 0<br>(0 - 0)     | 0<br>(0 - 0)      | 1<br>(1 - 3)             | 2<br>(1 - 3)             | 3<br>(1 - 6)             |
| Appendicitis                                        | 36<br>(22 - 53)          | 0<br>(0 - 0)     | 0<br>(0 - 0)      | 2<br>(1 - 3)             | 7<br>(5 - 10)            | 27<br>(15 - 43)          |
| Paralytic ileus and intestinal obstruction          | 304<br>(181 - 510)       | 1<br>(0 - 2)     | 0<br>(0 - 0)      | 14<br>(8 - 23)           | 51<br>(30 - 85)          | 238<br>(134 - 408)       |
| Inguinal, femoral, and abdominal hernia             | 39<br>(21 - 62)          | 0<br>(0 - 0)     | 0<br>(0 - 0)      | 2<br>(1 - 3)             | 7<br>(4 - 10)            | 30<br>(15 - 49)          |
| Inflammatory bowel disease                          | 56<br>(37 - 76)          | 1<br>(1 - 2)     | 0<br>(0 - 1)      | 7<br>(4 - 9)             | 14<br>(9 - 19)           | 34<br>(21 - 50)          |
| Vascular intestinal disorders                       | 277<br>(120 - 530)       | 0<br>(0 - 1)     | 0<br>(0 - 1)      | 11<br>(4 - 23)           | 54<br>(22 - 105)         | 212<br>(91 - 410)        |
| Gallbladder and biliary diseases                    | 448<br>(310 - 606)       | 0<br>(0 - 1)     | 0<br>(0 - 0)      | 19<br>(13 - 25)          | 74<br>(51 - 99)          | 355<br>(229 - 503)       |
| Pancreatitis                                        | 230<br>(163 - 316)       | 0<br>(0 - 1)     | 1<br>(0 - 1)      | 74<br>(55 - 96)          | 63<br>(44 - 92)          | 92<br>(56 - 144)         |
| Other digestive diseases                            | 227<br>(169 - 300)       | 1<br>(0 - 2)     | 0<br>(0 - 1)      | 28<br>(20 - 37)          | 62<br>(46 - 84)          | 134<br>(89 - 194)        |
| Neurological disorders                              | 3,337<br>(2,732 - 4,014) | 8<br>(5 - 12)    | 6<br>(4 - 8)      | 116<br>(92 - 138)        | 321<br>(275 - 375)       | 2,886<br>(2,283 - 3,560) |
| Alzheimer disease and other dementias               | 2,359<br>(1,779 - 2,986) | --               | --                | 1<br>(0 - 2)             | 123<br>(92 - 162)        | 2,235<br>(1,652 - 2,860) |
| Parkinson disease                                   | 603<br>(417 - 894)       | --               | --                | 3<br>(2 - 4)             | 70<br>(54 - 91)          | 530<br>(349 - 817)       |
| Epilepsy                                            | 237<br>(180 - 289)       | 6<br>(3 - 9)     | 3<br>(2 - 5)      | 82<br>(61 - 105)         | 67<br>(50 - 88)          | 79<br>(55 - 111)         |
| Multiple sclerosis                                  | 3<br>(2 - 6)             | --               | --                | 1<br>(1 - 2)             | 2<br>(1 - 3)             | 1<br>(0 - 1)             |
| Other neurological disorders                        | 135<br>(101 - 160)       | 2<br>(2 - 3)     | 3<br>(2 - 5)      | 28<br>(20 - 34)          | 60<br>(45 - 74)          | 41<br>(30 - 51)          |
| Mental and substance use disorders                  | 571<br>(442 - 669)       | 0<br>(0 - 1)     | 0<br>(0 - 0)      | 336<br>(266 - 401)       | 193<br>(137 - 238)       | 42<br>(33 - 51)          |
| Schizophrenia                                       | 38<br>(26 - 55)          | --               | --                | 11<br>(7 - 16)           | 20<br>(13 - 29)          | 7<br>(5 - 11)            |
| Alcohol use disorders                               | 285<br>(160 - 360)       | --               | --                | 142<br>(81 - 186)        | 128<br>(73 - 167)        | 15<br>(8 - 22)           |
| Drug use disorders                                  | 247<br>(215 - 280)       | 0<br>(0 - 1)     | --                | 182<br>(155 - 212)       | 45<br>(37 - 55)          | 19<br>(14 - 26)          |
| Opioid use disorders                                | 101<br>(87 - 117)        | 0<br>(0 - 0)     | --                | 75<br>(63 - 90)          | 17<br>(14 - 22)          | 8<br>(6 - 12)            |
| Cocaine use disorders                               | 19<br>(15 - 23)          | 0<br>(0 - 0)     | --                | 15<br>(11 - 19)          | 3<br>(2 - 4)             | 1<br>(1 - 2)             |
| Amphetamine use disorders                           | 18<br>(15 - 22)          | 0<br>(0 - 0)     | --                | 14<br>(11 - 17)          | 3<br>(3 - 5)             | 1<br>(1 - 2)             |
| Other drug use disorders                            | 108<br>(93 - 125)        | 0<br>(0 - 0)     | --                | 78<br>(64 - 93)          | 21<br>(17 - 27)          | 9<br>(6 - 12)            |
| Eating disorders                                    | 1<br>(1 - 2)             | --               | 0<br>(0 - 0)      | 1<br>(1 - 2)             | --                       | --                       |
| Anorexia nervosa                                    | 1<br>(1 - 2)             | --               | 0<br>(0 - 0)      | 1<br>(1 - 2)             | --                       | --                       |

Web Table 31- Taiwan deaths with 95% UI by age, sex, and cause in 2013

| Cause                                               | Males, All Ages           | Males, 0-4 Years   | Males, 5-14 Years | Males, 15-49 Years | Males, 50-69 Years       | Males, 70-80 Years       |
|-----------------------------------------------------|---------------------------|--------------------|-------------------|--------------------|--------------------------|--------------------------|
| Diabetes, urogenital, blood, and endocrine diseases | 9,587<br>(8,865 - 10,415) | 19<br>(12 - 26)    | 11<br>(9 - 14)    | 583<br>(521 - 644) | 2,713<br>(2,467 - 2,991) | 6,262<br>(5,618 - 6,990) |
| Diabetes mellitus                                   | 5,129<br>(4,628 - 5,715)  | 1<br>(0 - 1)       | 1<br>(1 - 1)      | 318<br>(276 - 369) | 1,702<br>(1,500 - 1,917) | 3,107<br>(2,680 - 3,602) |
| Acute glomerulonephritis                            | 3<br>(2 - 5)              | 0<br>(0 - 0)       | 0<br>(0 - 0)      | 1<br>(1 - 1)       | 1<br>(1 - 2)             | 1<br>(1 - 1)             |
| Chronic kidney disease                              | 2,606<br>(2,256 - 3,095)  | 1<br>(1 - 2)       | 1<br>(1 - 2)      | 129<br>(107 - 156) | 652<br>(561 - 772)       | 1,823<br>(1,484 - 2,241) |
| Chronic kidney disease due to diabetes mellitus     | 6<br>(3 - 13)             | 0<br>(0 - 0)       | 0<br>(0 - 0)      | 1<br>(1 - 3)       | 2<br>(1 - 3)             | 3<br>(1 - 7)             |
| Chronic kidney disease due to hypertension          | 1,246<br>(912 - 1,645)    | 0<br>(0 - 0)       | 0<br>(0 - 0)      | 56<br>(37 - 76)    | 320<br>(223 - 417)       | 870<br>(624 - 1,186)     |
| Chronic kidney disease due to glomerulonephritis    | 289<br>(169 - 400)        | 1<br>(0 - 1)       | 0<br>(0 - 0)      | 17<br>(10 - 24)    | 53<br>(32 - 74)          | 218<br>(123 - 319)       |
| Chronic kidney disease due to other causes          | 1,064<br>(726 - 1,551)    | 1<br>(0 - 1)       | 0<br>(0 - 1)      | 55<br>(35 - 79)    | 277<br>(188 - 419)       | 732<br>(453 - 1,093)     |
| Urinary diseases and male infertility               | 1,365<br>(1,031 - 1,677)  | 1<br>(1 - 2)       | 1<br>(1 - 1)      | 45<br>(33 - 55)    | 218<br>(165 - 267)       | 1,100<br>(796 - 1,404)   |
| Interstitial nephritis and urinary tract infections | 215<br>(127 - 359)        | 1<br>(0 - 1)       | 0<br>(0 - 0)      | 11<br>(7 - 18)     | 41<br>(24 - 64)          | 162<br>(81 - 297)        |
| Urolithiasis                                        | 42<br>(25 - 65)           | --                 | 0<br>(0 - 0)      | 2<br>(1 - 4)       | 11<br>(6 - 17)           | 28<br>(15 - 49)          |
| Other urinary diseases                              | 1,108<br>(799 - 1,412)    | 0<br>(0 - 1)       | 0<br>(0 - 1)      | 31<br>(21 - 40)    | 167<br>(122 - 206)       | 910<br>(617 - 1,212)     |
| Gynecological diseases                              | --                        | --                 | --                | --                 | --                       | --                       |
| Uterine fibroids                                    | --                        | --                 | --                | --                 | --                       | --                       |
| Polycystic ovarian syndrome                         | --                        | --                 | --                | --                 | --                       | --                       |
| Endometriosis                                       | --                        | --                 | --                | --                 | --                       | --                       |
| Genital prolapse                                    | --                        | --                 | --                | --                 | --                       | --                       |
| Other gynecological diseases                        | --                        | --                 | --                | --                 | --                       | --                       |
| Hemoglobinopathies and hemolytic anemias            | 115<br>(74 - 176)         | 3<br>(2 - 5)       | 2<br>(1 - 4)      | 14<br>(9 - 21)     | 30<br>(19 - 45)          | 65<br>(41 - 102)         |
| Thalassemias                                        | 13<br>(8 - 20)            | 3<br>(2 - 5)       | 2<br>(1 - 3)      | 7<br>(4 - 10)      | 1<br>(1 - 2)             | 0<br>(0 - 0)             |
| Sickle cell disorders                               | 0<br>(0 - 0)              | 0<br>(0 - 0)       | 0<br>(0 - 0)      | 0<br>(0 - 0)       | 0<br>(0 - 0)             | 0<br>(0 - 0)             |
| G6PD deficiency                                     | 4<br>(3 - 6)              | 0<br>(0 - 0)       | 0<br>(0 - 0)      | 1<br>(0 - 1)       | 3<br>(2 - 4)             | 1<br>(0 - 1)             |
| Other hemoglobinopathies and hemolytic anemias      | 97<br>(63 - 149)          | 0<br>(0 - 0)       | 0<br>(0 - 0)      | 7<br>(4 - 11)      | 26<br>(16 - 39)          | 64<br>(40 - 100)         |
| Endocrine, metabolic, blood, and immune disorders   | 369<br>(233 - 445)        | 12<br>(7 - 19)     | 6<br>(4 - 9)      | 76<br>(43 - 93)    | 109<br>(66 - 137)        | 166<br>(107 - 226)       |
| Musculoskeletal disorders                           | 288<br>(215 - 409)        | --                 | 1<br>(1 - 2)      | 32<br>(24 - 44)    | 75<br>(55 - 101)         | 179<br>(132 - 265)       |
| Rheumatoid arthritis                                | 30<br>(20 - 45)           | --                 | 0<br>(0 - 0)      | 2<br>(1 - 3)       | 8<br>(5 - 13)            | 19<br>(12 - 31)          |
| Other musculoskeletal disorders                     | 258<br>(190 - 366)        | --                 | 1<br>(1 - 2)      | 30<br>(22 - 42)    | 66<br>(49 - 90)          | 160<br>(117 - 239)       |
| Other non-communicable diseases                     | 642<br>(554 - 755)        | 143<br>(119 - 168) | 13<br>(9 - 17)    | 63<br>(54 - 73)    | 96<br>(79 - 113)         | 328<br>(252 - 430)       |
| Congenital anomalies                                | 230<br>(201 - 260)        | 124<br>(101 - 149) | 12<br>(9 - 17)    | 38<br>(31 - 46)    | 22<br>(18 - 28)          | 33<br>(25 - 42)          |
| Neural tube defects                                 | 3<br>(2 - 5)              | 2<br>(1 - 4)       | 0<br>(0 - 0)      | 1<br>(0 - 1)       | 0<br>(0 - 0)             | 0<br>(0 - 0)             |
| Congenital heart anomalies                          | 98<br>(81 - 117)          | 66<br>(51 - 83)    | 6<br>(4 - 9)      | 20<br>(15 - 25)    | 4<br>(3 - 6)             | 1<br>(1 - 2)             |
| Cleft lip and cleft palate                          | 0<br>(0 - 0)              | 0<br>(0 - 0)       | --                | --                 | --                       | --                       |
| Down syndrome                                       | 7<br>(4 - 10)             | 2<br>(1 - 3)       | 0<br>(0 - 1)      | 3<br>(2 - 5)       | 2<br>(1 - 3)             | 0<br>(0 - 0)             |
| Chromosomal unbalanced rearrangements               | 10<br>(8 - 14)            | 7<br>(5 - 11)      | 1<br>(1 - 2)      | 1<br>(1 - 2)       | 1<br>(0 - 1)             | 0<br>(0 - 0)             |
| Other congenital anomalies                          | 112<br>(95 - 130)         | 47<br>(34 - 63)    | 5<br>(3 - 7)      | 13<br>(10 - 17)    | 16<br>(13 - 20)          | 31<br>(24 - 40)          |
| Skin and subcutaneous diseases                      | 394<br>(315 - 497)        | 0<br>(0 - 1)       | 0<br>(0 - 0)      | 25<br>(19 - 32)    | 73<br>(57 - 90)          | 295<br>(221 - 395)       |
| Cellulitis                                          | 93<br>(60 - 135)          | 0<br>(0 - 0)       | 0<br>(0 - 0)      | 9<br>(6 - 13)      | 22<br>(14 - 31)          | 62<br>(37 - 95)          |
| Pyoderma                                            | 87<br>(63 - 118)          | 0<br>(0 - 0)       | 0<br>(0 - 0)      | 8<br>(5 - 11)      | 21<br>(15 - 28)          | 58<br>(39 - 86)          |
| Decubitus ulcer                                     | 185<br>(134 - 256)        | 0<br>(0 - 0)       | 0<br>(0 - 0)      | 6<br>(4 - 8)       | 27<br>(20 - 37)          | 151<br>(107 - 221)       |
| Other skin and subcutaneous diseases                | 30<br>(16 - 43)           | 0<br>(0 - 0)       | 0<br>(0 - 0)      | 2<br>(2 - 3)       | 4<br>(2 - 5)             | 24<br>(11 - 36)          |

Web Table 31- Taiwan deaths with 95% UI by age, sex, and cause in 2013

| Cause                                           | Males, All Ages            | Males, 0-4 Years | Males, 5-14 Years  | Males, 15-49 Years       | Males, 50-69 Years       | Males, 70-80 Years       |
|-------------------------------------------------|----------------------------|------------------|--------------------|--------------------------|--------------------------|--------------------------|
| Sudden infant death syndrome                    | 18<br>(8 - 31)             | 18<br>(8 - 31)   | --                 | --                       | --                       | --                       |
| Injuries                                        | 10,107<br>(9,454 - 11,349) | 97<br>(72 - 125) | 112<br>(100 - 125) | 3,944<br>(3,665 - 4,493) | 2,899<br>(2,625 - 3,352) | 3,056<br>(2,589 - 3,530) |
| Transport injuries                              | 3,284<br>(3,019 - 3,709)   | 30<br>(19 - 44)  | 49<br>(40 - 59)    | 1,438<br>(1,299 - 1,609) | 919<br>(798 - 1,117)     | 849<br>(701 - 1,026)     |
| Road injuries                                   | 3,168<br>(2,920 - 3,592)   | 28<br>(18 - 41)  | 46<br>(37 - 56)    | 1,392<br>(1,263 - 1,562) | 884<br>(769 - 1,081)     | 818<br>(678 - 983)       |
| Pedestrian road injuries                        | 556<br>(401 - 773)         | 11<br>(6 - 18)   | 12<br>(7 - 17)     | 154<br>(105 - 229)       | 124<br>(83 - 182)        | 256<br>(174 - 364)       |
| Cyclist road injuries                           | 318<br>(245 - 412)         | 3<br>(1 - 5)     | 8<br>(5 - 11)      | 79<br>(61 - 103)         | 97<br>(70 - 131)         | 131<br>(91 - 179)        |
| Motorcyclist road injuries                      | 1,033<br>(751 - 1,314)     | 6<br>(3 - 10)    | 12<br>(8 - 18)     | 524<br>(389 - 652)       | 286<br>(203 - 385)       | 205<br>(131 - 287)       |
| Motor vehicle road injuries                     | 1,232<br>(1,022 - 1,482)   | 8<br>(5 - 14)    | 14<br>(10 - 18)    | 622<br>(512 - 742)       | 369<br>(294 - 475)       | 219<br>(158 - 294)       |
| Other road injuries                             | 29<br>(18 - 45)            | 0<br>(0 - 1)     | 0<br>(0 - 1)       | 13<br>(7 - 19)           | 8<br>(4 - 13)            | 7<br>(4 - 13)            |
| Other transport injuries                        | 116<br>(90 - 138)          | 2<br>(1 - 3)     | 3<br>(2 - 5)       | 46<br>(34 - 57)          | 35<br>(25 - 47)          | 31<br>(21 - 43)          |
| Unintentional injuries                          | 3,462<br>(2,882 - 3,987)   | 61<br>(44 - 81)  | 48<br>(39 - 59)    | 759<br>(670 - 884)       | 923<br>(770 - 1,087)     | 1,671<br>(1,252 - 2,072) |
| Falls                                           | 1,407<br>(1,125 - 1,772)   | 9<br>(5 - 15)    | 6<br>(4 - 9)       | 310<br>(247 - 415)       | 434<br>(318 - 584)       | 648<br>(452 - 899)       |
| Drowning                                        | 378<br>(293 - 504)         | 16<br>(9 - 27)   | 29<br>(21 - 39)    | 151<br>(116 - 208)       | 111<br>(78 - 157)        | 71<br>(50 - 97)          |
| Fire, heat, and hot substances                  | 148<br>(100 - 192)         | 6<br>(3 - 11)    | 3<br>(2 - 4)       | 29<br>(20 - 39)          | 31<br>(21 - 40)          | 79<br>(47 - 114)         |
| Poisonings                                      | 77<br>(55 - 111)           | 1<br>(0 - 2)     | 2<br>(1 - 3)       | 26<br>(19 - 39)          | 21<br>(15 - 32)          | 27<br>(16 - 40)          |
| Exposure to mechanical forces                   | 180<br>(157 - 223)         | 10<br>(5 - 18)   | 3<br>(2 - 4)       | 72<br>(59 - 90)          | 59<br>(46 - 76)          | 35<br>(27 - 47)          |
| Unintentional firearm injuries                  | 3<br>(3 - 4)               | 0<br>(0 - 0)     | 0<br>(0 - 0)       | 2<br>(1 - 3)             | 1<br>(0 - 1)             | 1<br>(0 - 1)             |
| Unintentional suffocation                       | 22<br>(16 - 38)            | 6<br>(3 - 14)    | 0<br>(0 - 1)       | 4<br>(3 - 6)             | 5<br>(3 - 8)             | 7<br>(4 - 12)            |
| Other exposure to mechanical forces             | 155<br>(134 - 181)         | 3<br>(2 - 6)     | 3<br>(2 - 4)       | 67<br>(54 - 83)          | 54<br>(41 - 71)          | 28<br>(21 - 38)          |
| Adverse effects of medical treatment            | 733<br>(355 - 1,070)       | 3<br>(2 - 6)     | 1<br>(1 - 1)       | 67<br>(36 - 96)          | 158<br>(80 - 227)        | 504<br>(198 - 792)       |
| Animal contact                                  | 9<br>(7 - 15)              | 0<br>(0 - 0)     | 0<br>(0 - 0)       | 3<br>(2 - 5)             | 2<br>(1 - 3)             | 4<br>(3 - 7)             |
| Venomous animal contact                         | 4<br>(3 - 6)               | 0<br>(0 - 0)     | 0<br>(0 - 0)       | 2<br>(1 - 3)             | 1<br>(1 - 2)             | 1<br>(0 - 2)             |
| Non-venomous animal contact                     | 5<br>(4 - 8)               | 0<br>(0 - 0)     | 0<br>(0 - 0)       | 1<br>(1 - 1)             | 1<br>(0 - 1)             | 3<br>(2 - 6)             |
| Foreign body                                    | 430<br>(252 - 724)         | 15<br>(8 - 24)   | 3<br>(2 - 5)       | 46<br>(26 - 72)          | 81<br>(44 - 129)         | 285<br>(160 - 512)       |
| Pulmonary aspiration and foreign body in airway | 428<br>(250 - 723)         | 15<br>(8 - 24)   | 3<br>(2 - 5)       | 45<br>(25 - 71)          | 81<br>(44 - 128)         | 285<br>(159 - 512)       |
| Foreign body in other body part                 | 2<br>(1 - 3)               | 0<br>(0 - 0)     | 0<br>(0 - 0)       | 1<br>(0 - 1)             | 0<br>(0 - 1)             | 0<br>(0 - 1)             |
| Other unintentional injuries                    | 99<br>(85 - 115)           | 1<br>(0 - 1)     | 1<br>(1 - 2)       | 55<br>(45 - 67)          | 27<br>(20 - 34)          | 16<br>(12 - 20)          |
| Self-harm and interpersonal violence            | 3,360<br>(2,907 - 4,245)   | 6<br>(2 - 12)    | 14<br>(10 - 20)    | 1,747<br>(1,485 - 2,245) | 1,057<br>(851 - 1,381)   | 537<br>(393 - 726)       |
| Self-harm                                       | 2,962<br>(2,551 - 3,698)   | --               | 8<br>(4 - 14)      | 1,487<br>(1,236 - 1,806) | 970<br>(766 - 1,263)     | 497<br>(356 - 685)       |
| Interpersonal violence                          | 398<br>(286 - 817)         | 6<br>(2 - 12)    | 6<br>(3 - 11)      | 260<br>(168 - 578)       | 87<br>(54 - 178)         | 40<br>(19 - 68)          |
| Assault by firearm                              | 77<br>(38 - 204)           | 0<br>(0 - 1)     | 0<br>(0 - 1)       | 59<br>(28 - 161)         | 14<br>(7 - 37)           | 4<br>(1 - 8)             |
| Assault by sharp object                         | 63<br>(35 - 147)           | 1<br>(0 - 2)     | 1<br>(0 - 2)       | 40<br>(20 - 102)         | 16<br>(8 - 36)           | 5<br>(2 - 9)             |
| Assault by other means                          | 258<br>(183 - 520)         | 5<br>(1 - 10)    | 5<br>(2 - 8)       | 161<br>(102 - 359)       | 57<br>(35 - 119)         | 31<br>(14 - 54)          |
| Forces of nature, war, and legal intervention   | 0<br>(0 - 0)               | 0<br>(0 - 0)     | --                 | --                       | --                       | 0<br>(0 - 0)             |
| Exposure to forces of nature                    | 0<br>(0 - 0)               | 0<br>(0 - 0)     | --                 | --                       | --                       | 0<br>(0 - 0)             |

Web Table 31- Taiwan deaths with 95% UI by age, sex, and cause in 2013

| Cause                                                             | Females, All Ages           | Females, 0-4 Years | Females, 5-14 Years | Females, 15-49 Years     | Females, 50-69 Years        | Females, 70-80 Years        |
|-------------------------------------------------------------------|-----------------------------|--------------------|---------------------|--------------------------|-----------------------------|-----------------------------|
| All causes                                                        | 65,475<br>(63,614 - 67,482) | 441<br>(395 - 492) | 159<br>(148 - 169)  | 4,474<br>(4,285 - 4,685) | 13,782<br>(13,296 - 14,303) | 46,620<br>(45,382 - 47,892) |
| Communicable, maternal, neonatal, and nutritional diseases        | 6,145<br>(4,939 - 7,388)    | 183<br>(149 - 220) | 16<br>(13 - 21)     | 180<br>(159 - 202)       | 581<br>(484 - 676)          | 5,185<br>(4,013 - 6,413)    |
| HIV/AIDS and tuberculosis                                         | 273<br>(212 - 341)          | 1<br>(1 - 1)       | 1<br>(1 - 1)        | 30<br>(23 - 39)          | 34<br>(27 - 41)             | 207<br>(153 - 270)          |
| Tuberculosis                                                      | 247<br>(188 - 314)          | 1<br>(1 - 1)       | 0<br>(0 - 1)        | 11<br>(9 - 14)           | 28<br>(22 - 34)             | 207<br>(152 - 269)          |
| HIV/AIDS                                                          | 26<br>(18 - 39)             | 0<br>(0 - 0)       | 0<br>(0 - 1)        | 19<br>(13 - 28)          | 6<br>(4 - 9)                | 1<br>(0 - 2)                |
| HIV/AIDS resulting in mycobacterial infection                     | 1<br>(1 - 2)                | 0<br>(0 - 0)       | 0<br>(0 - 0)        | 1<br>(1 - 1)             | 0<br>(0 - 0)                | 0<br>(0 - 0)                |
| HIV/AIDS resulting in other diseases                              | 25<br>(17 - 38)             | 0<br>(0 - 0)       | 0<br>(0 - 1)        | 18<br>(12 - 27)          | 6<br>(4 - 9)                | 1<br>(0 - 1)                |
| Diarrhea, lower respiratory, and other common infectious diseases | 5,359<br>(4,161 - 6,597)    | 41<br>(28 - 68)    | 13<br>(9 - 18)      | 98<br>(81 - 117)         | 480<br>(382 - 574)          | 4,727<br>(3,576 - 5,977)    |
| Diarrheal diseases                                                | 67<br>(50 - 91)             | 2<br>(1 - 3)       | 0<br>(0 - 1)        | 5<br>(3 - 7)             | 11<br>(7 - 15)              | 50<br>(33 - 72)             |
| Intestinal infectious diseases                                    | 8<br>(3 - 15)               | 2<br>(1 - 4)       | 2<br>(1 - 3)        | 3<br>(1 - 6)             | 1<br>(0 - 3)                | 1<br>(0 - 2)                |
| Typhoid fever                                                     | 5<br>(2 - 10)               | 1<br>(0 - 3)       | 1<br>(0 - 2)        | 2<br>(0 - 5)             | 1<br>(0 - 2)                | 0<br>(0 - 1)                |
| Paratyphoid fever                                                 | 2<br>(1 - 3)                | 0<br>(0 - 1)       | 0<br>(0 - 1)        | 0<br>(0 - 1)             | 0<br>(0 - 0)                | 0<br>(0 - 0)                |
| Other intestinal infectious diseases                              | 1<br>(0 - 5)                | 0<br>(0 - 2)       | 0<br>(0 - 1)        | 0<br>(0 - 3)             | 0<br>(0 - 2)                | 0<br>(0 - 2)                |
| Lower respiratory infections                                      | 5,152<br>(3,956 - 6,393)    | 19<br>(13 - 28)    | 5<br>(4 - 8)        | 74<br>(58 - 92)          | 442<br>(344 - 535)          | 4,611<br>(3,462 - 5,857)    |
| Upper respiratory infections                                      | 1<br>(0 - 5)                | 0<br>(0 - 0)       | 0<br>(0 - 0)        | 0<br>(0 - 0)             | 0<br>(0 - 1)                | 1<br>(0 - 4)                |
| Otitis media                                                      | 5<br>(4 - 7)                | 0<br>(0 - 0)       | 0<br>(0 - 0)        | 1<br>(1 - 1)             | 1<br>(1 - 1)                | 4<br>(3 - 5)                |
| Meningitis                                                        | 63<br>(49 - 78)             | 3<br>(2 - 4)       | 1<br>(1 - 1)        | 7<br>(5 - 10)            | 14<br>(10 - 18)             | 39<br>(27 - 52)             |
| Pneumococcal meningitis                                           | 17<br>(10 - 26)             | 0<br>(0 - 1)       | 0<br>(0 - 0)        | 2<br>(1 - 3)             | 4<br>(2 - 6)                | 11<br>(6 - 19)              |
| H influenzae type B meningitis                                    | 6<br>(4 - 8)                | 0<br>(0 - 1)       | 0<br>(0 - 0)        | 1<br>(0 - 1)             | 1<br>(0 - 2)                | 4<br>(2 - 6)                |
| Meningococcal meningitis                                          | 10<br>(7 - 15)              | 0<br>(0 - 1)       | 0<br>(0 - 0)        | 1<br>(1 - 2)             | 2<br>(1 - 3)                | 7<br>(4 - 11)               |
| Other meningitis                                                  | 30<br>(21 - 39)             | 1<br>(1 - 2)       | 0<br>(0 - 1)        | 4<br>(2 - 5)             | 7<br>(5 - 10)               | 17<br>(10 - 25)             |
| Encephalitis                                                      | 41<br>(31 - 55)             | 6<br>(3 - 11)      | 3<br>(2 - 4)        | 7<br>(5 - 9)             | 10<br>(7 - 14)              | 15<br>(10 - 22)             |
| Diphtheria                                                        | 0<br>(0 - 1)                | 0<br>(0 - 1)       | 0<br>(0 - 0)        | 0<br>(0 - 0)             | 0<br>(0 - 0)                | --                          |
| Whooping cough                                                    | 7<br>(0 - 34)               | 6<br>(0 - 29)      | 1<br>(0 - 3)        | 0<br>(0 - 1)             | 0<br>(0 - 0)                | --                          |
| Tetanus                                                           | 1<br>(1 - 2)                | 0<br>(0 - 0)       | 0<br>(0 - 0)        | 1<br>(0 - 1)             | 0<br>(0 - 0)                | 0<br>(0 - 0)                |
| Measles                                                           | 4<br>(0 - 24)               | 3<br>(0 - 18)      | 1<br>(0 - 4)        | 0<br>(0 - 1)             | 0<br>(0 - 0)                | --                          |
| Varicella and herpes zoster                                       | 8<br>(1 - 33)               | 0<br>(0 - 1)       | 0<br>(0 - 1)        | 1<br>(0 - 3)             | 1<br>(0 - 3)                | 6<br>(0 - 31)               |
| Neglected tropical diseases and malaria                           | 7<br>(6 - 10)               | 0<br>(0 - 1)       | 1<br>(0 - 1)        | 3<br>(2 - 4)             | 2<br>(2 - 3)                | 2<br>(1 - 3)                |
| Leishmaniasis                                                     | 0<br>(0 - 0)                | 0<br>(0 - 0)       | 0<br>(0 - 0)        | 0<br>(0 - 0)             | 0<br>(0 - 0)                | 0<br>(0 - 0)                |
| Visceral leishmaniasis                                            | 0<br>(0 - 0)                | 0<br>(0 - 0)       | 0<br>(0 - 0)        | 0<br>(0 - 0)             | 0<br>(0 - 0)                | 0<br>(0 - 0)                |
| Cysticercosis                                                     | 0<br>(0 - 0)                | 0<br>(0 - 0)       | 0<br>(0 - 0)        | 0<br>(0 - 0)             | 0<br>(0 - 0)                | 0<br>(0 - 0)                |
| Cystic echinococcosis                                             | 1<br>(1 - 1)                | 0<br>(0 - 0)       | 0<br>(0 - 0)        | 0<br>(0 - 0)             | 0<br>(0 - 0)                | 0<br>(0 - 0)                |
| Dengue                                                            | 2<br>(2 - 3)                | 0<br>(0 - 0)       | 0<br>(0 - 0)        | 1<br>(1 - 1)             | 1<br>(1 - 1)                | 0<br>(0 - 1)                |
| Rabies                                                            | 1<br>(1 - 2)                | 0<br>(0 - 0)       | 0<br>(0 - 0)        | 1<br>(0 - 1)             | 0<br>(0 - 0)                | 0<br>(0 - 0)                |
| Intestinal nematode infections                                    | 0<br>(0 - 3)                | 0<br>(0 - 1)       | 0<br>(0 - 0)        | 0<br>(0 - 1)             | 0<br>(0 - 1)                | 0<br>(0 - 2)                |
| Ascariasis                                                        | 0<br>(0 - 3)                | 0<br>(0 - 1)       | 0<br>(0 - 0)        | 0<br>(0 - 1)             | 0<br>(0 - 1)                | 0<br>(0 - 2)                |
| Other neglected tropical diseases                                 | 2<br>(2 - 3)                | 0<br>(0 - 0)       | 0<br>(0 - 0)        | 1<br>(1 - 2)             | 0<br>(0 - 1)                | 0<br>(0 - 1)                |
| Maternal disorders                                                | 26<br>(20 - 33)             | --                 | 0<br>(0 - 0)        | 26<br>(20 - 33)          | --                          | --                          |
| Maternal hemorrhage                                               | 3<br>(2 - 4)                | --                 | 0<br>(0 - 0)        | 3<br>(2 - 4)             | --                          | --                          |
| Maternal sepsis and other maternal infections                     | 3<br>(2 - 5)                | --                 | 0<br>(0 - 0)        | 3<br>(2 - 5)             | --                          | --                          |

Web Table 31- Taiwan deaths with 95% UI by age, sex, and cause in 2013

| Cause                                                            | Females, All Ages           | Females, 0-4 Years | Females, 5-14 Years | Females, 15-49 Years     | Females, 50-69 Years        | Females, 70-80 Years        |
|------------------------------------------------------------------|-----------------------------|--------------------|---------------------|--------------------------|-----------------------------|-----------------------------|
| Maternal hypertensive disorders                                  | 2<br>(1 - 3)                | --                 | 0<br>(0 - 0)        | 2<br>(1 - 3)             | --                          | --                          |
| Maternal obstructed labor                                        | 3<br>(2 - 4)                | --                 | 0<br>(0 - 0)        | 3<br>(2 - 4)             | --                          | --                          |
| Maternal abortive outcome                                        | 4<br>(3 - 6)                | --                 | 0<br>(0 - 0)        | 4<br>(3 - 6)             | --                          | --                          |
| Indirect maternal deaths                                         | 3<br>(2 - 5)                | --                 | 0<br>(0 - 0)        | 3<br>(2 - 5)             | --                          | --                          |
| Late maternal deaths                                             | 3<br>(1 - 4)                | --                 | 0<br>(0 - 0)        | 3<br>(1 - 4)             | --                          | --                          |
| Maternal deaths aggravated by HIV/AIDS                           | 0<br>(0 - 0)                | --                 | --                  | 0<br>(0 - 0)             | --                          | --                          |
| Other maternal disorders                                         | 5<br>(3 - 7)                | --                 | 0<br>(0 - 0)        | 5<br>(3 - 7)             | --                          | --                          |
| Neonatal disorders                                               | 135<br>(108 - 166)          | 135<br>(108 - 166) | --                  | --                       | --                          | --                          |
| Neonatal preterm birth complications                             | 55<br>(35 - 79)             | 55<br>(35 - 79)    | --                  | --                       | --                          | --                          |
| Neonatal encephalopathy due to birth asphyxia and trauma         | 18<br>(10 - 29)             | 18<br>(10 - 29)    | --                  | --                       | --                          | --                          |
| Neonatal sepsis and other neonatal infections                    | 6<br>(2 - 13)               | 6<br>(2 - 13)      | --                  | --                       | --                          | --                          |
| Hemolytic disease and other neonatal jaundice                    | 0<br>(0 - 0)                | 0<br>(0 - 0)       | --                  | --                       | --                          | --                          |
| Other neonatal disorders                                         | 55<br>(39 - 75)             | 55<br>(39 - 75)    | --                  | --                       | --                          | --                          |
| Nutritional deficiencies                                         | 157<br>(116 - 209)          | 1<br>(0 - 1)       | 0<br>(0 - 1)        | 7<br>(5 - 9)             | 15<br>(11 - 19)             | 135<br>(96 - 188)           |
| Protein-energy malnutrition                                      | 64<br>(31 - 104)            | 0<br>(0 - 1)       | 0<br>(0 - 0)        | 3<br>(1 - 4)             | 7<br>(4 - 11)               | 54<br>(24 - 88)             |
| Iodine deficiency                                                | 2<br>(0 - 9)                | 0<br>(0 - 0)       | 0<br>(0 - 0)        | 0<br>(0 - 1)             | 0<br>(0 - 2)                | 1<br>(0 - 9)                |
| Iron-deficiency anemia                                           | 82<br>(44 - 133)            | 0<br>(0 - 0)       | 0<br>(0 - 0)        | 3<br>(2 - 5)             | 7<br>(4 - 10)               | 71<br>(39 - 118)            |
| Other nutritional deficiencies                                   | 10<br>(4 - 19)              | 0<br>(0 - 0)       | 0<br>(0 - 0)        | 1<br>(0 - 1)             | 0<br>(0 - 1)                | 9<br>(3 - 17)               |
| Other communicable, maternal, neonatal, and nutritional diseases | 188<br>(124 - 269)          | 4<br>(2 - 8)       | 1<br>(1 - 2)        | 17<br>(12 - 21)          | 51<br>(36 - 70)             | 114<br>(61 - 193)           |
| Sexually transmitted diseases excluding HIV                      | 15<br>(8 - 26)              | 1<br>(0 - 2)       | 0<br>(0 - 0)        | 3<br>(2 - 5)             | 2<br>(1 - 5)                | 9<br>(3 - 18)               |
| Syphilis                                                         | 10<br>(5 - 18)              | 1<br>(0 - 2)       | 0<br>(0 - 0)        | 1<br>(1 - 2)             | 1<br>(1 - 3)                | 7<br>(2 - 14)               |
| Chlamydial infection                                             | 1<br>(1 - 2)                | --                 | 0<br>(0 - 0)        | 1<br>(0 - 1)             | 0<br>(0 - 1)                | 0<br>(0 - 1)                |
| Gonococcal infection                                             | 2<br>(1 - 3)                | --                 | 0<br>(0 - 0)        | 1<br>(0 - 1)             | 0<br>(0 - 1)                | 1<br>(0 - 2)                |
| Other sexually transmitted diseases                              | 1<br>(1 - 2)                | --                 | 0<br>(0 - 0)        | 1<br>(0 - 1)             | 0<br>(0 - 1)                | 0<br>(0 - 1)                |
| Hepatitis                                                        | 63<br>(54 - 74)             | 0<br>(0 - 0)       | 0<br>(0 - 0)        | 6<br>(5 - 8)             | 24<br>(19 - 31)             | 32<br>(25 - 41)             |
| Acute hepatitis A                                                | 2<br>(1 - 6)                | 0<br>(0 - 0)       | 0<br>(0 - 0)        | 1<br>(0 - 1)             | 1<br>(0 - 3)                | 1<br>(0 - 2)                |
| Acute hepatitis B                                                | 55<br>(44 - 65)             | 0<br>(0 - 0)       | 0<br>(0 - 0)        | 4<br>(3 - 6)             | 21<br>(15 - 27)             | 29<br>(22 - 38)             |
| Acute hepatitis C                                                | 2<br>(0 - 6)                | --                 | 0<br>(0 - 0)        | 0<br>(0 - 1)             | 1<br>(0 - 2)                | 1<br>(0 - 4)                |
| Acute hepatitis E                                                | 4<br>(2 - 10)               | 0<br>(0 - 0)       | 0<br>(0 - 0)        | 1<br>(1 - 2)             | 1<br>(0 - 4)                | 1<br>(0 - 4)                |
| Other infectious diseases                                        | 109<br>(49 - 192)           | 3<br>(2 - 7)       | 1<br>(1 - 2)        | 7<br>(4 - 11)            | 24<br>(10 - 43)             | 73<br>(23 - 154)            |
| Non-communicable diseases                                        | 54,583<br>(52,505 - 56,641) | 191<br>(161 - 223) | 85<br>(76 - 94)     | 3,039<br>(2,872 - 3,211) | 11,968<br>(11,491 - 12,475) | 39,299<br>(37,680 - 40,898) |
| Neoplasms                                                        | 17,409<br>(15,528 - 18,480) | 22<br>(15 - 29)    | 37<br>(31 - 43)     | 1,851<br>(1,732 - 1,980) | 6,308<br>(5,824 - 6,672)    | 9,191<br>(7,965 - 10,067)   |
| Esophageal cancer                                                | 173<br>(92 - 205)           | --                 | --                  | 10<br>(6 - 13)           | 45<br>(33 - 56)             | 118<br>(55 - 148)           |
| Stomach cancer                                                   | 1,021<br>(848 - 1,204)      | --                 | --                  | 106<br>(88 - 128)        | 289<br>(244 - 338)          | 626<br>(471 - 795)          |
| Liver cancer                                                     | 2,826<br>(2,418 - 3,374)    | --                 | 1<br>(1 - 2)        | 116<br>(92 - 143)        | 956<br>(782 - 1,141)        | 1,753<br>(1,384 - 2,225)    |
| Liver cancer due to hepatitis B                                  | 891<br>(574 - 1,269)        | --                 | 0<br>(0 - 1)        | 51<br>(34 - 71)          | 355<br>(230 - 511)          | 485<br>(287 - 746)          |
| Liver cancer due to hepatitis C                                  | 1,317<br>(870 - 1,775)      | --                 | 0<br>(0 - 0)        | 35<br>(15 - 55)          | 393<br>(226 - 558)          | 889<br>(578 - 1,244)        |
| Liver cancer due to alcohol use                                  | 165<br>(93 - 255)           | --                 | --                  | 3<br>(1 - 5)             | 43<br>(22 - 70)             | 119<br>(63 - 192)           |
| Liver cancer due to other causes                                 | 453<br>(315 - 626)          | --                 | 1<br>(0 - 1)        | 27<br>(18 - 39)          | 165<br>(108 - 247)          | 260<br>(172 - 366)          |
| Larynx cancer                                                    | 13<br>(6 - 23)              | --                 | --                  | 1<br>(0 - 2)             | 5<br>(2 - 9)                | 7<br>(3 - 13)               |

Web Table 31- Taiwan deaths with 95% UI by age, sex, and cause in 2013

| Cause                                         | Females, All Ages           | Females, 0-4 Years | Females, 5-14 Years | Females, 15-49 Years | Females, 50-69 Years     | Females, 70-80 Years        |
|-----------------------------------------------|-----------------------------|--------------------|---------------------|----------------------|--------------------------|-----------------------------|
| Tracheal, bronchus and lung cancer            | 3,197<br>(2,502 - 3,660)    | --                 | --                  | 230<br>(194 - 272)   | 1,153<br>(1,012 - 1,317) | 1,814<br>(1,228 - 2,188)    |
| Breast cancer                                 | 1,826<br>(1,108 - 2,016)    | --                 | --                  | 448<br>(331 - 506)   | 975<br>(576 - 1,102)     | 404<br>(199 - 481)          |
| Cervical cancer                               | 841<br>(717 - 1,193)        | --                 | --                  | 140<br>(112 - 215)   | 342<br>(274 - 595)       | 360<br>(266 - 452)          |
| Uterine cancer                                | 162<br>(52 - 223)           | --                 | --                  | 25<br>(9 - 36)       | 93<br>(27 - 136)         | 44<br>(15 - 63)             |
| Prostate cancer                               | --                          | --                 | --                  | --                   | --                       | --                          |
| Colon and rectum cancer                       | 2,555<br>(2,244 - 2,915)    | --                 | --                  | 210<br>(182 - 241)   | 772<br>(691 - 864)       | 1,573<br>(1,309 - 1,884)    |
| Lip and oral cavity cancer                    | 143<br>(73 - 202)           | --                 | --                  | 22<br>(13 - 30)      | 55<br>(31 - 76)          | 66<br>(27 - 109)            |
| Nasopharynx cancer                            | 198<br>(140 - 351)          | --                 | 0<br>(0 - 1)        | 53<br>(37 - 102)     | 103<br>(69 - 195)        | 41<br>(19 - 61)             |
| Other pharynx cancer                          | 27<br>(21 - 33)             | --                 | --                  | 5<br>(3 - 8)         | 11<br>(8 - 14)           | 11<br>(8 - 15)              |
| Gallbladder and biliary tract cancer          | 290<br>(102 - 401)          | --                 | --                  | 15<br>(8 - 20)       | 99<br>(43 - 131)         | 177<br>(51 - 269)           |
| Pancreatic cancer                             | 813<br>(714 - 918)          | --                 | --                  | 40<br>(33 - 48)      | 292<br>(255 - 337)       | 481<br>(402 - 579)          |
| Malignant skin melanoma                       | 60<br>(50 - 71)             | --                 | --                  | 7<br>(5 - 8)         | 23<br>(18 - 29)          | 30<br>(23 - 39)             |
| Non-melanoma skin cancer                      | 59<br>(36 - 105)            | --                 | --                  | 2<br>(1 - 2)         | 6<br>(4 - 10)            | 51<br>(29 - 94)             |
| Ovarian cancer                                | 532<br>(471 - 607)          | --                 | --                  | 107<br>(88 - 127)    | 263<br>(219 - 313)       | 162<br>(134 - 200)          |
| Testicular cancer                             | --                          | --                 | --                  | --                   | --                       | --                          |
| Kidney cancer                                 | 316<br>(259 - 387)          | 1<br>(0 - 1)       | 1<br>(0 - 1)        | 13<br>(10 - 17)      | 91<br>(72 - 113)         | 210<br>(155 - 275)          |
| Bladder cancer                                | 253<br>(103 - 381)          | --                 | --                  | 7<br>(4 - 10)        | 54<br>(29 - 72)          | 192<br>(67 - 308)           |
| Brain and nervous system cancer               | 239<br>(193 - 273)          | 5<br>(3 - 9)       | 11<br>(8 - 14)      | 55<br>(46 - 66)      | 89<br>(73 - 106)         | 79<br>(41 - 100)            |
| Thyroid cancer                                | 86<br>(40 - 115)            | --                 | 0<br>(0 - 0)        | 5<br>(3 - 7)         | 27<br>(14 - 36)          | 54<br>(22 - 79)             |
| Mesothelioma                                  | 19<br>(15 - 24)             | --                 | --                  | 2<br>(1 - 3)         | 6<br>(4 - 9)             | 10<br>(7 - 15)              |
| Hodgkin lymphoma                              | 8<br>(6 - 11)               | 0<br>(0 - 0)       | 0<br>(0 - 1)        | 3<br>(2 - 4)         | 2<br>(2 - 4)             | 2<br>(1 - 4)                |
| Non-Hodgkin lymphoma                          | 483<br>(137 - 662)          | 1<br>(0 - 1)       | 1<br>(1 - 2)        | 49<br>(21 - 64)      | 164<br>(55 - 222)        | 268<br>(57 - 406)           |
| Multiple myeloma                              | 112<br>(70 - 153)           | --                 | --                  | 6<br>(5 - 9)         | 48<br>(32 - 64)          | 57<br>(32 - 90)             |
| Leukemia                                      | 381<br>(340 - 428)          | 7<br>(4 - 11)      | 11<br>(8 - 14)      | 78<br>(68 - 91)      | 120<br>(102 - 141)       | 166<br>(134 - 202)          |
| Other neoplasms                               | 777<br>(559 - 965)          | 8<br>(5 - 13)      | 11<br>(8 - 15)      | 97<br>(73 - 118)     | 226<br>(161 - 280)       | 434<br>(305 - 578)          |
| Cardiovascular diseases                       | 16,155<br>(14,175 - 18,913) | 12<br>(8 - 19)     | 12<br>(9 - 16)      | 464<br>(377 - 578)   | 2,278<br>(1,918 - 2,742) | 13,389<br>(11,722 - 15,629) |
| Rheumatic heart disease                       | 139<br>(91 - 187)           | 0<br>(0 - 0)       | 0<br>(0 - 1)        | 8<br>(6 - 12)        | 37<br>(24 - 51)          | 93<br>(59 - 128)            |
| Ischemic heart disease                        | 6,449<br>(5,054 - 7,938)    | 1<br>(0 - 1)       | 2<br>(1 - 3)        | 135<br>(96 - 176)    | 850<br>(651 - 1,077)     | 5,462<br>(4,232 - 6,732)    |
| Cerebrovascular disease                       | 6,044<br>(4,992 - 7,679)    | 3<br>(1 - 6)       | 4<br>(3 - 6)        | 199<br>(157 - 268)   | 886<br>(726 - 1,146)     | 4,952<br>(4,076 - 6,417)    |
| Ischemic stroke                               | 3,045<br>(2,343 - 4,055)    | 0<br>(0 - 0)       | 0<br>(0 - 1)        | 16<br>(10 - 23)      | 212<br>(153 - 286)       | 2,817<br>(2,172 - 3,747)    |
| Hemorrhagic stroke                            | 2,998<br>(2,367 - 4,009)    | 3<br>(1 - 6)       | 4<br>(2 - 5)        | 183<br>(145 - 248)   | 674<br>(551 - 876)       | 2,135<br>(1,609 - 2,906)    |
| Hypertensive heart disease                    | 1,777<br>(1,232 - 2,624)    | 0<br>(0 - 0)       | 0<br>(0 - 0)        | 26<br>(17 - 37)      | 172<br>(116 - 236)       | 1,579<br>(1,057 - 2,383)    |
| Cardiomyopathy and myocarditis                | 199<br>(153 - 273)          | 6<br>(4 - 10)      | 5<br>(3 - 7)        | 38<br>(27 - 50)      | 44<br>(32 - 60)          | 106<br>(74 - 169)           |
| Atrial fibrillation and flutter               | 97<br>(66 - 136)            | --                 | --                  | 1<br>(1 - 2)         | 7<br>(5 - 9)             | 89<br>(58 - 127)            |
| Aortic aneurysm                               | 257<br>(156 - 386)          | --                 | --                  | 9<br>(5 - 15)        | 55<br>(32 - 84)          | 192<br>(115 - 292)          |
| Peripheral vascular disease                   | 7<br>(5 - 10)               | --                 | --                  | 0<br>(0 - 0)         | 1<br>(1 - 1)             | 6<br>(4 - 9)                |
| Endocarditis                                  | 178<br>(96 - 255)           | 0<br>(0 - 1)       | 0<br>(0 - 0)        | 10<br>(6 - 15)       | 33<br>(17 - 46)          | 134<br>(66 - 201)           |
| Other cardiovascular and circulatory diseases | 1,010<br>(728 - 1,311)      | 2<br>(1 - 3)       | 1<br>(1 - 2)        | 38<br>(25 - 52)      | 193<br>(139 - 257)       | 776<br>(557 - 1,021)        |
| Chronic respiratory diseases                  | 3,499<br>(2,929 - 4,294)    | 4<br>(3 - 6)       | 2<br>(1 - 3)        | 47<br>(39 - 55)      | 307<br>(258 - 367)       | 3,139<br>(2,596 - 3,891)    |
| Chronic obstructive pulmonary disease         | 2,037<br>(1,541 - 2,609)    | 2<br>(1 - 4)       | 1<br>(0 - 1)        | 19<br>(13 - 26)      | 159<br>(116 - 208)       | 1,856<br>(1,386 - 2,413)    |



Web Table 31- Taiwan deaths with 95% UI by age, sex, and cause in 2013

| Cause                                               | Females, All Ages        | Females, 0-4 Years | Females, 5-14 Years | Females, 15-49 Years | Females, 50-69 Years | Females, 70-80 Years     |
|-----------------------------------------------------|--------------------------|--------------------|---------------------|----------------------|----------------------|--------------------------|
| Pneumoconiosis                                      | 11<br>(7 - 17)           | 0<br>(0 - 0)       | 0<br>(0 - 0)        | 1<br>(0 - 1)         | 1<br>(1 - 2)         | 9<br>(5 - 15)            |
| Silicosis                                           | 2<br>(1 - 4)             | 0<br>(0 - 0)       | 0<br>(0 - 0)        | 0<br>(0 - 0)         | 0<br>(0 - 0)         | 2<br>(1 - 3)             |
| Asbestosis                                          | 2<br>(1 - 3)             | 0<br>(0 - 0)       | 0<br>(0 - 0)        | 0<br>(0 - 0)         | 0<br>(0 - 0)         | 1<br>(1 - 2)             |
| Coal workers pneumoconiosis                         | 1<br>(1 - 3)             | 0<br>(0 - 0)       | 0<br>(0 - 0)        | 0<br>(0 - 0)         | 0<br>(0 - 0)         | 1<br>(0 - 2)             |
| Other pneumoconiosis                                | 6<br>(4 - 10)            | 0<br>(0 - 0)       | 0<br>(0 - 0)        | 0<br>(0 - 0)         | 1<br>(1 - 1)         | 5<br>(2 - 8)             |
| Asthma                                              | 402<br>(251 - 571)       | 1<br>(0 - 1)       | 1<br>(0 - 1)        | 19<br>(14 - 25)      | 57<br>(39 - 78)      | 325<br>(190 - 476)       |
| Interstitial lung disease and pulmonary sarcoidosis | 727<br>(447 - 1,130)     | 0<br>(0 - 0)       | 0<br>(0 - 0)        | 5<br>(3 - 8)         | 68<br>(44 - 100)     | 654<br>(392 - 1,026)     |
| Other chronic respiratory diseases                  | 322<br>(197 - 484)       | 1<br>(1 - 2)       | 0<br>(0 - 1)        | 3<br>(2 - 5)         | 22<br>(14 - 31)      | 296<br>(173 - 456)       |
| Cirrhosis                                           | 1,810<br>(1,602 - 2,067) | 1<br>(1 - 2)       | 1<br>(1 - 1)        | 161<br>(139 - 187)   | 580<br>(509 - 666)   | 1,067<br>(886 - 1,297)   |
| Cirrhosis due to hepatitis B                        | 964<br>(651 - 1,250)     | 0<br>(0 - 0)       | 0<br>(0 - 1)        | 78<br>(48 - 106)     | 300<br>(194 - 389)   | 585<br>(390 - 798)       |
| Cirrhosis due to hepatitis C                        | 486<br>(215 - 741)       | 0<br>(0 - 0)       | 0<br>(0 - 0)        | 46<br>(24 - 72)      | 170<br>(85 - 253)    | 269<br>(92 - 452)        |
| Cirrhosis due to alcohol use                        | 249<br>(140 - 398)       | --                 | --                  | 14<br>(8 - 23)       | 68<br>(40 - 109)     | 166<br>(83 - 276)        |
| Cirrhosis due to other causes                       | 112<br>(56 - 186)        | 1<br>(0 - 2)       | 1<br>(0 - 1)        | 22<br>(12 - 35)      | 42<br>(19 - 74)      | 46<br>(20 - 84)          |
| Digestive diseases                                  | 1,615<br>(1,362 - 1,927) | 4<br>(2 - 5)       | 2<br>(1 - 3)        | 42<br>(34 - 49)      | 233<br>(195 - 274)   | 1,336<br>(1,101 - 1,632) |
| Peptic ulcer disease                                | 305<br>(216 - 423)       | 0<br>(0 - 0)       | 0<br>(0 - 0)        | 6<br>(4 - 9)         | 41<br>(29 - 56)      | 257<br>(177 - 367)       |
| Gastritis and duodenitis                            | 6<br>(3 - 15)            | 0<br>(0 - 0)       | 0<br>(0 - 0)        | 1<br>(0 - 1)         | 1<br>(0 - 1)         | 5<br>(2 - 12)            |
| Appendicitis                                        | 28<br>(15 - 44)          | 0<br>(0 - 0)       | 0<br>(0 - 0)        | 1<br>(1 - 2)         | 5<br>(3 - 8)         | 21<br>(10 - 36)          |
| Paralytic ileus and intestinal obstruction          | 237<br>(129 - 415)       | 0<br>(0 - 1)       | 0<br>(0 - 0)        | 6<br>(4 - 10)        | 25<br>(14 - 42)      | 204<br>(110 - 358)       |
| Inguinal, femoral, and abdominal hernia             | 21<br>(10 - 34)          | 0<br>(0 - 0)       | 0<br>(0 - 0)        | 1<br>(0 - 1)         | 3<br>(1 - 5)         | 18<br>(7 - 29)           |
| Inflammatory bowel disease                          | 46<br>(27 - 70)          | 1<br>(0 - 1)       | 0<br>(0 - 1)        | 2<br>(1 - 3)         | 9<br>(6 - 14)        | 34<br>(18 - 54)          |
| Vascular intestinal disorders                       | 271<br>(137 - 439)       | 0<br>(0 - 0)       | 0<br>(0 - 0)        | 3<br>(1 - 5)         | 35<br>(19 - 61)      | 233<br>(113 - 381)       |
| Gallbladder and biliary diseases                    | 402<br>(278 - 543)       | 0<br>(0 - 0)       | 0<br>(0 - 0)        | 5<br>(4 - 7)         | 49<br>(34 - 65)      | 348<br>(231 - 484)       |
| Pancreatitis                                        | 135<br>(89 - 204)        | 0<br>(0 - 0)       | 0<br>(0 - 0)        | 10<br>(7 - 14)       | 31<br>(21 - 45)      | 93<br>(57 - 149)         |
| Other digestive diseases                            | 162<br>(118 - 217)       | 1<br>(1 - 2)       | 1<br>(0 - 1)        | 6<br>(4 - 8)         | 33<br>(23 - 43)      | 121<br>(84 - 173)        |
| Neurological disorders                              | 2,691<br>(2,176 - 3,296) | 8<br>(6 - 12)      | 4<br>(3 - 5)        | 53<br>(42 - 63)      | 215<br>(180 - 250)   | 2,411<br>(1,901 - 2,990) |
| Alzheimer disease and other dementias               | 2,024<br>(1,528 - 2,603) | --                 | --                  | 1<br>(0 - 2)         | 93<br>(67 - 122)     | 1,930<br>(1,441 - 2,502) |
| Parkinson disease                                   | 429<br>(270 - 594)       | --                 | --                  | 2<br>(1 - 3)         | 49<br>(32 - 67)      | 379<br>(235 - 532)       |
| Epilepsy                                            | 137<br>(97 - 182)        | 6<br>(3 - 10)      | 3<br>(2 - 4)        | 31<br>(21 - 42)      | 26<br>(18 - 37)      | 71<br>(44 - 107)         |
| Multiple sclerosis                                  | 9<br>(6 - 16)            | --                 | --                  | 3<br>(2 - 5)         | 5<br>(3 - 9)         | 1<br>(1 - 2)             |
| Other neurological disorders                        | 92<br>(82 - 103)         | 3<br>(2 - 4)       | 1<br>(1 - 1)        | 16<br>(13 - 18)      | 42<br>(36 - 49)      | 31<br>(25 - 37)          |
| Mental and substance use disorders                  | 108<br>(92 - 123)        | 0<br>(0 - 0)       | 0<br>(0 - 0)        | 57<br>(48 - 68)      | 29<br>(23 - 35)      | 22<br>(17 - 27)          |
| Schizophrenia                                       | 26<br>(18 - 33)          | --                 | --                  | 6<br>(4 - 8)         | 13<br>(8 - 17)       | 7<br>(5 - 11)            |
| Alcohol use disorders                               | 17<br>(8 - 30)           | --                 | --                  | 12<br>(5 - 20)       | 5<br>(2 - 9)         | 1<br>(0 - 1)             |
| Drug use disorders                                  | 61<br>(53 - 69)          | 0<br>(0 - 0)       | --                  | 37<br>(31 - 43)      | 11<br>(8 - 13)       | 14<br>(10 - 18)          |
| Opioid use disorders                                | 23<br>(20 - 27)          | 0<br>(0 - 0)       | --                  | 14<br>(12 - 16)      | 4<br>(3 - 5)         | 5<br>(4 - 7)             |
| Cocaine use disorders                               | 6<br>(5 - 8)             | 0<br>(0 - 0)       | --                  | 4<br>(3 - 5)         | 1<br>(1 - 1)         | 1<br>(1 - 2)             |
| Amphetamine use disorders                           | 7<br>(6 - 8)             | 0<br>(0 - 0)       | --                  | 4<br>(3 - 5)         | 1<br>(1 - 2)         | 1<br>(1 - 2)             |
| Other drug use disorders                            | 25<br>(21 - 29)          | 0<br>(0 - 0)       | --                  | 14<br>(12 - 17)      | 5<br>(4 - 6)         | 6<br>(4 - 7)             |
| Eating disorders                                    | 4<br>(2 - 6)             | --                 | 0<br>(0 - 0)        | 4<br>(2 - 5)         | --                   | --                       |
| Anorexia nervosa                                    | 4<br>(2 - 6)             | --                 | 0<br>(0 - 0)        | 4<br>(2 - 5)         | --                   | --                       |

Web Table 31- Taiwan deaths with 95% UI by age, sex, and cause in 2013

| Cause                                               | Females, All Ages          | Females, 0-4 Years | Females, 5-14 Years | Females, 15-49 Years | Females, 50-69 Years     | Females, 70-80 Years     |
|-----------------------------------------------------|----------------------------|--------------------|---------------------|----------------------|--------------------------|--------------------------|
| Diabetes, urogenital, blood, and endocrine diseases | 10,282<br>(9,209 - 11,461) | 13<br>(9 - 17)     | 11<br>(8 - 14)      | 246<br>(217 - 275)   | 1,841<br>(1,666 - 2,062) | 8,172<br>(7,227 - 9,261) |
| Diabetes mellitus                                   | 5,485<br>(4,800 - 6,279)   | 1<br>(0 - 1)       | 2<br>(1 - 3)        | 109<br>(92 - 130)    | 1,102<br>(958 - 1,282)   | 4,271<br>(3,646 - 5,015) |
| Acute glomerulonephritis                            | 3<br>(2 - 4)               | 0<br>(0 - 0)       | 0<br>(0 - 0)        | 1<br>(1 - 1)         | 1<br>(0 - 1)             | 1<br>(1 - 2)             |
| Chronic kidney disease                              | 2,568<br>(2,026 - 3,079)   | 1<br>(1 - 1)       | 2<br>(1 - 2)        | 56<br>(46 - 68)      | 476<br>(390 - 571)       | 2,033<br>(1,517 - 2,513) |
| Chronic kidney disease due to diabetes mellitus     | 5<br>(3 - 7)               | 0<br>(0 - 0)       | 0<br>(0 - 0)        | 1<br>(1 - 2)         | 1<br>(1 - 2)             | 2<br>(1 - 4)             |
| Chronic kidney disease due to hypertension          | 1,232<br>(803 - 1,685)     | 0<br>(0 - 0)       | 0<br>(0 - 1)        | 25<br>(16 - 34)      | 233<br>(153 - 315)       | 974<br>(625 - 1,370)     |
| Chronic kidney disease due to glomerulonephritis    | 242<br>(138 - 353)         | 0<br>(0 - 0)       | 0<br>(0 - 1)        | 6<br>(4 - 9)         | 40<br>(21 - 61)          | 195<br>(107 - 293)       |
| Chronic kidney disease due to other causes          | 1,089<br>(620 - 1,581)     | 1<br>(0 - 1)       | 1<br>(0 - 1)        | 24<br>(14 - 38)      | 202<br>(119 - 306)       | 862<br>(442 - 1,292)     |
| Urinary diseases and male infertility               | 1,828<br>(1,294 - 2,477)   | 1<br>(0 - 1)       | 1<br>(1 - 1)        | 27<br>(20 - 35)      | 182<br>(130 - 230)       | 1,617<br>(1,110 - 2,245) |
| Interstitial nephritis and urinary tract infections | 364<br>(213 - 620)         | 0<br>(0 - 1)       | 0<br>(0 - 0)        | 12<br>(8 - 18)       | 47<br>(28 - 72)          | 305<br>(160 - 555)       |
| Urolithiasis                                        | 37<br>(22 - 61)            | --                 | 0<br>(0 - 0)        | 1<br>(1 - 1)         | 6<br>(4 - 11)            | 30<br>(16 - 53)          |
| Other urinary diseases                              | 1,426<br>(965 - 1,965)     | 0<br>(0 - 1)       | 1<br>(0 - 1)        | 14<br>(8 - 19)       | 129<br>(85 - 167)        | 1,283<br>(841 - 1,804)   |
| Gynecological diseases                              | 4<br>(3 - 5)               | --                 | --                  | 1<br>(1 - 1)         | 1<br>(0 - 1)             | 2<br>(1 - 3)             |
| Uterine fibroids                                    | 1<br>(1 - 1)               | --                 | --                  | 0<br>(0 - 0)         | 0<br>(0 - 0)             | 1<br>(0 - 1)             |
| Polycystic ovarian syndrome                         | 0<br>(0 - 0)               | --                 | --                  | 0<br>(0 - 0)         | 0<br>(0 - 0)             | --                       |
| Endometriosis                                       | 0<br>(0 - 0)               | --                 | --                  | 0<br>(0 - 0)         | 0<br>(0 - 0)             | --                       |
| Genital prolapse                                    | 1<br>(1 - 1)               | --                 | --                  | 0<br>(0 - 0)         | 0<br>(0 - 0)             | 1<br>(0 - 1)             |
| Other gynecological diseases                        | 2<br>(1 - 2)               | --                 | --                  | 0<br>(0 - 1)         | 0<br>(0 - 1)             | 1<br>(1 - 1)             |
| Hemoglobinopathies and hemolytic anemias            | 97<br>(62 - 145)           | 3<br>(2 - 5)       | 2<br>(1 - 3)        | 15<br>(10 - 23)      | 17<br>(11 - 25)          | 59<br>(36 - 91)          |
| Thalassemias                                        | 13<br>(8 - 18)             | 3<br>(2 - 4)       | 2<br>(1 - 3)        | 7<br>(5 - 11)        | 0<br>(0 - 1)             | 0<br>(0 - 0)             |
| Sickle cell disorders                               | 0<br>(0 - 0)               | 0<br>(0 - 0)       | 0<br>(0 - 0)        | 0<br>(0 - 0)         | 0<br>(0 - 0)             | 0<br>(0 - 0)             |
| G6PD deficiency                                     | 2<br>(1 - 3)               | 0<br>(0 - 0)       | 0<br>(0 - 0)        | 1<br>(0 - 1)         | 1<br>(0 - 1)             | 0<br>(0 - 1)             |
| Other hemoglobinopathies and hemolytic anemias      | 82<br>(52 - 124)           | 1<br>(0 - 1)       | 0<br>(0 - 0)        | 7<br>(5 - 11)        | 16<br>(10 - 24)          | 58<br>(36 - 90)          |
| Endocrine, metabolic, blood, and immune disorders   | 299<br>(216 - 390)         | 8<br>(4 - 12)      | 4<br>(3 - 7)        | 36<br>(25 - 47)      | 63<br>(43 - 83)          | 188<br>(131 - 263)       |
| Musculoskeletal disorders                           | 380<br>(299 - 490)         | --                 | 4<br>(3 - 5)        | 80<br>(66 - 96)      | 111<br>(88 - 142)        | 184<br>(125 - 278)       |
| Rheumatoid arthritis                                | 73<br>(49 - 100)           | --                 | 0<br>(0 - 0)        | 2<br>(2 - 3)         | 22<br>(15 - 30)          | 49<br>(29 - 73)          |
| Other musculoskeletal disorders                     | 307<br>(244 - 401)         | --                 | 4<br>(3 - 5)        | 78<br>(64 - 93)      | 90<br>(70 - 114)         | 135<br>(90 - 211)        |
| Other non-communicable diseases                     | 634<br>(529 - 768)         | 127<br>(100 - 159) | 13<br>(9 - 18)      | 38<br>(32 - 46)      | 67<br>(55 - 81)          | 388<br>(294 - 510)       |
| Congenital anomalies                                | 203<br>(172 - 238)         | 111<br>(87 - 140)  | 12<br>(8 - 17)      | 24<br>(19 - 31)      | 20<br>(15 - 25)          | 36<br>(26 - 45)          |
| Neural tube defects                                 | 2<br>(1 - 4)               | 1<br>(0 - 2)       | 0<br>(0 - 0)        | 1<br>(0 - 1)         | 0<br>(0 - 0)             | 0<br>(0 - 0)             |
| Congenital heart anomalies                          | 77<br>(62 - 95)            | 51<br>(38 - 68)    | 6<br>(4 - 9)        | 12<br>(9 - 15)       | 4<br>(3 - 6)             | 4<br>(3 - 6)             |
| Cleft lip and cleft palate                          | 0<br>(0 - 0)               | 0<br>(0 - 0)       | --                  | --                   | --                       | --                       |
| Down syndrome                                       | 6<br>(3 - 8)               | 2<br>(1 - 3)       | 0<br>(0 - 1)        | 2<br>(1 - 3)         | 1<br>(1 - 2)             | 0<br>(0 - 0)             |
| Chromosomal unbalanced rearrangements               | 11<br>(7 - 16)             | 8<br>(5 - 13)      | 1<br>(0 - 2)        | 1<br>(1 - 2)         | 0<br>(0 - 0)             | 0<br>(0 - 0)             |
| Other congenital anomalies                          | 107<br>(87 - 128)          | 49<br>(36 - 65)    | 5<br>(3 - 7)        | 9<br>(7 - 12)        | 14<br>(11 - 18)          | 31<br>(22 - 39)          |
| Skin and subcutaneous diseases                      | 415<br>(318 - 541)         | 0<br>(0 - 1)       | 1<br>(1 - 1)        | 14<br>(11 - 18)      | 47<br>(37 - 60)          | 353<br>(260 - 478)       |
| Cellulitis                                          | 83<br>(46 - 122)           | 0<br>(0 - 0)       | 0<br>(0 - 0)        | 2<br>(1 - 3)         | 12<br>(7 - 17)           | 69<br>(38 - 105)         |
| Pyoderma                                            | 72<br>(50 - 106)           | 0<br>(0 - 0)       | 0<br>(0 - 0)        | 2<br>(1 - 3)         | 11<br>(8 - 16)           | 59<br>(37 - 92)          |
| Decubitus ulcer                                     | 230<br>(166 - 327)         | 0<br>(0 - 0)       | 0<br>(0 - 0)        | 3<br>(2 - 5)         | 18<br>(13 - 23)          | 210<br>(148 - 303)       |
| Other skin and subcutaneous diseases                | 30<br>(16 - 41)            | 0<br>(0 - 0)       | 1<br>(0 - 1)        | 7<br>(4 - 9)         | 7<br>(3 - 9)             | 16<br>(7 - 26)           |

Web Table 31- Taiwan deaths with 95% UI by age, sex, and cause in 2013

| Cause                                           | Females, All Ages        | Females, 0-4 Years | Females, 5-14 Years | Females, 15-49 Years     | Females, 50-69 Years     | Females, 70-80 Years     |
|-------------------------------------------------|--------------------------|--------------------|---------------------|--------------------------|--------------------------|--------------------------|
| Sudden infant death syndrome                    | 16<br>(5 - 35)           | 16<br>(5 - 35)     | --                  | --                       | --                       | --                       |
| Injuries                                        | 4,747<br>(4,211 - 5,216) | 66<br>(52 - 81)    | 57<br>(50 - 65)     | 1,254<br>(1,148 - 1,388) | 1,233<br>(1,093 - 1,391) | 2,136<br>(1,709 - 2,479) |
| Transport injuries                              | 1,331<br>(1,122 - 1,518) | 22<br>(14 - 30)    | 29<br>(22 - 36)     | 361<br>(303 - 421)       | 469<br>(381 - 572)       | 451<br>(334 - 558)       |
| Road injuries                                   | 1,294<br>(1,091 - 1,471) | 21<br>(14 - 29)    | 28<br>(21 - 34)     | 351<br>(294 - 410)       | 456<br>(369 - 556)       | 438<br>(325 - 543)       |
| Pedestrian road injuries                        | 444<br>(337 - 554)       | 7<br>(4 - 12)      | 8<br>(5 - 11)       | 48<br>(36 - 69)          | 121<br>(88 - 166)        | 260<br>(183 - 331)       |
| Cyclist road injuries                           | 131<br>(100 - 171)       | 1<br>(1 - 2)       | 3<br>(2 - 5)        | 27<br>(20 - 35)          | 61<br>(45 - 81)          | 38<br>(25 - 54)          |
| Motorcyclist road injuries                      | 288<br>(181 - 365)       | 4<br>(2 - 6)       | 8<br>(5 - 12)       | 123<br>(80 - 153)        | 114<br>(69 - 158)        | 40<br>(20 - 60)          |
| Motor vehicle road injuries                     | 423<br>(338 - 529)       | 8<br>(5 - 13)      | 8<br>(6 - 12)       | 151<br>(118 - 187)       | 157<br>(116 - 207)       | 99<br>(68 - 142)         |
| Other road injuries                             | 8<br>(5 - 13)            | 0<br>(0 - 0)       | 0<br>(0 - 1)        | 3<br>(2 - 4)             | 3<br>(2 - 5)             | 2<br>(1 - 4)             |
| Other transport injuries                        | 37<br>(29 - 50)          | 1<br>(1 - 2)       | 1<br>(1 - 1)        | 9<br>(7 - 13)            | 13<br>(9 - 18)           | 13<br>(8 - 19)           |
| Unintentional injuries                          | 1,867<br>(1,450 - 2,212) | 41<br>(31 - 52)    | 18<br>(14 - 22)     | 137<br>(119 - 161)       | 309<br>(253 - 364)       | 1,362<br>(991 - 1,691)   |
| Falls                                           | 710<br>(525 - 953)       | 6<br>(3 - 10)      | 3<br>(2 - 5)        | 35<br>(26 - 43)          | 125<br>(97 - 171)        | 541<br>(364 - 764)       |
| Drowning                                        | 110<br>(82 - 153)        | 11<br>(6 - 18)     | 7<br>(5 - 10)       | 25<br>(18 - 36)          | 34<br>(24 - 52)          | 34<br>(23 - 48)          |
| Fire, heat, and hot substances                  | 128<br>(83 - 181)        | 4<br>(2 - 7)       | 2<br>(2 - 4)        | 13<br>(8 - 17)           | 13<br>(8 - 18)           | 96<br>(58 - 145)         |
| Poisonings                                      | 53<br>(34 - 75)          | 1<br>(1 - 2)       | 2<br>(1 - 2)        | 20<br>(13 - 30)          | 9<br>(5 - 13)            | 22<br>(12 - 33)          |
| Exposure to mechanical forces                   | 50<br>(41 - 70)          | 6<br>(3 - 12)      | 1<br>(1 - 1)        | 9<br>(7 - 12)            | 11<br>(9 - 15)           | 24<br>(18 - 34)          |
| Unintentional firearm injuries                  | 2<br>(2 - 3)             | 0<br>(0 - 0)       | 0<br>(0 - 0)        | 1<br>(0 - 1)             | 0<br>(0 - 1)             | 1<br>(0 - 1)             |
| Unintentional suffocation                       | 11<br>(7 - 25)           | 3<br>(1 - 10)      | 0<br>(0 - 0)        | 2<br>(1 - 3)             | 2<br>(1 - 3)             | 5<br>(3 - 9)             |
| Other exposure to mechanical forces             | 37<br>(29 - 47)          | 2<br>(1 - 4)       | 1<br>(0 - 1)        | 7<br>(5 - 9)             | 9<br>(7 - 13)            | 18<br>(13 - 26)          |
| Adverse effects of medical treatment            | 554<br>(243 - 831)       | 2<br>(1 - 4)       | 1<br>(1 - 2)        | 17<br>(9 - 24)           | 76<br>(37 - 114)         | 458<br>(182 - 721)       |
| Animal contact                                  | 4<br>(2 - 9)             | 0<br>(0 - 0)       | 0<br>(0 - 0)        | 1<br>(1 - 3)             | 1<br>(0 - 2)             | 2<br>(1 - 4)             |
| Venomous animal contact                         | 1<br>(1 - 3)             | 0<br>(0 - 0)       | 0<br>(0 - 0)        | 1<br>(0 - 2)             | 0<br>(0 - 1)             | 0<br>(0 - 0)             |
| Non-venomous animal contact                     | 2<br>(1 - 6)             | 0<br>(0 - 0)       | 0<br>(0 - 0)        | 0<br>(0 - 1)             | 0<br>(0 - 1)             | 1<br>(1 - 4)             |
| Foreign body                                    | 234<br>(144 - 386)       | 10<br>(6 - 17)     | 1<br>(1 - 1)        | 13<br>(8 - 20)           | 35<br>(22 - 55)          | 175<br>(104 - 290)       |
| Pulmonary aspiration and foreign body in airway | 233<br>(142 - 385)       | 10<br>(6 - 17)     | 1<br>(0 - 1)        | 12<br>(8 - 20)           | 35<br>(22 - 55)          | 174<br>(103 - 290)       |
| Foreign body in other body part                 | 1<br>(1 - 2)             | 0<br>(0 - 0)       | 0<br>(0 - 0)        | 1<br>(0 - 1)             | 0<br>(0 - 0)             | 0<br>(0 - 0)             |
| Other unintentional injuries                    | 23<br>(16 - 69)          | 1<br>(0 - 3)       | 0<br>(0 - 1)        | 5<br>(3 - 18)            | 6<br>(4 - 17)            | 11<br>(6 - 31)           |
| Self-harm and interpersonal violence            | 1,549<br>(1,363 - 1,779) | 4<br>(1 - 8)       | 11<br>(7 - 15)      | 757<br>(657 - 884)       | 455<br>(371 - 566)       | 322<br>(245 - 439)       |
| Self-harm                                       | 1,435<br>(1,252 - 1,669) | --                 | 7<br>(4 - 11)       | 697<br>(596 - 806)       | 433<br>(349 - 544)       | 298<br>(227 - 410)       |
| Interpersonal violence                          | 114<br>(80 - 157)        | 4<br>(1 - 8)       | 4<br>(2 - 7)        | 59<br>(44 - 96)          | 22<br>(14 - 35)          | 24<br>(10 - 40)          |
| Assault by firearm                              | 9<br>(5 - 17)            | 0<br>(0 - 1)       | 0<br>(0 - 0)        | 7<br>(4 - 13)            | 1<br>(1 - 2)             | 1<br>(0 - 2)             |
| Assault by sharp object                         | 22<br>(14 - 36)          | 1<br>(0 - 1)       | 0<br>(0 - 1)        | 14<br>(8 - 24)           | 5<br>(3 - 10)            | 2<br>(1 - 5)             |
| Assault by other means                          | 83<br>(54 - 114)         | 3<br>(1 - 7)       | 4<br>(2 - 6)        | 39<br>(27 - 62)          | 16<br>(10 - 24)          | 21<br>(9 - 34)           |
| Forces of nature, war, and legal intervention   | 0<br>(0 - 0)             | 0<br>(0 - 0)       | --                  | --                       | --                       | 0<br>(0 - 0)             |
| Exposure to forces of nature                    | 0<br>(0 - 0)             | 0<br>(0 - 0)       | --                  | --                       | --                       | 0<br>(0 - 0)             |

Web Table 31- Tajikistan deaths with 95% UI by age, sex, and cause in 2013

| Cause                                                             | Both Sexes, All Ages        | Both Sexes, 0-4 Years       | Both Sexes, 5-14 Years | Both Sexes, 15-49 Years  | Both Sexes, 50-69 Years   | Both Sexes, 70-80 Years     |
|-------------------------------------------------------------------|-----------------------------|-----------------------------|------------------------|--------------------------|---------------------------|-----------------------------|
| All causes                                                        | 43,561<br>(40,139 - 46,870) | 11,095<br>(10,094 - 12,060) | 1,077<br>(974 - 1,209) | 8,369<br>(7,416 - 9,496) | 9,134<br>(7,922 - 10,359) | 13,886<br>(12,730 - 15,044) |
| Communicable, maternal, neonatal, and nutritional diseases        | 12,462<br>(11,438 - 13,467) | 9,266<br>(8,389 - 10,100)   | 420<br>(362 - 486)     | 1,653<br>(1,370 - 1,909) | 555<br>(461 - 654)        | 568<br>(451 - 706)          |
| HIV/AIDS and tuberculosis                                         | 932<br>(596 - 1,251)        | 32<br>(8 - 79)              | 16<br>(8 - 28)         | 674<br>(417 - 891)       | 167<br>(116 - 228)        | 43<br>(31 - 55)             |
| Tuberculosis                                                      | 679<br>(436 - 856)          | 7<br>(5 - 10)               | 9<br>(6 - 12)          | 489<br>(285 - 620)       | 134<br>(98 - 177)         | 39<br>(28 - 51)             |
| HIV/AIDS                                                          | 253<br>(33 - 537)           | 25<br>(1 - 71)              | 7<br>(0 - 18)          | 185<br>(28 - 363)        | 32<br>(4 - 79)            | 4<br>(0 - 9)                |
| HIV/AIDS resulting in mycobacterial infection                     | 14<br>(2 - 32)              | 1<br>(0 - 4)                | 0<br>(0 - 1)           | 11<br>(2 - 22)           | 2<br>(0 - 5)              | 0<br>(0 - 1)                |
| HIV/AIDS resulting in other diseases                              | 239<br>(31 - 505)           | 24<br>(1 - 67)              | 7<br>(0 - 17)          | 174<br>(26 - 343)        | 30<br>(4 - 74)            | 3<br>(0 - 9)                |
| Diarrhea, lower respiratory, and other common infectious diseases | 7,071<br>(6,209 - 7,958)    | 5,208<br>(4,449 - 5,971)    | 347<br>(294 - 408)     | 702<br>(571 - 852)       | 322<br>(251 - 403)        | 491<br>(375 - 628)          |
| Diarrheal diseases                                                | 1,438<br>(897 - 2,074)      | 1,314<br>(760 - 1,965)      | 32<br>(20 - 47)        | 53<br>(39 - 69)          | 20<br>(13 - 29)           | 19<br>(12 - 28)             |
| Intestinal infectious diseases                                    | 30<br>(18 - 45)             | 16<br>(8 - 26)              | 4<br>(2 - 9)           | 8<br>(4 - 14)            | 2<br>(0 - 5)              | 1<br>(0 - 4)                |
| Typhoid fever                                                     | 8<br>(4 - 15)               | 3<br>(1 - 6)                | 2<br>(1 - 4)           | 3<br>(1 - 5)             | 0<br>(0 - 1)              | 0<br>(0 - 0)                |
| Paratyphoid fever                                                 | 3<br>(1 - 5)                | 1<br>(1 - 2)                | 1<br>(0 - 1)           | 1<br>(0 - 1)             | 0<br>(0 - 0)              | 0<br>(0 - 0)                |
| Other intestinal infectious diseases                              | 19<br>(10 - 32)             | 11<br>(4 - 21)              | 2<br>(0 - 5)           | 4<br>(1 - 11)            | 1<br>(0 - 5)              | 1<br>(0 - 4)                |
| Lower respiratory infections                                      | 4,939<br>(4,084 - 5,720)    | 3,473<br>(2,716 - 4,222)    | 243<br>(192 - 304)     | 497<br>(384 - 626)       | 269<br>(203 - 347)        | 457<br>(342 - 591)          |
| Upper respiratory infections                                      | 4<br>(2 - 7)                | 1<br>(0 - 4)                | 0<br>(0 - 0)           | 1<br>(0 - 2)             | 1<br>(0 - 2)              | 1<br>(0 - 2)                |
| Otitis media                                                      | 2<br>(2 - 2)                | 1<br>(0 - 1)                | 0<br>(0 - 0)           | 1<br>(1 - 1)             | 0<br>(0 - 0)              | 0<br>(0 - 0)                |
| Meningitis                                                        | 491<br>(364 - 637)          | 286<br>(168 - 430)          | 51<br>(38 - 66)        | 119<br>(96 - 147)        | 25<br>(19 - 33)           | 10<br>(7 - 12)              |
| Pneumococcal meningitis                                           | 114<br>(86 - 147)           | 53<br>(31 - 80)             | 14<br>(9 - 19)         | 36<br>(25 - 48)          | 8<br>(5 - 11)             | 3<br>(2 - 4)                |
| H influenzae type B meningitis                                    | 184<br>(123 - 254)          | 140<br>(82 - 214)           | 17<br>(11 - 23)        | 21<br>(15 - 30)          | 4<br>(3 - 5)              | 1<br>(1 - 2)                |
| Meningococcal meningitis                                          | 106<br>(78 - 138)           | 60<br>(34 - 91)             | 13<br>(9 - 18)         | 27<br>(19 - 36)          | 5<br>(3 - 7)              | 2<br>(2 - 3)                |
| Other meningitis                                                  | 87<br>(64 - 113)            | 33<br>(17 - 55)             | 8<br>(5 - 12)          | 35<br>(23 - 48)          | 9<br>(5 - 13)             | 3<br>(2 - 5)                |
| Encephalitis                                                      | 109<br>(62 - 170)           | 73<br>(35 - 127)            | 13<br>(6 - 21)         | 18<br>(10 - 27)          | 4<br>(2 - 6)              | 1<br>(1 - 2)                |
| Diphtheria                                                        | 7<br>(0 - 32)               | 6<br>(0 - 30)               | 1<br>(0 - 6)           | 1<br>(0 - 2)             | 0<br>(0 - 1)              | --                          |
| Whooping cough                                                    | 38<br>(5 - 179)             | 35<br>(3 - 177)             | 1<br>(0 - 1)           | 1<br>(1 - 2)             | 0<br>(0 - 1)              | --                          |
| Tetanus                                                           | 4<br>(3 - 8)                | 0<br>(0 - 1)                | 1<br>(1 - 2)           | 2<br>(1 - 3)             | 1<br>(0 - 1)              | 0<br>(0 - 1)                |
| Measles                                                           | 0<br>(0 - 0)                | 0<br>(0 - 0)                | 0<br>(0 - 0)           | 0<br>(0 - 0)             | 0<br>(0 - 0)              | --                          |
| Varicella and herpes zoster                                       | 9<br>(4 - 19)               | 4<br>(0 - 11)               | 1<br>(0 - 2)           | 2<br>(1 - 4)             | 1<br>(0 - 2)              | 2<br>(0 - 8)                |
| Neglected tropical diseases and malaria                           | 60<br>(48 - 77)             | 23<br>(14 - 38)             | 8<br>(6 - 12)          | 19<br>(16 - 25)          | 6<br>(4 - 8)              | 3<br>(2 - 5)                |
| Malaria                                                           | 17<br>(12 - 28)             | 6<br>(3 - 16)               | 1<br>(1 - 2)           | 6<br>(4 - 8)             | 2<br>(1 - 3)              | 1<br>(1 - 2)                |
| Leishmaniasis                                                     | 13<br>(9 - 19)              | 6<br>(3 - 10)               | 2<br>(1 - 3)           | 4<br>(3 - 6)             | 1<br>(1 - 1)              | 0<br>(0 - 0)                |
| Visceral leishmaniasis                                            | 13<br>(9 - 19)              | 6<br>(3 - 10)               | 2<br>(1 - 3)           | 4<br>(3 - 6)             | 1<br>(1 - 1)              | 0<br>(0 - 0)                |
| Cysticercosis                                                     | 0<br>(0 - 0)                | 0<br>(0 - 0)                | 0<br>(0 - 0)           | 0<br>(0 - 0)             | 0<br>(0 - 0)              | 0<br>(0 - 0)                |
| Cystic echinococcosis                                             | 10<br>(9 - 11)              | 1<br>(1 - 1)                | 2<br>(1 - 2)           | 5<br>(4 - 5)             | 2<br>(2 - 2)              | 1<br>(1 - 1)                |
| Dengue                                                            | 1<br>(1 - 2)                | 0<br>(0 - 1)                | 0<br>(0 - 0)           | 1<br>(0 - 1)             | 0<br>(0 - 0)              | 0<br>(0 - 0)                |
| Rabies                                                            | 6<br>(4 - 9)                | 1<br>(0 - 2)                | 2<br>(1 - 3)           | 2<br>(2 - 4)             | 1<br>(0 - 1)              | 0<br>(0 - 0)                |
| Intestinal nematode infections                                    | 5<br>(1 - 14)               | 3<br>(0 - 11)               | 1<br>(0 - 4)           | 0<br>(0 - 3)             | 0<br>(0 - 2)              | 0<br>(0 - 2)                |
| Ascariasis                                                        | 5<br>(1 - 14)               | 3<br>(0 - 11)               | 1<br>(0 - 4)           | 0<br>(0 - 3)             | 0<br>(0 - 2)              | 0<br>(0 - 2)                |
| Other neglected tropical diseases                                 | 8<br>(4 - 12)               | 5<br>(2 - 9)                | 1<br>(0 - 1)           | 2<br>(1 - 3)             | 0<br>(0 - 1)              | 0<br>(0 - 0)                |
| Maternal disorders                                                | 82<br>(60 - 106)            | --                          | 0<br>(0 - 0)           | 82<br>(60 - 106)         | --                        | --                          |
| Maternal hemorrhage                                               | 12<br>(8 - 17)              | --                          | 0<br>(0 - 0)           | 12<br>(8 - 17)           | --                        | --                          |

Web Table 31- Tajikistan deaths with 95% UI by age, sex, and cause in 2013

| Cause                                                            | Both Sexes, All Ages        | Both Sexes, 0-4 Years    | Both Sexes, 5-14 Years | Both Sexes, 15-49 Years  | Both Sexes, 50-69 Years  | Both Sexes, 70-80 Years     |
|------------------------------------------------------------------|-----------------------------|--------------------------|------------------------|--------------------------|--------------------------|-----------------------------|
| Maternal sepsis and other maternal infections                    | 9<br>(5 - 14)               | --                       | 0<br>(0 - 0)           | 9<br>(5 - 14)            | --                       | --                          |
| Maternal hypertensive disorders                                  | 8<br>(5 - 12)               | --                       | 0<br>(0 - 0)           | 8<br>(5 - 12)            | --                       | --                          |
| Maternal obstructed labor                                        | 9<br>(5 - 13)               | --                       | 0<br>(0 - 0)           | 9<br>(5 - 13)            | --                       | --                          |
| Maternal abortive outcome                                        | 7<br>(4 - 11)               | --                       | 0<br>(0 - 0)           | 7<br>(4 - 11)            | --                       | --                          |
| Indirect maternal deaths                                         | 10<br>(6 - 16)              | --                       | 0<br>(0 - 0)           | 10<br>(6 - 16)           | --                       | --                          |
| Late maternal deaths                                             | 13<br>(8 - 18)              | --                       | 0<br>(0 - 0)           | 13<br>(8 - 18)           | --                       | --                          |
| Maternal deaths aggravated by HIV/AIDS                           | 0<br>(0 - 0)                | --                       | --                     | 0<br>(0 - 0)             | --                       | --                          |
| Other maternal disorders                                         | 15<br>(9 - 23)              | --                       | 0<br>(0 - 0)           | 15<br>(9 - 23)           | --                       | --                          |
| Neonatal disorders                                               | 3,636<br>(3,233 - 4,107)    | 3,636<br>(3,233 - 4,107) | --                     | --                       | --                       | --                          |
| Neonatal preterm birth complications                             | 1,383<br>(833 - 1,905)      | 1,383<br>(833 - 1,905)   | --                     | --                       | --                       | --                          |
| Neonatal encephalopathy due to birth asphyxia and trauma         | 1,412<br>(853 - 1,983)      | 1,412<br>(853 - 1,983)   | --                     | --                       | --                       | --                          |
| Neonatal sepsis and other neonatal infections                    | 163<br>(73 - 285)           | 163<br>(73 - 285)        | --                     | --                       | --                       | --                          |
| Hemolytic disease and other neonatal jaundice                    | 23<br>(11 - 44)             | 23<br>(11 - 44)          | --                     | --                       | --                       | --                          |
| Other neonatal disorders                                         | 655<br>(364 - 1,085)        | 655<br>(364 - 1,085)     | --                     | --                       | --                       | --                          |
| Nutritional deficiencies                                         | 340<br>(241 - 426)          | 153<br>(90 - 224)        | 23<br>(16 - 30)        | 106<br>(75 - 130)        | 38<br>(28 - 50)          | 20<br>(15 - 27)             |
| Protein-energy malnutrition                                      | 153<br>(84 - 231)           | 128<br>(67 - 208)        | 3<br>(1 - 7)           | 14<br>(4 - 33)           | 7<br>(2 - 16)            | 1<br>(0 - 1)                |
| Iodine deficiency                                                | 3<br>(1 - 8)                | 1<br>(0 - 4)             | 0<br>(0 - 2)           | 1<br>(0 - 3)             | 1<br>(0 - 3)             | 0<br>(0 - 1)                |
| Iron-deficiency anemia                                           | 157<br>(113 - 204)          | 19<br>(3 - 47)           | 14<br>(8 - 20)         | 79<br>(54 - 102)         | 26<br>(17 - 37)          | 18<br>(13 - 24)             |
| Other nutritional deficiencies                                   | 27<br>(14 - 59)             | 6<br>(1 - 19)            | 5<br>(2 - 9)           | 12<br>(6 - 23)           | 4<br>(1 - 7)             | 1<br>(0 - 2)                |
| Other communicable, maternal, neonatal, and nutritional diseases | 342<br>(208 - 501)          | 212<br>(89 - 359)        | 26<br>(17 - 38)        | 70<br>(56 - 90)          | 22<br>(16 - 29)          | 11<br>(8 - 16)              |
| Sexually transmitted diseases excluding HIV                      | 147<br>(21 - 282)           | 122<br>(2 - 248)         | 9<br>(1 - 17)          | 9<br>(6 - 13)            | 5<br>(3 - 8)             | 2<br>(1 - 3)                |
| Syphilis                                                         | 140<br>(13 - 274)           | 122<br>(2 - 248)         | 9<br>(0 - 17)          | 4<br>(3 - 6)             | 3<br>(2 - 5)             | 2<br>(1 - 3)                |
| Chlamydial infection                                             | 1<br>(1 - 2)                | --                       | 0<br>(0 - 0)           | 1<br>(1 - 1)             | 0<br>(0 - 0)             | 0<br>(0 - 0)                |
| Gonococcal infection                                             | 3<br>(2 - 5)                | --                       | 0<br>(0 - 0)           | 2<br>(1 - 3)             | 1<br>(1 - 1)             | 0<br>(0 - 0)                |
| Other sexually transmitted diseases                              | 3<br>(2 - 4)                | --                       | 0<br>(0 - 0)           | 2<br>(1 - 3)             | 1<br>(0 - 1)             | 0<br>(0 - 0)                |
| Hepatitis                                                        | 129<br>(102 - 171)          | 40<br>(23 - 69)          | 14<br>(9 - 21)         | 55<br>(42 - 71)          | 14<br>(10 - 20)          | 7<br>(5 - 10)               |
| Acute hepatitis A                                                | 22<br>(7 - 43)              | 14<br>(4 - 29)           | 4<br>(1 - 8)           | 4<br>(1 - 9)             | 0<br>(0 - 1)             | 0<br>(0 - 0)                |
| Acute hepatitis B                                                | 72<br>(47 - 103)            | 26<br>(12 - 49)          | 6<br>(3 - 11)          | 23<br>(14 - 35)          | 11<br>(7 - 16)           | 6<br>(4 - 9)                |
| Acute hepatitis C                                                | 7<br>(1 - 15)               | --                       | 1<br>(0 - 4)           | 3<br>(1 - 8)             | 1<br>(0 - 3)             | 1<br>(0 - 2)                |
| Acute hepatitis E                                                | 28<br>(18 - 44)             | 0<br>(0 - 1)             | 2<br>(1 - 4)           | 24<br>(15 - 38)          | 2<br>(1 - 3)             | 0<br>(0 - 1)                |
| Other infectious diseases                                        | 66<br>(32 - 148)            | 51<br>(21 - 132)         | 3<br>(2 - 6)           | 6<br>(3 - 12)            | 3<br>(1 - 7)             | 2<br>(1 - 5)                |
| Non-communicable diseases                                        | 27,749<br>(24,884 - 30,516) | 1,309<br>(956 - 1,714)   | 330<br>(285 - 383)     | 4,691<br>(4,094 - 5,376) | 8,214<br>(7,104 - 9,319) | 13,205<br>(12,108 - 14,348) |
| Neoplasms                                                        | 3,464<br>(2,979 - 3,993)    | 70<br>(49 - 97)          | 95<br>(79 - 114)       | 996<br>(857 - 1,150)     | 1,463<br>(1,234 - 1,719) | 840<br>(724 - 996)          |
| Esophageal cancer                                                | 344<br>(260 - 458)          | --                       | --                     | 55<br>(42 - 72)          | 162<br>(123 - 216)       | 126<br>(91 - 178)           |
| Stomach cancer                                                   | 631<br>(541 - 737)          | --                       | --                     | 137<br>(115 - 163)       | 288<br>(237 - 343)       | 206<br>(172 - 245)          |
| Liver cancer                                                     | 341<br>(243 - 432)          | --                       | 2<br>(1 - 3)           | 64<br>(45 - 83)          | 169<br>(108 - 226)       | 107<br>(76 - 145)           |
| Liver cancer due to hepatitis B                                  | 124<br>(84 - 165)           | --                       | 1<br>(0 - 1)           | 27<br>(18 - 37)          | 66<br>(41 - 93)          | 31<br>(21 - 44)             |
| Liver cancer due to hepatitis C                                  | 118<br>(81 - 155)           | --                       | 0<br>(0 - 1)           | 19<br>(13 - 27)          | 58<br>(37 - 81)          | 40<br>(28 - 57)             |
| Liver cancer due to alcohol use                                  | 66<br>(43 - 92)             | --                       | --                     | 8<br>(5 - 12)            | 30<br>(18 - 45)          | 27<br>(18 - 39)             |
| Liver cancer due to other causes                                 | 33<br>(21 - 48)             | --                       | 1<br>(0 - 2)           | 10<br>(7 - 14)           | 14<br>(8 - 22)           | 8<br>(5 - 14)               |

Web Table 31- Tajikistan deaths with 95% UI by age, sex, and cause in 2013

| Cause                                         | Both Sexes, All Ages        | Both Sexes, 0-4 Years | Both Sexes, 5-14 Years | Both Sexes, 15-49 Years  | Both Sexes, 50-69 Years  | Both Sexes, 70-80 Years   |
|-----------------------------------------------|-----------------------------|-----------------------|------------------------|--------------------------|--------------------------|---------------------------|
| Larynx cancer                                 | 32<br>(23 - 47)             | --                    | --                     | 9<br>(6 - 15)            | 16<br>(12 - 24)          | 7<br>(5 - 10)             |
| Tracheal, bronchus and lung cancer            | 248<br>(204 - 305)          | --                    | --                     | 59<br>(48 - 75)          | 132<br>(105 - 167)       | 56<br>(46 - 71)           |
| Breast cancer                                 | 201<br>(157 - 259)          | --                    | --                     | 96<br>(70 - 123)         | 85<br>(65 - 116)         | 20<br>(15 - 27)           |
| Cervical cancer                               | 58<br>(45 - 100)            | --                    | --                     | 20<br>(15 - 32)          | 26<br>(19 - 45)          | 12<br>(8 - 23)            |
| Uterine cancer                                | 35<br>(23 - 51)             | --                    | --                     | 11<br>(7 - 17)           | 17<br>(11 - 26)          | 7<br>(5 - 11)             |
| Prostate cancer                               | 42<br>(29 - 70)             | --                    | --                     | 4<br>(3 - 7)             | 15<br>(9 - 23)           | 23<br>(16 - 40)           |
| Colon and rectum cancer                       | 179<br>(153 - 206)          | --                    | --                     | 72<br>(61 - 84)          | 69<br>(56 - 82)          | 38<br>(32 - 45)           |
| Lip and oral cavity cancer                    | 62<br>(46 - 86)             | --                    | --                     | 15<br>(11 - 22)          | 31<br>(21 - 46)          | 16<br>(12 - 23)           |
| Nasopharynx cancer                            | 18<br>(13 - 24)             | --                    | 1<br>(0 - 1)           | 9<br>(6 - 12)            | 6<br>(4 - 9)             | 2<br>(1 - 3)              |
| Other pharynx cancer                          | 32<br>(21 - 44)             | --                    | --                     | 7<br>(5 - 11)            | 19<br>(11 - 28)          | 5<br>(4 - 8)              |
| Gallbladder and biliary tract cancer          | 56<br>(40 - 78)             | --                    | --                     | 8<br>(5 - 11)            | 28<br>(19 - 39)          | 21<br>(13 - 32)           |
| Pancreatic cancer                             | 113<br>(94 - 133)           | --                    | --                     | 20<br>(15 - 25)          | 59<br>(47 - 72)          | 34<br>(27 - 42)           |
| Malignant skin melanoma                       | 45<br>(31 - 60)             | --                    | --                     | 16<br>(10 - 22)          | 18<br>(12 - 25)          | 11<br>(7 - 15)            |
| Non-melanoma skin cancer                      | 12<br>(8 - 16)              | --                    | --                     | 3<br>(2 - 4)             | 4<br>(2 - 5)             | 5<br>(3 - 8)              |
| Ovarian cancer                                | 64<br>(45 - 91)             | --                    | --                     | 23<br>(15 - 32)          | 31<br>(20 - 47)          | 10<br>(6 - 16)            |
| Testicular cancer                             | 12<br>(7 - 18)              | --                    | --                     | 10<br>(5 - 15)           | 2<br>(1 - 3)             | 1<br>(0 - 1)              |
| Kidney cancer                                 | 66<br>(43 - 99)             | 3<br>(2 - 6)          | 2<br>(1 - 3)           | 15<br>(9 - 23)           | 33<br>(19 - 54)          | 14<br>(9 - 22)            |
| Bladder cancer                                | 74<br>(58 - 92)             | --                    | --                     | 7<br>(5 - 9)             | 30<br>(23 - 41)          | 36<br>(27 - 47)           |
| Brain and nervous system cancer               | 149<br>(109 - 190)          | 8<br>(4 - 15)         | 14<br>(10 - 20)        | 69<br>(46 - 92)          | 48<br>(32 - 64)          | 10<br>(7 - 15)            |
| Thyroid cancer                                | 13<br>(10 - 17)             | --                    | 0<br>(0 - 0)           | 3<br>(2 - 5)             | 6<br>(4 - 8)             | 4<br>(3 - 5)              |
| Mesothelioma                                  | 5<br>(2 - 7)                | --                    | --                     | 2<br>(1 - 3)             | 2<br>(1 - 4)             | 1<br>(0 - 1)              |
| Hodgkin lymphoma                              | 27<br>(20 - 36)             | 2<br>(1 - 3)          | 3<br>(1 - 6)           | 15<br>(10 - 20)          | 6<br>(4 - 9)             | 2<br>(1 - 3)              |
| Non-Hodgkin lymphoma                          | 88<br>(57 - 117)            | 5<br>(3 - 8)          | 6<br>(4 - 8)           | 34<br>(21 - 46)          | 29<br>(16 - 41)          | 14<br>(8 - 21)            |
| Multiple myeloma                              | 12<br>(9 - 15)              | --                    | --                     | 4<br>(2 - 5)             | 6<br>(4 - 8)             | 2<br>(2 - 3)              |
| Leukemia                                      | 193<br>(166 - 223)          | 22<br>(14 - 31)       | 43<br>(33 - 55)        | 97<br>(81 - 119)         | 25<br>(20 - 31)          | 6<br>(5 - 8)              |
| Other neoplasms                               | 312<br>(240 - 376)          | 29<br>(18 - 48)       | 25<br>(18 - 35)        | 113<br>(82 - 139)        | 102<br>(65 - 135)        | 43<br>(30 - 58)           |
| Cardiovascular diseases                       | 16,511<br>(14,746 - 18,267) | 21<br>(15 - 28)       | 22<br>(17 - 29)        | 1,671<br>(1,423 - 1,940) | 4,908<br>(4,227 - 5,595) | 9,890<br>(9,035 - 10,746) |
| Rheumatic heart disease                       | 378<br>(294 - 508)          | 1<br>(0 - 2)          | 8<br>(6 - 11)          | 218<br>(169 - 306)       | 119<br>(88 - 164)        | 32<br>(23 - 44)           |
| Ischemic heart disease                        | 10,310<br>(9,039 - 11,512)  | 5<br>(3 - 9)          | 6<br>(5 - 10)          | 957<br>(784 - 1,144)     | 3,028<br>(2,553 - 3,498) | 6,313<br>(5,622 - 6,967)  |
| Cerebrovascular disease                       | 5,174<br>(4,344 - 5,924)    | 5<br>(4 - 6)          | 3<br>(2 - 5)           | 381<br>(297 - 467)       | 1,553<br>(1,276 - 1,847) | 3,232<br>(2,709 - 3,684)  |
| Ischemic stroke                               | 2,442<br>(1,573 - 3,013)    | 1<br>(0 - 2)          | 1<br>(0 - 1)           | 63<br>(36 - 103)         | 497<br>(293 - 724)       | 1,880<br>(1,247 - 2,297)  |
| Hemorrhagic stroke                            | 2,732<br>(2,088 - 3,493)    | 4<br>(3 - 5)          | 2<br>(2 - 4)           | 318<br>(249 - 391)       | 1,056<br>(785 - 1,322)   | 1,352<br>(1,034 - 1,838)  |
| Hypertensive heart disease                    | 436<br>(282 - 654)          | 1<br>(0 - 2)          | 0<br>(0 - 1)           | 44<br>(26 - 71)          | 135<br>(82 - 208)        | 256<br>(159 - 398)        |
| Cardiomyopathy and myocarditis                | 97<br>(61 - 131)            | 5<br>(3 - 8)          | 2<br>(1 - 4)           | 32<br>(18 - 46)          | 33<br>(19 - 50)          | 24<br>(16 - 36)           |
| Atrial fibrillation and flutter               | 0<br>(0 - 0)                | --                    | --                     | 0<br>(0 - 0)             | 0<br>(0 - 0)             | 0<br>(0 - 0)              |
| Aortic aneurysm                               | 16<br>(12 - 23)             | --                    | --                     | 4<br>(2 - 5)             | 5<br>(3 - 7)             | 8<br>(6 - 12)             |
| Peripheral vascular disease                   | 1<br>(1 - 2)                | --                    | --                     | 0<br>(0 - 0)             | 1<br>(0 - 1)             | 1<br>(0 - 1)              |
| Endocarditis                                  | 23<br>(15 - 29)             | 3<br>(2 - 5)          | 0<br>(0 - 1)           | 6<br>(4 - 8)             | 6<br>(4 - 9)             | 7<br>(4 - 10)             |
| Other cardiovascular and circulatory diseases | 76<br>(57 - 102)            | 0<br>(0 - 1)          | 1<br>(0 - 1)           | 29<br>(21 - 41)          | 29<br>(20 - 40)          | 17<br>(12 - 25)           |
| Chronic respiratory diseases                  | 1,649<br>(1,409 - 1,959)    | 29<br>(11 - 42)       | 10<br>(7 - 13)         | 253<br>(199 - 305)       | 462<br>(382 - 569)       | 894<br>(757 - 1,107)      |

Web Table 31- Tajikistan deaths with 95% UI by age, sex, and cause in 2013

| Cause                                               | Both Sexes, All Ages     | Both Sexes, 0-4 Years | Both Sexes, 5-14 Years | Both Sexes, 15-49 Years | Both Sexes, 50-69 Years | Both Sexes, 70-80 Years |
|-----------------------------------------------------|--------------------------|-----------------------|------------------------|-------------------------|-------------------------|-------------------------|
| Chronic obstructive pulmonary disease               | 1,363<br>(1,130 - 1,622) | 14<br>(4 - 22)        | 5<br>(2 - 7)           | 184<br>(138 - 231)      | 391<br>(318 - 472)      | 769<br>(644 - 946)      |
| Pneumoconiosis                                      | 33<br>(21 - 54)          | 0<br>(0 - 1)          | 0<br>(0 - 1)           | 5<br>(3 - 9)            | 11<br>(7 - 20)          | 16<br>(9 - 27)          |
| Silicosis                                           | 4<br>(2 - 11)            | 0<br>(0 - 0)          | 0<br>(0 - 0)           | 1<br>(1 - 3)            | 2<br>(1 - 6)            | 1<br>(0 - 1)            |
| Asbestosis                                          | 9<br>(5 - 17)            | 0<br>(0 - 0)          | 0<br>(0 - 0)           | 1<br>(1 - 2)            | 2<br>(1 - 4)            | 5<br>(3 - 11)           |
| Coal workers pneumoconiosis                         | 14<br>(7 - 24)           | 0<br>(0 - 0)          | 0<br>(0 - 0)           | 1<br>(1 - 3)            | 5<br>(2 - 9)            | 7<br>(4 - 13)           |
| Other pneumoconiosis                                | 7<br>(4 - 10)            | 0<br>(0 - 0)          | 0<br>(0 - 0)           | 1<br>(1 - 2)            | 2<br>(1 - 4)            | 3<br>(1 - 4)            |
| Asthma                                              | 142<br>(101 - 222)       | 3<br>(1 - 5)          | 3<br>(2 - 5)           | 41<br>(28 - 59)         | 39<br>(25 - 64)         | 56<br>(35 - 101)        |
| Interstitial lung disease and pulmonary sarcoidosis | 70<br>(46 - 112)         | 1<br>(0 - 2)          | 0<br>(0 - 1)           | 5<br>(3 - 9)            | 16<br>(9 - 27)          | 48<br>(29 - 77)         |
| Other chronic respiratory diseases                  | 40<br>(28 - 53)          | 11<br>(5 - 16)        | 1<br>(1 - 2)           | 17<br>(11 - 23)         | 5<br>(3 - 8)            | 6<br>(4 - 9)            |
| Cirrhosis                                           | 1,373<br>(1,189 - 1,578) | 7<br>(5 - 11)         | 24<br>(20 - 30)        | 529<br>(450 - 626)      | 524<br>(435 - 620)      | 289<br>(246 - 343)      |
| Cirrhosis due to hepatitis B                        | 582<br>(407 - 736)       | 1<br>(0 - 1)          | 7<br>(4 - 11)          | 228<br>(149 - 304)      | 222<br>(154 - 287)      | 124<br>(91 - 156)       |
| Cirrhosis due to hepatitis C                        | 354<br>(252 - 478)       | 0<br>(0 - 1)          | 3<br>(1 - 6)           | 129<br>(88 - 180)       | 142<br>(91 - 200)       | 79<br>(54 - 112)        |
| Cirrhosis due to alcohol use                        | 263<br>(173 - 377)       | --                    | --                     | 77<br>(42 - 131)        | 116<br>(74 - 168)       | 70<br>(49 - 98)         |
| Cirrhosis due to other causes                       | 175<br>(123 - 241)       | 6<br>(4 - 9)          | 14<br>(9 - 18)         | 94<br>(60 - 138)        | 44<br>(29 - 67)         | 17<br>(11 - 23)         |
| Digestive diseases                                  | 451<br>(388 - 524)       | 19<br>(12 - 30)       | 14<br>(11 - 18)        | 187<br>(156 - 224)      | 140<br>(115 - 172)      | 90<br>(76 - 107)        |
| Peptic ulcer disease                                | 228<br>(180 - 273)       | 1<br>(0 - 1)          | 2<br>(1 - 3)           | 100<br>(80 - 123)       | 80<br>(60 - 102)        | 46<br>(34 - 57)         |
| Gastritis and duodenitis                            | 5<br>(3 - 7)             | 1<br>(0 - 1)          | 1<br>(0 - 1)           | 2<br>(1 - 3)            | 1<br>(0 - 1)            | 1<br>(1 - 2)            |
| Appendicitis                                        | 26<br>(19 - 34)          | 1<br>(0 - 1)          | 3<br>(2 - 5)           | 16<br>(12 - 21)         | 4<br>(3 - 6)            | 2<br>(1 - 3)            |
| Paralytic ileus and intestinal obstruction          | 75<br>(53 - 109)         | 9<br>(4 - 16)         | 4<br>(3 - 6)           | 27<br>(18 - 40)         | 19<br>(13 - 29)         | 15<br>(10 - 24)         |
| Inguinal, femoral, and abdominal hernia             | 14<br>(8 - 20)           | 1<br>(1 - 3)          | 1<br>(1 - 1)           | 3<br>(1 - 5)            | 4<br>(2 - 7)            | 5<br>(3 - 8)            |
| Inflammatory bowel disease                          | 13<br>(10 - 17)          | 3<br>(2 - 5)          | 1<br>(1 - 2)           | 4<br>(3 - 6)            | 2<br>(2 - 3)            | 2<br>(1 - 3)            |
| Vascular intestinal disorders                       | 8<br>(4 - 14)            | 1<br>(0 - 1)          | 0<br>(0 - 1)           | 2<br>(1 - 4)            | 3<br>(1 - 6)            | 2<br>(1 - 3)            |
| Gallbladder and biliary diseases                    | 35<br>(28 - 49)          | 1<br>(0 - 1)          | 1<br>(0 - 1)           | 10<br>(8 - 15)          | 13<br>(10 - 19)         | 10<br>(8 - 15)          |
| Pancreatitis                                        | 25<br>(17 - 36)          | 1<br>(0 - 1)          | 0<br>(0 - 1)           | 13<br>(8 - 19)          | 8<br>(5 - 12)           | 4<br>(2 - 6)            |
| Other digestive diseases                            | 21<br>(16 - 36)          | 2<br>(1 - 4)          | 1<br>(1 - 2)           | 9<br>(6 - 15)           | 6<br>(4 - 11)           | 3<br>(2 - 6)            |
| Neurological disorders                              | 1,313<br>(1,114 - 1,548) | 32<br>(17 - 59)       | 49<br>(32 - 71)        | 293<br>(215 - 374)      | 97<br>(79 - 119)        | 842<br>(685 - 1,037)    |
| Alzheimer disease and other dementias               | 887<br>(726 - 1,090)     | --                    | --                     | 0<br>(0 - 1)            | 59<br>(46 - 74)         | 828<br>(670 - 1,022)    |
| Parkinson disease                                   | 8<br>(5 - 12)            | --                    | --                     | 1<br>(1 - 1)            | 3<br>(2 - 4)            | 5<br>(3 - 7)            |
| Epilepsy                                            | 397<br>(286 - 515)       | 30<br>(15 - 56)       | 47<br>(31 - 69)        | 283<br>(204 - 362)      | 31<br>(22 - 41)         | 6<br>(5 - 8)            |
| Multiple sclerosis                                  | 6<br>(4 - 10)            | --                    | --                     | 3<br>(2 - 5)            | 2<br>(1 - 3)            | 1<br>(1 - 3)            |
| Other neurological disorders                        | 14<br>(12 - 17)          | 3<br>(2 - 3)          | 2<br>(1 - 3)           | 6<br>(5 - 8)            | 3<br>(2 - 4)            | 1<br>(1 - 1)            |
| Mental and substance use disorders                  | 152<br>(114 - 213)       | 2<br>(1 - 3)          | 0<br>(0 - 0)           | 112<br>(81 - 155)       | 34<br>(25 - 56)         | 4<br>(3 - 7)            |
| Schizophrenia                                       | 10<br>(4 - 19)           | --                    | --                     | 7<br>(3 - 14)           | 2<br>(1 - 5)            | 0<br>(0 - 1)            |
| Alcohol use disorders                               | 107<br>(74 - 166)        | --                    | --                     | 76<br>(50 - 114)        | 28<br>(19 - 50)         | 3<br>(2 - 5)            |
| Drug use disorders                                  | 35<br>(27 - 47)          | 2<br>(1 - 3)          | --                     | 29<br>(21 - 40)         | 4<br>(3 - 5)            | 1<br>(1 - 2)            |
| Opioid use disorders                                | 8<br>(6 - 11)            | 0<br>(0 - 1)          | --                     | 6<br>(5 - 9)            | 1<br>(1 - 1)            | 0<br>(0 - 0)            |
| Cocaine use disorders                               | 1<br>(1 - 1)             | 0<br>(0 - 0)          | --                     | 1<br>(1 - 1)            | 0<br>(0 - 0)            | 0<br>(0 - 0)            |
| Amphetamine use disorders                           | 1<br>(1 - 1)             | 0<br>(0 - 0)          | --                     | 1<br>(1 - 1)            | 0<br>(0 - 0)            | 0<br>(0 - 0)            |
| Other drug use disorders                            | 26<br>(20 - 34)          | 1<br>(1 - 2)          | --                     | 21<br>(15 - 28)         | 3<br>(2 - 4)            | 1<br>(1 - 1)            |
| Eating disorders                                    | 0<br>(0 - 0)             | --                    | 0<br>(0 - 0)           | 0<br>(0 - 0)            | --                      | --                      |

Web Table 31- Tajikistan deaths with 95% UI by age, sex, and cause in 2013

| Cause                                               | Both Sexes, All Ages     | Both Sexes, 0-4 Years  | Both Sexes, 5-14 Years | Both Sexes, 15-49 Years | Both Sexes, 50-69 Years | Both Sexes, 70-80 Years |
|-----------------------------------------------------|--------------------------|------------------------|------------------------|-------------------------|-------------------------|-------------------------|
| Anorexia nervosa                                    | 0<br>(0 - 0)             | --                     | 0<br>(0 - 0)           | 0<br>(0 - 0)            | --                      | --                      |
| Diabetes, urogenital, blood, and endocrine diseases | 1,664<br>(1,447 - 1,898) | 78<br>(57 - 107)       | 60<br>(48 - 74)        | 596<br>(506 - 697)      | 577<br>(483 - 686)      | 353<br>(307 - 406)      |
| Diabetes mellitus                                   | 641<br>(546 - 744)       | 1<br>(1 - 2)           | 7<br>(5 - 10)          | 143<br>(118 - 171)      | 334<br>(273 - 402)      | 156<br>(129 - 189)      |
| Acute glomerulonephritis                            | 12<br>(9 - 18)           | 2<br>(1 - 3)           | 1<br>(1 - 2)           | 6<br>(4 - 9)            | 2<br>(1 - 4)            | 1<br>(1 - 2)            |
| Chronic kidney disease                              | 582<br>(489 - 685)       | 21<br>(14 - 31)        | 24<br>(18 - 31)        | 274<br>(222 - 331)      | 147<br>(114 - 184)      | 118<br>(96 - 143)       |
| Chronic kidney disease due to diabetes mellitus     | 14<br>(3 - 24)           | 0<br>(0 - 0)           | 1<br>(0 - 1)           | 5<br>(2 - 10)           | 6<br>(1 - 10)           | 2<br>(0 - 3)            |
| Chronic kidney disease due to hypertension          | 58<br>(36 - 94)          | 3<br>(1 - 6)           | 1<br>(0 - 2)           | 17<br>(9 - 30)          | 16<br>(9 - 28)          | 21<br>(11 - 37)         |
| Chronic kidney disease due to glomerulonephritis    | 215<br>(140 - 276)       | 7<br>(4 - 11)          | 9<br>(6 - 12)          | 110<br>(67 - 150)       | 55<br>(35 - 75)         | 34<br>(25 - 45)         |
| Chronic kidney disease due to other causes          | 295<br>(227 - 386)       | 10<br>(6 - 19)         | 13<br>(9 - 21)         | 141<br>(99 - 198)       | 70<br>(46 - 100)        | 61<br>(43 - 80)         |
| Urinary diseases and male infertility               | 336<br>(280 - 402)       | 17<br>(11 - 25)        | 14<br>(11 - 20)        | 145<br>(117 - 179)      | 86<br>(67 - 108)        | 74<br>(58 - 96)         |
| Interstitial nephritis and urinary tract infections | 320<br>(268 - 382)       | 17<br>(11 - 25)        | 13<br>(10 - 19)        | 140<br>(114 - 173)      | 82<br>(63 - 102)        | 69<br>(54 - 90)         |
| Urolithiasis                                        | 5<br>(3 - 8)             | --                     | 0<br>(0 - 0)           | 2<br>(1 - 4)            | 1<br>(1 - 3)            | 1<br>(0 - 2)            |
| Other urinary diseases                              | 10<br>(7 - 17)           | 1<br>(0 - 1)           | 0<br>(0 - 1)           | 3<br>(2 - 5)            | 3<br>(2 - 5)            | 3<br>(2 - 7)            |
| Gynecological diseases                              | 1<br>(1 - 2)             | --                     | --                     | 1<br>(1 - 2)            | 0<br>(0 - 0)            | 0<br>(0 - 0)            |
| Uterine fibroids                                    | 0<br>(0 - 0)             | --                     | --                     | 0<br>(0 - 0)            | 0<br>(0 - 0)            | 0<br>(0 - 0)            |
| Polycystic ovarian syndrome                         | 0<br>(0 - 0)             | --                     | --                     | 0<br>(0 - 0)            | 0<br>(0 - 0)            | --                      |
| Endometriosis                                       | 0<br>(0 - 0)             | --                     | --                     | 0<br>(0 - 0)            | 0<br>(0 - 0)            | --                      |
| Genital prolapse                                    | 0<br>(0 - 0)             | --                     | --                     | 0<br>(0 - 0)            | 0<br>(0 - 0)            | 0<br>(0 - 0)            |
| Other gynecological diseases                        | 1<br>(0 - 1)             | --                     | --                     | 1<br>(0 - 1)            | 0<br>(0 - 0)            | 0<br>(0 - 0)            |
| Hemoglobinopathies and hemolytic anemias            | 48<br>(26 - 83)          | 23<br>(13 - 40)        | 7<br>(4 - 13)          | 13<br>(6 - 24)          | 3<br>(1 - 6)            | 2<br>(1 - 4)            |
| Thalassemias                                        | 36<br>(20 - 61)          | 20<br>(11 - 35)        | 7<br>(4 - 12)          | 8<br>(4 - 16)           | 0<br>(0 - 0)            | 0<br>(0 - 0)            |
| Sickle cell disorders                               | 0<br>(0 - 1)             | 0<br>(0 - 0)           | 0<br>(0 - 0)           | 0<br>(0 - 0)            | 0<br>(0 - 0)            | 0<br>(0 - 0)            |
| G6PD deficiency                                     | 0<br>(0 - 1)             | 0<br>(0 - 0)           | 0<br>(0 - 0)           | 0<br>(0 - 0)            | 0<br>(0 - 0)            | 0<br>(0 - 0)            |
| Other hemoglobinopathies and hemolytic anemias      | 12<br>(6 - 21)           | 2<br>(1 - 4)           | 0<br>(0 - 1)           | 4<br>(2 - 8)            | 3<br>(1 - 5)            | 2<br>(1 - 4)            |
| Endocrine, metabolic, blood, and immune disorders   | 43<br>(31 - 55)          | 14<br>(8 - 22)         | 6<br>(4 - 9)           | 15<br>(11 - 19)         | 5<br>(4 - 7)            | 2<br>(1 - 3)            |
| Musculoskeletal disorders                           | 19<br>(15 - 25)          | --                     | 4<br>(2 - 6)           | 10<br>(7 - 13)          | 3<br>(2 - 6)            | 2<br>(1 - 3)            |
| Rheumatoid arthritis                                | 5<br>(4 - 7)             | --                     | 1<br>(0 - 1)           | 2<br>(1 - 3)            | 1<br>(1 - 2)            | 1<br>(0 - 2)            |
| Other musculoskeletal disorders                     | 14<br>(11 - 18)          | --                     | 4<br>(2 - 5)           | 7<br>(5 - 10)           | 2<br>(1 - 4)            | 1<br>(1 - 2)            |
| Other non-communicable diseases                     | 1,154<br>(808 - 1,545)   | 1,052<br>(718 - 1,430) | 51<br>(35 - 70)        | 45<br>(36 - 56)         | 5<br>(4 - 7)            | 2<br>(1 - 2)            |
| Congenital anomalies                                | 1,136<br>(792 - 1,521)   | 1,035<br>(708 - 1,409) | 50<br>(35 - 69)        | 44<br>(35 - 55)         | 5<br>(4 - 7)            | 2<br>(1 - 2)            |
| Neural tube defects                                 | 61<br>(33 - 102)         | 58<br>(31 - 99)        | 2<br>(1 - 3)           | 1<br>(1 - 1)            | 0<br>(0 - 0)            | 0<br>(0 - 0)            |
| Congenital heart anomalies                          | 722<br>(440 - 1,008)     | 637<br>(369 - 909)     | 43<br>(29 - 61)        | 38<br>(29 - 47)         | 3<br>(3 - 5)            | 1<br>(1 - 1)            |
| Cleft lip and cleft palate                          | 14<br>(7 - 26)           | 14<br>(7 - 26)         | --                     | --                      | --                      | --                      |
| Down syndrome                                       | 23<br>(12 - 41)          | 21<br>(10 - 39)        | 1<br>(1 - 2)           | 1<br>(1 - 1)            | 0<br>(0 - 0)            | 0<br>(0 - 0)            |
| Chromosomal unbalanced rearrangements               | 3<br>(2 - 5)             | 2<br>(1 - 4)           | 0<br>(0 - 0)           | 1<br>(0 - 1)            | 0<br>(0 - 0)            | 0<br>(0 - 0)            |
| Other congenital anomalies                          | 314<br>(200 - 445)       | 303<br>(191 - 434)     | 4<br>(3 - 6)           | 4<br>(3 - 6)            | 1<br>(1 - 2)            | 1<br>(1 - 1)            |
| Skin and subcutaneous diseases                      | 2<br>(1 - 2)             | 0<br>(0 - 1)           | 0<br>(0 - 0)           | 1<br>(1 - 1)            | 0<br>(0 - 0)            | 0<br>(0 - 0)            |
| Cellulitis                                          | 1<br>(0 - 1)             | 0<br>(0 - 0)           | 0<br>(0 - 0)           | 0<br>(0 - 0)            | 0<br>(0 - 0)            | 0<br>(0 - 0)            |
| Pyoderma                                            | 1<br>(0 - 1)             | 0<br>(0 - 0)           | 0<br>(0 - 0)           | 0<br>(0 - 0)            | 0<br>(0 - 0)            | 0<br>(0 - 0)            |
| Decubitus ulcer                                     | 0<br>(0 - 0)             | 0<br>(0 - 0)           | 0<br>(0 - 0)           | 0<br>(0 - 0)            | 0<br>(0 - 0)            | 0<br>(0 - 0)            |



Web Table 31- Tajikistan deaths with 95% UI by age, sex, and cause in 2013

| Cause                                           | Both Sexes, All Ages     | Both Sexes, 0-4 Years | Both Sexes, 5-14 Years | Both Sexes, 15-49 Years  | Both Sexes, 50-69 Years | Both Sexes, 70-80 Years |
|-------------------------------------------------|--------------------------|-----------------------|------------------------|--------------------------|-------------------------|-------------------------|
| Other skin and subcutaneous diseases            | 0<br>(0 - 0)             | 0<br>(0 - 0)          | 0<br>(0 - 0)           | 0<br>(0 - 0)             | 0<br>(0 - 0)            | 0<br>(0 - 0)            |
| Sudden infant death syndrome                    | 16<br>(5 - 50)           | 16<br>(5 - 50)        | --                     | --                       | --                      | --                      |
| Injuries                                        | 3,350<br>(2,877 - 3,976) | 521<br>(359 - 758)    | 327<br>(276 - 397)     | 2,024<br>(1,725 - 2,467) | 366<br>(296 - 454)      | 112<br>(95 - 141)       |
| Transport injuries                              | 602<br>(493 - 785)       | 18<br>(12 - 26)       | 59<br>(45 - 78)        | 419<br>(334 - 558)       | 83<br>(64 - 109)        | 23<br>(18 - 30)         |
| Road injuries                                   | 557<br>(457 - 740)       | 13<br>(8 - 19)        | 54<br>(41 - 72)        | 389<br>(308 - 532)       | 79<br>(61 - 105)        | 22<br>(17 - 28)         |
| Pedestrian road injuries                        | 112<br>(75 - 153)        | 5<br>(3 - 8)          | 21<br>(14 - 30)        | 57<br>(33 - 85)          | 20<br>(12 - 30)         | 10<br>(7 - 13)          |
| Cyclist road injuries                           | 22<br>(16 - 30)          | 1<br>(0 - 2)          | 5<br>(3 - 7)           | 10<br>(7 - 14)           | 5<br>(4 - 7)            | 1<br>(1 - 2)            |
| Motorcyclist road injuries                      | 79<br>(46 - 128)         | 0<br>(0 - 1)          | 2<br>(1 - 3)           | 70<br>(40 - 115)         | 6<br>(3 - 10)           | 1<br>(0 - 1)            |
| Motor vehicle road injuries                     | 326<br>(258 - 438)       | 6<br>(4 - 9)          | 24<br>(17 - 35)        | 243<br>(187 - 329)       | 45<br>(34 - 62)         | 9<br>(6 - 13)           |
| Other road injuries                             | 17<br>(7 - 29)           | 1<br>(0 - 1)          | 3<br>(1 - 6)           | 9<br>(4 - 17)            | 3<br>(1 - 7)            | 1<br>(0 - 2)            |
| Other transport injuries                        | 45<br>(29 - 59)          | 5<br>(3 - 8)          | 5<br>(3 - 7)           | 30<br>(17 - 42)          | 3<br>(2 - 5)            | 1<br>(1 - 2)            |
| Unintentional injuries                          | 2,031<br>(1,701 - 2,462) | 497<br>(336 - 735)    | 252<br>(204 - 318)     | 1,016<br>(843 - 1,220)   | 196<br>(154 - 240)      | 70<br>(59 - 84)         |
| Falls                                           | 332<br>(259 - 441)       | 49<br>(29 - 86)       | 26<br>(17 - 41)        | 184<br>(143 - 249)       | 51<br>(38 - 70)         | 21<br>(17 - 28)         |
| Drowning                                        | 842<br>(619 - 1,171)     | 220<br>(118 - 413)    | 154<br>(111 - 218)     | 408<br>(278 - 540)       | 48<br>(26 - 68)         | 11<br>(7 - 15)          |
| Fire, heat, and hot substances                  | 364<br>(253 - 529)       | 95<br>(48 - 183)      | 27<br>(19 - 45)        | 182<br>(130 - 250)       | 44<br>(29 - 62)         | 16<br>(12 - 20)         |
| Poisonings                                      | 165<br>(123 - 211)       | 22<br>(13 - 33)       | 8<br>(6 - 11)          | 106<br>(77 - 143)        | 23<br>(15 - 33)         | 6<br>(4 - 8)            |
| Exposure to mechanical forces                   | 112<br>(83 - 140)        | 22<br>(12 - 39)       | 14<br>(9 - 21)         | 66<br>(45 - 88)          | 9<br>(6 - 13)           | 1<br>(1 - 2)            |
| Unintentional firearm injuries                  | 24<br>(15 - 36)          | 2<br>(1 - 3)          | 1<br>(1 - 2)           | 18<br>(10 - 30)          | 2<br>(1 - 3)            | 1<br>(0 - 1)            |
| Unintentional suffocation                       | 33<br>(14 - 49)          | 11<br>(4 - 26)        | 3<br>(1 - 6)           | 17<br>(4 - 26)           | 1<br>(1 - 2)            | 0<br>(0 - 0)            |
| Other exposure to mechanical forces             | 56<br>(41 - 81)          | 9<br>(5 - 17)         | 10<br>(5 - 16)         | 31<br>(21 - 50)          | 5<br>(3 - 9)            | 1<br>(0 - 1)            |
| Adverse effects of medical treatment            | 43<br>(25 - 67)          | 13<br>(7 - 25)        | 2<br>(1 - 3)           | 11<br>(6 - 19)           | 10<br>(4 - 18)          | 8<br>(4 - 16)           |
| Animal contact                                  | 16<br>(7 - 23)           | 7<br>(2 - 12)         | 4<br>(1 - 7)           | 4<br>(2 - 5)             | 2<br>(1 - 3)            | 0<br>(0 - 1)            |
| Venomous animal contact                         | 12<br>(3 - 18)           | 5<br>(1 - 10)         | 3<br>(1 - 6)           | 2<br>(1 - 3)             | 1<br>(0 - 2)            | 0<br>(0 - 0)            |
| Non-venomous animal contact                     | 4<br>(3 - 6)             | 1<br>(0 - 2)          | 1<br>(0 - 1)           | 1<br>(1 - 2)             | 1<br>(0 - 1)            | 0<br>(0 - 1)            |
| Foreign body                                    | 83<br>(47 - 127)         | 59<br>(32 - 99)       | 4<br>(2 - 7)           | 13<br>(6 - 20)           | 4<br>(2 - 6)            | 3<br>(2 - 6)            |
| Pulmonary aspiration and foreign body in airway | 82<br>(45 - 125)         | 59<br>(31 - 98)       | 4<br>(2 - 6)           | 12<br>(6 - 19)           | 4<br>(2 - 6)            | 3<br>(2 - 6)            |
| Foreign body in other body part                 | 1<br>(1 - 2)             | 0<br>(0 - 1)          | 0<br>(0 - 0)           | 1<br>(0 - 1)             | 0<br>(0 - 0)            | 0<br>(0 - 0)            |
| Other unintentional injuries                    | 73<br>(59 - 91)          | 10<br>(6 - 15)        | 12<br>(8 - 17)         | 44<br>(33 - 59)          | 6<br>(4 - 9)            | 2<br>(1 - 3)            |
| Self-harm and interpersonal violence            | 718<br>(554 - 1,135)     | 6<br>(3 - 11)         | 16<br>(12 - 24)        | 589<br>(451 - 922)       | 87<br>(60 - 150)        | 20<br>(14 - 36)         |
| Self-harm                                       | 404<br>(324 - 593)       | --                    | 10<br>(6 - 15)         | 326<br>(262 - 468)       | 55<br>(41 - 86)         | 13<br>(10 - 22)         |
| Interpersonal violence                          | 314<br>(210 - 620)       | 6<br>(3 - 11)         | 7<br>(4 - 12)          | 263<br>(175 - 519)       | 32<br>(16 - 78)         | 7<br>(3 - 18)           |
| Assault by firearm                              | 88<br>(39 - 197)         | 1<br>(0 - 2)          | 1<br>(0 - 2)           | 77<br>(32 - 172)         | 9<br>(3 - 24)           | 1<br>(0 - 3)            |
| Assault by sharp object                         | 118<br>(60 - 275)        | 1<br>(1 - 3)          | 1<br>(1 - 3)           | 103<br>(52 - 240)        | 11<br>(4 - 31)          | 2<br>(1 - 5)            |
| Assault by other means                          | 108<br>(63 - 208)        | 4<br>(2 - 7)          | 4<br>(2 - 7)           | 83<br>(48 - 164)         | 13<br>(6 - 29)          | 4<br>(2 - 10)           |

Web Table 31- Tajikistan deaths with 95% UI by age, sex, and cause in 2013

| Cause                                                             | Males, All Ages             | Males, 0-4 Years         | Males, 5-14 Years  | Males, 15-49 Years       | Males, 50-69 Years       | Males, 70-80 Years       |
|-------------------------------------------------------------------|-----------------------------|--------------------------|--------------------|--------------------------|--------------------------|--------------------------|
| All causes                                                        | 24,279<br>(21,494 - 26,699) | 6,213<br>(5,510 - 6,913) | 651<br>(574 - 741) | 5,281<br>(4,595 - 6,250) | 5,425<br>(4,388 - 6,375) | 6,710<br>(5,822 - 7,269) |
| Communicable, maternal, neonatal, and nutritional diseases        | 6,871<br>(6,164 - 7,536)    | 5,152<br>(4,561 - 5,715) | 237<br>(190 - 291) | 886<br>(674 - 1,065)     | 314<br>(248 - 387)       | 281<br>(205 - 376)       |
| HIV/AIDS and tuberculosis                                         | 528<br>(319 - 715)          | 17<br>(4 - 40)           | 8<br>(4 - 14)      | 389<br>(215 - 531)       | 91<br>(61 - 128)         | 22<br>(15 - 30)          |
| Tuberculosis                                                      | 420<br>(239 - 557)          | 4<br>(2 - 7)             | 5<br>(3 - 6)       | 313<br>(156 - 425)       | 77<br>(52 - 108)         | 20<br>(14 - 28)          |
| HIV/AIDS                                                          | 108<br>(18 - 247)           | 13<br>(1 - 36)           | 4<br>(0 - 9)       | 76<br>(15 - 165)         | 14<br>(2 - 37)           | 2<br>(0 - 5)             |
| HIV/AIDS resulting in mycobacterial infection                     | 7<br>(1 - 16)               | 1<br>(0 - 2)             | 0<br>(0 - 1)       | 5<br>(1 - 11)            | 1<br>(0 - 3)             | 0<br>(0 - 0)             |
| HIV/AIDS resulting in other diseases                              | 101<br>(17 - 231)           | 12<br>(1 - 34)           | 3<br>(0 - 9)       | 71<br>(14 - 154)         | 13<br>(2 - 35)           | 2<br>(0 - 5)             |
| Diarrhea, lower respiratory, and other common infectious diseases | 3,851<br>(3,229 - 4,483)    | 2,822<br>(2,277 - 3,401) | 196<br>(150 - 250) | 403<br>(305 - 527)       | 187<br>(135 - 253)       | 243<br>(165 - 334)       |
| Diarrheal diseases                                                | 771<br>(411 - 1,262)        | 698<br>(337 - 1,184)     | 18<br>(10 - 32)    | 32<br>(22 - 47)          | 13<br>(8 - 21)           | 11<br>(6 - 19)           |
| Intestinal infectious diseases                                    | 17<br>(8 - 28)              | 9<br>(3 - 18)            | 2<br>(1 - 6)       | 5<br>(2 - 10)            | 1<br>(0 - 4)             | 0<br>(0 - 3)             |
| Typhoid fever                                                     | 4<br>(2 - 8)                | 2<br>(1 - 3)             | 1<br>(0 - 2)       | 1<br>(0 - 3)             | 0<br>(0 - 0)             | 0<br>(0 - 0)             |
| Paratyphoid fever                                                 | 1<br>(1 - 3)                | 1<br>(0 - 1)             | 0<br>(0 - 1)       | 0<br>(0 - 1)             | 0<br>(0 - 0)             | 0<br>(0 - 0)             |
| Other intestinal infectious diseases                              | 11<br>(4 - 21)              | 7<br>(2 - 16)            | 1<br>(0 - 4)       | 3<br>(0 - 8)             | 1<br>(0 - 3)             | 0<br>(0 - 3)             |
| Lower respiratory infections                                      | 2,707<br>(2,123 - 3,304)    | 1,909<br>(1,394 - 2,461) | 134<br>(93 - 186)  | 284<br>(199 - 391)       | 154<br>(104 - 218)       | 224<br>(148 - 317)       |
| Upper respiratory infections                                      | 2<br>(1 - 4)                | 1<br>(0 - 3)             | 0<br>(0 - 0)       | 1<br>(0 - 2)             | 0<br>(0 - 1)             | 0<br>(0 - 1)             |
| Otitis media                                                      | 1<br>(1 - 1)                | 0<br>(0 - 1)             | 0<br>(0 - 0)       | 0<br>(0 - 0)             | 0<br>(0 - 0)             | 0<br>(0 - 0)             |
| Meningitis                                                        | 269<br>(173 - 393)          | 150<br>(65 - 266)        | 32<br>(22 - 45)    | 67<br>(50 - 88)          | 16<br>(11 - 22)          | 5<br>(3 - 7)             |
| Pneumococcal meningitis                                           | 63<br>(42 - 89)             | 28<br>(12 - 51)          | 8<br>(5 - 13)      | 21<br>(12 - 30)          | 5<br>(3 - 7)             | 1<br>(1 - 2)             |
| H influenzae type B meningitis                                    | 101<br>(57 - 162)           | 75<br>(33 - 136)         | 12<br>(6 - 16)     | 12<br>(8 - 18)           | 2<br>(1 - 4)             | 1<br>(0 - 1)             |
| Meningococcal meningitis                                          | 58<br>(38 - 86)             | 31<br>(13 - 57)          | 8<br>(4 - 13)      | 15<br>(9 - 23)           | 3<br>(2 - 5)             | 1<br>(1 - 2)             |
| Other meningitis                                                  | 47<br>(31 - 68)             | 17<br>(6 - 35)           | 5<br>(2 - 9)       | 19<br>(11 - 30)          | 5<br>(3 - 8)             | 2<br>(1 - 3)             |
| Encephalitis                                                      | 57<br>(26 - 108)            | 36<br>(11 - 80)          | 7<br>(2 - 13)      | 11<br>(5 - 18)           | 2<br>(1 - 4)             | 1<br>(0 - 1)             |
| Diphtheria                                                        | 4<br>(0 - 23)               | 3<br>(0 - 21)            | 1<br>(0 - 4)       | 0<br>(0 - 2)             | 0<br>(0 - 1)             | --                       |
| Whooping cough                                                    | 14<br>(2 - 81)              | 14<br>(1 - 79)           | 0<br>(0 - 0)       | 1<br>(0 - 1)             | 0<br>(0 - 0)             | --                       |
| Tetanus                                                           | 3<br>(2 - 7)                | 0<br>(0 - 1)             | 1<br>(0 - 2)       | 1<br>(1 - 2)             | 0<br>(0 - 1)             | 0<br>(0 - 1)             |
| Measles                                                           | 0<br>(0 - 0)                | 0<br>(0 - 0)             | 0<br>(0 - 0)       | 0<br>(0 - 0)             | 0<br>(0 - 0)             | --                       |
| Varicella and herpes zoster                                       | 4<br>(1 - 11)               | 2<br>(0 - 8)             | 0<br>(0 - 1)       | 1<br>(0 - 3)             | 0<br>(0 - 1)             | 1<br>(0 - 5)             |
| Neglected tropical diseases and malaria                           | 33<br>(25 - 47)             | 13<br>(7 - 24)           | 5<br>(4 - 8)       | 11<br>(8 - 15)           | 3<br>(2 - 4)             | 1<br>(1 - 3)             |
| Malaria                                                           | 8<br>(4 - 16)               | 3<br>(1 - 10)            | 1<br>(0 - 1)       | 2<br>(1 - 4)             | 1<br>(0 - 2)             | 1<br>(0 - 1)             |
| Leishmaniasis                                                     | 9<br>(6 - 14)               | 4<br>(2 - 8)             | 1<br>(1 - 2)       | 3<br>(2 - 4)             | 1<br>(0 - 1)             | 0<br>(0 - 0)             |
| Visceral leishmaniasis                                            | 9<br>(6 - 14)               | 4<br>(2 - 8)             | 1<br>(1 - 2)       | 3<br>(2 - 4)             | 1<br>(0 - 1)             | 0<br>(0 - 0)             |
| Cysticercosis                                                     | 0<br>(0 - 0)                | 0<br>(0 - 0)             | 0<br>(0 - 0)       | 0<br>(0 - 0)             | 0<br>(0 - 0)             | 0<br>(0 - 0)             |
| Cystic echinococcosis                                             | 5<br>(4 - 6)                | 0<br>(0 - 1)             | 1<br>(1 - 1)       | 3<br>(2 - 3)             | 1<br>(1 - 1)             | 0<br>(0 - 0)             |
| Dengue                                                            | 1<br>(0 - 1)                | 0<br>(0 - 0)             | 0<br>(0 - 0)       | 0<br>(0 - 0)             | 0<br>(0 - 0)             | 0<br>(0 - 0)             |
| Rabies                                                            | 4<br>(2 - 7)                | 1<br>(0 - 1)             | 1<br>(1 - 3)       | 2<br>(1 - 3)             | 0<br>(0 - 1)             | 0<br>(0 - 0)             |
| Intestinal nematode infections                                    | 3<br>(0 - 9)                | 2<br>(0 - 8)             | 0<br>(0 - 3)       | 0<br>(0 - 2)             | 0<br>(0 - 1)             | 0<br>(0 - 1)             |
| Ascariasis                                                        | 3<br>(0 - 9)                | 2<br>(0 - 8)             | 0<br>(0 - 3)       | 0<br>(0 - 2)             | 0<br>(0 - 1)             | 0<br>(0 - 1)             |
| Other neglected tropical diseases                                 | 4<br>(2 - 6)                | 2<br>(1 - 4)             | 0<br>(0 - 0)       | 1<br>(0 - 2)             | 0<br>(0 - 0)             | 0<br>(0 - 0)             |
| Maternal disorders                                                | --                          | --                       | --                 | --                       | --                       | --                       |
| Maternal hemorrhage                                               | --                          | --                       | --                 | --                       | --                       | --                       |

Web Table 31- Tajikistan deaths with 95% UI by age, sex, and cause in 2013

| Cause                                                            | Males, All Ages             | Males, 0-4 Years         | Males, 5-14 Years  | Males, 15-49 Years       | Males, 50-69 Years       | Males, 70-80 Years       |
|------------------------------------------------------------------|-----------------------------|--------------------------|--------------------|--------------------------|--------------------------|--------------------------|
| Maternal sepsis and other maternal infections                    | --                          | --                       | --                 | --                       | --                       | --                       |
| Maternal hypertensive disorders                                  | --                          | --                       | --                 | --                       | --                       | --                       |
| Maternal obstructed labor                                        | --                          | --                       | --                 | --                       | --                       | --                       |
| Maternal abortive outcome                                        | --                          | --                       | --                 | --                       | --                       | --                       |
| Indirect maternal deaths                                         | --                          | --                       | --                 | --                       | --                       | --                       |
| Late maternal deaths                                             | --                          | --                       | --                 | --                       | --                       | --                       |
| Maternal deaths aggravated by HIV/AIDS                           | --                          | --                       | --                 | --                       | --                       | --                       |
| Other maternal disorders                                         | --                          | --                       | --                 | --                       | --                       | --                       |
| Neonatal disorders                                               | 2,106<br>(1,835 - 2,409)    | 2,106<br>(1,835 - 2,409) | --                 | --                       | --                       | --                       |
| Neonatal preterm birth complications                             | 789<br>(370 - 1,224)        | 789<br>(370 - 1,224)     | --                 | --                       | --                       | --                       |
| Neonatal encephalopathy due to birth asphyxia and trauma         | 831<br>(426 - 1,261)        | 831<br>(426 - 1,261)     | --                 | --                       | --                       | --                       |
| Neonatal sepsis and other neonatal infections                    | 87<br>(26 - 189)            | 87<br>(26 - 189)         | --                 | --                       | --                       | --                       |
| Hemolytic disease and other neonatal jaundice                    | 13<br>(4 - 31)              | 13<br>(4 - 31)           | --                 | --                       | --                       | --                       |
| Other neonatal disorders                                         | 385<br>(171 - 711)          | 385<br>(171 - 711)       | --                 | --                       | --                       | --                       |
| Nutritional deficiencies                                         | 172<br>(86 - 247)           | 84<br>(37 - 147)         | 13<br>(7 - 19)     | 47<br>(24 - 65)          | 20<br>(10 - 29)          | 9<br>(5 - 13)            |
| Protein-energy malnutrition                                      | 87<br>(33 - 150)            | 72<br>(27 - 130)         | 2<br>(1 - 5)       | 9<br>(1 - 22)            | 4<br>(1 - 10)            | 0<br>(0 - 1)             |
| Iodine deficiency                                                | 1<br>(0 - 5)                | 0<br>(0 - 2)             | 0<br>(0 - 2)       | 1<br>(0 - 2)             | 0<br>(0 - 2)             | 0<br>(0 - 1)             |
| Iron-deficiency anemia                                           | 68<br>(35 - 105)            | 9<br>(1 - 29)            | 7<br>(3 - 12)      | 31<br>(14 - 46)          | 13<br>(6 - 21)           | 8<br>(4 - 12)            |
| Other nutritional deficiencies                                   | 16<br>(6 - 38)              | 3<br>(0 - 12)            | 3<br>(1 - 7)       | 7<br>(2 - 15)            | 2<br>(1 - 6)             | 1<br>(0 - 2)             |
| Other communicable, maternal, neonatal, and nutritional diseases | 180<br>(109 - 275)          | 111<br>(46 - 202)        | 15<br>(9 - 22)     | 36<br>(26 - 49)          | 13<br>(8 - 18)           | 6<br>(4 - 8)             |
| Sexually transmitted diseases excluding HIV                      | 74<br>(12 - 141)            | 60<br>(1 - 124)          | 4<br>(1 - 8)       | 5<br>(3 - 8)             | 3<br>(1 - 6)             | 1<br>(0 - 2)             |
| Syphilis                                                         | 70<br>(8 - 138)             | 60<br>(1 - 124)          | 4<br>(0 - 8)       | 3<br>(2 - 4)             | 2<br>(1 - 4)             | 1<br>(0 - 2)             |
| Chlamydial infection                                             | --                          | --                       | --                 | --                       | --                       | --                       |
| Gonococcal infection                                             | 2<br>(1 - 3)                | --                       | 0<br>(0 - 0)       | 1<br>(1 - 2)             | 0<br>(0 - 1)             | 0<br>(0 - 0)             |
| Other sexually transmitted diseases                              | 2<br>(1 - 2)                | --                       | 0<br>(0 - 0)       | 1<br>(1 - 2)             | 0<br>(0 - 1)             | 0<br>(0 - 0)             |
| Hepatitis                                                        | 74<br>(55 - 102)            | 25<br>(12 - 50)          | 9<br>(5 - 15)      | 27<br>(20 - 38)          | 9<br>(5 - 13)            | 3<br>(2 - 5)             |
| Acute hepatitis A                                                | 12<br>(4 - 28)              | 7<br>(2 - 19)            | 3<br>(1 - 5)       | 2<br>(1 - 5)             | 0<br>(0 - 0)             | 0<br>(0 - 0)             |
| Acute hepatitis B                                                | 46<br>(30 - 70)             | 17<br>(7 - 36)           | 4<br>(2 - 8)       | 14<br>(8 - 22)           | 7<br>(4 - 11)            | 3<br>(2 - 5)             |
| Acute hepatitis C                                                | 4<br>(1 - 9)                | --                       | 1<br>(0 - 2)       | 2<br>(0 - 5)             | 1<br>(0 - 2)             | 0<br>(0 - 1)             |
| Acute hepatitis E                                                | 11<br>(6 - 20)              | 0<br>(0 - 1)             | 1<br>(0 - 3)       | 9<br>(4 - 15)            | 1<br>(0 - 2)             | 0<br>(0 - 1)             |
| Other infectious diseases                                        | 33<br>(13 - 91)             | 26<br>(8 - 83)           | 1<br>(1 - 3)       | 3<br>(2 - 8)             | 1<br>(1 - 4)             | 1<br>(0 - 3)             |
| Non-communicable diseases                                        | 14,871<br>(12,634 - 16,745) | 747<br>(492 - 1,008)     | 190<br>(156 - 229) | 2,740<br>(2,303 - 3,335) | 4,830<br>(3,889 - 5,703) | 6,364<br>(5,511 - 6,879) |
| Neoplasms                                                        | 1,957<br>(1,598 - 2,304)    | 39<br>(24 - 60)          | 57<br>(44 - 73)    | 518<br>(424 - 638)       | 860<br>(668 - 1,044)     | 483<br>(397 - 567)       |
| Esophageal cancer                                                | 223<br>(162 - 324)          | --                       | --                 | 30<br>(22 - 45)          | 107<br>(77 - 157)        | 85<br>(59 - 130)         |
| Stomach cancer                                                   | 389<br>(313 - 465)          | --                       | --                 | 81<br>(64 - 102)         | 186<br>(142 - 230)       | 122<br>(96 - 149)        |
| Liver cancer                                                     | 211<br>(135 - 285)          | --                       | 1<br>(1 - 2)       | 38<br>(22 - 57)          | 112<br>(65 - 162)        | 60<br>(38 - 84)          |
| Liver cancer due to hepatitis B                                  | 85<br>(52 - 121)            | --                       | 0<br>(0 - 1)       | 18<br>(10 - 28)          | 47<br>(26 - 70)          | 20<br>(12 - 29)          |
| Liver cancer due to hepatitis C                                  | 71<br>(44 - 102)            | --                       | 0<br>(0 - 0)       | 11<br>(6 - 18)           | 38<br>(21 - 58)          | 22<br>(13 - 33)          |
| Liver cancer due to alcohol use                                  | 44<br>(26 - 65)             | --                       | --                 | 6<br>(3 - 10)            | 22<br>(12 - 35)          | 16<br>(9 - 24)           |
| Liver cancer due to other causes                                 | 10<br>(6 - 16)              | --                       | 1<br>(0 - 1)       | 3<br>(2 - 5)             | 5<br>(2 - 8)             | 2<br>(1 - 3)             |

Web Table 31- Tajikistan deaths with 95% UI by age, sex, and cause in 2013

| Cause                                         | Males, All Ages          | Males, 0-4 Years | Males, 5-14 Years | Males, 15-49 Years     | Males, 50-69 Years       | Males, 70-80 Years       |
|-----------------------------------------------|--------------------------|------------------|-------------------|------------------------|--------------------------|--------------------------|
| Larynx cancer                                 | 22<br>(16 - 36)          | --               | --                | 5<br>(3 - 9)           | 12<br>(8 - 20)           | 5<br>(3 - 7)             |
| Tracheal, bronchus and lung cancer            | 170<br>(132 - 209)       | --               | --                | 37<br>(28 - 47)        | 97<br>(72 - 125)         | 36<br>(28 - 46)          |
| Breast cancer                                 | 0<br>(0 - 0)             | --               | --                | 0<br>(0 - 0)           | 0<br>(0 - 0)             | 0<br>(0 - 0)             |
| Cervical cancer                               | --                       | --               | --                | --                     | --                       | --                       |
| Uterine cancer                                | --                       | --               | --                | --                     | --                       | --                       |
| Prostate cancer                               | 42<br>(29 - 70)          | --               | --                | 4<br>(3 - 7)           | 15<br>(9 - 23)           | 23<br>(16 - 40)          |
| Colon and rectum cancer                       | 104<br>(84 - 126)        | --               | --                | 44<br>(35 - 55)        | 40<br>(30 - 50)          | 20<br>(16 - 25)          |
| Lip and oral cavity cancer                    | 44<br>(29 - 66)          | --               | --                | 10<br>(7 - 16)         | 23<br>(14 - 38)          | 10<br>(7 - 15)           |
| Nasopharynx cancer                            | 14<br>(9 - 19)           | --               | 0<br>(0 - 1)      | 7<br>(5 - 10)          | 5<br>(3 - 8)             | 1<br>(1 - 2)             |
| Other pharynx cancer                          | 27<br>(16 - 40)          | --               | --                | 6<br>(3 - 9)           | 17<br>(9 - 26)           | 5<br>(3 - 7)             |
| Gallbladder and biliary tract cancer          | 23<br>(15 - 32)          | --               | --                | 3<br>(2 - 4)           | 12<br>(7 - 18)           | 8<br>(5 - 12)            |
| Pancreatic cancer                             | 69<br>(53 - 84)          | --               | --                | 14<br>(10 - 18)        | 38<br>(28 - 50)          | 17<br>(13 - 22)          |
| Malignant skin melanoma                       | 25<br>(11 - 39)          | --               | --                | 9<br>(4 - 15)          | 10<br>(4 - 16)           | 6<br>(3 - 9)             |
| Non-melanoma skin cancer                      | 5<br>(3 - 8)             | --               | --                | 1<br>(1 - 2)           | 2<br>(1 - 3)             | 2<br>(1 - 3)             |
| Ovarian cancer                                | --                       | --               | --                | --                     | --                       | --                       |
| Testicular cancer                             | 12<br>(7 - 18)           | --               | --                | 10<br>(5 - 15)         | 2<br>(1 - 3)             | 1<br>(0 - 1)             |
| Kidney cancer                                 | 41<br>(24 - 65)          | 2<br>(1 - 5)     | 1<br>(0 - 1)      | 9<br>(4 - 15)          | 21<br>(11 - 38)          | 8<br>(5 - 13)            |
| Bladder cancer                                | 59<br>(43 - 75)          | --               | --                | 5<br>(3 - 7)           | 25<br>(17 - 34)          | 29<br>(21 - 39)          |
| Brain and nervous system cancer               | 90<br>(49 - 126)         | 4<br>(1 - 9)     | 9<br>(5 - 15)     | 42<br>(21 - 62)        | 29<br>(14 - 44)          | 5<br>(3 - 8)             |
| Thyroid cancer                                | 5<br>(3 - 7)             | --               | 0<br>(0 - 0)      | 2<br>(1 - 2)           | 2<br>(1 - 4)             | 1<br>(1 - 2)             |
| Mesothelioma                                  | 3<br>(1 - 5)             | --               | --                | 1<br>(0 - 2)           | 1<br>(0 - 3)             | 0<br>(0 - 1)             |
| Hodgkin lymphoma                              | 17<br>(11 - 25)          | 1<br>(1 - 2)     | 2<br>(1 - 5)      | 8<br>(5 - 13)          | 4<br>(2 - 7)             | 1<br>(1 - 2)             |
| Non-Hodgkin lymphoma                          | 59<br>(33 - 82)          | 3<br>(1 - 5)     | 4<br>(3 - 6)      | 24<br>(12 - 34)        | 20<br>(9 - 29)           | 9<br>(5 - 14)            |
| Multiple myeloma                              | 7<br>(4 - 10)            | --               | --                | 2<br>(1 - 3)           | 4<br>(2 - 5)             | 2<br>(1 - 2)             |
| Leukemia                                      | 119<br>(98 - 144)        | 13<br>(7 - 22)   | 26<br>(19 - 36)   | 62<br>(49 - 81)        | 14<br>(11 - 19)          | 4<br>(3 - 4)             |
| Other neoplasms                               | 179<br>(120 - 225)       | 16<br>(8 - 30)   | 13<br>(8 - 20)    | 63<br>(39 - 84)        | 62<br>(33 - 90)          | 23<br>(15 - 32)          |
| Cardiovascular diseases                       | 8,625<br>(7,214 - 9,663) | 11<br>(8 - 16)   | 11<br>(9 - 14)    | 1,025<br>(841 - 1,252) | 2,907<br>(2,324 - 3,387) | 4,670<br>(4,031 - 5,062) |
| Rheumatic heart disease                       | 183<br>(127 - 259)       | 1<br>(0 - 1)     | 4<br>(3 - 6)      | 106<br>(68 - 156)      | 57<br>(35 - 92)          | 15<br>(9 - 24)           |
| Ischemic heart disease                        | 5,712<br>(4,656 - 6,551) | 3<br>(2 - 5)     | 3<br>(2 - 5)      | 671<br>(525 - 851)     | 1,932<br>(1,513 - 2,307) | 3,102<br>(2,609 - 3,473) |
| Cerebrovascular disease                       | 2,414<br>(1,926 - 2,940) | 2<br>(2 - 3)     | 2<br>(1 - 2)      | 186<br>(134 - 251)     | 801<br>(605 - 1,017)     | 1,423<br>(1,140 - 1,720) |
| Ischemic stroke                               | 1,140<br>(685 - 1,707)   | 0<br>(0 - 1)     | 1<br>(0 - 1)      | 35<br>(14 - 76)        | 284<br>(132 - 506)       | 821<br>(527 - 1,107)     |
| Hemorrhagic stroke                            | 1,274<br>(768 - 1,815)   | 2<br>(1 - 3)     | 1<br>(1 - 2)      | 151<br>(100 - 211)     | 517<br>(289 - 751)       | 602<br>(351 - 925)       |
| Hypertensive heart disease                    | 200<br>(100 - 370)       | 0<br>(0 - 1)     | 0<br>(0 - 0)      | 25<br>(12 - 52)        | 73<br>(33 - 144)         | 101<br>(49 - 190)        |
| Cardiomyopathy and myocarditis                | 52<br>(29 - 91)          | 3<br>(2 - 5)     | 1<br>(1 - 2)      | 17<br>(9 - 31)         | 19<br>(9 - 37)           | 11<br>(6 - 20)           |
| Atrial fibrillation and flutter               | 0<br>(0 - 0)             | --               | --                | 0<br>(0 - 0)           | 0<br>(0 - 0)             | 0<br>(0 - 0)             |
| Aortic aneurysm                               | 9<br>(6 - 14)            | --               | --                | 2<br>(1 - 3)           | 3<br>(2 - 5)             | 4<br>(2 - 5)             |
| Peripheral vascular disease                   | 1<br>(0 - 1)             | --               | --                | 0<br>(0 - 0)           | 0<br>(0 - 1)             | 0<br>(0 - 0)             |
| Endocarditis                                  | 13<br>(8 - 19)           | 2<br>(1 - 3)     | 0<br>(0 - 0)      | 2<br>(1 - 3)           | 6<br>(3 - 9)             | 3<br>(2 - 5)             |
| Other cardiovascular and circulatory diseases | 42<br>(29 - 59)          | 0<br>(0 - 0)     | 0<br>(0 - 1)      | 15<br>(10 - 22)        | 17<br>(11 - 25)          | 10<br>(6 - 14)           |
| Chronic respiratory diseases                  | 869<br>(696 - 1,102)     | 15<br>(6 - 25)   | 6<br>(3 - 7)      | 137<br>(97 - 178)      | 267<br>(201 - 348)       | 444<br>(355 - 597)       |

Web Table 31- Tajikistan deaths with 95% UI by age, sex, and cause in 2013

| Cause                                               | Males, All Ages    | Males, 0-4 Years | Males, 5-14 Years | Males, 15-49 Years | Males, 50-69 Years | Males, 70-80 Years |
|-----------------------------------------------------|--------------------|------------------|-------------------|--------------------|--------------------|--------------------|
| Chronic obstructive pulmonary disease               | 735<br>(555 - 919) | 7<br>(2 - 13)    | 3<br>(1 - 4)      | 111<br>(65 - 146)  | 228<br>(164 - 294) | 386<br>(305 - 495) |
| Pneumoconiosis                                      | 32<br>(19 - 53)    | 0<br>(0 - 1)     | 0<br>(0 - 0)      | 5<br>(2 - 8)       | 11<br>(6 - 20)     | 16<br>(9 - 27)     |
| Silicosis                                           | 4<br>(2 - 11)      | 0<br>(0 - 0)     | 0<br>(0 - 0)      | 1<br>(1 - 3)       | 2<br>(1 - 6)       | 1<br>(0 - 1)       |
| Asbestosis                                          | 8<br>(5 - 17)      | 0<br>(0 - 0)     | 0<br>(0 - 0)      | 1<br>(1 - 2)       | 2<br>(1 - 4)       | 5<br>(3 - 11)      |
| Coal workers pneumoconiosis                         | 14<br>(7 - 23)     | 0<br>(0 - 0)     | 0<br>(0 - 0)      | 1<br>(0 - 2)       | 5<br>(2 - 9)       | 7<br>(4 - 13)      |
| Other pneumoconiosis                                | 6<br>(3 - 9)       | 0<br>(0 - 0)     | 0<br>(0 - 0)      | 1<br>(1 - 2)       | 2<br>(1 - 4)       | 3<br>(1 - 4)       |
| Asthma                                              | 49<br>(32 - 113)   | 1<br>(0 - 3)     | 2<br>(1 - 3)      | 12<br>(7 - 28)     | 13<br>(8 - 34)     | 20<br>(12 - 50)    |
| Interstitial lung disease and pulmonary sarcoidosis | 33<br>(19 - 64)    | 0<br>(0 - 1)     | 0<br>(0 - 0)      | 2<br>(1 - 5)       | 11<br>(5 - 21)     | 20<br>(10 - 38)    |
| Other chronic respiratory diseases                  | 20<br>(13 - 30)    | 6<br>(3 - 11)    | 0<br>(0 - 1)      | 7<br>(4 - 13)      | 4<br>(2 - 7)       | 2<br>(1 - 4)       |
| Cirrhosis                                           | 780<br>(631 - 931) | 5<br>(3 - 7)     | 15<br>(12 - 19)   | 322<br>(257 - 403) | 304<br>(232 - 375) | 133<br>(108 - 160) |
| Cirrhosis due to hepatitis B                        | 323<br>(193 - 442) | 0<br>(0 - 1)     | 5<br>(2 - 8)      | 138<br>(78 - 203)  | 128<br>(73 - 179)  | 52<br>(32 - 72)    |
| Cirrhosis due to hepatitis C                        | 147<br>(78 - 254)  | 0<br>(0 - 1)     | 2<br>(1 - 5)      | 64<br>(33 - 112)   | 55<br>(19 - 105)   | 25<br>(12 - 45)    |
| Cirrhosis due to alcohol use                        | 213<br>(128 - 322) | --               | --                | 67<br>(32 - 120)   | 97<br>(57 - 146)   | 49<br>(32 - 68)    |
| Cirrhosis due to other causes                       | 97<br>(52 - 161)   | 4<br>(2 - 6)     | 8<br>(4 - 12)     | 54<br>(23 - 95)    | 24<br>(11 - 44)    | 7<br>(4 - 10)      |
| Digestive diseases                                  | 293<br>(235 - 354) | 12<br>(7 - 20)   | 9<br>(7 - 11)     | 129<br>(102 - 161) | 95<br>(71 - 122)   | 48<br>(36 - 59)    |
| Peptic ulcer disease                                | 161<br>(116 - 200) | 0<br>(0 - 1)     | 1<br>(1 - 1)      | 73<br>(54 - 94)    | 60<br>(40 - 80)    | 27<br>(16 - 36)    |
| Gastritis and duodenitis                            | 3<br>(1 - 5)       | 1<br>(0 - 1)     | 0<br>(0 - 0)      | 1<br>(1 - 2)       | 1<br>(0 - 1)       | 0<br>(0 - 1)       |
| Appendicitis                                        | 16<br>(10 - 22)    | 0<br>(0 - 1)     | 2<br>(1 - 3)      | 10<br>(6 - 15)     | 3<br>(1 - 4)       | 1<br>(1 - 2)       |
| Paralytic ileus and intestinal obstruction          | 47<br>(31 - 76)    | 5<br>(2 - 11)    | 3<br>(2 - 5)      | 19<br>(11 - 30)    | 12<br>(7 - 21)     | 8<br>(4 - 13)      |
| Inguinal, femoral, and abdominal hernia             | 7<br>(3 - 11)      | 1<br>(0 - 2)     | 0<br>(0 - 1)      | 2<br>(1 - 4)       | 2<br>(1 - 3)       | 2<br>(1 - 3)       |
| Inflammatory bowel disease                          | 7<br>(5 - 11)      | 2<br>(1 - 4)     | 1<br>(0 - 1)      | 2<br>(1 - 4)       | 1<br>(1 - 2)       | 1<br>(1 - 2)       |
| Vascular intestinal disorders                       | 5<br>(2 - 11)      | 0<br>(0 - 1)     | 0<br>(0 - 0)      | 1<br>(1 - 3)       | 2<br>(1 - 4)       | 1<br>(0 - 2)       |
| Gallbladder and biliary diseases                    | 15<br>(11 - 21)    | 0<br>(0 - 1)     | 0<br>(0 - 1)      | 5<br>(3 - 7)       | 5<br>(3 - 8)       | 4<br>(3 - 6)       |
| Pancreatitis                                        | 17<br>(10 - 28)    | 0<br>(0 - 1)     | 0<br>(0 - 0)      | 10<br>(5 - 16)     | 5<br>(3 - 10)      | 2<br>(1 - 3)       |
| Other digestive diseases                            | 15<br>(10 - 28)    | 1<br>(0 - 3)     | 1<br>(0 - 1)      | 7<br>(4 - 13)      | 4<br>(2 - 9)       | 2<br>(1 - 5)       |
| Neurological disorders                              | 682<br>(540 - 827) | 18<br>(8 - 38)   | 30<br>(19 - 47)   | 176<br>(123 - 238) | 56<br>(41 - 72)    | 403<br>(308 - 505) |
| Alzheimer disease and other dementias               | 427<br>(328 - 532) | --               | --                | 0<br>(0 - 0)       | 32<br>(23 - 44)    | 395<br>(300 - 496) |
| Parkinson disease                                   | 5<br>(3 - 8)       | --               | --                | 0<br>(0 - 1)       | 2<br>(1 - 3)       | 3<br>(1 - 5)       |
| Epilepsy                                            | 238<br>(165 - 324) | 17<br>(7 - 36)   | 29<br>(18 - 46)   | 169<br>(117 - 231) | 19<br>(13 - 28)    | 4<br>(3 - 5)       |
| Multiple sclerosis                                  | 4<br>(2 - 6)       | --               | --                | 2<br>(1 - 4)       | 1<br>(0 - 2)       | 1<br>(0 - 1)       |
| Other neurological disorders                        | 8<br>(6 - 11)      | 1<br>(1 - 2)     | 1<br>(0 - 1)      | 4<br>(3 - 6)       | 2<br>(1 - 2)       | 0<br>(0 - 1)       |
| Mental and substance use disorders                  | 112<br>(75 - 159)  | 1<br>(0 - 1)     | 0<br>(0 - 0)      | 87<br>(57 - 126)   | 22<br>(14 - 35)    | 2<br>(2 - 4)       |
| Schizophrenia                                       | 6<br>(2 - 15)      | --               | --                | 4<br>(1 - 11)      | 1<br>(0 - 4)       | 0<br>(0 - 1)       |
| Alcohol use disorders                               | 79<br>(45 - 122)   | --               | --                | 60<br>(34 - 92)    | 18<br>(11 - 31)    | 1<br>(1 - 3)       |
| Drug use disorders                                  | 27<br>(19 - 38)    | 1<br>(0 - 1)     | --                | 24<br>(16 - 34)    | 2<br>(2 - 4)       | 1<br>(0 - 1)       |
| Opioid use disorders                                | 6<br>(4 - 9)       | 0<br>(0 - 0)     | --                | 5<br>(4 - 8)       | 0<br>(0 - 1)       | 0<br>(0 - 0)       |
| Cocaine use disorders                               | 1<br>(0 - 1)       | 0<br>(0 - 0)     | --                | 1<br>(0 - 1)       | 0<br>(0 - 0)       | 0<br>(0 - 0)       |
| Amphetamine use disorders                           | 1<br>(0 - 1)       | 0<br>(0 - 0)     | --                | 1<br>(0 - 1)       | 0<br>(0 - 0)       | 0<br>(0 - 0)       |
| Other drug use disorders                            | 20<br>(14 - 28)    | 0<br>(0 - 1)     | --                | 17<br>(12 - 25)    | 2<br>(1 - 3)       | 0<br>(0 - 1)       |
| Eating disorders                                    | 0<br>(0 - 0)       | --               | 0<br>(0 - 0)      | 0<br>(0 - 0)       | --                 | --                 |

Web Table 31- Tajikistan deaths with 95% UI by age, sex, and cause in 2013

| Cause                                               | Males, All Ages      | Males, 0-4 Years   | Males, 5-14 Years | Males, 15-49 Years | Males, 50-69 Years | Males, 70-80 Years |
|-----------------------------------------------------|----------------------|--------------------|-------------------|--------------------|--------------------|--------------------|
| Anorexia nervosa                                    | 0<br>(0 - 0)         | --                 | 0<br>(0 - 0)      | 0<br>(0 - 0)       | --                 | --                 |
| Diabetes, urogenital, blood, and endocrine diseases | 887<br>(732 - 1,059) | 44<br>(30 - 65)    | 32<br>(25 - 41)   | 318<br>(256 - 396) | 314<br>(244 - 385) | 179<br>(146 - 211) |
| Diabetes mellitus                                   | 340<br>(268 - 412)   | 1<br>(1 - 1)       | 3<br>(2 - 4)      | 83<br>(64 - 108)   | 181<br>(135 - 231) | 72<br>(55 - 91)    |
| Acute glomerulonephritis                            | 7<br>(5 - 11)        | 1<br>(0 - 1)       | 1<br>(0 - 1)      | 4<br>(2 - 6)       | 2<br>(1 - 3)       | 0<br>(0 - 1)       |
| Chronic kidney disease                              | 312<br>(243 - 386)   | 12<br>(8 - 20)     | 13<br>(9 - 18)    | 141<br>(104 - 183) | 81<br>(56 - 108)   | 65<br>(48 - 82)    |
| Chronic kidney disease due to diabetes mellitus     | 7<br>(0 - 14)        | 0<br>(0 - 0)       | 0<br>(0 - 1)      | 3<br>(0 - 6)       | 3<br>(0 - 5)       | 1<br>(0 - 2)       |
| Chronic kidney disease due to hypertension          | 32<br>(17 - 55)      | 2<br>(0 - 5)       | 1<br>(0 - 1)      | 11<br>(4 - 21)     | 9<br>(4 - 18)      | 10<br>(5 - 19)     |
| Chronic kidney disease due to glomerulonephritis    | 115<br>(68 - 160)    | 3<br>(2 - 6)       | 4<br>(2 - 6)      | 56<br>(29 - 83)    | 31<br>(17 - 46)    | 21<br>(13 - 29)    |
| Chronic kidney disease due to other causes          | 157<br>(112 - 221)   | 6<br>(3 - 13)      | 8<br>(5 - 13)     | 71<br>(46 - 108)   | 39<br>(24 - 62)    | 33<br>(20 - 48)    |
| Urinary diseases and male infertility               | 178<br>(134 - 220)   | 10<br>(6 - 17)     | 8<br>(6 - 11)     | 74<br>(53 - 97)    | 47<br>(34 - 61)    | 39<br>(27 - 53)    |
| Interstitial nephritis and urinary tract infections | 168<br>(125 - 207)   | 9<br>(6 - 16)      | 7<br>(5 - 11)     | 71<br>(50 - 93)    | 44<br>(31 - 58)    | 36<br>(24 - 49)    |
| Urolithiasis                                        | 3<br>(1 - 5)         | --                 | 0<br>(0 - 0)      | 1<br>(0 - 2)       | 1<br>(0 - 2)       | 1<br>(0 - 1)       |
| Other urinary diseases                              | 8<br>(5 - 14)        | 0<br>(0 - 1)       | 0<br>(0 - 1)      | 2<br>(1 - 4)       | 2<br>(1 - 4)       | 3<br>(1 - 7)       |
| Gynecological diseases                              | --                   | --                 | --                | --                 | --                 | --                 |
| Uterine fibroids                                    | --                   | --                 | --                | --                 | --                 | --                 |
| Polycystic ovarian syndrome                         | --                   | --                 | --                | --                 | --                 | --                 |
| Endometriosis                                       | --                   | --                 | --                | --                 | --                 | --                 |
| Genital prolapse                                    | --                   | --                 | --                | --                 | --                 | --                 |
| Other gynecological diseases                        | --                   | --                 | --                | --                 | --                 | --                 |
| Hemoglobinopathies and hemolytic anemias            | 25<br>(14 - 45)      | 11<br>(6 - 21)     | 4<br>(2 - 8)      | 7<br>(3 - 14)      | 2<br>(1 - 4)       | 1<br>(0 - 2)       |
| Thalassemias                                        | 18<br>(10 - 33)      | 10<br>(5 - 19)     | 4<br>(2 - 7)      | 4<br>(2 - 9)       | 0<br>(0 - 0)       | 0<br>(0 - 0)       |
| Sickle cell disorders                               | 0<br>(0 - 0)         | 0<br>(0 - 0)       | 0<br>(0 - 0)      | 0<br>(0 - 0)       | 0<br>(0 - 0)       | 0<br>(0 - 0)       |
| G6PD deficiency                                     | 0<br>(0 - 0)         | 0<br>(0 - 0)       | 0<br>(0 - 0)      | 0<br>(0 - 0)       | 0<br>(0 - 0)       | 0<br>(0 - 0)       |
| Other hemoglobinopathies and hemolytic anemias      | 6<br>(3 - 12)        | 1<br>(0 - 2)       | 0<br>(0 - 0)      | 2<br>(1 - 5)       | 2<br>(1 - 3)       | 1<br>(0 - 2)       |
| Endocrine, metabolic, blood, and immune disorders   | 25<br>(15 - 33)      | 9<br>(4 - 14)      | 3<br>(2 - 5)      | 9<br>(5 - 12)      | 3<br>(1 - 4)       | 1<br>(1 - 2)       |
| Musculoskeletal disorders                           | 9<br>(5 - 12)        | --                 | 2<br>(1 - 4)      | 4<br>(2 - 6)       | 2<br>(1 - 3)       | 1<br>(0 - 2)       |
| Rheumatoid arthritis                                | 2<br>(1 - 3)         | --                 | 0<br>(0 - 0)      | 1<br>(0 - 1)       | 0<br>(0 - 1)       | 0<br>(0 - 1)       |
| Other musculoskeletal disorders                     | 7<br>(4 - 10)        | --                 | 2<br>(1 - 3)      | 3<br>(2 - 5)       | 1<br>(1 - 2)       | 1<br>(0 - 1)       |
| Other non-communicable diseases                     | 657<br>(402 - 911)   | 603<br>(359 - 850) | 27<br>(17 - 39)   | 24<br>(17 - 31)    | 3<br>(2 - 4)       | 1<br>(1 - 1)       |
| Congenital anomalies                                | 648<br>(394 - 899)   | 594<br>(354 - 839) | 27<br>(17 - 38)   | 23<br>(17 - 31)    | 3<br>(2 - 3)       | 1<br>(1 - 1)       |
| Neural tube defects                                 | 34<br>(16 - 65)      | 33<br>(15 - 63)    | 1<br>(0 - 2)      | 1<br>(0 - 1)       | 0<br>(0 - 0)       | 0<br>(0 - 0)       |
| Congenital heart anomalies                          | 406<br>(216 - 602)   | 361<br>(179 - 553) | 23<br>(14 - 33)   | 20<br>(14 - 26)    | 1<br>(1 - 2)       | 1<br>(0 - 1)       |
| Cleft lip and cleft palate                          | 7<br>(2 - 15)        | 7<br>(2 - 15)      | --                | --                 | --                 | --                 |
| Down syndrome                                       | 12<br>(5 - 27)       | 11<br>(4 - 26)     | 0<br>(0 - 1)      | 0<br>(0 - 1)       | 0<br>(0 - 0)       | 0<br>(0 - 0)       |
| Chromosomal unbalanced rearrangements               | 1<br>(1 - 3)         | 1<br>(0 - 2)       | 0<br>(0 - 0)      | 0<br>(0 - 0)       | 0<br>(0 - 0)       | 0<br>(0 - 0)       |
| Other congenital anomalies                          | 188<br>(106 - 299)   | 181<br>(100 - 292) | 3<br>(1 - 5)      | 3<br>(1 - 4)       | 1<br>(1 - 1)       | 0<br>(0 - 1)       |
| Skin and subcutaneous diseases                      | 1<br>(1 - 1)         | 0<br>(0 - 0)       | 0<br>(0 - 0)      | 0<br>(0 - 0)       | 0<br>(0 - 0)       | 0<br>(0 - 0)       |
| Cellulitis                                          | 0<br>(0 - 0)         | 0<br>(0 - 0)       | 0<br>(0 - 0)      | 0<br>(0 - 0)       | 0<br>(0 - 0)       | 0<br>(0 - 0)       |
| Pyoderma                                            | 0<br>(0 - 1)         | 0<br>(0 - 0)       | 0<br>(0 - 0)      | 0<br>(0 - 0)       | 0<br>(0 - 0)       | 0<br>(0 - 0)       |
| Decubitus ulcer                                     | 0<br>(0 - 0)         | 0<br>(0 - 0)       | 0<br>(0 - 0)      | 0<br>(0 - 0)       | 0<br>(0 - 0)       | 0<br>(0 - 0)       |

Web Table 31- Tajikistan deaths with 95% UI by age, sex, and cause in 2013

| Cause                                           | Males, All Ages          | Males, 0-4 Years   | Males, 5-14 Years  | Males, 15-49 Years       | Males, 50-69 Years | Males, 70-80 Years |
|-------------------------------------------------|--------------------------|--------------------|--------------------|--------------------------|--------------------|--------------------|
| Other skin and subcutaneous diseases            | 0<br>(0 - 0)             | 0<br>(0 - 0)       | 0<br>(0 - 0)       | 0<br>(0 - 0)             | 0<br>(0 - 0)       | 0<br>(0 - 0)       |
| Sudden infant death syndrome                    | 9<br>(2 - 33)            | 9<br>(2 - 33)      | --                 | --                       | --                 | --                 |
| Injuries                                        | 2,537<br>(2,130 - 3,052) | 313<br>(202 - 479) | 224<br>(182 - 282) | 1,655<br>(1,385 - 2,060) | 280<br>(217 - 358) | 65<br>(52 - 77)    |
| Transport injuries                              | 495<br>(386 - 672)       | 11<br>(7 - 18)     | 42<br>(30 - 60)    | 365<br>(279 - 503)       | 62<br>(44 - 87)    | 14<br>(11 - 19)    |
| Road injuries                                   | 462<br>(360 - 636)       | 8<br>(5 - 13)      | 39<br>(27 - 56)    | 342<br>(259 - 475)       | 60<br>(43 - 84)    | 14<br>(10 - 18)    |
| Pedestrian road injuries                        | 89<br>(55 - 130)         | 3<br>(2 - 6)       | 16<br>(9 - 25)     | 48<br>(26 - 75)          | 16<br>(8 - 25)     | 6<br>(4 - 9)       |
| Cyclist road injuries                           | 17<br>(11 - 25)          | 1<br>(0 - 2)       | 3<br>(2 - 6)       | 8<br>(5 - 12)            | 4<br>(2 - 6)       | 1<br>(1 - 2)       |
| Motorcyclist road injuries                      | 76<br>(42 - 125)         | 0<br>(0 - 1)       | 1<br>(1 - 3)       | 68<br>(37 - 113)         | 5<br>(3 - 9)       | 1<br>(0 - 1)       |
| Motor vehicle road injuries                     | 265<br>(202 - 372)       | 3<br>(2 - 6)       | 15<br>(9 - 24)     | 209<br>(155 - 294)       | 32<br>(23 - 48)    | 5<br>(3 - 8)       |
| Other road injuries                             | 15<br>(5 - 27)           | 0<br>(0 - 1)       | 3<br>(1 - 5)       | 8<br>(3 - 16)            | 3<br>(1 - 6)       | 1<br>(0 - 2)       |
| Other transport injuries                        | 33<br>(19 - 46)          | 3<br>(2 - 6)       | 3<br>(2 - 5)       | 23<br>(12 - 35)          | 2<br>(1 - 4)       | 1<br>(0 - 1)       |
| Unintentional injuries                          | 1,473<br>(1,190 - 1,807) | 298<br>(189 - 464) | 171<br>(132 - 225) | 812<br>(654 - 1,007)     | 152<br>(113 - 196) | 39<br>(31 - 47)    |
| Falls                                           | 259<br>(198 - 350)       | 29<br>(15 - 54)    | 20<br>(12 - 31)    | 156<br>(118 - 217)       | 43<br>(30 - 60)    | 12<br>(9 - 16)     |
| Drowning                                        | 630<br>(439 - 885)       | 130<br>(64 - 262)  | 106<br>(71 - 162)  | 347<br>(228 - 484)       | 40<br>(20 - 59)    | 7<br>(4 - 11)      |
| Fire, heat, and hot substances                  | 213<br>(136 - 323)       | 52<br>(24 - 111)   | 13<br>(7 - 22)     | 110<br>(70 - 160)        | 31<br>(19 - 48)    | 8<br>(5 - 12)      |
| Poisonings                                      | 123<br>(85 - 168)        | 12<br>(6 - 22)     | 4<br>(3 - 7)       | 86<br>(58 - 122)         | 17<br>(10 - 27)    | 3<br>(2 - 5)       |
| Exposure to mechanical forces                   | 85<br>(63 - 111)         | 12<br>(6 - 25)     | 10<br>(6 - 15)     | 55<br>(37 - 77)          | 7<br>(5 - 11)      | 1<br>(1 - 2)       |
| Unintentional firearm injuries                  | 20<br>(10 - 32)          | 1<br>(0 - 2)       | 1<br>(0 - 2)       | 16<br>(8 - 27)           | 2<br>(1 - 3)       | 1<br>(0 - 1)       |
| Unintentional suffocation                       | 20<br>(7 - 31)           | 6<br>(1 - 16)      | 2<br>(1 - 5)       | 11<br>(2 - 18)           | 1<br>(0 - 2)       | 0<br>(0 - 0)       |
| Other exposure to mechanical forces             | 45<br>(32 - 69)          | 5<br>(2 - 10)      | 7<br>(4 - 11)      | 28<br>(18 - 47)          | 5<br>(3 - 8)       | 0<br>(0 - 1)       |
| Adverse effects of medical treatment            | 24<br>(12 - 43)          | 7<br>(3 - 16)      | 1<br>(0 - 2)       | 6<br>(3 - 13)            | 6<br>(2 - 13)      | 4<br>(2 - 8)       |
| Animal contact                                  | 13<br>(4 - 19)           | 5<br>(1 - 10)      | 3<br>(1 - 6)       | 3<br>(1 - 5)             | 1<br>(1 - 2)       | 0<br>(0 - 1)       |
| Venomous animal contact                         | 10<br>(2 - 16)           | 5<br>(1 - 9)       | 3<br>(0 - 6)       | 2<br>(1 - 3)             | 1<br>(0 - 1)       | 0<br>(0 - 0)       |
| Non-venomous animal contact                     | 3<br>(2 - 5)             | 1<br>(0 - 2)       | 0<br>(0 - 1)       | 1<br>(0 - 2)             | 0<br>(0 - 1)       | 0<br>(0 - 0)       |
| Foreign body                                    | 63<br>(32 - 104)         | 45<br>(20 - 80)    | 4<br>(2 - 6)       | 10<br>(4 - 18)           | 3<br>(1 - 5)       | 2<br>(1 - 4)       |
| Pulmonary aspiration and foreign body in airway | 63<br>(31 - 103)         | 44<br>(20 - 80)    | 4<br>(1 - 6)       | 10<br>(4 - 17)           | 3<br>(1 - 5)       | 2<br>(1 - 4)       |
| Foreign body in other body part                 | 1<br>(1 - 2)             | 0<br>(0 - 1)       | 0<br>(0 - 0)       | 0<br>(0 - 1)             | 0<br>(0 - 0)       | 0<br>(0 - 0)       |
| Other unintentional injuries                    | 62<br>(49 - 79)          | 6<br>(3 - 11)      | 10<br>(6 - 15)     | 40<br>(29 - 54)          | 5<br>(3 - 8)       | 1<br>(1 - 2)       |
| Self-harm and interpersonal violence            | 570<br>(427 - 920)       | 4<br>(2 - 7)       | 11<br>(7 - 17)     | 478<br>(356 - 778)       | 66<br>(43 - 116)   | 11<br>(8 - 20)     |
| Self-harm                                       | 305<br>(233 - 448)       | --                 | 7<br>(4 - 11)      | 250<br>(190 - 368)       | 41<br>(28 - 64)    | 7<br>(5 - 11)      |
| Interpersonal violence                          | 265<br>(170 - 546)       | 4<br>(2 - 7)       | 4<br>(2 - 8)       | 228<br>(145 - 472)       | 25<br>(12 - 67)    | 4<br>(2 - 12)      |
| Assault by firearm                              | 82<br>(34 - 190)         | 0<br>(0 - 1)       | 1<br>(0 - 1)       | 73<br>(30 - 169)         | 7<br>(2 - 22)      | 1<br>(0 - 2)       |
| Assault by sharp object                         | 100<br>(42 - 251)        | 1<br>(0 - 2)       | 1<br>(0 - 2)       | 88<br>(37 - 220)         | 9<br>(3 - 29)      | 1<br>(0 - 4)       |
| Assault by other means                          | 82<br>(44 - 175)         | 2<br>(1 - 5)       | 2<br>(1 - 5)       | 67<br>(35 - 143)         | 9<br>(4 - 23)      | 2<br>(1 - 6)       |

Web Table 31- Tajikistan deaths with 95% UI by age, sex, and cause in 2013

| Cause                                                             | Females, All Ages           | Females, 0-4 Years       | Females, 5-14 Years | Females, 15-49 Years     | Females, 50-69 Years     | Females, 70-80 Years     |
|-------------------------------------------------------------------|-----------------------------|--------------------------|---------------------|--------------------------|--------------------------|--------------------------|
| All causes                                                        | 19,283<br>(17,491 - 21,585) | 4,883<br>(4,292 - 5,530) | 425<br>(371 - 497)  | 3,088<br>(2,548 - 3,531) | 3,710<br>(3,177 - 4,520) | 7,176<br>(6,567 - 8,216) |
| Communicable, maternal, neonatal, and nutritional diseases        | 5,591<br>(4,979 - 6,309)    | 4,113<br>(3,573 - 4,735) | 183<br>(149 - 219)  | 768<br>(629 - 910)       | 241<br>(188 - 308)       | 287<br>(210 - 391)       |
| HIV/AIDS and tuberculosis                                         | 404<br>(234 - 577)          | 15<br>(3 - 38)           | 8<br>(3 - 14)       | 284<br>(160 - 402)       | 76<br>(44 - 114)         | 21<br>(13 - 30)          |
| Tuberculosis                                                      | 259<br>(167 - 351)          | 3<br>(2 - 5)             | 4<br>(3 - 7)        | 175<br>(108 - 240)       | 57<br>(35 - 85)          | 19<br>(12 - 27)          |
| HIV/AIDS                                                          | 145<br>(14 - 290)           | 12<br>(1 - 35)           | 3<br>(0 - 9)        | 109<br>(12 - 209)        | 18<br>(1 - 44)           | 2<br>(0 - 5)             |
| HIV/AIDS resulting in mycobacterial infection                     | 7<br>(1 - 15)               | 1<br>(0 - 2)             | 0<br>(0 - 0)        | 6<br>(1 - 11)            | 1<br>(0 - 2)             | 0<br>(0 - 0)             |
| HIV/AIDS resulting in other diseases                              | 138<br>(13 - 275)           | 12<br>(1 - 33)           | 3<br>(0 - 8)        | 103<br>(11 - 200)        | 17<br>(1 - 42)           | 2<br>(0 - 4)             |
| Diarrhea, lower respiratory, and other common infectious diseases | 3,220<br>(2,746 - 3,757)    | 2,386<br>(1,963 - 2,863) | 151<br>(120 - 184)  | 300<br>(226 - 381)       | 135<br>(98 - 190)        | 248<br>(173 - 355)       |
| Diarrheal diseases                                                | 666<br>(344 - 1,140)        | 617<br>(294 - 1,085)     | 14<br>(7 - 24)      | 21<br>(13 - 30)          | 7<br>(4 - 11)            | 8<br>(4 - 13)            |
| Intestinal infectious diseases                                    | 13<br>(7 - 22)              | 7<br>(3 - 13)            | 2<br>(1 - 5)        | 3<br>(1 - 8)             | 1<br>(0 - 3)             | 0<br>(0 - 2)             |
| Typhoid fever                                                     | 4<br>(2 - 8)                | 2<br>(1 - 3)             | 1<br>(0 - 2)        | 1<br>(0 - 2)             | 0<br>(0 - 0)             | 0<br>(0 - 0)             |
| Paratyphoid fever                                                 | 1<br>(1 - 3)                | 1<br>(0 - 1)             | 0<br>(0 - 1)        | 0<br>(0 - 1)             | 0<br>(0 - 0)             | 0<br>(0 - 0)             |
| Other intestinal infectious diseases                              | 8<br>(2 - 15)               | 4<br>(1 - 11)            | 1<br>(0 - 3)        | 2<br>(0 - 6)             | 0<br>(0 - 3)             | 0<br>(0 - 2)             |
| Lower respiratory infections                                      | 2,233<br>(1,738 - 2,735)    | 1,564<br>(1,122 - 2,026) | 109<br>(80 - 141)   | 213<br>(155 - 287)       | 114<br>(80 - 164)        | 233<br>(159 - 340)       |
| Upper respiratory infections                                      | 2<br>(1 - 4)                | 1<br>(0 - 2)             | 0<br>(0 - 0)        | 0<br>(0 - 1)             | 0<br>(0 - 1)             | 0<br>(0 - 2)             |
| Otitis media                                                      | 1<br>(1 - 1)                | 0<br>(0 - 0)             | 0<br>(0 - 0)        | 0<br>(0 - 0)             | 0<br>(0 - 0)             | 0<br>(0 - 0)             |
| Meningitis                                                        | 221<br>(156 - 309)          | 136<br>(75 - 224)        | 19<br>(13 - 27)     | 52<br>(36 - 69)          | 10<br>(7 - 14)           | 5<br>(3 - 7)             |
| Pneumococcal meningitis                                           | 50<br>(36 - 70)             | 25<br>(13 - 42)          | 5<br>(3 - 8)        | 16<br>(10 - 22)          | 3<br>(2 - 5)             | 1<br>(1 - 2)             |
| H influenzae type B meningitis                                    | 83<br>(53 - 124)            | 66<br>(36 - 108)         | 6<br>(3 - 9)        | 9<br>(5 - 15)            | 1<br>(1 - 2)             | 1<br>(0 - 1)             |
| Meningococcal meningitis                                          | 48<br>(32 - 70)             | 28<br>(15 - 50)          | 5<br>(3 - 8)        | 12<br>(7 - 18)           | 2<br>(1 - 3)             | 1<br>(1 - 2)             |
| Other meningitis                                                  | 40<br>(28 - 56)             | 16<br>(7 - 31)           | 3<br>(1 - 5)        | 16<br>(10 - 23)          | 4<br>(1 - 6)             | 2<br>(1 - 3)             |
| Encephalitis                                                      | 51<br>(27 - 81)             | 36<br>(16 - 66)          | 6<br>(2 - 10)       | 7<br>(4 - 11)            | 2<br>(1 - 3)             | 0<br>(0 - 1)             |
| Diphtheria                                                        | 3<br>(0 - 19)               | 3<br>(0 - 18)            | 0<br>(0 - 3)        | 0<br>(0 - 1)             | 0<br>(0 - 1)             | --                       |
| Whooping cough                                                    | 23<br>(2 - 122)             | 22<br>(1 - 120)          | 0<br>(0 - 1)        | 1<br>(0 - 1)             | 0<br>(0 - 0)             | --                       |
| Tetanus                                                           | 1<br>(1 - 2)                | 0<br>(0 - 0)             | 0<br>(0 - 0)        | 1<br>(0 - 1)             | 0<br>(0 - 0)             | 0<br>(0 - 0)             |
| Measles                                                           | 0<br>(0 - 0)                | 0<br>(0 - 0)             | 0<br>(0 - 0)        | 0<br>(0 - 0)             | 0<br>(0 - 0)             | --                       |
| Varicella and herpes zoster                                       | 5<br>(1 - 12)               | 2<br>(0 - 7)             | 0<br>(0 - 1)        | 1<br>(0 - 3)             | 0<br>(0 - 1)             | 1<br>(0 - 7)             |
| Neglected tropical diseases and malaria                           | 26<br>(20 - 35)             | 10<br>(6 - 18)           | 3<br>(2 - 5)        | 8<br>(6 - 11)            | 3<br>(2 - 4)             | 2<br>(1 - 3)             |
| Malaria                                                           | 9<br>(5 - 15)               | 3<br>(1 - 9)             | 1<br>(0 - 1)        | 3<br>(2 - 5)             | 1<br>(1 - 2)             | 1<br>(0 - 1)             |
| Leishmaniasis                                                     | 4<br>(2 - 6)                | 2<br>(1 - 4)             | 0<br>(0 - 1)        | 1<br>(1 - 2)             | 0<br>(0 - 1)             | 0<br>(0 - 0)             |
| Visceral leishmaniasis                                            | 4<br>(2 - 6)                | 2<br>(1 - 4)             | 0<br>(0 - 1)        | 1<br>(1 - 2)             | 0<br>(0 - 1)             | 0<br>(0 - 0)             |
| Cysticercosis                                                     | 0<br>(0 - 0)                | 0<br>(0 - 0)             | 0<br>(0 - 0)        | 0<br>(0 - 0)             | 0<br>(0 - 0)             | 0<br>(0 - 0)             |
| Cystic echinococcosis                                             | 5<br>(4 - 6)                | 0<br>(0 - 1)             | 1<br>(1 - 1)        | 2<br>(2 - 3)             | 1<br>(1 - 1)             | 1<br>(1 - 1)             |
| Dengue                                                            | 1<br>(0 - 1)                | 0<br>(0 - 0)             | 0<br>(0 - 0)        | 0<br>(0 - 0)             | 0<br>(0 - 0)             | 0<br>(0 - 0)             |
| Rabies                                                            | 2<br>(1 - 2)                | 0<br>(0 - 0)             | 1<br>(0 - 1)        | 1<br>(0 - 1)             | 0<br>(0 - 0)             | 0<br>(0 - 0)             |
| Intestinal nematode infections                                    | 2<br>(0 - 8)                | 2<br>(0 - 7)             | 0<br>(0 - 2)        | 0<br>(0 - 1)             | 0<br>(0 - 1)             | 0<br>(0 - 1)             |
| Ascariasis                                                        | 2<br>(0 - 8)                | 2<br>(0 - 7)             | 0<br>(0 - 2)        | 0<br>(0 - 1)             | 0<br>(0 - 1)             | 0<br>(0 - 1)             |
| Other neglected tropical diseases                                 | 4<br>(2 - 7)                | 3<br>(1 - 6)             | 0<br>(0 - 1)        | 1<br>(0 - 1)             | 0<br>(0 - 0)             | 0<br>(0 - 0)             |
| Maternal disorders                                                | 82<br>(60 - 106)            | --                       | 0<br>(0 - 0)        | 82<br>(60 - 106)         | --                       | --                       |
| Maternal hemorrhage                                               | 12<br>(8 - 17)              | --                       | 0<br>(0 - 0)        | 12<br>(8 - 17)           | --                       | --                       |



Web Table 31- Tajikistan deaths with 95% UI by age, sex, and cause in 2013

| Cause                                                            | Females, All Ages           | Females, 0-4 Years       | Females, 5-14 Years | Females, 15-49 Years     | Females, 50-69 Years     | Females, 70-80 Years     |
|------------------------------------------------------------------|-----------------------------|--------------------------|---------------------|--------------------------|--------------------------|--------------------------|
| Maternal sepsis and other maternal infections                    | 9<br>(5 - 14)               | --                       | 0<br>(0 - 0)        | 9<br>(5 - 14)            | --                       | --                       |
| Maternal hypertensive disorders                                  | 8<br>(5 - 12)               | --                       | 0<br>(0 - 0)        | 8<br>(5 - 12)            | --                       | --                       |
| Maternal obstructed labor                                        | 9<br>(5 - 13)               | --                       | 0<br>(0 - 0)        | 9<br>(5 - 13)            | --                       | --                       |
| Maternal abortive outcome                                        | 7<br>(4 - 11)               | --                       | 0<br>(0 - 0)        | 7<br>(4 - 11)            | --                       | --                       |
| Indirect maternal deaths                                         | 10<br>(6 - 16)              | --                       | 0<br>(0 - 0)        | 10<br>(6 - 16)           | --                       | --                       |
| Late maternal deaths                                             | 13<br>(8 - 18)              | --                       | 0<br>(0 - 0)        | 13<br>(8 - 18)           | --                       | --                       |
| Maternal deaths aggravated by HIV/AIDS                           | 0<br>(0 - 0)                | --                       | --                  | 0<br>(0 - 0)             | --                       | --                       |
| Other maternal disorders                                         | 15<br>(9 - 23)              | --                       | 0<br>(0 - 0)        | 15<br>(9 - 23)           | --                       | --                       |
| Neonatal disorders                                               | 1,530<br>(1,270 - 1,825)    | 1,530<br>(1,270 - 1,825) | --                  | --                       | --                       | --                       |
| Neonatal preterm birth complications                             | 594<br>(307 - 932)          | 594<br>(307 - 932)       | --                  | --                       | --                       | --                       |
| Neonatal encephalopathy due to birth asphyxia and trauma         | 581<br>(294 - 909)          | 581<br>(294 - 909)       | --                  | --                       | --                       | --                       |
| Neonatal sepsis and other neonatal infections                    | 75<br>(30 - 151)            | 75<br>(30 - 151)         | --                  | --                       | --                       | --                       |
| Hemolytic disease and other neonatal jaundice                    | 10<br>(4 - 21)              | 10<br>(4 - 21)           | --                  | --                       | --                       | --                       |
| Other neonatal disorders                                         | 270<br>(124 - 504)          | 270<br>(124 - 504)       | --                  | --                       | --                       | --                       |
| Nutritional deficiencies                                         | 167<br>(114 - 217)          | 69<br>(36 - 110)         | 10<br>(6 - 14)      | 59<br>(42 - 76)          | 18<br>(12 - 26)          | 11<br>(8 - 15)           |
| Protein-energy malnutrition                                      | 66<br>(33 - 108)            | 56<br>(26 - 97)          | 1<br>(0 - 4)        | 5<br>(2 - 16)            | 3<br>(1 - 7)             | 0<br>(0 - 1)             |
| Iodine deficiency                                                | 1<br>(0 - 5)                | 0<br>(0 - 3)             | 0<br>(0 - 2)        | 0<br>(0 - 2)             | 0<br>(0 - 2)             | 0<br>(0 - 1)             |
| Iron-deficiency anemia                                           | 89<br>(59 - 120)            | 10<br>(1 - 27)           | 7<br>(3 - 10)       | 48<br>(31 - 64)          | 14<br>(8 - 20)           | 10<br>(7 - 14)           |
| Other nutritional deficiencies                                   | 11<br>(4 - 29)              | 3<br>(0 - 10)            | 2<br>(1 - 4)        | 5<br>(2 - 13)            | 1<br>(0 - 3)             | 0<br>(0 - 1)             |
| Other communicable, maternal, neonatal, and nutritional diseases | 162<br>(95 - 248)           | 102<br>(39 - 181)        | 11<br>(6 - 18)      | 34<br>(23 - 49)          | 9<br>(6 - 14)            | 6<br>(4 - 9)             |
| Sexually transmitted diseases excluding HIV                      | 73<br>(10 - 143)            | 61<br>(1 - 127)          | 5<br>(0 - 9)        | 4<br>(3 - 6)             | 2<br>(2 - 3)             | 1<br>(1 - 2)             |
| Syphilis                                                         | 70<br>(5 - 139)             | 61<br>(1 - 127)          | 5<br>(0 - 9)        | 2<br>(1 - 2)             | 1<br>(1 - 2)             | 1<br>(1 - 1)             |
| Chlamydial infection                                             | 1<br>(1 - 2)                | --                       | 0<br>(0 - 0)        | 1<br>(1 - 1)             | 0<br>(0 - 0)             | 0<br>(0 - 0)             |
| Gonococcal infection                                             | 1<br>(1 - 2)                | --                       | 0<br>(0 - 0)        | 1<br>(1 - 1)             | 0<br>(0 - 1)             | 0<br>(0 - 0)             |
| Other sexually transmitted diseases                              | 1<br>(1 - 2)                | --                       | 0<br>(0 - 0)        | 1<br>(1 - 1)             | 0<br>(0 - 0)             | 0<br>(0 - 0)             |
| Hepatitis                                                        | 55<br>(39 - 77)             | 15<br>(7 - 31)           | 5<br>(3 - 8)        | 27<br>(17 - 42)          | 5<br>(3 - 9)             | 3<br>(2 - 6)             |
| Acute hepatitis A                                                | 10<br>(3 - 20)              | 6<br>(2 - 15)            | 2<br>(0 - 4)        | 2<br>(0 - 5)             | 0<br>(0 - 0)             | 0<br>(0 - 0)             |
| Acute hepatitis B                                                | 26<br>(15 - 41)             | 9<br>(3 - 20)            | 2<br>(1 - 4)        | 9<br>(4 - 15)            | 4<br>(2 - 7)             | 3<br>(1 - 5)             |
| Acute hepatitis C                                                | 3<br>(1 - 7)                | --                       | 1<br>(0 - 2)        | 1<br>(0 - 4)             | 1<br>(0 - 2)             | 0<br>(0 - 1)             |
| Acute hepatitis E                                                | 17<br>(10 - 27)             | 0<br>(0 - 0)             | 1<br>(0 - 2)        | 15<br>(8 - 25)           | 1<br>(0 - 2)             | 0<br>(0 - 1)             |
| Other infectious diseases                                        | 33<br>(14 - 84)             | 25<br>(9 - 77)           | 2<br>(1 - 4)        | 3<br>(1 - 5)             | 2<br>(1 - 4)             | 1<br>(0 - 4)             |
| Non-communicable diseases                                        | 12,878<br>(11,400 - 14,921) | 562<br>(371 - 788)       | 140<br>(115 - 171)  | 1,952<br>(1,567 - 2,287) | 3,384<br>(2,883 - 4,145) | 6,841<br>(6,238 - 7,815) |
| Neoplasms                                                        | 1,507<br>(1,252 - 1,857)    | 31<br>(21 - 45)          | 38<br>(30 - 49)     | 478<br>(377 - 568)       | 603<br>(488 - 770)       | 357<br>(297 - 460)       |
| Esophageal cancer                                                | 121<br>(83 - 172)           | --                       | --                  | 25<br>(16 - 36)          | 55<br>(37 - 80)          | 41<br>(26 - 64)          |
| Stomach cancer                                                   | 242<br>(191 - 311)          | --                       | --                  | 56<br>(42 - 71)          | 103<br>(78 - 136)        | 84<br>(65 - 110)         |
| Liver cancer                                                     | 131<br>(92 - 181)           | --                       | 0<br>(0 - 1)        | 26<br>(17 - 36)          | 57<br>(36 - 85)          | 48<br>(28 - 77)          |
| Liver cancer due to hepatitis B                                  | 39<br>(26 - 57)             | --                       | 0<br>(0 - 0)        | 9<br>(5 - 13)            | 19<br>(11 - 30)          | 11<br>(6 - 20)           |
| Liver cancer due to hepatitis C                                  | 47<br>(31 - 68)             | --                       | 0<br>(0 - 0)        | 8<br>(5 - 12)            | 20<br>(12 - 31)          | 19<br>(10 - 31)          |
| Liver cancer due to alcohol use                                  | 22<br>(12 - 35)             | --                       | --                  | 2<br>(1 - 4)             | 8<br>(4 - 14)            | 11<br>(6 - 20)           |
| Liver cancer due to other causes                                 | 23<br>(12 - 36)             | --                       | 0<br>(0 - 0)        | 7<br>(4 - 10)            | 9<br>(4 - 16)            | 7<br>(3 - 12)            |

Web Table 31- Tajikistan deaths with 95% UI by age, sex, and cause in 2013

| Cause                                         | Females, All Ages        | Females, 0-4 Years | Females, 5-14 Years | Females, 15-49 Years | Females, 50-69 Years     | Females, 70-80 Years     |
|-----------------------------------------------|--------------------------|--------------------|---------------------|----------------------|--------------------------|--------------------------|
| Larynx cancer                                 | 10<br>(5 - 18)           | --                 | --                  | 4<br>(2 - 7)         | 4<br>(2 - 7)             | 2<br>(1 - 4)             |
| Tracheal, bronchus and lung cancer            | 78<br>(61 - 111)         | --                 | --                  | 22<br>(16 - 33)      | 35<br>(26 - 52)          | 20<br>(15 - 29)          |
| Breast cancer                                 | 201<br>(156 - 258)       | --                 | --                  | 96<br>(70 - 122)     | 85<br>(64 - 116)         | 20<br>(15 - 27)          |
| Cervical cancer                               | 58<br>(45 - 100)         | --                 | --                  | 20<br>(15 - 32)      | 26<br>(19 - 45)          | 12<br>(8 - 23)           |
| Uterine cancer                                | 35<br>(23 - 51)          | --                 | --                  | 11<br>(7 - 17)       | 17<br>(11 - 26)          | 7<br>(5 - 11)            |
| Prostate cancer                               | --                       | --                 | --                  | --                   | --                       | --                       |
| Colon and rectum cancer                       | 74<br>(61 - 91)          | --                 | --                  | 27<br>(22 - 34)      | 29<br>(23 - 38)          | 18<br>(14 - 23)          |
| Lip and oral cavity cancer                    | 19<br>(13 - 27)          | --                 | --                  | 5<br>(3 - 7)         | 8<br>(5 - 11)            | 6<br>(4 - 10)            |
| Nasopharynx cancer                            | 4<br>(3 - 7)             | --                 | 0<br>(0 - 1)        | 2<br>(1 - 3)         | 1<br>(1 - 3)             | 1<br>(0 - 1)             |
| Other pharynx cancer                          | 5<br>(3 - 7)             | --                 | --                  | 1<br>(1 - 2)         | 2<br>(1 - 4)             | 1<br>(1 - 2)             |
| Gallbladder and biliary tract cancer          | 34<br>(22 - 51)          | --                 | --                  | 5<br>(3 - 8)         | 16<br>(10 - 25)          | 13<br>(7 - 22)           |
| Pancreatic cancer                             | 44<br>(35 - 58)          | --                 | --                  | 6<br>(4 - 8)         | 21<br>(16 - 29)          | 17<br>(12 - 24)          |
| Malignant skin melanoma                       | 20<br>(15 - 26)          | --                 | --                  | 7<br>(5 - 9)         | 8<br>(5 - 12)            | 5<br>(3 - 8)             |
| Non-melanoma skin cancer                      | 6<br>(3 - 10)            | --                 | --                  | 2<br>(1 - 3)         | 2<br>(1 - 3)             | 3<br>(2 - 5)             |
| Ovarian cancer                                | 64<br>(45 - 91)          | --                 | --                  | 23<br>(15 - 32)      | 31<br>(20 - 47)          | 10<br>(6 - 16)           |
| Testicular cancer                             | --                       | --                 | --                  | --                   | --                       | --                       |
| Kidney cancer                                 | 25<br>(15 - 41)          | 1<br>(1 - 3)       | 1<br>(0 - 2)        | 6<br>(3 - 9)         | 11<br>(6 - 20)           | 6<br>(3 - 11)            |
| Bladder cancer                                | 15<br>(10 - 24)          | --                 | --                  | 2<br>(1 - 3)         | 6<br>(4 - 9)             | 7<br>(4 - 13)            |
| Brain and nervous system cancer               | 60<br>(47 - 75)          | 4<br>(2 - 8)       | 5<br>(3 - 8)        | 27<br>(19 - 36)      | 19<br>(13 - 27)          | 5<br>(3 - 8)             |
| Thyroid cancer                                | 8<br>(5 - 11)            | --                 | 0<br>(0 - 0)        | 2<br>(1 - 3)         | 3<br>(2 - 5)             | 3<br>(2 - 4)             |
| Mesothelioma                                  | 2<br>(1 - 3)             | --                 | --                  | 1<br>(0 - 1)         | 1<br>(0 - 1)             | 0<br>(0 - 1)             |
| Hodgkin lymphoma                              | 10<br>(7 - 13)           | 1<br>(0 - 1)       | 1<br>(0 - 2)        | 6<br>(4 - 9)         | 2<br>(1 - 3)             | 1<br>(0 - 1)             |
| Non-Hodgkin lymphoma                          | 29<br>(19 - 44)          | 2<br>(1 - 5)       | 2<br>(1 - 3)        | 11<br>(7 - 16)       | 9<br>(5 - 15)            | 5<br>(3 - 9)             |
| Multiple myeloma                              | 5<br>(3 - 6)             | --                 | --                  | 2<br>(1 - 2)         | 2<br>(2 - 3)             | 1<br>(1 - 1)             |
| Leukemia                                      | 74<br>(59 - 91)          | 9<br>(5 - 13)      | 17<br>(12 - 23)     | 35<br>(26 - 45)      | 11<br>(8 - 15)           | 3<br>(2 - 4)             |
| Other neoplasms                               | 134<br>(100 - 175)       | 13<br>(7 - 24)     | 12<br>(7 - 19)      | 49<br>(35 - 67)      | 40<br>(26 - 59)          | 20<br>(13 - 32)          |
| Cardiovascular diseases                       | 7,886<br>(6,918 - 9,255) | 9<br>(5 - 16)      | 10<br>(7 - 16)      | 646<br>(490 - 809)   | 2,001<br>(1,659 - 2,504) | 5,219<br>(4,677 - 5,971) |
| Rheumatic heart disease                       | 196<br>(142 - 286)       | 0<br>(0 - 1)       | 4<br>(2 - 6)        | 112<br>(79 - 174)    | 62<br>(41 - 94)          | 17<br>(12 - 24)          |
| Ischemic heart disease                        | 4,598<br>(3,930 - 5,518) | 2<br>(1 - 6)       | 3<br>(2 - 5)        | 286<br>(200 - 380)   | 1,096<br>(884 - 1,402)   | 3,211<br>(2,731 - 3,785) |
| Cerebrovascular disease                       | 2,760<br>(2,145 - 3,357) | 3<br>(1 - 4)       | 2<br>(1 - 3)        | 195<br>(137 - 255)   | 752<br>(580 - 969)       | 1,809<br>(1,380 - 2,167) |
| Ischemic stroke                               | 1,302<br>(752 - 1,700)   | 1<br>(0 - 1)       | 0<br>(0 - 1)        | 28<br>(14 - 41)      | 214<br>(114 - 312)       | 1,059<br>(604 - 1,364)   |
| Hemorrhagic stroke                            | 1,458<br>(1,072 - 1,940) | 2<br>(1 - 3)       | 1<br>(1 - 2)        | 167<br>(118 - 222)   | 538<br>(389 - 714)       | 749<br>(524 - 1,089)     |
| Hypertensive heart disease                    | 237<br>(153 - 380)       | 0<br>(0 - 1)       | 0<br>(0 - 0)        | 19<br>(11 - 30)      | 62<br>(38 - 103)         | 155<br>(90 - 266)        |
| Cardiomyopathy and myocarditis                | 45<br>(23 - 73)          | 2<br>(1 - 3)       | 1<br>(0 - 2)        | 15<br>(6 - 25)       | 14<br>(7 - 25)           | 13<br>(6 - 24)           |
| Atrial fibrillation and flutter               | 0<br>(0 - 0)             | --                 | --                  | 0<br>(0 - 0)         | 0<br>(0 - 0)             | 0<br>(0 - 0)             |
| Aortic aneurysm                               | 8<br>(5 - 12)            | --                 | --                  | 2<br>(1 - 2)         | 1<br>(1 - 2)             | 5<br>(3 - 8)             |
| Peripheral vascular disease                   | 1<br>(0 - 1)             | --                 | --                  | 0<br>(0 - 0)         | 0<br>(0 - 0)             | 0<br>(0 - 1)             |
| Endocarditis                                  | 9<br>(6 - 14)            | 1<br>(0 - 3)       | 0<br>(0 - 0)        | 4<br>(2 - 6)         | 1<br>(0 - 1)             | 3<br>(2 - 6)             |
| Other cardiovascular and circulatory diseases | 34<br>(22 - 52)          | 0<br>(0 - 0)       | 0<br>(0 - 1)        | 14<br>(8 - 23)       | 12<br>(7 - 20)           | 7<br>(5 - 12)            |
| Chronic respiratory diseases                  | 780<br>(616 - 991)       | 14<br>(5 - 21)     | 5<br>(3 - 7)        | 116<br>(81 - 148)    | 195<br>(147 - 262)       | 450<br>(351 - 604)       |

Web Table 31- Tajikistan deaths with 95% UI by age, sex, and cause in 2013

| Cause                                               | Females, All Ages  | Females, 0-4 Years | Females, 5-14 Years | Females, 15-49 Years | Females, 50-69 Years | Females, 70-80 Years |
|-----------------------------------------------------|--------------------|--------------------|---------------------|----------------------|----------------------|----------------------|
| Chronic obstructive pulmonary disease               | 628<br>(493 - 813) | 7<br>(2 - 12)      | 2<br>(1 - 3)        | 74<br>(52 - 100)     | 163<br>(123 - 221)   | 382<br>(292 - 509)   |
| Pneumoconiosis                                      | 2<br>(1 - 2)       | 0<br>(0 - 0)       | 0<br>(0 - 0)        | 1<br>(0 - 1)         | 0<br>(0 - 0)         | 0<br>(0 - 0)         |
| Silicosis                                           | 0<br>(0 - 0)       | 0<br>(0 - 0)       | 0<br>(0 - 0)        | 0<br>(0 - 0)         | 0<br>(0 - 0)         | 0<br>(0 - 0)         |
| Asbestosis                                          | 0<br>(0 - 0)       | 0<br>(0 - 0)       | 0<br>(0 - 0)        | 0<br>(0 - 0)         | 0<br>(0 - 0)         | 0<br>(0 - 0)         |
| Coal workers pneumoconiosis                         | 0<br>(0 - 0)       | 0<br>(0 - 0)       | 0<br>(0 - 0)        | 0<br>(0 - 0)         | 0<br>(0 - 0)         | 0<br>(0 - 0)         |
| Other pneumoconiosis                                | 1<br>(0 - 1)       | 0<br>(0 - 0)       | 0<br>(0 - 0)        | 0<br>(0 - 1)         | 0<br>(0 - 0)         | 0<br>(0 - 0)         |
| Asthma                                              | 94<br>(48 - 165)   | 1<br>(0 - 3)       | 2<br>(1 - 3)        | 29<br>(13 - 47)      | 26<br>(12 - 49)      | 36<br>(18 - 73)      |
| Interstitial lung disease and pulmonary sarcoidosis | 36<br>(20 - 63)    | 0<br>(0 - 1)       | 0<br>(0 - 0)        | 3<br>(1 - 6)         | 5<br>(3 - 11)        | 28<br>(14 - 51)      |
| Other chronic respiratory diseases                  | 20<br>(13 - 29)    | 5<br>(2 - 8)       | 1<br>(0 - 1)        | 10<br>(5 - 15)       | 1<br>(1 - 2)         | 4<br>(2 - 7)         |
| Cirrhosis                                           | 593<br>(483 - 744) | 3<br>(2 - 4)       | 9<br>(7 - 12)       | 206<br>(161 - 260)   | 219<br>(172 - 294)   | 156<br>(124 - 204)   |
| Cirrhosis due to hepatitis B                        | 259<br>(182 - 347) | 0<br>(0 - 1)       | 3<br>(2 - 5)        | 90<br>(61 - 123)     | 94<br>(62 - 134)     | 71<br>(47 - 102)     |
| Cirrhosis due to hepatitis C                        | 207<br>(121 - 296) | 0<br>(0 - 0)       | 1<br>(0 - 2)        | 65<br>(35 - 98)      | 86<br>(47 - 131)     | 54<br>(31 - 83)      |
| Cirrhosis due to alcohol use                        | 50<br>(29 - 84)    | --                 | --                  | 11<br>(5 - 18)       | 18<br>(10 - 32)      | 21<br>(10 - 39)      |
| Cirrhosis due to other causes                       | 78<br>(53 - 110)   | 3<br>(2 - 4)       | 5<br>(3 - 7)        | 40<br>(24 - 56)      | 20<br>(11 - 35)      | 10<br>(6 - 16)       |
| Digestive diseases                                  | 158<br>(128 - 208) | 8<br>(5 - 13)      | 5<br>(4 - 7)        | 58<br>(43 - 76)      | 45<br>(34 - 62)      | 42<br>(33 - 57)      |
| Peptic ulcer disease                                | 68<br>(50 - 91)    | 0<br>(0 - 1)       | 1<br>(1 - 2)        | 27<br>(20 - 39)      | 20<br>(14 - 28)      | 19<br>(13 - 25)      |
| Gastritis and duodenitis                            | 2<br>(1 - 4)       | 0<br>(0 - 1)       | 0<br>(0 - 1)        | 1<br>(0 - 1)         | 0<br>(0 - 1)         | 1<br>(0 - 1)         |
| Appendicitis                                        | 11<br>(7 - 17)     | 1<br>(0 - 1)       | 1<br>(1 - 2)        | 6<br>(4 - 10)        | 2<br>(1 - 3)         | 1<br>(0 - 1)         |
| Paralytic ileus and intestinal obstruction          | 28<br>(17 - 47)    | 3<br>(1 - 6)       | 1<br>(1 - 2)        | 9<br>(5 - 15)        | 7<br>(4 - 12)        | 8<br>(4 - 15)        |
| Inguinal, femoral, and abdominal hernia             | 7<br>(4 - 12)      | 1<br>(0 - 1)       | 0<br>(0 - 1)        | 1<br>(0 - 1)         | 2<br>(1 - 4)         | 3<br>(1 - 5)         |
| Inflammatory bowel disease                          | 6<br>(3 - 8)       | 2<br>(1 - 3)       | 0<br>(0 - 1)        | 2<br>(1 - 3)         | 1<br>(1 - 2)         | 1<br>(0 - 2)         |
| Vascular intestinal disorders                       | 3<br>(1 - 6)       | 0<br>(0 - 0)       | 0<br>(0 - 0)        | 1<br>(0 - 1)         | 1<br>(1 - 3)         | 1<br>(0 - 2)         |
| Gallbladder and biliary diseases                    | 20<br>(15 - 33)    | 0<br>(0 - 0)       | 0<br>(0 - 1)        | 6<br>(4 - 10)        | 8<br>(5 - 12)        | 7<br>(4 - 11)        |
| Pancreatitis                                        | 7<br>(4 - 11)      | 0<br>(0 - 0)       | 0<br>(0 - 0)        | 3<br>(2 - 4)         | 2<br>(1 - 4)         | 2<br>(1 - 3)         |
| Other digestive diseases                            | 7<br>(4 - 10)      | 1<br>(0 - 1)       | 0<br>(0 - 1)        | 2<br>(1 - 4)         | 2<br>(1 - 3)         | 1<br>(1 - 2)         |
| Neurological disorders                              | 631<br>(498 - 828) | 14<br>(7 - 30)     | 19<br>(11 - 31)     | 117<br>(78 - 165)    | 41<br>(30 - 57)      | 439<br>(321 - 604)   |
| Alzheimer disease and other dementias               | 460<br>(339 - 627) | --                 | --                  | 0<br>(0 - 1)         | 26<br>(18 - 37)      | 434<br>(316 - 597)   |
| Parkinson disease                                   | 3<br>(2 - 5)       | --                 | --                  | 0<br>(0 - 1)         | 1<br>(1 - 2)         | 2<br>(1 - 3)         |
| Epilepsy                                            | 159<br>(102 - 226) | 13<br>(6 - 28)     | 18<br>(10 - 30)     | 114<br>(74 - 161)    | 12<br>(8 - 17)       | 3<br>(2 - 4)         |
| Multiple sclerosis                                  | 3<br>(2 - 5)       | --                 | --                  | 1<br>(1 - 2)         | 1<br>(0 - 1)         | 1<br>(0 - 2)         |
| Other neurological disorders                        | 6<br>(5 - 7)       | 1<br>(1 - 2)       | 1<br>(1 - 1)        | 2<br>(1 - 2)         | 1<br>(1 - 1)         | 0<br>(0 - 1)         |
| Mental and substance use disorders                  | 40<br>(26 - 77)    | 1<br>(0 - 2)       | 0<br>(0 - 0)        | 25<br>(16 - 45)      | 12<br>(7 - 27)       | 2<br>(1 - 4)         |
| Schizophrenia                                       | 4<br>(2 - 6)       | --                 | --                  | 3<br>(1 - 5)         | 1<br>(0 - 1)         | 0<br>(0 - 0)         |
| Alcohol use disorders                               | 28<br>(14 - 64)    | --                 | --                  | 17<br>(8 - 36)       | 10<br>(5 - 25)       | 1<br>(1 - 3)         |
| Drug use disorders                                  | 8<br>(6 - 11)      | 1<br>(0 - 2)       | --                  | 5<br>(3 - 8)         | 1<br>(1 - 2)         | 1<br>(0 - 1)         |
| Opioid use disorders                                | 2<br>(1 - 2)       | 0<br>(0 - 0)       | --                  | 1<br>(1 - 2)         | 0<br>(0 - 0)         | 0<br>(0 - 0)         |
| Cocaine use disorders                               | 0<br>(0 - 0)       | 0<br>(0 - 0)       | --                  | 0<br>(0 - 0)         | 0<br>(0 - 0)         | 0<br>(0 - 0)         |
| Amphetamine use disorders                           | 0<br>(0 - 0)       | 0<br>(0 - 0)       | --                  | 0<br>(0 - 0)         | 0<br>(0 - 0)         | 0<br>(0 - 0)         |
| Other drug use disorders                            | 6<br>(4 - 8)       | 1<br>(0 - 1)       | --                  | 4<br>(2 - 5)         | 1<br>(1 - 2)         | 1<br>(0 - 1)         |
| Eating disorders                                    | 0<br>(0 - 0)       | --                 | 0<br>(0 - 0)        | 0<br>(0 - 0)         | --                   | --                   |

Web Table 31- Tajikistan deaths with 95% UI by age, sex, and cause in 2013

| Cause                                               | Females, All Ages  | Females, 0-4 Years | Females, 5-14 Years | Females, 15-49 Years | Females, 50-69 Years | Females, 70-80 Years |
|-----------------------------------------------------|--------------------|--------------------|---------------------|----------------------|----------------------|----------------------|
| Anorexia nervosa                                    | 0<br>(0 - 0)       | --                 | 0<br>(0 - 0)        | 0<br>(0 - 0)         | --                   | --                   |
| Diabetes, urogenital, blood, and endocrine diseases | 777<br>(634 - 975) | 34<br>(23 - 50)    | 28<br>(21 - 36)     | 279<br>(217 - 349)   | 263<br>(208 - 348)   | 174<br>(142 - 224)   |
| Diabetes mellitus                                   | 301<br>(238 - 387) | 0<br>(0 - 1)       | 4<br>(2 - 7)        | 59<br>(44 - 76)      | 153<br>(113 - 207)   | 84<br>(64 - 111)     |
| Acute glomerulonephritis                            | 5<br>(4 - 7)       | 1<br>(0 - 1)       | 1<br>(0 - 1)        | 2<br>(2 - 3)         | 1<br>(0 - 1)         | 0<br>(0 - 1)         |
| Chronic kidney disease                              | 270<br>(215 - 352) | 8<br>(5 - 15)      | 11<br>(8 - 16)      | 133<br>(98 - 175)    | 66<br>(49 - 93)      | 53<br>(39 - 76)      |
| Chronic kidney disease due to diabetes mellitus     | 7<br>(1 - 12)      | 0<br>(0 - 0)       | 0<br>(0 - 0)        | 2<br>(1 - 4)         | 3<br>(0 - 6)         | 1<br>(0 - 2)         |
| Chronic kidney disease due to hypertension          | 26<br>(13 - 48)    | 1<br>(0 - 2)       | 0<br>(0 - 1)        | 6<br>(3 - 11)        | 8<br>(3 - 15)        | 11<br>(4 - 22)       |
| Chronic kidney disease due to glomerulonephritis    | 100<br>(63 - 133)  | 4<br>(2 - 5)       | 5<br>(3 - 7)        | 54<br>(32 - 76)      | 24<br>(14 - 35)      | 14<br>(8 - 21)       |
| Chronic kidney disease due to other causes          | 138<br>(93 - 209)  | 4<br>(2 - 10)      | 6<br>(3 - 11)       | 70<br>(43 - 110)     | 31<br>(17 - 53)      | 28<br>(15 - 42)      |
| Urinary diseases and male infertility               | 157<br>(120 - 214) | 7<br>(4 - 14)      | 6<br>(4 - 10)       | 70<br>(50 - 101)     | 39<br>(27 - 57)      | 34<br>(23 - 53)      |
| Interstitial nephritis and urinary tract infections | 153<br>(117 - 207) | 7<br>(4 - 13)      | 6<br>(4 - 10)       | 68<br>(49 - 98)      | 38<br>(26 - 55)      | 34<br>(23 - 51)      |
| Urolithiasis                                        | 2<br>(1 - 4)       | --                 | 0<br>(0 - 0)        | 1<br>(0 - 2)         | 1<br>(0 - 1)         | 0<br>(0 - 1)         |
| Other urinary diseases                              | 2<br>(1 - 4)       | 0<br>(0 - 0)       | 0<br>(0 - 0)        | 1<br>(0 - 2)         | 1<br>(0 - 1)         | 0<br>(0 - 1)         |
| Gynecological diseases                              | 1<br>(1 - 2)       | --                 | --                  | 1<br>(1 - 2)         | 0<br>(0 - 0)         | 0<br>(0 - 0)         |
| Uterine fibroids                                    | 0<br>(0 - 0)       | --                 | --                  | 0<br>(0 - 0)         | 0<br>(0 - 0)         | 0<br>(0 - 0)         |
| Polycystic ovarian syndrome                         | 0<br>(0 - 0)       | --                 | --                  | 0<br>(0 - 0)         | 0<br>(0 - 0)         | --                   |
| Endometriosis                                       | 0<br>(0 - 0)       | --                 | --                  | 0<br>(0 - 0)         | 0<br>(0 - 0)         | --                   |
| Genital prolapse                                    | 0<br>(0 - 0)       | --                 | --                  | 0<br>(0 - 0)         | 0<br>(0 - 0)         | 0<br>(0 - 0)         |
| Other gynecological diseases                        | 1<br>(0 - 1)       | --                 | --                  | 1<br>(0 - 1)         | 0<br>(0 - 0)         | 0<br>(0 - 0)         |
| Hemoglobinopathies and hemolytic anemias            | 24<br>(12 - 46)    | 12<br>(6 - 24)     | 3<br>(1 - 6)        | 6<br>(3 - 13)        | 1<br>(1 - 3)         | 1<br>(0 - 3)         |
| Thalassemias                                        | 17<br>(9 - 33)     | 10<br>(5 - 20)     | 3<br>(1 - 6)        | 4<br>(2 - 9)         | 0<br>(0 - 0)         | 0<br>(0 - 0)         |
| Sickle cell disorders                               | 0<br>(0 - 0)       | 0<br>(0 - 0)       | 0<br>(0 - 0)        | 0<br>(0 - 0)         | 0<br>(0 - 0)         | 0<br>(0 - 0)         |
| G6PD deficiency                                     | 0<br>(0 - 0)       | 0<br>(0 - 0)       | 0<br>(0 - 0)        | 0<br>(0 - 0)         | 0<br>(0 - 0)         | 0<br>(0 - 0)         |
| Other hemoglobinopathies and hemolytic anemias      | 6<br>(3 - 12)      | 2<br>(1 - 3)       | 0<br>(0 - 0)        | 2<br>(1 - 4)         | 1<br>(1 - 3)         | 1<br>(0 - 2)         |
| Endocrine, metabolic, blood, and immune disorders   | 18<br>(12 - 26)    | 5<br>(3 - 10)      | 3<br>(2 - 5)        | 7<br>(4 - 9)         | 3<br>(2 - 4)         | 1<br>(1 - 1)         |
| Musculoskeletal disorders                           | 10<br>(7 - 14)     | --                 | 2<br>(1 - 3)        | 6<br>(4 - 8)         | 2<br>(1 - 3)         | 1<br>(0 - 2)         |
| Rheumatoid arthritis                                | 3<br>(2 - 5)       | --                 | 0<br>(0 - 1)        | 2<br>(1 - 2)         | 1<br>(1 - 2)         | 1<br>(0 - 1)         |
| Other musculoskeletal disorders                     | 7<br>(5 - 9)       | --                 | 1<br>(1 - 2)        | 4<br>(3 - 6)         | 1<br>(1 - 2)         | 0<br>(0 - 1)         |
| Other non-communicable diseases                     | 497<br>(314 - 722) | 449<br>(276 - 664) | 23<br>(14 - 36)     | 21<br>(14 - 29)      | 3<br>(2 - 4)         | 1<br>(1 - 1)         |
| Congenital anomalies                                | 488<br>(304 - 717) | 441<br>(268 - 660) | 23<br>(14 - 36)     | 21<br>(14 - 28)      | 3<br>(2 - 4)         | 1<br>(1 - 1)         |
| Neural tube defects                                 | 27<br>(11 - 51)    | 25<br>(10 - 49)    | 1<br>(0 - 2)        | 0<br>(0 - 1)         | 0<br>(0 - 0)         | 0<br>(0 - 0)         |
| Congenital heart anomalies                          | 316<br>(180 - 484) | 276<br>(149 - 434) | 20<br>(12 - 31)     | 18<br>(12 - 25)      | 2<br>(1 - 3)         | 0<br>(0 - 1)         |
| Cleft lip and cleft palate                          | 7<br>(2 - 17)      | 7<br>(2 - 17)      | --                  | --                   | --                   | --                   |
| Down syndrome                                       | 11<br>(5 - 21)     | 10<br>(4 - 20)     | 1<br>(0 - 1)        | 0<br>(0 - 1)         | 0<br>(0 - 0)         | 0<br>(0 - 0)         |
| Chromosomal unbalanced rearrangements               | 1<br>(1 - 3)       | 1<br>(0 - 2)       | 0<br>(0 - 0)        | 0<br>(0 - 1)         | 0<br>(0 - 0)         | 0<br>(0 - 0)         |
| Other congenital anomalies                          | 126<br>(60 - 211)  | 122<br>(57 - 207)  | 2<br>(1 - 3)        | 1<br>(1 - 2)         | 0<br>(0 - 1)         | 0<br>(0 - 0)         |
| Skin and subcutaneous diseases                      | 1<br>(1 - 1)       | 0<br>(0 - 0)       | 0<br>(0 - 0)        | 0<br>(0 - 0)         | 0<br>(0 - 0)         | 0<br>(0 - 0)         |
| Cellulitis                                          | 0<br>(0 - 0)       | 0<br>(0 - 0)       | 0<br>(0 - 0)        | 0<br>(0 - 0)         | 0<br>(0 - 0)         | 0<br>(0 - 0)         |
| Pyoderma                                            | 0<br>(0 - 0)       | 0<br>(0 - 0)       | 0<br>(0 - 0)        | 0<br>(0 - 0)         | 0<br>(0 - 0)         | 0<br>(0 - 0)         |
| Decubitus ulcer                                     | 0<br>(0 - 0)       | 0<br>(0 - 0)       | 0<br>(0 - 0)        | 0<br>(0 - 0)         | 0<br>(0 - 0)         | 0<br>(0 - 0)         |

Web Table 31- Tajikistan deaths with 95% UI by age, sex, and cause in 2013

| Cause                                           | Females, All Ages    | Females, 0-4 Years | Females, 5-14 Years | Females, 15-49 Years | Females, 50-69 Years | Females, 70-80 Years |
|-------------------------------------------------|----------------------|--------------------|---------------------|----------------------|----------------------|----------------------|
| Other skin and subcutaneous diseases            | 0<br>(0 - 0)         | 0<br>(0 - 0)       | 0<br>(0 - 0)        | 0<br>(0 - 0)         | 0<br>(0 - 0)         | 0<br>(0 - 0)         |
| Sudden infant death syndrome                    | 8<br>(1 - 36)        | 8<br>(1 - 36)      | --                  | --                   | --                   | --                   |
| Injuries                                        | 813<br>(658 - 1,038) | 208<br>(127 - 311) | 103<br>(80 - 136)   | 369<br>(288 - 458)   | 86<br>(66 - 119)     | 48<br>(38 - 69)      |
| Transport injuries                              | 107<br>(85 - 144)    | 7<br>(5 - 10)      | 17<br>(12 - 25)     | 54<br>(39 - 71)      | 21<br>(15 - 31)      | 9<br>(6 - 13)        |
| Road injuries                                   | 95<br>(74 - 133)     | 5<br>(3 - 8)       | 15<br>(11 - 23)     | 47<br>(34 - 64)      | 20<br>(14 - 30)      | 8<br>(6 - 13)        |
| Pedestrian road injuries                        | 23<br>(16 - 31)      | 2<br>(1 - 3)       | 5<br>(3 - 7)        | 9<br>(5 - 13)        | 4<br>(3 - 7)         | 3<br>(2 - 5)         |
| Cyclist road injuries                           | 5<br>(3 - 9)         | 0<br>(0 - 1)       | 1<br>(1 - 2)        | 2<br>(1 - 3)         | 2<br>(1 - 3)         | 0<br>(0 - 1)         |
| Motorcyclist road injuries                      | 3<br>(2 - 6)         | 0<br>(0 - 0)       | 0<br>(0 - 0)        | 2<br>(1 - 4)         | 0<br>(0 - 1)         | 0<br>(0 - 0)         |
| Motor vehicle road injuries                     | 61<br>(47 - 91)      | 3<br>(2 - 4)       | 9<br>(6 - 14)       | 33<br>(24 - 48)      | 13<br>(9 - 20)       | 4<br>(3 - 7)         |
| Other road injuries                             | 2<br>(1 - 3)         | 0<br>(0 - 0)       | 0<br>(0 - 1)        | 1<br>(0 - 2)         | 0<br>(0 - 1)         | 0<br>(0 - 1)         |
| Other transport injuries                        | 12<br>(6 - 16)       | 2<br>(1 - 3)       | 2<br>(1 - 3)        | 7<br>(3 - 10)        | 1<br>(1 - 2)         | 1<br>(0 - 1)         |
| Unintentional injuries                          | 558<br>(423 - 739)   | 198<br>(118 - 302) | 80<br>(59 - 114)    | 204<br>(155 - 261)   | 44<br>(33 - 59)      | 31<br>(24 - 42)      |
| Falls                                           | 73<br>(53 - 108)     | 20<br>(11 - 39)    | 6<br>(4 - 10)       | 28<br>(20 - 41)      | 9<br>(6 - 13)        | 9<br>(6 - 14)        |
| Drowning                                        | 212<br>(131 - 360)   | 90<br>(43 - 184)   | 48<br>(29 - 79)     | 61<br>(38 - 93)      | 9<br>(5 - 13)        | 4<br>(2 - 6)         |
| Fire, heat, and hot substances                  | 150<br>(95 - 233)    | 43<br>(19 - 83)    | 15<br>(9 - 25)      | 72<br>(47 - 107)     | 13<br>(8 - 19)       | 8<br>(5 - 11)        |
| Poisonings                                      | 42<br>(23 - 55)      | 10<br>(4 - 16)     | 4<br>(2 - 6)        | 20<br>(11 - 27)      | 6<br>(3 - 9)         | 3<br>(2 - 5)         |
| Exposure to mechanical forces                   | 27<br>(17 - 40)      | 10<br>(5 - 20)     | 4<br>(2 - 6)        | 12<br>(6 - 17)       | 1<br>(1 - 2)         | 0<br>(0 - 1)         |
| Unintentional firearm injuries                  | 4<br>(2 - 6)         | 1<br>(0 - 1)       | 0<br>(0 - 1)        | 2<br>(1 - 4)         | 0<br>(0 - 1)         | 0<br>(0 - 0)         |
| Unintentional suffocation                       | 13<br>(4 - 24)       | 5<br>(1 - 15)      | 1<br>(0 - 2)        | 6<br>(1 - 11)        | 0<br>(0 - 0)         | 0<br>(0 - 0)         |
| Other exposure to mechanical forces             | 11<br>(5 - 16)       | 4<br>(2 - 8)       | 3<br>(1 - 4)        | 3<br>(2 - 5)         | 1<br>(0 - 1)         | 0<br>(0 - 0)         |
| Adverse effects of medical treatment            | 19<br>(11 - 31)      | 6<br>(3 - 13)      | 1<br>(0 - 1)        | 4<br>(2 - 8)         | 4<br>(2 - 7)         | 4<br>(2 - 9)         |
| Animal contact                                  | 4<br>(1 - 6)         | 2<br>(0 - 3)       | 1<br>(0 - 1)        | 1<br>(0 - 1)         | 0<br>(0 - 1)         | 0<br>(0 - 0)         |
| Venomous animal contact                         | 2<br>(1 - 3)         | 1<br>(0 - 2)       | 0<br>(0 - 1)        | 0<br>(0 - 1)         | 0<br>(0 - 1)         | 0<br>(0 - 0)         |
| Non-venomous animal contact                     | 2<br>(0 - 3)         | 1<br>(0 - 1)       | 0<br>(0 - 1)        | 0<br>(0 - 1)         | 0<br>(0 - 0)         | 0<br>(0 - 0)         |
| Foreign body                                    | 20<br>(11 - 34)      | 15<br>(7 - 28)     | 1<br>(0 - 1)        | 2<br>(1 - 4)         | 1<br>(1 - 2)         | 1<br>(0 - 2)         |
| Pulmonary aspiration and foreign body in airway | 19<br>(10 - 33)      | 15<br>(7 - 28)     | 1<br>(0 - 1)        | 2<br>(1 - 3)         | 1<br>(1 - 2)         | 1<br>(0 - 2)         |
| Foreign body in other body part                 | 1<br>(0 - 1)         | 0<br>(0 - 0)       | 0<br>(0 - 0)        | 0<br>(0 - 0)         | 0<br>(0 - 0)         | 0<br>(0 - 0)         |
| Other unintentional injuries                    | 11<br>(8 - 14)       | 3<br>(2 - 6)       | 2<br>(1 - 3)        | 4<br>(3 - 6)         | 1<br>(1 - 2)         | 1<br>(0 - 1)         |
| Self-harm and interpersonal violence            | 149<br>(109 - 237)   | 2<br>(1 - 5)       | 5<br>(4 - 9)        | 111<br>(80 - 176)    | 21<br>(14 - 40)      | 9<br>(6 - 19)        |
| Self-harm                                       | 99<br>(72 - 160)     | --                 | 3<br>(2 - 5)        | 76<br>(54 - 120)     | 14<br>(10 - 28)      | 6<br>(4 - 12)        |
| Interpersonal violence                          | 50<br>(33 - 93)      | 2<br>(1 - 5)       | 3<br>(1 - 5)        | 35<br>(22 - 64)      | 7<br>(3 - 17)        | 3<br>(1 - 8)         |
| Assault by firearm                              | 6<br>(3 - 11)        | 0<br>(0 - 1)       | 0<br>(0 - 1)        | 4<br>(1 - 7)         | 1<br>(0 - 3)         | 0<br>(0 - 1)         |
| Assault by sharp object                         | 18<br>(10 - 38)      | 1<br>(0 - 1)       | 0<br>(0 - 1)        | 15<br>(8 - 30)       | 2<br>(1 - 5)         | 1<br>(0 - 2)         |
| Assault by other means                          | 25<br>(15 - 51)      | 2<br>(1 - 3)       | 2<br>(1 - 4)        | 16<br>(9 - 32)       | 4<br>(2 - 10)        | 2<br>(1 - 5)         |

Web Table 31- Tanzania deaths with 95% UI by age, sex, and cause in 2013

| Cause                                                             | Both Sexes, All Ages           | Both Sexes, 0-4 Years          | Both Sexes, 5-14 Years      | Both Sexes, 15-49 Years        | Both Sexes, 50-69 Years     | Both Sexes, 70-80 Years     |
|-------------------------------------------------------------------|--------------------------------|--------------------------------|-----------------------------|--------------------------------|-----------------------------|-----------------------------|
| All causes                                                        | 406,709<br>(373,265 - 440,848) | 145,246<br>(121,108 - 171,818) | 15,589<br>(13,467 - 18,229) | 114,156<br>(103,730 - 124,456) | 62,062<br>(54,979 - 70,282) | 69,655<br>(63,203 - 76,954) |
| Communicable, maternal, neonatal, and nutritional diseases        | 273,859<br>(246,032 - 303,370) | 123,806<br>(102,775 - 147,784) | 11,998<br>(10,174 - 14,059) | 83,398<br>(75,802 - 91,471)    | 29,669<br>(25,409 - 34,034) | 24,988<br>(21,605 - 28,665) |
| HIV/AIDS and tuberculosis                                         | 89,083<br>(80,468 - 99,045)    | 3,793<br>(2,813 - 5,300)       | 4,653<br>(3,691 - 5,695)    | 57,287<br>(51,671 - 64,860)    | 18,231<br>(14,408 - 22,975) | 5,119<br>(3,907 - 6,263)    |
| Tuberculosis                                                      | 20,041<br>(14,575 - 24,332)    | 1,804<br>(1,140 - 2,757)       | 267<br>(164 - 397)          | 9,761<br>(6,928 - 12,450)      | 4,549<br>(3,285 - 5,781)    | 3,661<br>(2,549 - 4,571)    |
| HIV/AIDS                                                          | 69,041<br>(61,368 - 78,390)    | 1,989<br>(1,324 - 3,322)       | 4,386<br>(3,428 - 5,422)    | 47,526<br>(42,034 - 55,501)    | 13,682<br>(9,693 - 19,166)  | 1,458<br>(959 - 2,112)      |
| HIV/AIDS resulting in mycobacterial infection                     | 4,360<br>(3,465 - 5,423)       | 117<br>(73 - 203)              | 239<br>(174 - 325)          | 2,988<br>(2,371 - 3,771)       | 914<br>(613 - 1,332)        | 101<br>(63 - 161)           |
| HIV/AIDS resulting in other diseases                              | 64,682<br>(57,452 - 73,597)    | 1,872<br>(1,243 - 3,112)       | 4,147<br>(3,239 - 5,138)    | 44,538<br>(39,270 - 52,148)    | 12,768<br>(9,007 - 17,759)  | 1,356<br>(891 - 1,960)      |
| Diarrhea, lower respiratory, and other common infectious diseases | 83,410<br>(69,020 - 100,662)   | 44,124<br>(30,986 - 60,296)    | 3,513<br>(2,515 - 5,047)    | 10,708<br>(8,244 - 13,333)     | 8,634<br>(6,625 - 10,995)   | 16,431<br>(13,631 - 19,654) |
| Diarrheal diseases                                                | 25,809<br>(20,250 - 33,134)    | 9,951<br>(5,386 - 16,203)      | 1,140<br>(670 - 1,855)      | 4,914<br>(3,572 - 6,528)       | 3,641<br>(2,482 - 5,189)    | 6,162<br>(4,462 - 8,408)    |
| Intestinal infectious diseases                                    | 2,397<br>(1,231 - 4,151)       | 1,174<br>(546 - 2,153)         | 548<br>(269 - 1,005)        | 573<br>(276 - 1,053)           | 70<br>(36 - 128)            | 32<br>(17 - 54)             |
| Typhoid fever                                                     | 1,740<br>(834 - 3,205)         | 801<br>(336 - 1,571)           | 425<br>(196 - 775)          | 442<br>(202 - 844)             | 51<br>(23 - 99)             | 21<br>(11 - 40)             |
| Paratyphoid fever                                                 | 441<br>(203 - 821)             | 222<br>(86 - 448)              | 107<br>(47 - 217)           | 97<br>(42 - 192)               | 10<br>(5 - 22)              | 5<br>(2 - 9)                |
| Other intestinal infectious diseases                              | 216<br>(146 - 306)             | 152<br>(88 - 233)              | 16<br>(8 - 27)              | 33<br>(19 - 52)                | 9<br>(3 - 17)               | 6<br>(2 - 14)               |
| Lower respiratory infections                                      | 43,667<br>(34,028 - 54,401)    | 25,290<br>(16,609 - 35,221)    | 1,042<br>(663 - 1,526)      | 3,285<br>(2,466 - 4,259)       | 4,244<br>(3,202 - 5,548)    | 9,806<br>(7,617 - 12,337)   |
| Upper respiratory infections                                      | 57<br>(27 - 111)               | 28<br>(4 - 80)                 | 2<br>(0 - 6)                | 15<br>(5 - 33)                 | 6<br>(1 - 15)               | 6<br>(1 - 16)               |
| Otitis media                                                      | 31<br>(23 - 40)                | 13<br>(7 - 22)                 | 1<br>(1 - 1)                | 4<br>(3 - 5)                   | 4<br>(3 - 5)                | 9<br>(7 - 12)               |
| Meningitis                                                        | 6,458<br>(4,699 - 8,606)       | 3,593<br>(2,160 - 5,490)       | 452<br>(279 - 707)          | 1,500<br>(1,038 - 2,076)       | 552<br>(379 - 765)          | 361<br>(252 - 496)          |
| Pneumococcal meningitis                                           | 1,536<br>(1,111 - 2,039)       | 678<br>(361 - 1,094)           | 130<br>(65 - 222)           | 480<br>(299 - 702)             | 148<br>(88 - 234)           | 101<br>(63 - 157)           |
| H influenzae type B meningitis                                    | 1,488<br>(954 - 2,233)         | 1,117<br>(610 - 1,831)         | 110<br>(59 - 188)           | 175<br>(90 - 289)              | 53<br>(25 - 90)             | 33<br>(17 - 56)             |
| Meningococcal meningitis                                          | 912<br>(602 - 1,247)           | 399<br>(197 - 683)             | 53<br>(27 - 92)             | 248<br>(143 - 412)             | 129<br>(77 - 199)           | 83<br>(45 - 140)            |
| Other meningitis                                                  | 2,522<br>(1,764 - 3,500)       | 1,400<br>(769 - 2,249)         | 159<br>(83 - 272)           | 597<br>(382 - 864)             | 223<br>(132 - 331)          | 143<br>(94 - 215)           |
| Encephalitis                                                      | 289<br>(207 - 406)             | 159<br>(101 - 254)             | 16<br>(9 - 25)              | 62<br>(38 - 92)                | 30<br>(20 - 45)             | 23<br>(16 - 32)             |
| Diphtheria                                                        | 33<br>(2 - 161)                | 28<br>(0 - 152)                | 3<br>(0 - 19)               | 2<br>(0 - 5)                   | 0<br>(0 - 1)                | --                          |
| Whooping cough                                                    | 384<br>(1 - 2,075)             | 371<br>(1 - 2,003)             | 11<br>(0 - 56)              | 2<br>(0 - 10)                  | 0<br>(0 - 1)                | --                          |
| Tetanus                                                           | 890<br>(591 - 1,253)           | 446<br>(227 - 750)             | 35<br>(19 - 61)             | 305<br>(193 - 447)             | 82<br>(50 - 123)            | 21<br>(13 - 32)             |
| Measles                                                           | 3,345<br>(82 - 18,920)         | 3,045<br>(75 - 17,252)         | 260<br>(5 - 1,554)          | 39<br>(1 - 215)                | 1<br>(0 - 5)                | --                          |
| Varicella and herpes zoster                                       | 51<br>(20 - 112)               | 26<br>(3 - 84)                 | 3<br>(0 - 12)               | 8<br>(2 - 19)                  | 3<br>(1 - 8)                | 10<br>(1 - 33)              |
| Neglected tropical diseases and malaria                           | 34,583<br>(21,845 - 53,416)    | 24,406<br>(13,355 - 41,981)    | 2,750<br>(1,551 - 4,455)    | 5,526<br>(3,300 - 9,310)       | 1,210<br>(691 - 2,344)      | 691<br>(350 - 1,639)        |
| Malaria                                                           | 29,737<br>(17,572 - 48,950)    | 22,604<br>(11,569 - 40,058)    | 1,922<br>(927 - 3,565)      | 3,731<br>(2,002 - 8,041)       | 930<br>(434 - 2,102)        | 549<br>(212 - 1,507)        |
| Leishmaniasis                                                     | 4,089<br>(2,138 - 6,281)       | 1,549<br>(590 - 3,139)         | 737<br>(273 - 1,276)        | 1,546<br>(746 - 2,567)         | 189<br>(73 - 339)           | 69<br>(38 - 118)            |
| Visceral leishmaniasis                                            | 4,089<br>(2,138 - 6,281)       | 1,549<br>(590 - 3,139)         | 737<br>(273 - 1,276)        | 1,546<br>(746 - 2,567)         | 189<br>(73 - 339)           | 69<br>(38 - 118)            |
| African trypanosomiasis                                           | 8<br>(4 - 15)                  | 1<br>(0 - 1)                   | 1<br>(0 - 2)                | 5<br>(2 - 9)                   | 1<br>(0 - 2)                | 0<br>(0 - 0)                |
| Schistosomiasis                                                   | 157<br>(118 - 207)             | 4<br>(2 - 7)                   | 5<br>(2 - 8)                | 80<br>(53 - 114)               | 43<br>(27 - 62)             | 26<br>(16 - 39)             |
| Cysticercosis                                                     | 10<br>(2 - 31)                 | 1<br>(0 - 2)                   | 1<br>(0 - 1)                | 7<br>(2 - 22)                  | 1<br>(0 - 4)                | 0<br>(0 - 1)                |
| Cystic echinococcosis                                             | 22<br>(18 - 27)                | 4<br>(2 - 6)                   | 3<br>(2 - 4)                | 12<br>(9 - 15)                 | 2<br>(2 - 3)                | 1<br>(1 - 1)                |
| Dengue                                                            | 11<br>(8 - 15)                 | 4<br>(2 - 6)                   | 2<br>(1 - 3)                | 4<br>(3 - 5)                   | 1<br>(0 - 2)                | 0<br>(0 - 1)                |
| Yellow fever                                                      | 0<br>(0 - 1)                   | 0<br>(0 - 0)                   | 0<br>(0 - 0)                | 0<br>(0 - 1)                   | 0<br>(0 - 0)                | 0<br>(0 - 0)                |
| Rabies                                                            | 258<br>(165 - 391)             | 66<br>(27 - 137)               | 63<br>(33 - 109)            | 107<br>(75 - 153)              | 17<br>(11 - 25)             | 5<br>(2 - 9)                |
| Intestinal nematode infections                                    | 144<br>(80 - 224)              | 120<br>(60 - 200)              | 13<br>(5 - 25)              | 8<br>(2 - 18)                  | 2<br>(0 - 7)                | 2<br>(0 - 8)                |
| Ascariasis                                                        | 144<br>(80 - 224)              | 120<br>(60 - 200)              | 13<br>(5 - 25)              | 8<br>(2 - 18)                  | 2<br>(0 - 7)                | 2<br>(0 - 8)                |

Web Table 31- Tanzania deaths with 95% UI by age, sex, and cause in 2013

| Cause                                                            | Both Sexes, All Ages          | Both Sexes, 0-4 Years       | Both Sexes, 5-14 Years   | Both Sexes, 15-49 Years     | Both Sexes, 50-69 Years     | Both Sexes, 70-80 Years     |
|------------------------------------------------------------------|-------------------------------|-----------------------------|--------------------------|-----------------------------|-----------------------------|-----------------------------|
| Other neglected tropical diseases                                | 145<br>(108 - 190)            | 54<br>(32 - 88)             | 4<br>(2 - 6)             | 25<br>(18 - 37)             | 24<br>(15 - 35)             | 38<br>(24 - 56)             |
| Maternal disorders                                               | 7,745<br>(5,298 - 10,908)     | --                          | 22<br>(7 - 51)           | 7,723<br>(5,278 - 10,883)   | --                          | --                          |
| Maternal hemorrhage                                              | 995<br>(638 - 1,448)          | --                          | 2<br>(1 - 4)             | 993<br>(636 - 1,447)        | --                          | --                          |
| Maternal sepsis and other maternal infections                    | 598<br>(320 - 989)            | --                          | 2<br>(1 - 6)             | 596<br>(318 - 988)          | --                          | --                          |
| Maternal hypertensive disorders                                  | 743<br>(420 - 1,174)          | --                          | 3<br>(1 - 7)             | 740<br>(418 - 1,168)        | --                          | --                          |
| Maternal obstructed labor                                        | 414<br>(251 - 632)            | --                          | 1<br>(0 - 3)             | 413<br>(250 - 631)          | --                          | --                          |
| Maternal abortive outcome                                        | 1,697<br>(1,078 - 2,568)      | --                          | 5<br>(1 - 11)            | 1,692<br>(1,073 - 2,561)    | --                          | --                          |
| Indirect maternal deaths                                         | 474<br>(237 - 792)            | --                          | 1<br>(0 - 3)             | 473<br>(237 - 789)          | --                          | --                          |
| Late maternal deaths                                             | 677<br>(386 - 1,094)          | --                          | 3<br>(1 - 9)             | 674<br>(384 - 1,091)        | --                          | --                          |
| Maternal deaths aggravated by HIV/AIDS                           | 141<br>(77 - 225)             | --                          | --                       | 141<br>(77 - 225)           | --                          | --                          |
| Other maternal disorders                                         | 1,990<br>(1,281 - 2,871)      | --                          | 5<br>(2 - 13)            | 1,984<br>(1,277 - 2,866)    | --                          | --                          |
| Neonatal disorders                                               | 31,707<br>(25,799 - 38,500)   | 31,707<br>(25,799 - 38,500) | --                       | --                          | --                          | --                          |
| Neonatal preterm birth complications                             | 8,086<br>(4,532 - 12,565)     | 8,086<br>(4,532 - 12,565)   | --                       | --                          | --                          | --                          |
| Neonatal encephalopathy due to birth asphyxia and trauma         | 8,948<br>(5,552 - 12,853)     | 8,948<br>(5,552 - 12,853)   | --                       | --                          | --                          | --                          |
| Neonatal sepsis and other neonatal infections                    | 8,409<br>(4,508 - 13,231)     | 8,409<br>(4,508 - 13,231)   | --                       | --                          | --                          | --                          |
| Hemolytic disease and other neonatal jaundice                    | 178<br>(76 - 374)             | 178<br>(76 - 374)           | --                       | --                          | --                          | --                          |
| Other neonatal disorders                                         | 6,085<br>(3,383 - 9,685)      | 6,085<br>(3,383 - 9,685)    | --                       | --                          | --                          | --                          |
| Nutritional deficiencies                                         | 14,731<br>(10,496 - 20,649)   | 9,000<br>(5,184 - 13,800)   | 458<br>(281 - 667)       | 1,630<br>(1,181 - 2,113)    | 1,264<br>(895 - 1,731)      | 2,380<br>(1,724 - 3,145)    |
| Protein-energy malnutrition                                      | 11,329<br>(7,452 - 16,190)    | 7,967<br>(4,579 - 12,471)   | 376<br>(228 - 553)       | 676<br>(385 - 1,051)        | 830<br>(504 - 1,196)        | 1,480<br>(895 - 2,091)      |
| Iodine deficiency                                                | 36<br>(6 - 132)               | 19<br>(0 - 105)             | 2<br>(0 - 9)             | 8<br>(0 - 29)               | 4<br>(0 - 18)               | 5<br>(0 - 24)               |
| Iron-deficiency anemia                                           | 3,249<br>(1,869 - 4,980)      | 1,000<br>(339 - 2,107)      | 79<br>(27 - 153)         | 928<br>(575 - 1,311)        | 413<br>(206 - 681)          | 829<br>(455 - 1,370)        |
| Other nutritional deficiencies                                   | 117<br>(60 - 209)             | 15<br>(4 - 40)              | 1<br>(1 - 3)             | 18<br>(8 - 33)              | 17<br>(9 - 31)              | 66<br>(27 - 141)            |
| Other communicable, maternal, neonatal, and nutritional diseases | 12,600<br>(3,825 - 22,506)    | 10,776<br>(2,571 - 20,080)  | 602<br>(148 - 1,159)     | 523<br>(385 - 692)          | 331<br>(207 - 548)          | 367<br>(205 - 632)          |
| Sexually transmitted diseases excluding HIV                      | 11,013<br>(2,269 - 20,606)    | 10,163<br>(1,862 - 19,250)  | 553<br>(102 - 1,107)     | 171<br>(108 - 259)          | 65<br>(32 - 133)            | 62<br>(30 - 129)            |
| Syphilis                                                         | 10,876<br>(2,136 - 20,502)    | 10,163<br>(1,862 - 19,250)  | 550<br>(99 - 1,105)      | 74<br>(47 - 111)            | 41<br>(21 - 101)            | 48<br>(24 - 101)            |
| Chlamydial infection                                             | 34<br>(20 - 56)               | --                          | 1<br>(0 - 1)             | 26<br>(14 - 42)             | 5<br>(2 - 14)               | 2<br>(1 - 6)                |
| Gonococcal infection                                             | 57<br>(39 - 85)               | --                          | 1<br>(1 - 2)             | 37<br>(24 - 56)             | 11<br>(6 - 23)              | 7<br>(4 - 15)               |
| Other sexually transmitted diseases                              | 46<br>(31 - 69)               | --                          | 1<br>(1 - 2)             | 34<br>(21 - 51)             | 8<br>(4 - 17)               | 3<br>(2 - 7)                |
| Hepatitis                                                        | 424<br>(328 - 593)            | 118<br>(63 - 209)           | 22<br>(14 - 33)          | 190<br>(137 - 276)          | 65<br>(47 - 89)             | 29<br>(20 - 39)             |
| Acute hepatitis A                                                | 70<br>(22 - 148)              | 44<br>(13 - 98)             | 9<br>(3 - 17)            | 17<br>(4 - 38)              | 1<br>(0 - 2)                | 0<br>(0 - 0)                |
| Acute hepatitis B                                                | 278<br>(198 - 387)            | 73<br>(31 - 141)            | 11<br>(5 - 20)           | 106<br>(65 - 157)           | 60<br>(42 - 83)             | 28<br>(19 - 38)             |
| Acute hepatitis C                                                | 4<br>(1 - 10)                 | --                          | 0<br>(0 - 1)             | 2<br>(0 - 6)                | 1<br>(0 - 2)                | 0<br>(0 - 1)                |
| Acute hepatitis E                                                | 72<br>(40 - 117)              | 1<br>(0 - 2)                | 2<br>(1 - 3)             | 65<br>(36 - 107)            | 4<br>(1 - 8)                | 1<br>(0 - 2)                |
| Other infectious diseases                                        | 1,162<br>(769 - 1,688)        | 495<br>(248 - 910)          | 28<br>(14 - 55)          | 162<br>(102 - 262)          | 201<br>(99 - 403)           | 277<br>(127 - 523)          |
| Non-communicable diseases                                        | 107,513<br>(94,698 - 122,395) | 15,576<br>(10,805 - 22,867) | 1,876<br>(1,387 - 2,457) | 19,145<br>(15,626 - 22,728) | 29,388<br>(24,233 - 36,086) | 41,528<br>(36,729 - 46,793) |
| Neoplasms                                                        | 19,033<br>(15,899 - 22,851)   | 1,180<br>(714 - 1,762)      | 414<br>(256 - 601)       | 4,526<br>(3,465 - 5,513)    | 7,286<br>(5,795 - 9,347)    | 5,626<br>(4,791 - 6,678)    |
| Esophageal cancer                                                | 1,366<br>(1,046 - 1,803)      | --                          | --                       | 171<br>(117 - 237)          | 728<br>(507 - 1,042)        | 468<br>(340 - 659)          |
| Stomach cancer                                                   | 1,105<br>(901 - 1,331)        | --                          | --                       | 179<br>(136 - 230)          | 493<br>(380 - 636)          | 434<br>(337 - 547)          |
| Liver cancer                                                     | 2,235<br>(1,334 - 3,163)      | --                          | 26<br>(11 - 44)          | 589<br>(329 - 857)          | 1,011<br>(567 - 1,557)      | 610<br>(359 - 989)          |
| Liver cancer due to hepatitis B                                  | 521<br>(262 - 840)            | --                          | 7<br>(3 - 14)            | 191<br>(94 - 296)           | 221<br>(91 - 404)           | 102<br>(44 - 191)           |

Web Table 31- Tanzania deaths with 95% UI by age, sex, and cause in 2013

| Cause                                | Both Sexes, All Ages        | Both Sexes, 0-4 Years  | Both Sexes, 5-14 Years | Both Sexes, 15-49 Years  | Both Sexes, 50-69 Years     | Both Sexes, 70-80 Years     |
|--------------------------------------|-----------------------------|------------------------|------------------------|--------------------------|-----------------------------|-----------------------------|
| Liver cancer due to hepatitis C      | 1,028<br>(521 - 1,662)      | --                     | 5<br>(1 - 11)          | 224<br>(98 - 379)        | 496<br>(232 - 838)          | 303<br>(145 - 542)          |
| Liver cancer due to alcohol use      | 270<br>(156 - 436)          | --                     | --                     | 40<br>(17 - 71)          | 121<br>(67 - 195)           | 109<br>(58 - 194)           |
| Liver cancer due to other causes     | 416<br>(232 - 761)          | --                     | 14<br>(6 - 26)         | 134<br>(77 - 215)        | 172<br>(82 - 335)           | 96<br>(46 - 212)            |
| Larynx cancer                        | 100<br>(71 - 132)           | --                     | --                     | 15<br>(10 - 23)          | 39<br>(27 - 55)             | 46<br>(31 - 64)             |
| Tracheal, bronchus and lung cancer   | 899<br>(724 - 1,081)        | --                     | --                     | 83<br>(61 - 126)         | 456<br>(346 - 573)          | 359<br>(291 - 438)          |
| Breast cancer                        | 1,559<br>(1,059 - 2,030)    | --                     | --                     | 731<br>(427 - 986)       | 551<br>(381 - 795)          | 276<br>(206 - 368)          |
| Cervical cancer                      | 2,258<br>(1,526 - 3,131)    | --                     | --                     | 502<br>(352 - 690)       | 1,314<br>(771 - 1,961)      | 442<br>(285 - 647)          |
| Uterine cancer                       | 114<br>(66 - 167)           | --                     | --                     | 13<br>(7 - 21)           | 61<br>(31 - 95)             | 40<br>(23 - 64)             |
| Prostate cancer                      | 801<br>(519 - 1,234)        | --                     | --                     | 15<br>(7 - 28)           | 214<br>(130 - 323)          | 573<br>(365 - 891)          |
| Colon and rectum cancer              | 1,737<br>(1,457 - 2,061)    | --                     | --                     | 479<br>(372 - 591)       | 639<br>(504 - 804)          | 620<br>(496 - 759)          |
| Lip and oral cavity cancer           | 255<br>(190 - 335)          | --                     | --                     | 69<br>(43 - 101)         | 103<br>(72 - 144)           | 84<br>(60 - 114)            |
| Nasopharynx cancer                   | 45<br>(33 - 62)             | --                     | 1<br>(0 - 3)           | 25<br>(17 - 36)          | 12<br>(8 - 18)              | 7<br>(4 - 10)               |
| Other pharynx cancer                 | 114<br>(85 - 145)           | --                     | --                     | 31<br>(19 - 46)          | 51<br>(35 - 72)             | 32<br>(22 - 44)             |
| Gallbladder and biliary tract cancer | 315<br>(233 - 400)          | --                     | --                     | 127<br>(84 - 169)        | 128<br>(86 - 182)           | 59<br>(44 - 82)             |
| Pancreatic cancer                    | 367<br>(303 - 437)          | --                     | --                     | 114<br>(88 - 144)        | 168<br>(131 - 215)          | 85<br>(67 - 108)            |
| Malignant skin melanoma              | 83<br>(62 - 111)            | --                     | --                     | 25<br>(15 - 37)          | 34<br>(24 - 47)             | 24<br>(18 - 33)             |
| Non-melanoma skin cancer             | 85<br>(56 - 135)            | --                     | --                     | 15<br>(8 - 26)           | 23<br>(14 - 38)             | 47<br>(27 - 87)             |
| Ovarian cancer                       | 191<br>(132 - 267)          | --                     | --                     | 69<br>(40 - 108)         | 86<br>(57 - 128)            | 37<br>(25 - 55)             |
| Testicular cancer                    | 56<br>(36 - 78)             | --                     | --                     | 32<br>(20 - 47)          | 20<br>(11 - 32)             | 4<br>(3 - 7)                |
| Kidney cancer                        | 385<br>(298 - 504)          | 85<br>(40 - 166)       | 13<br>(7 - 24)         | 57<br>(39 - 82)          | 118<br>(87 - 162)           | 113<br>(83 - 151)           |
| Bladder cancer                       | 214<br>(163 - 271)          | --                     | --                     | 30<br>(21 - 41)          | 56<br>(40 - 78)             | 128<br>(94 - 173)           |
| Brain and nervous system cancer      | 418<br>(302 - 535)          | 41<br>(14 - 86)        | 40<br>(23 - 62)        | 223<br>(156 - 295)       | 67<br>(46 - 95)             | 48<br>(34 - 66)             |
| Thyroid cancer                       | 41<br>(28 - 63)             | --                     | 0<br>(0 - 1)           | 4<br>(3 - 6)             | 21<br>(12 - 40)             | 15<br>(11 - 21)             |
| Mesothelioma                         | 41<br>(30 - 56)             | --                     | --                     | 6<br>(4 - 9)             | 19<br>(12 - 31)             | 16<br>(10 - 25)             |
| Hodgkin lymphoma                     | 190<br>(128 - 264)          | 20<br>(9 - 46)         | 14<br>(6 - 38)         | 58<br>(38 - 92)          | 43<br>(27 - 62)             | 54<br>(33 - 79)             |
| Non-Hodgkin lymphoma                 | 990<br>(725 - 1,277)        | 255<br>(128 - 438)     | 65<br>(36 - 112)       | 241<br>(158 - 332)       | 184<br>(129 - 243)          | 244<br>(171 - 321)          |
| Multiple myeloma                     | 180<br>(139 - 229)          | --                     | --                     | 47<br>(33 - 64)          | 48<br>(34 - 66)             | 85<br>(65 - 113)            |
| Leukemia                             | 383<br>(295 - 460)          | 60<br>(30 - 99)        | 38<br>(23 - 56)        | 144<br>(104 - 184)       | 58<br>(44 - 75)             | 83<br>(65 - 103)            |
| Other neoplasms                      | 2,502<br>(1,820 - 3,164)    | 718<br>(395 - 1,142)   | 217<br>(113 - 346)     | 433<br>(272 - 569)       | 540<br>(390 - 719)          | 594<br>(449 - 755)          |
| Cardiovascular diseases              | 43,198<br>(37,101 - 50,111) | 1,016<br>(639 - 1,570) | 229<br>(153 - 329)     | 5,161<br>(4,143 - 6,550) | 13,315<br>(10,821 - 16,250) | 23,478<br>(20,262 - 26,971) |
| Rheumatic heart disease              | 1,970<br>(1,479 - 2,889)    | 32<br>(12 - 75)        | 45<br>(27 - 71)        | 662<br>(463 - 1,019)     | 579<br>(398 - 878)          | 651<br>(441 - 1,013)        |
| Ischemic heart disease               | 11,301<br>(8,577 - 14,400)  | 6<br>(2 - 15)          | 16<br>(9 - 30)         | 1,050<br>(787 - 1,491)   | 4,104<br>(3,070 - 5,365)    | 6,125<br>(4,501 - 7,840)    |
| Cerebrovascular disease              | 11,166<br>(8,576 - 13,535)  | 90<br>(48 - 150)       | 21<br>(13 - 34)        | 982<br>(736 - 1,275)     | 3,245<br>(2,419 - 4,179)    | 6,827<br>(5,221 - 8,329)    |
| Ischemic stroke                      | 5,014<br>(2,399 - 7,038)    | 8<br>(2 - 19)          | 2<br>(1 - 5)           | 136<br>(58 - 207)        | 1,052<br>(423 - 1,675)      | 3,815<br>(1,874 - 5,360)    |
| Hemorrhagic stroke                   | 6,152<br>(4,535 - 8,435)    | 82<br>(44 - 139)       | 19<br>(12 - 30)        | 846<br>(647 - 1,123)     | 2,193<br>(1,602 - 2,999)    | 3,012<br>(1,940 - 4,443)    |
| Hypertensive heart disease           | 6,559<br>(4,185 - 10,490)   | 18<br>(7 - 37)         | 6<br>(3 - 10)          | 378<br>(259 - 532)       | 1,737<br>(1,051 - 2,842)    | 4,420<br>(2,738 - 7,448)    |
| Cardiomyopathy and myocarditis       | 3,204<br>(2,451 - 4,296)    | 457<br>(240 - 757)     | 67<br>(38 - 104)       | 693<br>(443 - 953)       | 860<br>(591 - 1,217)        | 1,128<br>(695 - 1,926)      |
| Atrial fibrillation and flutter      | 29<br>(10 - 51)             | --                     | --                     | 1<br>(1 - 2)             | 5<br>(2 - 9)                | 23<br>(6 - 42)              |
| Aortic aneurysm                      | 632<br>(398 - 950)          | --                     | --                     | 68<br>(33 - 111)         | 200<br>(118 - 304)          | 364<br>(228 - 558)          |
| Peripheral vascular disease          | 37<br>(22 - 69)             | --                     | --                     | 1<br>(0 - 2)             | 9<br>(5 - 17)               | 27<br>(16 - 52)             |



Web Table 31- Tanzania deaths with 95% UI by age, sex, and cause in 2013

| Cause                                               | Both Sexes, All Ages      | Both Sexes, 0-4 Years | Both Sexes, 5-14 Years | Both Sexes, 15-49 Years  | Both Sexes, 50-69 Years  | Both Sexes, 70-80 Years  |
|-----------------------------------------------------|---------------------------|-----------------------|------------------------|--------------------------|--------------------------|--------------------------|
| Endocarditis                                        | 865<br>(590 - 1,279)      | 63<br>(25 - 144)      | 11<br>(6 - 21)         | 142<br>(83 - 207)        | 248<br>(156 - 383)       | 401<br>(248 - 668)       |
| Other cardiovascular and circulatory diseases       | 7,436<br>(4,999 - 10,325) | 350<br>(148 - 714)    | 62<br>(33 - 108)       | 1,183<br>(732 - 1,789)   | 2,328<br>(1,504 - 3,426) | 3,512<br>(2,202 - 5,315) |
| Chronic respiratory diseases                        | 5,474<br>(4,568 - 6,491)  | 347<br>(200 - 546)    | 65<br>(45 - 92)        | 705<br>(555 - 860)       | 1,595<br>(1,242 - 2,035) | 2,762<br>(2,277 - 3,261) |
| Chronic obstructive pulmonary disease               | 3,217<br>(2,596 - 3,909)  | 74<br>(36 - 130)      | 27<br>(18 - 41)        | 247<br>(184 - 321)       | 980<br>(751 - 1,291)     | 1,888<br>(1,506 - 2,315) |
| Pneumoconiosis                                      | 300<br>(203 - 430)        | 8<br>(3 - 17)         | 3<br>(2 - 5)           | 75<br>(48 - 110)         | 102<br>(63 - 164)        | 111<br>(69 - 167)        |
| Silicosis                                           | 82<br>(48 - 128)          | 2<br>(1 - 5)          | 1<br>(0 - 1)           | 17<br>(8 - 29)           | 27<br>(15 - 46)          | 35<br>(19 - 58)          |
| Asbestosis                                          | 35<br>(22 - 57)           | 1<br>(0 - 3)          | 1<br>(0 - 1)           | 9<br>(5 - 16)            | 14<br>(8 - 25)           | 10<br>(5 - 17)           |
| Coal workers pneumoconiosis                         | 41<br>(22 - 68)           | 1<br>(0 - 2)          | 0<br>(0 - 1)           | 8<br>(5 - 13)            | 17<br>(8 - 31)           | 15<br>(7 - 26)           |
| Other pneumoconiosis                                | 142<br>(93 - 206)         | 4<br>(2 - 8)          | 1<br>(1 - 2)           | 41<br>(27 - 62)          | 44<br>(26 - 72)          | 52<br>(30 - 80)          |
| Asthma                                              | 886<br>(644 - 1,122)      | 63<br>(23 - 127)      | 14<br>(8 - 23)         | 159<br>(113 - 210)       | 284<br>(193 - 394)       | 366<br>(254 - 498)       |
| Interstitial lung disease and pulmonary sarcoidosis | 559<br>(170 - 977)        | 11<br>(2 - 35)        | 3<br>(1 - 7)           | 70<br>(25 - 145)         | 173<br>(50 - 319)        | 301<br>(78 - 581)        |
| Other chronic respiratory diseases                  | 512<br>(381 - 674)        | 192<br>(109 - 317)    | 17<br>(10 - 26)        | 153<br>(102 - 212)       | 55<br>(36 - 81)          | 96<br>(64 - 143)         |
| Cirrhosis                                           | 5,017<br>(4,219 - 5,972)  | 119<br>(54 - 221)     | 65<br>(44 - 90)        | 1,545<br>(1,223 - 1,919) | 1,986<br>(1,551 - 2,513) | 1,302<br>(1,044 - 1,627) |
| Cirrhosis due to hepatitis B                        | 1,248<br>(657 - 1,850)    | 5<br>(2 - 11)         | 10<br>(5 - 17)         | 389<br>(216 - 584)       | 513<br>(243 - 810)       | 331<br>(139 - 523)       |
| Cirrhosis due to hepatitis C                        | 1,144<br>(742 - 1,656)    | 8<br>(2 - 24)         | 7<br>(3 - 15)          | 290<br>(165 - 454)       | 486<br>(278 - 740)       | 353<br>(224 - 535)       |
| Cirrhosis due to alcohol use                        | 1,870<br>(1,449 - 2,374)  | --                    | --                     | 535<br>(373 - 725)       | 803<br>(582 - 1,091)     | 532<br>(386 - 741)       |
| Cirrhosis due to other causes                       | 754<br>(555 - 1,006)      | 106<br>(47 - 202)     | 47<br>(31 - 67)        | 331<br>(214 - 497)       | 185<br>(121 - 279)       | 85<br>(53 - 132)         |
| Digestive diseases                                  | 4,715<br>(3,762 - 5,699)  | 273<br>(127 - 460)    | 161<br>(111 - 230)     | 1,523<br>(1,171 - 1,920) | 1,163<br>(854 - 1,511)   | 1,596<br>(1,243 - 1,990) |
| Peptic ulcer disease                                | 1,171<br>(789 - 1,617)    | 21<br>(8 - 43)        | 15<br>(8 - 26)         | 321<br>(198 - 488)       | 319<br>(199 - 485)       | 495<br>(325 - 701)       |
| Gastritis and duodenitis                            | 188<br>(67 - 396)         | 15<br>(4 - 34)        | 9<br>(3 - 18)          | 54<br>(22 - 93)          | 39<br>(11 - 96)          | 70<br>(18 - 196)         |
| Appendicitis                                        | 334<br>(197 - 477)        | 23<br>(9 - 44)        | 23<br>(14 - 36)        | 133<br>(81 - 196)        | 69<br>(32 - 114)         | 87<br>(37 - 162)         |
| Paralytic ileus and intestinal obstruction          | 1,543<br>(1,025 - 2,120)  | 74<br>(30 - 141)      | 69<br>(44 - 102)       | 528<br>(353 - 754)       | 415<br>(247 - 591)       | 457<br>(277 - 684)       |
| Inguinal, femoral, and abdominal hernia             | 84<br>(52 - 122)          | 6<br>(2 - 17)         | 2<br>(1 - 3)           | 34<br>(20 - 54)          | 12<br>(6 - 20)           | 30<br>(16 - 49)          |
| Inflammatory bowel disease                          | 302<br>(195 - 426)        | 61<br>(25 - 114)      | 13<br>(8 - 21)         | 108<br>(69 - 161)        | 48<br>(24 - 78)          | 72<br>(37 - 124)         |
| Vascular intestinal disorders                       | 37<br>(20 - 72)           | 1<br>(0 - 4)          | 1<br>(0 - 2)           | 7<br>(3 - 12)            | 9<br>(4 - 20)            | 19<br>(9 - 44)           |
| Gallbladder and biliary diseases                    | 288<br>(182 - 394)        | 7<br>(3 - 13)         | 4<br>(2 - 6)           | 69<br>(45 - 98)          | 75<br>(43 - 120)         | 133<br>(74 - 207)        |
| Pancreatitis                                        | 230<br>(116 - 354)        | 4<br>(1 - 10)         | 3<br>(1 - 6)           | 112<br>(54 - 182)        | 56<br>(25 - 99)          | 55<br>(23 - 102)         |
| Other digestive diseases                            | 538<br>(392 - 704)        | 60<br>(23 - 113)      | 22<br>(13 - 34)        | 158<br>(100 - 221)       | 121<br>(77 - 174)        | 177<br>(113 - 260)       |
| Neurological disorders                              | 4,248<br>(3,577 - 5,188)  | 553<br>(299 - 1,083)  | 233<br>(142 - 394)     | 928<br>(650 - 1,384)     | 354<br>(277 - 451)       | 2,181<br>(1,811 - 2,625) |
| Alzheimer disease and other dementias               | 2,120<br>(1,764 - 2,598)  | --                    | --                     | 1<br>(0 - 2)             | 191<br>(144 - 246)       | 1,929<br>(1,587 - 2,378) |
| Parkinson disease                                   | 31<br>(19 - 50)           | --                    | --                     | 2<br>(1 - 3)             | 4<br>(2 - 8)             | 24<br>(13 - 43)          |
| Epilepsy                                            | 1,785<br>(1,303 - 2,593)  | 457<br>(220 - 949)    | 213<br>(124 - 370)     | 841<br>(570 - 1,290)     | 93<br>(63 - 141)         | 181<br>(119 - 272)       |
| Multiple sclerosis                                  | 12<br>(6 - 18)            | --                    | --                     | 7<br>(3 - 13)            | 3<br>(2 - 6)             | 2<br>(1 - 3)             |
| Other neurological disorders                        | 300<br>(224 - 379)        | 96<br>(56 - 170)      | 20<br>(13 - 28)        | 77<br>(55 - 103)         | 63<br>(43 - 83)          | 45<br>(32 - 57)          |
| Mental and substance use disorders                  | 1,853<br>(1,307 - 2,569)  | 122<br>(37 - 245)     | 0<br>(0 - 0)           | 1,336<br>(924 - 1,882)   | 309<br>(199 - 475)       | 86<br>(54 - 145)         |
| Schizophrenia                                       | 55<br>(29 - 92)           | --                    | --                     | 34<br>(15 - 61)          | 12<br>(6 - 22)           | 8<br>(4 - 14)            |
| Alcohol use disorders                               | 1,055<br>(611 - 1,566)    | --                    | --                     | 766<br>(431 - 1,184)     | 236<br>(139 - 371)       | 53<br>(31 - 93)          |
| Drug use disorders                                  | 742<br>(452 - 1,037)      | 122<br>(37 - 245)     | --                     | 533<br>(355 - 733)       | 60<br>(21 - 105)         | 26<br>(7 - 51)           |
| Opioid use disorders                                | 79<br>(48 - 111)          | 14<br>(4 - 29)        | --                     | 57<br>(38 - 79)          | 6<br>(2 - 10)            | 3<br>(1 - 5)             |
| Cocaine use disorders                               | 3<br>(2 - 5)              | 1<br>(0 - 1)          | --                     | 2<br>(2 - 4)             | 0<br>(0 - 0)             | 0<br>(0 - 0)             |

Web Table 31- Tanzania deaths with 95% UI by age, sex, and cause in 2013

| Cause                                               | Both Sexes, All Ages        | Both Sexes, 0-4 Years     | Both Sexes, 5-14 Years | Both Sexes, 15-49 Years  | Both Sexes, 50-69 Years  | Both Sexes, 70-80 Years  |
|-----------------------------------------------------|-----------------------------|---------------------------|------------------------|--------------------------|--------------------------|--------------------------|
| Amphetamine use disorders                           | 2<br>(1 - 3)                | 0<br>(0 - 1)              | --                     | 2<br>(1 - 2)             | 0<br>(0 - 0)             | 0<br>(0 - 0)             |
| Other drug use disorders                            | 657<br>(400 - 918)          | 108<br>(32 - 218)         | --                     | 472<br>(314 - 649)       | 54<br>(19 - 94)          | 23<br>(7 - 45)           |
| Eating disorders                                    | 2<br>(1 - 4)                | --                        | 0<br>(0 - 0)           | 2<br>(1 - 4)             | --                       | --                       |
| Anorexia nervosa                                    | 2<br>(1 - 4)                | --                        | 0<br>(0 - 0)           | 2<br>(1 - 4)             | --                       | --                       |
| Diabetes, urogenital, blood, and endocrine diseases | 12,038<br>(10,245 - 13,969) | 1,990<br>(1,234 - 2,972)  | 379<br>(253 - 534)     | 2,684<br>(2,145 - 3,284) | 3,034<br>(2,441 - 3,809) | 3,953<br>(3,328 - 4,675) |
| Diabetes mellitus                                   | 4,685<br>(3,889 - 5,577)    | 55<br>(33 - 89)           | 18<br>(12 - 27)        | 580<br>(452 - 706)       | 1,711<br>(1,329 - 2,158) | 2,320<br>(1,905 - 2,833) |
| Acute glomerulonephritis                            | 199<br>(158 - 259)          | 25<br>(13 - 44)           | 6<br>(3 - 9)           | 57<br>(37 - 87)          | 61<br>(44 - 85)          | 50<br>(35 - 68)          |
| Chronic kidney disease                              | 1,902<br>(1,564 - 2,386)    | 239<br>(134 - 383)        | 68<br>(46 - 105)       | 614<br>(467 - 816)       | 392<br>(298 - 512)       | 589<br>(465 - 750)       |
| Chronic kidney disease due to diabetes mellitus     | 12<br>(6 - 23)              | 1<br>(0 - 1)              | 1<br>(0 - 1)           | 3<br>(1 - 5)             | 4<br>(2 - 8)             | 4<br>(1 - 8)             |
| Chronic kidney disease due to hypertension          | 739<br>(536 - 987)          | 33<br>(13 - 63)           | 8<br>(5 - 14)          | 164<br>(109 - 236)       | 205<br>(133 - 298)       | 330<br>(223 - 464)       |
| Chronic kidney disease due to glomerulonephritis    | 630<br>(464 - 862)          | 135<br>(76 - 210)         | 37<br>(25 - 54)        | 251<br>(174 - 358)       | 94<br>(54 - 138)         | 113<br>(60 - 177)        |
| Chronic kidney disease due to other causes          | 520<br>(338 - 775)          | 70<br>(31 - 138)          | 22<br>(11 - 42)        | 195<br>(118 - 307)       | 91<br>(48 - 149)         | 142<br>(66 - 229)        |
| Urinary diseases and male infertility               | 1,747<br>(1,393 - 2,130)    | 191<br>(98 - 341)         | 35<br>(22 - 56)        | 504<br>(376 - 674)       | 491<br>(359 - 652)       | 527<br>(389 - 689)       |
| Interstitial nephritis and urinary tract infections | 1,268<br>(960 - 1,612)      | 132<br>(65 - 249)         | 20<br>(12 - 34)        | 331<br>(222 - 452)       | 371<br>(258 - 510)       | 415<br>(284 - 568)       |
| Urolithiasis                                        | 60<br>(35 - 104)            | --                        | 3<br>(1 - 6)           | 25<br>(13 - 45)          | 19<br>(10 - 38)          | 13<br>(6 - 28)           |
| Other urinary diseases                              | 419<br>(280 - 624)          | 59<br>(25 - 117)          | 11<br>(6 - 19)         | 149<br>(98 - 232)        | 100<br>(51 - 177)        | 100<br>(45 - 182)        |
| Gynecological diseases                              | 25<br>(15 - 46)             | --                        | --                     | 10<br>(6 - 22)           | 8<br>(4 - 14)            | 7<br>(4 - 13)            |
| Uterine fibroids                                    | 6<br>(3 - 10)               | --                        | --                     | 1<br>(1 - 3)             | 2<br>(1 - 4)             | 2<br>(1 - 4)             |
| Polycystic ovarian syndrome                         | 1<br>(0 - 2)                | --                        | --                     | 1<br>(0 - 2)             | 0<br>(0 - 0)             | --                       |
| Endometriosis                                       | 2<br>(1 - 4)                | --                        | --                     | 2<br>(1 - 4)             | 0<br>(0 - 0)             | --                       |
| Genital prolapse                                    | 5<br>(3 - 8)                | --                        | --                     | 1<br>(1 - 3)             | 1<br>(1 - 3)             | 2<br>(1 - 3)             |
| Other gynecological diseases                        | 12<br>(7 - 22)              | --                        | --                     | 5<br>(3 - 11)            | 4<br>(2 - 8)             | 3<br>(2 - 6)             |
| Hemoglobinopathies and hemolytic anemias            | 1,942<br>(1,074 - 2,939)    | 1,028<br>(432 - 1,775)    | 208<br>(106 - 333)     | 506<br>(256 - 774)       | 115<br>(52 - 266)        | 86<br>(44 - 203)         |
| Thalassemias                                        | 29<br>(14 - 47)             | 23<br>(10 - 39)           | 2<br>(1 - 4)           | 4<br>(2 - 7)             | 0<br>(0 - 0)             | 0<br>(0 - 0)             |
| Sickle cell disorders                               | 1,730<br>(928 - 2,641)      | 942<br>(392 - 1,631)      | 200<br>(102 - 320)     | 482<br>(244 - 739)       | 99<br>(44 - 227)         | 8<br>(4 - 18)            |
| G6PD deficiency                                     | 23<br>(13 - 34)             | 12<br>(5 - 20)            | 2<br>(1 - 3)           | 6<br>(3 - 8)             | 1<br>(1 - 3)             | 2<br>(1 - 5)             |
| Other hemoglobinopathies and hemolytic anemias      | 160<br>(90 - 285)           | 51<br>(26 - 81)           | 4<br>(2 - 6)           | 14<br>(7 - 23)           | 15<br>(7 - 35)           | 76<br>(39 - 182)         |
| Endocrine, metabolic, blood, and immune disorders   | 1,538<br>(1,053 - 2,003)    | 453<br>(252 - 699)        | 44<br>(22 - 72)        | 412<br>(251 - 601)       | 256<br>(169 - 373)       | 374<br>(249 - 507)       |
| Musculoskeletal disorders                           | 417<br>(303 - 559)          | --                        | 34<br>(19 - 48)        | 211<br>(121 - 307)       | 90<br>(59 - 147)         | 82<br>(54 - 144)         |
| Rheumatoid arthritis                                | 110<br>(69 - 177)           | --                        | 7<br>(3 - 11)          | 30<br>(15 - 44)          | 35<br>(19 - 64)          | 39<br>(20 - 81)          |
| Other musculoskeletal disorders                     | 307<br>(209 - 419)          | --                        | 27<br>(15 - 38)        | 181<br>(100 - 268)       | 55<br>(34 - 89)          | 44<br>(26 - 78)          |
| Other non-communicable diseases                     | 11,520<br>(7,881 - 18,119)  | 9,975<br>(6,460 - 16,482) | 298<br>(193 - 445)     | 528<br>(388 - 729)       | 255<br>(187 - 338)       | 464<br>(337 - 640)       |
| Congenital anomalies                                | 10,086<br>(6,574 - 16,678)  | 9,411<br>(5,967 - 15,962) | 278<br>(174 - 423)     | 290<br>(203 - 439)       | 48<br>(35 - 67)          | 58<br>(45 - 77)          |
| Neural tube defects                                 | 2,806<br>(647 - 6,256)      | 2,694<br>(620 - 6,062)    | 49<br>(9 - 113)        | 55<br>(10 - 141)         | 4<br>(1 - 11)            | 3<br>(1 - 8)             |
| Congenital heart anomalies                          | 4,437<br>(2,111 - 8,819)    | 4,088<br>(1,844 - 8,455)  | 153<br>(86 - 262)      | 149<br>(94 - 237)        | 21<br>(14 - 30)          | 26<br>(18 - 37)          |
| Cleft lip and cleft palate                          | 58<br>(11 - 147)            | 58<br>(11 - 147)          | --                     | --                       | --                       | --                       |
| Down syndrome                                       | 567<br>(160 - 1,261)        | 504<br>(124 - 1,176)      | 24<br>(9 - 49)         | 32<br>(14 - 59)          | 6<br>(3 - 9)             | 1<br>(1 - 2)             |
| Chromosomal unbalanced rearrangements               | 299<br>(93 - 668)           | 283<br>(86 - 645)         | 6<br>(2 - 12)          | 8<br>(3 - 17)            | 1<br>(1 - 2)             | 1<br>(1 - 2)             |
| Other congenital anomalies                          | 1,919<br>(841 - 4,417)      | 1,785<br>(743 - 4,212)    | 46<br>(23 - 91)        | 45<br>(26 - 83)          | 16<br>(11 - 26)          | 26<br>(18 - 37)          |
| Skin and subcutaneous diseases                      | 1,288<br>(936 - 1,732)      | 418<br>(221 - 733)        | 20<br>(12 - 29)        | 237<br>(162 - 347)       | 207<br>(146 - 282)       | 406<br>(282 - 572)       |

Web Table 31- Tanzania deaths with 95% UI by age, sex, and cause in 2013

| Cause                                           | Both Sexes, All Ages        | Both Sexes, 0-4 Years    | Both Sexes, 5-14 Years   | Both Sexes, 15-49 Years    | Both Sexes, 50-69 Years  | Both Sexes, 70-80 Years  |
|-------------------------------------------------|-----------------------------|--------------------------|--------------------------|----------------------------|--------------------------|--------------------------|
| Cellulitis                                      | 524<br>(296 - 887)          | 172<br>(64 - 389)        | 9<br>(4 - 16)            | 106<br>(54 - 188)          | 91<br>(53 - 140)         | 145<br>(81 - 234)        |
| Pyoderma                                        | 590<br>(374 - 848)          | 228<br>(107 - 417)       | 8<br>(4 - 12)            | 103<br>(64 - 161)          | 89<br>(52 - 138)         | 162<br>(92 - 265)        |
| Decubitus ulcer                                 | 130<br>(77 - 198)           | 5<br>(2 - 12)            | 2<br>(1 - 3)             | 15<br>(8 - 23)             | 19<br>(10 - 31)          | 89<br>(45 - 144)         |
| Other skin and subcutaneous diseases            | 44<br>(23 - 72)             | 12<br>(3 - 31)           | 1<br>(1 - 3)             | 13<br>(6 - 22)             | 7<br>(4 - 12)            | 10<br>(5 - 18)           |
| Sudden infant death syndrome                    | 146<br>(50 - 353)           | 146<br>(50 - 353)        | --                       | --                         | --                       | --                       |
| Injuries                                        | 25,336<br>(21,208 - 30,204) | 5,865<br>(3,844 - 8,440) | 1,714<br>(1,238 - 2,282) | 11,613<br>(9,003 - 14,798) | 3,006<br>(2,375 - 3,710) | 3,138<br>(2,624 - 3,776) |
| Transport injuries                              | 6,771<br>(5,518 - 8,515)    | 1,214<br>(742 - 1,934)   | 538<br>(351 - 782)       | 3,465<br>(2,663 - 4,558)   | 896<br>(683 - 1,177)     | 658<br>(508 - 875)       |
| Road injuries                                   | 6,343<br>(5,179 - 7,993)    | 1,067<br>(640 - 1,705)   | 484<br>(315 - 702)       | 3,362<br>(2,566 - 4,419)   | 840<br>(641 - 1,099)     | 590<br>(457 - 789)       |
| Pedestrian road injuries                        | 3,354<br>(2,606 - 4,287)    | 637<br>(372 - 1,045)     | 301<br>(188 - 438)       | 1,559<br>(1,108 - 2,091)   | 493<br>(365 - 659)       | 364<br>(273 - 490)       |
| Cyclist road injuries                           | 343<br>(243 - 466)          | 38<br>(15 - 78)          | 35<br>(20 - 57)          | 146<br>(95 - 215)          | 76<br>(50 - 105)         | 48<br>(31 - 70)          |
| Motorcyclist road injuries                      | 428<br>(305 - 612)          | 38<br>(21 - 65)          | 10<br>(6 - 18)           | 310<br>(206 - 462)         | 37<br>(24 - 54)          | 33<br>(21 - 51)          |
| Motor vehicle road injuries                     | 2,134<br>(1,625 - 2,776)    | 313<br>(181 - 531)       | 127<br>(76 - 202)        | 1,339<br>(966 - 1,825)     | 220<br>(155 - 311)       | 135<br>(91 - 191)        |
| Other road injuries                             | 84<br>(47 - 136)            | 41<br>(18 - 81)          | 10<br>(5 - 20)           | 8<br>(5 - 13)              | 14<br>(7 - 24)           | 11<br>(5 - 17)           |
| Other transport injuries                        | 429<br>(319 - 601)          | 148<br>(80 - 255)        | 54<br>(32 - 87)          | 103<br>(71 - 165)          | 56<br>(39 - 84)          | 68<br>(47 - 96)          |
| Unintentional injuries                          | 11,933<br>(9,614 - 14,704)  | 4,272<br>(2,733 - 6,288) | 1,024<br>(715 - 1,411)   | 3,273<br>(2,458 - 4,417)   | 1,367<br>(1,083 - 1,727) | 1,997<br>(1,582 - 2,453) |
| Falls                                           | 2,268<br>(1,741 - 2,814)    | 304<br>(174 - 490)       | 138<br>(85 - 223)        | 591<br>(394 - 833)         | 417<br>(288 - 590)       | 818<br>(566 - 1,133)     |
| Drowning                                        | 2,712<br>(1,818 - 4,308)    | 1,098<br>(577 - 2,082)   | 398<br>(239 - 666)       | 943<br>(593 - 1,569)       | 161<br>(108 - 243)       | 113<br>(81 - 158)        |
| Fire, heat, and hot substances                  | 1,870<br>(1,222 - 2,707)    | 887<br>(455 - 1,588)     | 154<br>(90 - 263)        | 390<br>(259 - 589)         | 203<br>(135 - 295)       | 237<br>(151 - 341)       |
| Poisonings                                      | 459<br>(323 - 625)          | 145<br>(72 - 265)        | 19<br>(12 - 31)          | 200<br>(131 - 283)         | 66<br>(45 - 94)          | 30<br>(20 - 41)          |
| Exposure to mechanical forces                   | 1,345<br>(996 - 1,865)      | 569<br>(302 - 984)       | 110<br>(66 - 177)        | 425<br>(312 - 602)         | 150<br>(107 - 209)       | 91<br>(65 - 124)         |
| Unintentional firearm injuries                  | 277<br>(203 - 389)          | 44<br>(23 - 82)          | 11<br>(6 - 19)           | 185<br>(125 - 285)         | 21<br>(14 - 31)          | 16<br>(11 - 23)          |
| Unintentional suffocation                       | 266<br>(126 - 567)          | 211<br>(84 - 498)        | 17<br>(7 - 32)           | 19<br>(11 - 30)            | 15<br>(8 - 25)           | 5<br>(3 - 8)             |
| Other exposure to mechanical forces             | 801<br>(583 - 1,179)        | 313<br>(148 - 654)       | 83<br>(43 - 141)         | 222<br>(154 - 334)         | 114<br>(75 - 166)        | 70<br>(47 - 101)         |
| Adverse effects of medical treatment            | 1,499<br>(1,066 - 2,129)    | 564<br>(299 - 992)       | 38<br>(22 - 62)          | 227<br>(151 - 358)         | 213<br>(140 - 314)       | 457<br>(286 - 684)       |
| Animal contact                                  | 622<br>(426 - 1,169)        | 146<br>(69 - 292)        | 71<br>(38 - 134)         | 222<br>(138 - 459)         | 94<br>(59 - 168)         | 90<br>(57 - 155)         |
| Venomous animal contact                         | 380<br>(237 - 744)          | 101<br>(44 - 224)        | 33<br>(14 - 74)          | 136<br>(75 - 288)          | 49<br>(29 - 84)          | 62<br>(38 - 106)         |
| Non-venomous animal contact                     | 242<br>(159 - 442)          | 44<br>(19 - 95)          | 38<br>(21 - 74)          | 86<br>(53 - 173)           | 45<br>(26 - 87)          | 28<br>(16 - 52)          |
| Foreign body                                    | 628<br>(374 - 935)          | 418<br>(230 - 679)       | 26<br>(15 - 43)          | 41<br>(24 - 64)            | 21<br>(14 - 29)          | 122<br>(73 - 180)        |
| Pulmonary aspiration and foreign body in airway | 602<br>(355 - 906)          | 408<br>(222 - 668)       | 24<br>(13 - 40)          | 38<br>(22 - 60)            | 16<br>(9 - 23)           | 116<br>(68 - 175)        |
| Foreign body in other body part                 | 26<br>(18 - 39)             | 9<br>(5 - 16)            | 3<br>(2 - 4)             | 3<br>(2 - 5)               | 5<br>(3 - 8)             | 6<br>(4 - 9)             |
| Other unintentional injuries                    | 530<br>(405 - 697)          | 141<br>(79 - 242)        | 69<br>(44 - 104)         | 235<br>(169 - 320)         | 44<br>(31 - 59)          | 41<br>(31 - 54)          |
| Self-harm and interpersonal violence            | 6,632<br>(5,020 - 8,832)    | 379<br>(195 - 678)       | 152<br>(96 - 235)        | 4,875<br>(3,470 - 6,896)   | 743<br>(548 - 987)       | 483<br>(360 - 638)       |
| Self-harm                                       | 2,829<br>(2,089 - 3,790)    | --                       | 43<br>(19 - 83)          | 1,846<br>(1,228 - 2,649)   | 519<br>(364 - 715)       | 422<br>(301 - 573)       |
| Interpersonal violence                          | 3,803<br>(2,527 - 5,493)    | 379<br>(195 - 678)       | 109<br>(64 - 174)        | 3,029<br>(1,946 - 4,519)   | 224<br>(144 - 324)       | 62<br>(39 - 94)          |
| Assault by firearm                              | 1,332<br>(750 - 2,171)      | 101<br>(47 - 194)        | 28<br>(14 - 51)          | 1,124<br>(614 - 1,855)     | 71<br>(40 - 119)         | 9<br>(4 - 17)            |
| Assault by sharp object                         | 875<br>(552 - 1,462)        | 95<br>(41 - 182)         | 22<br>(11 - 39)          | 660<br>(390 - 1,166)       | 74<br>(41 - 121)         | 25<br>(14 - 39)          |
| Assault by other means                          | 1,596<br>(956 - 2,429)      | 184<br>(90 - 338)        | 59<br>(32 - 96)          | 1,245<br>(705 - 2,010)     | 79<br>(46 - 121)         | 28<br>(16 - 45)          |

Web Table 31- Tanzania deaths with 95% UI by age, sex, and cause in 2013

| Cause                                                             | Males, All Ages                | Males, 0-4 Years            | Males, 5-14 Years        | Males, 15-49 Years          | Males, 50-69 Years          | Males, 70-80 Years          |
|-------------------------------------------------------------------|--------------------------------|-----------------------------|--------------------------|-----------------------------|-----------------------------|-----------------------------|
| All causes                                                        | 204,770<br>(183,189 - 224,418) | 77,100<br>(63,547 - 91,596) | 8,153<br>(6,921 - 9,647) | 55,627<br>(48,844 - 61,720) | 32,055<br>(27,568 - 36,646) | 31,836<br>(28,056 - 34,074) |
| Communicable, maternal, neonatal, and nutritional diseases        | 136,947<br>(122,583 - 152,650) | 65,858<br>(54,671 - 79,537) | 6,149<br>(5,122 - 7,322) | 37,465<br>(33,433 - 42,222) | 15,968<br>(13,307 - 18,761) | 11,507<br>(9,658 - 13,333)  |
| HIV/AIDS and tuberculosis                                         | 46,318<br>(41,081 - 52,503)    | 2,024<br>(1,447 - 2,809)    | 2,348<br>(1,873 - 2,875) | 28,822<br>(25,130 - 33,534) | 10,443<br>(7,998 - 13,440)  | 2,681<br>(2,026 - 3,370)    |
| Tuberculosis                                                      | 10,942<br>(7,615 - 14,080)     | 1,026<br>(614 - 1,659)      | 140<br>(81 - 221)        | 5,500<br>(3,606 - 7,671)    | 2,448<br>(1,659 - 3,335)    | 1,828<br>(1,258 - 2,425)    |
| HIV/AIDS                                                          | 35,376<br>(30,606 - 41,040)    | 997<br>(666 - 1,658)        | 2,209<br>(1,724 - 2,731) | 23,322<br>(19,947 - 27,823) | 7,995<br>(5,561 - 11,038)   | 853<br>(523 - 1,307)        |
| HIV/AIDS resulting in mycobacterial infection                     | 2,522<br>(1,962 - 3,181)       | 66<br>(41 - 114)            | 135<br>(98 - 184)        | 1,664<br>(1,291 - 2,135)    | 591<br>(385 - 877)          | 66<br>(40 - 107)            |
| HIV/AIDS resulting in other diseases                              | 32,854<br>(28,437 - 38,353)    | 931<br>(619 - 1,537)        | 2,073<br>(1,617 - 2,571) | 21,659<br>(18,461 - 25,948) | 7,404<br>(5,112 - 10,244)   | 787<br>(487 - 1,207)        |
| Diarrhea, lower respiratory, and other common infectious diseases | 41,784<br>(32,925 - 51,614)    | 23,298<br>(15,976 - 32,248) | 1,889<br>(1,289 - 2,767) | 5,085<br>(3,693 - 6,595)    | 4,170<br>(2,946 - 5,520)    | 7,342<br>(5,767 - 9,008)    |
| Diarrheal diseases                                                | 12,355<br>(8,930 - 17,222)     | 5,349<br>(2,399 - 9,741)    | 618<br>(297 - 1,127)     | 2,163<br>(1,439 - 3,070)    | 1,644<br>(960 - 2,595)      | 2,580<br>(1,634 - 3,877)    |
| Intestinal infectious diseases                                    | 1,235<br>(641 - 2,147)         | 577<br>(272 - 1,078)        | 284<br>(131 - 541)       | 325<br>(150 - 614)          | 34<br>(16 - 65)             | 15<br>(7 - 26)              |
| Typhoid fever                                                     | 866<br>(406 - 1,555)           | 374<br>(158 - 750)          | 213<br>(92 - 422)        | 246<br>(103 - 480)          | 24<br>(9 - 49)              | 9<br>(4 - 18)               |
| Paratyphoid fever                                                 | 239<br>(107 - 461)             | 112<br>(39 - 237)           | 60<br>(23 - 132)         | 59<br>(23 - 124)            | 5<br>(2 - 13)               | 2<br>(1 - 5)                |
| Other intestinal infectious diseases                              | 130<br>(81 - 194)              | 92<br>(49 - 150)            | 10<br>(4 - 19)           | 20<br>(10 - 35)             | 5<br>(1 - 11)               | 3<br>(0 - 9)                |
| Lower respiratory infections                                      | 22,329<br>(16,572 - 28,628)    | 13,401<br>(8,198 - 19,550)  | 568<br>(318 - 918)       | 1,640<br>(1,103 - 2,312)    | 2,160<br>(1,455 - 2,989)    | 4,561<br>(3,273 - 6,068)    |
| Upper respiratory infections                                      | 30<br>(10 - 72)                | 14<br>(1 - 55)              | 1<br>(0 - 4)             | 8<br>(1 - 20)               | 3<br>(0 - 10)               | 3<br>(0 - 10)               |
| Otitis media                                                      | 11<br>(8 - 16)                 | 5<br>(2 - 9)                | 1<br>(0 - 1)             | 2<br>(2 - 4)                | 1<br>(1 - 2)                | 2<br>(1 - 3)                |
| Meningitis                                                        | 3,188<br>(2,130 - 4,642)       | 1,802<br>(904 - 3,142)      | 250<br>(134 - 434)       | 708<br>(456 - 1,062)        | 268<br>(163 - 419)          | 159<br>(94 - 247)           |
| Pneumococcal meningitis                                           | 744<br>(480 - 1,075)           | 321<br>(152 - 580)          | 72<br>(31 - 142)         | 232<br>(124 - 389)          | 75<br>(38 - 138)            | 44<br>(22 - 79)             |
| H influenzae type B meningitis                                    | 776<br>(429 - 1,272)           | 590<br>(267 - 1,073)        | 62<br>(27 - 121)         | 85<br>(41 - 152)            | 25<br>(11 - 45)             | 15<br>(6 - 29)              |
| Meningococcal meningitis                                          | 433<br>(262 - 675)             | 212<br>(79 - 428)           | 30<br>(11 - 62)          | 103<br>(44 - 207)           | 53<br>(22 - 99)             | 34<br>(15 - 63)             |
| Other meningitis                                                  | 1,234<br>(755 - 1,921)         | 680<br>(277 - 1,275)        | 86<br>(38 - 165)         | 289<br>(166 - 466)          | 115<br>(48 - 192)           | 65<br>(33 - 108)            |
| Encephalitis                                                      | 168<br>(111 - 257)             | 104<br>(57 - 181)           | 8<br>(4 - 15)            | 36<br>(22 - 62)             | 12<br>(7 - 19)              | 9<br>(5 - 13)               |
| Diphtheria                                                        | 17<br>(0 - 113)                | 14<br>(0 - 110)             | 2<br>(0 - 14)            | 1<br>(0 - 4)                | 0<br>(0 - 1)                | --                          |
| Whooping cough                                                    | 180<br>(0 - 948)               | 174<br>(0 - 915)            | 5<br>(0 - 25)            | 1<br>(0 - 5)                | 0<br>(0 - 0)                | --                          |
| Tetanus                                                           | 520<br>(327 - 799)             | 266<br>(130 - 497)          | 21<br>(10 - 42)          | 179<br>(103 - 288)          | 45<br>(23 - 78)             | 10<br>(5 - 17)              |
| Measles                                                           | 1,726<br>(42 - 9,821)          | 1,578<br>(39 - 9,010)       | 130<br>(3 - 772)         | 17<br>(0 - 94)              | 0<br>(0 - 3)                | --                          |
| Varicella and herpes zoster                                       | 25<br>(7 - 75)                 | 13<br>(0 - 60)              | 2<br>(0 - 8)             | 4<br>(1 - 13)               | 1<br>(0 - 5)                | 4<br>(0 - 18)               |
| Neglected tropical diseases and malaria                           | 16,544<br>(9,821 - 25,733)     | 11,879<br>(6,142 - 19,915)  | 1,365<br>(652 - 2,371)   | 2,538<br>(1,389 - 4,464)    | 508<br>(293 - 934)          | 254<br>(135 - 560)          |
| Malaria                                                           | 13,495<br>(7,362 - 22,215)     | 10,628<br>(5,182 - 18,714)  | 835<br>(343 - 1,774)     | 1,519<br>(689 - 3,411)      | 342<br>(150 - 784)          | 172<br>(62 - 484)           |
| Leishmaniasis                                                     | 2,670<br>(1,284 - 4,306)       | 1,117<br>(331 - 2,670)      | 479<br>(158 - 886)       | 905<br>(348 - 1,731)        | 119<br>(41 - 224)           | 51<br>(20 - 99)             |
| Visceral leishmaniasis                                            | 2,670<br>(1,284 - 4,306)       | 1,117<br>(331 - 2,670)      | 479<br>(158 - 886)       | 905<br>(348 - 1,731)        | 119<br>(41 - 224)           | 51<br>(20 - 99)             |
| African trypanosomiasis                                           | 4<br>(2 - 8)                   | 0<br>(0 - 1)                | 0<br>(0 - 1)             | 3<br>(1 - 5)                | 0<br>(0 - 1)                | 0<br>(0 - 0)                |
| Schistosomiasis                                                   | 85<br>(59 - 119)               | 2<br>(1 - 5)                | 3<br>(1 - 5)             | 44<br>(26 - 71)             | 23<br>(13 - 37)             | 13<br>(7 - 21)              |
| Cysticercosis                                                     | 4<br>(1 - 13)                  | 0<br>(0 - 1)                | 0<br>(0 - 1)             | 3<br>(1 - 9)                | 1<br>(0 - 2)                | 0<br>(0 - 0)                |
| Cystic echinococcosis                                             | 9<br>(7 - 11)                  | 2<br>(1 - 3)                | 1<br>(1 - 2)             | 5<br>(4 - 6)                | 1<br>(1 - 1)                | 0<br>(0 - 1)                |
| Dengue                                                            | 9<br>(6 - 12)                  | 3<br>(1 - 5)                | 2<br>(1 - 2)             | 3<br>(2 - 4)                | 1<br>(0 - 2)                | 0<br>(0 - 1)                |
| Yellow fever                                                      | 0<br>(0 - 1)                   | 0<br>(0 - 0)                | 0<br>(0 - 0)             | 0<br>(0 - 0)                | 0<br>(0 - 0)                | 0<br>(0 - 0)                |
| Rabies                                                            | 118<br>(64 - 202)              | 36<br>(10 - 86)             | 36<br>(18 - 72)          | 37<br>(22 - 57)             | 7<br>(4 - 12)               | 1<br>(1 - 3)                |
| Intestinal nematode infections                                    | 72<br>(35 - 128)               | 60<br>(26 - 115)            | 7<br>(2 - 16)            | 4<br>(0 - 11)               | 1<br>(0 - 4)                | 1<br>(0 - 5)                |
| Ascariasis                                                        | 72<br>(35 - 128)               | 60<br>(26 - 115)            | 7<br>(2 - 16)            | 4<br>(0 - 11)               | 1<br>(0 - 4)                | 1<br>(0 - 5)                |

Web Table 31- Tanzania deaths with 95% UI by age, sex, and cause in 2013

| Cause                                                            | Males, All Ages             | Males, 0-4 Years            | Males, 5-14 Years      | Males, 15-49 Years         | Males, 50-69 Years          | Males, 70-80 Years          |
|------------------------------------------------------------------|-----------------------------|-----------------------------|------------------------|----------------------------|-----------------------------|-----------------------------|
| Other neglected tropical diseases                                | 76<br>(53 - 108)            | 31<br>(15 - 57)             | 2<br>(1 - 4)           | 15<br>(10 - 24)            | 13<br>(7 - 20)              | 15<br>(9 - 24)              |
| Maternal disorders                                               | --                          | --                          | --                     | --                         | --                          | --                          |
| Maternal hemorrhage                                              | --                          | --                          | --                     | --                         | --                          | --                          |
| Maternal sepsis and other maternal infections                    | --                          | --                          | --                     | --                         | --                          | --                          |
| Maternal hypertensive disorders                                  | --                          | --                          | --                     | --                         | --                          | --                          |
| Maternal obstructed labor                                        | --                          | --                          | --                     | --                         | --                          | --                          |
| Maternal abortive outcome                                        | --                          | --                          | --                     | --                         | --                          | --                          |
| Indirect maternal deaths                                         | --                          | --                          | --                     | --                         | --                          | --                          |
| Late maternal deaths                                             | --                          | --                          | --                     | --                         | --                          | --                          |
| Maternal deaths aggravated by HIV/AIDS                           | --                          | --                          | --                     | --                         | --                          | --                          |
| Other maternal disorders                                         | --                          | --                          | --                     | --                         | --                          | --                          |
| Neonatal disorders                                               | 18,299<br>(14,602 - 22,460) | 18,299<br>(14,602 - 22,460) | --                     | --                         | --                          | --                          |
| Neonatal preterm birth complications                             | 4,606<br>(2,127 - 7,975)    | 4,606<br>(2,127 - 7,975)    | --                     | --                         | --                          | --                          |
| Neonatal encephalopathy due to birth asphyxia and trauma         | 4,894<br>(2,482 - 8,032)    | 4,894<br>(2,482 - 8,032)    | --                     | --                         | --                          | --                          |
| Neonatal sepsis and other neonatal infections                    | 5,186<br>(2,179 - 9,459)    | 5,186<br>(2,179 - 9,459)    | --                     | --                         | --                          | --                          |
| Hemolytic disease and other neonatal jaundice                    | 126<br>(39 - 319)           | 126<br>(39 - 319)           | --                     | --                         | --                          | --                          |
| Other neonatal disorders                                         | 3,488<br>(1,520 - 6,359)    | 3,488<br>(1,520 - 6,359)    | --                     | --                         | --                          | --                          |
| Nutritional deficiencies                                         | 7,618<br>(4,607 - 11,922)   | 4,861<br>(2,501 - 8,263)    | 252<br>(126 - 421)     | 761<br>(442 - 1,150)       | 661<br>(397 - 1,034)        | 1,083<br>(665 - 1,656)      |
| Protein-energy malnutrition                                      | 6,153<br>(3,455 - 9,832)    | 4,351<br>(2,143 - 7,471)    | 208<br>(100 - 355)     | 424<br>(192 - 701)         | 466<br>(230 - 733)          | 705<br>(333 - 1,173)        |
| Iodine deficiency                                                | 14<br>(1 - 68)              | 7<br>(0 - 59)               | 1<br>(0 - 5)           | 3<br>(0 - 15)              | 1<br>(0 - 8)                | 1<br>(0 - 9)                |
| Iron-deficiency anemia                                           | 1,415<br>(552 - 2,795)      | 502<br>(101 - 1,348)        | 42<br>(10 - 105)       | 321<br>(121 - 578)         | 188<br>(66 - 390)           | 363<br>(139 - 731)          |
| Other nutritional deficiencies                                   | 36<br>(13 - 71)             | 2<br>(0 - 5)                | 1<br>(0 - 2)           | 13<br>(5 - 27)             | 6<br>(2 - 13)               | 14<br>(5 - 30)              |
| Other communicable, maternal, neonatal, and nutritional diseases | 6,384<br>(1,982 - 11,372)   | 5,496<br>(1,321 - 10,201)   | 296<br>(77 - 572)      | 258<br>(177 - 380)         | 186<br>(105 - 347)          | 147<br>(69 - 300)           |
| Sexually transmitted diseases excluding HIV                      | 5,547<br>(1,128 - 10,496)   | 5,188<br>(971 - 9,869)      | 268<br>(49 - 538)      | 43<br>(24 - 73)            | 27<br>(13 - 57)             | 22<br>(9 - 48)              |
| Syphilis                                                         | 5,514<br>(1,091 - 10,469)   | 5,188<br>(971 - 9,869)      | 266<br>(47 - 536)      | 23<br>(13 - 39)            | 20<br>(9 - 41)              | 18<br>(7 - 41)              |
| Chlamydial infection                                             | --                          | --                          | --                     | --                         | --                          | --                          |
| Gonococcal infection                                             | 19<br>(12 - 31)             | --                          | 1<br>(0 - 1)           | 11<br>(6 - 19)             | 5<br>(2 - 10)               | 3<br>(1 - 6)                |
| Other sexually transmitted diseases                              | 14<br>(9 - 22)              | --                          | 1<br>(0 - 1)           | 9<br>(5 - 15)              | 3<br>(1 - 6)                | 1<br>(0 - 2)                |
| Hepatitis                                                        | 259<br>(191 - 377)          | 68<br>(30 - 142)            | 14<br>(8 - 23)         | 110<br>(73 - 171)          | 48<br>(31 - 69)             | 19<br>(12 - 29)             |
| Acute hepatitis A                                                | 39<br>(11 - 93)             | 23<br>(5 - 60)              | 5<br>(1 - 12)          | 10<br>(2 - 24)             | 1<br>(0 - 1)                | 0<br>(0 - 0)                |
| Acute hepatitis B                                                | 199<br>(138 - 290)          | 45<br>(17 - 99)             | 8<br>(3 - 15)          | 83<br>(49 - 130)           | 45<br>(29 - 66)             | 19<br>(11 - 28)             |
| Acute hepatitis C                                                | 2<br>(0 - 7)                | --                          | 0<br>(0 - 1)           | 2<br>(0 - 5)               | 0<br>(0 - 2)                | 0<br>(0 - 1)                |
| Acute hepatitis E                                                | 20<br>(7 - 45)              | 0<br>(0 - 0)                | 1<br>(0 - 2)           | 17<br>(6 - 39)             | 2<br>(0 - 5)                | 0<br>(0 - 1)                |
| Other infectious diseases                                        | 577<br>(331 - 975)          | 241<br>(100 - 537)          | 14<br>(6 - 31)         | 105<br>(57 - 184)          | 112<br>(41 - 260)           | 105<br>(33 - 257)           |
| Non-communicable diseases                                        | 52,786<br>(43,948 - 60,279) | 8,163<br>(5,255 - 13,559)   | 1,007<br>(732 - 1,345) | 10,336<br>(7,773 - 12,538) | 14,355<br>(10,910 - 17,762) | 18,925<br>(16,003 - 21,204) |
| Neoplasms                                                        | 7,822<br>(6,300 - 9,144)    | 588<br>(344 - 912)          | 210<br>(132 - 301)     | 1,819<br>(1,328 - 2,280)   | 2,561<br>(1,907 - 3,212)    | 2,644<br>(2,162 - 3,127)    |
| Esophageal cancer                                                | 341<br>(240 - 447)          | --                          | --                     | 46<br>(31 - 63)            | 155<br>(100 - 225)          | 139<br>(97 - 194)           |
| Stomach cancer                                                   | 643<br>(496 - 796)          | --                          | --                     | 132<br>(92 - 179)          | 252<br>(177 - 342)          | 258<br>(189 - 342)          |
| Liver cancer                                                     | 947<br>(575 - 1,324)        | --                          | 14<br>(5 - 26)         | 322<br>(154 - 494)         | 407<br>(237 - 620)          | 205<br>(136 - 299)          |
| Liver cancer due to hepatitis B                                  | 278<br>(129 - 474)          | --                          | 5<br>(1 - 11)          | 121<br>(52 - 212)          | 109<br>(35 - 220)           | 43<br>(16 - 84)             |

Web Table 31- Tanzania deaths with 95% UI by age, sex, and cause in 2013

| Cause                                | Males, All Ages             | Males, 0-4 Years   | Males, 5-14 Years | Males, 15-49 Years       | Males, 50-69 Years       | Males, 70-80 Years         |
|--------------------------------------|-----------------------------|--------------------|-------------------|--------------------------|--------------------------|----------------------------|
| Liver cancer due to hepatitis C      | 444<br>(206 - 691)          | --                 | 3<br>(0 - 8)      | 128<br>(40 - 236)        | 208<br>(94 - 342)        | 106<br>(56 - 169)          |
| Liver cancer due to alcohol use      | 128<br>(69 - 211)           | --                 | --                | 28<br>(11 - 56)          | 58<br>(30 - 104)         | 42<br>(21 - 69)            |
| Liver cancer due to other causes     | 98<br>(50 - 169)            | --                 | 7<br>(3 - 13)     | 45<br>(20 - 83)          | 32<br>(14 - 62)          | 14<br>(7 - 25)             |
| Larynx cancer                        | 83<br>(57 - 113)            | --                 | --                | 14<br>(9 - 21)           | 25<br>(16 - 36)          | 44<br>(30 - 62)            |
| Tracheal, bronchus and lung cancer   | 636<br>(485 - 775)          | --                 | --                | 59<br>(39 - 89)          | 335<br>(239 - 428)       | 242<br>(184 - 302)         |
| Breast cancer                        | 51<br>(31 - 79)             | --                 | --                | 10<br>(5 - 19)           | 22<br>(11 - 40)          | 18<br>(9 - 33)             |
| Cervical cancer                      | --                          | --                 | --                | --                       | --                       | --                         |
| Uterine cancer                       | --                          | --                 | --                | --                       | --                       | --                         |
| Prostate cancer                      | 801<br>(519 - 1,234)        | --                 | --                | 15<br>(7 - 28)           | 214<br>(130 - 323)       | 573<br>(365 - 891)         |
| Colon and rectum cancer              | 977<br>(762 - 1,184)        | --                 | --                | 339<br>(242 - 443)       | 305<br>(226 - 404)       | 333<br>(253 - 428)         |
| Lip and oral cavity cancer           | 135<br>(88 - 183)           | --                 | --                | 22<br>(13 - 37)          | 53<br>(32 - 78)          | 60<br>(38 - 87)            |
| Nasopharynx cancer                   | 22<br>(16 - 30)             | --                 | 1<br>(0 - 2)      | 12<br>(8 - 17)           | 8<br>(4 - 12)            | 2<br>(2 - 4)               |
| Other pharynx cancer                 | 79<br>(51 - 107)            | --                 | --                | 20<br>(10 - 33)          | 32<br>(19 - 50)          | 26<br>(17 - 38)            |
| Gallbladder and biliary tract cancer | 120<br>(78 - 160)           | --                 | --                | 71<br>(41 - 100)         | 29<br>(18 - 45)          | 20<br>(14 - 28)            |
| Pancreatic cancer                    | 191<br>(147 - 235)          | --                 | --                | 72<br>(49 - 98)          | 85<br>(60 - 113)         | 35<br>(26 - 46)            |
| Malignant skin melanoma              | 37<br>(20 - 58)             | --                 | --                | 17<br>(8 - 28)           | 10<br>(5 - 17)           | 10<br>(5 - 16)             |
| Non-melanoma skin cancer             | 35<br>(21 - 50)             | --                 | --                | 4<br>(2 - 6)             | 12<br>(6 - 20)           | 20<br>(12 - 30)            |
| Ovarian cancer                       | --                          | --                 | --                | --                       | --                       | --                         |
| Testicular cancer                    | 56<br>(36 - 78)             | --                 | --                | 32<br>(20 - 47)          | 20<br>(11 - 32)          | 4<br>(3 - 7)               |
| Kidney cancer                        | 228<br>(166 - 310)          | 45<br>(16 - 98)    | 7<br>(3 - 14)     | 33<br>(20 - 50)          | 84<br>(57 - 120)         | 59<br>(41 - 85)            |
| Bladder cancer                       | 177<br>(132 - 231)          | --                 | --                | 19<br>(12 - 28)          | 48<br>(32 - 68)          | 111<br>(79 - 153)          |
| Brain and nervous system cancer      | 205<br>(124 - 286)          | 2<br>(0 - 4)       | 32<br>(16 - 54)   | 100<br>(54 - 153)        | 47<br>(29 - 74)          | 24<br>(14 - 40)            |
| Thyroid cancer                       | 10<br>(7 - 14)              | --                 | 0<br>(0 - 0)      | 2<br>(1 - 3)             | 3<br>(2 - 4)             | 5<br>(4 - 8)               |
| Mesothelioma                         | 33<br>(22 - 47)             | --                 | --                | 2<br>(1 - 3)             | 17<br>(10 - 28)          | 14<br>(8 - 23)             |
| Hodgkin lymphoma                     | 105<br>(60 - 166)           | 16<br>(5 - 41)     | 10<br>(3 - 30)    | 35<br>(19 - 62)          | 21<br>(12 - 34)          | 23<br>(11 - 38)            |
| Non-Hodgkin lymphoma                 | 549<br>(382 - 745)          | 153<br>(66 - 290)  | 39<br>(20 - 72)   | 139<br>(84 - 204)        | 98<br>(66 - 138)         | 120<br>(81 - 171)          |
| Multiple myeloma                     | 75<br>(49 - 100)            | --                 | --                | 20<br>(10 - 30)          | 20<br>(12 - 30)          | 35<br>(23 - 50)            |
| Leukemia                             | 191<br>(147 - 238)          | 30<br>(14 - 55)    | 19<br>(10 - 31)   | 85<br>(59 - 115)         | 24<br>(17 - 33)          | 33<br>(24 - 44)            |
| Other neoplasms                      | 1,093<br>(777 - 1,378)      | 344<br>(180 - 560) | 88<br>(46 - 143)  | 196<br>(123 - 268)       | 234<br>(153 - 318)       | 231<br>(160 - 321)         |
| Cardiovascular diseases              | 20,514<br>(16,685 - 23,693) | 473<br>(273 - 775) | 123<br>(76 - 190) | 2,781<br>(2,009 - 3,504) | 6,961<br>(5,270 - 8,649) | 10,176<br>(8,481 - 11,596) |
| Rheumatic heart disease              | 845<br>(570 - 1,330)        | 19<br>(6 - 50)     | 25<br>(13 - 46)   | 285<br>(181 - 468)       | 255<br>(158 - 413)       | 260<br>(162 - 421)         |
| Ischemic heart disease               | 5,783<br>(4,103 - 7,307)    | 4<br>(1 - 12)      | 11<br>(6 - 20)    | 646<br>(438 - 868)       | 2,434<br>(1,658 - 3,261) | 2,688<br>(1,840 - 3,410)   |
| Cerebrovascular disease              | 5,482<br>(4,023 - 7,010)    | 40<br>(21 - 73)    | 14<br>(7 - 24)    | 532<br>(352 - 722)       | 1,634<br>(1,093 - 2,225) | 3,261<br>(2,384 - 4,206)   |
| Ischemic stroke                      | 2,478<br>(850 - 3,683)      | 4<br>(1 - 9)       | 2<br>(0 - 3)      | 76<br>(25 - 130)         | 569<br>(444 - 975)       | 1,827<br>(672 - 2,667)     |
| Hemorrhagic stroke                   | 3,004<br>(2,018 - 4,518)    | 37<br>(20 - 67)    | 12<br>(7 - 22)    | 456<br>(301 - 629)       | 1,065<br>(688 - 1,582)   | 1,434<br>(856 - 2,403)     |
| Hypertensive heart disease           | 2,630<br>(1,379 - 5,237)    | 8<br>(2 - 19)      | 3<br>(1 - 5)      | 200<br>(109 - 325)       | 857<br>(415 - 1,807)     | 1,563<br>(738 - 3,180)     |
| Cardiomyopathy and myocarditis       | 1,542<br>(1,017 - 2,113)    | 205<br>(54 - 398)  | 31<br>(12 - 55)   | 378<br>(195 - 571)       | 474<br>(266 - 712)       | 453<br>(261 - 712)         |
| Atrial fibrillation and flutter      | 6<br>(2 - 14)               | --                 | --                | 1<br>(0 - 1)             | 1<br>(0 - 3)             | 4<br>(1 - 10)              |
| Aortic aneurysm                      | 354<br>(193 - 549)          | --                 | --                | 38<br>(19 - 62)          | 124<br>(62 - 199)        | 192<br>(100 - 314)         |
| Peripheral vascular disease          | 19<br>(8 - 43)              | --                 | --                | 1<br>(0 - 1)             | 5<br>(2 - 12)            | 13<br>(5 - 30)             |

Web Table 31- Tanzania deaths with 95% UI by age, sex, and cause in 2013

| Cause                                               | Males, All Ages          | Males, 0-4 Years   | Males, 5-14 Years | Males, 15-49 Years     | Males, 50-69 Years     | Males, 70-80 Years       |
|-----------------------------------------------------|--------------------------|--------------------|-------------------|------------------------|------------------------|--------------------------|
| Endocarditis                                        | 469<br>(248 - 758)       | 26<br>(10 - 59)    | 5<br>(2 - 11)     | 84<br>(43 - 137)       | 162<br>(75 - 282)      | 192<br>(100 - 329)       |
| Other cardiovascular and circulatory diseases       | 3,385<br>(2,020 - 5,062) | 172<br>(67 - 343)  | 33<br>(16 - 61)   | 616<br>(358 - 958)     | 1,015<br>(569 - 1,546) | 1,550<br>(845 - 2,334)   |
| Chronic respiratory diseases                        | 2,911<br>(2,212 - 3,534) | 148<br>(80 - 272)  | 26<br>(18 - 39)   | 347<br>(243 - 444)     | 881<br>(605 - 1,180)   | 1,509<br>(1,137 - 1,902) |
| Chronic obstructive pulmonary disease               | 1,746<br>(1,316 - 2,174) | 37<br>(15 - 77)    | 12<br>(7 - 19)    | 140<br>(97 - 189)      | 535<br>(372 - 734)     | 1,022<br>(770 - 1,312)   |
| Pneumoconiosis                                      | 282<br>(182 - 413)       | 5<br>(1 - 14)      | 2<br>(1 - 4)      | 66<br>(40 - 100)       | 100<br>(60 - 160)      | 109<br>(67 - 164)        |
| Silicosis                                           | 80<br>(47 - 127)         | 2<br>(0 - 5)       | 1<br>(0 - 1)      | 17<br>(7 - 28)         | 27<br>(14 - 46)        | 34<br>(19 - 58)          |
| Asbestosis                                          | 34<br>(21 - 56)          | 1<br>(0 - 3)       | 0<br>(0 - 1)      | 9<br>(4 - 16)          | 14<br>(8 - 25)         | 10<br>(5 - 17)           |
| Coal workers pneumoconiosis                         | 40<br>(21 - 67)          | 0<br>(0 - 1)       | 0<br>(0 - 1)      | 8<br>(5 - 12)          | 17<br>(8 - 31)         | 15<br>(7 - 26)           |
| Other pneumoconiosis                                | 127<br>(79 - 191)        | 2<br>(1 - 6)       | 1<br>(0 - 1)      | 33<br>(20 - 52)        | 42<br>(23 - 70)        | 49<br>(27 - 78)          |
| Asthma                                              | 388<br>(265 - 522)       | 7<br>(2 - 17)      | 3<br>(2 - 5)      | 62<br>(41 - 87)        | 125<br>(74 - 185)      | 192<br>(122 - 280)       |
| Interstitial lung disease and pulmonary sarcoidosis | 268<br>(83 - 478)        | 4<br>(0 - 15)      | 1<br>(0 - 3)      | 24<br>(9 - 52)         | 94<br>(27 - 187)       | 145<br>(41 - 290)        |
| Other chronic respiratory diseases                  | 227<br>(145 - 327)       | 96<br>(49 - 174)   | 8<br>(4 - 13)     | 54<br>(32 - 84)        | 28<br>(15 - 46)        | 41<br>(23 - 65)          |
| Cirrhosis                                           | 2,915<br>(2,257 - 3,555) | 66<br>(24 - 146)   | 32<br>(21 - 48)   | 1,016<br>(732 - 1,326) | 1,163<br>(830 - 1,578) | 638<br>(469 - 823)       |
| Cirrhosis due to hepatitis B                        | 609<br>(216 - 1,055)     | 2<br>(0 - 6)       | 4<br>(1 - 9)      | 209<br>(96 - 354)      | 254<br>(72 - 470)      | 139<br>(26 - 273)        |
| Cirrhosis due to hepatitis C                        | 618<br>(300 - 1,019)     | 6<br>(1 - 21)      | 5<br>(1 - 10)     | 186<br>(78 - 313)      | 257<br>(114 - 463)     | 164<br>(71 - 296)        |
| Cirrhosis due to alcohol use                        | 1,297<br>(916 - 1,737)   | --                 | --                | 437<br>(277 - 621)     | 560<br>(363 - 807)     | 300<br>(196 - 436)       |
| Cirrhosis due to other causes                       | 392<br>(250 - 575)       | 58<br>(20 - 129)   | 23<br>(14 - 36)   | 184<br>(99 - 309)      | 92<br>(48 - 156)       | 35<br>(18 - 59)          |
| Digestive diseases                                  | 2,322<br>(1,659 - 2,957) | 139<br>(58 - 276)  | 93<br>(58 - 145)  | 897<br>(603 - 1,224)   | 576<br>(367 - 805)     | 618<br>(437 - 827)       |
| Peptic ulcer disease                                | 627<br>(386 - 955)       | 12<br>(3 - 32)     | 9<br>(3 - 20)     | 206<br>(111 - 347)     | 178<br>(100 - 299)     | 222<br>(133 - 345)       |
| Gastritis and duodenitis                            | 84<br>(25 - 243)         | 8<br>(1 - 20)      | 5<br>(1 - 12)     | 28<br>(9 - 67)         | 18<br>(4 - 68)         | 25<br>(6 - 99)           |
| Appendicitis                                        | 143<br>(70 - 235)        | 9<br>(3 - 22)      | 13<br>(6 - 23)    | 64<br>(29 - 118)       | 30<br>(12 - 59)        | 27<br>(11 - 53)          |
| Paralytic ileus and intestinal obstruction          | 807<br>(502 - 1,235)     | 33<br>(11 - 72)    | 39<br>(23 - 68)   | 359<br>(205 - 561)     | 206<br>(110 - 336)     | 170<br>(91 - 301)        |
| Inguinal, femoral, and abdominal hernia             | 35<br>(17 - 58)          | 0<br>(0 - 0)       | 1<br>(1 - 3)      | 13<br>(6 - 23)         | 9<br>(3 - 17)          | 12<br>(5 - 21)           |
| Inflammatory bowel disease                          | 127<br>(63 - 205)        | 33<br>(10 - 73)    | 7<br>(3 - 14)     | 42<br>(20 - 70)        | 19<br>(7 - 48)         | 25<br>(10 - 66)          |
| Vascular intestinal disorders                       | 16<br>(5 - 38)           | 1<br>(0 - 4)       | 1<br>(0 - 2)      | 4<br>(1 - 8)           | 4<br>(1 - 10)          | 7<br>(2 - 17)            |
| Gallbladder and biliary diseases                    | 94<br>(51 - 150)         | 3<br>(1 - 7)       | 2<br>(1 - 4)      | 23<br>(12 - 36)        | 24<br>(11 - 45)        | 42<br>(20 - 76)          |
| Pancreatitis                                        | 128<br>(46 - 233)        | 2<br>(0 - 6)       | 2<br>(1 - 4)      | 74<br>(28 - 132)       | 29<br>(8 - 69)         | 21<br>(5 - 53)           |
| Other digestive diseases                            | 262<br>(135 - 397)       | 37<br>(11 - 81)    | 13<br>(6 - 24)    | 85<br>(43 - 138)       | 58<br>(25 - 101)       | 69<br>(31 - 116)         |
| Neurological disorders                              | 2,170<br>(1,736 - 2,799) | 233<br>(102 - 482) | 144<br>(76 - 273) | 562<br>(361 - 869)     | 172<br>(123 - 228)     | 1,059<br>(840 - 1,325)   |
| Alzheimer disease and other dementias               | 1,014<br>(803 - 1,263)   | --                 | --                | 0<br>(0 - 1)           | 101<br>(67 - 137)      | 913<br>(714 - 1,155)     |
| Parkinson disease                                   | 19<br>(9 - 38)           | --                 | --                | 1<br>(1 - 2)           | 0<br>(0 - 0)           | 17<br>(8 - 36)           |
| Epilepsy                                            | 970<br>(675 - 1,475)     | 183<br>(67 - 428)  | 134<br>(67 - 261) | 506<br>(314 - 809)     | 40<br>(23 - 62)        | 108<br>(64 - 182)        |
| Multiple sclerosis                                  | 3<br>(1 - 5)             | --                 | --                | 2<br>(1 - 3)           | 1<br>(0 - 2)           | 0<br>(0 - 1)             |
| Other neurological disorders                        | 164<br>(92 - 226)        | 50<br>(23 - 122)   | 11<br>(6 - 16)    | 53<br>(30 - 75)        | 31<br>(15 - 45)        | 20<br>(10 - 29)          |
| Mental and substance use disorders                  | 1,409<br>(913 - 2,078)   | 95<br>(20 - 212)   | 0<br>(0 - 0)      | 1,016<br>(628 - 1,519) | 238<br>(137 - 383)     | 59<br>(36 - 101)         |
| Schizophrenia                                       | 20<br>(8 - 45)           | --                 | --                | 13<br>(4 - 31)         | 5<br>(2 - 12)          | 3<br>(1 - 7)             |
| Alcohol use disorders                               | 885<br>(514 - 1,380)     | --                 | --                | 645<br>(342 - 1,060)   | 197<br>(107 - 332)     | 43<br>(23 - 85)          |
| Drug use disorders                                  | 503<br>(299 - 699)       | 95<br>(20 - 212)   | --                | 359<br>(227 - 493)     | 36<br>(13 - 56)        | 13<br>(4 - 19)           |
| Opioid use disorders                                | 54<br>(31 - 78)          | 11<br>(2 - 25)     | --                | 39<br>(23 - 55)        | 3<br>(1 - 6)           | 1<br>(0 - 2)             |
| Cocaine use disorders                               | 2<br>(1 - 3)             | 0<br>(0 - 1)       | --                | 1<br>(1 - 2)           | 0<br>(0 - 0)           | 0<br>(0 - 0)             |

Web Table 31- Tanzania deaths with 95% UI by age, sex, and cause in 2013

| Cause                                               | Males, All Ages           | Males, 0-4 Years          | Males, 5-14 Years  | Males, 15-49 Years       | Males, 50-69 Years       | Males, 70-80 Years       |
|-----------------------------------------------------|---------------------------|---------------------------|--------------------|--------------------------|--------------------------|--------------------------|
| Amphetamine use disorders                           | 1<br>(1 - 2)              | 0<br>(0 - 1)              | --                 | 1<br>(1 - 1)             | 0<br>(0 - 0)             | 0<br>(0 - 0)             |
| Other drug use disorders                            | 445<br>(264 - 619)        | 84<br>(17 - 187)          | --                 | 317<br>(201 - 440)       | 33<br>(12 - 51)          | 11<br>(4 - 17)           |
| Eating disorders                                    | 0<br>(0 - 0)              | --                        | 0<br>(0 - 0)       | 0<br>(0 - 0)             | --                       | --                       |
| Anorexia nervosa                                    | 0<br>(0 - 0)              | --                        | 0<br>(0 - 0)       | 0<br>(0 - 0)             | --                       | --                       |
| Diabetes, urogenital, blood, and endocrine diseases | 6,495<br>(5,215 - 7,795)  | 1,092<br>(645 - 1,654)    | 204<br>(126 - 342) | 1,548<br>(1,151 - 2,033) | 1,643<br>(1,207 - 2,123) | 2,008<br>(1,602 - 2,417) |
| Diabetes mellitus                                   | 2,478<br>(1,924 - 3,020)  | 47<br>(27 - 80)           | 11<br>(6 - 19)     | 361<br>(251 - 468)       | 915<br>(646 - 1,222)     | 1,143<br>(860 - 1,475)   |
| Acute glomerulonephritis                            | 83<br>(57 - 120)          | 16<br>(7 - 32)            | 3<br>(2 - 6)       | 3<br>(2 - 4)             | 34<br>(21 - 53)          | 26<br>(16 - 41)          |
| Chronic kidney disease                              | 1,008<br>(784 - 1,287)    | 138<br>(73 - 236)         | 29<br>(18 - 46)    | 384<br>(269 - 540)       | 190<br>(130 - 265)       | 267<br>(192 - 352)       |
| Chronic kidney disease due to diabetes mellitus     | 6<br>(1 - 13)             | 0<br>(0 - 1)              | 0<br>(0 - 1)       | 2<br>(0 - 4)             | 2<br>(0 - 5)             | 1<br>(0 - 4)             |
| Chronic kidney disease due to hypertension          | 373<br>(222 - 543)        | 18<br>(6 - 40)            | 3<br>(1 - 6)       | 93<br>(51 - 149)         | 106<br>(57 - 173)        | 153<br>(84 - 236)        |
| Chronic kidney disease due to glomerulonephritis    | 316<br>(217 - 455)        | 77<br>(40 - 131)          | 17<br>(11 - 26)    | 133<br>(86 - 204)        | 40<br>(16 - 72)          | 49<br>(20 - 88)          |
| Chronic kidney disease due to other causes          | 312<br>(186 - 532)        | 42<br>(15 - 102)          | 8<br>(4 - 16)      | 155<br>(85 - 264)        | 43<br>(16 - 84)          | 63<br>(24 - 126)         |
| Urinary diseases and male infertility               | 1,192<br>(901 - 1,511)    | 116<br>(48 - 259)         | 20<br>(13 - 33)    | 351<br>(241 - 497)       | 328<br>(215 - 465)       | 376<br>(251 - 521)       |
| Interstitial nephritis and urinary tract infections | 843<br>(601 - 1,111)      | 85<br>(34 - 191)          | 12<br>(7 - 20)     | 229<br>(144 - 331)       | 235<br>(145 - 361)       | 281<br>(176 - 420)       |
| Urolithiasis                                        | 27<br>(13 - 62)           | --                        | 1<br>(1 - 2)       | 10<br>(5 - 22)           | 9<br>(3 - 25)            | 7<br>(2 - 20)            |
| Other urinary diseases                              | 322<br>(194 - 504)        | 31<br>(9 - 86)            | 7<br>(3 - 12)      | 112<br>(65 - 186)        | 84<br>(37 - 156)         | 88<br>(37 - 170)         |
| Gynecological diseases                              | --                        | --                        | --                 | --                       | --                       | --                       |
| Uterine fibroids                                    | --                        | --                        | --                 | --                       | --                       | --                       |
| Polycystic ovarian syndrome                         | --                        | --                        | --                 | --                       | --                       | --                       |
| Endometriosis                                       | --                        | --                        | --                 | --                       | --                       | --                       |
| Genital prolapse                                    | --                        | --                        | --                 | --                       | --                       | --                       |
| Other gynecological diseases                        | --                        | --                        | --                 | --                       | --                       | --                       |
| Hemoglobinopathies and hemolytic anemias            | 984<br>(437 - 1,805)      | 552<br>(211 - 1,030)      | 112<br>(45 - 237)  | 220<br>(87 - 515)        | 55<br>(17 - 192)         | 46<br>(17 - 143)         |
| Thalassemias                                        | 16<br>(7 - 28)            | 12<br>(5 - 23)            | 1<br>(1 - 3)       | 2<br>(1 - 5)             | 0<br>(0 - 0)             | 0<br>(0 - 0)             |
| Sickle cell disorders                               | 877<br>(388 - 1,588)      | 510<br>(191 - 960)        | 107<br>(43 - 228)  | 208<br>(82 - 486)        | 47<br>(14 - 166)         | 4<br>(1 - 14)            |
| G6PD deficiency                                     | 13<br>(6 - 24)            | 8<br>(3 - 15)             | 1<br>(0 - 2)       | 2<br>(1 - 5)             | 1<br>(0 - 2)             | 1<br>(0 - 4)             |
| Other hemoglobinopathies and hemolytic anemias      | 78<br>(32 - 211)          | 21<br>(9 - 38)            | 2<br>(1 - 4)       | 8<br>(3 - 18)            | 7<br>(2 - 26)            | 40<br>(15 - 127)         |
| Endocrine, metabolic, blood, and immune disorders   | 751<br>(439 - 1,022)      | 222<br>(106 - 367)        | 28<br>(13 - 51)    | 229<br>(119 - 351)       | 120<br>(70 - 181)        | 151<br>(83 - 239)        |
| Musculoskeletal disorders                           | 218<br>(115 - 332)        | --                        | 23<br>(11 - 36)    | 97<br>(52 - 140)         | 51<br>(24 - 106)         | 47<br>(23 - 99)          |
| Rheumatoid arthritis                                | 50<br>(21 - 97)           | --                        | 4<br>(2 - 9)       | 13<br>(6 - 22)           | 15<br>(5 - 38)           | 17<br>(6 - 43)           |
| Other musculoskeletal disorders                     | 168<br>(92 - 251)         | --                        | 19<br>(9 - 30)     | 84<br>(46 - 121)         | 36<br>(17 - 70)          | 30<br>(14 - 60)          |
| Other non-communicable diseases                     | 6,009<br>(3,684 - 11,188) | 5,329<br>(3,046 - 10,467) | 151<br>(88 - 251)  | 253<br>(173 - 357)       | 108<br>(72 - 150)        | 167<br>(112 - 237)       |
| Congenital anomalies                                | 5,378<br>(3,142 - 10,623) | 5,051<br>(2,829 - 10,272) | 142<br>(80 - 241)  | 144<br>(90 - 218)        | 20<br>(14 - 29)          | 20<br>(15 - 28)          |
| Neural tube defects                                 | 1,432<br>(263 - 3,384)    | 1,379<br>(250 - 3,309)    | 24<br>(3 - 65)     | 25<br>(4 - 62)           | 2<br>(0 - 5)             | 1<br>(0 - 4)             |
| Congenital heart anomalies                          | 2,427<br>(1,027 - 5,728)  | 2,252<br>(860 - 5,534)    | 81<br>(39 - 150)   | 77<br>(46 - 120)         | 9<br>(5 - 14)            | 8<br>(5 - 13)            |
| Cleft lip and cleft palate                          | 38<br>(5 - 116)           | 38<br>(5 - 116)           | --                 | --                       | --                       | --                       |
| Down syndrome                                       | 291<br>(58 - 836)         | 264<br>(40 - 792)         | 10<br>(3 - 23)     | 15<br>(7 - 27)           | 2<br>(1 - 3)             | 0<br>(0 - 1)             |
| Chromosomal unbalanced rearrangements               | 96<br>(25 - 320)          | 91<br>(22 - 311)          | 2<br>(1 - 6)       | 2<br>(1 - 4)             | 0<br>(0 - 1)             | 0<br>(0 - 0)             |
| Other congenital anomalies                          | 1,094<br>(326 - 3,223)    | 1,028<br>(274 - 3,101)    | 25<br>(9 - 61)     | 24<br>(13 - 42)          | 7<br>(4 - 11)            | 10<br>(6 - 15)           |
| Skin and subcutaneous diseases                      | 528<br>(373 - 766)        | 175<br>(85 - 359)         | 10<br>(6 - 16)     | 109<br>(70 - 179)        | 87<br>(56 - 127)         | 147<br>(93 - 215)        |



Web Table 31- Tanzania deaths with 95% UI by age, sex, and cause in 2013

| Cause                                           | Males, All Ages             | Males, 0-4 Years         | Males, 5-14 Years    | Males, 15-49 Years        | Males, 50-69 Years       | Males, 70-80 Years       |
|-------------------------------------------------|-----------------------------|--------------------------|----------------------|---------------------------|--------------------------|--------------------------|
| Cellulitis                                      | 228<br>(92 - 468)           | 75<br>(19 - 219)         | 4<br>(1 - 10)        | 49<br>(20 - 104)          | 40<br>(17 - 75)          | 59<br>(22 - 114)         |
| Pyoderma                                        | 239<br>(118 - 378)          | 91<br>(34 - 186)         | 4<br>(2 - 6)         | 46<br>(21 - 76)           | 38<br>(16 - 65)          | 61<br>(28 - 108)         |
| Decubitus ulcer                                 | 47<br>(22 - 81)             | 4<br>(1 - 10)            | 1<br>(0 - 2)         | 9<br>(4 - 16)             | 8<br>(3 - 15)            | 25<br>(11 - 49)          |
| Other skin and subcutaneous diseases            | 15<br>(4 - 39)              | 5<br>(1 - 20)            | 1<br>(0 - 2)         | 5<br>(2 - 11)             | 2<br>(1 - 4)             | 2<br>(1 - 5)             |
| Sudden infant death syndrome                    | 103<br>(28 - 271)           | 103<br>(28 - 271)        | --                   | --                        | --                       | --                       |
| Injuries                                        | 15,037<br>(12,086 - 18,261) | 3,079<br>(1,924 - 4,783) | 996<br>(697 - 1,361) | 7,826<br>(5,686 - 10,130) | 1,732<br>(1,268 - 2,237) | 1,404<br>(1,121 - 1,729) |
| Transport injuries                              | 4,005<br>(3,094 - 5,247)    | 629<br>(340 - 1,123)     | 311<br>(190 - 480)   | 2,293<br>(1,628 - 3,074)  | 474<br>(324 - 654)       | 298<br>(217 - 401)       |
| Road injuries                                   | 3,785<br>(2,914 - 4,931)    | 556<br>(300 - 986)       | 279<br>(170 - 430)   | 2,239<br>(1,591 - 3,003)  | 443<br>(304 - 610)       | 267<br>(193 - 357)       |
| Pedestrian road injuries                        | 1,914<br>(1,381 - 2,629)    | 322<br>(163 - 581)       | 163<br>(93 - 260)    | 1,046<br>(708 - 1,491)    | 239<br>(156 - 345)       | 145<br>(96 - 205)        |
| Cyclist road injuries                           | 268<br>(177 - 387)          | 27<br>(9 - 66)           | 26<br>(13 - 46)      | 129<br>(78 - 195)         | 49<br>(28 - 74)          | 37<br>(21 - 58)          |
| Motorcyclist road injuries                      | 299<br>(187 - 450)          | 26<br>(12 - 51)          | 8<br>(4 - 15)        | 220<br>(132 - 345)        | 24<br>(14 - 39)          | 21<br>(12 - 36)          |
| Motor vehicle road injuries                     | 1,249<br>(856 - 1,740)      | 151<br>(74 - 288)        | 74<br>(39 - 131)     | 838<br>(536 - 1,223)      | 127<br>(77 - 196)        | 58<br>(36 - 90)          |
| Other road injuries                             | 55<br>(26 - 102)            | 30<br>(10 - 68)          | 8<br>(3 - 18)        | 6<br>(3 - 10)             | 5<br>(2 - 10)            | 6<br>(2 - 11)            |
| Other transport injuries                        | 221<br>(155 - 322)          | 73<br>(32 - 145)         | 32<br>(16 - 57)      | 54<br>(34 - 86)           | 31<br>(19 - 49)          | 31<br>(19 - 46)          |
| Unintentional injuries                          | 6,501<br>(4,935 - 8,287)    | 2,246<br>(1,349 - 3,542) | 595<br>(401 - 845)   | 2,102<br>(1,473 - 2,863)  | 745<br>(531 - 1,004)     | 815<br>(615 - 1,041)     |
| Falls                                           | 1,203<br>(841 - 1,594)      | 140<br>(64 - 278)        | 82<br>(43 - 147)     | 415<br>(243 - 619)        | 258<br>(154 - 406)       | 308<br>(193 - 483)       |
| Drowning                                        | 1,679<br>(1,049 - 2,764)    | 593<br>(251 - 1,211)     | 245<br>(134 - 440)   | 690<br>(397 - 1,158)      | 87<br>(52 - 143)         | 64<br>(41 - 98)          |
| Fire, heat, and hot substances                  | 936<br>(579 - 1,540)        | 459<br>(198 - 930)       | 77<br>(44 - 134)     | 188<br>(120 - 294)        | 103<br>(61 - 160)        | 109<br>(63 - 166)        |
| Poisonings                                      | 308<br>(188 - 456)          | 93<br>(38 - 207)         | 13<br>(7 - 23)       | 158<br>(91 - 236)         | 30<br>(17 - 48)          | 14<br>(8 - 23)           |
| Exposure to mechanical forces                   | 815<br>(590 - 1,174)        | 313<br>(152 - 597)       | 73<br>(42 - 120)     | 289<br>(203 - 419)        | 101<br>(64 - 151)        | 39<br>(28 - 53)          |
| Unintentional firearm injuries                  | 161<br>(103 - 241)          | 21<br>(9 - 45)           | 6<br>(3 - 11)        | 116<br>(66 - 192)         | 10<br>(5 - 16)           | 8<br>(4 - 13)            |
| Unintentional suffocation                       | 181<br>(76 - 434)           | 138<br>(43 - 382)        | 11<br>(4 - 23)       | 17<br>(9 - 28)            | 13<br>(6 - 22)           | 3<br>(1 - 5)             |
| Other exposure to mechanical forces             | 472<br>(343 - 667)          | 153<br>(70 - 308)        | 56<br>(29 - 99)      | 157<br>(103 - 237)        | 78<br>(47 - 121)         | 28<br>(19 - 41)          |
| Adverse effects of medical treatment            | 708<br>(456 - 1,133)        | 325<br>(157 - 703)       | 17<br>(9 - 30)       | 95<br>(58 - 165)          | 85<br>(48 - 138)         | 186<br>(99 - 314)        |
| Animal contact                                  | 253<br>(166 - 387)          | 53<br>(22 - 115)         | 34<br>(17 - 66)      | 80<br>(47 - 131)          | 41<br>(23 - 67)          | 46<br>(26 - 78)          |
| Venomous animal contact                         | 117<br>(78 - 170)           | 15<br>(6 - 32)           | 8<br>(3 - 18)        | 36<br>(20 - 63)           | 25<br>(13 - 42)          | 34<br>(19 - 61)          |
| Non-venomous animal contact                     | 136<br>(82 - 220)           | 38<br>(15 - 85)          | 26<br>(13 - 50)      | 44<br>(24 - 78)           | 16<br>(8 - 29)           | 12<br>(6 - 23)           |
| Foreign body                                    | 276<br>(126 - 464)          | 202<br>(81 - 366)        | 13<br>(6 - 23)       | 22<br>(11 - 36)           | 12<br>(7 - 18)           | 27<br>(14 - 44)          |
| Pulmonary aspiration and foreign body in airway | 260<br>(108 - 445)          | 195<br>(75 - 358)        | 11<br>(5 - 20)       | 20<br>(9 - 33)            | 7<br>(3 - 12)            | 26<br>(12 - 42)          |
| Foreign body in other body part                 | 16<br>(10 - 28)             | 6<br>(3 - 12)            | 2<br>(1 - 4)         | 2<br>(1 - 4)              | 4<br>(2 - 7)             | 2<br>(1 - 3)             |
| Other unintentional injuries                    | 324<br>(244 - 440)          | 69<br>(37 - 117)         | 41<br>(24 - 64)      | 165<br>(110 - 240)        | 28<br>(19 - 41)          | 22<br>(16 - 31)          |
| Self-harm and interpersonal violence            | 4,530<br>(3,163 - 6,206)    | 204<br>(90 - 417)        | 90<br>(51 - 152)     | 3,431<br>(2,226 - 4,972)  | 513<br>(333 - 716)       | 292<br>(187 - 431)       |
| Self-harm                                       | 1,945<br>(1,264 - 2,745)    | --                       | 33<br>(12 - 75)      | 1,304<br>(750 - 1,979)    | 350<br>(213 - 532)       | 258<br>(159 - 394)       |
| Interpersonal violence                          | 2,585<br>(1,543 - 3,842)    | 204<br>(90 - 417)        | 57<br>(27 - 100)     | 2,127<br>(1,231 - 3,334)  | 163<br>(90 - 262)        | 34<br>(17 - 59)          |
| Assault by firearm                              | 1,014<br>(498 - 1,720)      | 45<br>(14 - 106)         | 17<br>(6 - 34)       | 893<br>(429 - 1,537)      | 52<br>(22 - 95)          | 7<br>(2 - 15)            |
| Assault by sharp object                         | 542<br>(281 - 1,014)        | 48<br>(18 - 117)         | 12<br>(5 - 25)       | 409<br>(202 - 809)        | 61<br>(29 - 105)         | 12<br>(5 - 24)           |
| Assault by other means                          | 1,029<br>(520 - 1,585)      | 111<br>(46 - 227)        | 27<br>(11 - 50)      | 826<br>(398 - 1,368)      | 50<br>(22 - 88)          | 15<br>(7 - 28)           |

Web Table 31- Tanzania deaths with 95% UI by age, sex, and cause in 2013

| Cause                                                             | Females, All Ages              | Females, 0-4 Years          | Females, 5-14 Years      | Females, 15-49 Years        | Females, 50-69 Years        | Females, 70-80 Years        |
|-------------------------------------------------------------------|--------------------------------|-----------------------------|--------------------------|-----------------------------|-----------------------------|-----------------------------|
| All causes                                                        | 201,939<br>(181,648 - 224,132) | 68,146<br>(54,990 - 81,957) | 7,436<br>(6,154 - 8,838) | 58,529<br>(50,183 - 65,587) | 30,008<br>(25,391 - 37,249) | 37,820<br>(33,463 - 45,014) |
| Communicable, maternal, neonatal, and nutritional diseases        | 136,912<br>(120,595 - 154,643) | 57,948<br>(45,776 - 70,398) | 5,849<br>(4,795 - 7,157) | 45,933<br>(39,689 - 51,915) | 13,701<br>(11,308 - 16,586) | 13,481<br>(11,045 - 16,429) |
| HIV/AIDS and tuberculosis                                         | 42,765<br>(36,014 - 49,338)    | 1,770<br>(1,214 - 2,547)    | 2,304<br>(1,826 - 2,827) | 28,465<br>(24,185 - 33,868) | 7,788<br>(5,797 - 10,233)   | 2,437<br>(1,718 - 3,248)    |
| Tuberculosis                                                      | 9,099<br>(6,309 - 11,620)      | 778<br>(365 - 1,299)        | 127<br>(67 - 213)        | 4,261<br>(2,742 - 5,834)    | 2,100<br>(1,391 - 3,036)    | 1,832<br>(1,168 - 2,596)    |
| HIV/AIDS                                                          | 33,666<br>(26,958 - 40,319)    | 992<br>(657 - 1,664)        | 2,177<br>(1,705 - 2,691) | 24,204<br>(19,937 - 29,873) | 5,687<br>(3,831 - 7,967)    | 605<br>(309 - 1,029)        |
| HIV/AIDS resulting in mycobacterial infection                     | 1,838<br>(1,362 - 2,374)       | 51<br>(32 - 89)             | 104<br>(75 - 141)        | 1,325<br>(1,003 - 1,731)    | 323<br>(195 - 491)          | 36<br>(18 - 63)             |
| HIV/AIDS resulting in other diseases                              | 31,827<br>(25,611 - 38,193)    | 941<br>(622 - 1,578)        | 2,074<br>(1,621 - 2,567) | 22,879<br>(18,777 - 28,321) | 5,365<br>(3,614 - 7,544)    | 569<br>(290 - 963)          |
| Diarrhea, lower respiratory, and other common infectious diseases | 41,627<br>(31,473 - 52,064)    | 20,825<br>(12,978 - 29,813) | 1,624<br>(1,047 - 2,463) | 5,624<br>(3,765 - 7,535)    | 4,464<br>(3,174 - 6,345)    | 9,090<br>(6,949 - 11,686)   |
| Diarrheal diseases                                                | 13,454<br>(9,628 - 18,504)     | 4,601<br>(1,936 - 8,911)    | 522<br>(248 - 972)       | 2,751<br>(1,704 - 4,104)    | 1,997<br>(1,180 - 3,206)    | 3,582<br>(2,299 - 5,489)    |
| Intestinal infectious diseases                                    | 1,163<br>(569 - 2,080)         | 597<br>(247 - 1,125)        | 265<br>(120 - 491)       | 248<br>(106 - 498)          | 36<br>(15 - 74)             | 17<br>(8 - 32)              |
| Typhoid fever                                                     | 874<br>(403 - 1,640)           | 427<br>(161 - 854)          | 211<br>(94 - 396)        | 197<br>(78 - 401)           | 27<br>(10 - 57)             | 12<br>(5 - 25)              |
| Paratyphoid fever                                                 | 202<br>(89 - 406)              | 110<br>(38 - 239)           | 47<br>(18 - 100)         | 38<br>(13 - 86)             | 5<br>(2 - 13)               | 2<br>(1 - 6)                |
| Other intestinal infectious diseases                              | 86<br>(50 - 133)               | 60<br>(28 - 102)            | 6<br>(2 - 13)            | 13<br>(6 - 23)              | 4<br>(1 - 10)               | 3<br>(0 - 8)                |
| Lower respiratory infections                                      | 21,337<br>(15,046 - 28,321)    | 11,889<br>(6,602 - 18,100)  | 474<br>(255 - 777)       | 1,645<br>(1,056 - 2,362)    | 2,084<br>(1,396 - 3,036)    | 5,245<br>(3,631 - 7,274)    |
| Upper respiratory infections                                      | 27<br>(8 - 68)                 | 13<br>(1 - 54)              | 1<br>(0 - 4)             | 7<br>(1 - 20)               | 3<br>(0 - 9)                | 3<br>(0 - 11)               |
| Otitis media                                                      | 20<br>(14 - 26)                | 8<br>(4 - 15)               | 1<br>(0 - 1)             | 1<br>(1 - 2)                | 2<br>(2 - 4)                | 7<br>(5 - 10)               |
| Meningitis                                                        | 3,270<br>(2,255 - 4,560)       | 1,791<br>(930 - 2,967)      | 202<br>(106 - 352)       | 791<br>(482 - 1,217)        | 284<br>(175 - 436)          | 202<br>(123 - 312)          |
| Pneumococcal meningitis                                           | 792<br>(519 - 1,106)           | 357<br>(150 - 627)          | 58<br>(25 - 118)         | 248<br>(128 - 412)          | 72<br>(33 - 144)            | 57<br>(24 - 103)            |
| H influenzae type B meningitis                                    | 711<br>(428 - 1,116)           | 527<br>(261 - 919)          | 48<br>(22 - 90)          | 91<br>(42 - 166)            | 28<br>(11 - 53)             | 18<br>(8 - 32)              |
| Meningococcal meningitis                                          | 479<br>(289 - 722)             | 187<br>(81 - 364)           | 23<br>(9 - 45)           | 145<br>(62 - 287)           | 76<br>(35 - 141)            | 49<br>(17 - 93)             |
| Other meningitis                                                  | 1,288<br>(750 - 1,976)         | 720<br>(304 - 1,281)        | 73<br>(30 - 144)         | 308<br>(156 - 518)          | 108<br>(44 - 188)           | 79<br>(38 - 135)            |
| Encephalitis                                                      | 121<br>(82 - 175)              | 55<br>(29 - 98)             | 8<br>(4 - 13)            | 26<br>(13 - 44)             | 18<br>(10 - 30)             | 14<br>(9 - 22)              |
| Diphtheria                                                        | 16<br>(0 - 102)                | 14<br>(0 - 100)             | 1<br>(0 - 10)            | 1<br>(0 - 4)                | 0<br>(0 - 1)                | --                          |
| Whooping cough                                                    | 204<br>(0 - 1,124)             | 197<br>(0 - 1,083)          | 6<br>(0 - 31)            | 1<br>(0 - 5)                | 0<br>(0 - 0)                | --                          |
| Tetanus                                                           | 369<br>(215 - 586)             | 181<br>(73 - 367)           | 14<br>(6 - 27)           | 126<br>(69 - 199)           | 37<br>(20 - 63)             | 12<br>(6 - 20)              |
| Measles                                                           | 1,619<br>(39 - 9,368)          | 1,467<br>(35 - 8,524)       | 129<br>(3 - 774)         | 22<br>(0 - 129)             | 0<br>(0 - 2)                | --                          |
| Varicella and herpes zoster                                       | 26<br>(6 - 73)                 | 13<br>(0 - 62)              | 2<br>(0 - 8)             | 4<br>(0 - 11)               | 2<br>(0 - 6)                | 6<br>(0 - 29)               |
| Neglected tropical diseases and malaria                           | 18,039<br>(9,697 - 34,155)     | 12,527<br>(5,885 - 27,408)  | 1,385<br>(560 - 2,580)   | 2,988<br>(1,334 - 6,067)    | 702<br>(216 - 1,683)        | 437<br>(122 - 1,266)        |
| Malaria                                                           | 16,242<br>(7,989 - 32,819)     | 11,977<br>(5,378 - 27,091)  | 1,087<br>(269 - 2,290)   | 2,213<br>(635 - 5,453)      | 588<br>(126 - 1,580)        | 377<br>(64 - 1,221)         |
| Leishmaniasis                                                     | 1,419<br>(644 - 2,643)         | 432<br>(107 - 966)          | 259<br>(51 - 606)        | 640<br>(266 - 1,194)        | 70<br>(19 - 146)            | 18<br>(4 - 38)              |
| Visceral leishmaniasis                                            | 1,419<br>(644 - 2,643)         | 432<br>(107 - 966)          | 259<br>(51 - 606)        | 640<br>(266 - 1,194)        | 70<br>(19 - 146)            | 18<br>(4 - 38)              |
| African trypanosomiasis                                           | 4<br>(2 - 7)                   | 0<br>(0 - 1)                | 0<br>(0 - 1)             | 3<br>(1 - 5)                | 1<br>(0 - 1)                | 0<br>(0 - 0)                |
| Schistosomiasis                                                   | 72<br>(49 - 101)               | 2<br>(1 - 4)                | 2<br>(1 - 4)             | 36<br>(21 - 57)             | 19<br>(11 - 32)             | 13<br>(7 - 23)              |
| Cysticercosis                                                     | 6<br>(1 - 18)                  | 0<br>(0 - 1)                | 0<br>(0 - 1)             | 4<br>(1 - 12)               | 1<br>(0 - 2)                | 0<br>(0 - 1)                |
| Cystic echinococcosis                                             | 13<br>(10 - 16)                | 2<br>(1 - 4)                | 2<br>(1 - 2)             | 7<br>(5 - 9)                | 1<br>(1 - 2)                | 1<br>(1 - 1)                |
| Dengue                                                            | 2<br>(1 - 3)                   | 1<br>(0 - 1)                | 0<br>(0 - 1)             | 1<br>(0 - 1)                | 0<br>(0 - 0)                | 0<br>(0 - 0)                |
| Yellow fever                                                      | 0<br>(0 - 0)                   | 0<br>(0 - 0)                | 0<br>(0 - 0)             | 0<br>(0 - 0)                | 0<br>(0 - 0)                | 0<br>(0 - 0)                |
| Rabies                                                            | 140<br>(81 - 225)              | 30<br>(10 - 67)             | 26<br>(11 - 53)          | 70<br>(41 - 108)            | 10<br>(5 - 16)              | 3<br>(1 - 6)                |
| Intestinal nematode infections                                    | 72<br>(35 - 125)               | 60<br>(24 - 111)            | 6<br>(1 - 16)            | 4<br>(0 - 12)               | 1<br>(0 - 5)                | 1<br>(0 - 6)                |
| Ascariasis                                                        | 72<br>(35 - 125)               | 60<br>(24 - 111)            | 6<br>(1 - 16)            | 4<br>(0 - 12)               | 1<br>(0 - 5)                | 1<br>(0 - 6)                |

Web Table 31- Tanzania deaths with 95% UI by age, sex, and cause in 2013

| Cause                                                            | Females, All Ages           | Females, 0-4 Years          | Females, 5-14 Years  | Females, 15-49 Years      | Females, 50-69 Years        | Females, 70-80 Years        |
|------------------------------------------------------------------|-----------------------------|-----------------------------|----------------------|---------------------------|-----------------------------|-----------------------------|
| Other neglected tropical diseases                                | 69<br>(45 - 102)            | 23<br>(12 - 44)             | 2<br>(1 - 4)         | 10<br>(6 - 17)            | 11<br>(6 - 20)              | 23<br>(12 - 38)             |
| Maternal disorders                                               | 7,745<br>(5,298 - 10,908)   | --                          | 22<br>(7 - 51)       | 7,723<br>(5,278 - 10,883) | --                          | --                          |
| Maternal hemorrhage                                              | 995<br>(638 - 1,448)        | --                          | 2<br>(1 - 4)         | 993<br>(636 - 1,447)      | --                          | --                          |
| Maternal sepsis and other maternal infections                    | 598<br>(320 - 989)          | --                          | 2<br>(1 - 6)         | 596<br>(318 - 988)        | --                          | --                          |
| Maternal hypertensive disorders                                  | 743<br>(420 - 1,174)        | --                          | 3<br>(1 - 7)         | 740<br>(418 - 1,168)      | --                          | --                          |
| Maternal obstructed labor                                        | 414<br>(251 - 632)          | --                          | 1<br>(0 - 3)         | 413<br>(250 - 631)        | --                          | --                          |
| Maternal abortive outcome                                        | 1,697<br>(1,078 - 2,568)    | --                          | 5<br>(1 - 11)        | 1,692<br>(1,073 - 2,561)  | --                          | --                          |
| Indirect maternal deaths                                         | 474<br>(237 - 792)          | --                          | 1<br>(0 - 3)         | 473<br>(237 - 789)        | --                          | --                          |
| Late maternal deaths                                             | 677<br>(386 - 1,094)        | --                          | 3<br>(1 - 9)         | 674<br>(384 - 1,091)      | --                          | --                          |
| Maternal deaths aggravated by HIV/AIDS                           | 141<br>(77 - 225)           | --                          | --                   | 141<br>(77 - 225)         | --                          | --                          |
| Other maternal disorders                                         | 1,990<br>(1,281 - 2,871)    | --                          | 5<br>(2 - 13)        | 1,984<br>(1,277 - 2,866)  | --                          | --                          |
| Neonatal disorders                                               | 13,408<br>(10,175 - 17,214) | 13,408<br>(10,175 - 17,214) | --                   | --                        | --                          | --                          |
| Neonatal preterm birth complications                             | 3,481<br>(1,579 - 6,137)    | 3,481<br>(1,579 - 6,137)    | --                   | --                        | --                          | --                          |
| Neonatal encephalopathy due to birth asphyxia and trauma         | 4,054<br>(2,196 - 6,317)    | 4,054<br>(2,196 - 6,317)    | --                   | --                        | --                          | --                          |
| Neonatal sepsis and other neonatal infections                    | 3,223<br>(1,467 - 5,671)    | 3,223<br>(1,467 - 5,671)    | --                   | --                        | --                          | --                          |
| Hemolytic disease and other neonatal jaundice                    | 52<br>(18 - 131)            | 52<br>(18 - 131)            | --                   | --                        | --                          | --                          |
| Other neonatal disorders                                         | 2,597<br>(1,308 - 4,416)    | 2,597<br>(1,308 - 4,416)    | --                   | --                        | --                          | --                          |
| Nutritional deficiencies                                         | 7,113<br>(4,725 - 9,894)    | 4,138<br>(2,028 - 7,028)    | 207<br>(116 - 336)   | 868<br>(575 - 1,215)      | 603<br>(389 - 885)          | 1,297<br>(845 - 1,890)      |
| Protein-energy malnutrition                                      | 5,176<br>(2,848 - 7,895)    | 3,616<br>(1,626 - 6,278)    | 168<br>(92 - 284)    | 253<br>(109 - 466)        | 364<br>(198 - 588)          | 775<br>(403 - 1,235)        |
| Iodine deficiency                                                | 22<br>(1 - 95)              | 11<br>(0 - 79)              | 1<br>(0 - 7)         | 5<br>(0 - 22)             | 2<br>(0 - 12)               | 3<br>(0 - 22)               |
| Iron-deficiency anemia                                           | 1,833<br>(874 - 2,964)      | 498<br>(114 - 1,170)        | 37<br>(10 - 80)      | 607<br>(352 - 918)        | 225<br>(93 - 399)           | 466<br>(205 - 889)          |
| Other nutritional deficiencies                                   | 81<br>(34 - 165)            | 13<br>(3 - 37)              | 1<br>(0 - 1)         | 4<br>(2 - 9)              | 11<br>(4 - 23)              | 52<br>(17 - 125)            |
| Other communicable, maternal, neonatal, and nutritional diseases | 6,216<br>(1,837 - 11,358)   | 5,280<br>(1,164 - 10,165)   | 306<br>(66 - 610)    | 265<br>(170 - 386)        | 145<br>(72 - 306)           | 220<br>(92 - 458)           |
| Sexually transmitted diseases excluding HIV                      | 5,466<br>(1,124 - 10,535)   | 4,975<br>(860 - 9,814)      | 285<br>(46 - 576)    | 128<br>(70 - 211)         | 38<br>(13 - 100)            | 40<br>(13 - 104)            |
| Syphilis                                                         | 5,361<br>(1,015 - 10,403)   | 4,975<br>(860 - 9,814)      | 284<br>(45 - 575)    | 51<br>(28 - 85)           | 21<br>(7 - 55)              | 30<br>(10 - 80)             |
| Chlamydial infection                                             | 34<br>(20 - 56)             | --                          | 1<br>(0 - 1)         | 26<br>(14 - 42)           | 5<br>(2 - 14)               | 2<br>(1 - 6)                |
| Gonococcal infection                                             | 38<br>(22 - 64)             | --                          | 0<br>(0 - 1)         | 26<br>(14 - 43)           | 7<br>(2 - 18)               | 5<br>(2 - 12)               |
| Other sexually transmitted diseases                              | 33<br>(19 - 55)             | --                          | 0<br>(0 - 1)         | 25<br>(14 - 41)           | 5<br>(2 - 14)               | 2<br>(1 - 6)                |
| Hepatitis                                                        | 165<br>(119 - 241)          | 51<br>(24 - 94)             | 8<br>(4 - 13)        | 80<br>(48 - 124)          | 17<br>(11 - 26)             | 9<br>(6 - 14)               |
| Acute hepatitis A                                                | 32<br>(10 - 66)             | 21<br>(7 - 48)              | 3<br>(1 - 7)         | 7<br>(2 - 16)             | 0<br>(0 - 1)                | 0<br>(0 - 0)                |
| Acute hepatitis B                                                | 79<br>(48 - 124)            | 29<br>(11 - 60)             | 3<br>(1 - 7)         | 24<br>(11 - 44)           | 15<br>(9 - 23)              | 9<br>(6 - 13)               |
| Acute hepatitis C                                                | 1<br>(0 - 4)                | --                          | 0<br>(0 - 0)         | 1<br>(0 - 2)              | 0<br>(0 - 1)                | 0<br>(0 - 1)                |
| Acute hepatitis E                                                | 52<br>(29 - 87)             | 0<br>(0 - 1)                | 1<br>(0 - 2)         | 49<br>(26 - 83)           | 2<br>(0 - 4)                | 0<br>(0 - 1)                |
| Other infectious diseases                                        | 585<br>(338 - 1,077)        | 254<br>(98 - 572)           | 13<br>(4 - 35)       | 57<br>(29 - 98)           | 89<br>(33 - 242)            | 171<br>(54 - 402)           |
| Non-communicable diseases                                        | 54,727<br>(45,634 - 66,591) | 7,413<br>(4,572 - 11,286)   | 869<br>(582 - 1,206) | 8,809<br>(6,520 - 11,076) | 15,033<br>(11,560 - 20,309) | 22,604<br>(19,048 - 27,563) |
| Neoplasms                                                        | 11,211<br>(8,795 - 14,264)  | 593<br>(305 - 983)          | 204<br>(113 - 334)   | 2,707<br>(1,958 - 3,381)  | 4,725<br>(3,526 - 6,607)    | 2,982<br>(2,360 - 3,856)    |
| Esophageal cancer                                                | 1,025<br>(732 - 1,479)      | --                          | --                   | 125<br>(73 - 191)         | 572<br>(364 - 890)          | 328<br>(215 - 538)          |
| Stomach cancer                                                   | 463<br>(345 - 631)          | --                          | --                   | 47<br>(33 - 61)           | 240<br>(170 - 354)          | 176<br>(121 - 258)          |
| Liver cancer                                                     | 1,288<br>(666 - 2,023)      | --                          | 12<br>(4 - 24)       | 267<br>(137 - 420)        | 604<br>(274 - 1,041)        | 405<br>(187 - 740)          |
| Liver cancer due to hepatitis B                                  | 244<br>(77 - 460)           | --                          | 2<br>(1 - 5)         | 70<br>(31 - 124)          | 112<br>(20 - 242)           | 60<br>(14 - 130)            |

Web Table 31- Tanzania deaths with 95% UI by age, sex, and cause in 2013

| Cause                                | Females, All Ages           | Females, 0-4 Years   | Females, 5-14 Years | Females, 15-49 Years     | Females, 50-69 Years     | Females, 70-80 Years        |
|--------------------------------------|-----------------------------|----------------------|---------------------|--------------------------|--------------------------|-----------------------------|
| Liver cancer due to hepatitis C      | 584<br>(182 - 1,077)        | --                   | 2<br>(0 - 5)        | 97<br>(33 - 178)         | 288<br>(66 - 566)        | 197<br>(59 - 404)           |
| Liver cancer due to alcohol use      | 142<br>(57 - 284)           | --                   | --                  | 12<br>(4 - 22)           | 63<br>(23 - 130)         | 67<br>(23 - 145)            |
| Liver cancer due to other causes     | 318<br>(160 - 641)          | --                   | 7<br>(3 - 16)       | 88<br>(46 - 162)         | 140<br>(56 - 305)        | 82<br>(35 - 200)            |
| Larynx cancer                        | 17<br>(8 - 32)              | --                   | --                  | 1<br>(1 - 2)             | 14<br>(7 - 27)           | 2<br>(1 - 3)                |
| Tracheal, bronchus and lung cancer   | 262<br>(194 - 367)          | --                   | --                  | 24<br>(15 - 43)          | 121<br>(83 - 183)        | 118<br>(83 - 165)           |
| Breast cancer                        | 1,508<br>(1,016 - 1,975)    | --                   | --                  | 721<br>(421 - 976)       | 529<br>(360 - 773)       | 259<br>(191 - 349)          |
| Cervical cancer                      | 2,258<br>(1,526 - 3,131)    | --                   | --                  | 502<br>(352 - 690)       | 1,314<br>(771 - 1,961)   | 442<br>(285 - 647)          |
| Uterine cancer                       | 114<br>(66 - 167)           | --                   | --                  | 13<br>(7 - 21)           | 61<br>(31 - 95)          | 40<br>(23 - 64)             |
| Prostate cancer                      | --                          | --                   | --                  | --                       | --                       | --                          |
| Colon and rectum cancer              | 760<br>(581 - 1,006)        | --                   | --                  | 140<br>(101 - 181)       | 333<br>(237 - 477)       | 287<br>(209 - 397)          |
| Lip and oral cavity cancer           | 120<br>(74 - 183)           | --                   | --                  | 46<br>(23 - 77)          | 50<br>(29 - 81)          | 24<br>(14 - 38)             |
| Nasopharynx cancer                   | 23<br>(14 - 37)             | --                   | 0<br>(0 - 1)        | 13<br>(7 - 24)           | 5<br>(3 - 8)             | 4<br>(2 - 7)                |
| Other pharynx cancer                 | 36<br>(24 - 54)             | --                   | --                  | 10<br>(6 - 20)           | 19<br>(12 - 30)          | 6<br>(4 - 9)                |
| Gallbladder and biliary tract cancer | 195<br>(132 - 262)          | --                   | --                  | 57<br>(33 - 81)          | 99<br>(62 - 153)         | 39<br>(25 - 60)             |
| Pancreatic cancer                    | 175<br>(135 - 229)          | --                   | --                  | 42<br>(29 - 56)          | 83<br>(58 - 120)         | 50<br>(35 - 69)             |
| Malignant skin melanoma              | 46<br>(32 - 64)             | --                   | --                  | 8<br>(4 - 12)            | 24<br>(16 - 35)          | 14<br>(10 - 21)             |
| Non-melanoma skin cancer             | 50<br>(26 - 101)            | --                   | --                  | 11<br>(4 - 21)           | 11<br>(5 - 26)           | 27<br>(11 - 68)             |
| Ovarian cancer                       | 191<br>(132 - 267)          | --                   | --                  | 69<br>(40 - 108)         | 86<br>(57 - 128)         | 37<br>(25 - 55)             |
| Testicular cancer                    | --                          | --                   | --                  | --                       | --                       | --                          |
| Kidney cancer                        | 157<br>(107 - 230)          | 40<br>(14 - 88)      | 6<br>(3 - 13)       | 24<br>(15 - 40)          | 34<br>(21 - 54)          | 54<br>(33 - 84)             |
| Bladder cancer                       | 37<br>(23 - 62)             | --                   | --                  | 11<br>(7 - 18)           | 9<br>(5 - 16)            | 17<br>(9 - 33)              |
| Brain and nervous system cancer      | 213<br>(139 - 288)          | 40<br>(12 - 84)      | 8<br>(4 - 13)       | 122<br>(76 - 171)        | 20<br>(13 - 31)          | 24<br>(16 - 35)             |
| Thyroid cancer                       | 31<br>(19 - 53)             | --                   | 0<br>(0 - 1)        | 2<br>(1 - 3)             | 19<br>(10 - 36)          | 10<br>(6 - 15)              |
| Mesothelioma                         | 8<br>(6 - 12)               | --                   | --                  | 4<br>(2 - 6)             | 3<br>(1 - 5)             | 2<br>(1 - 4)                |
| Hodgkin lymphoma                     | 84<br>(54 - 121)            | 5<br>(2 - 10)        | 4<br>(2 - 10)       | 23<br>(13 - 40)          | 22<br>(12 - 38)          | 31<br>(17 - 51)             |
| Non-Hodgkin lymphoma                 | 441<br>(239 - 636)          | 103<br>(40 - 215)    | 26<br>(10 - 53)     | 102<br>(52 - 162)        | 86<br>(48 - 131)         | 124<br>(67 - 180)           |
| Multiple myeloma                     | 105<br>(74 - 143)           | --                   | --                  | 27<br>(17 - 41)          | 28<br>(18 - 43)          | 50<br>(34 - 72)             |
| Leukemia                             | 193<br>(136 - 247)          | 31<br>(12 - 58)      | 19<br>(9 - 30)      | 59<br>(35 - 83)          | 34<br>(24 - 50)          | 50<br>(36 - 68)             |
| Other neoplasms                      | 1,410<br>(921 - 1,956)      | 375<br>(179 - 697)   | 128<br>(60 - 242)   | 237<br>(130 - 359)       | 306<br>(199 - 459)       | 363<br>(240 - 511)          |
| Cardiovascular diseases              | 22,684<br>(18,047 - 28,732) | 543<br>(287 - 1,017) | 106<br>(60 - 196)   | 2,379<br>(1,647 - 3,669) | 6,354<br>(4,718 - 8,744) | 13,302<br>(10,846 - 16,421) |
| Rheumatic heart disease              | 1,125<br>(750 - 1,867)      | 13<br>(3 - 43)       | 20<br>(9 - 38)      | 377<br>(223 - 689)       | 325<br>(191 - 554)       | 391<br>(235 - 685)          |
| Ischemic heart disease               | 5,518<br>(3,573 - 7,918)    | 2<br>(0 - 7)         | 5<br>(2 - 16)       | 404<br>(245 - 839)       | 1,670<br>(1,075 - 2,531) | 3,437<br>(2,156 - 4,856)    |
| Cerebrovascular disease              | 5,684<br>(3,896 - 7,600)    | 49<br>(21 - 101)     | 7<br>(4 - 15)       | 450<br>(293 - 694)       | 1,611<br>(1,054 - 2,312) | 3,566<br>(2,354 - 4,793)    |
| Ischemic stroke                      | 2,536<br>(1,164 - 3,808)    | 4<br>(1 - 13)        | 1<br>(0 - 2)        | 60<br>(23 - 106)         | 483<br>(194 - 805)       | 1,988<br>(929 - 2,980)      |
| Hemorrhagic stroke                   | 3,148<br>(2,111 - 4,573)    | 45<br>(18 - 95)      | 7<br>(3 - 13)       | 391<br>(252 - 631)       | 1,128<br>(740 - 1,680)   | 1,578<br>(913 - 2,544)      |
| Hypertensive heart disease           | 3,929<br>(2,345 - 8,049)    | 10<br>(3 - 28)       | 3<br>(1 - 7)        | 178<br>(109 - 286)       | 880<br>(465 - 1,827)     | 2,857<br>(1,627 - 5,997)    |
| Cardiomyopathy and myocarditis       | 1,663<br>(1,054 - 2,800)    | 252<br>(106 - 471)   | 36<br>(14 - 64)     | 315<br>(129 - 499)       | 385<br>(212 - 751)       | 675<br>(312 - 1,461)        |
| Atrial fibrillation and flutter      | 23<br>(6 - 43)              | --                   | --                  | 1<br>(0 - 1)             | 4<br>(1 - 7)             | 19<br>(4 - 37)              |
| Aortic aneurysm                      | 278<br>(136 - 573)          | --                   | --                  | 30<br>(8 - 66)           | 76<br>(35 - 154)         | 172<br>(82 - 361)           |
| Peripheral vascular disease          | 18<br>(10 - 36)             | --                   | --                  | 0<br>(0 - 1)             | 3<br>(2 - 7)             | 14<br>(8 - 30)              |

Web Table 31- Tanzania deaths with 95% UI by age, sex, and cause in 2013

| Cause                                               | Females, All Ages        | Females, 0-4 Years | Females, 5-14 Years | Females, 15-49 Years | Females, 50-69 Years   | Females, 70-80 Years     |
|-----------------------------------------------------|--------------------------|--------------------|---------------------|----------------------|------------------------|--------------------------|
| Endocarditis                                        | 396<br>(191 - 834)       | 37<br>(10 - 112)   | 6<br>(2 - 15)       | 57<br>(28 - 114)     | 86<br>(33 - 192)       | 209<br>(66 - 482)        |
| Other cardiovascular and circulatory diseases       | 4,051<br>(2,610 - 6,371) | 179<br>(63 - 464)  | 29<br>(12 - 69)     | 567<br>(275 - 1,023) | 1,313<br>(789 - 2,165) | 1,962<br>(1,112 - 3,550) |
| Chronic respiratory diseases                        | 2,563<br>(2,010 - 3,266) | 199<br>(97 - 360)  | 38<br>(24 - 60)     | 358<br>(249 - 468)   | 713<br>(503 - 1,018)   | 1,254<br>(962 - 1,643)   |
| Chronic obstructive pulmonary disease               | 1,470<br>(1,046 - 1,995) | 37<br>(14 - 79)    | 15<br>(8 - 25)      | 107<br>(68 - 158)    | 445<br>(294 - 660)     | 866<br>(601 - 1,200)     |
| Pneumoconiosis                                      | 18<br>(12 - 27)          | 3<br>(1 - 6)       | 1<br>(1 - 2)        | 10<br>(6 - 15)       | 2<br>(1 - 4)           | 3<br>(1 - 4)             |
| Silicosis                                           | 1<br>(1 - 2)             | 0<br>(0 - 1)       | 0<br>(0 - 0)        | 1<br>(0 - 1)         | 0<br>(0 - 0)           | 0<br>(0 - 0)             |
| Asbestosis                                          | 1<br>(1 - 2)             | 0<br>(0 - 1)       | 0<br>(0 - 0)        | 0<br>(0 - 1)         | 0<br>(0 - 0)           | 0<br>(0 - 0)             |
| Coal workers pneumoconiosis                         | 1<br>(1 - 2)             | 0<br>(0 - 1)       | 0<br>(0 - 0)        | 0<br>(0 - 1)         | 0<br>(0 - 0)           | 0<br>(0 - 0)             |
| Other pneumoconiosis                                | 15<br>(10 - 22)          | 2<br>(1 - 4)       | 1<br>(0 - 1)        | 8<br>(5 - 13)        | 2<br>(1 - 4)           | 2<br>(1 - 4)             |
| Asthma                                              | 498<br>(303 - 704)       | 56<br>(18 - 118)   | 11<br>(6 - 19)      | 97<br>(58 - 140)     | 160<br>(92 - 254)      | 173<br>(91 - 275)        |
| Interstitial lung disease and pulmonary sarcoidosis | 291<br>(64 - 559)        | 8<br>(1 - 24)      | 2<br>(1 - 5)        | 46<br>(12 - 100)     | 79<br>(15 - 165)       | 156<br>(26 - 348)        |
| Other chronic respiratory diseases                  | 286<br>(186 - 433)       | 96<br>(45 - 178)   | 9<br>(4 - 16)       | 99<br>(59 - 158)     | 27<br>(15 - 51)        | 55<br>(30 - 98)          |
| Cirrhosis                                           | 2,101<br>(1,621 - 2,733) | 53<br>(19 - 112)   | 33<br>(19 - 50)     | 529<br>(378 - 709)   | 823<br>(583 - 1,159)   | 664<br>(477 - 934)       |
| Cirrhosis due to hepatitis B                        | 639<br>(295 - 993)       | 3<br>(1 - 7)       | 6<br>(2 - 13)       | 179<br>(88 - 294)    | 259<br>(107 - 450)     | 192<br>(71 - 332)        |
| Cirrhosis due to hepatitis C                        | 526<br>(264 - 852)       | 2<br>(0 - 6)       | 2<br>(0 - 7)        | 105<br>(16 - 190)    | 228<br>(108 - 398)     | 188<br>(103 - 318)       |
| Cirrhosis due to alcohol use                        | 574<br>(367 - 841)       | --                 | --                  | 98<br>(51 - 159)     | 243<br>(140 - 390)     | 233<br>(135 - 366)       |
| Cirrhosis due to other causes                       | 362<br>(231 - 552)       | 49<br>(17 - 99)    | 24<br>(14 - 39)     | 147<br>(76 - 247)    | 93<br>(46 - 173)       | 50<br>(23 - 91)          |
| Digestive diseases                                  | 2,393<br>(1,818 - 3,090) | 134<br>(55 - 243)  | 68<br>(43 - 103)    | 626<br>(429 - 853)   | 588<br>(411 - 850)     | 977<br>(712 - 1,309)     |
| Peptic ulcer disease                                | 544<br>(329 - 849)       | 9<br>(3 - 20)      | 6<br>(2 - 11)       | 115<br>(63 - 193)    | 142<br>(75 - 233)      | 273<br>(155 - 442)       |
| Gastritis and duodenitis                            | 104<br>(27 - 276)        | 7<br>(2 - 19)      | 4<br>(1 - 10)       | 26<br>(9 - 52)       | 21<br>(4 - 66)         | 45<br>(9 - 155)          |
| Appendicitis                                        | 191<br>(105 - 277)       | 13<br>(4 - 29)     | 10<br>(5 - 19)      | 69<br>(38 - 112)     | 39<br>(16 - 73)        | 60<br>(23 - 122)         |
| Paralytic ileus and intestinal obstruction          | 737<br>(419 - 1,119)     | 42<br>(13 - 92)    | 29<br>(16 - 48)     | 169<br>(92 - 276)    | 209<br>(110 - 338)     | 288<br>(150 - 487)       |
| Inguinal, femoral, and abdominal hernia             | 49<br>(24 - 82)          | 6<br>(2 - 17)      | 0<br>(0 - 1)        | 21<br>(9 - 38)       | 3<br>(1 - 5)           | 19<br>(8 - 36)           |
| Inflammatory bowel disease                          | 175<br>(100 - 278)       | 28<br>(9 - 63)     | 6<br>(3 - 11)       | 66<br>(36 - 112)     | 29<br>(13 - 52)        | 46<br>(22 - 83)          |
| Vascular intestinal disorders                       | 21<br>(9 - 50)           | 0<br>(0 - 1)       | 0<br>(0 - 1)        | 3<br>(1 - 6)         | 5<br>(2 - 12)          | 13<br>(5 - 34)           |
| Gallbladder and biliary diseases                    | 194<br>(109 - 289)       | 4<br>(1 - 8)       | 2<br>(1 - 3)        | 46<br>(27 - 72)      | 51<br>(25 - 88)        | 91<br>(43 - 158)         |
| Pancreatitis                                        | 102<br>(51 - 172)        | 2<br>(0 - 6)       | 1<br>(1 - 3)        | 38<br>(15 - 67)      | 27<br>(12 - 58)        | 34<br>(14 - 78)          |
| Other digestive diseases                            | 275<br>(181 - 390)       | 23<br>(7 - 47)     | 9<br>(4 - 15)       | 73<br>(40 - 113)     | 62<br>(35 - 104)       | 109<br>(58 - 189)        |
| Neurological disorders                              | 2,078<br>(1,619 - 2,780) | 320<br>(138 - 710) | 88<br>(46 - 161)    | 366<br>(216 - 620)   | 182<br>(134 - 256)     | 1,121<br>(841 - 1,486)   |
| Alzheimer disease and other dementias               | 1,106<br>(836 - 1,477)   | --                 | --                  | 0<br>(0 - 1)         | 90<br>(62 - 130)       | 1,016<br>(753 - 1,372)   |
| Parkinson disease                                   | 12<br>(7 - 20)           | --                 | --                  | 1<br>(1 - 1)         | 4<br>(2 - 8)           | 7<br>(3 - 13)            |
| Epilepsy                                            | 816<br>(516 - 1,386)     | 274<br>(107 - 664) | 79<br>(38 - 151)    | 335<br>(188 - 589)   | 54<br>(31 - 92)        | 73<br>(40 - 127)         |
| Multiple sclerosis                                  | 9<br>(4 - 14)            | --                 | --                  | 5<br>(2 - 11)        | 3<br>(1 - 4)           | 1<br>(0 - 2)             |
| Other neurological disorders                        | 136<br>(102 - 172)       | 46<br>(25 - 72)    | 9<br>(6 - 14)       | 25<br>(18 - 32)      | 32<br>(23 - 45)        | 24<br>(18 - 33)          |
| Mental and substance use disorders                  | 445<br>(302 - 640)       | 27<br>(8 - 46)     | 0<br>(0 - 0)        | 319<br>(200 - 464)   | 71<br>(43 - 125)       | 27<br>(14 - 56)          |
| Schizophrenia                                       | 34<br>(14 - 58)          | --                 | --                  | 22<br>(5 - 40)       | 7<br>(3 - 13)          | 5<br>(2 - 10)            |
| Alcohol use disorders                               | 170<br>(53 - 299)        | --                 | --                  | 121<br>(32 - 230)    | 39<br>(11 - 76)        | 10<br>(3 - 20)           |
| Drug use disorders                                  | 239<br>(122 - 417)       | 27<br>(8 - 46)     | --                  | 175<br>(93 - 300)    | 24<br>(6 - 63)         | 13<br>(3 - 36)           |
| Opioid use disorders                                | 24<br>(13 - 43)          | 3<br>(1 - 5)       | --                  | 18<br>(9 - 32)       | 2<br>(1 - 6)           | 1<br>(0 - 4)             |
| Cocaine use disorders                               | 1<br>(1 - 3)             | 0<br>(0 - 0)       | --                  | 1<br>(1 - 2)         | 0<br>(0 - 0)           | 0<br>(0 - 0)             |

Web Table 31- Tanzania deaths with 95% UI by age, sex, and cause in 2013

| Cause                                               | Females, All Ages        | Females, 0-4 Years       | Females, 5-14 Years | Females, 15-49 Years   | Females, 50-69 Years     | Females, 70-80 Years     |
|-----------------------------------------------------|--------------------------|--------------------------|---------------------|------------------------|--------------------------|--------------------------|
| Amphetamine use disorders                           | 1<br>(1 - 2)             | 0<br>(0 - 0)             | --                  | 1<br>(0 - 1)           | 0<br>(0 - 0)             | 0<br>(0 - 0)             |
| Other drug use disorders                            | 212<br>(109 - 372)       | 24<br>(7 - 40)           | --                  | 155<br>(82 - 269)      | 22<br>(6 - 57)           | 11<br>(2 - 33)           |
| Eating disorders                                    | 2<br>(1 - 3)             | --                       | 0<br>(0 - 0)        | 2<br>(1 - 3)           | --                       | --                       |
| Anorexia nervosa                                    | 2<br>(1 - 3)             | --                       | 0<br>(0 - 0)        | 2<br>(1 - 3)           | --                       | --                       |
| Diabetes, urogenital, blood, and endocrine diseases | 5,543<br>(4,332 - 7,034) | 898<br>(439 - 1,545)     | 175<br>(105 - 275)  | 1,136<br>(776 - 1,573) | 1,391<br>(1,040 - 1,954) | 1,944<br>(1,509 - 2,499) |
| Diabetes mellitus                                   | 2,207<br>(1,696 - 2,945) | 8<br>(4 - 14)            | 7<br>(4 - 12)       | 219<br>(159 - 287)     | 796<br>(557 - 1,150)     | 1,178<br>(861 - 1,572)   |
| Acute glomerulonephritis                            | 116<br>(84 - 164)        | 9<br>(4 - 17)            | 2<br>(1 - 4)        | 55<br>(35 - 83)        | 27<br>(17 - 42)          | 24<br>(14 - 36)          |
| Chronic kidney disease                              | 894<br>(664 - 1,227)     | 101<br>(46 - 193)        | 39<br>(23 - 68)     | 230<br>(153 - 356)     | 202<br>(134 - 304)       | 323<br>(221 - 459)       |
| Chronic kidney disease due to diabetes mellitus     | 6<br>(3 - 12)            | 0<br>(0 - 1)             | 1<br>(0 - 1)        | 1<br>(1 - 2)           | 2<br>(1 - 5)             | 2<br>(1 - 5)             |
| Chronic kidney disease due to hypertension          | 366<br>(219 - 540)       | 14<br>(4 - 33)           | 5<br>(2 - 9)        | 71<br>(36 - 121)       | 99<br>(56 - 168)         | 177<br>(106 - 282)       |
| Chronic kidney disease due to glomerulonephritis    | 314<br>(194 - 467)       | 58<br>(26 - 107)         | 20<br>(11 - 32)     | 118<br>(66 - 185)      | 53<br>(24 - 92)          | 64<br>(24 - 114)         |
| Chronic kidney disease due to other causes          | 208<br>(111 - 358)       | 28<br>(9 - 68)           | 14<br>(6 - 31)      | 40<br>(20 - 83)        | 48<br>(21 - 89)          | 79<br>(26 - 155)         |
| Urinary diseases and male infertility               | 555<br>(397 - 774)       | 74<br>(32 - 159)         | 15<br>(6 - 32)      | 153<br>(96 - 255)      | 163<br>(103 - 254)       | 150<br>(97 - 227)        |
| Interstitial nephritis and urinary tract infections | 426<br>(288 - 595)       | 47<br>(18 - 105)         | 8<br>(3 - 19)       | 102<br>(58 - 181)      | 136<br>(82 - 215)        | 133<br>(83 - 204)        |
| Urolithiasis                                        | 33<br>(16 - 60)          | --                       | 2<br>(1 - 5)        | 15<br>(5 - 31)         | 10<br>(4 - 23)           | 6<br>(2 - 13)            |
| Other urinary diseases                              | 97<br>(60 - 173)         | 28<br>(10 - 61)          | 5<br>(2 - 12)       | 37<br>(20 - 73)        | 16<br>(8 - 34)           | 11<br>(5 - 24)           |
| Gynecological diseases                              | 25<br>(15 - 46)          | --                       | --                  | 10<br>(6 - 22)         | 8<br>(4 - 14)            | 7<br>(4 - 13)            |
| Uterine fibroids                                    | 6<br>(3 - 10)            | --                       | --                  | 1<br>(1 - 3)           | 2<br>(1 - 4)             | 2<br>(1 - 4)             |
| Polycystic ovarian syndrome                         | 1<br>(0 - 2)             | --                       | --                  | 1<br>(0 - 2)           | 0<br>(0 - 0)             | --                       |
| Endometriosis                                       | 2<br>(1 - 4)             | --                       | --                  | 2<br>(1 - 4)           | 0<br>(0 - 0)             | --                       |
| Genital prolapse                                    | 5<br>(3 - 8)             | --                       | --                  | 1<br>(1 - 3)           | 1<br>(1 - 3)             | 2<br>(1 - 3)             |
| Other gynecological diseases                        | 12<br>(7 - 22)           | --                       | --                  | 5<br>(3 - 11)          | 4<br>(2 - 8)             | 3<br>(2 - 6)             |
| Hemoglobinopathies and hemolytic anemias            | 958<br>(416 - 1,780)     | 476<br>(151 - 984)       | 96<br>(42 - 177)    | 286<br>(110 - 540)     | 60<br>(29 - 109)         | 40<br>(20 - 81)          |
| Thalassemias                                        | 14<br>(5 - 27)           | 10<br>(3 - 21)           | 1<br>(0 - 2)        | 2<br>(1 - 5)           | 0<br>(0 - 0)             | 0<br>(0 - 0)             |
| Sickle cell disorders                               | 853<br>(350 - 1,611)     | 432<br>(133 - 898)       | 93<br>(41 - 170)    | 274<br>(105 - 517)     | 51<br>(24 - 94)          | 4<br>(2 - 7)             |
| G6PD deficiency                                     | 10<br>(4 - 18)           | 4<br>(1 - 9)             | 1<br>(0 - 2)        | 3<br>(1 - 6)           | 1<br>(0 - 1)             | 1<br>(0 - 2)             |
| Other hemoglobinopathies and hemolytic anemias      | 81<br>(45 - 129)         | 30<br>(12 - 58)          | 2<br>(1 - 3)        | 7<br>(3 - 12)          | 7<br>(4 - 14)            | 36<br>(18 - 72)          |
| Endocrine, metabolic, blood, and immune disorders   | 788<br>(506 - 1,138)     | 231<br>(112 - 404)       | 15<br>(7 - 31)      | 183<br>(104 - 305)     | 136<br>(77 - 229)        | 223<br>(130 - 337)       |
| Musculoskeletal disorders                           | 198<br>(116 - 302)       | --                       | 11<br>(6 - 17)      | 114<br>(55 - 200)      | 38<br>(18 - 77)          | 35<br>(16 - 81)          |
| Rheumatoid arthritis                                | 60<br>(35 - 102)         | --                       | 2<br>(1 - 4)        | 17<br>(7 - 29)         | 19<br>(9 - 41)           | 21<br>(9 - 49)           |
| Other musculoskeletal disorders                     | 138<br>(78 - 227)        | --                       | 8<br>(4 - 13)       | 98<br>(47 - 173)       | 19<br>(8 - 44)           | 14<br>(5 - 42)           |
| Other non-communicable diseases                     | 5,511<br>(3,439 - 9,151) | 4,646<br>(2,665 - 8,184) | 147<br>(83 - 254)   | 274<br>(173 - 421)     | 148<br>(100 - 219)       | 296<br>(192 - 436)       |
| Congenital anomalies                                | 4,708<br>(2,718 - 8,351) | 4,360<br>(2,431 - 7,875) | 137<br>(75 - 246)   | 146<br>(78 - 284)      | 28<br>(18 - 43)          | 38<br>(26 - 53)          |
| Neural tube defects                                 | 1,374<br>(240 - 3,772)   | 1,315<br>(227 - 3,651)   | 25<br>(5 - 68)      | 30<br>(6 - 100)        | 2<br>(1 - 6)             | 2<br>(1 - 5)             |
| Congenital heart anomalies                          | 2,010<br>(834 - 3,970)   | 1,836<br>(706 - 3,755)   | 72<br>(33 - 144)    | 72<br>(29 - 153)       | 11<br>(6 - 18)           | 18<br>(11 - 28)          |
| Cleft lip and cleft palate                          | 20<br>(2 - 71)           | 20<br>(2 - 71)           | --                  | --                     | --                       | --                       |
| Down syndrome                                       | 276<br>(68 - 638)        | 240<br>(51 - 577)        | 14<br>(5 - 32)      | 18<br>(5 - 39)         | 4<br>(2 - 7)             | 1<br>(0 - 1)             |
| Chromosomal unbalanced rearrangements               | 203<br>(51 - 503)        | 192<br>(46 - 487)        | 3<br>(1 - 8)        | 6<br>(2 - 14)          | 1<br>(0 - 2)             | 1<br>(0 - 2)             |
| Other congenital anomalies                          | 826<br>(324 - 1,792)     | 757<br>(269 - 1,684)     | 22<br>(8 - 50)      | 21<br>(8 - 51)         | 10<br>(5 - 17)           | 16<br>(9 - 26)           |
| Skin and subcutaneous diseases                      | 759<br>(522 - 1,085)     | 243<br>(101 - 469)       | 10<br>(5 - 16)      | 128<br>(77 - 202)      | 120<br>(75 - 186)        | 259<br>(161 - 398)       |

Web Table 31- Tanzania deaths with 95% UI by age, sex, and cause in 2013

| Cause                                           | Females, All Ages          | Females, 0-4 Years       | Females, 5-14 Years  | Females, 15-49 Years     | Females, 50-69 Years   | Females, 70-80 Years     |
|-------------------------------------------------|----------------------------|--------------------------|----------------------|--------------------------|------------------------|--------------------------|
| Cellulitis                                      | 296<br>(157 - 540)         | 97<br>(22 - 238)         | 4<br>(2 - 9)         | 56<br>(21 - 108)         | 51<br>(26 - 90)        | 87<br>(42 - 149)         |
| Pyoderma                                        | 351<br>(204 - 555)         | 137<br>(51 - 291)        | 4<br>(2 - 7)         | 57<br>(30 - 105)         | 51<br>(26 - 87)        | 101<br>(49 - 176)        |
| Decubitus ulcer                                 | 83<br>(44 - 142)           | 2<br>(0 - 5)             | 1<br>(0 - 1)         | 6<br>(3 - 12)            | 12<br>(5 - 22)         | 64<br>(31 - 114)         |
| Other skin and subcutaneous diseases            | 29<br>(15 - 48)            | 7<br>(2 - 18)            | 1<br>(0 - 2)         | 8<br>(4 - 16)            | 5<br>(2 - 10)          | 8<br>(3 - 15)            |
| Sudden infant death syndrome                    | 44<br>(8 - 136)            | 44<br>(8 - 136)          | --                   | --                       | --                     | --                       |
| Injuries                                        | 10,299<br>(8,166 - 12,994) | 2,786<br>(1,706 - 4,281) | 718<br>(476 - 1,019) | 3,787<br>(2,524 - 5,278) | 1,274<br>(949 - 1,776) | 1,734<br>(1,351 - 2,261) |
| Transport injuries                              | 2,766<br>(2,031 - 3,903)   | 585<br>(310 - 1,042)     | 227<br>(130 - 362)   | 1,172<br>(750 - 1,758)   | 422<br>(289 - 639)     | 360<br>(249 - 538)       |
| Road injuries                                   | 2,558<br>(1,871 - 3,552)   | 510<br>(271 - 918)       | 204<br>(117 - 331)   | 1,123<br>(721 - 1,677)   | 397<br>(274 - 599)     | 323<br>(223 - 492)       |
| Pedestrian road injuries                        | 1,439<br>(1,037 - 2,115)   | 315<br>(159 - 578)       | 139<br>(73 - 225)    | 512<br>(309 - 843)       | 255<br>(171 - 392)     | 219<br>(151 - 335)       |
| Cyclist road injuries                           | 75<br>(49 - 112)           | 11<br>(3 - 27)           | 9<br>(4 - 17)        | 17<br>(10 - 29)          | 27<br>(16 - 44)        | 11<br>(6 - 18)           |
| Motorcyclist road injuries                      | 129<br>(76 - 232)          | 12<br>(5 - 25)           | 2<br>(1 - 4)         | 90<br>(45 - 174)         | 13<br>(7 - 24)         | 12<br>(6 - 22)           |
| Motor vehicle road injuries                     | 886<br>(610 - 1,297)       | 162<br>(73 - 309)        | 53<br>(26 - 97)      | 501<br>(314 - 784)       | 94<br>(57 - 146)       | 77<br>(45 - 125)         |
| Other road injuries                             | 29<br>(14 - 50)            | 11<br>(4 - 24)           | 2<br>(1 - 5)         | 2<br>(1 - 5)             | 9<br>(3 - 18)          | 5<br>(2 - 9)             |
| Other transport injuries                        | 208<br>(138 - 347)         | 75<br>(34 - 154)         | 23<br>(11 - 43)      | 49<br>(28 - 98)          | 25<br>(15 - 43)        | 37<br>(21 - 61)          |
| Unintentional injuries                          | 5,432<br>(4,190 - 7,089)   | 2,026<br>(1,197 - 3,202) | 429<br>(275 - 644)   | 1,171<br>(794 - 1,710)   | 622<br>(448 - 887)     | 1,183<br>(865 - 1,586)   |
| Falls                                           | 1,065<br>(727 - 1,455)     | 164<br>(83 - 297)        | 56<br>(30 - 105)     | 176<br>(106 - 273)       | 159<br>(101 - 242)     | 510<br>(320 - 787)       |
| Drowning                                        | 1,033<br>(646 - 1,950)     | 506<br>(239 - 1,096)     | 152<br>(79 - 291)    | 253<br>(137 - 467)       | 73<br>(45 - 129)       | 48<br>(30 - 77)          |
| Fire, heat, and hot substances                  | 934<br>(545 - 1,455)       | 428<br>(185 - 844)       | 77<br>(37 - 148)     | 201<br>(108 - 348)       | 99<br>(55 - 160)       | 128<br>(73 - 204)        |
| Poisonings                                      | 151<br>(92 - 221)          | 52<br>(23 - 102)         | 6<br>(3 - 12)        | 41<br>(23 - 71)          | 35<br>(20 - 58)        | 16<br>(9 - 25)           |
| Exposure to mechanical forces                   | 530<br>(349 - 815)         | 256<br>(125 - 513)       | 37<br>(20 - 69)      | 136<br>(83 - 219)        | 48<br>(32 - 75)        | 52<br>(34 - 77)          |
| Unintentional firearm injuries                  | 116<br>(75 - 185)          | 23<br>(9 - 51)           | 5<br>(2 - 10)        | 69<br>(36 - 127)         | 10<br>(6 - 18)         | 8<br>(5 - 14)            |
| Unintentional suffocation                       | 85<br>(30 - 263)           | 73<br>(22 - 245)         | 6<br>(2 - 14)        | 2<br>(1 - 4)             | 2<br>(1 - 5)           | 2<br>(1 - 4)             |
| Other exposure to mechanical forces             | 329<br>(206 - 552)         | 160<br>(65 - 361)        | 27<br>(12 - 55)      | 65<br>(36 - 110)         | 36<br>(22 - 60)        | 41<br>(26 - 66)          |
| Adverse effects of medical treatment            | 791<br>(503 - 1,263)       | 239<br>(92 - 569)        | 21<br>(11 - 40)      | 132<br>(76 - 221)        | 128<br>(69 - 212)      | 271<br>(138 - 466)       |
| Animal contact                                  | 370<br>(186 - 850)         | 93<br>(35 - 216)         | 37<br>(14 - 89)      | 142<br>(67 - 371)        | 53<br>(23 - 119)       | 43<br>(19 - 105)         |
| Venomous animal contact                         | 263<br>(125 - 599)         | 86<br>(32 - 201)         | 25<br>(8 - 60)       | 100<br>(43 - 251)        | 24<br>(10 - 54)        | 28<br>(12 - 70)          |
| Non-venomous animal contact                     | 107<br>(47 - 250)          | 7<br>(2 - 20)            | 13<br>(4 - 32)       | 43<br>(16 - 113)         | 29<br>(12 - 65)        | 16<br>(6 - 37)           |
| Foreign body                                    | 352<br>(169 - 604)         | 216<br>(90 - 425)        | 13<br>(6 - 24)       | 19<br>(9 - 35)           | 10<br>(5 - 16)         | 94<br>(46 - 154)         |
| Pulmonary aspiration and foreign body in airway | 342<br>(160 - 594)         | 213<br>(89 - 422)        | 12<br>(5 - 24)       | 18<br>(8 - 33)           | 8<br>(4 - 14)          | 90<br>(42 - 150)         |
| Foreign body in other body part                 | 10<br>(6 - 16)             | 3<br>(1 - 6)             | 1<br>(0 - 1)         | 1<br>(1 - 2)             | 1<br>(1 - 2)           | 4<br>(2 - 7)             |
| Other unintentional injuries                    | 206<br>(117 - 335)         | 73<br>(32 - 150)         | 28<br>(12 - 53)      | 70<br>(38 - 130)         | 16<br>(9 - 25)         | 19<br>(11 - 30)          |
| Self-harm and interpersonal violence            | 2,102<br>(1,446 - 3,071)   | 175<br>(75 - 376)        | 62<br>(34 - 108)     | 1,443<br>(871 - 2,341)   | 230<br>(156 - 349)     | 191<br>(123 - 285)       |
| Self-harm                                       | 884<br>(593 - 1,348)       | --                       | 9<br>(3 - 22)        | 542<br>(323 - 933)       | 169<br>(107 - 272)     | 163<br>(97 - 253)        |
| Interpersonal violence                          | 1,218<br>(737 - 2,047)     | 175<br>(75 - 376)        | 53<br>(27 - 95)      | 901<br>(495 - 1,633)     | 61<br>(36 - 100)       | 28<br>(15 - 52)          |
| Assault by firearm                              | 319<br>(156 - 607)         | 55<br>(20 - 126)         | 11<br>(4 - 24)       | 231<br>(103 - 469)       | 19<br>(9 - 36)         | 2<br>(1 - 4)             |
| Assault by sharp object                         | 332<br>(183 - 623)         | 46<br>(16 - 109)         | 9<br>(4 - 19)        | 251<br>(121 - 522)       | 13<br>(6 - 23)         | 13<br>(7 - 25)           |
| Assault by other means                          | 567<br>(297 - 978)         | 73<br>(30 - 158)         | 32<br>(15 - 61)      | 420<br>(200 - 786)       | 29<br>(15 - 49)        | 13<br>(6 - 25)           |

Web Table 31- Thailand deaths with 95% UI by age, sex, and cause in 2013

| Cause                                                             | Both Sexes, All Ages           | Both Sexes, 0-4 Years    | Both Sexes, 5-14 Years   | Both Sexes, 15-49 Years      | Both Sexes, 50-69 Years        | Both Sexes, 70-80 Years        |
|-------------------------------------------------------------------|--------------------------------|--------------------------|--------------------------|------------------------------|--------------------------------|--------------------------------|
| All causes                                                        | 514,495<br>(456,983 - 577,607) | 7,675<br>(6,460 - 9,155) | 3,424<br>(3,043 - 3,888) | 98,242<br>(81,965 - 117,593) | 138,565<br>(118,486 - 161,514) | 266,588<br>(245,799 - 288,227) |
| Communicable, maternal, neonatal, and nutritional diseases        | 65,923<br>(56,604 - 76,469)    | 4,588<br>(3,784 - 5,533) | 697<br>(527 - 890)       | 16,091<br>(12,896 - 19,992)  | 14,969<br>(12,116 - 18,596)    | 29,578<br>(24,732 - 34,928)    |
| HIV/AIDS and tuberculosis                                         | 20,747<br>(16,002 - 27,169)    | 12<br>(5 - 21)           | 13<br>(5 - 23)           | 8,207<br>(5,344 - 11,758)    | 5,533<br>(3,989 - 8,416)       | 6,982<br>(5,492 - 9,614)       |
| Tuberculosis                                                      | 9,152<br>(7,399 - 12,480)      | 2<br>(1 - 3)             | 6<br>(4 - 8)             | 635<br>(493 - 824)           | 1,928<br>(1,523 - 2,694)       | 6,582<br>(5,145 - 9,210)       |
| HIV/AIDS                                                          | 11,595<br>(7,310 - 18,164)     | 10<br>(3 - 19)           | 7<br>(0 - 17)            | 7,572<br>(4,760 - 11,079)    | 3,604<br>(2,192 - 6,495)       | 401<br>(188 - 773)             |
| HIV/AIDS resulting in mycobacterial infection                     | 704<br>(431 - 1,190)           | 0<br>(0 - 1)             | 0<br>(0 - 1)             | 444<br>(274 - 689)           | 230<br>(134 - 440)             | 29<br>(14 - 58)                |
| HIV/AIDS resulting in other diseases                              | 10,891<br>(6,872 - 17,018)     | 10<br>(3 - 19)           | 7<br>(0 - 16)            | 7,128<br>(4,466 - 10,442)    | 3,374<br>(2,041 - 6,073)       | 372<br>(175 - 712)             |
| Diarrhea, lower respiratory, and other common infectious diseases | 38,149<br>(29,204 - 45,881)    | 1,171<br>(900 - 1,514)   | 553<br>(397 - 740)       | 6,625<br>(4,886 - 8,552)     | 8,632<br>(6,329 - 10,903)      | 21,168<br>(15,856 - 26,716)    |
| Diarrheal diseases                                                | 3,147<br>(2,275 - 4,343)       | 113<br>(58 - 206)        | 30<br>(18 - 49)          | 371<br>(259 - 493)           | 540<br>(378 - 767)             | 2,092<br>(1,339 - 3,227)       |
| Intestinal infectious diseases                                    | 747<br>(344 - 1,391)           | 178<br>(76 - 361)        | 174<br>(77 - 337)        | 272<br>(111 - 546)           | 83<br>(32 - 187)               | 40<br>(18 - 80)                |
| Typhoid fever                                                     | 572<br>(255 - 1,057)           | 127<br>(52 - 260)        | 133<br>(58 - 255)        | 213<br>(87 - 428)            | 67<br>(25 - 155)               | 32<br>(13 - 64)                |
| Paratyphoid fever                                                 | 158<br>(71 - 306)              | 47<br>(18 - 96)          | 41<br>(16 - 85)          | 53<br>(20 - 114)             | 13<br>(4 - 30)                 | 6<br>(2 - 13)                  |
| Other intestinal infectious diseases                              | 17<br>(9 - 29)                 | 4<br>(1 - 10)            | 1<br>(0 - 5)             | 6<br>(2 - 14)                | 3<br>(0 - 8)                   | 3<br>(0 - 8)                   |
| Lower respiratory infections                                      | 31,373<br>(22,929 - 38,476)    | 680<br>(491 - 910)       | 211<br>(140 - 299)       | 4,726<br>(3,321 - 6,349)     | 7,402<br>(5,280 - 9,495)       | 18,355<br>(13,155 - 26,867)    |
| Upper respiratory infections                                      | 24<br>(10 - 48)                | 0<br>(0 - 1)             | 0<br>(0 - 1)             | 7<br>(2 - 15)                | 6<br>(1 - 15)                  | 10<br>(2 - 33)                 |
| Otitis media                                                      | 57<br>(48 - 68)                | 1<br>(1 - 1)             | 1<br>(1 - 1)             | 6<br>(5 - 7)                 | 17<br>(13 - 21)                | 33<br>(25 - 41)                |
| Meningitis                                                        | 1,787<br>(1,111 - 2,253)       | 83<br>(52 - 122)         | 59<br>(36 - 87)          | 938<br>(478 - 1,304)         | 363<br>(223 - 496)             | 344<br>(240 - 466)             |
| Pneumococcal meningitis                                           | 471<br>(279 - 634)             | 14<br>(8 - 22)           | 14<br>(8 - 24)           | 254<br>(126 - 382)           | 102<br>(45 - 153)              | 88<br>(45 - 138)               |
| H influenzae type B meningitis                                    | 302<br>(188 - 402)             | 35<br>(21 - 52)          | 18<br>(10 - 29)          | 148<br>(71 - 229)            | 50<br>(30 - 74)                | 52<br>(34 - 75)                |
| Meningococcal meningitis                                          | 231<br>(153 - 339)             | 4<br>(2 - 7)             | 5<br>(2 - 9)             | 125<br>(65 - 211)            | 45<br>(18 - 75)                | 52<br>(30 - 83)                |
| Other meningitis                                                  | 782<br>(459 - 1,025)           | 30<br>(18 - 47)          | 22<br>(12 - 34)          | 412<br>(177 - 607)           | 166<br>(106 - 236)             | 153<br>(98 - 218)              |
| Encephalitis                                                      | 819<br>(646 - 1,072)           | 56<br>(36 - 83)          | 64<br>(38 - 121)         | 277<br>(200 - 381)           | 188<br>(133 - 260)             | 234<br>(173 - 308)             |
| Diphtheria                                                        | 3<br>(0 - 9)                   | 1<br>(0 - 3)             | 1<br>(0 - 4)             | 1<br>(0 - 5)                 | 0<br>(0 - 3)                   | --                             |
| Whooping cough                                                    | 8<br>(0 - 38)                  | 7<br>(0 - 34)            | 1<br>(0 - 3)             | 0<br>(0 - 1)                 | 0<br>(0 - 0)                   | --                             |
| Tetanus                                                           | 90<br>(28 - 145)               | 3<br>(2 - 6)             | 2<br>(0 - 3)             | 19<br>(5 - 31)               | 27<br>(7 - 46)                 | 39<br>(12 - 71)                |
| Measles                                                           | 58<br>(4 - 263)                | 46<br>(3 - 212)          | 9<br>(1 - 41)            | 2<br>(0 - 11)                | 0<br>(0 - 1)                   | --                             |
| Varicella and herpes zoster                                       | 37<br>(14 - 90)                | 3<br>(0 - 9)             | 1<br>(0 - 4)             | 7<br>(2 - 16)                | 5<br>(1 - 12)                  | 21<br>(2 - 76)                 |
| Neglected tropical diseases and malaria                           | 425<br>(346 - 554)             | 40<br>(26 - 65)          | 90<br>(66 - 154)         | 168<br>(132 - 214)           | 67<br>(50 - 90)                | 61<br>(45 - 83)                |
| Malaria                                                           | 118<br>(78 - 184)              | 5<br>(3 - 7)             | 5<br>(3 - 11)            | 61<br>(36 - 105)             | 29<br>(17 - 49)                | 18<br>(10 - 34)                |
| Leishmaniasis                                                     | 0<br>(0 - 0)                   | 0<br>(0 - 0)             | 0<br>(0 - 0)             | 0<br>(0 - 0)                 | 0<br>(0 - 0)                   | 0<br>(0 - 0)                   |
| Visceral leishmaniasis                                            | 0<br>(0 - 0)                   | 0<br>(0 - 0)             | 0<br>(0 - 0)             | 0<br>(0 - 0)                 | 0<br>(0 - 0)                   | 0<br>(0 - 0)                   |
| Cysticercosis                                                     | 1<br>(1 - 2)                   | 0<br>(0 - 0)             | 0<br>(0 - 0)             | 1<br>(1 - 1)                 | 0<br>(0 - 0)                   | 0<br>(0 - 0)                   |
| Cystic echinococcosis                                             | 9<br>(8 - 10)                  | 0<br>(0 - 0)             | 0<br>(0 - 1)             | 4<br>(4 - 5)                 | 2<br>(2 - 3)                   | 2<br>(2 - 2)                   |
| Dengue                                                            | 176<br>(138 - 307)             | 27<br>(16 - 48)          | 73<br>(54 - 136)         | 51<br>(40 - 71)              | 11<br>(9 - 18)                 | 14<br>(8 - 28)                 |
| Rabies                                                            | 27<br>(17 - 57)                | 1<br>(0 - 1)             | 3<br>(2 - 8)             | 13<br>(7 - 25)               | 7<br>(4 - 15)                  | 4<br>(2 - 8)                   |
| Intestinal nematode infections                                    | 16<br>(6 - 30)                 | 2<br>(0 - 8)             | 2<br>(0 - 9)             | 5<br>(0 - 13)                | 3<br>(0 - 9)                   | 4<br>(0 - 12)                  |
| Ascariasis                                                        | 16<br>(6 - 30)                 | 2<br>(0 - 8)             | 2<br>(0 - 9)             | 5<br>(0 - 13)                | 3<br>(0 - 9)                   | 4<br>(0 - 12)                  |
| Other neglected tropical diseases                                 | 77<br>(59 - 101)               | 6<br>(4 - 11)            | 5<br>(3 - 7)             | 33<br>(23 - 46)              | 14<br>(9 - 21)                 | 19<br>(12 - 28)                |
| Maternal disorders                                                | 481<br>(328 - 684)             | --                       | 0<br>(0 - 1)             | 481<br>(327 - 683)           | --                             | --                             |
| Maternal hemorrhage                                               | 57<br>(32 - 91)                | --                       | 0<br>(0 - 0)             | 57<br>(32 - 91)              | --                             | --                             |



Web Table 31- Thailand deaths with 95% UI by age, sex, and cause in 2013

| Cause                                                            | Both Sexes, All Ages           | Both Sexes, 0-4 Years    | Both Sexes, 5-14 Years | Both Sexes, 15-49 Years     | Both Sexes, 50-69 Years       | Both Sexes, 70-80 Years        |
|------------------------------------------------------------------|--------------------------------|--------------------------|------------------------|-----------------------------|-------------------------------|--------------------------------|
| Maternal sepsis and other maternal infections                    | 71<br>(44 - 108)               | --                       | 0<br>(0 - 0)           | 71<br>(44 - 108)            | --                            | --                             |
| Maternal hypertensive disorders                                  | 41<br>(20 - 77)                | --                       | 0<br>(0 - 0)           | 41<br>(19 - 77)             | --                            | --                             |
| Maternal obstructed labor                                        | 50<br>(30 - 77)                | --                       | 0<br>(0 - 0)           | 50<br>(30 - 77)             | --                            | --                             |
| Maternal abortive outcome                                        | 121<br>(73 - 183)              | --                       | 0<br>(0 - 0)           | 121<br>(73 - 183)           | --                            | --                             |
| Indirect maternal deaths                                         | 34<br>(18 - 60)                | --                       | 0<br>(0 - 0)           | 34<br>(18 - 60)             | --                            | --                             |
| Late maternal deaths                                             | 56<br>(31 - 97)                | --                       | 0<br>(0 - 0)           | 56<br>(31 - 97)             | --                            | --                             |
| Maternal deaths aggravated by HIV/AIDS                           | 1<br>(0 - 1)                   | --                       | --                     | 1<br>(0 - 1)                | --                            | --                             |
| Other maternal disorders                                         | 50<br>(24 - 83)                | --                       | 0<br>(0 - 0)           | 50<br>(24 - 83)             | --                            | --                             |
| Neonatal disorders                                               | 3,220<br>(2,545 - 3,980)       | 3,220<br>(2,545 - 3,980) | --                     | --                          | --                            | --                             |
| Neonatal preterm birth complications                             | 1,669<br>(1,184 - 2,184)       | 1,669<br>(1,184 - 2,184) | --                     | --                          | --                            | --                             |
| Neonatal encephalopathy due to birth asphyxia and trauma         | 666<br>(383 - 1,035)           | 666<br>(383 - 1,035)     | --                     | --                          | --                            | --                             |
| Neonatal sepsis and other neonatal infections                    | 579<br>(280 - 971)             | 579<br>(280 - 971)       | --                     | --                          | --                            | --                             |
| Hemolytic disease and other neonatal jaundice                    | 9<br>(3 - 19)                  | 9<br>(3 - 19)            | --                     | --                          | --                            | --                             |
| Other neonatal disorders                                         | 297<br>(192 - 501)             | 297<br>(192 - 501)       | --                     | --                          | --                            | --                             |
| Nutritional deficiencies                                         | 949<br>(706 - 1,529)           | 9<br>(5 - 18)            | 6<br>(4 - 10)          | 159<br>(109 - 320)          | 170<br>(119 - 302)            | 605<br>(424 - 937)             |
| Protein-energy malnutrition                                      | 278<br>(153 - 484)             | 2<br>(1 - 5)             | 1<br>(0 - 2)           | 35<br>(17 - 85)             | 54<br>(31 - 114)              | 187<br>(92 - 319)              |
| Iodine deficiency                                                | 18<br>(3 - 61)                 | 0<br>(0 - 2)             | 0<br>(0 - 1)           | 4<br>(0 - 12)               | 4<br>(0 - 17)                 | 9<br>(0 - 46)                  |
| Iron-deficiency anemia                                           | 543<br>(359 - 858)             | 5<br>(2 - 8)             | 3<br>(2 - 6)           | 103<br>(64 - 198)           | 90<br>(53 - 144)              | 341<br>(209 - 556)             |
| Other nutritional deficiencies                                   | 110<br>(51 - 287)              | 2<br>(1 - 6)             | 1<br>(0 - 2)           | 17<br>(7 - 54)              | 22<br>(10 - 62)               | 67<br>(28 - 186)               |
| Other communicable, maternal, neonatal, and nutritional diseases | 1,952<br>(1,070 - 2,975)       | 136<br>(52 - 257)        | 35<br>(20 - 55)        | 451<br>(236 - 725)          | 568<br>(263 - 949)            | 762<br>(282 - 1,458)           |
| Sexually transmitted diseases excluding HIV                      | 166<br>(74 - 284)              | 80<br>(0 - 183)          | 8<br>(1 - 17)          | 31<br>(19 - 50)             | 19<br>(8 - 41)                | 28<br>(12 - 58)                |
| Syphilis                                                         | 134<br>(45 - 249)              | 80<br>(0 - 183)          | 7<br>(0 - 17)          | 14<br>(9 - 23)              | 11<br>(5 - 24)                | 22<br>(10 - 47)                |
| Chlamydial infection                                             | 8<br>(5 - 12)                  | --                       | 0<br>(0 - 0)           | 4<br>(2 - 7)                | 2<br>(1 - 5)                  | 1<br>(0 - 3)                   |
| Gonococcal infection                                             | 14<br>(9 - 21)                 | --                       | 0<br>(0 - 0)           | 7<br>(4 - 11)               | 3<br>(1 - 7)                  | 3<br>(1 - 6)                   |
| Other sexually transmitted diseases                              | 10<br>(7 - 16)                 | --                       | 0<br>(0 - 0)           | 6<br>(4 - 10)               | 2<br>(1 - 6)                  | 1<br>(1 - 3)                   |
| Hepatitis                                                        | 186<br>(150 - 231)             | 1<br>(1 - 2)             | 1<br>(1 - 1)           | 51<br>(37 - 72)             | 65<br>(50 - 85)               | 67<br>(50 - 86)                |
| Acute hepatitis A                                                | 11<br>(3 - 24)                 | 1<br>(0 - 1)             | 0<br>(0 - 1)           | 5<br>(1 - 12)               | 3<br>(1 - 7)                  | 2<br>(0 - 4)                   |
| Acute hepatitis B                                                | 136<br>(104 - 174)             | 1<br>(0 - 1)             | 0<br>(0 - 1)           | 27<br>(15 - 41)             | 51<br>(36 - 67)               | 58<br>(42 - 74)                |
| Acute hepatitis C                                                | 7<br>(1 - 19)                  | --                       | 0<br>(0 - 0)           | 2<br>(0 - 5)                | 3<br>(0 - 7)                  | 3<br>(0 - 9)                   |
| Acute hepatitis E                                                | 32<br>(15 - 56)                | 0<br>(0 - 0)             | 0<br>(0 - 0)           | 18<br>(9 - 31)              | 9<br>(4 - 19)                 | 5<br>(1 - 11)                  |
| Other infectious diseases                                        | 1,601<br>(710 - 2,627)         | 54<br>(31 - 102)         | 26<br>(15 - 43)        | 369<br>(154 - 638)          | 484<br>(180 - 855)            | 667<br>(192 - 1,352)           |
| Non-communicable diseases                                        | 390,020<br>(346,456 - 438,309) | 2,411<br>(1,880 - 3,096) | 969<br>(795 - 1,175)   | 48,848<br>(39,795 - 59,002) | 109,887<br>(93,182 - 128,635) | 227,905<br>(208,862 - 248,412) |
| Neoplasms                                                        | 96,196<br>(82,708 - 111,270)   | 124<br>(80 - 184)        | 313<br>(246 - 389)     | 14,589<br>(11,908 - 17,625) | 40,520<br>(34,087 - 47,716)   | 40,650<br>(35,571 - 45,983)    |
| Esophageal cancer                                                | 2,021<br>(1,420 - 2,646)       | --                       | --                     | 178<br>(106 - 276)          | 835<br>(553 - 1,157)          | 1,008<br>(736 - 1,312)         |
| Stomach cancer                                                   | 4,981<br>(4,093 - 5,877)       | --                       | --                     | 700<br>(540 - 881)          | 1,901<br>(1,477 - 2,330)      | 2,380<br>(1,915 - 2,964)       |
| Liver cancer                                                     | 22,197<br>(17,648 - 27,250)    | --                       | 12<br>(7 - 19)         | 3,501<br>(2,455 - 4,713)    | 10,754<br>(8,336 - 13,626)    | 7,929<br>(6,015 - 10,016)      |
| Liver cancer due to hepatitis B                                  | 10,823<br>(6,985 - 14,774)     | --                       | 5<br>(3 - 9)           | 2,061<br>(1,279 - 3,039)    | 5,621<br>(3,514 - 7,968)      | 3,135<br>(1,962 - 4,484)       |
| Liver cancer due to hepatitis C                                  | 7,412<br>(4,378 - 11,622)      | --                       | 1<br>(0 - 2)           | 853<br>(365 - 1,585)        | 3,367<br>(1,768 - 5,572)      | 3,191<br>(1,943 - 4,854)       |
| Liver cancer due to alcohol use                                  | 1,739<br>(1,075 - 2,744)       | --                       | --                     | 162<br>(73 - 296)           | 737<br>(412 - 1,278)          | 840<br>(528 - 1,338)           |
| Liver cancer due to other causes                                 | 2,223<br>(1,370 - 3,374)       | --                       | 5<br>(3 - 9)           | 425<br>(261 - 639)          | 1,029<br>(590 - 1,638)        | 764<br>(440 - 1,253)           |

Web Table 31- Thailand deaths with 95% UI by age, sex, and cause in 2013

| Cause                                         | Both Sexes, All Ages           | Both Sexes, 0-4 Years | Both Sexes, 5-14 Years | Both Sexes, 15-49 Years    | Both Sexes, 50-69 Years     | Both Sexes, 70-80 Years      |
|-----------------------------------------------|--------------------------------|-----------------------|------------------------|----------------------------|-----------------------------|------------------------------|
| Larynx cancer                                 | 772<br>(513 - 998)             | --                    | --                     | 67<br>(40 - 96)            | 273<br>(181 - 369)          | 432<br>(282 - 578)           |
| Tracheal, bronchus and lung cancer            | 20,559<br>(17,072 - 24,780)    | --                    | --                     | 1,825<br>(1,385 - 2,384)   | 8,811<br>(7,115 - 11,043)   | 9,923<br>(8,200 - 12,054)    |
| Breast cancer                                 | 3,742<br>(2,728 - 4,661)       | --                    | --                     | 1,155<br>(780 - 1,534)     | 1,721<br>(1,224 - 2,212)    | 865<br>(613 - 1,117)         |
| Cervical cancer                               | 3,862<br>(2,632 - 4,968)       | --                    | --                     | 896<br>(570 - 1,252)       | 1,669<br>(1,127 - 2,200)    | 1,297<br>(837 - 1,778)       |
| Uterine cancer                                | 355<br>(213 - 503)             | --                    | --                     | 43<br>(25 - 70)            | 202<br>(117 - 309)          | 110<br>(61 - 164)            |
| Prostate cancer                               | 1,320<br>(665 - 1,868)         | --                    | --                     | 11<br>(6 - 17)             | 161<br>(82 - 246)           | 1,148<br>(567 - 1,659)       |
| Colon and rectum cancer                       | 8,226<br>(7,043 - 9,570)       | --                    | --                     | 1,012<br>(807 - 1,237)     | 3,062<br>(2,519 - 3,678)    | 4,152<br>(3,447 - 4,988)     |
| Lip and oral cavity cancer                    | 2,255<br>(1,580 - 2,902)       | --                    | --                     | 260<br>(173 - 370)         | 770<br>(533 - 1,041)        | 1,225<br>(827 - 1,688)       |
| Nasopharynx cancer                            | 976<br>(722 - 1,251)           | --                    | 3<br>(1 - 6)           | 249<br>(176 - 350)         | 456<br>(318 - 642)          | 268<br>(190 - 371)           |
| Other pharynx cancer                          | 876<br>(652 - 1,165)           | --                    | --                     | 143<br>(96 - 206)          | 432<br>(311 - 583)          | 301<br>(218 - 430)           |
| Gallbladder and biliary tract cancer          | 3,702<br>(2,475 - 4,981)       | --                    | --                     | 399<br>(246 - 560)         | 1,806<br>(1,181 - 2,457)    | 1,497<br>(955 - 2,102)       |
| Pancreatic cancer                             | 2,841<br>(2,377 - 3,348)       | --                    | --                     | 372<br>(279 - 482)         | 1,326<br>(1,056 - 1,621)    | 1,143<br>(938 - 1,384)       |
| Malignant skin melanoma                       | 317<br>(236 - 406)             | --                    | --                     | 94<br>(63 - 127)           | 143<br>(103 - 184)          | 80<br>(59 - 108)             |
| Non-melanoma skin cancer                      | 576<br>(350 - 817)             | --                    | --                     | 48<br>(29 - 67)            | 123<br>(76 - 174)           | 405<br>(236 - 600)           |
| Ovarian cancer                                | 1,733<br>(1,260 - 2,298)       | --                    | --                     | 397<br>(259 - 580)         | 879<br>(605 - 1,202)        | 457<br>(323 - 644)           |
| Testicular cancer                             | 67<br>(42 - 114)               | --                    | --                     | 42<br>(25 - 71)            | 14<br>(8 - 26)              | 12<br>(7 - 22)               |
| Kidney cancer                                 | 1,004<br>(799 - 1,243)         | 3<br>(1 - 6)          | 3<br>(2 - 5)           | 126<br>(91 - 172)          | 482<br>(365 - 636)          | 390<br>(297 - 504)           |
| Bladder cancer                                | 1,624<br>(1,294 - 2,077)       | --                    | --                     | 62<br>(44 - 84)            | 435<br>(320 - 584)          | 1,127<br>(870 - 1,474)       |
| Brain and nervous system cancer               | 2,100<br>(1,503 - 2,576)       | 12<br>(6 - 22)        | 56<br>(37 - 77)        | 645<br>(436 - 827)         | 790<br>(565 - 1,003)        | 597<br>(421 - 789)           |
| Thyroid cancer                                | 530<br>(389 - 664)             | --                    | 1<br>(0 - 1)           | 41<br>(29 - 56)            | 172<br>(128 - 227)          | 316<br>(209 - 428)           |
| Mesothelioma                                  | 94<br>(72 - 119)               | --                    | --                     | 12<br>(9 - 18)             | 51<br>(36 - 68)             | 30<br>(20 - 43)              |
| Hodgkin lymphoma                              | 116<br>(91 - 153)              | 4<br>(2 - 7)          | 3<br>(2 - 6)           | 49<br>(34 - 68)            | 35<br>(24 - 48)             | 25<br>(18 - 35)              |
| Non-Hodgkin lymphoma                          | 1,887<br>(1,418 - 2,365)       | 8<br>(4 - 13)         | 24<br>(16 - 35)        | 417<br>(302 - 563)         | 773<br>(551 - 1,015)        | 666<br>(469 - 869)           |
| Multiple myeloma                              | 272<br>(213 - 350)             | --                    | --                     | 67<br>(49 - 87)            | 122<br>(92 - 166)           | 84<br>(64 - 109)             |
| Leukemia                                      | 3,128<br>(2,631 - 3,651)       | 43<br>(23 - 70)       | 131<br>(96 - 169)      | 955<br>(761 - 1,177)       | 898<br>(715 - 1,095)        | 1,102<br>(888 - 1,350)       |
| Other neoplasms                               | 4,063<br>(3,218 - 5,143)       | 56<br>(27 - 89)       | 82<br>(50 - 113)       | 822<br>(606 - 1,111)       | 1,425<br>(1,063 - 1,877)    | 1,680<br>(1,298 - 2,163)     |
| Cardiovascular diseases                       | 137,869<br>(120,842 - 161,391) | 155<br>(108 - 226)    | 190<br>(140 - 256)     | 12,519<br>(9,930 - 15,607) | 30,441<br>(25,193 - 36,938) | 94,564<br>(83,441 - 110,616) |
| Rheumatic heart disease                       | 511<br>(392 - 655)             | 1<br>(1 - 2)          | 7<br>(4 - 11)          | 131<br>(89 - 176)          | 155<br>(100 - 206)          | 217<br>(158 - 330)           |
| Ischemic heart disease                        | 61,576<br>(50,751 - 71,158)    | 17<br>(9 - 32)        | 42<br>(21 - 63)        | 5,623<br>(4,235 - 7,701)   | 14,906<br>(11,861 - 18,348) | 40,988<br>(31,563 - 47,684)  |
| Cerebrovascular disease                       | 61,700<br>(50,903 - 79,804)    | 32<br>(21 - 47)       | 58<br>(41 - 80)        | 4,387<br>(3,315 - 5,614)   | 11,602<br>(9,331 - 14,474)  | 45,620<br>(37,135 - 61,504)  |
| Ischemic stroke                               | 21,053<br>(14,734 - 27,159)    | 4<br>(2 - 8)          | 6<br>(4 - 9)           | 562<br>(397 - 822)         | 3,076<br>(2,008 - 4,085)    | 17,404<br>(11,726 - 22,725)  |
| Hemorrhagic stroke                            | 40,647<br>(30,836 - 58,425)    | 28<br>(19 - 40)       | 52<br>(37 - 73)        | 3,825<br>(2,861 - 4,911)   | 8,526<br>(6,739 - 10,966)   | 28,216<br>(20,347 - 43,920)  |
| Hypertensive heart disease                    | 1,849<br>(1,095 - 2,696)       | 1<br>(0 - 1)          | 1<br>(1 - 2)           | 304<br>(197 - 420)         | 599<br>(341 - 921)          | 944<br>(505 - 1,474)         |
| Cardiomyopathy and myocarditis                | 1,491<br>(913 - 3,279)         | 23<br>(11 - 54)       | 23<br>(12 - 51)        | 346<br>(197 - 747)         | 345<br>(197 - 750)          | 755<br>(462 - 1,759)         |
| Atrial fibrillation and flutter               | 10<br>(7 - 14)                 | --                    | --                     | 4<br>(3 - 6)               | 4<br>(3 - 5)                | 2<br>(1 - 3)                 |
| Aortic aneurysm                               | 1,264<br>(752 - 1,830)         | --                    | --                     | 66<br>(38 - 92)            | 165<br>(93 - 228)           | 1,033<br>(623 - 1,529)       |
| Peripheral vascular disease                   | 29<br>(21 - 38)                | --                    | --                     | 2<br>(1 - 3)               | 5<br>(4 - 7)                | 21<br>(15 - 30)              |
| Endocarditis                                  | 1,583<br>(703 - 2,579)         | 33<br>(18 - 52)       | 14<br>(7 - 21)         | 391<br>(195 - 623)         | 567<br>(256 - 927)          | 579<br>(195 - 1,042)         |
| Other cardiovascular and circulatory diseases | 7,856<br>(6,073 - 13,005)      | 48<br>(32 - 76)       | 45<br>(29 - 66)        | 1,264<br>(928 - 1,881)     | 2,094<br>(1,469 - 3,870)    | 4,405<br>(3,127 - 7,500)     |
| Chronic respiratory diseases                  | 36,755<br>(30,737 - 43,047)    | 106<br>(75 - 149)     | 65<br>(42 - 85)        | 2,773<br>(2,140 - 3,548)   | 7,015<br>(5,608 - 9,095)    | 26,797<br>(21,386 - 31,837)  |

Web Table 31- Thailand deaths with 95% UI by age, sex, and cause in 2013

| Cause                                               | Both Sexes, All Ages        | Both Sexes, 0-4 Years | Both Sexes, 5-14 Years | Both Sexes, 15-49 Years  | Both Sexes, 50-69 Years  | Both Sexes, 70-80 Years     |
|-----------------------------------------------------|-----------------------------|-----------------------|------------------------|--------------------------|--------------------------|-----------------------------|
| Chronic obstructive pulmonary disease               | 26,932<br>(22,015 - 31,891) | 53<br>(35 - 77)       | 18<br>(11 - 25)        | 1,102<br>(794 - 1,641)   | 4,460<br>(3,402 - 5,817) | 21,300<br>(16,882 - 25,662) |
| Pneumoconiosis                                      | 621<br>(217 - 1,110)        | 0<br>(0 - 1)          | 1<br>(1 - 1)           | 138<br>(45 - 262)        | 282<br>(86 - 546)        | 200<br>(75 - 372)           |
| Silicosis                                           | 221<br>(74 - 406)           | 0<br>(0 - 0)          | 0<br>(0 - 0)           | 6<br>(2 - 11)            | 69<br>(20 - 139)         | 145<br>(49 - 281)           |
| Asbestosis                                          | 86<br>(27 - 162)            | 0<br>(0 - 0)          | 0<br>(0 - 0)           | 24<br>(8 - 46)           | 60<br>(17 - 117)         | 1<br>(1 - 2)                |
| Coal workers pneumoconiosis                         | 185<br>(59 - 335)           | 0<br>(0 - 0)          | 0<br>(0 - 0)           | 75<br>(23 - 145)         | 103<br>(31 - 199)        | 6<br>(2 - 11)               |
| Other pneumoconiosis                                | 130<br>(52 - 222)           | 0<br>(0 - 0)          | 0<br>(0 - 0)           | 32<br>(11 - 59)          | 50<br>(17 - 96)          | 48<br>(20 - 89)             |
| Asthma                                              | 7,171<br>(4,857 - 9,342)    | 31<br>(13 - 53)       | 39<br>(23 - 52)        | 1,352<br>(956 - 1,755)   | 1,638<br>(1,154 - 2,247) | 4,112<br>(2,499 - 5,661)    |
| Interstitial lung disease and pulmonary sarcoidosis | 1,610<br>(459 - 3,815)      | 1<br>(0 - 3)          | 3<br>(1 - 5)           | 35<br>(12 - 81)          | 573<br>(160 - 1,325)     | 998<br>(270 - 2,453)        |
| Other chronic respiratory diseases                  | 421<br>(328 - 552)          | 21<br>(15 - 28)       | 5<br>(3 - 7)           | 147<br>(106 - 205)       | 62<br>(42 - 88)          | 186<br>(128 - 274)          |
| Cirrhosis                                           | 17,102<br>(14,173 - 20,404) | 7<br>(4 - 13)         | 18<br>(14 - 24)        | 4,677<br>(3,533 - 6,059) | 6,669<br>(5,344 - 8,278) | 5,730<br>(4,637 - 6,989)    |
| Cirrhosis due to hepatitis B                        | 4,872<br>(3,455 - 6,470)    | 0<br>(0 - 1)          | 3<br>(2 - 5)           | 1,354<br>(855 - 1,987)   | 1,852<br>(1,251 - 2,575) | 1,663<br>(1,124 - 2,339)    |
| Cirrhosis due to hepatitis C                        | 4,041<br>(2,578 - 5,596)    | 0<br>(0 - 1)          | 3<br>(1 - 5)           | 923<br>(524 - 1,422)     | 1,549<br>(878 - 2,223)   | 1,565<br>(961 - 2,421)      |
| Cirrhosis due to alcohol use                        | 6,691<br>(4,342 - 9,115)    | --                    | --                     | 1,720<br>(960 - 2,639)   | 2,229<br>(1,697 - 3,925) | 2,229<br>(1,491 - 3,060)    |
| Cirrhosis due to other causes                       | 1,498<br>(1,010 - 2,167)    | 7<br>(4 - 12)         | 13<br>(9 - 17)         | 680<br>(433 - 1,022)     | 527<br>(309 - 826)       | 272<br>(171 - 405)          |
| Digestive diseases                                  | 12,939<br>(10,871 - 15,233) | 19<br>(12 - 31)       | 32<br>(24 - 42)        | 1,517<br>(1,086 - 1,966) | 2,712<br>(2,122 - 3,324) | 8,659<br>(7,117 - 10,665)   |
| Peptic ulcer disease                                | 1,873<br>(1,363 - 2,480)    | 1<br>(0 - 1)          | 3<br>(2 - 4)           | 168<br>(95 - 246)        | 359<br>(232 - 490)       | 1,343<br>(987 - 1,846)      |
| Gastritis and duodenitis                            | 282<br>(183 - 505)          | 0<br>(0 - 1)          | 1<br>(0 - 1)           | 36<br>(21 - 61)          | 77<br>(48 - 131)         | 169<br>(97 - 342)           |
| Appendicitis                                        | 533<br>(367 - 735)          | 1<br>(0 - 1)          | 4<br>(3 - 6)           | 105<br>(71 - 150)        | 161<br>(107 - 229)       | 262<br>(161 - 405)          |
| Paralytic ileus and intestinal obstruction          | 1,697<br>(1,103 - 2,828)    | 8<br>(4 - 15)         | 7<br>(4 - 13)          | 124<br>(79 - 219)        | 306<br>(196 - 546)       | 1,251<br>(758 - 2,128)      |
| Inguinal, femoral, and abdominal hernia             | 84<br>(41 - 127)            | 0<br>(0 - 1)          | 1<br>(0 - 1)           | 7<br>(3 - 10)            | 18<br>(9 - 27)           | 59<br>(26 - 97)             |
| Inflammatory bowel disease                          | 223<br>(120 - 503)          | 1<br>(0 - 1)          | 1<br>(1 - 3)           | 37<br>(20 - 80)          | 51<br>(28 - 108)         | 132<br>(63 - 334)           |
| Vascular intestinal disorders                       | 11<br>(6 - 17)              | 0<br>(0 - 1)          | 1<br>(0 - 2)           | 4<br>(2 - 7)             | 2<br>(1 - 4)             | 4<br>(2 - 6)                |
| Gallbladder and biliary diseases                    | 2,803<br>(2,121 - 3,589)    | 2<br>(1 - 3)          | 3<br>(2 - 4)           | 146<br>(94 - 192)        | 577<br>(421 - 744)       | 2,075<br>(1,548 - 2,758)    |
| Pancreatitis                                        | 679<br>(395 - 941)          | 1<br>(0 - 2)          | 2<br>(1 - 3)           | 249<br>(130 - 369)       | 187<br>(112 - 272)       | 241<br>(137 - 359)          |
| Other digestive diseases                            | 4,755<br>(3,753 - 5,896)    | 6<br>(3 - 11)         | 10<br>(7 - 14)         | 640<br>(417 - 841)       | 975<br>(704 - 1,269)     | 3,123<br>(2,407 - 4,031)    |
| Neurological disorders                              | 19,251<br>(16,168 - 22,852) | 23<br>(15 - 35)       | 54<br>(38 - 80)        | 687<br>(469 - 945)       | 1,756<br>(1,401 - 2,160) | 16,731<br>(13,807 - 20,348) |
| Alzheimer disease and other dementias               | 17,718<br>(14,771 - 21,307) | --                    | --                     | 11<br>(5 - 19)           | 1,391<br>(1,088 - 1,748) | 16,316<br>(13,439 - 19,957) |
| Parkinson disease                                   | 134<br>(99 - 186)           | --                    | --                     | 8<br>(6 - 14)            | 39<br>(27 - 58)          | 87<br>(59 - 126)            |
| Epilepsy                                            | 910<br>(580 - 1,252)        | 13<br>(6 - 23)        | 38<br>(23 - 63)        | 479<br>(280 - 708)       | 206<br>(130 - 295)       | 175<br>(107 - 267)          |
| Multiple sclerosis                                  | 50<br>(34 - 95)             | --                    | --                     | 19<br>(12 - 38)          | 18<br>(11 - 33)          | 14<br>(8 - 24)              |
| Other neurological disorders                        | 439<br>(356 - 608)          | 11<br>(7 - 15)        | 16<br>(12 - 23)        | 170<br>(129 - 246)       | 102<br>(79 - 142)        | 139<br>(109 - 185)          |
| Mental and substance use disorders                  | 6,781<br>(4,039 - 8,655)    | 22<br>(12 - 33)       | 0<br>(0 - 1)           | 4,972<br>(2,603 - 6,502) | 1,454<br>(1,043 - 1,906) | 332<br>(258 - 421)          |
| Schizophrenia                                       | 31<br>(22 - 46)             | --                    | --                     | 11<br>(7 - 17)           | 8<br>(5 - 12)            | 12<br>(8 - 20)              |
| Alcohol use disorders                               | 1,323<br>(703 - 1,855)      | --                    | --                     | 672<br>(327 - 968)       | 538<br>(274 - 786)       | 113<br>(64 - 161)           |
| Drug use disorders                                  | 5,418<br>(2,911 - 6,967)    | 22<br>(12 - 33)       | --                     | 4,282<br>(2,068 - 5,641) | 908<br>(614 - 1,161)     | 207<br>(148 - 284)          |
| Opioid use disorders                                | 3,462<br>(1,856 - 4,460)    | 15<br>(8 - 22)        | --                     | 2,764<br>(1,322 - 3,642) | 551<br>(377 - 711)       | 133<br>(95 - 183)           |
| Cocaine use disorders                               | 86<br>(50 - 111)            | 0<br>(0 - 1)          | --                     | 70<br>(37 - 94)          | 12<br>(8 - 16)           | 3<br>(2 - 5)                |
| Amphetamine use disorders                           | 88<br>(53 - 116)            | 1<br>(0 - 1)          | --                     | 68<br>(37 - 91)          | 16<br>(11 - 22)          | 4<br>(3 - 6)                |
| Other drug use disorders                            | 1,782<br>(978 - 2,309)      | 6<br>(4 - 10)         | --                     | 1,380<br>(658 - 1,830)   | 329<br>(220 - 429)       | 67<br>(48 - 94)             |
| Eating disorders                                    | 8<br>(5 - 13)               | --                    | 0<br>(0 - 1)           | 8<br>(5 - 12)            | --                       | --                          |

Web Table 31- Thailand deaths with 95% UI by age, sex, and cause in 2013

| Cause                                               | Both Sexes, All Ages        | Both Sexes, 0-4 Years    | Both Sexes, 5-14 Years | Both Sexes, 15-49 Years  | Both Sexes, 50-69 Years     | Both Sexes, 70-80 Years     |
|-----------------------------------------------------|-----------------------------|--------------------------|------------------------|--------------------------|-----------------------------|-----------------------------|
| Anorexia nervosa                                    | 8<br>(5 - 13)               | --                       | 0<br>(0 - 1)           | 8<br>(5 - 12)            | --                          | --                          |
| Diabetes, urogenital, blood, and endocrine diseases | 56,372<br>(44,506 - 65,444) | 107<br>(74 - 165)        | 108<br>(81 - 148)      | 5,881<br>(4,700 - 7,231) | 17,907<br>(14,487 - 21,249) | 32,369<br>(23,577 - 37,933) |
| Diabetes mellitus                                   | 24,199<br>(20,121 - 28,415) | 5<br>(3 - 8)             | 8<br>(6 - 13)          | 1,458<br>(1,132 - 1,871) | 8,002<br>(6,446 - 9,823)    | 14,725<br>(11,873 - 17,818) |
| Acute glomerulonephritis                            | 19<br>(14 - 29)             | 1<br>(0 - 1)             | 1<br>(1 - 2)           | 6<br>(4 - 8)             | 4<br>(3 - 6)                | 7<br>(5 - 13)               |
| Chronic kidney disease                              | 22,590<br>(14,099 - 27,478) | 9<br>(6 - 14)            | 29<br>(21 - 40)        | 2,741<br>(2,068 - 3,506) | 7,450<br>(5,217 - 9,260)    | 12,360<br>(6,607 - 15,578)  |
| Chronic kidney disease due to diabetes mellitus     | 4,514<br>(1,780 - 6,029)    | 1<br>(1 - 2)             | 3<br>(2 - 4)           | 459<br>(203 - 645)       | 1,905<br>(710 - 2,582)      | 2,145<br>(784 - 2,963)      |
| Chronic kidney disease due to hypertension          | 3,292<br>(2,365 - 4,932)    | 2<br>(2 - 4)             | 4<br>(3 - 7)           | 575<br>(390 - 946)       | 1,378<br>(953 - 2,185)      | 1,332<br>(864 - 1,989)      |
| Chronic kidney disease due to glomerulonephritis    | 1,066<br>(654 - 1,736)      | 1<br>(0 - 1)             | 2<br>(2 - 3)           | 119<br>(79 - 187)        | 267<br>(159 - 442)          | 677<br>(385 - 1,159)        |
| Chronic kidney disease due to other causes          | 13,718<br>(7,035 - 17,755)  | 5<br>(3 - 9)             | 20<br>(13 - 29)        | 1,588<br>(1,021 - 2,205) | 3,899<br>(2,201 - 5,313)    | 8,206<br>(3,488 - 11,168)   |
| Urinary diseases and male infertility               | 7,087<br>(3,342 - 9,862)    | 10<br>(4 - 17)           | 12<br>(6 - 17)         | 904<br>(518 - 1,289)     | 1,838<br>(1,019 - 2,498)    | 4,324<br>(1,678 - 6,614)    |
| Interstitial nephritis and urinary tract infections | 3,499<br>(1,003 - 5,726)    | 8<br>(3 - 14)            | 7<br>(3 - 10)          | 391<br>(128 - 648)       | 697<br>(234 - 1,115)        | 2,396<br>(599 - 4,306)      |
| Urolithiasis                                        | 678<br>(383 - 1,430)        | --                       | 1<br>(1 - 3)           | 97<br>(42 - 219)         | 228<br>(107 - 488)          | 352<br>(183 - 856)          |
| Other urinary diseases                              | 2,910<br>(1,533 - 4,307)    | 2<br>(1 - 4)             | 4<br>(2 - 6)           | 416<br>(235 - 616)       | 913<br>(472 - 1,310)        | 1,575<br>(743 - 2,578)      |
| Gynecological diseases                              | 9<br>(6 - 13)               | --                       | --                     | 5<br>(3 - 7)             | 2<br>(1 - 3)                | 3<br>(2 - 5)                |
| Uterine fibroids                                    | 2<br>(1 - 3)                | --                       | --                     | 1<br>(1 - 1)             | 0<br>(0 - 1)                | 1<br>(0 - 1)                |
| Polycystic ovarian syndrome                         | 0<br>(0 - 0)                | --                       | --                     | 0<br>(0 - 0)             | 0<br>(0 - 0)                | --                          |
| Endometriosis                                       | 1<br>(1 - 1)                | --                       | --                     | 1<br>(0 - 1)             | 0<br>(0 - 0)                | --                          |
| Genital prolapse                                    | 2<br>(1 - 2)                | --                       | --                     | 1<br>(0 - 1)             | 0<br>(0 - 0)                | 1<br>(0 - 1)                |
| Other gynecological diseases                        | 4<br>(3 - 6)                | --                       | --                     | 2<br>(1 - 3)             | 1<br>(0 - 1)                | 1<br>(1 - 2)                |
| Hemoglobinopathies and hemolytic anemias            | 455<br>(307 - 723)          | 38<br>(23 - 70)          | 41<br>(23 - 71)        | 231<br>(140 - 384)       | 77<br>(49 - 121)            | 68<br>(45 - 104)            |
| Thalassemias                                        | 314<br>(206 - 506)          | 36<br>(22 - 66)          | 40<br>(23 - 69)        | 195<br>(121 - 323)       | 38<br>(25 - 60)             | 5<br>(3 - 7)                |
| Sickle cell disorders                               | 0<br>(0 - 0)                | 0<br>(0 - 0)             | 0<br>(0 - 0)           | 0<br>(0 - 0)             | 0<br>(0 - 0)                | 0<br>(0 - 0)                |
| G6PD deficiency                                     | 12<br>(7 - 19)              | 0<br>(0 - 0)             | 0<br>(0 - 0)           | 6<br>(3 - 11)            | 4<br>(3 - 6)                | 1<br>(1 - 2)                |
| Other hemoglobinopathies and hemolytic anemias      | 129<br>(85 - 203)           | 2<br>(1 - 4)             | 1<br>(0 - 1)           | 30<br>(16 - 54)          | 35<br>(22 - 54)             | 62<br>(41 - 95)             |
| Endocrine, metabolic, blood, and immune disorders   | 2,015<br>(1,475 - 2,638)    | 44<br>(28 - 75)          | 17<br>(11 - 28)        | 536<br>(394 - 814)       | 535<br>(389 - 746)          | 882<br>(488 - 1,239)        |
| Musculoskeletal disorders                           | 2,071<br>(1,500 - 2,572)    | --                       | 27<br>(20 - 38)        | 552<br>(386 - 702)       | 723<br>(507 - 927)          | 769<br>(510 - 1,020)        |
| Rheumatoid arthritis                                | 199<br>(94 - 276)           | --                       | 3<br>(2 - 4)           | 34<br>(18 - 48)          | 74<br>(35 - 111)            | 87<br>(33 - 139)            |
| Other musculoskeletal disorders                     | 1,872<br>(1,375 - 2,314)    | --                       | 24<br>(18 - 34)        | 518<br>(366 - 660)       | 649<br>(465 - 832)          | 681<br>(459 - 908)          |
| Other non-communicable diseases                     | 4,683<br>(3,618 - 5,556)    | 1,848<br>(1,356 - 2,410) | 161<br>(113 - 220)     | 681<br>(523 - 854)       | 689<br>(423 - 872)          | 1,304<br>(614 - 1,830)      |
| Congenital anomalies                                | 2,716<br>(2,120 - 3,343)    | 1,823<br>(1,333 - 2,387) | 154<br>(107 - 211)     | 359<br>(275 - 472)       | 209<br>(156 - 274)          | 171<br>(130 - 227)          |
| Neural tube defects                                 | 124<br>(60 - 196)           | 116<br>(53 - 186)        | 2<br>(1 - 3)           | 5<br>(3 - 8)             | 1<br>(1 - 2)                | 1<br>(0 - 1)                |
| Congenital heart anomalies                          | 1,406<br>(1,009 - 1,849)    | 1,073<br>(723 - 1,485)   | 84<br>(54 - 122)       | 164<br>(119 - 224)       | 34<br>(23 - 50)             | 51<br>(35 - 73)             |
| Cleft lip and cleft palate                          | 6<br>(1 - 20)               | 6<br>(1 - 20)            | --                     | --                       | --                          | --                          |
| Down syndrome                                       | 48<br>(30 - 81)             | 26<br>(15 - 45)          | 10<br>(5 - 21)         | 8<br>(5 - 12)            | 4<br>(2 - 8)                | 1<br>(0 - 1)                |
| Chromosomal unbalanced rearrangements               | 55<br>(37 - 83)             | 34<br>(21 - 55)          | 3<br>(2 - 5)           | 15<br>(9 - 26)           | 2<br>(1 - 3)                | 1<br>(1 - 2)                |
| Other congenital anomalies                          | 1,077<br>(840 - 1,359)      | 568<br>(385 - 818)       | 56<br>(36 - 85)        | 167<br>(120 - 228)       | 167<br>(121 - 225)          | 118<br>(87 - 161)           |
| Skin and subcutaneous diseases                      | 1,950<br>(864 - 2,562)      | 8<br>(5 - 13)            | 7<br>(4 - 10)          | 321<br>(160 - 437)       | 480<br>(245 - 633)          | 1,133<br>(450 - 1,659)      |
| Cellulitis                                          | 150<br>(60 - 244)           | 2<br>(1 - 3)             | 1<br>(1 - 2)           | 36<br>(14 - 59)          | 56<br>(22 - 96)             | 55<br>(17 - 107)            |
| Pyoderma                                            | 1,308<br>(722 - 1,771)      | 6<br>(3 - 9)             | 5<br>(3 - 7)           | 245<br>(135 - 338)       | 362<br>(209 - 494)          | 691<br>(374 - 1,023)        |
| Decubitus ulcer                                     | 479<br>(74 - 722)           | 0<br>(0 - 1)             | 1<br>(0 - 1)           | 34<br>(8 - 52)           | 60<br>(11 - 92)             | 384<br>(53 - 608)           |

Web Table 31- Thailand deaths with 95% UI by age, sex, and cause in 2013

| Cause                                           | Both Sexes, All Ages        | Both Sexes, 0-4 Years | Both Sexes, 5-14 Years   | Both Sexes, 15-49 Years     | Both Sexes, 50-69 Years     | Both Sexes, 70-80 Years   |
|-------------------------------------------------|-----------------------------|-----------------------|--------------------------|-----------------------------|-----------------------------|---------------------------|
| Other skin and subcutaneous diseases            | 13<br>(8 - 21)              | 0<br>(0 - 1)          | 1<br>(0 - 1)             | 6<br>(3 - 10)               | 3<br>(2 - 5)                | 3<br>(1 - 7)              |
| Sudden infant death syndrome                    | 17<br>(1 - 46)              | 17<br>(1 - 46)        | --                       | --                          | --                          | --                        |
| Injuries                                        | 58,551<br>(47,659 - 70,662) | 676<br>(456 - 961)    | 1,758<br>(1,483 - 2,067) | 33,302<br>(26,474 - 41,619) | 13,710<br>(10,907 - 16,960) | 9,106<br>(6,381 - 11,156) |
| Transport injuries                              | 23,991<br>(19,027 - 29,354) | 132<br>(84 - 202)     | 643<br>(494 - 818)       | 14,370<br>(10,950 - 18,244) | 5,685<br>(4,438 - 7,161)    | 3,160<br>(2,231 - 3,938)  |
| Road injuries                                   | 23,179<br>(18,337 - 28,399) | 124<br>(79 - 190)     | 622<br>(478 - 791)       | 13,958<br>(10,638 - 17,704) | 5,473<br>(4,281 - 6,889)    | 3,002<br>(2,158 - 3,752)  |
| Pedestrian road injuries                        | 4,648<br>(3,434 - 6,332)    | 50<br>(30 - 79)       | 230<br>(158 - 317)       | 1,972<br>(1,342 - 2,941)    | 1,330<br>(936 - 1,808)      | 1,066<br>(735 - 1,430)    |
| Cyclist road injuries                           | 586<br>(396 - 805)          | 3<br>(1 - 7)          | 33<br>(22 - 49)          | 259<br>(167 - 376)          | 176<br>(110 - 260)          | 114<br>(68 - 169)         |
| Motorcyclist road injuries                      | 10,583<br>(7,903 - 13,658)  | 21<br>(11 - 37)       | 152<br>(90 - 231)        | 7,653<br>(5,608 - 10,082)   | 2,040<br>(1,457 - 2,777)    | 717<br>(455 - 993)        |
| Motor vehicle road injuries                     | 7,288<br>(5,541 - 9,239)    | 49<br>(30 - 76)       | 203<br>(145 - 282)       | 4,028<br>(2,915 - 5,401)    | 1,915<br>(1,432 - 2,511)    | 1,093<br>(732 - 1,467)    |
| Other road injuries                             | 75<br>(46 - 104)            | 1<br>(0 - 1)          | 4<br>(2 - 6)             | 45<br>(24 - 67)             | 13<br>(7 - 20)              | 13<br>(7 - 22)            |
| Other transport injuries                        | 812<br>(494 - 1,093)        | 8<br>(4 - 13)         | 21<br>(11 - 31)          | 413<br>(256 - 583)          | 212<br>(123 - 307)          | 158<br>(63 - 237)         |
| Unintentional injuries                          | 16,896<br>(11,467 - 21,609) | 528<br>(332 - 814)    | 1,002<br>(757 - 1,338)   | 6,452<br>(4,458 - 8,350)    | 4,495<br>(2,961 - 5,885)    | 4,419<br>(2,288 - 6,058)  |
| Falls                                           | 3,767<br>(1,605 - 5,146)    | 19<br>(8 - 35)        | 39<br>(21 - 63)          | 855<br>(377 - 1,234)        | 1,287<br>(650 - 1,806)      | 1,567<br>(477 - 2,404)    |
| Drowning                                        | 5,283<br>(3,455 - 7,292)    | 348<br>(181 - 628)    | 794<br>(563 - 1,148)     | 2,339<br>(1,384 - 3,415)    | 1,243<br>(749 - 1,858)      | 560<br>(345 - 795)        |
| Fire, heat, and hot substances                  | 532<br>(295 - 768)          | 17<br>(9 - 30)        | 15<br>(8 - 26)           | 169<br>(98 - 252)           | 125<br>(65 - 196)           | 206<br>(94 - 334)         |
| Poisonings                                      | 345<br>(199 - 457)          | 4<br>(2 - 7)          | 6<br>(3 - 8)             | 183<br>(90 - 256)           | 86<br>(46 - 123)            | 66<br>(40 - 92)           |
| Exposure to mechanical forces                   | 2,051<br>(1,219 - 2,587)    | 15<br>(9 - 26)        | 41<br>(28 - 62)          | 1,149<br>(700 - 1,548)      | 506<br>(292 - 687)          | 340<br>(163 - 455)        |
| Unintentional firearm injuries                  | 1,299<br>(350 - 1,728)      | 3<br>(1 - 5)          | 10<br>(3 - 17)           | 736<br>(180 - 1,061)        | 313<br>(86 - 449)           | 237<br>(60 - 342)         |
| Unintentional suffocation                       | 87<br>(53 - 122)            | 7<br>(3 - 16)         | 5<br>(3 - 9)             | 47<br>(27 - 69)             | 22<br>(12 - 35)             | 7<br>(4 - 11)             |
| Other exposure to mechanical forces             | 664<br>(510 - 916)          | 6<br>(3 - 11)         | 26<br>(15 - 43)          | 366<br>(249 - 559)          | 171<br>(120 - 243)          | 96<br>(66 - 133)          |
| Adverse effects of medical treatment            | 1,868<br>(819 - 2,970)      | 30<br>(15 - 54)       | 16<br>(8 - 25)           | 471<br>(215 - 763)          | 521<br>(222 - 870)          | 830<br>(278 - 1,510)      |
| Animal contact                                  | 320<br>(174 - 419)          | 9<br>(5 - 17)         | 16<br>(9 - 24)           | 90<br>(50 - 127)            | 124<br>(67 - 176)           | 81<br>(37 - 114)          |
| Venomous animal contact                         | 199<br>(108 - 266)          | 7<br>(3 - 14)         | 13<br>(8 - 21)           | 59<br>(31 - 85)             | 78<br>(37 - 114)            | 42<br>(17 - 63)           |
| Non-venomous animal contact                     | 121<br>(61 - 167)           | 2<br>(1 - 4)          | 3<br>(1 - 5)             | 31<br>(15 - 46)             | 46<br>(23 - 71)             | 39<br>(18 - 59)           |
| Foreign body                                    | 1,057<br>(639 - 1,386)      | 71<br>(39 - 105)      | 22<br>(13 - 34)          | 119<br>(56 - 181)           | 248<br>(140 - 366)          | 597<br>(350 - 813)        |
| Pulmonary aspiration and foreign body in airway | 959<br>(567 - 1,263)        | 67<br>(36 - 100)      | 20<br>(12 - 32)          | 108<br>(48 - 166)           | 226<br>(126 - 342)          | 537<br>(310 - 742)        |
| Foreign body in other body part                 | 99<br>(48 - 148)            | 4<br>(2 - 6)          | 2<br>(1 - 2)             | 11<br>(6 - 16)              | 22<br>(9 - 36)              | 60<br>(27 - 99)           |
| Other unintentional injuries                    | 1,673<br>(1,271 - 2,113)    | 14<br>(9 - 21)        | 53<br>(37 - 76)          | 1,078<br>(772 - 1,434)      | 354<br>(249 - 482)          | 173<br>(120 - 221)        |
| Self-harm and interpersonal violence            | 17,664<br>(13,430 - 25,109) | 16<br>(9 - 30)        | 114<br>(70 - 181)        | 12,479<br>(9,311 - 17,520)  | 3,529<br>(2,495 - 5,476)    | 1,526<br>(1,101 - 2,236)  |
| Self-harm                                       | 10,300<br>(7,509 - 13,124)  | --                    | 39<br>(17 - 75)          | 6,649<br>(4,692 - 8,718)    | 2,400<br>(1,679 - 3,226)    | 1,211<br>(858 - 1,722)    |
| Interpersonal violence                          | 7,364<br>(4,790 - 13,719)   | 16<br>(9 - 30)        | 74<br>(45 - 130)         | 5,830<br>(3,860 - 10,130)   | 1,129<br>(587 - 2,816)      | 316<br>(138 - 821)        |
| Assault by firearm                              | 5,008<br>(3,181 - 9,459)    | 5<br>(3 - 11)         | 32<br>(17 - 58)          | 4,091<br>(2,628 - 7,522)    | 752<br>(370 - 1,921)        | 127<br>(49 - 379)         |
| Assault by sharp object                         | 1,354<br>(658 - 2,564)      | 2<br>(1 - 5)          | 10<br>(5 - 20)           | 1,092<br>(510 - 1,966)      | 180<br>(80 - 470)           | 69<br>(29 - 185)          |
| Assault by other means                          | 1,003<br>(557 - 2,245)      | 8<br>(4 - 16)         | 32<br>(17 - 64)          | 646<br>(359 - 1,369)        | 197<br>(85 - 565)           | 119<br>(47 - 342)         |

Web Table 31- Thailand deaths with 95% UI by age, sex, and cause in 2013

| Cause                                                             | Males, All Ages                | Males, 0-4 Years         | Males, 5-14 Years        | Males, 15-49 Years          | Males, 50-69 Years           | Males, 70-80 Years             |
|-------------------------------------------------------------------|--------------------------------|--------------------------|--------------------------|-----------------------------|------------------------------|--------------------------------|
| All causes                                                        | 289,388<br>(242,946 - 343,954) | 4,332<br>(3,556 - 5,247) | 2,093<br>(1,835 - 2,421) | 71,704<br>(56,569 - 89,775) | 83,872<br>(66,596 - 103,850) | 127,387<br>(112,509 - 144,013) |
| Communicable, maternal, neonatal, and nutritional diseases        | 39,576<br>(33,319 - 47,438)    | 2,617<br>(2,126 - 3,220) | 380<br>(274 - 516)       | 11,518<br>(8,928 - 14,793)  | 10,006<br>(7,782 - 13,158)   | 15,056<br>(12,213 - 18,881)    |
| HIV/AIDS and tuberculosis                                         | 15,109<br>(11,133 - 21,054)    | 6<br>(2 - 11)            | 8<br>(3 - 13)            | 6,407<br>(4,048 - 9,408)    | 4,384<br>(3,042 - 7,206)     | 4,304<br>(3,203 - 6,761)       |
| Tuberculosis                                                      | 5,688<br>(4,374 - 8,927)       | 1<br>(1 - 2)             | 4<br>(3 - 6)             | 436<br>(317 - 636)          | 1,306<br>(966 - 1,951)       | 3,941<br>(2,872 - 6,426)       |
| HIV/AIDS                                                          | 9,421<br>(5,777 - 15,345)      | 5<br>(2 - 10)            | 4<br>(0 - 8)             | 5,972<br>(3,624 - 8,988)    | 3,078<br>(1,837 - 5,851)     | 363<br>(169 - 708)             |
| HIV/AIDS resulting in mycobacterial infection                     | 601<br>(359 - 1,041)           | 0<br>(0 - 1)             | 0<br>(0 - 0)             | 370<br>(221 - 585)          | 204<br>(117 - 401)           | 27<br>(12 - 54)                |
| HIV/AIDS resulting in other diseases                              | 8,820<br>(5,424 - 14,374)      | 5<br>(1 - 9)             | 3<br>(0 - 8)             | 5,602<br>(3,387 - 8,430)    | 2,874<br>(1,703 - 5,457)     | 336<br>(156 - 656)             |
| Diarrhea, lower respiratory, and other common infectious diseases | 20,836<br>(15,478 - 26,484)    | 646<br>(454 - 882)       | 306<br>(209 - 434)       | 4,589<br>(3,157 - 6,269)    | 5,169<br>(3,478 - 7,006)     | 10,127<br>(7,251 - 13,797)     |
| Diarrheal diseases                                                | 1,427<br>(978 - 2,002)         | 73<br>(31 - 150)         | 18<br>(9 - 34)           | 260<br>(168 - 367)          | 300<br>(178 - 480)           | 776<br>(452 - 1,285)           |
| Intestinal infectious diseases                                    | 398<br>(159 - 793)             | 90<br>(30 - 193)         | 92<br>(36 - 200)         | 144<br>(50 - 310)           | 51<br>(13 - 131)             | 21<br>(6 - 45)                 |
| Typhoid fever                                                     | 305<br>(117 - 608)             | 64<br>(20 - 139)         | 70<br>(26 - 157)         | 113<br>(38 - 250)           | 41<br>(10 - 112)             | 17<br>(4 - 37)                 |
| Paratyphoid fever                                                 | 83<br>(32 - 173)               | 24<br>(7 - 53)           | 21<br>(7 - 48)           | 27<br>(9 - 62)              | 8<br>(2 - 21)                | 3<br>(1 - 7)                   |
| Other intestinal infectious diseases                              | 10<br>(4 - 18)                 | 2<br>(0 - 7)             | 1<br>(0 - 4)             | 3<br>(0 - 9)                | 2<br>(0 - 6)                 | 1<br>(0 - 5)                   |
| Lower respiratory infections                                      | 17,331<br>(12,247 - 22,557)    | 386<br>(254 - 558)       | 121<br>(70 - 185)        | 3,341<br>(2,148 - 4,733)    | 4,473<br>(2,929 - 6,133)     | 9,010<br>(6,138 - 12,609)      |
| Upper respiratory infections                                      | 14<br>(4 - 29)                 | 0<br>(0 - 1)             | 0<br>(0 - 1)             | 5<br>(1 - 14)               | 4<br>(0 - 12)                | 5<br>(0 - 17)                  |
| Otitis media                                                      | 27<br>(20 - 35)                | 0<br>(0 - 1)             | 0<br>(0 - 1)             | 3<br>(2 - 5)                | 9<br>(6 - 12)                | 14<br>(10 - 20)                |
| Meningitis                                                        | 1,098<br>(634 - 1,498)         | 38<br>(19 - 66)          | 32<br>(17 - 52)          | 658<br>(332 - 980)          | 210<br>(116 - 319)           | 160<br>(92 - 266)              |
| Pneumococcal meningitis                                           | 291<br>(160 - 431)             | 6<br>(2 - 11)            | 8<br>(3 - 15)            | 175<br>(80 - 286)           | 58<br>(24 - 102)             | 45<br>(18 - 82)                |
| H influenzae type B meningitis                                    | 185<br>(105 - 277)             | 16<br>(8 - 28)           | 10<br>(5 - 18)           | 105<br>(48 - 180)           | 31<br>(14 - 53)              | 24<br>(11 - 42)                |
| Meningococcal meningitis                                          | 141<br>(83 - 240)              | 2<br>(1 - 4)             | 3<br>(1 - 6)             | 88<br>(39 - 171)            | 25<br>(9 - 46)               | 23<br>(11 - 45)                |
| Other meningitis                                                  | 480<br>(268 - 700)             | 14<br>(6 - 27)           | 12<br>(6 - 21)           | 290<br>(131 - 467)          | 96<br>(52 - 161)             | 68<br>(35 - 116)               |
| Encephalitis                                                      | 437<br>(323 - 650)             | 29<br>(15 - 49)          | 35<br>(19 - 75)          | 159<br>(108 - 250)          | 101<br>(66 - 161)            | 113<br>(71 - 161)              |
| Diphtheria                                                        | 2<br>(0 - 7)                   | 0<br>(0 - 2)             | 0<br>(0 - 3)             | 1<br>(0 - 4)                | 0<br>(0 - 2)                 | --                             |
| Whooping cough                                                    | 4<br>(0 - 18)                  | 3<br>(0 - 16)            | 0<br>(0 - 1)             | 0<br>(0 - 0)                | 0<br>(0 - 0)                 | --                             |
| Tetanus                                                           | 54<br>(13 - 108)               | 2<br>(1 - 3)             | 1<br>(0 - 2)             | 13<br>(3 - 25)              | 18<br>(4 - 36)               | 20<br>(4 - 44)                 |
| Measles                                                           | 29<br>(2 - 126)                | 23<br>(2 - 99)           | 5<br>(0 - 20)            | 1<br>(0 - 5)                | 0<br>(0 - 0)                 | --                             |
| Varicella and herpes zoster                                       | 16<br>(5 - 49)                 | 2<br>(0 - 6)             | 1<br>(0 - 2)             | 4<br>(0 - 10)               | 2<br>(0 - 7)                 | 8<br>(0 - 40)                  |
| Neglected tropical diseases and malaria                           | 234<br>(179 - 311)             | 17<br>(10 - 30)          | 45<br>(32 - 80)          | 107<br>(76 - 148)           | 37<br>(25 - 55)              | 29<br>(20 - 43)                |
| Malaria                                                           | 78<br>(45 - 136)               | 2<br>(1 - 4)             | 3<br>(1 - 6)             | 44<br>(23 - 83)             | 18<br>(9 - 35)               | 10<br>(4 - 21)                 |
| Leishmaniasis                                                     | 0<br>(0 - 0)                   | 0<br>(0 - 0)             | 0<br>(0 - 0)             | 0<br>(0 - 0)                | 0<br>(0 - 0)                 | 0<br>(0 - 0)                   |
| Visceral leishmaniasis                                            | 0<br>(0 - 0)                   | 0<br>(0 - 0)             | 0<br>(0 - 0)             | 0<br>(0 - 0)                | 0<br>(0 - 0)                 | 0<br>(0 - 0)                   |
| Cysticercosis                                                     | 1<br>(1 - 1)                   | 0<br>(0 - 0)             | 0<br>(0 - 0)             | 0<br>(0 - 1)                | 0<br>(0 - 0)                 | 0<br>(0 - 0)                   |
| Cystic echinococcosis                                             | 5<br>(4 - 6)                   | 0<br>(0 - 0)             | 0<br>(0 - 0)             | 3<br>(2 - 4)                | 1<br>(1 - 2)                 | 1<br>(1 - 1)                   |
| Dengue                                                            | 88<br>(67 - 153)               | 10<br>(6 - 21)           | 36<br>(25 - 70)          | 29<br>(20 - 42)             | 6<br>(4 - 11)                | 7<br>(4 - 16)                  |
| Rabies                                                            | 15<br>(9 - 33)                 | 0<br>(0 - 1)             | 2<br>(1 - 5)             | 8<br>(4 - 17)               | 3<br>(2 - 7)                 | 1<br>(1 - 3)                   |
| Intestinal nematode infections                                    | 9<br>(2 - 21)                  | 1<br>(0 - 6)             | 1<br>(0 - 7)             | 3<br>(0 - 10)               | 2<br>(0 - 7)                 | 2<br>(0 - 8)                   |
| Ascariasis                                                        | 9<br>(2 - 21)                  | 1<br>(0 - 6)             | 1<br>(0 - 7)             | 3<br>(0 - 10)               | 2<br>(0 - 7)                 | 2<br>(0 - 8)                   |
| Other neglected tropical diseases                                 | 39<br>(27 - 55)                | 3<br>(1 - 6)             | 3<br>(1 - 5)             | 19<br>(12 - 30)             | 6<br>(4 - 10)                | 8<br>(5 - 13)                  |
| Maternal disorders                                                | --                             | --                       | --                       | --                          | --                           | --                             |
| Maternal hemorrhage                                               | --                             | --                       | --                       | --                          | --                           | --                             |

Web Table 31- Thailand deaths with 95% UI by age, sex, and cause in 2013

| Cause                                                            | Males, All Ages                | Males, 0-4 Years         | Males, 5-14 Years  | Males, 15-49 Years          | Males, 50-69 Years          | Males, 70-80 Years            |
|------------------------------------------------------------------|--------------------------------|--------------------------|--------------------|-----------------------------|-----------------------------|-------------------------------|
| Maternal sepsis and other maternal infections                    | --                             | --                       | --                 | --                          | --                          | --                            |
| Maternal hypertensive disorders                                  | --                             | --                       | --                 | --                          | --                          | --                            |
| Maternal obstructed labor                                        | --                             | --                       | --                 | --                          | --                          | --                            |
| Maternal abortive outcome                                        | --                             | --                       | --                 | --                          | --                          | --                            |
| Indirect maternal deaths                                         | --                             | --                       | --                 | --                          | --                          | --                            |
| Late maternal deaths                                             | --                             | --                       | --                 | --                          | --                          | --                            |
| Maternal deaths aggravated by HIV/AIDS                           | --                             | --                       | --                 | --                          | --                          | --                            |
| Other maternal disorders                                         | --                             | --                       | --                 | --                          | --                          | --                            |
| Neonatal disorders                                               | 1,872<br>(1,476 - 2,347)       | 1,872<br>(1,476 - 2,347) | --                 | --                          | --                          | --                            |
| Neonatal preterm birth complications                             | 1,008<br>(672 - 1,367)         | 1,008<br>(672 - 1,367)   | --                 | --                          | --                          | --                            |
| Neonatal encephalopathy due to birth asphyxia and trauma         | 400<br>(203 - 653)             | 400<br>(203 - 653)       | --                 | --                          | --                          | --                            |
| Neonatal sepsis and other neonatal infections                    | 283<br>(75 - 559)              | 283<br>(75 - 559)        | --                 | --                          | --                          | --                            |
| Hemolytic disease and other neonatal jaundice                    | 7<br>(3 - 17)                  | 7<br>(3 - 17)            | --                 | --                          | --                          | --                            |
| Other neonatal disorders                                         | 174<br>(100 - 332)             | 174<br>(100 - 332)       | --                 | --                          | --                          | --                            |
| Nutritional deficiencies                                         | 433<br>(268 - 895)             | 5<br>(2 - 12)            | 3<br>(1 - 6)       | 103<br>(60 - 239)           | 92<br>(52 - 198)            | 230<br>(127 - 446)            |
| Protein-energy malnutrition                                      | 136<br>(55 - 307)              | 1<br>(0 - 4)             | 1<br>(0 - 1)       | 25<br>(10 - 70)             | 34<br>(14 - 81)             | 76<br>(25 - 155)              |
| Iodine deficiency                                                | 8<br>(1 - 31)                  | 0<br>(0 - 1)             | 0<br>(0 - 1)       | 3<br>(0 - 11)               | 2<br>(0 - 11)               | 3<br>(0 - 22)                 |
| Iron-deficiency anemia                                           | 235<br>(111 - 477)             | 2<br>(1 - 6)             | 2<br>(1 - 3)       | 61<br>(29 - 136)            | 43<br>(16 - 85)             | 128<br>(56 - 250)             |
| Other nutritional deficiencies                                   | 53<br>(20 - 169)               | 1<br>(0 - 4)             | 1<br>(0 - 2)       | 15<br>(5 - 50)              | 14<br>(5 - 45)              | 23<br>(8 - 69)                |
| Other communicable, maternal, neonatal, and nutritional diseases | 1,092<br>(513 - 1,762)         | 71<br>(26 - 141)         | 19<br>(10 - 34)    | 313<br>(139 - 555)          | 324<br>(111 - 628)          | 366<br>(112 - 781)            |
| Sexually transmitted diseases excluding HIV                      | 64<br>(19 - 126)               | 40<br>(0 - 95)           | 4<br>(0 - 8)       | 9<br>(4 - 19)               | 5<br>(2 - 12)               | 7<br>(2 - 20)                 |
| Syphilis                                                         | 58<br>(15 - 118)               | 40<br>(0 - 95)           | 3<br>(0 - 8)       | 5<br>(2 - 11)               | 4<br>(1 - 9)                | 6<br>(2 - 17)                 |
| Chlamydial infection                                             | --                             | --                       | --                 | --                          | --                          | --                            |
| Gonococcal infection                                             | 4<br>(2 - 8)                   | --                       | 0<br>(0 - 0)       | 2<br>(1 - 5)                | 1<br>(0 - 2)                | 1<br>(0 - 2)                  |
| Other sexually transmitted diseases                              | 3<br>(1 - 6)                   | --                       | 0<br>(0 - 0)       | 2<br>(1 - 4)                | 1<br>(0 - 1)                | 0<br>(0 - 1)                  |
| Hepatitis                                                        | 110<br>(82 - 149)              | 1<br>(0 - 1)             | 1<br>(0 - 1)       | 40<br>(26 - 59)             | 40<br>(27 - 58)             | 30<br>(21 - 43)               |
| Acute hepatitis A                                                | 6<br>(2 - 15)                  | 0<br>(0 - 1)             | 0<br>(0 - 0)       | 4<br>(1 - 9)                | 2<br>(0 - 4)                | 1<br>(0 - 1)                  |
| Acute hepatitis B                                                | 79<br>(57 - 109)               | 0<br>(0 - 1)             | 0<br>(0 - 0)       | 22<br>(11 - 35)             | 31<br>(20 - 45)             | 26<br>(17 - 38)               |
| Acute hepatitis C                                                | 5<br>(1 - 12)                  | --                       | 0<br>(0 - 0)       | 1<br>(0 - 4)                | 2<br>(0 - 5)                | 1<br>(0 - 5)                  |
| Acute hepatitis E                                                | 20<br>(9 - 38)                 | 0<br>(0 - 0)             | 0<br>(0 - 0)       | 13<br>(6 - 24)              | 5<br>(2 - 12)               | 2<br>(1 - 5)                  |
| Other infectious diseases                                        | 918<br>(344 - 1,574)           | 30<br>(13 - 71)          | 15<br>(6 - 28)     | 264<br>(91 - 501)           | 280<br>(67 - 584)           | 329<br>(76 - 742)             |
| Non-communicable diseases                                        | 205,819<br>(171,202 - 247,825) | 1,339<br>(996 - 1,769)   | 549<br>(432 - 693) | 32,582<br>(24,267 - 42,310) | 64,117<br>(50,371 - 81,051) | 107,232<br>(93,996 - 123,395) |
| Neoplasms                                                        | 55,051<br>(44,385 - 67,698)    | 70<br>(40 - 112)         | 181<br>(136 - 237) | 8,116<br>(6,011 - 10,713)   | 23,910<br>(18,543 - 30,278) | 22,774<br>(19,225 - 26,989)   |
| Esophageal cancer                                                | 1,477<br>(940 - 2,053)         | --                       | --                 | 152<br>(82 - 249)           | 668<br>(403 - 979)          | 657<br>(430 - 920)            |
| Stomach cancer                                                   | 3,084<br>(2,368 - 3,915)       | --                       | --                 | 435<br>(313 - 595)          | 1,253<br>(901 - 1,644)      | 1,396<br>(1,062 - 1,805)      |
| Liver cancer                                                     | 15,292<br>(11,535 - 19,835)    | --                       | 8<br>(4 - 14)      | 2,719<br>(1,788 - 3,886)    | 7,735<br>(5,573 - 10,404)   | 4,829<br>(3,470 - 6,453)      |
| Liver cancer due to hepatitis B                                  | 8,261<br>(4,883 - 12,072)      | --                       | 4<br>(2 - 8)       | 1,726<br>(995 - 2,691)      | 4,405<br>(2,461 - 6,732)    | 2,126<br>(1,144 - 3,324)      |
| Liver cancer due to hepatitis C                                  | 4,705<br>(1,954 - 8,396)       | --                       | 1<br>(0 - 2)       | 613<br>(171 - 1,289)        | 2,242<br>(792 - 4,230)      | 1,849<br>(828 - 3,151)        |
| Liver cancer due to alcohol use                                  | 1,294<br>(685 - 2,306)         | --                       | --                 | 135<br>(56 - 264)           | 582<br>(283 - 1,099)        | 577<br>(294 - 1,046)          |
| Liver cancer due to other causes                                 | 1,032<br>(501 - 1,867)         | --                       | 3<br>(1 - 6)       | 244<br>(125 - 441)          | 507<br>(220 - 971)          | 278<br>(128 - 507)            |

Web Table 31- Thailand deaths with 95% UI by age, sex, and cause in 2013

| Cause                                         | Males, All Ages             | Males, 0-4 Years | Males, 5-14 Years | Males, 15-49 Years        | Males, 50-69 Years          | Males, 70-80 Years          |
|-----------------------------------------------|-----------------------------|------------------|-------------------|---------------------------|-----------------------------|-----------------------------|
| Larynx cancer                                 | 670<br>(411 - 895)          | --               | --                | 61<br>(35 - 90)           | 234<br>(144 - 330)          | 374<br>(226 - 512)          |
| Tracheal, bronchus and lung cancer            | 13,860<br>(10,850 - 17,530) | --               | --                | 1,205<br>(842 - 1,677)    | 6,087<br>(4,599 - 8,125)    | 6,569<br>(5,188 - 8,143)    |
| Breast cancer                                 | 32<br>(21 - 48)             | --               | --                | 6<br>(4 - 11)             | 11<br>(6 - 18)              | 15<br>(8 - 27)              |
| Cervical cancer                               | --                          | --               | --                | --                        | --                          | --                          |
| Uterine cancer                                | --                          | --               | --                | --                        | --                          | --                          |
| Prostate cancer                               | 1,320<br>(665 - 1,868)      | --               | --                | 11<br>(6 - 17)            | 161<br>(82 - 246)           | 1,148<br>(567 - 1,659)      |
| Colon and rectum cancer                       | 4,373<br>(3,460 - 5,432)    | --               | --                | 569<br>(413 - 767)        | 1,657<br>(1,245 - 2,170)    | 2,147<br>(1,668 - 2,718)    |
| Lip and oral cavity cancer                    | 1,242<br>(744 - 1,707)      | --               | --                | 188<br>(106 - 292)        | 500<br>(278 - 729)          | 554<br>(331 - 793)          |
| Nasopharynx cancer                            | 705<br>(488 - 948)          | --               | 2<br>(1 - 5)      | 185<br>(116 - 275)        | 337<br>(212 - 502)          | 181<br>(120 - 263)          |
| Other pharynx cancer                          | 709<br>(496 - 972)          | --               | --                | 123<br>(78 - 188)         | 357<br>(238 - 508)          | 228<br>(151 - 348)          |
| Gallbladder and biliary tract cancer          | 1,829<br>(1,040 - 2,583)    | --               | --                | 176<br>(89 - 275)         | 917<br>(512 - 1,367)        | 737<br>(389 - 1,106)        |
| Pancreatic cancer                             | 1,537<br>(1,174 - 1,963)    | --               | --                | 260<br>(184 - 353)        | 767<br>(544 - 1,005)        | 511<br>(387 - 659)          |
| Malignant skin melanoma                       | 145<br>(70 - 220)           | --               | --                | 50<br>(24 - 78)           | 59<br>(27 - 92)             | 37<br>(20 - 60)             |
| Non-melanoma skin cancer                      | 289<br>(165 - 408)          | --               | --                | 32<br>(18 - 48)           | 74<br>(42 - 115)            | 183<br>(101 - 279)          |
| Ovarian cancer                                | --                          | --               | --                | --                        | --                          | --                          |
| Testicular cancer                             | 67<br>(42 - 114)            | --               | --                | 42<br>(25 - 71)           | 14<br>(8 - 26)              | 12<br>(7 - 22)              |
| Kidney cancer                                 | 693<br>(515 - 919)          | 2<br>(1 - 4)     | 2<br>(1 - 3)      | 98<br>(66 - 143)          | 355<br>(244 - 497)          | 238<br>(168 - 327)          |
| Bladder cancer                                | 1,209<br>(923 - 1,600)      | --               | --                | 46<br>(29 - 67)           | 346<br>(243 - 483)          | 818<br>(600 - 1,116)        |
| Brain and nervous system cancer               | 1,079<br>(603 - 1,493)      | 6<br>(2 - 13)    | 30<br>(15 - 47)   | 352<br>(184 - 514)        | 417<br>(236 - 597)          | 273<br>(134 - 394)          |
| Thyroid cancer                                | 210<br>(156 - 280)          | --               | --                | 21<br>(0 - 1)             | 83<br>(55 - 124)            | 106<br>(74 - 145)           |
| Mesothelioma                                  | 59<br>(41 - 79)             | --               | --                | 8<br>(5 - 12)             | 29<br>(19 - 44)             | 22<br>(13 - 34)             |
| Hodgkin lymphoma                              | 68<br>(48 - 97)             | 2<br>(1 - 5)     | 2<br>(1 - 4)      | 29<br>(18 - 43)           | 20<br>(12 - 31)             | 16<br>(9 - 26)              |
| Non-Hodgkin lymphoma                          | 1,209<br>(831 - 1,608)      | 4<br>(2 - 8)     | 16<br>(9 - 26)    | 291<br>(195 - 424)        | 505<br>(325 - 707)          | 393<br>(261 - 552)          |
| Multiple myeloma                              | 155<br>(107 - 221)          | --               | --                | 41<br>(26 - 60)           | 69<br>(43 - 105)            | 44<br>(30 - 64)             |
| Leukemia                                      | 1,598<br>(1,250 - 1,983)    | 22<br>(10 - 43)  | 73<br>(49 - 106)  | 517<br>(371 - 681)        | 459<br>(337 - 614)          | 528<br>(394 - 704)          |
| Other neoplasms                               | 2,139<br>(1,547 - 2,991)    | 34<br>(15 - 58)  | 49<br>(29 - 74)   | 502<br>(341 - 735)        | 795<br>(525 - 1,165)        | 759<br>(521 - 1,097)        |
| Cardiovascular diseases                       | 65,244<br>(53,941 - 78,389) | 92<br>(60 - 133) | 99<br>(69 - 143)  | 8,752<br>(6,510 - 11,391) | 18,097<br>(13,776 - 23,222) | 38,203<br>(32,526 - 45,100) |
| Rheumatic heart disease                       | 228<br>(130 - 317)          | 1<br>(0 - 2)     | 4<br>(1 - 7)      | 69<br>(35 - 107)          | 77<br>(36 - 119)            | 77<br>(47 - 119)            |
| Ischemic heart disease                        | 29,989<br>(23,417 - 37,296) | 9<br>(4 - 20)    | 20<br>(9 - 33)    | 4,166<br>(2,956 - 5,747)  | 9,271<br>(6,853 - 12,005)   | 16,523<br>(12,814 - 20,412) |
| Cerebrovascular disease                       | 28,581<br>(22,746 - 36,721) | 22<br>(13 - 33)  | 35<br>(23 - 52)   | 3,120<br>(2,093 - 4,220)  | 6,912<br>(4,946 - 9,250)    | 18,492<br>(14,913 - 24,116) |
| Ischemic stroke                               | 9,007<br>(5,486 - 12,501)   | 2<br>(1 - 5)     | 3<br>(2 - 5)      | 358<br>(214 - 541)        | 1,790<br>(996 - 2,608)      | 6,854<br>(3,987 - 9,790)    |
| Hemorrhagic stroke                            | 19,574<br>(14,443 - 26,585) | 20<br>(12 - 29)  | 32<br>(21 - 48)   | 2,762<br>(1,858 - 3,741)  | 5,122<br>(3,668 - 6,995)    | 11,639<br>(8,071 - 16,778)  |
| Hypertensive heart disease                    | 769<br>(306 - 1,362)        | 0<br>(0 - 1)     | 1<br>(0 - 1)      | 175<br>(79 - 291)         | 286<br>(108 - 539)          | 306<br>(97 - 588)           |
| Cardiomyopathy and myocarditis                | 749<br>(396 - 1,595)        | 13<br>(6 - 28)   | 12<br>(6 - 27)    | 199<br>(103 - 430)        | 196<br>(94 - 440)           | 329<br>(159 - 755)          |
| Atrial fibrillation and flutter               | 5<br>(3 - 8)                | --               | --                | 2<br>(1 - 4)              | 2<br>(1 - 4)                | 1<br>(1 - 2)                |
| Aortic aneurysm                               | 840<br>(446 - 1,114)        | --               | --                | 53<br>(26 - 77)           | 123<br>(56 - 176)           | 664<br>(353 - 905)          |
| Peripheral vascular disease                   | 12<br>(8 - 16)              | --               | --                | 1<br>(1 - 2)              | 3<br>(2 - 4)                | 7<br>(5 - 11)               |
| Endocarditis                                  | 779<br>(348 - 1,371)        | 22<br>(11 - 37)  | 7<br>(3 - 12)     | 238<br>(106 - 422)        | 295<br>(125 - 531)          | 216<br>(78 - 437)           |
| Other cardiovascular and circulatory diseases | 3,292<br>(2,406 - 5,290)    | 25<br>(16 - 38)  | 20<br>(12 - 31)   | 729<br>(496 - 1,147)      | 932<br>(636 - 1,517)        | 1,587<br>(1,097 - 2,723)    |
| Chronic respiratory diseases                  | 24,730<br>(19,140 - 30,336) | 59<br>(36 - 93)  | 43<br>(27 - 61)   | 1,985<br>(1,454 - 2,741)  | 4,904<br>(3,667 - 6,684)    | 17,738<br>(13,017 - 22,011) |



Web Table 31- Thailand deaths with 95% UI by age, sex, and cause in 2013

| Cause                                               | Males, All Ages             | Males, 0-4 Years | Males, 5-14 Years | Males, 15-49 Years       | Males, 50-69 Years       | Males, 70-80 Years          |
|-----------------------------------------------------|-----------------------------|------------------|-------------------|--------------------------|--------------------------|-----------------------------|
| Chronic obstructive pulmonary disease               | 18,713<br>(13,966 - 23,216) | 32<br>(18 - 54)  | 13<br>(7 - 19)    | 831<br>(563 - 1,219)     | 3,101<br>(2,199 - 4,232) | 14,736<br>(10,752 - 18,316) |
| Pneumoconiosis                                      | 599<br>(196 - 1,082)        | 0<br>(0 - 0)     | 1<br>(0 - 1)      | 133<br>(41 - 258)        | 278<br>(82 - 541)        | 187<br>(63 - 361)           |
| Silicosis                                           | 218<br>(72 - 404)           | 0<br>(0 - 0)     | 0<br>(0 - 0)      | 6<br>(2 - 11)            | 69<br>(20 - 139)         | 144<br>(48 - 280)           |
| Asbestosis                                          | 85<br>(26 - 160)            | 0<br>(0 - 0)     | 0<br>(0 - 0)      | 24<br>(7 - 46)           | 60<br>(17 - 117)         | 1<br>(0 - 2)                |
| Coal workers pneumoconiosis                         | 183<br>(57 - 334)           | 0<br>(0 - 0)     | 0<br>(0 - 0)      | 75<br>(23 - 145)         | 103<br>(31 - 199)        | 5<br>(2 - 9)                |
| Other pneumoconiosis                                | 113<br>(36 - 208)           | 0<br>(0 - 0)     | 0<br>(0 - 0)      | 29<br>(9 - 57)           | 47<br>(13 - 93)          | 38<br>(12 - 76)             |
| Asthma                                              | 4,228<br>(2,946 - 5,807)    | 13<br>(5 - 28)   | 24<br>(14 - 35)   | 903<br>(611 - 1,240)     | 1,082<br>(726 - 1,558)   | 2,205<br>(1,387 - 3,258)    |
| Interstitial lung disease and pulmonary sarcoidosis | 972<br>(260 - 2,425)        | 1<br>(0 - 2)     | 2<br>(1 - 4)      | 22<br>(7 - 54)           | 404<br>(102 - 994)       | 543<br>(132 - 1,483)        |
| Other chronic respiratory diseases                  | 218<br>(156 - 297)          | 13<br>(8 - 18)   | 4<br>(2 - 6)      | 96<br>(62 - 147)         | 38<br>(24 - 58)          | 68<br>(43 - 105)            |
| Cirrhosis                                           | 11,389<br>(8,840 - 14,541)  | 4<br>(2 - 8)     | 10<br>(7 - 15)    | 3,818<br>(2,744 - 5,188) | 4,650<br>(3,528 - 6,231) | 2,907<br>(2,223 - 3,716)    |
| Cirrhosis due to hepatitis B                        | 2,814<br>(1,476 - 4,322)    | 0<br>(0 - 0)     | 2<br>(1 - 4)      | 1,087<br>(592 - 1,694)   | 1,136<br>(584 - 1,792)   | 588<br>(215 - 1,020)        |
| Cirrhosis due to hepatitis C                        | 1,939<br>(730 - 3,217)      | 0<br>(0 - 0)     | 1<br>(0 - 2)      | 598<br>(234 - 1,095)     | 786<br>(308 - 1,395)     | 555<br>(175 - 1,009)        |
| Cirrhosis due to alcohol use                        | 5,649<br>(3,448 - 8,005)    | --               | --                | 1,608<br>(845 - 2,534)   | 2,397<br>(1,401 - 3,575) | 1,644<br>(1,027 - 2,315)    |
| Cirrhosis due to other causes                       | 988<br>(569 - 1,582)        | 4<br>(2 - 7)     | 7<br>(5 - 10)     | 525<br>(298 - 848)       | 331<br>(168 - 575)       | 121<br>(63 - 207)           |
| Digestive diseases                                  | 6,688<br>(5,163 - 8,372)    | 8<br>(4 - 15)    | 19<br>(13 - 27)   | 1,191<br>(798 - 1,602)   | 1,707<br>(1,219 - 2,290) | 3,762<br>(2,814 - 4,838)    |
| Peptic ulcer disease                                | 944<br>(629 - 1,341)        | 0<br>(0 - 1)     | 1<br>(1 - 2)      | 135<br>(72 - 205)        | 233<br>(134 - 348)       | 575<br>(387 - 841)          |
| Gastritis and duodenitis                            | 141<br>(74 - 274)           | 0<br>(0 - 0)     | 0<br>(0 - 1)      | 23<br>(12 - 47)          | 44<br>(22 - 84)          | 73<br>(35 - 164)            |
| Appendicitis                                        | 258<br>(165 - 391)          | 0<br>(0 - 0)     | 2<br>(1 - 4)      | 73<br>(43 - 115)         | 84<br>(49 - 134)         | 98<br>(53 - 162)            |
| Paralytic ileus and intestinal obstruction          | 767<br>(460 - 1,443)        | 3<br>(2 - 7)     | 5<br>(3 - 10)     | 87<br>(46 - 178)         | 174<br>(101 - 349)       | 498<br>(266 - 925)          |
| Inguinal, femoral, and abdominal hernia             | 59<br>(27 - 96)             | 0<br>(0 - 0)     | 0<br>(0 - 1)      | 5<br>(2 - 9)             | 13<br>(7 - 23)           | 40<br>(17 - 70)             |
| Inflammatory bowel disease                          | 115<br>(60 - 272)           | 0<br>(0 - 1)     | 1<br>(0 - 2)      | 27<br>(14 - 63)          | 31<br>(15 - 73)          | 56<br>(25 - 145)            |
| Vascular intestinal disorders                       | 6<br>(2 - 12)               | 0<br>(0 - 0)     | 0<br>(0 - 1)      | 2<br>(1 - 4)             | 1<br>(0 - 2)             | 2<br>(1 - 4)                |
| Gallbladder and biliary diseases                    | 1,190<br>(800 - 1,625)      | 1<br>(0 - 1)     | 1<br>(1 - 2)      | 95<br>(57 - 135)         | 325<br>(211 - 468)       | 768<br>(491 - 1,086)        |
| Pancreatitis                                        | 483<br>(256 - 705)          | 0<br>(0 - 1)     | 1<br>(0 - 2)      | 217<br>(106 - 333)       | 137<br>(72 - 211)        | 128<br>(62 - 196)           |
| Other digestive diseases                            | 2,725<br>(1,922 - 3,615)    | 3<br>(1 - 6)     | 6<br>(3 - 9)      | 526<br>(318 - 721)       | 666<br>(430 - 942)       | 1,524<br>(1,054 - 2,194)    |
| Neurological disorders                              | 9,891<br>(7,784 - 12,292)   | 12<br>(6 - 21)   | 35<br>(22 - 57)   | 493<br>(322 - 703)       | 1,036<br>(749 - 1,412)   | 8,315<br>(6,404 - 10,556)   |
| Alzheimer disease and other dementias               | 8,911<br>(6,929 - 11,214)   | --               | --                | 6<br>(2 - 14)            | 801<br>(553 - 1,121)     | 8,104<br>(6,212 - 10,347)   |
| Parkinson disease                                   | 80<br>(51 - 122)            | --               | --                | 5<br>(3 - 8)             | 26<br>(16 - 41)          | 50<br>(27 - 84)             |
| Epilepsy                                            | 598<br>(348 - 864)          | 7<br>(3 - 16)    | 25<br>(14 - 47)   | 338<br>(188 - 529)       | 135<br>(78 - 204)        | 92<br>(50 - 152)            |
| Multiple sclerosis                                  | 29<br>(15 - 63)             | --               | --                | 12<br>(6 - 27)           | 9<br>(5 - 20)            | 8<br>(4 - 17)               |
| Other neurological disorders                        | 272<br>(198 - 434)          | 5<br>(2 - 9)     | 10<br>(6 - 17)    | 131<br>(91 - 208)        | 65<br>(45 - 105)         | 61<br>(44 - 102)            |
| Mental and substance use disorders                  | 5,313<br>(2,626 - 7,134)    | 11<br>(5 - 20)   | 0<br>(0 - 0)      | 4,150<br>(1,754 - 5,650) | 1,019<br>(620 - 1,441)   | 133<br>(90 - 184)           |
| Schizophrenia                                       | 20<br>(12 - 31)             | --               | --                | 8<br>(4 - 13)            | 5<br>(3 - 9)             | 6<br>(3 - 12)               |
| Alcohol use disorders                               | 1,161<br>(562 - 1,663)      | --               | --                | 615<br>(281 - 911)       | 462<br>(225 - 702)       | 84<br>(42 - 126)            |
| Drug use disorders                                  | 4,129<br>(1,616 - 5,644)    | 11<br>(5 - 20)   | --                | 3,525<br>(1,238 - 4,847) | 552<br>(273 - 785)       | 42<br>(27 - 68)             |
| Opioid use disorders                                | 2,656<br>(1,026 - 3,657)    | 7<br>(3 - 13)    | --                | 2,283<br>(819 - 3,164)   | 338<br>(167 - 476)       | 27<br>(17 - 44)             |
| Cocaine use disorders                               | 59<br>(22 - 82)             | 0<br>(0 - 0)     | --                | 52<br>(18 - 75)          | 6<br>(3 - 9)             | 0<br>(0 - 1)                |
| Amphetamine use disorders                           | 58<br>(23 - 82)             | 0<br>(0 - 0)     | --                | 49<br>(18 - 71)          | 8<br>(3 - 12)            | 1<br>(0 - 1)                |
| Other drug use disorders                            | 1,357<br>(537 - 1,870)      | 3<br>(1 - 6)     | --                | 1,140<br>(401 - 1,591)   | 200<br>(99 - 287)        | 14<br>(9 - 25)              |
| Eating disorders                                    | 2<br>(1 - 3)                | --               | 0<br>(0 - 0)      | 2<br>(1 - 3)             | --                       | --                          |

Web Table 31- Thailand deaths with 95% UI by age, sex, and cause in 2013

| Cause                                               | Males, All Ages             | Males, 0-4 Years       | Males, 5-14 Years | Males, 15-49 Years       | Males, 50-69 Years        | Males, 70-80 Years         |
|-----------------------------------------------------|-----------------------------|------------------------|-------------------|--------------------------|---------------------------|----------------------------|
| Anorexia nervosa                                    | 2<br>(1 - 3)                | --                     | 0<br>(0 - 0)      | 2<br>(1 - 3)             | --                        | --                         |
| Diabetes, urogenital, blood, and endocrine diseases | 23,709<br>(18,106 - 29,753) | 55<br>(36 - 89)        | 59<br>(41 - 87)   | 3,343<br>(2,454 - 4,483) | 8,036<br>(5,932 - 10,408) | 12,216<br>(9,094 - 15,000) |
| Diabetes mellitus                                   | 8,799<br>(6,961 - 11,125)   | 1<br>(1 - 2)           | 3<br>(2 - 5)      | 794<br>(552 - 1,111)     | 3,198<br>(2,373 - 4,260)  | 4,802<br>(3,669 - 6,094)   |
| Acute glomerulonephritis                            | 8<br>(6 - 14)               | 0<br>(0 - 0)           | 1<br>(0 - 1)      | 3<br>(2 - 5)             | 2<br>(1 - 3)              | 3<br>(2 - 5)               |
| Chronic kidney disease                              | 10,488<br>(6,971 - 13,938)  | 4<br>(3 - 7)           | 15<br>(10 - 23)   | 1,621<br>(1,108 - 2,225) | 3,601<br>(2,382 - 4,915)  | 5,246<br>(3,003 - 7,081)   |
| Chronic kidney disease due to diabetes mellitus     | 1,913<br>(262 - 2,849)      | 0<br>(0 - 1)           | 1<br>(0 - 2)      | 230<br>(32 - 372)        | 763<br>(88 - 1,193)       | 918<br>(121 - 1,419)       |
| Chronic kidney disease due to hypertension          | 1,872<br>(1,279 - 3,397)    | 1<br>(1 - 2)           | 3<br>(2 - 5)      | 380<br>(242 - 701)       | 812<br>(501 - 1,496)      | 676<br>(414 - 1,208)       |
| Chronic kidney disease due to glomerulonephritis    | 457<br>(243 - 914)          | 0<br>(0 - 1)           | 1<br>(1 - 2)      | 70<br>(40 - 129)         | 144<br>(75 - 283)         | 242<br>(110 - 536)         |
| Chronic kidney disease due to other causes          | 6,246<br>(3,379 - 8,949)    | 2<br>(1 - 5)           | 10<br>(6 - 16)    | 942<br>(568 - 1,412)     | 1,882<br>(1,027 - 2,838)  | 3,410<br>(1,689 - 5,158)   |
| Urinary diseases and male infertility               | 3,279<br>(1,696 - 4,536)    | 5<br>(2 - 11)          | 6<br>(3 - 9)      | 457<br>(290 - 663)       | 954<br>(548 - 1,361)      | 1,857<br>(798 - 2,849)     |
| Interstitial nephritis and urinary tract infections | 872<br>(244 - 1,480)        | 4<br>(1 - 9)           | 3<br>(1 - 6)      | 78<br>(28 - 127)         | 184<br>(61 - 306)         | 603<br>(130 - 1,115)       |
| Urolithiasis                                        | 405<br>(226 - 784)          | --                     | 1<br>(0 - 2)      | 63<br>(27 - 152)         | 137<br>(63 - 310)         | 206<br>(99 - 418)          |
| Other urinary diseases                              | 2,002<br>(985 - 2,920)      | 1<br>(0 - 2)           | 2<br>(1 - 3)      | 317<br>(171 - 469)       | 634<br>(307 - 937)        | 1,049<br>(489 - 1,680)     |
| Gynecological diseases                              | --                          | --                     | --                | --                       | --                        | --                         |
| Uterine fibroids                                    | --                          | --                     | --                | --                       | --                        | --                         |
| Polycystic ovarian syndrome                         | --                          | --                     | --                | --                       | --                        | --                         |
| Endometriosis                                       | --                          | --                     | --                | --                       | --                        | --                         |
| Genital prolapse                                    | --                          | --                     | --                | --                       | --                        | --                         |
| Other gynecological diseases                        | --                          | --                     | --                | --                       | --                        | --                         |
| Hemoglobinopathies and hemolytic anemias            | 260<br>(152 - 479)          | 20<br>(11 - 40)        | 23<br>(12 - 44)   | 145<br>(74 - 280)        | 39<br>(21 - 71)           | 33<br>(18 - 59)            |
| Thalassemias                                        | 184<br>(105 - 338)          | 19<br>(10 - 38)        | 23<br>(12 - 43)   | 120<br>(63 - 229)        | 20<br>(11 - 37)           | 3<br>(1 - 5)               |
| Sickle cell disorders                               | 0<br>(0 - 0)                | 0<br>(0 - 0)           | 0<br>(0 - 0)      | 0<br>(0 - 0)             | 0<br>(0 - 0)              | 0<br>(0 - 0)               |
| G6PD deficiency                                     | 8<br>(4 - 15)               | 0<br>(0 - 0)           | 0<br>(0 - 0)      | 4<br>(2 - 9)             | 3<br>(1 - 5)              | 1<br>(0 - 1)               |
| Other hemoglobinopathies and hemolytic anemias      | 68<br>(38 - 127)            | 1<br>(0 - 2)           | 0<br>(0 - 1)      | 21<br>(9 - 43)           | 17<br>(9 - 30)            | 29<br>(16 - 53)            |
| Endocrine, metabolic, blood, and immune disorders   | 874<br>(593 - 1,299)        | 24<br>(14 - 45)        | 11<br>(6 - 22)    | 323<br>(210 - 533)       | 241<br>(146 - 374)        | 276<br>(138 - 434)         |
| Musculoskeletal disorders                           | 944<br>(567 - 1,296)        | --                     | 13<br>(8 - 21)    | 304<br>(184 - 446)       | 331<br>(196 - 472)        | 296<br>(164 - 422)         |
| Rheumatoid arthritis                                | 77<br>(36 - 125)            | --                     | 2<br>(1 - 3)      | 17<br>(7 - 31)           | 30<br>(13 - 58)           | 28<br>(11 - 54)            |
| Other musculoskeletal disorders                     | 867<br>(530 - 1,197)        | --                     | 11<br>(7 - 19)    | 287<br>(175 - 420)       | 301<br>(180 - 430)        | 268<br>(151 - 380)         |
| Other non-communicable diseases                     | 2,861<br>(2,099 - 3,568)    | 1,029<br>(710 - 1,382) | 88<br>(56 - 131)  | 430<br>(300 - 586)       | 427<br>(232 - 591)        | 887<br>(382 - 1,361)       |
| Congenital anomalies                                | 1,498<br>(1,114 - 1,905)    | 1,016<br>(700 - 1,375) | 85<br>(52 - 127)  | 210<br>(144 - 296)       | 108<br>(70 - 154)         | 79<br>(55 - 115)           |
| Neural tube defects                                 | 72<br>(30 - 118)            | 67<br>(25 - 111)       | 1<br>(0 - 2)      | 3<br>(2 - 5)             | 1<br>(0 - 1)              | 0<br>(0 - 1)               |
| Congenital heart anomalies                          | 794<br>(546 - 1,087)        | 597<br>(382 - 871)     | 47<br>(26 - 77)   | 104<br>(69 - 153)        | 21<br>(11 - 34)           | 25<br>(13 - 41)            |
| Cleft lip and cleft palate                          | 4<br>(0 - 19)               | 4<br>(0 - 19)          | --                | --                       | --                        | --                         |
| Down syndrome                                       | 19<br>(10 - 34)             | 11<br>(5 - 22)         | 4<br>(1 - 8)      | 3<br>(2 - 5)             | 1<br>(0 - 2)              | 0<br>(0 - 1)               |
| Chromosomal unbalanced rearrangements               | 24<br>(13 - 38)             | 18<br>(8 - 30)         | 2<br>(1 - 3)      | 3<br>(2 - 5)             | 1<br>(1 - 2)              | 0<br>(0 - 1)               |
| Other congenital anomalies                          | 585<br>(425 - 777)          | 319<br>(197 - 497)     | 32<br>(15 - 54)   | 97<br>(59 - 143)         | 84<br>(53 - 123)          | 54<br>(33 - 80)            |
| Skin and subcutaneous diseases                      | 1,354<br>(542 - 1,880)      | 3<br>(2 - 6)           | 4<br>(2 - 6)      | 220<br>(112 - 318)       | 320<br>(145 - 461)        | 807<br>(290 - 1,281)       |
| Cellulitis                                          | 102<br>(35 - 179)           | 1<br>(0 - 2)           | 1<br>(0 - 1)      | 23<br>(8 - 40)           | 37<br>(12 - 71)           | 41<br>(10 - 88)            |
| Pyoderma                                            | 919<br>(464 - 1,334)        | 2<br>(1 - 5)           | 2<br>(1 - 4)      | 171<br>(96 - 256)        | 240<br>(126 - 357)        | 503<br>(237 - 826)         |
| Decubitus ulcer                                     | 325<br>(49 - 551)           | 0<br>(0 - 0)           | 0<br>(0 - 1)      | 23<br>(5 - 38)           | 41<br>(7 - 70)            | 260<br>(36 - 470)          |

Web Table 31- Thailand deaths with 95% UI by age, sex, and cause in 2013

| Cause                                           | Males, All Ages             | Males, 0-4 Years   | Males, 5-14 Years    | Males, 15-49 Years         | Males, 50-69 Years          | Males, 70-80 Years       |
|-------------------------------------------------|-----------------------------|--------------------|----------------------|----------------------------|-----------------------------|--------------------------|
| Other skin and subcutaneous diseases            | 7<br>(3 - 12)               | 0<br>(0 - 0)       | 0<br>(0 - 1)         | 3<br>(2 - 5)               | 2<br>(1 - 3)                | 2<br>(1 - 5)             |
| Sudden infant death syndrome                    | 9<br>43,992                 | 9<br>(0 - 23)      | 377<br>(239 - 590)   | 1,164<br>(960 - 1,411)     | 27,604<br>(20,861 - 35,920) | 5,099<br>(3,557 - 6,359) |
| Injuries                                        | 18,183<br>(34,268 - 56,177) | 70<br>(239 - 590)  | 436<br>(960 - 1,411) | 11,926<br>(8,739 - 15,817) | 9,748<br>(7,264 - 12,947)   | 1,864<br>(1,270 - 2,471) |
| Transport injuries                              | 17,598<br>(13,064 - 22,738) | 65<br>(41 - 117)   | 421<br>(321 - 567)   | 11,571<br>(8,463 - 15,307) | 3,743<br>(2,648 - 5,037)    | 1,798<br>(1,234 - 2,384) |
| Road injuries                                   | 3,262<br>(2,146 - 4,856)    | 28<br>(14 - 48)    | 164<br>(105 - 242)   | 1,580<br>(976 - 2,558)     | 901<br>(558 - 1,352)        | 589<br>(367 - 892)       |
| Pedestrian road injuries                        | 448<br>(275 - 664)          | 2<br>(1 - 5)       | 28<br>(17 - 43)      | 204<br>(117 - 318)         | 129<br>(70 - 209)           | 85<br>(47 - 140)         |
| Cyclist road injuries                           | 8,825<br>(6,182 - 11,968)   | 11<br>(5 - 22)     | 103<br>(54 - 168)    | 6,605<br>(4,721 - 8,992)   | 1,574<br>(1,030 - 2,344)    | 532<br>(311 - 786)       |
| Motorcyclist road injuries                      | 5,009<br>(3,620 - 6,947)    | 24<br>(13 - 41)    | 124<br>(77 - 192)    | 3,147<br>(2,135 - 4,491)   | 1,130<br>(744 - 1,645)      | 584<br>(348 - 869)       |
| Motor vehicle road injuries                     | 55<br>(29 - 83)             | 0<br>(0 - 1)       | 2<br>(1 - 4)         | 35<br>(15 - 56)            | 9<br>(4 - 16)               | 9<br>(4 - 17)            |
| Other road injuries                             | 585<br>(336 - 834)          | 5<br>(2 - 9)       | 15<br>(8 - 24)       | 356<br>(198 - 522)         | 143<br>(72 - 229)           | 66<br>(30 - 109)         |
| Other transport injuries                        | 11,718<br>(7,927 - 15,356)  | 299<br>(174 - 508) | 653<br>(470 - 890)   | 5,374<br>(3,574 - 7,196)   | 3,210<br>(2,101 - 4,389)    | 2,182<br>(1,187 - 2,943) |
| Unintentional injuries                          | 2,439<br>(1,056 - 3,440)    | 12<br>(5 - 25)     | 33<br>(17 - 56)      | 750<br>(314 - 1,121)       | 936<br>(419 - 1,414)        | 709<br>(218 - 1,153)     |
| Falls                                           | 3,914<br>(2,283 - 5,734)    | 197<br>(89 - 400)  | 504<br>(325 - 758)   | 1,917<br>(999 - 2,941)     | 949<br>(525 - 1,493)        | 348<br>(188 - 554)       |
| Drowning                                        | 335<br>(173 - 499)          | 9<br>(4 - 17)      | 10<br>(5 - 16)       | 125<br>(67 - 190)          | 77<br>(35 - 126)            | 115<br>(49 - 195)        |
| Fire, heat, and hot substances                  | 229<br>(88 - 328)           | 2<br>(1 - 4)       | 3<br>(1 - 6)         | 134<br>(44 - 206)          | 62<br>(22 - 97)             | 27<br>(13 - 43)          |
| Poisonings                                      | 1,621<br>(802 - 2,170)      | 9<br>(4 - 18)      | 24<br>(15 - 35)      | 1,013<br>(561 - 1,407)     | 361<br>(161 - 523)          | 215<br>(59 - 322)        |
| Exposure to mechanical forces                   | 1,067<br>(211 - 1,487)      | 1<br>(0 - 3)       | 7<br>(2 - 13)        | 663<br>(137 - 990)         | 226<br>(39 - 354)           | 170<br>(22 - 269)        |
| Unintentional firearm injuries                  | 73<br>(43 - 106)            | 5<br>(2 - 14)      | 3<br>(2 - 7)         | 41<br>(21 - 63)            | 18<br>(9 - 30)              | 5<br>(2 - 9)             |
| Unintentional suffocation                       | 481<br>(343 - 686)          | 2<br>(1 - 3)       | 13<br>(7 - 21)       | 309<br>(207 - 483)         | 118<br>(76 - 173)           | 40<br>(25 - 57)          |
| Other exposure to mechanical forces             | 954<br>(423 - 1,531)        | 16<br>(8 - 32)     | 9<br>(4 - 15)        | 302<br>(131 - 512)         | 278<br>(110 - 496)          | 349<br>(115 - 667)       |
| Adverse effects of medical treatment            | 198<br>(103 - 269)          | 4<br>(2 - 8)       | 10<br>(6 - 17)       | 72<br>(36 - 107)           | 73<br>(37 - 113)            | 39<br>(19 - 59)          |
| Animal contact                                  | 119<br>(61 - 168)           | 3<br>(1 - 6)       | 9<br>(4 - 15)        | 46<br>(22 - 68)            | 44<br>(21 - 71)             | 17<br>(8 - 29)           |
| Venomous animal contact                         | 79<br>(35 - 111)            | 1<br>(0 - 2)       | 2<br>(1 - 3)         | 26<br>(11 - 41)            | 29<br>(12 - 48)             | 21<br>(10 - 35)          |
| Non-venomous animal contact                     | 622<br>(314 - 910)          | 43<br>(19 - 68)    | 18<br>(10 - 30)      | 87<br>(35 - 138)           | 200<br>(109 - 318)          | 275<br>(129 - 428)       |
| Foreign body                                    | 575<br>(282 - 856)          | 40<br>(17 - 66)    | 17<br>(9 - 29)       | 78<br>(30 - 127)           | 183<br>(101 - 306)          | 257<br>(118 - 404)       |
| Pulmonary aspiration and foreign body in airway | 46<br>(19 - 70)             | 3<br>(1 - 5)       | 1<br>(1 - 2)         | 8<br>(4 - 13)              | 17<br>(6 - 28)              | 18<br>(7 - 29)           |
| Foreign body in other body part                 | 1,407<br>(1,022 - 1,858)    | 8<br>(5 - 15)      | 43<br>(28 - 64)      | 975<br>(681 - 1,325)       | 275<br>(185 - 402)          | 106<br>(74 - 145)        |
| Other unintentional injuries                    | 14,091<br>(10,145 - 20,635) | 7<br>(3 - 15)      | 76<br>(44 - 129)     | 10,304<br>(7,292 - 15,172) | 2,652<br>(1,723 - 4,405)    | 1,053<br>(687 - 1,636)   |
| Self-harm and interpersonal violence            | 7,838<br>(5,057 - 10,545)   | --                 | 27<br>(11 - 55)      | 5,206<br>(3,251 - 7,194)   | 1,747<br>(1,070 - 2,498)    | 859<br>(499 - 1,319)     |
| Self-harm                                       | 6,253<br>(3,945 - 12,084)   | 7<br>(3 - 15)      | 49<br>(27 - 95)      | 5,098<br>(3,263 - 9,232)   | 905<br>(434 - 2,360)        | 194<br>(75 - 579)        |
| Interpersonal violence                          | 4,452<br>(2,728 - 8,521)    | 3<br>(1 - 6)       | 25<br>(11 - 47)      | 3,685<br>(2,274 - 6,902)   | 645<br>(304 - 1,719)        | 95<br>(33 - 298)         |
| Assault by firearm                              | 1,070<br>(430 - 2,150)      | 1<br>(0 - 3)       | 6<br>(2 - 13)        | 907<br>(350 - 1,734)       | 122<br>(42 - 319)           | 34<br>(11 - 102)         |
| Assault by sharp object                         | 730<br>(347 - 1,782)        | 3<br>(1 - 7)       | 19<br>(8 - 42)       | 506<br>(237 - 1,171)       | 138<br>(45 - 450)           | 65<br>(21 - 218)         |
| Assault by other means                          |                             |                    |                      |                            |                             |                          |

Web Table 31- Thailand deaths with 95% UI by age, sex, and cause in 2013

| Cause                                                              | Females, All Ages              | Females, 0-4 Years       | Females, 5-14 Years      | Females, 15-49 Years        | Females, 50-69 Years        | Females, 70-80 Years           |
|--------------------------------------------------------------------|--------------------------------|--------------------------|--------------------------|-----------------------------|-----------------------------|--------------------------------|
| All causes                                                         | 225,107<br>(193,790 - 257,911) | 3,343<br>(2,787 - 3,976) | 1,331<br>(1,164 - 1,511) | 26,537<br>(21,006 - 32,405) | 54,694<br>(44,322 - 65,766) | 139,202<br>(124,234 - 154,921) |
| Communicable, maternal, neonatal, and nutritional diseases         | 26,347<br>(21,010 - 31,763)    | 1,972<br>(1,561 - 2,439) | 317<br>(231 - 411)       | 4,573<br>(3,568 - 5,607)    | 4,963<br>(3,669 - 6,332)    | 14,522<br>(10,788 - 18,785)    |
| HIV/AIDS and tuberculosis                                          | 5,637<br>(4,414 - 7,227)       | 6<br>(2 - 11)            | 5<br>(1 - 10)            | 1,799<br>(1,218 - 2,554)    | 1,148<br>(825 - 1,597)      | 2,678<br>(1,877 - 3,786)       |
| Tuberculosis                                                       | 3,464<br>(2,555 - 4,696)       | 1<br>(0 - 1)             | 2<br>(1 - 3)             | 199<br>(139 - 274)          | 622<br>(440 - 890)          | 2,640<br>(1,837 - 3,753)       |
| HIV/AIDS                                                           | 2,173<br>(1,354 - 3,324)       | 5<br>(2 - 10)            | 4<br>(0 - 8)             | 1,600<br>(1,008 - 2,368)    | 526<br>(270 - 945)          | 38<br>(8 - 93)                 |
| HIV/AIDS resulting in mycobacterial infection                      | 103<br>(61 - 165)              | 0<br>(0 - 0)             | 0<br>(0 - 0)             | 74<br>(46 - 115)            | 26<br>(13 - 47)             | 2<br>(0 - 5)                   |
| HIV/AIDS resulting in other diseases                               | 2,071<br>(1,286 - 3,170)       | 5<br>(1 - 9)             | 4<br>(0 - 8)             | 1,526<br>(963 - 2,259)      | 500<br>(256 - 907)          | 36<br>(7 - 88)                 |
| Diarrrhea, lower respiratory, and other common infectious diseases | 17,313<br>(12,471 - 22,441)    | 525<br>(395 - 685)       | 248<br>(170 - 342)       | 2,037<br>(1,350 - 2,794)    | 3,463<br>(2,294 - 4,664)    | 11,041<br>(7,389 - 15,248)     |
| Diarrheal diseases                                                 | 1,720<br>(1,054 - 2,759)       | 40<br>(17 - 79)          | 12<br>(6 - 22)           | 111<br>(70 - 166)           | 241<br>(143 - 386)          | 1,316<br>(685 - 2,349)         |
| Intestinal infectious diseases                                     | 349<br>(150 - 674)             | 88<br>(24 - 186)         | 82<br>(30 - 171)         | 128<br>(43 - 280)           | 32<br>(9 - 81)              | 19<br>(7 - 42)                 |
| Typhoid fever                                                      | 267<br>(113 - 516)             | 64<br>(16 - 136)         | 62<br>(22 - 132)         | 100<br>(32 - 219)           | 26<br>(6 - 66)              | 15<br>(5 - 34)                 |
| Paratyphoid fever                                                  | 75<br>(30 - 153)               | 23<br>(6 - 52)           | 19<br>(6 - 43)           | 26<br>(7 - 59)              | 5<br>(1 - 14)               | 3<br>(1 - 7)                   |
| Other intestinal infectious diseases                               | 7<br>(2 - 15)                  | 2<br>(0 - 6)             | 0<br>(0 - 3)             | 3<br>(0 - 8)                | 1<br>(0 - 5)                | 1<br>(0 - 5)                   |
| Lower respiratory infections                                       | 14,042<br>(9,390 - 18,929)     | 294<br>(201 - 414)       | 90<br>(57 - 129)         | 1,385<br>(878 - 1,978)      | 2,929<br>(1,860 - 4,075)    | 9,345<br>(5,900 - 13,537)      |
| Upper respiratory infections                                       | 10<br>(3 - 28)                 | 0<br>(0 - 1)             | 0<br>(0 - 0)             | 2<br>(0 - 5)                | 3<br>(0 - 7)                | 6<br>(0 - 23)                  |
| Otitis media                                                       | 30<br>(23 - 38)                | 0<br>(0 - 1)             | 1<br>(0 - 1)             | 2<br>(2 - 3)                | 8<br>(6 - 11)               | 18<br>(13 - 25)                |
| Meningitis                                                         | 689<br>(424 - 914)             | 45<br>(26 - 71)          | 27<br>(15 - 43)          | 280<br>(117 - 435)          | 152<br>(82 - 229)           | 185<br>(114 - 282)             |
| Pneumococcal meningitis                                            | 180<br>(104 - 267)             | 8<br>(4 - 16)            | 7<br>(2 - 13)            | 79<br>(30 - 140)            | 44<br>(16 - 76)             | 42<br>(18 - 76)                |
| H influenzae type B meningitis                                     | 117<br>(71 - 160)              | 18<br>(11 - 29)          | 8<br>(4 - 14)            | 43<br>(16 - 73)             | 20<br>(10 - 33)             | 28<br>(15 - 48)                |
| Meningococcal meningitis                                           | 90<br>(48 - 138)               | 2<br>(1 - 4)             | 2<br>(1 - 5)             | 37<br>(16 - 70)             | 20<br>(5 - 41)              | 29<br>(14 - 51)                |
| Other meningitis                                                   | 302<br>(173 - 410)             | 16<br>(8 - 26)           | 10<br>(4 - 18)           | 122<br>(50 - 196)           | 69<br>(38 - 109)            | 85<br>(47 - 136)               |
| Encephalitis                                                       | 382<br>(265 - 519)             | 28<br>(16 - 46)          | 30<br>(17 - 55)          | 117<br>(72 - 176)           | 87<br>(56 - 126)            | 121<br>(78 - 179)              |
| Diphtheria                                                         | 1<br>(0 - 4)                   | 0<br>(0 - 2)             | 0<br>(0 - 2)             | 0<br>(0 - 2)                | 0<br>(0 - 1)                | --                             |
| Whooping cough                                                     | 4<br>(0 - 20)                  | 4<br>(0 - 18)            | 0<br>(0 - 2)             | 0<br>(0 - 1)                | 0<br>(0 - 0)                | --                             |
| Tetanus                                                            | 36<br>(11 - 67)                | 1<br>(1 - 3)             | 1<br>(0 - 1)             | 6<br>(2 - 11)               | 9<br>(2 - 16)               | 20<br>(6 - 42)                 |
| Measles                                                            | 29<br>(2 - 135)                | 23<br>(2 - 107)          | 5<br>(0 - 21)            | 1<br>(0 - 6)                | 0<br>(0 - 0)                | --                             |
| Varicella and herpes zoster                                        | 20<br>(5 - 73)                 | 1<br>(0 - 6)             | 0<br>(0 - 2)             | 4<br>(1 - 10)               | 3<br>(0 - 9)                | 12<br>(0 - 65)                 |
| Neglected tropical diseases and malaria                            | 191<br>(152 - 271)             | 23<br>(15 - 39)          | 45<br>(30 - 85)          | 61<br>(45 - 83)             | 30<br>(21 - 43)             | 32<br>(22 - 46)                |
| Malaria                                                            | 41<br>(29 - 58)                | 2<br>(1 - 4)             | 2<br>(1 - 4)             | 17<br>(11 - 26)             | 11<br>(6 - 18)              | 8<br>(5 - 14)                  |
| Leishmaniasis                                                      | 0<br>(0 - 0)                   | 0<br>(0 - 0)             | 0<br>(0 - 0)             | 0<br>(0 - 0)                | 0<br>(0 - 0)                | 0<br>(0 - 0)                   |
| Visceral leishmaniasis                                             | 0<br>(0 - 0)                   | 0<br>(0 - 0)             | 0<br>(0 - 0)             | 0<br>(0 - 0)                | 0<br>(0 - 0)                | 0<br>(0 - 0)                   |
| Cysticercosis                                                      | 1<br>(0 - 1)                   | 0<br>(0 - 0)             | 0<br>(0 - 0)             | 0<br>(0 - 0)                | 0<br>(0 - 0)                | 0<br>(0 - 0)                   |
| Cystic echinococcosis                                              | 4<br>(3 - 5)                   | 0<br>(0 - 0)             | 0<br>(0 - 0)             | 2<br>(1 - 2)                | 1<br>(1 - 1)                | 1<br>(1 - 1)                   |
| Dengue                                                             | 88<br>(64 - 162)               | 16<br>(9 - 32)           | 38<br>(25 - 76)          | 22<br>(15 - 35)             | 5<br>(4 - 9)                | 7<br>(3 - 16)                  |
| Rabies                                                             | 12<br>(7 - 30)                 | 0<br>(0 - 1)             | 1<br>(1 - 3)             | 5<br>(2 - 11)               | 4<br>(2 - 11)               | 2<br>(1 - 6)                   |
| Intestinal nematode infections                                     | 7<br>(2 - 17)                  | 1<br>(0 - 6)             | 1<br>(0 - 5)             | 1<br>(0 - 7)                | 1<br>(0 - 5)                | 2<br>(0 - 8)                   |
| Ascariasis                                                         | 7<br>(2 - 17)                  | 1<br>(0 - 6)             | 1<br>(0 - 5)             | 1<br>(0 - 7)                | 1<br>(0 - 5)                | 2<br>(0 - 8)                   |
| Other neglected tropical diseases                                  | 38<br>(24 - 55)                | 3<br>(2 - 7)             | 2<br>(1 - 4)             | 14<br>(8 - 21)              | 8<br>(4 - 14)               | 11<br>(6 - 19)                 |
| Maternal disorders                                                 | 481<br>(328 - 684)             | --                       | 0<br>(0 - 1)             | 481<br>(327 - 683)          | --                          | --                             |
| Maternal hemorrhage                                                | 57<br>(32 - 91)                | --                       | 0<br>(0 - 0)             | 57<br>(32 - 91)             | --                          | --                             |

Web Table 31- Thailand deaths with 95% UI by age, sex, and cause in 2013

| Cause                                                            | Females, All Ages              | Females, 0-4 Years       | Females, 5-14 Years | Females, 15-49 Years        | Females, 50-69 Years        | Females, 70-80 Years           |
|------------------------------------------------------------------|--------------------------------|--------------------------|---------------------|-----------------------------|-----------------------------|--------------------------------|
| Maternal sepsis and other maternal infections                    | 71<br>(44 - 108)               | --                       | 0<br>(0 - 0)        | 71<br>(44 - 108)            | --                          | --                             |
| Maternal hypertensive disorders                                  | 41<br>(20 - 77)                | --                       | 0<br>(0 - 0)        | 41<br>(19 - 77)             | --                          | --                             |
| Maternal obstructed labor                                        | 50<br>(30 - 77)                | --                       | 0<br>(0 - 0)        | 50<br>(30 - 77)             | --                          | --                             |
| Maternal abortive outcome                                        | 121<br>(73 - 183)              | --                       | 0<br>(0 - 0)        | 121<br>(73 - 183)           | --                          | --                             |
| Indirect maternal deaths                                         | 34<br>(18 - 60)                | --                       | 0<br>(0 - 0)        | 34<br>(18 - 60)             | --                          | --                             |
| Late maternal deaths                                             | 56<br>(31 - 97)                | --                       | 0<br>(0 - 0)        | 56<br>(31 - 97)             | --                          | --                             |
| Maternal deaths aggravated by HIV/AIDS                           | 1<br>(0 - 1)                   | --                       | --                  | 1<br>(0 - 1)                | --                          | --                             |
| Other maternal disorders                                         | 50<br>(24 - 83)                | --                       | 0<br>(0 - 0)        | 50<br>(24 - 83)             | --                          | --                             |
| Neonatal disorders                                               | 1,349<br>(1,019 - 1,751)       | 1,349<br>(1,019 - 1,751) | --                  | --                          | --                          | --                             |
| Neonatal preterm birth complications                             | 661<br>(391 - 943)             | 661<br>(391 - 943)       | --                  | --                          | --                          | --                             |
| Neonatal encephalopathy due to birth asphyxia and trauma         | 266<br>(121 - 465)             | 266<br>(121 - 465)       | --                  | --                          | --                          | --                             |
| Neonatal sepsis and other neonatal infections                    | 297<br>(126 - 513)             | 297<br>(126 - 513)       | --                  | --                          | --                          | --                             |
| Hemolytic disease and other neonatal jaundice                    | 2<br>(0 - 5)                   | 2<br>(0 - 5)             | --                  | --                          | --                          | --                             |
| Other neonatal disorders                                         | 123<br>(75 - 205)              | 123<br>(75 - 205)        | --                  | --                          | --                          | --                             |
| Nutritional deficiencies                                         | 516<br>(357 - 798)             | 4<br>(2 - 7)             | 3<br>(2 - 5)        | 57<br>(37 - 104)            | 78<br>(52 - 123)            | 375<br>(235 - 592)             |
| Protein-energy malnutrition                                      | 142<br>(57 - 265)              | 1<br>(0 - 2)             | 0<br>(0 - 1)        | 10<br>(4 - 24)              | 20<br>(9 - 44)              | 111<br>(36 - 216)              |
| Iodine deficiency                                                | 10<br>(1 - 45)                 | 0<br>(0 - 1)             | 0<br>(0 - 1)        | 1<br>(0 - 5)                | 2<br>(0 - 11)               | 6<br>(0 - 39)                  |
| Iron-deficiency anemia                                           | 308<br>(176 - 494)             | 2<br>(1 - 4)             | 2<br>(1 - 3)        | 43<br>(25 - 73)             | 47<br>(25 - 76)             | 214<br>(108 - 360)             |
| Other nutritional deficiencies                                   | 56<br>(20 - 176)               | 1<br>(0 - 2)             | 0<br>(0 - 1)        | 3<br>(1 - 8)                | 8<br>(3 - 25)               | 44<br>(15 - 141)               |
| Other communicable, maternal, neonatal, and nutritional diseases | 860<br>(437 - 1,497)           | 65<br>(24 - 121)         | 16<br>(8 - 28)      | 139<br>(71 - 248)           | 244<br>(108 - 457)          | 396<br>(134 - 912)             |
| Sexually transmitted diseases excluding HIV                      | 101<br>(50 - 168)              | 40<br>(0 - 94)           | 4<br>(1 - 9)        | 23<br>(12 - 39)             | 14<br>(5 - 36)              | 21<br>(7 - 49)                 |
| Syphilis                                                         | 77<br>(31 - 134)               | 40<br>(0 - 94)           | 4<br>(0 - 9)        | 9<br>(5 - 16)               | 7<br>(3 - 19)               | 16<br>(6 - 39)                 |
| Chlamydial infection                                             | 8<br>(5 - 12)                  | --                       | 0<br>(0 - 0)        | 4<br>(2 - 7)                | 2<br>(1 - 5)                | 1<br>(0 - 3)                   |
| Gonococcal infection                                             | 10<br>(6 - 16)                 | --                       | 0<br>(0 - 0)        | 5<br>(3 - 8)                | 2<br>(1 - 6)                | 2<br>(1 - 5)                   |
| Other sexually transmitted diseases                              | 7<br>(4 - 12)                  | --                       | 0<br>(0 - 0)        | 4<br>(2 - 7)                | 2<br>(1 - 5)                | 1<br>(0 - 2)                   |
| Hepatitis                                                        | 75<br>(55 - 98)                | 1<br>(0 - 1)             | 0<br>(0 - 1)        | 12<br>(7 - 17)              | 26<br>(17 - 36)             | 37<br>(25 - 54)                |
| Acute hepatitis A                                                | 4<br>(1 - 10)                  | 0<br>(0 - 1)             | 0<br>(0 - 0)        | 1<br>(0 - 3)                | 1<br>(0 - 4)                | 1<br>(0 - 3)                   |
| Acute hepatitis B                                                | 57<br>(39 - 76)                | 0<br>(0 - 1)             | 0<br>(0 - 0)        | 5<br>(2 - 8)                | 20<br>(13 - 29)             | 32<br>(20 - 46)                |
| Acute hepatitis C                                                | 3<br>(0 - 8)                   | --                       | 0<br>(0 - 0)        | 0<br>(0 - 1)                | 1<br>(0 - 3)                | 2<br>(0 - 5)                   |
| Acute hepatitis E                                                | 12<br>(5 - 23)                 | 0<br>(0 - 0)             | 0<br>(0 - 0)        | 5<br>(3 - 9)                | 4<br>(1 - 9)                | 3<br>(0 - 8)                   |
| Other infectious diseases                                        | 683<br>(259 - 1,306)           | 24<br>(12 - 50)          | 12<br>(5 - 23)      | 105<br>(41 - 204)           | 204<br>(69 - 410)           | 338<br>(77 - 854)              |
| Non-communicable diseases                                        | 184,201<br>(157,719 - 211,218) | 1,073<br>(808 - 1,410)   | 420<br>(331 - 509)  | 16,266<br>(12,428 - 20,296) | 45,770<br>(37,038 - 55,090) | 120,673<br>(107,031 - 135,266) |
| Neoplasms                                                        | 41,145<br>(33,512 - 49,263)    | 55<br>(34 - 84)          | 132<br>(96 - 171)   | 6,472<br>(4,870 - 8,206)    | 16,610<br>(13,157 - 20,313) | 17,876<br>(14,936 - 21,270)    |
| Esophageal cancer                                                | 544<br>(364 - 720)             | --                       | --                  | 27<br>(16 - 40)             | 167<br>(107 - 231)          | 350<br>(223 - 487)             |
| Stomach cancer                                                   | 1,897<br>(1,415 - 2,450)       | --                       | --                  | 265<br>(182 - 368)          | 648<br>(478 - 844)          | 984<br>(671 - 1,414)           |
| Liver cancer                                                     | 6,905<br>(5,038 - 9,088)       | --                       | 4<br>(2 - 6)        | 782<br>(485 - 1,184)        | 3,019<br>(2,101 - 4,197)    | 3,100<br>(2,032 - 4,539)       |
| Liver cancer due to hepatitis B                                  | 2,561<br>(1,455 - 3,755)       | --                       | 1<br>(0 - 3)        | 335<br>(183 - 552)          | 1,216<br>(668 - 1,874)      | 1,010<br>(508 - 1,576)         |
| Liver cancer due to hepatitis C                                  | 2,707<br>(1,396 - 4,278)       | --                       | 0<br>(0 - 1)        | 240<br>(86 - 434)           | 1,126<br>(520 - 1,910)      | 1,342<br>(704 - 2,286)         |
| Liver cancer due to alcohol use                                  | 445<br>(230 - 728)             | --                       | --                  | 27<br>(7 - 51)              | 155<br>(74 - 270)           | 263<br>(130 - 465)             |
| Liver cancer due to other causes                                 | 1,191<br>(638 - 1,960)         | --                       | 2<br>(1 - 4)        | 181<br>(93 - 307)           | 522<br>(245 - 907)          | 486<br>(231 - 853)             |

Web Table 31- Thailand deaths with 95% UI by age, sex, and cause in 2013

| Cause                                         | Females, All Ages           | Females, 0-4 Years | Females, 5-14 Years | Females, 15-49 Years     | Females, 50-69 Years       | Females, 70-80 Years        |
|-----------------------------------------------|-----------------------------|--------------------|---------------------|--------------------------|----------------------------|-----------------------------|
| Larynx cancer                                 | 103<br>(50 - 180)           | --                 | --                  | 6<br>(3 - 11)            | 39<br>(19 - 70)            | 58<br>(28 - 104)            |
| Tracheal, bronchus and lung cancer            | 6,699<br>(5,214 - 8,578)    | --                 | --                  | 620<br>(420 - 884)       | 2,724<br>(2,034 - 3,691)   | 3,355<br>(2,395 - 4,580)    |
| Breast cancer                                 | 3,709<br>(2,693 - 4,622)    | --                 | --                  | 1,149<br>(774 - 1,527)   | 1,710<br>(1,213 - 2,203)   | 850<br>(602 - 1,103)        |
| Cervical cancer                               | 3,862<br>(2,632 - 4,968)    | --                 | --                  | 896<br>(570 - 1,252)     | 1,669<br>(1,127 - 2,200)   | 1,297<br>(837 - 1,778)      |
| Uterine cancer                                | 355<br>(213 - 503)          | --                 | --                  | 43<br>(25 - 70)          | 202<br>(117 - 309)         | 110<br>(61 - 164)           |
| Prostate cancer                               | --                          | --                 | --                  | --                       | --                         | --                          |
| Colon and rectum cancer                       | 3,853<br>(3,059 - 4,716)    | --                 | --                  | 443<br>(319 - 590)       | 1,405<br>(1,073 - 1,774)   | 2,004<br>(1,501 - 2,664)    |
| Lip and oral cavity cancer                    | 1,013<br>(584 - 1,473)      | --                 | --                  | 73<br>(43 - 111)         | 270<br>(165 - 391)         | 670<br>(369 - 1,048)        |
| Nasopharynx cancer                            | 271<br>(161 - 415)          | --                 | 1<br>(0 - 1)        | 65<br>(35 - 104)         | 119<br>(65 - 208)          | 87<br>(48 - 141)            |
| Other pharynx cancer                          | 167<br>(119 - 237)          | --                 | --                  | 20<br>(11 - 34)          | 75<br>(50 - 113)           | 72<br>(45 - 109)            |
| Gallbladder and biliary tract cancer          | 1,873<br>(1,100 - 2,837)    | --                 | --                  | 223<br>(126 - 361)       | 889<br>(510 - 1,392)       | 760<br>(408 - 1,253)        |
| Pancreatic cancer                             | 1,303<br>(1,023 - 1,624)    | --                 | --                  | 112<br>(80 - 155)        | 559<br>(415 - 730)         | 632<br>(469 - 827)          |
| Malignant skin melanoma                       | 171<br>(123 - 217)          | --                 | --                  | 44<br>(29 - 62)          | 84<br>(57 - 112)           | 43<br>(29 - 60)             |
| Non-melanoma skin cancer                      | 287<br>(147 - 484)          | --                 | --                  | 16<br>(8 - 27)           | 49<br>(24 - 79)            | 222<br>(112 - 397)          |
| Ovarian cancer                                | 1,733<br>(1,260 - 2,298)    | --                 | --                  | 397<br>(259 - 580)       | 879<br>(605 - 1,202)       | 457<br>(323 - 644)          |
| Testicular cancer                             | --                          | --                 | --                  | --                       | --                         | --                          |
| Kidney cancer                                 | 310<br>(222 - 415)          | 1<br>(1 - 3)       | 1<br>(1 - 3)        | 28<br>(18 - 42)          | 127<br>(84 - 184)          | 152<br>(97 - 224)           |
| Bladder cancer                                | 415<br>(278 - 636)          | --                 | --                  | 16<br>(10 - 27)          | 89<br>(57 - 146)           | 310<br>(200 - 479)          |
| Brain and nervous system cancer               | 1,021<br>(743 - 1,293)      | 6<br>(3 - 11)      | 26<br>(17 - 39)     | 293<br>(198 - 403)       | 373<br>(263 - 506)         | 324<br>(208 - 460)          |
| Thyroid cancer                                | 320<br>(179 - 448)          | --                 | 0<br>(0 - 1)        | 21<br>(12 - 31)          | 88<br>(54 - 132)           | 210<br>(105 - 318)          |
| Mesothelioma                                  | 35<br>(24 - 49)             | --                 | --                  | 5<br>(3 - 7)             | 22<br>(13 - 34)            | 9<br>(5 - 14)               |
| Hodgkin lymphoma                              | 48<br>(33 - 66)             | 2<br>(1 - 3)       | 2<br>(1 - 3)        | 20<br>(12 - 32)          | 15<br>(8 - 23)             | 10<br>(6 - 15)              |
| Non-Hodgkin lymphoma                          | 678<br>(393 - 917)          | 3<br>(2 - 6)       | 8<br>(4 - 14)       | 126<br>(70 - 192)        | 268<br>(147 - 379)         | 273<br>(164 - 388)          |
| Multiple myeloma                              | 118<br>(88 - 157)           | --                 | --                  | 26<br>(18 - 36)          | 52<br>(37 - 75)            | 39<br>(28 - 56)             |
| Leukemia                                      | 1,530<br>(1,181 - 1,903)    | 21<br>(10 - 39)    | 58<br>(37 - 81)     | 438<br>(312 - 577)       | 439<br>(318 - 568)         | 575<br>(420 - 759)          |
| Other neoplasms                               | 1,924<br>(1,359 - 2,548)    | 22<br>(9 - 39)     | 33<br>(17 - 52)     | 319<br>(202 - 466)       | 630<br>(413 - 887)         | 921<br>(602 - 1,313)        |
| Cardiovascular diseases                       | 72,625<br>(60,406 - 89,991) | 63<br>(38 - 123)   | 91<br>(61 - 135)    | 3,767<br>(2,666 - 5,448) | 12,344<br>(9,432 - 16,277) | 56,361<br>(47,592 - 68,551) |
| Rheumatic heart disease                       | 283<br>(204 - 442)          | 1<br>(0 - 1)       | 4<br>(2 - 6)        | 61<br>(41 - 96)          | 78<br>(51 - 115)           | 140<br>(93 - 237)           |
| Ischemic heart disease                        | 31,588<br>(22,533 - 38,677) | 8<br>(3 - 21)      | 21<br>(9 - 38)      | 1,458<br>(947 - 2,491)   | 5,635<br>(4,113 - 7,702)   | 24,466<br>(16,304 - 30,132) |
| Cerebrovascular disease                       | 33,119<br>(25,309 - 48,781) | 10<br>(5 - 19)     | 23<br>(14 - 36)     | 1,268<br>(867 - 1,821)   | 4,690<br>(3,514 - 6,381)   | 27,128<br>(20,196 - 40,683) |
| Ischemic stroke                               | 12,045<br>(7,433 - 16,783)  | 2<br>(1 - 4)       | 3<br>(1 - 5)        | 204<br>(111 - 342)       | 1,286<br>(759 - 1,837)     | 10,550<br>(6,339 - 14,971)  |
| Hemorrhagic stroke                            | 21,073<br>(14,225 - 35,292) | 9<br>(4 - 16)      | 20<br>(12 - 32)     | 1,063<br>(735 - 1,525)   | 3,404<br>(2,478 - 4,914)   | 16,577<br>(10,698 - 29,535) |
| Hypertensive heart disease                    | 1,081<br>(611 - 1,510)      | 0<br>(0 - 0)       | 1<br>(0 - 1)        | 130<br>(82 - 211)        | 313<br>(169 - 462)         | 638<br>(329 - 969)          |
| Cardiomyopathy and myocarditis                | 742<br>(469 - 1,906)        | 9<br>(4 - 30)      | 11<br>(6 - 26)      | 147<br>(80 - 423)        | 149<br>(87 - 414)          | 426<br>(263 - 1,072)        |
| Atrial fibrillation and flutter               | 4<br>(3 - 6)                | --                 | --                  | 2<br>(1 - 3)             | 2<br>(1 - 2)               | 1<br>(1 - 1)                |
| Aortic aneurysm                               | 423<br>(172 - 876)          | --                 | --                  | 13<br>(6 - 24)           | 42<br>(18 - 76)            | 369<br>(143 - 789)          |
| Peripheral vascular disease                   | 17<br>(11 - 25)             | --                 | --                  | 1<br>(1 - 2)             | 2<br>(2 - 4)               | 14<br>(8 - 21)              |
| Endocarditis                                  | 805<br>(256 - 1,389)        | 11<br>(4 - 21)     | 6<br>(2 - 12)       | 152<br>(59 - 267)        | 272<br>(92 - 478)          | 363<br>(87 - 695)           |
| Other cardiovascular and circulatory diseases | 4,564<br>(3,264 - 8,584)    | 23<br>(13 - 45)    | 25<br>(14 - 41)     | 535<br>(348 - 873)       | 1,162<br>(744 - 2,489)     | 2,818<br>(1,853 - 4,992)    |
| Chronic respiratory diseases                  | 12,026<br>(9,499 - 15,251)  | 47<br>(31 - 70)    | 21<br>(13 - 29)     | 788<br>(554 - 1,083)     | 2,111<br>(1,515 - 2,951)   | 9,058<br>(7,007 - 11,549)   |

Web Table 31- Thailand deaths with 95% UI by age, sex, and cause in 2013

| Cause                                               | Females, All Ages         | Females, 0-4 Years | Females, 5-14 Years | Females, 15-49 Years | Females, 50-69 Years     | Females, 70-80 Years      |
|-----------------------------------------------------|---------------------------|--------------------|---------------------|----------------------|--------------------------|---------------------------|
| Chronic obstructive pulmonary disease               | 8,220<br>(6,023 - 10,803) | 21<br>(12 - 36)    | 5<br>(3 - 8)        | 271<br>(161 - 474)   | 1,359<br>(906 - 2,009)   | 6,564<br>(4,786 - 8,547)  |
| Pneumoconiosis                                      | 22<br>(13 - 37)           | 0<br>(0 - 0)       | 0<br>(0 - 1)        | 5<br>(3 - 8)         | 4<br>(2 - 8)             | 13<br>(6 - 24)            |
| Silicosis                                           | 2<br>(1 - 4)              | 0<br>(0 - 0)       | 0<br>(0 - 0)        | 1<br>(0 - 1)         | 0<br>(0 - 1)             | 1<br>(0 - 2)              |
| Asbestosis                                          | 2<br>(1 - 3)              | 0<br>(0 - 0)       | 0<br>(0 - 0)        | 1<br>(0 - 1)         | 0<br>(0 - 1)             | 1<br>(0 - 1)              |
| Coal workers pneumoconiosis                         | 2<br>(1 - 4)              | 0<br>(0 - 0)       | 0<br>(0 - 0)        | 1<br>(0 - 1)         | 0<br>(0 - 0)             | 1<br>(0 - 2)              |
| Other pneumoconiosis                                | 16<br>(10 - 29)           | 0<br>(0 - 0)       | 0<br>(0 - 0)        | 3<br>(2 - 6)         | 3<br>(2 - 7)             | 10<br>(5 - 20)            |
| Asthma                                              | 2,943<br>(1,305 - 4,339)  | 17<br>(6 - 32)     | 14<br>(6 - 20)      | 448<br>(238 - 627)   | 556<br>(265 - 865)       | 1,907<br>(788 - 3,063)    |
| Interstitial lung disease and pulmonary sarcoidosis | 638<br>(174 - 1,875)      | 1<br>(0 - 2)       | 1<br>(0 - 2)        | 13<br>(4 - 39)       | 168<br>(44 - 489)        | 455<br>(113 - 1,399)      |
| Other chronic respiratory diseases                  | 203<br>(133 - 322)        | 8<br>(6 - 12)      | 1<br>(1 - 2)        | 52<br>(31 - 94)      | 24<br>(14 - 40)          | 119<br>(66 - 201)         |
| Cirrhosis                                           | 5,713<br>(4,414 - 7,169)  | 3<br>(2 - 6)       | 8<br>(5 - 12)       | 860<br>(595 - 1,172) | 2,019<br>(1,535 - 2,628) | 2,823<br>(2,021 - 3,885)  |
| Cirrhosis due to hepatitis B                        | 2,059<br>(1,215 - 3,145)  | 0<br>(0 - 0)       | 1<br>(0 - 2)        | 266<br>(133 - 457)   | 716<br>(386 - 1,154)     | 1,075<br>(618 - 1,713)    |
| Cirrhosis due to hepatitis C                        | 2,102<br>(1,097 - 3,230)  | 0<br>(0 - 0)       | 2<br>(0 - 3)        | 326<br>(145 - 544)   | 764<br>(348 - 1,239)     | 1,011<br>(492 - 1,676)    |
| Cirrhosis due to alcohol use                        | 1,043<br>(548 - 1,867)    | --                 | --                  | 113<br>(44 - 221)    | 344<br>(162 - 645)       | 586<br>(282 - 1,086)      |
| Cirrhosis due to other causes                       | 510<br>(287 - 859)        | 3<br>(1 - 6)       | 6<br>(3 - 9)        | 155<br>(84 - 262)    | 195<br>(95 - 354)        | 151<br>(74 - 268)         |
| Digestive diseases                                  | 6,252<br>(4,870 - 8,030)  | 11<br>(6 - 19)     | 13<br>(9 - 18)      | 326<br>(226 - 444)   | 1,005<br>(716 - 1,313)   | 4,896<br>(3,744 - 6,492)  |
| Peptic ulcer disease                                | 929<br>(605 - 1,414)      | 0<br>(0 - 1)       | 1<br>(1 - 2)        | 34<br>(18 - 54)      | 126<br>(74 - 192)        | 768<br>(491 - 1,194)      |
| Gastritis and duodenitis                            | 141<br>(72 - 327)         | 0<br>(0 - 0)       | 0<br>(0 - 1)        | 12<br>(6 - 25)       | 33<br>(16 - 66)          | 96<br>(43 - 243)          |
| Appendicitis                                        | 275<br>(161 - 457)        | 0<br>(0 - 1)       | 2<br>(1 - 3)        | 32<br>(19 - 51)      | 77<br>(41 - 129)         | 163<br>(84 - 297)         |
| Paralytic ileus and intestinal obstruction          | 929<br>(498 - 1,785)      | 5<br>(2 - 9)       | 2<br>(1 - 4)        | 37<br>(20 - 75)      | 132<br>(70 - 258)        | 753<br>(376 - 1,473)      |
| Inguinal, femoral, and abdominal hernia             | 26<br>(8 - 48)            | 0<br>(0 - 0)       | 0<br>(0 - 1)        | 2<br>(1 - 3)         | 4<br>(2 - 7)             | 19<br>(6 - 40)            |
| Inflammatory bowel disease                          | 107<br>(49 - 268)         | 0<br>(0 - 1)       | 1<br>(0 - 1)        | 10<br>(5 - 21)       | 20<br>(10 - 48)          | 76<br>(30 - 207)          |
| Vascular intestinal disorders                       | 5<br>(2 - 9)              | 0<br>(0 - 0)       | 0<br>(0 - 1)        | 2<br>(1 - 4)         | 1<br>(0 - 2)             | 2<br>(1 - 4)              |
| Gallbladder and biliary diseases                    | 1,613<br>(1,113 - 2,290)  | 1<br>(0 - 2)       | 1<br>(1 - 2)        | 51<br>(28 - 76)      | 252<br>(163 - 354)       | 1,307<br>(861 - 1,949)    |
| Pancreatitis                                        | 196<br>(103 - 319)        | 0<br>(0 - 1)       | 1<br>(0 - 1)        | 32<br>(16 - 57)      | 50<br>(26 - 82)          | 113<br>(54 - 199)         |
| Other digestive diseases                            | 2,030<br>(1,473 - 2,789)  | 3<br>(1 - 6)       | 5<br>(3 - 7)        | 114<br>(73 - 163)    | 309<br>(207 - 422)       | 1,599<br>(1,107 - 2,302)  |
| Neurological disorders                              | 9,360<br>(7,192 - 12,097) | 11<br>(7 - 18)     | 19<br>(12 - 30)     | 194<br>(113 - 301)   | 719<br>(515 - 978)       | 8,416<br>(6,333 - 11,007) |
| Alzheimer disease and other dementias               | 8,807<br>(6,693 - 11,445) | --                 | --                  | 4<br>(1 - 8)         | 590<br>(407 - 826)       | 8,213<br>(6,146 - 10,814) |
| Parkinson disease                                   | 54<br>(35 - 84)           | --                 | --                  | 3<br>(2 - 6)         | 13<br>(8 - 24)           | 37<br>(22 - 58)           |
| Epilepsy                                            | 313<br>(174 - 465)        | 5<br>(2 - 11)      | 12<br>(6 - 23)      | 141<br>(69 - 240)    | 71<br>(39 - 115)         | 83<br>(43 - 151)          |
| Multiple sclerosis                                  | 21<br>(13 - 41)           | --                 | --                  | 7<br>(4 - 14)        | 8<br>(4 - 18)            | 5<br>(3 - 11)             |
| Other neurological disorders                        | 166<br>(130 - 207)        | 6<br>(4 - 9)       | 7<br>(5 - 9)        | 39<br>(29 - 51)      | 37<br>(27 - 49)          | 78<br>(55 - 104)          |
| Mental and substance use disorders                  | 1,468<br>(1,111 - 1,858)  | 11<br>(5 - 19)     | 0<br>(0 - 1)        | 822<br>(597 - 1,100) | 435<br>(309 - 584)       | 200<br>(139 - 275)        |
| Schizophrenia                                       | 11<br>(7 - 21)            | --                 | --                  | 3<br>(2 - 5)         | 3<br>(1 - 5)             | 6<br>(3 - 11)             |
| Alcohol use disorders                               | 162<br>(57 - 249)         | --                 | --                  | 57<br>(19 - 93)      | 77<br>(25 - 123)         | 29<br>(10 - 49)           |
| Drug use disorders                                  | 1,289<br>(955 - 1,649)    | 11<br>(5 - 19)     | --                  | 756<br>(544 - 1,035) | 356<br>(239 - 495)       | 165<br>(108 - 233)        |
| Opioid use disorders                                | 806<br>(597 - 1,035)      | 7<br>(3 - 12)      | --                  | 481<br>(344 - 654)   | 213<br>(143 - 295)       | 105<br>(69 - 152)         |
| Cocaine use disorders                               | 27<br>(19 - 35)           | 0<br>(0 - 1)       | --                  | 18<br>(12 - 25)      | 6<br>(4 - 9)             | 3<br>(2 - 4)              |
| Amphetamine use disorders                           | 30<br>(22 - 40)           | 0<br>(0 - 1)       | --                  | 18<br>(12 - 26)      | 8<br>(5 - 12)            | 3<br>(2 - 5)              |
| Other drug use disorders                            | 425<br>(312 - 551)        | 3<br>(1 - 5)       | --                  | 240<br>(168 - 330)   | 129<br>(84 - 182)        | 53<br>(35 - 78)           |
| Eating disorders                                    | 6<br>(3 - 10)             | --                 | 0<br>(0 - 1)        | 6<br>(3 - 10)        | --                       | --                        |

Web Table 31- Thailand deaths with 95% UI by age, sex, and cause in 2013

| Cause                                               | Females, All Ages           | Females, 0-4 Years   | Females, 5-14 Years | Females, 15-49 Years     | Females, 50-69 Years      | Females, 70-80 Years        |
|-----------------------------------------------------|-----------------------------|----------------------|---------------------|--------------------------|---------------------------|-----------------------------|
| Anorexia nervosa                                    | 6<br>(3 - 10)               | --                   | 0<br>(0 - 1)        | 6<br>(3 - 10)            | --                        | --                          |
| Diabetes, urogenital, blood, and endocrine diseases | 32,663<br>(23,786 - 40,079) | 52<br>(35 - 81)      | 48<br>(35 - 67)     | 2,538<br>(1,829 - 3,323) | 9,871<br>(7,483 - 12,385) | 20,153<br>(13,911 - 24,972) |
| Diabetes mellitus                                   | 15,399<br>(12,010 - 19,343) | 4<br>(2 - 7)         | 5<br>(3 - 8)        | 664<br>(464 - 968)       | 4,804<br>(3,525 - 6,342)  | 9,923<br>(7,510 - 12,687)   |
| Acute glomerulonephritis                            | 10<br>(7 - 17)              | 0<br>(0 - 0)         | 1<br>(0 - 1)        | 3<br>(2 - 4)             | 2<br>(1 - 4)              | 5<br>(2 - 8)                |
| Chronic kidney disease                              | 12,102<br>(6,810 - 15,733)  | 5<br>(3 - 8)         | 14<br>(9 - 21)      | 1,120<br>(735 - 1,578)   | 3,848<br>(2,443 - 5,262)  | 7,115<br>(3,445 - 9,664)    |
| Chronic kidney disease due to diabetes mellitus     | 2,601<br>(891 - 3,591)      | 1<br>(0 - 1)         | 1<br>(1 - 2)        | 230<br>(93 - 335)        | 1,142<br>(439 - 1,649)    | 1,227<br>(380 - 1,807)      |
| Chronic kidney disease due to hypertension          | 1,420<br>(752 - 2,594)      | 1<br>(1 - 2)         | 2<br>(1 - 3)        | 194<br>(106 - 367)       | 566<br>(305 - 1,090)      | 656<br>(324 - 1,235)        |
| Chronic kidney disease due to glomerulonephritis    | 609<br>(351 - 1,062)        | 0<br>(0 - 1)         | 1<br>(1 - 2)        | 50<br>(31 - 82)          | 123<br>(67 - 226)         | 435<br>(226 - 798)          |
| Chronic kidney disease due to other causes          | 7,472<br>(3,174 - 10,616)   | 3<br>(1 - 5)         | 9<br>(5 - 16)       | 647<br>(336 - 1,013)     | 2,017<br>(966 - 3,071)    | 4,796<br>(1,673 - 7,241)    |
| Urinary diseases and male infertility               | 3,808<br>(1,377 - 6,100)    | 5<br>(2 - 11)        | 6<br>(2 - 10)       | 447<br>(186 - 770)       | 884<br>(399 - 1,372)      | 2,467<br>(710 - 4,430)      |
| Interstitial nephritis and urinary tract infections | 2,627<br>(638 - 4,633)      | 4<br>(1 - 9)         | 3<br>(1 - 6)        | 313<br>(90 - 573)        | 513<br>(139 - 882)        | 1,793<br>(365 - 3,467)      |
| Urolithiasis                                        | 273<br>(121 - 757)          | --                   | 1<br>(0 - 2)        | 34<br>(10 - 94)          | 92<br>(31 - 235)          | 147<br>(57 - 492)           |
| Other urinary diseases                              | 908<br>(381 - 1,852)        | 1<br>(0 - 2)         | 2<br>(1 - 4)        | 100<br>(47 - 238)        | 279<br>(125 - 541)        | 527<br>(181 - 1,224)        |
| Gynecological diseases                              | 9<br>(6 - 13)               | --                   | --                  | 5<br>(3 - 7)             | 2<br>(1 - 3)              | 3<br>(2 - 5)                |
| Uterine fibroids                                    | 2<br>(1 - 3)                | --                   | --                  | 1<br>(1 - 1)             | 0<br>(0 - 1)              | 1<br>(0 - 1)                |
| Polycystic ovarian syndrome                         | 0<br>(0 - 0)                | --                   | --                  | 0<br>(0 - 0)             | 0<br>(0 - 0)              | --                          |
| Endometriosis                                       | 1<br>(1 - 1)                | --                   | --                  | 1<br>(0 - 1)             | 0<br>(0 - 0)              | --                          |
| Genital prolapse                                    | 2<br>(1 - 2)                | --                   | --                  | 1<br>(0 - 1)             | 0<br>(0 - 0)              | 1<br>(0 - 1)                |
| Other gynecological diseases                        | 4<br>(3 - 6)                | --                   | --                  | 2<br>(1 - 3)             | 1<br>(0 - 1)              | 1<br>(1 - 2)                |
| Hemoglobinopathies and hemolytic anemias            | 194<br>(129 - 320)          | 18<br>(10 - 36)      | 17<br>(9 - 32)      | 86<br>(52 - 149)         | 37<br>(23 - 62)           | 35<br>(20 - 58)             |
| Thalassemias                                        | 130<br>(84 - 221)           | 17<br>(9 - 34)       | 17<br>(9 - 32)      | 76<br>(46 - 131)         | 18<br>(11 - 30)           | 2<br>(1 - 4)                |
| Sickle cell disorders                               | 0<br>(0 - 0)                | 0<br>(0 - 0)         | 0<br>(0 - 0)        | 0<br>(0 - 0)             | 0<br>(0 - 0)              | 0<br>(0 - 0)                |
| G6PD deficiency                                     | 4<br>(2 - 6)                | 0<br>(0 - 0)         | 0<br>(0 - 0)        | 2<br>(1 - 3)             | 1<br>(1 - 2)              | 0<br>(0 - 1)                |
| Other hemoglobinopathies and hemolytic anemias      | 61<br>(38 - 97)             | 1<br>(1 - 2)         | 0<br>(0 - 1)        | 9<br>(5 - 16)            | 18<br>(11 - 30)           | 33<br>(18 - 53)             |
| Endocrine, metabolic, blood, and immune disorders   | 1,140<br>(692 - 1,646)      | 19<br>(11 - 37)      | 6<br>(3 - 11)       | 213<br>(135 - 360)       | 295<br>(191 - 461)        | 606<br>(284 - 944)          |
| Musculoskeletal disorders                           | 1,127<br>(716 - 1,527)      | --                   | 14<br>(9 - 20)      | 248<br>(138 - 345)       | 392<br>(239 - 550)        | 472<br>(275 - 700)          |
| Rheumatoid arthritis                                | 122<br>(37 - 186)           | --                   | 1<br>(1 - 2)        | 16<br>(6 - 27)           | 45<br>(15 - 73)           | 59<br>(16 - 105)            |
| Other musculoskeletal disorders                     | 1,005<br>(652 - 1,368)      | --                   | 13<br>(8 - 19)      | 232<br>(129 - 327)       | 348<br>(220 - 490)        | 413<br>(245 - 614)          |
| Other non-communicable diseases                     | 1,822<br>(1,404 - 2,205)    | 819<br>(570 - 1,095) | 73<br>(45 - 109)    | 250<br>(171 - 350)       | 262<br>(173 - 357)        | 417<br>(228 - 597)          |
| Congenital anomalies                                | 1,218<br>(883 - 1,527)      | 807<br>(556 - 1,085) | 70<br>(42 - 105)    | 149<br>(99 - 212)        | 101<br>(66 - 146)         | 91<br>(62 - 134)            |
| Neural tube defects                                 | 52<br>(23 - 89)             | 49<br>(21 - 85)      | 1<br>(0 - 1)        | 2<br>(1 - 4)             | 1<br>(0 - 1)              | 0<br>(0 - 0)                |
| Congenital heart anomalies                          | 612<br>(398 - 833)          | 476<br>(293 - 686)   | 37<br>(21 - 58)     | 60<br>(37 - 88)          | 13<br>(7 - 21)            | 26<br>(16 - 42)             |
| Cleft lip and cleft palate                          | 1<br>(1 - 3)                | 1<br>(1 - 3)         | --                  | --                       | --                        | --                          |
| Down syndrome                                       | 29<br>(16 - 53)             | 15<br>(7 - 28)       | 7<br>(3 - 15)       | 4<br>(2 - 8)             | 3<br>(2 - 7)              | 0<br>(0 - 0)                |
| Chromosomal unbalanced rearrangements               | 31<br>(17 - 55)             | 16<br>(7 - 31)       | 1<br>(0 - 2)        | 12<br>(6 - 22)           | 1<br>(0 - 2)              | 1<br>(0 - 1)                |
| Other congenital anomalies                          | 491<br>(343 - 662)          | 250<br>(155 - 365)   | 25<br>(12 - 43)     | 70<br>(43 - 106)         | 83<br>(54 - 122)          | 64<br>(42 - 96)             |
| Skin and subcutaneous diseases                      | 597<br>(296 - 818)          | 5<br>(2 - 8)         | 3<br>(2 - 5)        | 102<br>(43 - 157)        | 161<br>(90 - 234)         | 326<br>(152 - 498)          |
| Cellulitis                                          | 47<br>(16 - 87)             | 1<br>(0 - 2)         | 0<br>(0 - 1)        | 13<br>(4 - 27)           | 19<br>(6 - 37)            | 14<br>(3 - 31)              |
| Pyoderma                                            | 389<br>(228 - 544)          | 3<br>(2 - 6)         | 2<br>(1 - 3)        | 74<br>(34 - 117)         | 122<br>(70 - 183)         | 188<br>(105 - 288)          |
| Decubitus ulcer                                     | 154<br>(23 - 244)           | 0<br>(0 - 0)         | 0<br>(0 - 1)        | 11<br>(3 - 18)           | 19<br>(4 - 32)            | 124<br>(16 - 211)           |



Web Table 31- Thailand deaths with 95% UI by age, sex, and cause in 2013

| Cause                                           | Females, All Ages           | Females, 0-4 Years | Females, 5-14 Years | Females, 15-49 Years     | Females, 50-69 Years     | Females, 70-80 Years     |
|-------------------------------------------------|-----------------------------|--------------------|---------------------|--------------------------|--------------------------|--------------------------|
| Other skin and subcutaneous diseases            | 6<br>(3 - 11)               | 0<br>(0 - 0)       | 0<br>(0 - 1)        | 3<br>(1 - 6)             | 1<br>(0 - 3)             | 1<br>(0 - 3)             |
| Sudden infant death syndrome                    | 8<br>(0 - 33)               | 8<br>(0 - 33)      | --                  | --                       | --                       | --                       |
| Injuries                                        | 14,559<br>(11,174 - 17,891) | 299<br>(201 - 433) | 594<br>(468 - 734)  | 5,698<br>(4,254 - 7,318) | 3,961<br>(3,004 - 5,014) | 4,007<br>(2,481 - 5,007) |
| Transport injuries                              | 5,808<br>(4,280 - 7,295)    | 62<br>(34 - 102)   | 207<br>(135 - 284)  | 2,444<br>(1,722 - 3,258) | 1,799<br>(1,276 - 2,382) | 1,296<br>(751 - 1,806)   |
| Road injuries                                   | 5,581<br>(4,112 - 6,994)    | 59<br>(32 - 97)    | 201<br>(133 - 274)  | 2,387<br>(1,686 - 3,180) | 1,730<br>(1,230 - 2,294) | 1,204<br>(723 - 1,678)   |
| Pedestrian road injuries                        | 1,386<br>(933 - 1,832)      | 22<br>(11 - 40)    | 66<br>(39 - 100)    | 392<br>(251 - 612)       | 429<br>(260 - 619)       | 477<br>(257 - 715)       |
| Cyclist road injuries                           | 138<br>(76 - 192)           | 1<br>(0 - 2)       | 6<br>(3 - 10)       | 55<br>(30 - 82)          | 47<br>(24 - 71)          | 29<br>(14 - 48)          |
| Motorcyclist road injuries                      | 1,758<br>(1,101 - 2,398)    | 10<br>(4 - 19)     | 49<br>(22 - 82)     | 1,049<br>(672 - 1,503)   | 465<br>(268 - 693)       | 185<br>(75 - 313)        |
| Motor vehicle road injuries                     | 2,279<br>(1,569 - 2,972)    | 26<br>(14 - 45)    | 79<br>(49 - 115)    | 881<br>(564 - 1,226)     | 785<br>(536 - 1,104)     | 509<br>(301 - 751)       |
| Other road injuries                             | 20<br>(11 - 30)             | 0<br>(0 - 1)       | 1<br>(1 - 2)        | 10<br>(5 - 17)           | 4<br>(2 - 7)             | 4<br>(2 - 8)             |
| Other transport injuries                        | 227<br>(114 - 320)          | 3<br>(1 - 6)       | 6<br>(2 - 10)       | 57<br>(36 - 83)          | 69<br>(36 - 106)         | 92<br>(27 - 155)         |
| Unintentional injuries                          | 5,177<br>(3,079 - 7,022)    | 228<br>(140 - 359) | 349<br>(244 - 498)  | 1,079<br>(714 - 1,480)   | 1,285<br>(749 - 1,779)   | 2,237<br>(1,026 - 3,343) |
| Falls                                           | 1,328<br>(435 - 2,103)      | 7<br>(2 - 14)      | 6<br>(3 - 11)       | 105<br>(41 - 170)        | 351<br>(157 - 549)       | 858<br>(205 - 1,506)     |
| Drowning                                        | 1,369<br>(925 - 2,072)      | 151<br>(75 - 290)  | 290<br>(185 - 452)  | 422<br>(264 - 674)       | 294<br>(163 - 464)       | 212<br>(126 - 329)       |
| Fire, heat, and hot substances                  | 198<br>(90 - 316)           | 8<br>(4 - 18)      | 6<br>(3 - 11)       | 44<br>(21 - 72)          | 49<br>(22 - 81)          | 90<br>(32 - 171)         |
| Poisonings                                      | 116<br>(61 - 159)           | 2<br>(1 - 4)       | 2<br>(1 - 4)        | 49<br>(27 - 75)          | 25<br>(12 - 37)          | 38<br>(18 - 62)          |
| Exposure to mechanical forces                   | 430<br>(313 - 568)          | 7<br>(4 - 12)      | 18<br>(11 - 30)     | 136<br>(93 - 193)        | 145<br>(93 - 211)        | 125<br>(82 - 180)        |
| Unintentional firearm injuries                  | 232<br>(102 - 326)          | 1<br>(1 - 2)       | 3<br>(1 - 5)        | 73<br>(34 - 109)         | 87<br>(30 - 140)         | 67<br>(32 - 112)         |
| Unintentional suffocation                       | 15<br>(9 - 25)              | 1<br>(0 - 3)       | 2<br>(1 - 3)        | 6<br>(3 - 10)            | 4<br>(2 - 7)             | 2<br>(1 - 3)             |
| Other exposure to mechanical forces             | 183<br>(136 - 282)          | 4<br>(2 - 8)       | 13<br>(7 - 26)      | 57<br>(36 - 104)         | 53<br>(35 - 85)          | 56<br>(36 - 83)          |
| Adverse effects of medical treatment            | 914<br>(296 - 1,632)        | 14<br>(6 - 27)     | 7<br>(3 - 13)       | 168<br>(58 - 319)        | 243<br>(78 - 466)        | 481<br>(114 - 990)       |
| Animal contact                                  | 122<br>(38 - 189)           | 5<br>(1 - 11)      | 6<br>(2 - 11)       | 19<br>(6 - 32)           | 51<br>(15 - 86)          | 42<br>(11 - 72)          |
| Venomous animal contact                         | 81<br>(24 - 130)            | 4<br>(1 - 10)      | 5<br>(1 - 9)        | 14<br>(5 - 24)           | 34<br>(9 - 59)           | 24<br>(5 - 44)           |
| Non-venomous animal contact                     | 42<br>(11 - 75)             | 1<br>(0 - 2)       | 1<br>(0 - 2)        | 5<br>(1 - 9)             | 17<br>(5 - 33)           | 18<br>(4 - 33)           |
| Foreign body                                    | 436<br>(222 - 643)          | 28<br>(14 - 48)    | 4<br>(2 - 7)        | 32<br>(15 - 53)          | 48<br>(20 - 79)          | 322<br>(165 - 498)       |
| Pulmonary aspiration and foreign body in airway | 384<br>(185 - 580)          | 27<br>(12 - 47)    | 4<br>(2 - 6)        | 29<br>(12 - 49)          | 43<br>(16 - 72)          | 281<br>(130 - 448)       |
| Foreign body in other body part                 | 52<br>(22 - 90)             | 1<br>(0 - 2)       | 1<br>(0 - 1)        | 3<br>(2 - 4)             | 6<br>(2 - 10)            | 42<br>(17 - 77)          |
| Other unintentional injuries                    | 266<br>(83 - 362)           | 5<br>(2 - 10)      | 10<br>(4 - 17)      | 103<br>(39 - 153)        | 79<br>(20 - 118)         | 67<br>(13 - 102)         |
| Self-harm and interpersonal violence            | 3,574<br>(2,548 - 5,201)    | 9<br>(4 - 18)      | 38<br>(22 - 67)     | 2,176<br>(1,490 - 3,220) | 877<br>(595 - 1,408)     | 474<br>(305 - 823)       |
| Self-harm                                       | 2,462<br>(1,754 - 3,403)    | --                 | 13<br>(5 - 28)      | 1,444<br>(977 - 2,156)   | 653<br>(434 - 952)       | 352<br>(226 - 551)       |
| Interpersonal violence                          | 1,112<br>(671 - 2,278)      | 9<br>(4 - 18)      | 25<br>(13 - 50)     | 732<br>(447 - 1,390)     | 224<br>(106 - 569)       | 122<br>(44 - 359)        |
| Assault by firearm                              | 555<br>(311 - 1,146)        | 2<br>(1 - 6)       | 7<br>(3 - 16)       | 406<br>(221 - 803)       | 107<br>(47 - 285)        | 32<br>(10 - 112)         |
| Assault by sharp object                         | 284<br>(140 - 658)          | 1<br>(0 - 4)       | 4<br>(2 - 10)       | 185<br>(93 - 402)        | 58<br>(22 - 155)         | 35<br>(11 - 105)         |
| Assault by other means                          | 273<br>(152 - 619)          | 5<br>(2 - 11)      | 14<br>(6 - 30)      | 140<br>(76 - 285)        | 59<br>(25 - 171)         | 54<br>(18 - 162)         |

Web Table 31- The Bahamas deaths with 95% UI by age, sex, and cause in 2013

| Cause                                                             | Both Sexes, All Ages     | Both Sexes, 0-4 Years | Both Sexes, 5-14 Years | Both Sexes, 15-49 Years | Both Sexes, 50-69 Years | Both Sexes, 70-80 Years  |
|-------------------------------------------------------------------|--------------------------|-----------------------|------------------------|-------------------------|-------------------------|--------------------------|
| All causes                                                        | 2,883<br>(2,394 - 3,325) | 94<br>(43 - 187)      | 17<br>(11 - 26)        | 483<br>(375 - 601)      | 916<br>(718 - 1,106)    | 1,373<br>(1,164 - 1,524) |
| Communicable, maternal, neonatal, and nutritional diseases        | 331<br>(273 - 411)       | 70<br>(31 - 138)      | 3<br>(2 - 5)           | 95<br>(77 - 114)        | 63<br>(52 - 78)         | 99<br>(80 - 122)         |
| HIV/AIDS and tuberculosis                                         | 102<br>(77 - 130)        | 0<br>(0 - 0)          | 0<br>(0 - 0)           | 67<br>(49 - 86)         | 29<br>(21 - 40)         | 6<br>(4 - 7)             |
| Tuberculosis                                                      | 12<br>(8 - 15)           | 0<br>(0 - 0)          | 0<br>(0 - 0)           | 4<br>(2 - 5)            | 5<br>(3 - 6)            | 3<br>(2 - 4)             |
| HIV/AIDS                                                          | 90<br>(66 - 118)         | 0<br>(0 - 0)          | 0<br>(0 - 0)           | 63<br>(45 - 83)         | 24<br>(17 - 35)         | 2<br>(1 - 4)             |
| HIV/AIDS resulting in mycobacterial infection                     | 5<br>(4 - 7)             | 0<br>(0 - 0)          | 0<br>(0 - 0)           | 4<br>(2 - 5)            | 2<br>(1 - 2)            | 0<br>(0 - 0)             |
| HIV/AIDS resulting in other diseases                              | 85<br>(62 - 111)         | 0<br>(0 - 0)          | 0<br>(0 - 0)           | 59<br>(42 - 78)         | 23<br>(16 - 33)         | 2<br>(1 - 4)             |
| Diarrhea, lower respiratory, and other common infectious diseases | 128<br>(104 - 157)       | 9<br>(4 - 18)         | 2<br>(1 - 4)           | 17<br>(12 - 22)         | 25<br>(18 - 32)         | 76<br>(58 - 96)          |
| Diarrheal diseases                                                | 11<br>(9 - 15)           | 2<br>(1 - 5)          | 0<br>(0 - 0)           | 1<br>(1 - 2)            | 2<br>(1 - 3)            | 5<br>(4 - 8)             |
| Intestinal infectious diseases                                    | 2<br>(1 - 5)             | 1<br>(0 - 2)          | 0<br>(0 - 1)           | 1<br>(0 - 2)            | 0<br>(0 - 0)            | 0<br>(0 - 0)             |
| Typhoid fever                                                     | 2<br>(0 - 4)             | 0<br>(0 - 1)          | 0<br>(0 - 1)           | 1<br>(0 - 1)            | 0<br>(0 - 0)            | 0<br>(0 - 0)             |
| Paratyphoid fever                                                 | 0<br>(0 - 1)             | 0<br>(0 - 0)          | 0<br>(0 - 0)           | 0<br>(0 - 0)            | 0<br>(0 - 0)            | 0<br>(0 - 0)             |
| Other intestinal infectious diseases                              | 0<br>(0 - 0)             | 0<br>(0 - 0)          | 0<br>(0 - 0)           | 0<br>(0 - 0)            | 0<br>(0 - 0)            | 0<br>(0 - 0)             |
| Lower respiratory infections                                      | 106<br>(85 - 132)        | 5<br>(2 - 11)         | 1<br>(1 - 2)           | 12<br>(8 - 16)          | 20<br>(15 - 27)         | 68<br>(51 - 88)          |
| Upper respiratory infections                                      | 0<br>(0 - 0)             | 0<br>(0 - 0)          | 0<br>(0 - 0)           | 0<br>(0 - 0)            | 0<br>(0 - 0)            | 0<br>(0 - 0)             |
| Otitis media                                                      | 0<br>(0 - 0)             | 0<br>(0 - 0)          | 0<br>(0 - 0)           | 0<br>(0 - 0)            | 0<br>(0 - 0)            | 0<br>(0 - 0)             |
| Meningitis                                                        | 5<br>(4 - 6)             | 1<br>(0 - 1)          | 0<br>(0 - 0)           | 1<br>(1 - 2)            | 1<br>(1 - 2)            | 1<br>(1 - 2)             |
| Pneumococcal meningitis                                           | 2<br>(1 - 2)             | 0<br>(0 - 0)          | 0<br>(0 - 0)           | 0<br>(0 - 1)            | 0<br>(0 - 1)            | 0<br>(0 - 1)             |
| H influenzae type B meningitis                                    | 1<br>(0 - 1)             | 0<br>(0 - 0)          | 0<br>(0 - 0)           | 0<br>(0 - 0)            | 0<br>(0 - 0)            | 0<br>(0 - 0)             |
| Meningococcal meningitis                                          | 1<br>(0 - 1)             | 0<br>(0 - 0)          | 0<br>(0 - 0)           | 0<br>(0 - 0)            | 0<br>(0 - 0)            | 0<br>(0 - 0)             |
| Other meningitis                                                  | 2<br>(2 - 3)             | 0<br>(0 - 0)          | 0<br>(0 - 0)           | 1<br>(0 - 1)            | 1<br>(0 - 1)            | 1<br>(0 - 1)             |
| Encephalitis                                                      | 3<br>(2 - 5)             | 0<br>(0 - 1)          | 0<br>(0 - 1)           | 1<br>(1 - 2)            | 1<br>(1 - 1)            | 1<br>(0 - 1)             |
| Diphtheria                                                        | 0<br>(0 - 0)             | 0<br>(0 - 0)          | 0<br>(0 - 0)           | 0<br>(0 - 0)            | 0<br>(0 - 0)            | 0<br>(0 - 0)             |
| Whooping cough                                                    | 0<br>(0 - 0)             | 0<br>(0 - 0)          | 0<br>(0 - 0)           | 0<br>(0 - 0)            | 0<br>(0 - 0)            | 0<br>(0 - 0)             |
| Tetanus                                                           | 0<br>(0 - 1)             | 0<br>(0 - 0)          | 0<br>(0 - 0)           | 0<br>(0 - 0)            | 0<br>(0 - 0)            | 0<br>(0 - 0)             |
| Measles                                                           | 0<br>(0 - 0)             | 0<br>(0 - 0)          | 0<br>(0 - 0)           | 0<br>(0 - 0)            | 0<br>(0 - 0)            | 0<br>(0 - 0)             |
| Varicella and herpes zoster                                       | 0<br>(0 - 0)             | 0<br>(0 - 0)          | 0<br>(0 - 0)           | 0<br>(0 - 0)            | 0<br>(0 - 0)            | 0<br>(0 - 0)             |
| Neglected tropical diseases and malaria                           | 2<br>(2 - 3)             | 0<br>(0 - 0)          | 0<br>(0 - 0)           | 1<br>(1 - 1)            | 1<br>(0 - 1)            | 0<br>(0 - 1)             |
| Leishmaniasis                                                     | 0<br>(0 - 0)             | 0<br>(0 - 0)          | 0<br>(0 - 0)           | 0<br>(0 - 0)            | 0<br>(0 - 0)            | 0<br>(0 - 0)             |
| Visceral leishmaniasis                                            | 0<br>(0 - 0)             | 0<br>(0 - 0)          | 0<br>(0 - 0)           | 0<br>(0 - 0)            | 0<br>(0 - 0)            | 0<br>(0 - 0)             |
| Cysticercosis                                                     | 0<br>(0 - 0)             | 0<br>(0 - 0)          | 0<br>(0 - 0)           | 0<br>(0 - 0)            | 0<br>(0 - 0)            | 0<br>(0 - 0)             |
| Cystic echinococcosis                                             | 0<br>(0 - 0)             | 0<br>(0 - 0)          | 0<br>(0 - 0)           | 0<br>(0 - 0)            | 0<br>(0 - 0)            | 0<br>(0 - 0)             |
| Dengue                                                            | 1<br>(1 - 1)             | 0<br>(0 - 0)          | 0<br>(0 - 0)           | 0<br>(0 - 0)            | 0<br>(0 - 0)            | 0<br>(0 - 0)             |
| Rabies                                                            | 0<br>(0 - 0)             | 0<br>(0 - 0)          | 0<br>(0 - 0)           | 0<br>(0 - 0)            | 0<br>(0 - 0)            | 0<br>(0 - 0)             |
| Intestinal nematode infections                                    | 0<br>(0 - 1)             | 0<br>(0 - 0)          | 0<br>(0 - 0)           | 0<br>(0 - 0)            | 0<br>(0 - 0)            | 0<br>(0 - 0)             |
| Ascariasis                                                        | 0<br>(0 - 1)             | 0<br>(0 - 0)          | 0<br>(0 - 0)           | 0<br>(0 - 0)            | 0<br>(0 - 0)            | 0<br>(0 - 0)             |
| Other neglected tropical diseases                                 | 1<br>(1 - 1)             | 0<br>(0 - 0)          | 0<br>(0 - 0)           | 0<br>(0 - 0)            | 0<br>(0 - 0)            | 0<br>(0 - 0)             |
| Maternal disorders                                                | 4<br>(2 - 5)             | --                    | 0<br>(0 - 0)           | 4<br>(2 - 5)            | --                      | --                       |
| Maternal hemorrhage                                               | 1<br>(0 - 1)             | --                    | 0<br>(0 - 0)           | 1<br>(0 - 1)            | --                      | --                       |
| Maternal sepsis and other maternal infections                     | 0<br>(0 - 1)             | --                    | 0<br>(0 - 0)           | 0<br>(0 - 1)            | --                      | --                       |

Web Table 31- The Bahamas deaths with 95% UI by age, sex, and cause in 2013

| Cause                                                            | Both Sexes, All Ages     | Both Sexes, 0-4 Years | Both Sexes, 5-14 Years | Both Sexes, 15-49 Years | Both Sexes, 50-69 Years | Both Sexes, 70-80 Years  |
|------------------------------------------------------------------|--------------------------|-----------------------|------------------------|-------------------------|-------------------------|--------------------------|
| Maternal hypertensive disorders                                  | 1<br>(0 - 1)             | --                    | 0<br>(0 - 0)           | 1<br>(0 - 1)            | --                      | --                       |
| Maternal obstructed labor                                        | 0<br>(0 - 1)             | --                    | 0<br>(0 - 0)           | 0<br>(0 - 1)            | --                      | --                       |
| Maternal abortive outcome                                        | 1<br>(0 - 1)             | --                    | 0<br>(0 - 0)           | 1<br>(0 - 1)            | --                      | --                       |
| Indirect maternal deaths                                         | 0<br>(0 - 1)             | --                    | 0<br>(0 - 0)           | 0<br>(0 - 1)            | --                      | --                       |
| Late maternal deaths                                             | 0<br>(0 - 0)             | --                    | 0<br>(0 - 0)           | 0<br>(0 - 0)            | --                      | --                       |
| Maternal deaths aggravated by HIV/AIDS                           | 0<br>(0 - 0)             | --                    | --                     | 0<br>(0 - 0)            | --                      | --                       |
| Other maternal disorders                                         | 0<br>(0 - 1)             | --                    | 0<br>(0 - 0)           | 0<br>(0 - 1)            | --                      | --                       |
| Neonatal disorders                                               | 59<br>(25 - 115)         | 59<br>(25 - 115)      | --                     | --                      | --                      | --                       |
| Neonatal preterm birth complications                             | 27<br>(11 - 54)          | 27<br>(11 - 54)       | --                     | --                      | --                      | --                       |
| Neonatal encephalopathy due to birth asphyxia and trauma         | 15<br>(6 - 30)           | 15<br>(6 - 30)        | --                     | --                      | --                      | --                       |
| Neonatal sepsis and other neonatal infections                    | 9<br>(3 - 20)            | 9<br>(3 - 20)         | --                     | --                      | --                      | --                       |
| Hemolytic disease and other neonatal jaundice                    | 1<br>(0 - 2)             | 1<br>(0 - 2)          | --                     | --                      | --                      | --                       |
| Other neonatal disorders                                         | 8<br>(3 - 16)            | 8<br>(3 - 16)         | --                     | --                      | --                      | --                       |
| Nutritional deficiencies                                         | 28<br>(21 - 36)          | 2<br>(1 - 4)          | 0<br>(0 - 1)           | 4<br>(3 - 6)            | 6<br>(4 - 9)            | 15<br>(11 - 20)          |
| Protein-energy malnutrition                                      | 11<br>(8 - 17)           | 1<br>(1 - 3)          | 0<br>(0 - 0)           | 1<br>(1 - 2)            | 2<br>(1 - 3)            | 6<br>(4 - 9)             |
| Iodine deficiency                                                | 0<br>(0 - 0)             | 0<br>(0 - 0)          | 0<br>(0 - 0)           | 0<br>(0 - 0)            | 0<br>(0 - 0)            | 0<br>(0 - 0)             |
| Iron-deficiency anemia                                           | 15<br>(10 - 21)          | 0<br>(0 - 1)          | 0<br>(0 - 0)           | 3<br>(2 - 4)            | 4<br>(2 - 5)            | 8<br>(5 - 12)            |
| Other nutritional deficiencies                                   | 2<br>(1 - 2)             | 0<br>(0 - 0)          | 0<br>(0 - 0)           | 0<br>(0 - 0)            | 0<br>(0 - 1)            | 1<br>(0 - 1)             |
| Other communicable, maternal, neonatal, and nutritional diseases | 9<br>(6 - 11)            | 1<br>(0 - 2)          | 0<br>(0 - 0)           | 3<br>(2 - 4)            | 3<br>(2 - 4)            | 2<br>(2 - 3)             |
| Sexually transmitted diseases excluding HIV                      | 1<br>(1 - 2)             | 0<br>(0 - 1)          | 0<br>(0 - 0)           | 0<br>(0 - 0)            | 0<br>(0 - 0)            | 0<br>(0 - 0)             |
| Syphilis                                                         | 1<br>(0 - 2)             | 0<br>(0 - 1)          | 0<br>(0 - 0)           | 0<br>(0 - 0)            | 0<br>(0 - 0)            | 0<br>(0 - 0)             |
| Chlamydial infection                                             | 0<br>(0 - 0)             | --                    | 0<br>(0 - 0)           | 0<br>(0 - 0)            | 0<br>(0 - 0)            | 0<br>(0 - 0)             |
| Gonococcal infection                                             | 0<br>(0 - 0)             | --                    | 0<br>(0 - 0)           | 0<br>(0 - 0)            | 0<br>(0 - 0)            | 0<br>(0 - 0)             |
| Other sexually transmitted diseases                              | 0<br>(0 - 0)             | --                    | 0<br>(0 - 0)           | 0<br>(0 - 0)            | 0<br>(0 - 0)            | 0<br>(0 - 0)             |
| Hepatitis                                                        | 1<br>(1 - 1)             | 0<br>(0 - 0)          | 0<br>(0 - 0)           | 0<br>(0 - 0)            | 0<br>(0 - 0)            | 0<br>(0 - 0)             |
| Acute hepatitis A                                                | 0<br>(0 - 0)             | 0<br>(0 - 0)          | 0<br>(0 - 0)           | 0<br>(0 - 0)            | 0<br>(0 - 0)            | 0<br>(0 - 0)             |
| Acute hepatitis B                                                | 1<br>(0 - 1)             | 0<br>(0 - 0)          | 0<br>(0 - 0)           | 0<br>(0 - 0)            | 0<br>(0 - 0)            | 0<br>(0 - 0)             |
| Acute hepatitis C                                                | 0<br>(0 - 0)             | --                    | 0<br>(0 - 0)           | 0<br>(0 - 0)            | 0<br>(0 - 0)            | 0<br>(0 - 0)             |
| Other infectious diseases                                        | 7<br>(4 - 9)             | 0<br>(0 - 0)          | 0<br>(0 - 0)           | 2<br>(1 - 3)            | 2<br>(1 - 3)            | 2<br>(1 - 2)             |
| Non-communicable diseases                                        | 2,306<br>(1,893 - 2,670) | 20<br>(9 - 41)        | 8<br>(5 - 12)          | 247<br>(181 - 314)      | 798<br>(620 - 970)      | 1,234<br>(1,045 - 1,373) |
| Neoplasms                                                        | 512<br>(412 - 607)       | 1<br>(0 - 2)          | 2<br>(1 - 3)           | 68<br>(50 - 88)         | 210<br>(163 - 257)      | 231<br>(189 - 269)       |
| Esophageal cancer                                                | 13<br>(10 - 17)          | --                    | --                     | 1<br>(1 - 1)            | 6<br>(4 - 9)            | 6<br>(4 - 7)             |
| Stomach cancer                                                   | 31<br>(24 - 37)          | --                    | --                     | 3<br>(2 - 4)            | 12<br>(9 - 16)          | 16<br>(12 - 19)          |
| Liver cancer                                                     | 17<br>(13 - 22)          | --                    | 0<br>(0 - 0)           | 2<br>(2 - 3)            | 8<br>(6 - 10)           | 7<br>(5 - 9)             |
| Liver cancer due to hepatitis B                                  | 4<br>(2 - 7)             | --                    | 0<br>(0 - 0)           | 1<br>(0 - 2)            | 2<br>(1 - 4)            | 1<br>(1 - 2)             |
| Liver cancer due to hepatitis C                                  | 7<br>(5 - 10)            | --                    | 0<br>(0 - 0)           | 1<br>(0 - 1)            | 3<br>(2 - 5)            | 3<br>(2 - 4)             |
| Liver cancer due to alcohol use                                  | 4<br>(2 - 5)             | --                    | --                     | 0<br>(0 - 1)            | 1<br>(1 - 2)            | 2<br>(1 - 2)             |
| Liver cancer due to other causes                                 | 2<br>(1 - 3)             | --                    | 0<br>(0 - 0)           | 0<br>(0 - 1)            | 1<br>(0 - 1)            | 1<br>(0 - 1)             |
| Larynx cancer                                                    | 5<br>(3 - 7)             | --                    | --                     | 1<br>(0 - 1)            | 3<br>(2 - 4)            | 2<br>(1 - 2)             |
| Tracheal, bronchus and lung cancer                               | 52<br>(39 - 64)          | --                    | --                     | 6<br>(4 - 8)            | 27<br>(20 - 36)         | 19<br>(15 - 23)          |

Web Table 31- The Bahamas deaths with 95% UI by age, sex, and cause in 2013

| Cause                                         | Both Sexes, All Ages   | Both Sexes, 0-4 Years | Both Sexes, 5-14 Years | Both Sexes, 15-49 Years | Both Sexes, 50-69 Years | Both Sexes, 70-80 Years |
|-----------------------------------------------|------------------------|-----------------------|------------------------|-------------------------|-------------------------|-------------------------|
| Breast cancer                                 | 59<br>(41 - 79)        | --                    | --                     | 13<br>(8 - 19)          | 27<br>(18 - 38)         | 19<br>(14 - 25)         |
| Cervical cancer                               | 28<br>(19 - 38)        | --                    | --                     | 6<br>(4 - 9)            | 12<br>(8 - 17)          | 9<br>(7 - 13)           |
| Uterine cancer                                | 12<br>(6 - 16)         | --                    | --                     | 1<br>(0 - 1)            | 5<br>(3 - 7)            | 6<br>(3 - 8)            |
| Prostate cancer                               | 84<br>(51 - 115)       | --                    | --                     | 1<br>(0 - 1)            | 21<br>(12 - 32)         | 62<br>(37 - 86)         |
| Colon and rectum cancer                       | 56<br>(45 - 67)        | --                    | --                     | 5<br>(4 - 7)            | 22<br>(17 - 28)         | 29<br>(23 - 35)         |
| Lip and oral cavity cancer                    | 7<br>(5 - 9)           | --                    | --                     | 1<br>(1 - 1)            | 3<br>(2 - 4)            | 3<br>(2 - 3)            |
| Nasopharynx cancer                            | 2<br>(2 - 3)           | --                    | 0<br>(0 - 0)           | 1<br>(0 - 1)            | 1<br>(1 - 1)            | 0<br>(0 - 1)            |
| Other pharynx cancer                          | 3<br>(2 - 4)           | --                    | --                     | 1<br>(0 - 1)            | 2<br>(1 - 3)            | 1<br>(1 - 1)            |
| Gallbladder and biliary tract cancer          | 7<br>(4 - 13)          | --                    | --                     | 1<br>(0 - 1)            | 3<br>(2 - 5)            | 4<br>(2 - 6)            |
| Pancreatic cancer                             | 22<br>(17 - 27)        | --                    | --                     | 2<br>(1 - 3)            | 9<br>(7 - 12)           | 11<br>(8 - 14)          |
| Malignant skin melanoma                       | 2<br>(1 - 3)           | --                    | --                     | 1<br>(0 - 1)            | 1<br>(1 - 1)            | 1<br>(0 - 1)            |
| Non-melanoma skin cancer                      | 2<br>(2 - 3)           | --                    | --                     | 0<br>(0 - 0)            | 1<br>(0 - 1)            | 1<br>(1 - 2)            |
| Ovarian cancer                                | 15<br>(10 - 20)        | --                    | --                     | 2<br>(1 - 3)            | 7<br>(5 - 10)           | 6<br>(4 - 7)            |
| Testicular cancer                             | 0<br>(0 - 1)           | --                    | --                     | 0<br>(0 - 0)            | 0<br>(0 - 0)            | 0<br>(0 - 0)            |
| Kidney cancer                                 | 7<br>(6 - 9)           | 0<br>(0 - 0)          | 0<br>(0 - 0)           | 1<br>(1 - 1)            | 4<br>(3 - 5)            | 3<br>(2 - 3)            |
| Bladder cancer                                | 7<br>(5 - 9)           | --                    | --                     | 0<br>(0 - 0)            | 2<br>(2 - 3)            | 4<br>(3 - 6)            |
| Brain and nervous system cancer               | 7<br>(4 - 9)           | 0<br>(0 - 0)          | 0<br>(0 - 0)           | 2<br>(1 - 3)            | 3<br>(2 - 4)            | 2<br>(1 - 2)            |
| Thyroid cancer                                | 2<br>(2 - 3)           | --                    | 0<br>(0 - 0)           | 0<br>(0 - 0)            | 1<br>(1 - 1)            | 1<br>(1 - 1)            |
| Mesothelioma                                  | 1<br>(1 - 2)           | --                    | --                     | 0<br>(0 - 0)            | 1<br>(0 - 1)            | 1<br>(1 - 1)            |
| Hodgkin lymphoma                              | 1<br>(0 - 2)           | 0<br>(0 - 0)          | 0<br>(0 - 0)           | 1<br>(0 - 1)            | 0<br>(0 - 1)            | 0<br>(0 - 0)            |
| Non-Hodgkin lymphoma                          | 20<br>(15 - 26)        | 0<br>(0 - 0)          | 0<br>(0 - 0)           | 6<br>(4 - 8)            | 9<br>(6 - 12)           | 5<br>(4 - 7)            |
| Multiple myeloma                              | 9<br>(7 - 12)          | --                    | --                     | 1<br>(1 - 1)            | 5<br>(3 - 6)            | 3<br>(2 - 4)            |
| Leukemia                                      | 14<br>(11 - 17)        | 0<br>(0 - 1)          | 1<br>(0 - 1)           | 4<br>(3 - 6)            | 5<br>(3 - 6)            | 4<br>(3 - 5)            |
| Other neoplasms                               | 27<br>(20 - 35)        | 0<br>(0 - 1)          | 1<br>(0 - 1)           | 7<br>(5 - 9)            | 11<br>(8 - 14)          | 8<br>(6 - 11)           |
| Cardiovascular diseases                       | 1,016<br>(834 - 1,176) | 1<br>(1 - 2)          | 1<br>(1 - 2)           | 76<br>(55 - 98)         | 335<br>(260 - 411)      | 603<br>(503 - 680)      |
| Rheumatic heart disease                       | 5<br>(3 - 6)           | 0<br>(0 - 0)          | 0<br>(0 - 0)           | 2<br>(1 - 3)            | 2<br>(1 - 2)            | 1<br>(1 - 2)            |
| Ischemic heart disease                        | 437<br>(349 - 525)     | 0<br>(0 - 0)          | 0<br>(0 - 0)           | 33<br>(23 - 45)         | 159<br>(120 - 200)      | 245<br>(198 - 294)      |
| Cerebrovascular disease                       | 322<br>(257 - 384)     | 0<br>(0 - 1)          | 0<br>(0 - 1)           | 19<br>(14 - 26)         | 99<br>(74 - 125)        | 203<br>(163 - 241)      |
| Ischemic stroke                               | 194<br>(154 - 233)     | 0<br>(0 - 0)          | 0<br>(0 - 0)           | 5<br>(3 - 7)            | 50<br>(37 - 65)         | 139<br>(112 - 168)      |
| Hemorrhagic stroke                            | 128<br>(96 - 160)      | 0<br>(0 - 1)          | 0<br>(0 - 0)           | 14<br>(10 - 19)         | 50<br>(36 - 64)         | 64<br>(47 - 80)         |
| Hypertensive heart disease                    | 134<br>(94 - 169)      | 0<br>(0 - 0)          | 0<br>(0 - 0)           | 7<br>(5 - 10)           | 37<br>(26 - 49)         | 90<br>(61 - 117)        |
| Cardiomyopathy and myocarditis                | 32<br>(23 - 40)        | 0<br>(0 - 1)          | 0<br>(0 - 0)           | 6<br>(4 - 9)            | 12<br>(8 - 16)          | 13<br>(9 - 16)          |
| Atrial fibrillation and flutter               | 17<br>(12 - 23)        | --                    | --                     | 1<br>(0 - 1)            | 3<br>(2 - 5)            | 13<br>(9 - 18)          |
| Aortic aneurysm                               | 14<br>(11 - 19)        | --                    | --                     | 1<br>(1 - 1)            | 6<br>(4 - 8)            | 8<br>(6 - 10)           |
| Peripheral vascular disease                   | 8<br>(6 - 12)          | --                    | --                     | 0<br>(0 - 0)            | 1<br>(1 - 1)            | 7<br>(5 - 10)           |
| Endocarditis                                  | 4<br>(3 - 6)           | 0<br>(0 - 0)          | 0<br>(0 - 0)           | 1<br>(1 - 1)            | 1<br>(1 - 2)            | 2<br>(1 - 3)            |
| Other cardiovascular and circulatory diseases | 43<br>(31 - 55)        | 0<br>(0 - 1)          | 0<br>(0 - 0)           | 6<br>(4 - 9)            | 15<br>(10 - 21)         | 21<br>(14 - 28)         |
| Chronic respiratory diseases                  | 76<br>(61 - 96)        | 1<br>(0 - 1)          | 0<br>(0 - 0)           | 9<br>(7 - 12)           | 24<br>(18 - 31)         | 42<br>(34 - 54)         |
| Chronic obstructive pulmonary disease         | 49<br>(39 - 63)        | 0<br>(0 - 0)          | 0<br>(0 - 0)           | 3<br>(2 - 5)            | 14<br>(10 - 19)         | 31<br>(25 - 40)         |
| Pneumoconiosis                                | 2<br>(2 - 4)           | 0<br>(0 - 0)          | 0<br>(0 - 0)           | 0<br>(0 - 1)            | 1<br>(1 - 2)            | 1<br>(1 - 1)            |

Web Table 31- The Bahamas deaths with 95% UI by age, sex, and cause in 2013

| Cause                                               | Both Sexes, All Ages | Both Sexes, 0-4 Years | Both Sexes, 5-14 Years | Both Sexes, 15-49 Years | Both Sexes, 50-69 Years | Both Sexes, 70-80 Years |
|-----------------------------------------------------|----------------------|-----------------------|------------------------|-------------------------|-------------------------|-------------------------|
| Silicosis                                           | 0<br>(0 - 0)         | 0<br>(0 - 0)          | 0<br>(0 - 0)           | 0<br>(0 - 0)            | 0<br>(0 - 0)            | 0<br>(0 - 0)            |
| Asbestosis                                          | 0<br>(0 - 1)         | 0<br>(0 - 0)          | 0<br>(0 - 0)           | 0<br>(0 - 0)            | 0<br>(0 - 1)            | 0<br>(0 - 0)            |
| Coal workers pneumoconiosis                         | 1<br>(0 - 1)         | 0<br>(0 - 0)          | 0<br>(0 - 0)           | 0<br>(0 - 0)            | 0<br>(0 - 0)            | 0<br>(0 - 0)            |
| Other pneumoconiosis                                | 1<br>(1 - 2)         | 0<br>(0 - 0)          | 0<br>(0 - 0)           | 0<br>(0 - 0)            | 0<br>(0 - 1)            | 1<br>(0 - 1)            |
| Asthma                                              | 17<br>(13 - 21)      | 0<br>(0 - 0)          | 0<br>(0 - 0)           | 4<br>(3 - 5)            | 6<br>(4 - 8)            | 7<br>(5 - 9)            |
| Interstitial lung disease and pulmonary sarcoidosis | 6<br>(4 - 9)         | 0<br>(0 - 0)          | 0<br>(0 - 0)           | 1<br>(1 - 1)            | 2<br>(2 - 3)            | 3<br>(2 - 4)            |
| Other chronic respiratory diseases                  | 2<br>(2 - 3)         | 0<br>(0 - 0)          | 0<br>(0 - 0)           | 1<br>(0 - 1)            | 1<br>(0 - 1)            | 1<br>(1 - 1)            |
| Cirrhosis                                           | 57<br>(44 - 72)      | 0<br>(0 - 0)          | 0<br>(0 - 0)           | 16<br>(11 - 21)         | 30<br>(22 - 38)         | 12<br>(9 - 14)          |
| Cirrhosis due to hepatitis B                        | 5<br>(2 - 8)         | 0<br>(0 - 0)          | 0<br>(0 - 0)           | 1<br>(1 - 2)            | 2<br>(1 - 4)            | 1<br>(0 - 2)            |
| Cirrhosis due to hepatitis C                        | 20<br>(13 - 28)      | 0<br>(0 - 0)          | 0<br>(0 - 0)           | 5<br>(3 - 7)            | 10<br>(7 - 15)          | 5<br>(3 - 6)            |
| Cirrhosis due to alcohol use                        | 23<br>(15 - 33)      | --                    | --                     | 5<br>(3 - 9)            | 13<br>(8 - 19)          | 5<br>(4 - 6)            |
| Cirrhosis due to other causes                       | 10<br>(6 - 14)       | 0<br>(0 - 0)          | 0<br>(0 - 0)           | 4<br>(3 - 6)            | 4<br>(3 - 7)            | 1<br>(1 - 2)            |
| Digestive diseases                                  | 62<br>(49 - 75)      | 0<br>(0 - 1)          | 0<br>(0 - 1)           | 11<br>(8 - 15)          | 21<br>(16 - 27)         | 30<br>(24 - 35)         |
| Peptic ulcer disease                                | 16<br>(12 - 21)      | 0<br>(0 - 0)          | 0<br>(0 - 0)           | 3<br>(2 - 4)            | 6<br>(4 - 8)            | 7<br>(5 - 10)           |
| Gastritis and duodenitis                            | 4<br>(3 - 6)         | 0<br>(0 - 0)          | 0<br>(0 - 0)           | 1<br>(0 - 1)            | 1<br>(1 - 2)            | 2<br>(1 - 3)            |
| Appendicitis                                        | 2<br>(2 - 4)         | 0<br>(0 - 0)          | 0<br>(0 - 0)           | 1<br>(0 - 1)            | 1<br>(1 - 1)            | 1<br>(1 - 1)            |
| Paralytic ileus and intestinal obstruction          | 8<br>(4 - 12)        | 0<br>(0 - 0)          | 0<br>(0 - 0)           | 1<br>(1 - 2)            | 3<br>(1 - 4)            | 5<br>(2 - 7)            |
| Inguinal, femoral, and abdominal hernia             | 3<br>(2 - 6)         | 0<br>(0 - 0)          | 0<br>(0 - 0)           | 0<br>(0 - 1)            | 1<br>(1 - 2)            | 2<br>(1 - 3)            |
| Inflammatory bowel disease                          | 6<br>(4 - 8)         | 0<br>(0 - 0)          | 0<br>(0 - 0)           | 1<br>(1 - 1)            | 1<br>(1 - 2)            | 3<br>(2 - 5)            |
| Vascular intestinal disorders                       | 3<br>(2 - 6)         | 0<br>(0 - 0)          | 0<br>(0 - 0)           | 0<br>(0 - 1)            | 1<br>(1 - 2)            | 2<br>(1 - 3)            |
| Gallbladder and biliary diseases                    | 4<br>(3 - 5)         | 0<br>(0 - 0)          | 0<br>(0 - 0)           | 1<br>(0 - 1)            | 2<br>(1 - 2)            | 2<br>(1 - 3)            |
| Pancreatitis                                        | 4<br>(3 - 6)         | 0<br>(0 - 0)          | 0<br>(0 - 0)           | 2<br>(1 - 2)            | 2<br>(1 - 2)            | 1<br>(1 - 1)            |
| Other digestive diseases                            | 10<br>(8 - 13)       | 0<br>(0 - 0)          | 0<br>(0 - 0)           | 2<br>(1 - 2)            | 3<br>(2 - 4)            | 5<br>(4 - 7)            |
| Neurological disorders                              | 115<br>(92 - 136)    | 0<br>(0 - 1)          | 0<br>(0 - 1)           | 8<br>(6 - 10)           | 15<br>(12 - 19)         | 91<br>(72 - 109)        |
| Alzheimer disease and other dementias               | 89<br>(69 - 107)     | --                    | --                     | 0<br>(0 - 0)            | 8<br>(5 - 11)           | 81<br>(63 - 97)         |
| Parkinson disease                                   | 9<br>(7 - 12)        | --                    | --                     | 0<br>(0 - 0)            | 2<br>(1 - 3)            | 7<br>(5 - 9)            |
| Epilepsy                                            | 10<br>(7 - 14)       | 0<br>(0 - 0)          | 0<br>(0 - 1)           | 6<br>(4 - 8)            | 3<br>(2 - 4)            | 2<br>(1 - 2)            |
| Multiple sclerosis                                  | 1<br>(0 - 1)         | --                    | --                     | 0<br>(0 - 0)            | 0<br>(0 - 0)            | 0<br>(0 - 0)            |
| Other neurological disorders                        | 6<br>(5 - 7)         | 0<br>(0 - 0)          | 0<br>(0 - 0)           | 2<br>(1 - 2)            | 3<br>(2 - 3)            | 1<br>(1 - 2)            |
| Mental and substance use disorders                  | 12<br>(8 - 16)       | 0<br>(0 - 0)          | 0<br>(0 - 0)           | 5<br>(3 - 7)            | 5<br>(3 - 7)            | 2<br>(2 - 3)            |
| Schizophrenia                                       | 1<br>(1 - 1)         | --                    | --                     | 0<br>(0 - 0)            | 0<br>(0 - 0)            | 0<br>(0 - 1)            |
| Alcohol use disorders                               | 7<br>(4 - 10)        | --                    | --                     | 2<br>(1 - 4)            | 4<br>(2 - 5)            | 1<br>(1 - 1)            |
| Drug use disorders                                  | 4<br>(3 - 5)         | 0<br>(0 - 0)          | --                     | 2<br>(1 - 3)            | 1<br>(1 - 1)            | 1<br>(1 - 1)            |
| Opioid use disorders                                | 1<br>(1 - 1)         | 0<br>(0 - 0)          | --                     | 1<br>(0 - 1)            | 0<br>(0 - 0)            | 0<br>(0 - 0)            |
| Cocaine use disorders                               | 0<br>(0 - 0)         | 0<br>(0 - 0)          | --                     | 0<br>(0 - 0)            | 0<br>(0 - 0)            | 0<br>(0 - 0)            |
| Amphetamine use disorders                           | 0<br>(0 - 0)         | 0<br>(0 - 0)          | --                     | 0<br>(0 - 0)            | 0<br>(0 - 0)            | 0<br>(0 - 0)            |
| Other drug use disorders                            | 2<br>(2 - 3)         | 0<br>(0 - 0)          | --                     | 1<br>(1 - 2)            | 1<br>(0 - 1)            | 0<br>(0 - 1)            |
| Eating disorders                                    | 0<br>(0 - 0)         | --                    | 0<br>(0 - 0)           | 0<br>(0 - 0)            | --                      | --                      |
| Anorexia nervosa                                    | 0<br>(0 - 0)         | --                    | 0<br>(0 - 0)           | 0<br>(0 - 0)            | --                      | --                      |
| Diabetes, urogenital, blood, and endocrine diseases | 394<br>(316 - 475)   | 2<br>(1 - 4)          | 1<br>(1 - 2)           | 45<br>(32 - 59)         | 147<br>(113 - 183)      | 200<br>(162 - 236)      |

Web Table 31- The Bahamas deaths with 95% UI by age, sex, and cause in 2013

| Cause                                               | Both Sexes, All Ages | Both Sexes, 0-4 Years | Both Sexes, 5-14 Years | Both Sexes, 15-49 Years | Both Sexes, 50-69 Years | Both Sexes, 70-80 Years |
|-----------------------------------------------------|----------------------|-----------------------|------------------------|-------------------------|-------------------------|-------------------------|
| Diabetes mellitus                                   | 235<br>(188 - 282)   | 0<br>(0 - 0)          | 0<br>(0 - 0)           | 16<br>(12 - 22)         | 92<br>(71 - 114)        | 127<br>(101 - 152)      |
| Acute glomerulonephritis                            | 0<br>(0 - 0)         | 0<br>(0 - 0)          | 0<br>(0 - 0)           | 0<br>(0 - 0)            | 0<br>(0 - 0)            | 0<br>(0 - 0)            |
| Chronic kidney disease                              | 104<br>(77 - 146)    | 0<br>(0 - 1)          | 0<br>(0 - 1)           | 16<br>(11 - 24)         | 38<br>(27 - 54)         | 50<br>(36 - 72)         |
| Chronic kidney disease due to diabetes mellitus     | 19<br>(10 - 31)      | 0<br>(0 - 0)          | 0<br>(0 - 0)           | 3<br>(1 - 5)            | 10<br>(5 - 16)          | 7<br>(3 - 11)           |
| Chronic kidney disease due to hypertension          | 54<br>(39 - 76)      | 0<br>(0 - 0)          | 0<br>(0 - 0)           | 8<br>(5 - 12)           | 18<br>(13 - 27)         | 28<br>(20 - 39)         |
| Chronic kidney disease due to glomerulonephritis    | 2<br>(2 - 3)         | 0<br>(0 - 0)          | 0<br>(0 - 0)           | 1<br>(1 - 1)            | 1<br>(0 - 1)            | 1<br>(1 - 1)            |
| Chronic kidney disease due to other causes          | 29<br>(17 - 50)      | 0<br>(0 - 0)          | 0<br>(0 - 0)           | 5<br>(3 - 9)            | 9<br>(5 - 16)           | 14<br>(8 - 27)          |
| Urinary diseases and male infertility               | 20<br>(14 - 25)      | 0<br>(0 - 0)          | 0<br>(0 - 0)           | 2<br>(1 - 3)            | 6<br>(4 - 7)            | 12<br>(8 - 16)          |
| Interstitial nephritis and urinary tract infections | 15<br>(10 - 19)      | 0<br>(0 - 0)          | 0<br>(0 - 0)           | 1<br>(1 - 2)            | 4<br>(2 - 5)            | 10<br>(6 - 12)          |
| Urolithiasis                                        | 1<br>(1 - 2)         | --                    | 0<br>(0 - 0)           | 0<br>(0 - 0)            | 0<br>(0 - 1)            | 0<br>(0 - 1)            |
| Other urinary diseases                              | 4<br>(3 - 6)         | 0<br>(0 - 0)          | 0<br>(0 - 0)           | 0<br>(0 - 1)            | 1<br>(1 - 2)            | 2<br>(1 - 3)            |
| Gynecological diseases                              | 0<br>(0 - 0)         | --                    | --                     | 0<br>(0 - 0)            | 0<br>(0 - 0)            | 0<br>(0 - 0)            |
| Uterine fibroids                                    | 0<br>(0 - 0)         | --                    | --                     | 0<br>(0 - 0)            | 0<br>(0 - 0)            | 0<br>(0 - 0)            |
| Polycystic ovarian syndrome                         | 0<br>(0 - 0)         | --                    | --                     | 0<br>(0 - 0)            | 0<br>(0 - 0)            | --                      |
| Endometriosis                                       | 0<br>(0 - 0)         | --                    | --                     | 0<br>(0 - 0)            | 0<br>(0 - 0)            | --                      |
| Genital prolapse                                    | 0<br>(0 - 0)         | --                    | --                     | 0<br>(0 - 0)            | 0<br>(0 - 0)            | 0<br>(0 - 0)            |
| Other gynecological diseases                        | 0<br>(0 - 0)         | --                    | --                     | 0<br>(0 - 0)            | 0<br>(0 - 0)            | 0<br>(0 - 0)            |
| Hemoglobinopathies and hemolytic anemias            | 6<br>(4 - 9)         | 0<br>(0 - 1)          | 0<br>(0 - 1)           | 3<br>(2 - 4)            | 2<br>(1 - 2)            | 1<br>(1 - 1)            |
| Thalassemias                                        | 0<br>(0 - 0)         | 0<br>(0 - 0)          | 0<br>(0 - 0)           | 0<br>(0 - 0)            | 0<br>(0 - 0)            | 0<br>(0 - 0)            |
| Sickle cell disorders                               | 5<br>(3 - 7)         | 0<br>(0 - 1)          | 0<br>(0 - 1)           | 3<br>(2 - 4)            | 1<br>(1 - 2)            | 0<br>(0 - 0)            |
| G6PD deficiency                                     | 0<br>(0 - 0)         | 0<br>(0 - 0)          | 0<br>(0 - 0)           | 0<br>(0 - 0)            | 0<br>(0 - 0)            | 0<br>(0 - 0)            |
| Other hemoglobinopathies and hemolytic anemias      | 1<br>(1 - 1)         | 0<br>(0 - 0)          | 0<br>(0 - 0)           | 0<br>(0 - 0)            | 0<br>(0 - 0)            | 1<br>(0 - 1)            |
| Endocrine, metabolic, blood, and immune disorders   | 28<br>(20 - 51)      | 1<br>(0 - 2)          | 0<br>(0 - 0)           | 7<br>(5 - 14)           | 10<br>(7 - 19)          | 10<br>(7 - 19)          |
| Musculoskeletal disorders                           | 13<br>(7 - 17)       | --                    | 0<br>(0 - 0)           | 5<br>(3 - 7)            | 4<br>(2 - 5)            | 4<br>(2 - 6)            |
| Rheumatoid arthritis                                | 2<br>(1 - 2)         | --                    | 0<br>(0 - 0)           | 0<br>(0 - 0)            | 1<br>(0 - 1)            | 1<br>(1 - 2)            |
| Other musculoskeletal disorders                     | 11<br>(6 - 15)       | --                    | 0<br>(0 - 0)           | 5<br>(3 - 7)            | 3<br>(2 - 4)            | 3<br>(2 - 4)            |
| Other non-communicable diseases                     | 48<br>(31 - 68)      | 15<br>(7 - 31)        | 2<br>(1 - 3)           | 5<br>(4 - 7)            | 6<br>(4 - 8)            | 20<br>(9 - 28)          |
| Congenital anomalies                                | 23<br>(14 - 40)      | 14<br>(6 - 29)        | 2<br>(1 - 3)           | 4<br>(3 - 5)            | 2<br>(1 - 3)            | 2<br>(1 - 2)            |
| Neural tube defects                                 | 1<br>(0 - 3)         | 1<br>(0 - 3)          | 0<br>(0 - 0)           | 0<br>(0 - 0)            | 0<br>(0 - 0)            | 0<br>(0 - 0)            |
| Congenital heart anomalies                          | 11<br>(6 - 18)       | 6<br>(3 - 12)         | 1<br>(1 - 2)           | 2<br>(2 - 3)            | 1<br>(0 - 1)            | 1<br>(0 - 1)            |
| Cleft lip and cleft palate                          | 0<br>(0 - 0)         | 0<br>(0 - 0)          | --                     | --                      | --                      | --                      |
| Down syndrome                                       | 1<br>(1 - 2)         | 0<br>(0 - 1)          | 0<br>(0 - 0)           | 1<br>(0 - 1)            | 0<br>(0 - 0)            | 0<br>(0 - 0)            |
| Chromosomal unbalanced rearrangements               | 0<br>(0 - 1)         | 0<br>(0 - 1)          | 0<br>(0 - 0)           | 0<br>(0 - 0)            | 0<br>(0 - 0)            | 0<br>(0 - 0)            |
| Other congenital anomalies                          | 10<br>(5 - 18)       | 6<br>(2 - 14)         | 0<br>(0 - 1)           | 1<br>(1 - 2)            | 1<br>(1 - 2)            | 1<br>(1 - 1)            |
| Skin and subcutaneous diseases                      | 24<br>(10 - 33)      | 0<br>(0 - 0)          | 0<br>(0 - 0)           | 1<br>(1 - 2)            | 4<br>(2 - 5)            | 18<br>(8 - 26)          |
| Cellulitis                                          | 2<br>(1 - 2)         | 0<br>(0 - 0)          | 0<br>(0 - 0)           | 0<br>(0 - 0)            | 0<br>(0 - 1)            | 1<br>(0 - 2)            |
| Pyoderma                                            | 4<br>(2 - 6)         | 0<br>(0 - 0)          | 0<br>(0 - 0)           | 0<br>(0 - 1)            | 1<br>(0 - 2)            | 2<br>(1 - 4)            |
| Decubitus ulcer                                     | 17<br>(8 - 24)       | 0<br>(0 - 0)          | 0<br>(0 - 0)           | 1<br>(0 - 1)            | 2<br>(1 - 3)            | 14<br>(6 - 21)          |
| Other skin and subcutaneous diseases                | 1<br>(0 - 1)         | 0<br>(0 - 0)          | 0<br>(0 - 0)           | 0<br>(0 - 0)            | 0<br>(0 - 0)            | 0<br>(0 - 1)            |
| Sudden infant death syndrome                        | 1<br>(0 - 3)         | 1<br>(0 - 3)          | --                     | --                      | --                      | --                      |

Web Table 31- The Bahamas deaths with 95% UI by age, sex, and cause in 2013

| Cause                                           | Both Sexes, All Ages | Both Sexes, 0-4 Years | Both Sexes, 5-14 Years | Both Sexes, 15-49 Years | Both Sexes, 50-69 Years | Both Sexes, 70-80 Years |
|-------------------------------------------------|----------------------|-----------------------|------------------------|-------------------------|-------------------------|-------------------------|
| Injuries                                        | 247<br>(186 - 315)   | 5<br>(2 - 9)          | 6<br>(4 - 10)          | 141<br>(99 - 189)       | 55<br>(40 - 71)         | 40<br>(32 - 47)         |
| Transport injuries                              | 65<br>(47 - 82)      | 1<br>(0 - 2)          | 2<br>(1 - 4)           | 36<br>(25 - 49)         | 16<br>(11 - 21)         | 9<br>(7 - 11)           |
| Road injuries                                   | 60<br>(44 - 76)      | 1<br>(0 - 1)          | 2<br>(1 - 4)           | 34<br>(23 - 45)         | 15<br>(11 - 19)         | 8<br>(6 - 10)           |
| Pedestrian road injuries                        | 16<br>(11 - 21)      | 0<br>(0 - 1)          | 1<br>(1 - 1)           | 7<br>(4 - 10)           | 5<br>(3 - 7)            | 3<br>(2 - 4)            |
| Cyclist road injuries                           | 3<br>(2 - 5)         | 0<br>(0 - 0)          | 0<br>(0 - 0)           | 2<br>(1 - 2)            | 1<br>(1 - 1)            | 1<br>(0 - 1)            |
| Motorcyclist road injuries                      | 5<br>(3 - 7)         | 0<br>(0 - 0)          | 0<br>(0 - 0)           | 3<br>(2 - 5)            | 1<br>(0 - 1)            | 0<br>(0 - 1)            |
| Motor vehicle road injuries                     | 35<br>(26 - 46)      | 0<br>(0 - 1)          | 1<br>(1 - 2)           | 22<br>(15 - 29)         | 8<br>(6 - 11)           | 4<br>(3 - 5)            |
| Other road injuries                             | 1<br>(0 - 1)         | 0<br>(0 - 0)          | 0<br>(0 - 0)           | 0<br>(0 - 1)            | 0<br>(0 - 0)            | 0<br>(0 - 0)            |
| Other transport injuries                        | 5<br>(3 - 7)         | 0<br>(0 - 0)          | 0<br>(0 - 0)           | 3<br>(1 - 4)            | 1<br>(1 - 2)            | 1<br>(0 - 1)            |
| Unintentional injuries                          | 83<br>(64 - 103)     | 3<br>(1 - 6)          | 3<br>(2 - 4)           | 33<br>(23 - 44)         | 19<br>(14 - 25)         | 25<br>(20 - 31)         |
| Falls                                           | 17<br>(13 - 21)      | 0<br>(0 - 0)          | 0<br>(0 - 0)           | 4<br>(3 - 6)            | 4<br>(3 - 5)            | 9<br>(6 - 12)           |
| Drowning                                        | 19<br>(13 - 27)      | 1<br>(0 - 1)          | 1<br>(1 - 2)           | 12<br>(7 - 17)          | 4<br>(3 - 6)            | 1<br>(1 - 2)            |
| Fire, heat, and hot substances                  | 8<br>(6 - 11)        | 0<br>(0 - 1)          | 0<br>(0 - 1)           | 2<br>(2 - 3)            | 2<br>(1 - 3)            | 3<br>(2 - 5)            |
| Poisonings                                      | 2<br>(1 - 2)         | 0<br>(0 - 0)          | 0<br>(0 - 0)           | 1<br>(1 - 1)            | 0<br>(0 - 1)            | 0<br>(0 - 0)            |
| Exposure to mechanical forces                   | 11<br>(8 - 14)       | 0<br>(0 - 0)          | 0<br>(0 - 1)           | 7<br>(5 - 10)           | 2<br>(2 - 3)            | 1<br>(1 - 1)            |
| Unintentional firearm injuries                  | 6<br>(4 - 8)         | 0<br>(0 - 0)          | 0<br>(0 - 0)           | 4<br>(3 - 6)            | 1<br>(1 - 2)            | 0<br>(0 - 0)            |
| Unintentional suffocation                       | 1<br>(1 - 1)         | 0<br>(0 - 0)          | 0<br>(0 - 0)           | 0<br>(0 - 1)            | 0<br>(0 - 0)            | 0<br>(0 - 0)            |
| Other exposure to mechanical forces             | 4<br>(3 - 5)         | 0<br>(0 - 0)          | 0<br>(0 - 0)           | 2<br>(2 - 4)            | 1<br>(1 - 1)            | 0<br>(0 - 0)            |
| Adverse effects of medical treatment            | 11<br>(7 - 14)       | 0<br>(0 - 1)          | 0<br>(0 - 0)           | 2<br>(1 - 3)            | 3<br>(2 - 4)            | 5<br>(3 - 7)            |
| Animal contact                                  | 2<br>(1 - 3)         | 0<br>(0 - 0)          | 0<br>(0 - 0)           | 0<br>(0 - 1)            | 1<br>(0 - 1)            | 1<br>(0 - 1)            |
| Venomous animal contact                         | 1<br>(1 - 2)         | 0<br>(0 - 0)          | 0<br>(0 - 0)           | 0<br>(0 - 1)            | 0<br>(0 - 1)            | 0<br>(0 - 0)            |
| Non-venomous animal contact                     | 1<br>(0 - 1)         | 0<br>(0 - 0)          | 0<br>(0 - 0)           | 0<br>(0 - 0)            | 0<br>(0 - 0)            | 0<br>(0 - 1)            |
| Foreign body                                    | 12<br>(8 - 16)       | 1<br>(1 - 3)          | 0<br>(0 - 0)           | 3<br>(2 - 4)            | 3<br>(1 - 4)            | 5<br>(3 - 7)            |
| Pulmonary aspiration and foreign body in airway | 11<br>(7 - 16)       | 1<br>(1 - 3)          | 0<br>(0 - 0)           | 3<br>(2 - 4)            | 3<br>(1 - 4)            | 5<br>(3 - 7)            |
| Foreign body in other body part                 | 0<br>(0 - 0)         | 0<br>(0 - 0)          | 0<br>(0 - 0)           | 0<br>(0 - 0)            | 0<br>(0 - 0)            | 0<br>(0 - 0)            |
| Other unintentional injuries                    | 3<br>(2 - 4)         | 0<br>(0 - 0)          | 0<br>(0 - 0)           | 1<br>(1 - 2)            | 1<br>(0 - 1)            | 1<br>(0 - 1)            |
| Self-harm and interpersonal violence            | 99<br>(68 - 136)     | 1<br>(0 - 2)          | 1<br>(1 - 2)           | 72<br>(48 - 102)        | 19<br>(13 - 27)         | 5<br>(4 - 7)            |
| Self-harm                                       | 30<br>(22 - 43)      | -                     | 0<br>(0 - 1)           | 18<br>(12 - 27)         | 9<br>(6 - 12)           | 3<br>(2 - 4)            |
| Interpersonal violence                          | 68<br>(40 - 98)      | 1<br>(0 - 2)          | 1<br>(0 - 1)           | 54<br>(31 - 79)         | 10<br>(6 - 16)          | 2<br>(1 - 3)            |
| Assault by firearm                              | 39<br>(21 - 59)      | 0<br>(0 - 0)          | 0<br>(0 - 1)           | 34<br>(19 - 52)         | 4<br>(2 - 7)            | 0<br>(0 - 1)            |
| Assault by sharp object                         | 17<br>(9 - 26)       | 0<br>(0 - 0)          | 0<br>(0 - 0)           | 13<br>(7 - 22)          | 3<br>(1 - 5)            | 1<br>(0 - 1)            |
| Assault by other means                          | 12<br>(7 - 19)       | 0<br>(0 - 1)          | 0<br>(0 - 1)           | 7<br>(4 - 11)           | 3<br>(2 - 6)            | 1<br>(1 - 2)            |

Web Table 31- The Bahamas deaths with 95% UI by age, sex, and cause in 2013

| Cause                                                             | Males, All Ages          | Males, 0-4 Years | Males, 5-14 Years | Males, 15-49 Years | Males, 50-69 Years | Males, 70-80 Years |
|-------------------------------------------------------------------|--------------------------|------------------|-------------------|--------------------|--------------------|--------------------|
| All causes                                                        | 1,509<br>(1,176 - 1,874) | 53<br>(24 - 106) | 10<br>(6 - 16)    | 330<br>(236 - 441) | 541<br>(386 - 707) | 575<br>(462 - 666) |
| Communicable, maternal, neonatal, and nutritional diseases        | 195<br>(159 - 242)       | 39<br>(17 - 78)  | 2<br>(1 - 3)      | 66<br>(52 - 83)    | 45<br>(35 - 57)    | 42<br>(32 - 54)    |
| HIV/AIDS and tuberculosis                                         | 78<br>(58 - 100)         | 0<br>(0 - 0)     | 0<br>(0 - 0)      | 50<br>(35 - 65)    | 24<br>(17 - 33)    | 4<br>(3 - 6)       |
| Tuberculosis                                                      | 9<br>(6 - 12)            | 0<br>(0 - 0)     | 0<br>(0 - 0)      | 3<br>(2 - 4)       | 4<br>(2 - 5)       | 2<br>(1 - 3)       |
| HIV/AIDS                                                          | 70<br>(50 - 92)          | 0<br>(0 - 0)     | 0<br>(0 - 0)      | 47<br>(33 - 63)    | 20<br>(14 - 29)    | 2<br>(1 - 3)       |
| HIV/AIDS resulting in mycobacterial infection                     | 4<br>(3 - 6)             | 0<br>(0 - 0)     | 0<br>(0 - 0)      | 3<br>(2 - 4)       | 1<br>(1 - 2)       | 0<br>(0 - 0)       |
| HIV/AIDS resulting in other diseases                              | 65<br>(46 - 86)          | 0<br>(0 - 0)     | 0<br>(0 - 0)      | 44<br>(31 - 59)    | 19<br>(13 - 27)    | 2<br>(1 - 3)       |
| Diarrhea, lower respiratory, and other common infectious diseases | 64<br>(48 - 82)          | 5<br>(2 - 11)    | 1<br>(1 - 2)      | 11<br>(7 - 16)     | 16<br>(10 - 23)    | 30<br>(21 - 40)    |
| Diarrheal diseases                                                | 6<br>(4 - 8)             | 1<br>(1 - 3)     | 0<br>(0 - 0)      | 1<br>(1 - 1)       | 1<br>(1 - 2)       | 2<br>(1 - 3)       |
| Intestinal infectious diseases                                    | 1<br>(0 - 3)             | 0<br>(0 - 1)     | 0<br>(0 - 1)      | 0<br>(0 - 1)       | 0<br>(0 - 0)       | 0<br>(0 - 0)       |
| Typhoid fever                                                     | 1<br>(0 - 2)             | 0<br>(0 - 1)     | 0<br>(0 - 1)      | 0<br>(0 - 1)       | 0<br>(0 - 0)       | 0<br>(0 - 0)       |
| Paratyphoid fever                                                 | 0<br>(0 - 1)             | 0<br>(0 - 0)     | 0<br>(0 - 0)      | 0<br>(0 - 0)       | 0<br>(0 - 0)       | 0<br>(0 - 0)       |
| Other intestinal infectious diseases                              | 0<br>(0 - 0)             | 0<br>(0 - 0)     | 0<br>(0 - 0)      | 0<br>(0 - 0)       | 0<br>(0 - 0)       | 0<br>(0 - 0)       |
| Lower respiratory infections                                      | 52<br>(38 - 67)          | 3<br>(1 - 7)     | 1<br>(0 - 1)      | 8<br>(5 - 12)      | 13<br>(8 - 19)     | 27<br>(19 - 37)    |
| Upper respiratory infections                                      | 0<br>(0 - 0)             | 0<br>(0 - 0)     | 0<br>(0 - 0)      | 0<br>(0 - 0)       | 0<br>(0 - 0)       | 0<br>(0 - 0)       |
| Otitis media                                                      | 0<br>(0 - 0)             | 0<br>(0 - 0)     | 0<br>(0 - 0)      | 0<br>(0 - 0)       | 0<br>(0 - 0)       | 0<br>(0 - 0)       |
| Meningitis                                                        | 3<br>(2 - 4)             | 0<br>(0 - 1)     | 0<br>(0 - 0)      | 1<br>(1 - 2)       | 1<br>(1 - 1)       | 1<br>(0 - 1)       |
| Pneumococcal meningitis                                           | 1<br>(1 - 1)             | 0<br>(0 - 0)     | 0<br>(0 - 0)      | 0<br>(0 - 1)       | 0<br>(0 - 0)       | 0<br>(0 - 0)       |
| H influenzae type B meningitis                                    | 0<br>(0 - 1)             | 0<br>(0 - 0)     | 0<br>(0 - 0)      | 0<br>(0 - 0)       | 0<br>(0 - 0)       | 0<br>(0 - 0)       |
| Meningococcal meningitis                                          | 0<br>(0 - 1)             | 0<br>(0 - 0)     | 0<br>(0 - 0)      | 0<br>(0 - 0)       | 0<br>(0 - 0)       | 0<br>(0 - 0)       |
| Other meningitis                                                  | 1<br>(1 - 2)             | 0<br>(0 - 0)     | 0<br>(0 - 0)      | 0<br>(0 - 1)       | 0<br>(0 - 1)       | 0<br>(0 - 0)       |
| Encephalitis                                                      | 2<br>(1 - 3)             | 0<br>(0 - 1)     | 0<br>(0 - 0)      | 1<br>(1 - 2)       | 0<br>(0 - 1)       | 0<br>(0 - 0)       |
| Diphtheria                                                        | 0<br>(0 - 0)             | 0<br>(0 - 0)     | 0<br>(0 - 0)      | 0<br>(0 - 0)       | 0<br>(0 - 0)       | --<br>(0 - 0)      |
| Whooping cough                                                    | 0<br>(0 - 0)             | 0<br>(0 - 0)     | 0<br>(0 - 0)      | 0<br>(0 - 0)       | 0<br>(0 - 0)       | --<br>(0 - 0)      |
| Tetanus                                                           | 0<br>(0 - 0)             | 0<br>(0 - 0)     | 0<br>(0 - 0)      | 0<br>(0 - 0)       | 0<br>(0 - 0)       | 0<br>(0 - 0)       |
| Measles                                                           | 0<br>(0 - 0)             | 0<br>(0 - 0)     | 0<br>(0 - 0)      | 0<br>(0 - 0)       | 0<br>(0 - 0)       | --<br>(0 - 0)      |
| Varicella and herpes zoster                                       | 0<br>(0 - 0)             | 0<br>(0 - 0)     | 0<br>(0 - 0)      | 0<br>(0 - 0)       | 0<br>(0 - 0)       | 0<br>(0 - 0)       |
| Neglected tropical diseases and malaria                           | 1<br>(1 - 2)             | 0<br>(0 - 0)     | 0<br>(0 - 0)      | 1<br>(0 - 1)       | 0<br>(0 - 0)       | 0<br>(0 - 0)       |
| Leishmaniasis                                                     | 0<br>(0 - 0)             | 0<br>(0 - 0)     | 0<br>(0 - 0)      | 0<br>(0 - 0)       | 0<br>(0 - 0)       | 0<br>(0 - 0)       |
| Visceral leishmaniasis                                            | 0<br>(0 - 0)             | 0<br>(0 - 0)     | 0<br>(0 - 0)      | 0<br>(0 - 0)       | 0<br>(0 - 0)       | 0<br>(0 - 0)       |
| Cysticercosis                                                     | 0<br>(0 - 0)             | 0<br>(0 - 0)     | 0<br>(0 - 0)      | 0<br>(0 - 0)       | 0<br>(0 - 0)       | 0<br>(0 - 0)       |
| Cystic echinococcosis                                             | 0<br>(0 - 0)             | 0<br>(0 - 0)     | 0<br>(0 - 0)      | 0<br>(0 - 0)       | 0<br>(0 - 0)       | 0<br>(0 - 0)       |
| Dengue                                                            | 1<br>(0 - 1)             | 0<br>(0 - 0)     | 0<br>(0 - 0)      | 0<br>(0 - 0)       | 0<br>(0 - 0)       | 0<br>(0 - 0)       |
| Rabies                                                            | 0<br>(0 - 0)             | 0<br>(0 - 0)     | 0<br>(0 - 0)      | 0<br>(0 - 0)       | 0<br>(0 - 0)       | 0<br>(0 - 0)       |
| Intestinal nematode infections                                    | 0<br>(0 - 0)             | 0<br>(0 - 0)     | 0<br>(0 - 0)      | 0<br>(0 - 0)       | 0<br>(0 - 0)       | 0<br>(0 - 0)       |
| Ascariasis                                                        | 0<br>(0 - 0)             | 0<br>(0 - 0)     | 0<br>(0 - 0)      | 0<br>(0 - 0)       | 0<br>(0 - 0)       | 0<br>(0 - 0)       |
| Other neglected tropical diseases                                 | 1<br>(0 - 1)             | 0<br>(0 - 0)     | 0<br>(0 - 0)      | 0<br>(0 - 0)       | 0<br>(0 - 0)       | 0<br>(0 - 0)       |
| Maternal disorders                                                | --                       | --               | --                | --                 | --                 | --                 |
| Maternal hemorrhage                                               | --                       | --               | --                | --                 | --                 | --                 |
| Maternal sepsis and other maternal infections                     | --                       | --               | --                | --                 | --                 | --                 |



Web Table 31- The Bahamas deaths with 95% UI by age, sex, and cause in 2013

| Cause                                                            | Males, All Ages        | Males, 0-4 Years | Males, 5-14 Years | Males, 15-49 Years | Males, 50-69 Years | Males, 70-80 Years |
|------------------------------------------------------------------|------------------------|------------------|-------------------|--------------------|--------------------|--------------------|
| Maternal hypertensive disorders                                  | --                     | --               | --                | --                 | --                 | --                 |
| Maternal obstructed labor                                        | --                     | --               | --                | --                 | --                 | --                 |
| Maternal abortive outcome                                        | --                     | --               | --                | --                 | --                 | --                 |
| Indirect maternal deaths                                         | --                     | --               | --                | --                 | --                 | --                 |
| Late maternal deaths                                             | --                     | --               | --                | --                 | --                 | --                 |
| Maternal deaths aggravated by HIV/AIDS                           | --                     | --               | --                | --                 | --                 | --                 |
| Other maternal disorders                                         | --                     | --               | --                | --                 | --                 | --                 |
| Neonatal disorders                                               | 32<br>(14 - 63)        | 32<br>(14 - 63)  | --                | --                 | --                 | --                 |
| Neonatal preterm birth complications                             | 14<br>(5 - 30)         | 14<br>(5 - 30)   | --                | --                 | --                 | --                 |
| Neonatal encephalopathy due to birth asphyxia and trauma         | 8<br>(3 - 17)          | 8<br>(3 - 17)    | --                | --                 | --                 | --                 |
| Neonatal sepsis and other neonatal infections                    | 5<br>(1 - 12)          | 5<br>(1 - 12)    | --                | --                 | --                 | --                 |
| Hemolytic disease and other neonatal jaundice                    | 1<br>(0 - 2)           | 1<br>(0 - 2)     | --                | --                 | --                 | --                 |
| Other neonatal disorders                                         | 5<br>(2 - 10)          | 5<br>(2 - 10)    | --                | --                 | --                 | --                 |
| Nutritional deficiencies                                         | 14<br>(9 - 21)         | 1<br>(0 - 3)     | 0<br>(0 - 0)      | 2<br>(1 - 4)       | 4<br>(2 - 6)       | 7<br>(4 - 10)      |
| Protein-energy malnutrition                                      | 6<br>(4 - 11)          | 1<br>(0 - 2)     | 0<br>(0 - 0)      | 1<br>(0 - 2)       | 1<br>(1 - 3)       | 3<br>(1 - 5)       |
| Iodine deficiency                                                | 0<br>(0 - 0)           | 0<br>(0 - 0)     | 0<br>(0 - 0)      | 0<br>(0 - 0)       | 0<br>(0 - 0)       | 0<br>(0 - 0)       |
| Iron-deficiency anemia                                           | 7<br>(3 - 12)          | 0<br>(0 - 0)     | 0<br>(0 - 0)      | 1<br>(1 - 2)       | 2<br>(1 - 4)       | 4<br>(1 - 6)       |
| Other nutritional deficiencies                                   | 1<br>(0 - 2)           | 0<br>(0 - 0)     | 0<br>(0 - 0)      | 0<br>(0 - 0)       | 0<br>(0 - 0)       | 0<br>(0 - 1)       |
| Other communicable, maternal, neonatal, and nutritional diseases | 5<br>(3 - 7)           | 0<br>(0 - 1)     | 0<br>(0 - 0)      | 2<br>(1 - 3)       | 2<br>(1 - 3)       | 1<br>(1 - 1)       |
| Sexually transmitted diseases excluding HIV                      | 0<br>(0 - 1)           | 0<br>(0 - 1)     | 0<br>(0 - 0)      | 0<br>(0 - 0)       | 0<br>(0 - 0)       | 0<br>(0 - 0)       |
| Syphilis                                                         | 0<br>(0 - 1)           | 0<br>(0 - 1)     | 0<br>(0 - 0)      | 0<br>(0 - 0)       | 0<br>(0 - 0)       | 0<br>(0 - 0)       |
| Chlamydial infection                                             | --                     | --               | --                | --                 | --                 | --                 |
| Gonococcal infection                                             | 0<br>(0 - 0)           | --               | 0<br>(0 - 0)      | 0<br>(0 - 0)       | 0<br>(0 - 0)       | 0<br>(0 - 0)       |
| Other sexually transmitted diseases                              | 0<br>(0 - 0)           | --               | 0<br>(0 - 0)      | 0<br>(0 - 0)       | 0<br>(0 - 0)       | 0<br>(0 - 0)       |
| Hepatitis                                                        | 1<br>(0 - 1)           | 0<br>(0 - 0)     | 0<br>(0 - 0)      | 0<br>(0 - 0)       | 0<br>(0 - 0)       | 0<br>(0 - 0)       |
| Acute hepatitis A                                                | 0<br>(0 - 0)           | 0<br>(0 - 0)     | 0<br>(0 - 0)      | 0<br>(0 - 0)       | 0<br>(0 - 0)       | 0<br>(0 - 0)       |
| Acute hepatitis B                                                | 0<br>(0 - 1)           | 0<br>(0 - 0)     | 0<br>(0 - 0)      | 0<br>(0 - 0)       | 0<br>(0 - 0)       | 0<br>(0 - 0)       |
| Acute hepatitis C                                                | 0<br>(0 - 0)           | --               | 0<br>(0 - 0)      | 0<br>(0 - 0)       | 0<br>(0 - 0)       | 0<br>(0 - 0)       |
| Other infectious diseases                                        | 4<br>(2 - 6)           | 0<br>(0 - 0)     | 0<br>(0 - 0)      | 2<br>(1 - 3)       | 1<br>(1 - 2)       | 1<br>(0 - 1)       |
| Non-communicable diseases                                        | 1,127<br>(849 - 1,413) | 11<br>(5 - 23)   | 4<br>(2 - 7)      | 144<br>(95 - 205)  | 453<br>(317 - 601) | 514<br>(411 - 600) |
| Neoplasms                                                        | 262<br>(193 - 329)     | 1<br>(0 - 1)     | 1<br>(1 - 2)      | 30<br>(20 - 43)    | 107<br>(74 - 142)  | 123<br>(91 - 153)  |
| Esophageal cancer                                                | 9<br>(6 - 14)          | --               | --                | 1<br>(0 - 1)       | 5<br>(3 - 7)       | 3<br>(2 - 5)       |
| Stomach cancer                                                   | 18<br>(13 - 23)        | --               | --                | 2<br>(1 - 3)       | 8<br>(6 - 11)      | 8<br>(6 - 10)      |
| Liver cancer                                                     | 9<br>(6 - 12)          | --               | 0<br>(0 - 0)      | 2<br>(1 - 2)       | 5<br>(3 - 7)       | 3<br>(2 - 4)       |
| Liver cancer due to hepatitis B                                  | 3<br>(1 - 5)           | --               | 0<br>(0 - 0)      | 1<br>(0 - 1)       | 1<br>(1 - 3)       | 1<br>(0 - 1)       |
| Liver cancer due to hepatitis C                                  | 4<br>(2 - 6)           | --               | 0<br>(0 - 0)      | 1<br>(0 - 1)       | 2<br>(1 - 3)       | 2<br>(1 - 2)       |
| Liver cancer due to alcohol use                                  | 2<br>(1 - 3)           | --               | --                | 0<br>(0 - 0)       | 1<br>(0 - 2)       | 1<br>(0 - 1)       |
| Liver cancer due to other causes                                 | 1<br>(0 - 1)           | --               | 0<br>(0 - 0)      | 0<br>(0 - 0)       | 0<br>(0 - 0)       | 0<br>(0 - 0)       |
| Larynx cancer                                                    | 5<br>(3 - 6)           | --               | --                | 1<br>(0 - 1)       | 3<br>(2 - 4)       | 2<br>(1 - 2)       |
| Tracheal, bronchus and lung cancer                               | 38<br>(26 - 49)        | --               | --                | 4<br>(3 - 6)       | 21<br>(14 - 29)    | 12<br>(9 - 16)     |

Web Table 31- The Bahamas deaths with 95% UI by age, sex, and cause in 2013

| Cause                                         | Males, All Ages    | Males, 0-4 Years | Males, 5-14 Years | Males, 15-49 Years | Males, 50-69 Years | Males, 70-80 Years |
|-----------------------------------------------|--------------------|------------------|-------------------|--------------------|--------------------|--------------------|
| Breast cancer                                 | 1<br>(1 - 2)       | --               | --                | 0<br>(0 - 0)       | 1<br>(0 - 1)       | 0<br>(0 - 1)       |
| Cervical cancer                               | --                 | --               | --                | --                 | --                 | --                 |
| Uterine cancer                                | --                 | --               | --                | --                 | --                 | --                 |
| Prostate cancer                               | 84<br>(51 - 115)   | --               | --                | 1<br>(0 - 1)       | 21<br>(12 - 32)    | 62<br>(37 - 86)    |
| Colon and rectum cancer                       | 25<br>(18 - 32)    | --               | --                | 3<br>(2 - 4)       | 11<br>(8 - 16)     | 11<br>(8 - 14)     |
| Lip and oral cavity cancer                    | 5<br>(3 - 6)       | --               | --                | 1<br>(0 - 1)       | 2<br>(2 - 3)       | 1<br>(1 - 2)       |
| Nasopharynx cancer                            | 1<br>(1 - 2)       | --               | 0<br>(0 - 0)      | 0<br>(0 - 1)       | 1<br>(0 - 1)       | 0<br>(0 - 0)       |
| Other pharynx cancer                          | 3<br>(2 - 4)       | --               | --                | 0<br>(0 - 1)       | 2<br>(1 - 2)       | 1<br>(0 - 1)       |
| Gallbladder and biliary tract cancer          | 2<br>(1 - 5)       | --               | --                | 0<br>(0 - 1)       | 1<br>(1 - 2)       | 1<br>(1 - 2)       |
| Pancreatic cancer                             | 10<br>(7 - 13)     | --               | --                | 1<br>(1 - 2)       | 5<br>(3 - 7)       | 4<br>(3 - 5)       |
| Malignant skin melanoma                       | 1<br>(1 - 3)       | --               | --                | 0<br>(0 - 1)       | 1<br>(0 - 1)       | 0<br>(0 - 1)       |
| Non-melanoma skin cancer                      | 1<br>(1 - 2)       | --               | --                | 0<br>(0 - 0)       | 0<br>(0 - 1)       | 0<br>(0 - 1)       |
| Ovarian cancer                                | --                 | --               | --                | --                 | --                 | --                 |
| Testicular cancer                             | 0<br>(0 - 1)       | --               | --                | 0<br>(0 - 0)       | 0<br>(0 - 0)       | 0<br>(0 - 0)       |
| Kidney cancer                                 | 4<br>(3 - 6)       | 0<br>(0 - 0)     | 0<br>(0 - 0)      | 1<br>(0 - 1)       | 2<br>(2 - 3)       | 1<br>(1 - 2)       |
| Bladder cancer                                | 4<br>(3 - 5)       | --               | --                | 0<br>(0 - 0)       | 1<br>(1 - 2)       | 2<br>(2 - 3)       |
| Brain and nervous system cancer               | 3<br>(1 - 5)       | 0<br>(0 - 0)     | 0<br>(0 - 0)      | 1<br>(0 - 2)       | 1<br>(1 - 2)       | 1<br>(0 - 1)       |
| Thyroid cancer                                | 1<br>(0 - 1)       | --               | 0<br>(0 - 0)      | 0<br>(0 - 0)       | 0<br>(0 - 1)       | 0<br>(0 - 0)       |
| Mesothelioma                                  | 1<br>(1 - 1)       | --               | --                | 0<br>(0 - 0)       | 0<br>(0 - 1)       | 0<br>(0 - 1)       |
| Hodgkin lymphoma                              | 1<br>(0 - 1)       | 0<br>(0 - 0)     | 0<br>(0 - 0)      | 0<br>(0 - 1)       | 0<br>(0 - 0)       | 0<br>(0 - 0)       |
| Non-Hodgkin lymphoma                          | 11<br>(8 - 16)     | 0<br>(0 - 0)     | 0<br>(0 - 0)      | 4<br>(2 - 6)       | 5<br>(3 - 7)       | 3<br>(2 - 4)       |
| Multiple myeloma                              | 4<br>(3 - 6)       | --               | --                | 1<br>(0 - 1)       | 2<br>(1 - 4)       | 1<br>(1 - 2)       |
| Leukemia                                      | 7<br>(5 - 10)      | 0<br>(0 - 0)     | 0<br>(0 - 1)      | 3<br>(2 - 4)       | 2<br>(1 - 3)       | 2<br>(1 - 2)       |
| Other neoplasms                               | 13<br>(9 - 18)     | 0<br>(0 - 1)     | 0<br>(0 - 1)      | 4<br>(3 - 6)       | 5<br>(3 - 7)       | 3<br>(2 - 4)       |
| Cardiovascular diseases                       | 480<br>(356 - 606) | 1<br>(0 - 1)     | 1<br>(0 - 1)      | 50<br>(33 - 74)    | 202<br>(142 - 269) | 226<br>(176 - 268) |
| Rheumatic heart disease                       | 2<br>(1 - 3)       | 0<br>(0 - 0)     | 0<br>(0 - 0)      | 1<br>(1 - 1)       | 1<br>(0 - 1)       | 1<br>(0 - 1)       |
| Ischemic heart disease                        | 229<br>(166 - 301) | 0<br>(0 - 0)     | 0<br>(0 - 0)      | 24<br>(15 - 37)    | 104<br>(72 - 142)  | 101<br>(77 - 126)  |
| Cerebrovascular disease                       | 142<br>(102 - 186) | 0<br>(0 - 0)     | 0<br>(0 - 0)      | 11<br>(7 - 17)     | 56<br>(37 - 77)    | 74<br>(54 - 94)    |
| Ischemic stroke                               | 85<br>(60 - 111)   | 0<br>(0 - 0)     | 0<br>(0 - 0)      | 3<br>(2 - 5)       | 30<br>(19 - 42)    | 52<br>(37 - 67)    |
| Hemorrhagic stroke                            | 57<br>(37 - 79)    | 0<br>(0 - 0)     | 0<br>(0 - 0)      | 8<br>(5 - 12)      | 26<br>(16 - 37)    | 22<br>(14 - 31)    |
| Hypertensive heart disease                    | 49<br>(32 - 70)    | 0<br>(0 - 0)     | 0<br>(0 - 0)      | 4<br>(2 - 7)       | 19<br>(11 - 28)    | 26<br>(17 - 38)    |
| Cardiomyopathy and myocarditis                | 19<br>(12 - 26)    | 0<br>(0 - 0)     | 0<br>(0 - 0)      | 4<br>(3 - 7)       | 9<br>(5 - 13)      | 6<br>(4 - 8)       |
| Atrial fibrillation and flutter               | 6<br>(4 - 9)       | --               | --                | 0<br>(0 - 0)       | 2<br>(1 - 3)       | 4<br>(2 - 6)       |
| Aortic aneurysm                               | 8<br>(6 - 11)      | --               | --                | 1<br>(0 - 1)       | 4<br>(3 - 5)       | 4<br>(3 - 5)       |
| Peripheral vascular disease                   | 3<br>(2 - 4)       | --               | --                | 0<br>(0 - 0)       | 1<br>(0 - 1)       | 2<br>(2 - 4)       |
| Endocarditis                                  | 2<br>(1 - 3)       | 0<br>(0 - 0)     | 0<br>(0 - 0)      | 1<br>(0 - 1)       | 1<br>(0 - 1)       | 1<br>(0 - 1)       |
| Other cardiovascular and circulatory diseases | 18<br>(13 - 25)    | 0<br>(0 - 0)     | 0<br>(0 - 0)      | 4<br>(2 - 6)       | 7<br>(4 - 11)      | 7<br>(5 - 10)      |
| Chronic respiratory diseases                  | 49<br>(35 - 66)    | 0<br>(0 - 1)     | 0<br>(0 - 0)      | 6<br>(4 - 9)       | 17<br>(11 - 24)    | 26<br>(19 - 35)    |
| Chronic obstructive pulmonary disease         | 33<br>(24 - 45)    | 0<br>(0 - 0)     | 0<br>(0 - 0)      | 2<br>(1 - 4)       | 11<br>(7 - 15)     | 20<br>(15 - 27)    |
| Pneumoconiosis                                | 2<br>(1 - 3)       | 0<br>(0 - 0)     | 0<br>(0 - 0)      | 0<br>(0 - 0)       | 1<br>(1 - 2)       | 1<br>(0 - 1)       |

Web Table 31- The Bahamas deaths with 95% UI by age, sex, and cause in 2013

| Cause                                               | Males, All Ages    | Males, 0-4 Years | Males, 5-14 Years | Males, 15-49 Years | Males, 50-69 Years | Males, 70-80 Years |
|-----------------------------------------------------|--------------------|------------------|-------------------|--------------------|--------------------|--------------------|
| Silicosis                                           | 0<br>(0 - 0)       | 0<br>(0 - 0)     | 0<br>(0 - 0)      | 0<br>(0 - 0)       | 0<br>(0 - 0)       | 0<br>(0 - 0)       |
| Asbestosis                                          | 0<br>(0 - 1)       | 0<br>(0 - 0)     | 0<br>(0 - 0)      | 0<br>(0 - 0)       | 0<br>(0 - 1)       | 0<br>(0 - 0)       |
| Coal workers pneumoconiosis                         | 1<br>(0 - 1)       | 0<br>(0 - 0)     | 0<br>(0 - 0)      | 0<br>(0 - 0)       | 0<br>(0 - 0)       | 0<br>(0 - 0)       |
| Other pneumoconiosis                                | 1<br>(1 - 2)       | 0<br>(0 - 0)     | 0<br>(0 - 0)      | 0<br>(0 - 0)       | 0<br>(0 - 1)       | 1<br>(0 - 1)       |
| Asthma                                              | 9<br>(6 - 13)      | 0<br>(0 - 0)     | 0<br>(0 - 0)      | 2<br>(1 - 3)       | 3<br>(2 - 5)       | 3<br>(2 - 5)       |
| Interstitial lung disease and pulmonary sarcoidosis | 4<br>(2 - 6)       | 0<br>(0 - 0)     | 0<br>(0 - 0)      | 0<br>(0 - 1)       | 1<br>(1 - 2)       | 2<br>(1 - 3)       |
| Other chronic respiratory diseases                  | 1<br>(1 - 2)       | 0<br>(0 - 0)     | 0<br>(0 - 0)      | 0<br>(0 - 1)       | 0<br>(0 - 1)       | 0<br>(0 - 1)       |
| Cirrhosis                                           | 39<br>(27 - 54)    | 0<br>(0 - 0)     | 0<br>(0 - 0)      | 11<br>(7 - 17)     | 21<br>(15 - 30)    | 6<br>(5 - 8)       |
| Cirrhosis due to hepatitis B                        | 3<br>(1 - 6)       | 0<br>(0 - 0)     | 0<br>(0 - 0)      | 1<br>(0 - 2)       | 2<br>(1 - 3)       | 0<br>(0 - 1)       |
| Cirrhosis due to hepatitis C                        | 11<br>(5 - 18)     | 0<br>(0 - 0)     | 0<br>(0 - 0)      | 3<br>(1 - 5)       | 6<br>(3 - 10)      | 2<br>(1 - 3)       |
| Cirrhosis due to alcohol use                        | 20<br>(12 - 29)    | --               | --                | 5<br>(3 - 8)       | 11<br>(7 - 17)     | 3<br>(2 - 5)       |
| Cirrhosis due to other causes                       | 6<br>(3 - 10)      | 0<br>(0 - 0)     | 0<br>(0 - 0)      | 3<br>(2 - 5)       | 3<br>(1 - 5)       | 0<br>(0 - 1)       |
| Digestive diseases                                  | 33<br>(23 - 44)    | 0<br>(0 - 0)     | 0<br>(0 - 0)      | 8<br>(5 - 11)      | 13<br>(8 - 18)     | 12<br>(9 - 16)     |
| Peptic ulcer disease                                | 9<br>(6 - 14)      | 0<br>(0 - 0)     | 0<br>(0 - 0)      | 2<br>(1 - 3)       | 4<br>(2 - 6)       | 3<br>(2 - 5)       |
| Gastritis and duodenitis                            | 3<br>(1 - 4)       | 0<br>(0 - 0)     | 0<br>(0 - 0)      | 1<br>(0 - 1)       | 1<br>(0 - 2)       | 1<br>(0 - 2)       |
| Appendicitis                                        | 1<br>(1 - 2)       | 0<br>(0 - 0)     | 0<br>(0 - 0)      | 0<br>(0 - 1)       | 0<br>(0 - 1)       | 0<br>(0 - 1)       |
| Paralytic ileus and intestinal obstruction          | 4<br>(2 - 6)       | 0<br>(0 - 0)     | 0<br>(0 - 0)      | 1<br>(0 - 1)       | 1<br>(1 - 2)       | 2<br>(1 - 3)       |
| Inguinal, femoral, and abdominal hernia             | 2<br>(1 - 4)       | 0<br>(0 - 0)     | 0<br>(0 - 0)      | 0<br>(0 - 1)       | 1<br>(0 - 1)       | 1<br>(0 - 2)       |
| Inflammatory bowel disease                          | 3<br>(2 - 4)       | 0<br>(0 - 0)     | 0<br>(0 - 0)      | 1<br>(0 - 1)       | 1<br>(0 - 1)       | 1<br>(1 - 2)       |
| Vascular intestinal disorders                       | 2<br>(1 - 4)       | 0<br>(0 - 0)     | 0<br>(0 - 0)      | 0<br>(0 - 0)       | 1<br>(0 - 2)       | 1<br>(0 - 2)       |
| Gallbladder and biliary diseases                    | 2<br>(1 - 3)       | 0<br>(0 - 0)     | 0<br>(0 - 0)      | 0<br>(0 - 0)       | 1<br>(0 - 1)       | 1<br>(0 - 1)       |
| Pancreatitis                                        | 3<br>(2 - 4)       | 0<br>(0 - 0)     | 0<br>(0 - 0)      | 1<br>(1 - 2)       | 1<br>(1 - 2)       | 0<br>(0 - 0)       |
| Other digestive diseases                            | 4<br>(3 - 6)       | 0<br>(0 - 0)     | 0<br>(0 - 0)      | 1<br>(0 - 2)       | 2<br>(1 - 3)       | 2<br>(1 - 3)       |
| Neurological disorders                              | 56<br>(42 - 71)    | 0<br>(0 - 0)     | 0<br>(0 - 0)      | 5<br>(3 - 8)       | 9<br>(6 - 13)      | 41<br>(31 - 52)    |
| Alzheimer disease and other dementias               | 40<br>(30 - 53)    | --               | --                | 0<br>(0 - 0)       | 5<br>(3 - 7)       | 36<br>(26 - 47)    |
| Parkinson disease                                   | 5<br>(3 - 6)       | --               | --                | 0<br>(0 - 0)       | 1<br>(1 - 2)       | 3<br>(2 - 5)       |
| Epilepsy                                            | 7<br>(4 - 10)      | 0<br>(0 - 0)     | 0<br>(0 - 0)      | 4<br>(2 - 6)       | 2<br>(1 - 3)       | 1<br>(1 - 1)       |
| Multiple sclerosis                                  | 0<br>(0 - 1)       | --               | --                | 0<br>(0 - 0)       | 0<br>(0 - 0)       | 0<br>(0 - 0)       |
| Other neurological disorders                        | 3<br>(2 - 5)       | 0<br>(0 - 0)     | 0<br>(0 - 0)      | 1<br>(1 - 2)       | 2<br>(1 - 2)       | 1<br>(0 - 1)       |
| Mental and substance use disorders                  | 10<br>(6 - 14)     | 0<br>(0 - 0)     | 0<br>(0 - 0)      | 4<br>(2 - 6)       | 4<br>(2 - 6)       | 1<br>(1 - 2)       |
| Schizophrenia                                       | 0<br>(0 - 1)       | --               | --                | 0<br>(0 - 0)       | 0<br>(0 - 0)       | 0<br>(0 - 0)       |
| Alcohol use disorders                               | 6<br>(3 - 9)       | --               | --                | 2<br>(1 - 3)       | 3<br>(2 - 5)       | 1<br>(0 - 1)       |
| Drug use disorders                                  | 3<br>(2 - 4)       | 0<br>(0 - 0)     | --                | 2<br>(1 - 3)       | 1<br>(0 - 1)       | 0<br>(0 - 1)       |
| Opioid use disorders                                | 1<br>(1 - 1)       | 0<br>(0 - 0)     | --                | 0<br>(0 - 1)       | 0<br>(0 - 0)       | 0<br>(0 - 0)       |
| Cocaine use disorders                               | 0<br>(0 - 0)       | 0<br>(0 - 0)     | --                | 0<br>(0 - 0)       | 0<br>(0 - 0)       | 0<br>(0 - 0)       |
| Amphetamine use disorders                           | 0<br>(0 - 0)       | 0<br>(0 - 0)     | --                | 0<br>(0 - 0)       | 0<br>(0 - 0)       | 0<br>(0 - 0)       |
| Other drug use disorders                            | 2<br>(1 - 3)       | 0<br>(0 - 0)     | --                | 1<br>(1 - 2)       | 1<br>(0 - 1)       | 0<br>(0 - 0)       |
| Eating disorders                                    | 0<br>(0 - 0)       | --               | 0<br>(0 - 0)      | 0<br>(0 - 0)       | --                 | --                 |
| Anorexia nervosa                                    | 0<br>(0 - 0)       | --               | 0<br>(0 - 0)      | 0<br>(0 - 0)       | --                 | --                 |
| Diabetes, urogenital, blood, and endocrine diseases | 174<br>(126 - 229) | 1<br>(0 - 2)     | 1<br>(0 - 1)      | 25<br>(16 - 37)    | 75<br>(51 - 101)   | 73<br>(55 - 92)    |

Web Table 31- The Bahamas deaths with 95% UI by age, sex, and cause in 2013

| Cause                                               | Males, All Ages  | Males, 0-4 Years | Males, 5-14 Years | Males, 15-49 Years | Males, 50-69 Years | Males, 70-80 Years |
|-----------------------------------------------------|------------------|------------------|-------------------|--------------------|--------------------|--------------------|
| Diabetes mellitus                                   | 96<br>(68 - 126) | 0<br>(0 - 0)     | 0<br>(0 - 0)      | 9<br>(6 - 13)      | 45<br>(30 - 62)    | 42<br>(30 - 54)    |
| Acute glomerulonephritis                            | 0<br>(0 - 0)     | 0<br>(0 - 0)     | 0<br>(0 - 0)      | 0<br>(0 - 0)       | 0<br>(0 - 0)       | 0<br>(0 - 0)       |
| Chronic kidney disease                              | 52<br>(35 - 77)  | 0<br>(0 - 0)     | 0<br>(0 - 0)      | 9<br>(5 - 14)      | 20<br>(13 - 31)    | 22<br>(15 - 32)    |
| Chronic kidney disease due to diabetes mellitus     | 9<br>(5 - 20)    | 0<br>(0 - 0)     | 0<br>(0 - 0)      | 2<br>(1 - 4)       | 5<br>(2 - 10)      | 3<br>(1 - 6)       |
| Chronic kidney disease due to hypertension          | 26<br>(17 - 38)  | 0<br>(0 - 0)     | 0<br>(0 - 0)      | 4<br>(2 - 7)       | 10<br>(6 - 16)     | 12<br>(8 - 17)     |
| Chronic kidney disease due to glomerulonephritis    | 2<br>(1 - 2)     | 0<br>(0 - 0)     | 0<br>(0 - 0)      | 1<br>(0 - 1)       | 0<br>(0 - 1)       | 0<br>(0 - 1)       |
| Chronic kidney disease due to other causes          | 15<br>(8 - 26)   | 0<br>(0 - 0)     | 0<br>(0 - 0)      | 3<br>(1 - 5)       | 5<br>(2 - 9)       | 7<br>(3 - 13)      |
| Urinary diseases and male infertility               | 11<br>(7 - 15)   | 0<br>(0 - 0)     | 0<br>(0 - 0)      | 1<br>(1 - 2)       | 3<br>(2 - 5)       | 6<br>(4 - 9)       |
| Interstitial nephritis and urinary tract infections | 7<br>(4 - 10)    | 0<br>(0 - 0)     | 0<br>(0 - 0)      | 1<br>(0 - 1)       | 2<br>(1 - 3)       | 5<br>(2 - 6)       |
| Urolithiasis                                        | 1<br>(0 - 1)     | --               | 0<br>(0 - 0)      | 0<br>(0 - 0)       | 0<br>(0 - 1)       | 0<br>(0 - 0)       |
| Other urinary diseases                              | 3<br>(2 - 5)     | 0<br>(0 - 0)     | 0<br>(0 - 0)      | 0<br>(0 - 1)       | 1<br>(1 - 2)       | 1<br>(1 - 3)       |
| Gynecological diseases                              | --               | --               | --                | --                 | --                 | --                 |
| Uterine fibroids                                    | --               | --               | --                | --                 | --                 | --                 |
| Polycystic ovarian syndrome                         | --               | --               | --                | --                 | --                 | --                 |
| Endometriosis                                       | --               | --               | --                | --                 | --                 | --                 |
| Genital prolapse                                    | --               | --               | --                | --                 | --                 | --                 |
| Other gynecological diseases                        | --               | --               | --                | --                 | --                 | --                 |
| Hemoglobinopathies and hemolytic anemias            | 3<br>(2 - 5)     | 0<br>(0 - 1)     | 0<br>(0 - 0)      | 2<br>(1 - 3)       | 1<br>(0 - 1)       | 0<br>(0 - 1)       |
| Thalassemias                                        | 0<br>(0 - 0)     | 0<br>(0 - 0)     | 0<br>(0 - 0)      | 0<br>(0 - 0)       | 0<br>(0 - 0)       | 0<br>(0 - 0)       |
| Sickle cell disorders                               | 3<br>(2 - 4)     | 0<br>(0 - 1)     | 0<br>(0 - 0)      | 2<br>(1 - 2)       | 1<br>(0 - 1)       | 0<br>(0 - 0)       |
| G6PD deficiency                                     | 0<br>(0 - 0)     | 0<br>(0 - 0)     | 0<br>(0 - 0)      | 0<br>(0 - 0)       | 0<br>(0 - 0)       | 0<br>(0 - 0)       |
| Other hemoglobinopathies and hemolytic anemias      | 0<br>(0 - 1)     | 0<br>(0 - 0)     | 0<br>(0 - 0)      | 0<br>(0 - 0)       | 0<br>(0 - 0)       | 0<br>(0 - 0)       |
| Endocrine, metabolic, blood, and immune disorders   | 13<br>(8 - 28)   | 0<br>(0 - 1)     | 0<br>(0 - 0)      | 4<br>(2 - 10)      | 5<br>(3 - 12)      | 3<br>(2 - 7)       |
| Musculoskeletal disorders                           | 4<br>(2 - 6)     | --               | 0<br>(0 - 0)      | 2<br>(1 - 2)       | 1<br>(1 - 2)       | 1<br>(1 - 1)       |
| Rheumatoid arthritis                                | 0<br>(0 - 1)     | --               | 0<br>(0 - 0)      | 0<br>(0 - 0)       | 0<br>(0 - 0)       | 0<br>(0 - 0)       |
| Other musculoskeletal disorders                     | 4<br>(2 - 5)     | --               | 0<br>(0 - 0)      | 2<br>(1 - 2)       | 1<br>(1 - 2)       | 1<br>(0 - 1)       |
| Other non-communicable diseases                     | 21<br>(14 - 31)  | 8<br>(4 - 18)    | 1<br>(0 - 2)      | 3<br>(2 - 5)       | 3<br>(2 - 5)       | 5<br>(3 - 7)       |
| Congenital anomalies                                | 13<br>(7 - 22)   | 8<br>(3 - 16)    | 1<br>(0 - 1)      | 2<br>(1 - 3)       | 1<br>(1 - 2)       | 1<br>(0 - 1)       |
| Neural tube defects                                 | 0<br>(0 - 1)     | 0<br>(0 - 1)     | 0<br>(0 - 0)      | 0<br>(0 - 0)       | 0<br>(0 - 0)       | 0<br>(0 - 0)       |
| Congenital heart anomalies                          | 6<br>(3 - 10)    | 3<br>(1 - 7)     | 0<br>(0 - 1)      | 1<br>(1 - 2)       | 0<br>(0 - 1)       | 0<br>(0 - 0)       |
| Cleft lip and cleft palate                          | 0<br>(0 - 0)     | 0<br>(0 - 0)     | --                | --                 | --                 | --                 |
| Down syndrome                                       | 1<br>(0 - 1)     | 0<br>(0 - 1)     | 0<br>(0 - 0)      | 0<br>(0 - 1)       | 0<br>(0 - 0)       | 0<br>(0 - 0)       |
| Chromosomal unbalanced rearrangements               | 0<br>(0 - 1)     | 0<br>(0 - 1)     | 0<br>(0 - 0)      | 0<br>(0 - 0)       | 0<br>(0 - 0)       | 0<br>(0 - 0)       |
| Other congenital anomalies                          | 6<br>(3 - 10)    | 4<br>(1 - 8)     | 0<br>(0 - 1)      | 1<br>(0 - 1)       | 1<br>(0 - 1)       | 0<br>(0 - 1)       |
| Skin and subcutaneous diseases                      | 7<br>(4 - 10)    | 0<br>(0 - 0)     | 0<br>(0 - 0)      | 1<br>(0 - 1)       | 2<br>(1 - 3)       | 4<br>(2 - 6)       |
| Cellulitis                                          | 1<br>(0 - 1)     | 0<br>(0 - 0)     | 0<br>(0 - 0)      | 0<br>(0 - 0)       | 0<br>(0 - 0)       | 0<br>(0 - 1)       |
| Pyoderma                                            | 2<br>(1 - 3)     | 0<br>(0 - 0)     | 0<br>(0 - 0)      | 0<br>(0 - 0)       | 1<br>(0 - 1)       | 1<br>(0 - 2)       |
| Decubitus ulcer                                     | 4<br>(2 - 6)     | 0<br>(0 - 0)     | 0<br>(0 - 0)      | 0<br>(0 - 1)       | 1<br>(1 - 2)       | 3<br>(1 - 4)       |
| Other skin and subcutaneous diseases                | 0<br>(0 - 1)     | 0<br>(0 - 0)     | 0<br>(0 - 0)      | 0<br>(0 - 0)       | 0<br>(0 - 0)       | 0<br>(0 - 0)       |
| Sudden infant death syndrome                        | 1<br>(0 - 2)     | 1<br>(0 - 2)     | --                | --                 | --                 | --                 |

Web Table 31- The Bahamas deaths with 95% UI by age, sex, and cause in 2013

| Cause                                           | Males, All Ages    | Males, 0-4 Years | Males, 5-14 Years | Males, 15-49 Years | Males, 50-69 Years | Males, 70-80 Years |
|-------------------------------------------------|--------------------|------------------|-------------------|--------------------|--------------------|--------------------|
| Injuries                                        | 187<br>(129 - 251) | 3<br>(1 - 6)     | 4<br>(3 - 6)      | 120<br>(79 - 167)  | 42<br>(28 - 58)    | 18<br>(13 - 22)    |
| Transport injuries                              | 50<br>(34 - 67)    | 0<br>(0 - 1)     | 2<br>(1 - 3)      | 31<br>(20 - 43)    | 12<br>(8 - 17)     | 5<br>(3 - 6)       |
| Road injuries                                   | 46<br>(32 - 62)    | 0<br>(0 - 1)     | 2<br>(1 - 2)      | 29<br>(18 - 40)    | 11<br>(7 - 16)     | 4<br>(3 - 6)       |
| Pedestrian road injuries                        | 12<br>(7 - 17)     | 0<br>(0 - 0)     | 1<br>(0 - 1)      | 5<br>(3 - 9)       | 4<br>(2 - 6)       | 2<br>(1 - 3)       |
| Cyclist road injuries                           | 3<br>(2 - 4)       | 0<br>(0 - 0)     | 0<br>(0 - 0)      | 2<br>(1 - 2)       | 1<br>(0 - 1)       | 0<br>(0 - 1)       |
| Motorcyclist road injuries                      | 4<br>(2 - 6)       | 0<br>(0 - 0)     | 0<br>(0 - 0)      | 3<br>(2 - 5)       | 1<br>(0 - 1)       | 0<br>(0 - 0)       |
| Motor vehicle road injuries                     | 27<br>(18 - 38)    | 0<br>(0 - 0)     | 1<br>(0 - 1)      | 18<br>(11 - 26)    | 6<br>(4 - 9)       | 2<br>(1 - 3)       |
| Other road injuries                             | 0<br>(0 - 1)       | 0<br>(0 - 0)     | 0<br>(0 - 0)      | 0<br>(0 - 0)       | 0<br>(0 - 0)       | 0<br>(0 - 0)       |
| Other transport injuries                        | 4<br>(2 - 5)       | 0<br>(0 - 0)     | 0<br>(0 - 0)      | 2<br>(1 - 3)       | 1<br>(0 - 1)       | 0<br>(0 - 1)       |
| Unintentional injuries                          | 55<br>(39 - 72)    | 2<br>(1 - 4)     | 2<br>(1 - 3)      | 27<br>(18 - 39)    | 14<br>(9 - 19)     | 9<br>(7 - 12)      |
| Falls                                           | 9<br>(6 - 12)      | 0<br>(0 - 0)     | 0<br>(0 - 0)      | 4<br>(2 - 5)       | 3<br>(2 - 4)       | 3<br>(2 - 4)       |
| Drowning                                        | 16<br>(10 - 25)    | 0<br>(0 - 1)     | 1<br>(0 - 2)      | 11<br>(6 - 16)     | 3<br>(2 - 5)       | 1<br>(1 - 1)       |
| Fire, heat, and hot substances                  | 4<br>(3 - 6)       | 0<br>(0 - 1)     | 0<br>(0 - 0)      | 1<br>(1 - 2)       | 1<br>(1 - 2)       | 1<br>(1 - 2)       |
| Poisonings                                      | 1<br>(1 - 2)       | 0<br>(0 - 0)     | 0<br>(0 - 0)      | 1<br>(0 - 1)       | 0<br>(0 - 0)       | 0<br>(0 - 0)       |
| Exposure to mechanical forces                   | 9<br>(6 - 13)      | 0<br>(0 - 0)     | 0<br>(0 - 0)      | 6<br>(4 - 9)       | 2<br>(1 - 3)       | 0<br>(0 - 1)       |
| Unintentional firearm injuries                  | 5<br>(3 - 8)       | 0<br>(0 - 0)     | 0<br>(0 - 0)      | 4<br>(2 - 6)       | 1<br>(1 - 2)       | 0<br>(0 - 0)       |
| Unintentional suffocation                       | 1<br>(0 - 1)       | 0<br>(0 - 0)     | 0<br>(0 - 0)      | 0<br>(0 - 1)       | 0<br>(0 - 0)       | 0<br>(0 - 0)       |
| Other exposure to mechanical forces             | 3<br>(2 - 5)       | 0<br>(0 - 0)     | 0<br>(0 - 0)      | 2<br>(1 - 3)       | 1<br>(0 - 1)       | 0<br>(0 - 0)       |
| Adverse effects of medical treatment            | 5<br>(3 - 7)       | 0<br>(0 - 0)     | 0<br>(0 - 0)      | 1<br>(1 - 2)       | 2<br>(1 - 2)       | 2<br>(1 - 2)       |
| Animal contact                                  | 1<br>(0 - 1)       | 0<br>(0 - 0)     | 0<br>(0 - 0)      | 0<br>(0 - 1)       | 0<br>(0 - 1)       | 0<br>(0 - 0)       |
| Venomous animal contact                         | 1<br>(0 - 1)       | 0<br>(0 - 0)     | 0<br>(0 - 0)      | 0<br>(0 - 0)       | 0<br>(0 - 0)       | 0<br>(0 - 0)       |
| Non-venomous animal contact                     | 0<br>(0 - 0)       | 0<br>(0 - 0)     | 0<br>(0 - 0)      | 0<br>(0 - 0)       | 0<br>(0 - 0)       | 0<br>(0 - 0)       |
| Foreign body                                    | 7<br>(4 - 11)      | 1<br>(0 - 2)     | 0<br>(0 - 0)      | 2<br>(1 - 3)       | 2<br>(1 - 3)       | 2<br>(1 - 3)       |
| Pulmonary aspiration and foreign body in airway | 7<br>(3 - 11)      | 1<br>(0 - 2)     | 0<br>(0 - 0)      | 2<br>(1 - 3)       | 2<br>(1 - 3)       | 2<br>(1 - 3)       |
| Foreign body in other body part                 | 0<br>(0 - 0)       | 0<br>(0 - 0)     | 0<br>(0 - 0)      | 0<br>(0 - 0)       | 0<br>(0 - 0)       | 0<br>(0 - 0)       |
| Other unintentional injuries                    | 2<br>(1 - 3)       | 0<br>(0 - 0)     | 0<br>(0 - 0)      | 1<br>(1 - 2)       | 1<br>(0 - 1)       | 0<br>(0 - 1)       |
| Self-harm and interpersonal violence            | 82<br>(52 - 118)   | 0<br>(0 - 1)     | 1<br>(0 - 1)      | 61<br>(38 - 90)    | 16<br>(10 - 23)    | 3<br>(2 - 5)       |
| Self-harm                                       | 23<br>(15 - 34)    | -                | 0<br>(0 - 0)      | 13<br>(9 - 21)     | 7<br>(5 - 10)      | 2<br>(1 - 3)       |
| Interpersonal violence                          | 59<br>(33 - 88)    | 0<br>(0 - 1)     | 1<br>(0 - 1)      | 48<br>(27 - 73)    | 9<br>(4 - 14)      | 1<br>(1 - 2)       |
| Assault by firearm                              | 37<br>(19 - 56)    | 0<br>(0 - 0)     | 0<br>(0 - 1)      | 32<br>(17 - 49)    | 4<br>(1 - 7)       | 0<br>(0 - 1)       |
| Assault by sharp object                         | 13<br>(6 - 23)     | 0<br>(0 - 0)     | 0<br>(0 - 0)      | 11<br>(5 - 19)     | 2<br>(1 - 4)       | 0<br>(0 - 1)       |
| Assault by other means                          | 9<br>(4 - 15)      | 0<br>(0 - 1)     | 0<br>(0 - 0)      | 5<br>(2 - 9)       | 3<br>(1 - 5)       | 1<br>(0 - 1)       |

Web Table 31- The Bahamas deaths with 95% UI by age, sex, and cause in 2013

| Cause                                                             | Females, All Ages        | Females, 0-4 Years | Females, 5-14 Years | Females, 15-49 Years | Females, 50-69 Years | Females, 70-80 Years |
|-------------------------------------------------------------------|--------------------------|--------------------|---------------------|----------------------|----------------------|----------------------|
| All causes                                                        | 1,375<br>(1,043 - 1,681) | 41<br>(19 - 83)    | 7<br>(5 - 11)       | 153<br>(108 - 212)   | 375<br>(261 - 507)   | 798<br>(623 - 924)   |
| Communicable, maternal, neonatal, and nutritional diseases        | 136<br>(106 - 175)       | 31<br>(14 - 62)    | 1<br>(1 - 2)        | 28<br>(22 - 36)      | 18<br>(13 - 23)      | 57<br>(41 - 76)      |
| HIV/AIDS and tuberculosis                                         | 23<br>(17 - 33)          | 0<br>(0 - 0)       | 0<br>(0 - 0)        | 17<br>(12 - 24)      | 5<br>(3 - 8)         | 1<br>(1 - 2)         |
| Tuberculosis                                                      | 3<br>(2 - 4)             | 0<br>(0 - 0)       | 0<br>(0 - 0)        | 1<br>(0 - 1)         | 1<br>(1 - 2)         | 1<br>(1 - 1)         |
| HIV/AIDS                                                          | 21<br>(14 - 30)          | 0<br>(0 - 0)       | 0<br>(0 - 0)        | 16<br>(11 - 23)      | 4<br>(2 - 8)         | 0<br>(0 - 1)         |
| HIV/AIDS resulting in mycobacterial infection                     | 1<br>(1 - 1)             | 0<br>(0 - 0)       | 0<br>(0 - 0)        | 1<br>(0 - 1)         | 0<br>(0 - 0)         | 0<br>(0 - 0)         |
| HIV/AIDS resulting in other diseases                              | 20<br>(13 - 29)          | 0<br>(0 - 0)       | 0<br>(0 - 0)        | 15<br>(10 - 22)      | 4<br>(2 - 7)         | 0<br>(0 - 1)         |
| Diarrhea, lower respiratory, and other common infectious diseases | 64<br>(47 - 85)          | 3<br>(2 - 7)       | 1<br>(1 - 2)        | 5<br>(3 - 8)         | 9<br>(6 - 13)        | 46<br>(32 - 64)      |
| Diarrheal diseases                                                | 5<br>(4 - 8)             | 1<br>(0 - 2)       | 0<br>(0 - 0)        | 1<br>(0 - 1)         | 1<br>(1 - 1)         | 3<br>(2 - 6)         |
| Intestinal infectious diseases                                    | 1<br>(0 - 2)             | 0<br>(0 - 1)       | 0<br>(0 - 1)        | 0<br>(0 - 1)         | 0<br>(0 - 0)         | 0<br>(0 - 0)         |
| Typhoid fever                                                     | 1<br>(0 - 2)             | 0<br>(0 - 1)       | 0<br>(0 - 0)        | 0<br>(0 - 1)         | 0<br>(0 - 0)         | 0<br>(0 - 0)         |
| Paratyphoid fever                                                 | 0<br>(0 - 1)             | 0<br>(0 - 0)       | 0<br>(0 - 0)        | 0<br>(0 - 0)         | 0<br>(0 - 0)         | 0<br>(0 - 0)         |
| Other intestinal infectious diseases                              | 0<br>(0 - 0)             | 0<br>(0 - 0)       | 0<br>(0 - 0)        | 0<br>(0 - 0)         | 0<br>(0 - 0)         | 0<br>(0 - 0)         |
| Lower respiratory infections                                      | 54<br>(38 - 73)          | 2<br>(1 - 4)       | 0<br>(0 - 1)        | 3<br>(2 - 5)         | 7<br>(5 - 10)        | 41<br>(27 - 58)      |
| Upper respiratory infections                                      | 0<br>(0 - 0)             | 0<br>(0 - 0)       | 0<br>(0 - 0)        | 0<br>(0 - 0)         | 0<br>(0 - 0)         | 0<br>(0 - 0)         |
| Otitis media                                                      | 0<br>(0 - 0)             | 0<br>(0 - 0)       | 0<br>(0 - 0)        | 0<br>(0 - 0)         | 0<br>(0 - 0)         | 0<br>(0 - 0)         |
| Meningitis                                                        | 2<br>(1 - 3)             | 0<br>(0 - 0)       | 0<br>(0 - 0)        | 0<br>(0 - 1)         | 1<br>(0 - 1)         | 1<br>(1 - 1)         |
| Pneumococcal meningitis                                           | 1<br>(0 - 1)             | 0<br>(0 - 0)       | 0<br>(0 - 0)        | 0<br>(0 - 0)         | 0<br>(0 - 0)         | 0<br>(0 - 0)         |
| H influenzae type B meningitis                                    | 0<br>(0 - 0)             | 0<br>(0 - 0)       | 0<br>(0 - 0)        | 0<br>(0 - 0)         | 0<br>(0 - 0)         | 0<br>(0 - 0)         |
| Meningococcal meningitis                                          | 0<br>(0 - 0)             | 0<br>(0 - 0)       | 0<br>(0 - 0)        | 0<br>(0 - 0)         | 0<br>(0 - 0)         | 0<br>(0 - 0)         |
| Other meningitis                                                  | 1<br>(1 - 1)             | 0<br>(0 - 0)       | 0<br>(0 - 0)        | 0<br>(0 - 0)         | 0<br>(0 - 0)         | 0<br>(0 - 1)         |
| Encephalitis                                                      | 1<br>(1 - 2)             | 0<br>(0 - 0)       | 0<br>(0 - 0)        | 0<br>(0 - 1)         | 0<br>(0 - 1)         | 0<br>(0 - 0)         |
| Diphtheria                                                        | 0<br>(0 - 0)             | 0<br>(0 - 0)       | 0<br>(0 - 0)        | 0<br>(0 - 0)         | 0<br>(0 - 0)         | 0<br>(0 - 0)         |
| Whooping cough                                                    | 0<br>(0 - 0)             | 0<br>(0 - 0)       | 0<br>(0 - 0)        | 0<br>(0 - 0)         | 0<br>(0 - 0)         | 0<br>(0 - 0)         |
| Tetanus                                                           | 0<br>(0 - 0)             | 0<br>(0 - 0)       | 0<br>(0 - 0)        | 0<br>(0 - 0)         | 0<br>(0 - 0)         | 0<br>(0 - 0)         |
| Measles                                                           | 0<br>(0 - 0)             | 0<br>(0 - 0)       | 0<br>(0 - 0)        | 0<br>(0 - 0)         | 0<br>(0 - 0)         | 0<br>(0 - 0)         |
| Varicella and herpes zoster                                       | 0<br>(0 - 0)             | 0<br>(0 - 0)       | 0<br>(0 - 0)        | 0<br>(0 - 0)         | 0<br>(0 - 0)         | 0<br>(0 - 0)         |
| Neglected tropical diseases and malaria                           | 1<br>(1 - 1)             | 0<br>(0 - 0)       | 0<br>(0 - 0)        | 0<br>(0 - 0)         | 0<br>(0 - 0)         | 0<br>(0 - 0)         |
| Leishmaniasis                                                     | 0<br>(0 - 0)             | 0<br>(0 - 0)       | 0<br>(0 - 0)        | 0<br>(0 - 0)         | 0<br>(0 - 0)         | 0<br>(0 - 0)         |
| Visceral leishmaniasis                                            | 0<br>(0 - 0)             | 0<br>(0 - 0)       | 0<br>(0 - 0)        | 0<br>(0 - 0)         | 0<br>(0 - 0)         | 0<br>(0 - 0)         |
| Cysticercosis                                                     | 0<br>(0 - 0)             | 0<br>(0 - 0)       | 0<br>(0 - 0)        | 0<br>(0 - 0)         | 0<br>(0 - 0)         | 0<br>(0 - 0)         |
| Cystic echinococcosis                                             | 0<br>(0 - 0)             | 0<br>(0 - 0)       | 0<br>(0 - 0)        | 0<br>(0 - 0)         | 0<br>(0 - 0)         | 0<br>(0 - 0)         |
| Dengue                                                            | 0<br>(0 - 0)             | 0<br>(0 - 0)       | 0<br>(0 - 0)        | 0<br>(0 - 0)         | 0<br>(0 - 0)         | 0<br>(0 - 0)         |
| Rabies                                                            | 0<br>(0 - 0)             | 0<br>(0 - 0)       | 0<br>(0 - 0)        | 0<br>(0 - 0)         | 0<br>(0 - 0)         | 0<br>(0 - 0)         |
| Intestinal nematode infections                                    | 0<br>(0 - 0)             | 0<br>(0 - 0)       | 0<br>(0 - 0)        | 0<br>(0 - 0)         | 0<br>(0 - 0)         | 0<br>(0 - 0)         |
| Ascariasis                                                        | 0<br>(0 - 0)             | 0<br>(0 - 0)       | 0<br>(0 - 0)        | 0<br>(0 - 0)         | 0<br>(0 - 0)         | 0<br>(0 - 0)         |
| Other neglected tropical diseases                                 | 0<br>(0 - 0)             | 0<br>(0 - 0)       | 0<br>(0 - 0)        | 0<br>(0 - 0)         | 0<br>(0 - 0)         | 0<br>(0 - 0)         |
| Maternal disorders                                                | 4<br>(2 - 5)             | --                 | 0<br>(0 - 0)        | 4<br>(2 - 5)         | --                   | --                   |
| Maternal hemorrhage                                               | 1<br>(0 - 1)             | --                 | 0<br>(0 - 0)        | 1<br>(0 - 1)         | --                   | --                   |
| Maternal sepsis and other maternal infections                     | 0<br>(0 - 1)             | --                 | 0<br>(0 - 0)        | 0<br>(0 - 1)         | --                   | --                   |

Web Table 31- The Bahamas deaths with 95% UI by age, sex, and cause in 2013

| Cause                                                            | Females, All Ages      | Females, 0-4 Years | Females, 5-14 Years | Females, 15-49 Years | Females, 50-69 Years | Females, 70-80 Years |
|------------------------------------------------------------------|------------------------|--------------------|---------------------|----------------------|----------------------|----------------------|
| Maternal hypertensive disorders                                  | 1<br>(0 - 1)           | --                 | 0<br>(0 - 0)        | 1<br>(0 - 1)         | --                   | --                   |
| Maternal obstructed labor                                        | 0<br>(0 - 1)           | --                 | 0<br>(0 - 0)        | 0<br>(0 - 1)         | --                   | --                   |
| Maternal abortive outcome                                        | 1<br>(0 - 1)           | --                 | 0<br>(0 - 0)        | 1<br>(0 - 1)         | --                   | --                   |
| Indirect maternal deaths                                         | 0<br>(0 - 1)           | --                 | 0<br>(0 - 0)        | 0<br>(0 - 1)         | --                   | --                   |
| Late maternal deaths                                             | 0<br>(0 - 0)           | --                 | 0<br>(0 - 0)        | 0<br>(0 - 0)         | --                   | --                   |
| Maternal deaths aggravated by HIV/AIDS                           | 0<br>(0 - 0)           | --                 | --                  | 0<br>(0 - 0)         | --                   | --                   |
| Other maternal disorders                                         | 0<br>(0 - 1)           | --                 | 0<br>(0 - 0)        | 0<br>(0 - 1)         | --                   | --                   |
| Neonatal disorders                                               | 27<br>(11 - 53)        | 27<br>(11 - 53)    | --                  | --                   | --                   | --                   |
| Neonatal preterm birth complications                             | 13<br>(5 - 26)         | 13<br>(5 - 26)     | --                  | --                   | --                   | --                   |
| Neonatal encephalopathy due to birth asphyxia and trauma         | 7<br>(2 - 14)          | 7<br>(2 - 14)      | --                  | --                   | --                   | --                   |
| Neonatal sepsis and other neonatal infections                    | 4<br>(1 - 10)          | 4<br>(1 - 10)      | --                  | --                   | --                   | --                   |
| Hemolytic disease and other neonatal jaundice                    | 0<br>(0 - 1)           | 0<br>(0 - 1)       | --                  | --                   | --                   | --                   |
| Other neonatal disorders                                         | 3<br>(1 - 7)           | 3<br>(1 - 7)       | --                  | --                   | --                   | --                   |
| Nutritional deficiencies                                         | 14<br>(10 - 18)        | 1<br>(0 - 1)       | 0<br>(0 - 0)        | 2<br>(1 - 3)         | 2<br>(2 - 3)         | 8<br>(6 - 12)        |
| Protein-energy malnutrition                                      | 5<br>(3 - 8)           | 1<br>(0 - 1)       | 0<br>(0 - 0)        | 0<br>(0 - 1)         | 1<br>(0 - 1)         | 3<br>(2 - 6)         |
| Iodine deficiency                                                | 0<br>(0 - 0)           | 0<br>(0 - 0)       | 0<br>(0 - 0)        | 0<br>(0 - 0)         | 0<br>(0 - 0)         | 0<br>(0 - 0)         |
| Iron-deficiency anemia                                           | 8<br>(5 - 11)          | 0<br>(0 - 0)       | 0<br>(0 - 0)        | 2<br>(1 - 2)         | 1<br>(1 - 2)         | 5<br>(2 - 7)         |
| Other nutritional deficiencies                                   | 1<br>(0 - 1)           | 0<br>(0 - 0)       | 0<br>(0 - 0)        | 0<br>(0 - 0)         | 0<br>(0 - 0)         | 0<br>(0 - 1)         |
| Other communicable, maternal, neonatal, and nutritional diseases | 3<br>(2 - 5)           | 0<br>(0 - 1)       | 0<br>(0 - 0)        | 1<br>(0 - 1)         | 1<br>(1 - 2)         | 1<br>(1 - 2)         |
| Sexually transmitted diseases excluding HIV                      | 1<br>(0 - 1)           | 0<br>(0 - 1)       | 0<br>(0 - 0)        | 0<br>(0 - 0)         | 0<br>(0 - 0)         | 0<br>(0 - 0)         |
| Syphilis                                                         | 1<br>(0 - 1)           | 0<br>(0 - 1)       | 0<br>(0 - 0)        | 0<br>(0 - 0)         | 0<br>(0 - 0)         | 0<br>(0 - 0)         |
| Chlamydial infection                                             | 0<br>(0 - 0)           | --                 | 0<br>(0 - 0)        | 0<br>(0 - 0)         | 0<br>(0 - 0)         | 0<br>(0 - 0)         |
| Gonococcal infection                                             | 0<br>(0 - 0)           | --                 | 0<br>(0 - 0)        | 0<br>(0 - 0)         | 0<br>(0 - 0)         | 0<br>(0 - 0)         |
| Other sexually transmitted diseases                              | 0<br>(0 - 0)           | --                 | 0<br>(0 - 0)        | 0<br>(0 - 0)         | 0<br>(0 - 0)         | 0<br>(0 - 0)         |
| Hepatitis                                                        | 0<br>(0 - 0)           | 0<br>(0 - 0)       | 0<br>(0 - 0)        | 0<br>(0 - 0)         | 0<br>(0 - 0)         | 0<br>(0 - 0)         |
| Acute hepatitis A                                                | 0<br>(0 - 0)           | 0<br>(0 - 0)       | 0<br>(0 - 0)        | 0<br>(0 - 0)         | 0<br>(0 - 0)         | 0<br>(0 - 0)         |
| Acute hepatitis B                                                | 0<br>(0 - 0)           | 0<br>(0 - 0)       | 0<br>(0 - 0)        | 0<br>(0 - 0)         | 0<br>(0 - 0)         | 0<br>(0 - 0)         |
| Acute hepatitis C                                                | 0<br>(0 - 0)           | --                 | 0<br>(0 - 0)        | 0<br>(0 - 0)         | 0<br>(0 - 0)         | 0<br>(0 - 0)         |
| Other infectious diseases                                        | 2<br>(2 - 3)           | 0<br>(0 - 0)       | 0<br>(0 - 0)        | 0<br>(0 - 1)         | 1<br>(0 - 1)         | 1<br>(1 - 2)         |
| Non-communicable diseases                                        | 1,179<br>(881 - 1,462) | 9<br>(4 - 18)      | 4<br>(2 - 5)        | 103<br>(67 - 150)    | 344<br>(238 - 465)   | 720<br>(557 - 835)   |
| Neoplasms                                                        | 250<br>(178 - 327)     | 0<br>(0 - 1)       | 1<br>(1 - 1)        | 38<br>(25 - 56)      | 103<br>(70 - 143)    | 108<br>(80 - 129)    |
| Esophageal cancer                                                | 4<br>(3 - 5)           | --                 | --                  | 0<br>(0 - 0)         | 1<br>(1 - 2)         | 2<br>(1 - 3)         |
| Stomach cancer                                                   | 13<br>(9 - 17)         | --                 | --                  | 1<br>(1 - 1)         | 4<br>(3 - 6)         | 8<br>(6 - 10)        |
| Liver cancer                                                     | 8<br>(5 - 11)          | --                 | 0<br>(0 - 0)        | 1<br>(0 - 1)         | 3<br>(2 - 5)         | 4<br>(2 - 5)         |
| Liver cancer due to hepatitis B                                  | 2<br>(1 - 3)           | --                 | 0<br>(0 - 0)        | 0<br>(0 - 1)         | 1<br>(0 - 1)         | 1<br>(0 - 1)         |
| Liver cancer due to hepatitis C                                  | 3<br>(2 - 5)           | --                 | 0<br>(0 - 0)        | 0<br>(0 - 0)         | 1<br>(1 - 2)         | 2<br>(1 - 3)         |
| Liver cancer due to alcohol use                                  | 2<br>(1 - 2)           | --                 | --                  | 0<br>(0 - 0)         | 1<br>(0 - 1)         | 1<br>(1 - 2)         |
| Liver cancer due to other causes                                 | 1<br>(1 - 2)           | --                 | 0<br>(0 - 0)        | 0<br>(0 - 0)         | 0<br>(0 - 1)         | 0<br>(0 - 1)         |
| Larynx cancer                                                    | 0<br>(0 - 1)           | --                 | --                  | 0<br>(0 - 0)         | 0<br>(0 - 0)         | 0<br>(0 - 0)         |
| Tracheal, bronchus and lung cancer                               | 14<br>(10 - 19)        | --                 | --                  | 1<br>(1 - 2)         | 6<br>(4 - 9)         | 6<br>(4 - 8)         |

Web Table 31- The Bahamas deaths with 95% UI by age, sex, and cause in 2013

| Cause                                         | Females, All Ages  | Females, 0-4 Years | Females, 5-14 Years | Females, 15-49 Years | Females, 50-69 Years | Females, 70-80 Years |
|-----------------------------------------------|--------------------|--------------------|---------------------|----------------------|----------------------|----------------------|
| Breast cancer                                 | 58<br>(40 - 78)    | --                 | --                  | 13<br>(8 - 19)       | 27<br>(17 - 37)      | 19<br>(13 - 25)      |
| Cervical cancer                               | 28<br>(19 - 38)    | --                 | --                  | 6<br>(4 - 9)         | 12<br>(8 - 17)       | 9<br>(7 - 13)        |
| Uterine cancer                                | 12<br>(6 - 16)     | --                 | --                  | 1<br>(0 - 1)         | 5<br>(3 - 7)         | 6<br>(3 - 8)         |
| Prostate cancer                               | --                 | --                 | --                  | --                   | --                   | --                   |
| Colon and rectum cancer                       | 31<br>(22 - 41)    | --                 | --                  | 2<br>(1 - 3)         | 11<br>(7 - 15)       | 18<br>(13 - 23)      |
| Lip and oral cavity cancer                    | 2<br>(1 - 3)       | --                 | --                  | 0<br>(0 - 0)         | 1<br>(1 - 1)         | 1<br>(1 - 2)         |
| Nasopharynx cancer                            | 1<br>(0 - 1)       | --                 | 0<br>(0 - 0)        | 0<br>(0 - 0)         | 0<br>(0 - 1)         | 0<br>(0 - 0)         |
| Other pharynx cancer                          | 1<br>(0 - 1)       | --                 | --                  | 0<br>(0 - 0)         | 0<br>(0 - 0)         | 0<br>(0 - 0)         |
| Gallbladder and biliary tract cancer          | 5<br>(3 - 8)       | --                 | --                  | 0<br>(0 - 0)         | 2<br>(1 - 3)         | 2<br>(1 - 4)         |
| Pancreatic cancer                             | 12<br>(8 - 16)     | --                 | --                  | 1<br>(0 - 1)         | 4<br>(3 - 6)         | 7<br>(5 - 10)        |
| Malignant skin melanoma                       | 1<br>(1 - 1)       | --                 | --                  | 0<br>(0 - 0)         | 0<br>(0 - 0)         | 0<br>(0 - 0)         |
| Non-melanoma skin cancer                      | 1<br>(1 - 2)       | --                 | --                  | 0<br>(0 - 0)         | 0<br>(0 - 0)         | 1<br>(0 - 1)         |
| Ovarian cancer                                | 15<br>(10 - 20)    | --                 | --                  | 2<br>(1 - 3)         | 7<br>(5 - 10)        | 6<br>(4 - 7)         |
| Testicular cancer                             | --                 | --                 | --                  | --                   | --                   | --                   |
| Kidney cancer                                 | 3<br>(2 - 4)       | 0<br>(0 - 0)       | 0<br>(0 - 0)        | 0<br>(0 - 1)         | 1<br>(1 - 2)         | 1<br>(1 - 2)         |
| Bladder cancer                                | 3<br>(2 - 4)       | --                 | --                  | 0<br>(0 - 0)         | 1<br>(0 - 1)         | 2<br>(1 - 3)         |
| Brain and nervous system cancer               | 3<br>(2 - 5)       | 0<br>(0 - 0)       | 0<br>(0 - 0)        | 1<br>(0 - 1)         | 1<br>(1 - 2)         | 1<br>(0 - 1)         |
| Thyroid cancer                                | 2<br>(1 - 2)       | --                 | 0<br>(0 - 0)        | 0<br>(0 - 0)         | 1<br>(0 - 1)         | 1<br>(0 - 1)         |
| Mesothelioma                                  | 0<br>(0 - 1)       | --                 | --                  | 0<br>(0 - 0)         | 0<br>(0 - 0)         | 0<br>(0 - 0)         |
| Hodgkin lymphoma                              | 0<br>(0 - 1)       | 0<br>(0 - 0)       | 0<br>(0 - 0)        | 0<br>(0 - 0)         | 0<br>(0 - 0)         | 0<br>(0 - 0)         |
| Non-Hodgkin lymphoma                          | 9<br>(5 - 13)      | 0<br>(0 - 0)       | 0<br>(0 - 0)        | 2<br>(1 - 3)         | 4<br>(2 - 6)         | 3<br>(2 - 4)         |
| Multiple myeloma                              | 5<br>(3 - 7)       | --                 | --                  | 0<br>(0 - 1)         | 2<br>(1 - 4)         | 2<br>(1 - 3)         |
| Leukemia                                      | 7<br>(5 - 9)       | 0<br>(0 - 0)       | 0<br>(0 - 0)        | 2<br>(1 - 3)         | 2<br>(2 - 3)         | 2<br>(2 - 3)         |
| Other neoplasms                               | 14<br>(9 - 20)     | 0<br>(0 - 0)       | 0<br>(0 - 1)        | 3<br>(2 - 5)         | 6<br>(3 - 8)         | 5<br>(3 - 7)         |
| Cardiovascular diseases                       | 537<br>(404 - 667) | 1<br>(0 - 1)       | 1<br>(0 - 1)        | 25<br>(16 - 38)      | 133<br>(91 - 183)    | 377<br>(292 - 444)   |
| Rheumatic heart disease                       | 3<br>(2 - 4)       | 0<br>(0 - 0)       | 0<br>(0 - 0)        | 1<br>(1 - 1)         | 1<br>(0 - 1)         | 1<br>(1 - 1)         |
| Ischemic heart disease                        | 207<br>(152 - 271) | 0<br>(0 - 0)       | 0<br>(0 - 0)        | 8<br>(5 - 13)        | 55<br>(37 - 77)      | 144<br>(106 - 186)   |
| Cerebrovascular disease                       | 180<br>(127 - 234) | 0<br>(0 - 0)       | 0<br>(0 - 0)        | 8<br>(5 - 12)        | 44<br>(28 - 61)      | 129<br>(94 - 164)    |
| Ischemic stroke                               | 109<br>(77 - 143)  | 0<br>(0 - 0)       | 0<br>(0 - 0)        | 2<br>(1 - 3)         | 20<br>(12 - 28)      | 87<br>(63 - 112)     |
| Hemorrhagic stroke                            | 71<br>(47 - 96)    | 0<br>(0 - 0)       | 0<br>(0 - 0)        | 6<br>(3 - 9)         | 23<br>(14 - 33)      | 42<br>(28 - 56)      |
| Hypertensive heart disease                    | 85<br>(52 - 115)   | 0<br>(0 - 0)       | 0<br>(0 - 0)        | 3<br>(2 - 4)         | 18<br>(11 - 27)      | 64<br>(37 - 88)      |
| Cardiomyopathy and myocarditis                | 13<br>(8 - 18)     | 0<br>(0 - 0)       | 0<br>(0 - 0)        | 2<br>(1 - 3)         | 4<br>(2 - 5)         | 7<br>(4 - 10)        |
| Atrial fibrillation and flutter               | 11<br>(7 - 16)     | --                 | --                  | 0<br>(0 - 0)         | 2<br>(1 - 2)         | 9<br>(6 - 13)        |
| Aortic aneurysm                               | 6<br>(3 - 9)       | --                 | --                  | 0<br>(0 - 0)         | 2<br>(1 - 3)         | 4<br>(2 - 6)         |
| Peripheral vascular disease                   | 5<br>(3 - 8)       | --                 | --                  | 0<br>(0 - 0)         | 0<br>(0 - 1)         | 5<br>(3 - 8)         |
| Endocarditis                                  | 2<br>(1 - 3)       | 0<br>(0 - 0)       | 0<br>(0 - 0)        | 0<br>(0 - 1)         | 0<br>(0 - 1)         | 1<br>(1 - 2)         |
| Other cardiovascular and circulatory diseases | 25<br>(15 - 34)    | 0<br>(0 - 0)       | 0<br>(0 - 0)        | 3<br>(2 - 4)         | 8<br>(4 - 12)        | 14<br>(8 - 20)       |
| Chronic respiratory diseases                  | 27<br>(20 - 36)    | 0<br>(0 - 0)       | 0<br>(0 - 0)        | 3<br>(2 - 5)         | 7<br>(5 - 10)        | 17<br>(12 - 22)      |
| Chronic obstructive pulmonary disease         | 16<br>(11 - 22)    | 0<br>(0 - 0)       | 0<br>(0 - 0)        | 1<br>(1 - 2)         | 4<br>(2 - 5)         | 11<br>(8 - 15)       |
| Pneumoconiosis                                | 0<br>(0 - 0)       | 0<br>(0 - 0)       | 0<br>(0 - 0)        | 0<br>(0 - 0)         | 0<br>(0 - 0)         | 0<br>(0 - 0)         |



Web Table 31- The Bahamas deaths with 95% UI by age, sex, and cause in 2013

| Cause                                               | Females, All Ages  | Females, 0-4 Years | Females, 5-14 Years | Females, 15-49 Years | Females, 50-69 Years | Females, 70-80 Years |
|-----------------------------------------------------|--------------------|--------------------|---------------------|----------------------|----------------------|----------------------|
| Silicosis                                           | 0<br>(0 - 0)       | 0<br>(0 - 0)       | 0<br>(0 - 0)        | 0<br>(0 - 0)         | 0<br>(0 - 0)         | 0<br>(0 - 0)         |
| Asbestosis                                          | 0<br>(0 - 0)       | 0<br>(0 - 0)       | 0<br>(0 - 0)        | 0<br>(0 - 0)         | 0<br>(0 - 0)         | 0<br>(0 - 0)         |
| Coal workers pneumoconiosis                         | 0<br>(0 - 0)       | 0<br>(0 - 0)       | 0<br>(0 - 0)        | 0<br>(0 - 0)         | 0<br>(0 - 0)         | 0<br>(0 - 0)         |
| Other pneumoconiosis                                | 0<br>(0 - 0)       | 0<br>(0 - 0)       | 0<br>(0 - 0)        | 0<br>(0 - 0)         | 0<br>(0 - 0)         | 0<br>(0 - 0)         |
| Asthma                                              | 7<br>(5 - 11)      | 0<br>(0 - 0)       | 0<br>(0 - 0)        | 1<br>(1 - 2)         | 2<br>(1 - 4)         | 3<br>(2 - 6)         |
| Interstitial lung disease and pulmonary sarcoidosis | 3<br>(1 - 5)       | 0<br>(0 - 0)       | 0<br>(0 - 0)        | 0<br>(0 - 1)         | 1<br>(1 - 2)         | 1<br>(1 - 2)         |
| Other chronic respiratory diseases                  | 1<br>(1 - 1)       | 0<br>(0 - 0)       | 0<br>(0 - 0)        | 0<br>(0 - 0)         | 0<br>(0 - 0)         | 0<br>(0 - 1)         |
| Cirrhosis                                           | 18<br>(12 - 24)    | 0<br>(0 - 0)       | 0<br>(0 - 0)        | 4<br>(3 - 6)         | 8<br>(5 - 12)        | 5<br>(4 - 7)         |
| Cirrhosis due to hepatitis B                        | 2<br>(0 - 3)       | 0<br>(0 - 0)       | 0<br>(0 - 0)        | 0<br>(0 - 1)         | 1<br>(0 - 2)         | 1<br>(0 - 1)         |
| Cirrhosis due to hepatitis C                        | 9<br>(5 - 13)      | 0<br>(0 - 0)       | 0<br>(0 - 0)        | 2<br>(1 - 3)         | 4<br>(2 - 7)         | 3<br>(2 - 4)         |
| Cirrhosis due to alcohol use                        | 4<br>(2 - 6)       | --                 | --                  | 1<br>(0 - 1)         | 2<br>(1 - 3)         | 1<br>(1 - 2)         |
| Cirrhosis due to other causes                       | 3<br>(2 - 6)       | 0<br>(0 - 0)       | 0<br>(0 - 0)        | 1<br>(1 - 2)         | 1<br>(1 - 3)         | 1<br>(0 - 1)         |
| Digestive diseases                                  | 29<br>(21 - 37)    | 0<br>(0 - 0)       | 0<br>(0 - 0)        | 3<br>(2 - 5)         | 18<br>(5 - 11)       | 8<br>(13 - 22)       |
| Peptic ulcer disease                                | 6<br>(4 - 9)       | 0<br>(0 - 0)       | 0<br>(0 - 0)        | 1<br>(0 - 1)         | 2<br>(1 - 3)         | 4<br>(2 - 6)         |
| Gastritis and duodenitis                            | 2<br>(1 - 3)       | 0<br>(0 - 0)       | 0<br>(0 - 0)        | 0<br>(0 - 0)         | 0<br>(0 - 1)         | 1<br>(0 - 2)         |
| Appendicitis                                        | 1<br>(1 - 2)       | 0<br>(0 - 0)       | 0<br>(0 - 0)        | 0<br>(0 - 0)         | 0<br>(0 - 1)         | 0<br>(0 - 1)         |
| Paralytic ileus and intestinal obstruction          | 4<br>(2 - 7)       | 0<br>(0 - 0)       | 0<br>(0 - 0)        | 0<br>(0 - 1)         | 1<br>(0 - 2)         | 3<br>(1 - 4)         |
| Inguinal, femoral, and abdominal hernia             | 1<br>(1 - 3)       | 0<br>(0 - 0)       | 0<br>(0 - 0)        | 0<br>(0 - 0)         | 0<br>(0 - 1)         | 1<br>(0 - 2)         |
| Inflammatory bowel disease                          | 3<br>(2 - 4)       | 0<br>(0 - 0)       | 0<br>(0 - 0)        | 0<br>(0 - 1)         | 1<br>(0 - 1)         | 2<br>(1 - 3)         |
| Vascular intestinal disorders                       | 2<br>(1 - 3)       | 0<br>(0 - 0)       | 0<br>(0 - 0)        | 0<br>(0 - 0)         | 0<br>(0 - 1)         | 1<br>(1 - 2)         |
| Gallbladder and biliary diseases                    | 3<br>(2 - 4)       | 0<br>(0 - 0)       | 0<br>(0 - 0)        | 0<br>(0 - 1)         | 1<br>(1 - 1)         | 1<br>(1 - 2)         |
| Pancreatitis                                        | 2<br>(1 - 2)       | 0<br>(0 - 0)       | 0<br>(0 - 0)        | 0<br>(0 - 1)         | 1<br>(0 - 1)         | 1<br>(0 - 1)         |
| Other digestive diseases                            | 6<br>(4 - 8)       | 0<br>(0 - 0)       | 0<br>(0 - 0)        | 1<br>(0 - 1)         | 1<br>(1 - 2)         | 4<br>(2 - 5)         |
| Neurological disorders                              | 59<br>(42 - 75)    | 0<br>(0 - 0)       | 0<br>(0 - 0)        | 3<br>(2 - 4)         | 6<br>(4 - 8)         | 50<br>(36 - 65)      |
| Alzheimer disease and other dementias               | 48<br>(34 - 63)    | --                 | --                  | 0<br>(0 - 0)         | 3<br>(2 - 5)         | 45<br>(31 - 59)      |
| Parkinson disease                                   | 4<br>(3 - 6)       | --                 | --                  | 0<br>(0 - 0)         | 1<br>(0 - 1)         | 4<br>(2 - 5)         |
| Epilepsy                                            | 3<br>(2 - 5)       | 0<br>(0 - 0)       | 0<br>(0 - 0)        | 2<br>(1 - 3)         | 1<br>(0 - 1)         | 1<br>(0 - 1)         |
| Multiple sclerosis                                  | 0<br>(0 - 1)       | --                 | --                  | 0<br>(0 - 0)         | 0<br>(0 - 0)         | 0<br>(0 - 0)         |
| Other neurological disorders                        | 3<br>(2 - 3)       | 0<br>(0 - 0)       | 0<br>(0 - 0)        | 1<br>(0 - 1)         | 1<br>(1 - 1)         | 1<br>(1 - 1)         |
| Mental and substance use disorders                  | 2<br>(1 - 3)       | 0<br>(0 - 0)       | 0<br>(0 - 0)        | 1<br>(0 - 1)         | 1<br>(0 - 1)         | 1<br>(0 - 1)         |
| Schizophrenia                                       | 0<br>(0 - 1)       | --                 | --                  | 0<br>(0 - 0)         | 0<br>(0 - 0)         | 0<br>(0 - 0)         |
| Alcohol use disorders                               | 1<br>(0 - 2)       | --                 | --                  | 0<br>(0 - 1)         | 0<br>(0 - 1)         | 0<br>(0 - 0)         |
| Drug use disorders                                  | 1<br>(1 - 1)       | 0<br>(0 - 0)       | --                  | 0<br>(0 - 0)         | 0<br>(0 - 0)         | 0<br>(0 - 0)         |
| Opioid use disorders                                | 0<br>(0 - 0)       | 0<br>(0 - 0)       | --                  | 0<br>(0 - 0)         | 0<br>(0 - 0)         | 0<br>(0 - 0)         |
| Cocaine use disorders                               | 0<br>(0 - 0)       | 0<br>(0 - 0)       | --                  | 0<br>(0 - 0)         | 0<br>(0 - 0)         | 0<br>(0 - 0)         |
| Amphetamine use disorders                           | 0<br>(0 - 0)       | 0<br>(0 - 0)       | --                  | 0<br>(0 - 0)         | 0<br>(0 - 0)         | 0<br>(0 - 0)         |
| Other drug use disorders                            | 0<br>(0 - 1)       | 0<br>(0 - 0)       | --                  | 0<br>(0 - 0)         | 0<br>(0 - 0)         | 0<br>(0 - 0)         |
| Eating disorders                                    | 0<br>(0 - 0)       | --                 | 0<br>(0 - 0)        | 0<br>(0 - 0)         | --                   | --                   |
| Anorexia nervosa                                    | 0<br>(0 - 0)       | --                 | 0<br>(0 - 0)        | 0<br>(0 - 0)         | --                   | --                   |
| Diabetes, urogenital, blood, and endocrine diseases | 220<br>(156 - 277) | 1<br>(0 - 1)       | 1<br>(0 - 1)        | 20<br>(13 - 29)      | 72<br>(49 - 98)      | 127<br>(92 - 156)    |

Web Table 31- The Bahamas deaths with 95% UI by age, sex, and cause in 2013

| Cause                                               | Females, All Ages | Females, 0-4 Years | Females, 5-14 Years | Females, 15-49 Years | Females, 50-69 Years | Females, 70-80 Years |
|-----------------------------------------------------|-------------------|--------------------|---------------------|----------------------|----------------------|----------------------|
| Diabetes mellitus                                   | 140<br>(98 - 179) | 0<br>(0 - 0)       | 0<br>(0 - 0)        | 8<br>(5 - 11)        | 47<br>(31 - 66)      | 85<br>(61 - 108)     |
| Acute glomerulonephritis                            | 0<br>(0 - 0)      | 0<br>(0 - 0)       | 0<br>(0 - 0)        | 0<br>(0 - 0)         | 0<br>(0 - 0)         | 0<br>(0 - 0)         |
| Chronic kidney disease                              | 52<br>(34 - 81)   | 0<br>(0 - 0)       | 0<br>(0 - 0)        | 7<br>(4 - 11)        | 17<br>(11 - 27)      | 28<br>(18 - 43)      |
| Chronic kidney disease due to diabetes mellitus     | 10<br>(4 - 17)    | 0<br>(0 - 0)       | 0<br>(0 - 0)        | 1<br>(0 - 2)         | 5<br>(2 - 9)         | 4<br>(2 - 7)         |
| Chronic kidney disease due to hypertension          | 28<br>(17 - 44)   | 0<br>(0 - 0)       | 0<br>(0 - 0)        | 3<br>(2 - 5)         | 8<br>(4 - 13)        | 16<br>(10 - 25)      |
| Chronic kidney disease due to glomerulonephritis    | 1<br>(1 - 2)      | 0<br>(0 - 0)       | 0<br>(0 - 0)        | 0<br>(0 - 1)         | 0<br>(0 - 0)         | 0<br>(0 - 1)         |
| Chronic kidney disease due to other causes          | 14<br>(7 - 29)    | 0<br>(0 - 0)       | 0<br>(0 - 0)        | 2<br>(1 - 5)         | 4<br>(2 - 10)        | 7<br>(3 - 16)        |
| Urinary diseases and male infertility               | 9<br>(6 - 13)     | 0<br>(0 - 0)       | 0<br>(0 - 0)        | 1<br>(1 - 2)         | 2<br>(1 - 3)         | 6<br>(3 - 9)         |
| Interstitial nephritis and urinary tract infections | 8<br>(5 - 11)     | 0<br>(0 - 0)       | 0<br>(0 - 0)        | 1<br>(0 - 1)         | 2<br>(1 - 3)         | 5<br>(3 - 8)         |
| Urolithiasis                                        | 0<br>(0 - 1)      | --                 | 0<br>(0 - 0)        | 0<br>(0 - 0)         | 0<br>(0 - 0)         | 0<br>(0 - 0)         |
| Other urinary diseases                              | 1<br>(1 - 2)      | 0<br>(0 - 0)       | 0<br>(0 - 0)        | 0<br>(0 - 0)         | 0<br>(0 - 1)         | 1<br>(0 - 1)         |
| Gynecological diseases                              | 0<br>(0 - 0)      | --                 | --                  | 0<br>(0 - 0)         | 0<br>(0 - 0)         | 0<br>(0 - 0)         |
| Uterine fibroids                                    | 0<br>(0 - 0)      | --                 | --                  | 0<br>(0 - 0)         | 0<br>(0 - 0)         | 0<br>(0 - 0)         |
| Polycystic ovarian syndrome                         | 0<br>(0 - 0)      | --                 | --                  | 0<br>(0 - 0)         | 0<br>(0 - 0)         | --                   |
| Endometriosis                                       | 0<br>(0 - 0)      | --                 | --                  | 0<br>(0 - 0)         | 0<br>(0 - 0)         | --                   |
| Genital prolapse                                    | 0<br>(0 - 0)      | --                 | --                  | 0<br>(0 - 0)         | 0<br>(0 - 0)         | 0<br>(0 - 0)         |
| Other gynecological diseases                        | 0<br>(0 - 0)      | --                 | --                  | 0<br>(0 - 0)         | 0<br>(0 - 0)         | 0<br>(0 - 0)         |
| Hemoglobinopathies and hemolytic anemias            | 3<br>(2 - 5)      | 0<br>(0 - 0)       | 0<br>(0 - 0)        | 1<br>(1 - 2)         | 1<br>(0 - 1)         | 1<br>(0 - 1)         |
| Thalassemias                                        | 0<br>(0 - 0)      | 0<br>(0 - 0)       | 0<br>(0 - 0)        | 0<br>(0 - 0)         | 0<br>(0 - 0)         | 0<br>(0 - 0)         |
| Sickle cell disorders                               | 2<br>(1 - 4)      | 0<br>(0 - 0)       | 0<br>(0 - 0)        | 1<br>(1 - 2)         | 1<br>(0 - 1)         | 0<br>(0 - 0)         |
| G6PD deficiency                                     | 0<br>(0 - 0)      | 0<br>(0 - 0)       | 0<br>(0 - 0)        | 0<br>(0 - 0)         | 0<br>(0 - 0)         | 0<br>(0 - 0)         |
| Other hemoglobinopathies and hemolytic anemias      | 1<br>(0 - 1)      | 0<br>(0 - 0)       | 0<br>(0 - 0)        | 0<br>(0 - 0)         | 0<br>(0 - 0)         | 0<br>(0 - 1)         |
| Endocrine, metabolic, blood, and immune disorders   | 15<br>(10 - 26)   | 0<br>(0 - 1)       | 0<br>(0 - 0)        | 3<br>(2 - 5)         | 5<br>(3 - 8)         | 7<br>(4 - 13)        |
| Musculoskeletal disorders                           | 9<br>(4 - 13)     | --                 | 0<br>(0 - 0)        | 4<br>(2 - 5)         | 3<br>(1 - 4)         | 3<br>(1 - 4)         |
| Rheumatoid arthritis                                | 1<br>(1 - 2)      | --                 | 0<br>(0 - 0)        | 0<br>(0 - 0)         | 0<br>(0 - 1)         | 1<br>(0 - 1)         |
| Other musculoskeletal disorders                     | 8<br>(3 - 11)     | --                 | 0<br>(0 - 0)        | 3<br>(1 - 5)         | 2<br>(1 - 3)         | 2<br>(1 - 3)         |
| Other non-communicable diseases                     | 27<br>(15 - 39)   | 7<br>(3 - 14)      | 1<br>(0 - 1)        | 2<br>(1 - 3)         | 3<br>(1 - 4)         | 15<br>(6 - 22)       |
| Congenital anomalies                                | 11<br>(6 - 18)    | 6<br>(3 - 13)      | 1<br>(0 - 1)        | 2<br>(1 - 3)         | 1<br>(1 - 1)         | 1<br>(1 - 2)         |
| Neural tube defects                                 | 1<br>(0 - 2)      | 1<br>(0 - 2)       | 0<br>(0 - 0)        | 0<br>(0 - 0)         | 0<br>(0 - 0)         | 0<br>(0 - 0)         |
| Congenital heart anomalies                          | 5<br>(3 - 9)      | 3<br>(1 - 6)       | 0<br>(0 - 1)        | 1<br>(1 - 2)         | 0<br>(0 - 0)         | 1<br>(0 - 1)         |
| Cleft lip and cleft palate                          | 0<br>(0 - 0)      | 0<br>(0 - 0)       | --                  | --                   | --                   | --                   |
| Down syndrome                                       | 1<br>(0 - 1)      | 0<br>(0 - 0)       | 0<br>(0 - 0)        | 0<br>(0 - 0)         | 0<br>(0 - 0)         | 0<br>(0 - 0)         |
| Chromosomal unbalanced rearrangements               | 0<br>(0 - 1)      | 0<br>(0 - 0)       | 0<br>(0 - 0)        | 0<br>(0 - 0)         | 0<br>(0 - 0)         | 0<br>(0 - 0)         |
| Other congenital anomalies                          | 4<br>(2 - 9)      | 3<br>(1 - 6)       | 0<br>(0 - 0)        | 0<br>(0 - 1)         | 0<br>(0 - 1)         | 0<br>(0 - 1)         |
| Skin and subcutaneous diseases                      | 16<br>(7 - 24)    | 0<br>(0 - 0)       | 0<br>(0 - 0)        | 1<br>(0 - 1)         | 2<br>(1 - 3)         | 14<br>(5 - 21)       |
| Cellulitis                                          | 1<br>(0 - 2)      | 0<br>(0 - 0)       | 0<br>(0 - 0)        | 0<br>(0 - 0)         | 0<br>(0 - 0)         | 0<br>(0 - 1)         |
| Pyoderma                                            | 2<br>(1 - 4)      | 0<br>(0 - 0)       | 0<br>(0 - 0)        | 0<br>(0 - 0)         | 0<br>(0 - 1)         | 2<br>(1 - 3)         |
| Decubitus ulcer                                     | 13<br>(5 - 19)    | 0<br>(0 - 0)       | 0<br>(0 - 0)        | 0<br>(0 - 0)         | 1<br>(0 - 2)         | 11<br>(5 - 17)       |
| Other skin and subcutaneous diseases                | 0<br>(0 - 1)      | 0<br>(0 - 0)       | 0<br>(0 - 0)        | 0<br>(0 - 0)         | 0<br>(0 - 0)         | 0<br>(0 - 1)         |
| Sudden infant death syndrome                        | 0<br>(0 - 1)      | 0<br>(0 - 1)       | --                  | --                   | --                   | --                   |

Web Table 31- The Bahamas deaths with 95% UI by age, sex, and cause in 2013

| Cause                                           | Females, All Ages | Females, 0-4 Years | Females, 5-14 Years | Females, 15-49 Years | Females, 50-69 Years | Females, 70-80 Years |
|-------------------------------------------------|-------------------|--------------------|---------------------|----------------------|----------------------|----------------------|
| Injuries                                        | 60<br>(43 - 79)   | 2<br>(1 - 3)       | 2<br>(1 - 3)        | 22<br>(14 - 31)      | 13<br>(9 - 18)       | 22<br>(16 - 27)      |
| Transport injuries                              | 15<br>(10 - 20)   | 0<br>(0 - 1)       | 1<br>(0 - 1)        | 6<br>(4 - 8)         | 4<br>(2 - 6)         | 4<br>(3 - 5)         |
| Road injuries                                   | 13<br>(9 - 18)    | 0<br>(0 - 0)       | 1<br>(0 - 1)        | 5<br>(3 - 8)         | 3<br>(2 - 5)         | 4<br>(2 - 5)         |
| Pedestrian road injuries                        | 4<br>(3 - 6)      | 0<br>(0 - 0)       | 0<br>(0 - 1)        | 1<br>(1 - 2)         | 1<br>(1 - 2)         | 1<br>(1 - 1)         |
| Cyclist road injuries                           | 0<br>(0 - 1)      | 0<br>(0 - 0)       | 0<br>(0 - 0)        | 0<br>(0 - 0)         | 0<br>(0 - 0)         | 0<br>(0 - 0)         |
| Motorcyclist road injuries                      | 1<br>(0 - 1)      | 0<br>(0 - 0)       | 0<br>(0 - 0)        | 0<br>(0 - 0)         | 0<br>(0 - 0)         | 0<br>(0 - 0)         |
| Motor vehicle road injuries                     | 8<br>(5 - 11)     | 0<br>(0 - 0)       | 0<br>(0 - 1)        | 3<br>(2 - 5)         | 2<br>(1 - 3)         | 2<br>(1 - 3)         |
| Other road injuries                             | 0<br>(0 - 0)      | 0<br>(0 - 0)       | 0<br>(0 - 0)        | 0<br>(0 - 0)         | 0<br>(0 - 0)         | 0<br>(0 - 0)         |
| Other transport injuries                        | 1<br>(1 - 2)      | 0<br>(0 - 0)       | 0<br>(0 - 0)        | 0<br>(0 - 1)         | 0<br>(0 - 1)         | 0<br>(0 - 1)         |
| Unintentional injuries                          | 28<br>(21 - 37)   | 1<br>(1 - 2)       | 1<br>(1 - 1)        | 5<br>(3 - 8)         | 5<br>(3 - 8)         | 16<br>(11 - 20)      |
| Falls                                           | 8<br>(5 - 11)     | 0<br>(0 - 0)       | 0<br>(0 - 0)        | 0<br>(0 - 1)         | 1<br>(1 - 1)         | 6<br>(4 - 9)         |
| Drowning                                        | 3<br>(2 - 4)      | 0<br>(0 - 0)       | 0<br>(0 - 1)        | 1<br>(1 - 2)         | 1<br>(0 - 1)         | 0<br>(0 - 1)         |
| Fire, heat, and hot substances                  | 4<br>(2 - 6)      | 0<br>(0 - 0)       | 0<br>(0 - 0)        | 1<br>(0 - 1)         | 1<br>(0 - 1)         | 2<br>(1 - 3)         |
| Poisonings                                      | 1<br>(0 - 1)      | 0<br>(0 - 0)       | 0<br>(0 - 0)        | 0<br>(0 - 0)         | 0<br>(0 - 0)         | 0<br>(0 - 0)         |
| Exposure to mechanical forces                   | 2<br>(1 - 2)      | 0<br>(0 - 0)       | 0<br>(0 - 0)        | 1<br>(0 - 1)         | 0<br>(0 - 1)         | 0<br>(0 - 1)         |
| Unintentional firearm injuries                  | 1<br>(0 - 1)      | 0<br>(0 - 0)       | 0<br>(0 - 0)        | 0<br>(0 - 1)         | 0<br>(0 - 0)         | 0<br>(0 - 0)         |
| Unintentional suffocation                       | 0<br>(0 - 0)      | 0<br>(0 - 0)       | 0<br>(0 - 0)        | 0<br>(0 - 0)         | 0<br>(0 - 0)         | 0<br>(0 - 0)         |
| Other exposure to mechanical forces             | 1<br>(1 - 1)      | 0<br>(0 - 0)       | 0<br>(0 - 0)        | 0<br>(0 - 0)         | 0<br>(0 - 0)         | 0<br>(0 - 0)         |
| Adverse effects of medical treatment            | 6<br>(3 - 8)      | 0<br>(0 - 0)       | 0<br>(0 - 0)        | 1<br>(1 - 2)         | 1<br>(1 - 2)         | 3<br>(2 - 5)         |
| Animal contact                                  | 1<br>(0 - 1)      | 0<br>(0 - 0)       | 0<br>(0 - 0)        | 0<br>(0 - 0)         | 0<br>(0 - 1)         | 0<br>(0 - 1)         |
| Venomous animal contact                         | 0<br>(0 - 1)      | 0<br>(0 - 0)       | 0<br>(0 - 0)        | 0<br>(0 - 0)         | 0<br>(0 - 0)         | 0<br>(0 - 0)         |
| Non-venomous animal contact                     | 0<br>(0 - 1)      | 0<br>(0 - 0)       | 0<br>(0 - 0)        | 0<br>(0 - 0)         | 0<br>(0 - 0)         | 0<br>(0 - 1)         |
| Foreign body                                    | 5<br>(3 - 8)      | 1<br>(0 - 1)       | 0<br>(0 - 0)        | 1<br>(0 - 1)         | 1<br>(0 - 1)         | 3<br>(2 - 5)         |
| Pulmonary aspiration and foreign body in airway | 5<br>(3 - 8)      | 1<br>(0 - 1)       | 0<br>(0 - 0)        | 1<br>(0 - 1)         | 1<br>(0 - 1)         | 3<br>(1 - 5)         |
| Foreign body in other body part                 | 0<br>(0 - 0)      | 0<br>(0 - 0)       | 0<br>(0 - 0)        | 0<br>(0 - 0)         | 0<br>(0 - 0)         | 0<br>(0 - 0)         |
| Other unintentional injuries                    | 1<br>(0 - 1)      | 0<br>(0 - 0)       | 0<br>(0 - 0)        | 0<br>(0 - 0)         | 0<br>(0 - 0)         | 0<br>(0 - 0)         |
| Self-harm and interpersonal violence            | 17<br>(11 - 25)   | 0<br>(0 - 1)       | 0<br>(0 - 1)        | 11<br>(7 - 16)       | 4<br>(2 - 5)         | 2<br>(1 - 3)         |
| Self-harm                                       | 8<br>(5 - 11)     | -                  | 0<br>(0 - 0)        | 4<br>(3 - 7)         | 2<br>(1 - 3)         | 1<br>(1 - 2)         |
| Interpersonal violence                          | 10<br>(5 - 15)    | 0<br>(0 - 1)       | 0<br>(0 - 0)        | 6<br>(3 - 11)        | 2<br>(1 - 3)         | 1<br>(0 - 1)         |
| Assault by firearm                              | 3<br>(1 - 5)      | 0<br>(0 - 0)       | 0<br>(0 - 0)        | 2<br>(1 - 4)         | 0<br>(0 - 1)         | 0<br>(0 - 0)         |
| Assault by sharp object                         | 3<br>(2 - 5)      | 0<br>(0 - 0)       | 0<br>(0 - 0)        | 2<br>(1 - 4)         | 1<br>(0 - 1)         | 0<br>(0 - 0)         |
| Assault by other means                          | 4<br>(2 - 6)      | 0<br>(0 - 0)       | 0<br>(0 - 0)        | 2<br>(1 - 3)         | 1<br>(0 - 1)         | 0<br>(0 - 1)         |

Web Table 31- Timor-Leste deaths with 95% UI by age, sex, and cause in 2013

| Cause                                                             | Both Sexes, All Ages     | Both Sexes, 0-4 Years    | Both Sexes, 5-14 Years | Both Sexes, 15-49 Years | Both Sexes, 50-69 Years  | Both Sexes, 70-80 Years  |
|-------------------------------------------------------------------|--------------------------|--------------------------|------------------------|-------------------------|--------------------------|--------------------------|
| All causes                                                        | 5,032<br>(4,600 - 5,570) | 1,560<br>(1,340 - 1,826) | 186<br>(164 - 213)     | 785<br>(699 - 882)      | 1,209<br>(1,060 - 1,405) | 1,291<br>(1,167 - 1,442) |
| Communicable, maternal, neonatal, and nutritional diseases        | 1,822<br>(1,568 - 2,104) | 1,207<br>(988 - 1,458)   | 67<br>(54 - 84)        | 205<br>(176 - 240)      | 161<br>(135 - 193)       | 182<br>(149 - 214)       |
| HIV/AIDS and tuberculosis                                         | 155<br>(113 - 215)       | 3<br>(2 - 7)             | 3<br>(2 - 5)           | 35<br>(24 - 61)         | 68<br>(48 - 89)          | 45<br>(33 - 59)          |
| Tuberculosis                                                      | 150<br>(108 - 209)       | 3<br>(2 - 6)             | 3<br>(2 - 4)           | 32<br>(20 - 57)         | 67<br>(48 - 88)          | 45<br>(33 - 59)          |
| HIV/AIDS                                                          | 5<br>(4 - 9)             | 0<br>(0 - 0)             | 0<br>(0 - 0)           | 4<br>(3 - 7)            | 1<br>(1 - 2)             | 0<br>(0 - 0)             |
| HIV/AIDS resulting in mycobacterial infection                     | 0<br>(0 - 1)             | 0<br>(0 - 0)             | 0<br>(0 - 0)           | 0<br>(0 - 0)            | 0<br>(0 - 0)             | 0<br>(0 - 0)             |
| HIV/AIDS resulting in other diseases                              | 5<br>(3 - 8)             | 0<br>(0 - 0)             | 0<br>(0 - 0)           | 3<br>(3 - 7)            | 1<br>(1 - 1)             | 0<br>(0 - 0)             |
| Diarrhea, lower respiratory, and other common infectious diseases | 856<br>(691 - 1,045)     | 548<br>(389 - 720)       | 52<br>(40 - 66)        | 63<br>(51 - 77)         | 78<br>(59 - 97)          | 116<br>(88 - 145)        |
| Diarrheal diseases                                                | 231<br>(142 - 343)       | 172<br>(83 - 285)        | 8<br>(5 - 14)          | 11<br>(7 - 14)          | 17<br>(11 - 25)          | 24<br>(15 - 36)          |
| Intestinal infectious diseases                                    | 40<br>(20 - 76)          | 18<br>(8 - 36)           | 14<br>(6 - 26)         | 8<br>(3 - 15)           | 1<br>(0 - 3)             | 0<br>(0 - 1)             |
| Typhoid fever                                                     | 28<br>(13 - 55)          | 11<br>(4 - 24)           | 10<br>(5 - 20)         | 6<br>(2 - 11)           | 1<br>(0 - 2)             | 0<br>(0 - 0)             |
| Paratyphoid fever                                                 | 9<br>(4 - 17)            | 4<br>(2 - 9)             | 3<br>(1 - 6)           | 1<br>(1 - 3)            | 0<br>(0 - 0)             | 0<br>(0 - 0)             |
| Other intestinal infectious diseases                              | 4<br>(1 - 10)            | 3<br>(0 - 8)             | 0<br>(0 - 3)           | 1<br>(0 - 4)            | 0<br>(0 - 2)             | 0<br>(0 - 1)             |
| Lower respiratory infections                                      | 451<br>(351 - 577)       | 262<br>(168 - 381)       | 17<br>(11 - 24)        | 32<br>(24 - 41)         | 53<br>(39 - 69)          | 88<br>(65 - 115)         |
| Upper respiratory infections                                      | 0<br>(0 - 1)             | 0<br>(0 - 1)             | 0<br>(0 - 0)           | 0<br>(0 - 0)            | 0<br>(0 - 0)             | 0<br>(0 - 0)             |
| Otitis media                                                      | 1<br>(1 - 1)             | 0<br>(0 - 0)             | 0<br>(0 - 0)           | 0<br>(0 - 0)            | 0<br>(0 - 0)             | 0<br>(0 - 0)             |
| Meningitis                                                        | 64<br>(43 - 94)          | 44<br>(25 - 74)          | 6<br>(4 - 9)           | 8<br>(5 - 10)           | 4<br>(3 - 6)             | 2<br>(2 - 3)             |
| Pneumococcal meningitis                                           | 17<br>(11 - 23)          | 10<br>(5 - 16)           | 2<br>(1 - 4)           | 3<br>(2 - 4)            | 1<br>(1 - 2)             | 1<br>(1 - 1)             |
| H influenzae type B meningitis                                    | 21<br>(12 - 33)          | 17<br>(9 - 29)           | 2<br>(1 - 2)           | 1<br>(1 - 2)            | 0<br>(0 - 1)             | 0<br>(0 - 0)             |
| Meningococcal meningitis                                          | 6<br>(4 - 8)             | 3<br>(1 - 5)             | 1<br>(0 - 1)           | 1<br>(1 - 2)            | 1<br>(0 - 1)             | 0<br>(0 - 1)             |
| Other meningitis                                                  | 21<br>(13 - 33)          | 14<br>(7 - 25)           | 2<br>(1 - 3)           | 3<br>(2 - 4)            | 1<br>(1 - 2)             | 1<br>(1 - 1)             |
| Encephalitis                                                      | 14<br>(8 - 19)           | 7<br>(4 - 11)            | 2<br>(1 - 4)           | 3<br>(1 - 4)            | 1<br>(0 - 2)             | 1<br>(0 - 1)             |
| Diphtheria                                                        | 0<br>(0 - 2)             | 0<br>(0 - 2)             | 0<br>(0 - 1)           | 0<br>(0 - 0)            | 0<br>(0 - 0)             | --                       |
| Whooping cough                                                    | 32<br>(0 - 152)          | 30<br>(0 - 141)          | 2<br>(0 - 8)           | 0<br>(0 - 1)            | 0<br>(0 - 0)             | --                       |
| Tetanus                                                           | 7<br>(4 - 18)            | 3<br>(1 - 12)            | 1<br>(1 - 2)           | 1<br>(1 - 2)            | 1<br>(1 - 2)             | 1<br>(0 - 1)             |
| Measles                                                           | 13<br>(0 - 65)           | 11<br>(0 - 56)           | 2<br>(0 - 9)           | 0<br>(0 - 1)            | 0<br>(0 - 0)             | --                       |
| Varicella and herpes zoster                                       | 2<br>(1 - 3)             | 1<br>(0 - 2)             | 0<br>(0 - 1)           | 0<br>(0 - 1)            | 0<br>(0 - 0)             | 0<br>(0 - 1)             |
| Neglected tropical diseases and malaria                           | 35<br>(15 - 123)         | 21<br>(4 - 111)          | 6<br>(3 - 11)          | 6<br>(2 - 13)           | 2<br>(1 - 4)             | 1<br>(1 - 2)             |
| Malaria                                                           | 21<br>(3 - 108)          | 15<br>(0 - 105)          | 2<br>(0 - 4)           | 3<br>(1 - 8)            | 1<br>(0 - 2)             | 0<br>(0 - 1)             |
| Leishmaniasis                                                     | 0<br>(0 - 0)             | 0<br>(0 - 0)             | 0<br>(0 - 0)           | 0<br>(0 - 0)            | 0<br>(0 - 0)             | 0<br>(0 - 0)             |
| Visceral leishmaniasis                                            | 0<br>(0 - 0)             | 0<br>(0 - 0)             | 0<br>(0 - 0)           | 0<br>(0 - 0)            | 0<br>(0 - 0)             | 0<br>(0 - 0)             |
| Cysticercosis                                                     | 0<br>(0 - 0)             | 0<br>(0 - 0)             | 0<br>(0 - 0)           | 0<br>(0 - 0)            | 0<br>(0 - 0)             | 0<br>(0 - 0)             |
| Cystic echinococcosis                                             | 0<br>(0 - 0)             | 0<br>(0 - 0)             | 0<br>(0 - 0)           | 0<br>(0 - 0)            | 0<br>(0 - 0)             | 0<br>(0 - 0)             |
| Dengue                                                            | 4<br>(3 - 6)             | 2<br>(1 - 3)             | 2<br>(1 - 2)           | 0<br>(0 - 1)            | 0<br>(0 - 0)             | 0<br>(0 - 0)             |
| Rabies                                                            | 4<br>(2 - 14)            | 1<br>(0 - 2)             | 1<br>(0 - 5)           | 1<br>(1 - 6)            | 0<br>(0 - 1)             | 0<br>(0 - 0)             |
| Intestinal nematode infections                                    | 2<br>(0 - 8)             | 1<br>(0 - 7)             | 0<br>(0 - 3)           | 0<br>(0 - 1)            | 0<br>(0 - 1)             | 0<br>(0 - 0)             |
| Ascariasis                                                        | 2<br>(0 - 8)             | 1<br>(0 - 7)             | 0<br>(0 - 3)           | 0<br>(0 - 1)            | 0<br>(0 - 1)             | 0<br>(0 - 0)             |
| Other neglected tropical diseases                                 | 4<br>(3 - 7)             | 2<br>(1 - 4)             | 1<br>(0 - 1)           | 1<br>(0 - 1)            | 0<br>(0 - 1)             | 0<br>(0 - 1)             |
| Maternal disorders                                                | 89<br>(70 - 110)         | --                       | 1<br>(0 - 1)           | 88<br>(69 - 109)        | --                       | --                       |
| Maternal hemorrhage                                               | 12<br>(8 - 17)           | --                       | 0<br>(0 - 0)           | 12<br>(8 - 17)          | --                       | --                       |

Web Table 31- Timor-Leste deaths with 95% UI by age, sex, and cause in 2013

| Cause                                                            | Both Sexes, All Ages     | Both Sexes, 0-4 Years | Both Sexes, 5-14 Years | Both Sexes, 15-49 Years | Both Sexes, 50-69 Years | Both Sexes, 70-80 Years |
|------------------------------------------------------------------|--------------------------|-----------------------|------------------------|-------------------------|-------------------------|-------------------------|
| Maternal sepsis and other maternal infections                    | 10<br>(7 - 15)           | --                    | 0<br>(0 - 0)           | 10<br>(7 - 14)          | --                      | --                      |
| Maternal hypertensive disorders                                  | 9<br>(4 - 14)            | --                    | 0<br>(0 - 0)           | 9<br>(4 - 14)           | --                      | --                      |
| Maternal obstructed labor                                        | 7<br>(4 - 10)            | --                    | 0<br>(0 - 0)           | 7<br>(4 - 10)           | --                      | --                      |
| Maternal abortive outcome                                        | 16<br>(10 - 23)          | --                    | 0<br>(0 - 0)           | 16<br>(10 - 23)         | --                      | --                      |
| Indirect maternal deaths                                         | 9<br>(5 - 13)            | --                    | 0<br>(0 - 0)           | 9<br>(5 - 13)           | --                      | --                      |
| Late maternal deaths                                             | 12<br>(7 - 16)           | --                    | 0<br>(0 - 0)           | 11<br>(7 - 16)          | --                      | --                      |
| Maternal deaths aggravated by HIV/AIDS                           | 0<br>(0 - 0)             | --                    | --                     | 0<br>(0 - 0)            | --                      | --                      |
| Other maternal disorders                                         | 14<br>(9 - 20)           | --                    | 0<br>(0 - 0)           | 14<br>(9 - 20)          | --                      | --                      |
| Neonatal disorders                                               | 580<br>(490 - 691)       | 580<br>(490 - 691)    | --                     | --                      | --                      | --                      |
| Neonatal preterm birth complications                             | 294<br>(180 - 404)       | 294<br>(180 - 404)    | --                     | --                      | --                      | --                      |
| Neonatal encephalopathy due to birth asphyxia and trauma         | 119<br>(63 - 192)        | 119<br>(63 - 192)     | --                     | --                      | --                      | --                      |
| Neonatal sepsis and other neonatal infections                    | 25<br>(10 - 52)          | 25<br>(10 - 52)       | --                     | --                      | --                      | --                      |
| Hemolytic disease and other neonatal jaundice                    | 2<br>(1 - 4)             | 2<br>(1 - 4)          | --                     | --                      | --                      | --                      |
| Other neonatal disorders                                         | 141<br>(45 - 269)        | 141<br>(45 - 269)     | --                     | --                      | --                      | --                      |
| Nutritional deficiencies                                         | 53<br>(37 - 72)          | 24<br>(12 - 39)       | 2<br>(2 - 4)           | 6<br>(4 - 7)            | 7<br>(4 - 10)           | 14<br>(9 - 19)          |
| Protein-energy malnutrition                                      | 13<br>(6 - 25)           | 8<br>(3 - 18)         | 1<br>(0 - 1)           | 1<br>(0 - 2)            | 1<br>(0 - 3)            | 3<br>(1 - 6)            |
| Iodine deficiency                                                | 0<br>(0 - 1)             | 0<br>(0 - 1)          | 0<br>(0 - 0)           | 0<br>(0 - 0)            | 0<br>(0 - 0)            | 0<br>(0 - 0)            |
| Iron-deficiency anemia                                           | 36<br>(22 - 49)          | 14<br>(6 - 24)        | 2<br>(1 - 3)           | 4<br>(3 - 6)            | 5<br>(3 - 7)            | 11<br>(6 - 16)          |
| Other nutritional deficiencies                                   | 3<br>(2 - 7)             | 2<br>(1 - 4)          | 0<br>(0 - 1)           | 0<br>(0 - 1)            | 0<br>(0 - 1)            | 1<br>(0 - 1)            |
| Other communicable, maternal, neonatal, and nutritional diseases | 54<br>(35 - 100)         | 31<br>(18 - 51)       | 4<br>(2 - 7)           | 7<br>(4 - 22)           | 7<br>(4 - 21)           | 5<br>(2 - 14)           |
| Sexually transmitted diseases excluding HIV                      | 26<br>(14 - 43)          | 23<br>(12 - 38)       | 2<br>(1 - 4)           | 1<br>(0 - 1)            | 0<br>(0 - 1)            | 0<br>(0 - 1)            |
| Syphilis                                                         | 26<br>(14 - 43)          | 23<br>(12 - 38)       | 2<br>(1 - 4)           | 0<br>(0 - 0)            | 0<br>(0 - 1)            | 0<br>(0 - 1)            |
| Chlamydial infection                                             | 0<br>(0 - 0)             | --                    | 0<br>(0 - 0)           | 0<br>(0 - 0)            | 0<br>(0 - 0)            | 0<br>(0 - 0)            |
| Gonococcal infection                                             | 0<br>(0 - 0)             | --                    | 0<br>(0 - 0)           | 0<br>(0 - 0)            | 0<br>(0 - 0)            | 0<br>(0 - 0)            |
| Other sexually transmitted diseases                              | 0<br>(0 - 0)             | --                    | 0<br>(0 - 0)           | 0<br>(0 - 0)            | 0<br>(0 - 0)            | 0<br>(0 - 0)            |
| Hepatitis                                                        | 4<br>(3 - 5)             | 1<br>(0 - 1)          | 0<br>(0 - 0)           | 1<br>(1 - 2)            | 1<br>(1 - 2)            | 1<br>(0 - 1)            |
| Acute hepatitis A                                                | 1<br>(0 - 1)             | 0<br>(0 - 1)          | 0<br>(0 - 0)           | 0<br>(0 - 0)            | 0<br>(0 - 0)            | 0<br>(0 - 0)            |
| Acute hepatitis B                                                | 2<br>(1 - 3)             | 0<br>(0 - 1)          | 0<br>(0 - 0)           | 0<br>(0 - 1)            | 1<br>(1 - 1)            | 1<br>(0 - 1)            |
| Acute hepatitis C                                                | 0<br>(0 - 0)             | --                    | 0<br>(0 - 0)           | 0<br>(0 - 0)            | 0<br>(0 - 0)            | 0<br>(0 - 0)            |
| Acute hepatitis E                                                | 1<br>(1 - 2)             | 0<br>(0 - 0)          | 0<br>(0 - 0)           | 1<br>(0 - 1)            | 0<br>(0 - 1)            | 0<br>(0 - 0)            |
| Other infectious diseases                                        | 24<br>(13 - 70)          | 8<br>(2 - 19)         | 2<br>(1 - 5)           | 5<br>(2 - 20)           | 5<br>(2 - 19)           | 4<br>(1 - 13)           |
| Non-communicable diseases                                        | 2,749<br>(2,424 - 3,138) | 281<br>(193 - 423)    | 60<br>(49 - 73)        | 347<br>(296 - 410)      | 982<br>(855 - 1,152)    | 1,077<br>(968 - 1,213)  |
| Neoplasms                                                        | 401<br>(321 - 476)       | 9<br>(5 - 13)         | 12<br>(9 - 15)         | 70<br>(57 - 82)         | 194<br>(153 - 236)      | 116<br>(91 - 136)       |
| Esophageal cancer                                                | 8<br>(6 - 10)            | --                    | --                     | 1<br>(1 - 1)            | 4<br>(3 - 6)            | 3<br>(2 - 4)            |
| Stomach cancer                                                   | 36<br>(28 - 44)          | --                    | --                     | 4<br>(3 - 6)            | 18<br>(14 - 23)         | 13<br>(10 - 17)         |
| Liver cancer                                                     | 29<br>(22 - 37)          | --                    | 0<br>(0 - 0)           | 5<br>(3 - 7)            | 16<br>(12 - 21)         | 8<br>(6 - 10)           |
| Liver cancer due to hepatitis B                                  | 14<br>(7 - 21)           | --                    | 0<br>(0 - 0)           | 3<br>(1 - 4)            | 8<br>(4 - 12)           | 3<br>(2 - 5)            |
| Liver cancer due to hepatitis C                                  | 10<br>(5 - 17)           | --                    | 0<br>(0 - 0)           | 1<br>(1 - 3)            | 6<br>(3 - 10)           | 3<br>(2 - 5)            |
| Liver cancer due to alcohol use                                  | 2<br>(1 - 3)             | --                    | --                     | 0<br>(0 - 0)            | 1<br>(0 - 2)            | 1<br>(0 - 1)            |
| Liver cancer due to other causes                                 | 4<br>(3 - 6)             | --                    | 0<br>(0 - 0)           | 1<br>(0 - 1)            | 2<br>(1 - 3)            | 1<br>(1 - 2)            |

Web Table 31- Timor-Leste deaths with 95% UI by age, sex, and cause in 2013

| Cause                                         | Both Sexes, All Ages     | Both Sexes, 0-4 Years | Both Sexes, 5-14 Years | Both Sexes, 15-49 Years | Both Sexes, 50-69 Years | Both Sexes, 70-80 Years |
|-----------------------------------------------|--------------------------|-----------------------|------------------------|-------------------------|-------------------------|-------------------------|
| Larynx cancer                                 | 4<br>(3 - 6)             | --                    | --                     | 0<br>(0 - 1)            | 2<br>(1 - 3)            | 1<br>(1 - 2)            |
| Tracheal, bronchus and lung cancer            | 72<br>(59 - 89)          | --                    | --                     | 7<br>(5 - 9)            | 41<br>(33 - 52)         | 24<br>(19 - 30)         |
| Breast cancer                                 | 22<br>(13 - 29)          | --                    | --                     | 6<br>(4 - 8)            | 12<br>(7 - 17)          | 4<br>(2 - 5)            |
| Cervical cancer                               | 24<br>(14 - 34)          | --                    | --                     | 5<br>(3 - 7)            | 14<br>(8 - 21)          | 5<br>(3 - 7)            |
| Uterine cancer                                | 4<br>(2 - 6)             | --                    | --                     | 0<br>(0 - 1)            | 2<br>(1 - 4)            | 1<br>(1 - 2)            |
| Prostate cancer                               | 6<br>(3 - 9)             | --                    | --                     | 0<br>(0 - 0)            | 1<br>(1 - 2)            | 4<br>(2 - 7)            |
| Colon and rectum cancer                       | 43<br>(34 - 54)          | --                    | --                     | 6<br>(5 - 8)            | 21<br>(16 - 27)         | 16<br>(12 - 21)         |
| Lip and oral cavity cancer                    | 12<br>(8 - 15)           | --                    | --                     | 2<br>(1 - 3)            | 6<br>(4 - 8)            | 4<br>(3 - 5)            |
| Nasopharynx cancer                            | 7<br>(5 - 9)             | --                    | 0<br>(0 - 0)           | 2<br>(1 - 3)            | 3<br>(2 - 5)            | 1<br>(1 - 2)            |
| Other pharynx cancer                          | 6<br>(4 - 9)             | --                    | --                     | 1<br>(1 - 1)            | 4<br>(3 - 5)            | 2<br>(1 - 2)            |
| Gallbladder and biliary tract cancer          | 13<br>(8 - 18)           | --                    | --                     | 1<br>(1 - 2)            | 7<br>(4 - 11)           | 5<br>(3 - 7)            |
| Pancreatic cancer                             | 12<br>(9 - 15)           | --                    | --                     | 2<br>(1 - 2)            | 7<br>(5 - 9)            | 4<br>(3 - 4)            |
| Malignant skin melanoma                       | 2<br>(1 - 3)             | --                    | --                     | 1<br>(0 - 1)            | 1<br>(1 - 1)            | 0<br>(0 - 1)            |
| Non-melanoma skin cancer                      | 1<br>(1 - 2)             | --                    | --                     | 0<br>(0 - 0)            | 0<br>(0 - 1)            | 1<br>(0 - 1)            |
| Ovarian cancer                                | 5<br>(3 - 9)             | --                    | --                     | 1<br>(1 - 2)            | 3<br>(2 - 6)            | 1<br>(0 - 1)            |
| Testicular cancer                             | 1<br>(0 - 1)             | --                    | --                     | 0<br>(0 - 1)            | 0<br>(0 - 0)            | 0<br>(0 - 0)            |
| Kidney cancer                                 | 4<br>(2 - 6)             | 0<br>(0 - 1)          | 0<br>(0 - 0)           | 0<br>(0 - 1)            | 2<br>(1 - 3)            | 1<br>(1 - 2)            |
| Bladder cancer                                | 6<br>(5 - 8)             | --                    | --                     | 0<br>(0 - 0)            | 3<br>(2 - 4)            | 3<br>(2 - 4)            |
| Brain and nervous system cancer               | 11<br>(6 - 14)           | 1<br>(0 - 1)          | 1<br>(1 - 2)           | 4<br>(2 - 5)            | 4<br>(2 - 5)            | 1<br>(1 - 2)            |
| Thyroid cancer                                | 3<br>(2 - 4)             | --                    | 0<br>(0 - 0)           | 0<br>(0 - 0)            | 1<br>(1 - 2)            | 1<br>(1 - 2)            |
| Mesothelioma                                  | 1<br>(0 - 1)             | --                    | --                     | 0<br>(0 - 0)            | 0<br>(0 - 1)            | 0<br>(0 - 0)            |
| Hodgkin lymphoma                              | 1<br>(1 - 2)             | 0<br>(0 - 0)          | 0<br>(0 - 0)           | 0<br>(0 - 1)            | 0<br>(0 - 0)            | 0<br>(0 - 0)            |
| Non-Hodgkin lymphoma                          | 10<br>(5 - 16)           | 1<br>(0 - 1)          | 1<br>(1 - 2)           | 3<br>(1 - 4)            | 4<br>(2 - 6)            | 2<br>(1 - 4)            |
| Multiple myeloma                              | 2<br>(1 - 2)             | --                    | --                     | 0<br>(0 - 0)            | 1<br>(0 - 1)            | 0<br>(0 - 1)            |
| Leukemia                                      | 24<br>(15 - 30)          | 3<br>(1 - 5)          | 6<br>(4 - 8)           | 8<br>(5 - 11)           | 5<br>(3 - 6)            | 3<br>(2 - 3)            |
| Other neoplasms                               | 33<br>(24 - 42)          | 4<br>(2 - 8)          | 3<br>(2 - 5)           | 8<br>(5 - 10)           | 11<br>(7 - 15)          | 7<br>(4 - 9)            |
| Cardiovascular diseases                       | 1,322<br>(1,130 - 1,710) | 34<br>(21 - 55)       | 15<br>(10 - 25)        | 150<br>(123 - 211)      | 502<br>(420 - 655)      | 621<br>(538 - 767)      |
| Rheumatic heart disease                       | 28<br>(20 - 44)          | 1<br>(0 - 2)          | 4<br>(2 - 6)           | 10<br>(7 - 16)          | 7<br>(4 - 12)           | 6<br>(4 - 10)           |
| Ischemic heart disease                        | 659<br>(501 - 963)       | 5<br>(2 - 11)         | 3<br>(1 - 6)           | 72<br>(52 - 107)        | 269<br>(203 - 391)      | 311<br>(235 - 460)      |
| Cerebrovascular disease                       | 483<br>(383 - 618)       | 9<br>(5 - 16)         | 4<br>(2 - 6)           | 44<br>(32 - 60)         | 177<br>(135 - 237)      | 249<br>(196 - 311)      |
| Ischemic stroke                               | 254<br>(169 - 353)       | 1<br>(1 - 3)          | 0<br>(0 - 1)           | 8<br>(3 - 15)           | 71<br>(38 - 116)        | 174<br>(119 - 228)      |
| Hemorrhagic stroke                            | 229<br>(151 - 311)       | 8<br>(5 - 14)         | 3<br>(2 - 5)           | 36<br>(25 - 49)         | 106<br>(67 - 146)       | 75<br>(46 - 114)        |
| Hypertensive heart disease                    | 47<br>(29 - 72)          | 1<br>(0 - 1)          | 0<br>(0 - 0)           | 5<br>(3 - 8)            | 17<br>(10 - 28)         | 24<br>(15 - 38)         |
| Cardiomyopathy and myocarditis                | 23<br>(16 - 33)          | 7<br>(3 - 12)         | 2<br>(1 - 3)           | 5<br>(3 - 7)            | 5<br>(3 - 8)            | 5<br>(3 - 8)            |
| Atrial fibrillation and flutter               | 0<br>(0 - 0)             | --                    | --                     | 0<br>(0 - 0)            | 0<br>(0 - 0)            | 0<br>(0 - 0)            |
| Aortic aneurysm                               | 4<br>(2 - 6)             | --                    | --                     | 0<br>(0 - 1)            | 1<br>(1 - 2)            | 2<br>(1 - 4)            |
| Peripheral vascular disease                   | 0<br>(0 - 0)             | --                    | --                     | 0<br>(0 - 0)            | 0<br>(0 - 0)            | 0<br>(0 - 0)            |
| Endocarditis                                  | 10<br>(7 - 14)           | 2<br>(1 - 4)          | 1<br>(0 - 1)           | 3<br>(2 - 4)            | 3<br>(2 - 4)            | 2<br>(1 - 3)            |
| Other cardiovascular and circulatory diseases | 68<br>(39 - 121)         | 8<br>(3 - 19)         | 2<br>(1 - 5)           | 12<br>(7 - 23)          | 24<br>(13 - 46)         | 21<br>(11 - 37)         |
| Chronic respiratory diseases                  | 292<br>(239 - 404)       | 27<br>(16 - 42)       | 6<br>(4 - 8)           | 24<br>(19 - 32)         | 92<br>(72 - 133)        | 143<br>(115 - 196)      |

Web Table 31- Timor-Leste deaths with 95% UI by age, sex, and cause in 2013

| Cause                                               | Both Sexes, All Ages | Both Sexes, 0-4 Years | Both Sexes, 5-14 Years | Both Sexes, 15-49 Years | Both Sexes, 50-69 Years | Both Sexes, 70-80 Years |
|-----------------------------------------------------|----------------------|-----------------------|------------------------|-------------------------|-------------------------|-------------------------|
| Chronic obstructive pulmonary disease               | 152<br>(118 - 210)   | 12<br>(7 - 21)        | 1<br>(1 - 2)           | 6<br>(4 - 10)           | 46<br>(32 - 66)         | 87<br>(66 - 120)        |
| Pneumoconiosis                                      | 11<br>(6 - 18)       | 0<br>(0 - 0)          | 0<br>(0 - 0)           | 1<br>(1 - 2)            | 5<br>(3 - 9)            | 4<br>(2 - 7)            |
| Silicosis                                           | 6<br>(3 - 10)        | 0<br>(0 - 0)          | 0<br>(0 - 0)           | 0<br>(0 - 0)            | 2<br>(1 - 4)            | 4<br>(2 - 7)            |
| Asbestosis                                          | 1<br>(0 - 2)         | 0<br>(0 - 0)          | 0<br>(0 - 0)           | 0<br>(0 - 0)            | 1<br>(0 - 2)            | 0<br>(0 - 0)            |
| Coal workers pneumoconiosis                         | 3<br>(1 - 5)         | 0<br>(0 - 0)          | 0<br>(0 - 0)           | 1<br>(0 - 1)            | 2<br>(1 - 4)            | 0<br>(0 - 0)            |
| Other pneumoconiosis                                | 2<br>(1 - 3)         | 0<br>(0 - 0)          | 0<br>(0 - 0)           | 0<br>(0 - 1)            | 1<br>(0 - 1)            | 0<br>(0 - 1)            |
| Asthma                                              | 109<br>(61 - 179)    | 11<br>(5 - 20)        | 4<br>(3 - 6)           | 14<br>(9 - 21)          | 36<br>(19 - 63)         | 43<br>(21 - 78)         |
| Interstitial lung disease and pulmonary sarcoidosis | 9<br>(0 - 19)        | 0<br>(0 - 0)          | 0<br>(0 - 0)           | 0<br>(0 - 0)            | 3<br>(0 - 7)            | 5<br>(0 - 12)           |
| Other chronic respiratory diseases                  | 11<br>(7 - 17)       | 4<br>(2 - 7)          | 0<br>(0 - 1)           | 1<br>(1 - 2)            | 1<br>(1 - 2)            | 4<br>(2 - 6)            |
| Cirrhosis                                           | 76<br>(61 - 94)      | 1<br>(1 - 2)          | 1<br>(1 - 2)           | 21<br>(17 - 27)         | 37<br>(29 - 48)         | 15<br>(11 - 19)         |
| Cirrhosis due to hepatitis B                        | 27<br>(19 - 39)      | 0<br>(0 - 0)          | 0<br>(0 - 0)           | 8<br>(5 - 12)           | 14<br>(9 - 20)          | 6<br>(4 - 8)            |
| Cirrhosis due to hepatitis C                        | 22<br>(14 - 32)      | 0<br>(0 - 0)          | 0<br>(0 - 0)           | 6<br>(3 - 10)           | 11<br>(7 - 17)          | 4<br>(3 - 7)            |
| Cirrhosis due to alcohol use                        | 18<br>(10 - 27)      | -                     | -                      | 4<br>(2 - 7)            | 10<br>(5 - 15)          | 4<br>(2 - 6)            |
| Cirrhosis due to other causes                       | 9<br>(6 - 13)        | 1<br>(0 - 2)          | 1<br>(0 - 1)           | 3<br>(2 - 5)            | 3<br>(2 - 5)            | 1<br>(0 - 1)            |
| Digestive diseases                                  | 113<br>(77 - 159)    | 7<br>(3 - 12)         | 4<br>(2 - 6)           | 23<br>(15 - 34)         | 39<br>(25 - 56)         | 41<br>(27 - 58)         |
| Peptic ulcer disease                                | 40<br>(25 - 61)      | 0<br>(0 - 1)          | 0<br>(0 - 1)           | 7<br>(3 - 10)           | 16<br>(10 - 25)         | 17<br>(10 - 26)         |
| Gastritis and duodenitis                            | 4<br>(2 - 7)         | 0<br>(0 - 1)          | 0<br>(0 - 0)           | 1<br>(0 - 1)            | 1<br>(1 - 2)            | 1<br>(1 - 2)            |
| Appendicitis                                        | 9<br>(6 - 14)        | 1<br>(0 - 2)          | 1<br>(1 - 2)           | 3<br>(1 - 4)            | 3<br>(2 - 5)            | 2<br>(1 - 4)            |
| Paralytic ileus and intestinal obstruction          | 16<br>(8 - 24)       | 2<br>(1 - 3)          | 1<br>(0 - 1)           | 3<br>(1 - 4)            | 5<br>(2 - 7)            | 6<br>(3 - 10)           |
| Inguinal, femoral, and abdominal hernia             | 3<br>(2 - 6)         | 0<br>(0 - 1)          | 0<br>(0 - 0)           | 1<br>(0 - 1)            | 1<br>(1 - 2)            | 1<br>(1 - 2)            |
| Inflammatory bowel disease                          | 4<br>(2 - 5)         | 0<br>(0 - 1)          | 0<br>(0 - 0)           | 1<br>(0 - 1)            | 1<br>(0 - 2)            | 1<br>(1 - 2)            |
| Vascular intestinal disorders                       | 1<br>(0 - 2)         | 0<br>(0 - 0)          | 0<br>(0 - 0)           | 0<br>(0 - 0)            | 0<br>(0 - 1)            | 0<br>(0 - 1)            |
| Gallbladder and biliary diseases                    | 11<br>(7 - 16)       | 0<br>(0 - 1)          | 0<br>(0 - 0)           | 2<br>(1 - 3)            | 4<br>(2 - 6)            | 5<br>(3 - 7)            |
| Pancreatitis                                        | 10<br>(5 - 17)       | 0<br>(0 - 0)          | 0<br>(0 - 0)           | 4<br>(2 - 8)            | 3<br>(2 - 6)            | 2<br>(1 - 4)            |
| Other digestive diseases                            | 15<br>(8 - 27)       | 2<br>(1 - 4)          | 1<br>(0 - 1)           | 3<br>(2 - 6)            | 5<br>(2 - 10)           | 5<br>(3 - 9)            |
| Neurological disorders                              | 86<br>(67 - 103)     | 4<br>(2 - 8)          | 4<br>(2 - 5)           | 8<br>(6 - 12)           | 14<br>(11 - 18)         | 57<br>(44 - 70)         |
| Alzheimer disease and other dementias               | 65<br>(50 - 80)      | -                     | -                      | 0<br>(0 - 0)            | 11<br>(8 - 14)          | 55<br>(42 - 67)         |
| Parkinson disease                                   | 1<br>(1 - 1)         | -                     | -                      | 0<br>(0 - 0)            | 0<br>(0 - 1)            | 1<br>(0 - 1)            |
| Epilepsy                                            | 15<br>(9 - 20)       | 3<br>(1 - 7)          | 3<br>(2 - 4)           | 6<br>(4 - 10)           | 2<br>(1 - 3)            | 1<br>(1 - 1)            |
| Multiple sclerosis                                  | 0<br>(0 - 0)         | -                     | -                      | 0<br>(0 - 0)            | 0<br>(0 - 0)            | 0<br>(0 - 0)            |
| Other neurological disorders                        | 5<br>(4 - 6)         | 1<br>(1 - 2)          | 1<br>(1 - 1)           | 2<br>(1 - 2)            | 1<br>(1 - 1)            | 1<br>(0 - 1)            |
| Mental and substance use disorders                  | 18<br>(11 - 24)      | 0<br>(0 - 0)          | 0<br>(0 - 0)           | 10<br>(6 - 14)          | 6<br>(3 - 9)            | 1<br>(1 - 2)            |
| Schizophrenia                                       | 0<br>(0 - 1)         | -                     | -                      | 0<br>(0 - 0)            | 0<br>(0 - 0)            | 0<br>(0 - 0)            |
| Alcohol use disorders                               | 12<br>(6 - 18)       | -                     | -                      | 5<br>(3 - 8)            | 5<br>(3 - 8)            | 1<br>(0 - 1)            |
| Drug use disorders                                  | 5<br>(3 - 8)         | 0<br>(0 - 0)          | -                      | 4<br>(3 - 7)            | 1<br>(0 - 1)            | 0<br>(0 - 0)            |
| Opioid use disorders                                | 3<br>(2 - 6)         | 0<br>(0 - 0)          | -                      | 3<br>(2 - 5)            | 0<br>(0 - 1)            | 0<br>(0 - 0)            |
| Cocaine use disorders                               | 0<br>(0 - 0)         | 0<br>(0 - 0)          | -                      | 0<br>(0 - 0)            | 0<br>(0 - 0)            | 0<br>(0 - 0)            |
| Amphetamine use disorders                           | 0<br>(0 - 0)         | 0<br>(0 - 0)          | -                      | 0<br>(0 - 0)            | 0<br>(0 - 0)            | 0<br>(0 - 0)            |
| Other drug use disorders                            | 2<br>(1 - 3)         | 0<br>(0 - 0)          | -                      | 1<br>(1 - 2)            | 0<br>(0 - 0)            | 0<br>(0 - 0)            |
| Eating disorders                                    | 0<br>(0 - 0)         | -                     | 0<br>(0 - 0)           | 0<br>(0 - 0)            | -                       | -                       |

Web Table 31- Timor-Leste deaths with 95% UI by age, sex, and cause in 2013

| Cause                                               | Both Sexes, All Ages | Both Sexes, 0-4 Years | Both Sexes, 5-14 Years | Both Sexes, 15-49 Years | Both Sexes, 50-69 Years | Both Sexes, 70-80 Years |
|-----------------------------------------------------|----------------------|-----------------------|------------------------|-------------------------|-------------------------|-------------------------|
| Anorexia nervosa                                    | 0<br>(0 - 0)         | --                    | 0<br>(0 - 0)           | 0<br>(0 - 0)            | --                      | --                      |
| Diabetes, urogenital, blood, and endocrine diseases | 223<br>(162 - 287)   | 15<br>(10 - 21)       | 7<br>(5 - 8)           | 30<br>(23 - 39)         | 92<br>(65 - 124)        | 79<br>(55 - 103)        |
| Diabetes mellitus                                   | 106<br>(71 - 138)    | 0<br>(0 - 1)          | 0<br>(0 - 1)           | 8<br>(6 - 11)           | 52<br>(34 - 70)         | 46<br>(29 - 61)         |
| Acute glomerulonephritis                            | 1<br>(1 - 1)         | 0<br>(0 - 0)          | 0<br>(0 - 0)           | 0<br>(0 - 0)            | 0<br>(0 - 0)            | 0<br>(0 - 0)            |
| Chronic kidney disease                              | 73<br>(41 - 105)     | 3<br>(1 - 5)          | 2<br>(1 - 3)           | 13<br>(8 - 20)          | 31<br>(16 - 46)         | 24<br>(14 - 36)         |
| Chronic kidney disease due to diabetes mellitus     | 4<br>(1 - 7)         | 0<br>(0 - 0)          | 0<br>(0 - 0)           | 1<br>(0 - 1)            | 2<br>(1 - 3)            | 2<br>(1 - 3)            |
| Chronic kidney disease due to hypertension          | 19<br>(10 - 30)      | 0<br>(0 - 1)          | 0<br>(0 - 0)           | 3<br>(1 - 5)            | 9<br>(5 - 14)           | 7<br>(3 - 11)           |
| Chronic kidney disease due to glomerulonephritis    | 11<br>(8 - 16)       | 1<br>(1 - 2)          | 1<br>(1 - 1)           | 3<br>(2 - 4)            | 4<br>(2 - 6)            | 3<br>(2 - 5)            |
| Chronic kidney disease due to other causes          | 38<br>(14 - 65)      | 1<br>(0 - 3)          | 1<br>(0 - 2)           | 7<br>(3 - 12)           | 17<br>(6 - 28)          | 13<br>(4 - 22)          |
| Urinary diseases and male infertility               | 14<br>(9 - 19)       | 2<br>(1 - 3)          | 0<br>(0 - 0)           | 2<br>(1 - 3)            | 5<br>(3 - 7)            | 5<br>(3 - 7)            |
| Interstitial nephritis and urinary tract infections | 8<br>(4 - 11)        | 1<br>(0 - 2)          | 0<br>(0 - 0)           | 1<br>(1 - 2)            | 3<br>(1 - 4)            | 3<br>(2 - 4)            |
| Urolithiasis                                        | 1<br>(1 - 2)         | --                    | 0<br>(0 - 0)           | 0<br>(0 - 0)            | 0<br>(0 - 1)            | 0<br>(0 - 1)            |
| Other urinary diseases                              | 6<br>(4 - 8)         | 1<br>(0 - 2)          | 0<br>(0 - 0)           | 1<br>(1 - 1)            | 2<br>(1 - 3)            | 2<br>(1 - 3)            |
| Gynecological diseases                              | 1<br>(0 - 3)         | --                    | --                     | 1<br>(0 - 2)            | 0<br>(0 - 1)            | 0<br>(0 - 1)            |
| Uterine fibroids                                    | 0<br>(0 - 1)         | --                    | --                     | 0<br>(0 - 0)            | 0<br>(0 - 0)            | 0<br>(0 - 0)            |
| Polycystic ovarian syndrome                         | 0<br>(0 - 0)         | --                    | --                     | 0<br>(0 - 0)            | 0<br>(0 - 0)            | --                      |
| Endometriosis                                       | 0<br>(0 - 0)         | --                    | --                     | 0<br>(0 - 0)            | 0<br>(0 - 0)            | --                      |
| Genital prolapse                                    | 0<br>(0 - 1)         | --                    | --                     | 0<br>(0 - 0)            | 0<br>(0 - 0)            | 0<br>(0 - 0)            |
| Other gynecological diseases                        | 1<br>(0 - 2)         | --                    | --                     | 0<br>(0 - 1)            | 0<br>(0 - 0)            | 0<br>(0 - 0)            |
| Hemoglobinopathies and hemolytic anemias            | 17<br>(12 - 24)      | 8<br>(4 - 12)         | 3<br>(2 - 4)           | 4<br>(2 - 5)            | 2<br>(1 - 2)            | 1<br>(1 - 2)            |
| Thalassemias                                        | 14<br>(9 - 19)       | 7<br>(3 - 11)         | 3<br>(2 - 4)           | 3<br>(2 - 5)            | 0<br>(0 - 1)            | 0<br>(0 - 0)            |
| Sickle cell disorders                               | 0<br>(0 - 0)         | 0<br>(0 - 0)          | 0<br>(0 - 0)           | 0<br>(0 - 0)            | 0<br>(0 - 0)            | 0<br>(0 - 0)            |
| G6PD deficiency                                     | 0<br>(0 - 1)         | 0<br>(0 - 0)          | 0<br>(0 - 0)           | 0<br>(0 - 0)            | 0<br>(0 - 0)            | 0<br>(0 - 0)            |
| Other hemoglobinopathies and hemolytic anemias      | 3<br>(2 - 4)         | 0<br>(0 - 1)          | 0<br>(0 - 0)           | 0<br>(0 - 1)            | 1<br>(1 - 2)            | 1<br>(1 - 2)            |
| Endocrine, metabolic, blood, and immune disorders   | 11<br>(5 - 14)       | 2<br>(1 - 4)          | 1<br>(0 - 1)           | 2<br>(1 - 3)            | 3<br>(1 - 4)            | 2<br>(1 - 3)            |
| Musculoskeletal disorders                           | 3<br>(2 - 5)         | --                    | 0<br>(0 - 1)           | 1<br>(1 - 2)            | 1<br>(1 - 2)            | 1<br>(0 - 1)            |
| Rheumatoid arthritis                                | 1<br>(0 - 1)         | --                    | 0<br>(0 - 0)           | 0<br>(0 - 0)            | 0<br>(0 - 0)            | 0<br>(0 - 0)            |
| Other musculoskeletal disorders                     | 3<br>(2 - 4)         | --                    | 0<br>(0 - 1)           | 1<br>(1 - 2)            | 1<br>(0 - 1)            | 0<br>(0 - 1)            |
| Other non-communicable diseases                     | 215<br>(132 - 355)   | 186<br>(106 - 323)    | 12<br>(8 - 17)         | 9<br>(7 - 12)           | 4<br>(3 - 5)            | 4<br>(3 - 6)            |
| Congenital anomalies                                | 203<br>(121 - 342)   | 182<br>(104 - 317)    | 11<br>(7 - 17)         | 8<br>(5 - 11)           | 1<br>(1 - 2)            | 1<br>(1 - 1)            |
| Neural tube defects                                 | 37<br>(10 - 78)      | 35<br>(9 - 76)        | 1<br>(0 - 2)           | 1<br>(0 - 2)            | 0<br>(0 - 0)            | 0<br>(0 - 0)            |
| Congenital heart anomalies                          | 106<br>(51 - 206)    | 94<br>(42 - 191)      | 7<br>(4 - 11)          | 4<br>(3 - 6)            | 1<br>(0 - 1)            | 1<br>(0 - 1)            |
| Cleft lip and cleft palate                          | 1<br>(0 - 2)         | 1<br>(0 - 2)          | --                     | --                      | --                      | --                      |
| Down syndrome                                       | 5<br>(2 - 10)        | 4<br>(1 - 9)          | 1<br>(0 - 1)           | 0<br>(0 - 0)            | 0<br>(0 - 0)            | 0<br>(0 - 0)            |
| Chromosomal unbalanced rearrangements               | 4<br>(1 - 11)        | 4<br>(1 - 10)         | 0<br>(0 - 0)           | 0<br>(0 - 0)            | 0<br>(0 - 0)            | 0<br>(0 - 0)            |
| Other congenital anomalies                          | 50<br>(21 - 113)     | 44<br>(17 - 104)      | 3<br>(1 - 5)           | 2<br>(1 - 3)            | 1<br>(0 - 1)            | 0<br>(0 - 1)            |
| Skin and subcutaneous diseases                      | 9<br>(7 - 13)        | 2<br>(1 - 3)          | 0<br>(0 - 1)           | 2<br>(1 - 3)            | 3<br>(2 - 4)            | 3<br>(2 - 5)            |
| Cellulitis                                          | 6<br>(2 - 9)         | 1<br>(0 - 2)          | 0<br>(0 - 0)           | 1<br>(0 - 2)            | 2<br>(1 - 3)            | 2<br>(1 - 3)            |
| Pyoderma                                            | 2<br>(1 - 5)         | 1<br>(0 - 1)          | 0<br>(0 - 0)           | 0<br>(0 - 1)            | 1<br>(0 - 1)            | 1<br>(0 - 1)            |
| Decubitus ulcer                                     | 1<br>(0 - 3)         | 0<br>(0 - 0)          | 0<br>(0 - 0)           | 0<br>(0 - 0)            | 0<br>(0 - 1)            | 1<br>(0 - 2)            |



Web Table 31- Timor-Leste deaths with 95% UI by age, sex, and cause in 2013

| Cause                                           | Both Sexes, All Ages | Both Sexes, 0-4 Years | Both Sexes, 5-14 Years | Both Sexes, 15-49 Years | Both Sexes, 50-69 Years | Both Sexes, 70-80 Years |
|-------------------------------------------------|----------------------|-----------------------|------------------------|-------------------------|-------------------------|-------------------------|
| Other skin and subcutaneous diseases            | 0<br>(0 - 0)         | 0<br>(0 - 0)          | 0<br>(0 - 0)           | 0<br>(0 - 0)            | 0<br>(0 - 0)            | 0<br>(0 - 0)            |
| Sudden infant death syndrome                    | 2<br>(1 - 7)         | 2<br>(1 - 7)          | --                     | --                      | --                      | --                      |
| Injuries                                        | 462<br>(390 - 543)   | 72<br>(48 - 101)      | 59<br>(48 - 71)        | 233<br>(193 - 274)      | 66<br>(52 - 82)         | 32<br>(25 - 40)         |
| Transport injuries                              | 163<br>(134 - 194)   | 18<br>(11 - 29)       | 24<br>(18 - 31)        | 85<br>(69 - 104)        | 26<br>(18 - 33)         | 11<br>(8 - 14)          |
| Road injuries                                   | 153<br>(121 - 182)   | 16<br>(9 - 25)        | 22<br>(17 - 29)        | 81<br>(64 - 98)         | 24<br>(17 - 31)         | 10<br>(7 - 13)          |
| Pedestrian road injuries                        | 43<br>(31 - 59)      | 7<br>(4 - 12)         | 9<br>(7 - 13)          | 16<br>(10 - 23)         | 7<br>(5 - 10)           | 4<br>(3 - 5)            |
| Cyclist road injuries                           | 12<br>(9 - 16)       | 1<br>(0 - 2)          | 3<br>(2 - 4)           | 5<br>(4 - 7)            | 2<br>(2 - 3)            | 1<br>(1 - 1)            |
| Motorcyclist road injuries                      | 36<br>(24 - 47)      | 2<br>(1 - 3)          | 3<br>(2 - 4)           | 25<br>(16 - 34)         | 5<br>(3 - 7)            | 1<br>(1 - 2)            |
| Motor vehicle road injuries                     | 57<br>(39 - 77)      | 6<br>(3 - 9)          | 6<br>(4 - 9)           | 33<br>(23 - 45)         | 9<br>(5 - 13)           | 3<br>(2 - 5)            |
| Other road injuries                             | 5<br>(3 - 8)         | 1<br>(0 - 1)          | 1<br>(1 - 2)           | 2<br>(1 - 4)            | 1<br>(0 - 1)            | 0<br>(0 - 1)            |
| Other transport injuries                        | 11<br>(8 - 16)       | 2<br>(1 - 4)          | 1<br>(1 - 2)           | 5<br>(3 - 8)            | 2<br>(1 - 2)            | 1<br>(1 - 1)            |
| Unintentional injuries                          | 176<br>(145 - 222)   | 51<br>(32 - 76)       | 31<br>(23 - 40)        | 56<br>(43 - 79)         | 23<br>(18 - 34)         | 15<br>(11 - 20)         |
| Falls                                           | 24<br>(19 - 32)      | 3<br>(1 - 5)          | 2<br>(1 - 3)           | 8<br>(5 - 12)           | 6<br>(4 - 9)            | 5<br>(3 - 8)            |
| Drowning                                        | 76<br>(54 - 98)      | 22<br>(11 - 39)       | 20<br>(13 - 28)        | 25<br>(17 - 33)         | 6<br>(4 - 11)           | 2<br>(1 - 4)            |
| Fire, heat, and hot substances                  | 19<br>(14 - 28)      | 7<br>(3 - 12)         | 2<br>(2 - 4)           | 5<br>(3 - 9)            | 2<br>(2 - 5)            | 2<br>(1 - 4)            |
| Poisonings                                      | 6<br>(4 - 10)        | 1<br>(0 - 2)          | 1<br>(0 - 1)           | 2<br>(2 - 5)            | 1<br>(1 - 2)            | 0<br>(0 - 1)            |
| Exposure to mechanical forces                   | 18<br>(13 - 49)      | 3<br>(1 - 9)          | 3<br>(2 - 7)           | 9<br>(6 - 24)           | 3<br>(2 - 6)            | 1<br>(1 - 2)            |
| Unintentional firearm injuries                  | 7<br>(4 - 12)        | 1<br>(0 - 2)          | 1<br>(0 - 1)           | 4<br>(2 - 8)            | 1<br>(1 - 2)            | 1<br>(0 - 1)            |
| Unintentional suffocation                       | 1<br>(0 - 2)         | 0<br>(0 - 1)          | 0<br>(0 - 0)           | 0<br>(0 - 0)            | 0<br>(0 - 0)            | 0<br>(0 - 0)            |
| Other exposure to mechanical forces             | 11<br>(7 - 33)       | 2<br>(1 - 6)          | 2<br>(1 - 5)           | 5<br>(3 - 15)           | 1<br>(1 - 4)            | 0<br>(0 - 1)            |
| Adverse effects of medical treatment            | 11<br>(7 - 17)       | 3<br>(2 - 7)          | 1<br>(0 - 1)           | 2<br>(1 - 4)            | 3<br>(1 - 5)            | 2<br>(1 - 4)            |
| Animal contact                                  | 3<br>(2 - 6)         | 1<br>(0 - 2)          | 1<br>(0 - 1)           | 1<br>(0 - 1)            | 0<br>(0 - 1)            | 0<br>(0 - 0)            |
| Venomous animal contact                         | 2<br>(1 - 5)         | 1<br>(0 - 2)          | 1<br>(0 - 1)           | 0<br>(0 - 1)            | 0<br>(0 - 1)            | 0<br>(0 - 0)            |
| Non-venomous animal contact                     | 1<br>(0 - 2)         | 0<br>(0 - 1)          | 0<br>(0 - 0)           | 0<br>(0 - 1)            | 0<br>(0 - 0)            | 0<br>(0 - 0)            |
| Foreign body                                    | 14<br>(7 - 22)       | 10<br>(4 - 18)        | 1<br>(0 - 1)           | 1<br>(1 - 2)            | 1<br>(0 - 1)            | 1<br>(0 - 2)            |
| Pulmonary aspiration and foreign body in airway | 14<br>(6 - 22)       | 10<br>(4 - 18)        | 1<br>(0 - 1)           | 1<br>(0 - 2)            | 1<br>(0 - 1)            | 1<br>(0 - 2)            |
| Foreign body in other body part                 | 0<br>(0 - 0)         | 0<br>(0 - 0)          | 0<br>(0 - 0)           | 0<br>(0 - 0)            | 0<br>(0 - 0)            | 0<br>(0 - 0)            |
| Other unintentional injuries                    | 5<br>(4 - 7)         | 1<br>(1 - 2)          | 1<br>(0 - 1)           | 3<br>(2 - 4)            | 1<br>(1 - 1)            | 0<br>(0 - 1)            |
| Self-harm and interpersonal violence            | 122<br>(65 - 161)    | 3<br>(1 - 5)          | 4<br>(3 - 6)           | 92<br>(50 - 121)        | 17<br>(6 - 25)          | 6<br>(2 - 10)           |
| Self-harm                                       | 83<br>(22 - 118)     | --                    | 2<br>(1 - 4)           | 61<br>(16 - 88)         | 14<br>(4 - 22)          | 6<br>(2 - 9)            |
| Interpersonal violence                          | 39<br>(27 - 52)      | 3<br>(1 - 5)          | 2<br>(1 - 4)           | 31<br>(21 - 43)         | 2<br>(1 - 3)            | 0<br>(0 - 1)            |
| Assault by firearm                              | 11<br>(5 - 18)       | 0<br>(0 - 1)          | 0<br>(0 - 1)           | 9<br>(4 - 16)           | 1<br>(0 - 1)            | 0<br>(0 - 0)            |
| Assault by sharp object                         | 15<br>(9 - 26)       | 0<br>(0 - 1)          | 0<br>(0 - 1)           | 13<br>(8 - 23)          | 1<br>(0 - 1)            | 0<br>(0 - 0)            |
| Assault by other means                          | 13<br>(8 - 18)       | 2<br>(1 - 4)          | 2<br>(1 - 3)           | 8<br>(5 - 12)           | 1<br>(0 - 1)            | 0<br>(0 - 0)            |

Web Table 31- Timor-Leste deaths with 95% UI by age, sex, and cause in 2013

| Cause                                                             | Males, All Ages          | Males, 0-4 Years     | Males, 5-14 Years | Males, 15-49 Years | Males, 50-69 Years | Males, 70-80 Years |
|-------------------------------------------------------------------|--------------------------|----------------------|-------------------|--------------------|--------------------|--------------------|
| All causes                                                        | 2,681<br>(2,384 - 3,047) | 865<br>(728 - 1,024) | 107<br>(94 - 123) | 477<br>(402 - 550) | 633<br>(546 - 769) | 599<br>(544 - 685) |
| Communicable, maternal, neonatal, and nutritional diseases        | 952<br>(782 - 1,108)     | 667<br>(529 - 799)   | 36<br>(27 - 46)   | 73<br>(56 - 101)   | 88<br>(69 - 112)   | 88<br>(71 - 110)   |
| HIV/AIDS and tuberculosis                                         | 95<br>(64 - 142)         | 2<br>(1 - 4)         | 1<br>(1 - 3)      | 22<br>(13 - 42)    | 41<br>(27 - 63)    | 28<br>(18 - 41)    |
| Tuberculosis                                                      | 91<br>(60 - 138)         | 2<br>(1 - 3)         | 1<br>(1 - 3)      | 20<br>(11 - 40)    | 41<br>(26 - 62)    | 28<br>(18 - 41)    |
| HIV/AIDS                                                          | 3<br>(2 - 6)             | 0<br>(0 - 0)         | 0<br>(0 - 0)      | 3<br>(2 - 5)       | 1<br>(0 - 1)       | 0<br>(0 - 0)       |
| HIV/AIDS resulting in mycobacterial infection                     | 0<br>(0 - 0)             | 0<br>(0 - 0)         | 0<br>(0 - 0)      | 0<br>(0 - 0)       | 0<br>(0 - 0)       | 0<br>(0 - 0)       |
| HIV/AIDS resulting in other diseases                              | 3<br>(2 - 6)             | 0<br>(0 - 0)         | 0<br>(0 - 0)      | 2<br>(2 - 4)       | 1<br>(0 - 1)       | 0<br>(0 - 0)       |
| Diarrhea, lower respiratory, and other common infectious diseases | 471<br>(368 - 590)       | 313<br>(215 - 421)   | 28<br>(21 - 38)   | 39<br>(30 - 51)    | 40<br>(29 - 53)    | 51<br>(38 - 69)    |
| Diarrheal diseases                                                | 139<br>(71 - 230)        | 110<br>(44 - 199)    | 5<br>(2 - 10)     | 7<br>(4 - 9)       | 8<br>(4 - 13)      | 10<br>(6 - 16)     |
| Intestinal infectious diseases                                    | 22<br>(9 - 43)           | 9<br>(3 - 21)        | 7<br>(3 - 16)     | 4<br>(2 - 9)       | 1<br>(0 - 2)       | 0<br>(0 - 1)       |
| Typhoid fever                                                     | 15<br>(6 - 31)           | 5<br>(2 - 13)        | 5<br>(2 - 12)     | 3<br>(1 - 7)       | 0<br>(0 - 1)       | 0<br>(0 - 0)       |
| Paratyphoid fever                                                 | 5<br>(2 - 10)            | 2<br>(1 - 5)         | 2<br>(1 - 4)      | 1<br>(0 - 2)       | 0<br>(0 - 0)       | 0<br>(0 - 0)       |
| Other intestinal infectious diseases                              | 2<br>(0 - 8)             | 1<br>(0 - 6)         | 0<br>(0 - 2)      | 0<br>(0 - 3)       | 0<br>(0 - 1)       | 0<br>(0 - 1)       |
| Lower respiratory infections                                      | 240<br>(175 - 324)       | 143<br>(82 - 219)    | 9<br>(5 - 14)     | 20<br>(14 - 29)    | 28<br>(19 - 39)    | 40<br>(27 - 56)    |
| Upper respiratory infections                                      | 0<br>(0 - 0)             | 0<br>(0 - 0)         | 0<br>(0 - 0)      | 0<br>(0 - 0)       | 0<br>(0 - 0)       | 0<br>(0 - 0)       |
| Otitis media                                                      | 0<br>(0 - 1)             | 0<br>(0 - 0)         | 0<br>(0 - 0)      | 0<br>(0 - 0)       | 0<br>(0 - 0)       | 0<br>(0 - 0)       |
| Meningitis                                                        | 37<br>(22 - 60)          | 26<br>(12 - 49)      | 3<br>(2 - 6)      | 5<br>(3 - 7)       | 2<br>(1 - 3)       | 1<br>(1 - 2)       |
| Pneumococcal meningitis                                           | 9<br>(6 - 15)            | 6<br>(2 - 10)        | 1<br>(1 - 2)      | 2<br>(1 - 3)       | 1<br>(0 - 1)       | 0<br>(0 - 1)       |
| H influenzae type B meningitis                                    | 12<br>(6 - 22)           | 10<br>(4 - 20)       | 1<br>(0 - 2)      | 1<br>(0 - 1)       | 0<br>(0 - 0)       | 0<br>(0 - 0)       |
| Meningococcal meningitis                                          | 3<br>(2 - 6)             | 2<br>(1 - 4)         | 0<br>(0 - 1)      | 1<br>(0 - 1)       | 0<br>(0 - 1)       | 0<br>(0 - 0)       |
| Other meningitis                                                  | 12<br>(7 - 19)           | 8<br>(4 - 16)        | 1<br>(0 - 2)      | 1<br>(1 - 2)       | 1<br>(0 - 1)       | 0<br>(0 - 1)       |
| Encephalitis                                                      | 8<br>(5 - 11)            | 4<br>(2 - 7)         | 1<br>(1 - 2)      | 2<br>(1 - 3)       | 1<br>(0 - 1)       | 0<br>(0 - 0)       |
| Diphtheria                                                        | 0<br>(0 - 1)             | 0<br>(0 - 1)         | 0<br>(0 - 0)      | 0<br>(0 - 0)       | 0<br>(0 - 0)       | --                 |
| Whooping cough                                                    | 14<br>(0 - 69)           | 13<br>(0 - 64)       | 1<br>(0 - 4)      | 0<br>(0 - 1)       | 0<br>(0 - 0)       | --                 |
| Tetanus                                                           | 4<br>(2 - 8)             | 1<br>(0 - 4)         | 1<br>(0 - 1)      | 1<br>(0 - 2)       | 1<br>(0 - 1)       | 0<br>(0 - 1)       |
| Measles                                                           | 6<br>(0 - 34)            | 6<br>(0 - 30)        | 1<br>(0 - 4)      | 0<br>(0 - 0)       | 0<br>(0 - 0)       | --                 |
| Varicella and herpes zoster                                       | 1<br>(0 - 2)             | 0<br>(0 - 2)         | 0<br>(0 - 0)      | 0<br>(0 - 0)       | 0<br>(0 - 0)       | 0<br>(0 - 0)       |
| Neglected tropical diseases and malaria                           | 16<br>(5 - 77)           | 8<br>(2 - 70)        | 3<br>(1 - 8)      | 3<br>(1 - 11)      | 1<br>(0 - 3)       | 0<br>(0 - 1)       |
| Malaria                                                           | 7<br>(0 - 70)            | 5<br>(0 - 68)        | 1<br>(0 - 3)      | 2<br>(0 - 7)       | 0<br>(0 - 2)       | 0<br>(0 - 1)       |
| Leishmaniasis                                                     | 0<br>(0 - 0)             | 0<br>(0 - 0)         | 0<br>(0 - 0)      | 0<br>(0 - 0)       | 0<br>(0 - 0)       | 0<br>(0 - 0)       |
| Visceral leishmaniasis                                            | 0<br>(0 - 0)             | 0<br>(0 - 0)         | 0<br>(0 - 0)      | 0<br>(0 - 0)       | 0<br>(0 - 0)       | 0<br>(0 - 0)       |
| Cysticercosis                                                     | 0<br>(0 - 0)             | 0<br>(0 - 0)         | 0<br>(0 - 0)      | 0<br>(0 - 0)       | 0<br>(0 - 0)       | 0<br>(0 - 0)       |
| Cystic echinococcosis                                             | 0<br>(0 - 0)             | 0<br>(0 - 0)         | 0<br>(0 - 0)      | 0<br>(0 - 0)       | 0<br>(0 - 0)       | 0<br>(0 - 0)       |
| Dengue                                                            | 2<br>(1 - 3)             | 1<br>(0 - 2)         | 1<br>(0 - 1)      | 0<br>(0 - 0)       | 0<br>(0 - 0)       | 0<br>(0 - 0)       |
| Rabies                                                            | 3<br>(1 - 12)            | 0<br>(0 - 2)         | 1<br>(0 - 4)      | 1<br>(0 - 5)       | 0<br>(0 - 1)       | 0<br>(0 - 0)       |
| Intestinal nematode infections                                    | 1<br>(0 - 6)             | 1<br>(0 - 5)         | 0<br>(0 - 2)      | 0<br>(0 - 1)       | 0<br>(0 - 0)       | 0<br>(0 - 0)       |
| Ascariasis                                                        | 1<br>(0 - 6)             | 1<br>(0 - 5)         | 0<br>(0 - 2)      | 0<br>(0 - 1)       | 0<br>(0 - 0)       | 0<br>(0 - 0)       |
| Other neglected tropical diseases                                 | 2<br>(1 - 4)             | 1<br>(0 - 2)         | 0<br>(0 - 1)      | 0<br>(0 - 1)       | 0<br>(0 - 0)       | 0<br>(0 - 0)       |
| Maternal disorders                                                | --                       | --                   | --                | --                 | --                 | --                 |
| Maternal hemorrhage                                               | --                       | --                   | --                | --                 | --                 | --                 |

Web Table 31- Timor-Leste deaths with 95% UI by age, sex, and cause in 2013

| Cause                                                            | Males, All Ages          | Males, 0-4 Years   | Males, 5-14 Years | Males, 15-49 Years | Males, 50-69 Years | Males, 70-80 Years |
|------------------------------------------------------------------|--------------------------|--------------------|-------------------|--------------------|--------------------|--------------------|
| Maternal sepsis and other maternal infections                    | --                       | --                 | --                | --                 | --                 | --                 |
| Maternal hypertensive disorders                                  | --                       | --                 | --                | --                 | --                 | --                 |
| Maternal obstructed labor                                        | --                       | --                 | --                | --                 | --                 | --                 |
| Maternal abortive outcome                                        | --                       | --                 | --                | --                 | --                 | --                 |
| Indirect maternal deaths                                         | --                       | --                 | --                | --                 | --                 | --                 |
| Late maternal deaths                                             | --                       | --                 | --                | --                 | --                 | --                 |
| Maternal deaths aggravated by HIV/AIDS                           | --                       | --                 | --                | --                 | --                 | --                 |
| Other maternal disorders                                         | --                       | --                 | --                | --                 | --                 | --                 |
| Neonatal disorders                                               | 318<br>(267 - 377)       | 318<br>(267 - 377) | --                | --                 | --                 | --                 |
| Neonatal preterm birth complications                             | 159<br>(81 - 234)        | 159<br>(81 - 234)  | --                | --                 | --                 | --                 |
| Neonatal encephalopathy due to birth asphyxia and trauma         | 64<br>(24 - 127)         | 64<br>(24 - 127)   | --                | --                 | --                 | --                 |
| Neonatal sepsis and other neonatal infections                    | 14<br>(3 - 36)           | 14<br>(3 - 36)     | --                | --                 | --                 | --                 |
| Hemolytic disease and other neonatal jaundice                    | 1<br>(0 - 3)             | 1<br>(0 - 3)       | --                | --                 | --                 | --                 |
| Other neonatal disorders                                         | 81<br>(22 - 175)         | 81<br>(22 - 175)   | --                | --                 | --                 | --                 |
| Nutritional deficiencies                                         | 24<br>(14 - 39)          | 11<br>(5 - 22)     | 1<br>(1 - 2)      | 3<br>(2 - 4)       | 3<br>(2 - 4)       | 6<br>(3 - 9)       |
| Protein-energy malnutrition                                      | 10<br>(4 - 20)           | 6<br>(2 - 14)      | 0<br>(0 - 1)      | 1<br>(0 - 2)       | 1<br>(0 - 2)       | 2<br>(1 - 4)       |
| Iodine deficiency                                                | 0<br>(0 - 1)             | 0<br>(0 - 1)       | 0<br>(0 - 0)      | 0<br>(0 - 0)       | 0<br>(0 - 0)       | 0<br>(0 - 0)       |
| Iron-deficiency anemia                                           | 11<br>(5 - 19)           | 4<br>(1 - 9)       | 1<br>(0 - 1)      | 2<br>(1 - 3)       | 2<br>(1 - 3)       | 3<br>(1 - 6)       |
| Other nutritional deficiencies                                   | 2<br>(1 - 6)             | 1<br>(0 - 3)       | 0<br>(0 - 0)      | 0<br>(0 - 1)       | 0<br>(0 - 1)       | 0<br>(0 - 1)       |
| Other communicable, maternal, neonatal, and nutritional diseases | 28<br>(17 - 66)          | 16<br>(8 - 28)     | 2<br>(1 - 4)      | 5<br>(2 - 19)      | 3<br>(1 - 13)      | 2<br>(1 - 9)       |
| Sexually transmitted diseases excluding HIV                      | 13<br>(7 - 21)           | 11<br>(6 - 19)     | 1<br>(1 - 2)      | 0<br>(0 - 0)       | 0<br>(0 - 0)       | 0<br>(0 - 0)       |
| Syphilis                                                         | 12<br>(7 - 21)           | 11<br>(6 - 19)     | 1<br>(1 - 2)      | 0<br>(0 - 0)       | 0<br>(0 - 0)       | 0<br>(0 - 0)       |
| Chlamydial infection                                             | --                       | --                 | --                | --                 | --                 | --                 |
| Gonococcal infection                                             | 0<br>(0 - 0)             | --                 | 0<br>(0 - 0)      | 0<br>(0 - 0)       | 0<br>(0 - 0)       | 0<br>(0 - 0)       |
| Other sexually transmitted diseases                              | 0<br>(0 - 0)             | --                 | 0<br>(0 - 0)      | 0<br>(0 - 0)       | 0<br>(0 - 0)       | 0<br>(0 - 0)       |
| Hepatitis                                                        | 2<br>(2 - 3)             | 0<br>(0 - 1)       | 0<br>(0 - 0)      | 1<br>(1 - 1)       | 1<br>(0 - 1)       | 0<br>(0 - 0)       |
| Acute hepatitis A                                                | 0<br>(0 - 1)             | 0<br>(0 - 1)       | 0<br>(0 - 0)      | 0<br>(0 - 0)       | 0<br>(0 - 0)       | 0<br>(0 - 0)       |
| Acute hepatitis B                                                | 1<br>(1 - 2)             | 0<br>(0 - 1)       | 0<br>(0 - 0)      | 0<br>(0 - 1)       | 0<br>(0 - 1)       | 0<br>(0 - 0)       |
| Acute hepatitis C                                                | 0<br>(0 - 0)             | --                 | 0<br>(0 - 0)      | 0<br>(0 - 0)       | 0<br>(0 - 0)       | 0<br>(0 - 0)       |
| Acute hepatitis E                                                | 1<br>(0 - 1)             | 0<br>(0 - 0)       | 0<br>(0 - 0)      | 0<br>(0 - 1)       | 0<br>(0 - 0)       | 0<br>(0 - 0)       |
| Other infectious diseases                                        | 13<br>(6 - 49)           | 4<br>(1 - 14)      | 1<br>(0 - 3)      | 4<br>(1 - 17)      | 3<br>(1 - 12)      | 2<br>(0 - 9)       |
| Non-communicable diseases                                        | 1,393<br>(1,197 - 1,642) | 152<br>(98 - 244)  | 31<br>(25 - 39)   | 216<br>(174 - 259) | 501<br>(424 - 614) | 493<br>(439 - 571) |
| Neoplasms                                                        | 205<br>(171 - 247)       | 5<br>(3 - 9)       | 6<br>(5 - 9)      | 37<br>(29 - 45)    | 95<br>(77 - 118)   | 61<br>(51 - 74)    |
| Esophageal cancer                                                | 4<br>(3 - 6)             | --                 | --                | 1<br>(0 - 1)       | 2<br>(2 - 3)       | 1<br>(1 - 2)       |
| Stomach cancer                                                   | 20<br>(15 - 25)          | --                 | --                | 3<br>(2 - 3)       | 10<br>(7 - 13)     | 7<br>(5 - 10)      |
| Liver cancer                                                     | 19<br>(12 - 26)          | --                 | 0<br>(0 - 0)      | 4<br>(2 - 5)       | 11<br>(7 - 15)     | 5<br>(3 - 7)       |
| Liver cancer due to hepatitis B                                  | 10<br>(5 - 17)           | --                 | 0<br>(0 - 0)      | 2<br>(1 - 4)       | 6<br>(2 - 10)      | 2<br>(1 - 4)       |
| Liver cancer due to hepatitis C                                  | 6<br>(1 - 12)            | --                 | 0<br>(0 - 0)      | 1<br>(0 - 2)       | 4<br>(0 - 7)       | 2<br>(0 - 4)       |
| Liver cancer due to alcohol use                                  | 1<br>(1 - 2)             | --                 | --                | 0<br>(0 - 0)       | 1<br>(0 - 1)       | 0<br>(0 - 1)       |
| Liver cancer due to other causes                                 | 2<br>(1 - 3)             | --                 | 0<br>(0 - 0)      | 0<br>(0 - 1)       | 1<br>(0 - 2)       | 0<br>(0 - 1)       |

Web Table 31- Timor-Leste deaths with 95% UI by age, sex, and cause in 2013

| Cause                                         | Males, All Ages    | Males, 0-4 Years | Males, 5-14 Years | Males, 15-49 Years | Males, 50-69 Years | Males, 70-80 Years |
|-----------------------------------------------|--------------------|------------------|-------------------|--------------------|--------------------|--------------------|
| Larynx cancer                                 | 3<br>(2 - 4)       | --               | --                | 0<br>(0 - 0)       | 2<br>(1 - 2)       | 1<br>(1 - 2)       |
| Tracheal, bronchus and lung cancer            | 46<br>(37 - 58)    | --               | --                | 4<br>(3 - 6)       | 26<br>(20 - 34)    | 16<br>(12 - 21)    |
| Breast cancer                                 | 0<br>(0 - 0)       | --               | --                | 0<br>(0 - 0)       | 0<br>(0 - 0)       | 0<br>(0 - 0)       |
| Cervical cancer                               | --                 | --               | --                | --                 | --                 | --                 |
| Uterine cancer                                | --                 | --               | --                | --                 | --                 | --                 |
| Prostate cancer                               | 6<br>(3 - 9)       | --               | --                | 0<br>(0 - 0)       | 1<br>(1 - 2)       | 4<br>(2 - 7)       |
| Colon and rectum cancer                       | 21<br>(17 - 28)    | --               | --                | 4<br>(3 - 5)       | 10<br>(8 - 14)     | 8<br>(6 - 10)      |
| Lip and oral cavity cancer                    | 7<br>(5 - 10)      | --               | --                | 1<br>(1 - 2)       | 4<br>(2 - 5)       | 2<br>(1 - 3)       |
| Nasopharynx cancer                            | 5<br>(3 - 7)       | --               | 0<br>(0 - 0)      | 2<br>(1 - 2)       | 2<br>(1 - 4)       | 1<br>(0 - 1)       |
| Other pharynx cancer                          | 4<br>(3 - 6)       | --               | --                | 1<br>(0 - 1)       | 3<br>(2 - 4)       | 1<br>(1 - 2)       |
| Gallbladder and biliary tract cancer          | 5<br>(3 - 7)       | --               | --                | 1<br>(0 - 1)       | 3<br>(1 - 4)       | 2<br>(1 - 3)       |
| Pancreatic cancer                             | 7<br>(5 - 9)       | --               | --                | 1<br>(1 - 2)       | 4<br>(3 - 5)       | 2<br>(1 - 3)       |
| Malignant skin melanoma                       | 1<br>(0 - 2)       | --               | --                | 0<br>(0 - 1)       | 0<br>(0 - 1)       | 0<br>(0 - 0)       |
| Non-melanoma skin cancer                      | 1<br>(0 - 1)       | --               | --                | 0<br>(0 - 0)       | 0<br>(0 - 0)       | 0<br>(0 - 0)       |
| Ovarian cancer                                | --                 | --               | --                | --                 | --                 | --                 |
| Testicular cancer                             | 1<br>(0 - 1)       | --               | --                | 0<br>(0 - 1)       | 0<br>(0 - 0)       | 0<br>(0 - 0)       |
| Kidney cancer                                 | 2<br>(1 - 4)       | 0<br>(0 - 0)     | 0<br>(0 - 0)      | 0<br>(0 - 1)       | 1<br>(1 - 2)       | 1<br>(0 - 1)       |
| Bladder cancer                                | 5<br>(3 - 6)       | --               | --                | 0<br>(0 - 0)       | 2<br>(1 - 3)       | 2<br>(2 - 3)       |
| Brain and nervous system cancer               | 6<br>(3 - 9)       | 0<br>(0 - 1)     | 1<br>(0 - 1)      | 2<br>(1 - 4)       | 2<br>(1 - 3)       | 1<br>(0 - 1)       |
| Thyroid cancer                                | 1<br>(1 - 1)       | --               | 0<br>(0 - 0)      | 0<br>(0 - 0)       | 1<br>(0 - 1)       | 0<br>(0 - 0)       |
| Mesothelioma                                  | 0<br>(0 - 0)       | --               | --                | 0<br>(0 - 0)       | 0<br>(0 - 0)       | 0<br>(0 - 0)       |
| Hodgkin lymphoma                              | 1<br>(0 - 1)       | 0<br>(0 - 0)     | 0<br>(0 - 0)      | 0<br>(0 - 0)       | 0<br>(0 - 0)       | 0<br>(0 - 0)       |
| Non-Hodgkin lymphoma                          | 7<br>(3 - 11)      | 0<br>(0 - 1)     | 1<br>(0 - 1)      | 2<br>(1 - 4)       | 2<br>(1 - 4)       | 1<br>(1 - 2)       |
| Multiple myeloma                              | 1<br>(0 - 1)       | --               | --                | 0<br>(0 - 0)       | 0<br>(0 - 1)       | 0<br>(0 - 0)       |
| Leukemia                                      | 13<br>(8 - 17)     | 1<br>(1 - 3)     | 3<br>(2 - 4)      | 5<br>(3 - 7)       | 2<br>(1 - 3)       | 1<br>(1 - 2)       |
| Other neoplasms                               | 18<br>(12 - 24)    | 3<br>(1 - 6)     | 2<br>(1 - 3)      | 5<br>(2 - 7)       | 6<br>(3 - 9)       | 3<br>(2 - 5)       |
| Cardiovascular diseases                       | 626<br>(532 - 746) | 22<br>(13 - 38)  | 6<br>(4 - 9)      | 93<br>(72 - 114)   | 249<br>(204 - 305) | 256<br>(221 - 302) |
| Rheumatic heart disease                       | 12<br>(8 - 22)     | 1<br>(0 - 2)     | 2<br>(1 - 3)      | 5<br>(3 - 8)       | 3<br>(2 - 6)       | 2<br>(1 - 5)       |
| Ischemic heart disease                        | 307<br>(216 - 393) | 3<br>(1 - 8)     | 1<br>(0 - 2)      | 47<br>(30 - 61)    | 135<br>(95 - 172)  | 122<br>(85 - 154)  |
| Cerebrovascular disease                       | 236<br>(173 - 306) | 7<br>(4 - 13)    | 2<br>(1 - 3)      | 27<br>(18 - 38)    | 90<br>(63 - 123)   | 110<br>(81 - 140)  |
| Ischemic stroke                               | 115<br>(55 - 185)  | 1<br>(0 - 3)     | 0<br>(0 - 0)      | 4<br>(1 - 10)      | 36<br>(12 - 68)    | 74<br>(40 - 109)   |
| Hemorrhagic stroke                            | 121<br>(68 - 190)  | 6<br>(3 - 11)    | 1<br>(1 - 2)      | 23<br>(14 - 33)    | 55<br>(28 - 84)    | 36<br>(17 - 68)    |
| Hypertensive heart disease                    | 19<br>(10 - 39)    | 0<br>(0 - 1)     | 0<br>(0 - 0)      | 3<br>(1 - 6)       | 8<br>(4 - 17)      | 9<br>(4 - 17)      |
| Cardiomyopathy and myocarditis                | 12<br>(8 - 19)     | 4<br>(1 - 10)    | 1<br>(0 - 1)      | 3<br>(2 - 4)       | 2<br>(1 - 4)       | 2<br>(1 - 4)       |
| Atrial fibrillation and flutter               | 0<br>(0 - 0)       | --               | --                | 0<br>(0 - 0)       | 0<br>(0 - 0)       | 0<br>(0 - 0)       |
| Aortic aneurysm                               | 2<br>(1 - 4)       | --               | --                | 0<br>(0 - 0)       | 0<br>(0 - 1)       | 1<br>(1 - 3)       |
| Peripheral vascular disease                   | 0<br>(0 - 0)       | --               | --                | 0<br>(0 - 0)       | 0<br>(0 - 0)       | 0<br>(0 - 0)       |
| Endocarditis                                  | 5<br>(3 - 8)       | 1<br>(0 - 2)     | 0<br>(0 - 0)      | 2<br>(1 - 2)       | 1<br>(1 - 2)       | 1<br>(0 - 1)       |
| Other cardiovascular and circulatory diseases | 32<br>(16 - 60)    | 6<br>(2 - 13)    | 1<br>(0 - 2)      | 7<br>(3 - 13)      | 9<br>(4 - 20)      | 9<br>(4 - 18)      |
| Chronic respiratory diseases                  | 170<br>(131 - 250) | 15<br>(8 - 28)   | 3<br>(2 - 5)      | 15<br>(11 - 22)    | 54<br>(38 - 83)    | 83<br>(63 - 121)   |

Web Table 31- Timor-Leste deaths with 95% UI by age, sex, and cause in 2013

| Cause                                               | Males, All Ages  | Males, 0-4 Years | Males, 5-14 Years | Males, 15-49 Years | Males, 50-69 Years | Males, 70-80 Years |
|-----------------------------------------------------|------------------|------------------|-------------------|--------------------|--------------------|--------------------|
| Chronic obstructive pulmonary disease               | 86<br>(61 - 133) | 7<br>(3 - 15)    | 1<br>(0 - 1)      | 4<br>(3 - 7)       | 24<br>(16 - 42)    | 49<br>(34 - 75)    |
| Pneumoconiosis                                      | 11<br>(6 - 18)   | 0<br>(0 - 0)     | 0<br>(0 - 0)      | 1<br>(1 - 2)       | 5<br>(3 - 9)       | 4<br>(2 - 7)       |
| Silicosis                                           | 6<br>(3 - 10)    | 0<br>(0 - 0)     | 0<br>(0 - 0)      | 0<br>(0 - 0)       | 2<br>(1 - 4)       | 4<br>(2 - 7)       |
| Asbestosis                                          | 1<br>(0 - 2)     | 0<br>(0 - 0)     | 0<br>(0 - 0)      | 0<br>(0 - 0)       | 1<br>(0 - 2)       | 0<br>(0 - 0)       |
| Coal workers pneumoconiosis                         | 3<br>(1 - 5)     | 0<br>(0 - 0)     | 0<br>(0 - 0)      | 1<br>(0 - 1)       | 2<br>(1 - 4)       | 0<br>(0 - 0)       |
| Other pneumoconiosis                                | 1<br>(1 - 3)     | 0<br>(0 - 0)     | 0<br>(0 - 0)      | 0<br>(0 - 1)       | 1<br>(0 - 1)       | 0<br>(0 - 1)       |
| Asthma                                              | 61<br>(30 - 98)  | 6<br>(2 - 12)    | 2<br>(1 - 3)      | 8<br>(5 - 13)      | 21<br>(10 - 36)    | 24<br>(11 - 41)    |
| Interstitial lung disease and pulmonary sarcoidosis | 5<br>(0 - 12)    | 0<br>(0 - 0)     | 0<br>(0 - 0)      | 0<br>(0 - 0)       | 2<br>(0 - 5)       | 3<br>(0 - 7)       |
| Other chronic respiratory diseases                  | 6<br>(4 - 11)    | 2<br>(1 - 5)     | 0<br>(0 - 1)      | 1<br>(1 - 2)       | 1<br>(0 - 2)       | 2<br>(1 - 3)       |
| Cirrhosis                                           | 53<br>(41 - 68)  | 1<br>(0 - 1)     | 0<br>(0 - 1)      | 17<br>(12 - 22)    | 26<br>(20 - 35)    | 9<br>(6 - 12)      |
| Cirrhosis due to hepatitis B                        | 18<br>(10 - 28)  | 0<br>(0 - 0)     | 0<br>(0 - 0)      | 6<br>(3 - 10)      | 9<br>(5 - 15)      | 3<br>(1 - 5)       |
| Cirrhosis due to hepatitis C                        | 14<br>(6 - 23)   | 0<br>(0 - 0)     | 0<br>(0 - 0)      | 4<br>(2 - 8)       | 7<br>(3 - 12)      | 3<br>(1 - 5)       |
| Cirrhosis due to alcohol use                        | 15<br>(7 - 24)   | -                | -                 | 4<br>(2 - 7)       | 8<br>(4 - 14)      | 3<br>(1 - 5)       |
| Cirrhosis due to other causes                       | 6<br>(3 - 9)     | 1<br>(0 - 1)     | 0<br>(0 - 0)      | 3<br>(1 - 4)       | 2<br>(1 - 4)       | 0<br>(0 - 1)       |
| Digestive diseases                                  | 68<br>(43 - 106) | 4<br>(2 - 8)     | 2<br>(1 - 4)      | 17<br>(10 - 27)    | 24<br>(14 - 37)    | 21<br>(13 - 33)    |
| Peptic ulcer disease                                | 26<br>(14 - 43)  | 0<br>(0 - 1)     | 0<br>(0 - 1)      | 5<br>(2 - 9)       | 11<br>(6 - 18)     | 10<br>(5 - 16)     |
| Gastritis and duodenitis                            | 2<br>(1 - 4)     | 0<br>(0 - 0)     | 0<br>(0 - 0)      | 0<br>(0 - 1)       | 1<br>(0 - 2)       | 1<br>(0 - 2)       |
| Appendicitis                                        | 5<br>(2 - 8)     | 0<br>(0 - 1)     | 1<br>(0 - 1)      | 2<br>(1 - 3)       | 1<br>(1 - 3)       | 0<br>(0 - 2)       |
| Paralytic ileus and intestinal obstruction          | 10<br>(4 - 16)   | 1<br>(0 - 2)     | 0<br>(0 - 1)      | 2<br>(1 - 4)       | 3<br>(1 - 5)       | 3<br>(1 - 6)       |
| Inguinal, femoral, and abdominal hernia             | 2<br>(1 - 4)     | 0<br>(0 - 1)     | 0<br>(0 - 0)      | 0<br>(0 - 1)       | 1<br>(0 - 2)       | 1<br>(0 - 2)       |
| Inflammatory bowel disease                          | 2<br>(1 - 3)     | 0<br>(0 - 1)     | 0<br>(0 - 0)      | 0<br>(0 - 1)       | 0<br>(0 - 1)       | 0<br>(0 - 1)       |
| Vascular intestinal disorders                       | 1<br>(0 - 1)     | 0<br>(0 - 0)     | 0<br>(0 - 0)      | 0<br>(0 - 0)       | 0<br>(0 - 0)       | 0<br>(0 - 0)       |
| Gallbladder and biliary diseases                    | 5<br>(2 - 8)     | 0<br>(0 - 1)     | 0<br>(0 - 0)      | 1<br>(0 - 2)       | 2<br>(1 - 3)       | 2<br>(1 - 3)       |
| Pancreatitis                                        | 7<br>(3 - 12)    | 0<br>(0 - 0)     | 0<br>(0 - 0)      | 3<br>(1 - 6)       | 2<br>(1 - 4)       | 1<br>(0 - 2)       |
| Other digestive diseases                            | 9<br>(4 - 21)    | 1<br>(0 - 3)     | 0<br>(0 - 1)      | 2<br>(1 - 5)       | 3<br>(1 - 7)       | 3<br>(1 - 6)       |
| Neurological disorders                              | 45<br>(36 - 56)  | 2<br>(1 - 6)     | 2<br>(1 - 4)      | 6<br>(4 - 8)       | 7<br>(5 - 10)      | 27<br>(21 - 34)    |
| Alzheimer disease and other dementias               | 32<br>(25 - 41)  | -                | -                 | 0<br>(0 - 0)       | 6<br>(4 - 8)       | 26<br>(20 - 33)    |
| Parkinson disease                                   | 1<br>(0 - 1)     | -                | -                 | 0<br>(0 - 0)       | 0<br>(0 - 0)       | 0<br>(0 - 1)       |
| Epilepsy                                            | 9<br>(6 - 14)    | 2<br>(0 - 5)     | 2<br>(1 - 3)      | 4<br>(3 - 7)       | 1<br>(1 - 2)       | 0<br>(0 - 1)       |
| Multiple sclerosis                                  | 0<br>(0 - 0)     | -                | -                 | 0<br>(0 - 0)       | 0<br>(0 - 0)       | 0<br>(0 - 0)       |
| Other neurological disorders                        | 3<br>(2 - 4)     | 1<br>(0 - 2)     | 0<br>(0 - 1)      | 1<br>(1 - 2)       | 0<br>(0 - 1)       | 0<br>(0 - 0)       |
| Mental and substance use disorders                  | 15<br>(9 - 21)   | 0<br>(0 - 0)     | 0<br>(0 - 0)      | 9<br>(6 - 13)      | 5<br>(2 - 8)       | 1<br>(0 - 1)       |
| Schizophrenia                                       | 0<br>(0 - 1)     | -                | -                 | 0<br>(0 - 0)       | 0<br>(0 - 0)       | 0<br>(0 - 0)       |
| Alcohol use disorders                               | 10<br>(5 - 16)   | -                | -                 | 5<br>(2 - 8)       | 5<br>(2 - 7)       | 1<br>(0 - 1)       |
| Drug use disorders                                  | 5<br>(3 - 8)     | 0<br>(0 - 0)     | -                 | 4<br>(2 - 7)       | 0<br>(0 - 1)       | 0<br>(0 - 0)       |
| Opioid use disorders                                | 3<br>(2 - 5)     | 0<br>(0 - 0)     | -                 | 3<br>(2 - 4)       | 0<br>(0 - 1)       | 0<br>(0 - 0)       |
| Cocaine use disorders                               | 0<br>(0 - 0)     | 0<br>(0 - 0)     | -                 | 0<br>(0 - 0)       | 0<br>(0 - 0)       | 0<br>(0 - 0)       |
| Amphetamine use disorders                           | 0<br>(0 - 0)     | 0<br>(0 - 0)     | -                 | 0<br>(0 - 0)       | 0<br>(0 - 0)       | 0<br>(0 - 0)       |
| Other drug use disorders                            | 1<br>(1 - 3)     | 0<br>(0 - 0)     | -                 | 1<br>(1 - 2)       | 0<br>(0 - 0)       | 0<br>(0 - 0)       |
| Eating disorders                                    | 0<br>(0 - 0)     | -                | 0<br>(0 - 0)      | 0<br>(0 - 0)       | -                  | -                  |

Web Table 31- Timor-Leste deaths with 95% UI by age, sex, and cause in 2013

| Cause                                               | Males, All Ages   | Males, 0-4 Years | Males, 5-14 Years | Males, 15-49 Years | Males, 50-69 Years | Males, 70-80 Years |
|-----------------------------------------------------|-------------------|------------------|-------------------|--------------------|--------------------|--------------------|
| Anorexia nervosa                                    | 0<br>(0 - 0)      | --               | 0<br>(0 - 0)      | 0<br>(0 - 0)       | --                 | --                 |
| Diabetes, urogenital, blood, and endocrine diseases | 102<br>(77 - 130) | 9<br>(5 - 14)    | 4<br>(3 - 5)      | 17<br>(12 - 23)    | 39<br>(28 - 53)    | 32<br>(24 - 43)    |
| Diabetes mellitus                                   | 40<br>(31 - 54)   | 0<br>(0 - 0)     | 0<br>(0 - 0)      | 4<br>(3 - 6)       | 20<br>(14 - 27)    | 15<br>(11 - 22)    |
| Acute glomerulonephritis                            | 1<br>(0 - 1)      | 0<br>(0 - 0)     | 0<br>(0 - 0)      | 0<br>(0 - 0)       | 0<br>(0 - 0)       | 0<br>(0 - 0)       |
| Chronic kidney disease                              | 38<br>(22 - 59)   | 2<br>(1 - 3)     | 1<br>(1 - 2)      | 8<br>(4 - 13)      | 15<br>(8 - 25)     | 12<br>(7 - 19)     |
| Chronic kidney disease due to diabetes mellitus     | 2<br>(0 - 4)      | 0<br>(0 - 0)     | 0<br>(0 - 0)      | 0<br>(0 - 1)       | 1<br>(0 - 1)       | 1<br>(0 - 2)       |
| Chronic kidney disease due to hypertension          | 11<br>(5 - 19)    | 0<br>(0 - 0)     | 0<br>(0 - 0)      | 2<br>(1 - 4)       | 5<br>(2 - 9)       | 3<br>(1 - 6)       |
| Chronic kidney disease due to glomerulonephritis    | 6<br>(4 - 8)      | 1<br>(0 - 1)     | 1<br>(0 - 1)      | 1<br>(1 - 2)       | 2<br>(1 - 3)       | 1<br>(1 - 3)       |
| Chronic kidney disease due to other causes          | 20<br>(8 - 37)    | 1<br>(0 - 2)     | 1<br>(0 - 1)      | 4<br>(2 - 8)       | 8<br>(3 - 16)      | 7<br>(2 - 12)      |
| Urinary diseases and male infertility               | 8<br>(5 - 13)     | 1<br>(0 - 2)     | 0<br>(0 - 0)      | 1<br>(1 - 2)       | 3<br>(1 - 4)       | 3<br>(2 - 5)       |
| Interstitial nephritis and urinary tract infections | 3<br>(2 - 5)      | 1<br>(0 - 1)     | 0<br>(0 - 0)      | 0<br>(0 - 1)       | 1<br>(0 - 2)       | 1<br>(0 - 2)       |
| Urolithiasis                                        | 1<br>(0 - 1)      | --               | 0<br>(0 - 0)      | 0<br>(0 - 0)       | 0<br>(0 - 0)       | 0<br>(0 - 0)       |
| Other urinary diseases                              | 4<br>(2 - 7)      | 1<br>(0 - 1)     | 0<br>(0 - 0)      | 1<br>(0 - 1)       | 1<br>(1 - 2)       | 1<br>(1 - 3)       |
| Gynecological diseases                              | --                | --               | --                | --                 | --                 | --                 |
| Uterine fibroids                                    | --                | --               | --                | --                 | --                 | --                 |
| Polycystic ovarian syndrome                         | --                | --               | --                | --                 | --                 | --                 |
| Endometriosis                                       | --                | --               | --                | --                 | --                 | --                 |
| Genital prolapse                                    | --                | --               | --                | --                 | --                 | --                 |
| Other gynecological diseases                        | --                | --               | --                | --                 | --                 | --                 |
| Hemoglobinopathies and hemolytic anemias            | 10<br>(6 - 15)    | 4<br>(2 - 8)     | 2<br>(1 - 3)      | 2<br>(1 - 3)       | 1<br>(0 - 1)       | 1<br>(0 - 1)       |
| Thalassemias                                        | 8<br>(5 - 13)     | 4<br>(2 - 8)     | 2<br>(1 - 3)      | 2<br>(1 - 3)       | 0<br>(0 - 0)       | 0<br>(0 - 0)       |
| Sickle cell disorders                               | 0<br>(0 - 0)      | 0<br>(0 - 0)     | 0<br>(0 - 0)      | 0<br>(0 - 0)       | 0<br>(0 - 0)       | 0<br>(0 - 0)       |
| G6PD deficiency                                     | 0<br>(0 - 0)      | 0<br>(0 - 0)     | 0<br>(0 - 0)      | 0<br>(0 - 0)       | 0<br>(0 - 0)       | 0<br>(0 - 0)       |
| Other hemoglobinopathies and hemolytic anemias      | 2<br>(1 - 2)      | 0<br>(0 - 0)     | 0<br>(0 - 0)      | 0<br>(0 - 0)       | 0<br>(0 - 1)       | 1<br>(0 - 1)       |
| Endocrine, metabolic, blood, and immune disorders   | 5<br>(2 - 8)      | 1<br>(1 - 3)     | 0<br>(0 - 1)      | 1<br>(0 - 2)       | 1<br>(0 - 2)       | 1<br>(0 - 2)       |
| Musculoskeletal disorders                           | 2<br>(1 - 3)      | --               | 0<br>(0 - 0)      | 1<br>(0 - 1)       | 1<br>(0 - 1)       | 0<br>(0 - 1)       |
| Rheumatoid arthritis                                | 0<br>(0 - 1)      | --               | 0<br>(0 - 0)      | 0<br>(0 - 0)       | 0<br>(0 - 0)       | 0<br>(0 - 0)       |
| Other musculoskeletal disorders                     | 1<br>(1 - 2)      | --               | 0<br>(0 - 0)      | 1<br>(0 - 1)       | 0<br>(0 - 1)       | 0<br>(0 - 0)       |
| Other non-communicable diseases                     | 108<br>(65 - 198) | 93<br>(50 - 181) | 6<br>(4 - 10)     | 6<br>(4 - 8)       | 2<br>(1 - 3)       | 2<br>(1 - 3)       |
| Congenital anomalies                                | 102<br>(59 - 192) | 91<br>(49 - 179) | 6<br>(4 - 9)      | 5<br>(3 - 7)       | 1<br>(0 - 1)       | 1<br>(0 - 1)       |
| Neural tube defects                                 | 21<br>(3 - 48)    | 20<br>(3 - 46)   | 0<br>(0 - 1)      | 0<br>(0 - 1)       | 0<br>(0 - 0)       | 0<br>(0 - 0)       |
| Congenital heart anomalies                          | 53<br>(24 - 117)  | 46<br>(17 - 108) | 4<br>(2 - 6)      | 3<br>(1 - 4)       | 0<br>(0 - 1)       | 0<br>(0 - 0)       |
| Cleft lip and cleft palate                          | 0<br>(0 - 1)      | 0<br>(0 - 1)     | --                | --                 | --                 | --                 |
| Down syndrome                                       | 2<br>(1 - 6)      | 2<br>(0 - 5)     | 0<br>(0 - 0)      | 0<br>(0 - 0)       | 0<br>(0 - 0)       | 0<br>(0 - 0)       |
| Chromosomal unbalanced rearrangements               | 2<br>(0 - 5)      | 1<br>(0 - 5)     | 0<br>(0 - 0)      | 0<br>(0 - 0)       | 0<br>(0 - 0)       | 0<br>(0 - 0)       |
| Other congenital anomalies                          | 25<br>(8 - 71)    | 22<br>(6 - 67)   | 1<br>(1 - 3)      | 1<br>(1 - 2)       | 0<br>(0 - 1)       | 0<br>(0 - 0)       |
| Skin and subcutaneous diseases                      | 5<br>(3 - 8)      | 1<br>(0 - 2)     | 0<br>(0 - 0)      | 1<br>(1 - 2)       | 1<br>(1 - 3)       | 1<br>(1 - 2)       |
| Cellulitis                                          | 3<br>(1 - 5)      | 1<br>(0 - 1)     | 0<br>(0 - 0)      | 1<br>(0 - 1)       | 1<br>(0 - 2)       | 1<br>(0 - 2)       |
| Pyoderma                                            | 2<br>(0 - 3)      | 0<br>(0 - 1)     | 0<br>(0 - 0)      | 0<br>(0 - 1)       | 0<br>(0 - 1)       | 0<br>(0 - 1)       |
| Decubitus ulcer                                     | 1<br>(0 - 1)      | 0<br>(0 - 0)     | 0<br>(0 - 0)      | 0<br>(0 - 0)       | 0<br>(0 - 0)       | 0<br>(0 - 1)       |

Web Table 31- Timor-Leste deaths with 95% UI by age, sex, and cause in 2013

| Cause                                           | Males, All Ages    | Males, 0-4 Years | Males, 5-14 Years | Males, 15-49 Years | Males, 50-69 Years | Males, 70-80 Years |
|-------------------------------------------------|--------------------|------------------|-------------------|--------------------|--------------------|--------------------|
| Other skin and subcutaneous diseases            | 0<br>(0 - 0)       | 0<br>(0 - 0)     | 0<br>(0 - 0)      | 0<br>(0 - 0)       | 0<br>(0 - 0)       | 0<br>(0 - 0)       |
| Sudden infant death syndrome                    | 1<br>(0 - 4)       | 1<br>(0 - 4)     | --                | --                 | --                 | --                 |
| Injuries                                        | 336<br>(277 - 400) | 46<br>(27 - 68)  | 39<br>(31 - 48)   | 189<br>(151 - 223) | 44<br>(33 - 60)    | 19<br>(14 - 25)    |
| Transport injuries                              | 119<br>(94 - 145)  | 11<br>(6 - 19)   | 15<br>(11 - 21)   | 70<br>(53 - 87)    | 16<br>(11 - 22)    | 6<br>(4 - 9)       |
| Road injuries                                   | 111<br>(86 - 137)  | 10<br>(5 - 17)   | 15<br>(10 - 20)   | 66<br>(50 - 83)    | 15<br>(10 - 20)    | 6<br>(4 - 8)       |
| Pedestrian road injuries                        | 31<br>(21 - 46)    | 4<br>(2 - 8)     | 7<br>(4 - 10)     | 13<br>(8 - 20)     | 5<br>(3 - 8)       | 2<br>(1 - 4)       |
| Cyclist road injuries                           | 8<br>(6 - 11)      | 1<br>(0 - 1)     | 2<br>(1 - 3)      | 4<br>(2 - 6)       | 1<br>(1 - 2)       | 1<br>(0 - 1)       |
| Motorcyclist road injuries                      | 27<br>(18 - 38)    | 1<br>(0 - 2)     | 2<br>(1 - 3)      | 21<br>(13 - 30)    | 3<br>(2 - 4)       | 1<br>(0 - 1)       |
| Motor vehicle road injuries                     | 41<br>(27 - 57)    | 3<br>(1 - 6)     | 4<br>(2 - 6)      | 27<br>(18 - 38)    | 5<br>(3 - 9)       | 2<br>(1 - 3)       |
| Other road injuries                             | 4<br>(1 - 6)       | 0<br>(0 - 1)     | 1<br>(0 - 1)      | 2<br>(1 - 3)       | 1<br>(0 - 1)       | 0<br>(0 - 1)       |
| Other transport injuries                        | 7<br>(5 - 13)      | 1<br>(1 - 3)     | 1<br>(0 - 1)      | 4<br>(2 - 7)       | 1<br>(1 - 2)       | 0<br>(0 - 1)       |
| Unintentional injuries                          | 125<br>(100 - 162) | 33<br>(18 - 54)  | 21<br>(15 - 28)   | 46<br>(35 - 67)    | 16<br>(12 - 25)    | 8<br>(6 - 13)      |
| Falls                                           | 18<br>(13 - 26)    | 2<br>(1 - 4)     | 2<br>(1 - 3)      | 7<br>(4 - 11)      | 5<br>(3 - 8)       | 3<br>(2 - 5)       |
| Drowning                                        | 58<br>(41 - 78)    | 15<br>(6 - 30)   | 14<br>(9 - 21)    | 21<br>(14 - 29)    | 5<br>(2 - 9)       | 2<br>(1 - 3)       |
| Fire, heat, and hot substances                  | 9<br>(6 - 15)      | 3<br>(1 - 6)     | 1<br>(1 - 2)      | 3<br>(2 - 6)       | 1<br>(1 - 3)       | 1<br>(0 - 2)       |
| Poisonings                                      | 3<br>(2 - 7)       | 1<br>(0 - 1)     | 0<br>(0 - 1)      | 2<br>(1 - 4)       | 1<br>(0 - 1)       | 0<br>(0 - 0)       |
| Exposure to mechanical forces                   | 14<br>(9 - 39)     | 2<br>(1 - 5)     | 2<br>(1 - 5)      | 8<br>(5 - 22)      | 2<br>(1 - 4)       | 1<br>(0 - 1)       |
| Unintentional firearm injuries                  | 6<br>(3 - 10)      | 0<br>(0 - 1)     | 0<br>(0 - 1)      | 4<br>(2 - 7)       | 1<br>(0 - 2)       | 0<br>(0 - 1)       |
| Unintentional suffocation                       | 1<br>(0 - 2)       | 0<br>(0 - 1)     | 0<br>(0 - 0)      | 0<br>(0 - 0)       | 0<br>(0 - 0)       | 0<br>(0 - 0)       |
| Other exposure to mechanical forces             | 8<br>(5 - 22)      | 1<br>(0 - 3)     | 1<br>(1 - 3)      | 4<br>(2 - 12)      | 1<br>(0 - 2)       | 0<br>(0 - 1)       |
| Adverse effects of medical treatment            | 6<br>(4 - 11)      | 2<br>(1 - 5)     | 0<br>(0 - 1)      | 2<br>(1 - 3)       | 1<br>(1 - 3)       | 1<br>(1 - 2)       |
| Animal contact                                  | 2<br>(1 - 3)       | 0<br>(0 - 1)     | 0<br>(0 - 1)      | 1<br>(0 - 1)       | 0<br>(0 - 1)       | 0<br>(0 - 0)       |
| Venomous animal contact                         | 1<br>(1 - 2)       | 0<br>(0 - 1)     | 0<br>(0 - 1)      | 0<br>(0 - 1)       | 0<br>(0 - 0)       | 0<br>(0 - 0)       |
| Non-venomous animal contact                     | 1<br>(0 - 1)       | 0<br>(0 - 0)     | 0<br>(0 - 0)      | 0<br>(0 - 0)       | 0<br>(0 - 0)       | 0<br>(0 - 0)       |
| Foreign body                                    | 10<br>(4 - 17)     | 7<br>(3 - 14)    | 1<br>(0 - 1)      | 1<br>(0 - 2)       | 1<br>(0 - 1)       | 0<br>(0 - 1)       |
| Pulmonary aspiration and foreign body in airway | 10<br>(4 - 17)     | 7<br>(3 - 14)    | 1<br>(0 - 1)      | 1<br>(0 - 1)       | 1<br>(0 - 1)       | 0<br>(0 - 1)       |
| Foreign body in other body part                 | 0<br>(0 - 0)       | 0<br>(0 - 0)     | 0<br>(0 - 0)      | 0<br>(0 - 0)       | 0<br>(0 - 0)       | 0<br>(0 - 0)       |
| Other unintentional injuries                    | 4<br>(3 - 5)       | 1<br>(0 - 1)     | 0<br>(0 - 1)      | 2<br>(1 - 3)       | 0<br>(0 - 1)       | 0<br>(0 - 0)       |
| Self-harm and interpersonal violence            | 93<br>(46 - 128)   | 2<br>(1 - 3)     | 3<br>(1 - 4)      | 73<br>(37 - 100)   | 12<br>(4 - 19)     | 4<br>(1 - 8)       |
| Self-harm                                       | 61<br>(15 - 94)    | --               | 1<br>(0 - 2)      | 46<br>(11 - 70)    | 10<br>(2 - 18)     | 4<br>(1 - 8)       |
| Interpersonal violence                          | 32<br>(20 - 45)    | 2<br>(1 - 3)     | 1<br>(1 - 3)      | 27<br>(16 - 38)    | 2<br>(1 - 3)       | 0<br>(0 - 0)       |
| Assault by firearm                              | 9<br>(4 - 16)      | 0<br>(0 - 0)     | 0<br>(0 - 1)      | 8<br>(3 - 15)      | 1<br>(0 - 1)       | 0<br>(0 - 0)       |
| Assault by sharp object                         | 13<br>(7 - 23)     | 0<br>(0 - 0)     | 0<br>(0 - 0)      | 12<br>(7 - 22)     | 1<br>(0 - 1)       | 0<br>(0 - 0)       |
| Assault by other means                          | 9<br>(5 - 14)      | 1<br>(0 - 2)     | 1<br>(0 - 2)      | 6<br>(3 - 10)      | 1<br>(0 - 1)       | 0<br>(0 - 0)       |

Web Table 31- Timor-Leste deaths with 95% UI by age, sex, and cause in 2013

| Cause                                                             | Females, All Ages        | Females, 0-4 Years | Females, 5-14 Years | Females, 15-49 Years | Females, 50-69 Years | Females, 70-80 Years |
|-------------------------------------------------------------------|--------------------------|--------------------|---------------------|----------------------|----------------------|----------------------|
| All causes                                                        | 2,351<br>(2,076 - 2,654) | 695<br>(581 - 833) | 80<br>(67 - 95)     | 308<br>(268 - 359)   | 576<br>(464 - 708)   | 692<br>(589 - 795)   |
| Communicable, maternal, neonatal, and nutritional diseases        | 870<br>(743 - 1,017)     | 540<br>(431 - 674) | 31<br>(23 - 41)     | 132<br>(111 - 155)   | 73<br>(56 - 95)      | 94<br>(67 - 120)     |
| HIV/AIDS and tuberculosis                                         | 60<br>(37 - 85)          | 1<br>(1 - 3)       | 1<br>(1 - 2)        | 13<br>(7 - 22)       | 26<br>(16 - 39)      | 18<br>(10 - 26)      |
| Tuberculosis                                                      | 58<br>(35 - 83)          | 1<br>(1 - 3)       | 1<br>(1 - 2)        | 12<br>(6 - 21)       | 26<br>(16 - 39)      | 18<br>(10 - 26)      |
| HIV/AIDS                                                          | 2<br>(1 - 3)             | 0<br>(0 - 0)       | 0<br>(0 - 0)        | 1<br>(1 - 2)         | 0<br>(0 - 0)         | 0<br>(0 - 0)         |
| HIV/AIDS resulting in mycobacterial infection                     | 0<br>(0 - 0)             | 0<br>(0 - 0)       | 0<br>(0 - 0)        | 0<br>(0 - 0)         | 0<br>(0 - 0)         | 0<br>(0 - 0)         |
| HIV/AIDS resulting in other diseases                              | 1<br>(1 - 3)             | 0<br>(0 - 0)       | 0<br>(0 - 0)        | 1<br>(1 - 2)         | 0<br>(0 - 0)         | 0<br>(0 - 0)         |
| Diarrhea, lower respiratory, and other common infectious diseases | 385<br>(294 - 492)       | 235<br>(153 - 332) | 23<br>(16 - 32)     | 23<br>(17 - 31)      | 38<br>(24 - 54)      | 65<br>(41 - 89)      |
| Diarrheal diseases                                                | 92<br>(48 - 157)         | 62<br>(21 - 129)   | 3<br>(1 - 6)        | 4<br>(2 - 6)         | 9<br>(5 - 16)        | 14<br>(7 - 25)       |
| Intestinal infectious diseases                                    | 19<br>(8 - 37)           | 9<br>(3 - 20)      | 6<br>(2 - 13)       | 3<br>(1 - 7)         | 1<br>(0 - 2)         | 0<br>(0 - 1)         |
| Typhoid fever                                                     | 13<br>(5 - 28)           | 6<br>(2 - 13)      | 5<br>(2 - 10)       | 2<br>(1 - 5)         | 0<br>(0 - 1)         | 0<br>(0 - 0)         |
| Paratyphoid fever                                                 | 4<br>(2 - 9)             | 2<br>(1 - 5)       | 1<br>(0 - 3)        | 1<br>(0 - 1)         | 0<br>(0 - 0)         | 0<br>(0 - 0)         |
| Other intestinal infectious diseases                              | 2<br>(0 - 6)             | 1<br>(0 - 5)       | 0<br>(0 - 2)        | 0<br>(0 - 2)         | 0<br>(0 - 1)         | 0<br>(0 - 1)         |
| Lower respiratory infections                                      | 212<br>(150 - 295)       | 119<br>(67 - 194)  | 8<br>(5 - 12)       | 11<br>(8 - 16)       | 26<br>(16 - 38)      | 48<br>(30 - 70)      |
| Upper respiratory infections                                      | 0<br>(0 - 0)             | 0<br>(0 - 0)       | 0<br>(0 - 0)        | 0<br>(0 - 0)         | 0<br>(0 - 0)         | 0<br>(0 - 0)         |
| Otitis media                                                      | 0<br>(0 - 0)             | 0<br>(0 - 0)       | 0<br>(0 - 0)        | 0<br>(0 - 0)         | 0<br>(0 - 0)         | 0<br>(0 - 0)         |
| Meningitis                                                        | 27<br>(17 - 42)          | 18<br>(9 - 33)     | 3<br>(2 - 5)        | 3<br>(2 - 4)         | 2<br>(1 - 3)         | 1<br>(1 - 2)         |
| Pneumococcal meningitis                                           | 7<br>(4 - 11)            | 4<br>(2 - 8)       | 1<br>(0 - 2)        | 1<br>(1 - 2)         | 1<br>(0 - 1)         | 0<br>(0 - 1)         |
| H influenzae type B meningitis                                    | 9<br>(5 - 15)            | 7<br>(3 - 13)      | 1<br>(0 - 1)        | 0<br>(0 - 1)         | 0<br>(0 - 0)         | 0<br>(0 - 0)         |
| Meningococcal meningitis                                          | 2<br>(1 - 4)             | 1<br>(0 - 2)       | 0<br>(0 - 1)        | 0<br>(0 - 1)         | 0<br>(0 - 1)         | 0<br>(0 - 0)         |
| Other meningitis                                                  | 9<br>(5 - 16)            | 6<br>(2 - 12)      | 1<br>(0 - 2)        | 1<br>(1 - 2)         | 1<br>(0 - 1)         | 0<br>(0 - 1)         |
| Encephalitis                                                      | 6<br>(3 - 9)             | 3<br>(1 - 6)       | 1<br>(0 - 2)        | 1<br>(0 - 2)         | 0<br>(0 - 1)         | 0<br>(0 - 0)         |
| Diphtheria                                                        | 0<br>(0 - 1)             | 0<br>(0 - 1)       | 0<br>(0 - 0)        | 0<br>(0 - 0)         | 0<br>(0 - 0)         | --                   |
| Whooping cough                                                    | 17<br>(0 - 79)           | 16<br>(0 - 73)     | 1<br>(0 - 5)        | 0<br>(0 - 1)         | 0<br>(0 - 0)         | --                   |
| Tetanus                                                           | 4<br>(2 - 11)            | 2<br>(0 - 9)       | 0<br>(0 - 1)        | 0<br>(0 - 1)         | 0<br>(0 - 1)         | 0<br>(0 - 0)         |
| Measles                                                           | 7<br>(0 - 33)            | 6<br>(0 - 28)      | 1<br>(0 - 4)        | 0<br>(0 - 1)         | 0<br>(0 - 0)         | --                   |
| Varicella and herpes zoster                                       | 1<br>(0 - 2)             | 0<br>(0 - 1)       | 0<br>(0 - 0)        | 0<br>(0 - 0)         | 0<br>(0 - 0)         | 0<br>(0 - 1)         |
| Neglected tropical diseases and malaria                           | 20<br>(6 - 74)           | 13<br>(2 - 69)     | 3<br>(1 - 6)        | 2<br>(1 - 5)         | 1<br>(0 - 2)         | 0<br>(0 - 1)         |
| Malaria                                                           | 13<br>(0 - 69)           | 10<br>(0 - 66)     | 1<br>(0 - 3)        | 1<br>(0 - 4)         | 0<br>(0 - 2)         | 0<br>(0 - 1)         |
| Leishmaniasis                                                     | 0<br>(0 - 0)             | 0<br>(0 - 0)       | 0<br>(0 - 0)        | 0<br>(0 - 0)         | 0<br>(0 - 0)         | 0<br>(0 - 0)         |
| Visceral leishmaniasis                                            | 0<br>(0 - 0)             | 0<br>(0 - 0)       | 0<br>(0 - 0)        | 0<br>(0 - 0)         | 0<br>(0 - 0)         | 0<br>(0 - 0)         |
| Cysticercosis                                                     | 0<br>(0 - 0)             | 0<br>(0 - 0)       | 0<br>(0 - 0)        | 0<br>(0 - 0)         | 0<br>(0 - 0)         | 0<br>(0 - 0)         |
| Cystic echinococcosis                                             | 0<br>(0 - 0)             | 0<br>(0 - 0)       | 0<br>(0 - 0)        | 0<br>(0 - 0)         | 0<br>(0 - 0)         | 0<br>(0 - 0)         |
| Dengue                                                            | 2<br>(1 - 3)             | 1<br>(0 - 2)       | 1<br>(0 - 1)        | 0<br>(0 - 0)         | 0<br>(0 - 0)         | 0<br>(0 - 0)         |
| Rabies                                                            | 1<br>(1 - 5)             | 0<br>(0 - 1)       | 0<br>(0 - 2)        | 0<br>(0 - 1)         | 0<br>(0 - 1)         | 0<br>(0 - 0)         |
| Intestinal nematode infections                                    | 1<br>(0 - 5)             | 1<br>(0 - 4)       | 0<br>(0 - 2)        | 0<br>(0 - 0)         | 0<br>(0 - 1)         | 0<br>(0 - 0)         |
| Ascariasis                                                        | 1<br>(0 - 5)             | 1<br>(0 - 4)       | 0<br>(0 - 2)        | 0<br>(0 - 0)         | 0<br>(0 - 1)         | 0<br>(0 - 0)         |
| Other neglected tropical diseases                                 | 2<br>(1 - 3)             | 1<br>(0 - 2)       | 0<br>(0 - 1)        | 0<br>(0 - 0)         | 0<br>(0 - 0)         | 0<br>(0 - 0)         |
| Maternal disorders                                                | 89<br>(70 - 110)         | --                 | 1<br>(0 - 1)        | 88<br>(69 - 109)     | --                   | --                   |
| Maternal hemorrhage                                               | 12<br>(8 - 17)           | --                 | 0<br>(0 - 0)        | 12<br>(8 - 17)       | --                   | --                   |



Web Table 31- Timor-Leste deaths with 95% UI by age, sex, and cause in 2013

| Cause                                                            | Females, All Ages        | Females, 0-4 Years | Females, 5-14 Years | Females, 15-49 Years | Females, 50-69 Years | Females, 70-80 Years |
|------------------------------------------------------------------|--------------------------|--------------------|---------------------|----------------------|----------------------|----------------------|
| Maternal sepsis and other maternal infections                    | 10<br>(7 - 15)           | --                 | 0<br>(0 - 0)        | 10<br>(7 - 14)       | --                   | --                   |
| Maternal hypertensive disorders                                  | 9<br>(4 - 14)            | --                 | 0<br>(0 - 0)        | 9<br>(4 - 14)        | --                   | --                   |
| Maternal obstructed labor                                        | 7<br>(4 - 10)            | --                 | 0<br>(0 - 0)        | 7<br>(4 - 10)        | --                   | --                   |
| Maternal abortive outcome                                        | 16<br>(10 - 23)          | --                 | 0<br>(0 - 0)        | 16<br>(10 - 23)      | --                   | --                   |
| Indirect maternal deaths                                         | 9<br>(5 - 13)            | --                 | 0<br>(0 - 0)        | 9<br>(5 - 13)        | --                   | --                   |
| Late maternal deaths                                             | 12<br>(7 - 16)           | --                 | 0<br>(0 - 0)        | 11<br>(7 - 16)       | --                   | --                   |
| Maternal deaths aggravated by HIV/AIDS                           | 0<br>(0 - 0)             | --                 | --                  | 0<br>(0 - 0)         | --                   | --                   |
| Other maternal disorders                                         | 14<br>(9 - 20)           | --                 | 0<br>(0 - 0)        | 14<br>(9 - 20)       | --                   | --                   |
| Neonatal disorders                                               | 262<br>(213 - 330)       | 262<br>(213 - 330) | --                  | --                   | --                   | --                   |
| Neonatal preterm birth complications                             | 135<br>(66 - 200)        | 135<br>(66 - 200)  | --                  | --                   | --                   | --                   |
| Neonatal encephalopathy due to birth asphyxia and trauma         | 55<br>(22 - 106)         | 55<br>(22 - 106)   | --                  | --                   | --                   | --                   |
| Neonatal sepsis and other neonatal infections                    | 11<br>(3 - 25)           | 11<br>(3 - 25)     | --                  | --                   | --                   | --                   |
| Hemolytic disease and other neonatal jaundice                    | 1<br>(0 - 2)             | 1<br>(0 - 2)       | --                  | --                   | --                   | --                   |
| Other neonatal disorders                                         | 60<br>(18 - 145)         | 60<br>(18 - 145)   | --                  | --                   | --                   | --                   |
| Nutritional deficiencies                                         | 29<br>(19 - 40)          | 12<br>(5 - 23)     | 1<br>(1 - 2)        | 3<br>(2 - 4)         | 4<br>(2 - 6)         | 8<br>(4 - 13)        |
| Protein-energy malnutrition                                      | 3<br>(1 - 11)            | 2<br>(0 - 6)       | 0<br>(0 - 0)        | 0<br>(0 - 1)         | 0<br>(0 - 1)         | 1<br>(0 - 3)         |
| Iodine deficiency                                                | 0<br>(0 - 1)             | 0<br>(0 - 1)       | 0<br>(0 - 0)        | 0<br>(0 - 0)         | 0<br>(0 - 0)         | 0<br>(0 - 0)         |
| Iron-deficiency anemia                                           | 24<br>(13 - 35)          | 9<br>(4 - 19)      | 1<br>(1 - 2)        | 3<br>(2 - 4)         | 4<br>(2 - 6)         | 8<br>(3 - 11)        |
| Other nutritional deficiencies                                   | 1<br>(0 - 3)             | 1<br>(0 - 2)       | 0<br>(0 - 0)        | 0<br>(0 - 0)         | 0<br>(0 - 0)         | 0<br>(0 - 0)         |
| Other communicable, maternal, neonatal, and nutritional diseases | 26<br>(16 - 46)          | 15<br>(8 - 26)     | 2<br>(1 - 4)        | 2<br>(1 - 6)         | 3<br>(2 - 10)        | 3<br>(1 - 8)         |
| Sexually transmitted diseases excluding HIV                      | 14<br>(7 - 23)           | 11<br>(6 - 20)     | 1<br>(1 - 2)        | 0<br>(0 - 1)         | 0<br>(0 - 1)         | 0<br>(0 - 1)         |
| Syphilis                                                         | 13<br>(7 - 22)           | 11<br>(6 - 20)     | 1<br>(1 - 2)        | 0<br>(0 - 0)         | 0<br>(0 - 0)         | 0<br>(0 - 0)         |
| Chlamydial infection                                             | 0<br>(0 - 0)             | --                 | 0<br>(0 - 0)        | 0<br>(0 - 0)         | 0<br>(0 - 0)         | 0<br>(0 - 0)         |
| Gonococcal infection                                             | 0<br>(0 - 0)             | --                 | 0<br>(0 - 0)        | 0<br>(0 - 0)         | 0<br>(0 - 0)         | 0<br>(0 - 0)         |
| Other sexually transmitted diseases                              | 0<br>(0 - 0)             | --                 | 0<br>(0 - 0)        | 0<br>(0 - 0)         | 0<br>(0 - 0)         | 0<br>(0 - 0)         |
| Hepatitis                                                        | 2<br>(1 - 2)             | 0<br>(0 - 1)       | 0<br>(0 - 0)        | 0<br>(0 - 0)         | 1<br>(0 - 1)         | 0<br>(0 - 1)         |
| Acute hepatitis A                                                | 0<br>(0 - 1)             | 0<br>(0 - 1)       | 0<br>(0 - 0)        | 0<br>(0 - 0)         | 0<br>(0 - 0)         | 0<br>(0 - 0)         |
| Acute hepatitis B                                                | 1<br>(1 - 1)             | 0<br>(0 - 0)       | 0<br>(0 - 0)        | 0<br>(0 - 0)         | 0<br>(0 - 1)         | 0<br>(0 - 0)         |
| Acute hepatitis C                                                | 0<br>(0 - 0)             | --                 | 0<br>(0 - 0)        | 0<br>(0 - 0)         | 0<br>(0 - 0)         | 0<br>(0 - 0)         |
| Acute hepatitis E                                                | 0<br>(0 - 1)             | 0<br>(0 - 0)       | 0<br>(0 - 0)        | 0<br>(0 - 0)         | 0<br>(0 - 0)         | 0<br>(0 - 0)         |
| Other infectious diseases                                        | 10<br>(5 - 30)           | 3<br>(1 - 10)      | 1<br>(0 - 2)        | 1<br>(1 - 5)         | 3<br>(1 - 9)         | 2<br>(1 - 7)         |
| Non-communicable diseases                                        | 1,356<br>(1,119 - 1,612) | 130<br>(77 - 207)  | 29<br>(21 - 38)     | 132<br>(103 - 175)   | 481<br>(380 - 608)   | 585<br>(496 - 680)   |
| Neoplasms                                                        | 196<br>(125 - 247)       | 4<br>(2 - 6)       | 6<br>(4 - 8)        | 33<br>(23 - 41)      | 99<br>(61 - 129)     | 54<br>(34 - 69)      |
| Esophageal cancer                                                | 3<br>(2 - 5)             | --                 | --                  | 0<br>(0 - 0)         | 2<br>(1 - 3)         | 1<br>(1 - 2)         |
| Stomach cancer                                                   | 16<br>(10 - 22)          | --                 | --                  | 2<br>(1 - 3)         | 8<br>(5 - 12)        | 6<br>(4 - 9)         |
| Liver cancer                                                     | 10<br>(6 - 15)           | --                 | 0<br>(0 - 0)        | 1<br>(1 - 2)         | 6<br>(3 - 9)         | 3<br>(2 - 5)         |
| Liver cancer due to hepatitis B                                  | 3<br>(1 - 7)             | --                 | 0<br>(0 - 0)        | 0<br>(0 - 1)         | 2<br>(0 - 4)         | 1<br>(0 - 2)         |
| Liver cancer due to hepatitis C                                  | 4<br>(1 - 7)             | --                 | 0<br>(0 - 0)        | 0<br>(0 - 1)         | 2<br>(1 - 4)         | 1<br>(0 - 2)         |
| Liver cancer due to alcohol use                                  | 0<br>(0 - 1)             | --                 | --                  | 0<br>(0 - 0)         | 0<br>(0 - 1)         | 0<br>(0 - 0)         |
| Liver cancer due to other causes                                 | 2<br>(1 - 4)             | --                 | 0<br>(0 - 0)        | 0<br>(0 - 1)         | 1<br>(1 - 2)         | 1<br>(0 - 1)         |

Web Table 31- Timor-Leste deaths with 95% UI by age, sex, and cause in 2013

| Cause                                         | Females, All Ages    | Females, 0-4 Years | Females, 5-14 Years | Females, 15-49 Years | Females, 50-69 Years | Females, 70-80 Years |
|-----------------------------------------------|----------------------|--------------------|---------------------|----------------------|----------------------|----------------------|
| Larynx cancer                                 | 1<br>(0 - 2)         | --                 | --                  | 0<br>(0 - 0)         | 0<br>(0 - 1)         | 0<br>(0 - 1)         |
| Tracheal, bronchus and lung cancer            | 26<br>(15 - 36)      | --                 | --                  | 3<br>(2 - 4)         | 15<br>(8 - 21)       | 8<br>(5 - 12)        |
| Breast cancer                                 | 22<br>(13 - 29)      | --                 | --                  | 6<br>(3 - 8)         | 12<br>(7 - 17)       | 4<br>(2 - 5)         |
| Cervical cancer                               | 24<br>(14 - 34)      | --                 | --                  | 5<br>(3 - 7)         | 14<br>(8 - 21)       | 5<br>(3 - 7)         |
| Uterine cancer                                | 4<br>(2 - 6)         | --                 | --                  | 0<br>(0 - 1)         | 2<br>(1 - 4)         | 1<br>(1 - 2)         |
| Prostate cancer                               | --                   | --                 | --                  | --                   | --                   | --                   |
| Colon and rectum cancer                       | 22<br>(14 - 30)      | --                 | --                  | 2<br>(2 - 3)         | 11<br>(6 - 15)       | 9<br>(5 - 12)        |
| Lip and oral cavity cancer                    | 5<br>(2 - 7)         | --                 | --                  | 1<br>(0 - 1)         | 2<br>(1 - 4)         | 2<br>(1 - 3)         |
| Nasopharynx cancer                            | 2<br>(1 - 3)         | --                 | 0<br>(0 - 0)        | 1<br>(0 - 1)         | 1<br>(1 - 2)         | 0<br>(0 - 1)         |
| Other pharynx cancer                          | 2<br>(1 - 3)         | --                 | --                  | 0<br>(0 - 0)         | 1<br>(1 - 2)         | 0<br>(0 - 1)         |
| Gallbladder and biliary tract cancer          | 8<br>(4 - 12)        | --                 | --                  | 1<br>(0 - 1)         | 4<br>(2 - 7)         | 3<br>(1 - 5)         |
| Pancreatic cancer                             | 5<br>(3 - 6)         | --                 | --                  | 0<br>(0 - 1)         | 3<br>(2 - 4)         | 2<br>(1 - 2)         |
| Malignant skin melanoma                       | 1<br>(1 - 2)         | --                 | --                  | 0<br>(0 - 0)         | 1<br>(0 - 1)         | 0<br>(0 - 0)         |
| Non-melanoma skin cancer                      | 1<br>(0 - 1)         | --                 | --                  | 0<br>(0 - 0)         | 0<br>(0 - 0)         | 0<br>(0 - 1)         |
| Ovarian cancer                                | 5<br>(3 - 9)         | --                 | --                  | 1<br>(1 - 2)         | 3<br>(2 - 6)         | 1<br>(0 - 1)         |
| Testicular cancer                             | --                   | --                 | --                  | --                   | --                   | --                   |
| Kidney cancer                                 | 2<br>(1 - 3)         | 0<br>(0 - 0)       | 0<br>(0 - 0)        | 0<br>(0 - 0)         | 1<br>(0 - 1)         | 0<br>(0 - 1)         |
| Bladder cancer                                | 2<br>(1 - 3)         | --                 | --                  | 0<br>(0 - 0)         | 1<br>(0 - 1)         | 1<br>(0 - 1)         |
| Brain and nervous system cancer               | 4<br>(3 - 6)         | 0<br>(0 - 1)       | 1<br>(0 - 1)        | 1<br>(1 - 2)         | 1<br>(1 - 2)         | 1<br>(0 - 1)         |
| Thyroid cancer                                | 2<br>(1 - 3)         | --                 | 0<br>(0 - 0)        | 0<br>(0 - 0)         | 1<br>(0 - 1)         | 1<br>(0 - 1)         |
| Mesothelioma                                  | 0<br>(0 - 0)         | --                 | --                  | 0<br>(0 - 0)         | 0<br>(0 - 0)         | 0<br>(0 - 0)         |
| Hodgkin lymphoma                              | 1<br>(0 - 1)         | 0<br>(0 - 0)       | 0<br>(0 - 0)        | 0<br>(0 - 0)         | 0<br>(0 - 0)         | 0<br>(0 - 0)         |
| Non-Hodgkin lymphoma                          | 4<br>(1 - 8)         | 0<br>(0 - 1)       | 0<br>(0 - 1)        | 1<br>(0 - 1)         | 1<br>(1 - 3)         | 1<br>(0 - 2)         |
| Multiple myeloma                              | 1<br>(0 - 1)         | --                 | --                  | 0<br>(0 - 0)         | 0<br>(0 - 1)         | 0<br>(0 - 0)         |
| Leukemia                                      | 11<br>(6 - 15)       | 1<br>(1 - 3)       | 3<br>(1 - 4)        | 3<br>(2 - 4)         | 2<br>(1 - 3)         | 1<br>(1 - 2)         |
| Other neoplasms                               | 15<br>(9 - 21)       | 2<br>(1 - 3)       | 1<br>(1 - 2)        | 3<br>(2 - 4)         | 5<br>(3 - 8)         | 4<br>(2 - 6)         |
| Cardiovascular diseases                       | 696<br>(533 - 1,037) | 11<br>(5 - 23)     | 9<br>(5 - 18)       | 58<br>(38 - 114)     | 253<br>(187 - 391)   | 365<br>(292 - 498)   |
| Rheumatic heart disease                       | 16<br>(9 - 27)       | 0<br>(0 - 1)       | 2<br>(1 - 4)        | 5<br>(3 - 9)         | 4<br>(2 - 8)         | 4<br>(2 - 7)         |
| Ischemic heart disease                        | 352<br>(223 - 666)   | 2<br>(1 - 5)       | 2<br>(1 - 5)        | 25<br>(12 - 61)      | 134<br>(82 - 258)    | 189<br>(124 - 342)   |
| Cerebrovascular disease                       | 247<br>(167 - 356)   | 3<br>(1 - 5)       | 2<br>(1 - 4)        | 17<br>(11 - 27)      | 87<br>(57 - 136)     | 139<br>(92 - 194)    |
| Ischemic stroke                               | 139<br>(70 - 238)    | 0<br>(0 - 1)       | 0<br>(0 - 1)        | 3<br>(1 - 8)         | 35<br>(13 - 74)      | 100<br>(55 - 154)    |
| Hemorrhagic stroke                            | 109<br>(59 - 173)    | 2<br>(1 - 4)       | 2<br>(1 - 3)        | 14<br>(8 - 22)       | 52<br>(27 - 82)      | 39<br>(19 - 77)      |
| Hypertensive heart disease                    | 27<br>(16 - 51)      | 0<br>(0 - 1)       | 0<br>(0 - 0)        | 2<br>(1 - 4)         | 10<br>(5 - 18)       | 16<br>(8 - 29)       |
| Cardiomyopathy and myocarditis                | 11<br>(6 - 17)       | 2<br>(1 - 5)       | 1<br>(0 - 2)        | 2<br>(1 - 4)         | 2<br>(1 - 4)         | 3<br>(1 - 5)         |
| Atrial fibrillation and flutter               | 0<br>(0 - 0)         | --                 | --                  | 0<br>(0 - 0)         | 0<br>(0 - 0)         | 0<br>(0 - 0)         |
| Aortic aneurysm                               | 2<br>(1 - 3)         | --                 | --                  | 0<br>(0 - 0)         | 1<br>(0 - 1)         | 1<br>(0 - 2)         |
| Peripheral vascular disease                   | 0<br>(0 - 0)         | --                 | --                  | 0<br>(0 - 0)         | 0<br>(0 - 0)         | 0<br>(0 - 0)         |
| Endocarditis                                  | 5<br>(3 - 9)         | 1<br>(0 - 3)       | 0<br>(0 - 1)        | 1<br>(1 - 2)         | 1<br>(1 - 2)         | 1<br>(1 - 2)         |
| Other cardiovascular and circulatory diseases | 36<br>(19 - 74)      | 3<br>(1 - 7)       | 1<br>(1 - 3)        | 5<br>(2 - 12)        | 15<br>(7 - 29)       | 12<br>(6 - 24)       |
| Chronic respiratory diseases                  | 122<br>(89 - 174)    | 12<br>(6 - 19)     | 3<br>(2 - 4)        | 9<br>(6 - 13)        | 38<br>(25 - 59)      | 61<br>(42 - 87)      |

Web Table 31- Timor-Leste deaths with 95% UI by age, sex, and cause in 2013

| Cause                                               | Females, All Ages | Females, 0-4 Years | Females, 5-14 Years | Females, 15-49 Years | Females, 50-69 Years | Females, 70-80 Years |
|-----------------------------------------------------|-------------------|--------------------|---------------------|----------------------|----------------------|----------------------|
| Chronic obstructive pulmonary disease               | 66<br>(37 - 97)   | 5<br>(2 - 10)      | 0<br>(0 - 1)        | 2<br>(1 - 4)         | 21<br>(10 - 34)      | 38<br>(21 - 55)      |
| Pneumoconiosis                                      | 0<br>(0 - 0)      | 0<br>(0 - 0)       | 0<br>(0 - 0)        | 0<br>(0 - 0)         | 0<br>(0 - 0)         | 0<br>(0 - 0)         |
| Silicosis                                           | 0<br>(0 - 0)      | 0<br>(0 - 0)       | 0<br>(0 - 0)        | 0<br>(0 - 0)         | 0<br>(0 - 0)         | 0<br>(0 - 0)         |
| Asbestosis                                          | 0<br>(0 - 0)      | 0<br>(0 - 0)       | 0<br>(0 - 0)        | 0<br>(0 - 0)         | 0<br>(0 - 0)         | 0<br>(0 - 0)         |
| Coal workers pneumoconiosis                         | 0<br>(0 - 0)      | 0<br>(0 - 0)       | 0<br>(0 - 0)        | 0<br>(0 - 0)         | 0<br>(0 - 0)         | 0<br>(0 - 0)         |
| Other pneumoconiosis                                | 0<br>(0 - 0)      | 0<br>(0 - 0)       | 0<br>(0 - 0)        | 0<br>(0 - 0)         | 0<br>(0 - 0)         | 0<br>(0 - 0)         |
| Asthma                                              | 47<br>(25 - 113)  | 5<br>(2 - 10)      | 2<br>(1 - 3)        | 6<br>(4 - 10)        | 15<br>(7 - 41)       | 18<br>(8 - 53)       |
| Interstitial lung disease and pulmonary sarcoidosis | 4<br>(0 - 9)      | 0<br>(0 - 0)       | 0<br>(0 - 0)        | 0<br>(0 - 0)         | 1<br>(0 - 3)         | 3<br>(0 - 7)         |
| Other chronic respiratory diseases                  | 4<br>(2 - 8)      | 1<br>(1 - 3)       | 0<br>(0 - 0)        | 0<br>(0 - 1)         | 0<br>(0 - 1)         | 2<br>(1 - 4)         |
| Cirrhosis                                           | 24<br>(15 - 32)   | 0<br>(0 - 1)       | 1<br>(0 - 1)        | 5<br>(3 - 6)         | 12<br>(7 - 17)       | 6<br>(4 - 9)         |
| Cirrhosis due to hepatitis B                        | 10<br>(5 - 16)    | 0<br>(0 - 0)       | 0<br>(0 - 0)        | 2<br>(1 - 3)         | 5<br>(2 - 8)         | 3<br>(1 - 5)         |
| Cirrhosis due to hepatitis C                        | 8<br>(3 - 13)     | 0<br>(0 - 0)       | 0<br>(0 - 0)        | 2<br>(1 - 3)         | 4<br>(2 - 7)         | 2<br>(1 - 3)         |
| Cirrhosis due to alcohol use                        | 3<br>(1 - 5)      | --                 | --                  | 0<br>(0 - 1)         | 1<br>(1 - 3)         | 1<br>(0 - 2)         |
| Cirrhosis due to other causes                       | 3<br>(2 - 5)      | 0<br>(0 - 1)       | 1<br>(0 - 1)        | 1<br>(0 - 2)         | 1<br>(0 - 2)         | 0<br>(0 - 1)         |
| Digestive diseases                                  | 45<br>(28 - 67)   | 2<br>(1 - 5)       | 2<br>(1 - 3)        | 6<br>(4 - 9)         | 16<br>(9 - 25)       | 20<br>(12 - 30)      |
| Peptic ulcer disease                                | 14<br>(8 - 22)    | 0<br>(0 - 0)       | 0<br>(0 - 0)        | 1<br>(1 - 2)         | 5<br>(3 - 9)         | 7<br>(4 - 12)        |
| Gastritis and duodenitis                            | 2<br>(1 - 3)      | 0<br>(0 - 0)       | 0<br>(0 - 0)        | 0<br>(0 - 0)         | 0<br>(0 - 1)         | 1<br>(0 - 1)         |
| Appendicitis                                        | 5<br>(3 - 8)      | 0<br>(0 - 1)       | 0<br>(0 - 1)        | 1<br>(1 - 2)         | 2<br>(1 - 3)         | 1<br>(1 - 3)         |
| Paralytic ileus and intestinal obstruction          | 6<br>(3 - 11)     | 1<br>(0 - 1)       | 0<br>(0 - 0)        | 1<br>(0 - 1)         | 2<br>(1 - 4)         | 3<br>(1 - 5)         |
| Inguinal, femoral, and abdominal hernia             | 1<br>(1 - 2)      | 0<br>(0 - 0)       | 0<br>(0 - 0)        | 0<br>(0 - 0)         | 0<br>(0 - 1)         | 0<br>(0 - 1)         |
| Inflammatory bowel disease                          | 2<br>(1 - 3)      | 0<br>(0 - 0)       | 0<br>(0 - 0)        | 0<br>(0 - 1)         | 0<br>(0 - 1)         | 1<br>(0 - 1)         |
| Vascular intestinal disorders                       | 0                 | 0                  | 0                   | 0                    | 0                    | 0                    |
| Gallbladder and biliary diseases                    | 6<br>(3 - 10)     | 0<br>(0 - 1)       | 0<br>(0 - 0)        | 1<br>(0 - 1)         | 2<br>(1 - 4)         | 3<br>(1 - 5)         |
| Pancreatitis                                        | 4<br>(2 - 6)      | 0<br>(0 - 0)       | 0<br>(0 - 0)        | 1<br>(0 - 1)         | 1<br>(1 - 3)         | 1<br>(1 - 2)         |
| Other digestive diseases                            | 5<br>(3 - 9)      | 0<br>(0 - 1)       | 0<br>(0 - 0)        | 1<br>(0 - 1)         | 2<br>(1 - 3)         | 2<br>(1 - 4)         |
| Neurological disorders                              | 41<br>(26 - 54)   | 1<br>(1 - 3)       | 1<br>(1 - 2)        | 3<br>(2 - 4)         | 6<br>(4 - 9)         | 29<br>(18 - 41)      |
| Alzheimer disease and other dementias               | 33<br>(21 - 45)   | --                 | --                  | 0<br>(0 - 0)         | 5<br>(3 - 7)         | 28<br>(18 - 40)      |
| Parkinson disease                                   | 0<br>(0 - 1)      | --                 | --                  | 0<br>(0 - 0)         | 0<br>(0 - 0)         | 0<br>(0 - 0)         |
| Epilepsy                                            | 5<br>(3 - 8)      | 1<br>(0 - 3)       | 1<br>(0 - 2)        | 2<br>(1 - 4)         | 1<br>(0 - 1)         | 0<br>(0 - 1)         |
| Multiple sclerosis                                  | 0<br>(0 - 0)      | --                 | --                  | 0<br>(0 - 0)         | 0<br>(0 - 0)         | 0<br>(0 - 0)         |
| Other neurological disorders                        | 2<br>(1 - 3)      | 0<br>(0 - 1)       | 0<br>(0 - 0)        | 0<br>(0 - 1)         | 1<br>(0 - 1)         | 0<br>(0 - 1)         |
| Mental and substance use disorders                  | 2<br>(1 - 4)      | 0<br>(0 - 0)       | 0<br>(0 - 0)        | 1<br>(1 - 2)         | 1<br>(0 - 2)         | 0<br>(0 - 0)         |
| Schizophrenia                                       | 0<br>(0 - 1)      | --                 | --                  | 0<br>(0 - 0)         | 0<br>(0 - 0)         | 0<br>(0 - 0)         |
| Alcohol use disorders                               | 2<br>(0 - 3)      | --                 | --                  | 1<br>(0 - 1)         | 1<br>(0 - 2)         | 0<br>(0 - 0)         |
| Drug use disorders                                  | 1<br>(0 - 1)      | 0<br>(0 - 0)       | --                  | 0<br>(0 - 1)         | 0<br>(0 - 0)         | 0<br>(0 - 0)         |
| Opioid use disorders                                | 0<br>(0 - 1)      | 0<br>(0 - 0)       | --                  | 0<br>(0 - 0)         | 0<br>(0 - 0)         | 0<br>(0 - 0)         |
| Cocaine use disorders                               | 0<br>(0 - 0)      | 0<br>(0 - 0)       | --                  | 0<br>(0 - 0)         | 0<br>(0 - 0)         | 0<br>(0 - 0)         |
| Amphetamine use disorders                           | 0<br>(0 - 0)      | 0<br>(0 - 0)       | --                  | 0<br>(0 - 0)         | 0<br>(0 - 0)         | 0<br>(0 - 0)         |
| Other drug use disorders                            | 0<br>(0 - 0)      | 0<br>(0 - 0)       | --                  | 0<br>(0 - 0)         | 0<br>(0 - 0)         | 0<br>(0 - 0)         |
| Eating disorders                                    | 0<br>(0 - 0)      | --                 | 0<br>(0 - 0)        | 0<br>(0 - 0)         | --                   | --                   |

Web Table 31- Timor-Leste deaths with 95% UI by age, sex, and cause in 2013

| Cause                                               | Females, All Ages | Females, 0-4 Years | Females, 5-14 Years | Females, 15-49 Years | Females, 50-69 Years | Females, 70-80 Years |
|-----------------------------------------------------|-------------------|--------------------|---------------------|----------------------|----------------------|----------------------|
| Anorexia nervosa                                    | 0<br>(0 - 0)      | --                 | 0<br>(0 - 0)        | 0<br>(0 - 0)         | --                   | --                   |
| Diabetes, urogenital, blood, and endocrine diseases | 121<br>(78 - 166) | 6<br>(4 - 9)       | 3<br>(2 - 4)        | 13<br>(9 - 18)       | 53<br>(30 - 77)      | 47<br>(27 - 65)      |
| Diabetes mellitus                                   | 66<br>(36 - 92)   | 0<br>(0 - 0)       | 0<br>(0 - 0)        | 4<br>(2 - 5)         | 32<br>(17 - 46)      | 30<br>(16 - 43)      |
| Acute glomerulonephritis                            | 0<br>(0 - 1)      | 0<br>(0 - 0)       | 0<br>(0 - 0)        | 0<br>(0 - 0)         | 0<br>(0 - 0)         | 0<br>(0 - 0)         |
| Chronic kidney disease                              | 34<br>(13 - 58)   | 1<br>(0 - 2)       | 1<br>(0 - 1)        | 5<br>(2 - 9)         | 16<br>(5 - 27)       | 12<br>(4 - 22)       |
| Chronic kidney disease due to diabetes mellitus     | 3<br>(1 - 5)      | 0<br>(0 - 0)       | 0<br>(0 - 0)        | 0<br>(0 - 1)         | 1<br>(0 - 3)         | 1<br>(0 - 2)         |
| Chronic kidney disease due to hypertension          | 8<br>(3 - 16)     | 0<br>(0 - 0)       | 0<br>(0 - 0)        | 1<br>(0 - 2)         | 4<br>(1 - 8)         | 3<br>(1 - 7)         |
| Chronic kidney disease due to glomerulonephritis    | 6<br>(3 - 9)      | 0<br>(0 - 1)       | 0<br>(0 - 0)        | 1<br>(1 - 2)         | 2<br>(1 - 4)         | 2<br>(1 - 3)         |
| Chronic kidney disease due to other causes          | 18<br>(4 - 37)    | 0<br>(0 - 1)       | 0<br>(0 - 1)        | 3<br>(1 - 6)         | 9<br>(2 - 17)        | 6<br>(1 - 13)        |
| Urinary diseases and male infertility               | 6<br>(3 - 10)     | 0<br>(0 - 1)       | 0<br>(0 - 0)        | 1<br>(0 - 2)         | 3<br>(1 - 4)         | 2<br>(1 - 4)         |
| Interstitial nephritis and urinary tract infections | 5<br>(2 - 7)      | 0<br>(0 - 1)       | 0<br>(0 - 0)        | 1<br>(0 - 1)         | 2<br>(1 - 3)         | 2<br>(1 - 3)         |
| Urolithiasis                                        | 1<br>(0 - 1)      | --                 | 0<br>(0 - 0)        | 0<br>(0 - 0)         | 0<br>(0 - 0)         | 0<br>(0 - 0)         |
| Other urinary diseases                              | 1<br>(1 - 2)      | 0<br>(0 - 0)       | 0<br>(0 - 0)        | 0<br>(0 - 0)         | 1<br>(0 - 1)         | 0<br>(0 - 1)         |
| Gynecological diseases                              | 1<br>(0 - 3)      | --                 | --                  | 1<br>(0 - 2)         | 0<br>(0 - 1)         | 0<br>(0 - 1)         |
| Uterine fibroids                                    | 0<br>(0 - 1)      | --                 | --                  | 0<br>(0 - 0)         | 0<br>(0 - 0)         | 0<br>(0 - 0)         |
| Polycystic ovarian syndrome                         | 0<br>(0 - 0)      | --                 | --                  | 0<br>(0 - 0)         | 0<br>(0 - 0)         | --                   |
| Endometriosis                                       | 0<br>(0 - 0)      | --                 | --                  | 0<br>(0 - 0)         | 0<br>(0 - 0)         | --                   |
| Genital prolapse                                    | 0<br>(0 - 1)      | --                 | --                  | 0<br>(0 - 0)         | 0<br>(0 - 0)         | 0<br>(0 - 0)         |
| Other gynecological diseases                        | 1<br>(0 - 2)      | --                 | --                  | 0<br>(0 - 1)         | 0<br>(0 - 0)         | 0<br>(0 - 0)         |
| Hemoglobinopathies and hemolytic anemias            | 8<br>(5 - 12)     | 3<br>(1 - 6)       | 1<br>(1 - 2)        | 2<br>(1 - 2)         | 1<br>(0 - 1)         | 1<br>(0 - 1)         |
| Thalassemias                                        | 6<br>(3 - 9)      | 3<br>(1 - 6)       | 1<br>(1 - 2)        | 1<br>(1 - 2)         | 0<br>(0 - 0)         | 0<br>(0 - 0)         |
| Sickle cell disorders                               | 0<br>(0 - 0)      | 0<br>(0 - 0)       | 0<br>(0 - 0)        | 0<br>(0 - 0)         | 0<br>(0 - 0)         | 0<br>(0 - 0)         |
| G6PD deficiency                                     | 0<br>(0 - 0)      | 0<br>(0 - 0)       | 0<br>(0 - 0)        | 0<br>(0 - 0)         | 0<br>(0 - 0)         | 0<br>(0 - 0)         |
| Other hemoglobinopathies and hemolytic anemias      | 2<br>(1 - 2)      | 0<br>(0 - 1)       | 0<br>(0 - 0)        | 0<br>(0 - 0)         | 1<br>(0 - 1)         | 1<br>(0 - 1)         |
| Endocrine, metabolic, blood, and immune disorders   | 5<br>(3 - 7)      | 1<br>(1 - 2)       | 0<br>(0 - 1)        | 1<br>(0 - 1)         | 2<br>(1 - 3)         | 1<br>(1 - 2)         |
| Musculoskeletal disorders                           | 2<br>(1 - 2)      | --                 | 0<br>(0 - 0)        | 1<br>(0 - 1)         | 0<br>(0 - 1)         | 0<br>(0 - 1)         |
| Rheumatoid arthritis                                | 0<br>(0 - 1)      | --                 | 0<br>(0 - 0)        | 0<br>(0 - 0)         | 0<br>(0 - 0)         | 0<br>(0 - 0)         |
| Other musculoskeletal disorders                     | 1<br>(1 - 2)      | --                 | 0<br>(0 - 0)        | 1<br>(0 - 1)         | 0<br>(0 - 1)         | 0<br>(0 - 0)         |
| Other non-communicable diseases                     | 106<br>(55 - 185) | 93<br>(44 - 169)   | 5<br>(3 - 9)        | 4<br>(2 - 6)         | 2<br>(1 - 3)         | 2<br>(1 - 4)         |
| Congenital anomalies                                | 101<br>(51 - 180) | 91<br>(43 - 167)   | 5<br>(3 - 9)        | 3<br>(2 - 5)         | 1<br>(0 - 1)         | 0<br>(0 - 1)         |
| Neural tube defects                                 | 16<br>(3 - 47)    | 15<br>(3 - 46)     | 0<br>(0 - 1)        | 0<br>(0 - 1)         | 0<br>(0 - 0)         | 0<br>(0 - 0)         |
| Congenital heart anomalies                          | 53<br>(22 - 109)  | 48<br>(17 - 102)   | 3<br>(2 - 5)        | 2<br>(1 - 3)         | 0<br>(0 - 0)         | 0<br>(0 - 0)         |
| Cleft lip and cleft palate                          | 0<br>(0 - 1)      | 0<br>(0 - 1)       | --                  | --                   | --                   | --                   |
| Down syndrome                                       | 3<br>(1 - 6)      | 2<br>(1 - 5)       | 0<br>(0 - 1)        | 0<br>(0 - 0)         | 0<br>(0 - 0)         | 0<br>(0 - 0)         |
| Chromosomal unbalanced rearrangements               | 3<br>(0 - 9)      | 3<br>(0 - 8)       | 0<br>(0 - 0)        | 0<br>(0 - 0)         | 0<br>(0 - 0)         | 0<br>(0 - 0)         |
| Other congenital anomalies                          | 25<br>(10 - 56)   | 23<br>(8 - 52)     | 1<br>(1 - 3)        | 1<br>(0 - 2)         | 0<br>(0 - 1)         | 0<br>(0 - 0)         |
| Skin and subcutaneous diseases                      | 5<br>(3 - 6)      | 1<br>(0 - 1)       | 0<br>(0 - 0)        | 1<br>(0 - 1)         | 1<br>(1 - 2)         | 2<br>(1 - 3)         |
| Cellulitis                                          | 3<br>(1 - 5)      | 0<br>(0 - 1)       | 0<br>(0 - 0)        | 0<br>(0 - 1)         | 1<br>(0 - 1)         | 1<br>(0 - 2)         |
| Pyoderma                                            | 1<br>(0 - 2)      | 0<br>(0 - 1)       | 0<br>(0 - 0)        | 0<br>(0 - 0)         | 0<br>(0 - 1)         | 0<br>(0 - 1)         |
| Decubitus ulcer                                     | 1<br>(0 - 2)      | 0<br>(0 - 0)       | 0<br>(0 - 0)        | 0<br>(0 - 0)         | 0<br>(0 - 0)         | 0<br>(0 - 1)         |

Web Table 31- Timor-Leste deaths with 95% UI by age, sex, and cause in 2013

| Cause                                           | Females, All Ages | Females, 0-4 Years | Females, 5-14 Years | Females, 15-49 Years | Females, 50-69 Years | Females, 70-80 Years |
|-------------------------------------------------|-------------------|--------------------|---------------------|----------------------|----------------------|----------------------|
| Other skin and subcutaneous diseases            | 0<br>(0 - 0)      | 0<br>(0 - 0)       | 0<br>(0 - 0)        | 0<br>(0 - 0)         | 0<br>(0 - 0)         | 0<br>(0 - 0)         |
| Sudden infant death syndrome                    | 1<br>(0 - 4)      | 1<br>(0 - 4)       | --                  | --                   | --                   | --                   |
| Injuries                                        | 126<br>(95 - 156) | 26<br>(17 - 39)    | 20<br>(15 - 25)     | 44<br>(31 - 57)      | 22<br>(13 - 30)      | 13<br>(8 - 18)       |
| Transport injuries                              | 45<br>(31 - 58)   | 7<br>(4 - 11)      | 8<br>(5 - 12)       | 15<br>(10 - 21)      | 10<br>(5 - 14)       | 5<br>(2 - 7)         |
| Road injuries                                   | 41<br>(28 - 54)   | 6<br>(3 - 10)      | 8<br>(5 - 11)       | 15<br>(10 - 20)      | 9<br>(5 - 13)        | 4<br>(2 - 6)         |
| Pedestrian road injuries                        | 12<br>(8 - 17)    | 2<br>(1 - 4)       | 3<br>(1 - 4)        | 3<br>(2 - 5)         | 2<br>(1 - 4)         | 2<br>(1 - 2)         |
| Cyclist road injuries                           | 3<br>(2 - 5)      | 0<br>(0 - 1)       | 1<br>(0 - 1)        | 1<br>(1 - 2)         | 1<br>(0 - 1)         | 0<br>(0 - 1)         |
| Motorcyclist road injuries                      | 9<br>(5 - 13)     | 1<br>(0 - 2)       | 1<br>(1 - 2)        | 4<br>(2 - 7)         | 2<br>(1 - 3)         | 1<br>(0 - 1)         |
| Motor vehicle road injuries                     | 16<br>(9 - 24)    | 2<br>(1 - 4)       | 3<br>(1 - 4)        | 6<br>(4 - 10)        | 3<br>(2 - 6)         | 2<br>(1 - 3)         |
| Other road injuries                             | 2<br>(0 - 3)      | 0<br>(0 - 1)       | 0<br>(0 - 1)        | 1<br>(0 - 1)         | 0<br>(0 - 1)         | 0<br>(0 - 0)         |
| Other transport injuries                        | 3<br>(2 - 5)      | 1<br>(0 - 2)       | 0<br>(0 - 1)        | 1<br>(0 - 1)         | 1<br>(0 - 1)         | 1<br>(0 - 1)         |
| Unintentional injuries                          | 52<br>(39 - 68)   | 18<br>(11 - 28)    | 10<br>(6 - 14)      | 10<br>(7 - 13)       | 7<br>(5 - 10)        | 7<br>(4 - 9)         |
| Falls                                           | 6<br>(4 - 9)      | 1<br>(0 - 2)       | 1<br>(0 - 1)        | 1<br>(0 - 1)         | 1<br>(1 - 2)         | 2<br>(1 - 4)         |
| Drowning                                        | 19<br>(11 - 27)   | 7<br>(3 - 13)      | 6<br>(3 - 9)        | 3<br>(2 - 5)         | 2<br>(1 - 3)         | 1<br>(0 - 1)         |
| Fire, heat, and hot substances                  | 9<br>(6 - 16)     | 4<br>(1 - 8)       | 1<br>(1 - 3)        | 2<br>(1 - 3)         | 1<br>(1 - 2)         | 1<br>(0 - 2)         |
| Poisonings                                      | 2<br>(1 - 5)      | 0<br>(0 - 1)       | 0<br>(0 - 1)        | 1<br>(0 - 2)         | 0<br>(0 - 1)         | 0<br>(0 - 1)         |
| Exposure to mechanical forces                   | 4<br>(3 - 8)      | 1<br>(0 - 3)       | 1<br>(0 - 2)        | 1<br>(1 - 2)         | 1<br>(0 - 1)         | 0<br>(0 - 1)         |
| Unintentional firearm injuries                  | 1<br>(1 - 2)      | 0<br>(0 - 1)       | 0<br>(0 - 0)        | 0<br>(0 - 1)         | 0<br>(0 - 1)         | 0<br>(0 - 0)         |
| Unintentional suffocation                       | 0<br>(0 - 0)      | 0<br>(0 - 0)       | 0<br>(0 - 0)        | 0<br>(0 - 0)         | 0<br>(0 - 0)         | 0<br>(0 - 0)         |
| Other exposure to mechanical forces             | 3<br>(2 - 6)      | 1<br>(0 - 2)       | 1<br>(0 - 1)        | 1<br>(0 - 1)         | 0<br>(0 - 1)         | 0<br>(0 - 0)         |
| Adverse effects of medical treatment            | 5<br>(3 - 7)      | 1<br>(1 - 3)       | 0<br>(0 - 0)        | 1<br>(0 - 1)         | 1<br>(0 - 2)         | 1<br>(0 - 2)         |
| Animal contact                                  | 1<br>(1 - 4)      | 0<br>(0 - 1)       | 0<br>(0 - 1)        | 0<br>(0 - 0)         | 0<br>(0 - 1)         | 0<br>(0 - 0)         |
| Venomous animal contact                         | 1<br>(0 - 3)      | 0<br>(0 - 1)       | 0<br>(0 - 1)        | 0<br>(0 - 0)         | 0<br>(0 - 0)         | 0<br>(0 - 0)         |
| Non-venomous animal contact                     | 0<br>(0 - 1)      | 0<br>(0 - 0)       | 0<br>(0 - 0)        | 0<br>(0 - 0)         | 0<br>(0 - 0)         | 0<br>(0 - 0)         |
| Foreign body                                    | 4<br>(2 - 8)      | 3<br>(1 - 6)       | 0<br>(0 - 0)        | 0<br>(0 - 1)         | 0<br>(0 - 1)         | 0<br>(0 - 1)         |
| Pulmonary aspiration and foreign body in airway | 4<br>(2 - 8)      | 3<br>(1 - 6)       | 0<br>(0 - 0)        | 0<br>(0 - 0)         | 0<br>(0 - 1)         | 0<br>(0 - 1)         |
| Foreign body in other body part                 | 0<br>(0 - 0)      | 0<br>(0 - 0)       | 0<br>(0 - 0)        | 0<br>(0 - 0)         | 0<br>(0 - 0)         | 0<br>(0 - 0)         |
| Other unintentional injuries                    | 1<br>(1 - 2)      | 0<br>(0 - 1)       | 0<br>(0 - 0)        | 0<br>(0 - 1)         | 0<br>(0 - 0)         | 0<br>(0 - 0)         |
| Self-harm and interpersonal violence            | 29<br>(12 - 39)   | 1<br>(1 - 3)       | 2<br>(1 - 3)        | 19<br>(8 - 27)       | 5<br>(1 - 8)         | 2<br>(0 - 3)         |
| Self-harm                                       | 22<br>(4 - 31)    | --                 | 1<br>(0 - 2)        | 15<br>(3 - 23)       | 4<br>(1 - 7)         | 2<br>(0 - 3)         |
| Interpersonal violence                          | 7<br>(4 - 11)     | 1<br>(1 - 3)       | 1<br>(0 - 2)        | 4<br>(3 - 7)         | 1<br>(0 - 1)         | 0<br>(0 - 0)         |
| Assault by firearm                              | 1<br>(1 - 3)      | 0<br>(0 - 0)       | 0<br>(0 - 0)        | 1<br>(0 - 2)         | 0<br>(0 - 0)         | 0<br>(0 - 0)         |
| Assault by sharp object                         | 2<br>(1 - 3)      | 0<br>(0 - 0)       | 0<br>(0 - 0)        | 1<br>(1 - 2)         | 0<br>(0 - 0)         | 0<br>(0 - 0)         |
| Assault by other means                          | 4<br>(2 - 6)      | 1<br>(0 - 2)       | 1<br>(0 - 1)        | 2<br>(1 - 3)         | 0<br>(0 - 0)         | 0<br>(0 - 0)         |

Web Table 31- Togo deaths with 95% UI by age, sex, and cause in 2013

| Cause                                                             | Both Sexes, All Ages        | Both Sexes, 0-4 Years       | Both Sexes, 5-14 Years   | Both Sexes, 15-49 Years     | Both Sexes, 50-69 Years  | Both Sexes, 70-80 Years  |
|-------------------------------------------------------------------|-----------------------------|-----------------------------|--------------------------|-----------------------------|--------------------------|--------------------------|
| All causes                                                        | 53,057<br>(47,839 - 58,978) | 22,620<br>(18,905 - 27,231) | 2,294<br>(2,003 - 2,620) | 13,191<br>(11,713 - 15,057) | 8,173<br>(7,237 - 9,349) | 6,779<br>(6,294 - 7,567) |
| Communicable, maternal, neonatal, and nutritional diseases        | 33,846<br>(29,920 - 38,409) | 19,278<br>(15,770 - 23,708) | 1,528<br>(1,267 - 1,804) | 8,114<br>(7,280 - 9,065)    | 2,909<br>(2,468 - 3,416) | 2,017<br>(1,594 - 2,396) |
| HIV/AIDS and tuberculosis                                         | 7,695<br>(6,691 - 8,846)    | 269<br>(181 - 384)          | 549<br>(448 - 655)       | 5,122<br>(4,377 - 5,965)    | 1,421<br>(1,123 - 1,800) | 334<br>(260 - 410)       |
| Tuberculosis                                                      | 1,366<br>(1,038 - 1,789)    | 70<br>(36 - 123)            | 27<br>(17 - 41)          | 612<br>(425 - 867)          | 412<br>(300 - 559)       | 245<br>(183 - 309)       |
| HIV/AIDS                                                          | 6,329<br>(5,267 - 7,440)    | 199<br>(125 - 297)          | 522<br>(424 - 628)       | 4,510<br>(3,805 - 5,351)    | 1,009<br>(725 - 1,363)   | 89<br>(60 - 130)         |
| HIV/AIDS resulting in mycobacterial infection                     | 385<br>(298 - 487)          | 11<br>(7 - 18)              | 28<br>(21 - 37)          | 274<br>(209 - 352)          | 65<br>(44 - 90)          | 6<br>(4 - 9)             |
| HIV/AIDS resulting in other diseases                              | 5,945<br>(4,982 - 7,044)    | 188<br>(117 - 282)          | 494<br>(400 - 592)       | 4,236<br>(3,563 - 5,027)    | 944<br>(680 - 1,282)     | 83<br>(55 - 122)         |
| Diarrhea, lower respiratory, and other common infectious diseases | 10,469<br>(7,941 - 13,124)  | 6,680<br>(4,707 - 9,102)    | 459<br>(293 - 652)       | 1,244<br>(933 - 1,635)      | 925<br>(639 - 1,228)     | 1,161<br>(796 - 1,459)   |
| Diarrheal diseases                                                | 3,267<br>(2,167 - 4,747)    | 2,277<br>(1,178 - 3,696)    | 100<br>(51 - 172)        | 380<br>(266 - 539)          | 244<br>(160 - 353)       | 267<br>(180 - 378)       |
| Intestinal infectious diseases                                    | 298<br>(150 - 521)          | 105<br>(48 - 202)           | 78<br>(36 - 142)         | 98<br>(45 - 177)            | 12<br>(5 - 23)           | 4<br>(2 - 9)             |
| Typhoid fever                                                     | 194<br>(91 - 356)           | 64<br>(27 - 127)            | 53<br>(25 - 101)         | 66<br>(29 - 124)            | 8<br>(3 - 16)            | 3<br>(1 - 5)             |
| Paratyphoid fever                                                 | 86<br>(40 - 156)            | 31<br>(12 - 63)             | 23<br>(10 - 45)          | 27<br>(11 - 56)             | 3<br>(1 - 7)             | 1<br>(0 - 2)             |
| Other intestinal infectious diseases                              | 19<br>(10 - 35)             | 11<br>(4 - 24)              | 2<br>(0 - 7)             | 4<br>(1 - 10)               | 1<br>(0 - 6)             | 1<br>(0 - 4)             |
| Lower respiratory infections                                      | 5,220<br>(3,764 - 6,650)    | 3,293<br>(2,233 - 4,660)    | 134<br>(80 - 207)        | 419<br>(302 - 574)          | 550<br>(345 - 780)       | 825<br>(528 - 1,095)     |
| Upper respiratory infections                                      | 8<br>(4 - 15)               | 4<br>(1 - 11)               | 0<br>(0 - 1)             | 2<br>(1 - 5)                | 1<br>(0 - 3)             | 1<br>(0 - 2)             |
| Otitis media                                                      | 3<br>(2 - 4)                | 1<br>(1 - 2)                | 0<br>(0 - 0)             | 1<br>(0 - 1)                | 1<br>(0 - 1)             | 1<br>(1 - 1)             |
| Meningitis                                                        | 1,223<br>(841 - 1,678)      | 651<br>(357 - 1,049)        | 105<br>(57 - 171)        | 307<br>(189 - 436)          | 103<br>(57 - 149)        | 56<br>(29 - 82)          |
| Pneumococcal meningitis                                           | 211<br>(130 - 307)          | 98<br>(52 - 176)            | 20<br>(9 - 38)           | 61<br>(30 - 99)             | 19<br>(9 - 32)           | 12<br>(6 - 21)           |
| H influenzae type B meningitis                                    | 150<br>(90 - 238)           | 98<br>(44 - 175)            | 14<br>(7 - 27)           | 28<br>(15 - 46)             | 7<br>(3 - 12)            | 3<br>(2 - 6)             |
| Meningococcal meningitis                                          | 716<br>(493 - 1,011)        | 393<br>(214 - 642)          | 61<br>(33 - 98)          | 171<br>(105 - 258)          | 59<br>(34 - 88)          | 32<br>(16 - 49)          |
| Other meningitis                                                  | 146<br>(98 - 206)           | 61<br>(32 - 101)            | 11<br>(5 - 19)           | 47<br>(24 - 81)             | 18<br>(9 - 32)           | 10<br>(5 - 17)           |
| Encephalitis                                                      | 63<br>(44 - 87)             | 26<br>(13 - 45)             | 7<br>(4 - 13)            | 17<br>(11 - 27)             | 8<br>(5 - 12)            | 5<br>(2 - 7)             |
| Diphtheria                                                        | 4<br>(0 - 18)               | 3<br>(0 - 17)               | 1<br>(0 - 3)             | 0<br>(0 - 1)                | 0<br>(0 - 0)             | --                       |
| Whooping cough                                                    | 26<br>(0 - 127)             | 24<br>(0 - 120)             | 1<br>(0 - 6)             | 0<br>(0 - 1)                | 0<br>(0 - 0)             | --                       |
| Tetanus                                                           | 76<br>(31 - 122)            | 53<br>(13 - 96)             | 3<br>(2 - 6)             | 14<br>(7 - 20)              | 5<br>(3 - 8)             | 2<br>(1 - 2)             |
| Measles                                                           | 276<br>(18 - 1,386)         | 242<br>(16 - 1,212)         | 29<br>(2 - 155)          | 5<br>(0 - 26)               | 0<br>(0 - 1)             | --                       |
| Varicella and herpes zoster                                       | 5<br>(2 - 11)               | 2<br>(0 - 7)                | 0<br>(0 - 1)             | 1<br>(0 - 3)                | 0<br>(0 - 1)             | 1<br>(0 - 3)             |
| Neglected tropical diseases and malaria                           | 6,386<br>(3,784 - 9,877)    | 4,922<br>(2,440 - 8,355)    | 381<br>(201 - 624)       | 547<br>(302 - 964)          | 295<br>(153 - 562)       | 241<br>(115 - 454)       |
| Malaria                                                           | 6,299<br>(3,690 - 9,808)    | 4,897<br>(2,417 - 8,335)    | 367<br>(185 - 611)       | 518<br>(272 - 934)          | 282<br>(141 - 550)       | 235<br>(108 - 448)       |
| Leishmaniasis                                                     | 0<br>(0 - 0)                | 0<br>(0 - 0)                | 0<br>(0 - 0)             | 0<br>(0 - 0)                | 0<br>(0 - 0)             | 0<br>(0 - 0)             |
| Visceral leishmaniasis                                            | 0<br>(0 - 0)                | 0<br>(0 - 0)                | 0<br>(0 - 0)             | 0<br>(0 - 0)                | 0<br>(0 - 0)             | 0<br>(0 - 0)             |
| Schistosomiasis                                                   | 22<br>(16 - 29)             | 0<br>(0 - 1)                | 1<br>(0 - 1)             | 10<br>(7 - 15)              | 7<br>(5 - 11)            | 3<br>(2 - 5)             |
| Cysticercosis                                                     | 3<br>(2 - 3)                | 0<br>(0 - 0)                | 0<br>(0 - 0)             | 2<br>(1 - 2)                | 0<br>(0 - 1)             | 0<br>(0 - 0)             |
| Cystic echinococcosis                                             | 3<br>(2 - 3)                | 1<br>(0 - 1)                | 0<br>(0 - 1)             | 1<br>(1 - 2)                | 0<br>(0 - 0)             | 0<br>(0 - 0)             |
| Dengue                                                            | 5<br>(3 - 7)                | 2<br>(1 - 4)                | 1<br>(0 - 1)             | 1<br>(1 - 3)                | 0<br>(0 - 1)             | 0<br>(0 - 0)             |
| Yellow fever                                                      | 1<br>(0 - 1)                | 0<br>(0 - 0)                | 0<br>(0 - 0)             | 0<br>(0 - 1)                | 0<br>(0 - 0)             | 0<br>(0 - 0)             |
| Rabies                                                            | 33<br>(15 - 50)             | 8<br>(2 - 18)               | 9<br>(3 - 16)            | 12<br>(6 - 17)              | 3<br>(1 - 5)             | 1<br>(0 - 2)             |
| Intestinal nematode infections                                    | 14<br>(5 - 30)              | 12<br>(3 - 27)              | 2<br>(0 - 7)             | 1<br>(0 - 4)                | 0<br>(0 - 2)             | 0<br>(0 - 2)             |
| Ascariasis                                                        | 14<br>(5 - 30)              | 12<br>(3 - 27)              | 2<br>(0 - 7)             | 1<br>(0 - 4)                | 0<br>(0 - 2)             | 0<br>(0 - 2)             |
| Other neglected tropical diseases                                 | 7<br>(5 - 11)               | 3<br>(1 - 5)                | 0<br>(0 - 1)             | 2<br>(1 - 3)                | 1<br>(1 - 1)             | 1<br>(1 - 1)             |

Web Table 31- Togo deaths with 95% UI by age, sex, and cause in 2013

| Cause                                                            | Both Sexes, All Ages        | Both Sexes, 0-4 Years    | Both Sexes, 5-14 Years | Both Sexes, 15-49 Years  | Both Sexes, 50-69 Years  | Both Sexes, 70-80 Years  |
|------------------------------------------------------------------|-----------------------------|--------------------------|------------------------|--------------------------|--------------------------|--------------------------|
| Maternal disorders                                               | 817<br>(528 - 1,185)        | --                       | 3<br>(1 - 6)           | 815<br>(526 - 1,180)     | --                       | --                       |
| Maternal hemorrhage                                              | 160<br>(93 - 247)           | --                       | 0<br>(0 - 1)           | 160<br>(93 - 247)        | --                       | --                       |
| Maternal sepsis and other maternal infections                    | 46<br>(25 - 77)             | --                       | 0<br>(0 - 0)           | 46<br>(25 - 77)          | --                       | --                       |
| Maternal hypertensive disorders                                  | 63<br>(36 - 99)             | --                       | 0<br>(0 - 1)           | 63<br>(36 - 98)          | --                       | --                       |
| Maternal obstructed labor                                        | 42<br>(22 - 67)             | --                       | 0<br>(0 - 0)           | 41<br>(22 - 66)          | --                       | --                       |
| Maternal abortive outcome                                        | 139<br>(81 - 219)           | --                       | 0<br>(0 - 1)           | 138<br>(81 - 218)        | --                       | --                       |
| Indirect maternal deaths                                         | 87<br>(48 - 150)            | --                       | 0<br>(0 - 1)           | 86<br>(47 - 150)         | --                       | --                       |
| Late maternal deaths                                             | 119<br>(62 - 195)           | --                       | 1<br>(0 - 2)           | 118<br>(61 - 194)        | --                       | --                       |
| Maternal deaths aggravated by HIV/AIDS                           | 8<br>(4 - 13)               | --                       | --                     | 8<br>(4 - 13)            | --                       | --                       |
| Other maternal disorders                                         | 153<br>(92 - 238)           | --                       | 0<br>(0 - 1)           | 152<br>(92 - 237)        | --                       | --                       |
| Neonatal disorders                                               | 5,557<br>(4,630 - 6,592)    | 5,557<br>(4,630 - 6,592) | --                     | --                       | --                       | --                       |
| Neonatal preterm birth complications                             | 2,154<br>(1,395 - 3,218)    | 2,154<br>(1,395 - 3,218) | --                     | --                       | --                       | --                       |
| Neonatal encephalopathy due to birth asphyxia and trauma         | 1,587<br>(946 - 2,257)      | 1,587<br>(946 - 2,257)   | --                     | --                       | --                       | --                       |
| Neonatal sepsis and other neonatal infections                    | 1,332<br>(671 - 2,019)      | 1,332<br>(671 - 2,019)   | --                     | --                       | --                       | --                       |
| Hemolytic disease and other neonatal jaundice                    | 32<br>(12 - 79)             | 32<br>(12 - 79)          | --                     | --                       | --                       | --                       |
| Other neonatal disorders                                         | 452<br>(277 - 713)          | 452<br>(277 - 713)       | --                     | --                       | --                       | --                       |
| Nutritional deficiencies                                         | 2,184<br>(1,516 - 3,106)    | 1,339<br>(775 - 2,143)   | 95<br>(58 - 140)       | 306<br>(216 - 443)       | 210<br>(171 - 295)       | 234<br>(171 - 324)       |
| Protein-energy malnutrition                                      | 1,587<br>(985 - 2,394)      | 1,183<br>(653 - 1,928)   | 69<br>(38 - 109)       | 108<br>(55 - 209)        | 107<br>(64 - 174)        | 120<br>(71 - 194)        |
| Iodine deficiency                                                | 8<br>(1 - 28)               | 4<br>(0 - 24)            | 1<br>(0 - 3)           | 2<br>(0 - 7)             | 1<br>(0 - 5)             | 1<br>(0 - 3)             |
| Iron-deficiency anemia                                           | 581<br>(328 - 911)          | 150<br>(40 - 384)        | 25<br>(10 - 48)        | 194<br>(115 - 280)       | 99<br>(46 - 157)         | 112<br>(63 - 179)        |
| Other nutritional deficiencies                                   | 9<br>(4 - 14)               | 2<br>(1 - 6)             | 0<br>(0 - 1)           | 3<br>(1 - 5)             | 2<br>(1 - 4)             | 1<br>(1 - 3)             |
| Other communicable, maternal, neonatal, and nutritional diseases | 737<br>(445 - 1,133)        | 510<br>(251 - 868)       | 42<br>(21 - 72)        | 80<br>(54 - 116)         | 59<br>(41 - 83)          | 47<br>(29 - 68)          |
| Sexually transmitted diseases excluding HIV                      | 499<br>(228 - 886)          | 438<br>(186 - 795)       | 32<br>(14 - 60)        | 15<br>(8 - 38)           | 8<br>(3 - 20)            | 6<br>(2 - 13)            |
| Syphilis                                                         | 487<br>(218 - 871)          | 438<br>(186 - 795)       | 32<br>(14 - 59)        | 7<br>(4 - 19)            | 5<br>(2 - 14)            | 5<br>(2 - 11)            |
| Chlamydial infection                                             | 2<br>(1 - 3)                | --                       | 0<br>(0 - 0)           | 1<br>(1 - 2)             | 0<br>(0 - 1)             | 0<br>(0 - 0)             |
| Gonococcal infection                                             | 6<br>(3 - 15)               | --                       | 0<br>(0 - 1)           | 4<br>(2 - 10)            | 1<br>(1 - 3)             | 1<br>(0 - 2)             |
| Other sexually transmitted diseases                              | 5<br>(3 - 12)               | --                       | 0<br>(0 - 1)           | 3<br>(2 - 8)             | 1<br>(0 - 2)             | 0<br>(0 - 1)             |
| Hepatitis                                                        | 119<br>(70 - 166)           | 19<br>(7 - 37)           | 5<br>(2 - 8)           | 43<br>(24 - 64)          | 30<br>(18 - 47)          | 23<br>(13 - 35)          |
| Acute hepatitis A                                                | 9<br>(2 - 20)               | 6<br>(1 - 13)            | 1<br>(0 - 3)           | 2<br>(0 - 4)             | 0<br>(0 - 1)             | 0<br>(0 - 0)             |
| Acute hepatitis B                                                | 77<br>(45 - 114)            | 13<br>(5 - 26)           | 2<br>(1 - 4)           | 17<br>(8 - 30)           | 24<br>(14 - 39)          | 20<br>(11 - 32)          |
| Acute hepatitis C                                                | 3<br>(1 - 9)                | --                       | 0<br>(0 - 1)           | 1<br>(0 - 4)             | 1<br>(0 - 3)             | 1<br>(0 - 3)             |
| Acute hepatitis E                                                | 30<br>(14 - 50)             | 0<br>(0 - 1)             | 1<br>(0 - 2)           | 22<br>(11 - 37)          | 5<br>(2 - 10)            | 2<br>(1 - 4)             |
| Other infectious diseases                                        | 119<br>(78 - 180)           | 53<br>(26 - 102)         | 5<br>(2 - 10)          | 22<br>(12 - 40)          | 21<br>(11 - 37)          | 18<br>(8 - 35)           |
| Non-communicable diseases                                        | 15,943<br>(13,325 - 19,332) | 2,768<br>(1,371 - 4,571) | 478<br>(277 - 832)     | 3,372<br>(2,680 - 4,354) | 4,836<br>(4,050 - 5,727) | 4,489<br>(4,035 - 5,168) |
| Neoplasms                                                        | 2,348<br>(1,988 - 2,795)    | 64<br>(39 - 107)         | 48<br>(33 - 68)        | 719<br>(566 - 906)       | 1,001<br>(821 - 1,219)   | 516<br>(444 - 607)       |
| Esophageal cancer                                                | 60<br>(45 - 87)             | --                       | --                     | 11<br>(8 - 16)           | 33<br>(23 - 48)          | 16<br>(11 - 25)          |
| Stomach cancer                                                   | 209<br>(174 - 255)          | --                       | --                     | 52<br>(39 - 69)          | 110<br>(87 - 139)        | 48<br>(38 - 61)          |
| Liver cancer                                                     | 666<br>(521 - 845)          | --                       | 2<br>(1 - 4)           | 252<br>(180 - 349)       | 289<br>(212 - 385)       | 122<br>(92 - 162)        |
| Liver cancer due to hepatitis B                                  | 303<br>(180 - 464)          | --                       | 1<br>(0 - 2)           | 139<br>(81 - 215)        | 123<br>(69 - 202)        | 40<br>(20 - 68)          |
| Liver cancer due to hepatitis C                                  | 194<br>(107 - 296)          | --                       | 0<br>(0 - 0)           | 50<br>(24 - 83)          | 96<br>(51 - 154)         | 47<br>(26 - 73)          |

Web Table 31- Togo deaths with 95% UI by age, sex, and cause in 2013

| Cause                                | Both Sexes, All Ages     | Both Sexes, 0-4 Years | Both Sexes, 5-14 Years | Both Sexes, 15-49 Years | Both Sexes, 50-69 Years  | Both Sexes, 70-80 Years  |
|--------------------------------------|--------------------------|-----------------------|------------------------|-------------------------|--------------------------|--------------------------|
| Liver cancer due to alcohol use      | 72<br>(41 - 116)         | --                    | --                     | 17<br>(6 - 30)          | 34<br>(18 - 58)          | 22<br>(12 - 38)          |
| Liver cancer due to other causes     | 96<br>(62 - 143)         | --                    | 1<br>(0 - 2)           | 46<br>(26 - 76)         | 36<br>(21 - 57)          | 13<br>(7 - 21)           |
| Larynx cancer                        | 8<br>(5 - 18)            | --                    | --                     | 2<br>(1 - 3)            | 4<br>(2 - 10)            | 2<br>(2 - 6)             |
| Tracheal, bronchus and lung cancer   | 97<br>(81 - 119)         | --                    | --                     | 13<br>(10 - 18)         | 54<br>(42 - 70)          | 30<br>(24 - 35)          |
| Breast cancer                        | 148<br>(114 - 198)       | --                    | --                     | 59<br>(41 - 83)         | 67<br>(50 - 93)          | 22<br>(17 - 31)          |
| Cervical cancer                      | 276<br>(178 - 386)       | --                    | --                     | 91<br>(54 - 136)        | 140<br>(85 - 204)        | 44<br>(26 - 66)          |
| Uterine cancer                       | 25<br>(14 - 37)          | --                    | --                     | 5<br>(3 - 9)            | 13<br>(6 - 20)           | 8<br>(4 - 12)            |
| Prostate cancer                      | 81<br>(53 - 129)         | --                    | --                     | 2<br>(1 - 3)            | 25<br>(15 - 42)          | 54<br>(36 - 90)          |
| Colon and rectum cancer              | 119<br>(101 - 143)       | --                    | --                     | 35<br>(27 - 46)         | 46<br>(37 - 58)          | 38<br>(32 - 46)          |
| Lip and oral cavity cancer           | 15<br>(11 - 20)          | --                    | --                     | 5<br>(3 - 6)            | 6<br>(4 - 9)             | 4<br>(3 - 6)             |
| Nasopharynx cancer                   | 5<br>(4 - 7)             | --                    | 0<br>(0 - 0)           | 2<br>(2 - 4)            | 2<br>(1 - 3)             | 1<br>(0 - 1)             |
| Other pharynx cancer                 | 6<br>(4 - 8)             | --                    | --                     | 2<br>(1 - 3)            | 2<br>(2 - 4)             | 1<br>(1 - 2)             |
| Gallbladder and biliary tract cancer | 30<br>(21 - 43)          | --                    | --                     | 5<br>(3 - 8)            | 16<br>(11 - 25)          | 8<br>(6 - 13)            |
| Pancreatic cancer                    | 53<br>(44 - 65)          | --                    | --                     | 11<br>(8 - 14)          | 30<br>(24 - 38)          | 12<br>(10 - 15)          |
| Malignant skin melanoma              | 7<br>(5 - 10)            | --                    | --                     | 2<br>(1 - 3)            | 3<br>(2 - 5)             | 1<br>(1 - 2)             |
| Non-melanoma skin cancer             | 5<br>(4 - 8)             | --                    | --                     | 1<br>(1 - 2)            | 2<br>(1 - 3)             | 3<br>(2 - 4)             |
| Ovarian cancer                       | 43<br>(32 - 61)          | --                    | --                     | 13<br>(8 - 20)          | 25<br>(17 - 36)          | 6<br>(4 - 9)             |
| Testicular cancer                    | 2<br>(2 - 4)             | --                    | --                     | 2<br>(1 - 3)            | 0<br>(0 - 1)             | 0<br>(0 - 0)             |
| Kidney cancer                        | 19<br>(15 - 25)          | 3<br>(1 - 6)          | 1<br>(1 - 2)           | 4<br>(3 - 5)            | 8<br>(6 - 11)            | 3<br>(2 - 4)             |
| Bladder cancer                       | 45<br>(35 - 60)          | --                    | --                     | 10<br>(6 - 14)          | 16<br>(12 - 24)          | 18<br>(13 - 27)          |
| Brain and nervous system cancer      | 28<br>(19 - 37)          | 2<br>(1 - 3)          | 3<br>(1 - 4)           | 14<br>(8 - 19)          | 7<br>(5 - 10)            | 3<br>(2 - 4)             |
| Thyroid cancer                       | 6<br>(4 - 10)            | --                    | 0<br>(0 - 0)           | 1<br>(1 - 1)            | 3<br>(2 - 5)             | 2<br>(1 - 4)             |
| Mesothelioma                         | 3<br>(2 - 4)             | --                    | --                     | 1<br>(0 - 1)            | 1<br>(1 - 2)             | 1<br>(1 - 2)             |
| Hodgkin lymphoma                     | 12<br>(9 - 17)           | 1<br>(1 - 3)          | 1<br>(1 - 3)           | 5<br>(4 - 8)            | 2<br>(1 - 3)             | 2<br>(1 - 4)             |
| Non-Hodgkin lymphoma                 | 117<br>(88 - 152)        | 16<br>(8 - 31)        | 16<br>(9 - 26)         | 45<br>(32 - 63)         | 26<br>(18 - 37)          | 14<br>(9 - 21)           |
| Multiple myeloma                     | 12<br>(9 - 16)           | --                    | --                     | 2<br>(2 - 3)            | 6<br>(5 - 9)             | 3<br>(2 - 5)             |
| Leukemia                             | 47<br>(38 - 58)          | 4<br>(2 - 8)          | 6<br>(4 - 9)           | 21<br>(16 - 28)         | 8<br>(7 - 11)            | 7<br>(5 - 8)             |
| Other neoplasms                      | 201<br>(142 - 269)       | 38<br>(22 - 64)       | 18<br>(11 - 29)        | 51<br>(34 - 76)         | 55<br>(34 - 85)          | 40<br>(27 - 60)          |
| Cardiovascular diseases              | 5,685<br>(4,900 - 6,874) | 166<br>(106 - 260)    | 46<br>(30 - 68)        | 859<br>(671 - 1,118)    | 2,187<br>(1,796 - 2,735) | 2,428<br>(2,122 - 2,911) |
| Rheumatic heart disease              | 63<br>(38 - 147)         | 3<br>(1 - 8)          | 3<br>(1 - 5)           | 20<br>(9 - 56)          | 18<br>(9 - 48)           | 19<br>(13 - 38)          |
| Ischemic heart disease               | 1,546<br>(1,250 - 2,032) | 7<br>(2 - 15)         | 6<br>(3 - 9)           | 220<br>(161 - 307)      | 624<br>(481 - 830)       | 689<br>(556 - 947)       |
| Cerebrovascular disease              | 2,536<br>(2,147 - 3,078) | 46<br>(28 - 76)       | 13<br>(8 - 20)         | 309<br>(233 - 404)      | 970<br>(776 - 1,208)     | 1,198<br>(1,030 - 1,439) |
| Ischemic stroke                      | 1,434<br>(751 - 1,870)   | 5<br>(2 - 11)         | 1<br>(1 - 3)           | 62<br>(28 - 94)         | 517<br>(210 - 738)       | 849<br>(483 - 1,078)     |
| Hemorrhagic stroke                   | 1,102<br>(732 - 1,858)   | 41<br>(26 - 66)       | 12<br>(7 - 18)         | 247<br>(182 - 332)      | 454<br>(284 - 803)       | 349<br>(191 - 750)       |
| Hypertensive heart disease           | 393<br>(213 - 578)       | 2<br>(1 - 4)          | 1<br>(0 - 1)           | 49<br>(22 - 81)         | 146<br>(73 - 234)        | 195<br>(108 - 282)       |
| Cardiomyopathy and myocarditis       | 299<br>(225 - 379)       | 31<br>(16 - 61)       | 8<br>(5 - 12)          | 77<br>(54 - 105)        | 96<br>(60 - 140)         | 86<br>(49 - 120)         |
| Atrial fibrillation and flutter      | 0<br>(0 - 1)             | --                    | --                     | 0<br>(0 - 0)            | 0<br>(0 - 0)             | 0<br>(0 - 0)             |
| Aortic aneurysm                      | 50<br>(35 - 70)          | --                    | --                     | 8<br>(5 - 12)           | 22<br>(15 - 31)          | 20<br>(14 - 31)          |
| Peripheral vascular disease          | 1<br>(1 - 2)             | --                    | --                     | 0<br>(0 - 0)            | 1<br>(0 - 1)             | 1<br>(0 - 1)             |
| Endocarditis                         | 116<br>(83 - 162)        | 20<br>(9 - 34)        | 3<br>(2 - 4)           | 28<br>(19 - 41)         | 32<br>(22 - 52)          | 32<br>(22 - 52)          |



Web Table 31- Togo deaths with 95% UI by age, sex, and cause in 2013

| Cause                                               | Both Sexes, All Ages | Both Sexes, 0-4 Years | Both Sexes, 5-14 Years | Both Sexes, 15-49 Years | Both Sexes, 50-69 Years | Both Sexes, 70-80 Years |
|-----------------------------------------------------|----------------------|-----------------------|------------------------|-------------------------|-------------------------|-------------------------|
| Other cardiovascular and circulatory diseases       | 681<br>(474 - 1,249) | 57<br>(30 - 104)      | 13<br>(7 - 22)         | 147<br>(95 - 261)       | 277<br>(180 - 502)      | 186<br>(117 - 394)      |
| Chronic respiratory diseases                        | 998<br>(809 - 1,477) | 58<br>(31 - 109)      | 11<br>(8 - 17)         | 141<br>(106 - 210)      | 350<br>(264 - 526)      | 438<br>(354 - 642)      |
| Chronic obstructive pulmonary disease               | 604<br>(476 - 946)   | 26<br>(13 - 49)       | 5<br>(3 - 8)           | 49<br>(34 - 74)         | 215<br>(159 - 335)      | 310<br>(240 - 478)      |
| Pneumoconiosis                                      | 46<br>(28 - 79)      | 1<br>(0 - 1)          | 0<br>(0 - 1)           | 10<br>(6 - 18)          | 24<br>(13 - 41)         | 10<br>(6 - 21)          |
| Silicosis                                           | 8<br>(4 - 14)        | 0<br>(0 - 0)          | 0<br>(0 - 0)           | 2<br>(1 - 3)            | 2<br>(1 - 4)            | 4<br>(2 - 8)            |
| Asbestosis                                          | 3<br>(2 - 6)         | 0<br>(0 - 0)          | 0<br>(0 - 0)           | 1<br>(0 - 2)            | 2<br>(1 - 3)            | 0<br>(0 - 1)            |
| Coal workers pneumoconiosis                         | 14<br>(8 - 24)       | 0<br>(0 - 0)          | 0<br>(0 - 0)           | 1<br>(0 - 1)            | 11<br>(6 - 19)          | 2<br>(1 - 3)            |
| Other pneumoconiosis                                | 21<br>(13 - 37)      | 0<br>(0 - 0)          | 0<br>(0 - 0)           | 7<br>(4 - 12)           | 9<br>(5 - 16)           | 5<br>(3 - 10)           |
| Asthma                                              | 193<br>(148 - 264)   | 20<br>(8 - 40)        | 3<br>(2 - 5)           | 50<br>(36 - 72)         | 65<br>(44 - 91)         | 55<br>(39 - 77)         |
| Interstitial lung disease and pulmonary sarcoidosis | 83<br>(30 - 137)     | 1<br>(0 - 2)          | 0<br>(0 - 1)           | 5<br>(3 - 8)            | 31<br>(11 - 55)         | 46<br>(14 - 76)         |
| Other chronic respiratory diseases                  | 72<br>(53 - 125)     | 11<br>(6 - 23)        | 2<br>(2 - 4)           | 27<br>(19 - 44)         | 15<br>(9 - 27)          | 17<br>(11 - 30)         |
| Cirrhosis                                           | 773<br>(618 - 959)   | 25<br>(10 - 49)       | 9<br>(6 - 13)          | 266<br>(201 - 353)      | 329<br>(249 - 422)      | 144<br>(112 - 183)      |
| Cirrhosis due to hepatitis B                        | 227<br>(147 - 322)   | 1<br>(0 - 3)          | 2<br>(1 - 3)           | 80<br>(47 - 120)        | 99<br>(62 - 147)        | 44<br>(26 - 66)         |
| Cirrhosis due to hepatitis C                        | 181<br>(85 - 294)    | 1<br>(0 - 3)          | 1<br>(1 - 3)           | 59<br>(29 - 106)        | 83<br>(33 - 140)        | 36<br>(14 - 61)         |
| Cirrhosis due to alcohol use                        | 249<br>(171 - 337)   | --                    | --                     | 77<br>(47 - 116)        | 118<br>(77 - 165)       | 54<br>(38 - 77)         |
| Cirrhosis due to other causes                       | 116<br>(81 - 161)    | 22<br>(8 - 44)        | 6<br>(4 - 9)           | 49<br>(33 - 73)         | 29<br>(17 - 44)         | 9<br>(6 - 14)           |
| Digestive diseases                                  | 871<br>(662 - 1,079) | 62<br>(28 - 116)      | 30<br>(20 - 43)        | 278<br>(191 - 383)      | 267<br>(186 - 347)      | 234<br>(181 - 287)      |
| Peptic ulcer disease                                | 193<br>(134 - 257)   | 6<br>(2 - 16)         | 4<br>(2 - 7)           | 60<br>(40 - 88)         | 64<br>(42 - 94)         | 59<br>(39 - 81)         |
| Gastritis and duodenitis                            | 36<br>(18 - 70)      | 4<br>(1 - 8)          | 2<br>(1 - 3)           | 11<br>(6 - 19)          | 10<br>(4 - 22)          | 10<br>(4 - 26)          |
| Appendicitis                                        | 65<br>(42 - 89)      | 8<br>(3 - 18)         | 5<br>(3 - 8)           | 24<br>(16 - 36)         | 14<br>(7 - 24)          | 13<br>(5 - 25)          |
| Paralytic ileus and intestinal obstruction          | 279<br>(166 - 374)   | 16<br>(7 - 34)        | 10<br>(5 - 16)         | 72<br>(38 - 109)        | 98<br>(53 - 139)        | 83<br>(52 - 119)        |
| Inguinal, femoral, and abdominal hernia             | 19<br>(11 - 29)      | 1<br>(0 - 2)          | 0<br>(0 - 1)           | 5<br>(3 - 9)            | 6<br>(3 - 10)           | 7<br>(4 - 11)           |
| Inflammatory bowel disease                          | 50<br>(18 - 72)      | 11<br>(4 - 25)        | 2<br>(1 - 3)           | 17<br>(6 - 27)          | 11<br>(2 - 18)          | 9<br>(2 - 15)           |
| Vascular intestinal disorders                       | 4<br>(2 - 9)         | 0<br>(0 - 1)          | 0<br>(0 - 0)           | 1<br>(1 - 3)            | 1<br>(0 - 3)            | 1<br>(0 - 3)            |
| Gallbladder and biliary diseases                    | 57<br>(36 - 75)      | 2<br>(1 - 4)          | 2<br>(1 - 3)           | 16<br>(9 - 24)          | 17<br>(10 - 25)         | 20<br>(12 - 29)         |
| Pancreatitis                                        | 55<br>(29 - 80)      | 1<br>(0 - 2)          | 1<br>(0 - 1)           | 28<br>(15 - 45)         | 15<br>(8 - 26)          | 9<br>(4 - 17)           |
| Other digestive diseases                            | 114<br>(85 - 150)    | 13<br>(5 - 28)        | 5<br>(3 - 8)           | 44<br>(28 - 65)         | 30<br>(20 - 42)         | 23<br>(14 - 33)         |
| Neurological disorders                              | 405<br>(339 - 486)   | 50<br>(27 - 93)       | 18<br>(10 - 28)        | 96<br>(65 - 135)        | 45<br>(35 - 59)         | 196<br>(162 - 232)      |
| Alzheimer disease and other dementias               | 202<br>(167 - 240)   | --                    | --                     | 0<br>(0 - 0)            | 23<br>(18 - 30)         | 179<br>(145 - 214)      |
| Parkinson disease                                   | 3<br>(1 - 5)         | --                    | --                     | 0<br>(0 - 1)            | 0<br>(0 - 1)            | 2<br>(1 - 4)            |
| Epilepsy                                            | 153<br>(109 - 214)   | 40<br>(20 - 81)       | 14<br>(7 - 24)         | 80<br>(52 - 117)        | 9<br>(6 - 15)           | 9<br>(5 - 15)           |
| Multiple sclerosis                                  | 1<br>(0 - 3)         | --                    | --                     | 0<br>(0 - 2)            | 0<br>(0 - 1)            | 0<br>(0 - 0)            |
| Other neurological disorders                        | 47<br>(37 - 58)      | 10<br>(6 - 18)        | 3<br>(2 - 4)           | 15<br>(11 - 20)         | 12<br>(9 - 17)          | 7<br>(5 - 9)            |
| Mental and substance use disorders                  | 346<br>(213 - 469)   | 11<br>(3 - 23)        | 0<br>(0 - 0)           | 253<br>(142 - 360)      | 62<br>(35 - 90)         | 20<br>(10 - 28)         |
| Schizophrenia                                       | 1<br>(1 - 2)         | --                    | --                     | 1<br>(0 - 1)            | 0<br>(0 - 1)            | 0<br>(0 - 0)            |
| Alcohol use disorders                               | 130<br>(57 - 187)    | --                    | --                     | 73<br>(35 - 114)        | 44<br>(18 - 67)         | 13<br>(4 - 21)          |
| Drug use disorders                                  | 214<br>(114 - 299)   | 11<br>(3 - 23)        | --                     | 179<br>(88 - 255)       | 18<br>(12 - 24)         | 7<br>(5 - 9)            |
| Opioid use disorders                                | 23<br>(12 - 33)      | 1<br>(0 - 3)          | --                     | 19<br>(9 - 29)          | 2<br>(1 - 2)            | 1<br>(0 - 1)            |
| Cocaine use disorders                               | 1<br>(0 - 1)         | 0<br>(0 - 0)          | --                     | 1<br>(0 - 1)            | 0<br>(0 - 0)            | 0<br>(0 - 0)            |
| Amphetamine use disorders                           | 1<br>(0 - 1)         | 0<br>(0 - 0)          | --                     | 0<br>(0 - 1)            | 0<br>(0 - 0)            | 0<br>(0 - 0)            |

Web Table 31- Togo deaths with 95% UI by age, sex, and cause in 2013

| Cause                                               | Both Sexes, All Ages     | Both Sexes, 0-4 Years  | Both Sexes, 5-14 Years | Both Sexes, 15-49 Years | Both Sexes, 50-69 Years | Both Sexes, 70-80 Years |
|-----------------------------------------------------|--------------------------|------------------------|------------------------|-------------------------|-------------------------|-------------------------|
| Other drug use disorders                            | 190<br>(102 - 264)       | 9<br>(3 - 20)          | --                     | 158<br>(78 - 227)       | 16<br>(11 - 22)         | 6<br>(4 - 8)            |
| Eating disorders                                    | 0<br>(0 - 0)             | --                     | 0<br>(0 - 0)           | 0<br>(0 - 0)            | --                      | --                      |
| Anorexia nervosa                                    | 0<br>(0 - 0)             | --                     | 0<br>(0 - 0)           | 0<br>(0 - 0)            | --                      | --                      |
| Diabetes, urogenital, blood, and endocrine diseases | 2,824<br>(1,737 - 4,460) | 932<br>(280 - 2,019)   | 257<br>(76 - 625)      | 646<br>(395 - 1,133)    | 537<br>(427 - 674)      | 453<br>(365 - 540)      |
| Diabetes mellitus                                   | 611<br>(491 - 738)       | 9<br>(6 - 13)          | 3<br>(2 - 4)           | 90<br>(69 - 117)        | 272<br>(210 - 347)      | 237<br>(180 - 294)      |
| Acute glomerulonephritis                            | 7<br>(5 - 10)            | 1<br>(0 - 3)           | 1<br>(0 - 1)           | 3<br>(2 - 4)            | 2<br>(1 - 3)            | 1<br>(0 - 1)            |
| Chronic kidney disease                              | 323<br>(261 - 408)       | 32<br>(18 - 54)        | 13<br>(7 - 19)         | 117<br>(82 - 161)       | 84<br>(64 - 112)        | 78<br>(61 - 100)        |
| Chronic kidney disease due to diabetes mellitus     | 4<br>(2 - 6)             | 0<br>(0 - 0)           | 0<br>(0 - 0)           | 0<br>(0 - 1)            | 3<br>(1 - 5)            | 0<br>(0 - 0)            |
| Chronic kidney disease due to hypertension          | 106<br>(79 - 141)        | 3<br>(1 - 7)           | 1<br>(0 - 2)           | 28<br>(18 - 41)         | 37<br>(25 - 53)         | 37<br>(26 - 53)         |
| Chronic kidney disease due to glomerulonephritis    | 131<br>(93 - 170)        | 19<br>(10 - 31)        | 8<br>(4 - 12)          | 60<br>(39 - 85)         | 24<br>(16 - 33)         | 21<br>(14 - 29)         |
| Chronic kidney disease due to other causes          | 83<br>(52 - 124)         | 10<br>(4 - 18)         | 4<br>(1 - 7)           | 29<br>(16 - 49)         | 20<br>(11 - 34)         | 20<br>(11 - 31)         |
| Urinary diseases and male infertility               | 274<br>(181 - 351)       | 33<br>(16 - 60)        | 5<br>(3 - 8)           | 75<br>(42 - 108)        | 80<br>(50 - 109)        | 81<br>(57 - 107)        |
| Interstitial nephritis and urinary tract infections | 238<br>(149 - 304)       | 29<br>(12 - 56)        | 4<br>(2 - 7)           | 62<br>(32 - 89)         | 70<br>(43 - 97)         | 72<br>(50 - 95)         |
| Urolithiasis                                        | 4<br>(1 - 10)            | --                     | 0<br>(0 - 1)           | 2<br>(0 - 5)            | 1<br>(0 - 3)            | 1<br>(0 - 2)            |
| Other urinary diseases                              | 33<br>(20 - 47)          | 3<br>(1 - 8)           | 1<br>(0 - 2)           | 12<br>(6 - 20)          | 9<br>(4 - 15)           | 8<br>(4 - 14)           |
| Gynecological diseases                              | 3<br>(1 - 4)             | --                     | --                     | 2<br>(1 - 3)            | 1<br>(0 - 1)            | 0<br>(0 - 1)            |
| Uterine fibroids                                    | 1<br>(0 - 1)             | --                     | --                     | 0<br>(0 - 0)            | 0<br>(0 - 0)            | 0<br>(0 - 0)            |
| Polycystic ovarian syndrome                         | 0<br>(0 - 0)             | --                     | --                     | 0<br>(0 - 0)            | 0<br>(0 - 0)            | --                      |
| Endometriosis                                       | 0<br>(0 - 1)             | --                     | --                     | 0<br>(0 - 1)            | 0<br>(0 - 0)            | --                      |
| Genital prolapse                                    | 0<br>(0 - 1)             | --                     | --                     | 0<br>(0 - 0)            | 0<br>(0 - 0)            | 0<br>(0 - 0)            |
| Other gynecological diseases                        | 1<br>(1 - 2)             | --                     | --                     | 1<br>(0 - 2)            | 0<br>(0 - 1)            | 0<br>(0 - 0)            |
| Hemoglobinopathies and hemolytic anemias            | 1,387<br>(319 - 3,308)   | 797<br>(164 - 1,868)   | 226<br>(43 - 604)      | 302<br>(82 - 807)       | 48<br>(14 - 138)        | 13<br>(6 - 33)          |
| Thalassemias                                        | 11<br>(2 - 28)           | 9<br>(2 - 22)          | 1<br>(0 - 3)           | 1<br>(0 - 4)            | 0<br>(0 - 0)            | 0<br>(0 - 0)            |
| Sickle cell disorders                               | 1,347<br>(308 - 3,216)   | 774<br>(159 - 1,816)   | 224<br>(42 - 597)      | 297<br>(81 - 794)       | 46<br>(14 - 133)        | 5<br>(2 - 13)           |
| G6PD deficiency                                     | 8<br>(2 - 19)            | 5<br>(1 - 12)          | 1<br>(0 - 2)           | 1<br>(0 - 4)            | 0<br>(0 - 1)            | 0<br>(0 - 1)            |
| Other hemoglobinopathies and hemolytic anemias      | 21<br>(7 - 48)           | 9<br>(2 - 23)          | 1<br>(0 - 2)           | 2<br>(0 - 6)            | 2<br>(1 - 4)            | 8<br>(3 - 19)           |
| Endocrine, metabolic, blood, and immune disorders   | 220<br>(134 - 285)       | 60<br>(35 - 91)        | 9<br>(5 - 14)          | 58<br>(36 - 82)         | 50<br>(25 - 73)         | 43<br>(17 - 64)         |
| Musculoskeletal disorders                           | 53<br>(39 - 73)          | --                     | 5<br>(3 - 7)           | 22<br>(16 - 31)         | 15<br>(10 - 23)         | 11<br>(7 - 17)          |
| Rheumatoid arthritis                                | 7<br>(5 - 12)            | --                     | 1<br>(0 - 1)           | 2<br>(1 - 2)            | 2<br>(1 - 4)            | 3<br>(2 - 5)            |
| Other musculoskeletal disorders                     | 46<br>(34 - 63)          | --                     | 4<br>(2 - 6)           | 21<br>(15 - 29)         | 13<br>(9 - 19)          | 8<br>(5 - 12)           |
| Other non-communicable diseases                     | 1,640<br>(904 - 2,713)   | 1,400<br>(693 - 2,420) | 54<br>(30 - 91)        | 91<br>(63 - 133)        | 45<br>(30 - 63)         | 50<br>(33 - 70)         |
| Congenital anomalies                                | 1,473<br>(730 - 2,502)   | 1,352<br>(647 - 2,363) | 50<br>(26 - 88)        | 54<br>(32 - 90)         | 10<br>(6 - 15)          | 7<br>(5 - 10)           |
| Neural tube defects                                 | 394<br>(98 - 974)        | 374<br>(90 - 941)      | 9<br>(2 - 21)          | 10<br>(2 - 24)          | 1<br>(0 - 2)            | 0<br>(0 - 1)            |
| Congenital heart anomalies                          | 572<br>(282 - 967)       | 518<br>(247 - 895)     | 23<br>(12 - 43)        | 23<br>(13 - 38)         | 5<br>(3 - 7)            | 3<br>(2 - 4)            |
| Cleft lip and cleft palate                          | 6<br>(1 - 17)            | 6<br>(1 - 17)          | --                     | --                      | --                      | --                      |
| Down syndrome                                       | 170<br>(54 - 368)        | 151<br>(42 - 347)      | 8<br>(3 - 15)          | 9<br>(5 - 18)           | 1<br>(1 - 3)            | 0<br>(0 - 0)            |
| Chromosomal unbalanced rearrangements               | 51<br>(13 - 129)         | 47<br>(12 - 123)       | 1<br>(0 - 3)           | 2<br>(1 - 4)            | 0<br>(0 - 0)            | 0<br>(0 - 0)            |
| Other congenital anomalies                          | 281<br>(78 - 949)        | 256<br>(63 - 896)      | 9<br>(3 - 28)          | 10<br>(5 - 21)          | 2<br>(1 - 4)            | 3<br>(2 - 4)            |
| Skin and subcutaneous diseases                      | 157<br>(96 - 204)        | 37<br>(18 - 65)        | 4<br>(2 - 6)           | 37<br>(21 - 54)         | 35<br>(21 - 51)         | 43<br>(26 - 62)         |
| Cellulitis                                          | 46<br>(23 - 70)          | 9<br>(3 - 19)          | 2<br>(1 - 3)           | 10<br>(5 - 17)          | 11<br>(5 - 18)          | 15<br>(7 - 25)          |

Web Table 31- Togo deaths with 95% UI by age, sex, and cause in 2013

| Cause                                           | Both Sexes, All Ages     | Both Sexes, 0-4 Years | Both Sexes, 5-14 Years | Both Sexes, 15-49 Years  | Both Sexes, 50-69 Years | Both Sexes, 70-80 Years |
|-------------------------------------------------|--------------------------|-----------------------|------------------------|--------------------------|-------------------------|-------------------------|
| Pyoderma                                        | 103<br>(64 - 147)        | 26<br>(13 - 48)       | 2<br>(1 - 3)           | 25<br>(14 - 38)          | 24<br>(13 - 37)         | 26<br>(13 - 41)         |
| Decubitus ulcer                                 | 3<br>(2 - 5)             | 0<br>(0 - 0)          | 0<br>(0 - 0)           | 1<br>(0 - 1)             | 0<br>(0 - 1)            | 2<br>(1 - 3)            |
| Other skin and subcutaneous diseases            | 4<br>(2 - 7)             | 1<br>(0 - 3)          | 0<br>(0 - 0)           | 2<br>(1 - 3)             | 0<br>(0 - 1)            | 1<br>(0 - 1)            |
| Sudden infant death syndrome                    | 11<br>(3 - 29)           | 11<br>(3 - 29)        | --                     | --                       | --                      | --                      |
| Injuries                                        | 3,268<br>(2,668 - 4,028) | 574<br>(333 - 917)    | 288<br>(195 - 398)     | 1,705<br>(1,306 - 2,251) | 428<br>(338 - 533)      | 274<br>(197 - 344)      |
| Transport injuries                              | 1,544<br>(1,237 - 1,955) | 127<br>(65 - 235)     | 140<br>(95 - 195)      | 993<br>(747 - 1,337)     | 202<br>(155 - 258)      | 83<br>(64 - 102)        |
| Road injuries                                   | 1,489<br>(1,188 - 1,888) | 112<br>(55 - 206)     | 132<br>(90 - 185)      | 974<br>(733 - 1,310)     | 194<br>(148 - 248)      | 77<br>(60 - 97)         |
| Pedestrian road injuries                        | 384<br>(278 - 513)       | 38<br>(17 - 75)       | 46<br>(28 - 68)        | 214<br>(143 - 309)       | 58<br>(39 - 79)         | 28<br>(20 - 37)         |
| Cyclist road injuries                           | 72<br>(52 - 93)          | 8<br>(3 - 17)         | 12<br>(7 - 20)         | 34<br>(23 - 48)          | 14<br>(9 - 20)          | 5<br>(3 - 7)            |
| Motorcyclist road injuries                      | 177<br>(119 - 271)       | 7<br>(3 - 15)         | 8<br>(5 - 14)          | 137<br>(87 - 223)        | 19<br>(12 - 27)         | 5<br>(4 - 8)            |
| Motor vehicle road injuries                     | 831<br>(650 - 1,073)     | 54<br>(26 - 100)      | 61<br>(40 - 88)        | 579<br>(426 - 791)       | 99<br>(75 - 134)        | 37<br>(27 - 49)         |
| Other road injuries                             | 24<br>(17 - 40)          | 4<br>(1 - 9)          | 5<br>(2 - 9)           | 10<br>(6 - 19)           | 4<br>(2 - 7)            | 2<br>(1 - 3)            |
| Other transport injuries                        | 55<br>(38 - 75)          | 15<br>(7 - 29)        | 7<br>(4 - 12)          | 18<br>(12 - 31)          | 9<br>(4 - 13)           | 6<br>(2 - 9)            |
| Unintentional injuries                          | 1,284<br>(915 - 1,649)   | 433<br>(234 - 693)    | 138<br>(84 - 201)      | 395<br>(296 - 537)       | 160<br>(116 - 206)      | 159<br>(101 - 214)      |
| Falls                                           | 288<br>(222 - 381)       | 51<br>(25 - 92)       | 18<br>(10 - 30)        | 94<br>(63 - 148)         | 51<br>(34 - 74)         | 74<br>(47 - 108)        |
| Drowning                                        | 309<br>(187 - 501)       | 135<br>(54 - 263)     | 56<br>(29 - 96)        | 92<br>(55 - 163)         | 18<br>(12 - 27)         | 8<br>(5 - 12)           |
| Fire, heat, and hot substances                  | 141<br>(74 - 207)        | 62<br>(23 - 113)      | 12<br>(5 - 19)         | 38<br>(23 - 54)          | 16<br>(9 - 24)          | 14<br>(7 - 23)          |
| Poisonings                                      | 59<br>(39 - 89)          | 20<br>(8 - 40)        | 5<br>(2 - 8)           | 23<br>(15 - 41)          | 8<br>(4 - 11)           | 3<br>(2 - 4)            |
| Exposure to mechanical forces                   | 166<br>(117 - 217)       | 51<br>(26 - 88)       | 19<br>(11 - 31)        | 66<br>(47 - 96)          | 21<br>(12 - 29)         | 9<br>(4 - 12)           |
| Unintentional firearm injuries                  | 56<br>(39 - 81)          | 11<br>(5 - 21)        | 4<br>(2 - 7)           | 33<br>(21 - 53)          | 6<br>(4 - 9)            | 3<br>(2 - 4)            |
| Unintentional suffocation                       | 20<br>(11 - 41)          | 12<br>(4 - 31)        | 2<br>(1 - 4)           | 4<br>(2 - 8)             | 1<br>(1 - 2)            | 1<br>(0 - 1)            |
| Other exposure to mechanical forces             | 89<br>(51 - 121)         | 28<br>(11 - 53)       | 13<br>(6 - 23)         | 29<br>(20 - 44)          | 13<br>(5 - 20)          | 6<br>(1 - 9)            |
| Adverse effects of medical treatment            | 117<br>(46 - 193)        | 34<br>(10 - 71)       | 5<br>(2 - 10)          | 28<br>(12 - 48)          | 24<br>(8 - 45)          | 25<br>(7 - 48)          |
| Animal contact                                  | 41<br>(22 - 59)          | 10<br>(5 - 19)        | 6<br>(3 - 10)          | 12<br>(6 - 19)           | 7<br>(3 - 11)           | 5<br>(2 - 9)            |
| Venomous animal contact                         | 21<br>(10 - 34)          | 6<br>(2 - 13)         | 3<br>(1 - 5)           | 7<br>(3 - 12)            | 3<br>(1 - 6)            | 2<br>(1 - 4)            |
| Non-venomous animal contact                     | 20<br>(10 - 28)          | 4<br>(2 - 8)          | 3<br>(1 - 6)           | 6<br>(3 - 9)             | 4<br>(2 - 6)            | 3<br>(1 - 5)            |
| Foreign body                                    | 86<br>(57 - 135)         | 53<br>(31 - 97)       | 6<br>(3 - 9)           | 10<br>(7 - 16)           | 6<br>(4 - 9)            | 11<br>(5 - 17)          |
| Pulmonary aspiration and foreign body in airway | 82<br>(53 - 131)         | 51<br>(29 - 96)       | 5<br>(3 - 8)           | 10<br>(6 - 15)           | 5<br>(3 - 8)            | 10<br>(5 - 16)          |
| Foreign body in other body part                 | 4<br>(3 - 6)             | 1<br>(1 - 3)          | 1<br>(0 - 1)           | 1<br>(0 - 1)             | 1<br>(0 - 1)            | 1<br>(0 - 1)            |
| Other unintentional injuries                    | 77<br>(58 - 100)         | 18<br>(11 - 29)       | 11<br>(7 - 16)         | 30<br>(21 - 43)          | 9<br>(7 - 13)           | 8<br>(6 - 12)           |
| Self-harm and interpersonal violence            | 440<br>(317 - 629)       | 13<br>(7 - 26)        | 10<br>(5 - 18)         | 318<br>(216 - 490)       | 66<br>(45 - 95)         | 32<br>(18 - 47)         |
| Self-harm                                       | 290<br>(202 - 419)       | --                    | 5<br>(2 - 11)          | 195<br>(123 - 319)       | 59<br>(40 - 87)         | 31<br>(16 - 46)         |
| Interpersonal violence                          | 150<br>(103 - 238)       | 13<br>(7 - 26)        | 5<br>(3 - 9)           | 123<br>(82 - 204)        | 7<br>(4 - 11)           | 1<br>(1 - 2)            |
| Assault by firearm                              | 78<br>(47 - 129)         | 3<br>(1 - 7)          | 1<br>(1 - 3)           | 70<br>(41 - 117)         | 3<br>(2 - 5)            | 0<br>(0 - 1)            |
| Assault by sharp object                         | 30<br>(17 - 52)          | 2<br>(1 - 5)          | 1<br>(0 - 2)           | 24<br>(13 - 46)          | 2<br>(1 - 3)            | 0<br>(0 - 0)            |
| Assault by other means                          | 42<br>(27 - 70)          | 8<br>(4 - 16)         | 3<br>(1 - 5)           | 29<br>(16 - 55)          | 2<br>(1 - 3)            | 0<br>(0 - 1)            |

Web Table 31- Togo deaths with 95% UI by age, sex, and cause in 2013

| Cause                                                              | Males, All Ages             | Males, 0-4 Years           | Males, 5-14 Years        | Males, 15-49 Years       | Males, 50-69 Years       | Males, 70-80 Years       |
|--------------------------------------------------------------------|-----------------------------|----------------------------|--------------------------|--------------------------|--------------------------|--------------------------|
| All causes                                                         | 27,876<br>(24,381 - 31,552) | 11,942<br>(9,830 - 14,167) | 1,259<br>(1,066 - 1,482) | 6,810<br>(5,849 - 8,141) | 4,519<br>(3,738 - 5,433) | 3,345<br>(2,916 - 3,647) |
| Communicable, maternal, neonatal, and nutritional diseases         | 17,202<br>(14,796 - 19,711) | 10,163<br>(8,070 - 12,480) | 794<br>(619 - 978)       | 3,599<br>(3,052 - 4,280) | 1,610<br>(1,320 - 1,929) | 1,037<br>(806 - 1,262)   |
| HIV/AIDS and tuberculosis                                          | 3,965<br>(3,348 - 4,740)    | 145<br>(96 - 207)          | 282<br>(230 - 338)       | 2,506<br>(1,990 - 3,099) | 818<br>(637 - 1,047)     | 215<br>(160 - 279)       |
| Tuberculosis                                                       | 832<br>(562 - 1,231)        | 43<br>(21 - 83)            | 17<br>(9 - 29)           | 330<br>(199 - 550)       | 278<br>(179 - 413)       | 163<br>(112 - 224)       |
| HIV/AIDS                                                           | 3,133<br>(2,563 - 3,808)    | 102<br>(64 - 151)          | 266<br>(216 - 319)       | 2,175<br>(1,688 - 2,754) | 539<br>(391 - 714)       | 51<br>(31 - 78)          |
| HIV/AIDS resulting in mycobacterial infection                      | 216<br>(160 - 278)          | 7<br>(4 - 10)              | 16<br>(12 - 21)          | 150<br>(107 - 200)       | 39<br>(25 - 55)          | 4<br>(2 - 6)             |
| HIV/AIDS resulting in other diseases                               | 2,918<br>(2,394 - 3,563)    | 95<br>(60 - 142)           | 250<br>(202 - 300)       | 2,025<br>(1,566 - 2,562) | 500<br>(360 - 667)       | 47<br>(29 - 72)          |
| Diarrrhea, lower respiratory, and other common infectious diseases | 5,690<br>(4,109 - 7,427)    | 3,633<br>(2,349 - 5,198)   | 267<br>(155 - 392)       | 654<br>(458 - 910)       | 526<br>(353 - 734)       | 610<br>(416 - 794)       |
| Diarrheal diseases                                                 | 1,811<br>(1,064 - 2,928)    | 1,300<br>(554 - 2,404)     | 60<br>(24 - 120)         | 186<br>(117 - 280)       | 134<br>(75 - 219)        | 132<br>(81 - 203)        |
| Intestinal infectious diseases                                     | 155<br>(73 - 275)           | 53<br>(21 - 104)           | 42<br>(18 - 80)          | 52<br>(23 - 97)          | 6<br>(2 - 12)            | 2<br>(1 - 4)             |
| Typhoid fever                                                      | 98<br>(44 - 181)            | 31<br>(12 - 65)            | 29<br>(12 - 54)          | 34<br>(14 - 68)          | 4<br>(1 - 7)             | 1<br>(0 - 2)             |
| Paratyphoid fever                                                  | 45<br>(19 - 87)             | 15<br>(5 - 36)             | 13<br>(4 - 28)           | 15<br>(5 - 34)           | 2<br>(0 - 4)             | 0<br>(0 - 1)             |
| Other intestinal infectious diseases                               | 11<br>(4 - 23)              | 6<br>(2 - 16)              | 1<br>(0 - 5)             | 3<br>(0 - 8)             | 1<br>(0 - 4)             | 0<br>(0 - 2)             |
| Lower respiratory infections                                       | 2,838<br>(1,928 - 3,833)    | 1,755<br>(1,086 - 2,704)   | 79<br>(43 - 132)         | 235<br>(153 - 357)       | 323<br>(190 - 484)       | 447<br>(274 - 621)       |
| Upper respiratory infections                                       | 4<br>(2 - 10)               | 2<br>(0 - 7)               | 0<br>(0 - 1)             | 1<br>(0 - 3)             | 1<br>(0 - 2)             | 0<br>(0 - 1)             |
| Otitis media                                                       | 1<br>(1 - 2)                | 0<br>(0 - 1)               | 0<br>(0 - 0)             | 0<br>(0 - 0)             | 0<br>(0 - 0)             | 0<br>(0 - 0)             |
| Meningitis                                                         | 639<br>(403 - 990)          | 335<br>(147 - 657)         | 64<br>(31 - 114)         | 158<br>(86 - 248)        | 57<br>(30 - 91)          | 25<br>(13 - 40)          |
| Pneumococcal meningitis                                            | 111<br>(61 - 185)           | 50<br>(19 - 114)           | 12<br>(4 - 25)           | 33<br>(13 - 59)          | 10<br>(3 - 20)           | 5<br>(2 - 9)             |
| H influenzae type B meningitis                                     | 90<br>(47 - 168)            | 58<br>(23 - 126)           | 10<br>(3 - 21)           | 16<br>(8 - 32)           | 4<br>(1 - 9)             | 2<br>(0 - 4)             |
| Meningococcal meningitis                                           | 363<br>(222 - 551)          | 198<br>(84 - 381)          | 35<br>(17 - 64)          | 85<br>(42 - 141)         | 31<br>(16 - 52)          | 14<br>(7 - 23)           |
| Other meningitis                                                   | 75<br>(40 - 128)            | 29<br>(10 - 61)            | 6<br>(2 - 14)            | 24<br>(10 - 51)          | 11<br>(5 - 23)           | 4<br>(2 - 9)             |
| Encephalitis                                                       | 36<br>(23 - 57)             | 15<br>(7 - 31)             | 5<br>(2 - 10)            | 11<br>(7 - 18)           | 4<br>(2 - 6)             | 2<br>(1 - 3)             |
| Diphtheria                                                         | 2<br>(0 - 14)               | 2<br>(0 - 13)              | 0<br>(0 - 3)             | 0<br>(0 - 1)             | 0<br>(0 - 0)             | --                       |
| Whooping cough                                                     | 12<br>(0 - 56)              | 11<br>(0 - 53)             | 1<br>(0 - 3)             | 0<br>(0 - 1)             | 0<br>(0 - 0)             | --                       |
| Tetanus                                                            | 48<br>(16 - 79)             | 35<br>(8 - 67)             | 2<br>(1 - 3)             | 8<br>(3 - 14)            | 3<br>(1 - 5)             | 1<br>(0 - 1)             |
| Measles                                                            | 141<br>(8 - 723)            | 124<br>(7 - 646)           | 15<br>(1 - 81)           | 2<br>(0 - 11)            | 0<br>(0 - 0)             | --                       |
| Varicella and herpes zoster                                        | 3<br>(1 - 7)                | 1<br>(0 - 5)               | 0<br>(0 - 1)             | 1<br>(0 - 2)             | 0<br>(0 - 1)             | 0<br>(0 - 2)             |
| Neglected tropical diseases and malaria                            | 2,857<br>(1,478 - 5,100)    | 2,246<br>(1,030 - 4,275)   | 166<br>(64 - 362)        | 235<br>(97 - 550)        | 128<br>(50 - 305)        | 82<br>(28 - 221)         |
| Malaria                                                            | 2,811<br>(1,429 - 5,062)    | 2,233<br>(1,019 - 4,259)   | 158<br>(55 - 357)        | 220<br>(82 - 537)        | 121<br>(43 - 298)        | 79<br>(26 - 219)         |
| Leishmaniasis                                                      | 0<br>(0 - 0)                | 0<br>(0 - 0)               | 0<br>(0 - 0)             | 0<br>(0 - 0)             | 0<br>(0 - 0)             | 0<br>(0 - 0)             |
| Visceral leishmaniasis                                             | 0<br>(0 - 0)                | 0<br>(0 - 0)               | 0<br>(0 - 0)             | 0<br>(0 - 0)             | 0<br>(0 - 0)             | 0<br>(0 - 0)             |
| Schistosomiasis                                                    | 12<br>(8 - 17)              | 0<br>(0 - 1)               | 0<br>(0 - 1)             | 6<br>(4 - 9)             | 4<br>(2 - 7)             | 2<br>(1 - 3)             |
| Cysticercosis                                                      | 1<br>(1 - 2)                | 0<br>(0 - 0)               | 0<br>(0 - 0)             | 1<br>(1 - 1)             | 0<br>(0 - 0)             | 0<br>(0 - 0)             |
| Cystic echinococcosis                                              | 1<br>(1 - 2)                | 0<br>(0 - 0)               | 0<br>(0 - 0)             | 1<br>(0 - 1)             | 0<br>(0 - 0)             | 0<br>(0 - 0)             |
| Dengue                                                             | 3<br>(1 - 5)                | 1<br>(0 - 3)               | 1<br>(0 - 1)             | 1<br>(0 - 2)             | 0<br>(0 - 0)             | 0<br>(0 - 0)             |
| Yellow fever                                                       | 0<br>(0 - 1)                | 0<br>(0 - 0)               | 0<br>(0 - 0)             | 0<br>(0 - 1)             | 0<br>(0 - 0)             | 0<br>(0 - 0)             |
| Rabies                                                             | 17<br>(6 - 31)              | 5<br>(1 - 12)              | 6<br>(1 - 12)            | 5<br>(2 - 8)             | 1<br>(0 - 2)             | 0<br>(0 - 0)             |
| Intestinal nematode infections                                     | 7<br>(1 - 18)               | 6<br>(1 - 16)              | 1<br>(0 - 5)             | 0<br>(0 - 3)             | 0<br>(0 - 1)             | 0<br>(0 - 1)             |
| Ascariasis                                                         | 7<br>(1 - 18)               | 6<br>(1 - 16)              | 1<br>(0 - 5)             | 0<br>(0 - 3)             | 0<br>(0 - 1)             | 0<br>(0 - 1)             |
| Other neglected tropical diseases                                  | 4<br>(2 - 6)                | 1<br>(0 - 3)               | 0<br>(0 - 1)             | 1<br>(1 - 2)             | 1<br>(0 - 1)             | 0<br>(0 - 1)             |

Web Table 31- Togo deaths with 95% UI by age, sex, and cause in 2013

| Cause                                                            | Males, All Ages           | Males, 0-4 Years         | Males, 5-14 Years  | Males, 15-49 Years       | Males, 50-69 Years       | Males, 70-80 Years       |
|------------------------------------------------------------------|---------------------------|--------------------------|--------------------|--------------------------|--------------------------|--------------------------|
| Maternal disorders                                               | --                        | --                       | --                 | --                       | --                       | --                       |
| Maternal hemorrhage                                              | --                        | --                       | --                 | --                       | --                       | --                       |
| Maternal sepsis and other maternal infections                    | --                        | --                       | --                 | --                       | --                       | --                       |
| Maternal hypertensive disorders                                  | --                        | --                       | --                 | --                       | --                       | --                       |
| Maternal obstructed labor                                        | --                        | --                       | --                 | --                       | --                       | --                       |
| Maternal abortive outcome                                        | --                        | --                       | --                 | --                       | --                       | --                       |
| Indirect maternal deaths                                         | --                        | --                       | --                 | --                       | --                       | --                       |
| Late maternal deaths                                             | --                        | --                       | --                 | --                       | --                       | --                       |
| Maternal deaths aggravated by HIV/AIDS                           | --                        | --                       | --                 | --                       | --                       | --                       |
| Other maternal disorders                                         | --                        | --                       | --                 | --                       | --                       | --                       |
| Neonatal disorders                                               | 3,176<br>(2,672 - 3,820)  | 3,176<br>(2,672 - 3,820) | --                 | --                       | --                       | --                       |
| Neonatal preterm birth complications                             | 1,203<br>(687 - 1,948)    | 1,203<br>(687 - 1,948)   | --                 | --                       | --                       | --                       |
| Neonatal encephalopathy due to birth asphyxia and trauma         | 829<br>(412 - 1,279)      | 829<br>(412 - 1,279)     | --                 | --                       | --                       | --                       |
| Neonatal sepsis and other neonatal infections                    | 863<br>(348 - 1,460)      | 863<br>(348 - 1,460)     | --                 | --                       | --                       | --                       |
| Hemolytic disease and other neonatal jaundice                    | 21<br>(5 - 69)            | 21<br>(5 - 69)           | --                 | --                       | --                       | --                       |
| Other neonatal disorders                                         | 260<br>(145 - 473)        | 260<br>(145 - 473)       | --                 | --                       | --                       | --                       |
| Nutritional deficiencies                                         | 1,137<br>(645 - 1,866)    | 704<br>(323 - 1,339)     | 56<br>(28 - 97)    | 156<br>(90 - 254)        | 109<br>(60 - 177)        | 112<br>(66 - 194)        |
| Protein-energy malnutrition                                      | 847<br>(421 - 1,514)      | 606<br>(266 - 1,156)     | 41<br>(19 - 74)    | 77<br>(33 - 157)         | 63<br>(29 - 124)         | 60<br>(27 - 125)         |
| Iodine deficiency                                                | 4<br>(0 - 18)             | 2<br>(0 - 14)            | 0<br>(0 - 2)       | 1<br>(0 - 5)             | 0<br>(0 - 2)             | 0<br>(0 - 2)             |
| Iron-deficiency anemia                                           | 282<br>(108 - 545)        | 96<br>(13 - 285)         | 14<br>(4 - 33)     | 76<br>(27 - 139)         | 45<br>(15 - 82)          | 51<br>(17 - 100)         |
| Other nutritional deficiencies                                   | 4<br>(2 - 9)              | 1<br>(0 - 3)             | 0<br>(0 - 1)       | 2<br>(1 - 4)             | 1<br>(0 - 2)             | 1<br>(0 - 2)             |
| Other communicable, maternal, neonatal, and nutritional diseases | 378<br>(220 - 607)        | 258<br>(123 - 464)       | 22<br>(11 - 39)    | 49<br>(29 - 86)          | 29<br>(17 - 51)          | 19<br>(11 - 35)          |
| Sexually transmitted diseases excluding HIV                      | 254<br>(110 - 463)        | 220<br>(91 - 420)        | 16<br>(6 - 31)     | 9<br>(4 - 32)            | 5<br>(2 - 17)            | 3<br>(1 - 10)            |
| Syphilis                                                         | 247<br>(105 - 458)        | 220<br>(91 - 420)        | 16<br>(6 - 30)     | 5<br>(2 - 17)            | 4<br>(1 - 13)            | 3<br>(1 - 8)             |
| Chlamydial infection                                             | --                        | --                       | --                 | --                       | --                       | --                       |
| Gonococcal infection                                             | 4<br>(2 - 13)             | --                       | 0<br>(0 - 1)       | 2<br>(1 - 8)             | 1<br>(0 - 3)             | 0<br>(0 - 1)             |
| Other sexually transmitted diseases                              | 3<br>(1 - 10)             | --                       | 0<br>(0 - 1)       | 2<br>(1 - 7)             | 0<br>(0 - 2)             | 0<br>(0 - 0)             |
| Hepatitis                                                        | 56<br>(32 - 83)           | 10<br>(4 - 22)           | 3<br>(1 - 6)       | 25<br>(13 - 41)          | 12<br>(6 - 20)           | 6<br>(3 - 10)            |
| Acute hepatitis A                                                | 5<br>(1 - 10)             | 3<br>(0 - 7)             | 1<br>(0 - 2)       | 1<br>(0 - 2)             | 0<br>(0 - 0)             | 0<br>(0 - 0)             |
| Acute hepatitis B                                                | 35<br>(19 - 54)           | 8<br>(3 - 16)            | 2<br>(1 - 3)       | 11<br>(5 - 21)           | 10<br>(5 - 16)           | 5<br>(3 - 9)             |
| Acute hepatitis C                                                | 2<br>(0 - 4)              | --                       | 0<br>(0 - 1)       | 1<br>(0 - 2)             | 0<br>(0 - 1)             | 0<br>(0 - 1)             |
| Acute hepatitis E                                                | 14<br>(6 - 28)            | 0<br>(0 - 0)             | 0<br>(0 - 1)       | 11<br>(5 - 22)           | 2<br>(1 - 5)             | 0<br>(0 - 1)             |
| Other infectious diseases                                        | 68<br>(37 - 126)          | 28<br>(10 - 60)          | 3<br>(1 - 7)       | 15<br>(7 - 33)           | 13<br>(5 - 29)           | 10<br>(3 - 22)           |
| Non-communicable diseases                                        | 8,544<br>(6,594 - 11,060) | 1,445<br>(639 - 2,856)   | 276<br>(136 - 570) | 2,014<br>(1,512 - 2,801) | 2,635<br>(2,044 - 3,336) | 2,174<br>(1,842 - 2,484) |
| Neoplasms                                                        | 1,181<br>(926 - 1,499)    | 41<br>(23 - 72)          | 28<br>(17 - 43)    | 380<br>(278 - 524)       | 458<br>(335 - 598)       | 274<br>(219 - 341)       |
| Esophageal cancer                                                | 40<br>(26 - 62)           | --                       | --                 | 9<br>(6 - 13)            | 21<br>(13 - 34)          | 10<br>(6 - 18)           |
| Stomach cancer                                                   | 122<br>(93 - 158)         | --                       | --                 | 34<br>(23 - 49)          | 60<br>(42 - 80)          | 28<br>(21 - 38)          |
| Liver cancer                                                     | 475<br>(348 - 632)        | --                       | 2<br>(1 - 4)       | 203<br>(134 - 301)       | 192<br>(130 - 276)       | 79<br>(55 - 112)         |
| Liver cancer due to hepatitis B                                  | 242<br>(128 - 395)        | --                       | 1<br>(0 - 2)       | 120<br>(66 - 196)        | 92<br>(41 - 161)         | 30<br>(10 - 55)          |
| Liver cancer due to hepatitis C                                  | 125<br>(45 - 223)         | --                       | 0<br>(0 - 0)       | 37<br>(13 - 70)          | 60<br>(19 - 113)         | 28<br>(7 - 53)           |

Web Table 31- Togo deaths with 95% UI by age, sex, and cause in 2013

| Cause                                | Males, All Ages          | Males, 0-4 Years | Males, 5-14 Years | Males, 15-49 Years | Males, 50-69 Years     | Males, 70-80 Years     |
|--------------------------------------|--------------------------|------------------|-------------------|--------------------|------------------------|------------------------|
| Liver cancer due to alcohol use      | 57<br>(27 - 99)          | --               | --                | 15<br>(5 - 28)     | 25<br>(11 - 49)        | 17<br>(8 - 32)         |
| Liver cancer due to other causes     | 52<br>(26 - 91)          | --               | 1<br>(0 - 2)      | 31<br>(12 - 57)    | 15<br>(7 - 28)         | 5<br>(2 - 9)           |
| Larynx cancer                        | 7<br>(4 - 17)            | --               | --                | 1<br>(1 - 3)       | 3<br>(2 - 9)           | 2<br>(1 - 5)           |
| Tracheal, bronchus and lung cancer   | 66<br>(50 - 82)          | --               | --                | 8<br>(6 - 12)      | 37<br>(27 - 50)        | 20<br>(15 - 25)        |
| Breast cancer                        | 3<br>(2 - 4)             | --               | --                | 1<br>(0 - 1)       | 1<br>(1 - 2)           | 0<br>(0 - 1)           |
| Cervical cancer                      | --                       | --               | --                | --                 | --                     | --                     |
| Uterine cancer                       | --                       | --               | --                | --                 | --                     | --                     |
| Prostate cancer                      | 81<br>(53 - 129)         | --               | --                | 2<br>(1 - 3)       | 25<br>(15 - 42)        | 54<br>(36 - 90)        |
| Colon and rectum cancer              | 59<br>(46 - 75)          | --               | --                | 19<br>(14 - 27)    | 23<br>(16 - 31)        | 18<br>(14 - 22)        |
| Lip and oral cavity cancer           | 7<br>(5 - 10)            | --               | --                | 2<br>(1 - 3)       | 3<br>(2 - 5)           | 2<br>(1 - 3)           |
| Nasopharynx cancer                   | 3<br>(2 - 4)             | --               | 0<br>(0 - 0)      | 1<br>(1 - 2)       | 1<br>(1 - 2)           | 0<br>(0 - 0)           |
| Other pharynx cancer                 | 4<br>(3 - 5)             | --               | --                | 1<br>(1 - 2)       | 1<br>(1 - 3)           | 1<br>(1 - 1)           |
| Gallbladder and biliary tract cancer | 6<br>(4 - 11)            | --               | --                | 2<br>(1 - 3)       | 2<br>(1 - 5)           | 2<br>(1 - 4)           |
| Pancreatic cancer                    | 27<br>(21 - 36)          | --               | --                | 7<br>(5 - 10)      | 15<br>(11 - 21)        | 5<br>(4 - 6)           |
| Malignant skin melanoma              | 3<br>(2 - 6)             | --               | --                | 1<br>(1 - 2)       | 1<br>(1 - 2)           | 1<br>(0 - 1)           |
| Non-melanoma skin cancer             | 3<br>(2 - 5)             | --               | --                | 1<br>(0 - 1)       | 1<br>(1 - 2)           | 1<br>(1 - 2)           |
| Ovarian cancer                       | --                       | --               | --                | --                 | --                     | --                     |
| Testicular cancer                    | 2<br>(2 - 4)             | --               | --                | 2<br>(1 - 3)       | 0<br>(0 - 1)           | 0<br>(0 - 0)           |
| Kidney cancer                        | 10<br>(7 - 14)           | 2<br>(1 - 4)     | 1<br>(0 - 1)      | 2<br>(1 - 3)       | 4<br>(3 - 6)           | 2<br>(1 - 3)           |
| Bladder cancer                       | 29<br>(21 - 41)          | --               | --                | 6<br>(3 - 9)       | 10<br>(7 - 16)         | 13<br>(9 - 19)         |
| Brain and nervous system cancer      | 13<br>(6 - 18)           | 0<br>(0 - 1)     | 2<br>(1 - 3)      | 6<br>(3 - 9)       | 4<br>(1 - 5)           | 1<br>(1 - 2)           |
| Thyroid cancer                       | 1<br>(1 - 2)             | --               | 0<br>(0 - 0)      | 0<br>(0 - 1)       | 0<br>(0 - 1)           | 0<br>(0 - 0)           |
| Mesothelioma                         | 2<br>(1 - 3)             | --               | --                | 0<br>(0 - 0)       | 1<br>(0 - 1)           | 1<br>(0 - 1)           |
| Hodgkin lymphoma                     | 7<br>(4 - 11)            | 1<br>(0 - 2)     | 1<br>(0 - 2)      | 3<br>(2 - 6)       | 1<br>(1 - 2)           | 1<br>(0 - 1)           |
| Non-Hodgkin lymphoma                 | 73<br>(51 - 99)          | 9<br>(4 - 20)    | 10<br>(5 - 18)    | 28<br>(18 - 42)    | 16<br>(10 - 26)        | 9<br>(6 - 15)          |
| Multiple myeloma                     | 4<br>(3 - 5)             | --               | --                | 1<br>(1 - 2)       | 2<br>(1 - 3)           | 1<br>(0 - 1)           |
| Leukemia                             | 26<br>(19 - 33)          | 3<br>(1 - 7)     | 4<br>(2 - 6)      | 12<br>(9 - 18)     | 3<br>(2 - 5)           | 3<br>(2 - 4)           |
| Other neoplasms                      | 110<br>(71 - 165)        | 26<br>(14 - 47)  | 9<br>(5 - 16)     | 28<br>(16 - 48)    | 28<br>(15 - 50)        | 19<br>(11 - 33)        |
| Cardiovascular diseases              | 2,812<br>(2,289 - 3,369) | 80<br>(45 - 136) | 27<br>(16 - 43)   | 480<br>(360 - 653) | 1,164<br>(897 - 1,473) | 1,062<br>(892 - 1,227) |
| Rheumatic heart disease              | 25<br>(13 - 63)          | 2<br>(1 - 5)     | 1<br>(0 - 3)      | 8<br>(3 - 22)      | 8<br>(3 - 21)          | 6<br>(4 - 14)          |
| Ischemic heart disease               | 827<br>(621 - 1,083)     | 5<br>(1 - 11)    | 4<br>(2 - 7)      | 137<br>(93 - 200)  | 378<br>(269 - 513)     | 303<br>(225 - 405)     |
| Cerebrovascular disease              | 1,313<br>(1,017 - 1,650) | 27<br>(14 - 48)  | 9<br>(5 - 14)     | 180<br>(126 - 258) | 532<br>(385 - 704)     | 565<br>(449 - 689)     |
| Ischemic stroke                      | 734<br>(331 - 1,031)     | 2<br>(1 - 5)     | 1<br>(0 - 2)      | 40<br>(14 - 67)    | 293<br>(106 - 448)     | 399<br>(203 - 536)     |
| Hemorrhagic stroke                   | 578<br>(338 - 963)       | 25<br>(13 - 44)  | 8<br>(4 - 13)     | 140<br>(94 - 208)  | 240<br>(128 - 440)     | 166<br>(76 - 335)      |
| Hypertensive heart disease           | 121<br>(52 - 208)        | 1<br>(0 - 2)     | 0<br>(0 - 1)      | 22<br>(7 - 45)     | 49<br>(20 - 94)        | 48<br>(21 - 81)        |
| Cardiomyopathy and myocarditis       | 151<br>(90 - 219)        | 11<br>(4 - 26)   | 4<br>(2 - 8)      | 38<br>(23 - 57)    | 62<br>(27 - 103)       | 35<br>(16 - 60)        |
| Atrial fibrillation and flutter      | 0<br>(0 - 0)             | --               | --                | 0<br>(0 - 0)       | 0<br>(0 - 0)           | 0<br>(0 - 0)           |
| Aortic aneurysm                      | 26<br>(17 - 37)          | --               | --                | 4<br>(2 - 6)       | 13<br>(8 - 20)         | 9<br>(6 - 13)          |
| Peripheral vascular disease          | 1<br>(0 - 1)             | --               | --                | 0<br>(0 - 0)       | 0<br>(0 - 0)           | 0<br>(0 - 1)           |
| Endocarditis                         | 70<br>(42 - 107)         | 9<br>(3 - 19)    | 1<br>(1 - 3)      | 16<br>(10 - 27)    | 24<br>(14 - 41)        | 19<br>(11 - 32)        |

Web Table 31- Togo deaths with 95% UI by age, sex, and cause in 2013

| Cause                                               | Males, All Ages    | Males, 0-4 Years | Males, 5-14 Years | Males, 15-49 Years | Males, 50-69 Years | Males, 70-80 Years |
|-----------------------------------------------------|--------------------|------------------|-------------------|--------------------|--------------------|--------------------|
| Other cardiovascular and circulatory diseases       | 279<br>(190 - 479) | 25<br>(12 - 50)  | 7<br>(4 - 12)     | 74<br>(47 - 121)   | 97<br>(59 - 179)   | 76<br>(47 - 155)   |
| Chronic respiratory diseases                        | 620<br>(471 - 996) | 31<br>(14 - 64)  | 6<br>(4 - 11)     | 83<br>(57 - 134)   | 223<br>(154 - 361) | 276<br>(210 - 444) |
| Chronic obstructive pulmonary disease               | 389<br>(281 - 642) | 14<br>(6 - 30)   | 3<br>(2 - 5)      | 30<br>(19 - 49)    | 136<br>(92 - 229)  | 206<br>(148 - 336) |
| Pneumoconiosis                                      | 45<br>(26 - 78)    | 0<br>(0 - 1)     | 0<br>(0 - 1)      | 10<br>(6 - 17)     | 24<br>(13 - 41)    | 10<br>(6 - 21)     |
| Silicosis                                           | 7<br>(4 - 14)      | 0<br>(0 - 0)     | 0<br>(0 - 0)      | 2<br>(1 - 3)       | 2<br>(1 - 4)       | 4<br>(2 - 8)       |
| Asbestosis                                          | 3<br>(2 - 6)       | 0<br>(0 - 0)     | 0<br>(0 - 0)      | 1<br>(0 - 2)       | 2<br>(1 - 3)       | 0<br>(0 - 1)       |
| Coal workers pneumoconiosis                         | 14<br>(8 - 24)     | 0<br>(0 - 0)     | 0<br>(0 - 0)      | 1<br>(0 - 1)       | 11<br>(6 - 19)     | 2<br>(1 - 3)       |
| Other pneumoconiosis                                | 21<br>(12 - 36)    | 0<br>(0 - 0)     | 0<br>(0 - 0)      | 7<br>(4 - 12)      | 9<br>(5 - 15)      | 5<br>(3 - 9)       |
| Asthma                                              | 94<br>(64 - 153)   | 9<br>(3 - 22)    | 2<br>(1 - 3)      | 27<br>(18 - 42)    | 32<br>(19 - 53)    | 24<br>(15 - 42)    |
| Interstitial lung disease and pulmonary sarcoidosis | 53<br>(17 - 90)    | 0<br>(0 - 2)     | 0<br>(0 - 0)      | 2<br>(1 - 4)       | 22<br>(6 - 43)     | 28<br>(7 - 53)     |
| Other chronic respiratory diseases                  | 38<br>(26 - 71)    | 7<br>(3 - 16)    | 2<br>(1 - 3)      | 14<br>(9 - 26)     | 9<br>(5 - 16)      | 7<br>(4 - 13)      |
| Cirrhosis                                           | 525<br>(394 - 695) | 14<br>(5 - 32)   | 6<br>(3 - 9)      | 193<br>(134 - 276) | 230<br>(163 - 310) | 83<br>(59 - 109)   |
| Cirrhosis due to hepatitis B                        | 154<br>(89 - 242)  | 1<br>(0 - 2)     | 1<br>(0 - 2)      | 59<br>(32 - 97)    | 68<br>(37 - 116)   | 25<br>(12 - 41)    |
| Cirrhosis due to hepatitis C                        | 99<br>(30 - 178)   | 1<br>(0 - 2)     | 1<br>(0 - 1)      | 33<br>(9 - 68)     | 47<br>(14 - 85)    | 18<br>(6 - 31)     |
| Cirrhosis due to alcohol use                        | 197<br>(119 - 283) | --               | --                | 67<br>(37 - 105)   | 94<br>(54 - 141)   | 35<br>(22 - 53)    |
| Cirrhosis due to other causes                       | 76<br>(51 - 118)   | 12<br>(4 - 29)   | 4<br>(2 - 7)      | 35<br>(21 - 58)    | 19<br>(10 - 32)    | 5<br>(3 - 8)       |
| Digestive diseases                                  | 527<br>(377 - 695) | 34<br>(13 - 71)  | 19<br>(11 - 30)   | 184<br>(112 - 268) | 169<br>(107 - 236) | 121<br>(90 - 160)  |
| Peptic ulcer disease                                | 133<br>(89 - 191)  | 4<br>(1 - 12)    | 3<br>(1 - 6)      | 44<br>(26 - 71)    | 46<br>(28 - 73)    | 35<br>(21 - 53)    |
| Gastritis and duodenitis                            | 18<br>(7 - 43)     | 2<br>(0 - 5)     | 1<br>(0 - 2)      | 5<br>(2 - 13)      | 5<br>(2 - 16)      | 4<br>(1 - 13)      |
| Appendicitis                                        | 25<br>(14 - 39)    | 3<br>(1 - 7)     | 2<br>(1 - 4)      | 9<br>(5 - 15)      | 6<br>(2 - 12)      | 5<br>(2 - 10)      |
| Paralytic ileus and intestinal obstruction          | 172<br>(93 - 255)  | 9<br>(3 - 23)    | 7<br>(3 - 12)     | 52<br>(24 - 88)    | 62<br>(29 - 95)    | 42<br>(24 - 64)    |
| Inguinal, femoral, and abdominal hernia             | 15<br>(9 - 26)     | 0<br>(0 - 1)     | 0<br>(0 - 1)      | 4<br>(2 - 8)       | 5<br>(3 - 10)      | 5<br>(3 - 9)       |
| Inflammatory bowel disease                          | 27<br>(7 - 41)     | 6<br>(2 - 15)    | 1<br>(0 - 2)      | 8<br>(2 - 16)      | 7<br>(1 - 13)      | 5<br>(1 - 9)       |
| Vascular intestinal disorders                       | 2<br>(1 - 5)       | 0<br>(0 - 1)     | 0<br>(0 - 0)      | 1<br>(0 - 1)       | 1<br>(0 - 1)       | 1<br>(0 - 2)       |
| Gallbladder and biliary diseases                    | 27<br>(14 - 40)    | 1<br>(0 - 2)     | 1<br>(0 - 2)      | 9<br>(3 - 15)      | 7<br>(4 - 12)      | 9<br>(4 - 16)      |
| Pancreatitis                                        | 39<br>(17 - 63)    | 0<br>(0 - 1)     | 0<br>(0 - 1)      | 24<br>(10 - 41)    | 9<br>(4 - 15)      | 5<br>(2 - 10)      |
| Other digestive diseases                            | 68<br>(44 - 101)   | 8<br>(2 - 20)    | 3<br>(2 - 6)      | 27<br>(15 - 44)    | 19<br>(11 - 30)    | 10<br>(5 - 17)     |
| Neurological disorders                              | 209<br>(163 - 266) | 25<br>(10 - 55)  | 10<br>(5 - 17)    | 52<br>(34 - 79)    | 24<br>(17 - 32)    | 98<br>(77 - 122)   |
| Alzheimer disease and other dementias               | 103<br>(80 - 129)  | --               | --                | 0<br>(0 - 0)       | 13<br>(8 - 18)     | 90<br>(69 - 113)   |
| Parkinson disease                                   | 2<br>(1 - 4)       | --               | --                | 0<br>(0 - 0)       | 0<br>(0 - 0)       | 1<br>(1 - 3)       |
| Epilepsy                                            | 78<br>(51 - 121)   | 20<br>(7 - 48)   | 8<br>(3 - 15)     | 41<br>(25 - 66)    | 5<br>(3 - 8)       | 4<br>(2 - 6)       |
| Multiple sclerosis                                  | 0<br>(0 - 0)       | --               | --                | 0<br>(0 - 0)       | 0<br>(0 - 0)       | 0<br>(0 - 0)       |
| Other neurological disorders                        | 27<br>(18 - 35)    | 5<br>(2 - 14)    | 2<br>(1 - 3)      | 10<br>(7 - 16)     | 6<br>(3 - 9)       | 3<br>(2 - 4)       |
| Mental and substance use disorders                  | 307<br>(184 - 436) | 8<br>(2 - 20)    | 0<br>(0 - 0)      | 232<br>(131 - 336) | 51<br>(27 - 78)    | 16<br>(7 - 24)     |
| Schizophrenia                                       | 0<br>(0 - 0)       | --               | --                | 0<br>(0 - 0)       | 0<br>(0 - 0)       | 0<br>(0 - 0)       |
| Alcohol use disorders                               | 114<br>(52 - 170)  | --               | --                | 63<br>(31 - 101)   | 39<br>(16 - 62)    | 12<br>(3 - 20)     |
| Drug use disorders                                  | 193<br>(94 - 277)  | 8<br>(2 - 20)    | --                | 169<br>(78 - 244)  | 13<br>(7 - 17)     | 4<br>(2 - 5)       |
| Opioid use disorders                                | 21<br>(10 - 31)    | 1<br>(0 - 2)     | --                | 18<br>(8 - 28)     | 1<br>(1 - 2)       | 0<br>(0 - 1)       |
| Cocaine use disorders                               | 1<br>(0 - 1)       | 0<br>(0 - 0)     | --                | 1<br>(0 - 1)       | 0<br>(0 - 0)       | 0<br>(0 - 0)       |
| Amphetamine use disorders                           | 0<br>(0 - 1)       | 0<br>(0 - 0)     | --                | 0<br>(0 - 1)       | 0<br>(0 - 0)       | 0<br>(0 - 0)       |

Web Table 31- Togo deaths with 95% UI by age, sex, and cause in 2013

| Cause                                               | Males, All Ages        | Males, 0-4 Years     | Males, 5-14 Years | Males, 15-49 Years | Males, 50-69 Years | Males, 70-80 Years |
|-----------------------------------------------------|------------------------|----------------------|-------------------|--------------------|--------------------|--------------------|
| Other drug use disorders                            | 171<br>(83 - 245)      | 7<br>(1 - 18)        | --                | 149<br>(69 - 216)  | 11<br>(7 - 16)     | 3<br>(2 - 5)       |
| Eating disorders                                    | 0<br>(0 - 0)           | --                   | 0<br>(0 - 0)      | 0<br>(0 - 0)       | --                 | --                 |
| Anorexia nervosa                                    | 0<br>(0 - 0)           | --                   | 0<br>(0 - 0)      | 0<br>(0 - 0)       | --                 | --                 |
| Diabetes, urogenital, blood, and endocrine diseases | 1,566<br>(729 - 3,171) | 538<br>(86 - 1,601)  | 151<br>(26 - 470) | 362<br>(172 - 825) | 293<br>(208 - 402) | 222<br>(177 - 269) |
| Diabetes mellitus                                   | 303<br>(232 - 391)     | 7<br>(4 - 11)        | 2<br>(1 - 3)      | 46<br>(32 - 66)    | 144<br>(99 - 198)  | 105<br>(78 - 135)  |
| Acute glomerulonephritis                            | 3<br>(2 - 7)           | 1<br>(0 - 2)         | 0<br>(0 - 1)      | 1<br>(1 - 2)       | 1<br>(0 - 1)       | 0<br>(0 - 1)       |
| Chronic kidney disease                              | 184<br>(137 - 242)     | 17<br>(8 - 33)       | 8<br>(4 - 13)     | 73<br>(44 - 107)   | 46<br>(31 - 65)    | 42<br>(30 - 57)    |
| Chronic kidney disease due to diabetes mellitus     | 2<br>(0 - 3)           | 0<br>(0 - 0)         | 0<br>(0 - 0)      | 0<br>(0 - 0)       | 1<br>(0 - 3)       | 0<br>(0 - 0)       |
| Chronic kidney disease due to hypertension          | 46<br>(29 - 73)        | 2<br>(0 - 4)         | 0<br>(0 - 1)      | 14<br>(6 - 23)     | 16<br>(8 - 28)     | 14<br>(8 - 26)     |
| Chronic kidney disease due to glomerulonephritis    | 91<br>(61 - 125)       | 10<br>(4 - 21)       | 6<br>(3 - 9)      | 40<br>(23 - 62)    | 18<br>(11 - 26)    | 17<br>(10 - 24)    |
| Chronic kidney disease due to other causes          | 46<br>(25 - 72)        | 5<br>(1 - 11)        | 2<br>(0 - 4)      | 18<br>(8 - 34)     | 11<br>(5 - 19)     | 10<br>(5 - 18)     |
| Urinary diseases and male infertility               | 176<br>(106 - 235)     | 22<br>(9 - 45)       | 3<br>(2 - 4)      | 49<br>(23 - 76)    | 50<br>(28 - 73)    | 53<br>(35 - 74)    |
| Interstitial nephritis and urinary tract infections | 150<br>(90 - 202)      | 20<br>(8 - 42)       | 2<br>(1 - 4)      | 39<br>(18 - 62)    | 43<br>(24 - 63)    | 46<br>(30 - 66)    |
| Urolithiasis                                        | 1<br>(0 - 2)           | --                   | 0<br>(0 - 0)      | 0<br>(0 - 1)       | 0<br>(0 - 1)       | 0<br>(0 - 0)       |
| Other urinary diseases                              | 24<br>(13 - 38)        | 2<br>(1 - 6)         | 0<br>(0 - 1)      | 9<br>(4 - 16)      | 7<br>(3 - 11)      | 6<br>(3 - 12)      |
| Gynecological diseases                              | --                     | --                   | --                | --                 | --                 | --                 |
| Uterine fibroids                                    | --                     | --                   | --                | --                 | --                 | --                 |
| Polycystic ovarian syndrome                         | --                     | --                   | --                | --                 | --                 | --                 |
| Endometriosis                                       | --                     | --                   | --                | --                 | --                 | --                 |
| Genital prolapse                                    | --                     | --                   | --                | --                 | --                 | --                 |
| Other gynecological diseases                        | --                     | --                   | --                | --                 | --                 | --                 |
| Hemoglobinopathies and hemolytic anemias            | 791<br>(48 - 2,457)    | 465<br>(25 - 1,541)  | 133<br>(7 - 458)  | 162<br>(10 - 648)  | 25<br>(2 - 110)    | 6<br>(2 - 22)      |
| Thalassemias                                        | 7<br>(0 - 23)          | 6<br>(0 - 19)        | 1<br>(0 - 3)      | 1<br>(0 - 3)       | 0<br>(0 - 0)       | 0<br>(0 - 0)       |
| Sickle cell disorders                               | 770<br>(46 - 2,398)    | 453<br>(24 - 1,499)  | 131<br>(7 - 452)  | 159<br>(9 - 637)   | 25<br>(2 - 106)    | 2<br>(1 - 8)       |
| G6PD deficiency                                     | 4<br>(0 - 13)          | 3<br>(0 - 9)         | 0<br>(0 - 2)      | 1<br>(0 - 3)       | 0<br>(0 - 1)       | 0<br>(0 - 1)       |
| Other hemoglobinopathies and hemolytic anemias      | 10<br>(2 - 33)         | 4<br>(0 - 12)        | 0<br>(0 - 1)      | 1<br>(0 - 5)       | 1<br>(0 - 3)       | 4<br>(1 - 13)      |
| Endocrine, metabolic, blood, and immune disorders   | 109<br>(58 - 149)      | 27<br>(14 - 48)      | 5<br>(3 - 9)      | 32<br>(14 - 50)    | 27<br>(11 - 42)    | 17<br>(6 - 26)     |
| Musculoskeletal disorders                           | 27<br>(19 - 39)        | --                   | 3<br>(1 - 5)      | 11<br>(7 - 17)     | 8<br>(5 - 12)      | 5<br>(3 - 8)       |
| Rheumatoid arthritis                                | 2<br>(1 - 4)           | --                   | 0<br>(0 - 1)      | 1<br>(0 - 1)       | 1<br>(0 - 1)       | 1<br>(0 - 1)       |
| Other musculoskeletal disorders                     | 25<br>(17 - 36)        | --                   | 3<br>(1 - 4)      | 11<br>(7 - 16)     | 7<br>(4 - 11)      | 4<br>(3 - 7)       |
| Other non-communicable diseases                     | 769<br>(394 - 1,399)   | 672<br>(314 - 1,281) | 27<br>(13 - 52)   | 37<br>(23 - 56)    | 16<br>(8 - 24)     | 17<br>(7 - 24)     |
| Congenital anomalies                                | 712<br>(337 - 1,343)   | 653<br>(295 - 1,263) | 25<br>(11 - 51)   | 26<br>(15 - 42)    | 5<br>(3 - 8)       | 3<br>(2 - 5)       |
| Neural tube defects                                 | 193<br>(36 - 504)      | 183<br>(33 - 479)    | 5<br>(1 - 13)     | 5<br>(1 - 12)      | 0<br>(0 - 1)       | 0<br>(0 - 1)       |
| Congenital heart anomalies                          | 280<br>(135 - 551)     | 251<br>(113 - 509)   | 13<br>(6 - 28)    | 12<br>(7 - 21)     | 2<br>(1 - 4)       | 1<br>(1 - 2)       |
| Cleft lip and cleft palate                          | 3<br>(0 - 13)          | 3<br>(0 - 13)        | --                | --                 | --                 | --                 |
| Down syndrome                                       | 53<br>(12 - 142)       | 48<br>(9 - 137)      | 2<br>(1 - 4)      | 2<br>(1 - 5)       | 0<br>(0 - 1)       | 0<br>(0 - 0)       |
| Chromosomal unbalanced rearrangements               | 21<br>(5 - 59)         | 19<br>(4 - 57)       | 1<br>(0 - 2)      | 1<br>(0 - 2)       | 0<br>(0 - 0)       | 0<br>(0 - 0)       |
| Other congenital anomalies                          | 162<br>(35 - 620)      | 148<br>(28 - 588)    | 5<br>(1 - 18)     | 5<br>(2 - 11)      | 1<br>(1 - 2)       | 2<br>(1 - 3)       |
| Skin and subcutaneous diseases                      | 49<br>(16 - 66)        | 12<br>(4 - 23)       | 2<br>(1 - 3)      | 11<br>(4 - 16)     | 11<br>(3 - 17)     | 13<br>(4 - 20)     |
| Cellulitis                                          | 17<br>(5 - 28)         | 4<br>(1 - 10)        | 1<br>(0 - 1)      | 3<br>(1 - 5)       | 5<br>(1 - 9)       | 4<br>(1 - 7)       |



Web Table 31- Togo deaths with 95% UI by age, sex, and cause in 2013

| Cause                                           | Males, All Ages          | Males, 0-4 Years   | Males, 5-14 Years  | Males, 15-49 Years     | Males, 50-69 Years | Males, 70-80 Years |
|-------------------------------------------------|--------------------------|--------------------|--------------------|------------------------|--------------------|--------------------|
| Pyoderma                                        | 31<br>(11 - 44)          | 8<br>(3 - 15)      | 1<br>(0 - 1)       | 8<br>(3 - 12)          | 6<br>(2 - 11)      | 9<br>(3 - 13)      |
| Decubitus ulcer                                 | 1<br>(0 - 3)             | 0<br>(0 - 0)       | 0<br>(0 - 0)       | 0<br>(0 - 0)           | 0<br>(0 - 0)       | 1<br>(0 - 2)       |
| Other skin and subcutaneous diseases            | 0<br>(0 - 0)             | 0<br>(0 - 0)       | 0<br>(0 - 0)       | 0<br>(0 - 0)           | 0<br>(0 - 0)       | 0<br>(0 - 0)       |
| Sudden infant death syndrome                    | 7<br>(2 - 21)            | 7<br>(2 - 21)      | --                 | --                     | --                 | --                 |
| Injuries                                        | 2,129<br>(1,654 - 2,766) | 335<br>(177 - 589) | 190<br>(116 - 277) | 1,197<br>(889 - 1,651) | 274<br>(200 - 359) | 134<br>(103 - 167) |
| Transport injuries                              | 1,001<br>(761 - 1,324)   | 72<br>(30 - 150)   | 90<br>(53 - 136)   | 662<br>(476 - 924)     | 129<br>(91 - 176)  | 48<br>(35 - 64)    |
| Road injuries                                   | 966<br>(734 - 1,278)     | 62<br>(25 - 132)   | 85<br>(49 - 126)   | 650<br>(466 - 905)     | 124<br>(87 - 170)  | 44<br>(33 - 60)    |
| Pedestrian road injuries                        | 237<br>(151 - 338)       | 23<br>(8 - 53)     | 30<br>(16 - 49)    | 137<br>(82 - 210)      | 33<br>(20 - 50)    | 14<br>(8 - 21)     |
| Cyclist road injuries                           | 52<br>(36 - 72)          | 5<br>(2 - 13)      | 9<br>(4 - 16)      | 26<br>(16 - 38)        | 9<br>(5 - 14)      | 3<br>(2 - 6)       |
| Motorcyclist road injuries                      | 134<br>(81 - 227)        | 5<br>(2 - 11)      | 7<br>(3 - 12)      | 104<br>(58 - 186)      | 15<br>(9 - 23)     | 4<br>(2 - 6)       |
| Motor vehicle road injuries                     | 527<br>(388 - 725)       | 27<br>(10 - 58)    | 36<br>(20 - 57)    | 377<br>(264 - 533)     | 65<br>(43 - 94)    | 22<br>(15 - 32)    |
| Other road injuries                             | 16<br>(9 - 30)           | 3<br>(1 - 7)       | 3<br>(1 - 7)       | 6<br>(3 - 14)          | 3<br>(1 - 5)       | 1<br>(1 - 2)       |
| Other transport injuries                        | 35<br>(24 - 52)          | 9<br>(4 - 21)      | 5<br>(3 - 9)       | 12<br>(6 - 27)         | 5<br>(3 - 8)       | 3<br>(1 - 6)       |
| Unintentional injuries                          | 802<br>(587 - 1,083)     | 255<br>(125 - 446) | 93<br>(52 - 145)   | 289<br>(203 - 422)     | 98<br>(69 - 132)   | 67<br>(46 - 91)    |
| Falls                                           | 188<br>(130 - 294)       | 34<br>(15 - 71)    | 13<br>(6 - 24)     | 76<br>(46 - 131)       | 37<br>(22 - 58)    | 29<br>(17 - 50)    |
| Drowning                                        | 220<br>(121 - 392)       | 88<br>(30 - 200)   | 41<br>(18 - 78)    | 74<br>(41 - 140)       | 12<br>(8 - 20)     | 5<br>(3 - 8)       |
| Fire, heat, and hot substances                  | 73<br>(36 - 116)         | 31<br>(9 - 64)     | 6<br>(2 - 12)      | 21<br>(12 - 33)        | 8<br>(4 - 14)      | 6<br>(3 - 10)      |
| Poisonings                                      | 43<br>(28 - 79)          | 13<br>(5 - 31)     | 3<br>(2 - 7)       | 19<br>(12 - 38)        | 5<br>(3 - 9)       | 2<br>(1 - 3)       |
| Exposure to mechanical forces                   | 114<br>(79 - 155)        | 30<br>(14 - 54)    | 13<br>(7 - 23)     | 53<br>(35 - 82)        | 13<br>(8 - 19)     | 4<br>(2 - 6)       |
| Unintentional firearm injuries                  | 42<br>(26 - 68)          | 7<br>(3 - 17)      | 3<br>(1 - 6)       | 26<br>(15 - 46)        | 4<br>(2 - 7)       | 2<br>(1 - 3)       |
| Unintentional suffocation                       | 15<br>(7 - 32)           | 8<br>(2 - 23)      | 2<br>(1 - 4)       | 4<br>(2 - 7)           | 1<br>(1 - 2)       | 0<br>(0 - 1)       |
| Other exposure to mechanical forces             | 57<br>(32 - 79)          | 15<br>(4 - 29)     | 9<br>(3 - 16)      | 23<br>(15 - 35)        | 8<br>(3 - 12)      | 3<br>(1 - 4)       |
| Adverse effects of medical treatment            | 56<br>(20 - 104)         | 19<br>(4 - 47)     | 3<br>(1 - 6)       | 13<br>(5 - 25)         | 10<br>(3 - 21)     | 10<br>(3 - 22)     |
| Animal contact                                  | 18<br>(8 - 26)           | 4<br>(2 - 9)       | 3<br>(1 - 6)       | 5<br>(2 - 7)           | 3<br>(1 - 5)       | 3<br>(1 - 4)       |
| Venomous animal contact                         | 7<br>(3 - 10)            | 1<br>(0 - 4)       | 1<br>(0 - 2)       | 2<br>(1 - 4)           | 1<br>(0 - 2)       | 1<br>(0 - 2)       |
| Non-venomous animal contact                     | 11<br>(5 - 17)           | 3<br>(1 - 6)       | 2<br>(1 - 4)       | 2<br>(1 - 4)           | 2<br>(1 - 4)       | 2<br>(0 - 3)       |
| Foreign body                                    | 40<br>(22 - 71)          | 25<br>(12 - 50)    | 3<br>(1 - 5)       | 6<br>(3 - 11)          | 3<br>(2 - 5)       | 3<br>(1 - 5)       |
| Pulmonary aspiration and foreign body in airway | 37<br>(19 - 66)          | 24<br>(11 - 49)    | 3<br>(1 - 5)       | 6<br>(3 - 10)          | 2<br>(1 - 4)       | 3<br>(1 - 5)       |
| Foreign body in other body part                 | 3<br>(2 - 4)             | 1<br>(0 - 2)       | 0<br>(0 - 1)       | 0<br>(0 - 1)           | 1<br>(0 - 1)       | 0<br>(0 - 0)       |
| Other unintentional injuries                    | 49<br>(34 - 69)          | 10<br>(5 - 19)     | 7<br>(4 - 12)      | 22<br>(15 - 34)        | 6<br>(3 - 8)       | 4<br>(3 - 6)       |
| Self-harm and interpersonal violence            | 327<br>(221 - 499)       | 7<br>(3 - 17)      | 7<br>(3 - 13)      | 246<br>(160 - 401)     | 47<br>(28 - 74)    | 20<br>(10 - 33)    |
| Self-harm                                       | 212<br>(136 - 340)       | --                 | 4<br>(1 - 9)       | 148<br>(89 - 253)      | 41<br>(24 - 67)    | 19<br>(9 - 32)     |
| Interpersonal violence                          | 115<br>(70 - 194)        | 7<br>(3 - 17)      | 3<br>(1 - 6)       | 98<br>(58 - 172)       | 5<br>(3 - 9)       | 1<br>(0 - 1)       |
| Assault by firearm                              | 68<br>(38 - 117)         | 2<br>(1 - 5)       | 1<br>(0 - 2)       | 63<br>(34 - 109)       | 2<br>(1 - 5)       | 0<br>(0 - 1)       |
| Assault by sharp object                         | 19<br>(9 - 41)           | 1<br>(0 - 3)       | 1<br>(0 - 1)       | 15<br>(6 - 37)         | 2<br>(1 - 3)       | 0<br>(0 - 0)       |
| Assault by other means                          | 28<br>(14 - 55)          | 4<br>(2 - 11)      | 2<br>(1 - 4)       | 20<br>(8 - 44)         | 1<br>(1 - 3)       | 0<br>(0 - 1)       |

Web Table 31- Togo deaths with 95% UI by age, sex, and cause in 2013

| Cause                                                             | Females, All Ages           | Females, 0-4 Years         | Females, 5-14 Years    | Females, 15-49 Years     | Females, 50-69 Years     | Females, 70-80 Years     |
|-------------------------------------------------------------------|-----------------------------|----------------------------|------------------------|--------------------------|--------------------------|--------------------------|
| All causes                                                        | 25,181<br>(22,534 - 27,937) | 10,677<br>(8,756 - 12,810) | 1,035<br>(876 - 1,219) | 6,381<br>(5,351 - 7,342) | 3,654<br>(3,142 - 4,550) | 3,434<br>(3,212 - 4,098) |
| Communicable, maternal, neonatal, and nutritional diseases        | 16,644<br>(14,590 - 19,029) | 9,115<br>(7,370 - 11,259)  | 735<br>(591 - 899)     | 4,515<br>(3,859 - 5,185) | 1,299<br>(1,043 - 1,601) | 980<br>(716 - 1,234)     |
| HIV/AIDS and tuberculosis                                         | 3,730<br>(3,055 - 4,417)    | 125<br>(82 - 183)          | 266<br>(217 - 319)     | 2,616<br>(2,165 - 3,147) | 603<br>(413 - 844)       | 120<br>(84 - 163)        |
| Tuberculosis                                                      | 534<br>(388 - 718)          | 27<br>(13 - 50)            | 10<br>(6 - 17)         | 281<br>(184 - 414)       | 134<br>(89 - 193)        | 82<br>(53 - 115)         |
| HIV/AIDS                                                          | 3,196<br>(2,524 - 3,915)    | 98<br>(61 - 146)           | 256<br>(207 - 308)     | 2,335<br>(1,897 - 2,858) | 469<br>(277 - 714)       | 38<br>(17 - 65)          |
| HIV/AIDS resulting in mycobacterial infection                     | 169<br>(125 - 223)          | 5<br>(3 - 8)               | 12<br>(9 - 16)         | 124<br>(92 - 163)        | 26<br>(15 - 40)          | 2<br>(1 - 4)             |
| HIV/AIDS resulting in other diseases                              | 3,027<br>(2,389 - 3,703)    | 93<br>(58 - 139)           | 244<br>(198 - 293)     | 2,210<br>(1,794 - 2,711) | 444<br>(262 - 677)       | 36<br>(16 - 61)          |
| Diarrhea, lower respiratory, and other common infectious diseases | 4,780<br>(3,517 - 6,130)    | 3,047<br>(1,980 - 4,344)   | 192<br>(108 - 303)     | 590<br>(391 - 850)       | 399<br>(261 - 586)       | 551<br>(353 - 754)       |
| Diarrheal diseases                                                | 1,456<br>(886 - 2,311)      | 977<br>(438 - 1,827)       | 40<br>(18 - 78)        | 194<br>(118 - 306)       | 110<br>(63 - 189)        | 135<br>(75 - 221)        |
| Intestinal infectious diseases                                    | 143<br>(67 - 272)           | 53<br>(22 - 104)           | 36<br>(16 - 68)        | 46<br>(19 - 90)          | 6<br>(2 - 14)            | 2<br>(1 - 6)             |
| Typhoid fever                                                     | 95<br>(43 - 183)            | 33<br>(12 - 69)            | 25<br>(10 - 50)        | 32<br>(13 - 65)          | 4<br>(1 - 10)            | 2<br>(1 - 3)             |
| Paratyphoid fever                                                 | 40<br>(17 - 83)             | 16<br>(5 - 35)             | 11<br>(3 - 24)         | 12<br>(4 - 28)           | 2<br>(0 - 4)             | 1<br>(0 - 1)             |
| Other intestinal infectious diseases                              | 8<br>(2 - 17)               | 4<br>(1 - 12)              | 1<br>(0 - 4)           | 2<br>(0 - 6)             | 1<br>(0 - 4)             | 0<br>(0 - 2)             |
| Lower respiratory infections                                      | 2,382<br>(1,637 - 3,208)    | 1,538<br>(905 - 2,355)     | 55<br>(29 - 94)        | 184<br>(116 - 276)       | 227<br>(130 - 344)       | 377<br>(224 - 545)       |
| Upper respiratory infections                                      | 4<br>(1 - 9)                | 2<br>(0 - 7)               | 0<br>(0 - 1)           | 1<br>(0 - 3)             | 1<br>(0 - 2)             | 0<br>(0 - 2)             |
| Otitis media                                                      | 2<br>(1 - 2)                | 1<br>(0 - 1)               | 0<br>(0 - 0)           | 0<br>(0 - 0)             | 0<br>(0 - 0)             | 0<br>(0 - 1)             |
| Meningitis                                                        | 584<br>(389 - 838)          | 315<br>(161 - 557)         | 42<br>(21 - 70)        | 149<br>(86 - 234)        | 47<br>(23 - 75)          | 32<br>(14 - 53)          |
| Pneumococcal meningitis                                           | 100<br>(57 - 153)           | 48<br>(21 - 89)            | 8<br>(3 - 17)          | 28<br>(9 - 57)           | 9<br>(4 - 18)            | 7<br>(2 - 14)            |
| H influenzae type B meningitis                                    | 60<br>(30 - 106)            | 40<br>(9 - 85)             | 4<br>(2 - 9)           | 11<br>(4 - 22)           | 2<br>(1 - 5)             | 2<br>(1 - 3)             |
| Meningococcal meningitis                                          | 353<br>(229 - 525)          | 195<br>(96 - 351)          | 25<br>(13 - 44)        | 86<br>(49 - 143)         | 28<br>(13 - 47)          | 18<br>(7 - 31)           |
| Other meningitis                                                  | 72<br>(42 - 107)            | 32<br>(14 - 60)            | 4<br>(2 - 9)           | 24<br>(10 - 45)          | 7<br>(3 - 14)            | 5<br>(2 - 11)            |
| Encephalitis                                                      | 26<br>(17 - 38)             | 10<br>(5 - 20)             | 3<br>(1 - 5)           | 7<br>(4 - 11)            | 4<br>(2 - 7)             | 3<br>(1 - 5)             |
| Diphtheria                                                        | 2<br>(0 - 9)                | 1<br>(0 - 9)               | 0<br>(0 - 1)           | 0<br>(0 - 0)             | 0<br>(0 - 0)             | --                       |
| Whooping cough                                                    | 14<br>(0 - 72)              | 13<br>(0 - 68)             | 1<br>(0 - 3)           | 0<br>(0 - 1)             | 0<br>(0 - 0)             | --                       |
| Tetanus                                                           | 29<br>(10 - 50)             | 18<br>(3 - 38)             | 2<br>(1 - 3)           | 6<br>(3 - 10)            | 2<br>(1 - 4)             | 1<br>(0 - 2)             |
| Measles                                                           | 135<br>(8 - 672)            | 117<br>(7 - 583)           | 14<br>(1 - 73)         | 3<br>(0 - 16)            | 0<br>(0 - 0)             | --                       |
| Varicella and herpes zoster                                       | 3<br>(1 - 7)                | 1<br>(0 - 4)               | 0<br>(0 - 1)           | 1<br>(0 - 2)             | 0<br>(0 - 1)             | 1<br>(0 - 3)             |
| Neglected tropical diseases and malaria                           | 3,529<br>(1,961 - 5,623)    | 2,676<br>(1,155 - 4,566)   | 215<br>(65 - 402)      | 312<br>(89 - 659)        | 167<br>(42 - 371)        | 159<br>(37 - 373)        |
| Malaria                                                           | 3,488<br>(1,900 - 5,575)    | 2,664<br>(1,144 - 4,560)   | 210<br>(57 - 399)      | 298<br>(73 - 642)        | 161<br>(35 - 363)        | 156<br>(33 - 369)        |
| Leishmaniasis                                                     | 0<br>(0 - 0)                | 0<br>(0 - 0)               | 0<br>(0 - 0)           | 0<br>(0 - 0)             | 0<br>(0 - 0)             | 0<br>(0 - 0)             |
| Visceral leishmaniasis                                            | 0<br>(0 - 0)                | 0<br>(0 - 0)               | 0<br>(0 - 0)           | 0<br>(0 - 0)             | 0<br>(0 - 0)             | 0<br>(0 - 0)             |
| Schistosomiasis                                                   | 10<br>(6 - 14)              | 0<br>(0 - 1)               | 0<br>(0 - 1)           | 4<br>(2 - 7)             | 3<br>(2 - 5)             | 2<br>(1 - 3)             |
| Cysticercosis                                                     | 1<br>(1 - 2)                | 0<br>(0 - 0)               | 0<br>(0 - 0)           | 1<br>(1 - 1)             | 0<br>(0 - 0)             | 0<br>(0 - 0)             |
| Cystic echinococcosis                                             | 2<br>(1 - 2)                | 0<br>(0 - 1)               | 0<br>(0 - 0)           | 1<br>(1 - 1)             | 0<br>(0 - 0)             | 0<br>(0 - 0)             |
| Dengue                                                            | 2<br>(1 - 3)                | 1<br>(0 - 1)               | 0<br>(0 - 1)           | 1<br>(0 - 1)             | 0<br>(0 - 0)             | 0<br>(0 - 0)             |
| Yellow fever                                                      | 0<br>(0 - 0)                | 0<br>(0 - 0)               | 0<br>(0 - 0)           | 0<br>(0 - 0)             | 0<br>(0 - 0)             | 0<br>(0 - 0)             |
| Rabies                                                            | 16<br>(7 - 23)              | 3<br>(1 - 7)               | 3<br>(1 - 6)           | 7<br>(3 - 10)            | 2<br>(1 - 4)             | 1<br>(0 - 2)             |
| Intestinal nematode infections                                    | 7<br>(2 - 17)               | 6<br>(1 - 16)              | 1<br>(0 - 5)           | 0<br>(0 - 2)             | 0<br>(0 - 1)             | 0<br>(0 - 1)             |
| Ascariasis                                                        | 7<br>(2 - 17)               | 6<br>(1 - 16)              | 1<br>(0 - 5)           | 0<br>(0 - 2)             | 0<br>(0 - 1)             | 0<br>(0 - 1)             |
| Other neglected tropical diseases                                 | 3<br>(2 - 7)                | 1<br>(1 - 3)               | 0<br>(0 - 0)           | 1<br>(0 - 2)             | 0<br>(0 - 1)             | 0<br>(0 - 1)             |

Web Table 31- Togo deaths with 95% UI by age, sex, and cause in 2013

| Cause                                                            | Females, All Ages        | Females, 0-4 Years       | Females, 5-14 Years | Females, 15-49 Years   | Females, 50-69 Years     | Females, 70-80 Years     |
|------------------------------------------------------------------|--------------------------|--------------------------|---------------------|------------------------|--------------------------|--------------------------|
| Maternal disorders                                               | 817<br>(528 - 1,185)     | --                       | 3<br>(1 - 6)        | 815<br>(526 - 1,180)   | --                       | --                       |
| Maternal hemorrhage                                              | 160<br>(93 - 247)        | --                       | 0<br>(0 - 1)        | 160<br>(93 - 247)      | --                       | --                       |
| Maternal sepsis and other maternal infections                    | 46<br>(25 - 77)          | --                       | 0<br>(0 - 0)        | 46<br>(25 - 77)        | --                       | --                       |
| Maternal hypertensive disorders                                  | 63<br>(36 - 99)          | --                       | 0<br>(0 - 1)        | 63<br>(36 - 98)        | --                       | --                       |
| Maternal obstructed labor                                        | 42<br>(22 - 67)          | --                       | 0<br>(0 - 0)        | 41<br>(22 - 66)        | --                       | --                       |
| Maternal abortive outcome                                        | 139<br>(81 - 219)        | --                       | 0<br>(0 - 1)        | 138<br>(81 - 218)      | --                       | --                       |
| Indirect maternal deaths                                         | 87<br>(48 - 150)         | --                       | 0<br>(0 - 1)        | 86<br>(47 - 150)       | --                       | --                       |
| Late maternal deaths                                             | 119<br>(62 - 195)        | --                       | 1<br>(0 - 2)        | 118<br>(61 - 194)      | --                       | --                       |
| Maternal deaths aggravated by HIV/AIDS                           | 8<br>(4 - 13)            | --                       | --                  | 8<br>(4 - 13)          | --                       | --                       |
| Other maternal disorders                                         | 153<br>(92 - 238)        | --                       | 0<br>(0 - 1)        | 152<br>(92 - 237)      | --                       | --                       |
| Neonatal disorders                                               | 2,381<br>(1,886 - 2,981) | 2,381<br>(1,886 - 2,981) | --                  | --                     | --                       | --                       |
| Neonatal preterm birth complications                             | 951<br>(479 - 1,557)     | 951<br>(479 - 1,557)     | --                  | --                     | --                       | --                       |
| Neonatal encephalopathy due to birth asphyxia and trauma         | 759<br>(388 - 1,279)     | 759<br>(388 - 1,279)     | --                  | --                     | --                       | --                       |
| Neonatal sepsis and other neonatal infections                    | 469<br>(168 - 849)       | 469<br>(168 - 849)       | --                  | --                     | --                       | --                       |
| Hemolytic disease and other neonatal jaundice                    | 11<br>(3 - 25)           | 11<br>(3 - 25)           | --                  | --                     | --                       | --                       |
| Other neonatal disorders                                         | 193<br>(106 - 346)       | 193<br>(106 - 346)       | --                  | --                     | --                       | --                       |
| Nutritional deficiencies                                         | 1,047<br>(702 - 1,509)   | 635<br>(309 - 1,057)     | 39<br>(20 - 67)     | 150<br>(98 - 226)      | 101<br>(68 - 147)        | 123<br>(84 - 176)        |
| Protein-energy malnutrition                                      | 740<br>(386 - 1,174)     | 576<br>(262 - 977)       | 28<br>(13 - 50)     | 31<br>(13 - 75)        | 45<br>(21 - 78)          | 60<br>(28 - 99)          |
| Iodine deficiency                                                | 4<br>(0 - 19)            | 2<br>(0 - 16)            | 0<br>(0 - 2)        | 1<br>(0 - 4)           | 1<br>(0 - 4)             | 0<br>(0 - 2)             |
| Iron-deficiency anemia                                           | 299<br>(164 - 478)       | 55<br>(11 - 175)         | 11<br>(4 - 22)      | 118<br>(69 - 183)      | 54<br>(24 - 89)          | 62<br>(29 - 104)         |
| Other nutritional deficiencies                                   | 4<br>(2 - 8)             | 2<br>(0 - 5)             | 0<br>(0 - 0)        | 1<br>(0 - 1)           | 1<br>(0 - 3)             | 1<br>(0 - 1)             |
| Other communicable, maternal, neonatal, and nutritional diseases | 360<br>(209 - 568)       | 252<br>(121 - 438)       | 20<br>(9 - 35)      | 32<br>(19 - 48)        | 29<br>(16 - 47)          | 28<br>(14 - 46)          |
| Sexually transmitted diseases excluding HIV                      | 246<br>(112 - 445)       | 218<br>(90 - 400)        | 16<br>(6 - 30)      | 6<br>(3 - 11)          | 3<br>(1 - 7)             | 2<br>(1 - 6)             |
| Syphilis                                                         | 240<br>(105 - 439)       | 218<br>(90 - 400)        | 16<br>(6 - 30)      | 3<br>(1 - 5)           | 2<br>(0 - 4)             | 2<br>(1 - 5)             |
| Chlamydial infection                                             | 2<br>(1 - 3)             | --                       | 0<br>(0 - 0)        | 1<br>(1 - 2)           | 0<br>(0 - 1)             | 0<br>(0 - 0)             |
| Gonococcal infection                                             | 2<br>(1 - 4)             | --                       | 0<br>(0 - 0)        | 1<br>(1 - 2)           | 1<br>(0 - 1)             | 0<br>(0 - 1)             |
| Other sexually transmitted diseases                              | 2<br>(1 - 3)             | --                       | 0<br>(0 - 0)        | 1<br>(1 - 2)           | 0<br>(0 - 1)             | 0<br>(0 - 0)             |
| Hepatitis                                                        | 64<br>(33 - 99)          | 9<br>(3 - 19)            | 2<br>(1 - 3)        | 18<br>(8 - 31)         | 18<br>(9 - 33)           | 17<br>(8 - 28)           |
| Acute hepatitis A                                                | 4<br>(1 - 10)            | 3<br>(1 - 8)             | 0<br>(0 - 1)        | 1<br>(0 - 2)           | 0<br>(0 - 0)             | 0<br>(0 - 0)             |
| Acute hepatitis B                                                | 42<br>(21 - 69)          | 6<br>(2 - 13)            | 1<br>(0 - 2)        | 6<br>(2 - 12)          | 15<br>(7 - 27)           | 15<br>(7 - 26)           |
| Acute hepatitis C                                                | 2<br>(0 - 5)             | --                       | 0<br>(0 - 0)        | 1<br>(0 - 2)           | 1<br>(0 - 2)             | 1<br>(0 - 2)             |
| Acute hepatitis E                                                | 15<br>(6 - 28)           | 0<br>(0 - 1)             | 0<br>(0 - 1)        | 11<br>(4 - 20)         | 3<br>(1 - 6)             | 1<br>(0 - 4)             |
| Other infectious diseases                                        | 50<br>(27 - 94)          | 25<br>(10 - 63)          | 2<br>(1 - 5)        | 7<br>(4 - 13)          | 8<br>(3 - 18)            | 8<br>(2 - 22)            |
| Non-communicable diseases                                        | 7,399<br>(5,945 - 9,269) | 1,323<br>(643 - 2,205)   | 202<br>(115 - 339)  | 1,358<br>(929 - 1,868) | 2,201<br>(1,742 - 2,898) | 2,315<br>(2,006 - 2,860) |
| Neoplasms                                                        | 1,166<br>(929 - 1,508)   | 23<br>(12 - 42)          | 20<br>(11 - 31)     | 339<br>(243 - 460)     | 543<br>(426 - 732)       | 241<br>(199 - 302)       |
| Esophageal cancer                                                | 21<br>(14 - 31)          | --                       | --                  | 2<br>(2 - 4)           | 12<br>(8 - 19)           | 6<br>(4 - 10)            |
| Stomach cancer                                                   | 88<br>(67 - 120)         | --                       | --                  | 18<br>(12 - 25)        | 50<br>(36 - 71)          | 20<br>(14 - 29)          |
| Liver cancer                                                     | 190<br>(131 - 262)       | --                       | 1<br>(0 - 1)        | 50<br>(32 - 73)        | 97<br>(61 - 147)         | 43<br>(27 - 67)          |
| Liver cancer due to hepatitis B                                  | 61<br>(31 - 99)          | --                       | 0<br>(0 - 0)        | 19<br>(8 - 33)         | 31<br>(13 - 54)          | 10<br>(4 - 18)           |
| Liver cancer due to hepatitis C                                  | 69<br>(37 - 109)         | --                       | 0<br>(0 - 0)        | 13<br>(6 - 24)         | 37<br>(18 - 64)          | 19<br>(9 - 32)           |

Web Table 31- Togo deaths with 95% UI by age, sex, and cause in 2013

| Cause                                | Females, All Ages        | Females, 0-4 Years | Females, 5-14 Years | Females, 15-49 Years | Females, 50-69 Years   | Females, 70-80 Years     |
|--------------------------------------|--------------------------|--------------------|---------------------|----------------------|------------------------|--------------------------|
| Liver cancer due to alcohol use      | 16<br>(7 - 30)           | --                 | --                  | 2<br>(1 - 4)         | 8<br>(3 - 17)          | 5<br>(2 - 11)            |
| Liver cancer due to other causes     | 45<br>(23 - 76)          | --                 | 0<br>(0 - 1)        | 15<br>(8 - 26)       | 21<br>(9 - 39)         | 8<br>(4 - 16)            |
| Larynx cancer                        | 1<br>(0 - 2)             | --                 | --                  | 0<br>(0 - 0)         | 0<br>(0 - 1)           | 0<br>(0 - 0)             |
| Tracheal, bronchus and lung cancer   | 31<br>(24 - 43)          | --                 | --                  | 5<br>(3 - 7)         | 17<br>(12 - 25)        | 10<br>(7 - 13)           |
| Breast cancer                        | 146<br>(111 - 196)       | --                 | --                  | 58<br>(40 - 82)      | 66<br>(48 - 91)        | 22<br>(17 - 31)          |
| Cervical cancer                      | 276<br>(178 - 386)       | --                 | --                  | 91<br>(54 - 136)     | 140<br>(85 - 204)      | 44<br>(26 - 66)          |
| Uterine cancer                       | 25<br>(14 - 37)          | --                 | --                  | 5<br>(3 - 9)         | 13<br>(6 - 20)         | 8<br>(4 - 12)            |
| Prostate cancer                      | --                       | --                 | --                  | --                   | --                     | --                       |
| Colon and rectum cancer              | 60<br>(47 - 78)          | --                 | --                  | 16<br>(11 - 23)      | 23<br>(17 - 32)        | 21<br>(15 - 28)          |
| Lip and oral cavity cancer           | 8<br>(5 - 11)            | --                 | --                  | 3<br>(1 - 4)         | 3<br>(2 - 5)           | 2<br>(1 - 4)             |
| Nasopharynx cancer                   | 2<br>(1 - 3)             | --                 | 0<br>(0 - 0)        | 1<br>(1 - 2)         | 1<br>(0 - 1)           | 0<br>(0 - 1)             |
| Other pharynx cancer                 | 2<br>(1 - 3)             | --                 | --                  | 1<br>(0 - 1)         | 1<br>(1 - 2)           | 0<br>(0 - 1)             |
| Gallbladder and biliary tract cancer | 24<br>(15 - 36)          | --                 | --                  | 4<br>(2 - 6)         | 14<br>(8 - 22)         | 7<br>(4 - 10)            |
| Pancreatic cancer                    | 26<br>(20 - 34)          | --                 | --                  | 3<br>(2 - 5)         | 15<br>(11 - 21)        | 7<br>(5 - 10)            |
| Malignant skin melanoma              | 3<br>(2 - 5)             | --                 | --                  | 1<br>(1 - 1)         | 2<br>(1 - 3)           | 1<br>(0 - 1)             |
| Non-melanoma skin cancer             | 3<br>(1 - 4)             | --                 | --                  | 1<br>(0 - 1)         | 1<br>(0 - 1)           | 1<br>(1 - 3)             |
| Ovarian cancer                       | 43<br>(32 - 61)          | --                 | --                  | 13<br>(8 - 20)       | 25<br>(17 - 36)        | 6<br>(4 - 9)             |
| Testicular cancer                    | --                       | --                 | --                  | --                   | --                     | --                       |
| Kidney cancer                        | 9<br>(6 - 13)            | 1<br>(0 - 4)       | 1<br>(0 - 1)        | 2<br>(1 - 3)         | 4<br>(2 - 6)           | 1<br>(1 - 2)             |
| Bladder cancer                       | 16<br>(11 - 24)          | --                 | --                  | 4<br>(2 - 7)         | 6<br>(4 - 10)          | 6<br>(3 - 10)            |
| Brain and nervous system cancer      | 15<br>(10 - 21)          | 1<br>(0 - 3)       | 1<br>(0 - 1)        | 8<br>(4 - 12)        | 4<br>(2 - 5)           | 2<br>(1 - 3)             |
| Thyroid cancer                       | 5<br>(3 - 8)             | --                 | 0<br>(0 - 0)        | 1<br>(0 - 1)         | 3<br>(2 - 5)           | 2<br>(1 - 3)             |
| Mesothelioma                         | 1<br>(1 - 2)             | --                 | --                  | 0<br>(0 - 1)         | 0<br>(0 - 1)           | 0<br>(0 - 0)             |
| Hodgkin lymphoma                     | 5<br>(3 - 8)             | 1<br>(0 - 1)       | 0<br>(0 - 1)        | 2<br>(1 - 3)         | 1<br>(0 - 1)           | 2<br>(1 - 4)             |
| Non-Hodgkin lymphoma                 | 44<br>(25 - 67)          | 7<br>(2 - 15)      | 6<br>(2 - 11)       | 17<br>(9 - 29)       | 10<br>(5 - 17)         | 4<br>(2 - 9)             |
| Multiple myeloma                     | 8<br>(6 - 12)            | --                 | --                  | 1<br>(1 - 2)         | 4<br>(3 - 7)           | 3<br>(2 - 4)             |
| Leukemia                             | 21<br>(16 - 28)          | 1<br>(0 - 2)       | 3<br>(2 - 4)        | 8<br>(5 - 12)        | 5<br>(4 - 7)           | 4<br>(3 - 5)             |
| Other neoplasms                      | 91<br>(65 - 124)         | 12<br>(6 - 23)     | 9<br>(4 - 16)       | 23<br>(15 - 35)      | 27<br>(16 - 41)        | 21<br>(13 - 31)          |
| Cardiovascular diseases              | 2,873<br>(2,321 - 3,938) | 86<br>(45 - 156)   | 19<br>(10 - 36)     | 379<br>(250 - 602)   | 1,023<br>(774 - 1,445) | 1,366<br>(1,128 - 1,814) |
| Rheumatic heart disease              | 38<br>(21 - 100)         | 1<br>(0 - 4)       | 1<br>(1 - 3)        | 12<br>(5 - 39)       | 10<br>(4 - 31)         | 13<br>(8 - 28)           |
| Ischemic heart disease               | 719<br>(531 - 1,117)     | 2<br>(0 - 7)       | 2<br>(1 - 4)        | 83<br>(51 - 138)     | 246<br>(166 - 401)     | 386<br>(284 - 602)       |
| Cerebrovascular disease              | 1,223<br>(968 - 1,610)   | 19<br>(9 - 42)     | 4<br>(2 - 9)        | 128<br>(83 - 191)    | 438<br>(322 - 597)     | 633<br>(500 - 828)       |
| Ischemic stroke                      | 699<br>(339 - 967)       | 3<br>(1 - 7)       | 0<br>(0 - 1)        | 21<br>(9 - 38)       | 224<br>(82 - 344)      | 451<br>(239 - 603)       |
| Hemorrhagic stroke                   | 524<br>(342 - 1,004)     | 16<br>(8 - 35)     | 4<br>(2 - 8)        | 107<br>(71 - 163)    | 214<br>(132 - 399)     | 183<br>(99 - 433)        |
| Hypertensive heart disease           | 272<br>(137 - 475)       | 1<br>(0 - 3)       | 0<br>(0 - 1)        | 27<br>(12 - 49)      | 96<br>(41 - 191)       | 147<br>(76 - 247)        |
| Cardiomyopathy and myocarditis       | 148<br>(101 - 236)       | 20<br>(9 - 45)     | 4<br>(2 - 7)        | 39<br>(24 - 65)      | 34<br>(19 - 65)        | 51<br>(26 - 93)          |
| Atrial fibrillation and flutter      | 0<br>(0 - 1)             | --                 | --                  | 0<br>(0 - 0)         | 0<br>(0 - 0)           | 0<br>(0 - 0)             |
| Aortic aneurysm                      | 24<br>(13 - 42)          | --                 | --                  | 4<br>(2 - 7)         | 9<br>(4 - 16)          | 11<br>(6 - 21)           |
| Peripheral vascular disease          | 1<br>(0 - 2)             | --                 | --                  | 0<br>(0 - 0)         | 0<br>(0 - 1)           | 0<br>(0 - 1)             |
| Endocarditis                         | 46<br>(29 - 75)          | 10<br>(4 - 21)     | 1<br>(1 - 2)        | 12<br>(7 - 20)       | 8<br>(4 - 18)          | 14<br>(7 - 29)           |

Web Table 31- Togo deaths with 95% UI by age, sex, and cause in 2013

| Cause                                               | Females, All Ages  | Females, 0-4 Years | Females, 5-14 Years | Females, 15-49 Years | Females, 50-69 Years | Females, 70-80 Years |
|-----------------------------------------------------|--------------------|--------------------|---------------------|----------------------|----------------------|----------------------|
| Other cardiovascular and circulatory diseases       | 402<br>(258 - 812) | 32<br>(14 - 68)    | 6<br>(3 - 13)       | 73<br>(40 - 159)     | 181<br>(111 - 360)   | 110<br>(65 - 246)    |
| Chronic respiratory diseases                        | 378<br>(286 - 608) | 27<br>(12 - 55)    | 5<br>(3 - 8)        | 58<br>(38 - 96)      | 126<br>(88 - 207)    | 162<br>(119 - 253)   |
| Chronic obstructive pulmonary disease               | 215<br>(151 - 356) | 11<br>(5 - 23)     | 2<br>(1 - 4)        | 19<br>(11 - 33)      | 78<br>(50 - 130)     | 104<br>(72 - 174)    |
| Pneumoconiosis                                      | 1<br>(1 - 2)       | 0<br>(0 - 0)       | 0<br>(0 - 0)        | 0<br>(0 - 1)         | 0<br>(0 - 1)         | 0<br>(0 - 0)         |
| Silicosis                                           | 0<br>(0 - 0)       | 0<br>(0 - 0)       | 0<br>(0 - 0)        | 0<br>(0 - 0)         | 0<br>(0 - 0)         | 0<br>(0 - 0)         |
| Asbestosis                                          | 0<br>(0 - 0)       | 0<br>(0 - 0)       | 0<br>(0 - 0)        | 0<br>(0 - 0)         | 0<br>(0 - 0)         | 0<br>(0 - 0)         |
| Coal workers pneumoconiosis                         | 0<br>(0 - 0)       | 0<br>(0 - 0)       | 0<br>(0 - 0)        | 0<br>(0 - 0)         | 0<br>(0 - 0)         | 0<br>(0 - 0)         |
| Other pneumoconiosis                                | 1<br>(0 - 1)       | 0<br>(0 - 0)       | 0<br>(0 - 0)        | 0<br>(0 - 1)         | 0<br>(0 - 0)         | 0<br>(0 - 0)         |
| Asthma                                              | 99<br>(62 - 146)   | 11<br>(4 - 25)     | 2<br>(1 - 3)        | 23<br>(14 - 39)      | 33<br>(17 - 53)      | 31<br>(15 - 47)      |
| Interstitial lung disease and pulmonary sarcoidosis | 29<br>(10 - 58)    | 0<br>(0 - 1)       | 0<br>(0 - 0)        | 3<br>(1 - 5)         | 9<br>(3 - 19)        | 18<br>(4 - 35)       |
| Other chronic respiratory diseases                  | 34<br>(23 - 63)    | 5<br>(2 - 10)      | 1<br>(0 - 1)        | 12<br>(7 - 23)       | 6<br>(3 - 11)        | 10<br>(6 - 19)       |
| Cirrhosis                                           | 247<br>(182 - 351) | 11<br>(3 - 25)     | 4<br>(2 - 6)        | 73<br>(48 - 107)     | 99<br>(68 - 145)     | 61<br>(41 - 92)      |
| Cirrhosis due to hepatitis B                        | 73<br>(42 - 122)   | 1<br>(0 - 2)       | 1<br>(0 - 1)        | 21<br>(10 - 38)      | 31<br>(18 - 53)      | 20<br>(9 - 35)       |
| Cirrhosis due to hepatitis C                        | 82<br>(27 - 142)   | 1<br>(0 - 2)       | 1<br>(0 - 2)        | 27<br>(8 - 45)       | 35<br>(11 - 70)      | 19<br>(6 - 36)       |
| Cirrhosis due to alcohol use                        | 52<br>(29 - 97)    | --                 | --                  | 10<br>(5 - 19)       | 24<br>(12 - 47)      | 18<br>(10 - 35)      |
| Cirrhosis due to other causes                       | 40<br>(21 - 71)    | 9<br>(3 - 23)      | 2<br>(1 - 5)        | 15<br>(6 - 28)       | 9<br>(4 - 18)        | 4<br>(2 - 8)         |
| Digestive diseases                                  | 344<br>(257 - 447) | 28<br>(12 - 54)    | 11<br>(6 - 19)      | 94<br>(61 - 135)     | 98<br>(67 - 135)     | 113<br>(79 - 150)    |
| Peptic ulcer disease                                | 60<br>(34 - 91)    | 2<br>(1 - 5)       | 1<br>(0 - 2)        | 16<br>(8 - 26)       | 18<br>(10 - 30)      | 23<br>(12 - 38)      |
| Gastritis and duodenitis                            | 18<br>(7 - 45)     | 2<br>(0 - 4)       | 1<br>(0 - 2)        | 5<br>(2 - 12)        | 4<br>(1 - 14)        | 6<br>(1 - 20)        |
| Appendicitis                                        | 40<br>(24 - 60)    | 5<br>(2 - 13)      | 3<br>(1 - 5)        | 15<br>(9 - 25)       | 8<br>(4 - 15)        | 8<br>(3 - 17)        |
| Paralytic ileus and intestinal obstruction          | 106<br>(59 - 160)  | 7<br>(2 - 16)      | 3<br>(1 - 6)        | 20<br>(9 - 33)       | 35<br>(17 - 55)      | 41<br>(23 - 69)      |
| Inguinal, femoral, and abdominal hernia             | 4<br>(1 - 6)       | 0<br>(0 - 1)       | 0<br>(0 - 0)        | 1<br>(0 - 2)         | 1<br>(0 - 2)         | 1<br>(0 - 3)         |
| Inflammatory bowel disease                          | 23<br>(5 - 38)     | 5<br>(1 - 12)      | 1<br>(0 - 1)        | 9<br>(2 - 16)        | 4<br>(1 - 7)         | 5<br>(1 - 8)         |
| Vascular intestinal disorders                       | 2<br>(1 - 7)       | 0<br>(0 - 0)       | 0<br>(0 - 0)        | 1<br>(0 - 2)         | 1<br>(0 - 2)         | 1<br>(0 - 2)         |
| Gallbladder and biliary diseases                    | 30<br>(19 - 43)    | 1<br>(0 - 3)       | 1<br>(0 - 2)        | 8<br>(4 - 12)        | 10<br>(5 - 16)       | 10<br>(6 - 16)       |
| Pancreatitis                                        | 16<br>(7 - 29)     | 0<br>(0 - 1)       | 0<br>(0 - 1)        | 4<br>(2 - 8)         | 6<br>(2 - 14)        | 4<br>(1 - 10)        |
| Other digestive diseases                            | 46<br>(31 - 67)    | 5<br>(2 - 11)      | 2<br>(1 - 3)        | 16<br>(10 - 26)      | 11<br>(6 - 17)       | 13<br>(7 - 21)       |
| Neurological disorders                              | 196<br>(155 - 248) | 25<br>(12 - 50)    | 8<br>(4 - 13)       | 44<br>(25 - 71)      | 22<br>(16 - 31)      | 98<br>(72 - 127)     |
| Alzheimer disease and other dementias               | 99<br>(73 - 130)   | --                 | --                  | 0<br>(0 - 0)         | 10<br>(7 - 15)       | 89<br>(64 - 118)     |
| Parkinson disease                                   | 1<br>(0 - 2)       | --                 | --                  | 0<br>(0 - 0)         | 0<br>(0 - 1)         | 0<br>(0 - 1)         |
| Epilepsy                                            | 75<br>(48 - 114)   | 20<br>(8 - 44)     | 7<br>(3 - 12)       | 39<br>(21 - 65)      | 4<br>(2 - 9)         | 5<br>(2 - 10)        |
| Multiple sclerosis                                  | 1<br>(0 - 3)       | --                 | --                  | 0<br>(0 - 1)         | 0<br>(0 - 1)         | 0<br>(0 - 0)         |
| Other neurological disorders                        | 21<br>(16 - 27)    | 5<br>(3 - 7)       | 1<br>(1 - 2)        | 5<br>(3 - 7)         | 6<br>(5 - 9)         | 4<br>(3 - 5)         |
| Mental and substance use disorders                  | 38<br>(23 - 58)    | 2<br>(1 - 4)       | 0<br>(0 - 0)        | 21<br>(10 - 34)      | 11<br>(7 - 17)       | 4<br>(3 - 5)         |
| Schizophrenia                                       | 1<br>(1 - 2)       | --                 | --                  | 1<br>(0 - 1)         | 0<br>(0 - 1)         | 0<br>(0 - 0)         |
| Alcohol use disorders                               | 16<br>(2 - 32)     | --                 | --                  | 10<br>(1 - 21)       | 5<br>(1 - 11)        | 1<br>(0 - 2)         |
| Drug use disorders                                  | 21<br>(14 - 29)    | 2<br>(1 - 4)       | --                  | 10<br>(6 - 15)       | 6<br>(4 - 8)         | 3<br>(2 - 4)         |
| Opioid use disorders                                | 2<br>(1 - 3)       | 0<br>(0 - 1)       | --                  | 1<br>(1 - 2)         | 0<br>(0 - 1)         | 0<br>(0 - 0)         |
| Cocaine use disorders                               | 0<br>(0 - 0)       | 0<br>(0 - 0)       | --                  | 0<br>(0 - 0)         | 0<br>(0 - 0)         | 0<br>(0 - 0)         |
| Amphetamine use disorders                           | 0<br>(0 - 0)       | 0<br>(0 - 0)       | --                  | 0<br>(0 - 0)         | 0<br>(0 - 0)         | 0<br>(0 - 0)         |

Web Table 31- Togo deaths with 95% UI by age, sex, and cause in 2013

| Cause                                               | Females, All Ages      | Females, 0-4 Years   | Females, 5-14 Years | Females, 15-49 Years | Females, 50-69 Years | Females, 70-80 Years |
|-----------------------------------------------------|------------------------|----------------------|---------------------|----------------------|----------------------|----------------------|
| Other drug use disorders                            | 19<br>(13 - 25)        | 2<br>(1 - 4)         | --                  | 9<br>(6 - 13)        | 5<br>(3 - 8)         | 3<br>(2 - 4)         |
| Eating disorders                                    | 0<br>(0 - 0)           | --                   | 0<br>(0 - 0)        | 0<br>(0 - 0)         | --                   | --                   |
| Anorexia nervosa                                    | 0<br>(0 - 0)           | --                   | 0<br>(0 - 0)        | 0<br>(0 - 0)         | --                   | --                   |
| Diabetes, urogenital, blood, and endocrine diseases | 1,258<br>(867 - 1,919) | 393<br>(163 - 819)   | 106<br>(42 - 238)   | 285<br>(174 - 442)   | 244<br>(183 - 327)   | 230<br>(164 - 299)   |
| Diabetes mellitus                                   | 308<br>(233 - 402)     | 2<br>(1 - 3)         | 1<br>(1 - 2)        | 45<br>(30 - 62)      | 128<br>(91 - 177)    | 133<br>(90 - 178)    |
| Acute glomerulonephritis                            | 4<br>(2 - 5)           | 0<br>(0 - 1)         | 0<br>(0 - 0)        | 2<br>(1 - 3)         | 1<br>(0 - 2)         | 0<br>(0 - 0)         |
| Chronic kidney disease                              | 139<br>(101 - 188)     | 15<br>(7 - 26)       | 5<br>(2 - 9)        | 44<br>(29 - 66)      | 38<br>(25 - 57)      | 36<br>(25 - 51)      |
| Chronic kidney disease due to diabetes mellitus     | 2<br>(1 - 4)           | 0<br>(0 - 0)         | 0<br>(0 - 0)        | 0<br>(0 - 0)         | 1<br>(0 - 3)         | 0<br>(0 - 0)         |
| Chronic kidney disease due to hypertension          | 60<br>(39 - 85)        | 2<br>(1 - 4)         | 1<br>(0 - 1)        | 14<br>(8 - 22)       | 21<br>(13 - 32)      | 22<br>(15 - 32)      |
| Chronic kidney disease due to glomerulonephritis    | 40<br>(26 - 56)        | 8<br>(4 - 15)        | 2<br>(1 - 4)        | 20<br>(11 - 30)      | 6<br>(3 - 11)        | 4<br>(2 - 8)         |
| Chronic kidney disease due to other causes          | 37<br>(20 - 66)        | 5<br>(2 - 11)        | 2<br>(1 - 4)        | 10<br>(5 - 21)       | 10<br>(4 - 21)       | 10<br>(3 - 19)       |
| Urinary diseases and male infertility               | 98<br>(62 - 136)       | 11<br>(4 - 24)       | 2<br>(1 - 5)        | 26<br>(15 - 41)      | 30<br>(17 - 48)      | 28<br>(17 - 45)      |
| Interstitial nephritis and urinary tract infections | 87<br>(51 - 124)       | 10<br>(3 - 23)       | 2<br>(1 - 4)        | 22<br>(11 - 37)      | 27<br>(15 - 43)      | 26<br>(16 - 42)      |
| Urolithiasis                                        | 3<br>(1 - 8)           | --                   | 0<br>(0 - 1)        | 1<br>(0 - 4)         | 1<br>(0 - 3)         | 0<br>(0 - 2)         |
| Other urinary diseases                              | 8<br>(5 - 15)          | 1<br>(0 - 4)         | 0<br>(0 - 1)        | 3<br>(1 - 6)         | 2<br>(1 - 5)         | 2<br>(1 - 3)         |
| Gynecological diseases                              | 3<br>(1 - 4)           | --                   | --                  | 2<br>(1 - 3)         | 1<br>(0 - 1)         | 0<br>(0 - 1)         |
| Uterine fibroids                                    | 1<br>(0 - 1)           | --                   | --                  | 0<br>(0 - 0)         | 0<br>(0 - 0)         | 0<br>(0 - 0)         |
| Polycystic ovarian syndrome                         | 0<br>(0 - 0)           | --                   | --                  | 0<br>(0 - 0)         | 0<br>(0 - 0)         | --                   |
| Endometriosis                                       | 0<br>(0 - 1)           | --                   | --                  | 0<br>(0 - 1)         | 0<br>(0 - 0)         | --                   |
| Genital prolapse                                    | 0<br>(0 - 1)           | --                   | --                  | 0<br>(0 - 0)         | 0<br>(0 - 0)         | 0<br>(0 - 0)         |
| Other gynecological diseases                        | 1<br>(1 - 2)           | --                   | --                  | 1<br>(0 - 2)         | 0<br>(0 - 1)         | 0<br>(0 - 0)         |
| Hemoglobinopathies and hemolytic anemias            | 595<br>(231 - 1,250)   | 332<br>(116 - 747)   | 93<br>(28 - 227)    | 140<br>(61 - 272)    | 23<br>(10 - 42)      | 7<br>(3 - 17)        |
| Thalassemias                                        | 4<br>(1 - 8)           | 3<br>(1 - 7)         | 0<br>(0 - 1)        | 0<br>(0 - 1)         | 0<br>(0 - 0)         | 0<br>(0 - 0)         |
| Sickle cell disorders                               | 577<br>(223 - 1,216)   | 322<br>(112 - 720)   | 92<br>(28 - 224)    | 138<br>(60 - 268)    | 22<br>(10 - 41)      | 3<br>(1 - 8)         |
| G6PD deficiency                                     | 4<br>(1 - 8)           | 2<br>(1 - 6)         | 0<br>(0 - 1)        | 1<br>(0 - 1)         | 0<br>(0 - 0)         | 0<br>(0 - 1)         |
| Other hemoglobinopathies and hemolytic anemias      | 11<br>(5 - 20)         | 5<br>(2 - 13)        | 0<br>(0 - 1)        | 1<br>(0 - 1)         | 1<br>(0 - 2)         | 4<br>(1 - 9)         |
| Endocrine, metabolic, blood, and immune disorders   | 111<br>(63 - 155)      | 33<br>(17 - 58)      | 4<br>(2 - 7)        | 26<br>(15 - 41)      | 23<br>(11 - 39)      | 26<br>(9 - 43)       |
| Musculoskeletal disorders                           | 26<br>(16 - 42)        | --                   | 2<br>(1 - 3)        | 11<br>(7 - 17)       | 7<br>(4 - 13)        | 6<br>(3 - 11)        |
| Rheumatoid arthritis                                | 5<br>(3 - 9)           | --                   | 0<br>(0 - 1)        | 1<br>(1 - 2)         | 1<br>(1 - 3)         | 2<br>(1 - 4)         |
| Other musculoskeletal disorders                     | 21<br>(13 - 33)        | --                   | 2<br>(1 - 3)        | 10<br>(6 - 16)       | 6<br>(3 - 11)        | 3<br>(2 - 7)         |
| Other non-communicable diseases                     | 872<br>(417 - 1,607)   | 728<br>(287 - 1,436) | 27<br>(12 - 55)     | 54<br>(33 - 92)      | 29<br>(18 - 46)      | 33<br>(21 - 51)      |
| Congenital anomalies                                | 760<br>(306 - 1,476)   | 699<br>(269 - 1,388) | 25<br>(10 - 52)     | 28<br>(12 - 58)      | 5<br>(3 - 9)         | 4<br>(2 - 6)         |
| Neural tube defects                                 | 201<br>(45 - 593)      | 191<br>(42 - 570)    | 4<br>(1 - 12)       | 5<br>(1 - 14)        | 0<br>(0 - 1)         | 0<br>(0 - 0)         |
| Congenital heart anomalies                          | 291<br>(116 - 583)     | 267<br>(103 - 547)   | 10<br>(3 - 23)      | 10<br>(4 - 23)       | 2<br>(1 - 4)         | 2<br>(1 - 3)         |
| Cleft lip and cleft palate                          | 3<br>(0 - 9)           | 3<br>(0 - 9)         | --                  | --                   | --                   | --                   |
| Down syndrome                                       | 117<br>(31 - 283)      | 103<br>(23 - 263)    | 6<br>(2 - 14)       | 7<br>(3 - 15)        | 1<br>(0 - 2)         | 0<br>(0 - 0)         |
| Chromosomal unbalanced rearrangements               | 30<br>(6 - 76)         | 27<br>(5 - 72)       | 1<br>(0 - 2)        | 1<br>(0 - 3)         | 0<br>(0 - 0)         | 0<br>(0 - 0)         |
| Other congenital anomalies                          | 119<br>(32 - 437)      | 108<br>(26 - 406)    | 4<br>(1 - 13)       | 5<br>(2 - 13)        | 1<br>(1 - 2)         | 1<br>(1 - 3)         |
| Skin and subcutaneous diseases                      | 107<br>(74 - 150)      | 25<br>(11 - 47)      | 2<br>(1 - 4)        | 27<br>(15 - 41)      | 24<br>(14 - 39)      | 30<br>(18 - 47)      |
| Cellulitis                                          | 30<br>(13 - 50)        | 5<br>(1 - 13)        | 1<br>(0 - 2)        | 7<br>(3 - 14)        | 6<br>(2 - 11)        | 11<br>(4 - 20)       |

Web Table 31- Togo deaths with 95% UI by age, sex, and cause in 2013

| Cause                                           | Females, All Ages      | Females, 0-4 Years | Females, 5-14 Years | Females, 15-49 Years | Females, 50-69 Years | Females, 70-80 Years |
|-------------------------------------------------|------------------------|--------------------|---------------------|----------------------|----------------------|----------------------|
| Pyoderma                                        | 72<br>(44 - 110)       | 19<br>(8 - 38)     | 1<br>(1 - 2)        | 17<br>(9 - 28)       | 18<br>(9 - 30)       | 18<br>(8 - 32)       |
| Decubitus ulcer                                 | 2<br>(1 - 2)           | 0<br>(0 - 0)       | 0<br>(0 - 0)        | 0<br>(0 - 1)         | 0<br>(0 - 0)         | 1<br>(0 - 1)         |
| Other skin and subcutaneous diseases            | 4<br>(2 - 6)           | 1<br>(0 - 3)       | 0<br>(0 - 0)        | 1<br>(1 - 3)         | 0<br>(0 - 1)         | 1<br>(0 - 1)         |
| Sudden infant death syndrome                    | 4<br>(1 - 14)          | 4<br>(1 - 14)      | --                  | --                   | --                   | --                   |
| Injuries                                        | 1,138<br>(840 - 1,478) | 239<br>(138 - 389) | 98<br>(60 - 145)    | 508<br>(337 - 736)   | 154<br>(105 - 212)   | 139<br>(82 - 193)    |
| Transport injuries                              | 544<br>(391 - 757)     | 55<br>(25 - 107)   | 50<br>(29 - 79)     | 331<br>(212 - 507)   | 73<br>(50 - 102)     | 35<br>(24 - 49)      |
| Road injuries                                   | 524<br>(374 - 730)     | 49<br>(21 - 96)    | 48<br>(27 - 76)     | 325<br>(207 - 497)   | 69<br>(49 - 96)      | 33<br>(23 - 45)      |
| Pedestrian road injuries                        | 147<br>(98 - 213)      | 15<br>(5 - 32)     | 17<br>(9 - 30)      | 77<br>(46 - 127)     | 24<br>(15 - 37)      | 14<br>(8 - 21)       |
| Cyclist road injuries                           | 20<br>(12 - 30)        | 3<br>(1 - 8)       | 3<br>(1 - 6)        | 8<br>(4 - 14)        | 5<br>(2 - 9)         | 1<br>(0 - 2)         |
| Motorcyclist road injuries                      | 43<br>(24 - 70)        | 2<br>(1 - 5)       | 2<br>(1 - 4)        | 33<br>(17 - 58)      | 4<br>(2 - 7)         | 2<br>(1 - 3)         |
| Motor vehicle road injuries                     | 305<br>(206 - 428)     | 28<br>(12 - 56)    | 25<br>(13 - 42)     | 203<br>(123 - 309)   | 34<br>(24 - 51)      | 15<br>(10 - 23)      |
| Other road injuries                             | 9<br>(5 - 14)          | 1<br>(0 - 3)       | 1<br>(1 - 3)        | 4<br>(2 - 8)         | 1<br>(1 - 3)         | 1<br>(0 - 2)         |
| Other transport injuries                        | 20<br>(7 - 31)         | 6<br>(2 - 14)      | 2<br>(0 - 4)        | 6<br>(2 - 10)        | 3<br>(1 - 6)         | 3<br>(0 - 5)         |
| Unintentional injuries                          | 482<br>(304 - 651)     | 178<br>(96 - 290)  | 45<br>(25 - 69)     | 105<br>(67 - 152)    | 62<br>(37 - 93)      | 92<br>(48 - 137)     |
| Falls                                           | 100<br>(54 - 143)      | 17<br>(7 - 34)     | 5<br>(2 - 11)       | 18<br>(10 - 28)      | 14<br>(8 - 22)       | 45<br>(20 - 77)      |
| Drowning                                        | 89<br>(52 - 142)       | 46<br>(19 - 95)    | 15<br>(7 - 26)      | 18<br>(11 - 30)      | 6<br>(3 - 10)        | 3<br>(2 - 6)         |
| Fire, heat, and hot substances                  | 68<br>(33 - 108)       | 31<br>(10 - 64)    | 6<br>(2 - 10)       | 17<br>(8 - 27)       | 8<br>(4 - 13)        | 8<br>(3 - 14)        |
| Poisonings                                      | 16<br>(5 - 30)         | 7<br>(2 - 17)      | 1<br>(0 - 3)        | 4<br>(2 - 7)         | 2<br>(1 - 4)         | 1<br>(0 - 2)         |
| Exposure to mechanical forces                   | 52<br>(32 - 73)        | 21<br>(10 - 37)    | 6<br>(3 - 10)       | 13<br>(8 - 21)       | 7<br>(3 - 12)        | 5<br>(1 - 7)         |
| Unintentional firearm injuries                  | 14<br>(9 - 20)         | 3<br>(1 - 7)       | 1<br>(1 - 2)        | 6<br>(4 - 11)        | 2<br>(1 - 3)         | 1<br>(0 - 2)         |
| Unintentional suffocation                       | 6<br>(2 - 13)          | 4<br>(1 - 11)      | 1<br>(0 - 1)        | 0<br>(0 - 1)         | 0<br>(0 - 1)         | 0<br>(0 - 0)         |
| Other exposure to mechanical forces             | 33<br>(15 - 48)        | 13<br>(6 - 25)     | 4<br>(2 - 8)        | 7<br>(4 - 11)        | 5<br>(1 - 9)         | 3<br>(1 - 5)         |
| Adverse effects of medical treatment            | 61<br>(20 - 106)       | 14<br>(4 - 35)     | 3<br>(1 - 6)        | 15<br>(5 - 28)       | 14<br>(4 - 30)       | 15<br>(3 - 32)       |
| Animal contact                                  | 23<br>(7 - 38)         | 6<br>(2 - 13)      | 3<br>(1 - 6)        | 8<br>(2 - 14)        | 4<br>(1 - 7)         | 3<br>(0 - 6)         |
| Venomous animal contact                         | 14<br>(5 - 27)         | 4<br>(1 - 11)      | 2<br>(1 - 4)        | 5<br>(1 - 9)         | 2<br>(0 - 5)         | 1<br>(0 - 3)         |
| Non-venomous animal contact                     | 9<br>(2 - 15)          | 1<br>(0 - 3)       | 1<br>(0 - 2)        | 3<br>(1 - 6)         | 2<br>(0 - 4)         | 2<br>(0 - 3)         |
| Foreign body                                    | 46<br>(27 - 79)        | 28<br>(14 - 57)    | 3<br>(1 - 5)        | 4<br>(2 - 8)         | 3<br>(2 - 6)         | 8<br>(3 - 13)        |
| Pulmonary aspiration and foreign body in airway | 44<br>(26 - 78)        | 28<br>(14 - 57)    | 3<br>(1 - 5)        | 4<br>(2 - 7)         | 3<br>(1 - 5)         | 7<br>(3 - 13)        |
| Foreign body in other body part                 | 1<br>(1 - 2)           | 0<br>(0 - 1)       | 0<br>(0 - 0)        | 0<br>(0 - 1)         | 0<br>(0 - 0)         | 0<br>(0 - 1)         |
| Other unintentional injuries                    | 28<br>(18 - 39)        | 8<br>(4 - 15)      | 4<br>(2 - 7)        | 8<br>(5 - 12)        | 4<br>(2 - 6)         | 4<br>(1 - 7)         |
| Self-harm and interpersonal violence            | 113<br>(77 - 162)      | 6<br>(3 - 12)      | 3<br>(2 - 6)        | 72<br>(43 - 119)     | 19<br>(11 - 30)      | 12<br>(5 - 20)       |
| Self-harm                                       | 78<br>(51 - 120)       | --                 | 1<br>(0 - 3)        | 47<br>(27 - 92)      | 18<br>(10 - 29)      | 12<br>(4 - 19)       |
| Interpersonal violence                          | 35<br>(21 - 54)        | 6<br>(3 - 12)      | 2<br>(1 - 4)        | 25<br>(14 - 41)      | 1<br>(1 - 2)         | 0<br>(0 - 1)         |
| Assault by firearm                              | 10<br>(5 - 18)         | 2<br>(1 - 4)       | 1<br>(0 - 1)        | 7<br>(3 - 14)        | 1<br>(0 - 1)         | 0<br>(0 - 0)         |
| Assault by sharp object                         | 11<br>(5 - 17)         | 1<br>(0 - 3)       | 0<br>(0 - 1)        | 9<br>(4 - 15)        | 0<br>(0 - 1)         | 0<br>(0 - 0)         |
| Assault by other means                          | 14<br>(8 - 24)         | 3<br>(1 - 7)       | 1<br>(0 - 2)        | 9<br>(4 - 16)        | 1<br>(0 - 1)         | 0<br>(0 - 0)         |

Web Table 31- Tonga deaths with 95% UI by age, sex, and cause in 2013

| Cause                                                             | Both Sexes, All Ages | Both Sexes, 0-4 Years | Both Sexes, 5-14 Years | Both Sexes, 15-49 Years | Both Sexes, 50-69 Years | Both Sexes, 70-80 Years |
|-------------------------------------------------------------------|----------------------|-----------------------|------------------------|-------------------------|-------------------------|-------------------------|
| All causes                                                        | 755<br>(647 - 869)   | 64<br>(37 - 107)      | 11<br>(9 - 15)         | 113<br>(89 - 147)       | 182<br>(146 - 222)      | 383<br>(333 - 419)      |
| Communicable, maternal, neonatal, and nutritional diseases        | 127<br>(102 - 160)   | 45<br>(25 - 74)       | 3<br>(2 - 5)           | 18<br>(14 - 22)         | 16<br>(12 - 20)         | 46<br>(36 - 58)         |
| HIV/AIDS and tuberculosis                                         | 6<br>(4 - 7)         | 0<br>(0 - 0)          | 0<br>(0 - 0)           | 2<br>(2 - 3)            | 1<br>(1 - 2)            | 2<br>(1 - 2)            |
| Tuberculosis                                                      | 4<br>(3 - 5)         | 0<br>(0 - 0)          | 0<br>(0 - 0)           | 1<br>(1 - 1)            | 1<br>(1 - 2)            | 2<br>(1 - 2)            |
| HIV/AIDS                                                          | 2<br>(1 - 2)         | 0<br>(0 - 0)          | 0<br>(0 - 0)           | 1<br>(1 - 1)            | 0<br>(0 - 0)            | 0<br>(0 - 0)            |
| HIV/AIDS resulting in mycobacterial infection                     | 0<br>(0 - 0)         | 0<br>(0 - 0)          | 0<br>(0 - 0)           | 0<br>(0 - 0)            | 0<br>(0 - 0)            | 0<br>(0 - 0)            |
| HIV/AIDS resulting in other diseases                              | 1<br>(1 - 2)         | 0<br>(0 - 0)          | 0<br>(0 - 0)           | 1<br>(1 - 1)            | 0<br>(0 - 0)            | 0<br>(0 - 0)            |
| Diarrhea, lower respiratory, and other common infectious diseases | 67<br>(54 - 86)      | 13<br>(7 - 25)        | 2<br>(1 - 4)           | 7<br>(5 - 9)            | 9<br>(7 - 12)           | 36<br>(27 - 47)         |
| Diarrheal diseases                                                | 4<br>(3 - 5)         | 0<br>(0 - 1)          | 0<br>(0 - 0)           | 0<br>(0 - 0)            | 0<br>(0 - 1)            | 2<br>(1 - 4)            |
| Intestinal infectious diseases                                    | 2<br>(1 - 3)         | 1<br>(0 - 2)          | 0<br>(0 - 1)           | 0<br>(0 - 1)            | 0<br>(0 - 0)            | 0<br>(0 - 0)            |
| Typhoid fever                                                     | 1<br>(0 - 2)         | 1<br>(0 - 1)          | 0<br>(0 - 1)           | 0<br>(0 - 0)            | 0<br>(0 - 0)            | 0<br>(0 - 0)            |
| Paratyphoid fever                                                 | 0<br>(0 - 1)         | 0<br>(0 - 0)          | 0<br>(0 - 0)           | 0<br>(0 - 0)            | 0<br>(0 - 0)            | 0<br>(0 - 0)            |
| Other intestinal infectious diseases                              | 0<br>(0 - 1)         | 0<br>(0 - 0)          | 0<br>(0 - 0)           | 0<br>(0 - 0)            | 0<br>(0 - 0)            | 0<br>(0 - 0)            |
| Lower respiratory infections                                      | 50<br>(40 - 64)      | 7<br>(3 - 13)         | 1<br>(0 - 1)           | 4<br>(3 - 6)            | 7<br>(5 - 10)           | 32<br>(23 - 42)         |
| Upper respiratory infections                                      | 0<br>(0 - 0)         | 0<br>(0 - 0)          | 0<br>(0 - 0)           | 0<br>(0 - 0)            | 0<br>(0 - 0)            | 0<br>(0 - 0)            |
| Otitis media                                                      | 0<br>(0 - 0)         | 0<br>(0 - 0)          | 0<br>(0 - 0)           | 0<br>(0 - 0)            | 0<br>(0 - 0)            | 0<br>(0 - 0)            |
| Meningitis                                                        | 8<br>(5 - 12)        | 3<br>(1 - 6)          | 1<br>(0 - 1)           | 2<br>(1 - 3)            | 1<br>(1 - 2)            | 1<br>(1 - 2)            |
| Pneumococcal meningitis                                           | 3<br>(2 - 4)         | 1<br>(0 - 2)          | 0<br>(0 - 0)           | 1<br>(0 - 1)            | 0<br>(0 - 1)            | 0<br>(0 - 1)            |
| H influenzae type B meningitis                                    | 1<br>(1 - 2)         | 1<br>(0 - 1)          | 0<br>(0 - 0)           | 0<br>(0 - 0)            | 0<br>(0 - 0)            | 0<br>(0 - 0)            |
| Meningococcal meningitis                                          | 1<br>(1 - 2)         | 0<br>(0 - 1)          | 0<br>(0 - 0)           | 0<br>(0 - 1)            | 0<br>(0 - 0)            | 0<br>(0 - 1)            |
| Other meningitis                                                  | 3<br>(2 - 4)         | 1<br>(0 - 2)          | 0<br>(0 - 0)           | 1<br>(0 - 1)            | 0<br>(0 - 1)            | 0<br>(0 - 1)            |
| Encephalitis                                                      | 1<br>(1 - 1)         | 0<br>(0 - 0)          | 0<br>(0 - 0)           | 0<br>(0 - 0)            | 0<br>(0 - 0)            | 0<br>(0 - 0)            |
| Diphtheria                                                        | 0<br>(0 - 0)         | 0<br>(0 - 0)          | 0<br>(0 - 0)           | 0<br>(0 - 0)            | 0<br>(0 - 0)            | 0<br>(0 - 0)            |
| Whooping cough                                                    | 0<br>(0 - 0)         | 0<br>(0 - 0)          | 0<br>(0 - 0)           | 0<br>(0 - 0)            | 0<br>(0 - 0)            | 0<br>(0 - 0)            |
| Tetanus                                                           | 0<br>(0 - 0)         | 0<br>(0 - 0)          | 0<br>(0 - 0)           | 0<br>(0 - 0)            | 0<br>(0 - 0)            | 0<br>(0 - 0)            |
| Measles                                                           | 2<br>(0 - 14)        | 2<br>(0 - 11)         | 0<br>(0 - 2)           | 0<br>(0 - 0)            | 0<br>(0 - 0)            | 0<br>(0 - 0)            |
| Varicella and herpes zoster                                       | 0<br>(0 - 0)         | 0<br>(0 - 0)          | 0<br>(0 - 0)           | 0<br>(0 - 0)            | 0<br>(0 - 0)            | 0<br>(0 - 0)            |
| Neglected tropical diseases and malaria                           | 4<br>(2 - 6)         | 1<br>(0 - 2)          | 0<br>(0 - 0)           | 1<br>(0 - 1)            | 1<br>(0 - 1)            | 2<br>(1 - 3)            |
| Leishmaniasis                                                     | 0<br>(0 - 0)         | 0<br>(0 - 0)          | 0<br>(0 - 0)           | 0<br>(0 - 0)            | 0<br>(0 - 0)            | 0<br>(0 - 0)            |
| Visceral leishmaniasis                                            | 0<br>(0 - 0)         | 0<br>(0 - 0)          | 0<br>(0 - 0)           | 0<br>(0 - 0)            | 0<br>(0 - 0)            | 0<br>(0 - 0)            |
| Cysticercosis                                                     | 0<br>(0 - 0)         | 0<br>(0 - 0)          | 0<br>(0 - 0)           | 0<br>(0 - 0)            | 0<br>(0 - 0)            | 0<br>(0 - 0)            |
| Cystic echinococcosis                                             | 0<br>(0 - 0)         | 0<br>(0 - 0)          | 0<br>(0 - 0)           | 0<br>(0 - 0)            | 0<br>(0 - 0)            | 0<br>(0 - 0)            |
| Dengue                                                            | 4<br>(2 - 5)         | 1<br>(0 - 2)          | 0<br>(0 - 0)           | 1<br>(0 - 1)            | 1<br>(0 - 1)            | 2<br>(1 - 2)            |
| Rabies                                                            | 0<br>(0 - 0)         | 0<br>(0 - 0)          | 0<br>(0 - 0)           | 0<br>(0 - 0)            | 0<br>(0 - 0)            | 0<br>(0 - 0)            |
| Intestinal nematode infections                                    | 0<br>(0 - 1)         | 0<br>(0 - 0)          | 0<br>(0 - 0)           | 0<br>(0 - 0)            | 0<br>(0 - 0)            | 0<br>(0 - 0)            |
| Ascariasis                                                        | 0<br>(0 - 1)         | 0<br>(0 - 0)          | 0<br>(0 - 0)           | 0<br>(0 - 0)            | 0<br>(0 - 0)            | 0<br>(0 - 0)            |
| Other neglected tropical diseases                                 | 0<br>(0 - 0)         | 0<br>(0 - 0)          | 0<br>(0 - 0)           | 0<br>(0 - 0)            | 0<br>(0 - 0)            | 0<br>(0 - 0)            |
| Maternal disorders                                                | 3<br>(2 - 5)         | --                    | 0<br>(0 - 0)           | 3<br>(2 - 5)            | --                      | --                      |
| Maternal hemorrhage                                               | 1<br>(0 - 1)         | --                    | 0<br>(0 - 0)           | 1<br>(0 - 1)            | --                      | --                      |
| Maternal sepsis and other maternal infections                     | 0<br>(0 - 0)         | --                    | 0<br>(0 - 0)           | 0<br>(0 - 0)            | --                      | --                      |



Web Table 31- Tonga deaths with 95% UI by age, sex, and cause in 2013

| Cause                                                            | Both Sexes, All Ages | Both Sexes, 0-4 Years | Both Sexes, 5-14 Years | Both Sexes, 15-49 Years | Both Sexes, 50-69 Years | Both Sexes, 70-80 Years |
|------------------------------------------------------------------|----------------------|-----------------------|------------------------|-------------------------|-------------------------|-------------------------|
| Maternal hypertensive disorders                                  | 0<br>(0 - 0)         | --                    | 0<br>(0 - 0)           | 0<br>(0 - 0)            | --                      | --                      |
| Maternal obstructed labor                                        | 0<br>(0 - 0)         | --                    | 0<br>(0 - 0)           | 0<br>(0 - 0)            | --                      | --                      |
| Maternal abortive outcome                                        | 0<br>(0 - 1)         | --                    | 0<br>(0 - 0)           | 0<br>(0 - 1)            | --                      | --                      |
| Indirect maternal deaths                                         | 0<br>(0 - 0)         | --                    | 0<br>(0 - 0)           | 0<br>(0 - 0)            | --                      | --                      |
| Late maternal deaths                                             | 0<br>(0 - 1)         | --                    | 0<br>(0 - 0)           | 0<br>(0 - 1)            | --                      | --                      |
| Maternal deaths aggravated by HIV/AIDS                           | 0<br>(0 - 0)         | --                    | --                     | 0<br>(0 - 0)            | --                      | --                      |
| Other maternal disorders                                         | 0<br>(0 - 1)         | --                    | 0<br>(0 - 0)           | 0<br>(0 - 1)            | --                      | --                      |
| Neonatal disorders                                               | 28<br>(15 - 45)      | 28<br>(15 - 45)       | --                     | --                      | --                      | --                      |
| Neonatal preterm birth complications                             | 12<br>(6 - 20)       | 12<br>(6 - 20)        | --                     | --                      | --                      | --                      |
| Neonatal encephalopathy due to birth asphyxia and trauma         | 4<br>(2 - 8)         | 4<br>(2 - 8)          | --                     | --                      | --                      | --                      |
| Neonatal sepsis and other neonatal infections                    | 4<br>(2 - 9)         | 4<br>(2 - 9)          | --                     | --                      | --                      | --                      |
| Hemolytic disease and other neonatal jaundice                    | 0<br>(0 - 0)         | 0<br>(0 - 0)          | --                     | --                      | --                      | --                      |
| Other neonatal disorders                                         | 7<br>(4 - 13)        | 7<br>(4 - 13)         | --                     | --                      | --                      | --                      |
| Nutritional deficiencies                                         | 6<br>(5 - 9)         | 1<br>(1 - 3)          | 0<br>(0 - 0)           | 1<br>(1 - 1)            | 1<br>(1 - 1)            | 3<br>(2 - 5)            |
| Protein-energy malnutrition                                      | 4<br>(3 - 6)         | 1<br>(1 - 2)          | 0<br>(0 - 0)           | 0<br>(0 - 0)            | 0<br>(0 - 1)            | 2<br>(1 - 3)            |
| Iodine deficiency                                                | 0<br>(0 - 0)         | 0<br>(0 - 0)          | 0<br>(0 - 0)           | 0<br>(0 - 0)            | 0<br>(0 - 0)            | 0<br>(0 - 0)            |
| Iron-deficiency anemia                                           | 2<br>(1 - 3)         | 0<br>(0 - 0)          | 0<br>(0 - 0)           | 0<br>(0 - 1)            | 0<br>(0 - 1)            | 1<br>(1 - 2)            |
| Other nutritional deficiencies                                   | 0<br>(0 - 1)         | 0<br>(0 - 0)          | 0<br>(0 - 0)           | 0<br>(0 - 0)            | 0<br>(0 - 0)            | 0<br>(0 - 0)            |
| Other communicable, maternal, neonatal, and nutritional diseases | 13<br>(10 - 17)      | 1<br>(1 - 3)          | 0<br>(0 - 1)           | 4<br>(3 - 6)            | 3<br>(2 - 5)            | 3<br>(2 - 6)            |
| Sexually transmitted diseases excluding HIV                      | 1<br>(0 - 1)         | 0<br>(0 - 1)          | 0<br>(0 - 0)           | 0<br>(0 - 0)            | 0<br>(0 - 0)            | 0<br>(0 - 0)            |
| Syphilis                                                         | 1<br>(0 - 1)         | 0<br>(0 - 1)          | 0<br>(0 - 0)           | 0<br>(0 - 0)            | 0<br>(0 - 0)            | 0<br>(0 - 0)            |
| Chlamydial infection                                             | 0<br>(0 - 0)         | --                    | 0<br>(0 - 0)           | 0<br>(0 - 0)            | 0<br>(0 - 0)            | 0<br>(0 - 0)            |
| Gonococcal infection                                             | 0<br>(0 - 0)         | --                    | 0<br>(0 - 0)           | 0<br>(0 - 0)            | 0<br>(0 - 0)            | 0<br>(0 - 0)            |
| Other sexually transmitted diseases                              | 0<br>(0 - 0)         | --                    | 0<br>(0 - 0)           | 0<br>(0 - 0)            | 0<br>(0 - 0)            | 0<br>(0 - 0)            |
| Hepatitis                                                        | 7<br>(5 - 9)         | 0<br>(0 - 1)          | 0<br>(0 - 0)           | 3<br>(2 - 4)            | 2<br>(2 - 3)            | 1<br>(1 - 2)            |
| Acute hepatitis A                                                | 0<br>(0 - 1)         | 0<br>(0 - 0)          | 0<br>(0 - 0)           | 0<br>(0 - 0)            | 0<br>(0 - 0)            | 0<br>(0 - 0)            |
| Acute hepatitis B                                                | 5<br>(4 - 7)         | 0<br>(0 - 0)          | 0<br>(0 - 0)           | 2<br>(1 - 3)            | 2<br>(1 - 3)            | 1<br>(1 - 2)            |
| Acute hepatitis C                                                | 0<br>(0 - 0)         | --                    | 0<br>(0 - 0)           | 0<br>(0 - 0)            | 0<br>(0 - 0)            | 0<br>(0 - 0)            |
| Acute hepatitis E                                                | 1<br>(1 - 2)         | 0<br>(0 - 0)          | 0<br>(0 - 0)           | 1<br>(0 - 2)            | 0<br>(0 - 1)            | 0<br>(0 - 0)            |
| Other infectious diseases                                        | 5<br>(3 - 8)         | 1<br>(0 - 2)          | 0<br>(0 - 0)           | 1<br>(1 - 2)            | 1<br>(0 - 2)            | 2<br>(1 - 4)            |
| Non-communicable diseases                                        | 560<br>(472 - 647)   | 13<br>(7 - 22)        | 4<br>(3 - 6)           | 67<br>(51 - 89)         | 157<br>(125 - 191)      | 320<br>(278 - 353)      |
| Neoplasms                                                        | 100<br>(79 - 119)    | 1<br>(0 - 2)          | 1<br>(0 - 1)           | 18<br>(13 - 23)         | 33<br>(25 - 42)         | 47<br>(37 - 55)         |
| Esophageal cancer                                                | 1<br>(0 - 1)         | --                    | --                     | 0<br>(0 - 0)            | 0<br>(0 - 0)            | 0<br>(0 - 1)            |
| Stomach cancer                                                   | 11<br>(8 - 13)       | --                    | --                     | 1<br>(1 - 2)            | 4<br>(3 - 5)            | 6<br>(4 - 7)            |
| Liver cancer                                                     | 7<br>(5 - 10)        | --                    | 0<br>(0 - 0)           | 1<br>(1 - 1)            | 3<br>(2 - 4)            | 3<br>(2 - 5)            |
| Liver cancer due to hepatitis B                                  | 3<br>(2 - 4)         | --                    | 0<br>(0 - 0)           | 0<br>(0 - 1)            | 1<br>(1 - 2)            | 1<br>(1 - 2)            |
| Liver cancer due to hepatitis C                                  | 2<br>(1 - 4)         | --                    | 0<br>(0 - 0)           | 0<br>(0 - 0)            | 1<br>(0 - 2)            | 1<br>(1 - 2)            |
| Liver cancer due to alcohol use                                  | 0<br>(0 - 1)         | --                    | --                     | 0<br>(0 - 0)            | 0<br>(0 - 0)            | 0<br>(0 - 0)            |
| Liver cancer due to other causes                                 | 1<br>(1 - 2)         | --                    | 0<br>(0 - 0)           | 0<br>(0 - 0)            | 0<br>(0 - 1)            | 0<br>(0 - 1)            |
| Larynx cancer                                                    | 0<br>(0 - 0)         | --                    | --                     | 0<br>(0 - 0)            | 0<br>(0 - 0)            | 0<br>(0 - 0)            |

Web Table 31- Tonga deaths with 95% UI by age, sex, and cause in 2013

| Cause                                         | Both Sexes, All Ages | Both Sexes, 0-4 Years | Both Sexes, 5-14 Years | Both Sexes, 15-49 Years | Both Sexes, 50-69 Years | Both Sexes, 70-80 Years |
|-----------------------------------------------|----------------------|-----------------------|------------------------|-------------------------|-------------------------|-------------------------|
| Tracheal, bronchus and lung cancer            | 23<br>(18 - 28)      | --                    | --                     | 4<br>(3 - 5)            | 8<br>(6 - 11)           | 11<br>(9 - 13)          |
| Breast cancer                                 | 17<br>(11 - 23)      | --                    | --                     | 5<br>(3 - 7)            | 7<br>(4 - 10)           | 5<br>(3 - 7)            |
| Cervical cancer                               | 7<br>(3 - 11)        | --                    | --                     | 1<br>(1 - 2)            | 2<br>(1 - 3)            | 4<br>(1 - 6)            |
| Uterine cancer                                | 1<br>(1 - 2)         | --                    | --                     | 0<br>(0 - 0)            | 1<br>(0 - 1)            | 1<br>(0 - 1)            |
| Prostate cancer                               | 8<br>(4 - 11)        | --                    | --                     | 0<br>(0 - 0)            | 2<br>(1 - 3)            | 6<br>(3 - 9)            |
| Colon and rectum cancer                       | 6<br>(5 - 8)         | --                    | --                     | 1<br>(1 - 1)            | 2<br>(1 - 2)            | 4<br>(3 - 5)            |
| Lip and oral cavity cancer                    | 0<br>(0 - 1)         | --                    | --                     | 0<br>(0 - 0)            | 0<br>(0 - 0)            | 0<br>(0 - 0)            |
| Nasopharynx cancer                            | 0<br>(0 - 1)         | --                    | 0<br>(0 - 0)           | 0<br>(0 - 0)            | 0<br>(0 - 0)            | 0<br>(0 - 0)            |
| Other pharynx cancer                          | 0<br>(0 - 0)         | --                    | --                     | 0<br>(0 - 0)            | 0<br>(0 - 0)            | 0<br>(0 - 0)            |
| Gallbladder and biliary tract cancer          | 0<br>(0 - 1)         | --                    | --                     | 0<br>(0 - 0)            | 0<br>(0 - 0)            | 0<br>(0 - 0)            |
| Pancreatic cancer                             | 3<br>(3 - 4)         | --                    | --                     | 0<br>(0 - 0)            | 1<br>(1 - 2)            | 2<br>(1 - 2)            |
| Malignant skin melanoma                       | 0<br>(0 - 0)         | --                    | --                     | 0<br>(0 - 0)            | 0<br>(0 - 0)            | 0<br>(0 - 0)            |
| Non-melanoma skin cancer                      | 1<br>(1 - 1)         | --                    | --                     | 0<br>(0 - 0)            | 0<br>(0 - 0)            | 1<br>(0 - 1)            |
| Ovarian cancer                                | 0<br>(0 - 0)         | --                    | --                     | 0<br>(0 - 0)            | 0<br>(0 - 0)            | 0<br>(0 - 0)            |
| Testicular cancer                             | 0<br>(0 - 0)         | --                    | --                     | 0<br>(0 - 0)            | 0<br>(0 - 0)            | 0<br>(0 - 0)            |
| Kidney cancer                                 | 0<br>(0 - 0)         | 0<br>(0 - 0)          | 0<br>(0 - 0)           | 0<br>(0 - 0)            | 0<br>(0 - 0)            | 0<br>(0 - 0)            |
| Bladder cancer                                | 0<br>(0 - 0)         | --                    | --                     | 0<br>(0 - 0)            | 0<br>(0 - 0)            | 0<br>(0 - 0)            |
| Brain and nervous system cancer               | 1<br>(0 - 2)         | 0<br>(0 - 0)          | 0<br>(0 - 0)           | 1<br>(0 - 1)            | 0<br>(0 - 1)            | 0<br>(0 - 0)            |
| Thyroid cancer                                | 0<br>(0 - 0)         | --                    | 0<br>(0 - 0)           | 0<br>(0 - 0)            | 0<br>(0 - 0)            | 0<br>(0 - 0)            |
| Mesothelioma                                  | 0<br>(0 - 0)         | --                    | --                     | 0<br>(0 - 0)            | 0<br>(0 - 0)            | 0<br>(0 - 0)            |
| Hodgkin lymphoma                              | 0<br>(0 - 0)         | 0<br>(0 - 0)          | 0<br>(0 - 0)           | 0<br>(0 - 0)            | 0<br>(0 - 0)            | 0<br>(0 - 0)            |
| Non-Hodgkin lymphoma                          | 4<br>(2 - 7)         | 0<br>(0 - 1)          | 0<br>(0 - 0)           | 1<br>(0 - 1)            | 1<br>(0 - 1)            | 3<br>(1 - 4)            |
| Multiple myeloma                              | 1<br>(1 - 1)         | --                    | --                     | 0<br>(0 - 0)            | 0<br>(0 - 1)            | 1<br>(0 - 1)            |
| Leukemia                                      | 3<br>(3 - 4)         | 0<br>(0 - 1)          | 0<br>(0 - 1)           | 1<br>(1 - 2)            | 1<br>(0 - 1)            | 1<br>(1 - 1)            |
| Other neoplasms                               | 2<br>(1 - 3)         | 0<br>(0 - 1)          | 0<br>(0 - 0)           | 1<br>(0 - 1)            | 1<br>(0 - 1)            | 1<br>(0 - 1)            |
| Cardiovascular diseases                       | 203<br>(169 - 240)   | 1<br>(1 - 2)          | 1<br>(0 - 1)           | 23<br>(16 - 31)         | 54<br>(42 - 68)         | 124<br>(106 - 144)      |
| Rheumatic heart disease                       | 3<br>(2 - 4)         | 0<br>(0 - 0)          | 0<br>(0 - 0)           | 1<br>(1 - 2)            | 1<br>(0 - 1)            | 1<br>(1 - 1)            |
| Ischemic heart disease                        | 108<br>(87 - 133)    | 0<br>(0 - 1)          | 0<br>(0 - 0)           | 13<br>(9 - 18)          | 32<br>(25 - 41)         | 62<br>(52 - 77)         |
| Cerebrovascular disease                       | 67<br>(54 - 81)      | 0<br>(0 - 1)          | 0<br>(0 - 0)           | 5<br>(3 - 6)            | 14<br>(11 - 18)         | 48<br>(38 - 57)         |
| Ischemic stroke                               | 29<br>(21 - 40)      | 0<br>(0 - 0)          | 0<br>(0 - 0)           | 1<br>(0 - 2)            | 4<br>(3 - 7)            | 24<br>(18 - 33)         |
| Hemorrhagic stroke                            | 38<br>(27 - 48)      | 0<br>(0 - 1)          | 0<br>(0 - 0)           | 4<br>(3 - 5)            | 10<br>(7 - 13)          | 23<br>(16 - 30)         |
| Hypertensive heart disease                    | 6<br>(4 - 9)         | 0<br>(0 - 0)          | 0<br>(0 - 0)           | 1<br>(0 - 1)            | 2<br>(1 - 3)            | 4<br>(3 - 6)            |
| Cardiomyopathy and myocarditis                | 4<br>(3 - 6)         | 0<br>(0 - 0)          | 0<br>(0 - 0)           | 1<br>(1 - 2)            | 1<br>(1 - 2)            | 1<br>(1 - 2)            |
| Atrial fibrillation and flutter               | 1<br>(1 - 2)         | --                    | --                     | 0<br>(0 - 0)            | 0<br>(0 - 0)            | 1<br>(1 - 2)            |
| Aortic aneurysm                               | 2<br>(1 - 3)         | --                    | --                     | 0<br>(0 - 0)            | 1<br>(0 - 1)            | 1<br>(1 - 2)            |
| Peripheral vascular disease                   | 2<br>(1 - 3)         | --                    | --                     | 0<br>(0 - 0)            | 0<br>(0 - 0)            | 2<br>(1 - 2)            |
| Endocarditis                                  | 2<br>(1 - 3)         | 0<br>(0 - 0)          | 0<br>(0 - 0)           | 1<br>(0 - 1)            | 0<br>(0 - 1)            | 1<br>(1 - 1)            |
| Other cardiovascular and circulatory diseases | 7<br>(6 - 11)        | 0<br>(0 - 0)          | 0<br>(0 - 0)           | 1<br>(1 - 2)            | 2<br>(2 - 4)            | 4<br>(3 - 6)            |
| Chronic respiratory diseases                  | 59<br>(47 - 71)      | 0<br>(0 - 1)          | 0<br>(0 - 0)           | 3<br>(2 - 5)            | 13<br>(10 - 17)         | 42<br>(33 - 50)         |
| Chronic obstructive pulmonary disease         | 23<br>(18 - 30)      | 0<br>(0 - 1)          | 0<br>(0 - 0)           | 1<br>(1 - 1)            | 4<br>(3 - 6)            | 18<br>(14 - 24)         |

Web Table 31- Tonga deaths with 95% UI by age, sex, and cause in 2013

| Cause                                               | Both Sexes, All Ages | Both Sexes, 0-4 Years | Both Sexes, 5-14 Years | Both Sexes, 15-49 Years | Both Sexes, 50-69 Years | Both Sexes, 70-80 Years |
|-----------------------------------------------------|----------------------|-----------------------|------------------------|-------------------------|-------------------------|-------------------------|
| Pneumoconiosis                                      | 4<br>(2 - 6)         | 0<br>(0 - 0)          | 0<br>(0 - 0)           | 0<br>(0 - 0)            | 1<br>(1 - 2)            | 2<br>(1 - 4)            |
| Silicosis                                           | 1<br>(0 - 2)         | 0<br>(0 - 0)          | 0<br>(0 - 0)           | 0<br>(0 - 0)            | 0<br>(0 - 1)            | 1<br>(0 - 2)            |
| Asbestosis                                          | 0<br>(0 - 1)         | 0<br>(0 - 0)          | 0<br>(0 - 0)           | 0<br>(0 - 0)            | 0<br>(0 - 0)            | 0<br>(0 - 0)            |
| Coal workers pneumoconiosis                         | 0<br>(0 - 1)         | 0<br>(0 - 0)          | 0<br>(0 - 0)           | 0<br>(0 - 0)            | 0<br>(0 - 0)            | 0<br>(0 - 1)            |
| Other pneumoconiosis                                | 2<br>(1 - 3)         | 0<br>(0 - 0)          | 0<br>(0 - 0)           | 0<br>(0 - 0)            | 1<br>(0 - 1)            | 1<br>(1 - 2)            |
| Asthma                                              | 23<br>(14 - 30)      | 0<br>(0 - 0)          | 0<br>(0 - 0)           | 2<br>(1 - 2)            | 7<br>(4 - 9)            | 14<br>(8 - 19)          |
| Interstitial lung disease and pulmonary sarcoidosis | 4<br>(2 - 6)         | 0<br>(0 - 0)          | 0<br>(0 - 0)           | 0<br>(0 - 0)            | 1<br>(0 - 1)            | 2<br>(1 - 4)            |
| Other chronic respiratory diseases                  | 5<br>(4 - 7)         | 0<br>(0 - 0)          | 0<br>(0 - 0)           | 0<br>(0 - 1)            | 1<br>(0 - 1)            | 4<br>(3 - 6)            |
| Cirrhosis                                           | 13<br>(10 - 16)      | 0<br>(0 - 0)          | 0<br>(0 - 0)           | 5<br>(3 - 7)            | 5<br>(3 - 6)            | 3<br>(2 - 4)            |
| Cirrhosis due to hepatitis B                        | 7<br>(5 - 9)         | 0<br>(0 - 0)          | 0<br>(0 - 0)           | 3<br>(2 - 4)            | 2<br>(2 - 3)            | 1<br>(1 - 2)            |
| Cirrhosis due to hepatitis C                        | 2<br>(1 - 4)         | 0<br>(0 - 0)          | 0<br>(0 - 0)           | 1<br>(0 - 1)            | 1<br>(0 - 1)            | 1<br>(0 - 1)            |
| Cirrhosis due to alcohol use                        | 2<br>(1 - 3)         | --                    | --                     | 1<br>(0 - 1)            | 1<br>(1 - 1)            | 1<br>(0 - 1)            |
| Cirrhosis due to other causes                       | 1<br>(1 - 1)         | 0<br>(0 - 0)          | 0<br>(0 - 0)           | 1<br>(0 - 1)            | 0<br>(0 - 0)            | 0<br>(0 - 0)            |
| Digestive diseases                                  | 34<br>(28 - 41)      | 0<br>(0 - 1)          | 1<br>(0 - 1)           | 6<br>(4 - 8)            | 8<br>(6 - 11)           | 19<br>(15 - 23)         |
| Peptic ulcer disease                                | 6<br>(4 - 8)         | 0<br>(0 - 0)          | 0<br>(0 - 0)           | 1<br>(1 - 1)            | 2<br>(1 - 2)            | 3<br>(2 - 5)            |
| Gastritis and duodenitis                            | 0<br>(0 - 1)         | 0<br>(0 - 0)          | 0<br>(0 - 0)           | 0<br>(0 - 0)            | 0<br>(0 - 0)            | 0<br>(0 - 0)            |
| Appendicitis                                        | 2<br>(1 - 3)         | 0<br>(0 - 0)          | 0<br>(0 - 0)           | 0<br>(0 - 1)            | 0<br>(0 - 1)            | 1<br>(0 - 1)            |
| Paralytic ileus and intestinal obstruction          | 9<br>(6 - 13)        | 0<br>(0 - 0)          | 0<br>(0 - 0)           | 2<br>(1 - 2)            | 2<br>(1 - 3)            | 5<br>(4 - 8)            |
| Inguinal, femoral, and abdominal hernia             | 1<br>(0 - 1)         | 0<br>(0 - 0)          | 0<br>(0 - 0)           | 0<br>(0 - 0)            | 0<br>(0 - 0)            | 0<br>(0 - 1)            |
| Inflammatory bowel disease                          | 1<br>(1 - 2)         | 0<br>(0 - 0)          | 0<br>(0 - 0)           | 0<br>(0 - 0)            | 0<br>(0 - 0)            | 1<br>(0 - 1)            |
| Vascular intestinal disorders                       | 0<br>(0 - 0)         | 0<br>(0 - 0)          | 0<br>(0 - 0)           | 0<br>(0 - 0)            | 0<br>(0 - 0)            | 0<br>(0 - 0)            |
| Gallbladder and biliary diseases                    | 5<br>(3 - 7)         | 0<br>(0 - 0)          | 0<br>(0 - 0)           | 1<br>(0 - 1)            | 1<br>(1 - 2)            | 3<br>(2 - 5)            |
| Pancreatitis                                        | 1<br>(1 - 2)         | 0<br>(0 - 0)          | 0<br>(0 - 0)           | 0<br>(0 - 1)            | 0<br>(0 - 0)            | 1<br>(0 - 1)            |
| Other digestive diseases                            | 9<br>(6 - 12)        | 0<br>(0 - 0)          | 0<br>(0 - 0)           | 1<br>(1 - 2)            | 2<br>(2 - 4)            | 4<br>(3 - 7)            |
| Neurological disorders                              | 21<br>(17 - 25)      | 0<br>(0 - 0)          | 0<br>(0 - 0)           | 1<br>(0 - 1)            | 1<br>(1 - 2)            | 18<br>(15 - 22)         |
| Alzheimer disease and other dementias               | 19<br>(15 - 23)      | --                    | --                     | 0<br>(0 - 0)            | 1<br>(1 - 1)            | 18<br>(14 - 22)         |
| Parkinson disease                                   | 0<br>(0 - 0)         | --                    | --                     | 0<br>(0 - 0)            | 0<br>(0 - 0)            | 0<br>(0 - 0)            |
| Epilepsy                                            | 1<br>(0 - 1)         | 0<br>(0 - 0)          | 0<br>(0 - 0)           | 0<br>(0 - 1)            | 0<br>(0 - 0)            | 0<br>(0 - 0)            |
| Multiple sclerosis                                  | 0<br>(0 - 0)         | --                    | --                     | 0<br>(0 - 0)            | 0<br>(0 - 0)            | 0<br>(0 - 0)            |
| Other neurological disorders                        | 1<br>(1 - 2)         | 0<br>(0 - 0)          | 0<br>(0 - 0)           | 0<br>(0 - 0)            | 0<br>(0 - 0)            | 1<br>(0 - 1)            |
| Mental and substance use disorders                  | 1<br>(1 - 1)         | 0<br>(0 - 0)          | 0<br>(0 - 0)           | 1<br>(0 - 1)            | 0<br>(0 - 0)            | 0<br>(0 - 0)            |
| Schizophrenia                                       | 0<br>(0 - 0)         | --                    | --                     | 0<br>(0 - 0)            | 0<br>(0 - 0)            | 0<br>(0 - 0)            |
| Alcohol use disorders                               | 1<br>(0 - 1)         | --                    | --                     | 0<br>(0 - 1)            | 0<br>(0 - 0)            | 0<br>(0 - 0)            |
| Drug use disorders                                  | 0<br>(0 - 0)         | 0<br>(0 - 0)          | --                     | 0<br>(0 - 0)            | 0<br>(0 - 0)            | 0<br>(0 - 0)            |
| Opioid use disorders                                | 0<br>(0 - 0)         | 0<br>(0 - 0)          | --                     | 0<br>(0 - 0)            | 0<br>(0 - 0)            | 0<br>(0 - 0)            |
| Cocaine use disorders                               | 0<br>(0 - 0)         | 0<br>(0 - 0)          | --                     | 0<br>(0 - 0)            | 0<br>(0 - 0)            | 0<br>(0 - 0)            |
| Amphetamine use disorders                           | 0<br>(0 - 0)         | 0<br>(0 - 0)          | --                     | 0<br>(0 - 0)            | 0<br>(0 - 0)            | 0<br>(0 - 0)            |
| Other drug use disorders                            | 0<br>(0 - 0)         | 0<br>(0 - 0)          | --                     | 0<br>(0 - 0)            | 0<br>(0 - 0)            | 0<br>(0 - 0)            |
| Eating disorders                                    | 0<br>(0 - 0)         | --                    | 0<br>(0 - 0)           | 0<br>(0 - 0)            | --                      | --                      |
| Anorexia nervosa                                    | 0<br>(0 - 0)         | --                    | 0<br>(0 - 0)           | 0<br>(0 - 0)            | --                      | --                      |

Web Table 31- Tonga deaths with 95% UI by age, sex, and cause in 2013

| Cause                                               | Both Sexes, All Ages | Both Sexes, 0-4 Years | Both Sexes, 5-14 Years | Both Sexes, 15-49 Years | Both Sexes, 50-69 Years | Both Sexes, 70-80 Years |
|-----------------------------------------------------|----------------------|-----------------------|------------------------|-------------------------|-------------------------|-------------------------|
| Diabetes, urogenital, blood, and endocrine diseases | 116<br>(92 - 147)    | 1<br>(1 - 3)          | 0<br>(0 - 1)           | 10<br>(7 - 14)          | 41<br>(31 - 53)         | 63<br>(50 - 81)         |
| Diabetes mellitus                                   | 93<br>(73 - 115)     | 0<br>(0 - 1)          | 0<br>(0 - 0)           | 6<br>(5 - 9)            | 34<br>(25 - 44)         | 52<br>(41 - 64)         |
| Acute glomerulonephritis                            | 0<br>(0 - 0)         | 0<br>(0 - 0)          | 0<br>(0 - 0)           | 0<br>(0 - 0)            | 0<br>(0 - 0)            | 0<br>(0 - 0)            |
| Chronic kidney disease                              | 13<br>(7 - 32)       | 0<br>(0 - 0)          | 0<br>(0 - 0)           | 2<br>(1 - 4)            | 4<br>(2 - 9)            | 7<br>(4 - 18)           |
| Chronic kidney disease due to diabetes mellitus     | 2<br>(1 - 4)         | 0<br>(0 - 0)          | 0<br>(0 - 0)           | 0<br>(0 - 1)            | 1<br>(0 - 2)            | 1<br>(0 - 2)            |
| Chronic kidney disease due to hypertension          | 4<br>(2 - 9)         | 0<br>(0 - 0)          | 0<br>(0 - 0)           | 0<br>(0 - 1)            | 1<br>(0 - 2)            | 2<br>(1 - 5)            |
| Chronic kidney disease due to glomerulonephritis    | 0<br>(0 - 1)         | 0<br>(0 - 0)          | 0<br>(0 - 0)           | 0<br>(0 - 0)            | 0<br>(0 - 0)            | 0<br>(0 - 1)            |
| Chronic kidney disease due to other causes          | 6<br>(2 - 20)        | 0<br>(0 - 0)          | 0<br>(0 - 0)           | 1<br>(0 - 3)            | 2<br>(1 - 6)            | 3<br>(1 - 11)           |
| Urinary diseases and male infertility               | 4<br>(3 - 5)         | 0<br>(0 - 0)          | 0<br>(0 - 0)           | 1<br>(0 - 1)            | 1<br>(1 - 1)            | 2<br>(2 - 3)            |
| Interstitial nephritis and urinary tract infections | 2<br>(1 - 2)         | 0<br>(0 - 0)          | 0<br>(0 - 0)           | 0<br>(0 - 0)            | 0<br>(0 - 1)            | 1<br>(1 - 1)            |
| Urolithiasis                                        | 0<br>(0 - 0)         | --                    | 0<br>(0 - 0)           | 0<br>(0 - 0)            | 0<br>(0 - 0)            | 0<br>(0 - 0)            |
| Other urinary diseases                              | 2<br>(1 - 3)         | 0<br>(0 - 0)          | 0<br>(0 - 0)           | 0<br>(0 - 1)            | 0<br>(0 - 1)            | 1<br>(1 - 2)            |
| Gynecological diseases                              | 0<br>(0 - 0)         | --                    | --                     | 0<br>(0 - 0)            | 0<br>(0 - 0)            | 0<br>(0 - 0)            |
| Uterine fibroids                                    | 0<br>(0 - 0)         | --                    | --                     | 0<br>(0 - 0)            | 0<br>(0 - 0)            | 0<br>(0 - 0)            |
| Polycystic ovarian syndrome                         | 0<br>(0 - 0)         | --                    | --                     | 0<br>(0 - 0)            | 0<br>(0 - 0)            | --                      |
| Endometriosis                                       | 0<br>(0 - 0)         | --                    | --                     | 0<br>(0 - 0)            | 0<br>(0 - 0)            | --                      |
| Genital prolapse                                    | 0<br>(0 - 0)         | --                    | --                     | 0<br>(0 - 0)            | 0<br>(0 - 0)            | 0<br>(0 - 0)            |
| Other gynecological diseases                        | 0<br>(0 - 0)         | --                    | --                     | 0<br>(0 - 0)            | 0<br>(0 - 0)            | 0<br>(0 - 0)            |
| Hemoglobinopathies and hemolytic anemias            | 1<br>(1 - 2)         | 0<br>(0 - 1)          | 0<br>(0 - 0)           | 0<br>(0 - 1)            | 0<br>(0 - 0)            | 0<br>(0 - 1)            |
| Thalassemias                                        | 1<br>(0 - 1)         | 0<br>(0 - 1)          | 0<br>(0 - 0)           | 0<br>(0 - 0)            | 0<br>(0 - 0)            | 0<br>(0 - 0)            |
| Sickle cell disorders                               | 0<br>(0 - 0)         | 0<br>(0 - 0)          | 0<br>(0 - 0)           | 0<br>(0 - 0)            | 0<br>(0 - 0)            | 0<br>(0 - 0)            |
| G6PD deficiency                                     | 0<br>(0 - 0)         | 0<br>(0 - 0)          | 0<br>(0 - 0)           | 0<br>(0 - 0)            | 0<br>(0 - 0)            | 0<br>(0 - 0)            |
| Other hemoglobinopathies and hemolytic anemias      | 1<br>(0 - 1)         | 0<br>(0 - 0)          | 0<br>(0 - 0)           | 0<br>(0 - 0)            | 0<br>(0 - 0)            | 0<br>(0 - 1)            |
| Endocrine, metabolic, blood, and immune disorders   | 5<br>(3 - 7)         | 1<br>(0 - 1)          | 0<br>(0 - 0)           | 1<br>(0 - 2)            | 1<br>(1 - 2)            | 2<br>(1 - 3)            |
| Musculoskeletal disorders                           | 1<br>(1 - 2)         | --                    | 0<br>(0 - 0)           | 0<br>(0 - 0)            | 0<br>(0 - 0)            | 1<br>(0 - 1)            |
| Rheumatoid arthritis                                | 0<br>(0 - 0)         | --                    | 0<br>(0 - 0)           | 0<br>(0 - 0)            | 0<br>(0 - 0)            | 0<br>(0 - 0)            |
| Other musculoskeletal disorders                     | 1<br>(1 - 2)         | --                    | 0<br>(0 - 0)           | 0<br>(0 - 0)            | 0<br>(0 - 0)            | 0<br>(0 - 1)            |
| Other non-communicable diseases                     | 14<br>(9 - 21)       | 8<br>(4 - 15)         | 1<br>(1 - 1)           | 1<br>(1 - 2)            | 1<br>(1 - 2)            | 2<br>(2 - 3)            |
| Congenital anomalies                                | 11<br>(6 - 17)       | 8<br>(4 - 14)         | 1<br>(1 - 1)           | 1<br>(1 - 1)            | 0<br>(0 - 1)            | 1<br>(0 - 1)            |
| Neural tube defects                                 | 0<br>(0 - 0)         | 0<br>(0 - 0)          | 0<br>(0 - 0)           | 0<br>(0 - 0)            | 0<br>(0 - 0)            | 0<br>(0 - 0)            |
| Congenital heart anomalies                          | 2<br>(1 - 3)         | 1<br>(1 - 3)          | 0<br>(0 - 0)           | 0<br>(0 - 0)            | 0<br>(0 - 0)            | 0<br>(0 - 0)            |
| Cleft lip and cleft palate                          | 0<br>(0 - 0)         | 0<br>(0 - 0)          | --                     | --                      | --                      | --                      |
| Down syndrome                                       | 1<br>(0 - 1)         | 0<br>(0 - 1)          | 0<br>(0 - 0)           | 0<br>(0 - 0)            | 0<br>(0 - 0)            | 0<br>(0 - 0)            |
| Chromosomal unbalanced rearrangements               | 0<br>(0 - 1)         | 0<br>(0 - 1)          | 0<br>(0 - 0)           | 0<br>(0 - 0)            | 0<br>(0 - 0)            | 0<br>(0 - 0)            |
| Other congenital anomalies                          | 8<br>(5 - 13)        | 6<br>(3 - 10)         | 1<br>(0 - 1)           | 1<br>(1 - 1)            | 0<br>(0 - 0)            | 1<br>(0 - 1)            |
| Skin and subcutaneous diseases                      | 3<br>(2 - 4)         | 0<br>(0 - 0)          | 0<br>(0 - 0)           | 0<br>(0 - 1)            | 1<br>(0 - 1)            | 2<br>(1 - 3)            |
| Cellulitis                                          | 0<br>(0 - 1)         | 0<br>(0 - 0)          | 0<br>(0 - 0)           | 0<br>(0 - 0)            | 0<br>(0 - 0)            | 0<br>(0 - 0)            |
| Pyoderma                                            | 2<br>(1 - 2)         | 0<br>(0 - 0)          | 0<br>(0 - 0)           | 0<br>(0 - 0)            | 0<br>(0 - 1)            | 1<br>(0 - 1)            |
| Decubitus ulcer                                     | 1<br>(0 - 2)         | 0<br>(0 - 0)          | 0<br>(0 - 0)           | 0<br>(0 - 0)            | 0<br>(0 - 0)            | 1<br>(0 - 1)            |
| Other skin and subcutaneous diseases                | 0<br>(0 - 0)         | 0<br>(0 - 0)          | 0<br>(0 - 0)           | 0<br>(0 - 0)            | 0<br>(0 - 0)            | 0<br>(0 - 0)            |

Web Table 31- Tonga deaths with 95% UI by age, sex, and cause in 2013

| Cause                                           | Both Sexes, All Ages | Both Sexes, 0-4 Years | Both Sexes, 5-14 Years | Both Sexes, 15-49 Years | Both Sexes, 50-69 Years | Both Sexes, 70-80 Years |
|-------------------------------------------------|----------------------|-----------------------|------------------------|-------------------------|-------------------------|-------------------------|
| Sudden infant death syndrome                    | 0<br>(0 - 1)         | 0<br>(0 - 1)          | --                     | --                      | --                      | --                      |
| Injuries                                        | 67<br>(51 - 88)      | 7<br>(3 - 14)         | 4<br>(3 - 6)           | 29<br>(21 - 39)         | 10<br>(7 - 14)          | 18<br>(13 - 22)         |
| Transport injuries                              | 15<br>(12 - 19)      | 1<br>(0 - 2)          | 1<br>(1 - 2)           | 8<br>(6 - 11)           | 2<br>(2 - 3)            | 2<br>(2 - 3)            |
| Road injuries                                   | 14<br>(11 - 18)      | 1<br>(0 - 2)          | 1<br>(1 - 2)           | 7<br>(5 - 10)           | 2<br>(2 - 3)            | 2<br>(2 - 3)            |
| Pedestrian road injuries                        | 3<br>(2 - 4)         | 0<br>(0 - 0)          | 0<br>(0 - 0)           | 1<br>(1 - 2)            | 0<br>(0 - 1)            | 1<br>(0 - 1)            |
| Cyclist road injuries                           | 1<br>(0 - 1)         | 0<br>(0 - 0)          | 0<br>(0 - 0)           | 0<br>(0 - 0)            | 0<br>(0 - 0)            | 0<br>(0 - 0)            |
| Motorcyclist road injuries                      | 2<br>(1 - 3)         | 0<br>(0 - 0)          | 0<br>(0 - 0)           | 1<br>(1 - 2)            | 0<br>(0 - 0)            | 0<br>(0 - 0)            |
| Motor vehicle road injuries                     | 8<br>(6 - 11)        | 1<br>(0 - 1)          | 1<br>(0 - 1)           | 4<br>(3 - 6)            | 1<br>(1 - 2)            | 1<br>(1 - 2)            |
| Other road injuries                             | 0<br>(0 - 0)         | 0<br>(0 - 0)          | 0<br>(0 - 0)           | 0<br>(0 - 0)            | 0<br>(0 - 0)            | 0<br>(0 - 0)            |
| Other transport injuries                        | 2<br>(1 - 2)         | 0<br>(0 - 0)          | 0<br>(0 - 0)           | 1<br>(0 - 1)            | 0<br>(0 - 0)            | 0<br>(0 - 1)            |
| Unintentional injuries                          | 41<br>(27 - 57)      | 6<br>(2 - 12)         | 2<br>(2 - 4)           | 14<br>(9 - 20)          | 6<br>(4 - 9)            | 14<br>(9 - 18)          |
| Falls                                           | 4<br>(3 - 6)         | 0<br>(0 - 0)          | 0<br>(0 - 0)           | 1<br>(0 - 1)            | 0<br>(0 - 0)            | 3<br>(2 - 5)            |
| Drowning                                        | 8<br>(4 - 12)        | 1<br>(0 - 3)          | 1<br>(0 - 2)           | 4<br>(2 - 6)            | 1<br>(0 - 2)            | 0<br>(0 - 1)            |
| Fire, heat, and hot substances                  | 4<br>(1 - 6)         | 0<br>(0 - 1)          | 0<br>(0 - 1)           | 1<br>(0 - 3)            | 1<br>(0 - 2)            | 1<br>(0 - 2)            |
| Poisonings                                      | 2<br>(1 - 2)         | 0<br>(0 - 0)          | 0<br>(0 - 0)           | 0<br>(0 - 1)            | 0<br>(0 - 0)            | 1<br>(0 - 1)            |
| Exposure to mechanical forces                   | 3<br>(1 - 24)        | 1<br>(0 - 7)          | 0<br>(0 - 2)           | 1<br>(0 - 8)            | 1<br>(0 - 4)            | 1<br>(0 - 4)            |
| Unintentional firearm injuries                  | 0<br>(0 - 0)         | 0<br>(0 - 0)          | 0<br>(0 - 0)           | 0<br>(0 - 0)            | 0<br>(0 - 0)            | 0<br>(0 - 0)            |
| Unintentional suffocation                       | 2<br>(0 - 23)        | 1<br>(0 - 7)          | 0<br>(0 - 2)           | 1<br>(0 - 8)            | 0<br>(0 - 4)            | 0<br>(0 - 4)            |
| Other exposure to mechanical forces             | 1<br>(0 - 1)         | 0<br>(0 - 0)          | 0<br>(0 - 0)           | 0<br>(0 - 0)            | 0<br>(0 - 0)            | 0<br>(0 - 0)            |
| Adverse effects of medical treatment            | 4<br>(2 - 6)         | 0<br>(0 - 1)          | 0<br>(0 - 0)           | 1<br>(0 - 2)            | 1<br>(0 - 1)            | 2<br>(1 - 3)            |
| Animal contact                                  | 0<br>(0 - 1)         | 0<br>(0 - 0)          | 0<br>(0 - 0)           | 0<br>(0 - 0)            | 0<br>(0 - 0)            | 0<br>(0 - 0)            |
| Venomous animal contact                         | 0<br>(0 - 0)         | 0<br>(0 - 0)          | 0<br>(0 - 0)           | 0<br>(0 - 0)            | 0<br>(0 - 0)            | 0<br>(0 - 0)            |
| Non-venomous animal contact                     | 0<br>(0 - 0)         | 0<br>(0 - 0)          | 0<br>(0 - 0)           | 0<br>(0 - 0)            | 0<br>(0 - 0)            | 0<br>(0 - 0)            |
| Foreign body                                    | 9<br>(5 - 12)        | 2<br>(1 - 4)          | 1<br>(0 - 1)           | 1<br>(1 - 2)            | 1<br>(1 - 2)            | 4<br>(3 - 6)            |
| Pulmonary aspiration and foreign body in airway | 9<br>(5 - 12)        | 2<br>(1 - 4)          | 1<br>(0 - 1)           | 1<br>(0 - 2)            | 1<br>(1 - 1)            | 4<br>(2 - 6)            |
| Foreign body in other body part                 | 0<br>(0 - 1)         | 0<br>(0 - 0)          | 0<br>(0 - 0)           | 0<br>(0 - 0)            | 0<br>(0 - 0)            | 0<br>(0 - 0)            |
| Other unintentional injuries                    | 8<br>(5 - 10)        | 0<br>(0 - 1)          | 0<br>(0 - 1)           | 4<br>(3 - 5)            | 1<br>(1 - 2)            | 2<br>(1 - 2)            |
| Self-harm and interpersonal violence            | 11<br>(7 - 20)       | 0<br>(0 - 0)          | 0<br>(0 - 1)           | 7<br>(4 - 14)           | 2<br>(1 - 3)            | 2<br>(1 - 2)            |
| Self-harm                                       | 7<br>(5 - 10)        | --                    | 0<br>(0 - 0)           | 4<br>(3 - 6)            | 1<br>(1 - 2)            | 1<br>(1 - 2)            |
| Interpersonal violence                          | 4<br>(2 - 11)        | 0<br>(0 - 0)          | 0<br>(0 - 0)           | 3<br>(1 - 9)            | 1<br>(0 - 2)            | 0<br>(0 - 0)            |
| Assault by firearm                              | 1<br>(0 - 5)         | 0<br>(0 - 0)          | 0<br>(0 - 0)           | 1<br>(0 - 4)            | 0<br>(0 - 1)            | 0<br>(0 - 0)            |
| Assault by sharp object                         | 1<br>(0 - 4)         | 0<br>(0 - 0)          | 0<br>(0 - 0)           | 1<br>(0 - 4)            | 0<br>(0 - 1)            | 0<br>(0 - 0)            |
| Assault by other means                          | 1<br>(1 - 3)         | 0<br>(0 - 0)          | 0<br>(0 - 0)           | 1<br>(0 - 2)            | 0<br>(0 - 0)            | 0<br>(0 - 0)            |

Web Table 31- Tonga deaths with 95% UI by age, sex, and cause in 2013

| Cause                                                             | Males, All Ages    | Males, 0-4 Years | Males, 5-14 Years | Males, 15-49 Years | Males, 50-69 Years | Males, 70-80 Years |
|-------------------------------------------------------------------|--------------------|------------------|-------------------|--------------------|--------------------|--------------------|
| All causes                                                        | 391<br>(307 - 481) | 36<br>(20 - 59)  | 7<br>(5 - 9)      | 76<br>(54 - 104)   | 107<br>(77 - 141)  | 165<br>(136 - 188) |
| Communicable, maternal, neonatal, and nutritional diseases        | 62<br>(48 - 80)    | 24<br>(13 - 38)  | 2<br>(1 - 3)      | 10<br>(7 - 14)     | 9<br>(6 - 13)      | 18<br>(13 - 23)    |
| HIV/AIDS and tuberculosis                                         | 2<br>(2 - 3)       | 0<br>(0 - 0)     | 0<br>(0 - 0)      | 1<br>(1 - 1)       | 1<br>(0 - 1)       | 1<br>(0 - 1)       |
| Tuberculosis                                                      | 2<br>(1 - 2)       | 0<br>(0 - 0)     | 0<br>(0 - 0)      | 0<br>(0 - 1)       | 1<br>(0 - 1)       | 1<br>(0 - 1)       |
| HIV/AIDS                                                          | 1<br>(1 - 1)       | 0<br>(0 - 0)     | 0<br>(0 - 0)      | 1<br>(0 - 1)       | 0<br>(0 - 0)       | 0<br>(0 - 0)       |
| HIV/AIDS resulting in mycobacterial infection                     | 0<br>(0 - 0)       | 0<br>(0 - 0)     | 0<br>(0 - 0)      | 0<br>(0 - 0)       | 0<br>(0 - 0)       | 0<br>(0 - 0)       |
| HIV/AIDS resulting in other diseases                              | 1<br>(0 - 1)       | 0<br>(0 - 0)     | 0<br>(0 - 0)      | 0<br>(0 - 1)       | 0<br>(0 - 0)       | 0<br>(0 - 0)       |
| Diarrhea, lower respiratory, and other common infectious diseases | 32<br>(23 - 41)    | 7<br>(3 - 13)    | 1<br>(1 - 2)      | 4<br>(3 - 7)       | 6<br>(4 - 8)       | 14<br>(9 - 19)     |
| Diarrheal diseases                                                | 1<br>(1 - 2)       | 0<br>(0 - 1)     | 0<br>(0 - 0)      | 0<br>(0 - 0)       | 0<br>(0 - 0)       | 1<br>(0 - 1)       |
| Intestinal infectious diseases                                    | 1<br>(0 - 2)       | 0<br>(0 - 1)     | 0<br>(0 - 0)      | 0<br>(0 - 0)       | 0<br>(0 - 0)       | 0<br>(0 - 0)       |
| Typhoid fever                                                     | 1<br>(0 - 1)       | 0<br>(0 - 1)     | 0<br>(0 - 0)      | 0<br>(0 - 0)       | 0<br>(0 - 0)       | 0<br>(0 - 0)       |
| Paratyphoid fever                                                 | 0<br>(0 - 0)       | 0<br>(0 - 0)     | 0<br>(0 - 0)      | 0<br>(0 - 0)       | 0<br>(0 - 0)       | 0<br>(0 - 0)       |
| Other intestinal infectious diseases                              | 0<br>(0 - 0)       | 0<br>(0 - 0)     | 0<br>(0 - 0)      | 0<br>(0 - 0)       | 0<br>(0 - 0)       | 0<br>(0 - 0)       |
| Lower respiratory infections                                      | 24<br>(17 - 31)    | 4<br>(2 - 7)     | 0<br>(0 - 1)      | 3<br>(2 - 4)       | 5<br>(3 - 7)       | 12<br>(8 - 17)     |
| Upper respiratory infections                                      | 0<br>(0 - 0)       | 0<br>(0 - 0)     | 0<br>(0 - 0)      | 0<br>(0 - 0)       | 0<br>(0 - 0)       | 0<br>(0 - 0)       |
| Otitis media                                                      | 0<br>(0 - 0)       | 0<br>(0 - 0)     | 0<br>(0 - 0)      | 0<br>(0 - 0)       | 0<br>(0 - 0)       | 0<br>(0 - 0)       |
| Meningitis                                                        | 4<br>(3 - 6)       | 1<br>(0 - 2)     | 0<br>(0 - 1)      | 1<br>(1 - 2)       | 1<br>(0 - 1)       | 0<br>(0 - 1)       |
| Pneumococcal meningitis                                           | 1<br>(1 - 2)       | 0<br>(0 - 1)     | 0<br>(0 - 0)      | 1<br>(0 - 1)       | 0<br>(0 - 0)       | 0<br>(0 - 0)       |
| H influenzae type B meningitis                                    | 0<br>(0 - 1)       | 0<br>(0 - 0)     | 0<br>(0 - 0)      | 0<br>(0 - 0)       | 0<br>(0 - 0)       | 0<br>(0 - 0)       |
| Meningococcal meningitis                                          | 1<br>(0 - 1)       | 0<br>(0 - 0)     | 0<br>(0 - 0)      | 0<br>(0 - 0)       | 0<br>(0 - 0)       | 0<br>(0 - 0)       |
| Other meningitis                                                  | 1<br>(1 - 2)       | 0<br>(0 - 1)     | 0<br>(0 - 0)      | 0<br>(0 - 1)       | 0<br>(0 - 0)       | 0<br>(0 - 0)       |
| Encephalitis                                                      | 1<br>(0 - 1)       | 0<br>(0 - 0)     | 0<br>(0 - 0)      | 0<br>(0 - 0)       | 0<br>(0 - 0)       | 0<br>(0 - 0)       |
| Diphtheria                                                        | 0<br>(0 - 0)       | 0<br>(0 - 0)     | 0<br>(0 - 0)      | 0<br>(0 - 0)       | 0<br>(0 - 0)       | 0<br>(0 - 0)       |
| Whooping cough                                                    | 0<br>(0 - 0)       | 0<br>(0 - 0)     | 0<br>(0 - 0)      | 0<br>(0 - 0)       | 0<br>(0 - 0)       | 0<br>(0 - 0)       |
| Tetanus                                                           | 0<br>(0 - 0)       | 0<br>(0 - 0)     | 0<br>(0 - 0)      | 0<br>(0 - 0)       | 0<br>(0 - 0)       | 0<br>(0 - 0)       |
| Measles                                                           | 1<br>(0 - 7)       | 1<br>(0 - 6)     | 0<br>(0 - 1)      | 0<br>(0 - 0)       | 0<br>(0 - 0)       | 0<br>(0 - 0)       |
| Varicella and herpes zoster                                       | 0<br>(0 - 0)       | 0<br>(0 - 0)     | 0<br>(0 - 0)      | 0<br>(0 - 0)       | 0<br>(0 - 0)       | 0<br>(0 - 0)       |
| Neglected tropical diseases and malaria                           | 2<br>(1 - 3)       | 0<br>(0 - 1)     | 0<br>(0 - 0)      | 0<br>(0 - 1)       | 0<br>(0 - 0)       | 1<br>(0 - 1)       |
| Leishmaniasis                                                     | 0<br>(0 - 0)       | 0<br>(0 - 0)     | 0<br>(0 - 0)      | 0<br>(0 - 0)       | 0<br>(0 - 0)       | 0<br>(0 - 0)       |
| Visceral leishmaniasis                                            | 0<br>(0 - 0)       | 0<br>(0 - 0)     | 0<br>(0 - 0)      | 0<br>(0 - 0)       | 0<br>(0 - 0)       | 0<br>(0 - 0)       |
| Cysticercosis                                                     | 0<br>(0 - 0)       | 0<br>(0 - 0)     | 0<br>(0 - 0)      | 0<br>(0 - 0)       | 0<br>(0 - 0)       | 0<br>(0 - 0)       |
| Cystic echinococcosis                                             | 0<br>(0 - 0)       | 0<br>(0 - 0)     | 0<br>(0 - 0)      | 0<br>(0 - 0)       | 0<br>(0 - 0)       | 0<br>(0 - 0)       |
| Dengue                                                            | 2<br>(1 - 2)       | 0<br>(0 - 1)     | 0<br>(0 - 0)      | 0<br>(0 - 1)       | 0<br>(0 - 0)       | 1<br>(0 - 1)       |
| Rabies                                                            | 0<br>(0 - 0)       | 0<br>(0 - 0)     | 0<br>(0 - 0)      | 0<br>(0 - 0)       | 0<br>(0 - 0)       | 0<br>(0 - 0)       |
| Intestinal nematode infections                                    | 0<br>(0 - 0)       | 0<br>(0 - 0)     | 0<br>(0 - 0)      | 0<br>(0 - 0)       | 0<br>(0 - 0)       | 0<br>(0 - 0)       |
| Ascariasis                                                        | 0<br>(0 - 0)       | 0<br>(0 - 0)     | 0<br>(0 - 0)      | 0<br>(0 - 0)       | 0<br>(0 - 0)       | 0<br>(0 - 0)       |
| Other neglected tropical diseases                                 | 0<br>(0 - 0)       | 0<br>(0 - 0)     | 0<br>(0 - 0)      | 0<br>(0 - 0)       | 0<br>(0 - 0)       | 0<br>(0 - 0)       |
| Maternal disorders                                                | --                 | --               | --                | --                 | --                 | --                 |
| Maternal hemorrhage                                               | --                 | --               | --                | --                 | --                 | --                 |
| Maternal sepsis and other maternal infections                     | --                 | --               | --                | --                 | --                 | --                 |

Web Table 31- Tonga deaths with 95% UI by age, sex, and cause in 2013

| Cause                                                            | Males, All Ages    | Males, 0-4 Years | Males, 5-14 Years | Males, 15-49 Years | Males, 50-69 Years | Males, 70-80 Years |
|------------------------------------------------------------------|--------------------|------------------|-------------------|--------------------|--------------------|--------------------|
| Maternal hypertensive disorders                                  | --                 | --               | --                | --                 | --                 | --                 |
| Maternal obstructed labor                                        | --                 | --               | --                | --                 | --                 | --                 |
| Maternal abortive outcome                                        | --                 | --               | --                | --                 | --                 | --                 |
| Indirect maternal deaths                                         | --                 | --               | --                | --                 | --                 | --                 |
| Late maternal deaths                                             | --                 | --               | --                | --                 | --                 | --                 |
| Maternal deaths aggravated by HIV/AIDS                           | --                 | --               | --                | --                 | --                 | --                 |
| Other maternal disorders                                         | --                 | --               | --                | --                 | --                 | --                 |
| Neonatal disorders                                               | 15<br>(8 - 25)     | 15<br>(8 - 25)   | --                | --                 | --                 | --                 |
| Neonatal preterm birth complications                             | 6<br>(3 - 10)      | 6<br>(3 - 10)    | --                | --                 | --                 | --                 |
| Neonatal encephalopathy due to birth asphyxia and trauma         | 2<br>(1 - 5)       | 2<br>(1 - 5)     | --                | --                 | --                 | --                 |
| Neonatal sepsis and other neonatal infections                    | 2<br>(1 - 6)       | 2<br>(1 - 6)     | --                | --                 | --                 | --                 |
| Hemolytic disease and other neonatal jaundice                    | 0<br>(0 - 0)       | 0<br>(0 - 0)     | --                | --                 | --                 | --                 |
| Other neonatal disorders                                         | 4<br>(2 - 8)       | 4<br>(2 - 8)     | --                | --                 | --                 | --                 |
| Nutritional deficiencies                                         | 3<br>(2 - 5)       | 1<br>(0 - 2)     | 0<br>(0 - 0)      | 1<br>(0 - 1)       | 1<br>(0 - 1)       | 1<br>(1 - 2)       |
| Protein-energy malnutrition                                      | 2<br>(1 - 3)       | 1<br>(0 - 2)     | 0<br>(0 - 0)      | 0<br>(0 - 0)       | 0<br>(0 - 1)       | 1<br>(0 - 1)       |
| Iodine deficiency                                                | 0<br>(0 - 0)       | 0<br>(0 - 0)     | 0<br>(0 - 0)      | 0<br>(0 - 0)       | 0<br>(0 - 0)       | 0<br>(0 - 0)       |
| Iron-deficiency anemia                                           | 1<br>(0 - 2)       | 0<br>(0 - 0)     | 0<br>(0 - 0)      | 0<br>(0 - 0)       | 0<br>(0 - 0)       | 1<br>(0 - 1)       |
| Other nutritional deficiencies                                   | 0<br>(0 - 0)       | 0<br>(0 - 0)     | 0<br>(0 - 0)      | 0<br>(0 - 0)       | 0<br>(0 - 0)       | 0<br>(0 - 0)       |
| Other communicable, maternal, neonatal, and nutritional diseases | 8<br>(6 - 11)      | 1<br>(0 - 2)     | 0<br>(0 - 1)      | 3<br>(2 - 5)       | 2<br>(1 - 2)       | 1<br>(1 - 2)       |
| Sexually transmitted diseases excluding HIV                      | 0<br>(0 - 0)       | 0<br>(0 - 0)     | 0<br>(0 - 0)      | 0<br>(0 - 0)       | 0<br>(0 - 0)       | 0<br>(0 - 0)       |
| Syphilis                                                         | 0<br>(0 - 0)       | 0<br>(0 - 0)     | 0<br>(0 - 0)      | 0<br>(0 - 0)       | 0<br>(0 - 0)       | 0<br>(0 - 0)       |
| Chlamydial infection                                             | --                 | --               | --                | --                 | --                 | --                 |
| Gonococcal infection                                             | 0<br>(0 - 0)       | --               | 0<br>(0 - 0)      | 0<br>(0 - 0)       | 0<br>(0 - 0)       | 0<br>(0 - 0)       |
| Other sexually transmitted diseases                              | 0<br>(0 - 0)       | --               | 0<br>(0 - 0)      | 0<br>(0 - 0)       | 0<br>(0 - 0)       | 0<br>(0 - 0)       |
| Hepatitis                                                        | 5<br>(4 - 7)       | 0<br>(0 - 0)     | 0<br>(0 - 0)      | 3<br>(2 - 4)       | 1<br>(1 - 2)       | 1<br>(1 - 1)       |
| Acute hepatitis A                                                | 0<br>(0 - 0)       | 0<br>(0 - 0)     | 0<br>(0 - 0)      | 0<br>(0 - 0)       | 0<br>(0 - 0)       | 0<br>(0 - 0)       |
| Acute hepatitis B                                                | 4<br>(2 - 6)       | 0<br>(0 - 0)     | 0<br>(0 - 0)      | 2<br>(1 - 3)       | 1<br>(1 - 2)       | 1<br>(0 - 1)       |
| Acute hepatitis C                                                | 0<br>(0 - 0)       | --               | 0<br>(0 - 0)      | 0<br>(0 - 0)       | 0<br>(0 - 0)       | 0<br>(0 - 0)       |
| Acute hepatitis E                                                | 1<br>(0 - 2)       | 0<br>(0 - 0)     | 0<br>(0 - 0)      | 1<br>(0 - 2)       | 0<br>(0 - 0)       | 0<br>(0 - 0)       |
| Other infectious diseases                                        | 3<br>(1 - 4)       | 0<br>(0 - 1)     | 0<br>(0 - 0)      | 1<br>(0 - 2)       | 0<br>(0 - 1)       | 1<br>(0 - 1)       |
| Non-communicable diseases                                        | 284<br>(219 - 353) | 8<br>(4 - 14)    | 2<br>(2 - 3)      | 42<br>(29 - 61)    | 91<br>(65 - 120)   | 140<br>(113 - 161) |
| Neoplasms                                                        | 45<br>(35 - 57)    | 1<br>(0 - 1)     | 0<br>(0 - 1)      | 8<br>(6 - 12)      | 16<br>(11 - 21)    | 20<br>(16 - 25)    |
| Esophageal cancer                                                | 0<br>(0 - 1)       | --               | --                | 0<br>(0 - 0)       | 0<br>(0 - 0)       | 0<br>(0 - 0)       |
| Stomach cancer                                                   | 7<br>(5 - 9)       | --               | --                | 1<br>(1 - 1)       | 2<br>(1 - 3)       | 4<br>(3 - 5)       |
| Liver cancer                                                     | 1<br>(1 - 2)       | --               | 0<br>(0 - 0)      | 0<br>(0 - 1)       | 1<br>(0 - 1)       | 0<br>(0 - 0)       |
| Liver cancer due to hepatitis B                                  | 1<br>(0 - 1)       | --               | 0<br>(0 - 0)      | 0<br>(0 - 0)       | 0<br>(0 - 1)       | 0<br>(0 - 0)       |
| Liver cancer due to hepatitis C                                  | 0<br>(0 - 0)       | --               | 0<br>(0 - 0)      | 0<br>(0 - 0)       | 0<br>(0 - 0)       | 0<br>(0 - 0)       |
| Liver cancer due to alcohol use                                  | 0<br>(0 - 0)       | --               | --                | 0<br>(0 - 0)       | 0<br>(0 - 0)       | 0<br>(0 - 0)       |
| Liver cancer due to other causes                                 | 0<br>(0 - 0)       | --               | 0<br>(0 - 0)      | 0<br>(0 - 0)       | 0<br>(0 - 0)       | 0<br>(0 - 0)       |
| Larynx cancer                                                    | 0<br>(0 - 0)       | --               | --                | 0<br>(0 - 0)       | 0<br>(0 - 0)       | 0<br>(0 - 0)       |

Web Table 31- Tonga deaths with 95% UI by age, sex, and cause in 2013

| Cause                                         | Males, All Ages   | Males, 0-4 Years | Males, 5-14 Years | Males, 15-49 Years | Males, 50-69 Years | Males, 70-80 Years |
|-----------------------------------------------|-------------------|------------------|-------------------|--------------------|--------------------|--------------------|
| Tracheal, bronchus and lung cancer            | 16<br>(12 - 21)   | --               | --                | 3<br>(2 - 5)       | 7<br>(5 - 9)       | 7<br>(5 - 8)       |
| Breast cancer                                 | 0<br>(0 - 0)      | --               | --                | 0<br>(0 - 0)       | 0<br>(0 - 0)       | 0<br>(0 - 0)       |
| Cervical cancer                               | --                | --               | --                | --                 | --                 | --                 |
| Uterine cancer                                | --                | --               | --                | --                 | --                 | --                 |
| Prostate cancer                               | 8<br>(4 - 11)     | --               | --                | 0<br>(0 - 0)       | 2<br>(1 - 3)       | 6<br>(3 - 9)       |
| Colon and rectum cancer                       | 2<br>(1 - 2)      | --               | --                | 0<br>(0 - 0)       | 1<br>(1 - 1)       | 1<br>(1 - 1)       |
| Lip and oral cavity cancer                    | 0<br>(0 - 1)      | --               | --                | 0<br>(0 - 0)       | 0<br>(0 - 0)       | 0<br>(0 - 0)       |
| Nasopharynx cancer                            | 0<br>(0 - 0)      | --               | 0<br>(0 - 0)      | 0<br>(0 - 0)       | 0<br>(0 - 0)       | 0<br>(0 - 0)       |
| Other pharynx cancer                          | 0<br>(0 - 0)      | --               | --                | 0<br>(0 - 0)       | 0<br>(0 - 0)       | 0<br>(0 - 0)       |
| Gallbladder and biliary tract cancer          | 0<br>(0 - 0)      | --               | --                | 0<br>(0 - 0)       | 0<br>(0 - 0)       | 0<br>(0 - 0)       |
| Pancreatic cancer                             | 2<br>(1 - 2)      | --               | --                | 0<br>(0 - 0)       | 1<br>(0 - 1)       | 1<br>(1 - 1)       |
| Malignant skin melanoma                       | 0<br>(0 - 0)      | --               | --                | 0<br>(0 - 0)       | 0<br>(0 - 0)       | 0<br>(0 - 0)       |
| Non-melanoma skin cancer                      | 1<br>(0 - 1)      | --               | --                | 0<br>(0 - 0)       | 0<br>(0 - 0)       | 0<br>(0 - 0)       |
| Ovarian cancer                                | --                | --               | --                | --                 | --                 | --                 |
| Testicular cancer                             | 0<br>(0 - 0)      | --               | --                | 0<br>(0 - 0)       | 0<br>(0 - 0)       | 0<br>(0 - 0)       |
| Kidney cancer                                 | 0<br>(0 - 0)      | 0<br>(0 - 0)     | 0<br>(0 - 0)      | 0<br>(0 - 0)       | 0<br>(0 - 0)       | 0<br>(0 - 0)       |
| Bladder cancer                                | 0<br>(0 - 0)      | --               | --                | 0<br>(0 - 0)       | 0<br>(0 - 0)       | 0<br>(0 - 0)       |
| Brain and nervous system cancer               | 1<br>(0 - 2)      | 0<br>(0 - 0)     | 0<br>(0 - 0)      | 1<br>(0 - 1)       | 0<br>(0 - 1)       | 0<br>(0 - 0)       |
| Thyroid cancer                                | 0<br>(0 - 0)      | --               | 0<br>(0 - 0)      | 0<br>(0 - 0)       | 0<br>(0 - 0)       | 0<br>(0 - 0)       |
| Mesothelioma                                  | 0<br>(0 - 0)      | --               | --                | 0<br>(0 - 0)       | 0<br>(0 - 0)       | 0<br>(0 - 0)       |
| Hodgkin lymphoma                              | 0<br>(0 - 0)      | 0<br>(0 - 0)     | 0<br>(0 - 0)      | 0<br>(0 - 0)       | 0<br>(0 - 0)       | 0<br>(0 - 0)       |
| Non-Hodgkin lymphoma                          | 1<br>(0 - 1)      | 0<br>(0 - 0)     | 0<br>(0 - 0)      | 0<br>(0 - 0)       | 0<br>(0 - 0)       | 0<br>(0 - 0)       |
| Multiple myeloma                              | 1<br>(0 - 1)      | --               | --                | 0<br>(0 - 0)       | 0<br>(0 - 0)       | 0<br>(0 - 0)       |
| Leukemia                                      | 2<br>(2 - 3)      | 0<br>(0 - 0)     | 0<br>(0 - 0)      | 1<br>(1 - 1)       | 1<br>(0 - 1)       | 0<br>(0 - 0)       |
| Other neoplasms                               | 2<br>(1 - 2)      | 0<br>(0 - 0)     | 0<br>(0 - 0)      | 1<br>(0 - 1)       | 0<br>(0 - 1)       | 0<br>(0 - 0)       |
| Cardiovascular diseases                       | 108<br>(82 - 136) | 1<br>(0 - 1)     | 0<br>(0 - 1)      | 17<br>(11 - 24)    | 37<br>(26 - 49)    | 53<br>(43 - 63)    |
| Rheumatic heart disease                       | 1<br>(1 - 2)      | 0<br>(0 - 0)     | 0<br>(0 - 0)      | 0<br>(0 - 1)       | 0<br>(0 - 1)       | 0<br>(0 - 1)       |
| Ischemic heart disease                        | 66<br>(49 - 85)   | 0<br>(0 - 0)     | 0<br>(0 - 0)      | 11<br>(7 - 16)     | 25<br>(17 - 34)    | 30<br>(24 - 37)    |
| Cerebrovascular disease                       | 29<br>(21 - 37)   | 0<br>(0 - 0)     | 0<br>(0 - 0)      | 3<br>(2 - 4)       | 8<br>(5 - 11)      | 17<br>(13 - 22)    |
| Ischemic stroke                               | 12<br>(8 - 17)    | 0<br>(0 - 0)     | 0<br>(0 - 0)      | 0<br>(0 - 1)       | 2<br>(1 - 4)       | 9<br>(6 - 13)      |
| Hemorrhagic stroke                            | 16<br>(11 - 23)   | 0<br>(0 - 0)     | 0<br>(0 - 0)      | 2<br>(1 - 3)       | 6<br>(4 - 8)       | 8<br>(5 - 11)      |
| Hypertensive heart disease                    | 3<br>(2 - 5)      | 0<br>(0 - 0)     | 0<br>(0 - 0)      | 0<br>(0 - 1)       | 1<br>(1 - 2)       | 2<br>(1 - 3)       |
| Cardiomyopathy and myocarditis                | 2<br>(1 - 3)      | 0<br>(0 - 0)     | 0<br>(0 - 0)      | 1<br>(0 - 1)       | 1<br>(0 - 1)       | 0<br>(0 - 1)       |
| Atrial fibrillation and flutter               | 1<br>(0 - 1)      | --               | --                | 0<br>(0 - 0)       | 0<br>(0 - 1)       | 1<br>(0 - 1)       |
| Aortic aneurysm                               | 1<br>(1 - 2)      | --               | --                | 0<br>(0 - 0)       | 0<br>(0 - 1)       | 1<br>(0 - 1)       |
| Peripheral vascular disease                   | 1<br>(0 - 1)      | --               | --                | 0<br>(0 - 0)       | 0<br>(0 - 1)       | 0<br>(0 - 1)       |
| Endocarditis                                  | 1<br>(1 - 2)      | 0<br>(0 - 0)     | 0<br>(0 - 0)      | 0<br>(0 - 1)       | 0<br>(0 - 1)       | 0<br>(0 - 1)       |
| Other cardiovascular and circulatory diseases | 4<br>(3 - 6)      | 0<br>(0 - 0)     | 0<br>(0 - 0)      | 1<br>(0 - 1)       | 1<br>(1 - 2)       | 2<br>(1 - 3)       |
| Chronic respiratory diseases                  | 40<br>(29 - 51)   | 0<br>(0 - 1)     | 0<br>(0 - 0)      | 2<br>(1 - 4)       | 10<br>(7 - 15)     | 27<br>(20 - 33)    |
| Chronic obstructive pulmonary disease         | 15<br>(10 - 21)   | 0<br>(0 - 0)     | 0<br>(0 - 0)      | 1<br>(0 - 1)       | 3<br>(2 - 4)       | 11<br>(8 - 16)     |



Web Table 31- Tonga deaths with 95% UI by age, sex, and cause in 2013

| Cause                                               | Males, All Ages | Males, 0-4 Years | Males, 5-14 Years | Males, 15-49 Years | Males, 50-69 Years | Males, 70-80 Years |
|-----------------------------------------------------|-----------------|------------------|-------------------|--------------------|--------------------|--------------------|
| Pneumoconiosis                                      | 4<br>(2 - 6)    | 0<br>(0 - 0)     | 0<br>(0 - 0)      | 0<br>(0 - 0)       | 1<br>(1 - 2)       | 2<br>(1 - 4)       |
| Silicosis                                           | 1<br>(0 - 2)    | 0<br>(0 - 0)     | 0<br>(0 - 0)      | 0<br>(0 - 0)       | 0<br>(0 - 1)       | 1<br>(0 - 2)       |
| Asbestosis                                          | 0<br>(0 - 1)    | 0<br>(0 - 0)     | 0<br>(0 - 0)      | 0<br>(0 - 0)       | 0<br>(0 - 0)       | 0<br>(0 - 0)       |
| Coal workers pneumoconiosis                         | 0<br>(0 - 1)    | 0<br>(0 - 0)     | 0<br>(0 - 0)      | 0<br>(0 - 0)       | 0<br>(0 - 0)       | 0<br>(0 - 0)       |
| Other pneumoconiosis                                | 2<br>(1 - 3)    | 0<br>(0 - 0)     | 0<br>(0 - 0)      | 0<br>(0 - 0)       | 1<br>(0 - 1)       | 1<br>(1 - 2)       |
| Asthma                                              | 16<br>(9 - 22)  | 0<br>(0 - 0)     | 0<br>(0 - 0)      | 1<br>(1 - 2)       | 5<br>(3 - 7)       | 9<br>(5 - 13)      |
| Interstitial lung disease and pulmonary sarcoidosis | 2<br>(1 - 4)    | 0<br>(0 - 0)     | 0<br>(0 - 0)      | 0<br>(0 - 0)       | 1<br>(0 - 1)       | 1<br>(1 - 3)       |
| Other chronic respiratory diseases                  | 3<br>(2 - 5)    | 0<br>(0 - 0)     | 0<br>(0 - 0)      | 0<br>(0 - 0)       | 1<br>(0 - 1)       | 2<br>(1 - 4)       |
| Cirrhosis                                           | 8<br>(6 - 11)   | 0<br>(0 - 0)     | 0<br>(0 - 0)      | 4<br>(2 - 5)       | 3<br>(2 - 4)       | 1<br>(1 - 2)       |
| Cirrhosis due to hepatitis B                        | 4<br>(3 - 6)    | 0<br>(0 - 0)     | 0<br>(0 - 0)      | 2<br>(1 - 3)       | 2<br>(1 - 2)       | 1<br>(0 - 1)       |
| Cirrhosis due to hepatitis C                        | 1<br>(0 - 2)    | 0<br>(0 - 0)     | 0<br>(0 - 0)      | 1<br>(0 - 1)       | 1<br>(0 - 1)       | 0<br>(0 - 1)       |
| Cirrhosis due to alcohol use                        | 2<br>(1 - 3)    | --               | --                | 1<br>(0 - 1)       | 1<br>(0 - 1)       | 0<br>(0 - 1)       |
| Cirrhosis due to other causes                       | 1<br>(0 - 1)    | 0<br>(0 - 0)     | 0<br>(0 - 0)      | 0<br>(0 - 1)       | 0<br>(0 - 0)       | 0<br>(0 - 0)       |
| Digestive diseases                                  | 19<br>(14 - 24) | 0<br>(0 - 0)     | 0<br>(0 - 0)      | 4<br>(3 - 6)       | 6<br>(4 - 8)       | 8<br>(6 - 11)      |
| Peptic ulcer disease                                | 4<br>(3 - 6)    | 0<br>(0 - 0)     | 0<br>(0 - 0)      | 1<br>(0 - 1)       | 1<br>(1 - 2)       | 2<br>(1 - 3)       |
| Gastritis and duodenitis                            | 0<br>(0 - 1)    | 0<br>(0 - 0)     | 0<br>(0 - 0)      | 0<br>(0 - 0)       | 0<br>(0 - 0)       | 0<br>(0 - 0)       |
| Appendicitis                                        | 1<br>(0 - 1)    | 0<br>(0 - 0)     | 0<br>(0 - 0)      | 0<br>(0 - 1)       | 0<br>(0 - 0)       | 0<br>(0 - 1)       |
| Paralytic ileus and intestinal obstruction          | 5<br>(3 - 7)    | 0<br>(0 - 0)     | 0<br>(0 - 0)      | 1<br>(1 - 2)       | 1<br>(1 - 2)       | 2<br>(1 - 4)       |
| Inguinal, femoral, and abdominal hernia             | 1<br>(0 - 1)    | 0<br>(0 - 0)     | 0<br>(0 - 0)      | 0<br>(0 - 0)       | 0<br>(0 - 0)       | 0<br>(0 - 1)       |
| Inflammatory bowel disease                          | 0<br>(0 - 1)    | 0<br>(0 - 0)     | 0<br>(0 - 0)      | 0<br>(0 - 0)       | 0<br>(0 - 0)       | 0<br>(0 - 0)       |
| Vascular intestinal disorders                       | 0<br>(0 - 0)    | 0<br>(0 - 0)     | 0<br>(0 - 0)      | 0<br>(0 - 0)       | 0<br>(0 - 0)       | 0<br>(0 - 0)       |
| Gallbladder and biliary diseases                    | 3<br>(2 - 4)    | 0<br>(0 - 0)     | 0<br>(0 - 0)      | 0<br>(0 - 1)       | 1<br>(0 - 1)       | 1<br>(1 - 2)       |
| Pancreatitis                                        | 0<br>(0 - 1)    | 0<br>(0 - 0)     | 0<br>(0 - 0)      | 0<br>(0 - 0)       | 0<br>(0 - 0)       | 0<br>(0 - 0)       |
| Other digestive diseases                            | 4<br>(2 - 7)    | 0<br>(0 - 0)     | 0<br>(0 - 0)      | 1<br>(0 - 2)       | 2<br>(1 - 3)       | 2<br>(1 - 2)       |
| Neurological disorders                              | 9<br>(7 - 11)   | 0<br>(0 - 0)     | 0<br>(0 - 0)      | 1<br>(0 - 1)       | 1<br>(0 - 1)       | 7<br>(6 - 9)       |
| Alzheimer disease and other dementias               | 7<br>(6 - 9)    | --               | --                | 0<br>(0 - 0)       | 1<br>(0 - 1)       | 7<br>(5 - 9)       |
| Parkinson disease                                   | 0<br>(0 - 0)    | --               | --                | 0<br>(0 - 0)       | 0<br>(0 - 0)       | 0<br>(0 - 0)       |
| Epilepsy                                            | 1<br>(0 - 1)    | 0<br>(0 - 0)     | 0<br>(0 - 0)      | 0<br>(0 - 1)       | 0<br>(0 - 0)       | 0<br>(0 - 0)       |
| Multiple sclerosis                                  | 0<br>(0 - 0)    | --               | --                | 0<br>(0 - 0)       | 0<br>(0 - 0)       | 0<br>(0 - 0)       |
| Other neurological disorders                        | 1<br>(0 - 1)    | 0<br>(0 - 0)     | 0<br>(0 - 0)      | 0<br>(0 - 0)       | 0<br>(0 - 0)       | 0<br>(0 - 1)       |
| Mental and substance use disorders                  | 1<br>(0 - 1)    | 0<br>(0 - 0)     | 0<br>(0 - 0)      | 0<br>(0 - 1)       | 0<br>(0 - 0)       | 0<br>(0 - 0)       |
| Schizophrenia                                       | 0<br>(0 - 0)    | --               | --                | 0<br>(0 - 0)       | 0<br>(0 - 0)       | 0<br>(0 - 0)       |
| Alcohol use disorders                               | 1<br>(0 - 1)    | --               | --                | 0<br>(0 - 1)       | 0<br>(0 - 0)       | 0<br>(0 - 0)       |
| Drug use disorders                                  | 0<br>(0 - 0)    | 0<br>(0 - 0)     | --                | 0<br>(0 - 0)       | 0<br>(0 - 0)       | 0<br>(0 - 0)       |
| Opioid use disorders                                | 0<br>(0 - 0)    | 0<br>(0 - 0)     | --                | 0<br>(0 - 0)       | 0<br>(0 - 0)       | 0<br>(0 - 0)       |
| Cocaine use disorders                               | 0<br>(0 - 0)    | 0<br>(0 - 0)     | --                | 0<br>(0 - 0)       | 0<br>(0 - 0)       | 0<br>(0 - 0)       |
| Amphetamine use disorders                           | 0<br>(0 - 0)    | 0<br>(0 - 0)     | --                | 0<br>(0 - 0)       | 0<br>(0 - 0)       | 0<br>(0 - 0)       |
| Other drug use disorders                            | 0<br>(0 - 0)    | 0<br>(0 - 0)     | --                | 0<br>(0 - 0)       | 0<br>(0 - 0)       | 0<br>(0 - 0)       |
| Eating disorders                                    | 0<br>(0 - 0)    | --               | 0<br>(0 - 0)      | 0<br>(0 - 0)       | --                 | --                 |
| Anorexia nervosa                                    | 0<br>(0 - 0)    | --               | 0<br>(0 - 0)      | 0<br>(0 - 0)       | --                 | --                 |

Web Table 31- Tonga deaths with 95% UI by age, sex, and cause in 2013

| Cause                                               | Males, All Ages | Males, 0-4 Years | Males, 5-14 Years | Males, 15-49 Years | Males, 50-69 Years | Males, 70-80 Years |
|-----------------------------------------------------|-----------------|------------------|-------------------|--------------------|--------------------|--------------------|
| Diabetes, urogenital, blood, and endocrine diseases | 45<br>(32 - 60) | 1<br>(0 - 1)     | 0<br>(0 - 0)      | 5<br>(3 - 8)       | 18<br>(12 - 25)    | 21<br>(16 - 27)    |
| Diabetes mellitus                                   | 36<br>(26 - 49) | 0<br>(0 - 0)     | 0<br>(0 - 0)      | 4<br>(2 - 6)       | 15<br>(10 - 22)    | 17<br>(13 - 23)    |
| Acute glomerulonephritis                            | 0<br>(0 - 0)    | 0<br>(0 - 0)     | 0<br>(0 - 0)      | 0<br>(0 - 0)       | 0<br>(0 - 0)       | 0<br>(0 - 0)       |
| Chronic kidney disease                              | 1<br>(1 - 3)    | 0<br>(0 - 0)     | 0<br>(0 - 0)      | 0<br>(0 - 1)       | 0<br>(0 - 1)       | 0<br>(0 - 1)       |
| Chronic kidney disease due to diabetes mellitus     | 0<br>(0 - 1)    | 0<br>(0 - 0)     | 0<br>(0 - 0)      | 0<br>(0 - 0)       | 0<br>(0 - 0)       | 0<br>(0 - 0)       |
| Chronic kidney disease due to hypertension          | 1<br>(0 - 1)    | 0<br>(0 - 0)     | 0<br>(0 - 0)      | 0<br>(0 - 0)       | 0<br>(0 - 0)       | 0<br>(0 - 1)       |
| Chronic kidney disease due to glomerulonephritis    | 0<br>(0 - 0)    | 0<br>(0 - 0)     | 0<br>(0 - 0)      | 0<br>(0 - 0)       | 0<br>(0 - 0)       | 0<br>(0 - 0)       |
| Chronic kidney disease due to other causes          | 0<br>(0 - 1)    | 0<br>(0 - 0)     | 0<br>(0 - 0)      | 0<br>(0 - 0)       | 0<br>(0 - 0)       | 0<br>(0 - 0)       |
| Urinary diseases and male infertility               | 3<br>(2 - 4)    | 0<br>(0 - 0)     | 0<br>(0 - 0)      | 1<br>(0 - 1)       | 1<br>(0 - 1)       | 2<br>(1 - 3)       |
| Interstitial nephritis and urinary tract infections | 1<br>(1 - 2)    | 0<br>(0 - 0)     | 0<br>(0 - 0)      | 0<br>(0 - 0)       | 0<br>(0 - 0)       | 1<br>(0 - 1)       |
| Urolithiasis                                        | 0<br>(0 - 0)    | --               | 0<br>(0 - 0)      | 0<br>(0 - 0)       | 0<br>(0 - 0)       | 0<br>(0 - 0)       |
| Other urinary diseases                              | 2<br>(1 - 3)    | 0<br>(0 - 0)     | 0<br>(0 - 0)      | 0<br>(0 - 1)       | 0<br>(0 - 1)       | 1<br>(1 - 2)       |
| Gynecological diseases                              | --              | --               | --                | --                 | --                 | --                 |
| Uterine fibroids                                    | --              | --               | --                | --                 | --                 | --                 |
| Polycystic ovarian syndrome                         | --              | --               | --                | --                 | --                 | --                 |
| Endometriosis                                       | --              | --               | --                | --                 | --                 | --                 |
| Genital prolapse                                    | --              | --               | --                | --                 | --                 | --                 |
| Other gynecological diseases                        | --              | --               | --                | --                 | --                 | --                 |
| Hemoglobinopathies and hemolytic anemias            | 1<br>(0 - 1)    | 0<br>(0 - 0)     | 0<br>(0 - 0)      | 0<br>(0 - 0)       | 0<br>(0 - 0)       | 0<br>(0 - 0)       |
| Thalassemias                                        | 0<br>(0 - 1)    | 0<br>(0 - 0)     | 0<br>(0 - 0)      | 0<br>(0 - 0)       | 0<br>(0 - 0)       | 0<br>(0 - 0)       |
| Sickle cell disorders                               | 0<br>(0 - 0)    | 0<br>(0 - 0)     | 0<br>(0 - 0)      | 0<br>(0 - 0)       | 0<br>(0 - 0)       | 0<br>(0 - 0)       |
| G6PD deficiency                                     | 0<br>(0 - 0)    | 0<br>(0 - 0)     | 0<br>(0 - 0)      | 0<br>(0 - 0)       | 0<br>(0 - 0)       | 0<br>(0 - 0)       |
| Other hemoglobinopathies and hemolytic anemias      | 0<br>(0 - 1)    | 0<br>(0 - 0)     | 0<br>(0 - 0)      | 0<br>(0 - 0)       | 0<br>(0 - 0)       | 0<br>(0 - 0)       |
| Endocrine, metabolic, blood, and immune disorders   | 3<br>(2 - 6)    | 0<br>(0 - 1)     | 0<br>(0 - 0)      | 1<br>(0 - 1)       | 1<br>(1 - 2)       | 1<br>(1 - 2)       |
| Musculoskeletal disorders                           | 0<br>(0 - 1)    | --               | 0<br>(0 - 0)      | 0<br>(0 - 0)       | 0<br>(0 - 0)       | 0<br>(0 - 0)       |
| Rheumatoid arthritis                                | 0<br>(0 - 0)    | --               | 0<br>(0 - 0)      | 0<br>(0 - 0)       | 0<br>(0 - 0)       | 0<br>(0 - 0)       |
| Other musculoskeletal disorders                     | 0<br>(0 - 1)    | --               | 0<br>(0 - 0)      | 0<br>(0 - 0)       | 0<br>(0 - 0)       | 0<br>(0 - 0)       |
| Other non-communicable diseases                     | 9<br>(5 - 14)   | 6<br>(3 - 10)    | 1<br>(0 - 1)      | 1<br>(1 - 1)       | 1<br>(0 - 1)       | 1<br>(1 - 1)       |
| Congenital anomalies                                | 8<br>(4 - 12)   | 5<br>(3 - 10)    | 1<br>(0 - 1)      | 1<br>(0 - 1)       | 0<br>(0 - 0)       | 0<br>(0 - 1)       |
| Neural tube defects                                 | 0<br>(0 - 0)    | 0<br>(0 - 0)     | 0<br>(0 - 0)      | 0<br>(0 - 0)       | 0<br>(0 - 0)       | 0<br>(0 - 0)       |
| Congenital heart anomalies                          | 1<br>(1 - 3)    | 1<br>(0 - 2)     | 0<br>(0 - 0)      | 0<br>(0 - 0)       | 0<br>(0 - 0)       | 0<br>(0 - 0)       |
| Cleft lip and cleft palate                          | 0<br>(0 - 0)    | 0<br>(0 - 0)     | --                | --                 | --                 | --                 |
| Down syndrome                                       | 0<br>(0 - 1)    | 0<br>(0 - 1)     | 0<br>(0 - 0)      | 0<br>(0 - 0)       | 0<br>(0 - 0)       | 0<br>(0 - 0)       |
| Chromosomal unbalanced rearrangements               | 0<br>(0 - 1)    | 0<br>(0 - 1)     | 0<br>(0 - 0)      | 0<br>(0 - 0)       | 0<br>(0 - 0)       | 0<br>(0 - 0)       |
| Other congenital anomalies                          | 5<br>(3 - 9)    | 4<br>(2 - 7)     | 0<br>(0 - 1)      | 1<br>(0 - 1)       | 0<br>(0 - 0)       | 0<br>(0 - 0)       |
| Skin and subcutaneous diseases                      | 1<br>(1 - 2)    | 0<br>(0 - 0)     | 0<br>(0 - 0)      | 0<br>(0 - 0)       | 0<br>(0 - 0)       | 1<br>(0 - 1)       |
| Cellulitis                                          | 0<br>(0 - 0)    | 0<br>(0 - 0)     | 0<br>(0 - 0)      | 0<br>(0 - 0)       | 0<br>(0 - 0)       | 0<br>(0 - 0)       |
| Pyoderma                                            | 1<br>(0 - 1)    | 0<br>(0 - 0)     | 0<br>(0 - 0)      | 0<br>(0 - 0)       | 0<br>(0 - 0)       | 0<br>(0 - 1)       |
| Decubitus ulcer                                     | 0<br>(0 - 0)    | 0<br>(0 - 0)     | 0<br>(0 - 0)      | 0<br>(0 - 0)       | 0<br>(0 - 0)       | 0<br>(0 - 0)       |
| Other skin and subcutaneous diseases                | 0<br>(0 - 0)    | 0<br>(0 - 0)     | 0<br>(0 - 0)      | 0<br>(0 - 0)       | 0<br>(0 - 0)       | 0<br>(0 - 0)       |

Web Table 31- Tonga deaths with 95% UI by age, sex, and cause in 2013

| Cause                                           | Males, All Ages | Males, 0-4 Years | Males, 5-14 Years | Males, 15-49 Years | Males, 50-69 Years | Males, 70-80 Years |
|-------------------------------------------------|-----------------|------------------|-------------------|--------------------|--------------------|--------------------|
| Sudden infant death syndrome                    | 0<br>(0 - 1)    | 0<br>(0 - 1)     | --                | --                 | --                 | --                 |
| Injuries                                        | 44<br>(32 - 59) | 4<br>(2 - 8)     | 3<br>(2 - 4)      | 24<br>(16 - 33)    | 7<br>(4 - 10)      | 7<br>(5 - 9)       |
| Transport injuries                              | 11<br>(8 - 15)  | 1<br>(0 - 1)     | 1<br>(1 - 1)      | 7<br>(5 - 10)      | 2<br>(1 - 2)       | 1<br>(1 - 2)       |
| Road injuries                                   | 11<br>(7 - 14)  | 1<br>(0 - 1)     | 1<br>(1 - 1)      | 6<br>(4 - 9)       | 2<br>(1 - 2)       | 1<br>(1 - 2)       |
| Pedestrian road injuries                        | 2<br>(1 - 3)    | 0<br>(0 - 0)     | 0<br>(0 - 0)      | 1<br>(1 - 2)       | 0<br>(0 - 1)       | 0<br>(0 - 0)       |
| Cyclist road injuries                           | 0<br>(0 - 1)    | 0<br>(0 - 0)     | 0<br>(0 - 0)      | 0<br>(0 - 0)       | 0<br>(0 - 0)       | 0<br>(0 - 0)       |
| Motorcyclist road injuries                      | 2<br>(1 - 3)    | 0<br>(0 - 0)     | 0<br>(0 - 0)      | 1<br>(1 - 2)       | 0<br>(0 - 0)       | 0<br>(0 - 0)       |
| Motor vehicle road injuries                     | 6<br>(4 - 9)    | 0<br>(0 - 1)     | 0<br>(0 - 1)      | 4<br>(3 - 5)       | 1<br>(1 - 1)       | 1<br>(1 - 1)       |
| Other road injuries                             | 0<br>(0 - 0)    | 0<br>(0 - 0)     | 0<br>(0 - 0)      | 0<br>(0 - 0)       | 0<br>(0 - 0)       | 0<br>(0 - 0)       |
| Other transport injuries                        | 1<br>(0 - 2)    | 0<br>(0 - 0)     | 0<br>(0 - 0)      | 1<br>(0 - 1)       | 0<br>(0 - 0)       | 0<br>(0 - 0)       |
| Unintentional injuries                          | 25<br>(16 - 36) | 3<br>(1 - 7)     | 2<br>(1 - 3)      | 11<br>(7 - 18)     | 4<br>(2 - 6)       | 5<br>(3 - 7)       |
| Falls                                           | 1<br>(1 - 2)    | 0<br>(0 - 0)     | 0<br>(0 - 0)      | 0<br>(0 - 1)       | 0<br>(0 - 0)       | 0<br>(0 - 1)       |
| Drowning                                        | 7<br>(3 - 11)   | 1<br>(0 - 2)     | 1<br>(0 - 1)      | 4<br>(2 - 6)       | 1<br>(0 - 2)       | 0<br>(0 - 0)       |
| Fire, heat, and hot substances                  | 3<br>(1 - 5)    | 0<br>(0 - 1)     | 0<br>(0 - 0)      | 1<br>(0 - 2)       | 1<br>(0 - 1)       | 1<br>(0 - 1)       |
| Poisonings                                      | 1<br>(0 - 2)    | 0<br>(0 - 0)     | 0<br>(0 - 0)      | 0<br>(0 - 1)       | 0<br>(0 - 0)       | 0<br>(0 - 1)       |
| Exposure to mechanical forces                   | 2<br>(0 - 13)   | 0<br>(0 - 4)     | 0<br>(0 - 1)      | 1<br>(0 - 4)       | 0<br>(0 - 2)       | 0<br>(0 - 1)       |
| Unintentional firearm injuries                  | 0<br>(0 - 0)    | 0<br>(0 - 0)     | 0<br>(0 - 0)      | 0<br>(0 - 0)       | 0<br>(0 - 0)       | 0<br>(0 - 0)       |
| Unintentional suffocation                       | 1<br>(0 - 13)   | 0<br>(0 - 4)     | 0<br>(0 - 1)      | 0<br>(0 - 4)       | 0<br>(0 - 2)       | 0<br>(0 - 1)       |
| Other exposure to mechanical forces             | 0<br>(0 - 1)    | 0<br>(0 - 0)     | 0<br>(0 - 0)      | 0<br>(0 - 0)       | 0<br>(0 - 0)       | 0<br>(0 - 0)       |
| Adverse effects of medical treatment            | 2<br>(1 - 3)    | 0<br>(0 - 1)     | 0<br>(0 - 0)      | 1<br>(0 - 1)       | 0<br>(0 - 1)       | 1<br>(0 - 1)       |
| Animal contact                                  | 0<br>(0 - 0)    | 0<br>(0 - 0)     | 0<br>(0 - 0)      | 0<br>(0 - 0)       | 0<br>(0 - 0)       | 0<br>(0 - 0)       |
| Venomous animal contact                         | 0<br>(0 - 0)    | 0<br>(0 - 0)     | 0<br>(0 - 0)      | 0<br>(0 - 0)       | 0<br>(0 - 0)       | 0<br>(0 - 0)       |
| Non-venomous animal contact                     | 0<br>(0 - 0)    | 0<br>(0 - 0)     | 0<br>(0 - 0)      | 0<br>(0 - 0)       | 0<br>(0 - 0)       | 0<br>(0 - 0)       |
| Foreign body                                    | 4<br>(2 - 6)    | 1<br>(0 - 2)     | 0<br>(0 - 0)      | 1<br>(0 - 2)       | 1<br>(0 - 1)       | 2<br>(1 - 2)       |
| Pulmonary aspiration and foreign body in airway | 4<br>(2 - 6)    | 1<br>(0 - 2)     | 0<br>(0 - 0)      | 1<br>(0 - 2)       | 1<br>(0 - 1)       | 2<br>(1 - 2)       |
| Foreign body in other body part                 | 0<br>(0 - 0)    | 0<br>(0 - 0)     | 0<br>(0 - 0)      | 0<br>(0 - 0)       | 0<br>(0 - 0)       | 0<br>(0 - 0)       |
| Other unintentional injuries                    | 5<br>(4 - 7)    | 0<br>(0 - 0)     | 0<br>(0 - 0)      | 3<br>(2 - 5)       | 1<br>(0 - 1)       | 1<br>(1 - 1)       |
| Self-harm and interpersonal violence            | 8<br>(4 - 15)   | 0<br>(0 - 0)     | 0<br>(0 - 0)      | 6<br>(3 - 12)      | 1<br>(1 - 2)       | 1<br>(0 - 1)       |
| Self-harm                                       | 4<br>(3 - 7)    | --               | 0<br>(0 - 0)      | 3<br>(2 - 5)       | 1<br>(0 - 1)       | 1<br>(0 - 1)       |
| Interpersonal violence                          | 3<br>(1 - 10)   | 0<br>(0 - 0)     | 0<br>(0 - 0)      | 2<br>(1 - 8)       | 0<br>(0 - 1)       | 0<br>(0 - 0)       |
| Assault by firearm                              | 1<br>(0 - 4)    | 0<br>(0 - 0)     | 0<br>(0 - 0)      | 1<br>(0 - 4)       | 0<br>(0 - 1)       | 0<br>(0 - 0)       |
| Assault by sharp object                         | 1<br>(0 - 4)    | 0<br>(0 - 0)     | 0<br>(0 - 0)      | 1<br>(0 - 3)       | 0<br>(0 - 0)       | 0<br>(0 - 0)       |
| Assault by other means                          | 1<br>(0 - 2)    | 0<br>(0 - 0)     | 0<br>(0 - 0)      | 0<br>(0 - 1)       | 0<br>(0 - 0)       | 0<br>(0 - 0)       |

Web Table 31- Tonga deaths with 95% UI by age, sex, and cause in 2013

| Cause                                                             | Females, All Ages  | Females, 0-4 Years | Females, 5-14 Years | Females, 15-49 Years | Females, 50-69 Years | Females, 70-80 Years |
|-------------------------------------------------------------------|--------------------|--------------------|---------------------|----------------------|----------------------|----------------------|
| All causes                                                        | 364<br>(285 - 441) | 28<br>(16 - 48)    | 5<br>(3 - 6)        | 38<br>(26 - 53)      | 75<br>(51 - 102)     | 219<br>(173 - 249)   |
| Communicable, maternal, neonatal, and nutritional diseases        | 65<br>(49 - 84)    | 21<br>(12 - 35)    | 2<br>(1 - 2)        | 8<br>(6 - 10)        | 6<br>(4 - 9)         | 28<br>(20 - 39)      |
| HIV/AIDS and tuberculosis                                         | 3<br>(2 - 4)       | 0<br>(0 - 0)       | 0<br>(0 - 0)        | 1<br>(1 - 1)         | 1<br>(0 - 1)         | 1<br>(0 - 2)         |
| Tuberculosis                                                      | 2<br>(1 - 4)       | 0<br>(0 - 0)       | 0<br>(0 - 0)        | 1<br>(0 - 1)         | 1<br>(0 - 1)         | 1<br>(0 - 2)         |
| HIV/AIDS                                                          | 1<br>(1 - 1)       | 0<br>(0 - 0)       | 0<br>(0 - 0)        | 1<br>(0 - 1)         | 0<br>(0 - 0)         | 0<br>(0 - 0)         |
| HIV/AIDS resulting in mycobacterial infection                     | 0<br>(0 - 0)       | 0<br>(0 - 0)       | 0<br>(0 - 0)        | 0<br>(0 - 0)         | 0<br>(0 - 0)         | 0<br>(0 - 0)         |
| HIV/AIDS resulting in other diseases                              | 1<br>(1 - 1)       | 0<br>(0 - 0)       | 0<br>(0 - 0)        | 1<br>(0 - 1)         | 0<br>(0 - 0)         | 0<br>(0 - 0)         |
| Diarrhea, lower respiratory, and other common infectious diseases | 36<br>(26 - 49)    | 7<br>(3 - 13)      | 1<br>(1 - 2)        | 2<br>(2 - 4)         | 4<br>(2 - 6)         | 22<br>(15 - 32)      |
| Diarrheal diseases                                                | 2<br>(1 - 4)       | 0<br>(0 - 1)       | 0<br>(0 - 0)        | 0<br>(0 - 0)         | 0<br>(0 - 0)         | 2<br>(1 - 3)         |
| Intestinal infectious diseases                                    | 1<br>(0 - 2)       | 0<br>(0 - 1)       | 0<br>(0 - 0)        | 0<br>(0 - 0)         | 0<br>(0 - 0)         | 0<br>(0 - 0)         |
| Typhoid fever                                                     | 1<br>(0 - 1)       | 0<br>(0 - 1)       | 0<br>(0 - 0)        | 0<br>(0 - 0)         | 0<br>(0 - 0)         | 0<br>(0 - 0)         |
| Paratyphoid fever                                                 | 0<br>(0 - 0)       | 0<br>(0 - 0)       | 0<br>(0 - 0)        | 0<br>(0 - 0)         | 0<br>(0 - 0)         | 0<br>(0 - 0)         |
| Other intestinal infectious diseases                              | 0<br>(0 - 0)       | 0<br>(0 - 0)       | 0<br>(0 - 0)        | 0<br>(0 - 0)         | 0<br>(0 - 0)         | 0<br>(0 - 0)         |
| Lower respiratory infections                                      | 27<br>(19 - 37)    | 3<br>(1 - 6)       | 0<br>(0 - 1)        | 1<br>(1 - 2)         | 3<br>(2 - 4)         | 19<br>(12 - 29)      |
| Upper respiratory infections                                      | 0<br>(0 - 0)       | 0<br>(0 - 0)       | 0<br>(0 - 0)        | 0<br>(0 - 0)         | 0<br>(0 - 0)         | 0<br>(0 - 0)         |
| Otitis media                                                      | 0<br>(0 - 0)       | 0<br>(0 - 0)       | 0<br>(0 - 0)        | 0<br>(0 - 0)         | 0<br>(0 - 0)         | 0<br>(0 - 0)         |
| Meningitis                                                        | 4<br>(2 - 7)       | 2<br>(1 - 4)       | 0<br>(0 - 1)        | 1<br>(0 - 1)         | 1<br>(0 - 1)         | 1<br>(0 - 2)         |
| Pneumococcal meningitis                                           | 2<br>(1 - 2)       | 1<br>(0 - 1)       | 0<br>(0 - 0)        | 0<br>(0 - 0)         | 0<br>(0 - 0)         | 0<br>(0 - 1)         |
| H influenzae type B meningitis                                    | 1<br>(0 - 1)       | 0<br>(0 - 1)       | 0<br>(0 - 0)        | 0<br>(0 - 0)         | 0<br>(0 - 0)         | 0<br>(0 - 0)         |
| Meningococcal meningitis                                          | 1<br>(0 - 1)       | 0<br>(0 - 1)       | 0<br>(0 - 0)        | 0<br>(0 - 0)         | 0<br>(0 - 0)         | 0<br>(0 - 0)         |
| Other meningitis                                                  | 1<br>(1 - 2)       | 1<br>(0 - 1)       | 0<br>(0 - 0)        | 0<br>(0 - 0)         | 0<br>(0 - 0)         | 0<br>(0 - 1)         |
| Encephalitis                                                      | 0<br>(0 - 0)       | 0<br>(0 - 0)       | 0<br>(0 - 0)        | 0<br>(0 - 0)         | 0<br>(0 - 0)         | 0<br>(0 - 0)         |
| Diphtheria                                                        | 0<br>(0 - 0)       | 0<br>(0 - 0)       | 0<br>(0 - 0)        | 0<br>(0 - 0)         | 0<br>(0 - 0)         | 0<br>(0 - 0)         |
| Whooping cough                                                    | 0<br>(0 - 0)       | 0<br>(0 - 0)       | 0<br>(0 - 0)        | 0<br>(0 - 0)         | 0<br>(0 - 0)         | 0<br>(0 - 0)         |
| Tetanus                                                           | 0<br>(0 - 0)       | 0<br>(0 - 0)       | 0<br>(0 - 0)        | 0<br>(0 - 0)         | 0<br>(0 - 0)         | 0<br>(0 - 0)         |
| Measles                                                           | 1<br>(0 - 7)       | 1<br>(0 - 6)       | 0<br>(0 - 1)        | 0<br>(0 - 0)         | 0<br>(0 - 0)         | 0<br>(0 - 0)         |
| Varicella and herpes zoster                                       | 0<br>(0 - 0)       | 0<br>(0 - 0)       | 0<br>(0 - 0)        | 0<br>(0 - 0)         | 0<br>(0 - 0)         | 0<br>(0 - 0)         |
| Neglected tropical diseases and malaria                           | 2<br>(1 - 3)       | 0<br>(0 - 1)       | 0<br>(0 - 0)        | 0<br>(0 - 0)         | 0<br>(0 - 0)         | 1<br>(0 - 2)         |
| Leishmaniasis                                                     | 0<br>(0 - 0)       | 0<br>(0 - 0)       | 0<br>(0 - 0)        | 0<br>(0 - 0)         | 0<br>(0 - 0)         | 0<br>(0 - 0)         |
| Visceral leishmaniasis                                            | 0<br>(0 - 0)       | 0<br>(0 - 0)       | 0<br>(0 - 0)        | 0<br>(0 - 0)         | 0<br>(0 - 0)         | 0<br>(0 - 0)         |
| Cysticercosis                                                     | 0<br>(0 - 0)       | 0<br>(0 - 0)       | 0<br>(0 - 0)        | 0<br>(0 - 0)         | 0<br>(0 - 0)         | 0<br>(0 - 0)         |
| Cystic echinococcosis                                             | 0<br>(0 - 0)       | 0<br>(0 - 0)       | 0<br>(0 - 0)        | 0<br>(0 - 0)         | 0<br>(0 - 0)         | 0<br>(0 - 0)         |
| Dengue                                                            | 2<br>(1 - 3)       | 0<br>(0 - 1)       | 0<br>(0 - 0)        | 0<br>(0 - 0)         | 0<br>(0 - 0)         | 1<br>(0 - 2)         |
| Rabies                                                            | 0<br>(0 - 0)       | 0<br>(0 - 0)       | 0<br>(0 - 0)        | 0<br>(0 - 0)         | 0<br>(0 - 0)         | 0<br>(0 - 0)         |
| Intestinal nematode infections                                    | 0<br>(0 - 0)       | 0<br>(0 - 0)       | 0<br>(0 - 0)        | 0<br>(0 - 0)         | 0<br>(0 - 0)         | 0<br>(0 - 0)         |
| Ascariasis                                                        | 0<br>(0 - 0)       | 0<br>(0 - 0)       | 0<br>(0 - 0)        | 0<br>(0 - 0)         | 0<br>(0 - 0)         | 0<br>(0 - 0)         |
| Other neglected tropical diseases                                 | 0<br>(0 - 0)       | 0<br>(0 - 0)       | 0<br>(0 - 0)        | 0<br>(0 - 0)         | 0<br>(0 - 0)         | 0<br>(0 - 0)         |
| Maternal disorders                                                | 3<br>(2 - 5)       | --                 | 0<br>(0 - 0)        | 3<br>(2 - 5)         | --                   | --                   |
| Maternal hemorrhage                                               | 1<br>(0 - 1)       | --                 | 0<br>(0 - 0)        | 1<br>(0 - 1)         | --                   | --                   |
| Maternal sepsis and other maternal infections                     | 0<br>(0 - 0)       | --                 | 0<br>(0 - 0)        | 0<br>(0 - 0)         | --                   | --                   |

Web Table 31- Tonga deaths with 95% UI by age, sex, and cause in 2013

| Cause                                                            | Females, All Ages  | Females, 0-4 Years | Females, 5-14 Years | Females, 15-49 Years | Females, 50-69 Years | Females, 70-80 Years |
|------------------------------------------------------------------|--------------------|--------------------|---------------------|----------------------|----------------------|----------------------|
| Maternal hypertensive disorders                                  | 0<br>(0 - 0)       | --                 | 0<br>(0 - 0)        | 0<br>(0 - 0)         | --                   | --                   |
| Maternal obstructed labor                                        | 0<br>(0 - 0)       | --                 | 0<br>(0 - 0)        | 0<br>(0 - 0)         | --                   | --                   |
| Maternal abortive outcome                                        | 0<br>(0 - 1)       | --                 | 0<br>(0 - 0)        | 0<br>(0 - 1)         | --                   | --                   |
| Indirect maternal deaths                                         | 0<br>(0 - 0)       | --                 | 0<br>(0 - 0)        | 0<br>(0 - 0)         | --                   | --                   |
| Late maternal deaths                                             | 0<br>(0 - 1)       | --                 | 0<br>(0 - 0)        | 0<br>(0 - 1)         | --                   | --                   |
| Maternal deaths aggravated by HIV/AIDS                           | 0<br>(0 - 0)       | --                 | --                  | 0<br>(0 - 0)         | --                   | --                   |
| Other maternal disorders                                         | 0<br>(0 - 1)       | --                 | 0<br>(0 - 0)        | 0<br>(0 - 1)         | --                   | --                   |
| Neonatal disorders                                               | 13<br>(7 - 21)     | 13<br>(7 - 21)     | --                  | --                   | --                   | --                   |
| Neonatal preterm birth complications                             | 6<br>(3 - 10)      | 6<br>(3 - 10)      | --                  | --                   | --                   | --                   |
| Neonatal encephalopathy due to birth asphyxia and trauma         | 2<br>(1 - 4)       | 2<br>(1 - 4)       | --                  | --                   | --                   | --                   |
| Neonatal sepsis and other neonatal infections                    | 2<br>(1 - 4)       | 2<br>(1 - 4)       | --                  | --                   | --                   | --                   |
| Hemolytic disease and other neonatal jaundice                    | 0<br>(0 - 0)       | 0<br>(0 - 0)       | --                  | --                   | --                   | --                   |
| Other neonatal disorders                                         | 3<br>(1 - 6)       | 3<br>(1 - 6)       | --                  | --                   | --                   | --                   |
| Nutritional deficiencies                                         | 3<br>(2 - 4)       | 0<br>(0 - 1)       | 0<br>(0 - 0)        | 0<br>(0 - 0)         | 0<br>(0 - 0)         | 2<br>(1 - 3)         |
| Protein-energy malnutrition                                      | 2<br>(1 - 3)       | 0<br>(0 - 1)       | 0<br>(0 - 0)        | 0<br>(0 - 0)         | 0<br>(0 - 0)         | 1<br>(1 - 2)         |
| Iodine deficiency                                                | 0<br>(0 - 0)       | 0<br>(0 - 0)       | 0<br>(0 - 0)        | 0<br>(0 - 0)         | 0<br>(0 - 0)         | 0<br>(0 - 0)         |
| Iron-deficiency anemia                                           | 1<br>(0 - 2)       | 0<br>(0 - 0)       | 0<br>(0 - 0)        | 0<br>(0 - 0)         | 0<br>(0 - 0)         | 1<br>(0 - 1)         |
| Other nutritional deficiencies                                   | 0<br>(0 - 0)       | 0<br>(0 - 0)       | 0<br>(0 - 0)        | 0<br>(0 - 0)         | 0<br>(0 - 0)         | 0<br>(0 - 0)         |
| Other communicable, maternal, neonatal, and nutritional diseases | 5<br>(3 - 7)       | 1<br>(0 - 1)       | 0<br>(0 - 0)        | 1<br>(0 - 1)         | 1<br>(1 - 2)         | 2<br>(1 - 4)         |
| Sexually transmitted diseases excluding HIV                      | 0<br>(0 - 1)       | 0<br>(0 - 0)       | 0<br>(0 - 0)        | 0<br>(0 - 0)         | 0<br>(0 - 0)         | 0<br>(0 - 0)         |
| Syphilis                                                         | 0<br>(0 - 1)       | 0<br>(0 - 0)       | 0<br>(0 - 0)        | 0<br>(0 - 0)         | 0<br>(0 - 0)         | 0<br>(0 - 0)         |
| Chlamydial infection                                             | 0<br>(0 - 0)       | --                 | 0<br>(0 - 0)        | 0<br>(0 - 0)         | 0<br>(0 - 0)         | 0<br>(0 - 0)         |
| Gonococcal infection                                             | 0<br>(0 - 0)       | --                 | 0<br>(0 - 0)        | 0<br>(0 - 0)         | 0<br>(0 - 0)         | 0<br>(0 - 0)         |
| Other sexually transmitted diseases                              | 0<br>(0 - 0)       | --                 | 0<br>(0 - 0)        | 0<br>(0 - 0)         | 0<br>(0 - 0)         | 0<br>(0 - 0)         |
| Hepatitis                                                        | 2<br>(1 - 3)       | 0<br>(0 - 0)       | 0<br>(0 - 0)        | 0<br>(0 - 0)         | 1<br>(1 - 1)         | 1<br>(0 - 1)         |
| Acute hepatitis A                                                | 0<br>(0 - 0)       | 0<br>(0 - 0)       | 0<br>(0 - 0)        | 0<br>(0 - 0)         | 0<br>(0 - 0)         | 0<br>(0 - 0)         |
| Acute hepatitis B                                                | 1<br>(1 - 2)       | 0<br>(0 - 0)       | 0<br>(0 - 0)        | 0<br>(0 - 0)         | 1<br>(0 - 1)         | 1<br>(0 - 1)         |
| Acute hepatitis C                                                | 0<br>(0 - 0)       | --                 | 0<br>(0 - 0)        | 0<br>(0 - 0)         | 0<br>(0 - 0)         | 0<br>(0 - 0)         |
| Acute hepatitis E                                                | 0<br>(0 - 1)       | 0<br>(0 - 0)       | 0<br>(0 - 0)        | 0<br>(0 - 0)         | 0<br>(0 - 0)         | 0<br>(0 - 0)         |
| Other infectious diseases                                        | 2<br>(1 - 5)       | 0<br>(0 - 1)       | 0<br>(0 - 0)        | 0<br>(0 - 1)         | 1<br>(0 - 1)         | 1<br>(0 - 3)         |
| Non-communicable diseases                                        | 276<br>(209 - 342) | 4<br>(2 - 8)       | 2<br>(1 - 2)        | 25<br>(16 - 36)      | 65<br>(44 - 89)      | 180<br>(143 - 208)   |
| Neoplasms                                                        | 54<br>(38 - 72)    | 0<br>(0 - 1)       | 0<br>(0 - 0)        | 9<br>(6 - 14)        | 18<br>(12 - 25)      | 27<br>(18 - 33)      |
| Esophageal cancer                                                | 0<br>(0 - 0)       | --                 | --                  | 0<br>(0 - 0)         | 0<br>(0 - 0)         | 0<br>(0 - 0)         |
| Stomach cancer                                                   | 4<br>(2 - 5)       | --                 | --                  | 0<br>(0 - 1)         | 1<br>(1 - 2)         | 2<br>(1 - 3)         |
| Liver cancer                                                     | 6<br>(4 - 9)       | --                 | 0<br>(0 - 0)        | 1<br>(0 - 1)         | 2<br>(1 - 4)         | 3<br>(2 - 5)         |
| Liver cancer due to hepatitis B                                  | 2<br>(1 - 3)       | --                 | 0<br>(0 - 0)        | 0<br>(0 - 0)         | 1<br>(1 - 2)         | 1<br>(0 - 2)         |
| Liver cancer due to hepatitis C                                  | 2<br>(1 - 4)       | --                 | 0<br>(0 - 0)        | 0<br>(0 - 0)         | 1<br>(0 - 1)         | 1<br>(1 - 2)         |
| Liver cancer due to alcohol use                                  | 0<br>(0 - 1)       | --                 | --                  | 0<br>(0 - 0)         | 0<br>(0 - 0)         | 0<br>(0 - 0)         |
| Liver cancer due to other causes                                 | 1<br>(1 - 2)       | --                 | 0<br>(0 - 0)        | 0<br>(0 - 0)         | 0<br>(0 - 1)         | 0<br>(0 - 1)         |
| Larynx cancer                                                    | 0<br>(0 - 0)       | --                 | --                  | 0<br>(0 - 0)         | 0<br>(0 - 0)         | 0<br>(0 - 0)         |

Web Table 31- Tonga deaths with 95% UI by age, sex, and cause in 2013

| Cause                                         | Females, All Ages | Females, 0-4 Years | Females, 5-14 Years | Females, 15-49 Years | Females, 50-69 Years | Females, 70-80 Years |
|-----------------------------------------------|-------------------|--------------------|---------------------|----------------------|----------------------|----------------------|
| Tracheal, bronchus and lung cancer            | 6<br>(4 - 8)      | --                 | --                  | 0<br>(0 - 1)         | 1<br>(1 - 2)         | 4<br>(3 - 6)         |
| Breast cancer                                 | 17<br>(11 - 23)   | --                 | --                  | 5<br>(3 - 7)         | 7<br>(4 - 10)        | 5<br>(3 - 7)         |
| Cervical cancer                               | 7<br>(3 - 11)     | --                 | --                  | 1<br>(1 - 2)         | 2<br>(1 - 3)         | 4<br>(1 - 6)         |
| Uterine cancer                                | 1<br>(1 - 2)      | --                 | --                  | 0<br>(0 - 0)         | 1<br>(0 - 1)         | 1<br>(0 - 1)         |
| Prostate cancer                               | --                | --                 | --                  | --                   | --                   | --                   |
| Colon and rectum cancer                       | 4<br>(3 - 6)      | --                 | --                  | 0<br>(0 - 1)         | 1<br>(1 - 1)         | 3<br>(2 - 4)         |
| Lip and oral cavity cancer                    | 0<br>(0 - 0)      | --                 | --                  | 0<br>(0 - 0)         | 0<br>(0 - 0)         | 0<br>(0 - 0)         |
| Nasopharynx cancer                            | 0<br>(0 - 0)      | --                 | 0<br>(0 - 0)        | 0<br>(0 - 0)         | 0<br>(0 - 0)         | 0<br>(0 - 0)         |
| Other pharynx cancer                          | 0<br>(0 - 0)      | --                 | --                  | 0<br>(0 - 0)         | 0<br>(0 - 0)         | 0<br>(0 - 0)         |
| Gallbladder and biliary tract cancer          | 0<br>(0 - 0)      | --                 | --                  | 0<br>(0 - 0)         | 0<br>(0 - 0)         | 0<br>(0 - 0)         |
| Pancreatic cancer                             | 2<br>(1 - 2)      | --                 | --                  | 0<br>(0 - 0)         | 1<br>(0 - 1)         | 1<br>(1 - 1)         |
| Malignant skin melanoma                       | 0<br>(0 - 0)      | --                 | --                  | 0<br>(0 - 0)         | 0<br>(0 - 0)         | 0<br>(0 - 0)         |
| Non-melanoma skin cancer                      | 0<br>(0 - 1)      | --                 | --                  | 0<br>(0 - 0)         | 0<br>(0 - 0)         | 0<br>(0 - 1)         |
| Ovarian cancer                                | 0<br>(0 - 0)      | --                 | --                  | 0<br>(0 - 0)         | 0<br>(0 - 0)         | 0<br>(0 - 0)         |
| Testicular cancer                             | --                | --                 | --                  | --                   | --                   | --                   |
| Kidney cancer                                 | 0<br>(0 - 0)      | 0<br>(0 - 0)       | 0<br>(0 - 0)        | 0<br>(0 - 0)         | 0<br>(0 - 0)         | 0<br>(0 - 0)         |
| Bladder cancer                                | 0<br>(0 - 0)      | --                 | --                  | 0<br>(0 - 0)         | 0<br>(0 - 0)         | 0<br>(0 - 0)         |
| Brain and nervous system cancer               | 0<br>(0 - 0)      | 0<br>(0 - 0)       | 0<br>(0 - 0)        | 0<br>(0 - 0)         | 0<br>(0 - 0)         | 0<br>(0 - 0)         |
| Thyroid cancer                                | 0<br>(0 - 0)      | --                 | 0<br>(0 - 0)        | 0<br>(0 - 0)         | 0<br>(0 - 0)         | 0<br>(0 - 0)         |
| Mesothelioma                                  | 0<br>(0 - 0)      | --                 | --                  | 0<br>(0 - 0)         | 0<br>(0 - 0)         | 0<br>(0 - 0)         |
| Hodgkin lymphoma                              | 0<br>(0 - 0)      | 0<br>(0 - 0)       | 0<br>(0 - 0)        | 0<br>(0 - 0)         | 0<br>(0 - 0)         | 0<br>(0 - 0)         |
| Non-Hodgkin lymphoma                          | 4<br>(1 - 6)      | 0<br>(0 - 1)       | 0<br>(0 - 0)        | 1<br>(0 - 1)         | 1<br>(0 - 1)         | 2<br>(1 - 4)         |
| Multiple myeloma                              | 1<br>(0 - 1)      | --                 | --                  | 0<br>(0 - 0)         | 0<br>(0 - 0)         | 0<br>(0 - 0)         |
| Leukemia                                      | 1<br>(1 - 1)      | 0<br>(0 - 0)       | 0<br>(0 - 0)        | 0<br>(0 - 0)         | 0<br>(0 - 0)         | 0<br>(0 - 1)         |
| Other neoplasms                               | 1<br>(0 - 1)      | 0<br>(0 - 0)       | 0<br>(0 - 0)        | 0<br>(0 - 0)         | 0<br>(0 - 0)         | 0<br>(0 - 0)         |
| Cardiovascular diseases                       | 94<br>(72 - 120)  | 0<br>(0 - 1)       | 0<br>(0 - 1)        | 6<br>(4 - 9)         | 17<br>(11 - 24)      | 71<br>(56 - 89)      |
| Rheumatic heart disease                       | 2<br>(1 - 3)      | 0<br>(0 - 0)       | 0<br>(0 - 0)        | 1<br>(0 - 1)         | 0<br>(0 - 1)         | 1<br>(0 - 1)         |
| Ischemic heart disease                        | 42<br>(31 - 58)   | 0<br>(0 - 0)       | 0<br>(0 - 0)        | 2<br>(1 - 4)         | 8<br>(5 - 11)        | 32<br>(24 - 44)      |
| Cerebrovascular disease                       | 38<br>(28 - 50)   | 0<br>(0 - 0)       | 0<br>(0 - 0)        | 2<br>(1 - 3)         | 6<br>(4 - 9)         | 30<br>(23 - 39)      |
| Ischemic stroke                               | 17<br>(10 - 25)   | 0<br>(0 - 0)       | 0<br>(0 - 0)        | 0<br>(0 - 1)         | 2<br>(1 - 3)         | 15<br>(9 - 22)       |
| Hemorrhagic stroke                            | 21<br>(14 - 30)   | 0<br>(0 - 0)       | 0<br>(0 - 0)        | 1<br>(1 - 2)         | 4<br>(3 - 6)         | 15<br>(10 - 22)      |
| Hypertensive heart disease                    | 3<br>(2 - 5)      | 0<br>(0 - 0)       | 0<br>(0 - 0)        | 0<br>(0 - 0)         | 1<br>(0 - 1)         | 2<br>(1 - 4)         |
| Cardiomyopathy and myocarditis                | 2<br>(1 - 4)      | 0<br>(0 - 0)       | 0<br>(0 - 0)        | 0<br>(0 - 1)         | 1<br>(0 - 1)         | 1<br>(0 - 2)         |
| Atrial fibrillation and flutter               | 1<br>(0 - 1)      | --                 | --                  | 0<br>(0 - 0)         | 0<br>(0 - 0)         | 1<br>(0 - 1)         |
| Aortic aneurysm                               | 1<br>(0 - 1)      | --                 | --                  | 0<br>(0 - 0)         | 0<br>(0 - 0)         | 0<br>(0 - 1)         |
| Peripheral vascular disease                   | 1<br>(1 - 2)      | --                 | --                  | 0<br>(0 - 0)         | 0<br>(0 - 0)         | 1<br>(1 - 2)         |
| Endocarditis                                  | 1<br>(0 - 1)      | 0<br>(0 - 0)       | 0<br>(0 - 0)        | 0<br>(0 - 0)         | 0<br>(0 - 0)         | 1<br>(0 - 1)         |
| Other cardiovascular and circulatory diseases | 3<br>(2 - 6)      | 0<br>(0 - 0)       | 0<br>(0 - 0)        | 0<br>(0 - 1)         | 1<br>(1 - 2)         | 2<br>(1 - 3)         |
| Chronic respiratory diseases                  | 19<br>(13 - 25)   | 0<br>(0 - 0)       | 0<br>(0 - 0)        | 1<br>(1 - 2)         | 3<br>(2 - 4)         | 15<br>(10 - 19)      |
| Chronic obstructive pulmonary disease         | 8<br>(5 - 12)     | 0<br>(0 - 0)       | 0<br>(0 - 0)        | 0<br>(0 - 0)         | 1<br>(1 - 2)         | 7<br>(4 - 10)        |

Web Table 31- Tonga deaths with 95% UI by age, sex, and cause in 2013

| Cause                                               | Females, All Ages | Females, 0-4 Years | Females, 5-14 Years | Females, 15-49 Years | Females, 50-69 Years | Females, 70-80 Years |
|-----------------------------------------------------|-------------------|--------------------|---------------------|----------------------|----------------------|----------------------|
| Pneumoconiosis                                      | 0<br>(0 - 1)      | 0<br>(0 - 0)       | 0<br>(0 - 0)        | 0<br>(0 - 0)         | 0<br>(0 - 0)         | 0<br>(0 - 1)         |
| Silicosis                                           | 0<br>(0 - 0)      | 0<br>(0 - 0)       | 0<br>(0 - 0)        | 0<br>(0 - 0)         | 0<br>(0 - 0)         | 0<br>(0 - 0)         |
| Asbestosis                                          | 0<br>(0 - 0)      | 0<br>(0 - 0)       | 0<br>(0 - 0)        | 0<br>(0 - 0)         | 0<br>(0 - 0)         | 0<br>(0 - 0)         |
| Coal workers pneumoconiosis                         | 0<br>(0 - 0)      | 0<br>(0 - 0)       | 0<br>(0 - 0)        | 0<br>(0 - 0)         | 0<br>(0 - 0)         | 0<br>(0 - 0)         |
| Other pneumoconiosis                                | 0<br>(0 - 0)      | 0<br>(0 - 0)       | 0<br>(0 - 0)        | 0<br>(0 - 0)         | 0<br>(0 - 0)         | 0<br>(0 - 0)         |
| Asthma                                              | 7<br>(3 - 10)     | 0<br>(0 - 0)       | 0<br>(0 - 0)        | 1<br>(0 - 1)         | 1<br>(1 - 2)         | 5<br>(2 - 7)         |
| Interstitial lung disease and pulmonary sarcoidosis | 1<br>(1 - 2)      | 0<br>(0 - 0)       | 0<br>(0 - 0)        | 0<br>(0 - 0)         | 0<br>(0 - 0)         | 1<br>(0 - 2)         |
| Other chronic respiratory diseases                  | 2<br>(1 - 3)      | 0<br>(0 - 0)       | 0<br>(0 - 0)        | 0<br>(0 - 0)         | 0<br>(0 - 0)         | 2<br>(1 - 3)         |
| Cirrhosis                                           | 4<br>(3 - 6)      | 0<br>(0 - 0)       | 0<br>(0 - 0)        | 1<br>(1 - 2)         | 1<br>(1 - 2)         | 2<br>(1 - 2)         |
| Cirrhosis due to hepatitis B                        | 2<br>(2 - 4)      | 0<br>(0 - 0)       | 0<br>(0 - 0)        | 1<br>(0 - 1)         | 1<br>(1 - 1)         | 1<br>(1 - 1)         |
| Cirrhosis due to hepatitis C                        | 1<br>(0 - 2)      | 0<br>(0 - 0)       | 0<br>(0 - 0)        | 0<br>(0 - 1)         | 0<br>(0 - 1)         | 0<br>(0 - 1)         |
| Cirrhosis due to alcohol use                        | 0<br>(0 - 1)      | --                 | --                  | 0<br>(0 - 0)         | 0<br>(0 - 0)         | 0<br>(0 - 0)         |
| Cirrhosis due to other causes                       | 0<br>(0 - 1)      | 0<br>(0 - 0)       | 0<br>(0 - 0)        | 0<br>(0 - 0)         | 0<br>(0 - 0)         | 0<br>(0 - 0)         |
| Digestive diseases                                  | 15<br>(11 - 19)   | 0<br>(0 - 0)       | 0<br>(0 - 0)        | 2<br>(1 - 2)         | 2<br>(2 - 3)         | 11<br>(8 - 14)       |
| Peptic ulcer disease                                | 2<br>(1 - 3)      | 0<br>(0 - 0)       | 0<br>(0 - 0)        | 0<br>(0 - 0)         | 0<br>(0 - 0)         | 1<br>(1 - 2)         |
| Gastritis and duodenitis                            | 0<br>(0 - 0)      | 0<br>(0 - 0)       | 0<br>(0 - 0)        | 0<br>(0 - 0)         | 0<br>(0 - 0)         | 0<br>(0 - 0)         |
| Appendicitis                                        | 1<br>(1 - 1)      | 0<br>(0 - 0)       | 0<br>(0 - 0)        | 0<br>(0 - 0)         | 0<br>(0 - 0)         | 0<br>(0 - 1)         |
| Paralytic ileus and intestinal obstruction          | 4<br>(2 - 7)      | 0<br>(0 - 0)       | 0<br>(0 - 0)        | 0<br>(0 - 1)         | 1<br>(0 - 1)         | 3<br>(2 - 5)         |
| Inguinal, femoral, and abdominal hernia             | 0<br>(0 - 0)      | 0<br>(0 - 0)       | 0<br>(0 - 0)        | 0<br>(0 - 0)         | 0<br>(0 - 0)         | 0<br>(0 - 0)         |
| Inflammatory bowel disease                          | 1<br>(0 - 1)      | 0<br>(0 - 0)       | 0<br>(0 - 0)        | 0<br>(0 - 0)         | 0<br>(0 - 0)         | 0<br>(0 - 1)         |
| Vascular intestinal disorders                       | 0<br>(0 - 0)      | 0<br>(0 - 0)       | 0<br>(0 - 0)        | 0<br>(0 - 0)         | 0<br>(0 - 0)         | 0<br>(0 - 0)         |
| Gallbladder and biliary diseases                    | 2<br>(1 - 4)      | 0<br>(0 - 0)       | 0<br>(0 - 0)        | 0<br>(0 - 0)         | 0<br>(0 - 0)         | 2<br>(1 - 3)         |
| Pancreatitis                                        | 1<br>(0 - 2)      | 0<br>(0 - 0)       | 0<br>(0 - 0)        | 0<br>(0 - 0)         | 0<br>(0 - 0)         | 1<br>(0 - 1)         |
| Other digestive diseases                            | 4<br>(2 - 7)      | 0<br>(0 - 0)       | 0<br>(0 - 0)        | 1<br>(0 - 1)         | 1<br>(0 - 1)         | 3<br>(1 - 5)         |
| Neurological disorders                              | 12<br>(9 - 15)    | 0<br>(0 - 0)       | 0<br>(0 - 0)        | 0<br>(0 - 0)         | 1<br>(0 - 1)         | 11<br>(8 - 14)       |
| Alzheimer disease and other dementias               | 11<br>(8 - 15)    | --                 | --                  | 0<br>(0 - 0)         | 0<br>(0 - 1)         | 11<br>(8 - 14)       |
| Parkinson disease                                   | 0<br>(0 - 0)      | --                 | --                  | 0<br>(0 - 0)         | 0<br>(0 - 0)         | 0<br>(0 - 0)         |
| Epilepsy                                            | 0<br>(0 - 0)      | 0<br>(0 - 0)       | 0<br>(0 - 0)        | 0<br>(0 - 0)         | 0<br>(0 - 0)         | 0<br>(0 - 0)         |
| Multiple sclerosis                                  | 0<br>(0 - 0)      | --                 | --                  | 0<br>(0 - 0)         | 0<br>(0 - 0)         | 0<br>(0 - 0)         |
| Other neurological disorders                        | 1<br>(0 - 1)      | 0<br>(0 - 0)       | 0<br>(0 - 0)        | 0<br>(0 - 0)         | 0<br>(0 - 0)         | 0<br>(0 - 0)         |
| Mental and substance use disorders                  | 0<br>(0 - 0)      | 0<br>(0 - 0)       | 0<br>(0 - 0)        | 0<br>(0 - 0)         | 0<br>(0 - 0)         | 0<br>(0 - 0)         |
| Schizophrenia                                       | 0<br>(0 - 0)      | --                 | --                  | 0<br>(0 - 0)         | 0<br>(0 - 0)         | 0<br>(0 - 0)         |
| Alcohol use disorders                               | 0<br>(0 - 0)      | --                 | --                  | 0<br>(0 - 0)         | 0<br>(0 - 0)         | 0<br>(0 - 0)         |
| Drug use disorders                                  | 0<br>(0 - 0)      | 0<br>(0 - 0)       | --                  | 0<br>(0 - 0)         | 0<br>(0 - 0)         | 0<br>(0 - 0)         |
| Opioid use disorders                                | 0<br>(0 - 0)      | 0<br>(0 - 0)       | --                  | 0<br>(0 - 0)         | 0<br>(0 - 0)         | 0<br>(0 - 0)         |
| Cocaine use disorders                               | 0<br>(0 - 0)      | 0<br>(0 - 0)       | --                  | 0<br>(0 - 0)         | 0<br>(0 - 0)         | 0<br>(0 - 0)         |
| Amphetamine use disorders                           | 0<br>(0 - 0)      | 0<br>(0 - 0)       | --                  | 0<br>(0 - 0)         | 0<br>(0 - 0)         | 0<br>(0 - 0)         |
| Other drug use disorders                            | 0<br>(0 - 0)      | 0<br>(0 - 0)       | --                  | 0<br>(0 - 0)         | 0<br>(0 - 0)         | 0<br>(0 - 0)         |
| Eating disorders                                    | 0<br>(0 - 0)      | --                 | 0<br>(0 - 0)        | 0<br>(0 - 0)         | --                   | --                   |
| Anorexia nervosa                                    | 0<br>(0 - 0)      | --                 | 0<br>(0 - 0)        | 0<br>(0 - 0)         | --                   | --                   |

Web Table 31- Tonga deaths with 95% UI by age, sex, and cause in 2013

| Cause                                               | Females, All Ages | Females, 0-4 Years | Females, 5-14 Years | Females, 15-49 Years | Females, 50-69 Years | Females, 70-80 Years |
|-----------------------------------------------------|-------------------|--------------------|---------------------|----------------------|----------------------|----------------------|
| Diabetes, urogenital, blood, and endocrine diseases | 71<br>(51 - 99)   | 1<br>(0 - 1)       | 0<br>(0 - 1)        | 5<br>(3 - 8)         | 23<br>(15 - 34)      | 43<br>(31 - 59)      |
| Diabetes mellitus                                   | 56<br>(40 - 77)   | 0<br>(0 - 0)       | 0<br>(0 - 0)        | 3<br>(2 - 5)         | 19<br>(12 - 27)      | 35<br>(25 - 46)      |
| Acute glomerulonephritis                            | 0<br>(0 - 0)      | 0<br>(0 - 0)       | 0<br>(0 - 0)        | 0<br>(0 - 0)         | 0<br>(0 - 0)         | 0<br>(0 - 0)         |
| Chronic kidney disease                              | 12<br>(6 - 29)    | 0<br>(0 - 0)       | 0<br>(0 - 0)        | 2<br>(1 - 4)         | 3<br>(2 - 9)         | 7<br>(3 - 17)        |
| Chronic kidney disease due to diabetes mellitus     | 2<br>(1 - 4)      | 0<br>(0 - 0)       | 0<br>(0 - 0)        | 0<br>(0 - 1)         | 1<br>(0 - 1)         | 1<br>(0 - 2)         |
| Chronic kidney disease due to hypertension          | 3<br>(1 - 7)      | 0<br>(0 - 0)       | 0<br>(0 - 0)        | 0<br>(0 - 1)         | 1<br>(0 - 2)         | 2<br>(1 - 5)         |
| Chronic kidney disease due to glomerulonephritis    | 0<br>(0 - 1)      | 0<br>(0 - 0)       | 0<br>(0 - 0)        | 0<br>(0 - 0)         | 0<br>(0 - 0)         | 0<br>(0 - 1)         |
| Chronic kidney disease due to other causes          | 6<br>(2 - 19)     | 0<br>(0 - 0)       | 0<br>(0 - 0)        | 1<br>(0 - 3)         | 2<br>(1 - 6)         | 3<br>(1 - 11)        |
| Urinary diseases and male infertility               | 1<br>(0 - 1)      | 0<br>(0 - 0)       | 0<br>(0 - 0)        | 0<br>(0 - 0)         | 0<br>(0 - 0)         | 0<br>(0 - 1)         |
| Interstitial nephritis and urinary tract infections | 0<br>(0 - 1)      | 0<br>(0 - 0)       | 0<br>(0 - 0)        | 0<br>(0 - 0)         | 0<br>(0 - 0)         | 0<br>(0 - 0)         |
| Urolithiasis                                        | 0<br>(0 - 0)      | --                 | 0<br>(0 - 0)        | 0<br>(0 - 0)         | 0<br>(0 - 0)         | 0<br>(0 - 0)         |
| Other urinary diseases                              | 0<br>(0 - 0)      | 0<br>(0 - 0)       | 0<br>(0 - 0)        | 0<br>(0 - 0)         | 0<br>(0 - 0)         | 0<br>(0 - 0)         |
| Gynecological diseases                              | 0<br>(0 - 0)      | --                 | --                  | 0<br>(0 - 0)         | 0<br>(0 - 0)         | 0<br>(0 - 0)         |
| Uterine fibroids                                    | 0<br>(0 - 0)      | --                 | --                  | 0<br>(0 - 0)         | 0<br>(0 - 0)         | 0<br>(0 - 0)         |
| Polycystic ovarian syndrome                         | 0<br>(0 - 0)      | --                 | --                  | 0<br>(0 - 0)         | 0<br>(0 - 0)         | --                   |
| Endometriosis                                       | 0<br>(0 - 0)      | --                 | --                  | 0<br>(0 - 0)         | 0<br>(0 - 0)         | --                   |
| Genital prolapse                                    | 0<br>(0 - 0)      | --                 | --                  | 0<br>(0 - 0)         | 0<br>(0 - 0)         | 0<br>(0 - 0)         |
| Other gynecological diseases                        | 0<br>(0 - 0)      | --                 | --                  | 0<br>(0 - 0)         | 0<br>(0 - 0)         | 0<br>(0 - 0)         |
| Hemoglobinopathies and hemolytic anemias            | 1<br>(0 - 1)      | 0<br>(0 - 0)       | 0<br>(0 - 0)        | 0<br>(0 - 0)         | 0<br>(0 - 0)         | 0<br>(0 - 0)         |
| Thalassemias                                        | 0<br>(0 - 1)      | 0<br>(0 - 0)       | 0<br>(0 - 0)        | 0<br>(0 - 0)         | 0<br>(0 - 0)         | 0<br>(0 - 0)         |
| Sickle cell disorders                               | 0<br>(0 - 0)      | 0<br>(0 - 0)       | 0<br>(0 - 0)        | 0<br>(0 - 0)         | 0<br>(0 - 0)         | 0<br>(0 - 0)         |
| G6PD deficiency                                     | 0<br>(0 - 0)      | 0<br>(0 - 0)       | 0<br>(0 - 0)        | 0<br>(0 - 0)         | 0<br>(0 - 0)         | 0<br>(0 - 0)         |
| Other hemoglobinopathies and hemolytic anemias      | 0<br>(0 - 1)      | 0<br>(0 - 0)       | 0<br>(0 - 0)        | 0<br>(0 - 0)         | 0<br>(0 - 0)         | 0<br>(0 - 0)         |
| Endocrine, metabolic, blood, and immune disorders   | 2<br>(1 - 3)      | 0<br>(0 - 0)       | 0<br>(0 - 0)        | 0<br>(0 - 0)         | 0<br>(0 - 1)         | 1<br>(0 - 1)         |
| Musculoskeletal disorders                           | 1<br>(0 - 1)      | --                 | 0<br>(0 - 0)        | 0<br>(0 - 0)         | 0<br>(0 - 0)         | 0<br>(0 - 1)         |
| Rheumatoid arthritis                                | 0<br>(0 - 0)      | --                 | 0<br>(0 - 0)        | 0<br>(0 - 0)         | 0<br>(0 - 0)         | 0<br>(0 - 0)         |
| Other musculoskeletal disorders                     | 1<br>(0 - 1)      | --                 | 0<br>(0 - 0)        | 0<br>(0 - 0)         | 0<br>(0 - 0)         | 0<br>(0 - 1)         |
| Other non-communicable diseases                     | 5<br>(3 - 8)      | 3<br>(1 - 5)       | 0<br>(0 - 0)        | 0<br>(0 - 1)         | 0<br>(0 - 1)         | 1<br>(1 - 2)         |
| Congenital anomalies                                | 3<br>(2 - 6)      | 2<br>(1 - 5)       | 0<br>(0 - 0)        | 0<br>(0 - 0)         | 0<br>(0 - 0)         | 0<br>(0 - 0)         |
| Neural tube defects                                 | 0<br>(0 - 0)      | 0<br>(0 - 0)       | 0<br>(0 - 0)        | 0<br>(0 - 0)         | 0<br>(0 - 0)         | 0<br>(0 - 0)         |
| Congenital heart anomalies                          | 1<br>(0 - 1)      | 0<br>(0 - 1)       | 0<br>(0 - 0)        | 0<br>(0 - 0)         | 0<br>(0 - 0)         | 0<br>(0 - 0)         |
| Cleft lip and cleft palate                          | 0<br>(0 - 0)      | 0<br>(0 - 0)       | --                  | --                   | --                   | --                   |
| Down syndrome                                       | 0<br>(0 - 1)      | 0<br>(0 - 0)       | 0<br>(0 - 0)        | 0<br>(0 - 0)         | 0<br>(0 - 0)         | 0<br>(0 - 0)         |
| Chromosomal unbalanced rearrangements               | 0<br>(0 - 0)      | 0<br>(0 - 0)       | 0<br>(0 - 0)        | 0<br>(0 - 0)         | 0<br>(0 - 0)         | 0<br>(0 - 0)         |
| Other congenital anomalies                          | 2<br>(1 - 4)      | 2<br>(1 - 3)       | 0<br>(0 - 0)        | 0<br>(0 - 0)         | 0<br>(0 - 0)         | 0<br>(0 - 0)         |
| Skin and subcutaneous diseases                      | 2<br>(1 - 3)      | 0<br>(0 - 0)       | 0<br>(0 - 0)        | 0<br>(0 - 0)         | 0<br>(0 - 0)         | 1<br>(1 - 2)         |
| Cellulitis                                          | 0<br>(0 - 0)      | 0<br>(0 - 0)       | 0<br>(0 - 0)        | 0<br>(0 - 0)         | 0<br>(0 - 0)         | 0<br>(0 - 0)         |
| Pyoderma                                            | 1<br>(0 - 1)      | 0<br>(0 - 0)       | 0<br>(0 - 0)        | 0<br>(0 - 0)         | 0<br>(0 - 0)         | 0<br>(0 - 1)         |
| Decubitus ulcer                                     | 1<br>(0 - 1)      | 0<br>(0 - 0)       | 0<br>(0 - 0)        | 0<br>(0 - 0)         | 0<br>(0 - 0)         | 1<br>(0 - 1)         |
| Other skin and subcutaneous diseases                | 0<br>(0 - 0)      | 0<br>(0 - 0)       | 0<br>(0 - 0)        | 0<br>(0 - 0)         | 0<br>(0 - 0)         | 0<br>(0 - 0)         |



Web Table 31- Tonga deaths with 95% UI by age, sex, and cause in 2013

| Cause                                           | Females, All Ages | Females, 0-4 Years | Females, 5-14 Years | Females, 15-49 Years | Females, 50-69 Years | Females, 70-80 Years |
|-------------------------------------------------|-------------------|--------------------|---------------------|----------------------|----------------------|----------------------|
| Sudden infant death syndrome                    | 0<br>(0 - 0)      | 0<br>(0 - 0)       | --                  | --                   | --                   | --                   |
| Injuries                                        | 23<br>(16 - 33)   | 3<br>(1 - 7)       | 1<br>(1 - 2)        | 5<br>(3 - 9)         | 3<br>(2 - 5)         | 10<br>(7 - 14)       |
| Transport injuries                              | 4<br>(3 - 5)      | 0<br>(0 - 1)       | 0<br>(0 - 1)        | 1<br>(1 - 2)         | 1<br>(0 - 1)         | 1<br>(1 - 2)         |
| Road injuries                                   | 3<br>(2 - 4)      | 0<br>(0 - 1)       | 0<br>(0 - 1)        | 1<br>(1 - 2)         | 1<br>(0 - 1)         | 1<br>(1 - 1)         |
| Pedestrian road injuries                        | 1<br>(0 - 1)      | 0<br>(0 - 0)       | 0<br>(0 - 0)        | 0<br>(0 - 0)         | 0<br>(0 - 0)         | 0<br>(0 - 0)         |
| Cyclist road injuries                           | 0<br>(0 - 0)      | 0<br>(0 - 0)       | 0<br>(0 - 0)        | 0<br>(0 - 0)         | 0<br>(0 - 0)         | 0<br>(0 - 0)         |
| Motorcyclist road injuries                      | 0<br>(0 - 0)      | 0<br>(0 - 0)       | 0<br>(0 - 0)        | 0<br>(0 - 0)         | 0<br>(0 - 0)         | 0<br>(0 - 0)         |
| Motor vehicle road injuries                     | 2<br>(1 - 3)      | 0<br>(0 - 0)       | 0<br>(0 - 0)        | 1<br>(0 - 1)         | 0<br>(0 - 1)         | 1<br>(0 - 1)         |
| Other road injuries                             | 0<br>(0 - 0)      | 0<br>(0 - 0)       | 0<br>(0 - 0)        | 0<br>(0 - 0)         | 0<br>(0 - 0)         | 0<br>(0 - 0)         |
| Other transport injuries                        | 1<br>(0 - 1)      | 0<br>(0 - 0)       | 0<br>(0 - 0)        | 0<br>(0 - 0)         | 0<br>(0 - 0)         | 0<br>(0 - 0)         |
| Unintentional injuries                          | 16<br>(9 - 25)    | 2<br>(1 - 6)       | 1<br>(1 - 2)        | 2<br>(1 - 6)         | 2<br>(1 - 3)         | 8<br>(5 - 12)        |
| Falls                                           | 3<br>(2 - 5)      | 0<br>(0 - 0)       | 0<br>(0 - 0)        | 0<br>(0 - 0)         | 0<br>(0 - 0)         | 3<br>(1 - 4)         |
| Drowning                                        | 1<br>(0 - 2)      | 0<br>(0 - 1)       | 0<br>(0 - 0)        | 0<br>(0 - 0)         | 0<br>(0 - 0)         | 0<br>(0 - 0)         |
| Fire, heat, and hot substances                  | 1<br>(0 - 1)      | 0<br>(0 - 0)       | 0<br>(0 - 0)        | 0<br>(0 - 0)         | 0<br>(0 - 0)         | 0<br>(0 - 1)         |
| Poisonings                                      | 1<br>(0 - 1)      | 0<br>(0 - 0)       | 0<br>(0 - 0)        | 0<br>(0 - 0)         | 0<br>(0 - 0)         | 0<br>(0 - 1)         |
| Exposure to mechanical forces                   | 2<br>(0 - 14)     | 0<br>(0 - 4)       | 0<br>(0 - 1)        | 1<br>(0 - 4)         | 0<br>(0 - 2)         | 0<br>(0 - 2)         |
| Unintentional firearm injuries                  | 0<br>(0 - 0)      | 0<br>(0 - 0)       | 0<br>(0 - 0)        | 0<br>(0 - 0)         | 0<br>(0 - 0)         | 0<br>(0 - 0)         |
| Unintentional suffocation                       | 1<br>(0 - 13)     | 0<br>(0 - 4)       | 0<br>(0 - 1)        | 0<br>(0 - 4)         | 0<br>(0 - 2)         | 0<br>(0 - 2)         |
| Other exposure to mechanical forces             | 0<br>(0 - 0)      | 0<br>(0 - 0)       | 0<br>(0 - 0)        | 0<br>(0 - 0)         | 0<br>(0 - 0)         | 0<br>(0 - 0)         |
| Adverse effects of medical treatment            | 2<br>(1 - 3)      | 0<br>(0 - 0)       | 0<br>(0 - 0)        | 0<br>(0 - 1)         | 0<br>(0 - 1)         | 1<br>(0 - 2)         |
| Animal contact                                  | 0<br>(0 - 0)      | 0<br>(0 - 0)       | 0<br>(0 - 0)        | 0<br>(0 - 0)         | 0<br>(0 - 0)         | 0<br>(0 - 0)         |
| Venomous animal contact                         | 0<br>(0 - 0)      | 0<br>(0 - 0)       | 0<br>(0 - 0)        | 0<br>(0 - 0)         | 0<br>(0 - 0)         | 0<br>(0 - 0)         |
| Non-venomous animal contact                     | 0<br>(0 - 0)      | 0<br>(0 - 0)       | 0<br>(0 - 0)        | 0<br>(0 - 0)         | 0<br>(0 - 0)         | 0<br>(0 - 0)         |
| Foreign body                                    | 5<br>(2 - 7)      | 1<br>(0 - 2)       | 0<br>(0 - 1)        | 0<br>(0 - 0)         | 0<br>(0 - 1)         | 3<br>(1 - 5)         |
| Pulmonary aspiration and foreign body in airway | 5<br>(2 - 7)      | 1<br>(0 - 2)       | 0<br>(0 - 1)        | 0<br>(0 - 0)         | 0<br>(0 - 1)         | 3<br>(1 - 5)         |
| Foreign body in other body part                 | 0<br>(0 - 1)      | 0<br>(0 - 0)       | 0<br>(0 - 0)        | 0<br>(0 - 0)         | 0<br>(0 - 0)         | 0<br>(0 - 0)         |
| Other unintentional injuries                    | 2<br>(0 - 4)      | 0<br>(0 - 1)       | 0<br>(0 - 0)        | 1<br>(0 - 1)         | 0<br>(0 - 1)         | 1<br>(0 - 1)         |
| Self-harm and interpersonal violence            | 3<br>(2 - 5)      | 0<br>(0 - 0)       | 0<br>(0 - 0)        | 1<br>(1 - 3)         | 1<br>(0 - 1)         | 1<br>(1 - 1)         |
| Self-harm                                       | 2<br>(2 - 4)      | --                 | 0<br>(0 - 0)        | 1<br>(1 - 2)         | 0<br>(0 - 1)         | 1<br>(0 - 1)         |
| Interpersonal violence                          | 1<br>(0 - 2)      | 0<br>(0 - 0)       | 0<br>(0 - 0)        | 0<br>(0 - 1)         | 0<br>(0 - 0)         | 0<br>(0 - 0)         |
| Assault by firearm                              | 0<br>(0 - 1)      | 0<br>(0 - 0)       | 0<br>(0 - 0)        | 0<br>(0 - 0)         | 0<br>(0 - 0)         | 0<br>(0 - 0)         |
| Assault by sharp object                         | 0<br>(0 - 1)      | 0<br>(0 - 0)       | 0<br>(0 - 0)        | 0<br>(0 - 0)         | 0<br>(0 - 0)         | 0<br>(0 - 0)         |
| Assault by other means                          | 0<br>(0 - 1)      | 0<br>(0 - 0)       | 0<br>(0 - 0)        | 1<br>(0 - 1)         | 0<br>(0 - 0)         | 0<br>(0 - 0)         |

Web Table 31- Trinidad and Tobago deaths with 95% UI by age, sex, and cause in 2013

| Cause                                                             | Both Sexes, All Ages        | Both Sexes, 0-4 Years | Both Sexes, 5-14 Years | Both Sexes, 15-49 Years  | Both Sexes, 50-69 Years  | Both Sexes, 70-80 Years  |
|-------------------------------------------------------------------|-----------------------------|-----------------------|------------------------|--------------------------|--------------------------|--------------------------|
| All causes                                                        | 12,228<br>(11,117 - 13,234) | 433<br>(193 - 879)    | 61<br>(37 - 98)        | 1,752<br>(1,539 - 1,978) | 4,212<br>(3,758 - 4,704) | 5,770<br>(5,362 - 6,159) |
| Communicable, maternal, neonatal, and nutritional diseases        | 1,141<br>(895 - 1,454)      | 285<br>(122 - 554)    | 11<br>(6 - 18)         | 282<br>(202 - 382)       | 216<br>(173 - 270)       | 348<br>(290 - 419)       |
| HIV/AIDS and tuberculosis                                         | 275<br>(159 - 434)          | 1<br>(0 - 2)          | 0<br>(0 - 1)           | 181<br>(101 - 284)       | 75<br>(41 - 130)         | 17<br>(12 - 24)          |
| Tuberculosis                                                      | 37<br>(23 - 45)             | 0<br>(0 - 1)          | 0<br>(0 - 0)           | 11<br>(7 - 15)           | 16<br>(9 - 20)           | 10<br>(6 - 12)           |
| HIV/AIDS                                                          | 237<br>(119 - 397)          | 1<br>(0 - 2)          | 0<br>(0 - 1)           | 170<br>(88 - 274)        | 60<br>(25 - 115)         | 7<br>(2 - 14)            |
| HIV/AIDS resulting in mycobacterial infection                     | 14<br>(7 - 24)              | 0<br>(0 - 0)          | 0<br>(0 - 0)           | 10<br>(5 - 16)           | 4<br>(1 - 7)             | 0<br>(0 - 1)             |
| HIV/AIDS resulting in other diseases                              | 223<br>(113 - 373)          | 1<br>(0 - 2)          | 0<br>(0 - 0)           | 160<br>(83 - 259)        | 56<br>(23 - 107)         | 6<br>(2 - 13)            |
| Diarrhea, lower respiratory, and other common infectious diseases | 490<br>(412 - 579)          | 48<br>(22 - 107)      | 8<br>(4 - 14)          | 64<br>(51 - 80)          | 104<br>(85 - 127)        | 266<br>(212 - 331)       |
| Diarrheal diseases                                                | 44<br>(34 - 59)             | 11<br>(5 - 27)        | 1<br>(1 - 2)           | 5<br>(4 - 6)             | 8<br>(6 - 11)            | 18<br>(12 - 26)          |
| Intestinal infectious diseases                                    | 8<br>(3 - 19)               | 3<br>(1 - 8)          | 2<br>(1 - 5)           | 3<br>(1 - 7)             | 1<br>(0 - 2)             | 0<br>(0 - 1)             |
| Typhoid fever                                                     | 6<br>(2 - 15)               | 2<br>(0 - 6)          | 1<br>(0 - 4)           | 2<br>(1 - 5)             | 0<br>(0 - 1)             | 0<br>(0 - 0)             |
| Paratyphoid fever                                                 | 2<br>(0 - 4)                | 1<br>(0 - 2)          | 0<br>(0 - 1)           | 1<br>(0 - 1)             | 0<br>(0 - 0)             | 0<br>(0 - 0)             |
| Other intestinal infectious diseases                              | 0<br>(0 - 2)                | 0<br>(0 - 1)          | 0<br>(0 - 0)           | 0<br>(0 - 1)             | 0<br>(0 - 0)             | 0<br>(0 - 0)             |
| Lower respiratory infections                                      | 401<br>(333 - 475)          | 29<br>(12 - 63)       | 3<br>(2 - 6)           | 45<br>(35 - 58)          | 85<br>(67 - 107)         | 239<br>(187 - 304)       |
| Upper respiratory infections                                      | 0<br>(0 - 1)                | 0<br>(0 - 0)          | 0<br>(0 - 0)           | 0<br>(0 - 0)             | 0<br>(0 - 0)             | 0<br>(0 - 0)             |
| Otitis media                                                      | 1<br>(1 - 1)                | 0<br>(0 - 0)          | 0<br>(0 - 0)           | 0<br>(0 - 0)             | 0<br>(0 - 0)             | 0<br>(0 - 0)             |
| Meningitis                                                        | 20<br>(17 - 26)             | 3<br>(1 - 8)          | 1<br>(0 - 1)           | 5<br>(4 - 7)             | 6<br>(5 - 7)             | 5<br>(4 - 7)             |
| Pneumococcal meningitis                                           | 6<br>(5 - 8)                | 1<br>(0 - 2)          | 0<br>(0 - 0)           | 2<br>(1 - 2)             | 2<br>(1 - 2)             | 2<br>(1 - 2)             |
| H influenzae type B meningitis                                    | 3<br>(2 - 4)                | 1<br>(0 - 3)          | 0<br>(0 - 0)           | 0<br>(0 - 1)             | 0<br>(0 - 1)             | 1<br>(0 - 1)             |
| Meningococcal meningitis                                          | 2<br>(2 - 3)                | 0<br>(0 - 1)          | 0<br>(0 - 0)           | 1<br>(0 - 1)             | 1<br>(0 - 1)             | 1<br>(0 - 1)             |
| Other meningitis                                                  | 9<br>(7 - 11)               | 1<br>(0 - 2)          | 0<br>(0 - 0)           | 3<br>(2 - 4)             | 3<br>(2 - 4)             | 2<br>(2 - 3)             |
| Encephalitis                                                      | 14<br>(10 - 20)             | 2<br>(1 - 5)          | 1<br>(1 - 2)           | 5<br>(4 - 8)             | 3<br>(2 - 6)             | 2<br>(1 - 3)             |
| Diphtheria                                                        | 0<br>(0 - 0)                | 0<br>(0 - 0)          | 0<br>(0 - 0)           | 0<br>(0 - 0)             | 0<br>(0 - 0)             | --                       |
| Whooping cough                                                    | 0<br>(0 - 1)                | 0<br>(0 - 1)          | 0<br>(0 - 0)           | 0<br>(0 - 0)             | 0<br>(0 - 0)             | --                       |
| Tetanus                                                           | 2<br>(1 - 3)                | 0<br>(0 - 0)          | 0<br>(0 - 0)           | 0<br>(0 - 1)             | 1<br>(0 - 1)             | 1<br>(0 - 1)             |
| Measles                                                           | 0<br>(0 - 0)                | 0<br>(0 - 0)          | 0<br>(0 - 0)           | 0<br>(0 - 0)             | 0<br>(0 - 0)             | --                       |
| Varicella and herpes zoster                                       | 1<br>(0 - 2)                | 0<br>(0 - 0)          | 0<br>(0 - 0)           | 0<br>(0 - 0)             | 0<br>(0 - 0)             | 0<br>(0 - 1)             |
| Neglected tropical diseases and malaria                           | 8<br>(7 - 11)               | 1<br>(0 - 2)          | 0<br>(0 - 1)           | 3<br>(2 - 3)             | 2<br>(2 - 3)             | 2<br>(1 - 3)             |
| Leishmaniasis                                                     | 0<br>(0 - 0)                | 0<br>(0 - 0)          | 0<br>(0 - 0)           | 0<br>(0 - 0)             | 0<br>(0 - 0)             | 0<br>(0 - 0)             |
| Visceral leishmaniasis                                            | 0<br>(0 - 0)                | 0<br>(0 - 0)          | 0<br>(0 - 0)           | 0<br>(0 - 0)             | 0<br>(0 - 0)             | 0<br>(0 - 0)             |
| Cysticercosis                                                     | 1<br>(1 - 1)                | 0<br>(0 - 0)          | 0<br>(0 - 0)           | 0<br>(0 - 0)             | 0<br>(0 - 0)             | 0<br>(0 - 0)             |
| Cystic echinococcosis                                             | 0<br>(0 - 0)                | 0<br>(0 - 0)          | 0<br>(0 - 0)           | 0<br>(0 - 0)             | 0<br>(0 - 0)             | 0<br>(0 - 0)             |
| Dengue                                                            | 3<br>(3 - 4)                | 0<br>(0 - 1)          | 0<br>(0 - 0)           | 1<br>(1 - 2)             | 1<br>(1 - 1)             | 1<br>(0 - 1)             |
| Yellow fever                                                      | 0<br>(0 - 0)                | 0<br>(0 - 0)          | 0<br>(0 - 0)           | 0<br>(0 - 0)             | 0<br>(0 - 0)             | 0<br>(0 - 0)             |
| Rabies                                                            | 0<br>(0 - 0)                | 0<br>(0 - 0)          | 0<br>(0 - 0)           | 0<br>(0 - 0)             | 0<br>(0 - 0)             | 0<br>(0 - 0)             |
| Intestinal nematode infections                                    | 0<br>(0 - 2)                | 0<br>(0 - 0)          | 0<br>(0 - 0)           | 0<br>(0 - 0)             | 0<br>(0 - 0)             | 0<br>(0 - 0)             |
| Ascariasis                                                        | 0<br>(0 - 2)                | 0<br>(0 - 0)          | 0<br>(0 - 0)           | 0<br>(0 - 0)             | 0<br>(0 - 0)             | 0<br>(0 - 0)             |
| Other neglected tropical diseases                                 | 4<br>(3 - 5)                | 0<br>(0 - 1)          | 0<br>(0 - 0)           | 1<br>(1 - 1)             | 1<br>(1 - 1)             | 1<br>(1 - 2)             |
| Maternal disorders                                                | 10<br>(7 - 13)              | --                    | 0<br>(0 - 0)           | 10<br>(7 - 13)           | --                       | --                       |
| Maternal hemorrhage                                               | 2<br>(1 - 3)                | --                    | 0<br>(0 - 0)           | 2<br>(1 - 3)             | --                       | --                       |

Web Table 31- Trinidad and Tobago deaths with 95% UI by age, sex, and cause in 2013

| Cause                                                            | Both Sexes, All Ages       | Both Sexes, 0-4 Years | Both Sexes, 5-14 Years | Both Sexes, 15-49 Years | Both Sexes, 50-69 Years  | Both Sexes, 70-80 Years  |
|------------------------------------------------------------------|----------------------------|-----------------------|------------------------|-------------------------|--------------------------|--------------------------|
| Maternal sepsis and other maternal infections                    | 1<br>(0 - 1)               | --                    | 0<br>(0 - 0)           | 1<br>(0 - 1)            | --                       | --                       |
| Maternal hypertensive disorders                                  | 2<br>(1 - 3)               | --                    | 0<br>(0 - 0)           | 2<br>(1 - 3)            | --                       | --                       |
| Maternal obstructed labor                                        | 1<br>(0 - 1)               | --                    | 0<br>(0 - 0)           | 1<br>(0 - 1)            | --                       | --                       |
| Maternal abortive outcome                                        | 2<br>(1 - 3)               | --                    | 0<br>(0 - 0)           | 2<br>(1 - 3)            | --                       | --                       |
| Indirect maternal deaths                                         | 1<br>(0 - 1)               | --                    | 0<br>(0 - 0)           | 1<br>(0 - 1)            | --                       | --                       |
| Late maternal deaths                                             | 1<br>(0 - 1)               | --                    | 0<br>(0 - 0)           | 1<br>(0 - 1)            | --                       | --                       |
| Maternal deaths aggravated by HIV/AIDS                           | 0<br>(0 - 0)               | --                    | --                     | 0<br>(0 - 0)            | --                       | --                       |
| Other maternal disorders                                         | 1<br>(1 - 2)               | --                    | 0<br>(0 - 0)           | 1<br>(1 - 2)            | --                       | --                       |
| Neonatal disorders                                               | 224<br>(94 - 420)          | 224<br>(94 - 420)     | --                     | --                      | --                       | --                       |
| Neonatal preterm birth complications                             | 96<br>(39 - 188)           | 96<br>(39 - 188)      | --                     | --                      | --                       | --                       |
| Neonatal encephalopathy due to birth asphyxia and trauma         | 55<br>(21 - 113)           | 55<br>(21 - 113)      | --                     | --                      | --                       | --                       |
| Neonatal sepsis and other neonatal infections                    | 32<br>(13 - 67)            | 32<br>(13 - 67)       | --                     | --                      | --                       | --                       |
| Hemolytic disease and other neonatal jaundice                    | 3<br>(1 - 8)               | 3<br>(1 - 8)          | --                     | --                      | --                       | --                       |
| Other neonatal disorders                                         | 38<br>(15 - 73)            | 38<br>(15 - 73)       | --                     | --                      | --                       | --                       |
| Nutritional deficiencies                                         | 101<br>(79 - 132)          | 8<br>(3 - 19)         | 1<br>(1 - 2)           | 14<br>(11 - 19)         | 22<br>(16 - 31)          | 56<br>(41 - 73)          |
| Protein-energy malnutrition                                      | 41<br>(28 - 63)            | 6<br>(3 - 15)         | 1<br>(0 - 1)           | 4<br>(2 - 7)            | 8<br>(4 - 13)            | 22<br>(14 - 37)          |
| Iodine deficiency                                                | 0<br>(0 - 0)               | 0<br>(0 - 0)          | 0<br>(0 - 0)           | 0<br>(0 - 0)            | 0<br>(0 - 0)             | 0<br>(0 - 0)             |
| Iron-deficiency anemia                                           | 55<br>(36 - 75)            | 1<br>(0 - 4)          | 0<br>(0 - 1)           | 9<br>(6 - 13)           | 13<br>(8 - 19)           | 31<br>(19 - 44)          |
| Other nutritional deficiencies                                   | 6<br>(3 - 9)               | 0<br>(0 - 1)          | 0<br>(0 - 0)           | 1<br>(0 - 2)            | 2<br>(1 - 2)             | 3<br>(1 - 5)             |
| Other communicable, maternal, neonatal, and nutritional diseases | 33<br>(23 - 42)            | 2<br>(1 - 7)          | 1<br>(0 - 1)           | 10<br>(7 - 13)          | 11<br>(7 - 15)           | 8<br>(6 - 11)            |
| Sexually transmitted diseases excluding HIV                      | 4<br>(2 - 9)               | 1<br>(0 - 6)          | 0<br>(0 - 0)           | 1<br>(0 - 1)            | 1<br>(1 - 2)             | 1<br>(1 - 2)             |
| Syphilis                                                         | 3<br>(1 - 8)               | 1<br>(0 - 6)          | 0<br>(0 - 0)           | 0<br>(0 - 0)            | 1<br>(0 - 1)             | 1<br>(0 - 1)             |
| Chlamydial infection                                             | 0<br>(0 - 0)               | --                    | 0<br>(0 - 0)           | 0<br>(0 - 0)            | 0<br>(0 - 0)             | 0<br>(0 - 0)             |
| Gonococcal infection                                             | 0<br>(0 - 1)               | --                    | 0<br>(0 - 0)           | 0<br>(0 - 0)            | 0<br>(0 - 0)             | 0<br>(0 - 0)             |
| Other sexually transmitted diseases                              | 0<br>(0 - 0)               | --                    | 0<br>(0 - 0)           | 0<br>(0 - 0)            | 0<br>(0 - 0)             | 0<br>(0 - 0)             |
| Hepatitis                                                        | 3<br>(3 - 4)               | 0<br>(0 - 0)          | 0<br>(0 - 0)           | 1<br>(1 - 2)            | 1<br>(1 - 2)             | 1<br>(0 - 1)             |
| Acute hepatitis A                                                | 1<br>(0 - 2)               | 0<br>(0 - 0)          | 0<br>(0 - 0)           | 1<br>(0 - 1)            | 0<br>(0 - 0)             | 0<br>(0 - 0)             |
| Acute hepatitis B                                                | 2<br>(2 - 3)               | 0<br>(0 - 0)          | 0<br>(0 - 0)           | 1<br>(0 - 1)            | 1<br>(1 - 2)             | 0<br>(0 - 1)             |
| Acute hepatitis C                                                | 0<br>(0 - 1)               | --                    | 0<br>(0 - 0)           | 0<br>(0 - 0)            | 0<br>(0 - 0)             | 0<br>(0 - 0)             |
| Other infectious diseases                                        | 25<br>(16 - 32)            | 1<br>(0 - 2)          | 0<br>(0 - 1)           | 8<br>(5 - 11)           | 9<br>(5 - 12)            | 7<br>(4 - 9)             |
| Non-communicable diseases                                        | 10,023<br>(9,168 - 10,870) | 120<br>(56 - 258)     | 26<br>(16 - 43)        | 878<br>(743 - 1,017)    | 3,738<br>(3,337 - 4,177) | 5,260<br>(4,886 - 5,628) |
| Neoplasms                                                        | 1,811<br>(1,604 - 2,044)   | 5<br>(2 - 10)         | 7<br>(4 - 11)          | 213<br>(179 - 249)      | 765<br>(670 - 868)       | 822<br>(712 - 952)       |
| Esophageal cancer                                                | 42<br>(33 - 54)            | --                    | --                     | 4<br>(3 - 5)            | 21<br>(16 - 28)          | 17<br>(13 - 23)          |
| Stomach cancer                                                   | 88<br>(75 - 105)           | --                    | --                     | 7<br>(6 - 9)            | 35<br>(29 - 43)          | 46<br>(37 - 57)          |
| Liver cancer                                                     | 52<br>(43 - 62)            | --                    | 0<br>(0 - 0)           | 7<br>(5 - 9)            | 23<br>(18 - 29)          | 21<br>(16 - 27)          |
| Liver cancer due to hepatitis B                                  | 13<br>(6 - 18)             | --                    | 0<br>(0 - 0)           | 3<br>(2 - 4)            | 6<br>(3 - 10)            | 4<br>(2 - 5)             |
| Liver cancer due to hepatitis C                                  | 25<br>(18 - 33)            | --                    | 0<br>(0 - 0)           | 3<br>(2 - 4)            | 11<br>(8 - 16)           | 11<br>(8 - 15)           |
| Liver cancer due to alcohol use                                  | 9<br>(6 - 13)              | --                    | --                     | 1<br>(0 - 1)            | 4<br>(2 - 5)             | 5<br>(3 - 7)             |
| Liver cancer due to other causes                                 | 5<br>(3 - 7)               | --                    | 0<br>(0 - 0)           | 1<br>(1 - 2)            | 2<br>(1 - 3)             | 2<br>(1 - 2)             |
| Larynx cancer                                                    | 19<br>(14 - 25)            | --                    | --                     | 2<br>(1 - 3)            | 10<br>(7 - 13)           | 8<br>(6 - 10)            |

Web Table 31- Trinidad and Tobago deaths with 95% UI by age, sex, and cause in 2013

| Cause                                         | Both Sexes, All Ages     | Both Sexes, 0-4 Years | Both Sexes, 5-14 Years | Both Sexes, 15-49 Years | Both Sexes, 50-69 Years  | Both Sexes, 70-80 Years  |
|-----------------------------------------------|--------------------------|-----------------------|------------------------|-------------------------|--------------------------|--------------------------|
| Tracheal, bronchus and lung cancer            | 191<br>(164 - 220)       | --                    | --                     | 17<br>(14 - 22)         | 104<br>(87 - 123)        | 70<br>(58 - 83)          |
| Breast cancer                                 | 198<br>(159 - 242)       | --                    | --                     | 41<br>(31 - 53)         | 96<br>(75 - 118)         | 61<br>(47 - 81)          |
| Cervical cancer                               | 103<br>(79 - 133)        | --                    | --                     | 24<br>(17 - 32)         | 46<br>(33 - 62)          | 32<br>(23 - 46)          |
| Uterine cancer                                | 41<br>(22 - 56)          | --                    | --                     | 2<br>(1 - 3)            | 19<br>(9 - 27)           | 21<br>(11 - 30)          |
| Prostate cancer                               | 331<br>(215 - 469)       | --                    | --                     | 2<br>(1 - 3)            | 80<br>(53 - 120)         | 249<br>(154 - 354)       |
| Colon and rectum cancer                       | 196<br>(172 - 224)       | --                    | --                     | 16<br>(13 - 19)         | 85<br>(72 - 99)          | 95<br>(80 - 114)         |
| Lip and oral cavity cancer                    | 23<br>(18 - 32)          | --                    | --                     | 3<br>(2 - 4)            | 12<br>(9 - 17)           | 8<br>(6 - 11)            |
| Nasopharynx cancer                            | 7<br>(6 - 10)            | --                    | 0<br>(0 - 0)           | 2<br>(1 - 3)            | 4<br>(3 - 5)             | 2<br>(1 - 2)             |
| Other pharynx cancer                          | 12<br>(10 - 16)          | --                    | --                     | 2<br>(1 - 3)            | 7<br>(5 - 10)            | 3<br>(2 - 4)             |
| Gallbladder and biliary tract cancer          | 26<br>(17 - 42)          | --                    | --                     | 2<br>(1 - 3)            | 12<br>(7 - 19)           | 12<br>(8 - 20)           |
| Pancreatic cancer                             | 90<br>(77 - 105)         | --                    | --                     | 6<br>(5 - 8)            | 40<br>(33 - 48)          | 44<br>(36 - 54)          |
| Malignant skin melanoma                       | 6<br>(4 - 9)             | --                    | --                     | 1<br>(1 - 2)            | 2<br>(2 - 4)             | 2<br>(2 - 3)             |
| Non-melanoma skin cancer                      | 8<br>(6 - 11)            | --                    | --                     | 1<br>(1 - 1)            | 3<br>(2 - 4)             | 4<br>(3 - 6)             |
| Ovarian cancer                                | 48<br>(38 - 61)          | --                    | --                     | 6<br>(5 - 9)            | 24<br>(18 - 32)          | 18<br>(13 - 24)          |
| Testicular cancer                             | 1<br>(1 - 2)             | --                    | --                     | 1<br>(0 - 1)            | 0<br>(0 - 0)             | 0<br>(0 - 1)             |
| Kidney cancer                                 | 20<br>(16 - 24)          | 0<br>(0 - 0)          | 0<br>(0 - 0)           | 2<br>(2 - 3)            | 10<br>(8 - 13)           | 7<br>(6 - 10)            |
| Bladder cancer                                | 27<br>(22 - 35)          | --                    | --                     | 1<br>(1 - 2)            | 11<br>(8 - 14)           | 15<br>(12 - 20)          |
| Brain and nervous system cancer               | 22<br>(15 - 28)          | 0<br>(0 - 1)          | 1<br>(0 - 2)           | 6<br>(4 - 8)            | 10<br>(6 - 13)           | 5<br>(3 - 6)             |
| Thyroid cancer                                | 6<br>(5 - 8)             | --                    | 0<br>(0 - 0)           | 1<br>(1 - 1)            | 3<br>(2 - 4)             | 3<br>(2 - 4)             |
| Mesothelioma                                  | 6<br>(5 - 8)             | --                    | --                     | 1<br>(0 - 1)            | 2<br>(2 - 3)             | 3<br>(2 - 4)             |
| Hodgkin lymphoma                              | 5<br>(2 - 7)             | 0<br>(0 - 0)          | 0<br>(0 - 0)           | 2<br>(1 - 3)            | 2<br>(1 - 3)             | 1<br>(0 - 1)             |
| Non-Hodgkin lymphoma                          | 55<br>(45 - 69)          | 0<br>(0 - 1)          | 1<br>(0 - 1)           | 14<br>(10 - 18)         | 25<br>(19 - 32)          | 16<br>(12 - 21)          |
| Multiple myeloma                              | 37<br>(27 - 45)          | --                    | --                     | 3<br>(2 - 4)            | 20<br>(15 - 26)          | 14<br>(10 - 18)          |
| Leukemia                                      | 44<br>(37 - 51)          | 1<br>(0 - 3)          | 2<br>(1 - 4)           | 12<br>(10 - 15)         | 15<br>(13 - 18)          | 13<br>(11 - 16)          |
| Other neoplasms                               | 106<br>(89 - 127)        | 3<br>(1 - 6)          | 3<br>(1 - 4)           | 25<br>(20 - 31)         | 45<br>(36 - 56)          | 31<br>(25 - 38)          |
| Cardiovascular diseases                       | 4,274<br>(3,829 - 4,745) | 6<br>(3 - 15)         | 4<br>(2 - 7)           | 275<br>(227 - 328)      | 1,503<br>(1,316 - 1,722) | 2,486<br>(2,238 - 2,709) |
| Rheumatic heart disease                       | 17<br>(12 - 21)          | 0<br>(0 - 0)          | 0<br>(0 - 1)           | 6<br>(4 - 8)            | 5<br>(4 - 7)             | 5<br>(3 - 6)             |
| Ischemic heart disease                        | 2,172<br>(1,874 - 2,476) | 1<br>(0 - 2)          | 1<br>(0 - 1)           | 127<br>(102 - 158)      | 827<br>(701 - 974)       | 1,216<br>(1,028 - 1,374) |
| Cerebrovascular disease                       | 1,339<br>(1,155 - 1,566) | 2<br>(1 - 5)          | 1<br>(1 - 2)           | 74<br>(59 - 92)         | 430<br>(355 - 517)       | 831<br>(708 - 978)       |
| Ischemic stroke                               | 845<br>(719 - 1,040)     | 0<br>(0 - 1)          | 0<br>(0 - 1)           | 21<br>(15 - 29)         | 226<br>(180 - 286)       | 597<br>(507 - 739)       |
| Hemorrhagic stroke                            | 494<br>(366 - 586)       | 2<br>(1 - 4)          | 1<br>(1 - 2)           | 53<br>(40 - 66)         | 204<br>(155 - 252)       | 234<br>(160 - 287)       |
| Hypertensive heart disease                    | 363<br>(285 - 487)       | 0<br>(0 - 0)          | 0<br>(0 - 0)           | 20<br>(15 - 28)         | 112<br>(85 - 155)        | 231<br>(176 - 319)       |
| Cardiomyopathy and myocarditis                | 99<br>(76 - 120)         | 2<br>(1 - 4)          | 1<br>(0 - 1)           | 18<br>(13 - 24)         | 38<br>(28 - 48)          | 40<br>(31 - 52)          |
| Atrial fibrillation and flutter               | 55<br>(41 - 71)          | --                    | --                     | 2<br>(1 - 2)            | 11<br>(8 - 14)           | 42<br>(30 - 57)          |
| Aortic aneurysm                               | 55<br>(45 - 68)          | --                    | --                     | 3<br>(3 - 4)            | 22<br>(17 - 27)          | 30<br>(23 - 39)          |
| Peripheral vascular disease                   | 26<br>(19 - 33)          | --                    | --                     | 0<br>(0 - 0)            | 4<br>(3 - 5)             | 21<br>(15 - 29)          |
| Endocarditis                                  | 14<br>(10 - 18)          | 0<br>(0 - 1)          | 0<br>(0 - 0)           | 3<br>(2 - 4)            | 4<br>(3 - 6)             | 6<br>(4 - 9)             |
| Other cardiovascular and circulatory diseases | 136<br>(92 - 168)        | 1<br>(1 - 3)          | 1<br>(0 - 1)           | 21<br>(15 - 28)         | 50<br>(32 - 65)          | 62<br>(41 - 82)          |
| Chronic respiratory diseases                  | 335<br>(289 - 412)       | 4<br>(2 - 9)          | 1<br>(1 - 2)           | 31<br>(25 - 42)         | 103<br>(86 - 128)        | 195<br>(166 - 242)       |
| Chronic obstructive pulmonary disease         | 213<br>(181 - 268)       | 1<br>(1 - 3)          | 0<br>(0 - 0)           | 12<br>(9 - 17)          | 60<br>(48 - 75)          | 140<br>(116 - 178)       |

Web Table 31- Trinidad and Tobago deaths with 95% UI by age, sex, and cause in 2013

| Cause                                               | Both Sexes, All Ages | Both Sexes, 0-4 Years | Both Sexes, 5-14 Years | Both Sexes, 15-49 Years | Both Sexes, 50-69 Years | Both Sexes, 70-80 Years |
|-----------------------------------------------------|----------------------|-----------------------|------------------------|-------------------------|-------------------------|-------------------------|
| Pneumoconiosis                                      | 10<br>(7 - 15)       | 0<br>(0 - 0)          | 0<br>(0 - 0)           | 1<br>(1 - 2)            | 5<br>(3 - 7)            | 4<br>(3 - 6)            |
| Silicosis                                           | 1<br>(0 - 1)         | 0<br>(0 - 0)          | 0<br>(0 - 0)           | 0<br>(0 - 0)            | 0<br>(0 - 0)            | 0<br>(0 - 0)            |
| Asbestosis                                          | 2<br>(1 - 3)         | 0<br>(0 - 0)          | 0<br>(0 - 0)           | 0<br>(0 - 0)            | 2<br>(1 - 3)            | 0<br>(0 - 0)            |
| Coal workers pneumoconiosis                         | 2<br>(2 - 3)         | 0<br>(0 - 0)          | 0<br>(0 - 0)           | 1<br>(0 - 1)            | 1<br>(1 - 2)            | 1<br>(0 - 1)            |
| Other pneumoconiosis                                | 5<br>(4 - 8)         | 0<br>(0 - 0)          | 0<br>(0 - 0)           | 0<br>(0 - 1)            | 2<br>(1 - 3)            | 3<br>(2 - 5)            |
| Asthma                                              | 68<br>(55 - 85)      | 1<br>(0 - 2)          | 1<br>(0 - 1)           | 13<br>(10 - 17)         | 23<br>(18 - 30)         | 30<br>(23 - 40)         |
| Interstitial lung disease and pulmonary sarcoidosis | 34<br>(24 - 52)      | 0<br>(0 - 0)          | 0<br>(0 - 0)           | 4<br>(2 - 6)            | 13<br>(9 - 20)          | 17<br>(12 - 27)         |
| Other chronic respiratory diseases                  | 10<br>(8 - 13)       | 1<br>(1 - 3)          | 0<br>(0 - 0)           | 2<br>(2 - 3)            | 3<br>(2 - 4)            | 3<br>(2 - 5)            |
| Cirrhosis                                           | 206<br>(177 - 235)   | 0<br>(0 - 1)          | 1<br>(0 - 1)           | 49<br>(40 - 59)         | 109<br>(90 - 128)       | 47<br>(40 - 55)         |
| Cirrhosis due to hepatitis B                        | 15<br>(6 - 27)       | 0<br>(0 - 0)          | 0<br>(0 - 0)           | 4<br>(2 - 7)            | 8<br>(3 - 15)           | 3<br>(1 - 6)            |
| Cirrhosis due to hepatitis C                        | 68<br>(43 - 94)      | 0<br>(0 - 0)          | 0<br>(0 - 0)           | 15<br>(9 - 22)          | 35<br>(19 - 51)         | 18<br>(12 - 24)         |
| Cirrhosis due to alcohol use                        | 91<br>(68 - 123)     | --                    | --                     | 19<br>(12 - 27)         | 51<br>(36 - 71)         | 21<br>(16 - 28)         |
| Cirrhosis due to other causes                       | 32<br>(21 - 44)      | 0<br>(0 - 1)          | 0<br>(0 - 1)           | 12<br>(8 - 17)          | 15<br>(9 - 22)          | 4<br>(2 - 6)            |
| Digestive diseases                                  | 291<br>(249 - 330)   | 1<br>(1 - 3)          | 1<br>(1 - 2)           | 42<br>(34 - 54)         | 101<br>(84 - 121)       | 145<br>(122 - 167)      |
| Peptic ulcer disease                                | 81<br>(66 - 103)     | 0<br>(0 - 0)          | 0<br>(0 - 0)           | 10<br>(7 - 15)          | 30<br>(23 - 39)         | 41<br>(32 - 53)         |
| Gastritis and duodenitis                            | 22<br>(14 - 31)      | 0<br>(0 - 0)          | 0<br>(0 - 0)           | 3<br>(2 - 5)            | 8<br>(5 - 11)           | 11<br>(6 - 15)          |
| Appendicitis                                        | 12<br>(9 - 17)       | 0<br>(0 - 0)          | 0<br>(0 - 0)           | 3<br>(2 - 5)            | 4<br>(3 - 6)            | 4<br>(3 - 6)            |
| Paralytic ileus and intestinal obstruction          | 34<br>(14 - 49)      | 0<br>(0 - 1)          | 0<br>(0 - 0)           | 4<br>(1 - 5)            | 10<br>(4 - 16)          | 19<br>(7 - 29)          |
| Inguinal, femoral, and abdominal hernia             | 16<br>(9 - 33)       | 0<br>(0 - 0)          | 0<br>(0 - 0)           | 2<br>(1 - 4)            | 5<br>(3 - 11)           | 9<br>(5 - 19)           |
| Inflammatory bowel disease                          | 22<br>(17 - 30)      | 1<br>(0 - 1)          | 0<br>(0 - 0)           | 4<br>(3 - 5)            | 7<br>(5 - 9)            | 11<br>(8 - 15)          |
| Vascular intestinal disorders                       | 16<br>(9 - 27)       | 0<br>(0 - 0)          | 0<br>(0 - 0)           | 2<br>(1 - 3)            | 5<br>(3 - 10)           | 9<br>(5 - 15)           |
| Gallbladder and biliary diseases                    | 19<br>(14 - 23)      | 0<br>(0 - 0)          | 0<br>(0 - 0)           | 3<br>(2 - 3)            | 8<br>(6 - 10)           | 9<br>(6 - 12)           |
| Pancreatitis                                        | 21<br>(16 - 29)      | 0<br>(0 - 0)          | 0<br>(0 - 0)           | 7<br>(5 - 10)           | 9<br>(6 - 13)           | 5<br>(4 - 7)            |
| Other digestive diseases                            | 47<br>(35 - 58)      | 0<br>(0 - 0)          | 0<br>(0 - 0)           | 6<br>(4 - 7)            | 14<br>(9 - 18)          | 27<br>(19 - 35)         |
| Neurological disorders                              | 457<br>(398 - 526)   | 1<br>(1 - 3)          | 2<br>(1 - 3)           | 28<br>(21 - 38)         | 64<br>(54 - 76)         | 362<br>(307 - 425)      |
| Alzheimer disease and other dementias               | 350<br>(296 - 413)   | --                    | --                     | 0<br>(0 - 0)            | 32<br>(24 - 40)         | 318<br>(265 - 380)      |
| Parkinson disease                                   | 40<br>(33 - 53)      | --                    | --                     | 1<br>(0 - 1)            | 9<br>(7 - 13)           | 31<br>(24 - 42)         |
| Epilepsy                                            | 40<br>(30 - 55)      | 1<br>(0 - 2)          | 1<br>(1 - 2)           | 20<br>(14 - 28)         | 11<br>(8 - 15)          | 7<br>(5 - 9)            |
| Multiple sclerosis                                  | 3<br>(2 - 5)         | --                    | --                     | 1<br>(1 - 2)            | 1<br>(1 - 2)            | 1<br>(0 - 1)            |
| Other neurological disorders                        | 24<br>(20 - 28)      | 1<br>(0 - 1)          | 0<br>(0 - 1)           | 6<br>(5 - 8)            | 11<br>(9 - 13)          | 6<br>(5 - 7)            |
| Mental and substance use disorders                  | 46<br>(32 - 56)      | 0<br>(0 - 0)          | 0<br>(0 - 0)           | 16<br>(11 - 21)         | 21<br>(14 - 27)         | 9<br>(6 - 11)           |
| Schizophrenia                                       | 4<br>(2 - 5)         | --                    | --                     | 1<br>(0 - 1)            | 1<br>(1 - 2)            | 1<br>(1 - 2)            |
| Alcohol use disorders                               | 28<br>(17 - 37)      | --                    | --                     | 9<br>(5 - 12)           | 15<br>(8 - 21)          | 4<br>(2 - 6)            |
| Drug use disorders                                  | 14<br>(8 - 17)       | 0<br>(0 - 0)          | --                     | 6<br>(3 - 9)            | 4<br>(3 - 6)            | 3<br>(2 - 4)            |
| Opioid use disorders                                | 4<br>(2 - 5)         | 0<br>(0 - 0)          | --                     | 2<br>(1 - 3)            | 1<br>(1 - 2)            | 1<br>(1 - 1)            |
| Cocaine use disorders                               | 1<br>(0 - 1)         | 0<br>(0 - 0)          | --                     | 0<br>(0 - 0)            | 0<br>(0 - 0)            | 0<br>(0 - 0)            |
| Amphetamine use disorders                           | 0<br>(0 - 1)         | 0<br>(0 - 0)          | --                     | 0<br>(0 - 0)            | 0<br>(0 - 0)            | 0<br>(0 - 0)            |
| Other drug use disorders                            | 9<br>(5 - 11)        | 0<br>(0 - 0)          | --                     | 4<br>(2 - 5)            | 3<br>(2 - 4)            | 2<br>(1 - 3)            |
| Eating disorders                                    | 0<br>(0 - 1)         | --                    | 0<br>(0 - 0)           | 0<br>(0 - 1)            | --                      | --                      |
| Anorexia nervosa                                    | 0<br>(0 - 1)         | --                    | 0<br>(0 - 0)           | 0<br>(0 - 1)            | --                      | --                      |

Web Table 31- Trinidad and Tobago deaths with 95% UI by age, sex, and cause in 2013

| Cause                                               | Both Sexes, All Ages     | Both Sexes, 0-4 Years | Both Sexes, 5-14 Years | Both Sexes, 15-49 Years | Both Sexes, 50-69 Years | Both Sexes, 70-80 Years |
|-----------------------------------------------------|--------------------------|-----------------------|------------------------|-------------------------|-------------------------|-------------------------|
| Diabetes, urogenital, blood, and endocrine diseases | 2,371<br>(2,097 - 2,644) | 9<br>(4 - 21)         | 4<br>(3 - 7)           | 188<br>(155 - 229)      | 1,034<br>(902 - 1,177)  | 1,135<br>(989 - 1,289)  |
| Diabetes mellitus                                   | 1,783<br>(1,560 - 2,016) | 1<br>(0 - 2)          | 1<br>(0 - 1)           | 93<br>(76 - 113)        | 805<br>(691 - 924)      | 884<br>(757 - 1,012)    |
| Acute glomerulonephritis                            | 1<br>(1 - 1)             | 0<br>(0 - 0)          | 0<br>(0 - 0)           | 0<br>(0 - 0)            | 0<br>(0 - 0)            | 0<br>(0 - 1)            |
| Chronic kidney disease                              | 393<br>(317 - 497)       | 2<br>(1 - 4)          | 1<br>(1 - 2)           | 54<br>(41 - 77)         | 164<br>(126 - 206)      | 172<br>(136 - 223)      |
| Chronic kidney disease due to diabetes mellitus     | 73<br>(48 - 119)         | 0<br>(0 - 0)          | 0<br>(0 - 0)           | 9<br>(5 - 15)           | 39<br>(25 - 62)         | 25<br>(15 - 42)         |
| Chronic kidney disease due to hypertension          | 189<br>(140 - 238)       | 0<br>(0 - 1)          | 0<br>(0 - 0)           | 24<br>(18 - 32)         | 76<br>(53 - 97)         | 87<br>(65 - 114)        |
| Chronic kidney disease due to glomerulonephritis    | 10<br>(7 - 13)           | 0<br>(0 - 1)          | 0<br>(0 - 0)           | 3<br>(2 - 4)            | 3<br>(2 - 4)            | 4<br>(2 - 5)            |
| Chronic kidney disease due to other causes          | 121<br>(74 - 189)        | 1<br>(0 - 3)          | 1<br>(0 - 1)           | 19<br>(12 - 33)         | 45<br>(25 - 73)         | 55<br>(33 - 92)         |
| Urinary diseases and male infertility               | 66<br>(50 - 78)          | 0<br>(0 - 1)          | 0<br>(0 - 0)           | 7<br>(5 - 9)            | 22<br>(15 - 27)         | 36<br>(27 - 46)         |
| Interstitial nephritis and urinary tract infections | 46<br>(33 - 56)          | 0<br>(0 - 1)          | 0<br>(0 - 0)           | 5<br>(3 - 6)            | 14<br>(9 - 18)          | 27<br>(19 - 35)         |
| Urolithiasis                                        | 4<br>(2 - 6)             | --                    | 0<br>(0 - 0)           | 1<br>(0 - 1)            | 2<br>(1 - 3)            | 2<br>(1 - 3)            |
| Other urinary diseases                              | 16<br>(11 - 22)          | 0<br>(0 - 0)          | 0<br>(0 - 0)           | 2<br>(1 - 3)            | 6<br>(4 - 8)            | 8<br>(5 - 12)           |
| Gynecological diseases                              | 1<br>(1 - 2)             | --                    | --                     | 0<br>(0 - 1)            | 0<br>(0 - 0)            | 0<br>(0 - 1)            |
| Uterine fibroids                                    | 0<br>(0 - 1)             | --                    | --                     | 0<br>(0 - 0)            | 0<br>(0 - 0)            | 0<br>(0 - 0)            |
| Polycystic ovarian syndrome                         | 0<br>(0 - 0)             | --                    | --                     | 0<br>(0 - 0)            | 0<br>(0 - 0)            | --                      |
| Endometriosis                                       | 0<br>(0 - 0)             | --                    | --                     | 0<br>(0 - 0)            | 0<br>(0 - 0)            | --                      |
| Genital prolapse                                    | 0<br>(0 - 0)             | --                    | --                     | 0<br>(0 - 0)            | 0<br>(0 - 0)            | 0<br>(0 - 0)            |
| Other gynecological diseases                        | 0<br>(0 - 1)             | --                    | --                     | 0<br>(0 - 0)            | 0<br>(0 - 0)            | 0<br>(0 - 0)            |
| Hemoglobinopathies and hemolytic anemias            | 24<br>(16 - 33)          | 2<br>(1 - 6)          | 2<br>(1 - 3)           | 10<br>(6 - 14)          | 6<br>(4 - 9)            | 4<br>(2 - 5)            |
| Thalassemias                                        | 0<br>(0 - 0)             | 0<br>(0 - 0)          | 0<br>(0 - 0)           | 0<br>(0 - 0)            | 0<br>(0 - 0)            | 0<br>(0 - 0)            |
| Sickle cell disorders                               | 18<br>(12 - 26)          | 2<br>(1 - 5)          | 2<br>(1 - 3)           | 9<br>(6 - 13)           | 5<br>(4 - 7)            | 1<br>(0 - 1)            |
| G6PD deficiency                                     | 1<br>(0 - 1)             | 0<br>(0 - 0)          | 0<br>(0 - 0)           | 0<br>(0 - 0)            | 0<br>(0 - 0)            | 0<br>(0 - 0)            |
| Other hemoglobinopathies and hemolytic anemias      | 5<br>(3 - 7)             | 0<br>(0 - 1)          | 0<br>(0 - 0)           | 0<br>(0 - 1)            | 1<br>(1 - 1)            | 3<br>(2 - 4)            |
| Endocrine, metabolic, blood, and immune disorders   | 103<br>(80 - 183)        | 4<br>(1 - 9)          | 1<br>(0 - 2)           | 23<br>(17 - 44)         | 37<br>(27 - 65)         | 38<br>(27 - 73)         |
| Musculoskeletal disorders                           | 46<br>(23 - 57)          | --                    | 1<br>(0 - 1)           | 18<br>(9 - 23)          | 14<br>(8 - 18)          | 14<br>(6 - 18)          |
| Rheumatoid arthritis                                | 7<br>(3 - 9)             | --                    | 0<br>(0 - 0)           | 1<br>(0 - 1)            | 2<br>(1 - 3)            | 4<br>(1 - 6)            |
| Other musculoskeletal disorders                     | 39<br>(20 - 49)          | --                    | 1<br>(0 - 1)           | 17<br>(9 - 22)          | 12<br>(6 - 15)          | 10<br>(5 - 14)          |
| Other non-communicable diseases                     | 186<br>(125 - 289)       | 93<br>(42 - 199)      | 6<br>(3 - 10)          | 18<br>(14 - 24)         | 22<br>(13 - 28)         | 47<br>(21 - 60)         |
| Congenital anomalies                                | 121<br>(68 - 223)        | 87<br>(39 - 185)      | 6<br>(3 - 10)          | 13<br>(10 - 18)         | 9<br>(7 - 12)           | 6<br>(5 - 9)            |
| Neural tube defects                                 | 5<br>(2 - 10)            | 5<br>(2 - 10)         | 0<br>(0 - 0)           | 0<br>(0 - 0)            | 0<br>(0 - 0)            | 0<br>(0 - 0)            |
| Congenital heart anomalies                          | 63<br>(35 - 117)         | 45<br>(21 - 95)       | 4<br>(2 - 6)           | 8<br>(6 - 12)           | 3<br>(2 - 5)            | 3<br>(2 - 5)            |
| Cleft lip and cleft palate                          | 0<br>(0 - 1)             | 0<br>(0 - 1)          | --                     | --                      | --                      | --                      |
| Down syndrome                                       | 6<br>(4 - 10)            | 2<br>(1 - 6)          | 0<br>(0 - 1)           | 2<br>(1 - 3)            | 1<br>(1 - 2)            | 0<br>(0 - 0)            |
| Chromosomal unbalanced rearrangements               | 3<br>(1 - 6)             | 2<br>(1 - 5)          | 0<br>(0 - 0)           | 0<br>(0 - 0)            | 0<br>(0 - 0)            | 0<br>(0 - 0)            |
| Other congenital anomalies                          | 43<br>(22 - 83)          | 31<br>(13 - 68)       | 1<br>(1 - 3)           | 3<br>(2 - 5)            | 4<br>(3 - 6)            | 3<br>(2 - 4)            |
| Skin and subcutaneous diseases                      | 60<br>(23 - 75)          | 1<br>(0 - 2)          | 0<br>(0 - 0)           | 5<br>(2 - 6)            | 14<br>(5 - 18)          | 40<br>(15 - 53)         |
| Cellulitis                                          | 7<br>(2 - 10)            | 0<br>(0 - 0)          | 0<br>(0 - 0)           | 1<br>(0 - 1)            | 2<br>(1 - 3)            | 4<br>(1 - 7)            |
| Pyoderma                                            | 14<br>(5 - 19)           | 0<br>(0 - 1)          | 0<br>(0 - 0)           | 2<br>(1 - 2)            | 4<br>(1 - 5)            | 8<br>(3 - 12)           |
| Decubitus ulcer                                     | 36<br>(14 - 48)          | 0<br>(0 - 0)          | 0<br>(0 - 0)           | 2<br>(1 - 3)            | 7<br>(3 - 9)            | 27<br>(10 - 37)         |
| Other skin and subcutaneous diseases                | 3<br>(1 - 5)             | 0<br>(0 - 0)          | 0<br>(0 - 0)           | 1<br>(0 - 1)            | 1<br>(0 - 1)            | 2<br>(0 - 4)            |

Web Table 31- Trinidad and Tobago deaths with 95% UI by age, sex, and cause in 2013

| Cause                                           | Both Sexes, All Ages   | Both Sexes, 0-4 Years | Both Sexes, 5-14 Years | Both Sexes, 15-49 Years | Both Sexes, 50-69 Years | Both Sexes, 70-80 Years |
|-------------------------------------------------|------------------------|-----------------------|------------------------|-------------------------|-------------------------|-------------------------|
| Sudden infant death syndrome                    | 5<br>(2 - 15)          | 5<br>(2 - 15)         | --                     | --                      | --                      | --                      |
| Injuries                                        | 1,064<br>(860 - 1,257) | 28<br>(12 - 62)       | 23<br>(14 - 37)        | 592<br>(463 - 727)      | 259<br>(205 - 314)      | 162<br>(133 - 188)      |
| Transport injuries                              | 290<br>(232 - 345)     | 5<br>(2 - 10)         | 9<br>(5 - 15)          | 153<br>(120 - 194)      | 83<br>(63 - 103)        | 40<br>(31 - 48)         |
| Road injuries                                   | 270<br>(217 - 325)     | 4<br>(2 - 9)          | 8<br>(5 - 14)          | 143<br>(113 - 182)      | 77<br>(58 - 96)         | 37<br>(29 - 44)         |
| Pedestrian road injuries                        | 76<br>(55 - 100)       | 1<br>(1 - 3)          | 3<br>(2 - 6)           | 29<br>(20 - 43)         | 27<br>(19 - 37)         | 14<br>(10 - 19)         |
| Cyclist road injuries                           | 14<br>(10 - 19)        | 0<br>(0 - 0)          | 1<br>(0 - 1)           | 6<br>(4 - 9)            | 5<br>(3 - 7)            | 2<br>(2 - 3)            |
| Motorcyclist road injuries                      | 17<br>(12 - 24)        | 0<br>(0 - 0)          | 0<br>(0 - 1)           | 12<br>(8 - 17)          | 3<br>(2 - 5)            | 2<br>(1 - 3)            |
| Motor vehicle road injuries                     | 160<br>(128 - 197)     | 2<br>(1 - 5)          | 4<br>(2 - 7)           | 95<br>(74 - 123)        | 41<br>(30 - 53)         | 18<br>(13 - 22)         |
| Other road injuries                             | 2<br>(1 - 4)           | 0<br>(0 - 0)          | 0<br>(0 - 0)           | 1<br>(1 - 2)            | 1<br>(0 - 1)            | 0<br>(0 - 1)            |
| Other transport injuries                        | 21<br>(12 - 28)        | 1<br>(0 - 1)          | 1<br>(0 - 1)           | 10<br>(5 - 14)          | 6<br>(3 - 9)            | 4<br>(2 - 5)            |
| Unintentional injuries                          | 322<br>(270 - 379)     | 20<br>(9 - 44)        | 10<br>(6 - 16)         | 111<br>(89 - 137)       | 83<br>(67 - 98)         | 99<br>(78 - 119)        |
| Falls                                           | 69<br>(56 - 87)        | 1<br>(0 - 2)          | 1<br>(0 - 1)           | 15<br>(11 - 21)         | 17<br>(13 - 24)         | 34<br>(26 - 46)         |
| Drowning                                        | 66<br>(49 - 93)        | 3<br>(1 - 7)          | 4<br>(2 - 7)           | 38<br>(27 - 58)         | 15<br>(11 - 22)         | 6<br>(4 - 8)            |
| Fire, heat, and hot substances                  | 32<br>(22 - 40)        | 2<br>(1 - 5)          | 1<br>(1 - 2)           | 8<br>(5 - 10)           | 8<br>(5 - 10)           | 13<br>(8 - 18)          |
| Poisonings                                      | 7<br>(5 - 11)          | 0<br>(0 - 1)          | 0<br>(0 - 0)           | 3<br>(2 - 6)            | 2<br>(1 - 3)            | 1<br>(1 - 2)            |
| Exposure to mechanical forces                   | 36<br>(29 - 52)        | 1<br>(0 - 2)          | 1<br>(1 - 2)           | 21<br>(16 - 31)         | 10<br>(8 - 13)          | 3<br>(2 - 5)            |
| Unintentional firearm injuries                  | 16<br>(11 - 21)        | 0<br>(0 - 0)          | 0<br>(0 - 1)           | 10<br>(6 - 14)          | 5<br>(3 - 7)            | 1<br>(1 - 2)            |
| Unintentional suffocation                       | 4<br>(3 - 7)           | 0<br>(0 - 1)          | 0<br>(0 - 0)           | 2<br>(1 - 3)            | 1<br>(1 - 3)            | 1<br>(0 - 1)            |
| Other exposure to mechanical forces             | 16<br>(12 - 29)        | 0<br>(0 - 1)          | 1<br>(0 - 2)           | 9<br>(6 - 18)           | 4<br>(3 - 7)            | 1<br>(1 - 2)            |
| Adverse effects of medical treatment            | 39<br>(25 - 50)        | 2<br>(1 - 5)          | 0<br>(0 - 1)           | 7<br>(5 - 10)           | 12<br>(8 - 16)          | 17<br>(10 - 24)         |
| Animal contact                                  | 8<br>(4 - 12)          | 0<br>(0 - 1)          | 0<br>(0 - 1)           | 2<br>(1 - 3)            | 3<br>(1 - 5)            | 2<br>(1 - 4)            |
| Venomous animal contact                         | 5<br>(2 - 8)           | 0<br>(0 - 1)          | 0<br>(0 - 0)           | 2<br>(1 - 2)            | 2<br>(1 - 4)            | 1<br>(0 - 2)            |
| Non-venomous animal contact                     | 3<br>(1 - 4)           | 0<br>(0 - 0)          | 0<br>(0 - 0)           | 1<br>(0 - 1)            | 1<br>(0 - 1)            | 1<br>(0 - 2)            |
| Foreign body                                    | 53<br>(34 - 75)        | 9<br>(4 - 22)         | 1<br>(1 - 2)           | 11<br>(7 - 16)          | 12<br>(7 - 18)          | 19<br>(12 - 27)         |
| Pulmonary aspiration and foreign body in airway | 52<br>(33 - 74)        | 9<br>(4 - 22)         | 1<br>(1 - 2)           | 11<br>(7 - 16)          | 12<br>(7 - 18)          | 19<br>(12 - 26)         |
| Foreign body in other body part                 | 1<br>(1 - 2)           | 0<br>(0 - 0)          | 0<br>(0 - 0)           | 0<br>(0 - 0)            | 0<br>(0 - 0)            | 0<br>(0 - 1)            |
| Other unintentional injuries                    | 13<br>(9 - 17)         | 0<br>(0 - 1)          | 0<br>(0 - 1)           | 6<br>(4 - 9)            | 3<br>(2 - 6)            | 3<br>(2 - 4)            |
| Self-harm and interpersonal violence            | 451<br>(299 - 567)     | 4<br>(1 - 8)          | 4<br>(3 - 7)           | 328<br>(209 - 422)      | 93<br>(63 - 123)        | 22<br>(17 - 29)         |
| Self-harm                                       | 169<br>(138 - 216)     | --                    | 1<br>(1 - 2)           | 109<br>(85 - 146)       | 46<br>(36 - 60)         | 14<br>(11 - 18)         |
| Interpersonal violence                          | 282<br>(135 - 381)     | 4<br>(1 - 8)          | 3<br>(1 - 5)           | 219<br>(103 - 301)      | 47<br>(20 - 73)         | 9<br>(4 - 14)           |
| Assault by firearm                              | 174<br>(72 - 254)      | 1<br>(0 - 2)          | 1<br>(0 - 2)           | 151<br>(63 - 224)       | 20<br>(7 - 34)          | 1<br>(1 - 3)            |
| Assault by sharp object                         | 58<br>(26 - 95)        | 1<br>(0 - 1)          | 1<br>(0 - 1)           | 42<br>(19 - 72)         | 12<br>(5 - 20)          | 2<br>(1 - 4)            |
| Assault by other means                          | 49<br>(25 - 73)        | 2<br>(1 - 5)          | 1<br>(1 - 2)           | 26<br>(12 - 41)         | 15<br>(7 - 25)          | 5<br>(2 - 8)            |

Web Table 31- Trinidad and Tobago deaths with 95% UI by age, sex, and cause in 2013

| Cause                                                             | Males, All Ages          | Males, 0-4 Years   | Males, 5-14 Years | Males, 15-49 Years       | Males, 50-69 Years       | Males, 70-80 Years       |
|-------------------------------------------------------------------|--------------------------|--------------------|-------------------|--------------------------|--------------------------|--------------------------|
| All causes                                                        | 7,111<br>(6,258 - 8,038) | 245<br>(109 - 472) | 35<br>(21 - 58)   | 1,227<br>(1,042 - 1,446) | 2,673<br>(2,287 - 3,139) | 2,932<br>(2,635 - 3,238) |
| Communicable, maternal, neonatal, and nutritional diseases        | 707<br>(530 - 913)       | 167<br>(72 - 314)  | 6<br>(3 - 10)     | 201<br>(135 - 278)       | 159<br>(121 - 209)       | 175<br>(139 - 221)       |
| HIV/AIDS and tuberculosis                                         | 216<br>(118 - 344)       | 1<br>(0 - 1)       | 0<br>(0 - 0)      | 139<br>(73 - 219)        | 64<br>(33 - 111)         | 13<br>(9 - 20)           |
| Tuberculosis                                                      | 29<br>(17 - 36)          | 0<br>(0 - 0)       | 0<br>(0 - 0)      | 9<br>(5 - 12)            | 13<br>(7 - 17)           | 7<br>(5 - 9)             |
| HIV/AIDS                                                          | 188<br>(87 - 319)        | 0<br>(0 - 1)       | 0<br>(0 - 0)      | 130<br>(64 - 211)        | 51<br>(20 - 98)          | 6<br>(2 - 13)            |
| HIV/AIDS resulting in mycobacterial infection                     | 12<br>(5 - 20)           | 0<br>(0 - 0)       | 0<br>(0 - 0)      | 8<br>(4 - 13)            | 3<br>(1 - 7)             | 0<br>(0 - 1)             |
| HIV/AIDS resulting in other diseases                              | 176<br>(82 - 298)        | 0<br>(0 - 1)       | 0<br>(0 - 0)      | 122<br>(61 - 198)        | 48<br>(19 - 92)          | 6<br>(2 - 12)            |
| Diarrhea, lower respiratory, and other common infectious diseases | 274<br>(221 - 339)       | 26<br>(12 - 55)    | 4<br>(2 - 8)      | 45<br>(34 - 60)          | 71<br>(54 - 92)          | 127<br>(96 - 167)        |
| Diarrheal diseases                                                | 23<br>(17 - 33)          | 6<br>(3 - 14)      | 1<br>(0 - 1)      | 3<br>(2 - 5)             | 5<br>(3 - 7)             | 8<br>(5 - 13)            |
| Intestinal infectious diseases                                    | 4<br>(1 - 10)            | 1<br>(0 - 4)       | 1<br>(0 - 3)      | 1<br>(0 - 4)             | 0<br>(0 - 1)             | 0<br>(0 - 0)             |
| Typhoid fever                                                     | 3<br>(1 - 8)             | 1<br>(0 - 3)       | 1<br>(0 - 2)      | 1<br>(0 - 3)             | 0<br>(0 - 1)             | 0<br>(0 - 0)             |
| Paratyphoid fever                                                 | 1<br>(0 - 2)             | 0<br>(0 - 1)       | 0<br>(0 - 1)      | 0<br>(0 - 1)             | 0<br>(0 - 0)             | 0<br>(0 - 0)             |
| Other intestinal infectious diseases                              | 0<br>(0 - 1)             | 0<br>(0 - 1)       | 0<br>(0 - 0)      | 0<br>(0 - 0)             | 0<br>(0 - 0)             | 0<br>(0 - 0)             |
| Lower respiratory infections                                      | 224<br>(180 - 281)       | 15<br>(7 - 35)     | 2<br>(1 - 3)      | 33<br>(23 - 45)          | 60<br>(44 - 79)          | 114<br>(83 - 156)        |
| Upper respiratory infections                                      | 0<br>(0 - 0)             | 0<br>(0 - 0)       | 0<br>(0 - 0)      | 0<br>(0 - 0)             | 0<br>(0 - 0)             | 0<br>(0 - 0)             |
| Otitis media                                                      | 1<br>(0 - 1)             | 0<br>(0 - 0)       | 0<br>(0 - 0)      | 0<br>(0 - 0)             | 0<br>(0 - 0)             | 0<br>(0 - 0)             |
| Meningitis                                                        | 13<br>(10 - 17)          | 2<br>(1 - 4)       | 0<br>(0 - 1)      | 4<br>(3 - 5)             | 4<br>(3 - 5)             | 3<br>(2 - 4)             |
| Pneumococcal meningitis                                           | 4<br>(3 - 5)             | 0<br>(0 - 1)       | 0<br>(0 - 0)      | 1<br>(1 - 2)             | 1<br>(1 - 2)             | 1<br>(1 - 1)             |
| H influenzae type B meningitis                                    | 2<br>(1 - 3)             | 1<br>(0 - 1)       | 0<br>(0 - 0)      | 0<br>(0 - 1)             | 0<br>(0 - 1)             | 0<br>(0 - 0)             |
| Meningococcal meningitis                                          | 2<br>(1 - 2)             | 0<br>(0 - 0)       | 0<br>(0 - 0)      | 1<br>(0 - 1)             | 0<br>(0 - 1)             | 0<br>(0 - 1)             |
| Other meningitis                                                  | 6<br>(4 - 8)             | 1<br>(0 - 1)       | 0<br>(0 - 0)      | 2<br>(1 - 3)             | 2<br>(1 - 3)             | 1<br>(1 - 2)             |
| Encephalitis                                                      | 8<br>(6 - 13)            | 1<br>(0 - 3)       | 1<br>(0 - 1)      | 3<br>(2 - 5)             | 2<br>(1 - 4)             | 1<br>(1 - 2)             |
| Diphtheria                                                        | 0<br>(0 - 0)             | 0<br>(0 - 0)       | 0<br>(0 - 0)      | 0<br>(0 - 0)             | 0<br>(0 - 0)             | --                       |
| Whooping cough                                                    | 0<br>(0 - 0)             | 0<br>(0 - 0)       | 0<br>(0 - 0)      | 0<br>(0 - 0)             | 0<br>(0 - 0)             | --                       |
| Tetanus                                                           | 1<br>(1 - 2)             | 0<br>(0 - 0)       | 0<br>(0 - 0)      | 0<br>(0 - 0)             | 0<br>(0 - 1)             | 0<br>(0 - 1)             |
| Measles                                                           | 0<br>(0 - 0)             | 0<br>(0 - 0)       | 0<br>(0 - 0)      | 0<br>(0 - 0)             | 0<br>(0 - 0)             | --                       |
| Varicella and herpes zoster                                       | 0<br>(0 - 1)             | 0<br>(0 - 0)       | 0<br>(0 - 0)      | 0<br>(0 - 0)             | 0<br>(0 - 0)             | 0<br>(0 - 1)             |
| Neglected tropical diseases and malaria                           | 5<br>(4 - 7)             | 0<br>(0 - 1)       | 0<br>(0 - 0)      | 2<br>(1 - 3)             | 1<br>(1 - 2)             | 1<br>(1 - 2)             |
| Leishmaniasis                                                     | 0<br>(0 - 0)             | 0<br>(0 - 0)       | 0<br>(0 - 0)      | 0<br>(0 - 0)             | 0<br>(0 - 0)             | 0<br>(0 - 0)             |
| Visceral leishmaniasis                                            | 0<br>(0 - 0)             | 0<br>(0 - 0)       | 0<br>(0 - 0)      | 0<br>(0 - 0)             | 0<br>(0 - 0)             | 0<br>(0 - 0)             |
| Cysticercosis                                                     | 0<br>(0 - 0)             | 0<br>(0 - 0)       | 0<br>(0 - 0)      | 0<br>(0 - 0)             | 0<br>(0 - 0)             | 0<br>(0 - 0)             |
| Cystic echinococcosis                                             | 0<br>(0 - 0)             | 0<br>(0 - 0)       | 0<br>(0 - 0)      | 0<br>(0 - 0)             | 0<br>(0 - 0)             | 0<br>(0 - 0)             |
| Dengue                                                            | 2<br>(1 - 3)             | 0<br>(0 - 0)       | 0<br>(0 - 0)      | 1<br>(1 - 1)             | 1<br>(0 - 1)             | 0<br>(0 - 0)             |
| Yellow fever                                                      | 0<br>(0 - 0)             | 0<br>(0 - 0)       | 0<br>(0 - 0)      | 0<br>(0 - 0)             | 0<br>(0 - 0)             | 0<br>(0 - 0)             |
| Rabies                                                            | 0<br>(0 - 0)             | 0<br>(0 - 0)       | 0<br>(0 - 0)      | 0<br>(0 - 0)             | 0<br>(0 - 0)             | 0<br>(0 - 0)             |
| Intestinal nematode infections                                    | 0<br>(0 - 1)             | 0<br>(0 - 0)       | 0<br>(0 - 0)      | 0<br>(0 - 0)             | 0<br>(0 - 0)             | 0<br>(0 - 0)             |
| Ascariasis                                                        | 0<br>(0 - 1)             | 0<br>(0 - 0)       | 0<br>(0 - 0)      | 0<br>(0 - 0)             | 0<br>(0 - 0)             | 0<br>(0 - 0)             |
| Other neglected tropical diseases                                 | 2<br>(2 - 3)             | 0<br>(0 - 0)       | 0<br>(0 - 0)      | 1<br>(1 - 1)             | 1<br>(0 - 1)             | 1<br>(0 - 1)             |
| Maternal disorders                                                | --                       | --                 | --                | --                       | --                       | --                       |
| Maternal hemorrhage                                               | --                       | --                 | --                | --                       | --                       | --                       |



Web Table 31- Trinidad and Tobago deaths with 95% UI by age, sex, and cause in 2013

| Cause                                                            | Males, All Ages          | Males, 0-4 Years  | Males, 5-14 Years | Males, 15-49 Years | Males, 50-69 Years       | Males, 70-80 Years       |
|------------------------------------------------------------------|--------------------------|-------------------|-------------------|--------------------|--------------------------|--------------------------|
| Maternal sepsis and other maternal infections                    | --                       | --                | --                | --                 | --                       | --                       |
| Maternal hypertensive disorders                                  | --                       | --                | --                | --                 | --                       | --                       |
| Maternal obstructed labor                                        | --                       | --                | --                | --                 | --                       | --                       |
| Maternal abortive outcome                                        | --                       | --                | --                | --                 | --                       | --                       |
| Indirect maternal deaths                                         | --                       | --                | --                | --                 | --                       | --                       |
| Late maternal deaths                                             | --                       | --                | --                | --                 | --                       | --                       |
| Maternal deaths aggravated by HIV/AIDS                           | --                       | --                | --                | --                 | --                       | --                       |
| Other maternal disorders                                         | --                       | --                | --                | --                 | --                       | --                       |
| Neonatal disorders                                               | 134<br>(57 - 244)        | 134<br>(57 - 244) | --                | --                 | --                       | --                       |
| Neonatal preterm birth complications                             | 57<br>(22 - 116)         | 57<br>(22 - 116)  | --                | --                 | --                       | --                       |
| Neonatal encephalopathy due to birth asphyxia and trauma         | 33<br>(12 - 67)          | 33<br>(12 - 67)   | --                | --                 | --                       | --                       |
| Neonatal sepsis and other neonatal infections                    | 19<br>(6 - 44)           | 19<br>(6 - 44)    | --                | --                 | --                       | --                       |
| Hemolytic disease and other neonatal jaundice                    | 2<br>(1 - 6)             | 2<br>(1 - 6)      | --                | --                 | --                       | --                       |
| Other neonatal disorders                                         | 23<br>(9 - 45)           | 23<br>(9 - 45)    | --                | --                 | --                       | --                       |
| Nutritional deficiencies                                         | 57<br>(36 - 87)          | 4<br>(2 - 10)     | 1<br>(0 - 2)      | 8<br>(5 - 13)      | 15<br>(9 - 24)           | 29<br>(18 - 44)          |
| Protein-energy malnutrition                                      | 24<br>(13 - 42)          | 3<br>(1 - 8)      | 0<br>(0 - 1)      | 3<br>(2 - 6)       | 6<br>(3 - 10)            | 12<br>(6 - 23)           |
| Iodine deficiency                                                | 0<br>(0 - 0)             | 0<br>(0 - 0)      | 0<br>(0 - 0)      | 0<br>(0 - 0)       | 0<br>(0 - 0)             | 0<br>(0 - 0)             |
| Iron-deficiency anemia                                           | 29<br>(15 - 47)          | 1<br>(0 - 2)      | 0<br>(0 - 0)      | 4<br>(2 - 8)       | 8<br>(4 - 14)            | 16<br>(7 - 25)           |
| Other nutritional deficiencies                                   | 3<br>(1 - 6)             | 0<br>(0 - 1)      | 0<br>(0 - 0)      | 1<br>(0 - 1)       | 1<br>(0 - 2)             | 1<br>(0 - 3)             |
| Other communicable, maternal, neonatal, and nutritional diseases | 20<br>(12 - 27)          | 1<br>(0 - 4)      | 0<br>(0 - 1)      | 7<br>(4 - 10)      | 7<br>(4 - 10)            | 4<br>(2 - 6)             |
| Sexually transmitted diseases excluding HIV                      | 2<br>(1 - 4)             | 1<br>(0 - 3)      | 0<br>(0 - 0)      | 0<br>(0 - 0)       | 0<br>(0 - 1)             | 0<br>(0 - 1)             |
| Syphilis                                                         | 2<br>(1 - 4)             | 1<br>(0 - 3)      | 0<br>(0 - 0)      | 0<br>(0 - 0)       | 0<br>(0 - 1)             | 0<br>(0 - 1)             |
| Chlamydial infection                                             | --                       | --                | --                | --                 | --                       | --                       |
| Gonococcal infection                                             | 0<br>(0 - 0)             | --                | 0<br>(0 - 0)      | 0<br>(0 - 0)       | 0<br>(0 - 0)             | 0<br>(0 - 0)             |
| Other sexually transmitted diseases                              | 0<br>(0 - 0)             | --                | 0<br>(0 - 0)      | 0<br>(0 - 0)       | 0<br>(0 - 0)             | 0<br>(0 - 0)             |
| Hepatitis                                                        | 2<br>(2 - 3)             | 0<br>(0 - 0)      | 0<br>(0 - 0)      | 1<br>(1 - 1)       | 1<br>(1 - 1)             | 0<br>(0 - 1)             |
| Acute hepatitis A                                                | 1<br>(0 - 1)             | 0<br>(0 - 0)      | 0<br>(0 - 0)      | 0<br>(0 - 1)       | 0<br>(0 - 0)             | 0<br>(0 - 0)             |
| Acute hepatitis B                                                | 2<br>(1 - 2)             | 0<br>(0 - 0)      | 0<br>(0 - 0)      | 1<br>(0 - 1)       | 1<br>(0 - 1)             | 0<br>(0 - 0)             |
| Acute hepatitis C                                                | 0<br>(0 - 0)             | --                | 0<br>(0 - 0)      | 0<br>(0 - 0)       | 0<br>(0 - 0)             | 0<br>(0 - 0)             |
| Other infectious diseases                                        | 16<br>(9 - 22)           | 0<br>(0 - 1)      | 0<br>(0 - 1)      | 6<br>(3 - 9)       | 6<br>(3 - 9)             | 4<br>(2 - 5)             |
| Non-communicable diseases                                        | 5,571<br>(4,891 - 6,319) | 63<br>(28 - 132)  | 14<br>(8 - 24)    | 519<br>(414 - 646) | 2,304<br>(1,968 - 2,706) | 2,670<br>(2,397 - 2,951) |
| Neoplasms                                                        | 1,020<br>(866 - 1,190)   | 3<br>(1 - 6)      | 4<br>(2 - 6)      | 91<br>(73 - 111)   | 418<br>(350 - 493)       | 505<br>(416 - 606)       |
| Esophageal cancer                                                | 32<br>(24 - 43)          | --                | --                | 3<br>(2 - 4)       | 16<br>(12 - 23)          | 13<br>(9 - 18)           |
| Stomach cancer                                                   | 56<br>(46 - 67)          | --                | --                | 5<br>(3 - 6)       | 25<br>(20 - 31)          | 26<br>(20 - 34)          |
| Liver cancer                                                     | 30<br>(24 - 37)          | --                | 0<br>(0 - 0)      | 5<br>(3 - 6)       | 15<br>(11 - 19)          | 11<br>(8 - 15)           |
| Liver cancer due to hepatitis B                                  | 9<br>(3 - 13)            | --                | 0<br>(0 - 0)      | 2<br>(1 - 3)       | 4<br>(1 - 8)             | 2<br>(1 - 4)             |
| Liver cancer due to hepatitis C                                  | 15<br>(9 - 21)           | --                | 0<br>(0 - 0)      | 2<br>(1 - 3)       | 7<br>(4 - 11)            | 6<br>(4 - 8)             |
| Liver cancer due to alcohol use                                  | 5<br>(3 - 8)             | --                | --                | 1<br>(0 - 1)       | 2<br>(1 - 4)             | 2<br>(1 - 4)             |
| Liver cancer due to other causes                                 | 2<br>(1 - 3)             | --                | 0<br>(0 - 0)      | 0<br>(0 - 1)       | 1<br>(0 - 1)             | 0<br>(0 - 1)             |
| Larynx cancer                                                    | 18<br>(13 - 23)          | --                | --                | 2<br>(1 - 2)       | 9<br>(7 - 13)            | 7<br>(5 - 10)            |

Web Table 31- Trinidad and Tobago deaths with 95% UI by age, sex, and cause in 2013

| Cause                                         | Males, All Ages          | Males, 0-4 Years | Males, 5-14 Years | Males, 15-49 Years | Males, 50-69 Years   | Males, 70-80 Years       |
|-----------------------------------------------|--------------------------|------------------|-------------------|--------------------|----------------------|--------------------------|
| Tracheal, bronchus and lung cancer            | 153<br>(128 - 180)       | --               | --                | 13<br>(10 - 18)    | 86<br>(69 - 104)     | 53<br>(43 - 65)          |
| Breast cancer                                 | 5<br>(4 - 9)             | --               | --                | 1<br>(0 - 1)       | 2<br>(1 - 4)         | 2<br>(1 - 4)             |
| Cervical cancer                               | --                       | --               | --                | --                 | --                   | --                       |
| Uterine cancer                                | --                       | --               | --                | --                 | --                   | --                       |
| Prostate cancer                               | 331<br>(215 - 469)       | --               | --                | 2<br>(1 - 3)       | 80<br>(53 - 120)     | 249<br>(154 - 354)       |
| Colon and rectum cancer                       | 107<br>(88 - 126)        | --               | --                | 9<br>(7 - 12)      | 50<br>(40 - 62)      | 47<br>(37 - 58)          |
| Lip and oral cavity cancer                    | 17<br>(13 - 25)          | --               | --                | 2<br>(1 - 3)       | 9<br>(7 - 14)        | 6<br>(4 - 8)             |
| Nasopharynx cancer                            | 5<br>(4 - 7)             | --               | 0<br>(0 - 0)      | 1<br>(1 - 2)       | 3<br>(2 - 4)         | 1<br>(1 - 1)             |
| Other pharynx cancer                          | 10<br>(8 - 14)           | --               | --                | 1<br>(1 - 2)       | 6<br>(4 - 8)         | 3<br>(2 - 4)             |
| Gallbladder and biliary tract cancer          | 10<br>(6 - 17)           | --               | --                | 1<br>(0 - 1)       | 5<br>(3 - 8)         | 4<br>(3 - 8)             |
| Pancreatic cancer                             | 48<br>(40 - 58)          | --               | --                | 4<br>(3 - 6)       | 25<br>(19 - 31)      | 19<br>(15 - 24)          |
| Malignant skin melanoma                       | 4<br>(2 - 7)             | --               | --                | 1<br>(1 - 2)       | 1<br>(1 - 3)         | 1<br>(1 - 3)             |
| Non-melanoma skin cancer                      | 5<br>(3 - 7)             | --               | --                | 1<br>(0 - 1)       | 2<br>(1 - 3)         | 2<br>(1 - 3)             |
| Ovarian cancer                                | --                       | --               | --                | --                 | --                   | --                       |
| Testicular cancer                             | 1<br>(1 - 2)             | --               | --                | 1<br>(0 - 1)       | 0<br>(0 - 0)         | 0<br>(0 - 1)             |
| Kidney cancer                                 | 13<br>(10 - 16)          | 0<br>(0 - 0)     | 0<br>(0 - 0)      | 1<br>(1 - 2)       | 7<br>(5 - 10)        | 4<br>(3 - 6)             |
| Bladder cancer                                | 19<br>(14 - 25)          | --               | --                | 1<br>(0 - 1)       | 8<br>(6 - 11)        | 10<br>(7 - 14)           |
| Brain and nervous system cancer               | 13<br>(6 - 17)           | 0<br>(0 - 1)     | 0<br>(0 - 1)      | 4<br>(2 - 5)       | 6<br>(3 - 8)         | 3<br>(1 - 4)             |
| Thyroid cancer                                | 3<br>(2 - 3)             | --               | 0<br>(0 - 0)      | 0<br>(0 - 0)       | 1<br>(1 - 2)         | 1<br>(1 - 1)             |
| Mesothelioma                                  | 4<br>(3 - 6)             | --               | --                | 0<br>(0 - 1)       | 2<br>(1 - 3)         | 2<br>(1 - 4)             |
| Hodgkin lymphoma                              | 3<br>(1 - 5)             | 0<br>(0 - 0)     | 0<br>(0 - 0)      | 1<br>(0 - 2)       | 1<br>(0 - 2)         | 0<br>(0 - 1)             |
| Non-Hodgkin lymphoma                          | 35<br>(27 - 46)          | 0<br>(0 - 0)     | 0<br>(0 - 1)      | 9<br>(6 - 13)      | 15<br>(11 - 21)      | 10<br>(7 - 14)           |
| Multiple myeloma                              | 20<br>(14 - 26)          | --               | --                | 2<br>(1 - 3)       | 11<br>(7 - 15)       | 7<br>(5 - 10)            |
| Leukemia                                      | 25<br>(20 - 30)          | 1<br>(0 - 1)     | 1<br>(1 - 2)      | 7<br>(6 - 10)      | 8<br>(7 - 11)        | 7<br>(5 - 9)             |
| Other neoplasms                               | 54<br>(44 - 65)          | 1<br>(1 - 3)     | 1<br>(1 - 2)      | 13<br>(10 - 18)    | 23<br>(17 - 30)      | 15<br>(11 - 20)          |
| Cardiovascular diseases                       | 2,341<br>(2,022 - 2,695) | 3<br>(1 - 7)     | 2<br>(1 - 3)      | 183<br>(145 - 227) | 976<br>(818 - 1,161) | 1,177<br>(1,036 - 1,320) |
| Rheumatic heart disease                       | 8<br>(5 - 11)            | 0<br>(0 - 0)     | 0<br>(0 - 0)      | 3<br>(2 - 5)       | 3<br>(2 - 4)         | 2<br>(1 - 3)             |
| Ischemic heart disease                        | 1,251<br>(1,045 - 1,477) | 0<br>(0 - 1)     | 0<br>(0 - 1)      | 94<br>(73 - 122)   | 559<br>(457 - 673)   | 597<br>(501 - 703)       |
| Cerebrovascular disease                       | 715<br>(567 - 875)       | 1<br>(1 - 2)     | 1<br>(0 - 1)      | 46<br>(34 - 61)    | 273<br>(209 - 346)   | 394<br>(314 - 484)       |
| Ischemic stroke                               | 449<br>(353 - 570)       | 0<br>(0 - 1)     | 0<br>(0 - 0)      | 14<br>(9 - 21)     | 149<br>(111 - 196)   | 285<br>(226 - 360)       |
| Hemorrhagic stroke                            | 266<br>(170 - 341)       | 1<br>(0 - 2)     | 1<br>(0 - 1)      | 32<br>(21 - 43)    | 124<br>(80 - 165)    | 109<br>(65 - 147)        |
| Hypertensive heart disease                    | 164<br>(116 - 246)       | 0<br>(0 - 0)     | 0<br>(0 - 0)      | 11<br>(7 - 18)     | 63<br>(43 - 98)      | 89<br>(58 - 137)         |
| Cardiomyopathy and myocarditis                | 62<br>(44 - 85)          | 1<br>(0 - 2)     | 0<br>(0 - 1)      | 12<br>(8 - 18)     | 27<br>(18 - 37)      | 22<br>(14 - 30)          |
| Atrial fibrillation and flutter               | 23<br>(16 - 32)          | --               | --                | 1<br>(1 - 1)       | 6<br>(4 - 9)         | 16<br>(10 - 23)          |
| Aortic aneurysm                               | 36<br>(29 - 46)          | --               | --                | 2<br>(2 - 3)       | 16<br>(12 - 21)      | 18<br>(14 - 23)          |
| Peripheral vascular disease                   | 11<br>(7 - 15)           | --               | --                | 0<br>(0 - 0)       | 2<br>(2 - 3)         | 8<br>(5 - 12)            |
| Endocarditis                                  | 7<br>(5 - 11)            | 0<br>(0 - 0)     | 0<br>(0 - 0)      | 1<br>(1 - 2)       | 3<br>(2 - 4)         | 3<br>(2 - 5)             |
| Other cardiovascular and circulatory diseases | 63<br>(43 - 80)          | 1<br>(0 - 1)     | 0<br>(0 - 0)      | 11<br>(7 - 15)     | 24<br>(16 - 33)      | 27<br>(18 - 36)          |
| Chronic respiratory diseases                  | 237<br>(197 - 297)       | 2<br>(1 - 5)     | 1<br>(0 - 1)      | 20<br>(15 - 29)    | 77<br>(61 - 99)      | 136<br>(113 - 171)       |
| Chronic obstructive pulmonary disease         | 159<br>(129 - 201)       | 1<br>(0 - 2)     | 0<br>(0 - 0)      | 8<br>(6 - 12)      | 48<br>(37 - 62)      | 102<br>(82 - 130)        |

Web Table 31- Trinidad and Tobago deaths with 95% UI by age, sex, and cause in 2013

| Cause                                               | Males, All Ages    | Males, 0-4 Years | Males, 5-14 Years | Males, 15-49 Years | Males, 50-69 Years | Males, 70-80 Years |
|-----------------------------------------------------|--------------------|------------------|-------------------|--------------------|--------------------|--------------------|
| Pneumoconiosis                                      | 10<br>(7 - 14)     | 0<br>(0 - 0)     | 0<br>(0 - 0)      | 1<br>(1 - 2)       | 5<br>(3 - 7)       | 4<br>(2 - 5)       |
| Silicosis                                           | 0<br>(0 - 1)       | 0<br>(0 - 0)     | 0<br>(0 - 0)      | 0<br>(0 - 0)       | 0<br>(0 - 0)       | 0<br>(0 - 0)       |
| Asbestosis                                          | 2<br>(1 - 3)       | 0<br>(0 - 0)     | 0<br>(0 - 0)      | 0<br>(0 - 0)       | 2<br>(1 - 3)       | 0<br>(0 - 0)       |
| Coal workers pneumoconiosis                         | 2<br>(2 - 3)       | 0<br>(0 - 0)     | 0<br>(0 - 0)      | 1<br>(0 - 1)       | 1<br>(1 - 2)       | 1<br>(0 - 1)       |
| Other pneumoconiosis                                | 5<br>(3 - 7)       | 0<br>(0 - 0)     | 0<br>(0 - 0)      | 0<br>(0 - 1)       | 2<br>(1 - 3)       | 3<br>(2 - 4)       |
| Asthma                                              | 41<br>(32 - 54)    | 1<br>(0 - 1)     | 0<br>(0 - 1)      | 8<br>(6 - 11)      | 14<br>(10 - 20)    | 18<br>(13 - 24)    |
| Interstitial lung disease and pulmonary sarcoidosis | 21<br>(15 - 36)    | 0<br>(0 - 0)     | 0<br>(0 - 0)      | 2<br>(1 - 4)       | 8<br>(5 - 14)      | 11<br>(7 - 20)     |
| Other chronic respiratory diseases                  | 6<br>(5 - 9)       | 1<br>(0 - 2)     | 0<br>(0 - 0)      | 1<br>(1 - 2)       | 2<br>(1 - 3)       | 2<br>(1 - 3)       |
| Cirrhosis                                           | 150<br>(124 - 176) | 0<br>(0 - 0)     | 0<br>(0 - 0)      | 36<br>(28 - 46)    | 83<br>(66 - 101)   | 30<br>(24 - 36)    |
| Cirrhosis due to hepatitis B                        | 9<br>(2 - 21)      | 0<br>(0 - 0)     | 0<br>(0 - 0)      | 2<br>(1 - 5)       | 5<br>(1 - 12)      | 2<br>(0 - 5)       |
| Cirrhosis due to hepatitis C                        | 40<br>(12 - 65)    | 0<br>(0 - 0)     | 0<br>(0 - 0)      | 9<br>(3 - 15)      | 21<br>(5 - 37)     | 9<br>(3 - 15)      |
| Cirrhosis due to alcohol use                        | 79<br>(56 - 111)   | --               | --                | 17<br>(11 - 25)    | 46<br>(31 - 66)    | 17<br>(12 - 23)    |
| Cirrhosis due to other causes                       | 22<br>(13 - 32)    | 0<br>(0 - 0)     | 0<br>(0 - 0)      | 9<br>(5 - 13)      | 11<br>(5 - 16)     | 2<br>(1 - 4)       |
| Digestive diseases                                  | 171<br>(142 - 206) | 1<br>(0 - 2)     | 1<br>(0 - 1)      | 30<br>(22 - 42)    | 68<br>(54 - 87)    | 71<br>(58 - 86)    |
| Peptic ulcer disease                                | 53<br>(40 - 72)    | 0<br>(0 - 0)     | 0<br>(0 - 0)      | 8<br>(5 - 13)      | 22<br>(16 - 30)    | 23<br>(16 - 31)    |
| Gastritis and duodenitis                            | 15<br>(8 - 23)     | 0<br>(0 - 0)     | 0<br>(0 - 0)      | 3<br>(2 - 5)       | 6<br>(3 - 9)       | 6<br>(3 - 9)       |
| Appendicitis                                        | 7<br>(4 - 11)      | 0<br>(0 - 0)     | 0<br>(0 - 0)      | 2<br>(1 - 4)       | 3<br>(2 - 4)       | 2<br>(1 - 4)       |
| Paralytic ileus and intestinal obstruction          | 18<br>(6 - 26)     | 0<br>(0 - 0)     | 0<br>(0 - 0)      | 2<br>(1 - 4)       | 6<br>(2 - 10)      | 9<br>(3 - 14)      |
| Inguinal, femoral, and abdominal hernia             | 10<br>(5 - 22)     | 0<br>(0 - 0)     | 0<br>(0 - 0)      | 1<br>(1 - 3)       | 4<br>(2 - 8)       | 5<br>(2 - 11)      |
| Inflammatory bowel disease                          | 13<br>(9 - 19)     | 0<br>(0 - 1)     | 0<br>(0 - 0)      | 2<br>(2 - 4)       | 4<br>(3 - 7)       | 5<br>(3 - 8)       |
| Vascular intestinal disorders                       | 10<br>(4 - 19)     | 0<br>(0 - 0)     | 0<br>(0 - 0)      | 1<br>(0 - 2)       | 4<br>(1 - 8)       | 5<br>(2 - 10)      |
| Gallbladder and biliary diseases                    | 9<br>(6 - 12)      | 0<br>(0 - 0)     | 0<br>(0 - 0)      | 1<br>(1 - 2)       | 4<br>(3 - 6)       | 4<br>(2 - 5)       |
| Pancreatitis                                        | 14<br>(10 - 21)    | 0<br>(0 - 0)     | 0<br>(0 - 0)      | 5<br>(3 - 8)       | 7<br>(4 - 11)      | 2<br>(1 - 3)       |
| Other digestive diseases                            | 23<br>(12 - 30)    | 0<br>(0 - 0)     | 0<br>(0 - 0)      | 4<br>(2 - 5)       | 9<br>(5 - 12)      | 10<br>(5 - 15)     |
| Neurological disorders                              | 236<br>(192 - 283) | 1<br>(0 - 2)     | 1<br>(1 - 2)      | 18<br>(13 - 27)    | 41<br>(32 - 52)    | 175<br>(135 - 215) |
| Alzheimer disease and other dementias               | 169<br>(129 - 212) | --               | --                | 0<br>(0 - 0)       | 19<br>(12 - 27)    | 150<br>(110 - 188) |
| Parkinson disease                                   | 24<br>(19 - 31)    | --               | --                | 0<br>(0 - 0)       | 6<br>(4 - 9)       | 18<br>(13 - 24)    |
| Epilepsy                                            | 27<br>(19 - 39)    | 0<br>(0 - 1)     | 1<br>(0 - 1)      | 14<br>(9 - 21)     | 8<br>(5 - 12)      | 4<br>(3 - 6)       |
| Multiple sclerosis                                  | 1<br>(1 - 2)       | --               | --                | 0<br>(0 - 1)       | 1<br>(0 - 1)       | 0<br>(0 - 1)       |
| Other neurological disorders                        | 14<br>(11 - 18)    | 0<br>(0 - 0)     | 0<br>(0 - 1)      | 4<br>(3 - 5)       | 7<br>(5 - 9)       | 3<br>(2 - 4)       |
| Mental and substance use disorders                  | 39<br>(26 - 48)    | 0<br>(0 - 0)     | 0<br>(0 - 0)      | 14<br>(9 - 19)     | 18<br>(11 - 24)    | 7<br>(4 - 9)       |
| Schizophrenia                                       | 2<br>(1 - 4)       | --               | --                | 1<br>(0 - 1)       | 1<br>(1 - 2)       | 1<br>(0 - 2)       |
| Alcohol use disorders                               | 25<br>(14 - 33)    | --               | --                | 8<br>(4 - 11)      | 13<br>(7 - 19)     | 4<br>(2 - 5)       |
| Drug use disorders                                  | 11<br>(6 - 15)     | 0<br>(0 - 0)     | --                | 6<br>(3 - 8)       | 4<br>(2 - 5)       | 2<br>(1 - 3)       |
| Opioid use disorders                                | 3<br>(2 - 4)       | 0<br>(0 - 0)     | --                | 2<br>(1 - 2)       | 1<br>(1 - 1)       | 1<br>(0 - 1)       |
| Cocaine use disorders                               | 0<br>(0 - 1)       | 0<br>(0 - 0)     | --                | 0<br>(0 - 0)       | 0<br>(0 - 0)       | 0<br>(0 - 0)       |
| Amphetamine use disorders                           | 0<br>(0 - 0)       | 0<br>(0 - 0)     | --                | 0<br>(0 - 0)       | 0<br>(0 - 0)       | 0<br>(0 - 0)       |
| Other drug use disorders                            | 7<br>(4 - 9)       | 0<br>(0 - 0)     | --                | 4<br>(2 - 5)       | 2<br>(1 - 3)       | 1<br>(1 - 2)       |
| Eating disorders                                    | 0<br>(0 - 0)       | --               | 0<br>(0 - 0)      | 0<br>(0 - 0)       | --                 | --                 |
| Anorexia nervosa                                    | 0<br>(0 - 0)       | --               | 0<br>(0 - 0)      | 0<br>(0 - 0)       | --                 | --                 |

Web Table 31- Trinidad and Tobago deaths with 95% UI by age, sex, and cause in 2013

| Cause                                               | Males, All Ages          | Males, 0-4 Years | Males, 5-14 Years | Males, 15-49 Years | Males, 50-69 Years | Males, 70-80 Years |
|-----------------------------------------------------|--------------------------|------------------|-------------------|--------------------|--------------------|--------------------|
| Diabetes, urogenital, blood, and endocrine diseases | 1,270<br>(1,079 - 1,472) | 5<br>(2 - 11)    | 2<br>(1 - 4)      | 110<br>(85 - 144)  | 605<br>(504 - 726) | 548<br>(459 - 633) |
| Diabetes mellitus                                   | 933<br>(790 - 1,083)     | 0<br>(0 - 1)     | 0<br>(0 - 0)      | 54<br>(41 - 71)    | 463<br>(384 - 559) | 415<br>(341 - 488) |
| Acute glomerulonephritis                            | 1<br>(0 - 1)             | 0<br>(0 - 0)     | 0<br>(0 - 0)      | 0<br>(0 - 0)       | 0<br>(0 - 0)       | 0<br>(0 - 1)       |
| Chronic kidney disease                              | 231<br>(182 - 305)       | 1<br>(0 - 2)     | 1<br>(0 - 1)      | 33<br>(23 - 50)    | 103<br>(76 - 137)  | 94<br>(72 - 129)   |
| Chronic kidney disease due to diabetes mellitus     | 41<br>(24 - 85)          | 0<br>(0 - 0)     | 0<br>(0 - 0)      | 6<br>(3 - 12)      | 22<br>(12 - 46)    | 13<br>(7 - 27)     |
| Chronic kidney disease due to hypertension          | 112<br>(75 - 147)        | 0<br>(0 - 0)     | 0<br>(0 - 0)      | 15<br>(9 - 21)     | 51<br>(31 - 67)    | 47<br>(29 - 63)    |
| Chronic kidney disease due to glomerulonephritis    | 7<br>(4 - 9)             | 0<br>(0 - 0)     | 0<br>(0 - 0)      | 2<br>(1 - 3)       | 2<br>(1 - 3)       | 2<br>(1 - 4)       |
| Chronic kidney disease due to other causes          | 71<br>(38 - 110)         | 1<br>(0 - 1)     | 0<br>(0 - 1)      | 11<br>(6 - 20)     | 28<br>(12 - 46)    | 32<br>(16 - 56)    |
| Urinary diseases and male infertility               | 41<br>(29 - 52)          | 0<br>(0 - 1)     | 0<br>(0 - 0)      | 4<br>(3 - 5)       | 14<br>(9 - 19)     | 22<br>(16 - 30)    |
| Interstitial nephritis and urinary tract infections | 25<br>(15 - 33)          | 0<br>(0 - 1)     | 0<br>(0 - 0)      | 2<br>(1 - 3)       | 8<br>(4 - 11)      | 15<br>(9 - 20)     |
| Urolithiasis                                        | 3<br>(1 - 5)             | --               | 0<br>(0 - 0)      | 0<br>(0 - 1)       | 2<br>(1 - 2)       | 1<br>(0 - 2)       |
| Other urinary diseases                              | 13<br>(8 - 18)           | 0<br>(0 - 0)     | 0<br>(0 - 0)      | 1<br>(1 - 2)       | 5<br>(3 - 7)       | 6<br>(4 - 10)      |
| Gynecological diseases                              | --                       | --               | --                | --                 | --                 | --                 |
| Uterine fibroids                                    | --                       | --               | --                | --                 | --                 | --                 |
| Polycystic ovarian syndrome                         | --                       | --               | --                | --                 | --                 | --                 |
| Endometriosis                                       | --                       | --               | --                | --                 | --                 | --                 |
| Genital prolapse                                    | --                       | --               | --                | --                 | --                 | --                 |
| Other gynecological diseases                        | --                       | --               | --                | --                 | --                 | --                 |
| Hemoglobinopathies and hemolytic anemias            | 13<br>(8 - 21)           | 1<br>(0 - 3)     | 1<br>(0 - 2)      | 6<br>(3 - 9)       | 3<br>(2 - 5)       | 2<br>(1 - 3)       |
| Thalassemias                                        | 0<br>(0 - 0)             | 0<br>(0 - 0)     | 0<br>(0 - 0)      | 0<br>(0 - 0)       | 0<br>(0 - 0)       | 0<br>(0 - 0)       |
| Sickle cell disorders                               | 10<br>(6 - 16)           | 1<br>(0 - 3)     | 1<br>(0 - 2)      | 5<br>(3 - 9)       | 3<br>(2 - 4)       | 0<br>(0 - 1)       |
| G6PD deficiency                                     | 0<br>(0 - 1)             | 0<br>(0 - 0)     | 0<br>(0 - 0)      | 0<br>(0 - 0)       | 0<br>(0 - 0)       | 0<br>(0 - 0)       |
| Other hemoglobinopathies and hemolytic anemias      | 3<br>(2 - 4)             | 0<br>(0 - 0)     | 0<br>(0 - 0)      | 0<br>(0 - 0)       | 1<br>(0 - 1)       | 2<br>(1 - 2)       |
| Endocrine, metabolic, blood, and immune disorders   | 51<br>(37 - 113)         | 2<br>(1 - 5)     | 0<br>(0 - 1)      | 14<br>(9 - 29)     | 21<br>(14 - 46)    | 15<br>(9 - 35)     |
| Musculoskeletal disorders                           | 15<br>(8 - 19)           | --               | 0<br>(0 - 0)      | 5<br>(3 - 7)       | 5<br>(3 - 7)       | 5<br>(2 - 6)       |
| Rheumatoid arthritis                                | 2<br>(1 - 3)             | --               | 0<br>(0 - 0)      | 0<br>(0 - 1)       | 1<br>(0 - 1)       | 1<br>(0 - 2)       |
| Other musculoskeletal disorders                     | 13<br>(7 - 17)           | --               | 0<br>(0 - 0)      | 5<br>(3 - 7)       | 4<br>(2 - 6)       | 4<br>(2 - 5)       |
| Other non-communicable diseases                     | 93<br>(61 - 149)         | 49<br>(22 - 101) | 3<br>(2 - 6)      | 11<br>(8 - 15)     | 13<br>(8 - 17)     | 17<br>(9 - 23)     |
| Congenital anomalies                                | 64<br>(35 - 117)         | 46<br>(20 - 96)  | 3<br>(1 - 5)      | 8<br>(5 - 11)      | 5<br>(4 - 8)       | 3<br>(2 - 4)       |
| Neural tube defects                                 | 2<br>(1 - 5)             | 2<br>(1 - 5)     | 0<br>(0 - 0)      | 0<br>(0 - 0)       | 0<br>(0 - 0)       | 0<br>(0 - 0)       |
| Congenital heart anomalies                          | 32<br>(17 - 60)          | 23<br>(10 - 48)  | 2<br>(1 - 4)      | 4<br>(3 - 6)       | 2<br>(1 - 3)       | 1<br>(1 - 2)       |
| Cleft lip and cleft palate                          | 0<br>(0 - 1)             | 0<br>(0 - 1)     | --                | --                 | --                 | --                 |
| Down syndrome                                       | 3<br>(2 - 5)             | 1<br>(0 - 3)     | 0<br>(0 - 0)      | 1<br>(1 - 2)       | 1<br>(0 - 1)       | 0<br>(0 - 0)       |
| Chromosomal unbalanced rearrangements               | 1<br>(1 - 3)             | 1<br>(0 - 3)     | 0<br>(0 - 0)      | 0<br>(0 - 0)       | 0<br>(0 - 0)       | 0<br>(0 - 0)       |
| Other congenital anomalies                          | 25<br>(12 - 48)          | 18<br>(7 - 40)   | 1<br>(0 - 2)      | 2<br>(1 - 3)       | 2<br>(1 - 4)       | 2<br>(1 - 3)       |
| Skin and subcutaneous diseases                      | 26<br>(11 - 33)          | 0<br>(0 - 1)     | 0<br>(0 - 0)      | 3<br>(1 - 4)       | 8<br>(3 - 11)      | 14<br>(6 - 20)     |
| Cellulitis                                          | 4<br>(1 - 7)             | 0<br>(0 - 0)     | 0<br>(0 - 0)      | 0<br>(0 - 1)       | 1<br>(0 - 2)       | 2<br>(1 - 4)       |
| Pyoderma                                            | 7<br>(3 - 10)            | 0<br>(0 - 0)     | 0<br>(0 - 0)      | 1<br>(0 - 1)       | 2<br>(1 - 3)       | 4<br>(1 - 6)       |
| Decubitus ulcer                                     | 13<br>(6 - 17)           | 0<br>(0 - 0)     | 0<br>(0 - 0)      | 2<br>(1 - 2)       | 4<br>(2 - 5)       | 8<br>(3 - 11)      |
| Other skin and subcutaneous diseases                | 2<br>(1 - 3)             | 0<br>(0 - 0)     | 0<br>(0 - 0)      | 0<br>(0 - 0)       | 1<br>(0 - 1)       | 1<br>(0 - 2)       |

Web Table 31- Trinidad and Tobago deaths with 95% UI by age, sex, and cause in 2013

| Cause                                           | Males, All Ages      | Males, 0-4 Years | Males, 5-14 Years | Males, 15-49 Years | Males, 50-69 Years | Males, 70-80 Years |
|-------------------------------------------------|----------------------|------------------|-------------------|--------------------|--------------------|--------------------|
| Sudden infant death syndrome                    | 3<br>(1 - 7)         | 3<br>(1 - 7)     | --                | --                 | --                 | --                 |
| Injuries                                        | 834<br>(662 - 1,003) | 15<br>(7 - 33)   | 15<br>(9 - 25)    | 507<br>(389 - 635) | 209<br>(163 - 262) | 87<br>(69 - 103)   |
| Transport injuries                              | 229<br>(177 - 285)   | 2<br>(1 - 5)     | 6<br>(3 - 10)     | 128<br>(97 - 170)  | 68<br>(48 - 87)    | 25<br>(18 - 32)    |
| Road injuries                                   | 214<br>(166 - 269)   | 2<br>(1 - 5)     | 5<br>(3 - 10)     | 121<br>(91 - 162)  | 63<br>(45 - 82)    | 23<br>(17 - 30)    |
| Pedestrian road injuries                        | 59<br>(40 - 85)      | 1<br>(0 - 2)     | 2<br>(1 - 4)      | 24<br>(15 - 37)    | 22<br>(15 - 33)    | 10<br>(7 - 15)     |
| Cyclist road injuries                           | 12<br>(8 - 17)       | 0<br>(0 - 0)     | 1<br>(0 - 1)      | 6<br>(4 - 8)       | 4<br>(2 - 6)       | 2<br>(1 - 3)       |
| Motorcyclist road injuries                      | 15<br>(10 - 22)      | 0<br>(0 - 0)     | 0<br>(0 - 0)      | 11<br>(7 - 16)     | 3<br>(2 - 4)       | 1<br>(1 - 2)       |
| Motor vehicle road injuries                     | 126<br>(96 - 164)    | 1<br>(0 - 2)     | 2<br>(1 - 4)      | 80<br>(59 - 107)   | 33<br>(23 - 45)    | 9<br>(6 - 13)      |
| Other road injuries                             | 2<br>(1 - 3)         | 0<br>(0 - 0)     | 0<br>(0 - 0)      | 1<br>(0 - 2)       | 0<br>(0 - 1)       | 0<br>(0 - 1)       |
| Other transport injuries                        | 15<br>(8 - 21)       | 0<br>(0 - 1)     | 0<br>(0 - 1)      | 8<br>(4 - 12)      | 4<br>(2 - 7)       | 2<br>(1 - 3)       |
| Unintentional injuries                          | 219<br>(180 - 264)   | 11<br>(5 - 24)   | 7<br>(4 - 11)     | 93<br>(72 - 119)   | 63<br>(50 - 78)    | 46<br>(35 - 56)    |
| Falls                                           | 41<br>(32 - 57)      | 0<br>(0 - 1)     | 0<br>(0 - 1)      | 14<br>(10 - 20)    | 14<br>(10 - 20)    | 13<br>(9 - 18)     |
| Drowning                                        | 57<br>(41 - 84)      | 2<br>(1 - 5)     | 3<br>(2 - 6)      | 34<br>(23 - 53)    | 13<br>(9 - 19)     | 4<br>(3 - 6)       |
| Fire, heat, and hot substances                  | 18<br>(12 - 23)      | 1<br>(0 - 3)     | 1<br>(0 - 1)      | 5<br>(3 - 7)       | 5<br>(3 - 7)       | 6<br>(4 - 8)       |
| Poisonings                                      | 4<br>(3 - 8)         | 0<br>(0 - 1)     | 0<br>(0 - 0)      | 3<br>(2 - 5)       | 1<br>(1 - 2)       | 0<br>(0 - 1)       |
| Exposure to mechanical forces                   | 29<br>(23 - 43)      | 0<br>(0 - 1)     | 1<br>(0 - 2)      | 18<br>(13 - 28)    | 9<br>(6 - 12)      | 2<br>(1 - 3)       |
| Unintentional firearm injuries                  | 13<br>(9 - 18)       | 0<br>(0 - 0)     | 0<br>(0 - 0)      | 8<br>(5 - 12)      | 4<br>(2 - 6)       | 1<br>(0 - 1)       |
| Unintentional suffocation                       | 3<br>(2 - 7)         | 0<br>(0 - 0)     | 0<br>(0 - 0)      | 1<br>(1 - 3)       | 1<br>(1 - 3)       | 0<br>(0 - 1)       |
| Other exposure to mechanical forces             | 13<br>(9 - 25)       | 0<br>(0 - 0)     | 0<br>(0 - 1)      | 8<br>(5 - 16)      | 3<br>(2 - 6)       | 1<br>(0 - 1)       |
| Adverse effects of medical treatment            | 20<br>(13 - 26)      | 1<br>(0 - 2)     | 0<br>(0 - 0)      | 4<br>(2 - 5)       | 7<br>(4 - 10)      | 8<br>(5 - 11)      |
| Animal contact                                  | 6<br>(3 - 8)         | 0<br>(0 - 1)     | 0<br>(0 - 0)      | 2<br>(1 - 3)       | 2<br>(1 - 3)       | 1<br>(0 - 2)       |
| Venomous animal contact                         | 4<br>(2 - 6)         | 0<br>(0 - 0)     | 0<br>(0 - 0)      | 1<br>(1 - 2)       | 2<br>(1 - 2)       | 1<br>(0 - 1)       |
| Non-venomous animal contact                     | 1<br>(1 - 2)         | 0<br>(0 - 0)     | 0<br>(0 - 0)      | 0<br>(0 - 1)       | 1<br>(0 - 1)       | 0<br>(0 - 1)       |
| Foreign body                                    | 33<br>(17 - 52)      | 5<br>(2 - 11)    | 1<br>(0 - 1)      | 8<br>(4 - 13)      | 10<br>(5 - 15)     | 10<br>(5 - 16)     |
| Pulmonary aspiration and foreign body in airway | 33<br>(16 - 52)      | 5<br>(2 - 11)    | 1<br>(0 - 1)      | 8<br>(4 - 13)      | 9<br>(5 - 15)      | 10<br>(5 - 16)     |
| Foreign body in other body part                 | 1<br>(0 - 1)         | 0<br>(0 - 0)     | 0<br>(0 - 0)      | 0<br>(0 - 0)       | 0<br>(0 - 0)       | 0<br>(0 - 0)       |
| Other unintentional injuries                    | 11<br>(7 - 16)       | 0<br>(0 - 1)     | 0<br>(0 - 1)      | 5<br>(3 - 8)       | 3<br>(1 - 5)       | 2<br>(1 - 3)       |
| Self-harm and interpersonal violence            | 385<br>(246 - 496)   | 2<br>(1 - 5)     | 3<br>(1 - 5)      | 285<br>(176 - 377) | 79<br>(50 - 108)   | 16<br>(11 - 22)    |
| Self-harm                                       | 141<br>(109 - 184)   | --               | 1<br>(0 - 1)      | 91<br>(67 - 128)   | 39<br>(29 - 52)    | 10<br>(7 - 14)     |
| Interpersonal violence                          | 244<br>(108 - 340)   | 2<br>(1 - 5)     | 2<br>(1 - 4)      | 194<br>(85 - 274)  | 40<br>(14 - 63)    | 6<br>(2 - 11)      |
| Assault by firearm                              | 164<br>(65 - 241)    | 0<br>(0 - 1)     | 1<br>(0 - 2)      | 143<br>(57 - 215)  | 18<br>(5 - 31)     | 1<br>(0 - 2)       |
| Assault by sharp object                         | 45<br>(16 - 79)      | 0<br>(0 - 1)     | 1<br>(0 - 1)      | 33<br>(12 - 60)    | 10<br>(3 - 17)     | 2<br>(1 - 3)       |
| Assault by other means                          | 36<br>(15 - 58)      | 1<br>(0 - 3)     | 1<br>(0 - 1)      | 18<br>(7 - 31)     | 13<br>(4 - 21)     | 3<br>(1 - 6)       |

Web Table 31- Trinidad and Tobago deaths with 95% UI by age, sex, and cause in 2013

| Cause                                                             | Females, All Ages        | Females, 0-4 Years | Females, 5-14 Years | Females, 15-49 Years | Females, 50-69 Years     | Females, 70-80 Years     |
|-------------------------------------------------------------------|--------------------------|--------------------|---------------------|----------------------|--------------------------|--------------------------|
| All causes                                                        | 5,117<br>(4,457 - 5,756) | 188<br>(84 - 399)  | 26<br>(17 - 41)     | 525<br>(435 - 618)   | 1,539<br>(1,276 - 1,796) | 2,839<br>(2,528 - 3,127) |
| Communicable, maternal, neonatal, and nutritional diseases        | 434<br>(340 - 545)       | 118<br>(51 - 238)  | 5<br>(3 - 8)        | 81<br>(63 - 111)     | 56<br>(44 - 70)          | 173<br>(132 - 229)       |
| HIV/AIDS and tuberculosis                                         | 58<br>(36 - 101)         | 0<br>(0 - 1)       | 0<br>(0 - 0)        | 43<br>(25 - 74)      | 12<br>(7 - 23)           | 3<br>(2 - 5)             |
| Tuberculosis                                                      | 9<br>(5 - 12)            | 0<br>(0 - 0)       | 0<br>(0 - 0)        | 3<br>(2 - 4)         | 3<br>(2 - 4)             | 3<br>(2 - 4)             |
| HIV/AIDS                                                          | 49<br>(27 - 92)          | 0<br>(0 - 1)       | 0<br>(0 - 0)        | 40<br>(22 - 72)      | 8<br>(4 - 20)            | 1<br>(0 - 2)             |
| HIV/AIDS resulting in mycobacterial infection                     | 2<br>(1 - 4)             | 0<br>(0 - 0)       | 0<br>(0 - 0)        | 2<br>(1 - 3)         | 0<br>(0 - 1)             | 0<br>(0 - 0)             |
| HIV/AIDS resulting in other diseases                              | 47<br>(26 - 88)          | 0<br>(0 - 1)       | 0<br>(0 - 0)        | 38<br>(21 - 69)      | 8<br>(4 - 19)            | 1<br>(0 - 2)             |
| Diarrhea, lower respiratory, and other common infectious diseases | 216<br>(170 - 274)       | 22<br>(10 - 51)    | 4<br>(2 - 6)        | 19<br>(15 - 25)      | 33<br>(24 - 42)          | 138<br>(99 - 189)        |
| Diarrheal diseases                                                | 20<br>(14 - 30)          | 5<br>(2 - 13)      | 0<br>(0 - 1)        | 2<br>(1 - 3)         | 3<br>(2 - 5)             | 10<br>(6 - 16)           |
| Intestinal infectious diseases                                    | 4<br>(1 - 10)            | 1<br>(0 - 4)       | 1<br>(0 - 2)        | 1<br>(0 - 3)         | 0<br>(0 - 1)             | 0<br>(0 - 0)             |
| Typhoid fever                                                     | 3<br>(1 - 8)             | 1<br>(0 - 3)       | 1<br>(0 - 2)        | 1<br>(0 - 3)         | 0<br>(0 - 1)             | 0<br>(0 - 0)             |
| Paratyphoid fever                                                 | 1<br>(0 - 2)             | 0<br>(0 - 1)       | 0<br>(0 - 0)        | 0<br>(0 - 1)         | 0<br>(0 - 0)             | 0<br>(0 - 0)             |
| Other intestinal infectious diseases                              | 0<br>(0 - 1)             | 0<br>(0 - 0)       | 0<br>(0 - 0)        | 0<br>(0 - 0)         | 0<br>(0 - 0)             | 0<br>(0 - 0)             |
| Lower respiratory infections                                      | 177<br>(133 - 234)       | 13<br>(5 - 30)     | 2<br>(1 - 3)        | 12<br>(9 - 16)       | 25<br>(18 - 34)          | 125<br>(86 - 175)        |
| Upper respiratory infections                                      | 0<br>(0 - 0)             | 0<br>(0 - 0)       | 0<br>(0 - 0)        | 0<br>(0 - 0)         | 0<br>(0 - 0)             | 0<br>(0 - 0)             |
| Otitis media                                                      | 0<br>(0 - 0)             | 0<br>(0 - 0)       | 0<br>(0 - 0)        | 0<br>(0 - 0)         | 0<br>(0 - 0)             | 0<br>(0 - 0)             |
| Meningitis                                                        | 8<br>(6 - 10)            | 2<br>(1 - 4)       | 0<br>(0 - 1)        | 2<br>(1 - 2)         | 2<br>(1 - 3)             | 2<br>(2 - 3)             |
| Pneumococcal meningitis                                           | 2<br>(2 - 4)             | 0<br>(0 - 1)       | 0<br>(0 - 0)        | 0<br>(0 - 1)         | 1<br>(0 - 1)             | 1<br>(1 - 1)             |
| H influenzae type B meningitis                                    | 1<br>(1 - 2)             | 1<br>(0 - 1)       | 0<br>(0 - 0)        | 0<br>(0 - 0)         | 0<br>(0 - 0)             | 0<br>(0 - 0)             |
| Meningococcal meningitis                                          | 1<br>(1 - 1)             | 0<br>(0 - 0)       | 0<br>(0 - 0)        | 0<br>(0 - 0)         | 0<br>(0 - 0)             | 0<br>(0 - 1)             |
| Other meningitis                                                  | 3<br>(2 - 4)             | 0<br>(0 - 1)       | 0<br>(0 - 0)        | 1<br>(0 - 1)         | 1<br>(1 - 1)             | 1<br>(1 - 2)             |
| Encephalitis                                                      | 5<br>(4 - 9)             | 1<br>(0 - 2)       | 0<br>(0 - 1)        | 2<br>(1 - 3)         | 1<br>(1 - 2)             | 1<br>(1 - 2)             |
| Diphtheria                                                        | 0<br>(0 - 0)             | 0<br>(0 - 0)       | 0<br>(0 - 0)        | 0<br>(0 - 0)         | 0<br>(0 - 0)             | --                       |
| Whooping cough                                                    | 0<br>(0 - 0)             | 0<br>(0 - 0)       | 0<br>(0 - 0)        | 0<br>(0 - 0)         | 0<br>(0 - 0)             | --                       |
| Tetanus                                                           | 1<br>(0 - 1)             | 0<br>(0 - 0)       | 0<br>(0 - 0)        | 0<br>(0 - 0)         | 0<br>(0 - 0)             | 0<br>(0 - 0)             |
| Measles                                                           | 0<br>(0 - 0)             | 0<br>(0 - 0)       | 0<br>(0 - 0)        | 0<br>(0 - 0)         | 0<br>(0 - 0)             | --                       |
| Varicella and herpes zoster                                       | 0<br>(0 - 1)             | 0<br>(0 - 0)       | 0<br>(0 - 0)        | 0<br>(0 - 0)         | 0<br>(0 - 0)             | 0<br>(0 - 1)             |
| Neglected tropical diseases and malaria                           | 3<br>(2 - 5)             | 0<br>(0 - 1)       | 0<br>(0 - 0)        | 1<br>(1 - 1)         | 1<br>(1 - 1)             | 1<br>(1 - 1)             |
| Leishmaniasis                                                     | 0<br>(0 - 0)             | 0<br>(0 - 0)       | 0<br>(0 - 0)        | 0<br>(0 - 0)         | 0<br>(0 - 0)             | 0<br>(0 - 0)             |
| Visceral leishmaniasis                                            | 0<br>(0 - 0)             | 0<br>(0 - 0)       | 0<br>(0 - 0)        | 0<br>(0 - 0)         | 0<br>(0 - 0)             | 0<br>(0 - 0)             |
| Cysticercosis                                                     | 0<br>(0 - 0)             | 0<br>(0 - 0)       | 0<br>(0 - 0)        | 0<br>(0 - 0)         | 0<br>(0 - 0)             | 0<br>(0 - 0)             |
| Cystic echinococcosis                                             | 0<br>(0 - 0)             | 0<br>(0 - 0)       | 0<br>(0 - 0)        | 0<br>(0 - 0)         | 0<br>(0 - 0)             | 0<br>(0 - 0)             |
| Dengue                                                            | 1<br>(1 - 2)             | 0<br>(0 - 0)       | 0<br>(0 - 0)        | 0<br>(0 - 1)         | 0<br>(0 - 0)             | 0<br>(0 - 0)             |
| Yellow fever                                                      | 0<br>(0 - 0)             | 0<br>(0 - 0)       | 0<br>(0 - 0)        | 0<br>(0 - 0)         | 0<br>(0 - 0)             | 0<br>(0 - 0)             |
| Rabies                                                            | 0<br>(0 - 0)             | 0<br>(0 - 0)       | 0<br>(0 - 0)        | 0<br>(0 - 0)         | 0<br>(0 - 0)             | 0<br>(0 - 0)             |
| Intestinal nematode infections                                    | 0<br>(0 - 1)             | 0<br>(0 - 0)       | 0<br>(0 - 0)        | 0<br>(0 - 0)         | 0<br>(0 - 0)             | 0<br>(0 - 0)             |
| Ascariasis                                                        | 0<br>(0 - 1)             | 0<br>(0 - 0)       | 0<br>(0 - 0)        | 0<br>(0 - 0)         | 0<br>(0 - 0)             | 0<br>(0 - 0)             |
| Other neglected tropical diseases                                 | 1<br>(1 - 2)             | 0<br>(0 - 1)       | 0<br>(0 - 0)        | 0<br>(0 - 0)         | 0<br>(0 - 1)             | 1<br>(0 - 1)             |
| Maternal disorders                                                | 10<br>(7 - 13)           | --                 | 0<br>(0 - 0)        | 10<br>(7 - 13)       | --                       | --                       |
| Maternal hemorrhage                                               | 2<br>(1 - 3)             | --                 | 0<br>(0 - 0)        | 2<br>(1 - 3)         | --                       | --                       |

Web Table 31- Trinidad and Tobago deaths with 95% UI by age, sex, and cause in 2013

| Cause                                                            | Females, All Ages        | Females, 0-4 Years | Females, 5-14 Years | Females, 15-49 Years | Females, 50-69 Years     | Females, 70-80 Years     |
|------------------------------------------------------------------|--------------------------|--------------------|---------------------|----------------------|--------------------------|--------------------------|
| Maternal sepsis and other maternal infections                    | 1<br>(0 - 1)             | --                 | 0<br>(0 - 0)        | 1<br>(0 - 1)         | --                       | --                       |
| Maternal hypertensive disorders                                  | 2<br>(1 - 3)             | --                 | 0<br>(0 - 0)        | 2<br>(1 - 3)         | --                       | --                       |
| Maternal obstructed labor                                        | 1<br>(0 - 1)             | --                 | 0<br>(0 - 0)        | 1<br>(0 - 1)         | --                       | --                       |
| Maternal abortive outcome                                        | 2<br>(1 - 3)             | --                 | 0<br>(0 - 0)        | 2<br>(1 - 3)         | --                       | --                       |
| Indirect maternal deaths                                         | 1<br>(0 - 1)             | --                 | 0<br>(0 - 0)        | 1<br>(0 - 1)         | --                       | --                       |
| Late maternal deaths                                             | 1<br>(0 - 1)             | --                 | 0<br>(0 - 0)        | 1<br>(0 - 1)         | --                       | --                       |
| Maternal deaths aggravated by HIV/AIDS                           | 0<br>(0 - 0)             | --                 | --                  | 0<br>(0 - 0)         | --                       | --                       |
| Other maternal disorders                                         | 1<br>(1 - 2)             | --                 | 0<br>(0 - 0)        | 1<br>(1 - 2)         | --                       | --                       |
| Neonatal disorders                                               | 90<br>(38 - 172)         | 90<br>(38 - 172)   | --                  | --                   | --                       | --                       |
| Neonatal preterm birth complications                             | 39<br>(15 - 76)          | 39<br>(15 - 76)    | --                  | --                   | --                       | --                       |
| Neonatal encephalopathy due to birth asphyxia and trauma         | 22<br>(8 - 46)           | 22<br>(8 - 46)     | --                  | --                   | --                       | --                       |
| Neonatal sepsis and other neonatal infections                    | 13<br>(5 - 29)           | 13<br>(5 - 29)     | --                  | --                   | --                       | --                       |
| Hemolytic disease and other neonatal jaundice                    | 1<br>(0 - 4)             | 1<br>(0 - 4)       | --                  | --                   | --                       | --                       |
| Other neonatal disorders                                         | 15<br>(6 - 32)           | 15<br>(6 - 32)     | --                  | --                   | --                       | --                       |
| Nutritional deficiencies                                         | 44<br>(35 - 59)          | 4<br>(2 - 9)       | 1<br>(0 - 1)        | 6<br>(4 - 8)         | 7<br>(5 - 10)            | 27<br>(19 - 38)          |
| Protein-energy malnutrition                                      | 17<br>(9 - 28)           | 3<br>(1 - 8)       | 0<br>(0 - 1)        | 1<br>(0 - 2)         | 2<br>(1 - 4)             | 10<br>(5 - 18)           |
| Iodine deficiency                                                | 0<br>(0 - 0)             | 0<br>(0 - 0)       | 0<br>(0 - 0)        | 0<br>(0 - 0)         | 0<br>(0 - 0)             | 0<br>(0 - 0)             |
| Iron-deficiency anemia                                           | 25<br>(15 - 36)          | 1<br>(0 - 2)       | 0<br>(0 - 0)        | 5<br>(3 - 7)         | 5<br>(3 - 7)             | 15<br>(8 - 24)           |
| Other nutritional deficiencies                                   | 2<br>(1 - 4)             | 0<br>(0 - 0)       | 0<br>(0 - 0)        | 0<br>(0 - 1)         | 1<br>(0 - 1)             | 1<br>(0 - 3)             |
| Other communicable, maternal, neonatal, and nutritional diseases | 12<br>(9 - 16)           | 1<br>(0 - 4)       | 0<br>(0 - 0)        | 3<br>(2 - 4)         | 4<br>(3 - 5)             | 4<br>(3 - 6)             |
| Sexually transmitted diseases excluding HIV                      | 3<br>(1 - 5)             | 1<br>(0 - 3)       | 0<br>(0 - 0)        | 1<br>(0 - 1)         | 1<br>(0 - 1)             | 1<br>(0 - 1)             |
| Syphilis                                                         | 2<br>(1 - 4)             | 1<br>(0 - 3)       | 0<br>(0 - 0)        | 0<br>(0 - 0)         | 0<br>(0 - 1)             | 0<br>(0 - 1)             |
| Chlamydial infection                                             | 0<br>(0 - 0)             | --                 | 0<br>(0 - 0)        | 0<br>(0 - 0)         | 0<br>(0 - 0)             | 0<br>(0 - 0)             |
| Gonococcal infection                                             | 0<br>(0 - 0)             | --                 | 0<br>(0 - 0)        | 0<br>(0 - 0)         | 0<br>(0 - 0)             | 0<br>(0 - 0)             |
| Other sexually transmitted diseases                              | 0<br>(0 - 0)             | --                 | 0<br>(0 - 0)        | 0<br>(0 - 0)         | 0<br>(0 - 0)             | 0<br>(0 - 0)             |
| Hepatitis                                                        | 1<br>(1 - 2)             | 0<br>(0 - 0)       | 0<br>(0 - 0)        | 0<br>(0 - 1)         | 0<br>(0 - 1)             | 0<br>(0 - 0)             |
| Acute hepatitis A                                                | 0<br>(0 - 1)             | 0<br>(0 - 0)       | 0<br>(0 - 0)        | 0<br>(0 - 0)         | 0<br>(0 - 0)             | 0<br>(0 - 0)             |
| Acute hepatitis B                                                | 1<br>(0 - 1)             | 0<br>(0 - 0)       | 0<br>(0 - 0)        | 0<br>(0 - 0)         | 0<br>(0 - 1)             | 0<br>(0 - 0)             |
| Acute hepatitis C                                                | 0<br>(0 - 0)             | --                 | 0<br>(0 - 0)        | 0<br>(0 - 0)         | 0<br>(0 - 0)             | 0<br>(0 - 0)             |
| Other infectious diseases                                        | 9<br>(5 - 11)            | 0<br>(0 - 1)       | 0<br>(0 - 0)        | 2<br>(1 - 2)         | 3<br>(2 - 4)             | 3<br>(2 - 5)             |
| Non-communicable diseases                                        | 4,452<br>(3,869 - 5,031) | 57<br>(25 - 126)   | 12<br>(8 - 20)      | 359<br>(287 - 437)   | 1,433<br>(1,187 - 1,679) | 2,590<br>(2,299 - 2,853) |
| Neoplasms                                                        | 791<br>(660 - 954)       | 2<br>(1 - 5)       | 3<br>(2 - 5)        | 122<br>(96 - 153)    | 347<br>(284 - 423)       | 317<br>(267 - 386)       |
| Esophageal cancer                                                | 10<br>(8 - 13)           | --                 | --                  | 1<br>(0 - 1)         | 5<br>(3 - 6)             | 5<br>(3 - 7)             |
| Stomach cancer                                                   | 32<br>(24 - 43)          | --                 | --                  | 3<br>(2 - 4)         | 11<br>(8 - 14)           | 19<br>(13 - 28)          |
| Liver cancer                                                     | 21<br>(16 - 29)          | --                 | 0<br>(0 - 0)        | 3<br>(2 - 4)         | 9<br>(6 - 12)            | 10<br>(7 - 15)           |
| Liver cancer due to hepatitis B                                  | 4<br>(2 - 8)             | --                 | 0<br>(0 - 0)        | 1<br>(0 - 2)         | 2<br>(1 - 4)             | 1<br>(0 - 3)             |
| Liver cancer due to hepatitis C                                  | 10<br>(6 - 15)           | --                 | 0<br>(0 - 0)        | 1<br>(0 - 1)         | 4<br>(2 - 6)             | 5<br>(3 - 8)             |
| Liver cancer due to alcohol use                                  | 4<br>(2 - 7)             | --                 | --                  | 0<br>(0 - 0)         | 1<br>(1 - 2)             | 2<br>(1 - 5)             |
| Liver cancer due to other causes                                 | 3<br>(2 - 5)             | --                 | 0<br>(0 - 0)        | 1<br>(0 - 1)         | 1<br>(1 - 2)             | 1<br>(1 - 2)             |
| Larynx cancer                                                    | 1<br>(1 - 3)             | --                 | --                  | 0<br>(0 - 0)         | 1<br>(0 - 1)             | 1<br>(0 - 1)             |

Web Table 31- Trinidad and Tobago deaths with 95% UI by age, sex, and cause in 2013

| Cause                                         | Females, All Ages        | Females, 0-4 Years | Females, 5-14 Years | Females, 15-49 Years | Females, 50-69 Years | Females, 70-80 Years     |
|-----------------------------------------------|--------------------------|--------------------|---------------------|----------------------|----------------------|--------------------------|
| Tracheal, bronchus and lung cancer            | 39<br>(30 - 50)          | --                 | --                  | 4<br>(3 - 5)         | 18<br>(14 - 24)      | 17<br>(12 - 23)          |
| Breast cancer                                 | 193<br>(153 - 237)       | --                 | --                  | 40<br>(30 - 52)      | 93<br>(73 - 116)     | 59<br>(45 - 78)          |
| Cervical cancer                               | 103<br>(79 - 133)        | --                 | --                  | 24<br>(17 - 32)      | 46<br>(33 - 62)      | 32<br>(23 - 46)          |
| Uterine cancer                                | 41<br>(22 - 56)          | --                 | --                  | 2<br>(1 - 3)         | 19<br>(9 - 27)       | 21<br>(11 - 30)          |
| Prostate cancer                               | --                       | --                 | --                  | --                   | --                   | --                       |
| Colon and rectum cancer                       | 89<br>(73 - 110)         | --                 | --                  | 7<br>(5 - 9)         | 35<br>(27 - 43)      | 48<br>(37 - 63)          |
| Lip and oral cavity cancer                    | 6<br>(4 - 9)             | --                 | --                  | 1<br>(1 - 1)         | 3<br>(2 - 4)         | 3<br>(2 - 4)             |
| Nasopharynx cancer                            | 3<br>(1 - 4)             | --                 | 0<br>(0 - 0)        | 1<br>(0 - 1)         | 1<br>(1 - 2)         | 1<br>(0 - 1)             |
| Other pharynx cancer                          | 2<br>(1 - 3)             | --                 | --                  | 0<br>(0 - 1)         | 1<br>(1 - 1)         | 1<br>(0 - 1)             |
| Gallbladder and biliary tract cancer          | 16<br>(10 - 26)          | --                 | --                  | 1<br>(1 - 1)         | 7<br>(4 - 11)        | 8<br>(4 - 14)            |
| Pancreatic cancer                             | 42<br>(33 - 53)          | --                 | --                  | 2<br>(1 - 3)         | 15<br>(11 - 20)      | 25<br>(18 - 34)          |
| Malignant skin melanoma                       | 2<br>(1 - 2)             | --                 | --                  | 0<br>(0 - 1)         | 1<br>(1 - 1)         | 1<br>(1 - 1)             |
| Non-melanoma skin cancer                      | 3<br>(2 - 5)             | --                 | --                  | 0<br>(0 - 0)         | 1<br>(0 - 1)         | 2<br>(1 - 3)             |
| Ovarian cancer                                | 48<br>(38 - 61)          | --                 | --                  | 6<br>(5 - 9)         | 24<br>(18 - 32)      | 18<br>(13 - 24)          |
| Testicular cancer                             | --                       | --                 | --                  | --                   | --                   | --                       |
| Kidney cancer                                 | 7<br>(5 - 9)             | 0<br>(0 - 0)       | 0<br>(0 - 0)        | 1<br>(1 - 1)         | 3<br>(2 - 4)         | 3<br>(2 - 5)             |
| Bladder cancer                                | 8<br>(6 - 13)            | --                 | --                  | 0<br>(0 - 1)         | 3<br>(2 - 5)         | 5<br>(3 - 8)             |
| Brain and nervous system cancer               | 9<br>(6 - 12)            | 0<br>(0 - 0)       | 0<br>(0 - 1)        | 3<br>(2 - 4)         | 4<br>(2 - 5)         | 2<br>(1 - 3)             |
| Thyroid cancer                                | 4<br>(2 - 5)             | --                 | 0<br>(0 - 0)        | 0<br>(0 - 0)         | 1<br>(1 - 2)         | 2<br>(1 - 3)             |
| Mesothelioma                                  | 2<br>(1 - 2)             | --                 | --                  | 0<br>(0 - 0)         | 1<br>(0 - 1)         | 1<br>(0 - 1)             |
| Hodgkin lymphoma                              | 2<br>(1 - 2)             | 0<br>(0 - 0)       | 0<br>(0 - 0)        | 1<br>(0 - 1)         | 0<br>(0 - 1)         | 0<br>(0 - 1)             |
| Non-Hodgkin lymphoma                          | 20<br>(13 - 27)          | 0<br>(0 - 0)       | 0<br>(0 - 0)        | 5<br>(3 - 7)         | 9<br>(6 - 13)        | 6<br>(4 - 9)             |
| Multiple myeloma                              | 17<br>(11 - 22)          | --                 | --                  | 1<br>(1 - 2)         | 9<br>(6 - 12)        | 7<br>(4 - 10)            |
| Leukemia                                      | 19<br>(15 - 23)          | 0<br>(0 - 1)       | 1<br>(0 - 1)        | 5<br>(4 - 7)         | 7<br>(5 - 9)         | 6<br>(4 - 8)             |
| Other neoplasms                               | 52<br>(39 - 72)          | 1<br>(0 - 3)       | 1<br>(1 - 2)        | 11<br>(8 - 16)       | 22<br>(16 - 31)      | 16<br>(11 - 23)          |
| Cardiovascular diseases                       | 1,933<br>(1,624 - 2,258) | 3<br>(1 - 8)       | 2<br>(1 - 3)        | 92<br>(69 - 122)     | 528<br>(430 - 649)   | 1,309<br>(1,097 - 1,498) |
| Rheumatic heart disease                       | 9<br>(5 - 12)            | 0<br>(0 - 0)       | 0<br>(0 - 0)        | 3<br>(2 - 5)         | 3<br>(2 - 4)         | 3<br>(1 - 4)             |
| Ischemic heart disease                        | 921<br>(722 - 1,115)     | 0<br>(0 - 1)       | 0<br>(0 - 1)        | 33<br>(24 - 49)      | 269<br>(211 - 342)   | 618<br>(477 - 744)       |
| Cerebrovascular disease                       | 624<br>(500 - 807)       | 1<br>(0 - 3)       | 1<br>(0 - 1)        | 28<br>(20 - 39)      | 157<br>(118 - 213)   | 437<br>(350 - 564)       |
| Ischemic stroke                               | 396<br>(304 - 537)       | 0<br>(0 - 1)       | 0<br>(0 - 0)        | 7<br>(5 - 11)        | 76<br>(53 - 110)     | 312<br>(243 - 419)       |
| Hemorrhagic stroke                            | 228<br>(162 - 300)       | 1<br>(0 - 2)       | 0<br>(0 - 1)        | 21<br>(14 - 29)      | 81<br>(57 - 111)     | 125<br>(81 - 165)        |
| Hypertensive heart disease                    | 199<br>(140 - 283)       | 0<br>(0 - 0)       | 0<br>(0 - 0)        | 9<br>(6 - 13)        | 48<br>(33 - 69)      | 142<br>(96 - 210)        |
| Cardiomyopathy and myocarditis                | 36<br>(25 - 50)          | 1<br>(0 - 2)       | 0<br>(0 - 1)        | 6<br>(4 - 9)         | 10<br>(7 - 14)       | 19<br>(12 - 28)          |
| Atrial fibrillation and flutter               | 32<br>(22 - 46)          | --                 | --                  | 1<br>(0 - 1)         | 5<br>(3 - 7)         | 26<br>(17 - 38)          |
| Aortic aneurysm                               | 19<br>(12 - 29)          | --                 | --                  | 1<br>(1 - 2)         | 6<br>(3 - 10)        | 12<br>(7 - 19)           |
| Peripheral vascular disease                   | 15<br>(9 - 22)           | --                 | --                  | 0<br>(0 - 0)         | 2<br>(1 - 2)         | 13<br>(8 - 20)           |
| Endocarditis                                  | 6<br>(4 - 9)             | 0<br>(0 - 0)       | 0<br>(0 - 0)        | 1<br>(1 - 2)         | 1<br>(1 - 2)         | 4<br>(2 - 5)             |
| Other cardiovascular and circulatory diseases | 72<br>(39 - 95)          | 1<br>(0 - 2)       | 0<br>(0 - 1)        | 10<br>(5 - 14)       | 26<br>(12 - 36)      | 35<br>(18 - 49)          |
| Chronic respiratory diseases                  | 98<br>(79 - 138)         | 2<br>(1 - 4)       | 1<br>(0 - 1)        | 11<br>(8 - 15)       | 26<br>(20 - 36)      | 59<br>(45 - 87)          |
| Chronic obstructive pulmonary disease         | 55<br>(39 - 80)          | 1<br>(0 - 1)       | 0<br>(0 - 0)        | 4<br>(2 - 6)         | 12<br>(8 - 18)       | 38<br>(27 - 57)          |



Web Table 31- Trinidad and Tobago deaths with 95% UI by age, sex, and cause in 2013

| Cause                                               | Females, All Ages  | Females, 0-4 Years | Females, 5-14 Years | Females, 15-49 Years | Females, 50-69 Years | Females, 70-80 Years |
|-----------------------------------------------------|--------------------|--------------------|---------------------|----------------------|----------------------|----------------------|
| Pneumoconiosis                                      | 1<br>(0 - 1)       | 0<br>(0 - 0)       | 0<br>(0 - 0)        | 0<br>(0 - 0)         | 0<br>(0 - 0)         | 0<br>(0 - 1)         |
| Silicosis                                           | 0<br>(0 - 0)       | 0<br>(0 - 0)       | 0<br>(0 - 0)        | 0<br>(0 - 0)         | 0<br>(0 - 0)         | 0<br>(0 - 0)         |
| Asbestosis                                          | 0<br>(0 - 0)       | 0<br>(0 - 0)       | 0<br>(0 - 0)        | 0<br>(0 - 0)         | 0<br>(0 - 0)         | 0<br>(0 - 0)         |
| Coal workers pneumoconiosis                         | 0<br>(0 - 0)       | 0<br>(0 - 0)       | 0<br>(0 - 0)        | 0<br>(0 - 0)         | 0<br>(0 - 0)         | 0<br>(0 - 0)         |
| Other pneumoconiosis                                | 1<br>(0 - 1)       | 0<br>(0 - 0)       | 0<br>(0 - 0)        | 0<br>(0 - 0)         | 0<br>(0 - 0)         | 0<br>(0 - 1)         |
| Asthma                                              | 27<br>(18 - 39)    | 0<br>(0 - 1)       | 0<br>(0 - 1)        | 5<br>(3 - 7)         | 9<br>(6 - 13)        | 13<br>(8 - 20)       |
| Interstitial lung disease and pulmonary sarcoidosis | 12<br>(7 - 23)     | 0<br>(0 - 0)       | 0<br>(0 - 0)        | 2<br>(1 - 3)         | 5<br>(3 - 8)         | 6<br>(3 - 11)        |
| Other chronic respiratory diseases                  | 3<br>(2 - 5)       | 1<br>(0 - 1)       | 0<br>(0 - 0)        | 1<br>(0 - 1)         | 1<br>(0 - 1)         | 1<br>(1 - 3)         |
| Cirrhosis                                           | 56<br>(45 - 69)    | 0<br>(0 - 0)       | 0<br>(0 - 1)        | 13<br>(9 - 16)       | 26<br>(20 - 33)      | 17<br>(13 - 22)      |
| Cirrhosis due to hepatitis B                        | 5<br>(3 - 10)      | 0<br>(0 - 0)       | 0<br>(0 - 0)        | 1<br>(1 - 2)         | 3<br>(1 - 5)         | 2<br>(1 - 4)         |
| Cirrhosis due to hepatitis C                        | 28<br>(18 - 39)    | 0<br>(0 - 0)       | 0<br>(0 - 0)        | 6<br>(4 - 9)         | 13<br>(8 - 19)       | 9<br>(5 - 13)        |
| Cirrhosis due to alcohol use                        | 12<br>(7 - 18)     | --                 | --                  | 2<br>(1 - 3)         | 6<br>(3 - 8)         | 5<br>(3 - 7)         |
| Cirrhosis due to other causes                       | 10<br>(6 - 16)     | 0<br>(0 - 0)       | 0<br>(0 - 0)        | 4<br>(2 - 5)         | 5<br>(2 - 7)         | 2<br>(1 - 4)         |
| Digestive diseases                                  | 120<br>(94 - 145)  | 1<br>(0 - 2)       | 1<br>(0 - 1)        | 12<br>(9 - 16)       | 33<br>(23 - 41)      | 74<br>(56 - 90)      |
| Peptic ulcer disease                                | 29<br>(20 - 39)    | 0<br>(0 - 0)       | 0<br>(0 - 0)        | 2<br>(1 - 3)         | 8<br>(5 - 11)        | 18<br>(12 - 27)      |
| Gastritis and duodenitis                            | 7<br>(3 - 12)      | 0<br>(0 - 0)       | 0<br>(0 - 0)        | 1<br>(0 - 1)         | 2<br>(1 - 3)         | 5<br>(2 - 8)         |
| Appendicitis                                        | 5<br>(3 - 7)       | 0<br>(0 - 0)       | 0<br>(0 - 0)        | 1<br>(1 - 2)         | 1<br>(1 - 2)         | 2<br>(1 - 3)         |
| Paralytic ileus and intestinal obstruction          | 16<br>(5 - 26)     | 0<br>(0 - 0)       | 0<br>(0 - 0)        | 1<br>(0 - 2)         | 4<br>(1 - 7)         | 10<br>(3 - 18)       |
| Inguinal, femoral, and abdominal hernia             | 6<br>(3 - 15)      | 0<br>(0 - 0)       | 0<br>(0 - 0)        | 1<br>(0 - 2)         | 2<br>(1 - 4)         | 4<br>(2 - 10)        |
| Inflammatory bowel disease                          | 9<br>(6 - 14)      | 0<br>(0 - 1)       | 0<br>(0 - 0)        | 1<br>(1 - 2)         | 3<br>(2 - 4)         | 5<br>(3 - 8)         |
| Vascular intestinal disorders                       | 7<br>(4 - 13)      | 0<br>(0 - 0)       | 0<br>(0 - 0)        | 1<br>(0 - 1)         | 2<br>(1 - 3)         | 4<br>(2 - 9)         |
| Gallbladder and biliary diseases                    | 10<br>(7 - 13)     | 0<br>(0 - 0)       | 0<br>(0 - 0)        | 1<br>(1 - 2)         | 4<br>(2 - 5)         | 5<br>(3 - 7)         |
| Pancreatitis                                        | 7<br>(4 - 10)      | 0<br>(0 - 0)       | 0<br>(0 - 0)        | 1<br>(1 - 2)         | 2<br>(1 - 4)         | 3<br>(2 - 5)         |
| Other digestive diseases                            | 24<br>(18 - 32)    | 0<br>(0 - 0)       | 0<br>(0 - 0)        | 2<br>(1 - 3)         | 6<br>(4 - 8)         | 17<br>(11 - 23)      |
| Neurological disorders                              | 221<br>(172 - 280) | 1<br>(0 - 2)       | 1<br>(0 - 1)        | 9<br>(7 - 13)        | 23<br>(18 - 30)      | 187<br>(142 - 241)   |
| Alzheimer disease and other dementias               | 181<br>(137 - 235) | --                 | --                  | 0<br>(0 - 0)         | 13<br>(9 - 18)       | 168<br>(124 - 221)   |
| Parkinson disease                                   | 16<br>(12 - 25)    | --                 | --                  | 0<br>(0 - 0)         | 3<br>(2 - 5)         | 13<br>(9 - 20)       |
| Epilepsy                                            | 13<br>(9 - 18)     | 0<br>(0 - 1)       | 1<br>(0 - 1)        | 6<br>(4 - 9)         | 3<br>(2 - 4)         | 3<br>(2 - 4)         |
| Multiple sclerosis                                  | 2<br>(1 - 3)       | --                 | --                  | 1<br>(0 - 1)         | 1<br>(0 - 1)         | 0<br>(0 - 1)         |
| Other neurological disorders                        | 9<br>(8 - 11)      | 0<br>(0 - 1)       | 0<br>(0 - 0)        | 2<br>(2 - 3)         | 4<br>(3 - 5)         | 3<br>(2 - 4)         |
| Mental and substance use disorders                  | 7<br>(5 - 10)      | 0<br>(0 - 0)       | 0<br>(0 - 0)        | 2<br>(2 - 3)         | 3<br>(2 - 4)         | 2<br>(1 - 3)         |
| Schizophrenia                                       | 1<br>(0 - 2)       | --                 | --                  | 0<br>(0 - 0)         | 0<br>(0 - 1)         | 0<br>(0 - 1)         |
| Alcohol use disorders                               | 3<br>(1 - 6)       | --                 | --                  | 1<br>(0 - 2)         | 2<br>(1 - 3)         | 1<br>(0 - 1)         |
| Drug use disorders                                  | 3<br>(2 - 3)       | 0<br>(0 - 0)       | --                  | 1<br>(1 - 1)         | 1<br>(0 - 1)         | 1<br>(1 - 2)         |
| Opioid use disorders                                | 1<br>(1 - 1)       | 0<br>(0 - 0)       | --                  | 0<br>(0 - 0)         | 0<br>(0 - 0)         | 0<br>(0 - 0)         |
| Cocaine use disorders                               | 0<br>(0 - 0)       | 0<br>(0 - 0)       | --                  | 0<br>(0 - 0)         | 0<br>(0 - 0)         | 0<br>(0 - 0)         |
| Amphetamine use disorders                           | 0<br>(0 - 0)       | 0<br>(0 - 0)       | --                  | 0<br>(0 - 0)         | 0<br>(0 - 0)         | 0<br>(0 - 0)         |
| Other drug use disorders                            | 2<br>(1 - 2)       | 0<br>(0 - 0)       | --                  | 0<br>(0 - 1)         | 0<br>(0 - 1)         | 1<br>(0 - 1)         |
| Eating disorders                                    | 0<br>(0 - 1)       | --                 | 0<br>(0 - 0)        | 0<br>(0 - 1)         | --                   | --                   |
| Anorexia nervosa                                    | 0<br>(0 - 1)       | --                 | 0<br>(0 - 0)        | 0<br>(0 - 1)         | --                   | --                   |

Web Table 31- Trinidad and Tobago deaths with 95% UI by age, sex, and cause in 2013

| Cause                                               | Females, All Ages      | Females, 0-4 Years | Females, 5-14 Years | Females, 15-49 Years | Females, 50-69 Years | Females, 70-80 Years |
|-----------------------------------------------------|------------------------|--------------------|---------------------|----------------------|----------------------|----------------------|
| Diabetes, urogenital, blood, and endocrine diseases | 1,101<br>(916 - 1,308) | 4<br>(2 - 10)      | 2<br>(1 - 3)        | 78<br>(60 - 98)      | 430<br>(346 - 524)   | 587<br>(486 - 700)   |
| Diabetes mellitus                                   | 851<br>(684 - 1,028)   | 0<br>(0 - 1)       | 0<br>(0 - 1)        | 39<br>(29 - 50)      | 342<br>(267 - 425)   | 469<br>(375 - 564)   |
| Acute glomerulonephritis                            | 0<br>(0 - 1)           | 0<br>(0 - 0)       | 0<br>(0 - 0)        | 0<br>(0 - 0)         | 0<br>(0 - 0)         | 0<br>(0 - 0)         |
| Chronic kidney disease                              | 162<br>(119 - 229)     | 1<br>(0 - 2)       | 1<br>(0 - 1)        | 21<br>(15 - 32)      | 61<br>(41 - 87)      | 78<br>(55 - 111)     |
| Chronic kidney disease due to diabetes mellitus     | 32<br>(17 - 48)        | 0<br>(0 - 0)       | 0<br>(0 - 0)        | 3<br>(2 - 5)         | 17<br>(9 - 26)       | 12<br>(6 - 20)       |
| Chronic kidney disease due to hypertension          | 76<br>(49 - 112)       | 0<br>(0 - 0)       | 0<br>(0 - 0)        | 10<br>(6 - 15)       | 26<br>(15 - 39)      | 41<br>(26 - 61)      |
| Chronic kidney disease due to glomerulonephritis    | 4<br>(2 - 5)           | 0<br>(0 - 0)       | 0<br>(0 - 0)        | 1<br>(1 - 2)         | 1<br>(1 - 2)         | 1<br>(1 - 2)         |
| Chronic kidney disease due to other causes          | 50<br>(27 - 94)        | 1<br>(0 - 2)       | 0<br>(0 - 1)        | 8<br>(4 - 15)        | 17<br>(8 - 33)       | 24<br>(11 - 46)      |
| Urinary diseases and male infertility               | 25<br>(18 - 33)        | 0<br>(0 - 0)       | 0<br>(0 - 0)        | 3<br>(2 - 5)         | 7<br>(4 - 10)        | 14<br>(9 - 20)       |
| Interstitial nephritis and urinary tract infections | 21<br>(14 - 28)        | 0<br>(0 - 0)       | 0<br>(0 - 0)        | 3<br>(2 - 4)         | 6<br>(3 - 8)         | 12<br>(7 - 17)       |
| Urolithiasis                                        | 1<br>(0 - 2)           | --                 | 0<br>(0 - 0)        | 0<br>(0 - 0)         | 0<br>(0 - 1)         | 0<br>(0 - 1)         |
| Other urinary diseases                              | 3<br>(2 - 5)           | 0<br>(0 - 0)       | 0<br>(0 - 0)        | 0<br>(0 - 1)         | 1<br>(1 - 2)         | 2<br>(1 - 3)         |
| Gynecological diseases                              | 1<br>(1 - 2)           | --                 | --                  | 0<br>(0 - 1)         | 0<br>(0 - 0)         | 0<br>(0 - 1)         |
| Uterine fibroids                                    | 0<br>(0 - 1)           | --                 | --                  | 0<br>(0 - 0)         | 0<br>(0 - 0)         | 0<br>(0 - 0)         |
| Polycystic ovarian syndrome                         | 0<br>(0 - 0)           | --                 | --                  | 0<br>(0 - 0)         | 0<br>(0 - 0)         | --                   |
| Endometriosis                                       | 0<br>(0 - 0)           | --                 | --                  | 0<br>(0 - 0)         | 0<br>(0 - 0)         | --                   |
| Genital prolapse                                    | 0<br>(0 - 0)           | --                 | --                  | 0<br>(0 - 0)         | 0<br>(0 - 0)         | 0<br>(0 - 0)         |
| Other gynecological diseases                        | 0<br>(0 - 1)           | --                 | --                  | 0<br>(0 - 0)         | 0<br>(0 - 0)         | 0<br>(0 - 0)         |
| Hemoglobinopathies and hemolytic anemias            | 11<br>(6 - 16)         | 1<br>(0 - 3)       | 1<br>(0 - 1)        | 4<br>(2 - 6)         | 3<br>(2 - 5)         | 2<br>(1 - 3)         |
| Thalassemias                                        | 0<br>(0 - 0)           | 0<br>(0 - 0)       | 0<br>(0 - 0)        | 0<br>(0 - 0)         | 0<br>(0 - 0)         | 0<br>(0 - 0)         |
| Sickle cell disorders                               | 8<br>(5 - 13)          | 1<br>(0 - 2)       | 1<br>(0 - 1)        | 4<br>(2 - 6)         | 3<br>(1 - 4)         | 0<br>(0 - 1)         |
| G6PD deficiency                                     | 0<br>(0 - 0)           | 0<br>(0 - 0)       | 0<br>(0 - 0)        | 0<br>(0 - 0)         | 0<br>(0 - 0)         | 0<br>(0 - 0)         |
| Other hemoglobinopathies and hemolytic anemias      | 2<br>(1 - 3)           | 0<br>(0 - 0)       | 0<br>(0 - 0)        | 0<br>(0 - 0)         | 0<br>(0 - 1)         | 1<br>(1 - 2)         |
| Endocrine, metabolic, blood, and immune disorders   | 52<br>(39 - 88)        | 2<br>(1 - 5)       | 0<br>(0 - 1)        | 10<br>(7 - 16)       | 16<br>(11 - 25)      | 24<br>(16 - 46)      |
| Musculoskeletal disorders                           | 31<br>(12 - 40)        | --                 | 0<br>(0 - 1)        | 12<br>(5 - 17)       | 9<br>(4 - 12)        | 9<br>(4 - 13)        |
| Rheumatoid arthritis                                | 5<br>(1 - 7)           | --                 | 0<br>(0 - 0)        | 0<br>(0 - 1)         | 2<br>(0 - 2)         | 3<br>(1 - 4)         |
| Other musculoskeletal disorders                     | 26<br>(11 - 34)        | --                 | 0<br>(0 - 1)        | 12<br>(5 - 16)       | 7<br>(3 - 10)        | 7<br>(3 - 10)        |
| Other non-communicable diseases                     | 93<br>(59 - 147)       | 44<br>(19 - 96)    | 3<br>(2 - 5)        | 8<br>(5 - 10)        | 9<br>(5 - 12)        | 29<br>(11 - 42)      |
| Congenital anomalies                                | 57<br>(30 - 107)       | 41<br>(18 - 89)    | 3<br>(2 - 5)        | 6<br>(4 - 8)         | 3<br>(2 - 5)         | 3<br>(2 - 5)         |
| Neural tube defects                                 | 3<br>(1 - 6)           | 3<br>(1 - 6)       | 0<br>(0 - 0)        | 0<br>(0 - 0)         | 0<br>(0 - 0)         | 0<br>(0 - 0)         |
| Congenital heart anomalies                          | 31<br>(17 - 61)        | 23<br>(10 - 49)    | 2<br>(1 - 3)        | 4<br>(3 - 6)         | 1<br>(1 - 2)         | 2<br>(1 - 3)         |
| Cleft lip and cleft palate                          | 0<br>(0 - 1)           | 0<br>(0 - 1)       | --                  | --                   | --                   | --                   |
| Down syndrome                                       | 3<br>(1 - 5)           | 1<br>(0 - 3)       | 0<br>(0 - 0)        | 1<br>(0 - 1)         | 1<br>(0 - 1)         | 0<br>(0 - 0)         |
| Chromosomal unbalanced rearrangements               | 1<br>(1 - 3)           | 1<br>(0 - 3)       | 0<br>(0 - 0)        | 0<br>(0 - 0)         | 0<br>(0 - 0)         | 0<br>(0 - 0)         |
| Other congenital anomalies                          | 18<br>(8 - 35)         | 13<br>(5 - 30)     | 1<br>(0 - 1)        | 1<br>(1 - 2)         | 2<br>(1 - 2)         | 1<br>(1 - 2)         |
| Skin and subcutaneous diseases                      | 34<br>(11 - 47)        | 0<br>(0 - 1)       | 0<br>(0 - 0)        | 2<br>(1 - 2)         | 6<br>(2 - 8)         | 26<br>(8 - 38)       |
| Cellulitis                                          | 3<br>(1 - 5)           | 0<br>(0 - 0)       | 0<br>(0 - 0)        | 0<br>(0 - 0)         | 1<br>(0 - 1)         | 2<br>(0 - 4)         |
| Pyoderma                                            | 7<br>(2 - 10)          | 0<br>(0 - 1)       | 0<br>(0 - 0)        | 1<br>(0 - 1)         | 1<br>(0 - 2)         | 4<br>(1 - 8)         |
| Decubitus ulcer                                     | 23<br>(7 - 33)         | 0<br>(0 - 0)       | 0<br>(0 - 0)        | 1<br>(0 - 1)         | 3<br>(1 - 5)         | 19<br>(6 - 29)       |
| Other skin and subcutaneous diseases                | 1<br>(0 - 3)           | 0<br>(0 - 0)       | 0<br>(0 - 0)        | 0<br>(0 - 0)         | 0<br>(0 - 1)         | 1<br>(0 - 2)         |

Web Table 31- Trinidad and Tobago deaths with 95% UI by age, sex, and cause in 2013

| Cause                                           | Females, All Ages  | Females, 0-4 Years | Females, 5-14 Years | Females, 15-49 Years | Females, 50-69 Years | Females, 70-80 Years |
|-------------------------------------------------|--------------------|--------------------|---------------------|----------------------|----------------------|----------------------|
| Sudden infant death syndrome                    | 3<br>(1 - 9)       | 3<br>(1 - 9)       | --                  | --                   | --                   | --                   |
| Injuries                                        | 230<br>(175 - 282) | 13<br>(6 - 30)     | 8<br>(5 - 13)       | 85<br>(62 - 108)     | 49<br>(36 - 62)      | 75<br>(55 - 93)      |
| Transport injuries                              | 61<br>(39 - 78)    | 2<br>(1 - 5)       | 3<br>(2 - 5)        | 24<br>(15 - 32)      | 16<br>(9 - 21)       | 15<br>(9 - 20)       |
| Road injuries                                   | 55<br>(36 - 70)    | 2<br>(1 - 5)       | 3<br>(2 - 5)        | 22<br>(15 - 30)      | 14<br>(9 - 18)       | 14<br>(8 - 18)       |
| Pedestrian road injuries                        | 16<br>(11 - 22)    | 1<br>(0 - 1)       | 1<br>(1 - 2)        | 6<br>(4 - 8)         | 5<br>(3 - 7)         | 4<br>(2 - 6)         |
| Cyclist road injuries                           | 2<br>(1 - 3)       | 0<br>(0 - 0)       | 0<br>(0 - 0)        | 1<br>(0 - 1)         | 1<br>(0 - 1)         | 1<br>(0 - 1)         |
| Motorcyclist road injuries                      | 2<br>(1 - 3)       | 0<br>(0 - 0)       | 0<br>(0 - 0)        | 1<br>(0 - 1)         | 0<br>(0 - 1)         | 1<br>(0 - 1)         |
| Motor vehicle road injuries                     | 34<br>(20 - 44)    | 1<br>(0 - 3)       | 2<br>(1 - 3)        | 15<br>(9 - 20)       | 8<br>(4 - 11)        | 8<br>(5 - 11)        |
| Other road injuries                             | 1<br>(0 - 1)       | 0<br>(0 - 0)       | 0<br>(0 - 0)        | 0<br>(0 - 0)         | 0<br>(0 - 0)         | 0<br>(0 - 0)         |
| Other transport injuries                        | 6<br>(3 - 8)       | 0<br>(0 - 1)       | 0<br>(0 - 0)        | 2<br>(1 - 3)         | 2<br>(1 - 3)         | 2<br>(1 - 3)         |
| Unintentional injuries                          | 103<br>(77 - 130)  | 9<br>(4 - 22)      | 3<br>(2 - 5)        | 18<br>(13 - 23)      | 20<br>(14 - 25)      | 53<br>(37 - 67)      |
| Falls                                           | 27<br>(18 - 38)    | 0<br>(0 - 1)       | 0<br>(0 - 0)        | 1<br>(1 - 2)         | 3<br>(2 - 5)         | 22<br>(14 - 31)      |
| Drowning                                        | 10<br>(6 - 14)     | 1<br>(0 - 3)       | 1<br>(1 - 2)        | 4<br>(2 - 5)         | 2<br>(1 - 3)         | 1<br>(1 - 2)         |
| Fire, heat, and hot substances                  | 14<br>(7 - 20)     | 1<br>(0 - 3)       | 1<br>(0 - 1)        | 3<br>(1 - 4)         | 3<br>(2 - 4)         | 7<br>(3 - 11)        |
| Poisonings                                      | 2<br>(1 - 3)       | 0<br>(0 - 1)       | 0<br>(0 - 0)        | 1<br>(0 - 1)         | 0<br>(0 - 1)         | 1<br>(0 - 1)         |
| Exposure to mechanical forces                   | 7<br>(5 - 9)       | 0<br>(0 - 1)       | 0<br>(0 - 1)        | 3<br>(2 - 4)         | 1<br>(1 - 2)         | 1<br>(1 - 2)         |
| Unintentional firearm injuries                  | 3<br>(2 - 3)       | 0<br>(0 - 0)       | 0<br>(0 - 0)        | 1<br>(1 - 2)         | 1<br>(0 - 1)         | 0<br>(0 - 1)         |
| Unintentional suffocation                       | 1<br>(0 - 2)       | 0<br>(0 - 0)       | 0<br>(0 - 0)        | 0<br>(0 - 0)         | 0<br>(0 - 0)         | 0<br>(0 - 1)         |
| Other exposure to mechanical forces             | 3<br>(2 - 5)       | 0<br>(0 - 1)       | 0<br>(0 - 1)        | 1<br>(1 - 2)         | 1<br>(0 - 1)         | 1<br>(0 - 1)         |
| Adverse effects of medical treatment            | 19<br>(10 - 27)    | 1<br>(0 - 2)       | 0<br>(0 - 0)        | 3<br>(2 - 5)         | 5<br>(3 - 7)         | 10<br>(4 - 15)       |
| Animal contact                                  | 3<br>(1 - 5)       | 0<br>(0 - 0)       | 0<br>(0 - 0)        | 1<br>(0 - 1)         | 1<br>(0 - 2)         | 1<br>(0 - 2)         |
| Venomous animal contact                         | 1<br>(0 - 2)       | 0<br>(0 - 0)       | 0<br>(0 - 0)        | 0<br>(0 - 1)         | 1<br>(0 - 1)         | 0<br>(0 - 0)         |
| Non-venomous animal contact                     | 2<br>(0 - 3)       | 0<br>(0 - 0)       | 0<br>(0 - 0)        | 0<br>(0 - 0)         | 0<br>(0 - 1)         | 1<br>(0 - 2)         |
| Foreign body                                    | 19<br>(11 - 31)    | 4<br>(2 - 12)      | 0<br>(0 - 1)        | 3<br>(1 - 4)         | 3<br>(1 - 4)         | 9<br>(5 - 15)        |
| Pulmonary aspiration and foreign body in airway | 19<br>(10 - 31)    | 4<br>(2 - 12)      | 0<br>(0 - 1)        | 3<br>(1 - 4)         | 2<br>(1 - 4)         | 9<br>(5 - 15)        |
| Foreign body in other body part                 | 0<br>(0 - 1)       | 0<br>(0 - 0)       | 0<br>(0 - 0)        | 0<br>(0 - 0)         | 0<br>(0 - 0)         | 0<br>(0 - 0)         |
| Other unintentional injuries                    | 2<br>(1 - 3)       | 0<br>(0 - 0)       | 0<br>(0 - 0)        | 1<br>(0 - 1)         | 1<br>(0 - 1)         | 1<br>(0 - 1)         |
| Self-harm and interpersonal violence            | 66<br>(46 - 85)    | 1<br>(0 - 3)       | 2<br>(1 - 3)        | 43<br>(29 - 57)      | 14<br>(9 - 19)       | 6<br>(4 - 9)         |
| Self-harm                                       | 29<br>(22 - 41)    | --                 | 1<br>(0 - 1)        | 17<br>(13 - 25)      | 7<br>(5 - 10)        | 4<br>(3 - 5)         |
| Interpersonal violence                          | 38<br>(20 - 53)    | 1<br>(0 - 3)       | 1<br>(0 - 2)        | 25<br>(13 - 37)      | 7<br>(3 - 11)        | 3<br>(1 - 5)         |
| Assault by firearm                              | 11<br>(5 - 17)     | 0<br>(0 - 1)       | 0<br>(0 - 1)        | 8<br>(3 - 13)        | 2<br>(1 - 3)         | 0<br>(0 - 1)         |
| Assault by sharp object                         | 13<br>(6 - 20)     | 0<br>(0 - 0)       | 0<br>(0 - 0)        | 10<br>(4 - 15)       | 2<br>(1 - 4)         | 1<br>(0 - 1)         |
| Assault by other means                          | 14<br>(6 - 20)     | 1<br>(0 - 2)       | 1<br>(0 - 1)        | 8<br>(3 - 12)        | 3<br>(1 - 5)         | 2<br>(1 - 3)         |

Web Table 31- Tunisia deaths with 95% UI by age, sex, and cause in 2013

| Cause                                                             | Both Sexes, All Ages        | Both Sexes, 0-4 Years    | Both Sexes, 5-14 Years | Both Sexes, 15-49 Years  | Both Sexes, 50-69 Years     | Both Sexes, 70-80 Years     |
|-------------------------------------------------------------------|-----------------------------|--------------------------|------------------------|--------------------------|-----------------------------|-----------------------------|
| All causes                                                        | 57,993<br>(49,457 - 67,863) | 2,668<br>(2,385 - 3,000) | 459<br>(415 - 505)     | 6,948<br>(5,526 - 8,712) | 15,593<br>(12,360 - 19,461) | 32,325<br>(28,454 - 36,572) |
| Communicable, maternal, neonatal, and nutritional diseases        | 3,974<br>(3,414 - 4,666)    | 1,345<br>(1,123 - 1,599) | 82<br>(57 - 115)       | 410<br>(299 - 670)       | 494<br>(380 - 651)          | 1,643<br>(1,266 - 2,141)    |
| HIV/AIDS and tuberculosis                                         | 230<br>(133 - 525)          | 3<br>(1 - 12)            | 1<br>(0 - 2)           | 82<br>(30 - 303)         | 57<br>(33 - 129)            | 88<br>(51 - 119)            |
| Tuberculosis                                                      | 158<br>(108 - 204)          | 1<br>(1 - 1)             | 1<br>(0 - 1)           | 28<br>(20 - 39)          | 42<br>(29 - 58)             | 86<br>(50 - 115)            |
| HIV/AIDS                                                          | 72<br>(6 - 388)             | 2<br>(0 - 12)            | 0<br>(0 - 2)           | 53<br>(5 - 274)          | 15<br>(1 - 88)              | 2<br>(0 - 14)               |
| HIV/AIDS resulting in mycobacterial infection                     | 4<br>(0 - 22)               | 0<br>(0 - 1)             | 0<br>(0 - 0)           | 3<br>(0 - 15)            | 1<br>(0 - 5)                | 0<br>(0 - 1)                |
| HIV/AIDS resulting in other diseases                              | 68<br>(5 - 367)             | 2<br>(0 - 11)            | 0<br>(0 - 2)           | 50<br>(4 - 258)          | 14<br>(1 - 83)              | 2<br>(0 - 13)               |
| Diarrhea, lower respiratory, and other common infectious diseases | 2,370<br>(1,907 - 2,941)    | 302<br>(217 - 436)       | 74<br>(50 - 107)       | 246<br>(176 - 333)       | 360<br>(268 - 471)          | 1,388<br>(1,023 - 1,868)    |
| Diarrheal diseases                                                | 121<br>(88 - 168)           | 39<br>(18 - 72)          | 2<br>(1 - 4)           | 9<br>(6 - 13)            | 12<br>(8 - 19)              | 59<br>(36 - 93)             |
| Intestinal infectious diseases                                    | 190<br>(94 - 338)           | 46<br>(22 - 86)          | 40<br>(20 - 70)        | 76<br>(34 - 140)         | 19<br>(8 - 36)              | 9<br>(4 - 17)               |
| Typhoid fever                                                     | 145<br>(71 - 261)           | 34<br>(15 - 63)          | 31<br>(15 - 55)        | 59<br>(26 - 112)         | 14<br>(6 - 29)              | 7<br>(3 - 14)               |
| Paratyphoid fever                                                 | 41<br>(20 - 75)             | 11<br>(5 - 23)           | 9<br>(4 - 17)          | 15<br>(7 - 31)           | 4<br>(1 - 7)                | 2<br>(1 - 3)                |
| Other intestinal infectious diseases                              | 4<br>(1 - 10)               | 1<br>(0 - 5)             | 0<br>(0 - 2)           | 1<br>(0 - 5)             | 1<br>(0 - 3)                | 0<br>(0 - 3)                |
| Lower respiratory infections                                      | 1,881<br>(1,458 - 2,418)    | 156<br>(105 - 225)       | 21<br>(15 - 30)        | 126<br>(90 - 169)        | 303<br>(220 - 404)          | 1,275<br>(924 - 1,743)      |
| Upper respiratory infections                                      | 3<br>(1 - 5)                | 0<br>(0 - 0)             | 0<br>(0 - 0)           | 0<br>(0 - 1)             | 1<br>(0 - 2)                | 1<br>(0 - 4)                |
| Otitis media                                                      | 4<br>(3 - 6)                | 0<br>(0 - 0)             | 0<br>(0 - 0)           | 1<br>(1 - 1)             | 1<br>(1 - 1)                | 3<br>(2 - 4)                |
| Meningitis                                                        | 76<br>(58 - 97)             | 17<br>(11 - 26)          | 3<br>(2 - 5)           | 16<br>(11 - 22)          | 15<br>(10 - 20)             | 25<br>(16 - 37)             |
| Pneumococcal meningitis                                           | 19<br>(14 - 25)             | 3<br>(2 - 5)             | 1<br>(1 - 2)           | 4<br>(3 - 6)             | 4<br>(2 - 6)                | 6<br>(4 - 10)               |
| H influenzae type B meningitis                                    | 12<br>(9 - 16)              | 6<br>(4 - 10)            | 1<br>(0 - 1)           | 2<br>(1 - 3)             | 1<br>(1 - 2)                | 2<br>(1 - 4)                |
| Meningococcal meningitis                                          | 24<br>(18 - 31)             | 5<br>(3 - 9)             | 1<br>(1 - 2)           | 5<br>(3 - 7)             | 4<br>(3 - 7)                | 8<br>(5 - 13)               |
| Other meningitis                                                  | 21<br>(15 - 28)             | 2<br>(1 - 4)             | 0<br>(0 - 1)           | 5<br>(3 - 7)             | 5<br>(3 - 8)                | 8<br>(5 - 13)               |
| Encephalitis                                                      | 51<br>(33 - 95)             | 12<br>(6 - 22)           | 3<br>(2 - 7)           | 15<br>(8 - 32)           | 9<br>(5 - 20)               | 12<br>(7 - 21)              |
| Diphtheria                                                        | 0<br>(0 - 1)                | 0<br>(0 - 1)             | 0<br>(0 - 0)           | 0<br>(0 - 0)             | 0<br>(0 - 0)                | --                          |
| Whooping cough                                                    | 1<br>(0 - 6)                | 1<br>(0 - 5)             | 0<br>(0 - 0)           | 0<br>(0 - 0)             | 0<br>(0 - 0)                | --                          |
| Tetanus                                                           | 2<br>(1 - 3)                | 0<br>(0 - 0)             | 0<br>(0 - 0)           | 1<br>(0 - 1)             | 0<br>(0 - 1)                | 0<br>(0 - 1)                |
| Measles                                                           | 34<br>(1 - 182)             | 30<br>(1 - 156)          | 4<br>(0 - 20)          | 1<br>(0 - 6)             | 0<br>(0 - 0)                | --                          |
| Varicella and herpes zoster                                       | 6<br>(2 - 13)               | 1<br>(0 - 2)             | 0<br>(0 - 1)           | 1<br>(0 - 2)             | 1<br>(0 - 2)                | 3<br>(0 - 10)               |
| Neglected tropical diseases and malaria                           | 26<br>(20 - 34)             | 4<br>(2 - 9)             | 2<br>(1 - 4)           | 8<br>(6 - 12)            | 6<br>(4 - 9)                | 6<br>(4 - 10)               |
| Leishmaniasis                                                     | 7<br>(6 - 9)                | 2<br>(1 - 4)             | 0<br>(0 - 1)           | 3<br>(2 - 4)             | 2<br>(1 - 2)                | 1<br>(0 - 1)                |
| Visceral leishmaniasis                                            | 7<br>(6 - 9)                | 2<br>(1 - 4)             | 0<br>(0 - 1)           | 3<br>(2 - 4)             | 2<br>(1 - 2)                | 1<br>(0 - 1)                |
| Cysticercosis                                                     | 0<br>(0 - 0)                | 0<br>(0 - 0)             | 0<br>(0 - 0)           | 0<br>(0 - 0)             | 0<br>(0 - 0)                | 0<br>(0 - 0)                |
| Cystic echinococcosis                                             | 7<br>(5 - 8)                | 0<br>(0 - 0)             | 0<br>(0 - 0)           | 2<br>(2 - 3)             | 2<br>(2 - 3)                | 2<br>(1 - 2)                |
| Dengue                                                            | 1<br>(1 - 1)                | 0<br>(0 - 0)             | 0<br>(0 - 0)           | 1<br>(0 - 1)             | 0<br>(0 - 0)                | 0<br>(0 - 0)                |
| Rabies                                                            | 2<br>(1 - 4)                | 0<br>(0 - 0)             | 0<br>(0 - 1)           | 1<br>(1 - 2)             | 0<br>(0 - 1)                | 0<br>(0 - 0)                |
| Intestinal nematode infections                                    | 3<br>(0 - 9)                | 1<br>(0 - 5)             | 0<br>(0 - 3)           | 0<br>(0 - 3)             | 0<br>(0 - 3)                | 1<br>(0 - 4)                |
| Ascariasis                                                        | 3<br>(0 - 9)                | 1<br>(0 - 5)             | 0<br>(0 - 3)           | 0<br>(0 - 3)             | 0<br>(0 - 3)                | 1<br>(0 - 4)                |
| Other neglected tropical diseases                                 | 6<br>(4 - 8)                | 0<br>(0 - 1)             | 0<br>(0 - 0)           | 1<br>(1 - 2)             | 1<br>(1 - 1)                | 3<br>(2 - 4)                |
| Maternal disorders                                                | 35<br>(21 - 53)             | --                       | 0<br>(0 - 0)           | 35<br>(21 - 53)          | --                          | --                          |
| Maternal hemorrhage                                               | 7<br>(3 - 11)               | --                       | 0<br>(0 - 0)           | 7<br>(3 - 11)            | --                          | --                          |
| Maternal sepsis and other maternal infections                     | 3<br>(2 - 5)                | --                       | 0<br>(0 - 0)           | 3<br>(2 - 5)             | --                          | --                          |

Web Table 31- Tunisia deaths with 95% UI by age, sex, and cause in 2013

| Cause                                                            | Both Sexes, All Ages        | Both Sexes, 0-4 Years  | Both Sexes, 5-14 Years | Both Sexes, 15-49 Years  | Both Sexes, 50-69 Years     | Both Sexes, 70-80 Years     |
|------------------------------------------------------------------|-----------------------------|------------------------|------------------------|--------------------------|-----------------------------|-----------------------------|
| Maternal hypertensive disorders                                  | 5<br>(3 - 8)                | --                     | 0<br>(0 - 0)           | 5<br>(3 - 8)             | --                          | --                          |
| Maternal obstructed labor                                        | 4<br>(2 - 6)                | --                     | 0<br>(0 - 0)           | 4<br>(2 - 6)             | --                          | --                          |
| Maternal abortive outcome                                        | 5<br>(3 - 8)                | --                     | 0<br>(0 - 0)           | 5<br>(3 - 8)             | --                          | --                          |
| Indirect maternal deaths                                         | 3<br>(1 - 6)                | --                     | 0<br>(0 - 0)           | 3<br>(1 - 6)             | --                          | --                          |
| Late maternal deaths                                             | 3<br>(2 - 6)                | --                     | 0<br>(0 - 0)           | 3<br>(2 - 6)             | --                          | --                          |
| Maternal deaths aggravated by HIV/AIDS                           | 0<br>(0 - 0)                | --                     | --                     | 0<br>(0 - 0)             | --                          | --                          |
| Other maternal disorders                                         | 5<br>(3 - 9)                | --                     | 0<br>(0 - 0)           | 5<br>(3 - 9)             | --                          | --                          |
| Neonatal disorders                                               | 1,010<br>(811 - 1,255)      | 1,010<br>(811 - 1,255) | --                     | --                       | --                          | --                          |
| Neonatal preterm birth complications                             | 705<br>(534 - 897)          | 705<br>(534 - 897)     | --                     | --                       | --                          | --                          |
| Neonatal encephalopathy due to birth asphyxia and trauma         | 116<br>(52 - 215)           | 116<br>(52 - 215)      | --                     | --                       | --                          | --                          |
| Neonatal sepsis and other neonatal infections                    | 77<br>(35 - 144)            | 77<br>(35 - 144)       | --                     | --                       | --                          | --                          |
| Hemolytic disease and other neonatal jaundice                    | 2<br>(1 - 5)                | 2<br>(1 - 5)           | --                     | --                       | --                          | --                          |
| Other neonatal disorders                                         | 109<br>(58 - 181)           | 109<br>(58 - 181)      | --                     | --                       | --                          | --                          |
| Nutritional deficiencies                                         | 130<br>(93 - 182)           | 7<br>(4 - 11)          | 2<br>(1 - 3)           | 14<br>(10 - 20)          | 19<br>(13 - 30)             | 88<br>(60 - 129)            |
| Protein-energy malnutrition                                      | 31<br>(16 - 56)             | 4<br>(2 - 7)           | 1<br>(0 - 1)           | 2<br>(1 - 5)             | 3<br>(1 - 7)                | 21<br>(10 - 39)             |
| Iodine deficiency                                                | 1<br>(0 - 3)                | 0<br>(0 - 1)           | 0<br>(0 - 0)           | 0<br>(0 - 0)             | 0<br>(0 - 1)                | 0<br>(0 - 2)                |
| Iron-deficiency anemia                                           | 91<br>(61 - 134)            | 3<br>(1 - 5)           | 1<br>(1 - 1)           | 11<br>(7 - 15)           | 15<br>(10 - 23)             | 63<br>(40 - 98)             |
| Other nutritional deficiencies                                   | 7<br>(3 - 12)               | 1<br>(0 - 1)           | 0<br>(0 - 0)           | 1<br>(1 - 2)             | 1<br>(0 - 2)                | 4<br>(2 - 8)                |
| Other communicable, maternal, neonatal, and nutritional diseases | 171<br>(126 - 237)          | 18<br>(7 - 32)         | 3<br>(2 - 5)           | 25<br>(18 - 35)          | 53<br>(36 - 73)             | 73<br>(47 - 125)            |
| Sexually transmitted diseases excluding HIV                      | 21<br>(8 - 37)              | 10<br>(0 - 23)         | 1<br>(0 - 2)           | 2<br>(1 - 4)             | 2<br>(1 - 5)                | 5<br>(2 - 12)               |
| Syphilis                                                         | 18<br>(6 - 33)              | 10<br>(0 - 23)         | 1<br>(0 - 2)           | 1<br>(1 - 2)             | 1<br>(1 - 3)                | 4<br>(2 - 9)                |
| Chlamydial infection                                             | 1<br>(0 - 1)                | --                     | 0<br>(0 - 0)           | 0<br>(0 - 1)             | 0<br>(0 - 0)                | 0<br>(0 - 0)                |
| Gonococcal infection                                             | 1<br>(1 - 3)                | --                     | 0<br>(0 - 0)           | 1<br>(0 - 1)             | 0<br>(0 - 1)                | 1<br>(0 - 1)                |
| Other sexually transmitted diseases                              | 1<br>(1 - 2)                | --                     | 0<br>(0 - 0)           | 0<br>(0 - 1)             | 0<br>(0 - 1)                | 0<br>(0 - 1)                |
| Hepatitis                                                        | 74<br>(56 - 99)             | 2<br>(1 - 3)           | 1<br>(0 - 1)           | 12<br>(8 - 18)           | 33<br>(23 - 47)             | 27<br>(20 - 36)             |
| Acute hepatitis A                                                | 4<br>(1 - 9)                | 1<br>(0 - 1)           | 0<br>(0 - 0)           | 1<br>(0 - 3)             | 1<br>(0 - 3)                | 0<br>(0 - 1)                |
| Acute hepatitis B                                                | 55<br>(38 - 78)             | 1<br>(0 - 2)           | 0<br>(0 - 0)           | 6<br>(3 - 10)            | 26<br>(16 - 38)             | 22<br>(15 - 31)             |
| Acute hepatitis C                                                | 7<br>(1 - 16)               | --                     | 0<br>(0 - 0)           | 1<br>(0 - 3)             | 3<br>(1 - 8)                | 3<br>(0 - 7)                |
| Acute hepatitis E                                                | 8<br>(4 - 15)               | 0<br>(0 - 0)           | 0<br>(0 - 0)           | 3<br>(2 - 6)             | 3<br>(1 - 6)                | 1<br>(0 - 3)                |
| Other infectious diseases                                        | 77<br>(47 - 134)            | 6<br>(3 - 14)          | 2<br>(1 - 3)           | 10<br>(6 - 17)           | 17<br>(9 - 32)              | 41<br>(18 - 92)             |
| Non-communicable diseases                                        | 49,269<br>(41,832 - 57,589) | 1,092<br>(886 - 1,324) | 168<br>(141 - 199)     | 4,072<br>(3,200 - 5,183) | 14,082<br>(11,165 - 17,519) | 29,854<br>(26,211 - 33,861) |
| Neoplasms                                                        | 8,654<br>(7,035 - 10,695)   | 27<br>(18 - 40)        | 55<br>(44 - 69)        | 1,355<br>(1,060 - 1,737) | 4,012<br>(3,131 - 5,059)    | 3,206<br>(2,654 - 3,837)    |
| Esophageal cancer                                                | 70<br>(53 - 92)             | --                     | --                     | 9<br>(6 - 12)            | 34<br>(24 - 46)             | 27<br>(20 - 36)             |
| Stomach cancer                                                   | 547<br>(424 - 687)          | --                     | --                     | 78<br>(57 - 104)         | 247<br>(185 - 326)          | 222<br>(168 - 285)          |
| Liver cancer                                                     | 192<br>(148 - 245)          | --                     | 2<br>(1 - 3)           | 19<br>(13 - 26)          | 90<br>(65 - 120)            | 81<br>(60 - 110)            |
| Liver cancer due to hepatitis B                                  | 56<br>(38 - 79)             | --                     | 1<br>(0 - 1)           | 8<br>(5 - 12)            | 30<br>(19 - 44)             | 18<br>(12 - 26)             |
| Liver cancer due to hepatitis C                                  | 95<br>(71 - 122)            | --                     | 0<br>(0 - 0)           | 6<br>(4 - 9)             | 43<br>(29 - 59)             | 46<br>(32 - 62)             |
| Liver cancer due to alcohol use                                  | 14<br>(9 - 24)              | --                     | --                     | 1<br>(0 - 1)             | 6<br>(3 - 11)               | 8<br>(4 - 13)               |
| Liver cancer due to other causes                                 | 27<br>(17 - 38)             | --                     | 1<br>(0 - 1)           | 4<br>(2 - 6)             | 12<br>(7 - 18)              | 11<br>(6 - 16)              |
| Larynx cancer                                                    | 233<br>(154 - 320)          | --                     | --                     | 17<br>(11 - 26)          | 117<br>(74 - 166)           | 98<br>(63 - 138)            |

Web Table 31- Tunisia deaths with 95% UI by age, sex, and cause in 2013

| Cause                                         | Both Sexes, All Ages        | Both Sexes, 0-4 Years | Both Sexes, 5-14 Years | Both Sexes, 15-49 Years  | Both Sexes, 50-69 Years  | Both Sexes, 70-80 Years     |
|-----------------------------------------------|-----------------------------|-----------------------|------------------------|--------------------------|--------------------------|-----------------------------|
| Tracheal, bronchus and lung cancer            | 1,891<br>(1,380 - 2,459)    | --                    | --                     | 189<br>(132 - 273)       | 1,093<br>(777 - 1,442)   | 609<br>(451 - 809)          |
| Breast cancer                                 | 777<br>(535 - 1,038)        | --                    | --                     | 254<br>(163 - 358)       | 350<br>(228 - 493)       | 173<br>(126 - 224)          |
| Cervical cancer                               | 160<br>(99 - 224)           | --                    | --                     | 27<br>(16 - 40)          | 84<br>(49 - 125)         | 49<br>(32 - 70)             |
| Uterine cancer                                | 53<br>(31 - 78)             | --                    | --                     | 4<br>(2 - 6)             | 24<br>(13 - 37)          | 26<br>(15 - 39)             |
| Prostate cancer                               | 393<br>(248 - 636)          | --                    | --                     | 2<br>(1 - 3)             | 59<br>(34 - 101)         | 331<br>(206 - 536)          |
| Colon and rectum cancer                       | 826<br>(662 - 1,020)        | --                    | --                     | 139<br>(104 - 180)       | 359<br>(279 - 462)       | 328<br>(260 - 406)          |
| Lip and oral cavity cancer                    | 86<br>(60 - 116)            | --                    | --                     | 15<br>(10 - 21)          | 37<br>(25 - 51)          | 35<br>(23 - 48)             |
| Nasopharynx cancer                            | 200<br>(137 - 269)          | --                    | 5<br>(2 - 11)          | 69<br>(44 - 100)         | 93<br>(60 - 136)         | 33<br>(20 - 51)             |
| Other pharynx cancer                          | 45<br>(33 - 59)             | --                    | --                     | 10<br>(6 - 16)           | 23<br>(16 - 32)          | 12<br>(8 - 16)              |
| Gallbladder and biliary tract cancer          | 188<br>(121 - 272)          | --                    | --                     | 14<br>(9 - 22)           | 93<br>(56 - 139)         | 81<br>(50 - 122)            |
| Pancreatic cancer                             | 284<br>(226 - 358)          | --                    | --                     | 34<br>(25 - 47)          | 142<br>(107 - 186)       | 108<br>(84 - 138)           |
| Malignant skin melanoma                       | 28<br>(20 - 39)             | --                    | --                     | 5<br>(3 - 7)             | 9<br>(6 - 13)            | 14<br>(10 - 19)             |
| Non-melanoma skin cancer                      | 24<br>(17 - 38)             | --                    | --                     | 3<br>(2 - 4)             | 6<br>(4 - 9)             | 16<br>(10 - 26)             |
| Ovarian cancer                                | 217<br>(149 - 307)          | --                    | --                     | 42<br>(26 - 64)          | 121<br>(78 - 180)        | 54<br>(36 - 77)             |
| Testicular cancer                             | 7<br>(4 - 11)               | --                    | --                     | 5<br>(3 - 7)             | 1<br>(1 - 2)             | 1<br>(1 - 2)                |
| Kidney cancer                                 | 205<br>(160 - 265)          | 3<br>(2 - 6)          | 3<br>(2 - 6)           | 22<br>(15 - 31)          | 109<br>(76 - 150)        | 67<br>(50 - 90)             |
| Bladder cancer                                | 843<br>(555 - 1,138)        | --                    | --                     | 41<br>(26 - 62)          | 394<br>(253 - 563)       | 407<br>(265 - 556)          |
| Brain and nervous system cancer               | 214<br>(158 - 296)          | 4<br>(2 - 7)          | 9<br>(6 - 12)          | 71<br>(50 - 99)          | 105<br>(72 - 151)        | 24<br>(17 - 36)             |
| Thyroid cancer                                | 83<br>(54 - 114)            | --                    | 0<br>(0 - 0)           | 8<br>(5 - 11)            | 36<br>(23 - 52)          | 39<br>(25 - 57)             |
| Mesothelioma                                  | 17<br>(12 - 24)             | --                    | --                     | 4<br>(3 - 5)             | 8<br>(5 - 12)            | 5<br>(3 - 8)                |
| Hodgkin lymphoma                              | 61<br>(43 - 82)             | 1<br>(0 - 1)          | 3<br>(1 - 6)           | 31<br>(20 - 44)          | 20<br>(13 - 30)          | 7<br>(4 - 10)               |
| Non-Hodgkin lymphoma                          | 331<br>(248 - 425)          | 3<br>(2 - 5)          | 7<br>(4 - 10)          | 73<br>(53 - 98)          | 127<br>(91 - 170)        | 122<br>(89 - 161)           |
| Multiple myeloma                              | 102<br>(75 - 131)           | --                    | --                     | 13<br>(9 - 18)           | 47<br>(32 - 63)          | 42<br>(31 - 55)             |
| Leukemia                                      | 248<br>(200 - 303)          | 5<br>(3 - 9)          | 18<br>(13 - 23)        | 91<br>(71 - 117)         | 75<br>(57 - 97)          | 59<br>(45 - 74)             |
| Other neoplasms                               | 327<br>(240 - 439)          | 10<br>(5 - 17)        | 9<br>(6 - 13)          | 68<br>(45 - 97)          | 106<br>(72 - 153)        | 133<br>(99 - 179)           |
| Cardiovascular diseases                       | 26,932<br>(22,468 - 32,023) | 64<br>(44 - 90)       | 29<br>(22 - 40)        | 1,800<br>(1,367 - 2,340) | 7,237<br>(5,649 - 9,017) | 17,802<br>(15,405 - 20,531) |
| Rheumatic heart disease                       | 131<br>(82 - 183)           | 1<br>(0 - 1)          | 1<br>(1 - 2)           | 24<br>(14 - 36)          | 31<br>(19 - 45)          | 74<br>(46 - 108)            |
| Ischemic heart disease                        | 16,219<br>(12,988 - 19,898) | 11<br>(6 - 21)        | 6<br>(4 - 10)          | 1,173<br>(862 - 1,559)   | 4,912<br>(3,752 - 6,182) | 10,116<br>(8,253 - 12,377)  |
| Cerebrovascular disease                       | 7,571<br>(5,774 - 9,397)    | 18<br>(10 - 29)       | 11<br>(8 - 15)         | 331<br>(238 - 457)       | 1,498<br>(1,107 - 2,002) | 5,714<br>(4,326 - 7,045)    |
| Ischemic stroke                               | 4,235<br>(2,803 - 5,430)    | 1<br>(0 - 3)          | 1<br>(0 - 2)           | 65<br>(33 - 102)         | 612<br>(363 - 870)       | 3,555<br>(2,356 - 4,528)    |
| Hemorrhagic stroke                            | 3,337<br>(2,214 - 4,488)    | 17<br>(9 - 26)        | 10<br>(7 - 13)         | 265<br>(186 - 366)       | 886<br>(629 - 1,235)     | 2,159<br>(1,348 - 2,989)    |
| Hypertensive heart disease                    | 1,197<br>(821 - 1,667)      | 0<br>(0 - 1)          | 0<br>(0 - 1)           | 58<br>(36 - 85)          | 262<br>(166 - 371)       | 875<br>(587 - 1,269)        |
| Cardiomyopathy and myocarditis                | 472<br>(340 - 694)          | 16<br>(10 - 26)       | 5<br>(4 - 9)           | 75<br>(52 - 122)         | 128<br>(86 - 203)        | 248<br>(164 - 372)          |
| Atrial fibrillation and flutter               | 50<br>(26 - 77)             | --                    | --                     | 2<br>(1 - 3)             | 10<br>(5 - 15)           | 38<br>(20 - 62)             |
| Aortic aneurysm                               | 186<br>(124 - 291)          | --                    | --                     | 11<br>(7 - 20)           | 70<br>(45 - 115)         | 104<br>(67 - 162)           |
| Peripheral vascular disease                   | 21<br>(12 - 31)             | --                    | --                     | 1<br>(1 - 2)             | 4<br>(2 - 5)             | 16<br>(9 - 24)              |
| Endocarditis                                  | 108<br>(75 - 149)           | 4<br>(3 - 7)          | 1<br>(1 - 2)           | 14<br>(9 - 22)           | 25<br>(16 - 38)          | 64<br>(39 - 89)             |
| Other cardiovascular and circulatory diseases | 976<br>(698 - 1,610)        | 13<br>(7 - 20)        | 4<br>(3 - 7)           | 110<br>(73 - 192)        | 298<br>(198 - 496)       | 552<br>(371 - 939)          |
| Chronic respiratory diseases                  | 3,382<br>(2,714 - 4,267)    | 13<br>(8 - 19)        | 5<br>(4 - 6)           | 151<br>(113 - 195)       | 724<br>(539 - 959)       | 2,490<br>(2,003 - 3,136)    |
| Chronic obstructive pulmonary disease         | 2,736<br>(2,176 - 3,494)    | 8<br>(5 - 12)         | 2<br>(1 - 3)           | 82<br>(59 - 110)         | 563<br>(410 - 747)       | 2,081<br>(1,657 - 2,665)    |

Web Table 31- Tunisia deaths with 95% UI by age, sex, and cause in 2013

| Cause                                               | Both Sexes, All Ages     | Both Sexes, 0-4 Years | Both Sexes, 5-14 Years | Both Sexes, 15-49 Years | Both Sexes, 50-69 Years | Both Sexes, 70-80 Years  |
|-----------------------------------------------------|--------------------------|-----------------------|------------------------|-------------------------|-------------------------|--------------------------|
| Pneumoconiosis                                      | 53<br>(32 - 82)          | 0<br>(0 - 0)          | 0<br>(0 - 0)           | 10<br>(5 - 16)          | 16<br>(9 - 26)          | 27<br>(15 - 45)          |
| Silicosis                                           | 20<br>(10 - 34)          | 0<br>(0 - 0)          | 0<br>(0 - 0)           | 1<br>(0 - 1)            | 3<br>(2 - 6)            | 16<br>(8 - 27)           |
| Asbestosis                                          | 3<br>(2 - 4)             | 0<br>(0 - 0)          | 0<br>(0 - 0)           | 1<br>(1 - 2)            | 1<br>(0 - 1)            | 1<br>(0 - 1)             |
| Coal workers pneumoconiosis                         | 1<br>(1 - 2)             | 0<br>(0 - 0)          | 0<br>(0 - 0)           | 1<br>(0 - 1)            | 0<br>(0 - 0)            | 0<br>(0 - 1)             |
| Other pneumoconiosis                                | 29<br>(16 - 48)          | 0<br>(0 - 0)          | 0<br>(0 - 0)           | 7<br>(4 - 12)           | 11<br>(6 - 19)          | 10<br>(5 - 19)           |
| Asthma                                              | 345<br>(235 - 506)       | 2<br>(1 - 5)          | 2<br>(1 - 3)           | 41<br>(29 - 60)         | 90<br>(57 - 138)        | 209<br>(132 - 323)       |
| Interstitial lung disease and pulmonary sarcoidosis | 196<br>(40 - 383)        | 0<br>(0 - 0)          | 0<br>(0 - 0)           | 8<br>(2 - 17)           | 47<br>(9 - 92)          | 140<br>(28 - 288)        |
| Other chronic respiratory diseases                  | 53<br>(32 - 84)          | 2<br>(1 - 3)          | 1<br>(0 - 1)           | 9<br>(5 - 14)           | 8<br>(5 - 14)           | 34<br>(18 - 58)          |
| Cirrhosis                                           | 923<br>(722 - 1,147)     | 4<br>(2 - 8)          | 3<br>(2 - 4)           | 120<br>(86 - 163)       | 358<br>(263 - 468)      | 437<br>(335 - 562)       |
| Cirrhosis due to hepatitis B                        | 314<br>(206 - 456)       | 0<br>(0 - 1)          | 1<br>(0 - 1)           | 39<br>(22 - 65)         | 115<br>(68 - 182)       | 158<br>(98 - 239)        |
| Cirrhosis due to hepatitis C                        | 433<br>(283 - 591)       | 0<br>(0 - 1)          | 1<br>(0 - 1)           | 57<br>(27 - 86)         | 181<br>(98 - 262)       | 195<br>(125 - 281)       |
| Cirrhosis due to alcohol use                        | 109<br>(63 - 181)        | --                    | --                     | 8<br>(4 - 19)           | 37<br>(19 - 76)         | 63<br>(36 - 103)         |
| Cirrhosis due to other causes                       | 67<br>(42 - 105)         | 4<br>(2 - 6)          | 2<br>(1 - 3)           | 16<br>(10 - 28)         | 24<br>(12 - 43)         | 21<br>(12 - 35)          |
| Digestive diseases                                  | 710<br>(566 - 928)       | 5<br>(3 - 8)          | 4<br>(3 - 5)           | 66<br>(49 - 97)         | 162<br>(120 - 229)      | 474<br>(370 - 609)       |
| Peptic ulcer disease                                | 214<br>(150 - 298)       | 0<br>(0 - 0)          | 0<br>(0 - 1)           | 14<br>(9 - 22)          | 49<br>(33 - 73)         | 150<br>(102 - 214)       |
| Gastritis and duodenitis                            | 8<br>(5 - 17)            | 0<br>(0 - 0)          | 0<br>(0 - 0)           | 2<br>(1 - 3)            | 2<br>(1 - 4)            | 4<br>(2 - 9)             |
| Appendicitis                                        | 26<br>(18 - 37)          | 1<br>(0 - 1)          | 0<br>(0 - 1)           | 4<br>(3 - 6)            | 7<br>(4 - 11)           | 14<br>(9 - 21)           |
| Paralytic ileus and intestinal obstruction          | 157<br>(105 - 252)       | 2<br>(1 - 3)          | 1<br>(0 - 2)           | 14<br>(9 - 26)          | 34<br>(20 - 62)         | 106<br>(66 - 165)        |
| Inguinal, femoral, and abdominal hernia             | 14<br>(9 - 24)           | 0<br>(0 - 0)          | 0<br>(0 - 0)           | 1<br>(1 - 2)            | 2<br>(1 - 4)            | 10<br>(6 - 18)           |
| Inflammatory bowel disease                          | 35<br>(25 - 49)          | 1<br>(0 - 1)          | 0<br>(0 - 1)           | 5<br>(3 - 8)            | 8<br>(5 - 12)           | 22<br>(14 - 33)          |
| Vascular intestinal disorders                       | 20<br>(11 - 36)          | 0<br>(0 - 0)          | 0<br>(0 - 0)           | 3<br>(1 - 6)            | 5<br>(3 - 11)           | 11<br>(6 - 21)           |
| Gallbladder and biliary diseases                    | 120<br>(83 - 168)        | 1<br>(0 - 1)          | 0<br>(0 - 0)           | 7<br>(5 - 11)           | 24<br>(16 - 35)         | 88<br>(57 - 129)         |
| Pancreatitis                                        | 44<br>(26 - 66)          | 0<br>(0 - 0)          | 0<br>(0 - 0)           | 8<br>(4 - 13)           | 14<br>(8 - 22)          | 22<br>(12 - 35)          |
| Other digestive diseases                            | 72<br>(48 - 106)         | 1<br>(0 - 2)          | 0<br>(0 - 1)           | 7<br>(4 - 11)           | 17<br>(11 - 28)         | 47<br>(29 - 73)          |
| Neurological disorders                              | 2,916<br>(2,413 - 3,484) | 13<br>(8 - 21)        | 7<br>(4 - 11)          | 60<br>(36 - 87)         | 235<br>(175 - 309)      | 2,601<br>(2,146 - 3,133) |
| Alzheimer disease and other dementias               | 2,755<br>(2,256 - 3,312) | --                    | --                     | 1<br>(0 - 2)            | 205<br>(150 - 275)      | 2,549<br>(2,094 - 3,085) |
| Parkinson disease                                   | 24<br>(15 - 39)          | --                    | --                     | 1<br>(1 - 1)            | 4<br>(2 - 7)            | 19<br>(11 - 33)          |
| Epilepsy                                            | 92<br>(50 - 133)         | 6<br>(3 - 13)         | 5<br>(2 - 9)           | 47<br>(25 - 72)         | 17<br>(9 - 28)          | 17<br>(9 - 28)           |
| Multiple sclerosis                                  | 10<br>(6 - 15)           | --                    | --                     | 4<br>(2 - 6)            | 4<br>(2 - 6)            | 3<br>(1 - 5)             |
| Other neurological disorders                        | 35<br>(27 - 44)          | 7<br>(5 - 10)         | 1<br>(1 - 2)           | 8<br>(6 - 11)           | 6<br>(4 - 8)            | 12<br>(9 - 16)           |
| Mental and substance use disorders                  | 191<br>(139 - 263)       | 2<br>(1 - 3)          | 0<br>(0 - 0)           | 120<br>(85 - 167)       | 51<br>(34 - 71)         | 19<br>(14 - 25)          |
| Schizophrenia                                       | 3<br>(2 - 5)             | --                    | --                     | 1<br>(1 - 2)            | 1<br>(0 - 2)            | 1<br>(1 - 2)             |
| Alcohol use disorders                               | 20<br>(13 - 38)          | --                    | --                     | 7<br>(4 - 13)           | 9<br>(5 - 19)           | 4<br>(3 - 8)             |
| Drug use disorders                                  | 168<br>(120 - 227)       | 2<br>(1 - 3)          | --                     | 112<br>(79 - 155)       | 41<br>(27 - 57)         | 13<br>(10 - 18)          |
| Opioid use disorders                                | 91<br>(66 - 124)         | 1<br>(1 - 1)          | --                     | 62<br>(44 - 86)         | 21<br>(14 - 29)         | 7<br>(5 - 10)            |
| Cocaine use disorders                               | 2<br>(2 - 3)             | 0<br>(0 - 0)          | --                     | 2<br>(1 - 2)            | 0<br>(0 - 1)            | 0<br>(0 - 0)             |
| Amphetamine use disorders                           | 2<br>(1 - 3)             | 0<br>(0 - 0)          | --                     | 1<br>(1 - 2)            | 0<br>(0 - 1)            | 0<br>(0 - 0)             |
| Other drug use disorders                            | 72<br>(52 - 98)          | 1<br>(0 - 1)          | --                     | 47<br>(33 - 66)         | 19<br>(13 - 27)         | 6<br>(4 - 8)             |
| Eating disorders                                    | 1<br>(0 - 1)             | --                    | 0<br>(0 - 0)           | 0<br>(0 - 1)            | --                      | --                       |
| Anorexia nervosa                                    | 1<br>(0 - 1)             | --                    | 0<br>(0 - 0)           | 0<br>(0 - 1)            | --                      | --                       |

Web Table 31- Tunisia deaths with 95% UI by age, sex, and cause in 2013

| Cause                                               | Both Sexes, All Ages     | Both Sexes, 0-4 Years | Both Sexes, 5-14 Years | Both Sexes, 15-49 Years | Both Sexes, 50-69 Years | Both Sexes, 70-80 Years  |
|-----------------------------------------------------|--------------------------|-----------------------|------------------------|-------------------------|-------------------------|--------------------------|
| Diabetes, urogenital, blood, and endocrine diseases | 4,314<br>(3,326 - 5,476) | 48<br>(34 - 65)       | 19<br>(14 - 26)        | 320<br>(231 - 431)      | 1,250<br>(910 - 1,662)  | 2,677<br>(2,047 - 3,445) |
| Diabetes mellitus                                   | 2,158<br>(1,657 - 3,001) | 3<br>(2 - 6)          | 2<br>(1 - 3)           | 94<br>(67 - 135)        | 655<br>(474 - 916)      | 1,403<br>(1,059 - 1,950) |
| Acute glomerulonephritis                            | 8<br>(6 - 11)            | 0<br>(0 - 0)          | 0<br>(0 - 0)           | 1<br>(1 - 2)            | 2<br>(1 - 3)            | 4<br>(3 - 6)             |
| Chronic kidney disease                              | 1,743<br>(989 - 2,642)   | 8<br>(4 - 14)         | 5<br>(3 - 8)           | 144<br>(81 - 229)       | 515<br>(293 - 797)      | 1,070<br>(579 - 1,637)   |
| Chronic kidney disease due to diabetes mellitus     | 59<br>(16 - 98)          | 1<br>(0 - 1)          | 0<br>(0 - 1)           | 8<br>(2 - 14)           | 19<br>(6 - 35)          | 30<br>(7 - 52)           |
| Chronic kidney disease due to hypertension          | 764<br>(421 - 1,158)     | 1<br>(1 - 2)          | 1<br>(0 - 1)           | 59<br>(31 - 91)         | 236<br>(125 - 363)      | 467<br>(264 - 728)       |
| Chronic kidney disease due to glomerulonephritis    | 54<br>(33 - 82)          | 1<br>(1 - 2)          | 1<br>(0 - 1)           | 7<br>(4 - 12)           | 14<br>(7 - 22)          | 31<br>(18 - 49)          |
| Chronic kidney disease due to other causes          | 867<br>(327 - 1,571)     | 5<br>(2 - 11)         | 3<br>(1 - 6)           | 70<br>(26 - 134)        | 246<br>(84 - 469)       | 542<br>(196 - 1,004)     |
| Urinary diseases and male infertility               | 146<br>(102 - 206)       | 2<br>(1 - 4)          | 1<br>(0 - 1)           | 12<br>(8 - 18)          | 30<br>(20 - 45)         | 101<br>(68 - 147)        |
| Interstitial nephritis and urinary tract infections | 75<br>(46 - 119)         | 1<br>(1 - 3)          | 0<br>(0 - 1)           | 7<br>(4 - 12)           | 15<br>(9 - 24)          | 51<br>(29 - 84)          |
| Urolithiasis                                        | 7<br>(4 - 12)            | --                    | 0<br>(0 - 0)           | 1<br>(0 - 2)            | 2<br>(1 - 3)            | 4<br>(2 - 8)             |
| Other urinary diseases                              | 65<br>(42 - 102)         | 1<br>(0 - 1)          | 0<br>(0 - 0)           | 4<br>(3 - 7)            | 14<br>(9 - 24)          | 46<br>(28 - 76)          |
| Gynecological diseases                              | 1<br>(0 - 1)             | --                    | --                     | 0<br>(0 - 1)            | 0<br>(0 - 0)            | 0<br>(0 - 1)             |
| Uterine fibroids                                    | 0<br>(0 - 0)             | --                    | --                     | 0<br>(0 - 0)            | 0<br>(0 - 0)            | 0<br>(0 - 0)             |
| Polycystic ovarian syndrome                         | 0<br>(0 - 0)             | --                    | --                     | 0<br>(0 - 0)            | 0<br>(0 - 0)            | --                       |
| Endometriosis                                       | 0<br>(0 - 0)             | --                    | --                     | 0<br>(0 - 0)            | 0<br>(0 - 0)            | --                       |
| Genital prolapse                                    | 0<br>(0 - 0)             | --                    | --                     | 0<br>(0 - 0)            | 0<br>(0 - 0)            | 0<br>(0 - 0)             |
| Other gynecological diseases                        | 0<br>(0 - 1)             | --                    | --                     | 0<br>(0 - 0)            | 0<br>(0 - 0)            | 0<br>(0 - 0)             |
| Hemoglobinopathies and hemolytic anemias            | 136<br>(90 - 196)        | 17<br>(10 - 28)       | 8<br>(5 - 12)          | 48<br>(29 - 72)         | 20<br>(12 - 33)         | 43<br>(28 - 65)          |
| Thalassemias                                        | 42<br>(25 - 62)          | 13<br>(7 - 21)        | 6<br>(4 - 9)           | 24<br>(14 - 36)         | 0<br>(0 - 0)            | 0<br>(0 - 0)             |
| Sickle cell disorders                               | 41<br>(27 - 63)          | 3<br>(2 - 5)          | 2<br>(1 - 3)           | 21<br>(13 - 31)         | 14<br>(9 - 24)          | 1<br>(1 - 2)             |
| G6PD deficiency                                     | 1<br>(1 - 2)             | 0<br>(0 - 0)          | 0<br>(0 - 0)           | 0<br>(0 - 1)            | 0<br>(0 - 1)            | 0<br>(0 - 1)             |
| Other hemoglobinopathies and hemolytic anemias      | 51<br>(33 - 77)          | 1<br>(1 - 2)          | 0<br>(0 - 0)           | 3<br>(2 - 4)            | 5<br>(3 - 8)            | 41<br>(26 - 62)          |
| Endocrine, metabolic, blood, and immune disorders   | 122<br>(75 - 171)        | 17<br>(7 - 26)        | 4<br>(2 - 6)           | 20<br>(12 - 31)         | 27<br>(16 - 42)         | 55<br>(31 - 83)          |
| Musculoskeletal disorders                           | 104<br>(75 - 156)        | --                    | 2<br>(1 - 3)           | 24<br>(17 - 41)         | 24<br>(16 - 39)         | 55<br>(37 - 79)          |
| Rheumatoid arthritis                                | 21<br>(14 - 32)          | --                    | 1<br>(0 - 1)           | 4<br>(2 - 6)            | 5<br>(3 - 9)            | 12<br>(7 - 18)           |
| Other musculoskeletal disorders                     | 83<br>(59 - 126)         | --                    | 1<br>(1 - 3)           | 21<br>(14 - 36)         | 19<br>(12 - 31)         | 43<br>(28 - 63)          |
| Other non-communicable diseases                     | 1,141<br>(933 - 1,384)   | 916<br>(727 - 1,139)  | 44<br>(32 - 58)        | 57<br>(41 - 77)         | 31<br>(23 - 43)         | 93<br>(68 - 128)         |
| Congenital anomalies                                | 1,065<br>(864 - 1,297)   | 903<br>(714 - 1,128)  | 44<br>(32 - 58)        | 52<br>(37 - 71)         | 21<br>(15 - 30)         | 46<br>(32 - 65)          |
| Neural tube defects                                 | 20<br>(8 - 47)           | 19<br>(6 - 45)        | 0<br>(0 - 1)           | 1<br>(1 - 1)            | 0<br>(0 - 0)            | 0<br>(0 - 1)             |
| Congenital heart anomalies                          | 422<br>(315 - 559)       | 380<br>(280 - 514)    | 18<br>(11 - 26)        | 14<br>(10 - 20)         | 3<br>(2 - 5)            | 7<br>(5 - 12)            |
| Cleft lip and cleft palate                          | 1<br>(0 - 1)             | 1<br>(0 - 1)          | --                     | --                      | --                      | --                       |
| Down syndrome                                       | 31<br>(18 - 49)          | 22<br>(11 - 38)       | 3<br>(2 - 4)           | 5<br>(3 - 8)            | 1<br>(0 - 1)            | 0<br>(0 - 1)             |
| Chromosomal unbalanced rearrangements               | 14<br>(9 - 24)           | 11<br>(6 - 19)        | 1<br>(0 - 1)           | 2<br>(1 - 3)            | 0<br>(0 - 1)            | 1<br>(0 - 1)             |
| Other congenital anomalies                          | 577<br>(434 - 748)       | 472<br>(337 - 631)    | 22<br>(15 - 31)        | 30<br>(21 - 42)         | 16<br>(11 - 23)         | 37<br>(26 - 53)          |
| Skin and subcutaneous diseases                      | 64<br>(43 - 98)          | 1<br>(1 - 2)          | 0<br>(0 - 1)           | 5<br>(3 - 8)            | 10<br>(6 - 16)          | 48<br>(29 - 77)          |
| Cellulitis                                          | 7<br>(4 - 11)            | 0<br>(0 - 0)          | 0<br>(0 - 0)           | 1<br>(0 - 1)            | 1<br>(1 - 2)            | 4<br>(2 - 8)             |
| Pyoderma                                            | 26<br>(17 - 42)          | 1<br>(0 - 1)          | 0<br>(0 - 0)           | 2<br>(1 - 4)            | 5<br>(3 - 8)            | 18<br>(11 - 31)          |
| Decubitus ulcer                                     | 30<br>(18 - 48)          | 0<br>(0 - 0)          | 0<br>(0 - 0)           | 2<br>(1 - 3)            | 4<br>(2 - 6)            | 24<br>(14 - 41)          |
| Other skin and subcutaneous diseases                | 2<br>(1 - 3)             | 0<br>(0 - 0)          | 0<br>(0 - 0)           | 1<br>(0 - 1)            | 0<br>(0 - 1)            | 1<br>(0 - 1)             |



Web Table 31- Tunisia deaths with 95% UI by age, sex, and cause in 2013

| Cause                                           | Both Sexes, All Ages     | Both Sexes, 0-4 Years | Both Sexes, 5-14 Years | Both Sexes, 15-49 Years  | Both Sexes, 50-69 Years | Both Sexes, 70-80 Years |
|-------------------------------------------------|--------------------------|-----------------------|------------------------|--------------------------|-------------------------|-------------------------|
| Sudden infant death syndrome                    | 12<br>(3 - 32)           | 12<br>(3 - 32)        | --                     | --                       | --                      | --                      |
| Injuries                                        | 4,751<br>(3,773 - 5,881) | 232<br>(171 - 310)    | 209<br>(174 - 243)     | 2,466<br>(1,883 - 3,175) | 1,016<br>(741 - 1,341)  | 828<br>(665 - 1,015)    |
| Transport injuries                              | 2,649<br>(1,988 - 3,365) | 74<br>(47 - 112)      | 107<br>(83 - 133)      | 1,494<br>(1,094 - 1,946) | 614<br>(432 - 825)      | 359<br>(269 - 465)      |
| Road injuries                                   | 2,568<br>(1,936 - 3,253) | 71<br>(44 - 107)      | 104<br>(81 - 128)      | 1,458<br>(1,074 - 1,896) | 593<br>(421 - 797)      | 342<br>(256 - 444)      |
| Pedestrian road injuries                        | 826<br>(611 - 1,100)     | 26<br>(15 - 41)       | 38<br>(27 - 49)        | 439<br>(301 - 604)       | 200<br>(134 - 282)      | 123<br>(86 - 171)       |
| Cyclist road injuries                           | 78<br>(57 - 106)         | 2<br>(1 - 4)          | 4<br>(2 - 5)           | 41<br>(29 - 57)          | 20<br>(13 - 29)         | 11<br>(7 - 16)          |
| Motorcyclist road injuries                      | 335<br>(209 - 464)       | 8<br>(4 - 13)         | 11<br>(7 - 16)         | 202<br>(126 - 292)       | 72<br>(42 - 105)        | 42<br>(24 - 63)         |
| Motor vehicle road injuries                     | 1,322<br>(982 - 1,701)   | 34<br>(20 - 54)       | 52<br>(39 - 66)        | 772<br>(552 - 1,020)     | 299<br>(202 - 413)      | 164<br>(117 - 223)      |
| Other road injuries                             | 8<br>(5 - 12)            | 0<br>(0 - 1)          | 1<br>(0 - 1)           | 4<br>(2 - 6)             | 2<br>(1 - 3)            | 1<br>(1 - 2)            |
| Other transport injuries                        | 81<br>(42 - 110)         | 4<br>(2 - 6)          | 3<br>(2 - 5)           | 36<br>(19 - 52)          | 21<br>(9 - 31)          | 17<br>(8 - 27)          |
| Unintentional injuries                          | 1,658<br>(1,301 - 2,048) | 151<br>(103 - 224)    | 96<br>(72 - 122)       | 690<br>(502 - 923)       | 317<br>(232 - 431)      | 403<br>(325 - 509)      |
| Falls                                           | 292<br>(214 - 378)       | 14<br>(7 - 26)        | 7<br>(5 - 12)          | 87<br>(54 - 124)         | 53<br>(35 - 76)         | 130<br>(89 - 191)       |
| Drowning                                        | 197<br>(139 - 308)       | 29<br>(15 - 55)       | 23<br>(14 - 37)        | 96<br>(63 - 156)         | 26<br>(16 - 41)         | 24<br>(16 - 33)         |
| Fire, heat, and hot substances                  | 146<br>(103 - 200)       | 13<br>(7 - 24)        | 5<br>(3 - 8)           | 46<br>(30 - 69)          | 27<br>(18 - 40)         | 55<br>(37 - 79)         |
| Poisonings                                      | 58<br>(39 - 77)          | 5<br>(3 - 10)         | 2<br>(1 - 4)           | 25<br>(15 - 35)          | 11<br>(7 - 16)          | 15<br>(10 - 22)         |
| Exposure to mechanical forces                   | 689<br>(378 - 915)       | 71<br>(29 - 138)      | 50<br>(26 - 76)        | 359<br>(193 - 509)       | 139<br>(71 - 215)       | 70<br>(39 - 100)        |
| Unintentional firearm injuries                  | 37<br>(23 - 59)          | 1<br>(0 - 2)          | 1<br>(1 - 2)           | 21<br>(12 - 37)          | 8<br>(4 - 14)           | 6<br>(4 - 10)           |
| Unintentional suffocation                       | 6<br>(3 - 9)             | 1<br>(0 - 3)          | 0<br>(0 - 1)           | 2<br>(1 - 3)             | 2<br>(1 - 3)            | 1<br>(0 - 2)            |
| Other exposure to mechanical forces             | 646<br>(318 - 861)       | 69<br>(28 - 136)      | 48<br>(24 - 75)        | 335<br>(164 - 485)       | 130<br>(61 - 202)       | 63<br>(32 - 93)         |
| Adverse effects of medical treatment            | 137<br>(100 - 190)       | 6<br>(3 - 10)         | 2<br>(1 - 3)           | 23<br>(16 - 37)          | 40<br>(26 - 58)         | 65<br>(42 - 107)        |
| Animal contact                                  | 16<br>(11 - 25)          | 2<br>(1 - 3)          | 1<br>(1 - 2)           | 4<br>(3 - 7)             | 3<br>(2 - 5)            | 6<br>(4 - 9)            |
| Venomous animal contact                         | 8<br>(5 - 15)            | 1<br>(1 - 2)          | 1<br>(0 - 1)           | 2<br>(1 - 4)             | 2<br>(1 - 4)            | 3<br>(1 - 5)            |
| Non-venomous animal contact                     | 8<br>(4 - 12)            | 1<br>(0 - 1)          | 0<br>(0 - 1)           | 2<br>(1 - 3)             | 1<br>(1 - 2)            | 3<br>(2 - 5)            |
| Foreign body                                    | 37<br>(21 - 59)          | 5<br>(3 - 9)          | 1<br>(1 - 2)           | 5<br>(3 - 8)             | 4<br>(2 - 7)            | 22<br>(11 - 36)         |
| Pulmonary aspiration and foreign body in airway | 35<br>(18 - 57)          | 5<br>(3 - 9)          | 1<br>(1 - 2)           | 4<br>(2 - 7)             | 4<br>(2 - 6)            | 21<br>(11 - 35)         |
| Foreign body in other body part                 | 2<br>(1 - 3)             | 0<br>(0 - 0)          | 0<br>(0 - 0)           | 1<br>(0 - 1)             | 1<br>(0 - 1)            | 1<br>(0 - 1)            |
| Other unintentional injuries                    | 85<br>(61 - 119)         | 5<br>(3 - 8)          | 4<br>(2 - 5)           | 45<br>(30 - 69)          | 14<br>(9 - 21)          | 17<br>(11 - 24)         |
| Self-harm and interpersonal violence            | 438<br>(301 - 596)       | 2<br>(1 - 3)          | 5<br>(3 - 9)           | 281<br>(191 - 402)       | 85<br>(54 - 122)        | 66<br>(36 - 95)         |
| Self-harm                                       | 332<br>(191 - 458)       | --                    | 4<br>(1 - 7)           | 194<br>(111 - 286)       | 72<br>(43 - 105)        | 63<br>(32 - 91)         |
| Interpersonal violence                          | 106<br>(71 - 170)        | 2<br>(1 - 3)          | 2<br>(1 - 3)           | 87<br>(56 - 143)         | 13<br>(7 - 22)          | 3<br>(2 - 5)            |
| Assault by firearm                              | 52<br>(30 - 92)          | 0<br>(0 - 1)          | 0<br>(0 - 1)           | 45<br>(25 - 82)          | 6<br>(3 - 11)           | 1<br>(0 - 2)            |
| Assault by sharp object                         | 30<br>(17 - 52)          | 0<br>(0 - 0)          | 0<br>(0 - 1)           | 25<br>(13 - 43)          | 4<br>(2 - 7)            | 1<br>(0 - 1)            |
| Assault by other means                          | 24<br>(15 - 38)          | 1<br>(1 - 2)          | 1<br>(1 - 2)           | 17<br>(10 - 28)          | 3<br>(2 - 5)            | 2<br>(1 - 3)            |
| Forces of nature, war, and legal intervention   | 6<br>(6 - 7)             | 5<br>(5 - 6)          | 1<br>(1 - 1)           | 0<br>(0 - 0)             | 0<br>(0 - 0)            | 0<br>(0 - 0)            |
| Collective violence and legal intervention      | 6<br>(6 - 7)             | 5<br>(5 - 6)          | 1<br>(1 - 1)           | 0<br>(0 - 0)             | 0<br>(0 - 0)            | 0<br>(0 - 0)            |

Web Table 31- Tunisia deaths with 95% UI by age, sex, and cause in 2013

| Cause                                                              | Males, All Ages             | Males, 0-4 Years         | Males, 5-14 Years  | Males, 15-49 Years       | Males, 50-69 Years        | Males, 70-80 Years          |
|--------------------------------------------------------------------|-----------------------------|--------------------------|--------------------|--------------------------|---------------------------|-----------------------------|
| All causes                                                         | 32,680<br>(24,936 - 40,072) | 1,477<br>(1,276 - 1,682) | 267<br>(234 - 302) | 4,645<br>(3,269 - 6,250) | 9,905<br>(6,952 - 12,744) | 16,387<br>(12,891 - 19,582) |
| Communicable, maternal, neonatal, and nutritional diseases         | 2,182<br>(1,774 - 2,725)    | 763<br>(604 - 939)       | 45<br>(30 - 65)    | 229<br>(144 - 388)       | 303<br>(206 - 439)        | 842<br>(592 - 1,208)        |
| HIV/AIDS and tuberculosis                                          | 161<br>(85 - 394)           | 1<br>(0 - 6)             | 0<br>(0 - 1)       | 57<br>(19 - 220)         | 42<br>(22 - 93)           | 60<br>(33 - 89)             |
| Tuberculosis                                                       | 108<br>(69 - 150)           | 1<br>(0 - 1)             | 0<br>(0 - 1)       | 18<br>(12 - 28)          | 30<br>(19 - 44)           | 58<br>(32 - 85)             |
| HIV/AIDS                                                           | 53<br>(4 - 284)             | 1<br>(0 - 6)             | 0<br>(0 - 1)       | 39<br>(4 - 202)          | 12<br>(1 - 69)            | 2<br>(0 - 12)               |
| HIV/AIDS resulting in mycobacterial infection                      | 3<br>(0 - 17)               | 0<br>(0 - 0)             | 0<br>(0 - 0)       | 2<br>(0 - 12)            | 1<br>(0 - 4)              | 0<br>(0 - 1)                |
| HIV/AIDS resulting in other diseases                               | 50<br>(4 - 267)             | 1<br>(0 - 6)             | 0<br>(0 - 1)       | 37<br>(3 - 190)          | 11<br>(1 - 64)            | 2<br>(0 - 11)               |
| Diarrrhea, lower respiratory, and other common infectious diseases | 1,266<br>(943 - 1,699)      | 161<br>(104 - 236)       | 41<br>(26 - 61)    | 144<br>(92 - 216)        | 214<br>(142 - 313)        | 706<br>(464 - 1,062)        |
| Diarrheal diseases                                                 | 60<br>(38 - 90)             | 19<br>(7 - 44)           | 1<br>(0 - 2)       | 5<br>(3 - 9)             | 7<br>(3 - 13)             | 28<br>(14 - 50)             |
| Intestinal infectious diseases                                     | 101<br>(47 - 183)           | 25<br>(10 - 48)          | 23<br>(11 - 42)    | 40<br>(15 - 79)          | 9<br>(3 - 18)             | 4<br>(1 - 8)                |
| Typhoid fever                                                      | 76<br>(36 - 141)            | 18<br>(7 - 35)           | 17<br>(8 - 32)     | 31<br>(12 - 61)          | 7<br>(2 - 14)             | 3<br>(1 - 6)                |
| Paratyphoid fever                                                  | 22<br>(9 - 41)              | 6<br>(2 - 13)            | 5<br>(2 - 10)      | 8<br>(3 - 18)            | 2<br>(0 - 4)              | 1<br>(0 - 1)                |
| Other intestinal infectious diseases                               | 2<br>(0 - 8)                | 1<br>(0 - 4)             | 0<br>(0 - 1)       | 1<br>(0 - 4)             | 0<br>(0 - 2)              | 0<br>(0 - 2)                |
| Lower respiratory infections                                       | 1,010<br>(730 - 1,419)      | 83<br>(48 - 136)         | 11<br>(7 - 18)     | 78<br>(51 - 118)         | 184<br>(119 - 275)        | 653<br>(417 - 991)          |
| Upper respiratory infections                                       | 1<br>(0 - 3)                | 0<br>(0 - 0)             | 0<br>(0 - 0)       | 0<br>(0 - 1)             | 0<br>(0 - 1)              | 1<br>(0 - 2)                |
| Otitis media                                                       | 2<br>(2 - 3)                | 0<br>(0 - 0)             | 0<br>(0 - 0)       | 0<br>(0 - 1)             | 0<br>(0 - 1)              | 1<br>(1 - 2)                |
| Meningitis                                                         | 41<br>(29 - 57)             | 9<br>(4 - 15)            | 2<br>(1 - 3)       | 10<br>(6 - 15)           | 8<br>(5 - 13)             | 13<br>(7 - 23)              |
| Pneumococcal meningitis                                            | 10<br>(7 - 15)              | 2<br>(1 - 3)             | 1<br>(0 - 1)       | 3<br>(1 - 5)             | 2<br>(1 - 4)              | 3<br>(1 - 6)                |
| H influenzae type B meningitis                                     | 7<br>(4 - 10)               | 3<br>(1 - 6)             | 0<br>(0 - 1)       | 1<br>(1 - 2)             | 1<br>(0 - 1)              | 1<br>(0 - 2)                |
| Meningococcal meningitis                                           | 13<br>(8 - 19)              | 3<br>(1 - 5)             | 1<br>(0 - 1)       | 3<br>(2 - 5)             | 2<br>(1 - 4)              | 4<br>(2 - 8)                |
| Other meningitis                                                   | 12<br>(8 - 17)              | 1<br>(1 - 2)             | 0<br>(0 - 1)       | 3<br>(1 - 5)             | 3<br>(1 - 5)              | 4<br>(2 - 8)                |
| Encephalitis                                                       | 28<br>(17 - 59)             | 7<br>(3 - 15)            | 2<br>(1 - 5)       | 9<br>(4 - 21)            | 5<br>(3 - 13)             | 6<br>(3 - 11)               |
| Diphtheria                                                         | 0<br>(0 - 1)                | 0<br>(0 - 1)             | 0<br>(0 - 0)       | 0<br>(0 - 0)             | 0<br>(0 - 0)              | --                          |
| Whooping cough                                                     | 1<br>(0 - 3)                | 1<br>(0 - 3)             | 0<br>(0 - 0)       | 0<br>(0 - 0)             | 0<br>(0 - 0)              | --                          |
| Tetanus                                                            | 1<br>(1 - 2)                | 0<br>(0 - 0)             | 0<br>(0 - 0)       | 0<br>(0 - 1)             | 0<br>(0 - 0)              | 0<br>(0 - 0)                |
| Measles                                                            | 18<br>(0 - 97)              | 16<br>(0 - 84)           | 2<br>(0 - 10)      | 0<br>(0 - 2)             | 0<br>(0 - 0)              | --                          |
| Varicella and herpes zoster                                        | 3<br>(1 - 7)                | 0<br>(0 - 2)             | 0<br>(0 - 0)       | 1<br>(0 - 2)             | 0<br>(0 - 1)              | 1<br>(0 - 6)                |
| Neglected tropical diseases and malaria                            | 15<br>(11 - 21)             | 3<br>(1 - 6)             | 1<br>(1 - 3)       | 5<br>(4 - 9)             | 3<br>(2 - 6)              | 3<br>(2 - 6)                |
| Leishmaniasis                                                      | 5<br>(4 - 7)                | 2<br>(1 - 3)             | 0<br>(0 - 0)       | 2<br>(1 - 3)             | 1<br>(1 - 2)              | 0<br>(0 - 1)                |
| Visceral leishmaniasis                                             | 5<br>(4 - 7)                | 2<br>(1 - 3)             | 0<br>(0 - 0)       | 2<br>(1 - 3)             | 1<br>(1 - 2)              | 0<br>(0 - 1)                |
| Cysticercosis                                                      | 0<br>(0 - 0)                | 0<br>(0 - 0)             | 0<br>(0 - 0)       | 0<br>(0 - 0)             | 0<br>(0 - 0)              | 0<br>(0 - 0)                |
| Cystic echinococcosis                                              | 3<br>(3 - 5)                | 0<br>(0 - 0)             | 0<br>(0 - 0)       | 1<br>(1 - 2)             | 1<br>(1 - 1)              | 1<br>(1 - 1)                |
| Dengue                                                             | 1<br>(0 - 1)                | 0<br>(0 - 0)             | 0<br>(0 - 0)       | 0<br>(0 - 0)             | 0<br>(0 - 0)              | 0<br>(0 - 0)                |
| Rabies                                                             | 1<br>(1 - 3)                | 0<br>(0 - 0)             | 0<br>(0 - 0)       | 1<br>(0 - 2)             | 0<br>(0 - 1)              | 0<br>(0 - 0)                |
| Intestinal nematode infections                                     | 2<br>(0 - 7)                | 1<br>(0 - 4)             | 0<br>(0 - 2)       | 0<br>(0 - 3)             | 0<br>(0 - 2)              | 0<br>(0 - 3)                |
| Ascariasis                                                         | 2<br>(0 - 7)                | 1<br>(0 - 4)             | 0<br>(0 - 2)       | 0<br>(0 - 3)             | 0<br>(0 - 2)              | 0<br>(0 - 3)                |
| Other neglected tropical diseases                                  | 3<br>(2 - 4)                | 0<br>(0 - 1)             | 0<br>(0 - 0)       | 1<br>(1 - 1)             | 1<br>(0 - 1)              | 1<br>(1 - 2)                |
| Maternal disorders                                                 | --                          | --                       | --                 | --                       | --                        | --                          |
| Maternal hemorrhage                                                | --                          | --                       | --                 | --                       | --                        | --                          |
| Maternal sepsis and other maternal infections                      | --                          | --                       | --                 | --                       | --                        | --                          |

Web Table 31- Tunisia deaths with 95% UI by age, sex, and cause in 2013

| Cause                                                            | Males, All Ages             | Males, 0-4 Years   | Males, 5-14 Years | Males, 15-49 Years       | Males, 50-69 Years        | Males, 70-80 Years          |
|------------------------------------------------------------------|-----------------------------|--------------------|-------------------|--------------------------|---------------------------|-----------------------------|
| Maternal hypertensive disorders                                  | --                          | --                 | --                | --                       | --                        | --                          |
| Maternal obstructed labor                                        | --                          | --                 | --                | --                       | --                        | --                          |
| Maternal abortive outcome                                        | --                          | --                 | --                | --                       | --                        | --                          |
| Indirect maternal deaths                                         | --                          | --                 | --                | --                       | --                        | --                          |
| Late maternal deaths                                             | --                          | --                 | --                | --                       | --                        | --                          |
| Maternal deaths aggravated by HIV/AIDS                           | --                          | --                 | --                | --                       | --                        | --                          |
| Other maternal disorders                                         | --                          | --                 | --                | --                       | --                        | --                          |
| Neonatal disorders                                               | 586<br>(448 - 771)          | 586<br>(448 - 771) | --                | --                       | --                        | --                          |
| Neonatal preterm birth complications                             | 410<br>(288 - 549)          | 410<br>(288 - 549) | --                | --                       | --                        | --                          |
| Neonatal encephalopathy due to birth asphyxia and trauma         | 72<br>(27 - 155)            | 72<br>(27 - 155)   | --                | --                       | --                        | --                          |
| Neonatal sepsis and other neonatal infections                    | 44<br>(14 - 102)            | 44<br>(14 - 102)   | --                | --                       | --                        | --                          |
| Hemolytic disease and other neonatal jaundice                    | 1<br>(0 - 4)                | 1<br>(0 - 4)       | --                | --                       | --                        | --                          |
| Other neonatal disorders                                         | 58<br>(25 - 119)            | 58<br>(25 - 119)   | --                | --                       | --                        | --                          |
| Nutritional deficiencies                                         | 59<br>(36 - 104)            | 3<br>(1 - 6)       | 1<br>(0 - 1)      | 6<br>(4 - 11)            | 10<br>(6 - 20)            | 39<br>(22 - 69)             |
| Protein-energy malnutrition                                      | 14<br>(6 - 34)              | 2<br>(1 - 4)       | 0<br>(0 - 1)      | 1<br>(1 - 3)             | 2<br>(1 - 5)              | 9<br>(3 - 23)               |
| Iodine deficiency                                                | 0<br>(0 - 1)                | 0<br>(0 - 0)       | 0<br>(0 - 0)      | 0<br>(0 - 0)             | 0<br>(0 - 1)              | 0<br>(0 - 1)                |
| Iron-deficiency anemia                                           | 41<br>(22 - 75)             | 1<br>(0 - 3)       | 0<br>(0 - 1)      | 4<br>(2 - 7)             | 8<br>(4 - 15)             | 28<br>(14 - 49)             |
| Other nutritional deficiencies                                   | 4<br>(1 - 7)                | 0<br>(0 - 1)       | 0<br>(0 - 0)      | 1<br>(0 - 1)             | 1<br>(0 - 1)              | 2<br>(1 - 5)                |
| Other communicable, maternal, neonatal, and nutritional diseases | 94<br>(63 - 143)            | 9<br>(3 - 18)      | 2<br>(1 - 3)      | 16<br>(10 - 25)          | 33<br>(19 - 51)           | 34<br>(18 - 67)             |
| Sexually transmitted diseases excluding HIV                      | 10<br>(3 - 19)              | 5<br>(0 - 12)      | 0<br>(0 - 1)      | 1<br>(0 - 3)             | 1<br>(0 - 2)              | 2<br>(1 - 6)                |
| Syphilis                                                         | 9<br>(2 - 17)               | 5<br>(0 - 12)      | 0<br>(0 - 1)      | 1<br>(0 - 1)             | 1<br>(0 - 2)              | 2<br>(1 - 5)                |
| Chlamydial infection                                             | --                          | --                 | --                | --                       | --                        | --                          |
| Gonococcal infection                                             | 1<br>(0 - 2)                | --                 | 0<br>(0 - 0)      | 0<br>(0 - 1)             | 0<br>(0 - 0)              | 0<br>(0 - 1)                |
| Other sexually transmitted diseases                              | 0<br>(0 - 1)                | --                 | 0<br>(0 - 0)      | 0<br>(0 - 1)             | 0<br>(0 - 0)              | 0<br>(0 - 0)                |
| Hepatitis                                                        | 44<br>(29 - 63)             | 1<br>(0 - 2)       | 0<br>(0 - 0)      | 8<br>(5 - 13)            | 22<br>(13 - 34)           | 13<br>(8 - 20)              |
| Acute hepatitis A                                                | 2<br>(1 - 5)                | 0<br>(0 - 1)       | 0<br>(0 - 0)      | 1<br>(0 - 2)             | 1<br>(0 - 2)              | 0<br>(0 - 1)                |
| Acute hepatitis B                                                | 33<br>(21 - 50)             | 1<br>(0 - 1)       | 0<br>(0 - 0)      | 5<br>(2 - 8)             | 17<br>(10 - 27)           | 11<br>(7 - 17)              |
| Acute hepatitis C                                                | 4<br>(1 - 10)               | --                 | 0<br>(0 - 0)      | 1<br>(0 - 2)             | 2<br>(0 - 6)              | 1<br>(0 - 3)                |
| Acute hepatitis E                                                | 5<br>(2 - 11)               | 0<br>(0 - 0)       | 0<br>(0 - 0)      | 2<br>(1 - 4)             | 2<br>(1 - 5)              | 1<br>(0 - 2)                |
| Other infectious diseases                                        | 40<br>(21 - 78)             | 3<br>(1 - 9)       | 1<br>(0 - 2)      | 7<br>(3 - 13)            | 10<br>(4 - 24)            | 19<br>(6 - 50)              |
| Non-communicable diseases                                        | 27,147<br>(20,463 - 33,496) | 600<br>(465 - 765) | 95<br>(76 - 115)  | 2,488<br>(1,721 - 3,481) | 8,894<br>(6,210 - 11,480) | 15,070<br>(11,799 - 17,981) |
| Neoplasms                                                        | 5,394<br>(3,887 - 6,914)    | 15<br>(9 - 24)     | 33<br>(24 - 43)   | 666<br>(455 - 943)       | 2,602<br>(1,818 - 3,362)  | 2,078<br>(1,553 - 2,651)    |
| Esophageal cancer                                                | 40<br>(27 - 60)             | --                 | --                | 5<br>(3 - 7)             | 20<br>(12 - 31)           | 16<br>(10 - 23)             |
| Stomach cancer                                                   | 381<br>(267 - 510)          | --                 | --                | 50<br>(32 - 72)          | 185<br>(123 - 256)        | 147<br>(101 - 203)          |
| Liver cancer                                                     | 117<br>(80 - 163)           | --                 | 1<br>(1 - 2)      | 12<br>(8 - 18)           | 61<br>(38 - 87)           | 42<br>(28 - 62)             |
| Liver cancer due to hepatitis B                                  | 38<br>(23 - 60)             | --                 | 0<br>(0 - 1)      | 6<br>(3 - 10)            | 22<br>(12 - 35)           | 10<br>(6 - 17)              |
| Liver cancer due to hepatitis C                                  | 57<br>(35 - 83)             | --                 | 0<br>(0 - 0)      | 4<br>(2 - 7)             | 29<br>(16 - 42)           | 24<br>(15 - 35)             |
| Liver cancer due to alcohol use                                  | 11<br>(5 - 19)              | --                 | --                | 1<br>(0 - 1)             | 5<br>(2 - 9)              | 5<br>(2 - 9)                |
| Liver cancer due to other causes                                 | 11<br>(6 - 18)              | --                 | 1<br>(0 - 1)      | 2<br>(1 - 3)             | 5<br>(3 - 9)              | 3<br>(1 - 6)                |
| Larynx cancer                                                    | 216<br>(138 - 300)          | --                 | --                | 15<br>(8 - 24)           | 109<br>(65 - 159)         | 91<br>(57 - 131)            |

Web Table 31- Tunisia deaths with 95% UI by age, sex, and cause in 2013

| Cause                                         | Males, All Ages             | Males, 0-4 Years | Males, 5-14 Years | Males, 15-49 Years     | Males, 50-69 Years       | Males, 70-80 Years        |
|-----------------------------------------------|-----------------------------|------------------|-------------------|------------------------|--------------------------|---------------------------|
| Tracheal, bronchus and lung cancer            | 1,719<br>(1,206 - 2,285)    | --               | --                | 162<br>(103 - 247)     | 1,009<br>(692 - 1,361)   | 548<br>(387 - 751)        |
| Breast cancer                                 | 15<br>(9 - 23)              | --               | --                | 2<br>(1 - 4)           | 6<br>(3 - 10)            | 6<br>(3 - 12)             |
| Cervical cancer                               | --                          | --               | --                | --                     | --                       | --                        |
| Uterine cancer                                | --                          | --               | --                | --                     | --                       | --                        |
| Prostate cancer                               | 393<br>(248 - 636)          | --               | --                | 2<br>(1 - 3)           | 59<br>(34 - 101)         | 331<br>(206 - 536)        |
| Colon and rectum cancer                       | 414<br>(296 - 554)          | --               | --                | 61<br>(40 - 88)        | 191<br>(129 - 266)       | 162<br>(116 - 215)        |
| Lip and oral cavity cancer                    | 58<br>(37 - 84)             | --               | --                | 10<br>(6 - 15)         | 26<br>(16 - 39)          | 23<br>(14 - 35)           |
| Nasopharynx cancer                            | 139<br>(88 - 199)           | --               | 3<br>(1 - 10)     | 49<br>(28 - 78)        | 62<br>(36 - 97)          | 25<br>(14 - 43)           |
| Other pharynx cancer                          | 24<br>(15 - 35)             | --               | --                | 3<br>(2 - 5)           | 14<br>(8 - 21)           | 7<br>(5 - 11)             |
| Gallbladder and biliary tract cancer          | 62<br>(33 - 94)             | --               | --                | 5<br>(3 - 9)           | 31<br>(15 - 51)          | 26<br>(14 - 41)           |
| Pancreatic cancer                             | 154<br>(107 - 206)          | --               | --                | 24<br>(15 - 35)        | 85<br>(55 - 118)         | 45<br>(31 - 61)           |
| Malignant skin melanoma                       | 14<br>(7 - 24)              | --               | --                | 3<br>(1 - 5)           | 5<br>(3 - 9)             | 6<br>(3 - 10)             |
| Non-melanoma skin cancer                      | 13<br>(8 - 23)              | --               | --                | 2<br>(1 - 3)           | 3<br>(2 - 6)             | 8<br>(5 - 15)             |
| Ovarian cancer                                | --                          | --               | --                | --                     | --                       | --                        |
| Testicular cancer                             | 7<br>(4 - 11)               | --               | --                | 5<br>(3 - 7)           | 1<br>(1 - 2)             | 1<br>(1 - 2)              |
| Kidney cancer                                 | 117<br>(79 - 162)           | 1<br>(0 - 3)     | 1<br>(1 - 2)      | 10<br>(6 - 16)         | 66<br>(42 - 96)          | 39<br>(25 - 56)           |
| Bladder cancer                                | 731<br>(466 - 1,009)        | --               | --                | 34<br>(20 - 55)        | 355<br>(218 - 523)       | 341<br>(206 - 482)        |
| Brain and nervous system cancer               | 135<br>(85 - 214)           | 3<br>(1 - 5)     | 5<br>(3 - 8)      | 43<br>(25 - 69)        | 70<br>(41 - 113)         | 14<br>(8 - 24)            |
| Thyroid cancer                                | 19<br>(13 - 26)             | --               | 0<br>(0 - 0)      | 3<br>(2 - 5)           | 9<br>(6 - 14)            | 7<br>(4 - 10)             |
| Mesothelioma                                  | 12<br>(8 - 18)              | --               | --                | 2<br>(1 - 3)           | 7<br>(4 - 11)            | 4<br>(2 - 7)              |
| Hodgkin lymphoma                              | 38<br>(23 - 57)             | 0<br>(0 - 1)     | 2<br>(1 - 4)      | 18<br>(10 - 29)        | 15<br>(8 - 25)           | 3<br>(2 - 6)              |
| Non-Hodgkin lymphoma                          | 205<br>(137 - 283)          | 2<br>(1 - 4)     | 5<br>(3 - 8)      | 51<br>(33 - 73)        | 85<br>(53 - 124)         | 62<br>(39 - 91)           |
| Multiple myeloma                              | 49<br>(32 - 70)             | --               | --                | 6<br>(4 - 10)          | 23<br>(14 - 35)          | 19<br>(12 - 29)           |
| Leukemia                                      | 141<br>(103 - 189)          | 3<br>(1 - 6)     | 10<br>(7 - 15)    | 51<br>(34 - 74)        | 43<br>(28 - 60)          | 34<br>(23 - 47)           |
| Other neoplasms                               | 177<br>(124 - 240)          | 6<br>(3 - 11)    | 5<br>(3 - 8)      | 38<br>(23 - 57)        | 60<br>(37 - 89)          | 68<br>(44 - 98)           |
| Cardiovascular diseases                       | 14,242<br>(10,618 - 17,880) | 34<br>(21 - 52)  | 17<br>(12 - 24)   | 1,255<br>(861 - 1,770) | 4,576<br>(3,187 - 5,994) | 8,359<br>(6,483 - 10,169) |
| Rheumatic heart disease                       | 55<br>(32 - 84)             | 0<br>(0 - 1)     | 1<br>(0 - 1)      | 12<br>(7 - 19)         | 15<br>(9 - 25)           | 27<br>(15 - 44)           |
| Ischemic heart disease                        | 9,638<br>(7,003 - 12,244)   | 7<br>(3 - 15)    | 4<br>(2 - 6)      | 904<br>(618 - 1,276)   | 3,422<br>(2,375 - 4,549) | 5,300<br>(3,960 - 6,708)  |
| Cerebrovascular disease                       | 3,104<br>(2,183 - 4,252)    | 8<br>(4 - 12)    | 6<br>(4 - 9)      | 167<br>(105 - 255)     | 706<br>(454 - 1,020)     | 2,218<br>(1,570 - 3,013)  |
| Ischemic stroke                               | 1,735<br>(1,140 - 2,524)    | 1<br>(0 - 1)     | 1<br>(0 - 1)      | 37<br>(17 - 65)        | 296<br>(170 - 475)       | 1,401<br>(935 - 2,018)    |
| Hemorrhagic stroke                            | 1,369<br>(837 - 2,142)      | 7<br>(4 - 11)    | 5<br>(3 - 8)      | 130<br>(78 - 201)      | 411<br>(251 - 652)       | 817<br>(474 - 1,330)      |
| Hypertensive heart disease                    | 476<br>(213 - 764)          | 0<br>(0 - 1)     | 0<br>(0 - 0)      | 37<br>(18 - 61)        | 130<br>(58 - 215)        | 308<br>(130 - 507)        |
| Cardiomyopathy and myocarditis                | 283<br>(181 - 434)          | 9<br>(5 - 15)    | 3<br>(2 - 5)      | 52<br>(32 - 81)        | 88<br>(52 - 139)         | 131<br>(75 - 215)         |
| Atrial fibrillation and flutter               | 29<br>(14 - 47)             | --               | --                | 1<br>(1 - 2)           | 7<br>(3 - 11)            | 21<br>(9 - 36)            |
| Aortic aneurysm                               | 152<br>(95 - 257)           | --               | --                | 8<br>(5 - 16)          | 65<br>(40 - 109)         | 79<br>(46 - 136)          |
| Peripheral vascular disease                   | 11<br>(5 - 17)              | --               | --                | 1<br>(0 - 1)           | 2<br>(1 - 4)             | 8<br>(4 - 13)             |
| Endocarditis                                  | 60<br>(35 - 95)             | 3<br>(1 - 6)     | 1<br>(0 - 1)      | 9<br>(5 - 16)          | 18<br>(10 - 30)          | 29<br>(16 - 47)           |
| Other cardiovascular and circulatory diseases | 434<br>(275 - 870)          | 7<br>(3 - 13)    | 2<br>(1 - 4)      | 65<br>(39 - 122)       | 123<br>(73 - 257)        | 237<br>(140 - 463)        |
| Chronic respiratory diseases                  | 2,047<br>(1,453 - 2,847)    | 8<br>(4 - 13)    | 3<br>(2 - 4)      | 86<br>(56 - 125)       | 479<br>(306 - 681)       | 1,471<br>(1,053 - 2,036)  |
| Chronic obstructive pulmonary disease         | 1,699<br>(1,198 - 2,405)    | 5<br>(2 - 8)     | 1<br>(1 - 2)      | 49<br>(31 - 74)        | 380<br>(242 - 543)       | 1,265<br>(893 - 1,787)    |

Web Table 31- Tunisia deaths with 95% UI by age, sex, and cause in 2013

| Cause                                               | Males, All Ages          | Males, 0-4 Years | Males, 5-14 Years | Males, 15-49 Years | Males, 50-69 Years | Males, 70-80 Years     |
|-----------------------------------------------------|--------------------------|------------------|-------------------|--------------------|--------------------|------------------------|
| Pneumoconiosis                                      | 49<br>(28 - 78)          | 0<br>(0 - 0)     | 0<br>(0 - 0)      | 9<br>(5 - 15)      | 15<br>(8 - 25)     | 25<br>(13 - 43)        |
| Silicosis                                           | 19<br>(10 - 33)          | 0<br>(0 - 0)     | 0<br>(0 - 0)      | 1<br>(0 - 1)       | 3<br>(1 - 6)       | 15<br>(8 - 27)         |
| Asbestosis                                          | 2<br>(1 - 4)             | 0<br>(0 - 0)     | 0<br>(0 - 0)      | 1<br>(1 - 2)       | 1<br>(0 - 1)       | 0<br>(0 - 0)           |
| Coal workers pneumoconiosis                         | 1<br>(0 - 1)             | 0<br>(0 - 0)     | 0<br>(0 - 0)      | 0<br>(0 - 1)       | 0<br>(0 - 0)       | 0<br>(0 - 0)           |
| Other pneumoconiosis                                | 27<br>(15 - 46)          | 0<br>(0 - 0)     | 0<br>(0 - 0)      | 7<br>(4 - 12)      | 11<br>(6 - 19)     | 9<br>(4 - 18)          |
| Asthma                                              | 171<br>(94 - 276)        | 1<br>(1 - 3)     | 1<br>(1 - 1)      | 21<br>(12 - 35)    | 52<br>(26 - 88)    | 96<br>(50 - 162)       |
| Interstitial lung disease and pulmonary sarcoidosis | 105<br>(21 - 222)        | 0<br>(0 - 0)     | 0<br>(0 - 0)      | 3<br>(1 - 7)       | 28<br>(5 - 60)     | 74<br>(14 - 169)       |
| Other chronic respiratory diseases                  | 23<br>(12 - 39)          | 1<br>(1 - 2)     | 0<br>(0 - 1)      | 3<br>(2 - 6)       | 5<br>(2 - 10)      | 12<br>(6 - 24)         |
| Cirrhosis                                           | 567<br>(396 - 766)       | 2<br>(1 - 5)     | 2<br>(1 - 3)      | 84<br>(54 - 124)   | 242<br>(157 - 343) | 237<br>(162 - 328)     |
| Cirrhosis due to hepatitis B                        | 172<br>(79 - 287)        | 0<br>(0 - 0)     | 0<br>(0 - 1)      | 25<br>(10 - 48)    | 71<br>(30 - 126)   | 75<br>(35 - 129)       |
| Cirrhosis due to hepatitis C                        | 261<br>(128 - 400)       | 0<br>(0 - 1)     | 0<br>(0 - 1)      | 40<br>(12 - 70)    | 120<br>(46 - 198)  | 100<br>(55 - 153)      |
| Cirrhosis due to alcohol use                        | 91<br>(47 - 164)         | --               | --                | 8<br>(3 - 18)      | 33<br>(15 - 71)    | 50<br>(25 - 90)        |
| Cirrhosis due to other causes                       | 43<br>(23 - 77)          | 2<br>(1 - 4)     | 1<br>(1 - 2)      | 12<br>(6 - 23)     | 17<br>(7 - 34)     | 12<br>(5 - 22)         |
| Digestive diseases                                  | 366<br>(264 - 518)       | 3<br>(1 - 5)     | 2<br>(1 - 3)      | 42<br>(28 - 68)    | 94<br>(61 - 149)   | 226<br>(157 - 312)     |
| Peptic ulcer disease                                | 122<br>(76 - 189)        | 0<br>(0 - 0)     | 0<br>(0 - 0)      | 10<br>(6 - 17)     | 33<br>(19 - 52)    | 78<br>(46 - 126)       |
| Gastritis and duodenitis                            | 4<br>(2 - 9)             | 0<br>(0 - 0)     | 0<br>(0 - 0)      | 1<br>(1 - 2)       | 1<br>(0 - 2)       | 2<br>(1 - 4)           |
| Appendicitis                                        | 14<br>(8 - 21)           | 0<br>(0 - 1)     | 0<br>(0 - 0)      | 3<br>(1 - 4)       | 4<br>(2 - 6)       | 7<br>(3 - 12)          |
| Paralytic ileus and intestinal obstruction          | 74<br>(42 - 145)         | 1<br>(0 - 2)     | 1<br>(0 - 1)      | 8<br>(4 - 18)      | 18<br>(9 - 39)     | 46<br>(24 - 86)        |
| Inguinal, femoral, and abdominal hernia             | 7<br>(4 - 14)            | 0<br>(0 - 0)     | 0<br>(0 - 0)      | 1<br>(0 - 1)       | 1<br>(1 - 2)       | 5<br>(2 - 11)          |
| Inflammatory bowel disease                          | 20<br>(12 - 30)          | 0<br>(0 - 1)     | 0<br>(0 - 0)      | 3<br>(2 - 5)       | 5<br>(3 - 8)       | 11<br>(6 - 19)         |
| Vascular intestinal disorders                       | 10<br>(4 - 23)           | 0<br>(0 - 0)     | 0<br>(0 - 0)      | 2<br>(1 - 5)       | 3<br>(1 - 8)       | 5<br>(2 - 11)          |
| Gallbladder and biliary diseases                    | 55<br>(34 - 85)          | 0<br>(0 - 1)     | 0<br>(0 - 0)      | 4<br>(2 - 7)       | 11<br>(6 - 20)     | 40<br>(22 - 64)        |
| Pancreatitis                                        | 24<br>(12 - 37)          | 0<br>(0 - 0)     | 0<br>(0 - 0)      | 6<br>(3 - 10)      | 7<br>(4 - 13)      | 10<br>(5 - 18)         |
| Other digestive diseases                            | 38<br>(21 - 65)          | 0<br>(0 - 1)     | 0<br>(0 - 0)      | 4<br>(2 - 8)       | 10<br>(5 - 20)     | 22<br>(11 - 40)        |
| Neurological disorders                              | 1,466<br>(1,093 - 1,896) | 6<br>(3 - 12)    | 4<br>(2 - 7)      | 35<br>(20 - 55)    | 124<br>(83 - 175)  | 1,298<br>(951 - 1,688) |
| Alzheimer disease and other dementias               | 1,374<br>(1,017 - 1,785) | --               | --                | 0<br>(0 - 1)       | 106<br>(70 - 152)  | 1,268<br>(927 - 1,655) |
| Parkinson disease                                   | 18<br>(10 - 32)          | --               | --                | 0<br>(0 - 1)       | 3<br>(2 - 6)       | 14<br>(7 - 27)         |
| Epilepsy                                            | 53<br>(27 - 83)          | 3<br>(1 - 8)     | 3<br>(1 - 6)      | 27<br>(13 - 45)    | 10<br>(5 - 18)     | 9<br>(4 - 17)          |
| Multiple sclerosis                                  | 4<br>(2 - 7)             | --               | --                | 2<br>(1 - 3)       | 1<br>(1 - 3)       | 1<br>(0 - 2)           |
| Other neurological disorders                        | 17<br>(10 - 23)          | 3<br>(1 - 5)     | 1<br>(0 - 1)      | 5<br>(3 - 8)       | 3<br>(1 - 5)       | 5<br>(3 - 7)           |
| Mental and substance use disorders                  | 149<br>(100 - 217)       | 1<br>(1 - 2)     | 0<br>(0 - 0)      | 95<br>(62 - 140)   | 43<br>(28 - 61)    | 10<br>(7 - 15)         |
| Schizophrenia                                       | 2<br>(1 - 3)             | --               | --                | 1<br>(0 - 1)       | 0<br>(0 - 1)       | 1<br>(0 - 1)           |
| Alcohol use disorders                               | 15<br>(9 - 30)           | --               | --                | 5<br>(3 - 10)      | 7<br>(4 - 15)      | 3<br>(2 - 6)           |
| Drug use disorders                                  | 132<br>(87 - 190)        | 1<br>(1 - 2)     | --                | 89<br>(57 - 130)   | 36<br>(22 - 52)    | 7<br>(4 - 10)          |
| Opioid use disorders                                | 72<br>(47 - 104)         | 1<br>(0 - 1)     | --                | 50<br>(32 - 73)    | 18<br>(11 - 26)    | 4<br>(2 - 5)           |
| Cocaine use disorders                               | 2<br>(1 - 2)             | 0<br>(0 - 0)     | --                | 1<br>(1 - 2)       | 0<br>(0 - 0)       | 0<br>(0 - 0)           |
| Amphetamine use disorders                           | 1<br>(1 - 2)             | 0<br>(0 - 0)     | --                | 1<br>(1 - 1)       | 0<br>(0 - 1)       | 0<br>(0 - 0)           |
| Other drug use disorders                            | 57<br>(38 - 82)          | 0<br>(0 - 1)     | --                | 37<br>(24 - 56)    | 17<br>(10 - 24)    | 3<br>(2 - 4)           |
| Eating disorders                                    | 0<br>(0 - 0)             | --               | 0<br>(0 - 0)      | 0<br>(0 - 0)       | --                 | --                     |
| Anorexia nervosa                                    | 0<br>(0 - 0)             | --               | 0<br>(0 - 0)      | 0<br>(0 - 0)       | --                 | --                     |

Web Table 31- Tunisia deaths with 95% UI by age, sex, and cause in 2013

| Cause                                               | Males, All Ages          | Males, 0-4 Years   | Males, 5-14 Years | Males, 15-49 Years | Males, 50-69 Years   | Males, 70-80 Years     |
|-----------------------------------------------------|--------------------------|--------------------|-------------------|--------------------|----------------------|------------------------|
| Diabetes, urogenital, blood, and endocrine diseases | 2,250<br>(1,517 - 3,093) | 28<br>(18 - 41)    | 10<br>(7 - 15)    | 183<br>(117 - 276) | 705<br>(454 - 1,023) | 1,323<br>(869 - 1,843) |
| Diabetes mellitus                                   | 991<br>(660 - 1,495)     | 2<br>(1 - 2)       | 0<br>(0 - 1)      | 51<br>(30 - 79)    | 339<br>(213 - 516)   | 600<br>(387 - 922)     |
| Acute glomerulonephritis                            | 4<br>(3 - 6)             | 0<br>(0 - 0)       | 0<br>(0 - 0)      | 1<br>(0 - 1)       | 1<br>(1 - 2)         | 2<br>(1 - 4)           |
| Chronic kidney disease                              | 1,034<br>(533 - 1,629)   | 5<br>(2 - 10)      | 3<br>(1 - 5)      | 90<br>(44 - 158)   | 319<br>(159 - 531)   | 616<br>(304 - 995)     |
| Chronic kidney disease due to diabetes mellitus     | 32<br>(4 - 61)           | 0<br>(0 - 1)       | 0<br>(0 - 0)      | 5<br>(1 - 10)      | 9<br>(1 - 18)        | 17<br>(2 - 36)         |
| Chronic kidney disease due to hypertension          | 469<br>(227 - 742)       | 1<br>(0 - 2)       | 1<br>(0 - 1)      | 38<br>(18 - 64)    | 156<br>(69 - 258)    | 273<br>(132 - 441)     |
| Chronic kidney disease due to glomerulonephritis    | 28<br>(15 - 46)          | 1<br>(0 - 1)       | 0<br>(0 - 1)      | 4<br>(2 - 8)       | 7<br>(4 - 13)        | 16<br>(8 - 27)         |
| Chronic kidney disease due to other causes          | 505<br>(175 - 1,014)     | 4<br>(1 - 8)       | 2<br>(1 - 4)      | 43<br>(15 - 96)    | 147<br>(44 - 311)    | 310<br>(100 - 643)     |
| Urinary diseases and male infertility               | 90<br>(56 - 138)         | 1<br>(1 - 3)       | 0<br>(0 - 1)      | 7<br>(4 - 11)      | 21<br>(12 - 34)      | 61<br>(36 - 99)        |
| Interstitial nephritis and urinary tract infections | 32<br>(16 - 53)          | 1<br>(0 - 2)       | 0<br>(0 - 0)      | 3<br>(1 - 4)       | 7<br>(3 - 12)        | 21<br>(9 - 40)         |
| Urolithiasis                                        | 4<br>(2 - 7)             | --                 | 0<br>(0 - 0)      | 0<br>(0 - 1)       | 1<br>(0 - 2)         | 2<br>(1 - 4)           |
| Other urinary diseases                              | 54<br>(32 - 91)          | 0<br>(0 - 1)       | 0<br>(0 - 0)      | 3<br>(2 - 6)       | 12<br>(7 - 22)       | 38<br>(20 - 65)        |
| Gynecological diseases                              | --                       | --                 | --                | --                 | --                   | --                     |
| Uterine fibroids                                    | --                       | --                 | --                | --                 | --                   | --                     |
| Polycystic ovarian syndrome                         | --                       | --                 | --                | --                 | --                   | --                     |
| Endometriosis                                       | --                       | --                 | --                | --                 | --                   | --                     |
| Genital prolapse                                    | --                       | --                 | --                | --                 | --                   | --                     |
| Other gynecological diseases                        | --                       | --                 | --                | --                 | --                   | --                     |
| Hemoglobinopathies and hemolytic anemias            | 70<br>(41 - 119)         | 9<br>(4 - 18)      | 4<br>(2 - 7)      | 24<br>(13 - 42)    | 11<br>(5 - 21)       | 21<br>(12 - 37)        |
| Thalassemias                                        | 22<br>(12 - 37)          | 7<br>(3 - 13)      | 3<br>(2 - 5)      | 12<br>(6 - 21)     | 0<br>(0 - 0)         | 0<br>(0 - 0)           |
| Sickle cell disorders                               | 21<br>(12 - 39)          | 2<br>(1 - 3)       | 1<br>(1 - 2)      | 10<br>(5 - 18)     | 8<br>(4 - 15)        | 1<br>(0 - 1)           |
| G6PD deficiency                                     | 1<br>(1 - 2)             | 0<br>(0 - 0)       | 0<br>(0 - 0)      | 0<br>(0 - 1)       | 0<br>(0 - 0)         | 0<br>(0 - 1)           |
| Other hemoglobinopathies and hemolytic anemias      | 26<br>(14 - 45)          | 1<br>(0 - 1)       | 0<br>(0 - 0)      | 2<br>(1 - 3)       | 3<br>(1 - 6)         | 20<br>(11 - 36)        |
| Endocrine, metabolic, blood, and immune disorders   | 61<br>(30 - 86)          | 10<br>(3 - 18)     | 2<br>(1 - 4)      | 11<br>(5 - 17)     | 14<br>(7 - 23)       | 23<br>(10 - 38)        |
| Musculoskeletal disorders                           | 52<br>(25 - 84)          | --                 | 1<br>(1 - 2)      | 12<br>(5 - 20)     | 12<br>(7 - 22)       | 26<br>(12 - 44)        |
| Rheumatoid arthritis                                | 9<br>(4 - 15)            | --                 | 0<br>(0 - 1)      | 2<br>(1 - 3)       | 2<br>(1 - 4)         | 4<br>(2 - 9)           |
| Other musculoskeletal disorders                     | 43<br>(21 - 71)          | --                 | 1<br>(0 - 1)      | 10<br>(4 - 17)     | 10<br>(5 - 18)       | 22<br>(10 - 37)        |
| Other non-communicable diseases                     | 615<br>(480 - 775)       | 503<br>(378 - 661) | 23<br>(15 - 33)   | 31<br>(20 - 47)    | 17<br>(11 - 26)      | 42<br>(27 - 64)        |
| Congenital anomalies                                | 579<br>(450 - 738)       | 496<br>(372 - 656) | 23<br>(15 - 33)   | 28<br>(18 - 42)    | 11<br>(7 - 18)       | 21<br>(13 - 32)        |
| Neural tube defects                                 | 7<br>(2 - 20)            | 6<br>(2 - 19)      | 0<br>(0 - 0)      | 0<br>(0 - 1)       | 0<br>(0 - 0)         | 0<br>(0 - 0)           |
| Congenital heart anomalies                          | 218<br>(144 - 326)       | 198<br>(128 - 304) | 9<br>(4 - 14)     | 7<br>(4 - 11)      | 2<br>(1 - 3)         | 3<br>(2 - 5)           |
| Cleft lip and cleft palate                          | 0<br>(0 - 1)             | 0<br>(0 - 1)       | --                | --                 | --                   | --                     |
| Down syndrome                                       | 19<br>(8 - 33)           | 13<br>(5 - 26)     | 1<br>(1 - 2)      | 4<br>(2 - 7)       | 0<br>(0 - 1)         | 0<br>(0 - 0)           |
| Chromosomal unbalanced rearrangements               | 7<br>(4 - 14)            | 6<br>(3 - 12)      | 0<br>(0 - 0)      | 1<br>(0 - 1)       | 0<br>(0 - 0)         | 0<br>(0 - 0)           |
| Other congenital anomalies                          | 327<br>(225 - 458)       | 273<br>(175 - 399) | 12<br>(7 - 19)    | 15<br>(10 - 24)    | 9<br>(5 - 14)        | 17<br>(10 - 28)        |
| Skin and subcutaneous diseases                      | 30<br>(18 - 54)          | 1<br>(0 - 1)       | 0<br>(0 - 0)      | 3<br>(2 - 6)       | 5<br>(3 - 10)        | 21<br>(11 - 39)        |
| Cellulitis                                          | 4<br>(1 - 7)             | 0<br>(0 - 0)       | 0<br>(0 - 0)      | 0<br>(0 - 1)       | 1<br>(0 - 2)         | 2<br>(1 - 5)           |
| Pyoderma                                            | 15<br>(9 - 29)           | 0<br>(0 - 1)       | 0<br>(0 - 0)      | 1<br>(1 - 3)       | 3<br>(2 - 5)         | 11<br>(6 - 21)         |
| Decubitus ulcer                                     | 10<br>(5 - 20)           | 0<br>(0 - 0)       | 0<br>(0 - 0)      | 1<br>(1 - 2)       | 2<br>(1 - 3)         | 7<br>(3 - 15)          |
| Other skin and subcutaneous diseases                | 1<br>(0 - 2)             | 0<br>(0 - 0)       | 0<br>(0 - 0)      | 0<br>(0 - 1)       | 0<br>(0 - 0)         | 0<br>(0 - 1)           |

Web Table 31- Tunisia deaths with 95% UI by age, sex, and cause in 2013

| Cause                                           | Males, All Ages          | Males, 0-4 Years  | Males, 5-14 Years  | Males, 15-49 Years       | Males, 50-69 Years | Males, 70-80 Years |
|-------------------------------------------------|--------------------------|-------------------|--------------------|--------------------------|--------------------|--------------------|
| Sudden infant death syndrome                    | 6<br>(1 - 19)            | 6<br>(1 - 19)     | --                 | --                       | --                 | --                 |
| Injuries                                        | 3,351<br>(2,446 - 4,407) | 113<br>(78 - 160) | 127<br>(105 - 151) | 1,928<br>(1,355 - 2,618) | 708<br>(470 - 969) | 474<br>(347 - 617) |
| Transport injuries                              | 1,972<br>(1,405 - 2,620) | 45<br>(25 - 75)   | 71<br>(54 - 89)    | 1,186<br>(830 - 1,618)   | 440<br>(275 - 626) | 230<br>(156 - 322) |
| Road injuries                                   | 1,911<br>(1,364 - 2,556) | 42<br>(23 - 72)   | 69<br>(52 - 86)    | 1,156<br>(814 - 1,577)   | 425<br>(266 - 602) | 219<br>(149 - 308) |
| Pedestrian road injuries                        | 577<br>(373 - 842)       | 15<br>(7 - 27)    | 24<br>(15 - 33)    | 331<br>(205 - 490)       | 134<br>(79 - 211)  | 75<br>(44 - 118)   |
| Cyclist road injuries                           | 57<br>(37 - 82)          | 1<br>(1 - 3)      | 2<br>(1 - 4)       | 32<br>(20 - 47)          | 14<br>(8 - 22)     | 7<br>(4 - 12)      |
| Motorcyclist road injuries                      | 249<br>(146 - 363)       | 5<br>(2 - 9)      | 7<br>(4 - 12)      | 160<br>(90 - 246)        | 50<br>(26 - 80)    | 26<br>(14 - 45)    |
| Motor vehicle road injuries                     | 1,023<br>(704 - 1,399)   | 21<br>(11 - 39)   | 35<br>(25 - 47)    | 631<br>(427 - 868)       | 225<br>(141 - 335) | 110<br>(69 - 166)  |
| Other road injuries                             | 6<br>(3 - 9)             | 0<br>(0 - 0)      | 0<br>(0 - 1)       | 3<br>(1 - 5)             | 1<br>(1 - 2)       | 1<br>(0 - 1)       |
| Other transport injuries                        | 61<br>(31 - 88)          | 2<br>(1 - 5)      | 2<br>(1 - 4)       | 30<br>(15 - 45)          | 15<br>(6 - 25)     | 11<br>(5 - 19)     |
| Unintentional injuries                          | 1,045<br>(757 - 1,377)   | 65<br>(41 - 95)   | 52<br>(39 - 68)    | 520<br>(354 - 732)       | 205<br>(133 - 292) | 202<br>(144 - 273) |
| Falls                                           | 196<br>(129 - 271)       | 9<br>(4 - 19)     | 5<br>(3 - 9)       | 77<br>(44 - 114)         | 40<br>(24 - 61)    | 65<br>(38 - 108)   |
| Drowning                                        | 159<br>(108 - 254)       | 19<br>(8 - 39)    | 18<br>(10 - 30)    | 84<br>(52 - 142)         | 20<br>(12 - 33)    | 17<br>(11 - 26)    |
| Fire, heat, and hot substances                  | 77<br>(50 - 109)         | 7<br>(3 - 14)     | 3<br>(2 - 4)       | 30<br>(17 - 47)          | 14<br>(9 - 23)     | 24<br>(14 - 38)    |
| Poisonings                                      | 35<br>(19 - 51)          | 3<br>(1 - 7)      | 1<br>(1 - 2)       | 17<br>(8 - 27)           | 6<br>(3 - 10)      | 8<br>(4 - 13)      |
| Exposure to mechanical forces                   | 409<br>(223 - 580)       | 15<br>(6 - 29)    | 20<br>(10 - 31)    | 255<br>(132 - 378)       | 89<br>(43 - 142)   | 30<br>(18 - 44)    |
| Unintentional firearm injuries                  | 33<br>(19 - 55)          | 1<br>(0 - 1)      | 1<br>(0 - 2)       | 20<br>(10 - 35)          | 7<br>(3 - 13)      | 5<br>(2 - 9)       |
| Unintentional suffocation                       | 4<br>(1 - 6)             | 1<br>(0 - 2)      | 0<br>(0 - 1)       | 1<br>(0 - 3)             | 1<br>(0 - 1)       | 0<br>(0 - 1)       |
| Other exposure to mechanical forces             | 373<br>(184 - 534)       | 14<br>(5 - 28)    | 19<br>(9 - 29)     | 234<br>(112 - 354)       | 81<br>(36 - 134)   | 25<br>(13 - 38)    |
| Adverse effects of medical treatment            | 73<br>(47 - 116)         | 3<br>(1 - 6)      | 1<br>(1 - 2)       | 14<br>(8 - 23)           | 22<br>(12 - 38)    | 34<br>(17 - 63)    |
| Animal contact                                  | 10<br>(6 - 14)           | 1<br>(0 - 2)      | 1<br>(0 - 2)       | 3<br>(2 - 5)             | 2<br>(1 - 3)       | 3<br>(2 - 5)       |
| Venomous animal contact                         | 5<br>(3 - 9)             | 1<br>(0 - 1)      | 0<br>(0 - 1)       | 1<br>(1 - 3)             | 1<br>(0 - 2)       | 2<br>(1 - 3)       |
| Non-venomous animal contact                     | 5<br>(2 - 8)             | 0<br>(0 - 1)      | 0<br>(0 - 1)       | 1<br>(1 - 2)             | 1<br>(0 - 1)       | 2<br>(1 - 3)       |
| Foreign body                                    | 24<br>(13 - 42)          | 4<br>(2 - 7)      | 1<br>(1 - 2)       | 3<br>(2 - 6)             | 3<br>(1 - 5)       | 14<br>(7 - 25)     |
| Pulmonary aspiration and foreign body in airway | 23<br>(12 - 40)          | 4<br>(2 - 7)      | 1<br>(0 - 2)       | 3<br>(1 - 6)             | 2<br>(1 - 4)       | 14<br>(7 - 25)     |
| Foreign body in other body part                 | 1<br>(0 - 2)             | 0<br>(0 - 0)      | 0<br>(0 - 0)       | 0<br>(0 - 1)             | 0<br>(0 - 1)       | 0<br>(0 - 0)       |
| Other unintentional injuries                    | 61<br>(39 - 93)          | 3<br>(2 - 5)      | 3<br>(2 - 4)       | 37<br>(22 - 60)          | 10<br>(6 - 16)     | 8<br>(5 - 13)      |
| Self-harm and interpersonal violence            | 331<br>(203 - 476)       | 1<br>(0 - 2)      | 4<br>(2 - 7)       | 222<br>(136 - 330)       | 63<br>(35 - 98)    | 42<br>(20 - 67)    |
| Self-harm                                       | 239<br>(122 - 351)       | --                | 2<br>(1 - 5)       | 145<br>(73 - 227)        | 52<br>(25 - 84)    | 40<br>(18 - 65)    |
| Interpersonal violence                          | 92<br>(57 - 155)         | 1<br>(0 - 2)      | 1<br>(1 - 2)       | 77<br>(46 - 134)         | 11<br>(6 - 20)     | 2<br>(1 - 4)       |
| Assault by firearm                              | 49<br>(27 - 88)          | 0<br>(0 - 0)      | 0<br>(0 - 1)       | 43<br>(23 - 80)          | 5<br>(2 - 10)      | 1<br>(0 - 2)       |
| Assault by sharp object                         | 26<br>(12 - 47)          | 0<br>(0 - 0)      | 0<br>(0 - 1)       | 21<br>(10 - 40)          | 3<br>(1 - 7)       | 0<br>(0 - 1)       |
| Assault by other means                          | 17<br>(8 - 30)           | 1<br>(0 - 1)      | 1<br>(0 - 1)       | 13<br>(6 - 23)           | 2<br>(1 - 4)       | 1<br>(0 - 2)       |
| Forces of nature, war, and legal intervention   | 3<br>(3 - 4)             | 3<br>(3 - 4)      | 1<br>(0 - 1)       | 0<br>(0 - 0)             | 0<br>(0 - 0)       | 0<br>(0 - 0)       |
| Collective violence and legal intervention      | 3<br>(3 - 4)             | 3<br>(3 - 4)      | 1<br>(0 - 1)       | 0<br>(0 - 0)             | 0<br>(0 - 0)       | 0<br>(0 - 0)       |

Web Table 31- Tunisia deaths with 95% UI by age, sex, and cause in 2013

| Cause                                                             | Females, All Ages           | Females, 0-4 Years       | Females, 5-14 Years | Females, 15-49 Years     | Females, 50-69 Years     | Females, 70-80 Years        |
|-------------------------------------------------------------------|-----------------------------|--------------------------|---------------------|--------------------------|--------------------------|-----------------------------|
| All causes                                                        | 25,313<br>(21,042 - 29,866) | 1,192<br>(1,033 - 1,371) | 192<br>(172 - 214)  | 2,303<br>(1,642 - 3,077) | 5,688<br>(4,107 - 7,390) | 15,938<br>(13,900 - 18,038) |
| Communicable, maternal, neonatal, and nutritional diseases        | 1,792<br>(1,440 - 2,241)    | 582<br>(459 - 727)       | 37<br>(25 - 53)     | 181<br>(125 - 265)       | 192<br>(128 - 276)       | 801<br>(548 - 1,157)        |
| HIV/AIDS and tuberculosis                                         | 69<br>(36 - 165)            | 1<br>(0 - 6)             | 0<br>(0 - 1)        | 24<br>(9 - 86)           | 15<br>(8 - 33)           | 28<br>(14 - 43)             |
| Tuberculosis                                                      | 50<br>(28 - 75)             | 0<br>(0 - 1)             | 0<br>(0 - 1)        | 10<br>(5 - 16)           | 12<br>(7 - 19)           | 28<br>(14 - 43)             |
| HIV/AIDS                                                          | 19<br>(1 - 110)             | 1<br>(0 - 5)             | 0<br>(0 - 1)        | 14<br>(1 - 79)           | 3<br>(0 - 20)            | 0<br>(0 - 3)                |
| HIV/AIDS resulting in mycobacterial infection                     | 1<br>(0 - 5)                | 0<br>(0 - 0)             | 0<br>(0 - 0)        | 1<br>(0 - 3)             | 0<br>(0 - 1)             | 0<br>(0 - 0)                |
| HIV/AIDS resulting in other diseases                              | 18<br>(1 - 105)             | 1<br>(0 - 5)             | 0<br>(0 - 1)        | 14<br>(1 - 76)           | 3<br>(0 - 20)            | 0<br>(0 - 2)                |
| Diarrhea, lower respiratory, and other common infectious diseases | 1,103<br>(788 - 1,506)      | 141<br>(91 - 213)        | 33<br>(21 - 49)     | 101<br>(62 - 153)        | 146<br>(93 - 214)        | 682<br>(436 - 1,034)        |
| Diarrheal diseases                                                | 61<br>(39 - 101)            | 19<br>(6 - 41)           | 1<br>(0 - 2)        | 4<br>(2 - 6)             | 5<br>(3 - 9)             | 32<br>(16 - 60)             |
| Intestinal infectious diseases                                    | 89<br>(42 - 164)            | 21<br>(10 - 40)          | 17<br>(8 - 30)      | 35<br>(14 - 72)          | 10<br>(3 - 21)           | 6<br>(2 - 11)               |
| Typhoid fever                                                     | 69<br>(32 - 127)            | 15<br>(7 - 30)           | 13<br>(6 - 24)      | 28<br>(11 - 57)          | 8<br>(3 - 16)            | 4<br>(2 - 9)                |
| Paratyphoid fever                                                 | 19<br>(9 - 37)              | 5<br>(2 - 12)            | 4<br>(2 - 8)        | 7<br>(3 - 15)            | 2<br>(0 - 5)             | 1<br>(0 - 2)                |
| Other intestinal infectious diseases                              | 1<br>(0 - 5)                | 0<br>(0 - 3)             | 0<br>(0 - 1)        | 0<br>(0 - 3)             | 0<br>(0 - 2)             | 0<br>(0 - 2)                |
| Lower respiratory infections                                      | 871<br>(586 - 1,240)        | 73<br>(41 - 120)         | 10<br>(6 - 15)      | 48<br>(31 - 70)          | 119<br>(73 - 181)        | 622<br>(384 - 974)          |
| Upper respiratory infections                                      | 1<br>(0 - 3)                | 0<br>(0 - 0)             | 0<br>(0 - 0)        | 0<br>(0 - 0)             | 0<br>(0 - 1)             | 1<br>(0 - 2)                |
| Otitis media                                                      | 2<br>(2 - 3)                | 0<br>(0 - 0)             | 0<br>(0 - 0)        | 0<br>(0 - 0)             | 0<br>(0 - 1)             | 1<br>(1 - 2)                |
| Meningitis                                                        | 35<br>(25 - 48)             | 8<br>(5 - 15)            | 1<br>(1 - 2)        | 6<br>(3 - 10)            | 6<br>(4 - 10)            | 12<br>(7 - 21)              |
| Pneumococcal meningitis                                           | 9<br>(6 - 13)               | 2<br>(1 - 3)             | 0<br>(0 - 1)        | 2<br>(1 - 3)             | 2<br>(1 - 3)             | 3<br>(2 - 6)                |
| H influenzae type B meningitis                                    | 6<br>(4 - 9)                | 3<br>(2 - 6)             | 0<br>(0 - 1)        | 1<br>(0 - 1)             | 1<br>(0 - 1)             | 1<br>(0 - 2)                |
| Meningococcal meningitis                                          | 11<br>(7 - 16)              | 3<br>(1 - 5)             | 0<br>(0 - 1)        | 2<br>(1 - 3)             | 2<br>(1 - 3)             | 4<br>(2 - 7)                |
| Other meningitis                                                  | 9<br>(6 - 14)               | 1<br>(0 - 2)             | 0<br>(0 - 0)        | 2<br>(1 - 3)             | 2<br>(1 - 4)             | 4<br>(2 - 7)                |
| Encephalitis                                                      | 23<br>(14 - 45)             | 5<br>(2 - 10)            | 1<br>(1 - 3)        | 6<br>(3 - 14)            | 4<br>(2 - 9)             | 6<br>(3 - 12)               |
| Diphtheria                                                        | 0<br>(0 - 1)                | 0<br>(0 - 0)             | 0<br>(0 - 0)        | 0<br>(0 - 0)             | 0<br>(0 - 0)             | --                          |
| Whooping cough                                                    | 1<br>(0 - 3)                | 1<br>(0 - 3)             | 0<br>(0 - 0)        | 0<br>(0 - 0)             | 0<br>(0 - 0)             | --                          |
| Tetanus                                                           | 1<br>(0 - 1)                | 0<br>(0 - 0)             | 0<br>(0 - 0)        | 0<br>(0 - 0)             | 0<br>(0 - 0)             | 0<br>(0 - 0)                |
| Measles                                                           | 16<br>(0 - 89)              | 14<br>(0 - 77)           | 2<br>(0 - 9)        | 1<br>(0 - 3)             | 0<br>(0 - 0)             | --                          |
| Varicella and herpes zoster                                       | 3<br>(1 - 9)                | 0<br>(0 - 2)             | 0<br>(0 - 0)        | 1<br>(0 - 2)             | 0<br>(0 - 1)             | 2<br>(0 - 8)                |
| Neglected tropical diseases and malaria                           | 11<br>(8 - 15)              | 2<br>(1 - 5)             | 1<br>(0 - 2)        | 3<br>(2 - 4)             | 2<br>(1 - 4)             | 3<br>(2 - 6)                |
| Leishmaniasis                                                     | 2<br>(2 - 3)                | 1<br>(0 - 1)             | 0<br>(0 - 0)        | 1<br>(0 - 1)             | 0<br>(0 - 1)             | 0<br>(0 - 0)                |
| Visceral leishmaniasis                                            | 2<br>(2 - 3)                | 1<br>(0 - 1)             | 0<br>(0 - 0)        | 1<br>(0 - 1)             | 0<br>(0 - 1)             | 0<br>(0 - 0)                |
| Cysticercosis                                                     | 0<br>(0 - 0)                | 0<br>(0 - 0)             | 0<br>(0 - 0)        | 0<br>(0 - 0)             | 0<br>(0 - 0)             | 0<br>(0 - 0)                |
| Cystic echinococcosis                                             | 3<br>(2 - 4)                | 0<br>(0 - 0)             | 0<br>(0 - 0)        | 1<br>(1 - 1)             | 1<br>(1 - 1)             | 1<br>(1 - 1)                |
| Dengue                                                            | 1<br>(0 - 1)                | 0<br>(0 - 0)             | 0<br>(0 - 0)        | 0<br>(0 - 0)             | 0<br>(0 - 0)             | 0<br>(0 - 0)                |
| Rabies                                                            | 1<br>(0 - 2)                | 0<br>(0 - 0)             | 0<br>(0 - 0)        | 0<br>(0 - 1)             | 0<br>(0 - 0)             | 0<br>(0 - 0)                |
| Intestinal nematode infections                                    | 1<br>(0 - 5)                | 0<br>(0 - 4)             | 0<br>(0 - 2)        | 0<br>(0 - 1)             | 0<br>(0 - 2)             | 0<br>(0 - 3)                |
| Ascariasis                                                        | 1<br>(0 - 5)                | 0<br>(0 - 4)             | 0<br>(0 - 2)        | 0<br>(0 - 1)             | 0<br>(0 - 2)             | 0<br>(0 - 3)                |
| Other neglected tropical diseases                                 | 3<br>(2 - 4)                | 0<br>(0 - 0)             | 0<br>(0 - 0)        | 1<br>(0 - 1)             | 0<br>(0 - 1)             | 1<br>(1 - 3)                |
| Maternal disorders                                                | 35<br>(21 - 53)             | --                       | 0<br>(0 - 0)        | 35<br>(21 - 53)          | --                       | --                          |
| Maternal hemorrhage                                               | 7<br>(3 - 11)               | --                       | 0<br>(0 - 0)        | 7<br>(3 - 11)            | --                       | --                          |
| Maternal sepsis and other maternal infections                     | 3<br>(2 - 5)                | --                       | 0<br>(0 - 0)        | 3<br>(2 - 5)             | --                       | --                          |



Web Table 31- Tunisia deaths with 95% UI by age, sex, and cause in 2013

| Cause                                                            | Females, All Ages           | Females, 0-4 Years | Females, 5-14 Years | Females, 15-49 Years     | Females, 50-69 Years     | Females, 70-80 Years        |
|------------------------------------------------------------------|-----------------------------|--------------------|---------------------|--------------------------|--------------------------|-----------------------------|
| Maternal hypertensive disorders                                  | 5<br>(3 - 8)                | --                 | 0<br>(0 - 0)        | 5<br>(3 - 8)             | --                       | --                          |
| Maternal obstructed labor                                        | 4<br>(2 - 6)                | --                 | 0<br>(0 - 0)        | 4<br>(2 - 6)             | --                       | --                          |
| Maternal abortive outcome                                        | 5<br>(3 - 8)                | --                 | 0<br>(0 - 0)        | 5<br>(3 - 8)             | --                       | --                          |
| Indirect maternal deaths                                         | 3<br>(1 - 6)                | --                 | 0<br>(0 - 0)        | 3<br>(1 - 6)             | --                       | --                          |
| Late maternal deaths                                             | 3<br>(2 - 6)                | --                 | 0<br>(0 - 0)        | 3<br>(2 - 6)             | --                       | --                          |
| Maternal deaths aggravated by HIV/AIDS                           | 0<br>(0 - 0)                | --                 | --                  | 0<br>(0 - 0)             | --                       | --                          |
| Other maternal disorders                                         | 5<br>(3 - 9)                | --                 | 0<br>(0 - 0)        | 5<br>(3 - 9)             | --                       | --                          |
| Neonatal disorders                                               | 425<br>(311 - 557)          | 425<br>(311 - 557) | --                  | --                       | --                       | --                          |
| Neonatal preterm birth complications                             | 295<br>(202 - 399)          | 295<br>(202 - 399) | --                  | --                       | --                       | --                          |
| Neonatal encephalopathy due to birth asphyxia and trauma         | 45<br>(17 - 96)             | 45<br>(17 - 96)    | --                  | --                       | --                       | --                          |
| Neonatal sepsis and other neonatal infections                    | 32<br>(13 - 68)             | 32<br>(13 - 68)    | --                  | --                       | --                       | --                          |
| Hemolytic disease and other neonatal jaundice                    | 1<br>(0 - 2)                | 1<br>(0 - 2)       | --                  | --                       | --                       | --                          |
| Other neonatal disorders                                         | 52<br>(24 - 96)             | 52<br>(24 - 96)    | --                  | --                       | --                       | --                          |
| Nutritional deficiencies                                         | 71<br>(48 - 109)            | 4<br>(2 - 7)       | 1<br>(1 - 2)        | 8<br>(5 - 14)            | 9<br>(5 - 15)            | 49<br>(29 - 81)             |
| Protein-energy malnutrition                                      | 17<br>(7 - 34)              | 2<br>(1 - 4)       | 0<br>(0 - 1)        | 1<br>(0 - 2)             | 2<br>(1 - 3)             | 12<br>(4 - 27)              |
| Iodine deficiency                                                | 0<br>(0 - 2)                | 0<br>(0 - 0)       | 0<br>(0 - 0)        | 0<br>(0 - 0)             | 0<br>(0 - 1)             | 0<br>(0 - 2)                |
| Iron-deficiency anemia                                           | 50<br>(30 - 79)             | 1<br>(0 - 3)       | 1<br>(0 - 1)        | 7<br>(4 - 11)            | 7<br>(4 - 12)            | 35<br>(19 - 59)             |
| Other nutritional deficiencies                                   | 3<br>(1 - 7)                | 0<br>(0 - 1)       | 0<br>(0 - 0)        | 0<br>(0 - 1)             | 1<br>(0 - 1)             | 2<br>(1 - 5)                |
| Other communicable, maternal, neonatal, and nutritional diseases | 77<br>(52 - 121)            | 9<br>(3 - 17)      | 1<br>(1 - 2)        | 9<br>(6 - 13)            | 20<br>(12 - 32)          | 39<br>(21 - 77)             |
| Sexually transmitted diseases excluding HIV                      | 11<br>(4 - 20)              | 5<br>(0 - 12)      | 0<br>(0 - 1)        | 1<br>(1 - 3)             | 1<br>(0 - 3)             | 3<br>(1 - 8)                |
| Syphilis                                                         | 9<br>(3 - 17)               | 5<br>(0 - 12)      | 0<br>(0 - 1)        | 0<br>(0 - 1)             | 1<br>(0 - 2)             | 2<br>(1 - 6)                |
| Chlamydial infection                                             | 1<br>(0 - 1)                | --                 | 0<br>(0 - 0)        | 0<br>(0 - 1)             | 0<br>(0 - 0)             | 0<br>(0 - 0)                |
| Gonococcal infection                                             | 1<br>(0 - 2)                | --                 | 0<br>(0 - 0)        | 0<br>(0 - 1)             | 0<br>(0 - 1)             | 0<br>(0 - 1)                |
| Other sexually transmitted diseases                              | 1<br>(0 - 1)                | --                 | 0<br>(0 - 0)        | 0<br>(0 - 0)             | 0<br>(0 - 0)             | 0<br>(0 - 0)                |
| Hepatitis                                                        | 30<br>(21 - 43)             | 1<br>(0 - 2)       | 0<br>(0 - 0)        | 4<br>(2 - 6)             | 11<br>(7 - 18)           | 14<br>(9 - 20)              |
| Acute hepatitis A                                                | 2<br>(1 - 4)                | 0<br>(0 - 1)       | 0<br>(0 - 0)        | 0<br>(0 - 1)             | 1<br>(0 - 1)             | 0<br>(0 - 1)                |
| Acute hepatitis B                                                | 22<br>(14 - 34)             | 0<br>(0 - 1)       | 0<br>(0 - 0)        | 2<br>(1 - 3)             | 9<br>(5 - 15)            | 11<br>(7 - 17)              |
| Acute hepatitis C                                                | 3<br>(1 - 8)                | --                 | 0<br>(0 - 0)        | 0<br>(0 - 1)             | 1<br>(0 - 3)             | 2<br>(0 - 5)                |
| Acute hepatitis E                                                | 3<br>(1 - 6)                | 0<br>(0 - 0)       | 0<br>(0 - 0)        | 1<br>(1 - 2)             | 1<br>(0 - 3)             | 1<br>(0 - 2)                |
| Other infectious diseases                                        | 36<br>(17 - 75)             | 3<br>(1 - 8)       | 1<br>(0 - 2)        | 4<br>(2 - 7)             | 7<br>(3 - 16)            | 22<br>(6 - 59)              |
| Non-communicable diseases                                        | 22,121<br>(18,254 - 26,310) | 491<br>(369 - 619) | 74<br>(59 - 90)     | 1,584<br>(1,118 - 2,151) | 5,188<br>(3,762 - 6,776) | 14,784<br>(12,834 - 16,812) |
| Neoplasms                                                        | 3,260<br>(2,324 - 4,239)    | 12<br>(7 - 19)     | 22<br>(17 - 28)     | 689<br>(462 - 946)       | 1,409<br>(939 - 1,915)   | 1,129<br>(877 - 1,366)      |
| Esophageal cancer                                                | 30<br>(20 - 41)             | --                 | --                  | 4<br>(2 - 7)             | 14<br>(9 - 21)           | 12<br>(8 - 16)              |
| Stomach cancer                                                   | 166<br>(114 - 223)          | --                 | --                  | 28<br>(17 - 41)          | 63<br>(39 - 89)          | 75<br>(50 - 110)            |
| Liver cancer                                                     | 75<br>(51 - 105)            | --                 | 1<br>(0 - 1)        | 6<br>(4 - 10)            | 29<br>(18 - 44)          | 39<br>(25 - 60)             |
| Liver cancer due to hepatitis B                                  | 18<br>(12 - 26)             | --                 | 0<br>(0 - 0)        | 2<br>(1 - 4)             | 8<br>(4 - 13)            | 7<br>(4 - 12)               |
| Liver cancer due to hepatitis C                                  | 37<br>(25 - 53)             | --                 | 0<br>(0 - 0)        | 2<br>(1 - 3)             | 14<br>(8 - 22)           | 22<br>(14 - 33)             |
| Liver cancer due to alcohol use                                  | 4<br>(2 - 7)                | --                 | --                  | 0<br>(0 - 0)             | 1<br>(1 - 2)             | 3<br>(1 - 5)                |
| Liver cancer due to other causes                                 | 16<br>(9 - 26)              | --                 | 0<br>(0 - 1)        | 2<br>(1 - 3)             | 6<br>(3 - 11)            | 7<br>(4 - 13)               |
| Larynx cancer                                                    | 17<br>(8 - 30)              | --                 | --                  | 2<br>(1 - 4)             | 8<br>(4 - 15)            | 7<br>(3 - 12)               |

Web Table 31- Tunisia deaths with 95% UI by age, sex, and cause in 2013

| Cause                                         | Females, All Ages           | Females, 0-4 Years | Females, 5-14 Years | Females, 15-49 Years | Females, 50-69 Years     | Females, 70-80 Years      |
|-----------------------------------------------|-----------------------------|--------------------|---------------------|----------------------|--------------------------|---------------------------|
| Tracheal, bronchus and lung cancer            | 172<br>(121 - 239)          | --                 | --                  | 27<br>(16 - 41)      | 84<br>(54 - 122)         | 62<br>(44 - 85)           |
| Breast cancer                                 | 762<br>(522 - 1,025)        | --                 | --                  | 252<br>(160 - 356)   | 344<br>(223 - 488)       | 167<br>(121 - 217)        |
| Cervical cancer                               | 160<br>(99 - 224)           | --                 | --                  | 27<br>(16 - 40)      | 84<br>(49 - 125)         | 49<br>(32 - 70)           |
| Uterine cancer                                | 53<br>(31 - 78)             | --                 | --                  | 4<br>(2 - 6)         | 24<br>(13 - 37)          | 26<br>(15 - 39)           |
| Prostate cancer                               | --                          | --                 | --                  | --                   | --                       | --                        |
| Colon and rectum cancer                       | 412<br>(292 - 546)          | --                 | --                  | 78<br>(51 - 109)     | 168<br>(109 - 237)       | 166<br>(118 - 225)        |
| Lip and oral cavity cancer                    | 28<br>(17 - 41)             | --                 | --                  | 5<br>(3 - 8)         | 10<br>(6 - 17)           | 12<br>(7 - 19)            |
| Nasopharynx cancer                            | 61<br>(25 - 96)             | --                 | 2<br>(1 - 4)        | 20<br>(8 - 35)       | 31<br>(13 - 54)          | 8<br>(3 - 14)             |
| Other pharynx cancer                          | 21<br>(12 - 31)             | --                 | --                  | 7<br>(3 - 12)        | 10<br>(5 - 16)           | 5<br>(3 - 7)              |
| Gallbladder and biliary tract cancer          | 126<br>(73 - 196)           | --                 | --                  | 9<br>(5 - 16)        | 62<br>(34 - 102)         | 55<br>(30 - 90)           |
| Pancreatic cancer                             | 130<br>(93 - 173)           | --                 | --                  | 10<br>(6 - 15)       | 57<br>(37 - 82)          | 63<br>(44 - 87)           |
| Malignant skin melanoma                       | 13<br>(9 - 18)              | --                 | --                  | 2<br>(1 - 3)         | 4<br>(2 - 5)             | 8<br>(5 - 12)             |
| Non-melanoma skin cancer                      | 11<br>(6 - 19)              | --                 | --                  | 1<br>(1 - 2)         | 2<br>(1 - 5)             | 8<br>(4 - 14)             |
| Ovarian cancer                                | 217<br>(149 - 307)          | --                 | --                  | 42<br>(26 - 64)      | 121<br>(78 - 180)        | 54<br>(36 - 77)           |
| Testicular cancer                             | --                          | --                 | --                  | --                   | --                       | --                        |
| Kidney cancer                                 | 88<br>(58 - 123)            | 2<br>(1 - 4)       | 2<br>(1 - 5)        | 12<br>(7 - 18)       | 43<br>(25 - 69)          | 28<br>(17 - 42)           |
| Bladder cancer                                | 112<br>(67 - 158)           | --                 | --                  | 7<br>(4 - 11)        | 39<br>(22 - 60)          | 66<br>(39 - 96)           |
| Brain and nervous system cancer               | 78<br>(53 - 107)            | 2<br>(1 - 3)       | 4<br>(2 - 6)        | 28<br>(18 - 41)      | 35<br>(22 - 52)          | 10<br>(7 - 15)            |
| Thyroid cancer                                | 64<br>(36 - 93)             | --                 | 0<br>(0 - 0)        | 5<br>(2 - 8)         | 27<br>(14 - 43)          | 33<br>(19 - 50)           |
| Mesothelioma                                  | 5<br>(3 - 7)                | --                 | --                  | 2<br>(1 - 3)         | 1<br>(1 - 2)             | 1<br>(1 - 2)              |
| Hodgkin lymphoma                              | 23<br>(12 - 34)             | 0<br>(0 - 1)       | 1<br>(0 - 2)        | 13<br>(6 - 20)       | 5<br>(3 - 10)            | 4<br>(2 - 6)              |
| Non-Hodgkin lymphoma                          | 126<br>(83 - 176)           | 1<br>(1 - 2)       | 1<br>(1 - 2)        | 22<br>(13 - 33)      | 41<br>(24 - 63)          | 60<br>(36 - 89)           |
| Multiple myeloma                              | 53<br>(34 - 76)             | --                 | --                  | 7<br>(4 - 11)        | 24<br>(14 - 37)          | 22<br>(15 - 33)           |
| Leukemia                                      | 107<br>(78 - 139)           | 2<br>(1 - 5)       | 7<br>(5 - 11)       | 40<br>(27 - 54)      | 33<br>(21 - 47)          | 25<br>(18 - 34)           |
| Other neoplasms                               | 150<br>(93 - 235)           | 4<br>(2 - 8)       | 4<br>(2 - 6)        | 31<br>(17 - 51)      | 46<br>(25 - 80)          | 65<br>(42 - 104)          |
| Cardiovascular diseases                       | 12,691<br>(10,182 - 15,755) | 30<br>(17 - 47)    | 12<br>(8 - 20)      | 545<br>(357 - 803)   | 2,660<br>(1,849 - 3,672) | 9,443<br>(7,918 - 11,335) |
| Rheumatic heart disease                       | 76<br>(38 - 122)            | 0<br>(0 - 1)       | 1<br>(0 - 1)        | 13<br>(6 - 23)       | 15<br>(7 - 26)           | 47<br>(24 - 78)           |
| Ischemic heart disease                        | 6,581<br>(5,016 - 8,647)    | 4<br>(2 - 9)       | 2<br>(1 - 4)        | 269<br>(172 - 413)   | 1,490<br>(1,016 - 2,130) | 4,816<br>(3,710 - 6,212)  |
| Cerebrovascular disease                       | 4,467<br>(2,874 - 5,903)    | 10<br>(4 - 20)     | 5<br>(3 - 8)        | 164<br>(92 - 251)    | 791<br>(480 - 1,169)     | 3,496<br>(2,243 - 4,525)  |
| Ischemic stroke                               | 2,499<br>(1,291 - 3,471)    | 1<br>(0 - 2)       | 1<br>(0 - 1)        | 28<br>(9 - 50)       | 316<br>(132 - 508)       | 2,154<br>(1,153 - 2,926)  |
| Hemorrhagic stroke                            | 1,968<br>(1,147 - 2,719)    | 9<br>(4 - 18)      | 5<br>(3 - 7)        | 136<br>(75 - 207)    | 476<br>(286 - 721)       | 1,342<br>(744 - 1,919)    |
| Hypertensive heart disease                    | 721<br>(426 - 1,147)        | 0<br>(0 - 0)       | 0<br>(0 - 0)        | 22<br>(11 - 38)      | 132<br>(68 - 218)        | 567<br>(331 - 940)        |
| Cardiomyopathy and myocarditis                | 189<br>(116 - 335)          | 7<br>(3 - 15)      | 2<br>(1 - 4)        | 23<br>(13 - 45)      | 40<br>(22 - 80)          | 117<br>(63 - 211)         |
| Atrial fibrillation and flutter               | 21<br>(8 - 39)              | --                 | --                  | 1<br>(0 - 1)         | 3<br>(1 - 6)             | 17<br>(6 - 33)            |
| Aortic aneurysm                               | 34<br>(17 - 61)             | --                 | --                  | 3<br>(1 - 5)         | 6<br>(3 - 12)            | 25<br>(13 - 46)           |
| Peripheral vascular disease                   | 10<br>(4 - 17)              | --                 | --                  | 0<br>(0 - 1)         | 2<br>(1 - 3)             | 8<br>(3 - 14)             |
| Endocarditis                                  | 49<br>(26 - 75)             | 1<br>(1 - 3)       | 0<br>(0 - 1)        | 5<br>(3 - 10)        | 7<br>(4 - 13)            | 34<br>(17 - 57)           |
| Other cardiovascular and circulatory diseases | 543<br>(369 - 879)          | 6<br>(3 - 11)      | 2<br>(1 - 4)        | 45<br>(27 - 83)      | 175<br>(106 - 299)       | 315<br>(199 - 514)        |
| Chronic respiratory diseases                  | 1,335<br>(990 - 1,768)      | 5<br>(3 - 8)       | 2<br>(1 - 3)        | 64<br>(41 - 93)      | 245<br>(158 - 361)       | 1,019<br>(746 - 1,342)    |
| Chronic obstructive pulmonary disease         | 1,036<br>(753 - 1,393)      | 3<br>(2 - 5)       | 1<br>(0 - 1)        | 33<br>(18 - 50)      | 184<br>(115 - 275)       | 816<br>(583 - 1,106)      |

Web Table 31- Tunisia deaths with 95% UI by age, sex, and cause in 2013

| Cause                                               | Females, All Ages        | Females, 0-4 Years | Females, 5-14 Years | Females, 15-49 Years | Females, 50-69 Years | Females, 70-80 Years   |
|-----------------------------------------------------|--------------------------|--------------------|---------------------|----------------------|----------------------|------------------------|
| Pneumoconiosis                                      | 3<br>(2 - 6)             | 0<br>(0 - 0)       | 0<br>(0 - 0)        | 1<br>(0 - 1)         | 1<br>(0 - 1)         | 2<br>(1 - 4)           |
| Silicosis                                           | 1<br>(0 - 2)             | 0<br>(0 - 0)       | 0<br>(0 - 0)        | 0<br>(0 - 0)         | 0<br>(0 - 0)         | 0<br>(0 - 1)           |
| Asbestosis                                          | 1<br>(0 - 1)             | 0<br>(0 - 0)       | 0<br>(0 - 0)        | 0<br>(0 - 0)         | 0<br>(0 - 0)         | 0<br>(0 - 1)           |
| Coal workers pneumoconiosis                         | 1<br>(0 - 1)             | 0<br>(0 - 0)       | 0<br>(0 - 0)        | 0<br>(0 - 0)         | 0<br>(0 - 0)         | 0<br>(0 - 1)           |
| Other pneumoconiosis                                | 1<br>(1 - 3)             | 0<br>(0 - 0)       | 0<br>(0 - 0)        | 0<br>(0 - 0)         | 0<br>(0 - 0)         | 1<br>(0 - 2)           |
| Asthma                                              | 174<br>(90 - 315)        | 1<br>(0 - 2)       | 1<br>(1 - 1)        | 20<br>(11 - 33)      | 38<br>(18 - 72)      | 113<br>(56 - 213)      |
| Interstitial lung disease and pulmonary sarcoidosis | 91<br>(12 - 200)         | 0<br>(0 - 0)       | 0<br>(0 - 0)        | 5<br>(1 - 11)        | 19<br>(2 - 47)       | 66<br>(9 - 151)        |
| Other chronic respiratory diseases                  | 31<br>(15 - 57)          | 1<br>(0 - 1)       | 0<br>(0 - 0)        | 6<br>(3 - 10)        | 3<br>(1 - 6)         | 21<br>(9 - 44)         |
| Cirrhosis                                           | 356<br>(257 - 488)       | 2<br>(1 - 4)       | 1<br>(1 - 2)        | 36<br>(23 - 55)      | 116<br>(75 - 171)    | 201<br>(137 - 285)     |
| Cirrhosis due to hepatitis B                        | 142<br>(68 - 235)        | 0<br>(0 - 0)       | 0<br>(0 - 1)        | 14<br>(5 - 24)       | 44<br>(20 - 76)      | 83<br>(35 - 147)       |
| Cirrhosis due to hepatitis C                        | 173<br>(92 - 267)        | 0<br>(0 - 1)       | 0<br>(0 - 1)        | 17<br>(9 - 30)       | 60<br>(31 - 99)      | 95<br>(45 - 156)       |
| Cirrhosis due to alcohol use                        | 18<br>(9 - 33)           | --                 | --                  | 1<br>(0 - 1)         | 4<br>(2 - 8)         | 13<br>(6 - 26)         |
| Cirrhosis due to other causes                       | 24<br>(13 - 42)          | 2<br>(1 - 3)       | 1<br>(0 - 1)        | 5<br>(2 - 9)         | 7<br>(3 - 14)        | 10<br>(4 - 19)         |
| Digestive diseases                                  | 344<br>(252 - 459)       | 2<br>(1 - 4)       | 2<br>(1 - 2)        | 24<br>(16 - 36)      | 68<br>(43 - 102)     | 248<br>(178 - 335)     |
| Peptic ulcer disease                                | 92<br>(57 - 142)         | 0<br>(0 - 0)       | 0<br>(0 - 0)        | 4<br>(2 - 7)         | 16<br>(9 - 27)       | 72<br>(43 - 117)       |
| Gastritis and duodenitis                            | 4<br>(2 - 11)            | 0<br>(0 - 0)       | 0<br>(0 - 0)        | 1<br>(0 - 2)         | 1<br>(0 - 3)         | 2<br>(1 - 6)           |
| Appendicitis                                        | 12<br>(7 - 20)           | 0<br>(0 - 1)       | 0<br>(0 - 0)        | 2<br>(1 - 3)         | 3<br>(1 - 6)         | 7<br>(3 - 13)          |
| Paralytic ileus and intestinal obstruction          | 83<br>(47 - 144)         | 1<br>(0 - 2)       | 0<br>(0 - 1)        | 6<br>(3 - 12)        | 16<br>(8 - 29)       | 60<br>(31 - 104)       |
| Inguinal, femoral, and abdominal hernia             | 7<br>(4 - 14)            | 0<br>(0 - 0)       | 0<br>(0 - 0)        | 1<br>(0 - 1)         | 1<br>(1 - 3)         | 5<br>(2 - 11)          |
| Inflammatory bowel disease                          | 16<br>(9 - 25)           | 0<br>(0 - 1)       | 0<br>(0 - 0)        | 2<br>(1 - 3)         | 3<br>(2 - 5)         | 10<br>(5 - 18)         |
| Vascular intestinal disorders                       | 10<br>(5 - 22)           | 0<br>(0 - 0)       | 0<br>(0 - 0)        | 1<br>(0 - 3)         | 2<br>(1 - 5)         | 7<br>(3 - 15)          |
| Gallbladder and biliary diseases                    | 65<br>(36 - 103)         | 0<br>(0 - 1)       | 0<br>(0 - 0)        | 3<br>(2 - 5)         | 12<br>(7 - 20)       | 49<br>(24 - 82)        |
| Pancreatitis                                        | 20<br>(10 - 35)          | 0<br>(0 - 0)       | 0<br>(0 - 0)        | 2<br>(1 - 4)         | 6<br>(3 - 12)        | 12<br>(6 - 22)         |
| Other digestive diseases                            | 35<br>(20 - 63)          | 0<br>(0 - 1)       | 0<br>(0 - 1)        | 2<br>(1 - 4)         | 7<br>(3 - 12)        | 25<br>(13 - 48)        |
| Neurological disorders                              | 1,449<br>(1,099 - 1,850) | 7<br>(4 - 11)      | 3<br>(2 - 5)        | 25<br>(13 - 42)      | 111<br>(69 - 166)    | 1,303<br>(978 - 1,679) |
| Alzheimer disease and other dementias               | 1,381<br>(1,038 - 1,781) | --                 | --                  | 1<br>(0 - 1)         | 98<br>(60 - 150)     | 1,282<br>(959 - 1,656) |
| Parkinson disease                                   | 6<br>(3 - 10)            | --                 | --                  | 0<br>(0 - 1)         | 1<br>(0 - 2)         | 5<br>(2 - 8)           |
| Epilepsy                                            | 39<br>(19 - 65)          | 3<br>(1 - 7)       | 2<br>(1 - 5)        | 19<br>(9 - 35)       | 7<br>(3 - 13)        | 8<br>(4 - 17)          |
| Multiple sclerosis                                  | 6<br>(3 - 10)            | --                 | --                  | 2<br>(1 - 4)         | 2<br>(1 - 4)         | 2<br>(1 - 4)           |
| Other neurological disorders                        | 18<br>(13 - 23)          | 4<br>(2 - 6)       | 1<br>(1 - 1)        | 3<br>(2 - 4)         | 3<br>(2 - 4)         | 7<br>(5 - 10)          |
| Mental and substance use disorders                  | 43<br>(29 - 63)          | 0<br>(0 - 1)       | 0<br>(0 - 0)        | 26<br>(16 - 39)      | 8<br>(5 - 14)        | 8<br>(6 - 13)          |
| Schizophrenia                                       | 1<br>(1 - 2)             | --                 | --                  | 0<br>(0 - 1)         | 0<br>(0 - 1)         | 1<br>(0 - 1)           |
| Alcohol use disorders                               | 5<br>(2 - 13)            | --                 | --                  | 1<br>(1 - 4)         | 2<br>(1 - 6)         | 1<br>(1 - 3)           |
| Drug use disorders                                  | 36<br>(24 - 53)          | 0<br>(0 - 1)       | --                  | 23<br>(15 - 36)      | 5<br>(3 - 8)         | 7<br>(4 - 10)          |
| Opioid use disorders                                | 19<br>(13 - 28)          | 0<br>(0 - 0)       | --                  | 13<br>(8 - 19)       | 3<br>(2 - 4)         | 4<br>(2 - 5)           |
| Cocaine use disorders                               | 1<br>(0 - 1)             | 0<br>(0 - 0)       | --                  | 0<br>(0 - 1)         | 0<br>(0 - 0)         | 0<br>(0 - 0)           |
| Amphetamine use disorders                           | 1<br>(0 - 1)             | 0<br>(0 - 0)       | --                  | 0<br>(0 - 1)         | 0<br>(0 - 0)         | 0<br>(0 - 0)           |
| Other drug use disorders                            | 15<br>(10 - 22)          | 0<br>(0 - 0)       | --                  | 10<br>(6 - 15)       | 2<br>(2 - 4)         | 3<br>(2 - 4)           |
| Eating disorders                                    | 0<br>(0 - 1)             | --                 | 0<br>(0 - 0)        | 0<br>(0 - 1)         | --                   | --                     |
| Anorexia nervosa                                    | 0<br>(0 - 1)             | --                 | 0<br>(0 - 0)        | 0<br>(0 - 1)         | --                   | --                     |

Web Table 31- Tunisia deaths with 95% UI by age, sex, and cause in 2013

| Cause                                               | Females, All Ages        | Females, 0-4 Years | Females, 5-14 Years | Females, 15-49 Years | Females, 50-69 Years | Females, 70-80 Years   |
|-----------------------------------------------------|--------------------------|--------------------|---------------------|----------------------|----------------------|------------------------|
| Diabetes, urogenital, blood, and endocrine diseases | 2,064<br>(1,439 - 3,062) | 20<br>(13 - 29)    | 9<br>(6 - 13)       | 137<br>(87 - 222)    | 545<br>(342 - 912)   | 1,354<br>(943 - 2,000) |
| Diabetes mellitus                                   | 1,167<br>(812 - 1,806)   | 2<br>(1 - 3)       | 1<br>(1 - 3)        | 43<br>(27 - 71)      | 317<br>(197 - 519)   | 804<br>(540 - 1,239)   |
| Acute glomerulonephritis                            | 4<br>(2 - 6)             | 0<br>(0 - 0)       | 0<br>(0 - 0)        | 1<br>(0 - 1)         | 1<br>(1 - 1)         | 2<br>(1 - 4)           |
| Chronic kidney disease                              | 709<br>(256 - 1,426)     | 3<br>(1 - 7)       | 2<br>(1 - 5)        | 54<br>(19 - 119)     | 196<br>(66 - 428)    | 455<br>(166 - 905)     |
| Chronic kidney disease due to diabetes mellitus     | 26<br>(7 - 54)           | 0<br>(0 - 0)       | 0<br>(0 - 0)        | 3<br>(1 - 7)         | 10<br>(3 - 24)       | 13<br>(3 - 27)         |
| Chronic kidney disease due to hypertension          | 295<br>(124 - 586)       | 0<br>(0 - 1)       | 0<br>(0 - 1)        | 21<br>(7 - 42)       | 80<br>(33 - 155)     | 194<br>(84 - 397)      |
| Chronic kidney disease due to glomerulonephritis    | 26<br>(11 - 50)          | 0<br>(0 - 1)       | 0<br>(0 - 0)        | 3<br>(1 - 7)         | 7<br>(2 - 14)        | 16<br>(6 - 30)         |
| Chronic kidney disease due to other causes          | 362<br>(71 - 997)        | 2<br>(0 - 6)       | 2<br>(0 - 4)        | 27<br>(5 - 80)       | 99<br>(18 - 298)     | 232<br>(41 - 644)      |
| Urinary diseases and male infertility               | 56<br>(31 - 119)         | 1<br>(0 - 2)       | 0<br>(0 - 1)        | 5<br>(3 - 13)        | 10<br>(5 - 22)       | 40<br>(21 - 85)        |
| Interstitial nephritis and urinary tract infections | 43<br>(23 - 90)          | 1<br>(0 - 1)       | 0<br>(0 - 0)        | 4<br>(2 - 10)        | 7<br>(4 - 16)        | 30<br>(15 - 64)        |
| Urolithiasis                                        | 3<br>(1 - 8)             | --                 | 0<br>(0 - 0)        | 0<br>(0 - 1)         | 1<br>(0 - 2)         | 2<br>(1 - 6)           |
| Other urinary diseases                              | 10<br>(4 - 26)           | 0<br>(0 - 0)       | 0<br>(0 - 0)        | 1<br>(0 - 2)         | 2<br>(1 - 4)         | 8<br>(3 - 20)          |
| Gynecological diseases                              | 1<br>(0 - 1)             | --                 | --                  | 0<br>(0 - 1)         | 0<br>(0 - 1)         | 0<br>(0 - 1)           |
| Uterine fibroids                                    | 0<br>(0 - 0)             | --                 | --                  | 0<br>(0 - 0)         | 0<br>(0 - 0)         | 0<br>(0 - 0)           |
| Polycystic ovarian syndrome                         | 0<br>(0 - 0)             | --                 | --                  | 0<br>(0 - 0)         | 0<br>(0 - 0)         | --                     |
| Endometriosis                                       | 0<br>(0 - 0)             | --                 | --                  | 0<br>(0 - 0)         | 0<br>(0 - 0)         | --                     |
| Genital prolapse                                    | 0<br>(0 - 0)             | --                 | --                  | 0<br>(0 - 0)         | 0<br>(0 - 0)         | 0<br>(0 - 0)           |
| Other gynecological diseases                        | 0<br>(0 - 1)             | --                 | --                  | 0<br>(0 - 0)         | 0<br>(0 - 0)         | 0<br>(0 - 0)           |
| Hemoglobinopathies and hemolytic anemias            | 66<br>(38 - 104)         | 8<br>(4 - 13)      | 4<br>(2 - 6)        | 24<br>(12 - 40)      | 9<br>(5 - 16)        | 22<br>(11 - 39)        |
| Thalassemias                                        | 20<br>(11 - 32)          | 6<br>(3 - 10)      | 3<br>(2 - 4)        | 12<br>(6 - 20)       | 0<br>(0 - 0)         | 0<br>(0 - 0)           |
| Sickle cell disorders                               | 20<br>(11 - 33)          | 1<br>(1 - 2)       | 1<br>(0 - 1)        | 11<br>(6 - 18)       | 7<br>(4 - 12)        | 1<br>(0 - 1)           |
| G6PD deficiency                                     | 1<br>(0 - 1)             | 0<br>(0 - 0)       | 0<br>(0 - 0)        | 0<br>(0 - 0)         | 0<br>(0 - 0)         | 0<br>(0 - 0)           |
| Other hemoglobinopathies and hemolytic anemias      | 25<br>(14 - 44)          | 1<br>(0 - 1)       | 0<br>(0 - 0)        | 1<br>(1 - 2)         | 2<br>(1 - 4)         | 21<br>(11 - 38)        |
| Endocrine, metabolic, blood, and immune disorders   | 61<br>(33 - 100)         | 6<br>(3 - 12)      | 1<br>(1 - 3)        | 9<br>(5 - 17)        | 13<br>(6 - 24)       | 31<br>(15 - 55)        |
| Musculoskeletal disorders                           | 53<br>(31 - 94)          | --                 | 1<br>(1 - 2)        | 13<br>(7 - 26)       | 11<br>(6 - 23)       | 28<br>(15 - 48)        |
| Rheumatoid arthritis                                | 12<br>(7 - 23)           | --                 | 0<br>(0 - 0)        | 2<br>(1 - 4)         | 3<br>(1 - 7)         | 8<br>(3 - 14)          |
| Other musculoskeletal disorders                     | 41<br>(23 - 74)          | --                 | 1<br>(0 - 1)        | 11<br>(6 - 23)       | 8<br>(4 - 17)        | 21<br>(11 - 36)        |
| Other non-communicable diseases                     | 526<br>(403 - 656)       | 414<br>(301 - 539) | 21<br>(13 - 31)     | 26<br>(16 - 38)      | 14<br>(9 - 22)       | 51<br>(35 - 75)        |
| Congenital anomalies                                | 487<br>(363 - 611)       | 407<br>(294 - 529) | 21<br>(13 - 30)     | 24<br>(15 - 35)      | 10<br>(6 - 15)       | 25<br>(15 - 38)        |
| Neural tube defects                                 | 13<br>(4 - 36)           | 12<br>(3 - 35)     | 0<br>(0 - 0)        | 0<br>(0 - 1)         | 0<br>(0 - 0)         | 0<br>(0 - 0)           |
| Congenital heart anomalies                          | 204<br>(132 - 288)       | 182<br>(115 - 264) | 9<br>(5 - 15)       | 7<br>(4 - 11)        | 2<br>(1 - 3)         | 4<br>(2 - 8)           |
| Cleft lip and cleft palate                          | 0<br>(0 - 1)             | 0<br>(0 - 1)       | --                  | --                   | --                   | --                     |
| Down syndrome                                       | 12<br>(5 - 20)           | 9<br>(3 - 16)      | 1<br>(1 - 3)        | 1<br>(1 - 2)         | 0<br>(0 - 1)         | 0<br>(0 - 0)           |
| Chromosomal unbalanced rearrangements               | 7<br>(4 - 12)            | 5<br>(2 - 10)      | 0<br>(0 - 0)        | 1<br>(0 - 2)         | 0<br>(0 - 0)         | 0<br>(0 - 1)           |
| Other congenital anomalies                          | 250<br>(170 - 345)       | 199<br>(126 - 288) | 10<br>(5 - 16)      | 14<br>(9 - 22)       | 7<br>(4 - 12)        | 20<br>(12 - 31)        |
| Skin and subcutaneous diseases                      | 34<br>(21 - 55)          | 1<br>(0 - 1)       | 0<br>(0 - 0)        | 2<br>(1 - 3)         | 5<br>(3 - 8)         | 27<br>(16 - 45)        |
| Cellulitis                                          | 3<br>(1 - 6)             | 0<br>(0 - 0)       | 0<br>(0 - 0)        | 0<br>(0 - 1)         | 1<br>(0 - 1)         | 2<br>(1 - 4)           |
| Pyoderma                                            | 10<br>(6 - 18)           | 0<br>(0 - 1)       | 0<br>(0 - 0)        | 1<br>(0 - 1)         | 2<br>(1 - 4)         | 7<br>(4 - 14)          |
| Decubitus ulcer                                     | 20<br>(11 - 34)          | 0<br>(0 - 0)       | 0<br>(0 - 0)        | 1<br>(0 - 1)         | 2<br>(1 - 4)         | 17<br>(9 - 30)         |
| Other skin and subcutaneous diseases                | 1<br>(0 - 2)             | 0<br>(0 - 0)       | 0<br>(0 - 0)        | 0<br>(0 - 0)         | 0<br>(0 - 0)         | 0<br>(0 - 1)           |

Web Table 31- Tunisia deaths with 95% UI by age, sex, and cause in 2013

| Cause                                           | Females, All Ages      | Females, 0-4 Years | Females, 5-14 Years | Females, 15-49 Years | Females, 50-69 Years | Females, 70-80 Years |
|-------------------------------------------------|------------------------|--------------------|---------------------|----------------------|----------------------|----------------------|
| Sudden infant death syndrome                    | 6<br>(1 - 20)          | 6<br>(1 - 20)      | --                  | --                   | --                   | --                   |
| Injuries                                        | 1,400<br>(995 - 1,783) | 118<br>(79 - 176)  | 82<br>(63 - 102)    | 538<br>(347 - 730)   | 308<br>(196 - 434)   | 354<br>(264 - 450)   |
| Transport injuries                              | 677<br>(450 - 904)     | 29<br>(16 - 47)    | 36<br>(25 - 49)     | 308<br>(195 - 428)   | 174<br>(102 - 257)   | 129<br>(82 - 179)    |
| Road injuries                                   | 657<br>(440 - 879)     | 28<br>(15 - 45)    | 35<br>(24 - 48)     | 302<br>(191 - 419)   | 169<br>(99 - 249)    | 123<br>(80 - 170)    |
| Pedestrian road injuries                        | 248<br>(165 - 343)     | 12<br>(6 - 20)     | 14<br>(9 - 20)      | 108<br>(66 - 156)    | 66<br>(38 - 102)     | 49<br>(29 - 73)      |
| Cyclist road injuries                           | 21<br>(14 - 31)        | 1<br>(0 - 2)       | 1<br>(1 - 2)        | 9<br>(6 - 15)        | 6<br>(4 - 11)        | 4<br>(2 - 6)         |
| Motorcyclist road injuries                      | 86<br>(39 - 132)       | 3<br>(1 - 6)       | 4<br>(2 - 6)        | 42<br>(18 - 68)      | 22<br>(9 - 39)       | 16<br>(6 - 28)       |
| Motor vehicle road injuries                     | 299<br>(187 - 418)     | 13<br>(6 - 23)     | 16<br>(10 - 24)     | 142<br>(83 - 206)    | 74<br>(40 - 117)     | 54<br>(33 - 82)      |
| Other road injuries                             | 2<br>(1 - 4)           | 0<br>(0 - 0)       | 0<br>(0 - 0)        | 1<br>(1 - 2)         | 1<br>(0 - 1)         | 1<br>(0 - 1)         |
| Other transport injuries                        | 20<br>(8 - 28)         | 1<br>(1 - 2)       | 1<br>(0 - 1)        | 6<br>(2 - 10)        | 5<br>(2 - 9)         | 6<br>(2 - 10)        |
| Unintentional injuries                          | 613<br>(444 - 789)     | 86<br>(52 - 143)   | 43<br>(29 - 64)     | 170<br>(106 - 242)   | 112<br>(73 - 163)    | 201<br>(148 - 268)   |
| Falls                                           | 96<br>(65 - 142)       | 5<br>(2 - 10)      | 2<br>(1 - 4)        | 10<br>(6 - 16)       | 14<br>(8 - 22)       | 65<br>(39 - 107)     |
| Drowning                                        | 38<br>(24 - 65)        | 10<br>(5 - 21)     | 5<br>(3 - 9)        | 12<br>(6 - 20)       | 5<br>(3 - 10)        | 6<br>(4 - 10)        |
| Fire, heat, and hot substances                  | 68<br>(43 - 106)       | 6<br>(2 - 13)      | 2<br>(1 - 4)        | 16<br>(9 - 30)       | 13<br>(7 - 23)       | 31<br>(17 - 53)      |
| Poisonings                                      | 23<br>(14 - 34)        | 2<br>(1 - 4)       | 1<br>(0 - 2)        | 8<br>(4 - 12)        | 5<br>(3 - 8)         | 7<br>(4 - 13)        |
| Exposure to mechanical forces                   | 280<br>(126 - 391)     | 56<br>(21 - 115)   | 30<br>(15 - 51)     | 103<br>(46 - 158)    | 50<br>(22 - 79)      | 40<br>(18 - 60)      |
| Unintentional firearm injuries                  | 4<br>(3 - 7)           | 0<br>(0 - 1)       | 0<br>(0 - 0)        | 2<br>(1 - 3)         | 1<br>(0 - 2)         | 1<br>(1 - 2)         |
| Unintentional suffocation                       | 2<br>(0 - 4)           | 0<br>(0 - 1)       | 0<br>(0 - 0)        | 1<br>(0 - 1)         | 1<br>(0 - 2)         | 0<br>(0 - 1)         |
| Other exposure to mechanical forces             | 273<br>(119 - 384)     | 55<br>(21 - 115)   | 30<br>(14 - 50)     | 101<br>(44 - 156)    | 49<br>(21 - 76)      | 38<br>(17 - 59)      |
| Adverse effects of medical treatment            | 63<br>(40 - 99)        | 3<br>(1 - 6)       | 1<br>(1 - 1)        | 10<br>(5 - 17)       | 18<br>(10 - 31)      | 32<br>(17 - 59)      |
| Animal contact                                  | 7<br>(3 - 14)          | 1<br>(0 - 2)       | 0<br>(0 - 1)        | 1<br>(1 - 3)         | 1<br>(0 - 3)         | 3<br>(1 - 5)         |
| Venomous animal contact                         | 3<br>(1 - 8)           | 1<br>(0 - 1)       | 0<br>(0 - 1)        | 1<br>(0 - 2)         | 1<br>(0 - 2)         | 1<br>(0 - 2)         |
| Non-venomous animal contact                     | 3<br>(1 - 7)           | 0<br>(0 - 1)       | 0<br>(0 - 0)        | 1<br>(0 - 2)         | 1<br>(0 - 1)         | 2<br>(1 - 4)         |
| Foreign body                                    | 13<br>(5 - 27)         | 2<br>(0 - 4)       | 0<br>(0 - 1)        | 2<br>(1 - 3)         | 2<br>(1 - 4)         | 8<br>(3 - 17)        |
| Pulmonary aspiration and foreign body in airway | 12<br>(4 - 26)         | 2<br>(0 - 4)       | 0<br>(0 - 1)        | 1<br>(0 - 3)         | 1<br>(0 - 3)         | 8<br>(2 - 16)        |
| Foreign body in other body part                 | 1<br>(0 - 2)           | 0<br>(0 - 0)       | 0<br>(0 - 0)        | 0<br>(0 - 1)         | 0<br>(0 - 0)         | 0<br>(0 - 1)         |
| Other unintentional injuries                    | 24<br>(14 - 38)        | 2<br>(1 - 4)       | 1<br>(1 - 2)        | 8<br>(4 - 14)        | 4<br>(2 - 8)         | 8<br>(4 - 14)        |
| Self-harm and interpersonal violence            | 107<br>(58 - 162)      | 1<br>(0 - 2)       | 2<br>(1 - 3)        | 59<br>(31 - 94)      | 22<br>(11 - 37)      | 24<br>(10 - 40)      |
| Self-harm                                       | 93<br>(43 - 146)       | --                 | 1<br>(0 - 3)        | 49<br>(22 - 84)      | 20<br>(9 - 35)       | 23<br>(9 - 39)       |
| Interpersonal violence                          | 14<br>(9 - 21)         | 1<br>(0 - 2)       | 1<br>(0 - 1)        | 10<br>(6 - 15)       | 2<br>(1 - 4)         | 1<br>(1 - 2)         |
| Assault by firearm                              | 3<br>(1 - 5)           | 0<br>(0 - 0)       | 0<br>(0 - 0)        | 2<br>(1 - 3)         | 1<br>(0 - 1)         | 0<br>(0 - 0)         |
| Assault by sharp object                         | 4<br>(2 - 7)           | 0<br>(0 - 0)       | 0<br>(0 - 0)        | 4<br>(2 - 6)         | 0<br>(0 - 1)         | 0<br>(0 - 0)         |
| Assault by other means                          | 7<br>(4 - 11)          | 0<br>(0 - 1)       | 0<br>(0 - 1)        | 4<br>(2 - 7)         | 1<br>(1 - 2)         | 1<br>(0 - 1)         |
| Forces of nature, war, and legal intervention   | 3                      | 2                  | 0                   | 0                    | 0                    | 0                    |
| Collective violence and legal intervention      | 3<br>(2 - 3)           | 2<br>(2 - 3)       | 0<br>(0 - 0)        | 0<br>(0 - 0)         | 0<br>(0 - 0)         | 0<br>(0 - 0)         |

Web Table 31- Turkey deaths with 95% UI by age, sex, and cause in 2013

| Cause                                                             | Both Sexes, All Ages           | Both Sexes, 0-4 Years       | Both Sexes, 5-14 Years   | Both Sexes, 15-49 Years     | Both Sexes, 50-69 Years       | Both Sexes, 70-80 Years        |
|-------------------------------------------------------------------|--------------------------------|-----------------------------|--------------------------|-----------------------------|-------------------------------|--------------------------------|
| All causes                                                        | 410,518<br>(370,381 - 449,779) | 22,002<br>(19,613 - 24,800) | 4,337<br>(3,989 - 4,727) | 53,091<br>(44,490 - 61,484) | 106,612<br>(91,297 - 123,042) | 224,476<br>(207,513 - 240,418) |
| Communicable, maternal, neonatal, and nutritional diseases        | 25,298<br>(22,795 - 27,827)    | 12,322<br>(10,671 - 14,299) | 920<br>(704 - 1,216)     | 2,534<br>(2,105 - 3,096)    | 2,517<br>(2,033 - 2,985)      | 7,006<br>(5,261 - 8,416)       |
| HIV/AIDS and tuberculosis                                         | 1,228<br>(1,041 - 1,458)       | 25<br>(19 - 33)             | 19<br>(14 - 24)          | 448<br>(367 - 548)          | 342<br>(273 - 419)            | 395<br>(315 - 471)             |
| Tuberculosis                                                      | 1,079<br>(894 - 1,303)         | 15<br>(11 - 21)             | 16<br>(12 - 21)          | 339<br>(266 - 436)          | 319<br>(250 - 394)            | 391<br>(312 - 468)             |
| HIV/AIDS                                                          | 149<br>(120 - 198)             | 10<br>(5 - 16)              | 3<br>(1 - 4)             | 110<br>(88 - 144)           | 23<br>(15 - 33)               | 4<br>(2 - 6)                   |
| HIV/AIDS resulting in mycobacterial infection                     | 8<br>(6 - 12)                  | 0<br>(0 - 1)                | 0<br>(0 - 0)             | 6<br>(4 - 9)                | 1<br>(1 - 2)                  | 0<br>(0 - 0)                   |
| HIV/AIDS resulting in other diseases                              | 141<br>(113 - 187)             | 9<br>(5 - 15)               | 2<br>(1 - 4)             | 104<br>(83 - 136)           | 22<br>(14 - 32)               | 3<br>(2 - 5)                   |
| Diarrhea, lower respiratory, and other common infectious diseases | 12,231<br>(9,955 - 14,319)     | 2,471<br>(1,937 - 3,227)    | 825<br>(602 - 1,134)     | 1,565<br>(1,188 - 2,102)    | 1,813<br>(1,344 - 2,237)      | 5,558<br>(3,756 - 6,934)       |
| Diarrheal diseases                                                | 659<br>(535 - 822)             | 253<br>(153 - 401)          | 27<br>(18 - 40)          | 70<br>(55 - 89)             | 77<br>(57 - 101)              | 231<br>(173 - 308)             |
| Intestinal infectious diseases                                    | 1,456<br>(701 - 2,567)         | 344<br>(161 - 628)          | 392<br>(197 - 696)       | 540<br>(224 - 1,025)        | 117<br>(46 - 238)             | 62<br>(26 - 122)               |
| Typhoid fever                                                     | 1,126<br>(534 - 1,985)         | 255<br>(118 - 465)          | 306<br>(152 - 542)       | 423<br>(170 - 799)          | 93<br>(36 - 189)              | 49<br>(20 - 97)                |
| Paratyphoid fever                                                 | 319<br>(156 - 573)             | 85<br>(37 - 162)            | 85<br>(42 - 158)         | 113<br>(45 - 229)           | 23<br>(8 - 49)                | 12<br>(4 - 23)                 |
| Other intestinal infectious diseases                              | 11<br>(5 - 21)                 | 4<br>(1 - 10)               | 1<br>(0 - 4)             | 3<br>(0 - 9)                | 1<br>(0 - 5)                  | 1<br>(0 - 5)                   |
| Lower respiratory infections                                      | 8,808<br>(6,444 - 10,441)      | 1,273<br>(950 - 1,686)      | 267<br>(194 - 402)       | 725<br>(494 - 921)          | 1,464<br>(995 - 1,834)        | 5,079<br>(3,249 - 6,415)       |
| Upper respiratory infections                                      | 15<br>(7 - 29)                 | 1<br>(0 - 2)                | 0<br>(0 - 1)             | 3<br>(1 - 6)                | 4<br>(1 - 9)                  | 7<br>(1 - 20)                  |
| Otitis media                                                      | 22<br>(19 - 25)                | 2<br>(1 - 3)                | 2<br>(1 - 2)             | 6<br>(4 - 7)                | 4<br>(3 - 5)                  | 9<br>(7 - 11)                  |
| Meningitis                                                        | 447<br>(368 - 552)             | 210<br>(149 - 314)          | 30<br>(21 - 41)          | 80<br>(60 - 99)             | 61<br>(45 - 80)               | 66<br>(32 - 86)                |
| Pneumococcal meningitis                                           | 78<br>(59 - 103)               | 31<br>(18 - 53)             | 7<br>(4 - 10)            | 16<br>(10 - 23)             | 12<br>(6 - 17)                | 13<br>(7 - 19)                 |
| H influenzae type B meningitis                                    | 89<br>(58 - 134)               | 63<br>(37 - 107)            | 7<br>(4 - 10)            | 9<br>(5 - 14)               | 5<br>(3 - 7)                  | 5<br>(2 - 8)                   |
| Meningococcal meningitis                                          | 170<br>(137 - 217)             | 84<br>(55 - 127)            | 12<br>(8 - 17)           | 29<br>(20 - 39)             | 21<br>(14 - 31)               | 24<br>(10 - 34)                |
| Other meningitis                                                  | 110<br>(83 - 137)              | 32<br>(21 - 50)             | 5<br>(3 - 8)             | 26<br>(17 - 36)             | 24<br>(16 - 33)               | 23<br>(11 - 32)                |
| Encephalitis                                                      | 419<br>(289 - 722)             | 91<br>(47 - 183)            | 58<br>(32 - 122)         | 117<br>(78 - 219)           | 75<br>(54 - 123)              | 77<br>(51 - 138)               |
| Diphtheria                                                        | 3<br>(0 - 11)                  | 2<br>(0 - 8)                | 1<br>(0 - 5)             | 1<br>(0 - 3)                | 0<br>(0 - 2)                  | --                             |
| Whooping cough                                                    | 36<br>(0 - 178)                | 33<br>(0 - 165)             | 2<br>(0 - 10)            | 1<br>(0 - 3)                | 0<br>(0 - 1)                  | --                             |
| Tetanus                                                           | 17<br>(13 - 21)                | 2<br>(1 - 3)                | 1<br>(1 - 2)             | 5<br>(4 - 7)                | 5<br>(3 - 7)                  | 4<br>(2 - 5)                   |
| Measles                                                           | 302<br>(41 - 1,090)            | 252<br>(35 - 893)           | 41<br>(5 - 151)          | 8<br>(1 - 32)               | 0<br>(0 - 1)                  | --                             |
| Varicella and herpes zoster                                       | 48<br>(19 - 112)               | 8<br>(1 - 23)               | 2<br>(0 - 8)             | 10<br>(3 - 21)              | 5<br>(1 - 12)                 | 23<br>(2 - 88)                 |
| Neglected tropical diseases and malaria                           | 177<br>(149 - 207)             | 16<br>(10 - 25)             | 69<br>(9 - 20)           | 69<br>(56 - 85)             | 45<br>(35 - 56)               | 35<br>(28 - 45)                |
| Malaria                                                           | 1<br>(0 - 2)                   | 0<br>(0 - 0)                | 0<br>(0 - 0)             | 0<br>(0 - 0)                | 0<br>(0 - 1)                  | 0<br>(0 - 1)                   |
| Leishmaniasis                                                     | 2<br>(1 - 2)                   | 1<br>(0 - 1)                | 0<br>(0 - 0)             | 1<br>(0 - 1)                | 0<br>(0 - 0)                  | 0<br>(0 - 0)                   |
| Visceral leishmaniasis                                            | 2<br>(1 - 2)                   | 1<br>(0 - 1)                | 0<br>(0 - 0)             | 1<br>(0 - 1)                | 0<br>(0 - 0)                  | 0<br>(0 - 0)                   |
| Cysticercosis                                                     | 0<br>(0 - 1)                   | 0<br>(0 - 0)                | 0<br>(0 - 0)             | 0<br>(0 - 0)                | 0<br>(0 - 0)                  | 0<br>(0 - 0)                   |
| Cystic echinococcosis                                             | 45<br>(40 - 52)                | 1<br>(0 - 1)                | 4<br>(3 - 5)             | 17<br>(14 - 20)             | 13<br>(11 - 15)               | 11<br>(10 - 12)                |
| Dengue                                                            | 8<br>(7 - 11)                  | 1<br>(0 - 1)                | 1<br>(1 - 2)             | 5<br>(4 - 6)                | 1<br>(1 - 2)                  | 0<br>(0 - 1)                   |
| Rabies                                                            | 9<br>(8 - 13)                  | 1<br>(0 - 1)                | 2<br>(1 - 3)             | 5<br>(4 - 7)                | 2<br>(1 - 2)                  | 0<br>(0 - 1)                   |
| Intestinal nematode infections                                    | 15<br>(6 - 29)                 | 5<br>(1 - 13)               | 3<br>(0 - 10)            | 2<br>(0 - 9)                | 2<br>(0 - 8)                  | 3<br>(0 - 10)                  |
| Ascariasis                                                        | 15<br>(6 - 29)                 | 5<br>(1 - 13)               | 3<br>(0 - 10)            | 2<br>(0 - 9)                | 2<br>(0 - 8)                  | 3<br>(0 - 10)                  |
| Other neglected tropical diseases                                 | 96<br>(78 - 115)               | 8<br>(5 - 14)               | 2<br>(1 - 3)             | 40<br>(30 - 52)             | 26<br>(19 - 35)               | 20<br>(14 - 26)                |
| Maternal disorders                                                | 188<br>(134 - 250)             | --                          | 1<br>(1 - 2)             | 187<br>(133 - 249)          | --                            | --                             |
| Maternal hemorrhage                                               | 24<br>(16 - 35)                | --                          | 0<br>(0 - 0)             | 24<br>(16 - 35)             | --                            | --                             |

Web Table 31- Turkey deaths with 95% UI by age, sex, and cause in 2013

| Cause                                                            | Both Sexes, All Ages           | Both Sexes, 0-4 Years     | Both Sexes, 5-14 Years   | Both Sexes, 15-49 Years     | Both Sexes, 50-69 Years       | Both Sexes, 70-80 Years        |
|------------------------------------------------------------------|--------------------------------|---------------------------|--------------------------|-----------------------------|-------------------------------|--------------------------------|
| Maternal sepsis and other maternal infections                    | 28<br>(19 - 38)                | --                        | 0<br>(0 - 0)             | 27<br>(19 - 38)             | --                            | --                             |
| Maternal hypertensive disorders                                  | 29<br>(19 - 40)                | --                        | 0<br>(0 - 1)             | 29<br>(19 - 40)             | --                            | --                             |
| Maternal obstructed labor                                        | 13<br>(7 - 20)                 | --                        | 0<br>(0 - 0)             | 13<br>(7 - 20)              | --                            | --                             |
| Maternal abortive outcome                                        | 38<br>(26 - 51)                | --                        | 0<br>(0 - 0)             | 37<br>(25 - 51)             | --                            | --                             |
| Indirect maternal deaths                                         | 16<br>(10 - 25)                | --                        | 0<br>(0 - 0)             | 16<br>(10 - 25)             | --                            | --                             |
| Late maternal deaths                                             | 13<br>(7 - 21)                 | --                        | 0<br>(0 - 0)             | 13<br>(7 - 21)              | --                            | --                             |
| Maternal deaths aggravated by HIV/AIDS                           | 0<br>(0 - 0)                   | --                        | --                       | 0<br>(0 - 0)                | --                            | --                             |
| Other maternal disorders                                         | 28<br>(18 - 39)                | --                        | 0<br>(0 - 0)             | 28<br>(18 - 39)             | --                            | --                             |
| Neonatal disorders                                               | 9,612<br>(8,238 - 11,183)      | 9,612<br>(8,238 - 11,183) | --                       | --                          | --                            | --                             |
| Neonatal preterm birth complications                             | 4,785<br>(3,641 - 6,258)       | 4,785<br>(3,641 - 6,258)  | --                       | --                          | --                            | --                             |
| Neonatal encephalopathy due to birth asphyxia and trauma         | 1,345<br>(893 - 2,010)         | 1,345<br>(893 - 2,010)    | --                       | --                          | --                            | --                             |
| Neonatal sepsis and other neonatal infections                    | 1,214<br>(727 - 2,080)         | 1,214<br>(727 - 2,080)    | --                       | --                          | --                            | --                             |
| Hemolytic disease and other neonatal jaundice                    | 81<br>(32 - 171)               | 81<br>(32 - 171)          | --                       | --                          | --                            | --                             |
| Other neonatal disorders                                         | 2,185<br>(1,207 - 3,090)       | 2,185<br>(1,207 - 3,090)  | --                       | --                          | --                            | --                             |
| Nutritional deficiencies                                         | 1,048<br>(840 - 1,397)         | 58<br>(36 - 92)           | 22<br>(16 - 31)          | 106<br>(83 - 143)           | 112<br>(85 - 156)             | 750<br>(576 - 1,008)           |
| Protein-energy malnutrition                                      | 478<br>(285 - 669)             | 43<br>(24 - 70)           | 15<br>(9 - 21)           | 35<br>(22 - 53)             | 42<br>(23 - 65)               | 343<br>(181 - 513)             |
| Iodine deficiency                                                | 11<br>(2 - 34)                 | 1<br>(0 - 5)              | 0<br>(0 - 2)             | 2<br>(0 - 5)                | 2<br>(0 - 9)                  | 5<br>(0 - 28)                  |
| Iron-deficiency anemia                                           | 420<br>(251 - 701)             | 7<br>(3 - 15)             | 4<br>(2 - 8)             | 49<br>(35 - 71)             | 49<br>(31 - 75)               | 309<br>(168 - 540)             |
| Other nutritional deficiencies                                   | 139<br>(86 - 236)              | 7<br>(3 - 14)             | 3<br>(2 - 5)             | 20<br>(12 - 33)             | 18<br>(11 - 30)               | 92<br>(51 - 168)               |
| Other communicable, maternal, neonatal, and nutritional diseases | 814<br>(641 - 1,003)           | 141<br>(55 - 258)         | 41<br>(25 - 60)          | 159<br>(118 - 200)          | 205<br>(153 - 265)            | 268<br>(197 - 393)             |
| Sexually transmitted diseases excluding HIV                      | 163<br>(63 - 281)              | 90<br>(7 - 198)           | 8<br>(2 - 16)            | 15<br>(10 - 23)             | 14<br>(6 - 25)                | 36<br>(11 - 82)                |
| Syphilis                                                         | 142<br>(45 - 257)              | 90<br>(7 - 198)           | 7<br>(1 - 15)            | 7<br>(5 - 11)               | 9<br>(4 - 16)                 | 29<br>(9 - 65)                 |
| Chlamydial infection                                             | 4<br>(2 - 7)                   | --                        | 0<br>(0 - 0)             | 1<br>(1 - 2)                | 1<br>(0 - 2)                  | 2<br>(0 - 3)                   |
| Gonococcal infection                                             | 10<br>(6 - 17)                 | --                        | 0<br>(0 - 0)             | 3<br>(2 - 5)                | 2<br>(1 - 4)                  | 4<br>(1 - 9)                   |
| Other sexually transmitted diseases                              | 7<br>(4 - 10)                  | --                        | 0<br>(0 - 0)             | 3<br>(2 - 4)                | 2<br>(1 - 3)                  | 2<br>(1 - 4)                   |
| Hepatitis                                                        | 290<br>(245 - 347)             | 16<br>(10 - 26)           | 7<br>(6 - 10)            | 60<br>(47 - 78)             | 105<br>(81 - 136)             | 102<br>(82 - 127)              |
| Acute hepatitis A                                                | 18<br>(5 - 38)                 | 5<br>(1 - 10)             | 1<br>(0 - 2)             | 5<br>(1 - 12)               | 5<br>(1 - 11)                 | 2<br>(1 - 6)                   |
| Acute hepatitis B                                                | 192<br>(144 - 245)             | 9<br>(4 - 16)             | 1<br>(0 - 2)             | 25<br>(14 - 38)             | 76<br>(54 - 102)              | 83<br>(62 - 106)               |
| Acute hepatitis C                                                | 4<br>(1 - 11)                  | --                        | 0<br>(0 - 0)             | 1<br>(0 - 3)                | 2<br>(0 - 5)                  | 2<br>(0 - 4)                   |
| Acute hepatitis E                                                | 75<br>(44 - 120)               | 2<br>(1 - 4)              | 6<br>(4 - 8)             | 29<br>(18 - 43)             | 23<br>(11 - 41)               | 15<br>(6 - 32)                 |
| Other infectious diseases                                        | 361<br>(215 - 476)             | 34<br>(14 - 73)           | 25<br>(12 - 44)          | 84<br>(50 - 120)            | 87<br>(43 - 134)              | 130<br>(67 - 237)              |
| Non-communicable diseases                                        | 360,518<br>(325,546 - 397,453) | 8,797<br>(7,229 - 10,402) | 2,083<br>(1,813 - 2,351) | 35,369<br>(29,718 - 41,144) | 100,785<br>(86,376 - 116,384) | 213,484<br>(197,893 - 229,294) |
| Neoplasms                                                        | 93,842<br>(81,451 - 107,748)   | 245<br>(161 - 334)        | 780<br>(611 - 925)       | 15,268<br>(12,838 - 17,755) | 40,259<br>(34,226 - 47,235)   | 37,290<br>(33,060 - 42,566)    |
| Esophageal cancer                                                | 1,157<br>(930 - 1,380)         | --                        | --                       | 198<br>(150 - 244)          | 469<br>(355 - 583)            | 490<br>(403 - 591)             |
| Stomach cancer                                                   | 8,985<br>(7,707 - 10,548)      | --                        | --                       | 1,407<br>(1,139 - 1,719)    | 3,580<br>(2,980 - 4,322)      | 3,999<br>(3,353 - 4,788)       |
| Liver cancer                                                     | 3,381<br>(2,868 - 3,987)       | --                        | 12<br>(8 - 17)           | 379<br>(299 - 476)          | 1,545<br>(1,250 - 1,867)      | 1,445<br>(1,182 - 1,752)       |
| Liver cancer due to hepatitis B                                  | 1,310<br>(968 - 1,695)         | --                        | 5<br>(3 - 8)             | 203<br>(145 - 267)          | 674<br>(488 - 901)            | 428<br>(297 - 578)             |
| Liver cancer due to hepatitis C                                  | 1,587<br>(1,214 - 2,016)       | --                        | 1<br>(0 - 2)             | 121<br>(73 - 172)           | 790<br>(477 - 897)            | 790<br>(598 - 995)             |
| Liver cancer due to alcohol use                                  | 185<br>(117 - 283)             | --                        | --                       | 10<br>(4 - 18)              | 71<br>(40 - 119)              | 104<br>(63 - 161)              |
| Liver cancer due to other causes                                 | 299<br>(167 - 436)             | --                        | 5<br>(3 - 8)             | 46<br>(27 - 69)             | 125<br>(71 - 197)             | 123<br>(59 - 186)              |

Web Table 31- Turkey deaths with 95% UI by age, sex, and cause in 2013

| Cause                                         | Both Sexes, All Ages           | Both Sexes, 0-4 Years | Both Sexes, 5-14 Years | Both Sexes, 15-49 Years    | Both Sexes, 50-69 Years     | Both Sexes, 70-80 Years       |
|-----------------------------------------------|--------------------------------|-----------------------|------------------------|----------------------------|-----------------------------|-------------------------------|
| Larynx cancer                                 | 1,509<br>(1,126 - 1,944)       | --                    | --                     | 178<br>(129 - 256)         | 700<br>(501 - 929)          | 631<br>(471 - 812)            |
| Tracheal, bronchus and lung cancer            | 27,018<br>(22,784 - 32,420)    | --                    | --                     | 3,051<br>(2,413 - 3,858)   | 14,273<br>(11,783 - 17,293) | 9,693<br>(8,248 - 11,680)     |
| Breast cancer                                 | 5,383<br>(4,389 - 6,566)       | --                    | --                     | 1,602<br>(1,201 - 2,021)   | 2,332<br>(1,848 - 2,919)    | 1,450<br>(1,197 - 1,773)      |
| Cervical cancer                               | 1,098<br>(844 - 1,360)         | --                    | --                     | 272<br>(181 - 365)         | 471<br>(352 - 642)          | 355<br>(261 - 439)            |
| Uterine cancer                                | 676<br>(422 - 918)             | --                    | --                     | 58<br>(35 - 88)            | 346<br>(211 - 488)          | 272<br>(162 - 377)            |
| Prostate cancer                               | 4,467<br>(2,898 - 6,828)       | --                    | --                     | 52<br>(31 - 96)            | 872<br>(535 - 1,302)        | 3,542<br>(2,275 - 5,500)      |
| Colon and rectum cancer                       | 8,311<br>(7,181 - 9,681)       | --                    | --                     | 1,307<br>(1,078 - 1,561)   | 3,098<br>(2,611 - 3,668)    | 3,906<br>(3,375 - 4,572)      |
| Lip and oral cavity cancer                    | 538<br>(435 - 674)             | --                    | --                     | 115<br>(88 - 150)          | 236<br>(179 - 301)          | 187<br>(144 - 237)            |
| Nasopharynx cancer                            | 499<br>(394 - 632)             | --                    | 6<br>(3 - 11)          | 185<br>(141 - 239)         | 223<br>(166 - 294)          | 86<br>(65 - 117)              |
| Other pharynx cancer                          | 211<br>(169 - 259)             | --                    | --                     | 44<br>(33 - 57)            | 120<br>(92 - 154)           | 47<br>(35 - 60)               |
| Gallbladder and biliary tract cancer          | 1,252<br>(944 - 1,506)         | --                    | --                     | 131<br>(92 - 166)          | 544<br>(398 - 686)          | 578<br>(437 - 734)            |
| Pancreatic cancer                             | 5,059<br>(4,384 - 5,835)       | --                    | --                     | 574<br>(458 - 707)         | 2,296<br>(1,936 - 2,711)    | 2,189<br>(1,875 - 2,602)      |
| Malignant skin melanoma                       | 468<br>(347 - 630)             | --                    | --                     | 77<br>(51 - 116)           | 155<br>(102 - 206)          | 237<br>(183 - 333)            |
| Non-melanoma skin cancer                      | 618<br>(400 - 783)             | --                    | --                     | 78<br>(53 - 104)           | 130<br>(78 - 175)           | 411<br>(247 - 553)            |
| Ovarian cancer                                | 2,022<br>(1,611 - 2,508)       | --                    | --                     | 396<br>(292 - 511)         | 1,020<br>(765 - 1,336)      | 605<br>(485 - 748)            |
| Testicular cancer                             | 254<br>(129 - 370)             | --                    | --                     | 211<br>(105 - 318)         | 28<br>(15 - 41)             | 15<br>(8 - 22)                |
| Kidney cancer                                 | 1,597<br>(1,351 - 1,916)       | 4<br>(3 - 7)          | 19<br>(13 - 26)        | 238<br>(187 - 297)         | 762<br>(618 - 942)          | 574<br>(478 - 700)            |
| Bladder cancer                                | 3,576<br>(2,852 - 5,661)       | --                    | --                     | 193<br>(134 - 314)         | 1,516<br>(1,122 - 2,552)    | 1,868<br>(1,448 - 2,879)      |
| Brain and nervous system cancer               | 4,337<br>(3,189 - 5,159)       | 60<br>(27 - 93)       | 214<br>(134 - 278)     | 1,273<br>(862 - 1,610)     | 1,718<br>(1,303 - 2,138)    | 1,072<br>(757 - 1,319)        |
| Thyroid cancer                                | 591<br>(464 - 842)             | --                    | 2<br>(1 - 3)           | 89<br>(65 - 134)           | 273<br>(202 - 424)          | 227<br>(175 - 300)            |
| Mesothelioma                                  | 549<br>(452 - 667)             | --                    | --                     | 102<br>(74 - 139)          | 264<br>(207 - 329)          | 183<br>(142 - 236)            |
| Hodgkin lymphoma                              | 305<br>(247 - 400)             | 3<br>(2 - 4)          | 16<br>(9 - 27)         | 152<br>(114 - 207)         | 85<br>(64 - 120)            | 50<br>(38 - 69)               |
| Non-Hodgkin lymphoma                          | 2,679<br>(1,925 - 3,200)       | 5<br>(3 - 7)          | 70<br>(51 - 91)        | 745<br>(497 - 932)         | 970<br>(723 - 1,204)        | 890<br>(605 - 1,087)          |
| Multiple myeloma                              | 1,116<br>(803 - 1,375)         | --                    | --                     | 127<br>(87 - 165)          | 547<br>(393 - 693)          | 442<br>(310 - 558)            |
| Leukemia                                      | 4,396<br>(3,767 - 5,077)       | 138<br>(88 - 199)     | 346<br>(282 - 424)     | 1,484<br>(1,228 - 1,784)   | 1,138<br>(938 - 1,366)      | 1,290<br>(1,093 - 1,510)      |
| Other neoplasms                               | 1,792<br>(573 - 2,643)         | 35<br>(7 - 58)        | 97<br>(23 - 161)       | 551<br>(163 - 840)         | 549<br>(180 - 853)          | 561<br>(197 - 848)            |
| Cardiovascular diseases                       | 149,618<br>(134,008 - 168,879) | 432<br>(327 - 574)    | 292<br>(239 - 357)     | 11,864<br>(9,728 - 14,103) | 36,841<br>(31,499 - 43,260) | 100,188<br>(91,416 - 113,240) |
| Rheumatic heart disease                       | 806<br>(613 - 1,102)           | 1<br>(1 - 2)          | 3<br>(2 - 5)           | 79<br>(59 - 110)           | 131<br>(96 - 174)           | 590<br>(440 - 830)            |
| Ischemic heart disease                        | 77,475<br>(67,865 - 92,853)    | 36<br>(19 - 63)       | 17<br>(9 - 25)         | 7,155<br>(5,697 - 8,943)   | 22,944<br>(19,308 - 27,584) | 47,321<br>(41,888 - 57,734)   |
| Cerebrovascular disease                       | 44,978<br>(38,621 - 51,245)    | 143<br>(100 - 202)    | 151<br>(117 - 202)     | 2,303<br>(1,759 - 2,826)   | 8,236<br>(6,542 - 10,095)   | 34,145<br>(29,041 - 39,265)   |
| Ischemic stroke                               | 25,317<br>(21,025 - 29,575)    | 4<br>(2 - 8)          | 10<br>(7 - 15)         | 308<br>(212 - 398)         | 2,848<br>(2,114 - 3,534)    | 22,146<br>(18,436 - 25,876)   |
| Hemorrhagic stroke                            | 19,661<br>(16,170 - 23,319)    | 139<br>(97 - 196)     | 141<br>(109 - 188)     | 1,995<br>(1,531 - 2,442)   | 5,388<br>(4,275 - 6,595)    | 11,998<br>(9,753 - 14,847)    |
| Hypertensive heart disease                    | 13,555<br>(9,877 - 17,548)     | 2<br>(1 - 5)          | 2<br>(1 - 2)           | 344<br>(234 - 458)         | 1,631<br>(1,172 - 2,101)    | 11,575<br>(8,139 - 15,459)    |
| Cardiomyopathy and myocarditis                | 1,535<br>(1,269 - 1,897)       | 125<br>(85 - 180)     | 66<br>(48 - 87)        | 541<br>(393 - 692)         | 363<br>(282 - 482)          | 440<br>(337 - 632)            |
| Atrial fibrillation and flutter               | 1,210<br>(972 - 1,523)         | --                    | --                     | 17<br>(13 - 21)            | 182<br>(141 - 234)          | 1,011<br>(778 - 1,307)        |
| Aortic aneurysm                               | 1,814<br>(1,464 - 2,248)       | --                    | --                     | 300<br>(230 - 386)         | 708<br>(545 - 894)          | 806<br>(631 - 1,034)          |
| Peripheral vascular disease                   | 707<br>(596 - 842)             | --                    | --                     | 38<br>(27 - 51)            | 178<br>(139 - 222)          | 491<br>(411 - 595)            |
| Endocarditis                                  | 408<br>(306 - 556)             | 35<br>(22 - 55)       | 11<br>(7 - 17)         | 98<br>(69 - 141)           | 133<br>(93 - 192)           | 131<br>(93 - 188)             |
| Other cardiovascular and circulatory diseases | 7,132<br>(5,904 - 8,859)       | 90<br>(59 - 131)      | 42<br>(29 - 57)        | 989<br>(751 - 1,241)       | 2,334<br>(1,792 - 2,944)    | 3,677<br>(2,978 - 4,780)      |
| Chronic respiratory diseases                  | 40,553<br>(30,716 - 46,472)    | 133<br>(92 - 178)     | 91<br>(72 - 110)       | 2,005<br>(1,560 - 3,038)   | 8,487<br>(6,781 - 10,131)   | 29,836<br>(20,543 - 34,200)   |



Web Table 31- Turkey deaths with 95% UI by age, sex, and cause in 2013

| Cause                                               | Both Sexes, All Ages        | Both Sexes, 0-4 Years | Both Sexes, 5-14 Years | Both Sexes, 15-49 Years | Both Sexes, 50-69 Years  | Both Sexes, 70-80 Years     |
|-----------------------------------------------------|-----------------------------|-----------------------|------------------------|-------------------------|--------------------------|-----------------------------|
| Chronic obstructive pulmonary disease               | 33,765<br>(24,798 - 39,056) | 50<br>(29 - 79)       | 23<br>(17 - 31)        | 1,214<br>(940 - 1,773)  | 7,201<br>(5,699 - 8,670) | 25,277<br>(17,186 - 29,394) |
| Pneumoconiosis                                      | 450<br>(310 - 642)          | 2<br>(1 - 3)          | 3<br>(2 - 5)           | 156<br>(100 - 291)      | 93<br>(56 - 142)         | 195<br>(106 - 298)          |
| Silicosis                                           | 184<br>(120 - 266)          | 0<br>(0 - 1)          | 1<br>(1 - 1)           | 45<br>(28 - 86)         | 21<br>(12 - 32)          | 116<br>(60 - 177)           |
| Asbestosis                                          | 32<br>(23 - 44)             | 0<br>(0 - 1)          | 1<br>(1 - 1)           | 13<br>(8 - 23)          | 7<br>(4 - 11)            | 10<br>(6 - 15)              |
| Coal workers pneumoconiosis                         | 24<br>(17 - 34)             | 0<br>(0 - 1)          | 1<br>(1 - 1)           | 6<br>(4 - 10)           | 5<br>(3 - 8)             | 12<br>(7 - 18)              |
| Other pneumoconiosis                                | 211<br>(145 - 310)          | 1<br>(0 - 1)          | 1<br>(1 - 1)           | 92<br>(56 - 170)        | 60<br>(35 - 92)          | 58<br>(32 - 91)             |
| Asthma                                              | 2,603<br>(1,876 - 3,448)    | 6<br>(3 - 10)         | 37<br>(29 - 47)        | 315<br>(237 - 530)      | 530<br>(350 - 710)       | 1,715<br>(1,102 - 2,378)    |
| Interstitial lung disease and pulmonary sarcoidosis | 3,049<br>(2,054 - 4,107)    | 3<br>(1 - 6)          | 8<br>(5 - 11)          | 235<br>(164 - 414)      | 591<br>(396 - 797)       | 2,212<br>(1,339 - 3,157)    |
| Other chronic respiratory diseases                  | 685<br>(510 - 896)          | 72<br>(48 - 99)       | 20<br>(14 - 26)        | 84<br>(61 - 142)        | 72<br>(54 - 95)          | 437<br>(290 - 612)          |
| Cirrhosis                                           | 4,456<br>(3,833 - 5,156)    | 12<br>(7 - 19)        | 27<br>(21 - 34)        | 775<br>(629 - 944)      | 1,803<br>(1,514 - 2,142) | 1,840<br>(1,571 - 2,150)    |
| Cirrhosis due to hepatitis B                        | 2,697<br>(2,090 - 3,285)    | 1<br>(1 - 2)          | 9<br>(6 - 13)          | 450<br>(330 - 582)      | 1,091<br>(826 - 1,377)   | 1,146<br>(863 - 1,442)      |
| Cirrhosis due to hepatitis C                        | 884<br>(555 - 1,344)        | 0<br>(0 - 1)          | 3<br>(1 - 5)           | 154<br>(89 - 256)       | 373<br>(214 - 590)       | 354<br>(199 - 556)          |
| Cirrhosis due to alcohol use                        | 513<br>(345 - 740)          | --                    | --                     | 64<br>(37 - 101)        | 205<br>(134 - 309)       | 245<br>(158 - 359)          |
| Cirrhosis due to other causes                       | 361<br>(254 - 495)          | 10<br>(5 - 16)        | 15<br>(10 - 19)        | 107<br>(67 - 152)       | 134<br>(84 - 197)        | 96<br>(63 - 143)            |
| Digestive diseases                                  | 5,737<br>(4,940 - 7,266)    | 24<br>(15 - 35)       | 59<br>(45 - 84)        | 835<br>(637 - 1,336)    | 1,382<br>(1,136 - 1,784) | 3,438<br>(2,966 - 4,146)    |
| Peptic ulcer disease                                | 1,463<br>(830 - 2,804)      | 1<br>(0 - 2)          | 14<br>(9 - 23)         | 313<br>(182 - 649)      | 344<br>(199 - 618)       | 792<br>(398 - 1,553)        |
| Gastritis and duodenitis                            | 30<br>(19 - 66)             | 1<br>(0 - 2)          | 1<br>(1 - 2)           | 7<br>(5 - 18)           | 7<br>(4 - 15)            | 14<br>(8 - 31)              |
| Appendicitis                                        | 58<br>(33 - 87)             | 3<br>(1 - 5)          | 6<br>(4 - 10)          | 23<br>(12 - 37)         | 14<br>(7 - 23)           | 12<br>(6 - 19)              |
| Paralytic ileus and intestinal obstruction          | 988<br>(627 - 1,395)        | 3<br>(1 - 5)          | 12<br>(7 - 20)         | 96<br>(55 - 151)        | 223<br>(139 - 328)       | 655<br>(412 - 921)          |
| Inguinal, femoral, and abdominal hernia             | 197<br>(103 - 267)          | 1<br>(1 - 3)          | 5<br>(3 - 8)           | 18<br>(10 - 27)         | 46<br>(24 - 65)          | 127<br>(62 - 185)           |
| Inflammatory bowel disease                          | 273<br>(195 - 380)          | 2<br>(1 - 3)          | 7<br>(5 - 11)          | 74<br>(49 - 112)        | 74<br>(51 - 104)         | 116<br>(76 - 165)           |
| Vascular intestinal disorders                       | 676<br>(388 - 1,054)        | 1<br>(0 - 2)          | 1<br>(0 - 3)           | 59<br>(31 - 109)        | 184<br>(105 - 297)       | 431<br>(237 - 652)          |
| Gallbladder and biliary diseases                    | 1,067<br>(420 - 1,432)      | 7<br>(4 - 12)         | 4<br>(3 - 6)           | 68<br>(35 - 95)         | 213<br>(92 - 293)        | 774<br>(260 - 1,075)        |
| Pancreatitis                                        | 683<br>(481 - 927)          | 1<br>(1 - 2)          | 2<br>(1 - 4)           | 110<br>(73 - 176)       | 179<br>(125 - 248)       | 390<br>(266 - 549)          |
| Other digestive diseases                            | 301<br>(232 - 409)          | 5<br>(3 - 8)          | 6<br>(4 - 9)           | 66<br>(46 - 98)         | 96<br>(71 - 132)         | 128<br>(95 - 174)           |
| Neurological disorders                              | 24,889<br>(21,541 - 28,656) | 198<br>(88 - 332)     | 213<br>(151 - 277)     | 1,380<br>(975 - 1,748)  | 2,677<br>(2,154 - 3,251) | 20,420<br>(17,449 - 23,835) |
| Alzheimer disease and other dementias               | 20,373<br>(17,295 - 23,935) | --                    | --                     | 10<br>(2 - 17)          | 1,777<br>(1,383 - 2,286) | 18,586<br>(15,629 - 22,065) |
| Parkinson disease                                   | 1,608<br>(1,218 - 1,994)    | --                    | --                     | 36<br>(27 - 46)         | 262<br>(191 - 332)       | 1,311<br>(964 - 1,678)      |
| Epilepsy                                            | 1,464<br>(805 - 1,964)      | 143<br>(41 - 270)     | 141<br>(81 - 203)      | 734<br>(425 - 1,010)    | 203<br>(98 - 300)        | 242<br>(123 - 365)          |
| Multiple sclerosis                                  | 177<br>(118 - 297)          | --                    | --                     | 67<br>(39 - 113)        | 63<br>(36 - 97)          | 47<br>(29 - 101)            |
| Other neurological disorders                        | 1,266<br>(1,033 - 1,507)    | 55<br>(34 - 72)       | 71<br>(58 - 90)        | 534<br>(419 - 682)      | 372<br>(304 - 452)       | 234<br>(194 - 277)          |
| Mental and substance use disorders                  | 734<br>(585 - 933)          | 6<br>(5 - 9)          | 1<br>(0 - 2)           | 261<br>(206 - 372)      | 340<br>(230 - 443)       | 126<br>(101 - 153)          |
| Schizophrenia                                       | 135<br>(85 - 172)           | --                    | --                     | 36<br>(24 - 49)         | 57<br>(35 - 77)          | 42<br>(25 - 56)             |
| Alcohol use disorders                               | 341<br>(217 - 493)          | --                    | --                     | 75<br>(50 - 131)        | 230<br>(129 - 335)       | 36<br>(24 - 53)             |
| Drug use disorders                                  | 251<br>(208 - 324)          | 6<br>(5 - 9)          | --                     | 144<br>(113 - 203)      | 53<br>(42 - 68)          | 48<br>(39 - 62)             |
| Opioid use disorders                                | 136<br>(113 - 176)          | 4<br>(3 - 5)          | --                     | 80<br>(62 - 114)        | 27<br>(21 - 34)          | 26<br>(21 - 33)             |
| Cocaine use disorders                               | 3<br>(3 - 4)                | 0<br>(0 - 0)          | --                     | 2<br>(2 - 3)            | 1<br>(0 - 1)             | 1<br>(0 - 1)                |
| Amphetamine use disorders                           | 3<br>(3 - 4)                | 0<br>(0 - 0)          | --                     | 2<br>(1 - 2)            | 1<br>(1 - 1)             | 1<br>(0 - 1)                |
| Other drug use disorders                            | 108<br>(90 - 139)           | 2<br>(2 - 3)          | --                     | 60<br>(47 - 85)         | 25<br>(20 - 32)          | 21<br>(17 - 27)             |
| Eating disorders                                    | 7<br>(5 - 10)               | --                    | 1<br>(0 - 2)           | 6<br>(4 - 9)            | --                       | --                          |

Web Table 31- Turkey deaths with 95% UI by age, sex, and cause in 2013

| Cause                                               | Both Sexes, All Ages        | Both Sexes, 0-4 Years    | Both Sexes, 5-14 Years | Both Sexes, 15-49 Years  | Both Sexes, 50-69 Years   | Both Sexes, 70-80 Years     |
|-----------------------------------------------------|-----------------------------|--------------------------|------------------------|--------------------------|---------------------------|-----------------------------|
| Anorexia nervosa                                    | 7<br>(5 - 10)               | --                       | 1<br>(0 - 2)           | 6<br>(4 - 9)             | --                        | --                          |
| Diabetes, urogenital, blood, and endocrine diseases | 31,564<br>(19,665 - 36,413) | 406<br>(157 - 548)       | 228<br>(134 - 288)     | 2,461<br>(1,611 - 2,974) | 8,627<br>(5,543 - 10,340) | 19,842<br>(11,907 - 22,705) |
| Diabetes mellitus                                   | 19,194<br>(16,218 - 21,913) | 26<br>(18 - 36)          | 21<br>(15 - 29)        | 931<br>(760 - 1,116)     | 5,443<br>(4,483 - 6,488)  | 12,774<br>(10,333 - 14,661) |
| Acute glomerulonephritis                            | 19<br>(13 - 23)             | 2<br>(1 - 5)             | 2<br>(1 - 2)           | 6<br>(4 - 8)             | 4<br>(3 - 5)              | 5<br>(3 - 6)                |
| Chronic kidney disease                              | 9,917<br>(1,515 - 12,348)   | 64<br>(15 - 93)          | 63<br>(15 - 84)        | 969<br>(212 - 1,266)     | 2,674<br>(453 - 3,441)    | 6,148<br>(771 - 7,833)      |
| Chronic kidney disease due to diabetes mellitus     | 12<br>(5 - 16)              | 1<br>(1 - 2)             | 2<br>(1 - 3)           | 6<br>(2 - 9)             | 2<br>(1 - 3)              | 1<br>(0 - 1)                |
| Chronic kidney disease due to hypertension          | 5,064<br>(1,172 - 6,615)    | 2<br>(1 - 3)             | 4<br>(2 - 6)           | 393<br>(137 - 527)       | 1,258<br>(358 - 1,706)    | 3,408<br>(670 - 4,509)      |
| Chronic kidney disease due to glomerulonephritis    | 345<br>(86 - 461)           | 20<br>(7 - 30)           | 8<br>(4 - 12)          | 58<br>(20 - 84)          | 113<br>(28 - 161)         | 147<br>(26 - 211)           |
| Chronic kidney disease due to other causes          | 4,496<br>(173 - 6,327)      | 41<br>(5 - 65)           | 49<br>(6 - 68)         | 512<br>(38 - 715)        | 1,301<br>(61 - 1,879)     | 2,593<br>(58 - 3,842)       |
| Urinary diseases and male infertility               | 656<br>(525 - 867)          | 6<br>(4 - 10)            | 7<br>(5 - 12)          | 98<br>(66 - 191)         | 145<br>(110 - 211)        | 401<br>(304 - 523)          |
| Interstitial nephritis and urinary tract infections | 156<br>(67 - 342)           | 2<br>(1 - 4)             | 3<br>(1 - 7)           | 48<br>(20 - 123)         | 39<br>(14 - 93)           | 64<br>(27 - 143)            |
| Urolithiasis                                        | 15<br>(10 - 21)             | --                       | 1<br>(0 - 1)           | 5<br>(3 - 7)             | 4<br>(2 - 6)              | 6<br>(3 - 9)                |
| Other urinary diseases                              | 485<br>(329 - 623)          | 4<br>(2 - 8)             | 3<br>(2 - 5)           | 45<br>(23 - 65)          | 101<br>(65 - 136)         | 330<br>(217 - 445)          |
| Gynecological diseases                              | 26<br>(17 - 35)             | --                       | --                     | 4<br>(3 - 5)             | 11<br>(6 - 16)            | 12<br>(7 - 18)              |
| Uterine fibroids                                    | 7<br>(5 - 10)               | --                       | --                     | 1<br>(0 - 1)             | 3<br>(2 - 4)              | 4<br>(2 - 5)                |
| Polycystic ovarian syndrome                         | 0<br>(0 - 0)                | --                       | --                     | 0<br>(0 - 0)             | 0<br>(0 - 0)              | --                          |
| Endometriosis                                       | 1<br>(1 - 1)                | --                       | --                     | 1<br>(0 - 1)             | 0<br>(0 - 0)              | --                          |
| Genital prolapse                                    | 5<br>(4 - 7)                | --                       | --                     | 0<br>(0 - 1)             | 2<br>(1 - 3)              | 3<br>(2 - 5)                |
| Other gynecological diseases                        | 12<br>(8 - 17)              | --                       | --                     | 2<br>(1 - 3)             | 5<br>(3 - 8)              | 5<br>(3 - 8)                |
| Hemoglobinopathies and hemolytic anemias            | 916<br>(665 - 1,248)        | 117<br>(78 - 168)        | 93<br>(67 - 129)       | 313<br>(221 - 440)       | 128<br>(91 - 178)         | 265<br>(186 - 370)          |
| Thalassemias                                        | 250<br>(181 - 335)          | 65<br>(43 - 95)          | 52<br>(37 - 72)        | 133<br>(95 - 188)        | 0<br>(0 - 0)              | 0<br>(0 - 0)                |
| Sickle cell disorders                               | 265<br>(192 - 362)          | 31<br>(21 - 46)          | 32<br>(23 - 44)        | 127<br>(90 - 175)        | 68<br>(48 - 95)           | 7<br>(5 - 10)               |
| G6PD deficiency                                     | 14<br>(10 - 19)             | 1<br>(1 - 2)             | 2<br>(1 - 2)           | 6<br>(4 - 9)             | 3<br>(2 - 4)              | 2<br>(2 - 3)                |
| Other hemoglobinopathies and hemolytic anemias      | 386<br>(277 - 533)          | 19<br>(12 - 26)          | 7<br>(5 - 10)          | 47<br>(33 - 66)          | 57<br>(40 - 79)           | 255<br>(179 - 357)          |
| Endocrine, metabolic, blood, and immune disorders   | 836<br>(43 - 1,139)         | 191<br>(6 - 299)         | 44<br>(2 - 71)         | 140<br>(9 - 207)         | 223<br>(10 - 326)         | 238<br>(12 - 356)           |
| Musculoskeletal disorders                           | 1,062<br>(888 - 1,352)      | --                       | 32<br>(24 - 41)        | 370<br>(298 - 485)       | 308<br>(245 - 408)        | 351<br>(283 - 450)          |
| Rheumatoid arthritis                                | 239<br>(191 - 298)          | --                       | 2<br>(1 - 3)           | 25<br>(19 - 34)          | 84<br>(62 - 113)          | 129<br>(94 - 166)           |
| Other musculoskeletal disorders                     | 822<br>(685 - 1,047)        | --                       | 30<br>(23 - 38)        | 345<br>(276 - 458)       | 225<br>(177 - 302)        | 223<br>(177 - 303)          |
| Other non-communicable diseases                     | 8,063<br>(6,502 - 9,667)    | 7,339<br>(5,844 - 8,890) | 361<br>(270 - 559)     | 150<br>(80 - 188)        | 61<br>(25 - 77)           | 151<br>(40 - 189)           |
| Congenital anomalies                                | 7,575<br>(6,054 - 9,182)    | 7,014<br>(5,535 - 8,558) | 358<br>(267 - 557)     | 128<br>(72 - 163)        | 27<br>(17 - 34)           | 48<br>(26 - 62)             |
| Neural tube defects                                 | 328<br>(184 - 537)          | 324<br>(179 - 533)       | 2<br>(1 - 3)           | 2<br>(1 - 2)             | 0<br>(0 - 1)              | 0<br>(0 - 0)                |
| Congenital heart anomalies                          | 3,447<br>(2,586 - 4,375)    | 3,285<br>(2,425 - 4,199) | 141<br>(95 - 234)      | 16<br>(8 - 21)           | 3<br>(2 - 4)              | 3<br>(2 - 5)                |
| Cleft lip and cleft palate                          | 24<br>(9 - 45)              | 24<br>(9 - 45)           | --                     | --                       | --                        | --                          |
| Down syndrome                                       | 362<br>(233 - 509)          | 291<br>(176 - 424)       | 41<br>(26 - 62)        | 26<br>(14 - 35)          | 4<br>(3 - 6)              | 0<br>(0 - 1)                |
| Chromosomal unbalanced rearrangements               | 149<br>(102 - 210)          | 138<br>(92 - 196)        | 6<br>(3 - 11)          | 4<br>(2 - 6)             | 1<br>(0 - 1)              | 1<br>(0 - 1)                |
| Other congenital anomalies                          | 3,264<br>(2,525 - 4,077)    | 2,953<br>(2,246 - 3,742) | 169<br>(123 - 238)     | 80<br>(45 - 103)         | 18<br>(12 - 23)           | 44<br>(23 - 57)             |
| Skin and subcutaneous diseases                      | 169<br>(32 - 215)           | 6<br>(1 - 10)            | 3<br>(1 - 4)           | 22<br>(8 - 31)           | 35<br>(7 - 47)            | 103<br>(14 - 136)           |
| Cellulitis                                          | 21<br>(4 - 32)              | 2<br>(0 - 4)             | 1<br>(0 - 1)           | 3<br>(1 - 4)             | 5<br>(1 - 9)              | 10<br>(1 - 16)              |
| Pyoderma                                            | 52<br>(10 - 70)             | 2<br>(1 - 5)             | 1<br>(0 - 1)           | 9<br>(3 - 14)            | 15<br>(3 - 21)            | 24<br>(3 - 34)              |
| Decubitus ulcer                                     | 79<br>(14 - 107)            | 0<br>(0 - 1)             | 1<br>(0 - 1)           | 6<br>(2 - 8)             | 10<br>(2 - 15)            | 63<br>(9 - 87)              |

Web Table 31- Turkey deaths with 95% UI by age, sex, and cause in 2013

| Cause                                           | Both Sexes, All Ages        | Both Sexes, 0-4 Years | Both Sexes, 5-14 Years   | Both Sexes, 15-49 Years     | Both Sexes, 50-69 Years  | Both Sexes, 70-80 Years  |
|-------------------------------------------------|-----------------------------|-----------------------|--------------------------|-----------------------------|--------------------------|--------------------------|
| Other skin and subcutaneous diseases            | 17<br>(3 - 23)              | 1<br>(0 - 2)          | 1<br>(0 - 1)             | 5<br>(2 - 7)                | 5<br>(1 - 7)             | 6<br>(0 - 9)             |
| Sudden infant death syndrome                    | 319<br>(156 - 580)          | 319<br>(156 - 580)    | --                       | --                          | --                       | --                       |
| Injuries                                        | 24,703<br>(20,188 - 28,779) | 883<br>(639 - 1,152)  | 1,335<br>(1,156 - 1,529) | 15,188<br>(12,369 - 18,183) | 3,310<br>(2,668 - 3,975) | 3,986<br>(2,887 - 4,788) |
| Transport injuries                              | 9,433<br>(7,874 - 11,134)   | 306<br>(185 - 429)    | 691<br>(562 - 832)       | 5,870<br>(4,612 - 7,072)    | 1,486<br>(1,200 - 1,843) | 1,080<br>(879 - 1,588)   |
| Road injuries                                   | 9,020<br>(7,521 - 10,664)   | 288<br>(172 - 404)    | 649<br>(526 - 784)       | 5,632<br>(4,450 - 6,821)    | 1,418<br>(1,143 - 1,759) | 1,032<br>(839 - 1,511)   |
| Pedestrian road injuries                        | 1,955<br>(1,357 - 2,560)    | 78<br>(35 - 146)      | 191<br>(111 - 289)       | 968<br>(635 - 1,345)        | 349<br>(235 - 480)       | 368<br>(259 - 519)       |
| Cyclist road injuries                           | 664<br>(502 - 828)          | 29<br>(13 - 50)       | 82<br>(56 - 113)         | 312<br>(213 - 401)          | 132<br>(91 - 180)        | 109<br>(78 - 161)        |
| Motorcyclist road injuries                      | 822<br>(536 - 1,102)        | 12<br>(7 - 19)        | 32<br>(21 - 48)          | 633<br>(391 - 880)          | 84<br>(55 - 118)         | 60<br>(39 - 98)          |
| Motor vehicle road injuries                     | 5,542<br>(4,526 - 6,907)    | 162<br>(102 - 231)    | 334<br>(246 - 439)       | 3,712<br>(2,943 - 4,665)    | 850<br>(654 - 1,121)     | 484<br>(343 - 776)       |
| Other road injuries                             | 38<br>(26 - 61)             | 7<br>(4 - 13)         | 10<br>(5 - 16)           | 7<br>(4 - 13)               | 2<br>(2 - 5)             | 11<br>(5 - 29)           |
| Other transport injuries                        | 413<br>(289 - 511)          | 18<br>(11 - 26)       | 41<br>(30 - 56)          | 238<br>(139 - 321)          | 68<br>(47 - 90)          | 48<br>(34 - 86)          |
| Unintentional injuries                          | 9,261<br>(6,507 - 11,103)   | 563<br>(398 - 733)    | 492<br>(414 - 597)       | 4,540<br>(3,318 - 5,527)    | 1,113<br>(768 - 1,431)   | 2,552<br>(1,365 - 3,348) |
| Falls                                           | 3,026<br>(1,172 - 4,049)    | 123<br>(48 - 200)     | 76<br>(45 - 105)         | 899<br>(352 - 1,253)        | 330<br>(149 - 450)       | 1,599<br>(501 - 2,317)   |
| Drowning                                        | 1,030<br>(623 - 1,488)      | 46<br>(22 - 105)      | 113<br>(76 - 212)        | 742<br>(404 - 1,087)        | 83<br>(49 - 124)         | 46<br>(33 - 72)          |
| Fire, heat, and hot substances                  | 448<br>(352 - 580)          | 50<br>(29 - 102)      | 30<br>(20 - 46)          | 181<br>(134 - 258)          | 60<br>(42 - 79)          | 127<br>(88 - 166)        |
| Poisonings                                      | 453<br>(337 - 551)          | 22<br>(13 - 35)       | 30<br>(21 - 41)          | 230<br>(165 - 300)          | 69<br>(48 - 91)          | 101<br>(66 - 131)        |
| Exposure to mechanical forces                   | 2,302<br>(1,234 - 2,874)    | 35<br>(20 - 52)       | 94<br>(53 - 125)         | 1,817<br>(964 - 2,312)      | 263<br>(146 - 339)       | 92<br>(59 - 116)         |
| Unintentional firearm injuries                  | 1,486<br>(671 - 1,915)      | 7<br>(3 - 11)         | 52<br>(18 - 74)          | 1,240<br>(557 - 1,633)      | 142<br>(63 - 199)        | 44<br>(23 - 62)          |
| Unintentional suffocation                       | 389<br>(250 - 496)          | 7<br>(4 - 14)         | 16<br>(10 - 26)          | 266<br>(153 - 351)          | 75<br>(48 - 101)         | 25<br>(17 - 36)          |
| Other exposure to mechanical forces             | 427<br>(235 - 535)          | 21<br>(7 - 36)        | 26<br>(11 - 40)          | 312<br>(179 - 403)          | 46<br>(22 - 63)          | 23<br>(12 - 31)          |
| Adverse effects of medical treatment            | 204<br>(11 - 409)           | 10<br>(0 - 27)        | 4<br>(1 - 8)             | 38<br>(5 - 76)              | 72<br>(2 - 157)          | 80<br>(1 - 179)          |
| Animal contact                                  | 128<br>(93 - 189)           | 31<br>(15 - 52)       | 33<br>(20 - 48)          | 27<br>(18 - 41)             | 16<br>(11 - 30)          | 21<br>(14 - 46)          |
| Venomous animal contact                         | 93<br>(61 - 132)            | 29<br>(13 - 49)       | 30<br>(18 - 45)          | 17<br>(10 - 24)             | 12<br>(8 - 21)           | 6<br>(4 - 12)            |
| Non-venomous animal contact                     | 35<br>(25 - 69)             | 2<br>(1 - 5)          | 2<br>(1 - 4)             | 10<br>(7 - 18)              | 5<br>(3 - 9)             | 15<br>(9 - 35)           |
| Foreign body                                    | 767<br>(461 - 962)          | 185<br>(88 - 279)     | 48<br>(30 - 65)          | 133<br>(88 - 193)           | 81<br>(46 - 108)         | 318<br>(201 - 425)       |
| Pulmonary aspiration and foreign body in airway | 756<br>(449 - 949)          | 184<br>(87 - 278)     | 47<br>(29 - 63)          | 128<br>(82 - 187)           | 79<br>(45 - 106)         | 317<br>(199 - 423)       |
| Foreign body in other body part                 | 11<br>(9 - 17)              | 1<br>(1 - 1)          | 2<br>(1 - 2)             | 6<br>(4 - 9)                | 2<br>(1 - 3)             | 1<br>(1 - 3)             |
| Other unintentional injuries                    | 901<br>(729 - 1,356)        | 61<br>(41 - 102)      | 63<br>(47 - 101)         | 473<br>(363 - 679)          | 138<br>(104 - 215)       | 167<br>(126 - 297)       |
| Self-harm and interpersonal violence            | 6,009<br>(4,547 - 7,445)    | 14<br>(8 - 23)        | 151<br>(106 - 209)       | 4,778<br>(3,537 - 5,993)    | 711<br>(536 - 899)       | 354<br>(280 - 493)       |
| Self-harm                                       | 3,858<br>(2,717 - 4,771)    | --                    | 107<br>(67 - 158)        | 2,967<br>(2,001 - 3,784)    | 498<br>(358 - 626)       | 286<br>(220 - 403)       |
| Interpersonal violence                          | 2,151<br>(1,380 - 2,896)    | 14<br>(8 - 23)        | 44<br>(26 - 66)          | 1,811<br>(1,139 - 2,471)    | 213<br>(141 - 308)       | 69<br>(46 - 107)         |
| Assault by firearm                              | 1,241<br>(729 - 1,850)      | 5<br>(2 - 8)          | 21<br>(10 - 34)          | 1,071<br>(616 - 1,637)      | 123<br>(72 - 190)        | 22<br>(12 - 39)          |
| Assault by sharp object                         | 738<br>(407 - 1,167)        | 2<br>(1 - 4)          | 13<br>(7 - 22)           | 624<br>(333 - 993)          | 70<br>(39 - 119)         | 28<br>(18 - 47)          |
| Assault by other means                          | 171<br>(118 - 292)          | 7<br>(4 - 13)         | 10<br>(6 - 17)           | 115<br>(73 - 216)           | 20<br>(13 - 34)          | 19<br>(11 - 32)          |

Web Table 31- Turkey deaths with 95% UI by age, sex, and cause in 2013

| Cause                                                             | Males, All Ages                | Males, 0-4 Years            | Males, 5-14 Years        | Males, 15-49 Years          | Males, 50-69 Years          | Males, 70-80 Years            |
|-------------------------------------------------------------------|--------------------------------|-----------------------------|--------------------------|-----------------------------|-----------------------------|-------------------------------|
| All causes                                                        | 226,540<br>(192,947 - 265,640) | 12,058<br>(10,531 - 13,778) | 2,567<br>(2,314 - 2,852) | 38,046<br>(30,714 - 46,461) | 68,231<br>(55,579 - 83,308) | 105,638<br>(90,620 - 120,997) |
| Communicable, maternal, neonatal, and nutritional diseases        | 13,544<br>(11,845 - 15,406)    | 6,679<br>(5,536 - 7,884)    | 499<br>(362 - 684)       | 1,502<br>(1,207 - 1,872)    | 1,546<br>(1,200 - 1,933)    | 3,319<br>(2,372 - 4,244)      |
| HIV/AIDS and tuberculosis                                         | 876<br>(710 - 1,102)           | 13<br>(9 - 19)              | 10<br>(7 - 13)           | 348<br>(277 - 449)          | 258<br>(196 - 331)          | 247<br>(188 - 322)            |
| Tuberculosis                                                      | 769<br>(600 - 1,000)           | 8<br>(5 - 13)               | 8<br>(6 - 12)            | 269<br>(199 - 366)          | 240<br>(179 - 311)          | 244<br>(185 - 319)            |
| HIV/AIDS                                                          | 107<br>(85 - 142)              | 5<br>(3 - 8)                | 1<br>(1 - 2)             | 79<br>(63 - 105)            | 18<br>(12 - 27)             | 3<br>(2 - 5)                  |
| HIV/AIDS resulting in mycobacterial infection                     | 6<br>(5 - 9)                   | 0<br>(0 - 0)                | 0<br>(0 - 0)             | 5<br>(4 - 7)                | 1<br>(1 - 2)                | 0<br>(0 - 0)                  |
| HIV/AIDS resulting in other diseases                              | 100<br>(79 - 132)              | 5<br>(3 - 8)                | 1<br>(1 - 2)             | 75<br>(60 - 99)             | 17<br>(11 - 25)             | 3<br>(2 - 5)                  |
| Diarrhea, lower respiratory, and other common infectious diseases | 6,431<br>(5,114 - 7,842)       | 1,304<br>(957 - 1,767)      | 447<br>(308 - 643)       | 950<br>(687 - 1,295)        | 1,080<br>(761 - 1,414)      | 2,650<br>(1,706 - 3,532)      |
| Diarrheal diseases                                                | 332<br>(252 - 457)             | 135<br>(68 - 257)           | 15<br>(8 - 26)           | 47<br>(34 - 63)             | 43<br>(29 - 61)             | 92<br>(63 - 129)              |
| Intestinal infectious diseases                                    | 738<br>(358 - 1,360)           | 175<br>(78 - 329)           | 210<br>(102 - 381)       | 275<br>(108 - 565)          | 54<br>(19 - 114)            | 24<br>(8 - 52)                |
| Typhoid fever                                                     | 572<br>(271 - 1,071)           | 130<br>(57 - 252)           | 164<br>(75 - 304)        | 215<br>(81 - 452)           | 44<br>(16 - 95)             | 19<br>(7 - 44)                |
| Paratyphoid fever                                                 | 160<br>(74 - 301)              | 43<br>(16 - 85)             | 46<br>(20 - 94)          | 57<br>(21 - 122)            | 10<br>(2 - 23)              | 4<br>(1 - 10)                 |
| Other intestinal infectious diseases                              | 6<br>(2 - 14)                  | 2<br>(0 - 7)                | 1<br>(0 - 3)             | 2<br>(0 - 7)                | 1<br>(0 - 3)                | 1<br>(0 - 3)                  |
| Lower respiratory infections                                      | 4,685<br>(3,321 - 5,866)       | 689<br>(473 - 998)          | 151<br>(99 - 247)        | 487<br>(290 - 656)          | 899<br>(593 - 1,200)        | 2,460<br>(1,488 - 3,363)      |
| Upper respiratory infections                                      | 9<br>(3 - 18)                  | 0<br>(0 - 2)                | 0<br>(0 - 1)             | 2<br>(0 - 5)                | 3<br>(0 - 7)                | 3<br>(0 - 11)                 |
| Otitis media                                                      | 11<br>(9 - 13)                 | 1<br>(1 - 1)                | 1<br>(1 - 1)             | 3<br>(3 - 4)                | 2<br>(2 - 3)                | 4<br>(3 - 5)                  |
| Meningitis                                                        | 236<br>(175 - 325)             | 108<br>(65 - 193)           | 14<br>(8 - 22)           | 51<br>(37 - 70)             | 34<br>(24 - 49)             | 29<br>(9 - 43)                |
| Pneumococcal meningitis                                           | 41<br>(27 - 60)                | 16<br>(8 - 33)              | 3<br>(1 - 6)             | 10<br>(5 - 16)              | 6<br>(3 - 11)               | 6<br>(2 - 10)                 |
| H influenzae type B meningitis                                    | 47<br>(21 - 86)                | 33<br>(10 - 70)             | 3<br>(1 - 6)             | 6<br>(3 - 10)               | 3<br>(1 - 5)                | 3<br>(1 - 5)                  |
| Meningococcal meningitis                                          | 87<br>(58 - 124)               | 41<br>(18 - 76)             | 5<br>(3 - 9)             | 18<br>(10 - 28)             | 12<br>(7 - 19)              | 11<br>(3 - 17)                |
| Other meningitis                                                  | 61<br>(43 - 87)                | 18<br>(8 - 35)              | 2<br>(1 - 4)             | 17<br>(10 - 27)             | 14<br>(8 - 21)              | 10<br>(3 - 16)                |
| Encephalitis                                                      | 221<br>(150 - 402)             | 47<br>(23 - 103)            | 33<br>(18 - 73)          | 73<br>(48 - 138)            | 39<br>(26 - 69)             | 29<br>(19 - 53)               |
| Diphtheria                                                        | 2<br>(0 - 8)                   | 1<br>(0 - 5)                | 1<br>(0 - 3)             | 1<br>(0 - 2)                | 0<br>(0 - 1)                | --                            |
| Whooping cough                                                    | 16<br>(0 - 83)                 | 15<br>(0 - 78)              | 1<br>(0 - 5)             | 0<br>(0 - 1)                | 0<br>(0 - 0)                | --                            |
| Tetanus                                                           | 9<br>(6 - 12)                  | 1<br>(1 - 2)                | 1<br>(0 - 1)             | 3<br>(2 - 4)                | 2<br>(2 - 4)                | 2<br>(1 - 3)                  |
| Measles                                                           | 151<br>(20 - 548)              | 128<br>(17 - 462)           | 20<br>(3 - 75)           | 4<br>(0 - 14)               | 0<br>(0 - 1)                | --                            |
| Varicella and herpes zoster                                       | 21<br>(6 - 53)                 | 4<br>(0 - 15)               | 1<br>(0 - 5)             | 5<br>(1 - 14)               | 2<br>(0 - 7)                | 8<br>(0 - 38)                 |
| Neglected tropical diseases and malaria                           | 99<br>(79 - 125)               | 9<br>(5 - 16)               | 6<br>(4 - 12)            | 40<br>(30 - 53)             | 24<br>(17 - 32)             | 20<br>(15 - 28)               |
| Malaria                                                           | 0<br>(0 - 1)                   | 0<br>(0 - 0)                | 0<br>(0 - 0)             | 0<br>(0 - 0)                | 0<br>(0 - 0)                | 0<br>(0 - 0)                  |
| Leishmaniasis                                                     | 1<br>(1 - 1)                   | 0<br>(0 - 0)                | 0<br>(0 - 0)             | 0<br>(0 - 0)                | 0<br>(0 - 0)                | 0<br>(0 - 0)                  |
| Visceral leishmaniasis                                            | 1<br>(1 - 1)                   | 0<br>(0 - 0)                | 0<br>(0 - 0)             | 0<br>(0 - 0)                | 0<br>(0 - 0)                | 0<br>(0 - 0)                  |
| Cysticercosis                                                     | 0<br>(0 - 0)                   | 0<br>(0 - 0)                | 0<br>(0 - 0)             | 0<br>(0 - 0)                | 0<br>(0 - 0)                | 0<br>(0 - 0)                  |
| Cystic echinococcosis                                             | 25<br>(20 - 30)                | 0<br>(0 - 0)                | 2<br>(2 - 2)             | 11<br>(9 - 13)              | 7<br>(6 - 9)                | 4<br>(4 - 5)                  |
| Dengue                                                            | 4<br>(3 - 6)                   | 0<br>(0 - 0)                | 1<br>(1 - 1)             | 2<br>(2 - 4)                | 1<br>(0 - 1)                | 0<br>(0 - 0)                  |
| Rabies                                                            | 5<br>(4 - 8)                   | 0<br>(0 - 1)                | 1<br>(1 - 2)             | 3<br>(2 - 4)                | 1<br>(1 - 2)                | 0<br>(0 - 0)                  |
| Intestinal nematode infections                                    | 8<br>(2 - 18)                  | 2<br>(0 - 9)                | 2<br>(0 - 7)             | 2<br>(0 - 7)                | 1<br>(0 - 6)                | 1<br>(0 - 6)                  |
| Ascariasis                                                        | 8<br>(2 - 18)                  | 2<br>(0 - 9)                | 2<br>(0 - 7)             | 2<br>(0 - 7)                | 1<br>(0 - 6)                | 1<br>(0 - 6)                  |
| Other neglected tropical diseases                                 | 56<br>(43 - 72)                | 5<br>(3 - 9)                | 1<br>(1 - 2)             | 23<br>(16 - 32)             | 14<br>(9 - 20)              | 14<br>(9 - 20)                |
| Maternal disorders                                                | --                             | --                          | --                       | --                          | --                          | --                            |
| Maternal hemorrhage                                               | --                             | --                          | --                       | --                          | --                          | --                            |

Web Table 31- Turkey deaths with 95% UI by age, sex, and cause in 2013

| Cause                                                            | Males, All Ages                | Males, 0-4 Years         | Males, 5-14 Years      | Males, 15-49 Years          | Males, 50-69 Years          | Males, 70-80 Years            |
|------------------------------------------------------------------|--------------------------------|--------------------------|------------------------|-----------------------------|-----------------------------|-------------------------------|
| Maternal sepsis and other maternal infections                    | --                             | --                       | --                     | --                          | --                          | --                            |
| Maternal hypertensive disorders                                  | --                             | --                       | --                     | --                          | --                          | --                            |
| Maternal obstructed labor                                        | --                             | --                       | --                     | --                          | --                          | --                            |
| Maternal abortive outcome                                        | --                             | --                       | --                     | --                          | --                          | --                            |
| Indirect maternal deaths                                         | --                             | --                       | --                     | --                          | --                          | --                            |
| Late maternal deaths                                             | --                             | --                       | --                     | --                          | --                          | --                            |
| Maternal deaths aggravated by HIV/AIDS                           | --                             | --                       | --                     | --                          | --                          | --                            |
| Other maternal disorders                                         | --                             | --                       | --                     | --                          | --                          | --                            |
| Neonatal disorders                                               | 5,247<br>(4,334 - 6,252)       | 5,247<br>(4,334 - 6,252) | --                     | --                          | --                          | --                            |
| Neonatal preterm birth complications                             | 2,674<br>(1,800 - 3,699)       | 2,674<br>(1,800 - 3,699) | --                     | --                          | --                          | --                            |
| Neonatal encephalopathy due to birth asphyxia and trauma         | 729<br>(414 - 1,219)           | 729<br>(414 - 1,219)     | --                     | --                          | --                          | --                            |
| Neonatal sepsis and other neonatal infections                    | 671<br>(315 - 1,382)           | 671<br>(315 - 1,382)     | --                     | --                          | --                          | --                            |
| Hemolytic disease and other neonatal jaundice                    | 41<br>(10 - 120)               | 41<br>(10 - 120)         | --                     | --                          | --                          | --                            |
| Other neonatal disorders                                         | 1,132<br>(479 - 1,797)         | 1,132<br>(479 - 1,797)   | --                     | --                          | --                          | --                            |
| Nutritional deficiencies                                         | 462<br>(302 - 736)             | 32<br>(16 - 61)          | 12<br>(7 - 19)         | 58<br>(37 - 90)             | 65<br>(40 - 108)            | 295<br>(188 - 498)            |
| Protein-energy malnutrition                                      | 219<br>(104 - 343)             | 23<br>(11 - 47)          | 8<br>(4 - 13)          | 25<br>(13 - 41)             | 25<br>(11 - 43)             | 137<br>(55 - 235)             |
| Iodine deficiency                                                | 5<br>(1 - 17)                  | 0<br>(0 - 3)             | 0<br>(0 - 2)           | 1<br>(0 - 4)                | 1<br>(0 - 6)                | 2<br>(0 - 14)                 |
| Iron-deficiency anemia                                           | 176<br>(82 - 359)              | 4<br>(1 - 10)            | 2<br>(1 - 5)           | 19<br>(10 - 36)             | 28<br>(13 - 51)             | 123<br>(52 - 267)             |
| Other nutritional deficiencies                                   | 62<br>(27 - 121)               | 4<br>(1 - 11)            | 2<br>(1 - 4)           | 13<br>(6 - 25)              | 11<br>(5 - 20)              | 33<br>(11 - 67)               |
| Other communicable, maternal, neonatal, and nutritional diseases | 429<br>(323 - 557)             | 73<br>(28 - 139)         | 24<br>(13 - 37)        | 105<br>(75 - 140)           | 120<br>(80 - 172)           | 107<br>(73 - 160)             |
| Sexually transmitted diseases excluding HIV                      | 71<br>(24 - 135)               | 45<br>(4 - 99)           | 4<br>(1 - 8)           | 9<br>(6 - 15)               | 5<br>(2 - 12)               | 9<br>(3 - 28)                 |
| Syphilis                                                         | 64<br>(18 - 125)               | 45<br>(4 - 99)           | 3<br>(1 - 7)           | 5<br>(3 - 8)                | 4<br>(2 - 9)                | 7<br>(2 - 24)                 |
| Chlamydial infection                                             | --                             | --                       | --                     | --                          | --                          | --                            |
| Gonococcal infection                                             | 4<br>(3 - 8)                   | --                       | 0<br>(0 - 0)           | 2<br>(1 - 4)                | 1<br>(0 - 2)                | 1<br>(0 - 3)                  |
| Other sexually transmitted diseases                              | 3<br>(2 - 5)                   | --                       | 0<br>(0 - 0)           | 2<br>(1 - 3)                | 1<br>(0 - 1)                | 0<br>(0 - 1)                  |
| Hepatitis                                                        | 162<br>(128 - 212)             | 9<br>(5 - 17)            | 4<br>(3 - 6)           | 41<br>(29 - 57)             | 64<br>(45 - 90)             | 44<br>(31 - 62)               |
| Acute hepatitis A                                                | 10<br>(3 - 22)                 | 3<br>(1 - 6)             | 0<br>(0 - 1)           | 4<br>(1 - 9)                | 2<br>(1 - 6)                | 1<br>(0 - 2)                  |
| Acute hepatitis B                                                | 110<br>(77 - 150)              | 6<br>(2 - 11)            | 1<br>(0 - 1)           | 19<br>(10 - 30)             | 48<br>(31 - 70)             | 38<br>(25 - 53)               |
| Acute hepatitis C                                                | 2<br>(0 - 6)                   | --                       | 0<br>(0 - 0)           | 1<br>(0 - 2)                | 1<br>(0 - 3)                | 1<br>(0 - 2)                  |
| Acute hepatitis E                                                | 40<br>(22 - 68)                | 1<br>(0 - 3)             | 3<br>(2 - 5)           | 18<br>(10 - 29)             | 12<br>(5 - 25)              | 5<br>(1 - 13)                 |
| Other infectious diseases                                        | 196<br>(108 - 282)             | 19<br>(6 - 46)           | 16<br>(6 - 29)         | 56<br>(29 - 86)             | 51<br>(21 - 90)             | 55<br>(26 - 99)               |
| Non-communicable diseases                                        | 194,141<br>(163,530 - 228,574) | 4,828<br>(3,833 - 5,842) | 1,157<br>(972 - 1,335) | 23,615<br>(18,868 - 28,888) | 64,373<br>(52,645 - 78,847) | 100,168<br>(86,324 - 114,551) |
| Neoplasms                                                        | 60,059<br>(49,586 - 72,257)    | 129<br>(81 - 192)        | 455<br>(344 - 552)     | 9,181<br>(7,308 - 11,342)   | 26,878<br>(21,846 - 32,912) | 23,416<br>(19,663 - 28,006)   |
| Esophageal cancer                                                | 626<br>(418 - 818)             | --                       | --                     | 106<br>(67 - 146)           | 269<br>(169 - 365)          | 252<br>(171 - 346)            |
| Stomach cancer                                                   | 5,911<br>(4,827 - 7,254)       | --                       | --                     | 952<br>(714 - 1,233)        | 2,516<br>(1,986 - 3,199)    | 2,442<br>(1,960 - 3,085)      |
| Liver cancer                                                     | 2,196<br>(1,765 - 2,705)       | --                       | 7<br>(4 - 11)          | 274<br>(201 - 364)          | 1,119<br>(860 - 1,422)      | 797<br>(602 - 1,016)          |
| Liver cancer due to hepatitis B                                  | 937<br>(657 - 1,261)           | --                       | 4<br>(2 - 6)           | 154<br>(102 - 213)          | 516<br>(355 - 729)          | 263<br>(172 - 375)            |
| Liver cancer due to hepatitis C                                  | 1,006<br>(686 - 1,364)         | --                       | 1<br>(0 - 2)           | 90<br>(50 - 139)            | 486<br>(307 - 685)          | 430<br>(290 - 580)            |
| Liver cancer due to alcohol use                                  | 134<br>(67 - 221)              | --                       | --                     | 8<br>(2 - 16)               | 58<br>(27 - 102)            | 68<br>(33 - 113)              |
| Liver cancer due to other causes                                 | 119<br>(44 - 214)              | --                       | 2<br>(1 - 4)           | 22<br>(9 - 39)              | 59<br>(19 - 116)            | 37<br>(12 - 69)               |

Web Table 31- Turkey deaths with 95% UI by age, sex, and cause in 2013

| Cause                                         | Males, All Ages             | Males, 0-4 Years   | Males, 5-14 Years  | Males, 15-49 Years        | Males, 50-69 Years          | Males, 70-80 Years          |
|-----------------------------------------------|-----------------------------|--------------------|--------------------|---------------------------|-----------------------------|-----------------------------|
| Larynx cancer                                 | 1,321<br>(931 - 1,706)      | --                 | --                 | 152<br>(107 - 221)        | 627<br>(426 - 845)          | 542<br>(380 - 711)          |
| Tracheal, bronchus and lung cancer            | 22,751<br>(18,673 - 28,058) | --                 | --                 | 2,522<br>(1,913 - 3,299)  | 12,431<br>(10,066 - 15,410) | 7,797<br>(6,467 - 9,548)    |
| Breast cancer                                 | 104<br>(74 - 144)           | --                 | --                 | 20<br>(12 - 28)           | 44<br>(27 - 66)             | 41<br>(25 - 64)             |
| Cervical cancer                               | --                          | --                 | --                 | --                        | --                          | --                          |
| Uterine cancer                                | --                          | --                 | --                 | --                        | --                          | --                          |
| Prostate cancer                               | 4,467<br>(2,898 - 6,828)    | --                 | --                 | 52<br>(31 - 96)           | 872<br>(535 - 1,302)        | 3,542<br>(2,275 - 5,500)    |
| Colon and rectum cancer                       | 4,661<br>(3,785 - 5,732)    | --                 | --                 | 807<br>(623 - 1,008)      | 1,815<br>(1,434 - 2,289)    | 2,039<br>(1,633 - 2,515)    |
| Lip and oral cavity cancer                    | 343<br>(232 - 446)          | --                 | --                 | 77<br>(51 - 106)          | 163<br>(107 - 216)          | 104<br>(72 - 145)           |
| Nasopharynx cancer                            | 367<br>(279 - 473)          | --                 | 3<br>(1 - 8)       | 139<br>(97 - 187)         | 170<br>(124 - 231)          | 55<br>(38 - 75)             |
| Other pharynx cancer                          | 151<br>(111 - 195)          | --                 | --                 | 25<br>(17 - 35)           | 93<br>(66 - 126)            | 33<br>(22 - 46)             |
| Gallbladder and biliary tract cancer          | 458<br>(271 - 592)          | --                 | --                 | 52<br>(32 - 72)           | 201<br>(122 - 277)          | 205<br>(107 - 272)          |
| Pancreatic cancer                             | 2,883<br>(2,364 - 3,521)    | --                 | --                 | 406<br>(302 - 530)        | 1,392<br>(1,101 - 1,760)    | 1,085<br>(863 - 1,355)      |
| Malignant skin melanoma                       | 269<br>(137 - 417)          | --                 | --                 | 53<br>(26 - 86)           | 99<br>(44 - 145)            | 118<br>(66 - 199)           |
| Non-melanoma skin cancer                      | 327<br>(182 - 438)          | --                 | --                 | 53<br>(33 - 78)           | 87<br>(45 - 126)            | 187<br>(95 - 265)           |
| Ovarian cancer                                | --                          | --                 | --                 | --                        | --                          | --                          |
| Testicular cancer                             | 254<br>(129 - 370)          | --                 | --                 | 211<br>(105 - 318)        | 28<br>(15 - 41)             | 15<br>(8 - 22)              |
| Kidney cancer                                 | 1,033<br>(821 - 1,289)      | 3<br>(1 - 5)       | 8<br>(5 - 13)      | 155<br>(111 - 204)        | 515<br>(394 - 678)          | 353<br>(276 - 454)          |
| Bladder cancer                                | 2,945<br>(2,265 - 4,863)    | --                 | --                 | 152<br>(100 - 271)        | 1,315<br>(946 - 2,301)      | 1,477<br>(1,111 - 2,352)    |
| Brain and nervous system cancer               | 2,432<br>(1,328 - 3,170)    | 27<br>(8 - 52)     | 109<br>(43 - 160)  | 825<br>(420 - 1,124)      | 971<br>(583 - 1,330)        | 499<br>(265 - 682)          |
| Thyroid cancer                                | 178<br>(133 - 230)          | --                 | 1<br>(0 - 1)       | 39<br>(26 - 55)           | 88<br>(64 - 120)            | 51<br>(32 - 68)             |
| Mesothelioma                                  | 351<br>(271 - 453)          | --                 | --                 | 70<br>(46 - 104)          | 170<br>(124 - 233)          | 111<br>(77 - 157)           |
| Hodgkin lymphoma                              | 192<br>(144 - 264)          | 1<br>(1 - 2)       | 9<br>(4 - 19)      | 101<br>(72 - 148)         | 55<br>(37 - 83)             | 26<br>(17 - 39)             |
| Non-Hodgkin lymphoma                          | 1,594<br>(1,014 - 2,060)    | 3<br>(1 - 4)       | 46<br>(31 - 64)    | 518<br>(292 - 699)        | 592<br>(403 - 792)          | 435<br>(237 - 595)          |
| Multiple myeloma                              | 577<br>(344 - 790)          | --                 | --                 | 81<br>(47 - 114)          | 296<br>(184 - 405)          | 200<br>(101 - 299)          |
| Leukemia                                      | 2,659<br>(2,164 - 3,208)    | 77<br>(45 - 122)   | 220<br>(170 - 282) | 987<br>(772 - 1,261)      | 654<br>(510 - 832)          | 721<br>(578 - 886)          |
| Other neoplasms                               | 1,008<br>(323 - 1,558)      | 19<br>(4 - 33)     | 51<br>(10 - 89)    | 354<br>(104 - 561)        | 296<br>(102 - 486)          | 288<br>(90 - 464)           |
| Cardiovascular diseases                       | 73,482<br>(61,533 - 87,870) | 241<br>(164 - 338) | 163<br>(124 - 207) | 8,865<br>(7,022 - 10,997) | 23,445<br>(19,047 - 29,084) | 40,767<br>(34,681 - 48,117) |
| Rheumatic heart disease                       | 200<br>(146 - 319)          | 0<br>(0 - 1)       | 1<br>(1 - 2)       | 35<br>(23 - 60)           | 57<br>(40 - 90)             | 107<br>(73 - 164)           |
| Ischemic heart disease                        | 44,110<br>(36,189 - 54,364) | 19<br>(9 - 37)     | 9<br>(5 - 14)      | 5,962<br>(4,606 - 7,584)  | 16,584<br>(13,320 - 20,535) | 21,536<br>(17,679 - 27,335) |
| Cerebrovascular disease                       | 18,369<br>(14,652 - 23,628) | 85<br>(55 - 125)   | 87<br>(63 - 116)   | 1,239<br>(892 - 1,642)    | 3,926<br>(2,869 - 5,285)    | 13,032<br>(10,470 - 16,697) |
| Ischemic stroke                               | 9,935<br>(7,763 - 13,089)   | 2<br>(1 - 4)       | 5<br>(3 - 8)       | 176<br>(115 - 259)        | 1,437<br>(1,002 - 2,007)    | 8,314<br>(6,532 - 10,893)   |
| Hemorrhagic stroke                            | 8,433<br>(6,466 - 11,107)   | 83<br>(53 - 122)   | 82<br>(59 - 109)   | 1,063<br>(763 - 1,414)    | 2,488<br>(1,768 - 3,363)    | 4,717<br>(3,431 - 6,370)    |
| Hypertensive heart disease                    | 4,339<br>(2,798 - 6,042)    | 1<br>(0 - 1)       | 1<br>(0 - 1)       | 257<br>(157 - 369)        | 845<br>(487 - 1,209)        | 3,237<br>(2,034 - 4,620)    |
| Cardiomyopathy and myocarditis                | 1,021<br>(780 - 1,338)      | 68<br>(40 - 105)   | 41<br>(27 - 57)    | 419<br>(283 - 564)        | 257<br>(182 - 375)          | 237<br>(168 - 373)          |
| Atrial fibrillation and flutter               | 442<br>(326 - 594)          | --                 | --                 | 8<br>(5 - 11)             | 82<br>(55 - 111)            | 352<br>(251 - 488)          |
| Aortic aneurysm                               | 1,384<br>(1,096 - 1,788)    | --                 | --                 | 257<br>(191 - 342)        | 569<br>(414 - 746)          | 557<br>(423 - 748)          |
| Peripheral vascular disease                   | 441<br>(352 - 555)          | --                 | --                 | 32<br>(22 - 46)           | 141<br>(105 - 185)          | 267<br>(209 - 346)          |
| Endocarditis                                  | 250<br>(159 - 388)          | 25<br>(14 - 43)    | 7<br>(4 - 12)      | 69<br>(41 - 112)          | 85<br>(49 - 138)            | 65<br>(40 - 103)            |
| Other cardiovascular and circulatory diseases | 2,925<br>(2,293 - 3,841)    | 43<br>(25 - 69)    | 17<br>(11 - 26)    | 586<br>(416 - 776)        | 900<br>(656 - 1,205)        | 1,378<br>(1,058 - 1,903)    |
| Chronic respiratory diseases                  | 24,076<br>(15,873 - 29,389) | 77<br>(47 - 115)   | 53<br>(40 - 67)    | 1,393<br>(1,020 - 2,198)  | 5,891<br>(4,236 - 7,531)    | 16,661<br>(9,636 - 20,613)  |

Web Table 31- Turkey deaths with 95% UI by age, sex, and cause in 2013

| Cause                                               | Males, All Ages             | Males, 0-4 Years  | Males, 5-14 Years | Males, 15-49 Years   | Males, 50-69 Years       | Males, 70-80 Years         |
|-----------------------------------------------------|-----------------------------|-------------------|-------------------|----------------------|--------------------------|----------------------------|
| Chronic obstructive pulmonary disease               | 21,019<br>(13,365 - 25,867) | 36<br>(17 - 62)   | 14<br>(10 - 19)   | 875<br>(634 - 1,346) | 5,165<br>(3,717 - 6,635) | 14,929<br>(8,621 - 18,487) |
| Pneumoconiosis                                      | 436<br>(293 - 627)          | 1<br>(0 - 2)      | 2<br>(1 - 3)      | 152<br>(96 - 286)    | 92<br>(54 - 140)         | 189<br>(102 - 291)         |
| Silicosis                                           | 181<br>(118 - 264)          | 0<br>(0 - 0)      | 1<br>(0 - 1)      | 44<br>(27 - 85)      | 21<br>(12 - 32)          | 115<br>(60 - 177)          |
| Asbestosis                                          | 26<br>(17 - 39)             | 0<br>(0 - 0)      | 0<br>(0 - 1)      | 12<br>(8 - 22)       | 7<br>(4 - 11)            | 6<br>(3 - 10)              |
| Coal workers pneumoconiosis                         | 22<br>(14 - 32)             | 0<br>(0 - 0)      | 0<br>(0 - 1)      | 5<br>(3 - 9)         | 5<br>(3 - 8)             | 12<br>(6 - 18)             |
| Other pneumoconiosis                                | 207<br>(141 - 306)          | 0<br>(0 - 1)      | 1<br>(0 - 1)      | 91<br>(55 - 169)     | 59<br>(34 - 92)          | 56<br>(30 - 89)            |
| Asthma                                              | 939<br>(690 - 1,181)        | 4<br>(2 - 7)      | 24<br>(17 - 32)   | 167<br>(114 - 294)   | 218<br>(154 - 296)       | 526<br>(308 - 699)         |
| Interstitial lung disease and pulmonary sarcoidosis | 1,441<br>(853 - 2,019)      | 2<br>(1 - 4)      | 4<br>(2 - 6)      | 164<br>(102 - 309)   | 376<br>(220 - 554)       | 895<br>(462 - 1,331)       |
| Other chronic respiratory diseases                  | 242<br>(179 - 312)          | 35<br>(20 - 55)   | 9<br>(6 - 14)     | 35<br>(23 - 65)      | 40<br>(27 - 56)          | 122<br>(71 - 173)          |
| Cirrhosis                                           | 2,685<br>(2,171 - 3,289)    | 7<br>(3 - 13)     | 15<br>(11 - 21)   | 597<br>(457 - 758)   | 1,184<br>(931 - 1,501)   | 882<br>(705 - 1,094)       |
| Cirrhosis due to hepatitis B                        | 1,586<br>(1,156 - 2,084)    | 1<br>(0 - 2)      | 5<br>(3 - 8)      | 342<br>(235 - 462)   | 705<br>(492 - 955)       | 534<br>(377 - 716)         |
| Cirrhosis due to hepatitis C                        | 437<br>(194 - 787)          | 0<br>(0 - 1)      | 2<br>(0 - 3)      | 113<br>(59 - 209)    | 207<br>(82 - 375)        | 115<br>(42 - 224)          |
| Cirrhosis due to alcohol use                        | 424<br>(270 - 634)          | --                | --                | 60<br>(34 - 98)      | 180<br>(112 - 277)       | 185<br>(107 - 291)         |
| Cirrhosis due to other causes                       | 238<br>(136 - 355)          | 6<br>(3 - 11)     | 9<br>(5 - 13)     | 82<br>(47 - 124)     | 93<br>(45 - 149)         | 48<br>(24 - 82)            |
| Digestive diseases                                  | 2,878<br>(2,307 - 4,093)    | 13<br>(7 - 21)    | 33<br>(23 - 53)   | 574<br>(404 - 1,033) | 803<br>(606 - 1,129)     | 1,455<br>(1,176 - 1,916)   |
| Peptic ulcer disease                                | 836<br>(466 - 1,745)        | 0<br>(0 - 1)      | 9<br>(5 - 16)     | 232<br>(124 - 539)   | 229<br>(127 - 450)       | 366<br>(178 - 783)         |
| Gastritis and duodenitis                            | 16<br>(9 - 39)              | 0<br>(0 - 1)      | 1<br>(0 - 1)      | 4<br>(2 - 11)        | 4<br>(2 - 10)            | 7<br>(3 - 16)              |
| Appendicitis                                        | 31<br>(15 - 49)             | 1<br>(0 - 2)      | 3<br>(1 - 5)      | 14<br>(6 - 23)       | 8<br>(3 - 15)            | 5<br>(2 - 10)              |
| Paralytic ileus and intestinal obstruction          | 516<br>(266 - 800)          | 1<br>(0 - 3)      | 6<br>(3 - 12)     | 63<br>(30 - 112)     | 128<br>(63 - 213)        | 318<br>(163 - 490)         |
| Inguinal, femoral, and abdominal hernia             | 89<br>(44 - 130)            | 1<br>(0 - 1)      | 3<br>(2 - 6)      | 11<br>(6 - 20)       | 23<br>(11 - 36)          | 51<br>(23 - 79)            |
| Inflammatory bowel disease                          | 156<br>(100 - 226)          | 1<br>(0 - 2)      | 4<br>(3 - 8)      | 52<br>(31 - 85)      | 46<br>(28 - 69)          | 53<br>(32 - 79)            |
| Vascular intestinal disorders                       | 322<br>(136 - 634)          | 0<br>(0 - 1)      | 1<br>(0 - 2)      | 39<br>(15 - 86)      | 110<br>(45 - 214)        | 172<br>(72 - 337)          |
| Gallbladder and biliary diseases                    | 417<br>(133 - 623)          | 5<br>(2 - 9)      | 3<br>(2 - 4)      | 36<br>(12 - 56)      | 102<br>(32 - 161)        | 272<br>(76 - 417)          |
| Pancreatitis                                        | 330<br>(202 - 509)          | 0<br>(0 - 1)      | 1<br>(0 - 1)      | 76<br>(43 - 135)     | 98<br>(60 - 151)         | 155<br>(92 - 238)          |
| Other digestive diseases                            | 164<br>(112 - 246)          | 2<br>(1 - 5)      | 3<br>(2 - 5)      | 46<br>(29 - 78)      | 57<br>(36 - 88)          | 56<br>(36 - 85)            |
| Neurological disorders                              | 11,450<br>(9,208 - 14,062)  | 111<br>(40 - 205) | 121<br>(82 - 170) | 989<br>(675 - 1,324) | 1,328<br>(996 - 1,776)   | 8,900<br>(6,851 - 11,082)  |
| Alzheimer disease and other dementias               | 8,713<br>(6,680 - 10,905)   | --                | --                | 5<br>(1 - 12)        | 824<br>(556 - 1,153)     | 7,884<br>(5,931 - 9,963)   |
| Parkinson disease                                   | 918<br>(633 - 1,236)        | --                | --                | 24<br>(17 - 33)      | 147<br>(100 - 202)       | 747<br>(485 - 1,045)       |
| Epilepsy                                            | 895<br>(462 - 1,265)        | 82<br>(21 - 168)  | 78<br>(41 - 122)  | 498<br>(271 - 725)   | 122<br>(53 - 194)        | 115<br>(53 - 182)          |
| Multiple sclerosis                                  | 90<br>(45 - 188)            | --                | --                | 37<br>(17 - 78)      | 30<br>(14 - 55)          | 23<br>(12 - 55)            |
| Other neurological disorders                        | 834<br>(602 - 1,059)        | 29<br>(11 - 42)   | 43<br>(32 - 60)   | 424<br>(307 - 570)   | 205<br>(146 - 267)       | 132<br>(93 - 169)          |
| Mental and substance use disorders                  | 556<br>(420 - 760)          | 3<br>(2 - 4)      | 0<br>(0 - 0)      | 207<br>(155 - 318)   | 275<br>(165 - 376)       | 71<br>(53 - 94)            |
| Schizophrenia                                       | 76<br>(42 - 104)            | --                | --                | 24<br>(13 - 36)      | 33<br>(17 - 49)          | 18<br>(10 - 28)            |
| Alcohol use disorders                               | 312<br>(182 - 449)          | --                | --                | 70<br>(45 - 123)     | 212<br>(108 - 301)       | 30<br>(18 - 44)            |
| Drug use disorders                                  | 167<br>(129 - 235)          | 3<br>(2 - 4)      | --                | 111<br>(83 - 166)    | 29<br>(22 - 41)          | 23<br>(17 - 32)            |
| Opioid use disorders                                | 91<br>(70 - 129)            | 2<br>(1 - 2)      | --                | 62<br>(46 - 94)      | 15<br>(11 - 21)          | 13<br>(9 - 18)             |
| Cocaine use disorders                               | 2<br>(1 - 3)                | 0<br>(0 - 0)      | --                | 1<br>(1 - 2)         | 0<br>(0 - 0)             | 0<br>(0 - 0)               |
| Amphetamine use disorders                           | 2<br>(1 - 2)                | 0<br>(0 - 0)      | --                | 1<br>(1 - 2)         | 0<br>(0 - 0)             | 0<br>(0 - 0)               |
| Other drug use disorders                            | 72<br>(55 - 99)             | 1<br>(1 - 1)      | --                | 47<br>(34 - 71)      | 14<br>(10 - 19)          | 10<br>(7 - 14)             |
| Eating disorders                                    | 2<br>(1 - 3)                | --                | 0<br>(0 - 0)      | 2<br>(1 - 2)         | --                       | --                         |

Web Table 31- Turkey deaths with 95% UI by age, sex, and cause in 2013

| Cause                                               | Males, All Ages            | Males, 0-4 Years         | Males, 5-14 Years  | Males, 15-49 Years     | Males, 50-69 Years       | Males, 70-80 Years       |
|-----------------------------------------------------|----------------------------|--------------------------|--------------------|------------------------|--------------------------|--------------------------|
| Anorexia nervosa                                    | 2<br>(1 - 3)               | --                       | 0<br>(0 - 0)       | 2<br>(1 - 2)           | --                       | --                       |
| Diabetes, urogenital, blood, and endocrine diseases | 14,103<br>(9,597 - 17,421) | 207<br>(85 - 289)        | 114<br>(67 - 150)  | 1,529<br>(971 - 1,930) | 4,421<br>(2,949 - 5,657) | 7,833<br>(5,314 - 9,636) |
| Diabetes mellitus                                   | 7,831<br>(6,437 - 9,582)   | 15<br>(10 - 22)          | 11<br>(7 - 15)     | 585<br>(442 - 741)     | 2,732<br>(2,164 - 3,476) | 4,488<br>(3,610 - 5,561) |
| Acute glomerulonephritis                            | 11<br>(7 - 14)             | 1<br>(1 - 3)             | 1<br>(0 - 1)       | 4<br>(2 - 5)           | 3<br>(2 - 4)             | 3<br>(2 - 4)             |
| Chronic kidney disease                              | 5,105<br>(783 - 6,652)     | 38<br>(8 - 59)           | 32<br>(8 - 45)     | 619<br>(135 - 845)     | 1,453<br>(233 - 2,000)   | 2,963<br>(390 - 3,926)   |
| Chronic kidney disease due to diabetes mellitus     | 6<br>(2 - 10)              | 1<br>(0 - 1)             | 1<br>(1 - 2)       | 3<br>(1 - 5)           | 1<br>(0 - 1)             | 0<br>(0 - 0)             |
| Chronic kidney disease due to hypertension          | 2,537<br>(600 - 3,446)     | 1<br>(0 - 2)             | 2<br>(1 - 4)       | 256<br>(84 - 367)      | 672<br>(181 - 965)       | 1,606<br>(326 - 2,239)   |
| Chronic kidney disease due to glomerulonephritis    | 205<br>(52 - 288)          | 11<br>(4 - 18)           | 5<br>(3 - 8)       | 42<br>(14 - 66)        | 71<br>(16 - 108)         | 75<br>(12 - 117)         |
| Chronic kidney disease due to other causes          | 2,357<br>(91 - 3,398)      | 26<br>(3 - 44)           | 23<br>(3 - 35)     | 318<br>(23 - 477)      | 709<br>(30 - 1,085)      | 1,282<br>(30 - 1,982)    |
| Urinary diseases and male infertility               | 312<br>(235 - 466)         | 3<br>(2 - 6)             | 3<br>(2 - 6)       | 53<br>(32 - 119)       | 80<br>(58 - 124)         | 173<br>(124 - 243)       |
| Interstitial nephritis and urinary tract infections | 66<br>(20 - 175)           | 1<br>(0 - 2)             | 1<br>(0 - 4)       | 22<br>(6 - 72)         | 17<br>(5 - 46)           | 25<br>(6 - 67)           |
| Urolithiasis                                        | 7<br>(4 - 10)              | --                       | 0<br>(0 - 1)       | 2<br>(1 - 4)           | 2<br>(1 - 3)             | 3<br>(1 - 5)             |
| Other urinary diseases                              | 240<br>(152 - 328)         | 3<br>(1 - 5)             | 2<br>(1 - 3)       | 29<br>(13 - 48)        | 61<br>(35 - 87)          | 146<br>(92 - 208)        |
| Gynecological diseases                              | --                         | --                       | --                 | --                     | --                       | --                       |
| Uterine fibroids                                    | --                         | --                       | --                 | --                     | --                       | --                       |
| Polycystic ovarian syndrome                         | --                         | --                       | --                 | --                     | --                       | --                       |
| Endometriosis                                       | --                         | --                       | --                 | --                     | --                       | --                       |
| Genital prolapse                                    | --                         | --                       | --                 | --                     | --                       | --                       |
| Other gynecological diseases                        | --                         | --                       | --                 | --                     | --                       | --                       |
| Hemoglobinopathies and hemolytic anemias            | 457<br>(292 - 701)         | 60<br>(36 - 96)          | 44<br>(27 - 70)    | 180<br>(110 - 286)     | 63<br>(38 - 100)         | 110<br>(68 - 181)        |
| Thalassemias                                        | 134<br>(86 - 207)          | 34<br>(20 - 55)          | 25<br>(15 - 39)    | 76<br>(46 - 122)       | 0<br>(0 - 0)             | 0<br>(0 - 0)             |
| Sickle cell disorders                               | 140<br>(88 - 215)          | 17<br>(10 - 28)          | 15<br>(10 - 24)    | 71<br>(43 - 113)       | 33<br>(20 - 53)          | 3<br>(2 - 6)             |
| G6PD deficiency                                     | 8<br>(5 - 13)              | 1<br>(0 - 1)             | 1<br>(1 - 1)       | 4<br>(2 - 6)           | 2<br>(1 - 3)             | 1<br>(1 - 2)             |
| Other hemoglobinopathies and hemolytic anemias      | 174<br>(111 - 279)         | 8<br>(5 - 13)            | 3<br>(2 - 5)       | 29<br>(18 - 46)        | 28<br>(17 - 44)          | 105<br>(65 - 173)        |
| Endocrine, metabolic, blood, and immune disorders   | 386<br>(20 - 546)          | 88<br>(3 - 149)          | 23<br>(1 - 37)     | 88<br>(5 - 136)        | 91<br>(4 - 143)          | 96<br>(4 - 155)          |
| Musculoskeletal disorders                           | 449<br>(328 - 665)         | --                       | 15<br>(10 - 21)    | 197<br>(141 - 286)     | 114<br>(80 - 169)        | 124<br>(89 - 188)        |
| Rheumatoid arthritis                                | 55<br>(36 - 83)            | --                       | 1<br>(0 - 2)       | 11<br>(6 - 17)         | 23<br>(13 - 37)          | 21<br>(12 - 34)          |
| Other musculoskeletal disorders                     | 394<br>(283 - 586)         | --                       | 14<br>(10 - 20)    | 186<br>(132 - 271)     | 90<br>(63 - 137)         | 103<br>(75 - 157)        |
| Other non-communicable diseases                     | 4,404<br>(3,448 - 5,400)   | 4,040<br>(3,107 - 5,024) | 188<br>(127 - 298) | 83<br>(46 - 112)       | 33<br>(12 - 45)          | 59<br>(18 - 78)          |
| Congenital anomalies                                | 4,161<br>(3,207 - 5,207)   | 3,869<br>(2,943 - 4,913) | 187<br>(126 - 297) | 68<br>(41 - 94)        | 14<br>(9 - 19)           | 23<br>(13 - 32)          |
| Neural tube defects                                 | 131<br>(55 - 266)          | 129<br>(53 - 264)        | 1<br>(0 - 2)       | 1<br>(0 - 1)           | 0<br>(0 - 0)             | 0<br>(0 - 0)             |
| Congenital heart anomalies                          | 1,901<br>(1,349 - 2,532)   | 1,816<br>(1,255 - 2,434) | 74<br>(43 - 135)   | 8<br>(4 - 12)          | 1<br>(1 - 2)             | 1<br>(1 - 2)             |
| Cleft lip and cleft palate                          | 13<br>(3 - 29)             | 13<br>(3 - 29)           | --                 | --                     | --                       | --                       |
| Down syndrome                                       | 196<br>(105 - 312)         | 160<br>(78 - 274)        | 19<br>(10 - 33)    | 16<br>(9 - 22)         | 2<br>(1 - 2)             | 0<br>(0 - 1)             |
| Chromosomal unbalanced rearrangements               | 75<br>(45 - 117)           | 70<br>(41 - 112)         | 3<br>(1 - 5)       | 1<br>(1 - 2)           | 0<br>(0 - 1)             | 0<br>(0 - 1)             |
| Other congenital anomalies                          | 1,845<br>(1,363 - 2,459)   | 1,682<br>(1,217 - 2,283) | 90<br>(59 - 135)   | 42<br>(25 - 58)        | 10<br>(6 - 14)           | 21<br>(12 - 29)          |
| Skin and subcutaneous diseases                      | 75<br>(13 - 102)           | 3<br>(1 - 6)             | 1<br>(1 - 2)       | 15<br>(4 - 23)         | 19<br>(3 - 28)           | 36<br>(5 - 52)           |
| Cellulitis                                          | 8<br>(1 - 13)              | 1<br>(0 - 2)             | 0<br>(0 - 1)       | 1<br>(0 - 2)           | 2<br>(0 - 4)             | 4<br>(0 - 6)             |
| Pyoderma                                            | 34<br>(6 - 49)             | 1<br>(0 - 3)             | 0<br>(0 - 1)       | 7<br>(2 - 11)          | 10<br>(2 - 14)           | 15<br>(2 - 24)           |
| Decubitus ulcer                                     | 25<br>(4 - 35)             | 0<br>(0 - 0)             | 0<br>(0 - 1)       | 4<br>(1 - 6)           | 6<br>(1 - 9)             | 15<br>(2 - 22)           |



Web Table 31- Turkey deaths with 95% UI by age, sex, and cause in 2013

| Cause                                           | Males, All Ages             | Males, 0-4 Years   | Males, 5-14 Years    | Males, 15-49 Years          | Males, 50-69 Years       | Males, 70-80 Years       |
|-------------------------------------------------|-----------------------------|--------------------|----------------------|-----------------------------|--------------------------|--------------------------|
| Other skin and subcutaneous diseases            | 9<br>(1 - 13)               | 1<br>(0 - 1)       | 0<br>(0 - 1)         | 3<br>(1 - 4)                | 2<br>(0 - 4)             | 3<br>(0 - 4)             |
| Sudden infant death syndrome                    | 168<br>(65 - 327)           | 168<br>(65 - 327)  | --                   | --                          | --                       | --                       |
| Injuries                                        | 18,854<br>(14,801 - 23,110) | 552<br>(378 - 752) | 911<br>(766 - 1,066) | 12,930<br>(10,035 - 16,018) | 2,312<br>(1,739 - 2,926) | 2,150<br>(1,560 - 2,656) |
| Transport injuries                              | 7,449<br>(5,957 - 9,093)    | 185<br>(105 - 286) | 482<br>(378 - 596)   | 5,039<br>(3,865 - 6,242)    | 1,012<br>(759 - 1,331)   | 730<br>(573 - 1,062)     |
| Road injuries                                   | 7,113<br>(5,688 - 8,696)    | 174<br>(96 - 271)  | 452<br>(352 - 557)   | 4,830<br>(3,724 - 5,965)    | 963<br>(723 - 1,275)     | 694<br>(543 - 1,000)     |
| Pedestrian road injuries                        | 1,416<br>(869 - 1,964)      | 44<br>(18 - 99)    | 128<br>(67 - 210)    | 806<br>(488 - 1,177)        | 216<br>(121 - 329)       | 222<br>(131 - 338)       |
| Cyclist road injuries                           | 471<br>(333 - 632)          | 23<br>(10 - 43)    | 69<br>(45 - 98)      | 198<br>(129 - 277)          | 91<br>(55 - 135)         | 91<br>(63 - 137)         |
| Motorcyclist road injuries                      | 736<br>(454 - 1,027)        | 9<br>(5 - 16)      | 27<br>(16 - 43)      | 583<br>(344 - 839)          | 66<br>(39 - 98)          | 50<br>(31 - 83)          |
| Motor vehicle road injuries                     | 4,468<br>(3,505 - 5,725)    | 93<br>(50 - 145)   | 219<br>(147 - 298)   | 3,239<br>(2,464 - 4,157)    | 588<br>(424 - 816)       | 328<br>(224 - 525)       |
| Other road injuries                             | 22<br>(13 - 37)             | 6<br>(2 - 11)      | 8<br>(4 - 15)        | 4<br>(2 - 9)                | 1<br>(1 - 3)             | 2<br>(1 - 6)             |
| Other transport injuries                        | 336<br>(208 - 439)          | 11<br>(6 - 20)     | 30<br>(20 - 43)      | 209<br>(110 - 294)          | 49<br>(27 - 71)          | 36<br>(24 - 61)          |
| Unintentional injuries                          | 6,601<br>(4,498 - 8,153)    | 359<br>(236 - 490) | 338<br>(272 - 424)   | 3,940<br>(2,668 - 4,949)    | 758<br>(468 - 1,031)     | 1,206<br>(618 - 1,637)   |
| Falls                                           | 1,930<br>(739 - 2,644)      | 84<br>(28 - 146)   | 54<br>(29 - 80)      | 829<br>(299 - 1,182)        | 234<br>(101 - 331)       | 728<br>(224 - 1,100)     |
| Drowning                                        | 927<br>(517 - 1,334)        | 27<br>(12 - 64)    | 90<br>(56 - 168)     | 708<br>(369 - 1,058)        | 71<br>(35 - 110)         | 31<br>(21 - 49)          |
| Fire, heat, and hot substances                  | 294<br>(209 - 404)          | 31<br>(16 - 64)    | 18<br>(11 - 28)      | 154<br>(109 - 229)          | 39<br>(23 - 57)          | 52<br>(30 - 73)          |
| Poisonings                                      | 241<br>(163 - 321)          | 11<br>(5 - 19)     | 14<br>(9 - 21)       | 132<br>(90 - 196)           | 38<br>(24 - 56)          | 47<br>(24 - 64)          |
| Exposure to mechanical forces                   | 1,907<br>(993 - 2,455)      | 15<br>(8 - 23)     | 57<br>(27 - 81)      | 1,588<br>(828 - 2,067)      | 188<br>(95 - 261)        | 59<br>(36 - 78)          |
| Unintentional firearm injuries                  | 1,273<br>(536 - 1,681)      | 3<br>(1 - 6)       | 32<br>(8 - 52)       | 1,086<br>(483 - 1,461)      | 118<br>(51 - 172)        | 35<br>(13 - 51)          |
| Unintentional suffocation                       | 284<br>(153 - 381)          | 3<br>(1 - 8)       | 10<br>(5 - 19)       | 219<br>(109 - 302)          | 38<br>(21 - 57)          | 14<br>(9 - 22)           |
| Other exposure to mechanical forces             | 350<br>(204 - 448)          | 8<br>(3 - 14)      | 16<br>(7 - 24)       | 283<br>(167 - 368)          | 33<br>(16 - 47)          | 10<br>(6 - 14)           |
| Adverse effects of medical treatment            | 108<br>(5 - 235)            | 6<br>(0 - 17)      | 2<br>(1 - 5)         | 24<br>(3 - 53)              | 42<br>(1 - 101)          | 34<br>(0 - 82)           |
| Animal contact                                  | 103<br>(66 - 139)           | 29<br>(14 - 50)    | 30<br>(18 - 44)      | 22<br>(14 - 31)             | 10<br>(6 - 15)           | 11<br>(7 - 20)           |
| Venomous animal contact                         | 83<br>(48 - 117)            | 28<br>(13 - 49)    | 29<br>(17 - 42)      | 14<br>(8 - 21)              | 7<br>(4 - 11)            | 5<br>(3 - 9)             |
| Non-venomous animal contact                     | 20<br>(14 - 33)             | 1<br>(1 - 3)       | 1<br>(1 - 3)         | 7<br>(5 - 12)               | 3<br>(2 - 5)             | 7<br>(4 - 12)            |
| Foreign body                                    | 457<br>(228 - 616)          | 123<br>(49 - 191)  | 31<br>(15 - 45)      | 93<br>(53 - 146)            | 48<br>(23 - 70)          | 162<br>(82 - 239)        |
| Pulmonary aspiration and foreign body in airway | 452<br>(222 - 606)          | 122<br>(49 - 191)  | 30<br>(14 - 44)      | 90<br>(49 - 142)            | 47<br>(21 - 68)          | 162<br>(82 - 238)        |
| Foreign body in other body part                 | 6<br>(4 - 10)               | 0<br>(0 - 1)       | 1<br>(0 - 1)         | 3<br>(2 - 6)                | 1<br>(1 - 2)             | 0<br>(0 - 1)             |
| Other unintentional injuries                    | 634<br>(508 - 796)          | 33<br>(22 - 50)    | 42<br>(29 - 56)      | 389<br>(294 - 514)          | 89<br>(65 - 123)         | 82<br>(61 - 108)         |
| Self-harm and interpersonal violence            | 4,805<br>(3,319 - 6,242)    | 7<br>(3 - 15)      | 91<br>(55 - 137)     | 3,950<br>(2,667 - 5,220)    | 542<br>(368 - 725)       | 214<br>(153 - 326)       |
| Self-harm                                       | 2,960<br>(1,846 - 3,848)    | --                 | 62<br>(31 - 102)     | 2,353<br>(1,424 - 3,135)    | 372<br>(236 - 501)       | 172<br>(119 - 263)       |
| Interpersonal violence                          | 1,845<br>(1,123 - 2,573)    | 7<br>(3 - 15)      | 29<br>(13 - 48)      | 1,597<br>(962 - 2,254)      | 170<br>(100 - 262)       | 42<br>(24 - 73)          |
| Assault by firearm                              | 1,105<br>(613 - 1,731)      | 2<br>(1 - 5)       | 14<br>(5 - 25)       | 970<br>(535 - 1,537)        | 102<br>(54 - 164)        | 17<br>(8 - 34)           |
| Assault by sharp object                         | 622<br>(309 - 1,013)        | 1<br>(0 - 2)       | 9<br>(4 - 18)        | 541<br>(257 - 891)          | 55<br>(27 - 104)         | 16<br>(8 - 32)           |
| Assault by other means                          | 119<br>(68 - 224)           | 4<br>(2 - 9)       | 6<br>(3 - 12)        | 87<br>(49 - 174)            | 13<br>(6 - 25)           | 8<br>(4 - 18)            |

Web Table 31- Turkey deaths with 95% UI by age, sex, and cause in 2013

| Cause                                                             | Females, All Ages              | Females, 0-4 Years        | Females, 5-14 Years      | Females, 15-49 Years        | Females, 50-69 Years        | Females, 70-80 Years           |
|-------------------------------------------------------------------|--------------------------------|---------------------------|--------------------------|-----------------------------|-----------------------------|--------------------------------|
| All causes                                                        | 183,978<br>(164,036 - 202,894) | 9,944<br>(8,708 - 11,480) | 1,770<br>(1,606 - 1,947) | 15,045<br>(11,951 - 17,847) | 38,382<br>(31,188 - 47,003) | 118,838<br>(109,560 - 126,271) |
| Communicable, maternal, neonatal, and nutritional diseases        | 11,754<br>(10,141 - 13,355)    | 5,643<br>(4,645 - 6,717)  | 421<br>(314 - 555)       | 1,032<br>(802 - 1,344)      | 971<br>(724 - 1,215)        | 3,686<br>(2,541 - 4,651)       |
| HIV/AIDS and tuberculosis                                         | 352<br>(238 - 418)             | 11<br>(8 - 16)            | 9<br>(5 - 12)            | 100<br>(75 - 124)           | 84<br>(57 - 109)            | 148<br>(89 - 188)              |
| Tuberculosis                                                      | 310<br>(199 - 374)             | 7<br>(4 - 10)             | 8<br>(4 - 11)            | 70<br>(48 - 91)             | 79<br>(51 - 103)            | 147<br>(89 - 187)              |
| HIV/AIDS                                                          | 42<br>(31 - 59)                | 5<br>(3 - 8)              | 1<br>(1 - 2)             | 30<br>(22 - 43)             | 5<br>(3 - 9)                | 1<br>(0 - 1)                   |
| HIV/AIDS resulting in mycobacterial infection                     | 2<br>(1 - 3)                   | 0<br>(0 - 0)              | 0<br>(0 - 0)             | 1<br>(1 - 2)                | 0<br>(0 - 0)                | 0<br>(0 - 0)                   |
| HIV/AIDS resulting in other diseases                              | 40<br>(29 - 56)                | 4<br>(2 - 7)              | 1<br>(1 - 2)             | 29<br>(21 - 41)             | 5<br>(3 - 8)                | 1<br>(0 - 1)                   |
| Diarrhea, lower respiratory, and other common infectious diseases | 5,800<br>(4,385 - 7,113)       | 1,167<br>(842 - 1,584)    | 378<br>(268 - 517)       | 614<br>(400 - 901)          | 733<br>(517 - 959)          | 2,908<br>(1,768 - 3,885)       |
| Diarrheal diseases                                                | 327<br>(247 - 442)             | 118<br>(59 - 218)         | 12<br>(7 - 19)           | 24<br>(16 - 33)             | 34<br>(23 - 49)             | 139<br>(93 - 204)              |
| Intestinal infectious diseases                                    | 718<br>(340 - 1,297)           | 169<br>(78 - 312)         | 182<br>(88 - 321)        | 265<br>(99 - 553)           | 63<br>(20 - 139)            | 39<br>(13 - 77)                |
| Typhoid fever                                                     | 554<br>(254 - 1,021)           | 125<br>(56 - 231)         | 142<br>(65 - 251)        | 207<br>(75 - 431)           | 49<br>(15 - 107)            | 30<br>(10 - 63)                |
| Paratyphoid fever                                                 | 159<br>(74 - 297)              | 43<br>(17 - 83)           | 40<br>(18 - 79)          | 56<br>(19 - 126)            | 13<br>(4 - 34)              | 8<br>(3 - 16)                  |
| Other intestinal infectious diseases                              | 5<br>(1 - 11)                  | 2<br>(0 - 6)              | 0<br>(0 - 3)             | 1<br>(0 - 5)                | 1<br>(0 - 4)                | 1<br>(0 - 3)                   |
| Lower respiratory infections                                      | 4,123<br>(2,708 - 5,252)       | 584<br>(380 - 840)        | 116<br>(77 - 181)        | 239<br>(162 - 318)          | 565<br>(338 - 770)          | 2,619<br>(1,479 - 3,608)       |
| Upper respiratory infections                                      | 7<br>(2 - 19)                  | 0<br>(0 - 2)              | 0<br>(0 - 0)             | 1<br>(0 - 2)                | 1<br>(0 - 5)                | 4<br>(0 - 16)                  |
| Otitis media                                                      | 11<br>(9 - 13)                 | 1<br>(1 - 2)              | 1<br>(1 - 1)             | 2<br>(2 - 3)                | 2<br>(1 - 2)                | 5<br>(4 - 7)                   |
| Meningitis                                                        | 211<br>(165 - 265)             | 102<br>(65 - 157)         | 17<br>(10 - 24)          | 28<br>(18 - 38)             | 27<br>(16 - 39)             | 37<br>(20 - 53)                |
| Pneumococcal meningitis                                           | 37<br>(26 - 50)                | 15<br>(6 - 28)            | 3<br>(2 - 7)             | 6<br>(3 - 10)               | 5<br>(3 - 9)                | 7<br>(3 - 12)                  |
| H influenzae type B meningitis                                    | 41<br>(27 - 61)                | 30<br>(17 - 52)           | 3<br>(2 - 6)             | 3<br>(1 - 5)                | 2<br>(1 - 4)                | 3<br>(1 - 5)                   |
| Meningococcal meningitis                                          | 83<br>(63 - 109)               | 43<br>(26 - 69)           | 7<br>(4 - 11)            | 11<br>(6 - 16)              | 9<br>(5 - 15)               | 14<br>(7 - 21)                 |
| Other meningitis                                                  | 49<br>(31 - 64)                | 14<br>(6 - 23)            | 3<br>(1 - 5)             | 8<br>(4 - 13)               | 10<br>(6 - 16)              | 13<br>(7 - 21)                 |
| Encephalitis                                                      | 197<br>(128 - 388)             | 44<br>(19 - 105)          | 26<br>(13 - 61)          | 43<br>(25 - 94)             | 36<br>(23 - 64)             | 48<br>(30 - 92)                |
| Diphtheria                                                        | 1<br>(0 - 7)                   | 1<br>(0 - 5)              | 0<br>(0 - 3)             | 0<br>(0 - 1)                | 0<br>(0 - 1)                | --                             |
| Whooping cough                                                    | 19<br>(0 - 97)                 | 18<br>(0 - 90)            | 1<br>(0 - 6)             | 0<br>(0 - 1)                | 0<br>(0 - 0)                | --                             |
| Tetanus                                                           | 8<br>(6 - 11)                  | 1<br>(0 - 2)              | 1<br>(0 - 1)             | 3<br>(2 - 4)                | 2<br>(2 - 4)                | 2<br>(1 - 3)                   |
| Measles                                                           | 151<br>(21 - 539)              | 124<br>(17 - 450)         | 21<br>(3 - 79)           | 5<br>(1 - 18)               | 0<br>(0 - 1)                | --                             |
| Varicella and herpes zoster                                       | 27<br>(7 - 90)                 | 4<br>(0 - 16)             | 1<br>(0 - 4)             | 5<br>(1 - 13)               | 3<br>(0 - 8)                | 15<br>(0 - 75)                 |
| Neglected tropical diseases and malaria                           | 78<br>(62 - 97)                | 7<br>(4 - 15)             | 6<br>(4 - 11)            | 29<br>(21 - 39)             | 21<br>(15 - 29)             | 15<br>(11 - 22)                |
| Malaria                                                           | 0<br>(0 - 1)                   | 0<br>(0 - 0)              | 0<br>(0 - 0)             | 0<br>(0 - 0)                | 0<br>(0 - 0)                | 0<br>(0 - 1)                   |
| Leishmaniasis                                                     | 1<br>(1 - 1)                   | 0<br>(0 - 0)              | 0<br>(0 - 0)             | 0<br>(0 - 0)                | 0<br>(0 - 0)                | 0<br>(0 - 0)                   |
| Visceral leishmaniasis                                            | 1<br>(1 - 1)                   | 0<br>(0 - 0)              | 0<br>(0 - 0)             | 0<br>(0 - 0)                | 0<br>(0 - 0)                | 0<br>(0 - 0)                   |
| Cysticercosis                                                     | 0<br>(0 - 0)                   | 0<br>(0 - 0)              | 0<br>(0 - 0)             | 0<br>(0 - 0)                | 0<br>(0 - 0)                | 0<br>(0 - 0)                   |
| Cystic echinococcosis                                             | 21<br>(18 - 25)                | 0<br>(0 - 0)              | 2<br>(2 - 2)             | 6<br>(5 - 7)                | 6<br>(5 - 8)                | 7<br>(6 - 8)                   |
| Dengue                                                            | 4<br>(3 - 6)                   | 0<br>(0 - 1)              | 1<br>(0 - 1)             | 2<br>(1 - 3)                | 1<br>(0 - 1)                | 0<br>(0 - 0)                   |
| Rabies                                                            | 4<br>(3 - 6)                   | 0<br>(0 - 1)              | 1<br>(0 - 1)             | 2<br>(2 - 3)                | 1<br>(0 - 1)                | 0<br>(0 - 0)                   |
| Intestinal nematode infections                                    | 7<br>(2 - 16)                  | 2<br>(0 - 9)              | 1<br>(0 - 6)             | 1<br>(0 - 4)                | 1<br>(0 - 5)                | 2<br>(0 - 8)                   |
| Ascariasis                                                        | 7<br>(2 - 16)                  | 2<br>(0 - 9)              | 1<br>(0 - 6)             | 1<br>(0 - 4)                | 1<br>(0 - 5)                | 2<br>(0 - 8)                   |
| Other neglected tropical diseases                                 | 41<br>(29 - 53)                | 4<br>(2 - 6)              | 1<br>(1 - 2)             | 17<br>(11 - 25)             | 12<br>(8 - 19)              | 6<br>(4 - 9)                   |
| Maternal disorders                                                | 188<br>(134 - 250)             | --                        | 1<br>(1 - 2)             | 187<br>(133 - 249)          | --                          | --                             |
| Maternal hemorrhage                                               | 24<br>(16 - 35)                | --                        | 0<br>(0 - 0)             | 24<br>(16 - 35)             | --                          | --                             |

Web Table 31- Turkey deaths with 95% UI by age, sex, and cause in 2013

| Cause                                                            | Females, All Ages              | Females, 0-4 Years       | Females, 5-14 Years  | Females, 15-49 Years       | Females, 50-69 Years        | Females, 70-80 Years           |
|------------------------------------------------------------------|--------------------------------|--------------------------|----------------------|----------------------------|-----------------------------|--------------------------------|
| Maternal sepsis and other maternal infections                    | 28<br>(19 - 38)                | --                       | 0<br>(0 - 0)         | 27<br>(19 - 38)            | --                          | --                             |
| Maternal hypertensive disorders                                  | 29<br>(19 - 40)                | --                       | 0<br>(0 - 1)         | 29<br>(19 - 40)            | --                          | --                             |
| Maternal obstructed labor                                        | 13<br>(7 - 20)                 | --                       | 0<br>(0 - 0)         | 13<br>(7 - 20)             | --                          | --                             |
| Maternal abortive outcome                                        | 38<br>(26 - 51)                | --                       | 0<br>(0 - 0)         | 37<br>(25 - 51)            | --                          | --                             |
| Indirect maternal deaths                                         | 16<br>(10 - 25)                | --                       | 0<br>(0 - 0)         | 16<br>(10 - 25)            | --                          | --                             |
| Late maternal deaths                                             | 13<br>(7 - 21)                 | --                       | 0<br>(0 - 0)         | 13<br>(7 - 21)             | --                          | --                             |
| Maternal deaths aggravated by HIV/AIDS                           | 0<br>(0 - 0)                   | --                       | --                   | 0<br>(0 - 0)               | --                          | --                             |
| Other maternal disorders                                         | 28<br>(18 - 39)                | --                       | 0<br>(0 - 0)         | 28<br>(18 - 39)            | --                          | --                             |
| Neonatal disorders                                               | 4,365<br>(3,599 - 5,245)       | 4,365<br>(3,599 - 5,245) | --                   | --                         | --                          | --                             |
| Neonatal preterm birth complications                             | 2,112<br>(1,384 - 2,889)       | 2,112<br>(1,384 - 2,889) | --                   | --                         | --                          | --                             |
| Neonatal encephalopathy due to birth asphyxia and trauma         | 616<br>(356 - 1,027)           | 616<br>(356 - 1,027)     | --                   | --                         | --                          | --                             |
| Neonatal sepsis and other neonatal infections                    | 543<br>(280 - 1,085)           | 543<br>(280 - 1,085)     | --                   | --                         | --                          | --                             |
| Hemolytic disease and other neonatal jaundice                    | 41<br>(10 - 98)                | 41<br>(10 - 98)          | --                   | --                         | --                          | --                             |
| Other neonatal disorders                                         | 1,053<br>(556 - 1,588)         | 1,053<br>(556 - 1,588)   | --                   | --                         | --                          | --                             |
| Nutritional deficiencies                                         | 586<br>(442 - 775)             | 26<br>(14 - 44)          | 10<br>(7 - 15)       | 48<br>(36 - 64)            | 47<br>(34 - 63)             | 455<br>(321 - 631)             |
| Protein-energy malnutrition                                      | 259<br>(130 - 412)             | 19<br>(9 - 37)           | 7<br>(4 - 10)        | 10<br>(5 - 17)             | 16<br>(8 - 27)              | 206<br>(93 - 344)              |
| Iodine deficiency                                                | 6<br>(0 - 26)                  | 0<br>(0 - 3)             | 0<br>(0 - 1)         | 1<br>(0 - 3)               | 1<br>(0 - 6)                | 3<br>(0 - 22)                  |
| Iron-deficiency anemia                                           | 244<br>(113 - 403)             | 3<br>(1 - 8)             | 2<br>(1 - 5)         | 30<br>(19 - 43)            | 22<br>(10 - 33)             | 186<br>(77 - 331)              |
| Other nutritional deficiencies                                   | 77<br>(38 - 144)               | 2<br>(1 - 5)             | 1<br>(1 - 2)         | 7<br>(3 - 12)              | 8<br>(4 - 14)               | 59<br>(27 - 119)               |
| Other communicable, maternal, neonatal, and nutritional diseases | 384<br>(293 - 506)             | 67<br>(23 - 125)         | 17<br>(10 - 28)      | 53<br>(36 - 73)            | 86<br>(60 - 121)            | 161<br>(104 - 280)             |
| Sexually transmitted diseases excluding HIV                      | 92<br>(36 - 160)               | 46<br>(4 - 100)          | 4<br>(1 - 8)         | 6<br>(4 - 10)              | 8<br>(3 - 17)               | 27<br>(7 - 62)                 |
| Syphilis                                                         | 78<br>(26 - 141)               | 46<br>(4 - 100)          | 4<br>(0 - 8)         | 3<br>(1 - 4)               | 5<br>(2 - 10)               | 21<br>(5 - 49)                 |
| Chlamydial infection                                             | 4<br>(2 - 7)                   | --                       | 0<br>(0 - 0)         | 1<br>(1 - 2)               | 1<br>(0 - 2)                | 2<br>(0 - 3)                   |
| Gonococcal infection                                             | 6<br>(3 - 11)                  | --                       | 0<br>(0 - 0)         | 1<br>(1 - 2)               | 1<br>(1 - 3)                | 3<br>(1 - 7)                   |
| Other sexually transmitted diseases                              | 4<br>(2 - 6)                   | --                       | 0<br>(0 - 0)         | 1<br>(1 - 2)               | 1<br>(0 - 2)                | 1<br>(0 - 3)                   |
| Hepatitis                                                        | 128<br>(101 - 158)             | 7<br>(4 - 11)            | 3<br>(2 - 4)         | 19<br>(13 - 25)            | 41<br>(29 - 57)             | 58<br>(43 - 76)                |
| Acute hepatitis A                                                | 8<br>(2 - 17)                  | 2<br>(1 - 5)             | 0<br>(0 - 1)         | 2<br>(0 - 4)               | 2<br>(0 - 5)                | 2<br>(0 - 4)                   |
| Acute hepatitis B                                                | 82<br>(57 - 112)               | 3<br>(1 - 6)             | 0<br>(0 - 1)         | 6<br>(3 - 10)              | 28<br>(17 - 41)             | 45<br>(30 - 64)                |
| Acute hepatitis C                                                | 2<br>(0 - 5)                   | --                       | 0<br>(0 - 0)         | 0<br>(0 - 1)               | 1<br>(0 - 2)                | 1<br>(0 - 3)                   |
| Acute hepatitis E                                                | 35<br>(20 - 58)                | 1<br>(0 - 2)             | 2<br>(2 - 4)         | 11<br>(7 - 16)             | 11<br>(4 - 20)              | 10<br>(3 - 23)                 |
| Other infectious diseases                                        | 165<br>(85 - 258)              | 15<br>(5 - 37)           | 10<br>(4 - 19)       | 28<br>(15 - 47)            | 36<br>(15 - 64)             | 76<br>(28 - 185)               |
| Non-communicable diseases                                        | 166,377<br>(148,226 - 183,920) | 3,969<br>(3,073 - 4,900) | 926<br>(795 - 1,064) | 11,754<br>(9,221 - 14,098) | 36,412<br>(29,675 - 44,580) | 113,316<br>(104,519 - 120,643) |
| Neoplasms                                                        | 33,783<br>(28,418 - 40,135)    | 115<br>(67 - 158)        | 326<br>(242 - 400)   | 6,087<br>(4,801 - 7,501)   | 13,381<br>(10,762 - 16,658) | 13,874<br>(12,366 - 15,861)    |
| Esophageal cancer                                                | 531<br>(413 - 645)             | --                       | --                   | 92<br>(64 - 122)           | 201<br>(148 - 263)          | 238<br>(187 - 292)             |
| Stomach cancer                                                   | 3,074<br>(2,483 - 3,815)       | --                       | --                   | 454<br>(339 - 587)         | 1,063<br>(823 - 1,362)      | 1,556<br>(1,214 - 2,023)       |
| Liver cancer                                                     | 1,185<br>(951 - 1,444)         | --                       | 5<br>(3 - 8)         | 105<br>(77 - 142)          | 427<br>(322 - 556)          | 648<br>(497 - 836)             |
| Liver cancer due to hepatitis B                                  | 373<br>(232 - 550)             | --                       | 2<br>(1 - 3)         | 49<br>(32 - 71)            | 158<br>(91 - 240)           | 165<br>(93 - 264)              |
| Liver cancer due to hepatitis C                                  | 580<br>(410 - 768)             | --                       | 0<br>(0 - 1)         | 30<br>(17 - 48)            | 189<br>(125 - 268)          | 361<br>(240 - 492)             |
| Liver cancer due to alcohol use                                  | 51<br>(23 - 90)                | --                       | --                   | 2<br>(1 - 3)               | 13<br>(6 - 24)              | 36<br>(16 - 68)                |
| Liver cancer due to other causes                                 | 180<br>(79 - 290)              | --                       | 3<br>(2 - 5)         | 24<br>(13 - 39)            | 66<br>(28 - 118)            | 86<br>(33 - 147)               |

Web Table 31- Turkey deaths with 95% UI by age, sex, and cause in 2013

| Cause                                         | Females, All Ages           | Females, 0-4 Years | Females, 5-14 Years | Females, 15-49 Years     | Females, 50-69 Years        | Females, 70-80 Years        |
|-----------------------------------------------|-----------------------------|--------------------|---------------------|--------------------------|-----------------------------|-----------------------------|
| Larynx cancer                                 | 188<br>(102 - 360)          | --                 | --                  | 26<br>(14 - 51)          | 73<br>(36 - 139)            | 89<br>(48 - 180)            |
| Tracheal, bronchus and lung cancer            | 4,267<br>(3,435 - 5,402)    | --                 | --                  | 529<br>(393 - 725)       | 1,842<br>(1,426 - 2,421)    | 1,896<br>(1,519 - 2,362)    |
| Breast cancer                                 | 5,279<br>(4,284 - 6,452)    | --                 | --                  | 1,583<br>(1,175 - 2,001) | 2,288<br>(1,810 - 2,877)    | 1,408<br>(1,160 - 1,730)    |
| Cervical cancer                               | 1,098<br>(844 - 1,360)      | --                 | --                  | 272<br>(181 - 365)       | 471<br>(352 - 642)          | 355<br>(261 - 439)          |
| Uterine cancer                                | 676<br>(422 - 918)          | --                 | --                  | 58<br>(35 - 88)          | 346<br>(211 - 488)          | 272<br>(162 - 377)          |
| Prostate cancer                               | --                          | --                 | --                  | --                       | --                          | --                          |
| Colon and rectum cancer                       | 3,650<br>(3,039 - 4,411)    | --                 | --                  | 500<br>(384 - 635)       | 1,283<br>(1,014 - 1,621)    | 1,867<br>(1,537 - 2,316)    |
| Lip and oral cavity cancer                    | 195<br>(140 - 276)          | --                 | --                  | 38<br>(24 - 59)          | 74<br>(50 - 111)            | 83<br>(56 - 117)            |
| Nasopharynx cancer                            | 132<br>(85 - 224)           | --                 | 2<br>(1 - 5)        | 46<br>(26 - 73)          | 53<br>(31 - 96)             | 31<br>(19 - 54)             |
| Other pharynx cancer                          | 60<br>(44 - 79)             | --                 | --                  | 19<br>(12 - 29)          | 27<br>(19 - 38)             | 14<br>(10 - 19)             |
| Gallbladder and biliary tract cancer          | 794<br>(554 - 1,021)        | --                 | --                  | 79<br>(49 - 108)         | 343<br>(234 - 468)          | 373<br>(252 - 517)          |
| Pancreatic cancer                             | 2,175<br>(1,806 - 2,642)    | --                 | --                  | 167<br>(126 - 220)       | 904<br>(712 - 1,139)        | 1,104<br>(897 - 1,392)      |
| Malignant skin melanoma                       | 199<br>(158 - 246)          | --                 | --                  | 25<br>(17 - 33)          | 56<br>(42 - 75)             | 119<br>(90 - 156)           |
| Non-melanoma skin cancer                      | 291<br>(153 - 425)          | --                 | --                  | 25<br>(15 - 38)          | 43<br>(26 - 65)             | 224<br>(109 - 348)          |
| Ovarian cancer                                | 2,022<br>(1,611 - 2,508)    | --                 | --                  | 396<br>(292 - 511)       | 1,020<br>(765 - 1,336)      | 605<br>(485 - 748)          |
| Testicular cancer                             | --                          | --                 | --                  | --                       | --                          | --                          |
| Kidney cancer                                 | 564<br>(455 - 703)          | 2<br>(1 - 3)       | 11<br>(6 - 17)      | 83<br>(61 - 114)         | 247<br>(184 - 334)          | 221<br>(166 - 294)          |
| Bladder cancer                                | 632<br>(451 - 1,062)        | --                 | --                  | 41<br>(24 - 73)          | 201<br>(122 - 367)          | 390<br>(273 - 643)          |
| Brain and nervous system cancer               | 1,905<br>(1,468 - 2,333)    | 33<br>(13 - 54)    | 105<br>(62 - 139)   | 449<br>(337 - 574)       | 746<br>(566 - 984)          | 572<br>(365 - 738)          |
| Thyroid cancer                                | 412<br>(297 - 660)          | --                 | 1<br>(0 - 2)        | 51<br>(32 - 90)          | 185<br>(120 - 327)          | 176<br>(125 - 255)          |
| Mesothelioma                                  | 198<br>(151 - 254)          | --                 | --                  | 32<br>(21 - 46)          | 93<br>(63 - 131)            | 73<br>(50 - 99)             |
| Hodgkin lymphoma                              | 113<br>(86 - 152)           | 1<br>(1 - 3)       | 7<br>(3 - 15)       | 50<br>(35 - 73)          | 30<br>(20 - 46)             | 24<br>(16 - 37)             |
| Non-Hodgkin lymphoma                          | 1,085<br>(711 - 1,365)      | 2<br>(1 - 3)       | 23<br>(14 - 34)     | 226<br>(143 - 300)       | 378<br>(246 - 499)          | 455<br>(296 - 595)          |
| Multiple myeloma                              | 539<br>(397 - 710)          | --                 | --                  | 46<br>(31 - 66)          | 251<br>(167 - 350)          | 242<br>(175 - 337)          |
| Leukemia                                      | 1,736<br>(1,416 - 2,080)    | 61<br>(35 - 93)    | 126<br>(96 - 164)   | 497<br>(385 - 623)       | 484<br>(369 - 630)          | 568<br>(460 - 695)          |
| Other neoplasms                               | 784<br>(211 - 1,222)        | 16<br>(3 - 31)     | 46<br>(9 - 84)      | 197<br>(47 - 334)        | 252<br>(62 - 425)           | 272<br>(86 - 434)           |
| Cardiovascular diseases                       | 76,136<br>(67,232 - 87,290) | 191<br>(126 - 289) | 129<br>(99 - 174)   | 2,999<br>(2,191 - 3,779) | 13,396<br>(10,750 - 16,796) | 59,421<br>(53,466 - 67,000) |
| Rheumatic heart disease                       | 606<br>(417 - 844)          | 1<br>(0 - 2)       | 2<br>(1 - 4)        | 44<br>(25 - 64)          | 74<br>(45 - 106)            | 484<br>(332 - 707)          |
| Ischemic heart disease                        | 33,365<br>(28,439 - 41,634) | 17<br>(7 - 39)     | 8<br>(3 - 15)       | 1,193<br>(876 - 1,631)   | 6,360<br>(4,978 - 8,251)    | 25,786<br>(21,997 - 32,268) |
| Cerebrovascular disease                       | 26,609<br>(20,235 - 30,982) | 58<br>(34 - 99)    | 64<br>(44 - 101)    | 1,064<br>(663 - 1,399)   | 4,310<br>(3,063 - 5,594)    | 21,113<br>(16,305 - 24,917) |
| Ischemic stroke                               | 15,382<br>(11,484 - 18,592) | 2<br>(1 - 6)       | 5<br>(3 - 9)        | 132<br>(69 - 186)        | 1,411<br>(925 - 1,847)      | 13,832<br>(10,244 - 16,717) |
| Hemorrhagic stroke                            | 11,228<br>(8,274 - 13,846)  | 56<br>(32 - 96)    | 59<br>(41 - 93)     | 932<br>(569 - 1,232)     | 2,899<br>(2,055 - 3,783)    | 7,281<br>(5,158 - 9,329)    |
| Hypertensive heart disease                    | 9,215<br>(5,956 - 12,859)   | 2<br>(1 - 4)       | 1<br>(0 - 1)        | 88<br>(52 - 129)         | 786<br>(509 - 1,127)        | 8,338<br>(5,254 - 11,966)   |
| Cardiomyopathy and myocarditis                | 514<br>(387 - 670)          | 57<br>(31 - 99)    | 25<br>(15 - 38)     | 122<br>(73 - 164)        | 106<br>(74 - 151)           | 203<br>(140 - 300)          |
| Atrial fibrillation and flutter               | 767<br>(561 - 1,038)        | --                 | --                  | 8<br>(6 - 12)            | 100<br>(68 - 142)           | 659<br>(466 - 918)          |
| Aortic aneurysm                               | 429<br>(266 - 645)          | --                 | --                  | 42<br>(22 - 64)          | 138<br>(81 - 223)           | 249<br>(153 - 375)          |
| Peripheral vascular disease                   | 266<br>(211 - 340)          | --                 | --                  | 5<br>(3 - 8)             | 37<br>(27 - 49)             | 224<br>(174 - 291)          |
| Endocarditis                                  | 158<br>(102 - 233)          | 10<br>(5 - 19)     | 4<br>(2 - 7)        | 29<br>(16 - 43)          | 48<br>(30 - 78)             | 67<br>(39 - 105)            |
| Other cardiovascular and circulatory diseases | 4,206<br>(3,240 - 5,409)    | 47<br>(28 - 76)    | 24<br>(15 - 35)     | 403<br>(250 - 534)       | 1,434<br>(1,026 - 1,922)    | 2,299<br>(1,754 - 3,123)    |
| Chronic respiratory diseases                  | 16,476<br>(13,052 - 19,050) | 56<br>(36 - 84)    | 38<br>(29 - 50)     | 611<br>(456 - 882)       | 2,596<br>(2,029 - 3,363)    | 13,175<br>(9,834 - 15,171)  |

Web Table 31- Turkey deaths with 95% UI by age, sex, and cause in 2013

| Cause                                               | Females, All Ages           | Females, 0-4 Years | Females, 5-14 Years | Females, 15-49 Years | Females, 50-69 Years     | Females, 70-80 Years       |
|-----------------------------------------------------|-----------------------------|--------------------|---------------------|----------------------|--------------------------|----------------------------|
| Chronic obstructive pulmonary disease               | 12,747<br>(9,942 - 15,299)  | 14<br>(7 - 26)     | 10<br>(6 - 15)      | 339<br>(235 - 552)   | 2,036<br>(1,569 - 2,656) | 10,349<br>(7,526 - 12,344) |
| Pneumoconiosis                                      | 14<br>(9 - 21)              | 1<br>(0 - 2)       | 1<br>(1 - 2)        | 4<br>(3 - 6)         | 2<br>(1 - 3)             | 6<br>(3 - 11)              |
| Silicosis                                           | 2<br>(2 - 4)                | 0<br>(0 - 0)       | 0<br>(0 - 1)        | 1<br>(1 - 2)         | 0<br>(0 - 1)             | 1<br>(0 - 1)               |
| Asbestosis                                          | 5<br>(3 - 9)                | 0<br>(0 - 0)       | 0<br>(0 - 1)        | 1<br>(1 - 2)         | 0<br>(0 - 1)             | 3<br>(2 - 7)               |
| Coal workers pneumoconiosis                         | 2<br>(2 - 4)                | 0<br>(0 - 0)       | 0<br>(0 - 1)        | 1<br>(1 - 2)         | 0<br>(0 - 1)             | 0<br>(0 - 1)               |
| Other pneumoconiosis                                | 4<br>(2 - 5)                | 0<br>(0 - 0)       | 0<br>(0 - 1)        | 1<br>(1 - 2)         | 0<br>(0 - 1)             | 2<br>(1 - 3)               |
| Asthma                                              | 1,664<br>(985 - 2,456)      | 2<br>(1 - 4)       | 13<br>(9 - 19)      | 148<br>(98 - 256)    | 312<br>(163 - 474)       | 1,188<br>(646 - 1,819)     |
| Interstitial lung disease and pulmonary sarcoidosis | 1,608<br>(886 - 2,653)      | 1<br>(0 - 3)       | 4<br>(2 - 7)        | 71<br>(41 - 133)     | 215<br>(113 - 352)       | 1,317<br>(708 - 2,202)     |
| Other chronic respiratory diseases                  | 443<br>(289 - 647)          | 38<br>(22 - 59)    | 10<br>(6 - 15)      | 49<br>(32 - 84)      | 31<br>(19 - 51)          | 315<br>(182 - 491)         |
| Cirrhosis                                           | 1,771<br>(1,459 - 2,121)    | 5<br>(2 - 8)       | 11<br>(8 - 15)      | 178<br>(136 - 229)   | 618<br>(491 - 789)       | 959<br>(764 - 1,174)       |
| Cirrhosis due to hepatitis B                        | 1,111<br>(778 - 1,462)      | 1<br>(0 - 2)       | 4<br>(2 - 7)        | 108<br>(73 - 149)    | 386<br>(266 - 536)       | 612<br>(393 - 840)         |
| Cirrhosis due to hepatitis C                        | 448<br>(221 - 762)          | 0<br>(0 - 1)       | 1<br>(0 - 3)        | 41<br>(17 - 78)      | 166<br>(81 - 296)        | 240<br>(100 - 418)         |
| Cirrhosis due to alcohol use                        | 89<br>(50 - 146)            | --                 | --                  | 4<br>(2 - 7)         | 25<br>(14 - 42)          | 60<br>(31 - 105)           |
| Cirrhosis due to other causes                       | 124<br>(72 - 186)           | 4<br>(2 - 7)       | 6<br>(2 - 9)        | 25<br>(12 - 43)      | 41<br>(21 - 67)          | 47<br>(24 - 74)            |
| Digestive diseases                                  | 2,860<br>(2,376 - 3,512)    | 11<br>(7 - 17)     | 25<br>(18 - 35)     | 260<br>(193 - 370)   | 579<br>(450 - 746)       | 1,983<br>(1,629 - 2,451)   |
| Peptic ulcer disease                                | 627<br>(308 - 1,171)        | 0<br>(0 - 1)       | 5<br>(3 - 8)        | 81<br>(45 - 138)     | 115<br>(57 - 212)        | 426<br>(182 - 848)         |
| Gastritis and duodenitis                            | 14<br>(8 - 36)              | 0<br>(0 - 1)       | 1<br>(0 - 1)        | 3<br>(2 - 8)         | 3<br>(1 - 7)             | 7<br>(3 - 19)              |
| Appendicitis                                        | 27<br>(15 - 42)             | 2<br>(1 - 3)       | 4<br>(2 - 6)        | 10<br>(5 - 17)       | 6<br>(3 - 10)            | 6<br>(3 - 11)              |
| Paralytic ileus and intestinal obstruction          | 472<br>(245 - 736)          | 1<br>(0 - 3)       | 5<br>(3 - 10)       | 33<br>(16 - 55)      | 95<br>(50 - 151)         | 337<br>(164 - 541)         |
| Inguinal, femoral, and abdominal hernia             | 108<br>(44 - 164)           | 1<br>(0 - 1)       | 2<br>(1 - 3)        | 6<br>(3 - 10)        | 23<br>(10 - 37)          | 76<br>(28 - 125)           |
| Inflammatory bowel disease                          | 117<br>(72 - 169)           | 1<br>(0 - 2)       | 3<br>(2 - 5)        | 22<br>(14 - 34)      | 28<br>(16 - 44)          | 63<br>(34 - 101)           |
| Vascular intestinal disorders                       | 354<br>(160 - 598)          | 0<br>(0 - 1)       | 0<br>(0 - 2)        | 20<br>(10 - 41)      | 75<br>(35 - 127)         | 259<br>(113 - 438)         |
| Gallbladder and biliary diseases                    | 650<br>(234 - 913)          | 3<br>(1 - 5)       | 1<br>(0 - 2)        | 33<br>(14 - 50)      | 112<br>(48 - 164)        | 502<br>(162 - 740)         |
| Pancreatitis                                        | 353<br>(221 - 523)          | 1<br>(0 - 1)       | 2<br>(1 - 3)        | 33<br>(21 - 53)      | 82<br>(52 - 123)         | 236<br>(137 - 361)         |
| Other digestive diseases                            | 137<br>(99 - 186)           | 2<br>(1 - 4)       | 3<br>(2 - 5)        | 19<br>(13 - 28)      | 40<br>(27 - 58)          | 72<br>(48 - 103)           |
| Neurological disorders                              | 13,439<br>(11,119 - 16,202) | 88<br>(37 - 153)   | 91<br>(59 - 126)    | 391<br>(256 - 535)   | 1,349<br>(1,001 - 1,755) | 11,520<br>(9,311 - 13,954) |
| Alzheimer disease and other dementias               | 11,660<br>(9,403 - 14,200)  | --                 | --                  | 5<br>(1 - 11)        | 953<br>(670 - 1,306)     | 10,703<br>(8,445 - 13,083) |
| Parkinson disease                                   | 690<br>(409 - 927)          | --                 | --                  | 12<br>(8 - 17)       | 115<br>(73 - 157)        | 564<br>(328 - 792)         |
| Epilepsy                                            | 569<br>(286 - 805)          | 62<br>(15 - 124)   | 63<br>(32 - 98)     | 236<br>(118 - 355)   | 81<br>(37 - 130)         | 128<br>(59 - 211)          |
| Multiple sclerosis                                  | 87<br>(49 - 154)            | --                 | --                  | 29<br>(13 - 49)      | 34<br>(16 - 54)          | 24<br>(13 - 57)            |
| Other neurological disorders                        | 432<br>(360 - 514)          | 26<br>(18 - 35)    | 28<br>(22 - 36)     | 110<br>(85 - 136)    | 167<br>(130 - 212)       | 102<br>(84 - 126)          |
| Mental and substance use disorders                  | 178<br>(140 - 223)          | 4<br>(2 - 5)       | 1<br>(0 - 1)        | 54<br>(41 - 69)      | 65<br>(47 - 91)          | 55<br>(41 - 68)            |
| Schizophrenia                                       | 59<br>(33 - 80)             | --                 | --                  | 12<br>(7 - 18)       | 24<br>(13 - 35)          | 23<br>(11 - 34)            |
| Alcohol use disorders                               | 29<br>(15 - 64)             | --                 | --                  | 5<br>(2 - 11)        | 18<br>(9 - 39)           | 6<br>(3 - 14)              |
| Drug use disorders                                  | 85<br>(68 - 102)            | 4<br>(2 - 5)       | --                  | 32<br>(24 - 41)      | 24<br>(18 - 31)          | 25<br>(19 - 32)            |
| Opioid use disorders                                | 45<br>(36 - 54)             | 2<br>(1 - 3)       | --                  | 17<br>(13 - 22)      | 12<br>(9 - 15)           | 14<br>(10 - 18)            |
| Cocaine use disorders                               | 1<br>(1 - 2)                | 0<br>(0 - 0)       | --                  | 1<br>(0 - 1)         | 0<br>(0 - 0)             | 0<br>(0 - 0)               |
| Amphetamine use disorders                           | 1<br>(1 - 2)                | 0<br>(0 - 0)       | --                  | 1<br>(0 - 1)         | 0<br>(0 - 1)             | 0<br>(0 - 1)               |
| Other drug use disorders                            | 37<br>(29 - 45)             | 1<br>(1 - 2)       | --                  | 13<br>(10 - 17)      | 11<br>(8 - 15)           | 11<br>(8 - 14)             |
| Eating disorders                                    | 5<br>(3 - 9)                | --                 | 1<br>(0 - 1)        | 5<br>(3 - 8)         | --                       | --                         |

Web Table 31- Turkey deaths with 95% UI by age, sex, and cause in 2013

| Cause                                               | Females, All Ages          | Females, 0-4 Years       | Females, 5-14 Years | Females, 15-49 Years | Females, 50-69 Years     | Females, 70-80 Years       |
|-----------------------------------------------------|----------------------------|--------------------------|---------------------|----------------------|--------------------------|----------------------------|
| Anorexia nervosa                                    | 5<br>(3 - 9)               | --                       | 1<br>(0 - 1)        | 5<br>(3 - 8)         | --                       | --                         |
| Diabetes, urogenital, blood, and endocrine diseases | 17,461<br>(9,203 - 20,794) | 199<br>(66 - 289)        | 114<br>(63 - 155)   | 932<br>(548 - 1,201) | 4,206<br>(2,300 - 5,420) | 12,009<br>(6,081 - 14,239) |
| Diabetes mellitus                                   | 11,362<br>(7,606 - 13,418) | 10<br>(6 - 17)           | 10<br>(5 - 16)      | 346<br>(252 - 440)   | 2,710<br>(1,918 - 3,483) | 8,286<br>(5,294 - 9,774)   |
| Acute glomerulonephritis                            | 8<br>(5 - 10)              | 1<br>(1 - 3)             | 1<br>(0 - 1)        | 3<br>(1 - 4)         | 1<br>(1 - 2)             | 2<br>(1 - 3)               |
| Chronic kidney disease                              | 4,812<br>(611 - 6,426)     | 25<br>(5 - 44)           | 31<br>(6 - 46)      | 350<br>(61 - 492)    | 1,221<br>(186 - 1,716)   | 3,185<br>(339 - 4,398)     |
| Chronic kidney disease due to diabetes mellitus     | 6<br>(2 - 8)               | 0<br>(0 - 1)             | 1<br>(1 - 1)        | 3<br>(1 - 5)         | 1<br>(0 - 2)             | 0<br>(0 - 0)               |
| Chronic kidney disease due to hypertension          | 2,527<br>(500 - 3,628)     | 0<br>(0 - 1)             | 2<br>(1 - 3)        | 137<br>(43 - 217)    | 586<br>(145 - 909)       | 1,802<br>(304 - 2,616)     |
| Chronic kidney disease due to glomerulonephritis    | 140<br>(29 - 216)          | 9<br>(3 - 16)            | 3<br>(1 - 4)        | 16<br>(5 - 26)       | 42<br>(9 - 71)           | 71<br>(9 - 118)            |
| Chronic kidney disease due to other causes          | 2,139<br>(58 - 3,421)      | 16<br>(2 - 31)           | 25<br>(3 - 40)      | 194<br>(11 - 303)    | 592<br>(22 - 954)        | 1,311<br>(17 - 2,255)      |
| Urinary diseases and male infertility               | 344<br>(255 - 467)         | 3<br>(1 - 5)             | 4<br>(2 - 7)        | 45<br>(27 - 81)      | 65<br>(43 - 105)         | 227<br>(147 - 330)         |
| Interstitial nephritis and urinary tract infections | 91<br>(42 - 198)           | 1<br>(0 - 2)             | 2<br>(0 - 4)        | 26<br>(11 - 61)      | 22<br>(8 - 55)           | 40<br>(18 - 91)            |
| Urolithiasis                                        | 9<br>(5 - 13)              | --                       | 0<br>(0 - 1)        | 3<br>(1 - 5)         | 2<br>(1 - 4)             | 3<br>(2 - 6)               |
| Other urinary diseases                              | 245<br>(143 - 341)         | 2<br>(1 - 4)             | 2<br>(1 - 3)        | 16<br>(7 - 26)       | 40<br>(24 - 60)          | 185<br>(100 - 275)         |
| Gynecological diseases                              | 26<br>(17 - 35)            | --                       | --                  | 4<br>(3 - 5)         | 11<br>(6 - 16)           | 12<br>(7 - 18)             |
| Uterine fibroids                                    | 7<br>(5 - 10)              | --                       | --                  | 1<br>(0 - 1)         | 3<br>(2 - 4)             | 4<br>(2 - 5)               |
| Polycystic ovarian syndrome                         | 0<br>(0 - 0)               | --                       | --                  | 0<br>(0 - 0)         | 0<br>(0 - 0)             | --                         |
| Endometriosis                                       | 1<br>(1 - 1)               | --                       | --                  | 1<br>(0 - 1)         | 0<br>(0 - 0)             | --                         |
| Genital prolapse                                    | 5<br>(4 - 7)               | --                       | --                  | 0<br>(0 - 1)         | 2<br>(1 - 3)             | 3<br>(2 - 5)               |
| Other gynecological diseases                        | 12<br>(8 - 17)             | --                       | --                  | 2<br>(1 - 3)         | 5<br>(3 - 8)             | 5<br>(3 - 8)               |
| Hemoglobinopathies and hemolytic anemias            | 458<br>(296 - 672)         | 57<br>(32 - 89)          | 48<br>(30 - 72)     | 133<br>(82 - 202)    | 65<br>(40 - 102)         | 155<br>(95 - 232)          |
| Thalassemias                                        | 116<br>(73 - 165)          | 31<br>(17 - 49)          | 27<br>(17 - 41)     | 57<br>(35 - 86)      | 0<br>(0 - 0)             | 0<br>(0 - 0)               |
| Sickle cell disorders                               | 125<br>(79 - 184)          | 14<br>(8 - 23)           | 17<br>(10 - 25)     | 55<br>(34 - 84)      | 35<br>(21 - 55)          | 4<br>(3 - 6)               |
| G6PD deficiency                                     | 6<br>(4 - 8)               | 1<br>(0 - 1)             | 1<br>(0 - 1)        | 2<br>(1 - 4)         | 1<br>(1 - 2)             | 1<br>(1 - 1)               |
| Other hemoglobinopathies and hemolytic anemias      | 212<br>(134 - 308)         | 11<br>(6 - 16)           | 4<br>(2 - 6)        | 18<br>(11 - 27)      | 29<br>(18 - 46)          | 150<br>(92 - 225)          |
| Endocrine, metabolic, blood, and immune disorders   | 450<br>(19 - 651)          | 102<br>(2 - 177)         | 21<br>(1 - 38)      | 52<br>(3 - 87)       | 132<br>(5 - 211)         | 142<br>(7 - 231)           |
| Musculoskeletal disorders                           | 613<br>(487 - 755)         | --                       | 17<br>(12 - 24)     | 174<br>(129 - 228)   | 195<br>(145 - 262)       | 228<br>(172 - 287)         |
| Rheumatoid arthritis                                | 184<br>(140 - 233)         | --                       | 1<br>(0 - 1)        | 15<br>(10 - 21)      | 60<br>(40 - 87)          | 108<br>(75 - 143)          |
| Other musculoskeletal disorders                     | 429<br>(339 - 542)         | --                       | 16<br>(12 - 23)     | 159<br>(118 - 208)   | 134<br>(98 - 183)        | 119<br>(87 - 163)          |
| Other non-communicable diseases                     | 3,659<br>(2,736 - 4,605)   | 3,299<br>(2,434 - 4,225) | 173<br>(121 - 258)  | 67<br>(32 - 92)      | 29<br>(12 - 39)          | 92<br>(22 - 122)           |
| Congenital anomalies                                | 3,415<br>(2,500 - 4,351)   | 3,145<br>(2,285 - 4,069) | 171<br>(120 - 257)  | 60<br>(28 - 83)      | 13<br>(8 - 18)           | 26<br>(11 - 35)            |
| Neural tube defects                                 | 197<br>(88 - 380)          | 195<br>(86 - 378)        | 1<br>(0 - 2)        | 1<br>(0 - 1)         | 0<br>(0 - 0)             | 0<br>(0 - 0)               |
| Congenital heart anomalies                          | 1,547<br>(1,073 - 2,154)   | 1,469<br>(1,001 - 2,056) | 66<br>(39 - 111)    | 8<br>(4 - 12)        | 1<br>(1 - 2)             | 2<br>(1 - 3)               |
| Cleft lip and cleft palate                          | 12<br>(3 - 22)             | 12<br>(3 - 22)           | --                  | --                   | --                       | --                         |
| Down syndrome                                       | 166<br>(93 - 253)          | 131<br>(68 - 205)        | 22<br>(12 - 35)     | 11<br>(5 - 16)       | 3<br>(1 - 4)             | 0<br>(0 - 0)               |
| Chromosomal unbalanced rearrangements               | 74<br>(42 - 126)           | 68<br>(36 - 117)         | 3<br>(2 - 6)        | 3<br>(1 - 5)         | 0<br>(0 - 1)             | 0<br>(0 - 0)               |
| Other congenital anomalies                          | 1,419<br>(953 - 1,879)     | 1,271<br>(832 - 1,717)   | 79<br>(51 - 122)    | 38<br>(17 - 53)      | 8<br>(5 - 12)            | 23<br>(10 - 33)            |
| Skin and subcutaneous diseases                      | 93<br>(17 - 127)           | 3<br>(1 - 5)             | 1<br>(1 - 2)        | 7<br>(3 - 11)        | 16<br>(3 - 23)           | 67<br>(9 - 95)             |
| Cellulitis                                          | 13<br>(3 - 21)             | 1<br>(0 - 2)             | 0<br>(0 - 1)        | 2<br>(1 - 3)         | 4<br>(1 - 6)             | 7<br>(1 - 11)              |
| Pyoderma                                            | 18<br>(4 - 25)             | 1<br>(0 - 2)             | 0<br>(0 - 1)        | 2<br>(1 - 3)         | 5<br>(1 - 8)             | 9<br>(1 - 14)              |
| Decubitus ulcer                                     | 55<br>(9 - 80)             | 0<br>(0 - 0)             | 0<br>(0 - 0)        | 2<br>(1 - 3)         | 5<br>(1 - 7)             | 48<br>(7 - 72)             |

Web Table 31- Turkey deaths with 95% UI by age, sex, and cause in 2013

| Cause                                           | Females, All Ages        | Females, 0-4 Years | Females, 5-14 Years | Females, 15-49 Years     | Females, 50-69 Years | Females, 70-80 Years     |
|-------------------------------------------------|--------------------------|--------------------|---------------------|--------------------------|----------------------|--------------------------|
| Other skin and subcutaneous diseases            | 8<br>(2 - 12)            | 0<br>(0 - 1)       | 0<br>(0 - 1)        | 2<br>(1 - 3)             | 2<br>(0 - 4)         | 3<br>(0 - 6)             |
| Sudden infant death syndrome                    | 151<br>(40 - 372)        | 151<br>(40 - 372)  | --                  | --                       | --                   | --                       |
| Injuries                                        | 5,848<br>(4,561 - 6,875) | 332<br>(235 - 433) | 423<br>(353 - 507)  | 2,258<br>(1,769 - 2,763) | 998<br>(777 - 1,282) | 1,836<br>(1,121 - 2,386) |
| Transport injuries                              | 1,984<br>(1,609 - 2,451) | 121<br>(68 - 177)  | 209<br>(151 - 272)  | 830<br>(619 - 1,046)     | 474<br>(360 - 635)   | 350<br>(261 - 608)       |
| Road injuries                                   | 1,907<br>(1,545 - 2,345) | 114<br>(64 - 167)  | 197<br>(143 - 257)  | 802<br>(597 - 1,005)     | 455<br>(344 - 605)   | 338<br>(253 - 577)       |
| Pedestrian road injuries                        | 539<br>(350 - 680)       | 35<br>(11 - 60)    | 63<br>(31 - 98)     | 162<br>(110 - 224)       | 133<br>(77 - 186)    | 146<br>(89 - 217)        |
| Cyclist road injuries                           | 193<br>(135 - 258)       | 6<br>(2 - 11)      | 14<br>(8 - 21)      | 114<br>(68 - 160)        | 42<br>(28 - 60)      | 18<br>(11 - 35)          |
| Motorcyclist road injuries                      | 85<br>(57 - 134)         | 3<br>(1 - 5)       | 5<br>(3 - 9)        | 50<br>(31 - 74)          | 18<br>(11 - 32)      | 10<br>(5 - 23)           |
| Motor vehicle road injuries                     | 1,074<br>(854 - 1,432)   | 69<br>(42 - 104)   | 114<br>(81 - 163)   | 473<br>(352 - 606)       | 262<br>(191 - 375)   | 155<br>(98 - 299)        |
| Other road injuries                             | 16<br>(9 - 34)           | 2<br>(1 - 3)       | 1<br>(1 - 3)        | 3<br>(2 - 5)             | 1<br>(1 - 2)         | 9<br>(4 - 24)            |
| Other transport injuries                        | 77<br>(59 - 114)         | 6<br>(3 - 10)      | 12<br>(7 - 17)      | 29<br>(20 - 40)          | 19<br>(13 - 31)      | 12<br>(7 - 28)           |
| Unintentional injuries                          | 2,660<br>(1,735 - 3,353) | 205<br>(138 - 281) | 154<br>(125 - 199)  | 600<br>(463 - 761)       | 355<br>(236 - 467)   | 1,346<br>(637 - 1,905)   |
| Falls                                           | 1,096<br>(355 - 1,703)   | 38<br>(14 - 70)    | 22<br>(12 - 33)     | 70<br>(41 - 96)          | 96<br>(38 - 145)     | 871<br>(233 - 1,419)     |
| Drowning                                        | 103<br>(72 - 216)        | 19<br>(9 - 46)     | 23<br>(13 - 47)     | 34<br>(21 - 71)          | 13<br>(8 - 23)       | 15<br>(9 - 28)           |
| Fire, heat, and hot substances                  | 155<br>(110 - 213)       | 19<br>(10 - 45)    | 12<br>(7 - 21)      | 27<br>(18 - 40)          | 21<br>(14 - 30)      | 75<br>(46 - 111)         |
| Poisonings                                      | 212<br>(119 - 282)       | 12<br>(5 - 20)     | 16<br>(9 - 25)      | 98<br>(52 - 138)         | 31<br>(17 - 47)      | 54<br>(29 - 76)          |
| Exposure to mechanical forces                   | 395<br>(233 - 505)       | 20<br>(10 - 31)    | 37<br>(19 - 52)     | 229<br>(127 - 308)       | 75<br>(48 - 101)     | 34<br>(22 - 44)          |
| Unintentional firearm injuries                  | 213<br>(90 - 289)        | 4<br>(2 - 8)       | 20<br>(7 - 32)      | 154<br>(71 - 217)        | 25<br>(14 - 37)      | 10<br>(5 - 15)           |
| Unintentional suffocation                       | 105<br>(61 - 151)        | 4<br>(1 - 8)       | 6<br>(3 - 11)       | 46<br>(28 - 72)          | 37<br>(20 - 54)      | 11<br>(6 - 19)           |
| Other exposure to mechanical forces             | 77<br>(29 - 102)         | 13<br>(3 - 23)     | 10<br>(3 - 16)      | 29<br>(12 - 42)          | 13<br>(5 - 19)       | 12<br>(5 - 17)           |
| Adverse effects of medical treatment            | 97<br>(5 - 203)          | 5<br>(0 - 13)      | 2<br>(0 - 4)        | 14<br>(2 - 28)           | 30<br>(1 - 70)       | 46<br>(0 - 106)          |
| Animal contact                                  | 25<br>(15 - 71)          | 1<br>(1 - 4)       | 2<br>(1 - 6)        | 5<br>(3 - 13)            | 6<br>(3 - 19)        | 10<br>(5 - 29)           |
| Venomous animal contact                         | 11<br>(5 - 29)           | 0<br>(0 - 1)       | 2<br>(1 - 5)        | 2<br>(1 - 6)             | 5<br>(2 - 13)        | 2<br>(1 - 5)             |
| Non-venomous animal contact                     | 15<br>(8 - 43)           | 1<br>(0 - 3)       | 1<br>(0 - 2)        | 3<br>(1 - 8)             | 2<br>(1 - 5)         | 8<br>(4 - 25)            |
| Foreign body                                    | 309<br>(170 - 433)       | 62<br>(24 - 113)   | 18<br>(10 - 28)     | 40<br>(25 - 68)          | 33<br>(18 - 51)      | 156<br>(83 - 244)        |
| Pulmonary aspiration and foreign body in airway | 304<br>(165 - 427)       | 62<br>(23 - 112)   | 17<br>(9 - 27)      | 38<br>(23 - 65)          | 32<br>(18 - 50)      | 155<br>(82 - 243)        |
| Foreign body in other body part                 | 5<br>(4 - 9)             | 0<br>(0 - 1)       | 1<br>(1 - 1)        | 2<br>(2 - 4)             | 1<br>(0 - 1)         | 1<br>(1 - 2)             |
| Other unintentional injuries                    | 267<br>(190 - 658)       | 27<br>(17 - 57)    | 22<br>(13 - 56)     | 83<br>(53 - 217)         | 49<br>(31 - 122)     | 85<br>(54 - 201)         |
| Self-harm and interpersonal violence            | 1,204<br>(927 - 1,509)   | 6<br>(3 - 12)      | 60<br>(36 - 90)     | 827<br>(612 - 1,071)     | 169<br>(122 - 230)   | 140<br>(99 - 207)        |
| Self-harm                                       | 898<br>(649 - 1,149)     | --                 | 46<br>(23 - 75)     | 613<br>(425 - 825)       | 126<br>(89 - 178)    | 113<br>(77 - 174)        |
| Interpersonal violence                          | 306<br>(193 - 429)       | 6<br>(3 - 12)      | 15<br>(9 - 24)      | 214<br>(126 - 308)       | 43<br>(28 - 66)      | 27<br>(16 - 47)          |
| Assault by firearm                              | 137<br>(72 - 206)        | 2<br>(1 - 4)       | 7<br>(3 - 12)       | 102<br>(50 - 155)        | 21<br>(12 - 35)      | 5<br>(2 - 10)            |
| Assault by sharp object                         | 116<br>(67 - 180)        | 1<br>(1 - 2)       | 4<br>(2 - 8)        | 84<br>(45 - 136)         | 15<br>(8 - 25)       | 12<br>(6 - 22)           |
| Assault by other means                          | 53<br>(33 - 89)          | 3<br>(1 - 5)       | 4<br>(2 - 6)        | 29<br>(15 - 52)          | 7<br>(4 - 13)        | 10<br>(6 - 19)           |

Web Table 31- Turkmenistan deaths with 95% UI by age, sex, and cause in 2013

| Cause                                                             | Both Sexes, All Ages        | Both Sexes, 0-4 Years    | Both Sexes, 5-14 Years | Both Sexes, 15-49 Years  | Both Sexes, 50-69 Years   | Both Sexes, 70-80 Years     |
|-------------------------------------------------------------------|-----------------------------|--------------------------|------------------------|--------------------------|---------------------------|-----------------------------|
| All causes                                                        | 36,201<br>(31,721 - 41,945) | 5,821<br>(5,200 - 6,561) | 696<br>(623 - 775)     | 8,056<br>(6,359 - 9,822) | 9,891<br>(8,205 - 12,494) | 11,737<br>(10,781 - 13,478) |
| Communicable, maternal, neonatal, and nutritional diseases        | 6,637<br>(5,951 - 7,327)    | 4,836<br>(4,291 - 5,469) | 196<br>(155 - 239)     | 1,033<br>(804 - 1,232)   | 359<br>(290 - 449)        | 213<br>(173 - 262)          |
| HIV/AIDS and tuberculosis                                         | 713<br>(494 - 924)          | 5<br>(3 - 7)             | 5<br>(3 - 6)           | 513<br>(337 - 670)       | 160<br>(118 - 221)        | 32<br>(24 - 41)             |
| Tuberculosis                                                      | 565<br>(368 - 746)          | 4<br>(2 - 5)             | 5<br>(3 - 6)           | 395<br>(234 - 520)       | 133<br>(96 - 189)         | 29<br>(22 - 38)             |
| HIV/AIDS                                                          | 148<br>(65 - 272)           | 1<br>(0 - 3)             | 0<br>(0 - 1)           | 118<br>(51 - 221)        | 26<br>(12 - 48)           | 3<br>(1 - 5)                |
| HIV/AIDS resulting in mycobacterial infection                     | 10<br>(4 - 18)              | 0<br>(0 - 0)             | 0<br>(0 - 0)           | 8<br>(3 - 15)            | 2<br>(1 - 3)              | 0<br>(0 - 0)                |
| HIV/AIDS resulting in other diseases                              | 139<br>(61 - 256)           | 1<br>(0 - 3)             | 0<br>(0 - 1)           | 111<br>(47 - 208)        | 24<br>(11 - 45)           | 3<br>(1 - 5)                |
| Diarrhea, lower respiratory, and other common infectious diseases | 4,013<br>(3,489 - 4,559)    | 3,139<br>(2,670 - 3,614) | 162<br>(125 - 199)     | 373<br>(271 - 464)       | 171<br>(128 - 235)        | 169<br>(130 - 214)          |
| Diarrheal diseases                                                | 743<br>(535 - 982)          | 661<br>(451 - 901)       | 13<br>(8 - 19)         | 44<br>(30 - 60)          | 14<br>(9 - 21)            | 11<br>(8 - 16)              |
| Intestinal infectious diseases                                    | 5<br>(3 - 10)               | 2<br>(1 - 4)             | 1<br>(0 - 2)           | 2<br>(1 - 4)             | 0<br>(0 - 1)              | 0<br>(0 - 1)                |
| Typhoid fever                                                     | 3<br>(2 - 6)                | 1<br>(0 - 2)             | 1<br>(0 - 2)           | 1<br>(1 - 3)             | 0<br>(0 - 0)              | 0<br>(0 - 0)                |
| Paratyphoid fever                                                 | 1<br>(0 - 2)                | 0<br>(0 - 1)             | 0<br>(0 - 0)           | 0<br>(0 - 1)             | 0<br>(0 - 0)              | 0<br>(0 - 0)                |
| Other intestinal infectious diseases                              | 1<br>(0 - 4)                | 0<br>(0 - 3)             | 0<br>(0 - 1)           | 0<br>(0 - 2)             | 0<br>(0 - 1)              | 0<br>(0 - 1)                |
| Lower respiratory infections                                      | 3,089<br>(2,602 - 3,582)    | 2,398<br>(1,958 - 2,843) | 128<br>(95 - 164)      | 266<br>(191 - 343)       | 144<br>(105 - 202)        | 153<br>(114 - 198)          |
| Upper respiratory infections                                      | 2<br>(1 - 3)                | 0<br>(0 - 1)             | 0<br>(0 - 0)           | 0<br>(0 - 1)             | 0<br>(0 - 1)              | 0<br>(0 - 1)                |
| Otitis media                                                      | 2<br>(1 - 2)                | 0<br>(0 - 0)             | 0<br>(0 - 1)           | 1<br>(1 - 1)             | 0<br>(0 - 0)              | 0<br>(0 - 0)                |
| Meningitis                                                        | 138<br>(111 - 168)          | 59<br>(40 - 82)          | 17<br>(12 - 22)        | 51<br>(37 - 63)          | 9<br>(7 - 13)             | 3<br>(2 - 4)                |
| Pneumococcal meningitis                                           | 34<br>(26 - 43)             | 11<br>(7 - 15)           | 5<br>(3 - 6)           | 15<br>(10 - 21)          | 3<br>(2 - 4)              | 1<br>(1 - 1)                |
| H influenzae type B meningitis                                    | 46<br>(35 - 59)             | 29<br>(20 - 41)          | 6<br>(4 - 8)           | 9<br>(6 - 14)            | 1<br>(1 - 2)              | 0<br>(0 - 1)                |
| Meningococcal meningitis                                          | 30<br>(23 - 38)             | 12<br>(8 - 18)           | 4<br>(3 - 6)           | 11<br>(7 - 15)           | 2<br>(1 - 3)              | 1<br>(0 - 1)                |
| Other meningitis                                                  | 29<br>(21 - 38)             | 7<br>(4 - 10)            | 2<br>(1 - 4)           | 15<br>(9 - 22)           | 3<br>(2 - 5)              | 1<br>(1 - 1)                |
| Encephalitis                                                      | 25<br>(17 - 36)             | 16<br>(10 - 24)          | 2<br>(1 - 3)           | 6<br>(4 - 10)            | 2<br>(1 - 3)              | 0<br>(0 - 0)                |
| Diphtheria                                                        | 1<br>(0 - 4)                | 1<br>(0 - 3)             | 0<br>(0 - 1)           | 0<br>(0 - 0)             | 0<br>(0 - 0)              | --<br>(0 - 0)               |
| Whooping cough                                                    | 3<br>(1 - 6)                | 2<br>(0 - 4)             | 0<br>(0 - 1)           | 1<br>(1 - 2)             | 0<br>(0 - 0)              | --<br>(0 - 0)               |
| Tetanus                                                           | 3<br>(1 - 4)                | 0<br>(0 - 0)             | 0<br>(0 - 0)           | 1<br>(0 - 2)             | 1<br>(0 - 1)              | 0<br>(0 - 1)                |
| Measles                                                           | 0<br>(0 - 0)                | 0<br>(0 - 0)             | 0<br>(0 - 0)           | 0<br>(0 - 0)             | 0<br>(0 - 0)              | --<br>(0 - 0)               |
| Varicella and herpes zoster                                       | 2<br>(1 - 4)                | 1<br>(0 - 2)             | 0<br>(0 - 0)           | 1<br>(0 - 1)             | 0<br>(0 - 1)              | 1<br>(0 - 3)                |
| Neglected tropical diseases and malaria                           | 25<br>(12 - 38)             | 5<br>(2 - 11)            | 6<br>(1 - 11)          | 10<br>(4 - 16)           | 3<br>(1 - 5)              | 1<br>(0 - 2)                |
| Leishmaniasis                                                     | 2<br>(1 - 3)                | 0<br>(0 - 1)             | 0<br>(0 - 0)           | 1<br>(0 - 2)             | 0<br>(0 - 1)              | 0<br>(0 - 0)                |
| Visceral leishmaniasis                                            | 2<br>(1 - 3)                | 0<br>(0 - 1)             | 0<br>(0 - 0)           | 1<br>(0 - 2)             | 0<br>(0 - 1)              | 0<br>(0 - 0)                |
| Cysticercosis                                                     | 0<br>(0 - 0)                | 0<br>(0 - 0)             | 0<br>(0 - 0)           | 0<br>(0 - 0)             | 0<br>(0 - 0)              | 0<br>(0 - 0)                |
| Cystic echinococcosis                                             | 2<br>(2 - 3)                | 0<br>(0 - 0)             | 0<br>(0 - 0)           | 1<br>(1 - 1)             | 1<br>(0 - 1)              | 0<br>(0 - 0)                |
| Dengue                                                            | 3<br>(2 - 4)                | 1<br>(1 - 2)             | 1<br>(1 - 1)           | 1<br>(1 - 1)             | 0<br>(0 - 0)              | 0<br>(0 - 0)                |
| Rabies                                                            | 13<br>(1 - 24)              | 1<br>(0 - 3)             | 4<br>(0 - 8)           | 6<br>(1 - 11)            | 1<br>(0 - 3)              | 0<br>(0 - 0)                |
| Intestinal nematode infections                                    | 3<br>(0 - 10)               | 2<br>(0 - 7)             | 0<br>(0 - 3)           | 0<br>(0 - 3)             | 0<br>(0 - 2)              | 0<br>(0 - 2)                |
| Ascariasis                                                        | 3<br>(0 - 10)               | 2<br>(0 - 7)             | 0<br>(0 - 3)           | 0<br>(0 - 3)             | 0<br>(0 - 2)              | 0<br>(0 - 2)                |
| Other neglected tropical diseases                                 | 1<br>(1 - 2)                | 0<br>(0 - 1)             | 0<br>(0 - 0)           | 0<br>(0 - 1)             | 0<br>(0 - 0)              | 0<br>(0 - 0)                |
| Maternal disorders                                                | 42<br>(25 - 61)             | --                       | 0<br>(0 - 0)           | 42<br>(25 - 61)          | --                        | --                          |
| Maternal hemorrhage                                               | 6<br>(3 - 9)                | --                       | 0<br>(0 - 0)           | 6<br>(3 - 9)             | --                        | --                          |
| Maternal sepsis and other maternal infections                     | 5<br>(2 - 8)                | --                       | 0<br>(0 - 0)           | 5<br>(2 - 8)             | --                        | --                          |



Web Table 31- Turkmenistan deaths with 95% UI by age, sex, and cause in 2013

| Cause                                                            | Both Sexes, All Ages        | Both Sexes, 0-4 Years    | Both Sexes, 5-14 Years | Both Sexes, 15-49 Years  | Both Sexes, 50-69 Years   | Both Sexes, 70-80 Years     |
|------------------------------------------------------------------|-----------------------------|--------------------------|------------------------|--------------------------|---------------------------|-----------------------------|
| Maternal hypertensive disorders                                  | 4<br>(2 - 7)                | --                       | 0<br>(0 - 0)           | 4<br>(2 - 7)             | --                        | --                          |
| Maternal obstructed labor                                        | 4<br>(2 - 7)                | --                       | 0<br>(0 - 0)           | 4<br>(2 - 7)             | --                        | --                          |
| Maternal abortive outcome                                        | 4<br>(2 - 7)                | --                       | 0<br>(0 - 0)           | 4<br>(2 - 7)             | --                        | --                          |
| Indirect maternal deaths                                         | 5<br>(3 - 9)                | --                       | 0<br>(0 - 0)           | 5<br>(3 - 9)             | --                        | --                          |
| Late maternal deaths                                             | 6<br>(3 - 10)               | --                       | 0<br>(0 - 0)           | 6<br>(3 - 10)            | --                        | --                          |
| Maternal deaths aggravated by HIV/AIDS                           | 0<br>(0 - 0)                | --                       | --                     | 0<br>(0 - 0)             | --                        | --                          |
| Other maternal disorders                                         | 8<br>(4 - 12)               | --                       | 0<br>(0 - 0)           | 8<br>(4 - 12)            | --                        | --                          |
| Neonatal disorders                                               | 1,600<br>(1,384 - 1,820)    | 1,600<br>(1,384 - 1,820) | --                     | --                       | --                        | --                          |
| Neonatal preterm birth complications                             | 508<br>(189 - 870)          | 508<br>(189 - 870)       | --                     | --                       | --                        | --                          |
| Neonatal encephalopathy due to birth asphyxia and trauma         | 789<br>(450 - 1,220)        | 789<br>(450 - 1,220)     | --                     | --                       | --                        | --                          |
| Neonatal sepsis and other neonatal infections                    | 74<br>(25 - 203)            | 74<br>(25 - 203)         | --                     | --                       | --                        | --                          |
| Hemolytic disease and other neonatal jaundice                    | 9<br>(3 - 20)               | 9<br>(3 - 20)            | --                     | --                       | --                        | --                          |
| Other neonatal disorders                                         | 221<br>(97 - 404)           | 221<br>(97 - 404)        | --                     | --                       | --                        | --                          |
| Nutritional deficiencies                                         | 76<br>(57 - 97)             | 25<br>(17 - 35)          | 5<br>(4 - 7)           | 30<br>(21 - 40)          | 11<br>(8 - 15)            | 5<br>(4 - 7)                |
| Protein-energy malnutrition                                      | 31<br>(21 - 45)             | 16<br>(10 - 25)          | 2<br>(1 - 3)           | 9<br>(3 - 15)            | 4<br>(2 - 7)              | 0<br>(0 - 1)                |
| Iodine deficiency                                                | 1<br>(0 - 2)                | 0<br>(0 - 2)             | 0<br>(0 - 0)           | 0<br>(0 - 1)             | 0<br>(0 - 1)              | 0<br>(0 - 0)                |
| Iron-deficiency anemia                                           | 38<br>(24 - 55)             | 7<br>(2 - 14)            | 3<br>(1 - 4)           | 19<br>(11 - 28)          | 6<br>(3 - 10)             | 4<br>(3 - 6)                |
| Other nutritional deficiencies                                   | 6<br>(3 - 9)                | 2<br>(1 - 3)             | 1<br>(0 - 1)           | 3<br>(1 - 4)             | 1<br>(0 - 1)              | 0<br>(0 - 0)                |
| Other communicable, maternal, neonatal, and nutritional diseases | 168<br>(130 - 212)          | 63<br>(40 - 97)          | 18<br>(12 - 25)        | 65<br>(46 - 89)          | 15<br>(10 - 21)           | 7<br>(5 - 11)               |
| Sexually transmitted diseases excluding HIV                      | 15<br>(8 - 26)              | 5<br>(0 - 15)            | 1<br>(0 - 1)           | 5<br>(3 - 9)             | 3<br>(1 - 5)              | 1<br>(1 - 2)                |
| Syphilis                                                         | 11<br>(4 - 21)              | 5<br>(0 - 15)            | 0<br>(0 - 1)           | 2<br>(1 - 5)             | 2<br>(1 - 3)              | 1<br>(1 - 2)                |
| Chlamydial infection                                             | 1<br>(0 - 2)                | --                       | 0<br>(0 - 0)           | 1<br>(0 - 1)             | 0<br>(0 - 1)              | 0<br>(0 - 0)                |
| Gonococcal infection                                             | 2<br>(1 - 3)                | --                       | 0<br>(0 - 0)           | 1<br>(1 - 2)             | 0<br>(0 - 1)              | 0<br>(0 - 0)                |
| Other sexually transmitted diseases                              | 2<br>(1 - 3)                | --                       | 0<br>(0 - 0)           | 1<br>(1 - 2)             | 0<br>(0 - 1)              | 0<br>(0 - 0)                |
| Hepatitis                                                        | 119<br>(91 - 157)           | 37<br>(21 - 64)          | 14<br>(9 - 21)         | 54<br>(37 - 77)          | 10<br>(6 - 15)            | 4<br>(2 - 6)                |
| Acute hepatitis A                                                | 19<br>(5 - 40)              | 9<br>(3 - 22)            | 4<br>(1 - 7)           | 5<br>(1 - 12)            | 0<br>(0 - 1)              | 0<br>(0 - 0)                |
| Acute hepatitis B                                                | 71<br>(48 - 102)            | 27<br>(14 - 49)          | 7<br>(3 - 12)          | 26<br>(15 - 40)          | 8<br>(5 - 12)             | 3<br>(2 - 5)                |
| Acute hepatitis C                                                | 6<br>(1 - 16)               | --                       | 2<br>(0 - 4)           | 4<br>(1 - 9)             | 1<br>(0 - 2)              | 0<br>(0 - 1)                |
| Acute hepatitis E                                                | 23<br>(12 - 37)             | 0<br>(0 - 1)             | 2<br>(1 - 3)           | 20<br>(11 - 32)          | 1<br>(0 - 2)              | 0<br>(0 - 0)                |
| Other infectious diseases                                        | 34<br>(21 - 62)             | 21<br>(10 - 50)          | 3<br>(2 - 7)           | 5<br>(3 - 9)             | 2<br>(1 - 4)              | 2<br>(1 - 5)                |
| Non-communicable diseases                                        | 26,517<br>(22,809 - 31,806) | 665<br>(493 - 846)       | 227<br>(193 - 262)     | 4,989<br>(3,835 - 6,217) | 9,205<br>(7,579 - 11,638) | 11,432<br>(10,497 - 13,145) |
| Neoplasms                                                        | 3,861<br>(3,167 - 4,755)    | 42<br>(29 - 59)          | 71<br>(58 - 87)        | 1,047<br>(791 - 1,310)   | 1,857<br>(1,498 - 2,354)  | 843<br>(724 - 1,030)        |
| Esophageal cancer                                                | 686<br>(495 - 990)          | --                       | --                     | 95<br>(64 - 144)         | 382<br>(267 - 558)        | 209<br>(152 - 295)          |
| Stomach cancer                                                   | 432<br>(347 - 545)          | --                       | --                     | 85<br>(63 - 109)         | 220<br>(170 - 291)        | 127<br>(104 - 157)          |
| Liver cancer                                                     | 289<br>(229 - 370)          | --                       | 1<br>(1 - 2)           | 50<br>(35 - 71)          | 152<br>(113 - 203)        | 86<br>(65 - 115)            |
| Liver cancer due to hepatitis B                                  | 105<br>(75 - 139)           | --                       | 0<br>(0 - 1)           | 21<br>(14 - 30)          | 59<br>(41 - 82)           | 24<br>(17 - 33)             |
| Liver cancer due to hepatitis C                                  | 100<br>(74 - 133)           | --                       | 0<br>(0 - 0)           | 15<br>(10 - 22)          | 52<br>(37 - 72)           | 33<br>(23 - 45)             |
| Liver cancer due to alcohol use                                  | 56<br>(40 - 78)             | --                       | --                     | 6<br>(4 - 10)            | 28<br>(19 - 41)           | 22<br>(15 - 31)             |
| Liver cancer due to other causes                                 | 28<br>(18 - 40)             | --                       | 0<br>(0 - 1)           | 7<br>(5 - 11)            | 13<br>(8 - 20)            | 7<br>(4 - 12)               |
| Larynx cancer                                                    | 58<br>(41 - 93)             | --                       | --                     | 14<br>(9 - 24)           | 35<br>(24 - 57)           | 9<br>(6 - 14)               |

Web Table 31- Turkmenistan deaths with 95% UI by age, sex, and cause in 2013

| Cause                                         | Both Sexes, All Ages        | Both Sexes, 0-4 Years | Both Sexes, 5-14 Years | Both Sexes, 15-49 Years  | Both Sexes, 50-69 Years  | Both Sexes, 70-80 Years   |
|-----------------------------------------------|-----------------------------|-----------------------|------------------------|--------------------------|--------------------------|---------------------------|
| Tracheal, bronchus and lung cancer            | 395<br>(305 - 519)          | --                    | --                     | 98<br>(70 - 133)         | 239<br>(181 - 328)       | 58<br>(46 - 73)           |
| Breast cancer                                 | 233<br>(164 - 327)          | --                    | --                     | 107<br>(69 - 153)        | 97<br>(67 - 144)         | 29<br>(22 - 39)           |
| Cervical cancer                               | 100<br>(69 - 150)           | --                    | --                     | 37<br>(22 - 56)          | 44<br>(30 - 67)          | 19<br>(14 - 28)           |
| Uterine cancer                                | 20<br>(13 - 39)             | --                    | --                     | 4<br>(2 - 9)             | 10<br>(6 - 19)           | 6<br>(4 - 12)             |
| Prostate cancer                               | 25<br>(17 - 43)             | --                    | --                     | 3<br>(2 - 6)             | 11<br>(7 - 19)           | 11<br>(7 - 19)            |
| Colon and rectum cancer                       | 210<br>(165 - 262)          | --                    | --                     | 77<br>(57 - 98)          | 94<br>(73 - 120)         | 40<br>(33 - 49)           |
| Lip and oral cavity cancer                    | 73<br>(51 - 98)             | --                    | --                     | 17<br>(11 - 25)          | 37<br>(25 - 53)          | 18<br>(13 - 25)           |
| Nasopharynx cancer                            | 32<br>(23 - 45)             | --                    | 0<br>(0 - 1)           | 14<br>(9 - 22)           | 13<br>(9 - 20)           | 4<br>(3 - 6)              |
| Other pharynx cancer                          | 41<br>(28 - 56)             | --                    | --                     | 11<br>(6 - 16)           | 24<br>(15 - 34)          | 7<br>(5 - 9)              |
| Gallbladder and biliary tract cancer          | 99<br>(56 - 148)            | --                    | --                     | 15<br>(8 - 23)           | 54<br>(29 - 85)          | 30<br>(17 - 45)           |
| Pancreatic cancer                             | 123<br>(99 - 153)           | --                    | --                     | 20<br>(15 - 28)          | 68<br>(52 - 88)          | 35<br>(28 - 45)           |
| Malignant skin melanoma                       | 44<br>(32 - 63)             | --                    | --                     | 16<br>(11 - 24)          | 15<br>(11 - 23)          | 12<br>(9 - 17)            |
| Non-melanoma skin cancer                      | 10<br>(6 - 14)              | --                    | --                     | 3<br>(1 - 4)             | 3<br>(2 - 5)             | 4<br>(2 - 6)              |
| Ovarian cancer                                | 105<br>(72 - 150)           | --                    | --                     | 39<br>(24 - 57)          | 48<br>(31 - 72)          | 18<br>(12 - 27)           |
| Testicular cancer                             | 15<br>(9 - 23)              | --                    | --                     | 11<br>(6 - 18)           | 3<br>(1 - 5)             | 1<br>(1 - 2)              |
| Kidney cancer                                 | 81<br>(64 - 103)            | 3<br>(1 - 5)          | 2<br>(1 - 2)           | 17<br>(12 - 23)          | 44<br>(32 - 59)          | 16<br>(12 - 21)           |
| Bladder cancer                                | 75<br>(57 - 99)             | --                    | --                     | 8<br>(5 - 11)            | 36<br>(25 - 52)          | 31<br>(23 - 41)           |
| Brain and nervous system cancer               | 115<br>(87 - 161)           | 4<br>(2 - 8)          | 8<br>(6 - 13)          | 52<br>(37 - 73)          | 42<br>(31 - 61)          | 8<br>(6 - 13)             |
| Thyroid cancer                                | 8<br>(5 - 10)               | --                    | 0<br>(0 - 0)           | 3<br>(2 - 4)             | 3<br>(2 - 4)             | 2<br>(1 - 3)              |
| Mesothelioma                                  | 10<br>(7 - 13)              | --                    | --                     | 3<br>(2 - 4)             | 6<br>(4 - 8)             | 1<br>(1 - 2)              |
| Hodgkin lymphoma                              | 19<br>(12 - 27)             | 1<br>(0 - 1)          | 2<br>(1 - 4)           | 10<br>(6 - 15)           | 5<br>(3 - 8)             | 1<br>(1 - 2)              |
| Non-Hodgkin lymphoma                          | 71<br>(53 - 92)             | 3<br>(1 - 5)          | 4<br>(2 - 6)           | 27<br>(18 - 36)          | 26<br>(20 - 37)          | 11<br>(8 - 15)            |
| Multiple myeloma                              | 11<br>(8 - 15)              | --                    | --                     | 3<br>(2 - 5)             | 6<br>(4 - 8)             | 2<br>(2 - 3)              |
| Leukemia                                      | 156<br>(130 - 188)          | 18<br>(12 - 26)       | 39<br>(31 - 48)        | 71<br>(54 - 89)          | 22<br>(17 - 30)          | 6<br>(5 - 8)              |
| Other neoplasms                               | 326<br>(250 - 419)          | 14<br>(7 - 24)        | 15<br>(10 - 23)        | 138<br>(99 - 184)        | 118<br>(87 - 159)        | 41<br>(31 - 54)           |
| Cardiovascular diseases                       | 16,976<br>(14,701 - 20,258) | 80<br>(61 - 109)      | 47<br>(36 - 60)        | 2,421<br>(1,826 - 3,067) | 5,682<br>(4,678 - 7,172) | 8,747<br>(7,982 - 10,027) |
| Rheumatic heart disease                       | 245<br>(158 - 321)          | 3<br>(1 - 5)          | 12<br>(7 - 16)         | 166<br>(107 - 226)       | 51<br>(30 - 71)          | 13<br>(9 - 18)            |
| Ischemic heart disease                        | 11,559<br>(9,813 - 13,895)  | 40<br>(28 - 62)       | 22<br>(17 - 31)        | 1,550<br>(1,146 - 1,993) | 3,630<br>(2,902 - 4,607) | 6,316<br>(5,603 - 7,278)  |
| Cerebrovascular disease                       | 4,581<br>(3,786 - 5,695)    | 23<br>(18 - 30)       | 8<br>(6 - 11)          | 592<br>(433 - 790)       | 1,766<br>(1,399 - 2,309) | 2,193<br>(1,871 - 2,638)  |
| Ischemic stroke                               | 199<br>(143 - 277)          | 1<br>(0 - 2)          | 0<br>(0 - 1)           | 23<br>(15 - 35)          | 72<br>(49 - 109)         | 103<br>(73 - 141)         |
| Hemorrhagic stroke                            | 4,383<br>(3,613 - 5,448)    | 22<br>(18 - 29)       | 8<br>(6 - 10)          | 569<br>(415 - 759)       | 1,694<br>(1,344 - 2,217) | 2,090<br>(1,782 - 2,525)  |
| Hypertensive heart disease                    | 408<br>(302 - 549)          | 1<br>(1 - 2)          | 0<br>(0 - 0)           | 54<br>(35 - 80)          | 173<br>(121 - 242)       | 179<br>(124 - 246)        |
| Cardiomyopathy and myocarditis                | 92<br>(57 - 125)            | 6<br>(3 - 9)          | 3<br>(1 - 4)           | 30<br>(16 - 43)          | 33<br>(19 - 49)          | 21<br>(13 - 30)           |
| Atrial fibrillation and flutter               | 0<br>(0 - 1)                | --                    | --                     | 0<br>(0 - 0)             | 0<br>(0 - 0)             | 0<br>(0 - 0)              |
| Aortic aneurysm                               | 20<br>(14 - 28)             | --                    | --                     | 5<br>(2 - 7)             | 7<br>(4 - 10)            | 9<br>(6 - 13)             |
| Peripheral vascular disease                   | 4<br>(3 - 5)                | --                    | --                     | 1<br>(0 - 1)             | 2<br>(1 - 2)             | 1<br>(1 - 2)              |
| Endocarditis                                  | 13<br>(8 - 19)              | 2<br>(1 - 4)          | 0<br>(0 - 0)           | 3<br>(2 - 5)             | 4<br>(2 - 6)             | 4<br>(2 - 5)              |
| Other cardiovascular and circulatory diseases | 55<br>(40 - 70)             | 5<br>(3 - 8)          | 2<br>(1 - 2)           | 20<br>(14 - 27)          | 16<br>(11 - 24)          | 11<br>(8 - 16)            |
| Chronic respiratory diseases                  | 1,409<br>(1,154 - 1,758)    | 14<br>(10 - 18)       | 7<br>(6 - 9)           | 250<br>(181 - 322)       | 458<br>(353 - 610)       | 679<br>(565 - 845)        |
| Chronic obstructive pulmonary disease         | 1,163<br>(938 - 1,451)      | 6<br>(3 - 8)          | 3<br>(2 - 5)           | 181<br>(127 - 241)       | 389<br>(297 - 519)       | 583<br>(479 - 724)        |

Web Table 31- Turkmenistan deaths with 95% UI by age, sex, and cause in 2013

| Cause                                               | Both Sexes, All Ages     | Both Sexes, 0-4 Years | Both Sexes, 5-14 Years | Both Sexes, 15-49 Years | Both Sexes, 50-69 Years | Both Sexes, 70-80 Years |
|-----------------------------------------------------|--------------------------|-----------------------|------------------------|-------------------------|-------------------------|-------------------------|
| Pneumoconiosis                                      | 29<br>(19 - 51)          | 0<br>(0 - 0)          | 0<br>(0 - 1)           | 6<br>(4 - 10)           | 12<br>(7 - 22)          | 11<br>(6 - 19)          |
| Silicosis                                           | 5<br>(2 - 10)            | 0<br>(0 - 0)          | 0<br>(0 - 0)           | 2<br>(1 - 3)            | 3<br>(1 - 6)            | 0<br>(0 - 1)            |
| Asbestosis                                          | 8<br>(5 - 15)            | 0<br>(0 - 0)          | 0<br>(0 - 0)           | 1<br>(1 - 2)            | 2<br>(1 - 5)            | 4<br>(3 - 8)            |
| Coal workers pneumoconiosis                         | 8<br>(5 - 14)            | 0<br>(0 - 0)          | 0<br>(0 - 0)           | 1<br>(1 - 2)            | 4<br>(2 - 6)            | 4<br>(2 - 6)            |
| Other pneumoconiosis                                | 8<br>(5 - 13)            | 0<br>(0 - 0)          | 0<br>(0 - 0)           | 2<br>(1 - 3)            | 3<br>(2 - 6)            | 2<br>(1 - 4)            |
| Asthma                                              | 122<br>(76 - 182)        | 1<br>(1 - 2)          | 2<br>(2 - 3)           | 38<br>(22 - 56)         | 37<br>(21 - 56)         | 43<br>(25 - 71)         |
| Interstitial lung disease and pulmonary sarcoidosis | 54<br>(29 - 90)          | 0<br>(0 - 1)          | 0<br>(0 - 0)           | 4<br>(3 - 7)            | 13<br>(8 - 22)          | 36<br>(17 - 64)         |
| Other chronic respiratory diseases                  | 41<br>(26 - 66)          | 6<br>(4 - 8)          | 1<br>(1 - 1)           | 21<br>(12 - 36)         | 7<br>(4 - 14)           | 6<br>(3 - 11)           |
| Cirrhosis                                           | 1,400<br>(1,115 - 1,759) | 5<br>(3 - 7)          | 15<br>(13 - 19)        | 517<br>(383 - 659)      | 598<br>(466 - 769)      | 265<br>(222 - 332)      |
| Cirrhosis due to hepatitis B                        | 649<br>(445 - 863)       | 0<br>(0 - 1)          | 5<br>(3 - 7)           | 244<br>(152 - 344)      | 279<br>(190 - 386)      | 120<br>(90 - 157)       |
| Cirrhosis due to hepatitis C                        | 284<br>(153 - 460)       | 0<br>(0 - 0)          | 2<br>(0 - 4)           | 94<br>(34 - 179)        | 124<br>(64 - 201)       | 64<br>(41 - 94)         |
| Cirrhosis due to alcohol use                        | 295<br>(192 - 426)       | --                    | --                     | 88<br>(47 - 140)        | 142<br>(89 - 213)       | 65<br>(45 - 88)         |
| Cirrhosis due to other causes                       | 172<br>(110 - 251)       | 4<br>(3 - 6)          | 9<br>(6 - 11)          | 91<br>(54 - 140)        | 52<br>(30 - 83)         | 16<br>(10 - 23)         |
| Digestive diseases                                  | 390<br>(305 - 492)       | 9<br>(5 - 13)         | 11<br>(9 - 14)         | 180<br>(130 - 230)      | 124<br>(96 - 167)       | 65<br>(54 - 81)         |
| Peptic ulcer disease                                | 141<br>(98 - 200)        | 0<br>(0 - 1)          | 1<br>(0 - 1)           | 63<br>(41 - 90)         | 53<br>(36 - 77)         | 25<br>(17 - 34)         |
| Gastritis and duodenitis                            | 5<br>(2 - 8)             | 0<br>(0 - 1)          | 0<br>(0 - 0)           | 2<br>(1 - 4)            | 1<br>(0 - 2)            | 1<br>(1 - 2)            |
| Appendicitis                                        | 30<br>(19 - 43)          | 0<br>(0 - 0)          | 2<br>(1 - 3)           | 20<br>(12 - 30)         | 5<br>(3 - 8)            | 2<br>(1 - 3)            |
| Paralytic ileus and intestinal obstruction          | 86<br>(61 - 123)         | 6<br>(3 - 9)          | 6<br>(5 - 8)           | 47<br>(31 - 66)         | 19<br>(12 - 31)         | 8<br>(4 - 16)           |
| Inguinal, femoral, and abdominal hernia             | 10<br>(6 - 16)           | 0<br>(0 - 0)          | 0<br>(0 - 0)           | 1<br>(1 - 2)            | 4<br>(2 - 7)            | 4<br>(2 - 7)            |
| Inflammatory bowel disease                          | 12<br>(6 - 17)           | 1<br>(0 - 2)          | 1<br>(0 - 1)           | 5<br>(2 - 7)            | 3<br>(2 - 5)            | 2<br>(1 - 3)            |
| Vascular intestinal disorders                       | 9<br>(5 - 16)            | 0<br>(0 - 0)          | 0<br>(0 - 0)           | 2<br>(1 - 5)            | 4<br>(2 - 7)            | 2<br>(1 - 4)            |
| Gallbladder and biliary diseases                    | 41<br>(30 - 56)          | 0<br>(0 - 0)          | 1<br>(0 - 1)           | 12<br>(8 - 17)          | 16<br>(11 - 23)         | 12<br>(9 - 17)          |
| Pancreatitis                                        | 42<br>(23 - 71)          | 0<br>(0 - 1)          | 0<br>(0 - 1)           | 21<br>(11 - 37)         | 14<br>(7 - 24)          | 6<br>(4 - 11)           |
| Other digestive diseases                            | 15<br>(10 - 21)          | 0<br>(0 - 0)          | 0<br>(0 - 0)           | 7<br>(4 - 10)           | 5<br>(3 - 8)            | 2<br>(2 - 3)            |
| Neurological disorders                              | 835<br>(715 - 989)       | 9<br>(5 - 14)         | 18<br>(14 - 24)        | 103<br>(75 - 135)       | 64<br>(49 - 83)         | 642<br>(544 - 768)      |
| Alzheimer disease and other dementias               | 684<br>(581 - 820)       | --                    | --                     | 0<br>(0 - 1)            | 50<br>(37 - 65)         | 633<br>(536 - 757)      |
| Parkinson disease                                   | 3<br>(2 - 10)            | --                    | --                     | 1<br>(0 - 1)            | 1<br>(1 - 3)            | 2<br>(1 - 6)            |
| Epilepsy                                            | 130<br>(97 - 166)        | 8<br>(5 - 12)         | 17<br>(13 - 23)        | 95<br>(68 - 126)        | 8<br>(5 - 12)           | 2<br>(1 - 2)            |
| Multiple sclerosis                                  | 9<br>(6 - 18)            | --                    | --                     | 2<br>(1 - 4)            | 2<br>(1 - 5)            | 5<br>(3 - 10)           |
| Other neurological disorders                        | 10<br>(8 - 12)           | 1<br>(1 - 2)          | 1<br>(1 - 2)           | 4<br>(3 - 6)            | 2<br>(2 - 3)            | 1<br>(1 - 1)            |
| Mental and substance use disorders                  | 144<br>(102 - 199)       | 0<br>(0 - 1)          | 0<br>(0 - 0)           | 102<br>(70 - 143)       | 37<br>(25 - 53)         | 4<br>(3 - 6)            |
| Schizophrenia                                       | 19<br>(13 - 27)          | --                    | --                     | 12<br>(8 - 18)          | 6<br>(4 - 9)            | 1<br>(1 - 1)            |
| Alcohol use disorders                               | 95<br>(58 - 139)         | --                    | --                     | 66<br>(39 - 98)         | 27<br>(16 - 41)         | 2<br>(1 - 3)            |
| Drug use disorders                                  | 29<br>(20 - 41)          | 0<br>(0 - 1)          | --                     | 24<br>(16 - 34)         | 4<br>(2 - 5)            | 1<br>(1 - 2)            |
| Opioid use disorders                                | 6<br>(4 - 9)             | 0<br>(0 - 0)          | --                     | 5<br>(3 - 8)            | 1<br>(0 - 1)            | 0<br>(0 - 0)            |
| Cocaine use disorders                               | 1<br>(1 - 1)             | 0<br>(0 - 0)          | --                     | 1<br>(0 - 1)            | 0<br>(0 - 0)            | 0<br>(0 - 0)            |
| Amphetamine use disorders                           | 1<br>(1 - 1)             | 0<br>(0 - 0)          | --                     | 1<br>(0 - 1)            | 0<br>(0 - 0)            | 0<br>(0 - 0)            |
| Other drug use disorders                            | 21<br>(15 - 30)          | 0<br>(0 - 0)          | --                     | 17<br>(12 - 25)         | 3<br>(2 - 4)            | 1<br>(1 - 1)            |
| Eating disorders                                    | 1<br>(1 - 1)             | --                    | 0<br>(0 - 0)           | 1<br>(0 - 1)            | --                      | --                      |
| Anorexia nervosa                                    | 1<br>(1 - 1)             | --                    | 0<br>(0 - 0)           | 1<br>(0 - 1)            | --                      | --                      |

Web Table 31- Turkmenistan deaths with 95% UI by age, sex, and cause in 2013

| Cause                                               | Both Sexes, All Ages | Both Sexes, 0-4 Years | Both Sexes, 5-14 Years | Both Sexes, 15-49 Years | Both Sexes, 50-69 Years | Both Sexes, 70-80 Years |
|-----------------------------------------------------|----------------------|-----------------------|------------------------|-------------------------|-------------------------|-------------------------|
| Diabetes, urogenital, blood, and endocrine diseases | 958<br>(779 - 1,202) | 44<br>(32 - 61)       | 29<br>(23 - 36)        | 325<br>(242 - 422)      | 377<br>(300 - 488)      | 183<br>(154 - 227)      |
| Diabetes mellitus                                   | 490<br>(395 - 623)   | 1<br>(1 - 2)          | 5<br>(4 - 8)           | 103<br>(76 - 135)       | 267<br>(207 - 351)      | 113<br>(91 - 142)       |
| Acute glomerulonephritis                            | 5<br>(3 - 8)         | 0<br>(0 - 1)          | 0<br>(0 - 1)           | 3<br>(1 - 4)            | 1<br>(1 - 2)            | 0<br>(0 - 1)            |
| Chronic kidney disease                              | 298<br>(228 - 415)   | 7<br>(5 - 11)         | 11<br>(8 - 15)         | 153<br>(109 - 218)      | 76<br>(56 - 107)        | 51<br>(39 - 73)         |
| Chronic kidney disease due to diabetes mellitus     | 12<br>(6 - 19)       | 0<br>(0 - 0)          | 0<br>(0 - 1)           | 5<br>(2 - 8)            | 5<br>(2 - 8)            | 2<br>(1 - 2)            |
| Chronic kidney disease due to hypertension          | 47<br>(31 - 72)      | 2<br>(0 - 3)          | 1<br>(0 - 1)           | 15<br>(9 - 25)          | 14<br>(9 - 23)          | 15<br>(9 - 24)          |
| Chronic kidney disease due to glomerulonephritis    | 108<br>(76 - 144)    | 2<br>(1 - 4)          | 4<br>(3 - 5)           | 60<br>(38 - 82)         | 28<br>(19 - 40)         | 14<br>(10 - 20)         |
| Chronic kidney disease due to other causes          | 131<br>(83 - 231)    | 3<br>(2 - 6)          | 6<br>(4 - 10)          | 73<br>(41 - 132)        | 29<br>(17 - 50)         | 20<br>(12 - 35)         |
| Urinary diseases and male infertility               | 95<br>(73 - 118)     | 4<br>(3 - 6)          | 4<br>(3 - 5)           | 43<br>(32 - 57)         | 27<br>(20 - 36)         | 17<br>(13 - 22)         |
| Interstitial nephritis and urinary tract infections | 69<br>(53 - 88)      | 3<br>(2 - 5)          | 2<br>(1 - 3)           | 33<br>(24 - 45)         | 19<br>(13 - 25)         | 11<br>(9 - 15)          |
| Urolithiasis                                        | 17<br>(5 - 24)       | --                    | 1<br>(0 - 2)           | 7<br>(1 - 11)           | 5<br>(2 - 9)            | 3<br>(1 - 5)            |
| Other urinary diseases                              | 9<br>(6 - 15)        | 0<br>(0 - 1)          | 0<br>(0 - 0)           | 3<br>(2 - 5)            | 3<br>(2 - 5)            | 2<br>(1 - 5)            |
| Gynecological diseases                              | 4<br>(1 - 8)         | --                    | --                     | 4<br>(1 - 7)            | 0<br>(0 - 1)            | 0<br>(0 - 0)            |
| Uterine fibroids                                    | 1<br>(0 - 1)         | --                    | --                     | 0<br>(0 - 1)            | 0<br>(0 - 0)            | 0<br>(0 - 0)            |
| Polycystic ovarian syndrome                         | 0<br>(0 - 0)         | --                    | --                     | 0<br>(0 - 0)            | 0<br>(0 - 0)            | --                      |
| Endometriosis                                       | 1<br>(0 - 1)         | --                    | --                     | 1<br>(0 - 1)            | 0<br>(0 - 0)            | --                      |
| Genital prolapse                                    | 1<br>(0 - 1)         | --                    | --                     | 1<br>(0 - 1)            | 0<br>(0 - 0)            | 0<br>(0 - 0)            |
| Other gynecological diseases                        | 2<br>(0 - 4)         | --                    | --                     | 2<br>(0 - 3)            | 0<br>(0 - 0)            | 0<br>(0 - 0)            |
| Hemoglobinopathies and hemolytic anemias            | 35<br>(24 - 53)      | 21<br>(13 - 35)       | 4<br>(3 - 6)           | 8<br>(5 - 13)           | 1<br>(1 - 2)            | 1<br>(0 - 2)            |
| Thalassemias                                        | 23<br>(16 - 36)      | 15<br>(9 - 27)        | 4<br>(2 - 6)           | 5<br>(3 - 7)            | 0<br>(0 - 0)            | 0<br>(0 - 0)            |
| Sickle cell disorders                               | 1<br>(0 - 1)         | 0<br>(0 - 0)          | 0<br>(0 - 0)           | 0<br>(0 - 0)            | 0<br>(0 - 0)            | 0<br>(0 - 0)            |
| G6PD deficiency                                     | 0<br>(0 - 1)         | 0<br>(0 - 0)          | 0<br>(0 - 0)           | 0<br>(0 - 0)            | 0<br>(0 - 0)            | 0<br>(0 - 0)            |
| Other hemoglobinopathies and hemolytic anemias      | 11<br>(7 - 16)       | 5<br>(3 - 8)          | 0<br>(0 - 1)           | 3<br>(2 - 5)            | 1<br>(1 - 2)            | 1<br>(0 - 2)            |
| Endocrine, metabolic, blood, and immune disorders   | 31<br>(22 - 48)      | 10<br>(6 - 17)        | 5<br>(3 - 8)           | 10<br>(7 - 17)          | 4<br>(3 - 8)            | 1<br>(1 - 3)            |
| Musculoskeletal disorders                           | 11<br>(7 - 20)       | --                    | 2<br>(1 - 2)           | 6<br>(4 - 11)           | 2<br>(2 - 5)            | 1<br>(1 - 2)            |
| Rheumatoid arthritis                                | 3<br>(2 - 4)         | --                    | 0<br>(0 - 0)           | 1<br>(1 - 2)            | 1<br>(0 - 1)            | 0<br>(0 - 1)            |
| Other musculoskeletal disorders                     | 8<br>(5 - 16)        | --                    | 1<br>(1 - 2)           | 4<br>(3 - 9)            | 2<br>(1 - 4)            | 0<br>(0 - 1)            |
| Other non-communicable diseases                     | 534<br>(360 - 703)   | 463<br>(311 - 622)    | 26<br>(17 - 35)        | 36<br>(24 - 53)         | 5<br>(4 - 8)            | 3<br>(2 - 4)            |
| Congenital anomalies                                | 516<br>(333 - 686)   | 447<br>(285 - 607)    | 26<br>(16 - 35)        | 36<br>(24 - 53)         | 5<br>(3 - 8)            | 3<br>(2 - 4)            |
| Neural tube defects                                 | 41<br>(25 - 65)      | 38<br>(22 - 62)       | 1<br>(1 - 2)           | 1<br>(1 - 2)            | 0<br>(0 - 1)            | 0<br>(0 - 0)            |
| Congenital heart anomalies                          | 357<br>(224 - 489)   | 296<br>(179 - 417)    | 23<br>(15 - 31)        | 32<br>(21 - 48)         | 4<br>(2 - 6)            | 2<br>(1 - 3)            |
| Cleft lip and cleft palate                          | 7<br>(3 - 15)        | 7<br>(3 - 15)         | --                     | --                      | --                      | --                      |
| Down syndrome                                       | 16<br>(7 - 31)       | 14<br>(6 - 28)        | 1<br>(0 - 1)           | 1<br>(0 - 1)            | 0<br>(0 - 0)            | 0<br>(0 - 0)            |
| Chromosomal unbalanced rearrangements               | 2<br>(1 - 4)         | 1<br>(0 - 3)          | 0<br>(0 - 0)           | 1<br>(0 - 1)            | 0<br>(0 - 0)            | 0<br>(0 - 0)            |
| Other congenital anomalies                          | 93<br>(49 - 144)     | 90<br>(48 - 141)      | 1<br>(0 - 1)           | 1<br>(0 - 2)            | 1<br>(0 - 1)            | 0<br>(0 - 1)            |
| Skin and subcutaneous diseases                      | 2<br>(1 - 2)         | 0<br>(0 - 1)          | 0<br>(0 - 0)           | 1<br>(1 - 1)            | 0<br>(0 - 0)            | 0<br>(0 - 0)            |
| Cellulitis                                          | 0<br>(0 - 0)         | 0<br>(0 - 0)          | 0<br>(0 - 0)           | 0<br>(0 - 0)            | 0<br>(0 - 0)            | 0<br>(0 - 0)            |
| Pyoderma                                            | 1<br>(1 - 2)         | 0<br>(0 - 1)          | 0<br>(0 - 0)           | 1<br>(0 - 1)            | 0<br>(0 - 0)            | 0<br>(0 - 0)            |
| Decubitus ulcer                                     | 0<br>(0 - 0)         | 0<br>(0 - 0)          | 0<br>(0 - 0)           | 0<br>(0 - 0)            | 0<br>(0 - 0)            | 0<br>(0 - 0)            |
| Other skin and subcutaneous diseases                | 0<br>(0 - 0)         | 0<br>(0 - 0)          | 0<br>(0 - 0)           | 0<br>(0 - 0)            | 0<br>(0 - 0)            | 0<br>(0 - 0)            |

Web Table 31- Turkmenistan deaths with 95% UI by age, sex, and cause in 2013

| Cause                                           | Both Sexes, All Ages     | Both Sexes, 0-4 Years | Both Sexes, 5-14 Years | Both Sexes, 15-49 Years  | Both Sexes, 50-69 Years | Both Sexes, 70-80 Years |
|-------------------------------------------------|--------------------------|-----------------------|------------------------|--------------------------|-------------------------|-------------------------|
| Sudden infant death syndrome                    | 16<br>(3 - 65)           | 16<br>(3 - 65)        | --                     | --                       | --                      | --                      |
| Injuries                                        | 3,048<br>(2,380 - 3,761) | 321<br>(214 - 494)    | 273<br>(229 - 335)     | 2,034<br>(1,503 - 2,507) | 328<br>(252 - 435)      | 92<br>(78 - 113)        |
| Transport injuries                              | 751<br>(546 - 1,099)     | 20<br>(14 - 29)       | 66<br>(50 - 87)        | 543<br>(369 - 823)       | 96<br>(70 - 144)        | 26<br>(21 - 38)         |
| Road injuries                                   | 697<br>(506 - 1,026)     | 18<br>(12 - 25)       | 62<br>(47 - 81)        | 504<br>(341 - 768)       | 89<br>(65 - 132)        | 24<br>(19 - 35)         |
| Pedestrian road injuries                        | 123<br>(81 - 179)        | 6<br>(4 - 10)         | 22<br>(14 - 32)        | 64<br>(37 - 101)         | 20<br>(13 - 32)         | 11<br>(8 - 16)          |
| Cyclist road injuries                           | 27<br>(17 - 39)          | 1<br>(1 - 3)          | 5<br>(3 - 9)           | 13<br>(7 - 20)           | 6<br>(4 - 9)            | 2<br>(1 - 2)            |
| Motorcyclist road injuries                      | 99<br>(56 - 176)         | 1<br>(0 - 1)          | 2<br>(1 - 3)           | 90<br>(50 - 160)         | 6<br>(3 - 12)           | 1<br>(0 - 1)            |
| Motor vehicle road injuries                     | 441<br>(314 - 663)       | 9<br>(6 - 14)         | 31<br>(22 - 45)        | 334<br>(224 - 511)       | 55<br>(40 - 82)         | 11<br>(8 - 17)          |
| Other road injuries                             | 6<br>(2 - 11)            | 0<br>(0 - 1)          | 1<br>(0 - 2)           | 3<br>(1 - 6)             | 1<br>(0 - 2)            | 0<br>(0 - 1)            |
| Other transport injuries                        | 54<br>(37 - 84)          | 2<br>(1 - 4)          | 4<br>(3 - 7)           | 39<br>(24 - 63)          | 7<br>(5 - 12)           | 2<br>(1 - 3)            |
| Unintentional injuries                          | 1,428<br>(1,098 - 1,823) | 294<br>(191 - 463)    | 187<br>(151 - 249)     | 775<br>(551 - 990)       | 127<br>(92 - 178)       | 46<br>(38 - 56)         |
| Falls                                           | 176<br>(130 - 224)       | 20<br>(13 - 32)       | 13<br>(9 - 18)         | 104<br>(70 - 141)        | 27<br>(19 - 37)         | 12<br>(9 - 16)          |
| Drowning                                        | 564<br>(416 - 933)       | 145<br>(75 - 328)     | 116<br>(84 - 191)      | 263<br>(173 - 382)       | 31<br>(18 - 50)         | 9<br>(6 - 12)           |
| Fire, heat, and hot substances                  | 321<br>(193 - 466)       | 50<br>(21 - 104)      | 25<br>(15 - 41)        | 197<br>(117 - 284)       | 34<br>(19 - 54)         | 14<br>(9 - 20)          |
| Poisonings                                      | 92<br>(61 - 126)         | 9<br>(5 - 14)         | 5<br>(3 - 7)           | 63<br>(40 - 90)          | 12<br>(7 - 18)          | 4<br>(3 - 5)            |
| Exposure to mechanical forces                   | 163<br>(109 - 219)       | 10<br>(5 - 18)        | 20<br>(13 - 31)        | 120<br>(72 - 170)        | 13<br>(7 - 22)          | 0<br>(0 - 1)            |
| Unintentional firearm injuries                  | 3<br>(2 - 6)             | 0<br>(0 - 0)          | 0<br>(0 - 0)           | 3<br>(1 - 5)             | 0<br>(0 - 1)            | 0<br>(0 - 0)            |
| Unintentional suffocation                       | 16<br>(3 - 29)           | 4<br>(1 - 12)         | 1<br>(0 - 3)           | 10<br>(1 - 17)           | 1<br>(0 - 1)            | 0<br>(0 - 0)            |
| Other exposure to mechanical forces             | 144<br>(95 - 197)        | 6<br>(3 - 12)         | 18<br>(11 - 29)        | 108<br>(63 - 154)        | 12<br>(6 - 20)          | 0<br>(0 - 1)            |
| Adverse effects of medical treatment            | 13<br>(9 - 19)           | 5<br>(3 - 10)         | 1<br>(0 - 1)           | 3<br>(2 - 6)             | 2<br>(1 - 4)            | 1<br>(1 - 3)            |
| Animal contact                                  | 4<br>(2 - 12)            | 1<br>(0 - 3)          | 1<br>(0 - 2)           | 1<br>(0 - 4)             | 1<br>(0 - 2)            | 0<br>(0 - 1)            |
| Venomous animal contact                         | 2<br>(1 - 9)             | 1<br>(0 - 2)          | 0<br>(0 - 2)           | 1<br>(0 - 3)             | 0<br>(0 - 1)            | 0<br>(0 - 1)            |
| Non-venomous animal contact                     | 1<br>(1 - 4)             | 0<br>(0 - 1)          | 0<br>(0 - 1)           | 0<br>(0 - 1)             | 0<br>(0 - 1)            | 0<br>(0 - 0)            |
| Foreign body                                    | 87<br>(33 - 153)         | 51<br>(16 - 99)       | 5<br>(2 - 10)          | 20<br>(7 - 36)           | 7<br>(3 - 12)           | 4<br>(2 - 8)            |
| Pulmonary aspiration and foreign body in airway | 86<br>(33 - 152)         | 51<br>(16 - 99)       | 5<br>(2 - 10)          | 19<br>(7 - 36)           | 7<br>(3 - 12)           | 4<br>(2 - 7)            |
| Foreign body in other body part                 | 1<br>(1 - 1)             | 0<br>(0 - 0)          | 0<br>(0 - 0)           | 0<br>(0 - 1)             | 0<br>(0 - 0)            | 0<br>(0 - 0)            |
| Other unintentional injuries                    | 8<br>(4 - 13)            | 2<br>(0 - 3)          | 1<br>(1 - 2)           | 4<br>(2 - 6)             | 1<br>(1 - 2)            | 0<br>(0 - 1)            |
| Self-harm and interpersonal violence            | 868<br>(620 - 1,183)     | 7<br>(3 - 12)         | 20<br>(13 - 28)        | 717<br>(501 - 980)       | 105<br>(74 - 159)       | 20<br>(15 - 30)         |
| Self-harm                                       | 539<br>(394 - 722)       | --                    | 14<br>(9 - 21)         | 433<br>(310 - 576)       | 76<br>(55 - 111)        | 16<br>(12 - 23)         |
| Interpersonal violence                          | 329<br>(214 - 547)       | 7<br>(3 - 12)         | 6<br>(3 - 10)          | 283<br>(178 - 470)       | 29<br>(16 - 58)         | 4<br>(2 - 10)           |
| Assault by firearm                              | 92<br>(38 - 178)         | 1<br>(0 - 2)          | 1<br>(0 - 2)           | 82<br>(32 - 158)         | 8<br>(3 - 16)           | 1<br>(0 - 2)            |
| Assault by sharp object                         | 100<br>(56 - 183)        | 1<br>(0 - 3)          | 1<br>(0 - 2)           | 89<br>(49 - 163)         | 8<br>(4 - 18)           | 1<br>(0 - 2)            |
| Assault by other means                          | 137<br>(81 - 266)        | 4<br>(2 - 8)          | 4<br>(2 - 6)           | 113<br>(62 - 223)        | 14<br>(7 - 29)          | 3<br>(1 - 6)            |

Web Table 31- Turkmenistan deaths with 95% UI by age, sex, and cause in 2013

| Cause                                                             | Males, All Ages             | Males, 0-4 Years         | Males, 5-14 Years  | Males, 15-49 Years       | Males, 50-69 Years       | Males, 70-80 Years       |
|-------------------------------------------------------------------|-----------------------------|--------------------------|--------------------|--------------------------|--------------------------|--------------------------|
| All causes                                                        | 20,723<br>(17,025 - 25,211) | 3,227<br>(2,826 - 3,660) | 415<br>(369 - 460) | 5,672<br>(3,959 - 7,071) | 6,227<br>(4,820 - 8,297) | 5,182<br>(4,652 - 6,131) |
| Communicable, maternal, neonatal, and nutritional diseases        | 3,864<br>(3,433 - 4,331)    | 2,687<br>(2,359 - 3,040) | 107<br>(79 - 137)  | 711<br>(514 - 885)       | 252<br>(190 - 333)       | 107<br>(81 - 141)        |
| HIV/AIDS and tuberculosis                                         | 547<br>(364 - 738)          | 3<br>(2 - 4)             | 2<br>(2 - 3)       | 403<br>(257 - 546)       | 119<br>(82 - 176)        | 20<br>(15 - 28)          |
| Tuberculosis                                                      | 433<br>(265 - 605)          | 2<br>(1 - 3)             | 2<br>(1 - 3)       | 313<br>(172 - 431)       | 98<br>(65 - 149)         | 18<br>(13 - 25)          |
| HIV/AIDS                                                          | 114<br>(49 - 213)           | 0<br>(0 - 2)             | 0<br>(0 - 0)       | 90<br>(38 - 170)         | 21<br>(9 - 39)           | 2<br>(1 - 5)             |
| HIV/AIDS resulting in mycobacterial infection                     | 8<br>(3 - 15)               | 0<br>(0 - 0)             | 0<br>(0 - 0)       | 6<br>(3 - 12)            | 1<br>(1 - 3)             | 0<br>(0 - 0)             |
| HIV/AIDS resulting in other diseases                              | 106<br>(46 - 198)           | 0<br>(0 - 2)             | 0<br>(0 - 0)       | 84<br>(35 - 158)         | 19<br>(9 - 36)           | 2<br>(1 - 4)             |
| Diarrhea, lower respiratory, and other common infectious diseases | 2,249<br>(1,905 - 2,640)    | 1,710<br>(1,408 - 2,065) | 88<br>(63 - 117)   | 251<br>(169 - 332)       | 119<br>(80 - 175)        | 81<br>(57 - 113)         |
| Diarrheal diseases                                                | 406<br>(266 - 586)          | 350<br>(209 - 531)       | 8<br>(4 - 12)      | 33<br>(20 - 48)          | 10<br>(6 - 16)           | 5<br>(3 - 8)             |
| Intestinal infectious diseases                                    | 3<br>(1 - 6)                | 1<br>(0 - 3)             | 1<br>(0 - 1)       | 1<br>(0 - 3)             | 0<br>(0 - 1)             | 0<br>(0 - 0)             |
| Typhoid fever                                                     | 2<br>(1 - 3)                | 0<br>(0 - 1)             | 0<br>(0 - 1)       | 1<br>(0 - 2)             | 0<br>(0 - 0)             | 0<br>(0 - 0)             |
| Paratyphoid fever                                                 | 1<br>(0 - 1)                | 0<br>(0 - 0)             | 0<br>(0 - 0)       | 0<br>(0 - 0)             | 0<br>(0 - 0)             | 0<br>(0 - 0)             |
| Other intestinal infectious diseases                              | 1<br>(0 - 3)                | 0<br>(0 - 2)             | 0<br>(0 - 1)       | 0<br>(0 - 2)             | 0<br>(0 - 1)             | 0<br>(0 - 0)             |
| Lower respiratory infections                                      | 1,740<br>(1,401 - 2,110)    | 1,316<br>(1,027 - 1,652) | 69<br>(45 - 96)    | 182<br>(117 - 250)       | 100<br>(65 - 151)        | 74<br>(51 - 105)         |
| Upper respiratory infections                                      | 1<br>(0 - 2)                | 0<br>(0 - 1)             | 0<br>(0 - 0)       | 0<br>(0 - 1)             | 0<br>(0 - 1)             | 0<br>(0 - 0)             |
| Otitis media                                                      | 1<br>(1 - 1)                | 0<br>(0 - 0)             | 0<br>(0 - 0)       | 0<br>(0 - 1)             | 0<br>(0 - 0)             | 0<br>(0 - 0)             |
| Meningitis                                                        | 80<br>(58 - 103)            | 33<br>(16 - 51)          | 10<br>(6 - 14)     | 29<br>(20 - 39)          | 6<br>(4 - 9)             | 1<br>(1 - 2)             |
| Pneumococcal meningitis                                           | 19<br>(13 - 26)             | 6<br>(3 - 10)            | 3<br>(2 - 4)       | 9<br>(5 - 13)            | 2<br>(1 - 3)             | 0<br>(0 - 1)             |
| H influenzae type B meningitis                                    | 26<br>(17 - 37)             | 16<br>(8 - 27)           | 3<br>(2 - 5)       | 5<br>(3 - 9)             | 1<br>(0 - 2)             | 0<br>(0 - 0)             |
| Meningococcal meningitis                                          | 17<br>(12 - 24)             | 7<br>(3 - 11)            | 2<br>(1 - 4)       | 6<br>(4 - 10)            | 1<br>(1 - 2)             | 0<br>(0 - 1)             |
| Other meningitis                                                  | 17<br>(10 - 23)             | 4<br>(1 - 7)             | 1<br>(1 - 3)       | 9<br>(5 - 14)            | 2<br>(1 - 4)             | 0<br>(0 - 1)             |
| Encephalitis                                                      | 13<br>(8 - 21)              | 9<br>(5 - 15)            | 1<br>(1 - 2)       | 3<br>(1 - 5)             | 1<br>(0 - 2)             | 0<br>(0 - 0)             |
| Diphtheria                                                        | 1<br>(0 - 3)                | 0<br>(0 - 2)             | 0<br>(0 - 1)       | 0<br>(0 - 0)             | 0<br>(0 - 0)             | --<br>(0 - 0)            |
| Whooping cough                                                    | 2<br>(1 - 5)                | 1<br>(0 - 3)             | 0<br>(0 - 0)       | 1<br>(0 - 2)             | 0<br>(0 - 0)             | --<br>(0 - 0)            |
| Tetanus                                                           | 1<br>(0 - 2)                | 0<br>(0 - 0)             | 0<br>(0 - 0)       | 1<br>(0 - 1)             | 0<br>(0 - 1)             | 0<br>(0 - 0)             |
| Measles                                                           | 0<br>(0 - 0)                | 0<br>(0 - 0)             | 0<br>(0 - 0)       | 0<br>(0 - 0)             | 0<br>(0 - 0)             | --<br>(0 - 0)            |
| Varicella and herpes zoster                                       | 1<br>(0 - 2)                | 0<br>(0 - 1)             | 0<br>(0 - 0)       | 0<br>(0 - 1)             | 0<br>(0 - 0)             | 0<br>(0 - 1)             |
| Neglected tropical diseases and malaria                           | 15<br>(6 - 24)              | 3<br>(1 - 7)             | 3<br>(1 - 7)       | 7<br>(2 - 11)            | 1<br>(1 - 3)             | 0<br>(0 - 1)             |
| Leishmaniasis                                                     | 1<br>(1 - 3)                | 0<br>(0 - 1)             | 0<br>(0 - 0)       | 1<br>(0 - 1)             | 0<br>(0 - 1)             | 0<br>(0 - 0)             |
| Visceral leishmaniasis                                            | 1<br>(1 - 3)                | 0<br>(0 - 1)             | 0<br>(0 - 0)       | 1<br>(0 - 1)             | 0<br>(0 - 1)             | 0<br>(0 - 0)             |
| Cysticercosis                                                     | 0<br>(0 - 0)                | 0<br>(0 - 0)             | 0<br>(0 - 0)       | 0<br>(0 - 0)             | 0<br>(0 - 0)             | 0<br>(0 - 0)             |
| Cystic echinococcosis                                             | 1<br>(1 - 2)                | 0<br>(0 - 0)             | 0<br>(0 - 0)       | 1<br>(0 - 1)             | 0<br>(0 - 0)             | 0<br>(0 - 0)             |
| Dengue                                                            | 2<br>(1 - 3)                | 1<br>(0 - 1)             | 1<br>(0 - 1)       | 1<br>(0 - 1)             | 0<br>(0 - 0)             | 0<br>(0 - 0)             |
| Rabies                                                            | 8<br>(1 - 16)               | 1<br>(0 - 2)             | 2<br>(0 - 6)       | 4<br>(0 - 8)             | 1<br>(0 - 1)             | 0<br>(0 - 0)             |
| Intestinal nematode infections                                    | 2<br>(0 - 7)                | 1<br>(0 - 5)             | 0<br>(0 - 2)       | 0<br>(0 - 2)             | 0<br>(0 - 1)             | 0<br>(0 - 1)             |
| Ascariasis                                                        | 2<br>(0 - 7)                | 1<br>(0 - 5)             | 0<br>(0 - 2)       | 0<br>(0 - 2)             | 0<br>(0 - 1)             | 0<br>(0 - 1)             |
| Other neglected tropical diseases                                 | 1<br>(0 - 1)                | 0<br>(0 - 0)             | 0<br>(0 - 0)       | 0<br>(0 - 1)             | 0<br>(0 - 0)             | 0<br>(0 - 0)             |
| Maternal disorders                                                | --                          | --                       | --                 | --                       | --                       | --                       |
| Maternal hemorrhage                                               | --                          | --                       | --                 | --                       | --                       | --                       |
| Maternal sepsis and other maternal infections                     | --                          | --                       | --                 | --                       | --                       | --                       |

Web Table 31- Turkmenistan deaths with 95% UI by age, sex, and cause in 2013

| Cause                                                            | Males, All Ages             | Males, 0-4 Years     | Males, 5-14 Years  | Males, 15-49 Years       | Males, 50-69 Years       | Males, 70-80 Years       |
|------------------------------------------------------------------|-----------------------------|----------------------|--------------------|--------------------------|--------------------------|--------------------------|
| Maternal hypertensive disorders                                  | --                          | --                   | --                 | --                       | --                       | --                       |
| Maternal obstructed labor                                        | --                          | --                   | --                 | --                       | --                       | --                       |
| Maternal abortive outcome                                        | --                          | --                   | --                 | --                       | --                       | --                       |
| Indirect maternal deaths                                         | --                          | --                   | --                 | --                       | --                       | --                       |
| Late maternal deaths                                             | --                          | --                   | --                 | --                       | --                       | --                       |
| Maternal deaths aggravated by HIV/AIDS                           | --                          | --                   | --                 | --                       | --                       | --                       |
| Other maternal disorders                                         | --                          | --                   | --                 | --                       | --                       | --                       |
| Neonatal disorders                                               | 924<br>(760 - 1,069)        | 924<br>(760 - 1,069) | --                 | --                       | --                       | --                       |
| Neonatal preterm birth complications                             | 292<br>(93 - 527)           | 292<br>(93 - 527)    | --                 | --                       | --                       | --                       |
| Neonatal encephalopathy due to birth asphyxia and trauma         | 461<br>(238 - 736)          | 461<br>(238 - 736)   | --                 | --                       | --                       | --                       |
| Neonatal sepsis and other neonatal infections                    | 38<br>(8 - 143)             | 38<br>(8 - 143)      | --                 | --                       | --                       | --                       |
| Hemolytic disease and other neonatal jaundice                    | 5<br>(1 - 15)               | 5<br>(1 - 15)        | --                 | --                       | --                       | --                       |
| Other neonatal disorders                                         | 128<br>(42 - 287)           | 128<br>(42 - 287)    | --                 | --                       | --                       | --                       |
| Nutritional deficiencies                                         | 40<br>(24 - 56)             | 13<br>(7 - 21)       | 3<br>(2 - 4)       | 16<br>(9 - 23)           | 6<br>(3 - 9)             | 3<br>(1 - 4)             |
| Protein-energy malnutrition                                      | 17<br>(8 - 27)              | 8<br>(4 - 15)        | 1<br>(0 - 2)       | 5<br>(1 - 10)            | 2<br>(0 - 4)             | 0<br>(0 - 1)             |
| Iodine deficiency                                                | 0<br>(0 - 1)                | 0<br>(0 - 1)         | 0<br>(0 - 0)       | 0<br>(0 - 1)             | 0<br>(0 - 0)             | 0<br>(0 - 0)             |
| Iron-deficiency anemia                                           | 19<br>(9 - 33)              | 4<br>(1 - 8)         | 1<br>(0 - 2)       | 9<br>(5 - 17)            | 3<br>(1 - 7)             | 2<br>(1 - 3)             |
| Other nutritional deficiencies                                   | 3<br>(1 - 7)                | 1<br>(0 - 2)         | 0<br>(0 - 1)       | 2<br>(1 - 3)             | 0<br>(0 - 1)             | 0<br>(0 - 0)             |
| Other communicable, maternal, neonatal, and nutritional diseases | 90<br>(66 - 125)            | 34<br>(20 - 58)      | 10<br>(6 - 16)     | 34<br>(22 - 47)          | 8<br>(5 - 13)            | 3<br>(2 - 6)             |
| Sexually transmitted diseases excluding HIV                      | 6<br>(3 - 13)               | 3<br>(0 - 7)         | 0<br>(0 - 1)       | 2<br>(1 - 6)             | 1<br>(0 - 2)             | 0<br>(0 - 1)             |
| Syphilis                                                         | 5<br>(2 - 10)               | 3<br>(0 - 7)         | 0<br>(0 - 1)       | 1<br>(1 - 3)             | 1<br>(0 - 2)             | 0<br>(0 - 1)             |
| Chlamydial infection                                             | --                          | --                   | --                 | --                       | --                       | --                       |
| Gonococcal infection                                             | 1<br>(0 - 2)                | --                   | 0<br>(0 - 0)       | 1<br>(0 - 2)             | 0<br>(0 - 0)             | 0<br>(0 - 0)             |
| Other sexually transmitted diseases                              | 1<br>(0 - 2)                | --                   | 0<br>(0 - 0)       | 1<br>(0 - 1)             | 0<br>(0 - 0)             | 0<br>(0 - 0)             |
| Hepatitis                                                        | 67<br>(48 - 96)             | 22<br>(11 - 44)      | 8<br>(5 - 14)      | 28<br>(17 - 41)          | 6<br>(4 - 10)            | 2<br>(1 - 3)             |
| Acute hepatitis A                                                | 10<br>(3 - 23)              | 5<br>(1 - 13)        | 2<br>(1 - 4)       | 3<br>(1 - 6)             | 0<br>(0 - 0)             | 0<br>(0 - 0)             |
| Acute hepatitis B                                                | 44<br>(29 - 67)             | 17<br>(8 - 36)       | 5<br>(2 - 8)       | 16<br>(9 - 25)           | 5<br>(3 - 9)             | 2<br>(1 - 3)             |
| Acute hepatitis C                                                | 3<br>(1 - 9)                | --                   | 1<br>(0 - 2)       | 2<br>(0 - 5)             | 0<br>(0 - 1)             | 0<br>(0 - 1)             |
| Acute hepatitis E                                                | 10<br>(4 - 17)              | 0<br>(0 - 0)         | 1<br>(0 - 2)       | 8<br>(4 - 15)            | 0<br>(0 - 1)             | 0<br>(0 - 0)             |
| Other infectious diseases                                        | 16<br>(9 - 32)              | 10<br>(4 - 25)       | 1<br>(1 - 3)       | 4<br>(2 - 7)             | 1<br>(0 - 2)             | 1<br>(0 - 3)             |
| Non-communicable diseases                                        | 14,496<br>(11,533 - 18,294) | 354<br>(247 - 471)   | 126<br>(103 - 148) | 3,261<br>(2,171 - 4,247) | 5,728<br>(4,414 - 7,654) | 5,027<br>(4,495 - 5,937) |
| Neoplasms                                                        | 2,197<br>(1,681 - 2,874)    | 24<br>(14 - 37)      | 41<br>(32 - 52)    | 558<br>(377 - 727)       | 1,137<br>(851 - 1,555)   | 438<br>(355 - 554)       |
| Esophageal cancer                                                | 430<br>(274 - 708)          | --                   | --                 | 61<br>(34 - 103)         | 248<br>(153 - 415)       | 121<br>(78 - 195)        |
| Stomach cancer                                                   | 278<br>(206 - 382)          | --                   | --                 | 55<br>(37 - 78)          | 152<br>(109 - 223)       | 70<br>(54 - 91)          |
| Liver cancer                                                     | 176<br>(126 - 246)          | --                   | 1<br>(0 - 2)       | 31<br>(19 - 48)          | 100<br>(67 - 144)        | 44<br>(31 - 61)          |
| Liver cancer due to hepatitis B                                  | 72<br>(48 - 104)            | --                   | 0<br>(0 - 1)       | 15<br>(9 - 23)           | 42<br>(26 - 63)          | 14<br>(9 - 22)           |
| Liver cancer due to hepatitis C                                  | 59<br>(41 - 84)             | --                   | 0<br>(0 - 0)       | 9<br>(5 - 15)            | 34<br>(22 - 50)          | 16<br>(11 - 23)          |
| Liver cancer due to alcohol use                                  | 37<br>(24 - 55)             | --                   | --                 | 5<br>(2 - 8)             | 20<br>(12 - 33)          | 12<br>(7 - 18)           |
| Liver cancer due to other causes                                 | 9<br>(5 - 13)               | --                   | 0<br>(0 - 1)       | 2<br>(1 - 4)             | 4<br>(2 - 8)             | 2<br>(1 - 3)             |
| Larynx cancer                                                    | 49<br>(33 - 83)             | --                   | --                 | 12<br>(7 - 21)           | 31<br>(20 - 52)          | 7<br>(5 - 11)            |

Web Table 31- Turkmenistan deaths with 95% UI by age, sex, and cause in 2013

| Cause                                         | Males, All Ages           | Males, 0-4 Years | Males, 5-14 Years | Males, 15-49 Years       | Males, 50-69 Years       | Males, 70-80 Years       |
|-----------------------------------------------|---------------------------|------------------|-------------------|--------------------------|--------------------------|--------------------------|
| Tracheal, bronchus and lung cancer            | 317<br>(232 - 436)        | --               | --                | 79<br>(52 - 111)         | 199<br>(142 - 281)       | 40<br>(29 - 53)          |
| Breast cancer                                 | 0<br>(0 - 0)              | --               | --                | 0<br>(0 - 0)             | 0<br>(0 - 0)             | 0<br>(0 - 0)             |
| Cervical cancer                               | --                        | --               | --                | --                       | --                       | --                       |
| Uterine cancer                                | --                        | --               | --                | --                       | --                       | --                       |
| Prostate cancer                               | 25<br>(17 - 43)           | --               | --                | 3<br>(2 - 6)             | 11<br>(7 - 19)           | 11<br>(7 - 19)           |
| Colon and rectum cancer                       | 100<br>(73 - 131)         | --               | --                | 37<br>(24 - 48)          | 45<br>(33 - 63)          | 18<br>(14 - 23)          |
| Lip and oral cavity cancer                    | 57<br>(36 - 80)           | --               | --                | 15<br>(9 - 23)           | 30<br>(18 - 45)          | 12<br>(7 - 17)           |
| Nasopharynx cancer                            | 25<br>(16 - 36)           | --               | 0<br>(0 - 1)      | 12<br>(7 - 19)           | 10<br>(6 - 16)           | 3<br>(2 - 4)             |
| Other pharynx cancer                          | 36<br>(23 - 51)           | --               | --                | 10<br>(6 - 15)           | 21<br>(13 - 31)          | 5<br>(3 - 7)             |
| Gallbladder and biliary tract cancer          | 49<br>(22 - 78)           | --               | --                | 8<br>(3 - 13)            | 29<br>(12 - 50)          | 12<br>(5 - 19)           |
| Pancreatic cancer                             | 75<br>(55 - 101)          | --               | --                | 15<br>(9 - 21)           | 44<br>(31 - 62)          | 16<br>(12 - 22)          |
| Malignant skin melanoma                       | 22<br>(11 - 37)           | --               | --                | 8<br>(4 - 14)            | 9<br>(4 - 15)            | 5<br>(3 - 9)             |
| Non-melanoma skin cancer                      | 5<br>(3 - 8)              | --               | --                | 1<br>(1 - 2)             | 2<br>(1 - 4)             | 2<br>(1 - 3)             |
| Ovarian cancer                                | --                        | --               | --                | --                       | --                       | --                       |
| Testicular cancer                             | 15<br>(9 - 23)            | --               | --                | 11<br>(6 - 18)           | 3<br>(1 - 5)             | 1<br>(1 - 2)             |
| Kidney cancer                                 | 53<br>(39 - 73)           | 2<br>(0 - 4)     | 1<br>(0 - 1)      | 12<br>(7 - 17)           | 30<br>(20 - 44)          | 9<br>(6 - 13)            |
| Bladder cancer                                | 61<br>(43 - 84)           | --               | --                | 6<br>(3 - 10)            | 31<br>(20 - 46)          | 24<br>(17 - 33)          |
| Brain and nervous system cancer               | 71<br>(46 - 112)          | 2<br>(1 - 5)     | 6<br>(3 - 10)     | 34<br>(20 - 53)          | 26<br>(16 - 43)          | 4<br>(2 - 7)             |
| Thyroid cancer                                | 3<br>(2 - 4)              | --               | 0<br>(0 - 0)      | 2<br>(1 - 2)             | 1<br>(1 - 2)             | 0<br>(0 - 0)             |
| Mesothelioma                                  | 6<br>(4 - 9)              | --               | --                | 2<br>(1 - 3)             | 3<br>(2 - 5)             | 1<br>(0 - 1)             |
| Hodgkin lymphoma                              | 12<br>(7 - 19)            | 0<br>(0 - 1)     | 1<br>(0 - 3)      | 6<br>(3 - 10)            | 4<br>(2 - 6)             | 1<br>(0 - 1)             |
| Non-Hodgkin lymphoma                          | 47<br>(32 - 65)           | 1<br>(1 - 3)     | 3<br>(2 - 4)      | 19<br>(11 - 26)          | 18<br>(11 - 27)          | 7<br>(5 - 10)            |
| Multiple myeloma                              | 7<br>(4 - 10)             | --               | --                | 2<br>(1 - 3)             | 4<br>(2 - 6)             | 1<br>(1 - 2)             |
| Leukemia                                      | 89<br>(69 - 110)          | 10<br>(6 - 17)   | 21<br>(15 - 29)   | 42<br>(28 - 55)          | 12<br>(9 - 17)           | 4<br>(3 - 5)             |
| Other neoplasms                               | 191<br>(137 - 250)        | 8<br>(4 - 16)    | 9<br>(5 - 14)     | 77<br>(51 - 105)         | 75<br>(50 - 107)         | 21<br>(14 - 30)          |
| Cardiovascular diseases                       | 9,120<br>(7,218 - 11,456) | 42<br>(30 - 57)  | 25<br>(20 - 31)   | 1,697<br>(1,123 - 2,246) | 3,582<br>(2,676 - 4,766) | 3,773<br>(3,334 - 4,476) |
| Rheumatic heart disease                       | 127<br>(74 - 183)         | 1<br>(1 - 3)     | 6<br>(4 - 10)     | 87<br>(50 - 133)         | 26<br>(13 - 42)          | 6<br>(4 - 9)             |
| Ischemic heart disease                        | 6,348<br>(4,988 - 8,102)  | 20<br>(13 - 28)  | 12<br>(9 - 16)    | 1,167<br>(762 - 1,579)   | 2,378<br>(1,754 - 3,188) | 2,770<br>(2,407 - 3,309) |
| Cerebrovascular disease                       | 2,353<br>(1,771 - 3,182)  | 12<br>(9 - 17)   | 4<br>(3 - 6)      | 377<br>(240 - 544)       | 1,044<br>(740 - 1,482)   | 916<br>(726 - 1,178)     |
| Ischemic stroke                               | 107<br>(64 - 174)         | 0<br>(0 - 1)     | 0<br>(0 - 0)      | 14<br>(8 - 25)           | 43<br>(25 - 73)          | 48<br>(28 - 80)          |
| Hemorrhagic stroke                            | 2,246<br>(1,684 - 3,041)  | 12<br>(9 - 16)   | 4<br>(3 - 6)      | 363<br>(231 - 520)       | 1,000<br>(713 - 1,419)   | 867<br>(687 - 1,119)     |
| Hypertensive heart disease                    | 190<br>(113 - 291)        | 1<br>(0 - 2)     | 0<br>(0 - 0)      | 32<br>(17 - 54)          | 96<br>(54 - 151)         | 61<br>(36 - 96)          |
| Cardiomyopathy and myocarditis                | 53<br>(30 - 76)           | 4<br>(2 - 7)     | 2<br>(1 - 3)      | 18<br>(10 - 29)          | 20<br>(10 - 31)          | 9<br>(5 - 14)            |
| Atrial fibrillation and flutter               | 0<br>(0 - 0)              | --               | --                | 0<br>(0 - 0)             | 0<br>(0 - 0)             | 0<br>(0 - 0)             |
| Aortic aneurysm                               | 12<br>(8 - 18)            | --               | --                | 3<br>(2 - 5)             | 5<br>(3 - 8)             | 4<br>(3 - 6)             |
| Peripheral vascular disease                   | 2<br>(2 - 3)              | --               | --                | 0<br>(0 - 1)             | 1<br>(1 - 2)             | 1<br>(0 - 1)             |
| Endocarditis                                  | 8<br>(4 - 12)             | 1<br>(1 - 2)     | 0<br>(0 - 0)      | 1<br>(1 - 2)             | 3<br>(2 - 6)             | 2<br>(1 - 3)             |
| Other cardiovascular and circulatory diseases | 26<br>(18 - 36)           | 2<br>(1 - 3)     | 1<br>(0 - 1)      | 10<br>(6 - 15)           | 9<br>(5 - 13)            | 5<br>(3 - 6)             |
| Chronic respiratory diseases                  | 790<br>(592 - 1,047)      | 8<br>(5 - 12)    | 4<br>(3 - 5)      | 158<br>(104 - 213)       | 297<br>(205 - 420)       | 323<br>(257 - 412)       |
| Chronic obstructive pulmonary disease         | 669<br>(480 - 896)        | 3<br>(2 - 5)     | 2<br>(1 - 3)      | 126<br>(78 - 176)        | 255<br>(171 - 368)       | 282<br>(221 - 363)       |



Web Table 31- Turkmenistan deaths with 95% UI by age, sex, and cause in 2013

| Cause                                               | Males, All Ages      | Males, 0-4 Years | Males, 5-14 Years | Males, 15-49 Years | Males, 50-69 Years | Males, 70-80 Years |
|-----------------------------------------------------|----------------------|------------------|-------------------|--------------------|--------------------|--------------------|
| Pneumoconiosis                                      | 28<br>(17 - 50)      | 0<br>(0 - 0)     | 0<br>(0 - 0)      | 5<br>(3 - 9)       | 12<br>(7 - 22)     | 11<br>(6 - 19)     |
| Silicosis                                           | 5<br>(2 - 9)         | 0<br>(0 - 0)     | 0<br>(0 - 0)      | 1<br>(1 - 3)       | 3<br>(1 - 6)       | 0<br>(0 - 1)       |
| Asbestosis                                          | 8<br>(5 - 15)        | 0<br>(0 - 0)     | 0<br>(0 - 0)      | 1<br>(1 - 2)       | 2<br>(1 - 5)       | 4<br>(3 - 8)       |
| Coal workers pneumoconiosis                         | 8<br>(5 - 14)        | 0<br>(0 - 0)     | 0<br>(0 - 0)      | 1<br>(0 - 2)       | 4<br>(2 - 6)       | 4<br>(2 - 6)       |
| Other pneumoconiosis                                | 7<br>(4 - 12)        | 0<br>(0 - 0)     | 0<br>(0 - 0)      | 1<br>(1 - 3)       | 3<br>(2 - 6)       | 2<br>(1 - 4)       |
| Asthma                                              | 47<br>(26 - 83)      | 1<br>(0 - 1)     | 1<br>(1 - 2)      | 14<br>(7 - 26)     | 15<br>(7 - 29)     | 15<br>(8 - 27)     |
| Interstitial lung disease and pulmonary sarcoidosis | 24<br>(13 - 42)      | 0<br>(0 - 0)     | 0<br>(0 - 0)      | 2<br>(1 - 4)       | 9<br>(4 - 17)      | 13<br>(6 - 23)     |
| Other chronic respiratory diseases                  | 23<br>(12 - 42)      | 4<br>(3 - 6)     | 0<br>(0 - 1)      | 11<br>(5 - 22)     | 6<br>(2 - 12)      | 2<br>(1 - 5)       |
| Cirrhosis                                           | 846<br>(623 - 1,149) | 3<br>(2 - 4)     | 7<br>(7 - 12)     | 359<br>(239 - 489) | 361<br>(262 - 512) | 114<br>(91 - 150)  |
| Cirrhosis due to hepatitis B                        | 393<br>(235 - 578)   | 0<br>(0 - 1)     | 3<br>(2 - 5)      | 171<br>(91 - 258)  | 170<br>(100 - 263) | 49<br>(33 - 69)    |
| Cirrhosis due to hepatitis C                        | 110<br>(28 - 238)    | 0<br>(0 - 0)     | 1<br>(0 - 3)      | 49<br>(6 - 119)    | 43<br>(13 - 99)    | 17<br>(8 - 30)     |
| Cirrhosis due to alcohol use                        | 241<br>(139 - 369)   | --               | --                | 79<br>(38 - 131)   | 119<br>(67 - 191)  | 43<br>(27 - 62)    |
| Cirrhosis due to other causes                       | 102<br>(59 - 172)    | 2<br>(1 - 4)     | 5<br>(3 - 8)      | 60<br>(31 - 105)   | 29<br>(13 - 55)    | 6<br>(3 - 11)      |
| Digestive diseases                                  | 262<br>(188 - 350)   | 5<br>(2 - 8)     | 7<br>(5 - 9)      | 134<br>(88 - 179)  | 84<br>(58 - 124)   | 32<br>(25 - 41)    |
| Peptic ulcer disease                                | 111<br>(71 - 167)    | 0<br>(0 - 0)     | 0<br>(0 - 1)      | 54<br>(33 - 81)    | 42<br>(26 - 65)    | 15<br>(9 - 22)     |
| Gastritis and duodenitis                            | 3<br>(1 - 5)         | 0<br>(0 - 1)     | 0<br>(0 - 0)      | 2<br>(0 - 3)       | 1<br>(0 - 1)       | 0<br>(0 - 1)       |
| Appendicitis                                        | 21<br>(12 - 32)      | 0<br>(0 - 0)     | 1<br>(1 - 2)      | 15<br>(8 - 23)     | 3<br>(2 - 6)       | 1<br>(0 - 2)       |
| Paralytic ileus and intestinal obstruction          | 52<br>(32 - 81)      | 3<br>(1 - 5)     | 4<br>(3 - 5)      | 29<br>(16 - 44)    | 13<br>(7 - 23)     | 4<br>(2 - 9)       |
| Inguinal, femoral, and abdominal hernia             | 1<br>(1 - 2)         | 0<br>(0 - 0)     | 0<br>(0 - 0)      | 0<br>(0 - 1)       | 0<br>(0 - 1)       | 0<br>(0 - 1)       |
| Inflammatory bowel disease                          | 7<br>(3 - 11)        | 1<br>(0 - 1)     | 0<br>(0 - 1)      | 3<br>(1 - 5)       | 2<br>(1 - 4)       | 1<br>(1 - 2)       |
| Vascular intestinal disorders                       | 5<br>(2 - 13)        | 0<br>(0 - 0)     | 0<br>(0 - 0)      | 2<br>(1 - 4)       | 2<br>(1 - 6)       | 1<br>(0 - 2)       |
| Gallbladder and biliary diseases                    | 19<br>(13 - 28)      | 0<br>(0 - 0)     | 0<br>(0 - 1)      | 6<br>(4 - 9)       | 8<br>(5 - 12)      | 5<br>(3 - 7)       |
| Pancreatitis                                        | 32<br>(15 - 59)      | 0<br>(0 - 0)     | 0<br>(0 - 0)      | 18<br>(8 - 34)     | 10<br>(5 - 19)     | 3<br>(1 - 6)       |
| Other digestive diseases                            | 10<br>(6 - 16)       | 0<br>(0 - 0)     | 0<br>(0 - 0)      | 5<br>(3 - 8)       | 4<br>(2 - 6)       | 1<br>(1 - 2)       |
| Neurological disorders                              | 374<br>(290 - 466)   | 5<br>(3 - 9)     | 10<br>(7 - 15)    | 66<br>(41 - 91)    | 35<br>(23 - 49)    | 258<br>(190 - 331) |
| Alzheimer disease and other dementias               | 281<br>(210 - 359)   | --               | --                | 0<br>(0 - 1)       | 26<br>(16 - 38)    | 255<br>(187 - 327) |
| Parkinson disease                                   | 2<br>(1 - 6)         | --               | --                | 0<br>(0 - 0)       | 1<br>(0 - 2)       | 1<br>(0 - 3)       |
| Epilepsy                                            | 82<br>(55 - 111)     | 5<br>(2 - 9)     | 10<br>(6 - 14)    | 61<br>(38 - 86)    | 5<br>(3 - 8)       | 1<br>(0 - 1)       |
| Multiple sclerosis                                  | 4<br>(2 - 9)         | --               | --                | 1<br>(0 - 2)       | 1<br>(1 - 3)       | 2<br>(1 - 4)       |
| Other neurological disorders                        | 6<br>(4 - 8)         | 1<br>(0 - 1)     | 1<br>(0 - 1)      | 3<br>(2 - 4)       | 1<br>(1 - 2)       | 0<br>(0 - 1)       |
| Mental and substance use disorders                  | 106<br>(66 - 158)    | 0<br>(0 - 0)     | 0<br>(0 - 0)      | 78<br>(47 - 116)   | 26<br>(16 - 41)    | 2<br>(1 - 3)       |
| Schizophrenia                                       | 11<br>(6 - 17)       | --               | --                | 7<br>(4 - 11)      | 4<br>(2 - 7)       | 1<br>(0 - 1)       |
| Alcohol use disorders                               | 74<br>(41 - 117)     | --               | --                | 53<br>(29 - 82)    | 20<br>(11 - 33)    | 1<br>(1 - 2)       |
| Drug use disorders                                  | 21<br>(13 - 33)      | 0<br>(0 - 0)     | --                | 18<br>(11 - 28)    | 2<br>(1 - 4)       | 0<br>(0 - 1)       |
| Opioid use disorders                                | 5<br>(3 - 8)         | 0<br>(0 - 0)     | --                | 4<br>(2 - 7)       | 0<br>(0 - 1)       | 0<br>(0 - 0)       |
| Cocaine use disorders                               | 0<br>(0 - 1)         | 0<br>(0 - 0)     | --                | 0<br>(0 - 1)       | 0<br>(0 - 0)       | 0<br>(0 - 0)       |
| Amphetamine use disorders                           | 0<br>(0 - 1)         | 0<br>(0 - 0)     | --                | 0<br>(0 - 1)       | 0<br>(0 - 0)       | 0<br>(0 - 0)       |
| Other drug use disorders                            | 15<br>(9 - 24)       | 0<br>(0 - 0)     | --                | 13<br>(8 - 21)     | 2<br>(1 - 3)       | 0<br>(0 - 0)       |
| Eating disorders                                    | 0<br>(0 - 0)         | --               | 0<br>(0 - 0)      | 0<br>(0 - 0)       | --                 | --                 |
| Anorexia nervosa                                    | 0<br>(0 - 0)         | --               | 0<br>(0 - 0)      | 0<br>(0 - 0)       | --                 | --                 |

Web Table 31- Turkmenistan deaths with 95% UI by age, sex, and cause in 2013

| Cause                                               | Males, All Ages    | Males, 0-4 Years   | Males, 5-14 Years | Males, 15-49 Years | Males, 50-69 Years | Males, 70-80 Years |
|-----------------------------------------------------|--------------------|--------------------|-------------------|--------------------|--------------------|--------------------|
| Diabetes, urogenital, blood, and endocrine diseases | 519<br>(386 - 693) | 24<br>(16 - 34)    | 15<br>(12 - 20)   | 192<br>(127 - 266) | 202<br>(147 - 286) | 86<br>(68 - 114)   |
| Diabetes mellitus                                   | 251<br>(184 - 338) | 1<br>(0 - 1)       | 2<br>(1 - 3)      | 64<br>(42 - 89)    | 140<br>(99 - 200)  | 45<br>(34 - 61)    |
| Acute glomerulonephritis                            | 3<br>(2 - 5)       | 0<br>(0 - 1)       | 0<br>(0 - 0)      | 2<br>(1 - 3)       | 1<br>(0 - 1)       | 0<br>(0 - 0)       |
| Chronic kidney disease                              | 170<br>(118 - 262) | 4<br>(3 - 7)       | 6<br>(4 - 9)      | 88<br>(56 - 136)   | 43<br>(27 - 67)    | 28<br>(20 - 43)    |
| Chronic kidney disease due to diabetes mellitus     | 7<br>(1 - 13)      | 0<br>(0 - 0)       | 0<br>(0 - 1)      | 3<br>(1 - 6)       | 2<br>(0 - 5)       | 1<br>(0 - 2)       |
| Chronic kidney disease due to hypertension          | 27<br>(15 - 46)    | 1<br>(0 - 3)       | 1<br>(0 - 1)      | 10<br>(5 - 19)     | 8<br>(4 - 15)      | 7<br>(4 - 13)      |
| Chronic kidney disease due to glomerulonephritis    | 66<br>(40 - 95)    | 1<br>(0 - 2)       | 2<br>(1 - 3)      | 36<br>(20 - 55)    | 17<br>(11 - 28)    | 9<br>(6 - 14)      |
| Chronic kidney disease due to other causes          | 70<br>(41 - 129)   | 2<br>(1 - 4)       | 4<br>(2 - 7)      | 39<br>(20 - 77)    | 15<br>(8 - 30)     | 11<br>(5 - 21)     |
| Urinary diseases and male infertility               | 56<br>(39 - 73)    | 2<br>(1 - 3)       | 2<br>(1 - 2)      | 25<br>(16 - 33)    | 16<br>(11 - 23)    | 11<br>(8 - 15)     |
| Interstitial nephritis and urinary tract infections | 37<br>(25 - 50)    | 2<br>(1 - 3)       | 1<br>(0 - 1)      | 18<br>(11 - 25)    | 10<br>(6 - 15)     | 7<br>(4 - 10)      |
| Urolithiasis                                        | 12<br>(3 - 18)     | --                 | 1<br>(0 - 1)      | 5<br>(1 - 7)       | 4<br>(1 - 7)       | 2<br>(1 - 4)       |
| Other urinary diseases                              | 6<br>(4 - 12)      | 0<br>(0 - 0)       | 0<br>(0 - 0)      | 2<br>(1 - 4)       | 2<br>(1 - 4)       | 2<br>(1 - 4)       |
| Gynecological diseases                              | --                 | --                 | --                | --                 | --                 | --                 |
| Uterine fibroids                                    | --                 | --                 | --                | --                 | --                 | --                 |
| Polycystic ovarian syndrome                         | --                 | --                 | --                | --                 | --                 | --                 |
| Endometriosis                                       | --                 | --                 | --                | --                 | --                 | --                 |
| Genital prolapse                                    | --                 | --                 | --                | --                 | --                 | --                 |
| Other gynecological diseases                        | --                 | --                 | --                | --                 | --                 | --                 |
| Hemoglobinopathies and hemolytic anemias            | 19<br>(11 - 30)    | 10<br>(5 - 18)     | 2<br>(1 - 4)      | 6<br>(3 - 10)      | 1<br>(0 - 1)       | 0<br>(0 - 0)       |
| Thalassemias                                        | 13<br>(8 - 21)     | 8<br>(4 - 14)      | 2<br>(1 - 3)      | 3<br>(2 - 5)       | 0<br>(0 - 0)       | 0<br>(0 - 0)       |
| Sickle cell disorders                               | 0<br>(0 - 1)       | 0<br>(0 - 0)       | 0<br>(0 - 0)      | 0<br>(0 - 0)       | 0<br>(0 - 0)       | 0<br>(0 - 0)       |
| G6PD deficiency                                     | 0<br>(0 - 0)       | 0<br>(0 - 0)       | 0<br>(0 - 0)      | 0<br>(0 - 0)       | 0<br>(0 - 0)       | 0<br>(0 - 0)       |
| Other hemoglobinopathies and hemolytic anemias      | 5<br>(3 - 8)       | 2<br>(1 - 4)       | 0<br>(0 - 0)      | 2<br>(1 - 4)       | 1<br>(0 - 1)       | 0<br>(0 - 0)       |
| Endocrine, metabolic, blood, and immune disorders   | 20<br>(14 - 34)    | 7<br>(4 - 12)      | 3<br>(2 - 5)      | 7<br>(4 - 13)      | 3<br>(2 - 5)       | 1<br>(0 - 2)       |
| Musculoskeletal disorders                           | 5<br>(3 - 12)      | --                 | 0<br>(0 - 1)      | 3<br>(2 - 6)       | 2<br>(1 - 4)       | 1<br>(0 - 1)       |
| Rheumatoid arthritis                                | 1<br>(1 - 2)       | --                 | 0<br>(0 - 0)      | 0<br>(0 - 1)       | 0<br>(0 - 1)       | 0<br>(0 - 0)       |
| Other musculoskeletal disorders                     | 4<br>(3 - 10)      | --                 | 0<br>(0 - 1)      | 2<br>(1 - 5)       | 1<br>(1 - 3)       | 0<br>(0 - 1)       |
| Other non-communicable diseases                     | 277<br>(174 - 380) | 244<br>(148 - 340) | 13<br>(8 - 19)    | 17<br>(11 - 27)    | 2<br>(2 - 4)       | 1<br>(1 - 2)       |
| Congenital anomalies                                | 268<br>(161 - 365) | 236<br>(138 - 328) | 13<br>(8 - 19)    | 17<br>(10 - 27)    | 2<br>(1 - 4)       | 1<br>(1 - 2)       |
| Neural tube defects                                 | 21<br>(11 - 38)    | 19<br>(10 - 35)    | 1<br>(0 - 2)      | 1<br>(0 - 1)       | 0<br>(0 - 0)       | 0<br>(0 - 0)       |
| Congenital heart anomalies                          | 184<br>(110 - 258) | 156<br>(87 - 226)  | 11<br>(6 - 16)    | 15<br>(9 - 24)     | 2<br>(1 - 3)       | 1<br>(0 - 1)       |
| Cleft lip and cleft palate                          | 4<br>(1 - 9)       | 4<br>(1 - 9)       | --                | --                 | --                 | --                 |
| Down syndrome                                       | 7<br>(3 - 17)      | 6<br>(2 - 16)      | 0<br>(0 - 1)      | 0<br>(0 - 1)       | 0<br>(0 - 0)       | 0<br>(0 - 0)       |
| Chromosomal unbalanced rearrangements               | 1<br>(0 - 2)       | 0<br>(0 - 1)       | 0<br>(0 - 0)      | 0<br>(0 - 0)       | 0<br>(0 - 0)       | 0<br>(0 - 0)       |
| Other congenital anomalies                          | 51<br>(23 - 88)    | 49<br>(22 - 86)    | 0<br>(0 - 1)      | 1<br>(0 - 1)       | 0<br>(0 - 1)       | 0<br>(0 - 1)       |
| Skin and subcutaneous diseases                      | 1<br>(1 - 1)       | 0<br>(0 - 0)       | 0<br>(0 - 0)      | 0<br>(0 - 0)       | 0<br>(0 - 0)       | 0<br>(0 - 0)       |
| Cellulitis                                          | 0<br>(0 - 0)       | 0<br>(0 - 0)       | 0<br>(0 - 0)      | 0<br>(0 - 0)       | 0<br>(0 - 0)       | 0<br>(0 - 0)       |
| Pyoderma                                            | 1<br>(0 - 1)       | 0<br>(0 - 0)       | 0<br>(0 - 0)      | 0<br>(0 - 0)       | 0<br>(0 - 0)       | 0<br>(0 - 0)       |
| Decubitus ulcer                                     | 0<br>(0 - 0)       | 0<br>(0 - 0)       | 0<br>(0 - 0)      | 0<br>(0 - 0)       | 0<br>(0 - 0)       | 0<br>(0 - 0)       |
| Other skin and subcutaneous diseases                | 0<br>(0 - 0)       | 0<br>(0 - 0)       | 0<br>(0 - 0)      | 0<br>(0 - 0)       | 0<br>(0 - 0)       | 0<br>(0 - 0)       |

Web Table 31- Turkmenistan deaths with 95% UI by age, sex, and cause in 2013

| Cause                                           | Males, All Ages          | Males, 0-4 Years   | Males, 5-14 Years  | Males, 15-49 Years       | Males, 50-69 Years | Males, 70-80 Years |
|-------------------------------------------------|--------------------------|--------------------|--------------------|--------------------------|--------------------|--------------------|
| Sudden infant death syndrome                    | 8<br>(1 - 35)            | 8<br>(1 - 35)      | --                 | --                       | --                 | --                 |
| Injuries                                        | 2,362<br>(1,721 - 2,975) | 187<br>(109 - 303) | 181<br>(151 - 224) | 1,700<br>(1,151 - 2,153) | 247<br>(175 - 346) | 48<br>(39 - 61)    |
| Transport injuries                              | 610<br>(416 - 942)       | 11<br>(6 - 18)     | 43<br>(31 - 60)    | 472<br>(302 - 743)       | 68<br>(45 - 110)   | 15<br>(11 - 23)    |
| Road injuries                                   | 565<br>(383 - 880)       | 10<br>(5 - 15)     | 40<br>(28 - 55)    | 438<br>(281 - 696)       | 63<br>(42 - 101)   | 14<br>(10 - 22)    |
| Pedestrian road injuries                        | 91<br>(51 - 145)         | 4<br>(2 - 7)       | 15<br>(9 - 24)     | 51<br>(26 - 89)          | 14<br>(8 - 25)     | 6<br>(4 - 10)      |
| Cyclist road injuries                           | 20<br>(12 - 34)          | 1<br>(0 - 2)       | 4<br>(2 - 7)       | 11<br>(6 - 19)           | 4<br>(2 - 7)       | 1<br>(1 - 2)       |
| Motorcyclist road injuries                      | 96<br>(52 - 171)         | 0<br>(0 - 1)       | 2<br>(1 - 3)       | 87<br>(47 - 157)         | 6<br>(3 - 11)      | 1<br>(0 - 1)       |
| Motor vehicle road injuries                     | 353<br>(232 - 553)       | 4<br>(2 - 8)       | 18<br>(11 - 28)    | 286<br>(178 - 455)       | 38<br>(24 - 62)    | 6<br>(4 - 10)      |
| Other road injuries                             | 5<br>(2 - 10)            | 0<br>(0 - 1)       | 1<br>(0 - 2)       | 3<br>(1 - 6)             | 1<br>(0 - 2)       | 0<br>(0 - 1)       |
| Other transport injuries                        | 45<br>(29 - 72)          | 1<br>(1 - 3)       | 3<br>(2 - 6)       | 34<br>(20 - 55)          | 5<br>(3 - 10)      | 1<br>(1 - 2)       |
| Unintentional injuries                          | 1,030<br>(758 - 1,342)   | 172<br>(98 - 287)  | 123<br>(96 - 169)  | 616<br>(411 - 808)       | 97<br>(66 - 139)   | 22<br>(16 - 29)    |
| Falls                                           | 140<br>(96 - 188)        | 12<br>(7 - 21)     | 10<br>(7 - 15)     | 92<br>(57 - 128)         | 21<br>(14 - 31)    | 5<br>(4 - 7)       |
| Drowning                                        | 424<br>(293 - 677)       | 82<br>(36 - 196)   | 79<br>(54 - 131)   | 231<br>(143 - 347)       | 26<br>(14 - 44)    | 6<br>(3 - 8)       |
| Fire, heat, and hot substances                  | 177<br>(96 - 268)        | 27<br>(11 - 63)    | 11<br>(6 - 19)     | 110<br>(57 - 169)        | 23<br>(12 - 39)    | 6<br>(4 - 10)      |
| Poisonings                                      | 70<br>(41 - 101)         | 6<br>(3 - 10)      | 3<br>(2 - 5)       | 51<br>(29 - 78)          | 9<br>(4 - 14)      | 1<br>(1 - 2)       |
| Exposure to mechanical forces                   | 145<br>(93 - 200)        | 5<br>(2 - 11)      | 15<br>(9 - 24)     | 113<br>(67 - 161)        | 12<br>(6 - 21)     | 0<br>(0 - 0)       |
| Unintentional firearm injuries                  | 3<br>(2 - 6)             | 0<br>(0 - 0)       | 0<br>(0 - 0)       | 2<br>(1 - 5)             | 0<br>(0 - 1)       | 0<br>(0 - 0)       |
| Unintentional suffocation                       | 10<br>(1 - 18)           | 2<br>(0 - 7)       | 1<br>(0 - 3)       | 6<br>(0 - 12)            | 1<br>(0 - 1)       | 0<br>(0 - 0)       |
| Other exposure to mechanical forces             | 132<br>(83 - 183)        | 3<br>(1 - 6)       | 14<br>(8 - 23)     | 104<br>(60 - 149)        | 11<br>(6 - 19)     | 0<br>(0 - 0)       |
| Adverse effects of medical treatment            | 6<br>(4 - 9)             | 2<br>(1 - 5)       | 0<br>(0 - 0)       | 1<br>(1 - 2)             | 2<br>(1 - 4)       | 1<br>(0 - 1)       |
| Animal contact                                  | 1<br>(0 - 8)             | 0<br>(0 - 2)       | 0<br>(0 - 2)       | 0<br>(0 - 3)             | 0<br>(0 - 2)       | 0<br>(0 - 1)       |
| Venomous animal contact                         | 1<br>(0 - 6)             | 0<br>(0 - 1)       | 0<br>(0 - 1)       | 0<br>(0 - 2)             | 0<br>(0 - 1)       | 0<br>(0 - 0)       |
| Non-venomous animal contact                     | 0<br>(0 - 3)             | 0<br>(0 - 0)       | 0<br>(0 - 1)       | 0<br>(0 - 1)             | 0<br>(0 - 1)       | 0<br>(0 - 0)       |
| Foreign body                                    | 66<br>(20 - 124)         | 37<br>(10 - 79)    | 4<br>(1 - 9)       | 17<br>(5 - 33)           | 5<br>(1 - 10)      | 3<br>(1 - 6)       |
| Pulmonary aspiration and foreign body in airway | 65<br>(19 - 123)         | 37<br>(10 - 79)    | 4<br>(1 - 9)       | 17<br>(5 - 32)           | 5<br>(1 - 10)      | 3<br>(1 - 5)       |
| Foreign body in other body part                 | 0<br>(0 - 1)             | 0<br>(0 - 0)       | 0<br>(0 - 0)       | 0<br>(0 - 0)             | 0<br>(0 - 0)       | 0<br>(0 - 0)       |
| Other unintentional injuries                    | 2<br>(1 - 3)             | 0<br>(0 - 0)       | 0<br>(0 - 0)       | 1<br>(1 - 2)             | 0<br>(0 - 0)       | 0<br>(0 - 0)       |
| Self-harm and interpersonal violence            | 722<br>(489 - 990)       | 4<br>(1 - 7)       | 15<br>(9 - 23)     | 611<br>(406 - 835)       | 82<br>(54 - 129)   | 10<br>(7 - 16)     |
| Self-harm                                       | 440<br>(299 - 600)       | --                 | 11<br>(6 - 18)     | 362<br>(239 - 494)       | 59<br>(38 - 91)    | 8<br>(6 - 11)      |
| Interpersonal violence                          | 282<br>(169 - 487)       | 4<br>(1 - 7)       | 4<br>(2 - 7)       | 249<br>(148 - 426)       | 23<br>(12 - 49)    | 2<br>(1 - 6)       |
| Assault by firearm                              | 86<br>(31 - 170)         | 0<br>(0 - 1)       | 1<br>(0 - 1)       | 78<br>(28 - 154)         | 6<br>(2 - 14)      | 0<br>(0 - 1)       |
| Assault by sharp object                         | 81<br>(38 - 156)         | 1<br>(0 - 2)       | 1<br>(0 - 2)       | 73<br>(33 - 141)         | 6<br>(2 - 15)      | 1<br>(0 - 2)       |
| Assault by other means                          | 115<br>(62 - 238)        | 2<br>(1 - 5)       | 2<br>(1 - 4)       | 98<br>(50 - 206)         | 11<br>(5 - 24)     | 1<br>(1 - 4)       |

Web Table 31- Turkmenistan deaths with 95% UI by age, sex, and cause in 2013

| Cause                                                             | Females, All Ages           | Females, 0-4 Years       | Females, 5-14 Years | Females, 15-49 Years     | Females, 50-69 Years     | Females, 70-80 Years     |
|-------------------------------------------------------------------|-----------------------------|--------------------------|---------------------|--------------------------|--------------------------|--------------------------|
| All causes                                                        | 15,479<br>(13,327 - 19,041) | 2,594<br>(2,248 - 2,985) | 281<br>(235 - 331)  | 2,384<br>(1,628 - 3,173) | 3,664<br>(2,779 - 5,002) | 6,555<br>(5,964 - 7,932) |
| Communicable, maternal, neonatal, and nutritional diseases        | 2,772<br>(2,411 - 3,147)    | 2,149<br>(1,818 - 2,496) | 89<br>(67 - 113)    | 321<br>(247 - 399)       | 106<br>(80 - 141)        | 106<br>(79 - 146)        |
| HIV/AIDS and tuberculosis                                         | 166<br>(111 - 229)          | 2<br>(1 - 3)             | 3<br>(2 - 4)        | 109<br>(70 - 153)        | 41<br>(26 - 63)          | 12<br>(7 - 17)           |
| Tuberculosis                                                      | 132<br>(84 - 193)           | 1<br>(1 - 2)             | 3<br>(1 - 4)        | 81<br>(48 - 120)         | 35<br>(21 - 57)          | 11<br>(7 - 16)           |
| HIV/AIDS                                                          | 34<br>(15 - 65)             | 0<br>(0 - 2)             | 0<br>(0 - 0)        | 28<br>(12 - 53)          | 5<br>(2 - 10)            | 0<br>(0 - 1)             |
| HIV/AIDS resulting in mycobacterial infection                     | 2<br>(1 - 3)                | 0<br>(0 - 0)             | 0<br>(0 - 0)        | 1<br>(1 - 3)             | 0<br>(0 - 1)             | 0<br>(0 - 0)             |
| HIV/AIDS resulting in other diseases                              | 33<br>(15 - 62)             | 0<br>(0 - 2)             | 0<br>(0 - 0)        | 27<br>(11 - 50)          | 5<br>(2 - 10)            | 0<br>(0 - 1)             |
| Diarrhea, lower respiratory, and other common infectious diseases | 1,764<br>(1,482 - 2,062)    | 1,429<br>(1,160 - 1,693) | 74<br>(55 - 95)     | 122<br>(78 - 169)        | 52<br>(36 - 77)          | 87<br>(62 - 124)         |
| Diarrheal diseases                                                | 337<br>(207 - 479)          | 312<br>(181 - 455)       | 5<br>(3 - 9)        | 10<br>(6 - 15)           | 4<br>(2 - 7)             | 6<br>(3 - 10)            |
| Intestinal infectious diseases                                    | 2<br>(1 - 5)                | 1<br>(0 - 2)             | 1<br>(0 - 1)        | 1<br>(0 - 2)             | 0<br>(0 - 1)             | 0<br>(0 - 0)             |
| Typhoid fever                                                     | 2<br>(1 - 3)                | 0<br>(0 - 1)             | 0<br>(0 - 1)        | 1<br>(0 - 1)             | 0<br>(0 - 0)             | 0<br>(0 - 0)             |
| Paratyphoid fever                                                 | 1<br>(0 - 1)                | 0<br>(0 - 0)             | 0<br>(0 - 0)        | 0<br>(0 - 0)             | 0<br>(0 - 0)             | 0<br>(0 - 0)             |
| Other intestinal infectious diseases                              | 0<br>(0 - 2)                | 0<br>(0 - 2)             | 0<br>(0 - 0)        | 0<br>(0 - 1)             | 0<br>(0 - 1)             | 0<br>(0 - 0)             |
| Lower respiratory infections                                      | 1,349<br>(1,094 - 1,631)    | 1,082<br>(832 - 1,345)   | 60<br>(43 - 79)     | 85<br>(53 - 120)         | 44<br>(29 - 65)          | 79<br>(55 - 115)         |
| Upper respiratory infections                                      | 1<br>(0 - 1)                | 0<br>(0 - 1)             | 0<br>(0 - 0)        | 0<br>(0 - 0)             | 0<br>(0 - 0)             | 0<br>(0 - 1)             |
| Otitis media                                                      | 1<br>(1 - 1)                | 0<br>(0 - 0)             | 0<br>(0 - 1)        | 0<br>(0 - 0)             | 0<br>(0 - 0)             | 0<br>(0 - 0)             |
| Meningitis                                                        | 59<br>(44 - 78)             | 26<br>(18 - 37)          | 7<br>(5 - 10)       | 21<br>(13 - 31)          | 3<br>(2 - 4)             | 1<br>(1 - 2)             |
| Pneumococcal meningitis                                           | 15<br>(10 - 20)             | 5<br>(3 - 7)             | 2<br>(1 - 3)        | 6<br>(3 - 10)            | 1<br>(0 - 1)             | 0<br>(0 - 1)             |
| H influenzae type B meningitis                                    | 20<br>(14 - 27)             | 13<br>(8 - 19)           | 2<br>(1 - 3)        | 4<br>(2 - 6)             | 0<br>(0 - 1)             | 0<br>(0 - 0)             |
| Meningococcal meningitis                                          | 13<br>(9 - 17)              | 6<br>(4 - 8)             | 2<br>(1 - 3)        | 5<br>(2 - 7)             | 1<br>(0 - 1)             | 0<br>(0 - 0)             |
| Other meningitis                                                  | 12<br>(7 - 18)              | 3<br>(1 - 5)             | 1<br>(0 - 2)        | 6<br>(2 - 11)            | 1<br>(1 - 2)             | 1<br>(0 - 1)             |
| Encephalitis                                                      | 12<br>(7 - 18)              | 7<br>(4 - 12)            | 1<br>(0 - 1)        | 3<br>(2 - 6)             | 1<br>(0 - 2)             | 0<br>(0 - 0)             |
| Diphtheria                                                        | 0<br>(0 - 3)                | 0<br>(0 - 2)             | 0<br>(0 - 1)        | 0<br>(0 - 0)             | 0<br>(0 - 0)             | --<br>(0 - 0)            |
| Whooping cough                                                    | 1<br>(0 - 2)                | 1<br>(0 - 2)             | 0<br>(0 - 0)        | 0<br>(0 - 0)             | 0<br>(0 - 0)             | --<br>(0 - 0)            |
| Tetanus                                                           | 1<br>(0 - 2)                | 0<br>(0 - 0)             | 0<br>(0 - 0)        | 1<br>(0 - 1)             | 0<br>(0 - 1)             | 0<br>(0 - 0)             |
| Measles                                                           | 0<br>(0 - 0)                | 0<br>(0 - 0)             | 0<br>(0 - 0)        | 0<br>(0 - 0)             | 0<br>(0 - 0)             | --<br>(0 - 0)            |
| Varicella and herpes zoster                                       | 1<br>(0 - 3)                | 0<br>(0 - 1)             | 0<br>(0 - 0)        | 0<br>(0 - 1)             | 0<br>(0 - 0)             | 0<br>(0 - 2)             |
| Neglected tropical diseases and malaria                           | 10<br>(4 - 16)              | 2<br>(1 - 6)             | 2<br>(0 - 5)        | 4<br>(1 - 6)             | 1<br>(0 - 3)             | 0<br>(0 - 1)             |
| Leishmaniasis                                                     | 1<br>(0 - 1)                | 0<br>(0 - 0)             | 0<br>(0 - 0)        | 0<br>(0 - 1)             | 0<br>(0 - 0)             | 0<br>(0 - 0)             |
| Visceral leishmaniasis                                            | 1<br>(0 - 1)                | 0<br>(0 - 0)             | 0<br>(0 - 0)        | 0<br>(0 - 1)             | 0<br>(0 - 0)             | 0<br>(0 - 0)             |
| Cysticercosis                                                     | 0<br>(0 - 0)                | 0<br>(0 - 0)             | 0<br>(0 - 0)        | 0<br>(0 - 0)             | 0<br>(0 - 0)             | 0<br>(0 - 0)             |
| Cystic echinococcosis                                             | 1<br>(1 - 1)                | 0<br>(0 - 0)             | 0<br>(0 - 0)        | 0<br>(0 - 1)             | 0<br>(0 - 0)             | 0<br>(0 - 0)             |
| Dengue                                                            | 1<br>(1 - 2)                | 0<br>(0 - 1)             | 0<br>(0 - 1)        | 0<br>(0 - 0)             | 0<br>(0 - 0)             | 0<br>(0 - 0)             |
| Rabies                                                            | 5<br>(0 - 9)                | 1<br>(0 - 1)             | 1<br>(0 - 3)        | 2<br>(0 - 4)             | 1<br>(0 - 2)             | 0<br>(0 - 0)             |
| Intestinal nematode infections                                    | 1<br>(0 - 6)                | 1<br>(0 - 5)             | 0<br>(0 - 2)        | 0<br>(0 - 1)             | 0<br>(0 - 1)             | 0<br>(0 - 1)             |
| Ascariasis                                                        | 1<br>(0 - 6)                | 1<br>(0 - 5)             | 0<br>(0 - 2)        | 0<br>(0 - 1)             | 0<br>(0 - 1)             | 0<br>(0 - 1)             |
| Other neglected tropical diseases                                 | 0<br>(0 - 1)                | 0<br>(0 - 0)             | 0<br>(0 - 0)        | 0<br>(0 - 0)             | 0<br>(0 - 0)             | 0<br>(0 - 0)             |
| Maternal disorders                                                | 42<br>(25 - 61)             | --                       | 0<br>(0 - 0)        | 42<br>(25 - 61)          | --                       | --                       |
| Maternal hemorrhage                                               | 6<br>(3 - 9)                | --                       | 0<br>(0 - 0)        | 6<br>(3 - 9)             | --                       | --                       |
| Maternal sepsis and other maternal infections                     | 5<br>(2 - 8)                | --                       | 0<br>(0 - 0)        | 5<br>(2 - 8)             | --                       | --                       |

Web Table 31- Turkmenistan deaths with 95% UI by age, sex, and cause in 2013

| Cause                                                            | Females, All Ages           | Females, 0-4 Years | Females, 5-14 Years | Females, 15-49 Years     | Females, 50-69 Years     | Females, 70-80 Years     |
|------------------------------------------------------------------|-----------------------------|--------------------|---------------------|--------------------------|--------------------------|--------------------------|
| Maternal hypertensive disorders                                  | 4<br>(2 - 7)                | --                 | 0<br>(0 - 0)        | 4<br>(2 - 7)             | --                       | --                       |
| Maternal obstructed labor                                        | 4<br>(2 - 7)                | --                 | 0<br>(0 - 0)        | 4<br>(2 - 7)             | --                       | --                       |
| Maternal abortive outcome                                        | 4<br>(2 - 7)                | --                 | 0<br>(0 - 0)        | 4<br>(2 - 7)             | --                       | --                       |
| Indirect maternal deaths                                         | 5<br>(3 - 9)                | --                 | 0<br>(0 - 0)        | 5<br>(3 - 9)             | --                       | --                       |
| Late maternal deaths                                             | 6<br>(3 - 10)               | --                 | 0<br>(0 - 0)        | 6<br>(3 - 10)            | --                       | --                       |
| Maternal deaths aggravated by HIV/AIDS                           | 0<br>(0 - 0)                | --                 | --                  | 0<br>(0 - 0)             | --                       | --                       |
| Other maternal disorders                                         | 8<br>(4 - 12)               | --                 | 0<br>(0 - 0)        | 8<br>(4 - 12)            | --                       | --                       |
| Neonatal disorders                                               | 676<br>(554 - 808)          | 676<br>(554 - 808) | --                  | --                       | --                       | --                       |
| Neonatal preterm birth complications                             | 216<br>(60 - 441)           | 216<br>(60 - 441)  | --                  | --                       | --                       | --                       |
| Neonatal encephalopathy due to birth asphyxia and trauma         | 328<br>(139 - 558)          | 328<br>(139 - 558) | --                  | --                       | --                       | --                       |
| Neonatal sepsis and other neonatal infections                    | 36<br>(10 - 127)            | 36<br>(10 - 127)   | --                  | --                       | --                       | --                       |
| Hemolytic disease and other neonatal jaundice                    | 3<br>(1 - 9)                | 3<br>(1 - 9)       | --                  | --                       | --                       | --                       |
| Other neonatal disorders                                         | 93<br>(29 - 206)            | 93<br>(29 - 206)   | --                  | --                       | --                       | --                       |
| Nutritional deficiencies                                         | 36<br>(26 - 49)             | 12<br>(7 - 18)     | 2<br>(2 - 3)        | 14<br>(8 - 20)           | 5<br>(3 - 8)             | 2<br>(2 - 3)             |
| Protein-energy malnutrition                                      | 14<br>(8 - 23)              | 7<br>(3 - 13)      | 1<br>(0 - 2)        | 4<br>(2 - 7)             | 2<br>(1 - 4)             | 0<br>(0 - 0)             |
| Iodine deficiency                                                | 0<br>(0 - 2)                | 0<br>(0 - 1)       | 0<br>(0 - 0)        | 0<br>(0 - 0)             | 0<br>(0 - 0)             | 0<br>(0 - 0)             |
| Iron-deficiency anemia                                           | 19<br>(10 - 29)             | 4<br>(1 - 8)       | 1<br>(1 - 2)        | 9<br>(4 - 14)            | 3<br>(1 - 5)             | 2<br>(2 - 3)             |
| Other nutritional deficiencies                                   | 2<br>(1 - 4)                | 1<br>(0 - 2)       | 0<br>(0 - 1)        | 1<br>(0 - 2)             | 0<br>(0 - 0)             | 0<br>(0 - 0)             |
| Other communicable, maternal, neonatal, and nutritional diseases | 78<br>(54 - 111)            | 29<br>(15 - 54)    | 8<br>(5 - 13)       | 31<br>(18 - 52)          | 7<br>(4 - 11)            | 4<br>(2 - 7)             |
| Sexually transmitted diseases excluding HIV                      | 9<br>(5 - 15)               | 3<br>(0 - 8)       | 0<br>(0 - 1)        | 3<br>(1 - 5)             | 2<br>(1 - 4)             | 1<br>(1 - 2)             |
| Syphilis                                                         | 6<br>(3 - 11)               | 3<br>(0 - 8)       | 0<br>(0 - 1)        | 1<br>(1 - 2)             | 1<br>(1 - 2)             | 1<br>(0 - 1)             |
| Chlamydial infection                                             | 1<br>(0 - 2)                | --                 | 0<br>(0 - 0)        | 1<br>(0 - 1)             | 0<br>(0 - 1)             | 0<br>(0 - 0)             |
| Gonococcal infection                                             | 1<br>(1 - 2)                | --                 | 0<br>(0 - 0)        | 1<br>(0 - 1)             | 0<br>(0 - 1)             | 0<br>(0 - 0)             |
| Other sexually transmitted diseases                              | 1<br>(0 - 2)                | --                 | 0<br>(0 - 0)        | 1<br>(0 - 1)             | 0<br>(0 - 0)             | 0<br>(0 - 0)             |
| Hepatitis                                                        | 52<br>(34 - 77)             | 15<br>(7 - 28)     | 6<br>(3 - 10)       | 26<br>(14 - 45)          | 4<br>(2 - 6)             | 2<br>(1 - 3)             |
| Acute hepatitis A                                                | 9<br>(3 - 19)               | 5<br>(1 - 11)      | 2<br>(0 - 4)        | 3<br>(1 - 7)             | 0<br>(0 - 0)             | 0<br>(0 - 0)             |
| Acute hepatitis B                                                | 27<br>(15 - 43)             | 10<br>(4 - 22)     | 2<br>(1 - 5)        | 10<br>(4 - 19)           | 3<br>(1 - 5)             | 2<br>(1 - 3)             |
| Acute hepatitis C                                                | 3<br>(1 - 7)                | --                 | 1<br>(0 - 2)        | 2<br>(0 - 5)             | 0<br>(0 - 1)             | 0<br>(0 - 1)             |
| Acute hepatitis E                                                | 13<br>(6 - 24)              | 0<br>(0 - 0)       | 1<br>(0 - 2)        | 12<br>(6 - 23)           | 0<br>(0 - 1)             | 0<br>(0 - 0)             |
| Other infectious diseases                                        | 17<br>(9 - 37)              | 11<br>(4 - 32)     | 2<br>(1 - 5)        | 2<br>(1 - 4)             | 1<br>(0 - 3)             | 1<br>(0 - 4)             |
| Non-communicable diseases                                        | 12,021<br>(10,044 - 15,360) | 311<br>(210 - 430) | 101<br>(80 - 124)   | 1,728<br>(1,124 - 2,356) | 3,476<br>(2,628 - 4,767) | 6,405<br>(5,820 - 7,759) |
| Neoplasms                                                        | 1,663<br>(1,236 - 2,251)    | 18<br>(12 - 26)    | 30<br>(21 - 39)     | 489<br>(320 - 675)       | 720<br>(521 - 1,013)     | 406<br>(337 - 534)       |
| Esophageal cancer                                                | 256<br>(187 - 378)          | --                 | --                  | 35<br>(21 - 53)          | 134<br>(93 - 204)        | 88<br>(63 - 129)         |
| Stomach cancer                                                   | 154<br>(111 - 218)          | --                 | --                  | 29<br>(18 - 42)          | 68<br>(46 - 101)         | 56<br>(43 - 79)          |
| Liver cancer                                                     | 113<br>(79 - 164)           | --                 | 0<br>(0 - 1)        | 19<br>(11 - 30)          | 51<br>(34 - 81)          | 42<br>(27 - 65)          |
| Liver cancer due to hepatitis B                                  | 33<br>(22 - 50)             | --                 | 0<br>(0 - 0)        | 6<br>(3 - 10)            | 17<br>(11 - 29)          | 10<br>(5 - 16)           |
| Liver cancer due to hepatitis C                                  | 41<br>(27 - 62)             | --                 | 0<br>(0 - 0)        | 6<br>(3 - 10)            | 18<br>(11 - 30)          | 17<br>(11 - 27)          |
| Liver cancer due to alcohol use                                  | 20<br>(11 - 32)             | --                 | --                  | 2<br>(1 - 3)             | 8<br>(4 - 14)            | 10<br>(6 - 18)           |
| Liver cancer due to other causes                                 | 19<br>(11 - 31)             | --                 | 0<br>(0 - 0)        | 5<br>(3 - 8)             | 8<br>(4 - 15)            | 6<br>(3 - 10)            |
| Larynx cancer                                                    | 9<br>(5 - 19)               | --                 | --                  | 2<br>(1 - 5)             | 5<br>(2 - 9)             | 2<br>(1 - 5)             |

Web Table 31- Turkmenistan deaths with 95% UI by age, sex, and cause in 2013

| Cause                                         | Females, All Ages         | Females, 0-4 Years | Females, 5-14 Years | Females, 15-49 Years | Females, 50-69 Years     | Females, 70-80 Years     |
|-----------------------------------------------|---------------------------|--------------------|---------------------|----------------------|--------------------------|--------------------------|
| Tracheal, bronchus and lung cancer            | 78<br>(53 - 120)          | --                 | --                  | 19<br>(11 - 31)      | 41<br>(27 - 65)          | 18<br>(14 - 26)          |
| Breast cancer                                 | 232<br>(163 - 327)        | --                 | --                  | 107<br>(69 - 153)    | 97<br>(67 - 144)         | 29<br>(22 - 39)          |
| Cervical cancer                               | 100<br>(69 - 150)         | --                 | --                  | 37<br>(22 - 56)      | 44<br>(30 - 67)          | 19<br>(14 - 28)          |
| Uterine cancer                                | 20<br>(13 - 39)           | --                 | --                  | 4<br>(2 - 9)         | 10<br>(6 - 19)           | 6<br>(4 - 12)            |
| Prostate cancer                               | --                        | --                 | --                  | --                   | --                       | --                       |
| Colon and rectum cancer                       | 110<br>(79 - 149)         | --                 | --                  | 40<br>(26 - 56)      | 48<br>(34 - 68)          | 21<br>(17 - 29)          |
| Lip and oral cavity cancer                    | 16<br>(11 - 24)           | --                 | --                  | 2<br>(1 - 4)         | 7<br>(4 - 11)            | 7<br>(4 - 10)            |
| Nasopharynx cancer                            | 7<br>(4 - 11)             | --                 | 0<br>(0 - 0)        | 2<br>(1 - 4)         | 3<br>(2 - 6)             | 2<br>(1 - 3)             |
| Other pharynx cancer                          | 5<br>(3 - 8)              | --                 | --                  | 1<br>(0 - 1)         | 3<br>(2 - 4)             | 2<br>(1 - 2)             |
| Gallbladder and biliary tract cancer          | 50<br>(28 - 86)           | --                 | --                  | 7<br>(3 - 12)        | 25<br>(13 - 46)          | 18<br>(9 - 31)           |
| Pancreatic cancer                             | 49<br>(36 - 68)           | --                 | --                  | 6<br>(3 - 8)         | 24<br>(16 - 35)          | 19<br>(14 - 27)          |
| Malignant skin melanoma                       | 22<br>(15 - 31)           | --                 | --                  | 8<br>(5 - 12)        | 7<br>(4 - 10)            | 7<br>(5 - 10)            |
| Non-melanoma skin cancer                      | 5<br>(2 - 8)              | --                 | --                  | 1<br>(0 - 2)         | 1<br>(1 - 2)             | 2<br>(1 - 4)             |
| Ovarian cancer                                | 105<br>(72 - 150)         | --                 | --                  | 39<br>(24 - 57)      | 48<br>(31 - 72)          | 18<br>(12 - 27)          |
| Testicular cancer                             | --                        | --                 | --                  | --                   | --                       | --                       |
| Kidney cancer                                 | 28<br>(19 - 41)           | 1<br>(0 - 2)       | 1<br>(0 - 2)        | 6<br>(3 - 9)         | 14<br>(8 - 22)           | 7<br>(5 - 11)            |
| Bladder cancer                                | 14<br>(10 - 23)           | --                 | --                  | 2<br>(1 - 3)         | 5<br>(3 - 9)             | 7<br>(4 - 12)            |
| Brain and nervous system cancer               | 44<br>(31 - 61)           | 2<br>(1 - 4)       | 3<br>(2 - 4)        | 19<br>(12 - 28)      | 16<br>(11 - 24)          | 4<br>(3 - 7)             |
| Thyroid cancer                                | 4<br>(3 - 7)              | --                 | 0<br>(0 - 0)        | 1<br>(1 - 2)         | 2<br>(1 - 3)             | 1<br>(1 - 2)             |
| Mesothelioma                                  | 4<br>(2 - 6)              | --                 | --                  | 1<br>(1 - 2)         | 2<br>(1 - 4)             | 1<br>(0 - 1)             |
| Hodgkin lymphoma                              | 7<br>(4 - 11)             | 0<br>(0 - 1)       | 0<br>(0 - 1)        | 4<br>(2 - 7)         | 1<br>(1 - 2)             | 1<br>(0 - 1)             |
| Non-Hodgkin lymphoma                          | 24<br>(17 - 35)           | 1<br>(1 - 3)       | 1<br>(1 - 2)        | 9<br>(5 - 13)        | 9<br>(6 - 13)            | 4<br>(3 - 7)             |
| Multiple myeloma                              | 4<br>(3 - 6)              | --                 | --                  | 1<br>(1 - 2)         | 2<br>(1 - 4)             | 1<br>(1 - 1)             |
| Leukemia                                      | 67<br>(51 - 87)           | 8<br>(5 - 12)      | 18<br>(12 - 24)     | 28<br>(18 - 39)      | 10<br>(7 - 15)           | 3<br>(2 - 4)             |
| Other neoplasms                               | 136<br>(85 - 195)         | 6<br>(3 - 10)      | 7<br>(3 - 11)       | 61<br>(35 - 94)      | 43<br>(26 - 65)          | 20<br>(13 - 31)          |
| Cardiovascular diseases                       | 7,857<br>(6,601 - 10,002) | 38<br>(26 - 65)    | 22<br>(14 - 32)     | 724<br>(463 - 1,007) | 2,099<br>(1,569 - 2,932) | 4,974<br>(4,404 - 6,034) |
| Rheumatic heart disease                       | 117<br>(67 - 170)         | 1<br>(0 - 2)       | 5<br>(3 - 8)        | 79<br>(45 - 117)     | 24<br>(13 - 38)          | 7<br>(4 - 10)            |
| Ischemic heart disease                        | 5,211<br>(4,189 - 6,624)  | 20<br>(12 - 40)    | 10<br>(6 - 18)      | 383<br>(231 - 551)   | 1,252<br>(899 - 1,769)   | 3,546<br>(2,943 - 4,328) |
| Cerebrovascular disease                       | 2,229<br>(1,756 - 3,021)  | 11<br>(7 - 17)     | 4<br>(2 - 6)        | 215<br>(131 - 319)   | 722<br>(517 - 1,051)     | 1,277<br>(1,038 - 1,676) |
| Ischemic stroke                               | 92<br>(59 - 141)          | 0<br>(0 - 1)       | 0<br>(0 - 0)        | 8<br>(5 - 15)        | 29<br>(17 - 48)          | 54<br>(34 - 82)          |
| Hemorrhagic stroke                            | 2,137<br>(1,687 - 2,923)  | 10<br>(7 - 16)     | 4<br>(2 - 5)        | 206<br>(126 - 305)   | 693<br>(497 - 1,010)     | 1,223<br>(996 - 1,609)   |
| Hypertensive heart disease                    | 218<br>(141 - 325)        | 0<br>(0 - 1)       | 0<br>(0 - 0)        | 22<br>(12 - 37)      | 78<br>(47 - 126)         | 118<br>(75 - 178)        |
| Cardiomyopathy and myocarditis                | 39<br>(21 - 58)           | 2<br>(1 - 5)       | 1<br>(0 - 2)        | 12<br>(5 - 19)       | 13<br>(6 - 22)           | 12<br>(6 - 19)           |
| Atrial fibrillation and flutter               | 0<br>(0 - 0)              | --                 | --                  | 0<br>(0 - 0)         | 0<br>(0 - 0)             | 0<br>(0 - 0)             |
| Aortic aneurysm                               | 8<br>(4 - 13)             | --                 | --                  | 1<br>(1 - 2)         | 2<br>(1 - 3)             | 5<br>(3 - 9)             |
| Peripheral vascular disease                   | 1<br>(1 - 2)              | --                 | --                  | 0<br>(0 - 0)         | 1<br>(0 - 1)             | 1<br>(0 - 1)             |
| Endocarditis                                  | 6<br>(2 - 10)             | 1<br>(0 - 3)       | 0<br>(0 - 0)        | 2<br>(1 - 4)         | 0<br>(0 - 1)             | 2<br>(1 - 3)             |
| Other cardiovascular and circulatory diseases | 28<br>(19 - 41)           | 3<br>(2 - 5)       | 1<br>(0 - 2)        | 10<br>(6 - 15)       | 8<br>(4 - 12)            | 7<br>(4 - 11)            |
| Chronic respiratory diseases                  | 619<br>(472 - 842)        | 6<br>(4 - 8)       | 3<br>(2 - 5)        | 92<br>(56 - 130)     | 162<br>(111 - 239)       | 356<br>(270 - 483)       |
| Chronic obstructive pulmonary disease         | 494<br>(367 - 681)        | 3<br>(1 - 4)       | 1<br>(1 - 2)        | 55<br>(32 - 82)      | 134<br>(90 - 197)        | 301<br>(224 - 415)       |

Web Table 31- Turkmenistan deaths with 95% UI by age, sex, and cause in 2013

| Cause                                               | Females, All Ages  | Females, 0-4 Years | Females, 5-14 Years | Females, 15-49 Years | Females, 50-69 Years | Females, 70-80 Years |
|-----------------------------------------------------|--------------------|--------------------|---------------------|----------------------|----------------------|----------------------|
| Pneumoconiosis                                      | 2<br>(1 - 3)       | 0<br>(0 - 0)       | 0<br>(0 - 0)        | 1<br>(1 - 2)         | 0<br>(0 - 0)         | 0<br>(0 - 0)         |
| Silicosis                                           | 0<br>(0 - 0)       | 0<br>(0 - 0)       | 0<br>(0 - 0)        | 0<br>(0 - 0)         | 0<br>(0 - 0)         | 0<br>(0 - 0)         |
| Asbestosis                                          | 0<br>(0 - 0)       | 0<br>(0 - 0)       | 0<br>(0 - 0)        | 0<br>(0 - 0)         | 0<br>(0 - 0)         | 0<br>(0 - 0)         |
| Coal workers pneumoconiosis                         | 0<br>(0 - 0)       | 0<br>(0 - 0)       | 0<br>(0 - 0)        | 0<br>(0 - 0)         | 0<br>(0 - 0)         | 0<br>(0 - 0)         |
| Other pneumoconiosis                                | 1<br>(0 - 1)       | 0<br>(0 - 0)       | 0<br>(0 - 0)        | 0<br>(0 - 1)         | 0<br>(0 - 0)         | 0<br>(0 - 0)         |
| Asthma                                              | 75<br>(31 - 133)   | 1<br>(0 - 1)       | 1<br>(1 - 2)        | 24<br>(9 - 42)       | 22<br>(7 - 40)       | 28<br>(12 - 52)      |
| Interstitial lung disease and pulmonary sarcoidosis | 30<br>(11 - 60)    | 0<br>(0 - 0)       | 0<br>(0 - 0)        | 2<br>(1 - 4)         | 4<br>(2 - 9)         | 23<br>(7 - 49)       |
| Other chronic respiratory diseases                  | 19<br>(10 - 32)    | 2<br>(2 - 4)       | 1<br>(0 - 1)        | 10<br>(5 - 19)       | 1<br>(1 - 3)         | 4<br>(2 - 9)         |
| Cirrhosis                                           | 554<br>(415 - 748) | 2<br>(1 - 3)       | 6<br>(4 - 8)        | 159<br>(101 - 225)   | 237<br>(168 - 343)   | 150<br>(117 - 207)   |
| Cirrhosis due to hepatitis B                        | 255<br>(165 - 380) | 0<br>(0 - 0)       | 2<br>(1 - 3)        | 73<br>(39 - 113)     | 109<br>(67 - 173)    | 71<br>(46 - 105)     |
| Cirrhosis due to hepatitis C                        | 174<br>(95 - 277)  | 0<br>(0 - 0)       | 1<br>(0 - 1)        | 45<br>(20 - 77)      | 81<br>(39 - 134)     | 47<br>(28 - 76)      |
| Cirrhosis due to alcohol use                        | 55<br>(22 - 90)    | --                 | --                  | 9<br>(4 - 15)        | 23<br>(9 - 41)       | 22<br>(8 - 38)       |
| Cirrhosis due to other causes                       | 69<br>(42 - 107)   | 2<br>(1 - 3)       | 4<br>(2 - 5)        | 31<br>(16 - 49)      | 23<br>(12 - 41)      | 10<br>(5 - 16)       |
| Digestive diseases                                  | 128<br>(93 - 174)  | 4<br>(3 - 6)       | 4<br>(3 - 6)        | 46<br>(29 - 65)      | 40<br>(28 - 57)      | 34<br>(26 - 46)      |
| Peptic ulcer disease                                | 30<br>(19 - 45)    | 0<br>(0 - 0)       | 0<br>(0 - 0)        | 9<br>(5 - 14)        | 11<br>(7 - 17)       | 10<br>(6 - 15)       |
| Gastritis and duodenitis                            | 2<br>(1 - 3)       | 0<br>(0 - 0)       | 0<br>(0 - 0)        | 1<br>(0 - 1)         | 0<br>(0 - 1)         | 1<br>(0 - 1)         |
| Appendicitis                                        | 10<br>(6 - 15)     | 0<br>(0 - 0)       | 1<br>(1 - 2)        | 5<br>(3 - 9)         | 2<br>(1 - 3)         | 1<br>(1 - 2)         |
| Paralytic ileus and intestinal obstruction          | 34<br>(21 - 54)    | 3<br>(2 - 5)       | 2<br>(1 - 3)        | 18<br>(10 - 28)      | 6<br>(3 - 11)        | 4<br>(2 - 9)         |
| Inguinal, femoral, and abdominal hernia             | 8<br>(5 - 14)      | 0<br>(0 - 0)       | 0<br>(0 - 0)        | 1<br>(0 - 2)         | 4<br>(2 - 7)         | 4<br>(2 - 7)         |
| Inflammatory bowel disease                          | 5<br>(2 - 7)       | 1<br>(0 - 1)       | 0<br>(0 - 0)        | 2<br>(1 - 3)         | 1<br>(1 - 2)         | 1<br>(1 - 2)         |
| Vascular intestinal disorders                       | 3<br>(2 - 6)       | 0<br>(0 - 0)       | 0<br>(0 - 0)        | 1<br>(0 - 1)         | 1<br>(1 - 3)         | 1<br>(0 - 2)         |
| Gallbladder and biliary diseases                    | 21<br>(14 - 34)    | 0<br>(0 - 0)       | 0<br>(0 - 0)        | 6<br>(3 - 10)        | 8<br>(5 - 14)        | 7<br>(5 - 12)        |
| Pancreatitis                                        | 10<br>(5 - 17)     | 0<br>(0 - 0)       | 0<br>(0 - 0)        | 3<br>(1 - 5)         | 3<br>(2 - 6)         | 3<br>(2 - 6)         |
| Other digestive diseases                            | 4<br>(3 - 7)       | 0<br>(0 - 0)       | 0<br>(0 - 0)        | 2<br>(1 - 3)         | 2<br>(1 - 3)         | 1<br>(1 - 2)         |
| Neurological disorders                              | 461<br>(365 - 600) | 3<br>(2 - 6)       | 8<br>(5 - 12)       | 37<br>(22 - 54)      | 29<br>(20 - 42)      | 384<br>(299 - 512)   |
| Alzheimer disease and other dementias               | 403<br>(314 - 538) | --                 | --                  | 0<br>(0 - 0)         | 24<br>(16 - 35)      | 379<br>(294 - 507)   |
| Parkinson disease                                   | 2<br>(1 - 5)       | --                 | --                  | 0<br>(0 - 0)         | 1<br>(0 - 1)         | 1<br>(0 - 3)         |
| Epilepsy                                            | 48<br>(31 - 69)    | 3<br>(2 - 5)       | 7<br>(5 - 11)       | 34<br>(20 - 50)      | 3<br>(2 - 5)         | 1<br>(1 - 1)         |
| Multiple sclerosis                                  | 5<br>(3 - 10)      | --                 | --                  | 1<br>(1 - 2)         | 1<br>(1 - 2)         | 3<br>(1 - 6)         |
| Other neurological disorders                        | 4<br>(3 - 5)       | 1<br>(0 - 1)       | 1<br>(0 - 1)        | 1<br>(1 - 2)         | 1<br>(1 - 1)         | 0<br>(0 - 1)         |
| Mental and substance use disorders                  | 38<br>(21 - 58)    | 0<br>(0 - 0)       | 0<br>(0 - 0)        | 24<br>(13 - 38)      | 11<br>(5 - 17)       | 2<br>(1 - 3)         |
| Schizophrenia                                       | 8<br>(4 - 13)      | --                 | --                  | 6<br>(3 - 9)         | 2<br>(1 - 4)         | 0<br>(0 - 1)         |
| Alcohol use disorders                               | 21<br>(7 - 38)     | --                 | --                  | 13<br>(4 - 24)       | 7<br>(2 - 13)        | 1<br>(0 - 2)         |
| Drug use disorders                                  | 8<br>(5 - 11)      | 0<br>(0 - 0)       | --                  | 5<br>(3 - 8)         | 1<br>(1 - 2)         | 1<br>(1 - 1)         |
| Opioid use disorders                                | 2<br>(1 - 2)       | 0<br>(0 - 0)       | --                  | 1<br>(1 - 2)         | 0<br>(0 - 0)         | 0<br>(0 - 0)         |
| Cocaine use disorders                               | 0<br>(0 - 0)       | 0<br>(0 - 0)       | --                  | 0<br>(0 - 0)         | 0<br>(0 - 0)         | 0<br>(0 - 0)         |
| Amphetamine use disorders                           | 0<br>(0 - 0)       | 0<br>(0 - 0)       | --                  | 0<br>(0 - 0)         | 0<br>(0 - 0)         | 0<br>(0 - 0)         |
| Other drug use disorders                            | 6<br>(4 - 8)       | 0<br>(0 - 0)       | --                  | 4<br>(2 - 6)         | 1<br>(1 - 2)         | 1<br>(0 - 1)         |
| Eating disorders                                    | 1<br>(0 - 1)       | --                 | 0<br>(0 - 0)        | 1<br>(0 - 1)         | --                   | --                   |
| Anorexia nervosa                                    | 1<br>(0 - 1)       | --                 | 0<br>(0 - 0)        | 1<br>(0 - 1)         | --                   | --                   |

Web Table 31- Turkmenistan deaths with 95% UI by age, sex, and cause in 2013

| Cause                                               | Females, All Ages  | Females, 0-4 Years | Females, 5-14 Years | Females, 15-49 Years | Females, 50-69 Years | Females, 70-80 Years |
|-----------------------------------------------------|--------------------|--------------------|---------------------|----------------------|----------------------|----------------------|
| Diabetes, urogenital, blood, and endocrine diseases | 440<br>(324 - 607) | 20<br>(14 - 29)    | 14<br>(10 - 19)     | 133<br>(83 - 193)    | 175<br>(123 - 254)   | 97<br>(77 - 131)     |
| Diabetes mellitus                                   | 239<br>(174 - 335) | 1<br>(0 - 1)       | 3<br>(2 - 6)        | 40<br>(24 - 58)      | 128<br>(88 - 191)    | 68<br>(50 - 92)      |
| Acute glomerulonephritis                            | 2<br>(1 - 3)       | 0<br>(0 - 1)       | 0<br>(0 - 0)        | 1<br>(0 - 1)         | 0<br>(0 - 1)         | 0<br>(0 - 0)         |
| Chronic kidney disease                              | 128<br>(88 - 192)  | 3<br>(2 - 6)       | 5<br>(3 - 7)        | 65<br>(39 - 103)     | 33<br>(22 - 51)      | 22<br>(16 - 33)      |
| Chronic kidney disease due to diabetes mellitus     | 6<br>(2 - 10)      | 0<br>(0 - 0)       | 0<br>(0 - 0)        | 2<br>(1 - 4)         | 3<br>(1 - 5)         | 1<br>(0 - 1)         |
| Chronic kidney disease due to hypertension          | 20<br>(11 - 35)    | 0<br>(0 - 1)       | 0<br>(0 - 0)        | 5<br>(2 - 9)         | 7<br>(3 - 12)        | 8<br>(4 - 14)        |
| Chronic kidney disease due to glomerulonephritis    | 42<br>(25 - 64)    | 1<br>(1 - 2)       | 2<br>(1 - 3)        | 24<br>(12 - 37)      | 11<br>(6 - 18)       | 5<br>(3 - 8)         |
| Chronic kidney disease due to other causes          | 61<br>(34 - 108)   | 1<br>(1 - 4)       | 2<br>(1 - 5)        | 35<br>(17 - 64)      | 13<br>(6 - 25)       | 9<br>(5 - 16)        |
| Urinary diseases and male infertility               | 39<br>(26 - 57)    | 2<br>(1 - 3)       | 2<br>(1 - 3)        | 18<br>(11 - 27)      | 11<br>(7 - 17)       | 6<br>(4 - 9)         |
| Interstitial nephritis and urinary tract infections | 32<br>(21 - 46)    | 2<br>(1 - 3)       | 1<br>(1 - 2)        | 15<br>(9 - 24)       | 9<br>(6 - 13)        | 5<br>(3 - 7)         |
| Urolithiasis                                        | 5<br>(2 - 8)       | --                 | 0<br>(0 - 1)        | 2<br>(0 - 5)         | 1<br>(1 - 2)         | 1<br>(0 - 2)         |
| Other urinary diseases                              | 3<br>(2 - 5)       | 0<br>(0 - 0)       | 0<br>(0 - 0)        | 1<br>(0 - 2)         | 1<br>(1 - 2)         | 0<br>(0 - 1)         |
| Gynecological diseases                              | 4<br>(1 - 8)       | --                 | --                  | 4<br>(1 - 7)         | 0<br>(0 - 1)         | 0<br>(0 - 0)         |
| Uterine fibroids                                    | 1<br>(0 - 1)       | --                 | --                  | 0<br>(0 - 1)         | 0<br>(0 - 0)         | 0<br>(0 - 0)         |
| Polycystic ovarian syndrome                         | 0<br>(0 - 0)       | --                 | --                  | 0<br>(0 - 0)         | 0<br>(0 - 0)         | --                   |
| Endometriosis                                       | 1<br>(0 - 1)       | --                 | --                  | 1<br>(0 - 1)         | 0<br>(0 - 0)         | --                   |
| Genital prolapse                                    | 1<br>(0 - 1)       | --                 | --                  | 1<br>(0 - 1)         | 0<br>(0 - 0)         | 0<br>(0 - 0)         |
| Other gynecological diseases                        | 2<br>(0 - 4)       | --                 | --                  | 2<br>(0 - 3)         | 0<br>(0 - 0)         | 0<br>(0 - 0)         |
| Hemoglobinopathies and hemolytic anemias            | 17<br>(10 - 28)    | 11<br>(6 - 19)     | 2<br>(1 - 3)        | 3<br>(1 - 5)         | 0<br>(0 - 1)         | 1<br>(0 - 2)         |
| Thalassemias                                        | 11<br>(6 - 18)     | 8<br>(4 - 14)      | 2<br>(1 - 3)        | 1<br>(1 - 3)         | 0<br>(0 - 0)         | 0<br>(0 - 0)         |
| Sickle cell disorders                               | 0<br>(0 - 0)       | 0<br>(0 - 0)       | 0<br>(0 - 0)        | 0<br>(0 - 0)         | 0<br>(0 - 0)         | 0<br>(0 - 0)         |
| G6PD deficiency                                     | 0<br>(0 - 0)       | 0<br>(0 - 0)       | 0<br>(0 - 0)        | 0<br>(0 - 0)         | 0<br>(0 - 0)         | 0<br>(0 - 0)         |
| Other hemoglobinopathies and hemolytic anemias      | 6<br>(3 - 10)      | 3<br>(2 - 5)       | 0<br>(0 - 0)        | 1<br>(1 - 2)         | 0<br>(0 - 1)         | 1<br>(0 - 2)         |
| Endocrine, metabolic, blood, and immune disorders   | 11<br>(7 - 19)     | 4<br>(2 - 7)       | 2<br>(1 - 3)        | 3<br>(2 - 5)         | 1<br>(1 - 3)         | 0<br>(0 - 1)         |
| Musculoskeletal disorders                           | 5<br>(3 - 10)      | --                 | 1<br>(1 - 2)        | 3<br>(2 - 6)         | 1<br>(0 - 2)         | 0<br>(0 - 1)         |
| Rheumatoid arthritis                                | 2<br>(1 - 3)       | --                 | 0<br>(0 - 0)        | 1<br>(1 - 2)         | 0<br>(0 - 1)         | 0<br>(0 - 0)         |
| Other musculoskeletal disorders                     | 3<br>(2 - 8)       | --                 | 1<br>(1 - 2)        | 2<br>(1 - 5)         | 0<br>(0 - 1)         | 0<br>(0 - 0)         |
| Other non-communicable diseases                     | 256<br>(148 - 374) | 219<br>(125 - 327) | 13<br>(7 - 20)      | 20<br>(11 - 32)      | 3<br>(2 - 5)         | 2<br>(1 - 3)         |
| Congenital anomalies                                | 248<br>(140 - 363) | 211<br>(118 - 312) | 13<br>(7 - 19)      | 19<br>(11 - 31)      | 3<br>(2 - 5)         | 2<br>(1 - 3)         |
| Neural tube defects                                 | 19<br>(10 - 37)    | 18<br>(9 - 36)     | 0<br>(0 - 1)        | 0<br>(0 - 1)         | 0<br>(0 - 1)         | 0<br>(0 - 0)         |
| Congenital heart anomalies                          | 173<br>(95 - 263)  | 140<br>(74 - 215)  | 12<br>(6 - 18)      | 17<br>(10 - 28)      | 2<br>(1 - 4)         | 1<br>(1 - 2)         |
| Cleft lip and cleft palate                          | 3<br>(1 - 9)       | 3<br>(1 - 9)       | --                  | --                   | --                   | --                   |
| Down syndrome                                       | 9<br>(3 - 19)      | 8<br>(3 - 17)      | 0<br>(0 - 1)        | 0<br>(0 - 1)         | 0<br>(0 - 0)         | 0<br>(0 - 0)         |
| Chromosomal unbalanced rearrangements               | 1<br>(1 - 3)       | 1<br>(0 - 2)       | 0<br>(0 - 0)        | 0<br>(0 - 1)         | 0<br>(0 - 0)         | 0<br>(0 - 0)         |
| Other congenital anomalies                          | 42<br>(19 - 74)    | 41<br>(19 - 72)    | 0<br>(0 - 0)        | 0<br>(0 - 1)         | 0<br>(0 - 0)         | 0<br>(0 - 0)         |
| Skin and subcutaneous diseases                      | 1<br>(1 - 1)       | 0<br>(0 - 0)       | 0<br>(0 - 0)        | 0<br>(0 - 1)         | 0<br>(0 - 0)         | 0<br>(0 - 0)         |
| Cellulitis                                          | 0<br>(0 - 0)       | 0<br>(0 - 0)       | 0<br>(0 - 0)        | 0<br>(0 - 0)         | 0<br>(0 - 0)         | 0<br>(0 - 0)         |
| Pyoderma                                            | 1<br>(0 - 1)       | 0<br>(0 - 0)       | 0<br>(0 - 0)        | 0<br>(0 - 1)         | 0<br>(0 - 0)         | 0<br>(0 - 0)         |
| Decubitus ulcer                                     | 0<br>(0 - 0)       | 0<br>(0 - 0)       | 0<br>(0 - 0)        | 0<br>(0 - 0)         | 0<br>(0 - 0)         | 0<br>(0 - 0)         |
| Other skin and subcutaneous diseases                | 0<br>(0 - 0)       | 0<br>(0 - 0)       | 0<br>(0 - 0)        | 0<br>(0 - 0)         | 0<br>(0 - 0)         | 0<br>(0 - 0)         |



Web Table 31- Turkmenistan deaths with 95% UI by age, sex, and cause in 2013

| Cause                                           | Females, All Ages  | Females, 0-4 Years | Females, 5-14 Years | Females, 15-49 Years | Females, 50-69 Years | Females, 70-80 Years |
|-------------------------------------------------|--------------------|--------------------|---------------------|----------------------|----------------------|----------------------|
| Sudden infant death syndrome                    | 8<br>(1 - 39)      | 8<br>(1 - 39)      | --                  | --                   | --                   | --                   |
| Injuries                                        | 685<br>(503 - 912) | 134<br>(88 - 212)  | 91<br>(70 - 121)    | 335<br>(214 - 463)   | 81<br>(57 - 119)     | 44<br>(35 - 61)      |
| Transport injuries                              | 141<br>(101 - 198) | 9<br>(6 - 13)      | 23<br>(16 - 33)     | 70<br>(44 - 103)     | 28<br>(18 - 43)      | 11<br>(8 - 17)       |
| Road injuries                                   | 132<br>(94 - 183)  | 8<br>(5 - 12)      | 22<br>(15 - 31)     | 66<br>(41 - 93)      | 26<br>(17 - 40)      | 10<br>(7 - 15)       |
| Pedestrian road injuries                        | 33<br>(20 - 49)    | 3<br>(1 - 5)       | 7<br>(4 - 11)       | 13<br>(6 - 21)       | 6<br>(3 - 11)        | 4<br>(3 - 7)         |
| Cyclist road injuries                           | 6<br>(3 - 11)      | 0<br>(0 - 1)       | 1<br>(1 - 3)        | 2<br>(1 - 4)         | 2<br>(1 - 3)         | 0<br>(0 - 1)         |
| Motorcyclist road injuries                      | 4<br>(2 - 6)       | 0<br>(0 - 0)       | 0<br>(0 - 0)        | 3<br>(1 - 5)         | 0<br>(0 - 1)         | 0<br>(0 - 0)         |
| Motor vehicle road injuries                     | 89<br>(63 - 128)   | 5<br>(3 - 8)       | 13<br>(8 - 21)      | 48<br>(30 - 71)      | 18<br>(11 - 28)      | 5<br>(3 - 8)         |
| Other road injuries                             | 1<br>(0 - 1)       | 0<br>(0 - 0)       | 0<br>(0 - 0)        | 0<br>(0 - 1)         | 0<br>(0 - 0)         | 0<br>(0 - 0)         |
| Other transport injuries                        | 10<br>(6 - 19)     | 1<br>(0 - 1)       | 1<br>(1 - 2)        | 5<br>(2 - 11)        | 2<br>(1 - 4)         | 1<br>(1 - 2)         |
| Unintentional injuries                          | 398<br>(291 - 542) | 122<br>(77 - 199)  | 63<br>(47 - 91)     | 159<br>(94 - 230)    | 30<br>(20 - 45)      | 24<br>(18 - 31)      |
| Falls                                           | 36<br>(26 - 51)    | 8<br>(5 - 13)      | 3<br>(2 - 4)        | 13<br>(8 - 19)       | 6<br>(4 - 9)         | 7<br>(4 - 10)        |
| Drowning                                        | 140<br>(92 - 273)  | 63<br>(31 - 145)   | 37<br>(24 - 64)     | 31<br>(17 - 54)      | 6<br>(3 - 10)        | 3<br>(2 - 5)         |
| Fire, heat, and hot substances                  | 144<br>(76 - 229)  | 23<br>(8 - 50)     | 14<br>(7 - 25)      | 87<br>(45 - 140)     | 12<br>(6 - 20)       | 8<br>(4 - 12)        |
| Poisonings                                      | 22<br>(13 - 32)    | 3<br>(2 - 5)       | 2<br>(1 - 3)        | 12<br>(7 - 18)       | 3<br>(2 - 5)         | 2<br>(1 - 3)         |
| Exposure to mechanical forces                   | 18<br>(11 - 28)    | 5<br>(2 - 11)      | 5<br>(3 - 8)        | 7<br>(3 - 11)        | 1<br>(1 - 2)         | 0<br>(0 - 1)         |
| Unintentional firearm injuries                  | 0<br>(0 - 1)       | 0<br>(0 - 0)       | 0<br>(0 - 0)        | 0<br>(0 - 1)         | 0<br>(0 - 0)         | 0<br>(0 - 0)         |
| Unintentional suffocation                       | 6<br>(0 - 13)      | 2<br>(0 - 8)       | 0<br>(0 - 1)        | 3<br>(0 - 7)         | 0<br>(0 - 0)         | 0<br>(0 - 0)         |
| Other exposure to mechanical forces             | 11<br>(8 - 17)     | 3<br>(1 - 6)       | 4<br>(2 - 8)        | 4<br>(2 - 6)         | 1<br>(0 - 1)         | 0<br>(0 - 0)         |
| Adverse effects of medical treatment            | 7<br>(4 - 12)      | 3<br>(1 - 7)       | 1<br>(0 - 1)        | 2<br>(1 - 5)         | 1<br>(0 - 1)         | 1<br>(0 - 2)         |
| Animal contact                                  | 3<br>(1 - 7)       | 1<br>(0 - 2)       | 0<br>(0 - 1)        | 1<br>(0 - 2)         | 0<br>(0 - 1)         | 0<br>(0 - 1)         |
| Venomous animal contact                         | 2<br>(0 - 5)       | 1<br>(0 - 2)       | 0<br>(0 - 1)        | 0<br>(0 - 1)         | 0<br>(0 - 1)         | 0<br>(0 - 0)         |
| Non-venomous animal contact                     | 1<br>(0 - 3)       | 0<br>(0 - 1)       | 0<br>(0 - 0)        | 0<br>(0 - 1)         | 0<br>(0 - 1)         | 0<br>(0 - 0)         |
| Foreign body                                    | 21<br>(7 - 42)     | 14<br>(4 - 32)     | 1<br>(0 - 1)        | 3<br>(1 - 6)         | 2<br>(1 - 4)         | 1<br>(1 - 4)         |
| Pulmonary aspiration and foreign body in airway | 21<br>(7 - 41)     | 14<br>(4 - 32)     | 1<br>(0 - 1)        | 3<br>(1 - 6)         | 2<br>(1 - 3)         | 1<br>(0 - 4)         |
| Foreign body in other body part                 | 0<br>(0 - 1)       | 0<br>(0 - 0)       | 0<br>(0 - 0)        | 0<br>(0 - 0)         | 0<br>(0 - 0)         | 0<br>(0 - 0)         |
| Other unintentional injuries                    | 6<br>(2 - 11)      | 2<br>(0 - 3)       | 1<br>(0 - 2)        | 2<br>(1 - 4)         | 1<br>(0 - 2)         | 0<br>(0 - 1)         |
| Self-harm and interpersonal violence            | 146<br>(95 - 237)  | 3<br>(1 - 6)       | 5<br>(3 - 8)        | 105<br>(63 - 174)    | 23<br>(15 - 42)      | 10<br>(7 - 17)       |
| Self-harm                                       | 99<br>(64 - 164)   | --                 | 3<br>(2 - 5)        | 71<br>(43 - 119)     | 17<br>(11 - 30)      | 8<br>(6 - 14)        |
| Interpersonal violence                          | 47<br>(27 - 86)    | 3<br>(1 - 6)       | 2<br>(1 - 4)        | 34<br>(18 - 62)      | 6<br>(3 - 14)        | 2<br>(1 - 5)         |
| Assault by firearm                              | 6<br>(2 - 13)      | 0<br>(0 - 1)       | 0<br>(0 - 1)        | 4<br>(1 - 8)         | 1<br>(0 - 3)         | 0<br>(0 - 1)         |
| Assault by sharp object                         | 19<br>(9 - 41)     | 1<br>(0 - 2)       | 0<br>(0 - 1)        | 16<br>(7 - 35)       | 2<br>(1 - 5)         | 0<br>(0 - 1)         |
| Assault by other means                          | 22<br>(12 - 41)    | 2<br>(1 - 4)       | 2<br>(1 - 3)        | 14<br>(7 - 28)       | 3<br>(1 - 7)         | 1<br>(0 - 3)         |

Web Table 31- Uganda deaths with 95% UI by age, sex, and cause in 2013

| Cause                                                             | Both Sexes, All Ages           | Both Sexes, 0-4 Years          | Both Sexes, 5-14 Years      | Both Sexes, 15-49 Years      | Both Sexes, 50-69 Years     | Both Sexes, 70-80 Years     |
|-------------------------------------------------------------------|--------------------------------|--------------------------------|-----------------------------|------------------------------|-----------------------------|-----------------------------|
| All causes                                                        | 326,028<br>(303,567 - 355,560) | 127,340<br>(110,252 - 147,939) | 13,489<br>(11,414 - 17,921) | 93,404<br>(84,199 - 101,534) | 45,259<br>(41,109 - 51,710) | 46,566<br>(43,188 - 51,491) |
| Communicable, maternal, neonatal, and nutritional diseases        | 214,519<br>(194,419 - 235,466) | 110,397<br>(94,979 - 127,743)  | 9,294<br>(7,668 - 12,139)   | 63,128<br>(56,187 - 69,723)  | 18,545<br>(15,612 - 21,648) | 13,154<br>(10,908 - 15,239) |
| HIV/AIDS and tuberculosis                                         | 67,677<br>(59,935 - 75,692)    | 5,942<br>(4,029 - 7,643)       | 3,178<br>(2,581 - 3,853)    | 43,815<br>(38,619 - 49,928)  | 11,916<br>(9,572 - 15,194)  | 2,826<br>(2,024 - 3,416)    |
| Tuberculosis                                                      | 14,738<br>(9,637 - 18,062)     | 1,433<br>(912 - 2,096)         | 262<br>(154 - 427)          | 8,110<br>(5,094 - 10,287)    | 2,971<br>(1,874 - 3,987)    | 1,961<br>(1,217 - 2,458)    |
| HIV/AIDS                                                          | 52,939<br>(45,914 - 60,909)    | 4,509<br>(2,737 - 6,021)       | 2,916<br>(2,292 - 3,610)    | 35,705<br>(30,877 - 42,154)  | 8,944<br>(6,597 - 12,285)   | 865<br>(565 - 1,265)        |
| HIV/AIDS resulting in mycobacterial infection                     | 3,342<br>(2,588 - 4,188)       | 269<br>(154 - 386)             | 160<br>(116 - 209)          | 2,250<br>(1,773 - 2,874)     | 603<br>(416 - 861)          | 60<br>(39 - 86)             |
| HIV/AIDS resulting in other diseases                              | 49,597<br>(43,021 - 57,273)    | 4,240<br>(2,580 - 5,703)       | 2,756<br>(2,167 - 3,407)    | 33,455<br>(28,887 - 39,661)  | 8,342<br>(6,139 - 11,439)   | 804<br>(527 - 1,180)        |
| Diarrhea, lower respiratory, and other common infectious diseases | 57,436<br>(46,476 - 69,629)    | 33,463<br>(24,681 - 43,910)    | 2,881<br>(1,941 - 4,276)    | 8,145<br>(6,291 - 10,285)    | 4,759<br>(3,583 - 6,241)    | 8,188<br>(6,416 - 10,085)   |
| Diarrheal diseases                                                | 15,710<br>(10,900 - 22,614)    | 8,776<br>(4,678 - 14,348)      | 656<br>(304 - 1,215)        | 2,596<br>(1,655 - 3,902)     | 1,456<br>(854 - 2,315)      | 2,225<br>(1,327 - 3,562)    |
| Intestinal infectious diseases                                    | 1,888<br>(948 - 3,334)         | 902<br>(423 - 1,651)           | 465<br>(218 - 846)          | 461<br>(210 - 854)           | 41<br>(20 - 73)             | 20<br>(10 - 36)             |
| Typhoid fever                                                     | 1,395<br>(656 - 2,533)         | 629<br>(270 - 1,209)           | 363<br>(168 - 663)          | 358<br>(157 - 672)           | 31<br>(14 - 58)             | 14<br>(7 - 26)              |
| Paratyphoid fever                                                 | 362<br>(164 - 667)             | 179<br>(68 - 350)              | 91<br>(38 - 176)            | 83<br>(34 - 156)             | 6<br>(2 - 12)               | 3<br>(1 - 6)                |
| Other intestinal infectious diseases                              | 132<br>(88 - 191)              | 94<br>(54 - 147)               | 11<br>(5 - 20)              | 20<br>(10 - 34)              | 4<br>(1 - 10)               | 3<br>(0 - 8)                |
| Lower respiratory infections                                      | 28,046<br>(22,074 - 35,182)    | 15,339<br>(10,514 - 21,649)    | 981<br>(608 - 1,544)        | 3,290<br>(2,436 - 4,274)     | 2,786<br>(1,995 - 3,770)    | 5,649<br>(4,237 - 7,317)    |
| Upper respiratory infections                                      | 51<br>(22 - 106)               | 24<br>(3 - 76)                 | 2<br>(0 - 7)                | 15<br>(5 - 32)               | 5<br>(1 - 12)               | 5<br>(1 - 13)               |
| Otitis media                                                      | 32<br>(23 - 44)                | 18<br>(10 - 29)                | 2<br>(1 - 3)                | 5<br>(3 - 7)                 | 3<br>(2 - 4)                | 5<br>(3 - 6)                |
| Meningitis                                                        | 7,727<br>(5,593 - 10,537)      | 4,906<br>(2,922 - 7,566)       | 544<br>(326 - 903)          | 1,598<br>(1,168 - 2,192)     | 424<br>(282 - 595)          | 256<br>(164 - 367)          |
| Pneumococcal meningitis                                           | 1,726<br>(1,235 - 2,356)       | 909<br>(501 - 1,455)           | 173<br>(99 - 306)           | 464<br>(298 - 680)           | 115<br>(68 - 186)           | 66<br>(39 - 104)            |
| H influenzae type B meningitis                                    | 1,798<br>(1,061 - 2,720)       | 1,416<br>(688 - 2,302)         | 121<br>(57 - 216)           | 199<br>(122 - 298)           | 39<br>(21 - 66)             | 24<br>(12 - 38)             |
| Meningococcal meningitis                                          | 1,015<br>(735 - 1,371)         | 503<br>(262 - 821)             | 59<br>(32 - 103)            | 293<br>(193 - 444)           | 91<br>(53 - 136)            | 68<br>(35 - 114)            |
| Other meningitis                                                  | 3,189<br>(2,207 - 4,599)       | 2,078<br>(1,181 - 3,481)       | 191<br>(99 - 322)           | 642<br>(424 - 926)           | 179<br>(111 - 278)          | 99<br>(58 - 155)            |
| Encephalitis                                                      | 227<br>(158 - 340)             | 136<br>(73 - 243)              | 17<br>(9 - 32)              | 45<br>(30 - 67)              | 16<br>(9 - 25)              | 13<br>(6 - 19)              |
| Diphtheria                                                        | 49<br>(2 - 223)                | 41<br>(0 - 218)                | 5<br>(0 - 28)               | 3<br>(0 - 10)                | 0<br>(0 - 2)                | --                          |
| Whooping cough                                                    | 1,025<br>(1 - 4,568)           | 987<br>(1 - 4,405)             | 33<br>(0 - 144)             | 5<br>(0 - 24)                | 0<br>(0 - 2)                | --                          |
| Tetanus                                                           | 595<br>(256 - 914)             | 440<br>(209 - 708)             | 20<br>(4 - 41)              | 101<br>(15 - 192)            | 25<br>(4 - 51)              | 8<br>(1 - 15)               |
| Measles                                                           | 2,048<br>(360 - 6,287)         | 1,874<br>(329 - 5,796)         | 154<br>(26 - 468)           | 20<br>(3 - 61)               | 0<br>(0 - 1)                | --                          |
| Varicella and herpes zoster                                       | 38<br>(15 - 88)                | 20<br>(2 - 69)                 | 3<br>(0 - 10)               | 6<br>(2 - 14)                | 2<br>(0 - 5)                | 7<br>(1 - 23)               |
| Neglected tropical diseases and malaria                           | 30,759<br>(20,162 - 46,550)    | 22,766<br>(13,158 - 37,590)    | 2,375<br>(1,192 - 4,230)    | 3,910<br>(2,283 - 7,018)     | 955<br>(472 - 1,953)        | 753<br>(323 - 1,587)        |
| Malaria                                                           | 29,545<br>(18,946 - 45,298)    | 22,449<br>(12,791 - 37,247)    | 2,202<br>(993 - 4,077)      | 3,346<br>(1,736 - 6,416)     | 848<br>(374 - 1,842)        | 700<br>(274 - 1,529)        |
| Leishmaniasis                                                     | 232<br>(157 - 318)             | 89<br>(46 - 153)               | 50<br>(27 - 85)             | 83<br>(56 - 116)             | 7<br>(4 - 11)               | 3<br>(2 - 5)                |
| Visceral leishmaniasis                                            | 232<br>(157 - 318)             | 89<br>(46 - 153)               | 50<br>(27 - 85)             | 83<br>(56 - 116)             | 7<br>(4 - 11)               | 3<br>(2 - 5)                |
| African trypanosomiasis                                           | 381<br>(165 - 724)             | 33<br>(12 - 70)                | 41<br>(17 - 85)             | 257<br>(109 - 483)           | 39<br>(17 - 75)             | 11<br>(5 - 21)              |
| Schistosomiasis                                                   | 130<br>(99 - 172)              | 3<br>(2 - 6)                   | 5<br>(2 - 8)                | 73<br>(49 - 104)             | 31<br>(20 - 46)             | 17<br>(11 - 26)             |
| Cysticercosis                                                     | 19<br>(15 - 22)                | 1<br>(1 - 2)                   | 1<br>(1 - 2)                | 14<br>(11 - 17)              | 2<br>(2 - 3)                | 1<br>(1 - 1)                |
| Cystic echinococcosis                                             | 77<br>(65 - 91)                | 14<br>(8 - 22)                 | 12<br>(8 - 17)              | 42<br>(33 - 51)              | 7<br>(6 - 8)                | 3<br>(3 - 4)                |
| Dengue                                                            | 11<br>(8 - 14)                 | 2<br>(1 - 6)                   | 1<br>(1 - 3)                | 6<br>(3 - 7)                 | 1<br>(0 - 2)                | 0<br>(0 - 1)                |
| Yellow fever                                                      | 11<br>(7 - 17)                 | 1<br>(0 - 4)                   | 2<br>(1 - 6)                | 6<br>(3 - 11)                | 1<br>(0 - 2)                | 0<br>(0 - 1)                |
| Rabies                                                            | 184<br>(95 - 270)              | 54<br>(22 - 116)               | 49<br>(23 - 90)             | 67<br>(37 - 90)              | 11<br>(5 - 15)              | 3<br>(1 - 6)                |
| Intestinal nematode infections                                    | 114<br>(67 - 175)              | 95<br>(51 - 150)               | 11<br>(3 - 22)              | 6<br>(1 - 17)                | 1<br>(0 - 6)                | 1<br>(0 - 6)                |
| Ascariasis                                                        | 114<br>(67 - 175)              | 95<br>(51 - 150)               | 11<br>(3 - 22)              | 6<br>(1 - 17)                | 1<br>(0 - 6)                | 1<br>(0 - 6)                |

Web Table 31- Uganda deaths with 95% UI by age, sex, and cause in 2013

| Cause                                                            | Both Sexes, All Ages        | Both Sexes, 0-4 Years       | Both Sexes, 5-14 Years   | Both Sexes, 15-49 Years     | Both Sexes, 50-69 Years     | Both Sexes, 70-80 Years     |
|------------------------------------------------------------------|-----------------------------|-----------------------------|--------------------------|-----------------------------|-----------------------------|-----------------------------|
| Other neglected tropical diseases                                | 56<br>(26 - 101)            | 25<br>(11 - 45)             | 2<br>(1 - 5)             | 10<br>(4 - 22)              | 7<br>(3 - 17)               | 11<br>(4 - 25)              |
| Maternal disorders                                               | 5,385<br>(3,544 - 7,461)    | --                          | 20<br>(6 - 48)           | 5,365<br>(3,529 - 7,436)    | --                          | --                          |
| Maternal hemorrhage                                              | 615<br>(356 - 926)          | --                          | 1<br>(0 - 4)             | 614<br>(355 - 925)          | --                          | --                          |
| Maternal sepsis and other maternal infections                    | 513<br>(298 - 779)          | --                          | 3<br>(1 - 7)             | 510<br>(296 - 776)          | --                          | --                          |
| Maternal hypertensive disorders                                  | 553<br>(326 - 840)          | --                          | 3<br>(1 - 6)             | 550<br>(324 - 838)          | --                          | --                          |
| Maternal obstructed labor                                        | 284<br>(170 - 421)          | --                          | 1<br>(0 - 2)             | 283<br>(169 - 420)          | --                          | --                          |
| Maternal abortive outcome                                        | 1,000<br>(618 - 1,485)      | --                          | 4<br>(1 - 9)             | 997<br>(614 - 1,482)        | --                          | --                          |
| Indirect maternal deaths                                         | 421<br>(225 - 682)          | --                          | 1<br>(0 - 3)             | 420<br>(224 - 681)          | --                          | --                          |
| Late maternal deaths                                             | 487<br>(272 - 762)          | --                          | 3<br>(1 - 9)             | 484<br>(270 - 755)          | --                          | --                          |
| Maternal deaths aggravated by HIV/AIDS                           | 149<br>(78 - 230)           | --                          | --                       | 149<br>(78 - 230)           | --                          | --                          |
| Other maternal disorders                                         | 1,353<br>(866 - 1,971)      | --                          | 4<br>(1 - 10)            | 1,348<br>(862 - 1,968)      | --                          | --                          |
| Neonatal disorders                                               | 34,753<br>(29,178 - 40,954) | 34,753<br>(29,178 - 40,954) | --                       | --                          | --                          | --                          |
| Neonatal preterm birth complications                             | 10,838<br>(6,619 - 15,706)  | 10,838<br>(6,619 - 15,706)  | --                       | --                          | --                          | --                          |
| Neonatal encephalopathy due to birth asphyxia and trauma         | 10,733<br>(6,905 - 15,638)  | 10,733<br>(6,905 - 15,638)  | --                       | --                          | --                          | --                          |
| Neonatal sepsis and other neonatal infections                    | 8,604<br>(4,916 - 14,081)   | 8,604<br>(4,916 - 14,081)   | --                       | --                          | --                          | --                          |
| Hemolytic disease and other neonatal jaundice                    | 170<br>(73 - 339)           | 170<br>(73 - 339)           | --                       | --                          | --                          | --                          |
| Other neonatal disorders                                         | 4,409<br>(2,242 - 7,229)    | 4,409<br>(2,242 - 7,229)    | --                       | --                          | --                          | --                          |
| Nutritional deficiencies                                         | 11,043<br>(7,646 - 15,505)  | 7,548<br>(4,510 - 11,495)   | 434<br>(272 - 671)       | 1,259<br>(916 - 1,921)      | 653<br>(463 - 969)          | 1,150<br>(836 - 1,628)      |
| Protein-energy malnutrition                                      | 9,549<br>(6,331 - 13,842)   | 7,176<br>(4,256 - 11,176)   | 377<br>(224 - 594)       | 646<br>(388 - 1,234)        | 481<br>(312 - 732)          | 869<br>(594 - 1,268)        |
| Iodine deficiency                                                | 10<br>(1 - 38)              | 4<br>(0 - 28)               | 1<br>(0 - 4)             | 3<br>(0 - 11)               | 1<br>(0 - 4)                | 1<br>(0 - 5)                |
| Iron-deficiency anemia                                           | 1,438<br>(711 - 2,425)      | 359<br>(65 - 955)           | 54<br>(21 - 114)         | 599<br>(326 - 907)          | 165<br>(76 - 299)           | 261<br>(120 - 505)          |
| Other nutritional deficiencies                                   | 46<br>(19 - 83)             | 9<br>(2 - 25)               | 1<br>(1 - 3)             | 10<br>(4 - 22)              | 6<br>(2 - 12)               | 19<br>(5 - 45)              |
| Other communicable, maternal, neonatal, and nutritional diseases | 7,467<br>(3,368 - 12,915)   | 5,925<br>(2,211 - 11,011)   | 406<br>(154 - 784)       | 634<br>(409 - 853)          | 264<br>(147 - 425)          | 238<br>(115 - 436)          |
| Sexually transmitted diseases excluding HIV                      | 5,722<br>(1,621 - 11,064)   | 5,177<br>(1,353 - 10,253)   | 324<br>(83 - 683)        | 140<br>(73 - 225)           | 44<br>(20 - 95)             | 37<br>(17 - 80)             |
| Syphilis                                                         | 5,614<br>(1,535 - 10,945)   | 5,177<br>(1,353 - 10,253)   | 320<br>(79 - 679)        | 61<br>(33 - 95)             | 28<br>(13 - 58)             | 29<br>(13 - 63)             |
| Chlamydial infection                                             | 27<br>(13 - 44)             | --                          | 1<br>(0 - 1)             | 21<br>(9 - 37)              | 3<br>(1 - 10)               | 2<br>(0 - 4)                |
| Gonococcal infection                                             | 44<br>(27 - 65)             | --                          | 2<br>(1 - 3)             | 30<br>(16 - 48)             | 8<br>(4 - 17)               | 4<br>(2 - 10)               |
| Other sexually transmitted diseases                              | 37<br>(21 - 55)             | --                          | 2<br>(1 - 3)             | 28<br>(15 - 44)             | 5<br>(2 - 13)               | 2<br>(1 - 4)                |
| Hepatitis                                                        | 464<br>(366 - 566)          | 104<br>(61 - 169)           | 26<br>(17 - 40)          | 240<br>(166 - 319)          | 67<br>(47 - 90)             | 27<br>(20 - 36)             |
| Acute hepatitis A                                                | 66<br>(21 - 128)            | 38<br>(11 - 77)             | 9<br>(3 - 18)            | 17<br>(5 - 40)              | 1<br>(0 - 2)                | 0<br>(0 - 0)                |
| Acute hepatitis B                                                | 260<br>(181 - 352)          | 65<br>(31 - 114)            | 12<br>(6 - 22)           | 102<br>(53 - 159)           | 56<br>(39 - 77)             | 25<br>(18 - 33)             |
| Acute hepatitis C                                                | 5<br>(1 - 12)               | --                          | 1<br>(0 - 2)             | 3<br>(0 - 8)                | 1<br>(0 - 3)                | 0<br>(0 - 1)                |
| Acute hepatitis E                                                | 133<br>(77 - 206)           | 1<br>(0 - 2)                | 4<br>(1 - 8)             | 118<br>(68 - 182)           | 9<br>(4 - 18)               | 2<br>(1 - 4)                |
| Other infectious diseases                                        | 1,281<br>(595 - 2,165)      | 644<br>(275 - 1,360)        | 56<br>(23 - 119)         | 254<br>(76 - 409)           | 153<br>(52 - 291)           | 173<br>(58 - 359)           |
| Non-communicable diseases                                        | 85,007<br>(76,614 - 97,517) | 11,107<br>(7,340 - 17,133)  | 2,091<br>(1,540 - 3,007) | 17,631<br>(14,776 - 20,349) | 23,658<br>(20,271 - 28,718) | 30,519<br>(27,572 - 34,229) |
| Neoplasms                                                        | 17,181<br>(15,134 - 20,000) | 896<br>(552 - 1,349)        | 750<br>(511 - 1,090)     | 3,906<br>(3,236 - 4,556)    | 7,151<br>(5,976 - 8,799)    | 4,479<br>(3,928 - 5,214)    |
| Esophageal cancer                                                | 1,859<br>(1,508 - 2,352)    | --                          | --                       | 205<br>(154 - 267)          | 1,067<br>(821 - 1,412)      | 587<br>(454 - 753)          |
| Stomach cancer                                                   | 897<br>(756 - 1,075)        | --                          | --                       | 164<br>(131 - 202)          | 460<br>(373 - 578)          | 272<br>(213 - 341)          |
| Liver cancer                                                     | 1,517<br>(1,177 - 1,884)    | --                          | 21<br>(10 - 36)          | 512<br>(343 - 684)          | 636<br>(473 - 847)          | 348<br>(265 - 457)          |
| Liver cancer due to hepatitis B                                  | 360<br>(199 - 574)          | --                          | 5<br>(2 - 11)            | 152<br>(82 - 243)           | 143<br>(70 - 254)           | 60<br>(30 - 105)            |

Web Table 31- Uganda deaths with 95% UI by age, sex, and cause in 2013

| Cause                                | Both Sexes, All Ages        | Both Sexes, 0-4 Years | Both Sexes, 5-14 Years | Both Sexes, 15-49 Years  | Both Sexes, 50-69 Years   | Both Sexes, 70-80 Years     |
|--------------------------------------|-----------------------------|-----------------------|------------------------|--------------------------|---------------------------|-----------------------------|
| Liver cancer due to hepatitis C      | 688<br>(466 - 919)          | --                    | 6<br>(2 - 12)          | 209<br>(123 - 312)       | 301<br>(177 - 433)        | 172<br>(106 - 241)          |
| Liver cancer due to alcohol use      | 207<br>(123 - 325)          | --                    | --                     | 42<br>(22 - 83)          | 94<br>(53 - 161)          | 71<br>(41 - 114)            |
| Liver cancer due to other causes     | 261<br>(150 - 396)          | --                    | 10<br>(4 - 17)         | 109<br>(61 - 171)        | 98<br>(50 - 163)          | 45<br>(24 - 77)             |
| Larynx cancer                        | 139<br>(101 - 188)          | --                    | --                     | 25<br>(17 - 35)          | 73<br>(49 - 107)          | 41<br>(30 - 57)             |
| Tracheal, bronchus and lung cancer   | 757<br>(628 - 945)          | --                    | --                     | 108<br>(82 - 155)        | 459<br>(368 - 592)        | 190<br>(155 - 233)          |
| Breast cancer                        | 1,067<br>(842 - 1,326)      | --                    | --                     | 374<br>(278 - 480)       | 476<br>(353 - 637)        | 217<br>(162 - 281)          |
| Cervical cancer                      | 2,293<br>(1,569 - 3,049)    | --                    | --                     | 643<br>(453 - 863)       | 1,278<br>(815 - 1,806)    | 372<br>(238 - 533)          |
| Uterine cancer                       | 125<br>(79 - 181)           | --                    | --                     | 19<br>(11 - 29)          | 62<br>(37 - 99)           | 45<br>(26 - 68)             |
| Prostate cancer                      | 1,136<br>(766 - 1,807)      | --                    | --                     | 14<br>(8 - 24)           | 289<br>(177 - 495)        | 833<br>(556 - 1,334)        |
| Colon and rectum cancer              | 1,097<br>(935 - 1,309)      | --                    | --                     | 233<br>(190 - 279)       | 487<br>(395 - 607)        | 378<br>(307 - 462)          |
| Lip and oral cavity cancer           | 166<br>(131 - 223)          | --                    | --                     | 50<br>(34 - 72)          | 80<br>(60 - 106)          | 36<br>(26 - 51)             |
| Nasopharynx cancer                   | 220<br>(170 - 283)          | --                    | 17<br>(7 - 36)         | 103<br>(74 - 140)        | 79<br>(54 - 114)          | 21<br>(14 - 32)             |
| Other pharynx cancer                 | 155<br>(121 - 200)          | --                    | --                     | 47<br>(32 - 67)          | 81<br>(59 - 111)          | 27<br>(19 - 35)             |
| Gallbladder and biliary tract cancer | 82<br>(63 - 107)            | --                    | --                     | 17<br>(12 - 22)          | 44<br>(31 - 60)           | 22<br>(15 - 32)             |
| Pancreatic cancer                    | 300<br>(253 - 361)          | --                    | --                     | 58<br>(47 - 72)          | 154<br>(124 - 195)        | 88<br>(70 - 109)            |
| Malignant skin melanoma              | 68<br>(52 - 97)             | --                    | --                     | 11<br>(7 - 19)           | 34<br>(24 - 48)           | 23<br>(16 - 32)             |
| Non-melanoma skin cancer             | 65<br>(42 - 101)            | --                    | --                     | 15<br>(8 - 26)           | 17<br>(10 - 27)           | 33<br>(18 - 64)             |
| Ovarian cancer                       | 556<br>(422 - 724)          | --                    | --                     | 150<br>(107 - 203)       | 296<br>(204 - 413)        | 110<br>(75 - 155)           |
| Testicular cancer                    | 30<br>(20 - 45)             | --                    | --                     | 7<br>(4 - 11)            | 15<br>(8 - 24)            | 8<br>(4 - 14)               |
| Kidney cancer                        | 195<br>(144 - 272)          | 64<br>(29 - 126)      | 26<br>(14 - 46)        | 30<br>(23 - 40)          | 57<br>(43 - 75)           | 18<br>(13 - 24)             |
| Bladder cancer                       | 333<br>(270 - 419)          | --                    | --                     | 30<br>(22 - 41)          | 138<br>(103 - 186)        | 165<br>(127 - 213)          |
| Brain and nervous system cancer      | 143<br>(108 - 190)          | 8<br>(4 - 15)         | 12<br>(6 - 21)         | 42<br>(30 - 61)          | 51<br>(37 - 71)           | 30<br>(19 - 43)             |
| Thyroid cancer                       | 144<br>(106 - 190)          | --                    | 2<br>(1 - 3)           | 15<br>(11 - 21)          | 85<br>(60 - 118)          | 42<br>(27 - 58)             |
| Mesothelioma                         | 21<br>(14 - 29)             | --                    | --                     | 10<br>(6 - 15)           | 6<br>(4 - 9)              | 5<br>(3 - 8)                |
| Hodgkin lymphoma                     | 134<br>(103 - 173)          | 7<br>(3 - 14)         | 8<br>(3 - 16)          | 43<br>(31 - 61)          | 47<br>(32 - 67)           | 30<br>(16 - 44)             |
| Non-Hodgkin lymphoma                 | 1,731<br>(1,275 - 2,317)    | 421<br>(211 - 753)    | 453<br>(270 - 713)     | 495<br>(358 - 650)       | 236<br>(180 - 319)        | 125<br>(83 - 168)           |
| Multiple myeloma                     | 144<br>(112 - 191)          | --                    | --                     | 23<br>(16 - 32)          | 80<br>(55 - 113)          | 41<br>(31 - 53)             |
| Leukemia                             | 334<br>(277 - 397)          | 21<br>(10 - 37)       | 65<br>(42 - 100)       | 150<br>(116 - 186)       | 60<br>(48 - 78)           | 37<br>(29 - 47)             |
| Other neoplasms                      | 1,474<br>(883 - 1,912)      | 375<br>(183 - 594)    | 148<br>(78 - 245)      | 311<br>(193 - 449)       | 304<br>(191 - 423)        | 336<br>(205 - 463)          |
| Cardiovascular diseases              | 33,136<br>(29,532 - 38,279) | 768<br>(520 - 1,107)  | 231<br>(155 - 347)     | 5,180<br>(4,193 - 6,132) | 9,985<br>(8,338 - 12,392) | 16,972<br>(15,106 - 19,516) |
| Rheumatic heart disease              | 1,623<br>(1,180 - 2,716)    | 36<br>(14 - 81)       | 56<br>(33 - 91)        | 725<br>(489 - 1,270)     | 415<br>(269 - 713)        | 391<br>(266 - 679)          |
| Ischemic heart disease               | 9,115<br>(7,501 - 11,404)   | 5<br>(2 - 10)         | 9<br>(5 - 16)          | 1,076<br>(787 - 1,404)   | 3,084<br>(2,395 - 4,040)  | 4,942<br>(3,937 - 6,318)    |
| Cerebrovascular disease              | 10,572<br>(8,005 - 13,063)  | 68<br>(40 - 111)      | 21<br>(12 - 33)        | 1,000<br>(698 - 1,312)   | 3,170<br>(2,337 - 4,115)  | 6,312<br>(4,759 - 7,818)    |
| Ischemic stroke                      | 4,543<br>(1,750 - 6,467)    | 6<br>(2 - 13)         | 2<br>(1 - 5)           | 140<br>(41 - 225)        | 965<br>(319 - 1,531)      | 3,430<br>(1,389 - 4,812)    |
| Hemorrhagic stroke                   | 6,028<br>(4,202 - 9,046)    | 62<br>(36 - 100)      | 18<br>(11 - 30)        | 860<br>(611 - 1,149)     | 2,205<br>(1,554 - 3,101)  | 2,882<br>(1,807 - 5,000)    |
| Hypertensive heart disease           | 3,789<br>(2,737 - 5,576)    | 15<br>(5 - 30)        | 7<br>(3 - 11)          | 365<br>(191 - 532)       | 1,022<br>(673 - 1,553)    | 2,381<br>(1,616 - 3,730)    |
| Cardiomyopathy and myocarditis       | 1,920<br>(1,338 - 2,423)    | 310<br>(129 - 512)    | 59<br>(29 - 101)       | 582<br>(317 - 822)       | 465<br>(326 - 652)        | 504<br>(332 - 799)          |
| Atrial fibrillation and flutter      | 9<br>(4 - 17)               | --                    | --                     | 1<br>(1 - 1)             | 2<br>(1 - 4)              | 7<br>(3 - 13)               |
| Aortic aneurysm                      | 405<br>(250 - 661)          | --                    | --                     | 68<br>(37 - 120)         | 132<br>(79 - 217)         | 204<br>(123 - 355)          |
| Peripheral vascular disease          | 20<br>(13 - 34)             | --                    | --                     | 1<br>(0 - 2)             | 5<br>(3 - 9)              | 14<br>(9 - 25)              |

Web Table 31- Uganda deaths with 95% UI by age, sex, and cause in 2013

| Cause                                               | Both Sexes, All Ages     | Both Sexes, 0-4 Years | Both Sexes, 5-14 Years | Both Sexes, 15-49 Years  | Both Sexes, 50-69 Years  | Both Sexes, 70-80 Years  |
|-----------------------------------------------------|--------------------------|-----------------------|------------------------|--------------------------|--------------------------|--------------------------|
| Endocarditis                                        | 482<br>(330 - 675)       | 45<br>(19 - 94)       | 11<br>(6 - 19)         | 114<br>(68 - 170)        | 126<br>(79 - 188)        | 187<br>(116 - 301)       |
| Other cardiovascular and circulatory diseases       | 5,200<br>(3,324 - 8,141) | 289<br>(129 - 517)    | 69<br>(34 - 118)       | 1,248<br>(681 - 1,946)   | 1,564<br>(960 - 2,610)   | 2,029<br>(1,228 - 3,380) |
| Chronic respiratory diseases                        | 5,084<br>(4,344 - 6,077) | 465<br>(295 - 723)    | 80<br>(54 - 123)       | 836<br>(673 - 1,029)     | 1,332<br>(1,056 - 1,712) | 2,370<br>(1,976 - 2,924) |
| Chronic obstructive pulmonary disease               | 2,688<br>(2,190 - 3,421) | 91<br>(49 - 159)      | 27<br>(17 - 43)        | 293<br>(221 - 389)       | 786<br>(601 - 1,032)     | 1,490<br>(1,176 - 1,959) |
| Pneumoconiosis                                      | 291<br>(201 - 441)       | 10<br>(4 - 21)        | 4<br>(2 - 7)           | 88<br>(54 - 136)         | 93<br>(57 - 150)         | 97<br>(60 - 153)         |
| Silicosis                                           | 78<br>(41 - 133)         | 3<br>(1 - 7)          | 1<br>(1 - 2)           | 20<br>(8 - 39)           | 25<br>(13 - 45)          | 29<br>(16 - 55)          |
| Asbestosis                                          | 35<br>(20 - 61)          | 2<br>(0 - 4)          | 1<br>(0 - 1)           | 11<br>(5 - 22)           | 13<br>(7 - 23)           | 9<br>(5 - 15)            |
| Coal workers pneumoconiosis                         | 36<br>(21 - 57)          | 1<br>(0 - 2)          | 1<br>(0 - 1)           | 9<br>(5 - 14)            | 13<br>(7 - 23)           | 12<br>(6 - 22)           |
| Other pneumoconiosis                                | 142<br>(91 - 225)        | 5<br>(2 - 10)         | 2<br>(1 - 3)           | 48<br>(29 - 82)          | 42<br>(24 - 71)          | 46<br>(26 - 76)          |
| Asthma                                              | 894<br>(571 - 1,161)     | 75<br>(30 - 152)      | 18<br>(10 - 31)        | 182<br>(134 - 244)       | 244<br>(138 - 344)       | 375<br>(211 - 527)       |
| Interstitial lung disease and pulmonary sarcoidosis | 544<br>(219 - 837)       | 15<br>(3 - 49)        | 5<br>(2 - 10)          | 77<br>(28 - 158)         | 150<br>(59 - 253)        | 296<br>(100 - 525)       |
| Other chronic respiratory diseases                  | 668<br>(488 - 896)       | 273<br>(160 - 437)    | 26<br>(16 - 43)        | 197<br>(134 - 279)       | 60<br>(38 - 89)          | 111<br>(71 - 174)        |
| Cirrhosis                                           | 4,248<br>(3,565 - 5,108) | 126<br>(56 - 252)     | 72<br>(48 - 108)       | 1,537<br>(1,201 - 1,934) | 1,540<br>(1,218 - 1,975) | 973<br>(772 - 1,225)     |
| Cirrhosis due to hepatitis B                        | 1,073<br>(624 - 1,516)   | 5<br>(2 - 11)         | 11<br>(5 - 20)         | 391<br>(224 - 584)       | 412<br>(228 - 618)       | 255<br>(111 - 396)       |
| Cirrhosis due to hepatitis C                        | 754<br>(469 - 1,138)     | 10<br>(3 - 28)        | 8<br>(4 - 14)          | 224<br>(113 - 393)       | 289<br>(164 - 464)       | 223<br>(132 - 359)       |
| Cirrhosis due to alcohol use                        | 1,645<br>(1,208 - 2,208) | --                    | --                     | 549<br>(368 - 790)       | 673<br>(477 - 943)       | 423<br>(295 - 582)       |
| Cirrhosis due to other causes                       | 776<br>(570 - 1,018)     | 111<br>(50 - 220)     | 53<br>(34 - 83)        | 373<br>(257 - 507)       | 166<br>(92 - 243)        | 72<br>(43 - 106)         |
| Digestive diseases                                  | 3,625<br>(2,719 - 4,779) | 257<br>(131 - 468)    | 139<br>(90 - 206)      | 1,270<br>(890 - 1,757)   | 830<br>(602 - 1,106)     | 1,129<br>(847 - 1,499)   |
| Peptic ulcer disease                                | 826<br>(564 - 1,185)     | 18<br>(7 - 39)        | 12<br>(6 - 22)         | 280<br>(170 - 435)       | 217<br>(136 - 322)       | 300<br>(189 - 452)       |
| Gastritis and duodenitis                            | 142<br>(72 - 258)        | 14<br>(5 - 29)        | 8<br>(4 - 14)          | 48<br>(26 - 78)          | 27<br>(12 - 54)          | 46<br>(16 - 126)         |
| Appendicitis                                        | 297<br>(180 - 463)       | 24<br>(8 - 59)        | 24<br>(13 - 43)        | 135<br>(80 - 233)        | 51<br>(27 - 85)          | 64<br>(28 - 113)         |
| Paralytic ileus and intestinal obstruction          | 1,145<br>(800 - 1,741)   | 61<br>(26 - 134)      | 55<br>(31 - 91)        | 343<br>(211 - 525)       | 297<br>(193 - 464)       | 389<br>(239 - 639)       |
| Inguinal, femoral, and abdominal hernia             | 58<br>(31 - 86)          | 5<br>(1 - 12)         | 2<br>(1 - 3)           | 23<br>(11 - 36)          | 9<br>(4 - 16)            | 19<br>(10 - 31)          |
| Inflammatory bowel disease                          | 338<br>(185 - 824)       | 77<br>(25 - 199)      | 16<br>(7 - 37)         | 133<br>(68 - 343)        | 47<br>(25 - 118)         | 65<br>(34 - 163)         |
| Vascular intestinal disorders                       | 27<br>(14 - 50)          | 1<br>(0 - 4)          | 1<br>(0 - 2)           | 6<br>(3 - 13)            | 7<br>(3 - 13)            | 12<br>(6 - 24)           |
| Gallbladder and biliary diseases                    | 236<br>(163 - 325)       | 7<br>(3 - 15)         | 4<br>(2 - 7)           | 68<br>(44 - 104)         | 58<br>(36 - 88)          | 98<br>(59 - 148)         |
| Pancreatitis                                        | 202<br>(106 - 314)       | 4<br>(1 - 9)          | 3<br>(1 - 6)           | 113<br>(57 - 193)        | 44<br>(21 - 76)          | 38<br>(16 - 73)          |
| Other digestive diseases                            | 353<br>(236 - 533)       | 46<br>(17 - 99)       | 16<br>(8 - 26)         | 120<br>(75 - 188)        | 73<br>(45 - 118)         | 97<br>(58 - 160)         |
| Neurological disorders                              | 3,017<br>(2,459 - 3,642) | 420<br>(226 - 779)    | 199<br>(120 - 348)     | 760<br>(538 - 1,042)     | 207<br>(166 - 267)       | 1,432<br>(1,184 - 1,735) |
| Alzheimer disease and other dementias               | 1,382<br>(1,122 - 1,686) | --                    | --                     | 1<br>(0 - 1)             | 107<br>(83 - 138)        | 1,274<br>(1,027 - 1,564) |
| Parkinson disease                                   | 18<br>(9 - 33)           | --                    | --                     | 2<br>(1 - 3)             | 2<br>(1 - 4)             | 14<br>(6 - 28)           |
| Epilepsy                                            | 1,421<br>(1,026 - 1,901) | 356<br>(181 - 712)    | 184<br>(108 - 327)     | 699<br>(486 - 969)       | 64<br>(44 - 96)          | 119<br>(67 - 193)        |
| Multiple sclerosis                                  | 7<br>(3 - 12)            | --                    | --                     | 4<br>(1 - 9)             | 2<br>(1 - 3)             | 1<br>(0 - 2)             |
| Other neurological disorders                        | 189<br>(116 - 284)       | 64<br>(33 - 136)      | 15<br>(8 - 24)         | 54<br>(29 - 78)          | 32<br>(21 - 45)          | 24<br>(16 - 32)          |
| Mental and substance use disorders                  | 1,641<br>(1,151 - 2,383) | 87<br>(27 - 175)      | 0<br>(0 - 0)           | 1,239<br>(835 - 1,808)   | 254<br>(160 - 430)       | 61<br>(36 - 108)         |
| Schizophrenia                                       | 39<br>(20 - 75)          | --                    | --                     | 26<br>(12 - 54)          | 8<br>(4 - 16)            | 5<br>(2 - 10)            |
| Alcohol use disorders                               | 1,040<br>(604 - 1,655)   | --                    | --                     | 793<br>(425 - 1,306)     | 207<br>(123 - 363)       | 39<br>(23 - 69)          |
| Drug use disorders                                  | 560<br>(376 - 745)       | 87<br>(27 - 175)      | --                     | 417<br>(298 - 549)       | 39<br>(17 - 65)          | 17<br>(5 - 33)           |
| Opioid use disorders                                | 60<br>(40 - 80)          | 10<br>(3 - 21)        | --                     | 44<br>(31 - 60)          | 4<br>(2 - 6)             | 2<br>(1 - 4)             |
| Cocaine use disorders                               | 3<br>(2 - 4)             | 0<br>(0 - 1)          | --                     | 2<br>(1 - 3)             | 0<br>(0 - 0)             | 0<br>(0 - 0)             |

Web Table 31- Uganda deaths with 95% UI by age, sex, and cause in 2013

| Cause                                               | Both Sexes, All Ages      | Both Sexes, 0-4 Years     | Both Sexes, 5-14 Years | Both Sexes, 15-49 Years  | Both Sexes, 50-69 Years  | Both Sexes, 70-80 Years  |
|-----------------------------------------------------|---------------------------|---------------------------|------------------------|--------------------------|--------------------------|--------------------------|
| Amphetamine use disorders                           | 2<br>(1 - 3)              | 0<br>(0 - 1)              | --                     | 1<br>(1 - 2)             | 0<br>(0 - 0)             | 0<br>(0 - 0)             |
| Other drug use disorders                            | 496<br>(335 - 661)        | 77<br>(24 - 153)          | --                     | 370<br>(264 - 486)       | 35<br>(15 - 59)          | 15<br>(5 - 30)           |
| Eating disorders                                    | 2<br>(1 - 3)              | --                        | 0<br>(0 - 0)           | 1<br>(1 - 3)             | --                       | --                       |
| Anorexia nervosa                                    | 2<br>(1 - 3)              | --                        | 0<br>(0 - 0)           | 1<br>(1 - 3)             | --                       | --                       |
| Diabetes, urogenital, blood, and endocrine diseases | 9,095<br>(7,819 - 10,641) | 1,527<br>(942 - 2,276)    | 342<br>(229 - 517)     | 2,334<br>(1,873 - 2,814) | 2,141<br>(1,784 - 2,664) | 2,751<br>(2,371 - 3,230) |
| Diabetes mellitus                                   | 3,395<br>(2,906 - 4,075)  | 41<br>(26 - 63)           | 17<br>(11 - 27)        | 539<br>(432 - 652)       | 1,236<br>(986 - 1,583)   | 1,562<br>(1,281 - 1,953) |
| Acute glomerulonephritis                            | 97<br>(51 - 153)          | 17<br>(8 - 35)            | 5<br>(2 - 11)          | 30<br>(12 - 55)          | 24<br>(11 - 49)          | 20<br>(9 - 37)           |
| Chronic kidney disease                              | 1,727<br>(1,282 - 2,044)  | 212<br>(128 - 326)        | 66<br>(35 - 103)       | 607<br>(434 - 771)       | 324<br>(250 - 414)       | 518<br>(364 - 657)       |
| Chronic kidney disease due to diabetes mellitus     | 9<br>(4 - 15)             | 1<br>(0 - 1)              | 1<br>(0 - 1)           | 3<br>(1 - 4)             | 2<br>(1 - 5)             | 2<br>(1 - 6)             |
| Chronic kidney disease due to hypertension          | 601<br>(425 - 775)        | 25<br>(9 - 51)            | 7<br>(3 - 13)          | 146<br>(88 - 209)        | 156<br>(103 - 219)       | 267<br>(176 - 358)       |
| Chronic kidney disease due to glomerulonephritis    | 595<br>(428 - 751)        | 123<br>(73 - 190)         | 36<br>(22 - 58)        | 257<br>(185 - 335)       | 80<br>(48 - 119)         | 98<br>(47 - 147)         |
| Chronic kidney disease due to other causes          | 522<br>(284 - 713)        | 63<br>(31 - 115)          | 21<br>(8 - 37)         | 202<br>(107 - 297)       | 85<br>(46 - 129)         | 150<br>(64 - 244)        |
| Urinary diseases and male infertility               | 1,269<br>(954 - 1,564)    | 153<br>(82 - 273)         | 30<br>(19 - 49)        | 427<br>(288 - 550)       | 316<br>(208 - 431)       | 343<br>(247 - 457)       |
| Interstitial nephritis and urinary tract infections | 895<br>(621 - 1,143)      | 106<br>(50 - 206)         | 18<br>(10 - 30)        | 271<br>(156 - 370)       | 231<br>(142 - 330)       | 269<br>(181 - 370)       |
| Urolithiasis                                        | 44<br>(24 - 69)           | --                        | 3<br>(1 - 5)           | 21<br>(9 - 37)           | 12<br>(6 - 23)           | 8<br>(4 - 18)            |
| Other urinary diseases                              | 331<br>(238 - 471)        | 47<br>(22 - 99)           | 10<br>(6 - 17)         | 135<br>(90 - 196)        | 73<br>(40 - 123)         | 65<br>(32 - 119)         |
| Gynecological diseases                              | 23<br>(5 - 112)           | --                        | --                     | 13<br>(2 - 85)           | 5<br>(1 - 13)            | 5<br>(1 - 13)            |
| Uterine fibroids                                    | 4<br>(1 - 18)             | --                        | --                     | 2<br>(0 - 10)            | 1<br>(0 - 4)             | 1<br>(0 - 4)             |
| Polycystic ovarian syndrome                         | 1<br>(0 - 7)              | --                        | --                     | 1<br>(0 - 6)             | 0<br>(0 - 0)             | --                       |
| Endometriosis                                       | 2<br>(0 - 15)             | --                        | --                     | 2<br>(0 - 14)            | 0<br>(0 - 0)             | --                       |
| Genital prolapse                                    | 4<br>(1 - 17)             | --                        | --                     | 2<br>(0 - 12)            | 1<br>(0 - 2)             | 1<br>(0 - 3)             |
| Other gynecological diseases                        | 11<br>(2 - 54)            | --                        | --                     | 7<br>(1 - 42)            | 2<br>(1 - 7)             | 2<br>(1 - 6)             |
| Hemoglobinopathies and hemolytic anemias            | 1,507<br>(816 - 2,316)    | 782<br>(321 - 1,390)      | 182<br>(92 - 306)      | 415<br>(212 - 654)       | 70<br>(36 - 152)         | 58<br>(29 - 131)         |
| Thalassemias                                        | 22<br>(10 - 37)           | 17<br>(7 - 30)            | 2<br>(1 - 3)           | 3<br>(2 - 6)             | 0<br>(0 - 0)             | 0<br>(0 - 0)             |
| Sickle cell disorders                               | 1,320<br>(693 - 2,046)    | 701<br>(282 - 1,253)      | 171<br>(86 - 289)      | 387<br>(197 - 609)       | 57<br>(29 - 122)         | 4<br>(2 - 9)             |
| G6PD deficiency                                     | 40<br>(22 - 62)           | 21<br>(8 - 37)            | 4<br>(2 - 7)           | 11<br>(5 - 17)           | 2<br>(1 - 5)             | 2<br>(1 - 5)             |
| Other hemoglobinopathies and hemolytic anemias      | 125<br>(73 - 207)         | 43<br>(22 - 73)           | 4<br>(2 - 7)           | 15<br>(8 - 22)           | 11<br>(6 - 25)           | 51<br>(26 - 117)         |
| Endocrine, metabolic, blood, and immune disorders   | 1,077<br>(835 - 1,336)    | 321<br>(198 - 506)        | 42<br>(24 - 72)        | 301<br>(220 - 395)       | 166<br>(110 - 231)       | 247<br>(128 - 348)       |
| Musculoskeletal disorders                           | 311<br>(219 - 420)        | --                        | 31<br>(18 - 50)        | 169<br>(97 - 250)        | 60<br>(43 - 90)          | 52<br>(36 - 92)          |
| Rheumatoid arthritis                                | 71<br>(48 - 109)          | --                        | 6<br>(3 - 11)          | 23<br>(11 - 35)          | 20<br>(13 - 35)          | 23<br>(14 - 45)          |
| Other musculoskeletal disorders                     | 239<br>(158 - 334)        | --                        | 25<br>(14 - 41)        | 146<br>(83 - 218)        | 39<br>(27 - 59)          | 29<br>(19 - 48)          |
| Other non-communicable diseases                     | 7,669<br>(4,331 - 13,320) | 6,563<br>(3,428 - 11,942) | 247<br>(122 - 446)     | 400<br>(265 - 583)       | 157<br>(122 - 204)       | 301<br>(227 - 406)       |
| Congenital anomalies                                | 6,677<br>(3,308 - 12,397) | 6,153<br>(3,018 - 11,596) | 230<br>(107 - 424)     | 230<br>(117 - 390)       | 28<br>(17 - 41)          | 36<br>(22 - 51)          |
| Neural tube defects                                 | 1,645<br>(439 - 3,643)    | 1,564<br>(410 - 3,503)    | 36<br>(9 - 91)         | 40<br>(10 - 100)         | 2<br>(1 - 5)             | 2<br>(1 - 4)             |
| Congenital heart anomalies                          | 3,023<br>(1,239 - 6,622)  | 2,751<br>(1,094 - 6,155)  | 127<br>(54 - 250)      | 117<br>(53 - 224)        | 12<br>(7 - 18)           | 17<br>(9 - 26)           |
| Cleft lip and cleft palate                          | 38<br>(6 - 103)           | 38<br>(6 - 103)           | --                     | --                       | --                       | --                       |
| Down syndrome                                       | 459<br>(108 - 1,095)      | 401<br>(85 - 989)         | 23<br>(7 - 51)         | 30<br>(10 - 58)          | 4<br>(2 - 7)             | 1<br>(0 - 2)             |
| Chromosomal unbalanced rearrangements               | 237<br>(74 - 554)         | 222<br>(67 - 529)         | 5<br>(2 - 12)          | 8<br>(3 - 16)            | 1<br>(0 - 1)             | 1<br>(0 - 2)             |
| Other congenital anomalies                          | 1,277<br>(471 - 3,238)    | 1,178<br>(411 - 3,061)    | 38<br>(14 - 97)        | 35<br>(16 - 76)          | 9<br>(5 - 15)            | 16<br>(8 - 26)           |
| Skin and subcutaneous diseases                      | 883<br>(703 - 1,120)      | 301<br>(176 - 475)        | 17<br>(12 - 28)        | 171<br>(125 - 223)       | 129<br>(99 - 168)        | 265<br>(194 - 370)       |

Web Table 31- Uganda deaths with 95% UI by age, sex, and cause in 2013

| Cause                                           | Both Sexes, All Ages        | Both Sexes, 0-4 Years    | Both Sexes, 5-14 Years   | Both Sexes, 15-49 Years    | Both Sexes, 50-69 Years  | Both Sexes, 70-80 Years  |
|-------------------------------------------------|-----------------------------|--------------------------|--------------------------|----------------------------|--------------------------|--------------------------|
| Cellulitis                                      | 342<br>(200 - 545)          | 118<br>(46 - 240)        | 7<br>(3 - 14)            | 71<br>(42 - 111)           | 55<br>(34 - 83)          | 90<br>(53 - 147)         |
| Pyoderma                                        | 415<br>(269 - 578)          | 167<br>(83 - 288)        | 7<br>(4 - 12)            | 77<br>(43 - 114)           | 57<br>(35 - 88)          | 107<br>(64 - 168)        |
| Decubitus ulcer                                 | 92<br>(58 - 135)            | 5<br>(1 - 12)            | 2<br>(1 - 3)             | 13<br>(5 - 21)             | 12<br>(7 - 19)           | 60<br>(35 - 93)          |
| Other skin and subcutaneous diseases            | 34<br>(17 - 58)             | 11<br>(3 - 27)           | 1<br>(1 - 3)             | 10<br>(4 - 20)             | 5<br>(3 - 7)             | 7<br>(4 - 12)            |
| Sudden infant death syndrome                    | 108<br>(37 - 263)           | 108<br>(37 - 263)        | --                       | --                         | --                       | --                       |
| Injuries                                        | 26,502<br>(21,896 - 32,194) | 5,835<br>(3,853 - 9,199) | 2,104<br>(1,533 - 3,178) | 12,645<br>(9,914 - 15,800) | 3,026<br>(2,361 - 3,889) | 2,892<br>(2,312 - 3,549) |
| Transport injuries                              | 13,525<br>(11,182 - 16,032) | 1,603<br>(945 - 2,542)   | 1,037<br>(701 - 1,582)   | 6,758<br>(5,220 - 8,473)   | 2,086<br>(1,604 - 2,716) | 2,041<br>(1,617 - 2,553) |
| Road injuries                                   | 13,017<br>(10,742 - 15,473) | 1,437<br>(835 - 2,279)   | 975<br>(659 - 1,497)     | 6,622<br>(5,074 - 8,322)   | 2,022<br>(1,561 - 2,634) | 1,961<br>(1,551 - 2,456) |
| Pedestrian road injuries                        | 4,703<br>(3,605 - 6,098)    | 563<br>(300 - 945)       | 371<br>(234 - 596)       | 2,307<br>(1,641 - 3,183)   | 729<br>(508 - 1,007)     | 734<br>(519 - 981)       |
| Cyclist road injuries                           | 1,195<br>(872 - 1,539)      | 112<br>(47 - 235)        | 102<br>(60 - 169)        | 591<br>(398 - 811)         | 200<br>(136 - 286)       | 191<br>(129 - 273)       |
| Motorcyclist road injuries                      | 886<br>(600 - 1,204)        | 90<br>(44 - 165)         | 52<br>(30 - 87)          | 492<br>(325 - 708)         | 128<br>(81 - 192)        | 123<br>(75 - 180)        |
| Motor vehicle road injuries                     | 6,216<br>(4,806 - 7,711)    | 668<br>(378 - 1,109)     | 448<br>(286 - 704)       | 3,225<br>(2,359 - 4,301)   | 963<br>(698 - 1,313)     | 911<br>(672 - 1,192)     |
| Other road injuries                             | 17<br>(10 - 36)             | 2<br>(1 - 6)             | 2<br>(1 - 4)             | 7<br>(4 - 17)              | 3<br>(1 - 6)             | 3<br>(1 - 6)             |
| Other transport injuries                        | 508<br>(388 - 666)          | 166<br>(96 - 279)        | 62<br>(36 - 103)         | 136<br>(82 - 254)          | 64<br>(40 - 97)          | 80<br>(36 - 123)         |
| Unintentional injuries                          | 9,206<br>(6,847 - 13,719)   | 3,896<br>(2,366 - 7,141) | 976<br>(632 - 1,623)     | 2,852<br>(2,134 - 3,971)   | 708<br>(505 - 949)       | 774<br>(519 - 1,052)     |
| Falls                                           | 300<br>(183 - 687)          | 37<br>(23 - 58)          | 22<br>(7 - 78)           | 176<br>(82 - 490)          | 25<br>(17 - 37)          | 39<br>(27 - 61)          |
| Drowning                                        | 1,955<br>(1,327 - 2,864)    | 817<br>(408 - 1,408)     | 337<br>(203 - 547)       | 667<br>(441 - 991)         | 84<br>(55 - 125)         | 49<br>(29 - 74)          |
| Fire, heat, and hot substances                  | 1,271<br>(825 - 1,901)      | 742<br>(353 - 1,301)     | 173<br>(66 - 373)        | 179<br>(97 - 316)          | 86<br>(58 - 122)         | 92<br>(65 - 125)         |
| Poisonings                                      | 852<br>(555 - 1,176)        | 137<br>(58 - 320)        | 23<br>(12 - 49)          | 608<br>(338 - 894)         | 61<br>(24 - 107)         | 23<br>(14 - 33)          |
| Exposure to mechanical forces                   | 1,669<br>(824 - 6,886)      | 857<br>(265 - 4,022)     | 151<br>(66 - 552)        | 465<br>(253 - 1,609)       | 131<br>(72 - 293)        | 65<br>(31 - 150)         |
| Unintentional firearm injuries                  | 178<br>(121 - 255)          | 30<br>(16 - 52)          | 9<br>(5 - 17)            | 120<br>(75 - 188)          | 11<br>(7 - 17)           | 8<br>(5 - 12)            |
| Unintentional suffocation                       | 908<br>(175 - 6,127)        | 601<br>(95 - 3,806)      | 75<br>(15 - 477)         | 165<br>(25 - 1,230)        | 49<br>(13 - 234)         | 18<br>(5 - 111)          |
| Other exposure to mechanical forces             | 584<br>(354 - 895)          | 227<br>(98 - 444)        | 67<br>(33 - 124)         | 179<br>(100 - 334)         | 71<br>(35 - 111)         | 39<br>(13 - 58)          |
| Adverse effects of medical treatment            | 1,148<br>(783 - 1,589)      | 441<br>(225 - 774)       | 42<br>(26 - 66)          | 226<br>(135 - 344)         | 156<br>(95 - 243)        | 282<br>(128 - 479)       |
| Animal contact                                  | 1,344<br>(456 - 1,838)      | 407<br>(142 - 693)       | 198<br>(63 - 336)        | 474<br>(153 - 681)         | 143<br>(41 - 230)        | 121<br>(30 - 199)        |
| Venomous animal contact                         | 1,024<br>(245 - 1,463)      | 332<br>(80 - 591)        | 129<br>(25 - 236)        | 360<br>(92 - 559)          | 106<br>(17 - 167)        | 97<br>(10 - 153)         |
| Non-venomous animal contact                     | 320<br>(171 - 675)          | 76<br>(27 - 183)         | 69<br>(28 - 159)         | 115<br>(52 - 225)          | 36<br>(14 - 90)          | 24<br>(9 - 79)           |
| Foreign body                                    | 642<br>(351 - 1,005)        | 449<br>(244 - 749)       | 29<br>(14 - 50)          | 48<br>(27 - 73)            | 19<br>(11 - 27)          | 97<br>(31 - 185)         |
| Pulmonary aspiration and foreign body in airway | 613<br>(331 - 986)          | 438<br>(236 - 735)       | 25<br>(11 - 46)          | 43<br>(23 - 65)            | 15<br>(8 - 23)           | 93<br>(27 - 181)         |
| Foreign body in other body part                 | 29<br>(15 - 114)            | 11<br>(4 - 43)           | 4<br>(2 - 16)            | 5<br>(2 - 30)              | 4<br>(2 - 12)            | 4<br>(2 - 14)            |
| Other unintentional injuries                    | 25<br>(18 - 59)             | 7<br>(4 - 17)            | 1<br>(1 - 6)             | 8<br>(5 - 21)              | 4<br>(2 - 8)             | 5<br>(4 - 10)            |
| Self-harm and interpersonal violence            | 3,739<br>(2,240 - 5,130)    | 303<br>(143 - 524)       | 91<br>(50 - 156)         | 3,036<br>(1,855 - 4,316)   | 231<br>(115 - 360)       | 77<br>(36 - 126)         |
| Self-harm                                       | 67<br>(28 - 346)            | --                       | 1<br>(0 - 2)             | 44<br>(10 - 300)           | 9<br>(6 - 21)            | 14<br>(9 - 28)           |
| Interpersonal violence                          | 3,672<br>(2,172 - 5,021)    | 303<br>(143 - 524)       | 91<br>(50 - 155)         | 2,992<br>(1,769 - 4,238)   | 222<br>(101 - 353)       | 63<br>(23 - 115)         |
| Assault by firearm                              | 1,375<br>(723 - 2,327)      | 67<br>(26 - 137)         | 22<br>(10 - 45)          | 1,205<br>(604 - 2,069)     | 71<br>(33 - 134)         | 10<br>(3 - 20)           |
| Assault by sharp object                         | 739<br>(380 - 1,212)        | 50<br>(19 - 100)         | 15<br>(7 - 30)           | 599<br>(314 - 1,026)       | 59<br>(23 - 107)         | 15<br>(5 - 28)           |
| Assault by other means                          | 1,558<br>(813 - 2,265)      | 186<br>(91 - 327)        | 54<br>(28 - 95)          | 1,189<br>(585 - 1,775)     | 91<br>(37 - 153)         | 39<br>(13 - 73)          |
| Forces of nature, war, and legal intervention   | 33<br>(0 - 0)               | 33<br>(0 - 0)            | --                       | --                         | --                       | --                       |
| Exposure to forces of nature                    | 33<br>(0 - 0)               | 33<br>(0 - 0)            | --                       | --                         | --                       | --                       |

Web Table 31- Uganda deaths with 95% UI by age, sex, and cause in 2013

| Cause                                                             | Males, All Ages                | Males, 0-4 Years            | Males, 5-14 Years        | Males, 15-49 Years          | Males, 50-69 Years          | Males, 70-80 Years          |
|-------------------------------------------------------------------|--------------------------------|-----------------------------|--------------------------|-----------------------------|-----------------------------|-----------------------------|
| All causes                                                        | 173,830<br>(159,677 - 191,849) | 69,706<br>(60,068 - 81,013) | 7,110<br>(6,022 - 9,807) | 49,373<br>(42,919 - 54,468) | 25,672<br>(22,698 - 31,307) | 21,968<br>(20,532 - 25,739) |
| Communicable, maternal, neonatal, and nutritional diseases        | 111,176<br>(99,438 - 122,837)  | 60,389<br>(50,998 - 70,411) | 4,613<br>(3,720 - 6,239) | 29,005<br>(25,187 - 33,000) | 10,888<br>(8,935 - 13,013)  | 6,280<br>(5,069 - 7,565)    |
| HIV/AIDS and tuberculosis                                         | 35,650<br>(31,053 - 40,442)    | 3,134<br>(2,117 - 4,076)    | 1,603<br>(1,297 - 1,938) | 21,958<br>(18,485 - 26,030) | 7,333<br>(5,631 - 9,503)    | 1,622<br>(1,202 - 2,071)    |
| Tuberculosis                                                      | 8,923<br>(5,823 - 11,569)      | 855<br>(513 - 1,354)        | 138<br>(78 - 224)        | 4,892<br>(2,856 - 6,548)    | 1,934<br>(1,251 - 2,834)    | 1,104<br>(756 - 1,520)      |
| HIV/AIDS                                                          | 26,727<br>(22,583 - 31,140)    | 2,280<br>(1,387 - 3,070)    | 1,465<br>(1,151 - 1,815) | 17,066<br>(13,804 - 21,133) | 5,399<br>(3,751 - 7,523)    | 518<br>(327 - 783)          |
| HIV/AIDS resulting in mycobacterial infection                     | 1,907<br>(1,485 - 2,428)       | 153<br>(86 - 220)           | 90<br>(66 - 118)         | 1,223<br>(933 - 1,605)      | 401<br>(264 - 575)          | 40<br>(24 - 60)             |
| HIV/AIDS resulting in other diseases                              | 24,820<br>(20,850 - 29,117)    | 2,127<br>(1,296 - 2,875)    | 1,375<br>(1,081 - 1,699) | 15,843<br>(12,821 - 19,782) | 4,998<br>(3,491 - 6,961)    | 478<br>(302 - 720)          |
| Diarrhea, lower respiratory, and other common infectious diseases | 30,624<br>(24,014 - 38,282)    | 18,173<br>(12,576 - 25,241) | 1,587<br>(1,029 - 2,338) | 4,418<br>(3,216 - 5,801)    | 2,643<br>(1,884 - 3,843)    | 3,803<br>(2,798 - 4,964)    |
| Diarrheal diseases                                                | 8,327<br>(4,890 - 13,251)      | 4,923<br>(2,093 - 9,521)    | 372<br>(148 - 787)       | 1,331<br>(727 - 2,187)      | 757<br>(374 - 1,393)        | 943<br>(481 - 1,618)        |
| Intestinal infectious diseases                                    | 967<br>(457 - 1,736)           | 443<br>(187 - 867)          | 238<br>(103 - 455)       | 256<br>(113 - 497)          | 21<br>(9 - 40)              | 9<br>(4 - 18)               |
| Typhoid fever                                                     | 693<br>(306 - 1,327)           | 296<br>(110 - 602)          | 182<br>(76 - 354)        | 193<br>(79 - 385)           | 15<br>(6 - 30)              | 6<br>(2 - 12)               |
| Paratyphoid fever                                                 | 194<br>(86 - 374)              | 90<br>(31 - 190)            | 49<br>(17 - 100)         | 50<br>(17 - 107)            | 3<br>(1 - 8)                | 1<br>(0 - 3)                |
| Other intestinal infectious diseases                              | 80<br>(49 - 123)               | 58<br>(28 - 96)             | 7<br>(2 - 14)            | 12<br>(5 - 23)              | 2<br>(0 - 8)                | 2<br>(0 - 6)                |
| Lower respiratory infections                                      | 15,143<br>(11,016 - 20,480)    | 8,415<br>(5,174 - 13,000)   | 548<br>(311 - 932)       | 1,860<br>(1,270 - 2,607)    | 1,600<br>(1,038 - 2,351)    | 2,721<br>(1,894 - 3,751)    |
| Upper respiratory infections                                      | 28<br>(9 - 70)                 | 14<br>(1 - 52)              | 1<br>(0 - 4)             | 8<br>(2 - 21)               | 3<br>(0 - 9)                | 2<br>(0 - 7)                |
| Otitis media                                                      | 17<br>(10 - 27)                | 10<br>(5 - 18)              | 1<br>(1 - 2)             | 3<br>(2 - 5)                | 1<br>(1 - 2)                | 1<br>(1 - 2)                |
| Meningitis                                                        | 4,020<br>(2,614 - 6,171)       | 2,507<br>(1,218 - 4,597)    | 310<br>(157 - 584)       | 851<br>(550 - 1,304)        | 238<br>(138 - 373)          | 114<br>(66 - 198)           |
| Pneumococcal meningitis                                           | 906<br>(593 - 1,415)           | 443<br>(199 - 944)          | 99<br>(46 - 195)         | 268<br>(150 - 454)          | 67<br>(31 - 131)            | 29<br>(13 - 54)             |
| H influenzae type B meningitis                                    | 923<br>(400 - 1,668)           | 719<br>(240 - 1,441)        | 68<br>(27 - 145)         | 104<br>(50 - 183)           | 23<br>(9 - 46)              | 11<br>(4 - 21)              |
| Meningococcal meningitis                                          | 505<br>(325 - 755)             | 256<br>(120 - 501)          | 33<br>(15 - 65)          | 140<br>(81 - 221)           | 49<br>(23 - 78)             | 27<br>(14 - 49)             |
| Other meningitis                                                  | 1,687<br>(1,006 - 2,832)       | 1,091<br>(476 - 2,186)      | 110<br>(48 - 214)        | 339<br>(200 - 546)          | 99<br>(51 - 169)            | 48<br>(25 - 83)             |
| Encephalitis                                                      | 142<br>(91 - 243)              | 94<br>(45 - 187)            | 9<br>(4 - 19)            | 27<br>(16 - 40)             | 7<br>(4 - 12)               | 5<br>(2 - 8)                |
| Diphtheria                                                        | 29<br>(0 - 177)                | 24<br>(0 - 169)             | 3<br>(0 - 20)            | 2<br>(0 - 7)                | 0<br>(0 - 2)                | --                          |
| Whooping cough                                                    | 488<br>(1 - 2,165)             | 470<br>(1 - 2,092)          | 15<br>(0 - 65)           | 3<br>(0 - 12)               | 0<br>(0 - 1)                | --                          |
| Tetanus                                                           | 375<br>(140 - 624)             | 279<br>(116 - 494)          | 13<br>(3 - 32)           | 65<br>(9 - 143)             | 15<br>(2 - 38)              | 4<br>(1 - 9)                |
| Measles                                                           | 1,069<br>(198 - 3,384)         | 984<br>(180 - 3,136)        | 77<br>(12 - 229)         | 9<br>(2 - 25)               | 0<br>(0 - 1)                | --                          |
| Varicella and herpes zoster                                       | 19<br>(5 - 57)                 | 11<br>(0 - 48)              | 2<br>(0 - 7)             | 3<br>(1 - 9)                | 1<br>(0 - 3)                | 3<br>(0 - 12)               |
| Neglected tropical diseases and malaria                           | 14,904<br>(8,597 - 23,134)     | 11,628<br>(5,895 - 19,414)  | 989<br>(403 - 2,072)     | 1,660<br>(829 - 3,335)      | 391<br>(179 - 854)          | 236<br>(88 - 588)           |
| Malaria                                                           | 14,247<br>(7,967 - 22,532)     | 11,446<br>(5,710 - 19,289)  | 892<br>(308 - 2,007)     | 1,364<br>(573 - 3,075)      | 333<br>(123 - 793)          | 212<br>(65 - 561)           |
| Leishmaniasis                                                     | 142<br>(85 - 218)              | 58<br>(21 - 116)            | 30<br>(12 - 57)          | 47<br>(25 - 70)             | 5<br>(2 - 8)                | 2<br>(1 - 4)                |
| Visceral leishmaniasis                                            | 142<br>(85 - 218)              | 58<br>(21 - 116)            | 30<br>(12 - 57)          | 47<br>(25 - 70)             | 5<br>(2 - 8)                | 2<br>(1 - 4)                |
| African trypanosomiasis                                           | 199<br>(85 - 381)              | 17<br>(6 - 38)              | 22<br>(9 - 44)           | 136<br>(58 - 259)           | 20<br>(8 - 39)              | 5<br>(2 - 10)               |
| Schistosomiasis                                                   | 76<br>(52 - 105)               | 2<br>(1 - 4)                | 3<br>(1 - 5)             | 44<br>(26 - 67)             | 19<br>(11 - 30)             | 9<br>(4 - 14)               |
| Cysticercosis                                                     | 9<br>(7 - 11)                  | 1<br>(0 - 1)                | 0<br>(0 - 1)             | 6<br>(5 - 8)                | 1<br>(1 - 1)                | 0<br>(0 - 0)                |
| Cystic echinococcosis                                             | 35<br>(28 - 42)                | 7<br>(4 - 11)               | 5<br>(4 - 7)             | 19<br>(14 - 23)             | 3<br>(3 - 4)                | 1<br>(1 - 2)                |
| Dengue                                                            | 9<br>(6 - 11)                  | 1<br>(1 - 4)                | 1<br>(1 - 2)             | 5<br>(2 - 6)                | 1<br>(0 - 2)                | 0<br>(0 - 1)                |
| Yellow fever                                                      | 8<br>(4 - 13)                  | 1<br>(0 - 3)                | 2<br>(0 - 5)             | 4<br>(2 - 9)                | 1<br>(0 - 2)                | 0<br>(0 - 1)                |
| Rabies                                                            | 89<br>(36 - 145)               | 29<br>(8 - 70)              | 27<br>(10 - 58)          | 26<br>(12 - 39)             | 5<br>(1 - 8)                | 1<br>(0 - 2)                |
| Intestinal nematode infections                                    | 61<br>(31 - 103)               | 51<br>(23 - 94)             | 5<br>(1 - 14)            | 3<br>(0 - 12)               | 1<br>(0 - 4)                | 0<br>(0 - 4)                |
| Ascariasis                                                        | 61<br>(31 - 103)               | 51<br>(23 - 94)             | 5<br>(1 - 14)            | 3<br>(0 - 12)               | 1<br>(0 - 4)                | 0<br>(0 - 4)                |



Web Table 31- Uganda deaths with 95% UI by age, sex, and cause in 2013

| Cause                                                            | Males, All Ages             | Males, 0-4 Years            | Males, 5-14 Years      | Males, 15-49 Years         | Males, 50-69 Years          | Males, 70-80 Years          |
|------------------------------------------------------------------|-----------------------------|-----------------------------|------------------------|----------------------------|-----------------------------|-----------------------------|
| Other neglected tropical diseases                                | 30<br>(13 - 60)             | 14<br>(6 - 31)              | 1<br>(0 - 3)           | 6<br>(2 - 15)              | 4<br>(1 - 11)               | 4<br>(2 - 11)               |
| Maternal disorders                                               | --                          | --                          | --                     | --                         | --                          | --                          |
| Maternal hemorrhage                                              | --                          | --                          | --                     | --                         | --                          | --                          |
| Maternal sepsis and other maternal infections                    | --                          | --                          | --                     | --                         | --                          | --                          |
| Maternal hypertensive disorders                                  | --                          | --                          | --                     | --                         | --                          | --                          |
| Maternal obstructed labor                                        | --                          | --                          | --                     | --                         | --                          | --                          |
| Maternal abortive outcome                                        | --                          | --                          | --                     | --                         | --                          | --                          |
| Indirect maternal deaths                                         | --                          | --                          | --                     | --                         | --                          | --                          |
| Late maternal deaths                                             | --                          | --                          | --                     | --                         | --                          | --                          |
| Maternal deaths aggravated by HIV/AIDS                           | --                          | --                          | --                     | --                         | --                          | --                          |
| Other maternal disorders                                         | --                          | --                          | --                     | --                         | --                          | --                          |
| Neonatal disorders                                               | 20,065<br>(16,928 - 24,266) | 20,065<br>(16,928 - 24,266) | --                     | --                         | --                          | --                          |
| Neonatal preterm birth complications                             | 6,248<br>(3,217 - 9,968)    | 6,248<br>(3,217 - 9,968)    | --                     | --                         | --                          | --                          |
| Neonatal encephalopathy due to birth asphyxia and trauma         | 5,918<br>(3,186 - 9,781)    | 5,918<br>(3,186 - 9,781)    | --                     | --                         | --                          | --                          |
| Neonatal sepsis and other neonatal infections                    | 5,331<br>(2,409 - 9,616)    | 5,331<br>(2,409 - 9,616)    | --                     | --                         | --                          | --                          |
| Hemolytic disease and other neonatal jaundice                    | 121<br>(40 - 285)           | 121<br>(40 - 285)           | --                     | --                         | --                          | --                          |
| Other neonatal disorders                                         | 2,448<br>(962 - 4,928)      | 2,448<br>(962 - 4,928)      | --                     | --                         | --                          | --                          |
| Nutritional deficiencies                                         | 6,107<br>(3,422 - 9,714)    | 4,355<br>(2,041 - 7,584)    | 234<br>(115 - 409)     | 638<br>(369 - 1,139)       | 364<br>(207 - 643)          | 517<br>(299 - 895)          |
| Protein-energy malnutrition                                      | 5,444<br>(2,887 - 8,980)    | 4,161<br>(1,983 - 7,243)    | 202<br>(94 - 362)      | 410<br>(197 - 825)         | 279<br>(138 - 508)          | 390<br>(182 - 691)          |
| Iodine deficiency                                                | 3<br>(0 - 16)               | 1<br>(0 - 12)               | 0<br>(0 - 2)           | 1<br>(0 - 5)               | 0<br>(0 - 2)                | 0<br>(0 - 2)                |
| Iron-deficiency anemia                                           | 646<br>(190 - 1,417)        | 191<br>(15 - 679)           | 31<br>(6 - 81)         | 219<br>(68 - 456)          | 82<br>(22 - 205)            | 123<br>(35 - 304)           |
| Other nutritional deficiencies                                   | 15<br>(4 - 35)              | 1<br>(0 - 5)                | 1<br>(0 - 2)           | 7<br>(2 - 17)              | 2<br>(1 - 6)                | 4<br>(1 - 9)                |
| Other communicable, maternal, neonatal, and nutritional diseases | 3,826<br>(1,735 - 6,515)    | 3,034<br>(1,077 - 5,604)    | 200<br>(76 - 373)      | 332<br>(190 - 491)         | 158<br>(81 - 274)           | 103<br>(44 - 207)           |
| Sexually transmitted diseases excluding HIV                      | 2,871<br>(779 - 5,553)      | 2,647<br>(665 - 5,161)      | 156<br>(40 - 325)      | 35<br>(16 - 63)            | 19<br>(8 - 41)              | 13<br>(5 - 31)              |
| Syphilis                                                         | 2,845<br>(752 - 5,526)      | 2,647<br>(665 - 5,161)      | 154<br>(38 - 323)      | 19<br>(8 - 34)             | 14<br>(6 - 29)              | 11<br>(4 - 26)              |
| Chlamydial infection                                             | --                          | --                          | --                     | --                         | --                          | --                          |
| Gonococcal infection                                             | 15<br>(7 - 26)              | --                          | 1<br>(0 - 2)           | 9<br>(4 - 16)              | 3<br>(1 - 7)                | 2<br>(1 - 4)                |
| Other sexually transmitted diseases                              | 11<br>(5 - 19)              | --                          | 1<br>(0 - 2)           | 7<br>(3 - 13)              | 2<br>(1 - 4)                | 1<br>(0 - 1)                |
| Hepatitis                                                        | 278<br>(202 - 362)          | 61<br>(28 - 113)            | 16<br>(10 - 26)        | 139<br>(88 - 196)          | 46<br>(31 - 68)             | 16<br>(10 - 23)             |
| Acute hepatitis A                                                | 34<br>(10 - 72)             | 20<br>(5 - 45)              | 5<br>(1 - 11)          | 8<br>(2 - 19)              | 1<br>(0 - 2)                | 0<br>(0 - 0)                |
| Acute hepatitis B                                                | 172<br>(112 - 246)          | 41<br>(17 - 80)             | 8<br>(4 - 15)          | 71<br>(33 - 118)           | 38<br>(24 - 58)             | 14<br>(9 - 21)              |
| Acute hepatitis C                                                | 3<br>(1 - 8)                | --                          | 0<br>(0 - 1)           | 2<br>(0 - 5)               | 1<br>(0 - 2)                | 0<br>(0 - 1)                |
| Acute hepatitis E                                                | 69<br>(31 - 121)            | 0<br>(0 - 2)                | 2<br>(1 - 6)           | 58<br>(25 - 103)           | 7<br>(2 - 15)               | 1<br>(0 - 3)                |
| Other infectious diseases                                        | 678<br>(257 - 1,233)        | 326<br>(96 - 796)           | 28<br>(9 - 63)         | 158<br>(47 - 289)          | 92<br>(27 - 200)            | 74<br>(19 - 175)            |
| Non-communicable diseases                                        | 43,970<br>(38,031 - 52,952) | 5,929<br>(3,498 - 10,772)   | 1,178<br>(849 - 1,709) | 10,230<br>(8,032 - 12,414) | 12,605<br>(10,434 - 16,704) | 14,028<br>(12,417 - 16,870) |
| Neoplasms                                                        | 7,795<br>(6,574 - 9,638)    | 480<br>(265 - 803)          | 445<br>(274 - 696)     | 1,621<br>(1,245 - 2,019)   | 2,916<br>(2,357 - 3,886)    | 2,333<br>(1,950 - 2,965)    |
| Esophageal cancer                                                | 1,071<br>(778 - 1,506)      | --                          | --                     | 125<br>(84 - 182)          | 640<br>(443 - 936)          | 306<br>(214 - 420)          |
| Stomach cancer                                                   | 500<br>(405 - 637)          | --                          | --                     | 99<br>(71 - 132)           | 229<br>(172 - 318)          | 173<br>(131 - 233)          |
| Liver cancer                                                     | 910<br>(679 - 1,190)        | --                          | 15<br>(6 - 29)         | 336<br>(209 - 476)         | 359<br>(256 - 497)          | 199<br>(139 - 279)          |
| Liver cancer due to hepatitis B                                  | 260<br>(129 - 431)          | --                          | 5<br>(2 - 10)          | 119<br>(59 - 198)          | 97<br>(39 - 188)            | 39<br>(16 - 71)             |

Web Table 31- Uganda deaths with 95% UI by age, sex, and cause in 2013

| Cause                                | Males, All Ages             | Males, 0-4 Years   | Males, 5-14 Years  | Males, 15-49 Years       | Males, 50-69 Years       | Males, 70-80 Years       |
|--------------------------------------|-----------------------------|--------------------|--------------------|--------------------------|--------------------------|--------------------------|
| Liver cancer due to hepatitis C      | 405<br>(229 - 602)          | --                 | 4<br>(1 - 10)      | 134<br>(64 - 220)        | 164<br>(80 - 273)        | 102<br>(63 - 153)        |
| Liver cancer due to alcohol use      | 141<br>(76 - 250)           | --                 | --                 | 34<br>(15 - 72)          | 64<br>(31 - 123)         | 43<br>(23 - 76)          |
| Liver cancer due to other causes     | 104<br>(53 - 201)           | --                 | 6<br>(2 - 13)      | 49<br>(20 - 96)          | 35<br>(15 - 77)          | 14<br>(7 - 27)           |
| Larynx cancer                        | 93<br>(68 - 133)            | --                 | --                 | 17<br>(11 - 26)          | 45<br>(31 - 69)          | 31<br>(21 - 45)          |
| Tracheal, bronchus and lung cancer   | 444<br>(352 - 580)          | --                 | --                 | 64<br>(44 - 94)          | 279<br>(213 - 370)       | 102<br>(79 - 131)        |
| Breast cancer                        | 36<br>(23 - 56)             | --                 | --                 | 8<br>(5 - 16)            | 17<br>(8 - 31)           | 11<br>(5 - 19)           |
| Cervical cancer                      | --                          | --                 | --                 | --                       | --                       | --                       |
| Uterine cancer                       | --                          | --                 | --                 | --                       | --                       | --                       |
| Prostate cancer                      | 1,136<br>(766 - 1,807)      | --                 | --                 | 14<br>(8 - 24)           | 289<br>(177 - 495)       | 833<br>(556 - 1,334)     |
| Colon and rectum cancer              | 510<br>(418 - 650)          | --                 | --                 | 128<br>(97 - 165)        | 211<br>(163 - 286)       | 171<br>(132 - 228)       |
| Lip and oral cavity cancer           | 75<br>(53 - 105)            | --                 | --                 | 26<br>(17 - 39)          | 36<br>(24 - 54)          | 14<br>(9 - 20)           |
| Nasopharynx cancer                   | 127<br>(95 - 170)           | --                 | 12<br>(4 - 33)     | 61<br>(42 - 88)          | 43<br>(27 - 68)          | 10<br>(6 - 15)           |
| Other pharynx cancer                 | 108<br>(77 - 147)           | --                 | --                 | 30<br>(18 - 46)          | 61<br>(41 - 90)          | 17<br>(11 - 25)          |
| Gallbladder and biliary tract cancer | 39<br>(27 - 55)             | --                 | --                 | 5<br>(4 - 8)             | 21<br>(13 - 32)          | 12<br>(8 - 18)           |
| Pancreatic cancer                    | 156<br>(126 - 199)          | --                 | --                 | 36<br>(25 - 47)          | 77<br>(58 - 106)         | 43<br>(33 - 58)          |
| Malignant skin melanoma              | 31<br>(18 - 56)             | --                 | --                 | 9<br>(5 - 17)            | 15<br>(8 - 25)           | 8<br>(5 - 14)            |
| Non-melanoma skin cancer             | 27<br>(16 - 39)             | --                 | --                 | 5<br>(3 - 8)             | 10<br>(5 - 16)           | 13<br>(7 - 20)           |
| Ovarian cancer                       | --                          | --                 | --                 | --                       | --                       | --                       |
| Testicular cancer                    | 30<br>(20 - 45)             | --                 | --                 | 7<br>(4 - 11)            | 15<br>(8 - 24)           | 8<br>(4 - 14)            |
| Kidney cancer                        | 103<br>(72 - 160)           | 37<br>(14 - 85)    | 13<br>(6 - 28)     | 14<br>(10 - 20)          | 29<br>(21 - 41)          | 10<br>(7 - 13)           |
| Bladder cancer                       | 218<br>(171 - 296)          | --                 | --                 | 17<br>(11 - 26)          | 94<br>(68 - 138)         | 106<br>(79 - 142)        |
| Brain and nervous system cancer      | 92<br>(62 - 133)            | 4<br>(1 - 9)       | 8<br>(4 - 15)      | 21<br>(13 - 38)          | 37<br>(24 - 56)          | 22<br>(11 - 35)          |
| Thyroid cancer                       | 44<br>(32 - 63)             | --                 | 1<br>(0 - 1)       | 6<br>(4 - 10)            | 26<br>(17 - 40)          | 11<br>(6 - 16)           |
| Mesothelioma                         | 12<br>(9 - 17)              | --                 | --                 | 5<br>(3 - 9)             | 4<br>(2 - 6)             | 3<br>(2 - 6)             |
| Hodgkin lymphoma                     | 71<br>(48 - 101)            | 5<br>(2 - 11)      | 6<br>(2 - 13)      | 23<br>(15 - 37)          | 24<br>(14 - 38)          | 14<br>(5 - 24)           |
| Non-Hodgkin lymphoma                 | 1,054<br>(701 - 1,434)      | 241<br>(99 - 481)  | 292<br>(150 - 493) | 313<br>(205 - 428)       | 155<br>(109 - 225)       | 53<br>(35 - 75)          |
| Multiple myeloma                     | 65<br>(45 - 93)             | --                 | --                 | 15<br>(9 - 23)           | 30<br>(20 - 46)          | 19<br>(13 - 29)          |
| Leukemia                             | 179<br>(140 - 223)          | 9<br>(4 - 19)      | 36<br>(21 - 61)    | 99<br>(71 - 129)         | 23<br>(17 - 32)          | 13<br>(9 - 17)           |
| Other neoplasms                      | 662<br>(342 - 916)          | 185<br>(75 - 319)  | 62<br>(30 - 109)   | 135<br>(73 - 206)        | 147<br>(75 - 226)        | 133<br>(69 - 207)        |
| Cardiovascular diseases              | 16,670<br>(14,360 - 20,477) | 398<br>(242 - 635) | 130<br>(80 - 203)  | 3,175<br>(2,425 - 3,940) | 5,769<br>(4,649 - 7,562) | 7,198<br>(6,237 - 8,750) |
| Rheumatic heart disease              | 809<br>(538 - 1,425)        | 23<br>(7 - 53)     | 33<br>(16 - 62)    | 366<br>(224 - 671)       | 216<br>(128 - 408)       | 171<br>(106 - 311)       |
| Ischemic heart disease               | 5,468<br>(4,309 - 7,066)    | 3<br>(1 - 8)       | 6<br>(3 - 13)      | 814<br>(577 - 1,113)     | 2,180<br>(1,586 - 2,992) | 2,464<br>(1,903 - 3,205) |
| Cerebrovascular disease              | 4,363<br>(3,196 - 5,989)    | 30<br>(16 - 53)    | 12<br>(6 - 21)     | 537<br>(347 - 761)       | 1,520<br>(1,073 - 2,168) | 2,265<br>(1,640 - 3,082) |
| Ischemic stroke                      | 1,790<br>(642 - 2,755)      | 3<br>(0 - 8)       | 1<br>(0 - 3)       | 78<br>(20 - 155)         | 488<br>(150 - 817)       | 1,221<br>(466 - 1,864)   |
| Hemorrhagic stroke                   | 2,573<br>(1,763 - 3,983)    | 27<br>(14 - 50)    | 10<br>(5 - 19)     | 459<br>(290 - 682)       | 1,032<br>(687 - 1,603)   | 1,044<br>(645 - 1,841)   |
| Hypertensive heart disease           | 1,585<br>(780 - 2,812)      | 7<br>(1 - 18)      | 3<br>(1 - 6)       | 206<br>(48 - 335)        | 535<br>(241 - 955)       | 833<br>(406 - 1,648)     |
| Cardiomyopathy and myocarditis       | 1,096<br>(682 - 1,519)      | 156<br>(36 - 293)  | 30<br>(11 - 55)    | 371<br>(157 - 556)       | 303<br>(185 - 465)       | 236<br>(139 - 375)       |
| Atrial fibrillation and flutter      | 3<br>(1 - 8)                | --                 | --                 | 0<br>(0 - 1)             | 1<br>(0 - 2)             | 2<br>(1 - 5)             |
| Aortic aneurysm                      | 246<br>(132 - 430)          | --                 | --                 | 43<br>(20 - 78)          | 90<br>(47 - 161)         | 114<br>(59 - 224)        |
| Peripheral vascular disease          | 11<br>(6 - 21)              | --                 | --                 | 1<br>(0 - 1)             | 3<br>(2 - 6)             | 7<br>(4 - 13)            |

Web Table 31- Uganda deaths with 95% UI by age, sex, and cause in 2013

| Cause                                               | Males, All Ages          | Males, 0-4 Years   | Males, 5-14 Years | Males, 15-49 Years     | Males, 50-69 Years   | Males, 70-80 Years       |
|-----------------------------------------------------|--------------------------|--------------------|-------------------|------------------------|----------------------|--------------------------|
| Endocarditis                                        | 282<br>(172 - 435)       | 20<br>(8 - 44)     | 5<br>(2 - 11)     | 71<br>(38 - 112)       | 88<br>(49 - 145)     | 97<br>(55 - 153)         |
| Other cardiovascular and circulatory diseases       | 2,807<br>(1,635 - 5,384) | 160<br>(64 - 315)  | 40<br>(18 - 73)   | 766<br>(399 - 1,350)   | 832<br>(435 - 1,664) | 1,009<br>(567 - 1,962)   |
| Chronic respiratory diseases                        | 2,811<br>(2,217 - 3,616) | 220<br>(117 - 392) | 35<br>(23 - 56)   | 450<br>(324 - 594)     | 802<br>(584 - 1,130) | 1,304<br>(1,034 - 1,709) |
| Chronic obstructive pulmonary disease               | 1,530<br>(1,198 - 2,071) | 48<br>(18 - 96)    | 15<br>(9 - 25)    | 172<br>(119 - 253)     | 469<br>(339 - 680)   | 826<br>(632 - 1,132)     |
| Pneumoconiosis                                      | 275<br>(185 - 427)       | 7<br>(2 - 17)      | 3<br>(1 - 5)      | 79<br>(47 - 128)       | 91<br>(55 - 148)     | 95<br>(58 - 152)         |
| Silicosis                                           | 77<br>(40 - 132)         | 2<br>(0 - 7)       | 1<br>(0 - 2)      | 20<br>(7 - 38)         | 25<br>(13 - 45)      | 29<br>(16 - 55)          |
| Asbestosis                                          | 34<br>(19 - 60)          | 1<br>(0 - 4)       | 1<br>(0 - 1)      | 11<br>(5 - 22)         | 13<br>(7 - 23)       | 9<br>(5 - 15)            |
| Coal workers pneumoconiosis                         | 35<br>(21 - 56)          | 1<br>(0 - 2)       | 0<br>(0 - 1)      | 8<br>(4 - 14)          | 13<br>(7 - 23)       | 12<br>(6 - 22)           |
| Other pneumoconiosis                                | 129<br>(79 - 211)        | 3<br>(1 - 9)       | 1<br>(0 - 2)      | 40<br>(22 - 76)        | 40<br>(23 - 70)      | 44<br>(24 - 74)          |
| Asthma                                              | 427<br>(246 - 594)       | 11<br>(3 - 28)     | 4<br>(2 - 7)      | 86<br>(52 - 125)       | 126<br>(64 - 196)    | 200<br>(106 - 299)       |
| Interstitial lung disease and pulmonary sarcoidosis | 255<br>(110 - 434)       | 6<br>(1 - 24)      | 2<br>(1 - 4)      | 29<br>(11 - 66)        | 83<br>(33 - 149)     | 137<br>(51 - 253)        |
| Other chronic respiratory diseases                  | 324<br>(196 - 484)       | 148<br>(74 - 282)  | 12<br>(6 - 22)    | 83<br>(45 - 128)       | 34<br>(17 - 58)      | 46<br>(25 - 80)          |
| Cirrhosis                                           | 2,572<br>(2,057 - 3,262) | 72<br>(24 - 170)   | 35<br>(22 - 54)   | 1,052<br>(788 - 1,399) | 956<br>(706 - 1,338) | 458<br>(333 - 610)       |
| Cirrhosis due to hepatitis B                        | 553<br>(271 - 905)       | 3<br>(0 - 7)       | 5<br>(1 - 11)     | 229<br>(96 - 386)      | 215<br>(101 - 389)   | 101<br>(44 - 177)        |
| Cirrhosis due to hepatitis C                        | 473<br>(201 - 813)       | 8<br>(1 - 25)      | 5<br>(2 - 10)     | 161<br>(57 - 333)      | 192<br>(77 - 347)    | 107<br>(44 - 176)        |
| Cirrhosis due to alcohol use                        | 1,134<br>(794 - 1,607)   | --                 | --                | 447<br>(279 - 687)     | 464<br>(311 - 679)   | 223<br>(147 - 326)       |
| Cirrhosis due to other causes                       | 412<br>(238 - 608)       | 62<br>(20 - 142)   | 25<br>(15 - 42)   | 214<br>(115 - 333)     | 85<br>(24 - 146)     | 27<br>(9 - 45)           |
| Digestive diseases                                  | 1,986<br>(1,390 - 2,868) | 139<br>(57 - 291)  | 80<br>(47 - 136)  | 805<br>(516 - 1,218)   | 483<br>(312 - 724)   | 480<br>(322 - 710)       |
| Peptic ulcer disease                                | 510<br>(310 - 828)       | 11<br>(3 - 28)     | 7<br>(3 - 17)     | 202<br>(110 - 348)     | 142<br>(79 - 234)    | 149<br>(79 - 252)        |
| Gastritis and duodenitis                            | 66<br>(29 - 112)         | 7<br>(1 - 18)      | 4<br>(1 - 8)      | 26<br>(11 - 48)        | 14<br>(6 - 29)       | 15<br>(5 - 37)           |
| Appendicitis                                        | 141<br>(70 - 252)        | 10<br>(2 - 29)     | 13<br>(5 - 28)    | 72<br>(34 - 138)       | 25<br>(10 - 50)      | 21<br>(8 - 40)           |
| Paralytic ileus and intestinal obstruction          | 645<br>(389 - 1,095)     | 30<br>(9 - 76)     | 33<br>(16 - 62)   | 242<br>(123 - 407)     | 176<br>(97 - 311)    | 165<br>(87 - 313)        |
| Inguinal, femoral, and abdominal hernia             | 28<br>(10 - 47)          | 0<br>(0 - 1)       | 1<br>(0 - 3)      | 11<br>(4 - 19)         | 7<br>(2 - 14)        | 8<br>(3 - 15)            |
| Inflammatory bowel disease                          | 165<br>(79 - 463)        | 45<br>(8 - 138)    | 8<br>(3 - 21)     | 63<br>(28 - 193)       | 23<br>(10 - 68)      | 25<br>(10 - 67)          |
| Vascular intestinal disorders                       | 16<br>(5 - 36)           | 1<br>(0 - 4)       | 1<br>(0 - 2)      | 4<br>(1 - 11)          | 4<br>(1 - 10)        | 6<br>(2 - 14)            |
| Gallbladder and biliary diseases                    | 92<br>(53 - 140)         | 4<br>(1 - 9)       | 2<br>(1 - 5)      | 28<br>(15 - 48)        | 24<br>(11 - 42)      | 35<br>(16 - 62)          |
| Pancreatitis                                        | 130<br>(49 - 245)        | 2<br>(0 - 7)       | 2<br>(1 - 4)      | 83<br>(33 - 159)       | 27<br>(9 - 58)       | 16<br>(4 - 40)           |
| Other digestive diseases                            | 194<br>(107 - 339)       | 29<br>(6 - 79)     | 9<br>(4 - 17)     | 73<br>(38 - 137)       | 42<br>(22 - 79)      | 40<br>(19 - 78)          |
| Neurological disorders                              | 1,574<br>(1,199 - 2,020) | 190<br>(79 - 411)  | 126<br>(69 - 247) | 474<br>(297 - 705)     | 107<br>(79 - 150)    | 677<br>(513 - 862)       |
| Alzheimer disease and other dementias               | 637<br>(481 - 828)       | --                 | --                | 0<br>(0 - 1)           | 58<br>(40 - 81)      | 580<br>(429 - 758)       |
| Parkinson disease                                   | 12<br>(4 - 26)           | --                 | --                | 1<br>(0 - 2)           | 0<br>(0 - 0)         | 11<br>(4 - 25)           |
| Epilepsy                                            | 810<br>(528 - 1,186)     | 154<br>(55 - 369)  | 117<br>(61 - 235) | 433<br>(269 - 664)     | 31<br>(19 - 53)      | 74<br>(37 - 136)         |
| Multiple sclerosis                                  | 2<br>(1 - 4)             | --                 | --                | 1<br>(0 - 3)           | 1<br>(0 - 1)         | 0<br>(0 - 0)             |
| Other neurological disorders                        | 112<br>(41 - 188)        | 36<br>(10 - 101)   | 9<br>(3 - 15)     | 39<br>(15 - 58)        | 17<br>(7 - 28)       | 11<br>(4 - 17)           |
| Mental and substance use disorders                  | 1,258<br>(835 - 1,898)   | 69<br>(14 - 153)   | 0<br>(0 - 0)      | 951<br>(594 - 1,410)   | 198<br>(119 - 349)   | 39<br>(24 - 69)          |
| Schizophrenia                                       | 17<br>(6 - 39)           | --                 | --                | 11<br>(3 - 28)         | 4<br>(1 - 9)         | 2<br>(1 - 5)             |
| Alcohol use disorders                               | 859<br>(479 - 1,440)     | --                 | --                | 658<br>(330 - 1,126)   | 171<br>(98 - 318)    | 30<br>(16 - 57)          |
| Drug use disorders                                  | 382<br>(261 - 519)       | 69<br>(14 - 153)   | --                | 282<br>(193 - 393)     | 24<br>(12 - 36)      | 8<br>(3 - 12)            |
| Opioid use disorders                                | 41<br>(28 - 57)          | 8<br>(2 - 19)      | --                | 30<br>(21 - 44)        | 2<br>(1 - 4)         | 1<br>(0 - 1)             |
| Cocaine use disorders                               | 1<br>(1 - 2)             | 0<br>(0 - 1)       | --                | 1<br>(1 - 2)           | 0<br>(0 - 0)         | 0<br>(0 - 0)             |

Web Table 31- Uganda deaths with 95% UI by age, sex, and cause in 2013

| Cause                                               | Males, All Ages          | Males, 0-4 Years         | Males, 5-14 Years  | Males, 15-49 Years       | Males, 50-69 Years     | Males, 70-80 Years       |
|-----------------------------------------------------|--------------------------|--------------------------|--------------------|--------------------------|------------------------|--------------------------|
| Amphetamine use disorders                           | 1<br>(0 - 1)             | 0<br>(0 - 1)             | --                 | 1<br>(0 - 1)             | 0<br>(0 - 0)           | 0<br>(0 - 0)             |
| Other drug use disorders                            | 339<br>(232 - 461)       | 60<br>(13 - 135)         | --                 | 250<br>(171 - 350)       | 21<br>(10 - 32)        | 7<br>(3 - 11)            |
| Eating disorders                                    | 0<br>(0 - 0)             | --                       | 0<br>(0 - 0)       | 0<br>(0 - 0)             | --                     | --                       |
| Anorexia nervosa                                    | 0<br>(0 - 0)             | --                       | 0<br>(0 - 0)       | 0<br>(0 - 0)             | --                     | --                       |
| Diabetes, urogenital, blood, and endocrine diseases | 5,118<br>(4,264 - 6,253) | 867<br>(481 - 1,359)     | 184<br>(118 - 320) | 1,410<br>(1,072 - 1,753) | 1,259<br>(983 - 1,687) | 1,397<br>(1,149 - 1,722) |
| Diabetes mellitus                                   | 1,943<br>(1,598 - 2,454) | 33<br>(20 - 54)          | 10<br>(6 - 18)     | 359<br>(267 - 457)       | 742<br>(550 - 1,026)   | 798<br>(598 - 1,056)     |
| Acute glomerulonephritis                            | 41<br>(20 - 77)          | 11<br>(4 - 25)           | 3<br>(1 - 5)       | 3<br>(1 - 8)             | 14<br>(5 - 34)         | 10<br>(3 - 22)           |
| Chronic kidney disease                              | 959<br>(720 - 1,189)     | 132<br>(69 - 226)        | 29<br>(17 - 48)    | 392<br>(264 - 523)       | 172<br>(124 - 240)     | 234<br>(166 - 315)       |
| Chronic kidney disease due to diabetes mellitus     | 5<br>(1 - 9)             | 0<br>(0 - 1)             | 0<br>(0 - 1)       | 2<br>(0 - 3)             | 1<br>(0 - 3)           | 1<br>(0 - 3)             |
| Chronic kidney disease due to hypertension          | 324<br>(175 - 443)       | 16<br>(4 - 39)           | 3<br>(1 - 6)       | 90<br>(41 - 139)         | 89<br>(46 - 136)       | 126<br>(67 - 189)        |
| Chronic kidney disease due to glomerulonephritis    | 314<br>(211 - 430)       | 76<br>(40 - 127)         | 17<br>(10 - 28)    | 142<br>(92 - 197)        | 38<br>(17 - 64)        | 41<br>(17 - 72)          |
| Chronic kidney disease due to other causes          | 316<br>(179 - 488)       | 41<br>(15 - 88)          | 8<br>(3 - 16)      | 158<br>(75 - 248)        | 44<br>(21 - 84)        | 65<br>(26 - 140)         |
| Urinary diseases and male infertility               | 890<br>(622 - 1,156)     | 103<br>(41 - 213)        | 20<br>(12 - 32)    | 310<br>(187 - 420)       | 220<br>(135 - 322)     | 238<br>(154 - 336)       |
| Interstitial nephritis and urinary tract infections | 609<br>(382 - 820)       | 74<br>(26 - 164)         | 12<br>(7 - 20)     | 195<br>(94 - 287)        | 151<br>(86 - 232)      | 177<br>(105 - 265)       |
| Urolithiasis                                        | 18<br>(8 - 37)           | --                       | 1<br>(0 - 2)       | 8<br>(3 - 15)            | 5<br>(2 - 14)          | 4<br>(1 - 11)            |
| Other urinary diseases                              | 263<br>(178 - 397)       | 29<br>(8 - 76)           | 7<br>(3 - 13)      | 107<br>(66 - 164)        | 63<br>(32 - 111)       | 57<br>(25 - 111)         |
| Gynecological diseases                              | --                       | --                       | --                 | --                       | --                     | --                       |
| Uterine fibroids                                    | --                       | --                       | --                 | --                       | --                     | --                       |
| Polycystic ovarian syndrome                         | --                       | --                       | --                 | --                       | --                     | --                       |
| Endometriosis                                       | --                       | --                       | --                 | --                       | --                     | --                       |
| Genital prolapse                                    | --                       | --                       | --                 | --                       | --                     | --                       |
| Other gynecological diseases                        | --                       | --                       | --                 | --                       | --                     | --                       |
| Hemoglobinopathies and hemolytic anemias            | 806<br>(380 - 1,408)     | 446<br>(159 - 877)       | 99<br>(44 - 205)   | 193<br>(84 - 401)        | 37<br>(14 - 119)       | 30<br>(12 - 100)         |
| Thalassemias                                        | 10<br>(4 - 18)           | 8<br>(3 - 15)            | 1<br>(0 - 2)       | 1<br>(1 - 3)             | 0<br>(0 - 0)           | 0<br>(0 - 0)             |
| Sickle cell disorders                               | 713<br>(330 - 1,236)     | 408<br>(143 - 803)       | 94<br>(41 - 194)   | 179<br>(77 - 372)        | 30<br>(11 - 94)        | 2<br>(1 - 7)             |
| G6PD deficiency                                     | 21<br>(10 - 36)          | 11<br>(4 - 22)           | 2<br>(1 - 5)       | 5<br>(2 - 10)            | 1<br>(0 - 4)           | 1<br>(0 - 4)             |
| Other hemoglobinopathies and hemolytic anemias      | 63<br>(28 - 157)         | 19<br>(8 - 34)           | 2<br>(1 - 4)       | 8<br>(4 - 17)            | 6<br>(2 - 19)          | 27<br>(11 - 89)          |
| Endocrine, metabolic, blood, and immune disorders   | 479<br>(288 - 625)       | 142<br>(76 - 248)        | 24<br>(13 - 45)    | 153<br>(80 - 214)        | 74<br>(39 - 112)       | 87<br>(34 - 139)         |
| Musculoskeletal disorders                           | 185<br>(101 - 252)       | --                       | 22<br>(11 - 39)    | 92<br>(47 - 131)         | 39<br>(19 - 64)        | 31<br>(16 - 61)          |
| Rheumatoid arthritis                                | 34<br>(16 - 56)          | --                       | 4<br>(1 - 8)       | 11<br>(5 - 20)           | 9<br>(4 - 18)          | 10<br>(4 - 23)           |
| Other musculoskeletal disorders                     | 151<br>(83 - 209)        | --                       | 18<br>(9 - 32)     | 82<br>(42 - 118)         | 30<br>(15 - 49)        | 21<br>(11 - 40)          |
| Other non-communicable diseases                     | 4,002<br>(1,869 - 8,482) | 3,494<br>(1,485 - 7,879) | 120<br>(51 - 252)  | 199<br>(130 - 281)       | 77<br>(52 - 111)       | 112<br>(75 - 166)        |
| Congenital anomalies                                | 3,513<br>(1,418 - 8,079) | 3,274<br>(1,266 - 7,701) | 111<br>(43 - 245)  | 103<br>(53 - 174)        | 12<br>(6 - 21)         | 12<br>(6 - 21)           |
| Neural tube defects                                 | 883<br>(164 - 2,282)     | 843<br>(151 - 2,224)     | 19<br>(3 - 58)     | 19<br>(4 - 47)           | 1<br>(0 - 4)           | 1<br>(0 - 3)             |
| Congenital heart anomalies                          | 1,600<br>(460 - 4,673)   | 1,473<br>(397 - 4,417)   | 62<br>(20 - 151)   | 54<br>(22 - 103)         | 6<br>(3 - 10)          | 5<br>(2 - 9)             |
| Cleft lip and cleft palate                          | 22<br>(2 - 73)           | 22<br>(2 - 73)           | --                 | --                       | --                     | --                       |
| Down syndrome                                       | 233<br>(35 - 722)        | 210<br>(26 - 684)        | 9<br>(2 - 25)      | 12<br>(4 - 26)           | 1<br>(1 - 3)           | 0<br>(0 - 1)             |
| Chromosomal unbalanced rearrangements               | 72<br>(15 - 257)         | 68<br>(13 - 250)         | 2<br>(1 - 6)       | 2<br>(1 - 4)             | 0<br>(0 - 0)           | 0<br>(0 - 0)             |
| Other congenital anomalies                          | 703<br>(162 - 2,372)     | 658<br>(137 - 2,285)     | 19<br>(5 - 57)     | 17<br>(6 - 35)           | 4<br>(2 - 7)           | 6<br>(3 - 11)            |
| Skin and subcutaneous diseases                      | 410<br>(302 - 545)       | 141<br>(72 - 249)        | 9<br>(6 - 16)      | 95<br>(65 - 129)         | 64<br>(43 - 93)        | 99<br>(63 - 154)         |

Web Table 31- Uganda deaths with 95% UI by age, sex, and cause in 2013

| Cause                                           | Males, All Ages             | Males, 0-4 Years         | Males, 5-14 Years      | Males, 15-49 Years         | Males, 50-69 Years       | Males, 70-80 Years       |
|-------------------------------------------------|-----------------------------|--------------------------|------------------------|----------------------------|--------------------------|--------------------------|
| Cellulitis                                      | 171<br>(80 - 302)           | 58<br>(17 - 128)         | 4<br>(2 - 9)           | 41<br>(19 - 71)            | 29<br>(14 - 51)          | 38<br>(17 - 71)          |
| Pyoderma                                        | 187<br>(103 - 281)          | 74<br>(29 - 144)         | 4<br>(2 - 6)           | 41<br>(21 - 65)            | 28<br>(14 - 46)          | 40<br>(19 - 71)          |
| Decubitus ulcer                                 | 39<br>(19 - 62)             | 4<br>(0 - 11)            | 1<br>(0 - 2)           | 9<br>(3 - 16)              | 6<br>(3 - 11)            | 19<br>(9 - 35)           |
| Other skin and subcutaneous diseases            | 13<br>(4 - 31)              | 5<br>(1 - 17)            | 1<br>(0 - 2)           | 4<br>(1 - 10)              | 1<br>(0 - 3)             | 2<br>(1 - 3)             |
| Sudden infant death syndrome                    | 79<br>(22 - 215)            | 79<br>(22 - 215)         | --                     | --                         | --                       | --                       |
| Injuries                                        | 18,684<br>(14,633 - 23,451) | 3,388<br>(2,010 - 5,508) | 1,319<br>(923 - 2,103) | 10,139<br>(7,506 - 12,933) | 2,179<br>(1,597 - 2,983) | 1,660<br>(1,238 - 2,145) |
| Transport injuries                              | 10,217<br>(8,096 - 12,622)  | 1,102<br>(561 - 1,948)   | 706<br>(459 - 1,128)   | 5,519<br>(4,013 - 7,135)   | 1,606<br>(1,172 - 2,177) | 1,284<br>(909 - 1,729)   |
| Road injuries                                   | 9,917<br>(7,871 - 12,261)   | 1,000<br>(513 - 1,767)   | 668<br>(431 - 1,082)   | 5,435<br>(3,958 - 7,025)   | 1,567<br>(1,147 - 2,126) | 1,247<br>(894 - 1,683)   |
| Pedestrian road injuries                        | 3,534<br>(2,476 - 4,903)    | 400<br>(181 - 794)       | 249<br>(145 - 426)     | 1,878<br>(1,226 - 2,723)   | 555<br>(352 - 829)       | 452<br>(280 - 667)       |
| Cyclist road injuries                           | 923<br>(621 - 1,255)        | 82<br>(27 - 192)         | 70<br>(40 - 122)       | 496<br>(313 - 702)         | 150<br>(94 - 238)        | 124<br>(74 - 195)        |
| Motorcyclist road injuries                      | 705<br>(451 - 1,007)        | 67<br>(29 - 140)         | 39<br>(20 - 71)        | 417<br>(253 - 625)         | 102<br>(60 - 164)        | 80<br>(44 - 127)         |
| Motor vehicle road injuries                     | 4,743<br>(3,463 - 6,246)    | 450<br>(218 - 803)       | 309<br>(180 - 523)     | 2,638<br>(1,798 - 3,651)   | 757<br>(501 - 1,104)     | 589<br>(367 - 860)       |
| Other road injuries                             | 12<br>(7 - 29)              | 2<br>(1 - 5)             | 1<br>(0 - 3)           | 6<br>(3 - 15)              | 2<br>(1 - 5)             | 2<br>(1 - 4)             |
| Other transport injuries                        | 300<br>(192 - 437)          | 102<br>(42 - 199)        | 38<br>(19 - 67)        | 84<br>(47 - 155)           | 40<br>(19 - 69)          | 37<br>(12 - 66)          |
| Unintentional injuries                          | 5,336<br>(3,833 - 7,879)    | 2,064<br>(1,104 - 3,621) | 545<br>(335 - 964)     | 2,016<br>(1,427 - 2,983)   | 383<br>(262 - 580)       | 328<br>(227 - 463)       |
| Falls                                           | 223<br>(128 - 549)          | 28<br>(16 - 48)          | 21<br>(6 - 77)         | 152<br>(72 - 418)          | 9<br>(6 - 14)            | 14<br>(8 - 30)           |
| Drowning                                        | 1,278<br>(793 - 1,996)      | 467<br>(178 - 1,006)     | 224<br>(122 - 383)     | 509<br>(320 - 795)         | 50<br>(29 - 82)          | 27<br>(14 - 45)          |
| Fire, heat, and hot substances                  | 592<br>(362 - 966)          | 343<br>(142 - 688)       | 47<br>(25 - 82)        | 108<br>(66 - 170)          | 51<br>(32 - 79)          | 43<br>(26 - 66)          |
| Poisonings                                      | 694<br>(390 - 1,010)        | 113<br>(43 - 283)        | 20<br>(10 - 43)        | 541<br>(253 - 820)         | 11<br>(6 - 18)           | 10<br>(6 - 17)           |
| Exposure to mechanical forces                   | 1,069<br>(494 - 4,201)      | 513<br>(135 - 2,390)     | 97<br>(39 - 362)       | 333<br>(164 - 1,170)       | 97<br>(49 - 259)         | 30<br>(14 - 92)          |
| Unintentional firearm injuries                  | 102<br>(64 - 169)           | 14<br>(5 - 29)           | 5<br>(2 - 10)          | 75<br>(41 - 133)           | 5<br>(3 - 9)             | 3<br>(2 - 6)             |
| Unintentional suffocation                       | 606<br>(104 - 3,567)        | 383<br>(44 - 2,144)      | 48<br>(7 - 308)        | 123<br>(19 - 879)          | 40<br>(9 - 206)          | 12<br>(3 - 82)           |
| Other exposure to mechanical forces             | 361<br>(192 - 571)          | 116<br>(45 - 236)        | 45<br>(20 - 85)        | 134<br>(67 - 278)          | 52<br>(22 - 89)          | 15<br>(6 - 23)           |
| Adverse effects of medical treatment            | 593<br>(358 - 930)          | 266<br>(104 - 595)       | 21<br>(11 - 37)        | 113<br>(54 - 193)          | 76<br>(40 - 131)         | 117<br>(47 - 226)        |
| Animal contact                                  | 667<br>(176 - 1,022)        | 182<br>(48 - 372)        | 102<br>(24 - 204)      | 234<br>(67 - 369)          | 78<br>(16 - 141)         | 70<br>(10 - 130)         |
| Venomous animal contact                         | 462<br>(69 - 733)           | 123<br>(17 - 255)        | 52<br>(6 - 121)        | 160<br>(35 - 260)          | 64<br>(6 - 119)          | 62<br>(3 - 117)          |
| Non-venomous animal contact                     | 205<br>(91 - 393)           | 59<br>(19 - 141)         | 50<br>(16 - 103)       | 74<br>(27 - 138)           | 14<br>(6 - 39)           | 9<br>(3 - 22)            |
| Foreign body                                    | 206<br>(116 - 346)          | 147<br>(73 - 271)        | 12<br>(6 - 22)         | 22<br>(13 - 39)            | 9<br>(6 - 16)            | 16<br>(8 - 25)           |
| Pulmonary aspiration and foreign body in airway | 189<br>(98 - 329)           | 140<br>(67 - 263)        | 9<br>(4 - 17)          | 19<br>(10 - 32)            | 6<br>(3 - 10)            | 15<br>(6 - 23)           |
| Foreign body in other body part                 | 17<br>(9 - 64)              | 7<br>(3 - 28)            | 3<br>(1 - 11)          | 3<br>(1 - 13)              | 3<br>(2 - 9)             | 1<br>(1 - 3)             |
| Other unintentional injuries                    | 13<br>(10 - 17)             | 4<br>(3 - 6)             | 1<br>(0 - 1)           | 6<br>(4 - 9)               | 1<br>(1 - 2)             | 2<br>(1 - 2)             |
| Self-harm and interpersonal violence            | 3,113<br>(1,698 - 4,396)    | 205<br>(72 - 408)        | 68<br>(30 - 125)       | 2,603<br>(1,432 - 3,818)   | 190<br>(82 - 314)        | 48<br>(18 - 90)          |
| Self-harm                                       | 50<br>(14 - 322)            | --                       | 0<br>(0 - 1)           | 41<br>(8 - 295)            | 3<br>(2 - 10)            | 5<br>(3 - 15)            |
| Interpersonal violence                          | 3,063<br>(1,596 - 4,338)    | 205<br>(72 - 408)        | 67<br>(30 - 124)       | 2,562<br>(1,335 - 3,722)   | 186<br>(78 - 310)        | 43<br>(13 - 86)          |
| Assault by firearm                              | 1,221<br>(581 - 2,156)      | 43<br>(11 - 102)         | 18<br>(6 - 39)         | 1,090<br>(505 - 1,938)     | 62<br>(26 - 124)         | 8<br>(2 - 18)            |
| Assault by sharp object                         | 581<br>(249 - 1,007)        | 31<br>(7 - 74)           | 11<br>(4 - 25)         | 480<br>(206 - 876)         | 52<br>(17 - 100)         | 8<br>(2 - 16)            |
| Assault by other means                          | 1,260<br>(509 - 1,923)      | 130<br>(51 - 253)        | 38<br>(16 - 75)        | 993<br>(378 - 1,581)       | 72<br>(24 - 130)         | 27<br>(7 - 58)           |
| Forces of nature, war, and legal intervention   | 18<br>(0 - 0)               | 18<br>(0 - 0)            | --                     | --                         | --                       | --                       |
| Exposure to forces of nature                    | 18<br>(0 - 0)               | 18<br>(0 - 0)            | --                     | --                         | --                       | --                       |

Web Table 31- Uganda deaths with 95% UI by age, sex, and cause in 2013

| Cause                                                             | Females, All Ages              | Females, 0-4 Years          | Females, 5-14 Years      | Females, 15-49 Years        | Females, 50-69 Years        | Females, 70-80 Years        |
|-------------------------------------------------------------------|--------------------------------|-----------------------------|--------------------------|-----------------------------|-----------------------------|-----------------------------|
| All causes                                                        | 152,198<br>(140,002 - 167,176) | 57,633<br>(47,802 - 67,695) | 6,379<br>(5,161 - 8,254) | 44,031<br>(38,166 - 48,912) | 19,557<br>(17,015 - 23,083) | 24,597<br>(21,594 - 27,264) |
| Communicable, maternal, neonatal, and nutritional diseases        | 103,343<br>(91,546 - 115,832)  | 50,008<br>(41,499 - 58,638) | 4,681<br>(3,712 - 6,088) | 34,123<br>(29,408 - 38,741) | 7,657<br>(6,265 - 9,281)    | 6,874<br>(5,382 - 8,403)    |
| HIV/AIDS and tuberculosis                                         | 32,027<br>(27,219 - 37,204)    | 2,808<br>(1,869 - 3,653)    | 1,575<br>(1,271 - 1,921) | 21,857<br>(18,766 - 25,900) | 4,583<br>(3,459 - 6,192)    | 1,204<br>(745 - 1,595)      |
| Tuberculosis                                                      | 5,815<br>(3,394 - 7,326)       | 579<br>(298 - 966)          | 125<br>(59 - 220)        | 3,218<br>(2,000 - 4,331)    | 1,038<br>(515 - 1,466)      | 857<br>(417 - 1,173)        |
| HIV/AIDS                                                          | 26,212<br>(21,621 - 31,785)    | 2,229<br>(1,350 - 2,979)    | 1,451<br>(1,141 - 1,796) | 18,639<br>(15,701 - 22,846) | 3,545<br>(2,435 - 5,209)    | 347<br>(162 - 587)          |
| HIV/AIDS resulting in mycobacterial infection                     | 1,435<br>(1,081 - 1,829)       | 116<br>(67 - 166)           | 70<br>(51 - 91)          | 1,027<br>(772 - 1,323)      | 201<br>(134 - 303)          | 20<br>(10 - 35)             |
| HIV/AIDS resulting in other diseases                              | 24,777<br>(20,413 - 30,131)    | 2,113<br>(1,287 - 2,834)    | 1,381<br>(1,085 - 1,708) | 17,612<br>(14,838 - 21,571) | 3,344<br>(2,301 - 4,904)    | 326<br>(152 - 551)          |
| Diarrhea, lower respiratory, and other common infectious diseases | 26,812<br>(20,563 - 34,143)    | 15,290<br>(10,503 - 21,011) | 1,294<br>(780 - 2,072)   | 3,727<br>(2,663 - 5,035)    | 2,116<br>(1,464 - 2,989)    | 4,386<br>(3,149 - 5,756)    |
| Diarrheal diseases                                                | 7,383<br>(4,459 - 11,826)      | 3,853<br>(1,546 - 7,702)    | 284<br>(105 - 642)       | 1,264<br>(666 - 2,248)      | 700<br>(333 - 1,287)        | 1,282<br>(625 - 2,352)      |
| Intestinal infectious diseases                                    | 922<br>(446 - 1,662)           | 458<br>(195 - 903)          | 227<br>(106 - 445)       | 205<br>(86 - 388)           | 20<br>(8 - 41)              | 11<br>(5 - 22)              |
| Typhoid fever                                                     | 702<br>(326 - 1,306)           | 333<br>(135 - 691)          | 181<br>(82 - 354)        | 164<br>(65 - 319)           | 16<br>(6 - 33)              | 8<br>(3 - 16)               |
| Paratyphoid fever                                                 | 168<br>(71 - 320)              | 89<br>(31 - 192)            | 42<br>(15 - 88)          | 33<br>(12 - 69)             | 3<br>(1 - 7)                | 1<br>(0 - 4)                |
| Other intestinal infectious diseases                              | 52<br>(31 - 81)                | 36<br>(18 - 63)             | 4<br>(1 - 11)            | 8<br>(3 - 16)               | 2<br>(0 - 6)                | 2<br>(0 - 6)                |
| Lower respiratory infections                                      | 12,902<br>(9,347 - 17,498)     | 6,925<br>(3,805 - 10,934)   | 433<br>(219 - 741)       | 1,430<br>(938 - 2,083)      | 1,186<br>(734 - 1,731)      | 2,928<br>(1,958 - 4,115)    |
| Upper respiratory infections                                      | 23<br>(8 - 55)                 | 10<br>(1 - 41)              | 1<br>(0 - 4)             | 7<br>(1 - 18)               | 2<br>(0 - 6)                | 2<br>(0 - 9)                |
| Otitis media                                                      | 15<br>(11 - 22)                | 9<br>(4 - 15)               | 1<br>(0 - 1)             | 1<br>(1 - 2)                | 1<br>(1 - 2)                | 3<br>(2 - 5)                |
| Meningitis                                                        | 3,707<br>(2,470 - 5,240)       | 2,398<br>(1,291 - 3,823)    | 234<br>(123 - 433)       | 747<br>(481 - 1,114)        | 186<br>(109 - 291)          | 142<br>(82 - 235)           |
| Pneumococcal meningitis                                           | 821<br>(516 - 1,209)           | 466<br>(219 - 830)          | 73<br>(34 - 144)         | 196<br>(103 - 329)          | 48<br>(26 - 82)             | 37<br>(19 - 67)             |
| H influenzae type B meningitis                                    | 874<br>(475 - 1,472)           | 697<br>(324 - 1,274)        | 53<br>(20 - 109)         | 95<br>(45 - 167)            | 16<br>(6 - 31)              | 13<br>(6 - 25)              |
| Meningococcal meningitis                                          | 510<br>(302 - 754)             | 248<br>(100 - 481)          | 26<br>(11 - 56)          | 153<br>(79 - 276)           | 42<br>(20 - 78)             | 40<br>(15 - 84)             |
| Other meningitis                                                  | 1,502<br>(932 - 2,269)         | 987<br>(477 - 1,738)        | 81<br>(30 - 160)         | 303<br>(169 - 485)          | 80<br>(41 - 146)            | 51<br>(15 - 97)             |
| Encephalitis                                                      | 84<br>(58 - 132)               | 42<br>(19 - 86)             | 8<br>(4 - 15)            | 18<br>(11 - 33)             | 9<br>(4 - 15)               | 8<br>(3 - 12)               |
| Diphtheria                                                        | 21<br>(0 - 133)                | 17<br>(0 - 129)             | 2<br>(0 - 16)            | 1<br>(0 - 6)                | 0<br>(0 - 1)                | --                          |
| Whooping cough                                                    | 538<br>(1 - 2,331)             | 517<br>(1 - 2,217)          | 18<br>(0 - 81)           | 3<br>(0 - 13)               | 0<br>(0 - 1)                | --                          |
| Tetanus                                                           | 219<br>(67 - 410)              | 161<br>(52 - 338)           | 7<br>(1 - 14)            | 36<br>(4 - 83)              | 10<br>(1 - 23)              | 4<br>(1 - 10)               |
| Measles                                                           | 979<br>(165 - 2,970)           | 890<br>(151 - 2,689)        | 77<br>(12 - 248)         | 12<br>(2 - 36)              | 0<br>(0 - 0)                | --                          |
| Varicella and herpes zoster                                       | 19<br>(5 - 56)                 | 10<br>(0 - 45)              | 1<br>(0 - 7)             | 3<br>(0 - 9)                | 1<br>(0 - 3)                | 4<br>(0 - 19)               |
| Neglected tropical diseases and malaria                           | 15,855<br>(8,691 - 25,856)     | 11,139<br>(5,779 - 19,904)  | 1,386<br>(458 - 2,632)   | 2,250<br>(774 - 5,207)      | 564<br>(161 - 1,521)        | 517<br>(114 - 1,341)        |
| Malaria                                                           | 15,298<br>(8,111 - 25,181)     | 11,003<br>(5,610 - 19,785)  | 1,309<br>(370 - 2,556)   | 1,982<br>(515 - 4,966)      | 515<br>(114 - 1,460)        | 488<br>(86 - 1,314)         |
| Leishmaniasis                                                     | 90<br>(55 - 134)               | 30<br>(13 - 56)             | 19<br>(8 - 34)           | 36<br>(20 - 58)             | 3<br>(1 - 5)                | 1<br>(0 - 2)                |
| Visceral leishmaniasis                                            | 90<br>(55 - 134)               | 30<br>(13 - 56)             | 19<br>(8 - 34)           | 36<br>(20 - 58)             | 3<br>(1 - 5)                | 1<br>(0 - 2)                |
| African trypanosomiasis                                           | 182<br>(78 - 344)              | 15<br>(5 - 33)              | 20<br>(8 - 41)           | 121<br>(49 - 230)           | 19<br>(8 - 39)              | 6<br>(3 - 12)               |
| Schistosomiasis                                                   | 54<br>(38 - 75)                | 1<br>(0 - 3)                | 2<br>(1 - 4)             | 29<br>(17 - 45)             | 12<br>(7 - 21)              | 9<br>(5 - 15)               |
| Cysticercosis                                                     | 10<br>(8 - 12)                 | 1<br>(0 - 1)                | 1<br>(0 - 1)             | 7<br>(5 - 9)                | 1<br>(1 - 1)                | 0<br>(0 - 1)                |
| Cystic echinococcosis                                             | 42<br>(34 - 51)                | 7<br>(4 - 12)               | 6<br>(4 - 10)            | 23<br>(17 - 29)             | 3<br>(3 - 4)                | 2<br>(2 - 3)                |
| Dengue                                                            | 2<br>(1 - 4)                   | 1<br>(0 - 1)                | 0<br>(0 - 1)             | 1<br>(1 - 2)                | 0<br>(0 - 0)                | 0<br>(0 - 0)                |
| Yellow fever                                                      | 3<br>(2 - 6)                   | 0<br>(0 - 2)                | 1<br>(0 - 2)             | 2<br>(1 - 4)                | 0<br>(0 - 1)                | 0<br>(0 - 1)                |
| Rabies                                                            | 96<br>(45 - 149)               | 25<br>(9 - 59)              | 22<br>(9 - 42)           | 41<br>(18 - 61)             | 6<br>(2 - 10)               | 2<br>(1 - 5)                |
| Intestinal nematode infections                                    | 53<br>(27 - 93)                | 44<br>(20 - 81)             | 5<br>(1 - 13)            | 3<br>(0 - 11)               | 0<br>(0 - 3)                | 1<br>(0 - 4)                |
| Ascariasis                                                        | 53<br>(27 - 93)                | 44<br>(20 - 81)             | 5<br>(1 - 13)            | 3<br>(0 - 11)               | 0<br>(0 - 3)                | 1<br>(0 - 4)                |

Web Table 31- Uganda deaths with 95% UI by age, sex, and cause in 2013

| Cause                                                            | Females, All Ages           | Females, 0-4 Years          | Females, 5-14 Years  | Females, 15-49 Years     | Females, 50-69 Years       | Females, 70-80 Years        |
|------------------------------------------------------------------|-----------------------------|-----------------------------|----------------------|--------------------------|----------------------------|-----------------------------|
| Other neglected tropical diseases                                | 26<br>(11 - 48)             | 11<br>(4 - 22)              | 1<br>(0 - 2)         | 4<br>(1 - 8)             | 3<br>(1 - 7)               | 7<br>(2 - 15)               |
| Maternal disorders                                               | 5,385<br>(3,544 - 7,461)    | --                          | 20<br>(6 - 48)       | 5,365<br>(3,529 - 7,436) | --                         | --                          |
| Maternal hemorrhage                                              | 615<br>(356 - 926)          | --                          | 1<br>(0 - 4)         | 614<br>(355 - 925)       | --                         | --                          |
| Maternal sepsis and other maternal infections                    | 513<br>(298 - 779)          | --                          | 3<br>(1 - 7)         | 510<br>(296 - 776)       | --                         | --                          |
| Maternal hypertensive disorders                                  | 553<br>(326 - 840)          | --                          | 3<br>(1 - 6)         | 550<br>(324 - 838)       | --                         | --                          |
| Maternal obstructed labor                                        | 284<br>(170 - 421)          | --                          | 1<br>(0 - 2)         | 283<br>(169 - 420)       | --                         | --                          |
| Maternal abortive outcome                                        | 1,000<br>(618 - 1,485)      | --                          | 4<br>(1 - 9)         | 997<br>(614 - 1,482)     | --                         | --                          |
| Indirect maternal deaths                                         | 421<br>(225 - 682)          | --                          | 1<br>(0 - 3)         | 420<br>(224 - 681)       | --                         | --                          |
| Late maternal deaths                                             | 487<br>(272 - 762)          | --                          | 3<br>(1 - 9)         | 484<br>(270 - 755)       | --                         | --                          |
| Maternal deaths aggravated by HIV/AIDS                           | 149<br>(78 - 230)           | --                          | --                   | 149<br>(78 - 230)        | --                         | --                          |
| Other maternal disorders                                         | 1,353<br>(866 - 1,971)      | --                          | 4<br>(1 - 10)        | 1,348<br>(862 - 1,968)   | --                         | --                          |
| Neonatal disorders                                               | 14,688<br>(11,856 - 18,091) | 14,688<br>(11,856 - 18,091) | --                   | --                       | --                         | --                          |
| Neonatal preterm birth complications                             | 4,590<br>(2,314 - 7,645)    | 4,590<br>(2,314 - 7,645)    | --                   | --                       | --                         | --                          |
| Neonatal encephalopathy due to birth asphyxia and trauma         | 4,815<br>(2,427 - 7,545)    | 4,815<br>(2,427 - 7,545)    | --                   | --                       | --                         | --                          |
| Neonatal sepsis and other neonatal infections                    | 3,273<br>(1,533 - 5,889)    | 3,273<br>(1,533 - 5,889)    | --                   | --                       | --                         | --                          |
| Hemolytic disease and other neonatal jaundice                    | 49<br>(17 - 113)            | 49<br>(17 - 113)            | --                   | --                       | --                         | --                          |
| Other neonatal disorders                                         | 1,961<br>(856 - 3,312)      | 1,961<br>(856 - 3,312)      | --                   | --                       | --                         | --                          |
| Nutritional deficiencies                                         | 4,935<br>(3,290 - 7,116)    | 3,193<br>(1,663 - 5,242)    | 200<br>(112 - 343)   | 621<br>(424 - 860)       | 289<br>(201 - 444)         | 633<br>(423 - 925)          |
| Protein-energy malnutrition                                      | 4,105<br>(2,533 - 6,231)    | 3,015<br>(1,561 - 5,005)    | 175<br>(96 - 304)    | 236<br>(105 - 453)       | 202<br>(123 - 319)         | 479<br>(272 - 741)          |
| Iodine deficiency                                                | 6<br>(0 - 30)               | 3<br>(0 - 22)               | 0<br>(0 - 3)         | 2<br>(0 - 9)             | 1<br>(0 - 3)               | 1<br>(0 - 4)                |
| Iron-deficiency anemia                                           | 792<br>(362 - 1,385)        | 168<br>(29 - 515)           | 24<br>(7 - 60)       | 380<br>(188 - 584)       | 83<br>(30 - 150)           | 138<br>(54 - 309)           |
| Other nutritional deficiencies                                   | 31<br>(8 - 65)              | 8<br>(1 - 23)               | 1<br>(0 - 1)         | 3<br>(1 - 8)             | 4<br>(1 - 8)               | 16<br>(2 - 42)              |
| Other communicable, maternal, neonatal, and nutritional diseases | 3,640<br>(1,620 - 6,422)    | 2,891<br>(1,018 - 5,390)    | 206<br>(76 - 430)    | 302<br>(187 - 450)       | 106<br>(46 - 206)          | 135<br>(49 - 313)           |
| Sexually transmitted diseases excluding HIV                      | 2,851<br>(834 - 5,486)      | 2,530<br>(632 - 4,984)      | 168<br>(43 - 365)    | 104<br>(46 - 182)        | 25<br>(7 - 73)             | 25<br>(7 - 63)              |
| Syphilis                                                         | 2,770<br>(754 - 5,423)      | 2,530<br>(632 - 4,984)      | 166<br>(41 - 363)    | 42<br>(19 - 72)          | 13<br>(4 - 39)             | 19<br>(6 - 49)              |
| Chlamydial infection                                             | 27<br>(13 - 44)             | --                          | 1<br>(0 - 1)         | 21<br>(9 - 37)           | 3<br>(1 - 10)              | 2<br>(0 - 4)                |
| Gonococcal infection                                             | 29<br>(15 - 49)             | --                          | 1<br>(0 - 1)         | 21<br>(10 - 37)          | 4<br>(1 - 13)              | 3<br>(1 - 8)                |
| Other sexually transmitted diseases                              | 26<br>(13 - 43)             | --                          | 1<br>(0 - 1)         | 20<br>(9 - 36)           | 3<br>(1 - 10)              | 1<br>(0 - 4)                |
| Hepatitis                                                        | 186<br>(136 - 242)          | 43<br>(22 - 77)             | 10<br>(6 - 16)       | 101<br>(64 - 150)        | 20<br>(13 - 30)            | 12<br>(8 - 17)              |
| Acute hepatitis A                                                | 32<br>(10 - 64)             | 18<br>(5 - 39)              | 4<br>(1 - 8)         | 9<br>(2 - 22)            | 0<br>(0 - 1)               | 0<br>(0 - 0)                |
| Acute hepatitis B                                                | 88<br>(58 - 128)            | 24<br>(10 - 47)             | 4<br>(2 - 8)         | 32<br>(14 - 58)          | 17<br>(11 - 26)            | 11<br>(7 - 16)              |
| Acute hepatitis C                                                | 2<br>(0 - 5)                | --                          | 0<br>(0 - 1)         | 1<br>(0 - 3)             | 0<br>(0 - 1)               | 0<br>(0 - 1)                |
| Acute hepatitis E                                                | 64<br>(35 - 103)            | 0<br>(0 - 1)                | 1<br>(0 - 3)         | 60<br>(32 - 96)          | 2<br>(1 - 5)               | 1<br>(0 - 1)                |
| Other infectious diseases                                        | 603<br>(201 - 1,149)        | 318<br>(98 - 787)           | 28<br>(7 - 77)       | 96<br>(20 - 184)         | 61<br>(14 - 157)           | 99<br>(21 - 266)            |
| Non-communicable diseases                                        | 41,036<br>(35,619 - 47,911) | 5,178<br>(2,944 - 8,175)    | 913<br>(619 - 1,363) | 7,401<br>(5,931 - 8,939) | 11,053<br>(8,829 - 13,991) | 16,491<br>(14,165 - 18,935) |
| Neoplasms                                                        | 9,386<br>(7,860 - 11,447)   | 416<br>(222 - 693)          | 305<br>(184 - 511)   | 2,285<br>(1,835 - 2,778) | 4,235<br>(3,320 - 5,586)   | 2,146<br>(1,754 - 2,577)    |
| Esophageal cancer                                                | 788<br>(585 - 1,054)        | --                          | --                   | 80<br>(54 - 114)         | 428<br>(290 - 607)         | 280<br>(192 - 406)          |
| Stomach cancer                                                   | 396<br>(306 - 523)          | --                          | --                   | 66<br>(48 - 87)          | 232<br>(169 - 320)         | 99<br>(68 - 142)            |
| Liver cancer                                                     | 607<br>(448 - 830)          | --                          | 5<br>(3 - 10)        | 176<br>(114 - 257)       | 277<br>(180 - 411)         | 149<br>(93 - 225)           |
| Liver cancer due to hepatitis B                                  | 100<br>(32 - 200)           | --                          | 1<br>(0 - 2)         | 33<br>(10 - 59)          | 46<br>(11 - 103)           | 21<br>(6 - 50)              |

Web Table 31- Uganda deaths with 95% UI by age, sex, and cause in 2013

| Cause                                | Females, All Ages           | Females, 0-4 Years | Females, 5-14 Years | Females, 15-49 Years     | Females, 50-69 Years     | Females, 70-80 Years      |
|--------------------------------------|-----------------------------|--------------------|---------------------|--------------------------|--------------------------|---------------------------|
| Liver cancer due to hepatitis C      | 283<br>(149 - 445)          | --                 | 1<br>(0 - 3)        | 75<br>(35 - 128)         | 137<br>(62 - 236)        | 70<br>(26 - 123)          |
| Liver cancer due to alcohol use      | 67<br>(30 - 119)            | --                 | --                  | 9<br>(4 - 16)            | 30<br>(13 - 53)          | 28<br>(11 - 57)           |
| Liver cancer due to other causes     | 157<br>(84 - 260)           | --                 | 4<br>(2 - 7)        | 60<br>(33 - 98)          | 64<br>(28 - 118)         | 30<br>(13 - 65)           |
| Larynx cancer                        | 46<br>(19 - 77)             | --                 | --                  | 8<br>(4 - 13)            | 28<br>(11 - 54)          | 10<br>(5 - 18)            |
| Tracheal, bronchus and lung cancer   | 312<br>(239 - 426)          | --                 | --                  | 44<br>(31 - 68)          | 180<br>(126 - 257)       | 88<br>(64 - 124)          |
| Breast cancer                        | 1,031<br>(804 - 1,278)      | --                 | --                  | 366<br>(270 - 469)       | 458<br>(338 - 616)       | 207<br>(152 - 268)        |
| Cervical cancer                      | 2,293<br>(1,569 - 3,049)    | --                 | --                  | 643<br>(453 - 863)       | 1,278<br>(815 - 1,806)   | 372<br>(238 - 533)        |
| Uterine cancer                       | 125<br>(79 - 181)           | --                 | --                  | 19<br>(11 - 29)          | 62<br>(37 - 99)          | 45<br>(26 - 68)           |
| Prostate cancer                      | --                          | --                 | --                  | --                       | --                       | --                        |
| Colon and rectum cancer              | 587<br>(465 - 737)          | --                 | --                  | 105<br>(81 - 132)        | 275<br>(207 - 368)       | 207<br>(152 - 278)        |
| Lip and oral cavity cancer           | 90<br>(62 - 134)            | --                 | --                  | 24<br>(14 - 39)          | 44<br>(28 - 66)          | 23<br>(13 - 37)           |
| Nasopharynx cancer                   | 93<br>(53 - 141)            | --                 | 4<br>(2 - 10)       | 42<br>(22 - 68)          | 36<br>(20 - 62)          | 12<br>(5 - 20)            |
| Other pharynx cancer                 | 47<br>(34 - 65)             | --                 | --                  | 17<br>(10 - 28)          | 20<br>(13 - 31)          | 10<br>(6 - 15)            |
| Gallbladder and biliary tract cancer | 43<br>(31 - 65)             | --                 | --                  | 11<br>(8 - 16)           | 22<br>(15 - 35)          | 10<br>(6 - 17)            |
| Pancreatic cancer                    | 145<br>(113 - 186)          | --                 | --                  | 23<br>(17 - 30)          | 77<br>(55 - 105)         | 45<br>(32 - 60)           |
| Malignant skin melanoma              | 37<br>(27 - 50)             | --                 | --                  | 3<br>(2 - 4)             | 19<br>(13 - 28)          | 15<br>(10 - 22)           |
| Non-melanoma skin cancer             | 38<br>(20 - 74)             | --                 | --                  | 10<br>(4 - 20)           | 8<br>(4 - 16)            | 20<br>(8 - 51)            |
| Ovarian cancer                       | 556<br>(422 - 724)          | --                 | --                  | 150<br>(107 - 203)       | 296<br>(204 - 413)       | 110<br>(75 - 155)         |
| Testicular cancer                    | --                          | --                 | --                  | --                       | --                       | --                        |
| Kidney cancer                        | 91<br>(64 - 138)            | 27<br>(9 - 62)     | 12<br>(5 - 24)      | 16<br>(11 - 23)          | 28<br>(17 - 43)          | 8<br>(5 - 13)             |
| Bladder cancer                       | 115<br>(76 - 166)           | --                 | --                  | 13<br>(8 - 20)           | 43<br>(26 - 71)          | 59<br>(34 - 88)           |
| Brain and nervous system cancer      | 50<br>(39 - 65)             | 4<br>(2 - 9)       | 4<br>(2 - 7)        | 21<br>(15 - 28)          | 14<br>(9 - 20)           | 8<br>(5 - 12)             |
| Thyroid cancer                       | 99<br>(63 - 142)            | --                 | 1<br>(0 - 3)        | 9<br>(6 - 13)            | 59<br>(36 - 89)          | 31<br>(18 - 46)           |
| Mesothelioma                         | 9<br>(4 - 14)               | --                 | --                  | 4<br>(2 - 8)             | 3<br>(1 - 5)             | 2<br>(1 - 4)              |
| Hodgkin lymphoma                     | 63<br>(42 - 87)             | 2<br>(1 - 5)       | 2<br>(1 - 4)        | 20<br>(13 - 31)          | 23<br>(13 - 38)          | 16<br>(8 - 26)            |
| Non-Hodgkin lymphoma                 | 677<br>(382 - 1,023)        | 180<br>(67 - 375)  | 161<br>(75 - 325)   | 182<br>(111 - 267)       | 81<br>(48 - 120)         | 73<br>(37 - 108)          |
| Multiple myeloma                     | 79<br>(55 - 115)            | --                 | --                  | 8<br>(5 - 11)            | 50<br>(30 - 78)          | 21<br>(15 - 31)           |
| Leukemia                             | 155<br>(121 - 191)          | 12<br>(4 - 24)     | 30<br>(16 - 47)     | 52<br>(36 - 68)          | 38<br>(27 - 51)          | 24<br>(17 - 33)           |
| Other neoplasms                      | 812<br>(508 - 1,103)        | 190<br>(84 - 333)  | 86<br>(42 - 157)    | 176<br>(104 - 274)       | 157<br>(97 - 241)        | 203<br>(119 - 310)        |
| Cardiovascular diseases              | 16,466<br>(13,511 - 19,948) | 370<br>(209 - 631) | 102<br>(58 - 171)   | 2,005<br>(1,472 - 2,703) | 4,216<br>(3,155 - 5,495) | 9,774<br>(8,098 - 11,672) |
| Rheumatic heart disease              | 815<br>(493 - 1,568)        | 13<br>(4 - 39)     | 23<br>(11 - 46)     | 359<br>(208 - 757)       | 199<br>(108 - 408)       | 220<br>(121 - 448)        |
| Ischemic heart disease               | 3,647<br>(2,581 - 5,128)    | 1<br>(0 - 4)       | 3<br>(1 - 6)        | 261<br>(167 - 431)       | 903<br>(592 - 1,355)     | 2,478<br>(1,713 - 3,507)  |
| Cerebrovascular disease              | 6,209<br>(3,848 - 8,126)    | 38<br>(18 - 71)    | 9<br>(4 - 17)       | 463<br>(271 - 651)       | 1,651<br>(953 - 2,315)   | 4,048<br>(2,622 - 5,265)  |
| Ischemic stroke                      | 2,753<br>(808 - 4,137)      | 3<br>(1 - 10)      | 1<br>(0 - 2)        | 62<br>(12 - 123)         | 477<br>(103 - 815)       | 2,210<br>(685 - 3,236)    |
| Hemorrhagic stroke                   | 3,456<br>(1,886 - 5,479)    | 35<br>(16 - 67)    | 8<br>(4 - 16)       | 401<br>(220 - 574)       | 1,174<br>(628 - 1,719)   | 1,838<br>(897 - 3,340)    |
| Hypertensive heart disease           | 2,205<br>(1,433 - 3,709)    | 8<br>(2 - 21)      | 3<br>(2 - 7)        | 159<br>(86 - 272)        | 486<br>(295 - 820)       | 1,548<br>(946 - 2,855)    |
| Cardiomyopathy and myocarditis       | 824<br>(564 - 1,208)        | 154<br>(62 - 291)  | 29<br>(13 - 55)     | 210<br>(96 - 334)        | 162<br>(93 - 284)        | 268<br>(131 - 564)        |
| Atrial fibrillation and flutter      | 7<br>(2 - 13)               | --                 | --                  | 0<br>(0 - 1)             | 1<br>(0 - 2)             | 5<br>(2 - 11)             |
| Aortic aneurysm                      | 158<br>(79 - 314)           | --                 | --                  | 26<br>(6 - 57)           | 42<br>(20 - 84)          | 90<br>(43 - 184)          |
| Peripheral vascular disease          | 9<br>(5 - 18)               | --                 | --                  | 0<br>(0 - 0)             | 2<br>(1 - 3)             | 7<br>(4 - 14)             |



Web Table 31- Uganda deaths with 95% UI by age, sex, and cause in 2013

| Cause                                               | Females, All Ages        | Females, 0-4 Years | Females, 5-14 Years | Females, 15-49 Years | Females, 50-69 Years | Females, 70-80 Years   |
|-----------------------------------------------------|--------------------------|--------------------|---------------------|----------------------|----------------------|------------------------|
| Endocarditis                                        | 201<br>(118 - 351)       | 25<br>(7 - 70)     | 5<br>(2 - 11)       | 42<br>(19 - 80)      | 38<br>(18 - 75)      | 90<br>(38 - 193)       |
| Other cardiovascular and circulatory diseases       | 2,393<br>(1,553 - 4,008) | 130<br>(52 - 275)  | 30<br>(13 - 59)     | 483<br>(210 - 805)   | 731<br>(440 - 1,247) | 1,019<br>(612 - 1,960) |
| Chronic respiratory diseases                        | 2,273<br>(1,819 - 2,842) | 245<br>(133 - 427) | 45<br>(26 - 73)     | 386<br>(287 - 514)   | 531<br>(382 - 719)   | 1,066<br>(804 - 1,396) |
| Chronic obstructive pulmonary disease               | 1,157<br>(827 - 1,587)   | 43<br>(18 - 93)    | 12<br>(6 - 22)      | 120<br>(76 - 178)    | 317<br>(215 - 468)   | 664<br>(453 - 962)     |
| Pneumoconiosis                                      | 16<br>(11 - 24)          | 3<br>(1 - 6)       | 1<br>(1 - 2)        | 8<br>(5 - 13)        | 2<br>(1 - 3)         | 2<br>(1 - 4)           |
| Silicosis                                           | 1<br>(1 - 2)             | 0<br>(0 - 1)       | 0<br>(0 - 0)        | 0<br>(0 - 1)         | 0<br>(0 - 0)         | 0<br>(0 - 0)           |
| Asbestosis                                          | 1<br>(1 - 2)             | 0<br>(0 - 1)       | 0<br>(0 - 0)        | 0<br>(0 - 1)         | 0<br>(0 - 0)         | 0<br>(0 - 0)           |
| Coal workers pneumoconiosis                         | 1<br>(1 - 2)             | 0<br>(0 - 1)       | 0<br>(0 - 0)        | 0<br>(0 - 1)         | 0<br>(0 - 0)         | 0<br>(0 - 0)           |
| Other pneumoconiosis                                | 13<br>(9 - 19)           | 2<br>(1 - 5)       | 1<br>(0 - 1)        | 7<br>(4 - 11)        | 2<br>(1 - 3)         | 2<br>(1 - 4)           |
| Asthma                                              | 467<br>(255 - 671)       | 64<br>(22 - 136)   | 14<br>(6 - 26)      | 96<br>(56 - 154)     | 118<br>(54 - 186)    | 175<br>(78 - 294)      |
| Interstitial lung disease and pulmonary sarcoidosis | 288<br>(78 - 514)        | 10<br>(2 - 31)     | 3<br>(1 - 7)        | 48<br>(13 - 102)     | 67<br>(16 - 136)     | 160<br>(34 - 344)      |
| Other chronic respiratory diseases                  | 344<br>(205 - 525)       | 125<br>(60 - 223)  | 14<br>(7 - 25)      | 114<br>(62 - 180)    | 26<br>(13 - 49)      | 65<br>(32 - 123)       |
| Cirrhosis                                           | 1,676<br>(1,311 - 2,104) | 54<br>(20 - 116)   | 37<br>(21 - 62)     | 486<br>(342 - 650)   | 584<br>(414 - 799)   | 515<br>(357 - 705)     |
| Cirrhosis due to hepatitis B                        | 2<br>(165 - 881)         | 2<br>(1 - 6)       | 6<br>(1 - 13)       | 162<br>(49 - 274)    | 196<br>(63 - 351)    | 154<br>(42 - 295)      |
| Cirrhosis due to hepatitis C                        | 281<br>(107 - 500)       | 2<br>(1 - 6)       | 3<br>(1 - 8)        | 63<br>(12 - 130)     | 97<br>(28 - 193)     | 115<br>(37 - 242)      |
| Cirrhosis due to alcohol use                        | 511<br>(319 - 778)       | --                 | --                  | 102<br>(56 - 181)    | 209<br>(123 - 348)   | 200<br>(116 - 303)     |
| Cirrhosis due to other causes                       | 363<br>(236 - 554)       | 50<br>(18 - 108)   | 28<br>(14 - 48)     | 159<br>(90 - 255)    | 81<br>(38 - 145)     | 46<br>(22 - 77)        |
| Digestive diseases                                  | 1,638<br>(1,218 - 2,295) | 118<br>(52 - 238)  | 59<br>(35 - 97)     | 465<br>(308 - 694)   | 347<br>(234 - 503)   | 649<br>(465 - 938)     |
| Peptic ulcer disease                                | 316<br>(181 - 497)       | 7<br>(2 - 17)      | 4<br>(2 - 9)        | 78<br>(44 - 134)     | 75<br>(40 - 127)     | 152<br>(78 - 262)      |
| Gastritis and duodenitis                            | 77<br>(25 - 180)         | 7<br>(2 - 17)      | 4<br>(1 - 9)        | 22<br>(8 - 42)       | 13<br>(4 - 37)       | 30<br>(6 - 100)        |
| Appendicitis                                        | 157<br>(85 - 251)        | 14<br>(4 - 35)     | 11<br>(5 - 21)      | 62<br>(32 - 119)     | 26<br>(12 - 47)      | 43<br>(15 - 85)        |
| Paralytic ileus and intestinal obstruction          | 500<br>(298 - 797)       | 31<br>(9 - 77)     | 22<br>(9 - 41)      | 102<br>(46 - 169)    | 121<br>(66 - 201)    | 224<br>(120 - 391)     |
| Inguinal, femoral, and abdominal hernia             | 30<br>(14 - 50)          | 5<br>(1 - 12)      | 0<br>(0 - 1)        | 12<br>(5 - 21)       | 2<br>(1 - 3)         | 11<br>(5 - 21)         |
| Inflammatory bowel disease                          | 173<br>(90 - 570)        | 32<br>(9 - 89)     | 7<br>(3 - 25)       | 70<br>(32 - 239)     | 24<br>(10 - 85)      | 40<br>(16 - 139)       |
| Vascular intestinal disorders                       | 11<br>(4 - 21)           | 0<br>(0 - 1)       | 0<br>(0 - 0)        | 2<br>(1 - 4)         | 3<br>(1 - 5)         | 7<br>(2 - 13)          |
| Gallbladder and biliary diseases                    | 144<br>(83 - 221)        | 3<br>(1 - 8)       | 2<br>(1 - 4)        | 40<br>(22 - 70)      | 35<br>(18 - 59)      | 64<br>(32 - 108)       |
| Pancreatitis                                        | 72<br>(38 - 123)         | 2<br>(0 - 5)       | 1<br>(1 - 3)        | 30<br>(10 - 55)      | 17<br>(8 - 32)       | 22<br>(9 - 46)         |
| Other digestive diseases                            | 159<br>(103 - 239)       | 17<br>(4 - 38)     | 7<br>(3 - 13)       | 47<br>(24 - 78)      | 31<br>(17 - 54)      | 57<br>(30 - 105)       |
| Neurological disorders                              | 1,443<br>(1,134 - 1,849) | 229<br>(102 - 498) | 73<br>(40 - 129)    | 285<br>(179 - 442)   | 101<br>(73 - 139)    | 755<br>(564 - 980)     |
| Alzheimer disease and other dementias               | 744<br>(552 - 971)       | --                 | --                  | 0<br>(0 - 1)         | 50<br>(34 - 68)      | 694<br>(510 - 918)     |
| Parkinson disease                                   | 6<br>(3 - 10)            | --                 | --                  | 1<br>(0 - 1)         | 2<br>(1 - 4)         | 3<br>(1 - 6)           |
| Epilepsy                                            | 611<br>(391 - 929)       | 202<br>(80 - 458)  | 66<br>(35 - 120)    | 266<br>(161 - 422)   | 33<br>(19 - 57)      | 45<br>(22 - 87)        |
| Multiple sclerosis                                  | 5<br>(2 - 9)             | --                 | --                  | 3<br>(1 - 7)         | 1<br>(0 - 2)         | 1<br>(0 - 1)           |
| Other neurological disorders                        | 77<br>(54 - 113)         | 28<br>(15 - 46)    | 6<br>(4 - 10)       | 15<br>(11 - 24)      | 15<br>(10 - 23)      | 13<br>(8 - 19)         |
| Mental and substance use disorders                  | 383<br>(224 - 712)       | 19<br>(6 - 32)     | 0<br>(0 - 0)        | 288<br>(168 - 532)   | 56<br>(26 - 132)     | 21<br>(9 - 55)         |
| Schizophrenia                                       | 22<br>(7 - 44)           | --                 | --                  | 15<br>(3 - 31)       | 4<br>(2 - 8)         | 3<br>(1 - 6)           |
| Alcohol use disorders                               | 181<br>(58 - 456)        | --                 | --                  | 136<br>(42 - 351)    | 36<br>(11 - 98)      | 9<br>(3 - 28)          |
| Drug use disorders                                  | 178<br>(96 - 291)        | 19<br>(6 - 32)     | --                  | 136<br>(75 - 221)    | 15<br>(5 - 36)       | 9<br>(2 - 24)          |
| Opioid use disorders                                | 18<br>(10 - 30)          | 2<br>(1 - 4)       | --                  | 14<br>(7 - 23)       | 1<br>(0 - 3)         | 1<br>(0 - 3)           |
| Cocaine use disorders                               | 1<br>(1 - 2)             | 0<br>(0 - 0)       | --                  | 1<br>(0 - 1)         | 0<br>(0 - 0)         | 0<br>(0 - 0)           |

Web Table 31- Uganda deaths with 95% UI by age, sex, and cause in 2013

| Cause                                               | Females, All Ages        | Females, 0-4 Years       | Females, 5-14 Years | Females, 15-49 Years | Females, 50-69 Years | Females, 70-80 Years     |
|-----------------------------------------------------|--------------------------|--------------------------|---------------------|----------------------|----------------------|--------------------------|
| Amphetamine use disorders                           | 1<br>(0 - 1)             | 0<br>(0 - 0)             | --                  | 1<br>(0 - 1)         | 0<br>(0 - 0)         | 0<br>(0 - 0)             |
| Other drug use disorders                            | 158<br>(86 - 258)        | 16<br>(6 - 28)           | --                  | 120<br>(67 - 196)    | 14<br>(4 - 33)       | 8<br>(2 - 21)            |
| Eating disorders                                    | 1<br>(1 - 3)             | --                       | 0<br>(0 - 0)        | 1<br>(1 - 2)         | --                   | --                       |
| Anorexia nervosa                                    | 1<br>(1 - 3)             | --                       | 0<br>(0 - 0)        | 1<br>(1 - 2)         | --                   | --                       |
| Diabetes, urogenital, blood, and endocrine diseases | 3,977<br>(3,196 - 4,953) | 659<br>(349 - 1,127)     | 157<br>(90 - 259)   | 923<br>(670 - 1,237) | 883<br>(667 - 1,163) | 1,354<br>(1,066 - 1,698) |
| Diabetes mellitus                                   | 1,453<br>(1,137 - 1,899) | 8<br>(3 - 14)            | 7<br>(4 - 13)       | 180<br>(131 - 243)   | 494<br>(351 - 695)   | 764<br>(571 - 1,045)     |
| Acute glomerulonephritis                            | 56<br>(25 - 93)          | 7<br>(2 - 16)            | 3<br>(1 - 7)        | 27<br>(11 - 50)      | 10<br>(4 - 18)       | 10<br>(4 - 19)           |
| Chronic kidney disease                              | 768<br>(495 - 950)       | 80<br>(40 - 134)         | 37<br>(16 - 62)     | 215<br>(144 - 292)   | 152<br>(93 - 216)    | 284<br>(162 - 390)       |
| Chronic kidney disease due to diabetes mellitus     | 4<br>(2 - 7)             | 0<br>(0 - 1)             | 0<br>(0 - 1)        | 1<br>(0 - 1)         | 1<br>(0 - 3)         | 1<br>(0 - 3)             |
| Chronic kidney disease due to hypertension          | 277<br>(157 - 408)       | 9<br>(3 - 21)            | 4<br>(1 - 8)        | 56<br>(24 - 97)      | 67<br>(35 - 105)     | 141<br>(77 - 219)        |
| Chronic kidney disease due to glomerulonephritis    | 281<br>(165 - 383)       | 48<br>(23 - 78)          | 19<br>(9 - 34)      | 114<br>(68 - 165)    | 42<br>(18 - 71)      | 57<br>(20 - 98)          |
| Chronic kidney disease due to other causes          | 206<br>(82 - 307)        | 23<br>(8 - 48)           | 13<br>(3 - 26)      | 44<br>(21 - 74)      | 42<br>(15 - 74)      | 85<br>(20 - 155)         |
| Urinary diseases and male infertility               | 379<br>(272 - 491)       | 50<br>(24 - 96)          | 11<br>(5 - 21)      | 117<br>(75 - 166)    | 97<br>(57 - 145)     | 105<br>(65 - 160)        |
| Interstitial nephritis and urinary tract infections | 286<br>(192 - 382)       | 32<br>(14 - 69)          | 6<br>(2 - 12)       | 77<br>(45 - 112)     | 80<br>(45 - 123)     | 92<br>(58 - 140)         |
| Urolithiasis                                        | 25<br>(9 - 47)           | --                       | 2<br>(1 - 4)        | 13<br>(3 - 29)       | 7<br>(2 - 14)        | 4<br>(2 - 10)            |
| Other urinary diseases                              | 68<br>(45 - 102)         | 18<br>(8 - 34)           | 3<br>(1 - 7)        | 28<br>(15 - 46)      | 10<br>(5 - 19)       | 8<br>(4 - 17)            |
| Gynecological diseases                              | 23<br>(5 - 112)          | --                       | --                  | 13<br>(2 - 85)       | 5<br>(1 - 13)        | 5<br>(1 - 13)            |
| Uterine fibroids                                    | 4<br>(1 - 18)            | --                       | --                  | 2<br>(0 - 10)        | 1<br>(0 - 4)         | 1<br>(0 - 4)             |
| Polycystic ovarian syndrome                         | 1<br>(0 - 7)             | --                       | --                  | 1<br>(0 - 6)         | 0<br>(0 - 0)         | --                       |
| Endometriosis                                       | 2<br>(0 - 15)            | --                       | --                  | 2<br>(0 - 14)        | 0<br>(0 - 0)         | --                       |
| Genital prolapse                                    | 4<br>(1 - 17)            | --                       | --                  | 2<br>(0 - 12)        | 1<br>(0 - 2)         | 1<br>(0 - 3)             |
| Other gynecological diseases                        | 11<br>(2 - 54)           | --                       | --                  | 7<br>(1 - 42)        | 2<br>(1 - 7)         | 2<br>(1 - 6)             |
| Hemoglobinopathies and hemolytic anemias            | 701<br>(286 - 1,349)     | 335<br>(104 - 710)       | 83<br>(34 - 160)    | 222<br>(77 - 454)    | 33<br>(16 - 57)      | 27<br>(14 - 52)          |
| Thalassemias                                        | 12<br>(4 - 24)           | 9<br>(3 - 18)            | 1<br>(0 - 2)        | 2<br>(1 - 5)         | 0<br>(0 - 0)         | 0<br>(0 - 0)             |
| Sickle cell disorders                               | 607<br>(233 - 1,183)     | 293<br>(88 - 629)        | 78<br>(32 - 151)    | 207<br>(72 - 424)    | 27<br>(13 - 45)      | 2<br>(1 - 4)             |
| G6PD deficiency                                     | 20<br>(8 - 38)           | 9<br>(3 - 20)            | 2<br>(1 - 4)        | 6<br>(2 - 13)        | 1<br>(1 - 2)         | 1<br>(1 - 2)             |
| Other hemoglobinopathies and hemolytic anemias      | 62<br>(35 - 105)         | 24<br>(10 - 47)          | 2<br>(1 - 4)        | 6<br>(2 - 13)        | 5<br>(3 - 10)        | 24<br>(12 - 46)          |
| Endocrine, metabolic, blood, and immune disorders   | 598<br>(433 - 820)       | 180<br>(89 - 323)        | 18<br>(8 - 38)      | 148<br>(93 - 252)    | 92<br>(54 - 143)     | 160<br>(80 - 251)        |
| Musculoskeletal disorders                           | 126<br>(83 - 226)        | --                       | 8<br>(5 - 15)       | 77<br>(39 - 151)     | 20<br>(11 - 40)      | 20<br>(10 - 45)          |
| Rheumatoid arthritis                                | 38<br>(24 - 65)          | --                       | 2<br>(1 - 4)        | 12<br>(4 - 23)       | 11<br>(5 - 22)       | 13<br>(6 - 31)           |
| Other musculoskeletal disorders                     | 88<br>(55 - 165)         | --                       | 6<br>(3 - 12)       | 64<br>(33 - 125)     | 10<br>(5 - 22)       | 8<br>(3 - 22)            |
| Other non-communicable diseases                     | 3,667<br>(1,865 - 6,369) | 3,068<br>(1,364 - 5,557) | 127<br>(52 - 244)   | 202<br>(106 - 339)   | 81<br>(55 - 116)     | 189<br>(128 - 278)       |
| Congenital anomalies                                | 3,164<br>(1,373 - 5,804) | 2,879<br>(1,226 - 5,365) | 119<br>(44 - 235)   | 126<br>(47 - 249)    | 16<br>(8 - 25)       | 24<br>(12 - 36)          |
| Neural tube defects                                 | 762<br>(147 - 2,006)     | 721<br>(133 - 1,930)     | 17<br>(3 - 47)      | 22<br>(4 - 72)       | 1<br>(0 - 3)         | 1<br>(0 - 2)             |
| Congenital heart anomalies                          | 1,423<br>(518 - 2,965)   | 1,278<br>(447 - 2,752)   | 65<br>(21 - 141)    | 63<br>(19 - 143)     | 6<br>(3 - 11)        | 12<br>(5 - 20)           |
| Cleft lip and cleft palate                          | 16<br>(1 - 51)           | 16<br>(1 - 51)           | --                  | --                   | --                   | --                       |
| Down syndrome                                       | 226<br>(53 - 595)        | 191<br>(40 - 529)        | 14<br>(4 - 35)      | 18<br>(4 - 39)       | 2<br>(1 - 5)         | 1<br>(0 - 1)             |
| Chromosomal unbalanced rearrangements               | 164<br>(39 - 414)        | 154<br>(36 - 400)        | 4<br>(1 - 8)        | 6<br>(1 - 14)        | 1<br>(0 - 1)         | 1<br>(0 - 1)             |
| Other congenital anomalies                          | 573<br>(217 - 1,383)     | 520<br>(181 - 1,274)     | 19<br>(6 - 50)      | 18<br>(6 - 51)       | 5<br>(2 - 10)        | 10<br>(4 - 19)           |
| Skin and subcutaneous diseases                      | 474<br>(343 - 667)       | 160<br>(74 - 297)        | 8<br>(5 - 14)       | 75<br>(48 - 110)     | 65<br>(43 - 96)      | 166<br>(105 - 252)       |

Web Table 31- Uganda deaths with 95% UI by age, sex, and cause in 2013

| Cause                                           | Females, All Ages         | Females, 0-4 Years       | Females, 5-14 Years  | Females, 15-49 Years     | Females, 50-69 Years | Females, 70-80 Years   |
|-------------------------------------------------|---------------------------|--------------------------|----------------------|--------------------------|----------------------|------------------------|
| Cellulitis                                      | 171<br>(95 - 299)         | 60<br>(15 - 148)         | 3<br>(1 - 7)         | 30<br>(12 - 50)          | 26<br>(15 - 46)      | 52<br>(28 - 97)        |
| Pyoderma                                        | 229<br>(139 - 344)        | 93<br>(38 - 197)         | 3<br>(2 - 6)         | 36<br>(17 - 59)          | 30<br>(16 - 47)      | 67<br>(37 - 115)       |
| Decubitus ulcer                                 | 53<br>(31 - 87)           | 1<br>(0 - 4)             | 1<br>(0 - 1)         | 4<br>(2 - 9)             | 6<br>(3 - 10)        | 41<br>(21 - 73)        |
| Other skin and subcutaneous diseases            | 22<br>(11 - 35)           | 6<br>(2 - 15)            | 1<br>(0 - 2)         | 6<br>(2 - 13)            | 3<br>(2 - 6)         | 6<br>(3 - 10)          |
| Sudden infant death syndrome                    | 29<br>(6 - 97)            | 29<br>(6 - 97)           | --                   | --                       | --                   | --                     |
| Injuries                                        | 7,818<br>(6,163 - 10,334) | 2,447<br>(1,416 - 4,305) | 786<br>(502 - 1,216) | 2,507<br>(1,798 - 3,342) | 847<br>(621 - 1,135) | 1,231<br>(880 - 1,606) |
| Transport injuries                              | 3,308<br>(2,642 - 4,135)  | 501<br>(271 - 875)       | 331<br>(190 - 566)   | 1,239<br>(863 - 1,676)   | 480<br>(341 - 659)   | 757<br>(519 - 1,052)   |
| Road injuries                                   | 3,100<br>(2,458 - 3,860)  | 437<br>(232 - 795)       | 307<br>(175 - 527)   | 1,187<br>(832 - 1,607)   | 456<br>(323 - 626)   | 714<br>(493 - 1,000)   |
| Pedestrian road injuries                        | 1,169<br>(866 - 1,572)    | 163<br>(78 - 327)        | 122<br>(65 - 212)    | 429<br>(272 - 626)       | 174<br>(114 - 254)   | 281<br>(172 - 438)     |
| Cyclist road injuries                           | 273<br>(173 - 369)        | 30<br>(10 - 71)          | 32<br>(13 - 60)      | 94<br>(59 - 138)         | 49<br>(26 - 78)      | 67<br>(35 - 107)       |
| Motorcyclist road injuries                      | 181<br>(96 - 256)         | 23<br>(10 - 45)          | 13<br>(6 - 26)       | 76<br>(42 - 118)         | 25<br>(12 - 41)      | 43<br>(18 - 75)        |
| Motor vehicle road injuries                     | 1,473<br>(1,114 - 1,912)  | 219<br>(109 - 409)       | 139<br>(71 - 244)    | 587<br>(399 - 811)       | 206<br>(141 - 297)   | 322<br>(211 - 478)     |
| Other road injuries                             | 4<br>(2 - 10)             | 1<br>(0 - 2)             | 1<br>(0 - 1)         | 1<br>(1 - 3)             | 1<br>(0 - 2)         | 1<br>(0 - 2)           |
| Other transport injuries                        | 208<br>(141 - 339)        | 65<br>(31 - 128)         | 24<br>(11 - 45)      | 52<br>(26 - 129)         | 24<br>(14 - 40)      | 43<br>(18 - 77)        |
| Unintentional injuries                          | 3,870<br>(2,630 - 6,313)  | 1,832<br>(972 - 3,509)   | 431<br>(252 - 752)   | 835<br>(564 - 1,344)     | 325<br>(191 - 462)   | 446<br>(252 - 654)     |
| Falls                                           | 77<br>(46 - 162)          | 9<br>(4 - 18)            | 1<br>(0 - 2)         | 25<br>(6 - 89)           | 16<br>(10 - 26)      | 26<br>(16 - 40)        |
| Drowning                                        | 677<br>(419 - 1,099)      | 350<br>(162 - 684)       | 113<br>(55 - 202)    | 158<br>(90 - 265)        | 34<br>(19 - 54)      | 22<br>(13 - 36)        |
| Fire, heat, and hot substances                  | 679<br>(397 - 1,097)      | 399<br>(151 - 849)       | 126<br>(33 - 317)    | 71<br>(25 - 177)         | 34<br>(19 - 57)      | 49<br>(31 - 74)        |
| Poisonings                                      | 157<br>(98 - 270)         | 25<br>(7 - 82)           | 3<br>(1 - 11)        | 67<br>(37 - 134)         | 50<br>(14 - 96)      | 13<br>(5 - 22)         |
| Exposure to mechanical forces                   | 600<br>(250 - 3,185)      | 345<br>(92 - 2,014)      | 54<br>(21 - 270)     | 132<br>(62 - 680)        | 34<br>(15 - 92)      | 36<br>(12 - 83)        |
| Unintentional firearm injuries                  | 75<br>(49 - 119)          | 16<br>(7 - 31)           | 4<br>(2 - 9)         | 45<br>(23 - 87)          | 6<br>(3 - 10)        | 5<br>(3 - 8)           |
| Unintentional suffocation                       | 302<br>(39 - 2,910)       | 218<br>(22 - 1,917)      | 27<br>(4 - 244)      | 42<br>(4 - 597)          | 9<br>(2 - 68)        | 6<br>(1 - 53)          |
| Other exposure to mechanical forces             | 222<br>(107 - 365)        | 111<br>(41 - 237)        | 22<br>(11 - 44)      | 45<br>(24 - 77)          | 19<br>(7 - 31)       | 25<br>(6 - 40)         |
| Adverse effects of medical treatment            | 555<br>(344 - 818)        | 175<br>(76 - 358)        | 21<br>(11 - 38)      | 114<br>(62 - 185)        | 80<br>(39 - 137)     | 165<br>(66 - 294)      |
| Animal contact                                  | 677<br>(145 - 1,055)      | 226<br>(47 - 468)        | 96<br>(19 - 184)     | 240<br>(46 - 421)        | 64<br>(9 - 123)      | 51<br>(6 - 99)         |
| Venomous animal contact                         | 562<br>(85 - 932)         | 208<br>(34 - 433)        | 76<br>(8 - 161)      | 200<br>(28 - 378)        | 42<br>(3 - 88)       | 36<br>(2 - 79)         |
| Non-venomous animal contact                     | 115<br>(33 - 378)         | 17<br>(2 - 95)           | 19<br>(4 - 73)       | 40<br>(11 - 119)         | 22<br>(4 - 67)       | 15<br>(3 - 58)         |
| Foreign body                                    | 436<br>(174 - 784)        | 302<br>(126 - 582)       | 17<br>(5 - 37)       | 26<br>(10 - 49)          | 10<br>(4 - 18)       | 81<br>(18 - 169)       |
| Pulmonary aspiration and foreign body in airway | 425<br>(165 - 777)        | 298<br>(124 - 578)       | 16<br>(5 - 35)       | 24<br>(9 - 45)           | 9<br>(3 - 16)        | 78<br>(16 - 166)       |
| Foreign body in other body part                 | 12<br>(4 - 81)            | 4<br>(1 - 28)            | 1<br>(0 - 10)        | 2<br>(1 - 24)            | 1<br>(0 - 7)         | 3<br>(1 - 12)          |
| Other unintentional injuries                    | 12<br>(7 - 46)            | 3<br>(1 - 13)            | 1<br>(0 - 5)         | 2<br>(1 - 14)            | 2<br>(1 - 6)         | 4<br>(2 - 8)           |
| Self-harm and interpersonal violence            | 626<br>(412 - 927)        | 99<br>(47 - 188)         | 24<br>(12 - 43)      | 433<br>(262 - 701)       | 42<br>(22 - 65)      | 29<br>(15 - 49)        |
| Self-harm                                       | 17<br>(11 - 35)           | --                       | 0<br>(0 - 1)         | 3<br>(1 - 8)             | 6<br>(3 - 13)        | 8<br>(5 - 14)          |
| Interpersonal violence                          | 609<br>(393 - 910)        | 99<br>(47 - 188)         | 23<br>(12 - 43)      | 430<br>(260 - 699)       | 36<br>(17 - 59)      | 21<br>(7 - 41)         |
| Assault by firearm                              | 153<br>(81 - 274)         | 23<br>(8 - 50)           | 4<br>(2 - 9)         | 115<br>(53 - 232)        | 9<br>(4 - 17)        | 2<br>(1 - 4)           |
| Assault by sharp object                         | 158<br>(87 - 273)         | 20<br>(8 - 44)           | 4<br>(2 - 8)         | 119<br>(59 - 225)        | 7<br>(3 - 14)        | 8<br>(2 - 16)          |
| Assault by other means                          | 298<br>(175 - 455)        | 56<br>(25 - 113)         | 16<br>(7 - 29)       | 195<br>(104 - 328)       | 19<br>(8 - 33)       | 12<br>(4 - 25)         |
| Forces of nature, war, and legal intervention   | 14<br>(0 - 0)             | 14<br>(0 - 0)            | --                   | --                       | --                   | --                     |
| Exposure to forces of nature                    | 14<br>(0 - 0)             | 14<br>(0 - 0)            | --                   | --                       | --                   | --                     |

Web Table 31- Ukraine deaths with 95% UI by age, sex, and cause in 2013

| Cause                                                              | Both Sexes, All Ages           | Both Sexes, 0-4 Years    | Both Sexes, 5-14 Years | Both Sexes, 15-49 Years     | Both Sexes, 50-69 Years        | Both Sexes, 70-80 Years        |
|--------------------------------------------------------------------|--------------------------------|--------------------------|------------------------|-----------------------------|--------------------------------|--------------------------------|
| All causes                                                         | 672,507<br>(650,928 - 692,719) | 5,359<br>(4,075 - 6,863) | 1,011<br>(852 - 1,196) | 68,797<br>(65,660 - 71,905) | 167,565<br>(160,632 - 174,384) | 429,776<br>(417,933 - 441,645) |
| Communicable, maternal, neonatal, and nutritional diseases         | 25,190<br>(21,908 - 29,182)    | 2,654<br>(1,941 - 3,528) | 95<br>(71 - 122)       | 11,987<br>(10,158 - 13,990) | 7,912<br>(6,590 - 9,615)       | 2,542<br>(2,071 - 3,148)       |
| HIV/AIDS and tuberculosis                                          | 15,657<br>(12,566 - 19,679)    | 15<br>(8 - 23)           | 6<br>(2 - 12)          | 8,994<br>(7,188 - 11,092)   | 5,365<br>(4,165 - 7,089)       | 1,277<br>(906 - 1,790)         |
| Tuberculosis                                                       | 5,099<br>(3,140 - 5,841)       | 7<br>(3 - 10)            | 2<br>(1 - 3)           | 2,310<br>(1,230 - 2,771)    | 2,292<br>(1,465 - 2,718)       | 487<br>(398 - 587)             |
| HIV/AIDS                                                           | 10,558<br>(7,415 - 14,758)     | 8<br>(2 - 16)            | 4<br>(0 - 9)           | 6,684<br>(4,838 - 8,884)    | 3,073<br>(1,881 - 4,855)       | 790<br>(440 - 1,303)           |
| HIV/AIDS resulting in mycobacterial infection                      | 671<br>(439 - 1,010)           | 0<br>(0 - 1)             | 0<br>(0 - 0)           | 422<br>(283 - 606)          | 200<br>(118 - 327)             | 49<br>(26 - 83)                |
| HIV/AIDS resulting in other diseases                               | 9,887<br>(6,927 - 13,764)      | 7<br>(2 - 16)            | 4<br>(0 - 9)           | 6,262<br>(4,511 - 8,333)    | 2,874<br>(1,762 - 4,516)       | 741<br>(412 - 1,222)           |
| Diarrrhea, lower respiratory, and other common infectious diseases | 6,564<br>(5,274 - 7,695)       | 544<br>(404 - 704)       | 73<br>(53 - 96)        | 2,555<br>(1,872 - 3,172)    | 2,273<br>(1,673 - 2,846)       | 1,118<br>(905 - 1,399)         |
| Diarrheal diseases                                                 | 91<br>(74 - 112)               | 39<br>(25 - 58)          | 1<br>(1 - 2)           | 17<br>(13 - 21)             | 15<br>(11 - 19)                | 19<br>(14 - 26)                |
| Intestinal infectious diseases                                     | 118<br>(61 - 205)              | 18<br>(8 - 33)           | 12<br>(5 - 22)         | 42<br>(19 - 78)             | 25<br>(10 - 52)                | 22<br>(11 - 40)                |
| Typhoid fever                                                      | 87<br>(43 - 153)               | 12<br>(5 - 23)           | 9<br>(4 - 16)          | 31<br>(13 - 58)             | 19<br>(7 - 39)                 | 16<br>(8 - 31)                 |
| Paratyphoid fever                                                  | 26<br>(12 - 47)                | 4<br>(2 - 9)             | 3<br>(1 - 6)           | 10<br>(4 - 19)              | 5<br>(2 - 12)                  | 4<br>(2 - 9)                   |
| Other intestinal infectious diseases                               | 5<br>(1 - 12)                  | 1<br>(0 - 5)             | 0<br>(0 - 2)           | 1<br>(0 - 5)                | 1<br>(0 - 4)                   | 1<br>(0 - 5)                   |
| Lower respiratory infections                                       | 5,447<br>(4,170 - 6,516)       | 278<br>(193 - 374)       | 34<br>(23 - 47)        | 2,167<br>(1,508 - 2,754)    | 2,022<br>(1,408 - 2,589)       | 947<br>(754 - 1,213)           |
| Upper respiratory infections                                       | 28<br>(11 - 61)                | 0<br>(0 - 1)             | 0<br>(0 - 0)           | 4<br>(1 - 10)               | 8<br>(1 - 19)                  | 15<br>(2 - 47)                 |
| Otitis media                                                       | 10<br>(9 - 11)                 | 0<br>(0 - 1)             | 0<br>(0 - 0)           | 4<br>(3 - 4)                | 3<br>(3 - 4)                   | 2<br>(2 - 2)                   |
| Meningitis                                                         | 475<br>(407 - 559)             | 129<br>(82 - 181)        | 10<br>(7 - 13)         | 165<br>(140 - 191)          | 124<br>(106 - 147)             | 47<br>(38 - 56)                |
| Pneumococcal meningitis                                            | 117<br>(94 - 145)              | 23<br>(14 - 34)          | 2<br>(2 - 3)           | 48<br>(34 - 65)             | 31<br>(21 - 43)                | 12<br>(8 - 17)                 |
| H influenzae type B meningitis                                     | 93<br>(71 - 117)               | 51<br>(33 - 74)          | 3<br>(2 - 4)           | 21<br>(13 - 29)             | 13<br>(8 - 18)                 | 5<br>(4 - 7)                   |
| Meningococcal meningitis                                           | 99<br>(79 - 123)               | 30<br>(19 - 42)          | 3<br>(2 - 4)           | 35<br>(24 - 47)             | 23<br>(16 - 34)                | 9<br>(6 - 12)                  |
| Other meningitis                                                   | 166<br>(133 - 193)             | 26<br>(16 - 38)          | 2<br>(1 - 3)           | 62<br>(43 - 82)             | 56<br>(42 - 71)                | 20<br>(15 - 27)                |
| Encephalitis                                                       | 281<br>(215 - 349)             | 56<br>(35 - 82)          | 13<br>(9 - 20)         | 139<br>(100 - 186)          | 60<br>(44 - 83)                | 12<br>(9 - 18)                 |
| Diphtheria                                                         | 9<br>(2 - 29)                  | 2<br>(0 - 10)            | 1<br>(0 - 5)           | 4<br>(0 - 17)               | 3<br>(0 - 15)                  | --                             |
| Whooping cough                                                     | 18<br>(6 - 63)                 | 14<br>(2 - 59)           | 0<br>(0 - 1)           | 3<br>(2 - 3)                | 1<br>(1 - 1)                   | --                             |
| Tetanus                                                            | 23<br>(12 - 55)                | 0<br>(0 - 1)             | 1<br>(0 - 1)           | 4<br>(3 - 7)                | 7<br>(4 - 19)                  | 11<br>(4 - 29)                 |
| Measles                                                            | 5<br>(2 - 9)                   | 4<br>(2 - 8)             | 0<br>(0 - 1)           | 0<br>(0 - 0)                | 0<br>(0 - 0)                   | --                             |
| Varicella and herpes zoster                                        | 59<br>(16 - 193)               | 3<br>(0 - 11)            | 1<br>(0 - 2)           | 6<br>(2 - 14)               | 6<br>(1 - 15)                  | 43<br>(8 - 180)                |
| Neglected tropical diseases and malaria                            | 39<br>(35 - 43)                | 2<br>(1 - 4)             | 2<br>(1 - 2)           | 15<br>(13 - 18)             | 11<br>(9 - 12)                 | 9<br>(7 - 10)                  |
| Cysticercosis                                                      | 0<br>(0 - 0)                   | 0<br>(0 - 0)             | 0<br>(0 - 0)           | 0<br>(0 - 0)                | 0<br>(0 - 0)                   | 0<br>(0 - 0)                   |
| Cystic echinococcosis                                              | 14<br>(13 - 15)                | 0<br>(0 - 0)             | 0<br>(0 - 0)           | 4<br>(4 - 5)                | 5<br>(4 - 5)                   | 5<br>(5 - 5)                   |
| Dengue                                                             | 4<br>(4 - 6)                   | 0<br>(0 - 0)             | 0<br>(0 - 0)           | 2<br>(2 - 3)                | 1<br>(1 - 1)                   | 1<br>(0 - 1)                   |
| Rabies                                                             | 7<br>(5 - 8)                   | 0<br>(0 - 1)             | 1<br>(0 - 1)           | 3<br>(2 - 4)                | 2<br>(1 - 2)                   | 1<br>(1 - 1)                   |
| Other neglected tropical diseases                                  | 13<br>(9 - 17)                 | 2<br>(1 - 3)             | 1<br>(0 - 1)           | 6<br>(4 - 8)                | 3<br>(2 - 5)                   | 2<br>(1 - 4)                   |
| Maternal disorders                                                 | 116<br>(88 - 147)              | --                       | 0<br>(0 - 0)           | 116<br>(88 - 147)           | --                             | --                             |
| Maternal hemorrhage                                                | 12<br>(8 - 17)                 | --                       | 0<br>(0 - 0)           | 12<br>(8 - 17)              | --                             | --                             |
| Maternal sepsis and other maternal infections                      | 8<br>(4 - 12)                  | --                       | 0<br>(0 - 0)           | 8<br>(4 - 12)               | --                             | --                             |
| Maternal hypertensive disorders                                    | 10<br>(5 - 16)                 | --                       | 0<br>(0 - 0)           | 10<br>(5 - 16)              | --                             | --                             |
| Maternal obstructed labor                                          | 13<br>(8 - 19)                 | --                       | 0<br>(0 - 0)           | 13<br>(8 - 19)              | --                             | --                             |
| Maternal abortive outcome                                          | 16<br>(11 - 21)                | --                       | 0<br>(0 - 0)           | 16<br>(11 - 21)             | --                             | --                             |
| Indirect maternal deaths                                           | 27<br>(18 - 36)                | --                       | 0<br>(0 - 0)           | 27<br>(18 - 36)             | --                             | --                             |

Web Table 31- Ukraine deaths with 95% UI by age, sex, and cause in 2013

| Cause                                                            | Both Sexes, All Ages           | Both Sexes, 0-4 Years    | Both Sexes, 5-14 Years | Both Sexes, 15-49 Years     | Both Sexes, 50-69 Years        | Both Sexes, 70-80 Years        |
|------------------------------------------------------------------|--------------------------------|--------------------------|------------------------|-----------------------------|--------------------------------|--------------------------------|
| Late maternal deaths                                             | 10<br>(5 - 16)                 | --                       | 0<br>(0 - 0)           | 10<br>(5 - 16)              | --                             | --                             |
| Maternal deaths aggravated by HIV/AIDS                           | 0<br>(0 - 0)                   | --                       | --                     | 0<br>(0 - 0)                | --                             | --                             |
| Other maternal disorders                                         | 21<br>(14 - 29)                | --                       | 0<br>(0 - 0)           | 21<br>(14 - 29)             | --                             | --                             |
| Neonatal disorders                                               | 2,013<br>(1,424 - 2,753)       | 2,013<br>(1,424 - 2,753) | --                     | --                          | --                             | --                             |
| Neonatal preterm birth complications                             | 642<br>(346 - 1,016)           | 642<br>(346 - 1,016)     | --                     | --                          | --                             | --                             |
| Neonatal encephalopathy due to birth asphyxia and trauma         | 757<br>(456 - 1,170)           | 757<br>(456 - 1,170)     | --                     | --                          | --                             | --                             |
| Neonatal sepsis and other neonatal infections                    | 175<br>(80 - 333)              | 175<br>(80 - 333)        | --                     | --                          | --                             | --                             |
| Hemolytic disease and other neonatal jaundice                    | 6<br>(3 - 12)                  | 6<br>(3 - 12)            | --                     | --                          | --                             | --                             |
| Other neonatal disorders                                         | 434<br>(250 - 713)             | 434<br>(250 - 713)       | --                     | --                          | --                             | --                             |
| Nutritional deficiencies                                         | 344<br>(279 - 442)             | 26<br>(17 - 44)          | 6<br>(4 - 8)           | 142<br>(94 - 170)           | 103<br>(84 - 151)              | 68<br>(55 - 98)                |
| Protein-energy malnutrition                                      | 133<br>(95 - 203)              | 19<br>(10 - 35)          | 3<br>(2 - 5)           | 65<br>(38 - 89)             | 40<br>(25 - 72)                | 6<br>(3 - 15)                  |
| Iodine deficiency                                                | 34<br>(11 - 68)                | 2<br>(0 - 8)             | 0<br>(0 - 1)           | 12<br>(1 - 31)              | 11<br>(0 - 31)                 | 9<br>(0 - 28)                  |
| Iron-deficiency anemia                                           | 110<br>(70 - 160)              | 3<br>(1 - 5)             | 1<br>(0 - 2)           | 36<br>(19 - 55)             | 32<br>(19 - 53)                | 38<br>(23 - 57)                |
| Other nutritional deficiencies                                   | 68<br>(37 - 97)                | 2<br>(1 - 5)             | 1<br>(0 - 1)           | 29<br>(12 - 43)             | 21<br>(11 - 34)                | 15<br>(8 - 26)                 |
| Other communicable, maternal, neonatal, and nutritional diseases | 457<br>(380 - 581)             | 53<br>(31 - 86)          | 8<br>(5 - 13)          | 165<br>(131 - 205)          | 160<br>(118 - 247)             | 71<br>(45 - 122)               |
| Sexually transmitted diseases excluding HIV                      | 57<br>(16 - 127)               | 12<br>(0 - 31)           | 1<br>(0 - 3)           | 14<br>(6 - 33)              | 18<br>(4 - 50)                 | 12<br>(3 - 31)                 |
| Syphilis                                                         | 41<br>(10 - 89)                | 12<br>(0 - 31)           | 1<br>(0 - 2)           | 7<br>(3 - 17)               | 12<br>(2 - 34)                 | 9<br>(2 - 24)                  |
| Chlamydial infection                                             | 3<br>(1 - 5)                   | --                       | 0<br>(0 - 0)           | 1<br>(0 - 2)                | 1<br>(0 - 2)                   | 0<br>(0 - 1)                   |
| Gonococcal infection                                             | 8<br>(3 - 20)                  | --                       | 0<br>(0 - 0)           | 3<br>(1 - 8)                | 3<br>(1 - 9)                   | 1<br>(0 - 4)                   |
| Other sexually transmitted diseases                              | 6<br>(2 - 14)                  | --                       | 0<br>(0 - 0)           | 3<br>(1 - 6)                | 2<br>(1 - 6)                   | 1<br>(0 - 2)                   |
| Hepatitis                                                        | 119<br>(103 - 137)             | 10<br>(6 - 15)           | 3<br>(2 - 4)           | 55<br>(45 - 68)             | 36<br>(28 - 46)                | 16<br>(11 - 22)                |
| Acute hepatitis A                                                | 24<br>(8 - 44)                 | 4<br>(2 - 8)             | 1<br>(1 - 2)           | 14<br>(5 - 27)              | 3<br>(1 - 7)                   | 1<br>(0 - 2)                   |
| Acute hepatitis B                                                | 89<br>(67 - 111)               | 5<br>(2 - 10)            | 1<br>(0 - 2)           | 37<br>(24 - 52)             | 31<br>(23 - 41)                | 14<br>(10 - 20)                |
| Acute hepatitis C                                                | 6<br>(1 - 15)                  | --                       | 0<br>(0 - 0)           | 3<br>(1 - 9)                | 2<br>(0 - 5)                   | 1<br>(0 - 2)                   |
| Other infectious diseases                                        | 281<br>(197 - 376)             | 31<br>(17 - 60)          | 4<br>(2 - 8)           | 96<br>(58 - 136)            | 106<br>(63 - 176)              | 43<br>(22 - 85)                |
| Non-communicable diseases                                        | 605,928<br>(586,063 - 625,703) | 2,038<br>(1,547 - 2,654) | 387<br>(302 - 468)     | 35,930<br>(33,137 - 38,751) | 146,768<br>(140,602 - 153,124) | 420,805<br>(409,090 - 432,314) |
| Neoplasms                                                        | 91,220<br>(86,230 - 97,062)    | 131<br>(86 - 186)        | 176<br>(135 - 216)     | 8,604<br>(7,945 - 9,276)    | 41,917<br>(39,330 - 44,670)    | 40,392<br>(38,007 - 43,290)    |
| Esophageal cancer                                                | 1,701<br>(1,468 - 2,047)       | --                       | --                     | 130<br>(99 - 179)           | 1,024<br>(853 - 1,218)         | 547<br>(460 - 701)             |
| Stomach cancer                                                   | 10,156<br>(8,971 - 11,639)     | --                       | --                     | 866<br>(738 - 1,023)        | 4,371<br>(3,857 - 4,991)       | 4,919<br>(4,219 - 5,792)       |
| Liver cancer                                                     | 1,888<br>(1,539 - 2,364)       | --                       | 2<br>(1 - 3)           | 161<br>(122 - 201)          | 872<br>(691 - 1,107)           | 853<br>(685 - 1,128)           |
| Liver cancer due to hepatitis B                                  | 302<br>(189 - 455)             | --                       | 0<br>(0 - 1)           | 39<br>(27 - 59)             | 156<br>(91 - 245)              | 106<br>(67 - 165)              |
| Liver cancer due to hepatitis C                                  | 888<br>(668 - 1,204)           | --                       | 0<br>(0 - 1)           | 67<br>(46 - 93)             | 413<br>(298 - 566)             | 408<br>(298 - 556)             |
| Liver cancer due to alcohol use                                  | 489<br>(348 - 664)             | --                       | --                     | 28<br>(16 - 43)             | 210<br>(141 - 303)             | 251<br>(177 - 347)             |
| Liver cancer due to other causes                                 | 209<br>(147 - 279)             | --                       | 1<br>(1 - 2)           | 27<br>(20 - 36)             | 93<br>(63 - 128)               | 88<br>(57 - 130)               |
| Larynx cancer                                                    | 1,603<br>(1,308 - 2,257)       | --                       | --                     | 147<br>(109 - 258)          | 970<br>(767 - 1,377)           | 486<br>(368 - 666)             |
| Tracheal, bronchus and lung cancer                               | 16,848<br>(15,335 - 18,614)    | --                       | --                     | 1,061<br>(912 - 1,231)      | 8,980<br>(8,072 - 10,039)      | 6,807<br>(6,096 - 7,736)       |
| Breast cancer                                                    | 7,612<br>(5,639 - 9,224)       | --                       | --                     | 990<br>(802 - 1,326)        | 3,663<br>(2,675 - 4,520)       | 2,959<br>(2,013 - 3,690)       |
| Cervical cancer                                                  | 2,695<br>(2,075 - 3,349)       | --                       | --                     | 414<br>(302 - 525)          | 1,167<br>(869 - 1,459)         | 1,114<br>(856 - 1,471)         |
| Uterine cancer                                                   | 881<br>(704 - 1,318)           | --                       | --                     | 47<br>(35 - 64)             | 389<br>(296 - 600)             | 445<br>(331 - 719)             |
| Prostate cancer                                                  | 3,108<br>(2,097 - 3,808)       | --                       | --                     | 24<br>(16 - 34)             | 781<br>(518 - 1,034)           | 2,303<br>(1,486 - 2,869)       |

Web Table 31- Ukraine deaths with 95% UI by age, sex, and cause in 2013

| Cause                                         | Both Sexes, All Ages           | Both Sexes, 0-4 Years | Both Sexes, 5-14 Years | Both Sexes, 15-49 Years     | Both Sexes, 50-69 Years     | Both Sexes, 70-80 Years        |
|-----------------------------------------------|--------------------------------|-----------------------|------------------------|-----------------------------|-----------------------------|--------------------------------|
| Colon and rectum cancer                       | 12,923<br>(12,045 - 13,898)    | --                    | --                     | 664<br>(587 - 752)          | 4,970<br>(4,564 - 5,388)    | 7,288<br>(6,634 - 8,037)       |
| Lip and oral cavity cancer                    | 2,284<br>(1,745 - 2,573)       | --                    | --                     | 247<br>(164 - 309)          | 1,329<br>(914 - 1,579)      | 708<br>(599 - 827)             |
| Nasopharynx cancer                            | 311<br>(244 - 393)             | --                    | 1<br>(0 - 2)           | 71<br>(49 - 96)             | 188<br>(142 - 250)          | 52<br>(37 - 73)                |
| Other pharynx cancer                          | 1,105<br>(880 - 1,373)         | --                    | --                     | 108<br>(77 - 143)           | 783<br>(601 - 1,001)        | 214<br>(160 - 277)             |
| Gallbladder and biliary tract cancer          | 1,489<br>(1,053 - 1,807)       | --                    | --                     | 68<br>(43 - 87)             | 591<br>(418 - 715)          | 830<br>(574 - 1,055)           |
| Pancreatic cancer                             | 5,376<br>(4,968 - 5,785)       | --                    | --                     | 441<br>(376 - 505)          | 2,471<br>(2,254 - 2,695)    | 2,464<br>(2,217 - 2,730)       |
| Malignant skin melanoma                       | 1,181<br>(818 - 1,621)         | --                    | --                     | 244<br>(148 - 327)          | 513<br>(345 - 702)          | 424<br>(305 - 596)             |
| Non-melanoma skin cancer                      | 672<br>(436 - 938)             | --                    | --                     | 32<br>(20 - 51)             | 131<br>(77 - 220)           | 509<br>(318 - 749)             |
| Ovarian cancer                                | 3,140<br>(2,713 - 3,623)       | --                    | --                     | 439<br>(351 - 521)          | 1,633<br>(1,381 - 1,955)    | 1,068<br>(863 - 1,339)         |
| Testicular cancer                             | 90<br>(55 - 130)               | --                    | --                     | 60<br>(35 - 89)             | 19<br>(11 - 29)             | 11<br>(6 - 18)                 |
| Kidney cancer                                 | 3,428<br>(2,996 - 3,895)       | 14<br>(8 - 23)        | 10<br>(7 - 15)         | 314<br>(250 - 384)          | 1,756<br>(1,485 - 2,046)    | 1,333<br>(1,101 - 1,604)       |
| Bladder cancer                                | 2,727<br>(2,381 - 3,226)       | --                    | --                     | 71<br>(57 - 87)             | 919<br>(783 - 1,095)        | 1,737<br>(1,485 - 2,110)       |
| Brain and nervous system cancer               | 2,339<br>(2,051 - 2,846)       | 25<br>(13 - 43)       | 49<br>(34 - 65)        | 651<br>(549 - 781)          | 1,236<br>(1,062 - 1,572)    | 377<br>(309 - 477)             |
| Thyroid cancer                                | 539<br>(440 - 641)             | --                    | 0<br>(0 - 1)           | 42<br>(32 - 53)             | 232<br>(191 - 278)          | 265<br>(208 - 337)             |
| Mesothelioma                                  | 405<br>(183 - 544)             | --                    | --                     | 56<br>(24 - 82)             | 181<br>(79 - 254)           | 167<br>(68 - 254)              |
| Hodgkin lymphoma                              | 225<br>(164 - 317)             | 1<br>(0 - 2)          | 2<br>(1 - 4)           | 108<br>(78 - 159)           | 69<br>(49 - 104)            | 45<br>(31 - 66)                |
| Non-Hodgkin lymphoma                          | 1,874<br>(1,182 - 2,282)       | 5<br>(3 - 8)          | 14<br>(8 - 20)         | 303<br>(180 - 384)          | 800<br>(491 - 992)          | 752<br>(481 - 969)             |
| Multiple myeloma                              | 448<br>(283 - 607)             | --                    | --                     | 36<br>(22 - 50)             | 229<br>(139 - 314)          | 183<br>(116 - 254)             |
| Leukemia                                      | 2,664<br>(2,395 - 2,950)       | 40<br>(26 - 59)       | 59<br>(43 - 76)        | 451<br>(396 - 510)          | 1,031<br>(905 - 1,177)      | 1,083<br>(938 - 1,245)         |
| Other neoplasms                               | 1,508<br>(1,256 - 1,725)       | 45<br>(29 - 70)       | 38<br>(27 - 53)        | 356<br>(284 - 413)          | 620<br>(509 - 728)          | 448<br>(355 - 564)             |
| Cardiovascular diseases                       | 429,584<br>(409,325 - 445,325) | 40<br>(29 - 53)       | 19<br>(14 - 24)        | 12,772<br>(11,373 - 14,051) | 82,004<br>(76,263 - 86,774) | 334,749<br>(320,178 - 346,205) |
| Rheumatic heart disease                       | 1,566<br>(1,214 - 2,605)       | 1<br>(0 - 1)          | 2<br>(1 - 3)           | 369<br>(239 - 776)          | 902<br>(689 - 1,499)        | 293<br>(218 - 400)             |
| Ischemic heart disease                        | 298,495<br>(267,927 - 314,864) | 10<br>(6 - 18)        | 4<br>(3 - 6)           | 7,024<br>(6,130 - 7,887)    | 54,051<br>(47,126 - 58,087) | 237,405<br>(213,072 - 250,275) |
| Cerebrovascular disease                       | 110,362<br>(99,429 - 131,553)  | 5<br>(3 - 8)          | 5<br>(3 - 7)           | 2,678<br>(2,207 - 3,226)    | 20,416<br>(17,927 - 24,237) | 87,257<br>(78,213 - 104,669)   |
| Ischemic stroke                               | 82,653<br>(73,719 - 96,167)    | 1<br>(0 - 2)          | 1<br>(0 - 1)           | 583<br>(417 - 799)          | 11,070<br>(9,131 - 13,394)  | 70,999<br>(63,286 - 82,981)    |
| Hemorrhagic stroke                            | 27,709<br>(21,692 - 39,951)    | 4<br>(2 - 6)          | 5<br>(3 - 6)           | 2,095<br>(1,712 - 2,548)    | 9,346<br>(7,115 - 12,612)   | 16,259<br>(12,119 - 25,467)    |
| Hypertensive heart disease                    | 8,069<br>(4,828 - 11,038)      | 0<br>(0 - 0)          | 0<br>(0 - 0)           | 192<br>(109 - 282)          | 1,481<br>(866 - 2,126)      | 6,395<br>(3,686 - 8,938)       |
| Cardiomyopathy and myocarditis                | 7,989<br>(5,902 - 9,757)       | 23<br>(15 - 32)       | 7<br>(5 - 9)           | 2,163<br>(1,304 - 2,891)    | 4,031<br>(2,739 - 5,159)    | 1,766<br>(1,206 - 2,818)       |
| Atrial fibrillation and flutter               | 93<br>(65 - 135)               | --                    | --                     | 3<br>(2 - 4)                | 21<br>(15 - 30)             | 68<br>(44 - 108)               |
| Aortic aneurysm                               | 1,738<br>(1,365 - 2,305)       | --                    | --                     | 123<br>(92 - 162)           | 580<br>(447 - 771)          | 1,034<br>(768 - 1,477)         |
| Peripheral vascular disease                   | 125<br>(89 - 161)              | --                    | --                     | 3<br>(2 - 5)                | 29<br>(19 - 40)             | 93<br>(65 - 125)               |
| Endocarditis                                  | 264<br>(173 - 335)             | 1<br>(0 - 2)          | 1<br>(0 - 1)           | 72<br>(40 - 102)            | 106<br>(62 - 144)           | 85<br>(59 - 119)               |
| Other cardiovascular and circulatory diseases | 884<br>(708 - 1,223)           | 0<br>(0 - 0)          | 0<br>(0 - 0)           | 145<br>(110 - 191)          | 386<br>(291 - 557)          | 353<br>(258 - 520)             |
| Chronic respiratory diseases                  | 16,670<br>(13,944 - 28,745)    | 3<br>(2 - 4)          | 3<br>(2 - 4)           | 787<br>(640 - 1,282)        | 4,353<br>(3,541 - 7,466)    | 11,525<br>(9,486 - 20,340)     |
| Chronic obstructive pulmonary disease         | 14,432<br>(12,092 - 24,216)    | 1<br>(1 - 2)          | 1<br>(0 - 1)           | 513<br>(405 - 847)          | 3,657<br>(2,961 - 6,166)    | 10,259<br>(8,484 - 17,669)     |
| Pneumoconiosis                                | 30<br>(20 - 58)                | 0<br>(0 - 0)          | 0<br>(0 - 0)           | 8<br>(6 - 14)               | 10<br>(6 - 23)              | 11<br>(6 - 22)                 |
| Silicosis                                     | 11<br>(7 - 22)                 | 0<br>(0 - 0)          | 0<br>(0 - 0)           | 2<br>(1 - 3)                | 4<br>(2 - 9)                | 5<br>(2 - 10)                  |
| Asbestosis                                    | 5<br>(3 - 9)                   | 0<br>(0 - 0)          | 0<br>(0 - 0)           | 2<br>(1 - 3)                | 2<br>(1 - 4)                | 1<br>(1 - 2)                   |
| Coal workers pneumoconiosis                   | 5<br>(3 - 10)                  | 0<br>(0 - 0)          | 0<br>(0 - 0)           | 2<br>(1 - 3)                | 2<br>(1 - 4)                | 1<br>(1 - 3)                   |
| Other pneumoconiosis                          | 8<br>(6 - 17)                  | 0<br>(0 - 0)          | 0<br>(0 - 0)           | 2<br>(2 - 4)                | 3<br>(1 - 6)                | 3<br>(2 - 7)                   |

Web Table 31- Ukraine deaths with 95% UI by age, sex, and cause in 2013

| Cause                                               | Both Sexes, All Ages        | Both Sexes, 0-4 Years | Both Sexes, 5-14 Years | Both Sexes, 15-49 Years  | Both Sexes, 50-69 Years  | Both Sexes, 70-80 Years     |
|-----------------------------------------------------|-----------------------------|-----------------------|------------------------|--------------------------|--------------------------|-----------------------------|
| Asthma                                              | 1,620<br>(1,107 - 3,526)    | 0<br>(0 - 0)          | 1<br>(1 - 2)           | 168<br>(122 - 319)       | 506<br>(351 - 1,061)     | 945<br>(581 - 2,210)        |
| Interstitial lung disease and pulmonary sarcoidosis | 493<br>(298 - 1,061)        | 0<br>(0 - 0)          | 1<br>(0 - 1)           | 49<br>(32 - 80)          | 158<br>(99 - 326)        | 285<br>(133 - 668)          |
| Other chronic respiratory diseases                  | 97<br>(70 - 150)            | 1<br>(1 - 2)          | 1<br>(0 - 1)           | 48<br>(33 - 70)          | 22<br>(14 - 36)          | 25<br>(16 - 44)             |
| Cirrhosis                                           | 16,719<br>(15,337 - 18,143) | 5<br>(3 - 7)          | 7<br>(5 - 9)           | 5,932<br>(5,201 - 6,678) | 8,423<br>(7,653 - 9,268) | 2,351<br>(2,121 - 2,635)    |
| Cirrhosis due to hepatitis B                        | 2,860<br>(1,922 - 4,050)    | 0<br>(0 - 0)          | 1<br>(0 - 1)           | 1,024<br>(700 - 1,459)   | 1,429<br>(930 - 2,068)   | 406<br>(260 - 602)          |
| Cirrhosis due to hepatitis C                        | 6,036<br>(3,875 - 7,724)    | 0<br>(0 - 0)          | 1<br>(1 - 2)           | 2,017<br>(1,214 - 2,695) | 3,128<br>(1,908 - 4,128) | 889<br>(605 - 1,127)        |
| Cirrhosis due to alcohol use                        | 6,000<br>(4,691 - 7,586)    | --                    | --                     | 1,942<br>(1,448 - 2,527) | 3,149<br>(2,411 - 4,157) | 909<br>(701 - 1,143)        |
| Cirrhosis due to other causes                       | 1,824<br>(1,249 - 2,540)    | 5<br>(3 - 7)          | 5<br>(4 - 7)           | 950<br>(637 - 1,323)     | 718<br>(451 - 1,037)     | 146<br>(100 - 199)          |
| Digestive diseases                                  | 6,820<br>(6,027 - 7,505)    | 11<br>(7 - 17)        | 7<br>(5 - 8)           | 1,539<br>(1,223 - 1,763) | 2,331<br>(2,031 - 2,638) | 2,932<br>(2,625 - 3,330)    |
| Peptic ulcer disease                                | 1,356<br>(1,050 - 1,632)    | 0<br>(0 - 1)          | 0<br>(0 - 1)           | 354<br>(278 - 465)       | 572<br>(437 - 709)       | 429<br>(293 - 558)          |
| Gastritis and duodenitis                            | 62<br>(41 - 110)            | 0<br>(0 - 0)          | 0<br>(0 - 1)           | 16<br>(9 - 25)           | 22<br>(14 - 37)          | 24<br>(12 - 52)             |
| Appendicitis                                        | 113<br>(76 - 147)           | 2<br>(1 - 4)          | 1<br>(1 - 2)           | 38<br>(24 - 51)          | 39<br>(25 - 53)          | 32<br>(19 - 46)             |
| Paralytic ileus and intestinal obstruction          | 479<br>(335 - 779)          | 5<br>(2 - 8)          | 1<br>(1 - 2)           | 119<br>(77 - 197)        | 152<br>(104 - 246)       | 202<br>(130 - 350)          |
| Inguinal, femoral, and abdominal hernia             | 206<br>(133 - 305)          | 0<br>(0 - 1)          | 0<br>(0 - 0)           | 13<br>(9 - 22)           | 53<br>(34 - 76)          | 139<br>(84 - 217)           |
| Inflammatory bowel disease                          | 244<br>(188 - 348)          | 1<br>(1 - 3)          | 1<br>(0 - 1)           | 51<br>(37 - 71)          | 86<br>(61 - 117)         | 105<br>(67 - 176)           |
| Vascular intestinal disorders                       | 1,578<br>(1,006 - 2,165)    | 0<br>(0 - 1)          | 0<br>(0 - 1)           | 59<br>(28 - 109)         | 379<br>(220 - 599)       | 1,139<br>(717 - 1,508)      |
| Gallbladder and biliary diseases                    | 418<br>(311 - 699)          | 0<br>(0 - 0)          | 0<br>(0 - 0)           | 35<br>(26 - 54)          | 141<br>(103 - 237)       | 241<br>(167 - 409)          |
| Pancreatitis                                        | 2,032<br>(1,516 - 2,427)    | 1<br>(0 - 1)          | 1<br>(0 - 1)           | 777<br>(516 - 978)       | 758<br>(547 - 958)       | 495<br>(344 - 724)          |
| Other digestive diseases                            | 332<br>(249 - 445)          | 1<br>(0 - 1)          | 1<br>(1 - 1)           | 75<br>(45 - 109)         | 129<br>(91 - 179)        | 126<br>(85 - 182)           |
| Neurological disorders                              | 28,464<br>(24,186 - 33,247) | 35<br>(24 - 47)       | 26<br>(19 - 35)        | 831<br>(711 - 984)       | 1,567<br>(1,349 - 1,803) | 26,006<br>(21,782 - 30,688) |
| Alzheimer disease and other dementias               | 26,452<br>(22,198 - 31,295) | --                    | --                     | 4<br>(0 - 9)             | 954<br>(763 - 1,163)     | 25,495<br>(21,275 - 30,226) |
| Parkinson disease                                   | 321<br>(222 - 462)          | --                    | --                     | 4<br>(3 - 5)             | 58<br>(42 - 77)          | 259<br>(162 - 390)          |
| Epilepsy                                            | 676<br>(553 - 803)          | 7<br>(4 - 12)         | 17<br>(12 - 25)        | 480<br>(385 - 579)       | 151<br>(117 - 190)       | 21<br>(16 - 27)             |
| Multiple sclerosis                                  | 386<br>(282 - 599)          | --                    | --                     | 202<br>(142 - 315)       | 137<br>(90 - 217)        | 47<br>(28 - 95)             |
| Other neurological disorders                        | 629<br>(547 - 715)          | 27<br>(18 - 38)       | 9<br>(6 - 11)          | 142<br>(109 - 168)       | 267<br>(224 - 315)       | 183<br>(150 - 231)          |
| Mental and substance use disorders                  | 7,425<br>(5,084 - 9,500)    | 2<br>(1 - 4)          | 0<br>(0 - 0)           | 3,798<br>(2,614 - 4,897) | 3,226<br>(2,066 - 4,365) | 398<br>(297 - 581)          |
| Schizophrenia                                       | 42<br>(31 - 58)             | --                    | --                     | 12<br>(9 - 17)           | 16<br>(11 - 23)          | 13<br>(8 - 24)              |
| Alcohol use disorders                               | 6,249<br>(4,009 - 8,341)    | --                    | --                     | 3,081<br>(2,009 - 4,126) | 2,888<br>(1,755 - 3,990) | 279<br>(183 - 449)          |
| Drug use disorders                                  | 1,132<br>(834 - 1,705)      | 2<br>(1 - 4)          | --                     | 701<br>(478 - 1,120)     | 322<br>(218 - 478)       | 106<br>(71 - 156)           |
| Opioid use disorders                                | 487<br>(351 - 740)          | 1<br>(0 - 2)          | --                     | 309<br>(204 - 506)       | 129<br>(88 - 195)        | 47<br>(31 - 70)             |
| Cocaine use disorders                               | 29<br>(21 - 43)             | 0<br>(0 - 0)          | --                     | 19<br>(13 - 31)          | 7<br>(4 - 10)            | 3<br>(2 - 4)                |
| Amphetamine use disorders                           | 27<br>(20 - 40)             | 0<br>(0 - 0)          | --                     | 16<br>(11 - 24)          | 8<br>(5 - 12)            | 3<br>(2 - 4)                |
| Other drug use disorders                            | 590<br>(432 - 880)          | 1<br>(0 - 2)          | --                     | 357<br>(241 - 571)       | 178<br>(119 - 263)       | 54<br>(36 - 78)             |
| Eating disorders                                    | 3<br>(2 - 5)                | --                    | 0<br>(0 - 0)           | 3<br>(2 - 5)             | --                       | --                          |
| Anorexia nervosa                                    | 3<br>(2 - 5)                | --                    | 0<br>(0 - 0)           | 3<br>(2 - 5)             | --                       | --                          |
| Diabetes, urogenital, blood, and endocrine diseases | 5,658<br>(5,043 - 6,541)    | 64<br>(31 - 90)       | 23<br>(14 - 31)        | 1,151<br>(992 - 1,339)   | 2,412<br>(2,179 - 2,853) | 2,008<br>(1,755 - 2,357)    |
| Diabetes mellitus                                   | 2,302<br>(2,075 - 2,571)    | 1<br>(1 - 1)          | 3<br>(2 - 4)           | 399<br>(349 - 450)       | 1,042<br>(907 - 1,212)   | 857<br>(740 - 1,049)        |
| Acute glomerulonephritis                            | 23<br>(18 - 30)             | 0<br>(0 - 1)          | 0<br>(0 - 1)           | 9<br>(7 - 12)            | 9<br>(7 - 12)            | 4<br>(3 - 5)                |
| Chronic kidney disease                              | 720<br>(585 - 1,569)        | 1<br>(1 - 3)          | 2<br>(1 - 3)           | 225<br>(178 - 467)       | 313<br>(245 - 706)       | 178<br>(138 - 392)          |
| Chronic kidney disease due to diabetes mellitus     | 31<br>(20 - 75)             | 0<br>(0 - 0)          | 0<br>(0 - 0)           | 11<br>(7 - 23)           | 13<br>(8 - 32)           | 6<br>(3 - 16)               |

Web Table 31- Ukraine deaths with 95% UI by age, sex, and cause in 2013

| Cause                                               | Both Sexes, All Ages        | Both Sexes, 0-4 Years    | Both Sexes, 5-14 Years | Both Sexes, 15-49 Years     | Both Sexes, 50-69 Years     | Both Sexes, 70-80 Years  |
|-----------------------------------------------------|-----------------------------|--------------------------|------------------------|-----------------------------|-----------------------------|--------------------------|
| Chronic kidney disease due to hypertension          | 177<br>(123 - 350)          | 0<br>(0 - 0)             | 0<br>(0 - 0)           | 25<br>(15 - 48)             | 77<br>(49 - 145)            | 74<br>(49 - 163)         |
| Chronic kidney disease due to glomerulonephritis    | 312<br>(220 - 481)          | 0<br>(0 - 1)             | 1<br>(1 - 1)           | 110<br>(77 - 158)           | 132<br>(88 - 202)           | 69<br>(45 - 132)         |
| Chronic kidney disease due to other causes          | 201<br>(124 - 695)          | 1<br>(0 - 1)             | 1<br>(0 - 1)           | 79<br>(48 - 263)            | 92<br>(47 - 343)            | 29<br>(15 - 107)         |
| Urinary diseases and male infertility               | 1,731<br>(1,520 - 2,175)    | 3<br>(2 - 4)             | 2<br>(2 - 3)           | 298<br>(254 - 369)          | 732<br>(617 - 975)          | 697<br>(577 - 917)       |
| Interstitial nephritis and urinary tract infections | 1,402<br>(1,194 - 1,845)    | 2<br>(2 - 4)             | 2<br>(1 - 3)           | 270<br>(230 - 340)          | 630<br>(518 - 874)          | 498<br>(396 - 700)       |
| Urolithiasis                                        | 178<br>(110 - 263)          | --                       | 0<br>(0 - 0)           | 12<br>(7 - 19)              | 54<br>(27 - 84)             | 112<br>(64 - 179)        |
| Other urinary diseases                              | 152<br>(92 - 203)           | 0<br>(0 - 0)             | 0<br>(0 - 0)           | 16<br>(8 - 23)              | 48<br>(26 - 68)             | 87<br>(52 - 122)         |
| Gynecological diseases                              | 2<br>(2 - 3)                | --                       | --                     | 1<br>(1 - 2)                | 1<br>(0 - 1)                | 0<br>(0 - 1)             |
| Uterine fibroids                                    | 1<br>(0 - 1)                | --                       | --                     | 0<br>(0 - 0)                | 0<br>(0 - 0)                | 0<br>(0 - 0)             |
| Polycystic ovarian syndrome                         | 0<br>(0 - 0)                | --                       | --                     | 0<br>(0 - 0)                | 0<br>(0 - 0)                | --                       |
| Endometriosis                                       | 0<br>(0 - 0)                | --                       | --                     | 0<br>(0 - 0)                | 0<br>(0 - 0)                | --                       |
| Genital prolapse                                    | 0<br>(0 - 0)                | --                       | --                     | 0<br>(0 - 0)                | 0<br>(0 - 0)                | 0<br>(0 - 0)             |
| Other gynecological diseases                        | 1<br>(1 - 1)                | --                       | --                     | 1<br>(0 - 1)                | 0<br>(0 - 1)                | 0<br>(0 - 0)             |
| Hemoglobinopathies and hemolytic anemias            | 145<br>(98 - 193)           | 18<br>(11 - 27)          | 7<br>(4 - 11)          | 67<br>(42 - 95)             | 39<br>(27 - 53)             | 15<br>(11 - 21)          |
| Thalassemias                                        | 41<br>(25 - 58)             | 13<br>(8 - 20)           | 5<br>(3 - 8)           | 22<br>(14 - 32)             | 0<br>(0 - 0)                | 0<br>(0 - 0)             |
| Sickle cell disorders                               | 7<br>(4 - 9)                | 1<br>(1 - 2)             | 1<br>(0 - 1)           | 4<br>(2 - 5)                | 1<br>(1 - 1)                | 0<br>(0 - 0)             |
| G6PD deficiency                                     | 3<br>(2 - 4)                | 0<br>(0 - 0)             | 0<br>(0 - 0)           | 1<br>(1 - 2)                | 1<br>(1 - 1)                | 0<br>(0 - 0)             |
| Other hemoglobinopathies and hemolytic anemias      | 95<br>(65 - 126)            | 3<br>(2 - 5)             | 1<br>(1 - 1)           | 40<br>(25 - 57)             | 37<br>(25 - 50)             | 15<br>(10 - 21)          |
| Endocrine, metabolic, blood, and immune disorders   | 734<br>(181 - 928)          | 41<br>(12 - 61)          | 8<br>(2 - 12)          | 152<br>(42 - 200)           | 276<br>(66 - 364)           | 256<br>(52 - 348)        |
| Musculoskeletal disorders                           | 921<br>(743 - 1,295)        | --                       | 7<br>(4 - 9)           | 179<br>(134 - 228)          | 347<br>(262 - 485)          | 389<br>(272 - 640)       |
| Rheumatoid arthritis                                | 442<br>(332 - 643)          | --                       | 1<br>(1 - 2)           | 34<br>(22 - 47)             | 169<br>(114 - 237)          | 238<br>(159 - 397)       |
| Other musculoskeletal disorders                     | 479<br>(380 - 690)          | --                       | 5<br>(3 - 7)           | 144<br>(108 - 183)          | 178<br>(134 - 260)          | 151<br>(97 - 277)        |
| Other non-communicable diseases                     | 2,446<br>(1,978 - 3,051)    | 1,747<br>(1,319 - 2,303) | 120<br>(87 - 153)      | 338<br>(292 - 394)          | 187<br>(158 - 218)          | 55<br>(45 - 65)          |
| Congenital anomalies                                | 2,255<br>(1,801 - 2,861)    | 1,605<br>(1,188 - 2,155) | 119<br>(87 - 153)      | 329<br>(283 - 384)          | 166<br>(139 - 194)          | 35<br>(30 - 43)          |
| Neural tube defects                                 | 149<br>(95 - 254)           | 121<br>(72 - 213)        | 14<br>(8 - 22)         | 11<br>(8 - 16)              | 2<br>(1 - 3)                | 1<br>(0 - 1)             |
| Congenital heart anomalies                          | 1,161<br>(821 - 1,560)      | 865<br>(563 - 1,238)     | 52<br>(35 - 73)        | 185<br>(147 - 225)          | 55<br>(43 - 70)             | 4<br>(3 - 6)             |
| Cleft lip and cleft palate                          | 9<br>(3 - 17)               | 9<br>(3 - 17)            | --                     | --                          | --                          | --                       |
| Down syndrome                                       | 101<br>(68 - 144)           | 31<br>(16 - 56)          | 8<br>(4 - 14)          | 39<br>(25 - 52)             | 21<br>(14 - 29)             | 2<br>(1 - 3)             |
| Chromosomal unbalanced rearrangements               | 40<br>(27 - 60)             | 30<br>(19 - 50)          | 3<br>(1 - 5)           | 4<br>(3 - 7)                | 2<br>(1 - 4)                | 1<br>(0 - 2)             |
| Other congenital anomalies                          | 795<br>(605 - 1,062)        | 550<br>(373 - 795)       | 43<br>(27 - 60)        | 90<br>(74 - 110)            | 85<br>(70 - 102)            | 27<br>(23 - 33)          |
| Skin and subcutaneous diseases                      | 50<br>(27 - 60)             | 1<br>(0 - 1)             | 0<br>(0 - 0)           | 9<br>(4 - 11)               | 21<br>(11 - 27)             | 19<br>(10 - 25)          |
| Cellulitis                                          | 27<br>(13 - 35)             | 0<br>(0 - 0)             | 0<br>(0 - 0)           | 5<br>(2 - 6)                | 12<br>(6 - 16)              | 10<br>(5 - 14)           |
| Pyoderma                                            | 18<br>(10 - 24)             | 0<br>(0 - 0)             | 0<br>(0 - 0)           | 3<br>(1 - 4)                | 8<br>(4 - 11)               | 8<br>(4 - 11)            |
| Decubitus ulcer                                     | 4<br>(2 - 5)                | 0<br>(0 - 0)             | 0<br>(0 - 0)           | 1<br>(0 - 1)                | 1<br>(1 - 2)                | 2<br>(1 - 3)             |
| Other skin and subcutaneous diseases                | 1<br>(1 - 2)                | 0<br>(0 - 0)             | 0<br>(0 - 0)           | 1<br>(0 - 1)                | 0<br>(0 - 1)                | 0<br>(0 - 1)             |
| Sudden infant death syndrome                        | 141<br>(37 - 330)           | 141<br>(37 - 330)        | --                     | --                          | --                          | --                       |
| Injuries                                            | 41,390<br>(37,408 - 48,858) | 667<br>(494 - 878)       | 529<br>(433 - 653)     | 20,880<br>(18,848 - 24,038) | 12,885<br>(11,588 - 15,394) | 6,428<br>(5,606 - 8,322) |
| Transport injuries                                  | 7,701<br>(6,762 - 8,652)    | 71<br>(45 - 101)         | 151<br>(105 - 198)     | 4,699<br>(4,013 - 5,366)    | 1,903<br>(1,654 - 2,191)    | 877<br>(746 - 1,064)     |
| Road injuries                                       | 7,134<br>(6,164 - 8,126)    | 65<br>(42 - 93)          | 141<br>(97 - 186)      | 4,369<br>(3,677 - 5,061)    | 1,754<br>(1,497 - 2,055)    | 805<br>(677 - 967)       |
| Pedestrian road injuries                            | 2,580<br>(1,716 - 3,355)    | 31<br>(18 - 49)          | 74<br>(46 - 103)       | 1,117<br>(653 - 1,573)      | 849<br>(549 - 1,126)        | 509<br>(367 - 646)       |



Web Table 31- Ukraine deaths with 95% UI by age, sex, and cause in 2013

| Cause                                           | Both Sexes, All Ages        | Both Sexes, 0-4 Years | Both Sexes, 5-14 Years | Both Sexes, 15-49 Years   | Both Sexes, 50-69 Years  | Both Sexes, 70-80 Years  |
|-------------------------------------------------|-----------------------------|-----------------------|------------------------|---------------------------|--------------------------|--------------------------|
| Cyclist road injuries                           | 454<br>(271 - 636)          | 1<br>(0 - 3)          | 14<br>(7 - 23)         | 210<br>(131 - 295)        | 165<br>(89 - 256)        | 63<br>(28 - 101)         |
| Motorcyclist road injuries                      | 603<br>(357 - 946)          | 1<br>(0 - 3)          | 6<br>(2 - 13)          | 489<br>(283 - 787)        | 85<br>(46 - 148)         | 22<br>(10 - 36)          |
| Motor vehicle road injuries                     | 3,309<br>(2,456 - 4,060)    | 30<br>(15 - 47)       | 43<br>(25 - 62)        | 2,420<br>(1,732 - 2,941)  | 620<br>(436 - 867)       | 196<br>(126 - 323)       |
| Other road injuries                             | 189<br>(83 - 358)           | 2<br>(1 - 5)          | 4<br>(2 - 9)           | 132<br>(47 - 249)         | 35<br>(15 - 102)         | 16<br>(6 - 40)           |
| Other transport injuries                        | 567<br>(404 - 810)          | 6<br>(3 - 11)         | 10<br>(5 - 18)         | 330<br>(220 - 488)        | 150<br>(94 - 237)        | 72<br>(41 - 128)         |
| Unintentional injuries                          | 16,724<br>(14,324 - 21,811) | 552<br>(400 - 749)    | 319<br>(242 - 469)     | 7,037<br>(5,807 - 9,749)  | 5,872<br>(5,152 - 7,318) | 2,944<br>(2,443 - 3,868) |
| Falls                                           | 3,885<br>(3,260 - 5,266)    | 64<br>(43 - 95)       | 26<br>(19 - 41)        | 1,423<br>(1,149 - 2,062)  | 1,463<br>(1,175 - 1,914) | 909<br>(732 - 1,297)     |
| Drowning                                        | 4,094<br>(3,001 - 6,630)    | 120<br>(70 - 237)     | 203<br>(143 - 341)     | 2,380<br>(1,661 - 3,930)  | 1,038<br>(758 - 1,815)   | 353<br>(261 - 605)       |
| Fire, heat, and hot substances                  | 3,029<br>(2,503 - 4,187)    | 107<br>(66 - 174)     | 27<br>(18 - 44)        | 1,023<br>(770 - 1,441)    | 1,081<br>(852 - 1,518)   | 790<br>(614 - 1,086)     |
| Poisonings                                      | 1,569<br>(1,135 - 3,646)    | 44<br>(25 - 88)       | 17<br>(11 - 30)        | 539<br>(322 - 1,567)      | 650<br>(471 - 1,357)     | 319<br>(230 - 617)       |
| Exposure to mechanical forces                   | 986<br>(779 - 1,237)        | 44<br>(16 - 86)       | 22<br>(13 - 35)        | 541<br>(405 - 720)        | 303<br>(207 - 435)       | 76<br>(50 - 125)         |
| Unintentional firearm injuries                  | 46<br>(31 - 65)             | 0<br>(0 - 1)          | 2<br>(1 - 3)           | 35<br>(21 - 53)           | 7<br>(4 - 11)            | 2<br>(1 - 4)             |
| Unintentional suffocation                       | 72<br>(38 - 114)            | 27<br>(7 - 66)        | 3<br>(1 - 5)           | 23<br>(13 - 34)           | 13<br>(8 - 18)           | 6<br>(3 - 14)            |
| Other exposure to mechanical forces             | 867<br>(674 - 1,123)        | 16<br>(7 - 29)        | 18<br>(10 - 30)        | 483<br>(349 - 663)        | 283<br>(186 - 416)       | 67<br>(43 - 114)         |
| Adverse effects of medical treatment            | 355<br>(265 - 523)          | 15<br>(9 - 25)        | 1<br>(1 - 2)           | 77<br>(54 - 116)          | 173<br>(119 - 277)       | 89<br>(59 - 142)         |
| Animal contact                                  | 120<br>(91 - 171)           | 5<br>(3 - 9)          | 2<br>(1 - 3)           | 31<br>(22 - 46)           | 61<br>(45 - 88)          | 20<br>(14 - 32)          |
| Venomous animal contact                         | 30<br>(16 - 48)             | 2<br>(1 - 3)          | 1<br>(0 - 1)           | 10<br>(6 - 15)            | 15<br>(7 - 27)           | 2<br>(1 - 5)             |
| Non-venomous animal contact                     | 90<br>(67 - 129)            | 3<br>(2 - 6)          | 2<br>(1 - 3)           | 21<br>(14 - 32)           | 46<br>(32 - 66)          | 18<br>(12 - 28)          |
| Foreign body                                    | 2,248<br>(1,246 - 2,878)    | 145<br>(84 - 220)     | 11<br>(7 - 18)         | 773<br>(347 - 1,106)      | 948<br>(453 - 1,315)     | 370<br>(234 - 685)       |
| Pulmonary aspiration and foreign body in airway | 2,242<br>(1,241 - 2,872)    | 145<br>(83 - 220)     | 11<br>(7 - 17)         | 771<br>(345 - 1,103)      | 946<br>(451 - 1,314)     | 369<br>(233 - 684)       |
| Foreign body in other body part                 | 6<br>(4 - 9)                | 0<br>(0 - 1)          | 0<br>(0 - 0)           | 3<br>(2 - 3)              | 2<br>(1 - 2)             | 1<br>(1 - 2)             |
| Other unintentional injuries                    | 439<br>(374 - 515)          | 9<br>(6 - 13)         | 8<br>(5 - 11)          | 250<br>(204 - 306)        | 156<br>(125 - 196)       | 17<br>(13 - 23)          |
| Self-harm and interpersonal violence            | 16,965<br>(15,069 - 20,509) | 44<br>(30 - 63)       | 59<br>(38 - 77)        | 9,144<br>(7,986 - 10,971) | 5,110<br>(4,373 - 6,505) | 2,608<br>(2,211 - 3,599) |
| Self-harm                                       | 12,713<br>(11,110 - 15,355) | --                    | 38<br>(21 - 53)        | 6,604<br>(5,450 - 7,637)  | 3,942<br>(3,294 - 5,223) | 2,128<br>(1,757 - 3,040) |
| Interpersonal violence                          | 4,252<br>(3,481 - 6,555)    | 44<br>(30 - 63)       | 21<br>(14 - 29)        | 2,540<br>(2,033 - 3,977)  | 1,167<br>(901 - 1,817)   | 480<br>(380 - 743)       |
| Assault by firearm                              | 281<br>(140 - 548)          | 1<br>(0 - 2)          | 2<br>(1 - 3)           | 231<br>(111 - 435)        | 42<br>(21 - 92)          | 6<br>(3 - 13)            |
| Assault by sharp object                         | 1,587<br>(1,104 - 2,567)    | 6<br>(4 - 12)         | 5<br>(3 - 8)           | 993<br>(678 - 1,614)      | 449<br>(280 - 719)       | 133<br>(92 - 217)        |
| Assault by other means                          | 2,384<br>(1,855 - 3,660)    | 37<br>(24 - 52)       | 14<br>(9 - 21)         | 1,316<br>(982 - 2,119)    | 676<br>(481 - 1,050)     | 341<br>(262 - 522)       |

Web Table 31- Ukraine deaths with 95% UI by age, sex, and cause in 2013

| Cause                                                             | Males, All Ages                | Males, 0-4 Years         | Males, 5-14 Years  | Males, 15-49 Years          | Males, 50-69 Years             | Males, 70-80 Years             |
|-------------------------------------------------------------------|--------------------------------|--------------------------|--------------------|-----------------------------|--------------------------------|--------------------------------|
| All causes                                                        | 329,001<br>(314,486 - 344,025) | 3,084<br>(2,308 - 4,004) | 628<br>(518 - 750) | 51,912<br>(49,124 - 54,951) | 109,734<br>(103,910 - 116,027) | 163,643<br>(157,896 - 169,813) |
| Communicable, maternal, neonatal, and nutritional diseases        | 18,235<br>(15,793 - 21,064)    | 1,542<br>(1,118 - 2,062) | 50<br>(35 - 67)    | 8,926<br>(7,504 - 10,363)   | 6,185<br>(5,160 - 7,492)       | 1,531<br>(1,206 - 1,988)       |
| HIV/AIDS and tuberculosis                                         | 11,810<br>(9,631 - 14,618)     | 8<br>(4 - 12)            | 3<br>(1 - 6)       | 6,737<br>(5,462 - 8,296)    | 4,211<br>(3,278 - 5,506)       | 851<br>(580 - 1,239)           |
| Tuberculosis                                                      | 4,141<br>(2,591 - 4,870)       | 4<br>(2 - 5)             | 1<br>(0 - 1)       | 1,891<br>(1,010 - 2,314)    | 1,952<br>(1,263 - 2,382)       | 293<br>(233 - 384)             |
| HIV/AIDS                                                          | 7,670<br>(5,455 - 10,529)      | 4<br>(1 - 8)             | 2<br>(0 - 5)       | 4,846<br>(3,532 - 6,478)    | 2,259<br>(1,410 - 3,489)       | 559<br>(299 - 934)             |
| HIV/AIDS resulting in mycobacterial infection                     | 528<br>(346 - 792)             | 0<br>(0 - 0)             | 0<br>(0 - 0)       | 331<br>(224 - 473)          | 159<br>(94 - 261)              | 38<br>(20 - 65)                |
| HIV/AIDS resulting in other diseases                              | 7,141<br>(5,060 - 9,822)       | 4<br>(1 - 8)             | 2<br>(0 - 5)       | 4,515<br>(3,298 - 6,048)    | 2,100<br>(1,309 - 3,242)       | 521<br>(279 - 878)             |
| Diarrhea, lower respiratory, and other common infectious diseases | 4,761<br>(3,636 - 5,754)       | 310<br>(218 - 413)       | 39<br>(25 - 53)    | 1,980<br>(1,415 - 2,538)    | 1,817<br>(1,284 - 2,360)       | 615<br>(462 - 806)             |
| Diarrheal diseases                                                | 56<br>(42 - 73)                | 25<br>(14 - 41)          | 1<br>(0 - 1)       | 12<br>(9 - 15)              | 10<br>(7 - 15)                 | 9<br>(6 - 13)                  |
| Intestinal infectious diseases                                    | 55<br>(26 - 105)               | 9<br>(4 - 21)            | 6<br>(2 - 11)      | 21<br>(9 - 43)              | 11<br>(3 - 26)                 | 8<br>(3 - 16)                  |
| Typhoid fever                                                     | 40<br>(18 - 78)                | 6<br>(2 - 14)            | 4<br>(2 - 9)       | 16<br>(6 - 33)              | 8<br>(2 - 20)                  | 6<br>(2 - 13)                  |
| Paratyphoid fever                                                 | 12<br>(5 - 24)                 | 2<br>(1 - 5)             | 1<br>(0 - 3)       | 5<br>(2 - 10)               | 2<br>(1 - 6)                   | 1<br>(0 - 3)                   |
| Other intestinal infectious diseases                              | 3<br>(0 - 8)                   | 1<br>(0 - 4)             | 0<br>(0 - 1)       | 1<br>(0 - 4)                | 1<br>(0 - 3)                   | 1<br>(0 - 3)                   |
| Lower respiratory infections                                      | 4,099<br>(2,982 - 5,075)       | 160<br>(105 - 232)       | 18<br>(10 - 27)    | 1,715<br>(1,154 - 2,255)    | 1,657<br>(1,120 - 2,192)       | 549<br>(403 - 741)             |
| Upper respiratory infections                                      | 14<br>(4 - 34)                 | 0<br>(0 - 1)             | 0<br>(0 - 0)       | 3<br>(0 - 9)                | 5<br>(0 - 16)                  | 6<br>(0 - 22)                  |
| Otitis media                                                      | 5<br>(4 - 6)                   | 0<br>(0 - 0)             | 0<br>(0 - 0)       | 2<br>(2 - 3)                | 2<br>(1 - 3)                   | 1<br>(1 - 1)                   |
| Meningitis                                                        | 300<br>(247 - 363)             | 74<br>(39 - 114)         | 5<br>(3 - 8)       | 118<br>(97 - 140)           | 81<br>(67 - 101)               | 22<br>(17 - 28)                |
| Pneumococcal meningitis                                           | 77<br>(57 - 105)               | 13<br>(6 - 21)           | 1<br>(1 - 2)       | 35<br>(23 - 54)             | 21<br>(11 - 33)                | 6<br>(4 - 9)                   |
| H influenzae type B meningitis                                    | 56<br>(38 - 77)                | 29<br>(14 - 47)          | 1<br>(1 - 2)       | 14<br>(8 - 22)              | 9<br>(4 - 14)                  | 2<br>(1 - 4)                   |
| Meningococcal meningitis                                          | 61<br>(44 - 82)                | 17<br>(9 - 26)           | 1<br>(1 - 2)       | 24<br>(15 - 34)             | 15<br>(9 - 25)                 | 4<br>(2 - 7)                   |
| Other meningitis                                                  | 106<br>(77 - 132)              | 15<br>(8 - 26)           | 1<br>(1 - 2)       | 45<br>(26 - 61)             | 36<br>(23 - 49)                | 9<br>(6 - 14)                  |
| Encephalitis                                                      | 189<br>(135 - 247)             | 32<br>(18 - 53)          | 8<br>(4 - 12)      | 100<br>(66 - 142)           | 43<br>(30 - 63)                | 6<br>(4 - 9)                   |
| Diphtheria                                                        | 6<br>(0 - 25)                  | 1<br>(0 - 8)             | 0<br>(0 - 4)       | 3<br>(0 - 16)               | 2<br>(0 - 13)                  | --                             |
| Whooping cough                                                    | 6<br>(2 - 24)                  | 5<br>(0 - 21)            | 0<br>(0 - 0)       | 1<br>(1 - 2)                | 0<br>(0 - 0)                   | --                             |
| Tetanus                                                           | 6<br>(3 - 17)                  | 0<br>(0 - 0)             | 0<br>(0 - 1)       | 2<br>(1 - 4)                | 2<br>(1 - 7)                   | 1<br>(0 - 7)                   |
| Measles                                                           | 2<br>(1 - 5)                   | 2<br>(1 - 4)             | 0<br>(0 - 0)       | 0<br>(0 - 0)                | 0<br>(0 - 0)                   | --                             |
| Varicella and herpes zoster                                       | 21<br>(5 - 67)                 | 2<br>(0 - 7)             | 0<br>(0 - 2)       | 3<br>(0 - 9)                | 2<br>(0 - 9)                   | 13<br>(0 - 60)                 |
| Neglected tropical diseases and malaria                           | 19<br>(16 - 23)                | 1<br>(1 - 2)             | 1<br>(1 - 1)       | 9<br>(7 - 11)               | 6<br>(5 - 7)                   | 3<br>(3 - 4)                   |
| Cysticercosis                                                     | 0<br>(0 - 0)                   | 0<br>(0 - 0)             | 0<br>(0 - 0)       | 0<br>(0 - 0)                | 0<br>(0 - 0)                   | 0<br>(0 - 0)                   |
| Cystic echinococcosis                                             | 7<br>(7 - 8)                   | 0<br>(0 - 0)             | 0<br>(0 - 0)       | 3<br>(3 - 3)                | 3<br>(2 - 3)                   | 2<br>(1 - 2)                   |
| Dengue                                                            | 2<br>(2 - 2)                   | 0<br>(0 - 0)             | 0<br>(0 - 0)       | 1<br>(1 - 1)                | 0<br>(0 - 1)                   | 0<br>(0 - 0)                   |
| Rabies                                                            | 3<br>(2 - 4)                   | 0<br>(0 - 0)             | 0<br>(0 - 0)       | 2<br>(1 - 2)                | 1<br>(0 - 1)                   | 0<br>(0 - 1)                   |
| Other neglected tropical diseases                                 | 7<br>(4 - 10)                  | 1<br>(0 - 2)             | 0<br>(0 - 1)       | 3<br>(2 - 5)                | 2<br>(1 - 3)                   | 1<br>(0 - 2)                   |
| Maternal disorders                                                | --                             | --                       | --                 | --                          | --                             | --                             |
| Maternal hemorrhage                                               | --                             | --                       | --                 | --                          | --                             | --                             |
| Maternal sepsis and other maternal infections                     | --                             | --                       | --                 | --                          | --                             | --                             |
| Maternal hypertensive disorders                                   | --                             | --                       | --                 | --                          | --                             | --                             |
| Maternal obstructed labor                                         | --                             | --                       | --                 | --                          | --                             | --                             |
| Maternal abortive outcome                                         | --                             | --                       | --                 | --                          | --                             | --                             |
| Indirect maternal deaths                                          | --                             | --                       | --                 | --                          | --                             | --                             |

Web Table 31- Ukraine deaths with 95% UI by age, sex, and cause in 2013

| Cause                                                            | Males, All Ages                | Males, 0-4 Years       | Males, 5-14 Years  | Males, 15-49 Years          | Males, 50-69 Years          | Males, 70-80 Years             |
|------------------------------------------------------------------|--------------------------------|------------------------|--------------------|-----------------------------|-----------------------------|--------------------------------|
| Late maternal deaths                                             | --                             | --                     | --                 | --                          | --                          | --                             |
| Maternal deaths aggravated by HIV/AIDS                           | --                             | --                     | --                 | --                          | --                          | --                             |
| Other maternal disorders                                         | --                             | --                     | --                 | --                          | --                          | --                             |
| Neonatal disorders                                               | 1,178<br>(834 - 1,613)         | 1,178<br>(834 - 1,613) | --                 | --                          | --                          | --                             |
| Neonatal preterm birth complications                             | 377<br>(174 - 667)             | 377<br>(174 - 667)     | --                 | --                          | --                          | --                             |
| Neonatal encephalopathy due to birth asphyxia and trauma         | 414<br>(209 - 707)             | 414<br>(209 - 707)     | --                 | --                          | --                          | --                             |
| Neonatal sepsis and other neonatal infections                    | 119<br>(39 - 250)              | 119<br>(39 - 250)      | --                 | --                          | --                          | --                             |
| Hemolytic disease and other neonatal jaundice                    | 3<br>(1 - 7)                   | 3<br>(1 - 7)           | --                 | --                          | --                          | --                             |
| Other neonatal disorders                                         | 265<br>(134 - 472)             | 265<br>(134 - 472)     | --                 | --                          | --                          | --                             |
| Nutritional deficiencies                                         | 191<br>(123 - 278)             | 15<br>(8 - 32)         | 3<br>(2 - 5)       | 88<br>(43 - 114)            | 58<br>(41 - 98)             | 26<br>(18 - 47)                |
| Protein-energy malnutrition                                      | 89<br>(55 - 148)               | 12<br>(5 - 27)         | 2<br>(1 - 4)       | 44<br>(20 - 66)             | 26<br>(14 - 51)             | 4<br>(1 - 12)                  |
| Iodine deficiency                                                | 19<br>(3 - 46)                 | 1<br>(0 - 7)           | 0<br>(0 - 1)       | 8<br>(0 - 26)               | 6<br>(0 - 21)               | 4<br>(0 - 15)                  |
| Iron-deficiency anemia                                           | 42<br>(18 - 79)                | 1<br>(0 - 3)           | 0<br>(0 - 1)       | 16<br>(5 - 31)              | 13<br>(5 - 28)              | 11<br>(4 - 22)                 |
| Other nutritional deficiencies                                   | 41<br>(14 - 68)                | 1<br>(0 - 4)           | 0<br>(0 - 1)       | 20<br>(5 - 34)              | 12<br>(5 - 24)              | 7<br>(3 - 16)                  |
| Other communicable, maternal, neonatal, and nutritional diseases | 275<br>(217 - 387)             | 30<br>(16 - 54)        | 4<br>(2 - 6)       | 112<br>(83 - 151)           | 94<br>(63 - 166)            | 35<br>(20 - 69)                |
| Sexually transmitted diseases excluding HIV                      | 29<br>(7 - 89)                 | 6<br>(0 - 15)          | 1<br>(0 - 1)       | 8<br>(3 - 25)               | 10<br>(1 - 37)              | 5<br>(1 - 20)                  |
| Syphilis                                                         | 22<br>(5 - 65)                 | 6<br>(0 - 15)          | 0<br>(0 - 1)       | 5<br>(2 - 15)               | 7<br>(1 - 27)               | 4<br>(0 - 16)                  |
| Chlamydial infection                                             | --                             | --                     | --                 | --                          | --                          | --                             |
| Gonococcal infection                                             | 4<br>(1 - 15)                  | --                     | 0<br>(0 - 0)       | 2<br>(1 - 6)                | 2<br>(0 - 6)                | 1<br>(0 - 2)                   |
| Other sexually transmitted diseases                              | 3<br>(1 - 10)                  | --                     | 0<br>(0 - 0)       | 2<br>(1 - 5)                | 1<br>(0 - 4)                | 0<br>(0 - 1)                   |
| Hepatitis                                                        | 74<br>(62 - 90)                | 6<br>(3 - 10)          | 2<br>(1 - 3)       | 37<br>(28 - 48)             | 22<br>(16 - 30)             | 8<br>(5 - 12)                  |
| Acute hepatitis A                                                | 14<br>(4 - 27)                 | 3<br>(1 - 5)           | 1<br>(0 - 2)       | 9<br>(2 - 18)               | 2<br>(0 - 4)                | 0<br>(0 - 1)                   |
| Acute hepatitis B                                                | 57<br>(42 - 73)                | 4<br>(2 - 7)           | 1<br>(0 - 1)       | 26<br>(16 - 37)             | 19<br>(13 - 26)             | 7<br>(5 - 11)                  |
| Acute hepatitis C                                                | 4<br>(1 - 10)                  | --                     | 0<br>(0 - 0)       | 2<br>(0 - 7)                | 1<br>(0 - 3)                | 0<br>(0 - 1)                   |
| Other infectious diseases                                        | 172<br>(104 - 256)             | 18<br>(8 - 38)         | 2<br>(1 - 4)       | 66<br>(37 - 101)            | 62<br>(29 - 120)            | 23<br>(9 - 50)                 |
| Non-communicable diseases                                        | 278,400<br>(265,160 - 292,506) | 1,147<br>(854 - 1,523) | 216<br>(158 - 269) | 25,189<br>(22,619 - 27,602) | 93,322<br>(87,799 - 99,190) | 158,527<br>(152,807 - 164,638) |
| Neoplasms                                                        | 50,726<br>(47,682 - 54,041)    | 75<br>(46 - 113)       | 100<br>(72 - 129)  | 4,517<br>(4,103 - 4,974)    | 25,251<br>(23,403 - 27,191) | 20,783<br>(19,549 - 22,141)    |
| Esophageal cancer                                                | 1,492<br>(1,270 - 1,823)       | --                     | --                 | 122<br>(91 - 170)           | 955<br>(780 - 1,147)        | 415<br>(338 - 559)             |
| Stomach cancer                                                   | 5,995<br>(5,404 - 6,658)       | --                     | --                 | 510<br>(426 - 602)          | 2,859<br>(2,508 - 3,267)    | 2,626<br>(2,243 - 3,048)       |
| Liver cancer                                                     | 1,103<br>(815 - 1,533)         | --                     | 1<br>(1 - 2)       | 104<br>(69 - 138)           | 575<br>(423 - 805)          | 423<br>(295 - 635)             |
| Liver cancer due to hepatitis B                                  | 200<br>(88 - 321)              | --                     | 0<br>(0 - 1)       | 27<br>(15 - 45)             | 111<br>(43 - 195)           | 62<br>(28 - 103)               |
| Liver cancer due to hepatitis C                                  | 511<br>(311 - 773)             | --                     | 0<br>(0 - 0)       | 44<br>(26 - 68)             | 272<br>(160 - 408)          | 195<br>(119 - 318)             |
| Liver cancer due to alcohol use                                  | 323<br>(193 - 484)             | --                     | --                 | 21<br>(9 - 35)              | 156<br>(89 - 244)           | 145<br>(89 - 233)              |
| Liver cancer due to other causes                                 | 68<br>(36 - 112)               | --                     | 1<br>(0 - 1)       | 11<br>(6 - 17)              | 36<br>(17 - 62)             | 21<br>(10 - 36)                |
| Larynx cancer                                                    | 1,535<br>(1,236 - 2,193)       | --                     | --                 | 140<br>(101 - 250)          | 942<br>(737 - 1,348)        | 454<br>(332 - 634)             |
| Tracheal, bronchus and lung cancer                               | 13,507<br>(12,154 - 14,856)    | --                     | --                 | 829<br>(686 - 982)          | 7,623<br>(6,740 - 8,552)    | 5,056<br>(4,505 - 5,631)       |
| Breast cancer                                                    | 49<br>(3 - 76)                 | --                     | --                 | 5<br>(1 - 8)                | 22<br>(1 - 37)              | 23<br>(1 - 41)                 |
| Cervical cancer                                                  | --                             | --                     | --                 | --                          | --                          | --                             |
| Uterine cancer                                                   | --                             | --                     | --                 | --                          | --                          | --                             |
| Prostate cancer                                                  | 3,108<br>(2,097 - 3,808)       | --                     | --                 | 24<br>(16 - 34)             | 781<br>(518 - 1,034)        | 2,303<br>(1,486 - 2,869)       |

Web Table 31- Ukraine deaths with 95% UI by age, sex, and cause in 2013

| Cause                                         | Males, All Ages                | Males, 0-4 Years | Males, 5-14 Years | Males, 15-49 Years        | Males, 50-69 Years          | Males, 70-80 Years             |
|-----------------------------------------------|--------------------------------|------------------|-------------------|---------------------------|-----------------------------|--------------------------------|
| Colon and rectum cancer                       | 6,691<br>(6,152 - 7,267)       | --               | --                | 371<br>(317 - 430)        | 2,777<br>(2,494 - 3,074)    | 3,543<br>(3,180 - 3,955)       |
| Lip and oral cavity cancer                    | 1,892<br>(1,338 - 2,181)       | --               | --                | 217<br>(137 - 277)        | 1,206<br>(807 - 1,451)      | 468<br>(374 - 578)             |
| Nasopharynx cancer                            | 264<br>(200 - 336)             | --               | 1<br>(0 - 1)      | 60<br>(40 - 86)           | 166<br>(123 - 225)          | 37<br>(24 - 56)                |
| Other pharynx cancer                          | 1,014<br>(797 - 1,278)         | --               | --                | 98<br>(68 - 131)          | 737<br>(554 - 952)          | 179<br>(127 - 239)             |
| Gallbladder and biliary tract cancer          | 460<br>(287 - 592)             | --               | --                | 29<br>(14 - 40)           | 203<br>(122 - 267)          | 228<br>(151 - 311)             |
| Pancreatic cancer                             | 2,963<br>(2,679 - 3,247)       | --               | --                | 337<br>(279 - 397)        | 1,601<br>(1,423 - 1,793)    | 1,025<br>(896 - 1,167)         |
| Malignant skin melanoma                       | 568<br>(284 - 963)             | --               | --                | 132<br>(61 - 208)         | 255<br>(129 - 435)          | 181<br>(96 - 310)              |
| Non-melanoma skin cancer                      | 297<br>(143 - 468)             | --               | --                | 21<br>(10 - 38)           | 84<br>(38 - 162)            | 192<br>(83 - 318)              |
| Ovarian cancer                                | --                             | --               | --                | --                        | --                          | --                             |
| Testicular cancer                             | 90<br>(55 - 130)               | --               | --                | 60<br>(35 - 89)           | 19<br>(11 - 29)             | 11<br>(6 - 18)                 |
| Kidney cancer                                 | 2,143<br>(1,834 - 2,480)       | 9<br>(4 - 15)    | 5<br>(3 - 8)      | 225<br>(172 - 286)        | 1,203<br>(985 - 1,438)      | 702<br>(552 - 878)             |
| Bladder cancer                                | 2,220<br>(1,894 - 2,624)       | --               | --                | 56<br>(43 - 73)           | 796<br>(660 - 964)          | 1,368<br>(1,142 - 1,657)       |
| Brain and nervous system cancer               | 1,312<br>(1,079 - 1,706)       | 14<br>(6 - 27)   | 26<br>(17 - 38)   | 393<br>(308 - 503)        | 695<br>(563 - 960)          | 183<br>(139 - 251)             |
| Thyroid cancer                                | 189<br>(157 - 222)             | --               | 0<br>(0 - 0)      | 22<br>(16 - 29)           | 97<br>(77 - 119)            | 70<br>(55 - 89)                |
| Mesothelioma                                  | 246<br>(107 - 342)             | --               | --                | 30<br>(11 - 47)           | 116<br>(45 - 176)           | 100<br>(39 - 165)              |
| Hodgkin lymphoma                              | 129<br>(88 - 196)              | 1<br>(0 - 1)     | 2<br>(1 - 4)      | 60<br>(41 - 96)           | 43<br>(27 - 74)             | 23<br>(14 - 39)                |
| Non-Hodgkin lymphoma                          | 1,085<br>(514 - 1,335)         | 3<br>(1 - 6)     | 10<br>(4 - 15)    | 193<br>(88 - 249)         | 494<br>(222 - 630)          | 384<br>(183 - 504)             |
| Multiple myeloma                              | 216<br>(109 - 306)             | --               | --                | 22<br>(11 - 33)           | 116<br>(56 - 169)           | 78<br>(39 - 120)               |
| Leukemia                                      | 1,437<br>(1,250 - 1,617)       | 23<br>(13 - 38)  | 34<br>(23 - 47)   | 259<br>(219 - 306)        | 575<br>(479 - 671)          | 545<br>(461 - 639)             |
| Other neoplasms                               | 720<br>(509 - 873)             | 25<br>(14 - 46)  | 21<br>(13 - 32)   | 199<br>(136 - 245)        | 309<br>(219 - 392)          | 165<br>(108 - 237)             |
| Cardiovascular diseases                       | 180,816<br>(170,226 - 190,507) | 22<br>(15 - 29)  | 10<br>(7 - 13)    | 9,969<br>(8,770 - 11,141) | 52,821<br>(48,940 - 56,737) | 117,994<br>(111,824 - 123,121) |
| Rheumatic heart disease                       | 687<br>(454 - 1,456)           | 0<br>(0 - 1)     | 1<br>(0 - 1)      | 223<br>(121 - 536)        | 391<br>(250 - 790)          | 73<br>(47 - 130)               |
| Ischemic heart disease                        | 125,533<br>(113,027 - 134,843) | 5<br>(3 - 9)     | 2<br>(1 - 3)      | 5,709<br>(4,919 - 6,506)  | 35,431<br>(31,284 - 38,711) | 84,386<br>(75,918 - 90,625)    |
| Cerebrovascular disease                       | 44,498<br>(37,911 - 52,883)    | 3<br>(1 - 5)     | 2<br>(1 - 4)      | 1,852<br>(1,410 - 2,358)  | 12,295<br>(10,251 - 14,925) | 30,345<br>(25,666 - 35,952)    |
| Ischemic stroke                               | 32,153<br>(26,585 - 38,998)    | 0<br>(0 - 1)     | 0<br>(0 - 0)      | 430<br>(284 - 635)        | 6,997<br>(5,291 - 9,224)    | 24,725<br>(20,228 - 29,773)    |
| Hemorrhagic stroke                            | 12,345<br>(8,365 - 17,383)     | 3<br>(1 - 4)     | 2<br>(1 - 3)      | 1,422<br>(1,051 - 1,843)  | 5,298<br>(3,538 - 7,473)    | 5,620<br>(3,354 - 8,938)       |
| Hypertensive heart disease                    | 2,179<br>(1,224 - 3,138)       | 0<br>(0 - 0)     | 0<br>(0 - 0)      | 139<br>(62 - 220)         | 785<br>(373 - 1,239)        | 1,254<br>(699 - 1,987)         |
| Cardiomyopathy and myocarditis                | 6,087<br>(4,075 - 7,761)       | 12<br>(8 - 17)   | 4<br>(2 - 5)      | 1,809<br>(1,005 - 2,528)  | 3,155<br>(1,970 - 4,228)    | 1,107<br>(672 - 1,858)         |
| Atrial fibrillation and flutter               | 31<br>(22 - 47)                | --               | --                | 2<br>(1 - 2)              | 11<br>(7 - 16)              | 19<br>(11 - 32)                |
| Aortic aneurysm                               | 1,141<br>(869 - 1,549)         | --               | --                | 99<br>(71 - 134)          | 451<br>(336 - 619)          | 591<br>(404 - 897)             |
| Peripheral vascular disease                   | 74<br>(46 - 104)               | --               | --                | 2<br>(1 - 4)              | 23<br>(14 - 34)             | 49<br>(29 - 72)                |
| Endocarditis                                  | 162<br>(91 - 226)              | 1<br>(0 - 1)     | 1<br>(0 - 1)      | 53<br>(26 - 80)           | 70<br>(36 - 102)            | 37<br>(22 - 59)                |
| Other cardiovascular and circulatory diseases | 425<br>(336 - 667)             | 0<br>(0 - 0)     | 0<br>(0 - 0)      | 82<br>(60 - 110)          | 209<br>(157 - 337)          | 133<br>(95 - 227)              |
| Chronic respiratory diseases                  | 11,267<br>(9,365 - 18,996)     | 2<br>(1 - 3)     | 2<br>(1 - 3)      | 584<br>(455 - 1,015)      | 3,562<br>(2,826 - 6,260)    | 7,118<br>(5,875 - 11,729)      |
| Chronic obstructive pulmonary disease         | 10,030<br>(8,353 - 16,456)     | 1<br>(1 - 1)     | 0<br>(0 - 1)      | 414<br>(319 - 725)        | 3,093<br>(2,457 - 5,367)    | 6,522<br>(5,372 - 10,652)      |
| Pneumoconiosis                                | 24<br>(15 - 50)                | 0<br>(0 - 0)     | 0<br>(0 - 0)      | 5<br>(3 - 10)             | 9<br>(5 - 20)               | 9<br>(5 - 20)                  |
| Silicosis                                     | 10<br>(6 - 20)                 | 0<br>(0 - 0)     | 0<br>(0 - 0)      | 1<br>(1 - 2)              | 4<br>(2 - 9)                | 4<br>(2 - 9)                   |
| Asbestosis                                    | 4<br>(2 - 7)                   | 0<br>(0 - 0)     | 0<br>(0 - 0)      | 1<br>(1 - 2)              | 1<br>(1 - 3)                | 1<br>(0 - 2)                   |
| Coal workers pneumoconiosis                   | 4<br>(2 - 8)                   | 0<br>(0 - 0)     | 0<br>(0 - 0)      | 1<br>(1 - 2)              | 1<br>(1 - 3)                | 1<br>(0 - 3)                   |
| Other pneumoconiosis                          | 7<br>(4 - 14)                  | 0<br>(0 - 0)     | 0<br>(0 - 0)      | 2<br>(1 - 3)              | 2<br>(1 - 5)                | 3<br>(1 - 6)                   |

Web Table 31- Ukraine deaths with 95% UI by age, sex, and cause in 2013

| Cause                                               | Males, All Ages             | Males, 0-4 Years | Males, 5-14 Years | Males, 15-49 Years       | Males, 50-69 Years       | Males, 70-80 Years        |
|-----------------------------------------------------|-----------------------------|------------------|-------------------|--------------------------|--------------------------|---------------------------|
| Asthma                                              | 839<br>(570 - 1,863)        | 0<br>(0 - 0)     | 1<br>(0 - 1)      | 95<br>(63 - 208)         | 328<br>(203 - 775)       | 415<br>(254 - 924)        |
| Interstitial lung disease and pulmonary sarcoidosis | 303<br>(182 - 652)          | 0<br>(0 - 0)     | 0<br>(0 - 1)      | 32<br>(19 - 58)          | 115<br>(67 - 238)        | 155<br>(66 - 355)         |
| Other chronic respiratory diseases                  | 71<br>(48 - 108)            | 1<br>(0 - 1)     | 0<br>(0 - 1)      | 37<br>(24 - 59)          | 17<br>(10 - 29)          | 16<br>(9 - 28)            |
| Cirrhosis                                           | 11,088<br>(10,017 - 12,232) | 3<br>(2 - 5)     | 4<br>(3 - 5)      | 4,245<br>(3,640 - 4,879) | 5,560<br>(4,932 - 6,296) | 1,276<br>(1,106 - 1,471)  |
| Cirrhosis due to hepatitis B                        | 1,711<br>(1,031 - 2,469)    | 0<br>(0 - 0)     | 0<br>(0 - 1)      | 667<br>(400 - 1,039)     | 852<br>(494 - 1,262)     | 192<br>(113 - 293)        |
| Cirrhosis due to hepatitis C                        | 3,476<br>(1,928 - 4,928)    | 0<br>(0 - 0)     | 1<br>(0 - 2)      | 1,296<br>(674 - 1,926)   | 1,769<br>(923 - 2,597)   | 410<br>(246 - 585)        |
| Cirrhosis due to alcohol use                        | 4,790<br>(3,646 - 6,249)    | --<br>(0 - 0)    | --<br>(0 - 0)     | 1,667<br>(1,213 - 2,209) | 2,519<br>(1,833 - 3,409) | 605<br>(452 - 800)        |
| Cirrhosis due to other causes                       | 1,110<br>(637 - 1,666)      | 3<br>(2 - 5)     | 3<br>(2 - 4)      | 615<br>(342 - 960)       | 420<br>(222 - 678)       | 69<br>(41 - 105)          |
| Digestive diseases                                  | 3,967<br>(3,316 - 4,459)    | 7<br>(4 - 11)    | 4<br>(3 - 5)      | 1,230<br>(935 - 1,440)   | 1,547<br>(1,281 - 1,800) | 1,179<br>(1,009 - 1,410)  |
| Peptic ulcer disease                                | 966<br>(719 - 1,216)        | 0<br>(0 - 0)     | 0<br>(0 - 0)      | 296<br>(223 - 402)       | 435<br>(311 - 560)       | 234<br>(146 - 336)        |
| Gastritis and duodenitis                            | 37<br>(19 - 66)             | 0<br>(0 - 0)     | 0<br>(0 - 0)      | 12<br>(5 - 20)           | 15<br>(7 - 26)           | 11<br>(5 - 21)            |
| Appendicitis                                        | 64<br>(36 - 92)             | 1<br>(1 - 3)     | 1<br>(0 - 1)      | 24<br>(12 - 35)          | 22<br>(12 - 33)          | 15<br>(8 - 25)            |
| Paralytic ileus and intestinal obstruction          | 261<br>(161 - 452)          | 3<br>(1 - 6)     | 1<br>(0 - 1)      | 90<br>(52 - 166)         | 90<br>(53 - 163)         | 77<br>(41 - 137)          |
| Inguinal, femoral, and abdominal hernia             | 78<br>(40 - 119)            | 0<br>(0 - 0)     | 0<br>(0 - 0)      | 8<br>(5 - 15)            | 24<br>(12 - 37)          | 46<br>(22 - 73)           |
| Inflammatory bowel disease                          | 130<br>(91 - 185)           | 1<br>(0 - 2)     | 0<br>(0 - 1)      | 33<br>(22 - 50)          | 53<br>(34 - 77)          | 43<br>(23 - 71)           |
| Vascular intestinal disorders                       | 673<br>(332 - 1,148)        | 0<br>(0 - 1)     | 0<br>(0 - 1)      | 44<br>(16 - 93)          | 236<br>(101 - 441)       | 393<br>(198 - 648)        |
| Gallbladder and biliary diseases                    | 175<br>(115 - 298)          | 0<br>(0 - 0)     | 0<br>(0 - 0)      | 14<br>(9 - 24)           | 58<br>(38 - 107)         | 103<br>(63 - 175)         |
| Pancreatitis                                        | 1,377<br>(923 - 1,714)      | 0<br>(0 - 1)     | 0<br>(0 - 1)      | 647<br>(401 - 840)       | 526<br>(341 - 706)       | 203<br>(120 - 312)        |
| Other digestive diseases                            | 206<br>(130 - 285)          | 1<br>(0 - 1)     | 0<br>(0 - 1)      | 62<br>(32 - 95)          | 88<br>(52 - 133)         | 55<br>(32 - 90)           |
| Neurological disorders                              | 10,414<br>(8,596 - 12,340)  | 22<br>(13 - 32)  | 15<br>(11 - 22)   | 512<br>(411 - 634)       | 797<br>(655 - 969)       | 9,067<br>(7,285 - 10,949) |
| Alzheimer disease and other dementias               | 9,296<br>(7,464 - 11,186)   | --<br>(0 - 0)    | --<br>(0 - 0)     | 2<br>(0 - 6)             | 465<br>(346 - 614)       | 8,830<br>(7,058 - 10,728) |
| Parkinson disease                                   | 169<br>(95 - 276)           | --<br>(0 - 0)    | --<br>(0 - 0)     | 2<br>(1 - 2)             | 34<br>(22 - 50)          | 133<br>(66 - 240)         |
| Epilepsy                                            | 458<br>(348 - 570)          | 4<br>(2 - 8)     | 10<br>(6 - 16)    | 327<br>(245 - 418)       | 105<br>(75 - 143)        | 12<br>(8 - 17)            |
| Multiple sclerosis                                  | 162<br>(88 - 314)           | --<br>(0 - 0)    | --<br>(0 - 0)     | 86<br>(46 - 164)         | 59<br>(29 - 119)         | 16<br>(8 - 38)            |
| Other neurological disorders                        | 329<br>(253 - 414)          | 17<br>(10 - 26)  | 6<br>(4 - 8)      | 96<br>(67 - 120)         | 134<br>(99 - 174)        | 76<br>(56 - 115)          |
| Mental and substance use disorders                  | 5,831<br>(3,819 - 7,986)    | 1<br>(0 - 2)     | 0<br>(0 - 0)      | 3,174<br>(2,103 - 4,312) | 2,441<br>(1,406 - 3,398) | 216<br>(141 - 323)        |
| Schizophrenia                                       | 21<br>(13 - 32)             | --<br>(0 - 0)    | --<br>(0 - 0)     | 8<br>(5 - 13)            | 9<br>(5 - 15)            | 4<br>(2 - 8)              |
| Alcohol use disorders                               | 4,932<br>(3,015 - 6,989)    | --<br>(0 - 0)    | --<br>(0 - 0)     | 2,567<br>(1,590 - 3,709) | 2,201<br>(1,205 - 3,111) | 164<br>(89 - 271)         |
| Drug use disorders                                  | 877<br>(551 - 1,442)        | 1<br>(0 - 2)     | --<br>(0 - 0)     | 598<br>(367 - 1,015)     | 231<br>(136 - 391)       | 47<br>(27 - 86)           |
| Opioid use disorders                                | 381<br>(240 - 633)          | 0<br>(0 - 1)     | --<br>(0 - 0)     | 266<br>(162 - 463)       | 94<br>(55 - 159)         | 21<br>(12 - 40)           |
| Cocaine use disorders                               | 20<br>(13 - 34)             | 0<br>(0 - 0)     | --<br>(0 - 0)     | 15<br>(9 - 27)           | 4<br>(2 - 7)             | 1<br>(0 - 2)              |
| Amphetamine use disorders                           | 18<br>(11 - 30)             | 0<br>(0 - 0)     | --<br>(0 - 0)     | 12<br>(8 - 21)           | 5<br>(3 - 8)             | 1<br>(0 - 2)              |
| Other drug use disorders                            | 458<br>(285 - 755)          | 0<br>(0 - 1)     | --<br>(0 - 0)     | 306<br>(186 - 504)       | 128<br>(73 - 220)        | 24<br>(14 - 44)           |
| Eating disorders                                    | 1<br>(0 - 1)                | --<br>(0 - 0)    | 0<br>(0 - 0)      | 1<br>(0 - 1)             | --<br>(0 - 0)            | --<br>(0 - 0)             |
| Anorexia nervosa                                    | 1<br>(0 - 1)                | --<br>(0 - 0)    | 0<br>(0 - 0)      | 1<br>(0 - 1)             | --<br>(0 - 0)            | --<br>(0 - 0)             |
| Diabetes, urogenital, blood, and endocrine diseases | 2,653<br>(2,260 - 3,019)    | 38<br>(16 - 55)  | 12<br>(6 - 17)    | 690<br>(568 - 802)       | 1,141<br>(980 - 1,343)   | 772<br>(661 - 915)        |
| Diabetes mellitus                                   | 908<br>(807 - 1,007)        | 0<br>(0 - 0)     | 1<br>(1 - 1)      | 220<br>(186 - 255)       | 437<br>(374 - 503)       | 250<br>(212 - 297)        |
| Acute glomerulonephritis                            | 14<br>(11 - 20)             | 0<br>(0 - 0)     | 0<br>(0 - 0)      | 7<br>(5 - 10)            | 5<br>(4 - 8)             | 2<br>(1 - 3)              |
| Chronic kidney disease                              | 414<br>(330 - 958)          | 1<br>(0 - 1)     | 1<br>(1 - 2)      | 139<br>(107 - 293)       | 178<br>(133 - 415)       | 95<br>(72 - 217)          |
| Chronic kidney disease due to diabetes mellitus     | 17<br>(9 - 49)              | 0<br>(0 - 0)     | 0<br>(0 - 0)      | 7<br>(3 - 15)            | 7<br>(3 - 21)            | 3<br>(1 - 10)             |

Web Table 31- Ukraine deaths with 95% UI by age, sex, and cause in 2013

| Cause                                               | Males, All Ages             | Males, 0-4 Years     | Males, 5-14 Years  | Males, 15-49 Years          | Males, 50-69 Years         | Males, 70-80 Years       |
|-----------------------------------------------------|-----------------------------|----------------------|--------------------|-----------------------------|----------------------------|--------------------------|
| Chronic kidney disease due to hypertension          | 100<br>(66 - 222)           | 0<br>(0 - 0)         | 0<br>(0 - 0)       | 16<br>(8 - 38)              | 45<br>(26 - 100)           | 38<br>(22 - 91)          |
| Chronic kidney disease due to glomerulonephritis    | 184<br>(116 - 280)          | 0<br>(0 - 0)         | 0<br>(0 - 0)       | 71<br>(46 - 102)            | 76<br>(45 - 114)           | 36<br>(21 - 62)          |
| Chronic kidney disease due to other causes          | 113<br>(66 - 432)           | 0<br>(0 - 1)         | 0<br>(0 - 1)       | 45<br>(25 - 150)            | 50<br>(22 - 218)           | 18<br>(8 - 62)           |
| Urinary diseases and male infertility               | 803<br>(686 - 1,090)        | 1<br>(1 - 2)         | 1<br>(1 - 1)       | 158<br>(129 - 214)          | 334<br>(275 - 471)         | 309<br>(242 - 443)       |
| Interstitial nephritis and urinary tract infections | 635<br>(529 - 912)          | 1<br>(1 - 2)         | 1<br>(0 - 1)       | 141<br>(115 - 192)          | 279<br>(223 - 410)         | 214<br>(158 - 341)       |
| Urolithiasis                                        | 79<br>(41 - 129)            | --                   | 0<br>(0 - 0)       | 7<br>(3 - 12)               | 24<br>(12 - 42)            | 49<br>(22 - 84)          |
| Other urinary diseases                              | 88<br>(45 - 125)            | 0<br>(0 - 0)         | 0<br>(0 - 0)       | 10<br>(5 - 16)              | 31<br>(15 - 47)            | 47<br>(23 - 71)          |
| Gynecological diseases                              | --                          | --                   | --                 | --                          | --                         | --                       |
| Uterine fibroids                                    | --                          | --                   | --                 | --                          | --                         | --                       |
| Polycystic ovarian syndrome                         | --                          | --                   | --                 | --                          | --                         | --                       |
| Endometriosis                                       | --                          | --                   | --                 | --                          | --                         | --                       |
| Genital prolapse                                    | --                          | --                   | --                 | --                          | --                         | --                       |
| Other gynecological diseases                        | --                          | --                   | --                 | --                          | --                         | --                       |
| Hemoglobinopathies and hemolytic anemias            | 90<br>(51 - 128)            | 10<br>(5 - 16)       | 4<br>(2 - 7)       | 53<br>(30 - 77)             | 16<br>(9 - 24)             | 7<br>(4 - 11)            |
| Thalassemias                                        | 26<br>(14 - 39)             | 7<br>(4 - 12)        | 3<br>(1 - 6)       | 16<br>(9 - 24)              | 0<br>(0 - 0)               | 0<br>(0 - 0)             |
| Sickle cell disorders                               | 4<br>(2 - 6)                | 1<br>(0 - 1)         | 0<br>(0 - 1)       | 3<br>(1 - 4)                | 0<br>(0 - 1)               | 0<br>(0 - 0)             |
| G6PD deficiency                                     | 2<br>(1 - 3)                | 0<br>(0 - 0)         | 0<br>(0 - 0)       | 1<br>(1 - 2)                | 1<br>(0 - 1)               | 0<br>(0 - 0)             |
| Other hemoglobinopathies and hemolytic anemias      | 58<br>(33 - 83)             | 1<br>(1 - 2)         | 1<br>(0 - 1)       | 33<br>(19 - 50)             | 15<br>(9 - 23)             | 7<br>(4 - 11)            |
| Endocrine, metabolic, blood, and immune disorders   | 424<br>(86 - 548)           | 25<br>(7 - 39)       | 5<br>(1 - 8)       | 114<br>(27 - 154)           | 170<br>(30 - 234)          | 110<br>(19 - 157)        |
| Musculoskeletal disorders                           | 280<br>(212 - 531)          | --                   | 3<br>(1 - 5)       | 71<br>(46 - 116)            | 107<br>(74 - 194)          | 98<br>(62 - 221)         |
| Rheumatoid arthritis                                | 79<br>(50 - 174)            | --                   | 0<br>(0 - 1)       | 13<br>(7 - 21)              | 29<br>(18 - 61)            | 36<br>(17 - 93)          |
| Other musculoskeletal disorders                     | 201<br>(145 - 363)          | --                   | 3<br>(1 - 4)       | 59<br>(38 - 97)             | 77<br>(52 - 141)           | 62<br>(38 - 131)         |
| Other non-communicable diseases                     | 1,359<br>(1,083 - 1,732)    | 978<br>(720 - 1,310) | 66<br>(43 - 90)    | 197<br>(166 - 234)          | 96<br>(77 - 114)           | 23<br>(17 - 28)          |
| Congenital anomalies                                | 1,265<br>(987 - 1,619)      | 907<br>(659 - 1,234) | 66<br>(43 - 89)    | 192<br>(161 - 229)          | 85<br>(68 - 101)           | 16<br>(12 - 20)          |
| Neural tube defects                                 | 78<br>(47 - 131)            | 63<br>(34 - 113)     | 7<br>(4 - 13)      | 6<br>(4 - 9)                | 1<br>(1 - 2)               | 0<br>(0 - 0)             |
| Congenital heart anomalies                          | 652<br>(442 - 893)          | 487<br>(302 - 714)   | 29<br>(17 - 43)    | 108<br>(81 - 133)           | 27<br>(19 - 35)            | 2<br>(1 - 3)             |
| Cleft lip and cleft palate                          | 5<br>(1 - 12)               | 5<br>(1 - 12)        | --                 | --                          | --                         | --                       |
| Down syndrome                                       | 50<br>(27 - 79)             | 17<br>(6 - 37)       | 4<br>(1 - 8)       | 19<br>(10 - 27)             | 10<br>(6 - 16)             | 0<br>(0 - 1)             |
| Chromosomal unbalanced rearrangements               | 20<br>(12 - 32)             | 15<br>(8 - 26)       | 2<br>(1 - 4)       | 2<br>(2 - 3)                | 1<br>(1 - 2)               | 0<br>(0 - 1)             |
| Other congenital anomalies                          | 460<br>(326 - 637)          | 321<br>(195 - 482)   | 24<br>(13 - 38)    | 57<br>(44 - 73)             | 45<br>(35 - 56)            | 13<br>(10 - 17)          |
| Skin and subcutaneous diseases                      | 23<br>(10 - 30)             | 0<br>(0 - 1)         | 0<br>(0 - 0)       | 5<br>(2 - 6)                | 11<br>(5 - 15)             | 7<br>(3 - 9)             |
| Cellulitis                                          | 15<br>(6 - 19)              | 0<br>(0 - 0)         | 0<br>(0 - 0)       | 3<br>(1 - 4)                | 7<br>(3 - 10)              | 4<br>(2 - 6)             |
| Pyoderma                                            | 7<br>(3 - 10)               | 0<br>(0 - 0)         | 0<br>(0 - 0)       | 1<br>(1 - 2)                | 3<br>(2 - 6)               | 2<br>(1 - 3)             |
| Decubitus ulcer                                     | 2<br>(1 - 3)                | 0<br>(0 - 0)         | 0<br>(0 - 0)       | 0<br>(0 - 1)                | 1<br>(0 - 1)               | 1<br>(0 - 1)             |
| Other skin and subcutaneous diseases                | 0<br>(0 - 1)                | 0<br>(0 - 0)         | 0<br>(0 - 0)       | 0<br>(0 - 0)                | 0<br>(0 - 0)               | 0<br>(0 - 0)             |
| Sudden infant death syndrome                        | 71<br>(14 - 218)            | 71<br>(14 - 218)     | --                 | --                          | --                         | --                       |
| Injuries                                            | 32,366<br>(29,042 - 37,874) | 395<br>(272 - 536)   | 361<br>(290 - 451) | 17,796<br>(15,907 - 20,629) | 10,228<br>(9,063 - 12,188) | 3,586<br>(3,112 - 4,466) |
| Transport injuries                                  | 5,895<br>(5,130 - 6,764)    | 41<br>(25 - 62)      | 96<br>(63 - 132)   | 3,895<br>(3,305 - 4,536)    | 1,410<br>(1,191 - 1,661)   | 453<br>(380 - 540)       |
| Road injuries                                       | 5,458<br>(4,674 - 6,354)    | 38<br>(23 - 58)      | 90<br>(59 - 124)   | 3,615<br>(2,997 - 4,252)    | 1,294<br>(1,079 - 1,559)   | 421<br>(346 - 507)       |
| Pedestrian road injuries                            | 1,778<br>(978 - 2,523)      | 20<br>(9 - 34)       | 45<br>(25 - 69)    | 876<br>(420 - 1,342)        | 605<br>(325 - 862)         | 233<br>(152 - 329)       |

Web Table 31- Ukraine deaths with 95% UI by age, sex, and cause in 2013

| Cause                                           | Males, All Ages             | Males, 0-4 Years   | Males, 5-14 Years  | Males, 15-49 Years       | Males, 50-69 Years       | Males, 70-80 Years       |
|-------------------------------------------------|-----------------------------|--------------------|--------------------|--------------------------|--------------------------|--------------------------|
| Cyclist road injuries                           | 380<br>(207 - 559)          | 1<br>(0 - 3)       | 11<br>(5 - 20)     | 169<br>(97 - 252)        | 144<br>(69 - 236)        | 54<br>(19 - 91)          |
| Motorcyclist road injuries                      | 577<br>(328 - 919)          | 1<br>(0 - 2)       | 5<br>(1 - 12)      | 473<br>(263 - 765)       | 80<br>(40 - 143)         | 19<br>(7 - 33)           |
| Motor vehicle road injuries                     | 2,548<br>(1,734 - 3,274)    | 14<br>(6 - 26)     | 24<br>(11 - 41)    | 1,971<br>(1,320 - 2,475) | 435<br>(265 - 670)       | 103<br>(54 - 178)        |
| Other road injuries                             | 174<br>(72 - 343)           | 2<br>(1 - 4)       | 4<br>(1 - 8)       | 126<br>(41 - 244)        | 30<br>(11 - 97)          | 13<br>(4 - 37)           |
| Other transport injuries                        | 437<br>(289 - 660)          | 3<br>(1 - 8)       | 6<br>(3 - 14)      | 280<br>(175 - 432)       | 115<br>(63 - 192)        | 32<br>(16 - 63)          |
| Unintentional injuries                          | 13,021<br>(11,169 - 17,189) | 331<br>(224 - 460) | 225<br>(166 - 326) | 6,140<br>(5,043 - 8,568) | 4,777<br>(4,123 - 6,023) | 1,548<br>(1,296 - 2,026) |
| Falls                                           | 3,001<br>(2,481 - 4,063)    | 41<br>(26 - 64)    | 19<br>(13 - 31)    | 1,246<br>(996 - 1,850)   | 1,215<br>(948 - 1,579)   | 479<br>(373 - 635)       |
| Drowning                                        | 3,451<br>(2,510 - 5,703)    | 80<br>(43 - 150)   | 149<br>(102 - 249) | 2,142<br>(1,472 - 3,533) | 877<br>(628 - 1,545)     | 204<br>(148 - 348)       |
| Fire, heat, and hot substances                  | 2,117<br>(1,692 - 3,058)    | 60<br>(33 - 101)   | 16<br>(9 - 28)     | 854<br>(627 - 1,233)     | 845<br>(630 - 1,219)     | 342<br>(244 - 476)       |
| Poisonings                                      | 1,141<br>(809 - 2,888)      | 23<br>(11 - 52)    | 9<br>(5 - 18)      | 432<br>(249 - 1,368)     | 514<br>(363 - 1,137)     | 163<br>(116 - 330)       |
| Exposure to mechanical forces                   | 859<br>(670 - 1,096)        | 23<br>(8 - 54)     | 15<br>(8 - 24)     | 498<br>(370 - 670)       | 271<br>(182 - 395)       | 52<br>(33 - 82)          |
| Unintentional firearm injuries                  | 42<br>(27 - 60)             | 0<br>(0 - 1)       | 1<br>(1 - 3)       | 32<br>(19 - 51)          | 6<br>(3 - 10)            | 2<br>(1 - 3)             |
| Unintentional suffocation                       | 41<br>(21 - 75)             | 15<br>(3 - 44)     | 2<br>(1 - 4)       | 16<br>(8 - 25)           | 7<br>(4 - 12)            | 1<br>(0 - 3)             |
| Other exposure to mechanical forces             | 777<br>(598 - 1,014)        | 8<br>(4 - 14)      | 12<br>(6 - 19)     | 450<br>(323 - 622)       | 258<br>(168 - 382)       | 49<br>(30 - 79)          |
| Adverse effects of medical treatment            | 197<br>(140 - 300)          | 8<br>(4 - 14)      | 1<br>(0 - 1)       | 44<br>(28 - 75)          | 106<br>(67 - 175)        | 39<br>(23 - 67)          |
| Animal contact                                  | 94<br>(67 - 127)            | 2<br>(1 - 4)       | 2<br>(1 - 3)       | 26<br>(18 - 38)          | 49<br>(33 - 70)          | 14<br>(9 - 21)           |
| Venomous animal contact                         | 23<br>(12 - 35)             | 1<br>(0 - 2)       | 0<br>(0 - 1)       | 8<br>(4 - 13)            | 12<br>(5 - 22)           | 1<br>(0 - 2)             |
| Non-venomous animal contact                     | 71<br>(48 - 98)             | 1<br>(1 - 3)       | 1<br>(1 - 2)       | 18<br>(11 - 27)          | 37<br>(24 - 53)          | 13<br>(8 - 20)           |
| Foreign body                                    | 1,767<br>(836 - 2,387)      | 87<br>(42 - 144)   | 9<br>(5 - 14)      | 665<br>(277 - 968)       | 761<br>(322 - 1,098)     | 244<br>(147 - 493)       |
| Pulmonary aspiration and foreign body in airway | 1,764<br>(833 - 2,384)      | 87<br>(42 - 144)   | 8<br>(4 - 14)      | 664<br>(276 - 966)       | 761<br>(321 - 1,097)     | 244<br>(146 - 492)       |
| Foreign body in other body part                 | 3<br>(2 - 5)                | 0<br>(0 - 0)       | 0<br>(0 - 0)       | 2<br>(1 - 2)             | 1<br>(0 - 1)             | 0<br>(0 - 1)             |
| Other unintentional injuries                    | 393<br>(330 - 464)          | 6<br>(4 - 9)       | 7<br>(4 - 10)      | 231<br>(185 - 287)       | 138<br>(108 - 177)       | 12<br>(8 - 16)           |
| Self-harm and interpersonal violence            | 13,450<br>(11,631 - 16,517) | 24<br>(13 - 37)    | 40<br>(22 - 56)    | 7,761<br>(6,606 - 9,528) | 4,041<br>(3,391 - 5,285) | 1,585<br>(1,234 - 2,105) |
| Self-harm                                       | 10,452<br>(8,818 - 12,672)  | --                 | 31<br>(15 - 45)    | 5,818<br>(4,685 - 6,875) | 3,211<br>(2,602 - 4,228) | 1,391<br>(1,055 - 1,845) |
| Interpersonal violence                          | 2,999<br>(2,234 - 5,072)    | 24<br>(13 - 37)    | 9<br>(5 - 15)      | 1,943<br>(1,458 - 3,259) | 829<br>(563 - 1,436)     | 194<br>(137 - 347)       |
| Assault by firearm                              | 239<br>(107 - 496)          | 0<br>(0 - 1)       | 1<br>(0 - 2)       | 203<br>(88 - 402)        | 33<br>(14 - 80)          | 2<br>(1 - 7)             |
| Assault by sharp object                         | 1,206<br>(747 - 2,104)      | 3<br>(1 - 8)       | 2<br>(1 - 5)       | 795<br>(492 - 1,378)     | 345<br>(186 - 603)       | 60<br>(34 - 132)         |
| Assault by other means                          | 1,553<br>(1,087 - 2,712)    | 20<br>(11 - 31)    | 6<br>(3 - 10)      | 945<br>(644 - 1,669)     | 451<br>(271 - 821)       | 131<br>(85 - 241)        |

Web Table 31- Ukraine deaths with 95% UI by age, sex, and cause in 2013

| Cause                                                             | Females, All Ages              | Females, 0-4 Years       | Females, 5-14 Years | Females, 15-49 Years        | Females, 50-69 Years        | Females, 70-80 Years           |
|-------------------------------------------------------------------|--------------------------------|--------------------------|---------------------|-----------------------------|-----------------------------|--------------------------------|
| All causes                                                        | 343,507<br>(329,475 - 357,911) | 2,275<br>(1,723 - 2,945) | 384<br>(324 - 447)  | 16,885<br>(15,839 - 17,916) | 57,831<br>(54,838 - 60,942) | 266,132<br>(255,886 - 276,408) |
| Communicable, maternal, neonatal, and nutritional diseases        | 6,955<br>(5,597 - 8,614)       | 1,111<br>(788 - 1,506)   | 45<br>(33 - 59)     | 3,061<br>(2,361 - 3,862)    | 1,727<br>(1,266 - 2,336)    | 1,011<br>(790 - 1,360)         |
| HIV/AIDS and tuberculosis                                         | 3,846<br>(2,565 - 5,512)       | 7<br>(4 - 11)            | 3<br>(1 - 6)        | 2,256<br>(1,519 - 3,098)    | 1,155<br>(705 - 1,763)      | 425<br>(266 - 677)             |
| Tuberculosis                                                      | 958<br>(501 - 1,222)           | 3<br>(1 - 5)             | 1<br>(1 - 2)        | 419<br>(157 - 567)          | 340<br>(184 - 450)          | 194<br>(139 - 256)             |
| HIV/AIDS                                                          | 2,889<br>(1,515 - 4,597)       | 4<br>(1 - 8)             | 2<br>(0 - 5)        | 1,837<br>(1,064 - 2,733)    | 815<br>(353 - 1,457)        | 231<br>(80 - 492)              |
| HIV/AIDS resulting in mycobacterial infection                     | 143<br>(75 - 239)              | 0<br>(0 - 0)             | 0<br>(0 - 0)        | 91<br>(51 - 143)            | 41<br>(17 - 75)             | 11<br>(4 - 24)                 |
| HIV/AIDS resulting in other diseases                              | 2,746<br>(1,441 - 4,355)       | 4<br>(1 - 8)             | 2<br>(0 - 4)        | 1,747<br>(1,012 - 2,592)    | 774<br>(335 - 1,392)        | 220<br>(76 - 465)              |
| Diarrhea, lower respiratory, and other common infectious diseases | 1,802<br>(1,445 - 2,086)       | 234<br>(165 - 318)       | 34<br>(24 - 45)     | 575<br>(402 - 707)          | 456<br>(334 - 562)          | 503<br>(373 - 703)             |
| Diarrheal diseases                                                | 35<br>(26 - 48)                | 15<br>(8 - 25)           | 1<br>(0 - 1)        | 5<br>(4 - 7)                | 4<br>(3 - 6)                | 11<br>(6 - 17)                 |
| Intestinal infectious diseases                                    | 63<br>(31 - 113)               | 8<br>(3 - 16)            | 6<br>(2 - 12)       | 21<br>(8 - 41)              | 14<br>(5 - 30)              | 14<br>(6 - 28)                 |
| Typhoid fever                                                     | 46<br>(22 - 85)                | 6<br>(2 - 11)            | 5<br>(2 - 9)        | 15<br>(6 - 31)              | 11<br>(4 - 23)              | 11<br>(4 - 21)                 |
| Paratyphoid fever                                                 | 14<br>(7 - 27)                 | 2<br>(1 - 4)             | 1<br>(0 - 3)        | 5<br>(2 - 10)               | 3<br>(1 - 7)                | 3<br>(1 - 7)                   |
| Other intestinal infectious diseases                              | 3<br>(0 - 8)                   | 0<br>(0 - 3)             | 0<br>(0 - 1)        | 1<br>(0 - 3)                | 1<br>(0 - 3)                | 1<br>(0 - 4)                   |
| Lower respiratory infections                                      | 1,348<br>(1,020 - 1,596)       | 118<br>(77 - 172)        | 16<br>(11 - 22)     | 452<br>(279 - 573)          | 365<br>(236 - 469)          | 398<br>(294 - 542)             |
| Upper respiratory infections                                      | 13<br>(3 - 44)                 | 0<br>(0 - 0)             | 0<br>(0 - 0)        | 1<br>(0 - 3)                | 3<br>(0 - 8)                | 10<br>(0 - 41)                 |
| Otitis media                                                      | 5<br>(4 - 6)                   | 0<br>(0 - 0)             | 0<br>(0 - 0)        | 2<br>(1 - 2)                | 1<br>(1 - 2)                | 1<br>(1 - 2)                   |
| Meningitis                                                        | 175<br>(145 - 209)             | 56<br>(36 - 80)          | 4<br>(3 - 6)        | 47<br>(39 - 58)             | 43<br>(34 - 52)             | 25<br>(18 - 32)                |
| Pneumococcal meningitis                                           | 40<br>(29 - 51)                | 10<br>(6 - 15)           | 1<br>(1 - 2)        | 12<br>(8 - 17)              | 10<br>(6 - 17)              | 6<br>(4 - 9)                   |
| H influenzae type B meningitis                                    | 37<br>(27 - 49)                | 22<br>(13 - 33)          | 1<br>(1 - 2)        | 7<br>(4 - 10)               | 4<br>(2 - 7)                | 3<br>(2 - 4)                   |
| Meningococcal meningitis                                          | 38<br>(30 - 48)                | 13<br>(8 - 19)           | 1<br>(1 - 2)        | 11<br>(7 - 16)              | 8<br>(6 - 12)               | 5<br>(3 - 7)                   |
| Other meningitis                                                  | 60<br>(44 - 76)                | 11<br>(6 - 17)           | 1<br>(1 - 2)        | 18<br>(11 - 25)             | 20<br>(13 - 27)             | 11<br>(7 - 16)                 |
| Encephalitis                                                      | 92<br>(65 - 119)               | 23<br>(12 - 38)          | 6<br>(3 - 9)        | 40<br>(25 - 56)             | 17<br>(12 - 25)             | 6<br>(4 - 10)                  |
| Diphtheria                                                        | 3<br>(0 - 11)                  | 1<br>(0 - 6)             | 0<br>(0 - 3)        | 1<br>(0 - 4)                | 1<br>(0 - 5)                | --                             |
| Whooping cough                                                    | 11<br>(3 - 49)                 | 9<br>(1 - 47)            | 0<br>(0 - 0)        | 2<br>(1 - 2)                | 0<br>(0 - 1)                | --                             |
| Tetanus                                                           | 17<br>(9 - 40)                 | 0<br>(0 - 0)             | 0<br>(0 - 0)        | 2<br>(1 - 3)                | 5<br>(2 - 13)               | 9<br>(4 - 26)                  |
| Measles                                                           | 2<br>(1 - 4)                   | 2<br>(1 - 4)             | 0<br>(0 - 0)        | 0<br>(0 - 0)                | 0<br>(0 - 0)                | --                             |
| Varicella and herpes zoster                                       | 38<br>(6 - 165)                | 2<br>(0 - 7)             | 0<br>(0 - 2)        | 3<br>(0 - 9)                | 3<br>(0 - 11)               | 30<br>(1 - 155)                |
| Neglected tropical diseases and malaria                           | 19<br>(17 - 23)                | 1<br>(1 - 2)             | 1<br>(1 - 1)        | 7<br>(5 - 9)                | 5<br>(4 - 6)                | 6<br>(5 - 7)                   |
| Cysticercosis                                                     | 0<br>(0 - 0)                   | 0<br>(0 - 0)             | 0<br>(0 - 0)        | 0<br>(0 - 0)                | 0<br>(0 - 0)                | 0<br>(0 - 0)                   |
| Cystic echinococcosis                                             | 7<br>(6 - 8)                   | 0<br>(0 - 0)             | 0<br>(0 - 0)        | 1<br>(1 - 2)                | 2<br>(2 - 2)                | 3<br>(3 - 4)                   |
| Dengue                                                            | 2<br>(2 - 3)                   | 0<br>(0 - 0)             | 0<br>(0 - 0)        | 1<br>(1 - 1)                | 1<br>(0 - 1)                | 0<br>(0 - 1)                   |
| Rabies                                                            | 4<br>(2 - 5)                   | 0<br>(0 - 0)             | 0<br>(0 - 1)        | 2<br>(1 - 2)                | 1<br>(1 - 1)                | 0<br>(0 - 1)                   |
| Other neglected tropical diseases                                 | 6<br>(4 - 10)                  | 1<br>(0 - 2)             | 0<br>(0 - 0)        | 3<br>(2 - 4)                | 1<br>(1 - 2)                | 1<br>(1 - 3)                   |
| Maternal disorders                                                | 116<br>(88 - 147)              | --                       | 0<br>(0 - 0)        | 116<br>(88 - 147)           | --                          | --                             |
| Maternal hemorrhage                                               | 12<br>(8 - 17)                 | --                       | 0<br>(0 - 0)        | 12<br>(8 - 17)              | --                          | --                             |
| Maternal sepsis and other maternal infections                     | 8<br>(4 - 12)                  | --                       | 0<br>(0 - 0)        | 8<br>(4 - 12)               | --                          | --                             |
| Maternal hypertensive disorders                                   | 10<br>(5 - 16)                 | --                       | 0<br>(0 - 0)        | 10<br>(5 - 16)              | --                          | --                             |
| Maternal obstructed labor                                         | 13<br>(8 - 19)                 | --                       | 0<br>(0 - 0)        | 13<br>(8 - 19)              | --                          | --                             |
| Maternal abortive outcome                                         | 16<br>(11 - 21)                | --                       | 0<br>(0 - 0)        | 16<br>(11 - 21)             | --                          | --                             |
| Indirect maternal deaths                                          | 27<br>(18 - 36)                | --                       | 0<br>(0 - 0)        | 27<br>(18 - 36)             | --                          | --                             |



Web Table 31- Ukraine deaths with 95% UI by age, sex, and cause in 2013

| Cause                                                            | Females, All Ages              | Females, 0-4 Years   | Females, 5-14 Years | Females, 15-49 Years       | Females, 50-69 Years        | Females, 70-80 Years           |
|------------------------------------------------------------------|--------------------------------|----------------------|---------------------|----------------------------|-----------------------------|--------------------------------|
| Late maternal deaths                                             | 10<br>(5 - 16)                 | --                   | 0<br>(0 - 0)        | 10<br>(5 - 16)             | --                          | --                             |
| Maternal deaths aggravated by HIV/AIDS                           | 0<br>(0 - 0)                   | --                   | --                  | 0<br>(0 - 0)               | --                          | --                             |
| Other maternal disorders                                         | 21<br>(14 - 29)                | --                   | 0<br>(0 - 0)        | 21<br>(14 - 29)            | --                          | --                             |
| Neonatal disorders                                               | 836<br>(574 - 1,157)           | 836<br>(574 - 1,157) | --                  | --                         | --                          | --                             |
| Neonatal preterm birth complications                             | 265<br>(115 - 465)             | 265<br>(115 - 465)   | --                  | --                         | --                          | --                             |
| Neonatal encephalopathy due to birth asphyxia and trauma         | 343<br>(192 - 571)             | 343<br>(192 - 571)   | --                  | --                         | --                          | --                             |
| Neonatal sepsis and other neonatal infections                    | 56<br>(22 - 116)               | 56<br>(22 - 116)     | --                  | --                         | --                          | --                             |
| Hemolytic disease and other neonatal jaundice                    | 3<br>(1 - 6)                   | 3<br>(1 - 6)         | --                  | --                         | --                          | --                             |
| Other neonatal disorders                                         | 169<br>(84 - 304)              | 169<br>(84 - 304)    | --                  | --                         | --                          | --                             |
| Nutritional deficiencies                                         | 154<br>(135 - 199)             | 11<br>(7 - 17)       | 2<br>(2 - 3)        | 53<br>(43 - 64)            | 46<br>(37 - 69)             | 42<br>(32 - 58)                |
| Protein-energy malnutrition                                      | 44<br>(28 - 65)                | 7<br>(3 - 13)        | 1<br>(1 - 2)        | 20<br>(12 - 31)            | 13<br>(7 - 24)              | 2<br>(1 - 4)                   |
| Iodine deficiency                                                | 16<br>(2 - 37)                 | 1<br>(0 - 5)         | 0<br>(0 - 1)        | 4<br>(0 - 13)              | 5<br>(0 - 18)               | 6<br>(0 - 21)                  |
| Iron-deficiency anemia                                           | 68<br>(40 - 102)               | 2<br>(0 - 3)         | 1<br>(0 - 1)        | 20<br>(10 - 31)            | 19<br>(9 - 32)              | 27<br>(14 - 42)                |
| Other nutritional deficiencies                                   | 26<br>(12 - 42)                | 1<br>(0 - 2)         | 0<br>(0 - 1)        | 9<br>(3 - 14)              | 8<br>(4 - 15)               | 7<br>(3 - 15)                  |
| Other communicable, maternal, neonatal, and nutritional diseases | 182<br>(137 - 242)             | 23<br>(12 - 42)      | 4<br>(2 - 7)        | 53<br>(38 - 72)            | 66<br>(42 - 107)            | 36<br>(20 - 74)                |
| Sexually transmitted diseases excluding HIV                      | 28<br>(9 - 50)                 | 6<br>(0 - 15)        | 1<br>(0 - 1)        | 5<br>(2 - 9)               | 8<br>(2 - 17)               | 7<br>(2 - 15)                  |
| Syphilis                                                         | 19<br>(5 - 34)                 | 6<br>(0 - 15)        | 1<br>(0 - 1)        | 2<br>(1 - 4)               | 5<br>(1 - 9)                | 6<br>(1 - 12)                  |
| Chlamydial infection                                             | 3<br>(1 - 5)                   | --                   | 0<br>(0 - 0)        | 1<br>(0 - 2)               | 1<br>(0 - 2)                | 0<br>(0 - 1)                   |
| Gonococcal infection                                             | 4<br>(1 - 7)                   | --                   | 0<br>(0 - 0)        | 1<br>(0 - 2)               | 1<br>(0 - 3)                | 1<br>(0 - 2)                   |
| Other sexually transmitted diseases                              | 3<br>(1 - 5)                   | --                   | 0<br>(0 - 0)        | 1<br>(0 - 2)               | 1<br>(0 - 2)                | 0<br>(0 - 1)                   |
| Hepatitis                                                        | 45<br>(36 - 56)                | 4<br>(2 - 6)         | 1<br>(1 - 2)        | 18<br>(13 - 25)            | 14<br>(9 - 20)              | 8<br>(4 - 13)                  |
| Acute hepatitis A                                                | 10<br>(3 - 18)                 | 2<br>(1 - 4)         | 1<br>(0 - 1)        | 6<br>(2 - 11)              | 1<br>(0 - 4)                | 0<br>(0 - 1)                   |
| Acute hepatitis B                                                | 33<br>(22 - 44)                | 2<br>(1 - 4)         | 0<br>(0 - 1)        | 12<br>(6 - 18)             | 12<br>(7 - 18)              | 7<br>(4 - 12)                  |
| Acute hepatitis C                                                | 2<br>(0 - 5)                   | --                   | 0<br>(0 - 0)        | 1<br>(0 - 3)               | 1<br>(0 - 2)                | 0<br>(0 - 1)                   |
| Other infectious diseases                                        | 109<br>(66 - 159)              | 13<br>(6 - 30)       | 2<br>(1 - 5)        | 29<br>(16 - 46)            | 44<br>(21 - 78)             | 20<br>(8 - 50)                 |
| Non-communicable diseases                                        | 327,528<br>(313,183 - 341,201) | 891<br>(663 - 1,178) | 171<br>(136 - 206)  | 10,740<br>(9,765 - 11,675) | 53,446<br>(50,303 - 56,355) | 262,279<br>(251,900 - 272,397) |
| Neoplasms                                                        | 40,494<br>(37,070 - 45,343)    | 56<br>(37 - 79)      | 77<br>(57 - 95)     | 4,087<br>(3,609 - 4,587)   | 16,666<br>(14,966 - 18,638) | 19,609<br>(17,779 - 22,375)    |
| Esophageal cancer                                                | 209<br>(179 - 251)             | --                   | --                  | 8<br>(6 - 10)              | 69<br>(57 - 86)             | 132<br>(108 - 163)             |
| Stomach cancer                                                   | 4,161<br>(3,193 - 5,400)       | --                   | --                  | 356<br>(262 - 483)         | 1,512<br>(1,139 - 1,952)    | 2,293<br>(1,712 - 3,024)       |
| Liver cancer                                                     | 785<br>(629 - 960)             | --                   | 1<br>(0 - 1)        | 58<br>(42 - 73)            | 296<br>(230 - 373)          | 430<br>(321 - 549)             |
| Liver cancer due to hepatitis B                                  | 101<br>(49 - 174)              | --                   | 0<br>(0 - 0)        | 12<br>(6 - 21)             | 45<br>(19 - 83)             | 44<br>(21 - 78)                |
| Liver cancer due to hepatitis C                                  | 377<br>(256 - 513)             | --                   | 0<br>(0 - 0)        | 23<br>(13 - 34)            | 141<br>(89 - 200)           | 213<br>(137 - 300)             |
| Liver cancer due to alcohol use                                  | 166<br>(104 - 255)             | --                   | --                  | 7<br>(3 - 11)              | 53<br>(30 - 87)             | 106<br>(65 - 170)              |
| Liver cancer due to other causes                                 | 141<br>(84 - 203)              | --                   | 1<br>(0 - 1)        | 16<br>(10 - 23)            | 57<br>(33 - 84)             | 67<br>(36 - 106)               |
| Larynx cancer                                                    | 68<br>(47 - 97)                | --                   | --                  | 8<br>(5 - 11)              | 29<br>(19 - 40)             | 32<br>(20 - 48)                |
| Tracheal, bronchus and lung cancer                               | 3,341<br>(2,847 - 4,380)       | --                   | --                  | 232<br>(188 - 293)         | 1,357<br>(1,140 - 1,739)    | 1,751<br>(1,430 - 2,470)       |
| Breast cancer                                                    | 7,563<br>(5,629 - 9,209)       | --                   | --                  | 985<br>(798 - 1,323)       | 3,641<br>(2,672 - 4,508)    | 2,937<br>(2,009 - 3,677)       |
| Cervical cancer                                                  | 2,695<br>(2,075 - 3,349)       | --                   | --                  | 414<br>(302 - 525)         | 1,167<br>(869 - 1,459)      | 1,114<br>(856 - 1,471)         |
| Uterine cancer                                                   | 881<br>(704 - 1,318)           | --                   | --                  | 47<br>(35 - 64)            | 389<br>(296 - 600)          | 445<br>(331 - 719)             |
| Prostate cancer                                                  | --                             | --                   | --                  | --                         | --                          | --                             |

Web Table 31- Ukraine deaths with 95% UI by age, sex, and cause in 2013

| Cause                                         | Females, All Ages              | Females, 0-4 Years | Females, 5-14 Years | Females, 15-49 Years     | Females, 50-69 Years        | Females, 70-80 Years           |
|-----------------------------------------------|--------------------------------|--------------------|---------------------|--------------------------|-----------------------------|--------------------------------|
| Colon and rectum cancer                       | 6,232<br>(5,569 - 7,054)       | --                 | --                  | 294<br>(245 - 346)       | 2,193<br>(1,918 - 2,472)    | 3,745<br>(3,229 - 4,367)       |
| Lip and oral cavity cancer                    | 392<br>(313 - 473)             | --                 | --                  | 30<br>(23 - 38)          | 122<br>(98 - 151)           | 240<br>(177 - 303)             |
| Nasopharynx cancer                            | 48<br>(22 - 84)                | --                 | 0<br>(0 - 1)        | 11<br>(4 - 18)           | 22<br>(9 - 38)              | 15<br>(7 - 29)                 |
| Other pharynx cancer                          | 91<br>(71 - 117)               | --                 | --                  | 11<br>(7 - 15)           | 46<br>(34 - 60)             | 35<br>(25 - 48)                |
| Gallbladder and biliary tract cancer          | 1,029<br>(656 - 1,323)         | --                 | --                  | 39<br>(24 - 53)          | 387<br>(253 - 495)          | 602<br>(370 - 819)             |
| Pancreatic cancer                             | 2,414<br>(2,136 - 2,718)       | --                 | --                  | 104<br>(85 - 125)        | 870<br>(747 - 1,010)        | 1,439<br>(1,237 - 1,677)       |
| Malignant skin melanoma                       | 613<br>(386 - 762)             | --                 | --                  | 113<br>(61 - 145)        | 258<br>(153 - 327)          | 243<br>(167 - 334)             |
| Non-melanoma skin cancer                      | 375<br>(234 - 590)             | --                 | --                  | 12<br>(7 - 19)           | 46<br>(25 - 86)             | 317<br>(190 - 522)             |
| Ovarian cancer                                | 3,140<br>(2,713 - 3,623)       | --                 | --                  | 439<br>(351 - 521)       | 1,633<br>(1,381 - 1,955)    | 1,068<br>(863 - 1,339)         |
| Testicular cancer                             | --                             | --                 | --                  | --                       | --                          | --                             |
| Kidney cancer                                 | 1,285<br>(1,018 - 1,639)       | 6<br>(3 - 12)      | 5<br>(3 - 9)        | 89<br>(66 - 119)         | 553<br>(417 - 724)          | 631<br>(463 - 865)             |
| Bladder cancer                                | 507<br>(353 - 766)             | --                 | --                  | 14<br>(10 - 21)          | 123<br>(86 - 192)           | 369<br>(252 - 557)             |
| Brain and nervous system cancer               | 1,026<br>(860 - 1,384)         | 11<br>(5 - 18)     | 23<br>(15 - 32)     | 258<br>(205 - 330)       | 541<br>(438 - 782)          | 194<br>(143 - 271)             |
| Thyroid cancer                                | 350<br>(259 - 445)             | --                 | 0<br>(0 - 0)        | 20<br>(13 - 27)          | 134<br>(97 - 174)           | 195<br>(140 - 261)             |
| Mesothelioma                                  | 159<br>(51 - 248)              | --                 | --                  | 26<br>(10 - 45)          | 65<br>(19 - 109)            | 67<br>(19 - 115)               |
| Hodgkin lymphoma                              | 96<br>(62 - 141)               | 0<br>(0 - 0)       | 1<br>(0 - 2)        | 48<br>(30 - 72)          | 26<br>(16 - 41)             | 22<br>(13 - 36)                |
| Non-Hodgkin lymphoma                          | 790<br>(372 - 1,064)           | 2<br>(1 - 3)       | 4<br>(2 - 7)        | 110<br>(49 - 149)        | 306<br>(139 - 420)          | 368<br>(171 - 531)             |
| Multiple myeloma                              | 232<br>(135 - 339)             | --                 | --                  | 14<br>(8 - 22)           | 113<br>(62 - 166)           | 105<br>(58 - 165)              |
| Leukemia                                      | 1,227<br>(1,062 - 1,441)       | 17<br>(10 - 29)    | 25<br>(17 - 34)     | 192<br>(158 - 234)       | 456<br>(378 - 560)          | 538<br>(436 - 659)             |
| Other neoplasms                               | 788<br>(652 - 939)             | 20<br>(12 - 33)    | 17<br>(11 - 26)     | 157<br>(126 - 189)       | 311<br>(247 - 383)          | 283<br>(213 - 377)             |
| Cardiovascular diseases                       | 248,768<br>(234,615 - 260,953) | 18<br>(12 - 28)    | 9<br>(7 - 12)       | 2,803<br>(2,290 - 3,283) | 29,182<br>(25,977 - 31,457) | 216,755<br>(205,051 - 226,542) |
| Rheumatic heart disease                       | 879<br>(660 - 1,500)           | 0<br>(0 - 1)       | 1<br>(1 - 2)        | 147<br>(95 - 320)        | 511<br>(375 - 883)          | 220<br>(150 - 315)             |
| Ischemic heart disease                        | 172,962<br>(149,142 - 185,451) | 5<br>(2 - 11)      | 2<br>(2 - 4)        | 1,315<br>(919 - 1,596)   | 18,620<br>(14,719 - 20,736) | 153,019<br>(131,961 - 163,426) |
| Cerebrovascular disease                       | 65,864<br>(57,949 - 85,189)    | 2<br>(1 - 3)       | 3<br>(2 - 4)        | 826<br>(645 - 1,091)     | 8,121<br>(6,959 - 10,684)   | 56,913<br>(49,725 - 73,587)    |
| Ischemic stroke                               | 50,500<br>(43,308 - 63,805)    | 0<br>(0 - 1)       | 0<br>(0 - 1)        | 153<br>(100 - 233)       | 4,073<br>(3,118 - 5,399)    | 46,274<br>(39,574 - 58,566)    |
| Hemorrhagic stroke                            | 15,364<br>(11,635 - 24,582)    | 1<br>(1 - 2)       | 2<br>(1 - 3)        | 673<br>(526 - 888)       | 4,049<br>(3,093 - 5,884)    | 10,639<br>(7,581 - 18,086)     |
| Hypertensive heart disease                    | 5,890<br>(3,142 - 8,574)       | 0<br>(0 - 0)       | 0<br>(0 - 0)        | 53<br>(28 - 81)          | 695<br>(357 - 1,043)        | 5,141<br>(2,700 - 7,608)       |
| Cardiomyopathy and myocarditis                | 1,902<br>(1,382 - 2,646)       | 11<br>(6 - 17)     | 3<br>(2 - 5)        | 354<br>(180 - 510)       | 876<br>(499 - 1,281)        | 658<br>(388 - 1,246)           |
| Atrial fibrillation and flutter               | 62<br>(36 - 101)               | --                 | --                  | 1<br>(1 - 2)             | 11<br>(6 - 17)              | 50<br>(27 - 86)                |
| Aortic aneurysm                               | 597<br>(381 - 963)             | --                 | --                  | 24<br>(13 - 37)          | 129<br>(71 - 192)           | 443<br>(275 - 741)             |
| Peripheral vascular disease                   | 51<br>(26 - 76)                | --                 | --                  | 1<br>(0 - 1)             | 6<br>(3 - 8)                | 44<br>(22 - 67)                |
| Endocarditis                                  | 102<br>(59 - 137)              | 0<br>(0 - 1)       | 0<br>(0 - 0)        | 18<br>(9 - 26)           | 36<br>(18 - 51)             | 48<br>(29 - 73)                |
| Other cardiovascular and circulatory diseases | 459<br>(351 - 633)             | 0<br>(0 - 0)       | 0<br>(0 - 0)        | 63<br>(42 - 92)          | 177<br>(123 - 262)          | 220<br>(148 - 333)             |
| Chronic respiratory diseases                  | 5,403<br>(4,199 - 11,751)      | 1<br>(1 - 2)       | 1<br>(1 - 2)        | 203<br>(164 - 317)       | 791<br>(634 - 1,534)        | 4,407<br>(3,316 - 10,000)      |
| Chronic obstructive pulmonary disease         | 4,402<br>(3,320 - 9,716)       | 0<br>(0 - 1)       | 0<br>(0 - 0)        | 99<br>(66 - 163)         | 564<br>(415 - 1,129)        | 3,737<br>(2,782 - 8,338)       |
| Pneumoconiosis                                | 5<br>(4 - 11)                  | 0<br>(0 - 0)       | 0<br>(0 - 0)        | 3<br>(2 - 5)             | 1<br>(1 - 3)                | 1<br>(0 - 3)                   |
| Silicosis                                     | 1<br>(1 - 3)                   | 0<br>(0 - 0)       | 0<br>(0 - 0)        | 1<br>(0 - 1)             | 0<br>(0 - 1)                | 0<br>(0 - 1)                   |
| Asbestosis                                    | 1<br>(1 - 3)                   | 0<br>(0 - 0)       | 0<br>(0 - 0)        | 1<br>(0 - 1)             | 0<br>(0 - 1)                | 0<br>(0 - 1)                   |
| Coal workers pneumoconiosis                   | 1<br>(1 - 2)                   | 0<br>(0 - 0)       | 0<br>(0 - 0)        | 1<br>(0 - 1)             | 0<br>(0 - 1)                | 0<br>(0 - 1)                   |
| Other pneumoconiosis                          | 2<br>(1 - 3)                   | 0<br>(0 - 0)       | 0<br>(0 - 0)        | 1<br>(1 - 2)             | 0<br>(0 - 1)                | 0<br>(0 - 1)                   |

Web Table 31- Ukraine deaths with 95% UI by age, sex, and cause in 2013

| Cause                                               | Females, All Ages           | Females, 0-4 Years | Females, 5-14 Years | Females, 15-49 Years     | Females, 50-69 Years     | Females, 70-80 Years        |
|-----------------------------------------------------|-----------------------------|--------------------|---------------------|--------------------------|--------------------------|-----------------------------|
| Asthma                                              | 781<br>(441 - 1,768)        | 0<br>(0 - 0)       | 0<br>(0 - 1)        | 73<br>(49 - 123)         | 178<br>(104 - 328)       | 530<br>(265 - 1,316)        |
| Interstitial lung disease and pulmonary sarcoidosis | 190<br>(86 - 487)           | 0<br>(0 - 0)       | 0<br>(0 - 0)        | 17<br>(9 - 29)           | 43<br>(22 - 100)         | 129<br>(44 - 370)           |
| Other chronic respiratory diseases                  | 26<br>(17 - 52)             | 0<br>(0 - 1)       | 0<br>(0 - 0)        | 11<br>(7 - 19)           | 5<br>(3 - 11)            | 9<br>(5 - 23)               |
| Cirrhosis                                           | 5,631<br>(4,947 - 6,262)    | 2<br>(1 - 3)       | 3<br>(2 - 4)        | 1,688<br>(1,415 - 1,961) | 2,863<br>(2,445 - 3,295) | 1,075<br>(923 - 2,261)      |
| Cirrhosis due to hepatitis B                        | 1,149<br>(619 - 2,020)      | 0<br>(0 - 0)       | 0<br>(0 - 1)        | 357<br>(179 - 608)       | 577<br>(302 - 1,076)     | 214<br>(107 - 406)          |
| Cirrhosis due to hepatitis C                        | 2,560<br>(1,191 - 3,315)    | 0<br>(0 - 0)       | 0<br>(0 - 1)        | 721<br>(347 - 976)       | 1,358<br>(616 - 1,806)   | 479<br>(180 - 658)          |
| Cirrhosis due to alcohol use                        | 1,209<br>(717 - 1,844)      | --                 | --                  | 275<br>(140 - 446)       | 630<br>(362 - 1,002)     | 304<br>(176 - 465)          |
| Cirrhosis due to other causes                       | 714<br>(431 - 1,076)        | 2<br>(1 - 2)       | 2<br>(2 - 3)        | 335<br>(219 - 490)       | 298<br>(151 - 487)       | 77<br>(38 - 120)            |
| Digestive diseases                                  | 2,853<br>(2,466 - 3,258)    | 4<br>(3 - 6)       | 3<br>(2 - 4)        | 309<br>(251 - 358)       | 784<br>(660 - 915)       | 1,754<br>(1,463 - 2,045)    |
| Peptic ulcer disease                                | 390<br>(257 - 525)          | 0<br>(0 - 0)       | 0<br>(0 - 0)        | 58<br>(41 - 79)          | 137<br>(95 - 188)        | 195<br>(113 - 284)          |
| Gastritis and duodenitis                            | 25<br>(13 - 62)             | 0<br>(0 - 0)       | 0<br>(0 - 0)        | 4<br>(2 - 9)             | 7<br>(4 - 16)            | 13<br>(5 - 38)              |
| Appendicitis                                        | 49<br>(29 - 72)             | 1<br>(0 - 2)       | 1<br>(0 - 1)        | 14<br>(8 - 21)           | 17<br>(9 - 27)           | 17<br>(9 - 27)              |
| Paralytic ileus and intestinal obstruction          | 219<br>(116 - 411)          | 2<br>(1 - 3)       | 1<br>(0 - 1)        | 29<br>(16 - 49)          | 62<br>(33 - 115)         | 126<br>(66 - 248)           |
| Inguinal, femoral, and abdominal hernia             | 128<br>(69 - 215)           | 0<br>(0 - 0)       | 0<br>(0 - 0)        | 5<br>(3 - 9)             | 30<br>(15 - 48)          | 93<br>(48 - 166)            |
| Inflammatory bowel disease                          | 113<br>(74 - 196)           | 0<br>(0 - 1)       | 0<br>(0 - 0)        | 18<br>(11 - 27)          | 33<br>(19 - 50)          | 62<br>(33 - 124)            |
| Vascular intestinal disorders                       | 905<br>(472 - 1,238)        | 0<br>(0 - 0)       | 0<br>(0 - 0)        | 15<br>(8 - 34)           | 143<br>(70 - 228)        | 747<br>(383 - 1,040)        |
| Gallbladder and biliary diseases                    | 243<br>(172 - 452)          | 0<br>(0 - 0)       | 0<br>(0 - 0)        | 21<br>(15 - 35)          | 83<br>(58 - 143)         | 138<br>(86 - 266)           |
| Pancreatitis                                        | 655<br>(443 - 932)          | 0<br>(0 - 1)       | 0<br>(0 - 1)        | 131<br>(88 - 180)        | 231<br>(151 - 318)       | 292<br>(174 - 485)          |
| Other digestive diseases                            | 126<br>(88 - 182)           | 0<br>(0 - 1)       | 0<br>(0 - 1)        | 13<br>(9 - 19)           | 41<br>(27 - 61)          | 70<br>(41 - 116)            |
| Neurological disorders                              | 18,050<br>(14,242 - 22,099) | 13<br>(9 - 18)     | 10<br>(7 - 14)      | 318<br>(253 - 396)       | 770<br>(610 - 953)       | 16,938<br>(13,210 - 20,946) |
| Alzheimer disease and other dementias               | 17,156<br>(13,389 - 21,170) | --                 | --                  | 2<br>(0 - 4)             | 489<br>(352 - 649)       | 16,665<br>(12,924 - 20,647) |
| Parkinson disease                                   | 153<br>(93 - 231)           | --                 | --                  | 2<br>(1 - 3)             | 24<br>(14 - 36)          | 126<br>(72 - 204)           |
| Epilepsy                                            | 218<br>(163 - 288)          | 3<br>(2 - 6)       | 7<br>(5 - 11)       | 153<br>(114 - 209)       | 46<br>(32 - 62)          | 9<br>(6 - 12)               |
| Multiple sclerosis                                  | 224<br>(144 - 351)          | --                 | --                  | 116<br>(73 - 184)        | 77<br>(42 - 127)         | 31<br>(16 - 68)             |
| Other neurological disorders                        | 300<br>(253 - 352)          | 10<br>(7 - 14)     | 3<br>(2 - 4)        | 46<br>(37 - 55)          | 133<br>(106 - 162)       | 108<br>(82 - 142)           |
| Mental and substance use disorders                  | 1,594<br>(823 - 2,521)      | 2<br>(1 - 3)       | 0<br>(0 - 0)        | 624<br>(325 - 971)       | 786<br>(377 - 1,342)     | 183<br>(117 - 304)          |
| Schizophrenia                                       | 21<br>(14 - 33)             | --                 | --                  | 5<br>(3 - 7)             | 7<br>(4 - 11)            | 9<br>(5 - 18)               |
| Alcohol use disorders                               | 1,317<br>(543 - 2,219)      | --                 | --                  | 515<br>(217 - 864)       | 687<br>(274 - 1,240)     | 115<br>(47 - 229)           |
| Drug use disorders                                  | 255<br>(149 - 371)          | 2<br>(1 - 3)       | --                  | 103<br>(63 - 156)        | 91<br>(47 - 141)         | 59<br>(32 - 95)             |
| Opioid use disorders                                | 106<br>(62 - 154)           | 1<br>(0 - 1)       | --                  | 44<br>(27 - 67)          | 36<br>(19 - 56)          | 26<br>(14 - 42)             |
| Cocaine use disorders                               | 8<br>(5 - 13)               | 0<br>(0 - 0)       | --                  | 4<br>(2 - 6)             | 3<br>(1 - 4)             | 2<br>(1 - 3)                |
| Amphetamine use disorders                           | 9<br>(5 - 13)               | 0<br>(0 - 0)       | --                  | 4<br>(2 - 6)             | 3<br>(2 - 5)             | 2<br>(1 - 3)                |
| Other drug use disorders                            | 131<br>(76 - 192)           | 1<br>(0 - 1)       | --                  | 51<br>(31 - 78)          | 50<br>(25 - 78)          | 30<br>(16 - 49)             |
| Eating disorders                                    | 2<br>(1 - 4)                | --                 | 0<br>(0 - 0)        | 2<br>(1 - 4)             | --                       | --                          |
| Anorexia nervosa                                    | 2<br>(1 - 4)                | --                 | 0<br>(0 - 0)        | 2<br>(1 - 4)             | --                       | --                          |
| Diabetes, urogenital, blood, and endocrine diseases | 3,005<br>(2,649 - 3,606)    | 26<br>(12 - 38)    | 11<br>(7 - 14)      | 461<br>(394 - 563)       | 1,271<br>(1,099 - 1,588) | 1,236<br>(1,039 - 1,501)    |
| Diabetes mellitus                                   | 1,394<br>(1,203 - 1,671)    | 0<br>(0 - 1)       | 2<br>(1 - 3)        | 179<br>(147 - 215)       | 605<br>(500 - 747)       | 607<br>(495 - 805)          |
| Acute glomerulonephritis                            | 8<br>(6 - 12)               | 0<br>(0 - 0)       | 0<br>(0 - 0)        | 3<br>(2 - 4)             | 3<br>(2 - 5)             | 2<br>(1 - 3)                |
| Chronic kidney disease                              | 307<br>(235 - 667)          | 1<br>(0 - 1)       | 1<br>(1 - 2)        | 86<br>(64 - 187)         | 136<br>(98 - 305)        | 84<br>(59 - 189)            |
| Chronic kidney disease due to diabetes mellitus     | 14<br>(8 - 21)              | 0<br>(0 - 0)       | 0<br>(0 - 0)        | 5<br>(3 - 7)             | 6<br>(3 - 10)            | 3<br>(1 - 6)                |

Web Table 31- Ukraine deaths with 95% UI by age, sex, and cause in 2013

| Cause                                               | Females, All Ages         | Females, 0-4 Years   | Females, 5-14 Years | Females, 15-49 Years     | Females, 50-69 Years     | Females, 70-80 Years     |
|-----------------------------------------------------|---------------------------|----------------------|---------------------|--------------------------|--------------------------|--------------------------|
| Chronic kidney disease due to hypertension          | 77<br>(46 - 143)          | 0<br>(0 - 0)         | 0<br>(0 - 0)        | 9<br>(4 - 16)            | 32<br>(17 - 61)          | 36<br>(20 - 76)          |
| Chronic kidney disease due to glomerulonephritis    | 127<br>(80 - 230)         | 0<br>(0 - 0)         | 0<br>(0 - 1)        | 38<br>(26 - 61)          | 56<br>(31 - 95)          | 33<br>(17 - 76)          |
| Chronic kidney disease due to other causes          | 88<br>(46 - 314)          | 0<br>(0 - 1)         | 0<br>(0 - 1)        | 34<br>(18 - 112)         | 42<br>(18 - 168)         | 11<br>(4 - 42)           |
| Urinary diseases and male infertility               | 929<br>(752 - 1,228)      | 1<br>(1 - 2)         | 1<br>(1 - 2)        | 140<br>(109 - 190)       | 398<br>(307 - 578)       | 388<br>(280 - 557)       |
| Interstitial nephritis and urinary tract infections | 766<br>(615 - 1,084)      | 1<br>(1 - 2)         | 1<br>(1 - 2)        | 129<br>(99 - 175)        | 351<br>(269 - 533)       | 284<br>(202 - 432)       |
| Urolithiasis                                        | 99<br>(47 - 165)          | --                   | 0<br>(0 - 0)        | 6<br>(3 - 10)            | 30<br>(12 - 58)          | 63<br>(27 - 121)         |
| Other urinary diseases                              | 63<br>(33 - 99)           | 0<br>(0 - 0)         | 0<br>(0 - 0)        | 5<br>(2 - 9)             | 17<br>(7 - 30)           | 41<br>(20 - 70)          |
| Gynecological diseases                              | 2<br>(2 - 3)              | --                   | --                  | 1<br>(1 - 2)             | 1<br>(0 - 1)             | 0<br>(0 - 1)             |
| Uterine fibroids                                    | 1<br>(0 - 1)              | --                   | --                  | 0<br>(0 - 0)             | 0<br>(0 - 0)             | 0<br>(0 - 0)             |
| Polycystic ovarian syndrome                         | 0<br>(0 - 0)              | --                   | --                  | 0<br>(0 - 0)             | 0<br>(0 - 0)             | --                       |
| Endometriosis                                       | 0<br>(0 - 0)              | --                   | --                  | 0<br>(0 - 0)             | 0<br>(0 - 0)             | --                       |
| Genital prolapse                                    | 0<br>(0 - 0)              | --                   | --                  | 0<br>(0 - 0)             | 0<br>(0 - 0)             | 0<br>(0 - 0)             |
| Other gynecological diseases                        | 1<br>(1 - 1)              | --                   | --                  | 1<br>(0 - 1)             | 0<br>(0 - 1)             | 0<br>(0 - 0)             |
| Hemoglobinopathies and hemolytic anemias            | 55<br>(34 - 80)           | 8<br>(4 - 13)        | 3<br>(2 - 5)        | 14<br>(8 - 21)           | 22<br>(14 - 33)          | 8<br>(5 - 13)            |
| Thalassemias                                        | 14<br>(8 - 21)            | 6<br>(3 - 10)        | 2<br>(1 - 4)        | 6<br>(4 - 10)            | 0<br>(0 - 0)             | 0<br>(0 - 0)             |
| Sickle cell disorders                               | 2<br>(1 - 3)              | 1<br>(0 - 1)         | 0<br>(0 - 0)        | 1<br>(1 - 1)             | 1<br>(0 - 1)             | 0<br>(0 - 0)             |
| G6PD deficiency                                     | 1<br>(1 - 1)              | 0<br>(0 - 0)         | 0<br>(0 - 0)        | 0<br>(0 - 0)             | 0<br>(0 - 1)             | 0<br>(0 - 0)             |
| Other hemoglobinopathies and hemolytic anemias      | 38<br>(24 - 56)           | 2<br>(1 - 3)         | 0<br>(0 - 1)        | 6<br>(4 - 10)            | 21<br>(13 - 31)          | 8<br>(5 - 13)            |
| Endocrine, metabolic, blood, and immune disorders   | 310<br>(75 - 417)         | 16<br>(4 - 26)       | 3<br>(1 - 5)        | 38<br>(12 - 52)          | 106<br>(29 - 148)        | 147<br>(26 - 215)        |
| Musculoskeletal disorders                           | 641<br>(475 - 966)        | --                   | 3<br>(2 - 5)        | 107<br>(71 - 150)        | 240<br>(166 - 352)       | 291<br>(187 - 518)       |
| Rheumatoid arthritis                                | 364<br>(259 - 524)        | --                   | 1<br>(0 - 1)        | 22<br>(13 - 32)          | 139<br>(90 - 207)        | 202<br>(130 - 347)       |
| Other musculoskeletal disorders                     | 278<br>(194 - 436)        | --                   | 3<br>(2 - 4)        | 86<br>(56 - 118)         | 101<br>(65 - 159)        | 89<br>(46 - 180)         |
| Other non-communicable diseases                     | 1,087<br>(846 - 1,388)    | 769<br>(558 - 1,044) | 54<br>(38 - 70)     | 141<br>(116 - 182)       | 91<br>(73 - 112)         | 32<br>(25 - 39)          |
| Congenital anomalies                                | 990<br>(751 - 1,313)      | 699<br>(484 - 982)   | 53<br>(37 - 70)     | 137<br>(112 - 178)       | 81<br>(65 - 100)         | 20<br>(15 - 26)          |
| Neural tube defects                                 | 71<br>(40 - 127)          | 58<br>(30 - 109)     | 7<br>(3 - 11)       | 5<br>(3 - 8)             | 1<br>(0 - 1)             | 0<br>(0 - 0)             |
| Congenital heart anomalies                          | 509<br>(340 - 705)        | 378<br>(234 - 557)   | 23<br>(14 - 34)     | 77<br>(58 - 106)         | 28<br>(20 - 39)          | 3<br>(2 - 4)             |
| Cleft lip and cleft palate                          | 4<br>(1 - 9)              | 4<br>(1 - 9)         | --                  | --                       | --                       | --                       |
| Down syndrome                                       | 50<br>(32 - 75)           | 14<br>(7 - 27)       | 4<br>(2 - 7)        | 20<br>(12 - 29)          | 11<br>(6 - 17)           | 2<br>(1 - 3)             |
| Chromosomal unbalanced rearrangements               | 20<br>(11 - 33)           | 15<br>(8 - 27)       | 1<br>(0 - 1)        | 2<br>(1 - 5)             | 1<br>(1 - 2)             | 1<br>(0 - 1)             |
| Other congenital anomalies                          | 335<br>(240 - 467)        | 229<br>(145 - 342)   | 19<br>(12 - 27)     | 33<br>(25 - 47)          | 40<br>(31 - 54)          | 14<br>(11 - 19)          |
| Skin and subcutaneous diseases                      | 27<br>(15 - 33)           | 0<br>(0 - 0)         | 0<br>(0 - 0)        | 4<br>(2 - 5)             | 10<br>(5 - 13)           | 12<br>(7 - 17)           |
| Cellulitis                                          | 12<br>(7 - 18)            | 0<br>(0 - 0)         | 0<br>(0 - 0)        | 2<br>(1 - 3)             | 5<br>(3 - 8)             | 5<br>(3 - 8)             |
| Pyoderma                                            | 12<br>(6 - 16)            | 0<br>(0 - 0)         | 0<br>(0 - 0)        | 2<br>(1 - 2)             | 4<br>(2 - 6)             | 6<br>(3 - 9)             |
| Decubitus ulcer                                     | 2<br>(1 - 3)              | 0<br>(0 - 0)         | 0<br>(0 - 0)        | 0<br>(0 - 1)             | 0<br>(0 - 1)             | 1<br>(1 - 2)             |
| Other skin and subcutaneous diseases                | 1<br>(0 - 1)              | 0<br>(0 - 0)         | 0<br>(0 - 0)        | 0<br>(0 - 1)             | 0<br>(0 - 0)             | 0<br>(0 - 0)             |
| Sudden infant death syndrome                        | 70<br>(12 - 196)          | 70<br>(12 - 196)     | --                  | --                       | --                       | --                       |
| Injuries                                            | 9,024<br>(8,007 - 11,529) | 272<br>(199 - 365)   | 167<br>(137 - 214)  | 3,084<br>(2,716 - 3,736) | 2,658<br>(2,340 - 3,449) | 2,843<br>(2,389 - 4,078) |
| Transport injuries                                  | 1,806<br>(1,484 - 2,294)  | 30<br>(18 - 44)      | 55<br>(36 - 73)     | 804<br>(622 - 963)       | 493<br>(383 - 629)       | 424<br>(330 - 601)       |
| Road injuries                                       | 1,677<br>(1,347 - 2,066)  | 28<br>(17 - 40)      | 52<br>(33 - 69)     | 754<br>(568 - 898)       | 459<br>(347 - 576)       | 384<br>(298 - 540)       |
| Pedestrian road injuries                            | 802<br>(498 - 1,019)      | 12<br>(5 - 20)       | 29<br>(17 - 42)     | 241<br>(136 - 324)       | 244<br>(141 - 335)       | 276<br>(177 - 371)       |

Web Table 31- Ukraine deaths with 95% UI by age, sex, and cause in 2013

| Cause                                           | Females, All Ages        | Females, 0-4 Years | Females, 5-14 Years | Females, 15-49 Years     | Females, 50-69 Years   | Females, 70-80 Years     |
|-------------------------------------------------|--------------------------|--------------------|---------------------|--------------------------|------------------------|--------------------------|
| Cyclist road injuries                           | 74<br>(47 - 105)         | 0<br>(0 - 1)       | 3<br>(1 - 5)        | 41<br>(23 - 60)          | 21<br>(12 - 37)        | 9<br>(4 - 18)            |
| Motorcyclist road injuries                      | 25<br>(11 - 66)          | 0<br>(0 - 1)       | 1<br>(0 - 1)        | 17<br>(7 - 45)           | 5<br>(2 - 12)          | 3<br>(1 - 8)             |
| Motor vehicle road injuries                     | 761<br>(549 - 1,026)     | 15<br>(7 - 25)     | 19<br>(10 - 30)     | 450<br>(306 - 580)       | 185<br>(123 - 272)     | 92<br>(50 - 184)         |
| Other road injuries                             | 15<br>(7 - 25)           | 0<br>(0 - 1)       | 1<br>(0 - 2)        | 6<br>(3 - 10)            | 5<br>(2 - 10)          | 3<br>(1 - 8)             |
| Other transport injuries                        | 130<br>(79 - 249)        | 2<br>(1 - 4)       | 3<br>(2 - 6)        | 51<br>(30 - 86)          | 34<br>(18 - 68)        | 39<br>(17 - 85)          |
| Unintentional injuries                          | 3,703<br>(3,072 - 5,081) | 222<br>(159 - 309) | 94<br>(69 - 147)    | 897<br>(727 - 1,244)     | 1,095<br>(927 - 1,473) | 1,396<br>(1,088 - 1,947) |
| Falls                                           | 884<br>(698 - 1,331)     | 22<br>(14 - 36)    | 7<br>(5 - 11)       | 176<br>(137 - 269)       | 248<br>(192 - 362)     | 430<br>(315 - 694)       |
| Drowning                                        | 642<br>(467 - 1,185)     | 41<br>(24 - 85)    | 54<br>(36 - 98)     | 237<br>(167 - 399)       | 161<br>(113 - 298)     | 149<br>(99 - 284)        |
| Fire, heat, and hot substances                  | 912<br>(700 - 1,346)     | 47<br>(29 - 82)    | 12<br>(7 - 19)      | 169<br>(125 - 251)       | 236<br>(178 - 354)     | 449<br>(308 - 659)       |
| Poisonings                                      | 428<br>(288 - 950)       | 21<br>(11 - 43)    | 8<br>(5 - 16)       | 107<br>(59 - 273)        | 136<br>(88 - 291)      | 155<br>(97 - 341)        |
| Exposure to mechanical forces                   | 127<br>(96 - 163)        | 20<br>(7 - 46)     | 7<br>(4 - 12)       | 43<br>(28 - 56)          | 32<br>(23 - 44)        | 24<br>(16 - 46)          |
| Unintentional firearm injuries                  | 5<br>(3 - 6)             | 0<br>(0 - 0)       | 0<br>(0 - 1)        | 3<br>(2 - 4)             | 1<br>(1 - 2)           | 1<br>(0 - 1)             |
| Unintentional suffocation                       | 31<br>(13 - 58)          | 12<br>(2 - 38)     | 1<br>(0 - 2)        | 8<br>(3 - 12)            | 6<br>(3 - 9)           | 5<br>(3 - 13)            |
| Other exposure to mechanical forces             | 91<br>(70 - 116)         | 8<br>(3 - 15)      | 6<br>(3 - 11)       | 33<br>(20 - 45)          | 25<br>(17 - 36)        | 19<br>(12 - 38)          |
| Adverse effects of medical treatment            | 158<br>(104 - 272)       | 7<br>(3 - 14)      | 1<br>(0 - 1)        | 33<br>(21 - 57)          | 66<br>(40 - 126)       | 51<br>(28 - 94)          |
| Animal contact                                  | 26<br>(12 - 56)          | 2<br>(1 - 6)       | 0<br>(0 - 1)        | 5<br>(2 - 10)            | 12<br>(6 - 25)         | 6<br>(3 - 15)            |
| Venomous animal contact                         | 7<br>(3 - 15)            | 1<br>(0 - 2)       | 0<br>(0 - 0)        | 2<br>(1 - 3)             | 3<br>(1 - 8)           | 1<br>(0 - 3)             |
| Non-venomous animal contact                     | 19<br>(9 - 44)           | 2<br>(1 - 4)       | 0<br>(0 - 1)        | 3<br>(1 - 7)             | 9<br>(4 - 19)          | 5<br>(2 - 12)            |
| Foreign body                                    | 481<br>(280 - 682)       | 58<br>(29 - 101)   | 3<br>(2 - 5)        | 108<br>(50 - 160)        | 186<br>(90 - 275)      | 126<br>(61 - 263)        |
| Pulmonary aspiration and foreign body in airway | 478<br>(278 - 680)       | 58<br>(29 - 100)   | 3<br>(1 - 5)        | 107<br>(49 - 159)        | 186<br>(89 - 274)      | 125<br>(60 - 262)        |
| Foreign body in other body part                 | 3<br>(2 - 5)             | 0<br>(0 - 0)       | 0<br>(0 - 0)        | 1<br>(1 - 2)             | 1<br>(1 - 1)           | 1<br>(0 - 2)             |
| Other unintentional injuries                    | 46<br>(37 - 61)          | 3<br>(2 - 5)       | 2<br>(1 - 2)        | 18<br>(14 - 25)          | 17<br>(13 - 25)        | 6<br>(4 - 10)            |
| Self-harm and interpersonal violence            | 3,514<br>(3,066 - 4,845) | 20<br>(12 - 32)    | 19<br>(13 - 25)     | 1,383<br>(1,186 - 1,751) | 1,069<br>(900 - 1,532) | 1,023<br>(826 - 1,675)   |
| Self-harm                                       | 2,261<br>(1,925 - 3,329) | --                 | 7<br>(4 - 10)       | 786<br>(659 - 961)       | 731<br>(588 - 1,133)   | 737<br>(567 - 1,281)     |
| Interpersonal violence                          | 1,253<br>(1,003 - 1,908) | 20<br>(12 - 32)    | 12<br>(7 - 18)      | 596<br>(460 - 923)       | 338<br>(258 - 516)     | 286<br>(211 - 457)       |
| Assault by firearm                              | 41<br>(20 - 72)          | 0<br>(0 - 1)       | 1<br>(0 - 2)        | 28<br>(13 - 48)          | 9<br>(4 - 20)          | 3<br>(1 - 7)             |
| Assault by sharp object                         | 381<br>(266 - 612)       | 3<br>(1 - 5)       | 3<br>(1 - 5)        | 198<br>(130 - 334)       | 104<br>(62 - 168)      | 73<br>(44 - 125)         |
| Assault by other means                          | 831<br>(632 - 1,275)     | 17<br>(10 - 26)    | 8<br>(5 - 13)       | 371<br>(270 - 581)       | 225<br>(161 - 348)     | 210<br>(152 - 359)       |

Web Table 31- United Arab Emirates deaths with 95% UI by age, sex, and cause in 2013

| Cause                                                             | Both Sexes, All Ages        | Both Sexes, 0-4 Years | Both Sexes, 5-14 Years | Both Sexes, 15-49 Years   | Both Sexes, 50-69 Years  | Both Sexes, 70-80 Years  |
|-------------------------------------------------------------------|-----------------------------|-----------------------|------------------------|---------------------------|--------------------------|--------------------------|
| All causes                                                        | 13,059<br>(10,021 - 16,926) | 878<br>(779 - 993)    | 118<br>(101 - 142)     | 8,546<br>(6,305 - 11,521) | 2,296<br>(1,696 - 2,958) | 1,221<br>(1,027 - 1,349) |
| Communicable, maternal, neonatal, and nutritional diseases        | 1,199<br>(972 - 1,503)      | 375<br>(276 - 496)    | 29<br>(17 - 47)        | 630<br>(483 - 841)        | 92<br>(67 - 124)         | 73<br>(55 - 96)          |
| HIV/AIDS and tuberculosis                                         | 180<br>(144 - 227)          | 3<br>(2 - 6)          | 1<br>(1 - 1)           | 160<br>(127 - 199)        | 12<br>(8 - 17)           | 4<br>(3 - 9)             |
| Tuberculosis                                                      | 52<br>(33 - 88)             | 0<br>(0 - 0)          | 0<br>(0 - 0)           | 41<br>(25 - 71)           | 7<br>(4 - 12)            | 4<br>(3 - 5)             |
| HIV/AIDS                                                          | 128<br>(97 - 161)           | 3<br>(1 - 6)          | 1<br>(0 - 1)           | 119<br>(90 - 148)         | 5<br>(3 - 7)             | 0<br>(0 - 5)             |
| HIV/AIDS resulting in mycobacterial infection                     | 7<br>(5 - 9)                | 0<br>(0 - 0)          | 0<br>(0 - 0)           | 7<br>(5 - 9)              | 0<br>(0 - 0)             | 0<br>(0 - 0)             |
| HIV/AIDS resulting in other diseases                              | 121<br>(91 - 153)           | 3<br>(1 - 6)          | 1<br>(0 - 1)           | 112<br>(85 - 141)         | 5<br>(3 - 7)             | 0<br>(0 - 4)             |
| Diarrhea, lower respiratory, and other common infectious diseases | 630<br>(454 - 893)          | 91<br>(54 - 147)      | 26<br>(15 - 45)        | 386<br>(257 - 589)        | 66<br>(46 - 93)          | 61<br>(44 - 83)          |
| Diarrheal diseases                                                | 34<br>(23 - 48)             | 10<br>(4 - 21)        | 1<br>(0 - 1)           | 17<br>(11 - 27)           | 3<br>(2 - 4)             | 3<br>(2 - 5)             |
| Intestinal infectious diseases                                    | 161<br>(52 - 365)           | 26<br>(9 - 54)        | 17<br>(6 - 36)         | 114<br>(35 - 279)         | 4<br>(1 - 9)             | 0<br>(0 - 1)             |
| Typhoid fever                                                     | 119<br>(35 - 279)           | 18<br>(5 - 38)        | 13<br>(4 - 28)         | 85<br>(24 - 211)          | 3<br>(1 - 6)             | 0<br>(0 - 1)             |
| Paratyphoid fever                                                 | 34<br>(10 - 80)             | 6<br>(2 - 13)         | 4<br>(1 - 8)           | 24<br>(7 - 59)            | 1<br>(0 - 2)             | 0<br>(0 - 0)             |
| Other intestinal infectious diseases                              | 8<br>(3 - 17)               | 2<br>(0 - 6)          | 0<br>(0 - 2)           | 6<br>(1 - 14)             | 0<br>(0 - 2)             | 0<br>(0 - 1)             |
| Lower respiratory infections                                      | 349<br>(253 - 477)          | 35<br>(17 - 65)       | 6<br>(3 - 9)           | 199<br>(131 - 294)        | 54<br>(37 - 79)          | 56<br>(39 - 77)          |
| Upper respiratory infections                                      | 0<br>(0 - 1)                | 0<br>(0 - 0)          | 0<br>(0 - 0)           | 0<br>(0 - 1)              | 0<br>(0 - 0)             | 0<br>(0 - 0)             |
| Otitis media                                                      | 2<br>(1 - 3)                | 0<br>(0 - 0)          | 0<br>(0 - 0)           | 1<br>(1 - 2)              | 0<br>(0 - 0)             | 0<br>(0 - 0)             |
| Meningitis                                                        | 36<br>(24 - 53)             | 5<br>(3 - 8)          | 1<br>(0 - 1)           | 27<br>(16 - 42)           | 3<br>(2 - 5)             | 1<br>(1 - 2)             |
| Pneumococcal meningitis                                           | 7<br>(4 - 11)               | 1<br>(0 - 1)          | 0<br>(0 - 0)           | 5<br>(3 - 10)             | 0<br>(0 - 1)             | 0<br>(0 - 0)             |
| H influenzae type B meningitis                                    | 5<br>(3 - 8)                | 2<br>(1 - 3)          | 0<br>(0 - 0)           | 3<br>(1 - 5)              | 0<br>(0 - 0)             | 0<br>(0 - 0)             |
| Meningococcal meningitis                                          | 8<br>(5 - 14)               | 1<br>(1 - 2)          | 0<br>(0 - 0)           | 6<br>(3 - 11)             | 1<br>(0 - 1)             | 0<br>(0 - 0)             |
| Other meningitis                                                  | 16<br>(10 - 24)             | 1<br>(1 - 2)          | 0<br>(0 - 0)           | 12<br>(7 - 20)            | 2<br>(1 - 3)             | 1<br>(0 - 1)             |
| Encephalitis                                                      | 31<br>(18 - 54)             | 4<br>(2 - 8)          | 1<br>(0 - 2)           | 23<br>(13 - 44)           | 2<br>(1 - 3)             | 0<br>(0 - 1)             |
| Diphtheria                                                        | 0<br>(0 - 1)                | 0<br>(0 - 0)          | 0<br>(0 - 0)           | 0<br>(0 - 1)              | 0<br>(0 - 0)             | --                       |
| Whooping cough                                                    | 8<br>(0 - 37)               | 7<br>(0 - 34)         | 0<br>(0 - 1)           | 0<br>(0 - 2)              | 0<br>(0 - 0)             | --                       |
| Tetanus                                                           | 1<br>(0 - 2)                | 0<br>(0 - 0)          | 0<br>(0 - 0)           | 1<br>(0 - 2)              | 0<br>(0 - 0)             | 0<br>(0 - 0)             |
| Measles                                                           | 6<br>(0 - 39)               | 5<br>(0 - 33)         | 1<br>(0 - 3)           | 0<br>(0 - 3)              | 0<br>(0 - 0)             | --                       |
| Varicella and herpes zoster                                       | 3<br>(1 - 7)                | 0<br>(0 - 1)          | 0<br>(0 - 0)           | 2<br>(0 - 6)              | 0<br>(0 - 0)             | 0<br>(0 - 0)             |
| Neglected tropical diseases and malaria                           | 9<br>(6 - 14)               | 1<br>(0 - 2)          | 0<br>(0 - 1)           | 7<br>(5 - 12)             | 0<br>(0 - 1)             | 0<br>(0 - 0)             |
| Malaria                                                           | 2<br>(1 - 3)                | 0<br>(0 - 0)          | 0<br>(0 - 0)           | 1<br>(1 - 3)              | 0<br>(0 - 0)             | 0<br>(0 - 0)             |
| Leishmaniasis                                                     | 1<br>(0 - 2)                | 0<br>(0 - 0)          | 0<br>(0 - 0)           | 1<br>(0 - 1)              | 0<br>(0 - 0)             | 0<br>(0 - 0)             |
| Visceral leishmaniasis                                            | 1<br>(0 - 2)                | 0<br>(0 - 0)          | 0<br>(0 - 0)           | 1<br>(0 - 1)              | 0<br>(0 - 0)             | 0<br>(0 - 0)             |
| Cysticercosis                                                     | 0<br>(0 - 0)                | 0<br>(0 - 0)          | 0<br>(0 - 0)           | 0<br>(0 - 0)              | 0<br>(0 - 0)             | 0<br>(0 - 0)             |
| Cystic echinococcosis                                             | 1<br>(0 - 1)                | 0<br>(0 - 0)          | 0<br>(0 - 0)           | 1<br>(0 - 1)              | 0<br>(0 - 0)             | 0<br>(0 - 0)             |
| Dengue                                                            | 1<br>(1 - 2)                | 0<br>(0 - 0)          | 0<br>(0 - 0)           | 1<br>(1 - 2)              | 0<br>(0 - 0)             | 0<br>(0 - 0)             |
| Rabies                                                            | 1<br>(0 - 2)                | 0<br>(0 - 0)          | 0<br>(0 - 0)           | 1<br>(0 - 2)              | 0<br>(0 - 0)             | 0<br>(0 - 0)             |
| Intestinal nematode infections                                    | 1<br>(0 - 5)                | 0<br>(0 - 2)          | 0<br>(0 - 1)           | 0<br>(0 - 4)              | 0<br>(0 - 1)             | 0<br>(0 - 0)             |
| Ascariasis                                                        | 1<br>(0 - 5)                | 0<br>(0 - 2)          | 0<br>(0 - 1)           | 0<br>(0 - 4)              | 0<br>(0 - 1)             | 0<br>(0 - 0)             |
| Other neglected tropical diseases                                 | 3<br>(2 - 4)                | 0<br>(0 - 0)          | 0<br>(0 - 0)           | 2<br>(1 - 4)              | 0<br>(0 - 0)             | 0<br>(0 - 0)             |
| Maternal disorders                                                | 17<br>(10 - 29)             | --                    | 0<br>(0 - 0)           | 17<br>(10 - 29)           | --                       | --                       |
| Maternal hemorrhage                                               | 4<br>(2 - 6)                | --                    | 0<br>(0 - 0)           | 4<br>(2 - 6)              | --                       | --                       |

Web Table 31- United Arab Emirates deaths with 95% UI by age, sex, and cause in 2013

| Cause                                                            | Both Sexes, All Ages      | Both Sexes, 0-4 Years | Both Sexes, 5-14 Years | Both Sexes, 15-49 Years  | Both Sexes, 50-69 Years  | Both Sexes, 70-80 Years |
|------------------------------------------------------------------|---------------------------|-----------------------|------------------------|--------------------------|--------------------------|-------------------------|
| Maternal sepsis and other maternal infections                    | 1<br>(1 - 2)              | --                    | 0<br>(0 - 0)           | 1<br>(1 - 2)             | --                       | --                      |
| Maternal hypertensive disorders                                  | 2<br>(1 - 4)              | --                    | 0<br>(0 - 0)           | 2<br>(1 - 4)             | --                       | --                      |
| Maternal obstructed labor                                        | 2<br>(1 - 3)              | --                    | 0<br>(0 - 0)           | 2<br>(1 - 3)             | --                       | --                      |
| Maternal abortive outcome                                        | 2<br>(1 - 4)              | --                    | 0<br>(0 - 0)           | 2<br>(1 - 4)             | --                       | --                      |
| Indirect maternal deaths                                         | 1<br>(0 - 3)              | --                    | 0<br>(0 - 0)           | 1<br>(0 - 3)             | --                       | --                      |
| Late maternal deaths                                             | 2<br>(1 - 4)              | --                    | 0<br>(0 - 0)           | 2<br>(1 - 4)             | --                       | --                      |
| Maternal deaths aggravated by HIV/AIDS                           | 0<br>(0 - 0)              | --                    | --                     | 0<br>(0 - 0)             | --                       | --                      |
| Other maternal disorders                                         | 3<br>(1 - 5)              | --                    | 0<br>(0 - 0)           | 3<br>(1 - 5)             | --                       | --                      |
| Neonatal disorders                                               | 274<br>(197 - 360)        | 274<br>(197 - 360)    | --                     | --                       | --                       | --                      |
| Neonatal preterm birth complications                             | 160<br>(77 - 240)         | 160<br>(77 - 240)     | --                     | --                       | --                       | --                      |
| Neonatal encephalopathy due to birth asphyxia and trauma         | 28<br>(15 - 47)           | 28<br>(15 - 47)       | --                     | --                       | --                       | --                      |
| Neonatal sepsis and other neonatal infections                    | 32<br>(15 - 56)           | 32<br>(15 - 56)       | --                     | --                       | --                       | --                      |
| Hemolytic disease and other neonatal jaundice                    | 0<br>(0 - 1)              | 0<br>(0 - 1)          | --                     | --                       | --                       | --                      |
| Other neonatal disorders                                         | 53<br>(27 - 91)           | 53<br>(27 - 91)       | --                     | --                       | --                       | --                      |
| Nutritional deficiencies                                         | 33<br>(19 - 55)           | 2<br>(1 - 4)          | 1<br>(0 - 1)           | 22<br>(12 - 36)          | 4<br>(2 - 7)             | 4<br>(3 - 7)            |
| Protein-energy malnutrition                                      | 6<br>(3 - 11)             | 1<br>(0 - 2)          | 0<br>(0 - 0)           | 3<br>(1 - 7)             | 1<br>(0 - 1)             | 1<br>(0 - 2)            |
| Iodine deficiency                                                | 0<br>(0 - 1)              | 0<br>(0 - 0)          | 0<br>(0 - 0)           | 0<br>(0 - 1)             | 0<br>(0 - 0)             | 0<br>(0 - 0)            |
| Iron-deficiency anemia                                           | 23<br>(12 - 41)           | 1<br>(0 - 2)          | 0<br>(0 - 1)           | 16<br>(8 - 28)           | 3<br>(2 - 6)             | 3<br>(2 - 6)            |
| Other nutritional deficiencies                                   | 4<br>(2 - 8)              | 0<br>(0 - 1)          | 0<br>(0 - 0)           | 3<br>(1 - 6)             | 0<br>(0 - 1)             | 0<br>(0 - 1)            |
| Other communicable, maternal, neonatal, and nutritional diseases | 56<br>(38 - 79)           | 4<br>(2 - 8)          | 1<br>(0 - 1)           | 38<br>(24 - 58)          | 10<br>(6 - 16)           | 3<br>(2 - 5)            |
| Sexually transmitted diseases excluding HIV                      | 4<br>(2 - 7)              | 1<br>(0 - 3)          | 0<br>(0 - 0)           | 2<br>(1 - 4)             | 0<br>(0 - 0)             | 0<br>(0 - 0)            |
| Syphilis                                                         | 2<br>(1 - 5)              | 1<br>(0 - 3)          | 0<br>(0 - 0)           | 1<br>(1 - 2)             | 0<br>(0 - 0)             | 0<br>(0 - 0)            |
| Chlamydial infection                                             | 0<br>(0 - 0)              | --                    | 0<br>(0 - 0)           | 0<br>(0 - 0)             | 0<br>(0 - 0)             | 0<br>(0 - 0)            |
| Gonococcal infection                                             | 1<br>(0 - 1)              | --                    | 0<br>(0 - 0)           | 0<br>(0 - 1)             | 0<br>(0 - 0)             | 0<br>(0 - 0)            |
| Other sexually transmitted diseases                              | 0<br>(0 - 1)              | --                    | 0<br>(0 - 0)           | 0<br>(0 - 1)             | 0<br>(0 - 0)             | 0<br>(0 - 0)            |
| Hepatitis                                                        | 25<br>(17 - 38)           | 1<br>(0 - 1)          | 0<br>(0 - 0)           | 17<br>(11 - 26)          | 6<br>(4 - 10)            | 1<br>(1 - 2)            |
| Acute hepatitis A                                                | 2<br>(1 - 5)              | 0<br>(0 - 0)          | 0<br>(0 - 0)           | 2<br>(0 - 4)             | 0<br>(0 - 1)             | 0<br>(0 - 0)            |
| Acute hepatitis B                                                | 13<br>(8 - 20)            | 0<br>(0 - 1)          | 0<br>(0 - 0)           | 7<br>(3 - 13)            | 4<br>(3 - 7)             | 1<br>(1 - 1)            |
| Acute hepatitis C                                                | 2<br>(0 - 5)              | --                    | 0<br>(0 - 0)           | 1<br>(0 - 3)             | 0<br>(0 - 1)             | 0<br>(0 - 0)            |
| Acute hepatitis E                                                | 9<br>(4 - 16)             | 0<br>(0 - 0)          | 0<br>(0 - 0)           | 7<br>(3 - 14)            | 1<br>(0 - 3)             | 0<br>(0 - 0)            |
| Other infectious diseases                                        | 27<br>(16 - 43)           | 2<br>(1 - 6)          | 1<br>(0 - 1)           | 18<br>(10 - 33)          | 4<br>(2 - 8)             | 2<br>(1 - 4)            |
| Non-communicable diseases                                        | 7,961<br>(6,127 - 10,349) | 450<br>(317 - 575)    | 51<br>(37 - 66)        | 4,327<br>(3,203 - 5,945) | 2,025<br>(1,498 - 2,628) | 1,108<br>(931 - 1,227)  |
| Neoplasms                                                        | 1,638<br>(1,233 - 2,177)  | 12<br>(6 - 18)        | 16<br>(11 - 21)        | 1,056<br>(786 - 1,422)   | 434<br>(319 - 574)       | 120<br>(93 - 147)       |
| Esophageal cancer                                                | 29<br>(19 - 43)           | --                    | --                     | 16<br>(10 - 24)          | 10<br>(6 - 16)           | 3<br>(2 - 4)            |
| Stomach cancer                                                   | 109<br>(77 - 158)         | --                    | --                     | 62<br>(42 - 97)          | 35<br>(24 - 53)          | 12<br>(9 - 16)          |
| Liver cancer                                                     | 92<br>(64 - 129)          | --                    | 0<br>(0 - 1)           | 47<br>(30 - 70)          | 37<br>(25 - 52)          | 8<br>(6 - 11)           |
| Liver cancer due to hepatitis B                                  | 37<br>(21 - 61)           | --                    | 0<br>(0 - 0)           | 22<br>(12 - 37)          | 13<br>(6 - 23)           | 2<br>(1 - 3)            |
| Liver cancer due to hepatitis C                                  | 39<br>(21 - 62)           | --                    | 0<br>(0 - 0)           | 16<br>(8 - 30)           | 18<br>(10 - 28)          | 5<br>(3 - 7)            |
| Liver cancer due to alcohol use                                  | 5<br>(2 - 10)             | --                    | --                     | 2<br>(1 - 4)             | 3<br>(1 - 5)             | 1<br>(0 - 2)            |
| Liver cancer due to other causes                                 | 11<br>(5 - 20)            | --                    | 0<br>(0 - 0)           | 7<br>(3 - 13)            | 3<br>(1 - 7)             | 1<br>(0 - 1)            |

Web Table 31- United Arab Emirates deaths with 95% UI by age, sex, and cause in 2013

| Cause                                         | Both Sexes, All Ages     | Both Sexes, 0-4 Years | Both Sexes, 5-14 Years | Both Sexes, 15-49 Years  | Both Sexes, 50-69 Years | Both Sexes, 70-80 Years |
|-----------------------------------------------|--------------------------|-----------------------|------------------------|--------------------------|-------------------------|-------------------------|
| Larynx cancer                                 | 16<br>(10 - 24)          | --                    | --                     | 7<br>(4 - 11)            | 7<br>(4 - 11)           | 2<br>(1 - 3)            |
| Tracheal, bronchus and lung cancer            | 199<br>(138 - 283)       | --                    | --                     | 90<br>(60 - 137)         | 87<br>(59 - 121)        | 22<br>(16 - 29)         |
| Breast cancer                                 | 158<br>(97 - 247)        | --                    | --                     | 119<br>(73 - 189)        | 36<br>(21 - 58)         | 4<br>(3 - 6)            |
| Cervical cancer                               | 19<br>(12 - 31)          | --                    | --                     | 12<br>(7 - 20)           | 6<br>(3 - 10)           | 1<br>(1 - 2)            |
| Uterine cancer                                | 4<br>(2 - 9)             | --                    | --                     | 2<br>(1 - 4)             | 2<br>(1 - 4)            | 0<br>(0 - 1)            |
| Prostate cancer                               | 36<br>(19 - 73)          | --                    | --                     | 4<br>(2 - 9)             | 15<br>(7 - 31)          | 17<br>(9 - 34)          |
| Colon and rectum cancer                       | 163<br>(120 - 217)       | --                    | --                     | 111<br>(80 - 152)        | 42<br>(31 - 55)         | 11<br>(8 - 13)          |
| Lip and oral cavity cancer                    | 16<br>(11 - 22)          | --                    | --                     | 10<br>(7 - 15)           | 4<br>(3 - 6)            | 1<br>(1 - 1)            |
| Nasopharynx cancer                            | 14<br>(9 - 22)           | --                    | 0<br>(0 - 0)           | 11<br>(7 - 18)           | 3<br>(1 - 4)            | 0<br>(0 - 0)            |
| Other pharynx cancer                          | 7<br>(5 - 11)            | --                    | --                     | 5<br>(3 - 8)             | 2<br>(1 - 3)            | 0<br>(0 - 0)            |
| Gallbladder and biliary tract cancer          | 13<br>(9 - 18)           | --                    | --                     | 7<br>(4 - 9)             | 5<br>(3 - 7)            | 1<br>(1 - 2)            |
| Pancreatic cancer                             | 56<br>(41 - 76)          | --                    | --                     | 29<br>(20 - 43)          | 22<br>(15 - 29)         | 5<br>(4 - 7)            |
| Malignant skin melanoma                       | 7<br>(4 - 12)            | --                    | --                     | 5<br>(3 - 9)             | 1<br>(1 - 2)            | 0<br>(0 - 0)            |
| Non-melanoma skin cancer                      | 4<br>(3 - 7)             | --                    | --                     | 3<br>(2 - 5)             | 1<br>(0 - 1)            | 1<br>(0 - 1)            |
| Ovarian cancer                                | 27<br>(16 - 43)          | --                    | --                     | 17<br>(11 - 28)          | 8<br>(4 - 13)           | 1<br>(1 - 2)            |
| Testicular cancer                             | 10<br>(6 - 17)           | --                    | --                     | 10<br>(6 - 17)           | 0<br>(0 - 1)            | 0<br>(0 - 0)            |
| Kidney cancer                                 | 27<br>(19 - 38)          | 0<br>(0 - 1)          | 0<br>(0 - 1)           | 15<br>(10 - 23)          | 10<br>(6 - 14)          | 2<br>(1 - 3)            |
| Bladder cancer                                | 38<br>(27 - 53)          | --                    | --                     | 14<br>(9 - 21)           | 17<br>(11 - 25)         | 7<br>(5 - 10)           |
| Brain and nervous system cancer               | 145<br>(92 - 274)        | 2<br>(1 - 4)          | 4<br>(2 - 6)           | 112<br>(68 - 211)        | 23<br>(14 - 49)         | 3<br>(2 - 6)            |
| Thyroid cancer                                | 8<br>(6 - 12)            | --                    | 0<br>(0 - 0)           | 5<br>(4 - 8)             | 2<br>(2 - 4)            | 1<br>(0 - 1)            |
| Mesothelioma                                  | 2<br>(1 - 3)             | --                    | --                     | 1<br>(1 - 2)             | 0<br>(0 - 1)            | 0<br>(0 - 0)            |
| Hodgkin lymphoma                              | 16<br>(11 - 24)          | 0<br>(0 - 0)          | 0<br>(0 - 1)           | 14<br>(9 - 21)           | 1<br>(1 - 2)            | 0<br>(0 - 0)            |
| Non-Hodgkin lymphoma                          | 121<br>(83 - 171)        | 1<br>(0 - 2)          | 1<br>(1 - 2)           | 94<br>(63 - 137)         | 20<br>(13 - 29)         | 5<br>(3 - 7)            |
| Multiple myeloma                              | 12<br>(8 - 18)           | --                    | --                     | 7<br>(5 - 11)            | 4<br>(3 - 6)            | 1<br>(1 - 1)            |
| Leukemia                                      | 159<br>(114 - 223)       | 3<br>(1 - 6)          | 6<br>(4 - 8)           | 131<br>(91 - 188)        | 15<br>(11 - 23)         | 4<br>(3 - 6)            |
| Other neoplasms                               | 129<br>(86 - 195)        | 5<br>(2 - 9)          | 4<br>(2 - 6)           | 96<br>(62 - 148)         | 19<br>(12 - 30)         | 5<br>(4 - 8)            |
| Cardiovascular diseases                       | 3,552<br>(2,600 - 4,751) | 14<br>(8 - 24)        | 6<br>(3 - 9)           | 1,863<br>(1,307 - 2,681) | 1,070<br>(776 - 1,401)  | 600<br>(470 - 688)      |
| Rheumatic heart disease                       | 28<br>(14 - 43)          | 0<br>(0 - 0)          | 0<br>(0 - 0)           | 21<br>(10 - 34)          | 4<br>(2 - 6)            | 2<br>(1 - 3)            |
| Ischemic heart disease                        | 2,205<br>(1,491 - 3,020) | 2<br>(1 - 4)          | 1<br>(0 - 2)           | 1,163<br>(771 - 1,699)   | 718<br>(487 - 976)      | 320<br>(227 - 390)      |
| Cerebrovascular disease                       | 830<br>(595 - 1,112)     | 4<br>(2 - 7)          | 2<br>(1 - 3)           | 373<br>(252 - 544)       | 234<br>(163 - 322)      | 216<br>(164 - 270)      |
| Ischemic stroke                               | 315<br>(186 - 441)       | 0<br>(0 - 1)          | 0<br>(0 - 1)           | 79<br>(38 - 133)         | 97<br>(53 - 145)        | 138<br>(92 - 178)       |
| Hemorrhagic stroke                            | 515<br>(354 - 750)       | 4<br>(2 - 6)          | 2<br>(1 - 3)           | 294<br>(197 - 439)       | 138<br>(88 - 207)       | 78<br>(52 - 119)        |
| Hypertensive heart disease                    | 121<br>(74 - 185)        | 0<br>(0 - 0)          | 0<br>(0 - 0)           | 59<br>(33 - 98)          | 35<br>(20 - 53)         | 27<br>(17 - 40)         |
| Cardiomyopathy and myocarditis                | 120<br>(71 - 187)        | 3<br>(2 - 8)          | 1<br>(1 - 2)           | 87<br>(50 - 142)         | 20<br>(11 - 32)         | 8<br>(5 - 13)           |
| Atrial fibrillation and flutter               | 2<br>(1 - 3)             | --                    | --                     | 1<br>(1 - 2)             | 1<br>(0 - 1)            | 1<br>(0 - 1)            |
| Aortic aneurysm                               | 32<br>(20 - 49)          | --                    | --                     | 14<br>(9 - 23)           | 13<br>(8 - 21)          | 5<br>(3 - 7)            |
| Peripheral vascular disease                   | 2<br>(1 - 4)             | --                    | --                     | 1<br>(0 - 2)             | 1<br>(0 - 1)            | 1<br>(0 - 1)            |
| Endocarditis                                  | 25<br>(15 - 41)          | 1<br>(1 - 3)          | 0<br>(0 - 0)           | 17<br>(10 - 30)          | 4<br>(2 - 6)            | 2<br>(1 - 3)            |
| Other cardiovascular and circulatory diseases | 188<br>(120 - 281)       | 3<br>(1 - 5)          | 1<br>(0 - 1)           | 126<br>(75 - 202)        | 40<br>(25 - 61)         | 18<br>(12 - 27)         |
| Chronic respiratory diseases                  | 429<br>(295 - 608)       | 3<br>(2 - 6)          | 1<br>(1 - 2)           | 192<br>(124 - 286)       | 124<br>(81 - 184)       | 109<br>(80 - 151)       |



Web Table 31- United Arab Emirates deaths with 95% UI by age, sex, and cause in 2013

| Cause                                               | Both Sexes, All Ages | Both Sexes, 0-4 Years | Both Sexes, 5-14 Years | Both Sexes, 15-49 Years | Both Sexes, 50-69 Years | Both Sexes, 70-80 Years |
|-----------------------------------------------------|----------------------|-----------------------|------------------------|-------------------------|-------------------------|-------------------------|
| Chronic obstructive pulmonary disease               | 279<br>(184 - 409)   | 2<br>(1 - 3)          | 0<br>(0 - 1)           | 95<br>(56 - 150)        | 92<br>(57 - 140)        | 90<br>(63 - 128)        |
| Pneumoconiosis                                      | 19<br>(10 - 34)      | 0<br>(0 - 0)          | 0<br>(0 - 0)           | 15<br>(7 - 26)          | 3<br>(1 - 5)            | 1<br>(1 - 2)            |
| Silicosis                                           | 2<br>(1 - 4)         | 0<br>(0 - 0)          | 0<br>(0 - 0)           | 1<br>(1 - 2)            | 0<br>(0 - 1)            | 1<br>(0 - 1)            |
| Asbestosis                                          | 3<br>(1 - 5)         | 0<br>(0 - 0)          | 0<br>(0 - 0)           | 3<br>(1 - 5)            | 0<br>(0 - 0)            | 0<br>(0 - 0)            |
| Coal workers pneumoconiosis                         | 1<br>(1 - 2)         | 0<br>(0 - 0)          | 0<br>(0 - 0)           | 1<br>(1 - 2)            | 0<br>(0 - 0)            | 0<br>(0 - 0)            |
| Other pneumoconiosis                                | 13<br>(7 - 23)       | 0<br>(0 - 0)          | 0<br>(0 - 0)           | 10<br>(5 - 18)          | 2<br>(1 - 4)            | 1<br>(0 - 1)            |
| Asthma                                              | 85<br>(47 - 141)     | 1<br>(0 - 1)          | 0<br>(0 - 1)           | 56<br>(29 - 95)         | 18<br>(9 - 33)          | 10<br>(6 - 17)          |
| Interstitial lung disease and pulmonary sarcoidosis | 23<br>(4 - 52)       | 0<br>(0 - 0)          | 0<br>(0 - 0)           | 9<br>(1 - 20)           | 8<br>(1 - 20)           | 6<br>(1 - 12)           |
| Other chronic respiratory diseases                  | 23<br>(12 - 44)      | 1<br>(0 - 1)          | 0<br>(0 - 0)           | 17<br>(9 - 33)          | 3<br>(1 - 6)            | 2<br>(1 - 4)            |
| Cirrhosis                                           | 261<br>(189 - 359)   | 1<br>(1 - 2)          | 1<br>(1 - 1)           | 167<br>(116 - 241)      | 72<br>(50 - 100)        | 20<br>(15 - 25)         |
| Cirrhosis due to hepatitis B                        | 93<br>(48 - 158)     | 0<br>(0 - 0)          | 0<br>(0 - 0)           | 59<br>(29 - 108)        | 26<br>(13 - 45)         | 7<br>(3 - 11)           |
| Cirrhosis due to hepatitis C                        | 94<br>(30 - 180)     | 0<br>(0 - 0)          | 0<br>(0 - 0)           | 60<br>(16 - 120)        | 27<br>(7 - 55)          | 7<br>(2 - 12)           |
| Cirrhosis due to alcohol use                        | 31<br>(13 - 64)      | --                    | --                     | 16<br>(6 - 34)          | 11<br>(4 - 26)          | 4<br>(2 - 9)            |
| Cirrhosis due to other causes                       | 42<br>(21 - 78)      | 1<br>(0 - 2)          | 0<br>(0 - 1)           | 31<br>(15 - 58)         | 8<br>(3 - 18)           | 1<br>(1 - 3)            |
| Digestive diseases                                  | 146<br>(106 - 208)   | 1<br>(1 - 2)          | 1<br>(1 - 1)           | 95<br>(67 - 143)        | 29<br>(20 - 42)         | 20<br>(16 - 26)         |
| Peptic ulcer disease                                | 27<br>(17 - 41)      | 0<br>(0 - 0)          | 0<br>(0 - 0)           | 15<br>(8 - 24)          | 7<br>(4 - 11)           | 5<br>(4 - 8)            |
| Gastritis and duodenitis                            | 3<br>(2 - 6)         | 0<br>(0 - 0)          | 0<br>(0 - 0)           | 3<br>(2 - 5)            | 0<br>(0 - 1)            | 0<br>(0 - 0)            |
| Appendicitis                                        | 8<br>(5 - 13)        | 0<br>(0 - 0)          | 0<br>(0 - 0)           | 6<br>(3 - 10)           | 1<br>(1 - 2)            | 1<br>(0 - 1)            |
| Paralytic ileus and intestinal obstruction          | 28<br>(17 - 52)      | 1<br>(0 - 1)          | 0<br>(0 - 0)           | 18<br>(10 - 35)         | 5<br>(3 - 10)           | 4<br>(2 - 7)            |
| Inguinal, femoral, and abdominal hernia             | 3<br>(1 - 4)         | 0<br>(0 - 0)          | 0<br>(0 - 0)           | 2<br>(1 - 3)            | 0<br>(0 - 1)            | 0<br>(0 - 1)            |
| Inflammatory bowel disease                          | 11<br>(7 - 17)       | 0<br>(0 - 0)          | 0<br>(0 - 0)           | 8<br>(5 - 13)           | 2<br>(1 - 2)            | 1<br>(1 - 2)            |
| Vascular intestinal disorders                       | 6<br>(3 - 12)        | 0<br>(0 - 0)          | 0<br>(0 - 0)           | 5<br>(2 - 9)            | 1<br>(0 - 2)            | 1<br>(0 - 1)            |
| Gallbladder and biliary diseases                    | 19<br>(12 - 28)      | 0<br>(0 - 0)          | 0<br>(0 - 0)           | 10<br>(6 - 15)          | 5<br>(3 - 7)            | 4<br>(3 - 7)            |
| Pancreatitis                                        | 24<br>(13 - 47)      | 0<br>(0 - 0)          | 0<br>(0 - 0)           | 19<br>(10 - 37)         | 4<br>(2 - 8)            | 1<br>(1 - 3)            |
| Other digestive diseases                            | 16<br>(10 - 26)      | 0<br>(0 - 0)          | 0<br>(0 - 0)           | 10<br>(6 - 17)          | 3<br>(2 - 6)            | 2<br>(1 - 4)            |
| Neurological disorders                              | 244<br>(185 - 311)   | 7<br>(4 - 10)         | 2<br>(1 - 4)           | 95<br>(56 - 148)        | 34<br>(25 - 48)         | 106<br>(85 - 135)       |
| Alzheimer disease and other dementias               | 133<br>(106 - 167)   | --                    | --                     | 1<br>(0 - 1)            | 28<br>(20 - 40)         | 104<br>(84 - 132)       |
| Parkinson disease                                   | 3<br>(2 - 5)         | --                    | --                     | 1<br>(1 - 2)            | 1<br>(0 - 1)            | 1<br>(1 - 2)            |
| Epilepsy                                            | 81<br>(40 - 133)     | 2<br>(1 - 5)          | 2<br>(1 - 3)           | 73<br>(35 - 122)        | 3<br>(2 - 6)            | 1<br>(0 - 1)            |
| Multiple sclerosis                                  | 6<br>(3 - 11)        | --                    | --                     | 5<br>(3 - 9)            | 1<br>(0 - 1)            | 0<br>(0 - 0)            |
| Other neurological disorders                        | 22<br>(16 - 31)      | 5<br>(3 - 7)          | 1<br>(0 - 1)           | 15<br>(10 - 22)         | 1<br>(1 - 2)            | 1<br>(0 - 1)            |
| Mental and substance use disorders                  | 314<br>(209 - 480)   | 1<br>(0 - 2)          | 0<br>(0 - 0)           | 299<br>(199 - 456)      | 14<br>(9 - 22)          | 1<br>(1 - 1)            |
| Schizophrenia                                       | 2<br>(1 - 3)         | --                    | --                     | 2<br>(1 - 3)            | 0<br>(0 - 0)            | 0<br>(0 - 0)            |
| Alcohol use disorders                               | 14<br>(8 - 25)       | --                    | --                     | 12<br>(7 - 21)          | 2<br>(1 - 3)            | 0<br>(0 - 0)            |
| Drug use disorders                                  | 293<br>(192 - 453)   | 1<br>(0 - 2)          | --                     | 279<br>(183 - 434)      | 12<br>(7 - 19)          | 1<br>(0 - 1)            |
| Opioid use disorders                                | 164<br>(105 - 254)   | 1<br>(0 - 1)          | --                     | 157<br>(100 - 244)      | 6<br>(4 - 10)           | 0<br>(0 - 0)            |
| Cocaine use disorders                               | 4<br>(3 - 6)         | 0<br>(0 - 0)          | --                     | 4<br>(3 - 6)            | 0<br>(0 - 0)            | 0<br>(0 - 0)            |
| Amphetamine use disorders                           | 3<br>(2 - 5)         | 0<br>(0 - 0)          | --                     | 3<br>(2 - 5)            | 0<br>(0 - 0)            | 0<br>(0 - 0)            |
| Other drug use disorders                            | 122<br>(80 - 188)    | 0<br>(0 - 1)          | --                     | 116<br>(76 - 178)       | 6<br>(3 - 9)            | 0<br>(0 - 0)            |
| Eating disorders                                    | 5<br>(3 - 8)         | --                    | 0<br>(0 - 0)           | 5<br>(3 - 8)            | --                      | --                      |

Web Table 31- United Arab Emirates deaths with 95% UI by age, sex, and cause in 2013

| Cause                                               | Both Sexes, All Ages | Both Sexes, 0-4 Years | Both Sexes, 5-14 Years | Both Sexes, 15-49 Years | Both Sexes, 50-69 Years | Both Sexes, 70-80 Years |
|-----------------------------------------------------|----------------------|-----------------------|------------------------|-------------------------|-------------------------|-------------------------|
| Anorexia nervosa                                    | 5<br>(3 - 8)         | --                    | 0<br>(0 - 0)           | 5<br>(3 - 8)            | --                      | --                      |
| Diabetes, urogenital, blood, and endocrine diseases | 801<br>(595 - 1,047) | 18<br>(12 - 27)       | 6<br>(4 - 8)           | 421<br>(298 - 591)      | 234<br>(169 - 310)      | 123<br>(96 - 156)       |
| Diabetes mellitus                                   | 355<br>(261 - 474)   | 1<br>(1 - 2)          | 1<br>(0 - 1)           | 140<br>(96 - 204)       | 140<br>(99 - 194)       | 73<br>(55 - 98)         |
| Acute glomerulonephritis                            | 2<br>(1 - 3)         | 0<br>(0 - 0)          | 0<br>(0 - 0)           | 2<br>(1 - 3)            | 0<br>(0 - 0)            | 0<br>(0 - 0)            |
| Chronic kidney disease                              | 287<br>(191 - 417)   | 2<br>(1 - 4)          | 1<br>(1 - 2)           | 167<br>(108 - 257)      | 77<br>(50 - 113)        | 40<br>(26 - 58)         |
| Chronic kidney disease due to diabetes mellitus     | 12<br>(6 - 23)       | 0<br>(0 - 0)          | 0<br>(0 - 0)           | 9<br>(4 - 17)           | 2<br>(1 - 5)            | 1<br>(0 - 2)            |
| Chronic kidney disease due to hypertension          | 129<br>(81 - 202)    | 0<br>(0 - 1)          | 0<br>(0 - 0)           | 71<br>(42 - 119)        | 39<br>(23 - 61)         | 18<br>(12 - 27)         |
| Chronic kidney disease due to glomerulonephritis    | 10<br>(5 - 16)       | 0<br>(0 - 0)          | 0<br>(0 - 0)           | 7<br>(4 - 12)           | 2<br>(1 - 3)            | 1<br>(1 - 1)            |
| Chronic kidney disease due to other causes          | 136<br>(67 - 223)    | 1<br>(1 - 3)          | 1<br>(0 - 1)           | 80<br>(37 - 140)        | 34<br>(16 - 60)         | 20<br>(9 - 34)          |
| Urinary diseases and male infertility               | 36<br>(26 - 49)      | 1<br>(0 - 2)          | 0<br>(0 - 0)           | 22<br>(15 - 31)         | 7<br>(5 - 11)           | 6<br>(4 - 8)            |
| Interstitial nephritis and urinary tract infections | 17<br>(12 - 23)      | 1<br>(0 - 1)          | 0<br>(0 - 0)           | 10<br>(7 - 15)          | 3<br>(2 - 4)            | 3<br>(2 - 4)            |
| Urolithiasis                                        | 2<br>(1 - 3)         | --                    | 0<br>(0 - 0)           | 1<br>(1 - 2)            | 0<br>(0 - 1)            | 0<br>(0 - 0)            |
| Other urinary diseases                              | 17<br>(11 - 28)      | 0<br>(0 - 0)          | 0<br>(0 - 0)           | 10<br>(6 - 16)          | 4<br>(2 - 7)            | 3<br>(2 - 5)            |
| Gynecological diseases                              | 0<br>(0 - 0)         | --                    | --                     | 0<br>(0 - 0)            | 0<br>(0 - 0)            | 0<br>(0 - 0)            |
| Uterine fibroids                                    | 0<br>(0 - 0)         | --                    | --                     | 0<br>(0 - 0)            | 0<br>(0 - 0)            | 0<br>(0 - 0)            |
| Polycystic ovarian syndrome                         | 0<br>(0 - 0)         | --                    | --                     | 0<br>(0 - 0)            | 0<br>(0 - 0)            | --                      |
| Endometriosis                                       | 0<br>(0 - 0)         | --                    | --                     | 0<br>(0 - 0)            | 0<br>(0 - 0)            | --                      |
| Genital prolapse                                    | 0<br>(0 - 0)         | --                    | --                     | 0<br>(0 - 0)            | 0<br>(0 - 0)            | 0<br>(0 - 0)            |
| Other gynecological diseases                        | 0<br>(0 - 0)         | --                    | --                     | 0<br>(0 - 0)            | 0<br>(0 - 0)            | 0<br>(0 - 0)            |
| Hemoglobinopathies and hemolytic anemias            | 68<br>(42 - 112)     | 5<br>(2 - 12)         | 2<br>(1 - 4)           | 56<br>(32 - 95)         | 3<br>(1 - 6)            | 1<br>(1 - 3)            |
| Thalassemias                                        | 39<br>(24 - 63)      | 4<br>(2 - 9)          | 2<br>(1 - 3)           | 33<br>(19 - 56)         | 0<br>(0 - 0)            | 0<br>(0 - 0)            |
| Sickle cell disorders                               | 22<br>(12 - 39)      | 1<br>(0 - 2)          | 0<br>(0 - 1)           | 19<br>(10 - 33)         | 2<br>(1 - 4)            | 0<br>(0 - 0)            |
| G6PD deficiency                                     | 1<br>(1 - 2)         | 0<br>(0 - 0)          | 0<br>(0 - 0)           | 1<br>(1 - 2)            | 0<br>(0 - 0)            | 0<br>(0 - 0)            |
| Other hemoglobinopathies and hemolytic anemias      | 5<br>(3 - 10)        | 0<br>(0 - 1)          | 0<br>(0 - 0)           | 3<br>(2 - 5)            | 1<br>(0 - 1)            | 1<br>(1 - 3)            |
| Endocrine, metabolic, blood, and immune disorders   | 54<br>(36 - 80)      | 9<br>(3 - 15)         | 2<br>(1 - 3)           | 35<br>(22 - 55)         | 6<br>(4 - 9)            | 3<br>(2 - 4)            |
| Musculoskeletal disorders                           | 57<br>(34 - 102)     | --                    | 1<br>(0 - 2)           | 47<br>(28 - 85)         | 6<br>(3 - 12)           | 3<br>(2 - 4)            |
| Rheumatoid arthritis                                | 4<br>(2 - 7)         | --                    | 0<br>(0 - 0)           | 3<br>(2 - 6)            | 0<br>(0 - 1)            | 0<br>(0 - 0)            |
| Other musculoskeletal disorders                     | 53<br>(31 - 96)      | --                    | 1<br>(0 - 2)           | 45<br>(26 - 81)         | 5<br>(3 - 11)           | 3<br>(2 - 4)            |
| Other non-communicable diseases                     | 518<br>(361 - 651)   | 394<br>(256 - 518)    | 17<br>(9 - 27)         | 93<br>(64 - 132)        | 8<br>(5 - 11)           | 6<br>(4 - 9)            |
| Congenital anomalies                                | 479<br>(317 - 613)   | 380<br>(239 - 508)    | 17<br>(9 - 26)         | 76<br>(51 - 110)        | 4<br>(3 - 6)            | 2<br>(1 - 3)            |
| Neural tube defects                                 | 7<br>(3 - 15)        | 5<br>(1 - 14)         | 0<br>(0 - 0)           | 1<br>(1 - 2)            | 0<br>(0 - 0)            | 0<br>(0 - 0)            |
| Congenital heart anomalies                          | 212<br>(109 - 305)   | 178<br>(82 - 267)     | 8<br>(3 - 13)          | 25<br>(15 - 38)         | 1<br>(0 - 1)            | 0<br>(0 - 1)            |
| Cleft lip and cleft palate                          | 0<br>(0 - 0)         | 0<br>(0 - 0)          | --                     | --                      | --                      | --                      |
| Down syndrome                                       | 15<br>(6 - 26)       | 6<br>(2 - 14)         | 1<br>(0 - 1)           | 8<br>(3 - 14)           | 0<br>(0 - 0)            | 0<br>(0 - 0)            |
| Chromosomal unbalanced rearrangements               | 8<br>(4 - 14)        | 5<br>(2 - 10)         | 0<br>(0 - 0)           | 2<br>(1 - 4)            | 0<br>(0 - 0)            | 0<br>(0 - 0)            |
| Other congenital anomalies                          | 238<br>(142 - 338)   | 186<br>(107 - 277)    | 8<br>(4 - 14)          | 39<br>(23 - 59)         | 3<br>(2 - 4)            | 1<br>(1 - 2)            |
| Skin and subcutaneous diseases                      | 27<br>(19 - 38)      | 1<br>(1 - 2)          | 0<br>(0 - 1)           | 17<br>(10 - 26)         | 4<br>(2 - 6)            | 5<br>(3 - 7)            |
| Cellulitis                                          | 3<br>(2 - 6)         | 0<br>(0 - 0)          | 0<br>(0 - 0)           | 2<br>(1 - 4)            | 1<br>(0 - 1)            | 0<br>(0 - 1)            |
| Pyoderma                                            | 15<br>(10 - 22)      | 1<br>(0 - 2)          | 0<br>(0 - 0)           | 9<br>(6 - 15)           | 2<br>(1 - 4)            | 2<br>(1 - 4)            |
| Decubitus ulcer                                     | 7<br>(4 - 10)        | 0<br>(0 - 0)          | 0<br>(0 - 0)           | 4<br>(2 - 6)            | 1<br>(1 - 1)            | 2<br>(1 - 3)            |

Web Table 31- United Arab Emirates deaths with 95% UI by age, sex, and cause in 2013

| Cause                                           | Both Sexes, All Ages     | Both Sexes, 0-4 Years | Both Sexes, 5-14 Years | Both Sexes, 15-49 Years  | Both Sexes, 50-69 Years | Both Sexes, 70-80 Years |
|-------------------------------------------------|--------------------------|-----------------------|------------------------|--------------------------|-------------------------|-------------------------|
| Other skin and subcutaneous diseases            | 2<br>(1 - 3)             | 0<br>(0 - 0)          | 0<br>(0 - 0)           | 1<br>(1 - 2)             | 0<br>(0 - 0)            | 0<br>(0 - 0)            |
| Sudden infant death syndrome                    | 12<br>(3 - 32)           | 12<br>(3 - 32)        | --                     | --                       | --                      | --                      |
| Injuries                                        | 3,900<br>(2,775 - 5,299) | 53<br>(34 - 77)       | 39<br>(28 - 51)        | 3,590<br>(2,535 - 4,928) | 179<br>(121 - 259)      | 40<br>(29 - 53)         |
| Transport injuries                              | 2,424<br>(1,602 - 3,393) | 23<br>(12 - 38)       | 23<br>(15 - 31)        | 2,243<br>(1,478 - 3,169) | 116<br>(71 - 182)       | 20<br>(13 - 30)         |
| Road injuries                                   | 2,333<br>(1,540 - 3,276) | 22<br>(12 - 36)       | 22<br>(14 - 30)        | 2,161<br>(1,417 - 3,056) | 110<br>(68 - 172)       | 19<br>(12 - 29)         |
| Pedestrian road injuries                        | 481<br>(266 - 825)       | 7<br>(3 - 13)         | 7<br>(4 - 11)          | 427<br>(230 - 749)       | 32<br>(17 - 58)         | 7<br>(4 - 13)           |
| Cyclist road injuries                           | 75<br>(43 - 121)         | 1<br>(0 - 2)          | 1<br>(1 - 2)           | 65<br>(37 - 106)         | 7<br>(4 - 12)           | 1<br>(1 - 2)            |
| Motorcyclist road injuries                      | 223<br>(118 - 379)       | 1<br>(0 - 1)          | 1<br>(0 - 1)           | 216<br>(113 - 367)       | 6<br>(3 - 11)           | 1<br>(0 - 2)            |
| Motor vehicle road injuries                     | 1,550<br>(984 - 2,260)   | 13<br>(7 - 23)        | 13<br>(8 - 19)         | 1,451<br>(917 - 2,122)   | 65<br>(38 - 106)        | 9<br>(5 - 14)           |
| Other road injuries                             | 4<br>(2 - 7)             | 0<br>(0 - 1)          | 0<br>(0 - 0)           | 3<br>(1 - 5)             | 0<br>(0 - 1)            | 0<br>(0 - 0)            |
| Other transport injuries                        | 91<br>(51 - 151)         | 1<br>(0 - 2)          | 1<br>(1 - 2)           | 82<br>(46 - 138)         | 5<br>(3 - 10)           | 1<br>(0 - 2)            |
| Unintentional injuries                          | 903<br>(622 - 1,306)     | 30<br>(19 - 47)       | 14<br>(10 - 21)        | 798<br>(531 - 1,183)     | 44<br>(30 - 61)         | 17<br>(12 - 23)         |
| Falls                                           | 251<br>(130 - 404)       | 6<br>(2 - 13)         | 3<br>(1 - 5)           | 222<br>(113 - 369)       | 14<br>(8 - 24)          | 7<br>(4 - 12)           |
| Drowning                                        | 201<br>(98 - 378)        | 8<br>(4 - 24)         | 5<br>(3 - 13)          | 181<br>(87 - 340)        | 5<br>(2 - 10)           | 1<br>(1 - 2)            |
| Fire, heat, and hot substances                  | 89<br>(52 - 140)         | 4<br>(2 - 9)          | 1<br>(1 - 3)           | 77<br>(42 - 124)         | 5<br>(3 - 8)            | 2<br>(1 - 3)            |
| Poisonings                                      | 42<br>(19 - 74)          | 1<br>(0 - 2)          | 0<br>(0 - 1)           | 39<br>(16 - 69)          | 2<br>(1 - 3)            | 1<br>(0 - 1)            |
| Exposure to mechanical forces                   | 125<br>(76 - 201)        | 2<br>(1 - 4)          | 1<br>(1 - 3)           | 114<br>(68 - 186)        | 6<br>(3 - 10)           | 1<br>(1 - 1)            |
| Unintentional firearm injuries                  | 28<br>(13 - 59)          | 0<br>(0 - 0)          | 0<br>(0 - 0)           | 27<br>(12 - 57)          | 1<br>(1 - 2)            | 0<br>(0 - 0)            |
| Unintentional suffocation                       | 6<br>(3 - 12)            | 1<br>(0 - 2)          | 0<br>(0 - 0)           | 5<br>(2 - 10)            | 0<br>(0 - 1)            | 0<br>(0 - 0)            |
| Other exposure to mechanical forces             | 91<br>(51 - 147)         | 2<br>(1 - 3)          | 1<br>(1 - 2)           | 83<br>(44 - 137)         | 4<br>(2 - 7)            | 1<br>(0 - 1)            |
| Adverse effects of medical treatment            | 45<br>(30 - 70)          | 2<br>(1 - 5)          | 1<br>(0 - 1)           | 33<br>(20 - 54)          | 7<br>(4 - 11)           | 3<br>(1 - 4)            |
| Animal contact                                  | 10<br>(5 - 20)           | 1<br>(0 - 2)          | 0<br>(0 - 1)           | 8<br>(4 - 16)            | 1<br>(0 - 2)            | 0<br>(0 - 1)            |
| Venomous animal contact                         | 5<br>(3 - 14)            | 0<br>(0 - 1)          | 0<br>(0 - 1)           | 4<br>(2 - 11)            | 0<br>(0 - 1)            | 0<br>(0 - 0)            |
| Non-venomous animal contact                     | 4<br>(2 - 8)             | 0<br>(0 - 1)          | 0<br>(0 - 0)           | 4<br>(2 - 7)             | 0<br>(0 - 1)            | 0<br>(0 - 0)            |
| Foreign body                                    | 23<br>(11 - 47)          | 4<br>(1 - 7)          | 1<br>(0 - 1)           | 15<br>(7 - 34)           | 2<br>(1 - 3)            | 2<br>(1 - 4)            |
| Pulmonary aspiration and foreign body in airway | 22<br>(10 - 45)          | 4<br>(1 - 7)          | 1<br>(0 - 1)           | 14<br>(6 - 33)           | 1<br>(1 - 3)            | 2<br>(1 - 4)            |
| Foreign body in other body part                 | 1<br>(1 - 3)             | 0<br>(0 - 0)          | 0<br>(0 - 0)           | 1<br>(1 - 2)             | 0<br>(0 - 0)            | 0<br>(0 - 0)            |
| Other unintentional injuries                    | 116<br>(65 - 181)        | 2<br>(1 - 3)          | 1<br>(1 - 2)           | 109<br>(60 - 172)        | 4<br>(2 - 6)            | 1<br>(0 - 1)            |
| Self-harm and interpersonal violence            | 573<br>(340 - 900)       | 0<br>(0 - 1)          | 1<br>(1 - 3)           | 549<br>(324 - 861)       | 19<br>(11 - 31)         | 3<br>(2 - 5)            |
| Self-harm                                       | 427<br>(191 - 675)       | --                    | 1<br>(0 - 2)           | 407<br>(182 - 649)       | 17<br>(8 - 27)          | 3<br>(1 - 5)            |
| Interpersonal violence                          | 146<br>(86 - 287)        | 0<br>(0 - 1)          | 0<br>(0 - 1)           | 142<br>(84 - 282)        | 3<br>(1 - 6)            | 0<br>(0 - 0)            |
| Assault by firearm                              | 73<br>(34 - 154)         | 0<br>(0 - 0)          | 0<br>(0 - 0)           | 71<br>(33 - 152)         | 1<br>(0 - 3)            | 0<br>(0 - 0)            |
| Assault by sharp object                         | 43<br>(18 - 106)         | 0<br>(0 - 0)          | 0<br>(0 - 0)           | 42<br>(17 - 104)         | 1<br>(0 - 2)            | 0<br>(0 - 0)            |
| Assault by other means                          | 30<br>(13 - 77)          | 0<br>(0 - 0)          | 0<br>(0 - 0)           | 29<br>(13 - 75)          | 1<br>(0 - 2)            | 0<br>(0 - 0)            |
| Forces of nature, war, and legal intervention   | 0<br>(0 - 0)             | 0<br>(0 - 0)          | --                     | --                       | --                      | --                      |
| Exposure to forces of nature                    | 0<br>(0 - 0)             | 0<br>(0 - 0)          | --                     | --                       | --                      | --                      |

Web Table 31- United Arab Emirates deaths with 95% UI by age, sex, and cause in 2013

| Cause                                                             | Males, All Ages            | Males, 0-4 Years   | Males, 5-14 Years | Males, 15-49 Years       | Males, 50-69 Years       | Males, 70-80 Years |
|-------------------------------------------------------------------|----------------------------|--------------------|-------------------|--------------------------|--------------------------|--------------------|
| All causes                                                        | 10,253<br>(7,292 - 13,821) | 473<br>(402 - 546) | 65<br>(52 - 81)   | 7,174<br>(4,965 - 9,985) | 1,744<br>(1,192 - 2,398) | 797<br>(602 - 895) |
| Communicable, maternal, neonatal, and nutritional diseases        | 808<br>(625 - 1,068)       | 195<br>(142 - 276) | 15<br>(8 - 25)    | 482<br>(346 - 676)       | 69<br>(45 - 96)          | 48<br>(33 - 67)    |
| HIV/AIDS and tuberculosis                                         | 142<br>(109 - 183)         | 2<br>(1 - 3)       | 0<br>(0 - 1)      | 128<br>(98 - 164)        | 9<br>(6 - 13)            | 3<br>(2 - 8)       |
| Tuberculosis                                                      | 41<br>(23 - 73)            | 0<br>(0 - 0)       | 0<br>(0 - 0)      | 33<br>(17 - 60)          | 5<br>(3 - 10)            | 3<br>(2 - 4)       |
| HIV/AIDS                                                          | 101<br>(76 - 128)          | 2<br>(1 - 3)       | 0<br>(0 - 1)      | 95<br>(71 - 120)         | 4<br>(2 - 6)             | 0<br>(0 - 5)       |
| HIV/AIDS resulting in mycobacterial infection                     | 6<br>(4 - 8)               | 0<br>(0 - 0)       | 0<br>(0 - 0)      | 5<br>(4 - 7)             | 0<br>(0 - 0)             | 0<br>(0 - 0)       |
| HIV/AIDS resulting in other diseases                              | 96<br>(72 - 120)           | 1<br>(1 - 3)       | 0<br>(0 - 1)      | 90<br>(67 - 113)         | 4<br>(2 - 5)             | 0<br>(0 - 4)       |
| Diarrhea, lower respiratory, and other common infectious diseases | 451<br>(302 - 672)         | 45<br>(24 - 79)    | 13<br>(7 - 24)    | 303<br>(187 - 480)       | 49<br>(30 - 72)          | 40<br>(26 - 59)    |
| Diarrheal diseases                                                | 24<br>(14 - 38)            | 6<br>(2 - 16)      | 0<br>(0 - 1)      | 14<br>(8 - 24)           | 2<br>(1 - 4)             | 2<br>(1 - 3)       |
| Intestinal infectious diseases                                    | 109<br>(34 - 259)          | 13<br>(4 - 28)     | 9<br>(3 - 19)     | 85<br>(25 - 216)         | 2<br>(1 - 6)             | 0<br>(0 - 1)       |
| Typhoid fever                                                     | 80<br>(23 - 198)           | 9<br>(2 - 20)      | 7<br>(2 - 15)     | 63<br>(16 - 164)         | 2<br>(0 - 4)             | 0<br>(0 - 0)       |
| Paratyphoid fever                                                 | 23<br>(6 - 58)             | 3<br>(1 - 7)       | 2<br>(1 - 5)      | 18<br>(4 - 48)           | 0<br>(0 - 1)             | 0<br>(0 - 0)       |
| Other intestinal infectious diseases                              | 6<br>(2 - 14)              | 1<br>(0 - 4)       | 0<br>(0 - 2)      | 4<br>(1 - 12)            | 0<br>(0 - 2)             | 0<br>(0 - 0)       |
| Lower respiratory infections                                      | 257<br>(170 - 378)         | 17<br>(7 - 37)     | 3<br>(1 - 5)      | 160<br>(95 - 257)        | 41<br>(24 - 62)          | 37<br>(23 - 55)    |
| Upper respiratory infections                                      | 0<br>(0 - 1)               | 0<br>(0 - 0)       | 0<br>(0 - 0)      | 0<br>(0 - 1)             | 0<br>(0 - 0)             | 0<br>(0 - 0)       |
| Otitis media                                                      | 1<br>(1 - 2)               | 0<br>(0 - 0)       | 0<br>(0 - 0)      | 1<br>(1 - 2)             | 0<br>(0 - 0)             | 0<br>(0 - 0)       |
| Meningitis                                                        | 27<br>(15 - 44)            | 2<br>(1 - 5)       | 0<br>(0 - 1)      | 22<br>(11 - 37)          | 2<br>(1 - 4)             | 1<br>(0 - 1)       |
| Pneumococcal meningitis                                           | 5<br>(3 - 10)              | 0<br>(0 - 1)       | 0<br>(0 - 0)      | 4<br>(2 - 9)             | 0<br>(0 - 1)             | 0<br>(0 - 0)       |
| H influenzae type B meningitis                                    | 3<br>(2 - 6)               | 1<br>(0 - 2)       | 0<br>(0 - 0)      | 2<br>(1 - 4)             | 0<br>(0 - 0)             | 0<br>(0 - 0)       |
| Meningococcal meningitis                                          | 6<br>(3 - 12)              | 1<br>(0 - 1)       | 0<br>(0 - 0)      | 5<br>(2 - 10)            | 0<br>(0 - 1)             | 0<br>(0 - 0)       |
| Other meningitis                                                  | 12<br>(7 - 20)             | 1<br>(0 - 1)       | 0<br>(0 - 0)      | 10<br>(5 - 18)           | 1<br>(1 - 2)             | 0<br>(0 - 1)       |
| Encephalitis                                                      | 22<br>(12 - 44)            | 2<br>(1 - 5)       | 1<br>(0 - 1)      | 18<br>(9 - 37)           | 1<br>(1 - 2)             | 0<br>(0 - 0)       |
| Diphtheria                                                        | 0<br>(0 - 1)               | 0<br>(0 - 0)       | 0<br>(0 - 0)      | 0<br>(0 - 1)             | 0<br>(0 - 0)             | --                 |
| Whooping cough                                                    | 3<br>(0 - 17)              | 3<br>(0 - 16)      | 0<br>(0 - 1)      | 0<br>(0 - 1)             | 0<br>(0 - 0)             | --                 |
| Tetanus                                                           | 1<br>(0 - 2)               | 0<br>(0 - 0)       | 0<br>(0 - 0)      | 1<br>(0 - 2)             | 0<br>(0 - 0)             | 0<br>(0 - 0)       |
| Measles                                                           | 3<br>(0 - 20)              | 2<br>(0 - 16)      | 0<br>(0 - 2)      | 0<br>(0 - 2)             | 0<br>(0 - 0)             | --                 |
| Varicella and herpes zoster                                       | 2<br>(0 - 6)               | 0<br>(0 - 1)       | 0<br>(0 - 0)      | 2<br>(0 - 5)             | 0<br>(0 - 0)             | 0<br>(0 - 0)       |
| Neglected tropical diseases and malaria                           | 7<br>(4 - 12)              | 0<br>(0 - 1)       | 0<br>(0 - 0)      | 6<br>(4 - 10)            | 0<br>(0 - 1)             | 0<br>(0 - 0)       |
| Malaria                                                           | 1<br>(1 - 3)               | 0<br>(0 - 0)       | 0<br>(0 - 0)      | 1<br>(0 - 3)             | 0<br>(0 - 0)             | 0<br>(0 - 0)       |
| Leishmaniasis                                                     | 1<br>(0 - 1)               | 0<br>(0 - 0)       | 0<br>(0 - 0)      | 1<br>(0 - 1)             | 0<br>(0 - 0)             | 0<br>(0 - 0)       |
| Visceral leishmaniasis                                            | 1<br>(0 - 1)               | 0<br>(0 - 0)       | 0<br>(0 - 0)      | 1<br>(0 - 1)             | 0<br>(0 - 0)             | 0<br>(0 - 0)       |
| Cysticercosis                                                     | 0<br>(0 - 0)               | 0<br>(0 - 0)       | 0<br>(0 - 0)      | 0<br>(0 - 0)             | 0<br>(0 - 0)             | 0<br>(0 - 0)       |
| Cystic echinococcosis                                             | 0<br>(0 - 1)               | 0<br>(0 - 0)       | 0<br>(0 - 0)      | 0<br>(0 - 1)             | 0<br>(0 - 0)             | 0<br>(0 - 0)       |
| Dengue                                                            | 1<br>(1 - 1)               | 0<br>(0 - 0)       | 0<br>(0 - 0)      | 1<br>(0 - 1)             | 0<br>(0 - 0)             | 0<br>(0 - 0)       |
| Rabies                                                            | 1<br>(0 - 2)               | 0<br>(0 - 0)       | 0<br>(0 - 0)      | 1<br>(0 - 2)             | 0<br>(0 - 0)             | 0<br>(0 - 0)       |
| Intestinal nematode infections                                    | 1<br>(0 - 4)               | 0<br>(0 - 1)       | 0<br>(0 - 0)      | 0<br>(0 - 4)             | 0<br>(0 - 0)             | 0<br>(0 - 0)       |
| Ascariasis                                                        | 1<br>(0 - 4)               | 0<br>(0 - 1)       | 0<br>(0 - 0)      | 0<br>(0 - 4)             | 0<br>(0 - 0)             | 0<br>(0 - 0)       |
| Other neglected tropical diseases                                 | 2<br>(1 - 4)               | 0<br>(0 - 0)       | 0<br>(0 - 0)      | 2<br>(1 - 3)             | 0<br>(0 - 0)             | 0<br>(0 - 0)       |
| Maternal disorders                                                | --                         | --                 | --                | --                       | --                       | --                 |
| Maternal hemorrhage                                               | --                         | --                 | --                | --                       | --                       | --                 |

Web Table 31- United Arab Emirates deaths with 95% UI by age, sex, and cause in 2013

| Cause                                                            | Males, All Ages          | Males, 0-4 Years   | Males, 5-14 Years | Males, 15-49 Years       | Males, 50-69 Years       | Males, 70-80 Years |
|------------------------------------------------------------------|--------------------------|--------------------|-------------------|--------------------------|--------------------------|--------------------|
| Maternal sepsis and other maternal infections                    | --                       | --                 | --                | --                       | --                       | --                 |
| Maternal hypertensive disorders                                  | --                       | --                 | --                | --                       | --                       | --                 |
| Maternal obstructed labor                                        | --                       | --                 | --                | --                       | --                       | --                 |
| Maternal abortive outcome                                        | --                       | --                 | --                | --                       | --                       | --                 |
| Indirect maternal deaths                                         | --                       | --                 | --                | --                       | --                       | --                 |
| Late maternal deaths                                             | --                       | --                 | --                | --                       | --                       | --                 |
| Maternal deaths aggravated by HIV/AIDS                           | --                       | --                 | --                | --                       | --                       | --                 |
| Other maternal disorders                                         | --                       | --                 | --                | --                       | --                       | --                 |
| Neonatal disorders                                               | 145<br>(102 - 207)       | 145<br>(102 - 207) | --                | --                       | --                       | --                 |
| Neonatal preterm birth complications                             | 88<br>(40 - 141)         | 88<br>(40 - 141)   | --                | --                       | --                       | --                 |
| Neonatal encephalopathy due to birth asphyxia and trauma         | 16<br>(6 - 33)           | 16<br>(6 - 33)     | --                | --                       | --                       | --                 |
| Neonatal sepsis and other neonatal infections                    | 16<br>(5 - 36)           | 16<br>(5 - 36)     | --                | --                       | --                       | --                 |
| Hemolytic disease and other neonatal jaundice                    | 0<br>(0 - 1)             | 0<br>(0 - 1)       | --                | --                       | --                       | --                 |
| Other neonatal disorders                                         | 25<br>(10 - 49)          | 25<br>(10 - 49)    | --                | --                       | --                       | --                 |
| Nutritional deficiencies                                         | 21<br>(10 - 40)          | 1<br>(0 - 2)       | 0<br>(0 - 0)      | 14<br>(7 - 28)           | 3<br>(1 - 6)             | 3<br>(1 - 5)       |
| Protein-energy malnutrition                                      | 4<br>(1 - 9)             | 0<br>(0 - 1)       | 0<br>(0 - 0)      | 3<br>(1 - 6)             | 0<br>(0 - 1)             | 0<br>(0 - 1)       |
| Iodine deficiency                                                | 0<br>(0 - 1)             | 0<br>(0 - 0)       | 0<br>(0 - 0)      | 0<br>(0 - 1)             | 0<br>(0 - 0)             | 0<br>(0 - 0)       |
| Iron-deficiency anemia                                           | 14<br>(6 - 29)           | 0<br>(0 - 1)       | 0<br>(0 - 0)      | 9<br>(3 - 20)            | 2<br>(1 - 5)             | 2<br>(1 - 4)       |
| Other nutritional deficiencies                                   | 3<br>(1 - 7)             | 0<br>(0 - 0)       | 0<br>(0 - 0)      | 2<br>(1 - 5)             | 0<br>(0 - 1)             | 0<br>(0 - 0)       |
| Other communicable, maternal, neonatal, and nutritional diseases | 43<br>(27 - 66)          | 2<br>(1 - 5)       | 0<br>(0 - 1)      | 31<br>(18 - 52)          | 8<br>(4 - 13)            | 2<br>(1 - 4)       |
| Sexually transmitted diseases excluding HIV                      | 2<br>(1 - 4)             | 1<br>(0 - 2)       | 0<br>(0 - 0)      | 1<br>(1 - 3)             | 0<br>(0 - 0)             | 0<br>(0 - 0)       |
| Syphilis                                                         | 1<br>(1 - 3)             | 1<br>(0 - 2)       | 0<br>(0 - 0)      | 1<br>(0 - 2)             | 0<br>(0 - 0)             | 0<br>(0 - 0)       |
| Chlamydial infection                                             | --                       | --                 | --                | --                       | --                       | --                 |
| Gonococcal infection                                             | 0<br>(0 - 1)             | --                 | 0<br>(0 - 0)      | 0<br>(0 - 1)             | 0<br>(0 - 0)             | 0<br>(0 - 0)       |
| Other sexually transmitted diseases                              | 0<br>(0 - 1)             | --                 | 0<br>(0 - 0)      | 0<br>(0 - 1)             | 0<br>(0 - 0)             | 0<br>(0 - 0)       |
| Hepatitis                                                        | 21<br>(12 - 32)          | 0<br>(0 - 1)       | 0<br>(0 - 0)      | 15<br>(8 - 24)           | 5<br>(3 - 8)             | 1<br>(0 - 1)       |
| Acute hepatitis A                                                | 2<br>(0 - 4)             | 0<br>(0 - 0)       | 0<br>(0 - 0)      | 1<br>(0 - 3)             | 0<br>(0 - 1)             | 0<br>(0 - 0)       |
| Acute hepatitis B                                                | 10<br>(6 - 18)           | 0<br>(0 - 0)       | 0<br>(0 - 0)      | 6<br>(3 - 12)            | 4<br>(2 - 6)             | 1<br>(0 - 1)       |
| Acute hepatitis C                                                | 1<br>(0 - 4)             | --                 | 0<br>(0 - 0)      | 1<br>(0 - 3)             | 0<br>(0 - 1)             | 0<br>(0 - 0)       |
| Acute hepatitis E                                                | 7<br>(3 - 14)            | 0<br>(0 - 0)       | 0<br>(0 - 0)      | 6<br>(2 - 12)            | 1<br>(0 - 2)             | 0<br>(0 - 0)       |
| Other infectious diseases                                        | 20<br>(10 - 37)          | 1<br>(0 - 4)       | 0<br>(0 - 1)      | 15<br>(7 - 29)           | 3<br>(1 - 7)             | 1<br>(0 - 3)       |
| Non-communicable diseases                                        | 5,927<br>(4,171 - 8,191) | 249<br>(163 - 323) | 26<br>(18 - 36)   | 3,401<br>(2,350 - 4,965) | 1,531<br>(1,048 - 2,097) | 720<br>(547 - 814) |
| Neoplasms                                                        | 1,134<br>(765 - 1,621)   | 7<br>(3 - 11)      | 9<br>(6 - 13)     | 721<br>(480 - 1,065)     | 306<br>(203 - 428)       | 91<br>(65 - 113)   |
| Esophageal cancer                                                | 22<br>(14 - 35)          | --                 | --                | 12<br>(7 - 19)           | 8<br>(4 - 13)            | 2<br>(2 - 4)       |
| Stomach cancer                                                   | 84<br>(54 - 130)         | --                 | --                | 47<br>(29 - 80)          | 9<br>(17 - 45)           | 9<br>(6 - 13)      |
| Liver cancer                                                     | 73<br>(47 - 110)         | --                 | 0<br>(0 - 0)      | 37<br>(21 - 58)          | 30<br>(18 - 46)          | 6<br>(4 - 9)       |
| Liver cancer due to hepatitis B                                  | 30<br>(14 - 54)          | --                 | 0<br>(0 - 0)      | 18<br>(8 - 33)           | 11<br>(4 - 21)           | 1<br>(1 - 3)       |
| Liver cancer due to hepatitis C                                  | 32<br>(15 - 56)          | --                 | 0<br>(0 - 0)      | 14<br>(5 - 27)           | 15<br>(7 - 25)           | 4<br>(2 - 6)       |
| Liver cancer due to alcohol use                                  | 4<br>(1 - 9)             | --                 | --                | 2<br>(0 - 4)             | 2<br>(1 - 4)             | 1<br>(0 - 1)       |
| Liver cancer due to other causes                                 | 6<br>(2 - 14)            | --                 | 0<br>(0 - 0)      | 4<br>(1 - 9)             | 2<br>(0 - 4)             | 0<br>(0 - 1)       |

Web Table 31- United Arab Emirates deaths with 95% UI by age, sex, and cause in 2013

| Cause                                         | Males, All Ages          | Males, 0-4 Years | Males, 5-14 Years | Males, 15-49 Years       | Males, 50-69 Years   | Males, 70-80 Years |
|-----------------------------------------------|--------------------------|------------------|-------------------|--------------------------|----------------------|--------------------|
| Larynx cancer                                 | 14<br>(9 - 22)           | --               | --                | 6<br>(3 - 10)            | 6<br>(4 - 11)        | 2<br>(1 - 3)       |
| Tracheal, bronchus and lung cancer            | 169<br>(109 - 249)       | --               | --                | 74<br>(45 - 120)         | 75<br>(48 - 108)     | 19<br>(13 - 25)    |
| Breast cancer                                 | 4<br>(2 - 7)             | --               | --                | 3<br>(1 - 6)             | 1<br>(0 - 2)         | 0<br>(0 - 0)       |
| Cervical cancer                               | --                       | --               | --                | --                       | --                   | --                 |
| Uterine cancer                                | --                       | --               | --                | --                       | --                   | --                 |
| Prostate cancer                               | 36<br>(19 - 73)          | --               | --                | 4<br>(2 - 9)             | 15<br>(7 - 31)       | 17<br>(9 - 34)     |
| Colon and rectum cancer                       | 117<br>(78 - 169)        | --               | --                | 81<br>(53 - 125)         | 29<br>(19 - 41)      | 7<br>(5 - 9)       |
| Lip and oral cavity cancer                    | 12<br>(8 - 18)           | --               | --                | 8<br>(5 - 13)            | 3<br>(2 - 5)         | 1<br>(0 - 1)       |
| Nasopharynx cancer                            | 11<br>(7 - 20)           | --               | 0<br>(0 - 0)      | 9<br>(5 - 16)            | 2<br>(1 - 4)         | 0<br>(0 - 0)       |
| Other pharynx cancer                          | 6<br>(4 - 9)             | --               | --                | 4<br>(2 - 7)             | 2<br>(1 - 3)         | 0<br>(0 - 0)       |
| Gallbladder and biliary tract cancer          | 7<br>(4 - 11)            | --               | --                | 4<br>(2 - 6)             | 3<br>(1 - 4)         | 1<br>(0 - 1)       |
| Pancreatic cancer                             | 42<br>(27 - 62)          | --               | --                | 23<br>(14 - 37)          | 16<br>(10 - 23)      | 4<br>(2 - 5)       |
| Malignant skin melanoma                       | 5<br>(2 - 10)            | --               | --                | 4<br>(2 - 8)             | 1<br>(0 - 2)         | 0<br>(0 - 0)       |
| Non-melanoma skin cancer                      | 4<br>(2 - 6)             | --               | --                | 3<br>(1 - 4)             | 1<br>(0 - 1)         | 0<br>(0 - 1)       |
| Ovarian cancer                                | --                       | --               | --                | --                       | --                   | --                 |
| Testicular cancer                             | 10<br>(6 - 17)           | --               | --                | 10<br>(6 - 17)           | 0<br>(0 - 1)         | 0<br>(0 - 0)       |
| Kidney cancer                                 | 22<br>(14 - 33)          | 0<br>(0 - 0)     | 0<br>(0 - 0)      | 12<br>(8 - 20)           | 8<br>(5 - 12)        | 2<br>(1 - 2)       |
| Bladder cancer                                | 34<br>(23 - 49)          | --               | --                | 12<br>(7 - 19)           | 16<br>(10 - 24)      | 6<br>(4 - 9)       |
| Brain and nervous system cancer               | 114<br>(62 - 242)        | 1<br>(0 - 3)     | 2<br>(1 - 4)      | 90<br>(47 - 190)         | 18<br>(10 - 44)      | 2<br>(1 - 5)       |
| Thyroid cancer                                | 5<br>(3 - 8)             | --               | 0<br>(0 - 0)      | 3<br>(2 - 6)             | 1<br>(1 - 2)         | 0<br>(0 - 0)       |
| Mesothelioma                                  | 2<br>(1 - 3)             | --               | --                | 1<br>(1 - 2)             | 0<br>(0 - 1)         | 0<br>(0 - 0)       |
| Hodgkin lymphoma                              | 13<br>(8 - 21)           | 0<br>(0 - 0)     | 0<br>(0 - 1)      | 11<br>(7 - 19)           | 1<br>(1 - 2)         | 0<br>(0 - 0)       |
| Non-Hodgkin lymphoma                          | 95<br>(60 - 144)         | 1<br>(0 - 1)     | 1<br>(0 - 2)      | 76<br>(47 - 118)         | 15<br>(9 - 23)       | 3<br>(2 - 5)       |
| Multiple myeloma                              | 10<br>(6 - 15)           | --               | --                | 5<br>(3 - 9)             | 3<br>(2 - 5)         | 1<br>(0 - 1)       |
| Leukemia                                      | 127<br>(83 - 189)        | 2<br>(1 - 4)     | 3<br>(2 - 5)      | 107<br>(68 - 163)        | 11<br>(7 - 18)       | 3<br>(2 - 5)       |
| Other neoplasms                               | 96<br>(58 - 151)         | 3<br>(1 - 5)     | 2<br>(1 - 4)      | 74<br>(43 - 120)         | 14<br>(8 - 23)       | 4<br>(2 - 6)       |
| Cardiovascular diseases                       | 2,807<br>(1,931 - 3,954) | 6<br>(4 - 12)    | 3<br>(2 - 5)      | 1,581<br>(1,070 - 2,367) | 840<br>(568 - 1,145) | 376<br>(283 - 442) |
| Rheumatic heart disease                       | 15<br>(7 - 29)           | 0<br>(0 - 0)     | 0<br>(0 - 0)      | 12<br>(5 - 24)           | 2<br>(1 - 4)         | 1<br>(0 - 1)       |
| Ischemic heart disease                        | 1,845<br>(1,192 - 2,651) | 1<br>(0 - 3)     | 1<br>(0 - 1)      | 1,034<br>(644 - 1,557)   | 595<br>(391 - 835)   | 214<br>(150 - 267) |
| Cerebrovascular disease                       | 586<br>(385 - 857)       | 2<br>(1 - 3)     | 1<br>(1 - 2)      | 291<br>(177 - 463)       | 165<br>(105 - 243)   | 126<br>(89 - 167)  |
| Ischemic stroke                               | 217<br>(121 - 334)       | 0<br>(0 - 0)     | 0<br>(0 - 0)      | 65<br>(28 - 114)         | 70<br>(36 - 113)     | 82<br>(52 - 113)   |
| Hemorrhagic stroke                            | 368<br>(224 - 579)       | 2<br>(1 - 3)     | 1<br>(1 - 2)      | 226<br>(134 - 369)       | 95<br>(55 - 158)     | 44<br>(24 - 73)    |
| Hypertensive heart disease                    | 83<br>(39 - 145)         | 0<br>(0 - 0)     | 0<br>(0 - 0)      | 47<br>(22 - 87)          | 23<br>(10 - 40)      | 13<br>(6 - 21)     |
| Cardiomyopathy and myocarditis                | 98<br>(54 - 163)         | 2<br>(1 - 3)     | 1<br>(0 - 1)      | 73<br>(39 - 127)         | 16<br>(8 - 29)       | 6<br>(2 - 9)       |
| Atrial fibrillation and flutter               | 2<br>(1 - 3)             | --               | --                | 1<br>(0 - 2)             | 1<br>(0 - 1)         | 0<br>(0 - 1)       |
| Aortic aneurysm                               | 28<br>(17 - 47)          | --               | --                | 12<br>(7 - 21)           | 13<br>(7 - 20)       | 4<br>(2 - 6)       |
| Peripheral vascular disease                   | 2<br>(1 - 3)             | --               | --                | 1<br>(0 - 2)             | 1<br>(0 - 1)         | 0<br>(0 - 1)       |
| Endocarditis                                  | 19<br>(10 - 35)          | 1<br>(0 - 2)     | 0<br>(0 - 0)      | 14<br>(7 - 27)           | 3<br>(2 - 6)         | 1<br>(1 - 2)       |
| Other cardiovascular and circulatory diseases | 130<br>(74 - 223)        | 1<br>(0 - 2)     | 0<br>(0 - 1)      | 96<br>(51 - 171)         | 23<br>(12 - 39)      | 10<br>(6 - 16)     |
| Chronic respiratory diseases                  | 325<br>(199 - 499)       | 2<br>(1 - 4)     | 1<br>(0 - 1)      | 146<br>(84 - 238)        | 97<br>(55 - 158)     | 79<br>(52 - 115)   |

Web Table 31- United Arab Emirates deaths with 95% UI by age, sex, and cause in 2013

| Cause                                               | Males, All Ages    | Males, 0-4 Years | Males, 5-14 Years | Males, 15-49 Years | Males, 50-69 Years | Males, 70-80 Years |
|-----------------------------------------------------|--------------------|------------------|-------------------|--------------------|--------------------|--------------------|
| Chronic obstructive pulmonary disease               | 214<br>(130 - 343) | 1<br>(0 - 2)     | 0<br>(0 - 0)      | 74<br>(41 - 125)   | 73<br>(41 - 121)   | 66<br>(44 - 99)    |
| Pneumoconiosis                                      | 18<br>(9 - 33)     | 0<br>(0 - 0)     | 0<br>(0 - 0)      | 14<br>(7 - 25)     | 3<br>(1 - 5)       | 1<br>(1 - 2)       |
| Silicosis                                           | 2<br>(1 - 4)       | 0<br>(0 - 0)     | 0<br>(0 - 0)      | 1<br>(0 - 2)       | 0<br>(0 - 1)       | 1<br>(0 - 1)       |
| Asbestosis                                          | 3<br>(1 - 5)       | 0<br>(0 - 0)     | 0<br>(0 - 0)      | 2<br>(1 - 5)       | 0<br>(0 - 0)       | 0<br>(0 - 0)       |
| Coal workers pneumoconiosis                         | 1<br>(0 - 2)       | 0<br>(0 - 0)     | 0<br>(0 - 0)      | 1<br>(0 - 1)       | 0<br>(0 - 0)       | 0<br>(0 - 0)       |
| Other pneumoconiosis                                | 13<br>(6 - 23)     | 0<br>(0 - 0)     | 0<br>(0 - 0)      | 10<br>(5 - 18)     | 2<br>(1 - 4)       | 1<br>(0 - 1)       |
| Asthma                                              | 60<br>(24 - 113)   | 0<br>(0 - 1)     | 0<br>(0 - 0)      | 40<br>(16 - 77)    | 13<br>(5 - 26)     | 6<br>(3 - 12)      |
| Interstitial lung disease and pulmonary sarcoidosis | 16<br>(3 - 37)     | 0<br>(0 - 0)     | 0<br>(0 - 0)      | 6<br>(1 - 14)      | 6<br>(1 - 16)      | 4<br>(1 - 9)       |
| Other chronic respiratory diseases                  | 17<br>(7 - 38)     | 0<br>(0 - 1)     | 0<br>(0 - 0)      | 12<br>(5 - 29)     | 2<br>(1 - 5)       | 1<br>(1 - 3)       |
| Cirrhosis                                           | 213<br>(142 - 314) | 1<br>(0 - 1)     | 0<br>(0 - 1)      | 141<br>(89 - 215)  | 58<br>(37 - 87)    | 14<br>(9 - 18)     |
| Cirrhosis due to hepatitis B                        | 74<br>(32 - 139)   | 0<br>(0 - 0)     | 0<br>(0 - 0)      | 49<br>(20 - 98)    | 21<br>(8 - 39)     | 4<br>(1 - 8)       |
| Cirrhosis due to hepatitis C                        | 73<br>(11 - 159)   | 0<br>(0 - 0)     | 0<br>(0 - 0)      | 49<br>(6 - 108)    | 19<br>(1 - 46)     | 5<br>(0 - 9)       |
| Cirrhosis due to alcohol use                        | 30<br>(11 - 63)    | --               | --                | 15<br>(5 - 33)     | 11<br>(4 - 25)     | 4<br>(1 - 9)       |
| Cirrhosis due to other causes                       | 36<br>(16 - 73)    | 1<br>(0 - 1)     | 0<br>(0 - 0)      | 27<br>(11 - 54)    | 7<br>(2 - 17)      | 1<br>(0 - 3)       |
| Digestive diseases                                  | 112<br>(73 - 168)  | 1<br>(0 - 1)     | 0<br>(0 - 1)      | 78<br>(49 - 124)   | 21<br>(13 - 32)    | 13<br>(9 - 17)     |
| Peptic ulcer disease                                | 21<br>(12 - 34)    | 0<br>(0 - 0)     | 0<br>(0 - 0)      | 12<br>(6 - 22)     | 5<br>(3 - 9)       | 3<br>(2 - 5)       |
| Gastritis and duodenitis                            | 3<br>(1 - 5)       | 0<br>(0 - 0)     | 0<br>(0 - 0)      | 2<br>(1 - 4)       | 0<br>(0 - 1)       | 0<br>(0 - 0)       |
| Appendicitis                                        | 7<br>(3 - 11)      | 0<br>(0 - 0)     | 0<br>(0 - 0)      | 5<br>(2 - 9)       | 1<br>(0 - 1)       | 0<br>(0 - 1)       |
| Paralytic ileus and intestinal obstruction          | 20<br>(10 - 39)    | 0<br>(0 - 0)     | 0<br>(0 - 0)      | 13<br>(6 - 29)     | 4<br>(2 - 8)       | 2<br>(1 - 4)       |
| Inguinal, femoral, and abdominal hernia             | 2<br>(1 - 4)       | 0<br>(0 - 0)     | 0<br>(0 - 0)      | 2<br>(1 - 3)       | 0<br>(0 - 0)       | 0<br>(0 - 1)       |
| Inflammatory bowel disease                          | 8<br>(5 - 14)      | 0<br>(0 - 0)     | 0<br>(0 - 0)      | 6<br>(3 - 11)      | 1<br>(1 - 2)       | 1<br>(0 - 1)       |
| Vascular intestinal disorders                       | 5<br>(2 - 10)      | 0<br>(0 - 0)     | 0<br>(0 - 0)      | 4<br>(1 - 8)       | 1<br>(0 - 2)       | 0<br>(0 - 1)       |
| Gallbladder and biliary diseases                    | 13<br>(7 - 20)     | 0<br>(0 - 0)     | 0<br>(0 - 0)      | 7<br>(4 - 12)      | 3<br>(1 - 5)       | 3<br>(2 - 4)       |
| Pancreatitis                                        | 21<br>(10 - 44)    | 0<br>(0 - 0)     | 0<br>(0 - 0)      | 17<br>(8 - 35)     | 3<br>(1 - 7)       | 1<br>(0 - 2)       |
| Other digestive diseases                            | 13<br>(7 - 21)     | 0<br>(0 - 0)     | 0<br>(0 - 0)      | 8<br>(4 - 15)      | 3<br>(1 - 5)       | 1<br>(1 - 3)       |
| Neurological disorders                              | 172<br>(119 - 236) | 3<br>(1 - 6)     | 1<br>(1 - 2)      | 75<br>(40 - 126)   | 25<br>(16 - 37)    | 67<br>(52 - 83)    |
| Alzheimer disease and other dementias               | 86<br>(65 - 108)   | --               | --                | 0<br>(0 - 1)       | 21<br>(13 - 31)    | 65<br>(50 - 81)    |
| Parkinson disease                                   | 3<br>(2 - 4)       | --               | --                | 1<br>(1 - 2)       | 1<br>(0 - 1)       | 1<br>(0 - 2)       |
| Epilepsy                                            | 62<br>(28 - 112)   | 1<br>(0 - 3)     | 1<br>(0 - 2)      | 58<br>(25 - 105)   | 2<br>(1 - 4)       | 0<br>(0 - 1)       |
| Multiple sclerosis                                  | 4<br>(2 - 9)       | --               | --                | 4<br>(2 - 8)       | 0<br>(0 - 1)       | 0<br>(0 - 0)       |
| Other neurological disorders                        | 16<br>(10 - 24)    | 2<br>(1 - 4)     | 0<br>(0 - 1)      | 13<br>(8 - 20)     | 1<br>(0 - 2)       | 0<br>(0 - 0)       |
| Mental and substance use disorders                  | 266<br>(163 - 434) | 1<br>(0 - 1)     | 0<br>(0 - 0)      | 252<br>(153 - 415) | 12<br>(7 - 20)     | 1<br>(0 - 1)       |
| Schizophrenia                                       | 1<br>(1 - 3)       | --               | --                | 1<br>(0 - 3)       | 0<br>(0 - 0)       | 0<br>(0 - 0)       |
| Alcohol use disorders                               | 13<br>(7 - 23)     | --               | --                | 11<br>(6 - 20)     | 2<br>(1 - 3)       | 0<br>(0 - 0)       |
| Drug use disorders                                  | 249<br>(149 - 413) | 1<br>(0 - 1)     | --                | 238<br>(142 - 397) | 11<br>(6 - 18)     | 0<br>(0 - 1)       |
| Opioid use disorders                                | 140<br>(85 - 233)  | 0<br>(0 - 1)     | --                | 134<br>(80 - 222)  | 6<br>(3 - 9)       | 0<br>(0 - 0)       |
| Cocaine use disorders                               | 3<br>(2 - 5)       | 0<br>(0 - 0)     | --                | 3<br>(2 - 5)       | 0<br>(0 - 0)       | 0<br>(0 - 0)       |
| Amphetamine use disorders                           | 3<br>(2 - 4)       | 0<br>(0 - 0)     | --                | 2<br>(1 - 4)       | 0<br>(0 - 0)       | 0<br>(0 - 0)       |
| Other drug use disorders                            | 104<br>(61 - 168)  | 0<br>(0 - 0)     | --                | 98<br>(58 - 159)   | 5<br>(3 - 9)       | 0<br>(0 - 0)       |
| Eating disorders                                    | 2<br>(1 - 4)       | --               | 0<br>(0 - 0)      | 2<br>(1 - 4)       | --                 | --                 |

Web Table 31- United Arab Emirates deaths with 95% UI by age, sex, and cause in 2013

| Cause                                               | Males, All Ages    | Males, 0-4 Years   | Males, 5-14 Years | Males, 15-49 Years | Males, 50-69 Years | Males, 70-80 Years |
|-----------------------------------------------------|--------------------|--------------------|-------------------|--------------------|--------------------|--------------------|
| Anorexia nervosa                                    | 2<br>(1 - 4)       | --                 | 0<br>(0 - 0)      | 2<br>(1 - 4)       | --                 | --                 |
| Diabetes, urogenital, blood, and endocrine diseases | 562<br>(382 - 799) | 10<br>(6 - 17)     | 3<br>(2 - 4)      | 311<br>(203 - 469) | 162<br>(106 - 235) | 76<br>(55 - 95)    |
| Diabetes mellitus                                   | 242<br>(164 - 337) | 1<br>(0 - 1)       | 0<br>(0 - 0)      | 103<br>(66 - 159)  | 95<br>(61 - 140)   | 43<br>(30 - 57)    |
| Acute glomerulonephritis                            | 2<br>(1 - 3)       | 0<br>(0 - 0)       | 0<br>(0 - 0)      | 1<br>(1 - 2)       | 0<br>(0 - 0)       | 0<br>(0 - 0)       |
| Chronic kidney disease                              | 211<br>(128 - 328) | 1<br>(1 - 2)       | 1<br>(0 - 1)      | 128<br>(76 - 212)  | 55<br>(33 - 86)    | 27<br>(17 - 38)    |
| Chronic kidney disease due to diabetes mellitus     | 9<br>(3 - 20)      | 0<br>(0 - 0)       | 0<br>(0 - 0)      | 7<br>(2 - 15)      | 1<br>(0 - 3)       | 1<br>(0 - 1)       |
| Chronic kidney disease due to hypertension          | 95<br>(54 - 166)   | 0<br>(0 - 0)       | 0<br>(0 - 0)      | 54<br>(28 - 100)   | 29<br>(16 - 50)    | 12<br>(7 - 20)     |
| Chronic kidney disease due to glomerulonephritis    | 8<br>(4 - 13)      | 0<br>(0 - 0)       | 0<br>(0 - 0)      | 6<br>(3 - 10)      | 1<br>(0 - 2)       | 1<br>(0 - 1)       |
| Chronic kidney disease due to other causes          | 99<br>(43 - 172)   | 1<br>(0 - 2)       | 0<br>(0 - 1)      | 61<br>(25 - 115)   | 24<br>(9 - 46)     | 13<br>(5 - 24)     |
| Urinary diseases and male infertility               | 25<br>(16 - 37)    | 0<br>(0 - 1)       | 0<br>(0 - 0)      | 15<br>(9 - 23)     | 6<br>(3 - 9)       | 4<br>(2 - 6)       |
| Interstitial nephritis and urinary tract infections | 9<br>(4 - 14)      | 0<br>(0 - 1)       | 0<br>(0 - 0)      | 5<br>(2 - 9)       | 2<br>(1 - 3)       | 1<br>(0 - 2)       |
| Urolithiasis                                        | 1<br>(1 - 2)       | --                 | 0<br>(0 - 0)      | 1<br>(0 - 2)       | 0<br>(0 - 0)       | 0<br>(0 - 0)       |
| Other urinary diseases                              | 15<br>(9 - 26)     | 0<br>(0 - 0)       | 0<br>(0 - 0)      | 9<br>(5 - 15)      | 4<br>(2 - 7)       | 3<br>(2 - 5)       |
| Gynecological diseases                              | --                 | --                 | --                | --                 | --                 | --                 |
| Uterine fibroids                                    | --                 | --                 | --                | --                 | --                 | --                 |
| Polycystic ovarian syndrome                         | --                 | --                 | --                | --                 | --                 | --                 |
| Endometriosis                                       | --                 | --                 | --                | --                 | --                 | --                 |
| Genital prolapse                                    | --                 | --                 | --                | --                 | --                 | --                 |
| Other gynecological diseases                        | --                 | --                 | --                | --                 | --                 | --                 |
| Hemoglobinopathies and hemolytic anemias            | 43<br>(22 - 77)    | 2<br>(1 - 6)       | 1<br>(0 - 2)      | 37<br>(18 - 67)    | 2<br>(1 - 4)       | 1<br>(0 - 2)       |
| Thalassemias                                        | 24<br>(13 - 43)    | 2<br>(1 - 4)       | 1<br>(0 - 1)      | 22<br>(10 - 39)    | 0<br>(0 - 0)       | 0<br>(0 - 0)       |
| Sickle cell disorders                               | 14<br>(7 - 27)     | 0<br>(0 - 1)       | 0<br>(0 - 0)      | 12<br>(6 - 23)     | 1<br>(1 - 3)       | 0<br>(0 - 0)       |
| G6PD deficiency                                     | 1<br>(0 - 2)       | 0<br>(0 - 0)       | 0<br>(0 - 0)      | 1<br>(0 - 1)       | 0<br>(0 - 0)       | 0<br>(0 - 0)       |
| Other hemoglobinopathies and hemolytic anemias      | 3<br>(2 - 6)       | 0<br>(0 - 0)       | 0<br>(0 - 0)      | 2<br>(1 - 4)       | 0<br>(0 - 1)       | 1<br>(0 - 2)       |
| Endocrine, metabolic, blood, and immune disorders   | 39<br>(23 - 63)    | 6<br>(2 - 11)      | 1<br>(0 - 2)      | 27<br>(15 - 46)    | 4<br>(2 - 7)       | 1<br>(1 - 2)       |
| Musculoskeletal disorders                           | 31<br>(18 - 61)    | --                 | 0<br>(0 - 1)      | 26<br>(15 - 54)    | 3<br>(2 - 7)       | 2<br>(1 - 2)       |
| Rheumatoid arthritis                                | 2<br>(1 - 6)       | --                 | 0<br>(0 - 0)      | 2<br>(1 - 5)       | 0<br>(0 - 1)       | 0<br>(0 - 0)       |
| Other musculoskeletal disorders                     | 29<br>(17 - 57)    | --                 | 0<br>(0 - 1)      | 24<br>(14 - 49)    | 3<br>(2 - 6)       | 1<br>(1 - 2)       |
| Other non-communicable diseases                     | 306<br>(196 - 392) | 219<br>(129 - 289) | 9<br>(3 - 15)     | 69<br>(44 - 104)   | 5<br>(3 - 8)       | 4<br>(2 - 5)       |
| Congenital anomalies                                | 282<br>(170 - 366) | 213<br>(120 - 285) | 9<br>(3 - 15)     | 56<br>(34 - 87)    | 3<br>(2 - 4)       | 1<br>(1 - 2)       |
| Neural tube defects                                 | 3<br>(1 - 8)       | 2<br>(0 - 6)       | 0<br>(0 - 0)      | 1<br>(1 - 2)       | 0<br>(0 - 0)       | 0<br>(0 - 0)       |
| Congenital heart anomalies                          | 124<br>(64 - 177)  | 100<br>(47 - 153)  | 4<br>(1 - 7)      | 18<br>(10 - 31)    | 1<br>(0 - 1)       | 0<br>(0 - 0)       |
| Cleft lip and cleft palate                          | 0<br>(0 - 0)       | 0<br>(0 - 0)       | --                | --                 | --                 | --                 |
| Down syndrome                                       | 12<br>(4 - 22)     | 4<br>(1 - 11)      | 0<br>(0 - 1)      | 7<br>(3 - 13)      | 0<br>(0 - 0)       | 0<br>(0 - 0)       |
| Chromosomal unbalanced rearrangements               | 5<br>(2 - 9)       | 3<br>(1 - 7)       | 0<br>(0 - 0)      | 2<br>(1 - 3)       | 0<br>(0 - 0)       | 0<br>(0 - 0)       |
| Other congenital anomalies                          | 138<br>(67 - 212)  | 104<br>(48 - 173)  | 4<br>(1 - 8)      | 28<br>(14 - 45)    | 2<br>(1 - 3)       | 1<br>(1 - 1)       |
| Skin and subcutaneous diseases                      | 19<br>(10 - 28)    | 0<br>(0 - 1)       | 0<br>(0 - 0)      | 13<br>(7 - 21)     | 3<br>(1 - 4)       | 2<br>(1 - 4)       |
| Cellulitis                                          | 2<br>(1 - 4)       | 0<br>(0 - 0)       | 0<br>(0 - 0)      | 1<br>(1 - 3)       | 0<br>(0 - 1)       | 0<br>(0 - 1)       |
| Pyoderma                                            | 11<br>(6 - 17)     | 0<br>(0 - 1)       | 0<br>(0 - 0)      | 7<br>(4 - 12)      | 2<br>(1 - 3)       | 2<br>(1 - 3)       |
| Decubitus ulcer                                     | 4<br>(2 - 7)       | 0<br>(0 - 0)       | 0<br>(0 - 0)      | 3<br>(1 - 5)       | 1<br>(0 - 1)       | 1<br>(0 - 1)       |



Web Table 31- United Arab Emirates deaths with 95% UI by age, sex, and cause in 2013

| Cause                                           | Males, All Ages          | Males, 0-4 Years | Males, 5-14 Years | Males, 15-49 Years       | Males, 50-69 Years | Males, 70-80 Years |
|-------------------------------------------------|--------------------------|------------------|-------------------|--------------------------|--------------------|--------------------|
| Other skin and subcutaneous diseases            | 1<br>(1 - 2)             | 0<br>(0 - 0)     | 0<br>(0 - 0)      | 1<br>(1 - 2)             | 0<br>(0 - 0)       | 0<br>(0 - 0)       |
| Sudden infant death syndrome                    | 5<br>(1 - 17)            | 5<br>(1 - 17)    | --                | --                       | --                 | --                 |
| Injuries                                        | 3,518<br>(2,402 - 4,895) | 30<br>(17 - 47)  | 24<br>(17 - 32)   | 3,291<br>(2,242 - 4,580) | 144<br>(87 - 219)  | 29<br>(19 - 39)    |
| Transport injuries                              | 2,191<br>(1,379 - 3,155) | 12<br>(6 - 23)   | 14<br>(8 - 20)    | 2,057<br>(1,296 - 2,968) | 93<br>(50 - 153)   | 15<br>(9 - 24)     |
| Road injuries                                   | 2,111<br>(1,337 - 3,045) | 11<br>(5 - 22)   | 13<br>(8 - 19)    | 1,983<br>(1,255 - 2,871) | 89<br>(48 - 147)   | 15<br>(8 - 23)     |
| Pedestrian road injuries                        | 427<br>(218 - 767)       | 4<br>(1 - 9)     | 5<br>(2 - 8)      | 388<br>(196 - 700)       | 25<br>(12 - 49)    | 6<br>(3 - 10)      |
| Cyclist road injuries                           | 67<br>(34 - 112)         | 1<br>(0 - 1)     | 1<br>(0 - 1)      | 59<br>(31 - 99)          | 5<br>(2 - 10)      | 1<br>(0 - 2)       |
| Motorcyclist road injuries                      | 217<br>(112 - 370)       | 0<br>(0 - 1)     | 0<br>(0 - 1)      | 210<br>(108 - 358)       | 5<br>(2 - 10)      | 1<br>(0 - 2)       |
| Motor vehicle road injuries                     | 1,397<br>(828 - 2,092)   | 6<br>(2 - 13)    | 7<br>(4 - 12)     | 1,324<br>(786 - 1,992)   | 53<br>(27 - 91)    | 7<br>(3 - 12)      |
| Other road injuries                             | 3<br>(1 - 5)             | 0<br>(0 - 1)     | 0<br>(0 - 0)      | 2<br>(1 - 5)             | 0<br>(0 - 1)       | 0<br>(0 - 0)       |
| Other transport injuries                        | 81<br>(40 - 137)         | 1<br>(0 - 1)     | 1<br>(0 - 1)      | 74<br>(37 - 126)         | 4<br>(2 - 8)       | 1<br>(0 - 1)       |
| Unintentional injuries                          | 813<br>(531 - 1,208)     | 17<br>(9 - 29)   | 9<br>(6 - 15)     | 739<br>(476 - 1,121)     | 35<br>(22 - 53)    | 11<br>(8 - 16)     |
| Falls                                           | 233<br>(116 - 388)       | 4<br>(1 - 10)    | 2<br>(1 - 4)      | 211<br>(103 - 361)       | 11<br>(6 - 22)     | 4<br>(2 - 8)       |
| Drowning                                        | 188<br>(89 - 355)        | 5<br>(2 - 16)    | 4<br>(2 - 10)     | 173<br>(81 - 328)        | 5<br>(2 - 9)       | 1<br>(0 - 1)       |
| Fire, heat, and hot substances                  | 72<br>(36 - 119)         | 2<br>(1 - 5)     | 1<br>(0 - 1)      | 65<br>(31 - 109)         | 3<br>(2 - 6)       | 1<br>(1 - 2)       |
| Poisonings                                      | 36<br>(13 - 67)          | 1<br>(0 - 2)     | 0<br>(0 - 1)      | 33<br>(12 - 63)          | 1<br>(1 - 2)       | 0<br>(0 - 1)       |
| Exposure to mechanical forces                   | 117<br>(69 - 192)        | 1<br>(0 - 2)     | 1<br>(0 - 2)      | 110<br>(63 - 182)        | 5<br>(3 - 9)       | 1<br>(0 - 1)       |
| Unintentional firearm injuries                  | 27<br>(12 - 58)          | 0<br>(0 - 0)     | 0<br>(0 - 0)      | 26<br>(11 - 56)          | 1<br>(0 - 2)       | 0<br>(0 - 0)       |
| Unintentional suffocation                       | 5<br>(2 - 10)            | 0<br>(0 - 1)     | 0<br>(0 - 0)      | 4<br>(1 - 9)             | 0<br>(0 - 1)       | 0<br>(0 - 0)       |
| Other exposure to mechanical forces             | 86<br>(43 - 141)         | 1<br>(0 - 1)     | 1<br>(0 - 1)      | 80<br>(39 - 134)         | 4<br>(2 - 7)       | 1<br>(0 - 1)       |
| Adverse effects of medical treatment            | 34<br>(20 - 57)          | 1<br>(0 - 2)     | 0<br>(0 - 1)      | 26<br>(14 - 46)          | 5<br>(2 - 9)       | 2<br>(1 - 3)       |
| Animal contact                                  | 7<br>(4 - 14)            | 0<br>(0 - 1)     | 0<br>(0 - 1)      | 6<br>(3 - 12)            | 0<br>(0 - 1)       | 0<br>(0 - 0)       |
| Venomous animal contact                         | 4<br>(2 - 10)            | 0<br>(0 - 1)     | 0<br>(0 - 0)      | 3<br>(1 - 9)             | 0<br>(0 - 1)       | 0<br>(0 - 0)       |
| Non-venomous animal contact                     | 3<br>(1 - 6)             | 0<br>(0 - 0)     | 0<br>(0 - 0)      | 3<br>(1 - 5)             | 0<br>(0 - 0)       | 0<br>(0 - 0)       |
| Foreign body                                    | 18<br>(7 - 43)           | 2<br>(1 - 5)     | 0<br>(0 - 1)      | 12<br>(5 - 31)           | 1<br>(0 - 3)       | 2<br>(0 - 4)       |
| Pulmonary aspiration and foreign body in airway | 17<br>(6 - 42)           | 2<br>(1 - 5)     | 0<br>(0 - 1)      | 11<br>(4 - 30)           | 1<br>(0 - 3)       | 2<br>(0 - 3)       |
| Foreign body in other body part                 | 1<br>(1 - 2)             | 0<br>(0 - 0)     | 0<br>(0 - 0)      | 1<br>(0 - 2)             | 0<br>(0 - 0)       | 0<br>(0 - 0)       |
| Other unintentional injuries                    | 108<br>(58 - 173)        | 1<br>(0 - 2)     | 1<br>(0 - 1)      | 103<br>(54 - 166)        | 3<br>(2 - 5)       | 1<br>(0 - 1)       |
| Self-harm and interpersonal violence            | 514<br>(294 - 838)       | 0<br>(0 - 0)     | 1<br>(0 - 2)      | 495<br>(283 - 808)       | 16<br>(8 - 27)     | 2<br>(1 - 4)       |
| Self-harm                                       | 376<br>(157 - 615)       | --               | 1<br>(0 - 2)      | 359<br>(148 - 591)       | 14<br>(6 - 24)     | 2<br>(1 - 4)       |
| Interpersonal violence                          | 139<br>(78 - 281)        | 0<br>(0 - 0)     | 0<br>(0 - 0)      | 136<br>(77 - 276)        | 2<br>(1 - 5)       | 0<br>(0 - 0)       |
| Assault by firearm                              | 71<br>(33 - 153)         | 0<br>(0 - 0)     | 0<br>(0 - 0)      | 70<br>(32 - 151)         | 1<br>(0 - 3)       | 0<br>(0 - 0)       |
| Assault by sharp object                         | 39<br>(15 - 103)         | 0<br>(0 - 0)     | 0<br>(0 - 0)      | 39<br>(15 - 101)         | 1<br>(0 - 2)       | 0<br>(0 - 0)       |
| Assault by other means                          | 28<br>(11 - 74)          | 0<br>(0 - 0)     | 0<br>(0 - 0)      | 27<br>(11 - 72)          | 1<br>(0 - 1)       | 0<br>(0 - 0)       |
| Forces of nature, war, and legal intervention   | 0<br>(0 - 0)             | 0<br>(0 - 0)     | --                | --                       | --                 | --                 |
| Exposure to forces of nature                    | 0<br>(0 - 0)             | 0<br>(0 - 0)     | --                | --                       | --                 | --                 |

Web Table 31- United Arab Emirates deaths with 95% UI by age, sex, and cause in 2013

| Cause                                                             | Females, All Ages        | Females, 0-4 Years | Females, 5-14 Years | Females, 15-49 Years     | Females, 50-69 Years | Females, 70-80 Years |
|-------------------------------------------------------------------|--------------------------|--------------------|---------------------|--------------------------|----------------------|----------------------|
| All causes                                                        | 2,806<br>(2,184 - 3,793) | 405<br>(345 - 475) | 54<br>(43 - 70)     | 1,372<br>(1,015 - 2,041) | 552<br>(359 - 774)   | 424<br>(354 - 488)   |
| Communicable, maternal, neonatal, and nutritional diseases        | 391<br>(305 - 497)       | 181<br>(122 - 250) | 14<br>(8 - 24)      | 148<br>(108 - 211)       | 24<br>(15 - 38)      | 25<br>(16 - 42)      |
| HIV/AIDS and tuberculosis                                         | 38<br>(29 - 49)          | 2<br>(1 - 3)       | 0<br>(0 - 1)        | 32<br>(24 - 41)          | 3<br>(2 - 5)         | 1<br>(1 - 2)         |
| Tuberculosis                                                      | 11<br>(6 - 20)           | 0<br>(0 - 0)       | 0<br>(0 - 0)        | 8<br>(4 - 15)            | 2<br>(1 - 3)         | 1<br>(1 - 2)         |
| HIV/AIDS                                                          | 27<br>(19 - 36)          | 2<br>(1 - 3)       | 0<br>(0 - 1)        | 24<br>(17 - 31)          | 1<br>(1 - 2)         | 0<br>(0 - 0)         |
| HIV/AIDS resulting in mycobacterial infection                     | 1<br>(1 - 2)             | 0<br>(0 - 0)       | 0<br>(0 - 0)        | 1<br>(1 - 1)             | 0<br>(0 - 0)         | 0<br>(0 - 0)         |
| HIV/AIDS resulting in other diseases                              | 25<br>(19 - 34)          | 1<br>(1 - 3)       | 0<br>(0 - 1)        | 22<br>(16 - 30)          | 1<br>(1 - 2)         | 0<br>(0 - 0)         |
| Diarrhea, lower respiratory, and other common infectious diseases | 179<br>(122 - 261)       | 46<br>(25 - 74)    | 13<br>(7 - 22)      | 83<br>(50 - 138)         | 17<br>(10 - 29)      | 21<br>(12 - 36)      |
| Diarrheal diseases                                                | 10<br>(6 - 18)           | 4<br>(1 - 11)      | 0<br>(0 - 1)        | 3<br>(2 - 6)             | 1<br>(0 - 1)         | 1<br>(1 - 2)         |
| Intestinal infectious diseases                                    | 52<br>(17 - 118)         | 13<br>(4 - 28)     | 8<br>(3 - 18)       | 30<br>(8 - 75)           | 1<br>(0 - 4)         | 0<br>(0 - 0)         |
| Typhoid fever                                                     | 39<br>(12 - 92)          | 9<br>(3 - 20)      | 6<br>(2 - 14)       | 23<br>(6 - 58)           | 1<br>(0 - 3)         | 0<br>(0 - 0)         |
| Paratyphoid fever                                                 | 11<br>(3 - 25)           | 3<br>(1 - 7)       | 2<br>(1 - 4)        | 6<br>(1 - 15)            | 0<br>(0 - 1)         | 0<br>(0 - 0)         |
| Other intestinal infectious diseases                              | 2<br>(0 - 7)             | 1<br>(0 - 4)       | 0<br>(0 - 1)        | 1<br>(0 - 5)             | 0<br>(0 - 1)         | 0<br>(0 - 0)         |
| Lower respiratory infections                                      | 91<br>(61 - 137)         | 18<br>(7 - 37)     | 3<br>(2 - 5)        | 39<br>(23 - 65)          | 13<br>(7 - 23)       | 19<br>(10 - 34)      |
| Upper respiratory infections                                      | 0<br>(0 - 0)             | 0<br>(0 - 0)       | 0<br>(0 - 0)        | 0<br>(0 - 0)             | 0<br>(0 - 0)         | 0<br>(0 - 0)         |
| Otitis media                                                      | 1<br>(0 - 1)             | 0<br>(0 - 0)       | 0<br>(0 - 0)        | 0<br>(0 - 0)             | 0<br>(0 - 0)         | 0<br>(0 - 0)         |
| Meningitis                                                        | 9<br>(6 - 14)            | 3<br>(1 - 5)       | 0<br>(0 - 1)        | 5<br>(2 - 8)             | 1<br>(0 - 2)         | 0<br>(0 - 1)         |
| Pneumococcal meningitis                                           | 2<br>(1 - 3)             | 0<br>(0 - 1)       | 0<br>(0 - 0)        | 1<br>(0 - 2)             | 0<br>(0 - 0)         | 0<br>(0 - 0)         |
| H influenzae type B meningitis                                    | 2<br>(1 - 3)             | 1<br>(0 - 2)       | 0<br>(0 - 0)        | 1<br>(0 - 1)             | 0<br>(0 - 0)         | 0<br>(0 - 0)         |
| Meningococcal meningitis                                          | 2<br>(1 - 3)             | 1<br>(0 - 1)       | 0<br>(0 - 0)        | 1<br>(0 - 2)             | 0<br>(0 - 0)         | 0<br>(0 - 0)         |
| Other meningitis                                                  | 4<br>(2 - 6)             | 1<br>(0 - 1)       | 0<br>(0 - 0)        | 2<br>(1 - 4)             | 0<br>(0 - 1)         | 0<br>(0 - 0)         |
| Encephalitis                                                      | 9<br>(4 - 16)            | 2<br>(1 - 5)       | 1<br>(0 - 1)        | 5<br>(2 - 10)            | 0<br>(0 - 1)         | 0<br>(0 - 0)         |
| Diphtheria                                                        | 0<br>(0 - 0)             | 0<br>(0 - 0)       | 0<br>(0 - 0)        | 0<br>(0 - 0)             | 0<br>(0 - 0)         | --                   |
| Whooping cough                                                    | 4<br>(0 - 19)            | 4<br>(0 - 18)      | 0<br>(0 - 1)        | 0<br>(0 - 0)             | 0<br>(0 - 0)         | --                   |
| Tetanus                                                           | 0<br>(0 - 1)             | 0<br>(0 - 0)       | 0<br>(0 - 0)        | 0<br>(0 - 0)             | 0<br>(0 - 0)         | 0<br>(0 - 0)         |
| Measles                                                           | 3<br>(0 - 19)            | 2<br>(0 - 16)      | 0<br>(0 - 2)        | 0<br>(0 - 1)             | 0<br>(0 - 0)         | --                   |
| Varicella and herpes zoster                                       | 1<br>(0 - 2)             | 0<br>(0 - 1)       | 0<br>(0 - 0)        | 0<br>(0 - 1)             | 0<br>(0 - 0)         | 0<br>(0 - 0)         |
| Neglected tropical diseases and malaria                           | 2<br>(1 - 4)             | 0<br>(0 - 1)       | 0<br>(0 - 0)        | 1<br>(1 - 2)             | 0<br>(0 - 0)         | 0<br>(0 - 0)         |
| Malaria                                                           | 0<br>(0 - 1)             | 0<br>(0 - 0)       | 0<br>(0 - 0)        | 0<br>(0 - 0)             | 0<br>(0 - 0)         | 0<br>(0 - 0)         |
| Leishmaniasis                                                     | 0<br>(0 - 0)             | 0<br>(0 - 0)       | 0<br>(0 - 0)        | 0<br>(0 - 0)             | 0<br>(0 - 0)         | 0<br>(0 - 0)         |
| Visceral leishmaniasis                                            | 0<br>(0 - 0)             | 0<br>(0 - 0)       | 0<br>(0 - 0)        | 0<br>(0 - 0)             | 0<br>(0 - 0)         | 0<br>(0 - 0)         |
| Cysticercosis                                                     | 0<br>(0 - 0)             | 0<br>(0 - 0)       | 0<br>(0 - 0)        | 0<br>(0 - 0)             | 0<br>(0 - 0)         | 0<br>(0 - 0)         |
| Cystic echinococcosis                                             | 0<br>(0 - 0)             | 0<br>(0 - 0)       | 0<br>(0 - 0)        | 0<br>(0 - 0)             | 0<br>(0 - 0)         | 0<br>(0 - 0)         |
| Dengue                                                            | 0<br>(0 - 1)             | 0<br>(0 - 0)       | 0<br>(0 - 0)        | 0<br>(0 - 0)             | 0<br>(0 - 0)         | 0<br>(0 - 0)         |
| Rabies                                                            | 0<br>(0 - 1)             | 0<br>(0 - 0)       | 0<br>(0 - 0)        | 0<br>(0 - 0)             | 0<br>(0 - 0)         | 0<br>(0 - 0)         |
| Intestinal nematode infections                                    | 0<br>(0 - 2)             | 0<br>(0 - 1)       | 0<br>(0 - 0)        | 0<br>(0 - 1)             | 0<br>(0 - 0)         | 0<br>(0 - 0)         |
| Ascariasis                                                        | 0<br>(0 - 2)             | 0<br>(0 - 1)       | 0<br>(0 - 0)        | 0<br>(0 - 1)             | 0<br>(0 - 0)         | 0<br>(0 - 0)         |
| Other neglected tropical diseases                                 | 1<br>(0 - 1)             | 0<br>(0 - 0)       | 0<br>(0 - 0)        | 0<br>(0 - 1)             | 0<br>(0 - 0)         | 0<br>(0 - 0)         |
| Maternal disorders                                                | 17<br>(10 - 29)          | --                 | 0<br>(0 - 0)        | 17<br>(10 - 29)          | --                   | --                   |
| Maternal hemorrhage                                               | 4<br>(2 - 6)             | --                 | 0<br>(0 - 0)        | 4<br>(2 - 6)             | --                   | --                   |

Web Table 31- United Arab Emirates deaths with 95% UI by age, sex, and cause in 2013

| Cause                                                            | Females, All Ages        | Females, 0-4 Years | Females, 5-14 Years | Females, 15-49 Years | Females, 50-69 Years | Females, 70-80 Years |
|------------------------------------------------------------------|--------------------------|--------------------|---------------------|----------------------|----------------------|----------------------|
| Maternal sepsis and other maternal infections                    | 1<br>(1 - 2)             | --                 | 0<br>(0 - 0)        | 1<br>(1 - 2)         | --                   | --                   |
| Maternal hypertensive disorders                                  | 2<br>(1 - 4)             | --                 | 0<br>(0 - 0)        | 2<br>(1 - 4)         | --                   | --                   |
| Maternal obstructed labor                                        | 2<br>(1 - 3)             | --                 | 0<br>(0 - 0)        | 2<br>(1 - 3)         | --                   | --                   |
| Maternal abortive outcome                                        | 2<br>(1 - 4)             | --                 | 0<br>(0 - 0)        | 2<br>(1 - 4)         | --                   | --                   |
| Indirect maternal deaths                                         | 1<br>(0 - 3)             | --                 | 0<br>(0 - 0)        | 1<br>(0 - 3)         | --                   | --                   |
| Late maternal deaths                                             | 2<br>(1 - 4)             | --                 | 0<br>(0 - 0)        | 2<br>(1 - 4)         | --                   | --                   |
| Maternal deaths aggravated by HIV/AIDS                           | 0<br>(0 - 0)             | --                 | --                  | 0<br>(0 - 0)         | --                   | --                   |
| Other maternal disorders                                         | 3<br>(1 - 5)             | --                 | 0<br>(0 - 0)        | 3<br>(1 - 5)         | --                   | --                   |
| Neonatal disorders                                               | 129<br>(84 - 185)        | 129<br>(84 - 185)  | --                  | --                   | --                   | --                   |
| Neonatal preterm birth complications                             | 72<br>(27 - 118)         | 72<br>(27 - 118)   | --                  | --                   | --                   | --                   |
| Neonatal encephalopathy due to birth asphyxia and trauma         | 13<br>(6 - 25)           | 13<br>(6 - 25)     | --                  | --                   | --                   | --                   |
| Neonatal sepsis and other neonatal infections                    | 16<br>(6 - 35)           | 16<br>(6 - 35)     | --                  | --                   | --                   | --                   |
| Hemolytic disease and other neonatal jaundice                    | 0<br>(0 - 1)             | 0<br>(0 - 1)       | --                  | --                   | --                   | --                   |
| Other neonatal disorders                                         | 28<br>(12 - 57)          | 28<br>(12 - 57)    | --                  | --                   | --                   | --                   |
| Nutritional deficiencies                                         | 13<br>(5 - 21)           | 1<br>(0 - 3)       | 0<br>(0 - 1)        | 8<br>(3 - 14)        | 1<br>(0 - 2)         | 2<br>(1 - 4)         |
| Protein-energy malnutrition                                      | 2<br>(1 - 5)             | 1<br>(0 - 2)       | 0<br>(0 - 0)        | 1<br>(0 - 2)         | 0<br>(0 - 0)         | 0<br>(0 - 1)         |
| Iodine deficiency                                                | 0<br>(0 - 0)             | 0<br>(0 - 0)       | 0<br>(0 - 0)        | 0<br>(0 - 0)         | 0<br>(0 - 0)         | 0<br>(0 - 0)         |
| Iron-deficiency anemia                                           | 9<br>(4 - 16)            | 1<br>(0 - 1)       | 0<br>(0 - 0)        | 6<br>(2 - 11)        | 1<br>(0 - 2)         | 1<br>(1 - 3)         |
| Other nutritional deficiencies                                   | 1<br>(0 - 2)             | 0<br>(0 - 0)       | 0<br>(0 - 0)        | 1<br>(0 - 1)         | 0<br>(0 - 0)         | 0<br>(0 - 0)         |
| Other communicable, maternal, neonatal, and nutritional diseases | 13<br>(8 - 19)           | 2<br>(1 - 5)       | 0<br>(0 - 1)        | 7<br>(4 - 11)        | 3<br>(1 - 5)         | 1<br>(1 - 3)         |
| Sexually transmitted diseases excluding HIV                      | 1<br>(1 - 3)             | 1<br>(0 - 2)       | 0<br>(0 - 0)        | 1<br>(0 - 1)         | 0<br>(0 - 0)         | 0<br>(0 - 0)         |
| Syphilis                                                         | 1<br>(0 - 2)             | 1<br>(0 - 2)       | 0<br>(0 - 0)        | 0<br>(0 - 0)         | 0<br>(0 - 0)         | 0<br>(0 - 0)         |
| Chlamydial infection                                             | 0<br>(0 - 0)             | --                 | 0<br>(0 - 0)        | 0<br>(0 - 0)         | 0<br>(0 - 0)         | 0<br>(0 - 0)         |
| Gonococcal infection                                             | 0<br>(0 - 0)             | --                 | 0<br>(0 - 0)        | 0<br>(0 - 0)         | 0<br>(0 - 0)         | 0<br>(0 - 0)         |
| Other sexually transmitted diseases                              | 0<br>(0 - 0)             | --                 | 0<br>(0 - 0)        | 0<br>(0 - 0)         | 0<br>(0 - 0)         | 0<br>(0 - 0)         |
| Hepatitis                                                        | 5<br>(3 - 7)             | 0<br>(0 - 1)       | 0<br>(0 - 0)        | 3<br>(2 - 4)         | 1<br>(1 - 2)         | 0<br>(0 - 1)         |
| Acute hepatitis A                                                | 1<br>(0 - 1)             | 0<br>(0 - 0)       | 0<br>(0 - 0)        | 0<br>(0 - 1)         | 0<br>(0 - 0)         | 0<br>(0 - 0)         |
| Acute hepatitis B                                                | 2<br>(1 - 4)             | 0<br>(0 - 0)       | 0<br>(0 - 0)        | 1<br>(0 - 2)         | 1<br>(0 - 2)         | 0<br>(0 - 1)         |
| Acute hepatitis C                                                | 0<br>(0 - 1)             | --                 | 0<br>(0 - 0)        | 0<br>(0 - 1)         | 0<br>(0 - 0)         | 0<br>(0 - 0)         |
| Acute hepatitis E                                                | 1<br>(1 - 3)             | 0<br>(0 - 0)       | 0<br>(0 - 0)        | 1<br>(0 - 2)         | 0<br>(0 - 1)         | 0<br>(0 - 0)         |
| Other infectious diseases                                        | 7<br>(4 - 11)            | 1<br>(0 - 4)       | 0<br>(0 - 1)        | 3<br>(2 - 6)         | 1<br>(0 - 2)         | 1<br>(0 - 2)         |
| Non-communicable diseases                                        | 2,034<br>(1,512 - 2,805) | 201<br>(135 - 273) | 25<br>(17 - 35)     | 926<br>(653 - 1,423) | 494<br>(317 - 700)   | 388<br>(322 - 449)   |
| Neoplasms                                                        | 504<br>(342 - 756)       | 5<br>(2 - 8)       | 7<br>(4 - 10)       | 335<br>(230 - 517)   | 128<br>(79 - 199)    | 29<br>(21 - 44)      |
| Esophageal cancer                                                | 7<br>(3 - 12)            | --                 | --                  | 4<br>(1 - 7)         | 2<br>(1 - 4)         | 1<br>(0 - 1)         |
| Stomach cancer                                                   | 25<br>(15 - 40)          | --                 | --                  | 15<br>(9 - 24)       | 7<br>(4 - 12)        | 3<br>(2 - 5)         |
| Liver cancer                                                     | 19<br>(12 - 31)          | --                 | 0<br>(0 - 0)        | 10<br>(6 - 17)       | 7<br>(4 - 12)        | 2<br>(1 - 4)         |
| Liver cancer due to hepatitis B                                  | 7<br>(3 - 12)            | --                 | 0<br>(0 - 0)        | 4<br>(2 - 7)         | 2<br>(1 - 5)         | 0<br>(0 - 1)         |
| Liver cancer due to hepatitis C                                  | 7<br>(2 - 13)            | --                 | 0<br>(0 - 0)        | 3<br>(0 - 6)         | 3<br>(1 - 6)         | 1<br>(0 - 2)         |
| Liver cancer due to alcohol use                                  | 1<br>(0 - 3)             | --                 | --                  | 0<br>(0 - 1)         | 1<br>(0 - 1)         | 0<br>(0 - 1)         |
| Liver cancer due to other causes                                 | 5<br>(2 - 9)             | --                 | 0<br>(0 - 0)        | 3<br>(1 - 6)         | 2<br>(0 - 3)         | 0<br>(0 - 1)         |

Web Table 31- United Arab Emirates deaths with 95% UI by age, sex, and cause in 2013

| Cause                                         | Females, All Ages    | Females, 0-4 Years | Females, 5-14 Years | Females, 15-49 Years | Females, 50-69 Years | Females, 70-80 Years |
|-----------------------------------------------|----------------------|--------------------|---------------------|----------------------|----------------------|----------------------|
| Larynx cancer                                 | 2<br>(1 - 3)         | --                 | --                  | 1<br>(0 - 2)         | 0<br>(0 - 1)         | 0<br>(0 - 0)         |
| Tracheal, bronchus and lung cancer            | 31<br>(19 - 49)      | --                 | --                  | 16<br>(10 - 25)      | 12<br>(7 - 19)       | 3<br>(2 - 5)         |
| Breast cancer                                 | 154<br>(93 - 243)    | --                 | --                  | 116<br>(69 - 186)    | 35<br>(20 - 58)      | 4<br>(2 - 6)         |
| Cervical cancer                               | 19<br>(12 - 31)      | --                 | --                  | 12<br>(7 - 20)       | 6<br>(3 - 10)        | 1<br>(1 - 2)         |
| Uterine cancer                                | 4<br>(2 - 9)         | --                 | --                  | 2<br>(1 - 4)         | 2<br>(1 - 4)         | 0<br>(0 - 1)         |
| Prostate cancer                               | --                   | --                 | --                  | --                   | --                   | --                   |
| Colon and rectum cancer                       | 46<br>(30 - 70)      | --                 | --                  | 30<br>(20 - 48)      | 13<br>(7 - 20)       | 3<br>(2 - 6)         |
| Lip and oral cavity cancer                    | 3<br>(2 - 5)         | --                 | --                  | 2<br>(1 - 4)         | 1<br>(0 - 1)         | 0<br>(0 - 0)         |
| Nasopharynx cancer                            | 2<br>(1 - 4)         | --                 | 0<br>(0 - 0)        | 2<br>(1 - 4)         | 0<br>(0 - 1)         | 0<br>(0 - 0)         |
| Other pharynx cancer                          | 1<br>(1 - 2)         | --                 | --                  | 1<br>(0 - 2)         | 0<br>(0 - 1)         | 0<br>(0 - 0)         |
| Gallbladder and biliary tract cancer          | 6<br>(4 - 10)        | --                 | --                  | 3<br>(2 - 5)         | 3<br>(1 - 4)         | 1<br>(0 - 1)         |
| Pancreatic cancer                             | 14<br>(9 - 22)       | --                 | --                  | 6<br>(4 - 10)        | 6<br>(3 - 10)        | 2<br>(1 - 3)         |
| Malignant skin melanoma                       | 2<br>(1 - 2)         | --                 | --                  | 1<br>(1 - 2)         | 0<br>(0 - 1)         | 0<br>(0 - 0)         |
| Non-melanoma skin cancer                      | 1<br>(0 - 2)         | --                 | --                  | 1<br>(0 - 1)         | 0<br>(0 - 0)         | 0<br>(0 - 0)         |
| Ovarian cancer                                | 27<br>(16 - 43)      | --                 | --                  | 17<br>(11 - 28)      | 8<br>(4 - 13)        | 1<br>(1 - 2)         |
| Testicular cancer                             | --                   | --                 | --                  | --                   | --                   | --                   |
| Kidney cancer                                 | 5<br>(3 - 9)         | 0<br>(0 - 0)       | 0<br>(0 - 0)        | 3<br>(2 - 5)         | 2<br>(1 - 3)         | 0<br>(0 - 1)         |
| Bladder cancer                                | 4<br>(3 - 7)         | --                 | --                  | 2<br>(1 - 3)         | 2<br>(1 - 3)         | 1<br>(1 - 2)         |
| Brain and nervous system cancer               | 31<br>(19 - 49)      | 1<br>(0 - 2)       | 2<br>(1 - 3)        | 22<br>(13 - 36)      | 5<br>(3 - 9)         | 1<br>(0 - 1)         |
| Thyroid cancer                                | 4<br>(2 - 6)         | --                 | 0<br>(0 - 0)        | 2<br>(1 - 3)         | 1<br>(1 - 2)         | 0<br>(0 - 1)         |
| Mesothelioma                                  | 0<br>(0 - 1)         | --                 | --                  | 0<br>(0 - 1)         | 0<br>(0 - 0)         | 0<br>(0 - 0)         |
| Hodgkin lymphoma                              | 3<br>(2 - 5)         | 0<br>(0 - 0)       | 0<br>(0 - 0)        | 3<br>(1 - 4)         | 0<br>(0 - 1)         | 0<br>(0 - 0)         |
| Non-Hodgkin lymphoma                          | 25<br>(15 - 42)      | 0<br>(0 - 1)       | 1<br>(0 - 1)        | 18<br>(10 - 29)      | 5<br>(3 - 9)         | 1<br>(1 - 2)         |
| Multiple myeloma                              | 3<br>(2 - 5)         | --                 | --                  | 2<br>(1 - 3)         | 1<br>(1 - 2)         | 0<br>(0 - 0)         |
| Leukemia                                      | 33<br>(22 - 51)      | 1<br>(1 - 3)       | 2<br>(1 - 4)        | 24<br>(16 - 39)      | 4<br>(2 - 7)         | 1<br>(1 - 2)         |
| Other neoplasms                               | 32<br>(19 - 56)      | 2<br>(1 - 4)       | 2<br>(1 - 3)        | 22<br>(12 - 38)      | 5<br>(3 - 10)        | 2<br>(1 - 3)         |
| Cardiovascular diseases                       | 745<br>(400 - 1,106) | 7<br>(2 - 15)      | 3<br>(1 - 5)        | 281<br>(129 - 467)   | 230<br>(112 - 354)   | 225<br>(132 - 284)   |
| Rheumatic heart disease                       | 13<br>(5 - 23)       | 0<br>(0 - 0)       | 0<br>(0 - 0)        | 9<br>(3 - 18)        | 2<br>(1 - 4)         | 1<br>(1 - 2)         |
| Ischemic heart disease                        | 360<br>(140 - 572)   | 1<br>(0 - 3)       | 0<br>(0 - 1)        | 129<br>(49 - 228)    | 124<br>(48 - 203)    | 106<br>(37 - 149)    |
| Cerebrovascular disease                       | 244<br>(128 - 381)   | 2<br>(1 - 5)       | 1<br>(0 - 2)        | 82<br>(37 - 138)     | 69<br>(33 - 115)     | 90<br>(53 - 125)     |
| Ischemic stroke                               | 98<br>(38 - 147)     | 0<br>(0 - 1)       | 0<br>(0 - 0)        | 14<br>(3 - 27)       | 27<br>(9 - 47)       | 56<br>(26 - 81)      |
| Hemorrhagic stroke                            | 146<br>(71 - 241)    | 2<br>(0 - 4)       | 1<br>(0 - 2)        | 68<br>(31 - 119)     | 42<br>(20 - 75)      | 34<br>(16 - 54)      |
| Hypertensive heart disease                    | 39<br>(18 - 69)      | 0<br>(0 - 0)       | 0<br>(0 - 0)        | 12<br>(5 - 23)       | 12<br>(5 - 22)       | 14<br>(7 - 25)       |
| Cardiomyopathy and myocarditis                | 22<br>(9 - 42)       | 0<br>(1 - 5)       | 0<br>(0 - 1)        | 13<br>(5 - 28)       | 4<br>(1 - 7)         | 3<br>(1 - 5)         |
| Atrial fibrillation and flutter               | 1<br>(0 - 1)         | --                 | --                  | 0<br>(0 - 0)         | 0<br>(0 - 0)         | 0<br>(0 - 0)         |
| Aortic aneurysm                               | 3<br>(1 - 7)         | --                 | --                  | 2<br>(1 - 4)         | 1<br>(0 - 1)         | 1<br>(0 - 2)         |
| Peripheral vascular disease                   | 0<br>(0 - 1)         | --                 | --                  | 0<br>(0 - 0)         | 0<br>(0 - 0)         | 0<br>(0 - 0)         |
| Endocarditis                                  | 6<br>(2 - 11)        | 1<br>(0 - 1)       | 0<br>(0 - 0)        | 3<br>(1 - 7)         | 1<br>(0 - 1)         | 1<br>(0 - 2)         |
| Other cardiovascular and circulatory diseases | 58<br>(27 - 101)     | 1<br>(0 - 3)       | 1<br>(0 - 1)        | 30<br>(12 - 57)      | 18<br>(8 - 33)       | 8<br>(4 - 13)        |
| Chronic respiratory diseases                  | 105<br>(66 - 166)    | 1<br>(1 - 3)       | 1<br>(0 - 1)        | 45<br>(27 - 73)      | 27<br>(15 - 45)      | 30<br>(19 - 53)      |

Web Table 31- United Arab Emirates deaths with 95% UI by age, sex, and cause in 2013

| Cause                                               | Females, All Ages | Females, 0-4 Years | Females, 5-14 Years | Females, 15-49 Years | Females, 50-69 Years | Females, 70-80 Years |
|-----------------------------------------------------|-------------------|--------------------|---------------------|----------------------|----------------------|----------------------|
| Chronic obstructive pulmonary disease               | 65<br>(33 - 109)  | 1<br>(0 - 2)       | 0<br>(0 - 0)        | 21<br>(9 - 37)       | 19<br>(9 - 34)       | 24<br>(14 - 43)      |
| Pneumoconiosis                                      | 1<br>(0 - 2)      | 0<br>(0 - 0)       | 0<br>(0 - 0)        | 1<br>(0 - 1)         | 0<br>(0 - 0)         | 0<br>(0 - 0)         |
| Silicosis                                           | 0<br>(0 - 0)      | 0<br>(0 - 0)       | 0<br>(0 - 0)        | 0<br>(0 - 0)         | 0<br>(0 - 0)         | 0<br>(0 - 0)         |
| Asbestosis                                          | 0<br>(0 - 0)      | 0<br>(0 - 0)       | 0<br>(0 - 0)        | 0<br>(0 - 0)         | 0<br>(0 - 0)         | 0<br>(0 - 0)         |
| Coal workers pneumoconiosis                         | 0<br>(0 - 0)      | 0<br>(0 - 0)       | 0<br>(0 - 0)        | 0<br>(0 - 0)         | 0<br>(0 - 0)         | 0<br>(0 - 0)         |
| Other pneumoconiosis                                | 0<br>(0 - 0)      | 0<br>(0 - 0)       | 0<br>(0 - 0)        | 0<br>(0 - 0)         | 0<br>(0 - 0)         | 0<br>(0 - 0)         |
| Asthma                                              | 25<br>(11 - 49)   | 0<br>(0 - 1)       | 0<br>(0 - 0)        | 15<br>(7 - 29)       | 5<br>(2 - 12)        | 4<br>(1 - 9)         |
| Interstitial lung disease and pulmonary sarcoidosis | 8<br>(1 - 18)     | 0<br>(0 - 0)       | 0<br>(0 - 0)        | 4<br>(0 - 9)         | 2<br>(0 - 5)         | 2<br>(0 - 5)         |
| Other chronic respiratory diseases                  | 6<br>(3 - 13)     | 0<br>(0 - 1)       | 0<br>(0 - 0)        | 5<br>(2 - 10)        | 0<br>(0 - 1)         | 1<br>(0 - 2)         |
| Cirrhosis                                           | 47<br>(31 - 71)   | 1<br>(0 - 1)       | 0<br>(0 - 1)        | 26<br>(16 - 41)      | 14<br>(8 - 23)       | 6<br>(4 - 10)        |
| Cirrhosis due to hepatitis B                        | 19<br>(10 - 32)   | 0<br>(0 - 0)       | 0<br>(0 - 0)        | 10<br>(5 - 19)       | 6<br>(3 - 10)        | 2<br>(1 - 5)         |
| Cirrhosis due to hepatitis C                        | 21<br>(11 - 36)   | 0<br>(0 - 0)       | 0<br>(0 - 0)        | 11<br>(6 - 19)       | 7<br>(4 - 13)        | 3<br>(1 - 5)         |
| Cirrhosis due to alcohol use                        | 1<br>(1 - 2)      | --                 | --                  | 0<br>(0 - 1)         | 0<br>(0 - 1)         | 0<br>(0 - 1)         |
| Cirrhosis due to other causes                       | 6<br>(3 - 11)     | 0<br>(0 - 1)       | 0<br>(0 - 0)        | 4<br>(2 - 8)         | 1<br>(0 - 2)         | 0<br>(0 - 1)         |
| Digestive diseases                                  | 35<br>(23 - 53)   | 1<br>(0 - 1)       | 0<br>(0 - 1)        | 18<br>(11 - 28)      | 8<br>(5 - 13)        | 8<br>(5 - 12)        |
| Peptic ulcer disease                                | 6<br>(3 - 10)     | 0<br>(0 - 0)       | 0<br>(0 - 0)        | 2<br>(1 - 4)         | 2<br>(1 - 3)         | 2<br>(1 - 3)         |
| Gastritis and duodenitis                            | 1<br>(0 - 2)      | 0<br>(0 - 0)       | 0<br>(0 - 0)        | 1<br>(0 - 1)         | 0<br>(0 - 0)         | 0<br>(0 - 0)         |
| Appendicitis                                        | 2<br>(1 - 3)      | 0<br>(0 - 0)       | 0<br>(0 - 0)        | 1<br>(0 - 2)         | 0<br>(0 - 1)         | 0<br>(0 - 0)         |
| Paralytic ileus and intestinal obstruction          | 8<br>(5 - 16)     | 0<br>(0 - 1)       | 0<br>(0 - 0)        | 4<br>(2 - 9)         | 2<br>(1 - 4)         | 2<br>(1 - 4)         |
| Inguinal, femoral, and abdominal hernia             | 1<br>(0 - 1)      | 0<br>(0 - 0)       | 0<br>(0 - 0)        | 0<br>(0 - 1)         | 0<br>(0 - 0)         | 0<br>(0 - 0)         |
| Inflammatory bowel disease                          | 3<br>(1 - 4)      | 0<br>(0 - 0)       | 0<br>(0 - 0)        | 2<br>(1 - 3)         | 0<br>(0 - 1)         | 0<br>(0 - 1)         |
| Vascular intestinal disorders                       | 1<br>(1 - 3)      | 0<br>(0 - 0)       | 0<br>(0 - 0)        | 1<br>(0 - 2)         | 0<br>(0 - 1)         | 0<br>(0 - 1)         |
| Gallbladder and biliary diseases                    | 6<br>(4 - 11)     | 0<br>(0 - 0)       | 0<br>(0 - 0)        | 3<br>(2 - 5)         | 2<br>(1 - 3)         | 2<br>(1 - 4)         |
| Pancreatitis                                        | 3<br>(2 - 7)      | 0<br>(0 - 0)       | 0<br>(0 - 0)        | 2<br>(1 - 4)         | 1<br>(0 - 2)         | 0<br>(0 - 1)         |
| Other digestive diseases                            | 3<br>(2 - 6)      | 0<br>(0 - 0)       | 0<br>(0 - 0)        | 2<br>(1 - 3)         | 1<br>(0 - 2)         | 1<br>(0 - 2)         |
| Neurological disorders                              | 72<br>(50 - 102)  | 4<br>(2 - 6)       | 1<br>(1 - 3)        | 19<br>(10 - 34)      | 9<br>(5 - 15)        | 39<br>(27 - 61)      |
| Alzheimer disease and other dementias               | 46<br>(32 - 71)   | --                 | --                  | 0<br>(0 - 0)         | 8<br>(4 - 13)        | 38<br>(26 - 60)      |
| Parkinson disease                                   | 1<br>(0 - 1)      | --                 | --                  | 0<br>(0 - 1)         | 0<br>(0 - 0)         | 0<br>(0 - 0)         |
| Epilepsy                                            | 18<br>(8 - 33)    | 1<br>(0 - 3)       | 1<br>(0 - 2)        | 15<br>(6 - 29)       | 1<br>(0 - 2)         | 0<br>(0 - 0)         |
| Multiple sclerosis                                  | 2<br>(1 - 3)      | --                 | --                  | 1<br>(1 - 3)         | 0<br>(0 - 1)         | 0<br>(0 - 0)         |
| Other neurological disorders                        | 6<br>(4 - 8)      | 3<br>(2 - 4)       | 0<br>(0 - 1)        | 2<br>(2 - 3)         | 0<br>(0 - 1)         | 0<br>(0 - 0)         |
| Mental and substance use disorders                  | 48<br>(28 - 74)   | 0<br>(0 - 0)       | 0<br>(0 - 0)        | 46<br>(26 - 71)      | 2<br>(1 - 3)         | 0<br>(0 - 0)         |
| Schizophrenia                                       | 0<br>(0 - 1)      | --                 | --                  | 0<br>(0 - 1)         | 0<br>(0 - 0)         | 0<br>(0 - 0)         |
| Alcohol use disorders                               | 1<br>(1 - 3)      | --                 | --                  | 1<br>(0 - 2)         | 0<br>(0 - 1)         | 0<br>(0 - 0)         |
| Drug use disorders                                  | 44<br>(24 - 69)   | 0<br>(0 - 0)       | --                  | 42<br>(23 - 66)      | 1<br>(1 - 2)         | 0<br>(0 - 0)         |
| Opioid use disorders                                | 24<br>(13 - 38)   | 0<br>(0 - 0)       | --                  | 23<br>(12 - 37)      | 1<br>(0 - 1)         | 0<br>(0 - 0)         |
| Cocaine use disorders                               | 1<br>(0 - 1)      | 0<br>(0 - 0)       | --                  | 1<br>(0 - 1)         | 0<br>(0 - 0)         | 0<br>(0 - 0)         |
| Amphetamine use disorders                           | 1<br>(0 - 1)      | 0<br>(0 - 0)       | --                  | 1<br>(0 - 1)         | 0<br>(0 - 0)         | 0<br>(0 - 0)         |
| Other drug use disorders                            | 18<br>(10 - 28)   | 0<br>(0 - 0)       | --                  | 17<br>(9 - 27)       | 1<br>(0 - 1)         | 0<br>(0 - 0)         |
| Eating disorders                                    | 3<br>(2 - 5)      | --                 | 0<br>(0 - 0)        | 3<br>(1 - 5)         | --                   | --                   |

Web Table 31- United Arab Emirates deaths with 95% UI by age, sex, and cause in 2013

| Cause                                               | Females, All Ages  | Females, 0-4 Years | Females, 5-14 Years | Females, 15-49 Years | Females, 50-69 Years | Females, 70-80 Years |
|-----------------------------------------------------|--------------------|--------------------|---------------------|----------------------|----------------------|----------------------|
| Anorexia nervosa                                    | 3<br>(2 - 5)       | --                 | 0<br>(0 - 0)        | 3<br>(1 - 5)         | --                   | --                   |
| Diabetes, urogenital, blood, and endocrine diseases | 239<br>(152 - 388) | 8<br>(5 - 13)      | 3<br>(2 - 5)        | 110<br>(69 - 176)    | 71<br>(39 - 124)     | 47<br>(30 - 79)      |
| Diabetes mellitus                                   | 113<br>(68 - 190)  | 1<br>(0 - 1)       | 0<br>(0 - 1)        | 37<br>(22 - 65)      | 45<br>(24 - 80)      | 30<br>(18 - 52)      |
| Acute glomerulonephritis                            | 1<br>(0 - 1)       | 0<br>(0 - 0)       | 0<br>(0 - 0)        | 0<br>(0 - 1)         | 0<br>(0 - 0)         | 0<br>(0 - 0)         |
| Chronic kidney disease                              | 76<br>(40 - 142)   | 1<br>(0 - 2)       | 1<br>(0 - 1)        | 39<br>(20 - 73)      | 22<br>(11 - 45)      | 13<br>(7 - 27)       |
| Chronic kidney disease due to diabetes mellitus     | 3<br>(1 - 8)       | 0<br>(0 - 0)       | 0<br>(0 - 0)        | 2<br>(1 - 5)         | 1<br>(0 - 3)         | 0<br>(0 - 1)         |
| Chronic kidney disease due to hypertension          | 33<br>(16 - 67)    | 0<br>(0 - 0)       | 0<br>(0 - 0)        | 17<br>(8 - 35)       | 10<br>(5 - 21)       | 6<br>(3 - 12)        |
| Chronic kidney disease due to glomerulonephritis    | 2<br>(1 - 4)       | 0<br>(0 - 0)       | 0<br>(0 - 0)        | 1<br>(0 - 3)         | 0<br>(0 - 1)         | 0<br>(0 - 1)         |
| Chronic kidney disease due to other causes          | 37<br>(15 - 85)    | 1<br>(0 - 2)       | 0<br>(0 - 1)        | 19<br>(7 - 44)       | 10<br>(4 - 25)       | 6<br>(2 - 16)        |
| Urinary diseases and male infertility               | 11<br>(7 - 17)     | 0<br>(0 - 1)       | 0<br>(0 - 0)        | 7<br>(4 - 11)        | 2<br>(1 - 3)         | 2<br>(1 - 3)         |
| Interstitial nephritis and urinary tract infections | 8<br>(5 - 13)      | 0<br>(0 - 1)       | 0<br>(0 - 0)        | 5<br>(3 - 9)         | 1<br>(1 - 2)         | 1<br>(1 - 2)         |
| Urolithiasis                                        | 1<br>(0 - 1)       | --                 | 0<br>(0 - 0)        | 0<br>(0 - 1)         | 0<br>(0 - 0)         | 0<br>(0 - 0)         |
| Other urinary diseases                              | 2<br>(1 - 4)       | 0<br>(0 - 0)       | 0<br>(0 - 0)        | 1<br>(0 - 2)         | 0<br>(0 - 1)         | 0<br>(0 - 1)         |
| Gynecological diseases                              | 0<br>(0 - 0)       | --                 | --                  | 0<br>(0 - 0)         | 0<br>(0 - 0)         | 0<br>(0 - 0)         |
| Uterine fibroids                                    | 0<br>(0 - 0)       | --                 | --                  | 0<br>(0 - 0)         | 0<br>(0 - 0)         | 0<br>(0 - 0)         |
| Polycystic ovarian syndrome                         | 0<br>(0 - 0)       | --                 | --                  | 0<br>(0 - 0)         | 0<br>(0 - 0)         | --                   |
| Endometriosis                                       | 0<br>(0 - 0)       | --                 | --                  | 0<br>(0 - 0)         | 0<br>(0 - 0)         | --                   |
| Genital prolapse                                    | 0<br>(0 - 0)       | --                 | --                  | 0<br>(0 - 0)         | 0<br>(0 - 0)         | 0<br>(0 - 0)         |
| Other gynecological diseases                        | 0<br>(0 - 0)       | --                 | --                  | 0<br>(0 - 0)         | 0<br>(0 - 0)         | 0<br>(0 - 0)         |
| Hemoglobinopathies and hemolytic anemias            | 25<br>(13 - 48)    | 3<br>(1 - 8)       | 1<br>(1 - 3)        | 19<br>(10 - 36)      | 1<br>(0 - 2)         | 1<br>(0 - 1)         |
| Thalassemias                                        | 15<br>(7 - 28)     | 2<br>(1 - 6)       | 1<br>(0 - 2)        | 11<br>(6 - 21)       | 0<br>(0 - 0)         | 0<br>(0 - 0)         |
| Sickle cell disorders                               | 8<br>(4 - 15)      | 0<br>(0 - 1)       | 0<br>(0 - 0)        | 6<br>(3 - 13)        | 1<br>(0 - 2)         | 0<br>(0 - 0)         |
| G6PD deficiency                                     | 0<br>(0 - 1)       | 0<br>(0 - 0)       | 0<br>(0 - 0)        | 0<br>(0 - 1)         | 0<br>(0 - 0)         | 0<br>(0 - 0)         |
| Other hemoglobinopathies and hemolytic anemias      | 2<br>(1 - 4)       | 0<br>(0 - 1)       | 0<br>(0 - 0)        | 1<br>(0 - 2)         | 0<br>(0 - 0)         | 1<br>(0 - 1)         |
| Endocrine, metabolic, blood, and immune disorders   | 14<br>(8 - 26)     | 3<br>(1 - 7)       | 1<br>(0 - 1)        | 8<br>(4 - 16)        | 2<br>(1 - 3)         | 1<br>(1 - 2)         |
| Musculoskeletal disorders                           | 26<br>(10 - 54)    | --                 | 1<br>(0 - 1)        | 21<br>(9 - 46)       | 3<br>(1 - 6)         | 1<br>(1 - 2)         |
| Rheumatoid arthritis                                | 1<br>(0 - 2)       | --                 | 0<br>(0 - 0)        | 1<br>(0 - 2)         | 0<br>(0 - 0)         | 0<br>(0 - 0)         |
| Other musculoskeletal disorders                     | 25<br>(10 - 51)    | --                 | 1<br>(0 - 1)        | 21<br>(8 - 45)       | 2<br>(1 - 5)         | 1<br>(1 - 2)         |
| Other non-communicable diseases                     | 212<br>(135 - 290) | 175<br>(107 - 247) | 9<br>(4 - 15)       | 24<br>(14 - 38)      | 3<br>(1 - 4)         | 3<br>(2 - 5)         |
| Congenital anomalies                                | 197<br>(120 - 277) | 167<br>(96 - 240)  | 8<br>(4 - 15)       | 20<br>(12 - 32)      | 1<br>(1 - 2)         | 1<br>(0 - 1)         |
| Neural tube defects                                 | 3<br>(1 - 10)      | 3<br>(1 - 10)      | 0<br>(0 - 0)        | 0<br>(0 - 1)         | 0<br>(0 - 0)         | 0<br>(0 - 0)         |
| Congenital heart anomalies                          | 88<br>(33 - 146)   | 77<br>(26 - 133)   | 4<br>(1 - 8)        | 6<br>(3 - 12)        | 0<br>(0 - 1)         | 0<br>(0 - 0)         |
| Cleft lip and cleft palate                          | 0<br>(0 - 0)       | 0<br>(0 - 0)       | --                  | --                   | --                   | --                   |
| Down syndrome                                       | 3<br>(1 - 7)       | 2<br>(0 - 5)       | 0<br>(0 - 1)        | 1<br>(0 - 2)         | 0<br>(0 - 0)         | 0<br>(0 - 0)         |
| Chromosomal unbalanced rearrangements               | 3<br>(1 - 6)       | 2<br>(1 - 4)       | 0<br>(0 - 0)        | 1<br>(0 - 2)         | 0<br>(0 - 0)         | 0<br>(0 - 0)         |
| Other congenital anomalies                          | 99<br>(48 - 156)   | 82<br>(37 - 131)   | 4<br>(2 - 7)        | 11<br>(6 - 20)       | 1<br>(0 - 2)         | 1<br>(0 - 1)         |
| Skin and subcutaneous diseases                      | 8<br>(5 - 13)      | 1<br>(0 - 2)       | 0<br>(0 - 0)        | 4<br>(2 - 6)         | 1<br>(1 - 2)         | 2<br>(1 - 4)         |
| Cellulitis                                          | 1<br>(0 - 2)       | 0<br>(0 - 0)       | 0<br>(0 - 0)        | 0<br>(0 - 1)         | 0<br>(0 - 0)         | 0<br>(0 - 0)         |
| Pyoderma                                            | 4<br>(2 - 7)       | 1<br>(0 - 1)       | 0<br>(0 - 0)        | 2<br>(1 - 3)         | 1<br>(0 - 1)         | 1<br>(0 - 2)         |
| Decubitus ulcer                                     | 2<br>(1 - 4)       | 0<br>(0 - 0)       | 0<br>(0 - 0)        | 1<br>(1 - 2)         | 0<br>(0 - 1)         | 1<br>(0 - 2)         |

Web Table 31- United Arab Emirates deaths with 95% UI by age, sex, and cause in 2013

| Cause                                           | Females, All Ages  | Females, 0-4 Years | Females, 5-14 Years | Females, 15-49 Years | Females, 50-69 Years | Females, 70-80 Years |
|-------------------------------------------------|--------------------|--------------------|---------------------|----------------------|----------------------|----------------------|
| Other skin and subcutaneous diseases            | 1<br>(0 - 1)       | 0<br>(0 - 0)       | 0<br>(0 - 0)        | 0<br>(0 - 1)         | 0<br>(0 - 0)         | 0<br>(0 - 0)         |
| Sudden infant death syndrome                    | 7<br>(1 - 22)      | 7<br>(1 - 22)      | --                  | --                   | --                   | --                   |
| Injuries                                        | 381<br>(263 - 607) | 23<br>(14 - 35)    | 15<br>(10 - 21)     | 299<br>(202 - 489)   | 34<br>(19 - 62)      | 11<br>(7 - 18)       |
| Transport injuries                              | 233<br>(145 - 403) | 11<br>(5 - 18)     | 9<br>(5 - 14)       | 186<br>(113 - 329)   | 23<br>(12 - 46)      | 4<br>(2 - 9)         |
| Road injuries                                   | 223<br>(139 - 385) | 10<br>(5 - 17)     | 9<br>(5 - 13)       | 178<br>(108 - 316)   | 21<br>(11 - 43)      | 4<br>(2 - 8)         |
| Pedestrian road injuries                        | 53<br>(29 - 114)   | 3<br>(1 - 7)       | 3<br>(1 - 5)        | 39<br>(20 - 84)      | 7<br>(3 - 17)        | 2<br>(1 - 4)         |
| Cyclist road injuries                           | 8<br>(4 - 16)      | 0<br>(0 - 1)       | 0<br>(0 - 1)        | 6<br>(2 - 12)        | 2<br>(1 - 3)         | 0<br>(0 - 0)         |
| Motorcyclist road injuries                      | 7<br>(3 - 14)      | 0<br>(0 - 0)       | 0<br>(0 - 0)        | 6<br>(2 - 12)        | 1<br>(0 - 1)         | 0<br>(0 - 0)         |
| Motor vehicle road injuries                     | 153<br>(93 - 259)  | 6<br>(3 - 12)      | 5<br>(3 - 9)        | 127<br>(75 - 217)    | 13<br>(6 - 24)       | 2<br>(1 - 4)         |
| Other road injuries                             | 1<br>(0 - 2)       | 0<br>(0 - 0)       | 0<br>(0 - 0)        | 1<br>(0 - 1)         | 0<br>(0 - 0)         | 0<br>(0 - 0)         |
| Other transport injuries                        | 10<br>(5 - 23)     | 0<br>(0 - 1)       | 0<br>(0 - 1)        | 8<br>(4 - 18)        | 1<br>(0 - 3)         | 0<br>(0 - 1)         |
| Unintentional injuries                          | 90<br>(63 - 135)   | 12<br>(8 - 21)     | 5<br>(3 - 8)        | 59<br>(39 - 93)      | 9<br>(5 - 15)        | 6<br>(3 - 10)        |
| Falls                                           | 18<br>(9 - 33)     | 2<br>(1 - 5)       | 1<br>(0 - 2)        | 11<br>(5 - 19)       | 2<br>(1 - 5)         | 2<br>(1 - 6)         |
| Drowning                                        | 13<br>(7 - 31)     | 3<br>(1 - 10)      | 1<br>(1 - 4)        | 8<br>(3 - 17)        | 1<br>(0 - 1)         | 0<br>(0 - 0)         |
| Fire, heat, and hot substances                  | 17<br>(7 - 33)     | 2<br>(1 - 5)       | 1<br>(0 - 2)        | 13<br>(5 - 24)       | 1<br>(1 - 3)         | 1<br>(0 - 2)         |
| Poisonings                                      | 7<br>(3 - 12)      | 0<br>(0 - 1)       | 0<br>(0 - 0)        | 5<br>(2 - 9)         | 1<br>(0 - 1)         | 0<br>(0 - 0)         |
| Exposure to mechanical forces                   | 7<br>(4 - 19)      | 1<br>(1 - 3)       | 1<br>(0 - 1)        | 5<br>(3 - 12)        | 1<br>(0 - 2)         | 0<br>(0 - 1)         |
| Unintentional firearm injuries                  | 1<br>(1 - 2)       | 0<br>(0 - 0)       | 0<br>(0 - 0)        | 1<br>(1 - 2)         | 0<br>(0 - 0)         | 0<br>(0 - 0)         |
| Unintentional suffocation                       | 1<br>(0 - 3)       | 0<br>(0 - 1)       | 0<br>(0 - 0)        | 1<br>(0 - 2)         | 0<br>(0 - 0)         | 0<br>(0 - 0)         |
| Other exposure to mechanical forces             | 5<br>(3 - 15)      | 1<br>(0 - 2)       | 0<br>(0 - 1)        | 3<br>(1 - 10)        | 0<br>(0 - 2)         | 0<br>(0 - 0)         |
| Adverse effects of medical treatment            | 11<br>(7 - 19)     | 1<br>(0 - 3)       | 0<br>(0 - 1)        | 7<br>(4 - 13)        | 2<br>(1 - 4)         | 1<br>(0 - 2)         |
| Animal contact                                  | 2<br>(1 - 8)       | 0<br>(0 - 1)       | 0<br>(0 - 1)        | 1<br>(1 - 5)         | 0<br>(0 - 1)         | 0<br>(0 - 0)         |
| Venomous animal contact                         | 1<br>(0 - 4)       | 0<br>(0 - 1)       | 0<br>(0 - 0)        | 1<br>(0 - 3)         | 0<br>(0 - 0)         | 0<br>(0 - 0)         |
| Non-venomous animal contact                     | 1<br>(0 - 4)       | 0<br>(0 - 0)       | 0<br>(0 - 0)        | 1<br>(0 - 3)         | 0<br>(0 - 0)         | 0<br>(0 - 0)         |
| Foreign body                                    | 5<br>(2 - 10)      | 1<br>(0 - 3)       | 0<br>(0 - 1)        | 3<br>(1 - 5)         | 0<br>(0 - 1)         | 1<br>(0 - 1)         |
| Pulmonary aspiration and foreign body in airway | 5<br>(1 - 9)       | 1<br>(0 - 3)       | 0<br>(0 - 1)        | 2<br>(1 - 5)         | 0<br>(0 - 1)         | 0<br>(0 - 1)         |
| Foreign body in other body part                 | 0<br>(0 - 1)       | 0<br>(0 - 0)       | 0<br>(0 - 0)        | 0<br>(0 - 1)         | 0<br>(0 - 0)         | 0<br>(0 - 0)         |
| Other unintentional injuries                    | 8<br>(4 - 14)      | 1<br>(0 - 2)       | 0<br>(0 - 1)        | 6<br>(3 - 10)        | 1<br>(0 - 1)         | 0<br>(0 - 0)         |
| Self-harm and interpersonal violence            | 59<br>(28 - 102)   | 0<br>(0 - 0)       | 0<br>(0 - 1)        | 54<br>(26 - 95)      | 3<br>(1 - 6)         | 1<br>(0 - 1)         |
| Self-harm                                       | 52<br>(17 - 92)    | --                 | 0<br>(0 - 1)        | 48<br>(16 - 86)      | 3<br>(1 - 6)         | 1<br>(0 - 1)         |
| Interpersonal violence                          | 7<br>(4 - 13)      | 0<br>(0 - 0)       | 0<br>(0 - 0)        | 6<br>(4 - 12)        | 0<br>(0 - 1)         | 0<br>(0 - 0)         |
| Assault by firearm                              | 1<br>(0 - 4)       | 0<br>(0 - 0)       | 0<br>(0 - 0)        | 1<br>(0 - 3)         | 0<br>(0 - 0)         | 0<br>(0 - 0)         |
| Assault by sharp object                         | 3<br>(2 - 6)       | 0<br>(0 - 0)       | 0<br>(0 - 0)        | 3<br>(1 - 6)         | 0<br>(0 - 0)         | 0<br>(0 - 0)         |
| Assault by other means                          | 2<br>(1 - 5)       | 0<br>(0 - 0)       | 0<br>(0 - 0)        | 2<br>(1 - 4)         | 0<br>(0 - 0)         | 0<br>(0 - 0)         |
| Forces of nature, war, and legal intervention   | 0<br>(0 - 0)       | 0<br>(0 - 0)       | --                  | --                   | --                   | --                   |
| Exposure to forces of nature                    | 0<br>(0 - 0)       | 0<br>(0 - 0)       | --                  | --                   | --                   | --                   |

Web Table 31- United Kingdom deaths with 95% UI by age, sex, and cause in 2013

| Cause                                                             | Both Sexes, All Ages           | Both Sexes, 0-4 Years    | Both Sexes, 5-14 Years | Both Sexes, 15-49 Years     | Both Sexes, 50-69 Years       | Both Sexes, 70-80 Years        |
|-------------------------------------------------------------------|--------------------------------|--------------------------|------------------------|-----------------------------|-------------------------------|--------------------------------|
| All causes                                                        | 583,507<br>(563,046 - 603,904) | 3,785<br>(3,089 - 4,657) | 663<br>(584 - 753)     | 25,355<br>(23,947 - 26,712) | 102,274<br>(97,409 - 107,092) | 451,430<br>(436,871 - 465,558) |
| Communicable, maternal, neonatal, and nutritional diseases        | 46,809<br>(42,689 - 57,770)    | 1,941<br>(1,577 - 2,401) | 65<br>(52 - 81)        | 1,043<br>(923 - 1,149)      | 3,050<br>(2,586 - 3,339)      | 40,710<br>(36,660 - 51,724)    |
| HIV/AIDS and tuberculosis                                         | 717<br>(590 - 840)             | 1<br>(1 - 2)             | 1<br>(1 - 1)           | 206<br>(159 - 253)          | 187<br>(146 - 237)            | 321<br>(242 - 369)             |
| Tuberculosis                                                      | 471<br>(367 - 530)             | 1<br>(1 - 1)             | 1<br>(1 - 1)           | 42<br>(35 - 46)             | 116<br>(95 - 131)             | 311<br>(231 - 358)             |
| HIV/AIDS                                                          | 246<br>(168 - 333)             | 0<br>(0 - 1)             | 0<br>(0 - 0)           | 164<br>(118 - 210)          | 71<br>(36 - 117)              | 11<br>(3 - 22)                 |
| HIV/AIDS resulting in mycobacterial infection                     | 13<br>(8 - 19)                 | 0<br>(0 - 0)             | 0<br>(0 - 0)           | 8<br>(6 - 11)               | 4<br>(2 - 7)                  | 1<br>(0 - 1)                   |
| HIV/AIDS resulting in other diseases                              | 233<br>(159 - 316)             | 0<br>(0 - 1)             | 0<br>(0 - 0)           | 156<br>(112 - 199)          | 67<br>(34 - 110)              | 10<br>(3 - 20)                 |
| Diarrhea, lower respiratory, and other common infectious diseases | 43,074<br>(39,053 - 54,157)    | 299<br>(234 - 376)       | 52<br>(41 - 68)        | 647<br>(568 - 719)          | 2,628<br>(2,196 - 2,893)      | 39,448<br>(35,434 - 50,391)    |
| Diarrheal diseases                                                | 2,072<br>(1,817 - 2,356)       | 50<br>(39 - 63)          | 4<br>(3 - 5)           | 38<br>(35 - 42)             | 142<br>(127 - 160)            | 1,839<br>(1,597 - 2,113)       |
| Intestinal infectious diseases                                    | 77<br>(28 - 165)               | 14<br>(5 - 29)           | 13<br>(5 - 30)         | 30<br>(10 - 68)             | 10<br>(4 - 23)                | 9<br>(3 - 18)                  |
| Typhoid fever                                                     | 56<br>(18 - 128)               | 9<br>(3 - 20)            | 10<br>(3 - 22)         | 23<br>(8 - 53)              | 8<br>(2 - 18)                 | 6<br>(2 - 14)                  |
| Paratyphoid fever                                                 | 14<br>(5 - 32)                 | 3<br>(1 - 7)             | 3<br>(1 - 7)           | 5<br>(2 - 13)               | 1<br>(0 - 3)                  | 1<br>(0 - 3)                   |
| Other intestinal infectious diseases                              | 6<br>(2 - 13)                  | 1<br>(0 - 5)             | 0<br>(0 - 2)           | 2<br>(0 - 5)                | 1<br>(0 - 5)                  | 2<br>(0 - 5)                   |
| Lower respiratory infections                                      | 40,367<br>(36,267 - 51,349)    | 158<br>(121 - 206)       | 19<br>(16 - 22)        | 478<br>(414 - 531)          | 2,364<br>(1,941 - 2,621)      | 37,348<br>(33,319 - 48,299)    |
| Upper respiratory infections                                      | 12<br>(9 - 18)                 | 0<br>(0 - 0)             | 0<br>(0 - 0)           | 1<br>(1 - 1)                | 2<br>(2 - 3)                  | 9<br>(5 - 14)                  |
| Otitis media                                                      | 14<br>(13 - 15)                | 2<br>(2 - 3)             | 1<br>(1 - 1)           | 3<br>(3 - 4)                | 3<br>(2 - 3)                  | 5<br>(5 - 6)                   |
| Meningitis                                                        | 319<br>(287 - 395)             | 56<br>(42 - 80)          | 8<br>(7 - 10)          | 53<br>(48 - 61)             | 66<br>(59 - 79)               | 135<br>(119 - 186)             |
| Pneumococcal meningitis                                           | 55<br>(48 - 69)                | 7<br>(5 - 10)            | 1<br>(1 - 1)           | 9<br>(8 - 10)               | 12<br>(10 - 15)               | 25<br>(21 - 36)                |
| H influenzae type B meningitis                                    | 43<br>(37 - 52)                | 16<br>(12 - 23)          | 2<br>(1 - 2)           | 6<br>(5 - 7)                | 6<br>(5 - 7)                  | 13<br>(11 - 17)                |
| Meningococcal meningitis                                          | 103<br>(92 - 129)              | 17<br>(12 - 24)          | 3<br>(2 - 4)           | 17<br>(15 - 21)             | 20<br>(18 - 25)               | 45<br>(39 - 63)                |
| Other meningitis                                                  | 118<br>(107 - 147)             | 16<br>(12 - 23)          | 2<br>(2 - 3)           | 21<br>(19 - 23)             | 27<br>(24 - 33)               | 52<br>(44 - 71)                |
| Encephalitis                                                      | 136<br>(81 - 165)              | 11<br>(7 - 16)           | 5<br>(3 - 6)           | 33<br>(19 - 41)             | 32<br>(18 - 40)               | 55<br>(31 - 67)                |
| Diphtheria                                                        | 1<br>(1 - 1)                   | 0<br>(0 - 1)             | 0<br>(0 - 0)           | 0<br>(0 - 1)                | 0<br>(0 - 0)                  | --                             |
| Whooping cough                                                    | 8<br>(4 - 13)                  | 4<br>(1 - 8)             | 1<br>(0 - 1)           | 3<br>(2 - 3)                | 1<br>(1 - 1)                  | --                             |
| Tetanus                                                           | 6<br>(4 - 8)                   | 0<br>(0 - 0)             | 1<br>(0 - 1)           | 3<br>(1 - 3)                | 1<br>(1 - 2)                  | 1<br>(1 - 3)                   |
| Measles                                                           | 0<br>(0 - 1)                   | 0<br>(0 - 1)             | 0<br>(0 - 0)           | 0<br>(0 - 0)                | 0<br>(0 - 0)                  | --                             |
| Varicella and herpes zoster                                       | 62<br>(38 - 97)                | 3<br>(2 - 5)             | 1<br>(0 - 1)           | 5<br>(4 - 7)                | 5<br>(3 - 8)                  | 47<br>(24 - 82)                |
| Neglected tropical diseases and malaria                           | 52<br>(40 - 59)                | 3<br>(2 - 4)             | 2<br>(2 - 3)           | 17<br>(13 - 19)             | 17<br>(13 - 20)               | 12<br>(9 - 15)                 |
| Cysticercosis                                                     | 1<br>(1 - 1)                   | 0<br>(0 - 0)             | 0<br>(0 - 0)           | 0<br>(0 - 0)                | 0<br>(0 - 0)                  | 0<br>(0 - 0)                   |
| Cystic echinococcosis                                             | 5<br>(5 - 5)                   | 0<br>(0 - 0)             | 0<br>(0 - 0)           | 1<br>(1 - 1)                | 2<br>(1 - 2)                  | 3<br>(2 - 3)                   |
| Dengue                                                            | 6<br>(4 - 6)                   | 0<br>(0 - 0)             | 1<br>(0 - 1)           | 3<br>(2 - 3)                | 1<br>(1 - 2)                  | 1<br>(0 - 1)                   |
| Rabies                                                            | 5<br>(3 - 6)                   | 0<br>(0 - 0)             | 1<br>(0 - 1)           | 3<br>(2 - 3)                | 1<br>(1 - 2)                  | 1<br>(0 - 1)                   |
| Other neglected tropical diseases                                 | 35<br>(24 - 42)                | 3<br>(1 - 3)             | 1<br>(1 - 1)           | 11<br>(7 - 12)              | 13<br>(9 - 16)                | 8<br>(5 - 11)                  |
| Maternal disorders                                                | 47<br>(40 - 54)                | --                       | 1<br>(0 - 1)           | 47<br>(40 - 53)             | --                            | --                             |
| Maternal hemorrhage                                               | 5<br>(4 - 6)                   | --                       | 0<br>(0 - 0)           | 5<br>(4 - 6)                | --                            | --                             |
| Maternal sepsis and other maternal infections                     | 4<br>(4 - 5)                   | --                       | 0<br>(0 - 0)           | 4<br>(4 - 5)                | --                            | --                             |
| Maternal hypertensive disorders                                   | 6<br>(5 - 7)                   | --                       | 0<br>(0 - 0)           | 6<br>(5 - 7)                | --                            | --                             |
| Maternal obstructed labor                                         | 4<br>(3 - 4)                   | --                       | 0<br>(0 - 0)           | 4<br>(3 - 4)                | --                            | --                             |
| Maternal abortive outcome                                         | 9<br>(8 - 11)                  | --                       | 0<br>(0 - 0)           | 9<br>(8 - 11)               | --                            | --                             |
| Indirect maternal deaths                                          | 5<br>(4 - 6)                   | --                       | 0<br>(0 - 0)           | 5<br>(4 - 6)                | --                            | --                             |



Web Table 31- United Kingdom deaths with 95% UI by age, sex, and cause in 2013

| Cause                                                            | Both Sexes, All Ages           | Both Sexes, 0-4 Years    | Both Sexes, 5-14 Years | Both Sexes, 15-49 Years     | Both Sexes, 50-69 Years      | Both Sexes, 70-80 Years        |
|------------------------------------------------------------------|--------------------------------|--------------------------|------------------------|-----------------------------|------------------------------|--------------------------------|
| Late maternal deaths                                             | 3<br>(3 - 4)                   | --                       | 0<br>(0 - 0)           | 3<br>(3 - 4)                | --                           | --                             |
| Maternal deaths aggravated by HIV/AIDS                           | 0<br>(0 - 0)                   | --                       | --                     | 0<br>(0 - 0)                | --                           | --                             |
| Other maternal disorders                                         | 10<br>(8 - 12)                 | --                       | 0<br>(0 - 0)           | 10<br>(8 - 11)              | --                           | --                             |
| Neonatal disorders                                               | 1,601<br>(1,300 - 1,993)       | 1,601<br>(1,300 - 1,993) | --                     | --                          | --                           | --                             |
| Neonatal preterm birth complications                             | 1,164<br>(919 - 1,472)         | 1,164<br>(919 - 1,472)   | --                     | --                          | --                           | --                             |
| Neonatal encephalopathy due to birth asphyxia and trauma         | 243<br>(168 - 335)             | 243<br>(168 - 335)       | --                     | --                          | --                           | --                             |
| Neonatal sepsis and other neonatal infections                    | 77<br>(45 - 155)               | 77<br>(45 - 155)         | --                     | --                          | --                           | --                             |
| Hemolytic disease and other neonatal jaundice                    | 3<br>(2 - 5)                   | 3<br>(2 - 5)             | --                     | --                          | --                           | --                             |
| Other neonatal disorders                                         | 114<br>(74 - 158)              | 114<br>(74 - 158)        | --                     | --                          | --                           | --                             |
| Nutritional deficiencies                                         | 678<br>(572 - 883)             | 3<br>(2 - 4)             | 1<br>(1 - 1)           | 16<br>(13 - 22)             | 45<br>(36 - 57)              | 613<br>(518 - 799)             |
| Protein-energy malnutrition                                      | 104<br>(53 - 162)              | 1<br>(1 - 2)             | 0<br>(0 - 0)           | 5<br>(3 - 7)                | 13<br>(7 - 18)               | 85<br>(41 - 137)               |
| Iodine deficiency                                                | 4<br>(1 - 8)                   | 0<br>(0 - 0)             | 0<br>(0 - 0)           | 0<br>(0 - 0)                | 1<br>(0 - 1)                 | 3<br>(1 - 7)                   |
| Iron-deficiency anemia                                           | 506<br>(401 - 660)             | 1<br>(0 - 1)             | 0<br>(0 - 0)           | 9<br>(7 - 13)               | 27<br>(19 - 35)              | 469<br>(372 - 614)             |
| Other nutritional deficiencies                                   | 63<br>(34 - 136)               | 1<br>(0 - 1)             | 0<br>(0 - 0)           | 2<br>(1 - 4)                | 5<br>(3 - 9)                 | 56<br>(29 - 121)               |
| Other communicable, maternal, neonatal, and nutritional diseases | 641<br>(467 - 758)             | 34<br>(21 - 48)          | 9<br>(6 - 11)          | 110<br>(82 - 130)           | 173<br>(123 - 211)           | 315<br>(226 - 370)             |
| Sexually transmitted diseases excluding HIV                      | 70<br>(52 - 95)                | 7<br>(3 - 13)            | 1<br>(0 - 1)           | 6<br>(4 - 7)                | 10<br>(7 - 14)               | 47<br>(33 - 68)                |
| Syphilis                                                         | 53<br>(39 - 73)                | 7<br>(3 - 13)            | 1<br>(0 - 1)           | 2<br>(2 - 3)                | 6<br>(4 - 9)                 | 37<br>(27 - 54)                |
| Chlamydial infection                                             | 4<br>(3 - 6)                   | --                       | 0<br>(0 - 0)           | 1<br>(1 - 1)                | 1<br>(1 - 1)                 | 2<br>(2 - 3)                   |
| Gonococcal infection                                             | 8<br>(6 - 11)                  | --                       | 0<br>(0 - 0)           | 1<br>(1 - 2)                | 2<br>(1 - 2)                 | 5<br>(4 - 8)                   |
| Other sexually transmitted diseases                              | 5<br>(4 - 6)                   | --                       | 0<br>(0 - 0)           | 1<br>(1 - 1)                | 1<br>(1 - 2)                 | 2<br>(2 - 3)                   |
| Hepatitis                                                        | 97<br>(87 - 113)               | 2<br>(1 - 2)             | 1<br>(1 - 2)           | 29<br>(26 - 35)             | 37<br>(33 - 44)              | 27<br>(24 - 32)                |
| Acute hepatitis A                                                | 24<br>(9 - 43)                 | 1<br>(1 - 2)             | 1<br>(1 - 1)           | 11<br>(4 - 18)              | 8<br>(2 - 14)                | 4<br>(1 - 8)                   |
| Acute hepatitis B                                                | 62<br>(43 - 82)                | 0<br>(0 - 1)             | 0<br>(0 - 1)           | 16<br>(9 - 23)              | 26<br>(18 - 34)              | 20<br>(15 - 25)                |
| Acute hepatitis C                                                | 10<br>(2 - 22)                 | --                       | 0<br>(0 - 0)           | 3<br>(1 - 7)                | 4<br>(1 - 8)                 | 3<br>(1 - 7)                   |
| Other infectious diseases                                        | 474<br>(293 - 600)             | 26<br>(14 - 36)          | 7<br>(4 - 9)           | 75<br>(47 - 95)             | 126<br>(76 - 166)            | 241<br>(147 - 303)             |
| Non-communicable diseases                                        | 516,937<br>(498,845 - 535,545) | 1,615<br>(1,300 - 2,041) | 425<br>(372 - 482)     | 18,807<br>(17,776 - 19,866) | 95,858<br>(91,403 - 100,299) | 400,232<br>(386,833 - 413,406) |
| Neoplasms                                                        | 163,806<br>(152,446 - 171,777) | 115<br>(86 - 154)        | 206<br>(178 - 238)     | 7,710<br>(7,211 - 8,259)    | 49,283<br>(46,442 - 52,091)  | 106,491<br>(97,463 - 112,123)  |
| Esophageal cancer                                                | 8,123<br>(7,270 - 9,982)       | --                       | --                     | 264<br>(223 - 315)          | 2,769<br>(2,404 - 3,417)     | 5,090<br>(4,604 - 6,290)       |
| Stomach cancer                                                   | 7,522<br>(6,630 - 8,618)       | --                       | --                     | 210<br>(183 - 240)          | 1,556<br>(1,386 - 1,758)     | 5,756<br>(5,028 - 6,732)       |
| Liver cancer                                                     | 3,566<br>(2,587 - 4,122)       | --                       | 3<br>(2 - 3)           | 165<br>(131 - 193)          | 1,155<br>(894 - 1,338)       | 2,243<br>(1,598 - 2,628)       |
| Liver cancer due to hepatitis B                                  | 726<br>(512 - 907)             | --                       | 1<br>(1 - 2)           | 60<br>(46 - 74)             | 299<br>(217 - 381)           | 367<br>(231 - 455)             |
| Liver cancer due to hepatitis C                                  | 1,882<br>(1,424 - 2,260)       | --                       | 1<br>(0 - 1)           | 72<br>(55 - 93)             | 588<br>(444 - 719)           | 1,221<br>(905 - 1,474)         |
| Liver cancer due to alcohol use                                  | 785<br>(537 - 984)             | --                       | --                     | 21<br>(15 - 27)             | 214<br>(152 - 274)           | 550<br>(364 - 701)             |
| Liver cancer due to other causes                                 | 173<br>(108 - 223)             | --                       | 1<br>(1 - 1)           | 13<br>(9 - 17)              | 54<br>(39 - 70)              | 105<br>(58 - 138)              |
| Larynx cancer                                                    | 883<br>(693 - 1,124)           | --                       | --                     | 37<br>(29 - 47)             | 339<br>(263 - 422)           | 506<br>(393 - 649)             |
| Tracheal, bronchus and lung cancer                               | 37,830<br>(34,167 - 40,840)    | --                       | --                     | 898<br>(797 - 1,006)        | 12,920<br>(11,785 - 14,067)  | 24,012<br>(20,931 - 26,040)    |
| Breast cancer                                                    | 13,395<br>(10,452 - 15,740)    | --                       | --                     | 1,391<br>(1,193 - 1,685)    | 4,824<br>(3,813 - 5,666)     | 7,181<br>(5,283 - 8,451)       |
| Cervical cancer                                                  | 1,253<br>(1,048 - 1,457)       | --                       | --                     | 271<br>(223 - 318)          | 398<br>(316 - 463)           | 584<br>(482 - 716)             |
| Uterine cancer                                                   | 1,822<br>(1,390 - 2,085)       | --                       | --                     | 36<br>(29 - 43)             | 564<br>(419 - 657)           | 1,223<br>(908 - 1,397)         |
| Prostate cancer                                                  | 11,723<br>(7,807 - 16,411)     | --                       | --                     | 21<br>(14 - 29)             | 1,721<br>(1,037 - 2,355)     | 9,981<br>(6,578 - 14,211)      |

Web Table 31- United Kingdom deaths with 95% UI by age, sex, and cause in 2013

| Cause                                         | Both Sexes, All Ages           | Both Sexes, 0-4 Years | Both Sexes, 5-14 Years | Both Sexes, 15-49 Years  | Both Sexes, 50-69 Years     | Both Sexes, 70-80 Years        |
|-----------------------------------------------|--------------------------------|-----------------------|------------------------|--------------------------|-----------------------------|--------------------------------|
| Colon and rectum cancer                       | 20,467<br>(19,031 - 21,609)    | --                    | --                     | 619<br>(569 - 670)       | 5,390<br>(4,982 - 5,762)    | 14,458<br>(13,459 - 15,341)    |
| Lip and oral cavity cancer                    | 1,627<br>(1,365 - 1,787)       | --                    | --                     | 144<br>(124 - 160)       | 682<br>(517 - 754)          | 802<br>(690 - 901)             |
| Nasopharynx cancer                            | 168<br>(140 - 246)             | --                    | 1<br>(1 - 2)           | 32<br>(26 - 44)          | 74<br>(62 - 104)            | 61<br>(48 - 98)                |
| Other pharynx cancer                          | 732<br>(530 - 880)             | --                    | --                     | 66<br>(52 - 79)          | 393<br>(277 - 475)          | 273<br>(190 - 335)             |
| Gallbladder and biliary tract cancer          | 1,311<br>(982 - 1,628)         | --                    | --                     | 25<br>(19 - 30)          | 286<br>(220 - 357)          | 1,000<br>(741 - 1,271)         |
| Pancreatic cancer                             | 9,334<br>(8,707 - 9,868)       | --                    | --                     | 280<br>(258 - 305)       | 2,961<br>(2,733 - 3,176)    | 6,092<br>(5,645 - 6,456)       |
| Malignant skin melanoma                       | 2,281<br>(1,506 - 3,197)       | --                    | --                     | 361<br>(246 - 533)       | 815<br>(533 - 1,157)        | 1,105<br>(720 - 1,511)         |
| Non-melanoma skin cancer                      | 751<br>(563 - 997)             | --                    | --                     | 22<br>(16 - 31)          | 87<br>(60 - 118)            | 642<br>(476 - 861)             |
| Ovarian cancer                                | 4,935<br>(4,345 - 5,428)       | --                    | --                     | 316<br>(276 - 365)       | 1,891<br>(1,658 - 2,111)    | 2,727<br>(2,305 - 3,026)       |
| Testicular cancer                             | 92<br>(71 - 123)               | --                    | --                     | 58<br>(44 - 76)          | 17<br>(13 - 24)             | 17<br>(13 - 24)                |
| Kidney cancer                                 | 4,169<br>(3,715 - 4,568)       | 6<br>(4 - 8)          | 6<br>(4 - 7)           | 197<br>(171 - 227)       | 1,461<br>(1,286 - 1,651)    | 2,501<br>(2,152 - 2,796)       |
| Bladder cancer                                | 4,745<br>(4,006 - 5,543)       | --                    | --                     | 56<br>(47 - 66)          | 873<br>(752 - 1,010)        | 3,815<br>(3,182 - 4,460)       |
| Brain and nervous system cancer               | 3,754<br>(3,094 - 4,262)       | 22<br>(15 - 32)       | 57<br>(47 - 71)        | 612<br>(516 - 711)       | 1,721<br>(1,450 - 2,045)    | 1,342<br>(1,023 - 1,520)       |
| Thyroid cancer                                | 376<br>(317 - 442)             | --                    | 0<br>(0 - 0)           | 17<br>(14 - 20)          | 99<br>(83 - 114)            | 260<br>(214 - 309)             |
| Mesothelioma                                  | 2,222<br>(1,146 - 2,671)       | --                    | --                     | 55<br>(38 - 67)          | 820<br>(480 - 1,024)        | 1,346<br>(597 - 1,648)         |
| Hodgkin lymphoma                              | 343<br>(268 - 444)             | 0<br>(0 - 1)          | 2<br>(1 - 3)           | 115<br>(90 - 150)        | 105<br>(79 - 137)           | 121<br>(90 - 156)              |
| Non-Hodgkin lymphoma                          | 5,700<br>(3,700 - 6,774)       | 5<br>(3 - 7)          | 14<br>(8 - 19)         | 385<br>(257 - 507)       | 1,683<br>(1,087 - 2,161)    | 3,613<br>(2,321 - 4,230)       |
| Multiple myeloma                              | 3,356<br>(2,513 - 4,496)       | --                    | --                     | 86<br>(63 - 123)         | 965<br>(713 - 1,353)        | 2,306<br>(1,678 - 3,101)       |
| Leukemia                                      | 4,861<br>(4,346 - 5,247)       | 30<br>(22 - 41)       | 63<br>(52 - 75)        | 400<br>(355 - 439)       | 1,152<br>(1,001 - 1,256)    | 3,215<br>(2,867 - 3,485)       |
| Other neoplasms                               | 6,465<br>(5,160 - 7,161)       | 52<br>(37 - 69)       | 61<br>(47 - 73)        | 573<br>(474 - 637)       | 1,561<br>(1,313 - 1,761)    | 4,218<br>(3,232 - 4,754)       |
| Cardiovascular diseases                       | 192,004<br>(181,540 - 210,069) | 29<br>(22 - 37)       | 17<br>(15 - 21)        | 3,918<br>(3,582 - 4,257) | 26,076<br>(24,343 - 28,522) | 161,964<br>(153,032 - 177,482) |
| Rheumatic heart disease                       | 1,476<br>(1,212 - 2,383)       | 0<br>(0 - 0)          | 1<br>(0 - 1)           | 75<br>(60 - 107)         | 301<br>(247 - 509)          | 1,099<br>(875 - 1,768)         |
| Ischemic heart disease                        | 98,746<br>(90,783 - 115,006)   | 1<br>(1 - 2)          | 2<br>(1 - 2)           | 2,168<br>(1,966 - 2,434) | 16,391<br>(15,067 - 18,741) | 80,183<br>(72,593 - 94,254)    |
| Cerebrovascular disease                       | 57,146<br>(50,461 - 67,587)    | 6<br>(4 - 8)          | 6<br>(4 - 7)           | 831<br>(680 - 965)       | 4,922<br>(4,123 - 5,782)    | 51,381<br>(45,299 - 61,190)    |
| Ischemic stroke                               | 34,270<br>(29,644 - 42,656)    | 2<br>(1 - 2)          | 1<br>(0 - 1)           | 88<br>(58 - 110)         | 1,558<br>(1,141 - 2,020)    | 32,621<br>(28,375 - 40,723)    |
| Hemorrhagic stroke                            | 22,877<br>(17,286 - 26,966)    | 4<br>(3 - 6)          | 5<br>(4 - 6)           | 744<br>(613 - 858)       | 3,364<br>(2,762 - 3,957)    | 18,760<br>(13,743 - 22,621)    |
| Hypertensive heart disease                    | 3,017<br>(2,154 - 3,621)       | 0<br>(0 - 0)          | 0<br>(0 - 1)           | 84<br>(61 - 106)         | 561<br>(405 - 750)          | 2,371<br>(1,636 - 2,823)       |
| Cardiomyopathy and myocarditis                | 3,316<br>(2,728 - 4,382)       | 15<br>(11 - 19)       | 6<br>(5 - 8)           | 249<br>(183 - 308)       | 504<br>(362 - 643)          | 2,542<br>(2,122 - 3,476)       |
| Atrial fibrillation and flutter               | 5,084<br>(4,122 - 5,800)       | --                    | --                     | 7<br>(5 - 8)             | 182<br>(145 - 210)          | 4,895<br>(3,968 - 5,613)       |
| Aortic aneurysm                               | 8,067<br>(6,653 - 10,222)      | --                    | --                     | 90<br>(75 - 109)         | 1,093<br>(918 - 1,324)      | 6,884<br>(5,573 - 8,813)       |
| Peripheral vascular disease                   | 2,631<br>(2,254 - 2,994)       | --                    | --                     | 9<br>(8 - 11)            | 205<br>(177 - 239)          | 2,417<br>(2,052 - 2,755)       |
| Endocarditis                                  | 761<br>(602 - 1,072)           | 1<br>(1 - 2)          | 1<br>(0 - 1)           | 48<br>(36 - 62)          | 172<br>(135 - 243)          | 538<br>(421 - 781)             |
| Other cardiovascular and circulatory diseases | 11,762<br>(7,448 - 13,319)     | 4<br>(3 - 6)          | 2<br>(1 - 3)           | 358<br>(221 - 411)       | 1,743<br>(1,070 - 1,990)    | 9,654<br>(6,166 - 10,999)      |
| Chronic respiratory diseases                  | 42,036<br>(37,487 - 48,011)    | 32<br>(23 - 41)       | 17<br>(14 - 20)        | 497<br>(443 - 543)       | 6,328<br>(5,586 - 6,943)    | 35,162<br>(30,942 - 40,637)    |
| Chronic obstructive pulmonary disease         | 35,108<br>(31,327 - 41,394)    | 17<br>(12 - 21)       | 2<br>(2 - 3)           | 214<br>(176 - 256)       | 5,219<br>(4,563 - 5,893)    | 29,656<br>(26,418 - 35,247)    |
| Pneumoconiosis                                | 856<br>(574 - 1,331)           | 0<br>(0 - 1)          | 1<br>(0 - 1)           | 8<br>(6 - 10)            | 80<br>(52 - 116)            | 767<br>(506 - 1,206)           |
| Silicosis                                     | 26<br>(17 - 42)                | 0<br>(0 - 0)          | 0<br>(0 - 0)           | 2<br>(1 - 2)             | 4<br>(2 - 6)                | 20<br>(13 - 36)                |
| Asbestosis                                    | 377<br>(246 - 606)             | 0<br>(0 - 0)          | 0<br>(0 - 0)           | 2<br>(2 - 3)             | 41<br>(27 - 60)             | 333<br>(216 - 541)             |
| Coal workers pneumoconiosis                   | 313<br>(206 - 492)             | 0<br>(0 - 0)          | 0<br>(0 - 0)           | 2<br>(1 - 3)             | 21<br>(13 - 31)             | 290<br>(189 - 463)             |
| Other pneumoconiosis                          | 141<br>(93 - 209)              | 0<br>(0 - 0)          | 0<br>(0 - 0)           | 2<br>(1 - 2)             | 15<br>(9 - 20)              | 124<br>(81 - 188)              |

Web Table 31- United Kingdom deaths with 95% UI by age, sex, and cause in 2013

| Cause                                               | Both Sexes, All Ages        | Both Sexes, 0-4 Years | Both Sexes, 5-14 Years | Both Sexes, 15-49 Years  | Both Sexes, 50-69 Years  | Both Sexes, 70-80 Years     |
|-----------------------------------------------------|-----------------------------|-----------------------|------------------------|--------------------------|--------------------------|-----------------------------|
| Asthma                                              | 1,615<br>(1,125 - 2,254)    | 5<br>(3 - 7)          | 11<br>(9 - 13)         | 184<br>(157 - 214)       | 293<br>(219 - 420)       | 1,122<br>(706 - 1,647)      |
| Interstitial lung disease and pulmonary sarcoidosis | 4,200<br>(1,909 - 6,361)    | 4<br>(2 - 6)          | 2<br>(1 - 3)           | 83<br>(44 - 113)         | 714<br>(343 - 1,012)     | 3,397<br>(1,491 - 5,246)    |
| Other chronic respiratory diseases                  | 257<br>(202 - 331)          | 6<br>(5 - 8)          | 1<br>(1 - 1)           | 8<br>(7 - 9)             | 22<br>(18 - 27)          | 220<br>(170 - 290)          |
| Cirrhosis                                           | 8,474<br>(7,911 - 8,978)    | 5<br>(4 - 7)          | 5<br>(4 - 5)           | 1,861<br>(1,725 - 2,001) | 4,029<br>(3,735 - 4,303) | 2,575<br>(2,378 - 2,735)    |
| Cirrhosis due to hepatitis B                        | 925<br>(763 - 1,074)        | 0<br>(0 - 0)          | 0<br>(0 - 0)           | 186<br>(149 - 220)       | 432<br>(345 - 512)       | 307<br>(262 - 355)          |
| Cirrhosis due to hepatitis C                        | 3,938<br>(3,579 - 4,295)    | 0<br>(0 - 1)          | 1<br>(1 - 2)           | 877<br>(785 - 979)       | 1,876<br>(1,687 - 2,081) | 1,184<br>(1,078 - 1,312)    |
| Cirrhosis due to alcohol use                        | 2,665<br>(2,324 - 2,970)    | --                    | --                     | 476<br>(398 - 560)       | 1,287<br>(1,099 - 1,466) | 902<br>(792 - 1,000)        |
| Cirrhosis due to other causes                       | 946<br>(823 - 1,084)        | 4<br>(3 - 6)          | 3<br>(3 - 4)           | 323<br>(279 - 367)       | 434<br>(364 - 510)       | 182<br>(153 - 215)          |
| Digestive diseases                                  | 19,788<br>(17,687 - 24,464) | 13<br>(9 - 18)        | 12<br>(10 - 14)        | 518<br>(447 - 572)       | 2,658<br>(2,342 - 3,014) | 16,587<br>(14,826 - 21,022) |
| Peptic ulcer disease                                | 3,700<br>(2,925 - 5,414)    | 0<br>(0 - 1)          | 1<br>(0 - 1)           | 79<br>(62 - 98)          | 529<br>(399 - 666)       | 3,092<br>(2,418 - 4,705)    |
| Gastritis and duodenitis                            | 248<br>(141 - 354)          | 0<br>(0 - 1)          | 1<br>(0 - 1)           | 19<br>(11 - 25)          | 52<br>(29 - 74)          | 176<br>(96 - 266)           |
| Appendicitis                                        | 316<br>(196 - 547)          | 1<br>(1 - 1)          | 2<br>(2 - 3)           | 21<br>(16 - 28)          | 60<br>(40 - 90)          | 232<br>(132 - 434)          |
| Paralytic ileus and intestinal obstruction          | 2,661<br>(1,418 - 3,471)    | 4<br>(2 - 5)          | 3<br>(2 - 4)           | 55<br>(31 - 68)          | 270<br>(144 - 355)       | 2,329<br>(1,219 - 3,050)    |
| Inguinal, femoral, and abdominal hernia             | 999<br>(445 - 2,580)        | 0<br>(0 - 1)          | 1<br>(0 - 1)           | 11<br>(6 - 15)           | 95<br>(47 - 211)         | 892<br>(392 - 2,352)        |
| Inflammatory bowel disease                          | 1,374<br>(1,103 - 2,018)    | 4<br>(3 - 6)          | 2<br>(1 - 2)           | 55<br>(44 - 72)          | 189<br>(142 - 251)       | 1,125<br>(890 - 1,731)      |
| Vascular intestinal disorders                       | 3,091<br>(1,790 - 4,763)    | 1<br>(0 - 1)          | 0<br>(0 - 1)           | 46<br>(27 - 72)          | 468<br>(287 - 726)       | 2,576<br>(1,439 - 3,923)    |
| Gallbladder and biliary diseases                    | 2,184<br>(1,534 - 2,649)    | 0<br>(0 - 0)          | 1<br>(0 - 1)           | 34<br>(24 - 39)          | 225<br>(151 - 268)       | 1,925<br>(1,364 - 2,348)    |
| Pancreatitis                                        | 1,329<br>(984 - 1,851)      | 0<br>(0 - 1)          | 1<br>(0 - 1)           | 129<br>(97 - 158)        | 325<br>(226 - 424)       | 874<br>(635 - 1,281)        |
| Other digestive diseases                            | 3,887<br>(3,184 - 4,865)    | 2<br>(1 - 3)          | 2<br>(1 - 2)           | 70<br>(55 - 82)          | 445<br>(337 - 522)       | 3,368<br>(2,772 - 4,323)    |
| Neurological disorders                              | 59,810<br>(55,016 - 64,053) | 91<br>(71 - 112)      | 46<br>(39 - 56)        | 957<br>(839 - 1,121)     | 3,406<br>(3,014 - 3,733) | 55,311<br>(50,708 - 59,452) |
| Alzheimer disease and other dementias               | 49,349<br>(45,044 - 53,299) | --                    | --                     | 6<br>(4 - 8)             | 1,252<br>(1,120 - 1,369) | 48,092<br>(43,824 - 51,991) |
| Parkinson disease                                   | 5,120<br>(4,140 - 5,696)    | --                    | --                     | 5<br>(4 - 6)             | 281<br>(236 - 327)       | 4,833<br>(3,871 - 5,382)    |
| Epilepsy                                            | 972<br>(769 - 1,139)        | 17<br>(12 - 22)       | 19<br>(15 - 25)        | 415<br>(347 - 497)       | 209<br>(157 - 258)       | 312<br>(223 - 375)          |
| Multiple sclerosis                                  | 1,067<br>(720 - 1,462)      | --                    | --                     | 222<br>(159 - 329)       | 535<br>(354 - 753)       | 309<br>(192 - 407)          |
| Other neurological disorders                        | 3,302<br>(2,809 - 3,591)    | 74<br>(57 - 93)       | 27<br>(22 - 33)        | 308<br>(261 - 356)       | 1,129<br>(965 - 1,252)   | 1,765<br>(1,483 - 1,922)    |
| Mental and substance use disorders                  | 3,027<br>(2,239 - 3,408)    | 3<br>(2 - 4)          | 0<br>(0 - 0)           | 2,080<br>(1,498 - 2,300) | 703<br>(475 - 859)       | 241<br>(194 - 282)          |
| Schizophrenia                                       | 81<br>(67 - 119)            | --                    | --                     | 4<br>(3 - 5)             | 13<br>(10 - 20)          | 65<br>(52 - 96)             |
| Alcohol use disorders                               | 1,009<br>(562 - 1,302)      | --                    | --                     | 397<br>(226 - 520)       | 505<br>(279 - 658)       | 107<br>(56 - 137)           |
| Drug use disorders                                  | 1,928<br>(1,363 - 2,132)    | 3<br>(2 - 4)          | --                     | 1,671<br>(1,160 - 1,855) | 185<br>(142 - 208)       | 69<br>(53 - 80)             |
| Opioid use disorders                                | 712<br>(506 - 799)          | 1<br>(1 - 2)          | --                     | 623<br>(430 - 705)       | 62<br>(48 - 72)          | 25<br>(19 - 30)             |
| Cocaine use disorders                               | 57<br>(42 - 67)             | 0<br>(0 - 0)          | --                     | 51<br>(37 - 60)          | 4<br>(3 - 5)             | 2<br>(1 - 2)                |
| Amphetamine use disorders                           | 54<br>(40 - 63)             | 0<br>(0 - 0)          | --                     | 46<br>(34 - 54)          | 6<br>(4 - 7)             | 2<br>(1 - 2)                |
| Other drug use disorders                            | 1,105<br>(775 - 1,227)      | 2<br>(1 - 2)          | --                     | 951<br>(652 - 1,063)     | 113<br>(87 - 129)        | 40<br>(31 - 47)             |
| Eating disorders                                    | 8<br>(7 - 9)                | --                    | 0<br>(0 - 0)           | 8<br>(7 - 9)             | --                       | --                          |
| Anorexia nervosa                                    | 8<br>(7 - 9)                | --                    | 0<br>(0 - 0)           | 8<br>(7 - 9)             | --                       | --                          |
| Diabetes, urogenital, blood, and endocrine diseases | 21,781<br>(18,426 - 23,606) | 96<br>(74 - 122)      | 48<br>(41 - 62)        | 777<br>(706 - 851)       | 2,501<br>(2,242 - 2,685) | 18,359<br>(15,174 - 20,044) |
| Diabetes mellitus                                   | 5,944<br>(5,461 - 6,314)    | 3<br>(2 - 4)          | 3<br>(2 - 5)           | 214<br>(199 - 232)       | 910<br>(838 - 979)       | 4,813<br>(4,401 - 5,140)    |
| Acute glomerulonephritis                            | 14<br>(12 - 18)             | 0<br>(0 - 1)          | 1<br>(0 - 1)           | 3<br>(2 - 3)             | 3<br>(2 - 4)             | 8<br>(7 - 12)               |
| Chronic kidney disease                              | 5,922<br>(5,235 - 6,951)    | 5<br>(4 - 6)          | 3<br>(2 - 3)           | 150<br>(133 - 184)       | 572<br>(505 - 703)       | 5,192<br>(4,572 - 6,110)    |
| Chronic kidney disease due to diabetes mellitus     | 930<br>(780 - 1,449)        | 0<br>(0 - 1)          | 0<br>(0 - 1)           | 26<br>(22 - 41)          | 111<br>(91 - 165)        | 792<br>(657 - 1,238)        |

Web Table 31- United Kingdom deaths with 95% UI by age, sex, and cause in 2013

| Cause                                               | Both Sexes, All Ages        | Both Sexes, 0-4 Years  | Both Sexes, 5-14 Years | Both Sexes, 15-49 Years  | Both Sexes, 50-69 Years  | Both Sexes, 70-80 Years    |
|-----------------------------------------------------|-----------------------------|------------------------|------------------------|--------------------------|--------------------------|----------------------------|
| Chronic kidney disease due to hypertension          | 1,581<br>(1,120 - 2,025)    | 0<br>(0 - 1)           | 0<br>(0 - 1)           | 28<br>(20 - 38)          | 149<br>(106 - 201)       | 1,403<br>(973 - 1,810)     |
| Chronic kidney disease due to glomerulonephritis    | 350<br>(185 - 462)          | 1<br>(1 - 2)           | 1<br>(0 - 1)           | 16<br>(10 - 19)          | 43<br>(29 - 55)          | 290<br>(139 - 394)         |
| Chronic kidney disease due to other causes          | 3,061<br>(2,464 - 3,850)    | 3<br>(2 - 4)           | 1<br>(1 - 2)           | 80<br>(68 - 107)         | 270<br>(214 - 351)       | 2,707<br>(2,142 - 3,390)   |
| Urinary diseases and male infertility               | 7,595<br>(4,260 - 9,014)    | 10<br>(5 - 14)         | 3<br>(2 - 4)           | 112<br>(71 - 132)        | 518<br>(311 - 611)       | 6,950<br>(3,865 - 8,303)   |
| Interstitial nephritis and urinary tract infections | 6,798<br>(3,855 - 8,111)    | 7<br>(4 - 10)          | 2<br>(1 - 3)           | 90<br>(56 - 106)         | 428<br>(253 - 503)       | 6,271<br>(3,520 - 7,516)   |
| Urolithiasis                                        | 180<br>(100 - 350)          | --                     | 0<br>(0 - 1)           | 8<br>(5 - 14)            | 31<br>(18 - 57)          | 140<br>(76 - 280)          |
| Other urinary diseases                              | 617<br>(246 - 910)          | 3<br>(2 - 4)           | 1<br>(0 - 1)           | 14<br>(8 - 20)           | 60<br>(28 - 90)          | 540<br>(204 - 796)         |
| Gynecological diseases                              | 35<br>(29 - 51)             | --                     | --                     | 5<br>(4 - 7)             | 6<br>(5 - 9)             | 24<br>(19 - 35)            |
| Uterine fibroids                                    | 10<br>(8 - 15)              | --                     | --                     | 1<br>(1 - 2)             | 2<br>(1 - 2)             | 7<br>(6 - 10)              |
| Polycystic ovarian syndrome                         | 0<br>(0 - 0)                | --                     | --                     | 0<br>(0 - 0)             | 0<br>(0 - 0)             | --                         |
| Endometriosis                                       | 1<br>(1 - 1)                | --                     | --                     | 1<br>(1 - 1)             | 0<br>(0 - 0)             | --                         |
| Genital prolapse                                    | 8<br>(7 - 11)               | --                     | --                     | 1<br>(0 - 1)             | 1<br>(1 - 2)             | 6<br>(5 - 9)               |
| Other gynecological diseases                        | 16<br>(13 - 23)             | --                     | --                     | 2<br>(2 - 3)             | 3<br>(3 - 5)             | 11<br>(9 - 16)             |
| Hemoglobinopathies and hemolytic anemias            | 276<br>(203 - 401)          | 6<br>(4 - 9)           | 5<br>(3 - 7)           | 31<br>(23 - 44)          | 48<br>(35 - 68)          | 187<br>(138 - 277)         |
| Thalassemias                                        | 13<br>(10 - 19)             | 2<br>(2 - 4)           | 2<br>(1 - 3)           | 9<br>(7 - 13)            | 0<br>(0 - 0)             | 0<br>(0 - 0)               |
| Sickle cell disorders                               | 50<br>(38 - 71)             | 2<br>(2 - 4)           | 2<br>(1 - 3)           | 13<br>(10 - 19)          | 23<br>(17 - 32)          | 10<br>(7 - 15)             |
| G6PD deficiency                                     | 1<br>(1 - 1)                | 0<br>(0 - 0)           | 0<br>(0 - 0)           | 0<br>(0 - 0)             | 0<br>(0 - 0)             | 0<br>(0 - 0)               |
| Other hemoglobinopathies and hemolytic anemias      | 212<br>(157 - 313)          | 1<br>(1 - 2)           | 1<br>(1 - 1)           | 8<br>(6 - 12)            | 25<br>(18 - 35)          | 177<br>(130 - 263)         |
| Endocrine, metabolic, blood, and immune disorders   | 1,995<br>(1,750 - 2,935)    | 72<br>(55 - 95)        | 33<br>(27 - 47)        | 262<br>(226 - 342)       | 444<br>(382 - 612)       | 1,184<br>(1,017 - 1,858)   |
| Musculoskeletal disorders                           | 2,032<br>(1,445 - 2,372)    | --                     | 4<br>(3 - 4)           | 110<br>(93 - 130)        | 409<br>(314 - 493)       | 1,509<br>(990 - 1,759)     |
| Rheumatoid arthritis                                | 915<br>(694 - 1,099)        | --                     | 0<br>(0 - 1)           | 12<br>(9 - 14)           | 169<br>(127 - 205)       | 734<br>(548 - 891)         |
| Other musculoskeletal disorders                     | 1,117<br>(741 - 1,346)      | --                     | 3<br>(3 - 4)           | 98<br>(83 - 117)         | 240<br>(192 - 296)       | 775<br>(445 - 936)         |
| Other non-communicable diseases                     | 4,179<br>(3,745 - 4,621)    | 1,232<br>(976 - 1,584) | 69<br>(58 - 81)        | 380<br>(335 - 427)       | 466<br>(405 - 507)       | 2,033<br>(1,619 - 2,245)   |
| Congenital anomalies                                | 1,959<br>(1,714 - 2,274)    | 969<br>(774 - 1,210)   | 67<br>(57 - 80)        | 342<br>(298 - 387)       | 295<br>(252 - 329)       | 285<br>(249 - 332)         |
| Neural tube defects                                 | 78<br>(62 - 97)             | 54<br>(40 - 71)        | 4<br>(3 - 5)           | 16<br>(14 - 20)          | 2<br>(2 - 3)             | 1<br>(1 - 2)               |
| Congenital heart anomalies                          | 767<br>(664 - 880)          | 331<br>(265 - 411)     | 36<br>(29 - 43)        | 199<br>(171 - 227)       | 105<br>(83 - 133)        | 96<br>(82 - 114)           |
| Cleft lip and cleft palate                          | 1<br>(0 - 1)                | 1<br>(0 - 1)           | --                     | --                       | --                       | --                         |
| Down syndrome                                       | 219<br>(146 - 270)          | 25<br>(14 - 35)        | 3<br>(2 - 4)           | 48<br>(29 - 62)          | 131<br>(93 - 161)        | 12<br>(7 - 16)             |
| Chromosomal unbalanced rearrangements               | 115<br>(83 - 152)           | 99<br>(70 - 132)       | 4<br>(3 - 5)           | 8<br>(6 - 10)            | 2<br>(2 - 3)             | 2<br>(1 - 2)               |
| Other congenital anomalies                          | 780<br>(662 - 932)          | 458<br>(363 - 584)     | 21<br>(17 - 26)        | 71<br>(60 - 84)          | 54<br>(42 - 68)          | 175<br>(150 - 208)         |
| Skin and subcutaneous diseases                      | 1,962<br>(1,487 - 2,186)    | 4<br>(3 - 5)           | 2<br>(1 - 2)           | 38<br>(31 - 45)          | 171<br>(123 - 195)       | 1,747<br>(1,314 - 1,959)   |
| Cellulitis                                          | 781<br>(435 - 1,006)        | 1<br>(1 - 2)           | 0<br>(0 - 0)           | 15<br>(10 - 19)          | 81<br>(51 - 99)          | 684<br>(364 - 894)         |
| Pyoderma                                            | 745<br>(528 - 989)          | 2<br>(1 - 3)           | 1<br>(0 - 1)           | 16<br>(13 - 21)          | 62<br>(41 - 84)          | 664<br>(470 - 887)         |
| Decubitus ulcer                                     | 340<br>(260 - 479)          | 0<br>(0 - 0)           | 0<br>(0 - 0)           | 3<br>(3 - 5)             | 19<br>(14 - 28)          | 317<br>(243 - 448)         |
| Other skin and subcutaneous diseases                | 97<br>(63 - 174)            | 1<br>(0 - 1)           | 0<br>(0 - 0)           | 4<br>(3 - 5)             | 9<br>(6 - 17)            | 83<br>(53 - 154)           |
| Sudden infant death syndrome                        | 258<br>(163 - 480)          | 258<br>(163 - 480)     | --                     | --                       | --                       | --                         |
| Injuries                                            | 19,760<br>(17,544 - 21,247) | 228<br>(177 - 289)     | 173<br>(152 - 199)     | 5,505<br>(5,081 - 6,033) | 3,366<br>(3,075 - 3,679) | 10,488<br>(8,573 - 11,487) |
| Transport injuries                                  | 3,135<br>(2,876 - 3,425)    | 43<br>(31 - 57)        | 84<br>(72 - 98)        | 1,563<br>(1,420 - 1,705) | 627<br>(565 - 690)       | 819<br>(725 - 971)         |
| Road injuries                                       | 2,988<br>(2,738 - 3,273)    | 40<br>(29 - 53)        | 80<br>(69 - 93)        | 1,484<br>(1,352 - 1,624) | 587<br>(530 - 651)       | 797<br>(707 - 949)         |
| Pedestrian road injuries                            | 866<br>(676 - 1,141)        | 18<br>(12 - 25)        | 36<br>(29 - 45)        | 213<br>(146 - 315)       | 197<br>(149 - 261)       | 403<br>(323 - 522)         |

Web Table 31- United Kingdom deaths with 95% UI by age, sex, and cause in 2013

| Cause                                           | Both Sexes, All Ages       | Both Sexes, 0-4 Years | Both Sexes, 5-14 Years | Both Sexes, 15-49 Years  | Both Sexes, 50-69 Years  | Both Sexes, 70-80 Years  |
|-------------------------------------------------|----------------------------|-----------------------|------------------------|--------------------------|--------------------------|--------------------------|
| Cyclist road injuries                           | 162<br>(110 - 209)         | 3<br>(2 - 4)          | 15<br>(11 - 20)        | 62<br>(44 - 79)          | 41<br>(27 - 55)          | 40<br>(25 - 59)          |
| Motorcyclist road injuries                      | 422<br>(289 - 542)         | 1<br>(1 - 1)          | 2<br>(1 - 3)           | 353<br>(240 - 447)       | 46<br>(27 - 62)          | 20<br>(13 - 32)          |
| Motor vehicle road injuries                     | 1,516<br>(1,255 - 1,770)   | 18<br>(13 - 25)       | 25<br>(19 - 32)        | 849<br>(708 - 984)       | 297<br>(238 - 347)       | 327<br>(243 - 401)       |
| Other road injuries                             | 22<br>(15 - 36)            | 0<br>(0 - 1)          | 1<br>(0 - 1)           | 7<br>(5 - 12)            | 6<br>(4 - 10)            | 7<br>(5 - 14)            |
| Other transport injuries                        | 147<br>(115 - 174)         | 3<br>(2 - 4)          | 4<br>(3 - 5)           | 79<br>(60 - 93)          | 40<br>(31 - 49)          | 22<br>(16 - 28)          |
| Unintentional injuries                          | 11,603<br>(9,510 - 12,765) | 170<br>(132 - 219)    | 78<br>(67 - 92)        | 1,057<br>(954 - 1,189)   | 1,343<br>(1,175 - 1,495) | 8,955<br>(7,072 - 9,952) |
| Falls                                           | 7,706<br>(5,623 - 8,809)   | 17<br>(12 - 23)       | 12<br>(9 - 15)         | 320<br>(249 - 373)       | 628<br>(438 - 743)       | 6,728<br>(4,855 - 7,699) |
| Drowning                                        | 282<br>(223 - 369)         | 22<br>(15 - 32)       | 17<br>(13 - 23)        | 116<br>(92 - 142)        | 63<br>(49 - 90)          | 63<br>(47 - 116)         |
| Fire, heat, and hot substances                  | 475<br>(400 - 645)         | 22<br>(16 - 33)       | 9<br>(7 - 13)          | 88<br>(75 - 117)         | 108<br>(87 - 158)        | 248<br>(207 - 344)       |
| Poisonings                                      | 199<br>(157 - 377)         | 3<br>(2 - 5)          | 2<br>(1 - 3)           | 95<br>(76 - 178)         | 48<br>(38 - 90)          | 50<br>(36 - 108)         |
| Exposure to mechanical forces                   | 371<br>(282 - 409)         | 39<br>(20 - 51)       | 18<br>(11 - 22)        | 167<br>(128 - 187)       | 68<br>(54 - 79)          | 79<br>(58 - 90)          |
| Unintentional firearm injuries                  | 13<br>(12 - 15)            | 1<br>(0 - 1)          | 1<br>(1 - 1)           | 7<br>(6 - 8)             | 2<br>(2 - 3)             | 2<br>(2 - 3)             |
| Unintentional suffocation                       | 172<br>(79 - 202)          | 31<br>(14 - 42)       | 11<br>(5 - 15)         | 75<br>(31 - 89)          | 23<br>(11 - 27)          | 32<br>(16 - 39)          |
| Other exposure to mechanical forces             | 185<br>(164 - 222)         | 7<br>(5 - 9)          | 6<br>(5 - 7)           | 85<br>(74 - 103)         | 43<br>(37 - 54)          | 45<br>(35 - 56)          |
| Adverse effects of medical treatment            | 1,004<br>(816 - 1,303)     | 11<br>(8 - 17)        | 4<br>(3 - 5)           | 58<br>(45 - 75)          | 183<br>(140 - 259)       | 748<br>(604 - 978)       |
| Animal contact                                  | 41<br>(25 - 52)            | 2<br>(1 - 3)          | 1<br>(1 - 2)           | 10<br>(6 - 13)           | 12<br>(7 - 14)           | 16<br>(10 - 21)          |
| Venomous animal contact                         | 9<br>(6 - 14)              | 1<br>(0 - 1)          | 1<br>(0 - 1)           | 3<br>(2 - 5)             | 3<br>(2 - 4)             | 2<br>(1 - 4)             |
| Non-venomous animal contact                     | 32<br>(18 - 40)            | 2<br>(1 - 2)          | 1<br>(1 - 1)           | 7<br>(4 - 9)             | 9<br>(4 - 11)            | 14<br>(8 - 18)           |
| Foreign body                                    | 1,441<br>(811 - 1,783)     | 46<br>(28 - 63)       | 13<br>(9 - 19)         | 174<br>(112 - 239)       | 216<br>(135 - 271)       | 992<br>(512 - 1,287)     |
| Pulmonary aspiration and foreign body in airway | 1,424<br>(796 - 1,766)     | 45<br>(28 - 62)       | 13<br>(8 - 18)         | 170<br>(109 - 235)       | 212<br>(132 - 268)       | 985<br>(506 - 1,278)     |
| Foreign body in other body part                 | 17<br>(11 - 21)            | 0<br>(0 - 1)          | 1<br>(0 - 1)           | 4<br>(3 - 5)             | 4<br>(3 - 5)             | 8<br>(5 - 10)            |
| Other unintentional injuries                    | 85<br>(77 - 97)            | 8<br>(6 - 11)         | 2<br>(1 - 2)           | 28<br>(24 - 33)          | 17<br>(15 - 21)          | 30<br>(26 - 36)          |
| Self-harm and interpersonal violence            | 5,022<br>(4,422 - 5,817)   | 15<br>(10 - 22)       | 12<br>(9 - 15)         | 2,885<br>(2,527 - 3,322) | 1,395<br>(1,178 - 1,604) | 714<br>(636 - 883)       |
| Self-harm                                       | 4,709<br>(4,122 - 5,466)   | --                    | 5<br>(3 - 6)           | 2,682<br>(2,329 - 3,083) | 1,346<br>(1,127 - 1,548) | 676<br>(599 - 838)       |
| Interpersonal violence                          | 313<br>(231 - 415)         | 15<br>(10 - 22)       | 7<br>(5 - 9)           | 204<br>(151 - 286)       | 49<br>(35 - 67)          | 38<br>(26 - 47)          |
| Assault by firearm                              | 59<br>(37 - 97)            | 1<br>(1 - 2)          | 1<br>(0 - 1)           | 45<br>(28 - 75)          | 9<br>(5 - 14)            | 4<br>(2 - 6)             |
| Assault by sharp object                         | 79<br>(50 - 115)           | 1<br>(1 - 2)          | 1<br>(0 - 1)           | 61<br>(38 - 90)          | 11<br>(7 - 17)           | 4<br>(2 - 6)             |
| Assault by other means                          | 175<br>(127 - 234)         | 13<br>(9 - 19)        | 5<br>(4 - 7)           | 98<br>(71 - 138)         | 29<br>(20 - 40)          | 30<br>(20 - 37)          |

Web Table 31- United Kingdom deaths with 95% UI by age, sex, and cause in 2013

| Cause                                                             | Males, All Ages                | Males, 0-4 Years         | Males, 5-14 Years  | Males, 15-49 Years          | Males, 50-69 Years          | Males, 70-80 Years             |
|-------------------------------------------------------------------|--------------------------------|--------------------------|--------------------|-----------------------------|-----------------------------|--------------------------------|
| All causes                                                        | 282,830<br>(268,422 - 296,437) | 2,126<br>(1,697 - 2,645) | 376<br>(325 - 433) | 15,926<br>(14,722 - 17,060) | 60,449<br>(56,383 - 64,364) | 203,953<br>(194,738 - 212,794) |
| Communicable, maternal, neonatal, and nutritional diseases        | 19,281<br>(17,236 - 22,778)    | 1,110<br>(892 - 1,380)   | 33<br>(25 - 43)    | 617<br>(536 - 695)          | 1,771<br>(1,445 - 1,983)    | 15,750<br>(13,887 - 19,175)    |
| HIV/AIDS and tuberculosis                                         | 463<br>(353 - 561)             | 1<br>(0 - 1)             | 0<br>(0 - 0)       | 140<br>(105 - 182)          | 126<br>(92 - 164)           | 197<br>(137 - 235)             |
| Tuberculosis                                                      | 285<br>(210 - 331)             | 0<br>(0 - 1)             | 0<br>(0 - 0)       | 23<br>(19 - 26)             | 73<br>(57 - 84)             | 189<br>(131 - 225)             |
| HIV/AIDS                                                          | 178<br>(119 - 255)             | 0<br>(0 - 0)             | 0<br>(0 - 0)       | 117<br>(82 - 159)           | 53<br>(26 - 91)             | 8<br>(2 - 17)                  |
| HIV/AIDS resulting in mycobacterial infection                     | 10<br>(6 - 15)                 | 0<br>(0 - 0)             | 0<br>(0 - 0)       | 6<br>(4 - 9)                | 3<br>(1 - 5)                | 1<br>(0 - 1)                   |
| HIV/AIDS resulting in other diseases                              | 168<br>(112 - 240)             | 0<br>(0 - 0)             | 0<br>(0 - 0)       | 110<br>(78 - 151)           | 50<br>(24 - 85)             | 8<br>(2 - 16)                  |
| Diarrhea, lower respiratory, and other common infectious diseases | 17,325<br>(15,277 - 20,777)    | 170<br>(130 - 219)       | 27<br>(20 - 37)    | 389<br>(333 - 442)          | 1,516<br>(1,198 - 1,722)    | 15,224<br>(13,362 - 18,648)    |
| Diarrheal diseases                                                | 725<br>(611 - 853)             | 26<br>(19 - 33)          | 2<br>(2 - 2)       | 20<br>(18 - 22)             | 65<br>(56 - 76)             | 612<br>(500 - 736)             |
| Intestinal infectious diseases                                    | 43<br>(16 - 94)                | 8<br>(3 - 17)            | 8<br>(3 - 17)      | 18<br>(6 - 39)              | 6<br>(2 - 13)               | 5<br>(2 - 10)                  |
| Typhoid fever                                                     | 31<br>(10 - 70)                | 5<br>(2 - 11)            | 6<br>(2 - 13)      | 13<br>(4 - 30)              | 4<br>(1 - 10)               | 3<br>(1 - 7)                   |
| Paratyphoid fever                                                 | 9<br>(3 - 19)                  | 2<br>(1 - 4)             | 2<br>(1 - 4)       | 3<br>(1 - 8)                | 1<br>(0 - 2)                | 1<br>(0 - 2)                   |
| Other intestinal infectious diseases                              | 3<br>(1 - 8)                   | 1<br>(0 - 3)             | 0<br>(0 - 1)       | 1<br>(0 - 3)                | 1<br>(0 - 3)                | 1<br>(0 - 4)                   |
| Lower respiratory infections                                      | 16,280<br>(14,286 - 19,799)    | 90<br>(67 - 117)         | 9<br>(7 - 11)      | 293<br>(244 - 337)          | 1,387<br>(1,073 - 1,593)    | 14,501<br>(12,364 - 17,928)    |
| Upper respiratory infections                                      | 6<br>(4 - 9)                   | 0<br>(0 - 0)             | 0<br>(0 - 0)       | 0<br>(0 - 1)                | 1<br>(1 - 2)                | 4<br>(2 - 7)                   |
| Otitis media                                                      | 6<br>(5 - 7)                   | 1<br>(1 - 1)             | 0<br>(0 - 0)       | 2<br>(2 - 2)                | 1<br>(1 - 1)                | 2<br>(2 - 2)                   |
| Meningitis                                                        | 164<br>(144 - 197)             | 35<br>(24 - 58)          | 4<br>(3 - 5)       | 32<br>(28 - 36)             | 35<br>(31 - 41)             | 58<br>(49 - 81)                |
| Pneumococcal meningitis                                           | 27<br>(23 - 33)                | 5<br>(3 - 7)             | 1<br>(0 - 1)       | 5<br>(4 - 7)                | 6<br>(5 - 8)                | 10<br>(8 - 16)                 |
| H influenzae type B meningitis                                    | 24<br>(20 - 32)                | 10<br>(6 - 17)           | 1<br>(1 - 1)       | 4<br>(3 - 5)                | 4<br>(3 - 4)                | 6<br>(5 - 8)                   |
| Meningococcal meningitis                                          | 52<br>(45 - 64)                | 10<br>(7 - 17)           | 1<br>(1 - 2)       | 10<br>(8 - 13)              | 11<br>(9 - 13)              | 19<br>(15 - 26)                |
| Other meningitis                                                  | 61<br>(53 - 73)                | 10<br>(6 - 17)           | 1<br>(1 - 2)       | 12<br>(10 - 14)             | 14<br>(12 - 17)             | 22<br>(18 - 31)                |
| Encephalitis                                                      | 67<br>(37 - 84)                | 6<br>(3 - 9)             | 2<br>(1 - 3)       | 19<br>(10 - 24)             | 16<br>(8 - 20)              | 24<br>(13 - 31)                |
| Diphtheria                                                        | 1<br>(0 - 1)                   | 0<br>(0 - 0)             | 0<br>(0 - 0)       | 0<br>(0 - 0)                | 0<br>(0 - 0)                | --                             |
| Whooping cough                                                    | 4<br>(2 - 8)                   | 2<br>(0 - 5)             | 0<br>(0 - 0)       | 1<br>(1 - 2)                | 0<br>(0 - 0)                | --                             |
| Tetanus                                                           | 3<br>(2 - 5)                   | 0<br>(0 - 0)             | 0<br>(0 - 0)       | 1<br>(1 - 2)                | 1<br>(0 - 1)                | 1<br>(0 - 2)                   |
| Measles                                                           | 0<br>(0 - 0)                   | 0<br>(0 - 0)             | 0<br>(0 - 0)       | 0<br>(0 - 0)                | 0<br>(0 - 0)                | --                             |
| Varicella and herpes zoster                                       | 25<br>(14 - 45)                | 2<br>(1 - 3)             | 0<br>(0 - 1)       | 3<br>(2 - 4)                | 3<br>(1 - 4)                | 18<br>(7 - 37)                 |
| Neglected tropical diseases and malaria                           | 30<br>(25 - 36)                | 2<br>(1 - 2)             | 1<br>(1 - 1)       | 10<br>(7 - 11)              | 11<br>(9 - 14)              | 6<br>(5 - 9)                   |
| Cysticercosis                                                     | 0<br>(0 - 0)                   | 0<br>(0 - 0)             | 0<br>(0 - 0)       | 0<br>(0 - 0)                | 0<br>(0 - 0)                | 0<br>(0 - 0)                   |
| Cystic echinococcosis                                             | 2<br>(2 - 2)                   | 0<br>(0 - 0)             | 0<br>(0 - 0)       | 0<br>(0 - 1)                | 1<br>(1 - 1)                | 1<br>(1 - 1)                   |
| Dengue                                                            | 3<br>(2 - 3)                   | 0<br>(0 - 0)             | 0<br>(0 - 0)       | 1<br>(1 - 2)                | 1<br>(0 - 1)                | 0<br>(0 - 0)                   |
| Rabies                                                            | 3<br>(1 - 3)                   | 0<br>(0 - 0)             | 0<br>(0 - 0)       | 1<br>(1 - 2)                | 1<br>(0 - 1)                | 0<br>(0 - 0)                   |
| Other neglected tropical diseases                                 | 22<br>(17 - 28)                | 1<br>(1 - 2)             | 0<br>(0 - 1)       | 7<br>(5 - 8)                | 9<br>(6 - 11)               | 5<br>(3 - 7)                   |
| Maternal disorders                                                | --                             | --                       | --                 | --                          | --                          | --                             |
| Maternal hemorrhage                                               | --                             | --                       | --                 | --                          | --                          | --                             |
| Maternal sepsis and other maternal infections                     | --                             | --                       | --                 | --                          | --                          | --                             |
| Maternal hypertensive disorders                                   | --                             | --                       | --                 | --                          | --                          | --                             |
| Maternal obstructed labor                                         | --                             | --                       | --                 | --                          | --                          | --                             |
| Maternal abortive outcome                                         | --                             | --                       | --                 | --                          | --                          | --                             |
| Indirect maternal deaths                                          | --                             | --                       | --                 | --                          | --                          | --                             |

Web Table 31- United Kingdom deaths with 95% UI by age, sex, and cause in 2013

| Cause                                                            | Males, All Ages                | Males, 0-4 Years     | Males, 5-14 Years  | Males, 15-49 Years          | Males, 50-69 Years          | Males, 70-80 Years             |
|------------------------------------------------------------------|--------------------------------|----------------------|--------------------|-----------------------------|-----------------------------|--------------------------------|
| Late maternal deaths                                             | --                             | --                   | --                 | --                          | --                          | --                             |
| Maternal deaths aggravated by HIV/AIDS                           | --                             | --                   | --                 | --                          | --                          | --                             |
| Other maternal disorders                                         | --                             | --                   | --                 | --                          | --                          | --                             |
| Neonatal disorders                                               | 917<br>(730 - 1,144)           | 917<br>(730 - 1,144) | --                 | --                          | --                          | --                             |
| Neonatal preterm birth complications                             | 674<br>(508 - 860)             | 674<br>(508 - 860)   | --                 | --                          | --                          | --                             |
| Neonatal encephalopathy due to birth asphyxia and trauma         | 128<br>(82 - 197)              | 128<br>(82 - 197)    | --                 | --                          | --                          | --                             |
| Neonatal sepsis and other neonatal infections                    | 45<br>(21 - 105)               | 45<br>(21 - 105)     | --                 | --                          | --                          | --                             |
| Hemolytic disease and other neonatal jaundice                    | 2<br>(1 - 3)                   | 2<br>(1 - 3)         | --                 | --                          | --                          | --                             |
| Other neonatal disorders                                         | 69<br>(40 - 104)               | 69<br>(40 - 104)     | --                 | --                          | --                          | --                             |
| Nutritional deficiencies                                         | 217<br>(152 - 361)             | 1<br>(1 - 2)         | 0<br>(0 - 1)       | 8<br>(6 - 13)               | 20<br>(13 - 30)             | 188<br>(133 - 321)             |
| Protein-energy malnutrition                                      | 44<br>(19 - 84)                | 1<br>(0 - 1)         | 0<br>(0 - 0)       | 2<br>(1 - 4)                | 7<br>(3 - 11)               | 34<br>(14 - 68)                |
| Iodine deficiency                                                | 1<br>(0 - 3)                   | 0<br>(0 - 0)         | 0<br>(0 - 0)       | 0<br>(0 - 0)                | 0<br>(0 - 1)                | 1<br>(0 - 3)                   |
| Iron-deficiency anemia                                           | 146<br>(86 - 253)              | 0<br>(0 - 1)         | 0<br>(0 - 0)       | 4<br>(3 - 8)                | 10<br>(6 - 18)              | 131<br>(77 - 225)              |
| Other nutritional deficiencies                                   | 25<br>(11 - 64)                | 0<br>(0 - 1)         | 0<br>(0 - 0)       | 1<br>(1 - 2)                | 2<br>(1 - 5)                | 22<br>(8 - 56)                 |
| Other communicable, maternal, neonatal, and nutritional diseases | 329<br>(217 - 405)             | 20<br>(11 - 28)      | 5<br>(3 - 6)       | 71<br>(50 - 85)             | 99<br>(66 - 125)            | 135<br>(80 - 169)              |
| Sexually transmitted diseases excluding HIV                      | 10<br>(7 - 16)                 | 3<br>(1 - 6)         | 0<br>(0 - 1)       | 1<br>(1 - 2)                | 1<br>(1 - 3)                | 4<br>(2 - 8)                   |
| Syphilis                                                         | 9<br>(6 - 14)                  | 3<br>(1 - 6)         | 0<br>(0 - 0)       | 1<br>(0 - 1)                | 1<br>(1 - 2)                | 3<br>(2 - 7)                   |
| Chlamydial infection                                             | --                             | --                   | --                 | --                          | --                          | --                             |
| Gonococcal infection                                             | 1<br>(1 - 2)                   | --                   | 0<br>(0 - 0)       | 0<br>(0 - 0)                | 0<br>(0 - 1)                | 0<br>(0 - 1)                   |
| Other sexually transmitted diseases                              | 1<br>(0 - 1)                   | --                   | 0<br>(0 - 0)       | 0<br>(0 - 0)                | 0<br>(0 - 0)                | 0<br>(0 - 0)                   |
| Hepatitis                                                        | 63<br>(56 - 76)                | 1<br>(1 - 1)         | 1<br>(1 - 1)       | 21<br>(18 - 26)             | 26<br>(22 - 32)             | 14<br>(12 - 18)                |
| Acute hepatitis A                                                | 15<br>(5 - 26)                 | 1<br>(0 - 1)         | 0<br>(0 - 1)       | 7<br>(2 - 12)               | 5<br>(1 - 10)               | 2<br>(0 - 4)                   |
| Acute hepatitis B                                                | 42<br>(29 - 55)                | 0<br>(0 - 1)         | 0<br>(0 - 0)       | 12<br>(7 - 18)              | 18<br>(13 - 25)             | 11<br>(8 - 14)                 |
| Acute hepatitis C                                                | 7<br>(1 - 15)                  | --                   | 0<br>(0 - 0)       | 2<br>(0 - 5)                | 3<br>(1 - 6)                | 2<br>(0 - 4)                   |
| Other infectious diseases                                        | 255<br>(139 - 333)             | 15<br>(8 - 22)       | 4<br>(2 - 5)       | 48<br>(28 - 63)             | 72<br>(38 - 98)             | 116<br>(59 - 152)              |
| Non-communicable diseases                                        | 252,102<br>(238,749 - 264,160) | 879<br>(685 - 1,125) | 225<br>(192 - 261) | 10,937<br>(10,053 - 11,749) | 56,349<br>(52,548 - 59,979) | 183,713<br>(174,899 - 191,878) |
| Neoplasms                                                        | 86,290<br>(80,521 - 92,475)    | 61<br>(42 - 86)      | 114<br>(95 - 135)  | 3,453<br>(3,142 - 3,774)    | 26,689<br>(24,632 - 28,763) | 55,973<br>(51,862 - 60,122)    |
| Esophageal cancer                                                | 5,479<br>(4,692 - 7,159)       | --                   | --                 | 213<br>(173 - 263)          | 2,176<br>(1,827 - 2,806)    | 3,090<br>(2,677 - 4,195)       |
| Stomach cancer                                                   | 4,329<br>(3,985 - 4,796)       | --                   | --                 | 130<br>(116 - 153)          | 1,071<br>(972 - 1,217)      | 3,129<br>(2,871 - 3,510)       |
| Liver cancer                                                     | 2,057<br>(1,363 - 2,514)       | --                   | 2<br>(1 - 2)       | 105<br>(74 - 130)           | 778<br>(532 - 948)          | 1,172<br>(727 - 1,484)         |
| Liver cancer due to hepatitis B                                  | 433<br>(287 - 583)             | --                   | 1<br>(1 - 1)       | 40<br>(28 - 53)             | 200<br>(135 - 275)          | 192<br>(109 - 267)             |
| Liver cancer due to hepatitis C                                  | 1,066<br>(692 - 1,371)         | --                   | 0<br>(0 - 1)       | 45<br>(30 - 62)             | 396<br>(265 - 515)          | 624<br>(385 - 823)             |
| Liver cancer due to alcohol use                                  | 517<br>(310 - 677)             | --                   | --                 | 16<br>(10 - 24)             | 165<br>(104 - 221)          | 336<br>(196 - 450)             |
| Liver cancer due to other causes                                 | 40<br>(24 - 55)                | --                   | 0<br>(0 - 0)       | 3<br>(2 - 5)                | 16<br>(10 - 22)             | 20<br>(11 - 29)                |
| Larynx cancer                                                    | 697<br>(501 - 916)             | --                   | --                 | 29<br>(21 - 39)             | 269<br>(192 - 346)          | 399<br>(287 - 539)             |
| Tracheal, bronchus and lung cancer                               | 21,651<br>(19,504 - 23,795)    | --                   | --                 | 459<br>(388 - 525)          | 7,496<br>(6,532 - 8,381)    | 13,696<br>(12,467 - 14,974)    |
| Breast cancer                                                    | 98<br>(55 - 191)               | --                   | --                 | 5<br>(3 - 9)                | 30<br>(17 - 55)             | 63<br>(34 - 124)               |
| Cervical cancer                                                  | --                             | --                   | --                 | --                          | --                          | --                             |
| Uterine cancer                                                   | --                             | --                   | --                 | --                          | --                          | --                             |
| Prostate cancer                                                  | 11,723<br>(7,807 - 16,411)     | --                   | --                 | 21<br>(14 - 29)             | 1,721<br>(1,037 - 2,355)    | 9,981<br>(6,578 - 14,211)      |

Web Table 31- United Kingdom deaths with 95% UI by age, sex, and cause in 2013

| Cause                                         | Males, All Ages             | Males, 0-4 Years | Males, 5-14 Years | Males, 15-49 Years       | Males, 50-69 Years          | Males, 70-80 Years          |
|-----------------------------------------------|-----------------------------|------------------|-------------------|--------------------------|-----------------------------|-----------------------------|
| Colon and rectum cancer                       | 11,059<br>(10,150 - 11,821) | --               | --                | 354<br>(317 - 392)       | 3,374<br>(3,069 - 3,660)    | 7,330<br>(6,738 - 7,844)    |
| Lip and oral cavity cancer                    | 1,048<br>(769 - 1,166)      | --               | --                | 103<br>(83 - 118)        | 501<br>(342 - 564)          | 444<br>(352 - 509)          |
| Nasopharynx cancer                            | 108<br>(91 - 146)           | --               | 1<br>(0 - 1)      | 23<br>(19 - 31)          | 53<br>(44 - 73)             | 32<br>(25 - 45)             |
| Other pharynx cancer                          | 534<br>(339 - 668)          | --               | --                | 51<br>(38 - 64)          | 305<br>(191 - 383)          | 178<br>(102 - 233)          |
| Gallbladder and biliary tract cancer          | 373<br>(273 - 476)          | --               | --                | 10<br>(8 - 13)           | 99<br>(70 - 129)            | 263<br>(199 - 339)          |
| Pancreatic cancer                             | 4,565<br>(4,210 - 4,901)    | --               | --                | 171<br>(154 - 188)       | 1,713<br>(1,567 - 1,870)    | 2,681<br>(2,463 - 2,877)    |
| Malignant skin melanoma                       | 1,257<br>(568 - 2,050)      | --               | --                | 206<br>(98 - 349)        | 479<br>(214 - 773)          | 572<br>(258 - 909)          |
| Non-melanoma skin cancer                      | 408<br>(251 - 636)          | --               | --                | 16<br>(10 - 25)          | 58<br>(34 - 90)             | 333<br>(204 - 520)          |
| Ovarian cancer                                | --                          | --               | --                | --                       | --                          | --                          |
| Testicular cancer                             | 92<br>(71 - 123)            | --               | --                | 58<br>(44 - 76)          | 17<br>(13 - 24)             | 17<br>(13 - 24)             |
| Kidney cancer                                 | 2,603<br>(2,334 - 2,868)    | 3<br>(2 - 4)     | 2<br>(2 - 3)      | 132<br>(113 - 154)       | 975<br>(844 - 1,099)        | 1,490<br>(1,332 - 1,649)    |
| Bladder cancer                                | 3,140<br>(2,549 - 3,563)    | --               | --                | 34<br>(29 - 40)          | 626<br>(525 - 729)          | 2,480<br>(1,965 - 2,826)    |
| Brain and nervous system cancer               | 2,206<br>(1,676 - 2,675)    | 12<br>(8 - 19)   | 31<br>(24 - 42)   | 380<br>(292 - 472)       | 1,067<br>(824 - 1,363)      | 716<br>(507 - 843)          |
| Thyroid cancer                                | 148<br>(124 - 168)          | --               | 0<br>(0 - 0)      | 10<br>(8 - 12)           | 51<br>(42 - 59)             | 87<br>(70 - 101)            |
| Mesothelioma                                  | 1,863<br>(815 - 2,272)      | --               | --                | 41<br>(24 - 52)          | 684<br>(344 - 866)          | 1,138<br>(420 - 1,434)      |
| Hodgkin lymphoma                              | 186<br>(133 - 261)          | 0<br>(0 - 0)     | 1<br>(1 - 2)      | 66<br>(49 - 95)          | 61<br>(44 - 88)             | 57<br>(40 - 80)             |
| Non-Hodgkin lymphoma                          | 3,127<br>(1,558 - 3,762)    | 3<br>(2 - 5)     | 10<br>(5 - 14)    | 242<br>(135 - 321)       | 1,005<br>(505 - 1,334)      | 1,868<br>(906 - 2,239)      |
| Multiple myeloma                              | 1,798<br>(1,154 - 2,706)    | --               | --                | 52<br>(33 - 82)          | 560<br>(363 - 908)          | 1,186<br>(760 - 1,767)      |
| Leukemia                                      | 2,846<br>(2,457 - 3,102)    | 17<br>(12 - 24)  | 37<br>(30 - 45)   | 234<br>(201 - 260)       | 737<br>(618 - 821)          | 1,820<br>(1,577 - 1,992)    |
| Other neoplasms                               | 2,896<br>(2,118 - 3,279)    | 26<br>(14 - 37)  | 30<br>(18 - 38)   | 309<br>(245 - 355)       | 781<br>(599 - 948)          | 1,750<br>(1,186 - 2,036)    |
| Cardiovascular diseases                       | 88,973<br>(82,569 - 94,592) | 16<br>(12 - 20)  | 9<br>(7 - 11)     | 2,795<br>(2,538 - 3,057) | 17,882<br>(16,365 - 19,397) | 68,271<br>(63,044 - 72,243) |
| Rheumatic heart disease                       | 391<br>(269 - 597)          | 0<br>(0 - 0)     | 0<br>(0 - 0)      | 33<br>(23 - 49)          | 100<br>(71 - 159)           | 257<br>(171 - 401)          |
| Ischemic heart disease                        | 51,330<br>(46,272 - 57,060) | 1<br>(0 - 1)     | 1<br>(1 - 1)      | 1,756<br>(1,575 - 2,022) | 12,139<br>(11,099 - 13,428) | 37,433<br>(33,201 - 41,818) |
| Cerebrovascular disease                       | 22,202<br>(17,011 - 26,516) | 3<br>(2 - 5)     | 3<br>(2 - 3)      | 444<br>(332 - 550)       | 2,782<br>(2,000 - 3,433)    | 18,971<br>(14,567 - 22,637) |
| Ischemic stroke                               | 13,100<br>(9,602 - 16,847)  | 1<br>(1 - 1)     | 0<br>(0 - 1)      | 54<br>(31 - 73)          | 986<br>(594 - 1,324)        | 12,058<br>(8,980 - 15,516)  |
| Hemorrhagic stroke                            | 9,103<br>(5,553 - 12,014)   | 2<br>(1 - 3)     | 2<br>(2 - 3)      | 390<br>(295 - 481)       | 1,796<br>(1,239 - 2,257)    | 6,913<br>(3,833 - 9,490)    |
| Hypertensive heart disease                    | 1,274<br>(758 - 1,831)      | 0<br>(0 - 0)     | 0<br>(0 - 0)      | 60<br>(39 - 83)          | 360<br>(224 - 545)          | 853<br>(484 - 1,216)        |
| Cardiomyopathy and myocarditis                | 1,521<br>(1,100 - 2,298)    | 8<br>(6 - 11)    | 4<br>(3 - 5)      | 196<br>(128 - 257)       | 380<br>(236 - 517)          | 933<br>(704 - 1,544)        |
| Atrial fibrillation and flutter               | 1,508<br>(1,127 - 1,763)    | --               | --                | 4<br>(3 - 5)             | 102<br>(71 - 123)           | 1,401<br>(1,052 - 1,641)    |
| Aortic aneurysm                               | 4,518<br>(3,705 - 5,119)    | --               | --                | 67<br>(52 - 81)          | 784<br>(639 - 938)          | 3,667<br>(2,996 - 4,153)    |
| Peripheral vascular disease                   | 1,006<br>(837 - 1,169)      | --               | --                | 5<br>(4 - 6)             | 133<br>(108 - 163)          | 868<br>(715 - 1,017)        |
| Endocarditis                                  | 420<br>(283 - 654)          | 1<br>(0 - 1)     | 0<br>(0 - 0)      | 34<br>(23 - 46)          | 110<br>(76 - 160)           | 274<br>(172 - 446)          |
| Other cardiovascular and circulatory diseases | 4,803<br>(2,628 - 5,509)    | 2<br>(1 - 3)     | 1<br>(1 - 1)      | 195<br>(109 - 229)       | 991<br>(530 - 1,146)        | 3,613<br>(2,024 - 4,212)    |
| Chronic respiratory diseases                  | 22,810<br>(19,806 - 29,502) | 16<br>(11 - 21)  | 8<br>(6 - 9)      | 253<br>(216 - 293)       | 3,593<br>(3,011 - 4,329)    | 18,940<br>(16,435 - 24,978) |
| Chronic obstructive pulmonary disease         | 18,989<br>(16,263 - 25,426) | 8<br>(6 - 11)    | 1<br>(1 - 1)      | 116<br>(98 - 141)        | 2,949<br>(2,473 - 3,603)    | 15,915<br>(13,683 - 21,682) |
| Pneumoconiosis                                | 832<br>(546 - 1,307)        | 0<br>(0 - 0)     | 0<br>(0 - 0)      | 6<br>(4 - 8)             | 77<br>(49 - 113)            | 748<br>(488 - 1,190)        |
| Silicosis                                     | 25<br>(15 - 41)             | 0<br>(0 - 0)     | 0<br>(0 - 0)      | 1<br>(1 - 2)             | 3<br>(2 - 5)                | 20<br>(12 - 35)             |
| Asbestosis                                    | 373<br>(244 - 602)          | 0<br>(0 - 0)     | 0<br>(0 - 0)      | 2<br>(1 - 3)             | 41<br>(27 - 60)             | 330<br>(213 - 538)          |
| Coal workers pneumoconiosis                   | 312<br>(205 - 491)          | 0<br>(0 - 0)     | 0<br>(0 - 0)      | 1<br>(1 - 2)             | 21<br>(13 - 31)             | 290<br>(188 - 463)          |
| Other pneumoconiosis                          | 122<br>(77 - 191)           | 0<br>(0 - 0)     | 0<br>(0 - 0)      | 1<br>(1 - 2)             | 12<br>(7 - 18)              | 108<br>(68 - 171)           |



Web Table 31- United Kingdom deaths with 95% UI by age, sex, and cause in 2013

| Cause                                               | Males, All Ages             | Males, 0-4 Years | Males, 5-14 Years | Males, 15-49 Years       | Males, 50-69 Years       | Males, 70-80 Years          |
|-----------------------------------------------------|-----------------------------|------------------|-------------------|--------------------------|--------------------------|-----------------------------|
| Asthma                                              | 415<br>(355 - 541)          | 2<br>(1 - 3)     | 5<br>(4 - 6)      | 81<br>(69 - 99)          | 102<br>(83 - 125)        | 225<br>(185 - 312)          |
| Interstitial lung disease and pulmonary sarcoidosis | 2,442<br>(1,024 - 3,455)    | 2<br>(1 - 3)     | 1<br>(0 - 1)      | 45<br>(22 - 63)          | 450<br>(199 - 640)       | 1,944<br>(799 - 2,772)      |
| Other chronic respiratory diseases                  | 132<br>(108 - 178)          | 4<br>(3 - 5)     | 0<br>(0 - 1)      | 5<br>(4 - 6)             | 14<br>(11 - 18)          | 108<br>(87 - 150)           |
| Cirrhosis                                           | 5,169<br>(4,755 - 5,547)    | 3<br>(2 - 4)     | 3<br>(2 - 3)      | 1,230<br>(1,114 - 1,343) | 2,642<br>(2,410 - 2,858) | 1,293<br>(1,175 - 1,418)    |
| Cirrhosis due to hepatitis B                        | 470<br>(379 - 585)          | 0<br>(0 - 0)     | 0<br>(0 - 0)      | 110<br>(88 - 140)        | 241<br>(192 - 301)       | 119<br>(93 - 149)           |
| Cirrhosis due to hepatitis C                        | 2,132<br>(1,830 - 2,450)    | 0<br>(0 - 0)     | 1<br>(0 - 1)      | 523<br>(438 - 606)       | 1,102<br>(931 - 1,285)   | 505<br>(419 - 606)          |
| Cirrhosis due to alcohol use                        | 2,039<br>(1,736 - 2,332)    | --               | --                | 403<br>(332 - 478)       | 1,047<br>(878 - 1,207)   | 590<br>(486 - 680)          |
| Cirrhosis due to other causes                       | 528<br>(428 - 655)          | 2<br>(2 - 3)     | 2<br>(1 - 2)      | 194<br>(155 - 237)       | 252<br>(194 - 320)       | 79<br>(59 - 101)            |
| Digestive diseases                                  | 8,097<br>(6,970 - 11,413)   | 7<br>(5 - 11)    | 6<br>(5 - 7)      | 319<br>(258 - 362)       | 1,490<br>(1,288 - 1,741) | 6,275<br>(5,300 - 9,354)    |
| Peptic ulcer disease                                | 1,836<br>(1,308 - 3,198)    | 0<br>(0 - 0)     | 0<br>(0 - 0)      | 53<br>(39 - 69)          | 345<br>(245 - 460)       | 1,437<br>(989 - 2,654)      |
| Gastritis and duodenitis                            | 126<br>(57 - 198)           | 0<br>(0 - 0)     | 0<br>(0 - 0)      | 14<br>(6 - 19)           | 35<br>(16 - 53)          | 77<br>(33 - 136)            |
| Appendicitis                                        | 175<br>(86 - 340)           | 0<br>(0 - 1)     | 1<br>(1 - 1)      | 13<br>(9 - 18)           | 35<br>(20 - 59)          | 126<br>(54 - 263)           |
| Paralytic ileus and intestinal obstruction          | 1,092<br>(419 - 1,463)      | 2<br>(1 - 3)     | 2<br>(1 - 2)      | 29<br>(13 - 39)          | 150<br>(61 - 205)        | 909<br>(339 - 1,232)        |
| Inguinal, femoral, and abdominal hernia             | 471<br>(173 - 1,614)        | 0<br>(0 - 0)     | 0<br>(0 - 0)      | 6<br>(3 - 10)            | 52<br>(22 - 142)         | 412<br>(148 - 1,465)        |
| Inflammatory bowel disease                          | 501<br>(339 - 769)          | 2<br>(2 - 4)     | 1<br>(1 - 1)      | 27<br>(20 - 39)          | 90<br>(59 - 132)         | 381<br>(251 - 612)          |
| Vascular intestinal disorders                       | 1,090<br>(411 - 2,269)      | 0<br>(0 - 1)     | 0<br>(0 - 1)      | 23<br>(8 - 47)           | 228<br>(89 - 454)        | 839<br>(312 - 1,794)        |
| Gallbladder and biliary diseases                    | 877<br>(481 - 1,111)        | 0<br>(0 - 0)     | 0<br>(0 - 0)      | 17<br>(11 - 20)          | 118<br>(70 - 149)        | 742<br>(398 - 955)          |
| Pancreatitis                                        | 664<br>(405 - 949)          | 0<br>(0 - 0)     | 0<br>(0 - 0)      | 93<br>(65 - 120)         | 212<br>(128 - 289)       | 358<br>(205 - 573)          |
| Other digestive diseases                            | 1,265<br>(850 - 1,784)      | 1<br>(1 - 2)     | 1<br>(1 - 1)      | 44<br>(31 - 55)          | 225<br>(143 - 285)       | 994<br>(654 - 1,462)        |
| Neurological disorders                              | 26,869<br>(24,349 - 29,249) | 50<br>(37 - 68)  | 27<br>(22 - 36)   | 568<br>(477 - 695)       | 1,860<br>(1,622 - 2,083) | 24,364<br>(21,921 - 26,686) |
| Alzheimer disease and other dementias               | 21,092<br>(18,879 - 23,315) | --               | --                | 3<br>(2 - 4)             | 704<br>(614 - 804)       | 20,385<br>(18,178 - 22,597) |
| Parkinson disease                                   | 3,032<br>(2,531 - 3,378)    | --               | --                | 3<br>(3 - 4)             | 189<br>(150 - 219)       | 2,839<br>(2,347 - 3,176)    |
| Epilepsy                                            | 543<br>(412 - 693)          | 9<br>(6 - 13)    | 11<br>(8 - 15)    | 265<br>(213 - 337)       | 124<br>(87 - 166)        | 134<br>(90 - 179)           |
| Multiple sclerosis                                  | 380<br>(164 - 656)          | --               | --                | 89<br>(40 - 148)         | 190<br>(78 - 323)        | 102<br>(43 - 167)           |
| Other neurological disorders                        | 1,823<br>(1,383 - 2,117)    | 41<br>(30 - 57)  | 17<br>(13 - 24)   | 208<br>(164 - 257)       | 653<br>(513 - 801)       | 905<br>(645 - 1,034)        |
| Mental and substance use disorders                  | 2,229<br>(1,383 - 2,519)    | 2<br>(1 - 3)     | 0<br>(0 - 0)      | 1,641<br>(1,025 - 1,853) | 455<br>(242 - 534)       | 131<br>(84 - 155)           |
| Schizophrenia                                       | 30<br>(21 - 54)             | --               | --                | 2<br>(2 - 4)             | 7<br>(5 - 13)            | 21<br>(14 - 38)             |
| Alcohol use disorders                               | 679<br>(298 - 823)          | --               | --                | 276<br>(127 - 335)       | 329<br>(133 - 401)       | 74<br>(32 - 89)             |
| Drug use disorders                                  | 1,518<br>(926 - 1,712)      | 2<br>(1 - 3)     | --                | 1,362<br>(822 - 1,537)   | 119<br>(72 - 139)        | 36<br>(20 - 43)             |
| Opioid use disorders                                | 568<br>(348 - 654)          | 1<br>(0 - 1)     | --                | 513<br>(313 - 594)       | 41<br>(24 - 50)          | 13<br>(7 - 17)              |
| Cocaine use disorders                               | 41<br>(24 - 49)             | 0<br>(0 - 0)     | --                | 38<br>(22 - 46)          | 2<br>(1 - 3)             | 1<br>(0 - 1)                |
| Amphetamine use disorders                           | 37<br>(23 - 45)             | 0<br>(0 - 0)     | --                | 34<br>(20 - 41)          | 3<br>(2 - 4)             | 1<br>(0 - 1)                |
| Other drug use disorders                            | 873<br>(519 - 994)          | 1<br>(1 - 1)     | --                | 778<br>(468 - 887)       | 73<br>(45 - 86)          | 21<br>(12 - 26)             |
| Eating disorders                                    | 1<br>(1 - 2)                | --               | 0<br>(0 - 0)      | 1<br>(1 - 2)             | --                       | --                          |
| Anorexia nervosa                                    | 1<br>(1 - 2)                | --               | 0<br>(0 - 0)      | 1<br>(1 - 2)             | --                       | --                          |
| Diabetes, urogenital, blood, and endocrine diseases | 9,254<br>(7,918 - 10,039)   | 54<br>(40 - 74)  | 24<br>(19 - 33)   | 430<br>(389 - 492)       | 1,351<br>(1,225 - 1,476) | 7,396<br>(6,163 - 8,096)    |
| Diabetes mellitus                                   | 2,752<br>(2,560 - 2,944)    | 1<br>(1 - 2)     | 1<br>(1 - 2)      | 138<br>(125 - 152)       | 545<br>(497 - 592)       | 2,067<br>(1,905 - 2,226)    |
| Acute glomerulonephritis                            | 8<br>(6 - 11)               | 0<br>(0 - 0)     | 0<br>(0 - 0)      | 1<br>(1 - 2)             | 2<br>(1 - 2)             | 4<br>(3 - 7)                |
| Chronic kidney disease                              | 2,703<br>(2,412 - 3,187)    | 3<br>(2 - 3)     | 1<br>(1 - 2)      | 82<br>(71 - 105)         | 319<br>(274 - 397)       | 2,297<br>(2,047 - 2,698)    |
| Chronic kidney disease due to diabetes mellitus     | 460<br>(358 - 878)          | 0<br>(0 - 0)     | 0<br>(0 - 0)      | 13<br>(9 - 25)           | 65<br>(48 - 111)         | 381<br>(293 - 737)          |

Web Table 31- United Kingdom deaths with 95% UI by age, sex, and cause in 2013

| Cause                                               | Males, All Ages             | Males, 0-4 Years   | Males, 5-14 Years  | Males, 15-49 Years       | Males, 50-69 Years       | Males, 70-80 Years       |
|-----------------------------------------------------|-----------------------------|--------------------|--------------------|--------------------------|--------------------------|--------------------------|
| Chronic kidney disease due to hypertension          | 705<br>(379 - 902)          | 0<br>(0 - 0)       | 0<br>(0 - 0)       | 19<br>(10 - 27)          | 83<br>(46 - 122)         | 602<br>(320 - 758)       |
| Chronic kidney disease due to glomerulonephritis    | 162<br>(82 - 220)           | 1<br>(0 - 1)       | 0<br>(0 - 0)       | 9<br>(5 - 11)            | 24<br>(15 - 33)          | 128<br>(58 - 178)        |
| Chronic kidney disease due to other causes          | 1,376<br>(1,090 - 1,759)    | 2<br>(1 - 2)       | 1<br>(0 - 1)       | 42<br>(34 - 60)          | 146<br>(109 - 199)       | 1,186<br>(933 - 1,529)   |
| Urinary diseases and male infertility               | 2,802<br>(1,387 - 3,351)    | 6<br>(3 - 8)       | 1<br>(1 - 1)       | 46<br>(26 - 57)          | 229<br>(118 - 293)       | 2,521<br>(1,226 - 3,032) |
| Interstitial nephritis and urinary tract infections | 2,417<br>(1,192 - 2,919)    | 5<br>(2 - 6)       | 1<br>(0 - 1)       | 34<br>(19 - 41)          | 178<br>(95 - 234)        | 2,200<br>(1,078 - 2,660) |
| Urolithiasis                                        | 78<br>(25 - 162)            | --                 | 0<br>(0 - 0)       | 4<br>(2 - 7)             | 14<br>(5 - 28)           | 60<br>(18 - 129)         |
| Other urinary diseases                              | 307<br>(106 - 578)          | 1<br>(1 - 2)       | 0<br>(0 - 0)       | 8<br>(4 - 14)            | 37<br>(14 - 65)          | 260<br>(83 - 500)        |
| Gynecological diseases                              | --                          | --                 | --                 | --                       | --                       | --                       |
| Uterine fibroids                                    | --                          | --                 | --                 | --                       | --                       | --                       |
| Polycystic ovarian syndrome                         | --                          | --                 | --                 | --                       | --                       | --                       |
| Endometriosis                                       | --                          | --                 | --                 | --                       | --                       | --                       |
| Genital prolapse                                    | --                          | --                 | --                 | --                       | --                       | --                       |
| Other gynecological diseases                        | --                          | --                 | --                 | --                       | --                       | --                       |
| Hemoglobinopathies and hemolytic anemias            | 121<br>(77 - 194)           | 3<br>(2 - 5)       | 2<br>(1 - 4)       | 18<br>(11 - 28)          | 22<br>(14 - 36)          | 76<br>(49 - 121)         |
| Thalassemias                                        | 7<br>(4 - 11)               | 1<br>(1 - 2)       | 0<br>(0 - 1)       | 5<br>(3 - 7)             | 0<br>(0 - 0)             | 0<br>(0 - 0)             |
| Sickle cell disorders                               | 25<br>(16 - 39)             | 1<br>(1 - 2)       | 1<br>(1 - 2)       | 8<br>(5 - 12)            | 11<br>(7 - 17)           | 4<br>(2 - 6)             |
| G6PD deficiency                                     | 1<br>(0 - 1)                | 0<br>(0 - 0)       | 0<br>(0 - 0)       | 0<br>(0 - 0)             | 0<br>(0 - 0)             | 0<br>(0 - 0)             |
| Other hemoglobinopathies and hemolytic anemias      | 89<br>(57 - 143)            | 1<br>(0 - 1)       | 0<br>(0 - 1)       | 5<br>(3 - 8)             | 11<br>(7 - 18)           | 72<br>(46 - 115)         |
| Endocrine, metabolic, blood, and immune disorders   | 868<br>(709 - 1,417)        | 40<br>(29 - 60)    | 17<br>(13 - 26)    | 145<br>(119 - 201)       | 235<br>(187 - 376)       | 431<br>(343 - 772)       |
| Musculoskeletal disorders                           | 641<br>(337 - 774)          | --                 | 2<br>(1 - 2)       | 41<br>(26 - 51)          | 154<br>(92 - 200)        | 444<br>(203 - 531)       |
| Rheumatoid arthritis                                | 236<br>(112 - 309)          | --                 | 0<br>(0 - 0)       | 4<br>(2 - 6)             | 60<br>(32 - 88)          | 172<br>(71 - 226)        |
| Other musculoskeletal disorders                     | 405<br>(221 - 507)          | --                 | 1<br>(1 - 2)       | 36<br>(23 - 45)          | 95<br>(56 - 124)         | 272<br>(130 - 347)       |
| Other non-communicable diseases                     | 1,770<br>(1,574 - 1,998)    | 670<br>(523 - 867) | 34<br>(28 - 41)    | 208<br>(180 - 232)       | 232<br>(197 - 258)       | 626<br>(467 - 705)       |
| Congenital anomalies                                | 1,024<br>(890 - 1,191)      | 524<br>(408 - 660) | 33<br>(27 - 40)    | 188<br>(160 - 211)       | 151<br>(125 - 169)       | 128<br>(111 - 150)       |
| Neural tube defects                                 | 35<br>(26 - 46)             | 24<br>(17 - 33)    | 1<br>(1 - 2)       | 8<br>(6 - 10)            | 1<br>(1 - 1)             | 0<br>(0 - 1)             |
| Congenital heart anomalies                          | 407<br>(348 - 472)          | 182<br>(142 - 231) | 17<br>(14 - 22)    | 109<br>(92 - 126)        | 56<br>(42 - 76)          | 42<br>(35 - 52)          |
| Cleft lip and cleft palate                          | 0<br>(0 - 1)                | 0<br>(0 - 1)       | --                 | --                       | --                       | --                       |
| Down syndrome                                       | 108<br>(60 - 134)           | 14<br>(6 - 20)     | 1<br>(1 - 2)       | 22<br>(11 - 29)          | 64<br>(38 - 80)          | 6<br>(3 - 8)             |
| Chromosomal unbalanced rearrangements               | 47<br>(31 - 63)             | 39<br>(25 - 54)    | 2<br>(1 - 2)       | 4<br>(3 - 5)             | 1<br>(1 - 2)             | 1<br>(1 - 2)             |
| Other congenital anomalies                          | 427<br>(360 - 522)          | 264<br>(205 - 345) | 11<br>(9 - 15)     | 44<br>(36 - 53)          | 30<br>(22 - 40)          | 78<br>(66 - 94)          |
| Skin and subcutaneous diseases                      | 603<br>(402 - 693)          | 2<br>(1 - 3)       | 1<br>(0 - 1)       | 21<br>(14 - 26)          | 81<br>(51 - 100)         | 498<br>(337 - 572)       |
| Cellulitis                                          | 249<br>(123 - 333)          | 1<br>(0 - 1)       | 0<br>(0 - 0)       | 8<br>(4 - 11)            | 38<br>(20 - 50)          | 202<br>(99 - 277)        |
| Pyoderma                                            | 229<br>(149 - 312)          | 1<br>(1 - 2)       | 0<br>(0 - 0)       | 9<br>(7 - 13)            | 31<br>(20 - 46)          | 187<br>(123 - 257)       |
| Decubitus ulcer                                     | 97<br>(67 - 146)            | 0<br>(0 - 0)       | 0<br>(0 - 0)       | 2<br>(1 - 2)             | 8<br>(6 - 14)            | 86<br>(59 - 131)         |
| Other skin and subcutaneous diseases                | 29<br>(17 - 48)             | 0<br>(0 - 0)       | 0<br>(0 - 0)       | 2<br>(1 - 3)             | 4<br>(2 - 8)             | 23<br>(13 - 38)          |
| Sudden infant death syndrome                        | 144<br>(95 - 273)           | 144<br>(95 - 273)  | --                 | --                       | --                       | --                       |
| Injuries                                            | 11,447<br>(10,095 - 12,529) | 137<br>(101 - 181) | 118<br>(101 - 139) | 4,372<br>(3,945 - 4,867) | 2,329<br>(2,024 - 2,618) | 4,490<br>(3,503 - 4,987) |
| Transport injuries                                  | 2,284<br>(2,073 - 2,484)    | 26<br>(19 - 36)    | 55<br>(46 - 65)    | 1,271<br>(1,146 - 1,410) | 455<br>(409 - 499)       | 476<br>(404 - 539)       |
| Road injuries                                       | 2,167<br>(1,969 - 2,360)    | 25<br>(18 - 34)    | 52<br>(44 - 63)    | 1,206<br>(1,087 - 1,337) | 422<br>(378 - 463)       | 462<br>(391 - 524)       |
| Pedestrian road injuries                            | 586<br>(400 - 825)          | 12<br>(7 - 18)     | 24<br>(17 - 32)    | 172<br>(104 - 271)       | 147<br>(100 - 213)       | 231<br>(165 - 313)       |

Web Table 31- United Kingdom deaths with 95% UI by age, sex, and cause in 2013

| Cause                                           | Males, All Ages          | Males, 0-4 Years  | Males, 5-14 Years | Males, 15-49 Years       | Males, 50-69 Years     | Males, 70-80 Years       |
|-------------------------------------------------|--------------------------|-------------------|-------------------|--------------------------|------------------------|--------------------------|
| Cyclist road injuries                           | 125<br>(76 - 171)        | 2<br>(1 - 4)      | 12<br>(8 - 17)    | 47<br>(30 - 63)          | 31<br>(18 - 44)        | 32<br>(17 - 50)          |
| Motorcyclist road injuries                      | 392<br>(257 - 497)       | 1<br>(0 - 1)      | 2<br>(1 - 3)      | 333<br>(221 - 425)       | 41<br>(23 - 55)        | 15<br>(8 - 24)           |
| Motor vehicle road injuries                     | 1,056<br>(827 - 1,272)   | 10<br>(6 - 14)    | 14<br>(9 - 19)    | 650<br>(523 - 773)       | 201<br>(149 - 248)     | 181<br>(116 - 238)       |
| Other road injuries                             | 9<br>(5 - 18)            | 0<br>(0 - 0)      | 0<br>(0 - 0)      | 3<br>(2 - 7)             | 2<br>(1 - 5)           | 3<br>(1 - 6)             |
| Other transport injuries                        | 117<br>(87 - 138)        | 2<br>(1 - 2)      | 2<br>(1 - 3)      | 65<br>(48 - 78)          | 33<br>(24 - 41)        | 14<br>(10 - 20)          |
| Unintentional injuries                          | 5,366<br>(4,224 - 5,998) | 103<br>(75 - 136) | 57<br>(48 - 68)   | 806<br>(710 - 921)       | 853<br>(713 - 983)     | 3,547<br>(2,560 - 4,016) |
| Falls                                           | 3,266<br>(2,188 - 3,768) | 12<br>(8 - 17)    | 10<br>(7 - 13)    | 264<br>(197 - 313)       | 438<br>(288 - 527)     | 2,542<br>(1,665 - 2,939) |
| Drowning                                        | 219<br>(166 - 299)       | 15<br>(10 - 23)   | 14<br>(11 - 19)   | 100<br>(77 - 124)        | 47<br>(35 - 69)        | 42<br>(28 - 88)          |
| Fire, heat, and hot substances                  | 249<br>(204 - 374)       | 13<br>(9 - 21)    | 5<br>(4 - 8)      | 59<br>(49 - 81)          | 56<br>(44 - 89)        | 115<br>(92 - 177)        |
| Poisonings                                      | 108<br>(84 - 240)        | 1<br>(1 - 3)      | 1<br>(1 - 2)      | 61<br>(48 - 130)         | 23<br>(18 - 51)        | 21<br>(14 - 60)          |
| Exposure to mechanical forces                   | 269<br>(195 - 312)       | 22<br>(10 - 31)   | 13<br>(8 - 17)    | 143<br>(109 - 165)       | 53<br>(42 - 65)        | 36<br>(25 - 46)          |
| Unintentional firearm injuries                  | 8<br>(7 - 10)            | 0<br>(0 - 0)      | 0<br>(0 - 1)      | 5<br>(4 - 6)             | 1<br>(1 - 2)           | 1<br>(1 - 2)             |
| Unintentional suffocation                       | 126<br>(47 - 149)        | 19<br>(6 - 26)    | 9<br>(4 - 13)     | 62<br>(23 - 75)          | 18<br>(7 - 22)         | 18<br>(7 - 22)           |
| Other exposure to mechanical forces             | 135<br>(117 - 168)       | 3<br>(2 - 4)      | 4<br>(3 - 5)      | 76<br>(66 - 95)          | 34<br>(29 - 44)        | 17<br>(14 - 26)          |
| Adverse effects of medical treatment            | 429<br>(297 - 573)       | 7<br>(4 - 10)     | 2<br>(1 - 3)      | 31<br>(21 - 43)          | 90<br>(58 - 132)       | 299<br>(203 - 401)       |
| Animal contact                                  | 25<br>(12 - 29)          | 1<br>(1 - 2)      | 1<br>(0 - 1)      | 6<br>(3 - 7)             | 8<br>(4 - 10)          | 8<br>(4 - 10)            |
| Venomous animal contact                         | 5<br>(3 - 7)             | 0<br>(0 - 0)      | 0<br>(0 - 0)      | 2<br>(1 - 2)             | 2<br>(1 - 2)           | 1<br>(0 - 1)             |
| Non-venomous animal contact                     | 20<br>(9 - 23)           | 1<br>(0 - 1)      | 0<br>(0 - 1)      | 5<br>(2 - 5)             | 6<br>(3 - 8)           | 8<br>(3 - 9)             |
| Foreign body                                    | 746<br>(322 - 966)       | 25<br>(11 - 37)   | 9<br>(5 - 15)     | 118<br>(64 - 181)        | 125<br>(57 - 175)      | 469<br>(170 - 641)       |
| Pulmonary aspiration and foreign body in airway | 738<br>(312 - 957)       | 25<br>(11 - 37)   | 9<br>(5 - 15)     | 115<br>(61 - 178)        | 122<br>(55 - 172)      | 467<br>(167 - 638)       |
| Foreign body in other body part                 | 8<br>(5 - 12)            | 0<br>(0 - 0)      | 0<br>(0 - 0)      | 3<br>(1 - 4)             | 2<br>(1 - 4)           | 3<br>(2 - 4)             |
| Other unintentional injuries                    | 56<br>(49 - 63)          | 5<br>(4 - 7)      | 1<br>(1 - 2)      | 24<br>(20 - 28)          | 12<br>(10 - 14)        | 14<br>(11 - 16)          |
| Self-harm and interpersonal violence            | 3,797<br>(3,192 - 4,535) | 8<br>(5 - 13)     | 7<br>(5 - 9)      | 2,295<br>(1,952 - 2,731) | 1,021<br>(777 - 1,215) | 467<br>(387 - 600)       |
| Self-harm                                       | 3,581<br>(2,974 - 4,242) | --                | 3<br>(2 - 4)      | 2,139<br>(1,810 - 2,517) | 987<br>(748 - 1,173)   | 452<br>(370 - 584)       |
| Interpersonal violence                          | 217<br>(141 - 332)       | 8<br>(5 - 13)     | 4<br>(2 - 5)      | 155<br>(102 - 242)       | 34<br>(22 - 52)        | 15<br>(8 - 23)           |
| Assault by firearm                              | 48<br>(28 - 86)          | 1<br>(0 - 1)      | 0<br>(0 - 1)      | 38<br>(22 - 68)          | 7<br>(4 - 12)          | 2<br>(1 - 4)             |
| Assault by sharp object                         | 58<br>(33 - 92)          | 0<br>(0 - 1)      | 0<br>(0 - 1)      | 47<br>(27 - 74)          | 8<br>(4 - 13)          | 2<br>(1 - 4)             |
| Assault by other means                          | 110<br>(70 - 174)        | 7<br>(4 - 11)     | 3<br>(2 - 4)      | 71<br>(46 - 113)         | 19<br>(11 - 28)        | 11<br>(5 - 17)           |

Web Table 31- United Kingdom deaths with 95% UI by age, sex, and cause in 2013

| Cause                                                             | Females, All Ages              | Females, 0-4 Years       | Females, 5-14 Years | Females, 15-49 Years      | Females, 50-69 Years        | Females, 70-80 Years           |
|-------------------------------------------------------------------|--------------------------------|--------------------------|---------------------|---------------------------|-----------------------------|--------------------------------|
| All causes                                                        | 300,677<br>(286,823 - 317,547) | 1,658<br>(1,341 - 2,059) | 287<br>(255 - 324)  | 9,430<br>(8,736 - 10,288) | 41,825<br>(39,215 - 45,025) | 247,477<br>(236,771 - 260,392) |
| Communicable, maternal, neonatal, and nutritional diseases        | 27,529<br>(23,795 - 35,965)    | 832<br>(659 - 1,047)     | 32<br>(26 - 39)     | 426<br>(371 - 475)        | 1,279<br>(1,071 - 1,456)    | 24,960<br>(21,453 - 33,329)    |
| HIV/AIDS and tuberculosis                                         | 254<br>(205 - 298)             | 1<br>(1 - 1)             | 0<br>(0 - 1)        | 66<br>(49 - 89)           | 62<br>(48 - 78)             | 125<br>(93 - 146)              |
| Tuberculosis                                                      | 186<br>(142 - 213)             | 1<br>(0 - 1)             | 0<br>(0 - 1)        | 19<br>(15 - 22)           | 44<br>(35 - 51)             | 122<br>(91 - 144)              |
| HIV/AIDS                                                          | 68<br>(43 - 104)               | 0<br>(0 - 0)             | 0<br>(0 - 0)        | 47<br>(31 - 70)           | 18<br>(8 - 31)              | 3<br>(1 - 6)                   |
| HIV/AIDS resulting in mycobacterial infection                     | 3<br>(2 - 5)                   | 0<br>(0 - 0)             | 0<br>(0 - 0)        | 2<br>(1 - 3)              | 1<br>(0 - 1)                | 0<br>(0 - 0)                   |
| HIV/AIDS resulting in other diseases                              | 65<br>(41 - 99)                | 0<br>(0 - 0)             | 0<br>(0 - 0)        | 45<br>(30 - 67)           | 17<br>(8 - 30)              | 2<br>(1 - 6)                   |
| Diarrhea, lower respiratory, and other common infectious diseases | 25,749<br>(22,142 - 34,268)    | 130<br>(99 - 166)        | 25<br>(20 - 32)     | 258<br>(219 - 296)        | 1,112<br>(924 - 1,281)      | 24,224<br>(20,795 - 32,640)    |
| Diarrheal diseases                                                | 1,348<br>(1,143 - 1,586)       | 24<br>(18 - 32)          | 2<br>(2 - 3)        | 18<br>(16 - 21)           | 77<br>(65 - 91)             | 1,227<br>(1,028 - 1,457)       |
| Intestinal infectious diseases                                    | 33<br>(12 - 72)                | 6<br>(2 - 13)            | 6<br>(2 - 13)       | 13<br>(4 - 27)            | 4<br>(1 - 10)               | 4<br>(2 - 10)                  |
| Typhoid fever                                                     | 25<br>(8 - 56)                 | 4<br>(1 - 10)            | 4<br>(2 - 10)       | 10<br>(3 - 22)            | 3<br>(1 - 7)                | 3<br>(1 - 7)                   |
| Paratyphoid fever                                                 | 6<br>(2 - 13)                  | 1<br>(0 - 3)             | 1<br>(0 - 3)        | 2<br>(1 - 5)              | 1<br>(0 - 1)                | 1<br>(0 - 1)                   |
| Other intestinal infectious diseases                              | 3<br>(1 - 7)                   | 1<br>(0 - 3)             | 0<br>(0 - 1)        | 1<br>(0 - 3)              | 1<br>(0 - 3)                | 1<br>(0 - 3)                   |
| Lower respiratory infections                                      | 24,087<br>(20,551 - 32,585)    | 69<br>(50 - 91)          | 10<br>(8 - 12)      | 184<br>(154 - 212)        | 977<br>(801 - 1,126)        | 22,847<br>(19,453 - 31,242)    |
| Upper respiratory infections                                      | 6<br>(4 - 11)                  | 0<br>(0 - 0)             | 0<br>(0 - 0)        | 0<br>(0 - 0)              | 1<br>(1 - 2)                | 5<br>(2 - 10)                  |
| Otitis media                                                      | 8<br>(7 - 9)                   | 1<br>(1 - 2)             | 0<br>(0 - 0)        | 2<br>(1 - 2)              | 1<br>(1 - 2)                | 3<br>(3 - 4)                   |
| Meningitis                                                        | 155<br>(135 - 207)             | 21<br>(16 - 28)          | 4<br>(3 - 5)        | 21<br>(19 - 27)           | 31<br>(27 - 41)             | 78<br>(64 - 111)               |
| Pneumococcal meningitis                                           | 28<br>(23 - 38)                | 3<br>(2 - 3)             | 1<br>(0 - 1)        | 3<br>(3 - 4)              | 6<br>(5 - 8)                | 15<br>(12 - 23)                |
| H influenzae type B meningitis                                    | 19<br>(16 - 23)                | 6<br>(4 - 8)             | 1<br>(1 - 1)        | 2<br>(2 - 3)              | 3<br>(2 - 3)                | 7<br>(6 - 10)                  |
| Meningococcal meningitis                                          | 51<br>(43 - 69)                | 7<br>(5 - 9)             | 1<br>(1 - 2)        | 7<br>(6 - 9)              | 10<br>(7 - 13)              | 26<br>(21 - 38)                |
| Other meningitis                                                  | 57<br>(50 - 77)                | 6<br>(4 - 8)             | 1<br>(1 - 2)        | 9<br>(7 - 11)             | 13<br>(10 - 17)             | 29<br>(24 - 40)                |
| Encephalitis                                                      | 68<br>(39 - 85)                | 5<br>(3 - 7)             | 2<br>(1 - 3)        | 14<br>(8 - 19)            | 17<br>(9 - 21)              | 30<br>(16 - 38)                |
| Diphtheria                                                        | 0<br>(0 - 1)                   | 0<br>(0 - 0)             | 0<br>(0 - 0)        | 0<br>(0 - 0)              | 0<br>(0 - 0)                | --                             |
| Whooping cough                                                    | 4<br>(2 - 7)                   | 2<br>(0 - 4)             | 0<br>(0 - 0)        | 1<br>(1 - 2)              | 0<br>(0 - 0)                | --                             |
| Tetanus                                                           | 3<br>(2 - 4)                   | 0<br>(0 - 0)             | 0<br>(0 - 0)        | 1<br>(1 - 2)              | 1<br>(0 - 1)                | 1<br>(0 - 1)                   |
| Measles                                                           | 0<br>(0 - 0)                   | 0<br>(0 - 0)             | 0<br>(0 - 0)        | 0<br>(0 - 0)              | 0<br>(0 - 0)                | --                             |
| Varicella and herpes zoster                                       | 37<br>(17 - 67)                | 2<br>(1 - 3)             | 0<br>(0 - 1)        | 3<br>(2 - 4)              | 3<br>(1 - 4)                | 29<br>(10 - 60)                |
| Neglected tropical diseases and malaria                           | 22<br>(12 - 25)                | 1<br>(1 - 2)             | 1<br>(1 - 1)        | 7<br>(4 - 8)              | 6<br>(3 - 8)                | 6<br>(3 - 7)                   |
| Cysticercosis                                                     | 0<br>(0 - 0)                   | 0<br>(0 - 0)             | 0<br>(0 - 0)        | 0<br>(0 - 0)              | 0<br>(0 - 0)                | 0<br>(0 - 0)                   |
| Cystic echinococcosis                                             | 3<br>(3 - 3)                   | 0<br>(0 - 0)             | 0<br>(0 - 0)        | 0<br>(0 - 0)              | 1<br>(1 - 1)                | 2<br>(1 - 2)                   |
| Dengue                                                            | 3<br>(2 - 3)                   | 0<br>(0 - 0)             | 0<br>(0 - 0)        | 1<br>(1 - 2)              | 1<br>(0 - 1)                | 0<br>(0 - 1)                   |
| Rabies                                                            | 3<br>(1 - 3)                   | 0<br>(0 - 0)             | 0<br>(0 - 0)        | 1<br>(1 - 2)              | 1<br>(0 - 1)                | 0<br>(0 - 0)                   |
| Other neglected tropical diseases                                 | 13<br>(4 - 16)                 | 1<br>(0 - 2)             | 1<br>(0 - 1)        | 4<br>(2 - 5)              | 4<br>(1 - 5)                | 3<br>(1 - 4)                   |
| Maternal disorders                                                | 47<br>(40 - 54)                | --                       | 1<br>(0 - 1)        | 47<br>(40 - 53)           | --                          | --                             |
| Maternal hemorrhage                                               | 5<br>(4 - 6)                   | --                       | 0<br>(0 - 0)        | 5<br>(4 - 6)              | --                          | --                             |
| Maternal sepsis and other maternal infections                     | 4<br>(4 - 5)                   | --                       | 0<br>(0 - 0)        | 4<br>(4 - 5)              | --                          | --                             |
| Maternal hypertensive disorders                                   | 6<br>(5 - 7)                   | --                       | 0<br>(0 - 0)        | 6<br>(5 - 7)              | --                          | --                             |
| Maternal obstructed labor                                         | 4<br>(3 - 4)                   | --                       | 0<br>(0 - 0)        | 4<br>(3 - 4)              | --                          | --                             |
| Maternal abortive outcome                                         | 9<br>(8 - 11)                  | --                       | 0<br>(0 - 0)        | 9<br>(8 - 11)             | --                          | --                             |
| Indirect maternal deaths                                          | 5<br>(4 - 6)                   | --                       | 0<br>(0 - 0)        | 5<br>(4 - 6)              | --                          | --                             |

Web Table 31- United Kingdom deaths with 95% UI by age, sex, and cause in 2013

| Cause                                                            | Females, All Ages              | Females, 0-4 Years | Females, 5-14 Years | Females, 15-49 Years     | Females, 50-69 Years        | Females, 70-80 Years           |
|------------------------------------------------------------------|--------------------------------|--------------------|---------------------|--------------------------|-----------------------------|--------------------------------|
| Late maternal deaths                                             | 3<br>(3 - 4)                   | --                 | 0<br>(0 - 0)        | 3<br>(3 - 4)             | --                          | --                             |
| Maternal deaths aggravated by HIV/AIDS                           | 0<br>(0 - 0)                   | --                 | --                  | 0<br>(0 - 0)             | --                          | --                             |
| Other maternal disorders                                         | 10<br>(8 - 12)                 | --                 | 0<br>(0 - 0)        | 10<br>(8 - 11)           | --                          | --                             |
| Neonatal disorders                                               | 684<br>(540 - 860)             | 684<br>(540 - 860) | --                  | --                       | --                          | --                             |
| Neonatal preterm birth complications                             | 490<br>(373 - 627)             | 490<br>(373 - 627) | --                  | --                       | --                          | --                             |
| Neonatal encephalopathy due to birth asphyxia and trauma         | 115<br>(72 - 163)              | 115<br>(72 - 163)  | --                  | --                       | --                          | --                             |
| Neonatal sepsis and other neonatal infections                    | 32<br>(17 - 62)                | 32<br>(17 - 62)    | --                  | --                       | --                          | --                             |
| Hemolytic disease and other neonatal jaundice                    | 1<br>(1 - 2)                   | 1<br>(1 - 2)       | --                  | --                       | --                          | --                             |
| Other neonatal disorders                                         | 46<br>(26 - 66)                | 46<br>(26 - 66)    | --                  | --                       | --                          | --                             |
| Nutritional deficiencies                                         | 460<br>(387 - 564)             | 1<br>(1 - 2)       | 0<br>(0 - 1)        | 8<br>(7 - 10)            | 25<br>(21 - 31)             | 425<br>(355 - 521)             |
| Protein-energy malnutrition                                      | 60<br>(20 - 102)               | 1<br>(0 - 1)       | 0<br>(0 - 0)        | 2<br>(1 - 3)             | 6<br>(2 - 10)               | 51<br>(16 - 89)                |
| Iodine deficiency                                                | 2<br>(1 - 7)                   | 0<br>(0 - 0)       | 0<br>(0 - 0)        | 0<br>(0 - 0)             | 0<br>(0 - 1)                | 2<br>(0 - 6)                   |
| Iron-deficiency anemia                                           | 360<br>(273 - 465)             | 0<br>(0 - 1)       | 0<br>(0 - 0)        | 5<br>(3 - 7)             | 16<br>(11 - 21)             | 338<br>(258 - 440)             |
| Other nutritional deficiencies                                   | 38<br>(15 - 92)                | 0<br>(0 - 0)       | 0<br>(0 - 0)        | 1<br>(1 - 2)             | 3<br>(1 - 5)                | 34<br>(13 - 85)                |
| Other communicable, maternal, neonatal, and nutritional diseases | 312<br>(219 - 367)             | 14<br>(9 - 21)     | 4<br>(3 - 5)        | 39<br>(28 - 48)          | 73<br>(50 - 91)             | 181<br>(125 - 212)             |
| Sexually transmitted diseases excluding HIV                      | 60<br>(43 - 83)                | 3<br>(1 - 6)       | 0<br>(0 - 1)        | 4<br>(3 - 6)             | 9<br>(6 - 12)               | 43<br>(30 - 63)                |
| Syphilis                                                         | 44<br>(32 - 61)                | 3<br>(1 - 6)       | 0<br>(0 - 1)        | 2<br>(1 - 2)             | 5<br>(3 - 7)                | 34<br>(23 - 49)                |
| Chlamydial infection                                             | 4<br>(3 - 6)                   | --                 | 0<br>(0 - 0)        | 1<br>(1 - 1)             | 1<br>(1 - 1)                | 2<br>(2 - 3)                   |
| Gonococcal infection                                             | 7<br>(5 - 10)                  | --                 | 0<br>(0 - 0)        | 1<br>(1 - 1)             | 1<br>(1 - 2)                | 5<br>(3 - 7)                   |
| Other sexually transmitted diseases                              | 4<br>(3 - 5)                   | --                 | 0<br>(0 - 0)        | 1<br>(1 - 1)             | 1<br>(1 - 2)                | 2<br>(1 - 3)                   |
| Hepatitis                                                        | 33<br>(29 - 40)                | 1<br>(0 - 1)       | 1<br>(1 - 1)        | 8<br>(7 - 10)            | 11<br>(9 - 14)              | 13<br>(10 - 16)                |
| Acute hepatitis A                                                | 10<br>(4 - 17)                 | 0<br>(0 - 1)       | 0<br>(0 - 1)        | 4<br>(2 - 6)             | 3<br>(1 - 5)                | 2<br>(1 - 5)                   |
| Acute hepatitis B                                                | 20<br>(13 - 27)                | 0<br>(0 - 0)       | 0<br>(0 - 0)        | 4<br>(2 - 6)             | 7<br>(5 - 10)               | 9<br>(6 - 12)                  |
| Acute hepatitis C                                                | 3<br>(1 - 8)                   | --                 | 0<br>(0 - 0)        | 1<br>(0 - 2)             | 1<br>(0 - 2)                | 2<br>(0 - 4)                   |
| Other infectious diseases                                        | 219<br>(129 - 279)             | 10<br>(6 - 15)     | 3<br>(2 - 4)        | 27<br>(16 - 35)          | 54<br>(31 - 72)             | 125<br>(70 - 158)              |
| Non-communicable diseases                                        | 264,835<br>(251,451 - 279,717) | 736<br>(583 - 938) | 200<br>(177 - 228)  | 7,871<br>(7,266 - 8,579) | 39,509<br>(37,012 - 42,462) | 216,519<br>(206,107 - 227,642) |
| Neoplasms                                                        | 77,516<br>(67,933 - 83,807)    | 54<br>(42 - 68)    | 93<br>(81 - 107)    | 4,257<br>(3,890 - 4,659) | 22,594<br>(20,355 - 24,473) | 50,518<br>(43,312 - 54,564)    |
| Esophageal cancer                                                | 2,645<br>(2,391 - 2,952)       | --                 | --                  | 51<br>(43 - 61)          | 594<br>(521 - 677)          | 2,001<br>(1,802 - 2,230)       |
| Stomach cancer                                                   | 3,192<br>(2,369 - 4,296)       | --                 | --                  | 80<br>(59 - 104)         | 485<br>(355 - 644)          | 2,627<br>(1,932 - 3,549)       |
| Liver cancer                                                     | 1,509<br>(1,009 - 1,726)       | --                 | 1<br>(1 - 2)        | 60<br>(46 - 71)          | 378<br>(272 - 434)          | 1,070<br>(675 - 1,236)         |
| Liver cancer due to hepatitis B                                  | 293<br>(180 - 392)             | --                 | 0<br>(0 - 0)        | 20<br>(14 - 25)          | 98<br>(62 - 133)            | 175<br>(96 - 236)              |
| Liver cancer due to hepatitis C                                  | 815<br>(581 - 979)             | --                 | 0<br>(0 - 0)        | 27<br>(20 - 35)          | 191<br>(142 - 242)          | 597<br>(416 - 711)             |
| Liver cancer due to alcohol use                                  | 268<br>(159 - 337)             | --                 | --                  | 5<br>(3 - 6)             | 50<br>(35 - 63)             | 214<br>(119 - 274)             |
| Liver cancer due to other causes                                 | 133<br>(75 - 177)              | --                 | 1<br>(0 - 1)        | 9<br>(6 - 13)            | 38<br>(24 - 52)             | 85<br>(43 - 114)               |
| Larynx cancer                                                    | 185<br>(119 - 267)             | --                 | --                  | 8<br>(5 - 11)            | 70<br>(44 - 103)            | 107<br>(70 - 153)              |
| Tracheal, bronchus and lung cancer                               | 16,179<br>(12,369 - 18,188)    | --                 | --                  | 440<br>(379 - 513)       | 5,424<br>(4,418 - 5,994)    | 10,315<br>(7,276 - 11,778)     |
| Breast cancer                                                    | 13,298<br>(10,377 - 15,658)    | --                 | --                  | 1,386<br>(1,187 - 1,680) | 4,793<br>(3,788 - 5,643)    | 7,118<br>(5,249 - 8,397)       |
| Cervical cancer                                                  | 1,253<br>(1,048 - 1,457)       | --                 | --                  | 271<br>(223 - 318)       | 398<br>(316 - 463)          | 584<br>(482 - 716)             |
| Uterine cancer                                                   | 1,822<br>(1,390 - 2,085)       | --                 | --                  | 36<br>(29 - 43)          | 564<br>(419 - 657)          | 1,223<br>(908 - 1,397)         |
| Prostate cancer                                                  | --                             | --                 | --                  | --                       | --                          | --                             |

Web Table 31- United Kingdom deaths with 95% UI by age, sex, and cause in 2013

| Cause                                         | Females, All Ages             | Females, 0-4 Years | Females, 5-14 Years | Females, 15-49 Years   | Females, 50-69 Years      | Females, 70-80 Years         |
|-----------------------------------------------|-------------------------------|--------------------|---------------------|------------------------|---------------------------|------------------------------|
| Colon and rectum cancer                       | 9,408<br>(8,480 - 10,247)     | --                 | --                  | 264<br>(236 - 295)     | 2,016<br>(1,810 - 2,207)  | 7,128<br>(6,404 - 7,831)     |
| Lip and oral cavity cancer                    | 579<br>(494 - 670)            | --                 | --                  | 41<br>(33 - 47)        | 181<br>(150 - 214)        | 357<br>(297 - 429)           |
| Nasopharynx cancer                            | 60<br>(33 - 130)              | --                 | 1<br>(0 - 1)        | 9<br>(5 - 19)          | 21<br>(11 - 43)           | 30<br>(17 - 66)              |
| Other pharynx cancer                          | 199<br>(163 - 244)            | --                 | --                  | 15<br>(11 - 19)        | 88<br>(71 - 111)          | 95<br>(76 - 119)             |
| Gallbladder and biliary tract cancer          | 938<br>(643 - 1,230)          | --                 | --                  | 14<br>(10 - 18)        | 187<br>(128 - 240)        | 737<br>(500 - 978)           |
| Pancreatic cancer                             | 4,769<br>(4,296 - 5,165)      | --                 | --                  | 109<br>(96 - 123)      | 1,249<br>(1,110 - 1,374)  | 3,411<br>(3,056 - 3,699)     |
| Malignant skin melanoma                       | 1,024<br>(662 - 1,287)        | --                 | --                  | 155<br>(110 - 207)     | 336<br>(223 - 431)        | 533<br>(331 - 659)           |
| Non-melanoma skin cancer                      | 344<br>(250 - 438)            | --                 | --                  | 6<br>(5 - 8)           | 29<br>(22 - 37)           | 309<br>(219 - 400)           |
| Ovarian cancer                                | 4,935<br>(4,345 - 5,428)      | --                 | --                  | 316<br>(276 - 365)     | 1,891<br>(1,658 - 2,111)  | 2,727<br>(2,305 - 3,026)     |
| Testicular cancer                             | --                            | --                 | --                  | --                     | --                        | --                           |
| Kidney cancer                                 | 1,567<br>(1,168 - 1,914)      | 3<br>(2 - 4)       | 3<br>(2 - 4)        | 65<br>(52 - 81)        | 486<br>(394 - 605)        | 1,010<br>(689 - 1,301)       |
| Bladder cancer                                | 1,604<br>(1,108 - 2,256)      | --                 | --                  | 22<br>(15 - 31)        | 247<br>(172 - 359)        | 1,335<br>(905 - 1,910)       |
| Brain and nervous system cancer               | 1,548<br>(1,141 - 1,763)      | 10<br>(7 - 14)     | 26<br>(21 - 33)     | 232<br>(184 - 284)     | 653<br>(508 - 785)        | 626<br>(405 - 719)           |
| Thyroid cancer                                | 228<br>(169 - 287)            | --                 | 0<br>(0 - 0)        | 7<br>(5 - 9)           | 48<br>(34 - 62)           | 173<br>(130 - 223)           |
| Mesothelioma                                  | 359<br>(245 - 496)            | --                 | --                  | 15<br>(11 - 21)        | 136<br>(98 - 201)         | 208<br>(132 - 276)           |
| Hodgkin lymphoma                              | 157<br>(107 - 204)            | 0<br>(0 - 0)       | 1<br>(1 - 1)        | 48<br>(34 - 62)        | 64<br>(29 - 55)           | 64<br>(41 - 84)              |
| Non-Hodgkin lymphoma                          | 2,572<br>(1,485 - 3,625)      | 2<br>(1 - 3)       | 4<br>(2 - 6)        | 143<br>(86 - 214)      | 678<br>(406 - 959)        | 1,746<br>(945 - 2,421)       |
| Multiple myeloma                              | 1,558<br>(1,045 - 2,335)      | --                 | --                  | 34<br>(22 - 51)        | 405<br>(262 - 623)        | 1,120<br>(735 - 1,674)       |
| Leukemia                                      | 2,015<br>(1,662 - 2,291)      | 13<br>(9 - 18)     | 26<br>(20 - 32)     | 166<br>(141 - 194)     | 415<br>(330 - 484)        | 1,395<br>(1,156 - 1,586)     |
| Other neoplasms                               | 3,569<br>(2,686 - 4,066)      | 26<br>(19 - 33)    | 31<br>(25 - 37)     | 264<br>(208 - 302)     | 780<br>(609 - 891)        | 2,469<br>(1,760 - 2,862)     |
| Cardiovascular diseases                       | 103,032<br>(95,011 - 121,992) | 13<br>(9 - 18)     | 9<br>(6 - 11)       | 1,124<br>(892 - 1,326) | 8,193<br>(7,244 - 10,918) | 93,693<br>(86,554 - 109,883) |
| Rheumatic heart disease                       | 1,085<br>(831 - 1,955)        | 0<br>(0 - 0)       | 0<br>(0 - 0)        | 42<br>(32 - 63)        | 201<br>(155 - 401)        | 841<br>(632 - 1,514)         |
| Ischemic heart disease                        | 47,415<br>(41,458 - 62,743)   | 1<br>(0 - 1)       | 1<br>(1 - 2)        | 412<br>(294 - 530)     | 4,252<br>(3,628 - 6,398)  | 42,750<br>(37,100 - 55,979)  |
| Cerebrovascular disease                       | 34,944<br>(30,518 - 45,488)   | 3<br>(2 - 4)       | 3<br>(2 - 4)        | 387<br>(292 - 466)     | 2,140<br>(1,798 - 2,939)  | 32,411<br>(28,121 - 42,012)  |
| Ischemic stroke                               | 21,170<br>(18,009 - 28,522)   | 1<br>(0 - 1)       | 0<br>(0 - 1)        | 34<br>(20 - 44)        | 572<br>(423 - 863)        | 20,563<br>(17,537 - 27,636)  |
| Hemorrhagic stroke                            | 13,774<br>(9,921 - 17,873)    | 2<br>(1 - 3)       | 3<br>(2 - 3)        | 354<br>(267 - 426)     | 1,568<br>(1,273 - 2,170)  | 11,847<br>(8,336 - 15,543)   |
| Hypertensive heart disease                    | 1,743<br>(1,111 - 2,236)      | 0<br>(0 - 0)       | 0<br>(0 - 0)        | 24<br>(15 - 30)        | 201<br>(136 - 266)        | 1,518<br>(943 - 1,949)       |
| Cardiomyopathy and myocarditis                | 1,795<br>(1,363 - 2,409)      | 6<br>(4 - 9)       | 3<br>(2 - 4)        | 53<br>(35 - 70)        | 125<br>(82 - 168)         | 1,609<br>(1,224 - 2,159)     |
| Atrial fibrillation and flutter               | 3,576<br>(2,800 - 4,219)      | --                 | --                  | 2<br>(2 - 3)           | 80<br>(62 - 100)          | 3,494<br>(2,731 - 4,137)     |
| Aortic aneurysm                               | 3,548<br>(2,273 - 5,572)      | --                 | --                  | 23<br>(15 - 36)        | 309<br>(199 - 503)        | 3,216<br>(2,036 - 5,066)     |
| Peripheral vascular disease                   | 1,625<br>(1,287 - 1,936)      | --                 | --                  | 4<br>(3 - 5)           | 72<br>(58 - 93)           | 1,549<br>(1,230 - 1,841)     |
| Endocarditis                                  | 341<br>(249 - 551)            | 1<br>(0 - 1)       | 0<br>(0 - 0)        | 14<br>(9 - 23)         | 62<br>(42 - 112)          | 264<br>(191 - 428)           |
| Other cardiovascular and circulatory diseases | 6,959<br>(4,343 - 8,245)      | 2<br>(1 - 3)       | 1<br>(1 - 2)        | 163<br>(96 - 199)      | 752<br>(486 - 971)        | 6,041<br>(3,727 - 7,188)     |
| Chronic respiratory diseases                  | 19,226<br>(14,372 - 21,228)   | 16<br>(11 - 21)    | 10<br>(7 - 11)      | 244<br>(201 - 275)     | 2,735<br>(2,246 - 3,134)  | 16,222<br>(11,838 - 18,009)  |
| Chronic obstructive pulmonary disease         | 16,119<br>(12,841 - 18,499)   | 9<br>(5 - 12)      | 1<br>(1 - 2)        | 98<br>(69 - 130)       | 2,270<br>(1,881 - 2,656)  | 13,741<br>(10,793 - 15,906)  |
| Pneumoconiosis                                | 25<br>(16 - 37)               | 0<br>(0 - 0)       | 0<br>(0 - 0)        | 2<br>(1 - 2)           | 3<br>(2 - 5)              | 19<br>(11 - 30)              |
| Silicosis                                     | 1<br>(1 - 2)                  | 0<br>(0 - 0)       | 0<br>(0 - 0)        | 0<br>(0 - 1)           | 0<br>(0 - 0)              | 0<br>(0 - 1)                 |
| Asbestosis                                    | 4<br>(2 - 6)                  | 0<br>(0 - 0)       | 0<br>(0 - 0)        | 0<br>(0 - 1)           | 0<br>(0 - 1)              | 3<br>(2 - 5)                 |
| Coal workers pneumoconiosis                   | 1<br>(1 - 1)                  | 0<br>(0 - 0)       | 0<br>(0 - 0)        | 0<br>(0 - 1)           | 0<br>(0 - 0)              | 0<br>(0 - 0)                 |
| Other pneumoconiosis                          | 18<br>(11 - 28)               | 0<br>(0 - 0)       | 0<br>(0 - 0)        | 1<br>(0 - 1)           | 2<br>(1 - 3)              | 15<br>(9 - 24)               |

Web Table 31- United Kingdom deaths with 95% UI by age, sex, and cause in 2013

| Cause                                               | Females, All Ages           | Females, 0-4 Years | Females, 5-14 Years | Females, 15-49 Years | Females, 50-69 Years     | Females, 70-80 Years        |
|-----------------------------------------------------|-----------------------------|--------------------|---------------------|----------------------|--------------------------|-----------------------------|
| Asthma                                              | 1,200<br>(696 - 1,841)      | 3<br>(1 - 4)       | 6<br>(5 - 8)        | 103<br>(79 - 130)    | 191<br>(120 - 320)       | 897<br>(457 - 1,422)        |
| Interstitial lung disease and pulmonary sarcoidosis | 1,758<br>(540 - 3,140)      | 2<br>(1 - 3)       | 1<br>(0 - 2)        | 38<br>(15 - 56)      | 264<br>(92 - 451)        | 1,453<br>(431 - 2,657)      |
| Other chronic respiratory diseases                  | 125<br>(79 - 188)           | 3<br>(2 - 4)       | 0<br>(0 - 1)        | 3<br>(2 - 3)         | 8<br>(5 - 11)            | 112<br>(68 - 172)           |
| Cirrhosis                                           | 3,305<br>(2,996 - 3,566)    | 2<br>(2 - 3)       | 2<br>(2 - 2)        | 632<br>(568 - 698)   | 1,387<br>(1,234 - 1,514) | 1,282<br>(1,155 - 1,387)    |
| Cirrhosis due to hepatitis B                        | 455<br>(364 - 555)          | 0<br>(0 - 0)       | 0<br>(0 - 0)        | 76<br>(56 - 97)      | 190<br>(143 - 241)       | 188<br>(154 - 230)          |
| Cirrhosis due to hepatitis C                        | 1,806<br>(1,546 - 2,051)    | 0<br>(0 - 0)       | 1<br>(1 - 1)        | 353<br>(299 - 410)   | 773<br>(646 - 891)       | 679<br>(574 - 792)          |
| Cirrhosis due to alcohol use                        | 625<br>(526 - 738)          | --                 | --                  | 73<br>(51 - 94)      | 241<br>(188 - 296)       | 311<br>(264 - 375)          |
| Cirrhosis due to other causes                       | 418<br>(326 - 520)          | 2<br>(1 - 3)       | 1<br>(1 - 2)        | 129<br>(104 - 159)   | 182<br>(139 - 237)       | 103<br>(71 - 132)           |
| Digestive diseases                                  | 11,690<br>(10,003 - 14,383) | 6<br>(4 - 7)       | 6<br>(5 - 7)        | 198<br>(163 - 225)   | 1,168<br>(970 - 1,349)   | 10,312<br>(8,819 - 12,810)  |
| Peptic ulcer disease                                | 1,864<br>(1,384 - 2,797)    | 0<br>(0 - 0)       | 0<br>(0 - 0)        | 26<br>(19 - 34)      | 184<br>(128 - 242)       | 1,654<br>(1,235 - 2,515)    |
| Gastritis and duodenitis                            | 122<br>(57 - 212)           | 0<br>(0 - 0)       | 0<br>(0 - 1)        | 5<br>(2 - 8)         | 17<br>(7 - 29)           | 99<br>(46 - 174)            |
| Appendicitis                                        | 140<br>(89 - 264)           | 0<br>(0 - 1)       | 1<br>(1 - 1)        | 8<br>(6 - 12)        | 25<br>(16 - 43)          | 106<br>(64 - 213)           |
| Paralytic ileus and intestinal obstruction          | 1,569<br>(783 - 2,360)      | 2<br>(1 - 2)       | 1<br>(1 - 2)        | 25<br>(13 - 37)      | 120<br>(57 - 182)        | 1,420<br>(699 - 2,166)      |
| Inguinal, femoral, and abdominal hernia             | 528<br>(201 - 1,285)        | 0<br>(0 - 0)       | 0<br>(0 - 0)        | 5<br>(2 - 8)         | 43<br>(18 - 100)         | 480<br>(180 - 1,170)        |
| Inflammatory bowel disease                          | 873<br>(617 - 1,448)        | 2<br>(1 - 2)       | 1<br>(1 - 1)        | 28<br>(20 - 41)      | 99<br>(68 - 149)         | 744<br>(522 - 1,275)        |
| Vascular intestinal disorders                       | 2,001<br>(846 - 3,197)      | 0<br>(0 - 1)       | 0<br>(0 - 1)        | 23<br>(10 - 39)      | 241<br>(110 - 386)       | 1,738<br>(724 - 2,793)      |
| Gallbladder and biliary diseases                    | 1,306<br>(822 - 1,650)      | 0<br>(0 - 0)       | 0<br>(0 - 0)        | 17<br>(11 - 21)      | 106<br>(62 - 136)        | 1,183<br>(740 - 1,514)      |
| Pancreatitis                                        | 665<br>(420 - 1,015)        | 0<br>(0 - 0)       | 0<br>(0 - 1)        | 36<br>(24 - 48)      | 113<br>(70 - 169)        | 515<br>(320 - 805)          |
| Other digestive diseases                            | 2,622<br>(2,061 - 3,294)    | 1<br>(1 - 1)       | 1<br>(1 - 1)        | 26<br>(20 - 31)      | 221<br>(162 - 269)       | 2,374<br>(1,873 - 3,018)    |
| Neurological disorders                              | 32,941<br>(29,172 - 36,767) | 40<br>(31 - 51)    | 19<br>(16 - 22)     | 389<br>(330 - 477)   | 1,545<br>(1,310 - 1,731) | 30,947<br>(27,256 - 34,588) |
| Alzheimer disease and other dementias               | 28,258<br>(24,832 - 31,739) | --                 | --                  | 3<br>(2 - 4)         | 548<br>(471 - 626)       | 27,707<br>(24,328 - 31,205) |
| Parkinson disease                                   | 2,088<br>(1,351 - 2,480)    | --                 | --                  | 2<br>(1 - 3)         | 92<br>(65 - 128)         | 1,994<br>(1,267 - 2,368)    |
| Epilepsy                                            | 429<br>(294 - 513)          | 7<br>(5 - 10)      | 9<br>(6 - 11)       | 150<br>(112 - 185)   | 85<br>(61 - 107)         | 177<br>(103 - 224)          |
| Multiple sclerosis                                  | 687<br>(389 - 1,026)        | --                 | --                  | 134<br>(86 - 218)    | 346<br>(198 - 517)       | 208<br>(105 - 278)          |
| Other neurological disorders                        | 1,479<br>(1,337 - 1,597)    | 33<br>(25 - 42)    | 10<br>(9 - 12)      | 100<br>(90 - 111)    | 475<br>(425 - 523)       | 860<br>(764 - 938)          |
| Mental and substance use disorders                  | 798<br>(624 - 1,093)        | 1<br>(1 - 2)       | 0<br>(0 - 0)        | 439<br>(377 - 565)   | 248<br>(150 - 402)       | 110<br>(84 - 143)           |
| Schizophrenia                                       | 51<br>(37 - 73)             | --                 | --                  | 2<br>(1 - 2)         | 6<br>(4 - 8)             | 44<br>(31 - 64)             |
| Alcohol use disorders                               | 330<br>(144 - 599)          | --                 | --                  | 121<br>(54 - 222)    | 176<br>(77 - 323)        | 33<br>(13 - 58)             |
| Drug use disorders                                  | 410<br>(359 - 473)          | 1<br>(1 - 2)       | --                  | 310<br>(270 - 361)   | 66<br>(56 - 78)          | 33<br>(27 - 40)             |
| Opioid use disorders                                | 145<br>(125 - 170)          | 0<br>(0 - 1)       | --                  | 111<br>(94 - 132)    | 22<br>(17 - 26)          | 12<br>(9 - 15)              |
| Cocaine use disorders                               | 16<br>(14 - 20)             | 0<br>(0 - 0)       | --                  | 13<br>(11 - 16)      | 2<br>(2 - 3)             | 1<br>(1 - 1)                |
| Amphetamine use disorders                           | 17<br>(14 - 20)             | 0<br>(0 - 0)       | --                  | 13<br>(10 - 16)      | 3<br>(2 - 4)             | 1<br>(1 - 2)                |
| Other drug use disorders                            | 233<br>(204 - 270)          | 1<br>(0 - 1)       | --                  | 173<br>(150 - 204)   | 40<br>(34 - 47)          | 19<br>(15 - 24)             |
| Eating disorders                                    | 7<br>(5 - 8)                | --                 | 0<br>(0 - 0)        | 6<br>(5 - 8)         | --                       | --                          |
| Anorexia nervosa                                    | 7<br>(5 - 8)                | --                 | 0<br>(0 - 0)        | 6<br>(5 - 8)         | --                       | --                          |
| Diabetes, urogenital, blood, and endocrine diseases | 12,527<br>(9,679 - 13,988)  | 42<br>(30 - 55)    | 25<br>(20 - 32)     | 347<br>(295 - 392)   | 1,150<br>(960 - 1,289)   | 10,963<br>(8,289 - 12,318)  |
| Diabetes mellitus                                   | 3,192<br>(2,796 - 3,501)    | 1<br>(1 - 2)       | 2<br>(1 - 3)        | 76<br>(67 - 87)      | 366<br>(322 - 408)       | 2,746<br>(2,390 - 3,034)    |
| Acute glomerulonephritis                            | 7<br>(5 - 8)                | 0<br>(0 - 0)       | 0<br>(0 - 0)        | 1<br>(1 - 2)         | 1<br>(1 - 1)             | 4<br>(3 - 5)                |
| Chronic kidney disease                              | 3,219<br>(2,652 - 3,957)    | 2<br>(2 - 3)       | 2<br>(1 - 2)        | 68<br>(57 - 85)      | 253<br>(214 - 323)       | 2,894<br>(2,360 - 3,547)    |
| Chronic kidney disease due to diabetes mellitus     | 470<br>(364 - 604)          | 0<br>(0 - 0)       | 0<br>(0 - 0)        | 13<br>(11 - 17)      | 46<br>(35 - 58)          | 411<br>(311 - 531)          |

Web Table 31- United Kingdom deaths with 95% UI by age, sex, and cause in 2013

| Cause                                               | Females, All Ages        | Females, 0-4 Years | Females, 5-14 Years | Females, 15-49 Years     | Females, 50-69 Years   | Females, 70-80 Years     |
|-----------------------------------------------------|--------------------------|--------------------|---------------------|--------------------------|------------------------|--------------------------|
| Chronic kidney disease due to hypertension          | 876<br>(486 - 1,284)     | 0<br>(0 - 0)       | 0<br>(0 - 0)        | 10<br>(5 - 15)           | 65<br>(37 - 100)       | 801<br>(444 - 1,175)     |
| Chronic kidney disease due to glomerulonephritis    | 188<br>(82 - 286)        | 1<br>(0 - 1)       | 0<br>(0 - 0)        | 7<br>(4 - 9)             | 19<br>(11 - 26)        | 162<br>(66 - 253)        |
| Chronic kidney disease due to other causes          | 1,685<br>(1,218 - 2,329) | 1<br>(1 - 2)       | 1<br>(1 - 1)        | 38<br>(29 - 52)          | 124<br>(89 - 172)      | 1,521<br>(1,083 - 2,107) |
| Urinary diseases and male infertility               | 4,792<br>(2,474 - 5,932) | 4<br>(2 - 6)       | 2<br>(1 - 3)        | 66<br>(40 - 84)          | 290<br>(163 - 364)     | 4,430<br>(2,246 - 5,510) |
| Interstitial nephritis and urinary tract infections | 4,381<br>(2,234 - 5,442) | 3<br>(1 - 4)       | 2<br>(1 - 2)        | 56<br>(33 - 71)          | 250<br>(139 - 315)     | 4,070<br>(2,043 - 5,075) |
| Urolithiasis                                        | 102<br>(54 - 209)        | --                 | 0<br>(0 - 0)        | 4<br>(3 - 8)             | 17<br>(9 - 32)         | 80<br>(42 - 172)         |
| Other urinary diseases                              | 310<br>(101 - 447)       | 1<br>(1 - 2)       | 0<br>(0 - 0)        | 6<br>(3 - 8)             | 23<br>(10 - 33)        | 280<br>(85 - 411)        |
| Gynecological diseases                              | 35<br>(29 - 51)          | --                 | --                  | 5<br>(4 - 7)             | 6<br>(5 - 9)           | 24<br>(19 - 35)          |
| Uterine fibroids                                    | 10<br>(8 - 15)           | --                 | --                  | 1<br>(1 - 2)             | 2<br>(1 - 2)           | 7<br>(6 - 10)            |
| Polycystic ovarian syndrome                         | 0<br>(0 - 0)             | --                 | --                  | 0<br>(0 - 0)             | 0<br>(0 - 0)           | --                       |
| Endometriosis                                       | 1<br>(1 - 1)             | --                 | --                  | 1<br>(1 - 1)             | 0<br>(0 - 0)           | --                       |
| Genital prolapse                                    | 8<br>(7 - 11)            | --                 | --                  | 1<br>(0 - 1)             | 1<br>(1 - 2)           | 6<br>(5 - 9)             |
| Other gynecological diseases                        | 16<br>(13 - 23)          | --                 | --                  | 2<br>(2 - 3)             | 3<br>(3 - 5)           | 11<br>(9 - 16)           |
| Hemoglobinopathies and hemolytic anemias            | 155<br>(104 - 252)       | 3<br>(2 - 5)       | 2<br>(2 - 4)        | 13<br>(9 - 20)           | 25<br>(16 - 40)        | 111<br>(74 - 187)        |
| Thalassemias                                        | 6<br>(4 - 10)            | 1<br>(1 - 2)       | 1<br>(1 - 2)        | 4<br>(3 - 7)             | 0<br>(0 - 0)           | 0<br>(0 - 0)             |
| Sickle cell disorders                               | 25<br>(17 - 40)          | 1<br>(1 - 2)       | 1<br>(1 - 2)        | 5<br>(4 - 8)             | 12<br>(8 - 19)         | 6<br>(4 - 10)            |
| G6PD deficiency                                     | 0<br>(0 - 1)             | 0<br>(0 - 0)       | 0<br>(0 - 0)        | 0<br>(0 - 0)             | 0<br>(0 - 0)           | 0<br>(0 - 0)             |
| Other hemoglobinopathies and hemolytic anemias      | 123<br>(82 - 202)        | 1<br>(0 - 1)       | 0<br>(0 - 1)        | 3<br>(2 - 5)             | 13<br>(9 - 21)         | 105<br>(69 - 176)        |
| Endocrine, metabolic, blood, and immune disorders   | 1,127<br>(897 - 1,685)   | 31<br>(21 - 42)    | 16<br>(12 - 23)     | 117<br>(89 - 155)        | 209<br>(156 - 287)     | 753<br>(600 - 1,162)     |
| Musculoskeletal disorders                           | 1,391<br>(853 - 1,672)   | --                 | 2<br>(2 - 3)        | 69<br>(57 - 85)          | 255<br>(167 - 315)     | 1,065<br>(636 - 1,276)   |
| Rheumatoid arthritis                                | 679<br>(482 - 845)       | --                 | 0<br>(0 - 0)        | 7<br>(6 - 10)            | 109<br>(75 - 138)      | 562<br>(401 - 704)       |
| Other musculoskeletal disorders                     | 712<br>(401 - 885)       | --                 | 2<br>(1 - 2)        | 62<br>(51 - 77)          | 145<br>(93 - 185)      | 502<br>(246 - 625)       |
| Other non-communicable diseases                     | 2,409<br>(2,064 - 2,722) | 561<br>(433 - 736) | 35<br>(29 - 43)     | 172<br>(146 - 205)       | 233<br>(196 - 263)     | 1,407<br>(1,055 - 1,603) |
| Congenital anomalies                                | 935<br>(788 - 1,122)     | 445<br>(349 - 567) | 34<br>(28 - 42)     | 154<br>(129 - 188)       | 144<br>(120 - 171)     | 158<br>(126 - 196)       |
| Neural tube defects                                 | 43<br>(32 - 58)          | 30<br>(21 - 42)    | 2<br>(2 - 3)        | 8<br>(6 - 11)            | 1<br>(1 - 2)           | 1<br>(1 - 1)             |
| Congenital heart anomalies                          | 360<br>(298 - 435)       | 149<br>(115 - 193) | 18<br>(14 - 22)     | 89<br>(72 - 110)         | 50<br>(37 - 67)        | 54<br>(44 - 69)          |
| Cleft lip and cleft palate                          | 0<br>(0 - 0)             | 0<br>(0 - 0)       | --                  | --                       | --                     | --                       |
| Down syndrome                                       | 112<br>(61 - 146)        | 11<br>(5 - 17)     | 1<br>(1 - 2)        | 26<br>(13 - 35)          | 67<br>(39 - 88)        | 6<br>(2 - 8)             |
| Chromosomal unbalanced rearrangements               | 68<br>(42 - 96)          | 60<br>(37 - 87)    | 2<br>(1 - 3)        | 4<br>(2 - 6)             | 1<br>(1 - 2)           | 1<br>(0 - 1)             |
| Other congenital anomalies                          | 352<br>(287 - 435)       | 194<br>(147 - 255) | 10<br>(8 - 13)      | 27<br>(21 - 35)          | 24<br>(17 - 34)        | 96<br>(75 - 124)         |
| Skin and subcutaneous diseases                      | 1,359<br>(983 - 1,562)   | 2<br>(1 - 3)       | 1<br>(1 - 1)        | 18<br>(14 - 21)          | 89<br>(68 - 105)       | 1,250<br>(914 - 1,446)   |
| Cellulitis                                          | 532<br>(255 - 711)       | 0<br>(0 - 1)       | 0<br>(0 - 0)        | 7<br>(4 - 9)             | 43<br>(24 - 58)        | 482<br>(232 - 651)       |
| Pyoderma                                            | 516<br>(342 - 717)       | 1<br>(1 - 1)       | 0<br>(0 - 0)        | 7<br>(5 - 9)             | 31<br>(21 - 45)        | 477<br>(316 - 659)       |
| Decubitus ulcer                                     | 243<br>(181 - 372)       | 0<br>(0 - 0)       | 0<br>(0 - 0)        | 2<br>(1 - 3)             | 10<br>(7 - 17)         | 230<br>(170 - 353)       |
| Other skin and subcutaneous diseases                | 68<br>(41 - 142)         | 0<br>(0 - 0)       | 0<br>(0 - 0)        | 2<br>(1 - 3)             | 5<br>(3 - 10)          | 60<br>(35 - 127)         |
| Sudden infant death syndrome                        | 115<br>(62 - 245)        | 115<br>(62 - 245)  | --                  | --                       | --                     | --                       |
| Injuries                                            | 8,314<br>(6,765 - 9,296) | 91<br>(72 - 115)   | 55<br>(48 - 65)     | 1,133<br>(1,024 - 1,294) | 1,037<br>(909 - 1,190) | 5,998<br>(4,516 - 6,854) |
| Transport injuries                                  | 852<br>(707 - 1,108)     | 16<br>(12 - 21)    | 29<br>(24 - 37)     | 291<br>(245 - 354)       | 172<br>(134 - 214)     | 343<br>(273 - 485)       |
| Road injuries                                       | 821<br>(672 - 1,074)     | 15<br>(11 - 20)    | 27<br>(23 - 35)     | 278<br>(234 - 339)       | 165<br>(125 - 204)     | 335<br>(268 - 475)       |
| Pedestrian road injuries                            | 281<br>(202 - 403)       | 6<br>(4 - 9)       | 12<br>(9 - 17)      | 42<br>(26 - 60)          | 49<br>(32 - 70)        | 172<br>(124 - 264)       |



Web Table 31- United Kingdom deaths with 95% UI by age, sex, and cause in 2013

| Cause                                           | Females, All Ages        | Females, 0-4 Years | Females, 5-14 Years | Females, 15-49 Years | Females, 50-69 Years | Females, 70-80 Years     |
|-------------------------------------------------|--------------------------|--------------------|---------------------|----------------------|----------------------|--------------------------|
| Cyclist road injuries                           | 37<br>(24 - 51)          | 0<br>(0 - 1)       | 3<br>(2 - 4)        | 15<br>(10 - 20)      | 10<br>(7 - 14)       | 8<br>(5 - 12)            |
| Motorcyclist road injuries                      | 31<br>(13 - 59)          | 0<br>(0 - 0)       | 0<br>(0 - 1)        | 19<br>(8 - 36)       | 5<br>(2 - 10)        | 6<br>(2 - 13)            |
| Motor vehicle road injuries                     | 460<br>(340 - 586)       | 8<br>(5 - 11)      | 12<br>(8 - 16)      | 199<br>(159 - 245)   | 96<br>(68 - 123)     | 146<br>(98 - 206)        |
| Other road injuries                             | 13<br>(7 - 21)           | 0<br>(0 - 0)       | 0<br>(0 - 1)        | 4<br>(2 - 6)         | 4<br>(2 - 6)         | 5<br>(3 - 8)             |
| Other transport injuries                        | 30<br>(20 - 49)          | 1<br>(1 - 1)       | 2<br>(1 - 3)        | 13<br>(9 - 21)       | 7<br>(5 - 12)        | 7<br>(4 - 13)            |
| Unintentional injuries                          | 6,237<br>(4,792 - 7,147) | 67<br>(52 - 85)    | 21<br>(18 - 26)     | 250<br>(219 - 299)   | 490<br>(414 - 569)   | 5,408<br>(3,981 - 6,244) |
| Falls                                           | 4,440<br>(3,039 - 5,214) | 5<br>(4 - 7)       | 2<br>(2 - 3)        | 56<br>(40 - 68)      | 189<br>(125 - 232)   | 4,187<br>(2,847 - 4,935) |
| Drowning                                        | 63<br>(48 - 85)          | 7<br>(4 - 9)       | 3<br>(2 - 4)        | 16<br>(12 - 21)      | 16<br>(11 - 23)      | 21<br>(15 - 30)          |
| Fire, heat, and hot substances                  | 226<br>(174 - 317)       | 9<br>(7 - 14)      | 4<br>(3 - 6)        | 29<br>(23 - 39)      | 52<br>(40 - 74)      | 133<br>(99 - 188)        |
| Poisonings                                      | 90<br>(68 - 172)         | 1<br>(1 - 2)       | 1<br>(1 - 2)        | 34<br>(26 - 63)      | 25<br>(18 - 48)      | 29<br>(21 - 59)          |
| Exposure to mechanical forces                   | 102<br>(67 - 120)        | 16<br>(8 - 22)     | 5<br>(3 - 6)        | 23<br>(15 - 28)      | 15<br>(10 - 18)      | 43<br>(29 - 52)          |
| Unintentional firearm injuries                  | 5<br>(4 - 5)             | 0<br>(0 - 0)       | 0<br>(0 - 1)        | 2<br>(2 - 2)         | 1<br>(1 - 1)         | 1<br>(1 - 1)             |
| Unintentional suffocation                       | 46<br>(16 - 58)          | 12<br>(4 - 17)     | 2<br>(1 - 3)        | 13<br>(4 - 16)       | 5<br>(2 - 6)         | 14<br>(5 - 19)           |
| Other exposure to mechanical forces             | 51<br>(35 - 62)          | 4<br>(2 - 5)       | 2<br>(1 - 3)        | 9<br>(6 - 11)        | 9<br>(6 - 11)        | 27<br>(20 - 34)          |
| Adverse effects of medical treatment            | 575<br>(453 - 847)       | 5<br>(3 - 9)       | 2<br>(1 - 3)        | 26<br>(20 - 40)      | 93<br>(71 - 146)     | 449<br>(348 - 667)       |
| Animal contact                                  | 17<br>(6 - 25)           | 1<br>(0 - 2)       | 1<br>(0 - 1)        | 4<br>(1 - 6)         | 4<br>(1 - 6)         | 7<br>(3 - 12)            |
| Venomous animal contact                         | 4<br>(2 - 8)             | 0<br>(0 - 0)       | 0<br>(0 - 0)        | 1<br>(0 - 3)         | 1<br>(0 - 2)         | 1<br>(0 - 3)             |
| Non-venomous animal contact                     | 12<br>(4 - 19)           | 1<br>(0 - 1)       | 1<br>(0 - 1)        | 2<br>(1 - 4)         | 2<br>(1 - 4)         | 6<br>(2 - 10)            |
| Foreign body                                    | 695<br>(358 - 921)       | 20<br>(12 - 30)    | 4<br>(2 - 6)        | 56<br>(33 - 85)      | 91<br>(53 - 131)     | 523<br>(245 - 700)       |
| Pulmonary aspiration and foreign body in airway | 686<br>(351 - 913)       | 20<br>(11 - 30)    | 4<br>(2 - 5)        | 55<br>(32 - 83)      | 90<br>(52 - 130)     | 518<br>(242 - 696)       |
| Foreign body in other body part                 | 8<br>(5 - 11)            | 0<br>(0 - 0)       | 0<br>(0 - 0)        | 2<br>(1 - 2)         | 1<br>(1 - 2)         | 5<br>(3 - 7)             |
| Other unintentional injuries                    | 30<br>(25 - 37)          | 3<br>(2 - 4)       | 0<br>(0 - 0)        | 5<br>(4 - 6)         | 5<br>(4 - 7)         | 17<br>(13 - 22)          |
| Self-harm and interpersonal violence            | 1,225<br>(1,075 - 1,491) | 7<br>(5 - 10)      | 5<br>(4 - 6)        | 591<br>(523 - 706)   | 375<br>(316 - 456)   | 247<br>(209 - 311)       |
| Self-harm                                       | 1,128<br>(989 - 1,367)   | --                 | 2<br>(1 - 2)        | 542<br>(479 - 653)   | 360<br>(304 - 438)   | 225<br>(189 - 289)       |
| Interpersonal violence                          | 97<br>(65 - 128)         | 7<br>(5 - 10)      | 3<br>(2 - 5)        | 48<br>(33 - 64)      | 15<br>(10 - 20)      | 22<br>(15 - 30)          |
| Assault by firearm                              | 11<br>(6 - 18)           | 0<br>(0 - 1)       | 0<br>(0 - 1)        | 7<br>(4 - 11)        | 2<br>(1 - 3)         | 2<br>(1 - 3)             |
| Assault by sharp object                         | 20<br>(12 - 30)          | 1<br>(0 - 1)       | 0<br>(0 - 1)        | 14<br>(9 - 21)       | 3<br>(2 - 5)         | 2<br>(1 - 3)             |
| Assault by other means                          | 65<br>(43 - 86)          | 6<br>(4 - 8)       | 3<br>(2 - 4)        | 27<br>(17 - 37)      | 10<br>(7 - 14)       | 19<br>(13 - 25)          |

Web Table 31- United States deaths with 95% UI by age, sex, and cause in 2013

| Cause                                                             | Both Sexes, All Ages                 | Both Sexes, 0-4 Years       | Both Sexes, 5-14 Years   | Both Sexes, 15-49 Years        | Both Sexes, 50-69 Years        | Both Sexes, 70-80 Years              |
|-------------------------------------------------------------------|--------------------------------------|-----------------------------|--------------------------|--------------------------------|--------------------------------|--------------------------------------|
| All causes                                                        | 2,685,995<br>(2,553,603 - 2,813,524) | 28,013<br>(23,084 - 34,150) | 5,453<br>(4,855 - 6,166) | 209,143<br>(193,937 - 224,415) | 664,054<br>(620,662 - 706,418) | 1,779,333<br>(1,705,700 - 1,854,668) |
| Communicable, maternal, neonatal, and nutritional diseases        | 135,391<br>(118,196 - 156,038)       | 13,178<br>(10,857 - 15,964) | 334<br>(271 - 405)       | 12,445<br>(10,164 - 14,927)    | 22,120<br>(19,254 - 25,437)    | 87,313<br>(71,659 - 107,552)         |
| HIV/AIDS and tuberculosis                                         | 11,230<br>(7,355 - 15,483)           | 14<br>(6 - 30)              | 6<br>(3 - 10)            | 6,394<br>(4,100 - 8,792)       | 3,805<br>(2,178 - 6,013)       | 1,011<br>(679 - 1,559)               |
| Tuberculosis                                                      | 1,033<br>(862 - 1,814)               | 3<br>(2 - 5)                | 4<br>(2 - 5)             | 122<br>(99 - 214)              | 337<br>(278 - 553)             | 567<br>(436 - 1,077)                 |
| HIV/AIDS                                                          | 10,197<br>(6,265 - 14,519)           | 11<br>(3 - 27)              | 2<br>(0 - 6)             | 6,272<br>(3,989 - 8,665)       | 3,468<br>(1,816 - 5,674)       | 444<br>(173 - 819)                   |
| HIV/AIDS resulting in mycobacterial infection                     | 530<br>(303 - 821)                   | 0<br>(0 - 1)                | 0<br>(0 - 0)             | 316<br>(187 - 474)             | 187<br>(94 - 325)              | 26<br>(10 - 49)                      |
| HIV/AIDS resulting in other diseases                              | 9,667<br>(5,971 - 13,757)            | 10<br>(3 - 26)              | 2<br>(0 - 6)             | 5,955<br>(3,797 - 8,228)       | 3,281<br>(1,720 - 5,378)       | 418<br>(164 - 769)                   |
| Diarrhea, lower respiratory, and other common infectious diseases | 97,765<br>(82,093 - 118,516)         | 1,162<br>(850 - 1,528)      | 256<br>(203 - 318)       | 4,115<br>(3,547 - 4,742)       | 15,313<br>(12,957 - 17,952)    | 76,920<br>(61,432 - 98,823)          |
| Diarrheal diseases                                                | 8,881<br>(6,685 - 11,908)            | 150<br>(93 - 228)           | 15<br>(10 - 21)          | 285<br>(233 - 352)             | 1,239<br>(977 - 1,537)         | 7,192<br>(5,015 - 10,214)            |
| Intestinal infectious diseases                                    | 160<br>(72 - 328)                    | 31<br>(13 - 65)             | 27<br>(9 - 59)           | 61<br>(24 - 130)               | 24<br>(11 - 48)                | 18<br>(8 - 33)                       |
| Typhoid fever                                                     | 98<br>(32 - 224)                     | 16<br>(5 - 39)              | 18<br>(6 - 42)           | 41<br>(13 - 97)                | 14<br>(5 - 34)                 | 9<br>(3 - 20)                        |
| Paratyphoid fever                                                 | 32<br>(10 - 73)                      | 7<br>(2 - 16)               | 7<br>(2 - 15)            | 13<br>(4 - 31)                 | 4<br>(1 - 9)                   | 2<br>(1 - 5)                         |
| Other intestinal infectious diseases                              | 30<br>(19 - 45)                      | 8<br>(3 - 16)               | 2<br>(0 - 6)             | 7<br>(3 - 14)                  | 6<br>(2 - 12)                  | 7<br>(2 - 14)                        |
| Lower respiratory infections                                      | 85,756<br>(70,414 - 106,758)         | 627<br>(431 - 863)          | 119<br>(89 - 156)        | 3,144<br>(2,638 - 3,776)       | 13,319<br>(11,019 - 15,864)    | 68,547<br>(53,201 - 88,612)          |
| Upper respiratory infections                                      | 49<br>(18 - 120)                     | 1<br>(0 - 2)                | 0<br>(0 - 1)             | 6<br>(2 - 14)                  | 14<br>(3 - 34)                 | 28<br>(3 - 97)                       |
| Otitis media                                                      | 78<br>(67 - 91)                      | 5<br>(3 - 8)                | 4<br>(3 - 5)             | 16<br>(14 - 18)                | 22<br>(18 - 27)                | 31<br>(23 - 41)                      |
| Meningitis                                                        | 1,648<br>(1,476 - 1,923)             | 238<br>(164 - 366)          | 45<br>(36 - 57)          | 355<br>(309 - 410)             | 423<br>(366 - 490)             | 587<br>(492 - 723)                   |
| Pneumococcal meningitis                                           | 759<br>(646 - 952)                   | 89<br>(62 - 135)            | 21<br>(16 - 29)          | 162<br>(128 - 206)             | 199<br>(152 - 252)             | 287<br>(222 - 379)                   |
| H influenzae type B meningitis                                    | 124<br>(100 - 159)                   | 46<br>(30 - 74)             | 5<br>(3 - 7)             | 20<br>(14 - 27)                | 20<br>(13 - 29)                | 33<br>(22 - 48)                      |
| Meningococcal meningitis                                          | 295<br>(247 - 357)                   | 43<br>(27 - 67)             | 10<br>(7 - 15)           | 67<br>(50 - 90)                | 67<br>(44 - 93)                | 108<br>(73 - 155)                    |
| Other meningitis                                                  | 469<br>(361 - 574)                   | 59<br>(35 - 107)            | 9<br>(6 - 13)            | 106<br>(69 - 141)              | 136<br>(89 - 185)              | 160<br>(114 - 215)                   |
| Encephalitis                                                      | 874<br>(640 - 1,063)                 | 68<br>(39 - 105)            | 33<br>(17 - 46)          | 192<br>(135 - 238)             | 233<br>(161 - 312)             | 349<br>(235 - 475)                   |
| Diphtheria                                                        | 7<br>(1 - 22)                        | 2<br>(0 - 10)               | 1<br>(0 - 5)             | 3<br>(0 - 10)                  | 2<br>(0 - 12)                  | --                                   |
| Whooping cough                                                    | 43<br>(23 - 100)                     | 20<br>(3 - 77)              | 4<br>(3 - 5)             | 14<br>(12 - 16)                | 4<br>(4 - 5)                   | --                                   |
| Tetanus                                                           | 34<br>(27 - 46)                      | 2<br>(1 - 3)                | 4<br>(2 - 5)             | 14<br>(9 - 17)                 | 8<br>(6 - 11)                  | 6<br>(3 - 16)                        |
| Measles                                                           | 0<br>(0 - 0)                         | 0<br>(0 - 0)                | 0<br>(0 - 0)             | 0<br>(0 - 0)                   | 0<br>(0 - 0)                   | --                                   |
| Varicella and herpes zoster                                       | 235<br>(67 - 734)                    | 17<br>(2 - 57)              | 5<br>(0 - 17)            | 25<br>(8 - 50)                 | 25<br>(4 - 60)                 | 163<br>(11 - 677)                    |
| Neglected tropical diseases and malaria                           | 332<br>(245 - 382)                   | 12<br>(7 - 17)              | 15<br>(11 - 18)          | 87<br>(70 - 99)                | 111<br>(76 - 136)              | 107<br>(67 - 139)                    |
| Cysticercosis                                                     | 5<br>(4 - 6)                         | 0<br>(0 - 0)                | 0<br>(0 - 0)             | 2<br>(2 - 2)                   | 2<br>(2 - 2)                   | 1<br>(1 - 1)                         |
| Cystic echinococcosis                                             | 26<br>(24 - 28)                      | 0<br>(0 - 0)                | 1<br>(0 - 1)             | 7<br>(6 - 8)                   | 9<br>(9 - 10)                  | 9<br>(8 - 9)                         |
| Dengue                                                            | 31<br>(23 - 36)                      | 2<br>(1 - 3)                | 4<br>(2 - 5)             | 14<br>(11 - 17)                | 8<br>(6 - 9)                   | 3<br>(2 - 4)                         |
| Rabies                                                            | 28<br>(20 - 34)                      | 2<br>(1 - 3)                | 4<br>(2 - 5)             | 13<br>(9 - 16)                 | 7<br>(5 - 9)                   | 3<br>(2 - 3)                         |
| Other neglected tropical diseases                                 | 242<br>(148 - 287)                   | 8<br>(4 - 12)               | 7<br>(5 - 9)             | 51<br>(38 - 61)                | 85<br>(51 - 109)               | 92<br>(51 - 124)                     |
| Maternal disorders                                                | 796<br>(638 - 985)                   | --                          | 2<br>(1 - 3)             | 795<br>(637 - 983)             | --                             | --                                   |
| Maternal hemorrhage                                               | 41<br>(30 - 54)                      | --                          | 0<br>(0 - 0)             | 41<br>(30 - 54)                | --                             | --                                   |
| Maternal sepsis and other maternal infections                     | 60<br>(47 - 76)                      | --                          | 0<br>(0 - 0)             | 60<br>(47 - 76)                | --                             | --                                   |
| Maternal hypertensive disorders                                   | 60<br>(44 - 79)                      | --                          | 0<br>(0 - 0)             | 60<br>(44 - 79)                | --                             | --                                   |
| Maternal obstructed labor                                         | 48<br>(29 - 76)                      | --                          | 0<br>(0 - 0)             | 48<br>(29 - 75)                | --                             | --                                   |
| Maternal abortive outcome                                         | 92<br>(71 - 117)                     | --                          | 0<br>(0 - 0)             | 92<br>(71 - 117)               | --                             | --                                   |
| Indirect maternal deaths                                          | 139<br>(108 - 174)                   | --                          | 0<br>(0 - 0)             | 139<br>(108 - 174)             | --                             | --                                   |

Web Table 31- United States deaths with 95% UI by age, sex, and cause in 2013

| Cause                                                            | Both Sexes, All Ages                 | Both Sexes, 0-4 Years      | Both Sexes, 5-14 Years   | Both Sexes, 15-49 Years        | Both Sexes, 50-69 Years        | Both Sexes, 70-80 Years              |
|------------------------------------------------------------------|--------------------------------------|----------------------------|--------------------------|--------------------------------|--------------------------------|--------------------------------------|
| Late maternal deaths                                             | 137<br>(107 - 173)                   | --                         | 0<br>(0 - 1)             | 137<br>(107 - 172)             | --                             | --                                   |
| Maternal deaths aggravated by HIV/AIDS                           | 0<br>(0 - 0)                         | --                         | --                       | 0<br>(0 - 0)                   | --                             | --                                   |
| Other maternal disorders                                         | 217<br>(168 - 272)                   | --                         | 0<br>(0 - 1)             | 217<br>(168 - 272)             | --                             | --                                   |
| Neonatal disorders                                               | 11,700<br>(9,629 - 14,193)           | 11,700<br>(9,629 - 14,193) | --                       | --                             | --                             | --                                   |
| Neonatal preterm birth complications                             | 6,822<br>(5,215 - 8,683)             | 6,822<br>(5,215 - 8,683)   | --                       | --                             | --                             | --                                   |
| Neonatal encephalopathy due to birth asphyxia and trauma         | 1,650<br>(1,078 - 2,209)             | 1,650<br>(1,078 - 2,209)   | --                       | --                             | --                             | --                                   |
| Neonatal sepsis and other neonatal infections                    | 806<br>(468 - 1,452)                 | 806<br>(468 - 1,452)       | --                       | --                             | --                             | --                                   |
| Hemolytic disease and other neonatal jaundice                    | 23<br>(11 - 45)                      | 23<br>(11 - 45)            | --                       | --                             | --                             | --                                   |
| Other neonatal disorders                                         | 2,399<br>(1,648 - 3,266)             | 2,399<br>(1,648 - 3,266)   | --                       | --                             | --                             | --                                   |
| Nutritional deficiencies                                         | 8,295<br>(6,539 - 10,542)            | 25<br>(16 - 36)            | 9<br>(6 - 11)            | 357<br>(229 - 427)             | 1,016<br>(712 - 1,221)         | 6,888<br>(5,351 - 9,032)             |
| Protein-energy malnutrition                                      | 3,792<br>(2,509 - 5,474)             | 14<br>(8 - 23)             | 3<br>(2 - 5)             | 110<br>(57 - 164)              | 488<br>(277 - 659)             | 3,177<br>(2,030 - 4,749)             |
| Iodine deficiency                                                | 20<br>(3 - 80)                       | 0<br>(0 - 2)               | 0<br>(0 - 1)             | 2<br>(0 - 8)                   | 5<br>(0 - 21)                  | 12<br>(0 - 73)                       |
| Iron-deficiency anemia                                           | 3,990<br>(2,310 - 5,739)             | 6<br>(3 - 11)              | 3<br>(1 - 4)             | 215<br>(121 - 277)             | 460<br>(266 - 631)             | 3,306<br>(1,883 - 4,908)             |
| Other nutritional deficiencies                                   | 492<br>(260 - 862)                   | 5<br>(2 - 8)               | 3<br>(1 - 4)             | 29<br>(14 - 45)                | 63<br>(32 - 99)                | 393<br>(199 - 735)                   |
| Other communicable, maternal, neonatal, and nutritional diseases | 5,273<br>(4,167 - 6,142)             | 265<br>(168 - 371)         | 46<br>(34 - 61)          | 699<br>(571 - 941)             | 1,875<br>(1,444 - 2,175)       | 2,387<br>(1,695 - 2,943)             |
| Sexually transmitted diseases excluding HIV                      | 245<br>(167 - 347)                   | 58<br>(2 - 120)            | 6<br>(2 - 11)            | 37<br>(25 - 52)                | 43<br>(31 - 60)                | 101<br>(67 - 148)                    |
| Syphilis                                                         | 185<br>(117 - 272)                   | 58<br>(2 - 120)            | 5<br>(1 - 10)            | 16<br>(11 - 23)                | 26<br>(18 - 37)                | 80<br>(53 - 118)                     |
| Chlamydial infection                                             | 15<br>(11 - 21)                      | --                         | 0<br>(0 - 0)             | 6<br>(3 - 9)                   | 4<br>(3 - 6)                   | 5<br>(3 - 7)                         |
| Gonococcal infection                                             | 27<br>(21 - 37)                      | --                         | 0<br>(0 - 1)             | 8<br>(5 - 11)                  | 7<br>(5 - 10)                  | 11<br>(8 - 16)                       |
| Other sexually transmitted diseases                              | 18<br>(13 - 24)                      | --                         | 0<br>(0 - 1)             | 7<br>(5 - 10)                  | 5<br>(4 - 7)                   | 5<br>(3 - 7)                         |
| Hepatitis                                                        | 886<br>(744 - 1,043)                 | 4<br>(2 - 5)               | 4<br>(3 - 5)             | 211<br>(163 - 276)             | 457<br>(355 - 574)             | 210<br>(155 - 275)                   |
| Acute hepatitis A                                                | 313<br>(122 - 527)                   | 3<br>(2 - 4)               | 3<br>(2 - 5)             | 102<br>(44 - 166)              | 153<br>(57 - 275)              | 52<br>(15 - 108)                     |
| Acute hepatitis B                                                | 440<br>(266 - 654)                   | 1<br>(0 - 2)               | 0<br>(0 - 1)             | 76<br>(31 - 136)               | 239<br>(136 - 366)             | 124<br>(70 - 185)                    |
| Acute hepatitis C                                                | 133<br>(28 - 294)                    | --                         | 0<br>(0 - 1)             | 33<br>(6 - 78)                 | 66<br>(13 - 158)               | 34<br>(7 - 79)                       |
| Other infectious diseases                                        | 4,143<br>(3,035 - 4,966)             | 204<br>(128 - 277)         | 37<br>(25 - 49)          | 451<br>(357 - 678)             | 1,375<br>(933 - 1,651)         | 2,076<br>(1,366 - 2,598)             |
| Non-communicable diseases                                        | 2,372,972<br>(2,252,578 - 2,493,945) | 11,541<br>(9,182 - 14,506) | 2,553<br>(2,219 - 2,934) | 126,635<br>(116,122 - 136,628) | 599,855<br>(560,886 - 638,578) | 1,632,388<br>(1,560,604 - 1,707,355) |
| Neoplasms                                                        | 634,437<br>(594,190 - 676,367)       | 657<br>(458 - 921)         | 1,143<br>(964 - 1,344)   | 37,824<br>(34,111 - 42,578)    | 248,533<br>(230,715 - 269,503) | 346,281<br>(316,026 - 372,548)       |
| Esophageal cancer                                                | 15,588<br>(13,436 - 17,882)          | --                         | --                       | 796<br>(627 - 1,011)           | 7,653<br>(6,376 - 9,217)       | 7,138<br>(5,754 - 8,304)             |
| Stomach cancer                                                   | 17,657<br>(15,150 - 20,443)          | --                         | --                       | 1,130<br>(944 - 1,345)         | 5,684<br>(4,954 - 6,508)       | 10,843<br>(8,953 - 13,128)           |
| Liver cancer                                                     | 19,653<br>(13,955 - 24,829)          | --                         | 23<br>(16 - 34)          | 1,243<br>(903 - 1,720)         | 9,262<br>(6,184 - 12,347)      | 9,125<br>(6,364 - 12,217)            |
| Liver cancer due to hepatitis B                                  | 2,254<br>(1,516 - 3,152)             | --                         | 5<br>(3 - 9)             | 250<br>(170 - 370)             | 1,268<br>(785 - 1,869)         | 730<br>(498 - 1,038)                 |
| Liver cancer due to hepatitis C                                  | 9,711<br>(6,667 - 12,953)            | --                         | 3<br>(2 - 6)             | 548<br>(394 - 791)             | 4,621<br>(3,014 - 6,298)       | 4,539<br>(3,005 - 6,539)             |
| Liver cancer due to alcohol use                                  | 4,616<br>(3,019 - 6,354)             | --                         | --                       | 203<br>(129 - 307)             | 1,982<br>(1,205 - 2,911)       | 2,431<br>(1,559 - 3,473)             |
| Liver cancer due to other causes                                 | 3,073<br>(2,082 - 4,147)             | --                         | 14<br>(9 - 21)           | 242<br>(171 - 335)             | 1,390<br>(892 - 1,948)         | 1,426<br>(943 - 2,011)               |
| Larynx cancer                                                    | 4,039<br>(3,183 - 5,010)             | --                         | --                       | 218<br>(167 - 295)             | 2,111<br>(1,683 - 2,716)       | 1,709<br>(1,275 - 2,114)             |
| Tracheal, bronchus and lung cancer                               | 176,187<br>(159,444 - 192,076)       | --                         | --                       | 5,858<br>(4,980 - 7,091)       | 78,073<br>(70,409 - 87,712)    | 92,256<br>(77,648 - 104,336)         |
| Breast cancer                                                    | 45,299<br>(37,991 - 58,100)          | --                         | --                       | 5,265<br>(4,367 - 7,390)       | 20,051<br>(16,673 - 26,098)    | 19,983<br>(15,590 - 25,540)          |
| Cervical cancer                                                  | 6,419<br>(4,949 - 7,711)             | --                         | --                       | 1,381<br>(1,069 - 1,733)       | 2,829<br>(2,033 - 3,582)       | 2,209<br>(1,706 - 2,838)             |
| Uterine cancer                                                   | 6,571<br>(5,302 - 8,784)             | --                         | --                       | 218<br>(159 - 307)             | 2,757<br>(2,157 - 3,591)       | 3,595<br>(2,662 - 5,112)             |
| Prostate cancer                                                  | 37,950<br>(28,767 - 58,394)          | --                         | --                       | 152<br>(99 - 240)              | 7,993<br>(5,734 - 12,524)      | 29,805<br>(22,064 - 46,953)          |

Web Table 31- United States deaths with 95% UI by age, sex, and cause in 2013

| Cause                                         | Both Sexes, All Ages           | Both Sexes, 0-4 Years | Both Sexes, 5-14 Years | Both Sexes, 15-49 Years     | Both Sexes, 50-69 Years        | Both Sexes, 70-80 Years        |
|-----------------------------------------------|--------------------------------|-----------------------|------------------------|-----------------------------|--------------------------------|--------------------------------|
| Colon and rectum cancer                       | 68,003<br>(61,334 - 74,998)    | --                    | --                     | 3,714<br>(3,246 - 4,234)    | 23,638<br>(21,386 - 26,025)    | 40,650<br>(35,246 - 46,988)    |
| Lip and oral cavity cancer                    | 6,272<br>(5,536 - 7,089)       | --                    | --                     | 484<br>(404 - 590)          | 2,972<br>(2,506 - 3,470)       | 2,816<br>(2,367 - 3,324)       |
| Nasopharynx cancer                            | 1,195<br>(960 - 1,656)         | --                    | 6<br>(3 - 11)          | 194<br>(139 - 305)          | 632<br>(480 - 867)             | 362<br>(269 - 524)             |
| Other pharynx cancer                          | 3,460<br>(2,936 - 4,313)       | --                    | --                     | 265<br>(208 - 375)          | 2,072<br>(1,687 - 2,604)       | 1,123<br>(899 - 1,404)         |
| Gallbladder and biliary tract cancer          | 5,049<br>(3,852 - 6,623)       | --                    | --                     | 163<br>(122 - 212)          | 1,549<br>(1,195 - 1,953)       | 3,337<br>(2,478 - 4,574)       |
| Pancreatic cancer                             | 43,749<br>(39,517 - 47,967)    | --                    | --                     | 1,669<br>(1,420 - 1,934)    | 17,629<br>(15,847 - 19,528)    | 24,450<br>(21,417 - 27,777)    |
| Malignant skin melanoma                       | 10,644<br>(6,754 - 16,329)     | --                    | --                     | 1,597<br>(1,099 - 2,778)    | 4,574<br>(2,855 - 7,130)       | 4,473<br>(2,640 - 6,461)       |
| Non-melanoma skin cancer                      | 3,710<br>(2,736 - 5,395)       | --                    | --                     | 180<br>(123 - 304)          | 1,159<br>(830 - 1,778)         | 2,371<br>(1,663 - 3,326)       |
| Ovarian cancer                                | 17,376<br>(14,690 - 20,325)    | --                    | --                     | 1,187<br>(955 - 1,486)      | 7,642<br>(6,408 - 9,089)       | 8,548<br>(6,643 - 10,904)      |
| Testicular cancer                             | 419<br>(302 - 555)             | --                    | --                     | 279<br>(198 - 380)          | 96<br>(63 - 136)               | 44<br>(30 - 62)                |
| Kidney cancer                                 | 16,532<br>(14,269 - 19,336)    | 23<br>(13 - 35)       | 34<br>(22 - 50)        | 971<br>(783 - 1,204)        | 7,353<br>(6,076 - 8,896)       | 8,152<br>(6,469 - 10,336)      |
| Bladder cancer                                | 15,387<br>(12,037 - 18,154)    | --                    | --                     | 286<br>(225 - 356)          | 3,923<br>(3,208 - 4,593)       | 11,177<br>(8,532 - 13,570)     |
| Brain and nervous system cancer               | 15,900<br>(13,661 - 19,105)    | 123<br>(72 - 195)     | 335<br>(256 - 434)     | 2,460<br>(2,065 - 3,074)    | 7,514<br>(6,382 - 9,383)       | 5,468<br>(4,255 - 6,684)       |
| Thyroid cancer                                | 1,731<br>(1,266 - 2,098)       | --                    | 3<br>(2 - 4)           | 113<br>(89 - 137)           | 626<br>(476 - 751)             | 988<br>(668 - 1,269)           |
| Mesothelioma                                  | 3,387<br>(2,327 - 4,558)       | --                    | --                     | 114<br>(81 - 177)           | 1,266<br>(870 - 1,925)         | 2,007<br>(1,128 - 2,911)       |
| Hodgkin lymphoma                              | 1,565<br>(1,295 - 2,444)       | 2<br>(1 - 4)          | 11<br>(6 - 21)         | 490<br>(388 - 835)          | 494<br>(384 - 793)             | 568<br>(429 - 831)             |
| Non-Hodgkin lymphoma                          | 26,723<br>(17,550 - 34,052)    | 18<br>(10 - 31)       | 65<br>(38 - 107)       | 1,891<br>(1,318 - 2,886)    | 8,922<br>(5,839 - 12,436)      | 15,826<br>(9,886 - 20,135)     |
| Multiple myeloma                              | 13,541<br>(9,754 - 19,469)     | --                    | --                     | 475<br>(339 - 738)          | 5,121<br>(3,643 - 7,748)       | 7,946<br>(5,423 - 11,400)      |
| Leukemia                                      | 24,060<br>(21,652 - 26,510)    | 157<br>(94 - 244)     | 310<br>(242 - 391)     | 2,177<br>(1,926 - 2,466)    | 6,999<br>(6,200 - 7,863)       | 14,417<br>(12,477 - 16,613)    |
| Other neoplasms                               | 26,372<br>(20,859 - 30,721)    | 334<br>(235 - 468)    | 356<br>(257 - 447)     | 2,852<br>(2,446 - 3,545)    | 7,938<br>(6,827 - 9,391)       | 14,893<br>(10,285 - 18,486)    |
| Cardiovascular diseases                       | 870,626<br>(800,350 - 972,020) | 551<br>(388 - 728)    | 243<br>(189 - 294)     | 33,710<br>(29,883 - 37,651) | 183,580<br>(168,030 - 202,508) | 652,542<br>(595,052 - 740,304) |
| Rheumatic heart disease                       | 4,514<br>(3,584 - 6,517)       | 2<br>(1 - 3)          | 5<br>(3 - 7)           | 316<br>(240 - 528)          | 1,193<br>(924 - 2,020)         | 2,998<br>(2,203 - 4,116)       |
| Ischemic heart disease                        | 546,210<br>(493,493 - 634,080) | 32<br>(21 - 47)       | 29<br>(19 - 39)        | 18,032<br>(15,659 - 20,528) | 121,839<br>(110,527 - 137,283) | 406,277<br>(360,373 - 484,584) |
| Cerebrovascular disease                       | 164,233<br>(133,123 - 194,316) | 136<br>(87 - 189)     | 69<br>(50 - 87)        | 5,075<br>(3,967 - 6,217)    | 25,259<br>(20,047 - 29,865)    | 133,694<br>(106,674 - 160,765) |
| Ischemic stroke                               | 86,814<br>(70,233 - 110,541)   | 25<br>(15 - 40)       | 7<br>(5 - 11)          | 509<br>(341 - 669)          | 7,212<br>(5,508 - 9,026)       | 79,061<br>(63,223 - 101,209)   |
| Hemorrhagic stroke                            | 77,419<br>(56,812 - 92,237)    | 112<br>(67 - 155)     | 62<br>(45 - 79)        | 4,565<br>(3,536 - 5,562)    | 18,047<br>(13,705 - 21,498)    | 54,633<br>(38,365 - 66,272)    |
| Hypertensive heart disease                    | 34,775<br>(24,979 - 43,487)    | 2<br>(1 - 4)          | 4<br>(2 - 5)           | 2,599<br>(1,691 - 3,469)    | 9,920<br>(7,199 - 12,304)      | 22,250<br>(15,441 - 29,807)    |
| Cardiomyopathy and myocarditis                | 34,969<br>(27,629 - 44,281)    | 277<br>(193 - 370)    | 107<br>(80 - 132)      | 3,943<br>(3,149 - 5,076)    | 9,938<br>(8,147 - 13,939)      | 20,705<br>(15,201 - 26,581)    |
| Atrial fibrillation and flutter               | 18,906<br>(14,169 - 25,142)    | --                    | --                     | 69<br>(48 - 90)             | 1,374<br>(1,060 - 1,691)       | 17,463<br>(12,969 - 23,561)    |
| Aortic aneurysm                               | 15,789<br>(12,718 - 22,133)    | --                    | --                     | 700<br>(549 - 863)          | 3,877<br>(3,157 - 5,294)       | 11,213<br>(8,700 - 16,428)     |
| Peripheral vascular disease                   | 7,423<br>(5,840 - 9,369)       | --                    | --                     | 75<br>(58 - 95)             | 1,233<br>(981 - 1,510)         | 6,115<br>(4,594 - 7,975)       |
| Endocarditis                                  | 4,957<br>(3,566 - 7,091)       | 16<br>(9 - 25)        | 5<br>(3 - 8)           | 454<br>(330 - 655)          | 1,428<br>(991 - 2,043)         | 3,054<br>(2,077 - 4,553)       |
| Other cardiovascular and circulatory diseases | 38,851<br>(25,760 - 49,720)    | 85<br>(52 - 121)      | 25<br>(15 - 34)        | 2,448<br>(1,393 - 3,034)    | 7,519<br>(5,296 - 9,223)       | 28,774<br>(18,312 - 38,447)    |
| Chronic respiratory diseases                  | 182,748<br>(128,955 - 207,094) | 291<br>(169 - 420)    | 143<br>(97 - 176)      | 3,814<br>(2,942 - 4,394)    | 40,901<br>(31,281 - 46,074)    | 137,598<br>(93,673 - 159,008)  |
| Chronic obstructive pulmonary disease         | 153,204<br>(107,811 - 173,030) | 166<br>(82 - 256)     | 19<br>(11 - 25)        | 1,800<br>(1,263 - 2,188)    | 34,105<br>(25,609 - 38,499)    | 117,114<br>(79,731 - 134,789)  |
| Pneumoconiosis                                | 2,406<br>(1,567 - 3,443)       | 2<br>(1 - 3)          | 4<br>(2 - 6)           | 55<br>(34 - 77)             | 441<br>(287 - 648)             | 1,904<br>(1,200 - 2,816)       |
| Silicosis                                     | 104<br>(68 - 149)              | 0<br>(0 - 1)          | 1<br>(1 - 1)           | 13<br>(8 - 19)              | 28<br>(18 - 43)                | 61<br>(38 - 92)                |
| Asbestosis                                    | 1,044<br>(664 - 1,538)         | 0<br>(0 - 1)          | 1<br>(1 - 1)           | 13<br>(8 - 19)              | 177<br>(110 - 273)             | 852<br>(529 - 1,275)           |
| Coal workers pneumoconiosis                   | 407<br>(256 - 610)             | 0<br>(0 - 1)          | 1<br>(1 - 1)           | 6<br>(4 - 9)                | 53<br>(33 - 85)                | 346<br>(211 - 524)             |
| Other pneumoconiosis                          | 851<br>(558 - 1,229)           | 0<br>(0 - 1)          | 1<br>(1 - 1)           | 23<br>(14 - 32)             | 182<br>(121 - 259)             | 645<br>(404 - 967)             |

Web Table 31- United States deaths with 95% UI by age, sex, and cause in 2013

| Cause                                               | Both Sexes, All Ages           | Both Sexes, 0-4 Years | Both Sexes, 5-14 Years | Both Sexes, 15-49 Years     | Both Sexes, 50-69 Years     | Both Sexes, 70-80 Years        |
|-----------------------------------------------------|--------------------------------|-----------------------|------------------------|-----------------------------|-----------------------------|--------------------------------|
| Asthma                                              | 4,482<br>(2,993 - 6,017)       | 37<br>(18 - 60)       | 93<br>(58 - 117)       | 954<br>(670 - 1,163)        | 1,300<br>(906 - 1,747)      | 2,098<br>(1,199 - 3,189)       |
| Interstitial lung disease and pulmonary sarcoidosis | 20,590<br>(11,853 - 28,236)    | 26<br>(15 - 43)       | 17<br>(11 - 24)        | 748<br>(554 - 975)          | 4,422<br>(2,775 - 5,944)    | 15,376<br>(8,067 - 21,860)     |
| Other chronic respiratory diseases                  | 2,067<br>(1,463 - 2,697)       | 60<br>(37 - 89)       | 11<br>(7 - 16)         | 256<br>(183 - 322)          | 632<br>(461 - 821)          | 1,107<br>(713 - 1,580)         |
| Cirrhosis                                           | 53,262<br>(49,027 - 57,839)    | 33<br>(22 - 47)       | 21<br>(17 - 25)        | 8,907<br>(7,791 - 10,065)   | 28,929<br>(26,012 - 32,187) | 15,373<br>(13,686 - 17,248)    |
| Cirrhosis due to hepatitis B                        | 4,355<br>(2,634 - 6,283)       | 1<br>(1 - 2)          | 2<br>(1 - 3)           | 774<br>(469 - 1,123)        | 2,289<br>(1,389 - 3,378)    | 1,290<br>(701 - 1,949)         |
| Cirrhosis due to hepatitis C                        | 27,759<br>(20,384 - 34,536)    | 7<br>(3 - 13)         | 9<br>(6 - 13)          | 4,767<br>(3,492 - 6,096)    | 15,094<br>(10,845 - 19,272) | 7,882<br>(5,450 - 10,060)      |
| Cirrhosis due to alcohol use                        | 18,728<br>(12,898 - 24,385)    | --                    | --                     | 2,689<br>(1,627 - 3,780)    | 10,271<br>(6,709 - 13,902)  | 5,767<br>(4,263 - 7,550)       |
| Cirrhosis due to other causes                       | 2,420<br>(1,588 - 3,442)       | 25<br>(16 - 35)       | 10<br>(7 - 14)         | 677<br>(442 - 951)          | 1,274<br>(789 - 1,886)      | 434<br>(285 - 648)             |
| Digestive diseases                                  | 47,000<br>(41,654 - 54,630)    | 81<br>(52 - 118)      | 66<br>(51 - 79)        | 2,365<br>(2,060 - 2,749)    | 9,981<br>(8,807 - 11,385)   | 34,507<br>(29,853 - 41,550)    |
| Peptic ulcer disease                                | 4,905<br>(3,743 - 6,744)       | 2<br>(1 - 4)          | 3<br>(2 - 5)           | 237<br>(177 - 309)          | 1,102<br>(837 - 1,410)      | 3,560<br>(2,623 - 5,176)       |
| Gastritis and duodenitis                            | 494<br>(306 - 1,006)           | 2<br>(1 - 3)          | 3<br>(2 - 5)           | 55<br>(38 - 108)            | 123<br>(79 - 234)           | 311<br>(170 - 691)             |
| Appendicitis                                        | 770<br>(482 - 1,080)           | 3<br>(2 - 6)          | 7<br>(5 - 11)          | 85<br>(59 - 113)            | 205<br>(131 - 285)          | 470<br>(285 - 721)             |
| Paralytic ileus and intestinal obstruction          | 7,440<br>(4,764 - 10,547)      | 24<br>(12 - 40)       | 19<br>(12 - 26)        | 250<br>(146 - 344)          | 1,105<br>(652 - 1,535)      | 6,043<br>(3,841 - 8,722)       |
| Inguinal, femoral, and abdominal hernia             | 1,103<br>(561 - 1,573)         | 2<br>(1 - 4)          | 3<br>(1 - 5)           | 37<br>(18 - 52)             | 220<br>(129 - 298)          | 840<br>(390 - 1,260)           |
| Inflammatory bowel disease                          | 2,913<br>(1,971 - 5,304)       | 18<br>(10 - 31)       | 7<br>(5 - 9)           | 203<br>(152 - 321)          | 724<br>(526 - 1,186)        | 1,962<br>(1,193 - 3,755)       |
| Vascular intestinal disorders                       | 11,004<br>(7,158 - 15,784)     | 5<br>(1 - 12)         | 4<br>(1 - 8)           | 284<br>(166 - 454)          | 2,427<br>(1,597 - 3,557)    | 8,284<br>(5,175 - 12,391)      |
| Gallbladder and biliary diseases                    | 5,044<br>(3,844 - 6,482)       | 2<br>(1 - 3)          | 4<br>(2 - 5)           | 174<br>(137 - 217)          | 904<br>(682 - 1,112)        | 3,960<br>(2,912 - 5,232)       |
| Pancreatitis                                        | 4,192<br>(3,089 - 5,393)       | 2<br>(1 - 4)          | 6<br>(4 - 8)           | 673<br>(515 - 855)          | 1,409<br>(971 - 1,811)      | 2,101<br>(1,506 - 2,885)       |
| Other digestive diseases                            | 9,135<br>(7,043 - 11,779)      | 20<br>(11 - 32)       | 11<br>(8 - 14)         | 367<br>(285 - 454)          | 1,762<br>(1,358 - 2,190)    | 6,976<br>(5,217 - 9,328)       |
| Neurological disorders                              | 327,002<br>(265,533 - 386,960) | 311<br>(220 - 446)    | 157<br>(126 - 214)     | 3,629<br>(3,027 - 4,257)    | 19,208<br>(16,083 - 22,147) | 303,697<br>(242,319 - 362,695) |
| Alzheimer disease and other dementias               | 281,860<br>(221,383 - 343,614) | --                    | --                     | 12<br>(3 - 34)              | 7,628<br>(5,916 - 9,762)    | 274,220<br>(213,702 - 335,058) |
| Parkinson disease                                   | 24,028<br>(14,854 - 29,599)    | --                    | --                     | 48<br>(29 - 60)             | 2,193<br>(1,341 - 2,663)    | 21,787<br>(13,399 - 27,220)    |
| Epilepsy                                            | 2,164<br>(1,820 - 2,625)       | 43<br>(27 - 64)       | 39<br>(27 - 51)        | 747<br>(617 - 905)          | 588<br>(487 - 717)          | 748<br>(579 - 976)             |
| Multiple sclerosis                                  | 5,318<br>(2,755 - 6,698)       | --                    | --                     | 1,096<br>(703 - 1,557)      | 3,147<br>(1,515 - 4,154)    | 1,075<br>(444 - 1,519)         |
| Other neurological disorders                        | 13,631<br>(12,028 - 15,870)    | 268<br>(188 - 399)    | 119<br>(91 - 175)      | 1,726<br>(1,416 - 2,013)    | 5,652<br>(4,881 - 6,692)    | 5,866<br>(5,017 - 7,091)       |
| Mental and substance use disorders                  | 35,691<br>(25,019 - 41,374)    | 10<br>(5 - 15)        | 4<br>(2 - 7)           | 21,438<br>(13,756 - 24,989) | 12,267<br>(8,763 - 14,822)  | 1,971<br>(1,522 - 2,412)       |
| Schizophrenia                                       | 462<br>(289 - 623)             | --                    | --                     | 46<br>(26 - 64)             | 127<br>(67 - 178)           | 288<br>(180 - 444)             |
| Alcohol use disorders                               | 8,853<br>(5,702 - 11,852)      | --                    | --                     | 3,059<br>(2,106 - 4,149)    | 4,795<br>(2,920 - 6,687)    | 999<br>(615 - 1,360)           |
| Drug use disorders                                  | 26,272<br>(15,735 - 30,102)    | 10<br>(5 - 15)        | --                     | 18,234<br>(10,804 - 21,491) | 7,345<br>(4,624 - 8,881)    | 684<br>(542 - 837)             |
| Opioid use disorders                                | 10,805<br>(6,494 - 12,468)     | 4<br>(2 - 7)          | --                     | 7,647<br>(4,453 - 9,053)    | 2,863<br>(1,761 - 3,517)    | 291<br>(228 - 364)             |
| Cocaine use disorders                               | 1,328<br>(885 - 1,549)         | 1<br>(0 - 1)          | --                     | 996<br>(643 - 1,201)        | 302<br>(207 - 389)          | 30<br>(22 - 40)                |
| Amphetamine use disorders                           | 805<br>(554 - 942)             | 0<br>(0 - 1)          | --                     | 544<br>(359 - 652)          | 240<br>(169 - 304)          | 21<br>(15 - 28)                |
| Other drug use disorders                            | 13,333<br>(7,978 - 15,344)     | 5<br>(2 - 7)          | --                     | 9,046<br>(5,368 - 10,802)   | 3,941<br>(2,448 - 4,752)    | 342<br>(272 - 421)             |
| Eating disorders                                    | 103<br>(68 - 148)              | --                    | 4<br>(2 - 7)           | 99<br>(64 - 144)            | --                          | --                             |
| Anorexia nervosa                                    | 103<br>(68 - 148)              | --                    | 4<br>(2 - 7)           | 99<br>(64 - 144)            | --                          | --                             |
| Diabetes, urogenital, blood, and endocrine diseases | 191,851<br>(172,712 - 228,917) | 694<br>(516 - 956)    | 332<br>(271 - 414)     | 11,706<br>(10,362 - 13,508) | 50,238<br>(44,759 - 56,771) | 128,882<br>(112,990 - 159,360) |
| Diabetes mellitus                                   | 74,924<br>(66,912 - 83,928)    | 40<br>(28 - 54)       | 29<br>(20 - 40)        | 4,546<br>(3,972 - 5,241)    | 24,252<br>(21,459 - 27,373) | 46,058<br>(39,467 - 53,409)    |
| Acute glomerulonephritis                            | 77<br>(56 - 122)               | 2<br>(1 - 3)          | 4<br>(2 - 5)           | 14<br>(11 - 17)             | 14<br>(9 - 25)              | 43<br>(24 - 80)                |
| Chronic kidney disease                              | 70,199<br>(57,492 - 103,165)   | 64<br>(44 - 100)      | 23<br>(17 - 33)        | 2,736<br>(2,203 - 4,519)    | 14,880<br>(12,267 - 21,233) | 52,495<br>(41,940 - 77,271)    |
| Chronic kidney disease due to diabetes mellitus     | 10,515<br>(7,030 - 18,601)     | 4<br>(2 - 10)         | 4<br>(3 - 9)           | 481<br>(305 - 903)          | 3,509<br>(2,297 - 5,304)    | 6,516<br>(4,098 - 12,025)      |

Web Table 31- United States deaths with 95% UI by age, sex, and cause in 2013

| Cause                                               | Both Sexes, All Ages           | Both Sexes, 0-4 Years     | Both Sexes, 5-14 Years   | Both Sexes, 15-49 Years     | Both Sexes, 50-69 Years     | Both Sexes, 70-80 Years     |
|-----------------------------------------------------|--------------------------------|---------------------------|--------------------------|-----------------------------|-----------------------------|-----------------------------|
| Chronic kidney disease due to hypertension          | 29,374<br>(22,833 - 40,533)    | 10<br>(6 - 19)            | 4<br>(3 - 5)             | 1,216<br>(881 - 1,844)      | 6,691<br>(4,871 - 9,541)    | 21,453<br>(16,198 - 30,164) |
| Chronic kidney disease due to glomerulonephritis    | 2,413<br>(1,027 - 3,811)       | 13<br>(6 - 21)            | 4<br>(2 - 5)             | 120<br>(78 - 166)           | 515<br>(249 - 730)          | 1,761<br>(653 - 3,028)      |
| Chronic kidney disease due to other causes          | 27,897<br>(18,998 - 49,469)    | 37<br>(23 - 69)           | 11<br>(7 - 18)           | 920<br>(613 - 1,909)        | 4,164<br>(2,761 - 7,413)    | 22,765<br>(15,085 - 40,458) |
| Urinary diseases and male infertility               | 20,334<br>(16,253 - 28,539)    | 47<br>(35 - 62)           | 8<br>(6 - 11)            | 552<br>(374 - 661)          | 2,830<br>(2,069 - 3,334)    | 16,897<br>(12,764 - 25,349) |
| Interstitial nephritis and urinary tract infections | 17,891<br>(14,028 - 25,833)    | 27<br>(19 - 37)           | 4<br>(3 - 6)             | 427<br>(290 - 523)          | 2,260<br>(1,673 - 2,715)    | 15,172<br>(11,408 - 23,244) |
| Urolithiasis                                        | 390<br>(270 - 586)             | --                        | 2<br>(1 - 3)             | 24<br>(16 - 38)             | 87<br>(57 - 134)            | 278<br>(172 - 445)          |
| Other urinary diseases                              | 2,052<br>(1,180 - 2,886)       | 20<br>(14 - 28)           | 2<br>(1 - 3)             | 101<br>(55 - 134)           | 483<br>(251 - 651)          | 1,447<br>(770 - 2,269)      |
| Gynecological diseases                              | 84<br>(46 - 122)               | --                        | --                       | 11<br>(7 - 14)              | 11<br>(6 - 15)              | 62<br>(29 - 99)             |
| Uterine fibroids                                    | 24<br>(12 - 35)                | --                        | --                       | 2<br>(1 - 3)                | 3<br>(2 - 4)                | 18<br>(9 - 29)              |
| Polycystic ovarian syndrome                         | 1<br>(0 - 1)                   | --                        | --                       | 1<br>(0 - 1)                | 0<br>(0 - 0)                | --                          |
| Endometriosis                                       | 2<br>(1 - 2)                   | --                        | --                       | 2<br>(1 - 2)                | 0<br>(0 - 0)                | --                          |
| Genital prolapse                                    | 19<br>(10 - 29)                | --                        | --                       | 1<br>(1 - 2)                | 2<br>(1 - 3)                | 16<br>(8 - 26)              |
| Other gynecological diseases                        | 38<br>(21 - 56)                | --                        | --                       | 5<br>(3 - 7)                | 6<br>(3 - 8)                | 27<br>(13 - 44)             |
| Hemoglobinopathies and hemolytic anemias            | 2,304<br>(1,711 - 3,247)       | 70<br>(44 - 107)          | 45<br>(30 - 62)          | 486<br>(334 - 634)          | 506<br>(362 - 697)          | 1,198<br>(846 - 1,815)      |
| Thalassemias                                        | 141<br>(99 - 188)              | 18<br>(11 - 29)           | 14<br>(9 - 19)           | 84<br>(57 - 109)            | 20<br>(14 - 26)             | 6<br>(4 - 9)                |
| Sickle cell disorders                               | 672<br>(484 - 900)             | 39<br>(24 - 60)           | 26<br>(18 - 36)          | 286<br>(196 - 373)          | 259<br>(183 - 349)          | 63<br>(46 - 93)             |
| G6PD deficiency                                     | 23<br>(16 - 31)                | 1<br>(1 - 2)              | 1<br>(0 - 1)             | 9<br>(6 - 11)               | 8<br>(5 - 10)               | 5<br>(4 - 8)                |
| Other hemoglobinopathies and hemolytic anemias      | 1,468<br>(1,074 - 2,155)       | 12<br>(8 - 18)            | 4<br>(3 - 6)             | 108<br>(74 - 142)           | 220<br>(158 - 302)          | 1,124<br>(787 - 1,712)      |
| Endocrine, metabolic, blood, and immune disorders   | 23,929<br>(16,766 - 28,311)    | 470<br>(338 - 658)        | 224<br>(169 - 294)       | 3,360<br>(2,599 - 4,067)    | 7,745<br>(5,235 - 9,235)    | 12,130<br>(8,071 - 15,505)  |
| Musculoskeletal disorders                           | 10,809<br>(8,740 - 12,852)     | --                        | 27<br>(20 - 34)          | 1,203<br>(1,009 - 1,450)    | 3,307<br>(2,744 - 3,992)    | 6,273<br>(4,680 - 7,868)    |
| Rheumatoid arthritis                                | 2,622<br>(1,835 - 3,446)       | --                        | 3<br>(2 - 5)             | 65<br>(43 - 84)             | 666<br>(504 - 857)          | 1,887<br>(1,227 - 2,642)    |
| Other musculoskeletal disorders                     | 8,187<br>(6,519 - 9,791)       | --                        | 23<br>(17 - 30)          | 1,138<br>(956 - 1,376)      | 2,641<br>(2,165 - 3,205)    | 4,385<br>(3,212 - 5,576)    |
| Other non-communicable diseases                     | 19,547<br>(17,043 - 24,001)    | 8,914<br>(6,981 - 11,478) | 416<br>(332 - 511)       | 2,040<br>(1,769 - 2,446)    | 2,912<br>(2,541 - 3,392)    | 5,265<br>(4,139 - 6,982)    |
| Congenital anomalies                                | 11,982<br>(10,292 - 14,345)    | 6,350<br>(5,000 - 8,082)  | 412<br>(328 - 506)       | 1,808<br>(1,557 - 2,200)    | 1,787<br>(1,521 - 2,146)    | 1,625<br>(1,307 - 2,115)    |
| Neural tube defects                                 | 415<br>(285 - 586)             | 320<br>(199 - 485)        | 14<br>(9 - 20)           | 58<br>(35 - 73)             | 16<br>(10 - 21)             | 7<br>(4 - 10)               |
| Congenital heart anomalies                          | 4,067<br>(3,363 - 5,155)       | 1,915<br>(1,430 - 2,613)  | 174<br>(128 - 230)       | 899<br>(742 - 1,155)        | 590<br>(468 - 768)          | 489<br>(344 - 713)          |
| Cleft lip and cleft palate                          | 8<br>(2 - 27)                  | 8<br>(2 - 27)             | --                       | --                          | --                          | --                          |
| Down syndrome                                       | 901<br>(575 - 1,163)           | 150<br>(88 - 244)         | 16<br>(9 - 26)           | 213<br>(133 - 281)          | 491<br>(276 - 693)          | 31<br>(17 - 46)             |
| Chromosomal unbalanced rearrangements               | 1,014<br>(699 - 1,416)         | 950<br>(644 - 1,343)      | 21<br>(13 - 31)          | 27<br>(19 - 36)             | 11<br>(8 - 15)              | 5<br>(3 - 7)                |
| Other congenital anomalies                          | 5,577<br>(4,652 - 7,025)       | 3,007<br>(2,286 - 4,030)  | 186<br>(137 - 246)       | 610<br>(493 - 802)          | 679<br>(531 - 872)          | 1,094<br>(857 - 1,455)      |
| Skin and subcutaneous diseases                      | 5,016<br>(3,943 - 6,599)       | 15<br>(10 - 22)           | 5<br>(3 - 6)             | 232<br>(192 - 278)          | 1,125<br>(916 - 1,341)      | 3,639<br>(2,637 - 5,268)    |
| Cellulitis                                          | 1,604<br>(1,091 - 2,328)       | 5<br>(3 - 9)              | 1<br>(1 - 2)             | 99<br>(74 - 137)            | 426<br>(297 - 589)          | 1,072<br>(621 - 1,703)      |
| Pyoderma                                            | 1,693<br>(1,228 - 2,293)       | 6<br>(4 - 10)             | 1<br>(1 - 2)             | 82<br>(62 - 107)            | 414<br>(303 - 528)          | 1,190<br>(770 - 1,774)      |
| Decubitus ulcer                                     | 1,410<br>(968 - 2,438)         | 1<br>(1 - 2)              | 1<br>(1 - 2)             | 28<br>(21 - 38)             | 218<br>(162 - 299)          | 1,162<br>(738 - 2,243)      |
| Other skin and subcutaneous diseases                | 309<br>(180 - 581)             | 2<br>(1 - 4)              | 1<br>(1 - 2)             | 22<br>(16 - 31)             | 68<br>(43 - 104)            | 215<br>(96 - 480)           |
| Sudden infant death syndrome                        | 2,549<br>(1,521 - 4,174)       | 2,549<br>(1,521 - 4,174)  | --                       | --                          | --                          | --                          |
| Injuries                                            | 177,632<br>(162,428 - 193,370) | 3,294<br>(2,475 - 4,346)  | 2,566<br>(2,239 - 2,908) | 70,062<br>(63,994 - 78,115) | 42,078<br>(37,183 - 46,620) | 59,632<br>(49,396 - 68,688) |
| Transport injuries                                  | 47,199<br>(42,584 - 52,167)    | 798<br>(554 - 1,121)      | 1,245<br>(1,032 - 1,475) | 25,466<br>(22,825 - 28,625) | 12,228<br>(10,635 - 14,047) | 7,461<br>(6,406 - 8,712)    |
| Road injuries                                       | 44,216<br>(40,107 - 48,987)    | 769<br>(536 - 1,074)      | 1,129<br>(937 - 1,342)   | 23,812<br>(21,339 - 26,742) | 11,325<br>(9,871 - 13,061)  | 7,180<br>(6,146 - 8,437)    |
| Pedestrian road injuries                            | 9,047<br>(5,752 - 11,915)      | 339<br>(199 - 510)        | 393<br>(265 - 523)       | 3,104<br>(1,879 - 4,479)    | 2,722<br>(1,658 - 3,776)    | 2,489<br>(1,527 - 3,398)    |

Web Table 31- United States deaths with 95% UI by age, sex, and cause in 2013

| Cause                                           | Both Sexes, All Ages        | Both Sexes, 0-4 Years    | Both Sexes, 5-14 Years | Both Sexes, 15-49 Years     | Both Sexes, 50-69 Years     | Both Sexes, 70-80 Years     |
|-------------------------------------------------|-----------------------------|--------------------------|------------------------|-----------------------------|-----------------------------|-----------------------------|
| Cyclist road injuries                           | 2,293<br>(995 - 2,998)      | 30<br>(12 - 55)          | 152<br>(95 - 211)      | 868<br>(430 - 1,146)        | 810<br>(302 - 1,171)        | 434<br>(146 - 659)          |
| Motorcyclist road injuries                      | 5,929<br>(2,811 - 7,888)    | 7<br>(2 - 13)            | 41<br>(21 - 61)        | 4,097<br>(2,059 - 5,468)    | 1,617<br>(610 - 2,401)      | 168<br>(50 - 275)           |
| Motor vehicle road injuries                     | 26,734<br>(22,691 - 34,500) | 387<br>(260 - 568)       | 533<br>(398 - 709)     | 15,698<br>(13,354 - 19,729) | 6,081<br>(4,762 - 8,549)    | 4,035<br>(3,071 - 5,593)    |
| Other road injuries                             | 212<br>(56 - 325)           | 7<br>(2 - 14)            | 11<br>(3 - 21)         | 45<br>(14 - 74)             | 96<br>(22 - 167)            | 53<br>(10 - 103)            |
| Other transport injuries                        | 2,983<br>(2,076 - 3,816)    | 29<br>(15 - 50)          | 116<br>(68 - 172)      | 1,655<br>(1,185 - 2,147)    | 902<br>(564 - 1,232)        | 282<br>(147 - 438)          |
| Unintentional injuries                          | 71,536<br>(61,506 - 81,293) | 2,183<br>(1,612 - 2,909) | 855<br>(684 - 1,123)   | 9,248<br>(7,969 - 11,805)   | 13,327<br>(11,461 - 14,974) | 45,922<br>(35,976 - 54,690) |
| Falls                                           | 34,432<br>(22,645 - 42,438) | 84<br>(59 - 122)         | 44<br>(34 - 57)        | 1,725<br>(1,442 - 2,155)    | 4,632<br>(2,929 - 5,620)    | 27,947<br>(17,662 - 35,451) |
| Drowning                                        | 4,398<br>(3,494 - 6,012)    | 548<br>(346 - 860)       | 319<br>(231 - 521)     | 2,125<br>(1,685 - 3,032)    | 939<br>(667 - 1,233)        | 466<br>(334 - 597)          |
| Fire, heat, and hot substances                  | 4,531<br>(3,740 - 6,204)    | 322<br>(189 - 575)       | 191<br>(136 - 308)     | 990<br>(773 - 1,416)        | 1,217<br>(962 - 1,543)      | 1,811<br>(1,382 - 2,614)    |
| Poisonings                                      | 2,221<br>(1,822 - 3,212)    | 34<br>(22 - 51)          | 22<br>(15 - 30)        | 778<br>(568 - 1,619)        | 912<br>(587 - 1,133)        | 476<br>(350 - 673)          |
| Exposure to mechanical forces                   | 4,184<br>(3,606 - 4,887)    | 679<br>(312 - 1,032)     | 153<br>(118 - 198)     | 1,430<br>(1,201 - 1,992)    | 1,121<br>(938 - 1,385)      | 801<br>(602 - 968)          |
| Unintentional firearm injuries                  | 705<br>(590 - 876)          | 15<br>(8 - 25)           | 52<br>(34 - 79)        | 422<br>(331 - 568)          | 153<br>(115 - 214)          | 63<br>(45 - 89)             |
| Unintentional suffocation                       | 1,009<br>(447 - 1,393)      | 584<br>(227 - 921)       | 46<br>(20 - 76)        | 139<br>(59 - 181)           | 71<br>(34 - 96)             | 169<br>(70 - 260)           |
| Other exposure to mechanical forces             | 2,470<br>(2,136 - 3,022)    | 80<br>(50 - 125)         | 55<br>(40 - 77)        | 869<br>(701 - 1,314)        | 897<br>(723 - 1,130)        | 568<br>(427 - 706)          |
| Adverse effects of medical treatment            | 6,783<br>(5,366 - 9,148)    | 93<br>(62 - 148)         | 27<br>(18 - 42)        | 763<br>(604 - 1,162)        | 1,981<br>(1,473 - 2,726)    | 3,920<br>(2,860 - 5,473)    |
| Animal contact                                  | 283<br>(205 - 446)          | 19<br>(11 - 31)          | 11<br>(7 - 18)         | 73<br>(52 - 114)            | 106<br>(73 - 177)           | 75<br>(48 - 128)            |
| Venomous animal contact                         | 101<br>(71 - 169)           | 2<br>(1 - 4)             | 3<br>(2 - 5)           | 34<br>(23 - 56)             | 46<br>(30 - 77)             | 16<br>(9 - 29)              |
| Non-venomous animal contact                     | 182<br>(124 - 282)          | 17<br>(10 - 28)          | 8<br>(5 - 14)          | 38<br>(26 - 61)             | 59<br>(38 - 100)            | 59<br>(36 - 100)            |
| Foreign body                                    | 14,028<br>(10,197 - 21,890) | 388<br>(251 - 604)       | 74<br>(50 - 125)       | 1,046<br>(788 - 1,613)      | 2,248<br>(1,680 - 3,497)    | 10,272<br>(7,068 - 16,484)  |
| Pulmonary aspiration and foreign body in airway | 13,967<br>(10,125 - 21,836) | 385<br>(248 - 600)       | 70<br>(46 - 120)       | 1,030<br>(767 - 1,599)      | 2,235<br>(1,668 - 3,486)    | 10,247<br>(7,047 - 16,464)  |
| Foreign body in other body part                 | 61<br>(42 - 87)             | 3<br>(2 - 5)             | 4<br>(3 - 5)           | 16<br>(12 - 22)             | 13<br>(9 - 19)              | 25<br>(14 - 47)             |
| Other unintentional injuries                    | 675<br>(533 - 904)          | 16<br>(9 - 26)           | 15<br>(8 - 26)         | 318<br>(225 - 454)          | 170<br>(109 - 257)          | 156<br>(102 - 263)          |
| Self-harm and interpersonal violence            | 58,897<br>(50,382 - 67,558) | 312<br>(150 - 526)       | 465<br>(338 - 594)     | 35,348<br>(29,969 - 40,767) | 16,524<br>(13,074 - 19,696) | 6,248<br>(5,214 - 8,301)    |
| Self-harm                                       | 42,083<br>(33,891 - 47,685) | --                       | 236<br>(160 - 319)     | 22,742<br>(18,051 - 26,043) | 13,713<br>(10,264 - 16,006) | 5,391<br>(4,416 - 7,470)    |
| Interpersonal violence                          | 16,814<br>(12,937 - 22,777) | 312<br>(150 - 526)       | 229<br>(140 - 330)     | 12,605<br>(9,465 - 17,062)  | 2,810<br>(1,972 - 4,532)    | 857<br>(536 - 1,409)        |
| Assault by firearm                              | 11,299<br>(7,757 - 15,670)  | 46<br>(15 - 94)          | 133<br>(73 - 203)      | 9,260<br>(6,250 - 12,639)   | 1,529<br>(977 - 2,625)      | 331<br>(182 - 564)          |
| Assault by sharp object                         | 2,766<br>(1,797 - 4,986)    | 19<br>(8 - 38)           | 26<br>(14 - 51)        | 1,932<br>(1,207 - 3,699)    | 598<br>(357 - 1,173)        | 191<br>(108 - 384)          |
| Assault by other means                          | 2,749<br>(1,945 - 4,117)    | 247<br>(124 - 407)       | 70<br>(39 - 110)       | 1,414<br>(934 - 2,312)      | 683<br>(404 - 1,123)        | 335<br>(197 - 580)          |
| Forces of nature, war, and legal intervention   | 0<br>(0 - 0)                | 0<br>(0 - 0)             | --                     | --                          | --                          | 0<br>(0 - 0)                |
| Exposure to forces of nature                    | 0<br>(0 - 0)                | 0<br>(0 - 0)             | --                     | --                          | --                          | 0<br>(0 - 0)                |

Web Table 31- United States deaths with 95% UI by age, sex, and cause in 2013

| Cause                                                             | Males, All Ages                      | Males, 0-4 Years            | Males, 5-14 Years        | Males, 15-49 Years             | Males, 50-69 Years             | Males, 70-80 Years             |
|-------------------------------------------------------------------|--------------------------------------|-----------------------------|--------------------------|--------------------------------|--------------------------------|--------------------------------|
| All causes                                                        | 1,364,823<br>(1,278,746 - 1,457,235) | 15,696<br>(12,541 - 19,498) | 3,194<br>(2,770 - 3,666) | 138,003<br>(126,194 - 150,506) | 400,037<br>(368,192 - 434,662) | 807,894<br>(765,896 - 851,947) |
| Communicable, maternal, neonatal, and nutritional diseases        | 66,960<br>(56,395 - 81,774)          | 7,444<br>(5,948 - 9,111)    | 168<br>(130 - 214)       | 7,734<br>(5,712 - 10,039)      | 13,295<br>(10,979 - 16,104)    | 38,319<br>(29,734 - 51,438)    |
| HIV/AIDS and tuberculosis                                         | 8,324<br>(4,936 - 11,949)            | 7<br>(3 - 15)               | 3<br>(1 - 5)             | 4,749<br>(2,770 - 6,917)       | 2,907<br>(1,553 - 4,682)       | 659<br>(386 - 1,078)           |
| Tuberculosis                                                      | 630<br>(513 - 1,154)                 | 2<br>(1 - 3)                | 2<br>(1 - 3)             | 82<br>(63 - 145)               | 235<br>(186 - 404)             | 310<br>(231 - 629)             |
| HIV/AIDS                                                          | 7,694<br>(4,306 - 11,351)            | 5<br>(1 - 13)               | 1<br>(0 - 3)             | 4,667<br>(2,694 - 6,844)       | 2,672<br>(1,298 - 4,418)       | 349<br>(111 - 662)             |
| HIV/AIDS resulting in mycobacterial infection                     | 427<br>(230 - 687)                   | 0<br>(0 - 1)                | 0<br>(0 - 0)             | 252<br>(138 - 400)             | 153<br>(70 - 272)              | 21<br>(7 - 43)                 |
| HIV/AIDS resulting in other diseases                              | 7,268<br>(4,058 - 10,692)            | 5<br>(1 - 13)               | 1<br>(0 - 3)             | 4,415<br>(2,553 - 6,459)       | 2,519<br>(1,218 - 4,156)       | 327<br>(104 - 617)             |
| Diarrhea, lower respiratory, and other common infectious diseases | 45,984<br>(36,719 - 59,870)          | 664<br>(451 - 930)          | 130<br>(96 - 168)        | 2,345<br>(1,913 - 2,951)       | 8,732<br>(6,986 - 10,864)      | 34,114<br>(25,812 - 46,902)    |
| Diarrheal diseases                                                | 3,595<br>(2,551 - 5,099)             | 89<br>(49 - 151)            | 8<br>(5 - 12)            | 150<br>(113 - 203)             | 622<br>(450 - 854)             | 2,726<br>(1,744 - 4,195)       |
| Intestinal infectious diseases                                    | 63<br>(30 - 124)                     | 13<br>(5 - 28)              | 11<br>(4 - 24)           | 24<br>(10 - 49)                | 9<br>(4 - 18)                  | 7<br>(3 - 13)                  |
| Typhoid fever                                                     | 34<br>(11 - 77)                      | 6<br>(2 - 15)               | 7<br>(2 - 17)            | 14<br>(4 - 34)                 | 4<br>(1 - 10)                  | 3<br>(1 - 6)                   |
| Paratyphoid fever                                                 | 12<br>(4 - 29)                       | 2<br>(1 - 6)                | 3<br>(1 - 7)             | 5<br>(1 - 12)                  | 1<br>(0 - 3)                   | 1<br>(0 - 2)                   |
| Other intestinal infectious diseases                              | 17<br>(9 - 26)                       | 5<br>(1 - 11)               | 1<br>(0 - 4)             | 4<br>(1 - 10)                  | 3<br>(1 - 9)                   | 3<br>(1 - 8)                   |
| Lower respiratory infections                                      | 40,790<br>(31,640 - 54,563)          | 358<br>(218 - 552)          | 60<br>(40 - 88)          | 1,817<br>(1,425 - 2,378)       | 7,704<br>(5,975 - 9,776)       | 30,852<br>(22,637 - 43,439)    |
| Upper respiratory infections                                      | 26<br>(7 - 65)                       | 0<br>(0 - 1)                | 0<br>(0 - 0)             | 4<br>(1 - 10)                  | 8<br>(1 - 26)                  | 13<br>(0 - 52)                 |
| Otitis media                                                      | 43<br>(35 - 54)                      | 3<br>(2 - 6)                | 2<br>(1 - 3)             | 8<br>(7 - 10)                  | 12<br>(9 - 16)                 | 18<br>(12 - 27)                |
| Meningitis                                                        | 868<br>(747 - 1,045)                 | 143<br>(85 - 263)           | 24<br>(18 - 32)          | 206<br>(172 - 249)             | 229<br>(190 - 276)             | 265<br>(209 - 338)             |
| Pneumococcal meningitis                                           | 392<br>(318 - 484)                   | 54<br>(32 - 97)             | 12<br>(7 - 16)           | 92<br>(63 - 125)               | 106<br>(77 - 142)              | 127<br>(89 - 180)              |
| H influenzae type B meningitis                                    | 67<br>(50 - 93)                      | 28<br>(16 - 51)             | 3<br>(1 - 4)             | 12<br>(7 - 18)                 | 11<br>(6 - 19)                 | 13<br>(8 - 22)                 |
| Meningococcal meningitis                                          | 158<br>(124 - 205)                   | 25<br>(13 - 48)             | 5<br>(3 - 9)             | 41<br>(25 - 64)                | 39<br>(23 - 60)                | 48<br>(28 - 72)                |
| Other meningitis                                                  | 251<br>(185 - 338)                   | 37<br>(16 - 76)             | 4<br>(2 - 7)             | 61<br>(37 - 88)                | 73<br>(45 - 108)               | 76<br>(44 - 122)               |
| Encephalitis                                                      | 457<br>(284 - 589)                   | 37<br>(16 - 64)             | 18<br>(8 - 28)           | 107<br>(67 - 149)              | 128<br>(76 - 187)              | 166<br>(87 - 248)              |
| Diphtheria                                                        | 5<br>(0 - 17)                        | 1<br>(0 - 8)                | 1<br>(0 - 4)             | 2<br>(0 - 8)                   | 1<br>(0 - 10)                  | --                             |
| Whooping cough                                                    | 21<br>(10 - 58)                      | 10<br>(1 - 47)              | 2<br>(1 - 3)             | 7<br>(5 - 9)                   | 2<br>(2 - 3)                   | --                             |
| Tetanus                                                           | 17<br>(11 - 22)                      | 1<br>(0 - 2)                | 2<br>(1 - 3)             | 7<br>(4 - 9)                   | 4<br>(2 - 6)                   | 2<br>(1 - 8)                   |
| Measles                                                           | 0<br>(0 - 0)                         | 0<br>(0 - 0)                | 0<br>(0 - 0)             | 0<br>(0 - 0)                   | 0<br>(0 - 0)                   | --                             |
| Varicella and herpes zoster                                       | 100<br>(22 - 331)                    | 9<br>(0 - 37)               | 2<br>(0 - 11)            | 12<br>(2 - 33)                 | 12<br>(1 - 38)                 | 65<br>(1 - 304)                |
| Neglected tropical diseases and malaria                           | 193<br>(141 - 234)                   | 6<br>(3 - 10)               | 8<br>(5 - 10)            | 52<br>(41 - 63)                | 66<br>(44 - 89)                | 61<br>(39 - 87)                |
| Cysticercosis                                                     | 3<br>(2 - 3)                         | 0<br>(0 - 0)                | 0<br>(0 - 0)             | 1<br>(1 - 1)                   | 1<br>(1 - 1)                   | 0<br>(0 - 1)                   |
| Cystic echinococcosis                                             | 12<br>(11 - 14)                      | 0<br>(0 - 0)                | 0<br>(0 - 0)             | 4<br>(4 - 5)                   | 5<br>(4 - 5)                   | 3<br>(3 - 4)                   |
| Dengue                                                            | 15<br>(11 - 18)                      | 1<br>(0 - 2)                | 2<br>(1 - 3)             | 7<br>(5 - 9)                   | 4<br>(3 - 5)                   | 1<br>(1 - 2)                   |
| Rabies                                                            | 14<br>(8 - 18)                       | 1<br>(0 - 2)                | 2<br>(1 - 3)             | 7<br>(4 - 9)                   | 3<br>(2 - 5)                   | 1<br>(1 - 2)                   |
| Other neglected tropical diseases                                 | 150<br>(89 - 186)                    | 4<br>(2 - 7)                | 4<br>(2 - 5)             | 33<br>(23 - 42)                | 53<br>(32 - 75)                | 55<br>(34 - 81)                |
| Maternal disorders                                                | --                                   | --                          | --                       | --                             | --                             | --                             |
| Maternal hemorrhage                                               | --                                   | --                          | --                       | --                             | --                             | --                             |
| Maternal sepsis and other maternal infections                     | --                                   | --                          | --                       | --                             | --                             | --                             |
| Maternal hypertensive disorders                                   | --                                   | --                          | --                       | --                             | --                             | --                             |
| Maternal obstructed labor                                         | --                                   | --                          | --                       | --                             | --                             | --                             |
| Maternal abortive outcome                                         | --                                   | --                          | --                       | --                             | --                             | --                             |
| Indirect maternal deaths                                          | --                                   | --                          | --                       | --                             | --                             | --                             |



Web Table 31- United States deaths with 95% UI by age, sex, and cause in 2013

| Cause                                                            | Males, All Ages                      | Males, 0-4 Years         | Males, 5-14 Years        | Males, 15-49 Years          | Males, 50-69 Years             | Males, 70-80 Years             |
|------------------------------------------------------------------|--------------------------------------|--------------------------|--------------------------|-----------------------------|--------------------------------|--------------------------------|
| Late maternal deaths                                             | --                                   | --                       | --                       | --                          | --                             | --                             |
| Maternal deaths aggravated by HIV/AIDS                           | --                                   | --                       | --                       | --                          | --                             | --                             |
| Other maternal disorders                                         | --                                   | --                       | --                       | --                          | --                             | --                             |
| Neonatal disorders                                               | 6,607<br>(5,314 - 8,048)             | 6,607<br>(5,314 - 8,048) | --                       | --                          | --                             | --                             |
| Neonatal preterm birth complications                             | 3,877<br>(2,746 - 5,104)             | 3,877<br>(2,746 - 5,104) | --                       | --                          | --                             | --                             |
| Neonatal encephalopathy due to birth asphyxia and trauma         | 897<br>(509 - 1,295)                 | 897<br>(509 - 1,295)     | --                       | --                          | --                             | --                             |
| Neonatal sepsis and other neonatal infections                    | 455<br>(197 - 956)                   | 455<br>(197 - 956)       | --                       | --                          | --                             | --                             |
| Hemolytic disease and other neonatal jaundice                    | 13<br>(5 - 27)                       | 13<br>(5 - 27)           | --                       | --                          | --                             | --                             |
| Other neonatal disorders                                         | 1,366<br>(836 - 2,054)               | 1,366<br>(836 - 2,054)   | --                       | --                          | --                             | --                             |
| Nutritional deficiencies                                         | 3,052<br>(1,776 - 4,441)             | 13<br>(6 - 22)           | 4<br>(2 - 6)             | 160<br>(75 - 211)           | 507<br>(268 - 677)             | 2,368<br>(1,402 - 3,652)       |
| Protein-energy malnutrition                                      | 1,538<br>(767 - 2,430)               | 8<br>(3 - 14)            | 2<br>(0 - 3)             | 58<br>(19 - 90)             | 268<br>(104 - 392)             | 1,202<br>(580 - 2,022)         |
| Iodine deficiency                                                | 8<br>(1 - 33)                        | 0<br>(0 - 1)             | 0<br>(0 - 0)             | 1<br>(0 - 6)                | 2<br>(0 - 13)                  | 4<br>(0 - 26)                  |
| Iron-deficiency anemia                                           | 1,294<br>(525 - 2,147)               | 2<br>(1 - 4)             | 1<br>(0 - 2)             | 84<br>(33 - 125)            | 200<br>(83 - 316)              | 1,007<br>(392 - 1,747)         |
| Other nutritional deficiencies                                   | 213<br>(79 - 417)                    | 3<br>(1 - 6)             | 1<br>(0 - 2)             | 16<br>(5 - 27)              | 37<br>(13 - 64)                | 155<br>(53 - 339)              |
| Other communicable, maternal, neonatal, and nutritional diseases | 2,798<br>(2,084 - 3,509)             | 146<br>(87 - 214)        | 24<br>(15 - 34)          | 430<br>(332 - 639)          | 1,083<br>(764 - 1,385)         | 1,116<br>(707 - 1,516)         |
| Sexually transmitted diseases excluding HIV                      | 64<br>(32 - 114)                     | 29<br>(1 - 64)           | 3<br>(1 - 6)             | 7<br>(4 - 10)               | 10<br>(5 - 19)                 | 16<br>(7 - 38)                 |
| Syphilis                                                         | 56<br>(24 - 100)                     | 29<br>(1 - 64)           | 2<br>(0 - 5)             | 4<br>(2 - 5)                | 7<br>(4 - 14)                  | 13<br>(6 - 32)                 |
| Chlamydial infection                                             | --                                   | --                       | --                       | --                          | --                             | --                             |
| Gonococcal infection                                             | 5<br>(4 - 10)                        | --                       | 0<br>(0 - 1)             | 2<br>(1 - 2)                | 2<br>(1 - 3)                   | 2<br>(1 - 4)                   |
| Other sexually transmitted diseases                              | 3<br>(2 - 5)                         | --                       | 0<br>(0 - 1)             | 1<br>(1 - 2)                | 1<br>(0 - 2)                   | 1<br>(0 - 2)                   |
| Hepatitis                                                        | 593<br>(479 - 734)                   | 2<br>(1 - 3)             | 2<br>(1 - 3)             | 148<br>(105 - 208)          | 326<br>(238 - 438)             | 115<br>(79 - 162)              |
| Acute hepatitis A                                                | 197<br>(72 - 352)                    | 2<br>(1 - 3)             | 2<br>(1 - 3)             | 67<br>(26 - 119)            | 102<br>(33 - 199)              | 25<br>(6 - 56)                 |
| Acute hepatitis B                                                | 302<br>(173 - 458)                   | 0<br>(0 - 1)             | 0<br>(0 - 1)             | 56<br>(22 - 103)            | 174<br>(90 - 276)              | 71<br>(38 - 113)               |
| Acute hepatitis C                                                | 94<br>(19 - 218)                     | --                       | 0<br>(0 - 0)             | 25<br>(5 - 63)              | 50<br>(9 - 120)                | 19<br>(3 - 48)                 |
| Other infectious diseases                                        | 2,141<br>(1,418 - 2,810)             | 115<br>(64 - 165)        | 19<br>(11 - 28)          | 275<br>(201 - 472)          | 747<br>(461 - 1,005)           | 986<br>(561 - 1,377)           |
| Non-communicable diseases                                        | 1,179,815<br>(1,107,516 - 1,257,334) | 6,299<br>(4,846 - 8,077) | 1,392<br>(1,168 - 1,662) | 76,049<br>(68,315 - 83,715) | 356,656<br>(327,738 - 386,568) | 739,418<br>(701,284 - 778,768) |
| Neoplasms                                                        | 338,419<br>(311,072 - 372,189)       | 359<br>(228 - 538)       | 627<br>(501 - 771)       | 18,028<br>(15,777 - 21,015) | 136,506<br>(123,825 - 151,313) | 182,899<br>(166,706 - 202,484) |
| Esophageal cancer                                                | 12,393<br>(10,176 - 14,611)          | --                       | --                       | 684<br>(519 - 900)          | 6,489<br>(5,223 - 8,062)       | 5,221<br>(3,839 - 6,247)       |
| Stomach cancer                                                   | 10,377<br>(9,058 - 11,923)           | --                       | --                       | 695<br>(571 - 838)          | 3,874<br>(3,355 - 4,494)       | 5,807<br>(4,785 - 7,123)       |
| Liver cancer                                                     | 12,825<br>(7,778 - 17,615)           | --                       | 14<br>(8 - 22)           | 893<br>(572 - 1,380)        | 6,747<br>(3,887 - 9,741)       | 5,172<br>(3,112 - 7,988)       |
| Liver cancer due to hepatitis B                                  | 1,675<br>(968 - 2,574)               | --                       | 4<br>(2 - 7)             | 197<br>(119 - 320)          | 991<br>(514 - 1,614)           | 484<br>(273 - 740)             |
| Liver cancer due to hepatitis C                                  | 6,355<br>(3,888 - 9,526)             | --                       | 2<br>(1 - 4)             | 400<br>(245 - 655)          | 3,403<br>(1,911 - 5,033)       | 2,550<br>(1,519 - 4,306)       |
| Liver cancer due to alcohol use                                  | 3,482<br>(1,938 - 5,265)             | --                       | --                       | 170<br>(97 - 275)           | 1,639<br>(871 - 2,568)         | 1,673<br>(920 - 2,657)         |
| Liver cancer due to other causes                                 | 1,314<br>(642 - 2,050)               | --                       | 8<br>(4 - 13)            | 126<br>(74 - 200)           | 715<br>(325 - 1,163)           | 465<br>(223 - 757)             |
| Larynx cancer                                                    | 3,182<br>(2,372 - 4,072)             | --                       | --                       | 168<br>(122 - 241)          | 1,651<br>(1,264 - 2,232)       | 1,363<br>(942 - 1,792)         |
| Tracheal, bronchus and lung cancer                               | 100,723<br>(90,413 - 111,828)        | --                       | --                       | 2,957<br>(2,396 - 3,625)    | 45,482<br>(39,925 - 51,369)    | 52,284<br>(46,221 - 58,793)    |
| Breast cancer                                                    | 531<br>(236 - 1,213)                 | --                       | --                       | 35<br>(14 - 79)             | 226<br>(99 - 521)              | 270<br>(114 - 604)             |
| Cervical cancer                                                  | --                                   | --                       | --                       | --                          | --                             | --                             |
| Uterine cancer                                                   | --                                   | --                       | --                       | --                          | --                             | --                             |
| Prostate cancer                                                  | 37,950<br>(28,767 - 58,394)          | --                       | --                       | 152<br>(99 - 240)           | 7,993<br>(5,734 - 12,524)      | 29,805<br>(22,064 - 46,953)    |

Web Table 31- United States deaths with 95% UI by age, sex, and cause in 2013

| Cause                                         | Males, All Ages                | Males, 0-4 Years   | Males, 5-14 Years  | Males, 15-49 Years          | Males, 50-69 Years             | Males, 70-80 Years             |
|-----------------------------------------------|--------------------------------|--------------------|--------------------|-----------------------------|--------------------------------|--------------------------------|
| Colon and rectum cancer                       | 34,926<br>(31,008 - 39,465)    | --                 | --                 | 2,070<br>(1,730 - 2,447)    | 13,953<br>(12,234 - 15,716)    | 18,904<br>(16,041 - 22,212)    |
| Lip and oral cavity cancer                    | 3,987<br>(3,366 - 4,641)       | --                 | --                 | 324<br>(255 - 431)          | 2,085<br>(1,710 - 2,522)       | 1,578<br>(1,229 - 2,025)       |
| Nasopharynx cancer                            | 816<br>(635 - 1,143)           | --                 | 4<br>(1 - 8)       | 137<br>(93 - 221)           | 458<br>(328 - 640)             | 218<br>(154 - 302)             |
| Other pharynx cancer                          | 2,639<br>(2,140 - 3,484)       | --                 | --                 | 212<br>(162 - 316)          | 1,647<br>(1,292 - 2,171)       | 781<br>(581 - 1,043)           |
| Gallbladder and biliary tract cancer          | 1,818<br>(1,265 - 2,556)       | --                 | --                 | 69<br>(45 - 95)             | 621<br>(411 - 872)             | 1,128<br>(786 - 1,636)         |
| Pancreatic cancer                             | 21,964<br>(19,497 - 24,635)    | --                 | --                 | 993<br>(800 - 1,231)        | 10,175<br>(8,776 - 11,616)     | 10,796<br>(9,196 - 12,449)     |
| Malignant skin melanoma                       | 7,026<br>(3,539 - 12,254)      | --                 | --                 | 1,025<br>(570 - 2,099)      | 3,137<br>(1,628 - 5,680)       | 2,865<br>(1,258 - 4,538)       |
| Non-melanoma skin cancer                      | 2,549<br>(1,631 - 4,048)       | --                 | --                 | 143<br>(88 - 260)           | 916<br>(584 - 1,503)           | 1,490<br>(893 - 2,370)         |
| Ovarian cancer                                | --                             | --                 | --                 | --                          | --                             | --                             |
| Testicular cancer                             | 419<br>(302 - 555)             | --                 | --                 | 279<br>(198 - 380)          | 96<br>(63 - 136)               | 44<br>(30 - 62)                |
| Kidney cancer                                 | 10,687<br>(9,019 - 12,848)     | 11<br>(5 - 20)     | 15<br>(8 - 24)     | 661<br>(506 - 854)          | 5,095<br>(4,131 - 6,273)       | 4,906<br>(3,779 - 6,439)       |
| Bladder cancer                                | 10,937<br>(8,348 - 13,099)     | --                 | --                 | 189<br>(145 - 242)          | 2,974<br>(2,296 - 3,548)       | 7,773<br>(5,717 - 9,618)       |
| Brain and nervous system cancer               | 9,193<br>(7,213 - 11,972)      | 69<br>(35 - 121)   | 182<br>(126 - 262) | 1,547<br>(1,206 - 2,077)    | 4,544<br>(3,606 - 6,217)       | 2,852<br>(1,942 - 3,836)       |
| Thyroid cancer                                | 772<br>(596 - 947)             | --                 | 1<br>(1 - 1)       | 62<br>(48 - 79)             | 327<br>(254 - 409)             | 382<br>(265 - 511)             |
| Mesothelioma                                  | 2,624<br>(1,635 - 3,781)       | --                 | --                 | 71<br>(43 - 120)            | 948<br>(593 - 1,576)           | 1,605<br>(774 - 2,526)         |
| Hodgkin lymphoma                              | 893<br>(694 - 1,569)           | 1<br>(0 - 2)       | 6<br>(2 - 14)      | 291<br>(211 - 557)          | 305<br>(215 - 549)             | 291<br>(190 - 478)             |
| Non-Hodgkin lymphoma                          | 14,906<br>(7,190 - 19,101)     | 11<br>(5 - 21)     | 46<br>(23 - 83)    | 1,233<br>(723 - 1,937)      | 5,452<br>(2,616 - 7,801)       | 8,164<br>(3,629 - 11,141)      |
| Multiple myeloma                              | 7,311<br>(4,206 - 11,583)      | --                 | --                 | 273<br>(168 - 502)          | 2,900<br>(1,703 - 5,050)       | 4,138<br>(2,268 - 6,584)       |
| Leukemia                                      | 14,061<br>(12,286 - 15,991)    | 87<br>(46 - 149)   | 179<br>(131 - 241) | 1,272<br>(1,082 - 1,485)    | 4,335<br>(3,698 - 5,073)       | 8,188<br>(6,765 - 9,767)       |
| Other neoplasms                               | 12,908<br>(10,061 - 16,099)    | 180<br>(104 - 273) | 181<br>(95 - 247)  | 1,595<br>(1,292 - 2,178)    | 4,076<br>(3,280 - 5,409)       | 8,677<br>(4,133 - 9,193)       |
| Cardiovascular diseases                       | 421,663<br>(384,069 - 462,021) | 307<br>(214 - 413) | 135<br>(104 - 170) | 23,236<br>(20,427 - 26,388) | 121,934<br>(110,261 - 135,408) | 276,052<br>(249,200 - 305,491) |
| Rheumatic heart disease                       | 1,454<br>(1,016 - 2,232)       | 1<br>(0 - 2)       | 2<br>(1 - 4)       | 137<br>(93 - 252)           | 425<br>(290 - 786)             | 888<br>(532 - 1,395)           |
| Ischemic heart disease                        | 277,461<br>(247,563 - 313,560) | 19<br>(11 - 28)    | 18<br>(10 - 25)    | 13,626<br>(11,655 - 15,837) | 85,147<br>(74,989 - 95,733)    | 178,652<br>(155,544 - 204,372) |
| Cerebrovascular disease                       | 68,228<br>(51,584 - 85,186)    | 77<br>(47 - 115)   | 38<br>(25 - 51)    | 2,688<br>(1,997 - 3,565)    | 13,923<br>(10,324 - 17,561)    | 51,503<br>(37,946 - 66,194)    |
| Ischemic stroke                               | 34,261<br>(24,840 - 44,794)    | 14<br>(7 - 24)     | 3<br>(2 - 6)       | 297<br>(191 - 432)          | 4,400<br>(2,967 - 5,934)       | 29,547<br>(20,966 - 39,374)    |
| Hemorrhagic stroke                            | 33,967<br>(22,876 - 43,737)    | 63<br>(36 - 94)    | 34<br>(23 - 47)    | 2,391<br>(1,767 - 3,175)    | 9,523<br>(6,731 - 12,357)      | 21,956<br>(13,328 - 29,430)    |
| Hypertensive heart disease                    | 15,772<br>(10,083 - 20,936)    | 1<br>(1 - 2)       | 2<br>(1 - 3)       | 1,758<br>(1,012 - 2,563)    | 6,431<br>(3,976 - 8,791)       | 7,580<br>(4,635 - 11,008)      |
| Cardiomyopathy and myocarditis                | 20,204<br>(14,480 - 28,948)    | 152<br>(102 - 216) | 59<br>(40 - 78)    | 2,795<br>(2,082 - 3,943)    | 6,820<br>(5,196 - 10,405)      | 10,378<br>(6,521 - 14,721)     |
| Atrial fibrillation and flutter               | 7,153<br>(4,734 - 9,985)       | --                 | --                 | 52<br>(33 - 72)             | 844<br>(581 - 1,110)           | 6,257<br>(4,044 - 9,083)       |
| Aortic aneurysm                               | 8,680<br>(7,119 - 13,133)      | --                 | --                 | 526<br>(399 - 645)          | 2,642<br>(2,108 - 3,858)       | 5,512<br>(4,338 - 8,763)       |
| Peripheral vascular disease                   | 3,233<br>(2,293 - 4,264)       | --                 | --                 | 39<br>(28 - 54)             | 736<br>(541 - 950)             | 2,458<br>(1,654 - 3,430)       |
| Endocarditis                                  | 2,566<br>(1,625 - 4,203)       | 11<br>(5 - 18)     | 3<br>(2 - 5)       | 297<br>(195 - 483)          | 846<br>(498 - 1,374)           | 1,409<br>(835 - 2,451)         |
| Other cardiovascular and circulatory diseases | 16,912<br>(10,609 - 21,525)    | 46<br>(27 - 68)    | 13<br>(8 - 19)     | 1,317<br>(716 - 1,637)      | 4,121<br>(2,573 - 5,035)       | 11,415<br>(6,739 - 15,373)     |
| Chronic respiratory diseases                  | 94,300<br>(64,855 - 108,903)   | 175<br>(87 - 279)  | 84<br>(49 - 108)   | 1,943<br>(1,322 - 2,365)    | 22,243<br>(15,609 - 25,740)    | 69,855<br>(47,441 - 81,790)    |
| Chronic obstructive pulmonary disease         | 79,507<br>(54,319 - 91,751)    | 105<br>(46 - 174)  | 10<br>(5 - 14)     | 959<br>(583 - 1,231)        | 18,748<br>(12,922 - 21,848)    | 59,685<br>(40,591 - 70,042)    |
| Pneumoconiosis                                | 2,205<br>(1,370 - 3,289)       | 1<br>(0 - 2)       | 2<br>(1 - 3)       | 45<br>(25 - 67)             | 411<br>(260 - 619)             | 1,747<br>(1,058 - 2,665)       |
| Silicosis                                     | 98<br>(63 - 143)               | 0<br>(0 - 0)       | 0<br>(0 - 1)       | 12<br>(7 - 18)              | 28<br>(17 - 43)                | 58<br>(35 - 90)                |
| Asbestosis                                    | 1,007<br>(631 - 1,512)         | 0<br>(0 - 0)       | 0<br>(0 - 1)       | 11<br>(7 - 17)              | 175<br>(108 - 271)             | 820<br>(502 - 1,234)           |
| Coal workers pneumoconiosis                   | 402<br>(250 - 606)             | 0<br>(0 - 0)       | 0<br>(0 - 1)       | 5<br>(3 - 7)                | 52<br>(32 - 85)                | 344<br>(210 - 521)             |
| Other pneumoconiosis                          | 699<br>(422 - 1,072)           | 0<br>(0 - 0)       | 0<br>(0 - 1)       | 17<br>(9 - 26)              | 156<br>(99 - 237)              | 525<br>(295 - 833)             |

Web Table 31- United States deaths with 95% UI by age, sex, and cause in 2013

| Cause                                               | Males, All Ages                | Males, 0-4 Years   | Males, 5-14 Years  | Males, 15-49 Years         | Males, 50-69 Years          | Males, 70-80 Years            |
|-----------------------------------------------------|--------------------------------|--------------------|--------------------|----------------------------|-----------------------------|-------------------------------|
| Asthma                                              | 1,388<br>(1,011 - 1,638)       | 22<br>(10 - 39)    | 56<br>(33 - 75)    | 428<br>(301 - 523)         | 430<br>(313 - 547)          | 452<br>(305 - 603)            |
| Interstitial lung disease and pulmonary sarcoidosis | 10,174<br>(5,530 - 13,639)     | 14<br>(6 - 26)     | 9<br>(5 - 14)      | 343<br>(226 - 488)         | 2,319<br>(1,335 - 3,174)    | 7,490<br>(3,816 - 10,504)     |
| Other chronic respiratory diseases                  | 1,025<br>(708 - 1,308)         | 33<br>(18 - 53)    | 7<br>(3 - 11)      | 169<br>(109 - 223)         | 335<br>(230 - 447)          | 482<br>(315 - 705)            |
| Cirrhosis                                           | 33,718<br>(30,114 - 37,656)    | 17<br>(10 - 27)    | 10<br>(8 - 13)     | 5,954<br>(5,017 - 7,028)   | 20,022<br>(17,484 - 23,031) | 7,715<br>(6,610 - 8,963)      |
| Cirrhosis due to hepatitis B                        | 2,150<br>(1,200 - 3,420)       | 1<br>(0 - 1)       | 1<br>(0 - 1)       | 423<br>(212 - 710)         | 1,277<br>(706 - 2,062)      | 448<br>(250 - 705)            |
| Cirrhosis due to hepatitis C                        | 16,226<br>(10,568 - 21,538)    | 5<br>(2 - 9)       | 5<br>(3 - 7)       | 2,978<br>(1,727 - 4,245)   | 9,719<br>(5,948 - 13,175)   | 3,520<br>(2,353 - 4,721)      |
| Cirrhosis due to alcohol use                        | 14,080<br>(9,166 - 19,383)     | --                 | --                 | 2,185<br>(1,150 - 3,305)   | 8,305<br>(5,047 - 11,966)   | 3,590<br>(2,552 - 4,751)      |
| Cirrhosis due to other causes                       | 1,263<br>(686 - 2,087)         | 12<br>(7 - 19)     | 5<br>(3 - 7)       | 369<br>(203 - 602)         | 722<br>(348 - 1,265)        | 157<br>(79 - 259)             |
| Digestive diseases                                  | 19,965<br>(17,360 - 23,426)    | 46<br>(26 - 71)    | 36<br>(26 - 45)    | 1,431<br>(1,192 - 1,733)   | 5,426<br>(4,552 - 6,447)    | 13,027<br>(10,915 - 15,813)   |
| Peptic ulcer disease                                | 2,280<br>(1,612 - 3,167)       | 1<br>(1 - 2)       | 2<br>(1 - 3)       | 155<br>(108 - 216)         | 679<br>(477 - 925)          | 1,444<br>(942 - 2,214)        |
| Gastritis and duodenitis                            | 248<br>(144 - 520)             | 1<br>(0 - 2)       | 2<br>(1 - 3)       | 37<br>(23 - 78)            | 81<br>(47 - 170)            | 128<br>(63 - 295)             |
| Appendicitis                                        | 400<br>(225 - 601)             | 2<br>(1 - 3)       | 4<br>(2 - 6)       | 54<br>(34 - 77)            | 124<br>(70 - 184)           | 216<br>(102 - 356)            |
| Paralytic ileus and intestinal obstruction          | 2,944<br>(1,542 - 4,416)       | 13<br>(6 - 24)     | 11<br>(6 - 17)     | 139<br>(64 - 203)          | 579<br>(290 - 889)          | 2,202<br>(1,106 - 3,401)      |
| Inguinal, femoral, and abdominal hernia             | 499<br>(218 - 789)             | 1<br>(0 - 3)       | 2<br>(0 - 3)       | 23<br>(10 - 36)            | 124<br>(62 - 185)           | 349<br>(138 - 589)            |
| Inflammatory bowel disease                          | 1,180<br>(764 - 2,183)         | 9<br>(5 - 18)      | 3<br>(2 - 6)       | 105<br>(74 - 170)          | 353<br>(234 - 618)          | 710<br>(398 - 1,442)          |
| Vascular intestinal disorders                       | 4,183<br>(1,802 - 7,538)       | 4<br>(1 - 9)       | 3<br>(1 - 7)       | 150<br>(58 - 309)          | 1,148<br>(502 - 2,129)      | 2,878<br>(1,219 - 5,351)      |
| Gallbladder and biliary diseases                    | 2,339<br>(1,597 - 3,081)       | 1<br>(1 - 2)       | 2<br>(1 - 3)       | 91<br>(66 - 122)           | 520<br>(344 - 695)          | 1,725<br>(1,122 - 2,395)      |
| Pancreatitis                                        | 2,313<br>(1,511 - 3,186)       | 1<br>(1 - 2)       | 2<br>(1 - 4)       | 467<br>(331 - 624)         | 934<br>(575 - 1,270)        | 908<br>(536 - 1,359)          |
| Other digestive diseases                            | 3,578<br>(2,499 - 4,926)       | 12<br>(5 - 20)     | 5<br>(3 - 8)       | 210<br>(148 - 287)         | 885<br>(614 - 1,215)        | 2,467<br>(1,585 - 3,643)      |
| Neurological disorders                              | 138,553<br>(109,656 - 166,744) | 181<br>(117 - 316) | 93<br>(69 - 154)   | 2,091<br>(1,647 - 2,562)   | 10,273<br>(8,213 - 12,378)  | 125,914<br>(96,647 - 152,341) |
| Alzheimer disease and other dementias               | 113,381<br>(84,242 - 141,390)  | --                 | --                 | 2<br>(0 - 6)               | 4,106<br>(2,782 - 5,727)    | 109,273<br>(80,361 - 136,822) |
| Parkinson disease                                   | 14,478<br>(8,362 - 18,654)     | --                 | --                 | 33<br>(18 - 43)            | 1,494<br>(819 - 1,894)      | 12,951<br>(7,495 - 17,037)    |
| Epilepsy                                            | 1,196<br>(963 - 1,548)         | 23<br>(14 - 37)    | 21<br>(14 - 30)    | 463<br>(352 - 603)         | 339<br>(263 - 453)          | 350<br>(252 - 504)            |
| Multiple sclerosis                                  | 1,985<br>(741 - 2,762)         | --                 | --                 | 459<br>(204 - 787)         | 1,189<br>(385 - 1,745)      | 336<br>(99 - 535)             |
| Other neurological disorders                        | 7,513<br>(6,200 - 9,771)       | 158<br>(99 - 289)  | 73<br>(51 - 131)   | 1,134<br>(840 - 1,400)     | 3,145<br>(2,543 - 4,145)    | 3,004<br>(2,371 - 4,092)      |
| Mental and substance use disorders                  | 24,436<br>(13,398 - 29,037)    | 6<br>(2 - 9)       | 1<br>(0 - 1)       | 14,880<br>(7,069 - 18,205) | 8,369<br>(4,967 - 10,534)   | 1,181<br>(793 - 1,532)        |
| Schizophrenia                                       | 211<br>(109 - 294)             | --                 | --                 | 31<br>(15 - 46)            | 75<br>(32 - 115)            | 105<br>(55 - 170)             |
| Alcohol use disorders                               | 6,952<br>(4,097 - 9,638)       | --                 | --                 | 2,344<br>(1,449 - 3,373)   | 3,838<br>(2,108 - 5,633)    | 769<br>(422 - 1,130)          |
| Drug use disorders                                  | 17,252<br>(6,712 - 20,673)     | 6<br>(2 - 9)       | --                 | 12,484<br>(4,758 - 15,435) | 4,456<br>(1,795 - 5,800)    | 306<br>(211 - 401)            |
| Opioid use disorders                                | 7,234<br>(2,811 - 8,757)       | 3<br>(1 - 4)       | --                 | 5,328<br>(1,994 - 6,681)   | 1,770<br>(711 - 2,409)      | 133<br>(92 - 178)             |
| Cocaine use disorders                               | 746<br>(291 - 929)             | 0<br>(0 - 1)       | --                 | 586<br>(232 - 754)         | 150<br>(58 - 214)           | 10<br>(6 - 15)                |
| Amphetamine use disorders                           | 433<br>(170 - 548)             | 0<br>(0 - 0)       | --                 | 310<br>(113 - 405)         | 116<br>(45 - 164)           | 7<br>(4 - 10)                 |
| Other drug use disorders                            | 8,839<br>(3,413 - 10,732)      | 3<br>(1 - 4)       | --                 | 6,260<br>(2,415 - 7,865)   | 2,420<br>(986 - 3,157)      | 156<br>(106 - 207)            |
| Eating disorders                                    | 21<br>(12 - 31)                | --                 | 1<br>(0 - 1)       | 20<br>(11 - 31)            | --                          | --                            |
| Anorexia nervosa                                    | 21<br>(12 - 31)                | --                 | 1<br>(0 - 1)       | 20<br>(11 - 31)            | --                          | --                            |
| Diabetes, urogenital, blood, and endocrine diseases | 95,509<br>(83,280 - 120,363)   | 395<br>(272 - 585) | 179<br>(134 - 249) | 6,985<br>(5,934 - 8,742)   | 29,214<br>(25,110 - 34,262) | 58,736<br>(49,624 - 77,687)   |
| Diabetes mellitus                                   | 38,261<br>(33,458 - 44,074)    | 23<br>(16 - 32)    | 14<br>(11 - 18)    | 2,837<br>(2,386 - 3,401)   | 14,413<br>(12,253 - 16,937) | 20,974<br>(17,352 - 25,117)   |
| Acute glomerulonephritis                            | 37<br>(26 - 65)                | 1<br>(1 - 2)       | 2<br>(1 - 3)       | 7<br>(5 - 9)               | 7<br>(4 - 14)               | 19<br>(10 - 43)               |
| Chronic kidney disease                              | 36,251<br>(27,943 - 58,121)    | 39<br>(24 - 65)    | 12<br>(8 - 20)     | 1,663<br>(1,221 - 2,984)   | 8,656<br>(6,542 - 13,019)   | 25,881<br>(19,304 - 41,852)   |
| Chronic kidney disease due to diabetes mellitus     | 6,222<br>(3,595 - 13,442)      | 3<br>(1 - 7)       | 3<br>(1 - 7)       | 308<br>(153 - 742)         | 2,164<br>(1,155 - 4,236)    | 3,744<br>(2,070 - 8,863)      |

Web Table 31- United States deaths with 95% UI by age, sex, and cause in 2013

| Cause                                               | Males, All Ages                | Males, 0-4 Years         | Males, 5-14 Years        | Males, 15-49 Years          | Males, 50-69 Years          | Males, 70-80 Years          |
|-----------------------------------------------------|--------------------------------|--------------------------|--------------------------|-----------------------------|-----------------------------|-----------------------------|
| Chronic kidney disease due to hypertension          | 14,047<br>(9,051 - 21,413)     | 5<br>(3 - 11)            | 2<br>(1 - 3)             | 752<br>(408 - 1,309)        | 3,671<br>(2,060 - 5,774)    | 9,617<br>(6,304 - 14,917)   |
| Chronic kidney disease due to glomerulonephritis    | 1,330<br>(453 - 2,133)         | 8<br>(3 - 14)            | 2<br>(1 - 3)             | 73<br>(41 - 112)            | 309<br>(119 - 474)          | 939<br>(262 - 1,620)        |
| Chronic kidney disease due to other causes          | 14,652<br>(8,519 - 28,630)     | 23<br>(12 - 47)          | 6<br>(3 - 11)            | 530<br>(279 - 1,310)        | 2,512<br>(1,431 - 4,686)    | 11,581<br>(6,311 - 22,979)  |
| Urinary diseases and male infertility               | 7,597<br>(5,845 - 10,321)      | 26<br>(18 - 36)          | 3<br>(2 - 4)             | 221<br>(139 - 271)          | 1,336<br>(903 - 1,634)      | 6,011<br>(4,483 - 8,824)    |
| Interstitial nephritis and urinary tract infections | 6,001<br>(4,543 - 8,366)       | 14<br>(9 - 21)           | 1<br>(1 - 2)             | 145<br>(96 - 190)           | 942<br>(636 - 1,219)        | 4,899<br>(3,496 - 7,360)    |
| Urolithiasis                                        | 157<br>(96 - 245)              | --                       | 1<br>(0 - 2)             | 11<br>(7 - 19)              | 38<br>(23 - 63)             | 107<br>(57 - 190)           |
| Other urinary diseases                              | 1,438<br>(697 - 2,137)         | 11<br>(7 - 17)           | 1<br>(0 - 1)             | 65<br>(26 - 92)             | 356<br>(165 - 510)          | 1,005<br>(461 - 1,734)      |
| Gynecological diseases                              | --                             | --                       | --                       | --                          | --                          | --                          |
| Uterine fibroids                                    | --                             | --                       | --                       | --                          | --                          | --                          |
| Polycystic ovarian syndrome                         | --                             | --                       | --                       | --                          | --                          | --                          |
| Endometriosis                                       | --                             | --                       | --                       | --                          | --                          | --                          |
| Genital prolapse                                    | --                             | --                       | --                       | --                          | --                          | --                          |
| Other gynecological diseases                        | --                             | --                       | --                       | --                          | --                          | --                          |
| Hemoglobinopathies and hemolytic anemias            | 1,107<br>(704 - 1,685)         | 37<br>(19 - 63)          | 22<br>(12 - 34)          | 263<br>(151 - 376)          | 235<br>(143 - 360)          | 550<br>(352 - 918)          |
| Thalassemias                                        | 73<br>(43 - 108)               | 10<br>(5 - 18)           | 7<br>(4 - 11)            | 44<br>(25 - 64)             | 10<br>(6 - 14)              | 3<br>(2 - 5)                |
| Sickle cell disorders                               | 328<br>(198 - 478)             | 21<br>(11 - 36)          | 12<br>(7 - 20)           | 150<br>(85 - 214)           | 119<br>(71 - 181)           | 27<br>(17 - 44)             |
| G6PD deficiency                                     | 15<br>(9 - 21)                 | 1<br>(0 - 1)             | 0<br>(0 - 1)             | 5<br>(3 - 8)                | 5<br>(3 - 7)                | 3<br>(2 - 5)                |
| Other hemoglobinopathies and hemolytic anemias      | 691<br>(445 - 1,115)           | 5<br>(3 - 8)             | 2<br>(1 - 3)             | 65<br>(37 - 90)             | 102<br>(62 - 160)           | 517<br>(330 - 868)          |
| Endocrine, metabolic, blood, and immune disorders   | 12,256<br>(8,227 - 15,538)     | 269<br>(176 - 421)       | 126<br>(85 - 192)        | 1,993<br>(1,403 - 2,789)    | 4,565<br>(2,851 - 5,988)    | 5,301<br>(3,224 - 7,506)    |
| Musculoskeletal disorders                           | 3,412<br>(2,045 - 4,264)       | --                       | 9<br>(5 - 13)            | 345<br>(235 - 440)          | 1,130<br>(727 - 1,477)      | 1,928<br>(1,041 - 2,544)    |
| Rheumatoid arthritis                                | 646<br>(375 - 945)             | --                       | 2<br>(1 - 3)             | 19<br>(11 - 31)             | 218<br>(125 - 348)          | 407<br>(211 - 633)          |
| Other musculoskeletal disorders                     | 2,766<br>(1,628 - 3,542)       | --                       | 7<br>(4 - 11)            | 326<br>(222 - 416)          | 912<br>(564 - 1,203)        | 1,521<br>(807 - 2,064)      |
| Other non-communicable diseases                     | 9,838<br>(8,455 - 11,822)      | 4,813<br>(3,655 - 6,302) | 219<br>(165 - 288)       | 1,156<br>(982 - 1,391)      | 1,539<br>(1,301 - 1,815)    | 2,111<br>(1,679 - 2,776)    |
| Congenital anomalies                                | 6,240<br>(5,254 - 7,684)       | 3,346<br>(2,513 - 4,457) | 217<br>(162 - 285)       | 1,018<br>(847 - 1,237)      | 937<br>(774 - 1,138)        | 721<br>(565 - 946)          |
| Neural tube defects                                 | 185<br>(110 - 288)             | 141<br>(74 - 242)        | 6<br>(3 - 10)            | 27<br>(15 - 36)             | 8<br>(4 - 11)               | 3<br>(2 - 5)                |
| Congenital heart anomalies                          | 2,202<br>(1,735 - 3,072)       | 1,053<br>(693 - 1,536)   | 98<br>(61 - 147)         | 538<br>(422 - 724)          | 316<br>(226 - 464)          | 197<br>(117 - 320)          |
| Cleft lip and cleft palate                          | 5<br>(1 - 18)                  | 5<br>(1 - 18)            | --                       | --                          | --                          | --                          |
| Down syndrome                                       | 445<br>(207 - 609)             | 73<br>(31 - 139)         | 8<br>(3 - 14)            | 107<br>(48 - 156)           | 241<br>(99 - 358)           | 15<br>(6 - 27)              |
| Chromosomal unbalanced rearrangements               | 433<br>(249 - 662)             | 404<br>(222 - 631)       | 9<br>(4 - 16)            | 11<br>(6 - 16)              | 6<br>(4 - 9)                | 2<br>(1 - 4)                |
| Other congenital anomalies                          | 2,969<br>(2,317 - 3,841)       | 1,670<br>(1,150 - 2,344) | 96<br>(60 - 143)         | 335<br>(238 - 447)          | 366<br>(250 - 503)          | 503<br>(372 - 673)          |
| Skin and subcutaneous diseases                      | 2,139<br>(1,699 - 2,723)       | 8<br>(5 - 12)            | 3<br>(2 - 4)             | 137<br>(107 - 173)          | 601<br>(449 - 754)          | 1,390<br>(1,021 - 1,943)    |
| Cellulitis                                          | 739<br>(450 - 1,063)           | 3<br>(1 - 5)             | 1<br>(0 - 1)             | 59<br>(38 - 87)             | 233<br>(137 - 346)          | 444<br>(236 - 731)          |
| Pyoderma                                            | 739<br>(513 - 995)             | 3<br>(2 - 6)             | 1<br>(0 - 1)             | 52<br>(34 - 73)             | 227<br>(146 - 313)          | 457<br>(277 - 700)          |
| Decubitus ulcer                                     | 548<br>(369 - 903)             | 1<br>(0 - 1)             | 1<br>(0 - 1)             | 16<br>(10 - 24)             | 113<br>(75 - 171)           | 418<br>(258 - 779)          |
| Other skin and subcutaneous diseases                | 112<br>(64 - 207)              | 1<br>(1 - 2)             | 1<br>(0 - 1)             | 11<br>(7 - 16)              | 28<br>(15 - 44)             | 72<br>(31 - 165)            |
| Sudden infant death syndrome                        | 1,459<br>(775 - 2,563)         | 1,459<br>(775 - 2,563)   | --                       | --                          | --                          | --                          |
| Injuries                                            | 118,049<br>(106,147 - 131,146) | 1,952<br>(1,363 - 2,691) | 1,634<br>(1,394 - 1,892) | 54,220<br>(48,614 - 62,024) | 30,085<br>(25,795 - 34,177) | 30,158<br>(25,271 - 35,238) |
| Transport injuries                                  | 32,931<br>(29,247 - 36,768)    | 446<br>(287 - 681)       | 741<br>(581 - 924)       | 18,793<br>(16,389 - 21,442) | 8,569<br>(7,281 - 10,075)   | 4,382<br>(3,630 - 5,323)    |
| Road injuries                                       | 30,420<br>(27,098 - 33,993)    | 427<br>(275 - 649)       | 660<br>(518 - 824)       | 17,399<br>(15,202 - 19,886) | 7,783<br>(6,619 - 9,152)    | 4,151<br>(3,444 - 5,087)    |
| Pedestrian road injuries                            | 5,654<br>(2,699 - 8,708)       | 198<br>(94 - 334)        | 238<br>(132 - 349)       | 2,181<br>(996 - 3,547)      | 1,746<br>(849 - 2,907)      | 1,291<br>(578 - 2,015)      |

Web Table 31- United States deaths with 95% UI by age, sex, and cause in 2013

| Cause                                           | Males, All Ages             | Males, 0-4 Years       | Males, 5-14 Years  | Males, 15-49 Years          | Males, 50-69 Years         | Males, 70-80 Years          |
|-------------------------------------------------|-----------------------------|------------------------|--------------------|-----------------------------|----------------------------|-----------------------------|
| Cyclist road injuries                           | 1,669<br>(622 - 2,364)      | 19<br>(6 - 38)         | 107<br>(59 - 165)  | 631<br>(258 - 892)          | 589<br>(178 - 932)         | 322<br>(83 - 530)           |
| Motorcyclist road injuries                      | 5,278<br>(2,467 - 7,106)    | 5<br>(2 - 10)          | 34<br>(16 - 54)    | 3,667<br>(1,833 - 5,006)    | 1,424<br>(515 - 2,157)     | 147<br>(39 - 246)           |
| Motor vehicle road injuries                     | 17,677<br>(14,113 - 23,265) | 202<br>(116 - 325)     | 276<br>(176 - 416) | 10,898<br>(8,736 - 14,095)  | 3,955<br>(2,847 - 5,775)   | 2,346<br>(1,634 - 3,467)    |
| Other road injuries                             | 142<br>(28 - 234)           | 3<br>(1 - 7)           | 5<br>(1 - 9)       | 21<br>(5 - 35)              | 69<br>(12 - 130)           | 44<br>(7 - 90)              |
| Other transport injuries                        | 2,512<br>(1,623 - 3,204)    | 19<br>(8 - 38)         | 81<br>(39 - 133)   | 1,394<br>(946 - 1,880)      | 786<br>(458 - 1,102)       | 231<br>(101 - 386)          |
| Unintentional injuries                          | 38,778<br>(32,785 - 45,356) | 1,332<br>(900 - 1,917) | 577<br>(445 - 793) | 7,145<br>(6,041 - 9,641)    | 8,914<br>(7,578 - 10,324)  | 20,810<br>(15,656 - 25,502) |
| Falls                                           | 16,919<br>(10,676 - 21,080) | 55<br>(35 - 89)        | 30<br>(21 - 43)    | 1,405<br>(1,139 - 1,845)    | 3,241<br>(2,029 - 4,027)   | 12,188<br>(7,013 - 15,959)  |
| Drowning                                        | 3,523<br>(2,687 - 4,932)    | 356<br>(200 - 607)     | 238<br>(162 - 397) | 1,849<br>(1,411 - 2,678)    | 762<br>(518 - 1,022)       | 319<br>(216 - 430)          |
| Fire, heat, and hot substances                  | 2,549<br>(1,988 - 3,822)    | 186<br>(95 - 356)      | 101<br>(65 - 175)  | 653<br>(478 - 1,035)        | 771<br>(566 - 1,069)       | 837<br>(583 - 1,298)        |
| Poisonings                                      | 1,297<br>(1,035 - 2,150)    | 19<br>(10 - 33)        | 12<br>(7 - 18)     | 521<br>(361 - 1,250)        | 533<br>(305 - 700)         | 212<br>(141 - 327)          |
| Exposure to mechanical forces                   | 3,381<br>(2,879 - 4,066)    | 418<br>(169 - 719)     | 118<br>(86 - 160)  | 1,285<br>(1,062 - 1,809)    | 990<br>(824 - 1,258)       | 570<br>(427 - 691)          |
| Unintentional firearm injuries                  | 603<br>(491 - 771)          | 10<br>(5 - 20)         | 43<br>(27 - 70)    | 367<br>(278 - 509)          | 129<br>(92 - 192)          | 54<br>(37 - 80)             |
| Unintentional suffocation                       | 657<br>(243 - 971)          | 361<br>(116 - 646)     | 37<br>(14 - 65)    | 119<br>(46 - 161)           | 53<br>(20 - 77)            | 87<br>(25 - 149)            |
| Other exposure to mechanical forces             | 2,121<br>(1,812 - 2,734)    | 47<br>(28 - 74)        | 39<br>(28 - 54)    | 799<br>(639 - 1,232)        | 808<br>(651 - 1,030)       | 429<br>(319 - 537)          |
| Adverse effects of medical treatment            | 3,197<br>(2,384 - 4,676)    | 53<br>(31 - 91)        | 13<br>(8 - 24)     | 419<br>(300 - 731)          | 1,056<br>(736 - 1,686)     | 1,656<br>(1,076 - 2,429)    |
| Animal contact                                  | 195<br>(149 - 340)          | 11<br>(6 - 21)         | 6<br>(4 - 10)      | 53<br>(37 - 87)             | 78<br>(54 - 138)           | 46<br>(31 - 71)             |
| Venomous animal contact                         | 77<br>(54 - 125)            | 1<br>(0 - 2)           | 2<br>(1 - 3)       | 27<br>(17 - 44)             | 36<br>(23 - 64)            | 11<br>(6 - 19)              |
| Non-venomous animal contact                     | 118<br>(84 - 205)           | 10<br>(5 - 18)         | 5<br>(3 - 8)       | 26<br>(17 - 46)             | 42<br>(27 - 76)            | 35<br>(22 - 55)             |
| Foreign body                                    | 7,179<br>(4,239 - 12,262)   | 222<br>(110 - 372)     | 45<br>(26 - 87)    | 664<br>(409 - 1,094)        | 1,337<br>(772 - 2,160)     | 4,911<br>(2,710 - 8,843)    |
| Pulmonary aspiration and foreign body in airway | 7,151<br>(4,213 - 12,244)   | 220<br>(108 - 370)     | 43<br>(25 - 85)    | 655<br>(400 - 1,088)        | 1,329<br>(766 - 2,155)     | 4,903<br>(2,704 - 8,834)    |
| Foreign body in other body part                 | 28<br>(17 - 45)             | 2<br>(1 - 3)           | 2<br>(1 - 3)       | 9<br>(5 - 14)               | 8<br>(4 - 13)              | 8<br>(4 - 15)               |
| Other unintentional injuries                    | 536<br>(416 - 704)          | 11<br>(5 - 21)         | 13<br>(6 - 24)     | 297<br>(203 - 426)          | 146<br>(87 - 228)          | 70<br>(43 - 108)            |
| Self-harm and interpersonal violence            | 46,340<br>(38,089 - 55,122) | 174<br>(64 - 324)      | 315<br>(213 - 425) | 28,282<br>(23,311 - 33,807) | 12,602<br>(9,347 - 15,730) | 4,966<br>(3,956 - 6,882)    |
| Self-harm                                       | 32,876<br>(25,086 - 38,576) | --                     | 172<br>(108 - 247) | 17,790<br>(13,327 - 21,148) | 10,447<br>(7,466 - 12,602) | 4,468<br>(3,556 - 6,304)    |
| Interpersonal violence                          | 13,463<br>(9,594 - 19,046)  | 174<br>(64 - 324)      | 143<br>(69 - 227)  | 10,493<br>(7,371 - 14,652)  | 2,155<br>(1,360 - 3,790)   | 498<br>(269 - 945)          |
| Assault by firearm                              | 9,597<br>(6,098 - 13,770)   | 27<br>(6 - 64)         | 95<br>(41 - 156)   | 8,069<br>(5,120 - 11,326)   | 1,204<br>(681 - 2,211)     | 201<br>(95 - 404)           |
| Assault by sharp object                         | 2,121<br>(1,137 - 4,316)    | 11<br>(3 - 24)         | 14<br>(5 - 33)     | 1,524<br>(801 - 3,164)      | 456<br>(229 - 1,014)       | 117<br>(51 - 261)           |
| Assault by other means                          | 1,745<br>(986 - 3,048)      | 137<br>(51 - 256)      | 35<br>(13 - 63)    | 900<br>(487 - 1,728)        | 495<br>(242 - 937)         | 179<br>(86 - 356)           |
| Forces of nature, war, and legal intervention   | 0<br>(0 - 0)                | 0<br>(0 - 0)           | --                 | --                          | --                         | 0<br>(0 - 0)                |
| Exposure to forces of nature                    | 0<br>(0 - 0)                | 0<br>(0 - 0)           | --                 | --                          | --                         | 0<br>(0 - 0)                |

Web Table 31- United States deaths with 95% UI by age, sex, and cause in 2013

| Cause                                                             | Females, All Ages                    | Females, 0-4 Years          | Females, 5-14 Years      | Females, 15-49 Years        | Females, 50-69 Years           | Females, 70-80 Years             |
|-------------------------------------------------------------------|--------------------------------------|-----------------------------|--------------------------|-----------------------------|--------------------------------|----------------------------------|
| All causes                                                        | 1,321,172<br>(1,236,261 - 1,413,248) | 12,317<br>(10,208 - 14,925) | 2,259<br>(2,024 - 2,546) | 71,140<br>(64,547 - 79,230) | 264,017<br>(241,679 - 288,323) | 971,439<br>(913,085 - 1,031,920) |
| Communicable, maternal, neonatal, and nutritional diseases        | 68,431<br>(55,890 - 84,774)          | 5,734<br>(4,579 - 7,085)    | 166<br>(131 - 203)       | 4,711<br>(3,875 - 5,700)    | 8,825<br>(7,095 - 10,538)      | 48,995<br>(37,411 - 66,519)      |
| HIV/AIDS and tuberculosis                                         | 2,906<br>(1,711 - 4,449)             | 7<br>(3 - 15)               | 3<br>(1 - 5)             | 1,645<br>(914 - 2,615)      | 898<br>(446 - 1,488)           | 352<br>(236 - 606)               |
| Tuberculosis                                                      | 403<br>(304 - 747)                   | 2<br>(1 - 2)                | 2<br>(1 - 3)             | 41<br>(30 - 70)             | 102<br>(76 - 173)              | 257<br>(174 - 505)               |
| HIV/AIDS                                                          | 2,503<br>(1,333 - 4,016)             | 5<br>(1 - 13)               | 1<br>(0 - 3)             | 1,605<br>(868 - 2,575)      | 796<br>(355 - 1,388)           | 96<br>(22 - 208)                 |
| HIV/AIDS resulting in mycobacterial infection                     | 103<br>(52 - 172)                    | 0<br>(0 - 1)                | 0<br>(0 - 0)             | 64<br>(34 - 102)            | 34<br>(14 - 61)                | 4<br>(1 - 10)                    |
| HIV/AIDS resulting in other diseases                              | 2,400<br>(1,274 - 3,849)             | 5<br>(1 - 13)               | 1<br>(0 - 3)             | 1,540<br>(832 - 2,478)      | 762<br>(341 - 1,336)           | 91<br>(21 - 198)                 |
| Diarrhea, lower respiratory, and other common infectious diseases | 51,781<br>(40,474 - 68,360)          | 497<br>(341 - 681)          | 127<br>(96 - 162)        | 1,770<br>(1,463 - 2,122)    | 6,581<br>(5,051 - 8,062)       | 42,807<br>(31,521 - 59,603)      |
| Diarrheal diseases                                                | 5,286<br>(3,513 - 7,992)             | 61<br>(32 - 106)            | 7<br>(4 - 12)            | 135<br>(100 - 182)          | 617<br>(450 - 826)             | 4,466<br>(2,701 - 7,139)         |
| Intestinal infectious diseases                                    | 97<br>(40 - 209)                     | 18<br>(7 - 39)              | 16<br>(5 - 36)           | 37<br>(13 - 85)             | 15<br>(6 - 33)                 | 11<br>(5 - 22)                   |
| Typhoid fever                                                     | 64<br>(21 - 151)                     | 10<br>(3 - 24)              | 11<br>(4 - 26)           | 26<br>(8 - 65)              | 10<br>(3 - 24)                 | 6<br>(2 - 15)                    |
| Paratyphoid fever                                                 | 20<br>(6 - 47)                       | 5<br>(1 - 11)               | 4<br>(1 - 9)             | 8<br>(2 - 19)               | 2<br>(1 - 6)                   | 1<br>(0 - 3)                     |
| Other intestinal infectious diseases                              | 13<br>(6 - 22)                       | 3<br>(1 - 8)                | 1<br>(0 - 3)             | 3<br>(1 - 8)                | 3<br>(0 - 7)                   | 4<br>(1 - 9)                     |
| Lower respiratory infections                                      | 44,966<br>(33,764 - 60,930)          | 269<br>(170 - 405)          | 59<br>(40 - 81)          | 1,327<br>(1,057 - 1,645)    | 5,616<br>(4,183 - 7,066)       | 37,695<br>(26,367 - 54,004)      |
| Upper respiratory infections                                      | 23<br>(5 - 71)                       | 0<br>(0 - 1)                | 0<br>(0 - 0)             | 2<br>(0 - 6)                | 6<br>(1 - 17)                  | 15<br>(0 - 65)                   |
| Otitis media                                                      | 35<br>(29 - 42)                      | 2<br>(1 - 4)                | 2<br>(1 - 2)             | 8<br>(6 - 9)                | 10<br>(7 - 13)                 | 13<br>(9 - 19)                   |
| Meningitis                                                        | 780<br>(671 - 979)                   | 94<br>(65 - 142)            | 21<br>(16 - 28)          | 149<br>(122 - 183)          | 193<br>(155 - 244)             | 322<br>(246 - 444)               |
| Pneumococcal meningitis                                           | 367<br>(284 - 532)                   | 35<br>(22 - 56)             | 10<br>(6 - 14)           | 70<br>(49 - 99)             | 93<br>(61 - 139)               | 160<br>(111 - 257)               |
| H influenzae type B meningitis                                    | 57<br>(42 - 79)                      | 18<br>(11 - 30)             | 2<br>(1 - 4)             | 8<br>(5 - 13)               | 9<br>(4 - 15)                  | 19<br>(11 - 32)                  |
| Meningococcal meningitis                                          | 137<br>(106 - 184)                   | 18<br>(11 - 29)             | 5<br>(2 - 7)             | 26<br>(16 - 37)             | 29<br>(15 - 47)                | 60<br>(37 - 99)                  |
| Other meningitis                                                  | 218<br>(145 - 282)                   | 23<br>(12 - 38)             | 5<br>(2 - 7)             | 45<br>(23 - 64)             | 63<br>(31 - 101)               | 84<br>(48 - 123)                 |
| Encephalitis                                                      | 418<br>(284 - 583)                   | 31<br>(15 - 50)             | 15<br>(7 - 22)           | 85<br>(53 - 114)            | 104<br>(67 - 157)              | 182<br>(105 - 290)               |
| Diphtheria                                                        | 3<br>(0 - 10)                        | 1<br>(0 - 6)                | 0<br>(0 - 3)             | 1<br>(0 - 4)                | 1<br>(0 - 5)                   | --                               |
| Whooping cough                                                    | 22<br>(11 - 61)                      | 10<br>(1 - 49)              | 2<br>(1 - 3)             | 7<br>(6 - 9)                | 2<br>(2 - 3)                   | --                               |
| Tetanus                                                           | 18<br>(13 - 25)                      | 1<br>(1 - 1)                | 2<br>(1 - 2)             | 7<br>(4 - 9)                | 4<br>(2 - 6)                   | 4<br>(1 - 11)                    |
| Measles                                                           | 0<br>(0 - 0)                         | 0<br>(0 - 0)                | 0<br>(0 - 0)             | 0<br>(0 - 0)                | 0<br>(0 - 0)                   | --                               |
| Varicella and herpes zoster                                       | 134<br>(25 - 593)                    | 9<br>(0 - 35)               | 2<br>(0 - 12)            | 12<br>(2 - 33)              | 13<br>(1 - 41)                 | 98<br>(1 - 556)                  |
| Neglected tropical diseases and malaria                           | 138<br>(84 - 166)                    | 6<br>(3 - 9)                | 7<br>(5 - 9)             | 35<br>(27 - 42)             | 45<br>(26 - 57)                | 45<br>(23 - 67)                  |
| Cysticercosis                                                     | 2<br>(2 - 3)                         | 0<br>(0 - 0)                | 0<br>(0 - 0)             | 1<br>(1 - 1)                | 1<br>(1 - 1)                   | 1<br>(1 - 1)                     |
| Cystic echinococcosis                                             | 13<br>(12 - 15)                      | 0<br>(0 - 0)                | 0<br>(0 - 0)             | 3<br>(3 - 3)                | 5<br>(4 - 5)                   | 5<br>(5 - 6)                     |
| Dengue                                                            | 16<br>(10 - 20)                      | 1<br>(0 - 2)                | 2<br>(1 - 3)             | 7<br>(4 - 10)               | 4<br>(2 - 5)                   | 2<br>(1 - 3)                     |
| Rabies                                                            | 15<br>(9 - 18)                       | 1<br>(0 - 1)                | 2<br>(1 - 2)             | 7<br>(4 - 9)                | 4<br>(2 - 5)                   | 2<br>(1 - 2)                     |
| Other neglected tropical diseases                                 | 92<br>(40 - 117)                     | 4<br>(1 - 6)                | 3<br>(2 - 5)             | 18<br>(9 - 23)              | 36<br>(13 - 43)                | 32<br>(13 - 58)                  |
| Maternal disorders                                                | 796<br>(638 - 985)                   | --                          | 2<br>(1 - 3)             | 795<br>(637 - 983)          | --                             | --                               |
| Maternal hemorrhage                                               | 41<br>(30 - 54)                      | --                          | 0<br>(0 - 0)             | 41<br>(30 - 54)             | --                             | --                               |
| Maternal sepsis and other maternal infections                     | 60<br>(47 - 76)                      | --                          | 0<br>(0 - 0)             | 60<br>(47 - 76)             | --                             | --                               |
| Maternal hypertensive disorders                                   | 60<br>(44 - 79)                      | --                          | 0<br>(0 - 0)             | 60<br>(44 - 79)             | --                             | --                               |
| Maternal obstructed labor                                         | 48<br>(29 - 76)                      | --                          | 0<br>(0 - 0)             | 48<br>(29 - 75)             | --                             | --                               |
| Maternal abortive outcome                                         | 92<br>(71 - 117)                     | --                          | 0<br>(0 - 0)             | 92<br>(71 - 117)            | --                             | --                               |
| Indirect maternal deaths                                          | 139<br>(108 - 174)                   | --                          | 0<br>(0 - 0)             | 139<br>(108 - 174)          | --                             | --                               |

Web Table 31- United States deaths with 95% UI by age, sex, and cause in 2013

| Cause                                                            | Females, All Ages                    | Females, 0-4 Years       | Females, 5-14 Years      | Females, 15-49 Years        | Females, 50-69 Years           | Females, 70-80 Years           |
|------------------------------------------------------------------|--------------------------------------|--------------------------|--------------------------|-----------------------------|--------------------------------|--------------------------------|
| Late maternal deaths                                             | 137<br>(107 - 173)                   | --                       | 0<br>(0 - 1)             | 137<br>(107 - 172)          | --                             | --                             |
| Maternal deaths aggravated by HIV/AIDS                           | 0<br>(0 - 0)                         | --                       | --                       | 0<br>(0 - 0)                | --                             | --                             |
| Other maternal disorders                                         | 217<br>(168 - 272)                   | --                       | 0<br>(0 - 1)             | 217<br>(168 - 272)          | --                             | --                             |
| Neonatal disorders                                               | 5,092<br>(4,035 - 6,323)             | 5,092<br>(4,035 - 6,323) | --                       | --                          | --                             | --                             |
| Neonatal preterm birth complications                             | 2,945<br>(2,093 - 3,980)             | 2,945<br>(2,093 - 3,980) | --                       | --                          | --                             | --                             |
| Neonatal encephalopathy due to birth asphyxia and trauma         | 753<br>(439 - 1,079)                 | 753<br>(439 - 1,079)     | --                       | --                          | --                             | --                             |
| Neonatal sepsis and other neonatal infections                    | 351<br>(172 - 670)                   | 351<br>(172 - 670)       | --                       | --                          | --                             | --                             |
| Hemolytic disease and other neonatal jaundice                    | 10<br>(3 - 28)                       | 10<br>(3 - 28)           | --                       | --                          | --                             | --                             |
| Other neonatal disorders                                         | 1,033<br>(594 - 1,550)               | 1,033<br>(594 - 1,550)   | --                       | --                          | --                             | --                             |
| Nutritional deficiencies                                         | 5,242<br>(3,856 - 7,144)             | 12<br>(7 - 18)           | 5<br>(3 - 6)             | 197<br>(120 - 242)          | 509<br>(358 - 622)             | 4,519<br>(3,230 - 6,394)       |
| Protein-energy malnutrition                                      | 2,254<br>(1,224 - 3,742)             | 6<br>(2 - 11)            | 2<br>(1 - 3)             | 52<br>(23 - 98)             | 220<br>(115 - 350)             | 1,974<br>(1,044 - 3,343)       |
| Iodine deficiency                                                | 12<br>(1 - 63)                       | 0<br>(0 - 1)             | 0<br>(0 - 1)             | 1<br>(0 - 5)                | 3<br>(0 - 15)                  | 8<br>(0 - 59)                  |
| Iron-deficiency anemia                                           | 2,696<br>(1,302 - 4,178)             | 4<br>(1 - 8)             | 2<br>(1 - 2)             | 131<br>(69 - 177)           | 260<br>(127 - 371)             | 2,299<br>(1,085 - 3,639)       |
| Other nutritional deficiencies                                   | 280<br>(119 - 591)                   | 2<br>(1 - 4)             | 2<br>(1 - 2)             | 12<br>(5 - 24)              | 26<br>(11 - 47)                | 238<br>(92 - 526)              |
| Other communicable, maternal, neonatal, and nutritional diseases | 2,475<br>(1,797 - 3,024)             | 119<br>(70 - 179)        | 23<br>(16 - 31)          | 269<br>(211 - 365)          | 792<br>(547 - 990)             | 1,271<br>(808 - 1,689)         |
| Sexually transmitted diseases excluding HIV                      | 181<br>(127 - 247)                   | 29<br>(1 - 62)           | 3<br>(1 - 6)             | 30<br>(18 - 45)             | 33<br>(23 - 47)                | 85<br>(54 - 127)               |
| Syphilis                                                         | 130<br>(86 - 183)                    | 29<br>(1 - 62)           | 3<br>(0 - 5)             | 12<br>(7 - 19)              | 19<br>(13 - 27)                | 67<br>(42 - 100)               |
| Chlamydial infection                                             | 15<br>(11 - 21)                      | --                       | 0<br>(0 - 0)             | 6<br>(3 - 9)                | 4<br>(3 - 6)                   | 5<br>(3 - 7)                   |
| Gonococcal infection                                             | 22<br>(15 - 30)                      | --                       | 0<br>(0 - 0)             | 6<br>(4 - 9)                | 6<br>(4 - 8)                   | 9<br>(6 - 14)                  |
| Other sexually transmitted diseases                              | 14<br>(10 - 20)                      | --                       | 0<br>(0 - 0)             | 6<br>(3 - 8)                | 4<br>(3 - 6)                   | 4<br>(3 - 6)                   |
| Hepatitis                                                        | 293<br>(227 - 379)                   | 2<br>(1 - 3)             | 2<br>(1 - 3)             | 62<br>(42 - 92)             | 132<br>(88 - 188)              | 95<br>(58 - 144)               |
| Acute hepatitis A                                                | 116<br>(48 - 195)                    | 1<br>(1 - 2)             | 2<br>(1 - 3)             | 35<br>(15 - 59)             | 51<br>(18 - 96)                | 27<br>(7 - 59)                 |
| Acute hepatitis B                                                | 138<br>(71 - 218)                    | 0<br>(0 - 1)             | 0<br>(0 - 1)             | 20<br>(7 - 39)              | 65<br>(31 - 112)               | 53<br>(23 - 93)                |
| Acute hepatitis C                                                | 39<br>(7 - 94)                       | --                       | 0<br>(0 - 0)             | 8<br>(1 - 21)               | 15<br>(2 - 42)                 | 16<br>(2 - 42)                 |
| Other infectious diseases                                        | 2,002<br>(1,325 - 2,527)             | 89<br>(51 - 130)         | 18<br>(12 - 25)          | 177<br>(135 - 266)          | 627<br>(389 - 806)             | 1,091<br>(638 - 1,503)         |
| Non-communicable diseases                                        | 1,193,158<br>(1,114,598 - 1,278,121) | 5,242<br>(4,132 - 6,742) | 1,161<br>(1,003 - 1,341) | 50,586<br>(45,269 - 56,386) | 243,199<br>(222,150 - 266,594) | 892,970<br>(839,353 - 950,367) |
| Neoplasms                                                        | 296,018<br>(260,984 - 326,539)       | 298<br>(214 - 410)       | 516<br>(430 - 615)       | 19,796<br>(17,486 - 23,029) | 112,027<br>(100,389 - 125,695) | 163,381<br>(135,098 - 184,232) |
| Esophageal cancer                                                | 3,195<br>(2,745 - 3,715)             | --                       | --                       | 113<br>(89 - 146)           | 1,164<br>(941 - 1,438)         | 1,918<br>(1,578 - 2,317)       |
| Stomach cancer                                                   | 7,281<br>(5,222 - 9,909)             | --                       | --                       | 435<br>(305 - 602)          | 1,810<br>(1,328 - 2,389)       | 5,036<br>(3,476 - 7,155)       |
| Liver cancer                                                     | 6,828<br>(4,570 - 8,542)             | --                       | 9<br>(5 - 16)            | 351<br>(262 - 466)          | 2,514<br>(1,712 - 3,194)       | 3,953<br>(2,540 - 5,371)       |
| Liver cancer due to hepatitis B                                  | 579<br>(369 - 788)                   | --                       | 2<br>(1 - 3)             | 54<br>(37 - 76)             | 278<br>(183 - 390)             | 246<br>(136 - 378)             |
| Liver cancer due to hepatitis C                                  | 3,356<br>(2,147 - 4,512)             | --                       | 2<br>(1 - 3)             | 148<br>(98 - 209)           | 1,218<br>(798 - 1,646)         | 1,989<br>(1,072 - 2,942)       |
| Liver cancer due to alcohol use                                  | 1,134<br>(716 - 1,605)               | --                       | --                       | 33<br>(21 - 49)             | 343<br>(227 - 472)             | 757<br>(448 - 1,191)           |
| Liver cancer due to other causes                                 | 1,759<br>(1,098 - 2,428)             | --                       | 6<br>(4 - 11)            | 116<br>(78 - 163)           | 675<br>(403 - 933)             | 961<br>(537 - 1,463)           |
| Larynx cancer                                                    | 857<br>(576 - 1,206)                 | --                       | --                       | 51<br>(32 - 75)             | 460<br>(304 - 661)             | 346<br>(219 - 508)             |
| Tracheal, bronchus and lung cancer                               | 75,464<br>(59,234 - 87,339)          | --                       | --                       | 2,901<br>(2,269 - 3,835)    | 32,591<br>(27,524 - 39,250)    | 39,972<br>(25,523 - 49,907)    |
| Breast cancer                                                    | 44,768<br>(37,372 - 57,480)          | --                       | --                       | 5,230<br>(4,340 - 7,361)    | 19,825<br>(16,466 - 25,878)    | 19,713<br>(15,251 - 25,198)    |
| Cervical cancer                                                  | 6,419<br>(4,949 - 7,711)             | --                       | --                       | 1,381<br>(1,069 - 1,733)    | 2,829<br>(2,033 - 3,582)       | 2,209<br>(1,706 - 2,838)       |
| Uterine cancer                                                   | 6,571<br>(5,302 - 8,784)             | --                       | --                       | 218<br>(159 - 307)          | 2,757<br>(2,157 - 3,591)       | 3,595<br>(2,662 - 5,112)       |
| Prostate cancer                                                  | --                                   | --                       | --                       | --                          | --                             | --                             |

Web Table 31- United States deaths with 95% UI by age, sex, and cause in 2013

| Cause                                         | Females, All Ages              | Females, 0-4 Years | Females, 5-14 Years | Females, 15-49 Years       | Females, 50-69 Years        | Females, 70-80 Years           |
|-----------------------------------------------|--------------------------------|--------------------|---------------------|----------------------------|-----------------------------|--------------------------------|
| Colon and rectum cancer                       | 33,076<br>(27,918 - 39,553)    | --                 | --                  | 1,644<br>(1,362 - 1,971)   | 9,685<br>(8,362 - 11,168)   | 21,747<br>(17,184 - 27,393)    |
| Lip and oral cavity cancer                    | 2,285<br>(1,737 - 2,740)       | --                 | --                  | 160<br>(113 - 202)         | 887<br>(596 - 1,108)        | 1,238<br>(938 - 1,568)         |
| Nasopharynx cancer                            | 378<br>(194 - 779)             | --                 | 3<br>(1 - 6)        | 57<br>(32 - 126)           | 175<br>(90 - 373)           | 144<br>(66 - 290)              |
| Other pharynx cancer                          | 821<br>(609 - 1,058)           | --                 | --                  | 53<br>(33 - 76)            | 425<br>(293 - 579)          | 343<br>(245 - 461)             |
| Gallbladder and biliary tract cancer          | 3,231<br>(2,272 - 4,516)       | --                 | --                  | 95<br>(65 - 131)           | 927<br>(691 - 1,242)        | 2,209<br>(1,462 - 3,323)       |
| Pancreatic cancer                             | 21,785<br>(18,744 - 25,274)    | --                 | --                  | 676<br>(543 - 843)         | 7,454<br>(6,371 - 8,752)    | 13,655<br>(11,165 - 16,439)    |
| Malignant skin melanoma                       | 3,618<br>(2,418 - 5,010)       | --                 | --                  | 573<br>(434 - 904)         | 1,436<br>(968 - 1,955)      | 1,608<br>(982 - 2,226)         |
| Non-melanoma skin cancer                      | 1,161<br>(812 - 1,539)         | --                 | --                  | 37<br>(26 - 49)            | 243<br>(185 - 324)          | 881<br>(577 - 1,224)           |
| Ovarian cancer                                | 17,376<br>(14,690 - 20,325)    | --                 | --                  | 1,187<br>(955 - 1,486)     | 7,642<br>(6,408 - 9,089)    | 8,548<br>(6,643 - 10,904)      |
| Testicular cancer                             | --                             | --                 | --                  | --                         | --                          | --                             |
| Kidney cancer                                 | 5,845<br>(4,417 - 7,571)       | 12<br>(6 - 20)     | 19<br>(11 - 31)     | 310<br>(211 - 426)         | 2,258<br>(1,656 - 3,001)    | 3,247<br>(2,132 - 4,790)       |
| Bladder cancer                                | 4,450<br>(3,052 - 6,278)       | --                 | --                  | 97<br>(62 - 136)           | 949<br>(671 - 1,333)        | 3,404<br>(2,220 - 4,966)       |
| Brain and nervous system cancer               | 6,706<br>(5,371 - 8,338)       | 53<br>(30 - 90)    | 153<br>(109 - 209)  | 913<br>(730 - 1,187)       | 2,970<br>(2,375 - 3,872)    | 2,616<br>(1,820 - 3,383)       |
| Thyroid cancer                                | 958<br>(602 - 1,243)           | --                 | 1<br>(1 - 3)        | 52<br>(35 - 67)            | 299<br>(184 - 386)          | 606<br>(377 - 835)             |
| Mesothelioma                                  | 763<br>(525 - 1,040)           | --                 | --                  | 43<br>(29 - 71)            | 318<br>(217 - 477)          | 402<br>(246 - 597)             |
| Hodgkin lymphoma                              | 672<br>(515 - 999)             | 1<br>(1 - 2)       | 5<br>(2 - 11)       | 199<br>(150 - 322)         | 189<br>(131 - 285)          | 277<br>(190 - 397)             |
| Non-Hodgkin lymphoma                          | 11,817<br>(6,455 - 18,195)     | 7<br>(3 - 12)      | 19<br>(10 - 35)     | 659<br>(426 - 1,163)       | 3,470<br>(1,951 - 5,746)    | 7,662<br>(3,809 - 11,264)      |
| Multiple myeloma                              | 6,230<br>(3,983 - 10,025)      | --                 | --                  | 201<br>(122 - 340)         | 2,221<br>(1,352 - 3,695)    | 3,808<br>(2,288 - 6,205)       |
| Leukemia                                      | 9,999<br>(8,384 - 11,791)      | 70<br>(37 - 125)   | 131<br>(95 - 175)   | 905<br>(751 - 1,086)       | 2,664<br>(2,175 - 3,195)    | 6,229<br>(4,899 - 7,728)       |
| Other neoplasms                               | 13,464<br>(9,814 - 16,624)     | 155<br>(108 - 214) | 175<br>(130 - 228)  | 1,256<br>(1,011 - 1,550)   | 3,862<br>(2,994 - 4,688)    | 8,015<br>(4,968 - 10,782)      |
| Cardiovascular diseases                       | 448,963<br>(391,534 - 542,156) | 244<br>(143 - 334) | 109<br>(71 - 140)   | 10,474<br>(7,658 - 12,669) | 61,646<br>(52,250 - 75,947) | 376,490<br>(324,379 - 456,314) |
| Rheumatic heart disease                       | 3,060<br>(2,239 - 4,882)       | 1<br>(1 - 2)       | 3<br>(2 - 4)        | 179<br>(127 - 333)         | 768<br>(564 - 1,406)        | 2,110<br>(1,479 - 3,184)       |
| Ischemic heart disease                        | 268,748<br>(228,274 - 348,199) | 14<br>(7 - 22)     | 12<br>(6 - 17)      | 4,407<br>(2,957 - 5,547)   | 36,692<br>(30,561 - 47,495) | 227,625<br>(190,381 - 297,948) |
| Cerebrovascular disease                       | 96,005<br>(73,005 - 123,934)   | 59<br>(30 - 89)    | 32<br>(19 - 42)     | 2,387<br>(1,681 - 3,048)   | 11,336<br>(8,123 - 14,187)  | 82,192<br>(62,763 - 108,723)   |
| Ischemic stroke                               | 52,553<br>(38,834 - 74,671)    | 11<br>(5 - 19)     | 4<br>(2 - 6)        | 212<br>(122 - 292)         | 2,812<br>(1,826 - 4,111)    | 49,514<br>(36,130 - 69,813)    |
| Hemorrhagic stroke                            | 43,452<br>(29,990 - 57,032)    | 48<br>(24 - 72)    | 28<br>(17 - 37)     | 2,175<br>(1,530 - 2,794)   | 8,524<br>(5,809 - 10,583)   | 32,677<br>(21,066 - 44,489)    |
| Hypertensive heart disease                    | 19,003<br>(11,932 - 27,445)    | 1<br>(1 - 2)       | 2<br>(1 - 3)        | 841<br>(483 - 1,153)       | 3,489<br>(2,329 - 4,701)    | 14,670<br>(8,592 - 22,262)     |
| Cardiomyopathy and myocarditis                | 14,765<br>(10,175 - 19,150)    | 125<br>(73 - 174)  | 48<br>(29 - 65)     | 1,147<br>(751 - 1,468)     | 3,118<br>(2,226 - 4,405)    | 10,327<br>(6,700 - 14,158)     |
| Atrial fibrillation and flutter               | 11,752<br>(7,619 - 17,703)     | --                 | --                  | 17<br>(12 - 24)            | 530<br>(369 - 719)          | 11,206<br>(7,142 - 17,106)     |
| Aortic aneurysm                               | 7,109<br>(4,522 - 12,507)      | --                 | --                  | 173<br>(100 - 281)         | 1,235<br>(771 - 2,121)      | 5,701<br>(3,563 - 10,341)      |
| Peripheral vascular disease                   | 4,190<br>(2,932 - 5,873)       | --                 | --                  | 36<br>(24 - 51)            | 498<br>(355 - 683)          | 3,656<br>(2,426 - 5,272)       |
| Endocarditis                                  | 2,391<br>(1,409 - 3,931)       | 6<br>(2 - 10)      | 2<br>(1 - 3)        | 157<br>(88 - 237)          | 582<br>(326 - 945)          | 1,645<br>(933 - 2,880)         |
| Other cardiovascular and circulatory diseases | 21,939<br>(13,428 - 29,699)    | 39<br>(19 - 61)    | 11<br>(6 - 17)      | 1,131<br>(528 - 1,509)     | 3,398<br>(2,088 - 4,520)    | 17,359<br>(10,105 - 24,505)    |
| Chronic respiratory diseases                  | 88,448<br>(54,585 - 105,123)   | 116<br>(68 - 173)  | 60<br>(43 - 76)     | 1,871<br>(1,392 - 2,254)   | 18,658<br>(12,960 - 22,287) | 67,743<br>(39,576 - 82,957)    |
| Chronic obstructive pulmonary disease         | 73,697<br>(45,969 - 89,113)    | 61<br>(31 - 103)   | 8<br>(5 - 13)       | 842<br>(561 - 1,137)       | 15,357<br>(10,407 - 18,450) | 57,429<br>(33,485 - 71,454)    |
| Pneumoconiosis                                | 201<br>(98 - 340)              | 1<br>(0 - 2)       | 2<br>(1 - 3)        | 10<br>(7 - 13)             | 30<br>(16 - 50)             | 157<br>(70 - 290)              |
| Silicosis                                     | 6<br>(3 - 9)                   | 0<br>(0 - 0)       | 1<br>(0 - 1)        | 1<br>(1 - 2)               | 1<br>(0 - 1)                | 3<br>(1 - 5)                   |
| Asbestosis                                    | 37<br>(17 - 73)                | 0<br>(0 - 0)       | 1<br>(0 - 1)        | 1<br>(1 - 2)               | 2<br>(1 - 4)                | 33<br>(13 - 66)                |
| Coal workers pneumoconiosis                   | 5<br>(3 - 8)                   | 0<br>(0 - 0)       | 1<br>(0 - 1)        | 1<br>(1 - 2)               | 1<br>(0 - 1)                | 2<br>(1 - 4)                   |
| Other pneumoconiosis                          | 153<br>(74 - 258)              | 0<br>(0 - 0)       | 1<br>(0 - 1)        | 5<br>(3 - 8)               | 26<br>(14 - 44)             | 120<br>(53 - 218)              |



Web Table 31- United States deaths with 95% UI by age, sex, and cause in 2013

| Cause                                               | Females, All Ages              | Females, 0-4 Years | Females, 5-14 Years | Females, 15-49 Years     | Females, 50-69 Years        | Females, 70-80 Years           |
|-----------------------------------------------------|--------------------------------|--------------------|---------------------|--------------------------|-----------------------------|--------------------------------|
| Asthma                                              | 3,094<br>(1,708 - 4,541)       | 15<br>(6 - 25)     | 37<br>(22 - 47)     | 526<br>(316 - 700)       | 870<br>(506 - 1,289)        | 1,646<br>(722 - 2,734)         |
| Interstitial lung disease and pulmonary sarcoidosis | 10,416<br>(4,378 - 16,999)     | 12<br>(6 - 21)     | 8<br>(5 - 13)       | 406<br>(254 - 588)       | 2,104<br>(974 - 3,379)      | 7,886<br>(2,808 - 13,268)      |
| Other chronic respiratory diseases                  | 1,041<br>(584 - 1,587)         | 27<br>(15 - 47)    | 5<br>(3 - 7)        | 88<br>(59 - 127)         | 297<br>(171 - 456)          | 625<br>(306 - 1,066)           |
| Cirrhosis                                           | 19,543<br>(16,992 - 22,223)    | 16<br>(11 - 22)    | 11<br>(8 - 13)      | 2,953<br>(2,454 - 3,543) | 8,906<br>(7,560 - 10,368)   | 7,658<br>(6,320 - 9,187)       |
| Cirrhosis due to hepatitis B                        | 2,206<br>(1,065 - 3,575)       | 0<br>(0 - 1)       | 1<br>(0 - 2)        | 351<br>(161 - 561)       | 1,012<br>(479 - 1,684)      | 842<br>(373 - 1,434)           |
| Cirrhosis due to hepatitis C                        | 11,533<br>(7,423 - 14,725)     | 3<br>(0 - 7)       | 4<br>(1 - 7)        | 1,789<br>(1,177 - 2,409) | 5,375<br>(3,488 - 6,993)    | 4,362<br>(2,248 - 5,987)       |
| Cirrhosis due to alcohol use                        | 4,648<br>(2,951 - 7,053)       | --                 | --                  | 505<br>(203 - 811)       | 1,967<br>(1,184 - 2,972)    | 2,177<br>(1,283 - 3,555)       |
| Cirrhosis due to other causes                       | 1,157<br>(662 - 1,855)         | 13<br>(7 - 19)     | 6<br>(3 - 9)        | 308<br>(159 - 503)       | 553<br>(286 - 945)          | 277<br>(128 - 485)             |
| Digestive diseases                                  | 27,035<br>(22,605 - 33,380)    | 35<br>(23 - 51)    | 31<br>(23 - 38)     | 934<br>(776 - 1,124)     | 4,555<br>(3,749 - 5,400)    | 21,480<br>(17,446 - 27,649)    |
| Peptic ulcer disease                                | 2,625<br>(1,808 - 3,984)       | 1<br>(1 - 2)       | 2<br>(1 - 2)        | 83<br>(58 - 113)         | 423<br>(283 - 586)          | 2,117<br>(1,395 - 3,326)       |
| Gastritis and duodenitis                            | 246<br>(127 - 618)             | 1<br>(0 - 2)       | 2<br>(1 - 3)        | 18<br>(10 - 39)          | 42<br>(22 - 101)            | 183<br>(86 - 481)              |
| Appendicitis                                        | 371<br>(199 - 597)             | 2<br>(1 - 4)       | 4<br>(2 - 6)        | 30<br>(19 - 47)          | 81<br>(43 - 126)            | 254<br>(117 - 463)             |
| Paralytic ileus and intestinal obstruction          | 4,496<br>(2,354 - 7,367)       | 10<br>(4 - 19)     | 8<br>(4 - 12)       | 111<br>(54 - 172)        | 526<br>(249 - 833)          | 3,841<br>(1,941 - 6,484)       |
| Inguinal, femoral, and abdominal hernia             | 604<br>(234 - 978)             | 1<br>(0 - 2)       | 2<br>(0 - 3)        | 14<br>(5 - 21)           | 96<br>(41 - 143)            | 491<br>(176 - 842)             |
| Inflammatory bowel disease                          | 1,733<br>(1,039 - 3,517)       | 8<br>(4 - 15)      | 3<br>(2 - 5)        | 99<br>(66 - 170)         | 372<br>(240 - 688)          | 1,251<br>(681 - 2,701)         |
| Vascular intestinal disorders                       | 6,821<br>(3,942 - 11,221)      | 1<br>(0 - 6)       | 1<br>(0 - 4)        | 133<br>(71 - 229)        | 1,279<br>(740 - 2,007)      | 5,406<br>(2,985 - 9,117)       |
| Gallbladder and biliary diseases                    | 2,704<br>(1,829 - 3,900)       | 1<br>(0 - 1)       | 2<br>(1 - 3)        | 83<br>(59 - 114)         | 384<br>(256 - 516)          | 2,234<br>(1,488 - 3,391)       |
| Pancreatitis                                        | 1,878<br>(1,192 - 2,717)       | 1<br>(1 - 2)       | 3<br>(2 - 5)        | 206<br>(142 - 291)       | 475<br>(296 - 696)          | 1,193<br>(713 - 1,831)         |
| Other digestive diseases                            | 5,557<br>(3,737 - 7,456)       | 8<br>(4 - 14)      | 6<br>(3 - 8)        | 157<br>(110 - 203)       | 877<br>(601 - 1,131)        | 4,509<br>(2,902 - 6,272)       |
| Neurological disorders                              | 188,449<br>(138,599 - 242,198) | 130<br>(88 - 177)  | 64<br>(49 - 80)     | 1,538<br>(1,236 - 1,895) | 8,934<br>(6,994 - 11,016)   | 177,783<br>(128,233 - 230,741) |
| Alzheimer disease and other dementias               | 168,480<br>(117,799 - 220,721) | --                 | --                  | 10<br>(1 - 30)           | 3,522<br>(2,372 - 4,916)    | 164,948<br>(114,928 - 217,214) |
| Parkinson disease                                   | 9,550<br>(3,991 - 13,336)      | --                 | --                  | 15<br>(8 - 20)           | 699<br>(334 - 936)          | 8,836<br>(3,645 - 12,528)      |
| Epilepsy                                            | 968<br>(671 - 1,255)           | 20<br>(11 - 30)    | 18<br>(11 - 26)     | 284<br>(201 - 375)       | 249<br>(168 - 318)          | 398<br>(255 - 572)             |
| Multiple sclerosis                                  | 3,333<br>(1,478 - 4,342)       | --                 | --                  | 637<br>(370 - 941)       | 1,957<br>(811 - 2,770)      | 739<br>(237 - 1,125)           |
| Other neurological disorders                        | 6,118<br>(5,302 - 7,021)       | 110<br>(72 - 155)  | 46<br>(35 - 59)     | 592<br>(496 - 699)       | 2,507<br>(2,104 - 2,952)    | 2,863<br>(2,285 - 3,542)       |
| Mental and substance use disorders                  | 11,254<br>(9,494 - 13,344)     | 4<br>(2 - 8)       | 3<br>(1 - 7)        | 6,558<br>(5,404 - 7,917) | 3,898<br>(3,108 - 4,897)    | 791<br>(563 - 1,035)           |
| Schizophrenia                                       | 251<br>(138 - 379)             | --                 | --                  | 15<br>(8 - 22)           | 52<br>(25 - 78)             | 183<br>(96 - 307)              |
| Alcohol use disorders                               | 1,902<br>(881 - 3,359)         | --                 | --                  | 715<br>(318 - 1,312)     | 957<br>(407 - 1,801)        | 230<br>(99 - 409)              |
| Drug use disorders                                  | 9,020<br>(7,660 - 10,586)      | 4<br>(2 - 8)       | --                  | 5,749<br>(4,738 - 7,015) | 2,889<br>(2,256 - 3,584)    | 378<br>(278 - 510)             |
| Opioid use disorders                                | 3,571<br>(2,993 - 4,219)       | 2<br>(1 - 3)       | --                  | 2,318<br>(1,875 - 2,848) | 1,093<br>(842 - 1,404)      | 158<br>(114 - 217)             |
| Cocaine use disorders                               | 582<br>(477 - 717)             | 0<br>(0 - 1)       | --                  | 411<br>(319 - 532)       | 151<br>(109 - 204)          | 20<br>(13 - 28)                |
| Amphetamine use disorders                           | 373<br>(302 - 455)             | 0<br>(0 - 1)       | --                  | 234<br>(181 - 297)       | 124<br>(89 - 171)           | 14<br>(9 - 20)                 |
| Other drug use disorders                            | 4,494<br>(3,788 - 5,298)       | 2<br>(1 - 3)       | --                  | 2,786<br>(2,260 - 3,446) | 1,520<br>(1,164 - 1,896)    | 186<br>(135 - 251)             |
| Eating disorders                                    | 82<br>(49 - 128)               | --                 | 3<br>(1 - 7)        | 79<br>(46 - 124)         | --                          | --                             |
| Anorexia nervosa                                    | 82<br>(49 - 128)               | --                 | 3<br>(1 - 7)        | 79<br>(46 - 124)         | --                          | --                             |
| Diabetes, urogenital, blood, and endocrine diseases | 96,342<br>(82,314 - 115,162)   | 298<br>(219 - 415) | 153<br>(119 - 201)  | 4,721<br>(3,997 - 5,496) | 21,024<br>(17,934 - 24,321) | 70,146<br>(58,082 - 85,974)    |
| Diabetes mellitus                                   | 36,663<br>(30,560 - 44,299)    | 17<br>(9 - 27)     | 15<br>(8 - 25)      | 1,709<br>(1,396 - 2,041) | 9,839<br>(8,165 - 12,148)   | 25,084<br>(19,910 - 31,658)    |
| Acute glomerulonephritis                            | 40<br>(27 - 69)                | 1<br>(1 - 2)       | 2<br>(1 - 3)        | 7<br>(5 - 9)             | 7<br>(4 - 12)               | 23<br>(12 - 48)                |
| Chronic kidney disease                              | 33,948<br>(26,737 - 47,328)    | 26<br>(17 - 40)    | 11<br>(8 - 15)      | 1,073<br>(847 - 1,498)   | 6,224<br>(4,767 - 8,340)    | 26,614<br>(19,881 - 37,951)    |
| Chronic kidney disease due to diabetes mellitus     | 4,293<br>(2,429 - 6,277)       | 2<br>(1 - 3)       | 2<br>(1 - 3)        | 173<br>(100 - 253)       | 1,345<br>(734 - 2,073)      | 2,772<br>(1,475 - 4,188)       |

Web Table 31- United States deaths with 95% UI by age, sex, and cause in 2013

| Cause                                               | Females, All Ages           | Females, 0-4 Years       | Females, 5-14 Years  | Females, 15-49 Years        | Females, 50-69 Years       | Females, 70-80 Years        |
|-----------------------------------------------------|-----------------------------|--------------------------|----------------------|-----------------------------|----------------------------|-----------------------------|
| Chronic kidney disease due to hypertension          | 15,326<br>(10,247 - 22,680) | 5<br>(2 - 9)             | 2<br>(1 - 3)         | 464<br>(298 - 668)          | 3,020<br>(2,037 - 4,529)   | 11,836<br>(7,710 - 18,032)  |
| Chronic kidney disease due to glomerulonephritis    | 1,083<br>(422 - 1,971)      | 5<br>(2 - 9)             | 2<br>(1 - 2)         | 47<br>(29 - 69)             | 206<br>(90 - 328)          | 822<br>(267 - 1,617)        |
| Chronic kidney disease due to other causes          | 13,246<br>(7,833 - 22,823)  | 14<br>(8 - 27)           | 5<br>(3 - 9)         | 389<br>(245 - 678)          | 1,652<br>(906 - 2,991)     | 11,184<br>(6,327 - 20,095)  |
| Urinary diseases and male infertility               | 12,737<br>(9,168 - 19,913)  | 21<br>(15 - 30)          | 5<br>(3 - 7)         | 331<br>(202 - 427)          | 1,494<br>(982 - 1,909)     | 10,886<br>(7,463 - 18,232)  |
| Interstitial nephritis and urinary tract infections | 11,890<br>(8,551 - 18,720)  | 13<br>(8 - 19)           | 3<br>(2 - 4)         | 283<br>(168 - 367)          | 1,319<br>(879 - 1,699)     | 10,273<br>(6,955 - 17,377)  |
| Urolithiasis                                        | 233<br>(131 - 403)          | --                       | 1<br>(1 - 2)         | 12<br>(7 - 21)              | 49<br>(26 - 83)            | 171<br>(80 - 329)           |
| Other urinary diseases                              | 614<br>(294 - 1,091)        | 8<br>(5 - 13)            | 1<br>(1 - 2)         | 36<br>(19 - 57)             | 126<br>(56 - 196)          | 442<br>(172 - 907)          |
| Gynecological diseases                              | 84<br>(46 - 122)            | --                       | --                   | 11<br>(7 - 14)              | 11<br>(6 - 15)             | 62<br>(29 - 99)             |
| Uterine fibroids                                    | 24<br>(12 - 35)             | --                       | --                   | 2<br>(1 - 3)                | 3<br>(2 - 4)               | 18<br>(9 - 29)              |
| Polycystic ovarian syndrome                         | 1<br>(0 - 1)                | --                       | --                   | 1<br>(0 - 1)                | 0<br>(0 - 0)               | --                          |
| Endometriosis                                       | 2<br>(1 - 2)                | --                       | --                   | 2<br>(1 - 2)                | 0<br>(0 - 0)               | --                          |
| Genital prolapse                                    | 19<br>(10 - 29)             | --                       | --                   | 1<br>(1 - 2)                | 2<br>(1 - 3)               | 16<br>(8 - 26)              |
| Other gynecological diseases                        | 38<br>(21 - 56)             | --                       | --                   | 5<br>(3 - 7)                | 6<br>(3 - 8)               | 27<br>(13 - 44)             |
| Hemoglobinopathies and hemolytic anemias            | 1,197<br>(774 - 1,930)      | 33<br>(19 - 53)          | 23<br>(14 - 37)      | 223<br>(140 - 327)          | 270<br>(168 - 408)         | 648<br>(383 - 1,150)        |
| Thalassemias                                        | 68<br>(43 - 98)             | 8<br>(5 - 13)            | 7<br>(4 - 11)        | 40<br>(25 - 58)             | 10<br>(6 - 15)             | 3<br>(2 - 5)                |
| Sickle cell disorders                               | 344<br>(221 - 502)          | 18<br>(10 - 28)          | 14<br>(8 - 22)       | 136<br>(85 - 200)           | 140<br>(86 - 210)          | 36<br>(23 - 60)             |
| G6PD deficiency                                     | 8<br>(5 - 12)               | 0<br>(0 - 1)             | 0<br>(0 - 0)         | 3<br>(2 - 5)                | 3<br>(2 - 4)               | 2<br>(1 - 3)                |
| Other hemoglobinopathies and hemolytic anemias      | 777<br>(484 - 1,315)        | 7<br>(4 - 11)            | 2<br>(1 - 4)         | 44<br>(27 - 65)             | 117<br>(74 - 181)          | 607<br>(353 - 1,088)        |
| Endocrine, metabolic, blood, and immune disorders   | 11,673<br>(6,994 - 14,710)  | 201<br>(135 - 297)       | 97<br>(68 - 139)     | 1,367<br>(900 - 1,711)      | 3,179<br>(1,865 - 4,006)   | 6,828<br>(3,674 - 9,619)    |
| Musculoskeletal disorders                           | 7,397<br>(5,921 - 9,118)    | --                       | 18<br>(12 - 24)      | 857<br>(694 - 1,087)        | 2,177<br>(1,726 - 2,670)   | 4,345<br>(3,151 - 5,838)    |
| Rheumatoid arthritis                                | 1,976<br>(1,278 - 2,692)    | --                       | 2<br>(1 - 3)         | 46<br>(28 - 63)             | 448<br>(311 - 610)         | 1,481<br>(868 - 2,169)      |
| Other musculoskeletal disorders                     | 5,421<br>(4,296 - 6,888)    | --                       | 16<br>(11 - 22)      | 812<br>(656 - 1,039)        | 1,729<br>(1,363 - 2,143)   | 2,864<br>(2,017 - 3,968)    |
| Other non-communicable diseases                     | 9,709<br>(8,164 - 12,369)   | 4,100<br>(3,086 - 5,549) | 197<br>(143 - 261)   | 884<br>(726 - 1,154)        | 1,374<br>(1,133 - 1,671)   | 3,153<br>(2,241 - 4,515)    |
| Congenital anomalies                                | 5,742<br>(4,697 - 7,354)    | 3,004<br>(2,266 - 3,996) | 195<br>(141 - 258)   | 789<br>(638 - 1,062)        | 849<br>(675 - 1,086)       | 904<br>(643 - 1,303)        |
| Neural tube defects                                 | 230<br>(142 - 352)          | 179<br>(96 - 299)        | 8<br>(4 - 13)        | 31<br>(18 - 42)             | 8<br>(5 - 12)              | 4<br>(2 - 6)                |
| Congenital heart anomalies                          | 1,865<br>(1,479 - 2,395)    | 862<br>(599 - 1,224)     | 76<br>(51 - 104)     | 361<br>(281 - 491)          | 274<br>(197 - 368)         | 291<br>(190 - 456)          |
| Cleft lip and cleft palate                          | 3<br>(1 - 11)               | 3<br>(1 - 11)            | --                   | --                          | --                         | --                          |
| Down syndrome                                       | 456<br>(245 - 625)          | 77<br>(37 - 134)         | 9<br>(4 - 15)        | 106<br>(59 - 158)           | 249<br>(126 - 378)         | 16<br>(7 - 26)              |
| Chromosomal unbalanced rearrangements               | 581<br>(342 - 876)          | 546<br>(318 - 842)       | 12<br>(6 - 19)       | 16<br>(9 - 23)              | 5<br>(3 - 7)               | 2<br>(1 - 4)                |
| Other congenital anomalies                          | 2,608<br>(2,014 - 3,512)    | 1,337<br>(921 - 1,888)   | 91<br>(60 - 127)     | 275<br>(206 - 399)          | 313<br>(219 - 436)         | 591<br>(407 - 886)          |
| Skin and subcutaneous diseases                      | 2,877<br>(2,071 - 4,068)    | 7<br>(4 - 11)            | 2<br>(1 - 3)         | 95<br>(75 - 121)            | 524<br>(406 - 649)         | 2,249<br>(1,504 - 3,448)    |
| Cellulitis                                          | 865<br>(476 - 1,514)        | 3<br>(1 - 5)             | 0<br>(0 - 1)         | 40<br>(26 - 58)             | 193<br>(117 - 295)         | 628<br>(289 - 1,215)        |
| Pyoderma                                            | 954<br>(596 - 1,459)        | 3<br>(2 - 5)             | 1<br>(0 - 1)         | 31<br>(20 - 43)             | 187<br>(125 - 258)         | 733<br>(406 - 1,238)        |
| Decubitus ulcer                                     | 862<br>(511 - 1,598)        | 1<br>(0 - 1)             | 1<br>(0 - 1)         | 12<br>(8 - 19)              | 104<br>(69 - 154)          | 744<br>(401 - 1,521)        |
| Other skin and subcutaneous diseases                | 197<br>(91 - 450)           | 1<br>(0 - 2)             | 1<br>(0 - 1)         | 12<br>(7 - 18)              | 40<br>(21 - 71)            | 144<br>(47 - 378)           |
| Sudden infant death syndrome                        | 1,090<br>(521 - 2,138)      | 1,090<br>(521 - 2,138)   | --                   | --                          | --                         | --                          |
| Injuries                                            | 59,583<br>(49,691 - 69,089) | 1,342<br>(1,026 - 1,743) | 932<br>(799 - 1,097) | 15,842<br>(13,996 - 18,363) | 11,993<br>(9,868 - 13,846) | 29,474<br>(21,863 - 37,016) |
| Transport injuries                                  | 14,268<br>(11,685 - 17,270) | 352<br>(242 - 484)       | 504<br>(395 - 636)   | 6,674<br>(5,577 - 8,278)    | 3,658<br>(2,672 - 4,552)   | 3,080<br>(2,275 - 4,065)    |
| Road injuries                                       | 13,796<br>(11,311 - 16,632) | 342<br>(235 - 472)       | 469<br>(364 - 594)   | 6,413<br>(5,371 - 7,906)    | 3,542<br>(2,578 - 4,398)   | 3,029<br>(2,232 - 3,976)    |
| Pedestrian road injuries                            | 3,393<br>(1,790 - 4,470)    | 141<br>(72 - 216)        | 155<br>(97 - 219)    | 923<br>(487 - 1,263)        | 975<br>(433 - 1,382)       | 1,198<br>(553 - 1,793)      |

Web Table 31- United States deaths with 95% UI by age, sex, and cause in 2013

| Cause                                           | Females, All Ages           | Females, 0-4 Years   | Females, 5-14 Years | Females, 15-49 Years     | Females, 50-69 Years     | Females, 70-80 Years        |
|-------------------------------------------------|-----------------------------|----------------------|---------------------|--------------------------|--------------------------|-----------------------------|
| Cyclist road injuries                           | 625<br>(212 - 838)          | 11<br>(4 - 21)       | 45<br>(25 - 68)     | 237<br>(97 - 326)        | 220<br>(53 - 323)        | 112<br>(25 - 177)           |
| Motorcyclist road injuries                      | 652<br>(176 - 1,015)        | 2<br>(0 - 3)         | 7<br>(2 - 13)       | 429<br>(121 - 666)       | 193<br>(46 - 342)        | 21<br>(4 - 40)              |
| Motor vehicle road injuries                     | 9,057<br>(7,517 - 12,377)   | 185<br>(123 - 291)   | 257<br>(185 - 359)  | 4,800<br>(4,012 - 6,335) | 2,126<br>(1,575 - 3,073) | 1,689<br>(1,197 - 2,584)    |
| Other road injuries                             | 70<br>(19 - 122)            | 4<br>(1 - 8)         | 6<br>(1 - 15)       | 24<br>(7 - 47)           | 27<br>(6 - 57)           | 9<br>(2 - 20)               |
| Other transport injuries                        | 471<br>(295 - 768)          | 10<br>(5 - 19)       | 34<br>(19 - 59)     | 260<br>(163 - 441)       | 116<br>(62 - 200)        | 51<br>(26 - 96)             |
| Unintentional injuries                          | 32,758<br>(24,255 - 40,797) | 852<br>(634 - 1,139) | 279<br>(220 - 378)  | 2,103<br>(1,752 - 2,657) | 4,413<br>(3,375 - 5,297) | 25,112<br>(17,586 - 32,709) |
| Falls                                           | 17,512<br>(9,585 - 24,164)  | 29<br>(20 - 43)      | 14<br>(9 - 19)      | 320<br>(232 - 400)       | 1,391<br>(740 - 1,830)   | 15,759<br>(8,379 - 22,186)  |
| Drowning                                        | 874<br>(633 - 1,175)        | 192<br>(119 - 303)   | 81<br>(56 - 137)    | 277<br>(195 - 368)       | 177<br>(110 - 236)       | 147<br>(96 - 204)           |
| Fire, heat, and hot substances                  | 1,982<br>(1,522 - 2,806)    | 136<br>(81 - 237)    | 90<br>(61 - 142)    | 337<br>(259 - 472)       | 447<br>(315 - 583)       | 973<br>(676 - 1,522)        |
| Poisonings                                      | 925<br>(611 - 1,284)        | 15<br>(9 - 25)       | 10<br>(6 - 16)      | 257<br>(175 - 493)       | 379<br>(174 - 513)       | 263<br>(149 - 406)          |
| Exposure to mechanical forces                   | 803<br>(547 - 1,016)        | 261<br>(101 - 455)   | 35<br>(26 - 46)     | 145<br>(121 - 179)       | 131<br>(97 - 160)        | 231<br>(141 - 312)          |
| Unintentional firearm injuries                  | 102<br>(83 - 130)           | 5<br>(3 - 8)         | 9<br>(6 - 14)       | 55<br>(42 - 76)          | 24<br>(17 - 33)          | 9<br>(6 - 14)               |
| Unintentional suffocation                       | 352<br>(119 - 554)          | 223<br>(64 - 411)    | 9<br>(3 - 14)       | 20<br>(8 - 28)           | 18<br>(6 - 27)           | 82<br>(24 - 148)            |
| Other exposure to mechanical forces             | 349<br>(254 - 416)          | 33<br>(20 - 52)      | 17<br>(12 - 26)     | 70<br>(56 - 90)          | 89<br>(61 - 113)         | 140<br>(90 - 190)           |
| Adverse effects of medical treatment            | 3,586<br>(2,521 - 5,085)    | 40<br>(26 - 68)      | 13<br>(8 - 22)      | 345<br>(260 - 505)       | 925<br>(617 - 1,330)     | 2,263<br>(1,418 - 3,443)    |
| Animal contact                                  | 88<br>(41 - 173)            | 8<br>(3 - 15)        | 5<br>(2 - 9)        | 20<br>(9 - 38)           | 27<br>(11 - 57)          | 29<br>(11 - 65)             |
| Venomous animal contact                         | 24<br>(10 - 56)             | 1<br>(0 - 2)         | 1<br>(0 - 3)        | 8<br>(3 - 17)            | 10<br>(4 - 25)           | 4<br>(1 - 11)               |
| Non-venomous animal contact                     | 64<br>(26 - 127)            | 7<br>(3 - 13)        | 3<br>(1 - 7)        | 12<br>(5 - 23)           | 17<br>(6 - 35)           | 24<br>(9 - 53)              |
| Foreign body                                    | 6,849<br>(4,252 - 12,287)   | 166<br>(98 - 288)    | 29<br>(18 - 50)     | 382<br>(254 - 670)       | 911<br>(609 - 1,573)     | 5,361<br>(3,110 - 10,063)   |
| Pulmonary aspiration and foreign body in airway | 6,816<br>(4,220 - 12,258)   | 165<br>(97 - 287)    | 27<br>(16 - 48)     | 375<br>(247 - 663)       | 906<br>(604 - 1,568)     | 5,344<br>(3,092 - 10,047)   |
| Foreign body in other body part                 | 33<br>(20 - 55)             | 1<br>(1 - 2)         | 2<br>(1 - 3)        | 7<br>(5 - 10)            | 5<br>(4 - 8)             | 17<br>(7 - 38)              |
| Other unintentional injuries                    | 139<br>(91 - 288)           | 5<br>(3 - 11)        | 2<br>(1 - 5)        | 21<br>(13 - 42)          | 25<br>(15 - 51)          | 86<br>(46 - 193)            |
| Self-harm and interpersonal violence            | 12,557<br>(10,633 - 14,826) | 138<br>(56 - 254)    | 150<br>(101 - 208)  | 7,065<br>(5,863 - 8,434) | 3,922<br>(2,952 - 4,757) | 1,283<br>(976 - 1,830)      |
| Self-harm                                       | 9,207<br>(7,291 - 10,675)   | --                   | 64<br>(40 - 91)     | 4,953<br>(3,850 - 5,943) | 3,267<br>(2,395 - 4,026) | 923<br>(727 - 1,318)        |
| Interpersonal violence                          | 3,350<br>(2,338 - 4,633)    | 138<br>(56 - 254)    | 86<br>(48 - 143)    | 2,113<br>(1,472 - 3,112) | 655<br>(421 - 1,008)     | 360<br>(180 - 690)          |
| Assault by firearm                              | 1,702<br>(1,089 - 2,529)    | 19<br>(5 - 41)       | 38<br>(19 - 67)     | 1,191<br>(756 - 1,790)   | 325<br>(187 - 521)       | 130<br>(56 - 250)           |
| Assault by sharp object                         | 644<br>(392 - 1,075)        | 8<br>(3 - 18)        | 12<br>(5 - 24)      | 408<br>(241 - 713)       | 142<br>(76 - 250)        | 74<br>(32 - 158)            |
| Assault by other means                          | 1,004<br>(627 - 1,535)      | 111<br>(45 - 203)    | 35<br>(18 - 63)     | 514<br>(308 - 828)       | 188<br>(97 - 314)        | 156<br>(70 - 314)           |
| Forces of nature, war, and legal intervention   | 0<br>(0 - 0)                | 0<br>(0 - 0)         | --                  | --                       | --                       | 0<br>(0 - 0)                |
| Exposure to forces of nature                    | 0<br>(0 - 0)                | 0<br>(0 - 0)         | --                  | --                       | --                       | 0<br>(0 - 0)                |

Web Table 31- Uruguay deaths with 95% UI by age, sex, and cause in 2013

| Cause                                                              | Both Sexes, All Ages        | Both Sexes, 0-4 Years | Both Sexes, 5-14 Years | Both Sexes, 15-49 Years  | Both Sexes, 50-69 Years  | Both Sexes, 70-80 Years     |
|--------------------------------------------------------------------|-----------------------------|-----------------------|------------------------|--------------------------|--------------------------|-----------------------------|
| All causes                                                         | 33,672<br>(31,522 - 35,727) | 540<br>(346 - 828)    | 100<br>(79 - 132)      | 2,208<br>(1,958 - 2,457) | 7,130<br>(6,405 - 7,850) | 23,692<br>(22,415 - 24,953) |
| Communicable, maternal, neonatal, and nutritional diseases         | 2,428<br>(1,827 - 2,906)    | 283<br>(176 - 434)    | 10<br>(8 - 14)         | 201<br>(159 - 275)       | 304<br>(223 - 383)       | 1,630<br>(1,138 - 2,049)    |
| HIV/AIDS and tuberculosis                                          | 197<br>(139 - 335)          | 1<br>(0 - 1)          | 0<br>(0 - 0)           | 108<br>(73 - 182)        | 52<br>(31 - 106)         | 36<br>(28 - 50)             |
| Tuberculosis                                                       | 63<br>(54 - 75)             | 0<br>(0 - 0)          | 0<br>(0 - 0)           | 10<br>(9 - 13)           | 22<br>(18 - 27)          | 30<br>(25 - 39)             |
| HIV/AIDS                                                           | 133<br>(77 - 275)           | 0<br>(0 - 0)          | 0<br>(0 - 0)           | 98<br>(62 - 173)         | 30<br>(11 - 83)          | 6<br>(1 - 18)               |
| HIV/AIDS resulting in mycobacterial infection                      | 8<br>(4 - 16)               | 0<br>(0 - 0)          | 0<br>(0 - 0)           | 5<br>(3 - 10)            | 2<br>(1 - 5)             | 0<br>(0 - 1)                |
| HIV/AIDS resulting in other diseases                               | 126<br>(73 - 258)           | 0<br>(0 - 0)          | 0<br>(0 - 0)           | 92<br>(58 - 163)         | 28<br>(10 - 78)          | 5<br>(1 - 17)               |
| Diarrrhea, lower respiratory, and other common infectious diseases | 1,778<br>(1,189 - 2,210)    | 74<br>(45 - 111)      | 8<br>(6 - 11)          | 66<br>(49 - 80)          | 215<br>(137 - 273)       | 1,414<br>(911 - 1,828)      |
| Diarrheal diseases                                                 | 103<br>(75 - 148)           | 13<br>(7 - 21)        | 0<br>(0 - 1)           | 3<br>(3 - 4)             | 10<br>(7 - 13)           | 77<br>(51 - 120)            |
| Intestinal infectious diseases                                     | 1<br>(0 - 3)                | 0<br>(0 - 1)          | 0<br>(0 - 1)           | 0<br>(0 - 1)             | 0<br>(0 - 1)             | 0<br>(0 - 1)                |
| Typhoid fever                                                      | 1<br>(0 - 1)                | 0<br>(0 - 0)          | 0<br>(0 - 0)           | 0<br>(0 - 1)             | 0<br>(0 - 0)             | 0<br>(0 - 0)                |
| Paratyphoid fever                                                  | 0<br>(0 - 0)                | 0<br>(0 - 0)          | 0<br>(0 - 0)           | 0<br>(0 - 0)             | 0<br>(0 - 0)             | 0<br>(0 - 0)                |
| Other intestinal infectious diseases                               | 0<br>(0 - 2)                | 0<br>(0 - 1)          | 0<br>(0 - 0)           | 0<br>(0 - 1)             | 0<br>(0 - 1)             | 0<br>(0 - 1)                |
| Lower respiratory infections                                       | 1,593<br>(1,005 - 2,018)    | 50<br>(29 - 76)       | 4<br>(2 - 6)           | 51<br>(35 - 64)          | 187<br>(109 - 243)       | 1,302<br>(803 - 1,716)      |
| Upper respiratory infections                                       | 1<br>(0 - 2)                | 0<br>(0 - 0)          | 0<br>(0 - 0)           | 0<br>(0 - 0)             | 0<br>(0 - 1)             | 1<br>(0 - 2)                |
| Otitis media                                                       | 1<br>(1 - 1)                | 0<br>(0 - 1)          | 0<br>(0 - 0)           | 0<br>(0 - 0)             | 0<br>(0 - 0)             | 0<br>(0 - 0)                |
| Meningitis                                                         | 26<br>(22 - 35)             | 5<br>(3 - 8)          | 1<br>(1 - 1)           | 3<br>(3 - 5)             | 6<br>(5 - 9)             | 11<br>(9 - 15)              |
| Pneumococcal meningitis                                            | 6<br>(4 - 7)                | 1<br>(0 - 2)          | 0<br>(0 - 0)           | 1<br>(1 - 1)             | 1<br>(1 - 2)             | 3<br>(2 - 4)                |
| H influenzae type B meningitis                                     | 3<br>(2 - 4)                | 1<br>(1 - 2)          | 0<br>(0 - 0)           | 0<br>(0 - 0)             | 0<br>(0 - 1)             | 1<br>(1 - 1)                |
| Meningococcal meningitis                                           | 10<br>(8 - 13)              | 2<br>(1 - 3)          | 0<br>(0 - 1)           | 1<br>(1 - 2)             | 2<br>(2 - 3)             | 4<br>(3 - 6)                |
| Other meningitis                                                   | 8<br>(6 - 12)               | 1<br>(0 - 2)          | 0<br>(0 - 0)           | 1<br>(1 - 2)             | 2<br>(1 - 4)             | 4<br>(3 - 6)                |
| Encephalitis                                                       | 47<br>(30 - 61)             | 6<br>(3 - 10)         | 3<br>(1 - 4)           | 8<br>(5 - 10)            | 11<br>(6 - 14)           | 20<br>(10 - 30)             |
| Diphtheria                                                         | 0<br>(0 - 0)                | 0<br>(0 - 0)          | 0<br>(0 - 0)           | 0<br>(0 - 0)             | 0<br>(0 - 0)             | --                          |
| Whooping cough                                                     | 0<br>(0 - 1)                | 0<br>(0 - 1)          | 0<br>(0 - 0)           | 0<br>(0 - 0)             | 0<br>(0 - 0)             | --                          |
| Tetanus                                                            | 1<br>(1 - 1)                | 0<br>(0 - 0)          | 0<br>(0 - 0)           | 0<br>(0 - 0)             | 0<br>(0 - 0)             | 0<br>(0 - 0)                |
| Measles                                                            | 0<br>(0 - 0)                | 0<br>(0 - 0)          | 0<br>(0 - 0)           | 0<br>(0 - 0)             | 0<br>(0 - 0)             | --                          |
| Varicella and herpes zoster                                        | 3<br>(1 - 9)                | 0<br>(0 - 1)          | 0<br>(0 - 0)           | 0<br>(0 - 1)             | 0<br>(0 - 1)             | 2<br>(0 - 8)                |
| Neglected tropical diseases and malaria                            | 19<br>(11 - 58)             | 0<br>(0 - 0)          | 0<br>(0 - 1)           | 3<br>(2 - 6)             | 7<br>(3 - 21)            | 9<br>(5 - 31)               |
| Chagas disease                                                     | 11<br>(4 - 49)              | 0<br>(0 - 0)          | 0<br>(0 - 0)           | 1<br>(0 - 4)             | 4<br>(1 - 19)            | 6<br>(2 - 27)               |
| Leishmaniasis                                                      | 0<br>(0 - 0)                | 0<br>(0 - 0)          | 0<br>(0 - 0)           | 0<br>(0 - 0)             | 0<br>(0 - 0)             | 0<br>(0 - 0)                |
| Visceral leishmaniasis                                             | 0<br>(0 - 0)                | 0<br>(0 - 0)          | 0<br>(0 - 0)           | 0<br>(0 - 0)             | 0<br>(0 - 0)             | 0<br>(0 - 0)                |
| Cysticercosis                                                      | 0<br>(0 - 0)                | 0<br>(0 - 0)          | 0<br>(0 - 0)           | 0<br>(0 - 0)             | 0<br>(0 - 0)             | 0<br>(0 - 0)                |
| Cystic echinococcosis                                              | 5<br>(4 - 5)                | 0<br>(0 - 0)          | 0<br>(0 - 0)           | 1<br>(1 - 1)             | 2<br>(1 - 2)             | 2<br>(2 - 2)                |
| Dengue                                                             | 1<br>(0 - 1)                | 0<br>(0 - 0)          | 0<br>(0 - 0)           | 0<br>(0 - 0)             | 0<br>(0 - 0)             | 0<br>(0 - 0)                |
| Rabies                                                             | 0<br>(0 - 0)                | 0<br>(0 - 0)          | 0<br>(0 - 0)           | 0<br>(0 - 0)             | 0<br>(0 - 0)             | 0<br>(0 - 0)                |
| Other neglected tropical diseases                                  | 2<br>(2 - 3)                | 0<br>(0 - 0)          | 0<br>(0 - 0)           | 0<br>(0 - 0)             | 0<br>(0 - 1)             | 1<br>(1 - 2)                |
| Maternal disorders                                                 | 12<br>(9 - 15)              | --                    | 0<br>(0 - 0)           | 11<br>(9 - 15)           | --                       | --                          |
| Maternal hemorrhage                                                | 1<br>(1 - 2)                | --                    | 0<br>(0 - 0)           | 1<br>(1 - 1)             | --                       | --                          |
| Maternal sepsis and other maternal infections                      | 2<br>(1 - 3)                | --                    | 0<br>(0 - 0)           | 2<br>(1 - 2)             | --                       | --                          |
| Maternal hypertensive disorders                                    | 1<br>(1 - 2)                | --                    | 0<br>(0 - 0)           | 1<br>(1 - 2)             | --                       | --                          |

Web Table 31- Uruguay deaths with 95% UI by age, sex, and cause in 2013

| Cause                                                            | Both Sexes, All Ages        | Both Sexes, 0-4 Years | Both Sexes, 5-14 Years | Both Sexes, 15-49 Years  | Both Sexes, 50-69 Years  | Both Sexes, 70-80 Years     |
|------------------------------------------------------------------|-----------------------------|-----------------------|------------------------|--------------------------|--------------------------|-----------------------------|
| Maternal obstructed labor                                        | 1<br>(0 - 1)                | --                    | 0<br>(0 - 0)           | 1<br>(0 - 1)             | --                       | --                          |
| Maternal abortive outcome                                        | 3<br>(2 - 4)                | --                    | 0<br>(0 - 0)           | 3<br>(2 - 4)             | --                       | --                          |
| Indirect maternal deaths                                         | 1<br>(1 - 2)                | --                    | 0<br>(0 - 0)           | 1<br>(1 - 2)             | --                       | --                          |
| Late maternal deaths                                             | 1<br>(0 - 1)                | --                    | 0<br>(0 - 0)           | 1<br>(0 - 1)             | --                       | --                          |
| Maternal deaths aggravated by HIV/AIDS                           | 0<br>(0 - 0)                | --                    | --                     | 0<br>(0 - 0)             | --                       | --                          |
| Other maternal disorders                                         | 1<br>(1 - 2)                | --                    | 0<br>(0 - 0)           | 1<br>(1 - 2)             | --                       | --                          |
| Neonatal disorders                                               | 193<br>(120 - 311)          | 193<br>(120 - 311)    | --                     | --                       | --                       | --                          |
| Neonatal preterm birth complications                             | 93<br>(54 - 157)            | 93<br>(54 - 157)      | --                     | --                       | --                       | --                          |
| Neonatal encephalopathy due to birth asphyxia and trauma         | 29<br>(16 - 52)             | 29<br>(16 - 52)       | --                     | --                       | --                       | --                          |
| Neonatal sepsis and other neonatal infections                    | 40<br>(22 - 70)             | 40<br>(22 - 70)       | --                     | --                       | --                       | --                          |
| Hemolytic disease and other neonatal jaundice                    | 0<br>(0 - 1)                | 0<br>(0 - 1)          | --                     | --                       | --                       | --                          |
| Other neonatal disorders                                         | 31<br>(18 - 55)             | 31<br>(18 - 55)       | --                     | --                       | --                       | --                          |
| Nutritional deficiencies                                         | 190<br>(147 - 241)          | 9<br>(5 - 17)         | 1<br>(1 - 1)           | 8<br>(6 - 11)            | 20<br>(15 - 28)          | 152<br>(112 - 198)          |
| Protein-energy malnutrition                                      | 76<br>(47 - 106)            | 9<br>(5 - 17)         | 0<br>(0 - 0)           | 3<br>(2 - 4)             | 10<br>(6 - 14)           | 55<br>(28 - 81)             |
| Iodine deficiency                                                | 0<br>(0 - 1)                | 0<br>(0 - 0)          | 0<br>(0 - 0)           | 0<br>(0 - 0)             | 0<br>(0 - 0)             | 0<br>(0 - 1)                |
| Iron-deficiency anemia                                           | 64<br>(40 - 99)             | 0<br>(0 - 1)          | 0<br>(0 - 0)           | 3<br>(2 - 4)             | 6<br>(4 - 11)            | 55<br>(34 - 87)             |
| Other nutritional deficiencies                                   | 50<br>(27 - 76)             | 1<br>(0 - 1)          | 1<br>(0 - 1)           | 3<br>(2 - 4)             | 4<br>(2 - 6)             | 42<br>(22 - 66)             |
| Other communicable, maternal, neonatal, and nutritional diseases | 41<br>(32 - 56)             | 5<br>(2 - 10)         | 1<br>(0 - 1)           | 4<br>(3 - 6)             | 10<br>(8 - 14)           | 20<br>(15 - 31)             |
| Sexually transmitted diseases excluding HIV                      | 9<br>(5 - 15)               | 4<br>(1 - 9)          | 0<br>(0 - 1)           | 1<br>(1 - 1)             | 1<br>(1 - 2)             | 2<br>(1 - 4)                |
| Syphilis                                                         | 8<br>(4 - 13)               | 4<br>(1 - 9)          | 0<br>(0 - 1)           | 0<br>(0 - 1)             | 1<br>(0 - 1)             | 2<br>(1 - 3)                |
| Chlamydial infection                                             | 0<br>(0 - 0)                | --                    | 0<br>(0 - 0)           | 0<br>(0 - 0)             | 0<br>(0 - 0)             | 0<br>(0 - 0)                |
| Gonococcal infection                                             | 1<br>(0 - 1)                | --                    | 0<br>(0 - 0)           | 0<br>(0 - 0)             | 0<br>(0 - 0)             | 0<br>(0 - 0)                |
| Other sexually transmitted diseases                              | 0<br>(0 - 1)                | --                    | 0<br>(0 - 0)           | 0<br>(0 - 0)             | 0<br>(0 - 0)             | 0<br>(0 - 0)                |
| Hepatitis                                                        | 7<br>(6 - 9)                | 0<br>(0 - 0)          | 0<br>(0 - 0)           | 2<br>(1 - 2)             | 2<br>(2 - 3)             | 3<br>(2 - 4)                |
| Acute hepatitis A                                                | 3<br>(1 - 5)                | 0<br>(0 - 0)          | 0<br>(0 - 0)           | 1<br>(1 - 1)             | 1<br>(0 - 2)             | 1<br>(0 - 2)                |
| Acute hepatitis B                                                | 4<br>(2 - 6)                | 0<br>(0 - 0)          | 0<br>(0 - 0)           | 0<br>(0 - 1)             | 1<br>(1 - 2)             | 2<br>(1 - 3)                |
| Acute hepatitis C                                                | 0<br>(0 - 1)                | --                    | 0<br>(0 - 0)           | 0<br>(0 - 0)             | 0<br>(0 - 0)             | 0<br>(0 - 0)                |
| Other infectious diseases                                        | 25<br>(18 - 38)             | 1<br>(0 - 1)          | 0<br>(0 - 0)           | 2<br>(1 - 3)             | 7<br>(5 - 10)            | 15<br>(11 - 25)             |
| Non-communicable diseases                                        | 29,040<br>(27,046 - 30,998) | 208<br>(132 - 316)    | 46<br>(35 - 60)        | 1,202<br>(1,050 - 1,359) | 6,325<br>(5,691 - 6,989) | 21,260<br>(20,017 - 22,515) |
| Neoplasms                                                        | 8,680<br>(7,935 - 9,486)    | 9<br>(6 - 16)         | 20<br>(15 - 27)        | 551<br>(481 - 624)       | 2,956<br>(2,647 - 3,271) | 5,143<br>(4,696 - 5,650)    |
| Esophageal cancer                                                | 330<br>(270 - 429)          | --                    | --                     | 13<br>(10 - 18)          | 122<br>(95 - 168)        | 195<br>(157 - 254)          |
| Stomach cancer                                                   | 661<br>(571 - 766)          | --                    | --                     | 31<br>(25 - 37)          | 203<br>(171 - 238)       | 428<br>(352 - 520)          |
| Liver cancer                                                     | 144<br>(120 - 172)          | --                    | 0<br>(0 - 0)           | 6<br>(4 - 7)             | 49<br>(39 - 62)          | 90<br>(69 - 113)            |
| Liver cancer due to hepatitis B                                  | 15<br>(9 - 23)              | --                    | 0<br>(0 - 0)           | 1<br>(1 - 2)             | 7<br>(4 - 11)            | 7<br>(4 - 11)               |
| Liver cancer due to hepatitis C                                  | 78<br>(60 - 99)             | --                    | 0<br>(0 - 0)           | 2<br>(2 - 4)             | 26<br>(19 - 36)          | 50<br>(36 - 65)             |
| Liver cancer due to alcohol use                                  | 37<br>(25 - 51)             | --                    | --                     | 1<br>(1 - 2)             | 12<br>(7 - 17)           | 25<br>(15 - 35)             |
| Liver cancer due to other causes                                 | 13<br>(8 - 19)              | --                    | 0<br>(0 - 0)           | 1<br>(1 - 1)             | 4<br>(3 - 6)             | 8<br>(4 - 13)               |
| Larynx cancer                                                    | 128<br>(99 - 177)           | --                    | --                     | 7<br>(5 - 11)            | 65<br>(48 - 96)          | 56<br>(42 - 76)             |
| Tracheal, bronchus and lung cancer                               | 1,440<br>(1,265 - 1,659)    | --                    | --                     | 72<br>(58 - 91)          | 692<br>(587 - 822)       | 676<br>(587 - 789)          |
| Breast cancer                                                    | 729<br>(604 - 866)          | --                    | --                     | 83<br>(64 - 106)         | 281<br>(229 - 343)       | 365<br>(285 - 464)          |

Web Table 31- Uruguay deaths with 95% UI by age, sex, and cause in 2013

| Cause                                         | Both Sexes, All Ages       | Both Sexes, 0-4 Years | Both Sexes, 5-14 Years | Both Sexes, 15-49 Years | Both Sexes, 50-69 Years  | Both Sexes, 70-80 Years  |
|-----------------------------------------------|----------------------------|-----------------------|------------------------|-------------------------|--------------------------|--------------------------|
| Cervical cancer                               | 184<br>(143 - 232)         | --                    | --                     | 42<br>(30 - 56)         | 65<br>(47 - 86)          | 77<br>(55 - 107)         |
| Uterine cancer                                | 82<br>(54 - 117)           | --                    | --                     | 2<br>(1 - 4)            | 24<br>(15 - 37)          | 55<br>(35 - 84)          |
| Prostate cancer                               | 781<br>(524 - 1,121)       | --                    | --                     | 2<br>(1 - 4)            | 129<br>(81 - 194)        | 650<br>(427 - 943)       |
| Colon and rectum cancer                       | 1,248<br>(1,077 - 1,447)   | --                    | --                     | 48<br>(40 - 57)         | 321<br>(277 - 367)       | 879<br>(731 - 1,068)     |
| Lip and oral cavity cancer                    | 100<br>(79 - 130)          | --                    | --                     | 8<br>(6 - 11)           | 46<br>(34 - 62)          | 46<br>(34 - 61)          |
| Nasopharynx cancer                            | 25<br>(20 - 32)            | --                    | 0<br>(0 - 0)           | 4<br>(3 - 6)            | 13<br>(9 - 18)           | 8<br>(6 - 11)            |
| Other pharynx cancer                          | 52<br>(41 - 65)            | --                    | --                     | 4<br>(3 - 6)            | 30<br>(22 - 40)          | 18<br>(13 - 24)          |
| Gallbladder and biliary tract cancer          | 258<br>(190 - 348)         | --                    | --                     | 7<br>(5 - 10)           | 75<br>(54 - 102)         | 176<br>(123 - 254)       |
| Pancreatic cancer                             | 549<br>(474 - 638)         | --                    | --                     | 19<br>(15 - 23)         | 189<br>(161 - 221)       | 341<br>(282 - 413)       |
| Malignant skin melanoma                       | 59<br>(42 - 86)            | --                    | --                     | 10<br>(7 - 15)          | 21<br>(15 - 32)          | 28<br>(20 - 39)          |
| Non-melanoma skin cancer                      | 33<br>(25 - 46)            | --                    | --                     | 1<br>(0 - 1)            | 3<br>(2 - 4)             | 30<br>(22 - 41)          |
| Ovarian cancer                                | 176<br>(140 - 218)         | --                    | --                     | 16<br>(12 - 22)         | 66<br>(51 - 84)          | 93<br>(68 - 125)         |
| Testicular cancer                             | 9<br>(3 - 15)              | --                    | --                     | 6<br>(2 - 10)           | 1<br>(0 - 3)             | 1<br>(0 - 3)             |
| Kidney cancer                                 | 265<br>(222 - 310)         | 0<br>(0 - 0)          | 0<br>(0 - 0)           | 17<br>(13 - 22)         | 111<br>(89 - 136)        | 137<br>(108 - 171)       |
| Bladder cancer                                | 251<br>(208 - 301)         | --                    | --                     | 4<br>(3 - 5)            | 64<br>(50 - 80)          | 183<br>(146 - 225)       |
| Brain and nervous system cancer               | 126<br>(66 - 159)          | 1<br>(0 - 2)          | 2<br>(1 - 3)           | 22<br>(12 - 29)         | 57<br>(28 - 74)          | 44<br>(22 - 59)          |
| Thyroid cancer                                | 33<br>(26 - 45)            | --                    | 0<br>(0 - 0)           | 2<br>(2 - 3)            | 11<br>(8 - 15)           | 20<br>(15 - 28)          |
| Mesothelioma                                  | 11<br>(8 - 13)             | --                    | --                     | 1<br>(1 - 2)            | 5<br>(4 - 7)             | 4<br>(3 - 6)             |
| Hodgkin lymphoma                              | 14<br>(3 - 20)             | 0<br>(0 - 0)          | 0<br>(0 - 1)           | 5<br>(1 - 7)            | 5<br>(1 - 8)             | 4<br>(1 - 7)             |
| Non-Hodgkin lymphoma                          | 239<br>(178 - 290)         | 1<br>(0 - 1)          | 2<br>(1 - 3)           | 30<br>(23 - 38)         | 80<br>(61 - 98)          | 127<br>(83 - 164)        |
| Multiple myeloma                              | 110<br>(79 - 140)          | --                    | --                     | 5<br>(4 - 6)            | 40<br>(29 - 51)          | 65<br>(45 - 88)          |
| Leukemia                                      | 237<br>(208 - 271)         | 3<br>(1 - 5)          | 8<br>(6 - 11)          | 35<br>(29 - 41)         | 63<br>(53 - 73)          | 129<br>(108 - 156)       |
| Other neoplasms                               | 406<br>(315 - 474)         | 5<br>(3 - 8)          | 7<br>(5 - 10)          | 50<br>(39 - 62)         | 126<br>(97 - 152)        | 217<br>(148 - 269)       |
| Cardiovascular diseases                       | 10,683<br>(9,705 - 12,104) | 4<br>(3 - 7)          | 3<br>(2 - 5)           | 286<br>(243 - 335)      | 1,943<br>(1,708 - 2,185) | 8,446<br>(7,652 - 9,660) |
| Rheumatic heart disease                       | 48<br>(27 - 63)            | 0<br>(0 - 0)          | 0<br>(0 - 0)           | 8<br>(5 - 10)           | 13<br>(9 - 16)           | 28<br>(12 - 40)          |
| Ischemic heart disease                        | 4,361<br>(3,711 - 5,793)   | 0<br>(0 - 0)          | 0<br>(0 - 1)           | 106<br>(85 - 139)       | 904<br>(771 - 1,111)     | 3,350<br>(2,810 - 4,607) |
| Cerebrovascular disease                       | 4,113<br>(3,575 - 4,916)   | 1<br>(0 - 1)          | 1<br>(1 - 2)           | 103<br>(84 - 124)       | 612<br>(505 - 722)       | 3,396<br>(2,925 - 4,133) |
| Ischemic stroke                               | 2,631<br>(2,197 - 3,495)   | 0<br>(0 - 0)          | 0<br>(0 - 1)           | 22<br>(16 - 34)         | 252<br>(194 - 356)       | 2,357<br>(1,964 - 3,120) |
| Hemorrhagic stroke                            | 1,482<br>(1,034 - 1,781)   | 1<br>(0 - 1)          | 1<br>(1 - 1)           | 81<br>(65 - 99)         | 360<br>(255 - 446)       | 1,039<br>(677 - 1,291)   |
| Hypertensive heart disease                    | 500<br>(256 - 742)         | 0<br>(0 - 0)          | 0<br>(0 - 0)           | 7<br>(4 - 10)           | 55<br>(33 - 76)          | 438<br>(212 - 665)       |
| Cardiomyopathy and myocarditis                | 503<br>(411 - 643)         | 2<br>(1 - 3)          | 1<br>(1 - 1)           | 27<br>(21 - 36)         | 134<br>(105 - 176)       | 340<br>(271 - 447)       |
| Atrial fibrillation and flutter               | 151<br>(107 - 207)         | --                    | --                     | 1<br>(0 - 1)            | 14<br>(10 - 18)          | 136<br>(95 - 192)        |
| Aortic aneurysm                               | 225<br>(185 - 281)         | --                    | --                     | 8<br>(6 - 11)           | 69<br>(56 - 87)          | 148<br>(116 - 188)       |
| Peripheral vascular disease                   | 2<br>(2 - 2)               | --                    | --                     | 0<br>(0 - 0)            | 1<br>(0 - 1)             | 1<br>(1 - 2)             |
| Endocarditis                                  | 70<br>(48 - 92)            | 1<br>(0 - 1)          | 0<br>(0 - 0)           | 7<br>(5 - 9)            | 22<br>(15 - 30)          | 41<br>(26 - 54)          |
| Other cardiovascular and circulatory diseases | 710<br>(415 - 927)         | 1<br>(1 - 2)          | 0<br>(0 - 1)           | 20<br>(14 - 27)         | 121<br>(81 - 158)        | 567<br>(315 - 766)       |
| Chronic respiratory diseases                  | 2,226<br>(1,802 - 2,544)   | 5<br>(3 - 8)          | 2<br>(1 - 2)           | 50<br>(42 - 60)         | 401<br>(313 - 469)       | 1,769<br>(1,405 - 2,041) |
| Chronic obstructive pulmonary disease         | 1,835<br>(1,455 - 2,109)   | 3<br>(2 - 5)          | 0<br>(0 - 1)           | 26<br>(21 - 33)         | 324<br>(250 - 383)       | 1,481<br>(1,172 - 1,715) |
| Pneumoconiosis                                | 14<br>(10 - 21)            | 0<br>(0 - 0)          | 0<br>(0 - 0)           | 2<br>(2 - 3)            | 3<br>(2 - 5)             | 9<br>(5 - 13)            |
| Silicosis                                     | 3<br>(2 - 4)               | 0<br>(0 - 0)          | 0<br>(0 - 0)           | 1<br>(0 - 1)            | 1<br>(0 - 1)             | 2<br>(1 - 3)             |

Web Table 31- Uruguay deaths with 95% UI by age, sex, and cause in 2013

| Cause                                               | Both Sexes, All Ages     | Both Sexes, 0-4 Years | Both Sexes, 5-14 Years | Both Sexes, 15-49 Years | Both Sexes, 50-69 Years | Both Sexes, 70-80 Years  |
|-----------------------------------------------------|--------------------------|-----------------------|------------------------|-------------------------|-------------------------|--------------------------|
| Asbestosis                                          | 1<br>(1 - 1)             | 0<br>(0 - 0)          | 0<br>(0 - 0)           | 0<br>(0 - 0)            | 0<br>(0 - 0)            | 0<br>(0 - 1)             |
| Coal workers pneumoconiosis                         | 2<br>(1 - 3)             | 0<br>(0 - 0)          | 0<br>(0 - 0)           | 0<br>(0 - 1)            | 1<br>(1 - 2)            | 0<br>(0 - 0)             |
| Other pneumoconiosis                                | 8<br>(6 - 12)            | 0<br>(0 - 0)          | 0<br>(0 - 0)           | 1<br>(1 - 2)            | 1<br>(1 - 2)            | 6<br>(4 - 10)            |
| Asthma                                              | 145<br>(98 - 190)        | 0<br>(0 - 0)          | 1<br>(0 - 1)           | 14<br>(11 - 18)         | 40<br>(29 - 51)         | 90<br>(55 - 130)         |
| Interstitial lung disease and pulmonary sarcoidosis | 203<br>(129 - 283)       | 0<br>(0 - 0)          | 0<br>(0 - 0)           | 4<br>(3 - 6)            | 30<br>(19 - 41)         | 168<br>(101 - 248)       |
| Other chronic respiratory diseases                  | 30<br>(21 - 42)          | 1<br>(1 - 3)          | 0<br>(0 - 0)           | 3<br>(2 - 4)            | 4<br>(3 - 5)            | 21<br>(13 - 33)          |
| Cirrhosis                                           | 537<br>(477 - 601)       | 0<br>(0 - 1)          | 1<br>(1 - 1)           | 47<br>(39 - 57)         | 223<br>(191 - 260)      | 265<br>(231 - 304)       |
| Cirrhosis due to hepatitis B                        | 53<br>(32 - 78)          | 0<br>(0 - 0)          | 0<br>(0 - 0)           | 4<br>(2 - 6)            | 19<br>(12 - 29)         | 30<br>(17 - 47)          |
| Cirrhosis due to hepatitis C                        | 226<br>(158 - 287)       | 0<br>(0 - 0)          | 0<br>(0 - 1)           | 21<br>(13 - 29)         | 92<br>(58 - 127)        | 113<br>(72 - 149)        |
| Cirrhosis due to alcohol use                        | 217<br>(165 - 293)       | --                    | --                     | 16<br>(10 - 24)         | 93<br>(64 - 137)        | 108<br>(80 - 145)        |
| Cirrhosis due to other causes                       | 41<br>(24 - 66)          | 0<br>(0 - 0)          | 1<br>(0 - 1)           | 7<br>(4 - 12)           | 19<br>(10 - 33)         | 14<br>(9 - 23)           |
| Digestive diseases                                  | 884<br>(776 - 1,028)     | 1<br>(1 - 2)          | 2<br>(1 - 2)           | 38<br>(32 - 48)         | 160<br>(138 - 190)      | 683<br>(588 - 811)       |
| Peptic ulcer disease                                | 86<br>(63 - 118)         | 0<br>(0 - 0)          | 0<br>(0 - 0)           | 3<br>(2 - 5)            | 19<br>(14 - 26)         | 63<br>(45 - 92)          |
| Gastritis and duodenitis                            | 17<br>(11 - 31)          | 0<br>(0 - 0)          | 0<br>(0 - 0)           | 1<br>(1 - 2)            | 3<br>(2 - 6)            | 13<br>(8 - 25)           |
| Appendicitis                                        | 19<br>(14 - 28)          | 0<br>(0 - 0)          | 0<br>(0 - 1)           | 3<br>(2 - 4)            | 6<br>(4 - 8)            | 11<br>(7 - 17)           |
| Paralytic ileus and intestinal obstruction          | 131<br>(51 - 206)        | 0<br>(0 - 1)          | 0<br>(0 - 1)           | 6<br>(3 - 8)            | 19<br>(8 - 29)          | 105<br>(38 - 172)        |
| Inguinal, femoral, and abdominal hernia             | 46<br>(21 - 111)         | 0<br>(0 - 0)          | 0<br>(0 - 0)           | 2<br>(1 - 3)            | 7<br>(4 - 16)           | 37<br>(16 - 93)          |
| Inflammatory bowel disease                          | 21<br>(15 - 31)          | 0<br>(0 - 0)          | 0<br>(0 - 0)           | 2<br>(2 - 3)            | 5<br>(4 - 8)            | 14<br>(9 - 21)           |
| Vascular intestinal disorders                       | 296<br>(207 - 431)       | 0<br>(0 - 0)          | 0<br>(0 - 0)           | 4<br>(2 - 7)            | 41<br>(26 - 62)         | 250<br>(174 - 367)       |
| Gallbladder and biliary diseases                    | 120<br>(88 - 173)        | 0<br>(0 - 0)          | 0<br>(0 - 0)           | 4<br>(3 - 6)            | 20<br>(15 - 27)         | 96<br>(68 - 144)         |
| Pancreatitis                                        | 72<br>(52 - 98)          | 0<br>(0 - 0)          | 0<br>(0 - 0)           | 10<br>(7 - 14)          | 25<br>(18 - 34)         | 37<br>(26 - 52)          |
| Other digestive diseases                            | 76<br>(55 - 105)         | 0<br>(0 - 0)          | 0<br>(0 - 0)           | 3<br>(2 - 4)            | 14<br>(10 - 19)         | 58<br>(41 - 85)          |
| Neurological disorders                              | 3,525<br>(2,860 - 4,205) | 5<br>(3 - 8)          | 4<br>(3 - 5)           | 33<br>(27 - 39)         | 174<br>(144 - 209)      | 3,309<br>(2,654 - 3,985) |
| Alzheimer disease and other dementias               | 3,169<br>(2,526 - 3,854) | --                    | --                     | 0<br>(0 - 0)            | 101<br>(76 - 132)       | 3,068<br>(2,419 - 3,750) |
| Parkinson disease                                   | 206<br>(158 - 259)       | --                    | --                     | 0<br>(0 - 1)            | 22<br>(17 - 28)         | 184<br>(136 - 236)       |
| Epilepsy                                            | 41<br>(32 - 49)          | 1<br>(1 - 3)          | 1<br>(1 - 2)           | 16<br>(12 - 20)         | 10<br>(8 - 13)          | 12<br>(8 - 16)           |
| Multiple sclerosis                                  | 18<br>(12 - 26)          | --                    | --                     | 5<br>(3 - 7)            | 8<br>(5 - 12)           | 5<br>(3 - 8)             |
| Other neurological disorders                        | 91<br>(79 - 107)         | 4<br>(2 - 6)          | 2<br>(2 - 3)           | 12<br>(10 - 15)         | 33<br>(27 - 40)         | 40<br>(33 - 49)          |
| Mental and substance use disorders                  | 131<br>(70 - 168)        | 0<br>(0 - 0)          | 0<br>(0 - 0)           | 74<br>(24 - 95)         | 33<br>(22 - 49)         | 24<br>(16 - 32)          |
| Schizophrenia                                       | 11<br>(8 - 14)           | --                    | --                     | 2<br>(2 - 3)            | 4<br>(3 - 6)            | 4<br>(3 - 6)             |
| Alcohol use disorders                               | 50<br>(30 - 77)          | --                    | --                     | 9<br>(6 - 14)           | 25<br>(14 - 41)         | 16<br>(8 - 23)           |
| Drug use disorders                                  | 71<br>(17 - 91)          | 0<br>(0 - 0)          | --                     | 62<br>(12 - 82)         | 4<br>(2 - 5)            | 4<br>(3 - 6)             |
| Opioid use disorders                                | 7<br>(2 - 9)             | 0<br>(0 - 0)          | --                     | 6<br>(1 - 8)            | 0<br>(0 - 0)            | 0<br>(0 - 1)             |
| Cocaine use disorders                               | 2<br>(0 - 2)             | 0<br>(0 - 0)          | --                     | 1<br>(0 - 2)            | 0<br>(0 - 0)            | 0<br>(0 - 0)             |
| Amphetamine use disorders                           | 1<br>(0 - 1)             | 0<br>(0 - 0)          | --                     | 1<br>(0 - 1)            | 0<br>(0 - 0)            | 0<br>(0 - 0)             |
| Other drug use disorders                            | 61<br>(15 - 79)          | 0<br>(0 - 0)          | --                     | 54<br>(10 - 71)         | 3<br>(2 - 4)            | 4<br>(2 - 5)             |
| Eating disorders                                    | 0<br>(0 - 0)             | --                    | 0<br>(0 - 0)           | 0<br>(0 - 0)            | --                      | --                       |
| Anorexia nervosa                                    | 0<br>(0 - 0)             | --                    | 0<br>(0 - 0)           | 0<br>(0 - 0)            | --                      | --                       |
| Diabetes, urogenital, blood, and endocrine diseases | 1,880<br>(1,612 - 2,166) | 9<br>(5 - 15)         | 4<br>(3 - 6)           | 78<br>(65 - 97)         | 371<br>(321 - 431)      | 1,419<br>(1,198 - 1,641) |
| Diabetes mellitus                                   | 780<br>(676 - 891)       | 0<br>(0 - 0)          | 0<br>(0 - 1)           | 21<br>(18 - 26)         | 184<br>(157 - 214)      | 575<br>(489 - 676)       |

Web Table 31- Uruguay deaths with 95% UI by age, sex, and cause in 2013

| Cause                                               | Both Sexes, All Ages     | Both Sexes, 0-4 Years | Both Sexes, 5-14 Years | Both Sexes, 15-49 Years | Both Sexes, 50-69 Years | Both Sexes, 70-80 Years |
|-----------------------------------------------------|--------------------------|-----------------------|------------------------|-------------------------|-------------------------|-------------------------|
| Acute glomerulonephritis                            | 1<br>(0 - 1)             | 0<br>(0 - 0)          | 0<br>(0 - 0)           | 0<br>(0 - 0)            | 0<br>(0 - 0)            | 0<br>(0 - 0)            |
| Chronic kidney disease                              | 652<br>(531 - 862)       | 2<br>(1 - 3)          | 1<br>(1 - 2)           | 28<br>(22 - 40)         | 115<br>(91 - 158)       | 506<br>(407 - 664)      |
| Chronic kidney disease due to diabetes mellitus     | 110<br>(81 - 199)        | 0<br>(0 - 0)          | 0<br>(0 - 0)           | 5<br>(4 - 9)            | 36<br>(25 - 61)         | 69<br>(46 - 130)        |
| Chronic kidney disease due to hypertension          | 209<br>(127 - 287)       | 0<br>(0 - 0)          | 0<br>(0 - 0)           | 6<br>(4 - 8)            | 24<br>(14 - 35)         | 179<br>(109 - 246)      |
| Chronic kidney disease due to glomerulonephritis    | 11<br>(8 - 16)           | 0<br>(0 - 0)          | 0<br>(0 - 0)           | 1<br>(1 - 2)            | 2<br>(1 - 3)            | 7<br>(5 - 11)           |
| Chronic kidney disease due to other causes          | 322<br>(227 - 465)       | 1<br>(0 - 2)          | 1<br>(1 - 1)           | 16<br>(12 - 25)         | 53<br>(34 - 80)         | 251<br>(169 - 373)      |
| Urinary diseases and male infertility               | 271<br>(108 - 371)       | 1<br>(0 - 1)          | 0<br>(0 - 0)           | 8<br>(4 - 10)           | 34<br>(15 - 45)         | 228<br>(86 - 322)       |
| Interstitial nephritis and urinary tract infections | 245<br>(92 - 346)        | 1<br>(0 - 1)          | 0<br>(0 - 0)           | 7<br>(3 - 9)            | 27<br>(11 - 38)         | 211<br>(74 - 305)       |
| Urolithiasis                                        | 4<br>(2 - 8)             | --                    | 0<br>(0 - 0)           | 0<br>(0 - 1)            | 1<br>(1 - 2)            | 2<br>(1 - 5)            |
| Other urinary diseases                              | 21<br>(11 - 43)          | 0<br>(0 - 0)          | 0<br>(0 - 0)           | 1<br>(0 - 2)            | 5<br>(3 - 10)           | 15<br>(7 - 32)          |
| Gynecological diseases                              | 1<br>(0 - 2)             | --                    | --                     | 0<br>(0 - 1)            | 0<br>(0 - 0)            | 0<br>(0 - 1)            |
| Uterine fibroids                                    | 0<br>(0 - 0)             | --                    | --                     | 0<br>(0 - 0)            | 0<br>(0 - 0)            | 0<br>(0 - 0)            |
| Polycystic ovarian syndrome                         | 0<br>(0 - 0)             | --                    | --                     | 0<br>(0 - 0)            | 0<br>(0 - 0)            | --                      |
| Endometriosis                                       | 0<br>(0 - 0)             | --                    | --                     | 0<br>(0 - 0)            | 0<br>(0 - 0)            | --                      |
| Genital prolapse                                    | 0<br>(0 - 0)             | --                    | --                     | 0<br>(0 - 0)            | 0<br>(0 - 0)            | 0<br>(0 - 0)            |
| Other gynecological diseases                        | 0<br>(0 - 1)             | --                    | --                     | 0<br>(0 - 0)            | 0<br>(0 - 0)            | 0<br>(0 - 0)            |
| Hemoglobinopathies and hemolytic anemias            | 33<br>(20 - 46)          | 2<br>(1 - 3)          | 1<br>(1 - 2)           | 5<br>(3 - 7)            | 7<br>(4 - 10)           | 19<br>(11 - 27)         |
| Thalassemias                                        | 2<br>(1 - 3)             | 0<br>(0 - 1)          | 0<br>(0 - 0)           | 1<br>(1 - 1)            | 0<br>(0 - 0)            | 0<br>(0 - 0)            |
| Sickle cell disorders                               | 2<br>(1 - 3)             | 0<br>(0 - 1)          | 0<br>(0 - 0)           | 1<br>(0 - 1)            | 0<br>(0 - 0)            | 0<br>(0 - 0)            |
| G6PD deficiency                                     | 1<br>(0 - 1)             | 0<br>(0 - 0)          | 0<br>(0 - 0)           | 0<br>(0 - 0)            | 0<br>(0 - 0)            | 0<br>(0 - 0)            |
| Other hemoglobinopathies and hemolytic anemias      | 29<br>(17 - 40)          | 1<br>(0 - 1)          | 0<br>(0 - 1)           | 3<br>(2 - 4)            | 7<br>(4 - 9)            | 18<br>(10 - 27)         |
| Endocrine, metabolic, blood, and immune disorders   | 143<br>(109 - 243)       | 5<br>(3 - 10)         | 1<br>(1 - 2)           | 15<br>(11 - 26)         | 30<br>(23 - 50)         | 91<br>(64 - 163)        |
| Musculoskeletal disorders                           | 78<br>(47 - 95)          | --                    | 1<br>(1 - 1)           | 10<br>(7 - 13)          | 24<br>(14 - 30)         | 43<br>(24 - 56)         |
| Rheumatoid arthritis                                | 29<br>(14 - 37)          | --                    | 0<br>(0 - 0)           | 1<br>(1 - 2)            | 9<br>(4 - 12)           | 18<br>(8 - 25)          |
| Other musculoskeletal disorders                     | 49<br>(32 - 61)          | --                    | 1<br>(0 - 1)           | 9<br>(6 - 11)           | 15<br>(9 - 19)          | 25<br>(15 - 34)         |
| Other non-communicable diseases                     | 416<br>(300 - 524)       | 173<br>(108 - 267)    | 10<br>(7 - 14)         | 35<br>(29 - 43)         | 39<br>(24 - 47)         | 159<br>(58 - 218)       |
| Congenital anomalies                                | 218<br>(154 - 308)       | 152<br>(93 - 240)     | 10<br>(7 - 14)         | 30<br>(24 - 38)         | 17<br>(14 - 21)         | 10<br>(8 - 13)          |
| Neural tube defects                                 | 8<br>(5 - 12)            | 6<br>(3 - 11)         | 1<br>(0 - 1)           | 1<br>(1 - 1)            | 0<br>(0 - 0)            | 0<br>(0 - 0)            |
| Congenital heart anomalies                          | 86<br>(60 - 123)         | 58<br>(35 - 91)       | 6<br>(4 - 8)           | 15<br>(12 - 19)         | 5<br>(4 - 7)            | 2<br>(1 - 3)            |
| Cleft lip and cleft palate                          | 0<br>(0 - 0)             | 0<br>(0 - 0)          | --                     | --                      | --                      | --                      |
| Down syndrome                                       | 24<br>(17 - 33)          | 9<br>(5 - 15)         | 1<br>(0 - 1)           | 7<br>(5 - 10)           | 7<br>(5 - 9)            | 0<br>(0 - 0)            |
| Chromosomal unbalanced rearrangements               | 6<br>(3 - 10)            | 5<br>(3 - 9)          | 0<br>(0 - 0)           | 0<br>(0 - 0)            | 0<br>(0 - 0)            | 0<br>(0 - 0)            |
| Other congenital anomalies                          | 95<br>(63 - 141)         | 73<br>(44 - 117)      | 3<br>(2 - 4)           | 7<br>(5 - 9)            | 4<br>(3 - 6)            | 8<br>(6 - 10)           |
| Skin and subcutaneous diseases                      | 179<br>(58 - 239)        | 2<br>(1 - 3)          | 0<br>(0 - 0)           | 5<br>(2 - 7)            | 22<br>(8 - 28)          | 149<br>(48 - 207)       |
| Cellulitis                                          | 16<br>(6 - 28)           | 0<br>(0 - 1)          | 0<br>(0 - 0)           | 1<br>(1 - 2)            | 5<br>(2 - 9)            | 9<br>(3 - 18)           |
| Pyoderma                                            | 30<br>(10 - 43)          | 1<br>(0 - 2)          | 0<br>(0 - 0)           | 2<br>(1 - 3)            | 7<br>(2 - 9)            | 21<br>(6 - 32)          |
| Decubitus ulcer                                     | 129<br>(39 - 177)        | 0<br>(0 - 0)          | 0<br>(0 - 0)           | 1<br>(0 - 2)            | 10<br>(3 - 13)          | 118<br>(35 - 166)       |
| Other skin and subcutaneous diseases                | 3<br>(1 - 7)             | 0<br>(0 - 1)          | 0<br>(0 - 0)           | 1<br>(0 - 1)            | 1<br>(0 - 1)            | 2<br>(1 - 5)            |
| Sudden infant death syndrome                        | 19<br>(9 - 38)           | 19<br>(9 - 38)        | --                     | --                      | --                      | --                      |
| Injuries                                            | 2,203<br>(1,880 - 2,467) | 50<br>(31 - 74)       | 44<br>(33 - 57)        | 806<br>(700 - 914)      | 502<br>(412 - 574)      | 802<br>(632 - 933)      |



Web Table 31- Uruguay deaths with 95% UI by age, sex, and cause in 2013

| Cause                                           | Both Sexes, All Ages | Both Sexes, 0-4 Years | Both Sexes, 5-14 Years | Both Sexes, 15-49 Years | Both Sexes, 50-69 Years | Both Sexes, 70-80 Years |
|-------------------------------------------------|----------------------|-----------------------|------------------------|-------------------------|-------------------------|-------------------------|
| Transport injuries                              | 601<br>(481 - 686)   | 6<br>(4 - 10)         | 19<br>(14 - 26)        | 267<br>(224 - 311)      | 157<br>(112 - 188)      | 151<br>(109 - 181)      |
| Road injuries                                   | 570<br>(462 - 650)   | 6<br>(3 - 10)         | 18<br>(13 - 25)        | 254<br>(212 - 297)      | 147<br>(107 - 175)      | 145<br>(105 - 173)      |
| Pedestrian road injuries                        | 158<br>(118 - 195)   | 2<br>(1 - 3)          | 5<br>(4 - 8)           | 47<br>(35 - 62)         | 34<br>(23 - 45)         | 70<br>(49 - 88)         |
| Cyclist road injuries                           | 41<br>(31 - 50)      | 1<br>(0 - 1)          | 3<br>(2 - 4)           | 15<br>(11 - 19)         | 11<br>(8 - 15)          | 11<br>(8 - 15)          |
| Motorcyclist road injuries                      | 70<br>(49 - 92)      | 0<br>(0 - 1)          | 1<br>(1 - 2)           | 50<br>(34 - 67)         | 11<br>(7 - 15)          | 8<br>(5 - 11)           |
| Motor vehicle road injuries                     | 296<br>(232 - 344)   | 4<br>(2 - 6)          | 9<br>(7 - 13)          | 139<br>(113 - 167)      | 89<br>(64 - 108)        | 55<br>(38 - 69)         |
| Other road injuries                             | 5<br>(4 - 9)         | 0<br>(0 - 0)          | 0<br>(0 - 0)           | 2<br>(1 - 5)            | 1<br>(1 - 3)            | 1<br>(1 - 2)            |
| Other transport injuries                        | 31<br>(18 - 40)      | 0<br>(0 - 1)          | 1<br>(1 - 1)           | 13<br>(8 - 17)          | 11<br>(5 - 15)          | 6<br>(3 - 9)            |
| Unintentional injuries                          | 921<br>(772 - 1,058) | 42<br>(26 - 62)       | 19<br>(13 - 27)        | 194<br>(163 - 245)      | 150<br>(128 - 175)      | 517<br>(387 - 630)      |
| Falls                                           | 301<br>(206 - 396)   | 1<br>(1 - 2)          | 1<br>(1 - 2)           | 16<br>(13 - 22)         | 21<br>(16 - 26)         | 262<br>(167 - 359)      |
| Drowning                                        | 104<br>(81 - 167)    | 4<br>(2 - 9)          | 9<br>(6 - 17)          | 55<br>(41 - 91)         | 21<br>(16 - 33)         | 15<br>(11 - 22)         |
| Fire, heat, and hot substances                  | 64<br>(43 - 82)      | 4<br>(2 - 7)          | 2<br>(1 - 3)           | 12<br>(8 - 16)          | 14<br>(9 - 19)          | 32<br>(20 - 44)         |
| Poisonings                                      | 27<br>(20 - 37)      | 1<br>(0 - 1)          | 1<br>(0 - 1)           | 7<br>(6 - 11)           | 8<br>(5 - 10)           | 11<br>(7 - 16)          |
| Exposure to mechanical forces                   | 136<br>(111 - 182)   | 1<br>(1 - 3)          | 3<br>(2 - 5)           | 70<br>(55 - 98)         | 30<br>(23 - 42)         | 31<br>(22 - 44)         |
| Unintentional firearm injuries                  | 112<br>(88 - 138)    | 0<br>(0 - 1)          | 2<br>(1 - 3)           | 59<br>(46 - 75)         | 24<br>(17 - 33)         | 26<br>(17 - 39)         |
| Unintentional suffocation                       | 11<br>(8 - 18)       | 1<br>(0 - 1)          | 0<br>(0 - 1)           | 3<br>(2 - 6)            | 3<br>(2 - 5)            | 3<br>(2 - 6)            |
| Other exposure to mechanical forces             | 14<br>(9 - 45)       | 0<br>(0 - 1)          | 1<br>(0 - 2)           | 8<br>(5 - 29)           | 3<br>(2 - 10)           | 1<br>(1 - 5)            |
| Adverse effects of medical treatment            | 102<br>(80 - 129)    | 1<br>(1 - 3)          | 0<br>(0 - 1)           | 9<br>(7 - 13)           | 25<br>(19 - 35)         | 66<br>(48 - 86)         |
| Animal contact                                  | 4<br>(2 - 5)         | 0<br>(0 - 0)          | 0<br>(0 - 0)           | 1<br>(1 - 1)            | 1<br>(0 - 1)            | 2<br>(0 - 3)            |
| Venomous animal contact                         | 2<br>(1 - 2)         | 0<br>(0 - 0)          | 0<br>(0 - 0)           | 0<br>(0 - 0)            | 0<br>(0 - 0)            | 1<br>(0 - 1)            |
| Non-venomous animal contact                     | 2<br>(1 - 3)         | 0<br>(0 - 0)          | 0<br>(0 - 0)           | 1<br>(0 - 1)            | 1<br>(0 - 1)            | 1<br>(0 - 1)            |
| Foreign body                                    | 159<br>(90 - 215)    | 28<br>(15 - 44)       | 1<br>(1 - 2)           | 13<br>(7 - 17)          | 22<br>(13 - 30)         | 95<br>(49 - 140)        |
| Pulmonary aspiration and foreign body in airway | 158<br>(89 - 214)    | 28<br>(15 - 44)       | 1<br>(1 - 2)           | 13<br>(7 - 17)          | 22<br>(13 - 30)         | 95<br>(49 - 140)        |
| Foreign body in other body part                 | 1<br>(0 - 1)         | 0<br>(0 - 0)          | 0<br>(0 - 0)           | 0<br>(0 - 0)            | 0<br>(0 - 0)            | 0<br>(0 - 0)            |
| Other unintentional injuries                    | 25<br>(19 - 32)      | 1<br>(0 - 1)          | 1<br>(0 - 2)           | 11<br>(7 - 16)          | 7<br>(4 - 11)           | 6<br>(4 - 9)            |
| Self-harm and interpersonal violence            | 681<br>(500 - 787)   | 2<br>(1 - 3)          | 6<br>(4 - 8)           | 345<br>(259 - 408)      | 195<br>(138 - 233)      | 133<br>(98 - 162)       |
| Self-harm                                       | 534<br>(372 - 623)   | --                    | 3<br>(2 - 5)           | 243<br>(162 - 295)      | 165<br>(113 - 198)      | 122<br>(88 - 148)       |
| Interpersonal violence                          | 147<br>(93 - 190)    | 2<br>(1 - 3)          | 2<br>(1 - 4)           | 102<br>(62 - 134)       | 30<br>(17 - 43)         | 11<br>(7 - 18)          |
| Assault by firearm                              | 82<br>(51 - 116)     | 0<br>(0 - 1)          | 1<br>(1 - 2)           | 61<br>(37 - 90)         | 16<br>(9 - 25)          | 3<br>(2 - 5)            |
| Assault by sharp object                         | 47<br>(23 - 72)      | 0<br>(0 - 1)          | 0<br>(0 - 1)           | 34<br>(16 - 53)         | 9<br>(4 - 16)           | 3<br>(2 - 6)            |
| Assault by other means                          | 18<br>(10 - 26)      | 1<br>(0 - 2)          | 1<br>(0 - 1)           | 7<br>(3 - 10)           | 5<br>(2 - 8)            | 5<br>(3 - 9)            |

Web Table 31- Uruguay deaths with 95% UI by age, sex, and cause in 2013

| Cause                                                             | Males, All Ages             | Males, 0-4 Years   | Males, 5-14 Years | Males, 15-49 Years       | Males, 50-69 Years       | Males, 70-80 Years         |
|-------------------------------------------------------------------|-----------------------------|--------------------|-------------------|--------------------------|--------------------------|----------------------------|
| All causes                                                        | 17,069<br>(15,436 - 18,810) | 306<br>(194 - 471) | 60<br>(45 - 80)   | 1,487<br>(1,274 - 1,717) | 4,720<br>(4,075 - 5,376) | 10,495<br>(9,676 - 11,305) |
| Communicable, maternal, neonatal, and nutritional diseases        | 1,159<br>(863 - 1,441)      | 164<br>(101 - 256) | 5<br>(3 - 7)      | 133<br>(99 - 197)        | 203<br>(143 - 271)       | 654<br>(442 - 878)         |
| HIV/AIDS and tuberculosis                                         | 149<br>(100 - 267)          | 0<br>(0 - 0)       | 0<br>(0 - 0)      | 83<br>(53 - 151)         | 42<br>(24 - 89)          | 23<br>(14 - 36)            |
| Tuberculosis                                                      | 42<br>(34 - 53)             | 0<br>(0 - 0)       | 0<br>(0 - 0)      | 6<br>(5 - 8)             | 17<br>(13 - 21)          | 19<br>(14 - 26)            |
| HIV/AIDS                                                          | 107<br>(58 - 227)           | 0<br>(0 - 0)       | 0<br>(0 - 0)      | 77<br>(47 - 144)         | 25<br>(8 - 73)           | 5<br>(1 - 16)              |
| HIV/AIDS resulting in mycobacterial infection                     | 6<br>(3 - 14)               | 0<br>(0 - 0)       | 0<br>(0 - 0)      | 5<br>(3 - 9)             | 2<br>(1 - 5)             | 0<br>(0 - 1)               |
| HIV/AIDS resulting in other diseases                              | 100<br>(55 - 215)           | 0<br>(0 - 0)       | 0<br>(0 - 0)      | 73<br>(44 - 136)         | 23<br>(8 - 69)           | 4<br>(1 - 15)              |
| Diarrhea, lower respiratory, and other common infectious diseases | 787<br>(515 - 1,032)        | 42<br>(24 - 64)    | 4<br>(3 - 6)      | 41<br>(29 - 53)          | 138<br>(83 - 184)        | 562<br>(350 - 783)         |
| Diarrheal diseases                                                | 37<br>(26 - 53)             | 7<br>(3 - 12)      | 0<br>(0 - 0)      | 2<br>(1 - 2)             | 5<br>(4 - 8)             | 23<br>(14 - 38)            |
| Intestinal infectious diseases                                    | 1<br>(0 - 2)                | 0<br>(0 - 1)       | 0<br>(0 - 0)      | 0<br>(0 - 1)             | 0<br>(0 - 0)             | 0<br>(0 - 1)               |
| Typhoid fever                                                     | 0<br>(0 - 1)                | 0<br>(0 - 0)       | 0<br>(0 - 0)      | 0<br>(0 - 0)             | 0<br>(0 - 0)             | 0<br>(0 - 0)               |
| Paratyphoid fever                                                 | 0<br>(0 - 0)                | 0<br>(0 - 0)       | 0<br>(0 - 0)      | 0<br>(0 - 0)             | 0<br>(0 - 0)             | 0<br>(0 - 0)               |
| Other intestinal infectious diseases                              | 0<br>(0 - 2)                | 0<br>(0 - 1)       | 0<br>(0 - 0)      | 0<br>(0 - 1)             | 0<br>(0 - 0)             | 0<br>(0 - 1)               |
| Lower respiratory infections                                      | 709<br>(435 - 951)          | 28<br>(15 - 45)    | 2<br>(1 - 3)      | 32<br>(20 - 43)          | 122<br>(68 - 166)        | 525<br>(314 - 741)         |
| Upper respiratory infections                                      | 1<br>(0 - 1)                | 0<br>(0 - 0)       | 0<br>(0 - 0)      | 0<br>(0 - 0)             | 0<br>(0 - 1)             | 0<br>(0 - 1)               |
| Otitis media                                                      | 0<br>(0 - 1)                | 0<br>(0 - 0)       | 0<br>(0 - 0)      | 0<br>(0 - 0)             | 0<br>(0 - 0)             | 0<br>(0 - 0)               |
| Meningitis                                                        | 15<br>(12 - 19)             | 3<br>(1 - 6)       | 0<br>(0 - 1)      | 2<br>(2 - 3)             | 4<br>(3 - 6)             | 5<br>(4 - 8)               |
| Pneumococcal meningitis                                           | 3<br>(2 - 4)                | 1<br>(0 - 1)       | 0<br>(0 - 0)      | 0<br>(0 - 1)             | 1<br>(0 - 1)             | 1<br>(1 - 2)               |
| H influenzae type B meningitis                                    | 2<br>(1 - 2)                | 1<br>(0 - 1)       | 0<br>(0 - 0)      | 0<br>(0 - 0)             | 0<br>(0 - 0)             | 0<br>(0 - 1)               |
| Meningococcal meningitis                                          | 5<br>(4 - 7)                | 1<br>(0 - 2)       | 0<br>(0 - 0)      | 1<br>(1 - 1)             | 1<br>(1 - 2)             | 2<br>(1 - 3)               |
| Other meningitis                                                  | 5<br>(3 - 6)                | 1<br>(0 - 1)       | 0<br>(0 - 0)      | 1<br>(0 - 1)             | 1<br>(1 - 2)             | 2<br>(1 - 3)               |
| Encephalitis                                                      | 23<br>(14 - 30)             | 4<br>(2 - 7)       | 1<br>(1 - 2)      | 5<br>(2 - 6)             | 6<br>(3 - 8)             | 7<br>(3 - 11)              |
| Diphtheria                                                        | 0<br>(0 - 0)                | 0<br>(0 - 0)       | 0<br>(0 - 0)      | 0<br>(0 - 0)             | 0<br>(0 - 0)             | 0<br>(0 - 0)               |
| Whooping cough                                                    | 0<br>(0 - 0)                | 0<br>(0 - 0)       | 0<br>(0 - 0)      | 0<br>(0 - 0)             | 0<br>(0 - 0)             | 0<br>(0 - 0)               |
| Tetanus                                                           | 0<br>(0 - 1)                | 0<br>(0 - 0)       | 0<br>(0 - 0)      | 0<br>(0 - 0)             | 0<br>(0 - 0)             | 0<br>(0 - 0)               |
| Measles                                                           | 0<br>(0 - 0)                | 0<br>(0 - 0)       | 0<br>(0 - 0)      | 0<br>(0 - 0)             | 0<br>(0 - 0)             | 0<br>(0 - 0)               |
| Varicella and herpes zoster                                       | 1<br>(0 - 4)                | 0<br>(0 - 1)       | 0<br>(0 - 0)      | 0<br>(0 - 0)             | 0<br>(0 - 0)             | 1<br>(0 - 3)               |
| Neglected tropical diseases and malaria                           | 11<br>(6 - 35)              | 0<br>(0 - 0)       | 0<br>(0 - 0)      | 2<br>(1 - 4)             | 5<br>(2 - 19)            | 4<br>(2 - 14)              |
| Chagas disease                                                    | 7<br>(2 - 31)               | 0<br>(0 - 0)       | 0<br>(0 - 0)      | 1<br>(0 - 2)             | 4<br>(1 - 17)            | 3<br>(1 - 13)              |
| Leishmaniasis                                                     | 0<br>(0 - 0)                | 0<br>(0 - 0)       | 0<br>(0 - 0)      | 0<br>(0 - 0)             | 0<br>(0 - 0)             | 0<br>(0 - 0)               |
| Visceral leishmaniasis                                            | 0<br>(0 - 0)                | 0<br>(0 - 0)       | 0<br>(0 - 0)      | 0<br>(0 - 0)             | 0<br>(0 - 0)             | 0<br>(0 - 0)               |
| Cysticercosis                                                     | 0<br>(0 - 0)                | 0<br>(0 - 0)       | 0<br>(0 - 0)      | 0<br>(0 - 0)             | 0<br>(0 - 0)             | 0<br>(0 - 0)               |
| Cystic echinococcosis                                             | 2<br>(2 - 3)                | 0<br>(0 - 0)       | 0<br>(0 - 0)      | 1<br>(1 - 1)             | 1<br>(1 - 1)             | 1<br>(1 - 1)               |
| Dengue                                                            | 0<br>(0 - 1)                | 0<br>(0 - 0)       | 0<br>(0 - 0)      | 0<br>(0 - 0)             | 0<br>(0 - 0)             | 0<br>(0 - 0)               |
| Rabies                                                            | 0<br>(0 - 0)                | 0<br>(0 - 0)       | 0<br>(0 - 0)      | 0<br>(0 - 0)             | 0<br>(0 - 0)             | 0<br>(0 - 0)               |
| Other neglected tropical diseases                                 | 1<br>(1 - 2)                | 0<br>(0 - 0)       | 0<br>(0 - 0)      | 0<br>(0 - 0)             | 0<br>(0 - 0)             | 1<br>(0 - 1)               |
| Maternal disorders                                                | --                          | --                 | --                | --                       | --                       | --                         |
| Maternal hemorrhage                                               | --                          | --                 | --                | --                       | --                       | --                         |
| Maternal sepsis and other maternal infections                     | --                          | --                 | --                | --                       | --                       | --                         |
| Maternal hypertensive disorders                                   | --                          | --                 | --                | --                       | --                       | --                         |

Web Table 31- Uruguay deaths with 95% UI by age, sex, and cause in 2013

| Cause                                                            | Males, All Ages             | Males, 0-4 Years  | Males, 5-14 Years | Males, 15-49 Years | Males, 50-69 Years       | Males, 70-80 Years        |
|------------------------------------------------------------------|-----------------------------|-------------------|-------------------|--------------------|--------------------------|---------------------------|
| Maternal obstructed labor                                        | --                          | --                | --                | --                 | --                       | --                        |
| Maternal abortive outcome                                        | --                          | --                | --                | --                 | --                       | --                        |
| Indirect maternal deaths                                         | --                          | --                | --                | --                 | --                       | --                        |
| Late maternal deaths                                             | --                          | --                | --                | --                 | --                       | --                        |
| Maternal deaths aggravated by HIV/AIDS                           | --                          | --                | --                | --                 | --                       | --                        |
| Other maternal disorders                                         | --                          | --                | --                | --                 | --                       | --                        |
| Neonatal disorders                                               | 113<br>(70 - 183)           | 113<br>(70 - 183) | --                | --                 | --                       | --                        |
| Neonatal preterm birth complications                             | 54<br>(29 - 92)             | 54<br>(29 - 92)   | --                | --                 | --                       | --                        |
| Neonatal encephalopathy due to birth asphyxia and trauma         | 17<br>(9 - 31)              | 17<br>(9 - 31)    | --                | --                 | --                       | --                        |
| Neonatal sepsis and other neonatal infections                    | 23<br>(10 - 45)             | 23<br>(10 - 45)   | --                | --                 | --                       | --                        |
| Hemolytic disease and other neonatal jaundice                    | 0<br>(0 - 1)                | 0<br>(0 - 1)      | --                | --                 | --                       | --                        |
| Other neonatal disorders                                         | 19<br>(9 - 34)              | 19<br>(9 - 34)    | --                | --                 | --                       | --                        |
| Nutritional deficiencies                                         | 78<br>(48 - 117)            | 6<br>(3 - 13)     | 0<br>(0 - 1)      | 4<br>(3 - 7)       | 13<br>(8 - 20)           | 55<br>(30 - 82)           |
| Protein-energy malnutrition                                      | 38<br>(19 - 59)             | 5<br>(2 - 12)     | 0<br>(0 - 0)      | 2<br>(1 - 3)       | 7<br>(3 - 11)            | 25<br>(9 - 40)            |
| Iodine deficiency                                                | 0<br>(0 - 0)                | 0<br>(0 - 0)      | 0<br>(0 - 0)      | 0<br>(0 - 0)       | 0<br>(0 - 0)             | 0<br>(0 - 0)              |
| Iron-deficiency anemia                                           | 24<br>(11 - 44)             | 0<br>(0 - 0)      | 0<br>(0 - 0)      | 1<br>(1 - 2)       | 4<br>(2 - 8)             | 19<br>(9 - 35)            |
| Other nutritional deficiencies                                   | 16<br>(7 - 30)              | 0<br>(0 - 1)      | 0<br>(0 - 1)      | 1<br>(1 - 2)       | 2<br>(1 - 4)             | 12<br>(5 - 23)            |
| Other communicable, maternal, neonatal, and nutritional diseases | 21<br>(16 - 30)             | 3<br>(1 - 5)      | 0<br>(0 - 1)      | 2<br>(2 - 3)       | 6<br>(5 - 9)             | 9<br>(7 - 15)             |
| Sexually transmitted diseases excluding HIV                      | 3<br>(1 - 7)                | 2<br>(1 - 5)      | 0<br>(0 - 0)      | 0<br>(0 - 1)       | 0<br>(0 - 1)             | 0<br>(0 - 2)              |
| Syphilis                                                         | 3<br>(1 - 6)                | 2<br>(1 - 5)      | 0<br>(0 - 0)      | 0<br>(0 - 0)       | 0<br>(0 - 1)             | 0<br>(0 - 1)              |
| Chlamydial infection                                             | --                          | --                | --                | --                 | --                       | --                        |
| Gonococcal infection                                             | 0<br>(0 - 1)                | --                | 0<br>(0 - 0)      | 0<br>(0 - 0)       | 0<br>(0 - 0)             | 0<br>(0 - 0)              |
| Other sexually transmitted diseases                              | 0<br>(0 - 0)                | --                | 0<br>(0 - 0)      | 0<br>(0 - 0)       | 0<br>(0 - 0)             | 0<br>(0 - 0)              |
| Hepatitis                                                        | 4<br>(3 - 6)                | 0<br>(0 - 0)      | 0<br>(0 - 0)      | 1<br>(1 - 1)       | 2<br>(1 - 2)             | 2<br>(1 - 2)              |
| Acute hepatitis A                                                | 2<br>(1 - 3)                | 0<br>(0 - 0)      | 0<br>(0 - 0)      | 1<br>(0 - 1)       | 1<br>(0 - 1)             | 0<br>(0 - 1)              |
| Acute hepatitis B                                                | 3<br>(1 - 4)                | 0<br>(0 - 0)      | 0<br>(0 - 0)      | 0<br>(0 - 1)       | 1<br>(0 - 2)             | 1<br>(1 - 2)              |
| Acute hepatitis C                                                | 0<br>(0 - 0)                | --                | 0<br>(0 - 0)      | 0<br>(0 - 0)       | 0<br>(0 - 0)             | 0<br>(0 - 0)              |
| Other infectious diseases                                        | 13<br>(9 - 21)              | 0<br>(0 - 1)      | 0<br>(0 - 0)      | 1<br>(1 - 2)       | 4<br>(3 - 7)             | 7<br>(5 - 13)             |
| Non-communicable diseases                                        | 14,426<br>(13,086 - 15,865) | 113<br>(70 - 176) | 25<br>(18 - 34)   | 702<br>(593 - 825) | 4,135<br>(3,585 - 4,717) | 9,451<br>(8,744 - 10,185) |
| Neoplasms                                                        | 4,897<br>(4,338 - 5,547)    | 6<br>(3 - 10)     | 12<br>(9 - 17)    | 272<br>(229 - 322) | 1,855<br>(1,617 - 2,145) | 2,753<br>(2,437 - 3,107)  |
| Esophageal cancer                                                | 228<br>(177 - 322)          | --                | --                | 10<br>(7 - 16)     | 99<br>(74 - 145)         | 119<br>(89 - 171)         |
| Stomach cancer                                                   | 418<br>(350 - 495)          | --                | --                | 21<br>(16 - 27)    | 153<br>(124 - 189)       | 243<br>(196 - 305)        |
| Liver cancer                                                     | 89<br>(73 - 110)            | --                | 0<br>(0 - 0)      | 4<br>(3 - 5)       | 38<br>(29 - 50)          | 47<br>(35 - 62)           |
| Liver cancer due to hepatitis B                                  | 11<br>(5 - 17)              | --                | 0<br>(0 - 0)      | 1<br>(1 - 2)       | 5<br>(2 - 9)             | 4<br>(2 - 7)              |
| Liver cancer due to hepatitis C                                  | 48<br>(34 - 64)             | --                | 0<br>(0 - 0)      | 2<br>(1 - 3)       | 21<br>(14 - 30)          | 26<br>(17 - 35)           |
| Liver cancer due to alcohol use                                  | 26<br>(16 - 37)             | --                | --                | 1<br>(0 - 1)       | 10<br>(6 - 16)           | 15<br>(9 - 23)            |
| Liver cancer due to other causes                                 | 5<br>(3 - 7)                | --                | 0<br>(0 - 0)      | 0<br>(0 - 1)       | 2<br>(1 - 4)             | 2<br>(1 - 3)              |
| Larynx cancer                                                    | 119<br>(91 - 169)           | --                | --                | 7<br>(5 - 11)      | 62<br>(45 - 93)          | 50<br>(37 - 69)           |
| Tracheal, bronchus and lung cancer                               | 1,153<br>(992 - 1,362)      | --                | --                | 54<br>(41 - 71)    | 581<br>(483 - 699)       | 519<br>(437 - 623)        |
| Breast cancer                                                    | 12<br>(8 - 20)              | --                | --                | 1<br>(1 - 2)       | 4<br>(2 - 7)             | 7<br>(4 - 12)             |

Web Table 31- Uruguay deaths with 95% UI by age, sex, and cause in 2013

| Cause                                         | Males, All Ages          | Males, 0-4 Years | Males, 5-14 Years | Males, 15-49 Years | Males, 50-69 Years       | Males, 70-80 Years       |
|-----------------------------------------------|--------------------------|------------------|-------------------|--------------------|--------------------------|--------------------------|
| Cervical cancer                               | --                       | --               | --                | --                 | --                       | --                       |
| Uterine cancer                                | --                       | --               | --                | --                 | --                       | --                       |
| Prostate cancer                               | 781<br>(524 - 1,121)     | --               | --                | 2<br>(1 - 4)       | 129<br>(81 - 194)        | 650<br>(427 - 943)       |
| Colon and rectum cancer                       | 585<br>(495 - 687)       | --               | --                | 25<br>(20 - 32)    | 188<br>(155 - 226)       | 372<br>(300 - 458)       |
| Lip and oral cavity cancer                    | 75<br>(55 - 105)         | --               | --                | 6<br>(4 - 10)      | 40<br>(28 - 55)          | 29<br>(20 - 43)          |
| Nasopharynx cancer                            | 19<br>(14 - 25)          | --               | 0<br>(0 - 0)      | 3<br>(2 - 5)       | 11<br>(8 - 16)           | 5<br>(3 - 7)             |
| Other pharynx cancer                          | 45<br>(34 - 58)          | --               | --                | 4<br>(2 - 5)       | 28<br>(20 - 38)          | 14<br>(9 - 19)           |
| Gallbladder and biliary tract cancer          | 95<br>(66 - 127)         | --               | --                | 3<br>(2 - 4)       | 34<br>(22 - 50)          | 58<br>(38 - 82)          |
| Pancreatic cancer                             | 256<br>(215 - 304)       | --               | --                | 12<br>(9 - 16)     | 112<br>(90 - 138)        | 132<br>(106 - 162)       |
| Malignant skin melanoma                       | 38<br>(21 - 63)          | --               | --                | 7<br>(4 - 12)      | 14<br>(8 - 24)           | 17<br>(9 - 29)           |
| Non-melanoma skin cancer                      | 18<br>(12 - 27)          | --               | --                | 0<br>(0 - 1)       | 2<br>(1 - 3)             | 15<br>(10 - 23)          |
| Ovarian cancer                                | --                       | --               | --                | --                 | --                       | --                       |
| Testicular cancer                             | 9<br>(3 - 15)            | --               | --                | 6<br>(2 - 10)      | 1<br>(0 - 3)             | 1<br>(0 - 3)             |
| Kidney cancer                                 | 170<br>(137 - 208)       | 0<br>(0 - 0)     | 0<br>(0 - 0)      | 12<br>(8 - 16)     | 79<br>(60 - 105)         | 79<br>(59 - 105)         |
| Bladder cancer                                | 191<br>(155 - 240)       | --               | --                | 3<br>(2 - 4)       | 55<br>(41 - 70)          | 134<br>(102 - 172)       |
| Brain and nervous system cancer               | 67<br>(23 - 93)          | 1<br>(0 - 1)     | 1<br>(0 - 2)      | 14<br>(5 - 20)     | 33<br>(11 - 48)          | 18<br>(6 - 28)           |
| Thyroid cancer                                | 12<br>(9 - 17)           | --               | 0<br>(0 - 0)      | 1<br>(1 - 2)       | 5<br>(4 - 8)             | 6<br>(4 - 9)             |
| Mesothelioma                                  | 7<br>(5 - 9)             | --               | --                | 1<br>(1 - 1)       | 3<br>(2 - 5)             | 2<br>(2 - 4)             |
| Hodgkin lymphoma                              | 9<br>(2 - 14)            | 0<br>(0 - 0)     | 0<br>(0 - 0)      | 3<br>(1 - 5)       | 3<br>(1 - 6)             | 2<br>(0 - 4)             |
| Non-Hodgkin lymphoma                          | 135<br>(94 - 167)        | 0<br>(0 - 1)     | 1<br>(1 - 2)      | 21<br>(15 - 28)    | 51<br>(36 - 67)          | 61<br>(39 - 82)          |
| Multiple myeloma                              | 53<br>(35 - 71)          | --               | --                | 3<br>(2 - 5)       | 22<br>(14 - 31)          | 28<br>(18 - 39)          |
| Leukemia                                      | 127<br>(107 - 150)       | 2<br>(1 - 3)     | 5<br>(3 - 8)      | 19<br>(15 - 25)    | 38<br>(31 - 47)          | 63<br>(50 - 78)          |
| Other neoplasms                               | 187<br>(126 - 225)       | 3<br>(1 - 6)     | 4<br>(2 - 6)      | 29<br>(22 - 38)    | 68<br>(45 - 88)          | 82<br>(49 - 107)         |
| Cardiovascular diseases                       | 4,767<br>(4,286 - 5,339) | 2<br>(1 - 4)     | 2<br>(1 - 2)      | 186<br>(154 - 224) | 1,326<br>(1,144 - 1,532) | 3,251<br>(2,916 - 3,646) |
| Rheumatic heart disease                       | 13<br>(8 - 18)           | 0<br>(0 - 0)     | 0<br>(0 - 0)      | 3<br>(2 - 4)       | 5<br>(3 - 7)             | 5<br>(3 - 8)             |
| Ischemic heart disease                        | 2,079<br>(1,742 - 2,676) | 0<br>(0 - 0)     | 0<br>(0 - 0)      | 79<br>(62 - 104)   | 666<br>(551 - 801)       | 1,333<br>(1,089 - 1,796) |
| Cerebrovascular disease                       | 1,727<br>(1,386 - 2,067) | 0<br>(0 - 1)     | 1<br>(0 - 1)      | 56<br>(43 - 74)    | 373<br>(280 - 475)       | 1,297<br>(1,026 - 1,550) |
| Ischemic stroke                               | 1,086<br>(862 - 1,384)   | 0<br>(0 - 0)     | 0<br>(0 - 0)      | 13<br>(9 - 21)     | 167<br>(121 - 232)       | 906<br>(717 - 1,138)     |
| Hemorrhagic stroke                            | 642<br>(400 - 835)       | 0<br>(0 - 1)     | 1<br>(0 - 1)      | 43<br>(31 - 58)    | 206<br>(129 - 275)       | 391<br>(223 - 532)       |
| Hypertensive heart disease                    | 142<br>(75 - 217)        | 0<br>(0 - 0)     | 0<br>(0 - 0)      | 4<br>(2 - 6)       | 34<br>(18 - 52)          | 103<br>(50 - 164)        |
| Cardiomyopathy and myocarditis                | 295<br>(224 - 402)       | 1<br>(0 - 1)     | 0<br>(0 - 1)      | 22<br>(16 - 30)    | 105<br>(78 - 143)        | 167<br>(118 - 234)       |
| Atrial fibrillation and flutter               | 46<br>(30 - 64)          | --               | --                | 0<br>(0 - 1)       | 9<br>(6 - 12)            | 37<br>(23 - 53)          |
| Aortic aneurysm                               | 149<br>(119 - 181)       | --               | --                | 5<br>(4 - 7)       | 52<br>(41 - 67)          | 91<br>(73 - 113)         |
| Peripheral vascular disease                   | 1<br>(1 - 1)             | --               | --                | 0<br>(0 - 0)       | 0<br>(0 - 0)             | 1<br>(0 - 1)             |
| Endocarditis                                  | 40<br>(23 - 58)          | 0<br>(0 - 1)     | 0<br>(0 - 0)      | 4<br>(3 - 6)       | 15<br>(9 - 23)           | 20<br>(11 - 31)          |
| Other cardiovascular and circulatory diseases | 274<br>(177 - 352)       | 1<br>(0 - 1)     | 0<br>(0 - 0)      | 12<br>(8 - 16)     | 66<br>(46 - 87)          | 195<br>(119 - 261)       |
| Chronic respiratory diseases                  | 1,404<br>(1,128 - 1,624) | 3<br>(1 - 5)     | 1<br>(0 - 1)      | 29<br>(23 - 39)    | 302<br>(232 - 366)       | 1,070<br>(846 - 1,252)   |
| Chronic obstructive pulmonary disease         | 1,251<br>(986 - 1,448)   | 2<br>(1 - 3)     | 0<br>(0 - 0)      | 18<br>(14 - 23)    | 260<br>(201 - 314)       | 971<br>(759 - 1,139)     |
| Pneumoconiosis                                | 13<br>(9 - 19)           | 0<br>(0 - 0)     | 0<br>(0 - 0)      | 2<br>(1 - 3)       | 3<br>(2 - 5)             | 8<br>(5 - 12)            |
| Silicosis                                     | 3<br>(2 - 4)             | 0<br>(0 - 0)     | 0<br>(0 - 0)      | 1<br>(0 - 1)       | 1<br>(0 - 1)             | 2<br>(1 - 3)             |

Web Table 31- Uruguay deaths with 95% UI by age, sex, and cause in 2013

| Cause                                               | Males, All Ages          | Males, 0-4 Years | Males, 5-14 Years | Males, 15-49 Years | Males, 50-69 Years | Males, 70-80 Years     |
|-----------------------------------------------------|--------------------------|------------------|-------------------|--------------------|--------------------|------------------------|
| Asbestosis                                          | 1<br>(0 - 1)             | 0<br>(0 - 0)     | 0<br>(0 - 0)      | 0<br>(0 - 0)       | 0<br>(0 - 0)       | 0<br>(0 - 1)           |
| Coal workers pneumoconiosis                         | 2<br>(1 - 3)             | 0<br>(0 - 0)     | 0<br>(0 - 0)      | 0<br>(0 - 1)       | 1<br>(1 - 2)       | 0<br>(0 - 0)           |
| Other pneumoconiosis                                | 8<br>(5 - 12)            | 0<br>(0 - 0)     | 0<br>(0 - 0)      | 1<br>(1 - 2)       | 1<br>(1 - 2)       | 6<br>(3 - 9)           |
| Asthma                                              | 46<br>(35 - 58)          | 0<br>(0 - 0)     | 0<br>(0 - 0)      | 6<br>(5 - 9)       | 17<br>(12 - 22)    | 23<br>(16 - 31)        |
| Interstitial lung disease and pulmonary sarcoidosis | 83<br>(51 - 121)         | 0<br>(0 - 0)     | 0<br>(0 - 0)      | 2<br>(1 - 3)       | 20<br>(11 - 29)    | 62<br>(37 - 93)        |
| Other chronic respiratory diseases                  | 11<br>(8 - 14)           | 1<br>(0 - 1)     | 0<br>(0 - 0)      | 2<br>(1 - 2)       | 2<br>(1 - 3)       | 6<br>(4 - 9)           |
| Cirrhosis                                           | 371<br>(319 - 428)       | 0<br>(0 - 0)     | 0<br>(0 - 0)      | 36<br>(28 - 45)    | 182<br>(152 - 219) | 152<br>(128 - 180)     |
| Cirrhosis due to hepatitis B                        | 27<br>(11 - 51)          | 0<br>(0 - 0)     | 0<br>(0 - 0)      | 2<br>(1 - 4)       | 13<br>(6 - 24)     | 11<br>(3 - 24)         |
| Cirrhosis due to hepatitis C                        | 146<br>(81 - 207)        | 0<br>(0 - 0)     | 0<br>(0 - 0)      | 15<br>(7 - 23)     | 72<br>(36 - 106)   | 59<br>(34 - 84)        |
| Cirrhosis due to alcohol use                        | 173<br>(120 - 256)       | --               | --                | 14<br>(8 - 23)     | 84<br>(54 - 127)   | 75<br>(52 - 106)       |
| Cirrhosis due to other causes                       | 26<br>(11 - 49)          | 0<br>(0 - 0)     | 0<br>(0 - 0)      | 5<br>(2 - 9)       | 14<br>(5 - 28)     | 7<br>(3 - 12)          |
| Digestive diseases                                  | 386<br>(327 - 477)       | 1<br>(0 - 1)     | 1<br>(1 - 1)      | 22<br>(18 - 30)    | 94<br>(76 - 120)   | 268<br>(221 - 332)     |
| Peptic ulcer disease                                | 44<br>(29 - 65)          | 0<br>(0 - 0)     | 0<br>(0 - 0)      | 2<br>(2 - 4)       | 13<br>(9 - 19)     | 28<br>(17 - 43)        |
| Gastritis and duodenitis                            | 7<br>(4 - 14)            | 0<br>(0 - 0)     | 0<br>(0 - 0)      | 1<br>(0 - 1)       | 2<br>(1 - 3)       | 5<br>(3 - 10)          |
| Appendicitis                                        | 10<br>(6 - 15)           | 0<br>(0 - 0)     | 0<br>(0 - 0)      | 2<br>(1 - 2)       | 4<br>(2 - 6)       | 5<br>(3 - 7)           |
| Paralytic ileus and intestinal obstruction          | 67<br>(36 - 104)         | 0<br>(0 - 0)     | 0<br>(0 - 0)      | 4<br>(2 - 6)       | 12<br>(6 - 19)     | 50<br>(26 - 82)        |
| Inguinal, femoral, and abdominal hernia             | 17<br>(7 - 42)           | 0<br>(0 - 0)     | 0<br>(0 - 0)      | 1<br>(0 - 2)       | 4<br>(2 - 9)       | 12<br>(5 - 32)         |
| Inflammatory bowel disease                          | 10<br>(6 - 14)           | 0<br>(0 - 0)     | 0<br>(0 - 0)      | 1<br>(1 - 2)       | 3<br>(2 - 5)       | 5<br>(3 - 9)           |
| Vascular intestinal disorders                       | 116<br>(58 - 197)        | 0<br>(0 - 0)     | 0<br>(0 - 0)      | 2<br>(1 - 5)       | 24<br>(11 - 41)    | 90<br>(44 - 152)       |
| Gallbladder and biliary diseases                    | 45<br>(29 - 64)          | 0<br>(0 - 0)     | 0<br>(0 - 0)      | 2<br>(1 - 2)       | 7<br>(7 - 15)      | 33<br>(20 - 49)        |
| Pancreatitis                                        | 40<br>(25 - 58)          | 0<br>(0 - 0)     | 0<br>(0 - 0)      | 6<br>(4 - 9)       | 15<br>(9 - 23)     | 18<br>(10 - 28)        |
| Other digestive diseases                            | 31<br>(15 - 44)          | 0<br>(0 - 0)     | 0<br>(0 - 0)      | 2<br>(1 - 2)       | 8<br>(4 - 11)      | 21<br>(10 - 32)        |
| Neurological disorders                              | 1,362<br>(1,050 - 1,708) | 3<br>(2 - 5)     | 2<br>(2 - 4)      | 21<br>(16 - 26)    | 98<br>(77 - 124)   | 1,238<br>(930 - 1,576) |
| Alzheimer disease and other dementias               | 1,180<br>(867 - 1,529)   | --               | --                | 0<br>(0 - 0)       | 55<br>(36 - 79)    | 1,125<br>(821 - 1,463) |
| Parkinson disease                                   | 102<br>(75 - 133)        | --               | --                | 0<br>(0 - 0)       | 14<br>(10 - 19)    | 87<br>(62 - 119)       |
| Epilepsy                                            | 24<br>(18 - 30)          | 1<br>(0 - 2)     | 1<br>(1 - 1)      | 10<br>(7 - 13)     | 7<br>(5 - 9)       | 5<br>(4 - 7)           |
| Multiple sclerosis                                  | 8<br>(4 - 14)            | --               | --                | 2<br>(1 - 3)       | 4<br>(2 - 7)       | 2<br>(1 - 4)           |
| Other neurological disorders                        | 48<br>(39 - 63)          | 2<br>(1 - 3)     | 1<br>(1 - 2)      | 8<br>(6 - 11)      | 19<br>(14 - 25)    | 18<br>(13 - 24)        |
| Mental and substance use disorders                  | 116<br>(54 - 153)        | 0<br>(0 - 0)     | 0<br>(0 - 0)      | 70<br>(20 - 92)    | 28<br>(17 - 44)    | 18<br>(11 - 25)        |
| Schizophrenia                                       | 5<br>(3 - 8)             | --               | --                | 1<br>(1 - 2)       | 2<br>(1 - 4)       | 2<br>(1 - 3)           |
| Alcohol use disorders                               | 45<br>(25 - 74)          | --               | --                | 8<br>(5 - 13)      | 23<br>(13 - 40)    | 14<br>(7 - 21)         |
| Drug use disorders                                  | 65<br>(12 - 86)          | 0<br>(0 - 0)     | --                | 61<br>(11 - 80)    | 2<br>(1 - 3)       | 2<br>(1 - 3)           |
| Opioid use disorders                                | 6<br>(1 - 8)             | 0<br>(0 - 0)     | --                | 6<br>(1 - 8)       | 0<br>(0 - 0)       | 0<br>(0 - 0)           |
| Cocaine use disorders                               | 1<br>(0 - 2)             | 0<br>(0 - 0)     | --                | 1<br>(0 - 2)       | 0<br>(0 - 0)       | 0<br>(0 - 0)           |
| Amphetamine use disorders                           | 1<br>(0 - 1)             | 0<br>(0 - 0)     | --                | 1<br>(0 - 1)       | 0<br>(0 - 0)       | 0<br>(0 - 0)           |
| Other drug use disorders                            | 57<br>(11 - 74)          | 0<br>(0 - 0)     | --                | 53<br>(9 - 70)     | 2<br>(1 - 3)       | 2<br>(1 - 3)           |
| Eating disorders                                    | 0<br>(0 - 0)             | --               | 0<br>(0 - 0)      | 0<br>(0 - 0)       | --                 | --                     |
| Anorexia nervosa                                    | 0<br>(0 - 0)             | --               | 0<br>(0 - 0)      | 0<br>(0 - 0)       | --                 | --                     |
| Diabetes, urogenital, blood, and endocrine diseases | 910<br>(784 - 1,088)     | 5<br>(3 - 9)     | 2<br>(1 - 3)      | 44<br>(35 - 60)    | 220<br>(181 - 266) | 638<br>(545 - 778)     |
| Diabetes mellitus                                   | 355<br>(299 - 413)       | 0<br>(0 - 0)     | 0<br>(0 - 0)      | 13<br>(10 - 16)    | 109<br>(87 - 133)  | 234<br>(193 - 282)     |

Web Table 31- Uruguay deaths with 95% UI by age, sex, and cause in 2013

| Cause                                               | Males, All Ages          | Males, 0-4 Years | Males, 5-14 Years | Males, 15-49 Years | Males, 50-69 Years | Males, 70-80 Years |
|-----------------------------------------------------|--------------------------|------------------|-------------------|--------------------|--------------------|--------------------|
| Acute glomerulonephritis                            | 0<br>(0 - 1)             | 0<br>(0 - 0)     | 0<br>(0 - 0)      | 0<br>(0 - 0)       | 0<br>(0 - 0)       | 0<br>(0 - 0)       |
| Chronic kidney disease                              | 369<br>(282 - 512)       | 1<br>(1 - 2)     | 1<br>(0 - 1)      | 17<br>(12 - 26)    | 74<br>(53 - 106)   | 277<br>(205 - 379) |
| Chronic kidney disease due to diabetes mellitus     | 68<br>(44 - 142)         | 0<br>(0 - 0)     | 0<br>(0 - 0)      | 4<br>(2 - 7)       | 23<br>(14 - 48)    | 40<br>(23 - 91)    |
| Chronic kidney disease due to hypertension          | 117<br>(58 - 168)        | 0<br>(0 - 0)     | 0<br>(0 - 0)      | 3<br>(1 - 5)       | 17<br>(8 - 28)     | 97<br>(47 - 140)   |
| Chronic kidney disease due to glomerulonephritis    | 6<br>(4 - 9)             | 0<br>(0 - 0)     | 0<br>(0 - 0)      | 1<br>(1 - 1)       | 1<br>(1 - 2)       | 3<br>(2 - 6)       |
| Chronic kidney disease due to other causes          | 178<br>(110 - 291)       | 1<br>(0 - 1)     | 0<br>(0 - 1)      | 9<br>(5 - 16)      | 32<br>(16 - 52)    | 136<br>(81 - 236)  |
| Urinary diseases and male infertility               | 115<br>(44 - 157)        | 1<br>(0 - 1)     | 0<br>(0 - 0)      | 3<br>(2 - 4)       | 19<br>(8 - 26)     | 92<br>(32 - 131)   |
| Interstitial nephritis and urinary tract infections | 96<br>(32 - 136)         | 0<br>(0 - 1)     | 0<br>(0 - 0)      | 3<br>(1 - 4)       | 13<br>(5 - 19)     | 79<br>(25 - 116)   |
| Urolithiasis                                        | 2<br>(1 - 4)             | --               | 0<br>(0 - 0)      | 0<br>(0 - 0)       | 1<br>(0 - 2)       | 1<br>(0 - 3)       |
| Other urinary diseases                              | 17<br>(9 - 36)           | 0<br>(0 - 0)     | 0<br>(0 - 0)      | 1<br>(0 - 1)       | 5<br>(2 - 9)       | 12<br>(6 - 27)     |
| Gynecological diseases                              | --                       | --               | --                | --                 | --                 | --                 |
| Uterine fibroids                                    | --                       | --               | --                | --                 | --                 | --                 |
| Polycystic ovarian syndrome                         | --                       | --               | --                | --                 | --                 | --                 |
| Endometriosis                                       | --                       | --               | --                | --                 | --                 | --                 |
| Genital prolapse                                    | --                       | --               | --                | --                 | --                 | --                 |
| Other gynecological diseases                        | --                       | --               | --                | --                 | --                 | --                 |
| Hemoglobinopathies and hemolytic anemias            | 17<br>(9 - 24)           | 1<br>(0 - 2)     | 1<br>(0 - 1)      | 3<br>(2 - 4)       | 4<br>(2 - 6)       | 9<br>(5 - 13)      |
| Thalassemias                                        | 1<br>(1 - 1)             | 0<br>(0 - 0)     | 0<br>(0 - 0)      | 1<br>(0 - 1)       | 0<br>(0 - 0)       | 0<br>(0 - 0)       |
| Sickle cell disorders                               | 1<br>(1 - 2)             | 0<br>(0 - 1)     | 0<br>(0 - 0)      | 0<br>(0 - 1)       | 0<br>(0 - 0)       | 0<br>(0 - 0)       |
| G6PD deficiency                                     | 0<br>(0 - 1)             | 0<br>(0 - 0)     | 0<br>(0 - 0)      | 0<br>(0 - 0)       | 0<br>(0 - 0)       | 0<br>(0 - 0)       |
| Other hemoglobinopathies and hemolytic anemias      | 14<br>(8 - 21)           | 0<br>(0 - 1)     | 0<br>(0 - 0)      | 2<br>(1 - 3)       | 4<br>(2 - 5)       | 8<br>(5 - 13)      |
| Endocrine, metabolic, blood, and immune disorders   | 53<br>(38 - 112)         | 3<br>(1 - 6)     | 1<br>(0 - 1)      | 9<br>(6 - 18)      | 15<br>(10 - 30)    | 27<br>(16 - 65)    |
| Musculoskeletal disorders                           | 22<br>(12 - 28)          | --               | 0<br>(0 - 1)      | 3<br>(2 - 4)       | 8<br>(4 - 10)      | 11<br>(5 - 15)     |
| Rheumatoid arthritis                                | 5<br>(2 - 8)             | --               | 0<br>(0 - 0)      | 1<br>(0 - 1)       | 2<br>(1 - 4)       | 2<br>(1 - 4)       |
| Other musculoskeletal disorders                     | 17<br>(9 - 23)           | --               | 0<br>(0 - 0)      | 3<br>(1 - 3)       | 6<br>(3 - 8)       | 9<br>(4 - 12)      |
| Other non-communicable diseases                     | 191<br>(142 - 253)       | 93<br>(57 - 147) | 5<br>(3 - 8)      | 19<br>(15 - 24)    | 22<br>(13 - 27)    | 53<br>(18 - 75)    |
| Congenital anomalies                                | 117<br>(81 - 171)        | 83<br>(50 - 133) | 5<br>(3 - 7)      | 16<br>(13 - 21)    | 9<br>(7 - 12)      | 4<br>(3 - 6)       |
| Neural tube defects                                 | 3<br>(2 - 5)             | 2<br>(1 - 4)     | 0<br>(0 - 0)      | 0<br>(0 - 1)       | 0<br>(0 - 0)       | 0<br>(0 - 0)       |
| Congenital heart anomalies                          | 46<br>(31 - 69)          | 32<br>(18 - 52)  | 3<br>(2 - 4)      | 8<br>(6 - 11)      | 3<br>(2 - 4)       | 0<br>(0 - 1)       |
| Cleft lip and cleft palate                          | 0<br>(0 - 0)             | 0<br>(0 - 0)     | --                | --                 | --                 | --                 |
| Down syndrome                                       | 12<br>(8 - 17)           | 4<br>(2 - 8)     | 0<br>(0 - 1)      | 4<br>(2 - 6)       | 3<br>(2 - 5)       | 0<br>(0 - 0)       |
| Chromosomal unbalanced rearrangements               | 2<br>(1 - 4)             | 2<br>(1 - 4)     | 0<br>(0 - 0)      | 0<br>(0 - 0)       | 0<br>(0 - 0)       | 0<br>(0 - 0)       |
| Other congenital anomalies                          | 54<br>(35 - 82)          | 42<br>(24 - 70)  | 1<br>(1 - 3)      | 4<br>(3 - 6)       | 3<br>(2 - 4)       | 3<br>(3 - 5)       |
| Skin and subcutaneous diseases                      | 65<br>(21 - 89)          | 1<br>(0 - 1)     | 0<br>(0 - 0)      | 3<br>(1 - 4)       | 12<br>(4 - 17)     | 49<br>(14 - 71)    |
| Cellulitis                                          | 8<br>(3 - 15)            | 0<br>(0 - 0)     | 0<br>(0 - 0)      | 1<br>(0 - 2)       | 3<br>(1 - 6)       | 4<br>(1 - 9)       |
| Pyoderma                                            | 14<br>(5 - 20)           | 1<br>(0 - 1)     | 0<br>(0 - 0)      | 1<br>(0 - 1)       | 4<br>(1 - 6)       | 8<br>(3 - 13)      |
| Decubitus ulcer                                     | 42<br>(12 - 60)          | 0<br>(0 - 0)     | 0<br>(0 - 0)      | 1<br>(0 - 1)       | 5<br>(1 - 7)       | 36<br>(10 - 53)    |
| Other skin and subcutaneous diseases                | 1<br>(0 - 2)             | 0<br>(0 - 0)     | 0<br>(0 - 0)      | 0<br>(0 - 0)       | 0<br>(0 - 1)       | 0<br>(0 - 1)       |
| Sudden infant death syndrome                        | 9<br>(4 - 19)            | 9<br>(4 - 19)    | --                | --                 | --                 | --                 |
| Injuries                                            | 1,484<br>(1,260 - 1,692) | 30<br>(17 - 46)  | 29<br>(22 - 39)   | 652<br>(552 - 759) | 382<br>(309 - 448) | 391<br>(310 - 451) |

Web Table 31- Uruguay deaths with 95% UI by age, sex, and cause in 2013

| Cause                                           | Males, All Ages    | Males, 0-4 Years | Males, 5-14 Years | Males, 15-49 Years | Males, 50-69 Years | Males, 70-80 Years |
|-------------------------------------------------|--------------------|------------------|-------------------|--------------------|--------------------|--------------------|
| Transport injuries                              | 438<br>(346 - 516) | 4<br>(2 - 6)     | 13<br>(9 - 18)    | 217<br>(175 - 262) | 121<br>(82 - 150)  | 85<br>(60 - 106)   |
| Road injuries                                   | 413<br>(327 - 489) | 3<br>(2 - 6)     | 12<br>(8 - 17)    | 206<br>(166 - 249) | 112<br>(77 - 139)  | 80<br>(57 - 101)   |
| Pedestrian road injuries                        | 97<br>(65 - 131)   | 1<br>(0 - 2)     | 3<br>(2 - 5)      | 35<br>(23 - 50)    | 22<br>(13 - 32)    | 36<br>(24 - 50)    |
| Cyclist road injuries                           | 31<br>(22 - 40)    | 0<br>(0 - 1)     | 2<br>(1 - 4)      | 12<br>(9 - 17)     | 8<br>(5 - 11)      | 8<br>(5 - 11)      |
| Motorcyclist road injuries                      | 61<br>(40 - 83)    | 0<br>(0 - 0)     | 1<br>(0 - 1)      | 45<br>(29 - 63)    | 9<br>(5 - 13)      | 6<br>(3 - 9)       |
| Motor vehicle road injuries                     | 221<br>(168 - 267) | 2<br>(1 - 3)     | 6<br>(4 - 8)      | 112<br>(87 - 138)  | 72<br>(50 - 92)    | 30<br>(20 - 41)    |
| Other road injuries                             | 4<br>(2 - 8)       | 0<br>(0 - 0)     | 0<br>(0 - 0)      | 2<br>(1 - 4)       | 1<br>(1 - 2)       | 1<br>(0 - 2)       |
| Other transport injuries                        | 25<br>(14 - 34)    | 0<br>(0 - 1)     | 1<br>(0 - 1)      | 11<br>(7 - 15)     | 9<br>(4 - 13)      | 4<br>(2 - 7)       |
| Unintentional injuries                          | 494<br>(419 - 584) | 25<br>(14 - 40)  | 13<br>(9 - 19)    | 151<br>(122 - 200) | 104<br>(85 - 128)  | 201<br>(152 - 245) |
| Falls                                           | 105<br>(65 - 136)  | 1<br>(0 - 1)     | 1<br>(1 - 1)      | 13<br>(10 - 18)    | 16<br>(11 - 20)    | 75<br>(42 - 102)   |
| Drowning                                        | 86<br>(64 - 143)   | 3<br>(1 - 7)     | 7<br>(4 - 13)     | 49<br>(36 - 81)    | 17<br>(12 - 27)    | 10<br>(7 - 15)     |
| Fire, heat, and hot substances                  | 36<br>(23 - 47)    | 2<br>(1 - 5)     | 1<br>(1 - 2)      | 8<br>(6 - 11)      | 9<br>(5 - 13)      | 15<br>(9 - 21)     |
| Poisonings                                      | 10<br>(8 - 18)     | 0<br>(0 - 1)     | 0<br>(0 - 0)      | 4<br>(3 - 7)       | 2<br>(2 - 4)       | 3<br>(2 - 6)       |
| Exposure to mechanical forces                   | 102<br>(79 - 141)  | 1<br>(0 - 1)     | 2<br>(1 - 4)      | 52<br>(38 - 78)    | 23<br>(16 - 34)    | 24<br>(15 - 37)    |
| Unintentional firearm injuries                  | 85<br>(64 - 111)   | 0<br>(0 - 0)     | 1<br>(1 - 2)      | 43<br>(30 - 57)    | 19<br>(12 - 27)    | 22<br>(13 - 35)    |
| Unintentional suffocation                       | 7<br>(5 - 13)      | 0<br>(0 - 1)     | 0<br>(0 - 1)      | 3<br>(2 - 6)       | 2<br>(1 - 3)       | 1<br>(1 - 3)       |
| Other exposure to mechanical forces             | 10<br>(7 - 38)     | 0<br>(0 - 0)     | 0<br>(0 - 2)      | 6<br>(4 - 25)      | 3<br>(2 - 8)       | 1<br>(0 - 2)       |
| Adverse effects of medical treatment            | 52<br>(40 - 76)    | 1<br>(0 - 1)     | 0<br>(0 - 0)      | 5<br>(3 - 7)       | 16<br>(11 - 25)    | 30<br>(21 - 46)    |
| Animal contact                                  | 2<br>(1 - 3)       | 0<br>(0 - 0)     | 0<br>(0 - 0)      | 1<br>(0 - 1)       | 1<br>(0 - 1)       | 1<br>(0 - 1)       |
| Venomous animal contact                         | 1<br>(0 - 1)       | 0<br>(0 - 0)     | 0<br>(0 - 0)      | 0<br>(0 - 0)       | 0<br>(0 - 0)       | 0<br>(0 - 1)       |
| Non-venomous animal contact                     | 1<br>(1 - 2)       | 0<br>(0 - 0)     | 0<br>(0 - 0)      | 0<br>(0 - 1)       | 0<br>(0 - 1)       | 0<br>(0 - 0)       |
| Foreign body                                    | 82<br>(38 - 113)   | 17<br>(7 - 28)   | 1<br>(0 - 1)      | 10<br>(5 - 14)     | 15<br>(7 - 21)     | 39<br>(16 - 60)    |
| Pulmonary aspiration and foreign body in airway | 81<br>(38 - 112)   | 17<br>(7 - 28)   | 1<br>(0 - 1)      | 10<br>(5 - 14)     | 15<br>(7 - 21)     | 39<br>(16 - 60)    |
| Foreign body in other body part                 | 0<br>(0 - 0)       | 0<br>(0 - 0)     | 0<br>(0 - 0)      | 0<br>(0 - 0)       | 0<br>(0 - 0)       | 0<br>(0 - 0)       |
| Other unintentional injuries                    | 20<br>(15 - 27)    | 0<br>(0 - 1)     | 1<br>(0 - 1)      | 9<br>(6 - 14)      | 5<br>(3 - 9)       | 4<br>(2 - 6)       |
| Self-harm and interpersonal violence            | 552<br>(394 - 654) | 1<br>(0 - 2)     | 4<br>(2 - 6)      | 285<br>(204 - 345) | 157<br>(104 - 194) | 105<br>(75 - 133)  |
| Self-harm                                       | 429<br>(282 - 517) | --               | 2<br>(1 - 4)      | 198<br>(126 - 248) | 132<br>(85 - 163)  | 98<br>(69 - 125)   |
| Interpersonal violence                          | 122<br>(72 - 162)  | 1<br>(0 - 2)     | 1<br>(1 - 3)      | 87<br>(50 - 118)   | 25<br>(13 - 38)    | 8<br>(4 - 14)      |
| Assault by firearm                              | 71<br>(41 - 105)   | 0<br>(0 - 1)     | 1<br>(0 - 2)      | 54<br>(31 - 81)    | 14<br>(7 - 23)     | 2<br>(1 - 4)       |
| Assault by sharp object                         | 40<br>(16 - 62)    | 0<br>(0 - 0)     | 0<br>(0 - 0)      | 29<br>(11 - 47)    | 8<br>(3 - 14)      | 2<br>(1 - 5)       |
| Assault by other means                          | 12<br>(6 - 20)     | 1<br>(0 - 1)     | 0<br>(0 - 1)      | 5<br>(2 - 8)       | 3<br>(1 - 6)       | 3<br>(1 - 6)       |

Web Table 31- Uruguay deaths with 95% UI by age, sex, and cause in 2013

| Cause                                                             | Females, All Ages           | Females, 0-4 Years | Females, 5-14 Years | Females, 15-49 Years | Females, 50-69 Years     | Females, 70-80 Years        |
|-------------------------------------------------------------------|-----------------------------|--------------------|---------------------|----------------------|--------------------------|-----------------------------|
| All causes                                                        | 16,603<br>(15,226 - 18,186) | 234<br>(150 - 361) | 41<br>(32 - 52)     | 721<br>(608 - 860)   | 2,410<br>(2,079 - 2,803) | 13,197<br>(12,284 - 14,263) |
| Communicable, maternal, neonatal, and nutritional diseases        | 1,270<br>(893 - 1,610)      | 119<br>(74 - 188)  | 5<br>(4 - 7)        | 68<br>(56 - 81)      | 101<br>(67 - 127)        | 976<br>(628 - 1,305)        |
| HIV/AIDS and tuberculosis                                         | 48<br>(36 - 68)             | 0<br>(0 - 0)       | 0<br>(0 - 0)        | 25<br>(17 - 36)      | 10<br>(7 - 18)           | 13<br>(9 - 18)              |
| Tuberculosis                                                      | 21<br>(16 - 28)             | 0<br>(0 - 0)       | 0<br>(0 - 0)        | 4<br>(3 - 6)         | 5<br>(4 - 7)             | 12<br>(8 - 17)              |
| HIV/AIDS                                                          | 26<br>(16 - 48)             | 0<br>(0 - 0)       | 0<br>(0 - 0)        | 21<br>(13 - 32)      | 5<br>(2 - 13)            | 1<br>(0 - 3)                |
| HIV/AIDS resulting in mycobacterial infection                     | 1<br>(1 - 2)                | 0<br>(0 - 0)       | 0<br>(0 - 0)        | 1<br>(1 - 1)         | 0<br>(0 - 1)             | 0<br>(0 - 0)                |
| HIV/AIDS resulting in other diseases                              | 25<br>(15 - 45)             | 0<br>(0 - 0)       | 0<br>(0 - 0)        | 20<br>(12 - 31)      | 5<br>(2 - 12)            | 1<br>(0 - 2)                |
| Diarrhea, lower respiratory, and other common infectious diseases | 991<br>(607 - 1,335)        | 32<br>(19 - 50)    | 4<br>(3 - 6)        | 25<br>(18 - 32)      | 78<br>(45 - 102)         | 852<br>(504 - 1,185)        |
| Diarrheal diseases                                                | 66<br>(42 - 106)            | 6<br>(3 - 11)      | 0<br>(0 - 0)        | 2<br>(1 - 2)         | 5<br>(3 - 7)             | 53<br>(30 - 93)             |
| Intestinal infectious diseases                                    | 1<br>(0 - 2)                | 0<br>(0 - 1)       | 0<br>(0 - 0)        | 0<br>(0 - 1)         | 0<br>(0 - 0)             | 0<br>(0 - 1)                |
| Typhoid fever                                                     | 0<br>(0 - 1)                | 0<br>(0 - 0)       | 0<br>(0 - 0)        | 0<br>(0 - 0)         | 0<br>(0 - 0)             | 0<br>(0 - 0)                |
| Paratyphoid fever                                                 | 0<br>(0 - 0)                | 0<br>(0 - 0)       | 0<br>(0 - 0)        | 0<br>(0 - 0)         | 0<br>(0 - 0)             | 0<br>(0 - 0)                |
| Other intestinal infectious diseases                              | 0<br>(0 - 1)                | 0<br>(0 - 0)       | 0<br>(0 - 0)        | 0<br>(0 - 0)         | 0<br>(0 - 0)             | 0<br>(0 - 1)                |
| Lower respiratory infections                                      | 885<br>(502 - 1,221)        | 21<br>(12 - 35)    | 2<br>(1 - 3)        | 18<br>(12 - 24)      | 66<br>(35 - 89)          | 777<br>(434 - 1,094)        |
| Upper respiratory infections                                      | 0<br>(0 - 2)                | 0<br>(0 - 0)       | 0<br>(0 - 0)        | 0<br>(0 - 0)         | 0<br>(0 - 0)             | 0<br>(0 - 2)                |
| Otitis media                                                      | 1<br>(0 - 1)                | 0<br>(0 - 0)       | 0<br>(0 - 0)        | 0<br>(0 - 0)         | 0<br>(0 - 0)             | 0<br>(0 - 0)                |
| Meningitis                                                        | 12<br>(9 - 16)              | 2<br>(1 - 3)       | 0<br>(0 - 1)        | 1<br>(1 - 2)         | 2<br>(2 - 3)             | 6<br>(4 - 9)                |
| Pneumococcal meningitis                                           | 3<br>(2 - 4)                | 0<br>(0 - 1)       | 0<br>(0 - 0)        | 0<br>(0 - 0)         | 1<br>(0 - 1)             | 1<br>(1 - 2)                |
| H influenzae type B meningitis                                    | 1<br>(1 - 2)                | 0<br>(0 - 1)       | 0<br>(0 - 0)        | 0<br>(0 - 0)         | 0<br>(0 - 0)             | 0<br>(0 - 1)                |
| Meningococcal meningitis                                          | 4<br>(3 - 6)                | 1<br>(0 - 1)       | 0<br>(0 - 0)        | 1<br>(0 - 1)         | 1<br>(0 - 1)             | 2<br>(1 - 3)                |
| Other meningitis                                                  | 4<br>(3 - 6)                | 0<br>(0 - 1)       | 0<br>(0 - 0)        | 0<br>(0 - 1)         | 1<br>(0 - 2)             | 2<br>(1 - 3)                |
| Encephalitis                                                      | 25<br>(13 - 35)             | 3<br>(1 - 5)       | 1<br>(1 - 2)        | 3<br>(2 - 5)         | 4<br>(2 - 7)             | 13<br>(5 - 21)              |
| Diphtheria                                                        | 0<br>(0 - 0)                | 0<br>(0 - 0)       | 0<br>(0 - 0)        | 0<br>(0 - 0)         | 0<br>(0 - 0)             | 0<br>(0 - 0)                |
| Whooping cough                                                    | 0<br>(0 - 1)                | 0<br>(0 - 1)       | 0<br>(0 - 0)        | 0<br>(0 - 0)         | 0<br>(0 - 0)             | 0<br>(0 - 0)                |
| Tetanus                                                           | 0<br>(0 - 0)                | 0<br>(0 - 0)       | 0<br>(0 - 0)        | 0<br>(0 - 0)         | 0<br>(0 - 0)             | 0<br>(0 - 0)                |
| Measles                                                           | 0<br>(0 - 0)                | 0<br>(0 - 0)       | 0<br>(0 - 0)        | 0<br>(0 - 0)         | 0<br>(0 - 0)             | 0<br>(0 - 0)                |
| Varicella and herpes zoster                                       | 2<br>(0 - 7)                | 0<br>(0 - 0)       | 0<br>(0 - 0)        | 0<br>(0 - 0)         | 0<br>(0 - 0)             | 1<br>(0 - 7)                |
| Neglected tropical diseases and malaria                           | 8<br>(5 - 26)               | 0<br>(0 - 0)       | 0<br>(0 - 0)        | 1<br>(1 - 3)         | 2<br>(1 - 5)             | 5<br>(2 - 17)               |
| Chagas disease                                                    | 4<br>(1 - 22)               | 0<br>(0 - 0)       | 0<br>(0 - 0)        | 0<br>(0 - 2)         | 1<br>(0 - 4)             | 3<br>(1 - 15)               |
| Leishmaniasis                                                     | 0<br>(0 - 0)                | 0<br>(0 - 0)       | 0<br>(0 - 0)        | 0<br>(0 - 0)         | 0<br>(0 - 0)             | 0<br>(0 - 0)                |
| Visceral leishmaniasis                                            | 0<br>(0 - 0)                | 0<br>(0 - 0)       | 0<br>(0 - 0)        | 0<br>(0 - 0)         | 0<br>(0 - 0)             | 0<br>(0 - 0)                |
| Cysticercosis                                                     | 0<br>(0 - 0)                | 0<br>(0 - 0)       | 0<br>(0 - 0)        | 0<br>(0 - 0)         | 0<br>(0 - 0)             | 0<br>(0 - 0)                |
| Cystic echinococcosis                                             | 2<br>(2 - 3)                | 0<br>(0 - 0)       | 0<br>(0 - 0)        | 0<br>(0 - 1)         | 1<br>(1 - 1)             | 1<br>(1 - 1)                |
| Dengue                                                            | 0<br>(0 - 1)                | 0<br>(0 - 0)       | 0<br>(0 - 0)        | 0<br>(0 - 0)         | 0<br>(0 - 0)             | 0<br>(0 - 0)                |
| Rabies                                                            | 0<br>(0 - 0)                | 0<br>(0 - 0)       | 0<br>(0 - 0)        | 0<br>(0 - 0)         | 0<br>(0 - 0)             | 0<br>(0 - 0)                |
| Other neglected tropical diseases                                 | 1<br>(0 - 1)                | 0<br>(0 - 0)       | 0<br>(0 - 0)        | 0<br>(0 - 0)         | 0<br>(0 - 0)             | 1<br>(0 - 1)                |
| Maternal disorders                                                | 12<br>(9 - 15)              | --                 | 0<br>(0 - 0)        | 11<br>(9 - 15)       | --                       | --                          |
| Maternal hemorrhage                                               | 1<br>(1 - 2)                | --                 | 0<br>(0 - 0)        | 1<br>(1 - 1)         | --                       | --                          |
| Maternal sepsis and other maternal infections                     | 2<br>(1 - 3)                | --                 | 0<br>(0 - 0)        | 2<br>(1 - 2)         | --                       | --                          |
| Maternal hypertensive disorders                                   | 1<br>(1 - 2)                | --                 | 0<br>(0 - 0)        | 1<br>(1 - 2)         | --                       | --                          |



Web Table 31- Uruguay deaths with 95% UI by age, sex, and cause in 2013

| Cause                                                            | Females, All Ages           | Females, 0-4 Years | Females, 5-14 Years | Females, 15-49 Years | Females, 50-69 Years     | Females, 70-80 Years        |
|------------------------------------------------------------------|-----------------------------|--------------------|---------------------|----------------------|--------------------------|-----------------------------|
| Maternal obstructed labor                                        | 1<br>(0 - 1)                | --                 | 0<br>(0 - 0)        | 1<br>(0 - 1)         | --                       | --                          |
| Maternal abortive outcome                                        | 3<br>(2 - 4)                | --                 | 0<br>(0 - 0)        | 3<br>(2 - 4)         | --                       | --                          |
| Indirect maternal deaths                                         | 1<br>(1 - 2)                | --                 | 0<br>(0 - 0)        | 1<br>(1 - 2)         | --                       | --                          |
| Late maternal deaths                                             | 1<br>(0 - 1)                | --                 | 0<br>(0 - 0)        | 1<br>(0 - 1)         | --                       | --                          |
| Maternal deaths aggravated by HIV/AIDS                           | 0<br>(0 - 0)                | --                 | --                  | 0<br>(0 - 0)         | --                       | --                          |
| Other maternal disorders                                         | 1<br>(1 - 2)                | --                 | 0<br>(0 - 0)        | 1<br>(1 - 2)         | --                       | --                          |
| Neonatal disorders                                               | 81<br>(50 - 131)            | 81<br>(50 - 131)   | --                  | --                   | --                       | --                          |
| Neonatal preterm birth complications                             | 39<br>(21 - 66)             | 39<br>(21 - 66)    | --                  | --                   | --                       | --                          |
| Neonatal encephalopathy due to birth asphyxia and trauma         | 12<br>(6 - 23)              | 12<br>(6 - 23)     | --                  | --                   | --                       | --                          |
| Neonatal sepsis and other neonatal infections                    | 16<br>(8 - 31)              | 16<br>(8 - 31)     | --                  | --                   | --                       | --                          |
| Hemolytic disease and other neonatal jaundice                    | 0<br>(0 - 0)                | 0<br>(0 - 0)       | --                  | --                   | --                       | --                          |
| Other neonatal disorders                                         | 12<br>(7 - 23)              | 12<br>(7 - 23)     | --                  | --                   | --                       | --                          |
| Nutritional deficiencies                                         | 112<br>(80 - 148)           | 4<br>(2 - 7)       | 0<br>(0 - 1)        | 4<br>(3 - 5)         | 7<br>(5 - 10)            | 96<br>(66 - 133)            |
| Protein-energy malnutrition                                      | 38<br>(19 - 59)             | 3<br>(2 - 6)       | 0<br>(0 - 0)        | 1<br>(1 - 2)         | 3<br>(1 - 4)             | 30<br>(13 - 52)             |
| Iodine deficiency                                                | 0<br>(0 - 1)                | 0<br>(0 - 0)       | 0<br>(0 - 0)        | 0<br>(0 - 0)         | 0<br>(0 - 0)             | 0<br>(0 - 1)                |
| Iron-deficiency anemia                                           | 40<br>(19 - 69)             | 0<br>(0 - 0)       | 0<br>(0 - 0)        | 1<br>(1 - 2)         | 2<br>(1 - 4)             | 36<br>(17 - 63)             |
| Other nutritional deficiencies                                   | 34<br>(15 - 58)             | 0<br>(0 - 0)       | 0<br>(0 - 0)        | 1<br>(1 - 2)         | 2<br>(1 - 3)             | 30<br>(12 - 54)             |
| Other communicable, maternal, neonatal, and nutritional diseases | 20<br>(15 - 29)             | 2<br>(1 - 5)       | 0<br>(0 - 1)        | 2<br>(1 - 2)         | 4<br>(3 - 6)             | 11<br>(8 - 19)              |
| Sexually transmitted diseases excluding HIV                      | 6<br>(3 - 8)                | 2<br>(0 - 5)       | 0<br>(0 - 0)        | 1<br>(0 - 1)         | 1<br>(1 - 1)             | 2<br>(1 - 3)                |
| Syphilis                                                         | 4<br>(2 - 7)                | 2<br>(0 - 5)       | 0<br>(0 - 0)        | 0<br>(0 - 0)         | 0<br>(0 - 1)             | 1<br>(1 - 2)                |
| Chlamydial infection                                             | 0<br>(0 - 0)                | --                 | 0<br>(0 - 0)        | 0<br>(0 - 0)         | 0<br>(0 - 0)             | 0<br>(0 - 0)                |
| Gonococcal infection                                             | 0<br>(0 - 1)                | --                 | 0<br>(0 - 0)        | 0<br>(0 - 0)         | 0<br>(0 - 0)             | 0<br>(0 - 0)                |
| Other sexually transmitted diseases                              | 0<br>(0 - 0)                | --                 | 0<br>(0 - 0)        | 0<br>(0 - 0)         | 0<br>(0 - 0)             | 0<br>(0 - 0)                |
| Hepatitis                                                        | 3<br>(2 - 3)                | 0<br>(0 - 0)       | 0<br>(0 - 0)        | 1<br>(0 - 1)         | 1<br>(0 - 1)             | 1<br>(1 - 2)                |
| Acute hepatitis A                                                | 1<br>(1 - 2)                | 0<br>(0 - 0)       | 0<br>(0 - 0)        | 0<br>(0 - 1)         | 0<br>(0 - 1)             | 0<br>(0 - 1)                |
| Acute hepatitis B                                                | 1<br>(1 - 2)                | 0<br>(0 - 0)       | 0<br>(0 - 0)        | 0<br>(0 - 0)         | 0<br>(0 - 1)             | 1<br>(0 - 1)                |
| Acute hepatitis C                                                | 0<br>(0 - 0)                | --                 | 0<br>(0 - 0)        | 0<br>(0 - 0)         | 0<br>(0 - 0)             | 0<br>(0 - 0)                |
| Other infectious diseases                                        | 12<br>(8 - 21)              | 0<br>(0 - 0)       | 0<br>(0 - 0)        | 1<br>(0 - 1)         | 2<br>(2 - 4)             | 8<br>(5 - 16)               |
| Non-communicable diseases                                        | 14,614<br>(13,330 - 16,047) | 95<br>(59 - 145)   | 21<br>(16 - 27)     | 500<br>(414 - 605)   | 2,190<br>(1,885 - 2,550) | 11,809<br>(10,913 - 12,791) |
| Neoplasms                                                        | 3,783<br>(3,270 - 4,324)    | 4<br>(2 - 6)       | 8<br>(6 - 11)       | 280<br>(230 - 341)   | 1,101<br>(926 - 1,293)   | 2,390<br>(2,050 - 2,759)    |
| Esophageal cancer                                                | 102<br>(77 - 131)           | --                 | --                  | 3<br>(2 - 4)         | 23<br>(16 - 31)          | 76<br>(55 - 100)            |
| Stomach cancer                                                   | 244<br>(186 - 324)          | --                 | --                  | 10<br>(7 - 13)       | 49<br>(38 - 61)          | 185<br>(130 - 259)          |
| Liver cancer                                                     | 56<br>(39 - 77)             | --                 | 0<br>(0 - 0)        | 2<br>(1 - 3)         | 11<br>(8 - 15)           | 43<br>(28 - 64)             |
| Liver cancer due to hepatitis B                                  | 5<br>(2 - 8)                | --                 | 0<br>(0 - 0)        | 0<br>(0 - 1)         | 1<br>(1 - 3)             | 3<br>(1 - 5)                |
| Liver cancer due to hepatitis C                                  | 30<br>(19 - 45)             | --                 | 0<br>(0 - 0)        | 1<br>(0 - 1)         | 6<br>(3 - 8)             | 24<br>(14 - 38)             |
| Liver cancer due to alcohol use                                  | 12<br>(5 - 20)              | --                 | --                  | 0<br>(0 - 0)         | 2<br>(1 - 3)             | 10<br>(4 - 17)              |
| Liver cancer due to other causes                                 | 9<br>(4 - 14)               | --                 | 0<br>(0 - 0)        | 1<br>(0 - 1)         | 2<br>(1 - 3)             | 6<br>(2 - 11)               |
| Larynx cancer                                                    | 9<br>(4 - 15)               | --                 | --                  | 0<br>(0 - 1)         | 3<br>(1 - 5)             | 6<br>(3 - 10)               |
| Tracheal, bronchus and lung cancer                               | 286<br>(230 - 354)          | --                 | --                  | 18<br>(13 - 24)      | 111<br>(85 - 137)        | 158<br>(119 - 207)          |
| Breast cancer                                                    | 716<br>(591 - 854)          | --                 | --                  | 82<br>(63 - 104)     | 277<br>(225 - 339)       | 358<br>(279 - 457)          |

Web Table 31- Uruguay deaths with 95% UI by age, sex, and cause in 2013

| Cause                                         | Females, All Ages        | Females, 0-4 Years | Females, 5-14 Years | Females, 15-49 Years | Females, 50-69 Years | Females, 70-80 Years     |
|-----------------------------------------------|--------------------------|--------------------|---------------------|----------------------|----------------------|--------------------------|
| Cervical cancer                               | 184<br>(143 - 232)       | --                 | --                  | 42<br>(30 - 56)      | 65<br>(47 - 86)      | 77<br>(55 - 107)         |
| Uterine cancer                                | 82<br>(54 - 117)         | --                 | --                  | 2<br>(1 - 4)         | 24<br>(15 - 37)      | 55<br>(35 - 84)          |
| Prostate cancer                               | --                       | --                 | --                  | --                   | --                   | --                       |
| Colon and rectum cancer                       | 662<br>(527 - 846)       | --                 | --                  | 23<br>(18 - 29)      | 133<br>(107 - 160)   | 507<br>(380 - 677)       |
| Lip and oral cavity cancer                    | 25<br>(16 - 34)          | --                 | --                  | 2<br>(1 - 2)         | 7<br>(4 - 9)         | 17<br>(10 - 25)          |
| Nasopharynx cancer                            | 6<br>(4 - 9)             | --                 | 0<br>(0 - 0)        | 1<br>(1 - 2)         | 2<br>(1 - 3)         | 3<br>(2 - 5)             |
| Other pharynx cancer                          | 7<br>(5 - 9)             | --                 | --                  | 0<br>(0 - 1)         | 2<br>(2 - 3)         | 4<br>(3 - 6)             |
| Gallbladder and biliary tract cancer          | 163<br>(106 - 237)       | --                 | --                  | 4<br>(2 - 6)         | 41<br>(27 - 60)      | 118<br>(72 - 186)        |
| Pancreatic cancer                             | 293<br>(233 - 369)       | --                 | --                  | 7<br>(5 - 10)        | 77<br>(59 - 97)      | 209<br>(158 - 277)       |
| Malignant skin melanoma                       | 21<br>(17 - 27)          | --                 | --                  | 3<br>(2 - 4)         | 7<br>(5 - 10)        | 11<br>(8 - 15)           |
| Non-melanoma skin cancer                      | 15<br>(9 - 24)           | --                 | --                  | 0<br>(0 - 0)         | 1<br>(0 - 1)         | 14<br>(9 - 23)           |
| Ovarian cancer                                | 176<br>(140 - 218)       | --                 | --                  | 16<br>(12 - 22)      | 66<br>(51 - 84)      | 93<br>(68 - 125)         |
| Testicular cancer                             | --                       | --                 | --                  | --                   | --                   | --                       |
| Kidney cancer                                 | 95<br>(72 - 125)         | 0<br>(0 - 0)       | 0<br>(0 - 0)        | 5<br>(4 - 8)         | 32<br>(23 - 43)      | 58<br>(39 - 85)          |
| Bladder cancer                                | 60<br>(38 - 86)          | --                 | --                  | 1<br>(1 - 2)         | 9<br>(6 - 13)        | 49<br>(31 - 74)          |
| Brain and nervous system cancer               | 59<br>(28 - 75)          | 0<br>(0 - 1)       | 1<br>(0 - 1)        | 8<br>(4 - 11)        | 24<br>(10 - 32)      | 26<br>(12 - 36)          |
| Thyroid cancer                                | 21<br>(15 - 30)          | --                 | 0<br>(0 - 0)        | 1<br>(1 - 2)         | 5<br>(4 - 8)         | 15<br>(10 - 21)          |
| Mesothelioma                                  | 4<br>(3 - 6)             | --                 | --                  | 0<br>(0 - 0)         | 2<br>(1 - 3)         | 2<br>(1 - 3)             |
| Hodgkin lymphoma                              | 5<br>(1 - 8)             | 0<br>(0 - 0)       | 0<br>(0 - 0)        | 2<br>(0 - 3)         | 1<br>(0 - 2)         | 2<br>(0 - 4)             |
| Non-Hodgkin lymphoma                          | 105<br>(61 - 139)        | 0<br>(0 - 1)       | 1<br>(0 - 1)        | 9<br>(6 - 12)        | 29<br>(18 - 39)      | 66<br>(36 - 92)          |
| Multiple myeloma                              | 57<br>(37 - 79)          | --                 | --                  | 2<br>(1 - 3)         | 18<br>(12 - 24)      | 38<br>(23 - 55)          |
| Leukemia                                      | 110<br>(88 - 137)        | 1<br>(1 - 2)       | 3<br>(2 - 5)        | 15<br>(12 - 19)      | 24<br>(19 - 31)      | 66<br>(49 - 88)          |
| Other neoplasms                               | 219<br>(150 - 287)       | 2<br>(1 - 3)       | 3<br>(2 - 5)        | 21<br>(15 - 29)      | 58<br>(42 - 82)      | 135<br>(82 - 180)        |
| Cardiovascular diseases                       | 5,916<br>(5,137 - 7,095) | 2<br>(1 - 3)       | 2<br>(1 - 2)        | 100<br>(77 - 133)    | 617<br>(507 - 775)   | 5,196<br>(4,514 - 6,216) |
| Rheumatic heart disease                       | 35<br>(16 - 49)          | 0<br>(0 - 0)       | 0<br>(0 - 0)        | 5<br>(3 - 7)         | 8<br>(5 - 11)        | 23<br>(8 - 35)           |
| Ischemic heart disease                        | 2,282<br>(1,805 - 3,372) | 0<br>(0 - 0)       | 0<br>(0 - 0)        | 27<br>(18 - 43)      | 238<br>(182 - 360)   | 2,017<br>(1,577 - 2,974) |
| Cerebrovascular disease                       | 2,386<br>(1,926 - 3,148) | 0<br>(0 - 1)       | 1<br>(0 - 1)        | 46<br>(34 - 63)      | 239<br>(178 - 313)   | 2,099<br>(1,685 - 2,783) |
| Ischemic stroke                               | 1,546<br>(1,181 - 2,261) | 0<br>(0 - 0)       | 0<br>(0 - 0)        | 8<br>(5 - 15)        | 85<br>(59 - 142)     | 1,452<br>(1,111 - 2,132) |
| Hemorrhagic stroke                            | 840<br>(525 - 1,090)     | 0<br>(0 - 0)       | 0<br>(0 - 1)        | 38<br>(27 - 49)      | 154<br>(97 - 196)    | 648<br>(389 - 869)       |
| Hypertensive heart disease                    | 358<br>(154 - 577)       | 0<br>(0 - 0)       | 0<br>(0 - 0)        | 3<br>(1 - 4)         | 21<br>(10 - 31)      | 335<br>(139 - 542)       |
| Cardiomyopathy and myocarditis                | 208<br>(152 - 312)       | 1<br>(0 - 1)       | 0<br>(0 - 1)        | 6<br>(4 - 9)         | 29<br>(21 - 45)      | 172<br>(121 - 265)       |
| Atrial fibrillation and flutter               | 104<br>(65 - 159)        | --                 | --                  | 0<br>(0 - 0)         | 5<br>(3 - 7)         | 99<br>(61 - 154)         |
| Aortic aneurysm                               | 76<br>(46 - 121)         | --                 | --                  | 3<br>(2 - 5)         | 16<br>(9 - 25)       | 57<br>(33 - 92)          |
| Peripheral vascular disease                   | 1<br>(1 - 1)             | --                 | --                  | 0<br>(0 - 0)         | 0<br>(0 - 0)         | 1<br>(0 - 1)             |
| Endocarditis                                  | 30<br>(18 - 44)          | 0<br>(0 - 0)       | 0<br>(0 - 0)        | 2<br>(1 - 4)         | 7<br>(4 - 10)        | 21<br>(12 - 32)          |
| Other cardiovascular and circulatory diseases | 436<br>(219 - 605)       | 0<br>(0 - 1)       | 0<br>(0 - 0)        | 9<br>(5 - 13)        | 55<br>(31 - 76)      | 371<br>(180 - 534)       |
| Chronic respiratory diseases                  | 822<br>(549 - 1,025)     | 2<br>(1 - 4)       | 1<br>(1 - 1)        | 21<br>(16 - 26)      | 99<br>(69 - 125)     | 699<br>(460 - 887)       |
| Chronic obstructive pulmonary disease         | 583<br>(376 - 747)       | 1<br>(1 - 2)       | 0<br>(0 - 0)        | 9<br>(6 - 12)        | 63<br>(42 - 84)      | 510<br>(325 - 665)       |
| Pneumoconiosis                                | 1<br>(1 - 2)             | 0<br>(0 - 0)       | 0<br>(0 - 0)        | 0<br>(0 - 0)         | 0<br>(0 - 0)         | 1<br>(0 - 2)             |
| Silicosis                                     | 0<br>(0 - 0)             | 0<br>(0 - 0)       | 0<br>(0 - 0)        | 0<br>(0 - 0)         | 0<br>(0 - 0)         | 0<br>(0 - 0)             |

Web Table 31- Uruguay deaths with 95% UI by age, sex, and cause in 2013

| Cause                                               | Females, All Ages        | Females, 0-4 Years | Females, 5-14 Years | Females, 15-49 Years | Females, 50-69 Years | Females, 70-80 Years     |
|-----------------------------------------------------|--------------------------|--------------------|---------------------|----------------------|----------------------|--------------------------|
| Asbestosis                                          | 0<br>(0 - 0)             | 0<br>(0 - 0)       | 0<br>(0 - 0)        | 0<br>(0 - 0)         | 0<br>(0 - 0)         | 0<br>(0 - 0)             |
| Coal workers pneumoconiosis                         | 0<br>(0 - 0)             | 0<br>(0 - 0)       | 0<br>(0 - 0)        | 0<br>(0 - 0)         | 0<br>(0 - 0)         | 0<br>(0 - 0)             |
| Other pneumoconiosis                                | 1<br>(0 - 2)             | 0<br>(0 - 0)       | 0<br>(0 - 0)        | 0<br>(0 - 0)         | 0<br>(0 - 0)         | 1<br>(0 - 2)             |
| Asthma                                              | 99<br>(53 - 144)         | 0<br>(0 - 0)       | 0<br>(0 - 1)        | 8<br>(6 - 11)        | 23<br>(13 - 34)      | 67<br>(33 - 107)         |
| Interstitial lung disease and pulmonary sarcoidosis | 119<br>(58 - 204)        | 0<br>(0 - 0)       | 0<br>(0 - 0)        | 2<br>(1 - 4)         | 11<br>(5 - 17)       | 106<br>(51 - 185)        |
| Other chronic respiratory diseases                  | 19<br>(10 - 30)          | 1<br>(0 - 1)       | 0<br>(0 - 0)        | 1<br>(1 - 2)         | 2<br>(1 - 3)         | 15<br>(8 - 26)           |
| Cirrhosis                                           | 165<br>(136 - 198)       | 0<br>(0 - 0)       | 1<br>(0 - 1)        | 11<br>(9 - 15)       | 41<br>(32 - 51)      | 112<br>(89 - 141)        |
| Cirrhosis due to hepatitis B                        | 26<br>(11 - 47)          | 0<br>(0 - 0)       | 0<br>(0 - 0)        | 1<br>(0 - 3)         | 6<br>(2 - 12)        | 18<br>(8 - 35)           |
| Cirrhosis due to hepatitis C                        | 81<br>(46 - 118)         | 0<br>(0 - 0)       | 0<br>(0 - 0)        | 6<br>(3 - 9)         | 20<br>(9 - 29)       | 54<br>(29 - 83)          |
| Cirrhosis due to alcohol use                        | 44<br>(21 - 71)          | --                 | --                  | 2<br>(1 - 3)         | 10<br>(5 - 16)       | 32<br>(14 - 56)          |
| Cirrhosis due to other causes                       | 15<br>(7 - 26)           | 0<br>(0 - 0)       | 0<br>(0 - 1)        | 2<br>(1 - 4)         | 5<br>(2 - 9)         | 7<br>(3 - 13)            |
| Digestive diseases                                  | 498<br>(409 - 608)       | 1<br>(0 - 1)       | 1<br>(1 - 1)        | 15<br>(12 - 20)      | 66<br>(51 - 81)      | 415<br>(332 - 520)       |
| Peptic ulcer disease                                | 42<br>(27 - 66)          | 0<br>(0 - 0)       | 0<br>(0 - 0)        | 1<br>(1 - 1)         | 6<br>(4 - 8)         | 35<br>(21 - 57)          |
| Gastritis and duodenitis                            | 9<br>(4 - 21)            | 0<br>(0 - 0)       | 0<br>(0 - 0)        | 0<br>(0 - 1)         | 1<br>(1 - 3)         | 7<br>(3 - 18)            |
| Appendicitis                                        | 9<br>(5 - 16)            | 0<br>(0 - 0)       | 0<br>(0 - 0)        | 1<br>(1 - 2)         | 2<br>(1 - 3)         | 6<br>(3 - 11)            |
| Paralytic ileus and intestinal obstruction          | 64<br>(8 - 130)          | 0<br>(0 - 0)       | 0<br>(0 - 0)        | 2<br>(0 - 4)         | 7<br>(1 - 14)        | 55<br>(6 - 114)          |
| Inguinal, femoral, and abdominal hernia             | 29<br>(11 - 81)          | 0<br>(0 - 0)       | 0<br>(0 - 0)        | 1<br>(0 - 2)         | 4<br>(2 - 10)        | 25<br>(9 - 73)           |
| Inflammatory bowel disease                          | 12<br>(7 - 19)           | 0<br>(0 - 0)       | 0<br>(0 - 0)        | 1<br>(1 - 2)         | 2<br>(1 - 3)         | 8<br>(4 - 15)            |
| Vascular intestinal disorders                       | 180<br>(117 - 302)       | 0<br>(0 - 0)       | 0<br>(0 - 0)        | 2<br>(1 - 3)         | 18<br>(11 - 29)      | 160<br>(103 - 263)       |
| Gallbladder and biliary diseases                    | 75<br>(50 - 126)         | 0<br>(0 - 0)       | 0<br>(0 - 0)        | 2<br>(2 - 4)         | 10<br>(7 - 15)       | 63<br>(40 - 109)         |
| Pancreatitis                                        | 32<br>(20 - 50)          | 0<br>(0 - 0)       | 0<br>(0 - 0)        | 4<br>(2 - 5)         | 9<br>(6 - 15)        | 19<br>(10 - 31)          |
| Other digestive diseases                            | 46<br>(29 - 71)          | 0<br>(0 - 0)       | 0<br>(0 - 0)        | 1<br>(1 - 2)         | 7<br>(4 - 9)         | 37<br>(23 - 61)          |
| Neurological disorders                              | 2,163<br>(1,511 - 2,848) | 2<br>(1 - 3)       | 1<br>(1 - 2)        | 12<br>(9 - 15)       | 76<br>(57 - 97)      | 2,071<br>(1,427 - 2,758) |
| Alzheimer disease and other dementias               | 1,989<br>(1,334 - 2,667) | --                 | --                  | 0<br>(0 - 0)         | 46<br>(30 - 64)      | 1,943<br>(1,297 - 2,627) |
| Parkinson disease                                   | 105<br>(66 - 148)        | --                 | --                  | 0<br>(0 - 0)         | 8<br>(5 - 11)        | 97<br>(59 - 140)         |
| Epilepsy                                            | 17<br>(11 - 22)          | 1<br>(0 - 1)       | 0<br>(0 - 1)        | 6<br>(4 - 8)         | 4<br>(2 - 5)         | 6<br>(4 - 10)            |
| Multiple sclerosis                                  | 11<br>(6 - 15)           | --                 | --                  | 3<br>(1 - 4)         | 5<br>(2 - 7)         | 3<br>(2 - 5)             |
| Other neurological disorders                        | 43<br>(35 - 51)          | 2<br>(1 - 3)       | 1<br>(1 - 1)        | 3<br>(3 - 4)         | 14<br>(11 - 18)      | 23<br>(17 - 29)          |
| Mental and substance use disorders                  | 16<br>(11 - 20)          | 0<br>(0 - 0)       | 0<br>(0 - 0)        | 4<br>(3 - 5)         | 5<br>(4 - 7)         | 6<br>(4 - 9)             |
| Schizophrenia                                       | 6<br>(4 - 8)             | --                 | --                  | 1<br>(1 - 1)         | 2<br>(1 - 3)         | 3<br>(1 - 4)             |
| Alcohol use disorders                               | 4<br>(2 - 7)             | --                 | --                  | 1<br>(0 - 2)         | 2<br>(1 - 3)         | 2<br>(1 - 3)             |
| Drug use disorders                                  | 5<br>(4 - 6)             | 0<br>(0 - 0)       | --                  | 2<br>(1 - 2)         | 2<br>(1 - 2)         | 2<br>(1 - 3)             |
| Opioid use disorders                                | 0<br>(0 - 1)             | 0<br>(0 - 0)       | --                  | 0<br>(0 - 0)         | 0<br>(0 - 0)         | 0<br>(0 - 0)             |
| Cocaine use disorders                               | 0<br>(0 - 0)             | 0<br>(0 - 0)       | --                  | 0<br>(0 - 0)         | 0<br>(0 - 0)         | 0<br>(0 - 0)             |
| Amphetamine use disorders                           | 0<br>(0 - 0)             | 0<br>(0 - 0)       | --                  | 0<br>(0 - 0)         | 0<br>(0 - 0)         | 0<br>(0 - 0)             |
| Other drug use disorders                            | 4<br>(4 - 6)             | 0<br>(0 - 0)       | --                  | 1<br>(1 - 2)         | 1<br>(1 - 2)         | 2<br>(1 - 3)             |
| Eating disorders                                    | 0<br>(0 - 0)             | --                 | 0<br>(0 - 0)        | 0<br>(0 - 0)         | --                   | --                       |
| Anorexia nervosa                                    | 0<br>(0 - 0)             | --                 | 0<br>(0 - 0)        | 0<br>(0 - 0)         | --                   | --                       |
| Diabetes, urogenital, blood, and endocrine diseases | 971<br>(753 - 1,168)     | 4<br>(2 - 6)       | 2<br>(1 - 3)        | 33<br>(26 - 43)      | 151<br>(118 - 189)   | 780<br>(601 - 949)       |
| Diabetes mellitus                                   | 425<br>(340 - 531)       | 0<br>(0 - 0)       | 0<br>(0 - 0)        | 9<br>(7 - 12)        | 75<br>(58 - 98)      | 340<br>(267 - 438)       |

Web Table 31- Uruguay deaths with 95% UI by age, sex, and cause in 2013

| Cause                                               | Females, All Ages  | Females, 0-4 Years | Females, 5-14 Years | Females, 15-49 Years | Females, 50-69 Years | Females, 70-80 Years |
|-----------------------------------------------------|--------------------|--------------------|---------------------|----------------------|----------------------|----------------------|
| Acute glomerulonephritis                            | 0<br>(0 - 0)       | 0<br>(0 - 0)       | 0<br>(0 - 0)        | 0<br>(0 - 0)         | 0<br>(0 - 0)         | 0<br>(0 - 0)         |
| Chronic kidney disease                              | 283<br>(214 - 383) | 1<br>(0 - 1)       | 1<br>(0 - 1)        | 11<br>(8 - 16)       | 42<br>(31 - 57)      | 229<br>(168 - 317)   |
| Chronic kidney disease due to diabetes mellitus     | 43<br>(28 - 67)    | 0<br>(0 - 0)       | 0<br>(0 - 0)        | 1<br>(1 - 2)         | 13<br>(8 - 20)       | 29<br>(17 - 46)      |
| Chronic kidney disease due to hypertension          | 92<br>(49 - 142)   | 0<br>(0 - 0)       | 0<br>(0 - 0)        | 2<br>(1 - 4)         | 8<br>(4 - 12)        | 82<br>(44 - 127)     |
| Chronic kidney disease due to glomerulonephritis    | 5<br>(3 - 8)       | 0<br>(0 - 0)       | 0<br>(0 - 0)        | 0<br>(0 - 1)         | 1<br>(1 - 1)         | 4<br>(2 - 6)         |
| Chronic kidney disease due to other causes          | 143<br>(90 - 229)  | 0<br>(0 - 1)       | 0<br>(0 - 1)        | 7<br>(5 - 11)        | 21<br>(12 - 33)      | 115<br>(66 - 197)    |
| Urinary diseases and male infertility               | 155<br>(50 - 241)  | 0<br>(0 - 1)       | 0<br>(0 - 0)        | 4<br>(2 - 7)         | 15<br>(6 - 23)       | 135<br>(40 - 217)    |
| Interstitial nephritis and urinary tract infections | 150<br>(46 - 233)  | 0<br>(0 - 0)       | 0<br>(0 - 0)        | 4<br>(2 - 6)         | 14<br>(5 - 21)       | 131<br>(38 - 210)    |
| Urolithiasis                                        | 2<br>(1 - 5)       | --                 | 0<br>(0 - 0)        | 0<br>(0 - 0)         | 0<br>(0 - 1)         | 1<br>(0 - 3)         |
| Other urinary diseases                              | 4<br>(1 - 10)      | 0<br>(0 - 0)       | 0<br>(0 - 0)        | 0<br>(0 - 0)         | 1<br>(0 - 2)         | 3<br>(1 - 8)         |
| Gynecological diseases                              | 1<br>(0 - 2)       | --                 | --                  | 0<br>(0 - 1)         | 0<br>(0 - 0)         | 0<br>(0 - 1)         |
| Uterine fibroids                                    | 0<br>(0 - 0)       | --                 | --                  | 0<br>(0 - 0)         | 0<br>(0 - 0)         | 0<br>(0 - 0)         |
| Polycystic ovarian syndrome                         | 0<br>(0 - 0)       | --                 | --                  | 0<br>(0 - 0)         | 0<br>(0 - 0)         | --                   |
| Endometriosis                                       | 0<br>(0 - 0)       | --                 | --                  | 0<br>(0 - 0)         | 0<br>(0 - 0)         | --                   |
| Genital prolapse                                    | 0<br>(0 - 0)       | --                 | --                  | 0<br>(0 - 0)         | 0<br>(0 - 0)         | 0<br>(0 - 0)         |
| Other gynecological diseases                        | 0<br>(0 - 1)       | --                 | --                  | 0<br>(0 - 0)         | 0<br>(0 - 0)         | 0<br>(0 - 0)         |
| Hemoglobinopathies and hemolytic anemias            | 16<br>(8 - 25)     | 1<br>(0 - 1)       | 0<br>(0 - 1)        | 2<br>(1 - 3)         | 3<br>(2 - 5)         | 10<br>(5 - 17)       |
| Thalassemias                                        | 1<br>(0 - 1)       | 0<br>(0 - 0)       | 0<br>(0 - 0)        | 1<br>(0 - 1)         | 0<br>(0 - 0)         | 0<br>(0 - 0)         |
| Sickle cell disorders                               | 1<br>(0 - 1)       | 0<br>(0 - 0)       | 0<br>(0 - 0)        | 0<br>(0 - 0)         | 0<br>(0 - 0)         | 0<br>(0 - 0)         |
| G6PD deficiency                                     | 0<br>(0 - 0)       | 0<br>(0 - 0)       | 0<br>(0 - 0)        | 0<br>(0 - 0)         | 0<br>(0 - 0)         | 0<br>(0 - 0)         |
| Other hemoglobinopathies and hemolytic anemias      | 15<br>(7 - 23)     | 0<br>(0 - 1)       | 0<br>(0 - 0)        | 1<br>(1 - 2)         | 3<br>(2 - 5)         | 10<br>(4 - 17)       |
| Endocrine, metabolic, blood, and immune disorders   | 89<br>(64 - 151)   | 2<br>(1 - 4)       | 1<br>(0 - 1)        | 6<br>(4 - 10)        | 16<br>(11 - 25)      | 65<br>(43 - 114)     |
| Musculoskeletal disorders                           | 56<br>(28 - 71)    | --                 | 0<br>(0 - 1)        | 7<br>(4 - 10)        | 16<br>(8 - 21)       | 32<br>(15 - 44)      |
| Rheumatoid arthritis                                | 24<br>(10 - 32)    | --                 | 0<br>(0 - 0)        | 1<br>(0 - 1)         | 7<br>(3 - 10)        | 16<br>(7 - 24)       |
| Other musculoskeletal disorders                     | 32<br>(16 - 41)    | --                 | 0<br>(0 - 1)        | 6<br>(3 - 8)         | 9<br>(5 - 12)        | 16<br>(8 - 24)       |
| Other non-communicable diseases                     | 225<br>(145 - 293) | 80<br>(49 - 125)   | 5<br>(3 - 7)        | 16<br>(12 - 21)      | 17<br>(11 - 22)      | 106<br>(35 - 158)    |
| Congenital anomalies                                | 101<br>(69 - 143)  | 69<br>(42 - 109)   | 5<br>(3 - 7)        | 14<br>(10 - 18)      | 7<br>(5 - 10)        | 6<br>(4 - 9)         |
| Neural tube defects                                 | 5<br>(3 - 8)       | 4<br>(2 - 7)       | 0<br>(0 - 1)        | 0<br>(0 - 1)         | 0<br>(0 - 0)         | 0<br>(0 - 0)         |
| Congenital heart anomalies                          | 39<br>(26 - 56)    | 27<br>(15 - 43)    | 3<br>(2 - 4)        | 7<br>(5 - 9)         | 2<br>(1 - 3)         | 1<br>(1 - 2)         |
| Cleft lip and cleft palate                          | 0<br>(0 - 0)       | 0<br>(0 - 0)       | --                  | --                   | --                   | --                   |
| Down syndrome                                       | 13<br>(8 - 19)     | 5<br>(2 - 9)       | 0<br>(0 - 1)        | 4<br>(2 - 5)         | 4<br>(2 - 5)         | 0<br>(0 - 0)         |
| Chromosomal unbalanced rearrangements               | 4<br>(2 - 7)       | 3<br>(2 - 6)       | 0<br>(0 - 0)        | 0<br>(0 - 0)         | 0<br>(0 - 0)         | 0<br>(0 - 0)         |
| Other congenital anomalies                          | 41<br>(26 - 61)    | 31<br>(16 - 50)    | 1<br>(1 - 2)        | 3<br>(2 - 4)         | 2<br>(1 - 3)         | 4<br>(3 - 7)         |
| Skin and subcutaneous diseases                      | 114<br>(35 - 168)  | 1<br>(0 - 2)       | 0<br>(0 - 0)        | 2<br>(1 - 3)         | 10<br>(3 - 14)       | 100<br>(30 - 153)    |
| Cellulitis                                          | 7<br>(3 - 16)      | 0<br>(0 - 0)       | 0<br>(0 - 0)        | 0<br>(0 - 1)         | 2<br>(1 - 4)         | 5<br>(2 - 12)        |
| Pyoderma                                            | 17<br>(5 - 27)     | 1<br>(0 - 1)       | 0<br>(0 - 0)        | 1<br>(0 - 1)         | 3<br>(1 - 4)         | 12<br>(4 - 22)       |
| Decubitus ulcer                                     | 87<br>(26 - 131)   | 0<br>(0 - 0)       | 0<br>(0 - 0)        | 1<br>(0 - 1)         | 5<br>(1 - 7)         | 82<br>(23 - 126)     |
| Other skin and subcutaneous diseases                | 3<br>(1 - 6)       | 0<br>(0 - 1)       | 0<br>(0 - 0)        | 0<br>(0 - 1)         | 0<br>(0 - 1)         | 1<br>(0 - 4)         |
| Sudden infant death syndrome                        | 10<br>(3 - 23)     | 10<br>(3 - 23)     | --                  | --                   | --                   | --                   |
| Injuries                                            | 719<br>(557 - 865) | 20<br>(12 - 32)    | 14<br>(11 - 18)     | 154<br>(124 - 187)   | 119<br>(93 - 145)    | 411<br>(287 - 522)   |

Web Table 31- Uruguay deaths with 95% UI by age, sex, and cause in 2013

| Cause                                           | Females, All Ages  | Females, 0-4 Years | Females, 5-14 Years | Females, 15-49 Years | Females, 50-69 Years | Females, 70-80 Years |
|-------------------------------------------------|--------------------|--------------------|---------------------|----------------------|----------------------|----------------------|
| Transport injuries                              | 163<br>(112 - 199) | 3<br>(2 - 5)       | 7<br>(5 - 9)        | 50<br>(36 - 64)      | 36<br>(25 - 46)      | 66<br>(41 - 87)      |
| Road injuries                                   | 157<br>(109 - 191) | 3<br>(2 - 4)       | 7<br>(5 - 9)        | 48<br>(35 - 61)      | 35<br>(24 - 44)      | 64<br>(39 - 84)      |
| Pedestrian road injuries                        | 61<br>(39 - 79)    | 1<br>(0 - 1)       | 2<br>(1 - 3)        | 12<br>(8 - 16)       | 12<br>(8 - 16)       | 34<br>(20 - 47)      |
| Cyclist road injuries                           | 10<br>(6 - 13)     | 0<br>(0 - 0)       | 0<br>(0 - 1)        | 3<br>(2 - 4)         | 3<br>(2 - 4)         | 3<br>(2 - 5)         |
| Motorcyclist road injuries                      | 9<br>(5 - 13)      | 0<br>(0 - 0)       | 0<br>(0 - 0)        | 5<br>(3 - 8)         | 2<br>(1 - 3)         | 2<br>(1 - 3)         |
| Motor vehicle road injuries                     | 75<br>(50 - 94)    | 2<br>(1 - 3)       | 4<br>(3 - 5)        | 27<br>(19 - 35)      | 17<br>(11 - 23)      | 25<br>(15 - 35)      |
| Other road injuries                             | 1<br>(1 - 2)       | 0<br>(0 - 0)       | 0<br>(0 - 0)        | 0<br>(0 - 1)         | 0<br>(0 - 1)         | 0<br>(0 - 1)         |
| Other transport injuries                        | 6<br>(3 - 8)       | 0<br>(0 - 0)       | 0<br>(0 - 0)        | 2<br>(1 - 3)         | 2<br>(1 - 2)         | 2<br>(1 - 3)         |
| Unintentional injuries                          | 427<br>(314 - 536) | 17<br>(9 - 27)     | 6<br>(4 - 8)        | 43<br>(34 - 53)      | 45<br>(36 - 56)      | 317<br>(212 - 421)   |
| Falls                                           | 196<br>(115 - 287) | 0<br>(0 - 1)       | 0<br>(0 - 1)        | 3<br>(2 - 4)         | 6<br>(4 - 8)         | 186<br>(106 - 276)   |
| Drowning                                        | 18<br>(13 - 28)    | 1<br>(1 - 3)       | 2<br>(1 - 4)        | 5<br>(4 - 9)         | 4<br>(3 - 7)         | 5<br>(3 - 8)         |
| Fire, heat, and hot substances                  | 28<br>(16 - 39)    | 2<br>(1 - 3)       | 1<br>(0 - 1)        | 4<br>(2 - 5)         | 5<br>(3 - 7)         | 17<br>(8 - 25)       |
| Poisonings                                      | 17<br>(11 - 24)    | 0<br>(0 - 1)       | 0<br>(0 - 0)        | 3<br>(2 - 5)         | 5<br>(3 - 8)         | 7<br>(4 - 11)        |
| Exposure to mechanical forces                   | 34<br>(27 - 45)    | 1<br>(0 - 1)       | 1<br>(1 - 2)        | 19<br>(14 - 25)      | 7<br>(5 - 10)        | 7<br>(4 - 10)        |
| Unintentional firearm injuries                  | 27<br>(21 - 34)    | 0<br>(0 - 0)       | 1<br>(0 - 1)        | 16<br>(12 - 22)      | 5<br>(3 - 7)         | 4<br>(2 - 7)         |
| Unintentional suffocation                       | 4<br>(2 - 7)       | 0<br>(0 - 1)       | 0<br>(0 - 0)        | 1<br>(0 - 1)         | 1<br>(1 - 3)         | 2<br>(1 - 3)         |
| Other exposure to mechanical forces             | 4<br>(2 - 10)      | 0<br>(0 - 0)       | 0<br>(0 - 1)        | 2<br>(1 - 4)         | 1<br>(0 - 2)         | 1<br>(0 - 2)         |
| Adverse effects of medical treatment            | 50<br>(30 - 68)    | 1<br>(0 - 1)       | 0<br>(0 - 0)        | 4<br>(3 - 6)         | 9<br>(6 - 13)        | 36<br>(19 - 53)      |
| Animal contact                                  | 2<br>(0 - 3)       | 0<br>(0 - 0)       | 0<br>(0 - 0)        | 0<br>(0 - 0)         | 0<br>(0 - 1)         | 1<br>(0 - 2)         |
| Venomous animal contact                         | 1<br>(0 - 1)       | 0<br>(0 - 0)       | 0<br>(0 - 0)        | 0<br>(0 - 0)         | 0<br>(0 - 0)         | 1<br>(0 - 1)         |
| Non-venomous animal contact                     | 1<br>(0 - 2)       | 0<br>(0 - 0)       | 0<br>(0 - 0)        | 0<br>(0 - 0)         | 0<br>(0 - 1)         | 1<br>(0 - 1)         |
| Foreign body                                    | 77<br>(36 - 121)   | 11<br>(5 - 19)     | 0<br>(0 - 0)        | 3<br>(1 - 4)         | 7<br>(4 - 11)        | 56<br>(23 - 94)      |
| Pulmonary aspiration and foreign body in airway | 77<br>(36 - 121)   | 11<br>(5 - 19)     | 0<br>(0 - 0)        | 3<br>(1 - 4)         | 7<br>(4 - 10)        | 56<br>(23 - 94)      |
| Foreign body in other body part                 | 0<br>(0 - 1)       | 0<br>(0 - 0)       | 0<br>(0 - 0)        | 0<br>(0 - 0)         | 0<br>(0 - 0)         | 0<br>(0 - 0)         |
| Other unintentional injuries                    | 5<br>(1 - 7)       | 0<br>(0 - 0)       | 0<br>(0 - 0)        | 1<br>(0 - 2)         | 1<br>(0 - 2)         | 2<br>(0 - 4)         |
| Self-harm and interpersonal violence            | 129<br>(91 - 157)  | 1<br>(0 - 2)       | 2<br>(1 - 3)        | 60<br>(43 - 76)      | 38<br>(25 - 48)      | 28<br>(20 - 36)      |
| Self-harm                                       | 104<br>(67 - 128)  | --                 | 1<br>(1 - 2)        | 45<br>(28 - 58)      | 33<br>(20 - 42)      | 24<br>(16 - 32)      |
| Interpersonal violence                          | 25<br>(15 - 34)    | 1<br>(0 - 2)       | 1<br>(0 - 1)        | 15<br>(9 - 21)       | 5<br>(3 - 7)         | 4<br>(2 - 7)         |
| Assault by firearm                              | 11<br>(6 - 18)     | 0<br>(0 - 0)       | 0<br>(0 - 1)        | 8<br>(4 - 13)        | 2<br>(1 - 3)         | 1<br>(0 - 2)         |
| Assault by sharp object                         | 8<br>(4 - 11)      | 0<br>(0 - 0)       | 0<br>(0 - 0)        | 5<br>(2 - 8)         | 1<br>(1 - 2)         | 1<br>(0 - 2)         |
| Assault by other means                          | 6<br>(3 - 10)      | 0<br>(0 - 1)       | 0<br>(0 - 1)        | 2<br>(1 - 3)         | 1<br>(1 - 3)         | 2<br>(1 - 4)         |

Web Table 31- Uzbekistan deaths with 95% UI by age, sex, and cause in 2013

| Cause                                                             | Both Sexes, All Ages           | Both Sexes, 0-4 Years       | Both Sexes, 5-14 Years   | Both Sexes, 15-49 Years     | Both Sexes, 50-69 Years     | Both Sexes, 70-80 Years     |
|-------------------------------------------------------------------|--------------------------------|-----------------------------|--------------------------|-----------------------------|-----------------------------|-----------------------------|
| All causes                                                        | 183,621<br>(160,414 - 208,473) | 22,318<br>(20,183 - 24,785) | 2,983<br>(2,748 - 3,261) | 35,775<br>(28,783 - 43,528) | 48,904<br>(40,343 - 59,544) | 73,642<br>(65,640 - 81,762) |
| Communicable, maternal, neonatal, and nutritional diseases        | 25,983<br>(23,234 - 28,478)    | 17,760<br>(15,902 - 19,732) | 800<br>(659 - 927)       | 4,462<br>(3,311 - 5,387)    | 1,877<br>(1,404 - 2,280)    | 1,084<br>(824 - 1,339)      |
| HIV/AIDS and tuberculosis                                         | 3,136<br>(1,829 - 4,032)       | 7<br>(4 - 10)               | 10<br>(5 - 14)           | 2,110<br>(1,170 - 2,768)    | 851<br>(531 - 1,127)        | 157<br>(113 - 203)          |
| Tuberculosis                                                      | 2,870<br>(1,486 - 3,757)       | 6<br>(3 - 9)                | 10<br>(5 - 14)           | 1,894<br>(865 - 2,558)      | 806<br>(486 - 1,075)        | 153<br>(108 - 197)          |
| HIV/AIDS                                                          | 266<br>(156 - 466)             | 1<br>(0 - 1)                | 0<br>(0 - 1)             | 216<br>(126 - 362)          | 45<br>(21 - 106)            | 5<br>(2 - 11)               |
| HIV/AIDS resulting in mycobacterial infection                     | 17<br>(10 - 31)                | 0<br>(0 - 0)                | 0<br>(0 - 0)             | 14<br>(8 - 24)              | 3<br>(1 - 7)                | 0<br>(0 - 1)                |
| HIV/AIDS resulting in other diseases                              | 249<br>(146 - 435)             | 1<br>(0 - 1)                | 0<br>(0 - 1)             | 202<br>(118 - 339)          | 42<br>(20 - 99)             | 5<br>(2 - 11)               |
| Diarrhea, lower respiratory, and other common infectious diseases | 14,233<br>(12,409 - 16,091)    | 10,075<br>(8,694 - 11,646)  | 702<br>(564 - 828)       | 1,717<br>(1,280 - 2,202)    | 878<br>(653 - 1,132)        | 861<br>(616 - 1,109)        |
| Diarrheal diseases                                                | 471<br>(348 - 653)             | 376<br>(254 - 555)          | 16<br>(10 - 22)          | 46<br>(33 - 60)             | 19<br>(14 - 26)             | 15<br>(10 - 22)             |
| Intestinal infectious diseases                                    | 42<br>(24 - 68)                | 15<br>(8 - 26)              | 8<br>(4 - 14)            | 14<br>(7 - 27)              | 3<br>(1 - 7)                | 1<br>(0 - 4)                |
| Typhoid fever                                                     | 22<br>(11 - 40)                | 7<br>(3 - 13)               | 5<br>(3 - 10)            | 8<br>(3 - 17)               | 1<br>(1 - 3)                | 1<br>(0 - 1)                |
| Paratyphoid fever                                                 | 7<br>(4 - 14)                  | 3<br>(1 - 5)                | 2<br>(1 - 3)             | 2<br>(1 - 5)                | 0<br>(0 - 1)                | 0<br>(0 - 0)                |
| Other intestinal infectious diseases                              | 12<br>(5 - 21)                 | 5<br>(1 - 12)               | 1<br>(0 - 4)             | 3<br>(1 - 8)                | 1<br>(0 - 4)                | 1<br>(0 - 3)                |
| Lower respiratory infections                                      | 12,524<br>(10,848 - 14,197)    | 9,217<br>(7,876 - 10,706)   | 523<br>(419 - 636)       | 1,213<br>(899 - 1,583)      | 752<br>(544 - 981)          | 819<br>(578 - 1,070)        |
| Upper respiratory infections                                      | 13<br>(6 - 22)                 | 2<br>(0 - 5)                | 0<br>(0 - 1)             | 3<br>(1 - 7)                | 3<br>(1 - 8)                | 4<br>(1 - 11)               |
| Otitis media                                                      | 3<br>(2 - 3)                   | 0<br>(0 - 1)                | 0<br>(0 - 0)             | 1<br>(1 - 2)                | 0<br>(0 - 0)                | 0<br>(0 - 0)                |
| Meningitis                                                        | 597<br>(499 - 717)             | 214<br>(157 - 299)          | 67<br>(51 - 86)          | 246<br>(189 - 316)          | 58<br>(44 - 77)             | 13<br>(10 - 16)             |
| Pneumococcal meningitis                                           | 157<br>(124 - 194)             | 40<br>(28 - 57)             | 19<br>(13 - 26)          | 76<br>(52 - 107)            | 18<br>(12 - 26)             | 4<br>(3 - 5)                |
| H influenzae type B meningitis                                    | 179<br>(142 - 228)             | 104<br>(75 - 148)           | 21<br>(15 - 28)          | 44<br>(30 - 63)             | 8<br>(5 - 12)               | 2<br>(1 - 3)                |
| Meningococcal meningitis                                          | 134<br>(108 - 166)             | 45<br>(31 - 66)             | 18<br>(12 - 24)          | 57<br>(41 - 80)             | 11<br>(7 - 16)              | 3<br>(2 - 4)                |
| Other meningitis                                                  | 127<br>(94 - 166)              | 24<br>(15 - 38)             | 9<br>(6 - 14)            | 69<br>(40 - 99)             | 21<br>(12 - 30)             | 4<br>(2 - 6)                |
| Encephalitis                                                      | 561<br>(359 - 772)             | 245<br>(147 - 382)          | 85<br>(45 - 132)         | 187<br>(100 - 281)          | 39<br>(27 - 56)             | 5<br>(3 - 7)                |
| Diphtheria                                                        | 3<br>(0 - 12)                  | 2<br>(0 - 11)               | 1<br>(0 - 3)             | 0<br>(0 - 2)                | 0<br>(0 - 1)                | -                           |
| Whooping cough                                                    | 5<br>(3 - 9)                   | 2<br>(0 - 6)                | 1<br>(0 - 1)             | 2<br>(2 - 3)                | 0<br>(0 - 1)                | -                           |
| Tetanus                                                           | 3<br>(2 - 4)                   | 0<br>(0 - 0)                | 1<br>(0 - 1)             | 2<br>(1 - 2)                | 1<br>(0 - 1)                | 0<br>(0 - 0)                |
| Measles                                                           | 0<br>(0 - 2)                   | 0<br>(0 - 2)                | 0<br>(0 - 0)             | 0<br>(0 - 0)                | 0<br>(0 - 0)                | -                           |
| Varicella and herpes zoster                                       | 11<br>(5 - 22)                 | 3<br>(0 - 8)                | 1<br>(0 - 2)             | 3<br>(1 - 5)                | 1<br>(0 - 3)                | 4<br>(0 - 14)               |
| Neglected tropical diseases and malaria                           | 59<br>(49 - 70)                | 8<br>(5 - 13)               | 6<br>(5 - 10)            | 25<br>(20 - 31)             | 13<br>(10 - 16)             | 6<br>(5 - 9)                |
| Leishmaniasis                                                     | 4<br>(3 - 5)                   | 1<br>(1 - 2)                | 0<br>(0 - 1)             | 2<br>(1 - 2)                | 0<br>(0 - 1)                | 0<br>(0 - 0)                |
| Visceral leishmaniasis                                            | 4<br>(3 - 5)                   | 1<br>(1 - 2)                | 0<br>(0 - 1)             | 2<br>(1 - 2)                | 0<br>(0 - 1)                | 0<br>(0 - 0)                |
| Cysticercosis                                                     | 0<br>(0 - 0)                   | 0<br>(0 - 0)                | 0<br>(0 - 0)             | 0<br>(0 - 0)                | 0<br>(0 - 0)                | 0<br>(0 - 0)                |
| Cystic echinococcosis                                             | 38<br>(31 - 45)                | 2<br>(1 - 2)                | 4<br>(3 - 4)             | 17<br>(13 - 21)             | 10<br>(8 - 12)              | 5<br>(5 - 6)                |
| Dengue                                                            | 3<br>(2 - 4)                   | 0<br>(0 - 1)                | 0<br>(0 - 1)             | 2<br>(1 - 2)                | 0<br>(0 - 1)                | 0<br>(0 - 0)                |
| Rabies                                                            | 4<br>(3 - 5)                   | 0<br>(0 - 1)                | 1<br>(1 - 1)             | 2<br>(1 - 3)                | 1<br>(0 - 1)                | 0<br>(0 - 0)                |
| Intestinal nematode infections                                    | 3<br>(0 - 10)                  | 2<br>(0 - 8)                | 1<br>(0 - 4)             | 0<br>(0 - 3)                | 0<br>(0 - 2)                | 0<br>(0 - 2)                |
| Ascariasis                                                        | 3<br>(0 - 10)                  | 2<br>(0 - 8)                | 1<br>(0 - 4)             | 0<br>(0 - 3)                | 0<br>(0 - 2)                | 0<br>(0 - 2)                |
| Other neglected tropical diseases                                 | 7<br>(5 - 9)                   | 2<br>(1 - 3)                | 0<br>(0 - 1)             | 3<br>(2 - 4)                | 1<br>(1 - 2)                | 0<br>(0 - 1)                |
| Maternal disorders                                                | 187<br>(129 - 262)             | -                           | 0<br>(0 - 0)             | 187<br>(129 - 262)          | -                           | -                           |
| Maternal hemorrhage                                               | 30<br>(19 - 44)                | -                           | 0<br>(0 - 0)             | 30<br>(19 - 44)             | -                           | -                           |
| Maternal sepsis and other maternal infections                     | 24<br>(14 - 37)                | -                           | 0<br>(0 - 0)             | 24<br>(14 - 37)             | -                           | -                           |

Web Table 31- Uzbekistan deaths with 95% UI by age, sex, and cause in 2013

| Cause                                                            | Both Sexes, All Ages           | Both Sexes, 0-4 Years    | Both Sexes, 5-14 Years | Both Sexes, 15-49 Years     | Both Sexes, 50-69 Years     | Both Sexes, 70-80 Years     |
|------------------------------------------------------------------|--------------------------------|--------------------------|------------------------|-----------------------------|-----------------------------|-----------------------------|
| Maternal hypertensive disorders                                  | 15<br>(8 - 24)                 | --                       | 0<br>(0 - 0)           | 15<br>(8 - 24)              | --                          | --                          |
| Maternal obstructed labor                                        | 16<br>(9 - 26)                 | --                       | 0<br>(0 - 0)           | 16<br>(9 - 26)              | --                          | --                          |
| Maternal abortive outcome                                        | 16<br>(9 - 27)                 | --                       | 0<br>(0 - 0)           | 16<br>(9 - 27)              | --                          | --                          |
| Indirect maternal deaths                                         | 12<br>(6 - 21)                 | --                       | 0<br>(0 - 0)           | 12<br>(6 - 21)              | --                          | --                          |
| Late maternal deaths                                             | 30<br>(19 - 44)                | --                       | 0<br>(0 - 0)           | 30<br>(19 - 44)             | --                          | --                          |
| Maternal deaths aggravated by HIV/AIDS                           | 0<br>(0 - 0)                   | --                       | --                     | 0<br>(0 - 0)                | --                          | --                          |
| Other maternal disorders                                         | 44<br>(27 - 66)                | --                       | 0<br>(0 - 0)           | 44<br>(27 - 66)             | --                          | --                          |
| Neonatal disorders                                               | 7,421<br>(6,397 - 8,427)       | 7,421<br>(6,397 - 8,427) | --                     | --                          | --                          | --                          |
| Neonatal preterm birth complications                             | 1,673<br>(991 - 2,579)         | 1,673<br>(991 - 2,579)   | --                     | --                          | --                          | --                          |
| Neonatal encephalopathy due to birth asphyxia and trauma         | 4,454<br>(3,326 - 5,515)       | 4,454<br>(3,326 - 5,515) | --                     | --                          | --                          | --                          |
| Neonatal sepsis and other neonatal infections                    | 298<br>(147 - 546)             | 298<br>(147 - 546)       | --                     | --                          | --                          | --                          |
| Hemolytic disease and other neonatal jaundice                    | 41<br>(20 - 80)                | 41<br>(20 - 80)          | --                     | --                          | --                          | --                          |
| Other neonatal disorders                                         | 955<br>(599 - 1,436)           | 955<br>(599 - 1,436)     | --                     | --                          | --                          | --                          |
| Nutritional deficiencies                                         | 323<br>(253 - 447)             | 47<br>(29 - 87)          | 28<br>(21 - 42)        | 167<br>(125 - 220)          | 57<br>(42 - 82)             | 24<br>(18 - 33)             |
| Protein-energy malnutrition                                      | 9<br>(5 - 20)                  | 4<br>(1 - 11)            | 1<br>(1 - 3)           | 3<br>(2 - 6)                | 1<br>(0 - 2)                | 0<br>(0 - 0)                |
| Iodine deficiency                                                | 9<br>(2 - 22)                  | 3<br>(0 - 13)            | 0<br>(0 - 3)           | 2<br>(0 - 7)                | 2<br>(0 - 6)                | 1<br>(0 - 5)                |
| Iron-deficiency anemia                                           | 243<br>(182 - 333)             | 26<br>(15 - 51)          | 18<br>(13 - 29)        | 135<br>(97 - 183)           | 44<br>(32 - 64)             | 19<br>(14 - 27)             |
| Other nutritional deficiencies                                   | 62<br>(36 - 103)               | 13<br>(6 - 28)           | 8<br>(4 - 13)          | 27<br>(14 - 43)             | 10<br>(5 - 18)              | 3<br>(2 - 6)                |
| Other communicable, maternal, neonatal, and nutritional diseases | 624<br>(494 - 770)             | 202<br>(135 - 304)       | 53<br>(37 - 72)        | 256<br>(182 - 343)          | 78<br>(55 - 106)            | 35<br>(24 - 53)             |
| Sexually transmitted diseases excluding HIV                      | 54<br>(20 - 108)               | 26<br>(0 - 71)           | 3<br>(1 - 6)           | 15<br>(9 - 25)              | 7<br>(4 - 12)               | 3<br>(1 - 5)                |
| Syphilis                                                         | 42<br>(11 - 93)                | 26<br>(0 - 71)           | 2<br>(0 - 5)           | 7<br>(4 - 12)               | 4<br>(2 - 8)                | 2<br>(1 - 4)                |
| Chlamydial infection                                             | 2<br>(1 - 4)                   | --                       | 0<br>(0 - 0)           | 2<br>(1 - 3)                | 1<br>(0 - 1)                | 0<br>(0 - 0)                |
| Gonococcal infection                                             | 5<br>(3 - 9)                   | --                       | 0<br>(0 - 0)           | 3<br>(2 - 6)                | 1<br>(1 - 2)                | 0<br>(0 - 1)                |
| Other sexually transmitted diseases                              | 4<br>(3 - 7)                   | --                       | 0<br>(0 - 0)           | 3<br>(2 - 5)                | 1<br>(0 - 2)                | 0<br>(0 - 0)                |
| Hepatitis                                                        | 404<br>(318 - 501)             | 102<br>(63 - 162)        | 46<br>(31 - 65)        | 200<br>(140 - 276)          | 42<br>(28 - 58)             | 15<br>(10 - 22)             |
| Acute hepatitis A                                                | 63<br>(19 - 125)               | 31<br>(9 - 66)           | 13<br>(4 - 26)         | 17<br>(4 - 39)              | 1<br>(0 - 2)                | 0<br>(0 - 0)                |
| Acute hepatitis B                                                | 225<br>(155 - 310)             | 70<br>(34 - 124)         | 22<br>(11 - 36)        | 88<br>(52 - 136)            | 33<br>(21 - 48)             | 13<br>(8 - 19)              |
| Acute hepatitis C                                                | 19<br>(4 - 45)                 | --                       | 4<br>(1 - 10)          | 11<br>(2 - 27)              | 3<br>(1 - 7)                | 1<br>(0 - 3)                |
| Acute hepatitis E                                                | 97<br>(56 - 152)               | 1<br>(0 - 2)             | 7<br>(3 - 13)          | 84<br>(47 - 131)            | 5<br>(2 - 10)               | 1<br>(0 - 2)                |
| Other infectious diseases                                        | 167<br>(103 - 262)             | 74<br>(39 - 158)         | 4<br>(2 - 8)           | 41<br>(22 - 65)             | 30<br>(14 - 53)             | 18<br>(8 - 34)              |
| Non-communicable diseases                                        | 142,020<br>(122,402 - 164,509) | 2,681<br>(2,075 - 3,317) | 985<br>(865 - 1,102)   | 21,688<br>(17,074 - 26,730) | 44,787<br>(36,789 - 54,689) | 71,879<br>(64,118 - 79,793) |
| Neoplasms                                                        | 14,854<br>(12,373 - 17,982)    | 181<br>(131 - 250)       | 378<br>(317 - 442)     | 4,324<br>(3,456 - 5,336)    | 6,737<br>(5,506 - 8,297)    | 3,234<br>(2,708 - 3,965)    |
| Esophageal cancer                                                | 1,528<br>(1,060 - 2,382)       | --                       | --                     | 198<br>(137 - 300)          | 747<br>(513 - 1,162)        | 584<br>(376 - 942)          |
| Stomach cancer                                                   | 1,961<br>(1,581 - 2,470)       | --                       | --                     | 416<br>(318 - 544)          | 982<br>(774 - 1,291)        | 563<br>(464 - 696)          |
| Liver cancer                                                     | 980<br>(788 - 1,215)           | --                       | 5<br>(3 - 8)           | 207<br>(151 - 272)          | 516<br>(395 - 661)          | 252<br>(192 - 328)          |
| Liver cancer due to hepatitis B                                  | 345<br>(251 - 455)             | --                       | 1<br>(1 - 3)           | 82<br>(55 - 114)            | 194<br>(137 - 265)          | 68<br>(46 - 96)             |
| Liver cancer due to hepatitis C                                  | 354<br>(274 - 456)             | --                       | 1<br>(1 - 2)           | 66<br>(46 - 91)             | 186<br>(137 - 246)          | 100<br>(72 - 134)           |
| Liver cancer due to alcohol use                                  | 177<br>(127 - 241)             | --                       | --                     | 25<br>(16 - 37)             | 89<br>(60 - 127)            | 63<br>(43 - 90)             |
| Liver cancer due to other causes                                 | 104<br>(69 - 145)              | --                       | 3<br>(2 - 4)           | 34<br>(23 - 48)             | 47<br>(29 - 70)             | 20<br>(10 - 33)             |
| Larynx cancer                                                    | 308<br>(220 - 412)             | --                       | --                     | 65<br>(44 - 88)             | 173<br>(121 - 239)          | 69<br>(49 - 93)             |

Web Table 31- Uzbekistan deaths with 95% UI by age, sex, and cause in 2013

| Cause                                         | Both Sexes, All Ages         | Both Sexes, 0-4 Years | Both Sexes, 5-14 Years | Both Sexes, 15-49 Years   | Both Sexes, 50-69 Years     | Both Sexes, 70-80 Years     |
|-----------------------------------------------|------------------------------|-----------------------|------------------------|---------------------------|-----------------------------|-----------------------------|
| Tracheal, bronchus and lung cancer            | 1,725<br>(1,376 - 2,186)     | --                    | --                     | 363<br>(276 - 470)        | 1,002<br>(782 - 1,310)      | 359<br>(295 - 446)          |
| Breast cancer                                 | 1,317<br>(922 - 1,764)       | --                    | --                     | 516<br>(344 - 725)        | 607<br>(413 - 844)          | 194<br>(146 - 258)          |
| Cervical cancer                               | 637<br>(440 - 895)           | --                    | --                     | 256<br>(167 - 366)        | 289<br>(189 - 426)          | 92<br>(65 - 138)            |
| Uterine cancer                                | 150<br>(100 - 239)           | --                    | --                     | 36<br>(22 - 55)           | 80<br>(52 - 131)            | 35<br>(23 - 62)             |
| Prostate cancer                               | 179<br>(115 - 309)           | --                    | --                     | 9<br>(5 - 15)             | 64<br>(41 - 110)            | 106<br>(66 - 182)           |
| Colon and rectum cancer                       | 886<br>(728 - 1,067)         | --                    | --                     | 267<br>(211 - 329)        | 400<br>(320 - 493)          | 220<br>(183 - 265)          |
| Lip and oral cavity cancer                    | 313<br>(226 - 404)           | --                    | --                     | 86<br>(58 - 118)          | 156<br>(110 - 213)          | 71<br>(51 - 95)             |
| Nasopharynx cancer                            | 58<br>(42 - 76)              | --                    | 1<br>(0 - 2)           | 31<br>(21 - 44)           | 21<br>(14 - 31)             | 5<br>(3 - 7)                |
| Other pharynx cancer                          | 130<br>(96 - 171)            | --                    | --                     | 31<br>(21 - 43)           | 79<br>(57 - 107)            | 20<br>(14 - 26)             |
| Gallbladder and biliary tract cancer          | 195<br>(135 - 297)           | --                    | --                     | 24<br>(15 - 39)           | 99<br>(66 - 156)            | 72<br>(48 - 114)            |
| Pancreatic cancer                             | 390<br>(316 - 477)           | --                    | --                     | 76<br>(56 - 99)           | 210<br>(164 - 265)          | 104<br>(82 - 131)           |
| Malignant skin melanoma                       | 105<br>(76 - 159)            | --                    | --                     | 23<br>(15 - 34)           | 50<br>(34 - 81)             | 32<br>(23 - 45)             |
| Non-melanoma skin cancer                      | 67<br>(47 - 98)              | --                    | --                     | 13<br>(9 - 20)            | 23<br>(16 - 35)             | 31<br>(19 - 49)             |
| Ovarian cancer                                | 209<br>(146 - 294)           | --                    | --                     | 78<br>(51 - 116)          | 101<br>(67 - 150)           | 29<br>(19 - 43)             |
| Testicular cancer                             | 50<br>(27 - 76)              | --                    | --                     | 36<br>(19 - 57)           | 12<br>(6 - 19)              | 2<br>(1 - 4)                |
| Kidney cancer                                 | 226<br>(178 - 286)           | 7<br>(3 - 13)         | 2<br>(1 - 2)           | 52<br>(37 - 71)           | 127<br>(96 - 165)           | 38<br>(28 - 49)             |
| Bladder cancer                                | 204<br>(158 - 260)           | --                    | --                     | 28<br>(19 - 40)           | 100<br>(74 - 134)           | 76<br>(58 - 100)            |
| Brain and nervous system cancer               | 807<br>(595 - 1,016)         | 30<br>(16 - 50)       | 78<br>(54 - 106)       | 443<br>(315 - 590)        | 225<br>(163 - 307)          | 31<br>(22 - 45)             |
| Thyroid cancer                                | 19<br>(14 - 27)              | --                    | 0<br>(0 - 0)           | 5<br>(3 - 7)              | 8<br>(6 - 12)               | 5<br>(4 - 8)                |
| Mesothelioma                                  | 10<br>(7 - 14)               | --                    | --                     | 6<br>(3 - 9)              | 3<br>(2 - 4)                | 1<br>(1 - 1)                |
| Hodgkin lymphoma                              | 101<br>(76 - 134)            | 4<br>(2 - 6)          | 13<br>(6 - 27)         | 53<br>(38 - 73)           | 26<br>(17 - 38)             | 6<br>(4 - 9)                |
| Non-Hodgkin lymphoma                          | 387<br>(291 - 489)           | 12<br>(8 - 20)        | 26<br>(17 - 40)        | 169<br>(114 - 223)        | 130<br>(95 - 176)           | 49<br>(37 - 70)             |
| Multiple myeloma                              | 57<br>(42 - 73)              | --                    | --                     | 15<br>(10 - 21)           | 30<br>(21 - 40)             | 12<br>(9 - 17)              |
| Leukemia                                      | 935<br>(779 - 1,114)         | 79<br>(55 - 113)      | 183<br>(147 - 225)     | 476<br>(367 - 587)        | 160<br>(125 - 204)          | 37<br>(30 - 46)             |
| Other neoplasms                               | 921<br>(738 - 1,143)         | 50<br>(30 - 77)       | 70<br>(50 - 94)        | 347<br>(258 - 448)        | 316<br>(238 - 423)          | 138<br>(104 - 185)          |
| Cardiovascular diseases                       | 93,102<br>(80,577 - 107,310) | 39<br>(30 - 50)       | 65<br>(53 - 82)        | 8,424<br>(6,508 - 10,640) | 27,276<br>(22,368 - 33,272) | 57,299<br>(50,888 - 63,447) |
| Rheumatic heart disease                       | 1,422<br>(1,039 - 1,891)     | 3<br>(1 - 5)          | 32<br>(24 - 42)        | 914<br>(657 - 1,261)      | 402<br>(268 - 567)          | 71<br>(50 - 94)             |
| Ischemic heart disease                        | 56,090<br>(48,154 - 65,031)  | 9<br>(6 - 14)         | 16<br>(12 - 21)        | 4,565<br>(3,456 - 5,866)  | 14,894<br>(11,868 - 18,240) | 36,607<br>(31,948 - 41,310) |
| Cerebrovascular disease                       | 25,674<br>(21,759 - 30,875)  | 6<br>(5 - 8)          | 9<br>(6 - 12)          | 2,015<br>(1,512 - 2,666)  | 8,198<br>(6,575 - 10,363)   | 15,447<br>(12,913 - 17,937) |
| Ischemic stroke                               | 14,971<br>(12,471 - 17,907)  | 2<br>(1 - 3)          | 4<br>(3 - 6)           | 635<br>(456 - 882)        | 3,840<br>(2,995 - 4,946)    | 10,489<br>(8,614 - 12,381)  |
| Hemorrhagic stroke                            | 10,703<br>(8,706 - 13,448)   | 4<br>(3 - 5)          | 4<br>(3 - 6)           | 1,380<br>(1,036 - 1,871)  | 4,358<br>(3,424 - 5,707)    | 4,957<br>(3,882 - 6,257)    |
| Hypertensive heart disease                    | 9,288<br>(6,026 - 12,455)    | 0<br>(0 - 0)          | 1<br>(0 - 1)           | 734<br>(433 - 1,101)      | 3,549<br>(2,168 - 5,075)    | 5,004<br>(3,224 - 6,756)    |
| Cardiomyopathy and myocarditis                | 136<br>(105 - 187)           | 10<br>(7 - 15)        | 4<br>(3 - 6)           | 60<br>(43 - 87)           | 40<br>(29 - 58)             | 22<br>(15 - 34)             |
| Atrial fibrillation and flutter               | 2<br>(1 - 2)                 | --                    | --                     | 1<br>(1 - 1)              | 0<br>(0 - 1)                | 0<br>(0 - 0)                |
| Aortic aneurysm                               | 52<br>(36 - 79)              | --                    | --                     | 6<br>(4 - 9)              | 5<br>(4 - 7)                | 42<br>(27 - 65)             |
| Peripheral vascular disease                   | 14<br>(11 - 18)              | --                    | --                     | 1<br>(1 - 2)              | 3<br>(2 - 4)                | 10<br>(7 - 13)              |
| Endocarditis                                  | 48<br>(35 - 67)              | 9<br>(6 - 12)         | 3<br>(2 - 4)           | 16<br>(10 - 23)           | 13<br>(8 - 21)              | 8<br>(5 - 11)               |
| Other cardiovascular and circulatory diseases | 376<br>(223 - 491)           | 1<br>(1 - 2)          | 2<br>(1 - 3)           | 112<br>(63 - 156)         | 172<br>(91 - 238)           | 89<br>(57 - 123)            |
| Chronic respiratory diseases                  | 6,602<br>(5,443 - 8,256)     | 8<br>(6 - 10)         | 10<br>(8 - 12)         | 967<br>(744 - 1,222)      | 2,283<br>(1,811 - 2,924)    | 3,335<br>(2,764 - 4,315)    |
| Chronic obstructive pulmonary disease         | 4,433<br>(3,638 - 5,622)     | 0<br>(0 - 1)          | 3<br>(2 - 4)           | 550<br>(414 - 715)        | 1,504<br>(1,173 - 1,973)    | 2,376<br>(1,945 - 3,113)    |



Web Table 31- Uzbekistan deaths with 95% UI by age, sex, and cause in 2013

| Cause                                               | Both Sexes, All Ages      | Both Sexes, 0-4 Years | Both Sexes, 5-14 Years | Both Sexes, 15-49 Years  | Both Sexes, 50-69 Years  | Both Sexes, 70-80 Years  |
|-----------------------------------------------------|---------------------------|-----------------------|------------------------|--------------------------|--------------------------|--------------------------|
| Pneumoconiosis                                      | 151<br>(97 - 215)         | 0<br>(0 - 0)          | 1<br>(0 - 1)           | 25<br>(15 - 38)          | 80<br>(49 - 122)         | 44<br>(28 - 67)          |
| Silicosis                                           | 30<br>(19 - 45)           | 0<br>(0 - 0)          | 0<br>(0 - 0)           | 8<br>(5 - 12)            | 20<br>(12 - 31)          | 3<br>(2 - 4)             |
| Asbestosis                                          | 33<br>(21 - 47)           | 0<br>(0 - 0)          | 0<br>(0 - 0)           | 6<br>(4 - 9)             | 12<br>(7 - 19)           | 14<br>(9 - 22)           |
| Coal workers pneumoconiosis                         | 47<br>(29 - 68)           | 0<br>(0 - 0)          | 0<br>(0 - 0)           | 4<br>(3 - 7)             | 26<br>(15 - 40)          | 17<br>(10 - 26)          |
| Other pneumoconiosis                                | 41<br>(27 - 60)           | 0<br>(0 - 0)          | 0<br>(0 - 0)           | 8<br>(5 - 11)            | 23<br>(14 - 35)          | 11<br>(7 - 17)           |
| Asthma                                              | 1,276<br>(977 - 1,631)    | 1<br>(0 - 2)          | 4<br>(3 - 5)           | 191<br>(137 - 263)       | 459<br>(339 - 621)       | 621<br>(452 - 837)       |
| Interstitial lung disease and pulmonary sarcoidosis | 509<br>(367 - 737)        | 0<br>(0 - 0)          | 1<br>(0 - 1)           | 98<br>(68 - 145)         | 166<br>(113 - 243)       | 244<br>(159 - 382)       |
| Other chronic respiratory diseases                  | 233<br>(176 - 299)        | 6<br>(5 - 8)          | 2<br>(2 - 3)           | 102<br>(73 - 140)        | 72<br>(50 - 104)         | 50<br>(33 - 72)          |
| Cirrhosis                                           | 8,751<br>(7,152 - 10,639) | 33<br>(23 - 46)       | 116<br>(98 - 135)      | 3,125<br>(2,427 - 3,883) | 3,806<br>(3,037 - 4,737) | 1,671<br>(1,377 - 2,005) |
| Cirrhosis due to hepatitis B                        | 3,867<br>(2,887 - 4,948)  | 3<br>(2 - 5)          | 37<br>(24 - 52)        | 1,390<br>(990 - 1,883)   | 1,684<br>(1,219 - 2,214) | 753<br>(549 - 999)       |
| Cirrhosis due to hepatitis C                        | 2,052<br>(1,225 - 3,172)  | 1<br>(0 - 3)          | 15<br>(4 - 26)         | 698<br>(408 - 1,120)     | 946<br>(537 - 1,491)     | 391<br>(205 - 588)       |
| Cirrhosis due to alcohol use                        | 1,744<br>(1,177 - 2,417)  | --                    | --                     | 474<br>(255 - 728)       | 848<br>(559 - 1,202)     | 422<br>(310 - 567)       |
| Cirrhosis due to other causes                       | 1,088<br>(748 - 1,514)    | 28<br>(19 - 40)       | 65<br>(49 - 83)        | 564<br>(366 - 815)       | 327<br>(195 - 483)       | 104<br>(61 - 170)        |
| Digestive diseases                                  | 1,789<br>(1,448 - 2,314)  | 33<br>(23 - 47)       | 35<br>(28 - 45)        | 715<br>(548 - 962)       | 646<br>(506 - 849)       | 361<br>(298 - 448)       |
| Peptic ulcer disease                                | 828<br>(606 - 1,088)      | 2<br>(1 - 3)          | 4<br>(3 - 6)           | 324<br>(222 - 454)       | 324<br>(237 - 431)       | 174<br>(128 - 227)       |
| Gastritis and duodenitis                            | 5<br>(3 - 8)              | 0<br>(0 - 1)          | 1<br>(1 - 2)           | 3<br>(2 - 5)             | 1<br>(0 - 1)             | 0<br>(0 - 0)             |
| Appendicitis                                        | 59<br>(40 - 91)           | 1<br>(1 - 2)          | 7<br>(5 - 11)          | 33<br>(21 - 52)          | 13<br>(8 - 19)           | 5<br>(3 - 8)             |
| Paralytic ileus and intestinal obstruction          | 167<br>(117 - 265)        | 14<br>(8 - 22)        | 11<br>(7 - 15)         | 68<br>(44 - 108)         | 41<br>(26 - 73)          | 32<br>(19 - 58)          |
| Inguinal, femoral, and abdominal hernia             | 29<br>(20 - 46)           | 1<br>(0 - 2)          | 1<br>(0 - 1)           | 8<br>(5 - 15)            | 10<br>(6 - 17)           | 9<br>(5 - 14)            |
| Inflammatory bowel disease                          | 50<br>(38 - 70)           | 7<br>(4 - 11)         | 3<br>(2 - 5)           | 18<br>(12 - 27)          | 13<br>(9 - 20)           | 9<br>(6 - 14)            |
| Vascular intestinal disorders                       | 48<br>(27 - 83)           | 0<br>(0 - 1)          | 1<br>(0 - 3)           | 14<br>(6 - 26)           | 18<br>(10 - 33)          | 15<br>(8 - 25)           |
| Gallbladder and biliary diseases                    | 172<br>(127 - 260)        | 1<br>(0 - 1)          | 1<br>(1 - 2)           | 37<br>(26 - 56)          | 72<br>(51 - 111)         | 61<br>(44 - 92)          |
| Pancreatitis                                        | 263<br>(188 - 395)        | 1<br>(0 - 1)          | 1<br>(1 - 1)           | 125<br>(84 - 192)        | 99<br>(66 - 149)         | 38<br>(25 - 57)          |
| Other digestive diseases                            | 167<br>(126 - 223)        | 6<br>(3 - 11)         | 4<br>(3 - 6)           | 85<br>(61 - 119)         | 54<br>(37 - 77)          | 17<br>(12 - 26)          |
| Neurological disorders                              | 5,644<br>(4,728 - 6,788)  | 57<br>(40 - 80)       | 110<br>(84 - 138)      | 844<br>(620 - 1,083)     | 426<br>(334 - 529)       | 4,207<br>(3,380 - 5,175) |
| Alzheimer disease and other dementias               | 4,377<br>(3,535 - 5,360)  | --                    | --                     | 2<br>(1 - 4)             | 267<br>(206 - 346)       | 4,108<br>(3,280 - 5,069) |
| Parkinson disease                                   | 43<br>(31 - 58)           | --                    | --                     | 3<br>(2 - 4)             | 13<br>(9 - 18)           | 27<br>(18 - 40)          |
| Epilepsy                                            | 1,009<br>(754 - 1,266)    | 34<br>(19 - 55)       | 91<br>(67 - 117)       | 764<br>(552 - 989)       | 103<br>(70 - 141)        | 17<br>(12 - 24)          |
| Multiple sclerosis                                  | 15<br>(9 - 30)            | --                    | --                     | 6<br>(3 - 11)            | 4<br>(2 - 9)             | 5<br>(3 - 11)            |
| Other neurological disorders                        | 201<br>(157 - 236)        | 23<br>(17 - 32)       | 19<br>(13 - 24)        | 70<br>(51 - 90)          | 39<br>(28 - 50)          | 49<br>(38 - 61)          |
| Mental and substance use disorders                  | 847<br>(566 - 1,114)      | 4<br>(3 - 7)          | 0<br>(0 - 0)           | 589<br>(395 - 791)       | 228<br>(140 - 318)       | 25<br>(19 - 32)          |
| Schizophrenia                                       | 131<br>(68 - 198)         | --                    | --                     | 93<br>(44 - 152)         | 34<br>(19 - 53)          | 3<br>(2 - 7)             |
| Alcohol use disorders                               | 463<br>(259 - 632)        | --                    | --                     | 289<br>(161 - 410)       | 162<br>(83 - 234)        | 12<br>(7 - 18)           |
| Drug use disorders                                  | 252<br>(172 - 343)        | 4<br>(3 - 7)          | --                     | 207<br>(135 - 289)       | 32<br>(21 - 44)          | 9<br>(6 - 12)            |
| Opioid use disorders                                | 55<br>(37 - 76)           | 1<br>(1 - 2)          | --                     | 46<br>(30 - 66)          | 6<br>(4 - 9)             | 2<br>(1 - 3)             |
| Cocaine use disorders                               | 6<br>(4 - 9)              | 0<br>(0 - 0)          | --                     | 5<br>(4 - 8)             | 1<br>(0 - 1)             | 0<br>(0 - 0)             |
| Amphetamine use disorders                           | 6<br>(4 - 9)              | 0<br>(0 - 0)          | --                     | 5<br>(3 - 7)             | 1<br>(1 - 1)             | 0<br>(0 - 0)             |
| Other drug use disorders                            | 184<br>(126 - 251)        | 3<br>(2 - 5)          | --                     | 150<br>(98 - 211)        | 24<br>(16 - 34)          | 7<br>(5 - 9)             |
| Eating disorders                                    | 1<br>(1 - 1)              | --                    | 0<br>(0 - 0)           | 1<br>(0 - 1)             | --                       | --                       |
| Anorexia nervosa                                    | 1<br>(1 - 1)              | --                    | 0<br>(0 - 0)           | 1<br>(0 - 1)             | --                       | --                       |

Web Table 31- Uzbekistan deaths with 95% UI by age, sex, and cause in 2013

| Cause                                               | Both Sexes, All Ages     | Both Sexes, 0-4 Years    | Both Sexes, 5-14 Years | Both Sexes, 15-49 Years  | Both Sexes, 50-69 Years  | Both Sexes, 70-80 Years  |
|-----------------------------------------------------|--------------------------|--------------------------|------------------------|--------------------------|--------------------------|--------------------------|
| Diabetes, urogenital, blood, and endocrine diseases | 7,647<br>(6,196 - 9,159) | 168<br>(131 - 216)       | 155<br>(127 - 183)     | 2,407<br>(1,884 - 2,988) | 3,255<br>(2,588 - 3,984) | 1,661<br>(1,338 - 1,960) |
| Diabetes mellitus                                   | 3,556<br>(2,887 - 4,295) | 2<br>(1 - 3)             | 18<br>(13 - 25)        | 628<br>(483 - 801)       | 2,020<br>(1,594 - 2,539) | 888<br>(701 - 1,083)     |
| Acute glomerulonephritis                            | 99<br>(60 - 132)         | 2<br>(1 - 3)             | 3<br>(2 - 4)           | 57<br>(31 - 78)          | 29<br>(17 - 41)          | 8<br>(5 - 11)            |
| Chronic kidney disease                              | 2,656<br>(2,027 - 3,237) | 46<br>(33 - 64)          | 69<br>(54 - 84)        | 1,138<br>(862 - 1,430)   | 858<br>(614 - 1,097)     | 546<br>(380 - 671)       |
| Chronic kidney disease due to diabetes mellitus     | 3<br>(2 - 6)             | 0<br>(0 - 1)             | 1<br>(0 - 1)           | 2<br>(1 - 3)             | 0<br>(0 - 1)             | 0<br>(0 - 0)             |
| Chronic kidney disease due to hypertension          | 846<br>(596 - 1,093)     | 1<br>(0 - 1)             | 0<br>(0 - 1)           | 159<br>(98 - 235)        | 289<br>(276 - 525)       | 289<br>(199 - 374)       |
| Chronic kidney disease due to glomerulonephritis    | 1,100<br>(781 - 1,427)   | 24<br>(17 - 33)          | 41<br>(31 - 51)        | 629<br>(456 - 825)       | 267<br>(164 - 373)       | 139<br>(82 - 195)        |
| Chronic kidney disease due to other causes          | 707<br>(500 - 973)       | 21<br>(14 - 35)          | 26<br>(17 - 38)        | 349<br>(214 - 510)       | 193<br>(109 - 297)       | 118<br>(62 - 180)        |
| Urinary diseases and male infertility               | 970<br>(759 - 1,191)     | 19<br>(14 - 28)          | 24<br>(18 - 30)        | 430<br>(321 - 549)       | 300<br>(228 - 379)       | 197<br>(148 - 249)       |
| Interstitial nephritis and urinary tract infections | 902<br>(693 - 1,108)     | 18<br>(13 - 25)          | 22<br>(17 - 28)        | 401<br>(295 - 510)       | 281<br>(211 - 354)       | 179<br>(127 - 229)       |
| Urolithiasis                                        | 3<br>(2 - 4)             | --                       | 0<br>(0 - 1)           | 2<br>(1 - 2)             | 0<br>(0 - 1)             | 0<br>(0 - 0)             |
| Other urinary diseases                              | 66<br>(45 - 105)         | 1<br>(1 - 3)             | 1<br>(1 - 2)           | 28<br>(17 - 45)          | 18<br>(11 - 30)          | 18<br>(11 - 31)          |
| Gynecological diseases                              | 3<br>(2 - 5)             | --                       | --                     | 2<br>(1 - 3)             | 1<br>(1 - 2)             | 0<br>(0 - 0)             |
| Uterine fibroids                                    | 1<br>(0 - 1)             | --                       | --                     | 0<br>(0 - 1)             | 0<br>(0 - 1)             | 0<br>(0 - 0)             |
| Polycystic ovarian syndrome                         | 0<br>(0 - 0)             | --                       | --                     | 0<br>(0 - 0)             | 0<br>(0 - 0)             | --                       |
| Endometriosis                                       | 0<br>(0 - 0)             | --                       | --                     | 0<br>(0 - 0)             | 0<br>(0 - 0)             | --                       |
| Genital prolapse                                    | 0<br>(0 - 1)             | --                       | --                     | 0<br>(0 - 0)             | 0<br>(0 - 0)             | 0<br>(0 - 0)             |
| Other gynecological diseases                        | 2<br>(1 - 3)             | --                       | --                     | 1<br>(1 - 1)             | 1<br>(0 - 1)             | 0<br>(0 - 0)             |
| Hemoglobinopathies and hemolytic anemias            | 207<br>(143 - 277)       | 60<br>(40 - 85)          | 22<br>(15 - 31)        | 88<br>(57 - 122)         | 24<br>(16 - 33)          | 13<br>(9 - 19)           |
| Thalassemias                                        | 117<br>(81 - 157)        | 49<br>(33 - 71)          | 19<br>(13 - 27)        | 49<br>(32 - 68)          | 0<br>(0 - 0)             | 0<br>(0 - 0)             |
| Sickle cell disorders                               | 2<br>(2 - 3)             | 1<br>(0 - 1)             | 0<br>(0 - 0)           | 1<br>(1 - 2)             | 0<br>(0 - 1)             | 0<br>(0 - 0)             |
| G6PD deficiency                                     | 3<br>(2 - 5)             | 1<br>(0 - 1)             | 0<br>(0 - 0)           | 2<br>(1 - 3)             | 1<br>(0 - 1)             | 0<br>(0 - 0)             |
| Other hemoglobinopathies and hemolytic anemias      | 84<br>(57 - 114)         | 9<br>(6 - 13)            | 2<br>(2 - 3)           | 37<br>(23 - 51)          | 23<br>(15 - 32)          | 13<br>(9 - 19)           |
| Endocrine, metabolic, blood, and immune disorders   | 156<br>(102 - 195)       | 39<br>(24 - 57)          | 20<br>(12 - 27)        | 64<br>(41 - 84)          | 23<br>(15 - 31)          | 9<br>(6 - 12)            |
| Musculoskeletal disorders                           | 402<br>(294 - 563)       | --                       | 17<br>(12 - 24)        | 189<br>(133 - 275)       | 117<br>(81 - 172)        | 79<br>(53 - 121)         |
| Rheumatoid arthritis                                | 187<br>(117 - 263)       | --                       | 1<br>(0 - 1)           | 74<br>(38 - 111)         | 71<br>(43 - 102)         | 41<br>(25 - 63)          |
| Other musculoskeletal disorders                     | 215<br>(147 - 348)       | --                       | 17<br>(12 - 22)        | 116<br>(77 - 189)        | 45<br>(25 - 83)          | 38<br>(23 - 65)          |
| Other non-communicable diseases                     | 2,381<br>(1,792 - 3,014) | 2,158<br>(1,607 - 2,753) | 99<br>(72 - 140)       | 103<br>(72 - 146)        | 14<br>(10 - 19)          | 7<br>(5 - 11)            |
| Congenital anomalies                                | 2,332<br>(1,718 - 2,961) | 2,121<br>(1,553 - 2,723) | 97<br>(71 - 139)       | 97<br>(67 - 142)         | 11<br>(8 - 15)           | 7<br>(5 - 10)            |
| Neural tube defects                                 | 242<br>(143 - 351)       | 234<br>(135 - 341)       | 5<br>(3 - 9)           | 2<br>(1 - 4)             | 0<br>(0 - 1)             | 0<br>(0 - 0)             |
| Congenital heart anomalies                          | 1,246<br>(905 - 1,669)   | 1,072<br>(758 - 1,468)   | 82<br>(59 - 116)       | 81<br>(56 - 119)         | 6<br>(4 - 9)             | 5<br>(3 - 7)             |
| Cleft lip and cleft palate                          | 12<br>(6 - 22)           | 12<br>(6 - 22)           | --                     | --                       | --                       | --                       |
| Down syndrome                                       | 75<br>(43 - 120)         | 70<br>(39 - 114)         | 2<br>(1 - 4)           | 2<br>(1 - 4)             | 0<br>(0 - 1)             | 0<br>(0 - 0)             |
| Chromosomal unbalanced rearrangements               | 7<br>(4 - 13)            | 3<br>(1 - 7)             | 1<br>(0 - 1)           | 3<br>(2 - 4)             | 0<br>(0 - 1)             | 0<br>(0 - 0)             |
| Other congenital anomalies                          | 751<br>(518 - 1,029)     | 730<br>(501 - 1,006)     | 7<br>(4 - 12)          | 8<br>(5 - 12)            | 3<br>(2 - 5)             | 2<br>(1 - 2)             |
| Skin and subcutaneous diseases                      | 13<br>(9 - 17)           | 2<br>(1 - 3)             | 1<br>(1 - 2)           | 6<br>(4 - 8)             | 3<br>(2 - 4)             | 1<br>(1 - 1)             |
| Cellulitis                                          | 3<br>(2 - 4)             | 0<br>(0 - 1)             | 0<br>(0 - 0)           | 2<br>(1 - 2)             | 1<br>(0 - 1)             | 0<br>(0 - 0)             |
| Pyoderma                                            | 7<br>(5 - 9)             | 1<br>(1 - 2)             | 1<br>(0 - 1)           | 3<br>(2 - 4)             | 2<br>(1 - 3)             | 1<br>(0 - 1)             |
| Decubitus ulcer                                     | 1<br>(1 - 2)             | 0<br>(0 - 0)             | 0<br>(0 - 0)           | 1<br>(1 - 1)             | 0<br>(0 - 0)             | 0<br>(0 - 0)             |
| Other skin and subcutaneous diseases                | 2<br>(1 - 2)             | 0<br>(0 - 0)             | 0<br>(0 - 0)           | 1<br>(1 - 1)             | 0<br>(0 - 0)             | 0<br>(0 - 0)             |

Web Table 31- Uzbekistan deaths with 95% UI by age, sex, and cause in 2013

| Cause                                           | Both Sexes, All Ages        | Both Sexes, 0-4 Years    | Both Sexes, 5-14 Years   | Both Sexes, 15-49 Years   | Both Sexes, 50-69 Years  | Both Sexes, 70-80 Years |
|-------------------------------------------------|-----------------------------|--------------------------|--------------------------|---------------------------|--------------------------|-------------------------|
| Sudden infant death syndrome                    | 36<br>(11 - 111)            | 36<br>(11 - 111)         | --                       | --                        | --                       | --                      |
| Injuries                                        | 15,618<br>(12,531 - 19,241) | 1,877<br>(1,389 - 2,646) | 1,199<br>(1,048 - 1,414) | 9,624<br>(7,371 - 12,230) | 2,240<br>(1,751 - 2,865) | 679<br>(566 - 845)      |
| Transport injuries                              | 4,407<br>(3,396 - 5,687)    | 111<br>(75 - 160)        | 335<br>(268 - 417)       | 3,059<br>(2,227 - 4,065)  | 712<br>(528 - 946)       | 190<br>(149 - 264)      |
| Road injuries                                   | 4,290<br>(3,305 - 5,533)    | 104<br>(70 - 150)        | 328<br>(261 - 407)       | 2,969<br>(2,162 - 3,949)  | 701<br>(520 - 929)       | 187<br>(148 - 260)      |
| Pedestrian road injuries                        | 1,504<br>(1,091 - 2,005)    | 56<br>(34 - 84)          | 203<br>(156 - 263)       | 878<br>(588 - 1,266)      | 257<br>(176 - 362)       | 110<br>(82 - 157)       |
| Cyclist road injuries                           | 173<br>(122 - 241)          | 7<br>(4 - 11)            | 16<br>(10 - 23)          | 85<br>(56 - 122)          | 59<br>(40 - 87)          | 6<br>(4 - 10)           |
| Motorcyclist road injuries                      | 584<br>(354 - 880)          | 2<br>(1 - 5)             | 2<br>(1 - 4)             | 551<br>(329 - 836)        | 24<br>(14 - 40)          | 3<br>(2 - 6)            |
| Motor vehicle road injuries                     | 2,018<br>(1,494 - 2,675)    | 38<br>(24 - 58)          | 105<br>(73 - 144)        | 1,449<br>(1,038 - 1,966)  | 359<br>(256 - 494)       | 67<br>(47 - 96)         |
| Other road injuries                             | 10<br>(7 - 19)              | 1<br>(0 - 1)             | 2<br>(1 - 3)             | 6<br>(3 - 10)             | 2<br>(1 - 4)             | 1<br>(0 - 2)            |
| Other transport injuries                        | 117<br>(85 - 163)           | 7<br>(4 - 11)            | 7<br>(5 - 10)            | 90<br>(60 - 129)          | 11<br>(7 - 19)           | 2<br>(1 - 4)            |
| Unintentional injuries                          | 7,145<br>(5,842 - 8,865)    | 1,746<br>(1,277 - 2,517) | 778<br>(652 - 1,011)     | 3,367<br>(2,500 - 4,460)  | 890<br>(686 - 1,136)     | 364<br>(302 - 434)      |
| Falls                                           | 1,179<br>(926 - 1,529)      | 174<br>(122 - 256)       | 90<br>(67 - 116)         | 600<br>(426 - 830)        | 215<br>(154 - 294)       | 101<br>(78 - 137)       |
| Drowning                                        | 2,516<br>(1,890 - 3,999)    | 700<br>(420 - 1,276)     | 438<br>(333 - 705)       | 1,141<br>(771 - 1,811)    | 197<br>(131 - 322)       | 41<br>(27 - 61)         |
| Fire, heat, and hot substances                  | 980<br>(751 - 1,244)        | 248<br>(161 - 379)       | 63<br>(46 - 86)          | 463<br>(343 - 626)        | 147<br>(103 - 201)       | 59<br>(44 - 77)         |
| Poisonings                                      | 392<br>(288 - 539)          | 50<br>(33 - 76)          | 19<br>(14 - 26)          | 241<br>(165 - 350)        | 64<br>(42 - 92)          | 17<br>(12 - 24)         |
| Exposure to mechanical forces                   | 731<br>(509 - 1,137)        | 290<br>(135 - 612)       | 47<br>(29 - 73)          | 329<br>(229 - 470)        | 56<br>(38 - 82)          | 9<br>(6 - 13)           |
| Unintentional firearm injuries                  | 29<br>(22 - 38)             | 2<br>(1 - 3)             | 1<br>(1 - 2)             | 17<br>(12 - 23)           | 8<br>(5 - 13)            | 1<br>(1 - 2)            |
| Unintentional suffocation                       | 484<br>(290 - 885)          | 253<br>(100 - 576)       | 24<br>(11 - 49)          | 190<br>(120 - 297)        | 15<br>(8 - 33)           | 1<br>(1 - 3)            |
| Other exposure to mechanical forces             | 218<br>(160 - 285)          | 35<br>(19 - 64)          | 21<br>(12 - 32)          | 123<br>(81 - 174)         | 32<br>(21 - 47)          | 7<br>(4 - 10)           |
| Adverse effects of medical treatment            | 396<br>(274 - 520)          | 49<br>(29 - 86)          | 9<br>(6 - 14)            | 122<br>(77 - 172)         | 125<br>(77 - 180)        | 90<br>(55 - 133)        |
| Animal contact                                  | 44<br>(30 - 65)             | 15<br>(8 - 26)           | 11<br>(6 - 19)           | 9<br>(6 - 15)             | 6<br>(4 - 12)            | 2<br>(1 - 4)            |
| Venomous animal contact                         | 33<br>(22 - 50)             | 14<br>(7 - 24)           | 11<br>(6 - 18)           | 5<br>(3 - 10)             | 3<br>(1 - 5)             | 1<br>(0 - 2)            |
| Non-venomous animal contact                     | 10<br>(7 - 16)              | 1<br>(1 - 3)             | 1<br>(0 - 1)             | 4<br>(2 - 6)              | 4<br>(2 - 6)             | 1<br>(1 - 2)            |
| Foreign body                                    | 286<br>(183 - 399)          | 169<br>(104 - 248)       | 16<br>(11 - 25)          | 61<br>(34 - 93)           | 21<br>(13 - 35)          | 18<br>(12 - 27)         |
| Pulmonary aspiration and foreign body in airway | 280<br>(177 - 394)          | 168<br>(103 - 247)       | 16<br>(10 - 24)          | 58<br>(31 - 89)           | 20<br>(13 - 34)          | 18<br>(12 - 26)         |
| Foreign body in other body part                 | 6<br>(4 - 9)                | 1<br>(0 - 2)             | 1<br>(0 - 1)             | 3<br>(2 - 5)              | 1<br>(1 - 2)             | 0<br>(0 - 1)            |
| Other unintentional injuries                    | 622<br>(472 - 806)          | 51<br>(32 - 81)          | 85<br>(62 - 115)         | 402<br>(277 - 563)        | 59<br>(40 - 82)          | 25<br>(17 - 34)         |
| Self-harm and interpersonal violence            | 4,066<br>(3,060 - 5,611)    | 20<br>(12 - 34)          | 85<br>(60 - 116)         | 3,198<br>(2,372 - 4,377)  | 637<br>(466 - 958)       | 125<br>(96 - 194)       |
| Self-harm                                       | 2,952<br>(2,201 - 3,934)    | --                       | 63<br>(41 - 92)          | 2,282<br>(1,673 - 3,022)  | 505<br>(374 - 753)       | 102<br>(78 - 160)       |
| Interpersonal violence                          | 1,114<br>(763 - 1,837)      | 20<br>(12 - 34)          | 22<br>(14 - 35)          | 916<br>(605 - 1,478)      | 133<br>(77 - 263)        | 23<br>(12 - 48)         |
| Assault by firearm                              | 203<br>(96 - 400)           | 2<br>(1 - 4)             | 3<br>(2 - 6)             | 175<br>(78 - 344)         | 20<br>(9 - 49)           | 2<br>(1 - 6)            |
| Assault by sharp object                         | 611<br>(399 - 1,038)        | 12<br>(7 - 21)           | 8<br>(5 - 15)            | 502<br>(312 - 846)        | 76<br>(42 - 152)         | 13<br>(7 - 27)          |
| Assault by other means                          | 301<br>(195 - 516)          | 6<br>(3 - 12)            | 10<br>(6 - 17)           | 239<br>(143 - 408)        | 37<br>(20 - 73)          | 8<br>(4 - 19)           |

Web Table 31- Uzbekistan deaths with 95% UI by age, sex, and cause in 2013

| Cause                                                             | Males, All Ages               | Males, 0-4 Years            | Males, 5-14 Years        | Males, 15-49 Years          | Males, 50-69 Years          | Males, 70-80 Years          |
|-------------------------------------------------------------------|-------------------------------|-----------------------------|--------------------------|-----------------------------|-----------------------------|-----------------------------|
| All causes                                                        | 101,112<br>(83,040 - 122,489) | 12,704<br>(11,371 - 14,261) | 1,806<br>(1,636 - 1,984) | 24,166<br>(17,985 - 30,827) | 29,587<br>(22,544 - 38,852) | 32,849<br>(28,281 - 38,168) |
| Communicable, maternal, neonatal, and nutritional diseases        | 15,291<br>(13,417 - 17,122)   | 10,232<br>(9,102 - 11,507)  | 430<br>(332 - 529)       | 2,804<br>(1,918 - 3,561)    | 1,250<br>(897 - 1,608)      | 575<br>(417 - 747)          |
| HIV/AIDS and tuberculosis                                         | 2,249<br>(1,274 - 3,050)      | 4<br>(2 - 6)                | 5<br>(2 - 6)             | 1,534<br>(817 - 2,114)      | 609<br>(369 - 852)          | 97<br>(69 - 131)            |
| Tuberculosis                                                      | 2,048<br>(1,002 - 2,829)      | 4<br>(2 - 6)                | 4<br>(2 - 6)             | 1,375<br>(594 - 1,948)      | 573<br>(333 - 804)          | 93<br>(66 - 126)            |
| HIV/AIDS                                                          | 200<br>(115 - 348)            | 0<br>(0 - 1)                | 0<br>(0 - 0)             | 160<br>(92 - 268)           | 36<br>(17 - 83)             | 4<br>(2 - 9)                |
| HIV/AIDS resulting in mycobacterial infection                     | 14<br>(8 - 25)                | 0<br>(0 - 0)                | 0<br>(0 - 0)             | 11<br>(6 - 19)              | 3<br>(1 - 6)                | 0<br>(0 - 1)                |
| HIV/AIDS resulting in other diseases                              | 187<br>(107 - 324)            | 0<br>(0 - 1)                | 0<br>(0 - 0)             | 149<br>(86 - 250)           | 34<br>(16 - 77)             | 4<br>(2 - 9)                |
| Diarrhea, lower respiratory, and other common infectious diseases | 8,040<br>(6,795 - 9,443)      | 5,608<br>(4,604 - 6,766)    | 375<br>(281 - 473)       | 1,047<br>(712 - 1,447)      | 563<br>(381 - 798)          | 447<br>(299 - 605)          |
| Diarrheal diseases                                                | 262<br>(171 - 406)            | 211<br>(118 - 352)          | 8<br>(5 - 13)            | 26<br>(16 - 37)             | 11<br>(7 - 17)              | 7<br>(4 - 11)               |
| Intestinal infectious diseases                                    | 22<br>(12 - 39)               | 8<br>(3 - 15)               | 4<br>(2 - 8)             | 8<br>(3 - 16)               | 2<br>(0 - 4)                | 1<br>(0 - 3)                |
| Typhoid fever                                                     | 12<br>(5 - 23)                | 3<br>(1 - 7)                | 3<br>(1 - 5)             | 5<br>(1 - 11)               | 1<br>(0 - 2)                | 0<br>(0 - 0)                |
| Paratyphoid fever                                                 | 4<br>(2 - 7)                  | 1<br>(0 - 3)                | 1<br>(0 - 2)             | 1<br>(0 - 3)                | 0<br>(0 - 1)                | 0<br>(0 - 0)                |
| Other intestinal infectious diseases                              | 7<br>(2 - 14)                 | 3<br>(1 - 9)                | 1<br>(0 - 3)             | 2<br>(0 - 6)                | 1<br>(0 - 3)                | 0<br>(0 - 2)                |
| Lower respiratory infections                                      | 7,076<br>(5,910 - 8,351)      | 5,125<br>(4,168 - 6,203)    | 281<br>(198 - 375)       | 760<br>(496 - 1,089)        | 485<br>(318 - 703)          | 424<br>(278 - 583)          |
| Upper respiratory infections                                      | 7<br>(3 - 14)                 | 1<br>(0 - 4)                | 0<br>(0 - 1)             | 2<br>(0 - 6)                | 2<br>(0 - 6)                | 2<br>(0 - 5)                |
| Otitis media                                                      | 1<br>(1 - 2)                  | 0<br>(0 - 0)                | 0<br>(0 - 0)             | 1<br>(1 - 1)                | 0<br>(0 - 0)                | 0<br>(0 - 0)                |
| Meningitis                                                        | 355<br>(269 - 459)            | 122<br>(72 - 202)           | 39<br>(28 - 53)          | 149<br>(101 - 202)          | 39<br>(26 - 55)             | 7<br>(5 - 9)                |
| Pneumococcal meningitis                                           | 94<br>(66 - 127)              | 23<br>(13 - 39)             | 11<br>(7 - 17)           | 46<br>(27 - 70)             | 12<br>(7 - 18)              | 2<br>(1 - 3)                |
| H influenzae type B meningitis                                    | 104<br>(73 - 146)             | 59<br>(34 - 99)             | 12<br>(8 - 19)           | 26<br>(16 - 41)             | 6<br>(3 - 9)                | 1<br>(0 - 2)                |
| Meningococcal meningitis                                          | 80<br>(59 - 105)              | 25<br>(14 - 43)             | 10<br>(6 - 16)           | 36<br>(21 - 56)             | 7<br>(4 - 12)               | 1<br>(1 - 2)                |
| Other meningitis                                                  | 76<br>(49 - 113)              | 15<br>(7 - 27)              | 5<br>(2 - 9)             | 40<br>(19 - 67)             | 15<br>(7 - 23)              | 2<br>(1 - 4)                |
| Encephalitis                                                      | 305<br>(187 - 443)            | 137<br>(71 - 234)           | 42<br>(18 - 68)          | 98<br>(47 - 156)            | 23<br>(13 - 35)             | 5<br>(3 - 7)                |
| Diphtheria                                                        | 2<br>(0 - 8)                  | 1<br>(0 - 8)                | 0<br>(0 - 3)             | 0<br>(0 - 1)                | 0<br>(0 - 1)                | -                           |
| Whooping cough                                                    | 3<br>(2 - 6)                  | 1<br>(0 - 4)                | 0<br>(0 - 0)             | 1<br>(1 - 1)                | 0<br>(0 - 1)                | -                           |
| Tetanus                                                           | 2<br>(1 - 2)                  | 0<br>(0 - 0)                | 0<br>(0 - 0)             | 1<br>(1 - 1)                | 0<br>(0 - 1)                | 0<br>(0 - 0)                |
| Measles                                                           | 0<br>(0 - 1)                  | 0<br>(0 - 1)                | 0<br>(0 - 0)             | 0<br>(0 - 0)                | 0<br>(0 - 0)                | -                           |
| Varicella and herpes zoster                                       | 5<br>(2 - 11)                 | 1<br>(0 - 5)                | 0<br>(0 - 1)             | 1<br>(0 - 4)                | 0<br>(0 - 2)                | 1<br>(0 - 7)                |
| Neglected tropical diseases and malaria                           | 32<br>(25 - 41)               | 4<br>(2 - 9)                | 4<br>(3 - 6)             | 15<br>(11 - 20)             | 7<br>(5 - 9)                | 2<br>(2 - 3)                |
| Leishmaniasis                                                     | 3<br>(2 - 4)                  | 1<br>(0 - 1)                | 0<br>(0 - 0)             | 1<br>(1 - 2)                | 0<br>(0 - 1)                | 0<br>(0 - 0)                |
| Visceral leishmaniasis                                            | 3<br>(2 - 4)                  | 1<br>(0 - 1)                | 0<br>(0 - 0)             | 1<br>(1 - 2)                | 0<br>(0 - 1)                | 0<br>(0 - 0)                |
| Cysticercosis                                                     | 0<br>(0 - 0)                  | 0<br>(0 - 0)                | 0<br>(0 - 0)             | 0<br>(0 - 0)                | 0<br>(0 - 0)                | 0<br>(0 - 0)                |
| Cystic echinococcosis                                             | 20<br>(15 - 25)               | 1<br>(1 - 1)                | 2<br>(2 - 2)             | 10<br>(7 - 13)              | 5<br>(4 - 7)                | 2<br>(2 - 2)                |
| Dengue                                                            | 1<br>(1 - 2)                  | 0<br>(0 - 0)                | 0<br>(0 - 0)             | 1<br>(1 - 1)                | 0<br>(0 - 0)                | 0<br>(0 - 0)                |
| Rabies                                                            | 2<br>(1 - 4)                  | 0<br>(0 - 1)                | 1<br>(0 - 1)             | 1<br>(1 - 2)                | 0<br>(0 - 1)                | 0<br>(0 - 0)                |
| Intestinal nematode infections                                    | 2<br>(0 - 7)                  | 1<br>(0 - 6)                | 0<br>(0 - 3)             | 0<br>(0 - 3)                | 0<br>(0 - 1)                | 0<br>(0 - 1)                |
| Ascariasis                                                        | 2<br>(0 - 7)                  | 1<br>(0 - 6)                | 0<br>(0 - 3)             | 0<br>(0 - 3)                | 0<br>(0 - 1)                | 0<br>(0 - 1)                |
| Other neglected tropical diseases                                 | 4<br>(3 - 6)                  | 1<br>(1 - 2)                | 0<br>(0 - 0)             | 2<br>(1 - 3)                | 1<br>(0 - 1)                | 0<br>(0 - 0)                |
| Maternal disorders                                                | -                             | -                           | -                        | -                           | -                           | -                           |
| Maternal hemorrhage                                               | -                             | -                           | -                        | -                           | -                           | -                           |
| Maternal sepsis and other maternal infections                     | -                             | -                           | -                        | -                           | -                           | -                           |

Web Table 31- Uzbekistan deaths with 95% UI by age, sex, and cause in 2013

| Cause                                                            | Males, All Ages             | Males, 0-4 Years         | Males, 5-14 Years  | Males, 15-49 Years         | Males, 50-69 Years          | Males, 70-80 Years          |
|------------------------------------------------------------------|-----------------------------|--------------------------|--------------------|----------------------------|-----------------------------|-----------------------------|
| Maternal hypertensive disorders                                  | --                          | --                       | --                 | --                         | --                          | --                          |
| Maternal obstructed labor                                        | --                          | --                       | --                 | --                         | --                          | --                          |
| Maternal abortive outcome                                        | --                          | --                       | --                 | --                         | --                          | --                          |
| Indirect maternal deaths                                         | --                          | --                       | --                 | --                         | --                          | --                          |
| Late maternal deaths                                             | --                          | --                       | --                 | --                         | --                          | --                          |
| Maternal deaths aggravated by HIV/AIDS                           | --                          | --                       | --                 | --                         | --                          | --                          |
| Other maternal disorders                                         | --                          | --                       | --                 | --                         | --                          | --                          |
| Neonatal disorders                                               | 4,472<br>(3,829 - 5,121)    | 4,472<br>(3,829 - 5,121) | --                 | --                         | --                          | --                          |
| Neonatal preterm birth complications                             | 971<br>(447 - 1,750)        | 971<br>(447 - 1,750)     | --                 | --                         | --                          | --                          |
| Neonatal encephalopathy due to birth asphyxia and trauma         | 2,707<br>(1,864 - 3,522)    | 2,707<br>(1,864 - 3,522) | --                 | --                         | --                          | --                          |
| Neonatal sepsis and other neonatal infections                    | 156<br>(55 - 385)           | 156<br>(55 - 385)        | --                 | --                         | --                          | --                          |
| Hemolytic disease and other neonatal jaundice                    | 24<br>(9 - 55)              | 24<br>(9 - 55)           | --                 | --                         | --                          | --                          |
| Other neonatal disorders                                         | 614<br>(314 - 1,066)        | 614<br>(314 - 1,066)     | --                 | --                         | --                          | --                          |
| Nutritional deficiencies                                         | 147<br>(100 - 261)          | 27<br>(13 - 63)          | 15<br>(10 - 29)    | 68<br>(41 - 114)           | 27<br>(16 - 46)             | 10<br>(6 - 17)              |
| Protein-energy malnutrition                                      | 5<br>(2 - 13)               | 2<br>(0 - 9)             | 1<br>(0 - 2)       | 2<br>(1 - 5)               | 0<br>(0 - 1)                | 0<br>(0 - 0)                |
| Iodine deficiency                                                | 4<br>(0 - 15)               | 2<br>(0 - 11)            | 0<br>(0 - 1)       | 1<br>(0 - 5)               | 1<br>(0 - 4)                | 0<br>(0 - 2)                |
| Iron-deficiency anemia                                           | 104<br>(65 - 179)           | 15<br>(6 - 36)           | 9<br>(5 - 19)      | 53<br>(31 - 85)            | 19<br>(11 - 33)             | 8<br>(5 - 14)               |
| Other nutritional deficiencies                                   | 33<br>(16 - 69)             | 9<br>(3 - 21)            | 5<br>(3 - 10)      | 12<br>(5 - 24)             | 6<br>(3 - 13)               | 1<br>(0 - 3)                |
| Other communicable, maternal, neonatal, and nutritional diseases | 351<br>(261 - 463)          | 116<br>(68 - 193)        | 31<br>(20 - 48)    | 140<br>(91 - 205)          | 44<br>(28 - 67)             | 19<br>(11 - 34)             |
| Sexually transmitted diseases excluding HIV                      | 25<br>(8 - 52)              | 13<br>(0 - 37)           | 1<br>(0 - 3)       | 7<br>(4 - 15)              | 3<br>(1 - 7)                | 1<br>(0 - 3)                |
| Syphilis                                                         | 21<br>(5 - 46)              | 13<br>(0 - 37)           | 1<br>(0 - 2)       | 4<br>(2 - 8)               | 2<br>(1 - 5)                | 1<br>(0 - 2)                |
| Chlamydial infection                                             | --                          | --                       | --                 | --                         | --                          | --                          |
| Gonococcal infection                                             | 3<br>(1 - 6)                | --                       | 0<br>(0 - 0)       | 2<br>(1 - 4)               | 1<br>(0 - 1)                | 0<br>(0 - 0)                |
| Other sexually transmitted diseases                              | 2<br>(1 - 4)                | --                       | 0<br>(0 - 0)       | 1<br>(1 - 3)               | 0<br>(0 - 1)                | 0<br>(0 - 0)                |
| Hepatitis                                                        | 235<br>(168 - 316)          | 61<br>(31 - 114)         | 28<br>(16 - 44)    | 111<br>(70 - 165)          | 27<br>(16 - 42)             | 8<br>(5 - 13)               |
| Acute hepatitis A                                                | 34<br>(10 - 73)             | 16<br>(4 - 39)           | 7<br>(2 - 15)      | 10<br>(2 - 24)             | 0<br>(0 - 1)                | 0<br>(0 - 0)                |
| Acute hepatitis B                                                | 145<br>(95 - 207)           | 44<br>(20 - 82)          | 15<br>(7 - 25)     | 57<br>(31 - 97)            | 22<br>(12 - 35)             | 7<br>(4 - 12)               |
| Acute hepatitis C                                                | 11<br>(2 - 27)              | --                       | 2<br>(0 - 6)       | 7<br>(1 - 18)              | 2<br>(0 - 5)                | 0<br>(0 - 1)                |
| Acute hepatitis E                                                | 45<br>(22 - 80)             | 0<br>(0 - 1)             | 4<br>(1 - 9)       | 38<br>(18 - 66)            | 3<br>(1 - 7)                | 0<br>(0 - 1)                |
| Other infectious diseases                                        | 91<br>(50 - 159)            | 42<br>(18 - 106)         | 2<br>(1 - 5)       | 22<br>(11 - 39)            | 14<br>(5 - 29)              | 10<br>(3 - 24)              |
| Non-communicable diseases                                        | 73,841<br>(59,312 - 91,759) | 1,428<br>(1,059 - 1,922) | 559<br>(472 - 643) | 13,339<br>(9,615 - 17,674) | 26,621<br>(20,158 - 35,168) | 31,895<br>(27,455 - 37,003) |
| Neoplasms                                                        | 7,915<br>(6,117 - 10,128)   | 97<br>(61 - 149)         | 222<br>(178 - 271) | 2,144<br>(1,564 - 2,849)   | 3,750<br>(2,779 - 4,940)    | 1,702<br>(1,363 - 2,125)    |
| Esophageal cancer                                                | 984<br>(582 - 1,686)        | --                       | --                 | 113<br>(67 - 191)          | 503<br>(295 - 851)          | 367<br>(198 - 670)          |
| Stomach cancer                                                   | 1,233<br>(910 - 1,646)      | --                       | --                 | 248<br>(174 - 350)         | 650<br>(466 - 901)          | 335<br>(253 - 439)          |
| Liver cancer                                                     | 560<br>(405 - 747)          | --                       | 3<br>(2 - 5)       | 114<br>(73 - 165)          | 309<br>(211 - 428)          | 134<br>(92 - 187)           |
| Liver cancer due to hepatitis B                                  | 222<br>(151 - 317)          | --                       | 1<br>(0 - 2)       | 52<br>(32 - 82)            | 127<br>(82 - 188)           | 42<br>(25 - 65)             |
| Liver cancer due to hepatitis C                                  | 200<br>(134 - 283)          | --                       | 1<br>(0 - 1)       | 36<br>(21 - 58)            | 111<br>(69 - 164)           | 52<br>(32 - 77)             |
| Liver cancer due to alcohol use                                  | 110<br>(67 - 162)           | --                       | --                 | 16<br>(8 - 27)             | 58<br>(33 - 88)             | 36<br>(21 - 53)             |
| Liver cancer due to other causes                                 | 28<br>(17 - 43)             | --                       | 1<br>(1 - 2)       | 9<br>(5 - 16)              | 13<br>(7 - 22)              | 5<br>(2 - 8)                |
| Larynx cancer                                                    | 233<br>(159 - 331)          | --                       | --                 | 44<br>(28 - 67)            | 138<br>(93 - 201)           | 51<br>(35 - 70)             |

Web Table 31- Uzbekistan deaths with 95% UI by age, sex, and cause in 2013

| Cause                                         | Males, All Ages             | Males, 0-4 Years | Males, 5-14 Years | Males, 15-49 Years       | Males, 50-69 Years          | Males, 70-80 Years          |
|-----------------------------------------------|-----------------------------|------------------|-------------------|--------------------------|-----------------------------|-----------------------------|
| Tracheal, bronchus and lung cancer            | 1,284<br>(969 - 1,693)      | --               | --                | 260<br>(182 - 360)       | 781<br>(574 - 1,066)        | 243<br>(187 - 311)          |
| Breast cancer                                 | 1<br>(1 - 2)                | --               | --                | 1<br>(1 - 2)             | 0<br>(0 - 0)                | 0<br>(0 - 0)                |
| Cervical cancer                               | --                          | --               | --                | --                       | --                          | --                          |
| Uterine cancer                                | --                          | --               | --                | --                       | --                          | --                          |
| Prostate cancer                               | 179<br>(115 - 309)          | --               | --                | 9<br>(5 - 15)            | 64<br>(41 - 110)            | 106<br>(66 - 182)           |
| Colon and rectum cancer                       | 455<br>(345 - 594)          | --               | --                | 147<br>(105 - 199)       | 208<br>(153 - 279)          | 100<br>(78 - 130)           |
| Lip and oral cavity cancer                    | 199<br>(129 - 283)          | --               | --                | 56<br>(34 - 84)          | 105<br>(65 - 158)           | 37<br>(24 - 54)             |
| Nasopharynx cancer                            | 36<br>(24 - 52)             | --               | 0<br>(0 - 1)      | 22<br>(14 - 34)          | 11<br>(7 - 17)              | 2<br>(1 - 4)                |
| Other pharynx cancer                          | 100<br>(68 - 142)           | --               | --                | 22<br>(13 - 33)          | 64<br>(41 - 92)             | 14<br>(9 - 20)              |
| Gallbladder and biliary tract cancer          | 84<br>(52 - 130)            | --               | --                | 9<br>(5 - 15)            | 46<br>(27 - 74)             | 29<br>(17 - 44)             |
| Pancreatic cancer                             | 205<br>(152 - 271)          | --               | --                | 49<br>(33 - 70)          | 115<br>(82 - 157)           | 41<br>(31 - 54)             |
| Malignant skin melanoma                       | 64<br>(37 - 114)            | --               | --                | 13<br>(7 - 25)           | 34<br>(19 - 62)             | 16<br>(9 - 28)              |
| Non-melanoma skin cancer                      | 32<br>(20 - 49)             | --               | --                | 7<br>(4 - 11)            | 17<br>(10 - 27)             | 9<br>(5 - 13)               |
| Ovarian cancer                                | --                          | --               | --                | --                       | --                          | --                          |
| Testicular cancer                             | 50<br>(27 - 76)             | --               | --                | 36<br>(19 - 57)          | 12<br>(6 - 19)              | 2<br>(1 - 4)                |
| Kidney cancer                                 | 158<br>(113 - 208)          | 6<br>(2 - 12)    | 1<br>(1 - 2)      | 41<br>(26 - 58)          | 89<br>(61 - 124)            | 22<br>(15 - 30)             |
| Bladder cancer                                | 156<br>(116 - 213)          | --               | --                | 20<br>(12 - 32)          | 79<br>(54 - 113)            | 57<br>(41 - 77)             |
| Brain and nervous system cancer               | 472<br>(284 - 664)          | 13<br>(5 - 28)   | 45<br>(26 - 68)   | 268<br>(149 - 398)       | 133<br>(83 - 208)           | 13<br>(8 - 21)              |
| Thyroid cancer                                | 8<br>(5 - 12)               | --               | 0<br>(0 - 0)      | 3<br>(2 - 5)             | 3<br>(2 - 5)                | 2<br>(1 - 2)                |
| Mesothelioma                                  | 7<br>(5 - 11)               | --               | --                | 4<br>(2 - 8)             | 2<br>(1 - 4)                | 0<br>(0 - 1)                |
| Hodgkin lymphoma                              | 67<br>(45 - 95)             | 2<br>(1 - 5)     | 11<br>(4 - 25)    | 31<br>(18 - 46)          | 18<br>(11 - 29)             | 5<br>(3 - 8)                |
| Non-Hodgkin lymphoma                          | 260<br>(176 - 348)          | 7<br>(3 - 12)    | 21<br>(13 - 34)   | 126<br>(81 - 178)        | 83<br>(55 - 119)            | 23<br>(16 - 32)             |
| Multiple myeloma                              | 35<br>(22 - 49)             | --               | --                | 9<br>(5 - 14)            | 18<br>(11 - 27)             | 8<br>(5 - 12)               |
| Leukemia                                      | 539<br>(415 - 674)          | 47<br>(29 - 74)  | 105<br>(78 - 140) | 281<br>(198 - 376)       | 87<br>(62 - 121)            | 19<br>(14 - 24)             |
| Other neoplasms                               | 516<br>(384 - 679)          | 22<br>(10 - 41)  | 35<br>(22 - 51)   | 210<br>(141 - 293)       | 181<br>(120 - 263)          | 68<br>(47 - 95)             |
| Cardiovascular diseases                       | 47,215<br>(38,417 - 58,543) | 21<br>(15 - 28)  | 33<br>(26 - 41)   | 5,639<br>(4,064 - 7,629) | 16,581<br>(12,542 - 21,794) | 24,941<br>(21,748 - 28,997) |
| Rheumatic heart disease                       | 672<br>(420 - 988)          | 1<br>(1 - 3)     | 15<br>(10 - 21)   | 440<br>(265 - 651)       | 186<br>(108 - 296)          | 30<br>(19 - 47)             |
| Ischemic heart disease                        | 28,990<br>(23,427 - 35,518) | 5<br>(3 - 7)     | 8<br>(6 - 11)     | 3,371<br>(2,368 - 4,535) | 9,392<br>(7,052 - 12,323)   | 16,213<br>(13,914 - 18,928) |
| Cerebrovascular disease                       | 12,887<br>(9,903 - 16,747)  | 3<br>(2 - 5)     | 5<br>(3 - 7)      | 1,299<br>(868 - 1,871)   | 5,007<br>(3,671 - 6,876)    | 6,573<br>(5,290 - 8,133)    |
| Ischemic stroke                               | 7,421<br>(5,603 - 9,575)    | 1<br>(0 - 1)     | 2<br>(1 - 4)      | 447<br>(284 - 680)       | 2,534<br>(1,749 - 3,506)    | 4,437<br>(3,447 - 5,586)    |
| Hemorrhagic stroke                            | 5,467<br>(3,913 - 7,391)    | 2<br>(2 - 3)     | 2<br>(1 - 3)      | 852<br>(556 - 1,237)     | 2,474<br>(1,711 - 3,504)    | 2,136<br>(1,498 - 2,868)    |
| Hypertensive heart disease                    | 4,340<br>(2,268 - 6,700)    | 0<br>(0 - 0)     | 0<br>(0 - 0)      | 421<br>(191 - 729)       | 1,860<br>(946 - 3,067)      | 2,058<br>(1,022 - 3,184)    |
| Cardiomyopathy and myocarditis                | 77<br>(53 - 117)            | 5<br>(3 - 9)     | 3<br>(1 - 4)      | 33<br>(20 - 51)          | 25<br>(16 - 41)             | 11<br>(7 - 18)              |
| Atrial fibrillation and flutter               | 1<br>(1 - 1)                | --               | --                | 1<br>(0 - 1)             | 0<br>(0 - 0)                | 0<br>(0 - 0)                |
| Aortic aneurysm                               | 13<br>(9 - 18)              | --               | --                | 3<br>(2 - 5)             | 4<br>(3 - 6)                | 5<br>(4 - 8)                |
| Peripheral vascular disease                   | 7<br>(5 - 9)                | --               | --                | 0<br>(0 - 1)             | 2<br>(1 - 3)                | 4<br>(3 - 6)                |
| Endocarditis                                  | 27<br>(18 - 43)             | 6<br>(4 - 8)     | 2<br>(1 - 3)      | 4<br>(2 - 8)             | 11<br>(7 - 20)              | 4<br>(2 - 6)                |
| Other cardiovascular and circulatory diseases | 202<br>(105 - 285)          | 1<br>(0 - 1)     | 1<br>(1 - 2)      | 66<br>(28 - 99)          | 94<br>(48 - 137)            | 41<br>(24 - 55)             |
| Chronic respiratory diseases                  | 3,713<br>(2,789 - 4,809)    | 4<br>(3 - 7)     | 5<br>(4 - 7)      | 595<br>(406 - 816)       | 1,450<br>(1,049 - 1,978)    | 1,658<br>(1,288 - 2,164)    |
| Chronic obstructive pulmonary disease         | 2,468<br>(1,841 - 3,246)    | 0<br>(0 - 0)     | 1<br>(1 - 2)      | 341<br>(229 - 489)       | 944<br>(668 - 1,289)        | 1,182<br>(910 - 1,574)      |

Web Table 31- Uzbekistan deaths with 95% UI by age, sex, and cause in 2013

| Cause                                               | Males, All Ages          | Males, 0-4 Years | Males, 5-14 Years | Males, 15-49 Years       | Males, 50-69 Years       | Males, 70-80 Years       |
|-----------------------------------------------------|--------------------------|------------------|-------------------|--------------------------|--------------------------|--------------------------|
| Pneumoconiosis                                      | 147<br>(93 - 212)        | 0<br>(0 - 0)     | 0<br>(0 - 0)      | 24<br>(14 - 37)          | 78<br>(48 - 120)         | 44<br>(27 - 66)          |
| Silicosis                                           | 30<br>(18 - 44)          | 0<br>(0 - 0)     | 0<br>(0 - 0)      | 8<br>(4 - 12)            | 19<br>(12 - 30)          | 3<br>(2 - 4)             |
| Asbestosis                                          | 32<br>(21 - 47)          | 0<br>(0 - 0)     | 0<br>(0 - 0)      | 6<br>(3 - 9)             | 12<br>(7 - 19)           | 14<br>(9 - 22)           |
| Coal workers pneumoconiosis                         | 47<br>(29 - 68)          | 0<br>(0 - 0)     | 0<br>(0 - 0)      | 4<br>(2 - 7)             | 25<br>(15 - 39)          | 17<br>(10 - 26)          |
| Other pneumoconiosis                                | 38<br>(24 - 56)          | 0<br>(0 - 0)     | 0<br>(0 - 0)      | 7<br>(4 - 11)            | 21<br>(13 - 33)          | 10<br>(6 - 16)           |
| Asthma                                              | 670<br>(488 - 914)       | 1<br>(0 - 1)     | 3<br>(2 - 4)      | 108<br>(70 - 157)        | 258<br>(172 - 378)       | 300<br>(207 - 433)       |
| Interstitial lung disease and pulmonary sarcoidosis | 283<br>(186 - 434)       | 0<br>(0 - 0)     | 0<br>(0 - 1)      | 60<br>(36 - 101)         | 114<br>(68 - 180)        | 108<br>(64 - 173)        |
| Other chronic respiratory diseases                  | 145<br>(100 - 201)       | 4<br>(2 - 5)     | 1<br>(1 - 1)      | 61<br>(38 - 91)          | 55<br>(35 - 84)          | 24<br>(15 - 40)          |
| Cirrhosis                                           | 5,014<br>(3,804 - 6,518) | 20<br>(12 - 31)  | 73<br>(59 - 88)   | 1,970<br>(1,406 - 2,622) | 2,187<br>(1,609 - 2,933) | 764<br>(602 - 953)       |
| Cirrhosis due to hepatitis B                        | 2,051<br>(1,234 - 2,905) | 2<br>(1 - 4)     | 24<br>(12 - 38)   | 834<br>(456 - 1,260)     | 893<br>(521 - 1,302)     | 297<br>(182 - 419)       |
| Cirrhosis due to hepatitis C                        | 979<br>(473 - 1,587)     | 1<br>(0 - 2)     | 10<br>(1 - 22)    | 396<br>(174 - 705)       | 437<br>(185 - 777)       | 134<br>(52 - 224)        |
| Cirrhosis due to alcohol use                        | 1,403<br>(832 - 2,041)   | --               | --                | 413<br>(183 - 667)       | 696<br>(408 - 1,047)     | 294<br>(206 - 412)       |
| Cirrhosis due to other causes                       | 581<br>(352 - 918)       | 17<br>(10 - 27)  | 39<br>(26 - 55)   | 326<br>(176 - 566)       | 160<br>(83 - 284)        | 39<br>(21 - 62)          |
| Digestive diseases                                  | 1,171<br>(860 - 1,576)   | 20<br>(12 - 31)  | 20<br>(16 - 26)   | 507<br>(351 - 710)       | 430<br>(301 - 594)       | 194<br>(154 - 251)       |
| Peptic ulcer disease                                | 594<br>(406 - 838)       | 1<br>(0 - 1)     | 2<br>(1 - 3)      | 242<br>(151 - 361)       | 241<br>(160 - 350)       | 108<br>(75 - 150)        |
| Gastritis and duodenitis                            | 2<br>(1 - 4)             | 0<br>(0 - 1)     | 0<br>(0 - 1)      | 1<br>(1 - 2)             | 0<br>(0 - 1)             | 0<br>(0 - 0)             |
| Appendicitis                                        | 35<br>(21 - 56)          | 1<br>(0 - 2)     | 4<br>(2 - 6)      | 20<br>(11 - 34)          | 8<br>(4 - 13)            | 3<br>(2 - 5)             |
| Paralytic ileus and intestinal obstruction          | 101<br>(62 - 169)        | 8<br>(4 - 14)    | 9<br>(6 - 14)     | 42<br>(22 - 73)          | 26<br>(14 - 50)          | 15<br>(8 - 31)           |
| Inguinal, femoral, and abdominal hernia             | 16<br>(9 - 25)           | 0<br>(0 - 0)     | 0<br>(0 - 1)      | 7<br>(4 - 12)            | 5<br>(2 - 8)             | 4<br>(2 - 6)             |
| Inflammatory bowel disease                          | 26<br>(18 - 40)          | 3<br>(1 - 7)     | 1<br>(1 - 2)      | 8<br>(5 - 13)            | 8<br>(5 - 13)            | 6<br>(3 - 10)            |
| Vascular intestinal disorders                       | 27<br>(10 - 58)          | 0<br>(0 - 1)     | 1<br>(0 - 2)      | 9<br>(3 - 21)            | 10<br>(4 - 22)           | 6<br>(2 - 14)            |
| Gallbladder and biliary diseases                    | 75<br>(53 - 111)         | 0<br>(0 - 0)     | 1<br>(0 - 1)      | 16<br>(10 - 24)          | 31<br>(20 - 50)          | 27<br>(18 - 40)          |
| Pancreatitis                                        | 178<br>(111 - 290)       | 0<br>(0 - 1)     | 1<br>(0 - 1)      | 99<br>(61 - 166)         | 64<br>(37 - 105)         | 14<br>(8 - 24)           |
| Other digestive diseases                            | 117<br>(77 - 168)        | 5<br>(2 - 10)    | 2<br>(1 - 3)      | 62<br>(37 - 94)          | 37<br>(22 - 58)          | 11<br>(6 - 18)           |
| Neurological disorders                              | 2,724<br>(2,164 - 3,342) | 36<br>(23 - 55)  | 64<br>(46 - 85)   | 539<br>(364 - 747)       | 251<br>(183 - 344)       | 1,835<br>(1,422 - 2,283) |
| Alzheimer disease and other dementias               | 1,936<br>(1,501 - 2,400) | --               | --                | 1<br>(0 - 3)             | 146<br>(100 - 206)       | 1,789<br>(1,386 - 2,241) |
| Parkinson disease                                   | 22<br>(14 - 33)          | --               | --                | 2<br>(1 - 3)             | 7<br>(5 - 12)            | 13<br>(7 - 22)           |
| Epilepsy                                            | 639<br>(443 - 865)       | 20<br>(10 - 36)  | 53<br>(37 - 74)   | 487<br>(322 - 685)       | 69<br>(42 - 102)         | 10<br>(7 - 14)           |
| Multiple sclerosis                                  | 8<br>(5 - 20)            | --               | --                | 3<br>(2 - 8)             | 3<br>(1 - 7)             | 2<br>(1 - 6)             |
| Other neurological disorders                        | 118<br>(79 - 151)        | 16<br>(11 - 23)  | 11<br>(6 - 14)    | 45<br>(29 - 64)          | 27<br>(16 - 37)          | 20<br>(13 - 27)          |
| Mental and substance use disorders                  | 674<br>(419 - 956)       | 2<br>(1 - 3)     | 0<br>(0 - 0)      | 485<br>(302 - 692)       | 175<br>(95 - 259)        | 13<br>(8 - 18)           |
| Schizophrenia                                       | 104<br>(48 - 169)        | --               | --                | 75<br>(33 - 132)         | 27<br>(13 - 46)          | 1<br>(1 - 3)             |
| Alcohol use disorders                               | 368<br>(186 - 534)       | --               | --                | 234<br>(119 - 352)       | 125<br>(57 - 191)        | 8<br>(4 - 12)            |
| Drug use disorders                                  | 202<br>(127 - 294)       | 2<br>(1 - 3)     | --                | 175<br>(105 - 259)       | 22<br>(13 - 35)          | 3<br>(2 - 5)             |
| Opioid use disorders                                | 45<br>(28 - 66)          | 0<br>(0 - 1)     | --                | 39<br>(24 - 59)          | 4<br>(3 - 7)             | 1<br>(0 - 1)             |
| Cocaine use disorders                               | 5<br>(3 - 7)             | 0<br>(0 - 0)     | --                | 4<br>(3 - 7)             | 0<br>(0 - 1)             | 0<br>(0 - 0)             |
| Amphetamine use disorders                           | 4<br>(3 - 7)             | 0<br>(0 - 0)     | --                | 4<br>(2 - 6)             | 0<br>(0 - 1)             | 0<br>(0 - 0)             |
| Other drug use disorders                            | 148<br>(93 - 215)        | 1<br>(1 - 2)     | --                | 128<br>(77 - 188)        | 17<br>(10 - 26)          | 2<br>(1 - 4)             |
| Eating disorders                                    | 0<br>(0 - 0)             | --               | 0<br>(0 - 0)      | 0<br>(0 - 0)             | --                       | --                       |
| Anorexia nervosa                                    | 0<br>(0 - 0)             | --               | 0<br>(0 - 0)      | 0<br>(0 - 0)             | --                       | --                       |

Web Table 31- Uzbekistan deaths with 95% UI by age, sex, and cause in 2013

| Cause                                               | Males, All Ages          | Males, 0-4 Years       | Males, 5-14 Years | Males, 15-49 Years     | Males, 50-69 Years       | Males, 70-80 Years |
|-----------------------------------------------------|--------------------------|------------------------|-------------------|------------------------|--------------------------|--------------------|
| Diabetes, urogenital, blood, and endocrine diseases | 4,022<br>(3,034 - 5,249) | 93<br>(66 - 131)       | 83<br>(66 - 100)  | 1,337<br>(940 - 1,799) | 1,746<br>(1,275 - 2,380) | 764<br>(596 - 938) |
| Diabetes mellitus                                   | 1,795<br>(1,358 - 2,391) | 1<br>(1 - 1)           | 8<br>(6 - 10)     | 372<br>(256 - 519)     | 1,055<br>(774 - 1,454)   | 359<br>(274 - 455) |
| Acute glomerulonephritis                            | 55<br>(31 - 80)          | 1<br>(1 - 2)           | 2<br>(1 - 3)      | 34<br>(16 - 51)        | 15<br>(8 - 24)           | 3<br>(2 - 6)       |
| Chronic kidney disease                              | 1,481<br>(1,042 - 1,978) | 28<br>(17 - 43)        | 37<br>(26 - 48)   | 641<br>(434 - 897)     | 488<br>(314 - 697)       | 287<br>(193 - 373) |
| Chronic kidney disease due to diabetes mellitus     | 2<br>(1 - 4)             | 0<br>(0 - 0)           | 0<br>(0 - 1)      | 1<br>(0 - 2)           | 0<br>(0 - 0)             | 0<br>(0 - 0)       |
| Chronic kidney disease due to hypertension          | 467<br>(278 - 661)       | 0<br>(0 - 0)           | 0<br>(0 - 0)      | 92<br>(46 - 152)       | 229<br>(137 - 338)       | 146<br>(87 - 208)  |
| Chronic kidney disease due to glomerulonephritis    | 630<br>(413 - 874)       | 15<br>(10 - 24)        | 22<br>(15 - 30)   | 359<br>(234 - 513)     | 155<br>(84 - 241)        | 78<br>(43 - 117)   |
| Chronic kidney disease due to other causes          | 382<br>(231 - 569)       | 12<br>(6 - 23)         | 14<br>(8 - 22)    | 189<br>(103 - 313)     | 104<br>(48 - 177)        | 63<br>(29 - 106)   |
| Urinary diseases and male infertility               | 511<br>(359 - 676)       | 11<br>(7 - 16)         | 12<br>(8 - 16)    | 221<br>(144 - 307)     | 161<br>(107 - 227)       | 106<br>(72 - 142)  |
| Interstitial nephritis and urinary tract infections | 457<br>(315 - 608)       | 10<br>(6 - 15)         | 11<br>(8 - 15)    | 199<br>(126 - 274)     | 147<br>(97 - 208)        | 90<br>(57 - 125)   |
| Urolithiasis                                        | 1<br>(1 - 2)             | --                     | 0<br>(0 - 0)      | 1<br>(0 - 1)           | 0<br>(0 - 1)             | 0<br>(0 - 0)       |
| Other urinary diseases                              | 52<br>(32 - 86)          | 1<br>(0 - 2)           | 1<br>(0 - 1)      | 22<br>(12 - 38)        | 14<br>(7 - 25)           | 15<br>(8 - 27)     |
| Gynecological diseases                              | --                       | --                     | --                | --                     | --                       | --                 |
| Uterine fibroids                                    | --                       | --                     | --                | --                     | --                       | --                 |
| Polycystic ovarian syndrome                         | --                       | --                     | --                | --                     | --                       | --                 |
| Endometriosis                                       | --                       | --                     | --                | --                     | --                       | --                 |
| Genital prolapse                                    | --                       | --                     | --                | --                     | --                       | --                 |
| Other gynecological diseases                        | --                       | --                     | --                | --                     | --                       | --                 |
| Hemoglobinopathies and hemolytic anemias            | 89<br>(54 - 133)         | 27<br>(15 - 44)        | 11<br>(7 - 17)    | 33<br>(18 - 52)        | 12<br>(7 - 20)           | 5<br>(3 - 8)       |
| Thalassemias                                        | 50<br>(31 - 73)          | 23<br>(13 - 37)        | 10<br>(6 - 15)    | 17<br>(9 - 27)         | 0<br>(0 - 0)             | 0<br>(0 - 0)       |
| Sickle cell disorders                               | 1<br>(1 - 2)             | 0<br>(0 - 1)           | 0<br>(0 - 0)      | 0<br>(0 - 1)           | 0<br>(0 - 0)             | 0<br>(0 - 0)       |
| G6PD deficiency                                     | 2<br>(1 - 3)             | 0<br>(0 - 1)           | 0<br>(0 - 0)      | 1<br>(0 - 1)           | 0<br>(0 - 1)             | 0<br>(0 - 0)       |
| Other hemoglobinopathies and hemolytic anemias      | 36<br>(22 - 56)          | 4<br>(2 - 6)           | 1<br>(1 - 2)      | 15<br>(8 - 24)         | 12<br>(7 - 19)           | 5<br>(3 - 8)       |
| Endocrine, metabolic, blood, and immune disorders   | 91<br>(48 - 121)         | 26<br>(13 - 41)        | 13<br>(6 - 19)    | 36<br>(18 - 51)        | 13<br>(7 - 20)           | 4<br>(2 - 6)       |
| Musculoskeletal disorders                           | 142<br>(92 - 260)        | --                     | 10<br>(6 - 15)    | 67<br>(41 - 123)       | 44<br>(27 - 79)          | 21<br>(13 - 42)    |
| Rheumatoid arthritis                                | 45<br>(19 - 79)          | --                     | 0<br>(0 - 1)      | 19<br>(7 - 36)         | 19<br>(7 - 35)           | 7<br>(3 - 13)      |
| Other musculoskeletal disorders                     | 97<br>(57 - 198)         | --                     | 9<br>(6 - 15)     | 48<br>(26 - 101)       | 25<br>(11 - 55)          | 15<br>(8 - 30)     |
| Other non-communicable diseases                     | 1,251<br>(904 - 1,727)   | 1,134<br>(797 - 1,573) | 49<br>(33 - 72)   | 57<br>(37 - 91)        | 8<br>(5 - 11)            | 3<br>(2 - 4)       |
| Congenital anomalies                                | 1,225<br>(871 - 1,680)   | 1,114<br>(774 - 1,542) | 49<br>(32 - 71)   | 54<br>(34 - 87)        | 6<br>(4 - 9)             | 3<br>(2 - 4)       |
| Neural tube defects                                 | 128<br>(67 - 219)        | 124<br>(63 - 213)      | 3<br>(1 - 5)      | 1<br>(1 - 2)           | 0<br>(0 - 0)             | 0<br>(0 - 0)       |
| Congenital heart anomalies                          | 681<br>(450 - 997)       | 589<br>(367 - 886)     | 41<br>(27 - 60)   | 46<br>(30 - 76)        | 4<br>(2 - 6)             | 2<br>(1 - 3)       |
| Cleft lip and cleft palate                          | 7<br>(3 - 17)            | 7<br>(3 - 17)          | --                | --                     | --                       | --                 |
| Down syndrome                                       | 34<br>(15 - 69)          | 32<br>(13 - 67)        | 1<br>(0 - 2)      | 1<br>(1 - 2)           | 0<br>(0 - 0)             | 0<br>(0 - 0)       |
| Chromosomal unbalanced rearrangements               | 3<br>(2 - 5)             | 1<br>(0 - 4)           | 0<br>(0 - 1)      | 1<br>(1 - 1)           | 0<br>(0 - 0)             | 0<br>(0 - 0)       |
| Other congenital anomalies                          | 372<br>(225 - 576)       | 361<br>(217 - 565)     | 4<br>(2 - 7)      | 4<br>(2 - 7)           | 2<br>(1 - 3)             | 1<br>(1 - 1)       |
| Skin and subcutaneous diseases                      | 7<br>(4 - 10)            | 1<br>(0 - 2)           | 1<br>(0 - 1)      | 4<br>(2 - 5)           | 2<br>(1 - 3)             | 0<br>(0 - 1)       |
| Cellulitis                                          | 2<br>(1 - 3)             | 0<br>(0 - 0)           | 0<br>(0 - 0)      | 1<br>(1 - 2)           | 0<br>(0 - 1)             | 0<br>(0 - 0)       |
| Pyoderma                                            | 4<br>(3 - 6)             | 1<br>(0 - 1)           | 0<br>(0 - 1)      | 2<br>(1 - 2)           | 1<br>(1 - 2)             | 0<br>(0 - 0)       |
| Decubitus ulcer                                     | 1<br>(0 - 1)             | 0<br>(0 - 0)           | 0<br>(0 - 0)      | 0<br>(0 - 1)           | 0<br>(0 - 0)             | 0<br>(0 - 0)       |
| Other skin and subcutaneous diseases                | 1<br>(0 - 1)             | 0<br>(0 - 0)           | 0<br>(0 - 0)      | 0<br>(0 - 1)           | 0<br>(0 - 0)             | 0<br>(0 - 0)       |



Web Table 31- Uzbekistan deaths with 95% UI by age, sex, and cause in 2013

| Cause                                           | Males, All Ages            | Males, 0-4 Years       | Males, 5-14 Years  | Males, 15-49 Years        | Males, 50-69 Years       | Males, 70-80 Years |
|-------------------------------------------------|----------------------------|------------------------|--------------------|---------------------------|--------------------------|--------------------|
| Sudden infant death syndrome                    | 19<br>(4 - 60)             | 19<br>(4 - 60)         | --                 | --                        | --                       | --                 |
| Injuries                                        | 11,980<br>(9,062 - 15,221) | 1,045<br>(714 - 1,551) | 817<br>(698 - 979) | 8,023<br>(5,821 - 10,576) | 1,717<br>(1,241 - 2,297) | 379<br>(307 - 466) |
| Transport injuries                              | 3,600<br>(2,558 - 4,810)   | 66<br>(38 - 106)       | 222<br>(165 - 290) | 2,653<br>(1,818 - 3,656)  | 540<br>(366 - 748)       | 118<br>(89 - 160)  |
| Road injuries                                   | 3,505<br>(2,503 - 4,670)   | 62<br>(36 - 99)        | 217<br>(160 - 283) | 2,576<br>(1,759 - 3,542)  | 532<br>(361 - 736)       | 117<br>(88 - 159)  |
| Pedestrian road injuries                        | 1,173<br>(780 - 1,658)     | 35<br>(17 - 59)        | 137<br>(96 - 186)  | 744<br>(449 - 1,121)      | 194<br>(121 - 291)       | 63<br>(42 - 90)    |
| Cyclist road injuries                           | 135<br>(88 - 199)          | 5<br>(2 - 10)          | 12<br>(7 - 19)     | 67<br>(40 - 102)          | 47<br>(28 - 73)          | 5<br>(3 - 8)       |
| Motorcyclist road injuries                      | 570<br>(339 - 867)         | 2<br>(1 - 3)           | 2<br>(1 - 3)       | 541<br>(320 - 827)        | 22<br>(13 - 38)          | 3<br>(2 - 5)       |
| Motor vehicle road injuries                     | 1,618<br>(1,094 - 2,247)   | 20<br>(11 - 35)        | 65<br>(39 - 101)   | 1,220<br>(796 - 1,745)    | 267<br>(172 - 389)       | 46<br>(29 - 67)    |
| Other road injuries                             | 9<br>(5 - 17)              | 1<br>(0 - 1)           | 1<br>(1 - 3)       | 5<br>(3 - 10)             | 1<br>(1 - 3)             | 1<br>(0 - 1)       |
| Other transport injuries                        | 95<br>(63 - 138)           | 4<br>(2 - 7)           | 5<br>(3 - 8)       | 77<br>(48 - 115)          | 8<br>(4 - 14)            | 1<br>(0 - 2)       |
| Unintentional injuries                          | 5,113<br>(3,948 - 6,675)   | 968<br>(655 - 1,453)   | 532<br>(431 - 696) | 2,754<br>(1,949 - 3,821)  | 671<br>(477 - 913)       | 189<br>(149 - 236) |
| Falls                                           | 916<br>(664 - 1,235)       | 99<br>(63 - 161)       | 67<br>(47 - 91)    | 522<br>(353 - 747)        | 177<br>(120 - 256)       | 51<br>(37 - 71)    |
| Drowning                                        | 1,834<br>(1,295 - 2,950)   | 385<br>(207 - 722)     | 292<br>(208 - 473) | 970<br>(620 - 1,601)      | 161<br>(100 - 275)       | 27<br>(16 - 43)    |
| Fire, heat, and hot substances                  | 594<br>(431 - 831)         | 136<br>(78 - 232)      | 32<br>(20 - 49)    | 294<br>(195 - 452)        | 103<br>(64 - 156)        | 29<br>(20 - 42)    |
| Poisonings                                      | 289<br>(189 - 426)         | 27<br>(15 - 47)        | 10<br>(7 - 16)     | 195<br>(117 - 303)        | 49<br>(28 - 77)          | 9<br>(5 - 13)      |
| Exposure to mechanical forces                   | 510<br>(327 - 866)         | 157<br>(53 - 441)      | 37<br>(21 - 62)    | 262<br>(171 - 391)        | 47<br>(30 - 71)          | 7<br>(5 - 11)      |
| Unintentional firearm injuries                  | 18<br>(12 - 25)            | 1<br>(0 - 2)           | 1<br>(0 - 2)       | 9<br>(5 - 14)             | 6<br>(3 - 10)            | 1<br>(0 - 1)       |
| Unintentional suffocation                       | 323<br>(173 - 656)         | 143<br>(42 - 432)      | 21<br>(9 - 46)     | 146<br>(81 - 250)         | 12<br>(5 - 26)           | 1<br>(0 - 3)       |
| Other exposure to mechanical forces             | 169<br>(117 - 227)         | 12<br>(6 - 23)         | 14<br>(8 - 23)     | 108<br>(67 - 158)         | 29<br>(18 - 45)          | 6<br>(4 - 8)       |
| Adverse effects of medical treatment            | 214<br>(134 - 307)         | 27<br>(14 - 55)        | 4<br>(2 - 7)       | 76<br>(43 - 119)          | 65<br>(35 - 108)         | 41<br>(22 - 65)    |
| Animal contact                                  | 35<br>(23 - 51)            | 11<br>(5 - 21)         | 10<br>(5 - 17)     | 7<br>(4 - 12)             | 5<br>(3 - 10)            | 2<br>(1 - 3)       |
| Venomous animal contact                         | 27<br>(17 - 40)            | 10<br>(5 - 19)         | 10<br>(5 - 17)     | 4<br>(2 - 8)              | 3<br>(1 - 5)             | 1<br>(0 - 1)       |
| Non-venomous animal contact                     | 8<br>(5 - 13)              | 1<br>(0 - 2)           | 0<br>(0 - 1)       | 3<br>(2 - 5)              | 3<br>(2 - 5)             | 1<br>(1 - 2)       |
| Foreign body                                    | 185<br>(95 - 286)          | 94<br>(44 - 156)       | 12<br>(6 - 19)     | 53<br>(26 - 83)           | 16<br>(9 - 29)           | 10<br>(6 - 17)     |
| Pulmonary aspiration and foreign body in airway | 182<br>(92 - 284)          | 94<br>(44 - 155)       | 12<br>(6 - 19)     | 51<br>(25 - 82)           | 15<br>(8 - 27)           | 10<br>(5 - 17)     |
| Foreign body in other body part                 | 3<br>(2 - 5)               | 0<br>(0 - 1)           | 0<br>(0 - 1)       | 1<br>(1 - 2)              | 1<br>(0 - 1)             | 0<br>(0 - 0)       |
| Other unintentional injuries                    | 535<br>(390 - 718)         | 32<br>(18 - 56)        | 67<br>(46 - 95)    | 376<br>(249 - 537)        | 47<br>(30 - 70)          | 13<br>(9 - 19)     |
| Self-harm and interpersonal violence            | 3,267<br>(2,326 - 4,677)   | 11<br>(5 - 21)         | 63<br>(41 - 93)    | 2,616<br>(1,798 - 3,697)  | 506<br>(351 - 779)       | 72<br>(52 - 107)   |
| Self-harm                                       | 2,343<br>(1,626 - 3,298)   | --                     | 49<br>(29 - 79)    | 1,835<br>(1,235 - 2,605)  | 402<br>(275 - 607)       | 58<br>(41 - 84)    |
| Interpersonal violence                          | 924<br>(606 - 1,598)       | 11<br>(5 - 21)         | 14<br>(7 - 26)     | 781<br>(481 - 1,339)      | 105<br>(54 - 220)        | 14<br>(7 - 31)     |
| Assault by firearm                              | 191<br>(81 - 380)          | 1<br>(0 - 2)           | 2<br>(1 - 5)       | 169<br>(72 - 338)         | 17<br>(6 - 44)           | 1<br>(0 - 4)       |
| Assault by sharp object                         | 494<br>(292 - 864)         | 8<br>(3 - 15)          | 6<br>(3 - 12)      | 412<br>(234 - 734)        | 59<br>(29 - 125)         | 9<br>(4 - 20)      |
| Assault by other means                          | 240<br>(134 - 435)         | 2<br>(1 - 5)           | 6<br>(3 - 11)      | 199<br>(107 - 363)        | 29<br>(14 - 63)          | 4<br>(2 - 9)       |

Web Table 31- Uzbekistan deaths with 95% UI by age, sex, and cause in 2013

| Cause                                                             | Females, All Ages           | Females, 0-4 Years        | Females, 5-14 Years      | Females, 15-49 Years       | Females, 50-69 Years        | Females, 70-80 Years        |
|-------------------------------------------------------------------|-----------------------------|---------------------------|--------------------------|----------------------------|-----------------------------|-----------------------------|
| All causes                                                        | 82,509<br>(66,903 - 98,341) | 9,613<br>(8,283 - 11,115) | 1,178<br>(1,027 - 1,349) | 11,609<br>(8,466 - 15,016) | 19,316<br>(14,058 - 25,171) | 40,793<br>(33,929 - 46,702) |
| Communicable, maternal, neonatal, and nutritional diseases        | 10,692<br>(9,206 - 12,290)  | 7,528<br>(6,368 - 8,845)  | 370<br>(294 - 457)       | 1,658<br>(1,269 - 2,058)   | 628<br>(451 - 816)          | 509<br>(357 - 692)          |
| HIV/AIDS and tuberculosis                                         | 887<br>(505 - 1,213)        | 3<br>(2 - 5)              | 6<br>(3 - 9)             | 575<br>(309 - 795)         | 242<br>(139 - 360)          | 61<br>(36 - 89)             |
| Tuberculosis                                                      | 821<br>(420 - 1,147)        | 3<br>(1 - 4)              | 6<br>(2 - 9)             | 519<br>(234 - 743)         | 234<br>(130 - 353)          | 60<br>(35 - 88)             |
| HIV/AIDS                                                          | 66<br>(36 - 130)            | 0<br>(0 - 1)              | 0<br>(0 - 0)             | 56<br>(31 - 105)           | 9<br>(4 - 25)               | 1<br>(0 - 2)                |
| HIV/AIDS resulting in mycobacterial infection                     | 3<br>(2 - 7)                | 0<br>(0 - 0)              | 0<br>(0 - 0)             | 3<br>(2 - 5)               | 0<br>(0 - 1)                | 0<br>(0 - 0)                |
| HIV/AIDS resulting in other diseases                              | 63<br>(34 - 124)            | 0<br>(0 - 1)              | 0<br>(0 - 0)             | 53<br>(30 - 100)           | 8<br>(4 - 23)               | 1<br>(0 - 2)                |
| Diarrhea, lower respiratory, and other common infectious diseases | 6,193<br>(5,227 - 7,340)    | 4,467<br>(3,685 - 5,350)  | 327<br>(254 - 411)       | 670<br>(460 - 905)         | 315<br>(207 - 439)          | 414<br>(271 - 587)          |
| Diarrheal diseases                                                | 209<br>(136 - 316)          | 165<br>(92 - 274)         | 8<br>(4 - 13)            | 20<br>(13 - 30)            | 8<br>(5 - 13)               | 8<br>(4 - 13)               |
| Intestinal infectious diseases                                    | 19<br>(10 - 33)             | 7<br>(3 - 13)             | 4<br>(2 - 8)             | 6<br>(2 - 13)              | 1<br>(0 - 4)                | 1<br>(0 - 3)                |
| Typhoid fever                                                     | 11<br>(5 - 20)              | 3<br>(2 - 7)              | 3<br>(1 - 5)             | 4<br>(1 - 7)               | 1<br>(0 - 2)                | 0<br>(0 - 1)                |
| Paratyphoid fever                                                 | 4<br>(2 - 7)                | 1<br>(1 - 3)              | 1<br>(0 - 2)             | 1<br>(0 - 2)               | 0<br>(0 - 0)                | 0<br>(0 - 0)                |
| Other intestinal infectious diseases                              | 5<br>(1 - 11)               | 2<br>(0 - 7)              | 0<br>(0 - 2)             | 1<br>(0 - 5)               | 1<br>(0 - 3)                | 0<br>(0 - 2)                |
| Lower respiratory infections                                      | 5,448<br>(4,570 - 6,468)    | 4,092<br>(3,340 - 4,908)  | 242<br>(183 - 315)       | 452<br>(307 - 610)         | 267<br>(171 - 379)          | 394<br>(252 - 566)          |
| Upper respiratory infections                                      | 5<br>(2 - 13)               | 1<br>(0 - 3)              | 0<br>(0 - 1)             | 1<br>(0 - 3)               | 1<br>(0 - 4)                | 2<br>(0 - 8)                |
| Otitis media                                                      | 1<br>(1 - 2)                | 0<br>(0 - 0)              | 0<br>(0 - 0)             | 1<br>(0 - 1)               | 0<br>(0 - 0)                | 0<br>(0 - 0)                |
| Meningitis                                                        | 242<br>(192 - 303)          | 92<br>(66 - 125)          | 28<br>(19 - 38)          | 97<br>(67 - 136)           | 19<br>(13 - 28)             | 6<br>(4 - 8)                |
| Pneumococcal meningitis                                           | 62<br>(45 - 83)             | 17<br>(11 - 25)           | 8<br>(4 - 12)            | 30<br>(19 - 46)            | 6<br>(4 - 10)               | 2<br>(1 - 3)                |
| H influenzae type B meningitis                                    | 75<br>(57 - 98)             | 45<br>(31 - 64)           | 9<br>(6 - 14)            | 18<br>(11 - 29)            | 3<br>(1 - 5)                | 1<br>(0 - 1)                |
| Meningococcal meningitis                                          | 54<br>(39 - 72)             | 20<br>(13 - 30)           | 8<br>(4 - 12)            | 22<br>(13 - 33)            | 4<br>(2 - 7)                | 1<br>(1 - 2)                |
| Other meningitis                                                  | 51<br>(33 - 74)             | 10<br>(5 - 16)            | 4<br>(2 - 7)             | 29<br>(16 - 47)            | 7<br>(3 - 11)               | 2<br>(1 - 3)                |
| Encephalitis                                                      | 257<br>(149 - 384)          | 107<br>(51 - 187)         | 43<br>(21 - 73)          | 89<br>(41 - 148)           | 16<br>(10 - 27)             | 0<br>(0 - 1)                |
| Diphtheria                                                        | 1<br>(0 - 7)                | 1<br>(0 - 7)              | 0<br>(0 - 2)             | 0<br>(0 - 1)               | 0<br>(0 - 1)                | -                           |
| Whooping cough                                                    | 2<br>(1 - 6)                | 1<br>(0 - 4)              | 0<br>(0 - 1)             | 1<br>(1 - 1)               | 0<br>(0 - 0)                | -                           |
| Tetanus                                                           | 2<br>(1 - 2)                | 0<br>(0 - 0)              | 0<br>(0 - 0)             | 1<br>(0 - 1)               | 0<br>(0 - 0)                | 0<br>(0 - 0)                |
| Measles                                                           | 0<br>(0 - 1)                | 0<br>(0 - 1)              | 0<br>(0 - 0)             | 0<br>(0 - 0)               | 0<br>(0 - 0)                | -                           |
| Varicella and herpes zoster                                       | 6<br>(2 - 17)               | 1<br>(0 - 5)              | 0<br>(0 - 1)             | 1<br>(0 - 3)               | 1<br>(0 - 2)                | 3<br>(0 - 13)               |
| Neglected tropical diseases and malaria                           | 26<br>(20 - 34)             | 3<br>(2 - 7)              | 3<br>(2 - 4)             | 10<br>(7 - 13)             | 6<br>(4 - 8)                | 4<br>(3 - 6)                |
| Leishmaniasis                                                     | 1<br>(1 - 2)                | 0<br>(0 - 1)              | 0<br>(0 - 0)             | 0<br>(0 - 1)               | 0<br>(0 - 0)                | 0<br>(0 - 0)                |
| Visceral leishmaniasis                                            | 1<br>(1 - 2)                | 0<br>(0 - 1)              | 0<br>(0 - 0)             | 0<br>(0 - 1)               | 0<br>(0 - 0)                | 0<br>(0 - 0)                |
| Cysticercosis                                                     | 0<br>(0 - 0)                | 0<br>(0 - 0)              | 0<br>(0 - 0)             | 0<br>(0 - 0)               | 0<br>(0 - 0)                | 0<br>(0 - 0)                |
| Cystic echinococcosis                                             | 18<br>(14 - 23)             | 1<br>(1 - 1)              | 2<br>(2 - 2)             | 7<br>(5 - 9)               | 5<br>(3 - 6)                | 3<br>(3 - 4)                |
| Dengue                                                            | 1<br>(1 - 2)                | 0<br>(0 - 0)              | 0<br>(0 - 0)             | 1<br>(0 - 1)               | 0<br>(0 - 0)                | 0<br>(0 - 0)                |
| Rabies                                                            | 1<br>(1 - 2)                | 0<br>(0 - 0)              | 0<br>(0 - 0)             | 1<br>(0 - 1)               | 0<br>(0 - 1)                | 0<br>(0 - 0)                |
| Intestinal nematode infections                                    | 2<br>(0 - 6)                | 1<br>(0 - 5)              | 0<br>(0 - 2)             | 0<br>(0 - 1)               | 0<br>(0 - 1)                | 0<br>(0 - 2)                |
| Ascariasis                                                        | 2<br>(0 - 6)                | 1<br>(0 - 5)              | 0<br>(0 - 2)             | 0<br>(0 - 1)               | 0<br>(0 - 1)                | 0<br>(0 - 2)                |
| Other neglected tropical diseases                                 | 2<br>(2 - 3)                | 1<br>(0 - 1)              | 0<br>(0 - 0)             | 1<br>(1 - 1)               | 1<br>(0 - 1)                | 0<br>(0 - 0)                |
| Maternal disorders                                                | 187<br>(129 - 262)          | -                         | 0<br>(0 - 0)             | 187<br>(129 - 262)         | -                           | -                           |
| Maternal hemorrhage                                               | 30<br>(19 - 44)             | -                         | 0<br>(0 - 0)             | 30<br>(19 - 44)            | -                           | -                           |
| Maternal sepsis and other maternal infections                     | 24<br>(14 - 37)             | -                         | 0<br>(0 - 0)             | 24<br>(14 - 37)            | -                           | -                           |

Web Table 31- Uzbekistan deaths with 95% UI by age, sex, and cause in 2013

| Cause                                                            | Females, All Ages           | Females, 0-4 Years       | Females, 5-14 Years | Females, 15-49 Years      | Females, 50-69 Years        | Females, 70-80 Years        |
|------------------------------------------------------------------|-----------------------------|--------------------------|---------------------|---------------------------|-----------------------------|-----------------------------|
| Maternal hypertensive disorders                                  | 15<br>(8 - 24)              | --                       | 0<br>(0 - 0)        | 15<br>(8 - 24)            | --                          | --                          |
| Maternal obstructed labor                                        | 16<br>(9 - 26)              | --                       | 0<br>(0 - 0)        | 16<br>(9 - 26)            | --                          | --                          |
| Maternal abortive outcome                                        | 16<br>(9 - 27)              | --                       | 0<br>(0 - 0)        | 16<br>(9 - 27)            | --                          | --                          |
| Indirect maternal deaths                                         | 12<br>(6 - 21)              | --                       | 0<br>(0 - 0)        | 12<br>(6 - 21)            | --                          | --                          |
| Late maternal deaths                                             | 30<br>(19 - 44)             | --                       | 0<br>(0 - 0)        | 30<br>(19 - 44)           | --                          | --                          |
| Maternal deaths aggravated by HIV/AIDS                           | 0<br>(0 - 0)                | --                       | --                  | 0<br>(0 - 0)              | --                          | --                          |
| Other maternal disorders                                         | 44<br>(27 - 66)             | --                       | 0<br>(0 - 0)        | 44<br>(27 - 66)           | --                          | --                          |
| Neonatal disorders                                               | 2,949<br>(2,370 - 3,484)    | 2,949<br>(2,370 - 3,484) | --                  | --                        | --                          | --                          |
| Neonatal preterm birth complications                             | 702<br>(334 - 1,257)        | 702<br>(334 - 1,257)     | --                  | --                        | --                          | --                          |
| Neonatal encephalopathy due to birth asphyxia and trauma         | 1,747<br>(1,156 - 2,318)    | 1,747<br>(1,156 - 2,318) | --                  | --                        | --                          | --                          |
| Neonatal sepsis and other neonatal infections                    | 142<br>(59 - 280)           | 142<br>(59 - 280)        | --                  | --                        | --                          | --                          |
| Hemolytic disease and other neonatal jaundice                    | 17<br>(7 - 37)              | 17<br>(7 - 37)           | --                  | --                        | --                          | --                          |
| Other neonatal disorders                                         | 341<br>(180 - 583)          | 341<br>(180 - 583)       | --                  | --                        | --                          | --                          |
| Nutritional deficiencies                                         | 176<br>(128 - 237)          | 20<br>(12 - 32)          | 13<br>(9 - 17)      | 99<br>(66 - 140)          | 30<br>(20 - 46)             | 14<br>(10 - 21)             |
| Protein-energy malnutrition                                      | 4<br>(2 - 9)                | 2<br>(0 - 5)             | 1<br>(0 - 1)        | 1<br>(0 - 3)              | 0<br>(0 - 1)                | 0<br>(0 - 0)                |
| Iodine deficiency                                                | 4<br>(0 - 11)               | 1<br>(0 - 6)             | 0<br>(0 - 2)        | 1<br>(0 - 4)              | 1<br>(0 - 5)                | 1<br>(0 - 4)                |
| Iron-deficiency anemia                                           | 139<br>(92 - 193)           | 12<br>(6 - 19)           | 9<br>(6 - 13)       | 82<br>(53 - 117)          | 25<br>(16 - 39)             | 11<br>(7 - 17)              |
| Other nutritional deficiencies                                   | 28<br>(12 - 52)             | 5<br>(2 - 11)            | 3<br>(1 - 5)        | 15<br>(6 - 29)            | 4<br>(1 - 8)                | 2<br>(1 - 4)                |
| Other communicable, maternal, neonatal, and nutritional diseases | 274<br>(195 - 369)          | 86<br>(49 - 150)         | 21<br>(13 - 34)     | 116<br>(72 - 175)         | 34<br>(19 - 57)             | 16<br>(9 - 30)              |
| Sexually transmitted diseases excluding HIV                      | 29<br>(11 - 57)             | 13<br>(0 - 37)           | 2<br>(0 - 3)        | 8<br>(4 - 14)             | 4<br>(2 - 7)                | 2<br>(1 - 3)                |
| Syphilis                                                         | 21<br>(5 - 47)              | 13<br>(0 - 37)           | 1<br>(0 - 3)        | 3<br>(2 - 6)              | 2<br>(1 - 4)                | 1<br>(1 - 2)                |
| Chlamydial infection                                             | 2<br>(1 - 4)                | --                       | 0<br>(0 - 0)        | 2<br>(1 - 3)              | 1<br>(0 - 1)                | 0<br>(0 - 0)                |
| Gonococcal infection                                             | 3<br>(2 - 5)                | --                       | 0<br>(0 - 0)        | 2<br>(1 - 3)              | 1<br>(0 - 1)                | 0<br>(0 - 0)                |
| Other sexually transmitted diseases                              | 2<br>(1 - 4)                | --                       | 0<br>(0 - 0)        | 2<br>(1 - 3)              | 1<br>(0 - 1)                | 0<br>(0 - 0)                |
| Hepatitis                                                        | 169<br>(114 - 236)          | 41<br>(20 - 76)          | 18<br>(10 - 31)     | 89<br>(52 - 136)          | 14<br>(8 - 24)              | 6<br>(3 - 11)               |
| Acute hepatitis A                                                | 29<br>(9 - 59)              | 15<br>(4 - 35)           | 6<br>(2 - 13)       | 8<br>(2 - 18)             | 0<br>(0 - 1)                | 0<br>(0 - 0)                |
| Acute hepatitis B                                                | 80<br>(47 - 123)            | 25<br>(9 - 52)           | 7<br>(3 - 14)       | 31<br>(15 - 55)           | 11<br>(5 - 19)              | 5<br>(2 - 9)                |
| Acute hepatitis C                                                | 8<br>(2 - 20)               | --                       | 2<br>(0 - 5)        | 4<br>(1 - 12)             | 1<br>(0 - 3)                | 1<br>(0 - 2)                |
| Acute hepatitis E                                                | 52<br>(28 - 86)             | 0<br>(0 - 1)             | 3<br>(1 - 6)        | 46<br>(24 - 77)           | 2<br>(1 - 4)                | 0<br>(0 - 1)                |
| Other infectious diseases                                        | 76<br>(41 - 136)            | 32<br>(14 - 85)          | 2<br>(1 - 4)        | 19<br>(8 - 36)            | 16<br>(6 - 33)              | 8<br>(2 - 20)               |
| Non-communicable diseases                                        | 68,179<br>(53,997 - 82,613) | 1,253<br>(873 - 1,625)   | 426<br>(354 - 508)  | 8,350<br>(5,892 - 11,038) | 18,166<br>(13,202 - 23,767) | 39,985<br>(33,290 - 45,860) |
| Neoplasms                                                        | 6,939<br>(5,163 - 8,968)    | 84<br>(59 - 119)         | 156<br>(121 - 197)  | 2,180<br>(1,537 - 2,916)  | 2,987<br>(2,125 - 4,030)    | 1,532<br>(1,172 - 1,958)    |
| Esophageal cancer                                                | 545<br>(377 - 855)          | --                       | --                  | 84<br>(55 - 134)          | 244<br>(160 - 379)          | 217<br>(141 - 345)          |
| Stomach cancer                                                   | 728<br>(512 - 1,013)        | --                       | --                  | 168<br>(113 - 231)        | 332<br>(222 - 478)          | 228<br>(162 - 316)          |
| Liver cancer                                                     | 421<br>(289 - 572)          | --                       | 2<br>(1 - 4)        | 93<br>(58 - 139)          | 207<br>(132 - 307)          | 118<br>(73 - 177)           |
| Liver cancer due to hepatitis B                                  | 123<br>(74 - 186)           | --                       | 0<br>(0 - 1)        | 29<br>(16 - 48)           | 67<br>(39 - 107)            | 26<br>(14 - 43)             |
| Liver cancer due to hepatitis C                                  | 154<br>(102 - 219)          | --                       | 0<br>(0 - 1)        | 30<br>(18 - 48)           | 75<br>(46 - 116)            | 48<br>(29 - 75)             |
| Liver cancer due to alcohol use                                  | 67<br>(40 - 99)             | --                       | --                  | 9<br>(4 - 16)             | 31<br>(17 - 50)             | 28<br>(14 - 47)             |
| Liver cancer due to other causes                                 | 76<br>(42 - 117)            | --                       | 2<br>(1 - 3)        | 25<br>(15 - 38)           | 34<br>(16 - 57)             | 16<br>(6 - 28)              |
| Larynx cancer                                                    | 75<br>(31 - 125)            | --                       | --                  | 21<br>(9 - 36)            | 36<br>(14 - 61)             | 18<br>(7 - 31)              |

Web Table 31- Uzbekistan deaths with 95% UI by age, sex, and cause in 2013

| Cause                                         | Females, All Ages           | Females, 0-4 Years | Females, 5-14 Years | Females, 15-49 Years     | Females, 50-69 Years       | Females, 70-80 Years        |
|-----------------------------------------------|-----------------------------|--------------------|---------------------|--------------------------|----------------------------|-----------------------------|
| Tracheal, bronchus and lung cancer            | 441<br>(312 - 633)          | --                 | --                  | 103<br>(69 - 151)        | 221<br>(150 - 322)         | 116<br>(82 - 169)           |
| Breast cancer                                 | 1,315<br>(921 - 1,763)      | --                 | --                  | 515<br>(343 - 724)       | 607<br>(413 - 844)         | 194<br>(146 - 258)          |
| Cervical cancer                               | 637<br>(440 - 895)          | --                 | --                  | 256<br>(167 - 366)       | 289<br>(189 - 426)         | 92<br>(65 - 138)            |
| Uterine cancer                                | 150<br>(100 - 239)          | --                 | --                  | 36<br>(22 - 55)          | 80<br>(52 - 131)           | 35<br>(23 - 62)             |
| Prostate cancer                               | --                          | --                 | --                  | --                       | --                         | --                          |
| Colon and rectum cancer                       | 431<br>(317 - 563)          | --                 | --                  | 120<br>(83 - 160)        | 191<br>(135 - 263)         | 120<br>(89 - 157)           |
| Lip and oral cavity cancer                    | 114<br>(68 - 169)           | --                 | --                  | 29<br>(16 - 47)          | 51<br>(29 - 81)            | 34<br>(21 - 52)             |
| Nasopharynx cancer                            | 22<br>(12 - 33)             | --                 | 0<br>(0 - 1)        | 9<br>(4 - 14)            | 10<br>(5 - 18)             | 3<br>(1 - 4)                |
| Other pharynx cancer                          | 30<br>(19 - 42)             | --                 | --                  | 9<br>(5 - 15)            | 15<br>(9 - 24)             | 6<br>(4 - 9)                |
| Gallbladder and biliary tract cancer          | 111<br>(69 - 188)           | --                 | --                  | 15<br>(8 - 27)           | 52<br>(30 - 94)            | 44<br>(26 - 79)             |
| Pancreatic cancer                             | 185<br>(134 - 247)          | --                 | --                  | 27<br>(17 - 40)          | 95<br>(64 - 135)           | 63<br>(45 - 86)             |
| Malignant skin melanoma                       | 41<br>(29 - 55)             | --                 | --                  | 9<br>(6 - 14)            | 16<br>(11 - 24)            | 15<br>(10 - 22)             |
| Non-melanoma skin cancer                      | 35<br>(20 - 59)             | --                 | --                  | 7<br>(4 - 11)            | 7<br>(3 - 12)              | 22<br>(11 - 40)             |
| Ovarian cancer                                | 209<br>(146 - 294)          | --                 | --                  | 78<br>(51 - 116)         | 101<br>(67 - 150)          | 29<br>(19 - 43)             |
| Testicular cancer                             | --                          | --                 | --                  | --                       | --                         | --                          |
| Kidney cancer                                 | 68<br>(45 - 97)             | 1<br>(0 - 3)       | 1<br>(0 - 1)        | 12<br>(7 - 18)           | 39<br>(23 - 60)            | 16<br>(10 - 24)             |
| Bladder cancer                                | 48<br>(31 - 72)             | --                 | --                  | 8<br>(5 - 13)            | 21<br>(12 - 33)            | 19<br>(12 - 30)             |
| Brain and nervous system cancer               | 335<br>(239 - 451)          | 17<br>(8 - 33)     | 33<br>(21 - 49)     | 176<br>(113 - 255)       | 92<br>(58 - 133)           | 18<br>(12 - 27)             |
| Thyroid cancer                                | 11<br>(7 - 18)              | --                 | 0<br>(0 - 0)        | 2<br>(1 - 3)             | 5<br>(3 - 9)               | 4<br>(2 - 6)                |
| Mesothelioma                                  | 2<br>(2 - 3)                | --                 | --                  | 1<br>(1 - 2)             | 1<br>(0 - 1)               | 0<br>(0 - 1)                |
| Hodgkin lymphoma                              | 34<br>(23 - 50)             | 1<br>(1 - 3)       | 2<br>(1 - 4)        | 23<br>(14 - 35)          | 8<br>(4 - 14)              | 1<br>(0 - 2)                |
| Non-Hodgkin lymphoma                          | 127<br>(86 - 182)           | 6<br>(3 - 11)      | 5<br>(3 - 9)        | 43<br>(24 - 62)          | 47<br>(29 - 74)            | 27<br>(17 - 45)             |
| Multiple myeloma                              | 22<br>(14 - 32)             | --                 | --                  | 6<br>(4 - 10)            | 11<br>(6 - 17)             | 5<br>(3 - 7)                |
| Leukemia                                      | 397<br>(307 - 504)          | 32<br>(21 - 46)    | 78<br>(57 - 103)    | 195<br>(138 - 260)       | 74<br>(50 - 105)           | 18<br>(13 - 25)             |
| Other neoplasms                               | 405<br>(283 - 552)          | 27<br>(15 - 48)    | 35<br>(21 - 53)     | 137<br>(86 - 205)        | 135<br>(83 - 204)          | 71<br>(46 - 106)            |
| Cardiovascular diseases                       | 45,887<br>(36,490 - 55,266) | 18<br>(11 - 26)    | 32<br>(24 - 47)     | 2,785<br>(1,936 - 3,844) | 10,694<br>(7,711 - 14,089) | 32,359<br>(26,812 - 37,501) |
| Rheumatic heart disease                       | 750<br>(497 - 1,094)        | 1<br>(1 - 2)       | 17<br>(12 - 27)     | 474<br>(311 - 710)       | 217<br>(127 - 333)         | 40<br>(25 - 58)             |
| Ischemic heart disease                        | 27,101<br>(21,215 - 33,060) | 4<br>(2 - 8)       | 8<br>(5 - 12)       | 1,193<br>(784 - 1,690)   | 5,502<br>(3,827 - 7,377)   | 20,394<br>(16,540 - 24,126) |
| Cerebrovascular disease                       | 12,787<br>(9,867 - 16,046)  | 3<br>(2 - 4)       | 4<br>(3 - 7)        | 716<br>(457 - 1,157)     | 3,191<br>(2,272 - 4,481)   | 8,873<br>(6,748 - 10,777)   |
| Ischemic stroke                               | 7,550<br>(5,544 - 9,555)    | 1<br>(1 - 2)       | 2<br>(1 - 4)        | 188<br>(115 - 312)       | 1,307<br>(872 - 1,940)     | 6,052<br>(4,403 - 7,599)    |
| Hemorrhagic stroke                            | 5,237<br>(3,656 - 7,255)    | 2<br>(1 - 3)       | 2<br>(1 - 3)        | 528<br>(336 - 853)       | 1,884<br>(1,293 - 2,695)   | 2,821<br>(1,881 - 3,858)    |
| Hypertensive heart disease                    | 4,948<br>(3,050 - 6,936)    | 0<br>(0 - 0)       | 0<br>(0 - 0)        | 313<br>(169 - 499)       | 1,689<br>(941 - 2,512)     | 2,946<br>(1,796 - 4,134)    |
| Cardiomyopathy and myocarditis                | 59<br>(40 - 90)             | 5<br>(3 - 8)       | 1<br>(1 - 2)        | 27<br>(16 - 45)          | 15<br>(9 - 24)             | 11<br>(6 - 21)              |
| Atrial fibrillation and flutter               | 1<br>(0 - 1)                | --                 | --                  | 0<br>(0 - 1)             | 0<br>(0 - 0)               | 0<br>(0 - 0)                |
| Aortic aneurysm                               | 40<br>(24 - 66)             | --                 | --                  | 2<br>(1 - 4)             | 1<br>(1 - 2)               | 36<br>(22 - 59)             |
| Peripheral vascular disease                   | 7<br>(5 - 10)               | --                 | --                  | 1<br>(0 - 1)             | 1<br>(1 - 2)               | 5<br>(3 - 8)                |
| Endocarditis                                  | 21<br>(12 - 32)             | 3<br>(1 - 6)       | 1<br>(1 - 2)        | 11<br>(6 - 18)           | 1<br>(1 - 2)               | 4<br>(2 - 7)                |
| Other cardiovascular and circulatory diseases | 174<br>(91 - 254)           | 1<br>(0 - 1)       | 1<br>(0 - 1)        | 46<br>(24 - 72)          | 78<br>(33 - 122)           | 49<br>(27 - 76)             |
| Chronic respiratory diseases                  | 2,889<br>(2,158 - 4,090)    | 3<br>(2 - 5)       | 5<br>(4 - 6)        | 372<br>(251 - 517)       | 832<br>(583 - 1,195)       | 1,676<br>(1,256 - 2,386)    |
| Chronic obstructive pulmonary disease         | 1,965<br>(1,418 - 2,812)    | 0<br>(0 - 0)       | 2<br>(1 - 2)        | 209<br>(134 - 302)       | 560<br>(372 - 850)         | 1,194<br>(860 - 1,728)      |

Web Table 31- Uzbekistan deaths with 95% UI by age, sex, and cause in 2013

| Cause                                               | Females, All Ages        | Females, 0-4 Years | Females, 5-14 Years | Females, 15-49 Years   | Females, 50-69 Years     | Females, 70-80 Years     |
|-----------------------------------------------------|--------------------------|--------------------|---------------------|------------------------|--------------------------|--------------------------|
| Pneumoconiosis                                      | 4<br>(3 - 7)             | 0<br>(0 - 0)       | 0<br>(0 - 0)        | 1<br>(1 - 2)           | 2<br>(1 - 4)             | 1<br>(0 - 2)             |
| Silicosis                                           | 1<br>(0 - 1)             | 0<br>(0 - 0)       | 0<br>(0 - 0)        | 0<br>(0 - 0)           | 0<br>(0 - 1)             | 0<br>(0 - 0)             |
| Asbestosis                                          | 0<br>(0 - 0)             | 0<br>(0 - 0)       | 0<br>(0 - 0)        | 0<br>(0 - 0)           | 0<br>(0 - 0)             | 0<br>(0 - 0)             |
| Coal workers pneumoconiosis                         | 0<br>(0 - 1)             | 0<br>(0 - 0)       | 0<br>(0 - 0)        | 0<br>(0 - 0)           | 0<br>(0 - 0)             | 0<br>(0 - 0)             |
| Other pneumoconiosis                                | 3<br>(2 - 5)             | 0<br>(0 - 0)       | 0<br>(0 - 0)        | 1<br>(0 - 1)           | 1<br>(1 - 2)             | 1<br>(0 - 1)             |
| Asthma                                              | 606<br>(349 - 917)       | 0<br>(0 - 0)       | 1<br>(1 - 2)        | 83<br>(46 - 132)       | 201<br>(114 - 319)       | 321<br>(176 - 511)       |
| Interstitial lung disease and pulmonary sarcoidosis | 226<br>(128 - 393)       | 0<br>(0 - 0)       | 0<br>(0 - 1)        | 38<br>(21 - 65)        | 52<br>(26 - 91)          | 135<br>(70 - 251)        |
| Other chronic respiratory diseases                  | 88<br>(55 - 133)         | 3<br>(2 - 4)       | 1<br>(1 - 2)        | 41<br>(24 - 66)        | 17<br>(9 - 29)           | 25<br>(13 - 44)          |
| Cirrhosis                                           | 3,738<br>(2,739 - 4,903) | 13<br>(9 - 17)     | 43<br>(33 - 54)     | 1,156<br>(810 - 1,551) | 1,619<br>(1,148 - 2,215) | 908<br>(678 - 1,186)     |
| Cirrhosis due to hepatitis B                        | 1,817<br>(1,088 - 2,739) | 1<br>(0 - 2)       | 13<br>(7 - 19)      | 555<br>(329 - 858)     | 791<br>(452 - 1,284)     | 456<br>(280 - 688)       |
| Cirrhosis due to hepatitis C                        | 1,073<br>(322 - 1,871)   | 0<br>(0 - 1)       | 4<br>(1 - 8)        | 302<br>(77 - 563)      | 509<br>(133 - 944)       | 258<br>(100 - 434)       |
| Cirrhosis due to alcohol use                        | 341<br>(162 - 569)       | --                 | --                  | 61<br>(18 - 114)       | 152<br>(70 - 264)        | 128<br>(60 - 224)        |
| Cirrhosis due to other causes                       | 507<br>(300 - 819)       | 11<br>(8 - 16)     | 26<br>(18 - 36)     | 238<br>(140 - 382)     | 166<br>(79 - 296)        | 66<br>(30 - 123)         |
| Digestive diseases                                  | 619<br>(451 - 900)       | 13<br>(9 - 19)     | 14<br>(11 - 21)     | 208<br>(141 - 301)     | 216<br>(149 - 324)       | 167<br>(123 - 243)       |
| Peptic ulcer disease                                | 234<br>(156 - 340)       | 1<br>(0 - 2)       | 3<br>(2 - 4)        | 82<br>(53 - 122)       | 83<br>(54 - 127)         | 66<br>(43 - 97)          |
| Gastritis and duodenitis                            | 3<br>(1 - 6)             | 0<br>(0 - 1)       | 1<br>(0 - 1)        | 1<br>(1 - 3)           | 0<br>(0 - 1)             | 0<br>(0 - 0)             |
| Appendicitis                                        | 25<br>(14 - 40)          | 0<br>(0 - 1)       | 4<br>(2 - 7)        | 13<br>(7 - 22)         | 5<br>(2 - 9)             | 2<br>(1 - 5)             |
| Paralytic ileus and intestinal obstruction          | 66<br>(38 - 123)         | 6<br>(3 - 11)      | 1<br>(1 - 2)        | 26<br>(13 - 48)        | 15<br>(8 - 31)           | 17<br>(8 - 36)           |
| Inguinal, femoral, and abdominal hernia             | 14<br>(8 - 25)           | 1<br>(0 - 2)       | 0<br>(0 - 1)        | 2<br>(1 - 3)           | 6<br>(3 - 11)            | 5<br>(2 - 10)            |
| Inflammatory bowel disease                          | 24<br>(15 - 37)          | 3<br>(1 - 6)       | 2<br>(1 - 4)        | 10<br>(6 - 16)         | 5<br>(3 - 9)             | 3<br>(2 - 6)             |
| Vascular intestinal disorders                       | 21<br>(11 - 44)          | 0<br>(0 - 0)       | 0<br>(0 - 1)        | 4<br>(2 - 11)          | 8<br>(4 - 16)            | 9<br>(4 - 18)            |
| Gallbladder and biliary diseases                    | 98<br>(64 - 176)         | 0<br>(0 - 0)       | 1<br>(0 - 1)        | 22<br>(13 - 37)        | 41<br>(26 - 74)          | 34<br>(21 - 63)          |
| Pancreatitis                                        | 85<br>(52 - 140)         | 0<br>(0 - 0)       | 1<br>(0 - 1)        | 26<br>(15 - 42)        | 35<br>(19 - 59)          | 24<br>(14 - 39)          |
| Other digestive diseases                            | 50<br>(33 - 72)          | 1<br>(0 - 2)       | 2<br>(1 - 3)        | 23<br>(14 - 35)        | 17<br>(11 - 27)          | 7<br>(4 - 10)            |
| Neurological disorders                              | 2,920<br>(2,115 - 3,817) | 21<br>(14 - 32)    | 46<br>(31 - 62)     | 306<br>(193 - 428)     | 175<br>(117 - 252)       | 2,372<br>(1,643 - 3,193) |
| Alzheimer disease and other dementias               | 2,441<br>(1,706 - 3,291) | --                 | --                  | 1<br>(0 - 2)           | 122<br>(76 - 181)        | 2,319<br>(1,596 - 3,141) |
| Parkinson disease                                   | 21<br>(13 - 32)          | --                 | --                  | 1<br>(1 - 2)           | 5<br>(3 - 8)             | 14<br>(8 - 24)           |
| Epilepsy                                            | 369<br>(232 - 512)       | 14<br>(7 - 24)     | 38<br>(24 - 54)     | 277<br>(170 - 393)     | 34<br>(19 - 53)          | 7<br>(4 - 11)            |
| Multiple sclerosis                                  | 6<br>(4 - 14)            | --                 | --                  | 2<br>(1 - 4)           | 2<br>(1 - 4)             | 2<br>(1 - 7)             |
| Other neurological disorders                        | 82<br>(64 - 102)         | 7<br>(5 - 10)      | 9<br>(6 - 12)       | 25<br>(17 - 33)        | 12<br>(8 - 17)           | 29<br>(21 - 39)          |
| Mental and substance use disorders                  | 173<br>(100 - 257)       | 3<br>(1 - 4)       | 0<br>(0 - 0)        | 105<br>(60 - 159)      | 53<br>(27 - 86)          | 12<br>(8 - 17)           |
| Schizophrenia                                       | 27<br>(14 - 42)          | --                 | --                  | 18<br>(7 - 30)         | 7<br>(4 - 11)            | 2<br>(1 - 5)             |
| Alcohol use disorders                               | 96<br>(35 - 169)         | --                 | --                  | 55<br>(20 - 101)       | 37<br>(13 - 65)          | 4<br>(2 - 8)             |
| Drug use disorders                                  | 50<br>(34 - 66)          | 3<br>(1 - 4)       | --                  | 32<br>(21 - 44)        | 10<br>(6 - 14)           | 6<br>(4 - 9)             |
| Opioid use disorders                                | 10<br>(7 - 14)           | 1<br>(0 - 1)       | --                  | 7<br>(4 - 9)           | 2<br>(1 - 3)             | 1<br>(1 - 2)             |
| Cocaine use disorders                               | 2<br>(1 - 2)             | 0<br>(0 - 0)       | --                  | 1<br>(1 - 2)           | 0<br>(0 - 0)             | 0<br>(0 - 0)             |
| Amphetamine use disorders                           | 2<br>(1 - 3)             | 0<br>(0 - 0)       | --                  | 1<br>(1 - 2)           | 0<br>(0 - 1)             | 0<br>(0 - 0)             |
| Other drug use disorders                            | 36<br>(25 - 48)          | 2<br>(1 - 3)       | --                  | 23<br>(15 - 31)        | 7<br>(4 - 11)            | 4<br>(3 - 6)             |
| Eating disorders                                    | 1<br>(0 - 1)             | --                 | 0<br>(0 - 0)        | 1<br>(0 - 1)           | --                       | --                       |
| Anorexia nervosa                                    | 1<br>(0 - 1)             | --                 | 0<br>(0 - 0)        | 1<br>(0 - 1)           | --                       | --                       |

Web Table 31- Uzbekistan deaths with 95% UI by age, sex, and cause in 2013

| Cause                                               | Females, All Ages        | Females, 0-4 Years     | Females, 5-14 Years | Females, 15-49 Years   | Females, 50-69 Years     | Females, 70-80 Years |
|-----------------------------------------------------|--------------------------|------------------------|---------------------|------------------------|--------------------------|----------------------|
| Diabetes, urogenital, blood, and endocrine diseases | 3,624<br>(2,638 - 4,676) | 75<br>(57 - 99)        | 72<br>(55 - 91)     | 1,070<br>(750 - 1,410) | 1,510<br>(1,055 - 2,069) | 897<br>(643 - 1,150) |
| Diabetes mellitus                                   | 1,761<br>(1,198 - 2,363) | 1<br>(0 - 2)           | 10<br>(6 - 17)      | 256<br>(167 - 359)     | 965<br>(647 - 1,366)     | 529<br>(365 - 710)   |
| Acute glomerulonephritis                            | 43<br>(22 - 62)          | 1<br>(0 - 1)           | 1<br>(1 - 2)        | 23<br>(12 - 35)        | 14<br>(7 - 22)           | 5<br>(2 - 7)         |
| Chronic kidney disease                              | 1,176<br>(822 - 1,536)   | 18<br>(13 - 27)        | 32<br>(22 - 43)     | 496<br>(341 - 673)     | 370<br>(225 - 527)       | 260<br>(150 - 345)   |
| Chronic kidney disease due to diabetes mellitus     | 1<br>(1 - 2)             | 0<br>(0 - 0)           | 0<br>(0 - 0)        | 1<br>(0 - 1)           | 0<br>(0 - 0)             | 0<br>(0 - 0)         |
| Chronic kidney disease due to hypertension          | 379<br>(229 - 561)       | 0<br>(0 - 1)           | 0<br>(0 - 0)        | 67<br>(33 - 115)       | 168<br>(93 - 267)        | 144<br>(83 - 204)    |
| Chronic kidney disease due to glomerulonephritis    | 470<br>(302 - 666)       | 8<br>(6 - 12)          | 19<br>(13 - 25)     | 270<br>(170 - 386)     | 112<br>(56 - 177)        | 61<br>(28 - 102)     |
| Chronic kidney disease due to other causes          | 325<br>(195 - 502)       | 10<br>(6 - 16)         | 12<br>(6 - 20)      | 159<br>(85 - 271)      | 89<br>(41 - 165)         | 55<br>(22 - 97)      |
| Urinary diseases and male infertility               | 459<br>(314 - 625)       | 9<br>(6 - 14)          | 12<br>(8 - 17)      | 209<br>(137 - 291)     | 138<br>(90 - 200)        | 91<br>(56 - 135)     |
| Interstitial nephritis and urinary tract infections | 444<br>(304 - 607)       | 8<br>(5 - 13)          | 11<br>(7 - 16)      | 202<br>(132 - 284)     | 134<br>(88 - 192)        | 89<br>(55 - 132)     |
| Urolithiasis                                        | 1<br>(1 - 2)             | --                     | 0<br>(0 - 0)        | 1<br>(0 - 1)           | 0<br>(0 - 1)             | 0<br>(0 - 0)         |
| Other urinary diseases                              | 13<br>(8 - 27)           | 1<br>(0 - 2)           | 1<br>(0 - 1)        | 6<br>(3 - 10)          | 4<br>(2 - 8)             | 2<br>(1 - 7)         |
| Gynecological diseases                              | 3<br>(2 - 5)             | --                     | --                  | 2<br>(1 - 3)           | 1<br>(1 - 2)             | 0<br>(0 - 0)         |
| Uterine fibroids                                    | 1<br>(0 - 1)             | --                     | --                  | 0<br>(0 - 1)           | 0<br>(0 - 1)             | 0<br>(0 - 0)         |
| Polycystic ovarian syndrome                         | 0<br>(0 - 0)             | --                     | --                  | 0<br>(0 - 0)           | 0<br>(0 - 0)             | --                   |
| Endometriosis                                       | 0<br>(0 - 0)             | --                     | --                  | 0<br>(0 - 0)           | 0<br>(0 - 0)             | 0                    |
| Genital prolapse                                    | 0<br>(0 - 1)             | --                     | --                  | 0<br>(0 - 0)           | 0<br>(0 - 0)             | 0<br>(0 - 0)         |
| Other gynecological diseases                        | 2<br>(1 - 3)             | --                     | --                  | 1<br>(1 - 1)           | 1<br>(0 - 1)             | 0<br>(0 - 0)         |
| Hemoglobinopathies and hemolytic anemias            | 118<br>(70 - 172)        | 33<br>(19 - 52)        | 11<br>(6 - 17)      | 56<br>(31 - 85)        | 11<br>(6 - 18)           | 8<br>(5 - 13)        |
| Thalassemias                                        | 68<br>(40 - 99)          | 26<br>(15 - 42)        | 9<br>(5 - 14)       | 32<br>(18 - 50)        | 0<br>(0 - 0)             | 0<br>(0 - 0)         |
| Sickle cell disorders                               | 1<br>(1 - 2)             | 0<br>(0 - 0)           | 0<br>(0 - 0)        | 1<br>(0 - 1)           | 0<br>(0 - 0)             | 0<br>(0 - 0)         |
| G6PD deficiency                                     | 2<br>(1 - 3)             | 0<br>(0 - 0)           | 0<br>(0 - 0)        | 1<br>(1 - 2)           | 0<br>(0 - 0)             | 0<br>(0 - 0)         |
| Other hemoglobinopathies and hemolytic anemias      | 48<br>(28 - 71)          | 6<br>(3 - 9)           | 1<br>(1 - 2)        | 22<br>(12 - 34)        | 11<br>(6 - 17)           | 8<br>(5 - 13)        |
| Endocrine, metabolic, blood, and immune disorders   | 64<br>(41 - 86)          | 14<br>(8 - 22)         | 7<br>(4 - 11)       | 29<br>(17 - 41)        | 10<br>(6 - 15)           | 5<br>(3 - 7)         |
| Musculoskeletal disorders                           | 261<br>(166 - 378)       | --                     | 8<br>(5 - 11)       | 122<br>(74 - 182)      | 73<br>(43 - 115)         | 58<br>(34 - 94)      |
| Rheumatoid arthritis                                | 142<br>(83 - 203)        | --                     | 0<br>(0 - 1)        | 55<br>(26 - 85)        | 52<br>(30 - 81)          | 35<br>(19 - 56)      |
| Other musculoskeletal disorders                     | 118<br>(76 - 208)        | --                     | 7<br>(4 - 11)       | 68<br>(42 - 118)       | 20<br>(10 - 42)          | 23<br>(12 - 42)      |
| Other non-communicable diseases                     | 1,130<br>(742 - 1,543)   | 1,024<br>(654 - 1,406) | 50<br>(30 - 76)     | 46<br>(28 - 75)        | 6<br>(4 - 9)             | 5<br>(3 - 7)         |
| Congenital anomalies                                | 1,107<br>(713 - 1,499)   | 1,006<br>(633 - 1,375) | 49<br>(30 - 76)     | 43<br>(26 - 72)        | 5<br>(3 - 8)             | 4<br>(2 - 7)         |
| Neural tube defects                                 | 114<br>(57 - 186)        | 110<br>(53 - 181)      | 2<br>(1 - 5)        | 1<br>(1 - 2)           | 0<br>(0 - 0)             | 0<br>(0 - 0)         |
| Congenital heart anomalies                          | 564<br>(352 - 793)       | 483<br>(295 - 695)     | 41<br>(25 - 64)     | 35<br>(21 - 59)        | 2<br>(1 - 4)             | 3<br>(2 - 5)         |
| Cleft lip and cleft palate                          | 5<br>(1 - 11)            | 5<br>(1 - 11)          | --                  | --                     | --                       | --                   |
| Down syndrome                                       | 41<br>(20 - 73)          | 38<br>(18 - 68)        | 2<br>(1 - 3)        | 1<br>(1 - 2)           | 0<br>(0 - 0)             | 0<br>(0 - 0)         |
| Chromosomal unbalanced rearrangements               | 4<br>(2 - 8)             | 2<br>(1 - 4)           | 0<br>(0 - 1)        | 2<br>(1 - 3)           | 0<br>(0 - 0)             | 0<br>(0 - 0)         |
| Other congenital anomalies                          | 379<br>(213 - 576)       | 369<br>(205 - 563)     | 3<br>(2 - 6)        | 4<br>(2 - 7)           | 2<br>(1 - 3)             | 1<br>(0 - 1)         |
| Skin and subcutaneous diseases                      | 6<br>(4 - 8)             | 1<br>(0 - 2)           | 1<br>(0 - 1)        | 3<br>(2 - 4)           | 1<br>(1 - 2)             | 1<br>(0 - 1)         |
| Cellulitis                                          | 1<br>(1 - 2)             | 0<br>(0 - 1)           | 0<br>(0 - 0)        | 0<br>(0 - 1)           | 0<br>(0 - 0)             | 0<br>(0 - 0)         |
| Pyoderma                                            | 3<br>(2 - 4)             | 0<br>(0 - 1)           | 0<br>(0 - 0)        | 1<br>(1 - 2)           | 1<br>(0 - 1)             | 0<br>(0 - 0)         |
| Decubitus ulcer                                     | 1<br>(0 - 1)             | 0<br>(0 - 0)           | 0<br>(0 - 0)        | 0<br>(0 - 1)           | 0<br>(0 - 0)             | 0<br>(0 - 0)         |
| Other skin and subcutaneous diseases                | 1<br>(1 - 2)             | 0<br>(0 - 0)           | 0<br>(0 - 0)        | 1<br>(0 - 1)           | 0<br>(0 - 0)             | 0<br>(0 - 0)         |

Web Table 31- Uzbekistan deaths with 95% UI by age, sex, and cause in 2013

| Cause                                           | Females, All Ages        | Females, 0-4 Years   | Females, 5-14 Years | Females, 15-49 Years     | Females, 50-69 Years | Females, 70-80 Years |
|-------------------------------------------------|--------------------------|----------------------|---------------------|--------------------------|----------------------|----------------------|
| Sudden infant death syndrome                    | 17<br>(2 - 70)           | 17<br>(2 - 70)       | --                  | --                       | --                   | --                   |
| Injuries                                        | 3,638<br>(2,860 - 4,850) | 832<br>(606 - 1,216) | 382<br>(313 - 478)  | 1,602<br>(1,147 - 2,135) | 523<br>(355 - 759)   | 299<br>(222 - 415)   |
| Transport injuries                              | 807<br>(602 - 1,098)     | 45<br>(29 - 66)      | 113<br>(84 - 148)   | 406<br>(282 - 559)       | 172<br>(112 - 265)   | 72<br>(48 - 126)     |
| Road injuries                                   | 785<br>(586 - 1,062)     | 42<br>(27 - 62)      | 111<br>(82 - 145)   | 393<br>(271 - 539)       | 169<br>(109 - 259)   | 70<br>(47 - 123)     |
| Pedestrian road injuries                        | 332<br>(241 - 455)       | 21<br>(12 - 35)      | 66<br>(46 - 94)     | 135<br>(82 - 193)        | 63<br>(38 - 100)     | 47<br>(30 - 82)      |
| Cyclist road injuries                           | 38<br>(25 - 55)          | 2<br>(1 - 4)         | 4<br>(2 - 6)        | 18<br>(11 - 27)          | 13<br>(7 - 21)       | 1<br>(1 - 2)         |
| Motorcyclist road injuries                      | 13<br>(8 - 22)           | 1<br>(0 - 2)         | 1<br>(0 - 1)        | 10<br>(6 - 16)           | 2<br>(1 - 3)         | 0<br>(0 - 1)         |
| Motor vehicle road injuries                     | 400<br>(277 - 556)       | 18<br>(10 - 29)      | 40<br>(25 - 60)     | 229<br>(148 - 322)       | 92<br>(57 - 144)     | 22<br>(13 - 40)      |
| Other road injuries                             | 1<br>(1 - 2)             | 0<br>(0 - 0)         | 0<br>(0 - 0)        | 1<br>(0 - 1)             | 0<br>(0 - 0)         | 0<br>(0 - 0)         |
| Other transport injuries                        | 23<br>(15 - 38)          | 3<br>(2 - 5)         | 2<br>(1 - 4)        | 13<br>(8 - 22)           | 4<br>(2 - 8)         | 1<br>(1 - 3)         |
| Unintentional injuries                          | 2,032<br>(1,614 - 2,664) | 778<br>(561 - 1,163) | 247<br>(191 - 332)  | 613<br>(431 - 815)       | 220<br>(148 - 308)   | 174<br>(127 - 233)   |
| Falls                                           | 263<br>(199 - 367)       | 74<br>(50 - 116)     | 23<br>(16 - 34)     | 78<br>(53 - 111)         | 38<br>(25 - 59)      | 49<br>(33 - 78)      |
| Drowning                                        | 682<br>(488 - 1,131)     | 315<br>(176 - 625)   | 145<br>(100 - 236)  | 171<br>(114 - 267)       | 36<br>(22 - 55)      | 14<br>(9 - 23)       |
| Fire, heat, and hot substances                  | 386<br>(252 - 534)       | 112<br>(66 - 188)    | 30<br>(20 - 44)     | 169<br>(101 - 241)       | 44<br>(26 - 67)      | 30<br>(19 - 45)      |
| Poisonings                                      | 103<br>(65 - 152)        | 23<br>(14 - 38)      | 9<br>(5 - 14)       | 47<br>(26 - 73)          | 15<br>(8 - 26)       | 9<br>(5 - 14)        |
| Exposure to mechanical forces                   | 221<br>(125 - 449)       | 133<br>(52 - 344)    | 10<br>(6 - 16)      | 67<br>(43 - 108)         | 9<br>(5 - 17)        | 2<br>(1 - 3)         |
| Unintentional firearm injuries                  | 11<br>(8 - 16)           | 1<br>(0 - 1)         | 0<br>(0 - 1)        | 8<br>(5 - 12)            | 2<br>(1 - 4)         | 0<br>(0 - 1)         |
| Unintentional suffocation                       | 161<br>(70 - 381)        | 110<br>(31 - 318)    | 3<br>(1 - 6)        | 44<br>(24 - 84)          | 3<br>(2 - 10)        | 0<br>(0 - 1)         |
| Other exposure to mechanical forces             | 49<br>(35 - 73)          | 23<br>(12 - 41)      | 7<br>(4 - 12)       | 15<br>(9 - 23)           | 3<br>(2 - 5)         | 1<br>(1 - 2)         |
| Adverse effects of medical treatment            | 182<br>(107 - 266)       | 22<br>(10 - 48)      | 5<br>(3 - 8)        | 46<br>(25 - 75)          | 60<br>(30 - 100)     | 49<br>(24 - 83)      |
| Animal contact                                  | 8<br>(4 - 19)            | 4<br>(2 - 8)         | 1<br>(1 - 3)        | 2<br>(1 - 5)             | 1<br>(0 - 2)         | 0<br>(0 - 1)         |
| Venomous animal contact                         | 6<br>(3 - 14)            | 3<br>(1 - 7)         | 1<br>(0 - 3)        | 1<br>(1 - 3)             | 0<br>(0 - 0)         | 0<br>(0 - 1)         |
| Non-venomous animal contact                     | 2<br>(1 - 6)             | 0<br>(0 - 1)         | 0<br>(0 - 1)        | 1<br>(0 - 2)             | 1<br>(0 - 2)         | 0<br>(0 - 1)         |
| Foreign body                                    | 101<br>(54 - 160)        | 75<br>(37 - 131)     | 4<br>(2 - 10)       | 8<br>(4 - 12)            | 5<br>(3 - 10)        | 8<br>(4 - 15)        |
| Pulmonary aspiration and foreign body in airway | 98<br>(50 - 158)         | 75<br>(36 - 130)     | 4<br>(2 - 9)        | 6<br>(3 - 10)            | 5<br>(3 - 10)        | 8<br>(4 - 14)        |
| Foreign body in other body part                 | 3<br>(2 - 6)             | 1<br>(0 - 2)         | 0<br>(0 - 0)        | 2<br>(1 - 3)             | 0<br>(0 - 0)         | 0<br>(0 - 0)         |
| Other unintentional injuries                    | 87<br>(45 - 121)         | 20<br>(9 - 36)       | 18<br>(7 - 29)      | 26<br>(14 - 39)          | 11<br>(6 - 18)       | 12<br>(6 - 18)       |
| Self-harm and interpersonal violence            | 799<br>(561 - 1,194)     | 9<br>(4 - 19)        | 22<br>(15 - 32)     | 583<br>(397 - 854)       | 131<br>(84 - 232)    | 53<br>(36 - 99)      |
| Self-harm                                       | 609<br>(422 - 917)       | --                   | 14<br>(8 - 21)      | 447<br>(305 - 672)       | 103<br>(65 - 194)    | 44<br>(29 - 83)      |
| Interpersonal violence                          | 190<br>(118 - 323)       | 9<br>(4 - 19)        | 8<br>(4 - 15)       | 135<br>(79 - 233)        | 28<br>(14 - 62)      | 9<br>(4 - 22)        |
| Assault by firearm                              | 12<br>(6 - 27)           | 1<br>(0 - 3)         | 1<br>(0 - 3)        | 5<br>(2 - 12)            | 3<br>(1 - 8)         | 1<br>(0 - 2)         |
| Assault by sharp object                         | 117<br>(70 - 211)        | 4<br>(2 - 9)         | 2<br>(1 - 5)        | 90<br>(51 - 161)         | 17<br>(8 - 40)       | 4<br>(2 - 9)         |
| Assault by other means                          | 61<br>(37 - 108)         | 4<br>(1 - 8)         | 5<br>(2 - 9)        | 40<br>(22 - 74)          | 8<br>(4 - 18)        | 5<br>(2 - 11)        |

Web Table 31- Vanuatu deaths with 95% UI by age, sex, and cause in 2013

| Cause                                                             | Both Sexes, All Ages     | Both Sexes, 0-4 Years | Both Sexes, 5-14 Years | Both Sexes, 15-49 Years | Both Sexes, 50-69 Years | Both Sexes, 70-80 Years |
|-------------------------------------------------------------------|--------------------------|-----------------------|------------------------|-------------------------|-------------------------|-------------------------|
| All causes                                                        | 1,930<br>(1,360 - 2,718) | 230<br>(156 - 334)    | 40<br>(30 - 52)        | 472<br>(273 - 794)      | 612<br>(389 - 935)      | 576<br>(449 - 723)      |
| Communicable, maternal, neonatal, and nutritional diseases        | 470<br>(353 - 622)       | 180<br>(123 - 256)    | 17<br>(12 - 24)        | 97<br>(56 - 164)        | 77<br>(48 - 116)        | 98<br>(71 - 128)        |
| HIV/AIDS and tuberculosis                                         | 46<br>(28 - 71)          | 1<br>(0 - 1)          | 1<br>(1 - 1)           | 17<br>(10 - 29)         | 15<br>(9 - 23)          | 12<br>(6 - 18)          |
| Tuberculosis                                                      | 42<br>(25 - 66)          | 1<br>(0 - 1)          | 1<br>(0 - 1)           | 15<br>(8 - 26)          | 14<br>(8 - 23)          | 12<br>(6 - 18)          |
| HIV/AIDS                                                          | 4<br>(2 - 6)             | 0<br>(0 - 0)          | 0<br>(0 - 0)           | 3<br>(1 - 4)            | 1<br>(0 - 1)            | 0<br>(0 - 0)            |
| HIV/AIDS resulting in mycobacterial infection                     | 0<br>(0 - 0)             | 0<br>(0 - 0)          | 0<br>(0 - 0)           | 0<br>(0 - 0)            | 0<br>(0 - 0)            | 0<br>(0 - 0)            |
| HIV/AIDS resulting in other diseases                              | 3<br>(2 - 5)             | 0<br>(0 - 0)          | 0<br>(0 - 0)           | 3<br>(1 - 4)            | 1<br>(0 - 1)            | 0<br>(0 - 0)            |
| Diarrhea, lower respiratory, and other common infectious diseases | 225<br>(166 - 306)       | 64<br>(36 - 106)      | 11<br>(7 - 17)         | 39<br>(22 - 66)         | 44<br>(27 - 68)         | 67<br>(49 - 88)         |
| Diarrheal diseases                                                | 55<br>(39 - 77)          | 13<br>(5 - 25)        | 2<br>(1 - 3)           | 7<br>(4 - 13)           | 11<br>(6 - 18)          | 22<br>(14 - 34)         |
| Intestinal infectious diseases                                    | 6<br>(2 - 12)            | 2<br>(1 - 5)          | 2<br>(1 - 3)           | 1<br>(1 - 3)            | 0<br>(0 - 1)            | 0<br>(0 - 0)            |
| Typhoid fever                                                     | 4<br>(2 - 9)             | 2<br>(1 - 4)          | 1<br>(1 - 2)           | 1<br>(0 - 2)            | 0<br>(0 - 0)            | 0<br>(0 - 0)            |
| Paratyphoid fever                                                 | 1<br>(0 - 2)             | 1<br>(0 - 1)          | 0<br>(0 - 1)           | 0<br>(0 - 0)            | 0<br>(0 - 0)            | 0<br>(0 - 0)            |
| Other intestinal infectious diseases                              | 0<br>(0 - 2)             | 0<br>(0 - 2)          | 0<br>(0 - 0)           | 0<br>(0 - 1)            | 0<br>(0 - 0)            | 0<br>(0 - 0)            |
| Lower respiratory infections                                      | 127<br>(90 - 175)        | 30<br>(16 - 51)       | 3<br>(2 - 5)           | 22<br>(12 - 38)         | 30<br>(17 - 46)         | 42<br>(30 - 59)         |
| Upper respiratory infections                                      | 0<br>(0 - 0)             | 0<br>(0 - 0)          | 0<br>(0 - 0)           | 0<br>(0 - 0)            | 0<br>(0 - 0)            | 0<br>(0 - 0)            |
| Otitis media                                                      | 0<br>(0 - 0)             | 0<br>(0 - 0)          | 0<br>(0 - 0)           | 0<br>(0 - 0)            | 0<br>(0 - 0)            | 0<br>(0 - 0)            |
| Meningitis                                                        | 20<br>(13 - 29)          | 6<br>(3 - 13)         | 2<br>(1 - 3)           | 7<br>(4 - 11)           | 3<br>(2 - 5)            | 2<br>(1 - 2)            |
| Pneumococcal meningitis                                           | 7<br>(5 - 11)            | 2<br>(1 - 4)          | 1<br>(0 - 1)           | 3<br>(1 - 4)            | 1<br>(1 - 2)            | 1<br>(0 - 1)            |
| H influenzae type B meningitis                                    | 2<br>(1 - 4)             | 1<br>(1 - 3)          | 0<br>(0 - 0)           | 1<br>(0 - 1)            | 0<br>(0 - 0)            | 0<br>(0 - 0)            |
| Meningococcal meningitis                                          | 4<br>(2 - 5)             | 1<br>(0 - 2)          | 0<br>(0 - 1)           | 1<br>(1 - 2)            | 1<br>(0 - 1)            | 0<br>(0 - 1)            |
| Other meningitis                                                  | 6<br>(4 - 10)            | 2<br>(1 - 4)          | 1<br>(0 - 1)           | 2<br>(1 - 4)            | 1<br>(1 - 2)            | 1<br>(0 - 1)            |
| Encephalitis                                                      | 2<br>(1 - 3)             | 0<br>(0 - 1)          | 0<br>(0 - 0)           | 1<br>(0 - 1)            | 0<br>(0 - 1)            | 0<br>(0 - 0)            |
| Diphtheria                                                        | 0<br>(0 - 0)             | 0<br>(0 - 0)          | 0<br>(0 - 0)           | 0<br>(0 - 0)            | 0<br>(0 - 0)            | --                      |
| Whooping cough                                                    | 3<br>(0 - 12)            | 2<br>(0 - 11)         | 0<br>(0 - 1)           | 0<br>(0 - 0)            | 0<br>(0 - 0)            | --                      |
| Tetanus                                                           | 0<br>(0 - 0)             | 0<br>(0 - 0)          | 0<br>(0 - 0)           | 0<br>(0 - 0)            | 0<br>(0 - 0)            | 0<br>(0 - 0)            |
| Measles                                                           | 11<br>(0 - 50)           | 9<br>(0 - 41)         | 2<br>(0 - 9)           | 0<br>(0 - 2)            | 0<br>(0 - 0)            | --                      |
| Varicella and herpes zoster                                       | 0<br>(0 - 0)             | 0<br>(0 - 0)          | 0<br>(0 - 0)           | 0<br>(0 - 0)            | 0<br>(0 - 0)            | 0<br>(0 - 0)            |
| Neglected tropical diseases and malaria                           | 19<br>(8 - 38)           | 6<br>(1 - 21)         | 2<br>(1 - 4)           | 8<br>(3 - 16)           | 3<br>(1 - 6)            | 2<br>(1 - 3)            |
| Malaria                                                           | 15<br>(5 - 33)           | 5<br>(0 - 20)         | 1<br>(0 - 4)           | 6<br>(2 - 15)           | 2<br>(1 - 5)            | 0<br>(0 - 1)            |
| Leishmaniasis                                                     | 0<br>(0 - 0)             | 0<br>(0 - 0)          | 0<br>(0 - 0)           | 0<br>(0 - 0)            | 0<br>(0 - 0)            | 0<br>(0 - 0)            |
| Visceral leishmaniasis                                            | 0<br>(0 - 0)             | 0<br>(0 - 0)          | 0<br>(0 - 0)           | 0<br>(0 - 0)            | 0<br>(0 - 0)            | 0<br>(0 - 0)            |
| Cysticercosis                                                     | 0<br>(0 - 0)             | 0<br>(0 - 0)          | 0<br>(0 - 0)           | 0<br>(0 - 0)            | 0<br>(0 - 0)            | 0<br>(0 - 0)            |
| Cystic echinococcosis                                             | 0<br>(0 - 0)             | 0<br>(0 - 0)          | 0<br>(0 - 0)           | 0<br>(0 - 0)            | 0<br>(0 - 0)            | 0<br>(0 - 0)            |
| Dengue                                                            | 2<br>(2 - 4)             | 0<br>(0 - 1)          | 0<br>(0 - 0)           | 1<br>(0 - 2)            | 0<br>(0 - 1)            | 1<br>(0 - 1)            |
| Rabies                                                            | 0<br>(0 - 1)             | 0<br>(0 - 0)          | 0<br>(0 - 0)           | 0<br>(0 - 0)            | 0<br>(0 - 0)            | 0<br>(0 - 0)            |
| Intestinal nematode infections                                    | 0<br>(0 - 3)             | 0<br>(0 - 2)          | 0<br>(0 - 1)           | 0<br>(0 - 1)            | 0<br>(0 - 0)            | 0<br>(0 - 0)            |
| Ascariasis                                                        | 0<br>(0 - 3)             | 0<br>(0 - 2)          | 0<br>(0 - 1)           | 0<br>(0 - 1)            | 0<br>(0 - 0)            | 0<br>(0 - 0)            |
| Other neglected tropical diseases                                 | 1<br>(1 - 2)             | 0<br>(0 - 0)          | 0<br>(0 - 0)           | 0<br>(0 - 0)            | 0<br>(0 - 0)            | 1<br>(0 - 1)            |
| Maternal disorders                                                | 9<br>(5 - 17)            | --                    | 0<br>(0 - 0)           | 9<br>(5 - 17)           | --                      | --                      |
| Maternal hemorrhage                                               | 2<br>(1 - 3)             | --                    | 0<br>(0 - 0)           | 2<br>(1 - 3)            | --                      | --                      |



Web Table 31- Vanuatu deaths with 95% UI by age, sex, and cause in 2013

| Cause                                                            | Both Sexes, All Ages   | Both Sexes, 0-4 Years | Both Sexes, 5-14 Years | Both Sexes, 15-49 Years | Both Sexes, 50-69 Years | Both Sexes, 70-80 Years |
|------------------------------------------------------------------|------------------------|-----------------------|------------------------|-------------------------|-------------------------|-------------------------|
| Maternal sepsis and other maternal infections                    | 1<br>(0 - 1)           | --                    | 0<br>(0 - 0)           | 1<br>(0 - 1)            | --                      | --                      |
| Maternal hypertensive disorders                                  | 1<br>(0 - 2)           | --                    | 0<br>(0 - 0)           | 1<br>(0 - 2)            | --                      | --                      |
| Maternal obstructed labor                                        | 1<br>(0 - 2)           | --                    | 0<br>(0 - 0)           | 1<br>(0 - 2)            | --                      | --                      |
| Maternal abortive outcome                                        | 1<br>(1 - 3)           | --                    | 0<br>(0 - 0)           | 1<br>(1 - 3)            | --                      | --                      |
| Indirect maternal deaths                                         | 1<br>(0 - 2)           | --                    | 0<br>(0 - 0)           | 1<br>(0 - 2)            | --                      | --                      |
| Late maternal deaths                                             | 1<br>(1 - 2)           | --                    | 0<br>(0 - 0)           | 1<br>(1 - 2)            | --                      | --                      |
| Maternal deaths aggravated by HIV/AIDS                           | 0<br>(0 - 0)           | --                    | --                     | 0<br>(0 - 0)            | --                      | --                      |
| Other maternal disorders                                         | 1<br>(1 - 3)           | --                    | 0<br>(0 - 0)           | 1<br>(1 - 3)            | --                      | --                      |
| Neonatal disorders                                               | 98<br>(68 - 132)       | 98<br>(68 - 132)      | --                     | --                      | --                      | --                      |
| Neonatal preterm birth complications                             | 39<br>(22 - 58)        | 39<br>(22 - 58)       | --                     | --                      | --                      | --                      |
| Neonatal encephalopathy due to birth asphyxia and trauma         | 15<br>(7 - 26)         | 15<br>(7 - 26)        | --                     | --                      | --                      | --                      |
| Neonatal sepsis and other neonatal infections                    | 13<br>(5 - 25)         | 13<br>(5 - 25)        | --                     | --                      | --                      | --                      |
| Hemolytic disease and other neonatal jaundice                    | 1<br>(0 - 2)           | 1<br>(0 - 2)          | --                     | --                      | --                      | --                      |
| Other neonatal disorders                                         | 31<br>(16 - 50)        | 31<br>(16 - 50)       | --                     | --                      | --                      | --                      |
| Nutritional deficiencies                                         | 37<br>(24 - 52)        | 7<br>(3 - 13)         | 2<br>(1 - 2)           | 10<br>(5 - 16)          | 7<br>(4 - 10)           | 12<br>(7 - 17)          |
| Protein-energy malnutrition                                      | 18<br>(11 - 27)        | 6<br>(3 - 12)         | 1<br>(1 - 2)           | 2<br>(1 - 4)            | 3<br>(1 - 5)            | 6<br>(3 - 9)            |
| Iodine deficiency                                                | 0<br>(0 - 1)           | 0<br>(0 - 0)          | 0<br>(0 - 0)           | 0<br>(0 - 0)            | 0<br>(0 - 0)            | 0<br>(0 - 0)            |
| Iron-deficiency anemia                                           | 16<br>(9 - 25)         | 0<br>(0 - 1)          | 0<br>(0 - 1)           | 6<br>(3 - 11)           | 3<br>(2 - 6)            | 6<br>(3 - 9)            |
| Other nutritional deficiencies                                   | 2<br>(1 - 3)           | 0<br>(0 - 0)          | 0<br>(0 - 0)           | 1<br>(0 - 1)            | 0<br>(0 - 1)            | 1<br>(0 - 1)            |
| Other communicable, maternal, neonatal, and nutritional diseases | 36<br>(22 - 55)        | 6<br>(3 - 11)         | 2<br>(1 - 3)           | 14<br>(7 - 25)          | 9<br>(5 - 15)           | 5<br>(3 - 9)            |
| Sexually transmitted diseases excluding HIV                      | 4<br>(2 - 7)           | 2<br>(1 - 5)          | 0<br>(0 - 0)           | 1<br>(0 - 2)            | 0<br>(0 - 1)            | 0<br>(0 - 1)            |
| Syphilis                                                         | 3<br>(1 - 6)           | 2<br>(1 - 5)          | 0<br>(0 - 0)           | 0<br>(0 - 1)            | 0<br>(0 - 1)            | 0<br>(0 - 0)            |
| Chlamydial infection                                             | 0<br>(0 - 0)           | --                    | 0<br>(0 - 0)           | 0<br>(0 - 0)            | 0<br>(0 - 0)            | 0<br>(0 - 0)            |
| Gonococcal infection                                             | 0<br>(0 - 1)           | --                    | 0<br>(0 - 0)           | 0<br>(0 - 0)            | 0<br>(0 - 0)            | 0<br>(0 - 0)            |
| Other sexually transmitted diseases                              | 0<br>(0 - 0)           | --                    | 0<br>(0 - 0)           | 0<br>(0 - 0)            | 0<br>(0 - 0)            | 0<br>(0 - 0)            |
| Hepatitis                                                        | 14<br>(9 - 22)         | 1<br>(0 - 1)          | 1<br>(0 - 1)           | 6<br>(3 - 11)           | 5<br>(3 - 8)            | 2<br>(1 - 3)            |
| Acute hepatitis A                                                | 1<br>(0 - 1)           | 0<br>(0 - 0)          | 0<br>(0 - 0)           | 0<br>(0 - 1)            | 0<br>(0 - 0)            | 0<br>(0 - 0)            |
| Acute hepatitis B                                                | 10<br>(6 - 16)         | 1<br>(0 - 1)          | 0<br>(0 - 1)           | 3<br>(2 - 6)            | 4<br>(2 - 6)            | 2<br>(1 - 3)            |
| Acute hepatitis C                                                | 0<br>(0 - 1)           | --                    | 0<br>(0 - 0)           | 0<br>(0 - 0)            | 0<br>(0 - 0)            | 0<br>(0 - 0)            |
| Acute hepatitis E                                                | 3<br>(2 - 6)           | 0<br>(0 - 0)          | 0<br>(0 - 0)           | 2<br>(1 - 4)            | 1<br>(0 - 2)            | 0<br>(0 - 0)            |
| Other infectious diseases                                        | 17<br>(9 - 30)         | 3<br>(1 - 7)          | 1<br>(0 - 2)           | 7<br>(3 - 14)           | 4<br>(2 - 7)            | 3<br>(1 - 6)            |
| Non-communicable diseases                                        | 1,336<br>(920 - 1,931) | 42<br>(24 - 68)       | 15<br>(10 - 20)        | 300<br>(169 - 509)      | 516<br>(328 - 790)      | 464<br>(361 - 583)      |
| Neoplasms                                                        | 106<br>(68 - 165)      | 1<br>(1 - 2)          | 1<br>(1 - 2)           | 35<br>(20 - 62)         | 42<br>(26 - 67)         | 27<br>(19 - 36)         |
| Esophageal cancer                                                | 2<br>(1 - 3)           | --                    | --                     | 0<br>(0 - 1)            | 1<br>(0 - 1)            | 1<br>(0 - 1)            |
| Stomach cancer                                                   | 8<br>(5 - 13)          | --                    | --                     | 2<br>(1 - 3)            | 4<br>(2 - 6)            | 3<br>(2 - 4)            |
| Liver cancer                                                     | 3<br>(2 - 5)           | --                    | 0<br>(0 - 0)           | 1<br>(0 - 2)            | 2<br>(1 - 3)            | 1<br>(0 - 1)            |
| Liver cancer due to hepatitis B                                  | 1<br>(1 - 2)           | --                    | 0<br>(0 - 0)           | 0<br>(0 - 1)            | 1<br>(0 - 1)            | 0<br>(0 - 0)            |
| Liver cancer due to hepatitis C                                  | 1<br>(1 - 2)           | --                    | 0<br>(0 - 0)           | 0<br>(0 - 0)            | 0<br>(0 - 1)            | 0<br>(0 - 0)            |
| Liver cancer due to alcohol use                                  | 0<br>(0 - 0)           | --                    | --                     | 0<br>(0 - 0)            | 0<br>(0 - 0)            | 0<br>(0 - 0)            |
| Liver cancer due to other causes                                 | 1<br>(0 - 1)           | --                    | 0<br>(0 - 0)           | 0<br>(0 - 0)            | 0<br>(0 - 0)            | 0<br>(0 - 0)            |

Web Table 31- Vanuatu deaths with 95% UI by age, sex, and cause in 2013

| Cause                                         | Both Sexes, All Ages | Both Sexes, 0-4 Years | Both Sexes, 5-14 Years | Both Sexes, 15-49 Years | Both Sexes, 50-69 Years | Both Sexes, 70-80 Years |
|-----------------------------------------------|----------------------|-----------------------|------------------------|-------------------------|-------------------------|-------------------------|
| Larynx cancer                                 | 0<br>(0 - 1)         | --                    | --                     | 0<br>(0 - 0)            | 0<br>(0 - 0)            | 0<br>(0 - 0)            |
| Tracheal, bronchus and lung cancer            | 17<br>(11 - 25)      | --                    | --                     | 4<br>(2 - 7)            | 7<br>(5 - 12)           | 5<br>(4 - 7)            |
| Breast cancer                                 | 26<br>(14 - 43)      | --                    | --                     | 11<br>(6 - 20)          | 11<br>(6 - 17)          | 4<br>(3 - 6)            |
| Cervical cancer                               | 15<br>(9 - 25)       | --                    | --                     | 5<br>(3 - 10)           | 6<br>(3 - 10)           | 4<br>(2 - 6)            |
| Uterine cancer                                | 2<br>(1 - 3)         | --                    | --                     | 0<br>(0 - 1)            | 1<br>(0 - 2)            | 0<br>(0 - 1)            |
| Prostate cancer                               | 2<br>(1 - 5)         | --                    | --                     | 0<br>(0 - 0)            | 1<br>(0 - 2)            | 1<br>(1 - 3)            |
| Colon and rectum cancer                       | 7<br>(4 - 10)        | --                    | --                     | 2<br>(1 - 3)            | 3<br>(2 - 4)            | 2<br>(2 - 3)            |
| Lip and oral cavity cancer                    | 1<br>(1 - 2)         | --                    | --                     | 0<br>(0 - 1)            | 0<br>(0 - 1)            | 0<br>(0 - 1)            |
| Nasopharynx cancer                            | 1<br>(1 - 2)         | --                    | 0<br>(0 - 0)           | 1<br>(0 - 1)            | 1<br>(0 - 1)            | 0<br>(0 - 0)            |
| Other pharynx cancer                          | 1<br>(1 - 1)         | --                    | --                     | 0<br>(0 - 0)            | 0<br>(0 - 1)            | 0<br>(0 - 0)            |
| Gallbladder and biliary tract cancer          | 1<br>(1 - 2)         | --                    | --                     | 0<br>(0 - 0)            | 1<br>(0 - 1)            | 0<br>(0 - 0)            |
| Pancreatic cancer                             | 1<br>(1 - 1)         | --                    | --                     | 0<br>(0 - 0)            | 0<br>(0 - 1)            | 0<br>(0 - 0)            |
| Malignant skin melanoma                       | 1<br>(0 - 1)         | --                    | --                     | 0<br>(0 - 1)            | 0<br>(0 - 0)            | 0<br>(0 - 0)            |
| Non-melanoma skin cancer                      | 1<br>(1 - 2)         | --                    | --                     | 0<br>(0 - 0)            | 0<br>(0 - 1)            | 0<br>(0 - 1)            |
| Ovarian cancer                                | 0<br>(0 - 0)         | --                    | --                     | 0<br>(0 - 0)            | 0<br>(0 - 0)            | 0<br>(0 - 0)            |
| Testicular cancer                             | 0<br>(0 - 0)         | --                    | --                     | 0<br>(0 - 0)            | 0<br>(0 - 0)            | 0<br>(0 - 0)            |
| Kidney cancer                                 | 1<br>(0 - 1)         | 0<br>(0 - 0)          | 0<br>(0 - 0)           | 0<br>(0 - 0)            | 0<br>(0 - 0)            | 0<br>(0 - 0)            |
| Bladder cancer                                | 1<br>(0 - 1)         | --                    | --                     | 0<br>(0 - 0)            | 0<br>(0 - 0)            | 0<br>(0 - 0)            |
| Brain and nervous system cancer               | 1<br>(0 - 1)         | 0<br>(0 - 0)          | 0<br>(0 - 0)           | 0<br>(0 - 1)            | 0<br>(0 - 0)            | 0<br>(0 - 0)            |
| Thyroid cancer                                | 0<br>(0 - 0)         | --                    | 0<br>(0 - 0)           | 0<br>(0 - 0)            | 0<br>(0 - 0)            | 0<br>(0 - 0)            |
| Mesothelioma                                  | 0<br>(0 - 0)         | --                    | --                     | 0<br>(0 - 0)            | 0<br>(0 - 0)            | 0<br>(0 - 0)            |
| Hodgkin lymphoma                              | 0<br>(0 - 1)         | 0<br>(0 - 0)          | 0<br>(0 - 0)           | 0<br>(0 - 0)            | 0<br>(0 - 0)            | 0<br>(0 - 0)            |
| Non-Hodgkin lymphoma                          | 2<br>(1 - 3)         | 0<br>(0 - 0)          | 0<br>(0 - 0)           | 1<br>(0 - 1)            | 1<br>(0 - 1)            | 0<br>(0 - 1)            |
| Multiple myeloma                              | 1<br>(0 - 2)         | --                    | --                     | 0<br>(0 - 0)            | 0<br>(0 - 1)            | 0<br>(0 - 0)            |
| Leukemia                                      | 5<br>(3 - 7)         | 0<br>(0 - 1)          | 1<br>(0 - 1)           | 2<br>(1 - 4)            | 1<br>(1 - 1)            | 1<br>(0 - 1)            |
| Other neoplasms                               | 7<br>(5 - 11)        | 1<br>(0 - 1)          | 1<br>(0 - 1)           | 3<br>(2 - 5)            | 2<br>(1 - 3)            | 1<br>(1 - 2)            |
| Cardiovascular diseases                       | 595<br>(396 - 867)   | 5<br>(2 - 9)          | 4<br>(2 - 6)           | 138<br>(76 - 230)       | 240<br>(148 - 367)      | 208<br>(158 - 264)      |
| Rheumatic heart disease                       | 15<br>(9 - 24)       | 0<br>(0 - 0)          | 1<br>(0 - 2)           | 8<br>(4 - 14)           | 4<br>(2 - 6)            | 3<br>(2 - 4)            |
| Ischemic heart disease                        | 302<br>(199 - 457)   | 1<br>(0 - 2)          | 1<br>(0 - 1)           | 72<br>(40 - 122)        | 132<br>(82 - 203)       | 97<br>(70 - 135)        |
| Cerebrovascular disease                       | 202<br>(130 - 287)   | 2<br>(1 - 3)          | 1<br>(1 - 2)           | 34<br>(18 - 56)         | 77<br>(43 - 116)        | 89<br>(63 - 115)        |
| Ischemic stroke                               | 69<br>(40 - 100)     | 0<br>(0 - 0)          | 0<br>(0 - 0)           | 6<br>(2 - 11)           | 20<br>(10 - 31)         | 43<br>(27 - 59)         |
| Hemorrhagic stroke                            | 133<br>(85 - 198)    | 1<br>(1 - 2)          | 1<br>(1 - 2)           | 28<br>(15 - 47)         | 57<br>(33 - 89)         | 46<br>(32 - 63)         |
| Hypertensive heart disease                    | 12<br>(8 - 19)       | 0<br>(0 - 0)          | 0<br>(0 - 0)           | 2<br>(1 - 4)            | 5<br>(3 - 8)            | 5<br>(3 - 8)            |
| Cardiomyopathy and myocarditis                | 18<br>(10 - 31)      | 1<br>(0 - 2)          | 1<br>(0 - 1)           | 8<br>(4 - 15)           | 6<br>(3 - 10)           | 2<br>(1 - 4)            |
| Atrial fibrillation and flutter               | 0<br>(0 - 1)         | --                    | --                     | 0<br>(0 - 0)            | 0<br>(0 - 0)            | 0<br>(0 - 1)            |
| Aortic aneurysm                               | 4<br>(2 - 6)         | --                    | --                     | 1<br>(0 - 2)            | 1<br>(1 - 2)            | 1<br>(1 - 2)            |
| Peripheral vascular disease                   | 1<br>(1 - 2)         | --                    | --                     | 0<br>(0 - 0)            | 0<br>(0 - 1)            | 1<br>(0 - 2)            |
| Endocarditis                                  | 7<br>(4 - 11)        | 0<br>(0 - 1)          | 0<br>(0 - 0)           | 3<br>(2 - 6)            | 1<br>(1 - 3)            | 1<br>(1 - 2)            |
| Other cardiovascular and circulatory diseases | 33<br>(20 - 54)      | 1<br>(0 - 1)          | 0<br>(0 - 1)           | 10<br>(5 - 17)          | 14<br>(7 - 24)          | 9<br>(5 - 13)           |
| Chronic respiratory diseases                  | 173<br>(121 - 246)   | 2<br>(1 - 4)          | 1<br>(1 - 2)           | 22<br>(12 - 39)         | 60<br>(37 - 92)         | 88<br>(65 - 113)        |

Web Table 31- Vanuatu deaths with 95% UI by age, sex, and cause in 2013

| Cause                                               | Both Sexes, All Ages | Both Sexes, 0-4 Years | Both Sexes, 5-14 Years | Both Sexes, 15-49 Years | Both Sexes, 50-69 Years | Both Sexes, 70-80 Years |
|-----------------------------------------------------|----------------------|-----------------------|------------------------|-------------------------|-------------------------|-------------------------|
| Chronic obstructive pulmonary disease               | 63<br>(43 - 93)      | 1<br>(0 - 2)          | 0<br>(0 - 0)           | 5<br>(3 - 10)           | 19<br>(10 - 31)         | 38<br>(27 - 53)         |
| Pneumoconiosis                                      | 13<br>(8 - 20)       | 0<br>(0 - 0)          | 0<br>(0 - 0)           | 2<br>(1 - 3)            | 6<br>(3 - 9)            | 6<br>(4 - 8)            |
| Silicosis                                           | 4<br>(2 - 7)         | 0<br>(0 - 0)          | 0<br>(0 - 0)           | 0<br>(0 - 1)            | 2<br>(1 - 3)            | 2<br>(1 - 3)            |
| Asbestosis                                          | 2<br>(1 - 3)         | 0<br>(0 - 0)          | 0<br>(0 - 0)           | 0<br>(0 - 0)            | 1<br>(0 - 2)            | 1<br>(0 - 1)            |
| Coal workers pneumoconiosis                         | 2<br>(1 - 3)         | 0<br>(0 - 0)          | 0<br>(0 - 0)           | 0<br>(0 - 0)            | 1<br>(0 - 1)            | 1<br>(0 - 1)            |
| Other pneumoconiosis                                | 6<br>(3 - 9)         | 0<br>(0 - 0)          | 0<br>(0 - 0)           | 1<br>(0 - 2)            | 2<br>(1 - 4)            | 3<br>(2 - 4)            |
| Asthma                                              | 77<br>(51 - 112)     | 1<br>(0 - 1)          | 1<br>(0 - 1)           | 12<br>(7 - 21)          | 30<br>(18 - 47)         | 34<br>(23 - 47)         |
| Interstitial lung disease and pulmonary sarcoidosis | 8<br>(5 - 13)        | 0<br>(0 - 0)          | 0<br>(0 - 0)           | 1<br>(0 - 2)            | 3<br>(1 - 5)            | 4<br>(2 - 7)            |
| Other chronic respiratory diseases                  | 12<br>(8 - 17)       | 0<br>(0 - 1)          | 0<br>(0 - 0)           | 2<br>(1 - 4)            | 3<br>(1 - 5)            | 6<br>(4 - 9)            |
| Cirrhosis                                           | 33<br>(20 - 52)      | 0<br>(0 - 0)          | 1<br>(1 - 1)           | 15<br>(9 - 26)          | 12<br>(7 - 18)          | 5<br>(3 - 7)            |
| Cirrhosis due to hepatitis B                        | 18<br>(11 - 30)      | 0<br>(0 - 0)          | 0<br>(0 - 1)           | 9<br>(5 - 16)           | 6<br>(4 - 10)           | 3<br>(2 - 4)            |
| Cirrhosis due to hepatitis C                        | 7<br>(4 - 11)        | 0<br>(0 - 0)          | 0<br>(0 - 0)           | 3<br>(1 - 5)            | 3<br>(1 - 4)            | 1<br>(1 - 2)            |
| Cirrhosis due to alcohol use                        | 5<br>(3 - 9)         | --                    | --                     | 2<br>(1 - 4)            | 2<br>(1 - 4)            | 1<br>(1 - 2)            |
| Cirrhosis due to other causes                       | 3<br>(2 - 5)         | 0<br>(0 - 0)          | 0<br>(0 - 1)           | 2<br>(1 - 3)            | 1<br>(0 - 1)            | 0<br>(0 - 0)            |
| Digestive diseases                                  | 99<br>(64 - 156)     | 1<br>(0 - 2)          | 2<br>(1 - 3)           | 31<br>(17 - 52)         | 35<br>(21 - 57)         | 31<br>(21 - 44)         |
| Peptic ulcer disease                                | 21<br>(13 - 35)      | 0<br>(0 - 0)          | 0<br>(0 - 1)           | 6<br>(3 - 11)           | 8<br>(4 - 15)           | 7<br>(4 - 11)           |
| Gastritis and duodenitis                            | 1<br>(1 - 3)         | 0<br>(0 - 0)          | 0<br>(0 - 0)           | 0<br>(0 - 1)            | 1<br>(0 - 1)            | 0<br>(0 - 1)            |
| Appendicitis                                        | 11<br>(7 - 20)       | 0<br>(0 - 0)          | 0<br>(0 - 1)           | 5<br>(3 - 9)            | 4<br>(2 - 6)            | 2<br>(1 - 4)            |
| Paralytic ileus and intestinal obstruction          | 23<br>(13 - 36)      | 0<br>(0 - 1)          | 0<br>(0 - 1)           | 7<br>(3 - 11)           | 8<br>(4 - 13)           | 8<br>(5 - 12)           |
| Inguinal, femoral, and abdominal hernia             | 3<br>(1 - 5)         | 0<br>(0 - 0)          | 0<br>(0 - 0)           | 1<br>(0 - 1)            | 1<br>(0 - 2)            | 1<br>(1 - 2)            |
| Inflammatory bowel disease                          | 3<br>(2 - 5)         | 0<br>(0 - 0)          | 0<br>(0 - 0)           | 1<br>(0 - 2)            | 1<br>(0 - 2)            | 1<br>(1 - 2)            |
| Vascular intestinal disorders                       | 0<br>(0 - 1)         | 0<br>(0 - 0)          | 0<br>(0 - 0)           | 0<br>(0 - 0)            | 0<br>(0 - 0)            | 0<br>(0 - 0)            |
| Gallbladder and biliary diseases                    | 16<br>(10 - 26)      | 0<br>(0 - 0)          | 0<br>(0 - 1)           | 4<br>(2 - 8)            | 6<br>(3 - 10)           | 6<br>(4 - 9)            |
| Pancreatitis                                        | 4<br>(2 - 6)         | 0<br>(0 - 0)          | 0<br>(0 - 0)           | 2<br>(1 - 3)            | 1<br>(1 - 2)            | 1<br>(0 - 1)            |
| Other digestive diseases                            | 16<br>(10 - 27)      | 0<br>(0 - 0)          | 0<br>(0 - 1)           | 5<br>(3 - 9)            | 7<br>(4 - 11)           | 4<br>(2 - 6)            |
| Neurological disorders                              | 29<br>(21 - 37)      | 1<br>(0 - 1)          | 0<br>(0 - 1)           | 3<br>(1 - 5)            | 4<br>(2 - 6)            | 21<br>(16 - 26)         |
| Alzheimer disease and other dementias               | 23<br>(17 - 29)      | --                    | --                     | 0<br>(0 - 0)            | 3<br>(2 - 4)            | 20<br>(15 - 25)         |
| Parkinson disease                                   | 0<br>(0 - 0)         | --                    | --                     | 0<br>(0 - 0)            | 0<br>(0 - 0)            | 0<br>(0 - 0)            |
| Epilepsy                                            | 3<br>(1 - 5)         | 0<br>(0 - 1)          | 0<br>(0 - 1)           | 2<br>(1 - 4)            | 0<br>(0 - 0)            | 0<br>(0 - 0)            |
| Multiple sclerosis                                  | 0<br>(0 - 0)         | --                    | --                     | 0<br>(0 - 0)            | 0<br>(0 - 0)            | 0<br>(0 - 0)            |
| Other neurological disorders                        | 3<br>(1 - 4)         | 0<br>(0 - 1)          | 0<br>(0 - 0)           | 1<br>(0 - 1)            | 1<br>(0 - 1)            | 1<br>(0 - 1)            |
| Mental and substance use disorders                  | 4<br>(2 - 6)         | 0<br>(0 - 0)          | 0<br>(0 - 0)           | 3<br>(1 - 5)            | 1<br>(0 - 1)            | 0<br>(0 - 0)            |
| Schizophrenia                                       | 0<br>(0 - 0)         | --                    | --                     | 0<br>(0 - 0)            | 0<br>(0 - 0)            | 0<br>(0 - 0)            |
| Alcohol use disorders                               | 3<br>(1 - 5)         | --                    | --                     | 2<br>(1 - 4)            | 1<br>(0 - 1)            | 0<br>(0 - 0)            |
| Drug use disorders                                  | 1<br>(0 - 1)         | 0<br>(0 - 0)          | --                     | 0<br>(0 - 1)            | 0<br>(0 - 0)            | 0<br>(0 - 0)            |
| Opioid use disorders                                | 0<br>(0 - 0)         | 0<br>(0 - 0)          | --                     | 0<br>(0 - 0)            | 0<br>(0 - 0)            | 0<br>(0 - 0)            |
| Cocaine use disorders                               | 0<br>(0 - 0)         | 0<br>(0 - 0)          | --                     | 0<br>(0 - 0)            | 0<br>(0 - 0)            | 0<br>(0 - 0)            |
| Amphetamine use disorders                           | 0<br>(0 - 0)         | 0<br>(0 - 0)          | --                     | 0<br>(0 - 0)            | 0<br>(0 - 0)            | 0<br>(0 - 0)            |
| Other drug use disorders                            | 0<br>(0 - 1)         | 0<br>(0 - 0)          | --                     | 0<br>(0 - 0)            | 0<br>(0 - 0)            | 0<br>(0 - 0)            |
| Eating disorders                                    | 0<br>(0 - 0)         | --                    | --                     | 0<br>(0 - 0)            | --                      | --                      |

Web Table 31- Vanuatu deaths with 95% UI by age, sex, and cause in 2013

| Cause                                               | Both Sexes, All Ages | Both Sexes, 0-4 Years | Both Sexes, 5-14 Years | Both Sexes, 15-49 Years | Both Sexes, 50-69 Years | Both Sexes, 70-80 Years |
|-----------------------------------------------------|----------------------|-----------------------|------------------------|-------------------------|-------------------------|-------------------------|
| Anorexia nervosa                                    | 0<br>(0 - 0)         | --                    | 0<br>(0 - 0)           | 0<br>(0 - 0)            | --                      | --                      |
| Diabetes, urogenital, blood, and endocrine diseases | 252<br>(158 - 383)   | 3<br>(2 - 6)          | 2<br>(1 - 3)           | 45<br>(24 - 79)         | 120<br>(70 - 190)       | 82<br>(54 - 113)        |
| Diabetes mellitus                                   | 204<br>(120 - 316)   | 1<br>(0 - 1)          | 0<br>(0 - 1)           | 30<br>(15 - 53)         | 103<br>(59 - 166)       | 70<br>(44 - 100)        |
| Acute glomerulonephritis                            | 0<br>(0 - 0)         | 0<br>(0 - 0)          | 0<br>(0 - 0)           | 0<br>(0 - 0)            | 0<br>(0 - 0)            | 0<br>(0 - 0)            |
| Chronic kidney disease                              | 27<br>(15 - 47)      | 0<br>(0 - 1)          | 0<br>(0 - 1)           | 9<br>(4 - 16)           | 11<br>(6 - 19)          | 7<br>(5 - 11)           |
| Chronic kidney disease due to diabetes mellitus     | 1<br>(1 - 3)         | 0<br>(0 - 0)          | 0<br>(0 - 0)           | 0<br>(0 - 1)            | 1<br>(0 - 2)            | 0<br>(0 - 1)            |
| Chronic kidney disease due to hypertension          | 10<br>(6 - 17)       | 0<br>(0 - 0)          | 0<br>(0 - 0)           | 3<br>(1 - 5)            | 4<br>(2 - 7)            | 3<br>(2 - 5)            |
| Chronic kidney disease due to glomerulonephritis    | 3<br>(2 - 6)         | 0<br>(0 - 0)          | 0<br>(0 - 0)           | 1<br>(1 - 2)            | 1<br>(0 - 2)            | 1<br>(0 - 2)            |
| Chronic kidney disease due to other causes          | 12<br>(5 - 24)       | 0<br>(0 - 1)          | 0<br>(0 - 0)           | 4<br>(2 - 9)            | 5<br>(2 - 9)            | 3<br>(1 - 6)            |
| Urinary diseases and male infertility               | 6<br>(4 - 9)         | 0<br>(0 - 0)          | 0<br>(0 - 0)           | 2<br>(1 - 3)            | 2<br>(1 - 3)            | 2<br>(1 - 3)            |
| Interstitial nephritis and urinary tract infections | 3<br>(2 - 4)         | 0<br>(0 - 0)          | 0<br>(0 - 0)           | 1<br>(0 - 1)            | 1<br>(0 - 1)            | 1<br>(1 - 1)            |
| Urolithiasis                                        | 0<br>(0 - 0)         | --                    | 0<br>(0 - 0)           | 0<br>(0 - 0)            | 0<br>(0 - 0)            | 0<br>(0 - 0)            |
| Other urinary diseases                              | 3<br>(2 - 4)         | 0<br>(0 - 0)          | 0<br>(0 - 0)           | 1<br>(0 - 1)            | 1<br>(0 - 1)            | 1<br>(1 - 1)            |
| Gynecological diseases                              | 0<br>(0 - 2)         | --                    | --                     | 0<br>(0 - 1)            | 0<br>(0 - 0)            | 0<br>(0 - 0)            |
| Uterine fibroids                                    | 0<br>(0 - 0)         | --                    | --                     | 0<br>(0 - 0)            | 0<br>(0 - 0)            | 0<br>(0 - 0)            |
| Polycystic ovarian syndrome                         | 0<br>(0 - 0)         | --                    | --                     | 0<br>(0 - 0)            | 0<br>(0 - 0)            | --                      |
| Endometriosis                                       | 0<br>(0 - 0)         | --                    | --                     | 0<br>(0 - 0)            | 0<br>(0 - 0)            | --                      |
| Genital prolapse                                    | 0<br>(0 - 0)         | --                    | --                     | 0<br>(0 - 0)            | 0<br>(0 - 0)            | 0<br>(0 - 0)            |
| Other gynecological diseases                        | 0<br>(0 - 1)         | --                    | --                     | 0<br>(0 - 1)            | 0<br>(0 - 0)            | 0<br>(0 - 0)            |
| Hemoglobinopathies and hemolytic anemias            | 6<br>(4 - 9)         | 1<br>(1 - 3)          | 1<br>(0 - 1)           | 2<br>(1 - 4)            | 1<br>(0 - 1)            | 1<br>(0 - 1)            |
| Thalassemias                                        | 4<br>(2 - 6)         | 1<br>(0 - 2)          | 1<br>(0 - 1)           | 2<br>(1 - 3)            | 0<br>(0 - 0)            | 0<br>(0 - 0)            |
| Sickle cell disorders                               | 0<br>(0 - 0)         | 0<br>(0 - 0)          | 0<br>(0 - 0)           | 0<br>(0 - 0)            | 0<br>(0 - 0)            | 0<br>(0 - 0)            |
| G6PD deficiency                                     | 0<br>(0 - 1)         | 0<br>(0 - 0)          | 0<br>(0 - 0)           | 0<br>(0 - 0)            | 0<br>(0 - 0)            | 0<br>(0 - 0)            |
| Other hemoglobinopathies and hemolytic anemias      | 2<br>(1 - 3)         | 0<br>(0 - 0)          | 0<br>(0 - 0)           | 1<br>(0 - 1)            | 0<br>(0 - 1)            | 1<br>(0 - 1)            |
| Endocrine, metabolic, blood, and immune disorders   | 9<br>(6 - 13)        | 1<br>(0 - 2)          | 0<br>(0 - 0)           | 2<br>(1 - 4)            | 3<br>(2 - 5)            | 2<br>(1 - 3)            |
| Musculoskeletal disorders                           | 2<br>(1 - 4)         | --                    | 0<br>(0 - 0)           | 1<br>(0 - 2)            | 1<br>(0 - 1)            | 1<br>(0 - 1)            |
| Rheumatoid arthritis                                | 0<br>(0 - 1)         | --                    | 0<br>(0 - 0)           | 0<br>(0 - 0)            | 0<br>(0 - 0)            | 0<br>(0 - 0)            |
| Other musculoskeletal disorders                     | 2<br>(1 - 3)         | --                    | 0<br>(0 - 0)           | 1<br>(0 - 2)            | 0<br>(0 - 1)            | 0<br>(0 - 1)            |
| Other non-communicable diseases                     | 44<br>(29 - 64)      | 28<br>(16 - 46)       | 3<br>(2 - 5)           | 7<br>(4 - 11)           | 3<br>(2 - 4)            | 3<br>(2 - 4)            |
| Congenital anomalies                                | 38<br>(24 - 57)      | 27<br>(15 - 44)       | 3<br>(2 - 5)           | 5<br>(3 - 8)            | 1<br>(1 - 2)            | 1<br>(1 - 1)            |
| Neural tube defects                                 | 1<br>(0 - 3)         | 1<br>(0 - 3)          | 0<br>(0 - 0)           | 0<br>(0 - 0)            | 0<br>(0 - 0)            | 0<br>(0 - 0)            |
| Congenital heart anomalies                          | 7<br>(4 - 13)        | 5<br>(2 - 10)         | 1<br>(0 - 2)           | 1<br>(0 - 2)            | 0<br>(0 - 0)            | 0<br>(0 - 0)            |
| Cleft lip and cleft palate                          | 0<br>(0 - 0)         | 0<br>(0 - 0)          | --                     | --                      | --                      | --                      |
| Down syndrome                                       | 4<br>(2 - 7)         | 2<br>(1 - 5)          | 0<br>(0 - 1)           | 1<br>(0 - 1)            | 0<br>(0 - 0)            | 0<br>(0 - 0)            |
| Chromosomal unbalanced rearrangements               | 2<br>(1 - 5)         | 2<br>(1 - 4)          | 0<br>(0 - 0)           | 0<br>(0 - 0)            | 0<br>(0 - 0)            | 0<br>(0 - 0)            |
| Other congenital anomalies                          | 24<br>(14 - 37)      | 17<br>(9 - 29)        | 2<br>(1 - 3)           | 3<br>(2 - 6)            | 1<br>(0 - 1)            | 1<br>(0 - 1)            |
| Skin and subcutaneous diseases                      | 6<br>(4 - 9)         | 0<br>(0 - 1)          | 0<br>(0 - 0)           | 2<br>(1 - 3)            | 2<br>(1 - 3)            | 2<br>(1 - 3)            |
| Cellulitis                                          | 1<br>(1 - 2)         | 0<br>(0 - 0)          | 0<br>(0 - 0)           | 0<br>(0 - 1)            | 0<br>(0 - 0)            | 0<br>(0 - 1)            |
| Pyoderma                                            | 3<br>(2 - 6)         | 0<br>(0 - 0)          | 0<br>(0 - 0)           | 1<br>(1 - 2)            | 1<br>(1 - 2)            | 1<br>(1 - 2)            |
| Decubitus ulcer                                     | 1<br>(1 - 2)         | 0<br>(0 - 0)          | 0<br>(0 - 0)           | 0<br>(0 - 0)            | 0<br>(0 - 0)            | 1<br>(0 - 1)            |

Web Table 31- Vanuatu deaths with 95% UI by age, sex, and cause in 2013

| Cause                                           | Both Sexes, All Ages | Both Sexes, 0-4 Years | Both Sexes, 5-14 Years | Both Sexes, 15-49 Years | Both Sexes, 50-69 Years | Both Sexes, 70-80 Years |
|-------------------------------------------------|----------------------|-----------------------|------------------------|-------------------------|-------------------------|-------------------------|
| Other skin and subcutaneous diseases            | 0<br>(0 - 0)         | 0<br>(0 - 0)          | 0<br>(0 - 0)           | 0<br>(0 - 0)            | 0<br>(0 - 0)            | 0<br>(0 - 0)            |
| Sudden infant death syndrome                    | 0<br>(0 - 1)         | 0<br>(0 - 1)          | --                     | --                      | --                      | --                      |
| Injuries                                        | 125<br>(82 - 193)    | 8<br>(4 - 14)         | 8<br>(5 - 11)          | 76<br>(46 - 126)        | 19<br>(12 - 30)         | 14<br>(9 - 18)          |
| Transport injuries                              | 47<br>(30 - 75)      | 2<br>(1 - 4)          | 4<br>(2 - 5)           | 29<br>(18 - 51)         | 7<br>(4 - 12)           | 4<br>(3 - 5)            |
| Road injuries                                   | 42<br>(27 - 68)      | 2<br>(1 - 3)          | 3<br>(2 - 5)           | 27<br>(16 - 48)         | 6<br>(4 - 10)           | 3<br>(2 - 5)            |
| Pedestrian road injuries                        | 8<br>(5 - 13)        | 0<br>(0 - 1)          | 1<br>(0 - 1)           | 4<br>(2 - 8)            | 1<br>(1 - 2)            | 1<br>(1 - 1)            |
| Cyclist road injuries                           | 2<br>(1 - 3)         | 0<br>(0 - 0)          | 0<br>(0 - 0)           | 1<br>(0 - 2)            | 0<br>(0 - 1)            | 0<br>(0 - 0)            |
| Motorcyclist road injuries                      | 7<br>(4 - 12)        | 0<br>(0 - 0)          | 0<br>(0 - 1)           | 5<br>(3 - 10)           | 1<br>(0 - 1)            | 0<br>(0 - 0)            |
| Motor vehicle road injuries                     | 24<br>(15 - 39)      | 1<br>(0 - 2)          | 2<br>(1 - 3)           | 16<br>(9 - 27)          | 4<br>(2 - 6)            | 2<br>(1 - 3)            |
| Other road injuries                             | 1<br>(1 - 2)         | 0<br>(0 - 0)          | 0<br>(0 - 0)           | 1<br>(0 - 1)            | 0<br>(0 - 0)            | 0<br>(0 - 0)            |
| Other transport injuries                        | 5<br>(2 - 8)         | 0<br>(0 - 1)          | 0<br>(0 - 0)           | 3<br>(1 - 5)            | 1<br>(0 - 2)            | 1<br>(0 - 1)            |
| Unintentional injuries                          | 46<br>(30 - 68)      | 6<br>(3 - 11)         | 3<br>(2 - 5)           | 22<br>(13 - 37)         | 8<br>(5 - 12)           | 7<br>(5 - 11)           |
| Falls                                           | 4<br>(2 - 6)         | 0<br>(0 - 0)          | 0<br>(0 - 0)           | 2<br>(1 - 3)            | 1<br>(0 - 1)            | 1<br>(1 - 2)            |
| Drowning                                        | 10<br>(6 - 16)       | 2<br>(1 - 4)          | 1<br>(1 - 2)           | 5<br>(3 - 9)            | 1<br>(1 - 2)            | 1<br>(0 - 1)            |
| Fire, heat, and hot substances                  | 4<br>(2 - 6)         | 0<br>(0 - 1)          | 0<br>(0 - 0)           | 2<br>(1 - 3)            | 1<br>(0 - 1)            | 0<br>(0 - 1)            |
| Poisonings                                      | 2<br>(1 - 3)         | 0<br>(0 - 0)          | 0<br>(0 - 0)           | 1<br>(1 - 2)            | 0<br>(0 - 1)            | 1<br>(0 - 1)            |
| Exposure to mechanical forces                   | 5<br>(3 - 7)         | 1<br>(0 - 1)          | 0<br>(0 - 1)           | 3<br>(2 - 4)            | 1<br>(1 - 1)            | 0<br>(0 - 1)            |
| Unintentional firearm injuries                  | 0<br>(0 - 1)         | 0<br>(0 - 0)          | 0<br>(0 - 0)           | 0<br>(0 - 0)            | 0<br>(0 - 0)            | 0<br>(0 - 0)            |
| Unintentional suffocation                       | 1<br>(0 - 2)         | 0<br>(0 - 0)          | 0<br>(0 - 0)           | 1<br>(0 - 1)            | 0<br>(0 - 0)            | 0<br>(0 - 0)            |
| Other exposure to mechanical forces             | 3<br>(2 - 6)         | 0<br>(0 - 1)          | 0<br>(0 - 0)           | 2<br>(1 - 3)            | 1<br>(0 - 1)            | 0<br>(0 - 1)            |
| Adverse effects of medical treatment            | 10<br>(5 - 17)       | 1<br>(0 - 3)          | 0<br>(0 - 0)           | 4<br>(1 - 8)            | 2<br>(1 - 3)            | 3<br>(1 - 4)            |
| Animal contact                                  | 1<br>(1 - 3)         | 0<br>(0 - 0)          | 0<br>(0 - 0)           | 1<br>(0 - 1)            | 0<br>(0 - 1)            | 0<br>(0 - 0)            |
| Venomous animal contact                         | 1<br>(0 - 1)         | 0<br>(0 - 0)          | 0<br>(0 - 0)           | 0<br>(0 - 1)            | 0<br>(0 - 0)            | 0<br>(0 - 0)            |
| Non-venomous animal contact                     | 1<br>(0 - 2)         | 0<br>(0 - 0)          | 0<br>(0 - 0)           | 0<br>(0 - 1)            | 0<br>(0 - 0)            | 0<br>(0 - 0)            |
| Foreign body                                    | 4<br>(2 - 7)         | 1<br>(1 - 3)          | 0<br>(0 - 0)           | 1<br>(0 - 2)            | 1<br>(0 - 1)            | 1<br>(0 - 1)            |
| Pulmonary aspiration and foreign body in airway | 3<br>(2 - 6)         | 1<br>(0 - 3)          | 0<br>(0 - 0)           | 1<br>(0 - 2)            | 0<br>(0 - 1)            | 1<br>(0 - 1)            |
| Foreign body in other body part                 | 0<br>(0 - 0)         | 0<br>(0 - 0)          | 0<br>(0 - 0)           | 0<br>(0 - 0)            | 0<br>(0 - 0)            | 0<br>(0 - 0)            |
| Other unintentional injuries                    | 7<br>(4 - 10)        | 0<br>(0 - 1)          | 0<br>(0 - 1)           | 4<br>(3 - 7)            | 1<br>(1 - 2)            | 1<br>(0 - 1)            |
| Self-harm and interpersonal violence            | 32<br>(18 - 53)      | 0<br>(0 - 0)          | 1<br>(0 - 2)           | 24<br>(13 - 41)         | 4<br>(2 - 7)            | 2<br>(1 - 3)            |
| Self-harm                                       | 28<br>(14 - 46)      | --                    | 1<br>(0 - 2)           | 21<br>(10 - 35)         | 4<br>(2 - 6)            | 2<br>(1 - 3)            |
| Interpersonal violence                          | 4<br>(2 - 8)         | 0<br>(0 - 0)          | 0<br>(0 - 0)           | 3<br>(2 - 7)            | 0<br>(0 - 1)            | 0<br>(0 - 0)            |
| Assault by firearm                              | 1<br>(1 - 3)         | 0<br>(0 - 0)          | 0<br>(0 - 0)           | 1<br>(1 - 3)            | 0<br>(0 - 0)            | 0<br>(0 - 0)            |
| Assault by sharp object                         | 1<br>(1 - 3)         | 0<br>(0 - 0)          | 0<br>(0 - 0)           | 1<br>(1 - 3)            | 0<br>(0 - 0)            | 0<br>(0 - 0)            |
| Assault by other means                          | 1<br>(1 - 2)         | 0<br>(0 - 0)          | 0<br>(0 - 0)           | 1<br>(0 - 2)            | 0<br>(0 - 0)            | 0<br>(0 - 0)            |

Web Table 31- Vanuatu deaths with 95% UI by age, sex, and cause in 2013

| Cause                                                             | Males, All Ages        | Males, 0-4 Years  | Males, 5-14 Years | Males, 15-49 Years | Males, 50-69 Years | Males, 70-80 Years |
|-------------------------------------------------------------------|------------------------|-------------------|-------------------|--------------------|--------------------|--------------------|
| All causes                                                        | 1,096<br>(784 - 1,508) | 129<br>(89 - 184) | 23<br>(17 - 30)   | 289<br>(169 - 474) | 354<br>(228 - 532) | 300<br>(237 - 353) |
| Communicable, maternal, neonatal, and nutritional diseases        | 239<br>(183 - 307)     | 99<br>(68 - 139)  | 9<br>(7 - 13)     | 48<br>(28 - 78)    | 39<br>(25 - 59)    | 44<br>(32 - 55)    |
| HIV/AIDS and tuberculosis                                         | 21<br>(14 - 31)        | 0<br>(0 - 1)      | 0<br>(0 - 1)      | 8<br>(5 - 13)      | 7<br>(4 - 11)      | 6<br>(3 - 8)       |
| Tuberculosis                                                      | 19<br>(12 - 29)        | 0<br>(0 - 1)      | 0<br>(0 - 1)      | 7<br>(4 - 11)      | 7<br>(4 - 11)      | 6<br>(3 - 8)       |
| HIV/AIDS                                                          | 2<br>(1 - 3)           | 0<br>(0 - 0)      | 0<br>(0 - 0)      | 1<br>(1 - 2)       | 0<br>(0 - 1)       | 0<br>(0 - 0)       |
| HIV/AIDS resulting in mycobacterial infection                     | 0<br>(0 - 0)           | 0<br>(0 - 0)      | 0<br>(0 - 0)      | 0<br>(0 - 0)       | 0<br>(0 - 0)       | 0<br>(0 - 0)       |
| HIV/AIDS resulting in other diseases                              | 2<br>(1 - 3)           | 0<br>(0 - 0)      | 0<br>(0 - 0)      | 1<br>(1 - 2)       | 0<br>(0 - 1)       | 0<br>(0 - 0)       |
| Diarrhea, lower respiratory, and other common infectious diseases | 116<br>(83 - 160)      | 34<br>(19 - 58)   | 6<br>(4 - 9)      | 22<br>(13 - 37)    | 23<br>(14 - 36)    | 31<br>(22 - 41)    |
| Diarrheal diseases                                                | 26<br>(17 - 36)        | 7<br>(3 - 15)     | 1<br>(1 - 2)      | 3<br>(2 - 6)       | 5<br>(2 - 8)       | 9<br>(5 - 15)      |
| Intestinal infectious diseases                                    | 3<br>(1 - 6)           | 1<br>(0 - 3)      | 1<br>(0 - 2)      | 1<br>(0 - 1)       | 0<br>(0 - 0)       | 0<br>(0 - 0)       |
| Typhoid fever                                                     | 2<br>(1 - 4)           | 1<br>(0 - 2)      | 1<br>(0 - 1)      | 1<br>(0 - 1)       | 0<br>(0 - 0)       | 0<br>(0 - 0)       |
| Paratyphoid fever                                                 | 1<br>(0 - 1)           | 0<br>(0 - 1)      | 0<br>(0 - 0)      | 0<br>(0 - 0)       | 0<br>(0 - 0)       | 0<br>(0 - 0)       |
| Other intestinal infectious diseases                              | 0<br>(0 - 2)           | 0<br>(0 - 1)      | 0<br>(0 - 0)      | 0<br>(0 - 0)       | 0<br>(0 - 0)       | 0<br>(0 - 0)       |
| Lower respiratory infections                                      | 69<br>(48 - 98)        | 17<br>(8 - 29)    | 2<br>(1 - 3)      | 13<br>(7 - 24)     | 17<br>(9 - 26)     | 21<br>(14 - 30)    |
| Upper respiratory infections                                      | 0<br>(0 - 0)           | 0<br>(0 - 0)      | 0<br>(0 - 0)      | 0<br>(0 - 0)       | 0<br>(0 - 0)       | 0<br>(0 - 0)       |
| Otitis media                                                      | 0<br>(0 - 0)           | 0<br>(0 - 0)      | 0<br>(0 - 0)      | 0<br>(0 - 0)       | 0<br>(0 - 0)       | 0<br>(0 - 0)       |
| Meningitis                                                        | 10<br>(6 - 15)         | 3<br>(1 - 6)      | 1<br>(1 - 2)      | 4<br>(2 - 6)       | 1<br>(1 - 2)       | 1<br>(0 - 1)       |
| Pneumococcal meningitis                                           | 4<br>(2 - 5)           | 1<br>(0 - 2)      | 0<br>(0 - 1)      | 1<br>(1 - 2)       | 1<br>(0 - 1)       | 0<br>(0 - 0)       |
| H influenzae type B meningitis                                    | 1<br>(1 - 2)           | 1<br>(0 - 1)      | 0<br>(0 - 0)      | 0<br>(0 - 1)       | 0<br>(0 - 0)       | 0<br>(0 - 0)       |
| Meningococcal meningitis                                          | 2<br>(1 - 3)           | 1<br>(0 - 1)      | 0<br>(0 - 0)      | 1<br>(0 - 1)       | 0<br>(0 - 1)       | 0<br>(0 - 0)       |
| Other meningitis                                                  | 3<br>(2 - 5)           | 1<br>(0 - 2)      | 0<br>(0 - 1)      | 1<br>(1 - 2)       | 1<br>(0 - 1)       | 0<br>(0 - 0)       |
| Encephalitis                                                      | 1<br>(1 - 1)           | 0<br>(0 - 0)      | 0<br>(0 - 0)      | 0<br>(0 - 1)       | 0<br>(0 - 0)       | 0<br>(0 - 0)       |
| Diphtheria                                                        | 0<br>(0 - 0)           | 0<br>(0 - 0)      | 0<br>(0 - 0)      | 0<br>(0 - 0)       | 0<br>(0 - 0)       | --                 |
| Whooping cough                                                    | 1<br>(0 - 6)           | 1<br>(0 - 6)      | 0<br>(0 - 0)      | 0<br>(0 - 0)       | 0<br>(0 - 0)       | --                 |
| Tetanus                                                           | 0<br>(0 - 0)           | 0<br>(0 - 0)      | 0<br>(0 - 0)      | 0<br>(0 - 0)       | 0<br>(0 - 0)       | 0<br>(0 - 0)       |
| Measles                                                           | 6<br>(0 - 27)          | 5<br>(0 - 22)     | 1<br>(0 - 5)      | 0<br>(0 - 1)       | 0<br>(0 - 0)       | --                 |
| Varicella and herpes zoster                                       | 0<br>(0 - 0)           | 0<br>(0 - 0)      | 0<br>(0 - 0)      | 0<br>(0 - 0)       | 0<br>(0 - 0)       | 0<br>(0 - 0)       |
| Neglected tropical diseases and malaria                           | 11<br>(3 - 23)         | 2<br>(0 - 10)     | 1<br>(0 - 3)      | 5<br>(1 - 12)      | 2<br>(0 - 4)       | 1<br>(0 - 1)       |
| Malaria                                                           | 9<br>(2 - 21)          | 2<br>(0 - 10)     | 1<br>(0 - 3)      | 4<br>(1 - 11)      | 1<br>(0 - 4)       | 0<br>(0 - 1)       |
| Leishmaniasis                                                     | 0<br>(0 - 0)           | 0<br>(0 - 0)      | 0<br>(0 - 0)      | 0<br>(0 - 0)       | 0<br>(0 - 0)       | 0<br>(0 - 0)       |
| Visceral leishmaniasis                                            | 0<br>(0 - 0)           | 0<br>(0 - 0)      | 0<br>(0 - 0)      | 0<br>(0 - 0)       | 0<br>(0 - 0)       | 0<br>(0 - 0)       |
| Cysticercosis                                                     | 0<br>(0 - 0)           | 0<br>(0 - 0)      | 0<br>(0 - 0)      | 0<br>(0 - 0)       | 0<br>(0 - 0)       | 0<br>(0 - 0)       |
| Cystic echinococcosis                                             | 0<br>(0 - 0)           | 0<br>(0 - 0)      | 0<br>(0 - 0)      | 0<br>(0 - 0)       | 0<br>(0 - 0)       | 0<br>(0 - 0)       |
| Dengue                                                            | 1<br>(1 - 2)           | 0<br>(0 - 0)      | 0<br>(0 - 0)      | 0<br>(0 - 1)       | 0<br>(0 - 0)       | 0<br>(0 - 0)       |
| Rabies                                                            | 0<br>(0 - 0)           | 0<br>(0 - 0)      | 0<br>(0 - 0)      | 0<br>(0 - 0)       | 0<br>(0 - 0)       | 0<br>(0 - 0)       |
| Intestinal nematode infections                                    | 0<br>(0 - 2)           | 0<br>(0 - 1)      | 0<br>(0 - 0)      | 0<br>(0 - 0)       | 0<br>(0 - 0)       | 0<br>(0 - 0)       |
| Ascariasis                                                        | 0<br>(0 - 2)           | 0<br>(0 - 1)      | 0<br>(0 - 0)      | 0<br>(0 - 0)       | 0<br>(0 - 0)       | 0<br>(0 - 0)       |
| Other neglected tropical diseases                                 | 0<br>(0 - 1)           | 0<br>(0 - 0)      | 0<br>(0 - 0)      | 0<br>(0 - 0)       | 0<br>(0 - 0)       | 0<br>(0 - 0)       |
| Maternal disorders                                                | --                     | --                | --                | --                 | --                 | --                 |
| Maternal hemorrhage                                               | --                     | --                | --                | --                 | --                 | --                 |

Web Table 31- Vanuatu deaths with 95% UI by age, sex, and cause in 2013

| Cause                                                            | Males, All Ages      | Males, 0-4 Years | Males, 5-14 Years | Males, 15-49 Years | Males, 50-69 Years | Males, 70-80 Years |
|------------------------------------------------------------------|----------------------|------------------|-------------------|--------------------|--------------------|--------------------|
| Maternal sepsis and other maternal infections                    | --                   | --               | --                | --                 | --                 | --                 |
| Maternal hypertensive disorders                                  | --                   | --               | --                | --                 | --                 | --                 |
| Maternal obstructed labor                                        | --                   | --               | --                | --                 | --                 | --                 |
| Maternal abortive outcome                                        | --                   | --               | --                | --                 | --                 | --                 |
| Indirect maternal deaths                                         | --                   | --               | --                | --                 | --                 | --                 |
| Late maternal deaths                                             | --                   | --               | --                | --                 | --                 | --                 |
| Maternal deaths aggravated by HIV/AIDS                           | --                   | --               | --                | --                 | --                 | --                 |
| Other maternal disorders                                         | --                   | --               | --                | --                 | --                 | --                 |
| Neonatal disorders                                               | 55<br>(38 - 77)      | 55<br>(38 - 77)  | --                | --                 | --                 | --                 |
| Neonatal preterm birth complications                             | 20<br>(8 - 34)       | 20<br>(8 - 34)   | --                | --                 | --                 | --                 |
| Neonatal encephalopathy due to birth asphyxia and trauma         | 10<br>(4 - 20)       | 10<br>(4 - 20)   | --                | --                 | --                 | --                 |
| Neonatal sepsis and other neonatal infections                    | 8<br>(2 - 17)        | 8<br>(2 - 17)    | --                | --                 | --                 | --                 |
| Hemolytic disease and other neonatal jaundice                    | 0<br>(0 - 1)         | 0<br>(0 - 1)     | --                | --                 | --                 | --                 |
| Other neonatal disorders                                         | 17<br>(8 - 31)       | 17<br>(8 - 31)   | --                | --                 | --                 | --                 |
| Nutritional deficiencies                                         | 16<br>(9 - 24)       | 4<br>(2 - 8)     | 1<br>(0 - 1)      | 4<br>(2 - 6)       | 3<br>(2 - 6)       | 4<br>(2 - 6)       |
| Protein-energy malnutrition                                      | 9<br>(5 - 15)        | 4<br>(1 - 8)     | 1<br>(0 - 1)      | 2<br>(1 - 3)       | 2<br>(1 - 3)       | 2<br>(1 - 3)       |
| Iodine deficiency                                                | 0<br>(0 - 1)         | 0<br>(0 - 0)     | 0<br>(0 - 0)      | 0<br>(0 - 0)       | 0<br>(0 - 0)       | 0<br>(0 - 0)       |
| Iron-deficiency anemia                                           | 5<br>(2 - 9)         | 0<br>(0 - 0)     | 0<br>(0 - 0)      | 2<br>(1 - 3)       | 1<br>(0 - 3)       | 2<br>(1 - 3)       |
| Other nutritional deficiencies                                   | 1<br>(0 - 2)         | 0<br>(0 - 0)     | 0<br>(0 - 0)      | 0<br>(0 - 1)       | 0<br>(0 - 1)       | 0<br>(0 - 1)       |
| Other communicable, maternal, neonatal, and nutritional diseases | 20<br>(13 - 31)      | 3<br>(1 - 6)     | 1<br>(1 - 2)      | 9<br>(5 - 16)      | 4<br>(2 - 7)       | 3<br>(1 - 5)       |
| Sexually transmitted diseases excluding HIV                      | 1<br>(0 - 3)         | 1<br>(0 - 2)     | 0<br>(0 - 0)      | 0<br>(0 - 0)       | 0<br>(0 - 0)       | 0<br>(0 - 0)       |
| Syphilis                                                         | 1<br>(0 - 3)         | 1<br>(0 - 2)     | 0<br>(0 - 0)      | 0<br>(0 - 0)       | 0<br>(0 - 0)       | 0<br>(0 - 0)       |
| Chlamydial infection                                             | --                   | --               | --                | --                 | --                 | --                 |
| Gonococcal infection                                             | 0<br>(0 - 0)         | --               | 0<br>(0 - 0)      | 0<br>(0 - 0)       | 0<br>(0 - 0)       | 0<br>(0 - 0)       |
| Other sexually transmitted diseases                              | 0<br>(0 - 0)         | --               | 0<br>(0 - 0)      | 0<br>(0 - 0)       | 0<br>(0 - 0)       | 0<br>(0 - 0)       |
| Hepatitis                                                        | 10<br>(6 - 15)       | 0<br>(0 - 1)     | 1<br>(0 - 1)      | 5<br>(3 - 8)       | 3<br>(1 - 4)       | 1<br>(1 - 2)       |
| Acute hepatitis A                                                | 0<br>(0 - 1)         | 0<br>(0 - 0)     | 0<br>(0 - 0)      | 0<br>(0 - 0)       | 0<br>(0 - 0)       | 0<br>(0 - 0)       |
| Acute hepatitis B                                                | 7<br>(4 - 11)        | 0<br>(0 - 1)     | 0<br>(0 - 1)      | 3<br>(1 - 5)       | 2<br>(1 - 4)       | 1<br>(1 - 2)       |
| Acute hepatitis C                                                | 0<br>(0 - 1)         | --               | 0<br>(0 - 0)      | 0<br>(0 - 0)       | 0<br>(0 - 0)       | 0<br>(0 - 0)       |
| Acute hepatitis E                                                | 2<br>(1 - 4)         | 0<br>(0 - 0)     | 0<br>(0 - 0)      | 2<br>(1 - 3)       | 0<br>(0 - 1)       | 0<br>(0 - 0)       |
| Other infectious diseases                                        | 9<br>(4 - 16)        | 1<br>(0 - 4)     | 0<br>(0 - 1)      | 4<br>(2 - 9)       | 2<br>(1 - 4)       | 1<br>(0 - 3)       |
| Non-communicable diseases                                        | 769<br>(531 - 1,085) | 25<br>(14 - 42)  | 9<br>(6 - 12)     | 183<br>(105 - 302) | 303<br>(196 - 456) | 249<br>(193 - 293) |
| Neoplasms                                                        | 40<br>(27 - 60)      | 1<br>(0 - 2)     | 1<br>(1 - 1)      | 12<br>(7 - 20)     | 16<br>(10 - 24)    | 11<br>(8 - 14)     |
| Esophageal cancer                                                | 1<br>(0 - 2)         | --               | --                | 0<br>(0 - 0)       | 0<br>(0 - 1)       | 0<br>(0 - 1)       |
| Stomach cancer                                                   | 5<br>(3 - 7)         | --               | --                | 1<br>(1 - 2)       | 2<br>(1 - 3)       | 2<br>(1 - 2)       |
| Liver cancer                                                     | 1<br>(0 - 1)         | --               | 0<br>(0 - 0)      | 0<br>(0 - 1)       | 0<br>(0 - 1)       | 0<br>(0 - 0)       |
| Liver cancer due to hepatitis B                                  | 0<br>(0 - 1)         | --               | 0<br>(0 - 0)      | 0<br>(0 - 0)       | 0<br>(0 - 0)       | 0<br>(0 - 0)       |
| Liver cancer due to hepatitis C                                  | 0<br>(0 - 0)         | --               | 0<br>(0 - 0)      | 0<br>(0 - 0)       | 0<br>(0 - 0)       | 0<br>(0 - 0)       |
| Liver cancer due to alcohol use                                  | 0<br>(0 - 0)         | --               | --                | 0<br>(0 - 0)       | 0<br>(0 - 0)       | 0<br>(0 - 0)       |
| Liver cancer due to other causes                                 | 0<br>(0 - 0)         | --               | 0<br>(0 - 0)      | 0<br>(0 - 0)       | 0<br>(0 - 0)       | 0<br>(0 - 0)       |

Web Table 31- Vanuatu deaths with 95% UI by age, sex, and cause in 2013

| Cause                                         | Males, All Ages    | Males, 0-4 Years | Males, 5-14 Years | Males, 15-49 Years | Males, 50-69 Years | Males, 70-80 Years |
|-----------------------------------------------|--------------------|------------------|-------------------|--------------------|--------------------|--------------------|
| Larynx cancer                                 | 0<br>(0 - 0)       | --               | --                | 0<br>(0 - 0)       | 0<br>(0 - 0)       | 0<br>(0 - 0)       |
| Tracheal, bronchus and lung cancer            | 12<br>(8 - 18)     | --               | --                | 3<br>(2 - 6)       | 6<br>(3 - 9)       | 3<br>(2 - 4)       |
| Breast cancer                                 | 0<br>(0 - 0)       | --               | --                | 0<br>(0 - 0)       | 0<br>(0 - 0)       | 0<br>(0 - 0)       |
| Cervical cancer                               | --                 | --               | --                | --                 | --                 | --                 |
| Uterine cancer                                | --                 | --               | --                | --                 | --                 | --                 |
| Prostate cancer                               | 2<br>(1 - 5)       | --               | --                | 0<br>(0 - 0)       | 1<br>(0 - 2)       | 1<br>(1 - 3)       |
| Colon and rectum cancer                       | 4<br>(3 - 6)       | --               | --                | 1<br>(1 - 2)       | 2<br>(1 - 3)       | 1<br>(1 - 2)       |
| Lip and oral cavity cancer                    | 1<br>(1 - 2)       | --               | --                | 0<br>(0 - 1)       | 0<br>(0 - 1)       | 0<br>(0 - 1)       |
| Nasopharynx cancer                            | 1<br>(0 - 1)       | --               | 0<br>(0 - 0)      | 0<br>(0 - 1)       | 0<br>(0 - 1)       | 0<br>(0 - 0)       |
| Other pharynx cancer                          | 1<br>(0 - 1)       | --               | --                | 0<br>(0 - 0)       | 0<br>(0 - 1)       | 0<br>(0 - 0)       |
| Gallbladder and biliary tract cancer          | 1<br>(0 - 1)       | --               | --                | 0<br>(0 - 0)       | 0<br>(0 - 1)       | 0<br>(0 - 0)       |
| Pancreatic cancer                             | 0<br>(0 - 1)       | --               | --                | 0<br>(0 - 0)       | 0<br>(0 - 0)       | 0<br>(0 - 0)       |
| Malignant skin melanoma                       | 0<br>(0 - 1)       | --               | --                | 0<br>(0 - 0)       | 0<br>(0 - 0)       | 0<br>(0 - 0)       |
| Non-melanoma skin cancer                      | 1<br>(0 - 1)       | --               | --                | 0<br>(0 - 0)       | 0<br>(0 - 0)       | 0<br>(0 - 0)       |
| Ovarian cancer                                | --                 | --               | --                | --                 | --                 | --                 |
| Testicular cancer                             | 0<br>(0 - 0)       | --               | --                | 0<br>(0 - 0)       | 0<br>(0 - 0)       | 0<br>(0 - 0)       |
| Kidney cancer                                 | 0<br>(0 - 1)       | 0<br>(0 - 0)     | 0<br>(0 - 0)      | 0<br>(0 - 0)       | 0<br>(0 - 0)       | 0<br>(0 - 0)       |
| Bladder cancer                                | 0<br>(0 - 1)       | --               | --                | 0<br>(0 - 0)       | 0<br>(0 - 0)       | 0<br>(0 - 0)       |
| Brain and nervous system cancer               | 1<br>(0 - 1)       | 0<br>(0 - 0)     | 0<br>(0 - 0)      | 0<br>(0 - 1)       | 0<br>(0 - 0)       | 0<br>(0 - 0)       |
| Thyroid cancer                                | 0<br>(0 - 0)       | --               | 0<br>(0 - 0)      | 0<br>(0 - 0)       | 0<br>(0 - 0)       | 0<br>(0 - 0)       |
| Mesothelioma                                  | 0<br>(0 - 0)       | --               | --                | 0<br>(0 - 0)       | 0<br>(0 - 0)       | 0<br>(0 - 0)       |
| Hodgkin lymphoma                              | 0<br>(0 - 0)       | 0<br>(0 - 0)     | 0<br>(0 - 0)      | 0<br>(0 - 0)       | 0<br>(0 - 0)       | 0<br>(0 - 0)       |
| Non-Hodgkin lymphoma                          | 1<br>(0 - 1)       | 0<br>(0 - 0)     | 0<br>(0 - 0)      | 0<br>(0 - 0)       | 0<br>(0 - 0)       | 0<br>(0 - 0)       |
| Multiple myeloma                              | 0<br>(0 - 1)       | --               | --                | 0<br>(0 - 0)       | 0<br>(0 - 0)       | 0<br>(0 - 0)       |
| Leukemia                                      | 3<br>(2 - 4)       | 0<br>(0 - 0)     | 0<br>(0 - 1)      | 1<br>(1 - 2)       | 0<br>(0 - 1)       | 0<br>(0 - 0)       |
| Other neoplasms                               | 5<br>(3 - 7)       | 1<br>(0 - 1)     | 0<br>(0 - 1)      | 2<br>(1 - 4)       | 1<br>(1 - 2)       | 1<br>(0 - 1)       |
| Cardiovascular diseases                       | 372<br>(249 - 541) | 3<br>(2 - 6)     | 2<br>(1 - 3)      | 99<br>(56 - 164)   | 159<br>(100 - 242) | 110<br>(84 - 130)  |
| Rheumatic heart disease                       | 8<br>(5 - 12)      | 0<br>(0 - 0)     | 1<br>(0 - 1)      | 3<br>(2 - 6)       | 2<br>(1 - 4)       | 1<br>(1 - 2)       |
| Ischemic heart disease                        | 205<br>(133 - 305) | 1<br>(0 - 2)     | 0<br>(0 - 0)      | 58<br>(33 - 98)    | 95<br>(60 - 147)   | 50<br>(37 - 63)    |
| Cerebrovascular disease                       | 118<br>(76 - 166)  | 1<br>(0 - 2)     | 1<br>(0 - 1)      | 22<br>(12 - 37)    | 47<br>(28 - 71)    | 48<br>(34 - 60)    |
| Ischemic stroke                               | 39<br>(22 - 57)    | 0<br>(0 - 0)     | 0<br>(0 - 0)      | 3<br>(1 - 6)       | 12<br>(6 - 20)     | 24<br>(15 - 32)    |
| Hemorrhagic stroke                            | 79<br>(49 - 118)   | 1<br>(0 - 2)     | 1<br>(0 - 1)      | 19<br>(10 - 33)    | 35<br>(20 - 54)    | 24<br>(16 - 33)    |
| Hypertensive heart disease                    | 6<br>(3 - 10)      | 0<br>(0 - 0)     | 0<br>(0 - 0)      | 1<br>(1 - 2)       | 3<br>(1 - 5)       | 2<br>(1 - 4)       |
| Cardiomyopathy and myocarditis                | 10<br>(5 - 16)     | 0<br>(0 - 1)     | 0<br>(0 - 0)      | 5<br>(2 - 10)      | 3<br>(1 - 5)       | 1<br>(1 - 2)       |
| Atrial fibrillation and flutter               | 0<br>(0 - 1)       | --               | --                | 0<br>(0 - 0)       | 0<br>(0 - 0)       | 0<br>(0 - 0)       |
| Aortic aneurysm                               | 3<br>(2 - 4)       | --               | --                | 1<br>(0 - 1)       | 1<br>(1 - 2)       | 1<br>(1 - 1)       |
| Peripheral vascular disease                   | 1<br>(0 - 1)       | --               | --                | 0<br>(0 - 0)       | 0<br>(0 - 0)       | 0<br>(0 - 1)       |
| Endocarditis                                  | 4<br>(2 - 8)       | 0<br>(0 - 1)     | 0<br>(0 - 0)      | 2<br>(1 - 4)       | 1<br>(1 - 2)       | 1<br>(0 - 1)       |
| Other cardiovascular and circulatory diseases | 18<br>(11 - 28)    | 0<br>(0 - 1)     | 0<br>(0 - 0)      | 6<br>(3 - 10)      | 6<br>(3 - 11)      | 5<br>(3 - 7)       |
| Chronic respiratory diseases                  | 119<br>(83 - 163)  | 1<br>(1 - 3)     | 1<br>(0 - 1)      | 13<br>(7 - 21)     | 43<br>(26 - 66)    | 61<br>(45 - 77)    |



Web Table 31- Vanuatu deaths with 95% UI by age, sex, and cause in 2013

| Cause                                               | Males, All Ages | Males, 0-4 Years | Males, 5-14 Years | Males, 15-49 Years | Males, 50-69 Years | Males, 70-80 Years |
|-----------------------------------------------------|-----------------|------------------|-------------------|--------------------|--------------------|--------------------|
| Chronic obstructive pulmonary disease               | 39<br>(26 - 58) | 1<br>(0 - 2)     | 0<br>(0 - 0)      | 3<br>(2 - 5)       | 11<br>(6 - 19)     | 24<br>(16 - 35)    |
| Pneumoconiosis                                      | 13<br>(7 - 20)  | 0<br>(0 - 0)     | 0<br>(0 - 0)      | 2<br>(1 - 3)       | 5<br>(3 - 9)       | 5<br>(3 - 8)       |
| Silicosis                                           | 4<br>(2 - 7)    | 0<br>(0 - 0)     | 0<br>(0 - 0)      | 0<br>(0 - 1)       | 2<br>(1 - 3)       | 2<br>(1 - 3)       |
| Asbestosis                                          | 2<br>(1 - 3)    | 0<br>(0 - 0)     | 0<br>(0 - 0)      | 0<br>(0 - 0)       | 1<br>(0 - 2)       | 1<br>(0 - 1)       |
| Coal workers pneumoconiosis                         | 2<br>(1 - 3)    | 0<br>(0 - 0)     | 0<br>(0 - 0)      | 0<br>(0 - 0)       | 1<br>(0 - 1)       | 1<br>(0 - 1)       |
| Other pneumoconiosis                                | 6<br>(3 - 9)    | 0<br>(0 - 0)     | 0<br>(0 - 0)      | 1<br>(0 - 1)       | 2<br>(1 - 4)       | 2<br>(1 - 4)       |
| Asthma                                              | 54<br>(35 - 78) | 0<br>(0 - 1)     | 0<br>(0 - 1)      | 6<br>(4 - 11)      | 22<br>(13 - 35)    | 25<br>(16 - 34)    |
| Interstitial lung disease and pulmonary sarcoidosis | 6<br>(3 - 9)    | 0<br>(0 - 0)     | 0<br>(0 - 0)      | 1<br>(0 - 2)       | 2<br>(1 - 4)       | 2<br>(1 - 5)       |
| Other chronic respiratory diseases                  | 8<br>(5 - 12)   | 0<br>(0 - 1)     | 0<br>(0 - 0)      | 1<br>(0 - 2)       | 2<br>(1 - 4)       | 5<br>(3 - 7)       |
| Cirrhosis                                           | 21<br>(13 - 31) | 0<br>(0 - 0)     | 1<br>(0 - 1)      | 10<br>(6 - 17)     | 7<br>(4 - 11)      | 3<br>(2 - 3)       |
| Cirrhosis due to hepatitis B                        | 11<br>(7 - 18)  | 0<br>(0 - 0)     | 0<br>(0 - 0)      | 6<br>(3 - 10)      | 4<br>(2 - 6)       | 1<br>(1 - 2)       |
| Cirrhosis due to hepatitis C                        | 4<br>(2 - 6)    | 0<br>(0 - 0)     | 0<br>(0 - 0)      | 2<br>(1 - 3)       | 1<br>(1 - 3)       | 1<br>(0 - 1)       |
| Cirrhosis due to alcohol use                        | 4<br>(2 - 7)    | --               | --                | 2<br>(1 - 3)       | 2<br>(1 - 3)       | 1<br>(0 - 1)       |
| Cirrhosis due to other causes                       | 2<br>(1 - 3)    | 0<br>(0 - 0)     | 0<br>(0 - 0)      | 1<br>(0 - 2)       | 0<br>(0 - 1)       | 0<br>(0 - 0)       |
| Digestive diseases                                  | 58<br>(37 - 89) | 1<br>(0 - 2)     | 1<br>(1 - 2)      | 19<br>(11 - 32)    | 20<br>(12 - 33)    | 17<br>(11 - 25)    |
| Peptic ulcer disease                                | 16<br>(9 - 26)  | 0<br>(0 - 0)     | 0<br>(0 - 1)      | 5<br>(2 - 8)       | 6<br>(3 - 10)      | 5<br>(3 - 8)       |
| Gastritis and duodenitis                            | 1<br>(0 - 2)    | 0<br>(0 - 0)     | 0<br>(0 - 0)      | 0<br>(0 - 1)       | 0<br>(0 - 1)       | 0<br>(0 - 1)       |
| Appendicitis                                        | 5<br>(3 - 8)    | 0<br>(0 - 0)     | 0<br>(0 - 0)      | 2<br>(1 - 4)       | 1<br>(1 - 2)       | 1<br>(0 - 2)       |
| Paralytic ileus and intestinal obstruction          | 12<br>(6 - 19)  | 0<br>(0 - 1)     | 0<br>(0 - 0)      | 4<br>(2 - 8)       | 3<br>(1 - 6)       | 4<br>(2 - 6)       |
| Inguinal, femoral, and abdominal hernia             | 2<br>(1 - 4)    | 0<br>(0 - 0)     | 0<br>(0 - 0)      | 0<br>(0 - 1)       | 1<br>(0 - 1)       | 1<br>(0 - 2)       |
| Inflammatory bowel disease                          | 2<br>(1 - 3)    | 0<br>(0 - 0)     | 0<br>(0 - 0)      | 1<br>(0 - 1)       | 0<br>(0 - 1)       | 1<br>(0 - 1)       |
| Vascular intestinal disorders                       | 0<br>(0 - 1)    | 0<br>(0 - 0)     | 0<br>(0 - 0)      | 0<br>(0 - 0)       | 0<br>(0 - 0)       | 0<br>(0 - 0)       |
| Gallbladder and biliary diseases                    | 9<br>(5 - 15)   | 0<br>(0 - 0)     | 0<br>(0 - 0)      | 2<br>(1 - 4)       | 3<br>(2 - 6)       | 3<br>(2 - 5)       |
| Pancreatitis                                        | 2<br>(1 - 3)    | 0<br>(0 - 0)     | 0<br>(0 - 0)      | 1<br>(0 - 2)       | 0<br>(0 - 1)       | 0<br>(0 - 0)       |
| Other digestive diseases                            | 10<br>(5 - 18)  | 0<br>(0 - 0)     | 0<br>(0 - 1)      | 3<br>(2 - 6)       | 4<br>(2 - 8)       | 2<br>(1 - 4)       |
| Neurological disorders                              | 15<br>(11 - 20) | 0<br>(0 - 0)     | 0<br>(0 - 0)      | 2<br>(1 - 4)       | 2<br>(1 - 3)       | 11<br>(8 - 14)     |
| Alzheimer disease and other dementias               | 12<br>(9 - 15)  | --               | --                | 0<br>(0 - 0)       | 1<br>(1 - 2)       | 10<br>(8 - 13)     |
| Parkinson disease                                   | 0<br>(0 - 0)    | --               | --                | 0<br>(0 - 0)       | 0<br>(0 - 0)       | 0<br>(0 - 0)       |
| Epilepsy                                            | 2<br>(1 - 4)    | 0<br>(0 - 0)     | 0<br>(0 - 0)      | 1<br>(1 - 3)       | 0<br>(0 - 0)       | 0<br>(0 - 0)       |
| Multiple sclerosis                                  | 0<br>(0 - 0)    | --               | --                | 0<br>(0 - 0)       | 0<br>(0 - 0)       | 0<br>(0 - 0)       |
| Other neurological disorders                        | 1<br>(1 - 2)    | 0<br>(0 - 0)     | 0<br>(0 - 0)      | 1<br>(0 - 1)       | 0<br>(0 - 0)       | 0<br>(0 - 1)       |
| Mental and substance use disorders                  | 3<br>(1 - 5)    | 0<br>(0 - 0)     | 0<br>(0 - 0)      | 2<br>(1 - 4)       | 1<br>(0 - 1)       | 0<br>(0 - 0)       |
| Schizophrenia                                       | 0<br>(0 - 0)    | --               | --                | 0<br>(0 - 0)       | 0<br>(0 - 0)       | 0<br>(0 - 0)       |
| Alcohol use disorders                               | 3<br>(1 - 5)    | --               | --                | 2<br>(1 - 4)       | 1<br>(0 - 1)       | 0<br>(0 - 0)       |
| Drug use disorders                                  | 0<br>(0 - 0)    | 0<br>(0 - 0)     | --                | 0<br>(0 - 0)       | 0<br>(0 - 0)       | 0<br>(0 - 0)       |
| Opioid use disorders                                | 0<br>(0 - 0)    | 0<br>(0 - 0)     | --                | 0<br>(0 - 0)       | 0<br>(0 - 0)       | 0<br>(0 - 0)       |
| Cocaine use disorders                               | 0<br>(0 - 0)    | 0<br>(0 - 0)     | --                | 0<br>(0 - 0)       | 0<br>(0 - 0)       | 0<br>(0 - 0)       |
| Amphetamine use disorders                           | 0<br>(0 - 0)    | 0<br>(0 - 0)     | --                | 0<br>(0 - 0)       | 0<br>(0 - 0)       | 0<br>(0 - 0)       |
| Other drug use disorders                            | 0<br>(0 - 0)    | 0<br>(0 - 0)     | --                | 0<br>(0 - 0)       | 0<br>(0 - 0)       | 0<br>(0 - 0)       |
| Eating disorders                                    | 0<br>(0 - 0)    | --               | --                | 0<br>(0 - 0)       | --                 | --                 |

Web Table 31- Vanuatu deaths with 95% UI by age, sex, and cause in 2013

| Cause                                               | Males, All Ages   | Males, 0-4 Years | Males, 5-14 Years | Males, 15-49 Years | Males, 50-69 Years | Males, 70-80 Years |
|-----------------------------------------------------|-------------------|------------------|-------------------|--------------------|--------------------|--------------------|
| Anorexia nervosa                                    | 0<br>(0 - 0)      | --               | 0<br>(0 - 0)      | 0<br>(0 - 0)       | --                 | --                 |
| Diabetes, urogenital, blood, and endocrine diseases | 115<br>(69 - 177) | 2<br>(1 - 3)     | 1<br>(1 - 1)      | 22<br>(11 - 38)    | 54<br>(30 - 88)    | 36<br>(23 - 52)    |
| Diabetes mellitus                                   | 93<br>(51 - 147)  | 0<br>(0 - 1)     | 0<br>(0 - 0)      | 15<br>(7 - 27)     | 47<br>(24 - 77)    | 31<br>(18 - 46)    |
| Acute glomerulonephritis                            | 0<br>(0 - 0)      | 0<br>(0 - 0)     | 0<br>(0 - 0)      | 0<br>(0 - 0)       | 0<br>(0 - 0)       | 0<br>(0 - 0)       |
| Chronic kidney disease                              | 10<br>(6 - 17)    | 0<br>(0 - 0)     | 0<br>(0 - 0)      | 4<br>(2 - 7)       | 4<br>(0 - 0)       | 3<br>(2 - 4)       |
| Chronic kidney disease due to diabetes mellitus     | 1<br>(0 - 1)      | 0<br>(0 - 0)     | 0<br>(0 - 0)      | 0<br>(0 - 0)       | 0<br>(0 - 0)       | 0<br>(0 - 0)       |
| Chronic kidney disease due to hypertension          | 5<br>(3 - 8)      | 0<br>(0 - 0)     | 0<br>(0 - 0)      | 1<br>(1 - 3)       | 2<br>(1 - 3)       | 1<br>(1 - 2)       |
| Chronic kidney disease due to glomerulonephritis    | 1<br>(0 - 1)      | 0<br>(0 - 0)     | 0<br>(0 - 0)      | 0<br>(0 - 1)       | 0<br>(0 - 0)       | 0<br>(0 - 1)       |
| Chronic kidney disease due to other causes          | 4<br>(1 - 8)      | 0<br>(0 - 0)     | 0<br>(0 - 0)      | 2<br>(1 - 3)       | 1<br>(0 - 3)       | 1<br>(0 - 2)       |
| Urinary diseases and male infertility               | 3<br>(2 - 5)      | 0<br>(0 - 0)     | 0<br>(0 - 0)      | 1<br>(1 - 2)       | 1<br>(1 - 2)       | 1<br>(1 - 2)       |
| Interstitial nephritis and urinary tract infections | 1<br>(1 - 2)      | 0<br>(0 - 0)     | 0<br>(0 - 0)      | 0<br>(0 - 1)       | 0<br>(0 - 1)       | 1<br>(0 - 1)       |
| Urolithiasis                                        | 0<br>(0 - 0)      | --               | 0<br>(0 - 0)      | 0<br>(0 - 0)       | 0<br>(0 - 0)       | 0<br>(0 - 0)       |
| Other urinary diseases                              | 2<br>(1 - 3)      | 0<br>(0 - 0)     | 0<br>(0 - 0)      | 1<br>(0 - 1)       | 1<br>(0 - 1)       | 1<br>(0 - 1)       |
| Gynecological diseases                              | --                | --               | --                | --                 | --                 | --                 |
| Uterine fibroids                                    | --                | --               | --                | --                 | --                 | --                 |
| Polycystic ovarian syndrome                         | --                | --               | --                | --                 | --                 | --                 |
| Endometriosis                                       | --                | --               | --                | --                 | --                 | --                 |
| Genital prolapse                                    | --                | --               | --                | --                 | --                 | --                 |
| Other gynecological diseases                        | --                | --               | --                | --                 | --                 | --                 |
| Hemoglobinopathies and hemolytic anemias            | 3<br>(2 - 5)      | 1<br>(0 - 1)     | 0<br>(0 - 1)      | 1<br>(1 - 2)       | 0<br>(0 - 1)       | 0<br>(0 - 1)       |
| Thalassemias                                        | 2<br>(1 - 3)      | 1<br>(0 - 1)     | 0<br>(0 - 1)      | 1<br>(0 - 1)       | 0<br>(0 - 0)       | 0<br>(0 - 0)       |
| Sickle cell disorders                               | 0<br>(0 - 0)      | 0<br>(0 - 0)     | 0<br>(0 - 0)      | 0<br>(0 - 0)       | 0<br>(0 - 0)       | 0<br>(0 - 0)       |
| G6PD deficiency                                     | 0<br>(0 - 0)      | 0<br>(0 - 0)     | 0<br>(0 - 0)      | 0<br>(0 - 0)       | 0<br>(0 - 0)       | 0<br>(0 - 0)       |
| Other hemoglobinopathies and hemolytic anemias      | 1<br>(1 - 2)      | 0<br>(0 - 0)     | 0<br>(0 - 0)      | 0<br>(0 - 1)       | 0<br>(0 - 1)       | 0<br>(0 - 0)       |
| Endocrine, metabolic, blood, and immune disorders   | 6<br>(4 - 9)      | 1<br>(0 - 2)     | 0<br>(0 - 0)      | 1<br>(1 - 3)       | 2<br>(1 - 3)       | 1<br>(1 - 2)       |
| Musculoskeletal disorders                           | 1<br>(1 - 2)      | --               | 0<br>(0 - 0)      | 0<br>(0 - 1)       | 0<br>(0 - 1)       | 0<br>(0 - 0)       |
| Rheumatoid arthritis                                | 0<br>(0 - 0)      | --               | 0<br>(0 - 0)      | 0<br>(0 - 0)       | 0<br>(0 - 0)       | 0<br>(0 - 0)       |
| Other musculoskeletal disorders                     | 1<br>(1 - 2)      | --               | 0<br>(0 - 0)      | 0<br>(0 - 1)       | 0<br>(0 - 1)       | 0<br>(0 - 0)       |
| Other non-communicable diseases                     | 26<br>(17 - 39)   | 17<br>(9 - 28)   | 2<br>(1 - 4)      | 4<br>(2 - 7)       | 1<br>(1 - 2)       | 1<br>(1 - 2)       |
| Congenital anomalies                                | 23<br>(14 - 35)   | 16<br>(9 - 28)   | 2<br>(1 - 4)      | 3<br>(2 - 5)       | 1<br>(0 - 1)       | 0<br>(0 - 1)       |
| Neural tube defects                                 | 1<br>(0 - 2)      | 0<br>(0 - 1)     | 0<br>(0 - 0)      | 0<br>(0 - 0)       | 0<br>(0 - 0)       | 0<br>(0 - 0)       |
| Congenital heart anomalies                          | 5<br>(2 - 9)      | 3<br>(1 - 7)     | 1<br>(0 - 1)      | 1<br>(0 - 1)       | 0<br>(0 - 0)       | 0<br>(0 - 0)       |
| Cleft lip and cleft palate                          | 0<br>(0 - 0)      | 0<br>(0 - 0)     | --                | --                 | --                 | --                 |
| Down syndrome                                       | 2<br>(1 - 4)      | 1<br>(0 - 3)     | 0<br>(0 - 0)      | 0<br>(0 - 1)       | 0<br>(0 - 0)       | 0<br>(0 - 0)       |
| Chromosomal unbalanced rearrangements               | 1<br>(1 - 4)      | 1<br>(0 - 3)     | 0<br>(0 - 0)      | 0<br>(0 - 0)       | 0<br>(0 - 0)       | 0<br>(0 - 0)       |
| Other congenital anomalies                          | 14<br>(8 - 23)    | 10<br>(5 - 18)   | 1<br>(1 - 2)      | 2<br>(1 - 4)       | 0<br>(0 - 1)       | 0<br>(0 - 1)       |
| Skin and subcutaneous diseases                      | 3<br>(2 - 4)      | 0<br>(0 - 0)     | 0<br>(0 - 0)      | 1<br>(0 - 2)       | 1<br>(0 - 1)       | 1<br>(1 - 2)       |
| Cellulitis                                          | 0<br>(0 - 1)      | 0<br>(0 - 0)     | 0<br>(0 - 0)      | 0<br>(0 - 0)       | 0<br>(0 - 0)       | 0<br>(0 - 0)       |
| Pyoderma                                            | 2<br>(1 - 3)      | 0<br>(0 - 0)     | 0<br>(0 - 0)      | 1<br>(0 - 1)       | 1<br>(0 - 1)       | 1<br>(0 - 1)       |
| Decubitus ulcer                                     | 0<br>(0 - 1)      | 0<br>(0 - 0)     | 0<br>(0 - 0)      | 0<br>(0 - 0)       | 0<br>(0 - 0)       | 0<br>(0 - 0)       |

Web Table 31- Vanuatu deaths with 95% UI by age, sex, and cause in 2013

| Cause                                           | Males, All Ages  | Males, 0-4 Years | Males, 5-14 Years | Males, 15-49 Years | Males, 50-69 Years | Males, 70-80 Years |
|-------------------------------------------------|------------------|------------------|-------------------|--------------------|--------------------|--------------------|
| Other skin and subcutaneous diseases            | 0<br>(0 - 0)     | 0<br>(0 - 0)     | 0<br>(0 - 0)      | 0<br>(0 - 0)       | 0<br>(0 - 0)       | 0<br>(0 - 0)       |
| Sudden infant death syndrome                    | 0<br>(0 - 1)     | 0<br>(0 - 1)     | --                | --                 | --                 | --                 |
| Injuries                                        | 87<br>(58 - 134) | 5<br>(2 - 8)     | 5<br>(4 - 7)      | 58<br>(36 - 94)    | 12<br>(7 - 19)     | 8<br>(5 - 10)      |
| Transport injuries                              | 33<br>(21 - 54)  | 1<br>(0 - 2)     | 3<br>(2 - 4)      | 23<br>(13 - 39)    | 5<br>(3 - 8)       | 2<br>(2 - 3)       |
| Road injuries                                   | 31<br>(20 - 50)  | 1<br>(0 - 2)     | 2<br>(1 - 4)      | 21<br>(12 - 37)    | 4<br>(2 - 7)       | 2<br>(1 - 3)       |
| Pedestrian road injuries                        | 6<br>(3 - 10)    | 0<br>(0 - 1)     | 1<br>(0 - 1)      | 3<br>(2 - 6)       | 1<br>(0 - 2)       | 1<br>(0 - 1)       |
| Cyclist road injuries                           | 1<br>(1 - 2)     | 0<br>(0 - 0)     | 0<br>(0 - 0)      | 1<br>(0 - 1)       | 0<br>(0 - 0)       | 0<br>(0 - 0)       |
| Motorcyclist road injuries                      | 6<br>(3 - 10)    | 0<br>(0 - 0)     | 0<br>(0 - 0)      | 5<br>(2 - 8)       | 1<br>(0 - 1)       | 0<br>(0 - 0)       |
| Motor vehicle road injuries                     | 18<br>(11 - 29)  | 1<br>(0 - 1)     | 1<br>(1 - 2)      | 12<br>(7 - 21)     | 2<br>(1 - 4)       | 1<br>(1 - 2)       |
| Other road injuries                             | 1<br>(0 - 1)     | 0<br>(0 - 0)     | 0<br>(0 - 0)      | 0<br>(0 - 1)       | 0<br>(0 - 0)       | 0<br>(0 - 0)       |
| Other transport injuries                        | 3<br>(1 - 5)     | 0<br>(0 - 0)     | 0<br>(0 - 0)      | 2<br>(1 - 3)       | 1<br>(0 - 1)       | 0<br>(0 - 0)       |
| Unintentional injuries                          | 29<br>(20 - 44)  | 3<br>(1 - 6)     | 2<br>(1 - 3)      | 16<br>(10 - 25)    | 4<br>(3 - 7)       | 4<br>(3 - 5)       |
| Falls                                           | 2<br>(1 - 4)     | 0<br>(0 - 0)     | 0<br>(0 - 0)      | 1<br>(0 - 2)       | 0<br>(0 - 1)       | 1<br>(0 - 1)       |
| Drowning                                        | 7<br>(4 - 11)    | 1<br>(0 - 2)     | 1<br>(1 - 2)      | 4<br>(2 - 7)       | 1<br>(0 - 1)       | 0<br>(0 - 0)       |
| Fire, heat, and hot substances                  | 2<br>(1 - 3)     | 0<br>(0 - 0)     | 0<br>(0 - 0)      | 1<br>(0 - 2)       | 0<br>(0 - 1)       | 0<br>(0 - 0)       |
| Poisonings                                      | 1<br>(1 - 2)     | 0<br>(0 - 0)     | 0<br>(0 - 0)      | 1<br>(0 - 1)       | 0<br>(0 - 0)       | 0<br>(0 - 0)       |
| Exposure to mechanical forces                   | 3<br>(2 - 5)     | 0<br>(0 - 1)     | 0<br>(0 - 0)      | 2<br>(1 - 3)       | 1<br>(0 - 1)       | 0<br>(0 - 0)       |
| Unintentional firearm injuries                  | 0<br>(0 - 0)     | 0<br>(0 - 0)     | 0<br>(0 - 0)      | 0<br>(0 - 0)       | 0<br>(0 - 0)       | 0<br>(0 - 0)       |
| Unintentional suffocation                       | 0<br>(0 - 0)     | 0<br>(0 - 0)     | 0<br>(0 - 0)      | 0<br>(0 - 0)       | 0<br>(0 - 0)       | 0<br>(0 - 0)       |
| Other exposure to mechanical forces             | 2<br>(1 - 4)     | 0<br>(0 - 0)     | 0<br>(0 - 0)      | 1<br>(1 - 3)       | 1<br>(0 - 1)       | 0<br>(0 - 0)       |
| Adverse effects of medical treatment            | 6<br>(3 - 10)    | 1<br>(0 - 2)     | 0<br>(0 - 0)      | 2<br>(1 - 5)       | 1<br>(1 - 2)       | 1<br>(1 - 2)       |
| Animal contact                                  | 1<br>(1 - 2)     | 0<br>(0 - 0)     | 0<br>(0 - 0)      | 0<br>(0 - 1)       | 0<br>(0 - 0)       | 0<br>(0 - 0)       |
| Venomous animal contact                         | 0<br>(0 - 1)     | 0<br>(0 - 0)     | 0<br>(0 - 0)      | 0<br>(0 - 0)       | 0<br>(0 - 0)       | 0<br>(0 - 0)       |
| Non-venomous animal contact                     | 1<br>(0 - 1)     | 0<br>(0 - 0)     | 0<br>(0 - 0)      | 0<br>(0 - 1)       | 0<br>(0 - 0)       | 0<br>(0 - 0)       |
| Foreign body                                    | 2<br>(1 - 5)     | 1<br>(0 - 2)     | 0<br>(0 - 0)      | 1<br>(0 - 2)       | 0<br>(0 - 1)       | 0<br>(0 - 1)       |
| Pulmonary aspiration and foreign body in airway | 2<br>(1 - 5)     | 1<br>(0 - 2)     | 0<br>(0 - 0)      | 1<br>(0 - 2)       | 0<br>(0 - 1)       | 0<br>(0 - 1)       |
| Foreign body in other body part                 | 0<br>(0 - 0)     | 0<br>(0 - 0)     | 0<br>(0 - 0)      | 0<br>(0 - 0)       | 0<br>(0 - 0)       | 0<br>(0 - 0)       |
| Other unintentional injuries                    | 5<br>(3 - 8)     | 0<br>(0 - 0)     | 0<br>(0 - 0)      | 4<br>(2 - 6)       | 1<br>(0 - 1)       | 0<br>(0 - 1)       |
| Self-harm and interpersonal violence            | 25<br>(12 - 40)  | 0<br>(0 - 0)     | 1<br>(0 - 1)      | 20<br>(9 - 33)     | 3<br>(2 - 5)       | 1<br>(1 - 2)       |
| Self-harm                                       | 21<br>(9 - 35)   | --               | 0<br>(0 - 1)      | 17<br>(6 - 28)     | 3<br>(1 - 5)       | 1<br>(1 - 2)       |
| Interpersonal violence                          | 3<br>(2 - 7)     | 0<br>(0 - 0)     | 0<br>(0 - 0)      | 3<br>(2 - 6)       | 0<br>(0 - 1)       | 0<br>(0 - 0)       |
| Assault by firearm                              | 1<br>(1 - 3)     | 0<br>(0 - 0)     | 0<br>(0 - 0)      | 1<br>(1 - 2)       | 0<br>(0 - 0)       | 0<br>(0 - 0)       |
| Assault by sharp object                         | 1<br>(1 - 3)     | 0<br>(0 - 0)     | 0<br>(0 - 0)      | 1<br>(1 - 2)       | 0<br>(0 - 0)       | 0<br>(0 - 0)       |
| Assault by other means                          | 1<br>(0 - 1)     | 0<br>(0 - 0)     | 0<br>(0 - 0)      | 1<br>(0 - 1)       | 0<br>(0 - 0)       | 0<br>(0 - 0)       |

Web Table 31- Vanuatu deaths with 95% UI by age, sex, and cause in 2013

| Cause                                                             | Females, All Ages    | Females, 0-4 Years | Females, 5-14 Years | Females, 15-49 Years | Females, 50-69 Years | Females, 70-80 Years |
|-------------------------------------------------------------------|----------------------|--------------------|---------------------|----------------------|----------------------|----------------------|
| All causes                                                        | 835<br>(584 - 1,211) | 101<br>(66 - 150)  | 17<br>(12 - 23)     | 183<br>(103 - 321)   | 258<br>(159 - 403)   | 275<br>(210 - 370)   |
| Communicable, maternal, neonatal, and nutritional diseases        | 231<br>(168 - 314)   | 81<br>(53 - 120)   | 8<br>(5 - 11)       | 49<br>(28 - 85)      | 38<br>(22 - 59)      | 54<br>(36 - 77)      |
| HIV/AIDS and tuberculosis                                         | 25<br>(13 - 41)      | 0<br>(0 - 1)       | 1<br>(0 - 1)        | 9<br>(5 - 17)        | 8<br>(4 - 14)        | 7<br>(2 - 11)        |
| Tuberculosis                                                      | 23<br>(11 - 39)      | 0<br>(0 - 1)       | 0<br>(0 - 1)        | 8<br>(4 - 15)        | 8<br>(3 - 14)        | 7<br>(2 - 11)        |
| HIV/AIDS                                                          | 2<br>(1 - 3)         | 0<br>(0 - 0)       | 0<br>(0 - 0)        | 1<br>(1 - 2)         | 0<br>(0 - 1)         | 0<br>(0 - 0)         |
| HIV/AIDS resulting in mycobacterial infection                     | 0<br>(0 - 0)         | 0<br>(0 - 0)       | 0<br>(0 - 0)        | 0<br>(0 - 0)         | 0<br>(0 - 0)         | 0<br>(0 - 0)         |
| HIV/AIDS resulting in other diseases                              | 2<br>(1 - 3)         | 0<br>(0 - 0)       | 0<br>(0 - 0)        | 1<br>(1 - 2)         | 0<br>(0 - 0)         | 0<br>(0 - 0)         |
| Diarrhea, lower respiratory, and other common infectious diseases | 108<br>(76 - 150)    | 29<br>(16 - 51)    | 5<br>(3 - 8)        | 17<br>(9 - 30)       | 21<br>(12 - 34)      | 36<br>(23 - 53)      |
| Diarrheal diseases                                                | 30<br>(19 - 45)      | 6<br>(2 - 13)      | 1<br>(0 - 2)        | 4<br>(2 - 7)         | 6<br>(3 - 12)        | 13<br>(7 - 23)       |
| Intestinal infectious diseases                                    | 3<br>(1 - 6)         | 1<br>(0 - 3)       | 1<br>(0 - 2)        | 1<br>(0 - 2)         | 0<br>(0 - 0)         | 0<br>(0 - 0)         |
| Typhoid fever                                                     | 2<br>(1 - 5)         | 1<br>(0 - 2)       | 1<br>(0 - 1)        | 1<br>(0 - 1)         | 0<br>(0 - 0)         | 0<br>(0 - 0)         |
| Paratyphoid fever                                                 | 1<br>(0 - 1)         | 0<br>(0 - 1)       | 0<br>(0 - 0)        | 0<br>(0 - 0)         | 0<br>(0 - 0)         | 0<br>(0 - 0)         |
| Other intestinal infectious diseases                              | 0<br>(0 - 1)         | 0<br>(0 - 1)       | 0<br>(0 - 0)        | 0<br>(0 - 0)         | 0<br>(0 - 0)         | 0<br>(0 - 0)         |
| Lower respiratory infections                                      | 58<br>(38 - 84)      | 13<br>(7 - 25)     | 1<br>(1 - 2)        | 9<br>(4 - 16)        | 13<br>(6 - 22)       | 22<br>(13 - 34)      |
| Upper respiratory infections                                      | 0<br>(0 - 0)         | 0<br>(0 - 0)       | 0<br>(0 - 0)        | 0<br>(0 - 0)         | 0<br>(0 - 0)         | 0<br>(0 - 0)         |
| Otitis media                                                      | 0<br>(0 - 0)         | 0<br>(0 - 0)       | 0<br>(0 - 0)        | 0<br>(0 - 0)         | 0<br>(0 - 0)         | 0<br>(0 - 0)         |
| Meningitis                                                        | 10<br>(6 - 16)       | 3<br>(1 - 8)       | 1<br>(1 - 2)        | 3<br>(1 - 5)         | 1<br>(1 - 2)         | 1<br>(1 - 2)         |
| Pneumococcal meningitis                                           | 4<br>(2 - 6)         | 1<br>(0 - 3)       | 0<br>(0 - 1)        | 1<br>(1 - 2)         | 1<br>(0 - 1)         | 0<br>(0 - 1)         |
| H influenzae type B meningitis                                    | 1<br>(1 - 2)         | 1<br>(0 - 2)       | 0<br>(0 - 0)        | 0<br>(0 - 0)         | 0<br>(0 - 0)         | 0<br>(0 - 0)         |
| Meningococcal meningitis                                          | 2<br>(1 - 3)         | 0<br>(0 - 1)       | 0<br>(0 - 0)        | 1<br>(0 - 1)         | 0<br>(0 - 1)         | 0<br>(0 - 0)         |
| Other meningitis                                                  | 3<br>(2 - 5)         | 1<br>(0 - 3)       | 0<br>(0 - 1)        | 1<br>(0 - 2)         | 0<br>(0 - 1)         | 0<br>(0 - 1)         |
| Encephalitis                                                      | 1<br>(1 - 2)         | 0<br>(0 - 0)       | 0<br>(0 - 0)        | 0<br>(0 - 1)         | 0<br>(0 - 0)         | 0<br>(0 - 0)         |
| Diphtheria                                                        | 0<br>(0 - 0)         | 0<br>(0 - 0)       | 0<br>(0 - 0)        | 0<br>(0 - 0)         | 0<br>(0 - 0)         | --                   |
| Whooping cough                                                    | 1<br>(0 - 6)         | 1<br>(0 - 6)       | 0<br>(0 - 0)        | 0<br>(0 - 0)         | 0<br>(0 - 0)         | --                   |
| Tetanus                                                           | 0<br>(0 - 0)         | 0<br>(0 - 0)       | 0<br>(0 - 0)        | 0<br>(0 - 0)         | 0<br>(0 - 0)         | 0<br>(0 - 0)         |
| Measles                                                           | 5<br>(0 - 24)        | 4<br>(0 - 19)      | 1<br>(0 - 4)        | 0<br>(0 - 1)         | 0<br>(0 - 0)         | --                   |
| Varicella and herpes zoster                                       | 0<br>(0 - 0)         | 0<br>(0 - 0)       | 0<br>(0 - 0)        | 0<br>(0 - 0)         | 0<br>(0 - 0)         | 0<br>(0 - 0)         |
| Neglected tropical diseases and malaria                           | 9<br>(4 - 21)        | 3<br>(0 - 16)      | 1<br>(0 - 2)        | 3<br>(1 - 6)         | 1<br>(0 - 2)         | 1<br>(0 - 1)         |
| Malaria                                                           | 7<br>(2 - 19)        | 3<br>(0 - 16)      | 1<br>(0 - 1)        | 2<br>(1 - 5)         | 1<br>(0 - 2)         | 0<br>(0 - 0)         |
| Leishmaniasis                                                     | 0<br>(0 - 0)         | 0<br>(0 - 0)       | 0<br>(0 - 0)        | 0<br>(0 - 0)         | 0<br>(0 - 0)         | 0<br>(0 - 0)         |
| Visceral leishmaniasis                                            | 0<br>(0 - 0)         | 0<br>(0 - 0)       | 0<br>(0 - 0)        | 0<br>(0 - 0)         | 0<br>(0 - 0)         | 0<br>(0 - 0)         |
| Cysticercosis                                                     | 0<br>(0 - 0)         | 0<br>(0 - 0)       | 0<br>(0 - 0)        | 0<br>(0 - 0)         | 0<br>(0 - 0)         | 0<br>(0 - 0)         |
| Cystic echinococcosis                                             | 0<br>(0 - 0)         | 0<br>(0 - 0)       | 0<br>(0 - 0)        | 0<br>(0 - 0)         | 0<br>(0 - 0)         | 0<br>(0 - 0)         |
| Dengue                                                            | 1<br>(1 - 2)         | 0<br>(0 - 0)       | 0<br>(0 - 0)        | 0<br>(0 - 1)         | 0<br>(0 - 0)         | 0<br>(0 - 1)         |
| Rabies                                                            | 0<br>(0 - 1)         | 0<br>(0 - 0)       | 0<br>(0 - 0)        | 0<br>(0 - 0)         | 0<br>(0 - 0)         | 0<br>(0 - 0)         |
| Intestinal nematode infections                                    | 0<br>(0 - 2)         | 0<br>(0 - 1)       | 0<br>(0 - 0)        | 0<br>(0 - 0)         | 0<br>(0 - 0)         | 0<br>(0 - 0)         |
| Ascariasis                                                        | 0<br>(0 - 2)         | 0<br>(0 - 1)       | 0<br>(0 - 0)        | 0<br>(0 - 0)         | 0<br>(0 - 0)         | 0<br>(0 - 0)         |
| Other neglected tropical diseases                                 | 1<br>(0 - 1)         | 0<br>(0 - 0)       | 0<br>(0 - 0)        | 0<br>(0 - 0)         | 0<br>(0 - 0)         | 0<br>(0 - 1)         |
| Maternal disorders                                                | 9<br>(5 - 17)        | --                 | 0<br>(0 - 0)        | 9<br>(5 - 17)        | --                   | --                   |
| Maternal hemorrhage                                               | 2<br>(1 - 3)         | --                 | 0<br>(0 - 0)        | 2<br>(1 - 3)         | --                   | --                   |

Web Table 31- Vanuatu deaths with 95% UI by age, sex, and cause in 2013

| Cause                                                            | Females, All Ages  | Females, 0-4 Years | Females, 5-14 Years | Females, 15-49 Years | Females, 50-69 Years | Females, 70-80 Years |
|------------------------------------------------------------------|--------------------|--------------------|---------------------|----------------------|----------------------|----------------------|
| Maternal sepsis and other maternal infections                    | 1<br>(0 - 1)       | --                 | 0<br>(0 - 0)        | 1<br>(0 - 1)         | --                   | --                   |
| Maternal hypertensive disorders                                  | 1<br>(0 - 2)       | --                 | 0<br>(0 - 0)        | 1<br>(0 - 2)         | --                   | --                   |
| Maternal obstructed labor                                        | 1<br>(0 - 2)       | --                 | 0<br>(0 - 0)        | 1<br>(0 - 2)         | --                   | --                   |
| Maternal abortive outcome                                        | 1<br>(1 - 3)       | --                 | 0<br>(0 - 0)        | 1<br>(1 - 3)         | --                   | --                   |
| Indirect maternal deaths                                         | 1<br>(0 - 2)       | --                 | 0<br>(0 - 0)        | 1<br>(0 - 2)         | --                   | --                   |
| Late maternal deaths                                             | 1<br>(1 - 2)       | --                 | 0<br>(0 - 0)        | 1<br>(1 - 2)         | --                   | --                   |
| Maternal deaths aggravated by HIV/AIDS                           | 0<br>(0 - 0)       | --                 | --                  | 0<br>(0 - 0)         | --                   | --                   |
| Other maternal disorders                                         | 1<br>(1 - 3)       | --                 | 0<br>(0 - 0)        | 1<br>(1 - 3)         | --                   | --                   |
| Neonatal disorders                                               | 42<br>(28 - 61)    | 42<br>(28 - 61)    | --                  | --                   | --                   | --                   |
| Neonatal preterm birth complications                             | 18<br>(9 - 29)     | 18<br>(9 - 29)     | --                  | --                   | --                   | --                   |
| Neonatal encephalopathy due to birth asphyxia and trauma         | 5<br>(2 - 10)      | 5<br>(2 - 10)      | --                  | --                   | --                   | --                   |
| Neonatal sepsis and other neonatal infections                    | 5<br>(2 - 12)      | 5<br>(2 - 12)      | --                  | --                   | --                   | --                   |
| Hemolytic disease and other neonatal jaundice                    | 0<br>(0 - 1)       | 0<br>(0 - 1)       | --                  | --                   | --                   | --                   |
| Other neonatal disorders                                         | 14<br>(6 - 26)     | 14<br>(6 - 26)     | --                  | --                   | --                   | --                   |
| Nutritional deficiencies                                         | 21<br>(14 - 31)    | 3<br>(1 - 6)       | 1<br>(0 - 1)        | 6<br>(3 - 10)        | 3<br>(2 - 5)         | 8<br>(5 - 13)        |
| Protein-energy malnutrition                                      | 9<br>(5 - 15)      | 3<br>(1 - 5)       | 1<br>(0 - 1)        | 1<br>(0 - 2)         | 1<br>(0 - 2)         | 4<br>(1 - 7)         |
| Iodine deficiency                                                | 0<br>(0 - 1)       | 0<br>(0 - 0)       | 0<br>(0 - 0)        | 0<br>(0 - 0)         | 0<br>(0 - 0)         | 0<br>(0 - 0)         |
| Iron-deficiency anemia                                           | 11<br>(5 - 18)     | 0<br>(0 - 1)       | 0<br>(0 - 1)        | 5<br>(2 - 8)         | 2<br>(1 - 4)         | 4<br>(2 - 7)         |
| Other nutritional deficiencies                                   | 1<br>(0 - 2)       | 0<br>(0 - 0)       | 0<br>(0 - 0)        | 0<br>(0 - 1)         | 0<br>(0 - 0)         | 0<br>(0 - 1)         |
| Other communicable, maternal, neonatal, and nutritional diseases | 16<br>(9 - 25)     | 3<br>(1 - 6)       | 1<br>(0 - 1)        | 5<br>(2 - 9)         | 5<br>(3 - 8)         | 3<br>(1 - 5)         |
| Sexually transmitted diseases excluding HIV                      | 3<br>(1 - 5)       | 1<br>(0 - 2)       | 0<br>(0 - 0)        | 1<br>(0 - 2)         | 0<br>(0 - 1)         | 0<br>(0 - 1)         |
| Syphilis                                                         | 2<br>(1 - 4)       | 1<br>(0 - 2)       | 0<br>(0 - 0)        | 0<br>(0 - 1)         | 0<br>(0 - 1)         | 0<br>(0 - 0)         |
| Chlamydial infection                                             | 0<br>(0 - 0)       | --                 | 0<br>(0 - 0)        | 0<br>(0 - 0)         | 0<br>(0 - 0)         | 0<br>(0 - 0)         |
| Gonococcal infection                                             | 0<br>(0 - 1)       | --                 | 0<br>(0 - 0)        | 0<br>(0 - 0)         | 0<br>(0 - 0)         | 0<br>(0 - 0)         |
| Other sexually transmitted diseases                              | 0<br>(0 - 0)       | --                 | 0<br>(0 - 0)        | 0<br>(0 - 0)         | 0<br>(0 - 0)         | 0<br>(0 - 0)         |
| Hepatitis                                                        | 5<br>(3 - 8)       | 0<br>(0 - 1)       | 0<br>(0 - 0)        | 1<br>(1 - 2)         | 2<br>(1 - 4)         | 1<br>(1 - 1)         |
| Acute hepatitis A                                                | 0<br>(0 - 1)       | 0<br>(0 - 0)       | 0<br>(0 - 0)        | 0<br>(0 - 0)         | 0<br>(0 - 0)         | 0<br>(0 - 0)         |
| Acute hepatitis B                                                | 3<br>(2 - 5)       | 0<br>(0 - 0)       | 0<br>(0 - 0)        | 0<br>(0 - 1)         | 2<br>(1 - 3)         | 1<br>(0 - 1)         |
| Acute hepatitis C                                                | 0<br>(0 - 0)       | --                 | 0<br>(0 - 0)        | 0<br>(0 - 0)         | 0<br>(0 - 0)         | 0<br>(0 - 0)         |
| Acute hepatitis E                                                | 1<br>(1 - 2)       | 0<br>(0 - 0)       | 0<br>(0 - 0)        | 1<br>(0 - 1)         | 0<br>(0 - 1)         | 0<br>(0 - 0)         |
| Other infectious diseases                                        | 8<br>(4 - 16)      | 1<br>(0 - 4)       | 0<br>(0 - 1)        | 3<br>(1 - 6)         | 2<br>(1 - 5)         | 1<br>(0 - 4)         |
| Non-communicable diseases                                        | 567<br>(386 - 853) | 17<br>(9 - 28)     | 6<br>(4 - 9)        | 116<br>(64 - 205)    | 213<br>(131 - 333)   | 215<br>(164 - 291)   |
| Neoplasms                                                        | 66<br>(41 - 109)   | 0<br>(0 - 1)       | 1<br>(0 - 1)        | 23<br>(13 - 42)      | 26<br>(16 - 42)      | 16<br>(11 - 23)      |
| Esophageal cancer                                                | 1<br>(0 - 1)       | --                 | --                  | 0<br>(0 - 0)         | 0<br>(0 - 0)         | 0<br>(0 - 0)         |
| Stomach cancer                                                   | 4<br>(2 - 6)       | --                 | --                  | 1<br>(0 - 1)         | 2<br>(1 - 3)         | 1<br>(1 - 2)         |
| Liver cancer                                                     | 2<br>(1 - 4)       | --                 | 0<br>(0 - 0)        | 1<br>(0 - 1)         | 1<br>(1 - 2)         | 1<br>(0 - 1)         |
| Liver cancer due to hepatitis B                                  | 1<br>(0 - 2)       | --                 | 0<br>(0 - 0)        | 0<br>(0 - 1)         | 1<br>(0 - 1)         | 0<br>(0 - 0)         |
| Liver cancer due to hepatitis C                                  | 1<br>(0 - 1)       | --                 | 0<br>(0 - 0)        | 0<br>(0 - 0)         | 0<br>(0 - 1)         | 0<br>(0 - 0)         |
| Liver cancer due to alcohol use                                  | 0<br>(0 - 0)       | --                 | --                  | 0<br>(0 - 0)         | 0<br>(0 - 0)         | 0<br>(0 - 0)         |
| Liver cancer due to other causes                                 | 0<br>(0 - 1)       | --                 | 0<br>(0 - 0)        | 0<br>(0 - 0)         | 0<br>(0 - 0)         | 0<br>(0 - 0)         |

Web Table 31- Vanuatu deaths with 95% UI by age, sex, and cause in 2013

| Cause                                         | Females, All Ages  | Females, 0-4 Years | Females, 5-14 Years | Females, 15-49 Years | Females, 50-69 Years | Females, 70-80 Years |
|-----------------------------------------------|--------------------|--------------------|---------------------|----------------------|----------------------|----------------------|
| Larynx cancer                                 | 0<br>(0 - 0)       | --                 | --                  | 0<br>(0 - 0)         | 0<br>(0 - 0)         | 0<br>(0 - 0)         |
| Tracheal, bronchus and lung cancer            | 5<br>(3 - 9)       | --                 | --                  | 1<br>(0 - 2)         | 2<br>(1 - 3)         | 2<br>(1 - 4)         |
| Breast cancer                                 | 25<br>(14 - 43)    | --                 | --                  | 11<br>(6 - 20)       | 11<br>(6 - 17)       | 4<br>(3 - 6)         |
| Cervical cancer                               | 15<br>(9 - 25)     | --                 | --                  | 5<br>(3 - 10)        | 6<br>(3 - 10)        | 4<br>(2 - 6)         |
| Uterine cancer                                | 2<br>(1 - 3)       | --                 | --                  | 0<br>(0 - 1)         | 1<br>(0 - 2)         | 0<br>(0 - 1)         |
| Prostate cancer                               | --                 | --                 | --                  | --                   | --                   | --                   |
| Colon and rectum cancer                       | 3<br>(2 - 4)       | --                 | --                  | 1<br>(0 - 1)         | 1<br>(1 - 2)         | 1<br>(1 - 1)         |
| Lip and oral cavity cancer                    | 0<br>(0 - 0)       | --                 | --                  | 0<br>(0 - 0)         | 0<br>(0 - 0)         | 0<br>(0 - 0)         |
| Nasopharynx cancer                            | 1<br>(0 - 1)       | --                 | 0<br>(0 - 0)        | 0<br>(0 - 1)         | 0<br>(0 - 0)         | 0<br>(0 - 0)         |
| Other pharynx cancer                          | 0<br>(0 - 0)       | --                 | --                  | 0<br>(0 - 0)         | 0<br>(0 - 0)         | 0<br>(0 - 0)         |
| Gallbladder and biliary tract cancer          | 0<br>(0 - 1)       | --                 | --                  | 0<br>(0 - 0)         | 0<br>(0 - 0)         | 0<br>(0 - 0)         |
| Pancreatic cancer                             | 0<br>(0 - 1)       | --                 | --                  | 0<br>(0 - 0)         | 0<br>(0 - 0)         | 0<br>(0 - 0)         |
| Malignant skin melanoma                       | 0<br>(0 - 1)       | --                 | --                  | 0<br>(0 - 0)         | 0<br>(0 - 0)         | 0<br>(0 - 0)         |
| Non-melanoma skin cancer                      | 0<br>(0 - 1)       | --                 | --                  | 0<br>(0 - 0)         | 0<br>(0 - 0)         | 0<br>(0 - 0)         |
| Ovarian cancer                                | 0<br>(0 - 0)       | --                 | --                  | 0<br>(0 - 0)         | 0<br>(0 - 0)         | 0<br>(0 - 0)         |
| Testicular cancer                             | --                 | --                 | --                  | --                   | --                   | --                   |
| Kidney cancer                                 | 0<br>(0 - 0)       | 0<br>(0 - 0)       | 0<br>(0 - 0)        | 0<br>(0 - 0)         | 0<br>(0 - 0)         | 0<br>(0 - 0)         |
| Bladder cancer                                | 0<br>(0 - 0)       | --                 | --                  | 0<br>(0 - 0)         | 0<br>(0 - 0)         | 0<br>(0 - 0)         |
| Brain and nervous system cancer               | 0<br>(0 - 0)       | 0<br>(0 - 0)       | 0<br>(0 - 0)        | 0<br>(0 - 0)         | 0<br>(0 - 0)         | 0<br>(0 - 0)         |
| Thyroid cancer                                | 0<br>(0 - 0)       | --                 | 0<br>(0 - 0)        | 0<br>(0 - 0)         | 0<br>(0 - 0)         | 0<br>(0 - 0)         |
| Mesothelioma                                  | 0<br>(0 - 0)       | --                 | --                  | 0<br>(0 - 0)         | 0<br>(0 - 0)         | 0<br>(0 - 0)         |
| Hodgkin lymphoma                              | 0<br>(0 - 0)       | 0<br>(0 - 0)       | 0<br>(0 - 0)        | 0<br>(0 - 0)         | 0<br>(0 - 0)         | 0<br>(0 - 0)         |
| Non-Hodgkin lymphoma                          | 1<br>(1 - 2)       | 0<br>(0 - 0)       | 0<br>(0 - 0)        | 1<br>(0 - 1)         | 0<br>(0 - 1)         | 0<br>(0 - 1)         |
| Multiple myeloma                              | 0<br>(0 - 1)       | --                 | --                  | 0<br>(0 - 0)         | 0<br>(0 - 0)         | 0<br>(0 - 0)         |
| Leukemia                                      | 2<br>(2 - 4)       | 0<br>(0 - 0)       | 0<br>(0 - 0)        | 1<br>(1 - 2)         | 0<br>(0 - 1)         | 0<br>(0 - 1)         |
| Other neoplasms                               | 2<br>(1 - 4)       | 0<br>(0 - 0)       | 0<br>(0 - 0)        | 1<br>(0 - 2)         | 1<br>(0 - 2)         | 0<br>(0 - 1)         |
| Cardiovascular diseases                       | 223<br>(147 - 338) | 2<br>(1 - 3)       | 2<br>(1 - 3)        | 39<br>(20 - 69)      | 81<br>(47 - 129)     | 99<br>(71 - 141)     |
| Rheumatic heart disease                       | 8<br>(4 - 13)      | 0<br>(0 - 0)       | 0<br>(0 - 1)        | 4<br>(2 - 8)         | 2<br>(1 - 3)         | 1<br>(1 - 2)         |
| Ischemic heart disease                        | 97<br>(59 - 163)   | 0<br>(0 - 0)       | 0<br>(0 - 1)        | 14<br>(7 - 26)       | 37<br>(20 - 64)      | 46<br>(30 - 78)      |
| Cerebrovascular disease                       | 84<br>(48 - 128)   | 1<br>(0 - 1)       | 1<br>(0 - 1)        | 12<br>(5 - 21)       | 30<br>(15 - 48)      | 41<br>(27 - 58)      |
| Ischemic stroke                               | 29<br>(15 - 48)    | 0<br>(0 - 0)       | 0<br>(0 - 0)        | 3<br>(1 - 5)         | 7<br>(3 - 13)        | 19<br>(11 - 30)      |
| Hemorrhagic stroke                            | 55<br>(32 - 86)    | 1<br>(0 - 1)       | 1<br>(0 - 1)        | 9<br>(4 - 17)        | 22<br>(12 - 37)      | 22<br>(14 - 33)      |
| Hypertensive heart disease                    | 7<br>(4 - 11)      | 0<br>(0 - 0)       | 0<br>(0 - 0)        | 1<br>(0 - 2)         | 2<br>(1 - 4)         | 3<br>(2 - 5)         |
| Cardiomyopathy and myocarditis                | 8<br>(4 - 16)      | 1<br>(0 - 1)       | 0<br>(0 - 1)        | 3<br>(1 - 7)         | 3<br>(1 - 6)         | 1<br>(0 - 3)         |
| Atrial fibrillation and flutter               | 0<br>(0 - 0)       | --                 | --                  | 0<br>(0 - 0)         | 0<br>(0 - 0)         | 0<br>(0 - 0)         |
| Aortic aneurysm                               | 1<br>(1 - 3)       | --                 | --                  | 0<br>(0 - 1)         | 0<br>(0 - 1)         | 1<br>(0 - 1)         |
| Peripheral vascular disease                   | 1<br>(0 - 1)       | --                 | --                  | 0<br>(0 - 0)         | 0<br>(0 - 0)         | 0<br>(0 - 1)         |
| Endocarditis                                  | 2<br>(1 - 4)       | 0<br>(0 - 0)       | 0<br>(0 - 0)        | 1<br>(0 - 2)         | 0<br>(0 - 1)         | 1<br>(0 - 1)         |
| Other cardiovascular and circulatory diseases | 15<br>(8 - 26)     | 0<br>(0 - 1)       | 0<br>(0 - 0)        | 4<br>(2 - 7)         | 7<br>(4 - 14)        | 4<br>(2 - 7)         |
| Chronic respiratory diseases                  | 54<br>(34 - 87)    | 1<br>(0 - 2)       | 0<br>(0 - 1)        | 10<br>(5 - 18)       | 16<br>(9 - 29)       | 26<br>(18 - 40)      |

Web Table 31- Vanuatu deaths with 95% UI by age, sex, and cause in 2013

| Cause                                               | Females, All Ages | Females, 0-4 Years | Females, 5-14 Years | Females, 15-49 Years | Females, 50-69 Years | Females, 70-80 Years |
|-----------------------------------------------------|-------------------|--------------------|---------------------|----------------------|----------------------|----------------------|
| Chronic obstructive pulmonary disease               | 24<br>(14 - 41)   | 0<br>(0 - 1)       | 0<br>(0 - 0)        | 2<br>(1 - 5)         | 7<br>(4 - 14)        | 14<br>(8 - 22)       |
| Pneumoconiosis                                      | 1<br>(0 - 1)      | 0<br>(0 - 0)       | 0<br>(0 - 0)        | 0<br>(0 - 0)         | 0<br>(0 - 0)         | 0<br>(0 - 1)         |
| Silicosis                                           | 0<br>(0 - 0)      | 0<br>(0 - 0)       | 0<br>(0 - 0)        | 0<br>(0 - 0)         | 0<br>(0 - 0)         | 0<br>(0 - 0)         |
| Asbestosis                                          | 0<br>(0 - 0)      | 0<br>(0 - 0)       | 0<br>(0 - 0)        | 0<br>(0 - 0)         | 0<br>(0 - 0)         | 0<br>(0 - 0)         |
| Coal workers pneumoconiosis                         | 0<br>(0 - 0)      | 0<br>(0 - 0)       | 0<br>(0 - 0)        | 0<br>(0 - 0)         | 0<br>(0 - 0)         | 0<br>(0 - 0)         |
| Other pneumoconiosis                                | 0<br>(0 - 1)      | 0<br>(0 - 0)       | 0<br>(0 - 0)        | 0<br>(0 - 0)         | 0<br>(0 - 0)         | 0<br>(0 - 0)         |
| Asthma                                              | 23<br>(13 - 42)   | 0<br>(0 - 1)       | 0<br>(0 - 0)        | 6<br>(3 - 11)        | 8<br>(4 - 16)        | 9<br>(5 - 16)        |
| Interstitial lung disease and pulmonary sarcoidosis | 2<br>(1 - 4)      | 0<br>(0 - 0)       | 0<br>(0 - 0)        | 0<br>(0 - 1)         | 0<br>(0 - 1)         | 1<br>(1 - 3)         |
| Other chronic respiratory diseases                  | 4<br>(2 - 7)      | 0<br>(0 - 0)       | 0<br>(0 - 0)        | 1<br>(1 - 3)         | 1<br>(0 - 1)         | 2<br>(1 - 3)         |
| Cirrhosis                                           | 12<br>(7 - 20)    | 0<br>(0 - 0)       | 0<br>(0 - 0)        | 5<br>(3 - 9)         | 5<br>(3 - 7)         | 2<br>(2 - 4)         |
| Cirrhosis due to hepatitis B                        | 7<br>(4 - 12)     | 0<br>(0 - 0)       | 0<br>(0 - 0)        | 3<br>(1 - 6)         | 3<br>(1 - 5)         | 1<br>(1 - 2)         |
| Cirrhosis due to hepatitis C                        | 3<br>(1 - 5)      | 0<br>(0 - 0)       | 0<br>(0 - 0)        | 1<br>(0 - 2)         | 1<br>(0 - 2)         | 1<br>(0 - 1)         |
| Cirrhosis due to alcohol use                        | 1<br>(1 - 2)      | --                 | --                  | 0<br>(0 - 1)         | 1<br>(0 - 1)         | 0<br>(0 - 1)         |
| Cirrhosis due to other causes                       | 1<br>(1 - 2)      | 0<br>(0 - 0)       | 0<br>(0 - 0)        | 1<br>(0 - 1)         | 0<br>(0 - 1)         | 0<br>(0 - 0)         |
| Digestive diseases                                  | 42<br>(26 - 67)   | 0<br>(0 - 1)       | 1<br>(1 - 1)        | 12<br>(6 - 21)       | 15<br>(9 - 25)       | 14<br>(9 - 21)       |
| Peptic ulcer disease                                | 6<br>(3 - 11)     | 0<br>(0 - 0)       | 0<br>(0 - 0)        | 1<br>(1 - 3)         | 2<br>(1 - 4)         | 2<br>(1 - 4)         |
| Gastritis and duodenitis                            | 0<br>(0 - 1)      | 0<br>(0 - 0)       | 0<br>(0 - 0)        | 0<br>(0 - 0)         | 0<br>(0 - 0)         | 0<br>(0 - 0)         |
| Appendicitis                                        | 7<br>(3 - 13)     | 0<br>(0 - 0)       | 0<br>(0 - 1)        | 3<br>(1 - 5)         | 2<br>(1 - 4)         | 1<br>(1 - 3)         |
| Paralytic ileus and intestinal obstruction          | 11<br>(5 - 19)    | 0<br>(0 - 0)       | 0<br>(0 - 0)        | 2<br>(1 - 5)         | 4<br>(2 - 8)         | 4<br>(2 - 7)         |
| Inguinal, femoral, and abdominal hernia             | 0<br>(0 - 1)      | 0<br>(0 - 0)       | 0<br>(0 - 0)        | 0<br>(0 - 0)         | 0<br>(0 - 0)         | 0<br>(0 - 1)         |
| Inflammatory bowel disease                          | 1<br>(1 - 3)      | 0<br>(0 - 0)       | 0<br>(0 - 0)        | 0<br>(0 - 1)         | 0<br>(0 - 1)         | 1<br>(0 - 1)         |
| Vascular intestinal disorders                       | 0<br>(0 - 0)      | 0<br>(0 - 0)       | 0<br>(0 - 0)        | 0<br>(0 - 0)         | 0<br>(0 - 0)         | 0<br>(0 - 0)         |
| Gallbladder and biliary diseases                    | 8<br>(4 - 13)     | 0<br>(0 - 0)       | 0<br>(0 - 0)        | 2<br>(1 - 4)         | 3<br>(1 - 5)         | 3<br>(2 - 5)         |
| Pancreatitis                                        | 2<br>(1 - 4)      | 0<br>(0 - 0)       | 0<br>(0 - 0)        | 1<br>(0 - 2)         | 1<br>(0 - 1)         | 1<br>(0 - 1)         |
| Other digestive diseases                            | 6<br>(3 - 11)     | 0<br>(0 - 0)       | 0<br>(0 - 0)        | 2<br>(1 - 4)         | 2<br>(1 - 4)         | 2<br>(1 - 3)         |
| Neurological disorders                              | 13<br>(9 - 18)    | 0<br>(0 - 1)       | 0<br>(0 - 0)        | 1<br>(0 - 2)         | 2<br>(1 - 3)         | 10<br>(7 - 14)       |
| Alzheimer disease and other dementias               | 11<br>(8 - 16)    | --                 | --                  | 0<br>(0 - 0)         | 1<br>(1 - 2)         | 10<br>(7 - 14)       |
| Parkinson disease                                   | 0<br>(0 - 0)      | --                 | --                  | 0<br>(0 - 0)         | 0<br>(0 - 0)         | 0<br>(0 - 0)         |
| Epilepsy                                            | 1<br>(0 - 2)      | 0<br>(0 - 0)       | 0<br>(0 - 0)        | 1<br>(0 - 1)         | 0<br>(0 - 0)         | 0<br>(0 - 0)         |
| Multiple sclerosis                                  | 0<br>(0 - 0)      | --                 | --                  | 0<br>(0 - 0)         | 0<br>(0 - 0)         | 0<br>(0 - 0)         |
| Other neurological disorders                        | 1<br>(1 - 2)      | 0<br>(0 - 0)       | 0<br>(0 - 0)        | 0<br>(0 - 0)         | 1<br>(0 - 1)         | 0<br>(0 - 0)         |
| Mental and substance use disorders                  | 1<br>(0 - 1)      | 0<br>(0 - 0)       | 0<br>(0 - 0)        | 0<br>(0 - 1)         | 0<br>(0 - 0)         | 0<br>(0 - 0)         |
| Schizophrenia                                       | 0<br>(0 - 0)      | --                 | --                  | 0<br>(0 - 0)         | 0<br>(0 - 0)         | 0<br>(0 - 0)         |
| Alcohol use disorders                               | 0<br>(0 - 1)      | --                 | --                  | 0<br>(0 - 0)         | 0<br>(0 - 0)         | 0<br>(0 - 0)         |
| Drug use disorders                                  | 0<br>(0 - 1)      | 0<br>(0 - 0)       | --                  | 0<br>(0 - 0)         | 0<br>(0 - 0)         | 0<br>(0 - 0)         |
| Opioid use disorders                                | 0<br>(0 - 0)      | 0<br>(0 - 0)       | --                  | 0<br>(0 - 0)         | 0<br>(0 - 0)         | 0<br>(0 - 0)         |
| Cocaine use disorders                               | 0<br>(0 - 0)      | 0<br>(0 - 0)       | --                  | 0<br>(0 - 0)         | 0<br>(0 - 0)         | 0<br>(0 - 0)         |
| Amphetamine use disorders                           | 0<br>(0 - 0)      | 0<br>(0 - 0)       | --                  | 0<br>(0 - 0)         | 0<br>(0 - 0)         | 0<br>(0 - 0)         |
| Other drug use disorders                            | 0<br>(0 - 0)      | 0<br>(0 - 0)       | --                  | 0<br>(0 - 0)         | 0<br>(0 - 0)         | 0<br>(0 - 0)         |
| Eating disorders                                    | 0<br>(0 - 0)      | --                 | --                  | 0<br>(0 - 0)         | --                   | --                   |

Web Table 31- Vanuatu deaths with 95% UI by age, sex, and cause in 2013

| Cause                                               | Females, All Ages | Females, 0-4 Years | Females, 5-14 Years | Females, 15-49 Years | Females, 50-69 Years | Females, 70-80 Years |
|-----------------------------------------------------|-------------------|--------------------|---------------------|----------------------|----------------------|----------------------|
| Anorexia nervosa                                    | 0<br>(0 - 0)      | --                 | 0<br>(0 - 0)        | 0<br>(0 - 0)         | --                   | --                   |
| Diabetes, urogenital, blood, and endocrine diseases | 137<br>(83 - 213) | 2<br>(1 - 3)       | 1<br>(1 - 1)        | 23<br>(12 - 42)      | 66<br>(38 - 106)     | 46<br>(29 - 68)      |
| Diabetes mellitus                                   | 111<br>(65 - 177) | 0<br>(0 - 1)       | 0<br>(0 - 0)        | 15<br>(7 - 28)       | 57<br>(32 - 92)      | 39<br>(24 - 60)      |
| Acute glomerulonephritis                            | 0<br>(0 - 0)      | 0<br>(0 - 0)       | 0<br>(0 - 0)        | 0<br>(0 - 0)         | 0<br>(0 - 0)         | 0<br>(0 - 0)         |
| Chronic kidney disease                              | 17<br>(9 - 31)    | 0<br>(0 - 0)       | 0<br>(0 - 0)        | 5<br>(2 - 10)        | 7<br>(4 - 13)        | 5<br>(3 - 8)         |
| Chronic kidney disease due to diabetes mellitus     | 1<br>(0 - 2)      | 0<br>(0 - 0)       | 0<br>(0 - 0)        | 0<br>(0 - 1)         | 0<br>(0 - 1)         | 0<br>(0 - 0)         |
| Chronic kidney disease due to hypertension          | 5<br>(3 - 10)     | 0<br>(0 - 0)       | 0<br>(0 - 0)        | 1<br>(1 - 3)         | 2<br>(1 - 5)         | 2<br>(1 - 3)         |
| Chronic kidney disease due to glomerulonephritis    | 3<br>(1 - 5)      | 0<br>(0 - 0)       | 0<br>(0 - 0)        | 1<br>(0 - 1)         | 1<br>(0 - 2)         | 1<br>(0 - 2)         |
| Chronic kidney disease due to other causes          | 8<br>(3 - 17)     | 0<br>(0 - 0)       | 0<br>(0 - 0)        | 3<br>(1 - 6)         | 3<br>(1 - 7)         | 2<br>(1 - 5)         |
| Urinary diseases and male infertility               | 2<br>(1 - 3)      | 0<br>(0 - 0)       | 0<br>(0 - 0)        | 1<br>(0 - 1)         | 1<br>(0 - 1)         | 1<br>(0 - 1)         |
| Interstitial nephritis and urinary tract infections | 2<br>(1 - 3)      | 0<br>(0 - 0)       | 0<br>(0 - 0)        | 1<br>(0 - 1)         | 0<br>(0 - 1)         | 0<br>(0 - 1)         |
| Urolithiasis                                        | 0<br>(0 - 0)      | --                 | 0<br>(0 - 0)        | 0<br>(0 - 0)         | 0<br>(0 - 0)         | 0<br>(0 - 0)         |
| Other urinary diseases                              | 0<br>(0 - 1)      | 0<br>(0 - 0)       | 0<br>(0 - 0)        | 0<br>(0 - 0)         | 0<br>(0 - 0)         | 0<br>(0 - 0)         |
| Gynecological diseases                              | 0<br>(0 - 2)      | --                 | --                  | 0<br>(0 - 1)         | 0<br>(0 - 0)         | 0<br>(0 - 0)         |
| Uterine fibroids                                    | 0<br>(0 - 0)      | --                 | --                  | 0<br>(0 - 0)         | 0<br>(0 - 0)         | 0<br>(0 - 0)         |
| Polycystic ovarian syndrome                         | 0<br>(0 - 0)      | --                 | --                  | 0<br>(0 - 0)         | 0<br>(0 - 0)         | --                   |
| Endometriosis                                       | 0<br>(0 - 0)      | --                 | --                  | 0<br>(0 - 0)         | 0<br>(0 - 0)         | --                   |
| Genital prolapse                                    | 0<br>(0 - 0)      | --                 | --                  | 0<br>(0 - 0)         | 0<br>(0 - 0)         | 0<br>(0 - 0)         |
| Other gynecological diseases                        | 0<br>(0 - 1)      | --                 | --                  | 0<br>(0 - 1)         | 0<br>(0 - 0)         | 0<br>(0 - 0)         |
| Hemoglobinopathies and hemolytic anemias            | 3<br>(2 - 5)      | 1<br>(0 - 1)       | 0<br>(0 - 1)        | 1<br>(1 - 3)         | 0<br>(0 - 1)         | 0<br>(0 - 1)         |
| Thalassemias                                        | 2<br>(1 - 3)      | 1<br>(0 - 1)       | 0<br>(0 - 1)        | 1<br>(0 - 2)         | 0<br>(0 - 0)         | 0<br>(0 - 0)         |
| Sickle cell disorders                               | 0<br>(0 - 0)      | 0<br>(0 - 0)       | 0<br>(0 - 0)        | 0<br>(0 - 0)         | 0<br>(0 - 0)         | 0<br>(0 - 0)         |
| G6PD deficiency                                     | 0<br>(0 - 0)      | 0<br>(0 - 0)       | 0<br>(0 - 0)        | 0<br>(0 - 0)         | 0<br>(0 - 0)         | 0<br>(0 - 0)         |
| Other hemoglobinopathies and hemolytic anemias      | 1<br>(1 - 2)      | 0<br>(0 - 0)       | 0<br>(0 - 0)        | 0<br>(0 - 1)         | 0<br>(0 - 1)         | 0<br>(0 - 1)         |
| Endocrine, metabolic, blood, and immune disorders   | 3<br>(2 - 5)      | 0<br>(0 - 1)       | 0<br>(0 - 0)        | 1<br>(0 - 1)         | 1<br>(0 - 2)         | 1<br>(0 - 2)         |
| Musculoskeletal disorders                           | 1<br>(1 - 2)      | --                 | 0<br>(0 - 0)        | 0<br>(0 - 1)         | 0<br>(0 - 1)         | 0<br>(0 - 0)         |
| Rheumatoid arthritis                                | 0<br>(0 - 0)      | --                 | 0<br>(0 - 0)        | 0<br>(0 - 0)         | 0<br>(0 - 0)         | 0<br>(0 - 0)         |
| Other musculoskeletal disorders                     | 1<br>(0 - 2)      | --                 | 0<br>(0 - 0)        | 0<br>(0 - 1)         | 0<br>(0 - 0)         | 0<br>(0 - 0)         |
| Other non-communicable diseases                     | 18<br>(11 - 28)   | 11<br>(6 - 20)     | 1<br>(1 - 2)        | 3<br>(1 - 5)         | 1<br>(1 - 2)         | 2<br>(1 - 3)         |
| Congenital anomalies                                | 15<br>(9 - 24)    | 11<br>(6 - 20)     | 1<br>(1 - 2)        | 2<br>(1 - 4)         | 1<br>(0 - 1)         | 0<br>(0 - 1)         |
| Neural tube defects                                 | 0<br>(0 - 2)      | 0<br>(0 - 2)       | 0<br>(0 - 0)        | 0<br>(0 - 0)         | 0<br>(0 - 0)         | 0<br>(0 - 0)         |
| Congenital heart anomalies                          | 2<br>(1 - 6)      | 2<br>(0 - 5)       | 0<br>(0 - 1)        | 0<br>(0 - 1)         | 0<br>(0 - 0)         | 0<br>(0 - 0)         |
| Cleft lip and cleft palate                          | 0<br>(0 - 0)      | 0<br>(0 - 0)       | --                  | --                   | --                   | --                   |
| Down syndrome                                       | 2<br>(1 - 4)      | 1<br>(0 - 3)       | 0<br>(0 - 0)        | 0<br>(0 - 1)         | 0<br>(0 - 0)         | 0<br>(0 - 0)         |
| Chromosomal unbalanced rearrangements               | 1<br>(0 - 2)      | 1<br>(0 - 1)       | 0<br>(0 - 0)        | 0<br>(0 - 0)         | 0<br>(0 - 0)         | 0<br>(0 - 0)         |
| Other congenital anomalies                          | 10<br>(5 - 17)    | 7<br>(3 - 13)      | 1<br>(0 - 1)        | 1<br>(0 - 2)         | 0<br>(0 - 1)         | 0<br>(0 - 1)         |
| Skin and subcutaneous diseases                      | 3<br>(2 - 5)      | 0<br>(0 - 0)       | 0<br>(0 - 0)        | 1<br>(0 - 1)         | 1<br>(0 - 1)         | 1<br>(1 - 2)         |
| Cellulitis                                          | 1<br>(0 - 1)      | 0<br>(0 - 0)       | 0<br>(0 - 0)        | 0<br>(0 - 1)         | 0<br>(0 - 0)         | 0<br>(0 - 0)         |
| Pyoderma                                            | 1<br>(1 - 3)      | 0<br>(0 - 0)       | 0<br>(0 - 0)        | 0<br>(0 - 1)         | 0<br>(0 - 1)         | 0<br>(0 - 1)         |
| Decubitus ulcer                                     | 1<br>(0 - 1)      | 0<br>(0 - 0)       | 0<br>(0 - 0)        | 0<br>(0 - 0)         | 0<br>(0 - 0)         | 1<br>(0 - 1)         |



Web Table 31- Vanuatu deaths with 95% UI by age, sex, and cause in 2013

| Cause                                           | Females, All Ages | Females, 0-4 Years | Females, 5-14 Years | Females, 15-49 Years | Females, 50-69 Years | Females, 70-80 Years |
|-------------------------------------------------|-------------------|--------------------|---------------------|----------------------|----------------------|----------------------|
| Other skin and subcutaneous diseases            | 0<br>(0 - 0)      | 0<br>(0 - 0)       | 0<br>(0 - 0)        | 0<br>(0 - 0)         | 0<br>(0 - 0)         | 0<br>(0 - 0)         |
| Sudden infant death syndrome                    | 0<br>(0 - 1)      | 0<br>(0 - 1)       | --                  | --                   | --                   | --                   |
| Injuries                                        | 37<br>(23 - 58)   | 3<br>(2 - 6)       | 3<br>(2 - 4)        | 18<br>(10 - 32)      | 7<br>(4 - 11)        | 6<br>(4 - 9)         |
| Transport injuries                              | 13<br>(8 - 21)    | 1<br>(0 - 2)       | 1<br>(1 - 2)        | 7<br>(4 - 13)        | 3<br>(1 - 5)         | 2<br>(1 - 2)         |
| Road injuries                                   | 11<br>(7 - 19)    | 1<br>(0 - 1)       | 1<br>(1 - 2)        | 6<br>(3 - 11)        | 2<br>(1 - 4)         | 1<br>(1 - 2)         |
| Pedestrian road injuries                        | 2<br>(1 - 4)      | 0<br>(0 - 0)       | 0<br>(0 - 0)        | 1<br>(0 - 2)         | 0<br>(0 - 1)         | 0<br>(0 - 1)         |
| Cyclist road injuries                           | 0<br>(0 - 1)      | 0<br>(0 - 0)       | 0<br>(0 - 0)        | 0<br>(0 - 0)         | 0<br>(0 - 0)         | 0<br>(0 - 0)         |
| Motorcyclist road injuries                      | 1<br>(1 - 3)      | 0<br>(0 - 0)       | 0<br>(0 - 0)        | 1<br>(0 - 2)         | 0<br>(0 - 1)         | 0<br>(0 - 0)         |
| Motor vehicle road injuries                     | 7<br>(4 - 11)     | 0<br>(0 - 1)       | 1<br>(0 - 1)        | 4<br>(2 - 7)         | 1<br>(1 - 2)         | 1<br>(0 - 1)         |
| Other road injuries                             | 0<br>(0 - 1)      | 0<br>(0 - 0)       | 0<br>(0 - 0)        | 0<br>(0 - 0)         | 0<br>(0 - 0)         | 0<br>(0 - 0)         |
| Other transport injuries                        | 2<br>(1 - 3)      | 0<br>(0 - 0)       | 0<br>(0 - 0)        | 1<br>(0 - 2)         | 0<br>(0 - 1)         | 0<br>(0 - 0)         |
| Unintentional injuries                          | 17<br>(10 - 26)   | 3<br>(1 - 5)       | 1<br>(1 - 2)        | 6<br>(3 - 11)        | 3<br>(2 - 5)         | 4<br>(2 - 6)         |
| Falls                                           | 2<br>(1 - 3)      | 0<br>(0 - 0)       | 0<br>(0 - 0)        | 0<br>(0 - 1)         | 0<br>(0 - 0)         | 1<br>(0 - 1)         |
| Drowning                                        | 3<br>(2 - 5)      | 1<br>(0 - 2)       | 0<br>(0 - 1)        | 1<br>(0 - 2)         | 0<br>(0 - 1)         | 0<br>(0 - 1)         |
| Fire, heat, and hot substances                  | 2<br>(1 - 3)      | 0<br>(0 - 1)       | 0<br>(0 - 0)        | 1<br>(0 - 2)         | 0<br>(0 - 0)         | 0<br>(0 - 0)         |
| Poisonings                                      | 1<br>(0 - 2)      | 0<br>(0 - 0)       | 0<br>(0 - 0)        | 0<br>(0 - 1)         | 0<br>(0 - 0)         | 0<br>(0 - 1)         |
| Exposure to mechanical forces                   | 2<br>(1 - 3)      | 0<br>(0 - 1)       | 0<br>(0 - 0)        | 1<br>(0 - 2)         | 0<br>(0 - 1)         | 0<br>(0 - 0)         |
| Unintentional firearm injuries                  | 0<br>(0 - 0)      | 0<br>(0 - 0)       | 0<br>(0 - 0)        | 0<br>(0 - 0)         | 0<br>(0 - 0)         | 0<br>(0 - 0)         |
| Unintentional suffocation                       | 1<br>(0 - 1)      | 0<br>(0 - 0)       | 0<br>(0 - 0)        | 1<br>(0 - 1)         | 0<br>(0 - 0)         | 0<br>(0 - 0)         |
| Other exposure to mechanical forces             | 1<br>(1 - 2)      | 0<br>(0 - 1)       | 0<br>(0 - 0)        | 0<br>(0 - 1)         | 0<br>(0 - 0)         | 0<br>(0 - 0)         |
| Adverse effects of medical treatment            | 4<br>(2 - 8)      | 0<br>(0 - 1)       | 0<br>(0 - 0)        | 1<br>(0 - 3)         | 1<br>(0 - 2)         | 1<br>(0 - 2)         |
| Animal contact                                  | 0<br>(0 - 1)      | 0<br>(0 - 0)       | 0<br>(0 - 0)        | 0<br>(0 - 0)         | 0<br>(0 - 0)         | 0<br>(0 - 0)         |
| Venomous animal contact                         | 0<br>(0 - 1)      | 0<br>(0 - 0)       | 0<br>(0 - 0)        | 0<br>(0 - 0)         | 0<br>(0 - 0)         | 0<br>(0 - 0)         |
| Non-venomous animal contact                     | 0<br>(0 - 0)      | 0<br>(0 - 0)       | 0<br>(0 - 0)        | 0<br>(0 - 0)         | 0<br>(0 - 0)         | 0<br>(0 - 0)         |
| Foreign body                                    | 1<br>(0 - 2)      | 0<br>(0 - 1)       | 0<br>(0 - 0)        | 0<br>(0 - 0)         | 0<br>(0 - 0)         | 0<br>(0 - 1)         |
| Pulmonary aspiration and foreign body in airway | 1<br>(0 - 2)      | 0<br>(0 - 1)       | 0<br>(0 - 0)        | 0<br>(0 - 0)         | 0<br>(0 - 0)         | 0<br>(0 - 1)         |
| Foreign body in other body part                 | 0<br>(0 - 0)      | 0<br>(0 - 0)       | 0<br>(0 - 0)        | 0<br>(0 - 0)         | 0<br>(0 - 0)         | 0<br>(0 - 0)         |
| Other unintentional injuries                    | 2<br>(1 - 3)      | 0<br>(0 - 0)       | 0<br>(0 - 0)        | 1<br>(0 - 1)         | 0<br>(0 - 1)         | 0<br>(0 - 0)         |
| Self-harm and interpersonal violence            | 7<br>(4 - 13)     | 0<br>(0 - 0)       | 0<br>(0 - 1)        | 5<br>(3 - 9)         | 1<br>(1 - 2)         | 1<br>(0 - 1)         |
| Self-harm                                       | 7<br>(3 - 12)     | --                 | 0<br>(0 - 1)        | 4<br>(2 - 8)         | 1<br>(1 - 2)         | 1<br>(0 - 1)         |
| Interpersonal violence                          | 1<br>(0 - 1)      | 0<br>(0 - 0)       | 0<br>(0 - 0)        | 1<br>(0 - 1)         | 0<br>(0 - 0)         | 0<br>(0 - 0)         |
| Assault by firearm                              | 0<br>(0 - 0)      | 0<br>(0 - 0)       | 0<br>(0 - 0)        | 0<br>(0 - 0)         | 0<br>(0 - 0)         | 0<br>(0 - 0)         |
| Assault by sharp object                         | 0<br>(0 - 0)      | 0<br>(0 - 0)       | 0<br>(0 - 0)        | 0<br>(0 - 0)         | 0<br>(0 - 0)         | 0<br>(0 - 0)         |
| Assault by other means                          | 0<br>(0 - 1)      | 0<br>(0 - 0)       | 0<br>(0 - 0)        | 0<br>(0 - 0)         | 0<br>(0 - 0)         | 0<br>(0 - 0)         |

Web Table 31- Venezuela deaths with 95% UI by age, sex, and cause in 2013

| Cause                                                             | Both Sexes, All Ages           | Both Sexes, 0-4 Years    | Both Sexes, 5-14 Years   | Both Sexes, 15-49 Years     | Both Sexes, 50-69 Years     | Both Sexes, 70-80 Years     |
|-------------------------------------------------------------------|--------------------------------|--------------------------|--------------------------|-----------------------------|-----------------------------|-----------------------------|
| All causes                                                        | 156,608<br>(146,823 - 166,952) | 7,973<br>(7,510 - 8,495) | 1,560<br>(1,489 - 1,628) | 35,776<br>(32,506 - 39,216) | 42,662<br>(39,252 - 46,306) | 68,637<br>(65,397 - 71,970) |
| Communicable, maternal, neonatal, and nutritional diseases        | 15,685<br>(14,164 - 19,237)    | 5,070<br>(4,577 - 5,548) | 282<br>(232 - 341)       | 2,743<br>(2,414 - 3,352)    | 2,318<br>(1,893 - 3,869)    | 5,272<br>(4,318 - 7,549)    |
| HIV/AIDS and tuberculosis                                         | 1,929<br>(1,642 - 2,442)       | 7<br>(5 - 9)             | 7<br>(4 - 9)             | 1,088<br>(877 - 1,486)      | 501<br>(395 - 661)          | 327<br>(270 - 420)          |
| Tuberculosis                                                      | 769<br>(671 - 953)             | 6<br>(4 - 8)             | 5<br>(4 - 6)             | 202<br>(169 - 245)          | 256<br>(216 - 315)          | 300<br>(246 - 382)          |
| HIV/AIDS                                                          | 1,160<br>(900 - 1,687)         | 1<br>(0 - 2)             | 2<br>(0 - 4)             | 886<br>(676 - 1,287)        | 245<br>(152 - 391)          | 26<br>(13 - 47)             |
| HIV/AIDS resulting in mycobacterial infection                     | 69<br>(49 - 106)               | 0<br>(0 - 0)             | 0<br>(0 - 0)             | 52<br>(37 - 79)             | 15<br>(9 - 26)              | 2<br>(1 - 3)                |
| HIV/AIDS resulting in other diseases                              | 1,090<br>(842 - 1,578)         | 1<br>(0 - 2)             | 2<br>(0 - 4)             | 834<br>(633 - 1,215)        | 230<br>(143 - 364)          | 25<br>(12 - 44)             |
| Diarrhea, lower respiratory, and other common infectious diseases | 7,299<br>(6,468 - 8,252)       | 1,502<br>(1,251 - 1,795) | 198<br>(154 - 254)       | 958<br>(806 - 1,182)        | 1,067<br>(900 - 1,236)      | 3,575<br>(2,932 - 4,338)    |
| Diarrheal diseases                                                | 1,257<br>(1,013 - 1,506)       | 465<br>(330 - 625)       | 19<br>(13 - 26)          | 114<br>(92 - 140)           | 172<br>(131 - 219)          | 487<br>(339 - 680)          |
| Intestinal infectious diseases                                    | 274<br>(134 - 479)             | 85<br>(41 - 152)         | 74<br>(36 - 129)         | 95<br>(42 - 186)            | 15<br>(6 - 28)              | 5<br>(2 - 10)               |
| Typhoid fever                                                     | 209<br>(99 - 374)              | 62<br>(29 - 113)         | 58<br>(28 - 103)         | 74<br>(32 - 147)            | 11<br>(5 - 22)              | 4<br>(2 - 7)                |
| Paratyphoid fever                                                 | 57<br>(27 - 106)               | 19<br>(8 - 36)           | 16<br>(7 - 29)           | 19<br>(8 - 39)              | 3<br>(1 - 6)                | 1<br>(0 - 2)                |
| Other intestinal infectious diseases                              | 8<br>(3 - 15)                  | 3<br>(1 - 9)             | 1<br>(0 - 3)             | 2<br>(0 - 6)                | 1<br>(0 - 4)                | 1<br>(0 - 3)                |
| Lower respiratory infections                                      | 5,239<br>(4,520 - 6,094)       | 763<br>(601 - 971)       | 64<br>(48 - 83)          | 587<br>(479 - 734)          | 802<br>(652 - 945)          | 3,023<br>(2,405 - 3,767)    |
| Upper respiratory infections                                      | 6<br>(3 - 10)                  | 0<br>(0 - 1)             | 0<br>(0 - 0)             | 2<br>(1 - 4)                | 2<br>(0 - 4)                | 2<br>(0 - 6)                |
| Otitis media                                                      | 4<br>(3 - 4)                   | 1<br>(0 - 1)             | 0<br>(0 - 1)             | 2<br>(1 - 2)                | 0<br>(0 - 1)                | 0<br>(0 - 1)                |
| Meningitis                                                        | 317<br>(275 - 367)             | 117<br>(86 - 161)        | 21<br>(16 - 26)          | 99<br>(85 - 121)            | 47<br>(40 - 56)             | 32<br>(26 - 39)             |
| Pneumococcal meningitis                                           | 109<br>(92 - 129)              | 35<br>(24 - 48)          | 8<br>(6 - 10)            | 37<br>(28 - 48)             | 17<br>(13 - 23)             | 12<br>(9 - 16)              |
| H influenzae type B meningitis                                    | 68<br>(54 - 87)                | 46<br>(32 - 64)          | 5<br>(3 - 7)             | 10<br>(7 - 15)              | 4<br>(3 - 5)                | 3<br>(2 - 4)                |
| Meningococcal meningitis                                          | 37<br>(30 - 45)                | 12<br>(8 - 17)           | 3<br>(2 - 5)             | 13<br>(9 - 18)              | 5<br>(4 - 7)                | 4<br>(3 - 6)                |
| Other meningitis                                                  | 103<br>(85 - 124)              | 25<br>(16 - 39)          | 5<br>(3 - 7)             | 38<br>(29 - 51)             | 21<br>(16 - 26)             | 13<br>(9 - 17)              |
| Encephalitis                                                      | 126<br>(96 - 188)              | 29<br>(17 - 50)          | 16<br>(9 - 30)           | 47<br>(35 - 74)             | 23<br>(16 - 38)             | 11<br>(8 - 18)              |
| Diphtheria                                                        | 3<br>(0 - 11)                  | 2<br>(0 - 9)             | 1<br>(0 - 3)             | 1<br>(0 - 4)                | 0<br>(0 - 1)                | --                          |
| Whooping cough                                                    | 38<br>(9 - 155)                | 35<br>(6 - 152)          | 1<br>(1 - 1)             | 2<br>(1 - 2)                | 0<br>(0 - 0)                | --                          |
| Tetanus                                                           | 12<br>(9 - 19)                 | 1<br>(1 - 2)             | 1<br>(0 - 1)             | 4<br>(3 - 6)                | 4<br>(2 - 6)                | 3<br>(2 - 6)                |
| Measles                                                           | 0<br>(0 - 0)                   | 0<br>(0 - 0)             | 0<br>(0 - 0)             | 0<br>(0 - 0)                | 0<br>(0 - 0)                | --                          |
| Varicella and herpes zoster                                       | 25<br>(11 - 56)                | 5<br>(1 - 16)            | 1<br>(0 - 5)             | 5<br>(2 - 11)               | 3<br>(1 - 8)                | 11<br>(1 - 40)              |
| Neglected tropical diseases and malaria                           | 1,560<br>(726 - 5,115)         | 36<br>(23 - 53)          | 19<br>(14 - 27)          | 162<br>(107 - 389)          | 527<br>(198 - 1,920)        | 817<br>(314 - 2,975)        |
| Malaria                                                           | 17<br>(12 - 23)                | 2<br>(1 - 3)             | 1<br>(0 - 2)             | 9<br>(6 - 14)               | 3<br>(2 - 6)                | 2<br>(1 - 3)                |
| Chagas disease                                                    | 1,343<br>(522 - 4,906)         | 1<br>(0 - 2)             | 1<br>(0 - 3)             | 80<br>(30 - 304)            | 479<br>(149 - 1,872)        | 782<br>(285 - 2,940)        |
| Leishmaniasis                                                     | 8<br>(6 - 10)                  | 2<br>(1 - 3)             | 1<br>(0 - 1)             | 3<br>(2 - 4)                | 2<br>(1 - 2)                | 1<br>(0 - 1)                |
| Visceral leishmaniasis                                            | 8<br>(6 - 10)                  | 2<br>(1 - 3)             | 1<br>(0 - 1)             | 3<br>(2 - 4)                | 2<br>(1 - 2)                | 1<br>(0 - 1)                |
| Schistosomiasis                                                   | 52<br>(41 - 65)                | 0<br>(0 - 0)             | 0<br>(0 - 1)             | 19<br>(13 - 26)             | 20<br>(13 - 27)             | 13<br>(8 - 19)              |
| Cysticercosis                                                     | 18<br>(17 - 21)                | 0<br>(0 - 0)             | 0<br>(0 - 0)             | 11<br>(10 - 13)             | 5<br>(4 - 5)                | 2<br>(2 - 2)                |
| Cystic echinococcosis                                             | 3<br>(2 - 3)                   | 0<br>(0 - 0)             | 0<br>(0 - 0)             | 1<br>(1 - 2)                | 1<br>(1 - 1)                | 0<br>(0 - 0)                |
| Dengue                                                            | 48<br>(35 - 56)                | 8<br>(5 - 11)            | 7<br>(4 - 9)             | 18<br>(14 - 22)             | 8<br>(6 - 10)               | 7<br>(4 - 9)                |
| Yellow fever                                                      | 1<br>(1 - 2)                   | 0<br>(0 - 0)             | 0<br>(0 - 1)             | 1<br>(0 - 1)                | 0<br>(0 - 0)                | 0<br>(0 - 0)                |
| Rabies                                                            | 3<br>(3 - 5)                   | 0<br>(0 - 1)             | 1<br>(0 - 1)             | 2<br>(1 - 2)                | 1<br>(0 - 1)                | 0<br>(0 - 0)                |
| Intestinal nematode infections                                    | 46<br>(28 - 68)                | 18<br>(7 - 33)           | 6<br>(1 - 14)            | 11<br>(3 - 23)              | 5<br>(1 - 13)               | 6<br>(1 - 15)               |
| Ascariasis                                                        | 46<br>(28 - 68)                | 18<br>(7 - 33)           | 6<br>(1 - 14)            | 11<br>(3 - 23)              | 5<br>(1 - 13)               | 6<br>(1 - 15)               |

Web Table 31- Venezuela deaths with 95% UI by age, sex, and cause in 2013

| Cause                                                            | Both Sexes, All Ages           | Both Sexes, 0-4 Years    | Both Sexes, 5-14 Years | Both Sexes, 15-49 Years     | Both Sexes, 50-69 Years     | Both Sexes, 70-80 Years     |
|------------------------------------------------------------------|--------------------------------|--------------------------|------------------------|-----------------------------|-----------------------------|-----------------------------|
| Other neglected tropical diseases                                | 20<br>(17 - 29)                | 5<br>(3 - 8)             | 2<br>(1 - 3)           | 6<br>(5 - 8)                | 4<br>(3 - 5)                | 4<br>(3 - 6)                |
| Maternal disorders                                               | 336<br>(263 - 421)             | --                       | 2<br>(1 - 3)           | 334<br>(261 - 419)          | --                          | --                          |
| Maternal hemorrhage                                              | 32<br>(22 - 44)                | --                       | 0<br>(0 - 0)           | 31<br>(22 - 44)             | --                          | --                          |
| Maternal sepsis and other maternal infections                    | 25<br>(18 - 34)                | --                       | 0<br>(0 - 0)           | 25<br>(18 - 34)             | --                          | --                          |
| Maternal hypertensive disorders                                  | 74<br>(55 - 96)                | --                       | 1<br>(0 - 1)           | 74<br>(55 - 96)             | --                          | --                          |
| Maternal obstructed labor                                        | 18<br>(11 - 25)                | --                       | 0<br>(0 - 0)           | 18<br>(11 - 25)             | --                          | --                          |
| Maternal abortive outcome                                        | 39<br>(27 - 53)                | --                       | 0<br>(0 - 0)           | 39<br>(27 - 53)             | --                          | --                          |
| Indirect maternal deaths                                         | 81<br>(59 - 105)               | --                       | 0<br>(0 - 1)           | 80<br>(59 - 104)            | --                          | --                          |
| Late maternal deaths                                             | 27<br>(14 - 42)                | --                       | 0<br>(0 - 0)           | 27<br>(14 - 41)             | --                          | --                          |
| Maternal deaths aggravated by HIV/AIDS                           | 0<br>(0 - 0)                   | --                       | --                     | 0<br>(0 - 0)                | --                          | --                          |
| Other maternal disorders                                         | 40<br>(29 - 51)                | --                       | 0<br>(0 - 0)           | 39<br>(29 - 51)             | --                          | --                          |
| Neonatal disorders                                               | 2,926<br>(2,590 - 3,281)       | 2,926<br>(2,590 - 3,281) | --                     | --                          | --                          | --                          |
| Neonatal preterm birth complications                             | 1,418<br>(1,081 - 1,730)       | 1,418<br>(1,081 - 1,730) | --                     | --                          | --                          | --                          |
| Neonatal encephalopathy due to birth asphyxia and trauma         | 566<br>(390 - 715)             | 566<br>(390 - 715)       | --                     | --                          | --                          | --                          |
| Neonatal sepsis and other neonatal infections                    | 733<br>(475 - 1,099)           | 733<br>(475 - 1,099)     | --                     | --                          | --                          | --                          |
| Hemolytic disease and other neonatal jaundice                    | 16<br>(7 - 33)                 | 16<br>(7 - 33)           | --                     | --                          | --                          | --                          |
| Other neonatal disorders                                         | 192<br>(139 - 284)             | 192<br>(139 - 284)       | --                     | --                          | --                          | --                          |
| Nutritional deficiencies                                         | 932<br>(767 - 1,331)           | 220<br>(163 - 301)       | 20<br>(15 - 27)        | 103<br>(81 - 162)           | 127<br>(100 - 194)          | 462<br>(353 - 684)          |
| Protein-energy malnutrition                                      | 775<br>(616 - 1,090)           | 210<br>(153 - 283)       | 18<br>(13 - 24)        | 72<br>(53 - 117)            | 98<br>(72 - 145)            | 377<br>(279 - 557)          |
| Iodine deficiency                                                | 2<br>(0 - 5)                   | 0<br>(0 - 1)             | 0<br>(0 - 0)           | 1<br>(0 - 2)                | 0<br>(0 - 2)                | 1<br>(0 - 3)                |
| Iron-deficiency anemia                                           | 108<br>(63 - 198)              | 6<br>(2 - 15)            | 2<br>(1 - 3)           | 22<br>(13 - 40)             | 19<br>(10 - 37)             | 60<br>(31 - 113)            |
| Other nutritional deficiencies                                   | 47<br>(29 - 107)               | 3<br>(1 - 10)            | 1<br>(1 - 2)           | 8<br>(5 - 19)               | 10<br>(5 - 22)              | 25<br>(12 - 63)             |
| Other communicable, maternal, neonatal, and nutritional diseases | 703<br>(384 - 1,091)           | 380<br>(84 - 710)        | 37<br>(15 - 63)        | 98<br>(81 - 131)            | 97<br>(78 - 126)            | 91<br>(70 - 124)            |
| Sexually transmitted diseases excluding HIV                      | 413<br>(97 - 764)              | 360<br>(66 - 689)        | 28<br>(5 - 53)         | 10<br>(7 - 13)              | 9<br>(6 - 13)               | 8<br>(5 - 11)               |
| Syphilis                                                         | 403<br>(87 - 755)              | 360<br>(66 - 689)        | 27<br>(5 - 53)         | 4<br>(3 - 6)                | 6<br>(4 - 9)                | 6<br>(4 - 9)                |
| Chlamydial infection                                             | 2<br>(2 - 3)                   | --                       | 0<br>(0 - 0)           | 2<br>(1 - 2)                | 1<br>(0 - 1)                | 0<br>(0 - 0)                |
| Gonococcal infection                                             | 5<br>(4 - 6)                   | --                       | 0<br>(0 - 0)           | 2<br>(2 - 3)                | 1<br>(1 - 2)                | 1<br>(1 - 2)                |
| Other sexually transmitted diseases                              | 3<br>(3 - 4)                   | --                       | 0<br>(0 - 0)           | 2<br>(1 - 2)                | 1<br>(1 - 1)                | 0<br>(0 - 1)                |
| Hepatitis                                                        | 128<br>(107 - 151)             | 5<br>(3 - 8)             | 3<br>(2 - 4)           | 38<br>(30 - 50)             | 46<br>(35 - 61)             | 35<br>(25 - 49)             |
| Acute hepatitis A                                                | 33<br>(13 - 54)                | 3<br>(2 - 6)             | 2<br>(1 - 3)           | 17<br>(7 - 28)              | 8<br>(2 - 16)               | 3<br>(1 - 7)                |
| Acute hepatitis B                                                | 81<br>(55 - 109)               | 1<br>(0 - 3)             | 1<br>(0 - 1)           | 16<br>(8 - 27)              | 35<br>(23 - 48)             | 28<br>(18 - 40)             |
| Acute hepatitis C                                                | 14<br>(3 - 34)                 | --                       | 0<br>(0 - 1)           | 5<br>(1 - 13)               | 4<br>(1 - 12)               | 4<br>(1 - 11)               |
| Other infectious diseases                                        | 162<br>(128 - 242)             | 16<br>(11 - 24)          | 6<br>(4 - 9)           | 50<br>(38 - 80)             | 41<br>(32 - 66)             | 48<br>(34 - 80)             |
| Non-communicable diseases                                        | 113,752<br>(106,308 - 121,804) | 2,143<br>(1,775 - 2,515) | 575<br>(518 - 638)     | 12,945<br>(11,543 - 14,715) | 36,852<br>(33,665 - 40,149) | 61,237<br>(58,043 - 64,440) |
| Neoplasms                                                        | 26,809<br>(24,444 - 29,251)    | 169<br>(129 - 213)       | 251<br>(218 - 285)     | 4,267<br>(3,771 - 4,839)    | 10,891<br>(9,806 - 12,046)  | 11,230<br>(10,142 - 12,252) |
| Esophageal cancer                                                | 512<br>(427 - 638)             | --                       | --                     | 41<br>(33 - 55)             | 213<br>(171 - 271)          | 258<br>(213 - 317)          |
| Stomach cancer                                                   | 2,764<br>(2,473 - 3,037)       | --                       | --                     | 319<br>(273 - 370)          | 1,103<br>(955 - 1,262)      | 1,342<br>(1,175 - 1,518)    |
| Liver cancer                                                     | 1,141<br>(1,015 - 1,280)       | --                       | 3<br>(2 - 3)           | 118<br>(101 - 137)          | 493<br>(417 - 574)          | 528<br>(450 - 618)          |
| Liver cancer due to hepatitis B                                  | 258<br>(162 - 379)             | --                       | 1<br>(0 - 2)           | 40<br>(26 - 56)             | 126<br>(76 - 189)           | 90<br>(51 - 147)            |
| Liver cancer due to hepatitis C                                  | 548<br>(427 - 685)             | --                       | 1<br>(0 - 1)           | 48<br>(32 - 63)             | 237<br>(173 - 308)          | 263<br>(199 - 341)          |

Web Table 31- Venezuela deaths with 95% UI by age, sex, and cause in 2013

| Cause                                | Both Sexes, All Ages        | Both Sexes, 0-4 Years | Both Sexes, 5-14 Years | Both Sexes, 15-49 Years  | Both Sexes, 50-69 Years     | Both Sexes, 70-80 Years     |
|--------------------------------------|-----------------------------|-----------------------|------------------------|--------------------------|-----------------------------|-----------------------------|
| Liver cancer due to alcohol use      | 241<br>(161 - 334)          | --                    | --                     | 14<br>(7 - 23)           | 89<br>(56 - 131)            | 138<br>(89 - 191)           |
| Liver cancer due to other causes     | 94<br>(64 - 141)            | --                    | 1<br>(1 - 2)           | 16<br>(11 - 26)          | 40<br>(25 - 62)             | 37<br>(23 - 55)             |
| Larynx cancer                        | 478<br>(353 - 596)          | --                    | --                     | 42<br>(32 - 56)          | 248<br>(177 - 310)          | 188<br>(136 - 241)          |
| Tracheal, bronchus and lung cancer   | 4,131<br>(3,698 - 4,611)    | --                    | --                     | 405<br>(345 - 474)       | 2,013<br>(1,748 - 2,332)    | 1,713<br>(1,497 - 1,944)    |
| Breast cancer                        | 1,959<br>(1,645 - 2,295)    | --                    | --                     | 503<br>(405 - 616)       | 942<br>(768 - 1,128)        | 514<br>(419 - 618)          |
| Cervical cancer                      | 1,866<br>(1,500 - 2,266)    | --                    | --                     | 668<br>(524 - 844)       | 740<br>(575 - 915)          | 458<br>(350 - 567)          |
| Uterine cancer                       | 286<br>(222 - 459)          | --                    | --                     | 30<br>(22 - 49)          | 139<br>(105 - 226)          | 117<br>(87 - 191)           |
| Prostate cancer                      | 2,670<br>(1,653 - 3,555)    | --                    | --                     | 28<br>(17 - 41)          | 672<br>(424 - 948)          | 1,971<br>(1,174 - 2,732)    |
| Colon and rectum cancer              | 2,108<br>(1,882 - 2,331)    | --                    | --                     | 270<br>(235 - 310)       | 820<br>(717 - 926)          | 1,019<br>(890 - 1,158)      |
| Lip and oral cavity cancer           | 317<br>(252 - 387)          | --                    | --                     | 40<br>(31 - 51)          | 140<br>(106 - 172)          | 137<br>(109 - 172)          |
| Nasopharynx cancer                   | 61<br>(52 - 81)             | --                    | 1<br>(0 - 1)           | 17<br>(14 - 23)          | 27<br>(22 - 36)             | 16<br>(13 - 23)             |
| Other pharynx cancer                 | 127<br>(109 - 150)          | --                    | --                     | 18<br>(15 - 25)          | 65<br>(54 - 79)             | 44<br>(37 - 50)             |
| Gallbladder and biliary tract cancer | 443<br>(353 - 710)          | --                    | --                     | 33<br>(27 - 48)          | 199<br>(156 - 319)          | 210<br>(163 - 355)          |
| Pancreatic cancer                    | 1,138<br>(1,018 - 1,275)    | --                    | --                     | 114<br>(98 - 133)        | 518<br>(452 - 597)          | 506<br>(436 - 588)          |
| Malignant skin melanoma              | 136<br>(100 - 199)          | --                    | --                     | 32<br>(24 - 51)          | 51<br>(36 - 77)             | 52<br>(38 - 77)             |
| Non-melanoma skin cancer             | 340<br>(243 - 463)          | --                    | --                     | 35<br>(27 - 51)          | 98<br>(72 - 135)            | 206<br>(142 - 293)          |
| Ovarian cancer                       | 593<br>(500 - 700)          | --                    | --                     | 138<br>(109 - 171)       | 286<br>(231 - 351)          | 170<br>(138 - 208)          |
| Testicular cancer                    | 35<br>(12 - 56)             | --                    | --                     | 25<br>(8 - 42)           | 5<br>(2 - 8)                | 5<br>(2 - 8)                |
| Kidney cancer                        | 557<br>(483 - 633)          | 4<br>(3 - 4)          | 3<br>(3 - 4)           | 88<br>(74 - 104)         | 278<br>(234 - 324)          | 183<br>(155 - 213)          |
| Bladder cancer                       | 357<br>(303 - 437)          | --                    | --                     | 21<br>(18 - 28)          | 118<br>(99 - 150)           | 217<br>(180 - 270)          |
| Brain and nervous system cancer      | 479<br>(252 - 572)          | 14<br>(6 - 21)        | 26<br>(13 - 35)        | 145<br>(78 - 180)        | 189<br>(98 - 238)           | 105<br>(49 - 131)           |
| Thyroid cancer                       | 129<br>(88 - 155)           | --                    | 0<br>(0 - 0)           | 15<br>(11 - 18)          | 52<br>(36 - 65)             | 61<br>(39 - 76)             |
| Mesothelioma                         | 22<br>(19 - 26)             | --                    | --                     | 4<br>(4 - 5)             | 11<br>(9 - 13)              | 7<br>(5 - 8)                |
| Hodgkin lymphoma                     | 109<br>(35 - 145)           | 2<br>(1 - 3)          | 3<br>(1 - 5)           | 45<br>(14 - 61)          | 36<br>(11 - 50)             | 23<br>(6 - 32)              |
| Non-Hodgkin lymphoma                 | 859<br>(722 - 1,128)        | 12<br>(7 - 20)        | 19<br>(13 - 31)        | 212<br>(171 - 308)       | 343<br>(270 - 466)          | 273<br>(200 - 355)          |
| Multiple myeloma                     | 331<br>(271 - 405)          | --                    | --                     | 39<br>(31 - 50)          | 173<br>(138 - 214)          | 119<br>(92 - 148)           |
| Leukemia                             | 990<br>(896 - 1,093)        | 62<br>(44 - 83)       | 109<br>(91 - 128)      | 339<br>(293 - 396)       | 247<br>(215 - 286)          | 232<br>(201 - 268)          |
| Other neoplasms                      | 1,874<br>(1,591 - 2,151)    | 76<br>(44 - 100)      | 86<br>(63 - 108)       | 483<br>(413 - 605)       | 672<br>(549 - 810)          | 556<br>(416 - 660)          |
| Cardiovascular diseases              | 48,912<br>(45,307 - 52,882) | 50<br>(40 - 64)       | 44<br>(36 - 53)        | 4,154<br>(3,622 - 4,800) | 14,673<br>(13,308 - 16,311) | 29,992<br>(27,889 - 32,188) |
| Rheumatic heart disease              | 171<br>(138 - 232)          | 1<br>(0 - 1)          | 3<br>(2 - 5)           | 62<br>(48 - 95)          | 54<br>(41 - 73)             | 50<br>(35 - 65)             |
| Ischemic heart disease               | 28,317<br>(25,604 - 31,374) | 9<br>(6 - 13)         | 9<br>(7 - 12)          | 2,362<br>(2,027 - 2,800) | 9,168<br>(8,054 - 10,280)   | 16,769<br>(14,994 - 18,665) |
| Cerebrovascular disease              | 12,991<br>(11,174 - 14,757) | 11<br>(8 - 15)        | 16<br>(12 - 20)        | 1,138<br>(935 - 1,379)   | 3,476<br>(2,922 - 4,074)    | 8,351<br>(7,018 - 9,650)    |
| Ischemic stroke                      | 3,874<br>(2,776 - 6,196)    | 2<br>(1 - 4)          | 3<br>(2 - 5)           | 146<br>(103 - 252)       | 779<br>(566 - 1,267)        | 2,944<br>(2,045 - 4,791)    |
| Hemorrhagic stroke                   | 9,117<br>(6,366 - 10,925)   | 9<br>(5 - 12)         | 13<br>(10 - 16)        | 992<br>(784 - 1,199)     | 2,697<br>(2,007 - 3,237)    | 5,406<br>(3,344 - 6,692)    |
| Hypertensive heart disease           | 4,410<br>(3,382 - 5,688)    | 2<br>(1 - 3)          | 3<br>(2 - 4)           | 198<br>(147 - 291)       | 1,056<br>(802 - 1,479)      | 3,152<br>(2,322 - 4,031)    |
| Cardiomyopathy and myocarditis       | 823<br>(676 - 1,193)        | 9<br>(6 - 13)         | 5<br>(4 - 8)           | 144<br>(114 - 208)       | 255<br>(203 - 362)          | 410<br>(317 - 647)          |
| Atrial fibrillation and flutter      | 128<br>(100 - 162)          | --                    | --                     | 4<br>(3 - 5)             | 25<br>(19 - 31)             | 99<br>(74 - 131)            |
| Aortic aneurysm                      | 505<br>(403 - 676)          | --                    | --                     | 37<br>(28 - 49)          | 156<br>(122 - 214)          | 312<br>(245 - 423)          |
| Peripheral vascular disease          | 99<br>(70 - 126)            | --                    | --                     | 4<br>(3 - 5)             | 18<br>(12 - 22)             | 78<br>(53 - 104)            |
| Endocarditis                         | 100<br>(73 - 134)           | 7<br>(5 - 11)         | 2<br>(1 - 3)           | 27<br>(19 - 38)          | 25<br>(17 - 35)             | 39<br>(27 - 53)             |

Web Table 31- Venezuela deaths with 95% UI by age, sex, and cause in 2013

| Cause                                               | Both Sexes, All Ages     | Both Sexes, 0-4 Years | Both Sexes, 5-14 Years | Both Sexes, 15-49 Years | Both Sexes, 50-69 Years  | Both Sexes, 70-80 Years  |
|-----------------------------------------------------|--------------------------|-----------------------|------------------------|-------------------------|--------------------------|--------------------------|
| Other cardiovascular and circulatory diseases       | 1,369<br>(1,080 - 1,869) | 11<br>(8 - 16)        | 6<br>(4 - 9)           | 179<br>(136 - 263)      | 440<br>(332 - 591)       | 733<br>(542 - 1,045)     |
| Chronic respiratory diseases                        | 6,650<br>(5,659 - 7,422) | 54<br>(41 - 74)       | 16<br>(13 - 19)        | 373<br>(316 - 473)      | 1,528<br>(1,295 - 1,755) | 4,679<br>(3,846 - 5,285) |
| Chronic obstructive pulmonary disease               | 5,754<br>(4,881 - 6,427) | 25<br>(19 - 34)       | 5<br>(4 - 7)           | 232<br>(192 - 298)      | 1,273<br>(1,078 - 1,460) | 4,218<br>(3,459 - 4,787) |
| Pneumoconiosis                                      | 68<br>(48 - 101)         | 0<br>(0 - 0)          | 0<br>(0 - 1)           | 5<br>(4 - 7)            | 26<br>(17 - 39)          | 36<br>(24 - 58)          |
| Silicosis                                           | 2<br>(2 - 3)             | 0<br>(0 - 0)          | 0<br>(0 - 0)           | 1<br>(1 - 1)            | 1<br>(0 - 1)             | 1<br>(0 - 1)             |
| Asbestosis                                          | 13<br>(9 - 20)           | 0<br>(0 - 0)          | 0<br>(0 - 0)           | 1<br>(1 - 1)            | 6<br>(4 - 10)            | 6<br>(3 - 9)             |
| Coal workers pneumoconiosis                         | 8<br>(5 - 13)            | 0<br>(0 - 0)          | 0<br>(0 - 0)           | 1<br>(1 - 1)            | 3<br>(2 - 5)             | 4<br>(3 - 7)             |
| Other pneumoconiosis                                | 45<br>(31 - 66)          | 0<br>(0 - 0)          | 0<br>(0 - 0)           | 3<br>(2 - 4)            | 16<br>(10 - 24)          | 26<br>(17 - 41)          |
| Asthma                                              | 389<br>(307 - 505)       | 19<br>(12 - 34)       | 7<br>(6 - 9)           | 92<br>(73 - 121)        | 111<br>(81 - 144)        | 161<br>(111 - 227)       |
| Interstitial lung disease and pulmonary sarcoidosis | 335<br>(243 - 469)       | 3<br>(2 - 5)          | 2<br>(1 - 3)           | 31<br>(23 - 44)         | 102<br>(72 - 142)        | 198<br>(130 - 294)       |
| Other chronic respiratory diseases                  | 104<br>(78 - 139)        | 7<br>(5 - 9)          | 1<br>(1 - 1)           | 14<br>(10 - 19)         | 17<br>(12 - 22)          | 66<br>(43 - 96)          |
| Cirrhosis                                           | 3,684<br>(3,277 - 4,110) | 7<br>(5 - 10)         | 9<br>(8 - 11)          | 835<br>(693 - 995)      | 1,881<br>(1,629 - 2,145) | 952<br>(832 - 1,065)     |
| Cirrhosis due to hepatitis B                        | 100<br>(42 - 160)        | 0<br>(0 - 0)          | 0<br>(0 - 0)           | 22<br>(8 - 37)          | 51<br>(21 - 83)          | 25<br>(12 - 42)          |
| Cirrhosis due to hepatitis C                        | 1,197<br>(915 - 1,547)   | 1<br>(0 - 1)          | 2<br>(1 - 3)           | 223<br>(137 - 315)      | 591<br>(426 - 787)       | 380<br>(281 - 484)       |
| Cirrhosis due to alcohol use                        | 1,935<br>(1,575 - 2,321) | --                    | --                     | 425<br>(320 - 546)      | 1,031<br>(808 - 1,254)   | 479<br>(383 - 577)       |
| Cirrhosis due to other causes                       | 452<br>(297 - 616)       | 7<br>(5 - 9)          | 7<br>(5 - 9)           | 164<br>(108 - 226)      | 208<br>(122 - 297)       | 67<br>(44 - 94)          |
| Digestive diseases                                  | 3,094<br>(2,782 - 3,537) | 22<br>(16 - 30)       | 20<br>(17 - 24)        | 470<br>(401 - 611)      | 878<br>(768 - 1,027)     | 1,704<br>(1,488 - 1,931) |
| Peptic ulcer disease                                | 715<br>(573 - 921)       | 1<br>(0 - 2)          | 1<br>(1 - 2)           | 92<br>(70 - 136)        | 213<br>(166 - 289)       | 409<br>(316 - 532)       |
| Gastritis and duodenitis                            | 168<br>(114 - 267)       | 1<br>(0 - 1)          | 1<br>(1 - 2)           | 23<br>(16 - 40)         | 38<br>(26 - 60)          | 105<br>(67 - 174)        |
| Appendicitis                                        | 142<br>(104 - 209)       | 3<br>(1 - 4)          | 5<br>(4 - 7)           | 53<br>(39 - 83)         | 39<br>(28 - 56)          | 43<br>(27 - 70)          |
| Paralytic ileus and intestinal obstruction          | 359<br>(94 - 587)        | 8<br>(3 - 14)         | 5<br>(2 - 8)           | 42<br>(13 - 66)         | 89<br>(24 - 145)         | 214<br>(48 - 376)        |
| Inguinal, femoral, and abdominal hernia             | 219<br>(139 - 425)       | 3<br>(1 - 6)          | 2<br>(1 - 4)           | 25<br>(15 - 51)         | 58<br>(37 - 108)         | 131<br>(76 - 276)        |
| Inflammatory bowel disease                          | 40<br>(32 - 59)          | 1<br>(0 - 1)          | 1<br>(0 - 1)           | 13<br>(9 - 21)          | 11<br>(8 - 16)           | 15<br>(11 - 23)          |
| Vascular intestinal disorders                       | 535<br>(349 - 800)       | 2<br>(0 - 4)          | 1<br>(0 - 3)           | 40<br>(22 - 66)         | 138<br>(85 - 215)        | 354<br>(226 - 544)       |
| Gallbladder and biliary diseases                    | 300<br>(247 - 404)       | 0<br>(0 - 1)          | 1<br>(0 - 1)           | 49<br>(39 - 70)         | 98<br>(78 - 137)         | 152<br>(117 - 213)       |
| Pancreatitis                                        | 286<br>(216 - 371)       | 1<br>(0 - 1)          | 1<br>(1 - 2)           | 93<br>(67 - 129)        | 103<br>(76 - 137)        | 88<br>(62 - 119)         |
| Other digestive diseases                            | 330<br>(262 - 416)       | 3<br>(2 - 6)          | 2<br>(2 - 3)           | 40<br>(32 - 53)         | 91<br>(69 - 113)         | 193<br>(144 - 254)       |
| Neurological disorders                              | 5,795<br>(5,108 - 6,673) | 26<br>(21 - 36)       | 29<br>(23 - 37)        | 430<br>(353 - 587)      | 594<br>(510 - 692)       | 4,716<br>(4,054 - 5,530) |
| Alzheimer disease and other dementias               | 4,710<br>(4,045 - 5,527) | --                    | --                     | 2<br>(1 - 4)            | 318<br>(252 - 387)       | 4,390<br>(3,735 - 5,176) |
| Parkinson disease                                   | 270<br>(220 - 355)       | --                    | --                     | 7<br>(5 - 9)            | 54<br>(43 - 76)          | 209<br>(166 - 279)       |
| Epilepsy                                            | 497<br>(411 - 670)       | 12<br>(7 - 18)        | 19<br>(14 - 26)        | 311<br>(244 - 456)      | 102<br>(81 - 127)        | 54<br>(43 - 68)          |
| Multiple sclerosis                                  | 56<br>(36 - 79)          | --                    | --                     | 23<br>(15 - 33)         | 24<br>(15 - 35)          | 9<br>(5 - 14)            |
| Other neurological disorders                        | 262<br>(226 - 315)       | 15<br>(11 - 20)       | 10<br>(8 - 14)         | 87<br>(73 - 110)        | 97<br>(81 - 120)         | 53<br>(44 - 65)          |
| Mental and substance use disorders                  | 459<br>(372 - 682)       | 10<br>(3 - 15)        | 0<br>(0 - 0)           | 229<br>(181 - 339)      | 153<br>(117 - 255)       | 67<br>(52 - 88)          |
| Schizophrenia                                       | 8<br>(6 - 14)            | --                    | --                     | 4<br>(3 - 7)            | 3<br>(2 - 5)             | 2<br>(1 - 3)             |
| Alcohol use disorders                               | 268<br>(203 - 502)       | --                    | --                     | 117<br>(84 - 231)       | 117<br>(84 - 215)        | 34<br>(23 - 56)          |
| Drug use disorders                                  | 179<br>(106 - 212)       | 10<br>(3 - 15)        | --                     | 105<br>(55 - 130)       | 34<br>(20 - 42)          | 31<br>(23 - 41)          |
| Opioid use disorders                                | 38<br>(22 - 46)          | 2<br>(1 - 4)          | --                     | 23<br>(12 - 28)         | 6<br>(4 - 8)             | 7<br>(5 - 9)             |
| Cocaine use disorders                               | 5<br>(3 - 6)             | 0<br>(0 - 1)          | --                     | 3<br>(2 - 4)            | 1<br>(0 - 1)             | 1<br>(1 - 1)             |
| Amphetamine use disorders                           | 4<br>(3 - 5)             | 0<br>(0 - 1)          | --                     | 2<br>(1 - 3)            | 1<br>(0 - 1)             | 1<br>(0 - 1)             |

Web Table 31- Venezuela deaths with 95% UI by age, sex, and cause in 2013

| Cause                                               | Both Sexes, All Ages        | Both Sexes, 0-4 Years    | Both Sexes, 5-14 Years | Both Sexes, 15-49 Years  | Both Sexes, 50-69 Years  | Both Sexes, 70-80 Years  |
|-----------------------------------------------------|-----------------------------|--------------------------|------------------------|--------------------------|--------------------------|--------------------------|
| Other drug use disorders                            | 132<br>(78 - 156)           | 7<br>(2 - 10)            | --                     | 77<br>(40 - 96)          | 26<br>(16 - 32)          | 23<br>(17 - 31)          |
| Eating disorders                                    | 3<br>(2 - 5)                | --                       | 0<br>(0 - 0)           | 3<br>(2 - 5)             | --                       | --                       |
| Anorexia nervosa                                    | 3<br>(2 - 5)                | --                       | 0<br>(0 - 0)           | 3<br>(2 - 5)             | --                       | --                       |
| Diabetes, urogenital, blood, and endocrine diseases | 15,495<br>(13,919 - 17,178) | 105<br>(79 - 198)        | 64<br>(53 - 82)        | 1,691<br>(1,465 - 1,995) | 6,000<br>(5,191 - 6,747) | 7,635<br>(6,730 - 8,541) |
| Diabetes mellitus                                   | 7,744<br>(6,878 - 8,664)    | 7<br>(5 - 9)             | 9<br>(7 - 14)          | 603<br>(507 - 722)       | 2,994<br>(2,572 - 3,435) | 4,131<br>(3,565 - 4,766) |
| Acute glomerulonephritis                            | 7<br>(6 - 9)                | 0<br>(0 - 1)             | 1<br>(0 - 1)           | 2<br>(2 - 3)             | 2<br>(1 - 2)             | 2<br>(1 - 3)             |
| Chronic kidney disease                              | 6,564<br>(4,947 - 7,504)    | 24<br>(18 - 30)          | 26<br>(22 - 33)        | 817<br>(688 - 991)       | 2,709<br>(1,834 - 3,205) | 2,988<br>(2,186 - 3,521) |
| Chronic kidney disease due to diabetes mellitus     | 3,596<br>(2,662 - 4,296)    | 3<br>(2 - 5)             | 3<br>(2 - 6)           | 377<br>(289 - 520)       | 1,693<br>(1,184 - 2,051) | 1,520<br>(1,086 - 1,876) |
| Chronic kidney disease due to hypertension          | 1,039<br>(584 - 1,432)      | 5<br>(3 - 7)             | 5<br>(3 - 7)           | 161<br>(104 - 241)       | 313<br>(145 - 466)       | 556<br>(310 - 764)       |
| Chronic kidney disease due to glomerulonephritis    | 194<br>(77 - 300)           | 5<br>(3 - 7)             | 6<br>(4 - 8)           | 47<br>(24 - 70)          | 56<br>(15 - 95)          | 81<br>(27 - 138)         |
| Chronic kidney disease due to other causes          | 1,734<br>(894 - 2,268)      | 11<br>(7 - 16)           | 13<br>(9 - 17)         | 231<br>(157 - 319)       | 647<br>(254 - 905)       | 832<br>(414 - 1,144)     |
| Urinary diseases and male infertility               | 510<br>(368 - 608)          | 10<br>(8 - 14)           | 3<br>(2 - 4)           | 80<br>(64 - 95)          | 125<br>(88 - 152)        | 291<br>(191 - 369)       |
| Interstitial nephritis and urinary tract infections | 372<br>(245 - 460)          | 9<br>(7 - 13)            | 2<br>(1 - 3)           | 51<br>(36 - 61)          | 82<br>(51 - 104)         | 228<br>(135 - 301)       |
| Urolithiasis                                        | 55<br>(42 - 74)             | --                       | 0<br>(0 - 1)           | 13<br>(9 - 17)           | 19<br>(13 - 26)          | 23<br>(15 - 35)          |
| Other urinary diseases                              | 84<br>(64 - 120)            | 1<br>(1 - 2)             | 1<br>(1 - 1)           | 17<br>(13 - 23)          | 24<br>(17 - 33)          | 41<br>(27 - 68)          |
| Gynecological diseases                              | 3<br>(2 - 9)                | --                       | --                     | 2<br>(1 - 5)             | 1<br>(0 - 2)             | 1<br>(0 - 3)             |
| Uterine fibroids                                    | 1<br>(0 - 2)                | --                       | --                     | 0<br>(0 - 1)             | 0<br>(0 - 1)             | 0<br>(0 - 1)             |
| Polycystic ovarian syndrome                         | 0<br>(0 - 0)                | --                       | --                     | 0<br>(0 - 0)             | 0<br>(0 - 0)             | --                       |
| Endometriosis                                       | 0<br>(0 - 1)                | --                       | --                     | 0<br>(0 - 1)             | 0<br>(0 - 0)             | --                       |
| Genital prolapse                                    | 0<br>(0 - 2)                | --                       | --                     | 0<br>(0 - 1)             | 0<br>(0 - 0)             | 0<br>(0 - 1)             |
| Other gynecological diseases                        | 1<br>(1 - 4)                | --                       | --                     | 1<br>(0 - 2)             | 0<br>(0 - 1)             | 0<br>(0 - 1)             |
| Hemoglobinopathies and hemolytic anemias            | 191<br>(141 - 260)          | 20<br>(12 - 37)          | 15<br>(10 - 22)        | 73<br>(55 - 104)         | 38<br>(28 - 53)          | 44<br>(31 - 61)          |
| Thalassemias                                        | 4<br>(3 - 5)                | 1<br>(1 - 2)             | 1<br>(0 - 1)           | 2<br>(1 - 2)             | 0<br>(0 - 0)             | 0<br>(0 - 0)             |
| Sickle cell disorders                               | 103<br>(77 - 142)           | 13<br>(8 - 25)           | 11<br>(8 - 16)         | 56<br>(41 - 79)          | 21<br>(15 - 29)          | 2<br>(1 - 3)             |
| G6PD deficiency                                     | 6<br>(5 - 9)                | 1<br>(1 - 2)             | 1<br>(0 - 1)           | 3<br>(2 - 4)             | 1<br>(1 - 2)             | 1<br>(0 - 1)             |
| Other hemoglobinopathies and hemolytic anemias      | 77<br>(57 - 105)            | 4<br>(3 - 9)             | 2<br>(1 - 3)           | 13<br>(10 - 19)          | 16<br>(11 - 22)          | 42<br>(29 - 58)          |
| Endocrine, metabolic, blood, and immune disorders   | 477<br>(337 - 1,180)        | 45<br>(27 - 117)         | 9<br>(6 - 19)          | 114<br>(81 - 273)        | 131<br>(89 - 315)        | 179<br>(105 - 507)       |
| Musculoskeletal disorders                           | 614<br>(360 - 733)          | --                       | 12<br>(8 - 15)         | 246<br>(137 - 303)       | 178<br>(100 - 222)       | 179<br>(111 - 229)       |
| Rheumatoid arthritis                                | 193<br>(114 - 241)          | --                       | 1<br>(1 - 1)           | 20<br>(13 - 27)          | 66<br>(39 - 87)          | 105<br>(60 - 140)        |
| Other musculoskeletal disorders                     | 422<br>(242 - 505)          | --                       | 11<br>(7 - 14)         | 225<br>(118 - 279)       | 112<br>(61 - 143)        | 74<br>(48 - 98)          |
| Other non-communicable diseases                     | 2,239<br>(1,849 - 2,611)    | 1,699<br>(1,340 - 2,035) | 131<br>(102 - 160)     | 250<br>(213 - 301)       | 75<br>(64 - 93)          | 84<br>(70 - 109)         |
| Congenital anomalies                                | 2,149<br>(1,759 - 2,509)    | 1,675<br>(1,315 - 2,010) | 129<br>(101 - 158)     | 239<br>(204 - 288)       | 62<br>(53 - 76)          | 43<br>(36 - 52)          |
| Neural tube defects                                 | 89<br>(59 - 129)            | 78<br>(48 - 117)         | 4<br>(3 - 5)           | 6<br>(4 - 8)             | 1<br>(0 - 1)             | 1<br>(1 - 2)             |
| Congenital heart anomalies                          | 1,100<br>(881 - 1,311)      | 834<br>(619 - 1,041)     | 76<br>(59 - 97)        | 147<br>(121 - 182)       | 27<br>(22 - 34)          | 16<br>(12 - 22)          |
| Cleft lip and cleft palate                          | 4<br>(1 - 14)               | 4<br>(1 - 14)            | --                     | --                       | --                       | --                       |
| Down syndrome                                       | 103<br>(71 - 140)           | 54<br>(31 - 83)          | 6<br>(4 - 9)           | 29<br>(22 - 39)          | 12<br>(8 - 17)           | 1<br>(1 - 2)             |
| Chromosomal unbalanced rearrangements               | 24<br>(13 - 45)             | 20<br>(9 - 38)           | 1<br>(0 - 1)           | 2<br>(1 - 4)             | 1<br>(0 - 1)             | 1<br>(0 - 1)             |
| Other congenital anomalies                          | 829<br>(634 - 1,029)        | 685<br>(499 - 887)       | 42<br>(29 - 59)        | 56<br>(43 - 74)          | 22<br>(17 - 29)          | 24<br>(18 - 31)          |
| Skin and subcutaneous diseases                      | 71<br>(57 - 111)            | 6<br>(4 - 11)            | 1<br>(1 - 2)           | 10<br>(8 - 17)           | 13<br>(10 - 19)          | 41<br>(29 - 64)          |
| Cellulitis                                          | 11<br>(7 - 18)              | 1<br>(0 - 2)             | 0<br>(0 - 0)           | 2<br>(1 - 3)             | 2<br>(2 - 4)             | 5<br>(3 - 11)            |

Web Table 31- Venezuela deaths with 95% UI by age, sex, and cause in 2013

| Cause                                           | Both Sexes, All Ages        | Both Sexes, 0-4 Years | Both Sexes, 5-14 Years | Both Sexes, 15-49 Years     | Both Sexes, 50-69 Years  | Both Sexes, 70-80 Years  |
|-------------------------------------------------|-----------------------------|-----------------------|------------------------|-----------------------------|--------------------------|--------------------------|
| Pyoderma                                        | 26<br>(20 - 34)             | 3<br>(2 - 6)          | 0<br>(0 - 1)           | 4<br>(3 - 5)                | 6<br>(4 - 8)             | 13<br>(9 - 20)           |
| Decubitus ulcer                                 | 26<br>(18 - 52)             | 0<br>(0 - 0)          | 0<br>(0 - 0)           | 2<br>(2 - 5)                | 3<br>(2 - 6)             | 20<br>(12 - 41)          |
| Other skin and subcutaneous diseases            | 8<br>(6 - 15)               | 2<br>(1 - 4)          | 0<br>(0 - 1)           | 2<br>(2 - 4)                | 2<br>(1 - 3)             | 2<br>(1 - 6)             |
| Sudden infant death syndrome                    | 18<br>(8 - 31)              | 18<br>(8 - 31)        | --                     | --                          | --                       | --                       |
| Injuries                                        | 27,172<br>(24,053 - 30,254) | 760<br>(616 - 933)    | 703<br>(636 - 770)     | 20,088<br>(17,558 - 22,526) | 3,492<br>(2,985 - 4,056) | 2,127<br>(1,892 - 2,415) |
| Transport injuries                              | 8,110<br>(7,049 - 9,822)    | 157<br>(114 - 208)    | 299<br>(256 - 348)     | 5,625<br>(4,744 - 7,032)    | 1,425<br>(1,196 - 1,691) | 604<br>(518 - 724)       |
| Road injuries                                   | 7,889<br>(6,856 - 9,586)    | 152<br>(110 - 201)    | 289<br>(248 - 337)     | 5,471<br>(4,601 - 6,879)    | 1,384<br>(1,164 - 1,650) | 592<br>(509 - 710)       |
| Pedestrian road injuries                        | 2,751<br>(2,213 - 3,658)    | 96<br>(68 - 130)      | 172<br>(142 - 208)     | 1,493<br>(1,099 - 2,185)    | 618<br>(491 - 807)       | 373<br>(307 - 467)       |
| Cyclist road injuries                           | 489<br>(373 - 619)          | 7<br>(4 - 12)         | 22<br>(16 - 30)        | 255<br>(193 - 346)          | 167<br>(118 - 225)       | 37<br>(25 - 52)          |
| Motorcyclist road injuries                      | 915<br>(625 - 1,280)        | 4<br>(3 - 6)          | 10<br>(6 - 16)         | 759<br>(505 - 1,082)        | 121<br>(78 - 168)        | 20<br>(13 - 30)          |
| Motor vehicle road injuries                     | 3,652<br>(3,002 - 4,463)    | 43<br>(28 - 62)       | 79<br>(58 - 103)       | 2,901<br>(2,364 - 3,635)    | 469<br>(350 - 591)       | 159<br>(114 - 202)       |
| Other road injuries                             | 81<br>(57 - 150)            | 2<br>(1 - 3)          | 5<br>(3 - 9)           | 63<br>(42 - 118)            | 8<br>(5 - 13)            | 3<br>(2 - 6)             |
| Other transport injuries                        | 221<br>(166 - 275)          | 5<br>(3 - 7)          | 10<br>(7 - 14)         | 153<br>(112 - 198)          | 41<br>(26 - 53)          | 12<br>(7 - 17)           |
| Unintentional injuries                          | 4,697<br>(4,081 - 5,619)    | 513<br>(398 - 689)    | 228<br>(194 - 279)     | 2,076<br>(1,662 - 2,728)    | 739<br>(637 - 891)       | 1,141<br>(977 - 1,340)   |
| Falls                                           | 1,203<br>(1,016 - 1,480)    | 22<br>(15 - 33)       | 22<br>(16 - 29)        | 272<br>(216 - 411)          | 246<br>(199 - 306)       | 641<br>(497 - 810)       |
| Drowning                                        | 865<br>(626 - 1,387)        | 92<br>(59 - 183)      | 97<br>(73 - 154)       | 548<br>(354 - 917)          | 93<br>(67 - 153)         | 35<br>(27 - 50)          |
| Fire, heat, and hot substances                  | 201<br>(164 - 251)          | 23<br>(16 - 34)       | 10<br>(7 - 14)         | 80<br>(61 - 113)            | 32<br>(25 - 42)          | 55<br>(40 - 70)          |
| Poisonings                                      | 115<br>(92 - 174)           | 9<br>(6 - 14)         | 4<br>(3 - 6)           | 60<br>(45 - 104)            | 20<br>(15 - 30)          | 21<br>(14 - 29)          |
| Exposure to mechanical forces                   | 830<br>(666 - 1,136)        | 23<br>(16 - 36)       | 43<br>(33 - 60)        | 635<br>(482 - 891)          | 97<br>(76 - 135)         | 32<br>(25 - 42)          |
| Unintentional firearm injuries                  | 587<br>(431 - 786)          | 5<br>(3 - 8)          | 26<br>(17 - 38)        | 487<br>(341 - 681)          | 55<br>(35 - 78)          | 15<br>(10 - 20)          |
| Unintentional suffocation                       | 48<br>(37 - 73)             | 9<br>(5 - 16)         | 4<br>(3 - 8)           | 20<br>(14 - 29)             | 8<br>(5 - 13)            | 7<br>(4 - 13)            |
| Other exposure to mechanical forces             | 196<br>(149 - 443)          | 9<br>(5 - 17)         | 13<br>(9 - 25)         | 128<br>(90 - 316)           | 35<br>(25 - 69)          | 11<br>(8 - 17)           |
| Adverse effects of medical treatment            | 371<br>(289 - 528)          | 16<br>(11 - 31)       | 5<br>(3 - 8)           | 77<br>(57 - 116)            | 102<br>(75 - 157)        | 171<br>(128 - 251)       |
| Animal contact                                  | 101<br>(35 - 126)           | 8<br>(2 - 12)         | 7<br>(3 - 10)          | 36<br>(14 - 46)             | 27<br>(8 - 37)           | 24<br>(5 - 34)           |
| Venomous animal contact                         | 86<br>(28 - 107)            | 7<br>(2 - 11)         | 5<br>(2 - 7)           | 30<br>(11 - 39)             | 23<br>(7 - 32)           | 20<br>(4 - 29)           |
| Non-venomous animal contact                     | 16<br>(6 - 21)              | 1<br>(0 - 2)          | 2<br>(1 - 2)           | 5<br>(2 - 7)                | 4<br>(1 - 6)             | 4<br>(1 - 7)             |
| Foreign body                                    | 620<br>(438 - 853)          | 300<br>(201 - 428)    | 21<br>(14 - 29)        | 99<br>(62 - 139)            | 70<br>(43 - 101)         | 130<br>(87 - 199)        |
| Pulmonary aspiration and foreign body in airway | 614<br>(430 - 845)          | 299<br>(201 - 428)    | 21<br>(13 - 29)        | 96<br>(59 - 135)            | 68<br>(41 - 98)          | 129<br>(86 - 198)        |
| Foreign body in other body part                 | 6<br>(5 - 10)               | 1<br>(0 - 1)          | 1<br>(0 - 1)           | 2<br>(2 - 4)                | 2<br>(1 - 3)             | 1<br>(0 - 2)             |
| Other unintentional injuries                    | 391<br>(294 - 501)          | 20<br>(12 - 33)       | 18<br>(10 - 31)        | 268<br>(182 - 372)          | 51<br>(31 - 80)          | 32<br>(19 - 48)          |
| Self-harm and interpersonal violence            | 14,365<br>(10,968 - 16,655) | 90<br>(41 - 149)      | 176<br>(105 - 240)     | 12,388<br>(9,449 - 14,426)  | 1,328<br>(932 - 1,763)   | 382<br>(277 - 502)       |
| Self-harm                                       | 2,922<br>(2,433 - 3,582)    | --                    | 31<br>(20 - 44)        | 2,261<br>(1,795 - 2,828)    | 432<br>(349 - 597)       | 199<br>(161 - 274)       |
| Interpersonal violence                          | 11,443<br>(7,889 - 13,607)  | 90<br>(41 - 149)      | 146<br>(71 - 212)      | 10,127<br>(7,103 - 12,093)  | 897<br>(493 - 1,303)     | 183<br>(88 - 286)        |
| Assault by firearm                              | 9,933<br>(6,684 - 11,895)   | 42<br>(17 - 75)       | 119<br>(56 - 174)      | 8,993<br>(6,137 - 10,764)   | 669<br>(354 - 983)       | 110<br>(50 - 183)        |
| Assault by sharp object                         | 926<br>(504 - 1,627)        | 8<br>(4 - 15)         | 7<br>(3 - 13)          | 764<br>(430 - 1,386)        | 120<br>(53 - 224)        | 27<br>(12 - 48)          |
| Assault by other means                          | 583<br>(323 - 883)          | 40<br>(16 - 70)       | 20<br>(8 - 34)         | 370<br>(203 - 565)          | 108<br>(50 - 184)        | 46<br>(21 - 76)          |

Web Table 31- Venezuela deaths with 95% UI by age, sex, and cause in 2013

| Cause                                                             | Males, All Ages              | Males, 0-4 Years         | Males, 5-14 Years  | Males, 15-49 Years          | Males, 50-69 Years          | Males, 70-80 Years          |
|-------------------------------------------------------------------|------------------------------|--------------------------|--------------------|-----------------------------|-----------------------------|-----------------------------|
| All causes                                                        | 94,033<br>(85,316 - 102,153) | 4,477<br>(4,077 - 4,875) | 940<br>(879 - 993) | 27,321<br>(24,035 - 30,469) | 26,708<br>(23,674 - 29,608) | 34,588<br>(32,348 - 36,674) |
| Communicable, maternal, neonatal, and nutritional diseases        | 8,995<br>(7,939 - 11,708)    | 2,866<br>(2,546 - 3,196) | 152<br>(122 - 191) | 1,762<br>(1,492 - 2,267)    | 1,565<br>(1,224 - 2,525)    | 2,649<br>(2,049 - 4,054)    |
| HIV/AIDS and tuberculosis                                         | 1,518<br>(1,263 - 2,010)     | 4<br>(3 - 5)             | 3<br>(2 - 5)       | 883<br>(707 - 1,247)        | 406<br>(310 - 552)          | 222<br>(176 - 304)          |
| Tuberculosis                                                      | 527<br>(440 - 672)           | 3<br>(2 - 5)             | 3<br>(2 - 3)       | 140<br>(110 - 182)          | 184<br>(147 - 238)          | 197<br>(153 - 280)          |
| HIV/AIDS                                                          | 992<br>(770 - 1,470)         | 1<br>(0 - 1)             | 1<br>(0 - 2)       | 743<br>(574 - 1,087)        | 222<br>(137 - 359)          | 25<br>(12 - 46)             |
| HIV/AIDS resulting in mycobacterial infection                     | 62<br>(43 - 95)              | 0<br>(0 - 0)             | 0<br>(0 - 0)       | 46<br>(32 - 70)             | 14<br>(8 - 25)              | 2<br>(1 - 3)                |
| HIV/AIDS resulting in other diseases                              | 930<br>(722 - 1,376)         | 1<br>(0 - 1)             | 1<br>(0 - 2)       | 697<br>(539 - 1,022)        | 208<br>(129 - 334)          | 23<br>(11 - 43)             |
| Diarrhea, lower respiratory, and other common infectious diseases | 3,911<br>(3,383 - 4,498)     | 846<br>(669 - 1,056)     | 109<br>(81 - 143)  | 634<br>(509 - 825)          | 658<br>(524 - 809)          | 1,664<br>(1,289 - 2,097)    |
| Diarrheal diseases                                                | 653<br>(504 - 829)           | 268<br>(166 - 402)       | 10<br>(6 - 16)     | 72<br>(55 - 94)             | 96<br>(68 - 135)            | 207<br>(128 - 318)          |
| Intestinal infectious diseases                                    | 143<br>(68 - 254)            | 43<br>(20 - 81)          | 41<br>(19 - 74)    | 49<br>(20 - 100)            | 7<br>(3 - 14)               | 2<br>(1 - 5)                |
| Typhoid fever                                                     | 109<br>(51 - 202)            | 32<br>(14 - 60)          | 32<br>(15 - 58)    | 38<br>(14 - 81)             | 5<br>(2 - 10)               | 2<br>(1 - 3)                |
| Paratyphoid fever                                                 | 29<br>(13 - 54)              | 9<br>(4 - 19)            | 9<br>(3 - 17)      | 10<br>(4 - 21)              | 1<br>(0 - 3)                | 0<br>(0 - 1)                |
| Other intestinal infectious diseases                              | 5<br>(1 - 11)                | 2<br>(0 - 6)             | 0<br>(0 - 2)       | 1<br>(0 - 5)                | 1<br>(0 - 3)                | 0<br>(0 - 2)                |
| Lower respiratory infections                                      | 2,803<br>(2,339 - 3,367)     | 432<br>(301 - 592)       | 35<br>(23 - 50)    | 405<br>(311 - 552)          | 506<br>(387 - 642)          | 1,425<br>(1,072 - 1,856)    |
| Upper respiratory infections                                      | 4<br>(1 - 7)                 | 0<br>(0 - 1)             | 0<br>(0 - 0)       | 1<br>(0 - 4)                | 1<br>(0 - 3)                | 1<br>(0 - 4)                |
| Otitis media                                                      | 2<br>(2 - 2)                 | 0<br>(0 - 0)             | 0<br>(0 - 0)       | 1<br>(1 - 1)                | 0<br>(0 - 0)                | 0<br>(0 - 0)                |
| Meningitis                                                        | 196<br>(162 - 241)           | 67<br>(39 - 105)         | 12<br>(9 - 15)     | 69<br>(55 - 90)             | 30<br>(24 - 38)             | 18<br>(13 - 23)             |
| Pneumococcal meningitis                                           | 69<br>(54 - 86)              | 20<br>(11 - 32)          | 4<br>(3 - 6)       | 27<br>(18 - 37)             | 11<br>(8 - 16)              | 7<br>(4 - 9)                |
| H influenzae type B meningitis                                    | 40<br>(29 - 56)              | 26<br>(15 - 42)          | 3<br>(2 - 4)       | 7<br>(4 - 12)               | 2<br>(2 - 4)                | 2<br>(1 - 3)                |
| Meningococcal meningitis                                          | 23<br>(17 - 30)              | 7<br>(4 - 11)            | 2<br>(1 - 3)       | 9<br>(6 - 13)               | 3<br>(2 - 5)                | 2<br>(1 - 4)                |
| Other meningitis                                                  | 64<br>(48 - 83)              | 13<br>(7 - 24)           | 3<br>(1 - 4)       | 26<br>(16 - 38)             | 14<br>(9 - 19)              | 7<br>(5 - 11)               |
| Encephalitis                                                      | 71<br>(52 - 117)             | 15<br>(8 - 29)           | 9<br>(5 - 19)      | 29<br>(19 - 51)             | 13<br>(9 - 25)              | 5<br>(3 - 10)               |
| Diphtheria                                                        | 2<br>(0 - 8)                 | 1<br>(0 - 6)             | 0<br>(0 - 2)       | 1<br>(0 - 4)                | 0<br>(0 - 1)                | --                          |
| Whooping cough                                                    | 18<br>(4 - 72)               | 17<br>(3 - 71)           | 1<br>(0 - 1)       | 1<br>(1 - 1)                | 0<br>(0 - 0)                | --                          |
| Tetanus                                                           | 8<br>(6 - 13)                | 1<br>(0 - 1)             | 0<br>(0 - 1)       | 2<br>(2 - 4)                | 2<br>(1 - 4)                | 2<br>(1 - 4)                |
| Measles                                                           | 0<br>(0 - 0)                 | 0<br>(0 - 0)             | 0<br>(0 - 0)       | 0<br>(0 - 0)                | 0<br>(0 - 0)                | --                          |
| Varicella and herpes zoster                                       | 12<br>(4 - 30)               | 3<br>(0 - 11)            | 1<br>(0 - 3)       | 3<br>(0 - 8)                | 1<br>(0 - 5)                | 5<br>(0 - 22)               |
| Neglected tropical diseases and malaria                           | 990<br>(339 - 3,522)         | 20<br>(11 - 33)          | 11<br>(7 - 18)     | 116<br>(72 - 311)           | 357<br>(97 - 1,270)         | 486<br>(119 - 1,908)        |
| Malaria                                                           | 12<br>(7 - 17)               | 1<br>(0 - 2)             | 1<br>(0 - 1)       | 7<br>(4 - 11)               | 2<br>(1 - 4)                | 1<br>(0 - 3)                |
| Chagas disease                                                    | 852<br>(197 - 3,398)         | 0<br>(0 - 2)             | 1<br>(0 - 2)       | 57<br>(14 - 246)            | 327<br>(65 - 1,245)         | 467<br>(100 - 1,887)        |
| Leishmaniasis                                                     | 7<br>(5 - 8)                 | 2<br>(1 - 2)             | 0<br>(0 - 1)       | 3<br>(2 - 4)                | 1<br>(1 - 2)                | 1<br>(0 - 1)                |
| Visceral leishmaniasis                                            | 7<br>(5 - 8)                 | 2<br>(1 - 2)             | 0<br>(0 - 1)       | 3<br>(2 - 4)                | 1<br>(1 - 2)                | 1<br>(0 - 1)                |
| Schistosomiasis                                                   | 35<br>(26 - 46)              | 0<br>(0 - 0)             | 0<br>(0 - 1)       | 15<br>(10 - 21)             | 13<br>(7 - 19)              | 7<br>(4 - 12)               |
| Cysticercosis                                                     | 12<br>(10 - 13)              | 0<br>(0 - 0)             | 0<br>(0 - 0)       | 8<br>(7 - 10)               | 3<br>(2 - 3)                | 1<br>(1 - 1)                |
| Cystic echinococcosis                                             | 2<br>(1 - 2)                 | 0<br>(0 - 0)             | 0<br>(0 - 0)       | 1<br>(1 - 1)                | 0<br>(0 - 0)                | 0<br>(0 - 0)                |
| Dengue                                                            | 28<br>(19 - 34)              | 5<br>(2 - 7)             | 4<br>(2 - 5)       | 12<br>(8 - 14)              | 5<br>(3 - 6)                | 4<br>(2 - 6)                |
| Yellow fever                                                      | 1<br>(1 - 2)                 | 0<br>(0 - 0)             | 0<br>(0 - 1)       | 1<br>(0 - 1)                | 0<br>(0 - 0)                | 0<br>(0 - 0)                |
| Rabies                                                            | 2<br>(1 - 3)                 | 0<br>(0 - 0)             | 0<br>(0 - 1)       | 1<br>(1 - 1)                | 0<br>(0 - 1)                | 0<br>(0 - 0)                |
| Intestinal nematode infections                                    | 27<br>(14 - 45)              | 9<br>(2 - 21)            | 3<br>(0 - 10)      | 9<br>(2 - 19)               | 3<br>(0 - 10)               | 3<br>(0 - 9)                |
| Ascariasis                                                        | 27<br>(14 - 45)              | 9<br>(2 - 21)            | 3<br>(0 - 10)      | 9<br>(2 - 19)               | 3<br>(0 - 10)               | 3<br>(0 - 9)                |



Web Table 31- Venezuela deaths with 95% UI by age, sex, and cause in 2013

| Cause                                                            | Males, All Ages             | Males, 0-4 Years         | Males, 5-14 Years  | Males, 15-49 Years       | Males, 50-69 Years          | Males, 70-80 Years          |
|------------------------------------------------------------------|-----------------------------|--------------------------|--------------------|--------------------------|-----------------------------|-----------------------------|
| Other neglected tropical diseases                                | 13<br>(10 - 17)             | 3<br>(1 - 5)             | 1<br>(1 - 2)       | 4<br>(3 - 6)             | 2<br>(2 - 4)                | 2<br>(1 - 4)                |
| Maternal disorders                                               | --                          | --                       | --                 | --                       | --                          | --                          |
| Maternal hemorrhage                                              | --                          | --                       | --                 | --                       | --                          | --                          |
| Maternal sepsis and other maternal infections                    | --                          | --                       | --                 | --                       | --                          | --                          |
| Maternal hypertensive disorders                                  | --                          | --                       | --                 | --                       | --                          | --                          |
| Maternal obstructed labor                                        | --                          | --                       | --                 | --                       | --                          | --                          |
| Maternal abortive outcome                                        | --                          | --                       | --                 | --                       | --                          | --                          |
| Indirect maternal deaths                                         | --                          | --                       | --                 | --                       | --                          | --                          |
| Late maternal deaths                                             | --                          | --                       | --                 | --                       | --                          | --                          |
| Maternal deaths aggravated by HIV/AIDS                           | --                          | --                       | --                 | --                       | --                          | --                          |
| Other maternal disorders                                         | --                          | --                       | --                 | --                       | --                          | --                          |
| Neonatal disorders                                               | 1,689<br>(1,493 - 1,873)    | 1,689<br>(1,493 - 1,873) | --                 | --                       | --                          | --                          |
| Neonatal preterm birth complications                             | 825<br>(577 - 1,052)        | 825<br>(577 - 1,052)     | --                 | --                       | --                          | --                          |
| Neonatal encephalopathy due to birth asphyxia and trauma         | 322<br>(195 - 451)          | 322<br>(195 - 451)       | --                 | --                       | --                          | --                          |
| Neonatal sepsis and other neonatal infections                    | 423<br>(212 - 712)          | 423<br>(212 - 712)       | --                 | --                       | --                          | --                          |
| Hemolytic disease and other neonatal jaundice                    | 10<br>(4 - 25)              | 10<br>(4 - 25)           | --                 | --                       | --                          | --                          |
| Other neonatal disorders                                         | 109<br>(71 - 183)           | 109<br>(71 - 183)        | --                 | --                       | --                          | --                          |
| Nutritional deficiencies                                         | 509<br>(374 - 886)          | 117<br>(75 - 185)        | 11<br>(7 - 16)     | 66<br>(46 - 120)         | 84<br>(59 - 147)            | 231<br>(152 - 427)          |
| Protein-energy malnutrition                                      | 431<br>(302 - 731)          | 112<br>(70 - 175)        | 9<br>(6 - 15)      | 50<br>(32 - 90)          | 67<br>(45 - 116)            | 193<br>(125 - 354)          |
| Iodine deficiency                                                | 1<br>(0 - 3)                | 0<br>(0 - 0)             | 0<br>(0 - 0)       | 0<br>(0 - 2)             | 0<br>(0 - 1)                | 0<br>(0 - 1)                |
| Iron-deficiency anemia                                           | 51<br>(20 - 114)            | 3<br>(1 - 10)            | 1<br>(0 - 2)       | 11<br>(4 - 25)           | 11<br>(4 - 25)              | 25<br>(9 - 63)              |
| Other nutritional deficiencies                                   | 26<br>(12 - 72)             | 2<br>(1 - 8)             | 0<br>(0 - 1)       | 5<br>(2 - 14)            | 6<br>(2 - 17)               | 12<br>(4 - 37)              |
| Other communicable, maternal, neonatal, and nutritional diseases | 377<br>(212 - 580)          | 190<br>(44 - 368)        | 18<br>(8 - 32)     | 63<br>(48 - 93)          | 60<br>(46 - 82)             | 45<br>(33 - 67)             |
| Sexually transmitted diseases excluding HIV                      | 202<br>(45 - 388)           | 179<br>(33 - 353)        | 13<br>(2 - 26)     | 2<br>(1 - 3)             | 5<br>(2 - 8)                | 4<br>(2 - 7)                |
| Syphilis                                                         | 199<br>(42 - 385)           | 179<br>(33 - 353)        | 13<br>(2 - 26)     | 1<br>(1 - 2)             | 3<br>(2 - 6)                | 3<br>(1 - 6)                |
| Chlamydial infection                                             | --                          | --                       | --                 | --                       | --                          | --                          |
| Gonococcal infection                                             | 2<br>(1 - 3)                | --                       | 0<br>(0 - 0)       | 0<br>(0 - 1)             | 1<br>(0 - 1)                | 0<br>(0 - 1)                |
| Other sexually transmitted diseases                              | 1<br>(1 - 2)                | --                       | 0<br>(0 - 0)       | 0<br>(0 - 1)             | 0<br>(0 - 1)                | 0<br>(0 - 0)                |
| Hepatitis                                                        | 76<br>(60 - 94)             | 3<br>(2 - 5)             | 2<br>(1 - 3)       | 25<br>(18 - 35)          | 29<br>(20 - 40)             | 18<br>(11 - 26)             |
| Acute hepatitis A                                                | 19<br>(7 - 32)              | 2<br>(1 - 4)             | 1<br>(1 - 2)       | 10<br>(4 - 18)           | 4<br>(1 - 10)               | 1<br>(0 - 3)                |
| Acute hepatitis B                                                | 50<br>(34 - 69)             | 1<br>(0 - 2)             | 0<br>(0 - 1)       | 12<br>(5 - 20)           | 23<br>(14 - 33)             | 14<br>(8 - 22)              |
| Acute hepatitis C                                                | 7<br>(1 - 19)               | --                       | 0<br>(0 - 1)       | 3<br>(0 - 8)             | 2<br>(0 - 6)                | 2<br>(0 - 7)                |
| Other infectious diseases                                        | 99<br>(75 - 166)            | 9<br>(6 - 16)            | 3<br>(2 - 6)       | 36<br>(26 - 63)          | 26<br>(18 - 45)             | 24<br>(16 - 47)             |
| Non-communicable diseases                                        | 61,885<br>(56,172 - 67,552) | 1,185<br>(926 - 1,418)   | 316<br>(275 - 358) | 7,427<br>(6,344 - 8,721) | 22,264<br>(19,551 - 24,887) | 30,694<br>(28,458 - 32,740) |
| Neoplasms                                                        | 13,940<br>(12,297 - 15,585) | 97<br>(69 - 128)         | 147<br>(124 - 172) | 1,776<br>(1,484 - 2,091) | 5,655<br>(4,880 - 6,437)    | 6,264<br>(5,365 - 7,085)    |
| Esophageal cancer                                                | 357<br>(284 - 475)          | --                       | --                 | 32<br>(25 - 45)          | 168<br>(129 - 226)          | 157<br>(122 - 212)          |
| Stomach cancer                                                   | 1,720<br>(1,490 - 1,942)    | --                       | --                 | 196<br>(160 - 238)       | 742<br>(617 - 874)          | 782<br>(656 - 911)          |
| Liver cancer                                                     | 612<br>(524 - 710)          | --                       | 2<br>(1 - 2)       | 66<br>(54 - 82)          | 282<br>(228 - 344)          | 262<br>(213 - 325)          |
| Liver cancer due to hepatitis B                                  | 175<br>(91 - 283)           | --                       | 1<br>(0 - 1)       | 28<br>(17 - 40)          | 90<br>(41 - 145)            | 56<br>(24 - 114)            |
| Liver cancer due to hepatitis C                                  | 285<br>(183 - 388)          | --                       | 0<br>(0 - 1)       | 26<br>(15 - 37)          | 131<br>(82 - 185)           | 128<br>(70 - 180)           |

Web Table 31- Venezuela deaths with 95% UI by age, sex, and cause in 2013

| Cause                                | Males, All Ages             | Males, 0-4 Years | Males, 5-14 Years | Males, 15-49 Years       | Males, 50-69 Years        | Males, 70-80 Years          |
|--------------------------------------|-----------------------------|------------------|-------------------|--------------------------|---------------------------|-----------------------------|
| Liver cancer due to alcohol use      | 125<br>(76 - 198)           | --               | --                | 7<br>(3 - 15)            | 50<br>(27 - 87)           | 68<br>(41 - 107)            |
| Liver cancer due to other causes     | 27<br>(16 - 45)             | --               | 1<br>(0 - 1)      | 5<br>(3 - 10)            | 12<br>(6 - 21)            | 10<br>(5 - 17)              |
| Larynx cancer                        | 403<br>(280 - 498)          | --               | --                | 36<br>(27 - 50)          | 219<br>(151 - 279)        | 149<br>(97 - 188)           |
| Tracheal, bronchus and lung cancer   | 2,592<br>(2,227 - 2,967)    | --               | --                | 241<br>(196 - 296)       | 1,320<br>(1,087 - 1,580)  | 1,031<br>(866 - 1,214)      |
| Breast cancer                        | 22<br>(14 - 70)             | --               | --                | 4<br>(2 - 12)            | 8<br>(5 - 27)             | 9<br>(5 - 32)               |
| Cervical cancer                      | --                          | --               | --                | --                       | --                        | --                          |
| Uterine cancer                       | --                          | --               | --                | --                       | --                        | --                          |
| Prostate cancer                      | 2,670<br>(1,653 - 3,555)    | --               | --                | 28<br>(17 - 41)          | 672<br>(424 - 948)        | 1,971<br>(1,174 - 2,732)    |
| Colon and rectum cancer              | 1,025<br>(890 - 1,167)      | --               | --                | 150<br>(125 - 182)       | 429<br>(359 - 508)        | 445<br>(372 - 530)          |
| Lip and oral cavity cancer           | 201<br>(141 - 247)          | --               | --                | 28<br>(21 - 39)          | 101<br>(68 - 129)         | 71<br>(47 - 89)             |
| Nasopharynx cancer                   | 40<br>(34 - 47)             | --               | 0<br>(0 - 0)      | 13<br>(10 - 16)          | 19<br>(15 - 23)           | 8<br>(7 - 10)               |
| Other pharynx cancer                 | 101<br>(83 - 125)           | --               | --                | 15<br>(12 - 22)          | 55<br>(44 - 69)           | 31<br>(24 - 37)             |
| Gallbladder and biliary tract cancer | 147<br>(116 - 263)          | --               | --                | 13<br>(10 - 20)          | 64<br>(48 - 117)          | 71<br>(53 - 134)            |
| Pancreatic cancer                    | 564<br>(485 - 647)          | --               | --                | 71<br>(58 - 88)          | 273<br>(225 - 326)        | 220<br>(180 - 263)          |
| Malignant skin melanoma              | 84<br>(47 - 147)            | --               | --                | 20<br>(11 - 39)          | 32<br>(18 - 58)           | 31<br>(17 - 55)             |
| Non-melanoma skin cancer             | 213<br>(146 - 324)          | --               | --                | 22<br>(15 - 36)          | 69<br>(47 - 103)          | 121<br>(78 - 190)           |
| Ovarian cancer                       | --                          | --               | --                | --                       | --                        | --                          |
| Testicular cancer                    | 35<br>(12 - 56)             | --               | --                | 25<br>(8 - 42)           | 5<br>(2 - 8)              | 5<br>(2 - 8)                |
| Kidney cancer                        | 355<br>(301 - 407)          | 3<br>(2 - 4)     | 2<br>(1 - 2)      | 59<br>(48 - 71)          | 187<br>(154 - 225)        | 104<br>(85 - 124)           |
| Bladder cancer                       | 232<br>(196 - 299)          | --               | --                | 12<br>(9 - 15)           | 82<br>(67 - 107)          | 138<br>(112 - 179)          |
| Brain and nervous system cancer      | 250<br>(94 - 327)           | 8<br>(2 - 14)    | 14<br>(4 - 21)    | 79<br>(31 - 109)         | 101<br>(35 - 139)         | 48<br>(17 - 67)             |
| Thyroid cancer                       | 44<br>(30 - 53)             | --               | 0<br>(0 - 0)      | 7<br>(5 - 8)             | 19<br>(13 - 24)           | 18<br>(11 - 23)             |
| Mesothelioma                         | 12<br>(10 - 14)             | --               | --                | 3<br>(2 - 4)             | 6<br>(5 - 8)              | 4<br>(3 - 5)                |
| Hodgkin lymphoma                     | 64<br>(19 - 91)             | 1<br>(0 - 2)     | 2<br>(1 - 4)      | 28<br>(7 - 40)           | 22<br>(6 - 33)            | 11<br>(3 - 17)              |
| Non-Hodgkin lymphoma                 | 499<br>(400 - 683)          | 7<br>(4 - 14)    | 13<br>(8 - 22)    | 133<br>(102 - 214)       | 197<br>(144 - 290)        | 148<br>(101 - 208)          |
| Multiple myeloma                     | 174<br>(123 - 229)          | --               | --                | 24<br>(16 - 33)          | 90<br>(63 - 123)          | 60<br>(41 - 86)             |
| Leukemia                             | 549<br>(478 - 624)          | 35<br>(22 - 52)  | 64<br>(49 - 81)   | 195<br>(158 - 239)       | 132<br>(108 - 158)        | 123<br>(99 - 148)           |
| Other neoplasms                      | 975<br>(779 - 1,138)        | 44<br>(23 - 61)  | 50<br>(33 - 63)   | 276<br>(219 - 370)       | 359<br>(270 - 446)        | 246<br>(164 - 314)          |
| Cardiovascular diseases              | 26,937<br>(24,259 - 29,628) | 25<br>(19 - 32)  | 21<br>(17 - 27)   | 2,784<br>(2,323 - 3,307) | 9,642<br>(8,423 - 10,838) | 14,465<br>(13,203 - 15,686) |
| Rheumatic heart disease              | 69<br>(48 - 103)            | 0<br>(0 - 1)     | 1<br>(1 - 2)      | 26<br>(17 - 45)          | 22<br>(14 - 33)           | 19<br>(12 - 29)             |
| Ischemic heart disease               | 16,651<br>(14,530 - 18,744) | 4<br>(3 - 6)     | 5<br>(3 - 7)      | 1,736<br>(1,419 - 2,121) | 6,401<br>(5,403 - 7,325)  | 8,505<br>(7,379 - 9,614)    |
| Cerebrovascular disease              | 6,458<br>(5,245 - 7,893)    | 6<br>(4 - 8)     | 8<br>(6 - 10)     | 656<br>(484 - 875)       | 2,053<br>(1,599 - 2,573)  | 3,736<br>(2,975 - 4,574)    |
| Ischemic stroke                      | 1,903<br>(1,247 - 3,221)    | 1<br>(1 - 2)     | 1<br>(1 - 2)      | 92<br>(60 - 160)         | 484<br>(324 - 823)        | 1,325<br>(813 - 2,263)      |
| Hemorrhagic stroke                   | 4,555<br>(3,034 - 5,822)    | 5<br>(3 - 7)     | 7<br>(4 - 9)      | 564<br>(391 - 752)       | 1,568<br>(1,085 - 2,040)  | 2,411<br>(1,446 - 3,242)    |
| Hypertensive heart disease           | 2,162<br>(1,428 - 3,184)    | 1<br>(1 - 2)     | 1<br>(1 - 2)      | 118<br>(71 - 194)        | 645<br>(420 - 979)        | 1,397<br>(874 - 2,033)      |
| Cardiomyopathy and myocarditis       | 493<br>(376 - 758)          | 5<br>(3 - 7)     | 2<br>(2 - 4)      | 98<br>(71 - 151)         | 176<br>(132 - 271)        | 212<br>(148 - 360)          |
| Atrial fibrillation and flutter      | 65<br>(47 - 92)             | --               | --                | 2<br>(1 - 3)             | 16<br>(11 - 21)           | 47<br>(32 - 74)             |
| Aortic aneurysm                      | 338<br>(265 - 509)          | --               | --                | 26<br>(19 - 39)          | 115<br>(86 - 175)         | 197<br>(151 - 301)          |
| Peripheral vascular disease          | 47<br>(34 - 65)             | --               | --                | 2<br>(1 - 2)             | 9<br>(6 - 12)             | 37<br>(25 - 54)             |
| Endocarditis                         | 56<br>(36 - 85)             | 4<br>(3 - 7)     | 1<br>(1 - 2)      | 18<br>(11 - 28)          | 16<br>(10 - 25)           | 17<br>(10 - 27)             |

Web Table 31- Venezuela deaths with 95% UI by age, sex, and cause in 2013

| Cause                                               | Males, All Ages          | Males, 0-4 Years | Males, 5-14 Years | Males, 15-49 Years | Males, 50-69 Years       | Males, 70-80 Years       |
|-----------------------------------------------------|--------------------------|------------------|-------------------|--------------------|--------------------------|--------------------------|
| Other cardiovascular and circulatory diseases       | 598<br>(458 - 932)       | 4<br>(3 - 7)     | 2<br>(2 - 3)      | 102<br>(73 - 165)  | 191<br>(137 - 282)       | 298<br>(216 - 460)       |
| Chronic respiratory diseases                        | 3,672<br>(2,986 - 4,247) | 28<br>(19 - 42)  | 8<br>(6 - 10)     | 220<br>(174 - 300) | 950<br>(770 - 1,152)     | 2,467<br>(1,931 - 2,866) |
| Chronic obstructive pulmonary disease               | 3,208<br>(2,591 - 3,691) | 14<br>(9 - 21)   | 3<br>(2 - 4)      | 145<br>(115 - 199) | 803<br>(648 - 983)       | 2,243<br>(1,757 - 2,612) |
| Pneumoconiosis                                      | 62<br>(42 - 96)          | 0<br>(0 - 0)     | 0<br>(0 - 0)      | 4<br>(3 - 6)       | 25<br>(16 - 38)          | 33<br>(20 - 55)          |
| Silicosis                                           | 2<br>(1 - 3)             | 0<br>(0 - 0)     | 0<br>(0 - 0)      | 1<br>(0 - 1)       | 1<br>(0 - 1)             | 1<br>(0 - 1)             |
| Asbestosis                                          | 12<br>(8 - 19)           | 0<br>(0 - 0)     | 0<br>(0 - 0)      | 1<br>(0 - 1)       | 6<br>(4 - 10)            | 6<br>(3 - 9)             |
| Coal workers pneumoconiosis                         | 8<br>(5 - 12)            | 0<br>(0 - 0)     | 0<br>(0 - 0)      | 1<br>(0 - 1)       | 3<br>(2 - 5)             | 4<br>(3 - 7)             |
| Other pneumoconiosis                                | 40<br>(27 - 62)          | 0<br>(0 - 0)     | 0<br>(0 - 0)      | 2<br>(1 - 4)       | 15<br>(10 - 24)          | 22<br>(14 - 38)          |
| Asthma                                              | 175<br>(139 - 219)       | 9<br>(5 - 17)    | 4<br>(3 - 5)      | 46<br>(35 - 64)    | 52<br>(38 - 69)          | 64<br>(43 - 85)          |
| Interstitial lung disease and pulmonary sarcoidosis | 176<br>(117 - 262)       | 1<br>(0 - 3)     | 1<br>(0 - 1)      | 17<br>(12 - 27)    | 60<br>(39 - 92)          | 97<br>(59 - 149)         |
| Other chronic respiratory diseases                  | 51<br>(37 - 67)          | 4<br>(2 - 6)     | 1<br>(0 - 1)      | 6<br>(4 - 9)       | 10<br>(7 - 15)           | 30<br>(19 - 45)          |
| Cirrhosis                                           | 2,925<br>(2,533 - 3,326) | 4<br>(3 - 6)     | 5<br>(4 - 6)      | 720<br>(573 - 876) | 1,566<br>(1,331 - 1,818) | 630<br>(530 - 735)       |
| Cirrhosis due to hepatitis B                        | 75<br>(24 - 132)         | 0<br>(0 - 0)     | 0<br>(0 - 0)      | 18<br>(4 - 33)     | 40<br>(13 - 73)          | 17<br>(6 - 29)           |
| Cirrhosis due to hepatitis C                        | 803<br>(541 - 1,092)     | 0<br>(0 - 1)     | 1<br>(0 - 1)      | 169<br>(91 - 261)  | 431<br>(280 - 599)       | 202<br>(122 - 279)       |
| Cirrhosis due to alcohol use                        | 1,712<br>(1,344 - 2,097) | --               | --                | 402<br>(294 - 522) | 937<br>(718 - 1,171)     | 374<br>(288 - 468)       |
| Cirrhosis due to other causes                       | 335<br>(205 - 501)       | 3<br>(2 - 5)     | 4<br>(3 - 5)      | 132<br>(82 - 193)  | 158<br>(82 - 247)        | 38<br>(20 - 57)          |
| Digestive diseases                                  | 1,584<br>(1,350 - 1,932) | 12<br>(8 - 17)   | 11<br>(9 - 14)    | 301<br>(239 - 434) | 515<br>(424 - 639)       | 745<br>(617 - 882)       |
| Peptic ulcer disease                                | 420<br>(315 - 573)       | 0<br>(0 - 1)     | 1<br>(0 - 1)      | 69<br>(48 - 114)   | 146<br>(105 - 204)       | 203<br>(140 - 279)       |
| Gastritis and duodenitis                            | 86<br>(49 - 143)         | 0<br>(0 - 1)     | 0<br>(0 - 1)      | 17<br>(10 - 31)    | 24<br>(13 - 42)          | 44<br>(23 - 75)          |
| Appendicitis                                        | 84<br>(57 - 137)         | 1<br>(1 - 3)     | 3<br>(2 - 4)      | 36<br>(23 - 63)    | 24<br>(15 - 38)          | 20<br>(12 - 36)          |
| Paralytic ileus and intestinal obstruction          | 169<br>(38 - 272)        | 5<br>(1 - 8)     | 3<br>(1 - 5)      | 25<br>(6 - 41)     | 49<br>(11 - 83)          | 87<br>(18 - 154)         |
| Inguinal, femoral, and abdominal hernia             | 117<br>(72 - 251)        | 1<br>(0 - 4)     | 1<br>(1 - 2)      | 16<br>(9 - 35)     | 35<br>(20 - 72)          | 64<br>(34 - 146)         |
| Inflammatory bowel disease                          | 19<br>(14 - 31)          | 0<br>(0 - 1)     | 0<br>(0 - 0)      | 6<br>(4 - 12)      | 5<br>(4 - 9)             | 6<br>(4 - 11)            |
| Vascular intestinal disorders                       | 256<br>(113 - 472)       | 1<br>(0 - 3)     | 1<br>(0 - 2)      | 24<br>(10 - 50)    | 76<br>(32 - 147)         | 153<br>(67 - 284)        |
| Gallbladder and biliary diseases                    | 119<br>(87 - 177)        | 0<br>(0 - 0)     | 0<br>(0 - 0)      | 19<br>(13 - 33)    | 41<br>(29 - 64)          | 58<br>(38 - 88)          |
| Pancreatitis                                        | 169<br>(108 - 251)       | 0<br>(0 - 1)     | 1<br>(0 - 1)      | 63<br>(40 - 97)    | 64<br>(41 - 95)          | 40<br>(24 - 59)          |
| Other digestive diseases                            | 145<br>(93 - 192)        | 2<br>(1 - 3)     | 1<br>(1 - 1)      | 25<br>(17 - 36)    | 49<br>(30 - 66)          | 69<br>(40 - 98)          |
| Neurological disorders                              | 3,145<br>(2,645 - 3,773) | 14<br>(10 - 20)  | 17<br>(12 - 23)   | 284<br>(216 - 418) | 355<br>(285 - 435)       | 2,475<br>(2,025 - 3,018) |
| Alzheimer disease and other dementias               | 2,502<br>(2,052 - 3,067) | --               | --                | 1<br>(0 - 3)       | 197<br>(140 - 258)       | 2,303<br>(1,865 - 2,847) |
| Parkinson disease                                   | 148<br>(117 - 191)       | --               | --                | 4<br>(3 - 5)       | 32<br>(24 - 45)          | 112<br>(84 - 151)        |
| Epilepsy                                            | 327<br>(254 - 468)       | 6<br>(4 - 10)    | 10<br>(7 - 15)    | 214<br>(155 - 332) | 67<br>(49 - 87)          | 29<br>(22 - 38)          |
| Multiple sclerosis                                  | 21<br>(10 - 35)          | --               | --                | 9<br>(4 - 16)      | 9<br>(4 - 15)            | 3<br>(1 - 5)             |
| Other neurological disorders                        | 147<br>(120 - 198)       | 7<br>(5 - 12)    | 6<br>(4 - 10)     | 55<br>(43 - 74)    | 50<br>(39 - 71)          | 28<br>(22 - 38)          |
| Mental and substance use disorders                  | 363<br>(278 - 574)       | 5<br>(2 - 8)     | 0<br>(0 - 0)      | 188<br>(141 - 296) | 131<br>(96 - 230)        | 39<br>(28 - 62)          |
| Schizophrenia                                       | 5<br>(3 - 10)            | --               | --                | 3<br>(2 - 5)       | 2<br>(1 - 3)             | 1<br>(0 - 1)             |
| Alcohol use disorders                               | 249<br>(185 - 468)       | --               | --                | 109<br>(78 - 218)  | 109<br>(77 - 208)        | 30<br>(20 - 52)          |
| Drug use disorders                                  | 108<br>(42 - 135)        | 5<br>(2 - 8)     | --                | 75<br>(27 - 98)    | 20<br>(8 - 27)           | 9<br>(3 - 12)            |
| Opioid use disorders                                | 24<br>(9 - 30)           | 1<br>(0 - 2)     | --                | 16<br>(6 - 22)     | 4<br>(2 - 5)             | 2<br>(1 - 3)             |
| Cocaine use disorders                               | 3<br>(1 - 3)             | 0<br>(0 - 0)     | --                | 2<br>(1 - 3)       | 0<br>(0 - 1)             | 0<br>(0 - 0)             |
| Amphetamine use disorders                           | 2<br>(1 - 3)             | 0<br>(0 - 0)     | --                | 1<br>(0 - 2)       | 0<br>(0 - 1)             | 0<br>(0 - 0)             |

Web Table 31- Venezuela deaths with 95% UI by age, sex, and cause in 2013

| Cause                                               | Males, All Ages          | Males, 0-4 Years     | Males, 5-14 Years | Males, 15-49 Years   | Males, 50-69 Years       | Males, 70-80 Years       |
|-----------------------------------------------------|--------------------------|----------------------|-------------------|----------------------|--------------------------|--------------------------|
| Other drug use disorders                            | 80<br>(31 - 100)         | 4<br>(1 - 6)         | --                | 55<br>(20 - 72)      | 15<br>(6 - 21)           | 7<br>(3 - 9)             |
| Eating disorders                                    | 1<br>(1 - 2)             | --                   | 0<br>(0 - 0)      | 1<br>(1 - 2)         | --                       | --                       |
| Anorexia nervosa                                    | 1<br>(1 - 2)             | --                   | 0<br>(0 - 0)      | 1<br>(1 - 2)         | --                       | --                       |
| Diabetes, urogenital, blood, and endocrine diseases | 7,944<br>(6,915 - 8,995) | 57<br>(40 - 115)     | 30<br>(24 - 41)   | 971<br>(804 - 1,196) | 3,364<br>(2,787 - 3,905) | 3,522<br>(3,025 - 4,034) |
| Diabetes mellitus                                   | 3,739<br>(3,232 - 4,285) | 4<br>(3 - 5)         | 3<br>(2 - 4)      | 357<br>(289 - 447)   | 1,643<br>(1,338 - 1,951) | 1,732<br>(1,439 - 2,037) |
| Acute glomerulonephritis                            | 3<br>(3 - 5)             | 0<br>(0 - 0)         | 0<br>(0 - 0)      | 1<br>(1 - 2)         | 1<br>(0 - 1)             | 1<br>(1 - 2)             |
| Chronic kidney disease                              | 3,610<br>(2,710 - 4,287) | 13<br>(9 - 18)       | 13<br>(9 - 17)    | 470<br>(371 - 603)   | 1,566<br>(1,071 - 1,923) | 1,549<br>(1,143 - 1,875) |
| Chronic kidney disease due to diabetes mellitus     | 1,952<br>(1,416 - 2,656) | 1<br>(1 - 3)         | 2<br>(1 - 5)      | 220<br>(155 - 370)   | 963<br>(662 - 1,275)     | 766<br>(509 - 1,058)     |
| Chronic kidney disease due to hypertension          | 582<br>(246 - 812)       | 3<br>(2 - 4)         | 2<br>(1 - 4)      | 90<br>(45 - 147)     | 190<br>(66 - 285)        | 297<br>(122 - 428)       |
| Chronic kidney disease due to glomerulonephritis    | 121<br>(34 - 192)        | 3<br>(2 - 4)         | 3<br>(2 - 4)      | 30<br>(11 - 45)      | 36<br>(7 - 65)           | 49<br>(11 - 90)          |
| Chronic kidney disease due to other causes          | 955<br>(409 - 1,329)     | 6<br>(3 - 10)        | 6<br>(3 - 9)      | 130<br>(65 - 205)    | 376<br>(110 - 593)       | 437<br>(196 - 660)       |
| Urinary diseases and male infertility               | 260<br>(186 - 320)       | 5<br>(4 - 9)         | 1<br>(1 - 2)      | 38<br>(29 - 48)      | 68<br>(47 - 87)          | 147<br>(94 - 194)        |
| Interstitial nephritis and urinary tract infections | 175<br>(111 - 224)       | 5<br>(3 - 8)         | 1<br>(1 - 1)      | 22<br>(14 - 28)      | 42<br>(25 - 55)          | 106<br>(59 - 145)        |
| Urolithiasis                                        | 32<br>(22 - 47)          | --                   | 0<br>(0 - 0)      | 6<br>(4 - 9)         | 11<br>(7 - 17)           | 15<br>(8 - 24)           |
| Other urinary diseases                              | 53<br>(38 - 82)          | 1<br>(0 - 1)         | 0<br>(0 - 1)      | 10<br>(7 - 15)       | 16<br>(10 - 23)          | 26<br>(15 - 46)          |
| Gynecological diseases                              | --                       | --                   | --                | --                   | --                       | --                       |
| Uterine fibroids                                    | --                       | --                   | --                | --                   | --                       | --                       |
| Polycystic ovarian syndrome                         | --                       | --                   | --                | --                   | --                       | --                       |
| Endometriosis                                       | --                       | --                   | --                | --                   | --                       | --                       |
| Genital prolapse                                    | --                       | --                   | --                | --                   | --                       | --                       |
| Other gynecological diseases                        | --                       | --                   | --                | --                   | --                       | --                       |
| Hemoglobinopathies and hemolytic anemias            | 99<br>(63 - 153)         | 10<br>(5 - 20)       | 8<br>(5 - 13)     | 41<br>(26 - 67)      | 19<br>(12 - 30)          | 22<br>(13 - 33)          |
| Thalassemias                                        | 2<br>(1 - 3)             | 1<br>(0 - 1)         | 0<br>(0 - 1)      | 1<br>(0 - 1)         | 0<br>(0 - 0)             | 0<br>(0 - 0)             |
| Sickle cell disorders                               | 54<br>(35 - 85)          | 7<br>(4 - 14)        | 6<br>(3 - 10)     | 30<br>(19 - 50)      | 10<br>(6 - 16)           | 1<br>(1 - 2)             |
| G6PD deficiency                                     | 4<br>(3 - 7)             | 1<br>(0 - 1)         | 0<br>(0 - 1)      | 2<br>(1 - 3)         | 1<br>(1 - 1)             | 0<br>(0 - 1)             |
| Other hemoglobinopathies and hemolytic anemias      | 39<br>(24 - 60)          | 2<br>(1 - 4)         | 1<br>(1 - 2)      | 8<br>(5 - 13)        | 8<br>(5 - 13)            | 20<br>(12 - 31)          |
| Endocrine, metabolic, blood, and immune disorders   | 232<br>(158 - 626)       | 25<br>(13 - 71)      | 5<br>(3 - 11)     | 63<br>(42 - 159)     | 66<br>(41 - 177)         | 72<br>(40 - 212)         |
| Musculoskeletal disorders                           | 142<br>(93 - 176)        | --                   | 3<br>(2 - 4)      | 45<br>(29 - 59)      | 43<br>(27 - 55)          | 51<br>(31 - 68)          |
| Rheumatoid arthritis                                | 46<br>(26 - 64)          | --                   | 0<br>(0 - 0)      | 5<br>(3 - 8)         | 16<br>(9 - 24)           | 25<br>(12 - 39)          |
| Other musculoskeletal disorders                     | 96<br>(65 - 124)         | --                   | 3<br>(2 - 4)      | 40<br>(26 - 52)      | 27<br>(16 - 37)          | 26<br>(15 - 42)          |
| Other non-communicable diseases                     | 1,234<br>(973 - 1,449)   | 943<br>(698 - 1,148) | 75<br>(54 - 96)   | 140<br>(111 - 179)   | 42<br>(34 - 52)          | 35<br>(28 - 45)          |
| Congenital anomalies                                | 1,194<br>(936 - 1,405)   | 931<br>(687 - 1,135) | 74<br>(53 - 95)   | 134<br>(106 - 171)   | 35<br>(28 - 42)          | 21<br>(16 - 27)          |
| Neural tube defects                                 | 42<br>(26 - 63)          | 36<br>(21 - 57)      | 2<br>(1 - 3)      | 4<br>(2 - 6)         | 0<br>(0 - 0)             | 1<br>(0 - 1)             |
| Congenital heart anomalies                          | 605<br>(462 - 751)       | 459<br>(322 - 595)   | 44<br>(29 - 60)   | 80<br>(61 - 108)     | 15<br>(11 - 20)          | 7<br>(4 - 11)            |
| Cleft lip and cleft palate                          | 2<br>(0 - 8)             | 2<br>(0 - 8)         | --                | --                   | --                       | --                       |
| Down syndrome                                       | 55<br>(33 - 79)          | 27<br>(12 - 47)      | 3<br>(2 - 6)      | 17<br>(10 - 25)      | 7<br>(4 - 11)            | 0<br>(0 - 1)             |
| Chromosomal unbalanced rearrangements               | 10<br>(4 - 18)           | 8<br>(3 - 16)        | 0<br>(0 - 1)      | 1<br>(0 - 2)         | 0<br>(0 - 0)             | 0<br>(0 - 0)             |
| Other congenital anomalies                          | 480<br>(338 - 632)       | 398<br>(262 - 547)   | 24<br>(13 - 40)   | 32<br>(22 - 46)      | 12<br>(8 - 17)           | 13<br>(9 - 18)           |
| Skin and subcutaneous diseases                      | 30<br>(24 - 47)          | 3<br>(2 - 5)         | 1<br>(0 - 1)      | 6<br>(5 - 10)        | 7<br>(5 - 11)            | 14<br>(9 - 21)           |
| Cellulitis                                          | 5<br>(3 - 9)             | 0<br>(0 - 1)         | 0<br>(0 - 0)      | 1<br>(1 - 2)         | 1<br>(1 - 2)             | 2<br>(1 - 4)             |

Web Table 31- Venezuela deaths with 95% UI by age, sex, and cause in 2013

| Cause                                           | Males, All Ages             | Males, 0-4 Years   | Males, 5-14 Years  | Males, 15-49 Years          | Males, 50-69 Years       | Males, 70-80 Years       |
|-------------------------------------------------|-----------------------------|--------------------|--------------------|-----------------------------|--------------------------|--------------------------|
| Pyoderma                                        | 12<br>(9 - 16)              | 1<br>(1 - 3)       | 0<br>(0 - 0)       | 2<br>(2 - 3)                | 3<br>(2 - 5)             | 5<br>(3 - 8)             |
| Decubitus ulcer                                 | 10<br>(7 - 21)              | 0<br>(0 - 0)       | 0<br>(0 - 0)       | 2<br>(1 - 3)                | 2<br>(1 - 4)             | 6<br>(4 - 12)            |
| Other skin and subcutaneous diseases            | 3<br>(2 - 6)                | 1<br>(0 - 2)       | 0<br>(0 - 0)       | 1<br>(1 - 2)                | 1<br>(0 - 1)             | 1<br>(0 - 1)             |
| Sudden infant death syndrome                    | 10<br>(3 - 18)              | 10<br>(3 - 18)     | --                 | --                          | --                       | --                       |
| Injuries                                        | 23,153<br>(20,250 - 25,977) | 426<br>(323 - 556) | 472<br>(416 - 524) | 18,131<br>(15,668 - 20,324) | 2,879<br>(2,389 - 3,427) | 1,245<br>(1,065 - 1,447) |
| Transport injuries                              | 6,624<br>(5,590 - 8,418)    | 88<br>(59 - 124)   | 190<br>(155 - 232) | 4,785<br>(3,906 - 6,296)    | 1,141<br>(932 - 1,416)   | 420<br>(343 - 534)       |
| Road injuries                                   | 6,443<br>(5,431 - 8,188)    | 85<br>(58 - 121)   | 184<br>(149 - 223) | 4,655<br>(3,795 - 6,150)    | 1,108<br>(905 - 1,379)   | 411<br>(335 - 522)       |
| Pedestrian road injuries                        | 2,091<br>(1,582 - 3,002)    | 53<br>(33 - 77)    | 108<br>(82 - 139)  | 1,192<br>(825 - 1,877)      | 476<br>(350 - 647)       | 262<br>(198 - 347)       |
| Cyclist road injuries                           | 430<br>(317 - 564)          | 5<br>(3 - 9)       | 17<br>(11 - 25)    | 223<br>(160 - 315)          | 153<br>(105 - 208)       | 31<br>(20 - 46)          |
| Motorcyclist road injuries                      | 831<br>(541 - 1,196)        | 3<br>(1 - 5)       | 6<br>(3 - 11)      | 692<br>(444 - 1,021)        | 113<br>(71 - 160)        | 17<br>(9 - 26)           |
| Motor vehicle road injuries                     | 3,023<br>(2,398 - 3,853)    | 24<br>(14 - 37)    | 48<br>(32 - 69)    | 2,496<br>(1,974 - 3,234)    | 358<br>(254 - 475)       | 98<br>(64 - 136)         |
| Other road injuries                             | 68<br>(43 - 134)            | 1<br>(0 - 2)       | 4<br>(2 - 7)       | 53<br>(32 - 109)            | 7<br>(4 - 12)            | 3<br>(1 - 6)             |
| Other transport injuries                        | 180<br>(137 - 232)          | 2<br>(1 - 4)       | 6<br>(4 - 9)       | 129<br>(96 - 178)           | 33<br>(21 - 45)          | 9<br>(5 - 14)            |
| Unintentional injuries                          | 3,376<br>(2,851 - 4,174)    | 287<br>(204 - 411) | 157<br>(128 - 203) | 1,829<br>(1,428 - 2,432)    | 579<br>(480 - 711)       | 524<br>(436 - 631)       |
| Falls                                           | 738<br>(612 - 932)          | 13<br>(8 - 22)     | 17<br>(12 - 23)    | 246<br>(190 - 382)          | 197<br>(153 - 249)       | 265<br>(197 - 352)       |
| Drowning                                        | 735<br>(507 - 1,210)        | 51<br>(29 - 103)   | 68<br>(48 - 115)   | 508<br>(318 - 861)          | 82<br>(57 - 141)         | 26<br>(19 - 40)          |
| Fire, heat, and hot substances                  | 135<br>(92 - 180)           | 14<br>(8 - 23)     | 5<br>(4 - 9)       | 64<br>(44 - 94)             | 23<br>(16 - 32)          | 29<br>(19 - 41)          |
| Poisonings                                      | 77<br>(58 - 135)            | 4<br>(2 - 8)       | 2<br>(1 - 4)       | 48<br>(33 - 90)             | 15<br>(11 - 25)          | 8<br>(5 - 12)            |
| Exposure to mechanical forces                   | 708<br>(539 - 998)          | 11<br>(7 - 19)     | 30<br>(21 - 46)    | 562<br>(408 - 821)          | 86<br>(65 - 120)         | 19<br>(15 - 28)          |
| Unintentional firearm injuries                  | 513<br>(355 - 712)          | 3<br>(1 - 5)       | 19<br>(11 - 31)    | 431<br>(288 - 623)          | 51<br>(31 - 73)          | 9<br>(6 - 14)            |
| Unintentional suffocation                       | 35<br>(26 - 54)             | 5<br>(2 - 11)      | 3<br>(2 - 6)       | 16<br>(10 - 25)             | 7<br>(4 - 11)            | 4<br>(2 - 7)             |
| Other exposure to mechanical forces             | 161<br>(119 - 391)          | 3<br>(2 - 8)       | 8<br>(5 - 16)      | 115<br>(79 - 302)           | 28<br>(20 - 60)          | 6<br>(5 - 11)            |
| Adverse effects of medical treatment            | 181<br>(132 - 292)          | 9<br>(5 - 19)      | 3<br>(2 - 5)       | 41<br>(28 - 69)             | 56<br>(36 - 98)          | 73<br>(50 - 122)         |
| Animal contact                                  | 84<br>(25 - 105)            | 6<br>(1 - 10)      | 5<br>(2 - 8)       | 32<br>(11 - 42)             | 23<br>(6 - 32)           | 18<br>(3 - 26)           |
| Venomous animal contact                         | 72<br>(21 - 91)             | 5<br>(1 - 8)       | 4<br>(1 - 6)       | 27<br>(9 - 36)              | 20<br>(5 - 28)           | 16<br>(3 - 23)           |
| Non-venomous animal contact                     | 12<br>(4 - 16)              | 1<br>(0 - 2)       | 1<br>(0 - 2)       | 4<br>(2 - 6)                | 3<br>(1 - 5)             | 2<br>(0 - 4)             |
| Foreign body                                    | 377<br>(208 - 558)          | 166<br>(88 - 265)  | 13<br>(7 - 20)     | 77<br>(42 - 113)            | 53<br>(27 - 80)          | 67<br>(37 - 113)         |
| Pulmonary aspiration and foreign body in airway | 373<br>(203 - 551)          | 166<br>(88 - 265)  | 13<br>(6 - 19)     | 76<br>(40 - 111)            | 52<br>(25 - 78)          | 67<br>(37 - 113)         |
| Foreign body in other body part                 | 4<br>(3 - 7)                | 0<br>(0 - 1)       | 0<br>(0 - 0)       | 2<br>(1 - 3)                | 2<br>(1 - 3)             | 0<br>(0 - 1)             |
| Other unintentional injuries                    | 340<br>(245 - 454)          | 13<br>(7 - 24)     | 14<br>(6 - 26)     | 251<br>(166 - 357)          | 44<br>(25 - 74)          | 19<br>(11 - 29)          |
| Self-harm and interpersonal violence            | 13,153<br>(9,826 - 15,367)  | 52<br>(19 - 98)    | 124<br>(65 - 180)  | 11,517<br>(8,703 - 13,463)  | 1,159<br>(791 - 1,597)   | 301<br>(207 - 419)       |
| Self-harm                                       | 2,596<br>(2,056 - 3,229)    | --                 | 18<br>(11 - 28)    | 2,042<br>(1,537 - 2,605)    | 376<br>(299 - 530)       | 160<br>(123 - 233)       |
| Interpersonal violence                          | 10,557<br>(7,098 - 12,550)  | 52<br>(19 - 98)    | 106<br>(45 - 163)  | 9,476<br>(6,480 - 11,321)   | 783<br>(405 - 1,170)     | 141<br>(59 - 241)        |
| Assault by firearm                              | 9,321<br>(6,183 - 11,234)   | 28<br>(10 - 54)    | 92<br>(38 - 139)   | 8,512<br>(5,756 - 10,215)   | 596<br>(294 - 900)       | 93<br>(37 - 165)         |
| Assault by sharp object                         | 799<br>(402 - 1,459)        | 4<br>(2 - 9)       | 4<br>(1 - 9)       | 668<br>(343 - 1,264)        | 103<br>(39 - 200)        | 20<br>(7 - 40)           |
| Assault by other means                          | 436<br>(211 - 715)          | 19<br>(6 - 40)     | 10<br>(3 - 20)     | 295<br>(148 - 493)          | 84<br>(35 - 152)         | 28<br>(10 - 53)          |

Web Table 31- Venezuela deaths with 95% UI by age, sex, and cause in 2013

| Cause                                                             | Females, All Ages           | Females, 0-4 Years       | Females, 5-14 Years | Females, 15-49 Years     | Females, 50-69 Years        | Females, 70-80 Years        |
|-------------------------------------------------------------------|-----------------------------|--------------------------|---------------------|--------------------------|-----------------------------|-----------------------------|
| All causes                                                        | 62,576<br>(57,158 - 68,881) | 3,496<br>(3,176 - 3,860) | 621<br>(572 - 672)  | 8,455<br>(7,303 - 9,799) | 15,955<br>(14,047 - 18,160) | 34,049<br>(31,744 - 36,649) |
| Communicable, maternal, neonatal, and nutritional diseases        | 6,690<br>(5,833 - 8,338)    | 2,204<br>(1,874 - 2,541) | 130<br>(105 - 160)  | 981<br>(858 - 1,147)     | 753<br>(580 - 1,266)        | 2,623<br>(2,009 - 3,907)    |
| HIV/AIDS and tuberculosis                                         | 410<br>(334 - 517)          | 3<br>(2 - 4)             | 3<br>(2 - 5)        | 205<br>(152 - 274)       | 95<br>(74 - 126)            | 104<br>(75 - 142)           |
| Tuberculosis                                                      | 242<br>(193 - 301)          | 3<br>(2 - 4)             | 2<br>(2 - 3)        | 62<br>(47 - 79)          | 72<br>(54 - 98)             | 103<br>(74 - 141)           |
| HIV/AIDS                                                          | 168<br>(111 - 248)          | 1<br>(0 - 1)             | 1<br>(0 - 2)        | 143<br>(92 - 211)        | 23<br>(12 - 39)             | 1<br>(0 - 4)                |
| HIV/AIDS resulting in mycobacterial infection                     | 8<br>(5 - 12)               | 0<br>(0 - 0)             | 0<br>(0 - 0)        | 7<br>(4 - 10)            | 1<br>(1 - 2)                | 0<br>(0 - 0)                |
| HIV/AIDS resulting in other diseases                              | 161<br>(105 - 237)          | 1<br>(0 - 1)             | 1<br>(0 - 2)        | 137<br>(88 - 201)        | 22<br>(11 - 37)             | 1<br>(0 - 3)                |
| Diarrhea, lower respiratory, and other common infectious diseases | 3,388<br>(2,822 - 4,101)    | 656<br>(520 - 812)       | 89<br>(66 - 117)    | 324<br>(257 - 400)       | 409<br>(325 - 507)          | 1,910<br>(1,411 - 2,563)    |
| Diarrheal diseases                                                | 604<br>(458 - 803)          | 197<br>(120 - 297)       | 9<br>(6 - 14)       | 42<br>(31 - 55)          | 75<br>(52 - 103)            | 280<br>(166 - 465)          |
| Intestinal infectious diseases                                    | 131<br>(62 - 240)           | 41<br>(20 - 77)          | 32<br>(15 - 60)     | 46<br>(18 - 98)          | 8<br>(3 - 15)               | 3<br>(1 - 6)                |
| Typhoid fever                                                     | 100<br>(46 - 187)           | 31<br>(14 - 57)          | 25<br>(12 - 47)     | 36<br>(13 - 78)          | 6<br>(2 - 12)               | 2<br>(1 - 4)                |
| Paratyphoid fever                                                 | 28<br>(13 - 54)             | 9<br>(4 - 20)            | 7<br>(3 - 14)       | 9<br>(3 - 20)            | 1<br>(0 - 3)                | 1<br>(0 - 1)                |
| Other intestinal infectious diseases                              | 3<br>(0 - 8)                | 1<br>(0 - 5)             | 0<br>(0 - 2)        | 1<br>(0 - 4)             | 0<br>(0 - 2)                | 0<br>(0 - 2)                |
| Lower respiratory infections                                      | 2,436<br>(1,931 - 3,106)    | 330<br>(241 - 439)       | 29<br>(21 - 38)     | 182<br>(145 - 229)       | 296<br>(226 - 383)          | 1,598<br>(1,135 - 2,234)    |
| Upper respiratory infections                                      | 2<br>(1 - 5)                | 0<br>(0 - 1)             | 0<br>(0 - 0)        | 0<br>(0 - 1)             | 1<br>(0 - 2)                | 1<br>(0 - 4)                |
| Otitis media                                                      | 2<br>(1 - 2)                | 0<br>(0 - 1)             | 0<br>(0 - 0)        | 1<br>(1 - 1)             | 0<br>(0 - 0)                | 0<br>(0 - 0)                |
| Meningitis                                                        | 121<br>(102 - 147)          | 51<br>(37 - 72)          | 9<br>(7 - 12)       | 30<br>(23 - 37)          | 17<br>(13 - 22)             | 14<br>(11 - 19)             |
| Pneumococcal meningitis                                           | 40<br>(32 - 49)             | 14<br>(10 - 20)          | 3<br>(2 - 5)        | 11<br>(7 - 16)           | 6<br>(4 - 9)                | 5<br>(4 - 8)                |
| H influenzae type B meningitis                                    | 28<br>(21 - 37)             | 20<br>(13 - 28)          | 2<br>(1 - 3)        | 3<br>(2 - 5)             | 1<br>(1 - 2)                | 1<br>(1 - 2)                |
| Meningococcal meningitis                                          | 14<br>(11 - 18)             | 5<br>(3 - 8)             | 1<br>(1 - 2)        | 4<br>(2 - 6)             | 2<br>(1 - 3)                | 2<br>(1 - 3)                |
| Other meningitis                                                  | 39<br>(30 - 51)             | 12<br>(7 - 21)           | 2<br>(1 - 4)        | 12<br>(8 - 17)           | 7<br>(4 - 10)               | 6<br>(4 - 8)                |
| Encephalitis                                                      | 55<br>(41 - 87)             | 14<br>(8 - 27)           | 7<br>(4 - 15)       | 18<br>(13 - 30)          | 9<br>(6 - 17)               | 6<br>(4 - 11)               |
| Diphtheria                                                        | 1<br>(0 - 5)                | 1<br>(0 - 5)             | 0<br>(0 - 2)        | 0<br>(0 - 1)             | 0<br>(0 - 1)                | --                          |
| Whooping cough                                                    | 19<br>(4 - 80)              | 18<br>(2 - 78)           | 1<br>(0 - 1)        | 1<br>(1 - 1)             | 0<br>(0 - 0)                | --                          |
| Tetanus                                                           | 4<br>(3 - 7)                | 0<br>(0 - 1)             | 0<br>(0 - 0)        | 1<br>(1 - 2)             | 1<br>(1 - 2)                | 1<br>(1 - 2)                |
| Measles                                                           | 0<br>(0 - 0)                | 0<br>(0 - 0)             | 0<br>(0 - 0)        | 0<br>(0 - 0)             | 0<br>(0 - 0)                | --                          |
| Varicella and herpes zoster                                       | 13<br>(4 - 37)              | 3<br>(0 - 10)            | 1<br>(0 - 3)        | 3<br>(0 - 7)             | 1<br>(0 - 5)                | 6<br>(0 - 28)               |
| Neglected tropical diseases and malaria                           | 570<br>(196 - 2,018)        | 16<br>(9 - 27)           | 8<br>(5 - 13)       | 46<br>(27 - 126)         | 169<br>(49 - 695)           | 331<br>(74 - 1,249)         |
| Malaria                                                           | 5<br>(3 - 7)                | 1<br>(0 - 2)             | 0<br>(0 - 1)        | 2<br>(1 - 4)             | 1<br>(1 - 2)                | 0<br>(0 - 1)                |
| Chagas disease                                                    | 491<br>(114 - 1,931)        | 0<br>(0 - 1)             | 0<br>(0 - 1)        | 23<br>(6 - 103)          | 152<br>(34 - 676)           | 315<br>(57 - 1,231)         |
| Leishmaniasis                                                     | 1<br>(1 - 2)                | 0<br>(0 - 1)             | 0<br>(0 - 0)        | 0<br>(0 - 1)             | 0<br>(0 - 0)                | 0<br>(0 - 0)                |
| Visceral leishmaniasis                                            | 1<br>(1 - 2)                | 0<br>(0 - 1)             | 0<br>(0 - 0)        | 0<br>(0 - 1)             | 0<br>(0 - 0)                | 0<br>(0 - 0)                |
| Schistosomiasis                                                   | 17<br>(12 - 23)             | 0<br>(0 - 0)             | 0<br>(0 - 0)        | 4<br>(3 - 6)             | 7<br>(4 - 10)               | 6<br>(3 - 10)               |
| Cysticercosis                                                     | 7<br>(6 - 8)                | 0<br>(0 - 0)             | 0<br>(0 - 0)        | 3<br>(3 - 4)             | 2<br>(2 - 3)                | 1<br>(1 - 1)                |
| Cystic echinococcosis                                             | 1<br>(1 - 1)                | 0<br>(0 - 0)             | 0<br>(0 - 0)        | 0<br>(0 - 0)             | 0<br>(0 - 0)                | 0<br>(0 - 0)                |
| Dengue                                                            | 19<br>(12 - 25)             | 3<br>(2 - 5)             | 3<br>(2 - 4)        | 7<br>(4 - 9)             | 3<br>(2 - 4)                | 3<br>(2 - 5)                |
| Yellow fever                                                      | 0<br>(0 - 1)                | 0<br>(0 - 0)             | 0<br>(0 - 0)        | 0<br>(0 - 0)             | 0<br>(0 - 0)                | 0<br>(0 - 0)                |
| Rabies                                                            | 2<br>(1 - 2)                | 0<br>(0 - 0)             | 0<br>(0 - 0)        | 1<br>(1 - 1)             | 0<br>(0 - 0)                | 0<br>(0 - 0)                |
| Intestinal nematode infections                                    | 19<br>(8 - 34)              | 9<br>(2 - 20)            | 2<br>(0 - 8)        | 2<br>(0 - 8)             | 2<br>(0 - 7)                | 3<br>(0 - 10)               |
| Ascariasis                                                        | 19<br>(8 - 34)              | 9<br>(2 - 20)            | 2<br>(0 - 8)        | 2<br>(0 - 8)             | 2<br>(0 - 7)                | 3<br>(0 - 10)               |

Web Table 31- Venezuela deaths with 95% UI by age, sex, and cause in 2013

| Cause                                                            | Females, All Ages           | Females, 0-4 Years       | Females, 5-14 Years | Females, 15-49 Years     | Females, 50-69 Years        | Females, 70-80 Years        |
|------------------------------------------------------------------|-----------------------------|--------------------------|---------------------|--------------------------|-----------------------------|-----------------------------|
| Other neglected tropical diseases                                | 8<br>(6 - 12)               | 2<br>(1 - 4)             | 1<br>(0 - 1)        | 2<br>(1 - 3)             | 1<br>(1 - 2)                | 2<br>(1 - 3)                |
| Maternal disorders                                               | 336<br>(263 - 421)          | --                       | 2<br>(1 - 3)        | 334<br>(261 - 419)       | --                          | --                          |
| Maternal hemorrhage                                              | 32<br>(22 - 44)             | --                       | 0<br>(0 - 0)        | 31<br>(22 - 44)          | --                          | --                          |
| Maternal sepsis and other maternal infections                    | 25<br>(18 - 34)             | --                       | 0<br>(0 - 0)        | 25<br>(18 - 34)          | --                          | --                          |
| Maternal hypertensive disorders                                  | 74<br>(55 - 96)             | --                       | 1<br>(0 - 1)        | 74<br>(55 - 96)          | --                          | --                          |
| Maternal obstructed labor                                        | 18<br>(11 - 25)             | --                       | 0<br>(0 - 0)        | 18<br>(11 - 25)          | --                          | --                          |
| Maternal abortive outcome                                        | 39<br>(27 - 53)             | --                       | 0<br>(0 - 0)        | 39<br>(27 - 53)          | --                          | --                          |
| Indirect maternal deaths                                         | 81<br>(59 - 105)            | --                       | 0<br>(0 - 1)        | 80<br>(59 - 104)         | --                          | --                          |
| Late maternal deaths                                             | 27<br>(14 - 42)             | --                       | 0<br>(0 - 0)        | 27<br>(14 - 41)          | --                          | --                          |
| Maternal deaths aggravated by HIV/AIDS                           | 0<br>(0 - 0)                | --                       | --                  | 0<br>(0 - 0)             | --                          | --                          |
| Other maternal disorders                                         | 40<br>(29 - 51)             | --                       | 0<br>(0 - 0)        | 39<br>(29 - 51)          | --                          | --                          |
| Neonatal disorders                                               | 1,237<br>(1,018 - 1,483)    | 1,237<br>(1,018 - 1,483) | --                  | --                       | --                          | --                          |
| Neonatal preterm birth complications                             | 593<br>(393 - 782)          | 593<br>(393 - 782)       | --                  | --                       | --                          | --                          |
| Neonatal encephalopathy due to birth asphyxia and trauma         | 244<br>(155 - 337)          | 244<br>(155 - 337)       | --                  | --                       | --                          | --                          |
| Neonatal sepsis and other neonatal infections                    | 310<br>(168 - 515)          | 310<br>(168 - 515)       | --                  | --                       | --                          | --                          |
| Hemolytic disease and other neonatal jaundice                    | 6<br>(2 - 18)               | 6<br>(2 - 18)            | --                  | --                       | --                          | --                          |
| Other neonatal disorders                                         | 83<br>(52 - 131)            | 83<br>(52 - 131)         | --                  | --                       | --                          | --                          |
| Nutritional deficiencies                                         | 423<br>(343 - 539)          | 102<br>(75 - 138)        | 9<br>(7 - 12)       | 37<br>(29 - 51)          | 43<br>(32 - 58)             | 231<br>(162 - 323)          |
| Protein-energy malnutrition                                      | 344<br>(267 - 450)          | 98<br>(71 - 134)         | 8<br>(6 - 11)       | 23<br>(14 - 32)          | 31<br>(22 - 43)             | 184<br>(123 - 263)          |
| Iodine deficiency                                                | 1<br>(0 - 4)                | 0<br>(0 - 1)             | 0<br>(0 - 0)        | 0<br>(0 - 1)             | 0<br>(0 - 1)                | 0<br>(0 - 3)                |
| Iron-deficiency anemia                                           | 57<br>(24 - 115)            | 3<br>(1 - 8)             | 1<br>(0 - 1)        | 11<br>(5 - 20)           | 8<br>(3 - 15)               | 35<br>(12 - 74)             |
| Other nutritional deficiencies                                   | 21<br>(12 - 51)             | 1<br>(0 - 4)             | 0<br>(0 - 1)        | 4<br>(2 - 8)             | 4<br>(2 - 8)                | 13<br>(5 - 32)              |
| Other communicable, maternal, neonatal, and nutritional diseases | 326<br>(166 - 511)          | 190<br>(42 - 355)        | 18<br>(6 - 32)      | 35<br>(27 - 46)          | 37<br>(27 - 49)             | 46<br>(32 - 67)             |
| Sexually transmitted diseases excluding HIV                      | 211<br>(51 - 390)           | 181<br>(33 - 346)        | 14<br>(3 - 28)      | 8<br>(6 - 11)            | 4<br>(3 - 6)                | 4<br>(2 - 5)                |
| Syphilis                                                         | 204<br>(43 - 382)           | 181<br>(33 - 346)        | 14<br>(3 - 28)      | 3<br>(2 - 4)             | 2<br>(2 - 3)                | 3<br>(2 - 4)                |
| Chlamydial infection                                             | 2<br>(2 - 3)                | --                       | 0<br>(0 - 0)        | 2<br>(1 - 2)             | 1<br>(0 - 1)                | 0<br>(0 - 0)                |
| Gonococcal infection                                             | 3<br>(2 - 4)                | --                       | 0<br>(0 - 0)        | 2<br>(1 - 2)             | 1<br>(1 - 1)                | 0<br>(0 - 1)                |
| Other sexually transmitted diseases                              | 2<br>(2 - 3)                | --                       | 0<br>(0 - 0)        | 2<br>(1 - 2)             | 1<br>(0 - 1)                | 0<br>(0 - 0)                |
| Hepatitis                                                        | 52<br>(39 - 69)             | 2<br>(1 - 4)             | 1<br>(1 - 2)        | 13<br>(9 - 19)           | 17<br>(11 - 27)             | 18<br>(10 - 29)             |
| Acute hepatitis A                                                | 14<br>(6 - 24)              | 2<br>(1 - 3)             | 1<br>(0 - 2)        | 7<br>(3 - 11)            | 3<br>(1 - 7)                | 2<br>(0 - 4)                |
| Acute hepatitis B                                                | 31<br>(19 - 47)             | 0<br>(0 - 1)             | 0<br>(0 - 0)        | 4<br>(2 - 8)             | 12<br>(6 - 20)              | 14<br>(7 - 24)              |
| Acute hepatitis C                                                | 7<br>(1 - 17)               | --                       | 0<br>(0 - 0)        | 2<br>(0 - 5)             | 2<br>(0 - 7)                | 2<br>(0 - 7)                |
| Other infectious diseases                                        | 63<br>(48 - 99)             | 7<br>(5 - 11)            | 3<br>(2 - 4)        | 14<br>(10 - 21)          | 15<br>(11 - 24)             | 24<br>(16 - 44)             |
| Non-communicable diseases                                        | 51,867<br>(47,122 - 57,293) | 958<br>(767 - 1,172)     | 259<br>(226 - 296)  | 5,517<br>(4,667 - 6,472) | 14,588<br>(12,825 - 16,628) | 30,544<br>(28,273 - 33,025) |
| Neoplasms                                                        | 12,869<br>(11,221 - 14,640) | 72<br>(52 - 93)          | 104<br>(88 - 124)   | 2,491<br>(2,109 - 2,947) | 5,236<br>(4,499 - 6,055)    | 4,966<br>(4,387 - 5,547)    |
| Esophageal cancer                                                | 155<br>(116 - 195)          | --                       | --                  | 9<br>(6 - 12)            | 45<br>(32 - 58)             | 101<br>(73 - 130)           |
| Stomach cancer                                                   | 1,044<br>(874 - 1,248)      | --                       | --                  | 122<br>(98 - 151)        | 361<br>(293 - 445)          | 561<br>(456 - 695)          |
| Liver cancer                                                     | 529<br>(434 - 634)          | --                       | 1<br>(1 - 1)        | 52<br>(40 - 64)          | 210<br>(164 - 260)          | 266<br>(208 - 333)          |
| Liver cancer due to hepatitis B                                  | 83<br>(37 - 146)            | --                       | 0<br>(0 - 1)        | 12<br>(5 - 22)           | 37<br>(11 - 72)             | 34<br>(16 - 61)             |
| Liver cancer due to hepatitis C                                  | 263<br>(180 - 364)          | --                       | 0<br>(0 - 0)        | 22<br>(12 - 32)          | 106<br>(67 - 154)           | 135<br>(85 - 196)           |

Web Table 31- Venezuela deaths with 95% UI by age, sex, and cause in 2013

| Cause                                | Females, All Ages           | Females, 0-4 Years | Females, 5-14 Years | Females, 15-49 Years     | Females, 50-69 Years     | Females, 70-80 Years        |
|--------------------------------------|-----------------------------|--------------------|---------------------|--------------------------|--------------------------|-----------------------------|
| Liver cancer due to alcohol use      | 116<br>(59 - 176)           | --                 | --                  | 6<br>(3 - 11)            | 40<br>(19 - 62)          | 70<br>(34 - 109)            |
| Liver cancer due to other causes     | 67<br>(40 - 105)            | --                 | 1<br>(0 - 1)        | 11<br>(7 - 18)           | 28<br>(15 - 47)          | 27<br>(15 - 44)             |
| Larynx cancer                        | 74<br>(39 - 139)            | --                 | --                  | 6<br>(3 - 11)            | 29<br>(15 - 55)          | 39<br>(21 - 74)             |
| Tracheal, bronchus and lung cancer   | 1,539<br>(1,303 - 1,810)    | --                 | --                  | 164<br>(129 - 203)       | 693<br>(566 - 833)       | 682<br>(555 - 829)          |
| Breast cancer                        | 1,937<br>(1,629 - 2,274)    | --                 | --                  | 499<br>(401 - 612)       | 933<br>(761 - 1,121)     | 505<br>(412 - 610)          |
| Cervical cancer                      | 1,866<br>(1,500 - 2,266)    | --                 | --                  | 668<br>(524 - 844)       | 740<br>(575 - 915)       | 458<br>(350 - 567)          |
| Uterine cancer                       | 286<br>(222 - 459)          | --                 | --                  | 30<br>(22 - 49)          | 139<br>(105 - 226)       | 117<br>(87 - 191)           |
| Prostate cancer                      | --                          | --                 | --                  | --                       | --                       | --                          |
| Colon and rectum cancer              | 1,084<br>(928 - 1,250)      | --                 | --                  | 120<br>(99 - 144)        | 391<br>(323 - 463)       | 573<br>(473 - 694)          |
| Lip and oral cavity cancer           | 116<br>(87 - 160)           | --                 | --                  | 11<br>(8 - 16)           | 38<br>(28 - 54)          | 66<br>(49 - 94)             |
| Nasopharynx cancer                   | 21<br>(15 - 37)             | --                 | 0<br>(0 - 0)        | 4<br>(3 - 8)             | 8<br>(6 - 16)            | 8<br>(5 - 14)               |
| Other pharynx cancer                 | 25<br>(21 - 30)             | --                 | --                  | 3<br>(2 - 4)             | 9<br>(7 - 12)            | 13<br>(10 - 16)             |
| Gallbladder and biliary tract cancer | 295<br>(227 - 493)          | --                 | --                  | 20<br>(15 - 32)          | 136<br>(100 - 226)       | 139<br>(102 - 251)          |
| Pancreatic cancer                    | 574<br>(486 - 680)          | --                 | --                  | 43<br>(35 - 54)          | 244<br>(200 - 302)       | 286<br>(232 - 354)          |
| Malignant skin melanoma              | 52<br>(44 - 61)             | --                 | --                  | 12<br>(10 - 15)          | 19<br>(15 - 23)          | 21<br>(17 - 26)             |
| Non-melanoma skin cancer             | 127<br>(72 - 201)           | --                 | --                  | 14<br>(9 - 20)           | 28<br>(18 - 43)          | 85<br>(42 - 155)            |
| Ovarian cancer                       | 593<br>(500 - 700)          | --                 | --                  | 138<br>(109 - 171)       | 286<br>(231 - 351)       | 170<br>(138 - 208)          |
| Testicular cancer                    | --                          | --                 | --                  | --                       | --                       | --                          |
| Kidney cancer                        | 202<br>(162 - 253)          | 2<br>(1 - 2)       | 1<br>(1 - 2)        | 29<br>(22 - 38)          | 91<br>(69 - 119)         | 79<br>(61 - 101)            |
| Bladder cancer                       | 124<br>(84 - 182)           | --                 | --                  | 9<br>(7 - 14)            | 36<br>(25 - 54)          | 79<br>(51 - 119)            |
| Brain and nervous system cancer      | 230<br>(99 - 274)           | 6<br>(2 - 9)       | 12<br>(5 - 16)      | 65<br>(30 - 82)          | 89<br>(36 - 113)         | 57<br>(24 - 72)             |
| Thyroid cancer                       | 84<br>(48 - 108)            | --                 | 0<br>(0 - 0)        | 8<br>(5 - 11)            | 33<br>(18 - 45)          | 42<br>(23 - 56)             |
| Mesothelioma                         | 10<br>(8 - 12)              | --                 | --                  | 2<br>(1 - 2)             | 5<br>(4 - 7)             | 3<br>(2 - 4)                |
| Hodgkin lymphoma                     | 45<br>(13 - 60)             | 1<br>(0 - 1)       | 1<br>(0 - 2)        | 17<br>(5 - 24)           | 14<br>(4 - 20)           | 12<br>(3 - 17)              |
| Non-Hodgkin lymphoma                 | 360<br>(268 - 512)          | 5<br>(3 - 8)       | 6<br>(4 - 11)       | 78<br>(59 - 115)         | 145<br>(99 - 217)        | 125<br>(74 - 180)           |
| Multiple myeloma                     | 157<br>(120 - 204)          | --                 | --                  | 16<br>(11 - 21)          | 82<br>(61 - 113)         | 59<br>(41 - 78)             |
| Leukemia                             | 441<br>(380 - 510)          | 26<br>(18 - 37)    | 45<br>(35 - 56)     | 145<br>(119 - 176)       | 115<br>(93 - 142)        | 109<br>(88 - 133)           |
| Other neoplasms                      | 899<br>(681 - 1,160)        | 32<br>(15 - 48)    | 36<br>(23 - 51)     | 207<br>(156 - 284)       | 313<br>(228 - 431)       | 310<br>(213 - 416)          |
| Cardiovascular diseases              | 21,975<br>(19,528 - 24,932) | 24<br>(18 - 37)    | 22<br>(17 - 31)     | 1,370<br>(1,107 - 1,769) | 5,031<br>(4,281 - 6,043) | 15,527<br>(13,902 - 17,284) |
| Rheumatic heart disease              | 102<br>(76 - 146)           | 0<br>(0 - 1)       | 2<br>(1 - 4)        | 37<br>(27 - 60)          | 32<br>(23 - 48)          | 30<br>(19 - 42)             |
| Ischemic heart disease               | 11,666<br>(9,933 - 14,190)  | 5<br>(3 - 8)       | 5<br>(3 - 7)        | 625<br>(486 - 867)       | 2,768<br>(2,264 - 3,480) | 8,264<br>(6,991 - 9,941)    |
| Cerebrovascular disease              | 6,533<br>(5,059 - 7,839)    | 5<br>(3 - 8)       | 8<br>(6 - 11)       | 482<br>(373 - 633)       | 1,423<br>(1,119 - 1,760) | 4,615<br>(3,494 - 5,535)    |
| Ischemic stroke                      | 1,971<br>(1,372 - 3,330)    | 1<br>(1 - 2)       | 1<br>(1 - 3)        | 54<br>(35 - 108)         | 294<br>(200 - 544)       | 1,620<br>(1,097 - 2,770)    |
| Hemorrhagic stroke                   | 4,562<br>(2,886 - 5,564)    | 4<br>(2 - 6)       | 6<br>(4 - 8)        | 428<br>(323 - 542)       | 1,129<br>(806 - 1,398)   | 2,995<br>(1,665 - 3,782)    |
| Hypertensive heart disease           | 2,248<br>(1,596 - 3,047)    | 1<br>(1 - 2)       | 1<br>(1 - 2)        | 80<br>(54 - 132)         | 410<br>(285 - 618)       | 1,755<br>(1,185 - 2,412)    |
| Cardiomyopathy and myocarditis       | 330<br>(257 - 558)          | 4<br>(2 - 7)       | 3<br>(2 - 4)        | 47<br>(33 - 76)          | 79<br>(58 - 131)         | 198<br>(142 - 338)          |
| Atrial fibrillation and flutter      | 63<br>(44 - 88)             | --                 | --                  | 2<br>(1 - 3)             | 9<br>(6 - 12)            | 51<br>(34 - 76)             |
| Aortic aneurysm                      | 167<br>(103 - 260)          | --                 | --                  | 11<br>(7 - 16)           | 41<br>(25 - 65)          | 115<br>(69 - 184)           |
| Peripheral vascular disease          | 52<br>(30 - 75)             | --                 | --                  | 2<br>(1 - 3)             | 9<br>(5 - 12)            | 41<br>(23 - 62)             |
| Endocarditis                         | 44<br>(28 - 65)             | 3<br>(1 - 5)       | 1<br>(0 - 1)        | 9<br>(6 - 14)            | 10<br>(6 - 14)           | 22<br>(12 - 33)             |



Web Table 31- Venezuela deaths with 95% UI by age, sex, and cause in 2013

| Cause                                               | Females, All Ages        | Females, 0-4 Years | Females, 5-14 Years | Females, 15-49 Years | Females, 50-69 Years | Females, 70-80 Years     |
|-----------------------------------------------------|--------------------------|--------------------|---------------------|----------------------|----------------------|--------------------------|
| Other cardiovascular and circulatory diseases       | 771<br>(551 - 1,106)     | 7<br>(4 - 10)      | 3<br>(2 - 6)        | 76<br>(53 - 116)     | 249<br>(169 - 351)   | 435<br>(279 - 661)       |
| Chronic respiratory diseases                        | 2,978<br>(2,304 - 3,490) | 25<br>(18 - 39)    | 8<br>(6 - 10)       | 154<br>(123 - 199)   | 578<br>(449 - 711)   | 2,212<br>(1,633 - 2,644) |
| Chronic obstructive pulmonary disease               | 2,546<br>(1,929 - 3,004) | 11<br>(7 - 17)     | 2<br>(1 - 3)        | 87<br>(63 - 116)     | 470<br>(359 - 591)   | 1,975<br>(1,453 - 2,386) |
| Pneumoconiosis                                      | 6<br>(3 - 10)            | 0<br>(0 - 0)       | 0<br>(0 - 0)        | 1<br>(1 - 1)         | 1<br>(0 - 1)         | 4<br>(2 - 7)             |
| Silicosis                                           | 0<br>(0 - 1)             | 0<br>(0 - 0)       | 0<br>(0 - 0)        | 0<br>(0 - 0)         | 0<br>(0 - 0)         | 0<br>(0 - 0)             |
| Asbestosis                                          | 0<br>(0 - 1)             | 0<br>(0 - 0)       | 0<br>(0 - 0)        | 0<br>(0 - 0)         | 0<br>(0 - 0)         | 0<br>(0 - 0)             |
| Coal workers pneumoconiosis                         | 0<br>(0 - 0)             | 0<br>(0 - 0)       | 0<br>(0 - 0)        | 0<br>(0 - 0)         | 0<br>(0 - 0)         | 0<br>(0 - 0)             |
| Other pneumoconiosis                                | 5<br>(2 - 8)             | 0<br>(0 - 0)       | 0<br>(0 - 0)        | 0<br>(0 - 1)         | 1<br>(0 - 1)         | 4<br>(2 - 7)             |
| Asthma                                              | 214<br>(135 - 323)       | 10<br>(6 - 18)     | 4<br>(3 - 5)        | 45<br>(31 - 66)      | 59<br>(34 - 87)      | 97<br>(53 - 161)         |
| Interstitial lung disease and pulmonary sarcoidosis | 159<br>(89 - 269)        | 2<br>(1 - 3)       | 1<br>(1 - 2)        | 13<br>(8 - 21)       | 42<br>(22 - 73)      | 101<br>(49 - 186)        |
| Other chronic respiratory diseases                  | 53<br>(31 - 84)          | 3<br>(2 - 4)       | 1<br>(0 - 1)        | 7<br>(5 - 11)        | 7<br>(4 - 11)        | 36<br>(18 - 62)          |
| Cirrhosis                                           | 759<br>(644 - 895)       | 3<br>(2 - 4)       | 5<br>(4 - 6)        | 115<br>(91 - 142)    | 314<br>(256 - 379)   | 321<br>(261 - 393)       |
| Cirrhosis due to hepatitis B                        | 25<br>(4 - 59)           | 0<br>(0 - 0)       | 0<br>(0 - 0)        | 5<br>(1 - 8)         | 11<br>(2 - 26)       | 9<br>(1 - 24)            |
| Cirrhosis due to hepatitis C                        | 394<br>(179 - 530)       | 0<br>(0 - 0)       | 1<br>(0 - 2)        | 54<br>(19 - 80)      | 160<br>(59 - 231)    | 178<br>(90 - 240)        |
| Cirrhosis due to alcohol use                        | 223<br>(127 - 375)       | --                 | --                  | 24<br>(12 - 43)      | 94<br>(50 - 169)     | 105<br>(60 - 172)        |
| Cirrhosis due to other causes                       | 117<br>(67 - 180)        | 3<br>(2 - 4)       | 3<br>(2 - 5)        | 32<br>(18 - 51)      | 49<br>(26 - 85)      | 29<br>(15 - 48)          |
| Digestive diseases                                  | 1,511<br>(1,261 - 1,766) | 10<br>(7 - 14)     | 9<br>(8 - 12)       | 169<br>(137 - 208)   | 363<br>(295 - 442)   | 959<br>(780 - 1,137)     |
| Peptic ulcer disease                                | 295<br>(220 - 411)       | 0<br>(0 - 1)       | 1<br>(0 - 1)        | 22<br>(16 - 32)      | 66<br>(48 - 94)      | 205<br>(144 - 293)       |
| Gastritis and duodenitis                            | 82<br>(43 - 162)         | 0<br>(0 - 1)       | 0<br>(0 - 1)        | 7<br>(3 - 12)        | 14<br>(7 - 26)       | 61<br>(31 - 126)         |
| Appendicitis                                        | 58<br>(41 - 94)          | 1<br>(1 - 2)       | 3<br>(2 - 4)        | 18<br>(12 - 26)      | 15<br>(9 - 25)       | 22<br>(12 - 42)          |
| Paralytic ileus and intestinal obstruction          | 190<br>(37 - 338)        | 4<br>(1 - 6)       | 2<br>(1 - 4)        | 17<br>(4 - 29)       | 40<br>(9 - 73)       | 127<br>(21 - 243)        |
| Inguinal, femoral, and abdominal hernia             | 102<br>(57 - 242)        | 1<br>(0 - 3)       | 1<br>(0 - 2)        | 9<br>(5 - 22)        | 23<br>(13 - 53)      | 68<br>(34 - 170)         |
| Inflammatory bowel disease                          | 21<br>(14 - 34)          | 0<br>(0 - 1)       | 0<br>(0 - 0)        | 6<br>(4 - 10)        | 5<br>(3 - 8)         | 8<br>(5 - 15)            |
| Vascular intestinal disorders                       | 279<br>(166 - 501)       | 0<br>(0 - 2)       | 0<br>(0 - 2)        | 16<br>(9 - 29)       | 62<br>(36 - 113)     | 201<br>(116 - 361)       |
| Gallbladder and biliary diseases                    | 181<br>(138 - 253)       | 0<br>(0 - 0)       | 0<br>(0 - 0)        | 29<br>(22 - 40)      | 57<br>(42 - 81)      | 95<br>(66 - 140)         |
| Pancreatitis                                        | 117<br>(75 - 167)        | 0<br>(0 - 1)       | 0<br>(0 - 1)        | 30<br>(20 - 42)      | 39<br>(24 - 58)      | 48<br>(28 - 72)          |
| Other digestive diseases                            | 185<br>(138 - 253)       | 2<br>(1 - 3)       | 1<br>(1 - 2)        | 16<br>(12 - 21)      | 42<br>(31 - 57)      | 124<br>(85 - 180)        |
| Neurological disorders                              | 2,650<br>(2,125 - 3,252) | 13<br>(9 - 18)     | 12<br>(9 - 16)      | 146<br>(114 - 195)   | 239<br>(193 - 294)   | 2,240<br>(1,706 - 2,821) |
| Alzheimer disease and other dementias               | 2,208<br>(1,690 - 2,793) | --                 | --                  | 1<br>(0 - 2)         | 121<br>(85 - 162)    | 2,087<br>(1,564 - 2,654) |
| Parkinson disease                                   | 122<br>(84 - 185)        | --                 | --                  | 3<br>(2 - 4)         | 21<br>(15 - 34)      | 98<br>(63 - 147)         |
| Epilepsy                                            | 170<br>(130 - 243)       | 5<br>(3 - 10)      | 8<br>(6 - 12)       | 97<br>(70 - 142)     | 35<br>(25 - 48)      | 25<br>(18 - 35)          |
| Multiple sclerosis                                  | 35<br>(19 - 52)          | --                 | --                  | 14<br>(8 - 21)       | 15<br>(8 - 24)       | 6<br>(3 - 10)            |
| Other neurological disorders                        | 115<br>(98 - 136)        | 8<br>(6 - 10)      | 4<br>(3 - 5)        | 32<br>(25 - 40)      | 47<br>(38 - 58)      | 25<br>(19 - 31)          |
| Mental and substance use disorders                  | 96<br>(76 - 118)         | 5<br>(1 - 9)       | 0<br>(0 - 0)        | 41<br>(32 - 52)      | 22<br>(16 - 29)      | 28<br>(20 - 38)          |
| Schizophrenia                                       | 3<br>(2 - 6)             | --                 | --                  | 1<br>(1 - 2)         | 1<br>(1 - 2)         | 1<br>(1 - 2)             |
| Alcohol use disorders                               | 19<br>(8 - 33)           | --                 | --                  | 7<br>(3 - 13)        | 7<br>(3 - 13)        | 5<br>(2 - 8)             |
| Drug use disorders                                  | 71<br>(56 - 87)          | 5<br>(1 - 9)       | --                  | 30<br>(22 - 38)      | 14<br>(10 - 19)      | 22<br>(15 - 32)          |
| Opioid use disorders                                | 15<br>(11 - 18)          | 1<br>(0 - 2)       | --                  | 6<br>(5 - 8)         | 3<br>(2 - 3)         | 5<br>(3 - 7)             |
| Cocaine use disorders                               | 2<br>(2 - 3)             | 0<br>(0 - 0)       | --                  | 1<br>(1 - 2)         | 0<br>(0 - 1)         | 1<br>(0 - 1)             |
| Amphetamine use disorders                           | 2<br>(2 - 3)             | 0<br>(0 - 0)       | --                  | 1<br>(1 - 1)         | 0<br>(0 - 1)         | 1<br>(0 - 1)             |

Web Table 31- Venezuela deaths with 95% UI by age, sex, and cause in 2013

| Cause                                               | Females, All Ages        | Females, 0-4 Years | Females, 5-14 Years | Females, 15-49 Years | Females, 50-69 Years     | Females, 70-80 Years     |
|-----------------------------------------------------|--------------------------|--------------------|---------------------|----------------------|--------------------------|--------------------------|
| Other drug use disorders                            | 52<br>(40 - 64)          | 4<br>(1 - 6)       | --                  | 22<br>(16 - 28)      | 11<br>(8 - 14)           | 16<br>(11 - 23)          |
| Eating disorders                                    | 2<br>(1 - 4)             | --                 | 0<br>(0 - 0)        | 2<br>(1 - 3)         | --                       | --                       |
| Anorexia nervosa                                    | 2<br>(1 - 4)             | --                 | 0<br>(0 - 0)        | 2<br>(1 - 3)         | --                       | --                       |
| Diabetes, urogenital, blood, and endocrine diseases | 7,551<br>(6,447 - 8,799) | 48<br>(36 - 87)    | 34<br>(27 - 43)     | 720<br>(589 - 871)   | 2,636<br>(2,103 - 3,171) | 4,113<br>(3,448 - 4,784) |
| Diabetes mellitus                                   | 4,005<br>(3,366 - 4,762) | 3<br>(2 - 5)       | 6<br>(4 - 11)       | 246<br>(190 - 317)   | 1,351<br>(1,095 - 1,688) | 2,399<br>(1,914 - 2,941) |
| Acute glomerulonephritis                            | 3<br>(3 - 5)             | 0<br>(0 - 0)       | 0<br>(0 - 0)        | 1<br>(1 - 1)         | 1<br>(1 - 1)             | 1<br>(1 - 2)             |
| Chronic kidney disease                              | 2,954<br>(1,915 - 3,645) | 11<br>(8 - 15)     | 14<br>(10 - 18)     | 347<br>(267 - 442)   | 1,143<br>(639 - 1,461)   | 1,439<br>(897 - 1,822)   |
| Chronic kidney disease due to diabetes mellitus     | 1,644<br>(1,032 - 2,046) | 2<br>(1 - 3)       | 1<br>(1 - 2)        | 157<br>(111 - 214)   | 730<br>(420 - 953)       | 755<br>(470 - 973)       |
| Chronic kidney disease due to hypertension          | 457<br>(235 - 775)       | 2<br>(1 - 3)       | 2<br>(1 - 4)        | 71<br>(39 - 126)     | 123<br>(56 - 232)        | 259<br>(127 - 434)       |
| Chronic kidney disease due to glomerulonephritis    | 73<br>(32 - 129)         | 2<br>(1 - 3)       | 3<br>(2 - 4)        | 18<br>(9 - 29)       | 20<br>(7 - 39)           | 31<br>(10 - 63)          |
| Chronic kidney disease due to other causes          | 779<br>(340 - 1,112)     | 5<br>(3 - 9)       | 7<br>(4 - 11)       | 101<br>(63 - 147)    | 271<br>(86 - 422)        | 394<br>(165 - 622)       |
| Urinary diseases and male infertility               | 250<br>(152 - 325)       | 5<br>(3 - 8)       | 2<br>(1 - 3)        | 42<br>(29 - 54)      | 57<br>(32 - 75)          | 144<br>(73 - 206)        |
| Interstitial nephritis and urinary tract infections | 197<br>(109 - 265)       | 4<br>(3 - 7)       | 1<br>(1 - 2)        | 29<br>(19 - 37)      | 41<br>(21 - 56)          | 121<br>(56 - 178)        |
| Urolithiasis                                        | 23<br>(15 - 36)          | --                 | 0<br>(0 - 0)        | 7<br>(4 - 11)        | 8<br>(4 - 12)            | 8<br>(4 - 16)            |
| Other urinary diseases                              | 30<br>(18 - 52)          | 1<br>(0 - 1)       | 0<br>(0 - 1)        | 6<br>(4 - 10)        | 8<br>(5 - 14)            | 15<br>(7 - 31)           |
| Gynecological diseases                              | 3<br>(2 - 9)             | --                 | --                  | 2<br>(1 - 5)         | 1<br>(0 - 2)             | 1<br>(0 - 3)             |
| Uterine fibroids                                    | 1<br>(0 - 2)             | --                 | --                  | 0<br>(0 - 1)         | 0<br>(0 - 1)             | 0<br>(0 - 1)             |
| Polycystic ovarian syndrome                         | 0<br>(0 - 0)             | --                 | --                  | 0<br>(0 - 0)         | 0<br>(0 - 0)             | --                       |
| Endometriosis                                       | 0<br>(0 - 1)             | --                 | --                  | 0<br>(0 - 1)         | 0<br>(0 - 0)             | --                       |
| Genital prolapse                                    | 0<br>(0 - 2)             | --                 | --                  | 0<br>(0 - 1)         | 0<br>(0 - 0)             | 0<br>(0 - 1)             |
| Other gynecological diseases                        | 1<br>(1 - 4)             | --                 | --                  | 1<br>(0 - 2)         | 0<br>(0 - 1)             | 0<br>(0 - 1)             |
| Hemoglobinopathies and hemolytic anemias            | 91<br>(58 - 138)         | 10<br>(5 - 19)     | 7<br>(4 - 11)       | 33<br>(21 - 48)      | 19<br>(12 - 30)          | 23<br>(14 - 36)          |
| Thalassemias                                        | 2<br>(1 - 3)             | 1<br>(0 - 1)       | 0<br>(0 - 1)        | 1<br>(1 - 1)         | 0<br>(0 - 0)             | 0<br>(0 - 0)             |
| Sickle cell disorders                               | 49<br>(31 - 74)          | 6<br>(3 - 12)      | 5<br>(3 - 9)        | 25<br>(16 - 37)      | 11<br>(7 - 17)           | 1<br>(1 - 2)             |
| G6PD deficiency                                     | 2<br>(1 - 3)             | 0<br>(0 - 0)       | 0<br>(0 - 0)        | 1<br>(1 - 1)         | 0<br>(0 - 1)             | 0<br>(0 - 0)             |
| Other hemoglobinopathies and hemolytic anemias      | 38<br>(25 - 59)          | 3<br>(1 - 5)       | 1<br>(1 - 2)        | 6<br>(4 - 8)         | 8<br>(5 - 12)            | 21<br>(13 - 34)          |
| Endocrine, metabolic, blood, and immune disorders   | 246<br>(166 - 655)       | 20<br>(11 - 50)    | 4<br>(3 - 10)       | 50<br>(34 - 122)     | 64<br>(41 - 162)         | 107<br>(58 - 331)        |
| Musculoskeletal disorders                           | 473<br>(237 - 581)       | --                 | 9<br>(4 - 12)       | 201<br>(97 - 256)    | 135<br>(61 - 177)        | 128<br>(69 - 172)        |
| Rheumatoid arthritis                                | 147<br>(80 - 193)        | --                 | 1<br>(0 - 1)        | 15<br>(9 - 22)       | 50<br>(25 - 69)          | 81<br>(45 - 114)         |
| Other musculoskeletal disorders                     | 326<br>(151 - 402)       | --                 | 8<br>(4 - 11)       | 186<br>(85 - 237)    | 85<br>(36 - 114)         | 47<br>(22 - 68)          |
| Other non-communicable diseases                     | 1,005<br>(795 - 1,226)   | 757<br>(555 - 956) | 56<br>(42 - 71)     | 110<br>(88 - 140)    | 33<br>(27 - 45)          | 49<br>(37 - 66)          |
| Congenital anomalies                                | 955<br>(744 - 1,168)     | 744<br>(543 - 942) | 55<br>(42 - 71)     | 106<br>(85 - 135)    | 28<br>(21 - 37)          | 22<br>(16 - 29)          |
| Neural tube defects                                 | 46<br>(27 - 72)          | 41<br>(23 - 67)    | 2<br>(1 - 3)        | 2<br>(1 - 3)         | 0<br>(0 - 0)             | 1<br>(0 - 1)             |
| Congenital heart anomalies                          | 495<br>(367 - 628)       | 375<br>(255 - 503) | 32<br>(23 - 43)     | 67<br>(52 - 85)      | 12<br>(9 - 17)           | 9<br>(6 - 13)            |
| Cleft lip and cleft palate                          | 2<br>(0 - 9)             | 2<br>(0 - 9)       | --                  | --                   | --                       | --                       |
| Down syndrome                                       | 48<br>(29 - 78)          | 27<br>(13 - 49)    | 3<br>(1 - 5)        | 12<br>(8 - 18)       | 5<br>(3 - 7)             | 1<br>(1 - 2)             |
| Chromosomal unbalanced rearrangements               | 15<br>(7 - 29)           | 12<br>(5 - 25)     | 0<br>(0 - 1)        | 2<br>(1 - 3)         | 0<br>(0 - 1)             | 0<br>(0 - 1)             |
| Other congenital anomalies                          | 349<br>(263 - 451)       | 287<br>(204 - 385) | 18<br>(12 - 25)     | 23<br>(17 - 32)      | 10<br>(7 - 14)           | 11<br>(7 - 16)           |
| Skin and subcutaneous diseases                      | 41<br>(29 - 62)          | 3<br>(2 - 7)       | 1<br>(0 - 1)        | 4<br>(3 - 6)         | 6<br>(4 - 8)             | 27<br>(17 - 44)          |
| Cellulitis                                          | 6<br>(4 - 12)            | 1<br>(0 - 1)       | 0<br>(0 - 0)        | 1<br>(0 - 1)         | 1<br>(1 - 2)             | 4<br>(1 - 8)             |

Web Table 31- Venezuela deaths with 95% UI by age, sex, and cause in 2013

| Cause                                           | Females, All Ages        | Females, 0-4 Years | Females, 5-14 Years | Females, 15-49 Years     | Females, 50-69 Years | Females, 70-80 Years |
|-------------------------------------------------|--------------------------|--------------------|---------------------|--------------------------|----------------------|----------------------|
| Pyoderma                                        | 14<br>(10 - 20)          | 2<br>(1 - 4)       | 0<br>(0 - 0)        | 1<br>(1 - 2)             | 3<br>(2 - 4)         | 8<br>(4 - 14)        |
| Decubitus ulcer                                 | 16<br>(10 - 34)          | 0<br>(0 - 0)       | 0<br>(0 - 0)        | 1<br>(1 - 1)             | 1<br>(1 - 2)         | 14<br>(8 - 29)       |
| Other skin and subcutaneous diseases            | 4<br>(3 - 10)            | 1<br>(0 - 2)       | 0<br>(0 - 0)        | 1<br>(1 - 2)             | 1<br>(0 - 2)         | 1<br>(0 - 4)         |
| Sudden infant death syndrome                    | 9<br>(2 - 19)            | 9<br>(2 - 19)      | --                  | --                       | --                   | --                   |
| Injuries                                        | 4,019<br>(3,409 - 4,644) | 334<br>(263 - 427) | 232<br>(199 - 266)  | 1,957<br>(1,590 - 2,376) | 614<br>(494 - 742)   | 882<br>(724 - 1,058) |
| Transport injuries                              | 1,486<br>(1,200 - 1,753) | 69<br>(46 - 95)    | 109<br>(88 - 132)   | 840<br>(660 - 1,026)     | 284<br>(223 - 355)   | 184<br>(145 - 228)   |
| Road injuries                                   | 1,446<br>(1,175 - 1,705) | 67<br>(45 - 92)    | 106<br>(85 - 128)   | 816<br>(646 - 995)       | 276<br>(218 - 344)   | 181<br>(143 - 225)   |
| Pedestrian road injuries                        | 661<br>(539 - 820)       | 43<br>(28 - 61)    | 64<br>(49 - 82)     | 301<br>(229 - 389)       | 142<br>(108 - 189)   | 111<br>(84 - 143)    |
| Cyclist road injuries                           | 59<br>(39 - 76)          | 2<br>(1 - 4)       | 5<br>(3 - 7)        | 32<br>(20 - 42)          | 14<br>(9 - 20)       | 6<br>(4 - 9)         |
| Motorcyclist road injuries                      | 84<br>(44 - 116)         | 2<br>(1 - 3)       | 4<br>(2 - 7)        | 67<br>(35 - 96)          | 8<br>(4 - 12)        | 3<br>(2 - 5)         |
| Motor vehicle road injuries                     | 628<br>(461 - 763)       | 19<br>(11 - 30)    | 31<br>(20 - 42)     | 406<br>(297 - 507)       | 112<br>(75 - 147)    | 61<br>(38 - 83)      |
| Other road injuries                             | 14<br>(9 - 22)           | 1<br>(0 - 2)       | 1<br>(1 - 3)        | 10<br>(6 - 16)           | 1<br>(0 - 2)         | 1<br>(0 - 1)         |
| Other transport injuries                        | 40<br>(21 - 53)          | 2<br>(1 - 4)       | 4<br>(2 - 6)        | 24<br>(12 - 33)          | 8<br>(4 - 12)        | 3<br>(1 - 5)         |
| Unintentional injuries                          | 1,321<br>(1,119 - 1,595) | 226<br>(163 - 333) | 70<br>(59 - 89)     | 246<br>(198 - 311)       | 160<br>(132 - 200)   | 617<br>(480 - 784)   |
| Falls                                           | 465<br>(338 - 627)       | 8<br>(6 - 13)      | 5<br>(4 - 7)        | 26<br>(21 - 36)          | 49<br>(36 - 66)      | 375<br>(258 - 525)   |
| Drowning                                        | 130<br>(100 - 220)       | 41<br>(24 - 84)    | 29<br>(21 - 44)     | 40<br>(28 - 66)          | 10<br>(7 - 16)       | 9<br>(6 - 13)        |
| Fire, heat, and hot substances                  | 66<br>(51 - 90)          | 9<br>(6 - 15)      | 4<br>(3 - 6)        | 17<br>(12 - 25)          | 10<br>(7 - 13)       | 26<br>(17 - 37)      |
| Poisonings                                      | 38<br>(23 - 52)          | 4<br>(3 - 8)       | 2<br>(1 - 3)        | 12<br>(8 - 18)           | 5<br>(3 - 8)         | 14<br>(7 - 21)       |
| Exposure to mechanical forces                   | 122<br>(100 - 152)       | 12<br>(8 - 19)     | 13<br>(10 - 18)     | 73<br>(56 - 95)          | 12<br>(9 - 16)       | 12<br>(9 - 19)       |
| Unintentional firearm injuries                  | 75<br>(56 - 95)          | 3<br>(1 - 4)       | 6<br>(4 - 10)       | 56<br>(40 - 75)          | 4<br>(3 - 6)         | 5<br>(3 - 9)         |
| Unintentional suffocation                       | 13<br>(9 - 26)           | 4<br>(2 - 8)       | 1<br>(1 - 2)        | 4<br>(3 - 7)             | 1<br>(1 - 3)         | 3<br>(1 - 7)         |
| Other exposure to mechanical forces             | 35<br>(28 - 55)          | 6<br>(3 - 10)      | 6<br>(4 - 9)        | 13<br>(9 - 20)           | 6<br>(5 - 10)        | 4<br>(3 - 6)         |
| Adverse effects of medical treatment            | 190<br>(142 - 290)       | 8<br>(5 - 16)      | 2<br>(1 - 4)        | 36<br>(25 - 58)          | 46<br>(33 - 73)      | 98<br>(64 - 156)     |
| Animal contact                                  | 17<br>(5 - 25)           | 2<br>(0 - 5)       | 1<br>(1 - 2)        | 4<br>(1 - 6)             | 4<br>(1 - 6)         | 6<br>(1 - 10)        |
| Venomous animal contact                         | 14<br>(4 - 20)           | 2<br>(0 - 4)       | 1<br>(0 - 2)        | 3<br>(1 - 5)             | 3<br>(1 - 6)         | 4<br>(1 - 8)         |
| Non-venomous animal contact                     | 4<br>(1 - 7)             | 0<br>(0 - 1)       | 0<br>(0 - 1)        | 1<br>(0 - 2)             | 1<br>(0 - 1)         | 2<br>(0 - 4)         |
| Foreign body                                    | 243<br>(157 - 387)       | 134<br>(79 - 233)  | 8<br>(5 - 13)       | 21<br>(13 - 33)          | 16<br>(11 - 26)      | 63<br>(36 - 114)     |
| Pulmonary aspiration and foreign body in airway | 241<br>(155 - 385)       | 133<br>(79 - 233)  | 8<br>(4 - 12)       | 21<br>(13 - 33)          | 16<br>(10 - 26)      | 62<br>(36 - 114)     |
| Foreign body in other body part                 | 2<br>(2 - 3)             | 0<br>(0 - 0)       | 0<br>(0 - 0)        | 1<br>(1 - 1)             | 0<br>(0 - 0)         | 1<br>(0 - 1)         |
| Other unintentional injuries                    | 51<br>(16 - 69)          | 8<br>(2 - 15)      | 5<br>(1 - 8)        | 17<br>(6 - 27)           | 7<br>(2 - 12)        | 14<br>(3 - 25)       |
| Self-harm and interpersonal violence            | 1,212<br>(820 - 1,539)   | 39<br>(15 - 74)    | 52<br>(29 - 81)     | 871<br>(596 - 1,135)     | 169<br>(105 - 235)   | 81<br>(53 - 119)     |
| Self-harm                                       | 326<br>(260 - 450)       | --                 | 12<br>(8 - 18)      | 220<br>(168 - 303)       | 55<br>(43 - 82)      | 39<br>(29 - 53)      |
| Interpersonal violence                          | 886<br>(504 - 1,193)     | 39<br>(15 - 74)    | 40<br>(17 - 69)     | 651<br>(374 - 902)       | 114<br>(52 - 174)    | 42<br>(19 - 77)      |
| Assault by firearm                              | 612<br>(317 - 840)       | 14<br>(4 - 31)     | 27<br>(11 - 47)     | 481<br>(254 - 672)       | 73<br>(30 - 117)     | 17<br>(7 - 34)       |
| Assault by sharp object                         | 127<br>(57 - 213)        | 4<br>(2 - 9)       | 3<br>(1 - 6)        | 96<br>(42 - 165)         | 17<br>(7 - 30)       | 7<br>(3 - 15)        |
| Assault by other means                          | 147<br>(66 - 230)        | 21<br>(7 - 41)     | 10<br>(3 - 18)      | 75<br>(33 - 123)         | 25<br>(10 - 44)      | 18<br>(7 - 34)       |

Web Table 31- Vietnam deaths with 95% UI by age, sex, and cause in 2013

| Cause                                                             | Both Sexes, All Ages           | Both Sexes, 0-4 Years       | Both Sexes, 5-14 Years   | Both Sexes, 15-49 Years     | Both Sexes, 50-69 Years       | Both Sexes, 70-80 Years        |
|-------------------------------------------------------------------|--------------------------------|-----------------------------|--------------------------|-----------------------------|-------------------------------|--------------------------------|
| All causes                                                        | 537,245<br>(465,237 - 620,304) | 26,628<br>(22,613 - 31,506) | 4,683<br>(4,166 - 5,226) | 75,699<br>(59,135 - 93,271) | 118,492<br>(92,653 - 150,574) | 311,743<br>(279,221 - 346,246) |
| Communicable, maternal, neonatal, and nutritional diseases        | 61,347<br>(54,445 - 68,655)    | 16,978<br>(14,011 - 20,554) | 888<br>(667 - 1,288)     | 11,951<br>(10,163 - 14,111) | 7,993<br>(6,626 - 9,696)      | 23,536<br>(19,248 - 28,421)    |
| HIV/AIDS and tuberculosis                                         | 20,512<br>(16,925 - 24,994)    | 32<br>(17 - 54)             | 38<br>(25 - 56)          | 8,020<br>(6,451 - 10,013)   | 4,727<br>(3,711 - 6,164)      | 7,695<br>(6,167 - 9,662)       |
| Tuberculosis                                                      | 14,021<br>(11,297 - 17,789)    | 9<br>(6 - 14)               | 35<br>(23 - 52)          | 3,025<br>(2,192 - 4,135)    | 3,423<br>(2,497 - 4,690)      | 7,528<br>(6,005 - 9,477)       |
| HIV/AIDS                                                          | 6,492<br>(4,817 - 9,107)       | 23<br>(9 - 44)              | 3<br>(0 - 7)             | 4,995<br>(3,718 - 6,960)    | 1,304<br>(861 - 2,022)        | 167<br>(92 - 290)              |
| HIV/AIDS resulting in mycobacterial infection                     | 425<br>(296 - 639)             | 1<br>(0 - 2)                | 0<br>(0 - 0)             | 323<br>(224 - 477)          | 89<br>(56 - 145)              | 13<br>(7 - 23)                 |
| HIV/AIDS resulting in other diseases                              | 6,066<br>(4,492 - 8,466)       | 22<br>(8 - 42)              | 3<br>(0 - 6)             | 4,672<br>(3,470 - 6,524)    | 1,215<br>(796 - 1,902)        | 155<br>(85 - 268)              |
| Diarrhea, lower respiratory, and other common infectious diseases | 27,763<br>(22,437 - 33,561)    | 7,121<br>(5,582 - 9,156)    | 680<br>(467 - 1,085)     | 2,461<br>(1,764 - 3,289)    | 2,692<br>(1,920 - 3,675)      | 14,810<br>(11,018 - 19,450)    |
| Diarrheal diseases                                                | 2,289<br>(1,533 - 3,513)       | 222<br>(105 - 421)          | 46<br>(27 - 72)          | 107<br>(73 - 151)           | 166<br>(111 - 245)            | 1,749<br>(1,053 - 2,906)       |
| Intestinal infectious diseases                                    | 1,042<br>(497 - 1,886)         | 352<br>(152 - 699)          | 221<br>(91 - 429)        | 347<br>(129 - 691)          | 81<br>(26 - 176)              | 42<br>(19 - 80)                |
| Typhoid fever                                                     | 787<br>(363 - 1,463)           | 251<br>(102 - 510)          | 168<br>(68 - 331)        | 272<br>(95 - 549)           | 65<br>(19 - 146)              | 32<br>(14 - 63)                |
| Paratyphoid fever                                                 | 224<br>(99 - 420)              | 90<br>(36 - 185)            | 50<br>(19 - 106)         | 65<br>(23 - 135)            | 13<br>(3 - 30)                | 6<br>(2 - 13)                  |
| Other intestinal infectious diseases                              | 31<br>(19 - 48)                | 11<br>(4 - 21)              | 2<br>(0 - 8)             | 10<br>(4 - 20)              | 3<br>(1 - 8)                  | 3<br>(1 - 8)                   |
| Lower respiratory infections                                      | 21,414<br>(16,484 - 26,669)    | 5,321<br>(3,954 - 6,897)    | 179<br>(120 - 256)       | 1,295<br>(885 - 1,852)      | 2,135<br>(1,468 - 2,981)      | 12,485<br>(8,897 - 17,067)     |
| Upper respiratory infections                                      | 35<br>(15 - 74)                | 2<br>(0 - 7)                | 1<br>(0 - 2)             | 8<br>(2 - 18)               | 8<br>(2 - 22)                 | 16<br>(2 - 51)                 |
| Otitis media                                                      | 24<br>(19 - 28)                | 2<br>(2 - 3)                | 1<br>(1 - 2)             | 6<br>(4 - 8)                | 3<br>(2 - 4)                  | 11<br>(8 - 15)                 |
| Meningitis                                                        | 693<br>(488 - 1,024)           | 230<br>(109 - 485)          | 30<br>(19 - 45)          | 270<br>(176 - 392)          | 79<br>(51 - 121)              | 84<br>(50 - 153)               |
| Pneumococcal meningitis                                           | 262<br>(176 - 383)             | 72<br>(31 - 148)            | 13<br>(7 - 20)           | 113<br>(65 - 175)           | 32<br>(19 - 53)               | 32<br>(18 - 62)                |
| H influenzae type B meningitis                                    | 129<br>(78 - 224)              | 72<br>(33 - 158)            | 6<br>(3 - 11)            | 33<br>(17 - 56)             | 8<br>(4 - 14)                 | 9<br>(5 - 17)                  |
| Meningococcal meningitis                                          | 86<br>(53 - 130)               | 15<br>(7 - 37)              | 3<br>(1 - 5)             | 42<br>(21 - 75)             | 12<br>(6 - 21)                | 15<br>(8 - 26)                 |
| Other meningitis                                                  | 216<br>(146 - 317)             | 70<br>(32 - 145)            | 8<br>(4 - 15)            | 82<br>(43 - 141)            | 27<br>(14 - 47)               | 28<br>(16 - 53)                |
| Encephalitis                                                      | 1,303<br>(969 - 1,621)         | 291<br>(187 - 438)          | 101<br>(67 - 141)        | 379<br>(253 - 530)          | 195<br>(122 - 275)            | 337<br>(208 - 479)             |
| Diphtheria                                                        | 6<br>(1 - 23)                  | 3<br>(0 - 20)               | 1<br>(0 - 6)             | 1<br>(0 - 5)                | 1<br>(0 - 3)                  | --                             |
| Whooping cough                                                    | 143<br>(0 - 700)               | 131<br>(0 - 634)            | 8<br>(0 - 42)            | 3<br>(0 - 15)               | 0<br>(0 - 2)                  | --                             |
| Tetanus                                                           | 99<br>(65 - 158)               | 17<br>(9 - 29)              | 1<br>(1 - 2)             | 9<br>(6 - 17)               | 18<br>(11 - 29)               | 53<br>(26 - 109)               |
| Measles                                                           | 652<br>(13 - 3,933)            | 540<br>(11 - 3,212)         | 88<br>(2 - 550)          | 24<br>(0 - 145)             | 1<br>(0 - 6)                  | --                             |
| Varicella and herpes zoster                                       | 63<br>(23 - 162)               | 9<br>(1 - 28)               | 3<br>(0 - 8)             | 13<br>(4 - 29)              | 6<br>(1 - 14)                 | 33<br>(2 - 133)                |
| Neglected tropical diseases and malaria                           | 763<br>(595 - 962)             | 127<br>(73 - 186)           | 125<br>(88 - 186)        | 296<br>(218 - 392)          | 127<br>(90 - 176)             | 87<br>(63 - 120)               |
| Malaria                                                           | 345<br>(248 - 460)             | 23<br>(13 - 40)             | 24<br>(14 - 39)          | 182<br>(117 - 262)          | 85<br>(53 - 135)              | 31<br>(17 - 54)                |
| Leishmaniasis                                                     | 1<br>(0 - 1)                   | 0<br>(0 - 1)                | 0<br>(0 - 0)             | 0<br>(0 - 0)                | 0<br>(0 - 0)                  | 0<br>(0 - 0)                   |
| Visceral leishmaniasis                                            | 1<br>(0 - 1)                   | 0<br>(0 - 1)                | 0<br>(0 - 0)             | 0<br>(0 - 0)                | 0<br>(0 - 0)                  | 0<br>(0 - 0)                   |
| Cysticercosis                                                     | 1<br>(1 - 2)                   | 0<br>(0 - 0)                | 0<br>(0 - 0)             | 1<br>(0 - 1)                | 0<br>(0 - 0)                  | 0<br>(0 - 0)                   |
| Cystic echinococcosis                                             | 9<br>(7 - 11)                  | 0<br>(0 - 0)                | 1<br>(1 - 1)             | 4<br>(3 - 5)                | 2<br>(2 - 3)                  | 2<br>(2 - 3)                   |
| Dengue                                                            | 278<br>(161 - 414)             | 86<br>(38 - 134)            | 78<br>(35 - 124)         | 67<br>(39 - 117)            | 19<br>(12 - 29)               | 28<br>(17 - 42)                |
| Rabies                                                            | 82<br>(53 - 149)               | 2<br>(1 - 3)                | 18<br>(7 - 45)           | 31<br>(19 - 53)             | 16<br>(10 - 25)               | 16<br>(8 - 36)                 |
| Intestinal nematode infections                                    | 13<br>(4 - 26)                 | 6<br>(1 - 16)               | 2<br>(0 - 7)             | 2<br>(0 - 8)                | 1<br>(0 - 6)                  | 2<br>(0 - 9)                   |
| Ascariasis                                                        | 13<br>(4 - 26)                 | 6<br>(1 - 16)               | 2<br>(0 - 7)             | 2<br>(0 - 8)                | 1<br>(0 - 6)                  | 2<br>(0 - 9)                   |
| Other neglected tropical diseases                                 | 34<br>(26 - 45)                | 9<br>(5 - 16)               | 2<br>(2 - 4)             | 10<br>(7 - 15)              | 4<br>(2 - 6)                  | 8<br>(5 - 12)                  |
| Maternal disorders                                                | 800<br>(482 - 1,265)           | --                          | 2<br>(1 - 5)             | 798<br>(481 - 1,263)        | --                            | --                             |
| Maternal hemorrhage                                               | 89<br>(46 - 150)               | --                          | 0<br>(0 - 0)             | 89<br>(46 - 149)            | --                            | --                             |

Web Table 31- Vietnam deaths with 95% UI by age, sex, and cause in 2013

| Cause                                                            | Both Sexes, All Ages           | Both Sexes, 0-4 Years     | Both Sexes, 5-14 Years   | Both Sexes, 15-49 Years     | Both Sexes, 50-69 Years       | Both Sexes, 70-80 Years        |
|------------------------------------------------------------------|--------------------------------|---------------------------|--------------------------|-----------------------------|-------------------------------|--------------------------------|
| Maternal sepsis and other maternal infections                    | 98<br>(55 - 170)               | --                        | 0<br>(0 - 1)             | 98<br>(55 - 170)            | --                            | --                             |
| Maternal hypertensive disorders                                  | 51<br>(16 - 100)               | --                        | 0<br>(0 - 0)             | 50<br>(16 - 100)            | --                            | --                             |
| Maternal obstructed labor                                        | 57<br>(28 - 103)               | --                        | 0<br>(0 - 0)             | 57<br>(28 - 103)            | --                            | --                             |
| Maternal abortive outcome                                        | 128<br>(65 - 226)              | --                        | 0<br>(0 - 1)             | 127<br>(65 - 226)           | --                            | --                             |
| Indirect maternal deaths                                         | 120<br>(61 - 204)              | --                        | 0<br>(0 - 1)             | 120<br>(61 - 204)           | --                            | --                             |
| Late maternal deaths                                             | 99<br>(54 - 164)               | --                        | 0<br>(0 - 1)             | 99<br>(53 - 163)            | --                            | --                             |
| Maternal deaths aggravated by HIV/AIDS                           | 0<br>(0 - 0)                   | --                        | --                       | 0<br>(0 - 0)                | --                            | --                             |
| Other maternal disorders                                         | 156<br>(83 - 262)              | --                        | 0<br>(0 - 1)             | 156<br>(83 - 262)           | --                            | --                             |
| Neonatal disorders                                               | 9,375<br>(7,471 - 11,438)      | 9,375<br>(7,471 - 11,438) | --                       | --                          | --                            | --                             |
| Neonatal preterm birth complications                             | 5,522<br>(3,917 - 7,331)       | 5,522<br>(3,917 - 7,331)  | --                       | --                          | --                            | --                             |
| Neonatal encephalopathy due to birth asphyxia and trauma         | 2,270<br>(1,369 - 3,423)       | 2,270<br>(1,369 - 3,423)  | --                       | --                          | --                            | --                             |
| Neonatal sepsis and other neonatal infections                    | 1,053<br>(531 - 1,855)         | 1,053<br>(531 - 1,855)    | --                       | --                          | --                            | --                             |
| Hemolytic disease and other neonatal jaundice                    | 14<br>(6 - 31)                 | 14<br>(6 - 31)            | --                       | --                          | --                            | --                             |
| Other neonatal disorders                                         | 515<br>(271 - 900)             | 515<br>(271 - 900)        | --                       | --                          | --                            | --                             |
| Nutritional deficiencies                                         | 183<br>(120 - 395)             | 16<br>(8 - 35)            | 9<br>(5 - 20)            | 15<br>(8 - 36)              | 15<br>(8 - 36)                | 128<br>(80 - 285)              |
| Protein-energy malnutrition                                      | 31<br>(13 - 89)                | 6<br>(2 - 18)             | 3<br>(1 - 6)             | 3<br>(2 - 10)               | 2<br>(1 - 8)                  | 16<br>(4 - 51)                 |
| Iodine deficiency                                                | 4<br>(1 - 13)                  | 1<br>(0 - 3)              | 0<br>(0 - 2)             | 0<br>(0 - 1)                | 0<br>(0 - 2)                  | 2<br>(0 - 10)                  |
| Iron-deficiency anemia                                           | 78<br>(44 - 177)               | 5<br>(2 - 10)             | 4<br>(2 - 9)             | 7<br>(4 - 17)               | 7<br>(4 - 16)                 | 56<br>(27 - 130)               |
| Other nutritional deficiencies                                   | 70<br>(42 - 156)               | 4<br>(2 - 11)             | 2<br>(1 - 4)             | 5<br>(2 - 12)               | 5<br>(2 - 12)                 | 55<br>(32 - 118)               |
| Other communicable, maternal, neonatal, and nutritional diseases | 1,951<br>(1,390 - 2,930)       | 308<br>(147 - 524)        | 34<br>(20 - 54)          | 361<br>(249 - 531)          | 432<br>(272 - 708)            | 816<br>(442 - 1,604)           |
| Sexually transmitted diseases excluding HIV                      | 284<br>(114 - 515)             | 213<br>(54 - 424)         | 19<br>(6 - 37)           | 9<br>(5 - 14)               | 7<br>(3 - 15)                 | 36<br>(14 - 79)                |
| Syphilis                                                         | 269<br>(96 - 498)              | 213<br>(54 - 424)         | 18<br>(5 - 36)           | 4<br>(2 - 7)                | 4<br>(2 - 9)                  | 29<br>(11 - 63)                |
| Chlamydial infection                                             | 3<br>(2 - 6)                   | --                        | 0<br>(0 - 0)             | 1<br>(0 - 2)                | 1<br>(0 - 1)                  | 1<br>(0 - 3)                   |
| Gonococcal infection                                             | 8<br>(4 - 13)                  | --                        | 0<br>(0 - 0)             | 2<br>(1 - 3)                | 1<br>(1 - 3)                  | 4<br>(2 - 9)                   |
| Other sexually transmitted diseases                              | 5<br>(3 - 7)                   | --                        | 0<br>(0 - 0)             | 2<br>(1 - 3)                | 1<br>(0 - 2)                  | 2<br>(1 - 4)                   |
| Hepatitis                                                        | 616<br>(482 - 780)             | 21<br>(12 - 36)           | 10<br>(7 - 13)           | 198<br>(139 - 272)          | 181<br>(126 - 254)            | 206<br>(146 - 283)             |
| Acute hepatitis A                                                | 44<br>(13 - 87)                | 10<br>(3 - 18)            | 2<br>(1 - 4)             | 20<br>(5 - 45)              | 8<br>(2 - 19)                 | 4<br>(1 - 9)                   |
| Acute hepatitis B                                                | 419<br>(302 - 570)             | 10<br>(4 - 19)            | 2<br>(1 - 3)             | 99<br>(54 - 154)            | 136<br>(89 - 194)             | 174<br>(118 - 241)             |
| Acute hepatitis C                                                | 22<br>(4 - 59)                 | --                        | 0<br>(0 - 1)             | 6<br>(1 - 18)               | 7<br>(1 - 18)                 | 9<br>(1 - 25)                  |
| Acute hepatitis E                                                | 130<br>(69 - 222)              | 2<br>(1 - 5)              | 5<br>(3 - 8)             | 73<br>(40 - 123)            | 30<br>(12 - 62)               | 19<br>(6 - 46)                 |
| Other infectious diseases                                        | 1,051<br>(585 - 2,018)         | 73<br>(42 - 136)          | 6<br>(2 - 10)            | 154<br>(86 - 286)           | 244<br>(119 - 492)            | 574<br>(218 - 1,360)           |
| Non-communicable diseases                                        | 425,303<br>(365,378 - 495,746) | 6,257<br>(4,937 - 7,742)  | 1,280<br>(1,034 - 1,519) | 37,750<br>(28,300 - 48,057) | 100,897<br>(78,340 - 129,669) | 279,119<br>(250,187 - 311,425) |
| Neoplasms                                                        | 113,851<br>(93,588 - 137,263)  | 341<br>(213 - 500)        | 582<br>(447 - 718)       | 15,362<br>(11,456 - 19,451) | 39,448<br>(30,325 - 51,101)   | 58,119<br>(49,202 - 71,063)    |
| Esophageal cancer                                                | 4,698<br>(3,111 - 6,476)       | --                        | --                       | 496<br>(189 - 848)          | 1,659<br>(861 - 2,638)        | 2,543<br>(1,915 - 3,270)       |
| Stomach cancer                                                   | 19,530<br>(14,952 - 26,094)    | --                        | --                       | 1,835<br>(1,307 - 2,497)    | 4,158<br>(2,999 - 5,586)      | 13,537<br>(9,840 - 19,076)     |
| Liver cancer                                                     | 25,901<br>(19,778 - 32,604)    | --                        | 59<br>(41 - 84)          | 3,818<br>(2,639 - 5,117)    | 11,162<br>(8,150 - 15,080)    | 10,862<br>(8,207 - 14,209)     |
| Liver cancer due to hepatitis B                                  | 10,059<br>(6,279 - 14,213)     | --                        | 22<br>(10 - 35)          | 1,918<br>(1,157 - 2,829)    | 4,834<br>(2,745 - 7,252)      | 3,284<br>(1,956 - 4,743)       |
| Liver cancer due to hepatitis C                                  | 11,254<br>(7,338 - 15,966)     | --                        | 8<br>(4 - 13)            | 1,307<br>(673 - 2,096)      | 4,680<br>(2,663 - 7,304)      | 5,260<br>(3,480 - 7,734)       |
| Liver cancer due to alcohol use                                  | 1,954<br>(1,170 - 3,028)       | --                        | --                       | 152<br>(74 - 248)           | 668<br>(372 - 1,159)          | 1,134<br>(636 - 1,823)         |
| Liver cancer due to other causes                                 | 2,634<br>(1,587 - 4,277)       | --                        | 29<br>(18 - 45)          | 441<br>(281 - 708)          | 981<br>(539 - 1,772)          | 1,183<br>(613 - 2,068)         |

Web Table 31- Vietnam deaths with 95% UI by age, sex, and cause in 2013

| Cause                                         | Both Sexes, All Ages           | Both Sexes, 0-4 Years | Both Sexes, 5-14 Years | Both Sexes, 15-49 Years    | Both Sexes, 50-69 Years     | Both Sexes, 70-80 Years        |
|-----------------------------------------------|--------------------------------|-----------------------|------------------------|----------------------------|-----------------------------|--------------------------------|
| Larynx cancer                                 | 1,191<br>(786 - 1,662)         | --                    | --                     | 92<br>(43 - 145)           | 491<br>(184 - 779)          | 608<br>(390 - 1,114)           |
| Tracheal, bronchus and lung cancer            | 20,547<br>(16,279 - 26,056)    | --                    | --                     | 1,884<br>(1,373 - 2,495)   | 8,677<br>(6,459 - 11,440)   | 9,986<br>(8,096 - 12,721)      |
| Breast cancer                                 | 2,318<br>(1,634 - 3,329)       | --                    | --                     | 593<br>(385 - 870)         | 1,066<br>(708 - 1,596)      | 658<br>(467 - 1,340)           |
| Cervical cancer                               | 3,208<br>(2,224 - 5,175)       | --                    | --                     | 375<br>(205 - 587)         | 904<br>(557 - 1,421)        | 1,929<br>(1,202 - 4,033)       |
| Uterine cancer                                | 942<br>(516 - 1,370)           | --                    | --                     | 46<br>(20 - 86)            | 299<br>(115 - 496)          | 596<br>(350 - 967)             |
| Prostate cancer                               | 1,403<br>(647 - 3,268)         | --                    | --                     | 6<br>(3 - 10)              | 56<br>(31 - 92)             | 1,341<br>(589 - 3,178)         |
| Colon and rectum cancer                       | 6,281<br>(5,008 - 7,761)       | --                    | --                     | 809<br>(598 - 1,062)       | 2,116<br>(1,588 - 2,749)    | 3,356<br>(2,647 - 4,193)       |
| Lip and oral cavity cancer                    | 2,551<br>(1,507 - 3,505)       | --                    | --                     | 280<br>(135 - 452)         | 891<br>(398 - 1,401)        | 1,380<br>(904 - 1,936)         |
| Nasopharynx cancer                            | 546<br>(239 - 1,688)           | --                    | 4<br>(1 - 9)           | 84<br>(42 - 242)           | 137<br>(76 - 292)           | 321<br>(99 - 1,184)            |
| Other pharynx cancer                          | 1,547<br>(1,083 - 2,755)       | --                    | --                     | 166<br>(100 - 263)         | 575<br>(374 - 868)          | 806<br>(495 - 1,761)           |
| Gallbladder and biliary tract cancer          | 880<br>(612 - 1,263)           | --                    | --                     | 52<br>(34 - 76)            | 223<br>(120 - 327)          | 606<br>(384 - 999)             |
| Pancreatic cancer                             | 1,556<br>(1,244 - 1,927)       | --                    | --                     | 250<br>(180 - 333)         | 657<br>(490 - 854)          | 648<br>(521 - 795)             |
| Malignant skin melanoma                       | 125<br>(84 - 174)              | --                    | --                     | 32<br>(17 - 48)            | 45<br>(30 - 65)             | 48<br>(33 - 73)                |
| Non-melanoma skin cancer                      | 329<br>(210 - 509)             | --                    | --                     | 27<br>(15 - 53)            | 59<br>(38 - 96)             | 242<br>(143 - 401)             |
| Ovarian cancer                                | 533<br>(362 - 786)             | --                    | --                     | 169<br>(107 - 259)         | 304<br>(197 - 468)          | 60<br>(40 - 88)                |
| Testicular cancer                             | 161<br>(94 - 242)              | --                    | --                     | 56<br>(29 - 86)            | 30<br>(16 - 48)             | 76<br>(40 - 127)               |
| Kidney cancer                                 | 533<br>(386 - 744)             | 4<br>(2 - 7)          | 2<br>(1 - 3)           | 54<br>(36 - 75)            | 156<br>(109 - 218)          | 317<br>(205 - 499)             |
| Bladder cancer                                | 1,151<br>(703 - 2,278)         | --                    | --                     | 62<br>(40 - 100)           | 317<br>(219 - 457)          | 772<br>(403 - 1,795)           |
| Brain and nervous system cancer               | 3,534<br>(1,904 - 4,829)       | 38<br>(11 - 84)       | 94<br>(42 - 143)       | 866<br>(407 - 1,285)       | 1,338<br>(650 - 1,966)      | 1,197<br>(713 - 1,679)         |
| Thyroid cancer                                | 1,028<br>(483 - 2,524)         | --                    | 1<br>(1 - 2)           | 33<br>(19 - 66)            | 160<br>(100 - 278)          | 835<br>(331 - 2,193)           |
| Mesothelioma                                  | 61<br>(42 - 86)                | --                    | --                     | 13<br>(8 - 21)             | 19<br>(12 - 30)             | 30<br>(17 - 49)                |
| Hodgkin lymphoma                              | 125<br>(57 - 344)              | 5<br>(3 - 9)          | 3<br>(2 - 7)           | 25<br>(13 - 59)            | 15<br>(6 - 43)              | 77<br>(26 - 246)               |
| Non-Hodgkin lymphoma                          | 3,627<br>(2,577 - 4,781)       | 47<br>(25 - 81)       | 69<br>(45 - 98)        | 855<br>(541 - 1,201)       | 1,092<br>(688 - 1,588)      | 1,565<br>(1,087 - 2,102)       |
| Multiple myeloma                              | 131<br>(93 - 180)              | --                    | --                     | 36<br>(24 - 52)            | 53<br>(34 - 80)             | 41<br>(27 - 61)                |
| Leukemia                                      | 3,055<br>(2,410 - 4,008)       | 127<br>(62 - 225)     | 267<br>(181 - 349)     | 1,210<br>(847 - 1,611)     | 533<br>(387 - 716)          | 918<br>(634 - 1,370)           |
| Other neoplasms                               | 6,361<br>(4,533 - 8,229)       | 120<br>(70 - 192)     | 82<br>(57 - 116)       | 1,137<br>(751 - 1,556)     | 2,256<br>(1,492 - 3,135)    | 2,764<br>(1,976 - 3,653)       |
| Cardiovascular diseases                       | 198,849<br>(171,637 - 229,608) | 526<br>(367 - 726)    | 48<br>(34 - 64)        | 10,976<br>(8,114 - 14,159) | 39,587<br>(30,778 - 50,714) | 147,711<br>(130,439 - 165,226) |
| Rheumatic heart disease                       | 1,122<br>(646 - 1,572)         | 14<br>(5 - 29)        | 11<br>(5 - 18)         | 277<br>(140 - 415)         | 238<br>(151 - 358)          | 582<br>(316 - 854)             |
| Ischemic heart disease                        | 31,946<br>(25,348 - 40,654)    | 5<br>(2 - 11)         | 1<br>(1 - 2)           | 1,484<br>(1,008 - 2,087)   | 7,093<br>(5,176 - 9,557)    | 23,363<br>(18,636 - 30,805)    |
| Cerebrovascular disease                       | 145,734<br>(123,671 - 169,740) | 86<br>(50 - 130)      | 5<br>(3 - 8)           | 7,097<br>(5,150 - 9,296)   | 27,763<br>(21,152 - 36,135) | 110,783<br>(95,367 - 125,323)  |
| Ischemic stroke                               | 88,075<br>(62,710 - 105,439)   | 5<br>(2 - 11)         | 1<br>(0 - 1)           | 1,133<br>(622 - 1,847)     | 10,247<br>(6,536 - 14,703)  | 76,689<br>(54,182 - 90,976)    |
| Hemorrhagic stroke                            | 57,659<br>(44,919 - 79,896)    | 80<br>(47 - 121)      | 4<br>(3 - 7)           | 5,964<br>(4,303 - 7,824)   | 17,516<br>(12,768 - 23,321) | 34,094<br>(25,671 - 51,583)    |
| Hypertensive heart disease                    | 8,551<br>(5,935 - 11,741)      | 14<br>(6 - 27)        | 1<br>(1 - 2)           | 523<br>(311 - 796)         | 1,741<br>(1,107 - 2,510)    | 6,271<br>(4,283 - 8,951)       |
| Cardiomyopathy and myocarditis                | 2,414<br>(1,657 - 3,444)       | 172<br>(97 - 261)     | 13<br>(8 - 19)         | 447<br>(291 - 664)         | 519<br>(339 - 823)          | 1,263<br>(806 - 1,903)         |
| Atrial fibrillation and flutter               | 141<br>(82 - 218)              | --                    | --                     | 16<br>(9 - 26)             | 35<br>(19 - 55)             | 90<br>(49 - 146)               |
| Aortic aneurysm                               | 891<br>(615 - 1,285)           | --                    | --                     | 59<br>(38 - 86)            | 119<br>(81 - 177)           | 713<br>(477 - 1,055)           |
| Peripheral vascular disease                   | 85<br>(58 - 121)               | --                    | --                     | 4<br>(2 - 7)               | 15<br>(9 - 23)              | 66<br>(44 - 96)                |
| Endocarditis                                  | 871<br>(566 - 1,201)           | 64<br>(33 - 110)      | 4<br>(3 - 7)           | 215<br>(122 - 322)         | 231<br>(139 - 340)          | 357<br>(220 - 521)             |
| Other cardiovascular and circulatory diseases | 7,094<br>(4,713 - 10,844)      | 170<br>(102 - 270)    | 12<br>(7 - 20)         | 854<br>(524 - 1,351)       | 1,834<br>(1,155 - 3,032)    | 4,223<br>(2,683 - 6,719)       |
| Chronic respiratory diseases                  | 31,423<br>(22,056 - 37,824)    | 364<br>(235 - 511)    | 30<br>(13 - 42)        | 785<br>(476 - 1,075)       | 4,759<br>(2,931 - 6,423)    | 25,484<br>(18,291 - 30,309)    |

Web Table 31- Vietnam deaths with 95% UI by age, sex, and cause in 2013

| Cause                                               | Both Sexes, All Ages        | Both Sexes, 0-4 Years | Both Sexes, 5-14 Years | Both Sexes, 15-49 Years  | Both Sexes, 50-69 Years  | Both Sexes, 70-80 Years     |
|-----------------------------------------------------|-----------------------------|-----------------------|------------------------|--------------------------|--------------------------|-----------------------------|
| Chronic obstructive pulmonary disease               | 20,243<br>(14,421 - 25,035) | 152<br>(84 - 241)     | 4<br>(1 - 6)           | 236<br>(141 - 341)       | 2,609<br>(1,646 - 3,610) | 17,242<br>(12,373 - 21,199) |
| Pneumoconiosis                                      | 677<br>(337 - 1,071)        | 11<br>(5 - 22)        | 2<br>(1 - 4)           | 68<br>(31 - 108)         | 245<br>(105 - 420)       | 350<br>(184 - 560)          |
| Silicosis                                           | 345<br>(173 - 560)          | 2<br>(1 - 5)          | 1<br>(0 - 1)           | 4<br>(2 - 6)             | 60<br>(21 - 115)         | 278<br>(144 - 446)          |
| Asbestosis                                          | 53<br>(25 - 88)             | 3<br>(1 - 5)          | 1<br>(0 - 1)           | 10<br>(5 - 16)           | 39<br>(16 - 68)          | 1<br>(1 - 2)                |
| Coal workers pneumoconiosis                         | 165<br>(77 - 282)           | 3<br>(1 - 5)          | 1<br>(0 - 1)           | 39<br>(18 - 65)          | 110<br>(49 - 198)        | 13<br>(6 - 23)              |
| Other pneumoconiosis                                | 115<br>(58 - 180)           | 4<br>(1 - 7)          | 1<br>(0 - 1)           | 15<br>(7 - 25)           | 37<br>(17 - 66)          | 58<br>(29 - 101)            |
| Asthma                                              | 6,066<br>(3,588 - 8,122)    | 24<br>(6 - 45)        | 7<br>(3 - 11)          | 294<br>(168 - 406)       | 1,152<br>(621 - 1,670)   | 4,589<br>(2,727 - 6,372)    |
| Interstitial lung disease and pulmonary sarcoidosis | 2,874<br>(1,549 - 4,624)    | 15<br>(5 - 35)        | 3<br>(1 - 5)           | 45<br>(27 - 69)          | 602<br>(300 - 987)       | 2,209<br>(1,164 - 3,617)    |
| Other chronic respiratory diseases                  | 1,562<br>(1,006 - 2,290)    | 161<br>(111 - 226)    | 14<br>(6 - 21)         | 142<br>(80 - 206)        | 151<br>(89 - 228)        | 1,094<br>(648 - 1,765)      |
| Cirrhosis                                           | 16,473<br>(12,626 - 20,898) | 29<br>(13 - 53)       | 21<br>(15 - 28)        | 4,284<br>(2,911 - 5,750) | 6,809<br>(4,918 - 9,308) | 5,332<br>(4,166 - 6,755)    |
| Cirrhosis due to hepatitis B                        | 4,869<br>(2,509 - 7,919)    | 2<br>(0 - 5)          | 5<br>(2 - 9)           | 1,267<br>(514 - 2,361)   | 1,876<br>(848 - 3,403)   | 1,720<br>(848 - 2,788)      |
| Cirrhosis due to hepatitis C                        | 4,691<br>(2,584 - 7,212)    | 1<br>(0 - 3)          | 2<br>(1 - 5)           | 1,104<br>(499 - 1,914)   | 1,993<br>(1,050 - 3,171) | 1,590<br>(769 - 2,688)      |
| Cirrhosis due to alcohol use                        | 5,615<br>(3,591 - 8,224)    | --                    | --                     | 1,361<br>(701 - 2,300)   | 2,471<br>(1,449 - 3,929) | 1,783<br>(1,139 - 2,570)    |
| Cirrhosis due to other causes                       | 1,298<br>(855 - 1,910)      | 26<br>(11 - 49)       | 14<br>(9 - 19)         | 551<br>(333 - 844)       | 469<br>(277 - 744)       | 238<br>(127 - 400)          |
| Digestive diseases                                  | 9,790<br>(7,967 - 12,077)   | 127<br>(75 - 198)     | 45<br>(34 - 59)        | 832<br>(579 - 1,149)     | 1,474<br>(1,077 - 1,987) | 7,311<br>(5,779 - 9,181)    |
| Peptic ulcer disease                                | 3,266<br>(2,398 - 4,524)    | 7<br>(3 - 14)         | 6<br>(4 - 9)           | 239<br>(148 - 363)       | 560<br>(388 - 800)       | 2,455<br>(1,701 - 3,522)    |
| Gastritis and duodenitis                            | 378<br>(217 - 675)          | 6<br>(2 - 11)         | 3<br>(2 - 5)           | 28<br>(16 - 54)          | 52<br>(30 - 94)          | 289<br>(150 - 539)          |
| Appendicitis                                        | 532<br>(330 - 855)          | 15<br>(6 - 29)        | 5<br>(3 - 9)           | 21<br>(10 - 37)          | 60<br>(34 - 97)          | 431<br>(232 - 735)          |
| Paralytic ileus and intestinal obstruction          | 1,176<br>(632 - 2,123)      | 38<br>(14 - 79)       | 6<br>(3 - 12)          | 26<br>(12 - 62)          | 84<br>(41 - 178)         | 1,022<br>(533 - 1,895)      |
| Inguinal, femoral, and abdominal hernia             | 344<br>(176 - 591)          | 2<br>(1 - 4)          | 2<br>(1 - 3)           | 8<br>(5 - 15)            | 29<br>(18 - 49)          | 303<br>(141 - 545)          |
| Inflammatory bowel disease                          | 307<br>(174 - 464)          | 10<br>(4 - 19)        | 3<br>(2 - 5)           | 33<br>(17 - 56)          | 46<br>(25 - 70)          | 215<br>(115 - 357)          |
| Vascular intestinal disorders                       | 112<br>(58 - 213)           | 2<br>(0 - 5)          | 1<br>(0 - 3)           | 12<br>(5 - 25)           | 14<br>(6 - 29)           | 83<br>(43 - 158)            |
| Gallbladder and biliary diseases                    | 1,308<br>(772 - 1,941)      | 10<br>(4 - 17)        | 4<br>(2 - 6)           | 84<br>(47 - 134)         | 178<br>(102 - 265)       | 1,032<br>(571 - 1,646)      |
| Pancreatitis                                        | 866<br>(507 - 1,306)        | 5<br>(2 - 10)         | 4<br>(2 - 7)           | 239<br>(114 - 393)       | 195<br>(104 - 326)       | 423<br>(252 - 663)          |
| Other digestive diseases                            | 1,501<br>(1,040 - 2,126)    | 33<br>(15 - 56)       | 11<br>(7 - 15)         | 143<br>(88 - 239)        | 256<br>(164 - 395)       | 1,058<br>(678 - 1,596)      |
| Neurological disorders                              | 21,792<br>(17,766 - 26,140) | 42<br>(27 - 61)       | 113<br>(78 - 161)      | 949<br>(667 - 1,274)     | 1,625<br>(1,165 - 2,197) | 19,063<br>(15,418 - 23,044) |
| Alzheimer disease and other dementias               | 19,585<br>(15,778 - 23,663) | --                    | --                     | 11<br>(4 - 19)           | 1,092<br>(749 - 1,537)   | 18,483<br>(14,852 - 22,372) |
| Parkinson disease                                   | 156<br>(102 - 257)          | --                    | --                     | 5<br>(4 - 8)             | 25<br>(14 - 56)          | 126<br>(79 - 209)           |
| Epilepsy                                            | 1,431<br>(1,013 - 1,892)    | 5<br>(1 - 11)         | 84<br>(51 - 132)       | 747<br>(506 - 1,042)     | 364<br>(249 - 521)       | 232<br>(152 - 356)          |
| Multiple sclerosis                                  | 31<br>(16 - 51)             | --                    | --                     | 12<br>(6 - 21)           | 10<br>(5 - 18)           | 8<br>(4 - 16)               |
| Other neurological disorders                        | 589<br>(455 - 770)          | 37<br>(24 - 54)       | 29<br>(20 - 39)        | 174<br>(122 - 240)       | 135<br>(95 - 193)        | 214<br>(156 - 288)          |
| Mental and substance use disorders                  | 2,318<br>(1,582 - 3,337)    | 28<br>(7 - 57)        | 0<br>(0 - 0)           | 1,632<br>(1,093 - 2,362) | 557<br>(358 - 849)       | 101<br>(58 - 160)           |
| Schizophrenia                                       | 59<br>(39 - 95)             | --                    | --                     | 21<br>(13 - 36)          | 17<br>(10 - 31)          | 21<br>(13 - 33)             |
| Alcohol use disorders                               | 654<br>(386 - 1,093)        | --                    | --                     | 372<br>(206 - 616)       | 262<br>(153 - 465)       | 20<br>(13 - 37)             |
| Drug use disorders                                  | 1,603<br>(1,028 - 2,307)    | 28<br>(7 - 57)        | --                     | 1,237<br>(794 - 1,770)   | 277<br>(162 - 428)       | 60<br>(24 - 110)            |
| Opioid use disorders                                | 1,025<br>(661 - 1,469)      | 19<br>(5 - 38)        | --                     | 798<br>(509 - 1,145)     | 169<br>(99 - 263)        | 39<br>(15 - 70)             |
| Cocaine use disorders                               | 25<br>(15 - 37)             | 1<br>(0 - 1)          | --                     | 20<br>(12 - 30)          | 3<br>(2 - 5)             | 1<br>(0 - 2)                |
| Amphetamine use disorders                           | 25<br>(16 - 38)             | 1<br>(0 - 2)          | --                     | 19<br>(12 - 29)          | 5<br>(2 - 7)             | 1<br>(0 - 2)                |
| Other drug use disorders                            | 528<br>(339 - 758)          | 8<br>(2 - 17)         | --                     | 400<br>(257 - 581)       | 100<br>(57 - 154)        | 19<br>(8 - 36)              |
| Eating disorders                                    | 2<br>(1 - 3)                | --                    | 0<br>(0 - 0)           | 2<br>(1 - 3)             | --                       | --                          |

Web Table 31- Vietnam deaths with 95% UI by age, sex, and cause in 2013

| Cause                                               | Both Sexes, All Ages        | Both Sexes, 0-4 Years    | Both Sexes, 5-14 Years | Both Sexes, 15-49 Years  | Both Sexes, 50-69 Years  | Both Sexes, 70-80 Years     |
|-----------------------------------------------------|-----------------------------|--------------------------|------------------------|--------------------------|--------------------------|-----------------------------|
| Anorexia nervosa                                    | 2<br>(1 - 3)                | --                       | 0<br>(0 - 0)           | 2<br>(1 - 3)             | --                       | --                          |
| Diabetes, urogenital, blood, and endocrine diseases | 23,097<br>(19,019 - 27,676) | 237<br>(164 - 337)       | 95<br>(64 - 139)       | 2,008<br>(1,497 - 2,591) | 6,087<br>(4,686 - 7,841) | 14,671<br>(12,142 - 17,412) |
| Diabetes mellitus                                   | 12,273<br>(9,794 - 14,920)  | 6<br>(3 - 10)            | 2<br>(1 - 3)           | 592<br>(426 - 785)       | 3,343<br>(2,493 - 4,365) | 8,330<br>(6,569 - 10,385)   |
| Acute glomerulonephritis                            | 69<br>(46 - 101)            | 1<br>(1 - 2)             | 2<br>(1 - 2)           | 15<br>(8 - 32)           | 11<br>(6 - 18)           | 40<br>(20 - 66)             |
| Chronic kidney disease                              | 7,466<br>(5,925 - 9,185)    | 3<br>(2 - 4)             | 12<br>(9 - 20)         | 697<br>(493 - 943)       | 1,982<br>(1,486 - 2,665) | 4,771<br>(3,667 - 5,999)    |
| Chronic kidney disease due to diabetes mellitus     | 678<br>(294 - 1,176)        | 0<br>(0 - 0)             | 1<br>(0 - 1)           | 56<br>(23 - 109)         | 188<br>(77 - 364)        | 432<br>(187 - 762)          |
| Chronic kidney disease due to hypertension          | 2,458<br>(1,531 - 3,531)    | 1<br>(0 - 1)             | 2<br>(1 - 3)           | 239<br>(120 - 363)       | 737<br>(426 - 1,114)     | 1,479<br>(879 - 2,218)      |
| Chronic kidney disease due to glomerulonephritis    | 672<br>(436 - 982)          | 2<br>(1 - 3)             | 6<br>(4 - 9)           | 118<br>(75 - 174)        | 156<br>(93 - 258)        | 390<br>(242 - 581)          |
| Chronic kidney disease due to other causes          | 3,658<br>(2,489 - 5,111)    | 0<br>(0 - 0)             | 3<br>(2 - 8)           | 284<br>(170 - 445)       | 900<br>(557 - 1,396)     | 2,470<br>(1,561 - 3,584)    |
| Urinary diseases and male infertility               | 1,347<br>(983 - 1,838)      | 12<br>(7 - 21)           | 3<br>(2 - 4)           | 89<br>(61 - 129)         | 274<br>(193 - 391)       | 970<br>(661 - 1,398)        |
| Interstitial nephritis and urinary tract infections | 739<br>(455 - 1,121)        | 7<br>(4 - 13)            | 1<br>(1 - 2)           | 48<br>(30 - 73)          | 135<br>(83 - 200)        | 548<br>(311 - 902)          |
| Urolithiasis                                        | 81<br>(46 - 141)            | --                       | 0<br>(0 - 1)           | 8<br>(3 - 16)            | 21<br>(11 - 39)          | 52<br>(27 - 101)            |
| Other urinary diseases                              | 527<br>(340 - 851)          | 5<br>(3 - 9)             | 1<br>(1 - 2)           | 33<br>(19 - 59)          | 118<br>(75 - 197)        | 369<br>(221 - 611)          |
| Gynecological diseases                              | 10<br>(6 - 17)              | --                       | --                     | 3<br>(2 - 5)             | 1<br>(1 - 2)             | 6<br>(3 - 11)               |
| Uterine fibroids                                    | 3<br>(1 - 4)                | --                       | --                     | 0<br>(0 - 1)             | 0<br>(0 - 1)             | 2<br>(1 - 3)                |
| Polycystic ovarian syndrome                         | 0<br>(0 - 0)                | --                       | --                     | 0<br>(0 - 0)             | 0<br>(0 - 0)             | --                          |
| Endometriosis                                       | 1<br>(0 - 1)                | --                       | --                     | 1<br>(0 - 1)             | 0<br>(0 - 0)             | --                          |
| Genital prolapse                                    | 2<br>(1 - 4)                | --                       | --                     | 0<br>(0 - 1)             | 0<br>(0 - 0)             | 2<br>(1 - 3)                |
| Other gynecological diseases                        | 5<br>(3 - 8)                | --                       | --                     | 2<br>(1 - 3)             | 1<br>(0 - 1)             | 3<br>(1 - 5)                |
| Hemoglobinopathies and hemolytic anemias            | 832<br>(517 - 1,257)        | 136<br>(80 - 218)        | 71<br>(42 - 114)       | 284<br>(165 - 473)       | 132<br>(76 - 209)        | 209<br>(134 - 316)          |
| Thalassemias                                        | 511<br>(314 - 788)          | 130<br>(76 - 209)        | 69<br>(41 - 111)       | 243<br>(141 - 405)       | 58<br>(34 - 95)          | 11<br>(7 - 16)              |
| Sickle cell disorders                               | 0<br>(0 - 0)                | 0<br>(0 - 0)             | 0<br>(0 - 0)           | 0<br>(0 - 0)             | 0<br>(0 - 0)             | 0<br>(0 - 0)                |
| G6PD deficiency                                     | 7<br>(4 - 11)               | 0<br>(0 - 1)             | 0<br>(0 - 0)           | 3<br>(2 - 4)             | 3<br>(2 - 4)             | 1<br>(1 - 2)                |
| Other hemoglobinopathies and hemolytic anemias      | 314<br>(199 - 472)          | 6<br>(3 - 10)            | 2<br>(1 - 2)           | 38<br>(21 - 65)          | 71<br>(41 - 111)         | 197<br>(127 - 298)          |
| Endocrine, metabolic, blood, and immune disorders   | 1,100<br>(808 - 1,480)      | 79<br>(52 - 119)         | 5<br>(2 - 7)           | 327<br>(218 - 451)       | 345<br>(232 - 514)       | 345<br>(243 - 502)          |
| Musculoskeletal disorders                           | 1,026<br>(769 - 1,331)      | --                       | 24<br>(17 - 33)        | 190<br>(135 - 253)       | 273<br>(190 - 383)       | 540<br>(369 - 755)          |
| Rheumatoid arthritis                                | 282<br>(176 - 411)          | --                       | 4<br>(3 - 7)           | 20<br>(11 - 32)          | 58<br>(33 - 96)          | 199<br>(112 - 305)          |
| Other musculoskeletal disorders                     | 744<br>(549 - 965)          | --                       | 19<br>(14 - 27)        | 169<br>(121 - 227)       | 215<br>(150 - 307)       | 341<br>(233 - 486)          |
| Other non-communicable diseases                     | 6,684<br>(5,401 - 8,097)    | 4,563<br>(3,519 - 5,822) | 323<br>(215 - 434)     | 732<br>(492 - 1,004)     | 278<br>(191 - 417)       | 787<br>(570 - 1,113)        |
| Congenital anomalies                                | 5,676<br>(4,465 - 7,007)    | 4,411<br>(3,373 - 5,625) | 321<br>(213 - 432)     | 562<br>(354 - 804)       | 146<br>(92 - 234)        | 236<br>(174 - 321)          |
| Neural tube defects                                 | 476<br>(188 - 942)          | 443<br>(164 - 911)       | 8<br>(4 - 15)          | 19<br>(11 - 37)          | 4<br>(2 - 8)             | 2<br>(1 - 4)                |
| Congenital heart anomalies                          | 3,549<br>(2,610 - 4,543)    | 2,711<br>(1,938 - 3,604) | 235<br>(153 - 323)     | 372<br>(219 - 536)       | 67<br>(39 - 107)         | 164<br>(115 - 230)          |
| Cleft lip and cleft palate                          | 10<br>(3 - 20)              | 10<br>(3 - 20)           | --                     | --                       | --                       | --                          |
| Down syndrome                                       | 78<br>(44 - 130)            | 49<br>(24 - 94)          | 9<br>(5 - 17)          | 15<br>(8 - 24)           | 4<br>(2 - 9)             | 1<br>(0 - 1)                |
| Chromosomal unbalanced rearrangements               | 122<br>(75 - 197)           | 90<br>(49 - 160)         | 4<br>(2 - 7)           | 20<br>(12 - 33)          | 5<br>(3 - 8)             | 3<br>(2 - 5)                |
| Other congenital anomalies                          | 1,440<br>(1,020 - 1,973)    | 1,108<br>(735 - 1,592)   | 65<br>(36 - 101)       | 135<br>(77 - 213)        | 67<br>(40 - 104)         | 65<br>(42 - 99)             |
| Skin and subcutaneous diseases                      | 858<br>(621 - 1,197)        | 2<br>(1 - 4)             | 2<br>(2 - 3)           | 170<br>(118 - 233)       | 132<br>(92 - 192)        | 551<br>(361 - 853)          |
| Cellulitis                                          | 145<br>(77 - 249)           | 1<br>(0 - 1)             | 0<br>(0 - 1)           | 36<br>(19 - 62)          | 31<br>(17 - 53)          | 77<br>(35 - 152)            |
| Pyoderma                                            | 343<br>(240 - 498)          | 1<br>(1 - 2)             | 1<br>(1 - 1)           | 82<br>(56 - 114)         | 69<br>(45 - 111)         | 190<br>(105 - 323)          |
| Decubitus ulcer                                     | 346<br>(217 - 533)          | 0<br>(0 - 0)             | 0<br>(0 - 1)           | 40<br>(23 - 61)          | 27<br>(17 - 42)          | 278<br>(166 - 456)          |



Web Table 31- Vietnam deaths with 95% UI by age, sex, and cause in 2013

| Cause                                           | Both Sexes, All Ages        | Both Sexes, 0-4 Years    | Both Sexes, 5-14 Years   | Both Sexes, 15-49 Years     | Both Sexes, 50-69 Years   | Both Sexes, 70-80 Years   |
|-------------------------------------------------|-----------------------------|--------------------------|--------------------------|-----------------------------|---------------------------|---------------------------|
| Other skin and subcutaneous diseases            | 24<br>(16 - 38)             | 0<br>(0 - 0)             | 0<br>(0 - 0)             | 13<br>(7 - 20)              | 4<br>(2 - 7)              | 7<br>(4 - 14)             |
| Sudden infant death syndrome                    | 150<br>(29 - 445)           | 150<br>(29 - 445)        | --                       | --                          | --                        | --                        |
| Injuries                                        | 50,595<br>(39,994 - 62,174) | 3,393<br>(2,323 - 4,854) | 2,515<br>(2,097 - 2,910) | 25,998<br>(19,017 - 33,223) | 9,602<br>(7,095 - 12,779) | 9,088<br>(7,517 - 11,005) |
| Transport injuries                              | 24,782<br>(18,806 - 31,231) | 270<br>(156 - 436)       | 790<br>(613 - 988)       | 15,930<br>(11,791 - 20,372) | 5,357<br>(3,931 - 7,191)  | 2,435<br>(1,871 - 3,022)  |
| Road injuries                                   | 24,004<br>(18,222 - 30,331) | 217<br>(126 - 346)       | 761<br>(592 - 949)       | 15,509<br>(11,460 - 19,854) | 5,183<br>(3,756 - 6,975)  | 2,334<br>(1,788 - 2,919)  |
| Pedestrian road injuries                        | 4,936<br>(3,506 - 6,574)    | 97<br>(50 - 168)         | 302<br>(218 - 406)       | 1,802<br>(1,175 - 2,606)    | 1,502<br>(1,005 - 2,179)  | 1,233<br>(888 - 1,587)    |
| Cyclist road injuries                           | 1,144<br>(809 - 1,609)      | 7<br>(3 - 15)            | 105<br>(63 - 157)        | 440<br>(290 - 653)          | 428<br>(283 - 633)        | 164<br>(109 - 242)        |
| Motorcyclist road injuries                      | 13,266<br>(9,372 - 17,826)  | 43<br>(22 - 76)          | 214<br>(137 - 319)       | 10,054<br>(7,136 - 13,463)  | 2,380<br>(1,527 - 3,432)  | 573<br>(356 - 858)        |
| Motor vehicle road injuries                     | 4,535<br>(3,209 - 6,474)    | 67<br>(36 - 121)         | 135<br>(94 - 186)        | 3,145<br>(2,114 - 4,553)    | 852<br>(570 - 1,329)      | 336<br>(229 - 500)        |
| Other road injuries                             | 123<br>(72 - 255)           | 3<br>(1 - 5)             | 5<br>(3 - 10)            | 67<br>(33 - 160)            | 21<br>(11 - 47)           | 27<br>(15 - 52)           |
| Other transport injuries                        | 778<br>(569 - 1,010)        | 52<br>(27 - 87)          | 29<br>(19 - 44)          | 422<br>(286 - 591)          | 174<br>(114 - 260)        | 101<br>(64 - 158)         |
| Unintentional injuries                          | 19,515<br>(16,012 - 23,706) | 3,109<br>(2,103 - 4,560) | 1,688<br>(1,354 - 2,071) | 5,876<br>(4,169 - 7,868)    | 2,875<br>(2,105 - 3,905)  | 5,968<br>(4,642 - 7,585)  |
| Falls                                           | 6,406<br>(4,855 - 8,335)    | 82<br>(46 - 137)         | 36<br>(21 - 55)          | 1,126<br>(708 - 1,622)      | 1,155<br>(762 - 1,714)    | 4,006<br>(2,810 - 5,536)  |
| Drowning                                        | 7,362<br>(5,722 - 9,878)    | 2,417<br>(1,549 - 3,726) | 1,476<br>(1,150 - 1,855) | 2,294<br>(1,573 - 3,253)    | 695<br>(472 - 1,042)      | 481<br>(346 - 675)        |
| Fire, heat, and hot substances                  | 231<br>(133 - 393)          | 60<br>(26 - 110)         | 5<br>(3 - 7)             | 84<br>(44 - 150)            | 72<br>(35 - 143)          | 10<br>(6 - 19)            |
| Poisonings                                      | 439<br>(305 - 628)          | 3<br>(1 - 11)            | 2<br>(1 - 3)             | 251<br>(152 - 366)          | 117<br>(73 - 186)         | 66<br>(34 - 138)          |
| Exposure to mechanical forces                   | 1,218<br>(922 - 1,582)      | 124<br>(67 - 231)        | 60<br>(37 - 93)          | 620<br>(413 - 876)          | 178<br>(118 - 263)        | 236<br>(168 - 328)        |
| Unintentional firearm injuries                  | 237<br>(163 - 341)          | 5<br>(3 - 9)             | 6<br>(3 - 10)            | 136<br>(83 - 215)           | 40<br>(22 - 66)           | 50<br>(30 - 78)           |
| Unintentional suffocation                       | 63<br>(31 - 186)            | 40<br>(11 - 148)         | 2<br>(1 - 3)             | 13<br>(8 - 25)              | 6<br>(3 - 14)             | 3<br>(2 - 5)              |
| Other exposure to mechanical forces             | 919<br>(690 - 1,221)        | 79<br>(38 - 143)         | 53<br>(30 - 86)          | 471<br>(305 - 697)          | 132<br>(85 - 203)         | 184<br>(118 - 271)        |
| Adverse effects of medical treatment            | 996<br>(710 - 1,470)        | 39<br>(23 - 62)          | 9<br>(6 - 14)            | 191<br>(126 - 300)          | 201<br>(130 - 304)        | 556<br>(340 - 890)        |
| Animal contact                                  | 471<br>(260 - 655)          | 53<br>(21 - 93)          | 27<br>(14 - 48)          | 82<br>(49 - 130)            | 166<br>(89 - 250)         | 143<br>(59 - 227)         |
| Venomous animal contact                         | 236<br>(126 - 348)          | 42<br>(14 - 79)          | 20<br>(10 - 40)          | 37<br>(21 - 61)             | 75<br>(39 - 123)          | 62<br>(19 - 112)          |
| Non-venomous animal contact                     | 235<br>(129 - 328)          | 11<br>(5 - 19)           | 7<br>(3 - 12)            | 45<br>(26 - 71)             | 91<br>(45 - 139)          | 81<br>(37 - 126)          |
| Foreign body                                    | 744<br>(506 - 1,228)        | 301<br>(192 - 500)       | 5<br>(3 - 7)             | 42<br>(23 - 86)             | 60<br>(35 - 114)          | 337<br>(203 - 616)        |
| Pulmonary aspiration and foreign body in airway | 725<br>(487 - 1,208)        | 299<br>(191 - 498)       | 3<br>(1 - 5)             | 35<br>(18 - 78)             | 57<br>(33 - 110)          | 330<br>(197 - 610)        |
| Foreign body in other body part                 | 19<br>(14 - 28)             | 2<br>(1 - 3)             | 2<br>(1 - 2)             | 7<br>(5 - 10)               | 3<br>(2 - 5)              | 6<br>(4 - 10)             |
| Other unintentional injuries                    | 1,648<br>(1,178 - 2,228)    | 30<br>(20 - 44)          | 68<br>(47 - 97)          | 1,185<br>(800 - 1,659)      | 232<br>(144 - 365)        | 133<br>(93 - 187)         |
| Self-harm and interpersonal violence            | 6,298<br>(4,601 - 8,394)    | 14<br>(8 - 24)           | 37<br>(23 - 55)          | 4,192<br>(2,976 - 5,730)    | 1,370<br>(970 - 1,956)    | 685<br>(501 - 935)        |
| Self-harm                                       | 4,770<br>(3,500 - 6,447)    | --                       | 6<br>(3 - 11)            | 2,942<br>(2,079 - 4,065)    | 1,192<br>(825 - 1,734)    | 629<br>(446 - 873)        |
| Interpersonal violence                          | 1,528<br>(988 - 2,432)      | 14<br>(8 - 24)           | 30<br>(17 - 48)          | 1,249<br>(768 - 1,997)      | 179<br>(112 - 284)        | 56<br>(33 - 86)           |
| Assault by firearm                              | 138<br>(75 - 307)           | 1<br>(0 - 2)             | 2<br>(1 - 4)             | 115<br>(60 - 265)           | 19<br>(9 - 46)            | 2<br>(1 - 4)              |
| Assault by sharp object                         | 783<br>(480 - 1,283)        | 1<br>(0 - 2)             | 2<br>(1 - 4)             | 708<br>(428 - 1,182)        | 54<br>(31 - 91)           | 17<br>(10 - 30)           |
| Assault by other means                          | 607<br>(370 - 936)          | 12<br>(7 - 21)           | 27<br>(15 - 43)          | 426<br>(239 - 695)          | 106<br>(62 - 169)         | 36<br>(21 - 58)           |
| Forces of nature, war, and legal intervention   | 1<br>(0 - 0)                | 1<br>(0 - 0)             | --                       | --                          | --                        | --                        |
| Exposure to forces of nature                    | 1<br>(0 - 0)                | 1<br>(0 - 0)             | --                       | --                          | --                        | --                        |

Web Table 31- Vietnam deaths with 95% UI by age, sex, and cause in 2013

| Cause                                                             | Males, All Ages                | Males, 0-4 Years            | Males, 5-14 Years        | Males, 15-49 Years          | Males, 50-69 Years           | Males, 70-80 Years             |
|-------------------------------------------------------------------|--------------------------------|-----------------------------|--------------------------|-----------------------------|------------------------------|--------------------------------|
| All causes                                                        | 278,600<br>(220,360 - 347,315) | 15,722<br>(13,055 - 18,865) | 2,908<br>(2,526 - 3,275) | 57,171<br>(41,460 - 73,387) | 77,826<br>(55,050 - 105,356) | 124,973<br>(103,171 - 150,547) |
| Communicable, maternal, neonatal, and nutritional diseases        | 34,159<br>(29,672 - 39,681)    | 9,801<br>(8,015 - 12,021)   | 485<br>(339 - 715)       | 9,211<br>(7,537 - 11,223)   | 5,749<br>(4,527 - 7,287)     | 8,912<br>(6,890 - 11,354)      |
| HIV/AIDS and tuberculosis                                         | 14,938<br>(11,885 - 18,975)    | 20<br>(11 - 31)             | 35<br>(23 - 52)          | 6,987<br>(5,473 - 8,843)    | 3,669<br>(2,733 - 5,030)     | 4,227<br>(3,110 - 5,701)       |
| Tuberculosis                                                      | 8,851<br>(6,374 - 12,124)      | 7<br>(4 - 12)               | 34<br>(22 - 50)          | 2,331<br>(1,548 - 3,373)    | 2,415<br>(1,611 - 3,542)     | 4,064<br>(2,960 - 5,555)       |
| HIV/AIDS                                                          | 6,087<br>(4,485 - 8,580)       | 12<br>(5 - 24)              | 1<br>(0 - 4)             | 4,656<br>(3,438 - 6,482)    | 1,254<br>(815 - 1,968)       | 163<br>(90 - 284)              |
| HIV/AIDS resulting in mycobacterial infection                     | 406<br>(282 - 612)             | 1<br>(0 - 1)                | 0<br>(0 - 0)             | 306<br>(213 - 452)          | 86<br>(54 - 141)             | 12<br>(7 - 22)                 |
| HIV/AIDS resulting in other diseases                              | 5,681<br>(4,177 - 7,979)       | 11<br>(4 - 22)              | 1<br>(0 - 3)             | 4,350<br>(3,200 - 6,085)    | 1,168<br>(760 - 1,829)       | 151<br>(83 - 264)              |
| Diarrhea, lower respiratory, and other common infectious diseases | 12,620<br>(9,650 - 15,842)     | 4,333<br>(3,229 - 5,767)    | 367<br>(238 - 600)       | 1,755<br>(1,146 - 2,479)    | 1,787<br>(1,181 - 2,599)     | 4,378<br>(2,772 - 6,496)       |
| Diarrheal diseases                                                | 685<br>(477 - 967)             | 209<br>(90 - 411)           | 26<br>(12 - 49)          | 82<br>(50 - 124)            | 111<br>(62 - 180)            | 257<br>(148 - 420)             |
| Intestinal infectious diseases                                    | 537<br>(228 - 1,073)           | 190<br>(66 - 412)           | 121<br>(42 - 260)        | 171<br>(48 - 412)           | 36<br>(10 - 92)              | 20<br>(5 - 45)                 |
| Typhoid fever                                                     | 401<br>(160 - 804)             | 135<br>(42 - 295)           | 92<br>(31 - 198)         | 131<br>(33 - 319)           | 28<br>(7 - 75)               | 16<br>(3 - 36)                 |
| Paratyphoid fever                                                 | 119<br>(46 - 251)              | 49<br>(14 - 111)            | 28<br>(9 - 62)           | 33<br>(7 - 82)              | 6<br>(1 - 19)                | 3<br>(1 - 8)                   |
| Other intestinal infectious diseases                              | 18<br>(9 - 32)                 | 7<br>(2 - 17)               | 2<br>(0 - 6)             | 6<br>(1 - 14)               | 2<br>(0 - 6)                 | 1<br>(0 - 5)                   |
| Lower respiratory infections                                      | 9,642<br>(7,056 - 12,469)      | 3,266<br>(2,215 - 4,346)    | 100<br>(58 - 161)        | 976<br>(609 - 1,460)        | 1,436<br>(902 - 2,142)       | 3,864<br>(2,309 - 5,956)       |
| Upper respiratory infections                                      | 20<br>(7 - 45)                 | 1<br>(0 - 5)                | 0<br>(0 - 1)             | 6<br>(1 - 16)               | 6<br>(0 - 18)                | 7<br>(0 - 25)                  |
| Otitis media                                                      | 10<br>(8 - 13)                 | 1<br>(1 - 2)                | 1<br>(1 - 1)             | 3<br>(2 - 4)                | 1<br>(1 - 2)                 | 4<br>(2 - 5)                   |
| Meningitis                                                        | 505<br>(324 - 757)             | 137<br>(44 - 346)           | 20<br>(11 - 34)          | 239<br>(146 - 359)          | 59<br>(33 - 99)              | 49<br>(23 - 96)                |
| Pneumococcal meningitis                                           | 193<br>(115 - 291)             | 42<br>(13 - 105)            | 8<br>(4 - 15)            | 100<br>(52 - 161)           | 24<br>(12 - 43)              | 18<br>(8 - 36)                 |
| H influenzae type B meningitis                                    | 89<br>(47 - 163)               | 44<br>(13 - 109)            | 4<br>(2 - 9)             | 29<br>(14 - 53)             | 6<br>(2 - 12)                | 6<br>(2 - 12)                  |
| Meningococcal meningitis                                          | 65<br>(37 - 101)               | 9<br>(2 - 23)               | 2<br>(1 - 4)             | 38<br>(17 - 71)             | 9<br>(4 - 17)                | 8<br>(3 - 17)                  |
| Other meningitis                                                  | 157<br>(94 - 249)              | 42<br>(11 - 114)            | 5<br>(2 - 11)            | 72<br>(34 - 132)            | 21<br>(9 - 40)               | 17<br>(8 - 33)                 |
| Encephalitis                                                      | 749<br>(526 - 1,008)           | 176<br>(95 - 305)           | 48<br>(29 - 74)          | 253<br>(155 - 390)          | 118<br>(67 - 183)            | 154<br>(82 - 234)              |
| Diphtheria                                                        | 4<br>(0 - 19)                  | 2<br>(0 - 15)               | 1<br>(0 - 5)             | 1<br>(0 - 4)                | 0<br>(0 - 3)                 | --                             |
| Whooping cough                                                    | 65<br>(0 - 313)                | 59<br>(0 - 287)             | 4<br>(0 - 19)            | 1<br>(0 - 8)                | 0<br>(0 - 1)                 | --                             |
| Tetanus                                                           | 47<br>(30 - 71)                | 11<br>(5 - 20)              | 1<br>(0 - 2)             | 7<br>(4 - 13)               | 15<br>(8 - 26)               | 14<br>(7 - 27)                 |
| Measles                                                           | 331<br>(6 - 2,077)             | 275<br>(5 - 1,706)          | 45<br>(1 - 275)          | 10<br>(0 - 64)              | 1<br>(0 - 4)                 | --                             |
| Varicella and herpes zoster                                       | 26<br>(8 - 72)                 | 4<br>(0 - 18)               | 1<br>(0 - 6)             | 7<br>(1 - 19)               | 3<br>(0 - 8)                 | 11<br>(0 - 54)                 |
| Neglected tropical diseases and malaria                           | 420<br>(316 - 556)             | 62<br>(34 - 95)             | 63<br>(41 - 105)         | 199<br>(140 - 273)          | 66<br>(44 - 97)              | 31<br>(21 - 44)                |
| Malaria                                                           | 187<br>(119 - 275)             | 11<br>(5 - 21)              | 7<br>(4 - 13)            | 117<br>(67 - 180)           | 40<br>(21 - 68)              | 12<br>(6 - 23)                 |
| Leishmaniasis                                                     | 0<br>(0 - 1)                   | 0<br>(0 - 1)                | 0<br>(0 - 0)             | 0<br>(0 - 0)                | 0<br>(0 - 0)                 | 0<br>(0 - 0)                   |
| Visceral leishmaniasis                                            | 0<br>(0 - 1)                   | 0<br>(0 - 1)                | 0<br>(0 - 0)             | 0<br>(0 - 0)                | 0<br>(0 - 0)                 | 0<br>(0 - 0)                   |
| Cysticercosis                                                     | 1<br>(1 - 1)                   | 0<br>(0 - 0)                | 0<br>(0 - 0)             | 0<br>(0 - 1)                | 0<br>(0 - 0)                 | 0<br>(0 - 0)                   |
| Cystic echinococcosis                                             | 5<br>(4 - 7)                   | 0<br>(0 - 0)                | 0<br>(0 - 0)             | 3<br>(2 - 3)                | 1<br>(1 - 2)                 | 1<br>(1 - 1)                   |
| Dengue                                                            | 148<br>(74 - 228)              | 42<br>(18 - 70)             | 38<br>(15 - 66)          | 44<br>(23 - 80)             | 12<br>(7 - 20)               | 12<br>(7 - 17)                 |
| Rabies                                                            | 54<br>(31 - 103)               | 1<br>(0 - 2)                | 14<br>(5 - 37)           | 27<br>(16 - 49)             | 10<br>(6 - 16)               | 1<br>(1 - 3)                   |
| Intestinal nematode infections                                    | 7<br>(1 - 17)                  | 3<br>(0 - 11)               | 1<br>(0 - 5)             | 1<br>(0 - 7)                | 1<br>(0 - 5)                 | 1<br>(0 - 5)                   |
| Ascariasis                                                        | 7<br>(1 - 17)                  | 3<br>(0 - 11)               | 1<br>(0 - 5)             | 1<br>(0 - 7)                | 1<br>(0 - 5)                 | 1<br>(0 - 5)                   |
| Other neglected tropical diseases                                 | 19<br>(13 - 28)                | 5<br>(2 - 11)               | 2<br>(1 - 3)             | 6<br>(3 - 10)               | 2<br>(1 - 3)                 | 4<br>(2 - 7)                   |
| Maternal disorders                                                | --                             | --                          | --                       | --                          | --                           | --                             |
| Maternal hemorrhage                                               | --                             | --                          | --                       | --                          | --                           | --                             |

Web Table 31- Vietnam deaths with 95% UI by age, sex, and cause in 2013

| Cause                                                            | Males, All Ages                | Males, 0-4 Years         | Males, 5-14 Years  | Males, 15-49 Years          | Males, 50-69 Years          | Males, 70-80 Years            |
|------------------------------------------------------------------|--------------------------------|--------------------------|--------------------|-----------------------------|-----------------------------|-------------------------------|
| Maternal sepsis and other maternal infections                    | --                             | --                       | --                 | --                          | --                          | --                            |
| Maternal hypertensive disorders                                  | --                             | --                       | --                 | --                          | --                          | --                            |
| Maternal obstructed labor                                        | --                             | --                       | --                 | --                          | --                          | --                            |
| Maternal abortive outcome                                        | --                             | --                       | --                 | --                          | --                          | --                            |
| Indirect maternal deaths                                         | --                             | --                       | --                 | --                          | --                          | --                            |
| Late maternal deaths                                             | --                             | --                       | --                 | --                          | --                          | --                            |
| Maternal deaths aggravated by HIV/AIDS                           | --                             | --                       | --                 | --                          | --                          | --                            |
| Other maternal disorders                                         | --                             | --                       | --                 | --                          | --                          | --                            |
| Neonatal disorders                                               | 5,224<br>(4,128 - 6,413)       | 5,224<br>(4,128 - 6,413) | --                 | --                          | --                          | --                            |
| Neonatal preterm birth complications                             | 3,327<br>(2,205 - 4,469)       | 3,327<br>(2,205 - 4,469) | --                 | --                          | --                          | --                            |
| Neonatal encephalopathy due to birth asphyxia and trauma         | 1,210<br>(573 - 2,096)         | 1,210<br>(573 - 2,096)   | --                 | --                          | --                          | --                            |
| Neonatal sepsis and other neonatal infections                    | 627<br>(222 - 1,303)           | 627<br>(222 - 1,303)     | --                 | --                          | --                          | --                            |
| Hemolytic disease and other neonatal jaundice                    | 7<br>(2 - 17)                  | 7<br>(2 - 17)            | --                 | --                          | --                          | --                            |
| Other neonatal disorders                                         | 53<br>(16 - 172)               | 53<br>(16 - 172)         | --                 | --                          | --                          | --                            |
| Nutritional deficiencies                                         | 89<br>(43 - 253)               | 10<br>(4 - 29)           | 1<br>(1 - 3)       | 10<br>(4 - 30)              | 9<br>(4 - 29)               | 58<br>(25 - 162)              |
| Protein-energy malnutrition                                      | 24<br>(8 - 76)                 | 5<br>(1 - 17)            | 0<br>(0 - 1)       | 2<br>(1 - 9)                | 2<br>(1 - 8)                | 14<br>(3 - 47)                |
| Iodine deficiency                                                | 2<br>(0 - 10)                  | 0<br>(0 - 3)             | 0<br>(0 - 0)       | 0<br>(0 - 1)                | 0<br>(0 - 2)                | 1<br>(0 - 9)                  |
| Iron-deficiency anemia                                           | 46<br>(19 - 133)               | 2<br>(1 - 7)             | 0<br>(0 - 1)       | 4<br>(1 - 14)               | 4<br>(1 - 12)               | 36<br>(14 - 102)              |
| Other nutritional deficiencies                                   | 17<br>(7 - 53)                 | 3<br>(1 - 9)             | 0<br>(0 - 1)       | 3<br>(1 - 11)               | 3<br>(1 - 10)               | 7<br>(2 - 23)                 |
| Other communicable, maternal, neonatal, and nutritional diseases | 868<br>(576 - 1,400)           | 153<br>(72 - 267)        | 19<br>(11 - 29)    | 259<br>(156 - 418)          | 219<br>(112 - 466)          | 219<br>(111 - 478)            |
| Sexually transmitted diseases excluding HIV                      | 131<br>(44 - 250)              | 104<br>(27 - 210)        | 9<br>(3 - 18)      | 4<br>(2 - 7)                | 3<br>(1 - 5)                | 11<br>(3 - 35)                |
| Syphilis                                                         | 126<br>(40 - 245)              | 104<br>(27 - 210)        | 9<br>(2 - 17)      | 2<br>(1 - 4)                | 2<br>(1 - 4)                | 9<br>(3 - 30)                 |
| Chlamydial infection                                             | --                             | --                       | --                 | --                          | --                          | --                            |
| Gonococcal infection                                             | 3<br>(1 - 6)                   | --                       | 0<br>(0 - 0)       | 1<br>(1 - 2)                | 0<br>(0 - 1)                | 1<br>(0 - 4)                  |
| Other sexually transmitted diseases                              | 2<br>(1 - 3)                   | --                       | 0<br>(0 - 0)       | 1<br>(0 - 2)                | 0<br>(0 - 1)                | 0<br>(0 - 1)                  |
| Hepatitis                                                        | 335<br>(239 - 465)             | 13<br>(6 - 27)           | 6<br>(4 - 9)       | 154<br>(98 - 226)           | 95<br>(57 - 151)            | 66<br>(43 - 97)               |
| Acute hepatitis A                                                | 27<br>(8 - 56)                 | 5<br>(1 - 12)            | 1<br>(0 - 3)       | 16<br>(4 - 36)              | 4<br>(1 - 9)                | 1<br>(0 - 3)                  |
| Acute hepatitis B                                                | 218<br>(142 - 321)             | 7<br>(2 - 15)            | 1<br>(0 - 2)       | 80<br>(42 - 132)            | 73<br>(42 - 118)            | 57<br>(35 - 85)               |
| Acute hepatitis C                                                | 14<br>(2 - 36)                 | --                       | 0<br>(0 - 0)       | 5<br>(1 - 15)               | 4<br>(1 - 13)               | 4<br>(0 - 12)                 |
| Acute hepatitis E                                                | 77<br>(37 - 143)               | 1<br>(0 - 3)             | 3<br>(2 - 6)       | 53<br>(25 - 98)             | 14<br>(4 - 33)              | 5<br>(1 - 13)                 |
| Other infectious diseases                                        | 403<br>(197 - 884)             | 35<br>(13 - 80)          | 4<br>(1 - 7)       | 101<br>(43 - 219)           | 121<br>(40 - 340)           | 142<br>(42 - 389)             |
| Non-communicable diseases                                        | 208,304<br>(161,173 - 263,880) | 3,670<br>(2,804 - 4,728) | 740<br>(579 - 909) | 26,424<br>(18,022 - 35,290) | 65,262<br>(45,721 - 89,615) | 112,208<br>(92,075 - 136,093) |
| Neoplasms                                                        | 66,068<br>(49,699 - 85,374)    | 251<br>(159 - 380)       | 333<br>(239 - 431) | 10,027<br>(6,845 - 13,395)  | 26,479<br>(18,627 - 36,687) | 28,978<br>(22,963 - 36,079)   |
| Esophageal cancer                                                | 2,951<br>(1,603 - 4,578)       | --                       | --                 | 309<br>(96 - 623)           | 1,201<br>(511 - 2,135)      | 1,441<br>(959 - 2,044)        |
| Stomach cancer                                                   | 10,544<br>(7,213 - 14,370)     | --                       | --                 | 1,207<br>(756 - 1,733)      | 2,916<br>(1,884 - 4,305)    | 6,420<br>(4,162 - 9,035)      |
| Liver cancer                                                     | 17,335<br>(12,192 - 23,321)    | --                       | 30<br>(17 - 47)    | 3,103<br>(1,986 - 4,321)    | 8,461<br>(5,651 - 12,178)   | 5,741<br>(4,000 - 7,791)      |
| Liver cancer due to hepatitis B                                  | 7,315<br>(3,909 - 11,044)      | --                       | 14<br>(7 - 24)     | 1,620<br>(911 - 2,490)      | 3,804<br>(1,867 - 6,097)    | 1,877<br>(952 - 2,982)        |
| Liver cancer due to hepatitis C                                  | 7,616<br>(4,207 - 11,927)      | --                       | 4<br>(2 - 9)       | 1,087<br>(509 - 1,846)      | 3,641<br>(1,840 - 6,234)    | 2,884<br>(1,695 - 4,368)      |
| Liver cancer due to alcohol use                                  | 1,345<br>(750 - 2,241)         | --                       | --                 | 129<br>(56 - 224)           | 537<br>(268 - 966)          | 680<br>(353 - 1,257)          |
| Liver cancer due to other causes                                 | 1,059<br>(549 - 1,867)         | --                       | 12<br>(6 - 21)     | 266<br>(144 - 444)          | 480<br>(199 - 930)          | 301<br>(132 - 593)            |

Web Table 31- Vietnam deaths with 95% UI by age, sex, and cause in 2013

| Cause                                         | Males, All Ages              | Males, 0-4 Years   | Males, 5-14 Years | Males, 15-49 Years        | Males, 50-69 Years          | Males, 70-80 Years          |
|-----------------------------------------------|------------------------------|--------------------|-------------------|---------------------------|-----------------------------|-----------------------------|
| Larynx cancer                                 | 1,145<br>(731 - 1,596)       | --                 | --                | 88<br>(39 - 141)          | 487<br>(178 - 776)          | 571<br>(364 - 1,054)        |
| Tracheal, bronchus and lung cancer            | 13,665<br>(10,014 - 18,165)  | --                 | --                | 1,315<br>(828 - 1,861)    | 6,545<br>(4,518 - 9,088)    | 5,805<br>(4,337 - 7,561)    |
| Breast cancer                                 | 67<br>(35 - 111)             | --                 | --                | 21<br>(10 - 41)           | 42<br>(18 - 81)             | 4<br>(2 - 8)                |
| Cervical cancer                               | --                           | --                 | --                | --                        | --                          | --                          |
| Uterine cancer                                | --                           | --                 | --                | --                        | --                          | --                          |
| Prostate cancer                               | 1,403<br>(647 - 3,268)       | --                 | --                | 6<br>(3 - 10)             | 56<br>(31 - 92)             | 1,341<br>(589 - 3,178)      |
| Colon and rectum cancer                       | 3,310<br>(2,413 - 4,434)     | --                 | --                | 518<br>(339 - 723)        | 1,091<br>(737 - 1,580)      | 1,700<br>(1,245 - 2,348)    |
| Lip and oral cavity cancer                    | 1,823<br>(912 - 2,669)       | --                 | --                | 233<br>(75 - 394)         | 659<br>(191 - 1,155)        | 931<br>(558 - 1,439)        |
| Nasopharynx cancer                            | 202<br>(127 - 337)           | --                 | 2<br>(1 - 6)      | 51<br>(28 - 86)           | 90<br>(49 - 168)            | 59<br>(34 - 98)             |
| Other pharynx cancer                          | 980<br>(593 - 2,167)         | --                 | --                | 159<br>(93 - 252)         | 480<br>(288 - 777)          | 341<br>(162 - 1,246)        |
| Gallbladder and biliary tract cancer          | 302<br>(180 - 602)           | --                 | --                | 31<br>(18 - 52)           | 111<br>(61 - 180)           | 159<br>(83 - 447)           |
| Pancreatic cancer                             | 796<br>(571 - 1,085)         | --                 | --                | 150<br>(94 - 219)         | 303<br>(200 - 435)          | 344<br>(253 - 461)          |
| Malignant skin melanoma                       | 68<br>(34 - 108)             | --                 | --                | 25<br>(11 - 39)           | 24<br>(11 - 40)             | 20<br>(11 - 37)             |
| Non-melanoma skin cancer                      | 110<br>(67 - 215)            | --                 | --                | 23<br>(11 - 48)           | 27<br>(14 - 53)             | 60<br>(34 - 110)            |
| Ovarian cancer                                | --                           | --                 | --                | --                        | --                          | --                          |
| Testicular cancer                             | 161<br>(94 - 242)            | --                 | --                | 56<br>(29 - 86)           | 30<br>(16 - 48)             | 76<br>(40 - 127)            |
| Kidney cancer                                 | 154<br>(107 - 215)           | 1<br>(0 - 2)       | 1<br>(0 - 1)      | 25<br>(15 - 38)           | 67<br>(43 - 100)            | 60<br>(39 - 91)             |
| Bladder cancer                                | 789<br>(508 - 1,671)         | --                 | --                | 51<br>(30 - 86)           | 248<br>(157 - 382)          | 489<br>(297 - 1,240)        |
| Brain and nervous system cancer               | 2,384<br>(853 - 3,584)       | 33<br>(7 - 79)     | 66<br>(19 - 113)  | 664<br>(236 - 1,058)      | 911<br>(299 - 1,460)        | 710<br>(274 - 1,133)        |
| Thyroid cancer                                | 232<br>(128 - 551)           | --                 | 0<br>(0 - 1)      | 14<br>(6 - 40)            | 67<br>(33 - 149)            | 150<br>(76 - 377)           |
| Mesothelioma                                  | 51<br>(32 - 75)              | --                 | --                | 9<br>(5 - 17)             | 14<br>(8 - 24)              | 27<br>(15 - 47)             |
| Hodgkin lymphoma                              | 57<br>(19 - 176)             | 2<br>(1 - 4)       | 2<br>(0 - 4)      | 17<br>(7 - 42)            | 8<br>(2 - 28)               | 29<br>(5 - 117)             |
| Non-Hodgkin lymphoma                          | 2,135<br>(1,267 - 3,059)     | 32<br>(15 - 67)    | 42<br>(24 - 68)   | 622<br>(371 - 906)        | 818<br>(447 - 1,273)        | 621<br>(355 - 958)          |
| Multiple myeloma                              | 52<br>(30 - 91)              | --                 | --                | 20<br>(11 - 34)           | 25<br>(12 - 48)             | 8<br>(4 - 13)               |
| Leukemia                                      | 1,710<br>(1,227 - 2,324)     | 66<br>(27 - 139)   | 134<br>(87 - 190) | 579<br>(369 - 835)        | 236<br>(150 - 349)          | 695<br>(461 - 1,068)        |
| Other neoplasms                               | 3,641<br>(2,366 - 5,086)     | 116<br>(68 - 188)  | 56<br>(34 - 90)   | 731<br>(446 - 1,068)      | 1,563<br>(956 - 2,331)      | 1,175<br>(745 - 1,720)      |
| Cardiovascular diseases                       | 87,238<br>(67,722 - 111,788) | 509<br>(355 - 708) | 10<br>(7 - 14)    | 7,627<br>(5,048 - 10,371) | 24,749<br>(17,370 - 34,685) | 54,342<br>(44,570 - 66,917) |
| Rheumatic heart disease                       | 430<br>(261 - 658)           | 13<br>(5 - 28)     | 2<br>(1 - 4)      | 126<br>(71 - 208)         | 117<br>(66 - 193)           | 172<br>(98 - 272)           |
| Ischemic heart disease                        | 15,054<br>(10,641 - 20,729)  | 5<br>(2 - 11)      | 0<br>(0 - 0)      | 1,016<br>(598 - 1,511)    | 4,403<br>(2,787 - 6,313)    | 9,630<br>(6,902 - 13,647)   |
| Cerebrovascular disease                       | 63,147<br>(48,875 - 81,044)  | 83<br>(47 - 127)   | 1<br>(0 - 1)      | 5,136<br>(3,419 - 7,057)  | 17,817<br>(12,436 - 25,140) | 40,111<br>(32,385 - 49,164) |
| Ischemic stroke                               | 35,001<br>(23,193 - 45,849)  | 5<br>(2 - 10)      | 0<br>(0 - 0)      | 840<br>(413 - 1,412)      | 6,752<br>(3,911 - 10,465)   | 27,404<br>(18,405 - 35,002) |
| Hemorrhagic stroke                            | 28,146<br>(19,796 - 40,025)  | 78<br>(45 - 119)   | 1<br>(0 - 1)      | 4,296<br>(2,818 - 5,898)  | 11,065<br>(7,417 - 15,955)  | 12,706<br>(8,405 - 19,755)  |
| Hypertensive heart disease                    | 3,166<br>(1,784 - 4,857)     | 14<br>(6 - 27)     | 0<br>(0 - 1)      | 331<br>(163 - 586)        | 963<br>(495 - 1,650)        | 1,859<br>(1,030 - 2,920)    |
| Cardiomyopathy and myocarditis                | 1,246<br>(817 - 1,892)       | 167<br>(94 - 257)  | 3<br>(2 - 4)      | 279<br>(159 - 449)        | 308<br>(170 - 532)          | 490<br>(282 - 860)          |
| Atrial fibrillation and flutter               | 47<br>(26 - 81)              | --                 | --                | 7<br>(3 - 12)             | 15<br>(7 - 26)              | 26<br>(13 - 48)             |
| Aortic aneurysm                               | 532<br>(330 - 820)           | --                 | --                | 40<br>(23 - 66)           | 72<br>(43 - 113)            | 420<br>(249 - 661)          |
| Peripheral vascular disease                   | 42<br>(26 - 66)              | --                 | --                | 3<br>(1 - 5)              | 10<br>(6 - 18)              | 29<br>(18 - 46)             |
| Endocarditis                                  | 469<br>(261 - 718)           | 62<br>(31 - 108)   | 1<br>(0 - 1)      | 135<br>(67 - 218)         | 136<br>(67 - 223)           | 136<br>(72 - 231)           |
| Other cardiovascular and circulatory diseases | 3,104<br>(1,869 - 5,872)     | 166<br>(98 - 262)  | 3<br>(2 - 4)      | 555<br>(304 - 941)        | 909<br>(492 - 1,851)        | 1,472<br>(824 - 2,961)      |
| Chronic respiratory diseases                  | 15,193<br>(8,924 - 20,105)   | 192<br>(92 - 318)  | 28<br>(12 - 39)   | 560<br>(292 - 821)        | 3,068<br>(1,567 - 4,521)    | 11,346<br>(6,843 - 14,919)  |

Web Table 31- Vietnam deaths with 95% UI by age, sex, and cause in 2013

| Cause                                               | Males, All Ages            | Males, 0-4 Years  | Males, 5-14 Years | Males, 15-49 Years       | Males, 50-69 Years       | Males, 70-80 Years        |
|-----------------------------------------------------|----------------------------|-------------------|-------------------|--------------------------|--------------------------|---------------------------|
| Chronic obstructive pulmonary disease               | 9,651<br>(5,662 - 12,837)  | 125<br>(62 - 210) | 4<br>(1 - 6)      | 194<br>(105 - 291)       | 1,598<br>(858 - 2,398)   | 7,731<br>(4,549 - 10,274) |
| Pneumoconiosis                                      | 655<br>(314 - 1,047)       | 3<br>(1 - 8)      | 2<br>(1 - 3)      | 66<br>(29 - 106)         | 242<br>(103 - 416)       | 342<br>(178 - 550)        |
| Silicosis                                           | 342<br>(170 - 558)         | 1<br>(0 - 2)      | 0<br>(0 - 1)      | 3<br>(2 - 6)             | 60<br>(21 - 115)         | 277<br>(144 - 446)        |
| Asbestosis                                          | 50<br>(22 - 85)            | 1<br>(0 - 2)      | 0<br>(0 - 1)      | 10<br>(4 - 16)           | 38<br>(16 - 68)          | 1<br>(0 - 1)              |
| Coal workers pneumoconiosis                         | 162<br>(74 - 279)          | 1<br>(0 - 2)      | 1<br>(0 - 1)      | 39<br>(17 - 64)          | 109<br>(49 - 198)        | 13<br>(6 - 22)            |
| Other pneumoconiosis                                | 101<br>(47 - 167)          | 1<br>(0 - 3)      | 1<br>(0 - 1)      | 14<br>(6 - 24)           | 34<br>(15 - 64)          | 51<br>(22 - 93)           |
| Asthma                                              | 2,924<br>(1,513 - 4,268)   | 3<br>(1 - 6)      | 7<br>(3 - 10)     | 161<br>(76 - 249)        | 752<br>(350 - 1,176)     | 2,002<br>(1,071 - 3,030)  |
| Interstitial lung disease and pulmonary sarcoidosis | 1,357<br>(601 - 2,262)     | 4<br>(1 - 11)     | 2<br>(1 - 4)      | 28<br>(13 - 49)          | 381<br>(155 - 686)       | 941<br>(425 - 1,668)      |
| Other chronic respiratory diseases                  | 607<br>(327 - 882)         | 58<br>(23 - 102)  | 13<br>(6 - 20)    | 111<br>(54 - 171)        | 95<br>(45 - 161)         | 330<br>(175 - 540)        |
| Cirrhosis                                           | 12,037<br>(8,450 - 16,116) | 25<br>(10 - 50)   | 16<br>(11 - 23)   | 3,759<br>(2,414 - 5,252) | 5,516<br>(3,737 - 7,949) | 2,721<br>(1,938 - 3,712)  |
| Cirrhosis due to hepatitis B                        | 2,968<br>(865 - 6,068)     | 2<br>(0 - 4)      | 4<br>(1 - 8)      | 1,069<br>(333 - 2,184)   | 1,337<br>(374 - 2,859)   | 556<br>(111 - 1,174)      |
| Cirrhosis due to hepatitis C                        | 3,257<br>(1,617 - 5,602)   | 1<br>(0 - 3)      | 2<br>(0 - 4)      | 926<br>(371 - 1,675)     | 1,557<br>(709 - 2,775)   | 771<br>(281 - 1,500)      |
| Cirrhosis due to alcohol use                        | 4,864<br>(2,824 - 7,515)   | --                | --                | 1,298<br>(639 - 2,248)   | 2,273<br>(1,245 - 3,713) | 1,293<br>(745 - 1,995)    |
| Cirrhosis due to other causes                       | 948<br>(539 - 1,503)       | 23<br>(9 - 45)    | 10<br>(6 - 15)    | 464<br>(258 - 737)       | 350<br>(174 - 592)       | 101<br>(52 - 181)         |
| Digestive diseases                                  | 4,015<br>(2,866 - 5,602)   | 55<br>(28 - 92)   | 22<br>(15 - 32)   | 677<br>(439 - 995)       | 940<br>(606 - 1,381)     | 2,321<br>(1,631 - 3,261)  |
| Peptic ulcer disease                                | 1,568<br>(1,061 - 2,326)   | 4<br>(1 - 9)      | 3<br>(2 - 6)      | 208<br>(118 - 339)       | 398<br>(242 - 623)       | 956<br>(601 - 1,457)      |
| Gastritis and duodenitis                            | 146<br>(76 - 256)          | 3<br>(1 - 6)      | 1<br>(1 - 2)      | 20<br>(10 - 44)          | 31<br>(14 - 62)          | 91<br>(43 - 165)          |
| Appendicitis                                        | 138<br>(71 - 255)          | 2<br>(1 - 4)      | 1<br>(1 - 3)      | 12<br>(5 - 23)           | 29<br>(12 - 56)          | 93<br>(42 - 198)          |
| Paralytic ileus and intestinal obstruction          | 233<br>(110 - 571)         | 10<br>(2 - 32)    | 4<br>(2 - 10)     | 17<br>(6 - 48)           | 37<br>(15 - 105)         | 165<br>(74 - 397)         |
| Inguinal, femoral, and abdominal hernia             | 89<br>(50 - 146)           | 1<br>(0 - 2)      | 1<br>(0 - 1)      | 5<br>(2 - 12)            | 19<br>(9 - 37)           | 63<br>(33 - 107)          |
| Inflammatory bowel disease                          | 132<br>(59 - 225)          | 5<br>(2 - 12)     | 2<br>(1 - 3)      | 24<br>(10 - 47)          | 25<br>(11 - 45)          | 77<br>(31 - 138)          |
| Vascular intestinal disorders                       | 47<br>(14 - 113)           | 1<br>(0 - 4)      | 1<br>(0 - 2)      | 8<br>(2 - 22)            | 9<br>(3 - 22)            | 27<br>(8 - 68)            |
| Gallbladder and biliary diseases                    | 423<br>(262 - 649)         | 4<br>(2 - 8)      | 2<br>(1 - 3)      | 60<br>(32 - 107)         | 93<br>(48 - 156)         | 264<br>(139 - 464)        |
| Pancreatitis                                        | 498<br>(222 - 843)         | 3<br>(1 - 6)      | 2<br>(1 - 4)      | 207<br>(87 - 357)        | 133<br>(57 - 243)        | 153<br>(67 - 273)         |
| Other digestive diseases                            | 741<br>(452 - 1,182)       | 22<br>(10 - 39)   | 6<br>(3 - 9)      | 116<br>(63 - 220)        | 167<br>(92 - 301)        | 430<br>(229 - 704)        |
| Neurological disorders                              | 8,466<br>(6,198 - 10,962)  | 24<br>(13 - 40)   | 80<br>(48 - 125)  | 582<br>(372 - 852)       | 829<br>(520 - 1,231)     | 6,952<br>(4,978 - 9,016)  |
| Alzheimer disease and other dementias               | 7,324<br>(5,170 - 9,603)   | --                | --                | 7<br>(2 - 14)            | 586<br>(339 - 916)       | 6,731<br>(4,748 - 8,776)  |
| Parkinson disease                                   | 75<br>(37 - 149)           | --                | --                | 3<br>(2 - 4)             | 13<br>(6 - 28)           | 60<br>(24 - 126)          |
| Epilepsy                                            | 786<br>(519 - 1,120)       | 2<br>(0 - 7)      | 61<br>(31 - 108)  | 452<br>(279 - 690)       | 167<br>(99 - 262)        | 103<br>(61 - 165)         |
| Multiple sclerosis                                  | 13<br>(4 - 23)             | --                | --                | 6<br>(2 - 10)            | 4<br>(2 - 8)             | 3<br>(1 - 7)              |
| Other neurological disorders                        | 268<br>(173 - 398)         | 21<br>(12 - 35)   | 18<br>(11 - 27)   | 114<br>(69 - 178)        | 59<br>(33 - 100)         | 55<br>(33 - 86)           |
| Mental and substance use disorders                  | 1,966<br>(1,279 - 2,853)   | 11<br>(3 - 26)    | 0<br>(0 - 0)      | 1,435<br>(909 - 2,078)   | 483<br>(297 - 751)       | 37<br>(27 - 52)           |
| Schizophrenia                                       | 32<br>(18 - 59)            | --                | --                | 15<br>(8 - 28)           | 10<br>(5 - 21)           | 8<br>(4 - 13)             |
| Alcohol use disorders                               | 630<br>(363 - 1,069)       | --                | --                | 367<br>(200 - 611)       | 255<br>(143 - 457)       | 9<br>(5 - 14)             |
| Drug use disorders                                  | 1,303<br>(795 - 1,861)     | 11<br>(3 - 26)    | --                | 1,053<br>(659 - 1,507)   | 219<br>(125 - 327)       | 21<br>(13 - 31)           |
| Opioid use disorders                                | 836<br>(513 - 1,209)       | 7<br>(2 - 18)     | --                | 681<br>(420 - 981)       | 134<br>(76 - 206)        | 14<br>(9 - 20)            |
| Cocaine use disorders                               | 18<br>(11 - 26)            | 0<br>(0 - 0)      | --                | 16<br>(9 - 23)           | 2<br>(1 - 4)             | 0<br>(0 - 0)              |
| Amphetamine use disorders                           | 18<br>(11 - 26)            | 0<br>(0 - 1)      | --                | 15<br>(9 - 21)           | 3<br>(2 - 5)             | 0<br>(0 - 0)              |
| Other drug use disorders                            | 431<br>(270 - 618)         | 3<br>(1 - 8)      | --                | 341<br>(212 - 491)       | 79<br>(44 - 120)         | 7<br>(4 - 10)             |
| Eating disorders                                    | 1<br>(0 - 1)               | --                | 0<br>(0 - 0)      | 1<br>(0 - 1)             | --                       | --                        |

Web Table 31- Vietnam deaths with 95% UI by age, sex, and cause in 2013

| Cause                                               | Males, All Ages           | Males, 0-4 Years         | Males, 5-14 Years  | Males, 15-49 Years     | Males, 50-69 Years       | Males, 70-80 Years       |
|-----------------------------------------------------|---------------------------|--------------------------|--------------------|------------------------|--------------------------|--------------------------|
| Anorexia nervosa                                    | 1<br>(0 - 1)              | --                       | 0<br>(0 - 0)       | 1<br>(0 - 1)           | --                       | --                       |
| Diabetes, urogenital, blood, and endocrine diseases | 9,536<br>(7,069 - 12,476) | 121<br>(74 - 185)        | 54<br>(31 - 92)    | 1,259<br>(836 - 1,725) | 2,919<br>(1,986 - 4,138) | 5,184<br>(3,874 - 6,618) |
| Diabetes mellitus                                   | 3,972<br>(2,872 - 5,254)  | 1<br>(1 - 1)             | 1<br>(1 - 2)       | 314<br>(200 - 446)     | 1,376<br>(934 - 1,973)   | 2,280<br>(1,654 - 3,046) |
| Acute glomerulonephritis                            | 61<br>(37 - 92)           | 1<br>(0 - 1)             | 1<br>(0 - 1)       | 11<br>(5 - 28)         | 10<br>(5 - 17)           | 38<br>(17 - 65)          |
| Chronic kidney disease                              | 3,978<br>(2,789 - 5,296)  | 2<br>(1 - 3)             | 6<br>(4 - 10)      | 510<br>(335 - 722)     | 1,161<br>(758 - 1,715)   | 2,299<br>(1,597 - 3,171) |
| Chronic kidney disease due to diabetes mellitus     | 249<br>(77 - 633)         | 0<br>(0 - 0)             | 0<br>(0 - 1)       | 32<br>(9 - 80)         | 71<br>(19 - 196)         | 146<br>(45 - 373)        |
| Chronic kidney disease due to hypertension          | 1,374<br>(655 - 2,231)    | 0<br>(0 - 1)             | 1<br>(0 - 1)       | 185<br>(77 - 307)      | 481<br>(218 - 815)       | 706<br>(329 - 1,203)     |
| Chronic kidney disease due to glomerulonephritis    | 369<br>(197 - 612)        | 1<br>(1 - 2)             | 4<br>(2 - 6)       | 81<br>(45 - 136)       | 99<br>(44 - 188)         | 184<br>(91 - 326)        |
| Chronic kidney disease due to other causes          | 1,985<br>(1,162 - 3,085)  | 0<br>(0 - 0)             | 1<br>(0 - 4)       | 211<br>(111 - 381)     | 510<br>(261 - 928)       | 1,262<br>(686 - 2,082)   |
| Urinary diseases and male infertility               | 526<br>(350 - 773)        | 6<br>(3 - 12)            | 1<br>(1 - 2)       | 44<br>(25 - 78)        | 138<br>(83 - 226)        | 337<br>(206 - 512)       |
| Interstitial nephritis and urinary tract infections | 180<br>(91 - 297)         | 3<br>(1 - 7)             | 0<br>(0 - 1)       | 15<br>(7 - 28)         | 45<br>(21 - 83)          | 116<br>(52 - 207)        |
| Urolithiasis                                        | 35<br>(18 - 67)           | --                       | 0<br>(0 - 0)       | 4<br>(2 - 8)           | 11<br>(4 - 24)           | 20<br>(9 - 42)           |
| Other urinary diseases                              | 311<br>(193 - 522)        | 3<br>(1 - 6)             | 0<br>(0 - 1)       | 25<br>(14 - 49)        | 82<br>(46 - 143)         | 200<br>(113 - 355)       |
| Gynecological diseases                              | --                        | --                       | --                 | --                     | --                       | --                       |
| Uterine fibroids                                    | --                        | --                       | --                 | --                     | --                       | --                       |
| Polycystic ovarian syndrome                         | --                        | --                       | --                 | --                     | --                       | --                       |
| Endometriosis                                       | --                        | --                       | --                 | --                     | --                       | --                       |
| Genital prolapse                                    | --                        | --                       | --                 | --                     | --                       | --                       |
| Other gynecological diseases                        | --                        | --                       | --                 | --                     | --                       | --                       |
| Hemoglobinopathies and hemolytic anemias            | 474<br>(249 - 807)        | 77<br>(38 - 134)         | 42<br>(21 - 79)    | 179<br>(86 - 330)      | 76<br>(37 - 136)         | 100<br>(53 - 168)        |
| Thalassemias                                        | 307<br>(160 - 516)        | 74<br>(36 - 129)         | 41<br>(20 - 77)    | 152<br>(73 - 280)      | 35<br>(17 - 63)          | 6<br>(3 - 10)            |
| Sickle cell disorders                               | 0<br>(0 - 0)              | 0<br>(0 - 0)             | 0<br>(0 - 0)       | 0<br>(0 - 0)           | 0<br>(0 - 0)             | 0<br>(0 - 0)             |
| G6PD deficiency                                     | 4<br>(2 - 7)              | 0<br>(0 - 0)             | 0<br>(0 - 0)       | 1<br>(1 - 3)           | 2<br>(1 - 3)             | 1<br>(0 - 1)             |
| Other hemoglobinopathies and hemolytic anemias      | 163<br>(87 - 279)         | 3<br>(1 - 5)             | 1<br>(0 - 2)       | 26<br>(12 - 50)        | 40<br>(20 - 73)          | 94<br>(50 - 158)         |
| Endocrine, metabolic, blood, and immune disorders   | 526<br>(347 - 809)        | 34<br>(20 - 56)          | 3<br>(1 - 5)       | 201<br>(118 - 301)     | 157<br>(91 - 281)        | 130<br>(77 - 218)        |
| Musculoskeletal disorders                           | 341<br>(229 - 514)        | --                       | 10<br>(7 - 16)     | 90<br>(57 - 131)       | 111<br>(68 - 178)        | 129<br>(87 - 203)        |
| Rheumatoid arthritis                                | 57<br>(30 - 99)           | --                       | 2<br>(1 - 4)       | 10<br>(5 - 19)         | 19<br>(9 - 37)           | 25<br>(12 - 48)          |
| Other musculoskeletal disorders                     | 284<br>(185 - 423)        | --                       | 8<br>(5 - 13)      | 80<br>(50 - 121)       | 91<br>(54 - 147)         | 105<br>(67 - 164)        |
| Other non-communicable diseases                     | 3,444<br>(2,652 - 4,331)  | 2,482<br>(1,812 - 3,353) | 188<br>(113 - 284) | 409<br>(251 - 589)     | 167<br>(106 - 267)       | 198<br>(130 - 332)       |
| Congenital anomalies                                | 3,169<br>(2,376 - 4,097)  | 2,466<br>(1,803 - 3,342) | 187<br>(112 - 283) | 336<br>(200 - 500)     | 91<br>(53 - 151)         | 89<br>(59 - 134)         |
| Neural tube defects                                 | 310<br>(89 - 712)         | 292<br>(74 - 692)        | 5<br>(2 - 10)      | 11<br>(4 - 23)         | 2<br>(1 - 5)             | 1<br>(0 - 2)             |
| Congenital heart anomalies                          | 2,013<br>(1,388 - 2,711)  | 1,523<br>(985 - 2,172)   | 143<br>(86 - 223)  | 239<br>(139 - 358)     | 48<br>(27 - 78)          | 60<br>(38 - 90)          |
| Cleft lip and cleft palate                          | 4<br>(1 - 10)             | 4<br>(1 - 10)            | --                 | --                     | --                       | --                       |
| Down syndrome                                       | 34<br>(16 - 63)           | 21<br>(8 - 48)           | 4<br>(1 - 7)       | 7<br>(3 - 13)          | 1<br>(1 - 3)             | 0<br>(0 - 1)             |
| Chromosomal unbalanced rearrangements               | 48<br>(25 - 91)           | 34<br>(13 - 72)          | 2<br>(1 - 5)       | 8<br>(4 - 14)          | 2<br>(1 - 5)             | 1<br>(1 - 2)             |
| Other congenital anomalies                          | 760<br>(489 - 1,148)      | 592<br>(339 - 974)       | 34<br>(15 - 61)    | 70<br>(36 - 121)       | 37<br>(20 - 66)          | 27<br>(16 - 47)          |
| Skin and subcutaneous diseases                      | 259<br>(172 - 417)        | 1<br>(0 - 1)             | 1<br>(1 - 2)       | 73<br>(47 - 106)       | 76<br>(49 - 125)         | 109<br>(57 - 220)        |
| Cellulitis                                          | 53<br>(26 - 95)           | 0<br>(0 - 0)             | 0<br>(0 - 0)       | 15<br>(7 - 26)         | 18<br>(8 - 34)           | 20<br>(7 - 45)           |
| Pyoderma                                            | 134<br>(85 - 228)         | 0<br>(0 - 1)             | 1<br>(0 - 1)       | 42<br>(27 - 64)        | 44<br>(26 - 78)          | 47<br>(21 - 109)         |
| Decubitus ulcer                                     | 64<br>(34 - 122)          | 0<br>(0 - 0)             | 0<br>(0 - 0)       | 11<br>(6 - 19)         | 13<br>(7 - 23)           | 40<br>(17 - 89)          |

Web Table 31- Vietnam deaths with 95% UI by age, sex, and cause in 2013

| Cause                                           | Males, All Ages             | Males, 0-4 Years         | Males, 5-14 Years        | Males, 15-49 Years          | Males, 50-69 Years       | Males, 70-80 Years       |
|-------------------------------------------------|-----------------------------|--------------------------|--------------------------|-----------------------------|--------------------------|--------------------------|
| Other skin and subcutaneous diseases            | 8<br>(5 - 14)               | 0<br>(0 - 0)             | 0<br>(0 - 0)             | 4<br>(2 - 7)                | 2<br>(1 - 4)             | 2<br>(1 - 4)             |
| Sudden infant death syndrome                    | 16<br>(4 - 46)              | 16<br>(4 - 46)           | --                       | --                          | --                       | --                       |
| Injuries                                        | 36,138<br>(26,612 - 46,526) | 2,251<br>(1,491 - 3,293) | 1,683<br>(1,383 - 1,982) | 21,537<br>(14,946 - 28,432) | 6,815<br>(4,590 - 9,741) | 3,853<br>(2,939 - 4,982) |
| Transport injuries                              | 19,213<br>(13,655 - 25,441) | 194<br>(106 - 330)       | 560<br>(414 - 721)       | 13,151<br>(9,112 - 17,528)  | 3,866<br>(2,546 - 5,571) | 1,441<br>(1,008 - 1,941) |
| Road injuries                                   | 18,648<br>(13,252 - 24,779) | 161<br>(84 - 279)        | 535<br>(394 - 686)       | 12,783<br>(8,845 - 17,047)  | 3,759<br>(2,482 - 5,395) | 1,410<br>(990 - 1,900)   |
| Pedestrian road injuries                        | 3,154<br>(1,966 - 4,701)    | 72<br>(33 - 133)         | 214<br>(142 - 311)       | 1,293<br>(723 - 2,131)      | 943<br>(516 - 1,557)     | 632<br>(384 - 904)       |
| Cyclist road injuries                           | 855<br>(549 - 1,280)        | 6<br>(2 - 14)            | 88<br>(48 - 138)         | 341<br>(209 - 530)          | 306<br>(174 - 484)       | 114<br>(63 - 189)        |
| Motorcyclist road injuries                      | 11,046<br>(7,298 - 15,415)  | 28<br>(12 - 58)          | 140<br>(80 - 230)        | 8,506<br>(5,699 - 11,823)   | 1,904<br>(1,124 - 2,939) | 468<br>(255 - 743)       |
| Motor vehicle road injuries                     | 3,503<br>(2,256 - 5,223)    | 53<br>(25 - 97)          | 88<br>(54 - 135)         | 2,592<br>(1,586 - 3,915)    | 589<br>(333 - 1,001)     | 180<br>(105 - 294)       |
| Other road injuries                             | 89<br>(48 - 197)            | 2<br>(1 - 4)             | 4<br>(2 - 8)             | 51<br>(23 - 123)            | 17<br>(8 - 39)           | 16<br>(8 - 32)           |
| Other transport injuries                        | 565<br>(384 - 792)          | 34<br>(15 - 63)          | 25<br>(15 - 39)          | 368<br>(237 - 534)          | 108<br>(60 - 176)        | 31<br>(18 - 51)          |
| Unintentional injuries                          | 12,505<br>(9,636 - 16,213)  | 2,047<br>(1,345 - 3,088) | 1,095<br>(843 - 1,392)   | 5,145<br>(3,485 - 7,081)    | 2,114<br>(1,402 - 3,099) | 2,105<br>(1,486 - 2,928) |
| Falls                                           | 3,413<br>(2,342 - 4,765)    | 39<br>(20 - 70)          | 34<br>(20 - 52)          | 1,061<br>(657 - 1,544)      | 898<br>(532 - 1,421)     | 1,381<br>(876 - 2,104)   |
| Drowning                                        | 5,121<br>(3,792 - 7,050)    | 1,660<br>(998 - 2,659)   | 941<br>(695 - 1,244)     | 1,900<br>(1,211 - 2,875)    | 453<br>(270 - 725)       | 167<br>(109 - 261)       |
| Fire, heat, and hot substances                  | 123<br>(61 - 246)           | 6<br>(2 - 12)            | 3<br>(1 - 5)             | 66<br>(30 - 130)            | 40<br>(15 - 96)          | 8<br>(4 - 17)            |
| Poisonings                                      | 324<br>(183 - 485)          | 1<br>(0 - 5)             | 1<br>(1 - 2)             | 215<br>(115 - 329)          | 96<br>(49 - 157)         | 11<br>(5 - 29)           |
| Exposure to mechanical forces                   | 879<br>(612 - 1,230)        | 104<br>(56 - 203)        | 33<br>(19 - 54)          | 515<br>(329 - 754)          | 132<br>(81 - 206)        | 94<br>(63 - 133)         |
| Unintentional firearm injuries                  | 192<br>(120 - 292)          | 4<br>(2 - 7)             | 5<br>(2 - 9)             | 115<br>(63 - 195)           | 36<br>(18 - 62)          | 33<br>(17 - 57)          |
| Unintentional suffocation                       | 55<br>(24 - 173)            | 38<br>(10 - 145)         | 1<br>(0 - 2)             | 9<br>(5 - 21)               | 5<br>(2 - 12)            | 2<br>(1 - 4)             |
| Other exposure to mechanical forces             | 632<br>(433 - 884)          | 62<br>(29 - 117)         | 28<br>(14 - 47)          | 390<br>(238 - 587)          | 92<br>(54 - 149)         | 59<br>(36 - 90)          |
| Adverse effects of medical treatment            | 515<br>(337 - 852)          | 26<br>(12 - 46)          | 6<br>(4 - 10)            | 138<br>(82 - 230)           | 125<br>(67 - 218)        | 220<br>(113 - 441)       |
| Animal contact                                  | 248<br>(137 - 368)          | 15<br>(6 - 27)           | 11<br>(5 - 19)           | 74<br>(41 - 122)            | 109<br>(49 - 187)        | 40<br>(21 - 64)          |
| Venomous animal contact                         | 97<br>(52 - 153)            | 8<br>(3 - 15)            | 5<br>(2 - 10)            | 32<br>(16 - 54)             | 47<br>(20 - 86)          | 6<br>(3 - 11)            |
| Non-venomous animal contact                     | 151<br>(77 - 225)           | 8<br>(3 - 14)            | 5<br>(2 - 10)            | 42<br>(23 - 69)             | 61<br>(24 - 109)         | 34<br>(18 - 54)          |
| Foreign body                                    | 312<br>(194 - 606)          | 174<br>(97 - 310)        | 3<br>(1 - 4)             | 27<br>(12 - 66)             | 42<br>(22 - 89)          | 66<br>(33 - 158)         |
| Pulmonary aspiration and foreign body in airway | 303<br>(185 - 594)          | 173<br>(96 - 309)        | 2<br>(1 - 3)             | 23<br>(10 - 62)             | 40<br>(20 - 87)          | 65<br>(31 - 156)         |
| Foreign body in other body part                 | 9<br>(6 - 16)               | 1<br>(1 - 2)             | 1<br>(1 - 2)             | 4<br>(2 - 7)                | 2<br>(1 - 4)             | 1<br>(1 - 3)             |
| Other unintentional injuries                    | 1,570<br>(1,094 - 2,156)    | 22<br>(14 - 32)          | 63<br>(42 - 92)          | 1,148<br>(766 - 1,621)      | 218<br>(130 - 354)       | 118<br>(80 - 172)        |
| Self-harm and interpersonal violence            | 4,420<br>(2,994 - 6,311)    | 9<br>(4 - 17)            | 29<br>(15 - 46)          | 3,241<br>(2,154 - 4,693)    | 834<br>(536 - 1,280)     | 307<br>(198 - 473)       |
| Self-harm                                       | 3,046<br>(2,035 - 4,471)    | --                       | 3<br>(1 - 8)             | 2,076<br>(1,343 - 3,073)    | 690<br>(428 - 1,093)     | 276<br>(172 - 440)       |
| Interpersonal violence                          | 1,374<br>(837 - 2,225)      | 9<br>(4 - 17)            | 25<br>(13 - 43)          | 1,165<br>(689 - 1,903)      | 144<br>(80 - 249)        | 31<br>(15 - 56)          |
| Assault by firearm                              | 109<br>(50 - 267)           | 1<br>(0 - 1)             | 1<br>(0 - 3)             | 94<br>(41 - 233)            | 13<br>(5 - 38)           | 1<br>(0 - 2)             |
| Assault by sharp object                         | 736<br>(435 - 1,221)        | 1<br>(0 - 1)             | 1<br>(0 - 2)             | 679<br>(404 - 1,142)        | 45<br>(23 - 83)          | 11<br>(5 - 21)           |
| Assault by other means                          | 528<br>(291 - 854)          | 7<br>(3 - 15)            | 23<br>(12 - 38)          | 392<br>(202 - 656)          | 87<br>(45 - 154)         | 20<br>(9 - 37)           |
| Forces of nature, war, and legal intervention   | 1<br>(0 - 0)                | 1<br>(0 - 0)             | --                       | --                          | --                       | --                       |
| Exposure to forces of nature                    | 1<br>(0 - 0)                | 1<br>(0 - 0)             | --                       | --                          | --                       | --                       |

Web Table 31- Vietnam deaths with 95% UI by age, sex, and cause in 2013

| Cause                                                             | Females, All Ages              | Females, 0-4 Years         | Females, 5-14 Years      | Females, 15-49 Years        | Females, 50-69 Years        | Females, 70-80 Years           |
|-------------------------------------------------------------------|--------------------------------|----------------------------|--------------------------|-----------------------------|-----------------------------|--------------------------------|
| All causes                                                        | 258,645<br>(218,633 - 301,667) | 10,906<br>(9,108 - 12,993) | 1,775<br>(1,505 - 2,014) | 18,527<br>(13,125 - 25,085) | 40,666<br>(28,901 - 56,755) | 186,771<br>(164,050 - 207,022) |
| Communicable, maternal, neonatal, and nutritional diseases        | 27,188<br>(22,748 - 32,103)    | 7,177<br>(5,702 - 8,775)   | 403<br>(286 - 613)       | 2,740<br>(2,145 - 3,348)    | 2,243<br>(1,673 - 2,980)    | 14,624<br>(11,155 - 18,983)    |
| HIV/AIDS and tuberculosis                                         | 5,575<br>(4,145 - 7,261)       | 12<br>(6 - 23)             | 3<br>(1 - 5)             | 1,032<br>(731 - 1,396)      | 1,058<br>(712 - 1,552)      | 3,468<br>(2,454 - 4,777)       |
| Tuberculosis                                                      | 5,170<br>(3,727 - 6,860)       | 2<br>(1 - 3)               | 2<br>(1 - 3)             | 694<br>(434 - 1,030)        | 1,008<br>(663 - 1,508)      | 3,464<br>(2,451 - 4,773)       |
| HIV/AIDS                                                          | 404<br>(271 - 603)             | 11<br>(4 - 21)             | 1<br>(0 - 3)             | 338<br>(225 - 499)          | 50<br>(28 - 88)             | 4<br>(1 - 10)                  |
| HIV/AIDS resulting in mycobacterial infection                     | 20<br>(12 - 31)                | 0<br>(0 - 1)               | 0<br>(0 - 0)             | 16<br>(10 - 26)             | 3<br>(1 - 5)                | 0<br>(0 - 1)                   |
| HIV/AIDS resulting in other diseases                              | 385<br>(258 - 575)             | 10<br>(4 - 20)             | 1<br>(0 - 3)             | 322<br>(215 - 474)          | 48<br>(26 - 84)             | 4<br>(1 - 10)                  |
| Diarrhea, lower respiratory, and other common infectious diseases | 15,143<br>(11,544 - 19,554)    | 2,788<br>(2,100 - 3,656)   | 313<br>(198 - 529)       | 705<br>(447 - 1,047)        | 905<br>(602 - 1,415)        | 10,432<br>(7,195 - 14,386)     |
| Diarrheal diseases                                                | 1,604<br>(920 - 2,763)         | 14<br>(6 - 27)             | 20<br>(9 - 36)           | 25<br>(15 - 39)             | 55<br>(28 - 100)            | 1,492<br>(814 - 2,640)         |
| Intestinal infectious diseases                                    | 505<br>(235 - 923)             | 162<br>(59 - 357)          | 100<br>(33 - 227)        | 176<br>(61 - 381)           | 45<br>(13 - 104)            | 22<br>(8 - 49)                 |
| Typhoid fever                                                     | 386<br>(174 - 716)             | 116<br>(40 - 262)          | 76<br>(25 - 167)         | 140<br>(47 - 304)           | 37<br>(10 - 87)             | 16<br>(6 - 38)                 |
| Paratyphoid fever                                                 | 106<br>(46 - 201)              | 41<br>(13 - 95)            | 23<br>(7 - 58)           | 32<br>(10 - 72)             | 7<br>(2 - 18)               | 3<br>(1 - 8)                   |
| Other intestinal infectious diseases                              | 13<br>(6 - 24)                 | 5<br>(1 - 11)              | 1<br>(0 - 4)             | 4<br>(1 - 10)               | 2<br>(0 - 5)                | 2<br>(0 - 6)                   |
| Lower respiratory infections                                      | 11,772<br>(8,426 - 15,873)     | 2,055<br>(1,362 - 2,711)   | 79<br>(49 - 120)         | 319<br>(197 - 487)          | 698<br>(436 - 1,101)        | 8,621<br>(5,560 - 12,435)      |
| Upper respiratory infections                                      | 15<br>(4 - 47)                 | 1<br>(0 - 3)               | 0<br>(0 - 1)             | 2<br>(0 - 5)                | 3<br>(0 - 8)                | 9<br>(0 - 41)                  |
| Otitis media                                                      | 13<br>(10 - 18)                | 1<br>(1 - 2)               | 1<br>(1 - 1)             | 3<br>(2 - 4)                | 1<br>(1 - 2)                | 7<br>(5 - 11)                  |
| Meningitis                                                        | 188<br>(129 - 349)             | 92<br>(49 - 209)           | 10<br>(5 - 16)           | 31<br>(18 - 52)             | 20<br>(11 - 34)             | 35<br>(17 - 76)                |
| Pneumococcal meningitis                                           | 69<br>(45 - 131)               | 30<br>(14 - 72)            | 4<br>(2 - 7)             | 13<br>(7 - 22)              | 8<br>(4 - 16)               | 14<br>(6 - 33)                 |
| H influenzae type B meningitis                                    | 40<br>(24 - 88)                | 28<br>(14 - 73)            | 2<br>(1 - 4)             | 4<br>(2 - 7)                | 2<br>(1 - 4)                | 4<br>(2 - 8)                   |
| Meningococcal meningitis                                          | 21<br>(12 - 41)                | 6<br>(2 - 21)              | 1<br>(0 - 2)             | 4<br>(2 - 9)                | 3<br>(1 - 6)                | 6<br>(3 - 14)                  |
| Other meningitis                                                  | 58<br>(38 - 94)                | 28<br>(14 - 50)            | 3<br>(1 - 5)             | 10<br>(5 - 19)              | 6<br>(3 - 11)               | 11<br>(5 - 26)                 |
| Encephalitis                                                      | 554<br>(358 - 764)             | 115<br>(62 - 191)          | 54<br>(30 - 84)          | 126<br>(72 - 198)           | 76<br>(44 - 120)            | 183<br>(99 - 276)              |
| Diphtheria                                                        | 2<br>(0 - 11)                  | 1<br>(0 - 11)              | 0<br>(0 - 3)             | 0<br>(0 - 2)                | 0<br>(0 - 1)                | --                             |
| Whooping cough                                                    | 78<br>(0 - 383)                | 72<br>(0 - 353)            | 5<br>(0 - 23)            | 1<br>(0 - 8)                | 0<br>(0 - 1)                | --                             |
| Tetanus                                                           | 52<br>(26 - 105)               | 6<br>(3 - 13)              | 1<br>(0 - 1)             | 3<br>(1 - 4)                | 3<br>(1 - 9)                | 40<br>(14 - 93)                |
| Measles                                                           | 321<br>(6 - 1,881)             | 265<br>(5 - 1,562)         | 43<br>(1 - 266)          | 13<br>(0 - 85)              | 0<br>(0 - 3)                | --                             |
| Varicella and herpes zoster                                       | 37<br>(8 - 127)                | 4<br>(0 - 19)              | 1<br>(0 - 6)             | 6<br>(1 - 17)               | 3<br>(0 - 10)               | 23<br>(0 - 116)                |
| Neglected tropical diseases and malaria                           | 343<br>(249 - 454)             | 65<br>(30 - 101)           | 62<br>(35 - 95)          | 97<br>(62 - 145)            | 62<br>(38 - 99)             | 57<br>(38 - 84)                |
| Malaria                                                           | 159<br>(106 - 237)             | 12<br>(5 - 25)             | 17<br>(9 - 28)           | 65<br>(37 - 108)            | 45<br>(24 - 85)             | 19<br>(10 - 34)                |
| Leishmaniasis                                                     | 0<br>(0 - 1)                   | 0<br>(0 - 1)               | 0<br>(0 - 0)             | 0<br>(0 - 0)                | 0<br>(0 - 0)                | 0<br>(0 - 0)                   |
| Visceral leishmaniasis                                            | 0<br>(0 - 1)                   | 0<br>(0 - 1)               | 0<br>(0 - 0)             | 0<br>(0 - 0)                | 0<br>(0 - 0)                | 0<br>(0 - 0)                   |
| Cysticercosis                                                     | 0<br>(0 - 1)                   | 0<br>(0 - 0)               | 0<br>(0 - 0)             | 0<br>(0 - 0)                | 0<br>(0 - 0)                | 0<br>(0 - 0)                   |
| Cystic echinococcosis                                             | 4<br>(3 - 5)                   | 0<br>(0 - 0)               | 0<br>(0 - 0)             | 1<br>(1 - 2)                | 1<br>(1 - 1)                | 1<br>(1 - 1)                   |
| Dengue                                                            | 130<br>(54 - 219)              | 45<br>(14 - 76)            | 40<br>(13 - 71)          | 22<br>(8 - 50)              | 8<br>(4 - 14)               | 16<br>(8 - 30)                 |
| Rabies                                                            | 28<br>(17 - 58)                | 1<br>(0 - 1)               | 4<br>(2 - 10)            | 4<br>(2 - 6)                | 6<br>(3 - 12)               | 15<br>(6 - 34)                 |
| Intestinal nematode infections                                    | 6<br>(1 - 15)                  | 3<br>(0 - 10)              | 1<br>(0 - 5)             | 0<br>(0 - 4)                | 0<br>(0 - 3)                | 1<br>(0 - 6)                   |
| Ascariasis                                                        | 6<br>(1 - 15)                  | 3<br>(0 - 10)              | 1<br>(0 - 5)             | 0<br>(0 - 4)                | 0<br>(0 - 3)                | 1<br>(0 - 6)                   |
| Other neglected tropical diseases                                 | 15<br>(10 - 22)                | 4<br>(2 - 8)               | 1<br>(1 - 2)             | 4<br>(3 - 7)                | 2<br>(1 - 4)                | 4<br>(2 - 7)                   |
| Maternal disorders                                                | 800<br>(482 - 1,265)           | --                         | 2<br>(1 - 5)             | 798<br>(481 - 1,263)        | --                          | --                             |
| Maternal hemorrhage                                               | 89<br>(46 - 150)               | --                         | 0<br>(0 - 0)             | 89<br>(46 - 149)            | --                          | --                             |



Web Table 31- Vietnam deaths with 95% UI by age, sex, and cause in 2013

| Cause                                                            | Females, All Ages              | Females, 0-4 Years       | Females, 5-14 Years | Females, 15-49 Years       | Females, 50-69 Years        | Females, 70-80 Years           |
|------------------------------------------------------------------|--------------------------------|--------------------------|---------------------|----------------------------|-----------------------------|--------------------------------|
| Maternal sepsis and other maternal infections                    | 98<br>(55 - 170)               | --                       | 0<br>(0 - 1)        | 98<br>(55 - 170)           | --                          | --                             |
| Maternal hypertensive disorders                                  | 51<br>(16 - 100)               | --                       | 0<br>(0 - 0)        | 50<br>(16 - 100)           | --                          | --                             |
| Maternal obstructed labor                                        | 57<br>(28 - 103)               | --                       | 0<br>(0 - 0)        | 57<br>(28 - 103)           | --                          | --                             |
| Maternal abortive outcome                                        | 128<br>(65 - 226)              | --                       | 0<br>(0 - 1)        | 127<br>(65 - 226)          | --                          | --                             |
| Indirect maternal deaths                                         | 120<br>(61 - 204)              | --                       | 0<br>(0 - 1)        | 120<br>(61 - 204)          | --                          | --                             |
| Late maternal deaths                                             | 99<br>(54 - 164)               | --                       | 0<br>(0 - 1)        | 99<br>(53 - 163)           | --                          | --                             |
| Maternal deaths aggravated by HIV/AIDS                           | 0<br>(0 - 0)                   | --                       | --                  | 0<br>(0 - 0)               | --                          | --                             |
| Other maternal disorders                                         | 156<br>(83 - 262)              | --                       | 0<br>(0 - 1)        | 156<br>(83 - 262)          | --                          | --                             |
| Neonatal disorders                                               | 4,150<br>(3,152 - 5,267)       | 4,150<br>(3,152 - 5,267) | --                  | --                         | --                          | --                             |
| Neonatal preterm birth complications                             | 2,195<br>(1,383 - 3,178)       | 2,195<br>(1,383 - 3,178) | --                  | --                         | --                          | --                             |
| Neonatal encephalopathy due to birth asphyxia and trauma         | 1,059<br>(562 - 1,718)         | 1,059<br>(562 - 1,718)   | --                  | --                         | --                          | --                             |
| Neonatal sepsis and other neonatal infections                    | 426<br>(175 - 834)             | 426<br>(175 - 834)       | --                  | --                         | --                          | --                             |
| Hemolytic disease and other neonatal jaundice                    | 7<br>(2 - 20)                  | 7<br>(2 - 20)            | --                  | --                         | --                          | --                             |
| Other neonatal disorders                                         | 462<br>(241 - 816)             | 462<br>(241 - 816)       | --                  | --                         | --                          | --                             |
| Nutritional deficiencies                                         | 94<br>(66 - 180)               | 6<br>(3 - 10)            | 8<br>(4 - 17)       | 5<br>(3 - 7)               | 5<br>(3 - 9)                | 71<br>(46 - 148)               |
| Protein-energy malnutrition                                      | 7<br>(3 - 15)                  | 1<br>(0 - 4)             | 2<br>(1 - 5)        | 1<br>(0 - 2)               | 0<br>(0 - 1)                | 2<br>(1 - 6)                   |
| Iodine deficiency                                                | 2<br>(0 - 7)                   | 0<br>(0 - 2)             | 0<br>(0 - 2)        | 0<br>(0 - 0)               | 0<br>(0 - 1)                | 1<br>(0 - 5)                   |
| Iron-deficiency anemia                                           | 32<br>(19 - 57)                | 3<br>(1 - 5)             | 4<br>(2 - 9)        | 3<br>(1 - 4)               | 3<br>(2 - 6)                | 20<br>(10 - 39)                |
| Other nutritional deficiencies                                   | 54<br>(29 - 112)               | 1<br>(1 - 3)             | 2<br>(1 - 3)        | 1<br>(0 - 2)               | 2<br>(1 - 3)                | 48<br>(26 - 102)               |
| Other communicable, maternal, neonatal, and nutritional diseases | 1,083<br>(663 - 1,877)         | 155<br>(70 - 267)        | 16<br>(8 - 26)      | 102<br>(61 - 160)          | 213<br>(117 - 377)          | 597<br>(267 - 1,360)           |
| Sexually transmitted diseases excluding HIV                      | 153<br>(64 - 271)              | 109<br>(27 - 218)        | 10<br>(3 - 20)      | 5<br>(2 - 9)               | 5<br>(1 - 11)               | 25<br>(8 - 61)                 |
| Syphilis                                                         | 142<br>(55 - 258)              | 109<br>(27 - 218)        | 10<br>(3 - 19)      | 2<br>(1 - 4)               | 3<br>(1 - 6)                | 19<br>(6 - 47)                 |
| Chlamydial infection                                             | 3<br>(2 - 6)                   | --                       | 0<br>(0 - 0)        | 1<br>(0 - 2)               | 1<br>(0 - 1)                | 1<br>(0 - 3)                   |
| Gonococcal infection                                             | 5<br>(2 - 9)                   | --                       | 0<br>(0 - 0)        | 1<br>(0 - 2)               | 1<br>(0 - 2)                | 3<br>(1 - 7)                   |
| Other sexually transmitted diseases                              | 3<br>(1 - 5)                   | --                       | 0<br>(0 - 0)        | 1<br>(0 - 2)               | 1<br>(0 - 1)                | 1<br>(0 - 3)                   |
| Hepatitis                                                        | 281<br>(200 - 380)             | 8<br>(4 - 13)            | 4<br>(2 - 5)        | 44<br>(27 - 68)            | 86<br>(52 - 132)            | 139<br>(89 - 213)              |
| Acute hepatitis A                                                | 17<br>(5 - 36)                 | 4<br>(1 - 8)             | 1<br>(0 - 2)        | 5<br>(1 - 11)              | 4<br>(1 - 12)               | 3<br>(1 - 8)                   |
| Acute hepatitis B                                                | 202<br>(132 - 287)             | 3<br>(1 - 6)             | 1<br>(0 - 1)        | 18<br>(9 - 32)             | 63<br>(35 - 100)            | 117<br>(72 - 181)              |
| Acute hepatitis C                                                | 9<br>(1 - 26)                  | --                       | 0<br>(0 - 0)        | 1<br>(0 - 4)               | 3<br>(0 - 8)                | 5<br>(1 - 18)                  |
| Acute hepatitis E                                                | 54<br>(26 - 101)               | 1<br>(0 - 2)             | 2<br>(1 - 3)        | 20<br>(10 - 33)            | 16<br>(5 - 36)              | 14<br>(3 - 39)                 |
| Other infectious diseases                                        | 648<br>(283 - 1,401)           | 38<br>(20 - 70)          | 2<br>(1 - 5)        | 53<br>(25 - 100)           | 122<br>(50 - 262)           | 433<br>(117 - 1,186)           |
| Non-communicable diseases                                        | 216,999<br>(181,977 - 254,453) | 2,587<br>(1,924 - 3,339) | 540<br>(403 - 675)  | 11,326<br>(7,583 - 15,934) | 35,636<br>(25,095 - 50,408) | 166,912<br>(145,846 - 186,018) |
| Neoplasms                                                        | 47,783<br>(36,849 - 61,882)    | 90<br>(47 - 151)         | 249<br>(174 - 334)  | 5,335<br>(3,546 - 7,579)   | 12,969<br>(8,958 - 18,635)  | 29,142<br>(23,185 - 38,275)    |
| Esophageal cancer                                                | 1,747<br>(1,218 - 2,367)       | --                       | --                  | 187<br>(43 - 299)          | 458<br>(153 - 725)          | 1,102<br>(747 - 1,586)         |
| Stomach cancer                                                   | 8,986<br>(5,651 - 14,582)      | --                       | --                  | 628<br>(375 - 976)         | 1,242<br>(778 - 1,977)      | 7,117<br>(4,105 - 12,296)      |
| Liver cancer                                                     | 8,565<br>(6,037 - 11,660)      | --                       | 29<br>(17 - 46)     | 715<br>(428 - 1,098)       | 2,701<br>(1,758 - 4,026)    | 5,121<br>(3,307 - 7,597)       |
| Liver cancer due to hepatitis B                                  | 2,744<br>(1,286 - 4,863)       | --                       | 9<br>(2 - 17)       | 298<br>(126 - 548)         | 1,030<br>(467 - 1,881)      | 1,408<br>(558 - 2,754)         |
| Liver cancer due to hepatitis C                                  | 3,638<br>(1,498 - 6,257)       | --                       | 3<br>(1 - 7)        | 219<br>(67 - 447)          | 1,039<br>(384 - 1,989)      | 2,376<br>(894 - 4,267)         |
| Liver cancer due to alcohol use                                  | 609<br>(295 - 1,100)           | --                       | --                  | 22<br>(9 - 45)             | 131<br>(65 - 255)           | 455<br>(191 - 893)             |
| Liver cancer due to other causes                                 | 1,575<br>(746 - 2,835)         | --                       | 17<br>(9 - 31)      | 175<br>(84 - 332)          | 501<br>(222 - 1,021)        | 882<br>(374 - 1,672)           |

Web Table 31- Vietnam deaths with 95% UI by age, sex, and cause in 2013

| Cause                                         | Females, All Ages             | Females, 0-4 Years | Females, 5-14 Years | Females, 15-49 Years     | Females, 50-69 Years        | Females, 70-80 Years         |
|-----------------------------------------------|-------------------------------|--------------------|---------------------|--------------------------|-----------------------------|------------------------------|
| Larynx cancer                                 | 46<br>(7 - 120)               | --                 | --                  | 4<br>(2 - 8)             | 4<br>(1 - 10)               | 37<br>(3 - 105)              |
| Tracheal, bronchus and lung cancer            | 6,881<br>(5,045 - 9,429)      | --                 | --                  | 569<br>(351 - 857)       | 2,131<br>(1,434 - 3,192)    | 4,181<br>(3,016 - 5,980)     |
| Breast cancer                                 | 2,250<br>(1,574 - 3,271)      | --                 | --                  | 572<br>(366 - 843)       | 1,025<br>(666 - 1,557)      | 654<br>(463 - 1,329)         |
| Cervical cancer                               | 3,208<br>(2,224 - 5,175)      | --                 | --                  | 375<br>(205 - 587)       | 904<br>(557 - 1,421)        | 1,929<br>(1,202 - 4,033)     |
| Uterine cancer                                | 942<br>(516 - 1,370)          | --                 | --                  | 46<br>(20 - 86)          | 299<br>(115 - 496)          | 596<br>(350 - 967)           |
| Prostate cancer                               | --                            | --                 | --                  | --                       | --                          | --                           |
| Colon and rectum cancer                       | 2,971<br>(2,179 - 3,965)      | --                 | --                  | 291<br>(188 - 436)       | 1,025<br>(704 - 1,535)      | 1,655<br>(1,168 - 2,301)     |
| Lip and oral cavity cancer                    | 729<br>(400 - 1,104)          | --                 | --                  | 47<br>(20 - 98)          | 233<br>(124 - 368)          | 449<br>(223 - 775)           |
| Nasopharynx cancer                            | 344<br>(87 - 1,383)           | --                 | 2<br>(0 - 5)        | 33<br>(8 - 128)          | 47<br>(16 - 159)            | 262<br>(50 - 1,120)          |
| Other pharynx cancer                          | 567<br>(365 - 874)            | --                 | --                  | 7<br>(4 - 14)            | 95<br>(56 - 156)            | 465<br>(273 - 761)           |
| Gallbladder and biliary tract cancer          | 579<br>(366 - 899)            | --                 | --                  | 21<br>(12 - 35)          | 112<br>(39 - 195)           | 447<br>(262 - 726)           |
| Pancreatic cancer                             | 760<br>(543 - 1,024)          | --                 | --                  | 101<br>(64 - 148)        | 354<br>(231 - 524)          | 305<br>(223 - 402)           |
| Malignant skin melanoma                       | 56<br>(39 - 80)               | --                 | --                  | 7<br>(4 - 11)            | 21<br>(13 - 32)             | 28<br>(17 - 46)              |
| Non-melanoma skin cancer                      | 219<br>(116 - 386)            | --                 | --                  | 5<br>(3 - 8)             | 32<br>(17 - 55)             | 182<br>(91 - 336)            |
| Ovarian cancer                                | 533<br>(362 - 786)            | --                 | --                  | 169<br>(107 - 259)       | 304<br>(197 - 468)          | 60<br>(40 - 88)              |
| Testicular cancer                             | --                            | --                 | --                  | --                       | --                          | --                           |
| Kidney cancer                                 | 379<br>(243 - 570)            | 3<br>(1 - 6)       | 1<br>(1 - 3)        | 28<br>(16 - 45)          | 89<br>(51 - 145)            | 257<br>(150 - 429)           |
| Bladder cancer                                | 363<br>(130 - 947)            | --                 | --                  | 11<br>(6 - 19)           | 69<br>(41 - 113)            | 283<br>(63 - 831)            |
| Brain and nervous system cancer               | 1,150<br>(758 - 1,602)        | 5<br>(2 - 10)      | 28<br>(17 - 44)     | 203<br>(120 - 300)       | 427<br>(225 - 671)          | 487<br>(298 - 784)           |
| Thyroid cancer                                | 796<br>(312 - 2,127)          | --                 | 1<br>(0 - 1)        | 19<br>(10 - 34)          | 93<br>(52 - 158)            | 685<br>(220 - 1,963)         |
| Mesothelioma                                  | 10<br>(7 - 16)                | --                 | --                  | 3<br>(2 - 5)             | 5<br>(2 - 8)                | 3<br>(1 - 5)                 |
| Hodgkin lymphoma                              | 68<br>(32 - 197)              | 3<br>(1 - 6)       | 2<br>(1 - 4)        | 8<br>(4 - 22)            | 6<br>(3 - 19)               | 48<br>(18 - 159)             |
| Non-Hodgkin lymphoma                          | 1,492<br>(874 - 2,075)        | 14<br>(6 - 26)     | 26<br>(13 - 46)     | 233<br>(89 - 369)        | 274<br>(125 - 428)          | 944<br>(573 - 1,424)         |
| Multiple myeloma                              | 78<br>(52 - 115)              | --                 | --                  | 16<br>(8 - 27)           | 28<br>(17 - 46)             | 34<br>(20 - 52)              |
| Leukemia                                      | 1,345<br>(875 - 1,956)        | 61<br>(26 - 118)   | 134<br>(82 - 197)   | 632<br>(344 - 941)       | 297<br>(188 - 450)          | 222<br>(126 - 315)           |
| Other neoplasms                               | 2,719<br>(1,766 - 3,850)      | 4<br>(2 - 8)       | 26<br>(15 - 42)     | 406<br>(234 - 626)       | 694<br>(412 - 1,072)        | 1,589<br>(1,020 - 2,297)     |
| Cardiovascular diseases                       | 111,611<br>(93,348 - 130,953) | 17<br>(9 - 27)     | 38<br>(26 - 53)     | 3,349<br>(2,140 - 4,887) | 14,838<br>(10,399 - 21,189) | 93,369<br>(79,911 - 106,185) |
| Rheumatic heart disease                       | 692<br>(282 - 1,098)          | 1<br>(0 - 1)       | 9<br>(3 - 16)       | 152<br>(49 - 271)        | 121<br>(58 - 215)           | 410<br>(164 - 664)           |
| Ischemic heart disease                        | 16,892<br>(12,330 - 23,426)   | 1<br>(0 - 1)       | 1<br>(0 - 1)        | 467<br>(263 - 725)       | 2,690<br>(1,727 - 4,034)    | 13,733<br>(9,948 - 19,692)   |
| Cerebrovascular disease                       | 82,587<br>(66,343 - 97,666)   | 3<br>(2 - 5)       | 4<br>(2 - 7)        | 1,962<br>(1,215 - 2,909) | 9,946<br>(6,837 - 14,349)   | 70,672<br>(58,039 - 81,092)  |
| Ischemic stroke                               | 53,074<br>(35,863 - 64,984)   | 0<br>(0 - 1)       | 0<br>(0 - 1)        | 293<br>(111 - 588)       | 3,495<br>(1,777 - 5,531)    | 49,285<br>(34,014 - 59,603)  |
| Hemorrhagic stroke                            | 29,513<br>(21,296 - 45,127)   | 3<br>(1 - 4)       | 4<br>(2 - 6)        | 1,668<br>(1,040 - 2,485) | 6,451<br>(4,256 - 9,715)    | 21,388<br>(15,232 - 34,151)  |
| Hypertensive heart disease                    | 5,384<br>(3,351 - 8,721)      | 0<br>(0 - 1)       | 1<br>(1 - 2)        | 193<br>(91 - 403)        | 778<br>(429 - 1,443)        | 4,413<br>(2,636 - 7,087)     |
| Cardiomyopathy and myocarditis                | 1,168<br>(662 - 1,901)        | 5<br>(2 - 10)      | 10<br>(5 - 17)      | 168<br>(80 - 312)        | 211<br>(113 - 395)          | 773<br>(393 - 1,376)         |
| Atrial fibrillation and flutter               | 94<br>(48 - 167)              | --                 | --                  | 10<br>(4 - 18)           | 20<br>(9 - 40)              | 64<br>(30 - 120)             |
| Aortic aneurysm                               | 359<br>(177 - 630)            | --                 | --                  | 19<br>(7 - 37)           | 48<br>(21 - 92)             | 293<br>(145 - 521)           |
| Peripheral vascular disease                   | 43<br>(25 - 72)               | --                 | --                  | 1<br>(1 - 3)             | 4<br>(2 - 8)                | 37<br>(21 - 63)              |
| Endocarditis                                  | 402<br>(214 - 639)            | 2<br>(1 - 4)       | 3<br>(2 - 7)        | 80<br>(35 - 146)         | 95<br>(44 - 170)            | 221<br>(112 - 372)           |
| Other cardiovascular and circulatory diseases | 3,989<br>(2,467 - 6,134)      | 5<br>(2 - 9)       | 9<br>(5 - 17)       | 298<br>(159 - 507)       | 925<br>(511 - 1,624)        | 2,752<br>(1,594 - 4,381)     |
| Chronic respiratory diseases                  | 16,229<br>(11,754 - 20,239)   | 172<br>(111 - 255) | 2<br>(1 - 4)        | 225<br>(135 - 339)       | 1,691<br>(1,081 - 2,547)    | 14,138<br>(10,223 - 17,832)  |

Web Table 31- Vietnam deaths with 95% UI by age, sex, and cause in 2013

| Cause                                               | Females, All Ages           | Females, 0-4 Years | Females, 5-14 Years | Females, 15-49 Years | Females, 50-69 Years   | Females, 70-80 Years       |
|-----------------------------------------------------|-----------------------------|--------------------|---------------------|----------------------|------------------------|----------------------------|
| Chronic obstructive pulmonary disease               | 10,592<br>(7,195 - 13,902)  | 27<br>(11 - 52)    | 0<br>(0 - 0)        | 43<br>(22 - 76)      | 1,011<br>(611 - 1,544) | 9,511<br>(6,480 - 12,619)  |
| Pneumoconiosis                                      | 22<br>(13 - 34)             | 8<br>(3 - 18)      | 0<br>(0 - 0)        | 2<br>(1 - 4)         | 3<br>(2 - 5)           | 8<br>(4 - 14)              |
| Silicosis                                           | 3<br>(1 - 5)                | 2<br>(1 - 4)       | 0<br>(0 - 0)        | 0<br>(0 - 0)         | 0<br>(0 - 0)           | 0<br>(0 - 1)               |
| Asbestosis                                          | 3<br>(1 - 5)                | 2<br>(1 - 4)       | 0<br>(0 - 0)        | 0<br>(0 - 1)         | 0<br>(0 - 0)           | 0<br>(0 - 1)               |
| Coal workers pneumoconiosis                         | 3<br>(1 - 5)                | 2<br>(1 - 4)       | 0<br>(0 - 0)        | 0<br>(0 - 1)         | 0<br>(0 - 0)           | 0<br>(0 - 1)               |
| Other pneumoconiosis                                | 14<br>(8 - 21)              | 3<br>(1 - 6)       | 0<br>(0 - 0)        | 1<br>(1 - 2)         | 2<br>(1 - 4)           | 7<br>(4 - 13)              |
| Asthma                                              | 3,143<br>(1,640 - 4,924)    | 22<br>(4 - 42)     | 1<br>(0 - 2)        | 133<br>(73 - 206)    | 400<br>(197 - 659)     | 2,587<br>(1,312 - 4,218)   |
| Interstitial lung disease and pulmonary sarcoidosis | 1,517<br>(634 - 2,801)      | 11<br>(3 - 29)     | 0<br>(0 - 0)        | 17<br>(8 - 31)       | 221<br>(88 - 428)      | 1,268<br>(501 - 2,443)     |
| Other chronic respiratory diseases                  | 955<br>(544 - 1,582)        | 103<br>(68 - 153)  | 1<br>(0 - 1)        | 31<br>(17 - 53)      | 56<br>(28 - 102)       | 764<br>(375 - 1,373)       |
| Cirrhosis                                           | 4,436<br>(3,198 - 5,849)    | 3<br>(1 - 6)       | 5<br>(3 - 7)        | 525<br>(329 - 805)   | 1,292<br>(865 - 1,954) | 2,611<br>(1,794 - 3,579)   |
| Cirrhosis due to hepatitis B                        | 1,901<br>(838 - 3,233)      | 0<br>(0 - 0)       | 1<br>(0 - 1)        | 198<br>(93 - 369)    | 539<br>(242 - 1,024)   | 1,164<br>(433 - 2,135)     |
| Cirrhosis due to hepatitis C                        | 1,434<br>(573 - 2,596)      | 0<br>(0 - 0)       | 1<br>(0 - 1)        | 178<br>(54 - 340)    | 436<br>(150 - 797)     | 820<br>(303 - 1,651)       |
| Cirrhosis due to alcohol use                        | 751<br>(383 - 1,275)        | --                 | --                  | 63<br>(23 - 121)     | 198<br>(98 - 341)      | 490<br>(218 - 916)         |
| Cirrhosis due to other causes                       | 349<br>(165 - 649)          | 3<br>(1 - 6)       | 3<br>(2 - 5)        | 86<br>(42 - 156)     | 119<br>(50 - 238)      | 137<br>(47 - 276)          |
| Digestive diseases                                  | 5,775<br>(4,270 - 7,646)    | 72<br>(39 - 120)   | 23<br>(15 - 32)     | 155<br>(98 - 225)    | 534<br>(351 - 801)     | 4,991<br>(3,649 - 6,767)   |
| Peptic ulcer disease                                | 1,697<br>(1,022 - 2,688)    | 3<br>(1 - 7)       | 3<br>(1 - 5)        | 31<br>(16 - 49)      | 162<br>(95 - 259)      | 1,498<br>(881 - 2,447)     |
| Gastritis and duodenitis                            | 232<br>(91 - 496)           | 3<br>(1 - 7)       | 2<br>(1 - 4)        | 7<br>(3 - 16)        | 21<br>(9 - 46)         | 198<br>(74 - 440)          |
| Appendicitis                                        | 395<br>(199 - 720)          | 13<br>(4 - 28)     | 4<br>(2 - 7)        | 10<br>(4 - 19)       | 31<br>(16 - 55)        | 338<br>(153 - 662)         |
| Paralytic ileus and intestinal obstruction          | 943<br>(461 - 1,808)        | 28<br>(10 - 58)    | 2<br>(1 - 4)        | 9<br>(4 - 24)        | 47<br>(20 - 105)       | 857<br>(404 - 1,645)       |
| Inguinal, femoral, and abdominal hernia             | 255<br>(96 - 493)           | 1<br>(0 - 2)       | 1<br>(0 - 2)        | 3<br>(1 - 5)         | 11<br>(5 - 19)         | 240<br>(86 - 478)          |
| Inflammatory bowel disease                          | 175<br>(70 - 314)           | 4<br>(1 - 10)      | 2<br>(1 - 3)        | 9<br>(3 - 16)        | 21<br>(7 - 40)         | 139<br>(53 - 271)          |
| Vascular intestinal disorders                       | 66<br>(31 - 140)            | 0<br>(0 - 2)       | 0<br>(0 - 2)        | 4<br>(1 - 8)         | 5<br>(2 - 12)          | 56<br>(26 - 121)           |
| Gallbladder and biliary diseases                    | 885<br>(390 - 1,517)        | 6<br>(2 - 12)      | 2<br>(1 - 3)        | 24<br>(8 - 42)       | 85<br>(33 - 146)       | 768<br>(338 - 1,370)       |
| Pancreatitis                                        | 367<br>(194 - 642)          | 2<br>(1 - 5)       | 2<br>(1 - 5)        | 32<br>(14 - 62)      | 62<br>(30 - 114)       | 269<br>(140 - 484)         |
| Other digestive diseases                            | 760<br>(415 - 1,281)        | 11<br>(4 - 23)     | 5<br>(3 - 8)        | 27<br>(14 - 45)      | 89<br>(48 - 158)       | 628<br>(318 - 1,131)       |
| Neurological disorders                              | 13,326<br>(10,180 - 17,039) | 18<br>(11 - 27)    | 33<br>(21 - 49)     | 367<br>(217 - 564)   | 796<br>(497 - 1,229)   | 12,112<br>(9,077 - 15,588) |
| Alzheimer disease and other dementias               | 12,261<br>(9,220 - 15,858)  | --                 | --                  | 4<br>(1 - 9)         | 506<br>(282 - 825)     | 11,752<br>(8,752 - 15,173) |
| Parkinson disease                                   | 81<br>(49 - 136)            | --                 | --                  | 3<br>(2 - 4)         | 12<br>(5 - 35)         | 66<br>(38 - 105)           |
| Epilepsy                                            | 645<br>(380 - 968)          | 2<br>(0 - 6)       | 22<br>(12 - 37)     | 294<br>(163 - 468)   | 197<br>(114 - 321)     | 129<br>(72 - 231)          |
| Multiple sclerosis                                  | 18<br>(7 - 33)              | --                 | --                  | 7<br>(3 - 14)        | 6<br>(2 - 12)          | 5<br>(2 - 11)              |
| Other neurological disorders                        | 321<br>(222 - 434)          | 16<br>(10 - 23)    | 11<br>(7 - 15)      | 59<br>(36 - 89)      | 76<br>(46 - 116)       | 159<br>(104 - 229)         |
| Mental and substance use disorders                  | 353<br>(108 - 757)          | 18<br>(2 - 40)     | 0<br>(0 - 0)        | 198<br>(44 - 467)    | 74<br>(21 - 165)       | 64<br>(26 - 119)           |
| Schizophrenia                                       | 27<br>(15 - 49)             | --                 | --                  | 6<br>(3 - 12)        | 7<br>(4 - 14)          | 14<br>(7 - 25)             |
| Alcohol use disorders                               | 24<br>(12 - 54)             | --                 | --                  | 5<br>(2 - 12)        | 7<br>(3 - 15)          | 11<br>(5 - 27)             |
| Drug use disorders                                  | 301<br>(65 - 678)           | 18<br>(2 - 40)     | --                  | 185<br>(35 - 451)    | 59<br>(11 - 146)       | 39<br>(7 - 88)             |
| Opioid use disorders                                | 190<br>(41 - 428)           | 12<br>(2 - 27)     | --                  | 117<br>(22 - 279)    | 35<br>(6 - 88)         | 25<br>(5 - 56)             |
| Cocaine use disorders                               | 6<br>(1 - 15)               | 0<br>(0 - 1)       | --                  | 4<br>(1 - 11)        | 1<br>(0 - 2)           | 1<br>(0 - 1)               |
| Amphetamine use disorders                           | 7<br>(2 - 16)               | 1<br>(0 - 1)       | --                  | 4<br>(1 - 11)        | 1<br>(0 - 4)           | 1<br>(0 - 2)               |
| Other drug use disorders                            | 97<br>(20 - 225)            | 5<br>(1 - 12)      | --                  | 59<br>(11 - 145)     | 21<br>(4 - 52)         | 13<br>(2 - 28)             |
| Eating disorders                                    | 1<br>(1 - 2)                | --                 | 0<br>(0 - 0)        | 1<br>(1 - 2)         | --                     | --                         |

Web Table 31- Vietnam deaths with 95% UI by age, sex, and cause in 2013

| Cause                                               | Females, All Ages           | Females, 0-4 Years       | Females, 5-14 Years | Females, 15-49 Years | Females, 50-69 Years     | Females, 70-80 Years      |
|-----------------------------------------------------|-----------------------------|--------------------------|---------------------|----------------------|--------------------------|---------------------------|
| Anorexia nervosa                                    | 1<br>(1 - 2)                | --                       | 0<br>(0 - 0)        | 1<br>(1 - 2)         | --                       | --                        |
| Diabetes, urogenital, blood, and endocrine diseases | 13,561<br>(10,451 - 17,022) | 116<br>(72 - 179)        | 41<br>(24 - 63)     | 749<br>(482 - 1,111) | 3,168<br>(2,214 - 4,595) | 9,487<br>(7,395 - 11,692) |
| Diabetes mellitus                                   | 8,300<br>(6,076 - 10,625)   | 5<br>(2 - 9)             | 1<br>(0 - 1)        | 278<br>(174 - 420)   | 1,966<br>(1,335 - 2,957) | 6,050<br>(4,411 - 7,862)  |
| Acute glomerulonephritis                            | 9<br>(6 - 15)               | 1<br>(0 - 1)             | 1<br>(1 - 1)        | 4<br>(3 - 7)         | 1<br>(0 - 2)             | 2<br>(1 - 5)              |
| Chronic kidney disease                              | 3,488<br>(2,559 - 4,748)    | 1<br>(1 - 2)             | 6<br>(4 - 11)       | 188<br>(116 - 283)   | 820<br>(535 - 1,249)     | 2,473<br>(1,752 - 3,386)  |
| Chronic kidney disease due to diabetes mellitus     | 429<br>(133 - 905)          | 0<br>(0 - 0)             | 1<br>(0 - 1)        | 24<br>(6 - 58)       | 117<br>(29 - 258)        | 287<br>(94 - 590)         |
| Chronic kidney disease due to hypertension          | 1,084<br>(472 - 1,862)      | 0<br>(0 - 1)             | 1<br>(0 - 2)        | 54<br>(21 - 107)     | 255<br>(96 - 505)        | 773<br>(330 - 1,356)      |
| Chronic kidney disease due to glomerulonephritis    | 303<br>(157 - 470)          | 1<br>(0 - 1)             | 3<br>(2 - 4)        | 37<br>(18 - 62)      | 58<br>(25 - 110)         | 205<br>(101 - 333)        |
| Chronic kidney disease due to other causes          | 1,673<br>(950 - 2,579)      | 0<br>(0 - 0)             | 2<br>(1 - 5)        | 73<br>(36 - 121)     | 390<br>(186 - 659)       | 1,208<br>(607 - 1,995)    |
| Urinary diseases and male infertility               | 821<br>(514 - 1,255)        | 5<br>(2 - 11)            | 2<br>(1 - 3)        | 45<br>(26 - 73)      | 136<br>(82 - 213)        | 633<br>(368 - 1,027)      |
| Interstitial nephritis and urinary tract infections | 560<br>(317 - 910)          | 3<br>(1 - 8)             | 1<br>(0 - 1)        | 33<br>(18 - 55)      | 89<br>(49 - 144)         | 432<br>(216 - 771)        |
| Urolithiasis                                        | 46<br>(19 - 95)             | --                       | 0<br>(0 - 1)        | 4<br>(1 - 10)        | 10<br>(3 - 24)           | 32<br>(11 - 73)           |
| Other urinary diseases                              | 216<br>(99 - 421)           | 2<br>(1 - 4)             | 1<br>(0 - 1)        | 8<br>(3 - 17)        | 37<br>(17 - 69)          | 169<br>(66 - 360)         |
| Gynecological diseases                              | 10<br>(6 - 17)              | --                       | --                  | 3<br>(2 - 5)         | 1<br>(1 - 2)             | 6<br>(3 - 11)             |
| Uterine fibroids                                    | 3<br>(1 - 4)                | --                       | --                  | 0<br>(0 - 1)         | 0<br>(0 - 1)             | 2<br>(1 - 3)              |
| Polycystic ovarian syndrome                         | 0<br>(0 - 0)                | --                       | --                  | 0<br>(0 - 0)         | 0<br>(0 - 0)             | --                        |
| Endometriosis                                       | 1<br>(0 - 1)                | --                       | --                  | 1<br>(0 - 1)         | 0<br>(0 - 0)             | --                        |
| Genital prolapse                                    | 2<br>(1 - 4)                | --                       | --                  | 0<br>(0 - 1)         | 0<br>(0 - 0)             | 2<br>(1 - 3)              |
| Other gynecological diseases                        | 5<br>(3 - 8)                | --                       | --                  | 2<br>(1 - 3)         | 1<br>(0 - 1)             | 3<br>(1 - 5)              |
| Hemoglobinopathies and hemolytic anemias            | 358<br>(195 - 624)          | 59<br>(28 - 111)         | 29<br>(15 - 50)     | 105<br>(48 - 201)    | 56<br>(25 - 104)         | 109<br>(59 - 199)         |
| Thalassemias                                        | 204<br>(103 - 359)          | 56<br>(26 - 106)         | 28<br>(14 - 49)     | 91<br>(42 - 175)     | 23<br>(11 - 44)          | 5<br>(3 - 9)              |
| Sickle cell disorders                               | 0<br>(0 - 0)                | 0<br>(0 - 0)             | 0<br>(0 - 0)        | 0<br>(0 - 0)         | 0<br>(0 - 0)             | 0<br>(0 - 0)              |
| G6PD deficiency                                     | 3<br>(2 - 6)                | 0<br>(0 - 0)             | 0<br>(0 - 0)        | 1<br>(1 - 2)         | 1<br>(1 - 2)             | 1<br>(0 - 1)              |
| Other hemoglobinopathies and hemolytic anemias      | 150<br>(82 - 264)           | 3<br>(2 - 6)             | 1<br>(0 - 1)        | 12<br>(6 - 23)       | 31<br>(14 - 58)          | 103<br>(56 - 188)         |
| Endocrine, metabolic, blood, and immune disorders   | 574<br>(375 - 843)          | 44<br>(25 - 76)          | 2<br>(1 - 3)        | 125<br>(76 - 195)    | 188<br>(109 - 301)       | 214<br>(129 - 336)        |
| Musculoskeletal disorders                           | 685<br>(454 - 942)          | --                       | 13<br>(8 - 20)      | 99<br>(62 - 147)     | 163<br>(94 - 250)        | 410<br>(245 - 626)        |
| Rheumatoid arthritis                                | 225<br>(122 - 344)          | --                       | 2<br>(1 - 3)        | 10<br>(4 - 19)       | 39<br>(17 - 72)          | 174<br>(87 - 277)         |
| Other musculoskeletal disorders                     | 461<br>(301 - 652)          | --                       | 11<br>(7 - 17)      | 89<br>(54 - 133)     | 124<br>(71 - 197)        | 236<br>(137 - 371)        |
| Other non-communicable diseases                     | 3,240<br>(2,487 - 4,066)    | 2,081<br>(1,479 - 2,760) | 135<br>(78 - 209)   | 323<br>(191 - 524)   | 111<br>(67 - 182)        | 589<br>(404 - 859)        |
| Congenital anomalies                                | 2,508<br>(1,838 - 3,239)    | 1,946<br>(1,363 - 2,592) | 134<br>(77 - 209)   | 225<br>(118 - 387)   | 56<br>(31 - 99)          | 146<br>(95 - 220)         |
| Neural tube defects                                 | 166<br>(49 - 444)           | 152<br>(35 - 424)        | 3<br>(1 - 7)        | 8<br>(3 - 17)        | 2<br>(1 - 4)             | 1<br>(1 - 3)              |
| Congenital heart anomalies                          | 1,537<br>(1,021 - 2,068)    | 1,188<br>(777 - 1,663)   | 92<br>(50 - 148)    | 133<br>(57 - 240)    | 20<br>(8 - 39)           | 105<br>(64 - 158)         |
| Cleft lip and cleft palate                          | 6<br>(1 - 15)               | 6<br>(1 - 15)            | --                  | --                   | --                       | --                        |
| Down syndrome                                       | 45<br>(21 - 84)             | 28<br>(11 - 60)          | 6<br>(2 - 12)       | 7<br>(3 - 14)        | 3<br>(1 - 6)             | 0<br>(0 - 1)              |
| Chromosomal unbalanced rearrangements               | 74<br>(37 - 140)            | 57<br>(24 - 114)         | 2<br>(1 - 3)        | 12<br>(5 - 24)       | 2<br>(1 - 4)             | 2<br>(1 - 4)              |
| Other congenital anomalies                          | 680<br>(428 - 975)          | 516<br>(294 - 787)       | 32<br>(15 - 55)     | 65<br>(29 - 122)     | 30<br>(15 - 54)          | 38<br>(21 - 66)           |
| Skin and subcutaneous diseases                      | 599<br>(402 - 874)          | 2<br>(1 - 3)             | 1<br>(1 - 2)        | 98<br>(57 - 150)     | 55<br>(32 - 91)          | 443<br>(271 - 696)        |
| Cellulitis                                          | 92<br>(40 - 170)            | 0<br>(0 - 1)             | 0<br>(0 - 0)        | 22<br>(8 - 42)       | 13<br>(5 - 26)           | 57<br>(21 - 122)          |
| Pyoderma                                            | 209<br>(127 - 341)          | 1<br>(0 - 2)             | 0<br>(0 - 1)        | 39<br>(23 - 64)      | 26<br>(14 - 45)          | 142<br>(70 - 263)         |
| Decubitus ulcer                                     | 281<br>(159 - 447)          | 0<br>(0 - 0)             | 0<br>(0 - 0)        | 29<br>(13 - 47)      | 14<br>(7 - 25)           | 238<br>(126 - 400)        |

Web Table 31- Vietnam deaths with 95% UI by age, sex, and cause in 2013

| Cause                                           | Females, All Ages           | Females, 0-4 Years     | Females, 5-14 Years  | Females, 15-49 Years     | Females, 50-69 Years     | Females, 70-80 Years     |
|-------------------------------------------------|-----------------------------|------------------------|----------------------|--------------------------|--------------------------|--------------------------|
| Other skin and subcutaneous diseases            | 17<br>(10 - 28)             | 0<br>(0 - 0)           | 0<br>(0 - 0)         | 8<br>(4 - 15)            | 2<br>(1 - 5)             | 6<br>(3 - 11)            |
| Sudden infant death syndrome                    | 134<br>(19 - 429)           | 134<br>(19 - 429)      | --                   | --                       | --                       | --                       |
| Injuries                                        | 14,457<br>(11,147 - 18,517) | 1,142<br>(675 - 1,752) | 832<br>(643 - 1,025) | 4,461<br>(3,012 - 6,229) | 2,787<br>(1,868 - 4,091) | 5,234<br>(3,941 - 6,918) |
| Transport injuries                              | 5,569<br>(3,891 - 7,684)    | 75<br>(36 - 133)       | 230<br>(158 - 312)   | 2,779<br>(1,837 - 3,923) | 1,490<br>(961 - 2,264)   | 994<br>(677 - 1,351)     |
| Road injuries                                   | 5,356<br>(3,724 - 7,396)    | 57<br>(25 - 105)       | 226<br>(155 - 304)   | 2,726<br>(1,800 - 3,851) | 1,424<br>(917 - 2,147)   | 924<br>(633 - 1,243)     |
| Pedestrian road injuries                        | 1,782<br>(1,201 - 2,478)    | 25<br>(10 - 50)        | 88<br>(52 - 133)     | 509<br>(290 - 797)       | 559<br>(337 - 883)       | 601<br>(386 - 846)       |
| Cyclist road injuries                           | 289<br>(186 - 465)          | 1<br>(0 - 2)           | 16<br>(9 - 27)       | 100<br>(55 - 178)        | 122<br>(71 - 208)        | 50<br>(29 - 80)          |
| Motorcyclist road injuries                      | 2,219<br>(1,274 - 3,216)    | 15<br>(6 - 32)         | 74<br>(36 - 119)     | 1,548<br>(897 - 2,287)   | 476<br>(248 - 770)       | 105<br>(50 - 175)        |
| Motor vehicle road injuries                     | 1,032<br>(655 - 1,628)      | 15<br>(6 - 31)         | 47<br>(28 - 72)      | 552<br>(315 - 914)       | 262<br>(151 - 464)       | 156<br>(90 - 252)        |
| Other road injuries                             | 33<br>(17 - 83)             | 1<br>(0 - 2)           | 1<br>(0 - 2)         | 16<br>(6 - 50)           | 4<br>(2 - 10)            | 11<br>(5 - 26)           |
| Other transport injuries                        | 213<br>(140 - 332)          | 18<br>(9 - 33)         | 5<br>(2 - 8)         | 54<br>(32 - 93)          | 66<br>(38 - 117)         | 70<br>(38 - 122)         |
| Unintentional injuries                          | 7,010<br>(5,428 - 8,933)    | 1,062<br>(617 - 1,682) | 593<br>(433 - 778)   | 731<br>(481 - 1,059)     | 761<br>(514 - 1,116)     | 3,863<br>(2,715 - 5,404) |
| Falls                                           | 2,993<br>(1,873 - 4,549)    | 43<br>(20 - 88)        | 2<br>(1 - 4)         | 65<br>(39 - 108)         | 257<br>(159 - 398)       | 2,625<br>(1,574 - 4,123) |
| Drowning                                        | 2,241<br>(1,596 - 3,167)    | 757<br>(380 - 1,312)   | 535<br>(381 - 716)   | 394<br>(243 - 609)       | 241<br>(146 - 394)       | 314<br>(201 - 477)       |
| Fire, heat, and hot substances                  | 108<br>(61 - 190)           | 54<br>(22 - 103)       | 2<br>(1 - 4)         | 18<br>(9 - 34)           | 32<br>(15 - 64)          | 2<br>(1 - 3)             |
| Poisonings                                      | 115<br>(64 - 238)           | 2<br>(0 - 8)           | 1<br>(0 - 2)         | 36<br>(19 - 70)          | 21<br>(9 - 51)           | 55<br>(25 - 125)         |
| Exposure to mechanical forces                   | 339<br>(237 - 447)          | 19<br>(11 - 34)        | 27<br>(16 - 42)      | 105<br>(63 - 157)        | 46<br>(28 - 73)          | 142<br>(89 - 216)        |
| Unintentional firearm injuries                  | 45<br>(29 - 68)             | 2<br>(1 - 3)           | 1<br>(1 - 2)         | 21<br>(12 - 35)          | 4<br>(2 - 7)             | 17<br>(8 - 32)           |
| Unintentional suffocation                       | 7<br>(4 - 13)               | 1<br>(0 - 3)           | 1<br>(0 - 2)         | 3<br>(2 - 6)             | 1<br>(1 - 3)             | 1<br>(0 - 1)             |
| Other exposure to mechanical forces             | 287<br>(197 - 386)          | 17<br>(8 - 30)         | 25<br>(14 - 40)      | 80<br>(46 - 123)         | 40<br>(23 - 65)          | 125<br>(74 - 198)        |
| Adverse effects of medical treatment            | 482<br>(300 - 800)          | 14<br>(7 - 25)         | 3<br>(2 - 5)         | 54<br>(31 - 98)          | 75<br>(41 - 132)         | 336<br>(164 - 597)       |
| Animal contact                                  | 223<br>(71 - 354)           | 38<br>(10 - 76)        | 16<br>(6 - 36)       | 8<br>(3 - 18)            | 57<br>(17 - 104)         | 104<br>(27 - 184)        |
| Venomous animal contact                         | 138<br>(44 - 226)           | 34<br>(9 - 71)         | 15<br>(5 - 33)       | 5<br>(2 - 12)            | 28<br>(9 - 54)           | 56<br>(13 - 107)         |
| Non-venomous animal contact                     | 84<br>(22 - 147)            | 4<br>(1 - 8)           | 1<br>(0 - 2)         | 3<br>(1 - 6)             | 29<br>(7 - 56)           | 47<br>(11 - 90)          |
| Foreign body                                    | 432<br>(268 - 783)          | 127<br>(68 - 234)      | 2<br>(1 - 3)         | 15<br>(8 - 26)           | 18<br>(10 - 35)          | 270<br>(152 - 528)       |
| Pulmonary aspiration and foreign body in airway | 421<br>(259 - 771)          | 126<br>(68 - 233)      | 1<br>(1 - 2)         | 12<br>(6 - 23)           | 17<br>(9 - 35)           | 266<br>(147 - 523)       |
| Foreign body in other body part                 | 10<br>(7 - 16)              | 1<br>(0 - 2)           | 1<br>(0 - 1)         | 3<br>(2 - 5)             | 1<br>(1 - 2)             | 5<br>(2 - 8)             |
| Other unintentional injuries                    | 78<br>(56 - 113)            | 9<br>(5 - 15)          | 5<br>(3 - 8)         | 37<br>(22 - 57)          | 13<br>(8 - 23)           | 14<br>(8 - 34)           |
| Self-harm and interpersonal violence            | 1,878<br>(1,275 - 2,769)    | 5<br>(2 - 12)          | 8<br>(5 - 13)        | 951<br>(592 - 1,453)     | 536<br>(328 - 866)       | 378<br>(249 - 578)       |
| Self-harm                                       | 1,724<br>(1,152 - 2,547)    | --                     | 3<br>(1 - 6)         | 866<br>(526 - 1,340)     | 502<br>(302 - 814)       | 353<br>(227 - 550)       |
| Interpersonal violence                          | 154<br>(101 - 244)          | 5<br>(2 - 12)          | 5<br>(3 - 9)         | 84<br>(49 - 149)         | 34<br>(19 - 57)          | 25<br>(13 - 44)          |
| Assault by firearm                              | 29<br>(15 - 55)             | 0<br>(0 - 0)           | 0<br>(0 - 1)         | 21<br>(10 - 43)          | 6<br>(3 - 12)            | 1<br>(0 - 3)             |
| Assault by sharp object                         | 46<br>(27 - 83)             | 0<br>(0 - 1)           | 1<br>(0 - 3)         | 29<br>(15 - 56)          | 9<br>(5 - 18)            | 7<br>(3 - 14)            |
| Assault by other means                          | 78<br>(49 - 119)            | 5<br>(2 - 11)          | 4<br>(2 - 6)         | 34<br>(19 - 62)          | 19<br>(10 - 33)          | 17<br>(8 - 31)           |
| Forces of nature, war, and legal intervention   | 0<br>(0 - 0)                | 0<br>(0 - 0)           | --                   | --                       | --                       | --                       |
| Exposure to forces of nature                    | 0<br>(0 - 0)                | 0<br>(0 - 0)           | --                   | --                       | --                       | --                       |

Web Table 31- Wales deaths with 95% UI by age, sex, and cause in 2013

| Cause                                                              | Both Sexes, All Ages        | Both Sexes, 0-4 Years | Both Sexes, 5-14 Years | Both Sexes, 15-49 Years  | Both Sexes, 50-69 Years  | Both Sexes, 70-80 Years     |
|--------------------------------------------------------------------|-----------------------------|-----------------------|------------------------|--------------------------|--------------------------|-----------------------------|
| All causes                                                         | 32,240<br>(30,830 - 33,601) | 159<br>(129 - 196)    | 29<br>(25 - 33)        | 1,379<br>(1,276 - 1,478) | 5,709<br>(5,348 - 6,054) | 24,965<br>(24,004 - 25,904) |
| Communicable, maternal, neonatal, and nutritional diseases         | 2,498<br>(2,118 - 2,995)    | 81<br>(65 - 102)      | 3<br>(2 - 3)           | 51<br>(45 - 57)          | 169<br>(137 - 199)       | 2,194<br>(1,809 - 2,696)    |
| HIV/AIDS and tuberculosis                                          | 35<br>(28 - 41)             | 0<br>(0 - 0)          | 0<br>(0 - 0)           | 7<br>(6 - 9)             | 9<br>(7 - 11)            | 18<br>(13 - 23)             |
| Tuberculosis                                                       | 27<br>(21 - 33)             | 0<br>(0 - 0)          | 0<br>(0 - 0)           | 2<br>(2 - 3)             | 7<br>(5 - 9)             | 18<br>(13 - 23)             |
| HIV/AIDS                                                           | 8<br>(5 - 10)               | 0<br>(0 - 0)          | 0<br>(0 - 0)           | 5<br>(4 - 6)             | 2<br>(1 - 4)             | 0<br>(0 - 1)                |
| HIV/AIDS resulting in mycobacterial infection                      | 0<br>(0 - 1)                | 0<br>(0 - 0)          | 0<br>(0 - 0)           | 0<br>(0 - 0)             | 0<br>(0 - 0)             | 0<br>(0 - 0)                |
| HIV/AIDS resulting in other diseases                               | 7<br>(5 - 10)               | 0<br>(0 - 0)          | 0<br>(0 - 0)           | 5<br>(3 - 6)             | 2<br>(1 - 3)             | 0<br>(0 - 1)                |
| Diarrrhea, lower respiratory, and other common infectious diseases | 2,325<br>(1,946 - 2,816)    | 14<br>(11 - 19)       | 2<br>(2 - 3)           | 33<br>(28 - 39)          | 148<br>(118 - 178)       | 2,127<br>(1,742 - 2,626)    |
| Diarrrheal diseases                                                | 134<br>(96 - 184)           | 3<br>(2 - 4)          | 0<br>(0 - 0)           | 2<br>(2 - 3)             | 8<br>(6 - 11)            | 121<br>(83 - 171)           |
| Intestinal infectious diseases                                     | 3<br>(1 - 8)                | 1<br>(0 - 2)          | 1<br>(0 - 1)           | 1<br>(0 - 3)             | 1<br>(0 - 2)             | 0<br>(0 - 2)                |
| Typhoid fever                                                      | 3<br>(1 - 6)                | 0<br>(0 - 1)          | 0<br>(0 - 1)           | 1<br>(0 - 3)             | 0<br>(0 - 1)             | 0<br>(0 - 1)                |
| Paratyphoid fever                                                  | 1<br>(0 - 2)                | 0<br>(0 - 0)          | 0<br>(0 - 0)           | 0<br>(0 - 1)             | 0<br>(0 - 0)             | 0<br>(0 - 0)                |
| Other intestinal infectious diseases                               | 0<br>(0 - 2)                | 0<br>(0 - 1)          | 0<br>(0 - 0)           | 0<br>(0 - 1)             | 0<br>(0 - 1)             | 0<br>(0 - 1)                |
| Lower respiratory infections                                       | 2,158<br>(1,785 - 2,671)    | 8<br>(5 - 11)         | 1<br>(1 - 1)           | 25<br>(20 - 29)          | 133<br>(103 - 162)       | 1,992<br>(1,618 - 2,605)    |
| Upper respiratory infections                                       | 1<br>(0 - 2)                | 0<br>(0 - 0)          | 0<br>(0 - 0)           | 0<br>(0 - 0)             | 0<br>(0 - 0)             | 1<br>(0 - 2)                |
| Otitis media                                                       | 1<br>(1 - 1)                | 0<br>(0 - 0)          | 0<br>(0 - 0)           | 0<br>(0 - 0)             | 0<br>(0 - 0)             | 0<br>(0 - 0)                |
| Meningitis                                                         | 18<br>(15 - 23)             | 3<br>(2 - 4)          | 0<br>(0 - 0)           | 3<br>(3 - 4)             | 4<br>(3 - 5)             | 8<br>(6 - 11)               |
| Pneumococcal meningitis                                            | 3<br>(2 - 4)                | 0<br>(0 - 1)          | 0<br>(0 - 0)           | 1<br>(0 - 1)             | 1<br>(0 - 1)             | 2<br>(1 - 3)                |
| H influenzae type B meningitis                                     | 2<br>(2 - 3)                | 1<br>(0 - 1)          | 0<br>(0 - 0)           | 0<br>(0 - 1)             | 0<br>(0 - 1)             | 1<br>(1 - 1)                |
| Meningococcal meningitis                                           | 6<br>(4 - 7)                | 1<br>(0 - 1)          | 0<br>(0 - 0)           | 1<br>(1 - 1)             | 1<br>(1 - 2)             | 3<br>(2 - 4)                |
| Other meningitis                                                   | 7<br>(5 - 8)                | 1<br>(0 - 1)          | 0<br>(0 - 0)           | 1<br>(1 - 2)             | 2<br>(1 - 2)             | 3<br>(2 - 4)                |
| Encephalitis                                                       | 6<br>(4 - 8)                | 0<br>(0 - 1)          | 0<br>(0 - 0)           | 1<br>(1 - 2)             | 2<br>(1 - 2)             | 3<br>(1 - 4)                |
| Diphtheria                                                         | 0<br>(0 - 0)                | 0<br>(0 - 0)          | 0<br>(0 - 0)           | 0<br>(0 - 0)             | 0<br>(0 - 0)             | --<br>(0 - 0)               |
| Whooping cough                                                     | 0<br>(0 - 0)                | 0<br>(0 - 0)          | 0<br>(0 - 0)           | 0<br>(0 - 0)             | 0<br>(0 - 0)             | --<br>(0 - 0)               |
| Tetanus                                                            | 0<br>(0 - 0)                | 0<br>(0 - 0)          | 0<br>(0 - 0)           | 0<br>(0 - 0)             | 0<br>(0 - 0)             | 0<br>(0 - 0)                |
| Measles                                                            | 0<br>(0 - 0)                | 0<br>(0 - 0)          | 0<br>(0 - 0)           | 0<br>(0 - 0)             | 0<br>(0 - 0)             | --<br>(0 - 0)               |
| Varicella and herpes zoster                                        | 3<br>(1 - 10)               | 0<br>(0 - 0)          | 0<br>(0 - 0)           | 0<br>(0 - 1)             | 0<br>(0 - 1)             | 2<br>(0 - 9)                |
| Neglected tropical diseases and malaria                            | 2<br>(2 - 3)                | 0<br>(0 - 0)          | 0<br>(0 - 0)           | 1<br>(1 - 1)             | 1<br>(1 - 1)             | 1<br>(0 - 1)                |
| Cysticercosis                                                      | 0<br>(0 - 0)                | 0<br>(0 - 0)          | 0<br>(0 - 0)           | 0<br>(0 - 0)             | 0<br>(0 - 0)             | 0<br>(0 - 0)                |
| Cystic echinococcosis                                              | 0<br>(0 - 0)                | 0<br>(0 - 0)          | 0<br>(0 - 0)           | 0<br>(0 - 0)             | 0<br>(0 - 0)             | 0<br>(0 - 0)                |
| Dengue                                                             | 0<br>(0 - 0)                | 0<br>(0 - 0)          | 0<br>(0 - 0)           | 0<br>(0 - 0)             | 0<br>(0 - 0)             | 0<br>(0 - 0)                |
| Rabies                                                             | 0<br>(0 - 0)                | 0<br>(0 - 0)          | 0<br>(0 - 0)           | 0<br>(0 - 0)             | 0<br>(0 - 0)             | 0<br>(0 - 0)                |
| Other neglected tropical diseases                                  | 2<br>(1 - 2)                | 0<br>(0 - 0)          | 0<br>(0 - 0)           | 0<br>(0 - 1)             | 1<br>(0 - 1)             | 0<br>(0 - 1)                |
| Maternal disorders                                                 | 3<br>(2 - 4)                | --                    | 0<br>(0 - 0)           | 3<br>(2 - 4)             | --                       | --                          |
| Maternal hemorrhage                                                | 0<br>(0 - 0)                | --                    | 0<br>(0 - 0)           | 0<br>(0 - 0)             | --                       | --                          |
| Maternal sepsis and other maternal infections                      | 0<br>(0 - 0)                | --                    | 0<br>(0 - 0)           | 0<br>(0 - 0)             | --                       | --                          |
| Maternal hypertensive disorders                                    | 0<br>(0 - 1)                | --                    | 0<br>(0 - 0)           | 0<br>(0 - 1)             | --                       | --                          |
| Maternal obstructed labor                                          | 0<br>(0 - 0)                | --                    | 0<br>(0 - 0)           | 0<br>(0 - 0)             | --                       | --                          |
| Maternal abortive outcome                                          | 1<br>(0 - 1)                | --                    | 0<br>(0 - 0)           | 1<br>(0 - 1)             | --                       | --                          |
| Indirect maternal deaths                                           | 0<br>(0 - 0)                | --                    | 0<br>(0 - 0)           | 0<br>(0 - 0)             | --                       | --                          |

Web Table 31- Wales deaths with 95% UI by age, sex, and cause in 2013

| Cause                                                            | Both Sexes, All Ages        | Both Sexes, 0-4 Years | Both Sexes, 5-14 Years | Both Sexes, 15-49 Years | Both Sexes, 50-69 Years  | Both Sexes, 70-80 Years     |
|------------------------------------------------------------------|-----------------------------|-----------------------|------------------------|-------------------------|--------------------------|-----------------------------|
| Late maternal deaths                                             | 0<br>(0 - 0)                | --                    | 0<br>(0 - 0)           | 0<br>(0 - 0)            | --                       | --                          |
| Maternal deaths aggravated by HIV/AIDS                           | 0<br>(0 - 0)                | --                    | --                     | 0<br>(0 - 0)            | --                       | --                          |
| Other maternal disorders                                         | 1<br>(0 - 1)                | --                    | 0<br>(0 - 0)           | 1<br>(0 - 1)            | --                       | --                          |
| Neonatal disorders                                               | 65<br>(52 - 82)             | 65<br>(52 - 82)       | --                     | --                      | --                       | --                          |
| Neonatal preterm birth complications                             | 49<br>(38 - 62)             | 49<br>(38 - 62)       | --                     | --                      | --                       | --                          |
| Neonatal encephalopathy due to birth asphyxia and trauma         | 10<br>(7 - 14)              | 10<br>(7 - 14)        | --                     | --                      | --                       | --                          |
| Neonatal sepsis and other neonatal infections                    | 2<br>(1 - 5)                | 2<br>(1 - 5)          | --                     | --                      | --                       | --                          |
| Hemolytic disease and other neonatal jaundice                    | 0<br>(0 - 0)                | 0<br>(0 - 0)          | --                     | --                      | --                       | --                          |
| Other neonatal disorders                                         | 4<br>(3 - 6)                | 4<br>(3 - 6)          | --                     | --                      | --                       | --                          |
| Nutritional deficiencies                                         | 36<br>(27 - 49)             | 0<br>(0 - 0)          | 0<br>(0 - 0)           | 1<br>(1 - 1)            | 3<br>(2 - 3)             | 32<br>(24 - 45)             |
| Protein-energy malnutrition                                      | 6<br>(3 - 10)               | 0<br>(0 - 0)          | 0<br>(0 - 0)           | 0<br>(0 - 0)            | 1<br>(0 - 1)             | 5<br>(2 - 8)                |
| Iodine deficiency                                                | 0<br>(0 - 1)                | 0<br>(0 - 0)          | 0<br>(0 - 0)           | 0<br>(0 - 0)            | 0<br>(0 - 0)             | 0<br>(0 - 1)                |
| Iron-deficiency anemia                                           | 26<br>(18 - 36)             | 0<br>(0 - 0)          | 0<br>(0 - 0)           | 1<br>(0 - 1)            | 1<br>(1 - 2)             | 24<br>(17 - 34)             |
| Other nutritional deficiencies                                   | 4<br>(2 - 9)                | 0<br>(0 - 0)          | 0<br>(0 - 0)           | 0<br>(0 - 0)            | 0<br>(0 - 1)             | 3<br>(1 - 8)                |
| Other communicable, maternal, neonatal, and nutritional diseases | 31<br>(22 - 37)             | 1<br>(1 - 2)          | 0<br>(0 - 0)           | 5<br>(4 - 6)            | 8<br>(6 - 11)            | 16<br>(11 - 20)             |
| Sexually transmitted diseases excluding HIV                      | 4<br>(3 - 6)                | 0<br>(0 - 1)          | 0<br>(0 - 0)           | 0<br>(0 - 0)            | 1<br>(0 - 1)             | 3<br>(2 - 4)                |
| Syphilis                                                         | 3<br>(2 - 4)                | 0<br>(0 - 1)          | 0<br>(0 - 0)           | 0<br>(0 - 0)            | 0<br>(0 - 1)             | 2<br>(1 - 3)                |
| Chlamydial infection                                             | 0<br>(0 - 0)                | --                    | 0<br>(0 - 0)           | 0<br>(0 - 0)            | 0<br>(0 - 0)             | 0<br>(0 - 0)                |
| Gonococcal infection                                             | 0<br>(0 - 1)                | --                    | 0<br>(0 - 0)           | 0<br>(0 - 0)            | 0<br>(0 - 0)             | 0<br>(0 - 0)                |
| Other sexually transmitted diseases                              | 0<br>(0 - 0)                | --                    | 0<br>(0 - 0)           | 0<br>(0 - 0)            | 0<br>(0 - 0)             | 0<br>(0 - 0)                |
| Hepatitis                                                        | 4<br>(3 - 5)                | 0<br>(0 - 0)          | 0<br>(0 - 0)           | 1<br>(1 - 2)            | 2<br>(1 - 2)             | 1<br>(1 - 2)                |
| Acute hepatitis A                                                | 1<br>(0 - 2)                | 0<br>(0 - 0)          | 0<br>(0 - 0)           | 0<br>(0 - 1)            | 0<br>(0 - 1)             | 0<br>(0 - 0)                |
| Acute hepatitis B                                                | 3<br>(2 - 4)                | 0<br>(0 - 0)          | 0<br>(0 - 0)           | 1<br>(0 - 1)            | 1<br>(1 - 2)             | 1<br>(1 - 1)                |
| Acute hepatitis C                                                | 0<br>(0 - 1)                | --                    | 0<br>(0 - 0)           | 0<br>(0 - 0)            | 0<br>(0 - 0)             | 0<br>(0 - 0)                |
| Other infectious diseases                                        | 23<br>(14 - 30)             | 1<br>(1 - 1)          | 0<br>(0 - 0)           | 4<br>(2 - 5)            | 6<br>(4 - 9)             | 12<br>(7 - 16)              |
| Non-communicable diseases                                        | 28,630<br>(27,235 - 29,843) | 66<br>(53 - 84)       | 19<br>(16 - 21)        | 1,020<br>(940 - 1,094)  | 5,353<br>(5,011 - 5,674) | 22,173<br>(21,164 - 23,048) |
| Neoplasms                                                        | 8,804<br>(8,093 - 9,367)    | 5<br>(4 - 7)          | 9<br>(8 - 11)          | 410<br>(376 - 444)      | 2,685<br>(2,481 - 2,874) | 5,696<br>(5,109 - 6,099)    |
| Esophageal cancer                                                | 450<br>(392 - 555)          | --                    | --                     | 15<br>(12 - 20)         | 157<br>(132 - 192)       | 277<br>(237 - 349)          |
| Stomach cancer                                                   | 444<br>(378 - 533)          | --                    | --                     | 12<br>(10 - 14)         | 91<br>(79 - 105)         | 341<br>(283 - 418)          |
| Liver cancer                                                     | 197<br>(144 - 240)          | --                    | 0<br>(0 - 0)           | 9<br>(6 - 11)           | 63<br>(45 - 78)          | 125<br>(87 - 157)           |
| Liver cancer due to hepatitis B                                  | 40<br>(19 - 73)             | --                    | 0<br>(0 - 0)           | 3<br>(2 - 5)            | 17<br>(7 - 30)           | 20<br>(10 - 40)             |
| Liver cancer due to hepatitis C                                  | 110<br>(74 - 147)           | --                    | 0<br>(0 - 0)           | 4<br>(2 - 6)            | 33<br>(21 - 48)          | 73<br>(47 - 99)             |
| Liver cancer due to alcohol use                                  | 38<br>(17 - 60)             | --                    | --                     | 1<br>(0 - 2)            | 10<br>(4 - 16)           | 27<br>(12 - 44)             |
| Liver cancer due to other causes                                 | 9<br>(3 - 16)               | --                    | 0<br>(0 - 0)           | 1<br>(0 - 1)            | 3<br>(1 - 5)             | 5<br>(2 - 10)               |
| Larynx cancer                                                    | 49<br>(37 - 64)             | --                    | --                     | 2<br>(1 - 3)            | 19<br>(14 - 24)          | 28<br>(20 - 38)             |
| Tracheal, bronchus and lung cancer                               | 2,031<br>(1,768 - 2,240)    | --                    | --                     | 46<br>(39 - 54)         | 688<br>(609 - 768)       | 1,297<br>(1,060 - 1,449)    |
| Breast cancer                                                    | 718<br>(555 - 851)          | --                    | --                     | 72<br>(59 - 89)         | 262<br>(200 - 308)       | 384<br>(289 - 473)          |
| Cervical cancer                                                  | 71<br>(59 - 89)             | --                    | --                     | 16<br>(13 - 20)         | 23<br>(18 - 29)          | 32<br>(25 - 43)             |
| Uterine cancer                                                   | 112<br>(76 - 137)           | --                    | --                     | 2<br>(1 - 3)            | 36<br>(22 - 46)          | 74<br>(51 - 95)             |
| Prostate cancer                                                  | 614<br>(403 - 868)          | --                    | --                     | 1<br>(1 - 2)            | 93<br>(58 - 131)         | 521<br>(333 - 745)          |

Web Table 31- Wales deaths with 95% UI by age, sex, and cause in 2013

| Cause                                         | Both Sexes, All Ages        | Both Sexes, 0-4 Years | Both Sexes, 5-14 Years | Both Sexes, 15-49 Years | Both Sexes, 50-69 Years  | Both Sexes, 70-80 Years  |
|-----------------------------------------------|-----------------------------|-----------------------|------------------------|-------------------------|--------------------------|--------------------------|
| Colon and rectum cancer                       | 1,136<br>(1,027 - 1,252)    | --                    | --                     | 34<br>(30 - 38)         | 318<br>(287 - 351)       | 784<br>(691 - 883)       |
| Lip and oral cavity cancer                    | 91<br>(74 - 105)            | --                    | --                     | 8<br>(6 - 10)           | 40<br>(29 - 48)          | 44<br>(35 - 53)          |
| Nasopharynx cancer                            | 10<br>(7 - 14)              | --                    | 0<br>(0 - 0)           | 2<br>(1 - 3)            | 4<br>(3 - 6)             | 4<br>(3 - 6)             |
| Other pharynx cancer                          | 47<br>(34 - 59)             | --                    | --                     | 4<br>(3 - 5)            | 25<br>(18 - 32)          | 18<br>(12 - 24)          |
| Gallbladder and biliary tract cancer          | 73<br>(56 - 102)            | --                    | --                     | 1<br>(1 - 2)            | 16<br>(12 - 21)          | 56<br>(41 - 83)          |
| Pancreatic cancer                             | 505<br>(458 - 553)          | --                    | --                     | 15<br>(12 - 18)         | 162<br>(145 - 181)       | 328<br>(291 - 367)       |
| Malignant skin melanoma                       | 132<br>(84 - 183)           | --                    | --                     | 21<br>(14 - 30)         | 48<br>(30 - 66)          | 64<br>(40 - 88)          |
| Non-melanoma skin cancer                      | 44<br>(33 - 59)             | --                    | --                     | 1<br>(1 - 2)            | 5<br>(4 - 7)             | 37<br>(28 - 50)          |
| Ovarian cancer                                | 271<br>(227 - 317)          | --                    | --                     | 18<br>(14 - 22)         | 105<br>(86 - 124)        | 149<br>(115 - 185)       |
| Testicular cancer                             | 5<br>(4 - 7)                | --                    | --                     | 3<br>(2 - 5)            | 1<br>(1 - 1)             | 1<br>(1 - 2)             |
| Kidney cancer                                 | 201<br>(175 - 232)          | 0<br>(0 - 0)          | 0<br>(0 - 0)           | 10<br>(8 - 12)          | 74<br>(60 - 90)          | 117<br>(95 - 141)        |
| Bladder cancer                                | 238<br>(201 - 284)          | --                    | --                     | 3<br>(2 - 4)            | 46<br>(38 - 54)          | 190<br>(157 - 229)       |
| Brain and nervous system cancer               | 189<br>(150 - 216)          | 1<br>(1 - 2)          | 2<br>(2 - 3)           | 29<br>(24 - 35)         | 87<br>(71 - 103)         | 69<br>(47 - 86)          |
| Thyroid cancer                                | 19<br>(15 - 24)             | --                    | 0<br>(0 - 0)           | 1<br>(1 - 1)            | 5<br>(4 - 6)             | 14<br>(10 - 18)          |
| Mesothelioma                                  | 67<br>(39 - 114)            | --                    | --                     | 2<br>(1 - 3)            | 26<br>(16 - 41)          | 40<br>(19 - 74)          |
| Hodgkin lymphoma                              | 20<br>(14 - 25)             | 0<br>(0 - 0)          | 0<br>(0 - 0)           | 7<br>(5 - 9)            | 6<br>(4 - 8)             | 7<br>(5 - 9)             |
| Non-Hodgkin lymphoma                          | 292<br>(184 - 357)          | 0<br>(0 - 0)          | 1<br>(0 - 1)           | 20<br>(12 - 25)         | 89<br>(51 - 114)         | 183<br>(111 - 229)       |
| Multiple myeloma                              | 167<br>(116 - 241)          | --                    | --                     | 4<br>(3 - 6)            | 49<br>(33 - 71)          | 114<br>(76 - 165)        |
| Leukemia                                      | 265<br>(233 - 296)          | 1<br>(1 - 2)          | 3<br>(2 - 4)           | 23<br>(20 - 26)         | 64<br>(54 - 73)          | 174<br>(150 - 198)       |
| Other neoplasms                               | 345<br>(261 - 405)          | 2<br>(2 - 3)          | 3<br>(2 - 3)           | 30<br>(24 - 35)         | 84<br>(67 - 98)          | 226<br>(155 - 279)       |
| Cardiovascular diseases                       | 10,726<br>(10,031 - 11,837) | 1<br>(1 - 2)          | 1<br>(1 - 1)           | 218<br>(195 - 241)      | 1,524<br>(1,399 - 1,694) | 8,981<br>(8,353 - 9,894) |
| Rheumatic heart disease                       | 100<br>(76 - 164)           | 0<br>(0 - 0)          | 0<br>(0 - 0)           | 5<br>(4 - 8)            | 22<br>(17 - 38)          | 72<br>(52 - 118)         |
| Ischemic heart disease                        | 5,578<br>(4,978 - 6,432)    | 0<br>(0 - 0)          | 0<br>(0 - 0)           | 119<br>(104 - 140)      | 956<br>(863 - 1,108)     | 4,503<br>(3,947 - 5,247) |
| Cerebrovascular disease                       | 3,114<br>(2,703 - 3,701)    | 0<br>(0 - 0)          | 0<br>(0 - 0)           | 47<br>(38 - 56)         | 287<br>(238 - 338)       | 2,780<br>(2,393 - 3,356) |
| Ischemic stroke                               | 1,881<br>(1,583 - 2,384)    | 0<br>(0 - 0)          | 0<br>(0 - 0)           | 5<br>(3 - 7)            | 94<br>(67 - 123)         | 1,782<br>(1,503 - 2,271) |
| Hemorrhagic stroke                            | 1,233<br>(932 - 1,524)      | 0<br>(0 - 0)          | 0<br>(0 - 0)           | 42<br>(34 - 50)         | 193<br>(153 - 232)       | 998<br>(726 - 1,275)     |
| Hypertensive heart disease                    | 175<br>(119 - 223)          | 0<br>(0 - 0)          | 0<br>(0 - 0)           | 5<br>(3 - 7)            | 34<br>(23 - 47)          | 136<br>(88 - 179)        |
| Cardiomyopathy and myocarditis                | 203<br>(160 - 289)          | 1<br>(1 - 1)          | 0<br>(0 - 0)           | 14<br>(11 - 17)         | 29<br>(20 - 37)          | 159<br>(119 - 242)       |
| Atrial fibrillation and flutter               | 277<br>(207 - 359)          | --                    | --                     | 0<br>(0 - 0)            | 11<br>(8 - 14)           | 266<br>(197 - 347)       |
| Aortic aneurysm                               | 433<br>(346 - 550)          | --                    | --                     | 5<br>(4 - 6)            | 61<br>(50 - 77)          | 367<br>(288 - 474)       |
| Peripheral vascular disease                   | 130<br>(103 - 164)          | --                    | --                     | 0<br>(0 - 1)            | 11<br>(8 - 14)           | 119<br>(92 - 152)        |
| Endocarditis                                  | 44<br>(32 - 65)             | 0<br>(0 - 0)          | 0<br>(0 - 0)           | 3<br>(2 - 3)            | 10<br>(7 - 15)           | 32<br>(22 - 48)          |
| Other cardiovascular and circulatory diseases | 672<br>(401 - 848)          | 0<br>(0 - 0)          | 0<br>(0 - 0)           | 19<br>(12 - 24)         | 104<br>(58 - 128)        | 548<br>(323 - 707)       |
| Chronic respiratory diseases                  | 2,376<br>(2,057 - 2,859)    | 2<br>(1 - 2)          | 1<br>(1 - 1)           | 29<br>(25 - 34)         | 370<br>(319 - 427)       | 1,975<br>(1,700 - 2,383) |
| Chronic obstructive pulmonary disease         | 1,926<br>(1,666 - 2,377)    | 1<br>(0 - 1)          | 0<br>(0 - 0)           | 12<br>(9 - 15)          | 301<br>(257 - 352)       | 1,612<br>(1,380 - 2,010) |
| Pneumoconiosis                                | 114<br>(67 - 202)           | 0<br>(0 - 0)          | 0<br>(0 - 0)           | 1<br>(1 - 1)            | 10<br>(6 - 16)           | 103<br>(59 - 187)        |
| Silicosis                                     | 8<br>(5 - 15)               | 0<br>(0 - 0)          | 0<br>(0 - 0)           | 0<br>(0 - 0)            | 1<br>(1 - 2)             | 7<br>(3 - 13)            |
| Asbestosis                                    | 27<br>(15 - 52)             | 0<br>(0 - 0)          | 0<br>(0 - 0)           | 0<br>(0 - 0)            | 3<br>(2 - 5)             | 24<br>(13 - 47)          |
| Coal workers pneumoconiosis                   | 67<br>(38 - 116)            | 0<br>(0 - 0)          | 0<br>(0 - 0)           | 0<br>(0 - 0)            | 5<br>(3 - 8)             | 62<br>(35 - 111)         |
| Other pneumoconiosis                          | 12<br>(7 - 21)              | 0<br>(0 - 0)          | 0<br>(0 - 0)           | 0<br>(0 - 0)            | 1<br>(1 - 2)             | 10<br>(6 - 19)           |



Web Table 31- Wales deaths with 95% UI by age, sex, and cause in 2013

| Cause                                               | Both Sexes, All Ages     | Both Sexes, 0-4 Years | Both Sexes, 5-14 Years | Both Sexes, 15-49 Years | Both Sexes, 50-69 Years | Both Sexes, 70-80 Years  |
|-----------------------------------------------------|--------------------------|-----------------------|------------------------|-------------------------|-------------------------|--------------------------|
| Asthma                                              | 93<br>(64 - 137)         | 0<br>(0 - 0)          | 1<br>(0 - 1)           | 12<br>(10 - 14)         | 17<br>(12 - 27)         | 63<br>(38 - 101)         |
| Interstitial lung disease and pulmonary sarcoidosis | 229<br>(98 - 354)        | 0<br>(0 - 0)          | 0<br>(0 - 0)           | 5<br>(2 - 7)            | 40<br>(19 - 60)         | 184<br>(74 - 295)        |
| Other chronic respiratory diseases                  | 14<br>(10 - 20)          | 0<br>(0 - 0)          | 0<br>(0 - 0)           | 0<br>(0 - 1)            | 1<br>(1 - 2)            | 12<br>(8 - 18)           |
| Cirrhosis                                           | 471<br>(432 - 511)       | 0<br>(0 - 0)          | 0<br>(0 - 0)           | 102<br>(89 - 115)       | 218<br>(196 - 241)      | 151<br>(134 - 170)       |
| Cirrhosis due to hepatitis B                        | 51<br>(32 - 83)          | 0<br>(0 - 0)          | 0<br>(0 - 0)           | 10<br>(5 - 16)          | 24<br>(14 - 37)         | 18<br>(10 - 31)          |
| Cirrhosis due to hepatitis C                        | 206<br>(118 - 280)       | 0<br>(0 - 0)          | 0<br>(0 - 0)           | 44<br>(26 - 62)         | 94<br>(52 - 135)        | 68<br>(33 - 93)          |
| Cirrhosis due to alcohol use                        | 161<br>(109 - 218)       | --<br>(0 - 0)         | --<br>(0 - 0)          | 30<br>(17 - 45)         | 77<br>(49 - 108)        | 54<br>(36 - 79)          |
| Cirrhosis due to other causes                       | 53<br>(31 - 77)          | 0<br>(0 - 0)          | 0<br>(0 - 0)           | 18<br>(11 - 25)         | 23<br>(13 - 35)         | 11<br>(6 - 19)           |
| Digestive diseases                                  | 1,035<br>(887 - 1,326)   | 1<br>(0 - 1)          | 0<br>(0 - 1)           | 27<br>(24 - 31)         | 144<br>(124 - 174)      | 863<br>(728 - 1,120)     |
| Peptic ulcer disease                                | 187<br>(139 - 284)       | 0<br>(0 - 0)          | 0<br>(0 - 0)           | 4<br>(3 - 5)            | 28<br>(20 - 37)         | 155<br>(113 - 243)       |
| Gastritis and duodenitis                            | 11<br>(7 - 18)           | 0<br>(0 - 0)          | 0<br>(0 - 0)           | 1<br>(0 - 1)            | 2<br>(1 - 3)            | 8<br>(4 - 14)            |
| Appendicitis                                        | 20<br>(11 - 38)          | 0<br>(0 - 0)          | 0<br>(0 - 0)           | 1<br>(1 - 2)            | 4<br>(2 - 6)            | 15<br>(7 - 30)           |
| Paralytic ileus and intestinal obstruction          | 130<br>(64 - 174)        | 0<br>(0 - 0)          | 0<br>(0 - 0)           | 2<br>(1 - 3)            | 13<br>(6 - 18)          | 114<br>(54 - 156)        |
| Inguinal, femoral, and abdominal hernia             | 51<br>(20 - 129)         | 0<br>(0 - 0)          | 0<br>(0 - 0)           | 1<br>(0 - 1)            | 5<br>(2 - 12)           | 45<br>(17 - 118)         |
| Inflammatory bowel disease                          | 70<br>(50 - 105)         | 0<br>(0 - 0)          | 0<br>(0 - 0)           | 3<br>(2 - 4)            | 10<br>(7 - 14)          | 57<br>(40 - 88)          |
| Vascular intestinal disorders                       | 167<br>(97 - 262)        | 0<br>(0 - 0)          | 0<br>(0 - 0)           | 2<br>(1 - 4)            | 26<br>(15 - 42)         | 138<br>(77 - 221)        |
| Gallbladder and biliary diseases                    | 122<br>(87 - 158)        | 0<br>(0 - 0)          | 0<br>(0 - 0)           | 2<br>(1 - 2)            | 13<br>(9 - 17)          | 107<br>(77 - 141)        |
| Pancreatitis                                        | 74<br>(53 - 103)         | 0<br>(0 - 0)          | 0<br>(0 - 0)           | 7<br>(5 - 9)            | 19<br>(13 - 25)         | 48<br>(33 - 71)          |
| Other digestive diseases                            | 203<br>(153 - 267)       | 0<br>(0 - 0)          | 0<br>(0 - 0)           | 4<br>(3 - 5)            | 25<br>(17 - 31)         | 174<br>(131 - 231)       |
| Neurological disorders                              | 3,593<br>(3,003 - 4,131) | 4<br>(3 - 5)          | 2<br>(2 - 2)           | 49<br>(42 - 57)         | 193<br>(166 - 225)      | 3,345<br>(2,746 - 3,871) |
| Alzheimer disease and other dementias               | 3,065<br>(2,473 - 3,603) | --<br>(0 - 0)         | --<br>(0 - 1)          | 0<br>(0 - 1)            | 87<br>(67 - 109)        | 2,978<br>(2,376 - 3,505) |
| Parkinson disease                                   | 258<br>(198 - 315)       | --<br>(0 - 0)         | --<br>(0 - 0)          | 0<br>(0 - 0)            | 14<br>(11 - 19)         | 243<br>(184 - 301)       |
| Epilepsy                                            | 48<br>(39 - 57)          | 1<br>(0 - 1)          | 1<br>(1 - 1)           | 21<br>(17 - 25)         | 10<br>(8 - 13)          | 15<br>(11 - 20)          |
| Multiple sclerosis                                  | 47<br>(31 - 67)          | --<br>(0 - 0)         | --<br>(0 - 0)          | 10<br>(7 - 15)          | 23<br>(14 - 35)         | 14<br>(8 - 20)           |
| Other neurological disorders                        | 174<br>(146 - 198)       | 3<br>(2 - 4)          | 1<br>(1 - 2)           | 17<br>(13 - 20)         | 58<br>(48 - 68)         | 95<br>(77 - 111)         |
| Mental and substance use disorders                  | 156<br>(106 - 180)       | 0<br>(0 - 0)          | 0<br>(0 - 0)           | 114<br>(69 - 133)       | 30<br>(21 - 38)         | 12<br>(9 - 15)           |
| Schizophrenia                                       | 4<br>(3 - 7)             | --<br>(0 - 0)         | --<br>(0 - 0)          | 0<br>(0 - 0)            | 1<br>(0 - 1)            | 3<br>(2 - 6)             |
| Alcohol use disorders                               | 43<br>(24 - 57)          | --<br>(0 - 0)         | --<br>(0 - 0)          | 18<br>(10 - 24)         | 20<br>(11 - 27)         | 5<br>(2 - 6)             |
| Drug use disorders                                  | 108<br>(68 - 127)        | 0<br>(0 - 0)          | --<br>(0 - 0)          | 95<br>(57 - 112)        | 9<br>(7 - 12)           | 4<br>(3 - 5)             |
| Opioid use disorders                                | 40<br>(25 - 48)          | 0<br>(0 - 0)          | --<br>(0 - 0)          | 36<br>(21 - 43)         | 3<br>(2 - 4)            | 1<br>(1 - 2)             |
| Cocaine use disorders                               | 3<br>(2 - 4)             | 0<br>(0 - 0)          | --<br>(0 - 0)          | 3<br>(2 - 4)            | 0<br>(0 - 0)            | 0<br>(0 - 0)             |
| Amphetamine use disorders                           | 3<br>(2 - 4)             | 0<br>(0 - 0)          | --<br>(0 - 0)          | 3<br>(2 - 3)            | 0<br>(0 - 0)            | 0<br>(0 - 0)             |
| Other drug use disorders                            | 62<br>(39 - 73)          | 0<br>(0 - 0)          | --<br>(0 - 0)          | 54<br>(32 - 64)         | 6<br>(4 - 7)            | 2<br>(2 - 3)             |
| Eating disorders                                    | 0<br>(0 - 1)             | --<br>(0 - 0)         | 0<br>(0 - 0)           | 0<br>(0 - 0)            | --<br>(0 - 0)           | --<br>(0 - 0)            |
| Anorexia nervosa                                    | 0<br>(0 - 1)             | --<br>(0 - 0)         | 0<br>(0 - 0)           | 0<br>(0 - 0)            | --<br>(0 - 0)           | --<br>(0 - 0)            |
| Diabetes, urogenital, blood, and endocrine diseases | 1,164<br>(966 - 1,314)   | 4<br>(3 - 6)          | 2<br>(2 - 3)           | 44<br>(39 - 51)         | 141<br>(124 - 157)      | 972<br>(789 - 1,110)     |
| Diabetes mellitus                                   | 329<br>(285 - 373)       | 0<br>(0 - 0)          | 0<br>(0 - 0)           | 12<br>(10 - 14)         | 52<br>(45 - 60)         | 264<br>(225 - 306)       |
| Acute glomerulonephritis                            | 1<br>(1 - 1)             | 0<br>(0 - 0)          | 0<br>(0 - 0)           | 0<br>(0 - 0)            | 0<br>(0 - 0)            | 0<br>(0 - 1)             |
| Chronic kidney disease                              | 332<br>(281 - 415)       | 0<br>(0 - 0)          | 0<br>(0 - 0)           | 9<br>(8 - 12)           | 33<br>(27 - 42)         | 290<br>(242 - 361)       |
| Chronic kidney disease due to diabetes mellitus     | 50<br>(37 - 79)          | 0<br>(0 - 0)          | 0<br>(0 - 0)           | 1<br>(1 - 2)            | 6<br>(4 - 9)            | 43<br>(31 - 68)          |

Web Table 31- Wales deaths with 95% UI by age, sex, and cause in 2013

| Cause                                               | Both Sexes, All Ages   | Both Sexes, 0-4 Years | Both Sexes, 5-14 Years | Both Sexes, 15-49 Years | Both Sexes, 50-69 Years | Both Sexes, 70-80 Years |
|-----------------------------------------------------|------------------------|-----------------------|------------------------|-------------------------|-------------------------|-------------------------|
| Chronic kidney disease due to hypertension          | 87<br>(61 - 118)       | 0<br>(0 - 0)          | 0<br>(0 - 0)           | 2<br>(1 - 2)            | 8<br>(6 - 11)           | 78<br>(53 - 105)        |
| Chronic kidney disease due to glomerulonephritis    | 16<br>(9 - 23)         | 0<br>(0 - 0)          | 0<br>(0 - 0)           | 1<br>(1 - 1)            | 2<br>(1 - 3)            | 13<br>(7 - 19)          |
| Chronic kidney disease due to other causes          | 179<br>(136 - 244)     | 0<br>(0 - 0)          | 0<br>(0 - 0)           | 5<br>(4 - 7)            | 17<br>(12 - 23)         | 156<br>(115 - 215)      |
| Urinary diseases and male infertility               | 377<br>(191 - 494)     | 0<br>(0 - 1)          | 0<br>(0 - 0)           | 6<br>(4 - 7)            | 28<br>(16 - 36)         | 343<br>(166 - 454)      |
| Interstitial nephritis and urinary tract infections | 343<br>(172 - 455)     | 0<br>(0 - 0)          | 0<br>(0 - 0)           | 5<br>(3 - 6)            | 24<br>(13 - 30)         | 315<br>(152 - 423)      |
| Urolithiasis                                        | 10<br>(5 - 21)         | --                    | 0<br>(0 - 0)           | 0<br>(0 - 1)            | 2<br>(1 - 3)            | 8<br>(3 - 17)           |
| Other urinary diseases                              | 24<br>(10 - 46)        | 0<br>(0 - 0)          | 0<br>(0 - 0)           | 1<br>(0 - 1)            | 3<br>(1 - 5)            | 20<br>(8 - 41)          |
| Gynecological diseases                              | 2<br>(1 - 3)           | --                    | --                     | 0<br>(0 - 0)            | 0<br>(0 - 0)            | 1<br>(1 - 2)            |
| Uterine fibroids                                    | 1<br>(0 - 1)           | --                    | --                     | 0<br>(0 - 0)            | 0<br>(0 - 0)            | 0<br>(0 - 1)            |
| Polycystic ovarian syndrome                         | 0<br>(0 - 0)           | --                    | --                     | 0<br>(0 - 0)            | 0<br>(0 - 0)            | --                      |
| Endometriosis                                       | 0<br>(0 - 0)           | --                    | --                     | 0<br>(0 - 0)            | 0<br>(0 - 0)            | --                      |
| Genital prolapse                                    | 0<br>(0 - 1)           | --                    | --                     | 0<br>(0 - 0)            | 0<br>(0 - 0)            | 0<br>(0 - 1)            |
| Other gynecological diseases                        | 1<br>(1 - 1)           | --                    | --                     | 0<br>(0 - 0)            | 0<br>(0 - 0)            | 1<br>(0 - 1)            |
| Hemoglobinopathies and hemolytic anemias            | 15<br>(11 - 22)        | 0<br>(0 - 0)          | 0<br>(0 - 0)           | 2<br>(1 - 3)            | 3<br>(2 - 4)            | 10<br>(7 - 15)          |
| Thalassemias                                        | 1<br>(1 - 1)           | 0<br>(0 - 0)          | 0<br>(0 - 0)           | 1<br>(0 - 1)            | 0<br>(0 - 0)            | 0<br>(0 - 0)            |
| Sickle cell disorders                               | 3<br>(2 - 4)           | 0<br>(0 - 0)          | 0<br>(0 - 0)           | 1<br>(0 - 1)            | 1<br>(1 - 2)            | 1<br>(0 - 1)            |
| G6PD deficiency                                     | 0<br>(0 - 0)           | 0<br>(0 - 0)          | 0<br>(0 - 0)           | 0<br>(0 - 0)            | 0<br>(0 - 0)            | 0<br>(0 - 0)            |
| Other hemoglobinopathies and hemolytic anemias      | 12<br>(8 - 17)         | 0<br>(0 - 0)          | 0<br>(0 - 0)           | 1<br>(0 - 1)            | 2<br>(1 - 2)            | 10<br>(7 - 14)          |
| Endocrine, metabolic, blood, and immune disorders   | 108<br>(89 - 166)      | 3<br>(2 - 5)          | 2<br>(1 - 2)           | 15<br>(12 - 21)         | 25<br>(20 - 36)         | 64<br>(49 - 106)        |
| Musculoskeletal disorders                           | 111<br>(78 - 140)      | --                    | 0<br>(0 - 0)           | 7<br>(5 - 8)            | 23<br>(17 - 29)         | 82<br>(53 - 106)        |
| Rheumatoid arthritis                                | 53<br>(37 - 71)        | --                    | 0<br>(0 - 0)           | 1<br>(1 - 1)            | 10<br>(7 - 14)          | 43<br>(28 - 58)         |
| Other musculoskeletal disorders                     | 58<br>(38 - 75)        | --                    | 0<br>(0 - 0)           | 6<br>(5 - 7)            | 13<br>(10 - 17)         | 39<br>(22 - 54)         |
| Other non-communicable diseases                     | 195<br>(169 - 226)     | 49<br>(39 - 64)       | 3<br>(2 - 4)           | 21<br>(18 - 25)         | 25<br>(21 - 28)         | 97<br>(74 - 123)        |
| Congenital anomalies                                | 92<br>(80 - 108)       | 39<br>(31 - 50)       | 3<br>(2 - 4)           | 19<br>(16 - 23)         | 16<br>(13 - 19)         | 15<br>(12 - 20)         |
| Neural tube defects                                 | 4<br>(3 - 5)           | 3<br>(2 - 4)          | 0<br>(0 - 0)           | 1<br>(1 - 1)            | 0<br>(0 - 0)            | 0<br>(0 - 0)            |
| Congenital heart anomalies                          | 43<br>(37 - 51)        | 16<br>(12 - 21)       | 2<br>(1 - 2)           | 12<br>(10 - 15)         | 6<br>(5 - 9)            | 7<br>(5 - 9)            |
| Cleft lip and cleft palate                          | 0<br>(0 - 0)           | 0<br>(0 - 0)          | --                     | --                      | --                      | --                      |
| Down syndrome                                       | 12<br>(8 - 16)         | 1<br>(1 - 2)          | 0<br>(0 - 0)           | 3<br>(2 - 4)            | 7<br>(5 - 10)           | 1<br>(0 - 1)            |
| Chromosomal unbalanced rearrangements               | 5<br>(4 - 8)           | 5<br>(3 - 7)          | 0<br>(0 - 0)           | 0<br>(0 - 1)            | 0<br>(0 - 0)            | 0<br>(0 - 0)            |
| Other congenital anomalies                          | 27<br>(22 - 33)        | 14<br>(10 - 19)       | 1<br>(0 - 1)           | 3<br>(2 - 4)            | 2<br>(1 - 3)            | 8<br>(6 - 10)           |
| Skin and subcutaneous diseases                      | 93<br>(68 - 119)       | 0<br>(0 - 0)          | 0<br>(0 - 0)           | 2<br>(1 - 2)            | 9<br>(6 - 11)           | 82<br>(59 - 108)        |
| Cellulitis                                          | 36<br>(16 - 54)        | 0<br>(0 - 0)          | 0<br>(0 - 0)           | 1<br>(0 - 1)            | 4<br>(2 - 6)            | 31<br>(12 - 49)         |
| Pyoderma                                            | 34<br>(21 - 50)        | 0<br>(0 - 0)          | 0<br>(0 - 0)           | 1<br>(1 - 1)            | 3<br>(2 - 5)            | 30<br>(18 - 46)         |
| Decubitus ulcer                                     | 18<br>(11 - 29)        | 0<br>(0 - 0)          | 0<br>(0 - 0)           | 0<br>(0 - 0)            | 1<br>(1 - 2)            | 17<br>(10 - 28)         |
| Other skin and subcutaneous diseases                | 5<br>(2 - 12)          | 0<br>(0 - 0)          | 0<br>(0 - 0)           | 0<br>(0 - 0)            | 1<br>(0 - 1)            | 4<br>(2 - 11)           |
| Sudden infant death syndrome                        | 10<br>(5 - 21)         | 10<br>(5 - 21)        | --                     | --                      | --                      | --                      |
| Injuries                                            | 1,112<br>(984 - 1,247) | 11<br>(8 - 15)        | 7<br>(6 - 9)           | 308<br>(279 - 343)      | 187<br>(166 - 211)      | 598<br>(489 - 703)      |
| Transport injuries                                  | 171<br>(152 - 192)     | 2<br>(1 - 3)          | 3<br>(3 - 4)           | 88<br>(77 - 100)        | 33<br>(28 - 39)         | 44<br>(36 - 55)         |
| Road injuries                                       | 162<br>(144 - 182)     | 2<br>(1 - 3)          | 3<br>(2 - 4)           | 83<br>(73 - 94)         | 31<br>(26 - 36)         | 43<br>(35 - 53)         |
| Pedestrian road injuries                            | 42<br>(29 - 60)        | 1<br>(0 - 1)          | 1<br>(1 - 2)           | 11<br>(6 - 17)          | 10<br>(6 - 14)          | 20<br>(13 - 28)         |

Web Table 31- Wales deaths with 95% UI by age, sex, and cause in 2013

| Cause                                           | Both Sexes, All Ages | Both Sexes, 0-4 Years | Both Sexes, 5-14 Years | Both Sexes, 15-49 Years | Both Sexes, 50-69 Years | Both Sexes, 70-80 Years |
|-------------------------------------------------|----------------------|-----------------------|------------------------|-------------------------|-------------------------|-------------------------|
| Cyclist road injuries                           | 7<br>(5 - 10)        | 0<br>(0 - 0)          | 0<br>(0 - 1)           | 3<br>(2 - 4)            | 2<br>(1 - 3)            | 2<br>(1 - 3)            |
| Motorcyclist road injuries                      | 22<br>(15 - 31)      | 0<br>(0 - 0)          | 0<br>(0 - 0)           | 18<br>(12 - 26)         | 2<br>(1 - 4)            | 1<br>(1 - 2)            |
| Motor vehicle road injuries                     | 89<br>(71 - 109)     | 1<br>(1 - 1)          | 1<br>(1 - 2)           | 51<br>(41 - 62)         | 16<br>(12 - 21)         | 20<br>(14 - 27)         |
| Other road injuries                             | 1<br>(1 - 2)         | 0<br>(0 - 0)          | 0<br>(0 - 0)           | 0<br>(0 - 1)            | 0<br>(0 - 1)            | 0<br>(0 - 1)            |
| Other transport injuries                        | 9<br>(7 - 12)        | 0<br>(0 - 0)          | 0<br>(0 - 0)           | 5<br>(4 - 6)            | 2<br>(2 - 3)            | 1<br>(1 - 2)            |
| Unintentional injuries                          | 677<br>(564 - 790)   | 9<br>(6 - 12)         | 4<br>(3 - 5)           | 68<br>(60 - 78)         | 82<br>(71 - 94)         | 515<br>(405 - 622)      |
| Falls                                           | 454<br>(340 - 556)   | 1<br>(1 - 1)          | 1<br>(0 - 1)           | 19<br>(15 - 23)         | 39<br>(27 - 49)         | 394<br>(291 - 494)      |
| Drowning                                        | 20<br>(15 - 27)      | 1<br>(1 - 2)          | 1<br>(1 - 1)           | 8<br>(6 - 10)           | 4<br>(3 - 7)            | 5<br>(3 - 9)            |
| Fire, heat, and hot substances                  | 25<br>(20 - 36)      | 1<br>(1 - 2)          | 0<br>(0 - 1)           | 5<br>(4 - 6)            | 6<br>(4 - 9)            | 13<br>(10 - 20)         |
| Poisonings                                      | 16<br>(12 - 32)      | 0<br>(0 - 0)          | 0<br>(0 - 0)           | 8<br>(6 - 15)           | 4<br>(3 - 8)            | 4<br>(3 - 10)           |
| Exposure to mechanical forces                   | 25<br>(19 - 29)      | 2<br>(1 - 3)          | 1<br>(1 - 1)           | 12<br>(9 - 14)          | 5<br>(4 - 6)            | 5<br>(4 - 7)            |
| Unintentional firearm injuries                  | 1<br>(1 - 2)         | 0<br>(0 - 0)          | 0<br>(0 - 0)           | 1<br>(1 - 1)            | 0<br>(0 - 0)            | 0<br>(0 - 0)            |
| Unintentional suffocation                       | 11<br>(5 - 14)       | 2<br>(1 - 3)          | 1<br>(0 - 1)           | 5<br>(2 - 7)            | 2<br>(1 - 2)            | 2<br>(1 - 3)            |
| Other exposure to mechanical forces             | 13<br>(11 - 15)      | 0<br>(0 - 1)          | 0<br>(0 - 0)           | 6<br>(5 - 8)            | 3<br>(2 - 4)            | 3<br>(2 - 4)            |
| Adverse effects of medical treatment            | 49<br>(37 - 70)      | 0<br>(0 - 1)          | 0<br>(0 - 0)           | 3<br>(2 - 4)            | 9<br>(7 - 14)           | 37<br>(27 - 54)         |
| Animal contact                                  | 3<br>(2 - 4)         | 0<br>(0 - 0)          | 0<br>(0 - 0)           | 1<br>(0 - 1)            | 1<br>(0 - 1)            | 1<br>(1 - 2)            |
| Venomous animal contact                         | 1<br>(0 - 1)         | 0<br>(0 - 0)          | 0<br>(0 - 0)           | 0<br>(0 - 0)            | 0<br>(0 - 0)            | 0<br>(0 - 0)            |
| Non-venomous animal contact                     | 2<br>(1 - 3)         | 0<br>(0 - 0)          | 0<br>(0 - 0)           | 1<br>(0 - 1)            | 1<br>(0 - 1)            | 1<br>(1 - 1)            |
| Foreign body                                    | 80<br>(46 - 107)     | 2<br>(1 - 3)          | 1<br>(0 - 1)           | 11<br>(7 - 15)          | 12<br>(8 - 17)          | 54<br>(28 - 78)         |
| Pulmonary aspiration and foreign body in airway | 79<br>(45 - 107)     | 2<br>(1 - 3)          | 1<br>(0 - 1)           | 10<br>(7 - 15)          | 12<br>(8 - 16)          | 54<br>(27 - 78)         |
| Foreign body in other body part                 | 1<br>(1 - 1)         | 0<br>(0 - 0)          | 0<br>(0 - 0)           | 0<br>(0 - 0)            | 0<br>(0 - 0)            | 0<br>(0 - 1)            |
| Other unintentional injuries                    | 4<br>(4 - 6)         | 0<br>(0 - 1)          | 0<br>(0 - 0)           | 2<br>(1 - 2)            | 1<br>(1 - 1)            | 2<br>(1 - 2)            |
| Self-harm and interpersonal violence            | 264<br>(229 - 305)   | 0<br>(0 - 1)          | 0<br>(0 - 1)           | 152<br>(131 - 178)      | 73<br>(58 - 88)         | 39<br>(32 - 48)         |
| Self-harm                                       | 254<br>(219 - 294)   | --                    | 0<br>(0 - 0)           | 146<br>(124 - 170)      | 71<br>(57 - 86)         | 37<br>(30 - 46)         |
| Interpersonal violence                          | 10<br>(7 - 14)       | 0<br>(0 - 1)          | 0<br>(0 - 0)           | 7<br>(5 - 9)            | 2<br>(1 - 2)            | 1<br>(1 - 2)            |
| Assault by firearm                              | 2<br>(1 - 3)         | 0<br>(0 - 0)          | 0<br>(0 - 0)           | 1<br>(1 - 2)            | 0<br>(0 - 0)            | 0<br>(0 - 0)            |
| Assault by sharp object                         | 2<br>(1 - 2)         | 0<br>(0 - 0)          | 0<br>(0 - 0)           | 1<br>(1 - 2)            | 0<br>(0 - 0)            | 0<br>(0 - 0)            |
| Assault by other means                          | 7<br>(5 - 9)         | 0<br>(0 - 1)          | 0<br>(0 - 0)           | 4<br>(3 - 6)            | 1<br>(1 - 2)            | 1<br>(1 - 2)            |

Web Table 31- Wales deaths with 95% UI by age, sex, and cause in 2013

| Cause                                                              | Males, All Ages             | Males, 0-4 Years | Males, 5-14 Years | Males, 15-49 Years | Males, 50-69 Years       | Males, 70-80 Years          |
|--------------------------------------------------------------------|-----------------------------|------------------|-------------------|--------------------|--------------------------|-----------------------------|
| All causes                                                         | 15,727<br>(14,718 - 16,674) | 89<br>(70 - 112) | 15<br>(12 - 17)   | 863<br>(775 - 944) | 3,357<br>(3,058 - 3,642) | 11,403<br>(10,771 - 11,975) |
| Communicable, maternal, neonatal, and nutritional diseases         | 1,001<br>(809 - 1,225)      | 47<br>(37 - 59)  | 1<br>(1 - 2)      | 28<br>(23 - 33)    | 94<br>(72 - 116)         | 830<br>(651 - 1,041)        |
| HIV/AIDS and tuberculosis                                          | 23<br>(16 - 28)             | 0<br>(0 - 0)     | 0<br>(0 - 0)      | 5<br>(4 - 6)       | 6<br>(4 - 8)             | 12<br>(7 - 16)              |
| Tuberculosis                                                       | 17<br>(12 - 22)             | 0<br>(0 - 0)     | 0<br>(0 - 0)      | 1<br>(1 - 2)       | 4<br>(3 - 6)             | 12<br>(7 - 16)              |
| HIV/AIDS                                                           | 5<br>(3 - 7)                | 0<br>(0 - 0)     | 0<br>(0 - 0)      | 3<br>(2 - 5)       | 1<br>(1 - 3)             | 0<br>(0 - 1)                |
| HIV/AIDS resulting in mycobacterial infection                      | 0<br>(0 - 0)                | 0<br>(0 - 0)     | 0<br>(0 - 0)      | 0<br>(0 - 0)       | 0<br>(0 - 0)             | 0<br>(0 - 0)                |
| HIV/AIDS resulting in other diseases                               | 5<br>(3 - 7)                | 0<br>(0 - 0)     | 0<br>(0 - 0)      | 3<br>(2 - 4)       | 1<br>(1 - 2)             | 0<br>(0 - 0)                |
| Diarrrhea, lower respiratory, and other common infectious diseases | 912<br>(724 - 1,132)        | 8<br>(6 - 11)    | 1<br>(1 - 1)      | 20<br>(15 - 24)    | 82<br>(62 - 103)         | 801<br>(621 - 1,009)        |
| Diarrheal diseases                                                 | 47<br>(31 - 69)             | 1<br>(1 - 2)     | 0<br>(0 - 0)      | 1<br>(1 - 2)       | 4<br>(2 - 5)             | 40<br>(25 - 62)             |
| Intestinal infectious diseases                                     | 2<br>(1 - 4)                | 0<br>(0 - 1)     | 0<br>(0 - 1)      | 1<br>(0 - 2)       | 0<br>(0 - 1)             | 0<br>(0 - 1)                |
| Typhoid fever                                                      | 1<br>(0 - 3)                | 0<br>(0 - 1)     | 0<br>(0 - 1)      | 1<br>(0 - 1)       | 0<br>(0 - 1)             | 0<br>(0 - 1)                |
| Paratyphoid fever                                                  | 0<br>(0 - 1)                | 0<br>(0 - 0)     | 0<br>(0 - 0)      | 0<br>(0 - 0)       | 0<br>(0 - 0)             | 0<br>(0 - 0)                |
| Other intestinal infectious diseases                               | 0<br>(0 - 2)                | 0<br>(0 - 0)     | 0<br>(0 - 0)      | 0<br>(0 - 0)       | 0<br>(0 - 1)             | 0<br>(0 - 0)                |
| Lower respiratory infections                                       | 850<br>(663 - 1,064)        | 4<br>(3 - 7)     | 0<br>(0 - 0)      | 15<br>(11 - 19)    | 75<br>(55 - 96)          | 755<br>(573 - 967)          |
| Upper respiratory infections                                       | 0<br>(0 - 1)                | 0<br>(0 - 0)     | 0<br>(0 - 0)      | 0<br>(0 - 0)       | 0<br>(0 - 0)             | 0<br>(0 - 1)                |
| Otitis media                                                       | 0<br>(0 - 0)                | 0<br>(0 - 0)     | 0<br>(0 - 0)      | 0<br>(0 - 0)       | 0<br>(0 - 0)             | 0<br>(0 - 0)                |
| Meningitis                                                         | 9<br>(8 - 12)               | 2<br>(1 - 3)     | 0<br>(0 - 0)      | 2<br>(1 - 2)       | 2<br>(2 - 3)             | 3<br>(3 - 5)                |
| Pneumococcal meningitis                                            | 2<br>(1 - 3)                | 0<br>(0 - 0)     | 0<br>(0 - 0)      | 0<br>(0 - 1)       | 0<br>(0 - 1)             | 1<br>(0 - 1)                |
| H influenzae type B meningitis                                     | 1<br>(1 - 2)                | 0<br>(0 - 1)     | 0<br>(0 - 0)      | 0<br>(0 - 0)       | 0<br>(0 - 0)             | 0<br>(0 - 1)                |
| Meningococcal meningitis                                           | 3<br>(2 - 4)                | 0<br>(0 - 1)     | 0<br>(0 - 0)      | 1<br>(0 - 1)       | 1<br>(0 - 1)             | 1<br>(1 - 2)                |
| Other meningitis                                                   | 3<br>(2 - 5)                | 0<br>(0 - 1)     | 0<br>(0 - 0)      | 1<br>(0 - 1)       | 1<br>(0 - 1)             | 1<br>(1 - 2)                |
| Encephalitis                                                       | 3<br>(1 - 4)                | 0<br>(0 - 0)     | 0<br>(0 - 0)      | 1<br>(0 - 1)       | 1<br>(0 - 1)             | 1<br>(0 - 2)                |
| Diphtheria                                                         | 0<br>(0 - 0)                | 0<br>(0 - 0)     | 0<br>(0 - 0)      | 0<br>(0 - 0)       | 0<br>(0 - 0)             | --<br>(0 - 0)               |
| Whooping cough                                                     | 0<br>(0 - 0)                | 0<br>(0 - 0)     | 0<br>(0 - 0)      | 0<br>(0 - 0)       | 0<br>(0 - 0)             | --<br>(0 - 0)               |
| Tetanus                                                            | 0<br>(0 - 0)                | 0<br>(0 - 0)     | 0<br>(0 - 0)      | 0<br>(0 - 0)       | 0<br>(0 - 0)             | 0<br>(0 - 0)                |
| Measles                                                            | 0<br>(0 - 0)                | 0<br>(0 - 0)     | 0<br>(0 - 0)      | 0<br>(0 - 0)       | 0<br>(0 - 0)             | --<br>(0 - 0)               |
| Varicella and herpes zoster                                        | 1<br>(0 - 5)                | 0<br>(0 - 0)     | 0<br>(0 - 0)      | 0<br>(0 - 0)       | 0<br>(0 - 1)             | 1<br>(0 - 5)                |
| Neglected tropical diseases and malaria                            | 1<br>(1 - 2)                | 0<br>(0 - 0)     | 0<br>(0 - 0)      | 0<br>(0 - 1)       | 1<br>(0 - 1)             | 0<br>(0 - 0)                |
| Cysticercosis                                                      | 0<br>(0 - 0)                | 0<br>(0 - 0)     | 0<br>(0 - 0)      | 0<br>(0 - 0)       | 0<br>(0 - 0)             | 0<br>(0 - 0)                |
| Cystic echinococcosis                                              | 0<br>(0 - 0)                | 0<br>(0 - 0)     | 0<br>(0 - 0)      | 0<br>(0 - 0)       | 0<br>(0 - 0)             | 0<br>(0 - 0)                |
| Dengue                                                             | 0<br>(0 - 0)                | 0<br>(0 - 0)     | 0<br>(0 - 0)      | 0<br>(0 - 0)       | 0<br>(0 - 0)             | 0<br>(0 - 0)                |
| Rabies                                                             | 0<br>(0 - 0)                | 0<br>(0 - 0)     | 0<br>(0 - 0)      | 0<br>(0 - 0)       | 0<br>(0 - 0)             | 0<br>(0 - 0)                |
| Other neglected tropical diseases                                  | 1<br>(1 - 1)                | 0<br>(0 - 0)     | 0<br>(0 - 0)      | 0<br>(0 - 0)       | 0<br>(0 - 1)             | 0<br>(0 - 0)                |
| Maternal disorders                                                 | --                          | --               | --                | --                 | --                       | --                          |
| Maternal hemorrhage                                                | --                          | --               | --                | --                 | --                       | --                          |
| Maternal sepsis and other maternal infections                      | --                          | --               | --                | --                 | --                       | --                          |
| Maternal hypertensive disorders                                    | --                          | --               | --                | --                 | --                       | --                          |
| Maternal obstructed labor                                          | --                          | --               | --                | --                 | --                       | --                          |
| Maternal abortive outcome                                          | --                          | --               | --                | --                 | --                       | --                          |
| Indirect maternal deaths                                           | --                          | --               | --                | --                 | --                       | --                          |

Web Table 31- Wales deaths with 95% UI by age, sex, and cause in 2013

| Cause                                                            | Males, All Ages             | Males, 0-4 Years | Males, 5-14 Years | Males, 15-49 Years | Males, 50-69 Years       | Males, 70-80 Years         |
|------------------------------------------------------------------|-----------------------------|------------------|-------------------|--------------------|--------------------------|----------------------------|
| Late maternal deaths                                             | --                          | --               | --                | --                 | --                       | --                         |
| Maternal deaths aggravated by HIV/AIDS                           | --                          | --               | --                | --                 | --                       | --                         |
| Other maternal disorders                                         | --                          | --               | --                | --                 | --                       | --                         |
| Neonatal disorders                                               | 38<br>(30 - 48)             | 38<br>(30 - 48)  | --                | --                 | --                       | --                         |
| Neonatal preterm birth complications                             | 29<br>(21 - 38)             | 29<br>(21 - 38)  | --                | --                 | --                       | --                         |
| Neonatal encephalopathy due to birth asphyxia and trauma         | 6<br>(3 - 9)                | 6<br>(3 - 9)     | --                | --                 | --                       | --                         |
| Neonatal sepsis and other neonatal infections                    | 1<br>(1 - 4)                | 1<br>(1 - 4)     | --                | --                 | --                       | --                         |
| Hemolytic disease and other neonatal jaundice                    | 0<br>(0 - 0)                | 0<br>(0 - 0)     | --                | --                 | --                       | --                         |
| Other neonatal disorders                                         | 3<br>(1 - 4)                | 3<br>(1 - 4)     | --                | --                 | --                       | --                         |
| Nutritional deficiencies                                         | 12<br>(7 - 20)              | 0<br>(0 - 0)     | 0<br>(0 - 0)      | 0<br>(0 - 1)       | 1<br>(1 - 2)             | 10<br>(6 - 18)             |
| Protein-energy malnutrition                                      | 3<br>(1 - 6)                | 0<br>(0 - 0)     | 0<br>(0 - 0)      | 0<br>(0 - 0)       | 0<br>(0 - 1)             | 2<br>(1 - 5)               |
| Iodine deficiency                                                | 0<br>(0 - 0)                | 0<br>(0 - 0)     | 0<br>(0 - 0)      | 0<br>(0 - 0)       | 0<br>(0 - 0)             | 0<br>(0 - 0)               |
| Iron-deficiency anemia                                           | 7<br>(3 - 13)               | 0<br>(0 - 0)     | 0<br>(0 - 0)      | 0<br>(0 - 0)       | 1<br>(0 - 1)             | 6<br>(3 - 12)              |
| Other nutritional deficiencies                                   | 2<br>(1 - 4)                | 0<br>(0 - 0)     | 0<br>(0 - 0)      | 0<br>(0 - 0)       | 0<br>(0 - 0)             | 1<br>(0 - 4)               |
| Other communicable, maternal, neonatal, and nutritional diseases | 15<br>(10 - 20)             | 1<br>(0 - 1)     | 0<br>(0 - 0)      | 3<br>(2 - 4)       | 5<br>(3 - 6)             | 7<br>(4 - 9)               |
| Sexually transmitted diseases excluding HIV                      | 0<br>(0 - 1)                | 0<br>(0 - 0)     | 0<br>(0 - 0)      | 0<br>(0 - 0)       | 0<br>(0 - 0)             | 0<br>(0 - 0)               |
| Syphilis                                                         | 0<br>(0 - 1)                | 0<br>(0 - 0)     | 0<br>(0 - 0)      | 0<br>(0 - 0)       | 0<br>(0 - 0)             | 0<br>(0 - 0)               |
| Chlamydial infection                                             | --                          | --               | --                | --                 | --                       | --                         |
| Gonococcal infection                                             | 0<br>(0 - 0)                | --               | 0<br>(0 - 0)      | 0<br>(0 - 0)       | 0<br>(0 - 0)             | 0<br>(0 - 0)               |
| Other sexually transmitted diseases                              | 0<br>(0 - 0)                | --               | 0<br>(0 - 0)      | 0<br>(0 - 0)       | 0<br>(0 - 0)             | 0<br>(0 - 0)               |
| Hepatitis                                                        | 3<br>(2 - 3)                | 0<br>(0 - 0)     | 0<br>(0 - 0)      | 1<br>(1 - 1)       | 1<br>(1 - 1)             | 1<br>(0 - 1)               |
| Acute hepatitis A                                                | 1<br>(0 - 1)                | 0<br>(0 - 0)     | 0<br>(0 - 0)      | 0<br>(0 - 1)       | 0<br>(0 - 0)             | 0<br>(0 - 0)               |
| Acute hepatitis B                                                | 2<br>(1 - 2)                | 0<br>(0 - 0)     | 0<br>(0 - 0)      | 0<br>(0 - 1)       | 1<br>(0 - 1)             | 0<br>(0 - 1)               |
| Acute hepatitis C                                                | 0<br>(0 - 1)                | --               | 0<br>(0 - 0)      | 0<br>(0 - 0)       | 0<br>(0 - 0)             | 0<br>(0 - 0)               |
| Other infectious diseases                                        | 12<br>(7 - 17)              | 1<br>(0 - 1)     | 0<br>(0 - 0)      | 2<br>(1 - 3)       | 4<br>(2 - 5)             | 6<br>(3 - 8)               |
| Non-communicable diseases                                        | 14,080<br>(13,147 - 14,911) | 35<br>(26 - 46)  | 9<br>(7 - 10)     | 588<br>(524 - 647) | 3,132<br>(2,847 - 3,390) | 10,317<br>(9,699 - 10,853) |
| Neoplasms                                                        | 4,677<br>(4,257 - 5,095)    | 3<br>(2 - 4)     | 5<br>(4 - 6)      | 182<br>(160 - 203) | 1,455<br>(1,313 - 1,597) | 3,034<br>(2,728 - 3,323)   |
| Esophageal cancer                                                | 302<br>(253 - 404)          | --               | --                | 12<br>(9 - 16)     | 121<br>(97 - 153)        | 169<br>(139 - 239)         |
| Stomach cancer                                                   | 245<br>(210 - 288)          | --               | --                | 7<br>(6 - 8)       | 61<br>(52 - 72)          | 177<br>(146 - 217)         |
| Liver cancer                                                     | 112<br>(69 - 146)           | --               | 0<br>(0 - 0)      | 5<br>(3 - 7)       | 42<br>(24 - 56)          | 64<br>(35 - 88)            |
| Liver cancer due to hepatitis B                                  | 27<br>(9 - 56)              | --               | 0<br>(0 - 0)      | 2<br>(1 - 4)       | 12<br>(3 - 25)           | 12<br>(4 - 29)             |
| Liver cancer due to hepatitis C                                  | 59<br>(27 - 94)             | --               | 0<br>(0 - 0)      | 2<br>(1 - 4)       | 22<br>(10 - 35)          | 35<br>(14 - 57)            |
| Liver cancer due to alcohol use                                  | 24<br>(6 - 46)              | --               | --                | 1<br>(0 - 1)       | 7<br>(2 - 14)            | 16<br>(4 - 33)             |
| Liver cancer due to other causes                                 | 2<br>(1 - 5)                | --               | 0<br>(0 - 0)      | 0<br>(0 - 0)       | 1<br>(0 - 2)             | 1<br>(0 - 3)               |
| Larynx cancer                                                    | 40<br>(29 - 54)             | --               | --                | 2<br>(1 - 2)       | 15<br>(11 - 20)          | 23<br>(16 - 33)            |
| Tracheal, bronchus and lung cancer                               | 1,196<br>(1,047 - 1,346)    | --               | --                | 23<br>(18 - 28)    | 403<br>(342 - 465)       | 770<br>(673 - 872)         |
| Breast cancer                                                    | 5<br>(2 - 11)               | --               | --                | 0<br>(0 - 0)       | 2<br>(1 - 3)             | 3<br>(1 - 7)               |
| Cervical cancer                                                  | --                          | --               | --                | --                 | --                       | --                         |
| Uterine cancer                                                   | --                          | --               | --                | --                 | --                       | --                         |
| Prostate cancer                                                  | 614<br>(403 - 868)          | --               | --                | 1<br>(1 - 2)       | 93<br>(58 - 131)         | 521<br>(333 - 745)         |

Web Table 31- Wales deaths with 95% UI by age, sex, and cause in 2013

| Cause                                         | Males, All Ages          | Males, 0-4 Years | Males, 5-14 Years | Males, 15-49 Years | Males, 50-69 Years     | Males, 70-80 Years       |
|-----------------------------------------------|--------------------------|------------------|-------------------|--------------------|------------------------|--------------------------|
| Colon and rectum cancer                       | 639<br>(562 - 718)       | --               | --                | 19<br>(16 - 23)    | 202<br>(177 - 227)     | 418<br>(361 - 483)       |
| Lip and oral cavity cancer                    | 63<br>(45 - 75)          | --               | --                | 6<br>(4 - 8)       | 31<br>(19 - 38)        | 26<br>(19 - 34)          |
| Nasopharynx cancer                            | 6<br>(5 - 9)             | --               | 0<br>(0 - 0)      | 1<br>(1 - 2)       | 3<br>(2 - 4)           | 2<br>(1 - 3)             |
| Other pharynx cancer                          | 35<br>(22 - 46)          | --               | --                | 3<br>(2 - 4)       | 20<br>(12 - 26)        | 12<br>(6 - 17)           |
| Gallbladder and biliary tract cancer          | 20<br>(13 - 28)          | --               | --                | 1<br>(0 - 1)       | 5<br>(3 - 8)           | 14<br>(9 - 20)           |
| Pancreatic cancer                             | 251<br>(223 - 280)       | --               | --                | 9<br>(7 - 11)      | 93<br>(80 - 107)       | 149<br>(129 - 172)       |
| Malignant skin melanoma                       | 75<br>(32 - 119)         | --               | --                | 12<br>(5 - 19)     | 29<br>(12 - 46)        | 34<br>(15 - 55)          |
| Non-melanoma skin cancer                      | 23<br>(15 - 36)          | --               | --                | 1<br>(1 - 2)       | 3<br>(2 - 6)           | 19<br>(12 - 30)          |
| Ovarian cancer                                | --                       | --               | --                | --                 | --                     | --                       |
| Testicular cancer                             | 5<br>(4 - 7)             | --               | --                | 3<br>(2 - 5)       | 1<br>(1 - 1)           | 1<br>(1 - 2)             |
| Kidney cancer                                 | 129<br>(108 - 154)       | 0<br>(0 - 0)     | 0<br>(0 - 0)      | 7<br>(5 - 9)       | 50<br>(40 - 62)        | 72<br>(58 - 90)          |
| Bladder cancer                                | 159<br>(127 - 190)       | --               | --                | 2<br>(1 - 2)       | 33<br>(26 - 40)        | 124<br>(98 - 152)        |
| Brain and nervous system cancer               | 112<br>(81 - 136)        | 1<br>(0 - 1)     | 1<br>(1 - 2)      | 18<br>(14 - 23)    | 54<br>(40 - 68)        | 38<br>(24 - 52)          |
| Thyroid cancer                                | 8<br>(6 - 9)             | --               | 0<br>(0 - 0)      | 0<br>(0 - 1)       | 3<br>(2 - 3)           | 4<br>(3 - 6)             |
| Mesothelioma                                  | 59<br>(28 - 104)         | --               | --                | 1<br>(1 - 2)       | 23<br>(12 - 37)        | 35<br>(14 - 67)          |
| Hodgkin lymphoma                              | 11<br>(7 - 15)           | 0<br>(0 - 0)     | 0<br>(0 - 0)      | 4<br>(3 - 6)       | 4<br>(2 - 5)           | 3<br>(2 - 5)             |
| Non-Hodgkin lymphoma                          | 163<br>(68 - 206)        | 0<br>(0 - 0)     | 0<br>(0 - 1)      | 12<br>(6 - 16)     | 54<br>(22 - 70)        | 97<br>(40 - 126)         |
| Multiple myeloma                              | 90<br>(50 - 144)         | --               | --                | 3<br>(1 - 4)       | 29<br>(16 - 48)        | 59<br>(33 - 94)          |
| Leukemia                                      | 157<br>(134 - 179)       | 1<br>(0 - 1)     | 2<br>(1 - 2)      | 13<br>(11 - 15)    | 40<br>(32 - 48)        | 101<br>(84 - 119)        |
| Other neoplasms                               | 159<br>(110 - 198)       | 1<br>(1 - 2)     | 1<br>(1 - 2)      | 16<br>(13 - 21)    | 44<br>(32 - 56)        | 97<br>(55 - 128)         |
| Cardiovascular diseases                       | 5,037<br>(4,541 - 5,485) | 1<br>(0 - 1)     | 0<br>(0 - 0)      | 153<br>(133 - 173) | 1,030<br>(923 - 1,140) | 3,854<br>(3,446 - 4,213) |
| Rheumatic heart disease                       | 26<br>(16 - 44)          | 0<br>(0 - 0)     | 0<br>(0 - 0)      | 2<br>(1 - 4)       | 7<br>(4 - 11)          | 17<br>(10 - 30)          |
| Ischemic heart disease                        | 2,940<br>(2,555 - 3,337) | 0<br>(0 - 0)     | 0<br>(0 - 0)      | 96<br>(82 - 115)   | 701<br>(622 - 794)     | 2,142<br>(1,815 - 2,470) |
| Cerebrovascular disease                       | 1,212<br>(921 - 1,506)   | 0<br>(0 - 0)     | 0<br>(0 - 0)      | 24<br>(18 - 31)    | 158<br>(114 - 197)     | 1,030<br>(776 - 1,296)   |
| Ischemic stroke                               | 728<br>(504 - 969)       | 0<br>(0 - 0)     | 0<br>(0 - 0)      | 3<br>(2 - 4)       | 59<br>(35 - 82)        | 666<br>(458 - 892)       |
| Hemorrhagic stroke                            | 484<br>(272 - 667)       | 0<br>(0 - 0)     | 0<br>(0 - 0)      | 21<br>(16 - 27)    | 99<br>(66 - 130)       | 364<br>(175 - 529)       |
| Hypertensive heart disease                    | 76<br>(44 - 111)         | 0<br>(0 - 0)     | 0<br>(0 - 0)      | 3<br>(2 - 5)       | 22<br>(13 - 35)        | 50<br>(26 - 75)          |
| Cardiomyopathy and myocarditis                | 87<br>(63 - 139)         | 0<br>(0 - 1)     | 0<br>(0 - 0)      | 10<br>(7 - 14)     | 20<br>(12 - 29)        | 56<br>(38 - 99)          |
| Atrial fibrillation and flutter               | 80<br>(55 - 110)         | --               | --                | 0<br>(0 - 0)       | 6<br>(3 - 8)           | 74<br>(49 - 105)         |
| Aortic aneurysm                               | 255<br>(200 - 300)       | --               | --                | 4<br>(3 - 4)       | 44<br>(35 - 56)        | 207<br>(156 - 250)       |
| Peripheral vascular disease                   | 57<br>(41 - 77)          | --               | --                | 0<br>(0 - 0)       | 7<br>(5 - 10)          | 49<br>(35 - 69)          |
| Endocarditis                                  | 24<br>(13 - 39)          | 0<br>(0 - 0)     | 0<br>(0 - 0)      | 2<br>(1 - 2)       | 6<br>(4 - 10)          | 16<br>(8 - 28)           |
| Other cardiovascular and circulatory diseases | 281<br>(140 - 350)       | 0<br>(0 - 0)     | 0<br>(0 - 0)      | 11<br>(6 - 14)     | 59<br>(29 - 73)        | 212<br>(106 - 272)       |
| Chronic respiratory diseases                  | 1,331<br>(1,100 - 1,829) | 1<br>(0 - 1)     | 0<br>(0 - 0)      | 14<br>(12 - 17)    | 207<br>(169 - 262)     | 1,109<br>(908 - 1,565)   |
| Chronic obstructive pulmonary disease         | 1,053<br>(866 - 1,496)   | 0<br>(0 - 1)     | 0<br>(0 - 0)      | 6<br>(5 - 8)       | 165<br>(133 - 212)     | 881<br>(716 - 1,297)     |
| Pneumoconiosis                                | 113<br>(66 - 201)        | 0<br>(0 - 0)     | 0<br>(0 - 0)      | 1<br>(1 - 1)       | 10<br>(6 - 16)         | 102<br>(58 - 186)        |
| Silicosis                                     | 8<br>(5 - 15)            | 0<br>(0 - 0)     | 0<br>(0 - 0)      | 0<br>(0 - 0)       | 1<br>(1 - 2)           | 7<br>(3 - 13)            |
| Asbestosis                                    | 27<br>(15 - 52)          | 0<br>(0 - 0)     | 0<br>(0 - 0)      | 0<br>(0 - 0)       | 3<br>(2 - 5)           | 24<br>(13 - 47)          |
| Coal workers pneumoconiosis                   | 67<br>(38 - 116)         | 0<br>(0 - 0)     | 0<br>(0 - 0)      | 0<br>(0 - 0)       | 5<br>(3 - 8)           | 62<br>(35 - 111)         |
| Other pneumoconiosis                          | 11<br>(6 - 20)           | 0<br>(0 - 0)     | 0<br>(0 - 0)      | 0<br>(0 - 0)       | 1<br>(1 - 2)           | 10<br>(5 - 19)           |

Web Table 31- Wales deaths with 95% UI by age, sex, and cause in 2013

| Cause                                               | Males, All Ages          | Males, 0-4 Years | Males, 5-14 Years | Males, 15-49 Years | Males, 50-69 Years | Males, 70-80 Years       |
|-----------------------------------------------------|--------------------------|------------------|-------------------|--------------------|--------------------|--------------------------|
| Asthma                                              | 22<br>(17 - 31)          | 0<br>(0 - 0)     | 0<br>(0 - 0)      | 5<br>(4 - 6)       | 6<br>(4 - 7)       | 12<br>(8 - 17)           |
| Interstitial lung disease and pulmonary sarcoidosis | 135<br>(51 - 209)        | 0<br>(0 - 0)     | 0<br>(0 - 0)      | 2<br>(1 - 4)       | 26<br>(10 - 40)    | 107<br>(37 - 171)        |
| Other chronic respiratory diseases                  | 7<br>(5 - 12)            | 0<br>(0 - 0)     | 0<br>(0 - 0)      | 0<br>(0 - 0)       | 1<br>(1 - 1)       | 6<br>(4 - 10)            |
| Cirrhosis                                           | 282<br>(251 - 315)       | 0<br>(0 - 0)     | 0<br>(0 - 0)      | 66<br>(56 - 77)    | 140<br>(121 - 158) | 77<br>(65 - 90)          |
| Cirrhosis due to hepatitis B                        | 26<br>(13 - 42)          | 0<br>(0 - 0)     | 0<br>(0 - 0)      | 6<br>(2 - 10)      | 13<br>(7 - 21)     | 7<br>(3 - 12)            |
| Cirrhosis due to hepatitis C                        | 109<br>(52 - 165)        | 0<br>(0 - 0)     | 0<br>(0 - 0)      | 26<br>(10 - 41)    | 54<br>(23 - 86)    | 29<br>(13 - 46)          |
| Cirrhosis due to alcohol use                        | 121<br>(72 - 172)        | --               | --                | 24<br>(13 - 38)    | 61<br>(34 - 90)    | 36<br>(23 - 53)          |
| Cirrhosis due to other causes                       | 26<br>(13 - 41)          | 0<br>(0 - 0)     | 0<br>(0 - 0)      | 10<br>(5 - 16)     | 12<br>(5 - 20)     | 4<br>(2 - 8)             |
| Digestive diseases                                  | 437<br>(347 - 640)       | 0<br>(0 - 1)     | 0<br>(0 - 0)      | 17<br>(14 - 20)    | 80<br>(65 - 102)   | 339<br>(262 - 521)       |
| Peptic ulcer disease                                | 97<br>(61 - 177)         | 0<br>(0 - 0)     | 0<br>(0 - 0)      | 3<br>(2 - 4)       | 18<br>(12 - 27)    | 76<br>(45 - 149)         |
| Gastritis and duodenitis                            | 5<br>(2 - 10)            | 0<br>(0 - 0)     | 0<br>(0 - 0)      | 1<br>(0 - 1)       | 2<br>(1 - 3)       | 3<br>(1 - 6)             |
| Appendicitis                                        | 12<br>(5 - 24)           | 0<br>(0 - 0)     | 0<br>(0 - 0)      | 1<br>(1 - 1)       | 2<br>(1 - 4)       | 9<br>(3 - 20)            |
| Paralytic ileus and intestinal obstruction          | 56<br>(17 - 83)          | 0<br>(0 - 0)     | 0<br>(0 - 0)      | 1<br>(1 - 2)       | 7<br>(2 - 11)      | 47<br>(14 - 72)          |
| Inguinal, femoral, and abdominal hernia             | 24<br>(7 - 84)           | 0<br>(0 - 0)     | 0<br>(0 - 0)      | 0<br>(0 - 1)       | 3<br>(1 - 9)       | 21<br>(6 - 76)           |
| Inflammatory bowel disease                          | 25<br>(16 - 42)          | 0<br>(0 - 0)     | 0<br>(0 - 0)      | 1<br>(1 - 2)       | 5<br>(3 - 7)       | 19<br>(11 - 34)          |
| Vascular intestinal disorders                       | 60<br>(21 - 138)         | 0<br>(0 - 0)     | 0<br>(0 - 0)      | 1<br>(0 - 2)       | 12<br>(5 - 26)     | 46<br>(16 - 113)         |
| Gallbladder and biliary diseases                    | 47<br>(26 - 71)          | 0<br>(0 - 0)     | 0<br>(0 - 0)      | 1<br>(1 - 1)       | 6<br>(4 - 9)       | 40<br>(22 - 62)          |
| Pancreatitis                                        | 39<br>(23 - 57)          | 0<br>(0 - 0)     | 0<br>(0 - 0)      | 5<br>(4 - 7)       | 13<br>(7 - 18)     | 21<br>(11 - 34)          |
| Other digestive diseases                            | 72<br>(45 - 106)         | 0<br>(0 - 0)     | 0<br>(0 - 0)      | 2<br>(2 - 3)       | 13<br>(8 - 18)     | 56<br>(34 - 86)          |
| Neurological disorders                              | 1,582<br>(1,231 - 1,935) | 2<br>(1 - 3)     | 1<br>(1 - 1)      | 30<br>(24 - 36)    | 105<br>(85 - 126)  | 1,444<br>(1,097 - 1,792) |
| Alzheimer disease and other dementias               | 1,289<br>(953 - 1,654)   | --               | --                | 0<br>(0 - 0)       | 46<br>(28 - 64)    | 1,243<br>(902 - 1,599)   |
| Parkinson disease                                   | 149<br>(115 - 193)       | --               | --                | 0<br>(0 - 0)       | 10<br>(7 - 13)     | 139<br>(105 - 183)       |
| Epilepsy                                            | 27<br>(21 - 35)          | 0<br>(0 - 1)     | 0<br>(0 - 1)      | 13<br>(10 - 17)    | 6<br>(4 - 9)       | 7<br>(5 - 10)            |
| Multiple sclerosis                                  | 18<br>(8 - 31)           | --               | --                | 4<br>(2 - 7)       | 9<br>(3 - 16)      | 5<br>(2 - 8)             |
| Other neurological disorders                        | 99<br>(72 - 118)         | 2<br>(1 - 3)     | 1<br>(0 - 1)      | 12<br>(9 - 15)     | 34<br>(26 - 44)    | 50<br>(34 - 63)          |
| Mental and substance use disorders                  | 115<br>(60 - 136)        | 0<br>(0 - 0)     | 0<br>(0 - 0)      | 90<br>(45 - 108)   | 18<br>(10 - 23)    | 6<br>(4 - 8)             |
| Schizophrenia                                       | 2<br>(1 - 3)             | --               | --                | 0<br>(0 - 0)       | 0<br>(0 - 1)       | 1<br>(1 - 2)             |
| Alcohol use disorders                               | 27<br>(12 - 34)          | --               | --                | 12<br>(5 - 16)     | 12<br>(4 - 17)     | 3<br>(1 - 4)             |
| Drug use disorders                                  | 85<br>(42 - 102)         | 0<br>(0 - 0)     | --                | 78<br>(37 - 94)    | 5<br>(4 - 7)       | 2<br>(1 - 3)             |
| Opioid use disorders                                | 32<br>(16 - 39)          | 0<br>(0 - 0)     | --                | 29<br>(14 - 36)    | 2<br>(1 - 3)       | 1<br>(0 - 1)             |
| Cocaine use disorders                               | 2<br>(1 - 3)             | 0<br>(0 - 0)     | --                | 2<br>(1 - 3)       | 0<br>(0 - 0)       | 0<br>(0 - 0)             |
| Amphetamine use disorders                           | 2<br>(1 - 3)             | 0<br>(0 - 0)     | --                | 2<br>(1 - 2)       | 0<br>(0 - 0)       | 0<br>(0 - 0)             |
| Other drug use disorders                            | 49<br>(24 - 59)          | 0<br>(0 - 0)     | --                | 44<br>(21 - 54)    | 3<br>(2 - 5)       | 1<br>(1 - 2)             |
| Eating disorders                                    | 0<br>(0 - 0)             | --               | 0<br>(0 - 0)      | 0<br>(0 - 0)       | --                 | --                       |
| Anorexia nervosa                                    | 0<br>(0 - 0)             | --               | 0<br>(0 - 0)      | 0<br>(0 - 0)       | --                 | --                       |
| Diabetes, urogenital, blood, and endocrine diseases | 500<br>(417 - 568)       | 2<br>(2 - 4)     | 1<br>(1 - 1)      | 24<br>(20 - 29)    | 76<br>(65 - 88)    | 397<br>(319 - 458)       |
| Diabetes mellitus                                   | 155<br>(132 - 181)       | 0<br>(0 - 0)     | 0<br>(0 - 0)      | 8<br>(6 - 9)       | 31<br>(26 - 38)    | 116<br>(95 - 140)        |
| Acute glomerulonephritis                            | 0<br>(0 - 1)             | 0<br>(0 - 0)     | 0<br>(0 - 0)      | 0<br>(0 - 0)       | 0<br>(0 - 0)       | 0<br>(0 - 0)             |
| Chronic kidney disease                              | 157<br>(128 - 190)       | 0<br>(0 - 0)     | 0<br>(0 - 0)      | 5<br>(4 - 7)       | 18<br>(14 - 24)    | 133<br>(105 - 164)       |
| Chronic kidney disease due to diabetes mellitus     | 26<br>(14 - 52)          | 0<br>(0 - 0)     | 0<br>(0 - 0)      | 1<br>(0 - 2)       | 3<br>(2 - 6)       | 22<br>(12 - 44)          |

Web Table 31- Wales deaths with 95% UI by age, sex, and cause in 2013

| Cause                                               | Males, All Ages    | Males, 0-4 Years | Males, 5-14 Years | Males, 15-49 Years | Males, 50-69 Years | Males, 70-80 Years |
|-----------------------------------------------------|--------------------|------------------|-------------------|--------------------|--------------------|--------------------|
| Chronic kidney disease due to hypertension          | 39<br>(21 - 54)    | 0<br>(0 - 0)     | 0<br>(0 - 0)      | 1<br>(1 - 2)       | 5<br>(3 - 7)       | 34<br>(18 - 48)    |
| Chronic kidney disease due to glomerulonephritis    | 8<br>(4 - 15)      | 0<br>(0 - 0)     | 0<br>(0 - 0)      | 0<br>(0 - 1)       | 1<br>(1 - 2)       | 6<br>(3 - 12)      |
| Chronic kidney disease due to other causes          | 83<br>(58 - 114)   | 0<br>(0 - 0)     | 0<br>(0 - 0)      | 3<br>(2 - 4)       | 9<br>(6 - 14)      | 71<br>(47 - 101)   |
| Urinary diseases and male infertility               | 135<br>(58 - 177)  | 0<br>(0 - 0)     | 0<br>(0 - 0)      | 2<br>(1 - 3)       | 12<br>(6 - 17)     | 120<br>(51 - 162)  |
| Interstitial nephritis and urinary tract infections | 117<br>(51 - 157)  | 0<br>(0 - 0)     | 0<br>(0 - 0)      | 2<br>(1 - 2)       | 10<br>(4 - 13)     | 105<br>(45 - 145)  |
| Urolithiasis                                        | 4<br>(1 - 10)      | --               | 0<br>(0 - 0)      | 0<br>(0 - 0)       | 1<br>(0 - 2)       | 3<br>(1 - 8)       |
| Other urinary diseases                              | 14<br>(4 - 32)     | 0<br>(0 - 0)     | 0<br>(0 - 0)      | 0<br>(0 - 1)       | 2<br>(1 - 4)       | 11<br>(3 - 28)     |
| Gynecological diseases                              | --                 | --               | --                | --                 | --                 | --                 |
| Uterine fibroids                                    | --                 | --               | --                | --                 | --                 | --                 |
| Polycystic ovarian syndrome                         | --                 | --               | --                | --                 | --                 | --                 |
| Endometriosis                                       | --                 | --               | --                | --                 | --                 | --                 |
| Genital prolapse                                    | --                 | --               | --                | --                 | --                 | --                 |
| Other gynecological diseases                        | --                 | --               | --                | --                 | --                 | --                 |
| Hemoglobinopathies and hemolytic anemias            | 7<br>(4 - 11)      | 0<br>(0 - 0)     | 0<br>(0 - 0)      | 1<br>(1 - 2)       | 1<br>(1 - 2)       | 4<br>(3 - 7)       |
| Thalassemias                                        | 0<br>(0 - 1)       | 0<br>(0 - 0)     | 0<br>(0 - 0)      | 0<br>(0 - 0)       | 0<br>(0 - 0)       | 0<br>(0 - 0)       |
| Sickle cell disorders                               | 1<br>(1 - 2)       | 0<br>(0 - 0)     | 0<br>(0 - 0)      | 0<br>(0 - 1)       | 1<br>(0 - 1)       | 0<br>(0 - 0)       |
| G6PD deficiency                                     | 0<br>(0 - 0)       | 0<br>(0 - 0)     | 0<br>(0 - 0)      | 0<br>(0 - 0)       | 0<br>(0 - 0)       | 0<br>(0 - 0)       |
| Other hemoglobinopathies and hemolytic anemias      | 5<br>(3 - 8)       | 0<br>(0 - 0)     | 0<br>(0 - 0)      | 0<br>(0 - 0)       | 1<br>(0 - 1)       | 4<br>(3 - 7)       |
| Endocrine, metabolic, blood, and immune disorders   | 47<br>(35 - 83)    | 2<br>(1 - 3)     | 1<br>(0 - 1)      | 8<br>(6 - 13)      | 13<br>(9 - 21)     | 24<br>(16 - 48)    |
| Musculoskeletal disorders                           | 37<br>(18 - 47)    | --               | 0<br>(0 - 0)      | 2<br>(2 - 3)       | 9<br>(6 - 12)      | 25<br>(10 - 34)    |
| Rheumatoid arthritis                                | 16<br>(7 - 23)     | --               | 0<br>(0 - 0)      | 0<br>(0 - 0)       | 4<br>(2 - 6)       | 11<br>(4 - 18)     |
| Other musculoskeletal disorders                     | 21<br>(11 - 29)    | --               | 0<br>(0 - 0)      | 2<br>(1 - 3)       | 5<br>(3 - 7)       | 14<br>(6 - 21)     |
| Other non-communicable diseases                     | 83<br>(70 - 97)    | 26<br>(19 - 35)  | 1<br>(1 - 2)      | 11<br>(9 - 13)     | 12<br>(10 - 15)    | 32<br>(23 - 42)    |
| Congenital anomalies                                | 46<br>(39 - 55)    | 20<br>(15 - 26)  | 1<br>(1 - 2)      | 10<br>(8 - 12)     | 8<br>(6 - 10)      | 7<br>(6 - 9)       |
| Neural tube defects                                 | 2<br>(1 - 3)       | 1<br>(1 - 2)     | 0<br>(0 - 0)      | 0<br>(0 - 1)       | 0<br>(0 - 0)       | 0<br>(0 - 0)       |
| Congenital heart anomalies                          | 23<br>(19 - 27)    | 9<br>(6 - 12)    | 1<br>(1 - 1)      | 7<br>(5 - 8)       | 4<br>(2 - 5)       | 3<br>(2 - 4)       |
| Cleft lip and cleft palate                          | 0<br>(0 - 0)       | 0<br>(0 - 0)     | --                | --                 | --                 | --                 |
| Down syndrome                                       | 6<br>(3 - 8)       | 1<br>(0 - 1)     | 0<br>(0 - 0)      | 1<br>(1 - 2)       | 4<br>(2 - 5)       | 0<br>(0 - 1)       |
| Chromosomal unbalanced rearrangements               | 2<br>(1 - 3)       | 2<br>(1 - 2)     | 0<br>(0 - 0)      | 0<br>(0 - 0)       | 0<br>(0 - 0)       | 0<br>(0 - 0)       |
| Other congenital anomalies                          | 14<br>(11 - 18)    | 7<br>(5 - 11)    | 0<br>(0 - 1)      | 2<br>(1 - 2)       | 1<br>(1 - 2)       | 4<br>(2 - 5)       |
| Skin and subcutaneous diseases                      | 31<br>(19 - 41)    | 0<br>(0 - 0)     | 0<br>(0 - 0)      | 1<br>(1 - 1)       | 4<br>(3 - 6)       | 25<br>(16 - 35)    |
| Cellulitis                                          | 12<br>(5 - 19)     | 0<br>(0 - 0)     | 0<br>(0 - 0)      | 0<br>(0 - 1)       | 2<br>(1 - 3)       | 10<br>(3 - 16)     |
| Pyoderma                                            | 12<br>(7 - 19)     | 0<br>(0 - 0)     | 0<br>(0 - 0)      | 1<br>(0 - 1)       | 2<br>(1 - 3)       | 10<br>(5 - 16)     |
| Decubitus ulcer                                     | 5<br>(3 - 9)       | 0<br>(0 - 0)     | 0<br>(0 - 0)      | 0<br>(0 - 0)       | 0<br>(0 - 1)       | 4<br>(2 - 8)       |
| Other skin and subcutaneous diseases                | 2<br>(1 - 4)       | 0<br>(0 - 0)     | 0<br>(0 - 0)      | 0<br>(0 - 0)       | 0<br>(0 - 1)       | 1<br>(0 - 3)       |
| Sudden infant death syndrome                        | 6<br>(3 - 13)      | 6<br>(3 - 13)    | --                | --                 | --                 | --                 |
| Injuries                                            | 646<br>(568 - 728) | 7<br>(4 - 10)    | 5<br>(4 - 6)      | 247<br>(219 - 280) | 131<br>(111 - 153) | 256<br>(200 - 305) |
| Transport injuries                                  | 126<br>(110 - 143) | 1<br>(1 - 2)     | 2<br>(1 - 3)      | 71<br>(62 - 81)    | 24<br>(20 - 29)    | 27<br>(20 - 35)    |
| Road injuries                                       | 119<br>(104 - 135) | 1<br>(1 - 2)     | 2<br>(1 - 2)      | 67<br>(58 - 77)    | 22<br>(18 - 27)    | 26<br>(19 - 34)    |
| Pedestrian road injuries                            | 30<br>(18 - 47)    | 1<br>(0 - 1)     | 1<br>(0 - 1)      | 9<br>(4 - 15)      | 7<br>(4 - 12)      | 12<br>(7 - 20)     |



Web Table 31- Wales deaths with 95% UI by age, sex, and cause in 2013

| Cause                                           | Males, All Ages    | Males, 0-4 Years | Males, 5-14 Years | Males, 15-49 Years | Males, 50-69 Years | Males, 70-80 Years |
|-------------------------------------------------|--------------------|------------------|-------------------|--------------------|--------------------|--------------------|
| Cyclist road injuries                           | 6<br>(3 - 8)       | 0<br>(0 - 0)     | 0<br>(0 - 1)      | 2<br>(1 - 3)       | 1<br>(1 - 2)       | 2<br>(1 - 3)       |
| Motorcyclist road injuries                      | 20<br>(13 - 29)    | 0<br>(0 - 0)     | 0<br>(0 - 0)      | 17<br>(11 - 25)    | 2<br>(1 - 3)       | 1<br>(0 - 2)       |
| Motor vehicle road injuries                     | 62<br>(45 - 80)    | 0<br>(0 - 1)     | 1<br>(0 - 1)      | 39<br>(29 - 49)    | 11<br>(7 - 15)     | 11<br>(6 - 17)     |
| Other road injuries                             | 1<br>(0 - 1)       | 0<br>(0 - 0)     | 0<br>(0 - 0)      | 0<br>(0 - 0)       | 0<br>(0 - 0)       | 0<br>(0 - 0)       |
| Other transport injuries                        | 7<br>(5 - 9)       | 0<br>(0 - 0)     | 0<br>(0 - 0)      | 4<br>(3 - 5)       | 2<br>(1 - 3)       | 1<br>(0 - 2)       |
| Unintentional injuries                          | 314<br>(250 - 369) | 5<br>(3 - 8)     | 3<br>(2 - 3)      | 52<br>(45 - 61)    | 52<br>(42 - 62)    | 203<br>(148 - 250) |
| Falls                                           | 192<br>(131 - 240) | 1<br>(0 - 1)     | 0<br>(0 - 1)      | 16<br>(12 - 20)    | 27<br>(17 - 35)    | 149<br>(99 - 192)  |
| Drowning                                        | 15<br>(11 - 22)    | 1<br>(1 - 2)     | 1<br>(0 - 1)      | 7<br>(5 - 9)       | 3<br>(2 - 5)       | 3<br>(2 - 8)       |
| Fire, heat, and hot substances                  | 14<br>(10 - 21)    | 1<br>(0 - 1)     | 0<br>(0 - 0)      | 3<br>(2 - 5)       | 3<br>(2 - 5)       | 6<br>(4 - 10)      |
| Poisonings                                      | 8<br>(6 - 20)      | 0<br>(0 - 0)     | 0<br>(0 - 0)      | 5<br>(3 - 10)      | 2<br>(1 - 4)       | 2<br>(1 - 5)       |
| Exposure to mechanical forces                   | 19<br>(14 - 23)    | 1<br>(1 - 2)     | 1<br>(0 - 1)      | 11<br>(8 - 13)     | 4<br>(3 - 5)       | 3<br>(2 - 4)       |
| Unintentional firearm injuries                  | 1<br>(1 - 1)       | 0<br>(0 - 0)     | 0<br>(0 - 0)      | 1<br>(0 - 1)       | 0<br>(0 - 0)       | 0<br>(0 - 0)       |
| Unintentional suffocation                       | 9<br>(3 - 12)      | 1<br>(0 - 2)     | 1<br>(0 - 1)      | 5<br>(2 - 6)       | 1<br>(1 - 2)       | 1<br>(0 - 2)       |
| Other exposure to mechanical forces             | 10<br>(8 - 12)     | 0<br>(0 - 0)     | 0<br>(0 - 0)      | 6<br>(4 - 7)       | 2<br>(2 - 3)       | 1<br>(1 - 2)       |
| Adverse effects of medical treatment            | 20<br>(13 - 29)    | 0<br>(0 - 0)     | 0<br>(0 - 0)      | 1<br>(1 - 2)       | 4<br>(3 - 7)       | 14<br>(8 - 21)     |
| Animal contact                                  | 2<br>(1 - 2)       | 0<br>(0 - 0)     | 0<br>(0 - 0)      | 0<br>(0 - 1)       | 1<br>(0 - 1)       | 1<br>(0 - 1)       |
| Venomous animal contact                         | 0<br>(0 - 1)       | 0<br>(0 - 0)     | 0<br>(0 - 0)      | 0<br>(0 - 0)       | 0<br>(0 - 0)       | 0<br>(0 - 0)       |
| Non-venomous animal contact                     | 1<br>(1 - 2)       | 0<br>(0 - 0)     | 0<br>(0 - 0)      | 0<br>(0 - 0)       | 0<br>(0 - 1)       | 1<br>(0 - 1)       |
| Foreign body                                    | 41<br>(18 - 57)    | 1<br>(0 - 2)     | 0<br>(0 - 1)      | 7<br>(4 - 11)      | 7<br>(3 - 10)      | 25<br>(9 - 39)     |
| Pulmonary aspiration and foreign body in airway | 40<br>(17 - 57)    | 1<br>(0 - 2)     | 0<br>(0 - 1)      | 7<br>(4 - 11)      | 7<br>(3 - 10)      | 25<br>(9 - 39)     |
| Foreign body in other body part                 | 0<br>(0 - 1)       | 0<br>(0 - 0)     | 0<br>(0 - 0)      | 0<br>(0 - 0)       | 0<br>(0 - 0)       | 0<br>(0 - 0)       |
| Other unintentional injuries                    | 3<br>(2 - 4)       | 0<br>(0 - 0)     | 0<br>(0 - 0)      | 1<br>(1 - 2)       | 1<br>(0 - 1)       | 1<br>(0 - 1)       |
| Self-harm and interpersonal violence            | 205<br>(170 - 249) | 0<br>(0 - 0)     | 0<br>(0 - 0)      | 124<br>(102 - 149) | 55<br>(40 - 69)    | 26<br>(19 - 34)    |
| Self-harm                                       | 199<br>(165 - 243) | --               | 0<br>(0 - 0)      | 119<br>(98 - 142)  | 54<br>(39 - 68)    | 26<br>(19 - 34)    |
| Interpersonal violence                          | 6<br>(4 - 10)      | 0<br>(0 - 0)     | 0<br>(0 - 0)      | 5<br>(3 - 7)       | 1<br>(1 - 1)       | 0<br>(0 - 1)       |
| Assault by firearm                              | 1<br>(1 - 2)       | 0<br>(0 - 0)     | 0<br>(0 - 0)      | 1<br>(0 - 2)       | 0<br>(0 - 0)       | 0<br>(0 - 0)       |
| Assault by sharp object                         | 1<br>(0 - 1)       | 0<br>(0 - 0)     | 0<br>(0 - 0)      | 1<br>(0 - 1)       | 0<br>(0 - 0)       | 0<br>(0 - 0)       |
| Assault by other means                          | 4<br>(2 - 6)       | 0<br>(0 - 0)     | 0<br>(0 - 0)      | 3<br>(2 - 4)       | 1<br>(0 - 1)       | 0<br>(0 - 1)       |

Web Table 31- Wales deaths with 95% UI by age, sex, and cause in 2013

| Cause                                                             | Females, All Ages           | Females, 0-4 Years | Females, 5-14 Years | Females, 15-49 Years | Females, 50-69 Years     | Females, 70-80 Years        |
|-------------------------------------------------------------------|-----------------------------|--------------------|---------------------|----------------------|--------------------------|-----------------------------|
| All causes                                                        | 16,513<br>(15,470 - 17,543) | 69<br>(56 - 87)    | 14<br>(13 - 16)     | 516<br>(460 - 574)   | 2,352<br>(2,134 - 2,560) | 13,561<br>(12,759 - 14,338) |
| Communicable, maternal, neonatal, and nutritional diseases        | 1,496<br>(1,156 - 1,954)    | 34<br>(26 - 44)    | 2<br>(1 - 2)        | 22<br>(19 - 26)      | 74<br>(57 - 91)          | 1,364<br>(1,027 - 1,821)    |
| HIV/AIDS and tuberculosis                                         | 12<br>(10 - 16)             | 0<br>(0 - 0)       | 0<br>(0 - 0)        | 3<br>(2 - 4)         | 3<br>(2 - 4)             | 6<br>(4 - 9)                |
| Tuberculosis                                                      | 10<br>(7 - 13)              | 0<br>(0 - 0)       | 0<br>(0 - 0)        | 1<br>(1 - 1)         | 3<br>(2 - 3)             | 6<br>(4 - 9)                |
| HIV/AIDS                                                          | 3<br>(2 - 4)                | 0<br>(0 - 0)       | 0<br>(0 - 0)        | 2<br>(1 - 2)         | 1<br>(0 - 1)             | 0<br>(0 - 0)                |
| HIV/AIDS resulting in mycobacterial infection                     | 0<br>(0 - 0)                | 0<br>(0 - 0)       | 0<br>(0 - 0)        | 0<br>(0 - 0)         | 0<br>(0 - 0)             | 0<br>(0 - 0)                |
| HIV/AIDS resulting in other diseases                              | 2<br>(2 - 4)                | 0<br>(0 - 0)       | 0<br>(0 - 0)        | 2<br>(1 - 2)         | 1<br>(0 - 1)             | 0<br>(0 - 0)                |
| Diarrhea, lower respiratory, and other common infectious diseases | 1,413<br>(1,072 - 1,866)    | 6<br>(4 - 8)       | 1<br>(1 - 2)        | 14<br>(11 - 17)      | 66<br>(50 - 81)          | 1,326<br>(989 - 1,778)      |
| Diarrheal diseases                                                | 88<br>(55 - 132)            | 1<br>(1 - 2)       | 0<br>(0 - 0)        | 1<br>(1 - 1)         | 5<br>(3 - 7)             | 80<br>(48 - 125)            |
| Intestinal infectious diseases                                    | 2<br>(0 - 4)                | 0<br>(0 - 1)       | 0<br>(0 - 1)        | 1<br>(0 - 2)         | 0<br>(0 - 1)             | 0<br>(0 - 1)                |
| Typhoid fever                                                     | 1<br>(0 - 3)                | 0<br>(0 - 1)       | 0<br>(0 - 0)        | 0<br>(0 - 1)         | 0<br>(0 - 0)             | 0<br>(0 - 0)                |
| Paratyphoid fever                                                 | 0<br>(0 - 1)                | 0<br>(0 - 0)       | 0<br>(0 - 0)        | 0<br>(0 - 0)         | 0<br>(0 - 0)             | 0<br>(0 - 0)                |
| Other intestinal infectious diseases                              | 0<br>(0 - 1)                | 0<br>(0 - 0)       | 0<br>(0 - 0)        | 0<br>(0 - 0)         | 0<br>(0 - 0)             | 0<br>(0 - 0)                |
| Lower respiratory infections                                      | 1,309<br>(983 - 1,765)      | 3<br>(2 - 5)       | 1<br>(0 - 1)        | 10<br>(8 - 12)       | 58<br>(43 - 73)          | 1,237<br>(911 - 1,690)      |
| Upper respiratory infections                                      | 0<br>(0 - 1)                | 0<br>(0 - 0)       | 0<br>(0 - 0)        | 0<br>(0 - 0)         | 0<br>(0 - 0)             | 0<br>(0 - 1)                |
| Otitis media                                                      | 0<br>(0 - 0)                | 0<br>(0 - 0)       | 0<br>(0 - 0)        | 0<br>(0 - 0)         | 0<br>(0 - 0)             | 0<br>(0 - 0)                |
| Meningitis                                                        | 8<br>(7 - 12)               | 1<br>(1 - 1)       | 0<br>(0 - 0)        | 1<br>(1 - 2)         | 2<br>(1 - 2)             | 4<br>(3 - 6)                |
| Pneumococcal meningitis                                           | 2<br>(1 - 2)                | 0<br>(0 - 0)       | 0<br>(0 - 0)        | 0<br>(0 - 0)         | 0<br>(0 - 1)             | 1<br>(0 - 1)                |
| H influenzae type B meningitis                                    | 1<br>(1 - 1)                | 0<br>(0 - 0)       | 0<br>(0 - 0)        | 0<br>(0 - 0)         | 0<br>(0 - 0)             | 0<br>(0 - 1)                |
| Meningococcal meningitis                                          | 3<br>(2 - 4)                | 0<br>(0 - 0)       | 0<br>(0 - 0)        | 0<br>(0 - 1)         | 1<br>(0 - 1)             | 1<br>(1 - 2)                |
| Other meningitis                                                  | 3<br>(2 - 4)                | 0<br>(0 - 0)       | 0<br>(0 - 0)        | 0<br>(0 - 1)         | 1<br>(0 - 1)             | 2<br>(1 - 2)                |
| Encephalitis                                                      | 3<br>(2 - 5)                | 0<br>(0 - 0)       | 0<br>(0 - 0)        | 1<br>(0 - 1)         | 1<br>(0 - 1)             | 2<br>(1 - 2)                |
| Diphtheria                                                        | 0<br>(0 - 0)                | 0<br>(0 - 0)       | 0<br>(0 - 0)        | 0<br>(0 - 0)         | 0<br>(0 - 0)             | --<br>(0 - 0)               |
| Whooping cough                                                    | 0<br>(0 - 0)                | 0<br>(0 - 0)       | 0<br>(0 - 0)        | 0<br>(0 - 0)         | 0<br>(0 - 0)             | --<br>(0 - 0)               |
| Tetanus                                                           | 0<br>(0 - 0)                | 0<br>(0 - 0)       | 0<br>(0 - 0)        | 0<br>(0 - 0)         | 0<br>(0 - 0)             | 0<br>(0 - 0)                |
| Measles                                                           | 0<br>(0 - 0)                | 0<br>(0 - 0)       | 0<br>(0 - 0)        | 0<br>(0 - 0)         | 0<br>(0 - 0)             | --<br>(0 - 0)               |
| Varicella and herpes zoster                                       | 2<br>(0 - 8)                | 0<br>(0 - 0)       | 0<br>(0 - 0)        | 0<br>(0 - 0)         | 0<br>(0 - 0)             | 1<br>(0 - 7)                |
| Neglected tropical diseases and malaria                           | 1<br>(1 - 1)                | 0<br>(0 - 0)       | 0<br>(0 - 0)        | 0<br>(0 - 0)         | 0<br>(0 - 0)             | 0<br>(0 - 0)                |
| Cysticercosis                                                     | 0<br>(0 - 0)                | 0<br>(0 - 0)       | 0<br>(0 - 0)        | 0<br>(0 - 0)         | 0<br>(0 - 0)             | 0<br>(0 - 0)                |
| Cystic echinococcosis                                             | 0<br>(0 - 0)                | 0<br>(0 - 0)       | 0<br>(0 - 0)        | 0<br>(0 - 0)         | 0<br>(0 - 0)             | 0<br>(0 - 0)                |
| Dengue                                                            | 0<br>(0 - 0)                | 0<br>(0 - 0)       | 0<br>(0 - 0)        | 0<br>(0 - 0)         | 0<br>(0 - 0)             | 0<br>(0 - 0)                |
| Rabies                                                            | 0<br>(0 - 0)                | 0<br>(0 - 0)       | 0<br>(0 - 0)        | 0<br>(0 - 0)         | 0<br>(0 - 0)             | 0<br>(0 - 0)                |
| Other neglected tropical diseases                                 | 1<br>(0 - 1)                | 0<br>(0 - 0)       | 0<br>(0 - 0)        | 0<br>(0 - 0)         | 0<br>(0 - 0)             | 0<br>(0 - 0)                |
| Maternal disorders                                                | 3<br>(2 - 4)                | --                 | 0<br>(0 - 0)        | 3<br>(2 - 4)         | --                       | --                          |
| Maternal hemorrhage                                               | 0<br>(0 - 0)                | --                 | 0<br>(0 - 0)        | 0<br>(0 - 0)         | --                       | --                          |
| Maternal sepsis and other maternal infections                     | 0<br>(0 - 0)                | --                 | 0<br>(0 - 0)        | 0<br>(0 - 0)         | --                       | --                          |
| Maternal hypertensive disorders                                   | 0<br>(0 - 1)                | --                 | 0<br>(0 - 0)        | 0<br>(0 - 1)         | --                       | --                          |
| Maternal obstructed labor                                         | 0<br>(0 - 0)                | --                 | 0<br>(0 - 0)        | 0<br>(0 - 0)         | --                       | --                          |
| Maternal abortive outcome                                         | 1<br>(0 - 1)                | --                 | 0<br>(0 - 0)        | 1<br>(0 - 1)         | --                       | --                          |
| Indirect maternal deaths                                          | 0<br>(0 - 0)                | --                 | 0<br>(0 - 0)        | 0<br>(0 - 0)         | --                       | --                          |

Web Table 31- Wales deaths with 95% UI by age, sex, and cause in 2013

| Cause                                                            | Females, All Ages           | Females, 0-4 Years | Females, 5-14 Years | Females, 15-49 Years | Females, 50-69 Years     | Females, 70-80 Years        |
|------------------------------------------------------------------|-----------------------------|--------------------|---------------------|----------------------|--------------------------|-----------------------------|
| Late maternal deaths                                             | 0<br>(0 - 0)                | --                 | 0<br>(0 - 0)        | 0<br>(0 - 0)         | --                       | --                          |
| Maternal deaths aggravated by HIV/AIDS                           | 0<br>(0 - 0)                | --                 | --                  | 0<br>(0 - 0)         | --                       | --                          |
| Other maternal disorders                                         | 1<br>(0 - 1)                | --                 | 0<br>(0 - 0)        | 1<br>(0 - 1)         | --                       | --                          |
| Neonatal disorders                                               | 27<br>(20 - 36)             | 27<br>(20 - 36)    | --                  | --                   | --                       | --                          |
| Neonatal preterm birth complications                             | 20<br>(15 - 27)             | 20<br>(15 - 27)    | --                  | --                   | --                       | --                          |
| Neonatal encephalopathy due to birth asphyxia and trauma         | 4<br>(2 - 7)                | 4<br>(2 - 7)       | --                  | --                   | --                       | --                          |
| Neonatal sepsis and other neonatal infections                    | 1<br>(0 - 2)                | 1<br>(0 - 2)       | --                  | --                   | --                       | --                          |
| Hemolytic disease and other neonatal jaundice                    | 0<br>(0 - 0)                | 0<br>(0 - 0)       | --                  | --                   | --                       | --                          |
| Other neonatal disorders                                         | 1<br>(1 - 2)                | 1<br>(1 - 2)       | --                  | --                   | --                       | --                          |
| Nutritional deficiencies                                         | 24<br>(17 - 34)             | 0<br>(0 - 0)       | 0<br>(0 - 0)        | 0<br>(0 - 1)         | 1<br>(1 - 2)             | 22<br>(16 - 32)             |
| Protein-energy malnutrition                                      | 3<br>(1 - 6)                | 0<br>(0 - 0)       | 0<br>(0 - 0)        | 0<br>(0 - 0)         | 0<br>(0 - 1)             | 3<br>(1 - 5)                |
| Iodine deficiency                                                | 0<br>(0 - 1)                | 0<br>(0 - 0)       | 0<br>(0 - 0)        | 0<br>(0 - 0)         | 0<br>(0 - 0)             | 0<br>(0 - 1)                |
| Iron-deficiency anemia                                           | 19<br>(12 - 27)             | 0<br>(0 - 0)       | 0<br>(0 - 0)        | 0<br>(0 - 0)         | 1<br>(1 - 1)             | 18<br>(11 - 26)             |
| Other nutritional deficiencies                                   | 2<br>(1 - 6)                | 0<br>(0 - 0)       | 0<br>(0 - 0)        | 0<br>(0 - 0)         | 0<br>(0 - 0)             | 2<br>(1 - 5)                |
| Other communicable, maternal, neonatal, and nutritional diseases | 16<br>(11 - 20)             | 1<br>(0 - 1)       | 0<br>(0 - 0)        | 2<br>(1 - 3)         | 4<br>(2 - 5)             | 9<br>(6 - 12)               |
| Sexually transmitted diseases excluding HIV                      | 3<br>(2 - 5)                | 0<br>(0 - 0)       | 0<br>(0 - 0)        | 0<br>(0 - 0)         | 0<br>(0 - 1)             | 2<br>(1 - 4)                |
| Syphilis                                                         | 2<br>(2 - 4)                | 0<br>(0 - 0)       | 0<br>(0 - 0)        | 0<br>(0 - 0)         | 0<br>(0 - 0)             | 2<br>(1 - 3)                |
| Chlamydial infection                                             | 0<br>(0 - 0)                | --                 | 0<br>(0 - 0)        | 0<br>(0 - 0)         | 0<br>(0 - 0)             | 0<br>(0 - 0)                |
| Gonococcal infection                                             | 0<br>(0 - 1)                | --                 | 0<br>(0 - 0)        | 0<br>(0 - 0)         | 0<br>(0 - 0)             | 0<br>(0 - 0)                |
| Other sexually transmitted diseases                              | 0<br>(0 - 0)                | --                 | 0<br>(0 - 0)        | 0<br>(0 - 0)         | 0<br>(0 - 0)             | 0<br>(0 - 0)                |
| Hepatitis                                                        | 2<br>(1 - 2)                | 0<br>(0 - 0)       | 0<br>(0 - 0)        | 0<br>(0 - 1)         | 1<br>(0 - 1)             | 1<br>(0 - 1)                |
| Acute hepatitis A                                                | 0<br>(0 - 1)                | 0<br>(0 - 0)       | 0<br>(0 - 0)        | 0<br>(0 - 0)         | 0<br>(0 - 0)             | 0<br>(0 - 0)                |
| Acute hepatitis B                                                | 1<br>(1 - 2)                | 0<br>(0 - 0)       | 0<br>(0 - 0)        | 0<br>(0 - 0)         | 0<br>(0 - 1)             | 0<br>(0 - 1)                |
| Acute hepatitis C                                                | 0<br>(0 - 0)                | --                 | 0<br>(0 - 0)        | 0<br>(0 - 0)         | 0<br>(0 - 0)             | 0<br>(0 - 0)                |
| Other infectious diseases                                        | 11<br>(6 - 15)              | 0<br>(0 - 1)       | 0<br>(0 - 0)        | 1<br>(1 - 2)         | 3<br>(1 - 4)             | 6<br>(3 - 9)                |
| Non-communicable diseases                                        | 14,550<br>(13,576 - 15,531) | 31<br>(25 - 40)    | 10<br>(9 - 11)      | 432<br>(383 - 483)   | 2,221<br>(2,014 - 2,423) | 11,856<br>(11,120 - 12,600) |
| Neoplasms                                                        | 4,127<br>(3,609 - 4,559)    | 2<br>(2 - 3)       | 5<br>(4 - 5)        | 228<br>(202 - 255)   | 1,230<br>(1,082 - 1,363) | 2,662<br>(2,277 - 2,965)    |
| Esophageal cancer                                                | 148<br>(124 - 173)          | --                 | --                  | 3<br>(2 - 4)         | 37<br>(30 - 45)          | 108<br>(88 - 131)           |
| Stomach cancer                                                   | 199<br>(142 - 286)          | --                 | --                  | 5<br>(4 - 7)         | 30<br>(22 - 40)          | 164<br>(113 - 237)          |
| Liver cancer                                                     | 85<br>(55 - 106)            | --                 | 0<br>(0 - 0)        | 4<br>(2 - 5)         | 21<br>(15 - 27)          | 60<br>(36 - 79)             |
| Liver cancer due to hepatitis B                                  | 13<br>(4 - 26)              | --                 | 0<br>(0 - 0)        | 1<br>(0 - 2)         | 4<br>(1 - 9)             | 8<br>(2 - 16)               |
| Liver cancer due to hepatitis C                                  | 51<br>(31 - 71)             | --                 | 0<br>(0 - 0)        | 2<br>(1 - 3)         | 12<br>(6 - 18)           | 37<br>(23 - 53)             |
| Liver cancer due to alcohol use                                  | 14<br>(7 - 24)              | --                 | --                  | 0<br>(0 - 1)         | 3<br>(1 - 5)             | 11<br>(5 - 20)              |
| Liver cancer due to other causes                                 | 7<br>(2 - 13)               | --                 | 0<br>(0 - 0)        | 1<br>(0 - 1)         | 2<br>(1 - 4)             | 4<br>(1 - 9)                |
| Larynx cancer                                                    | 9<br>(6 - 14)               | --                 | --                  | 0<br>(0 - 1)         | 4<br>(2 - 5)             | 5<br>(3 - 8)                |
| Tracheal, bronchus and lung cancer                               | 834<br>(590 - 979)          | --                 | --                  | 23<br>(18 - 29)      | 284<br>(229 - 332)       | 527<br>(316 - 641)          |
| Breast cancer                                                    | 713<br>(551 - 845)          | --                 | --                  | 72<br>(59 - 89)      | 260<br>(199 - 307)       | 381<br>(286 - 467)          |
| Cervical cancer                                                  | 71<br>(59 - 89)             | --                 | --                  | 16<br>(13 - 20)      | 23<br>(18 - 29)          | 32<br>(25 - 43)             |
| Uterine cancer                                                   | 112<br>(76 - 137)           | --                 | --                  | 2<br>(1 - 3)         | 36<br>(22 - 46)          | 74<br>(51 - 95)             |
| Prostate cancer                                                  | --                          | --                 | --                  | --                   | --                       | --                          |

Web Table 31- Wales deaths with 95% UI by age, sex, and cause in 2013

| Cause                                         | Females, All Ages        | Females, 0-4 Years | Females, 5-14 Years | Females, 15-49 Years | Females, 50-69 Years | Females, 70-80 Years     |
|-----------------------------------------------|--------------------------|--------------------|---------------------|----------------------|----------------------|--------------------------|
| Colon and rectum cancer                       | 497<br>(419 - 586)       | --                 | --                  | 15<br>(12 - 18)      | 116<br>(100 - 132)   | 365<br>(299 - 447)       |
| Lip and oral cavity cancer                    | 28<br>(23 - 35)          | --                 | --                  | 2<br>(1 - 2)         | 9<br>(7 - 11)        | 17<br>(13 - 23)          |
| Nasopharynx cancer                            | 4<br>(2 - 7)             | --                 | 0<br>(0 - 0)        | 1<br>(0 - 1)         | 1<br>(1 - 2)         | 2<br>(1 - 4)             |
| Other pharynx cancer                          | 13<br>(10 - 16)          | --                 | --                  | 1<br>(1 - 1)         | 6<br>(4 - 8)         | 6<br>(4 - 9)             |
| Gallbladder and biliary tract cancer          | 54<br>(39 - 79)          | --                 | --                  | 1<br>(1 - 1)         | 11<br>(7 - 14)       | 42<br>(29 - 66)          |
| Pancreatic cancer                             | 254<br>(221 - 297)       | --                 | --                  | 6<br>(5 - 7)         | 70<br>(59 - 82)      | 179<br>(148 - 215)       |
| Malignant skin melanoma                       | 57<br>(36 - 72)          | --                 | --                  | 9<br>(6 - 12)        | 19<br>(12 - 25)      | 29<br>(18 - 39)          |
| Non-melanoma skin cancer                      | 20<br>(14 - 28)          | --                 | --                  | 0<br>(0 - 0)         | 2<br>(1 - 2)         | 18<br>(13 - 26)          |
| Ovarian cancer                                | 271<br>(227 - 317)       | --                 | --                  | 18<br>(14 - 22)      | 105<br>(86 - 124)    | 149<br>(115 - 185)       |
| Testicular cancer                             | --                       | --                 | --                  | --                   | --                   | --                       |
| Kidney cancer                                 | 72<br>(53 - 93)          | 0<br>(0 - 0)       | 0<br>(0 - 0)        | 3<br>(2 - 4)         | 24<br>(17 - 33)      | 45<br>(29 - 64)          |
| Bladder cancer                                | 79<br>(56 - 118)         | --                 | --                  | 1<br>(1 - 2)         | 13<br>(8 - 18)       | 66<br>(45 - 98)          |
| Brain and nervous system cancer               | 77<br>(56 - 93)          | 0<br>(0 - 1)       | 1<br>(1 - 2)        | 11<br>(9 - 14)       | 33<br>(25 - 42)      | 31<br>(18 - 40)          |
| Thyroid cancer                                | 12<br>(9 - 16)           | --                 | 0<br>(0 - 0)        | 0<br>(0 - 1)         | 2<br>(2 - 4)         | 9<br>(6 - 13)            |
| Mesothelioma                                  | 8<br>(6 - 16)            | --                 | --                  | 0<br>(0 - 1)         | 3<br>(2 - 6)         | 5<br>(3 - 9)             |
| Hodgkin lymphoma                              | 9<br>(5 - 11)            | 0<br>(0 - 0)       | 0<br>(0 - 0)        | 3<br>(2 - 4)         | 2<br>(1 - 4)         | 3<br>(2 - 5)             |
| Non-Hodgkin lymphoma                          | 129<br>(67 - 187)        | 0<br>(0 - 0)       | 0<br>(0 - 0)        | 7<br>(4 - 11)        | 35<br>(17 - 52)      | 86<br>(41 - 127)         |
| Multiple myeloma                              | 77<br>(46 - 123)         | --                 | --                  | 2<br>(1 - 3)         | 20<br>(12 - 33)      | 55<br>(32 - 90)          |
| Leukemia                                      | 108<br>(88 - 128)        | 1<br>(0 - 1)       | 1<br>(1 - 2)        | 10<br>(8 - 12)       | 23<br>(18 - 29)      | 73<br>(57 - 89)          |
| Other neoplasms                               | 186<br>(132 - 231)       | 1<br>(1 - 2)       | 1<br>(1 - 2)        | 14<br>(10 - 17)      | 41<br>(30 - 50)      | 129<br>(82 - 168)        |
| Cardiovascular diseases                       | 5,688<br>(5,108 - 6,774) | 1<br>(0 - 1)       | 0<br>(0 - 1)        | 66<br>(52 - 79)      | 494<br>(423 - 645)   | 5,128<br>(4,599 - 6,063) |
| Rheumatic heart disease                       | 73<br>(53 - 129)         | 0<br>(0 - 0)       | 0<br>(0 - 0)        | 3<br>(2 - 5)         | 15<br>(11 - 31)      | 55<br>(38 - 96)          |
| Ischemic heart disease                        | 2,638<br>(2,221 - 3,439) | 0<br>(0 - 0)       | 0<br>(0 - 0)        | 23<br>(17 - 31)      | 255<br>(208 - 372)   | 2,360<br>(1,956 - 3,071) |
| Cerebrovascular disease                       | 1,902<br>(1,591 - 2,511) | 0<br>(0 - 0)       | 0<br>(0 - 0)        | 23<br>(17 - 29)      | 129<br>(101 - 176)   | 1,750<br>(1,449 - 2,322) |
| Ischemic stroke                               | 1,153<br>(935 - 1,600)   | 0<br>(0 - 0)       | 0<br>(0 - 0)        | 2<br>(1 - 3)         | 35<br>(24 - 53)      | 1,116<br>(901 - 1,550)   |
| Hemorrhagic stroke                            | 749<br>(539 - 1,037)     | 0<br>(0 - 0)       | 0<br>(0 - 0)        | 21<br>(15 - 26)      | 94<br>(71 - 127)     | 634<br>(441 - 906)       |
| Hypertensive heart disease                    | 99<br>(59 - 141)         | 0<br>(0 - 0)       | 0<br>(0 - 0)        | 1<br>(1 - 2)         | 12<br>(7 - 17)       | 86<br>(50 - 125)         |
| Cardiomyopathy and myocarditis                | 116<br>(82 - 188)        | 0<br>(0 - 0)       | 0<br>(0 - 0)        | 4<br>(3 - 5)         | 8<br>(5 - 12)        | 103<br>(71 - 176)        |
| Atrial fibrillation and flutter               | 197<br>(136 - 276)       | --                 | --                  | 0<br>(0 - 0)         | 5<br>(4 - 7)         | 191<br>(131 - 270)       |
| Aortic aneurysm                               | 179<br>(107 - 283)       | --                 | --                  | 1<br>(1 - 2)         | 17<br>(10 - 28)      | 160<br>(95 - 256)        |
| Peripheral vascular disease                   | 73<br>(51 - 101)         | --                 | --                  | 0<br>(0 - 0)         | 4<br>(3 - 5)         | 69<br>(48 - 97)          |
| Endocarditis                                  | 21<br>(14 - 35)          | 0<br>(0 - 0)       | 0<br>(0 - 0)        | 1<br>(1 - 1)         | 4<br>(3 - 7)         | 16<br>(10 - 27)          |
| Other cardiovascular and circulatory diseases | 391<br>(215 - 518)       | 0<br>(0 - 0)       | 0<br>(0 - 0)        | 9<br>(5 - 12)        | 45<br>(25 - 62)      | 337<br>(186 - 454)       |
| Chronic respiratory diseases                  | 1,046<br>(784 - 1,234)   | 1<br>(0 - 1)       | 1<br>(0 - 1)        | 15<br>(12 - 19)      | 163<br>(128 - 196)   | 866<br>(634 - 1,048)     |
| Chronic obstructive pulmonary disease         | 873<br>(666 - 1,065)     | 0<br>(0 - 1)       | 0<br>(0 - 0)        | 6<br>(4 - 8)         | 136<br>(107 - 166)   | 731<br>(554 - 907)       |
| Pneumoconiosis                                | 1<br>(1 - 2)             | 0<br>(0 - 0)       | 0<br>(0 - 0)        | 0<br>(0 - 0)         | 0<br>(0 - 0)         | 1<br>(0 - 1)             |
| Silicosis                                     | 0<br>(0 - 0)             | 0<br>(0 - 0)       | 0<br>(0 - 0)        | 0<br>(0 - 0)         | 0<br>(0 - 0)         | 0<br>(0 - 0)             |
| Asbestosis                                    | 0<br>(0 - 0)             | 0<br>(0 - 0)       | 0<br>(0 - 0)        | 0<br>(0 - 0)         | 0<br>(0 - 0)         | 0<br>(0 - 0)             |
| Coal workers pneumoconiosis                   | 0<br>(0 - 0)             | 0<br>(0 - 0)       | 0<br>(0 - 0)        | 0<br>(0 - 0)         | 0<br>(0 - 0)         | 0<br>(0 - 0)             |
| Other pneumoconiosis                          | 1<br>(0 - 1)             | 0<br>(0 - 0)       | 0<br>(0 - 0)        | 0<br>(0 - 0)         | 0<br>(0 - 0)         | 1<br>(0 - 1)             |

Web Table 31- Wales deaths with 95% UI by age, sex, and cause in 2013

| Cause                                               | Females, All Ages        | Females, 0-4 Years | Females, 5-14 Years | Females, 15-49 Years | Females, 50-69 Years | Females, 70-80 Years     |
|-----------------------------------------------------|--------------------------|--------------------|---------------------|----------------------|----------------------|--------------------------|
| Asthma                                              | 71<br>(41 - 114)         | 0<br>(0 - 0)       | 0<br>(0 - 0)        | 7<br>(5 - 9)         | 12<br>(7 - 22)       | 52<br>(27 - 89)          |
| Interstitial lung disease and pulmonary sarcoidosis | 94<br>(28 - 179)         | 0<br>(0 - 0)       | 0<br>(0 - 0)        | 2<br>(1 - 3)         | 15<br>(5 - 26)       | 77<br>(20 - 149)         |
| Other chronic respiratory diseases                  | 6<br>(4 - 11)            | 0<br>(0 - 0)       | 0<br>(0 - 0)        | 0<br>(0 - 0)         | 0<br>(0 - 1)         | 6<br>(3 - 10)            |
| Cirrhosis                                           | 189<br>(165 - 213)       | 0<br>(0 - 0)       | 0<br>(0 - 0)        | 36<br>(30 - 43)      | 78<br>(66 - 92)      | 74<br>(62 - 88)          |
| Cirrhosis due to hepatitis B                        | 26<br>(10 - 51)          | 0<br>(0 - 0)       | 0<br>(0 - 0)        | 4<br>(2 - 8)         | 11<br>(4 - 22)       | 10<br>(4 - 23)           |
| Cirrhosis due to hepatitis C                        | 97<br>(56 - 141)         | 0<br>(0 - 0)       | 0<br>(0 - 0)        | 18<br>(10 - 27)      | 40<br>(21 - 60)      | 39<br>(19 - 57)          |
| Cirrhosis due to alcohol use                        | 39<br>(19 - 64)          | --                 | --                  | 5<br>(2 - 10)        | 16<br>(7 - 28)       | 18<br>(8 - 31)           |
| Cirrhosis due to other causes                       | 27<br>(10 - 49)          | 0<br>(0 - 0)       | 0<br>(0 - 0)        | 8<br>(4 - 14)        | 12<br>(4 - 22)       | 7<br>(2 - 15)            |
| Digestive diseases                                  | 598<br>(488 - 718)       | 0<br>(0 - 0)       | 0<br>(0 - 0)        | 11<br>(9 - 13)       | 64<br>(51 - 79)      | 523<br>(422 - 635)       |
| Peptic ulcer disease                                | 90<br>(60 - 127)         | 0<br>(0 - 0)       | 0<br>(0 - 0)        | 1<br>(1 - 2)         | 10<br>(6 - 14)       | 79<br>(51 - 113)         |
| Gastritis and duodenitis                            | 6<br>(3 - 11)            | 0<br>(0 - 0)       | 0<br>(0 - 0)        | 0<br>(0 - 0)         | 1<br>(0 - 1)         | 5<br>(2 - 9)             |
| Appendicitis                                        | 9<br>(5 - 17)            | 0<br>(0 - 0)       | 0<br>(0 - 0)        | 1<br>(0 - 1)         | 2<br>(1 - 3)         | 6<br>(3 - 13)            |
| Paralytic ileus and intestinal obstruction          | 74<br>(33 - 115)         | 0<br>(0 - 0)       | 0<br>(0 - 0)        | 1<br>(1 - 2)         | 6<br>(3 - 10)        | 67<br>(29 - 106)         |
| Inguinal, femoral, and abdominal hernia             | 26<br>(8 - 61)           | 0<br>(0 - 0)       | 0<br>(0 - 0)        | 0<br>(0 - 0)         | 2<br>(1 - 6)         | 24<br>(7 - 55)           |
| Inflammatory bowel disease                          | 45<br>(29 - 74)          | 0<br>(0 - 0)       | 0<br>(0 - 0)        | 1<br>(1 - 2)         | 5<br>(3 - 8)         | 38<br>(23 - 65)          |
| Vascular intestinal disorders                       | 107<br>(47 - 169)        | 0<br>(0 - 0)       | 0<br>(0 - 0)        | 1<br>(1 - 2)         | 14<br>(6 - 23)       | 92<br>(40 - 147)         |
| Gallbladder and biliary diseases                    | 75<br>(45 - 102)         | 0<br>(0 - 0)       | 0<br>(0 - 0)        | 1<br>(1 - 1)         | 7<br>(4 - 9)         | 67<br>(41 - 94)          |
| Pancreatitis                                        | 36<br>(22 - 54)          | 0<br>(0 - 0)       | 0<br>(0 - 0)        | 2<br>(1 - 3)         | 6<br>(4 - 10)        | 27<br>(16 - 43)          |
| Other digestive diseases                            | 131<br>(94 - 173)        | 0<br>(0 - 0)       | 0<br>(0 - 0)        | 1<br>(1 - 2)         | 12<br>(8 - 16)       | 118<br>(84 - 160)        |
| Neurological disorders                              | 2,011<br>(1,532 - 2,429) | 2<br>(1 - 2)       | 1<br>(1 - 1)        | 19<br>(15 - 24)      | 88<br>(71 - 107)     | 1,901<br>(1,431 - 2,316) |
| Alzheimer disease and other dementias               | 1,776<br>(1,324 - 2,193) | --                 | --                  | 0<br>(0 - 1)         | 41<br>(28 - 54)      | 1,735<br>(1,288 - 2,142) |
| Parkinson disease                                   | 109<br>(67 - 150)        | --                 | --                  | 0<br>(0 - 0)         | 5<br>(3 - 8)         | 104<br>(64 - 145)        |
| Epilepsy                                            | 21<br>(14 - 27)          | 0<br>(0 - 1)       | 0<br>(0 - 1)        | 8<br>(5 - 11)        | 4<br>(3 - 6)         | 8<br>(5 - 12)            |
| Multiple sclerosis                                  | 29<br>(16 - 44)          | --                 | --                  | 6<br>(4 - 10)        | 15<br>(8 - 23)       | 9<br>(5 - 14)            |
| Other neurological disorders                        | 75<br>(64 - 88)          | 1<br>(1 - 2)       | 0<br>(0 - 1)        | 5<br>(4 - 6)         | 24<br>(19 - 29)      | 45<br>(36 - 56)          |
| Mental and substance use disorders                  | 41<br>(31 - 56)          | 0<br>(0 - 0)       | 0<br>(0 - 0)        | 24<br>(19 - 30)      | 12<br>(7 - 20)       | 6<br>(4 - 8)             |
| Schizophrenia                                       | 3<br>(1 - 4)             | --                 | --                  | 0<br>(0 - 0)         | 0<br>(0 - 0)         | 2<br>(1 - 4)             |
| Alcohol use disorders                               | 15<br>(7 - 27)           | --                 | --                  | 6<br>(2 - 11)        | 8<br>(3 - 15)        | 2<br>(1 - 3)             |
| Drug use disorders                                  | 23<br>(19 - 28)          | 0<br>(0 - 0)       | --                  | 18<br>(14 - 22)      | 4<br>(3 - 5)         | 2<br>(1 - 3)             |
| Opioid use disorders                                | 8<br>(7 - 10)            | 0<br>(0 - 0)       | --                  | 6<br>(5 - 8)         | 1<br>(1 - 2)         | 1<br>(0 - 1)             |
| Cocaine use disorders                               | 1<br>(1 - 1)             | 0<br>(0 - 0)       | --                  | 1<br>(1 - 1)         | 0<br>(0 - 0)         | 0<br>(0 - 0)             |
| Amphetamine use disorders                           | 1<br>(1 - 1)             | 0<br>(0 - 0)       | --                  | 1<br>(1 - 1)         | 0<br>(0 - 0)         | 0<br>(0 - 0)             |
| Other drug use disorders                            | 13<br>(11 - 16)          | 0<br>(0 - 0)       | --                  | 10<br>(8 - 12)       | 2<br>(2 - 3)         | 1<br>(1 - 2)             |
| Eating disorders                                    | 0<br>(0 - 0)             | --                 | 0<br>(0 - 0)        | 0<br>(0 - 0)         | --                   | --                       |
| Anorexia nervosa                                    | 0<br>(0 - 0)             | --                 | 0<br>(0 - 0)        | 0<br>(0 - 0)         | --                   | --                       |
| Diabetes, urogenital, blood, and endocrine diseases | 664<br>(502 - 784)       | 2<br>(1 - 3)       | 1<br>(1 - 2)        | 20<br>(17 - 24)      | 66<br>(53 - 77)      | 575<br>(424 - 691)       |
| Diabetes mellitus                                   | 174<br>(140 - 213)       | 0<br>(0 - 0)       | 0<br>(0 - 0)        | 5<br>(4 - 6)         | 21<br>(17 - 26)      | 148<br>(117 - 186)       |
| Acute glomerulonephritis                            | 0<br>(0 - 1)             | 0<br>(0 - 0)       | 0<br>(0 - 0)        | 0<br>(0 - 0)         | 0<br>(0 - 0)         | 0<br>(0 - 0)             |
| Chronic kidney disease                              | 175<br>(132 - 239)       | 0<br>(0 - 0)       | 0<br>(0 - 0)        | 4<br>(3 - 5)         | 14<br>(11 - 20)      | 157<br>(116 - 214)       |
| Chronic kidney disease due to diabetes mellitus     | 24<br>(16 - 34)          | 0<br>(0 - 0)       | 0<br>(0 - 0)        | 1<br>(0 - 1)         | 2<br>(2 - 3)         | 21<br>(13 - 30)          |

Web Table 31- Wales deaths with 95% UI by age, sex, and cause in 2013

| Cause                                               | Females, All Ages  | Females, 0-4 Years | Females, 5-14 Years | Females, 15-49 Years | Females, 50-69 Years | Females, 70-80 Years |
|-----------------------------------------------------|--------------------|--------------------|---------------------|----------------------|----------------------|----------------------|
| Chronic kidney disease due to hypertension          | 48<br>(26 - 74)    | 0<br>(0 - 0)       | 0<br>(0 - 0)        | 1<br>(0 - 1)         | 4<br>(2 - 6)         | 44<br>(24 - 68)      |
| Chronic kidney disease due to glomerulonephritis    | 8<br>(4 - 12)      | 0<br>(0 - 0)       | 0<br>(0 - 0)        | 0<br>(0 - 0)         | 1<br>(1 - 1)         | 6<br>(3 - 11)        |
| Chronic kidney disease due to other causes          | 96<br>(62 - 151)   | 0<br>(0 - 0)       | 0<br>(0 - 0)        | 3<br>(2 - 4)         | 8<br>(5 - 13)        | 86<br>(53 - 139)     |
| Urinary diseases and male infertility               | 242<br>(107 - 341) | 0<br>(0 - 0)       | 0<br>(0 - 0)        | 4<br>(2 - 5)         | 16<br>(9 - 22)       | 223<br>(95 - 317)    |
| Interstitial nephritis and urinary tract infections | 227<br>(98 - 322)  | 0<br>(0 - 0)       | 0<br>(0 - 0)        | 3<br>(2 - 4)         | 14<br>(7 - 19)       | 209<br>(87 - 303)    |
| Urolithiasis                                        | 6<br>(3 - 13)      | --<br>(0 - 0)      | 0<br>(0 - 0)        | 0<br>(0 - 0)         | 1<br>(0 - 2)         | 4<br>(2 - 11)        |
| Other urinary diseases                              | 10<br>(4 - 21)     | 0<br>(0 - 0)       | 0<br>(0 - 0)        | 0<br>(0 - 0)         | 1<br>(0 - 2)         | 9<br>(3 - 20)        |
| Gynecological diseases                              | 2<br>(1 - 3)       | --<br>(0 - 0)      | --<br>(0 - 0)       | 0<br>(0 - 0)         | 0<br>(0 - 0)         | 1<br>(1 - 2)         |
| Uterine fibroids                                    | 1<br>(0 - 1)       | --<br>(0 - 0)      | --<br>(0 - 0)       | 0<br>(0 - 0)         | 0<br>(0 - 0)         | 0<br>(0 - 1)         |
| Polycystic ovarian syndrome                         | 0<br>(0 - 0)       | --<br>(0 - 0)      | --<br>(0 - 0)       | 0<br>(0 - 0)         | 0<br>(0 - 0)         | --<br>(0 - 0)        |
| Endometriosis                                       | 0<br>(0 - 0)       | --<br>(0 - 0)      | --<br>(0 - 0)       | 0<br>(0 - 0)         | 0<br>(0 - 0)         | --<br>(0 - 0)        |
| Genital prolapse                                    | 0<br>(0 - 1)       | --<br>(0 - 0)      | --<br>(0 - 0)       | 0<br>(0 - 0)         | 0<br>(0 - 0)         | 0<br>(0 - 1)         |
| Other gynecological diseases                        | 1<br>(1 - 1)       | --<br>(0 - 0)      | --<br>(0 - 0)       | 0<br>(0 - 0)         | 0<br>(0 - 0)         | 1<br>(0 - 1)         |
| Hemoglobinopathies and hemolytic anemias            | 8<br>(5 - 14)      | 0<br>(0 - 0)       | 0<br>(0 - 0)        | 1<br>(1 - 1)         | 1<br>(1 - 2)         | 6<br>(3 - 10)        |
| Thalassemias                                        | 0<br>(0 - 1)       | 0<br>(0 - 0)       | 0<br>(0 - 0)        | 0<br>(0 - 0)         | 0<br>(0 - 0)         | 0<br>(0 - 0)         |
| Sickle cell disorders                               | 1<br>(1 - 2)       | 0<br>(0 - 0)       | 0<br>(0 - 0)        | 0<br>(0 - 0)         | 1<br>(0 - 1)         | 0<br>(0 - 1)         |
| G6PD deficiency                                     | 0<br>(0 - 0)       | 0<br>(0 - 0)       | 0<br>(0 - 0)        | 0<br>(0 - 0)         | 0<br>(0 - 0)         | 0<br>(0 - 0)         |
| Other hemoglobinopathies and hemolytic anemias      | 6<br>(4 - 11)      | 0<br>(0 - 0)       | 0<br>(0 - 0)        | 0<br>(0 - 0)         | 1<br>(1 - 1)         | 5<br>(3 - 9)         |
| Endocrine, metabolic, blood, and immune disorders   | 62<br>(47 - 99)    | 1<br>(1 - 2)       | 1<br>(1 - 1)        | 7<br>(5 - 10)        | 12<br>(9 - 18)       | 40<br>(28 - 69)      |
| Musculoskeletal disorders                           | 74<br>(46 - 100)   | --<br>(0 - 0)      | 0<br>(0 - 0)        | 4<br>(3 - 5)         | 14<br>(9 - 19)       | 56<br>(32 - 78)      |
| Rheumatoid arthritis                                | 38<br>(23 - 54)    | --<br>(0 - 0)      | 0<br>(0 - 0)        | 0<br>(0 - 1)         | 6<br>(4 - 9)         | 31<br>(18 - 46)      |
| Other musculoskeletal disorders                     | 37<br>(20 - 51)    | --<br>(0 - 0)      | 0<br>(0 - 0)        | 4<br>(3 - 5)         | 8<br>(5 - 11)        | 25<br>(10 - 38)      |
| Other non-communicable diseases                     | 112<br>(91 - 138)  | 23<br>(18 - 31)    | 2<br>(1 - 2)        | 10<br>(8 - 13)       | 12<br>(10 - 15)      | 65<br>(44 - 89)      |
| Congenital anomalies                                | 46<br>(37 - 57)    | 19<br>(14 - 25)    | 2<br>(1 - 2)        | 9<br>(7 - 12)        | 8<br>(6 - 10)        | 8<br>(6 - 11)        |
| Neural tube defects                                 | 2<br>(1 - 3)       | 1<br>(1 - 2)       | 0<br>(0 - 0)        | 1<br>(0 - 1)         | 0<br>(0 - 0)         | 0<br>(0 - 0)         |
| Congenital heart anomalies                          | 21<br>(16 - 26)    | 7<br>(5 - 10)      | 1<br>(1 - 1)        | 5<br>(4 - 7)         | 3<br>(2 - 4)         | 4<br>(3 - 6)         |
| Cleft lip and cleft palate                          | 0<br>(0 - 0)       | 0<br>(0 - 0)       | --<br>(0 - 0)       | --<br>(0 - 0)        | --<br>(0 - 0)        | --<br>(0 - 0)        |
| Down syndrome                                       | 6<br>(4 - 9)       | 1<br>(0 - 1)       | 0<br>(0 - 0)        | 2<br>(1 - 2)         | 4<br>(2 - 5)         | 0<br>(0 - 1)         |
| Chromosomal unbalanced rearrangements               | 3<br>(2 - 5)       | 3<br>(2 - 5)       | 0<br>(0 - 0)        | 0<br>(0 - 0)         | 0<br>(0 - 0)         | 0<br>(0 - 0)         |
| Other congenital anomalies                          | 13<br>(10 - 17)    | 7<br>(5 - 10)      | 0<br>(0 - 1)        | 1<br>(1 - 2)         | 1<br>(1 - 1)         | 4<br>(2 - 6)         |
| Skin and subcutaneous diseases                      | 62<br>(41 - 87)    | 0<br>(0 - 0)       | 0<br>(0 - 0)        | 1<br>(1 - 1)         | 5<br>(3 - 6)         | 56<br>(37 - 81)      |
| Cellulitis                                          | 24<br>(9 - 40)     | 0<br>(0 - 0)       | 0<br>(0 - 0)        | 0<br>(0 - 0)         | 2<br>(1 - 3)         | 22<br>(7 - 38)       |
| Pyoderma                                            | 22<br>(11 - 37)    | 0<br>(0 - 0)       | 0<br>(0 - 0)        | 0<br>(0 - 0)         | 2<br>(1 - 3)         | 20<br>(10 - 34)      |
| Decubitus ulcer                                     | 13<br>(6 - 23)     | 0<br>(0 - 0)       | 0<br>(0 - 0)        | 0<br>(0 - 0)         | 1<br>(0 - 1)         | 12<br>(6 - 22)       |
| Other skin and subcutaneous diseases                | 3<br>(1 - 9)       | 0<br>(0 - 0)       | 0<br>(0 - 0)        | 0<br>(0 - 0)         | 0<br>(0 - 1)         | 3<br>(1 - 9)         |
| Sudden infant death syndrome                        | 4<br>(2 - 10)      | 4<br>(2 - 10)      | --<br>(0 - 0)       | --<br>(0 - 0)        | --<br>(0 - 0)        | --<br>(0 - 0)        |
| Injuries                                            | 466<br>(379 - 569) | 4<br>(3 - 6)       | 3<br>(2 - 3)        | 61<br>(53 - 72)      | 56<br>(48 - 66)      | 342<br>(257 - 441)   |
| Transport injuries                                  | 45<br>(36 - 56)    | 1<br>(0 - 1)       | 1<br>(1 - 2)        | 17<br>(13 - 21)      | 9<br>(6 - 12)        | 17<br>(12 - 24)      |
| Road injuries                                       | 42<br>(34 - 54)    | 1<br>(0 - 1)       | 1<br>(1 - 2)        | 16<br>(13 - 20)      | 8<br>(6 - 11)        | 17<br>(12 - 23)      |
| Pedestrian road injuries                            | 12<br>(8 - 18)     | 0<br>(0 - 0)       | 1<br>(0 - 1)        | 2<br>(1 - 3)         | 2<br>(1 - 3)         | 7<br>(5 - 12)        |

Web Table 31- Wales deaths with 95% UI by age, sex, and cause in 2013

| Cause                                           | Females, All Ages  | Females, 0-4 Years | Females, 5-14 Years | Females, 15-49 Years | Females, 50-69 Years | Females, 70-80 Years |
|-------------------------------------------------|--------------------|--------------------|---------------------|----------------------|----------------------|----------------------|
| Cyclist road injuries                           | 1<br>(1 - 2)       | 0<br>(0 - 0)       | 0<br>(0 - 0)        | 1<br>(0 - 1)         | 0<br>(0 - 1)         | 0<br>(0 - 1)         |
| Motorcyclist road injuries                      | 2<br>(1 - 3)       | 0<br>(0 - 0)       | 0<br>(0 - 0)        | 1<br>(0 - 2)         | 0<br>(0 - 1)         | 0<br>(0 - 1)         |
| Motor vehicle road injuries                     | 26<br>(20 - 34)    | 0<br>(0 - 1)       | 1<br>(0 - 1)        | 12<br>(9 - 15)       | 5<br>(3 - 7)         | 8<br>(5 - 12)        |
| Other road injuries                             | 1<br>(0 - 1)       | 0<br>(0 - 0)       | 0<br>(0 - 0)        | 0<br>(0 - 0)         | 0<br>(0 - 0)         | 0<br>(0 - 1)         |
| Other transport injuries                        | 2<br>(1 - 4)       | 0<br>(0 - 0)       | 0<br>(0 - 0)        | 1<br>(1 - 2)         | 1<br>(0 - 1)         | 0<br>(0 - 1)         |
| Unintentional injuries                          | 363<br>(278 - 464) | 3<br>(2 - 4)       | 1<br>(1 - 1)        | 16<br>(14 - 21)      | 30<br>(25 - 37)      | 312<br>(228 - 409)   |
| Falls                                           | 261<br>(177 - 356) | 0<br>(0 - 0)       | 0<br>(0 - 0)        | 4<br>(3 - 5)         | 12<br>(8 - 16)       | 245<br>(164 - 338)   |
| Drowning                                        | 4<br>(3 - 6)       | 0<br>(0 - 1)       | 0<br>(0 - 0)        | 1<br>(1 - 1)         | 1<br>(1 - 2)         | 1<br>(1 - 2)         |
| Fire, heat, and hot substances                  | 12<br>(8 - 17)     | 0<br>(0 - 1)       | 0<br>(0 - 0)        | 2<br>(1 - 2)         | 3<br>(2 - 4)         | 7<br>(5 - 10)        |
| Poisonings                                      | 8<br>(5 - 16)      | 0<br>(0 - 0)       | 0<br>(0 - 0)        | 3<br>(2 - 6)         | 2<br>(1 - 5)         | 3<br>(1 - 6)         |
| Exposure to mechanical forces                   | 6<br>(4 - 7)       | 1<br>(0 - 1)       | 0<br>(0 - 0)        | 1<br>(1 - 2)         | 1<br>(1 - 1)         | 2<br>(2 - 3)         |
| Unintentional firearm injuries                  | 0<br>(0 - 0)       | 0<br>(0 - 0)       | 0<br>(0 - 0)        | 0<br>(0 - 0)         | 0<br>(0 - 0)         | 0<br>(0 - 0)         |
| Unintentional suffocation                       | 2<br>(1 - 3)       | 1<br>(0 - 1)       | 0<br>(0 - 0)        | 1<br>(0 - 1)         | 0<br>(0 - 0)         | 1<br>(0 - 1)         |
| Other exposure to mechanical forces             | 3<br>(2 - 4)       | 0<br>(0 - 0)       | 0<br>(0 - 0)        | 1<br>(0 - 1)         | 1<br>(0 - 1)         | 2<br>(1 - 2)         |
| Adverse effects of medical treatment            | 30<br>(21 - 46)    | 0<br>(0 - 0)       | 0<br>(0 - 0)        | 1<br>(1 - 2)         | 5<br>(3 - 8)         | 23<br>(15 - 38)      |
| Animal contact                                  | 1<br>(0 - 2)       | 0<br>(0 - 0)       | 0<br>(0 - 0)        | 0<br>(0 - 0)         | 0<br>(0 - 0)         | 1<br>(0 - 1)         |
| Venomous animal contact                         | 0<br>(0 - 1)       | 0<br>(0 - 0)       | 0<br>(0 - 0)        | 0<br>(0 - 0)         | 0<br>(0 - 0)         | 0<br>(0 - 0)         |
| Non-venomous animal contact                     | 1<br>(0 - 2)       | 0<br>(0 - 0)       | 0<br>(0 - 0)        | 0<br>(0 - 0)         | 0<br>(0 - 0)         | 0<br>(0 - 1)         |
| Foreign body                                    | 39<br>(20 - 59)    | 1<br>(1 - 2)       | 0<br>(0 - 0)        | 3<br>(2 - 5)         | 5<br>(3 - 8)         | 29<br>(13 - 46)      |
| Pulmonary aspiration and foreign body in airway | 39<br>(19 - 59)    | 1<br>(1 - 2)       | 0<br>(0 - 0)        | 3<br>(2 - 5)         | 5<br>(3 - 8)         | 29<br>(13 - 46)      |
| Foreign body in other body part                 | 0<br>(0 - 1)       | 0<br>(0 - 0)       | 0<br>(0 - 0)        | 0<br>(0 - 0)         | 0<br>(0 - 0)         | 0<br>(0 - 0)         |
| Other unintentional injuries                    | 2<br>(1 - 2)       | 0<br>(0 - 0)       | 0<br>(0 - 0)        | 0<br>(0 - 0)         | 0<br>(0 - 0)         | 1<br>(0 - 2)         |
| Self-harm and interpersonal violence            | 59<br>(50 - 70)    | 0<br>(0 - 0)       | 0<br>(0 - 0)        | 28<br>(23 - 35)      | 18<br>(13 - 23)      | 13<br>(10 - 16)      |
| Self-harm                                       | 55<br>(46 - 67)    | --                 | 0<br>(0 - 0)        | 26<br>(22 - 33)      | 17<br>(13 - 22)      | 12<br>(9 - 15)       |
| Interpersonal violence                          | 4<br>(3 - 6)       | 0<br>(0 - 0)       | 0<br>(0 - 0)        | 2<br>(1 - 3)         | 1<br>(0 - 1)         | 1<br>(1 - 1)         |
| Assault by firearm                              | 1<br>(0 - 1)       | 0<br>(0 - 0)       | 0<br>(0 - 0)        | 0<br>(0 - 1)         | 0<br>(0 - 0)         | 0<br>(0 - 0)         |
| Assault by sharp object                         | 1<br>(1 - 1)       | 0<br>(0 - 0)       | 0<br>(0 - 0)        | 1<br>(0 - 1)         | 0<br>(0 - 0)         | 0<br>(0 - 0)         |
| Assault by other means                          | 3<br>(2 - 4)       | 0<br>(0 - 0)       | 0<br>(0 - 0)        | 1<br>(1 - 2)         | 0<br>(0 - 1)         | 1<br>(1 - 1)         |

Web Table 31- Yemen deaths with 95% UI by age, sex, and cause in 2013

| Cause                                                             | Both Sexes, All Ages          | Both Sexes, 0-4 Years       | Both Sexes, 5-14 Years   | Both Sexes, 15-49 Years     | Both Sexes, 50-69 Years     | Both Sexes, 70-80 Years     |
|-------------------------------------------------------------------|-------------------------------|-----------------------------|--------------------------|-----------------------------|-----------------------------|-----------------------------|
| All causes                                                        | 136,643<br>(97,436 - 192,767) | 38,030<br>(33,565 - 43,441) | 4,794<br>(3,838 - 5,911) | 29,016<br>(16,998 - 48,822) | 33,902<br>(19,964 - 53,974) | 30,901<br>(23,209 - 40,949) |
| Communicable, maternal, neonatal, and nutritional diseases        | 44,796<br>(34,012 - 60,044)   | 28,596<br>(22,370 - 34,382) | 2,187<br>(1,646 - 2,932) | 7,593<br>(4,526 - 13,622)   | 3,227<br>(1,909 - 5,361)    | 3,193<br>(2,247 - 4,421)    |
| HIV/AIDS and tuberculosis                                         | 2,880<br>(1,553 - 6,945)      | 149<br>(76 - 323)           | 85<br>(52 - 146)         | 1,489<br>(693 - 3,876)      | 742<br>(385 - 1,730)        | 415<br>(244 - 866)          |
| Tuberculosis                                                      | 2,291<br>(1,316 - 4,607)      | 113<br>(63 - 191)           | 78<br>(49 - 123)         | 1,036<br>(530 - 2,059)      | 659<br>(346 - 1,525)        | 405<br>(236 - 841)          |
| HIV/AIDS                                                          | 589<br>(56 - 2,857)           | 36<br>(2 - 191)             | 7<br>(0 - 39)            | 453<br>(44 - 2,057)         | 83<br>(7 - 399)             | 10<br>(1 - 56)              |
| HIV/AIDS resulting in mycobacterial infection                     | 36<br>(4 - 179)               | 2<br>(0 - 11)               | 0<br>(0 - 2)             | 28<br>(3 - 129)             | 5<br>(0 - 27)               | 1<br>(0 - 4)                |
| HIV/AIDS resulting in other diseases                              | 553<br>(52 - 2,684)           | 34<br>(2 - 180)             | 7<br>(0 - 37)            | 425<br>(41 - 1,929)         | 77<br>(6 - 374)             | 10<br>(1 - 52)              |
| Diarrhea, lower respiratory, and other common infectious diseases | 18,345<br>(13,378 - 24,683)   | 11,383<br>(8,167 - 15,051)  | 1,129<br>(792 - 1,583)   | 2,116<br>(1,250 - 3,681)    | 1,579<br>(909 - 2,564)      | 2,138<br>(1,466 - 3,000)    |
| Diarrheal diseases                                                | 6,708<br>(4,221 - 9,828)      | 5,177<br>(2,944 - 7,912)    | 251<br>(126 - 456)       | 497<br>(247 - 940)          | 309<br>(149 - 568)          | 474<br>(269 - 797)          |
| Intestinal infectious diseases                                    | 866<br>(446 - 1,620)          | 252<br>(121 - 474)          | 266<br>(122 - 474)       | 298<br>(127 - 625)          | 38<br>(16 - 82)             | 12<br>(6 - 21)              |
| Typhoid fever                                                     | 612<br>(290 - 1,190)          | 161<br>(70 - 325)           | 199<br>(86 - 354)        | 217<br>(87 - 480)           | 27<br>(10 - 58)             | 8<br>(3 - 15)               |
| Paratyphoid fever                                                 | 179<br>(82 - 355)             | 54<br>(23 - 109)            | 58<br>(24 - 114)         | 59<br>(24 - 128)            | 6<br>(2 - 15)               | 2<br>(1 - 4)                |
| Other intestinal infectious diseases                              | 75<br>(45 - 117)              | 37<br>(20 - 59)             | 9<br>(3 - 17)            | 22<br>(9 - 45)              | 5<br>(1 - 13)               | 2<br>(0 - 7)                |
| Lower respiratory infections                                      | 7,858<br>(5,207 - 11,354)     | 3,879<br>(2,227 - 5,966)    | 363<br>(217 - 572)       | 958<br>(522 - 1,794)        | 1,092<br>(593 - 1,823)      | 1,567<br>(1,024 - 2,337)    |
| Upper respiratory infections                                      | 12<br>(6 - 22)                | 3<br>(1 - 9)                | 1<br>(0 - 1)             | 3<br>(1 - 8)                | 3<br>(0 - 7)                | 2<br>(0 - 4)                |
| Otitis media                                                      | 21<br>(13 - 32)               | 3<br>(2 - 5)                | 2<br>(1 - 3)             | 6<br>(3 - 11)               | 5<br>(3 - 8)                | 5<br>(3 - 7)                |
| Meningitis                                                        | 1,133<br>(631 - 2,014)        | 708<br>(323 - 1,489)        | 89<br>(47 - 148)         | 198<br>(100 - 357)          | 86<br>(43 - 142)            | 52<br>(30 - 81)             |
| Pneumococcal meningitis                                           | 245<br>(133 - 419)            | 130<br>(53 - 269)           | 25<br>(12 - 43)          | 56<br>(26 - 106)            | 21<br>(9 - 37)              | 13<br>(7 - 21)              |
| H influenzae type B meningitis                                    | 329<br>(169 - 673)            | 270<br>(123 - 601)          | 22<br>(11 - 37)          | 23<br>(10 - 44)             | 8<br>(3 - 17)               | 5<br>(3 - 9)                |
| Meningococcal meningitis                                          | 320<br>(166 - 581)            | 203<br>(77 - 443)           | 28<br>(13 - 49)          | 55<br>(25 - 96)             | 20<br>(9 - 36)              | 15<br>(8 - 26)              |
| Other meningitis                                                  | 240<br>(132 - 398)            | 105<br>(44 - 210)           | 15<br>(7 - 27)           | 65<br>(31 - 121)            | 37<br>(18 - 62)             | 19<br>(10 - 31)             |
| Encephalitis                                                      | 236<br>(139 - 378)            | 139<br>(62 - 282)           | 22<br>(12 - 35)          | 50<br>(23 - 98)             | 15<br>(8 - 28)              | 10<br>(6 - 14)              |
| Diphtheria                                                        | 8<br>(1 - 32)                 | 5<br>(0 - 28)               | 2<br>(0 - 9)             | 1<br>(0 - 3)                | 0<br>(0 - 1)                | --                          |
| Whooping cough                                                    | 681<br>(1 - 3,222)            | 629<br>(1 - 2,935)          | 42<br>(0 - 201)          | 9<br>(0 - 48)               | 1<br>(0 - 4)                | --                          |
| Tetanus                                                           | 389<br>(192 - 836)            | 255<br>(83 - 658)           | 30<br>(11 - 56)          | 72<br>(25 - 141)            | 24<br>(9 - 46)              | 7<br>(2 - 13)               |
| Measles                                                           | 383<br>(8 - 2,448)            | 315<br>(6 - 1,972)          | 56<br>(1 - 380)          | 11<br>(0 - 71)              | 0<br>(0 - 1)                | --                          |
| Varicella and herpes zoster                                       | 51<br>(21 - 101)              | 18<br>(2 - 54)              | 5<br>(0 - 18)            | 14<br>(4 - 32)              | 5<br>(1 - 12)               | 10<br>(1 - 12)              |
| Neglected tropical diseases and malaria                           | 5,722<br>(2,994 - 10,678)     | 2,773<br>(996 - 6,121)      | 816<br>(445 - 1,465)     | 1,275<br>(574 - 2,908)      | 568<br>(274 - 1,147)        | 289<br>(133 - 589)          |
| Malaria                                                           | 5,196<br>(2,471 - 10,098)     | 2,645<br>(866 - 6,042)      | 729<br>(353 - 1,399)     | 1,058<br>(421 - 2,620)      | 500<br>(224 - 1,079)        | 264<br>(109 - 562)          |
| Leishmaniasis                                                     | 321<br>(166 - 572)            | 90<br>(22 - 182)            | 59<br>(18 - 121)         | 139<br>(62 - 274)           | 28<br>(11 - 56)             | 5<br>(2 - 8)                |
| Visceral leishmaniasis                                            | 321<br>(166 - 572)            | 90<br>(22 - 182)            | 59<br>(18 - 121)         | 139<br>(62 - 274)           | 28<br>(11 - 56)             | 5<br>(2 - 8)                |
| Schistosomiasis                                                   | 55<br>(32 - 92)               | 0<br>(0 - 1)                | 2<br>(1 - 3)             | 21<br>(11 - 38)             | 22<br>(12 - 38)             | 9<br>(5 - 15)               |
| Cysticercosis                                                     | 1<br>(0 - 1)                  | 0<br>(0 - 0)                | 0<br>(0 - 0)             | 0<br>(0 - 1)                | 0<br>(0 - 0)                | 0<br>(0 - 0)                |
| Cystic echinococcosis                                             | 5<br>(3 - 7)                  | 0<br>(0 - 0)                | 1<br>(1 - 1)             | 2<br>(1 - 4)                | 1<br>(1 - 2)                | 0<br>(0 - 0)                |
| Dengue                                                            | 7<br>(4 - 11)                 | 1<br>(1 - 2)                | 2<br>(1 - 2)             | 4<br>(2 - 6)                | 1<br>(0 - 1)                | 0<br>(0 - 0)                |
| Rabies                                                            | 26<br>(15 - 47)               | 4<br>(2 - 7)                | 7<br>(4 - 12)            | 12<br>(6 - 24)              | 2<br>(1 - 5)                | 1<br>(0 - 1)                |
| Intestinal nematode infections                                    | 17<br>(7 - 31)                | 10<br>(3 - 20)              | 4<br>(0 - 10)            | 2<br>(0 - 8)                | 1<br>(0 - 5)                | 1<br>(0 - 4)                |
| Ascariasis                                                        | 17<br>(7 - 31)                | 10<br>(3 - 20)              | 4<br>(0 - 10)            | 2<br>(0 - 8)                | 1<br>(0 - 5)                | 1<br>(0 - 4)                |
| Other neglected tropical diseases                                 | 95<br>(49 - 154)              | 23<br>(11 - 43)             | 13<br>(6 - 21)           | 37<br>(16 - 70)             | 12<br>(5 - 23)              | 10<br>(3 - 19)              |
| Maternal disorders                                                | 2,279<br>(1,244 - 4,099)      | --                          | 12<br>(4 - 28)           | 2,268<br>(1,236 - 4,071)    | --                          | --                          |



Web Table 31- Yemen deaths with 95% UI by age, sex, and cause in 2013

| Cause                                                            | Both Sexes, All Ages         | Both Sexes, 0-4 Years      | Both Sexes, 5-14 Years | Both Sexes, 15-49 Years    | Both Sexes, 50-69 Years     | Both Sexes, 70-80 Years     |
|------------------------------------------------------------------|------------------------------|----------------------------|------------------------|----------------------------|-----------------------------|-----------------------------|
| Maternal hemorrhage                                              | 463<br>(225 - 905)           | --                         | 2<br>(0 - 4)           | 462<br>(224 - 902)         | --                          | --                          |
| Maternal sepsis and other maternal infections                    | 198<br>(96 - 371)            | --                         | 1<br>(0 - 3)           | 197<br>(96 - 370)          | --                          | --                          |
| Maternal hypertensive disorders                                  | 336<br>(176 - 616)           | --                         | 2<br>(1 - 5)           | 334<br>(175 - 614)         | --                          | --                          |
| Maternal obstructed labor                                        | 215<br>(105 - 402)           | --                         | 1<br>(0 - 2)           | 214<br>(105 - 401)         | --                          | --                          |
| Maternal abortive outcome                                        | 294<br>(146 - 547)           | --                         | 1<br>(0 - 4)           | 292<br>(145 - 545)         | --                          | --                          |
| Indirect maternal deaths                                         | 193<br>(79 - 373)            | --                         | 1<br>(0 - 2)           | 192<br>(79 - 372)          | --                          | --                          |
| Late maternal deaths                                             | 208<br>(70 - 443)            | --                         | 2<br>(0 - 6)           | 206<br>(69 - 440)          | --                          | --                          |
| Maternal deaths aggravated by HIV/AIDS                           | 0<br>(0 - 1)                 | --                         | --                     | 0<br>(0 - 1)               | --                          | --                          |
| Other maternal disorders                                         | 368<br>(171 - 722)           | --                         | 2<br>(0 - 4)           | 366<br>(170 - 718)         | --                          | --                          |
| Neonatal disorders                                               | 13,387<br>(9,481 - 17,615)   | 13,387<br>(9,481 - 17,615) | --                     | --                         | --                          | --                          |
| Neonatal preterm birth complications                             | 9,343<br>(6,468 - 12,133)    | 9,343<br>(6,468 - 12,133)  | --                     | --                         | --                          | --                          |
| Neonatal encephalopathy due to birth asphyxia and trauma         | 1,391<br>(334 - 2,947)       | 1,391<br>(334 - 2,947)     | --                     | --                         | --                          | --                          |
| Neonatal sepsis and other neonatal infections                    | 345<br>(103 - 722)           | 345<br>(103 - 722)         | --                     | --                         | --                          | --                          |
| Hemolytic disease and other neonatal jaundice                    | 70<br>(20 - 173)             | 70<br>(20 - 173)           | --                     | --                         | --                          | --                          |
| Other neonatal disorders                                         | 2,237<br>(667 - 4,746)       | 2,237<br>(667 - 4,746)     | --                     | --                         | --                          | --                          |
| Nutritional deficiencies                                         | 1,043<br>(636 - 1,650)       | 329<br>(168 - 577)         | 72<br>(46 - 106)       | 262<br>(139 - 483)         | 155<br>(71 - 281)           | 225<br>(115 - 364)          |
| Protein-energy malnutrition                                      | 203<br>(63 - 477)            | 138<br>(38 - 346)          | 13<br>(4 - 28)         | 17<br>(4 - 44)             | 11<br>(3 - 32)              | 24<br>(5 - 69)              |
| Iodine deficiency                                                | 8<br>(1 - 29)                | 3<br>(0 - 21)              | 1<br>(0 - 5)           | 2<br>(0 - 6)               | 1<br>(0 - 6)                | 1<br>(0 - 6)                |
| Iron-deficiency anemia                                           | 766<br>(472 - 1,186)         | 168<br>(50 - 324)          | 51<br>(25 - 80)        | 225<br>(119 - 418)         | 134<br>(66 - 238)           | 189<br>(101 - 295)          |
| Other nutritional deficiencies                                   | 65<br>(28 - 143)             | 20<br>(6 - 49)             | 7<br>(3 - 16)          | 19<br>(6 - 48)             | 8<br>(2 - 21)               | 11<br>(3 - 28)              |
| Other communicable, maternal, neonatal, and nutritional diseases | 1,141<br>(731 - 1,988)       | 576<br>(355 - 951)         | 73<br>(43 - 143)       | 183<br>(88 - 432)          | 184<br>(88 - 401)           | 125<br>(58 - 357)           |
| Sexually transmitted diseases excluding HIV                      | 508<br>(296 - 859)           | 416<br>(220 - 749)         | 34<br>(19 - 56)        | 31<br>(14 - 59)            | 14<br>(6 - 28)              | 13<br>(6 - 30)              |
| Syphilis                                                         | 482<br>(269 - 833)           | 416<br>(220 - 749)         | 32<br>(17 - 53)        | 15<br>(7 - 27)             | 9<br>(4 - 17)               | 11<br>(5 - 24)              |
| Chlamydial infection                                             | 4<br>(2 - 9)                 | --                         | 0<br>(0 - 1)           | 3<br>(1 - 6)               | 1<br>(0 - 3)                | 0<br>(0 - 1)                |
| Gonococcal infection                                             | 12<br>(6 - 21)               | --                         | 1<br>(1 - 2)           | 7<br>(3 - 13)              | 2<br>(1 - 5)                | 2<br>(1 - 4)                |
| Other sexually transmitted diseases                              | 10<br>(5 - 17)               | --                         | 1<br>(1 - 2)           | 6<br>(3 - 12)              | 2<br>(1 - 4)                | 1<br>(0 - 2)                |
| Hepatitis                                                        | 218<br>(123 - 358)           | 28<br>(12 - 58)            | 7<br>(4 - 12)          | 58<br>(30 - 110)           | 91<br>(45 - 162)            | 34<br>(20 - 56)             |
| Acute hepatitis A                                                | 25<br>(8 - 52)               | 14<br>(4 - 31)             | 3<br>(1 - 7)           | 5<br>(1 - 13)              | 2<br>(0 - 6)                | 0<br>(0 - 1)                |
| Acute hepatitis B                                                | 140<br>(71 - 244)            | 14<br>(4 - 31)             | 2<br>(1 - 5)           | 25<br>(10 - 52)            | 70<br>(33 - 129)            | 29<br>(16 - 50)             |
| Acute hepatitis C                                                | 7<br>(1 - 17)                | --                         | 0<br>(0 - 1)           | 2<br>(0 - 6)               | 3<br>(0 - 9)                | 1<br>(0 - 3)                |
| Acute hepatitis E                                                | 46<br>(20 - 86)              | 0<br>(0 - 0)               | 1<br>(0 - 2)           | 27<br>(12 - 52)            | 15<br>(5 - 32)              | 3<br>(1 - 7)                |
| Other infectious diseases                                        | 415<br>(193 - 1,108)         | 132<br>(49 - 349)          | 32<br>(12 - 92)        | 93<br>(36 - 276)           | 79<br>(28 - 235)            | 78<br>(23 - 295)            |
| Non-communicable diseases                                        | 79,120<br>(51,262 - 116,436) | 7,851<br>(4,619 - 13,518)  | 1,289<br>(902 - 1,777) | 13,750<br>(7,465 - 24,204) | 29,172<br>(16,933 - 46,379) | 27,059<br>(20,080 - 35,702) |
| Neoplasms                                                        | 9,316<br>(5,637 - 14,505)    | 107<br>(62 - 185)          | 230<br>(162 - 332)     | 2,444<br>(1,322 - 4,240)   | 4,311<br>(2,469 - 6,804)    | 2,225<br>(1,575 - 2,998)    |
| Esophageal cancer                                                | 188<br>(114 - 295)           | --                         | --                     | 35<br>(18 - 65)            | 91<br>(50 - 152)            | 61<br>(40 - 91)             |
| Stomach cancer                                                   | 1,337<br>(801 - 2,174)       | --                         | --                     | 336<br>(174 - 620)         | 651<br>(373 - 1,071)        | 350<br>(243 - 484)          |
| Liver cancer                                                     | 554<br>(317 - 901)           | --                         | 5<br>(2 - 9)           | 90<br>(40 - 184)           | 302<br>(162 - 503)          | 157<br>(100 - 235)          |
| Liver cancer due to hepatitis B                                  | 197<br>(104 - 336)           | --                         | 2<br>(1 - 4)           | 43<br>(19 - 88)            | 111<br>(57 - 192)           | 42<br>(23 - 70)             |
| Liver cancer due to hepatitis C                                  | 270<br>(147 - 448)           | --                         | 1<br>(0 - 1)           | 30<br>(11 - 63)            | 148<br>(73 - 260)           | 92<br>(56 - 140)            |
| Liver cancer due to alcohol use                                  | 18<br>(9 - 33)               | --                         | --                     | 1<br>(0 - 3)               | 9<br>(4 - 18)               | 8<br>(4 - 14)               |

Web Table 31- Yemen deaths with 95% UI by age, sex, and cause in 2013

| Cause                                         | Both Sexes, All Ages        | Both Sexes, 0-4 Years | Both Sexes, 5-14 Years | Both Sexes, 15-49 Years   | Both Sexes, 50-69 Years     | Both Sexes, 70-80 Years     |
|-----------------------------------------------|-----------------------------|-----------------------|------------------------|---------------------------|-----------------------------|-----------------------------|
| Liver cancer due to other causes              | 68<br>(35 - 125)            | --                    | 2<br>(1 - 4)           | 17<br>(7 - 35)            | 34<br>(15 - 67)             | 15<br>(8 - 25)              |
| Larynx cancer                                 | 154<br>(88 - 260)           | --                    | --                     | 29<br>(13 - 55)           | 83<br>(45 - 145)            | 42<br>(26 - 66)             |
| Tracheal, bronchus and lung cancer            | 1,639<br>(861 - 2,624)      | --                    | --                     | 281<br>(110 - 535)        | 928<br>(470 - 1,530)        | 430<br>(273 - 601)          |
| Breast cancer                                 | 834<br>(431 - 1,797)        | --                    | --                     | 334<br>(153 - 796)        | 401<br>(203 - 826)          | 99<br>(63 - 152)            |
| Cervical cancer                               | 299<br>(168 - 515)          | --                    | --                     | 104<br>(52 - 207)         | 155<br>(85 - 270)           | 40<br>(23 - 63)             |
| Uterine cancer                                | 72<br>(32 - 131)            | --                    | --                     | 12<br>(4 - 25)            | 44<br>(19 - 82)             | 16<br>(8 - 28)              |
| Prostate cancer                               | 210<br>(112 - 331)          | --                    | --                     | 3<br>(1 - 6)              | 58<br>(27 - 99)             | 149<br>(79 - 239)           |
| Colon and rectum cancer                       | 627<br>(388 - 963)          | --                    | --                     | 146<br>(80 - 257)         | 299<br>(175 - 469)          | 181<br>(128 - 247)          |
| Lip and oral cavity cancer                    | 82<br>(45 - 134)            | --                    | --                     | 24<br>(11 - 44)           | 38<br>(20 - 64)             | 20<br>(13 - 30)             |
| Nasopharynx cancer                            | 79<br>(43 - 149)            | --                    | 4<br>(2 - 9)           | 36<br>(18 - 71)           | 31<br>(15 - 61)             | 8<br>(5 - 14)               |
| Other pharynx cancer                          | 38<br>(20 - 63)             | --                    | --                     | 13<br>(6 - 24)            | 19<br>(10 - 33)             | 6<br>(4 - 10)               |
| Gallbladder and biliary tract cancer          | 186<br>(99 - 308)           | --                    | --                     | 31<br>(15 - 59)           | 102<br>(51 - 176)           | 53<br>(30 - 87)             |
| Pancreatic cancer                             | 190<br>(116 - 296)          | --                    | --                     | 27<br>(14 - 48)           | 105<br>(61 - 168)           | 58<br>(40 - 83)             |
| Malignant skin melanoma                       | 27<br>(13 - 49)             | --                    | --                     | 9<br>(4 - 20)             | 11<br>(5 - 21)              | 6<br>(3 - 9)                |
| Non-melanoma skin cancer                      | 32<br>(18 - 55)             | --                    | --                     | 10<br>(4 - 18)            | 11<br>(5 - 20)              | 12<br>(7 - 20)              |
| Ovarian cancer                                | 151<br>(56 - 288)           | --                    | --                     | 48<br>(15 - 106)          | 79<br>(29 - 155)            | 24<br>(12 - 40)             |
| Testicular cancer                             | 14<br>(7 - 25)              | --                    | --                     | 11<br>(5 - 21)            | 2<br>(1 - 4)                | 1<br>(1 - 2)                |
| Kidney cancer                                 | 94<br>(53 - 159)            | 4<br>(2 - 10)         | 5<br>(2 - 10)          | 20<br>(9 - 39)            | 48<br>(25 - 85)             | 18<br>(11 - 27)             |
| Bladder cancer                                | 365<br>(231 - 562)          | --                    | --                     | 39<br>(19 - 75)           | 184<br>(107 - 299)          | 142<br>(98 - 199)           |
| Brain and nervous system cancer               | 404<br>(215 - 684)          | 16<br>(5 - 37)        | 45<br>(24 - 80)        | 149<br>(71 - 285)         | 146<br>(75 - 242)           | 49<br>(29 - 78)             |
| Thyroid cancer                                | 66<br>(34 - 123)            | --                    | 1<br>(0 - 2)           | 14<br>(6 - 30)            | 32<br>(15 - 64)             | 18<br>(10 - 31)             |
| Mesothelioma                                  | 21<br>(11 - 35)             | --                    | --                     | 9<br>(4 - 17)             | 8<br>(4 - 14)               | 4<br>(2 - 6)                |
| Hodgkin lymphoma                              | 60<br>(24 - 105)            | 3<br>(1 - 5)          | 7<br>(3 - 15)          | 34<br>(12 - 65)           | 12<br>(5 - 23)              | 4<br>(2 - 8)                |
| Non-Hodgkin lymphoma                          | 324<br>(194 - 553)          | 8<br>(4 - 16)         | 17<br>(10 - 27)        | 122<br>(64 - 235)         | 118<br>(64 - 211)           | 60<br>(38 - 95)             |
| Multiple myeloma                              | 52<br>(29 - 88)             | --                    | --                     | 10<br>(5 - 18)            | 28<br>(15 - 48)             | 15<br>(9 - 24)              |
| Leukemia                                      | 637<br>(405 - 970)          | 28<br>(14 - 52)       | 89<br>(62 - 126)       | 273<br>(154 - 462)        | 154<br>(89 - 248)           | 93<br>(64 - 127)            |
| Other neoplasms                               | 581<br>(322 - 1,037)        | 49<br>(24 - 103)      | 58<br>(33 - 107)       | 195<br>(92 - 387)         | 171<br>(87 - 323)           | 108<br>(70 - 163)           |
| Cardiovascular diseases                       | 42,530<br>(27,121 - 64,462) | 902<br>(552 - 1,327)  | 349<br>(229 - 501)     | 7,165<br>(3,741 - 12,938) | 17,423<br>(10,098 - 28,061) | 16,691<br>(12,112 - 22,230) |
| Rheumatic heart disease                       | 807<br>(437 - 1,484)        | 21<br>(8 - 43)        | 41<br>(23 - 70)        | 348<br>(166 - 678)        | 222<br>(114 - 407)          | 176<br>(106 - 293)          |
| Ischemic heart disease                        | 21,822<br>(13,284 - 33,663) | 148<br>(57 - 300)     | 49<br>(26 - 76)        | 3,557<br>(1,725 - 6,501)  | 9,883<br>(5,440 - 15,994)   | 8,185<br>(5,716 - 11,079)   |
| Cerebrovascular disease                       | 15,307<br>(10,163 - 23,273) | 400<br>(239 - 624)    | 176<br>(115 - 254)     | 2,302<br>(1,235 - 4,198)  | 5,615<br>(3,263 - 9,197)    | 6,815<br>(4,928 - 9,111)    |
| Ischemic stroke                               | 6,589<br>(3,909 - 9,750)    | 30<br>(11 - 67)       | 19<br>(9 - 35)         | 426<br>(181 - 827)        | 2,143<br>(1,091 - 3,570)    | 3,972<br>(2,536 - 5,382)    |
| Hemorrhagic stroke                            | 8,718<br>(5,326 - 13,697)   | 370<br>(225 - 581)    | 157<br>(101 - 228)     | 1,876<br>(1,025 - 3,415)  | 3,472<br>(1,936 - 5,741)    | 2,843<br>(1,894 - 4,309)    |
| Hypertensive heart disease                    | 1,560<br>(938 - 2,507)      | 4<br>(2 - 9)          | 3<br>(2 - 5)           | 196<br>(99 - 360)         | 602<br>(323 - 1,004)        | 754<br>(481 - 1,265)        |
| Cardiomyopathy and myocarditis                | 746<br>(431 - 1,122)        | 138<br>(60 - 243)     | 33<br>(18 - 54)        | 214<br>(100 - 390)        | 200<br>(103 - 322)          | 160<br>(95 - 254)           |
| Atrial fibrillation and flutter               | 8<br>(4 - 13)               | --                    | --                     | 1<br>(0 - 1)              | 3<br>(1 - 4)                | 5<br>(3 - 8)                |
| Aortic aneurysm                               | 145<br>(68 - 245)           | --                    | --                     | 25<br>(10 - 47)           | 69<br>(30 - 124)            | 51<br>(28 - 78)             |
| Peripheral vascular disease                   | 4<br>(2 - 6)                | --                    | --                     | 0<br>(0 - 1)              | 1<br>(1 - 2)                | 2<br>(1 - 4)                |
| Endocarditis                                  | 197<br>(107 - 363)          | 28<br>(13 - 58)       | 6<br>(3 - 12)          | 47<br>(21 - 101)          | 50<br>(24 - 95)             | 65<br>(33 - 116)            |
| Other cardiovascular and circulatory diseases | 1,935<br>(1,065 - 3,158)    | 162<br>(81 - 294)     | 40<br>(22 - 66)        | 474<br>(223 - 894)        | 779<br>(376 - 1,357)        | 479<br>(291 - 747)          |

Web Table 31- Yemen deaths with 95% UI by age, sex, and cause in 2013

| Cause                                               | Both Sexes, All Ages     | Both Sexes, 0-4 Years | Both Sexes, 5-14 Years | Both Sexes, 15-49 Years | Both Sexes, 50-69 Years  | Both Sexes, 70-80 Years  |
|-----------------------------------------------------|--------------------------|-----------------------|------------------------|-------------------------|--------------------------|--------------------------|
| Chronic respiratory diseases                        | 6,305<br>(4,173 - 9,518) | 243<br>(144 - 392)    | 79<br>(55 - 109)       | 962<br>(541 - 1,703)    | 2,232<br>(1,320 - 3,634) | 2,789<br>(1,987 - 3,835) |
| Chronic obstructive pulmonary disease               | 4,646<br>(3,053 - 7,059) | 162<br>(87 - 276)     | 29<br>(16 - 44)        | 472<br>(239 - 872)      | 1,688<br>(965 - 2,774)   | 2,296<br>(1,620 - 3,194) |
| Pneumoconiosis                                      | 138<br>(74 - 242)        | 3<br>(1 - 6)          | 4<br>(2 - 6)           | 57<br>(28 - 105)        | 43<br>(20 - 82)          | 31<br>(14 - 59)          |
| Silicosis                                           | 32<br>(13 - 67)          | 1<br>(0 - 2)          | 1<br>(0 - 2)           | 4<br>(2 - 9)            | 9<br>(3 - 22)            | 17<br>(6 - 37)           |
| Asbestosis                                          | 11<br>(5 - 20)           | 0<br>(0 - 1)          | 1<br>(0 - 1)           | 7<br>(3 - 14)           | 2<br>(1 - 4)             | 1<br>(0 - 1)             |
| Coal workers pneumoconiosis                         | 7<br>(3 - 12)            | 0<br>(0 - 1)          | 1<br>(0 - 1)           | 4<br>(2 - 7)            | 1<br>(0 - 2)             | 1<br>(0 - 1)             |
| Other pneumoconiosis                                | 89<br>(46 - 160)         | 1<br>(0 - 2)          | 1<br>(1 - 2)           | 43<br>(19 - 80)         | 31<br>(15 - 58)          | 12<br>(5 - 24)           |
| Asthma                                              | 989<br>(498 - 2,194)     | 33<br>(14 - 66)       | 31<br>(18 - 57)        | 300<br>(142 - 636)      | 351<br>(155 - 845)       | 273<br>(138 - 615)       |
| Interstitial lung disease and pulmonary sarcoidosis | 287<br>(101 - 608)       | 1<br>(0 - 4)          | 2<br>(1 - 5)           | 39<br>(10 - 103)        | 111<br>(35 - 246)        | 133<br>(50 - 263)        |
| Other chronic respiratory diseases                  | 245<br>(127 - 402)       | 45<br>(24 - 83)       | 12<br>(6 - 21)         | 94<br>(43 - 178)        | 38<br>(17 - 71)          | 56<br>(28 - 92)          |
| Cirrhosis                                           | 2,995<br>(1,567 - 5,368) | 73<br>(27 - 163)      | 59<br>(32 - 109)       | 782<br>(389 - 1,568)    | 1,364<br>(685 - 2,446)   | 718<br>(388 - 1,246)     |
| Cirrhosis due to hepatitis B                        | 1,310<br>(601 - 2,418)   | 5<br>(1 - 12)         | 14<br>(6 - 25)         | 326<br>(129 - 675)      | 620<br>(266 - 1,193)     | 346<br>(174 - 599)       |
| Cirrhosis due to hepatitis C                        | 1,054<br>(493 - 1,947)   | 4<br>(1 - 14)         | 11<br>(4 - 29)         | 284<br>(121 - 585)      | 516<br>(232 - 942)       | 239<br>(106 - 437)       |
| Cirrhosis due to alcohol use                        | 249<br>(125 - 504)       | --                    | --                     | 42<br>(17 - 97)         | 118<br>(54 - 254)        | 90<br>(45 - 173)         |
| Cirrhosis due to other causes                       | 382<br>(201 - 729)       | 63<br>(23 - 140)      | 34<br>(17 - 62)        | 131<br>(62 - 276)       | 110<br>(50 - 250)        | 44<br>(21 - 102)         |
| Digestive diseases                                  | 1,993<br>(1,131 - 3,318) | 85<br>(39 - 158)      | 73<br>(43 - 113)       | 518<br>(260 - 992)      | 652<br>(339 - 1,184)     | 665<br>(402 - 980)       |
| Peptic ulcer disease                                | 748<br>(399 - 1,234)     | 8<br>(3 - 19)         | 13<br>(6 - 22)         | 167<br>(77 - 323)       | 280<br>(137 - 493)       | 280<br>(156 - 430)       |
| Gastritis and duodenitis                            | 29<br>(10 - 67)          | 3<br>(1 - 7)          | 3<br>(1 - 8)           | 13<br>(4 - 31)          | 6<br>(2 - 14)            | 5<br>(2 - 10)            |
| Appendicitis                                        | 214<br>(109 - 412)       | 23<br>(9 - 46)        | 19<br>(9 - 35)         | 81<br>(35 - 177)        | 55<br>(25 - 111)         | 36<br>(19 - 65)          |
| Paralytic ileus and intestinal obstruction          | 208<br>(110 - 383)       | 8<br>(3 - 17)         | 6<br>(3 - 12)          | 43<br>(19 - 98)         | 60<br>(27 - 127)         | 91<br>(47 - 159)         |
| Inguinal, femoral, and abdominal hernia             | 63<br>(34 - 125)         | 5<br>(2 - 11)         | 5<br>(2 - 10)          | 17<br>(8 - 37)          | 15<br>(6 - 35)           | 21<br>(11 - 41)          |
| Inflammatory bowel disease                          | 103<br>(52 - 183)        | 9<br>(4 - 19)         | 7<br>(3 - 11)          | 36<br>(17 - 74)         | 26<br>(11 - 51)          | 26<br>(11 - 44)          |
| Vascular intestinal disorders                       | 43<br>(17 - 92)          | 1<br>(0 - 3)          | 2<br>(0 - 5)           | 15<br>(5 - 34)          | 14<br>(5 - 30)           | 12<br>(5 - 24)           |
| Gallbladder and biliary diseases                    | 262<br>(145 - 454)       | 11<br>(4 - 19)        | 6<br>(3 - 10)          | 54<br>(26 - 104)        | 90<br>(44 - 175)         | 101<br>(56 - 169)        |
| Pancreatitis                                        | 95<br>(37 - 180)         | 2<br>(1 - 4)          | 3<br>(1 - 6)           | 33<br>(12 - 68)         | 36<br>(14 - 68)          | 22<br>(8 - 41)           |
| Other digestive diseases                            | 225<br>(120 - 423)       | 16<br>(5 - 33)        | 9<br>(5 - 16)          | 57<br>(26 - 123)        | 71<br>(34 - 146)         | 71<br>(38 - 133)         |
| Neurological disorders                              | 2,254<br>(1,597 - 3,089) | 86<br>(41 - 176)      | 63<br>(29 - 114)       | 270<br>(112 - 514)      | 304<br>(172 - 486)       | 1,532<br>(1,157 - 1,973) |
| Alzheimer disease and other dementias               | 1,747<br>(1,286 - 2,307) | --                    | --                     | 2<br>(0 - 4)            | 249<br>(145 - 395)       | 1,497<br>(1,133 - 1,936) |
| Parkinson disease                                   | 15<br>(8 - 25)           | --                    | --                     | 1<br>(1 - 2)            | 4<br>(2 - 7)             | 9<br>(5 - 17)            |
| Epilepsy                                            | 411<br>(173 - 742)       | 59<br>(22 - 140)      | 56<br>(23 - 107)       | 240<br>(95 - 466)       | 39<br>(16 - 76)          | 16<br>(7 - 28)           |
| Multiple sclerosis                                  | 11<br>(3 - 24)           | --                    | --                     | 6<br>(2 - 14)           | 4<br>(1 - 9)             | 1<br>(0 - 3)             |
| Other neurological disorders                        | 70<br>(47 - 104)         | 27<br>(16 - 43)       | 7<br>(5 - 10)          | 21<br>(11 - 36)         | 7<br>(4 - 12)            | 8<br>(5 - 11)            |
| Mental and substance use disorders                  | 197<br>(100 - 375)       | 5<br>(2 - 11)         | 0<br>(0 - 0)           | 138<br>(63 - 292)       | 43<br>(23 - 85)          | 10<br>(6 - 16)           |
| Schizophrenia                                       | 5<br>(2 - 11)            | --                    | --                     | 3<br>(1 - 7)            | 1<br>(0 - 3)             | 1<br>(0 - 2)             |
| Alcohol use disorders                               | 62<br>(31 - 136)         | --                    | --                     | 34<br>(16 - 71)         | 24<br>(11 - 54)          | 5<br>(3 - 10)            |
| Drug use disorders                                  | 129<br>(57 - 305)        | 5<br>(2 - 11)         | --                     | 101<br>(41 - 255)       | 18<br>(8 - 45)           | 4<br>(2 - 9)             |
| Opioid use disorders                                | 71<br>(32 - 170)         | 3<br>(1 - 6)          | --                     | 56<br>(23 - 142)        | 9<br>(4 - 23)            | 2<br>(1 - 5)             |
| Cocaine use disorders                               | 2<br>(1 - 5)             | 0<br>(0 - 0)          | --                     | 2<br>(1 - 4)            | 0<br>(0 - 0)             | 0<br>(0 - 0)             |
| Amphetamine use disorders                           | 2<br>(1 - 4)             | 0<br>(0 - 0)          | --                     | 1<br>(1 - 3)            | 0<br>(0 - 1)             | 0<br>(0 - 0)             |
| Other drug use disorders                            | 54<br>(25 - 128)         | 2<br>(1 - 4)          | --                     | 42<br>(17 - 104)        | 9<br>(4 - 21)            | 2<br>(1 - 4)             |

Web Table 31- Yemen deaths with 95% UI by age, sex, and cause in 2013

| Cause                                               | Both Sexes, All Ages      | Both Sexes, 0-4 Years     | Both Sexes, 5-14 Years | Both Sexes, 15-49 Years | Both Sexes, 50-69 Years  | Both Sexes, 70-80 Years  |
|-----------------------------------------------------|---------------------------|---------------------------|------------------------|-------------------------|--------------------------|--------------------------|
| Eating disorders                                    | 1<br>(0 - 2)              | --                        | 0<br>(0 - 0)           | 1<br>(0 - 1)            | --                       | --                       |
| Anorexia nervosa                                    | 1<br>(0 - 2)              | --                        | 0<br>(0 - 0)           | 1<br>(0 - 1)            | --                       | --                       |
| Diabetes, urogenital, blood, and endocrine diseases | 6,781<br>(4,107 - 10,156) | 385<br>(221 - 580)        | 158<br>(98 - 224)      | 1,201<br>(620 - 2,094)  | 2,740<br>(1,503 - 4,300) | 2,296<br>(1,535 - 3,123) |
| Diabetes mellitus                                   | 3,383<br>(1,961 - 5,149)  | 29<br>(16 - 45)           | 10<br>(6 - 18)         | 360<br>(180 - 660)      | 1,638<br>(868 - 2,589)   | 1,346<br>(864 - 1,919)   |
| Acute glomerulonephritis                            | 49<br>(26 - 84)           | 5<br>(3 - 9)              | 5<br>(3 - 9)           | 16<br>(8 - 29)          | 12<br>(5 - 22)           | 10<br>(5 - 21)           |
| Chronic kidney disease                              | 2,267<br>(1,236 - 3,507)  | 80<br>(36 - 142)          | 43<br>(24 - 65)        | 472<br>(219 - 857)      | 918<br>(443 - 1,474)     | 754<br>(448 - 1,097)     |
| Chronic kidney disease due to diabetes mellitus     | 45<br>(11 - 96)           | 2<br>(0 - 3)              | 1<br>(0 - 3)           | 12<br>(3 - 27)          | 18<br>(4 - 41)           | 12<br>(3 - 24)           |
| Chronic kidney disease due to hypertension          | 833<br>(419 - 1,389)      | 6<br>(2 - 14)             | 4<br>(2 - 8)           | 143<br>(59 - 280)       | 373<br>(169 - 658)       | 307<br>(163 - 488)       |
| Chronic kidney disease due to glomerulonephritis    | 308<br>(166 - 494)        | 30<br>(17 - 49)           | 16<br>(9 - 23)         | 98<br>(46 - 178)        | 94<br>(41 - 163)         | 71<br>(36 - 120)         |
| Chronic kidney disease due to other causes          | 1,081<br>(454 - 1,825)    | 42<br>(11 - 88)           | 22<br>(9 - 38)         | 220<br>(75 - 430)       | 433<br>(153 - 776)       | 364<br>(155 - 592)       |
| Urinary diseases and male infertility               | 302<br>(195 - 457)        | 32<br>(16 - 60)           | 9<br>(6 - 13)          | 69<br>(35 - 125)        | 84<br>(45 - 142)         | 109<br>(73 - 160)        |
| Interstitial nephritis and urinary tract infections | 184<br>(114 - 275)        | 22<br>(10 - 42)           | 5<br>(3 - 7)           | 43<br>(21 - 78)         | 48<br>(25 - 82)          | 66<br>(41 - 99)          |
| Urolithiasis                                        | 23<br>(12 - 40)           | --                        | 2<br>(1 - 2)           | 8<br>(3 - 16)           | 7<br>(3 - 14)            | 7<br>(3 - 13)            |
| Other urinary diseases                              | 96<br>(57 - 158)          | 10<br>(4 - 23)            | 2<br>(1 - 4)           | 18<br>(9 - 34)          | 28<br>(14 - 54)          | 36<br>(20 - 64)          |
| Gynecological diseases                              | 15<br>(7 - 29)            | --                        | --                     | 11<br>(5 - 22)          | 3<br>(1 - 6)             | 1<br>(1 - 3)             |
| Uterine fibroids                                    | 3<br>(1 - 6)              | --                        | --                     | 2<br>(1 - 3)            | 1<br>(0 - 2)             | 0<br>(0 - 1)             |
| Polycystic ovarian syndrome                         | 1<br>(0 - 1)              | --                        | --                     | 1<br>(0 - 1)            | 0<br>(0 - 0)             | --                       |
| Endometriosis                                       | 2<br>(1 - 4)              | --                        | --                     | 2<br>(1 - 4)            | 0<br>(0 - 0)             | --                       |
| Genital prolapse                                    | 2<br>(1 - 4)              | --                        | --                     | 1<br>(1 - 3)            | 1<br>(0 - 1)             | 0<br>(0 - 1)             |
| Other gynecological diseases                        | 7<br>(3 - 14)             | --                        | --                     | 5<br>(2 - 10)           | 1<br>(1 - 3)             | 1<br>(0 - 1)             |
| Hemoglobinopathies and hemolytic anemias            | 499<br>(237 - 827)        | 145<br>(62 - 236)         | 68<br>(34 - 108)       | 213<br>(91 - 412)       | 39<br>(18 - 72)          | 35<br>(20 - 59)          |
| Thalassemias                                        | 308<br>(142 - 517)        | 111<br>(47 - 183)         | 55<br>(28 - 87)        | 142<br>(61 - 272)       | 0<br>(0 - 0)             | 0<br>(0 - 0)             |
| Sickle cell disorders                               | 95<br>(43 - 170)          | 14<br>(6 - 24)            | 8<br>(4 - 13)          | 49<br>(20 - 100)        | 22<br>(10 - 42)          | 1<br>(0 - 2)             |
| G6PD deficiency                                     | 7<br>(4 - 12)             | 2<br>(1 - 3)              | 1<br>(0 - 1)           | 3<br>(1 - 6)            | 1<br>(0 - 2)             | 0<br>(0 - 1)             |
| Other hemoglobinopathies and hemolytic anemias      | 89<br>(47 - 142)          | 17<br>(8 - 26)            | 3<br>(2 - 5)           | 19<br>(8 - 37)          | 16<br>(8 - 29)           | 33<br>(19 - 57)          |
| Endocrine, metabolic, blood, and immune disorders   | 264<br>(132 - 457)        | 95<br>(45 - 193)          | 22<br>(9 - 41)         | 61<br>(26 - 120)        | 46<br>(22 - 82)          | 40<br>(18 - 62)          |
| Musculoskeletal disorders                           | 142<br>(60 - 263)         | --                        | 12<br>(4 - 22)         | 67<br>(24 - 138)        | 33<br>(15 - 60)          | 30<br>(15 - 49)          |
| Rheumatoid arthritis                                | 35<br>(14 - 63)           | --                        | 4<br>(1 - 8)           | 14<br>(4 - 29)          | 9<br>(4 - 17)            | 8<br>(4 - 13)            |
| Other musculoskeletal disorders                     | 107<br>(42 - 209)         | --                        | 8<br>(3 - 15)          | 54<br>(18 - 112)        | 24<br>(10 - 46)          | 22<br>(10 - 38)          |
| Other non-communicable diseases                     | 6,607<br>(3,517 - 12,230) | 5,965<br>(3,067 - 11,321) | 267<br>(141 - 455)     | 202<br>(100 - 371)      | 70<br>(37 - 110)         | 104<br>(71 - 143)        |
| Congenital anomalies                                | 6,370<br>(3,307 - 11,983) | 5,883<br>(3,006 - 11,254) | 259<br>(135 - 447)     | 168<br>(82 - 323)       | 31<br>(16 - 52)          | 28<br>(18 - 41)          |
| Neural tube defects                                 | 605<br>(210 - 1,545)      | 576<br>(189 - 1,468)      | 12<br>(5 - 27)         | 14<br>(6 - 32)          | 2<br>(1 - 5)             | 1<br>(0 - 2)             |
| Congenital heart anomalies                          | 3,124<br>(1,481 - 6,328)  | 2,923<br>(1,357 - 5,991)  | 129<br>(60 - 246)      | 58<br>(26 - 114)        | 7<br>(3 - 13)            | 6<br>(4 - 9)             |
| Cleft lip and cleft palate                          | 17<br>(7 - 37)            | 17<br>(7 - 37)            | --                     | --                      | --                       | --                       |
| Down syndrome                                       | 224<br>(62 - 516)         | 182<br>(44 - 448)         | 21<br>(6 - 44)         | 19<br>(6 - 43)          | 1<br>(0 - 2)             | 0<br>(0 - 1)             |
| Chromosomal unbalanced rearrangements               | 85<br>(29 - 213)          | 75<br>(23 - 194)          | 3<br>(1 - 7)           | 5<br>(2 - 13)           | 1<br>(0 - 2)             | 0<br>(0 - 1)             |
| Other congenital anomalies                          | 2,315<br>(1,079 - 4,807)  | 2,110<br>(930 - 4,481)    | 94<br>(46 - 182)       | 71<br>(33 - 139)        | 20<br>(10 - 34)          | 21<br>(13 - 30)          |
| Skin and subcutaneous diseases                      | 179<br>(109 - 259)        | 23<br>(9 - 41)            | 7<br>(4 - 11)          | 34<br>(16 - 63)         | 39<br>(21 - 63)          | 75<br>(48 - 111)         |
| Cellulitis                                          | 110<br>(49 - 185)         | 16<br>(6 - 31)            | 5<br>(3 - 8)           | 21<br>(9 - 43)          | 25<br>(10 - 45)          | 42<br>(16 - 73)          |
| Pyoderma                                            | 41<br>(13 - 88)           | 7<br>(1 - 19)             | 1<br>(0 - 3)           | 8<br>(2 - 20)           | 9<br>(2 - 21)            | 16<br>(6 - 33)           |

Web Table 31- Yemen deaths with 95% UI by age, sex, and cause in 2013

| Cause                                           | Both Sexes, All Ages       | Both Sexes, 0-4 Years    | Both Sexes, 5-14 Years | Both Sexes, 15-49 Years   | Both Sexes, 50-69 Years | Both Sexes, 70-80 Years |
|-------------------------------------------------|----------------------------|--------------------------|------------------------|---------------------------|-------------------------|-------------------------|
| Decubitus ulcer                                 | 26<br>(7 - 54)             | 0<br>(0 - 1)             | 1<br>(0 - 2)           | 4<br>(1 - 10)             | 5<br>(1 - 10)           | 17<br>(4 - 37)          |
| Other skin and subcutaneous diseases            | 2<br>(0 - 8)               | 0<br>(0 - 2)             | 0<br>(0 - 1)           | 1<br>(0 - 4)              | 0<br>(0 - 1)            | 0<br>(0 - 1)            |
| Sudden infant death syndrome                    | 59<br>(13 - 231)           | 59<br>(13 - 231)         | --                     | --                        | --                      | --                      |
| Injuries                                        | 12,727<br>(8,061 - 19,188) | 1,583<br>(1,060 - 2,197) | 1,319<br>(984 - 1,694) | 7,673<br>(4,395 - 12,511) | 1,503<br>(939 - 2,387)  | 649<br>(476 - 882)      |
| Transport injuries                              | 5,564<br>(3,314 - 9,016)   | 520<br>(276 - 869)       | 626<br>(397 - 874)     | 3,574<br>(1,950 - 6,220)  | 637<br>(350 - 1,082)    | 207<br>(134 - 301)      |
| Road injuries                                   | 5,273<br>(3,158 - 8,501)   | 485<br>(261 - 809)       | 596<br>(383 - 826)     | 3,406<br>(1,855 - 5,885)  | 595<br>(331 - 1,019)    | 192<br>(125 - 279)      |
| Pedestrian road injuries                        | 1,505<br>(836 - 2,654)     | 188<br>(102 - 336)       | 229<br>(136 - 354)     | 807<br>(381 - 1,585)      | 197<br>(99 - 350)       | 84<br>(48 - 135)        |
| Cyclist road injuries                           | 245<br>(143 - 422)         | 21<br>(8 - 41)           | 36<br>(19 - 58)        | 126<br>(66 - 241)         | 50<br>(25 - 88)         | 13<br>(8 - 21)          |
| Motorcyclist road injuries                      | 641<br>(317 - 1,159)       | 32<br>(16 - 56)          | 35<br>(19 - 57)        | 512<br>(240 - 974)        | 51<br>(23 - 94)         | 12<br>(6 - 21)          |
| Motor vehicle road injuries                     | 2,760<br>(1,458 - 4,596)   | 211<br>(94 - 386)        | 264<br>(131 - 406)     | 1,926<br>(958 - 3,405)    | 283<br>(140 - 486)      | 75<br>(43 - 117)        |
| Other road injuries                             | 123<br>(52 - 245)          | 33<br>(11 - 69)          | 32<br>(11 - 68)        | 35<br>(13 - 79)           | 15<br>(6 - 32)          | 8<br>(3 - 19)           |
| Other transport injuries                        | 290<br>(101 - 522)         | 35<br>(12 - 70)          | 31<br>(10 - 55)        | 168<br>(56 - 330)         | 42<br>(12 - 77)         | 15<br>(5 - 26)          |
| Unintentional injuries                          | 4,470<br>(2,949 - 6,786)   | 911<br>(584 - 1,333)     | 582<br>(412 - 769)     | 2,163<br>(1,211 - 3,747)  | 483<br>(282 - 819)      | 332<br>(234 - 473)      |
| Falls                                           | 700<br>(378 - 1,195)       | 107<br>(45 - 217)        | 61<br>(31 - 106)       | 326<br>(149 - 640)        | 99<br>(52 - 171)        | 107<br>(64 - 170)       |
| Drowning                                        | 1,043<br>(505 - 1,671)     | 257<br>(91 - 459)        | 234<br>(102 - 376)     | 475<br>(234 - 841)        | 55<br>(26 - 107)        | 22<br>(13 - 37)         |
| Fire, heat, and hot substances                  | 800<br>(474 - 1,351)       | 190<br>(90 - 333)        | 81<br>(48 - 132)       | 348<br>(193 - 640)        | 103<br>(47 - 200)       | 77<br>(44 - 141)        |
| Poisonings                                      | 401<br>(223 - 650)         | 100<br>(49 - 182)        | 44<br>(24 - 72)        | 200<br>(99 - 371)         | 39<br>(20 - 70)         | 18<br>(10 - 28)         |
| Exposure to mechanical forces                   | 651<br>(360 - 1,138)       | 83<br>(43 - 145)         | 72<br>(42 - 111)       | 399<br>(197 - 779)        | 74<br>(36 - 134)        | 24<br>(14 - 36)         |
| Unintentional firearm injuries                  | 312<br>(115 - 602)         | 24<br>(9 - 53)           | 24<br>(10 - 47)        | 219<br>(77 - 484)         | 33<br>(12 - 69)         | 11<br>(5 - 20)          |
| Unintentional suffocation                       | 30<br>(9 - 75)             | 10<br>(2 - 35)           | 4<br>(1 - 11)          | 11<br>(3 - 27)            | 4<br>(1 - 9)            | 1<br>(0 - 2)            |
| Other exposure to mechanical forces             | 309<br>(175 - 522)         | 49<br>(22 - 94)          | 43<br>(22 - 74)        | 168<br>(83 - 323)         | 36<br>(18 - 69)         | 12<br>(7 - 20)          |
| Adverse effects of medical treatment            | 194<br>(119 - 316)         | 33<br>(16 - 59)          | 11<br>(7 - 16)         | 56<br>(29 - 104)          | 54<br>(27 - 97)         | 40<br>(20 - 72)         |
| Animal contact                                  | 63<br>(27 - 102)           | 17<br>(6 - 31)           | 13<br>(5 - 21)         | 21<br>(8 - 38)            | 7<br>(3 - 13)           | 6<br>(2 - 10)           |
| Venomous animal contact                         | 36<br>(14 - 62)            | 11<br>(3 - 21)           | 8<br>(3 - 14)          | 11<br>(4 - 21)            | 4<br>(2 - 7)            | 3<br>(1 - 5)            |
| Non-venomous animal contact                     | 27<br>(11 - 47)            | 6<br>(2 - 12)            | 5<br>(2 - 9)           | 10<br>(3 - 20)            | 3<br>(1 - 6)            | 4<br>(1 - 6)            |
| Foreign body                                    | 95<br>(52 - 174)           | 46<br>(21 - 95)          | 10<br>(6 - 18)         | 16<br>(8 - 33)            | 7<br>(4 - 14)           | 14<br>(8 - 26)          |
| Pulmonary aspiration and foreign body in airway | 89<br>(48 - 169)           | 45<br>(20 - 94)          | 9<br>(5 - 17)          | 14<br>(6 - 29)            | 7<br>(3 - 13)           | 14<br>(7 - 26)          |
| Foreign body in other body part                 | 5<br>(3 - 12)              | 1<br>(0 - 3)             | 1<br>(0 - 2)           | 2<br>(1 - 5)              | 1<br>(0 - 2)            | 1<br>(0 - 1)            |
| Other unintentional injuries                    | 522<br>(240 - 938)         | 77<br>(34 - 132)         | 57<br>(27 - 91)        | 320<br>(138 - 628)        | 46<br>(22 - 85)         | 22<br>(13 - 36)         |
| Self-harm and interpersonal violence            | 1,944<br>(1,034 - 3,178)   | 37<br>(21 - 60)          | 64<br>(35 - 108)       | 1,596<br>(810 - 2,716)    | 186<br>(99 - 315)       | 61<br>(38 - 91)         |
| Self-harm                                       | 1,007<br>(485 - 1,758)     | --                       | 29<br>(11 - 66)        | 786<br>(361 - 1,455)      | 137<br>(69 - 239)       | 55<br>(33 - 84)         |
| Interpersonal violence                          | 937<br>(494 - 1,585)       | 37<br>(21 - 60)          | 35<br>(19 - 55)        | 810<br>(407 - 1,415)      | 49<br>(26 - 87)         | 6<br>(4 - 11)           |
| Assault by firearm                              | 411<br>(162 - 760)         | 6<br>(2 - 12)            | 8<br>(3 - 15)          | 376<br>(140 - 705)        | 19<br>(8 - 38)          | 2<br>(1 - 3)            |
| Assault by sharp object                         | 244<br>(102 - 463)         | 3<br>(1 - 7)             | 5<br>(2 - 10)          | 222<br>(90 - 426)         | 13<br>(5 - 26)          | 1<br>(0 - 2)            |
| Assault by other means                          | 282<br>(162 - 498)         | 28<br>(16 - 47)          | 22<br>(12 - 36)        | 213<br>(109 - 402)        | 17<br>(8 - 32)          | 4<br>(2 - 6)            |
| Forces of nature, war, and legal intervention   | 750<br>(518 - 1,269)       | 116<br>(108 - 136)       | 48<br>(33 - 79)        | 340<br>(214 - 619)        | 197<br>(120 - 360)      | 49<br>(22 - 113)        |
| Collective violence and legal intervention      | 750<br>(518 - 1,269)       | 116<br>(108 - 136)       | 48<br>(33 - 79)        | 340<br>(214 - 619)        | 197<br>(120 - 360)      | 49<br>(22 - 113)        |

Web Table 31- Yemen deaths with 95% UI by age, sex, and cause in 2013

| Cause                                                             | Males, All Ages             | Males, 0-4 Years            | Males, 5-14 Years        | Males, 15-49 Years         | Males, 50-69 Years         | Males, 70-80 Years          |
|-------------------------------------------------------------------|-----------------------------|-----------------------------|--------------------------|----------------------------|----------------------------|-----------------------------|
| All causes                                                        | 68,261<br>(49,618 - 95,144) | 20,877<br>(18,295 - 24,072) | 2,647<br>(2,246 - 3,103) | 15,341<br>(8,851 - 25,385) | 15,330<br>(9,278 - 25,018) | 14,065<br>(10,691 - 18,405) |
| Communicable, maternal, neonatal, and nutritional diseases        | 22,393<br>(17,028 - 28,662) | 15,804<br>(12,076 - 18,999) | 1,102<br>(807 - 1,484)   | 2,650<br>(1,433 - 5,072)   | 1,367<br>(771 - 2,308)     | 1,470<br>(1,016 - 2,061)    |
| HIV/AIDS and tuberculosis                                         | 1,251<br>(605 - 3,250)      | 62<br>(30 - 155)            | 29<br>(14 - 51)          | 667<br>(263 - 1,941)       | 306<br>(151 - 736)         | 187<br>(111 - 385)          |
| Tuberculosis                                                      | 818<br>(454 - 1,807)        | 42<br>(22 - 77)             | 25<br>(13 - 43)          | 330<br>(157 - 786)         | 243<br>(126 - 569)         | 179<br>(105 - 362)          |
| HIV/AIDS                                                          | 433<br>(45 - 2,027)         | 20<br>(1 - 104)             | 4<br>(0 - 21)            | 337<br>(36 - 1,489)        | 63<br>(6 - 301)            | 9<br>(1 - 44)               |
| HIV/AIDS resulting in mycobacterial infection                     | 28<br>(3 - 139)             | 1<br>(0 - 7)                | 0<br>(0 - 1)             | 22<br>(2 - 100)            | 4<br>(0 - 22)              | 1<br>(0 - 3)                |
| HIV/AIDS resulting in other diseases                              | 405<br>(42 - 1,895)         | 18<br>(1 - 97)              | 4<br>(0 - 20)            | 316<br>(34 - 1,394)        | 59<br>(5 - 279)            | 8<br>(1 - 41)               |
| Diarrhea, lower respiratory, and other common infectious diseases | 9,413<br>(6,636 - 12,796)   | 6,206<br>(4,093 - 8,659)    | 554<br>(368 - 811)       | 1,014<br>(556 - 1,748)     | 650<br>(355 - 1,108)       | 989<br>(637 - 1,450)        |
| Diarrheal diseases                                                | 3,653<br>(1,811 - 5,857)    | 2,909<br>(1,141 - 4,857)    | 129<br>(50 - 274)        | 239<br>(103 - 462)         | 139<br>(56 - 284)          | 237<br>(117 - 448)          |
| Intestinal infectious diseases                                    | 461<br>(229 - 888)          | 130<br>(61 - 259)           | 140<br>(66 - 259)        | 167<br>(67 - 346)          | 18<br>(7 - 39)             | 6<br>(2 - 11)               |
| Typhoid fever                                                     | 320<br>(148 - 651)          | 81<br>(34 - 176)            | 104<br>(45 - 199)        | 119<br>(45 - 264)          | 12<br>(4 - 28)             | 3<br>(1 - 8)                |
| Paratyphoid fever                                                 | 95<br>(41 - 188)            | 26<br>(10 - 58)             | 31<br>(12 - 65)          | 34<br>(12 - 81)            | 3<br>(1 - 7)               | 1<br>(0 - 2)                |
| Other intestinal infectious diseases                              | 46<br>(25 - 78)             | 23<br>(11 - 41)             | 5<br>(1 - 12)            | 14<br>(5 - 31)             | 3<br>(0 - 9)               | 1<br>(0 - 5)                |
| Lower respiratory infections                                      | 3,769<br>(2,343 - 5,801)    | 2,044<br>(1,046 - 3,480)    | 160<br>(83 - 283)        | 426<br>(193 - 805)         | 433<br>(213 - 814)         | 706<br>(421 - 1,169)        |
| Upper respiratory infections                                      | 6<br>(2 - 13)               | 2<br>(0 - 6)                | 0<br>(0 - 1)             | 2<br>(0 - 5)               | 1<br>(0 - 4)               | 1<br>(0 - 3)                |
| Otitis media                                                      | 10<br>(4 - 17)              | 2<br>(1 - 3)                | 1<br>(1 - 2)             | 3<br>(1 - 6)               | 2<br>(1 - 4)               | 2<br>(1 - 3)                |
| Meningitis                                                        | 599<br>(302 - 1,097)        | 400<br>(149 - 862)          | 45<br>(20 - 84)          | 96<br>(43 - 176)           | 34<br>(15 - 63)            | 24<br>(12 - 42)             |
| Pneumococcal meningitis                                           | 128<br>(63 - 220)           | 72<br>(25 - 163)            | 14<br>(5 - 28)           | 28<br>(11 - 55)            | 8<br>(3 - 17)              | 6<br>(3 - 12)               |
| H influenzae type B meningitis                                    | 182<br>(79 - 380)           | 153<br>(54 - 342)           | 11<br>(5 - 23)           | 12<br>(4 - 26)             | 4<br>(1 - 8)               | 2<br>(1 - 5)                |
| Meningococcal meningitis                                          | 173<br>(69 - 334)           | 117<br>(29 - 268)           | 14<br>(5 - 29)           | 28<br>(10 - 54)            | 7<br>(3 - 15)              | 8<br>(4 - 14)               |
| Other meningitis                                                  | 117<br>(59 - 206)           | 59<br>(19 - 134)            | 6<br>(2 - 13)            | 29<br>(11 - 58)            | 15<br>(6 - 29)             | 8<br>(3 - 16)               |
| Encephalitis                                                      | 118<br>(57 - 216)           | 68<br>(17 - 161)            | 11<br>(5 - 18)           | 27<br>(13 - 51)            | 7<br>(4 - 13)              | 5<br>(3 - 7)                |
| Diphtheria                                                        | 4<br>(0 - 24)               | 3<br>(0 - 22)               | 1<br>(0 - 7)             | 0<br>(0 - 2)               | 0<br>(0 - 1)               | --                          |
| Whooping cough                                                    | 327<br>(0 - 1,536)          | 303<br>(0 - 1,412)          | 19<br>(0 - 90)           | 5<br>(0 - 25)              | 0<br>(0 - 2)               | --                          |
| Tetanus                                                           | 241<br>(105 - 558)          | 170<br>(59 - 468)           | 18<br>(1 - 39)           | 36<br>(4 - 73)             | 13<br>(1 - 29)             | 4<br>(0 - 8)                |
| Measles                                                           | 198<br>(4 - 1,289)          | 165<br>(4 - 1,044)          | 27<br>(1 - 193)          | 5<br>(0 - 34)              | 0<br>(0 - 1)               | --                          |
| Varicella and herpes zoster                                       | 27<br>(9 - 65)              | 10<br>(0 - 39)              | 3<br>(0 - 14)            | 7<br>(1 - 21)              | 2<br>(0 - 7)               | 5<br>(0 - 21)               |
| Neglected tropical diseases and malaria                           | 3,031<br>(1,503 - 5,978)    | 1,358<br>(381 - 3,254)      | 461<br>(224 - 883)       | 799<br>(344 - 1,848)       | 270<br>(118 - 510)         | 142<br>(60 - 324)           |
| Malaria                                                           | 2,713<br>(1,242 - 5,640)    | 1,282<br>(300 - 3,206)      | 410<br>(175 - 840)       | 658<br>(249 - 1,718)       | 234<br>(92 - 463)          | 129<br>(48 - 314)           |
| Leishmaniasis                                                     | 217<br>(99 - 451)           | 57<br>(12 - 154)            | 37<br>(6 - 102)          | 100<br>(37 - 223)          | 19<br>(5 - 41)             | 3<br>(1 - 7)                |
| Visceral leishmaniasis                                            | 217<br>(99 - 451)           | 57<br>(12 - 154)            | 37<br>(6 - 102)          | 100<br>(37 - 223)          | 19<br>(5 - 41)             | 3<br>(1 - 7)                |
| Schistosomiasis                                                   | 28<br>(16 - 48)             | 0<br>(0 - 0)                | 1<br>(0 - 2)             | 12<br>(6 - 23)             | 10<br>(5 - 18)             | 5<br>(2 - 8)                |
| Cysticercosis                                                     | 0<br>(0 - 0)                | 0<br>(0 - 0)                | 0<br>(0 - 0)             | 0<br>(0 - 0)               | 0<br>(0 - 0)               | 0<br>(0 - 0)                |
| Cystic echinococcosis                                             | 2<br>(1 - 3)                | 0<br>(0 - 0)                | 0<br>(0 - 0)             | 1<br>(1 - 2)               | 0<br>(0 - 1)               | 0<br>(0 - 0)                |
| Dengue                                                            | 3<br>(2 - 6)                | 1<br>(0 - 1)                | 1<br>(0 - 1)             | 2<br>(1 - 3)               | 0<br>(0 - 0)               | 0<br>(0 - 0)                |
| Rabies                                                            | 17<br>(9 - 32)              | 2<br>(1 - 5)                | 4<br>(2 - 8)             | 8<br>(4 - 17)              | 1<br>(1 - 3)               | 0<br>(0 - 1)                |
| Intestinal nematode infections                                    | 8<br>(2 - 19)               | 5<br>(1 - 12)               | 2<br>(0 - 7)             | 1<br>(0 - 6)               | 0<br>(0 - 3)               | 0<br>(0 - 2)                |
| Ascariasis                                                        | 8<br>(2 - 19)               | 5<br>(1 - 12)               | 2<br>(0 - 7)             | 1<br>(0 - 6)               | 0<br>(0 - 3)               | 0<br>(0 - 2)                |
| Other neglected tropical diseases                                 | 42<br>(16 - 74)             | 12<br>(3 - 25)              | 5<br>(2 - 10)            | 16<br>(5 - 34)             | 4<br>(1 - 9)               | 4<br>(1 - 9)                |
| Maternal disorders                                                | --                          | --                          | --                       | --                         | --                         | --                          |

Web Table 31- Yemen deaths with 95% UI by age, sex, and cause in 2013

| Cause                                                            | Males, All Ages             | Males, 0-4 Years          | Males, 5-14 Years  | Males, 15-49 Years        | Males, 50-69 Years         | Males, 70-80 Years         |
|------------------------------------------------------------------|-----------------------------|---------------------------|--------------------|---------------------------|----------------------------|----------------------------|
| Maternal hemorrhage                                              | --                          | --                        | --                 | --                        | --                         | --                         |
| Maternal sepsis and other maternal infections                    | --                          | --                        | --                 | --                        | --                         | --                         |
| Maternal hypertensive disorders                                  | --                          | --                        | --                 | --                        | --                         | --                         |
| Maternal obstructed labor                                        | --                          | --                        | --                 | --                        | --                         | --                         |
| Maternal abortive outcome                                        | --                          | --                        | --                 | --                        | --                         | --                         |
| Indirect maternal deaths                                         | --                          | --                        | --                 | --                        | --                         | --                         |
| Late maternal deaths                                             | --                          | --                        | --                 | --                        | --                         | --                         |
| Maternal deaths aggravated by HIV/AIDS                           | --                          | --                        | --                 | --                        | --                         | --                         |
| Other maternal disorders                                         | --                          | --                        | --                 | --                        | --                         | --                         |
| Neonatal disorders                                               | 7,754<br>(5,321 - 10,532)   | 7,754<br>(5,321 - 10,532) | --                 | --                        | --                         | --                         |
| Neonatal preterm birth complications                             | 5,345<br>(3,596 - 7,357)    | 5,345<br>(3,596 - 7,357)  | --                 | --                        | --                         | --                         |
| Neonatal encephalopathy due to birth asphyxia and trauma         | 817<br>(190 - 1,773)        | 817<br>(190 - 1,773)      | --                 | --                        | --                         | --                         |
| Neonatal sepsis and other neonatal infections                    | 195<br>(42 - 507)           | 195<br>(42 - 507)         | --                 | --                        | --                         | --                         |
| Hemolytic disease and other neonatal jaundice                    | 36<br>(8 - 111)             | 36<br>(8 - 111)           | --                 | --                        | --                         | --                         |
| Other neonatal disorders                                         | 1,362<br>(297 - 3,251)      | 1,362<br>(297 - 3,251)    | --                 | --                        | --                         | --                         |
| Nutritional deficiencies                                         | 385<br>(183 - 704)          | 134<br>(53 - 281)         | 24<br>(10 - 42)    | 73<br>(26 - 147)          | 57<br>(22 - 115)           | 97<br>(42 - 174)           |
| Protein-energy malnutrition                                      | 110<br>(32 - 284)           | 73<br>(14 - 200)          | 6<br>(2 - 13)      | 11<br>(3 - 30)            | 6<br>(1 - 20)              | 14<br>(3 - 40)             |
| Iodine deficiency                                                | 4<br>(0 - 21)               | 2<br>(0 - 16)             | 0<br>(0 - 3)       | 1<br>(0 - 5)              | 1<br>(0 - 4)               | 1<br>(0 - 4)               |
| Iron-deficiency anemia                                           | 229<br>(99 - 396)           | 47<br>(8 - 119)           | 14<br>(5 - 27)     | 49<br>(18 - 95)           | 45<br>(17 - 88)            | 74<br>(31 - 133)           |
| Other nutritional deficiencies                                   | 41<br>(15 - 102)            | 11<br>(3 - 33)            | 4<br>(1 - 10)      | 13<br>(4 - 35)            | 5<br>(1 - 14)              | 8<br>(2 - 25)              |
| Other communicable, maternal, neonatal, and nutritional diseases | 558<br>(332 - 1,098)        | 290<br>(167 - 503)        | 34<br>(18 - 68)    | 96<br>(41 - 237)          | 84<br>(37 - 203)           | 55<br>(24 - 162)           |
| Sexually transmitted diseases excluding HIV                      | 259<br>(142 - 428)          | 211<br>(110 - 371)        | 17<br>(9 - 27)     | 17<br>(6 - 35)            | 7<br>(3 - 15)              | 8<br>(3 - 20)              |
| Syphilis                                                         | 246<br>(134 - 414)          | 211<br>(110 - 371)        | 15<br>(8 - 26)     | 9<br>(3 - 18)             | 5<br>(2 - 11)              | 6<br>(2 - 17)              |
| Chlamydial infection                                             | --                          | --                        | --                 | --                        | --                         | --                         |
| Gonococcal infection                                             | 7<br>(3 - 13)               | --                        | 1<br>(0 - 1)       | 4<br>(2 - 9)              | 1<br>(0 - 3)               | 1<br>(0 - 2)               |
| Other sexually transmitted diseases                              | 5<br>(2 - 10)               | --                        | 1<br>(0 - 1)       | 4<br>(1 - 7)              | 1<br>(0 - 1)               | 0<br>(0 - 1)               |
| Hepatitis                                                        | 103<br>(53 - 179)           | 13<br>(3 - 32)            | 3<br>(2 - 5)       | 30<br>(13 - 60)           | 43<br>(20 - 78)            | 14<br>(8 - 25)             |
| Acute hepatitis A                                                | 11<br>(3 - 25)              | 6<br>(1 - 16)             | 1<br>(0 - 3)       | 3<br>(1 - 8)              | 1<br>(0 - 2)               | 0<br>(0 - 0)               |
| Acute hepatitis B                                                | 69<br>(34 - 125)            | 7<br>(2 - 19)             | 1<br>(0 - 3)       | 15<br>(5 - 32)            | 34<br>(16 - 63)            | 13<br>(6 - 23)             |
| Acute hepatitis C                                                | 3<br>(0 - 8)                | --                        | 0<br>(0 - 0)       | 1<br>(0 - 3)              | 1<br>(0 - 4)               | 1<br>(0 - 2)               |
| Acute hepatitis E                                                | 21<br>(7 - 42)              | 0<br>(0 - 0)              | 0<br>(0 - 1)       | 12<br>(5 - 25)            | 7<br>(2 - 17)              | 1<br>(0 - 3)               |
| Other infectious diseases                                        | 196<br>(78 - 636)           | 66<br>(19 - 220)          | 14<br>(4 - 47)     | 49<br>(16 - 180)          | 34<br>(8 - 140)            | 33<br>(7 - 137)            |
| Non-communicable diseases                                        | 36,749<br>(24,236 - 53,337) | 4,103<br>(2,336 - 7,460)  | 636<br>(453 - 891) | 6,750<br>(3,586 - 11,578) | 13,050<br>(7,812 - 21,141) | 12,209<br>(9,214 - 15,881) |
| Neoplasms                                                        | 4,613<br>(2,921 - 7,055)    | 58<br>(31 - 108)          | 124<br>(87 - 182)  | 1,017<br>(553 - 1,739)    | 2,096<br>(1,252 - 3,389)   | 1,318<br>(965 - 1,754)     |
| Esophageal cancer                                                | 83<br>(48 - 132)            | --                        | --                 | 15<br>(7 - 29)            | 40<br>(21 - 71)            | 27<br>(17 - 41)            |
| Stomach cancer                                                   | 706<br>(441 - 1,120)        | --                        | --                 | 143<br>(72 - 251)         | 353<br>(207 - 592)         | 211<br>(144 - 299)         |
| Liver cancer                                                     | 298<br>(179 - 472)          | --                        | 3<br>(1 - 5)       | 43<br>(20 - 82)           | 165<br>(90 - 275)          | 88<br>(54 - 136)           |
| Liver cancer due to hepatitis B                                  | 119<br>(63 - 197)           | --                        | 1<br>(1 - 3)       | 23<br>(11 - 46)           | 68<br>(33 - 115)           | 26<br>(14 - 45)            |
| Liver cancer due to hepatitis C                                  | 141<br>(79 - 234)           | --                        | 0<br>(0 - 1)       | 13<br>(5 - 28)            | 77<br>(39 - 139)           | 50<br>(28 - 82)            |
| Liver cancer due to alcohol use                                  | 14<br>(5 - 29)              | --                        | --                 | 1<br>(0 - 3)              | 7<br>(3 - 16)              | 6<br>(2 - 13)              |

Web Table 31- Yemen deaths with 95% UI by age, sex, and cause in 2013

| Cause                                         | Males, All Ages             | Males, 0-4 Years   | Males, 5-14 Years  | Males, 15-49 Years       | Males, 50-69 Years        | Males, 70-80 Years       |
|-----------------------------------------------|-----------------------------|--------------------|--------------------|--------------------------|---------------------------|--------------------------|
| Liver cancer due to other causes              | 24<br>(10 - 47)             | --                 | 1<br>(0 - 2)       | 5<br>(2 - 10)            | 12<br>(4 - 26)            | 6<br>(2 - 12)            |
| Larynx cancer                                 | 119<br>(70 - 207)           | --                 | --                 | 17<br>(8 - 32)           | 66<br>(36 - 119)          | 36<br>(23 - 59)          |
| Tracheal, bronchus and lung cancer            | 1,083<br>(623 - 1,679)      | --                 | --                 | 156<br>(67 - 291)        | 614<br>(340 - 1,008)      | 313<br>(207 - 430)       |
| Breast cancer                                 | 14<br>(7 - 23)              | --                 | --                 | 5<br>(2 - 9)             | 6<br>(3 - 12)             | 3<br>(2 - 6)             |
| Cervical cancer                               | --                          | --                 | --                 | --                       | --                        | --                       |
| Uterine cancer                                | --                          | --                 | --                 | --                       | --                        | --                       |
| Prostate cancer                               | 210<br>(112 - 331)          | --                 | --                 | 3<br>(1 - 6)             | 58<br>(27 - 99)           | 149<br>(79 - 239)        |
| Colon and rectum cancer                       | 321<br>(199 - 492)          | --                 | --                 | 72<br>(37 - 126)         | 150<br>(87 - 235)         | 100<br>(70 - 135)        |
| Lip and oral cavity cancer                    | 49<br>(26 - 84)             | --                 | --                 | 14<br>(6 - 26)           | 23<br>(12 - 41)           | 12<br>(7 - 18)           |
| Nasopharynx cancer                            | 38<br>(20 - 67)             | --                 | 2<br>(0 - 6)       | 15<br>(7 - 28)           | 16<br>(7 - 30)            | 5<br>(3 - 9)             |
| Other pharynx cancer                          | 20<br>(10 - 38)             | --                 | --                 | 6<br>(3 - 12)            | 11<br>(5 - 21)            | 3<br>(2 - 6)             |
| Gallbladder and biliary tract cancer          | 53<br>(27 - 96)             | --                 | --                 | 7<br>(3 - 14)            | 27<br>(12 - 53)           | 19<br>(10 - 33)          |
| Pancreatic cancer                             | 97<br>(60 - 156)            | --                 | --                 | 15<br>(7 - 27)           | 53<br>(30 - 91)           | 29<br>(20 - 42)          |
| Malignant skin melanoma                       | 13<br>(6 - 24)              | --                 | --                 | 5<br>(2 - 9)             | 5<br>(2 - 10)             | 4<br>(2 - 6)             |
| Non-melanoma skin cancer                      | 16<br>(8 - 28)              | --                 | --                 | 5<br>(2 - 10)            | 5<br>(2 - 10)             | 6<br>(3 - 10)            |
| Ovarian cancer                                | --                          | --                 | --                 | --                       | --                        | --                       |
| Testicular cancer                             | 14<br>(7 - 25)              | --                 | --                 | 11<br>(5 - 21)           | 2<br>(1 - 4)              | 1<br>(1 - 2)             |
| Kidney cancer                                 | 41<br>(24 - 65)             | 1<br>(0 - 3)       | 1<br>(1 - 2)       | 7<br>(4 - 13)            | 21<br>(11 - 37)           | 10<br>(6 - 16)           |
| Bladder cancer                                | 268<br>(168 - 420)          | --                 | --                 | 26<br>(12 - 49)          | 136<br>(76 - 231)         | 107<br>(71 - 156)        |
| Brain and nervous system cancer               | 242<br>(112 - 440)          | 10<br>(2 - 28)     | 26<br>(11 - 56)    | 90<br>(37 - 194)         | 86<br>(40 - 157)          | 29<br>(13 - 48)          |
| Thyroid cancer                                | 14<br>(8 - 25)              | --                 | 0<br>(0 - 1)       | 4<br>(2 - 8)             | 7<br>(3 - 12)             | 3<br>(2 - 6)             |
| Mesothelioma                                  | 8<br>(4 - 14)               | --                 | --                 | 2<br>(1 - 5)             | 4<br>(2 - 7)              | 2<br>(1 - 4)             |
| Hodgkin lymphoma                              | 33<br>(13 - 67)             | 1<br>(0 - 3)       | 4<br>(1 - 10)      | 18<br>(6 - 43)           | 7<br>(3 - 14)             | 2<br>(1 - 5)             |
| Non-Hodgkin lymphoma                          | 171<br>(103 - 280)          | 4<br>(2 - 8)       | 9<br>(5 - 15)      | 66<br>(35 - 119)         | 58<br>(32 - 97)           | 34<br>(20 - 52)          |
| Multiple myeloma                              | 31<br>(14 - 57)             | --                 | --                 | 6<br>(2 - 12)            | 16<br>(7 - 30)            | 9<br>(4 - 18)            |
| Leukemia                                      | 371<br>(233 - 560)          | 15<br>(6 - 30)     | 50<br>(31 - 75)    | 165<br>(92 - 280)        | 84<br>(48 - 133)          | 58<br>(38 - 83)          |
| Other neoplasms                               | 299<br>(180 - 473)          | 27<br>(13 - 62)    | 29<br>(15 - 53)    | 102<br>(51 - 179)        | 84<br>(46 - 142)          | 57<br>(37 - 87)          |
| Cardiovascular diseases                       | 19,380<br>(12,518 - 29,781) | 473<br>(269 - 764) | 174<br>(113 - 253) | 3,870<br>(2,043 - 6,780) | 7,840<br>(4,744 - 12,867) | 7,022<br>(5,239 - 9,225) |
| Rheumatic heart disease                       | 332<br>(175 - 647)          | 10<br>(3 - 24)     | 21<br>(10 - 38)    | 143<br>(66 - 302)        | 91<br>(43 - 186)          | 67<br>(36 - 129)         |
| Ischemic heart disease                        | 10,388<br>(6,423 - 16,122)  | 85<br>(28 - 207)   | 25<br>(13 - 41)    | 2,145<br>(1,079 - 3,791) | 4,781<br>(2,827 - 7,854)  | 3,352<br>(2,359 - 4,421) |
| Cerebrovascular disease                       | 6,796<br>(4,365 - 10,153)   | 206<br>(107 - 353) | 90<br>(55 - 136)   | 1,092<br>(551 - 1,981)   | 2,353<br>(1,339 - 3,886)  | 3,055<br>(2,171 - 4,064) |
| Ischemic stroke                               | 2,989<br>(1,580 - 4,553)    | 16<br>(5 - 43)     | 9<br>(3 - 19)      | 221<br>(78 - 453)        | 929<br>(448 - 1,613)      | 1,814<br>(983 - 2,589)   |
| Hemorrhagic stroke                            | 3,807<br>(2,256 - 6,297)    | 190<br>(100 - 329) | 81<br>(48 - 123)   | 871<br>(445 - 1,577)     | 1,424<br>(791 - 2,485)    | 1,241<br>(715 - 1,972)   |
| Hypertensive heart disease                    | 546<br>(270 - 1,099)        | 2<br>(1 - 5)       | 1<br>(1 - 2)       | 97<br>(40 - 194)         | 210<br>(99 - 436)         | 235<br>(120 - 526)       |
| Cardiomyopathy and myocarditis                | 394<br>(207 - 609)          | 69<br>(22 - 130)   | 17<br>(7 - 31)     | 127<br>(57 - 232)        | 108<br>(56 - 182)         | 72<br>(39 - 116)         |
| Atrial fibrillation and flutter               | 4<br>(2 - 7)                | --                 | --                 | 0<br>(0 - 1)             | 1<br>(0 - 3)              | 2<br>(1 - 4)             |
| Aortic aneurysm                               | 95<br>(39 - 172)            | --                 | --                 | 12<br>(5 - 26)           | 53<br>(19 - 103)          | 30<br>(13 - 53)          |
| Peripheral vascular disease                   | 1<br>(1 - 2)                | --                 | --                 | 0<br>(0 - 0)             | 0<br>(0 - 1)              | 1<br>(0 - 1)             |
| Endocarditis                                  | 87<br>(40 - 169)            | 13<br>(5 - 33)     | 3<br>(1 - 6)       | 22<br>(9 - 47)           | 27<br>(11 - 55)           | 22<br>(10 - 42)          |
| Other cardiovascular and circulatory diseases | 737<br>(404 - 1,305)        | 87<br>(37 - 177)   | 17<br>(8 - 30)     | 232<br>(111 - 466)       | 215<br>(110 - 411)        | 185<br>(106 - 300)       |



Web Table 31- Yemen deaths with 95% UI by age, sex, and cause in 2013

| Cause                                               | Males, All Ages          | Males, 0-4 Years  | Males, 5-14 Years | Males, 15-49 Years | Males, 50-69 Years     | Males, 70-80 Years     |
|-----------------------------------------------------|--------------------------|-------------------|-------------------|--------------------|------------------------|------------------------|
| Chronic respiratory diseases                        | 2,993<br>(1,978 - 4,545) | 136<br>(63 - 249) | 38<br>(25 - 58)   | 373<br>(189 - 644) | 1,020<br>(594 - 1,694) | 1,426<br>(997 - 2,029) |
| Chronic obstructive pulmonary disease               | 2,368<br>(1,553 - 3,591) | 90<br>(36 - 181)  | 16<br>(8 - 27)    | 207<br>(101 - 369) | 818<br>(481 - 1,360)   | 1,237<br>(861 - 1,756) |
| Pneumoconiosis                                      | 124<br>(62 - 225)        | 2<br>(0 - 5)      | 2<br>(1 - 5)      | 51<br>(24 - 95)    | 40<br>(18 - 77)        | 29<br>(12 - 55)        |
| Silicosis                                           | 30<br>(11 - 65)          | 1<br>(0 - 2)      | 1<br>(0 - 2)      | 3<br>(1 - 8)       | 9<br>(3 - 21)          | 17<br>(6 - 37)         |
| Asbestosis                                          | 9<br>(4 - 17)            | 0<br>(0 - 1)      | 0<br>(0 - 1)      | 6<br>(3 - 12)      | 2<br>(1 - 4)           | 0<br>(0 - 1)           |
| Coal workers pneumoconiosis                         | 4<br>(2 - 9)             | 0<br>(0 - 1)      | 1<br>(0 - 1)      | 2<br>(1 - 5)       | 1<br>(0 - 1)           | 0<br>(0 - 1)           |
| Other pneumoconiosis                                | 80<br>(40 - 149)         | 1<br>(0 - 2)      | 1<br>(0 - 1)      | 39<br>(17 - 75)    | 29<br>(14 - 55)        | 11<br>(4 - 23)         |
| Asthma                                              | 295<br>(145 - 802)       | 14<br>(4 - 34)    | 12<br>(5 - 28)    | 79<br>(33 - 207)   | 103<br>(46 - 308)      | 87<br>(41 - 255)       |
| Interstitial lung disease and pulmonary sarcoidosis | 104<br>(34 - 208)        | 0<br>(0 - 1)      | 1<br>(0 - 2)      | 8<br>(3 - 22)      | 41<br>(12 - 91)        | 53<br>(17 - 109)       |
| Other chronic respiratory diseases                  | 102<br>(44 - 201)        | 30<br>(12 - 68)   | 8<br>(3 - 15)     | 27<br>(9 - 65)     | 18<br>(6 - 43)         | 19<br>(7 - 43)         |
| Cirrhosis                                           | 1,350<br>(655 - 2,710)   | 31<br>(9 - 78)    | 30<br>(15 - 64)   | 377<br>(165 - 820) | 603<br>(272 - 1,221)   | 309<br>(158 - 592)     |
| Cirrhosis due to hepatitis B                        | 473<br>(163 - 1,181)     | 2<br>(0 - 6)      | 6<br>(2 - 14)     | 129<br>(44 - 336)  | 220<br>(68 - 565)      | 116<br>(38 - 273)      |
| Cirrhosis due to hepatitis C                        | 518<br>(205 - 1,039)     | 2<br>(0 - 7)      | 7<br>(2 - 19)     | 154<br>(54 - 326)  | 245<br>(90 - 519)      | 110<br>(44 - 223)      |
| Cirrhosis due to alcohol use                        | 181<br>(76 - 399)        | --                | --                | 33<br>(12 - 82)    | 86<br>(34 - 201)       | 63<br>(26 - 127)       |
| Cirrhosis due to other causes                       | 179<br>(82 - 360)        | 27<br>(8 - 69)    | 17<br>(8 - 38)    | 62<br>(24 - 140)   | 52<br>(20 - 118)       | 20<br>(8 - 41)         |
| Digestive diseases                                  | 983<br>(511 - 1,871)     | 44<br>(16 - 91)   | 38<br>(19 - 67)   | 276<br>(122 - 564) | 303<br>(142 - 653)     | 322<br>(179 - 545)     |
| Peptic ulcer disease                                | 410<br>(195 - 783)       | 4<br>(1 - 10)     | 8<br>(3 - 15)     | 101<br>(42 - 215)  | 150<br>(66 - 311)      | 147<br>(71 - 258)      |
| Gastritis and duodenitis                            | 15<br>(4 - 38)           | 1<br>(0 - 4)      | 2<br>(0 - 4)      | 7<br>(2 - 19)      | 2<br>(1 - 6)           | 2<br>(1 - 6)           |
| Appendicitis                                        | 108<br>(44 - 241)        | 13<br>(4 - 32)    | 11<br>(3 - 23)    | 41<br>(15 - 99)    | 25<br>(9 - 63)         | 18<br>(7 - 38)         |
| Paralytic ileus and intestinal obstruction          | 112<br>(48 - 240)        | 4<br>(1 - 11)     | 4<br>(1 - 8)      | 26<br>(9 - 66)     | 32<br>(12 - 74)        | 46<br>(20 - 94)        |
| Inguinal, femoral, and abdominal hernia             | 32<br>(14 - 74)          | 3<br>(1 - 8)      | 3<br>(1 - 6)      | 10<br>(4 - 22)     | 6<br>(2 - 19)          | 11<br>(4 - 25)         |
| Inflammatory bowel disease                          | 47<br>(19 - 86)          | 5<br>(2 - 12)     | 3<br>(1 - 6)      | 16<br>(6 - 35)     | 10<br>(4 - 21)         | 12<br>(4 - 24)         |
| Vascular intestinal disorders                       | 22<br>(6 - 59)           | 1<br>(0 - 3)      | 2<br>(0 - 4)      | 8<br>(2 - 23)      | 6<br>(2 - 17)          | 5<br>(1 - 13)          |
| Gallbladder and biliary diseases                    | 92<br>(43 - 175)         | 4<br>(1 - 9)      | 3<br>(1 - 6)      | 19<br>(7 - 42)     | 26<br>(10 - 58)        | 40<br>(17 - 78)        |
| Pancreatitis                                        | 41<br>(11 - 83)          | 1<br>(0 - 1)      | 1<br>(0 - 2)      | 18<br>(5 - 40)     | 13<br>(3 - 27)         | 9<br>(2 - 19)          |
| Other digestive diseases                            | 104<br>(40 - 246)        | 8<br>(2 - 21)     | 3<br>(1 - 8)      | 30<br>(10 - 74)    | 32<br>(10 - 82)        | 32<br>(12 - 79)        |
| Neurological disorders                              | 1,204<br>(837 - 1,619)   | 42<br>(16 - 102)  | 30<br>(12 - 64)   | 139<br>(55 - 267)  | 157<br>(89 - 254)      | 837<br>(604 - 1,098)   |
| Alzheimer disease and other dementias               | 949<br>(681 - 1,274)     | --                | --                | 1<br>(0 - 2)       | 131<br>(75 - 213)      | 817<br>(588 - 1,077)   |
| Parkinson disease                                   | 11<br>(5 - 19)           | --                | --                | 1<br>(0 - 1)       | 3<br>(1 - 6)           | 7<br>(3 - 14)          |
| Epilepsy                                            | 205<br>(78 - 382)        | 31<br>(9 - 87)    | 27<br>(10 - 61)   | 120<br>(43 - 239)  | 18<br>(7 - 37)         | 8<br>(4 - 17)          |
| Multiple sclerosis                                  | 5<br>(1 - 9)             | --                | --                | 3<br>(1 - 6)       | 1<br>(0 - 3)           | 1<br>(0 - 1)           |
| Other neurological disorders                        | 35<br>(20 - 57)          | 11<br>(5 - 24)    | 3<br>(2 - 4)      | 14<br>(7 - 25)     | 3<br>(2 - 6)           | 4<br>(2 - 5)           |
| Mental and substance use disorders                  | 127<br>(60 - 281)        | 4<br>(2 - 9)      | 0<br>(0 - 0)      | 92<br>(40 - 215)   | 26<br>(13 - 55)        | 5<br>(3 - 9)           |
| Schizophrenia                                       | 2<br>(1 - 5)             | --                | --                | 1<br>(0 - 3)       | 0<br>(0 - 1)           | 0<br>(0 - 1)           |
| Alcohol use disorders                               | 37<br>(18 - 79)          | --                | --                | 21<br>(10 - 44)    | 12<br>(6 - 31)         | 3<br>(2 - 6)           |
| Drug use disorders                                  | 88<br>(37 - 243)         | 4<br>(2 - 9)      | --                | 70<br>(27 - 194)   | 13<br>(6 - 39)         | 2<br>(1 - 5)           |
| Opioid use disorders                                | 49<br>(21 - 134)         | 2<br>(1 - 5)      | --                | 39<br>(15 - 109)   | 7<br>(3 - 20)          | 1<br>(0 - 3)           |
| Cocaine use disorders                               | 1<br>(0 - 3)             | 0<br>(0 - 0)      | --                | 1<br>(0 - 2)       | 0<br>(0 - 0)           | 0<br>(0 - 0)           |
| Amphetamine use disorders                           | 1<br>(0 - 3)             | 0<br>(0 - 0)      | --                | 1<br>(0 - 2)       | 0<br>(0 - 0)           | 0<br>(0 - 0)           |
| Other drug use disorders                            | 37<br>(16 - 100)         | 1<br>(1 - 3)      | --                | 29<br>(11 - 80)    | 6<br>(3 - 18)          | 1<br>(0 - 2)           |

Web Table 31- Yemen deaths with 95% UI by age, sex, and cause in 2013

| Cause                                               | Males, All Ages          | Males, 0-4 Years         | Males, 5-14 Years | Males, 15-49 Years | Males, 50-69 Years   | Males, 70-80 Years   |
|-----------------------------------------------------|--------------------------|--------------------------|-------------------|--------------------|----------------------|----------------------|
| Eating disorders                                    | 0<br>(0 - 0)             | --                       | 0<br>(0 - 0)      | 0<br>(0 - 0)       | --                   | --                   |
| Anorexia nervosa                                    | 0<br>(0 - 0)             | --                       | 0<br>(0 - 0)      | 0<br>(0 - 0)       | --                   | --                   |
| Diabetes, urogenital, blood, and endocrine diseases | 2,635<br>(1,620 - 3,915) | 212<br>(114 - 331)       | 71<br>(44 - 102)  | 476<br>(228 - 833) | 962<br>(544 - 1,547) | 914<br>(618 - 1,250) |
| Diabetes mellitus                                   | 1,137<br>(668 - 1,812)   | 18<br>(9 - 33)           | 3<br>(2 - 5)      | 131<br>(63 - 244)  | 518<br>(276 - 873)   | 466<br>(296 - 709)   |
| Acute glomerulonephritis                            | 23<br>(10 - 43)          | 2<br>(1 - 4)             | 2<br>(1 - 4)      | 7<br>(3 - 15)      | 6<br>(2 - 13)        | 5<br>(2 - 11)        |
| Chronic kidney disease                              | 995<br>(531 - 1,511)     | 47<br>(17 - 92)          | 19<br>(11 - 30)   | 203<br>(93 - 356)  | 368<br>(182 - 606)   | 358<br>(194 - 536)   |
| Chronic kidney disease due to diabetes mellitus     | 18<br>(1 - 40)           | 1<br>(0 - 2)             | 1<br>(0 - 1)      | 6<br>(1 - 14)      | 6<br>(0 - 13)        | 5<br>(0 - 12)        |
| Chronic kidney disease due to hypertension          | 363<br>(148 - 641)       | 4<br>(1 - 10)            | 2<br>(0 - 4)      | 61<br>(21 - 126)   | 158<br>(61 - 295)    | 139<br>(56 - 244)    |
| Chronic kidney disease due to glomerulonephritis    | 129<br>(67 - 203)        | 16<br>(7 - 29)           | 7<br>(4 - 11)     | 39<br>(16 - 72)    | 35<br>(15 - 64)      | 33<br>(15 - 54)      |
| Chronic kidney disease due to other causes          | 485<br>(193 - 850)       | 27<br>(5 - 63)           | 10<br>(3 - 17)    | 97<br>(35 - 194)   | 170<br>(58 - 325)    | 181<br>(59 - 344)    |
| Urinary diseases and male infertility               | 140<br>(85 - 227)        | 21<br>(8 - 48)           | 4<br>(2 - 7)      | 25<br>(12 - 46)    | 38<br>(19 - 70)      | 53<br>(31 - 90)      |
| Interstitial nephritis and urinary tract infections | 63<br>(31 - 104)         | 13<br>(5 - 32)           | 2<br>(1 - 4)      | 10<br>(4 - 20)     | 16<br>(6 - 30)       | 22<br>(9 - 42)       |
| Urolithiasis                                        | 8<br>(4 - 14)            | --                       | 1<br>(0 - 1)      | 2<br>(1 - 5)       | 2<br>(1 - 5)         | 2<br>(1 - 5)         |
| Other urinary diseases                              | 69<br>(38 - 116)         | 8<br>(2 - 19)            | 1<br>(1 - 3)      | 12<br>(6 - 23)     | 20<br>(9 - 40)       | 28<br>(13 - 53)      |
| Gynecological diseases                              | --                       | --                       | --                | --                 | --                   | --                   |
| Uterine fibroids                                    | --                       | --                       | --                | --                 | --                   | --                   |
| Polycystic ovarian syndrome                         | --                       | --                       | --                | --                 | --                   | --                   |
| Endometriosis                                       | --                       | --                       | --                | --                 | --                   | --                   |
| Genital prolapse                                    | --                       | --                       | --                | --                 | --                   | --                   |
| Other gynecological diseases                        | --                       | --                       | --                | --                 | --                   | --                   |
| Hemoglobinopathies and hemolytic anemias            | 229<br>(101 - 381)       | 79<br>(31 - 143)         | 32<br>(14 - 57)   | 86<br>(33 - 165)   | 15<br>(6 - 32)       | 16<br>(7 - 31)       |
| Thalassemias                                        | 144<br>(63 - 249)        | 60<br>(23 - 109)         | 25<br>(11 - 45)   | 59<br>(23 - 115)   | 0<br>(0 - 0)         | 0<br>(0 - 0)         |
| Sickle cell disorders                               | 42<br>(18 - 74)          | 10<br>(4 - 18)           | 5<br>(2 - 9)      | 19<br>(7 - 36)     | 8<br>(3 - 17)        | 0<br>(0 - 1)         |
| G6PD deficiency                                     | 4<br>(2 - 6)             | 1<br>(0 - 2)             | 0<br>(0 - 1)      | 1<br>(0 - 2)       | 0<br>(0 - 1)         | 0<br>(0 - 0)         |
| Other hemoglobinopathies and hemolytic anemias      | 39<br>(19 - 67)          | 8<br>(4 - 14)            | 1<br>(1 - 3)      | 8<br>(3 - 14)      | 6<br>(3 - 14)        | 15<br>(7 - 30)       |
| Endocrine, metabolic, blood, and immune disorders   | 110<br>(41 - 186)        | 45<br>(16 - 98)          | 10<br>(3 - 19)    | 24<br>(8 - 44)     | 17<br>(6 - 29)       | 16<br>(5 - 27)       |
| Musculoskeletal disorders                           | 58<br>(16 - 97)          | --                       | 6<br>(2 - 10)     | 26<br>(7 - 52)     | 12<br>(4 - 21)       | 13<br>(3 - 21)       |
| Rheumatoid arthritis                                | 13<br>(4 - 24)           | --                       | 2<br>(0 - 4)      | 6<br>(1 - 11)      | 3<br>(1 - 6)         | 3<br>(1 - 6)         |
| Other musculoskeletal disorders                     | 44<br>(12 - 75)          | --                       | 4<br>(1 - 7)      | 21<br>(5 - 40)     | 9<br>(3 - 17)        | 10<br>(3 - 17)       |
| Other non-communicable diseases                     | 3,406<br>(1,690 - 6,782) | 3,103<br>(1,505 - 6,315) | 125<br>(63 - 241) | 103<br>(53 - 177)  | 31<br>(17 - 49)      | 45<br>(28 - 64)      |
| Congenital anomalies                                | 3,294<br>(1,613 - 6,630) | 3,060<br>(1,457 - 6,228) | 121<br>(61 - 237) | 83<br>(41 - 147)   | 15<br>(8 - 25)       | 15<br>(9 - 22)       |
| Neural tube defects                                 | 236<br>(62 - 655)        | 223<br>(51 - 633)        | 6<br>(2 - 16)     | 6<br>(2 - 14)      | 1<br>(0 - 2)         | 0<br>(0 - 1)         |
| Congenital heart anomalies                          | 1,537<br>(754 - 3,264)   | 1,447<br>(690 - 3,095)   | 56<br>(26 - 116)  | 27<br>(14 - 49)    | 3<br>(2 - 6)         | 3<br>(1 - 5)         |
| Cleft lip and cleft palate                          | 9<br>(2 - 21)            | 9<br>(2 - 21)            | --                | --                 | --                   | --                   |
| Down syndrome                                       | 126<br>(32 - 327)        | 103<br>(21 - 293)        | 9<br>(2 - 22)     | 13<br>(4 - 29)     | 0<br>(0 - 1)         | 0<br>(0 - 0)         |
| Chromosomal unbalanced rearrangements               | 43<br>(13 - 116)         | 39<br>(11 - 109)         | 2<br>(1 - 4)      | 2<br>(1 - 4)       | 0<br>(0 - 1)         | 0<br>(0 - 0)         |
| Other congenital anomalies                          | 1,343<br>(548 - 3,244)   | 1,239<br>(465 - 3,075)   | 48<br>(20 - 102)  | 35<br>(16 - 64)    | 10<br>(5 - 17)       | 11<br>(6 - 17)       |
| Skin and subcutaneous diseases                      | 82<br>(40 - 125)         | 13<br>(3 - 28)           | 3<br>(1 - 5)      | 19<br>(7 - 35)     | 16<br>(8 - 27)       | 30<br>(16 - 48)      |
| Cellulitis                                          | 45<br>(19 - 95)          | 8<br>(2 - 21)            | 2<br>(1 - 4)      | 10<br>(4 - 25)     | 9<br>(3 - 20)        | 16<br>(6 - 33)       |
| Pyoderma                                            | 24<br>(5 - 55)           | 5<br>(0 - 15)            | 1<br>(0 - 2)      | 5<br>(1 - 14)      | 4<br>(1 - 11)        | 9<br>(2 - 21)        |

Web Table 31- Yemen deaths with 95% UI by age, sex, and cause in 2013

| Cause                                           | Males, All Ages           | Males, 0-4 Years     | Males, 5-14 Years    | Males, 15-49 Years       | Males, 50-69 Years   | Males, 70-80 Years |
|-------------------------------------------------|---------------------------|----------------------|----------------------|--------------------------|----------------------|--------------------|
| Decubitus ulcer                                 | 11<br>(2 - 27)            | 0<br>(0 - 1)         | 0<br>(0 - 1)         | 3<br>(0 - 9)             | 2<br>(0 - 6)         | 5<br>(1 - 13)      |
| Other skin and subcutaneous diseases            | 2<br>(0 - 6)              | 0<br>(0 - 2)         | 0<br>(0 - 1)         | 1<br>(0 - 3)             | 0<br>(0 - 1)         | 0<br>(0 - 0)       |
| Sudden infant death syndrome                    | 30<br>(4 - 122)           | 30<br>(4 - 122)      | --                   | --                       | --                   | --                 |
| Injuries                                        | 9,120<br>(5,683 - 13,869) | 970<br>(610 - 1,474) | 909<br>(679 - 1,167) | 5,941<br>(3,324 - 9,688) | 914<br>(566 - 1,479) | 385<br>(273 - 530) |
| Transport injuries                              | 4,260<br>(2,473 - 6,929)  | 338<br>(169 - 628)   | 452<br>(283 - 632)   | 2,914<br>(1,574 - 5,068) | 411<br>(222 - 706)   | 146<br>(89 - 229)  |
| Road injuries                                   | 4,045<br>(2,367 - 6,575)  | 312<br>(156 - 595)   | 429<br>(270 - 602)   | 2,782<br>(1,508 - 4,880) | 385<br>(209 - 664)   | 137<br>(83 - 213)  |
| Pedestrian road injuries                        | 1,193<br>(606 - 2,157)    | 134<br>(64 - 274)    | 178<br>(99 - 283)    | 684<br>(298 - 1,353)     | 135<br>(59 - 256)    | 63<br>(31 - 109)   |
| Cyclist road injuries                           | 152<br>(77 - 276)         | 12<br>(4 - 26)       | 25<br>(12 - 45)      | 84<br>(38 - 169)         | 22<br>(11 - 43)      | 9<br>(5 - 15)      |
| Motorcyclist road injuries                      | 461<br>(208 - 869)        | 16<br>(6 - 35)       | 20<br>(10 - 37)      | 384<br>(165 - 753)       | 31<br>(13 - 61)      | 9<br>(4 - 16)      |
| Motor vehicle road injuries                     | 2,160<br>(1,145 - 3,666)  | 128<br>(53 - 260)    | 182<br>(87 - 298)    | 1,609<br>(806 - 2,866)   | 190<br>(95 - 335)    | 51<br>(27 - 88)    |
| Other road injuries                             | 79<br>(9 - 186)           | 23<br>(2 - 58)       | 24<br>(3 - 55)       | 20<br>(2 - 65)           | 7<br>(1 - 21)        | 4<br>(1 - 12)      |
| Other transport injuries                        | 216<br>(73 - 402)         | 26<br>(8 - 57)       | 23<br>(7 - 44)       | 132<br>(44 - 263)        | 26<br>(7 - 53)       | 10<br>(3 - 19)     |
| Unintentional injuries                          | 3,019<br>(1,918 - 4,675)  | 550<br>(320 - 854)   | 389<br>(255 - 536)   | 1,636<br>(882 - 2,668)   | 272<br>(151 - 491)   | 171<br>(117 - 258) |
| Falls                                           | 493<br>(252 - 872)        | 65<br>(23 - 151)     | 40<br>(18 - 79)      | 273<br>(120 - 547)       | 61<br>(28 - 115)     | 54<br>(26 - 98)    |
| Drowning                                        | 798<br>(380 - 1,293)      | 164<br>(48 - 325)    | 177<br>(69 - 307)    | 402<br>(194 - 708)       | 40<br>(18 - 85)      | 16<br>(9 - 30)     |
| Fire, heat, and hot substances                  | 387<br>(237 - 654)        | 96<br>(39 - 177)     | 36<br>(20 - 61)      | 187<br>(99 - 347)        | 37<br>(17 - 79)      | 30<br>(17 - 57)    |
| Poisonings                                      | 217<br>(104 - 357)        | 61<br>(21 - 129)     | 24<br>(10 - 43)      | 107<br>(47 - 197)        | 17<br>(7 - 33)       | 9<br>(4 - 15)      |
| Exposure to mechanical forces                   | 556<br>(292 - 1,014)      | 59<br>(28 - 112)     | 55<br>(30 - 90)      | 365<br>(175 - 719)       | 60<br>(28 - 115)     | 17<br>(9 - 29)     |
| Unintentional firearm injuries                  | 284<br>(97 - 563)         | 21<br>(5 - 50)       | 20<br>(7 - 44)       | 205<br>(67 - 461)        | 29<br>(9 - 63)       | 9<br>(3 - 18)      |
| Unintentional suffocation                       | 18<br>(4 - 42)            | 5<br>(1 - 21)        | 3<br>(1 - 8)         | 8<br>(2 - 19)            | 2<br>(0 - 4)         | 1<br>(0 - 1)       |
| Other exposure to mechanical forces             | 254<br>(140 - 460)        | 33<br>(14 - 68)      | 32<br>(16 - 58)      | 152<br>(73 - 301)        | 29<br>(13 - 60)      | 8<br>(4 - 15)      |
| Adverse effects of medical treatment            | 99<br>(55 - 173)          | 18<br>(8 - 36)       | 5<br>(3 - 9)         | 30<br>(14 - 61)          | 25<br>(11 - 53)      | 20<br>(9 - 43)     |
| Animal contact                                  | 38<br>(15 - 64)           | 10<br>(3 - 19)       | 8<br>(3 - 15)        | 13<br>(5 - 26)           | 3<br>(1 - 7)         | 3<br>(1 - 6)       |
| Venomous animal contact                         | 20<br>(7 - 35)            | 6<br>(2 - 12)        | 5<br>(1 - 9)         | 6<br>(2 - 12)            | 2<br>(1 - 4)         | 2<br>(0 - 3)       |
| Non-venomous animal contact                     | 18<br>(6 - 33)            | 4<br>(1 - 10)        | 4<br>(1 - 8)         | 7<br>(2 - 14)            | 2<br>(1 - 3)         | 2<br>(1 - 4)       |
| Foreign body                                    | 57<br>(28 - 123)          | 30<br>(11 - 73)      | 6<br>(3 - 13)        | 9<br>(4 - 21)            | 3<br>(1 - 7)         | 8<br>(4 - 18)      |
| Pulmonary aspiration and foreign body in airway | 54<br>(26 - 120)          | 30<br>(11 - 72)      | 6<br>(3 - 13)        | 8<br>(3 - 19)            | 3<br>(1 - 7)         | 8<br>(4 - 18)      |
| Foreign body in other body part                 | 3<br>(1 - 6)              | 1<br>(0 - 2)         | 0<br>(0 - 1)         | 1<br>(1 - 2)             | 1<br>(0 - 1)         | 0<br>(0 - 0)       |
| Other unintentional injuries                    | 373<br>(165 - 703)        | 48<br>(16 - 89)      | 38<br>(16 - 67)      | 251<br>(105 - 511)       | 26<br>(11 - 51)      | 11<br>(6 - 19)     |
| Self-harm and interpersonal violence            | 1,370<br>(710 - 2,317)    | 20<br>(9 - 39)       | 37<br>(19 - 66)      | 1,164<br>(564 - 2,007)   | 111<br>(60 - 202)    | 37<br>(21 - 61)    |
| Self-harm                                       | 617<br>(296 - 1,185)      | --                   | 16<br>(5 - 40)       | 491<br>(207 - 973)       | 77<br>(38 - 144)     | 33<br>(18 - 57)    |
| Interpersonal violence                          | 752<br>(376 - 1,345)      | 20<br>(9 - 39)       | 21<br>(10 - 37)      | 673<br>(322 - 1,226)     | 34<br>(17 - 64)      | 4<br>(2 - 7)       |
| Assault by firearm                              | 374<br>(133 - 721)        | 3<br>(1 - 6)         | 5<br>(1 - 12)        | 350<br>(124 - 681)       | 15<br>(5 - 32)       | 1<br>(0 - 3)       |
| Assault by sharp object                         | 201<br>(85 - 406)         | 1<br>(0 - 4)         | 4<br>(1 - 8)         | 184<br>(76 - 377)        | 11<br>(5 - 25)       | 1<br>(0 - 2)       |
| Assault by other means                          | 178<br>(86 - 347)         | 16<br>(8 - 32)       | 12<br>(6 - 24)       | 139<br>(59 - 284)        | 8<br>(3 - 17)        | 2<br>(1 - 4)       |
| Forces of nature, war, and legal intervention   | 471<br>(290 - 956)        | 62<br>(41 - 80)      | 31<br>(19 - 61)      | 227<br>(125 - 500)       | 120<br>(66 - 260)    | 31<br>(13 - 77)    |
| Collective violence and legal intervention      | 471<br>(290 - 956)        | 62<br>(41 - 80)      | 31<br>(19 - 61)      | 227<br>(125 - 500)       | 120<br>(66 - 260)    | 31<br>(13 - 77)    |

Web Table 31- Yemen deaths with 95% UI by age, sex, and cause in 2013

| Cause                                                              | Females, All Ages           | Females, 0-4 Years          | Females, 5-14 Years      | Females, 15-49 Years       | Females, 50-69 Years        | Females, 70-80 Years        |
|--------------------------------------------------------------------|-----------------------------|-----------------------------|--------------------------|----------------------------|-----------------------------|-----------------------------|
| All causes                                                         | 68,382<br>(48,443 - 98,458) | 17,153<br>(14,912 - 19,754) | 2,147<br>(1,594 - 2,851) | 13,675<br>(8,171 - 23,963) | 18,571<br>(10,712 - 28,761) | 16,835<br>(12,518 - 22,328) |
| Communicable, maternal, neonatal, and nutritional diseases         | 22,403<br>(16,434 - 31,452) | 12,791<br>(9,541 - 16,077)  | 1,085<br>(767 - 1,549)   | 4,944<br>(3,031 - 9,133)   | 1,860<br>(1,050 - 3,156)    | 1,722<br>(1,160 - 2,471)    |
| HIV/AIDS and tuberculosis                                          | 1,629<br>(864 - 3,464)      | 87<br>(38 - 181)            | 57<br>(30 - 104)         | 822<br>(384 - 1,791)       | 436<br>(217 - 1,081)        | 228<br>(114 - 507)          |
| Tuberculosis                                                       | 1,473<br>(797 - 3,012)      | 70<br>(32 - 135)            | 54<br>(28 - 95)          | 706<br>(346 - 1,384)       | 416<br>(200 - 1,047)        | 226<br>(112 - 506)          |
| HIV/AIDS                                                           | 156<br>(10 - 807)           | 16<br>(1 - 87)              | 3<br>(0 - 18)            | 116<br>(8 - 594)           | 19<br>(1 - 101)             | 2<br>(0 - 10)               |
| HIV/AIDS resulting in mycobacterial infection                      | 8<br>(1 - 41)               | 1<br>(0 - 4)                | 0<br>(0 - 1)             | 6<br>(0 - 31)              | 1<br>(0 - 6)                | 0<br>(0 - 1)                |
| HIV/AIDS resulting in other diseases                               | 148<br>(9 - 767)            | 15<br>(1 - 83)              | 3<br>(0 - 17)            | 110<br>(7 - 563)           | 18<br>(1 - 95)              | 1<br>(0 - 9)                |
| Diarrrhea, lower respiratory, and other common infectious diseases | 8,932<br>(6,209 - 12,585)   | 5,177<br>(3,382 - 7,254)    | 575<br>(369 - 841)       | 1,103<br>(642 - 1,989)     | 929<br>(524 - 1,557)        | 1,149<br>(715 - 1,755)      |
| Diarrheal diseases                                                 | 3,055<br>(1,619 - 4,972)    | 2,267<br>(950 - 3,978)      | 122<br>(51 - 235)        | 258<br>(115 - 533)         | 170<br>(69 - 355)           | 237<br>(103 - 462)          |
| Intestinal infectious diseases                                     | 405<br>(190 - 776)          | 122<br>(53 - 247)           | 126<br>(51 - 242)        | 131<br>(49 - 289)          | 21<br>(7 - 46)              | 6<br>(2 - 13)               |
| Typhoid fever                                                      | 292<br>(124 - 584)          | 80<br>(31 - 169)            | 95<br>(38 - 186)         | 98<br>(34 - 222)           | 15<br>(5 - 34)              | 4<br>(2 - 8)                |
| Paratyphoid fever                                                  | 84<br>(36 - 171)            | 28<br>(10 - 59)             | 27<br>(9 - 61)           | 25<br>(8 - 60)             | 3<br>(1 - 9)                | 1<br>(0 - 2)                |
| Other intestinal infectious diseases                               | 29<br>(15 - 47)             | 14<br>(6 - 25)              | 3<br>(1 - 9)             | 8<br>(2 - 18)              | 2<br>(0 - 8)                | 1<br>(0 - 4)                |
| Lower respiratory infections                                       | 4,088<br>(2,549 - 6,134)    | 1,835<br>(822 - 3,231)      | 202<br>(115 - 324)       | 532<br>(287 - 1,016)       | 659<br>(347 - 1,159)        | 861<br>(507 - 1,380)        |
| Upper respiratory infections                                       | 6<br>(2 - 13)               | 1<br>(0 - 6)                | 0<br>(0 - 1)             | 1<br>(0 - 4)               | 2<br>(0 - 5)                | 1<br>(0 - 3)                |
| Otitis media                                                       | 11<br>(7 - 17)              | 1<br>(1 - 2)                | 1<br>(1 - 2)             | 3<br>(2 - 5)               | 3<br>(1 - 5)                | 3<br>(2 - 4)                |
| Meningitis                                                         | 534<br>(280 - 1,086)        | 307<br>(113 - 852)          | 44<br>(22 - 78)          | 102<br>(46 - 197)          | 53<br>(25 - 90)             | 28<br>(14 - 48)             |
| Pneumococcal meningitis                                            | 117<br>(56 - 246)           | 58<br>(19 - 167)            | 11<br>(4 - 22)           | 28<br>(11 - 57)            | 13<br>(5 - 25)              | 7<br>(3 - 13)               |
| H influenzae type B meningitis                                     | 147<br>(66 - 356)           | 117<br>(42 - 318)           | 11<br>(4 - 21)           | 11<br>(4 - 24)             | 5<br>(2 - 11)               | 2<br>(1 - 5)                |
| Meningococcal meningitis                                           | 147<br>(79 - 301)           | 86<br>(30 - 239)            | 14<br>(5 - 28)           | 27<br>(11 - 53)            | 13<br>(5 - 26)              | 8<br>(3 - 15)               |
| Other meningitis                                                   | 123<br>(63 - 239)           | 46<br>(16 - 131)            | 8<br>(3 - 17)            | 36<br>(15 - 76)            | 22<br>(10 - 39)             | 11<br>(4 - 19)              |
| Encephalitis                                                       | 118<br>(64 - 203)           | 71<br>(28 - 153)            | 11<br>(5 - 19)           | 23<br>(9 - 50)             | 8<br>(4 - 17)               | 5<br>(3 - 8)                |
| Diphtheria                                                         | 4<br>(0 - 19)               | 2<br>(0 - 18)               | 1<br>(0 - 6)             | 0<br>(0 - 2)               | 0<br>(0 - 1)                | --                          |
| Whooping cough                                                     | 354<br>(0 - 1,675)          | 326<br>(0 - 1,543)          | 23<br>(0 - 111)          | 4<br>(0 - 22)              | 0<br>(0 - 2)                | --                          |
| Tetanus                                                            | 148<br>(55 - 381)           | 85<br>(16 - 295)            | 12<br>(3 - 25)           | 36<br>(8 - 74)             | 11<br>(2 - 22)              | 3<br>(0 - 7)                |
| Measles                                                            | 185<br>(4 - 1,201)          | 150<br>(3 - 975)            | 29<br>(1 - 184)          | 5<br>(0 - 37)              | 0<br>(0 - 1)                | --                          |
| Varicella and herpes zoster                                        | 24<br>(8 - 56)              | 9<br>(0 - 32)               | 2<br>(0 - 9)             | 6<br>(1 - 17)              | 3<br>(0 - 9)                | 5<br>(0 - 23)               |
| Neglected tropical diseases and malaria                            | 2,691<br>(1,147 - 5,327)    | 1,415<br>(455 - 3,370)      | 355<br>(147 - 762)       | 476<br>(160 - 1,263)       | 298<br>(109 - 722)          | 147<br>(50 - 364)           |
| Malaria                                                            | 2,483<br>(941 - 5,133)      | 1,364<br>(385 - 3,339)      | 319<br>(102 - 731)       | 400<br>(102 - 1,202)       | 267<br>(82 - 695)           | 134<br>(38 - 354)           |
| Leishmaniasis                                                      | 105<br>(47 - 222)           | 33<br>(8 - 101)             | 23<br>(4 - 62)           | 38<br>(12 - 84)            | 9<br>(1 - 22)               | 1<br>(0 - 3)                |
| Visceral leishmaniasis                                             | 105<br>(47 - 222)           | 33<br>(8 - 101)             | 23<br>(4 - 62)           | 38<br>(12 - 84)            | 9<br>(1 - 22)               | 1<br>(0 - 3)                |
| Schistosomiasis                                                    | 27<br>(15 - 44)             | 0<br>(0 - 0)                | 1<br>(0 - 1)             | 9<br>(5 - 17)              | 12<br>(5 - 22)              | 5<br>(2 - 9)                |
| Cysticercosis                                                      | 0<br>(0 - 1)                | 0<br>(0 - 0)                | 0<br>(0 - 0)             | 0<br>(0 - 0)               | 0<br>(0 - 0)                | 0<br>(0 - 0)                |
| Cystic echinococcosis                                              | 3<br>(2 - 4)                | 0<br>(0 - 0)                | 0<br>(0 - 1)             | 1<br>(1 - 2)               | 1<br>(0 - 1)                | 0<br>(0 - 0)                |
| Dengue                                                             | 3<br>(2 - 6)                | 1<br>(0 - 1)                | 1<br>(0 - 1)             | 2<br>(1 - 3)               | 0<br>(0 - 1)                | 0<br>(0 - 0)                |
| Rabies                                                             | 9<br>(5 - 17)               | 1<br>(0 - 2)                | 2<br>(1 - 5)             | 4<br>(2 - 9)               | 1<br>(0 - 2)                | 0<br>(0 - 1)                |
| Intestinal nematode infections                                     | 8<br>(3 - 18)               | 5<br>(1 - 12)               | 2<br>(0 - 6)             | 1<br>(0 - 5)               | 1<br>(0 - 4)                | 0<br>(0 - 3)                |
| Ascariasis                                                         | 8<br>(3 - 18)               | 5<br>(1 - 12)               | 2<br>(0 - 6)             | 1<br>(0 - 5)               | 1<br>(0 - 4)                | 0<br>(0 - 3)                |
| Other neglected tropical diseases                                  | 53<br>(25 - 87)             | 12<br>(4 - 24)              | 7<br>(3 - 14)            | 21<br>(9 - 42)             | 8<br>(3 - 16)               | 6<br>(2 - 12)               |
| Maternal disorders                                                 | 2,279<br>(1,244 - 4,099)    | --                          | 12<br>(4 - 28)           | 2,268<br>(1,236 - 4,071)   | --                          | --                          |

Web Table 31- Yemen deaths with 95% UI by age, sex, and cause in 2013

| Cause                                                            | Females, All Ages           | Females, 0-4 Years       | Females, 5-14 Years | Females, 15-49 Years      | Females, 50-69 Years       | Females, 70-80 Years        |
|------------------------------------------------------------------|-----------------------------|--------------------------|---------------------|---------------------------|----------------------------|-----------------------------|
| Maternal hemorrhage                                              | 463<br>(225 - 905)          | --                       | 2<br>(0 - 4)        | 462<br>(224 - 902)        | --                         | --                          |
| Maternal sepsis and other maternal infections                    | 198<br>(96 - 371)           | --                       | 1<br>(0 - 3)        | 197<br>(96 - 370)         | --                         | --                          |
| Maternal hypertensive disorders                                  | 336<br>(176 - 616)          | --                       | 2<br>(1 - 5)        | 334<br>(175 - 614)        | --                         | --                          |
| Maternal obstructed labor                                        | 215<br>(105 - 402)          | --                       | 1<br>(0 - 2)        | 214<br>(105 - 401)        | --                         | --                          |
| Maternal abortive outcome                                        | 294<br>(146 - 547)          | --                       | 1<br>(0 - 4)        | 292<br>(145 - 545)        | --                         | --                          |
| Indirect maternal deaths                                         | 193<br>(79 - 373)           | --                       | 1<br>(0 - 2)        | 192<br>(79 - 372)         | --                         | --                          |
| Late maternal deaths                                             | 208<br>(70 - 443)           | --                       | 2<br>(0 - 6)        | 206<br>(69 - 440)         | --                         | --                          |
| Maternal deaths aggravated by HIV/AIDS                           | 0<br>(0 - 1)                | --                       | --                  | 0<br>(0 - 1)              | --                         | --                          |
| Other maternal disorders                                         | 368<br>(171 - 722)          | --                       | 2<br>(0 - 4)        | 366<br>(170 - 718)        | --                         | --                          |
| Neonatal disorders                                               | 5,632<br>(3,851 - 7,941)    | 5,632<br>(3,851 - 7,941) | --                  | --                        | --                         | --                          |
| Neonatal preterm birth complications                             | 3,999<br>(2,317 - 5,556)    | 3,999<br>(2,317 - 5,556) | --                  | --                        | --                         | --                          |
| Neonatal encephalopathy due to birth asphyxia and trauma         | 575<br>(93 - 1,473)         | 575<br>(93 - 1,473)      | --                  | --                        | --                         | --                          |
| Neonatal sepsis and other neonatal infections                    | 151<br>(32 - 363)           | 151<br>(32 - 363)        | --                  | --                        | --                         | --                          |
| Hemolytic disease and other neonatal jaundice                    | 34<br>(7 - 98)              | 34<br>(7 - 98)           | --                  | --                        | --                         | --                          |
| Other neonatal disorders                                         | 875<br>(254 - 2,335)        | 875<br>(254 - 2,335)     | --                  | --                        | --                         | --                          |
| Nutritional deficiencies                                         | 658<br>(410 - 1,057)        | 195<br>(89 - 381)        | 47<br>(26 - 77)     | 189<br>(98 - 355)         | 98<br>(45 - 177)           | 129<br>(60 - 216)           |
| Protein-energy malnutrition                                      | 93<br>(21 - 263)            | 64<br>(10 - 194)         | 7<br>(2 - 21)       | 6<br>(1 - 21)             | 5<br>(1 - 19)              | 10<br>(1 - 39)              |
| Iodine deficiency                                                | 3<br>(0 - 16)               | 1<br>(0 - 12)            | 0<br>(0 - 2)        | 1<br>(0 - 3)              | 1<br>(0 - 4)               | 0<br>(0 - 3)                |
| Iron-deficiency anemia                                           | 538<br>(298 - 860)          | 121<br>(28 - 255)        | 37<br>(16 - 64)     | 176<br>(91 - 336)         | 89<br>(41 - 162)           | 115<br>(55 - 194)           |
| Other nutritional deficiencies                                   | 24<br>(7 - 74)              | 8<br>(2 - 29)            | 3<br>(1 - 8)        | 6<br>(1 - 21)             | 3<br>(1 - 11)              | 3<br>(1 - 9)                |
| Other communicable, maternal, neonatal, and nutritional diseases | 582<br>(344 - 1,050)        | 286<br>(158 - 517)       | 40<br>(19 - 94)     | 87<br>(40 - 195)          | 100<br>(43 - 216)          | 70<br>(26 - 216)            |
| Sexually transmitted diseases excluding HIV                      | 249<br>(138 - 441)          | 205<br>(105 - 381)       | 17<br>(9 - 30)      | 14<br>(5 - 30)            | 7<br>(2 - 18)              | 6<br>(2 - 14)               |
| Syphilis                                                         | 235<br>(128 - 429)          | 205<br>(105 - 381)       | 17<br>(8 - 29)      | 6<br>(2 - 12)             | 4<br>(1 - 10)              | 4<br>(1 - 11)               |
| Chlamydial infection                                             | 4<br>(2 - 9)                | --                       | 0<br>(0 - 1)        | 3<br>(1 - 6)              | 1<br>(0 - 3)               | 0<br>(0 - 1)                |
| Gonococcal infection                                             | 5<br>(2 - 10)               | --                       | 0<br>(0 - 0)        | 3<br>(1 - 6)              | 1<br>(0 - 3)               | 1<br>(0 - 2)                |
| Other sexually transmitted diseases                              | 4<br>(2 - 8)                | --                       | 0<br>(0 - 0)        | 3<br>(1 - 6)              | 1<br>(0 - 3)               | 0<br>(0 - 1)                |
| Hepatitis                                                        | 114<br>(58 - 201)           | 15<br>(7 - 30)           | 4<br>(2 - 8)        | 28<br>(13 - 56)           | 48<br>(21 - 89)            | 19<br>(10 - 35)             |
| Acute hepatitis A                                                | 15<br>(5 - 31)              | 8<br>(3 - 18)            | 2<br>(1 - 4)        | 2<br>(1 - 7)              | 1<br>(0 - 4)               | 0<br>(0 - 1)                |
| Acute hepatitis B                                                | 70<br>(34 - 130)            | 7<br>(2 - 16)            | 1<br>(0 - 3)        | 10<br>(3 - 23)            | 36<br>(15 - 73)            | 17<br>(8 - 31)              |
| Acute hepatitis C                                                | 4<br>(1 - 10)               | --                       | 0<br>(0 - 1)        | 1<br>(0 - 3)              | 2<br>(0 - 6)               | 1<br>(0 - 2)                |
| Acute hepatitis E                                                | 26<br>(9 - 50)              | 0<br>(0 - 0)             | 1<br>(0 - 2)        | 15<br>(6 - 30)            | 8<br>(2 - 19)              | 2<br>(0 - 4)                |
| Other infectious diseases                                        | 218<br>(92 - 646)           | 66<br>(16 - 217)         | 18<br>(5 - 71)      | 45<br>(17 - 126)          | 45<br>(13 - 131)           | 45<br>(9 - 183)             |
| Non-communicable diseases                                        | 42,371<br>(27,112 - 62,359) | 3,748<br>(1,902 - 6,429) | 652<br>(421 - 959)  | 7,000<br>(3,937 - 12,510) | 16,122<br>(9,224 - 25,074) | 14,849<br>(10,845 - 19,717) |
| Neoplasms                                                        | 4,702<br>(2,643 - 7,476)    | 49<br>(24 - 87)          | 106<br>(68 - 164)   | 1,426<br>(760 - 2,549)    | 2,215<br>(1,190 - 3,440)   | 907<br>(591 - 1,246)        |
| Esophageal cancer                                                | 105<br>(58 - 175)           | --                       | --                  | 20<br>(9 - 38)            | 51<br>(26 - 90)            | 34<br>(19 - 58)             |
| Stomach cancer                                                   | 632<br>(343 - 1,043)        | --                       | --                  | 193<br>(94 - 367)         | 299<br>(158 - 493)         | 140<br>(84 - 214)           |
| Liver cancer                                                     | 256<br>(116 - 487)          | --                       | 2<br>(1 - 5)        | 48<br>(17 - 112)          | 137<br>(56 - 275)          | 68<br>(34 - 123)            |
| Liver cancer due to hepatitis B                                  | 79<br>(31 - 166)            | --                       | 1<br>(0 - 2)        | 19<br>(6 - 47)            | 43<br>(16 - 94)            | 15<br>(6 - 31)              |
| Liver cancer due to hepatitis C                                  | 129<br>(52 - 252)           | --                       | 0<br>(0 - 1)        | 16<br>(4 - 41)            | 71<br>(23 - 149)           | 42<br>(20 - 79)             |
| Liver cancer due to alcohol use                                  | 4<br>(1 - 10)               | --                       | --                  | 0<br>(0 - 1)              | 2<br>(0 - 5)               | 2<br>(0 - 5)                |

Web Table 31- Yemen deaths with 95% UI by age, sex, and cause in 2013

| Cause                                         | Females, All Ages           | Females, 0-4 Years | Females, 5-14 Years | Females, 15-49 Years     | Females, 50-69 Years      | Females, 70-80 Years      |
|-----------------------------------------------|-----------------------------|--------------------|---------------------|--------------------------|---------------------------|---------------------------|
| Liver cancer due to other causes              | 44<br>(15 - 93)             | --                 | 1<br>(1 - 3)        | 12<br>(4 - 27)           | 22<br>(7 - 50)            | 9<br>(3 - 18)             |
| Larynx cancer                                 | 34<br>(12 - 72)             | --                 | --                  | 11<br>(3 - 25)           | 17<br>(6 - 38)            | 5<br>(2 - 12)             |
| Tracheal, bronchus and lung cancer            | 555<br>(186 - 964)          | --                 | --                  | 125<br>(33 - 249)        | 314<br>(100 - 554)        | 116<br>(51 - 186)         |
| Breast cancer                                 | 820<br>(425 - 1,780)        | --                 | --                  | 329<br>(151 - 787)       | 395<br>(199 - 819)        | 96<br>(60 - 148)          |
| Cervical cancer                               | 299<br>(168 - 515)          | --                 | --                  | 104<br>(52 - 207)        | 155<br>(85 - 270)         | 40<br>(23 - 63)           |
| Uterine cancer                                | 72<br>(32 - 131)            | --                 | --                  | 12<br>(4 - 25)           | 44<br>(19 - 82)           | 16<br>(8 - 28)            |
| Prostate cancer                               | --                          | --                 | --                  | --                       | --                        | --                        |
| Colon and rectum cancer                       | 305<br>(181 - 479)          | --                 | --                  | 75<br>(40 - 133)         | 149<br>(81 - 242)         | 82<br>(52 - 117)          |
| Lip and oral cavity cancer                    | 33<br>(15 - 61)             | --                 | --                  | 10<br>(4 - 23)           | 15<br>(6 - 28)            | 8<br>(4 - 14)             |
| Nasopharynx cancer                            | 41<br>(18 - 90)             | --                 | 2<br>(1 - 5)        | 20<br>(8 - 45)           | 15<br>(6 - 35)            | 3<br>(1 - 7)              |
| Other pharynx cancer                          | 18<br>(8 - 32)              | --                 | --                  | 7<br>(3 - 15)            | 8<br>(3 - 15)             | 3<br>(2 - 5)              |
| Gallbladder and biliary tract cancer          | 133<br>(66 - 222)           | --                 | --                  | 24<br>(12 - 48)          | 75<br>(35 - 131)          | 33<br>(16 - 58)           |
| Pancreatic cancer                             | 93<br>(55 - 150)            | --                 | --                  | 12<br>(6 - 23)           | 51<br>(28 - 85)           | 29<br>(18 - 43)           |
| Malignant skin melanoma                       | 13<br>(6 - 31)              | --                 | --                  | 5<br>(2 - 13)            | 6<br>(2 - 14)             | 3<br>(1 - 5)              |
| Non-melanoma skin cancer                      | 17<br>(7 - 31)              | --                 | --                  | 4<br>(2 - 10)            | 6<br>(2 - 13)             | 6<br>(3 - 12)             |
| Ovarian cancer                                | 151<br>(56 - 288)           | --                 | --                  | 48<br>(15 - 106)         | 79<br>(29 - 155)          | 24<br>(12 - 40)           |
| Testicular cancer                             | --                          | --                 | --                  | --                       | --                        | --                        |
| Kidney cancer                                 | 54<br>(26 - 106)            | 3<br>(1 - 8)       | 4<br>(1 - 9)        | 13<br>(5 - 28)           | 26<br>(12 - 54)           | 8<br>(4 - 15)             |
| Bladder cancer                                | 97<br>(48 - 158)            | --                 | --                  | 14<br>(5 - 27)           | 48<br>(22 - 83)           | 35<br>(20 - 58)           |
| Brain and nervous system cancer               | 162<br>(85 - 281)           | 6<br>(2 - 13)      | 18<br>(9 - 32)      | 59<br>(29 - 117)         | 60<br>(28 - 106)          | 20<br>(11 - 33)           |
| Thyroid cancer                                | 51<br>(23 - 101)            | --                 | 1<br>(0 - 1)        | 10<br>(4 - 23)           | 26<br>(10 - 55)           | 15<br>(8 - 27)            |
| Mesothelioma                                  | 13<br>(5 - 23)              | --                 | --                  | 7<br>(3 - 13)            | 4<br>(2 - 8)              | 2<br>(1 - 3)              |
| Hodgkin lymphoma                              | 27<br>(10 - 54)             | 1<br>(0 - 3)       | 3<br>(1 - 9)        | 15<br>(5 - 33)           | 6<br>(2 - 12)             | 2<br>(1 - 4)              |
| Non-Hodgkin lymphoma                          | 153<br>(75 - 359)           | 4<br>(1 - 12)      | 7<br>(3 - 18)       | 56<br>(22 - 140)         | 60<br>(27 - 142)          | 27<br>(14 - 56)           |
| Multiple myeloma                              | 21<br>(12 - 36)             | --                 | --                  | 4<br>(2 - 7)             | 12<br>(7 - 21)            | 5<br>(3 - 8)              |
| Leukemia                                      | 266<br>(162 - 424)          | 13<br>(5 - 30)     | 39<br>(23 - 62)     | 107<br>(59 - 193)        | 70<br>(39 - 117)          | 36<br>(22 - 52)           |
| Other neoplasms                               | 282<br>(131 - 641)          | 22<br>(8 - 51)     | 29<br>(13 - 62)     | 93<br>(36 - 247)         | 87<br>(35 - 212)          | 51<br>(27 - 94)           |
| Cardiovascular diseases                       | 23,150<br>(14,464 - 34,859) | 429<br>(164 - 722) | 175<br>(93 - 278)   | 3,295<br>(1,563 - 6,111) | 9,583<br>(5,275 - 15,242) | 9,669<br>(6,739 - 12,966) |
| Rheumatic heart disease                       | 475<br>(206 - 869)          | 10<br>(2 - 26)     | 20<br>(7 - 43)      | 205<br>(77 - 425)        | 131<br>(54 - 244)         | 109<br>(50 - 200)         |
| Ischemic heart disease                        | 11,434<br>(6,144 - 17,646)  | 63<br>(12 - 150)   | 24<br>(8 - 48)      | 1,412<br>(479 - 2,666)   | 5,102<br>(2,444 - 8,293)  | 4,833<br>(3,091 - 6,830)  |
| Cerebrovascular disease                       | 8,511<br>(5,366 - 13,360)   | 194<br>(77 - 356)  | 86<br>(45 - 145)    | 1,210<br>(626 - 2,339)   | 3,262<br>(1,797 - 5,472)  | 3,760<br>(2,530 - 5,383)  |
| Ischemic stroke                               | 3,600<br>(1,811 - 5,571)    | 14<br>(4 - 36)     | 10<br>(4 - 23)      | 204<br>(71 - 460)        | 1,213<br>(532 - 2,084)    | 2,158<br>(1,212 - 3,148)  |
| Hemorrhagic stroke                            | 4,911<br>(2,780 - 8,281)    | 179<br>(72 - 330)  | 76<br>(40 - 131)    | 1,006<br>(511 - 1,894)   | 2,048<br>(1,053 - 3,540)  | 1,602<br>(977 - 2,644)    |
| Hypertensive heart disease                    | 1,014<br>(555 - 1,670)      | 2<br>(1 - 5)       | 2<br>(1 - 3)        | 99<br>(40 - 197)         | 392<br>(183 - 690)        | 518<br>(291 - 873)        |
| Cardiomyopathy and myocarditis                | 352<br>(139 - 557)          | 69<br>(16 - 157)   | 16<br>(5 - 29)      | 87<br>(25 - 162)         | 92<br>(31 - 162)          | 88<br>(41 - 165)          |
| Atrial fibrillation and flutter               | 5<br>(3 - 8)                | --                 | --                  | 0<br>(0 - 1)             | 1<br>(1 - 2)              | 3<br>(2 - 5)              |
| Aortic aneurysm                               | 50<br>(20 - 91)             | --                 | --                  | 13<br>(3 - 25)           | 16<br>(5 - 33)            | 21<br>(10 - 37)           |
| Peripheral vascular disease                   | 2<br>(1 - 5)                | --                 | --                  | 0<br>(0 - 1)             | 1<br>(0 - 2)              | 1<br>(1 - 3)              |
| Endocarditis                                  | 110<br>(48 - 249)           | 15<br>(4 - 41)     | 3<br>(1 - 9)        | 26<br>(9 - 64)           | 23<br>(9 - 59)            | 43<br>(17 - 98)           |
| Other cardiovascular and circulatory diseases | 1,198<br>(547 - 2,010)      | 75<br>(26 - 150)   | 24<br>(10 - 43)     | 242<br>(87 - 478)        | 564<br>(222 - 1,024)      | 294<br>(154 - 484)        |

Web Table 31- Yemen deaths with 95% UI by age, sex, and cause in 2013

| Cause                                               | Females, All Ages        | Females, 0-4 Years | Females, 5-14 Years | Females, 15-49 Years | Females, 50-69 Years   | Females, 70-80 Years   |
|-----------------------------------------------------|--------------------------|--------------------|---------------------|----------------------|------------------------|------------------------|
| Chronic respiratory diseases                        | 3,312<br>(2,050 - 5,246) | 107<br>(54 - 197)  | 40<br>(24 - 63)     | 590<br>(319 - 1,071) | 1,212<br>(669 - 2,098) | 1,363<br>(886 - 2,027) |
| Chronic obstructive pulmonary disease               | 2,279<br>(1,385 - 3,674) | 71<br>(33 - 142)   | 13<br>(6 - 24)      | 265<br>(123 - 520)   | 870<br>(463 - 1,504)   | 1,059<br>(672 - 1,638) |
| Pneumoconiosis                                      | 14<br>(8 - 25)           | 1<br>(0 - 2)       | 1<br>(1 - 3)        | 7<br>(3 - 13)        | 4<br>(1 - 7)           | 2<br>(1 - 4)           |
| Silicosis                                           | 2<br>(1 - 3)             | 0<br>(0 - 0)       | 0<br>(0 - 0)        | 1<br>(0 - 2)         | 0<br>(0 - 1)           | 0<br>(0 - 1)           |
| Asbestosis                                          | 2<br>(1 - 4)             | 0<br>(0 - 0)       | 0<br>(0 - 0)        | 1<br>(0 - 2)         | 0<br>(0 - 1)           | 0<br>(0 - 1)           |
| Coal workers pneumoconiosis                         | 2<br>(1 - 5)             | 0<br>(0 - 0)       | 0<br>(0 - 1)        | 1<br>(0 - 2)         | 1<br>(0 - 1)           | 0<br>(0 - 1)           |
| Other pneumoconiosis                                | 8<br>(4 - 15)            | 0<br>(0 - 1)       | 1<br>(0 - 1)        | 4<br>(2 - 8)         | 2<br>(1 - 4)           | 1<br>(0 - 2)           |
| Asthma                                              | 693<br>(310 - 1,665)     | 18<br>(6 - 43)     | 20<br>(10 - 37)     | 221<br>(94 - 485)    | 248<br>(94 - 651)      | 186<br>(78 - 491)      |
| Interstitial lung disease and pulmonary sarcoidosis | 183<br>(54 - 419)        | 1<br>(0 - 3)       | 1<br>(0 - 3)        | 30<br>(6 - 85)       | 70<br>(18 - 169)       | 80<br>(25 - 181)       |
| Other chronic respiratory diseases                  | 143<br>(74 - 249)        | 15<br>(7 - 32)     | 5<br>(2 - 9)        | 66<br>(30 - 130)     | 20<br>(9 - 43)         | 36<br>(17 - 66)        |
| Cirrhosis                                           | 1,645<br>(712 - 2,959)   | 41<br>(11 - 100)   | 28<br>(12 - 54)     | 405<br>(165 - 818)   | 761<br>(316 - 1,383)   | 409<br>(175 - 737)     |
| Cirrhosis due to hepatitis B                        | 837<br>(300 - 1,556)     | 3<br>(0 - 9)       | 8<br>(1 - 16)       | 197<br>(48 - 407)    | 400<br>(143 - 747)     | 230<br>(93 - 429)      |
| Cirrhosis due to hepatitis C                        | 537<br>(205 - 1,112)     | 2<br>(0 - 8)       | 4<br>(1 - 11)       | 130<br>(45 - 294)    | 271<br>(98 - 557)      | 129<br>(48 - 288)      |
| Cirrhosis due to alcohol use                        | 68<br>(23 - 153)         | --                 | --                  | 9<br>(3 - 20)        | 32<br>(10 - 71)        | 27<br>(8 - 66)         |
| Cirrhosis due to other causes                       | 203<br>(76 - 405)        | 36<br>(9 - 88)     | 17<br>(6 - 34)      | 69<br>(22 - 146)     | 58<br>(16 - 146)       | 24<br>(6 - 63)         |
| Digestive diseases                                  | 1,010<br>(554 - 1,700)   | 41<br>(16 - 78)    | 35<br>(19 - 57)     | 241<br>(124 - 462)   | 349<br>(172 - 629)     | 343<br>(185 - 553)     |
| Peptic ulcer disease                                | 339<br>(173 - 591)       | 4<br>(2 - 9)       | 5<br>(2 - 11)       | 66<br>(30 - 126)     | 130<br>(60 - 240)      | 133<br>(66 - 233)      |
| Gastritis and duodenitis                            | 15<br>(4 - 35)           | 1<br>(0 - 4)       | 2<br>(0 - 4)        | 6<br>(1 - 15)        | 3<br>(1 - 8)           | 2<br>(1 - 6)           |
| Appendicitis                                        | 106<br>(52 - 216)        | 10<br>(3 - 21)     | 8<br>(4 - 16)       | 40<br>(16 - 92)      | 30<br>(12 - 62)        | 18<br>(8 - 36)         |
| Paralytic ileus and intestinal obstruction          | 96<br>(42 - 205)         | 4<br>(1 - 10)      | 2<br>(1 - 6)        | 17<br>(7 - 42)       | 28<br>(10 - 69)        | 45<br>(18 - 88)        |
| Inguinal, femoral, and abdominal hernia             | 31<br>(13 - 62)          | 2<br>(0 - 5)       | 2<br>(1 - 5)        | 8<br>(2 - 19)        | 9<br>(3 - 20)          | 10<br>(4 - 22)         |
| Inflammatory bowel disease                          | 57<br>(26 - 109)         | 4<br>(1 - 10)      | 4<br>(1 - 7)        | 20<br>(8 - 43)       | 15<br>(6 - 33)         | 14<br>(5 - 26)         |
| Vascular intestinal disorders                       | 21<br>(8 - 51)           | 0<br>(0 - 1)       | 0<br>(0 - 2)        | 6<br>(2 - 17)        | 7<br>(2 - 18)          | 7<br>(3 - 15)          |
| Gallbladder and biliary diseases                    | 171<br>(85 - 304)        | 6<br>(2 - 13)      | 3<br>(1 - 5)        | 36<br>(17 - 70)      | 64<br>(29 - 127)       | 61<br>(27 - 110)       |
| Pancreatitis                                        | 54<br>(19 - 111)         | 1<br>(0 - 3)       | 2<br>(1 - 4)        | 15<br>(5 - 34)       | 23<br>(8 - 50)         | 13<br>(4 - 28)         |
| Other digestive diseases                            | 120<br>(62 - 208)        | 8<br>(2 - 17)      | 6<br>(3 - 11)       | 28<br>(12 - 55)      | 40<br>(17 - 72)        | 39<br>(18 - 71)        |
| Neurological disorders                              | 1,050<br>(688 - 1,527)   | 45<br>(21 - 94)    | 33<br>(13 - 66)     | 131<br>(51 - 270)    | 147<br>(79 - 249)      | 695<br>(468 - 970)     |
| Alzheimer disease and other dementias               | 799<br>(537 - 1,129)     | --                 | --                  | 1<br>(0 - 2)         | 118<br>(60 - 205)      | 680<br>(458 - 950)     |
| Parkinson disease                                   | 4<br>(2 - 7)             | --                 | --                  | 1<br>(0 - 1)         | 1<br>(0 - 2)           | 2<br>(1 - 4)           |
| Epilepsy                                            | 206<br>(75 - 397)        | 29<br>(9 - 76)     | 28<br>(10 - 62)     | 120<br>(42 - 254)    | 22<br>(8 - 45)         | 8<br>(3 - 16)          |
| Multiple sclerosis                                  | 6<br>(1 - 16)            | --                 | --                  | 3<br>(1 - 9)         | 2<br>(0 - 6)           | 1<br>(0 - 2)           |
| Other neurological disorders                        | 35<br>(23 - 55)          | 16<br>(9 - 27)     | 4<br>(3 - 7)        | 7<br>(4 - 12)        | 4<br>(2 - 7)           | 4<br>(3 - 6)           |
| Mental and substance use disorders                  | 70<br>(33 - 155)         | 2<br>(1 - 5)       | 0<br>(0 - 0)        | 46<br>(21 - 110)     | 17<br>(8 - 41)         | 5<br>(2 - 9)           |
| Schizophrenia                                       | 3<br>(1 - 7)             | --                 | --                  | 2<br>(0 - 4)         | 1<br>(0 - 2)           | 0<br>(0 - 1)           |
| Alcohol use disorders                               | 25<br>(9 - 75)           | --                 | --                  | 12<br>(4 - 36)       | 11<br>(4 - 35)         | 2<br>(1 - 5)           |
| Drug use disorders                                  | 41<br>(17 - 114)         | 2<br>(1 - 5)       | --                  | 31<br>(12 - 98)      | 5<br>(2 - 13)          | 3<br>(1 - 5)           |
| Opioid use disorders                                | 22<br>(9 - 62)           | 1<br>(0 - 3)       | --                  | 17<br>(7 - 54)       | 3<br>(1 - 6)           | 1<br>(0 - 3)           |
| Cocaine use disorders                               | 1<br>(0 - 2)             | 0<br>(0 - 0)       | --                  | 1<br>(0 - 2)         | 0<br>(0 - 0)           | 0<br>(0 - 0)           |
| Amphetamine use disorders                           | 1<br>(0 - 2)             | 0<br>(0 - 0)       | --                  | 1<br>(0 - 2)         | 0<br>(0 - 0)           | 0<br>(0 - 0)           |
| Other drug use disorders                            | 17<br>(7 - 47)           | 1<br>(0 - 2)       | --                  | 13<br>(5 - 40)       | 2<br>(1 - 6)           | 1<br>(0 - 2)           |

Web Table 31- Yemen deaths with 95% UI by age, sex, and cause in 2013

| Cause                                               | Females, All Ages        | Females, 0-4 Years       | Females, 5-14 Years | Females, 15-49 Years | Females, 50-69 Years   | Females, 70-80 Years   |
|-----------------------------------------------------|--------------------------|--------------------------|---------------------|----------------------|------------------------|------------------------|
| Eating disorders                                    | 1<br>(0 - 1)             | --                       | 0<br>(0 - 0)        | 1<br>(0 - 1)         | --                     | --                     |
| Anorexia nervosa                                    | 1<br>(0 - 1)             | --                       | 0<br>(0 - 0)        | 1<br>(0 - 1)         | --                     | --                     |
| Diabetes, urogenital, blood, and endocrine diseases | 4,146<br>(2,347 - 6,366) | 173<br>(89 - 290)        | 86<br>(49 - 137)    | 725<br>(372 - 1,319) | 1,778<br>(903 - 2,833) | 1,382<br>(844 - 1,986) |
| Diabetes mellitus                                   | 2,246<br>(1,230 - 3,421) | 10<br>(4 - 22)           | 7<br>(3 - 14)       | 229<br>(112 - 422)   | 1,120<br>(540 - 1,812) | 880<br>(510 - 1,289)   |
| Acute glomerulonephritis                            | 26<br>(13 - 44)          | 3<br>(1 - 6)             | 3<br>(1 - 5)        | 9<br>(4 - 16)        | 6<br>(3 - 11)          | 5<br>(2 - 10)          |
| Chronic kidney disease                              | 1,272<br>(646 - 2,150)   | 33<br>(14 - 69)          | 24<br>(12 - 42)     | 269<br>(115 - 514)   | 550<br>(240 - 973)     | 396<br>(216 - 632)     |
| Chronic kidney disease due to diabetes mellitus     | 26<br>(6 - 60)           | 1<br>(0 - 2)             | 1<br>(0 - 2)        | 6<br>(1 - 14)        | 13<br>(3 - 30)         | 6<br>(1 - 15)          |
| Chronic kidney disease due to hypertension          | 470<br>(182 - 857)       | 2<br>(1 - 6)             | 2<br>(1 - 5)        | 82<br>(26 - 177)     | 215<br>(78 - 427)      | 168<br>(66 - 300)      |
| Chronic kidney disease due to glomerulonephritis    | 179<br>(71 - 330)        | 15<br>(6 - 27)           | 8<br>(4 - 15)       | 59<br>(22 - 112)     | 59<br>(19 - 122)       | 39<br>(12 - 79)        |
| Chronic kidney disease due to other causes          | 596<br>(203 - 1,196)     | 16<br>(4 - 40)           | 13<br>(4 - 26)      | 123<br>(33 - 273)    | 263<br>(73 - 542)      | 182<br>(62 - 369)      |
| Urinary diseases and male infertility               | 162<br>(98 - 254)        | 11<br>(4 - 24)           | 4<br>(2 - 7)        | 44<br>(20 - 83)      | 46<br>(23 - 79)        | 57<br>(32 - 91)        |
| Interstitial nephritis and urinary tract infections | 120<br>(71 - 185)        | 9<br>(3 - 18)            | 2<br>(1 - 4)        | 33<br>(15 - 61)      | 33<br>(16 - 59)        | 44<br>(24 - 70)        |
| Urolithiasis                                        | 15<br>(7 - 28)           | --                       | 1<br>(0 - 2)        | 5<br>(2 - 12)        | 5<br>(2 - 11)          | 4<br>(2 - 10)          |
| Other urinary diseases                              | 26<br>(14 - 51)          | 3<br>(1 - 7)             | 1<br>(0 - 2)        | 6<br>(2 - 14)        | 8<br>(3 - 17)          | 8<br>(4 - 17)          |
| Gynecological diseases                              | 15<br>(7 - 29)           | --                       | --                  | 11<br>(5 - 22)       | 3<br>(1 - 6)           | 1<br>(1 - 3)           |
| Uterine fibroids                                    | 3<br>(1 - 6)             | --                       | --                  | 2<br>(1 - 3)         | 1<br>(0 - 2)           | 0<br>(0 - 1)           |
| Polycystic ovarian syndrome                         | 1<br>(0 - 1)             | --                       | --                  | 1<br>(0 - 1)         | 0<br>(0 - 0)           | --                     |
| Endometriosis                                       | 2<br>(1 - 4)             | --                       | --                  | 2<br>(1 - 4)         | 0<br>(0 - 0)           | --                     |
| Genital prolapse                                    | 2<br>(1 - 4)             | --                       | --                  | 1<br>(1 - 3)         | 1<br>(0 - 1)           | 0<br>(0 - 1)           |
| Other gynecological diseases                        | 7<br>(3 - 14)            | --                       | --                  | 5<br>(2 - 10)        | 1<br>(1 - 3)           | 1<br>(0 - 1)           |
| Hemoglobinopathies and hemolytic anemias            | 271<br>(106 - 525)       | 65<br>(23 - 123)         | 36<br>(14 - 62)     | 127<br>(44 - 275)    | 24<br>(9 - 49)         | 19<br>(9 - 36)         |
| Thalassemias                                        | 164<br>(61 - 315)        | 51<br>(17 - 99)          | 30<br>(12 - 52)     | 83<br>(30 - 179)     | 0<br>(0 - 0)           | 0<br>(0 - 0)           |
| Sickle cell disorders                               | 53<br>(19 - 113)         | 5<br>(2 - 9)             | 3<br>(1 - 6)        | 30<br>(10 - 70)      | 14<br>(5 - 30)         | 1<br>(0 - 1)           |
| G6PD deficiency                                     | 4<br>(1 - 8)             | 1<br>(0 - 2)             | 0<br>(0 - 1)        | 2<br>(1 - 4)         | 0<br>(0 - 1)           | 0<br>(0 - 0)           |
| Other hemoglobinopathies and hemolytic anemias      | 50<br>(22 - 89)          | 9<br>(3 - 15)            | 2<br>(1 - 3)        | 11<br>(4 - 26)       | 9<br>(4 - 19)          | 18<br>(8 - 34)         |
| Endocrine, metabolic, blood, and immune disorders   | 154<br>(69 - 285)        | 51<br>(19 - 116)         | 12<br>(5 - 26)      | 37<br>(14 - 82)      | 29<br>(11 - 58)        | 24<br>(9 - 44)         |
| Musculoskeletal disorders                           | 84<br>(26 - 176)         | --                       | 6<br>(1 - 13)       | 41<br>(9 - 95)       | 21<br>(8 - 42)         | 17<br>(7 - 31)         |
| Rheumatoid arthritis                                | 22<br>(8 - 43)           | --                       | 2<br>(1 - 5)        | 8<br>(2 - 20)        | 6<br>(2 - 13)          | 5<br>(2 - 10)          |
| Other musculoskeletal disorders                     | 63<br>(15 - 143)         | --                       | 4<br>(1 - 8)        | 33<br>(6 - 79)       | 14<br>(4 - 31)         | 12<br>(4 - 23)         |
| Other non-communicable diseases                     | 3,201<br>(1,528 - 5,780) | 2,862<br>(1,280 - 5,298) | 142<br>(61 - 279)   | 99<br>(42 - 212)     | 39<br>(20 - 67)        | 59<br>(36 - 89)        |
| Congenital anomalies                                | 3,076<br>(1,413 - 5,571) | 2,823<br>(1,257 - 5,230) | 138<br>(59 - 273)   | 84<br>(33 - 188)     | 16<br>(7 - 31)         | 14<br>(8 - 23)         |
| Neural tube defects                                 | 369<br>(109 - 927)       | 352<br>(99 - 895)        | 7<br>(2 - 15)       | 8<br>(3 - 20)        | 1<br>(0 - 3)           | 0<br>(0 - 1)           |
| Congenital heart anomalies                          | 1,587<br>(581 - 3,481)   | 1,476<br>(517 - 3,282)   | 73<br>(26 - 150)    | 31<br>(10 - 73)      | 4<br>(1 - 9)           | 3<br>(2 - 6)           |
| Cleft lip and cleft palate                          | 9<br>(3 - 22)            | 9<br>(3 - 22)            | --                  | --                   | --                     | --                     |
| Down syndrome                                       | 98<br>(25 - 235)         | 79<br>(18 - 200)         | 11<br>(3 - 27)      | 6<br>(1 - 16)        | 1<br>(0 - 2)           | 0<br>(0 - 0)           |
| Chromosomal unbalanced rearrangements               | 42<br>(11 - 117)         | 36<br>(9 - 105)          | 2<br>(0 - 4)        | 3<br>(1 - 9)         | 1<br>(0 - 1)           | 0<br>(0 - 1)           |
| Other congenital anomalies                          | 972<br>(415 - 2,031)     | 871<br>(353 - 1,833)     | 46<br>(18 - 98)     | 36<br>(13 - 84)      | 10<br>(4 - 19)         | 10<br>(5 - 16)         |
| Skin and subcutaneous diseases                      | 97<br>(57 - 144)         | 10<br>(4 - 20)           | 4<br>(2 - 7)        | 15<br>(7 - 29)       | 23<br>(11 - 40)        | 45<br>(25 - 73)        |
| Cellulitis                                          | 64<br>(22 - 110)         | 8<br>(2 - 17)            | 3<br>(1 - 5)        | 11<br>(4 - 23)       | 16<br>(5 - 30)         | 27<br>(7 - 50)         |
| Pyoderma                                            | 16<br>(3 - 41)           | 2<br>(0 - 7)             | 1<br>(0 - 2)        | 2<br>(0 - 8)         | 4<br>(1 - 12)          | 7<br>(2 - 15)          |



Web Table 31- Yemen deaths with 95% UI by age, sex, and cause in 2013

| Cause                                           | Females, All Ages        | Females, 0-4 Years | Females, 5-14 Years | Females, 15-49 Years   | Females, 50-69 Years | Females, 70-80 Years |
|-------------------------------------------------|--------------------------|--------------------|---------------------|------------------------|----------------------|----------------------|
| Decubitus ulcer                                 | 16<br>(3 - 43)           | 0<br>(0 - 0)       | 0<br>(0 - 1)        | 1<br>(0 - 4)           | 3<br>(0 - 7)         | 12<br>(3 - 32)       |
| Other skin and subcutaneous diseases            | 1<br>(0 - 2)             | 0<br>(0 - 0)       | 0<br>(0 - 0)        | 0<br>(0 - 1)           | 0<br>(0 - 1)         | 0<br>(0 - 0)         |
| Sudden infant death syndrome                    | 28<br>(3 - 126)          | 28<br>(3 - 126)    | --                  | --                     | --                   | --                   |
| Injuries                                        | 3,608<br>(2,264 - 5,499) | 613<br>(377 - 919) | 410<br>(261 - 600)  | 1,732<br>(974 - 2,991) | 589<br>(351 - 922)   | 264<br>(183 - 376)   |
| Transport injuries                              | 1,303<br>(712 - 2,242)   | 182<br>(79 - 345)  | 175<br>(90 - 295)   | 660<br>(330 - 1,229)   | 226<br>(108 - 389)   | 61<br>(36 - 97)      |
| Road injuries                                   | 1,229<br>(685 - 2,121)   | 173<br>(75 - 323)  | 166<br>(88 - 283)   | 624<br>(316 - 1,179)   | 210<br>(103 - 365)   | 56<br>(33 - 89)      |
| Pedestrian road injuries                        | 312<br>(153 - 569)       | 54<br>(23 - 113)   | 51<br>(24 - 98)     | 123<br>(51 - 257)      | 62<br>(28 - 117)     | 21<br>(11 - 36)      |
| Cyclist road injuries                           | 93<br>(48 - 168)         | 9<br>(3 - 21)      | 11<br>(5 - 21)      | 42<br>(19 - 84)        | 28<br>(12 - 52)      | 4<br>(2 - 8)         |
| Motorcyclist road injuries                      | 179<br>(89 - 344)        | 15<br>(6 - 32)     | 14<br>(6 - 29)      | 127<br>(59 - 256)      | 20<br>(7 - 42)       | 3<br>(1 - 6)         |
| Motor vehicle road injuries                     | 600<br>(272 - 1,047)     | 84<br>(29 - 184)   | 82<br>(33 - 149)    | 317<br>(133 - 614)     | 93<br>(40 - 164)     | 23<br>(11 - 40)      |
| Other road injuries                             | 44<br>(3 - 91)           | 10<br>(0 - 24)     | 8<br>(0 - 19)       | 14<br>(1 - 35)         | 8<br>(0 - 16)        | 4<br>(0 - 10)        |
| Other transport injuries                        | 75<br>(17 - 139)         | 10<br>(2 - 22)     | 8<br>(2 - 17)       | 36<br>(7 - 73)         | 16<br>(3 - 32)       | 5<br>(1 - 9)         |
| Unintentional injuries                          | 1,451<br>(947 - 2,185)   | 361<br>(205 - 560) | 192<br>(123 - 277)  | 526<br>(297 - 916)     | 211<br>(115 - 343)   | 161<br>(104 - 246)   |
| Falls                                           | 207<br>(111 - 354)       | 43<br>(16 - 96)    | 21<br>(8 - 39)      | 53<br>(22 - 113)       | 37<br>(17 - 67)      | 53<br>(28 - 90)      |
| Drowning                                        | 245<br>(82 - 416)        | 94<br>(26 - 196)   | 56<br>(19 - 103)    | 74<br>(22 - 141)       | 15<br>(5 - 28)       | 6<br>(3 - 9)         |
| Fire, heat, and hot substances                  | 413<br>(219 - 783)       | 94<br>(36 - 203)   | 45<br>(21 - 85)     | 162<br>(76 - 332)      | 66<br>(27 - 145)     | 47<br>(22 - 93)      |
| Poisonings                                      | 184<br>(92 - 313)        | 40<br>(17 - 84)    | 20<br>(8 - 38)      | 93<br>(42 - 191)       | 22<br>(10 - 42)      | 9<br>(4 - 16)        |
| Exposure to mechanical forces                   | 95<br>(45 - 158)         | 24<br>(9 - 48)     | 16<br>(7 - 28)      | 35<br>(16 - 66)        | 14<br>(6 - 24)       | 6<br>(3 - 9)         |
| Unintentional firearm injuries                  | 28<br>(14 - 49)          | 3<br>(1 - 7)       | 4<br>(2 - 7)        | 15<br>(6 - 30)         | 4<br>(2 - 8)         | 2<br>(1 - 3)         |
| Unintentional suffocation                       | 12<br>(2 - 35)           | 4<br>(0 - 18)      | 1<br>(0 - 4)        | 4<br>(1 - 11)          | 2<br>(0 - 6)         | 0<br>(0 - 1)         |
| Other exposure to mechanical forces             | 55<br>(20 - 94)          | 16<br>(5 - 33)     | 11<br>(4 - 21)      | 16<br>(6 - 32)         | 8<br>(3 - 14)        | 4<br>(1 - 7)         |
| Adverse effects of medical treatment            | 96<br>(54 - 159)         | 15<br>(6 - 32)     | 6<br>(3 - 9)        | 26<br>(13 - 51)        | 29<br>(13 - 52)      | 20<br>(8 - 39)       |
| Animal contact                                  | 25<br>(6 - 47)           | 7<br>(1 - 16)      | 4<br>(1 - 9)        | 8<br>(2 - 16)          | 3<br>(1 - 7)         | 3<br>(1 - 5)         |
| Venomous animal contact                         | 16<br>(3 - 31)           | 5<br>(1 - 12)      | 3<br>(1 - 7)        | 5<br>(1 - 10)          | 2<br>(0 - 4)         | 1<br>(0 - 2)         |
| Non-venomous animal contact                     | 9<br>(2 - 19)            | 2<br>(0 - 5)       | 1<br>(0 - 3)        | 3<br>(1 - 7)           | 1<br>(0 - 3)         | 2<br>(0 - 3)         |
| Foreign body                                    | 38<br>(16 - 84)          | 16<br>(5 - 41)     | 4<br>(2 - 9)        | 8<br>(3 - 18)          | 4<br>(2 - 9)         | 6<br>(3 - 12)        |
| Pulmonary aspiration and foreign body in airway | 35<br>(14 - 81)          | 16<br>(5 - 41)     | 4<br>(1 - 8)        | 7<br>(2 - 16)          | 4<br>(1 - 9)         | 6<br>(2 - 12)        |
| Foreign body in other body part                 | 3<br>(1 - 6)             | 0<br>(0 - 1)       | 0<br>(0 - 1)        | 1<br>(0 - 3)           | 0<br>(0 - 1)         | 0<br>(0 - 1)         |
| Other unintentional injuries                    | 149<br>(53 - 288)        | 29<br>(9 - 60)     | 19<br>(7 - 36)      | 69<br>(20 - 151)       | 20<br>(7 - 40)       | 11<br>(5 - 21)       |
| Self-harm and interpersonal violence            | 574<br>(282 - 1,030)     | 16<br>(8 - 30)     | 26<br>(12 - 50)     | 432<br>(201 - 805)     | 75<br>(35 - 134)     | 24<br>(13 - 39)      |
| Self-harm                                       | 389<br>(154 - 713)       | --                 | 13<br>(4 - 34)      | 295<br>(107 - 571)     | 60<br>(26 - 109)     | 22<br>(11 - 36)      |
| Interpersonal violence                          | 185<br>(104 - 320)       | 16<br>(8 - 30)     | 14<br>(6 - 25)      | 137<br>(71 - 254)      | 15<br>(7 - 28)       | 2<br>(1 - 4)         |
| Assault by firearm                              | 37<br>(15 - 73)          | 3<br>(1 - 7)       | 3<br>(1 - 7)        | 26<br>(9 - 55)         | 4<br>(2 - 9)         | 0<br>(0 - 1)         |
| Assault by sharp object                         | 43<br>(12 - 92)          | 2<br>(0 - 4)       | 2<br>(0 - 4)        | 38<br>(10 - 83)        | 1<br>(0 - 3)         | 0<br>(0 - 1)         |
| Assault by other means                          | 104<br>(55 - 190)        | 11<br>(5 - 22)     | 9<br>(4 - 17)       | 73<br>(34 - 142)       | 9<br>(4 - 18)        | 2<br>(1 - 3)         |
| Forces of nature, war, and legal intervention   | 280<br>(177 - 570)       | 54<br>(46 - 75)    | 17<br>(12 - 32)     | 113<br>(63 - 250)      | 77<br>(42 - 183)     | 18<br>(7 - 42)       |
| Collective violence and legal intervention      | 280<br>(177 - 570)       | 54<br>(46 - 75)    | 17<br>(12 - 32)     | 113<br>(63 - 250)      | 77<br>(42 - 183)     | 18<br>(7 - 42)       |

Web Table 31- Zambia deaths with 95% UI by age, sex, and cause in 2013

| Cause                                                             | Both Sexes, All Ages           | Both Sexes, 0-4 Years       | Both Sexes, 5-14 Years   | Both Sexes, 15-49 Years     | Both Sexes, 50-69 Years     | Both Sexes, 70-80 Years     |
|-------------------------------------------------------------------|--------------------------------|-----------------------------|--------------------------|-----------------------------|-----------------------------|-----------------------------|
| All causes                                                        | 147,912<br>(135,003 - 162,605) | 48,721<br>(38,284 - 61,280) | 6,466<br>(5,573 - 7,779) | 50,128<br>(45,521 - 54,351) | 20,704<br>(18,136 - 23,525) | 21,892<br>(19,684 - 24,294) |
| Communicable, maternal, neonatal, and nutritional diseases        | 105,923<br>(95,661 - 118,731)  | 43,105<br>(34,106 - 54,093) | 5,734<br>(4,901 - 6,783) | 39,355<br>(35,662 - 43,186) | 10,366<br>(8,941 - 11,931)  | 7,362<br>(6,431 - 8,359)    |
| HIV/AIDS and tuberculosis                                         | 42,738<br>(37,939 - 46,948)    | 2,665<br>(1,754 - 3,528)    | 3,749<br>(3,078 - 4,401) | 28,078<br>(25,000 - 31,045) | 6,328<br>(4,983 - 8,046)    | 1,918<br>(1,551 - 2,306)    |
| Tuberculosis                                                      | 8,957<br>(7,242 - 10,668)      | 470<br>(310 - 700)          | 67<br>(42 - 104)         | 4,939<br>(3,744 - 6,151)    | 2,042<br>(1,550 - 2,599)    | 1,438<br>(1,130 - 1,756)    |
| HIV/AIDS                                                          | 33,781<br>(28,877 - 38,397)    | 2,194<br>(1,343 - 3,094)    | 3,682<br>(3,007 - 4,350) | 23,139<br>(20,081 - 26,254) | 4,286<br>(2,851 - 6,071)    | 479<br>(307 - 755)          |
| HIV/AIDS resulting in mycobacterial infection                     | 2,131<br>(1,671 - 2,722)       | 130<br>(74 - 190)           | 202<br>(155 - 258)       | 1,472<br>(1,150 - 1,883)    | 293<br>(191 - 448)          | 34<br>(20 - 55)             |
| HIV/AIDS resulting in other diseases                              | 31,650<br>(27,115 - 35,846)    | 2,065<br>(1,265 - 2,897)    | 3,481<br>(2,846 - 4,112) | 21,667<br>(18,731 - 24,571) | 3,992<br>(2,684 - 5,691)    | 445<br>(284 - 696)          |
| Diarrhea, lower respiratory, and other common infectious diseases | 26,524<br>(21,997 - 31,726)    | 14,411<br>(10,437 - 19,189) | 715<br>(483 - 1,063)     | 4,605<br>(3,635 - 5,681)    | 2,711<br>(2,082 - 3,467)    | 4,083<br>(3,347 - 4,870)    |
| Diarrheal diseases                                                | 9,626<br>(7,507 - 12,272)      | 4,963<br>(3,082 - 7,596)    | 231<br>(130 - 405)       | 1,941<br>(1,470 - 2,561)    | 1,131<br>(769 - 1,606)      | 1,361<br>(983 - 1,815)      |
| Intestinal infectious diseases                                    | 590<br>(305 - 1,057)           | 292<br>(138 - 543)          | 107<br>(50 - 194)        | 167<br>(82 - 312)           | 16<br>(8 - 30)              | 7<br>(3 - 14)               |
| Typhoid fever                                                     | 431<br>(207 - 803)             | 201<br>(85 - 399)           | 83<br>(38 - 153)         | 130<br>(61 - 255)           | 11<br>(5 - 22)              | 5<br>(2 - 9)                |
| Paratyphoid fever                                                 | 109<br>(53 - 203)              | 57<br>(24 - 114)            | 21<br>(9 - 40)           | 28<br>(12 - 57)             | 2<br>(1 - 5)                | 1<br>(0 - 2)                |
| Other intestinal infectious diseases                              | 50<br>(29 - 75)                | 35<br>(17 - 60)             | 3<br>(1 - 7)             | 9<br>(3 - 18)               | 2<br>(0 - 6)                | 1<br>(0 - 5)                |
| Lower respiratory infections                                      | 12,714<br>(10,399 - 15,487)    | 7,127<br>(5,013 - 9,666)    | 207<br>(131 - 323)       | 1,499<br>(1,133 - 1,910)    | 1,314<br>(974 - 1,725)      | 2,568<br>(2,001 - 3,225)    |
| Upper respiratory infections                                      | 19<br>(9 - 35)                 | 8<br>(1 - 22)               | 0<br>(0 - 1)             | 7<br>(2 - 14)               | 2<br>(0 - 5)                | 2<br>(0 - 5)                |
| Otitis media                                                      | 12<br>(9 - 17)                 | 6<br>(4 - 10)               | 0<br>(0 - 1)             | 2<br>(2 - 3)                | 1<br>(1 - 2)                | 2<br>(2 - 3)                |
| Meningitis                                                        | 3,073<br>(2,343 - 3,984)       | 1,616<br>(994 - 2,396)      | 149<br>(89 - 241)        | 941<br>(649 - 1,261)        | 234<br>(159 - 325)          | 134<br>(93 - 187)           |
| Pneumococcal meningitis                                           | 729<br>(509 - 975)             | 306<br>(174 - 493)          | 46<br>(23 - 83)          | 275<br>(167 - 395)          | 63<br>(39 - 96)             | 38<br>(24 - 61)             |
| H influenzae type B meningitis                                    | 649<br>(448 - 951)             | 461<br>(275 - 758)          | 34<br>(17 - 58)          | 120<br>(72 - 184)           | 22<br>(12 - 35)             | 12<br>(7 - 19)              |
| Meningococcal meningitis                                          | 443<br>(312 - 597)             | 171<br>(90 - 285)           | 17<br>(8 - 29)           | 169<br>(96 - 272)           | 54<br>(32 - 82)             | 32<br>(20 - 51)             |
| Other meningitis                                                  | 1,253<br>(870 - 1,721)         | 678<br>(388 - 1,031)        | 51<br>(28 - 88)          | 377<br>(233 - 561)          | 95<br>(58 - 145)            | 52<br>(33 - 78)             |
| Encephalitis                                                      | 75<br>(55 - 103)               | 42<br>(26 - 66)             | 4<br>(2 - 7)             | 18<br>(10 - 31)             | 6<br>(3 - 11)               | 5<br>(3 - 8)                |
| Diphtheria                                                        | 10<br>(1 - 45)                 | 8<br>(0 - 44)               | 1<br>(0 - 4)             | 1<br>(0 - 3)                | 0<br>(0 - 0)                | --                          |
| Whooping cough                                                    | 118<br>(0 - 588)               | 115<br>(0 - 570)            | 3<br>(0 - 14)            | 1<br>(0 - 3)                | 0<br>(0 - 0)                | --                          |
| Tetanus                                                           | 84<br>(36 - 139)               | 49<br>(23 - 88)             | 2<br>(1 - 5)             | 25<br>(7 - 52)              | 6<br>(2 - 13)               | 2<br>(1 - 4)                |
| Measles                                                           | 191<br>(47 - 511)              | 179<br>(43 - 483)           | 10<br>(3 - 29)           | 2<br>(1 - 5)                | 0<br>(0 - 0)                | --                          |
| Varicella and herpes zoster                                       | 11<br>(4 - 25)                 | 6<br>(1 - 18)               | 1<br>(0 - 2)             | 2<br>(1 - 5)                | 1<br>(0 - 1)                | 2<br>(0 - 7)                |
| Neglected tropical diseases and malaria                           | 14,959<br>(11,068 - 20,259)    | 9,013<br>(5,600 - 13,745)   | 1,018<br>(629 - 1,646)   | 3,541<br>(2,524 - 4,823)    | 768<br>(484 - 1,183)        | 619<br>(343 - 1,001)        |
| Malaria                                                           | 13,812<br>(10,076 - 18,903)    | 8,621<br>(5,287 - 13,264)   | 877<br>(532 - 1,473)     | 3,025<br>(2,078 - 4,322)    | 702<br>(413 - 1,113)        | 588<br>(315 - 971)          |
| Leishmaniasis                                                     | 937<br>(365 - 1,613)           | 332<br>(81 - 782)           | 125<br>(43 - 275)        | 423<br>(166 - 704)          | 42<br>(19 - 73)             | 16<br>(8 - 30)              |
| Visceral leishmaniasis                                            | 937<br>(365 - 1,613)           | 332<br>(81 - 782)           | 125<br>(43 - 275)        | 423<br>(166 - 704)          | 42<br>(19 - 73)             | 16<br>(8 - 30)              |
| African trypanosomiasis                                           | 12<br>(6 - 20)                 | 1<br>(0 - 2)                | 1<br>(0 - 2)             | 8<br>(4 - 14)               | 1<br>(1 - 2)                | 0<br>(0 - 1)                |
| Schistosomiasis                                                   | 62<br>(47 - 84)                | 1<br>(1 - 2)                | 1<br>(1 - 2)             | 38<br>(26 - 55)             | 14<br>(9 - 22)              | 8<br>(5 - 12)               |
| Cysticercosis                                                     | 8<br>(7 - 10)                  | 0<br>(0 - 1)                | 0<br>(0 - 0)             | 7<br>(5 - 8)                | 1<br>(1 - 1)                | 0<br>(0 - 0)                |
| Cystic echinococcosis                                             | 7<br>(6 - 9)                   | 1<br>(1 - 2)                | 1<br>(0 - 1)             | 5<br>(4 - 6)                | 1<br>(1 - 1)                | 0<br>(0 - 0)                |
| Dengue                                                            | 2<br>(2 - 3)                   | 0<br>(0 - 1)                | 0<br>(0 - 0)             | 1<br>(1 - 2)                | 0<br>(0 - 0)                | 0<br>(0 - 0)                |
| Yellow fever                                                      | 0<br>(0 - 0)                   | 0<br>(0 - 0)                | 0<br>(0 - 0)             | 0<br>(0 - 0)                | 0<br>(0 - 0)                | 0<br>(0 - 0)                |
| Rabies                                                            | 59<br>(36 - 81)                | 16<br>(7 - 31)              | 10<br>(6 - 17)           | 28<br>(16 - 42)             | 4<br>(3 - 6)                | 1<br>(1 - 2)                |
| Intestinal nematode infections                                    | 39<br>(20 - 69)                | 33<br>(15 - 60)             | 2<br>(0 - 7)             | 3<br>(0 - 10)               | 1<br>(0 - 4)                | 1<br>(0 - 4)                |
| Ascariasis                                                        | 39<br>(20 - 69)                | 33<br>(15 - 60)             | 2<br>(0 - 7)             | 3<br>(0 - 10)               | 1<br>(0 - 4)                | 1<br>(0 - 4)                |

Web Table 31- Zambia deaths with 95% UI by age, sex, and cause in 2013

| Cause                                                            | Both Sexes, All Ages        | Both Sexes, 0-4 Years     | Both Sexes, 5-14 Years | Both Sexes, 15-49 Years  | Both Sexes, 50-69 Years   | Both Sexes, 70-80 Years     |
|------------------------------------------------------------------|-----------------------------|---------------------------|------------------------|--------------------------|---------------------------|-----------------------------|
| Other neglected tropical diseases                                | 20<br>(11 - 37)             | 8<br>(4 - 12)             | 0<br>(0 - 1)           | 4<br>(2 - 9)             | 3<br>(1 - 7)              | 5<br>(2 - 11)               |
| Maternal disorders                                               | 2,044<br>(1,341 - 2,980)    | --                        | 4<br>(2 - 10)          | 2,040<br>(1,337 - 2,976) | --                        | --                          |
| Maternal hemorrhage                                              | 240<br>(135 - 376)          | --                        | 0<br>(0 - 1)           | 240<br>(134 - 376)       | --                        | --                          |
| Maternal sepsis and other maternal infections                    | 187<br>(107 - 296)          | --                        | 1<br>(0 - 1)           | 187<br>(106 - 296)       | --                        | --                          |
| Maternal hypertensive disorders                                  | 202<br>(110 - 325)          | --                        | 1<br>(0 - 1)           | 201<br>(109 - 324)       | --                        | --                          |
| Maternal obstructed labor                                        | 103<br>(61 - 164)           | --                        | 0<br>(0 - 0)           | 103<br>(61 - 164)        | --                        | --                          |
| Maternal abortive outcome                                        | 364<br>(221 - 552)          | --                        | 1<br>(0 - 2)           | 364<br>(220 - 552)       | --                        | --                          |
| Indirect maternal deaths                                         | 158<br>(85 - 264)           | --                        | 0<br>(0 - 1)           | 158<br>(85 - 264)        | --                        | --                          |
| Late maternal deaths                                             | 169<br>(83 - 279)           | --                        | 1<br>(0 - 2)           | 169<br>(82 - 278)        | --                        | --                          |
| Maternal deaths aggravated by HIV/AIDS                           | 126<br>(73 - 190)           | --                        | --                     | 126<br>(73 - 190)        | --                        | --                          |
| Other maternal disorders                                         | 489<br>(301 - 760)          | --                        | 1<br>(0 - 2)           | 488<br>(300 - 759)       | --                        | --                          |
| Neonatal disorders                                               | 9,838<br>(7,960 - 11,916)   | 9,838<br>(7,960 - 11,916) | --                     | --                       | --                        | --                          |
| Neonatal preterm birth complications                             | 1,951<br>(1,135 - 2,961)    | 1,951<br>(1,135 - 2,961)  | --                     | --                       | --                        | --                          |
| Neonatal encephalopathy due to birth asphyxia and trauma         | 3,506<br>(2,321 - 4,886)    | 3,506<br>(2,321 - 4,886)  | --                     | --                       | --                        | --                          |
| Neonatal sepsis and other neonatal infections                    | 2,704<br>(1,556 - 4,248)    | 2,704<br>(1,556 - 4,248)  | --                     | --                       | --                        | --                          |
| Hemolytic disease and other neonatal jaundice                    | 52<br>(24 - 101)            | 52<br>(24 - 101)          | --                     | --                       | --                        | --                          |
| Other neonatal disorders                                         | 1,626<br>(924 - 2,604)      | 1,626<br>(924 - 2,604)    | --                     | --                       | --                        | --                          |
| Nutritional deficiencies                                         | 6,665<br>(4,857 - 9,003)    | 4,671<br>(2,945 - 6,815)  | 129<br>(79 - 216)      | 794<br>(590 - 1,036)     | 441<br>(320 - 600)        | 631<br>(464 - 843)          |
| Protein-energy malnutrition                                      | 5,703<br>(4,005 - 7,971)    | 4,433<br>(2,815 - 6,492)  | 112<br>(68 - 188)      | 352<br>(216 - 521)       | 317<br>(217 - 444)        | 489<br>(328 - 668)          |
| Iodine deficiency                                                | 7<br>(1 - 24)               | 3<br>(0 - 20)             | 0<br>(0 - 2)           | 2<br>(0 - 10)            | 1<br>(0 - 3)              | 1<br>(0 - 4)                |
| Iron-deficiency anemia                                           | 935<br>(570 - 1,495)        | 230<br>(69 - 546)         | 17<br>(6 - 33)         | 434<br>(271 - 618)       | 120<br>(58 - 210)         | 134<br>(68 - 263)           |
| Other nutritional deficiencies                                   | 21<br>(10 - 36)             | 4<br>(1 - 13)             | 0<br>(0 - 1)           | 5<br>(2 - 11)            | 4<br>(2 - 7)              | 7<br>(2 - 15)               |
| Other communicable, maternal, neonatal, and nutritional diseases | 3,154<br>(1,073 - 5,810)    | 2,508<br>(477 - 5,087)    | 119<br>(29 - 257)      | 297<br>(207 - 418)       | 119<br>(69 - 199)         | 111<br>(57 - 205)           |
| Sexually transmitted diseases excluding HIV                      | 2,557<br>(492 - 5,227)      | 2,299<br>(272 - 4,850)    | 104<br>(13 - 238)      | 103<br>(44 - 179)        | 27<br>(11 - 62)           | 23<br>(9 - 52)              |
| Syphilis                                                         | 2,481<br>(399 - 5,161)      | 2,299<br>(272 - 4,850)    | 103<br>(12 - 237)      | 44<br>(19 - 78)          | 17<br>(7 - 36)            | 18<br>(7 - 41)              |
| Chlamydial infection                                             | 21<br>(8 - 35)              | --                        | 0<br>(0 - 0)           | 17<br>(6 - 29)           | 2<br>(1 - 7)              | 1<br>(0 - 3)                |
| Gonococcal infection                                             | 30<br>(15 - 51)             | --                        | 0<br>(0 - 1)           | 22<br>(10 - 40)          | 5<br>(2 - 11)             | 3<br>(1 - 6)                |
| Other sexually transmitted diseases                              | 25<br>(12 - 43)             | --                        | 0<br>(0 - 1)           | 20<br>(9 - 35)           | 3<br>(1 - 8)              | 1<br>(1 - 3)                |
| Hepatitis                                                        | 159<br>(125 - 198)          | 30<br>(17 - 50)           | 5<br>(3 - 8)           | 92<br>(66 - 120)         | 22<br>(16 - 31)           | 10<br>(7 - 13)              |
| Acute hepatitis A                                                | 20<br>(6 - 40)              | 11<br>(3 - 23)            | 2<br>(1 - 4)           | 7<br>(2 - 16)            | 0<br>(0 - 1)              | 0<br>(0 - 0)                |
| Acute hepatitis B                                                | 90<br>(64 - 120)            | 19<br>(9 - 35)            | 2<br>(1 - 5)           | 41<br>(24 - 61)          | 19<br>(13 - 27)           | 9<br>(6 - 12)               |
| Acute hepatitis C                                                | 2<br>(0 - 4)                | --                        | 0<br>(0 - 0)           | 1<br>(0 - 3)             | 0<br>(0 - 1)              | 0<br>(0 - 0)                |
| Acute hepatitis E                                                | 47<br>(26 - 74)             | 0<br>(0 - 1)              | 1<br>(0 - 1)           | 43<br>(24 - 68)          | 3<br>(1 - 6)              | 1<br>(0 - 1)                |
| Other infectious diseases                                        | 438<br>(236 - 678)          | 178<br>(87 - 362)         | 10<br>(5 - 22)         | 102<br>(40 - 161)        | 69<br>(28 - 133)          | 78<br>(30 - 170)            |
| Non-communicable diseases                                        | 36,015<br>(31,142 - 41,012) | 4,166<br>(2,767 - 6,405)  | 417<br>(295 - 626)     | 7,774<br>(6,412 - 9,212) | 9,698<br>(7,741 - 11,779) | 13,960<br>(12,266 - 15,746) |
| Neoplasms                                                        | 5,226<br>(4,390 - 6,109)    | 253<br>(162 - 376)        | 89<br>(58 - 136)       | 1,380<br>(1,134 - 1,656) | 2,054<br>(1,632 - 2,551)  | 1,450<br>(1,235 - 1,690)    |
| Esophageal cancer                                                | 514<br>(350 - 733)          | --                        | --                     | 83<br>(51 - 124)         | 266<br>(163 - 398)        | 165<br>(114 - 237)          |
| Stomach cancer                                                   | 353<br>(282 - 439)          | --                        | --                     | 67<br>(51 - 86)          | 167<br>(125 - 216)        | 119<br>(91 - 151)           |
| Liver cancer                                                     | 438<br>(346 - 556)          | --                        | 4<br>(2 - 7)           | 148<br>(110 - 196)       | 181<br>(129 - 253)        | 106<br>(79 - 140)           |
| Liver cancer due to hepatitis B                                  | 95<br>(50 - 184)            | --                        | 1<br>(0 - 2)           | 43<br>(22 - 83)          | 35<br>(14 - 73)           | 16<br>(8 - 31)              |

Web Table 31- Zambia deaths with 95% UI by age, sex, and cause in 2013

| Cause                                | Both Sexes, All Ages        | Both Sexes, 0-4 Years | Both Sexes, 5-14 Years | Both Sexes, 15-49 Years  | Both Sexes, 50-69 Years  | Both Sexes, 70-80 Years  |
|--------------------------------------|-----------------------------|-----------------------|------------------------|--------------------------|--------------------------|--------------------------|
| Liver cancer due to hepatitis C      | 212<br>(141 - 304)          | --                    | 1<br>(0 - 2)           | 62<br>(36 - 95)          | 95<br>(59 - 147)         | 54<br>(34 - 79)          |
| Liver cancer due to alcohol use      | 52<br>(32 - 74)             | --                    | --                     | 10<br>(5 - 17)           | 22<br>(12 - 34)          | 20<br>(13 - 29)          |
| Liver cancer due to other causes     | 80<br>(50 - 121)            | --                    | 2<br>(1 - 4)           | 33<br>(21 - 48)          | 30<br>(15 - 53)          | 15<br>(8 - 26)           |
| Larynx cancer                        | 32<br>(22 - 44)             | --                    | --                     | 6<br>(4 - 9)             | 15<br>(9 - 22)           | 11<br>(8 - 16)           |
| Tracheal, bronchus and lung cancer   | 256<br>(203 - 316)          | --                    | --                     | 30<br>(23 - 38)          | 144<br>(108 - 186)       | 82<br>(66 - 101)         |
| Breast cancer                        | 419<br>(313 - 577)          | --                    | --                     | 176<br>(126 - 249)       | 172<br>(121 - 251)       | 72<br>(52 - 100)         |
| Cervical cancer                      | 738<br>(529 - 1,001)        | --                    | --                     | 243<br>(164 - 337)       | 342<br>(228 - 492)       | 153<br>(102 - 218)       |
| Uterine cancer                       | 43<br>(26 - 63)             | --                    | --                     | 6<br>(4 - 10)            | 23<br>(12 - 36)          | 14<br>(8 - 22)           |
| Prostate cancer                      | 233<br>(148 - 355)          | --                    | --                     | 6<br>(3 - 10)            | 57<br>(33 - 92)          | 170<br>(106 - 268)       |
| Colon and rectum cancer              | 356<br>(297 - 422)          | --                    | --                     | 95<br>(76 - 115)         | 142<br>(110 - 178)       | 120<br>(97 - 147)        |
| Lip and oral cavity cancer           | 73<br>(52 - 96)             | --                    | --                     | 21<br>(14 - 31)          | 32<br>(21 - 48)          | 19<br>(14 - 26)          |
| Nasopharynx cancer                   | 25<br>(16 - 34)             | --                    | 1<br>(0 - 1)           | 15<br>(9 - 22)           | 6<br>(4 - 10)            | 3<br>(2 - 4)             |
| Other pharynx cancer                 | 34<br>(24 - 44)             | --                    | --                     | 11<br>(6 - 16)           | 17<br>(11 - 24)          | 7<br>(5 - 9)             |
| Gallbladder and biliary tract cancer | 50<br>(36 - 69)             | --                    | --                     | 15<br>(9 - 21)           | 22<br>(15 - 34)          | 13<br>(8 - 19)           |
| Pancreatic cancer                    | 99<br>(80 - 121)            | --                    | --                     | 21<br>(16 - 26)          | 52<br>(40 - 67)          | 26<br>(20 - 33)          |
| Malignant skin melanoma              | 24<br>(17 - 32)             | --                    | --                     | 6<br>(4 - 8)             | 10<br>(7 - 15)           | 7<br>(5 - 10)            |
| Non-melanoma skin cancer             | 27<br>(17 - 39)             | --                    | --                     | 7<br>(3 - 13)            | 7<br>(4 - 10)            | 13<br>(7 - 21)           |
| Ovarian cancer                       | 94<br>(66 - 127)            | --                    | --                     | 29<br>(20 - 41)          | 48<br>(31 - 70)          | 17<br>(11 - 25)          |
| Testicular cancer                    | 11<br>(7 - 16)              | --                    | --                     | 6<br>(4 - 10)            | 3<br>(2 - 6)             | 2<br>(1 - 2)             |
| Kidney cancer                        | 78<br>(58 - 107)            | 18<br>(8 - 36)        | 3<br>(2 - 6)           | 15<br>(11 - 22)          | 26<br>(18 - 37)          | 15<br>(10 - 21)          |
| Bladder cancer                       | 94<br>(74 - 121)            | --                    | --                     | 17<br>(12 - 22)          | 33<br>(23 - 46)          | 45<br>(33 - 60)          |
| Brain and nervous system cancer      | 80<br>(60 - 105)            | 6<br>(2 - 11)         | 6<br>(3 - 11)          | 38<br>(28 - 53)          | 18<br>(12 - 27)          | 12<br>(8 - 17)           |
| Thyroid cancer                       | 17<br>(12 - 25)             | --                    | 0<br>(0 - 0)           | 2<br>(2 - 3)             | 9<br>(5 - 15)            | 6<br>(4 - 8)             |
| Mesothelioma                         | 13<br>(7 - 19)              | --                    | --                     | 3<br>(2 - 6)             | 5<br>(3 - 9)             | 4<br>(2 - 7)             |
| Hodgkin lymphoma                     | 48<br>(35 - 62)             | 3<br>(1 - 6)          | 2<br>(1 - 4)           | 18<br>(13 - 24)          | 13<br>(7 - 21)           | 12<br>(6 - 19)           |
| Non-Hodgkin lymphoma                 | 301<br>(221 - 389)          | 70<br>(33 - 135)      | 28<br>(14 - 48)        | 94<br>(70 - 132)         | 61<br>(43 - 88)          | 48<br>(34 - 63)          |
| Multiple myeloma                     | 43<br>(31 - 55)             | --                    | --                     | 10<br>(6 - 13)           | 19<br>(13 - 26)          | 15<br>(10 - 19)          |
| Leukemia                             | 105<br>(88 - 122)           | 11<br>(6 - 18)        | 8<br>(5 - 12)          | 44<br>(34 - 54)          | 19<br>(14 - 24)          | 24<br>(19 - 31)          |
| Other neoplasms                      | 626<br>(503 - 799)          | 145<br>(91 - 216)     | 37<br>(23 - 60)        | 148<br>(108 - 236)       | 143<br>(101 - 206)       | 153<br>(105 - 207)       |
| Cardiovascular diseases              | 15,323<br>(12,976 - 17,998) | 244<br>(163 - 361)    | 48<br>(32 - 75)        | 2,164<br>(1,765 - 2,621) | 4,534<br>(3,565 - 5,580) | 8,333<br>(7,200 - 9,528) |
| Rheumatic heart disease              | 581<br>(418 - 942)          | 10<br>(4 - 21)        | 10<br>(6 - 17)         | 277<br>(185 - 462)       | 147<br>(96 - 242)        | 137<br>(95 - 216)        |
| Ischemic heart disease               | 3,735<br>(2,932 - 4,565)    | 2<br>(1 - 4)          | 3<br>(2 - 6)           | 418<br>(313 - 529)       | 1,186<br>(875 - 1,539)   | 2,126<br>(1,682 - 2,597) |
| Cerebrovascular disease              | 6,747<br>(5,598 - 8,096)    | 21<br>(12 - 36)       | 5<br>(3 - 8)           | 543<br>(423 - 699)       | 1,994<br>(1,531 - 2,509) | 4,184<br>(3,491 - 4,977) |
| Ischemic stroke                      | 3,210<br>(2,183 - 3,972)    | 2<br>(1 - 5)          | 1<br>(0 - 1)           | 86<br>(38 - 156)         | 667<br>(409 - 913)       | 2,453<br>(1,648 - 3,077) |
| Hemorrhagic stroke                   | 3,537<br>(2,817 - 4,668)    | 19<br>(11 - 31)       | 4<br>(3 - 7)           | 456<br>(344 - 602)       | 1,327<br>(1,007 - 1,738) | 1,730<br>(1,268 - 2,477) |
| Hypertensive heart disease           | 1,291<br>(838 - 1,818)      | 4<br>(1 - 8)          | 1<br>(1 - 2)           | 128<br>(77 - 181)        | 351<br>(218 - 503)       | 806<br>(500 - 1,264)     |
| Cardiomyopathy and myocarditis       | 837<br>(562 - 1,302)        | 113<br>(57 - 188)     | 14<br>(8 - 24)         | 278<br>(137 - 452)       | 202<br>(127 - 336)       | 230<br>(139 - 420)       |
| Atrial fibrillation and flutter      | 6<br>(2 - 10)               | --                    | --                     | 0<br>(0 - 0)             | 1<br>(0 - 2)             | 4<br>(1 - 8)             |
| Aortic aneurysm                      | 149<br>(94 - 231)           | --                    | --                     | 27<br>(12 - 44)          | 47<br>(27 - 77)          | 75<br>(46 - 117)         |
| Peripheral vascular disease          | 11<br>(6 - 17)              | --                    | --                     | 0<br>(0 - 1)             | 3<br>(1 - 5)             | 7<br>(4 - 12)            |

Web Table 31- Zambia deaths with 95% UI by age, sex, and cause in 2013

| Cause                                               | Both Sexes, All Ages     | Both Sexes, 0-4 Years | Both Sexes, 5-14 Years | Both Sexes, 15-49 Years | Both Sexes, 50-69 Years | Both Sexes, 70-80 Years |
|-----------------------------------------------------|--------------------------|-----------------------|------------------------|-------------------------|-------------------------|-------------------------|
| Endocarditis                                        | 156<br>(100 - 218)       | 13<br>(6 - 27)        | 2<br>(1 - 4)           | 38<br>(20 - 63)         | 40<br>(24 - 59)         | 64<br>(40 - 99)         |
| Other cardiovascular and circulatory diseases       | 1,811<br>(1,315 - 2,581) | 82<br>(36 - 149)      | 13<br>(7 - 21)         | 454<br>(252 - 684)      | 563<br>(375 - 863)      | 700<br>(472 - 1,065)    |
| Chronic respiratory diseases                        | 2,045<br>(1,728 - 2,396) | 112<br>(65 - 174)     | 15<br>(10 - 23)        | 355<br>(283 - 438)      | 575<br>(436 - 737)      | 988<br>(818 - 1,184)    |
| Chronic obstructive pulmonary disease               | 1,087<br>(860 - 1,374)   | 20<br>(10 - 36)       | 6<br>(4 - 10)          | 119<br>(87 - 161)       | 347<br>(254 - 462)      | 595<br>(455 - 760)      |
| Pneumoconiosis                                      | 102<br>(72 - 143)        | 2<br>(1 - 5)          | 1<br>(0 - 1)           | 31<br>(21 - 45)         | 30<br>(18 - 45)         | 38<br>(24 - 56)         |
| Silicosis                                           | 28<br>(16 - 46)          | 1<br>(0 - 2)          | 0<br>(0 - 0)           | 7<br>(3 - 13)           | 8<br>(4 - 15)           | 12<br>(6 - 22)          |
| Asbestosis                                          | 11<br>(6 - 18)           | 0<br>(0 - 1)          | 0<br>(0 - 0)           | 3<br>(1 - 7)            | 4<br>(2 - 7)            | 3<br>(2 - 6)            |
| Coal workers pneumoconiosis                         | 11<br>(7 - 18)           | 0<br>(0 - 1)          | 0<br>(0 - 0)           | 2<br>(1 - 4)            | 4<br>(2 - 7)            | 5<br>(2 - 8)            |
| Other pneumoconiosis                                | 52<br>(34 - 77)          | 1<br>(1 - 3)          | 0<br>(0 - 0)           | 18<br>(12 - 28)         | 14<br>(8 - 22)          | 18<br>(10 - 29)         |
| Asthma                                              | 400<br>(302 - 516)       | 22<br>(10 - 44)       | 3<br>(2 - 5)           | 82<br>(62 - 107)        | 114<br>(77 - 164)       | 178<br>(126 - 245)      |
| Interstitial lung disease and pulmonary sarcoidosis | 223<br>(85 - 360)        | 4<br>(1 - 12)         | 1<br>(0 - 2)           | 33<br>(9 - 74)          | 58<br>(22 - 102)        | 127<br>(41 - 216)       |
| Other chronic respiratory diseases                  | 232<br>(168 - 304)       | 63<br>(37 - 104)      | 4<br>(2 - 7)           | 89<br>(58 - 125)        | 26<br>(16 - 39)         | 50<br>(31 - 79)         |
| Cirrhosis                                           | 1,909<br>(1,586 - 2,239) | 40<br>(20 - 75)       | 15<br>(10 - 23)        | 727<br>(569 - 896)      | 696<br>(545 - 885)      | 431<br>(338 - 539)      |
| Cirrhosis due to hepatitis B                        | 447<br>(283 - 633)       | 2<br>(1 - 4)          | 2<br>(1 - 4)           | 172<br>(113 - 244)      | 166<br>(96 - 249)       | 104<br>(51 - 168)       |
| Cirrhosis due to hepatitis C                        | 414<br>(221 - 659)       | 1<br>(0 - 3)          | 2<br>(0 - 3)           | 148<br>(79 - 226)       | 167<br>(81 - 278)       | 96<br>(38 - 189)        |
| Cirrhosis due to alcohol use                        | 726<br>(535 - 937)       | --                    | --                     | 243<br>(168 - 323)      | 288<br>(197 - 397)      | 195<br>(127 - 283)      |
| Cirrhosis due to other causes                       | 323<br>(235 - 425)       | 37<br>(18 - 70)       | 11<br>(7 - 17)         | 164<br>(111 - 223)      | 76<br>(43 - 116)        | 36<br>(18 - 58)         |
| Digestive diseases                                  | 2,222<br>(1,869 - 2,612) | 108<br>(61 - 179)     | 42<br>(28 - 68)        | 824<br>(657 - 1,004)    | 533<br>(404 - 674)      | 716<br>(576 - 874)      |
| Peptic ulcer disease                                | 560<br>(420 - 721)       | 8<br>(3 - 17)         | 4<br>(2 - 7)           | 197<br>(138 - 278)      | 146<br>(100 - 205)      | 205<br>(138 - 282)      |
| Gastritis and duodenitis                            | 94<br>(53 - 151)         | 7<br>(2 - 13)         | 3<br>(1 - 5)           | 35<br>(19 - 54)         | 19<br>(9 - 37)          | 30<br>(12 - 70)         |
| Appendicitis                                        | 171<br>(106 - 246)       | 9<br>(3 - 19)         | 6<br>(4 - 11)          | 84<br>(51 - 118)        | 32<br>(15 - 57)         | 40<br>(16 - 77)         |
| Paralytic ileus and intestinal obstruction          | 623<br>(454 - 889)       | 25<br>(12 - 52)       | 17<br>(10 - 29)        | 187<br>(120 - 263)      | 172<br>(113 - 253)      | 222<br>(148 - 346)      |
| Inguinal, femoral, and abdominal hernia             | 47<br>(27 - 65)          | 3<br>(1 - 6)          | 1<br>(0 - 1)           | 22<br>(12 - 33)         | 7<br>(3 - 11)           | 15<br>(7 - 23)          |
| Inflammatory bowel disease                          | 176<br>(95 - 241)        | 29<br>(11 - 55)       | 4<br>(2 - 7)           | 79<br>(45 - 117)        | 28<br>(12 - 43)         | 36<br>(14 - 59)         |
| Vascular intestinal disorders                       | 22<br>(12 - 40)          | 1<br>(0 - 2)          | 0<br>(0 - 1)           | 5<br>(2 - 9)            | 5<br>(3 - 11)           | 10<br>(5 - 23)          |
| Gallbladder and biliary diseases                    | 163<br>(114 - 212)       | 3<br>(1 - 6)          | 1<br>(1 - 2)           | 51<br>(36 - 73)         | 42<br>(26 - 62)         | 65<br>(39 - 96)         |
| Pancreatitis                                        | 130<br>(71 - 191)        | 2<br>(0 - 4)          | 1<br>(0 - 2)           | 75<br>(35 - 118)        | 28<br>(15 - 45)         | 24<br>(12 - 39)         |
| Other digestive diseases                            | 236<br>(175 - 308)       | 21<br>(9 - 40)        | 5<br>(3 - 9)           | 88<br>(60 - 122)        | 53<br>(35 - 78)         | 68<br>(44 - 102)        |
| Neurological disorders                              | 1,179<br>(992 - 1,389)   | 145<br>(83 - 242)     | 49<br>(30 - 83)        | 335<br>(236 - 456)      | 93<br>(71 - 121)        | 556<br>(469 - 666)      |
| Alzheimer disease and other dementias               | 521<br>(430 - 635)       | --                    | --                     | 0<br>(0 - 1)            | 43<br>(32 - 58)         | 478<br>(393 - 581)      |
| Parkinson disease                                   | 9<br>(5 - 16)            | --                    | --                     | 1<br>(0 - 1)            | 1<br>(0 - 3)            | 7<br>(3 - 13)           |
| Epilepsy                                            | 560<br>(420 - 730)       | 120<br>(65 - 213)     | 45<br>(26 - 77)        | 306<br>(214 - 418)      | 31<br>(20 - 47)         | 58<br>(40 - 85)         |
| Multiple sclerosis                                  | 6<br>(3 - 14)            | --                    | --                     | 4<br>(1 - 11)           | 1<br>(1 - 3)            | 1<br>(0 - 1)            |
| Other neurological disorders                        | 82<br>(60 - 105)         | 25<br>(15 - 42)       | 4<br>(3 - 7)           | 24<br>(17 - 33)         | 16<br>(11 - 21)         | 12<br>(8 - 16)          |
| Mental and substance use disorders                  | 673<br>(469 - 908)       | 31<br>(11 - 57)       | 0<br>(0 - 0)           | 529<br>(337 - 737)      | 89<br>(57 - 139)        | 24<br>(15 - 37)         |
| Schizophrenia                                       | 25<br>(10 - 43)          | --                    | --                     | 18<br>(6 - 31)          | 5<br>(2 - 8)            | 3<br>(1 - 5)            |
| Alcohol use disorders                               | 387<br>(203 - 585)       | --                    | --                     | 307<br>(146 - 491)      | 66<br>(37 - 107)        | 14<br>(8 - 22)          |
| Drug use disorders                                  | 259<br>(193 - 333)       | 31<br>(11 - 57)       | --                     | 202<br>(146 - 274)      | 19<br>(9 - 31)          | 8<br>(3 - 14)           |
| Opioid use disorders                                | 27<br>(20 - 36)          | 3<br>(1 - 7)          | --                     | 22<br>(15 - 30)         | 2<br>(1 - 3)            | 1<br>(0 - 2)            |
| Cocaine use disorders                               | 1<br>(1 - 2)             | 0<br>(0 - 0)          | --                     | 1<br>(1 - 1)            | 0<br>(0 - 0)            | 0<br>(0 - 0)            |

Web Table 31- Zambia deaths with 95% UI by age, sex, and cause in 2013

| Cause                                               | Both Sexes, All Ages     | Both Sexes, 0-4 Years    | Both Sexes, 5-14 Years | Both Sexes, 15-49 Years | Both Sexes, 50-69 Years | Both Sexes, 70-80 Years  |
|-----------------------------------------------------|--------------------------|--------------------------|------------------------|-------------------------|-------------------------|--------------------------|
| Amphetamine use disorders                           | 1<br>(1 - 1)             | 0<br>(0 - 0)             | --                     | 1<br>(0 - 1)            | 0<br>(0 - 0)            | 0<br>(0 - 0)             |
| Other drug use disorders                            | 230<br>(172 - 294)       | 27<br>(9 - 49)           | --                     | 179<br>(128 - 243)      | 17<br>(8 - 28)          | 7<br>(3 - 12)            |
| Eating disorders                                    | 1<br>(1 - 2)             | --                       | 0<br>(0 - 0)           | 1<br>(1 - 2)            | --                      | --                       |
| Anorexia nervosa                                    | 1<br>(1 - 2)             | --                       | 0<br>(0 - 0)           | 1<br>(1 - 2)            | --                      | --                       |
| Diabetes, urogenital, blood, and endocrine diseases | 4,081<br>(3,399 - 4,804) | 529<br>(314 - 815)       | 81<br>(52 - 125)       | 1,150<br>(872 - 1,429)  | 1,020<br>(794 - 1,260)  | 1,300<br>(1,092 - 1,520) |
| Diabetes mellitus                                   | 1,671<br>(1,401 - 1,967) | 13<br>(8 - 20)           | 4<br>(3 - 7)           | 276<br>(221 - 336)      | 606<br>(470 - 765)      | 772<br>(634 - 929)       |
| Acute glomerulonephritis                            | 52<br>(30 - 76)          | 7<br>(4 - 13)            | 1<br>(1 - 3)           | 21<br>(9 - 38)          | 12<br>(6 - 21)          | 10<br>(5 - 16)           |
| Chronic kidney disease                              | 777<br>(617 - 988)       | 69<br>(41 - 108)         | 16<br>(10 - 25)        | 292<br>(213 - 389)      | 157<br>(108 - 215)      | 243<br>(182 - 314)       |
| Chronic kidney disease due to diabetes mellitus     | 3<br>(1 - 5)             | 0<br>(0 - 0)             | 0<br>(0 - 0)           | 1<br>(0 - 2)            | 1<br>(0 - 2)            | 1<br>(0 - 2)             |
| Chronic kidney disease due to hypertension          | 317<br>(222 - 433)       | 10<br>(4 - 21)           | 2<br>(1 - 4)           | 86<br>(50 - 131)        | 84<br>(52 - 125)        | 135<br>(89 - 191)        |
| Chronic kidney disease due to glomerulonephritis    | 247<br>(159 - 336)       | 39<br>(23 - 62)          | 8<br>(5 - 13)          | 123<br>(72 - 181)       | 35<br>(18 - 56)         | 41<br>(20 - 67)          |
| Chronic kidney disease due to other causes          | 209<br>(117 - 305)       | 19<br>(9 - 36)           | 5<br>(2 - 9)           | 83<br>(44 - 129)        | 36<br>(15 - 67)         | 66<br>(25 - 109)         |
| Urinary diseases and male infertility               | 530<br>(363 - 683)       | 52<br>(27 - 92)          | 7<br>(4 - 11)          | 193<br>(119 - 267)      | 135<br>(84 - 194)       | 143<br>(95 - 198)        |
| Interstitial nephritis and urinary tract infections | 355<br>(226 - 477)       | 33<br>(16 - 63)          | 4<br>(2 - 7)           | 110<br>(57 - 163)       | 96<br>(56 - 145)        | 111<br>(69 - 160)        |
| Urolithiasis                                        | 25<br>(11 - 47)          | --                       | 1<br>(0 - 1)           | 13<br>(4 - 30)          | 7<br>(3 - 14)           | 4<br>(2 - 8)             |
| Other urinary diseases                              | 150<br>(99 - 217)        | 18<br>(8 - 38)           | 2<br>(1 - 4)           | 70<br>(40 - 105)        | 31<br>(18 - 49)         | 28<br>(14 - 48)          |
| Gynecological diseases                              | 18<br>(5 - 61)           | --                       | --                     | 11<br>(2 - 48)          | 4<br>(1 - 9)            | 3<br>(1 - 7)             |
| Uterine fibroids                                    | 4<br>(1 - 10)            | --                       | --                     | 1<br>(0 - 6)            | 1<br>(0 - 3)            | 1<br>(0 - 2)             |
| Polycystic ovarian syndrome                         | 1<br>(0 - 4)             | --                       | --                     | 1<br>(0 - 4)            | 0<br>(0 - 0)            | --                       |
| Endometriosis                                       | 2<br>(0 - 8)             | --                       | --                     | 2<br>(0 - 8)            | 0<br>(0 - 0)            | --                       |
| Genital prolapse                                    | 3<br>(1 - 9)             | --                       | --                     | 1<br>(0 - 7)            | 1<br>(0 - 2)            | 1<br>(0 - 2)             |
| Other gynecological diseases                        | 9<br>(3 - 29)            | --                       | --                     | 5<br>(1 - 24)           | 2<br>(1 - 5)            | 1<br>(0 - 3)             |
| Hemoglobinopathies and hemolytic anemias            | 610<br>(288 - 965)       | 286<br>(116 - 515)       | 44<br>(22 - 74)        | 223<br>(89 - 373)       | 33<br>(18 - 55)         | 24<br>(13 - 45)          |
| Thalassemias                                        | 9<br>(4 - 16)            | 7<br>(3 - 13)            | 1<br>(0 - 1)           | 2<br>(1 - 3)            | 0<br>(0 - 0)            | 0<br>(0 - 0)             |
| Sickle cell disorders                               | 551<br>(250 - 889)       | 264<br>(105 - 482)       | 43<br>(21 - 71)        | 214<br>(85 - 358)       | 28<br>(15 - 47)         | 2<br>(1 - 4)             |
| G6PD deficiency                                     | 6<br>(3 - 9)             | 3<br>(1 - 5)             | 0<br>(0 - 1)           | 2<br>(1 - 3)            | 0<br>(0 - 1)            | 0<br>(0 - 1)             |
| Other hemoglobinopathies and hemolytic anemias      | 44<br>(26 - 67)          | 12<br>(6 - 20)           | 1<br>(0 - 1)           | 6<br>(2 - 9)            | 4<br>(3 - 8)            | 21<br>(12 - 40)          |
| Endocrine, metabolic, blood, and immune disorders   | 423<br>(271 - 591)       | 102<br>(58 - 158)        | 8<br>(5 - 14)          | 134<br>(80 - 212)       | 73<br>(39 - 120)        | 106<br>(46 - 172)        |
| Musculoskeletal disorders                           | 165<br>(90 - 239)        | --                       | 7<br>(4 - 12)          | 102<br>(42 - 160)       | 30<br>(19 - 44)         | 25<br>(17 - 41)          |
| Rheumatoid arthritis                                | 36<br>(23 - 52)          | --                       | 1<br>(1 - 3)           | 13<br>(5 - 22)          | 11<br>(7 - 17)          | 11<br>(7 - 20)           |
| Other musculoskeletal disorders                     | 129<br>(64 - 192)        | --                       | 6<br>(3 - 10)          | 90<br>(36 - 140)        | 19<br>(12 - 29)         | 14<br>(9 - 23)           |
| Other non-communicable diseases                     | 3,192<br>(1,961 - 5,326) | 2,705<br>(1,588 - 4,674) | 70<br>(38 - 129)       | 208<br>(122 - 345)      | 74<br>(50 - 104)        | 137<br>(94 - 194)        |
| Congenital anomalies                                | 2,795<br>(1,616 - 4,895) | 2,568<br>(1,470 - 4,538) | 65<br>(35 - 122)       | 128<br>(64 - 247)       | 15<br>(10 - 24)         | 19<br>(13 - 27)          |
| Neural tube defects                                 | 686<br>(211 - 1,436)     | 647<br>(197 - 1,355)     | 10<br>(3 - 25)         | 26<br>(6 - 80)          | 1<br>(0 - 3)            | 1<br>(0 - 2)             |
| Congenital heart anomalies                          | 1,228<br>(548 - 2,482)   | 1,116<br>(484 - 2,276)   | 35<br>(16 - 72)        | 62<br>(24 - 133)        | 6<br>(4 - 10)           | 8<br>(5 - 13)            |
| Cleft lip and cleft palate                          | 13<br>(3 - 33)           | 13<br>(3 - 33)           | --                     | --                      | --                      | --                       |
| Down syndrome                                       | 193<br>(54 - 441)        | 167<br>(44 - 401)        | 7<br>(2 - 14)          | 17<br>(5 - 34)          | 2<br>(1 - 4)            | 0<br>(0 - 1)             |
| Chromosomal unbalanced rearrangements               | 100<br>(36 - 236)        | 93<br>(33 - 224)         | 2<br>(1 - 3)           | 4<br>(1 - 10)           | 0<br>(0 - 1)            | 0<br>(0 - 1)             |
| Other congenital anomalies                          | 574<br>(241 - 1,557)     | 531<br>(211 - 1,470)     | 12<br>(5 - 32)         | 19<br>(7 - 55)          | 5<br>(3 - 9)            | 9<br>(5 - 13)            |
| Skin and subcutaneous diseases                      | 366<br>(279 - 468)       | 106<br>(62 - 174)        | 4<br>(3 - 7)           | 80<br>(51 - 120)        | 58<br>(39 - 84)         | 118<br>(79 - 171)        |

Web Table 31- Zambia deaths with 95% UI by age, sex, and cause in 2013

| Cause                                           | Both Sexes, All Ages     | Both Sexes, 0-4 Years  | Both Sexes, 5-14 Years | Both Sexes, 15-49 Years  | Both Sexes, 50-69 Years | Both Sexes, 70-80 Years |
|-------------------------------------------------|--------------------------|------------------------|------------------------|--------------------------|-------------------------|-------------------------|
| Cellulitis                                      | 143<br>(87 - 216)        | 41<br>(16 - 90)        | 2<br>(1 - 3)           | 33<br>(18 - 50)          | 25<br>(14 - 39)         | 42<br>(24 - 65)         |
| Pyoderma                                        | 180<br>(106 - 266)       | 60<br>(30 - 107)       | 2<br>(1 - 3)           | 39<br>(18 - 67)          | 28<br>(14 - 47)         | 52<br>(28 - 89)         |
| Decubitus ulcer                                 | 32<br>(18 - 51)          | 2<br>(0 - 4)           | 0<br>(0 - 1)           | 5<br>(1 - 9)             | 4<br>(2 - 7)            | 21<br>(11 - 36)         |
| Other skin and subcutaneous diseases            | 11<br>(4 - 21)           | 3<br>(1 - 7)           | 0<br>(0 - 1)           | 4<br>(1 - 9)             | 1<br>(1 - 3)            | 2<br>(1 - 4)            |
| Sudden infant death syndrome                    | 31<br>(11 - 76)          | 31<br>(11 - 76)        | --                     | --                       | --                      | --                      |
| Injuries                                        | 5,974<br>(5,009 - 7,255) | 1,450<br>(974 - 2,090) | 315<br>(220 - 470)     | 2,999<br>(2,306 - 3,834) | 641<br>(488 - 821)      | 570<br>(448 - 707)      |
| Transport injuries                              | 1,889<br>(1,521 - 2,379) | 197<br>(117 - 319)     | 82<br>(46 - 138)       | 1,144<br>(854 - 1,497)   | 290<br>(214 - 423)      | 175<br>(133 - 274)      |
| Road injuries                                   | 1,807<br>(1,457 - 2,260) | 177<br>(105 - 288)     | 77<br>(43 - 129)       | 1,104<br>(825 - 1,447)   | 281<br>(206 - 410)      | 168<br>(126 - 268)      |
| Pedestrian road injuries                        | 882<br>(684 - 1,147)     | 89<br>(51 - 145)       | 40<br>(21 - 67)        | 525<br>(374 - 719)       | 141<br>(99 - 216)       | 87<br>(63 - 137)        |
| Cyclist road injuries                           | 166<br>(118 - 221)       | 13<br>(6 - 27)         | 8<br>(4 - 15)          | 100<br>(66 - 147)        | 28<br>(19 - 41)         | 17<br>(11 - 26)         |
| Motorcyclist road injuries                      | 83<br>(58 - 118)         | 7<br>(4 - 13)          | 3<br>(1 - 5)           | 56<br>(37 - 84)          | 10<br>(6 - 15)          | 7<br>(4 - 11)           |
| Motor vehicle road injuries                     | 670<br>(521 - 879)       | 65<br>(38 - 110)       | 27<br>(15 - 45)        | 421<br>(302 - 574)       | 101<br>(71 - 153)       | 58<br>(39 - 94)         |
| Other road injuries                             | 6<br>(3 - 12)            | 2<br>(1 - 4)           | 0<br>(0 - 1)           | 2<br>(1 - 6)             | 1<br>(0 - 2)            | 1<br>(0 - 1)            |
| Other transport injuries                        | 82<br>(59 - 136)         | 20<br>(10 - 37)        | 5<br>(2 - 9)           | 39<br>(23 - 83)          | 9<br>(6 - 15)           | 8<br>(4 - 11)           |
| Unintentional injuries                          | 2,942<br>(2,386 - 3,677) | 1,224<br>(818 - 1,789) | 214<br>(144 - 322)     | 937<br>(722 - 1,184)     | 255<br>(173 - 341)      | 311<br>(218 - 415)      |
| Falls                                           | 59<br>(38 - 105)         | 31<br>(15 - 57)        | 9<br>(5 - 16)          | 11<br>(6 - 29)           | 2<br>(1 - 2)            | 8<br>(5 - 12)           |
| Drowning                                        | 704<br>(503 - 1,027)     | 304<br>(164 - 552)     | 102<br>(60 - 173)      | 252<br>(174 - 344)       | 29<br>(13 - 45)         | 18<br>(10 - 28)         |
| Fire, heat, and hot substances                  | 426<br>(301 - 609)       | 249<br>(136 - 411)     | 15<br>(9 - 27)         | 88<br>(64 - 124)         | 32<br>(21 - 45)         | 42<br>(29 - 57)         |
| Poisonings                                      | 296<br>(148 - 432)       | 76<br>(25 - 154)       | 8<br>(3 - 14)          | 165<br>(92 - 238)        | 34<br>(10 - 59)         | 15<br>(5 - 24)          |
| Exposure to mechanical forces                   | 426<br>(269 - 697)       | 160<br>(82 - 316)      | 26<br>(14 - 52)        | 171<br>(90 - 333)        | 44<br>(23 - 68)         | 25<br>(15 - 38)         |
| Unintentional firearm injuries                  | 88<br>(52 - 141)         | 11<br>(6 - 21)         | 2<br>(1 - 4)           | 65<br>(36 - 108)         | 6<br>(3 - 10)           | 4<br>(2 - 7)            |
| Unintentional suffocation                       | 81<br>(26 - 184)         | 58<br>(16 - 156)       | 5<br>(2 - 10)          | 11<br>(4 - 20)           | 6<br>(1 - 10)           | 2<br>(1 - 4)            |
| Other exposure to mechanical forces             | 257<br>(157 - 516)       | 91<br>(41 - 189)       | 19<br>(9 - 43)         | 95<br>(40 - 258)         | 32<br>(17 - 54)         | 19<br>(11 - 32)         |
| Adverse effects of medical treatment            | 457<br>(320 - 624)       | 142<br>(70 - 244)      | 9<br>(6 - 16)          | 103<br>(60 - 156)        | 72<br>(45 - 108)        | 130<br>(73 - 208)       |
| Animal contact                                  | 261<br>(140 - 610)       | 69<br>(27 - 208)       | 22<br>(11 - 49)        | 110<br>(49 - 265)        | 33<br>(17 - 60)         | 27<br>(14 - 47)         |
| Venomous animal contact                         | 167<br>(75 - 457)        | 49<br>(17 - 171)       | 11<br>(4 - 29)         | 72<br>(25 - 200)         | 18<br>(8 - 37)          | 18<br>(7 - 30)          |
| Non-venomous animal contact                     | 94<br>(53 - 163)         | 20<br>(8 - 43)         | 11<br>(5 - 22)         | 39<br>(18 - 67)          | 15<br>(6 - 27)          | 10<br>(5 - 18)          |
| Foreign body                                    | 182<br>(115 - 295)       | 117<br>(66 - 212)      | 5<br>(3 - 9)           | 19<br>(10 - 32)          | 7<br>(5 - 11)           | 34<br>(17 - 57)         |
| Pulmonary aspiration and foreign body in airway | 176<br>(109 - 289)       | 115<br>(65 - 210)      | 5<br>(3 - 8)           | 18<br>(10 - 31)          | 6<br>(4 - 10)           | 32<br>(16 - 55)         |
| Foreign body in other body part                 | 6<br>(4 - 9)             | 2<br>(1 - 4)           | 0<br>(0 - 1)           | 1<br>(1 - 2)             | 1<br>(1 - 2)            | 1<br>(1 - 2)            |
| Other unintentional injuries                    | 129<br>(90 - 191)        | 77<br>(44 - 126)       | 18<br>(10 - 35)        | 18<br>(12 - 29)          | 3<br>(2 - 5)            | 13<br>(8 - 20)          |
| Self-harm and interpersonal violence            | 1,144<br>(835 - 1,706)   | 28<br>(13 - 71)        | 19<br>(11 - 35)        | 919<br>(637 - 1,450)     | 95<br>(64 - 140)        | 83<br>(54 - 118)        |
| Self-harm                                       | 526<br>(372 - 682)       | --                     | 8<br>(3 - 17)          | 386<br>(257 - 524)       | 64<br>(39 - 102)        | 68<br>(44 - 101)        |
| Interpersonal violence                          | 618<br>(404 - 1,145)     | 28<br>(13 - 71)        | 12<br>(6 - 24)         | 532<br>(329 - 1,017)     | 31<br>(19 - 47)         | 15<br>(5 - 25)          |
| Assault by firearm                              | 228<br>(106 - 506)       | 6<br>(2 - 17)          | 3<br>(1 - 6)           | 208<br>(91 - 472)        | 10<br>(5 - 18)          | 2<br>(1 - 4)            |
| Assault by sharp object                         | 129<br>(76 - 247)        | 5<br>(2 - 12)          | 2<br>(1 - 5)           | 110<br>(58 - 226)        | 8<br>(4 - 14)           | 4<br>(1 - 9)            |
| Assault by other means                          | 260<br>(160 - 472)       | 17<br>(7 - 47)         | 7<br>(4 - 14)          | 215<br>(122 - 402)       | 13<br>(7 - 20)          | 8<br>(3 - 15)           |

Web Table 31- Zambia deaths with 95% UI by age, sex, and cause in 2013

| Cause                                                             | Males, All Ages             | Males, 0-4 Years            | Males, 5-14 Years        | Males, 15-49 Years          | Males, 50-69 Years        | Males, 70-80 Years        |
|-------------------------------------------------------------------|-----------------------------|-----------------------------|--------------------------|-----------------------------|---------------------------|---------------------------|
| All causes                                                        | 68,987<br>(62,093 - 76,720) | 26,057<br>(21,171 - 32,628) | 3,199<br>(2,740 - 3,955) | 21,849<br>(19,270 - 24,251) | 9,271<br>(7,767 - 11,177) | 8,611<br>(7,572 - 10,236) |
| Communicable, maternal, neonatal, and nutritional diseases        | 49,946<br>(43,896 - 56,835) | 23,092<br>(18,445 - 28,961) | 2,773<br>(2,359 - 3,344) | 16,105<br>(14,148 - 18,207) | 4,946<br>(4,024 - 6,173)  | 3,030<br>(2,570 - 3,572)  |
| HIV/AIDS and tuberculosis                                         | 19,892<br>(16,982 - 23,096) | 1,294<br>(862 - 1,702)      | 1,745<br>(1,435 - 2,045) | 12,432<br>(10,524 - 14,641) | 3,438<br>(2,507 - 4,783)  | 982<br>(752 - 1,250)      |
| Tuberculosis                                                      | 4,197<br>(3,120 - 5,379)    | 262<br>(158 - 409)          | 33<br>(19 - 55)          | 2,201<br>(1,530 - 2,945)    | 998<br>(652 - 1,434)      | 703<br>(517 - 933)        |
| HIV/AIDS                                                          | 15,695<br>(12,805 - 19,018) | 1,032<br>(631 - 1,448)      | 1,712<br>(1,400 - 2,021) | 10,232<br>(8,265 - 12,760)  | 2,440<br>(1,480 - 3,946)  | 279<br>(148 - 520)        |
| HIV/AIDS resulting in mycobacterial infection                     | 1,123<br>(847 - 1,486)      | 69<br>(39 - 101)            | 106<br>(82 - 137)        | 741<br>(545 - 991)          | 185<br>(107 - 306)        | 22<br>(11 - 40)           |
| HIV/AIDS resulting in other diseases                              | 14,572<br>(11,862 - 17,646) | 963<br>(589 - 1,346)        | 1,606<br>(1,314 - 1,896) | 9,490<br>(7,678 - 11,701)   | 2,255<br>(1,363 - 3,654)  | 257<br>(136 - 482)        |
| Diarrhea, lower respiratory, and other common infectious diseases | 12,292<br>(10,031 - 15,052) | 7,566<br>(5,313 - 10,251)   | 382<br>(247 - 606)       | 1,782<br>(1,319 - 2,308)    | 1,010<br>(688 - 1,441)    | 1,552<br>(1,210 - 1,996)  |
| Diarrheal diseases                                                | 4,303<br>(3,031 - 6,045)    | 2,670<br>(1,436 - 4,311)    | 127<br>(59 - 244)        | 663<br>(449 - 936)          | 372<br>(217 - 602)        | 470<br>(289 - 690)        |
| Intestinal infectious diseases                                    | 287<br>(147 - 531)          | 138<br>(60 - 270)           | 52<br>(24 - 102)         | 86<br>(37 - 164)            | 7<br>(3 - 15)             | 3<br>(1 - 7)              |
| Typhoid fever                                                     | 202<br>(94 - 392)           | 90<br>(35 - 186)            | 39<br>(17 - 80)          | 66<br>(26 - 131)            | 5<br>(2 - 11)             | 2<br>(1 - 4)              |
| Paratyphoid fever                                                 | 56<br>(25 - 112)            | 28<br>(10 - 59)             | 11<br>(4 - 23)           | 15<br>(5 - 32)              | 1<br>(0 - 3)              | 1<br>(0 - 1)              |
| Other intestinal infectious diseases                              | 29<br>(15 - 48)             | 21<br>(9 - 38)              | 2<br>(0 - 5)             | 5<br>(1 - 12)               | 1<br>(0 - 4)              | 1<br>(0 - 4)              |
| Lower respiratory infections                                      | 5,998<br>(4,652 - 7,561)    | 3,714<br>(2,536 - 5,357)    | 111<br>(64 - 189)        | 620<br>(431 - 874)          | 529<br>(345 - 777)        | 1,025<br>(756 - 1,380)    |
| Upper respiratory infections                                      | 9<br>(3 - 22)               | 4<br>(0 - 16)               | 0<br>(0 - 1)             | 3<br>(1 - 8)                | 1<br>(0 - 3)              | 1<br>(0 - 2)              |
| Otitis media                                                      | 6<br>(4 - 9)                | 3<br>(1 - 6)                | 0<br>(0 - 0)             | 1<br>(1 - 2)                | 0<br>(0 - 1)              | 1<br>(0 - 1)              |
| Meningitis                                                        | 1,436<br>(970 - 2,088)      | 829<br>(424 - 1,455)        | 81<br>(39 - 157)         | 383<br>(244 - 559)          | 95<br>(53 - 153)          | 49<br>(30 - 80)           |
| Pneumococcal meningitis                                           | 339<br>(217 - 513)          | 155<br>(68 - 300)           | 25<br>(11 - 51)          | 119<br>(65 - 195)           | 25<br>(12 - 45)           | 14<br>(7 - 24)            |
| H influenzae type B meningitis                                    | 325<br>(188 - 535)          | 248<br>(122 - 458)          | 18<br>(7 - 37)           | 45<br>(20 - 80)             | 9<br>(4 - 16)             | 5<br>(2 - 9)              |
| Meningococcal meningitis                                          | 196<br>(114 - 311)          | 84<br>(34 - 175)            | 9<br>(4 - 20)            | 70<br>(28 - 134)            | 22<br>(10 - 41)           | 11<br>(5 - 19)            |
| Other meningitis                                                  | 576<br>(347 - 878)          | 341<br>(157 - 631)          | 28<br>(11 - 60)          | 149<br>(74 - 256)           | 39<br>(21 - 67)           | 20<br>(11 - 33)           |
| Encephalitis                                                      | 43<br>(30 - 64)             | 27<br>(15 - 47)             | 2<br>(1 - 4)             | 9<br>(5 - 14)               | 3<br>(1 - 4)              | 2<br>(1 - 3)              |
| Diphtheria                                                        | 5<br>(0 - 35)               | 4<br>(0 - 34)               | 0<br>(0 - 3)             | 0<br>(0 - 2)                | 0<br>(0 - 0)              | --                        |
| Whooping cough                                                    | 54<br>(0 - 269)             | 52<br>(0 - 262)             | 1<br>(0 - 6)             | 0<br>(0 - 2)                | 0<br>(0 - 0)              | --                        |
| Tetanus                                                           | 50<br>(21 - 96)             | 30<br>(12 - 57)             | 2<br>(1 - 4)             | 14<br>(4 - 41)              | 3<br>(1 - 9)              | 1<br>(0 - 2)              |
| Measles                                                           | 96<br>(22 - 264)            | 90<br>(21 - 251)            | 5<br>(1 - 14)            | 1<br>(0 - 2)                | 0<br>(0 - 0)              | --                        |
| Varicella and herpes zoster                                       | 5<br>(1 - 16)               | 3<br>(0 - 13)               | 0<br>(0 - 1)             | 1<br>(0 - 3)                | 0<br>(0 - 1)              | 1<br>(0 - 4)              |
| Neglected tropical diseases and malaria                           | 7,332<br>(5,028 - 10,132)   | 4,847<br>(2,756 - 7,509)    | 520<br>(300 - 866)       | 1,487<br>(967 - 2,169)      | 267<br>(155 - 425)        | 211<br>(105 - 360)        |
| Malaria                                                           | 6,667<br>(4,445 - 9,435)    | 4,614<br>(2,578 - 7,284)    | 433<br>(239 - 750)       | 1,193<br>(734 - 1,802)      | 233<br>(124 - 382)        | 194<br>(91 - 346)         |
| Leishmaniasis                                                     | 569<br>(193 - 1,109)        | 202<br>(45 - 562)           | 79<br>(24 - 183)         | 255<br>(65 - 505)           | 23<br>(5 - 52)            | 11<br>(4 - 24)            |
| Visceral leishmaniasis                                            | 569<br>(193 - 1,109)        | 202<br>(45 - 562)           | 79<br>(24 - 183)         | 255<br>(65 - 505)           | 23<br>(5 - 52)            | 11<br>(4 - 24)            |
| African trypanosomiasis                                           | 6<br>(3 - 10)               | 0<br>(0 - 1)                | 0<br>(0 - 1)             | 4<br>(2 - 7)                | 1<br>(0 - 1)              | 0<br>(0 - 0)              |
| Schistosomiasis                                                   | 29<br>(20 - 41)             | 1<br>(0 - 1)                | 1<br>(0 - 1)             | 18<br>(11 - 28)             | 6<br>(4 - 11)             | 3<br>(2 - 6)              |
| Cysticercosis                                                     | 3<br>(2 - 4)                | 0<br>(0 - 0)                | 0<br>(0 - 0)             | 2<br>(2 - 3)                | 0<br>(0 - 0)              | 0<br>(0 - 0)              |
| Cystic echinococcosis                                             | 3<br>(2 - 3)                | 0<br>(0 - 1)                | 0<br>(0 - 0)             | 2<br>(1 - 2)                | 0<br>(0 - 0)              | 0<br>(0 - 0)              |
| Dengue                                                            | 2<br>(1 - 2)                | 0<br>(0 - 1)                | 0<br>(0 - 0)             | 1<br>(1 - 2)                | 0<br>(0 - 0)              | 0<br>(0 - 0)              |
| Yellow fever                                                      | 0<br>(0 - 0)                | 0<br>(0 - 0)                | 0<br>(0 - 0)             | 0<br>(0 - 0)                | 0<br>(0 - 0)              | 0<br>(0 - 0)              |
| Rabies                                                            | 25<br>(14 - 39)             | 9<br>(3 - 20)               | 5<br>(2 - 10)            | 9<br>(5 - 14)               | 1<br>(1 - 2)              | 0<br>(0 - 1)              |
| Intestinal nematode infections                                    | 19<br>(7 - 40)              | 16<br>(5 - 36)              | 1<br>(0 - 4)             | 1<br>(0 - 6)                | 0<br>(0 - 2)              | 0<br>(0 - 2)              |
| Ascariasis                                                        | 19<br>(7 - 40)              | 16<br>(5 - 36)              | 1<br>(0 - 4)             | 1<br>(0 - 6)                | 0<br>(0 - 2)              | 0<br>(0 - 2)              |



Web Table 31- Zambia deaths with 95% UI by age, sex, and cause in 2013

| Cause                                                            | Males, All Ages             | Males, 0-4 Years         | Males, 5-14 Years  | Males, 15-49 Years       | Males, 50-69 Years       | Males, 70-80 Years       |
|------------------------------------------------------------------|-----------------------------|--------------------------|--------------------|--------------------------|--------------------------|--------------------------|
| Other neglected tropical diseases                                | 10<br>(5 - 20)              | 4<br>(2 - 8)             | 0<br>(0 - 1)       | 2<br>(1 - 5)             | 1<br>(1 - 3)             | 2<br>(1 - 4)             |
| Maternal disorders                                               | --                          | --                       | --                 | --                       | --                       | --                       |
| Maternal hemorrhage                                              | --                          | --                       | --                 | --                       | --                       | --                       |
| Maternal sepsis and other maternal infections                    | --                          | --                       | --                 | --                       | --                       | --                       |
| Maternal hypertensive disorders                                  | --                          | --                       | --                 | --                       | --                       | --                       |
| Maternal obstructed labor                                        | --                          | --                       | --                 | --                       | --                       | --                       |
| Maternal abortive outcome                                        | --                          | --                       | --                 | --                       | --                       | --                       |
| Indirect maternal deaths                                         | --                          | --                       | --                 | --                       | --                       | --                       |
| Late maternal deaths                                             | --                          | --                       | --                 | --                       | --                       | --                       |
| Maternal deaths aggravated by HIV/AIDS                           | --                          | --                       | --                 | --                       | --                       | --                       |
| Other maternal disorders                                         | --                          | --                       | --                 | --                       | --                       | --                       |
| Neonatal disorders                                               | 5,619<br>(4,586 - 6,858)    | 5,619<br>(4,586 - 6,858) | --                 | --                       | --                       | --                       |
| Neonatal preterm birth complications                             | 1,112<br>(503 - 1,908)      | 1,112<br>(503 - 1,908)   | --                 | --                       | --                       | --                       |
| Neonatal encephalopathy due to birth asphyxia and trauma         | 1,952<br>(1,035 - 3,035)    | 1,952<br>(1,035 - 3,035) | --                 | --                       | --                       | --                       |
| Neonatal sepsis and other neonatal infections                    | 1,588<br>(729 - 2,995)      | 1,588<br>(729 - 2,995)   | --                 | --                       | --                       | --                       |
| Hemolytic disease and other neonatal jaundice                    | 38<br>(13 - 85)             | 38<br>(13 - 85)          | --                 | --                       | --                       | --                       |
| Other neonatal disorders                                         | 929<br>(405 - 1,639)        | 929<br>(405 - 1,639)     | --                 | --                       | --                       | --                       |
| Nutritional deficiencies                                         | 3,323<br>(2,072 - 5,116)    | 2,536<br>(1,370 - 4,084) | 69<br>(36 - 126)   | 297<br>(182 - 455)       | 177<br>(106 - 279)       | 244<br>(151 - 381)       |
| Protein-energy malnutrition                                      | 2,979<br>(1,793 - 4,624)    | 2,407<br>(1,312 - 3,892) | 60<br>(31 - 114)   | 185<br>(93 - 301)        | 136<br>(74 - 228)        | 190<br>(97 - 310)        |
| Iodine deficiency                                                | 2<br>(0 - 12)               | 1<br>(0 - 11)            | 0<br>(0 - 1)       | 1<br>(0 - 4)             | 0<br>(0 - 1)             | 0<br>(0 - 1)             |
| Iron-deficiency anemia                                           | 336<br>(129 - 721)          | 127<br>(26 - 375)        | 9<br>(2 - 21)      | 108<br>(41 - 207)        | 39<br>(14 - 91)          | 53<br>(18 - 123)         |
| Other nutritional deficiencies                                   | 6<br>(2 - 14)               | 1<br>(0 - 4)             | 0<br>(0 - 1)       | 3<br>(1 - 7)             | 1<br>(0 - 2)             | 1<br>(0 - 3)             |
| Other communicable, maternal, neonatal, and nutritional diseases | 1,488<br>(439 - 2,802)      | 1,230<br>(215 - 2,493)   | 56<br>(14 - 124)   | 106<br>(71 - 161)        | 54<br>(29 - 103)         | 42<br>(21 - 83)          |
| Sexually transmitted diseases excluding HIV                      | 1,232<br>(190 - 2,522)      | 1,147<br>(140 - 2,410)   | 50<br>(6 - 115)    | 19<br>(6 - 50)           | 9<br>(3 - 27)            | 7<br>(2 - 19)            |
| Syphilis                                                         | 1,219<br>(181 - 2,516)      | 1,147<br>(140 - 2,410)   | 49<br>(6 - 113)    | 10<br>(3 - 27)           | 7<br>(2 - 19)            | 6<br>(2 - 16)            |
| Chlamydial infection                                             | --                          | --                       | --                 | --                       | --                       | --                       |
| Gonococcal infection                                             | 7<br>(3 - 20)               | --                       | 0<br>(0 - 1)       | 5<br>(2 - 13)            | 2<br>(1 - 5)             | 1<br>(0 - 2)             |
| Other sexually transmitted diseases                              | 5<br>(2 - 15)               | --                       | 0<br>(0 - 1)       | 4<br>(1 - 10)            | 1<br>(0 - 3)             | 0<br>(0 - 1)             |
| Hepatitis                                                        | 84<br>(62 - 110)            | 18<br>(8 - 34)           | 3<br>(2 - 5)       | 44<br>(30 - 62)          | 13<br>(8 - 21)           | 5<br>(3 - 8)             |
| Acute hepatitis A                                                | 10<br>(3 - 21)              | 6<br>(1 - 14)            | 1<br>(0 - 2)       | 3<br>(1 - 7)             | 0<br>(0 - 0)             | 0<br>(0 - 0)             |
| Acute hepatitis B                                                | 55<br>(38 - 80)             | 12<br>(5 - 25)           | 2<br>(1 - 3)       | 25<br>(14 - 41)          | 11<br>(7 - 18)           | 5<br>(3 - 7)             |
| Acute hepatitis C                                                | 1<br>(0 - 3)                | --                       | 0<br>(0 - 0)       | 1<br>(0 - 2)             | 0<br>(0 - 1)             | 0<br>(0 - 0)             |
| Acute hepatitis E                                                | 17<br>(6 - 32)              | 0<br>(0 - 0)             | 0<br>(0 - 1)       | 15<br>(5 - 28)           | 2<br>(0 - 3)             | 0<br>(0 - 1)             |
| Other infectious diseases                                        | 172<br>(103 - 293)          | 64<br>(25 - 141)         | 4<br>(1 - 8)       | 43<br>(22 - 77)          | 32<br>(12 - 73)          | 30<br>(11 - 67)          |
| Non-communicable diseases                                        | 15,448<br>(12,736 - 18,733) | 2,192<br>(1,311 - 3,849) | 220<br>(151 - 350) | 3,691<br>(2,821 - 4,620) | 4,042<br>(2,899 - 5,528) | 5,302<br>(4,479 - 6,396) |
| Neoplasms                                                        | 2,033<br>(1,643 - 2,538)    | 130<br>(76 - 213)        | 49<br>(30 - 81)    | 479<br>(357 - 606)       | 716<br>(501 - 982)       | 660<br>(538 - 827)       |
| Esophageal cancer                                                | 201<br>(122 - 298)          | --                       | --                 | 34<br>(22 - 53)          | 101<br>(54 - 163)        | 67<br>(40 - 102)         |
| Stomach cancer                                                   | 167<br>(125 - 225)          | --                       | --                 | 42<br>(29 - 59)          | 64<br>(42 - 96)          | 61<br>(44 - 82)          |
| Liver cancer                                                     | 227<br>(149 - 309)          | --                       | 3<br>(1 - 5)       | 90<br>(54 - 130)         | 87<br>(53 - 129)         | 48<br>(31 - 70)          |
| Liver cancer due to hepatitis B                                  | 64<br>(32 - 136)            | --                       | 1<br>(0 - 2)       | 32<br>(15 - 65)          | 21<br>(8 - 53)           | 10<br>(4 - 20)           |

Web Table 31- Zambia deaths with 95% UI by age, sex, and cause in 2013

| Cause                                | Males, All Ages          | Males, 0-4 Years  | Males, 5-14 Years | Males, 15-49 Years   | Males, 50-69 Years       | Males, 70-80 Years       |
|--------------------------------------|--------------------------|-------------------|-------------------|----------------------|--------------------------|--------------------------|
| Liver cancer due to hepatitis C      | 108<br>(59 - 166)        | --                | 1<br>(0 - 1)      | 38<br>(15 - 66)      | 46<br>(22 - 77)          | 24<br>(13 - 38)          |
| Liver cancer due to alcohol use      | 31<br>(14 - 53)          | --                | --                | 7<br>(3 - 14)        | 13<br>(5 - 24)           | 11<br>(5 - 19)           |
| Liver cancer due to other causes     | 25<br>(11 - 41)          | --                | 1<br>(0 - 3)      | 13<br>(6 - 22)       | 7<br>(3 - 15)            | 4<br>(1 - 7)             |
| Larynx cancer                        | 25<br>(17 - 36)          | --                | --                | 5<br>(3 - 7)         | 10<br>(6 - 16)           | 10<br>(7 - 15)           |
| Tracheal, bronchus and lung cancer   | 153<br>(114 - 205)       | --                | --                | 19<br>(13 - 25)      | 87<br>(60 - 123)         | 47<br>(36 - 62)          |
| Breast cancer                        | 13<br>(8 - 20)           | --                | --                | 3<br>(2 - 6)         | 6<br>(3 - 11)            | 4<br>(2 - 8)             |
| Cervical cancer                      | --                       | --                | --                | --                   | --                       | --                       |
| Uterine cancer                       | --                       | --                | --                | --                   | --                       | --                       |
| Prostate cancer                      | 233<br>(148 - 355)       | --                | --                | 6<br>(3 - 10)        | 57<br>(33 - 92)          | 170<br>(106 - 268)       |
| Colon and rectum cancer              | 172<br>(133 - 221)       | --                | --                | 52<br>(38 - 67)      | 67<br>(46 - 95)          | 53<br>(40 - 70)          |
| Lip and oral cavity cancer           | 34<br>(23 - 48)          | --                | --                | 9<br>(6 - 13)        | 14<br>(9 - 22)           | 11<br>(6 - 16)           |
| Nasopharynx cancer                   | 10<br>(6 - 15)           | --                | 0<br>(0 - 1)      | 5<br>(3 - 8)         | 3<br>(2 - 5)             | 1<br>(1 - 2)             |
| Other pharynx cancer                 | 20<br>(13 - 27)          | --                | --                | 5<br>(3 - 7)         | 10<br>(6 - 16)           | 5<br>(3 - 7)             |
| Gallbladder and biliary tract cancer | 19<br>(11 - 28)          | --                | --                | 6<br>(3 - 10)        | 7<br>(3 - 12)            | 5<br>(3 - 9)             |
| Pancreatic cancer                    | 49<br>(36 - 66)          | --                | --                | 12<br>(8 - 16)       | 26<br>(17 - 37)          | 12<br>(8 - 16)           |
| Malignant skin melanoma              | 10<br>(5 - 16)           | --                | --                | 4<br>(2 - 6)         | 3<br>(1 - 6)             | 3<br>(1 - 5)             |
| Non-melanoma skin cancer             | 10<br>(6 - 15)           | --                | --                | 2<br>(1 - 3)         | 3<br>(2 - 6)             | 5<br>(2 - 8)             |
| Ovarian cancer                       | --                       | --                | --                | --                   | --                       | --                       |
| Testicular cancer                    | 11<br>(7 - 16)           | --                | --                | 6<br>(4 - 10)        | 3<br>(2 - 6)             | 2<br>(1 - 2)             |
| Kidney cancer                        | 33<br>(21 - 52)          | 9<br>(3 - 21)     | 2<br>(1 - 3)      | 5<br>(3 - 7)         | 12<br>(7 - 19)           | 6<br>(4 - 10)            |
| Bladder cancer                       | 64<br>(47 - 86)          | --                | --                | 8<br>(5 - 12)        | 23<br>(15 - 33)          | 33<br>(23 - 46)          |
| Brain and nervous system cancer      | 45<br>(26 - 67)          | 1<br>(0 - 2)      | 5<br>(2 - 9)      | 19<br>(11 - 34)      | 12<br>(6 - 20)           | 7<br>(3 - 12)            |
| Thyroid cancer                       | 4<br>(3 - 6)             | --                | 0<br>(0 - 0)      | 1<br>(1 - 1)         | 2<br>(1 - 3)             | 2<br>(1 - 3)             |
| Mesothelioma                         | 8<br>(4 - 14)            | --                | --                | 1<br>(0 - 1)         | 4<br>(2 - 8)             | 3<br>(1 - 6)             |
| Hodgkin lymphoma                     | 21<br>(14 - 28)          | 2<br>(1 - 5)      | 1<br>(0 - 3)      | 9<br>(6 - 14)        | 4<br>(3 - 7)             | 4<br>(2 - 7)             |
| Non-Hodgkin lymphoma                 | 160<br>(103 - 219)       | 39<br>(15 - 79)   | 17<br>(8 - 32)    | 50<br>(32 - 71)      | 31<br>(18 - 49)          | 23<br>(14 - 34)          |
| Multiple myeloma                     | 17<br>(7 - 25)           | --                | --                | 4<br>(2 - 6)         | 7<br>(3 - 11)            | 6<br>(2 - 10)            |
| Leukemia                             | 44<br>(34 - 56)          | 4<br>(2 - 9)      | 4<br>(2 - 9)      | 21<br>(15 - 29)      | 6<br>(4 - 10)            | 8<br>(5 - 11)            |
| Other neoplasms                      | 283<br>(199 - 363)       | 75<br>(42 - 123)  | 17<br>(9 - 31)    | 61<br>(42 - 84)      | 66<br>(35 - 100)         | 65<br>(31 - 94)          |
| Cardiovascular diseases              | 5,818<br>(4,623 - 7,228) | 118<br>(70 - 187) | 26<br>(16 - 42)   | 986<br>(741 - 1,250) | 1,871<br>(1,325 - 2,583) | 2,818<br>(2,359 - 3,430) |
| Rheumatic heart disease              | 207<br>(131 - 346)       | 6<br>(2 - 16)     | 5<br>(3 - 11)     | 97<br>(58 - 167)     | 51<br>(29 - 91)          | 47<br>(29 - 81)          |
| Ischemic heart disease               | 1,713<br>(1,265 - 2,254) | 1<br>(0 - 3)      | 2<br>(1 - 4)      | 230<br>(162 - 316)   | 619<br>(412 - 891)       | 860<br>(622 - 1,119)     |
| Cerebrovascular disease              | 2,215<br>(1,709 - 2,878) | 10<br>(5 - 18)    | 3<br>(2 - 6)      | 244<br>(169 - 339)   | 724<br>(493 - 1,014)     | 1,234<br>(972 - 1,552)   |
| Ischemic stroke                      | 1,026<br>(585 - 1,471)   | 1<br>(0 - 3)      | 0<br>(0 - 1)      | 40<br>(17 - 72)      | 263<br>(130 - 421)       | 721<br>(414 - 1,019)     |
| Hemorrhagic stroke                   | 1,189<br>(813 - 1,646)   | 9<br>(5 - 16)     | 3<br>(1 - 5)      | 204<br>(139 - 288)   | 461<br>(299 - 672)       | 513<br>(286 - 805)       |
| Hypertensive heart disease           | 446<br>(242 - 797)       | 2<br>(0 - 5)      | 1<br>(0 - 1)      | 55<br>(27 - 89)      | 140<br>(69 - 264)        | 249<br>(119 - 505)       |
| Cardiomyopathy and myocarditis       | 366<br>(184 - 559)       | 52<br>(13 - 101)  | 7<br>(2 - 13)     | 129<br>(41 - 212)    | 94<br>(51 - 165)         | 84<br>(48 - 139)         |
| Atrial fibrillation and flutter      | 1<br>(0 - 4)             | --                | --                | 0<br>(0 - 0)         | 0<br>(0 - 1)             | 1<br>(0 - 3)             |
| Aortic aneurysm                      | 79<br>(38 - 145)         | --                | --                | 14<br>(6 - 26)       | 27<br>(12 - 52)          | 38<br>(18 - 75)          |
| Peripheral vascular disease          | 5<br>(2 - 9)             | --                | --                | 0<br>(0 - 1)         | 1<br>(0 - 3)             | 3<br>(1 - 6)             |

Web Table 31- Zambia deaths with 95% UI by age, sex, and cause in 2013

| Cause                                               | Males, All Ages        | Males, 0-4 Years | Males, 5-14 Years | Males, 15-49 Years | Males, 50-69 Years | Males, 70-80 Years |
|-----------------------------------------------------|------------------------|------------------|-------------------|--------------------|--------------------|--------------------|
| Endocarditis                                        | 78<br>(42 - 123)       | 5<br>(2 - 13)    | 1<br>(0 - 2)      | 18<br>(10 - 29)    | 24<br>(11 - 41)    | 30<br>(15 - 50)    |
| Other cardiovascular and circulatory diseases       | 708<br>(458 - 1,045)   | 41<br>(17 - 83)  | 7<br>(3 - 12)     | 198<br>(117 - 306) | 191<br>(111 - 327) | 271<br>(162 - 426) |
| Chronic respiratory diseases                        | 921<br>(719 - 1,159)   | 44<br>(23 - 78)  | 6<br>(4 - 9)      | 147<br>(105 - 193) | 260<br>(175 - 372) | 464<br>(359 - 593) |
| Chronic obstructive pulmonary disease               | 504<br>(381 - 657)     | 11<br>(4 - 21)   | 3<br>(2 - 5)      | 60<br>(41 - 84)    | 153<br>(103 - 227) | 277<br>(207 - 368) |
| Pneumoconiosis                                      | 94<br>(64 - 134)       | 2<br>(0 - 4)     | 0<br>(0 - 1)      | 26<br>(16 - 40)    | 29<br>(17 - 44)    | 37<br>(23 - 55)    |
| Silicosis                                           | 28<br>(15 - 46)        | 1<br>(0 - 1)     | 0<br>(0 - 0)      | 7<br>(3 - 12)      | 8<br>(4 - 15)      | 12<br>(6 - 22)     |
| Asbestosis                                          | 11<br>(6 - 18)         | 0<br>(0 - 1)     | 0<br>(0 - 0)      | 3<br>(1 - 6)       | 4<br>(2 - 7)       | 3<br>(2 - 6)       |
| Coal workers pneumoconiosis                         | 11<br>(7 - 17)         | 0<br>(0 - 0)     | 0<br>(0 - 0)      | 2<br>(1 - 4)       | 4<br>(2 - 7)       | 5<br>(2 - 8)       |
| Other pneumoconiosis                                | 44<br>(26 - 69)        | 1<br>(0 - 2)     | 0<br>(0 - 0)      | 14<br>(8 - 24)     | 13<br>(7 - 21)     | 17<br>(9 - 27)     |
| Asthma                                              | 150<br>(110 - 206)     | 2<br>(1 - 5)     | 1<br>(0 - 1)      | 27<br>(19 - 39)    | 42<br>(26 - 64)    | 79<br>(53 - 113)   |
| Interstitial lung disease and pulmonary sarcoidosis | 91<br>(33 - 157)       | 1<br>(0 - 5)     | 0<br>(0 - 1)      | 9<br>(3 - 22)      | 27<br>(9 - 52)     | 54<br>(17 - 97)    |
| Other chronic respiratory diseases                  | 82<br>(53 - 112)       | 29<br>(14 - 49)  | 2<br>(1 - 3)      | 25<br>(14 - 37)    | 10<br>(5 - 17)     | 17<br>(9 - 27)     |
| Cirrhosis                                           | 980<br>(751 - 1,239)   | 22<br>(8 - 50)   | 7<br>(5 - 12)     | 425<br>(307 - 562) | 347<br>(235 - 480) | 178<br>(132 - 235) |
| Cirrhosis due to hepatitis B                        | 184<br>(82 - 325)      | 1<br>(0 - 2)     | 1<br>(0 - 2)      | 85<br>(37 - 153)   | 65<br>(27 - 119)   | 32<br>(11 - 65)    |
| Cirrhosis due to hepatitis C                        | 194<br>(90 - 314)      | 1<br>(0 - 2)     | 1<br>(0 - 2)      | 70<br>(26 - 122)   | 76<br>(33 - 134)   | 46<br>(13 - 79)    |
| Cirrhosis due to alcohol use                        | 456<br>(315 - 630)     | --               | --                | 189<br>(122 - 268) | 176<br>(109 - 269) | 90<br>(56 - 133)   |
| Cirrhosis due to other causes                       | 147<br>(93 - 227)      | 21<br>(7 - 47)   | 5<br>(3 - 9)      | 81<br>(46 - 131)   | 29<br>(12 - 55)    | 10<br>(4 - 18)     |
| Digestive diseases                                  | 1,079<br>(816 - 1,372) | 54<br>(25 - 102) | 24<br>(15 - 42)   | 455<br>(323 - 609) | 256<br>(165 - 367) | 289<br>(219 - 372) |
| Peptic ulcer disease                                | 298<br>(204 - 428)     | 5<br>(1 - 12)    | 2<br>(1 - 5)      | 125<br>(77 - 196)  | 75<br>(43 - 119)   | 91<br>(55 - 137)   |
| Gastritis and duodenitis                            | 41<br>(19 - 79)        | 3<br>(1 - 9)     | 1<br>(1 - 3)      | 17<br>(8 - 30)     | 8<br>(3 - 22)      | 11<br>(4 - 31)     |
| Appendicitis                                        | 63<br>(31 - 104)       | 3<br>(1 - 8)     | 3<br>(2 - 6)      | 35<br>(18 - 61)    | 11<br>(4 - 24)     | 11<br>(4 - 22)     |
| Paralytic ileus and intestinal obstruction          | 349<br>(217 - 518)     | 12<br>(4 - 30)   | 10<br>(5 - 19)    | 130<br>(68 - 200)  | 98<br>(52 - 157)   | 99<br>(58 - 164)   |
| Inguinal, femoral, and abdominal hernia             | 20<br>(9 - 32)         | 0<br>(0 - 0)     | 0<br>(0 - 1)      | 9<br>(4 - 14)      | 5<br>(2 - 9)       | 6<br>(2 - 11)      |
| Inflammatory bowel disease                          | 69<br>(25 - 107)       | 15<br>(4 - 34)   | 2<br>(1 - 4)      | 29<br>(11 - 51)    | 10<br>(3 - 19)     | 13<br>(3 - 28)     |
| Vascular intestinal disorders                       | 9<br>(3 - 21)          | 1<br>(0 - 2)     | 0<br>(0 - 1)      | 3<br>(1 - 6)       | 2<br>(1 - 6)       | 4<br>(1 - 9)       |
| Gallbladder and biliary diseases                    | 50<br>(29 - 74)        | 2<br>(0 - 4)     | 1<br>(0 - 1)      | 16<br>(8 - 26)     | 12<br>(6 - 21)     | 20<br>(9 - 34)     |
| Pancreatitis                                        | 72<br>(33 - 121)       | 1<br>(0 - 3)     | 1<br>(0 - 1)      | 48<br>(22 - 84)    | 14<br>(5 - 28)     | 9<br>(3 - 21)      |
| Other digestive diseases                            | 106<br>(66 - 165)      | 12<br>(4 - 28)   | 3<br>(1 - 6)      | 44<br>(24 - 72)    | 22<br>(11 - 40)    | 25<br>(12 - 45)    |
| Neurological disorders                              | 566<br>(453 - 701)     | 60<br>(29 - 115) | 29<br>(16 - 56)   | 169<br>(110 - 250) | 41<br>(28 - 60)    | 267<br>(202 - 336) |
| Alzheimer disease and other dementias               | 245<br>(183 - 312)     | --               | --                | 0<br>(0 - 0)       | 22<br>(14 - 34)    | 223<br>(162 - 286) |
| Parkinson disease                                   | 6<br>(3 - 11)          | --               | --                | 0<br>(0 - 1)       | 0<br>(0 - 0)       | 5<br>(2 - 11)      |
| Epilepsy                                            | 271<br>(191 - 376)     | 48<br>(20 - 97)  | 27<br>(14 - 53)   | 152<br>(98 - 231)  | 11<br>(6 - 18)     | 33<br>(21 - 54)    |
| Multiple sclerosis                                  | 1<br>(1 - 2)           | --               | --                | 1<br>(0 - 2)       | 0<br>(0 - 1)       | 0<br>(0 - 0)       |
| Other neurological disorders                        | 43<br>(23 - 64)        | 13<br>(5 - 29)   | 2<br>(1 - 4)      | 15<br>(8 - 24)     | 7<br>(3 - 12)      | 5<br>(2 - 8)       |
| Mental and substance use disorders                  | 488<br>(305 - 741)     | 24<br>(5 - 49)   | 0<br>(0 - 0)      | 382<br>(220 - 598) | 66<br>(36 - 109)   | 16<br>(9 - 25)     |
| Schizophrenia                                       | 7<br>(2 - 17)          | --               | --                | 5<br>(1 - 13)      | 1<br>(1 - 3)       | 1<br>(0 - 2)       |
| Alcohol use disorders                               | 323<br>(159 - 533)     | --               | --                | 258<br>(115 - 453) | 54<br>(28 - 95)    | 11<br>(6 - 21)     |
| Drug use disorders                                  | 157<br>(107 - 217)     | 24<br>(5 - 49)   | --                | 119<br>(76 - 181)  | 10<br>(5 - 17)     | 4<br>(1 - 6)       |
| Opioid use disorders                                | 17<br>(11 - 24)        | 3<br>(1 - 6)     | --                | 13<br>(8 - 20)     | 1<br>(0 - 2)       | 0<br>(0 - 1)       |
| Cocaine use disorders                               | 1<br>(0 - 1)           | 0<br>(0 - 0)     | --                | 0<br>(0 - 1)       | 0<br>(0 - 0)       | 0<br>(0 - 0)       |

Web Table 31- Zambia deaths with 95% UI by age, sex, and cause in 2013

| Cause                                               | Males, All Ages          | Males, 0-4 Years       | Males, 5-14 Years | Males, 15-49 Years | Males, 50-69 Years | Males, 70-80 Years |
|-----------------------------------------------------|--------------------------|------------------------|-------------------|--------------------|--------------------|--------------------|
| Amphetamine use disorders                           | 0<br>(0 - 1)             | 0<br>(0 - 0)           | --                | 0<br>(0 - 0)       | 0<br>(0 - 0)       | 0<br>(0 - 0)       |
| Other drug use disorders                            | 139<br>(95 - 192)        | 21<br>(5 - 43)         | --                | 106<br>(69 - 161)  | 9<br>(4 - 15)      | 3<br>(1 - 5)       |
| Eating disorders                                    | 0<br>(0 - 0)             | --                     | 0<br>(0 - 0)      | 0<br>(0 - 0)       | --                 | --                 |
| Anorexia nervosa                                    | 0<br>(0 - 0)             | --                     | 0<br>(0 - 0)      | 0<br>(0 - 0)       | --                 | --                 |
| Diabetes, urogenital, blood, and endocrine diseases | 1,835<br>(1,469 - 2,268) | 271<br>(156 - 439)     | 40<br>(23 - 68)   | 528<br>(383 - 687) | 443<br>(309 - 609) | 553<br>(439 - 695) |
| Diabetes mellitus                                   | 785<br>(614 - 996)       | 11<br>(7 - 18)         | 2<br>(1 - 4)      | 152<br>(113 - 200) | 279<br>(188 - 381) | 340<br>(252 - 433) |
| Acute glomerulonephritis                            | 16<br>(9 - 25)           | 4<br>(2 - 7)           | 1<br>(0 - 1)      | 1<br>(0 - 3)       | 6<br>(2 - 12)      | 5<br>(2 - 8)       |
| Chronic kidney disease                              | 329<br>(250 - 418)       | 40<br>(21 - 66)        | 6<br>(4 - 11)     | 142<br>(99 - 193)  | 54<br>(36 - 78)    | 87<br>(62 - 120)   |
| Chronic kidney disease due to diabetes mellitus     | 1<br>(0 - 2)             | 0<br>(0 - 0)           | 0<br>(0 - 0)      | 1<br>(0 - 1)       | 0<br>(0 - 1)       | 0<br>(0 - 1)       |
| Chronic kidney disease due to hypertension          | 123<br>(66 - 208)        | 6<br>(2 - 15)          | 1<br>(0 - 2)      | 37<br>(19 - 73)    | 31<br>(15 - 53)    | 49<br>(25 - 82)    |
| Chronic kidney disease due to glomerulonephritis    | 101<br>(52 - 144)        | 22<br>(11 - 38)        | 4<br>(2 - 6)      | 50<br>(25 - 76)    | 11<br>(3 - 21)     | 14<br>(4 - 27)     |
| Chronic kidney disease due to other causes          | 104<br>(48 - 158)        | 12<br>(4 - 25)         | 2<br>(1 - 4)      | 54<br>(26 - 87)    | 13<br>(4 - 25)     | 24<br>(6 - 46)     |
| Urinary diseases and male infertility               | 303<br>(194 - 410)       | 31<br>(12 - 67)        | 4<br>(2 - 7)      | 112<br>(59 - 162)  | 71<br>(41 - 111)   | 85<br>(52 - 126)   |
| Interstitial nephritis and urinary tract infections | 203<br>(111 - 289)       | 22<br>(8 - 47)         | 2<br>(1 - 4)      | 68<br>(27 - 108)   | 49<br>(24 - 80)    | 62<br>(34 - 97)    |
| Urolithiasis                                        | 7<br>(4 - 11)            | --                     | 0<br>(0 - 0)      | 3<br>(1 - 6)       | 2<br>(1 - 4)       | 1<br>(0 - 4)       |
| Other urinary diseases                              | 93<br>(56 - 146)         | 9<br>(2 - 25)          | 1<br>(1 - 3)      | 41<br>(22 - 68)    | 20<br>(10 - 37)    | 21<br>(9 - 40)     |
| Gynecological diseases                              | --                       | --                     | --                | --                 | --                 | --                 |
| Uterine fibroids                                    | --                       | --                     | --                | --                 | --                 | --                 |
| Polycystic ovarian syndrome                         | --                       | --                     | --                | --                 | --                 | --                 |
| Endometriosis                                       | --                       | --                     | --                | --                 | --                 | --                 |
| Genital prolapse                                    | --                       | --                     | --                | --                 | --                 | --                 |
| Other gynecological diseases                        | --                       | --                     | --                | --                 | --                 | --                 |
| Hemoglobinopathies and hemolytic anemias            | 273<br>(126 - 476)       | 150<br>(56 - 295)      | 23<br>(9 - 47)    | 77<br>(34 - 139)   | 13<br>(4 - 39)     | 11<br>(4 - 33)     |
| Thalassemias                                        | 5<br>(2 - 9)             | 4<br>(2 - 7)           | 0<br>(0 - 1)      | 1<br>(0 - 1)       | 0<br>(0 - 0)       | 0<br>(0 - 0)       |
| Sickle cell disorders                               | 246<br>(113 - 427)       | 139<br>(52 - 277)      | 22<br>(9 - 45)    | 73<br>(32 - 132)   | 11<br>(4 - 33)     | 1<br>(0 - 3)       |
| G6PD deficiency                                     | 3<br>(1 - 5)             | 2<br>(1 - 3)           | 0<br>(0 - 0)      | 1<br>(0 - 1)       | 0<br>(0 - 0)       | 0<br>(0 - 1)       |
| Other hemoglobinopathies and hemolytic anemias      | 19<br>(9 - 47)           | 5<br>(2 - 9)           | 0<br>(0 - 1)      | 2<br>(1 - 4)       | 2<br>(1 - 5)       | 10<br>(4 - 29)     |
| Endocrine, metabolic, blood, and immune disorders   | 128<br>(39 - 183)        | 35<br>(13 - 60)        | 4<br>(1 - 8)      | 44<br>(12 - 69)    | 20<br>(4 - 33)     | 26<br>(4 - 43)     |
| Musculoskeletal disorders                           | 64<br>(32 - 106)         | --                     | 5<br>(2 - 8)      | 35<br>(18 - 60)    | 13<br>(6 - 26)     | 12<br>(5 - 25)     |
| Rheumatoid arthritis                                | 12<br>(6 - 23)           | --                     | 1<br>(0 - 2)      | 4<br>(2 - 9)       | 3<br>(1 - 8)       | 4<br>(2 - 10)      |
| Other musculoskeletal disorders                     | 52<br>(25 - 88)          | --                     | 4<br>(2 - 7)      | 31<br>(15 - 54)    | 10<br>(4 - 20)     | 8<br>(3 - 17)      |
| Other non-communicable diseases                     | 1,664<br>(978 - 3,274)   | 1,469<br>(792 - 3,033) | 34<br>(18 - 74)   | 86<br>(59 - 126)   | 29<br>(18 - 42)    | 46<br>(31 - 65)    |
| Congenital anomalies                                | 1,492<br>(817 - 3,113)   | 1,401<br>(737 - 2,958) | 32<br>(16 - 72)   | 48<br>(30 - 81)    | 6<br>(4 - 9)       | 6<br>(4 - 10)      |
| Neural tube defects                                 | 354<br>(79 - 797)        | 340<br>(74 - 774)      | 5<br>(1 - 13)     | 8<br>(2 - 17)      | 0<br>(0 - 1)       | 0<br>(0 - 1)       |
| Congenital heart anomalies                          | 662<br>(258 - 1,595)     | 615<br>(224 - 1,510)   | 18<br>(8 - 42)    | 24<br>(13 - 46)    | 3<br>(1 - 4)       | 3<br>(1 - 4)       |
| Cleft lip and cleft palate                          | 8<br>(1 - 23)            | 8<br>(1 - 23)          | --                | --                 | --                 | --                 |
| Down syndrome                                       | 101<br>(21 - 286)        | 91<br>(16 - 272)       | 3<br>(1 - 7)      | 6<br>(3 - 12)      | 1<br>(0 - 1)       | 0<br>(0 - 0)       |
| Chromosomal unbalanced rearrangements               | 33<br>(9 - 104)          | 31<br>(8 - 100)        | 1<br>(0 - 2)      | 1<br>(0 - 2)       | 0<br>(0 - 0)       | 0<br>(0 - 0)       |
| Other congenital anomalies                          | 335<br>(95 - 1,114)      | 315<br>(82 - 1,082)    | 6<br>(2 - 20)     | 8<br>(4 - 21)      | 2<br>(1 - 4)       | 3<br>(2 - 5)       |
| Skin and subcutaneous diseases                      | 150<br>(112 - 196)       | 47<br>(25 - 80)        | 2<br>(1 - 4)      | 38<br>(25 - 54)    | 23<br>(14 - 35)    | 40<br>(24 - 58)    |

Web Table 31- Zambia deaths with 95% UI by age, sex, and cause in 2013

| Cause                                           | Males, All Ages          | Males, 0-4 Years     | Males, 5-14 Years  | Males, 15-49 Years       | Males, 50-69 Years | Males, 70-80 Years |
|-------------------------------------------------|--------------------------|----------------------|--------------------|--------------------------|--------------------|--------------------|
| Cellulitis                                      | 62<br>(24 - 114)         | 19<br>(5 - 45)       | 1<br>(0 - 2)       | 16<br>(7 - 31)           | 10<br>(4 - 20)     | 15<br>(5 - 30)     |
| Pyoderma                                        | 72<br>(36 - 115)         | 26<br>(10 - 50)      | 1<br>(0 - 2)       | 18<br>(8 - 31)           | 11<br>(5 - 20)     | 17<br>(8 - 30)     |
| Decubitus ulcer                                 | 13<br>(6 - 23)           | 1<br>(0 - 3)         | 0<br>(0 - 0)       | 3<br>(1 - 6)             | 2<br>(1 - 4)       | 7<br>(3 - 13)      |
| Other skin and subcutaneous diseases            | 4<br>(1 - 9)             | 1<br>(0 - 4)         | 0<br>(0 - 0)       | 1<br>(0 - 3)             | 0<br>(0 - 1)       | 1<br>(0 - 1)       |
| Sudden infant death syndrome                    | 22<br>(6 - 60)           | 22<br>(6 - 60)       | --                 | --                       | --                 | --                 |
| Injuries                                        | 3,593<br>(2,852 - 4,455) | 773<br>(473 - 1,164) | 206<br>(140 - 325) | 2,053<br>(1,493 - 2,742) | 283<br>(194 - 406) | 279<br>(208 - 376) |
| Transport injuries                              | 1,226<br>(923 - 1,587)   | 111<br>(53 - 208)    | 52<br>(25 - 91)    | 847<br>(599 - 1,154)     | 107<br>(70 - 153)  | 109<br>(75 - 198)  |
| Road injuries                                   | 1,184<br>(882 - 1,538)   | 100<br>(47 - 192)    | 49<br>(24 - 86)    | 827<br>(583 - 1,128)     | 104<br>(68 - 149)  | 105<br>(72 - 192)  |
| Pedestrian road injuries                        | 570<br>(395 - 796)       | 50<br>(22 - 99)      | 25<br>(11 - 45)    | 391<br>(252 - 570)       | 50<br>(31 - 76)    | 53<br>(34 - 97)    |
| Cyclist road injuries                           | 114<br>(73 - 166)        | 9<br>(3 - 20)        | 5<br>(2 - 10)      | 78<br>(47 - 122)         | 10<br>(6 - 17)     | 11<br>(6 - 21)     |
| Motorcyclist road injuries                      | 59<br>(37 - 94)          | 4<br>(2 - 9)         | 2<br>(1 - 4)       | 44<br>(26 - 73)          | 4<br>(2 - 7)       | 4<br>(2 - 9)       |
| Motor vehicle road injuries                     | 438<br>(302 - 615)       | 34<br>(15 - 69)      | 17<br>(8 - 31)     | 312<br>(205 - 456)       | 39<br>(23 - 59)    | 35<br>(21 - 68)    |
| Other road injuries                             | 4<br>(2 - 9)             | 2<br>(0 - 4)         | 0<br>(0 - 1)       | 2<br>(0 - 5)             | 0<br>(0 - 1)       | 0<br>(0 - 1)       |
| Other transport injuries                        | 42<br>(27 - 73)          | 12<br>(5 - 25)       | 3<br>(1 - 6)       | 20<br>(10 - 44)          | 3<br>(2 - 5)       | 4<br>(2 - 7)       |
| Unintentional injuries                          | 1,475<br>(1,135 - 1,892) | 646<br>(387 - 970)   | 142<br>(91 - 222)  | 482<br>(343 - 643)       | 97<br>(63 - 144)   | 108<br>(70 - 164)  |
| Falls                                           | 36<br>(19 - 76)          | 22<br>(10 - 45)      | 7<br>(4 - 14)      | 6<br>(2 - 26)            | 0<br>(0 - 0)       | 0<br>(0 - 0)       |
| Drowning                                        | 407<br>(263 - 634)       | 174<br>(74 - 339)    | 76<br>(41 - 136)   | 147<br>(94 - 211)        | 6<br>(3 - 9)       | 5<br>(3 - 7)       |
| Fire, heat, and hot substances                  | 190<br>(120 - 305)       | 119<br>(55 - 235)    | 6<br>(3 - 11)      | 33<br>(21 - 51)          | 12<br>(7 - 18)     | 20<br>(13 - 30)    |
| Poisonings                                      | 121<br>(78 - 180)        | 21<br>(9 - 43)       | 2<br>(1 - 5)       | 86<br>(50 - 136)         | 8<br>(4 - 13)      | 4<br>(2 - 6)       |
| Exposure to mechanical forces                   | 242<br>(148 - 379)       | 85<br>(36 - 174)     | 16<br>(8 - 31)     | 105<br>(60 - 202)        | 27<br>(13 - 45)    | 10<br>(5 - 15)     |
| Unintentional firearm injuries                  | 43<br>(24 - 82)          | 5<br>(2 - 12)        | 1<br>(0 - 3)       | 33<br>(17 - 66)          | 2<br>(1 - 4)       | 1<br>(1 - 3)       |
| Unintentional suffocation                       | 50<br>(6 - 130)          | 34<br>(4 - 106)      | 3<br>(0 - 7)       | 8<br>(1 - 16)            | 4<br>(0 - 9)       | 1<br>(0 - 3)       |
| Other exposure to mechanical forces             | 150<br>(83 - 246)        | 46<br>(20 - 91)      | 12<br>(6 - 25)     | 64<br>(26 - 147)         | 21<br>(9 - 36)     | 7<br>(3 - 11)      |
| Adverse effects of medical treatment            | 211<br>(115 - 331)       | 87<br>(34 - 167)     | 5<br>(2 - 9)       | 45<br>(19 - 81)          | 27<br>(13 - 51)    | 46<br>(18 - 95)    |
| Animal contact                                  | 95<br>(58 - 149)         | 23<br>(9 - 54)       | 10<br>(4 - 21)     | 36<br>(18 - 64)          | 12<br>(5 - 22)     | 14<br>(4 - 24)     |
| Venomous animal contact                         | 44<br>(24 - 73)          | 8<br>(2 - 23)        | 2<br>(1 - 6)       | 17<br>(8 - 31)           | 7<br>(2 - 14)      | 9<br>(2 - 18)      |
| Non-venomous animal contact                     | 52<br>(29 - 84)          | 16<br>(6 - 36)       | 7<br>(3 - 15)      | 19<br>(9 - 35)           | 5<br>(2 - 10)      | 4<br>(2 - 8)       |
| Foreign body                                    | 63<br>(29 - 133)         | 45<br>(19 - 101)     | 2<br>(1 - 5)       | 7<br>(4 - 15)            | 3<br>(1 - 5)       | 6<br>(2 - 10)      |
| Pulmonary aspiration and foreign body in airway | 59<br>(26 - 129)         | 43<br>(17 - 99)      | 2<br>(1 - 4)       | 7<br>(3 - 14)            | 2<br>(1 - 4)       | 5<br>(2 - 10)      |
| Foreign body in other body part                 | 3<br>(2 - 6)             | 1<br>(1 - 3)         | 0<br>(0 - 1)       | 1<br>(0 - 1)             | 1<br>(0 - 1)       | 0<br>(0 - 1)       |
| Other unintentional injuries                    | 110<br>(71 - 166)        | 69<br>(38 - 115)     | 18<br>(10 - 34)    | 17<br>(11 - 25)          | 2<br>(1 - 3)       | 3<br>(2 - 5)       |
| Self-harm and interpersonal violence            | 892<br>(633 - 1,363)     | 15<br>(6 - 46)       | 12<br>(5 - 24)     | 723<br>(487 - 1,161)     | 79<br>(50 - 123)   | 62<br>(38 - 95)    |
| Self-harm                                       | 452<br>(307 - 605)       | --                   | 7<br>(3 - 16)      | 330<br>(211 - 460)       | 59<br>(34 - 97)    | 56<br>(32 - 87)    |
| Interpersonal violence                          | 440<br>(276 - 860)       | 15<br>(6 - 46)       | 4<br>(2 - 13)      | 393<br>(238 - 779)       | 21<br>(10 - 37)    | 7<br>(2 - 14)      |
| Assault by firearm                              | 183<br>(75 - 438)        | 3<br>(1 - 11)        | 1<br>(0 - 4)       | 170<br>(68 - 408)        | 7<br>(3 - 15)      | 1<br>(0 - 3)       |
| Assault by sharp object                         | 79<br>(37 - 166)         | 2<br>(1 - 5)         | 1<br>(0 - 2)       | 69<br>(30 - 151)         | 6<br>(2 - 11)      | 1<br>(0 - 3)       |
| Assault by other means                          | 178<br>(88 - 348)        | 10<br>(3 - 31)       | 2<br>(1 - 7)       | 154<br>(70 - 314)        | 8<br>(3 - 14)      | 4<br>(1 - 9)       |

Web Table 31- Zambia deaths with 95% UI by age, sex, and cause in 2013

| Cause                                                             | Females, All Ages           | Females, 0-4 Years          | Females, 5-14 Years      | Females, 15-49 Years        | Females, 50-69 Years       | Females, 70-80 Years        |
|-------------------------------------------------------------------|-----------------------------|-----------------------------|--------------------------|-----------------------------|----------------------------|-----------------------------|
| All causes                                                        | 78,926<br>(71,153 - 88,478) | 22,664<br>(17,188 - 29,551) | 3,268<br>(2,811 - 3,932) | 28,280<br>(24,904 - 31,528) | 11,433<br>(9,647 - 13,774) | 13,281<br>(11,488 - 15,357) |
| Communicable, maternal, neonatal, and nutritional diseases        | 55,977<br>(50,164 - 63,051) | 20,013<br>(15,423 - 25,766) | 2,962<br>(2,513 - 3,514) | 23,251<br>(20,233 - 26,250) | 5,420<br>(4,509 - 6,434)   | 4,332<br>(3,559 - 5,164)    |
| HIV/AIDS and tuberculosis                                         | 22,846<br>(19,264 - 26,242) | 1,371<br>(903 - 1,829)      | 2,004<br>(1,644 - 2,354) | 15,646<br>(13,060 - 18,182) | 2,890<br>(2,188 - 3,598)   | 936<br>(668 - 1,193)        |
| Tuberculosis                                                      | 4,760<br>(3,545 - 5,975)    | 208<br>(120 - 345)          | 34<br>(19 - 56)          | 2,738<br>(1,871 - 3,605)    | 1,044<br>(697 - 1,417)     | 735<br>(503 - 981)          |
| HIV/AIDS                                                          | 18,086<br>(14,231 - 21,569) | 1,163<br>(712 - 1,645)      | 1,970<br>(1,608 - 2,329) | 12,908<br>(10,077 - 15,449) | 1,845<br>(1,206 - 2,568)   | 200<br>(101 - 342)          |
| HIV/AIDS resulting in mycobacterial infection                     | 1,008<br>(751 - 1,346)      | 60<br>(35 - 89)             | 96<br>(73 - 122)         | 731<br>(544 - 987)          | 108<br>(69 - 160)          | 12<br>(6 - 22)              |
| HIV/AIDS resulting in other diseases                              | 17,078<br>(13,453 - 20,425) | 1,102<br>(677 - 1,553)      | 1,874<br>(1,529 - 2,215) | 12,177<br>(9,507 - 14,520)  | 1,737<br>(1,137 - 2,420)   | 188<br>(95 - 321)           |
| Diarrhea, lower respiratory, and other common infectious diseases | 14,232<br>(11,313 - 17,458) | 6,845<br>(4,674 - 9,674)    | 333<br>(212 - 504)       | 2,823<br>(2,035 - 3,687)    | 1,700<br>(1,219 - 2,308)   | 2,531<br>(1,914 - 3,197)    |
| Diarrheal diseases                                                | 5,323<br>(3,919 - 7,292)    | 2,292<br>(1,184 - 3,865)    | 103<br>(50 - 195)        | 1,278<br>(848 - 1,828)      | 758<br>(462 - 1,168)       | 891<br>(574 - 1,299)        |
| Intestinal infectious diseases                                    | 303<br>(146 - 538)          | 154<br>(69 - 298)           | 55<br>(24 - 106)         | 82<br>(33 - 171)            | 8<br>(3 - 17)              | 4<br>(2 - 8)                |
| Typhoid fever                                                     | 229<br>(104 - 420)          | 111<br>(46 - 222)           | 44<br>(19 - 85)          | 65<br>(25 - 137)            | 6<br>(2 - 13)              | 3<br>(1 - 6)                |
| Paratyphoid fever                                                 | 53<br>(23 - 103)            | 28<br>(11 - 62)             | 10<br>(4 - 21)           | 13<br>(5 - 31)              | 1<br>(0 - 3)               | 1<br>(0 - 1)                |
| Other intestinal infectious diseases                              | 21<br>(10 - 36)             | 14<br>(6 - 29)              | 1<br>(0 - 4)             | 4<br>(1 - 9)                | 1<br>(0 - 4)               | 1<br>(0 - 4)                |
| Lower respiratory infections                                      | 6,717<br>(5,125 - 8,619)    | 3,413<br>(2,087 - 5,081)    | 96<br>(54 - 168)         | 879<br>(599 - 1,212)        | 785<br>(534 - 1,109)       | 1,543<br>(1,077 - 2,077)    |
| Upper respiratory infections                                      | 10<br>(3 - 21)              | 4<br>(0 - 13)               | 0<br>(0 - 1)             | 4<br>(1 - 11)               | 1<br>(0 - 4)               | 1<br>(0 - 4)                |
| Otitis media                                                      | 7<br>(5 - 9)                | 3<br>(2 - 5)                | 0<br>(0 - 0)             | 1<br>(1 - 1)                | 1<br>(1 - 1)               | 2<br>(1 - 2)                |
| Meningitis                                                        | 1,637<br>(1,165 - 2,217)    | 788<br>(449 - 1,240)        | 68<br>(36 - 112)         | 557<br>(346 - 834)          | 139<br>(84 - 220)          | 85<br>(51 - 134)            |
| Pneumococcal meningitis                                           | 390<br>(253 - 547)          | 151<br>(72 - 270)           | 21<br>(9 - 39)           | 156<br>(65 - 255)           | 38<br>(19 - 69)            | 25<br>(12 - 45)             |
| H influenzae type B meningitis                                    | 324<br>(199 - 511)          | 213<br>(107 - 380)          | 16<br>(7 - 32)           | 75<br>(38 - 129)            | 13<br>(6 - 25)             | 7<br>(3 - 14)               |
| Meningococcal meningitis                                          | 246<br>(149 - 367)          | 87<br>(41 - 160)            | 8<br>(4 - 15)            | 99<br>(38 - 196)            | 32<br>(15 - 57)            | 21<br>(11 - 39)             |
| Other meningitis                                                  | 677<br>(453 - 972)          | 337<br>(177 - 548)          | 23<br>(11 - 42)          | 228<br>(129 - 381)          | 56<br>(29 - 100)           | 32<br>(17 - 55)             |
| Encephalitis                                                      | 32<br>(21 - 46)             | 15<br>(8 - 26)              | 2<br>(1 - 3)             | 8<br>(4 - 19)               | 4<br>(2 - 7)               | 3<br>(1 - 6)                |
| Diphtheria                                                        | 5<br>(0 - 32)               | 4<br>(0 - 30)               | 0<br>(0 - 3)             | 0<br>(0 - 2)                | 0<br>(0 - 0)               | --                          |
| Whooping cough                                                    | 64<br>(0 - 317)             | 62<br>(0 - 308)             | 2<br>(0 - 8)             | 0<br>(0 - 2)                | 0<br>(0 - 0)               | --                          |
| Tetanus                                                           | 35<br>(12 - 74)             | 19<br>(6 - 44)              | 1<br>(0 - 2)             | 11<br>(2 - 28)              | 3<br>(1 - 8)               | 1<br>(0 - 3)                |
| Measles                                                           | 95<br>(24 - 263)            | 89<br>(22 - 249)            | 5<br>(1 - 14)            | 1<br>(0 - 3)                | 0<br>(0 - 0)               | --                          |
| Varicella and herpes zoster                                       | 6<br>(1 - 15)               | 3<br>(0 - 11)               | 0<br>(0 - 1)             | 1<br>(0 - 3)                | 0<br>(0 - 1)               | 1<br>(0 - 6)                |
| Neglected tropical diseases and malaria                           | 7,627<br>(5,298 - 10,649)   | 4,166<br>(2,481 - 6,713)    | 498<br>(260 - 894)       | 2,053<br>(1,170 - 3,259)    | 501<br>(243 - 916)         | 409<br>(168 - 796)          |
| Malaria                                                           | 7,145<br>(4,894 - 10,132)   | 4,007<br>(2,367 - 6,475)    | 444<br>(226 - 837)       | 1,831<br>(981 - 3,010)      | 469<br>(213 - 881)         | 394<br>(153 - 782)          |
| Leishmaniasis                                                     | 368<br>(155 - 635)          | 130<br>(26 - 296)           | 46<br>(9 - 108)          | 168<br>(54 - 316)           | 18<br>(4 - 37)             | 5<br>(2 - 9)                |
| Visceral leishmaniasis                                            | 368<br>(155 - 635)          | 130<br>(26 - 296)           | 46<br>(9 - 108)          | 168<br>(54 - 316)           | 18<br>(4 - 37)             | 5<br>(2 - 9)                |
| African trypanosomiasis                                           | 6<br>(3 - 10)               | 0<br>(0 - 1)                | 0<br>(0 - 1)             | 4<br>(2 - 7)                | 1<br>(0 - 1)               | 0<br>(0 - 0)                |
| Schistosomiasis                                                   | 33<br>(23 - 48)             | 1<br>(0 - 1)                | 0<br>(0 - 1)             | 20<br>(12 - 31)             | 8<br>(4 - 13)              | 5<br>(2 - 8)                |
| Cysticercosis                                                     | 5<br>(4 - 7)                | 0<br>(0 - 0)                | 0<br>(0 - 0)             | 4<br>(3 - 5)                | 1<br>(0 - 1)               | 0<br>(0 - 0)                |
| Cystic echinococcosis                                             | 5<br>(4 - 6)                | 1<br>(0 - 1)                | 0<br>(0 - 0)             | 3<br>(2 - 4)                | 0<br>(0 - 1)               | 0<br>(0 - 0)                |
| Dengue                                                            | 1<br>(0 - 1)                | 0<br>(0 - 0)                | 0<br>(0 - 0)             | 0<br>(0 - 1)                | 0<br>(0 - 0)               | 0<br>(0 - 0)                |
| Yellow fever                                                      | 0<br>(0 - 0)                | 0<br>(0 - 0)                | 0<br>(0 - 0)             | 0<br>(0 - 0)                | 0<br>(0 - 0)               | 0<br>(0 - 0)                |
| Rabies                                                            | 35<br>(19 - 50)             | 8<br>(3 - 16)               | 5<br>(2 - 9)             | 19<br>(9 - 32)              | 3<br>(1 - 4)               | 1<br>(0 - 1)                |
| Intestinal nematode infections                                    | 20<br>(8 - 38)              | 16<br>(6 - 35)              | 1<br>(0 - 5)             | 2<br>(0 - 8)                | 0<br>(0 - 3)               | 0<br>(0 - 2)                |
| Ascariasis                                                        | 20<br>(8 - 38)              | 16<br>(6 - 35)              | 1<br>(0 - 5)             | 2<br>(0 - 8)                | 0<br>(0 - 3)               | 0<br>(0 - 2)                |

Web Table 31- Zambia deaths with 95% UI by age, sex, and cause in 2013

| Cause                                                            | Females, All Ages           | Females, 0-4 Years       | Females, 5-14 Years | Females, 15-49 Years     | Females, 50-69 Years     | Females, 70-80 Years      |
|------------------------------------------------------------------|-----------------------------|--------------------------|---------------------|--------------------------|--------------------------|---------------------------|
| Other neglected tropical diseases                                | 10<br>(4 - 19)              | 3<br>(2 - 6)             | 0<br>(0 - 0)        | 2<br>(1 - 4)             | 2<br>(0 - 4)             | 3<br>(1 - 7)              |
| Maternal disorders                                               | 2,044<br>(1,341 - 2,980)    | --                       | 4<br>(2 - 10)       | 2,040<br>(1,337 - 2,976) | --                       | --                        |
| Maternal hemorrhage                                              | 240<br>(135 - 376)          | --                       | 0<br>(0 - 1)        | 240<br>(134 - 376)       | --                       | --                        |
| Maternal sepsis and other maternal infections                    | 187<br>(107 - 296)          | --                       | 1<br>(0 - 1)        | 187<br>(106 - 296)       | --                       | --                        |
| Maternal hypertensive disorders                                  | 202<br>(110 - 325)          | --                       | 1<br>(0 - 1)        | 201<br>(109 - 324)       | --                       | --                        |
| Maternal obstructed labor                                        | 103<br>(61 - 164)           | --                       | 0<br>(0 - 0)        | 103<br>(61 - 164)        | --                       | --                        |
| Maternal abortive outcome                                        | 364<br>(221 - 552)          | --                       | 1<br>(0 - 2)        | 364<br>(220 - 552)       | --                       | --                        |
| Indirect maternal deaths                                         | 158<br>(85 - 264)           | --                       | 0<br>(0 - 1)        | 158<br>(85 - 264)        | --                       | --                        |
| Late maternal deaths                                             | 169<br>(83 - 279)           | --                       | 1<br>(0 - 2)        | 169<br>(82 - 278)        | --                       | --                        |
| Maternal deaths aggravated by HIV/AIDS                           | 126<br>(73 - 190)           | --                       | --                  | 126<br>(73 - 190)        | --                       | --                        |
| Other maternal disorders                                         | 489<br>(301 - 760)          | --                       | 1<br>(0 - 2)        | 488<br>(300 - 759)       | --                       | --                        |
| Neonatal disorders                                               | 4,218<br>(3,245 - 5,409)    | 4,218<br>(3,245 - 5,409) | --                  | --                       | --                       | --                        |
| Neonatal preterm birth complications                             | 839<br>(416 - 1,461)        | 839<br>(416 - 1,461)     | --                  | --                       | --                       | --                        |
| Neonatal encephalopathy due to birth asphyxia and trauma         | 1,554<br>(901 - 2,322)      | 1,554<br>(901 - 2,322)   | --                  | --                       | --                       | --                        |
| Neonatal sepsis and other neonatal infections                    | 1,116<br>(556 - 1,907)      | 1,116<br>(556 - 1,907)   | --                  | --                       | --                       | --                        |
| Hemolytic disease and other neonatal jaundice                    | 14<br>(5 - 31)              | 14<br>(5 - 31)           | --                  | --                       | --                       | --                        |
| Other neonatal disorders                                         | 697<br>(338 - 1,243)        | 697<br>(338 - 1,243)     | --                  | --                       | --                       | --                        |
| Nutritional deficiencies                                         | 3,342<br>(2,312 - 4,553)    | 2,135<br>(1,243 - 3,218) | 60<br>(35 - 100)    | 497<br>(341 - 686)       | 264<br>(173 - 387)       | 387<br>(262 - 559)        |
| Protein-energy malnutrition                                      | 2,724<br>(1,756 - 3,842)    | 2,026<br>(1,164 - 3,083) | 52<br>(28 - 88)     | 167<br>(72 - 294)        | 180<br>(106 - 284)       | 299<br>(184 - 436)        |
| Iodine deficiency                                                | 5<br>(0 - 19)               | 2<br>(0 - 14)            | 0<br>(0 - 1)        | 2<br>(0 - 9)             | 1<br>(0 - 3)             | 0<br>(0 - 4)              |
| Iron-deficiency anemia                                           | 599<br>(324 - 992)          | 103<br>(21 - 312)        | 8<br>(2 - 18)       | 326<br>(191 - 487)       | 81<br>(32 - 144)         | 82<br>(33 - 187)          |
| Other nutritional deficiencies                                   | 14<br>(6 - 27)              | 3<br>(1 - 11)            | 0<br>(0 - 0)        | 2<br>(1 - 6)             | 3<br>(1 - 6)             | 6<br>(1 - 14)             |
| Other communicable, maternal, neonatal, and nutritional diseases | 1,666<br>(606 - 3,113)      | 1,278<br>(258 - 2,637)   | 63<br>(15 - 138)    | 192<br>(111 - 285)       | 65<br>(29 - 129)         | 69<br>(25 - 158)          |
| Sexually transmitted diseases excluding HIV                      | 1,325<br>(276 - 2,704)      | 1,152<br>(127 - 2,465)   | 54<br>(6 - 125)     | 84<br>(29 - 148)         | 18<br>(6 - 47)           | 16<br>(5 - 42)            |
| Syphilis                                                         | 1,261<br>(198 - 2,626)      | 1,152<br>(127 - 2,465)   | 54<br>(6 - 125)     | 34<br>(12 - 60)          | 10<br>(3 - 26)           | 12<br>(4 - 32)            |
| Chlamydial infection                                             | 21<br>(8 - 35)              | --                       | 0<br>(0 - 0)        | 17<br>(6 - 29)           | 2<br>(1 - 7)             | 1<br>(0 - 3)              |
| Gonococcal infection                                             | 23<br>(10 - 39)             | --                       | 0<br>(0 - 0)        | 17<br>(6 - 31)           | 3<br>(1 - 8)             | 2<br>(1 - 5)              |
| Other sexually transmitted diseases                              | 20<br>(8 - 34)              | --                       | 0<br>(0 - 0)        | 16<br>(6 - 29)           | 2<br>(1 - 7)             | 1<br>(0 - 2)              |
| Hepatitis                                                        | 76<br>(47 - 103)            | 12<br>(7 - 21)           | 2<br>(1 - 3)        | 48<br>(24 - 73)          | 9<br>(4 - 15)            | 4<br>(3 - 7)              |
| Acute hepatitis A                                                | 10<br>(3 - 20)              | 5<br>(2 - 10)            | 1<br>(0 - 2)        | 4<br>(1 - 10)            | 0<br>(0 - 1)             | 0<br>(0 - 0)              |
| Acute hepatitis B                                                | 35<br>(21 - 52)             | 7<br>(3 - 13)            | 1<br>(0 - 2)        | 15<br>(6 - 27)           | 8<br>(4 - 13)            | 4<br>(2 - 6)              |
| Acute hepatitis C                                                | 1<br>(0 - 2)                | --                       | 0<br>(0 - 0)        | 0<br>(0 - 1)             | 0<br>(0 - 1)             | 0<br>(0 - 0)              |
| Acute hepatitis E                                                | 30<br>(13 - 50)             | 0<br>(0 - 0)             | 0<br>(0 - 1)        | 28<br>(12 - 48)          | 1<br>(0 - 3)             | 0<br>(0 - 1)              |
| Other infectious diseases                                        | 266<br>(89 - 484)           | 114<br>(42 - 267)        | 7<br>(2 - 17)       | 59<br>(9 - 110)          | 37<br>(7 - 93)           | 49<br>(9 - 133)           |
| Non-communicable diseases                                        | 20,568<br>(17,022 - 24,664) | 1,974<br>(1,229 - 3,162) | 196<br>(134 - 291)  | 4,083<br>(3,112 - 5,126) | 5,656<br>(4,352 - 7,302) | 8,658<br>(7,303 - 10,215) |
| Neoplasms                                                        | 3,193<br>(2,521 - 4,021)    | 123<br>(73 - 192)        | 40<br>(25 - 64)     | 901<br>(686 - 1,151)     | 1,339<br>(990 - 1,794)   | 790<br>(630 - 982)        |
| Esophageal cancer                                                | 313<br>(164 - 517)          | --                       | --                  | 49<br>(22 - 88)          | 165<br>(78 - 297)        | 98<br>(52 - 170)          |
| Stomach cancer                                                   | 186<br>(132 - 256)          | --                       | --                  | 25<br>(18 - 35)          | 104<br>(71 - 146)        | 58<br>(38 - 85)           |
| Liver cancer                                                     | 212<br>(145 - 305)          | --                       | 1<br>(1 - 3)        | 58<br>(38 - 84)          | 94<br>(55 - 159)         | 58<br>(35 - 89)           |
| Liver cancer due to hepatitis B                                  | 31<br>(10 - 63)             | --                       | 0<br>(0 - 1)        | 11<br>(3 - 23)           | 14<br>(4 - 29)           | 7<br>(2 - 15)             |

Web Table 31- Zambia deaths with 95% UI by age, sex, and cause in 2013

| Cause                                | Females, All Ages         | Females, 0-4 Years | Females, 5-14 Years | Females, 15-49 Years   | Females, 50-69 Years     | Females, 70-80 Years     |
|--------------------------------------|---------------------------|--------------------|---------------------|------------------------|--------------------------|--------------------------|
| Liver cancer due to hepatitis C      | 104<br>(62 - 166)         | --                 | 0<br>(0 - 1)        | 24<br>(11 - 39)        | 49<br>(25 - 91)          | 30<br>(16 - 50)          |
| Liver cancer due to alcohol use      | 21<br>(10 - 37)           | --                 | --                  | 3<br>(1 - 5)           | 9<br>(4 - 18)            | 9<br>(4 - 18)            |
| Liver cancer due to other causes     | 55<br>(30 - 98)           | --                 | 1<br>(0 - 2)        | 20<br>(11 - 35)        | 22<br>(9 - 46)           | 12<br>(5 - 23)           |
| Larynx cancer                        | 7<br>(3 - 13)             | --                 | --                  | 1<br>(1 - 3)           | 5<br>(2 - 9)             | 1<br>(0 - 2)             |
| Tracheal, bronchus and lung cancer   | 103<br>(71 - 138)         | --                 | --                  | 12<br>(8 - 16)         | 57<br>(37 - 80)          | 35<br>(24 - 48)          |
| Breast cancer                        | 406<br>(301 - 563)        | --                 | --                  | 173<br>(124 - 246)     | 166<br>(115 - 243)       | 68<br>(49 - 96)          |
| Cervical cancer                      | 738<br>(529 - 1,001)      | --                 | --                  | 243<br>(164 - 337)     | 342<br>(228 - 492)       | 153<br>(102 - 218)       |
| Uterine cancer                       | 43<br>(26 - 63)           | --                 | --                  | 6<br>(4 - 10)          | 23<br>(12 - 36)          | 14<br>(8 - 22)           |
| Prostate cancer                      | --                        | --                 | --                  | --                     | --                       | --                       |
| Colon and rectum cancer              | 184<br>(145 - 234)        | --                 | --                  | 42<br>(32 - 55)        | 75<br>(54 - 100)         | 67<br>(49 - 89)          |
| Lip and oral cavity cancer           | 38<br>(23 - 59)           | --                 | --                  | 12<br>(6 - 22)         | 18<br>(10 - 31)          | 8<br>(5 - 13)            |
| Nasopharynx cancer                   | 15<br>(7 - 23)            | --                 | 0<br>(0 - 0)        | 10<br>(4 - 16)         | 4<br>(2 - 6)             | 2<br>(1 - 3)             |
| Other pharynx cancer                 | 15<br>(7 - 22)            | --                 | --                  | 6<br>(2 - 10)          | 7<br>(3 - 11)            | 2<br>(1 - 3)             |
| Gallbladder and biliary tract cancer | 31<br>(21 - 45)           | --                 | --                  | 8<br>(4 - 14)          | 15<br>(10 - 24)          | 7<br>(4 - 12)            |
| Pancreatic cancer                    | 50<br>(38 - 66)           | --                 | --                  | 9<br>(6 - 12)          | 27<br>(18 - 37)          | 15<br>(11 - 20)          |
| Malignant skin melanoma              | 14<br>(10 - 20)           | --                 | --                  | 2<br>(1 - 3)           | 7<br>(5 - 12)            | 4<br>(3 - 7)             |
| Non-melanoma skin cancer             | 17<br>(9 - 28)            | --                 | --                  | 6<br>(1 - 11)          | 4<br>(2 - 6)             | 8<br>(4 - 16)            |
| Ovarian cancer                       | 94<br>(66 - 127)          | --                 | --                  | 29<br>(20 - 41)        | 48<br>(31 - 70)          | 17<br>(11 - 25)          |
| Testicular cancer                    | --                        | --                 | --                  | --                     | --                       | --                       |
| Kidney cancer                        | 45<br>(31 - 64)           | 10<br>(4 - 22)     | 2<br>(1 - 4)        | 11<br>(7 - 16)         | 14<br>(8 - 22)           | 8<br>(5 - 13)            |
| Bladder cancer                       | 31<br>(20 - 47)           | --                 | --                  | 9<br>(5 - 13)          | 10<br>(6 - 17)           | 12<br>(7 - 19)           |
| Brain and nervous system cancer      | 35<br>(26 - 47)           | 5<br>(2 - 10)      | 2<br>(1 - 3)        | 18<br>(13 - 26)        | 6<br>(4 - 9)             | 5<br>(3 - 7)             |
| Thyroid cancer                       | 13<br>(7 - 21)            | --                 | 0<br>(0 - 0)        | 1<br>(1 - 3)           | 7<br>(4 - 14)            | 4<br>(2 - 6)             |
| Mesothelioma                         | 5<br>(2 - 8)              | --                 | --                  | 3<br>(1 - 5)           | 1<br>(0 - 3)             | 1<br>(0 - 2)             |
| Hodgkin lymphoma                     | 27<br>(16 - 40)           | 1<br>(0 - 2)       | 1<br>(0 - 1)        | 9<br>(5 - 14)          | 9<br>(4 - 15)            | 9<br>(4 - 15)            |
| Non-Hodgkin lymphoma                 | 141<br>(93 - 202)         | 31<br>(12 - 66)    | 10<br>(4 - 22)      | 45<br>(30 - 75)        | 30<br>(20 - 49)          | 24<br>(14 - 36)          |
| Multiple myeloma                     | 26<br>(19 - 35)           | --                 | --                  | 6<br>(4 - 8)           | 12<br>(8 - 18)           | 8<br>(6 - 12)            |
| Leukemia                             | 61<br>(48 - 75)           | 7<br>(3 - 12)      | 4<br>(2 - 6)        | 22<br>(16 - 30)        | 12<br>(9 - 17)           | 16<br>(12 - 22)          |
| Other neoplasms                      | 343<br>(243 - 508)        | 70<br>(38 - 119)   | 20<br>(11 - 35)     | 87<br>(56 - 163)       | 77<br>(46 - 132)         | 89<br>(56 - 140)         |
| Cardiovascular diseases              | 9,505<br>(7,709 - 11,703) | 127<br>(73 - 206)  | 22<br>(13 - 37)     | 1,178<br>(867 - 1,588) | 2,663<br>(2,009 - 3,526) | 5,515<br>(4,525 - 6,592) |
| Rheumatic heart disease              | 374<br>(236 - 657)        | 4<br>(1 - 11)      | 4<br>(2 - 8)        | 180<br>(101 - 331)     | 96<br>(55 - 177)         | 90<br>(55 - 160)         |
| Ischemic heart disease               | 2,023<br>(1,485 - 2,658)  | 0<br>(0 - 1)       | 1<br>(0 - 2)        | 188<br>(120 - 278)     | 567<br>(381 - 804)       | 1,266<br>(916 - 1,669)   |
| Cerebrovascular disease              | 4,532<br>(3,528 - 5,687)  | 12<br>(5 - 23)     | 2<br>(1 - 3)        | 299<br>(206 - 430)     | 1,270<br>(920 - 1,720)   | 2,949<br>(2,330 - 3,656) |
| Ischemic stroke                      | 2,184<br>(1,329 - 2,894)  | 1<br>(0 - 3)       | 0<br>(0 - 0)        | 46<br>(13 - 115)       | 404<br>(216 - 591)       | 1,732<br>(1,097 - 2,266) |
| Hemorrhagic stroke                   | 2,348<br>(1,754 - 3,319)  | 11<br>(4 - 20)     | 2<br>(1 - 3)        | 253<br>(155 - 390)     | 865<br>(616 - 1,217)     | 1,217<br>(847 - 1,820)   |
| Hypertensive heart disease           | 845<br>(476 - 1,347)      | 2<br>(1 - 5)       | 1<br>(0 - 1)        | 74<br>(30 - 118)       | 211<br>(114 - 329)       | 557<br>(284 - 1,026)     |
| Cardiomyopathy and myocarditis       | 471<br>(286 - 943)        | 61<br>(26 - 109)   | 8<br>(3 - 14)       | 149<br>(47 - 326)      | 108<br>(58 - 231)        | 146<br>(69 - 333)        |
| Atrial fibrillation and flutter      | 4<br>(1 - 8)              | --                 | --                  | 0<br>(0 - 0)           | 1<br>(0 - 1)             | 3<br>(1 - 7)             |
| Aortic aneurysm                      | 71<br>(40 - 120)          | --                 | --                  | 13<br>(3 - 25)         | 21<br>(10 - 36)          | 37<br>(21 - 60)          |
| Peripheral vascular disease          | 6<br>(3 - 11)             | --                 | --                  | 0<br>(0 - 0)           | 1<br>(1 - 3)             | 4<br>(2 - 8)             |



Web Table 31- Zambia deaths with 95% UI by age, sex, and cause in 2013

| Cause                                               | Females, All Ages      | Females, 0-4 Years | Females, 5-14 Years | Females, 15-49 Years | Females, 50-69 Years | Females, 70-80 Years |
|-----------------------------------------------------|------------------------|--------------------|---------------------|----------------------|----------------------|----------------------|
| Endocarditis                                        | 78<br>(47 - 135)       | 7<br>(2 - 19)      | 1<br>(0 - 2)        | 19<br>(7 - 42)       | 16<br>(9 - 30)       | 34<br>(16 - 66)      |
| Other cardiovascular and circulatory diseases       | 1,103<br>(758 - 1,729) | 41<br>(15 - 90)    | 6<br>(3 - 11)       | 256<br>(91 - 441)    | 372<br>(234 - 626)   | 429<br>(270 - 717)   |
| Chronic respiratory diseases                        | 1,124<br>(901 - 1,406) | 67<br>(37 - 114)   | 9<br>(6 - 15)       | 208<br>(151 - 270)   | 315<br>(221 - 436)   | 524<br>(402 - 682)   |
| Chronic obstructive pulmonary disease               | 583<br>(400 - 817)     | 9<br>(4 - 20)      | 3<br>(2 - 6)        | 59<br>(36 - 90)      | 194<br>(127 - 281)   | 317<br>(207 - 454)   |
| Pneumoconiosis                                      | 9<br>(6 - 12)          | 1<br>(0 - 2)       | 0<br>(0 - 0)        | 5<br>(3 - 8)         | 1<br>(1 - 2)         | 1<br>(1 - 2)         |
| Silicosis                                           | 0<br>(0 - 1)           | 0<br>(0 - 0)       | 0<br>(0 - 0)        | 0<br>(0 - 1)         | 0<br>(0 - 0)         | 0<br>(0 - 0)         |
| Asbestosis                                          | 0<br>(0 - 1)           | 0<br>(0 - 0)       | 0<br>(0 - 0)        | 0<br>(0 - 1)         | 0<br>(0 - 0)         | 0<br>(0 - 0)         |
| Coal workers pneumoconiosis                         | 0<br>(0 - 1)           | 0<br>(0 - 0)       | 0<br>(0 - 0)        | 0<br>(0 - 1)         | 0<br>(0 - 0)         | 0<br>(0 - 0)         |
| Other pneumoconiosis                                | 7<br>(5 - 10)          | 1<br>(0 - 1)       | 0<br>(0 - 0)        | 4<br>(3 - 7)         | 1<br>(1 - 2)         | 1<br>(1 - 2)         |
| Asthma                                              | 250<br>(162 - 358)     | 20<br>(8 - 41)     | 3<br>(1 - 5)        | 55<br>(36 - 80)      | 73<br>(41 - 117)     | 100<br>(56 - 160)    |
| Interstitial lung disease and pulmonary sarcoidosis | 132<br>(37 - 230)      | 3<br>(0 - 9)       | 1<br>(0 - 1)        | 25<br>(5 - 57)       | 31<br>(8 - 60)       | 73<br>(16 - 145)     |
| Other chronic respiratory diseases                  | 150<br>(93 - 218)      | 34<br>(18 - 62)    | 2<br>(1 - 4)        | 64<br>(37 - 100)     | 16<br>(8 - 28)       | 34<br>(17 - 60)      |
| Cirrhosis                                           | 929<br>(730 - 1,161)   | 18<br>(7 - 38)     | 8<br>(5 - 13)       | 302<br>(218 - 405)   | 349<br>(252 - 480)   | 252<br>(182 - 343)   |
| Cirrhosis due to hepatitis B                        | 263<br>(135 - 422)     | 1<br>(0 - 2)       | 1<br>(1 - 3)        | 88<br>(49 - 142)     | 101<br>(46 - 175)    | 72<br>(25 - 138)     |
| Cirrhosis due to hepatitis C                        | 220<br>(72 - 431)      | 1<br>(0 - 2)       | 1<br>(0 - 2)        | 78<br>(29 - 141)     | 91<br>(24 - 185)     | 50<br>(9 - 128)      |
| Cirrhosis due to alcohol use                        | 270<br>(157 - 428)     | --                 | --                  | 54<br>(28 - 88)      | 111<br>(62 - 191)    | 105<br>(54 - 184)    |
| Cirrhosis due to other causes                       | 176<br>(107 - 252)     | 16<br>(7 - 35)     | 6<br>(3 - 9)        | 83<br>(46 - 128)     | 46<br>(22 - 80)      | 25<br>(11 - 45)      |
| Digestive diseases                                  | 1,143<br>(904 - 1,421) | 53<br>(28 - 93)    | 18<br>(11 - 28)     | 368<br>(263 - 487)   | 276<br>(196 - 374)   | 427<br>(321 - 559)   |
| Peptic ulcer disease                                | 263<br>(171 - 366)     | 3<br>(1 - 8)       | 1<br>(1 - 3)        | 72<br>(44 - 111)     | 72<br>(44 - 109)     | 114<br>(65 - 175)    |
| Gastritis and duodenitis                            | 53<br>(22 - 108)       | 3<br>(1 - 7)       | 1<br>(1 - 3)        | 18<br>(7 - 33)       | 10<br>(4 - 24)       | 19<br>(6 - 55)       |
| Appendicitis                                        | 108<br>(62 - 162)      | 6<br>(2 - 13)      | 3<br>(1 - 6)        | 49<br>(27 - 79)      | 21<br>(9 - 39)       | 29<br>(10 - 61)      |
| Paralytic ileus and intestinal obstruction          | 274<br>(174 - 454)     | 13<br>(4 - 29)     | 7<br>(3 - 12)       | 57<br>(31 - 91)      | 74<br>(41 - 123)     | 123<br>(69 - 226)    |
| Inguinal, femoral, and abdominal hernia             | 27<br>(13 - 41)        | 2<br>(1 - 6)       | 0<br>(0 - 0)        | 14<br>(6 - 23)       | 2<br>(1 - 3)         | 9<br>(4 - 15)        |
| Inflammatory bowel disease                          | 106<br>(40 - 166)      | 14<br>(4 - 30)     | 2<br>(1 - 3)        | 50<br>(19 - 85)      | 18<br>(6 - 32)       | 23<br>(7 - 42)       |
| Vascular intestinal disorders                       | 13<br>(5 - 29)         | 0<br>(0 - 1)       | 0<br>(0 - 0)        | 2<br>(1 - 5)         | 3<br>(1 - 7)         | 7<br>(2 - 18)        |
| Gallbladder and biliary diseases                    | 113<br>(70 - 160)      | 2<br>(1 - 3)       | 1<br>(0 - 1)        | 35<br>(21 - 55)      | 30<br>(16 - 48)      | 45<br>(23 - 75)      |
| Pancreatitis                                        | 58<br>(26 - 96)        | 1<br>(0 - 2)       | 0<br>(0 - 1)        | 27<br>(6 - 51)       | 15<br>(7 - 25)       | 15<br>(7 - 25)       |
| Other digestive diseases                            | 130<br>(89 - 183)      | 9<br>(3 - 18)      | 2<br>(1 - 4)        | 44<br>(22 - 67)      | 31<br>(19 - 49)      | 44<br>(24 - 73)      |
| Neurological disorders                              | 613<br>(482 - 775)     | 85<br>(42 - 167)   | 20<br>(10 - 36)     | 167<br>(103 - 256)   | 52<br>(38 - 72)      | 289<br>(221 - 369)   |
| Alzheimer disease and other dementias               | 276<br>(208 - 354)     | --                 | --                  | 0<br>(0 - 0)         | 21<br>(14 - 29)      | 255<br>(191 - 330)   |
| Parkinson disease                                   | 3<br>(1 - 6)           | --                 | --                  | 0<br>(0 - 1)         | 1<br>(0 - 3)         | 2<br>(1 - 4)         |
| Epilepsy                                            | 289<br>(192 - 421)     | 72<br>(32 - 153)   | 18<br>(9 - 34)      | 154<br>(92 - 243)    | 20<br>(12 - 33)      | 25<br>(13 - 43)      |
| Multiple sclerosis                                  | 5<br>(2 - 12)          | --                 | --                  | 3<br>(1 - 10)        | 1<br>(1 - 2)         | 0<br>(0 - 1)         |
| Other neurological disorders                        | 39<br>(30 - 50)        | 13<br>(8 - 20)     | 2<br>(1 - 3)        | 9<br>(6 - 11)        | 9<br>(6 - 12)        | 7<br>(5 - 9)         |
| Mental and substance use disorders                  | 185<br>(118 - 266)     | 7<br>(3 - 11)      | 0<br>(0 - 0)        | 146<br>(84 - 224)    | 24<br>(15 - 38)      | 8<br>(5 - 15)        |
| Schizophrenia                                       | 18<br>(4 - 32)         | --                 | --                  | 13<br>(2 - 23)       | 3<br>(1 - 6)         | 2<br>(1 - 4)         |
| Alcohol use disorders                               | 64<br>(11 - 119)       | --                 | --                  | 50<br>(6 - 96)       | 12<br>(3 - 21)       | 2<br>(1 - 4)         |
| Drug use disorders                                  | 103<br>(70 - 149)      | 7<br>(3 - 11)      | --                  | 83<br>(52 - 132)     | 9<br>(4 - 18)        | 4<br>(1 - 9)         |
| Opioid use disorders                                | 11<br>(7 - 16)         | 1<br>(0 - 1)       | --                  | 9<br>(5 - 14)        | 1<br>(0 - 2)         | 0<br>(0 - 1)         |
| Cocaine use disorders                               | 1<br>(0 - 1)           | 0<br>(0 - 0)       | --                  | 1<br>(0 - 1)         | 0<br>(0 - 0)         | 0<br>(0 - 0)         |

Web Table 31- Zambia deaths with 95% UI by age, sex, and cause in 2013

| Cause                                               | Females, All Ages        | Females, 0-4 Years     | Females, 5-14 Years | Females, 15-49 Years | Females, 50-69 Years | Females, 70-80 Years |
|-----------------------------------------------------|--------------------------|------------------------|---------------------|----------------------|----------------------|----------------------|
| Amphetamine use disorders                           | 0<br>(0 - 1)             | 0<br>(0 - 0)           | --                  | 0<br>(0 - 1)         | 0<br>(0 - 0)         | 0<br>(0 - 0)         |
| Other drug use disorders                            | 91<br>(62 - 132)         | 6<br>(2 - 9)           | --                  | 74<br>(46 - 116)     | 8<br>(3 - 16)        | 4<br>(1 - 8)         |
| Eating disorders                                    | 1<br>(1 - 2)             | --                     | 0<br>(0 - 0)        | 1<br>(1 - 2)         | --                   | --                   |
| Anorexia nervosa                                    | 1<br>(1 - 2)             | --                     | 0<br>(0 - 0)        | 1<br>(1 - 2)         | --                   | --                   |
| Diabetes, urogenital, blood, and endocrine diseases | 2,246<br>(1,729 - 2,839) | 259<br>(127 - 448)     | 41<br>(24 - 67)     | 622<br>(418 - 839)   | 577<br>(424 - 776)   | 747<br>(577 - 936)   |
| Diabetes mellitus                                   | 886<br>(678 - 1,129)     | 2<br>(1 - 3)           | 2<br>(1 - 3)        | 124<br>(90 - 165)    | 326<br>(234 - 439)   | 432<br>(319 - 565)   |
| Acute glomerulonephritis                            | 35<br>(18 - 58)          | 3<br>(1 - 7)           | 1<br>(0 - 2)        | 19<br>(8 - 36)       | 7<br>(3 - 12)        | 5<br>(3 - 9)         |
| Chronic kidney disease                              | 447<br>(318 - 617)       | 30<br>(16 - 53)        | 10<br>(5 - 16)      | 150<br>(87 - 237)    | 102<br>(61 - 156)    | 156<br>(104 - 223)   |
| Chronic kidney disease due to diabetes mellitus     | 2<br>(1 - 3)             | 0<br>(0 - 0)           | 0<br>(0 - 0)        | 1<br>(0 - 1)         | 1<br>(0 - 1)         | 1<br>(0 - 1)         |
| Chronic kidney disease due to hypertension          | 194<br>(121 - 302)       | 5<br>(1 - 10)          | 1<br>(1 - 3)        | 49<br>(20 - 91)      | 53<br>(30 - 85)      | 86<br>(51 - 133)     |
| Chronic kidney disease due to glomerulonephritis    | 146<br>(86 - 221)        | 17<br>(9 - 29)         | 5<br>(3 - 8)        | 72<br>(35 - 124)     | 25<br>(12 - 44)      | 27<br>(13 - 48)      |
| Chronic kidney disease due to other causes          | 105<br>(52 - 177)        | 8<br>(2 - 18)          | 3<br>(1 - 7)        | 29<br>(10 - 61)      | 24<br>(8 - 50)       | 42<br>(14 - 77)      |
| Urinary diseases and male infertility               | 227<br>(118 - 329)       | 20<br>(9 - 37)         | 3<br>(1 - 5)        | 81<br>(33 - 130)     | 64<br>(30 - 107)     | 59<br>(28 - 94)      |
| Interstitial nephritis and urinary tract infections | 152<br>(79 - 225)        | 11<br>(5 - 23)         | 1<br>(1 - 3)        | 42<br>(17 - 70)      | 47<br>(22 - 81)      | 49<br>(24 - 79)      |
| Urolithiasis                                        | 19<br>(5 - 41)           | --                     | 0<br>(0 - 1)        | 10<br>(1 - 27)       | 5<br>(1 - 12)        | 3<br>(1 - 6)         |
| Other urinary diseases                              | 57<br>(25 - 87)          | 9<br>(3 - 17)          | 1<br>(0 - 2)        | 29<br>(8 - 50)       | 11<br>(5 - 19)       | 7<br>(3 - 13)        |
| Gynecological diseases                              | 18<br>(5 - 61)           | --                     | --                  | 11<br>(2 - 48)       | 4<br>(1 - 9)         | 3<br>(1 - 7)         |
| Uterine fibroids                                    | 4<br>(1 - 10)            | --                     | --                  | 1<br>(0 - 6)         | 1<br>(0 - 3)         | 1<br>(0 - 2)         |
| Polycystic ovarian syndrome                         | 1<br>(0 - 4)             | --                     | --                  | 1<br>(0 - 4)         | 0<br>(0 - 0)         | --                   |
| Endometriosis                                       | 2<br>(0 - 8)             | --                     | --                  | 2<br>(0 - 8)         | 0<br>(0 - 0)         | --                   |
| Genital prolapse                                    | 3<br>(1 - 9)             | --                     | --                  | 1<br>(0 - 7)         | 1<br>(0 - 2)         | 1<br>(0 - 2)         |
| Other gynecological diseases                        | 9<br>(3 - 29)            | --                     | --                  | 5<br>(1 - 24)        | 2<br>(1 - 5)         | 1<br>(0 - 3)         |
| Hemoglobinopathies and hemolytic anemias            | 337<br>(105 - 657)       | 137<br>(38 - 287)      | 22<br>(9 - 40)      | 146<br>(33 - 303)    | 20<br>(10 - 37)      | 12<br>(7 - 21)       |
| Thalassemias                                        | 5<br>(1 - 9)             | 3<br>(1 - 7)           | 0<br>(0 - 0)        | 1<br>(0 - 3)         | 0<br>(0 - 0)         | 0<br>(0 - 0)         |
| Sickle cell disorders                               | 305<br>(89 - 599)        | 125<br>(33 - 264)      | 21<br>(8 - 39)      | 141<br>(32 - 292)    | 17<br>(9 - 32)       | 1<br>(0 - 2)         |
| G6PD deficiency                                     | 3<br>(1 - 6)             | 1<br>(0 - 2)           | 0<br>(0 - 0)        | 1<br>(0 - 2)         | 0<br>(0 - 0)         | 0<br>(0 - 0)         |
| Other hemoglobinopathies and hemolytic anemias      | 25<br>(12 - 43)          | 7<br>(3 - 14)          | 0<br>(0 - 1)        | 3<br>(1 - 6)         | 3<br>(1 - 5)         | 11<br>(6 - 19)       |
| Endocrine, metabolic, blood, and immune disorders   | 295<br>(182 - 451)       | 67<br>(33 - 116)       | 4<br>(2 - 8)        | 90<br>(40 - 163)     | 53<br>(26 - 95)      | 80<br>(33 - 143)     |
| Musculoskeletal disorders                           | 101<br>(51 - 169)        | --                     | 3<br>(2 - 5)        | 68<br>(21 - 120)     | 17<br>(10 - 26)      | 13<br>(8 - 23)       |
| Rheumatoid arthritis                                | 24<br>(15 - 36)          | --                     | 1<br>(0 - 1)        | 9<br>(2 - 17)        | 7<br>(4 - 11)        | 7<br>(4 - 13)        |
| Other musculoskeletal disorders                     | 77<br>(33 - 132)         | --                     | 2<br>(1 - 4)        | 59<br>(18 - 107)     | 10<br>(5 - 16)       | 6<br>(3 - 13)        |
| Other non-communicable diseases                     | 1,528<br>(853 - 2,788)   | 1,235<br>(653 - 2,363) | 35<br>(16 - 73)     | 122<br>(50 - 246)    | 45<br>(25 - 70)      | 91<br>(57 - 141)     |
| Congenital anomalies                                | 1,303<br>(671 - 2,554)   | 1,167<br>(593 - 2,303) | 33<br>(15 - 71)     | 80<br>(26 - 191)     | 10<br>(5 - 17)       | 13<br>(7 - 20)       |
| Neural tube defects                                 | 333<br>(93 - 940)        | 307<br>(79 - 860)      | 6<br>(2 - 16)       | 18<br>(3 - 73)       | 1<br>(0 - 2)         | 1<br>(0 - 2)         |
| Congenital heart anomalies                          | 566<br>(220 - 1,226)     | 501<br>(185 - 1,102)   | 17<br>(7 - 41)      | 38<br>(7 - 102)      | 4<br>(2 - 7)         | 6<br>(3 - 11)        |
| Cleft lip and cleft palate                          | 5<br>(0 - 18)            | 5<br>(0 - 18)          | --                  | --                   | --                   | --                   |
| Down syndrome                                       | 92<br>(23 - 219)         | 76<br>(18 - 195)       | 4<br>(1 - 9)        | 11<br>(2 - 27)       | 2<br>(1 - 3)         | 0<br>(0 - 1)         |
| Chromosomal unbalanced rearrangements               | 67<br>(20 - 170)         | 62<br>(18 - 161)       | 1<br>(0 - 2)        | 3<br>(1 - 9)         | 0<br>(0 - 1)         | 0<br>(0 - 1)         |
| Other congenital anomalies                          | 240<br>(97 - 597)        | 215<br>(82 - 543)      | 6<br>(2 - 14)       | 10<br>(3 - 39)       | 3<br>(1 - 6)         | 5<br>(3 - 10)        |
| Skin and subcutaneous diseases                      | 216<br>(142 - 304)       | 59<br>(28 - 105)       | 2<br>(1 - 3)        | 42<br>(21 - 75)      | 35<br>(19 - 58)      | 78<br>(48 - 124)     |

Web Table 31- Zambia deaths with 95% UI by age, sex, and cause in 2013

| Cause                                           | Females, All Ages        | Females, 0-4 Years   | Females, 5-14 Years | Females, 15-49 Years | Females, 50-69 Years | Females, 70-80 Years |
|-------------------------------------------------|--------------------------|----------------------|---------------------|----------------------|----------------------|----------------------|
| Cellulitis                                      | 82<br>(32 - 127)         | 22<br>(5 - 54)       | 1<br>(0 - 2)        | 17<br>(3 - 29)       | 15<br>(6 - 25)       | 27<br>(13 - 45)      |
| Pyoderma                                        | 108<br>(55 - 172)        | 34<br>(14 - 73)      | 1<br>(0 - 2)        | 21<br>(8 - 43)       | 17<br>(8 - 31)       | 35<br>(16 - 64)      |
| Decubitus ulcer                                 | 19<br>(9 - 34)           | 0<br>(0 - 1)         | 0<br>(0 - 0)        | 1<br>(0 - 6)         | 2<br>(1 - 4)         | 15<br>(7 - 27)       |
| Other skin and subcutaneous diseases            | 7<br>(3 - 14)            | 2<br>(0 - 4)         | 0<br>(0 - 0)        | 2<br>(0 - 7)         | 1<br>(0 - 2)         | 2<br>(1 - 3)         |
| Sudden infant death syndrome                    | 9<br>(2 - 30)            | 9<br>(2 - 30)        | --                  | --                   | --                   | --                   |
| Injuries                                        | 2,381<br>(1,909 - 3,045) | 677<br>(425 - 1,016) | 110<br>(71 - 166)   | 946<br>(679 - 1,280) | 358<br>(256 - 501)   | 291<br>(208 - 385)   |
| Transport injuries                              | 663<br>(518 - 910)       | 86<br>(48 - 142)     | 31<br>(17 - 55)     | 297<br>(207 - 426)   | 184<br>(120 - 310)   | 66<br>(48 - 94)      |
| Road injuries                                   | 624<br>(487 - 835)       | 77<br>(42 - 127)     | 29<br>(15 - 52)     | 277<br>(194 - 390)   | 177<br>(116 - 298)   | 63<br>(45 - 89)      |
| Pedestrian road injuries                        | 312<br>(238 - 452)       | 39<br>(20 - 69)      | 15<br>(8 - 28)      | 134<br>(92 - 200)    | 91<br>(55 - 165)     | 33<br>(22 - 50)      |
| Cyclist road injuries                           | 53<br>(34 - 73)          | 4<br>(1 - 10)        | 3<br>(1 - 6)        | 22<br>(13 - 34)      | 18<br>(11 - 30)      | 5<br>(3 - 8)         |
| Motorcyclist road injuries                      | 24<br>(14 - 39)          | 3<br>(1 - 6)         | 1<br>(0 - 2)        | 12<br>(7 - 22)       | 6<br>(3 - 11)        | 2<br>(1 - 4)         |
| Motor vehicle road injuries                     | 233<br>(170 - 330)       | 31<br>(16 - 54)      | 10<br>(5 - 18)      | 108<br>(71 - 161)    | 62<br>(38 - 112)     | 22<br>(14 - 34)      |
| Other road injuries                             | 2<br>(1 - 5)             | 1<br>(0 - 1)         | 0<br>(0 - 0)        | 1<br>(0 - 2)         | 1<br>(0 - 1)         | 0<br>(0 - 0)         |
| Other transport injuries                        | 39<br>(26 - 79)          | 9<br>(4 - 17)        | 2<br>(1 - 4)        | 19<br>(11 - 46)      | 6<br>(4 - 11)        | 3<br>(2 - 6)         |
| Unintentional injuries                          | 1,466<br>(1,097 - 1,932) | 579<br>(359 - 901)   | 71<br>(44 - 117)    | 454<br>(309 - 626)   | 158<br>(95 - 232)    | 204<br>(134 - 284)   |
| Falls                                           | 23<br>(17 - 34)          | 8<br>(3 - 18)        | 1<br>(1 - 3)        | 5<br>(3 - 7)         | 1<br>(1 - 2)         | 8<br>(5 - 12)        |
| Drowning                                        | 297<br>(182 - 453)       | 131<br>(63 - 268)    | 26<br>(13 - 48)     | 105<br>(50 - 171)    | 23<br>(8 - 39)       | 13<br>(6 - 23)       |
| Fire, heat, and hot substances                  | 237<br>(152 - 376)       | 130<br>(63 - 251)    | 10<br>(5 - 18)      | 55<br>(35 - 87)      | 21<br>(12 - 32)      | 21<br>(13 - 33)      |
| Poisonings                                      | 175<br>(51 - 300)        | 55<br>(11 - 134)     | 5<br>(1 - 11)       | 78<br>(27 - 139)     | 26<br>(4 - 52)       | 11<br>(2 - 20)       |
| Exposure to mechanical forces                   | 183<br>(102 - 338)       | 76<br>(34 - 173)     | 10<br>(5 - 24)      | 66<br>(29 - 147)     | 17<br>(8 - 30)       | 16<br>(9 - 26)       |
| Unintentional firearm injuries                  | 46<br>(19 - 81)          | 6<br>(3 - 13)        | 1<br>(0 - 2)        | 32<br>(10 - 64)      | 4<br>(1 - 7)         | 3<br>(1 - 5)         |
| Unintentional suffocation                       | 31<br>(5 - 82)           | 24<br>(3 - 73)       | 2<br>(0 - 4)        | 3<br>(1 - 7)         | 1<br>(0 - 3)         | 1<br>(0 - 2)         |
| Other exposure to mechanical forces             | 107<br>(55 - 293)        | 45<br>(18 - 114)     | 7<br>(3 - 22)       | 31<br>(11 - 113)     | 12<br>(5 - 24)       | 12<br>(6 - 22)       |
| Adverse effects of medical treatment            | 246<br>(155 - 351)       | 55<br>(23 - 117)     | 5<br>(2 - 8)        | 58<br>(32 - 89)      | 45<br>(24 - 73)      | 84<br>(44 - 140)     |
| Animal contact                                  | 166<br>(69 - 499)        | 46<br>(14 - 175)     | 12<br>(5 - 36)      | 74<br>(23 - 221)     | 20<br>(8 - 45)       | 14<br>(5 - 32)       |
| Venomous animal contact                         | 123<br>(45 - 409)        | 42<br>(12 - 163)     | 8<br>(3 - 26)       | 55<br>(12 - 180)     | 11<br>(3 - 28)       | 8<br>(3 - 18)        |
| Non-venomous animal contact                     | 43<br>(13 - 104)         | 4<br>(1 - 16)        | 4<br>(1 - 10)       | 20<br>(4 - 46)       | 10<br>(2 - 21)       | 5<br>(2 - 13)        |
| Foreign body                                    | 119<br>(64 - 219)        | 72<br>(35 - 147)     | 3<br>(2 - 6)        | 12<br>(5 - 24)       | 4<br>(2 - 8)         | 28<br>(11 - 51)      |
| Pulmonary aspiration and foreign body in airway | 116<br>(62 - 216)        | 71<br>(34 - 147)     | 3<br>(1 - 6)        | 11<br>(4 - 24)       | 4<br>(2 - 8)         | 27<br>(11 - 50)      |
| Foreign body in other body part                 | 2<br>(1 - 4)             | 1<br>(0 - 1)         | 0<br>(0 - 0)        | 0<br>(0 - 1)         | 0<br>(0 - 1)         | 1<br>(0 - 2)         |
| Other unintentional injuries                    | 19<br>(12 - 38)          | 7<br>(3 - 18)        | 0<br>(0 - 1)        | 2<br>(1 - 6)         | 1<br>(1 - 2)         | 10<br>(5 - 17)       |
| Self-harm and interpersonal violence            | 252<br>(161 - 443)       | 13<br>(5 - 34)       | 8<br>(4 - 16)       | 195<br>(110 - 366)   | 16<br>(9 - 24)       | 21<br>(12 - 31)      |
| Self-harm                                       | 74<br>(47 - 117)         | --                   | 0<br>(0 - 1)        | 56<br>(31 - 98)      | 5<br>(3 - 8)         | 13<br>(8 - 20)       |
| Interpersonal violence                          | 178<br>(104 - 359)       | 13<br>(5 - 34)       | 7<br>(3 - 15)       | 140<br>(70 - 302)    | 10<br>(5 - 17)       | 8<br>(2 - 15)        |
| Assault by firearm                              | 46<br>(18 - 133)         | 3<br>(1 - 8)         | 1<br>(0 - 3)        | 38<br>(13 - 117)     | 3<br>(1 - 6)         | 1<br>(0 - 2)         |
| Assault by sharp object                         | 50<br>(24 - 120)         | 3<br>(1 - 8)         | 1<br>(0 - 3)        | 40<br>(17 - 107)     | 2<br>(1 - 5)         | 3<br>(1 - 7)         |
| Assault by other means                          | 82<br>(44 - 160)         | 7<br>(3 - 18)        | 5<br>(2 - 9)        | 61<br>(27 - 137)     | 5<br>(2 - 9)         | 4<br>(1 - 8)         |

Web Table 31- Zimbabwe deaths with 95% UI by age, sex, and cause in 2013

| Cause                                                             | Both Sexes, All Ages           | Both Sexes, 0-4 Years       | Both Sexes, 5-14 Years   | Both Sexes, 15-49 Years     | Both Sexes, 50-69 Years     | Both Sexes, 70-80 Years     |
|-------------------------------------------------------------------|--------------------------------|-----------------------------|--------------------------|-----------------------------|-----------------------------|-----------------------------|
| All causes                                                        | 153,212<br>(137,613 - 169,319) | 30,278<br>(24,693 - 37,220) | 5,011<br>(4,318 - 6,147) | 61,179<br>(53,971 - 68,499) | 24,333<br>(19,899 - 29,182) | 32,411<br>(27,299 - 38,284) |
| Communicable, maternal, neonatal, and nutritional diseases        | 104,027<br>(95,854 - 113,421)  | 26,716<br>(22,043 - 32,865) | 4,355<br>(3,738 - 5,277) | 48,387<br>(43,538 - 53,442) | 14,295<br>(11,505 - 17,215) | 10,275<br>(8,670 - 12,204)  |
| HIV/AIDS and tuberculosis                                         | 54,101<br>(48,816 - 60,335)    | 2,032<br>(1,487 - 2,590)    | 3,277<br>(2,642 - 3,882) | 34,068<br>(30,615 - 37,650) | 11,210<br>(8,292 - 14,278)  | 3,513<br>(2,754 - 4,457)    |
| Tuberculosis                                                      | 8,905<br>(6,790 - 11,779)      | 483<br>(288 - 765)          | 114<br>(71 - 188)        | 4,232<br>(3,017 - 5,812)    | 1,915<br>(1,213 - 2,865)    | 2,162<br>(1,581 - 2,955)    |
| HIV/AIDS                                                          | 45,195<br>(40,323 - 51,392)    | 1,549<br>(1,036 - 2,031)    | 3,163<br>(2,524 - 3,779) | 29,837<br>(26,519 - 32,903) | 9,295<br>(6,275 - 12,504)   | 1,351<br>(876 - 1,993)      |
| HIV/AIDS resulting in mycobacterial infection                     | 2,896<br>(2,272 - 3,617)       | 94<br>(61 - 133)            | 178<br>(136 - 232)       | 1,896<br>(1,502 - 2,388)    | 631<br>(404 - 896)          | 96<br>(59 - 153)            |
| HIV/AIDS resulting in other diseases                              | 42,300<br>(37,660 - 47,973)    | 1,455<br>(973 - 1,903)      | 2,985<br>(2,374 - 3,553) | 27,941<br>(24,896 - 30,930) | 8,664<br>(5,861 - 11,696)   | 1,255<br>(813 - 1,838)      |
| Diarrhea, lower respiratory, and other common infectious diseases | 30,133<br>(25,411 - 35,909)    | 12,431<br>(9,394 - 16,058)  | 685<br>(464 - 1,102)     | 9,360<br>(6,943 - 11,799)   | 2,415<br>(1,586 - 3,460)    | 5,242<br>(3,963 - 6,790)    |
| Diarrheal diseases                                                | 10,789<br>(8,262 - 13,747)     | 7,126<br>(4,927 - 9,798)    | 231<br>(128 - 401)       | 1,709<br>(1,187 - 2,413)    | 550<br>(338 - 852)          | 1,173<br>(768 - 1,649)      |
| Intestinal infectious diseases                                    | 496<br>(255 - 869)             | 189<br>(90 - 336)           | 96<br>(43 - 191)         | 182<br>(86 - 346)           | 17<br>(7 - 35)              | 12<br>(6 - 24)              |
| Typhoid fever                                                     | 352<br>(172 - 627)             | 127<br>(56 - 237)           | 71<br>(31 - 139)         | 133<br>(60 - 257)           | 12<br>(5 - 26)              | 8<br>(4 - 16)               |
| Paratyphoid fever                                                 | 115<br>(56 - 209)              | 45<br>(18 - 86)             | 23<br>(10 - 48)          | 41<br>(17 - 87)             | 3<br>(1 - 7)                | 2<br>(1 - 5)                |
| Other intestinal infectious diseases                              | 29<br>(17 - 46)                | 17<br>(7 - 30)              | 2<br>(0 - 6)             | 7<br>(2 - 16)               | 1<br>(0 - 5)                | 2<br>(0 - 6)                |
| Lower respiratory infections                                      | 15,906<br>(12,819 - 19,445)    | 3,887<br>(2,653 - 5,538)    | 218<br>(135 - 357)       | 6,204<br>(4,434 - 8,132)    | 1,704<br>(1,095 - 2,490)    | 3,894<br>(2,830 - 5,178)    |
| Upper respiratory infections                                      | 28<br>(14 - 50)                | 6<br>(1 - 17)               | 1<br>(0 - 2)             | 13<br>(4 - 32)              | 3<br>(1 - 8)                | 5<br>(1 - 13)               |
| Otitis media                                                      | 14<br>(11 - 19)                | 3<br>(2 - 4)                | 1<br>(0 - 1)             | 2<br>(2 - 3)                | 3<br>(2 - 6)                | 6<br>(4 - 8)                |
| Meningitis                                                        | 2,180<br>(1,493 - 2,901)       | 698<br>(380 - 1,130)        | 98<br>(56 - 168)         | 1,147<br>(713 - 1,643)      | 114<br>(66 - 181)           | 123<br>(74 - 184)           |
| Pneumococcal meningitis                                           | 307<br>(194 - 440)             | 67<br>(34 - 115)            | 13<br>(7 - 25)           | 188<br>(106 - 295)          | 19<br>(9 - 33)              | 20<br>(11 - 33)             |
| H influenzae type B meningitis                                    | 450<br>(301 - 622)             | 251<br>(132 - 397)          | 25<br>(14 - 45)          | 151<br>(82 - 261)           | 11<br>(5 - 19)              | 12<br>(7 - 20)              |
| Meningococcal meningitis                                          | 752<br>(510 - 1,029)           | 221<br>(115 - 376)          | 37<br>(19 - 63)          | 409<br>(237 - 617)          | 39<br>(20 - 64)             | 46<br>(27 - 73)             |
| Other meningitis                                                  | 671<br>(434 - 943)             | 160<br>(85 - 278)           | 23<br>(11 - 40)          | 400<br>(221 - 631)          | 45<br>(24 - 73)             | 44<br>(23 - 69)             |
| Encephalitis                                                      | 198<br>(86 - 320)              | 56<br>(19 - 109)            | 11<br>(4 - 22)           | 87<br>(32 - 160)            | 20<br>(8 - 35)              | 23<br>(10 - 38)             |
| Diphtheria                                                        | 10<br>(1 - 48)                 | 7<br>(0 - 45)               | 1<br>(0 - 6)             | 2<br>(0 - 7)                | 0<br>(0 - 1)                | --                          |
| Whooping cough                                                    | 215<br>(0 - 1,005)             | 205<br>(0 - 963)            | 7<br>(0 - 33)            | 2<br>(0 - 10)               | 0<br>(0 - 1)                | --                          |
| Tetanus                                                           | 9<br>(5 - 23)                  | 1<br>(0 - 2)                | 0<br>(0 - 1)             | 4<br>(2 - 11)               | 2<br>(1 - 5)                | 2<br>(1 - 5)                |
| Measles                                                           | 274<br>(82 - 687)              | 249<br>(74 - 622)           | 20<br>(6 - 52)           | 5<br>(1 - 11)               | 0<br>(0 - 0)                | --                          |
| Varicella and herpes zoster                                       | 13<br>(5 - 29)                 | 4<br>(1 - 14)               | 1<br>(0 - 2)             | 3<br>(1 - 6)                | 1<br>(0 - 2)                | 4<br>(0 - 16)               |
| Neglected tropical diseases and malaria                           | 3,019<br>(2,232 - 4,167)       | 599<br>(291 - 1,078)        | 271<br>(155 - 477)       | 1,811<br>(1,234 - 2,681)    | 193<br>(122 - 301)          | 144<br>(96 - 221)           |
| Malaria                                                           | 2,345<br>(1,609 - 3,439)       | 459<br>(176 - 935)          | 233<br>(122 - 427)       | 1,411<br>(880 - 2,292)      | 147<br>(83 - 252)           | 96<br>(52 - 171)            |
| Leishmaniasis                                                     | 107<br>(75 - 146)              | 39<br>(21 - 63)             | 20<br>(10 - 35)          | 41<br>(24 - 66)             | 4<br>(2 - 7)                | 3<br>(2 - 5)                |
| Visceral leishmaniasis                                            | 107<br>(75 - 146)              | 39<br>(21 - 63)             | 20<br>(10 - 35)          | 41<br>(24 - 66)             | 4<br>(2 - 7)                | 3<br>(2 - 5)                |
| African trypanosomiasis                                           | 20<br>(9 - 37)                 | 1<br>(1 - 2)                | 1<br>(1 - 3)             | 15<br>(7 - 27)              | 2<br>(1 - 4)                | 1<br>(0 - 2)                |
| Schistosomiasis                                                   | 76<br>(52 - 105)               | 1<br>(0 - 1)                | 1<br>(0 - 1)             | 48<br>(29 - 71)             | 15<br>(8 - 24)              | 13<br>(7 - 19)              |
| Cysticercosis                                                     | 11<br>(8 - 14)                 | 0<br>(0 - 0)                | 0<br>(0 - 0)             | 9<br>(7 - 12)               | 1<br>(1 - 1)                | 0<br>(0 - 1)                |
| Cystic echinococcosis                                             | 7<br>(6 - 9)                   | 0<br>(0 - 1)                | 0<br>(0 - 1)             | 5<br>(4 - 7)                | 1<br>(0 - 1)                | 0<br>(0 - 1)                |
| Dengue                                                            | 1<br>(1 - 3)                   | 0<br>(0 - 1)                | 0<br>(0 - 1)             | 1<br>(0 - 2)                | 0<br>(0 - 0)                | 0<br>(0 - 0)                |
| Rabies                                                            | 14<br>(9 - 21)                 | 2<br>(1 - 4)                | 4<br>(2 - 9)             | 4<br>(3 - 6)                | 3<br>(2 - 5)                | 1<br>(0 - 1)                |
| Intestinal nematode infections                                    | 18<br>(7 - 34)                 | 12<br>(4 - 27)              | 1<br>(0 - 5)             | 3<br>(0 - 11)               | 0<br>(0 - 3)                | 1<br>(0 - 4)                |
| Ascariasis                                                        | 18<br>(7 - 34)                 | 12<br>(4 - 27)              | 1<br>(0 - 5)             | 3<br>(0 - 11)               | 0<br>(0 - 3)                | 1<br>(0 - 4)                |
| Other neglected tropical diseases                                 | 419<br>(269 - 590)             | 85<br>(42 - 160)            | 10<br>(5 - 19)           | 274<br>(162 - 424)          | 21<br>(13 - 35)             | 29<br>(18 - 45)             |

Web Table 31- Zimbabwe deaths with 95% UI by age, sex, and cause in 2013

| Cause                                                            | Both Sexes, All Ages        | Both Sexes, 0-4 Years     | Both Sexes, 5-14 Years | Both Sexes, 15-49 Years  | Both Sexes, 50-69 Years   | Both Sexes, 70-80 Years     |
|------------------------------------------------------------------|-----------------------------|---------------------------|------------------------|--------------------------|---------------------------|-----------------------------|
| Maternal disorders                                               | 2,306<br>(1,388 - 3,481)    | --                        | 3<br>(1 - 6)           | 2,303<br>(1,387 - 3,480) | --                        | --                          |
| Maternal hemorrhage                                              | 285<br>(162 - 451)          | --                        | 0<br>(0 - 1)           | 285<br>(162 - 451)       | --                        | --                          |
| Maternal sepsis and other maternal infections                    | 400<br>(232 - 650)          | --                        | 1<br>(0 - 1)           | 400<br>(231 - 650)       | --                        | --                          |
| Maternal hypertensive disorders                                  | 243<br>(125 - 395)          | --                        | 0<br>(0 - 1)           | 243<br>(125 - 395)       | --                        | --                          |
| Maternal obstructed labor                                        | 149<br>(83 - 253)           | --                        | 0<br>(0 - 0)           | 149<br>(83 - 253)        | --                        | --                          |
| Maternal abortive outcome                                        | 429<br>(241 - 697)          | --                        | 0<br>(0 - 1)           | 429<br>(241 - 697)       | --                        | --                          |
| Indirect maternal deaths                                         | 231<br>(122 - 392)          | --                        | 0<br>(0 - 1)           | 231<br>(122 - 392)       | --                        | --                          |
| Late maternal deaths                                             | 261<br>(109 - 489)          | --                        | 0<br>(0 - 1)           | 261<br>(109 - 489)       | --                        | --                          |
| Maternal deaths aggravated by HIV/AIDS                           | 127<br>(66 - 204)           | --                        | --                     | 127<br>(66 - 204)        | --                        | --                          |
| Other maternal disorders                                         | 175<br>(90 - 295)           | --                        | 0<br>(0 - 0)           | 175<br>(90 - 295)        | --                        | --                          |
| Neonatal disorders                                               | 9,112<br>(7,724 - 10,871)   | 9,112<br>(7,724 - 10,871) | --                     | --                       | --                        | --                          |
| Neonatal preterm birth complications                             | 3,777<br>(2,421 - 5,435)    | 3,777<br>(2,421 - 5,435)  | --                     | --                       | --                        | --                          |
| Neonatal encephalopathy due to birth asphyxia and trauma         | 3,180<br>(1,670 - 4,692)    | 3,180<br>(1,670 - 4,692)  | --                     | --                       | --                        | --                          |
| Neonatal sepsis and other neonatal infections                    | 1,538<br>(693 - 2,674)      | 1,538<br>(693 - 2,674)    | --                     | --                       | --                        | --                          |
| Hemolytic disease and other neonatal jaundice                    | 63<br>(20 - 172)            | 63<br>(20 - 172)          | --                     | --                       | --                        | --                          |
| Other neonatal disorders                                         | 554<br>(197 - 1,760)        | 554<br>(197 - 1,760)      | --                     | --                       | --                        | --                          |
| Nutritional deficiencies                                         | 4,222<br>(3,165 - 5,591)    | 1,818<br>(1,124 - 2,781)  | 74<br>(44 - 123)       | 627<br>(436 - 841)       | 420<br>(255 - 617)        | 1,283<br>(809 - 1,758)      |
| Protein-energy malnutrition                                      | 2,976<br>(2,122 - 4,178)    | 1,677<br>(1,035 - 2,609)  | 54<br>(31 - 92)        | 183<br>(95 - 304)        | 224<br>(122 - 360)        | 837<br>(502 - 1,189)        |
| Iodine deficiency                                                | 3<br>(1 - 10)               | 1<br>(0 - 5)              | 0<br>(0 - 1)           | 1<br>(0 - 6)             | 0<br>(0 - 1)              | 1<br>(0 - 4)                |
| Iron-deficiency anemia                                           | 1,085<br>(617 - 1,548)      | 124<br>(35 - 270)         | 19<br>(7 - 38)         | 401<br>(241 - 574)       | 170<br>(82 - 277)         | 371<br>(180 - 613)          |
| Other nutritional deficiencies                                   | 158<br>(80 - 276)           | 15<br>(5 - 36)            | 2<br>(1 - 4)           | 42<br>(20 - 77)          | 25<br>(11 - 49)           | 74<br>(29 - 145)            |
| Other communicable, maternal, neonatal, and nutritional diseases | 1,135<br>(743 - 1,652)      | 724<br>(389 - 1,205)      | 45<br>(25 - 78)        | 218<br>(132 - 317)       | 56<br>(33 - 89)           | 92<br>(53 - 158)            |
| Sexually transmitted diseases excluding HIV                      | 769<br>(413 - 1,282)        | 655<br>(321 - 1,130)      | 32<br>(15 - 60)        | 64<br>(14 - 126)         | 9<br>(3 - 21)             | 8<br>(3 - 19)               |
| Syphilis                                                         | 727<br>(381 - 1,220)        | 655<br>(321 - 1,130)      | 32<br>(14 - 60)        | 28<br>(7 - 54)           | 6<br>(2 - 13)             | 6<br>(2 - 14)               |
| Chlamydial infection                                             | 11<br>(2 - 22)              | --                        | 0<br>(0 - 0)           | 9<br>(2 - 20)            | 1<br>(0 - 2)              | 0<br>(0 - 1)                |
| Gonococcal infection                                             | 17<br>(5 - 31)              | --                        | 0<br>(0 - 0)           | 14<br>(3 - 27)           | 2<br>(1 - 4)              | 1<br>(0 - 2)                |
| Other sexually transmitted diseases                              | 14<br>(4 - 27)              | --                        | 0<br>(0 - 0)           | 13<br>(3 - 24)           | 1<br>(0 - 2)              | 0<br>(0 - 1)                |
| Hepatitis                                                        | 100<br>(59 - 145)           | 14<br>(7 - 27)            | 5<br>(3 - 9)           | 56<br>(26 - 87)          | 15<br>(8 - 25)            | 11<br>(6 - 17)              |
| Acute hepatitis A                                                | 14<br>(5 - 29)              | 7<br>(2 - 15)             | 2<br>(1 - 4)           | 5<br>(1 - 12)            | 0<br>(0 - 1)              | 0<br>(0 - 0)                |
| Acute hepatitis B                                                | 51<br>(28 - 81)             | 7<br>(3 - 15)             | 2<br>(1 - 4)           | 21<br>(8 - 41)           | 12<br>(6 - 21)            | 9<br>(5 - 15)               |
| Acute hepatitis C                                                | 3<br>(1 - 8)                | --                        | 0<br>(0 - 0)           | 2<br>(0 - 5)             | 1<br>(0 - 2)              | 0<br>(0 - 1)                |
| Acute hepatitis E                                                | 32<br>(16 - 57)             | 0<br>(0 - 1)              | 1<br>(0 - 2)           | 28<br>(13 - 50)          | 2<br>(1 - 5)              | 1<br>(0 - 3)                |
| Other infectious diseases                                        | 266<br>(183 - 389)          | 55<br>(27 - 111)          | 8<br>(4 - 16)          | 98<br>(55 - 162)         | 33<br>(17 - 59)           | 73<br>(37 - 137)            |
| Non-communicable diseases                                        | 38,905<br>(31,207 - 47,542) | 2,677<br>(1,919 - 3,646)  | 366<br>(256 - 563)     | 7,427<br>(5,682 - 9,277) | 8,815<br>(5,879 - 12,274) | 19,619<br>(15,905 - 24,029) |
| Neoplasms                                                        | 6,915<br>(5,266 - 8,900)    | 77<br>(49 - 120)          | 53<br>(36 - 85)        | 1,016<br>(769 - 1,245)   | 2,449<br>(1,600 - 3,504)  | 3,320<br>(2,557 - 4,211)    |
| Esophageal cancer                                                | 883<br>(620 - 1,292)        | --                        | --                     | 46<br>(32 - 65)          | 344<br>(211 - 537)        | 494<br>(351 - 709)          |
| Stomach cancer                                                   | 322<br>(238 - 421)          | --                        | --                     | 28<br>(21 - 34)          | 112<br>(74 - 160)         | 183<br>(132 - 243)          |
| Liver cancer                                                     | 499<br>(381 - 647)          | --                        | 2<br>(1 - 3)           | 112<br>(70 - 157)        | 166<br>(110 - 241)        | 219<br>(154 - 295)          |
| Liver cancer due to hepatitis B                                  | 142<br>(91 - 202)           | --                        | 1<br>(0 - 1)           | 49<br>(27 - 73)          | 46<br>(24 - 77)           | 45<br>(27 - 68)             |
| Liver cancer due to hepatitis C                                  | 205<br>(134 - 285)          | --                        | 0<br>(0 - 0)           | 32<br>(17 - 49)          | 71<br>(39 - 113)          | 102<br>(65 - 148)           |

Web Table 31- Zimbabwe deaths with 95% UI by age, sex, and cause in 2013

| Cause                                | Both Sexes, All Ages        | Both Sexes, 0-4 Years | Both Sexes, 5-14 Years | Both Sexes, 15-49 Years  | Both Sexes, 50-69 Years  | Both Sexes, 70-80 Years   |
|--------------------------------------|-----------------------------|-----------------------|------------------------|--------------------------|--------------------------|---------------------------|
| Liver cancer due to alcohol use      | 87<br>(56 - 130)            | --                    | --                     | 11<br>(5 - 18)           | 29<br>(17 - 47)          | 48<br>(29 - 71)           |
| Liver cancer due to other causes     | 66<br>(43 - 95)             | --                    | 1<br>(0 - 1)           | 21<br>(13 - 32)          | 20<br>(13 - 34)          | 24<br>(13 - 40)           |
| Larynx cancer                        | 54<br>(34 - 102)            | --                    | --                     | 4<br>(3 - 9)             | 25<br>(14 - 49)          | 25<br>(16 - 45)           |
| Tracheal, bronchus and lung cancer   | 233<br>(174 - 305)          | --                    | --                     | 21<br>(15 - 32)          | 93<br>(62 - 131)         | 119<br>(90 - 155)         |
| Breast cancer                        | 356<br>(247 - 505)          | --                    | --                     | 82<br>(49 - 113)         | 132<br>(75 - 211)        | 142<br>(97 - 200)         |
| Cervical cancer                      | 1,562<br>(848 - 2,401)      | --                    | --                     | 129<br>(86 - 192)        | 801<br>(392 - 1,323)     | 633<br>(280 - 986)        |
| Uterine cancer                       | 61<br>(36 - 103)            | --                    | --                     | 4<br>(2 - 7)             | 19<br>(9 - 37)           | 38<br>(22 - 64)           |
| Prostate cancer                      | 464<br>(281 - 858)          | --                    | --                     | 2<br>(1 - 4)             | 81<br>(43 - 157)         | 380<br>(228 - 697)        |
| Colon and rectum cancer              | 493<br>(368 - 650)          | --                    | --                     | 68<br>(53 - 86)          | 135<br>(88 - 196)        | 290<br>(214 - 394)        |
| Lip and oral cavity cancer           | 54<br>(38 - 80)             | --                    | --                     | 12<br>(8 - 17)           | 19<br>(12 - 29)          | 24<br>(16 - 36)           |
| Nasopharynx cancer                   | 17<br>(12 - 25)             | --                    | 1<br>(0 - 1)           | 6<br>(4 - 10)            | 5<br>(3 - 9)             | 5<br>(3 - 7)              |
| Other pharynx cancer                 | 26<br>(18 - 37)             | --                    | --                     | 4<br>(3 - 6)             | 15<br>(9 - 24)           | 7<br>(5 - 10)             |
| Gallbladder and biliary tract cancer | 45<br>(29 - 75)             | --                    | --                     | 6<br>(5 - 9)             | 15<br>(8 - 26)           | 24<br>(15 - 42)           |
| Pancreatic cancer                    | 150<br>(111 - 201)          | --                    | --                     | 11<br>(8 - 14)           | 57<br>(37 - 81)          | 83<br>(61 - 110)          |
| Malignant skin melanoma              | 35<br>(24 - 55)             | --                    | --                     | 5<br>(3 - 9)             | 10<br>(6 - 17)           | 19<br>(13 - 30)           |
| Non-melanoma skin cancer             | 49<br>(17 - 117)            | --                    | --                     | 41<br>(14 - 100)         | 4<br>(1 - 9)             | 4<br>(1 - 11)             |
| Ovarian cancer                       | 133<br>(88 - 190)           | --                    | --                     | 35<br>(20 - 56)          | 52<br>(28 - 88)          | 46<br>(28 - 71)           |
| Testicular cancer                    | 11<br>(7 - 16)              | --                    | --                     | 7<br>(4 - 11)            | 2<br>(1 - 4)             | 2<br>(1 - 4)              |
| Kidney cancer                        | 45<br>(34 - 59)             | 5<br>(2 - 10)         | 2<br>(1 - 3)           | 7<br>(5 - 10)            | 18<br>(12 - 27)          | 13<br>(9 - 18)            |
| Bladder cancer                       | 236<br>(163 - 383)          | --                    | --                     | 22<br>(14 - 35)          | 81<br>(47 - 144)         | 133<br>(93 - 205)         |
| Brain and nervous system cancer      | 55<br>(40 - 90)             | 3<br>(2 - 6)          | 5<br>(3 - 8)           | 17<br>(12 - 29)          | 14<br>(8 - 24)           | 17<br>(11 - 29)           |
| Thyroid cancer                       | 39<br>(25 - 66)             | --                    | 0<br>(0 - 0)           | 3<br>(2 - 4)             | 18<br>(9 - 36)           | 18<br>(12 - 27)           |
| Mesothelioma                         | 6<br>(4 - 8)                | --                    | --                     | 2<br>(1 - 3)             | 2<br>(1 - 3)             | 2<br>(1 - 3)              |
| Hodgkin lymphoma                     | 20<br>(12 - 36)             | 1<br>(1 - 3)          | 1<br>(1 - 3)           | 9<br>(5 - 16)            | 3<br>(2 - 6)             | 5<br>(3 - 9)              |
| Non-Hodgkin lymphoma                 | 235<br>(171 - 328)          | 9<br>(4 - 16)         | 8<br>(4 - 13)          | 117<br>(78 - 161)        | 58<br>(37 - 94)          | 43<br>(30 - 63)           |
| Multiple myeloma                     | 63<br>(38 - 103)            | --                    | --                     | 6<br>(4 - 8)             | 26<br>(13 - 46)          | 32<br>(19 - 51)           |
| Leukemia                             | 92<br>(72 - 118)            | 5<br>(3 - 9)          | 8<br>(5 - 14)          | 39<br>(28 - 51)          | 18<br>(12 - 27)          | 22<br>(16 - 30)           |
| Other neoplasms                      | 676<br>(416 - 924)          | 53<br>(30 - 91)       | 27<br>(16 - 48)        | 170<br>(98 - 255)        | 126<br>(71 - 195)        | 300<br>(173 - 442)        |
| Cardiovascular diseases              | 15,501<br>(12,027 - 20,489) | 589<br>(336 - 904)    | 122<br>(81 - 198)      | 2,861<br>(2,119 - 3,883) | 3,225<br>(2,096 - 4,847) | 8,703<br>(6,735 - 11,508) |
| Rheumatic heart disease              | 481<br>(335 - 821)          | 7<br>(3 - 15)         | 21<br>(10 - 49)        | 235<br>(139 - 469)       | 48<br>(26 - 90)          | 171<br>(112 - 247)        |
| Ischemic heart disease               | 3,728<br>(2,681 - 5,914)    | 6<br>(3 - 13)         | 2<br>(1 - 4)           | 546<br>(389 - 750)       | 663<br>(414 - 1,145)     | 2,511<br>(1,727 - 4,150)  |
| Cerebrovascular disease              | 7,017<br>(5,361 - 9,000)    | 291<br>(102 - 496)    | 58<br>(26 - 101)       | 1,114<br>(771 - 1,452)   | 1,522<br>(982 - 2,261)   | 4,033<br>(3,047 - 5,249)  |
| Ischemic stroke                      | 3,358<br>(2,445 - 4,476)    | 2<br>(0 - 8)          | 1<br>(0 - 3)           | 136<br>(86 - 224)        | 583<br>(354 - 908)       | 2,635<br>(1,959 - 3,494)  |
| Hemorrhagic stroke                   | 3,659<br>(2,589 - 4,731)    | 289<br>(99 - 495)     | 57<br>(25 - 99)        | 977<br>(664 - 1,251)     | 939<br>(594 - 1,424)     | 1,398<br>(930 - 1,903)    |
| Hypertensive heart disease           | 1,472<br>(920 - 2,389)      | 2<br>(1 - 5)          | 2<br>(1 - 4)           | 226<br>(134 - 387)       | 306<br>(160 - 544)       | 937<br>(570 - 1,552)      |
| Cardiomyopathy and myocarditis       | 1,195<br>(866 - 1,718)      | 154<br>(85 - 266)     | 21<br>(11 - 41)        | 444<br>(275 - 790)       | 214<br>(130 - 320)       | 362<br>(234 - 540)        |
| Atrial fibrillation and flutter      | 0<br>(0 - 1)                | --                    | --                     | 0<br>(0 - 0)             | 0<br>(0 - 0)             | 0<br>(0 - 0)              |
| Aortic aneurysm                      | 151<br>(99 - 234)           | --                    | --                     | 17<br>(10 - 27)          | 46<br>(26 - 76)          | 89<br>(59 - 137)          |
| Peripheral vascular disease          | 2<br>(1 - 2)                | --                    | --                     | 0<br>(0 - 0)             | 1<br>(0 - 1)             | 1<br>(1 - 1)              |
| Endocarditis                         | 98<br>(65 - 135)            | 20<br>(9 - 34)        | 3<br>(2 - 6)           | 47<br>(29 - 71)          | 8<br>(4 - 12)            | 21<br>(13 - 32)           |

Web Table 31- Zimbabwe deaths with 95% UI by age, sex, and cause in 2013

| Cause                                               | Both Sexes, All Ages     | Both Sexes, 0-4 Years | Both Sexes, 5-14 Years | Both Sexes, 15-49 Years | Both Sexes, 50-69 Years | Both Sexes, 70-80 Years  |
|-----------------------------------------------------|--------------------------|-----------------------|------------------------|-------------------------|-------------------------|--------------------------|
| Other cardiovascular and circulatory diseases       | 1,356<br>(951 - 1,976)   | 109<br>(59 - 194)     | 15<br>(8 - 30)         | 233<br>(145 - 444)      | 419<br>(242 - 691)      | 580<br>(390 - 836)       |
| Chronic respiratory diseases                        | 2,929<br>(2,229 - 4,282) | 103<br>(62 - 158)     | 17<br>(11 - 26)        | 437<br>(325 - 618)      | 650<br>(417 - 1,043)    | 1,722<br>(1,292 - 2,597) |
| Chronic obstructive pulmonary disease               | 1,262<br>(900 - 2,054)   | 18<br>(9 - 38)        | 2<br>(1 - 4)           | 70<br>(46 - 121)        | 242<br>(146 - 421)      | 929<br>(670 - 1,497)     |
| Pneumoconiosis                                      | 223<br>(137 - 358)       | 1<br>(0 - 2)          | 0<br>(0 - 0)           | 59<br>(37 - 92)         | 51<br>(26 - 94)         | 112<br>(66 - 185)        |
| Silicosis                                           | 32<br>(19 - 52)          | 0<br>(0 - 0)          | 0<br>(0 - 0)           | 5<br>(3 - 9)            | 6<br>(3 - 11)           | 20<br>(12 - 35)          |
| Asbestosis                                          | 46<br>(27 - 75)          | 0<br>(0 - 0)          | 0<br>(0 - 0)           | 12<br>(7 - 21)          | 10<br>(5 - 18)          | 23<br>(13 - 39)          |
| Coal workers pneumoconiosis                         | 47<br>(28 - 77)          | 0<br>(0 - 0)          | 0<br>(0 - 0)           | 12<br>(7 - 20)          | 12<br>(6 - 22)          | 22<br>(13 - 38)          |
| Other pneumoconiosis                                | 99<br>(63 - 155)         | 0<br>(0 - 1)          | 0<br>(0 - 0)           | 29<br>(18 - 44)         | 24<br>(12 - 42)         | 46<br>(27 - 79)          |
| Asthma                                              | 1,129<br>(852 - 1,635)   | 49<br>(24 - 85)       | 12<br>(8 - 19)         | 262<br>(193 - 367)      | 291<br>(184 - 478)      | 515<br>(364 - 770)       |
| Interstitial lung disease and pulmonary sarcoidosis | 147<br>(92 - 249)        | 1<br>(1 - 3)          | 0<br>(0 - 0)           | 10<br>(5 - 19)          | 41<br>(21 - 77)         | 95<br>(58 - 168)         |
| Other chronic respiratory diseases                  | 168<br>(124 - 241)       | 34<br>(20 - 56)       | 2<br>(1 - 3)           | 36<br>(24 - 59)         | 24<br>(15 - 40)         | 72<br>(46 - 109)         |
| Cirrhosis                                           | 906<br>(690 - 1,144)     | 12<br>(5 - 22)        | 4<br>(3 - 6)           | 270<br>(203 - 351)      | 281<br>(187 - 389)      | 340<br>(255 - 444)       |
| Cirrhosis due to hepatitis B                        | 156<br>(97 - 232)        | 0<br>(0 - 1)          | 0<br>(0 - 1)           | 47<br>(25 - 70)         | 50<br>(28 - 80)         | 58<br>(33 - 91)          |
| Cirrhosis due to hepatitis C                        | 164<br>(109 - 230)       | 1<br>(0 - 2)          | 0<br>(0 - 1)           | 37<br>(22 - 56)         | 50<br>(27 - 79)         | 76<br>(47 - 112)         |
| Cirrhosis due to alcohol use                        | 448<br>(326 - 599)       | --                    | --                     | 115<br>(77 - 161)       | 151<br>(96 - 217)       | 182<br>(127 - 250)       |
| Cirrhosis due to other causes                       | 138<br>(92 - 187)        | 11<br>(5 - 19)        | 3<br>(2 - 5)           | 71<br>(46 - 104)        | 30<br>(16 - 46)         | 23<br>(14 - 34)          |
| Digestive diseases                                  | 2,296<br>(1,794 - 2,854) | 96<br>(51 - 157)      | 27<br>(18 - 47)        | 557<br>(409 - 734)      | 450<br>(303 - 647)      | 1,166<br>(852 - 1,519)   |
| Peptic ulcer disease                                | 316<br>(206 - 463)       | 4<br>(1 - 8)          | 1<br>(1 - 2)           | 67<br>(40 - 109)        | 66<br>(37 - 108)        | 178<br>(106 - 268)       |
| Gastritis and duodenitis                            | 60<br>(33 - 93)          | 1<br>(1 - 3)          | 0<br>(0 - 1)           | 7<br>(4 - 13)           | 11<br>(5 - 18)          | 40<br>(22 - 66)          |
| Appendicitis                                        | 56<br>(32 - 98)          | 3<br>(1 - 6)          | 4<br>(2 - 8)           | 16<br>(7 - 33)          | 8<br>(4 - 16)           | 25<br>(14 - 43)          |
| Paralytic ileus and intestinal obstruction          | 934<br>(572 - 1,260)     | 31<br>(13 - 60)       | 14<br>(8 - 24)         | 176<br>(97 - 256)       | 189<br>(113 - 281)      | 525<br>(306 - 759)       |
| Inguinal, femoral, and abdominal hernia             | 51<br>(31 - 94)          | 1<br>(0 - 2)          | 0<br>(0 - 1)           | 7<br>(4 - 15)           | 13<br>(7 - 25)          | 30<br>(17 - 58)          |
| Inflammatory bowel disease                          | 433<br>(311 - 652)       | 46<br>(24 - 83)       | 5<br>(3 - 10)          | 210<br>(142 - 296)      | 64<br>(38 - 105)        | 108<br>(64 - 198)        |
| Vascular intestinal disorders                       | 2<br>(1 - 5)             | 0<br>(0 - 0)          | 0<br>(0 - 0)           | 1<br>(0 - 2)            | 0<br>(0 - 1)            | 1<br>(0 - 3)             |
| Gallbladder and biliary diseases                    | 45<br>(27 - 70)          | 0<br>(0 - 1)          | 0<br>(0 - 0)           | 2<br>(1 - 4)            | 8<br>(4 - 15)           | 34<br>(19 - 53)          |
| Pancreatitis                                        | 71<br>(43 - 103)         | 0<br>(0 - 1)          | 0<br>(0 - 1)           | 22<br>(11 - 38)         | 18<br>(10 - 30)         | 30<br>(17 - 47)          |
| Other digestive diseases                            | 329<br>(192 - 465)       | 9<br>(3 - 18)         | 2<br>(1 - 4)           | 49<br>(30 - 74)         | 73<br>(39 - 112)        | 196<br>(100 - 295)       |
| Neurological disorders                              | 1,635<br>(1,296 - 2,007) | 41<br>(21 - 76)       | 22<br>(12 - 43)        | 347<br>(225 - 496)      | 137<br>(89 - 202)       | 1,087<br>(848 - 1,370)   |
| Alzheimer disease and other dementias               | 1,027<br>(789 - 1,314)   | --                    | --                     | 0<br>(0 - 0)            | 56<br>(35 - 80)         | 971<br>(747 - 1,248)     |
| Parkinson disease                                   | 17<br>(9 - 50)           | --                    | --                     | 1<br>(1 - 3)            | 2<br>(1 - 6)            | 13<br>(6 - 41)           |
| Epilepsy                                            | 569<br>(403 - 764)       | 39<br>(19 - 74)       | 22<br>(12 - 42)        | 340<br>(217 - 488)      | 75<br>(45 - 122)        | 93<br>(61 - 135)         |
| Multiple sclerosis                                  | 2<br>(1 - 6)             | --                    | --                     | 1<br>(0 - 1)            | 1<br>(0 - 3)            | 0<br>(0 - 2)             |
| Other neurological disorders                        | 20<br>(15 - 29)          | 2<br>(1 - 3)          | 0<br>(0 - 1)           | 5<br>(4 - 9)            | 3<br>(2 - 5)            | 10<br>(7 - 13)           |
| Mental and substance use disorders                  | 529<br>(378 - 702)       | 21<br>(11 - 33)       | 0<br>(0 - 0)           | 382<br>(256 - 533)      | 55<br>(35 - 85)         | 71<br>(50 - 94)          |
| Schizophrenia                                       | 40<br>(26 - 66)          | --                    | --                     | 16<br>(10 - 28)         | 9<br>(5 - 14)           | 15<br>(9 - 26)           |
| Alcohol use disorders                               | 103<br>(70 - 176)        | --                    | --                     | 59<br>(39 - 106)        | 30<br>(17 - 50)         | 15<br>(8 - 23)           |
| Drug use disorders                                  | 385<br>(264 - 530)       | 21<br>(11 - 33)       | --                     | 307<br>(195 - 444)      | 16<br>(10 - 24)         | 41<br>(25 - 58)          |
| Opioid use disorders                                | 42<br>(28 - 59)          | 2<br>(1 - 4)          | --                     | 34<br>(21 - 49)         | 1<br>(1 - 2)            | 4<br>(3 - 7)             |
| Cocaine use disorders                               | 1<br>(1 - 2)             | 0<br>(0 - 0)          | --                     | 1<br>(1 - 2)            | 0<br>(0 - 0)            | 0<br>(0 - 0)             |
| Amphetamine use disorders                           | 1<br>(1 - 1)             | 0<br>(0 - 0)          | --                     | 1<br>(0 - 1)            | 0<br>(0 - 0)            | 0<br>(0 - 0)             |

Web Table 31- Zimbabwe deaths with 95% UI by age, sex, and cause in 2013

| Cause                                               | Both Sexes, All Ages     | Both Sexes, 0-4 Years  | Both Sexes, 5-14 Years | Both Sexes, 15-49 Years  | Both Sexes, 50-69 Years | Both Sexes, 70-80 Years  |
|-----------------------------------------------------|--------------------------|------------------------|------------------------|--------------------------|-------------------------|--------------------------|
| Other drug use disorders                            | 341<br>(233 - 466)       | 19<br>(10 - 29)        | --                     | 271<br>(173 - 391)       | 15<br>(9 - 22)          | 36<br>(22 - 52)          |
| Eating disorders                                    | 0<br>(0 - 1)             | --                     | 0<br>(0 - 0)           | 0<br>(0 - 1)             | --                      | --                       |
| Anorexia nervosa                                    | 0<br>(0 - 1)             | --                     | 0<br>(0 - 0)           | 0<br>(0 - 1)             | --                      | --                       |
| Diabetes, urogenital, blood, and endocrine diseases | 6,230<br>(4,872 - 7,777) | 347<br>(205 - 633)     | 73<br>(44 - 149)       | 1,382<br>(1,025 - 1,810) | 1,486<br>(995 - 2,066)  | 2,943<br>(2,274 - 3,734) |
| Diabetes mellitus                                   | 2,616<br>(1,960 - 3,423) | 16<br>(9 - 27)         | 6<br>(4 - 11)          | 297<br>(225 - 386)       | 857<br>(554 - 1,214)    | 1,440<br>(1,077 - 1,902) |
| Acute glomerulonephritis                            | 2<br>(1 - 2)             | 0<br>(0 - 0)           | 0<br>(0 - 0)           | 1<br>(0 - 1)             | 0<br>(0 - 0)            | 0<br>(0 - 0)             |
| Chronic kidney disease                              | 2,059<br>(1,603 - 2,565) | 55<br>(34 - 83)        | 19<br>(13 - 31)        | 578<br>(412 - 812)       | 422<br>(273 - 599)      | 985<br>(695 - 1,298)     |
| Chronic kidney disease due to diabetes mellitus     | 7<br>(4 - 11)            | 1<br>(1 - 2)           | 0<br>(0 - 1)           | 3<br>(1 - 5)             | 1<br>(0 - 2)            | 2<br>(1 - 3)             |
| Chronic kidney disease due to hypertension          | 583<br>(339 - 1,029)     | 4<br>(1 - 8)           | 2<br>(1 - 4)           | 246<br>(144 - 423)       | 147<br>(75 - 271)       | 185<br>(81 - 353)        |
| Chronic kidney disease due to glomerulonephritis    | 801<br>(394 - 1,263)     | 27<br>(13 - 45)        | 9<br>(5 - 15)          | 173<br>(88 - 266)        | 143<br>(53 - 262)       | 450<br>(204 - 738)       |
| Chronic kidney disease due to other causes          | 667<br>(450 - 992)       | 23<br>(11 - 42)        | 8<br>(4 - 15)          | 156<br>(88 - 283)        | 132<br>(69 - 224)       | 348<br>(208 - 549)       |
| Urinary diseases and male infertility               | 532<br>(376 - 696)       | 28<br>(15 - 47)        | 4<br>(2 - 6)           | 123<br>(86 - 172)        | 98<br>(62 - 142)        | 280<br>(184 - 387)       |
| Interstitial nephritis and urinary tract infections | 135<br>(83 - 197)        | 9<br>(4 - 16)          | 1<br>(1 - 3)           | 40<br>(24 - 63)          | 23<br>(13 - 36)         | 62<br>(34 - 102)         |
| Urolithiasis                                        | 5<br>(3 - 9)             | --                     | 0<br>(0 - 0)           | 2<br>(1 - 4)             | 1<br>(0 - 2)            | 2<br>(1 - 3)             |
| Other urinary diseases                              | 392<br>(271 - 516)       | 19<br>(10 - 34)        | 2<br>(1 - 3)           | 81<br>(56 - 114)         | 74<br>(46 - 112)        | 216<br>(141 - 304)       |
| Gynecological diseases                              | 4<br>(2 - 8)             | --                     | --                     | 4<br>(2 - 7)             | 0<br>(0 - 0)            | 0<br>(0 - 0)             |
| Uterine fibroids                                    | 1<br>(0 - 1)             | --                     | --                     | 0<br>(0 - 1)             | 0<br>(0 - 0)            | 0<br>(0 - 0)             |
| Polycystic ovarian syndrome                         | 0<br>(0 - 1)             | --                     | --                     | 0<br>(0 - 1)             | 0<br>(0 - 0)            | --                       |
| Endometriosis                                       | 1<br>(0 - 1)             | --                     | --                     | 1<br>(0 - 1)             | 0<br>(0 - 0)            | --                       |
| Genital prolapse                                    | 1<br>(0 - 1)             | --                     | --                     | 1<br>(0 - 1)             | 0<br>(0 - 0)            | 0<br>(0 - 0)             |
| Other gynecological diseases                        | 2<br>(1 - 4)             | --                     | --                     | 2<br>(1 - 4)             | 0<br>(0 - 0)            | 0<br>(0 - 0)             |
| Hemoglobinopathies and hemolytic anemias            | 554<br>(248 - 1,196)     | 97<br>(42 - 243)       | 25<br>(11 - 68)        | 259<br>(123 - 516)       | 53<br>(19 - 138)        | 120<br>(38 - 312)        |
| Thalassemias                                        | 30<br>(14 - 72)          | 21<br>(9 - 50)         | 4<br>(2 - 10)          | 5<br>(2 - 10)            | 0<br>(0 - 0)            | 0<br>(0 - 0)             |
| Sickle cell disorders                               | 237<br>(114 - 483)       | 38<br>(17 - 93)        | 14<br>(6 - 37)         | 168<br>(79 - 333)        | 15<br>(6 - 38)          | 1<br>(0 - 4)             |
| G6PD deficiency                                     | 18<br>(9 - 38)           | 5<br>(2 - 11)          | 1<br>(1 - 4)           | 10<br>(5 - 20)           | 1<br>(0 - 3)            | 1<br>(0 - 2)             |
| Other hemoglobinopathies and hemolytic anemias      | 270<br>(113 - 629)       | 33<br>(14 - 86)        | 6<br>(3 - 17)          | 77<br>(38 - 154)         | 36<br>(13 - 93)         | 118<br>(38 - 306)        |
| Endocrine, metabolic, blood, and immune disorders   | 464<br>(313 - 909)       | 151<br>(80 - 358)      | 19<br>(7 - 60)         | 119<br>(72 - 201)        | 57<br>(33 - 111)        | 118<br>(73 - 217)        |
| Musculoskeletal disorders                           | 106<br>(78 - 142)        | --                     | 2<br>(2 - 4)           | 32<br>(22 - 50)          | 21<br>(14 - 32)         | 50<br>(34 - 72)          |
| Rheumatoid arthritis                                | 52<br>(36 - 75)          | --                     | 1<br>(0 - 2)           | 11<br>(7 - 19)           | 11<br>(6 - 18)          | 30<br>(19 - 44)          |
| Other musculoskeletal disorders                     | 54<br>(36 - 76)          | --                     | 2<br>(1 - 3)           | 21<br>(14 - 33)          | 10<br>(6 - 17)          | 21<br>(11 - 32)          |
| Other non-communicable diseases                     | 1,859<br>(1,371 - 2,657) | 1,391<br>(955 - 2,105) | 46<br>(26 - 80)        | 142<br>(97 - 200)        | 61<br>(39 - 90)         | 218<br>(158 - 298)       |
| Congenital anomalies                                | 1,487<br>(1,037 - 2,236) | 1,337<br>(906 - 2,041) | 43<br>(24 - 74)        | 54<br>(35 - 85)          | 11<br>(7 - 17)          | 42<br>(29 - 65)          |
| Neural tube defects                                 | 149<br>(55 - 355)        | 148<br>(54 - 351)      | 0<br>(0 - 1)           | 1<br>(0 - 3)             | 0<br>(0 - 0)            | 0<br>(0 - 0)             |
| Congenital heart anomalies                          | 580<br>(378 - 889)       | 495<br>(300 - 790)     | 28<br>(15 - 51)        | 27<br>(18 - 41)          | 4<br>(3 - 7)            | 26<br>(16 - 41)          |
| Cleft lip and cleft palate                          | 7<br>(2 - 17)            | 7<br>(2 - 17)          | --                     | --                       | --                      | --                       |
| Down syndrome                                       | 117<br>(64 - 207)        | 104<br>(54 - 190)      | 5<br>(2 - 10)          | 6<br>(4 - 10)            | 1<br>(1 - 2)            | 1<br>(0 - 1)             |
| Chromosomal unbalanced rearrangements               | 125<br>(71 - 203)        | 117<br>(65 - 195)      | 1<br>(0 - 2)           | 5<br>(2 - 11)            | 0<br>(0 - 1)            | 1<br>(0 - 3)             |
| Other congenital anomalies                          | 510<br>(259 - 791)       | 466<br>(234 - 735)     | 9<br>(3 - 17)          | 15<br>(6 - 26)           | 5<br>(2 - 8)            | 15<br>(7 - 24)           |
| Skin and subcutaneous diseases                      | 342<br>(258 - 452)       | 25<br>(14 - 41)        | 3<br>(2 - 6)           | 89<br>(57 - 127)         | 51<br>(32 - 77)         | 175<br>(121 - 246)       |
| Cellulitis                                          | 118<br>(84 - 164)        | 9<br>(4 - 17)          | 1<br>(1 - 2)           | 31<br>(19 - 50)          | 18<br>(11 - 29)         | 58<br>(35 - 90)          |



Web Table 31- Zimbabwe deaths with 95% UI by age, sex, and cause in 2013

| Cause                                           | Both Sexes, All Ages       | Both Sexes, 0-4 Years | Both Sexes, 5-14 Years | Both Sexes, 15-49 Years  | Both Sexes, 50-69 Years | Both Sexes, 70-80 Years  |
|-------------------------------------------------|----------------------------|-----------------------|------------------------|--------------------------|-------------------------|--------------------------|
| Pyoderma                                        | 131<br>(96 - 173)          | 13<br>(7 - 22)        | 2<br>(1 - 3)           | 33<br>(22 - 48)          | 22<br>(13 - 33)         | 63<br>(39 - 93)          |
| Decubitus ulcer                                 | 42<br>(26 - 97)            | 0<br>(0 - 1)          | 0<br>(0 - 0)           | 7<br>(4 - 16)            | 5<br>(2 - 11)           | 30<br>(17 - 68)          |
| Other skin and subcutaneous diseases            | 51<br>(29 - 71)            | 3<br>(1 - 5)          | 0<br>(0 - 1)           | 17<br>(10 - 27)          | 6<br>(3 - 10)           | 24<br>(9 - 39)           |
| Sudden infant death syndrome                    | 29<br>(8 - 72)             | 29<br>(8 - 72)        | --                     | --                       | --                      | --                       |
| Injuries                                        | 10,280<br>(7,964 - 13,219) | 884<br>(538 - 1,365)  | 290<br>(175 - 499)     | 5,366<br>(3,672 - 7,955) | 1,223<br>(829 - 1,716)  | 2,518<br>(1,797 - 3,245) |
| Transport injuries                              | 3,063<br>(2,359 - 3,936)   | 284<br>(173 - 454)    | 119<br>(77 - 202)      | 1,713<br>(1,177 - 2,512) | 444<br>(293 - 626)      | 504<br>(321 - 677)       |
| Road injuries                                   | 2,706<br>(2,053 - 3,585)   | 252<br>(153 - 400)    | 106<br>(68 - 180)      | 1,529<br>(1,051 - 2,285) | 388<br>(256 - 558)      | 432<br>(294 - 572)       |
| Pedestrian road injuries                        | 640<br>(461 - 844)         | 90<br>(51 - 146)      | 35<br>(20 - 60)        | 244<br>(154 - 367)       | 109<br>(66 - 167)       | 162<br>(100 - 238)       |
| Cyclist road injuries                           | 287<br>(212 - 393)         | 14<br>(6 - 27)        | 9<br>(5 - 17)          | 138<br>(90 - 221)        | 59<br>(35 - 88)         | 66<br>(40 - 98)          |
| Motorcyclist road injuries                      | 199<br>(117 - 346)         | 8<br>(4 - 16)         | 5<br>(2 - 10)          | 147<br>(83 - 268)        | 22<br>(10 - 41)         | 17<br>(8 - 32)           |
| Motor vehicle road injuries                     | 1,392<br>(1,044 - 1,843)   | 129<br>(76 - 209)     | 49<br>(30 - 87)        | 879<br>(599 - 1,304)     | 172<br>(111 - 247)      | 163<br>(104 - 233)       |
| Other road injuries                             | 189<br>(107 - 427)         | 10<br>(4 - 24)        | 8<br>(3 - 20)          | 121<br>(60 - 291)        | 27<br>(13 - 61)         | 24<br>(12 - 54)          |
| Other transport injuries                        | 357<br>(206 - 482)         | 32<br>(12 - 62)       | 13<br>(5 - 23)         | 184<br>(119 - 268)       | 56<br>(24 - 92)         | 72<br>(23 - 115)         |
| Unintentional injuries                          | 3,732<br>(2,910 - 4,894)   | 551<br>(301 - 922)    | 145<br>(71 - 264)      | 1,101<br>(739 - 1,561)   | 471<br>(316 - 685)      | 1,464<br>(986 - 1,970)   |
| Falls                                           | 1,141<br>(573 - 1,642)     | 33<br>(18 - 58)       | 8<br>(4 - 16)          | 187<br>(97 - 297)        | 133<br>(64 - 215)       | 780<br>(368 - 1,191)     |
| Drowning                                        | 678<br>(439 - 1,066)       | 158<br>(74 - 289)     | 73<br>(28 - 153)       | 283<br>(159 - 478)       | 75<br>(45 - 124)        | 89<br>(60 - 127)         |
| Fire, heat, and hot substances                  | 537<br>(309 - 914)         | 119<br>(43 - 250)     | 23<br>(8 - 50)         | 165<br>(77 - 312)        | 54<br>(26 - 99)         | 177<br>(112 - 283)       |
| Poisonings                                      | 209<br>(142 - 396)         | 59<br>(25 - 155)      | 5<br>(3 - 11)          | 67<br>(39 - 136)         | 24<br>(13 - 45)         | 54<br>(35 - 79)          |
| Exposure to mechanical forces                   | 256<br>(192 - 430)         | 43<br>(23 - 81)       | 12<br>(7 - 21)         | 148<br>(102 - 255)       | 34<br>(21 - 53)         | 19<br>(14 - 27)          |
| Unintentional firearm injuries                  | 65<br>(44 - 88)            | 8<br>(4 - 13)         | 1<br>(1 - 3)           | 37<br>(22 - 58)          | 13<br>(7 - 21)          | 6<br>(4 - 10)            |
| Unintentional suffocation                       | 38<br>(23 - 73)            | 12<br>(4 - 40)        | 1<br>(1 - 2)           | 19<br>(10 - 31)          | 2<br>(1 - 4)            | 4<br>(2 - 6)             |
| Other exposure to mechanical forces             | 153<br>(106 - 308)         | 23<br>(10 - 45)       | 9<br>(5 - 17)          | 92<br>(57 - 198)         | 19<br>(11 - 35)         | 9<br>(6 - 15)            |
| Adverse effects of medical treatment            | 354<br>(253 - 482)         | 55<br>(30 - 91)       | 8<br>(4 - 14)          | 114<br>(67 - 181)        | 55<br>(34 - 86)         | 123<br>(80 - 185)        |
| Animal contact                                  | 83<br>(58 - 136)           | 14<br>(7 - 26)        | 6<br>(3 - 13)          | 29<br>(18 - 50)          | 14<br>(8 - 23)          | 20<br>(12 - 32)          |
| Venomous animal contact                         | 42<br>(27 - 78)            | 10<br>(5 - 20)        | 5<br>(2 - 10)          | 8<br>(5 - 15)            | 7<br>(4 - 13)           | 11<br>(6 - 22)           |
| Non-venomous animal contact                     | 41<br>(27 - 63)            | 3<br>(1 - 7)          | 2<br>(1 - 4)           | 21<br>(12 - 37)          | 7<br>(3 - 11)           | 8<br>(4 - 14)            |
| Foreign body                                    | 140<br>(82 - 267)          | 53<br>(24 - 108)      | 5<br>(2 - 11)          | 27<br>(14 - 52)          | 20<br>(10 - 42)         | 35<br>(22 - 63)          |
| Pulmonary aspiration and foreign body in airway | 132<br>(74 - 262)          | 52<br>(23 - 107)      | 5<br>(2 - 11)          | 24<br>(12 - 49)          | 19<br>(9 - 41)          | 33<br>(20 - 61)          |
| Foreign body in other body part                 | 8<br>(4 - 11)              | 1<br>(0 - 2)          | 0<br>(0 - 0)           | 3<br>(2 - 4)             | 1<br>(0 - 2)            | 2<br>(1 - 3)             |
| Other unintentional injuries                    | 334<br>(241 - 427)         | 17<br>(10 - 26)       | 4<br>(3 - 7)           | 81<br>(58 - 110)         | 65<br>(41 - 97)         | 167<br>(94 - 230)        |
| Self-harm and interpersonal violence            | 3,416<br>(2,372 - 5,457)   | 50<br>(26 - 95)       | 24<br>(13 - 48)        | 2,502<br>(1,603 - 4,343) | 295<br>(187 - 462)      | 545<br>(380 - 757)       |
| Self-harm                                       | 1,750<br>(1,210 - 3,044)   | --                    | 7<br>(3 - 18)          | 959<br>(555 - 2,078)     | 254<br>(159 - 401)      | 530<br>(364 - 742)       |
| Interpersonal violence                          | 1,666<br>(1,050 - 2,797)   | 50<br>(26 - 95)       | 16<br>(8 - 35)         | 1,543<br>(946 - 2,609)   | 42<br>(21 - 84)         | 16<br>(9 - 29)           |
| Assault by firearm                              | 381<br>(203 - 703)         | 6<br>(2 - 12)         | 2<br>(1 - 3)           | 353<br>(182 - 657)       | 16<br>(7 - 31)          | 4<br>(2 - 7)             |
| Assault by sharp object                         | 645<br>(382 - 1,133)       | 10<br>(5 - 21)        | 4<br>(2 - 10)          | 616<br>(358 - 1,090)     | 10<br>(5 - 21)          | 4<br>(2 - 7)             |
| Assault by other means                          | 641<br>(354 - 1,241)       | 33<br>(15 - 69)       | 11<br>(5 - 24)         | 574<br>(303 - 1,125)     | 15<br>(7 - 39)          | 8<br>(4 - 16)            |
| Forces of nature, war, and legal intervention   | 69<br>(37 - 147)           | 0<br>(0 - 0)          | 2<br>(1 - 6)           | 50<br>(27 - 106)         | 12<br>(7 - 28)          | 4<br>(2 - 8)             |
| Exposure to forces of nature                    | 69<br>(37 - 147)           | 0<br>(0 - 0)          | 2<br>(1 - 6)           | 50<br>(27 - 106)         | 12<br>(7 - 28)          | 4<br>(2 - 8)             |

Web Table 31- Zimbabwe deaths with 95% UI by age, sex, and cause in 2013

| Cause                                                             | Males, All Ages             | Males, 0-4 Years            | Males, 5-14 Years        | Males, 15-49 Years          | Males, 50-69 Years          | Males, 70-80 Years          |
|-------------------------------------------------------------------|-----------------------------|-----------------------------|--------------------------|-----------------------------|-----------------------------|-----------------------------|
| All causes                                                        | 78,373<br>(69,961 - 87,330) | 16,505<br>(13,521 - 19,806) | 2,638<br>(2,284 - 3,240) | 30,768<br>(27,064 - 34,592) | 13,236<br>(10,646 - 16,224) | 15,226<br>(12,970 - 17,985) |
| Communicable, maternal, neonatal, and nutritional diseases        | 53,374<br>(48,063 - 58,875) | 14,509<br>(11,880 - 17,417) | 2,235<br>(1,914 - 2,699) | 22,792<br>(20,266 - 25,661) | 8,263<br>(6,443 - 10,245)   | 5,576<br>(4,522 - 6,763)    |
| HIV/AIDS and tuberculosis                                         | 28,946<br>(24,998 - 33,513) | 1,035<br>(743 - 1,357)      | 1,633<br>(1,318 - 1,937) | 17,390<br>(14,970 - 20,222) | 6,521<br>(4,622 - 8,451)    | 2,367<br>(1,743 - 3,127)    |
| Tuberculosis                                                      | 5,625<br>(3,921 - 8,124)    | 261<br>(131 - 471)          | 58<br>(31 - 108)         | 2,475<br>(1,637 - 3,698)    | 1,258<br>(710 - 2,102)      | 1,574<br>(1,062 - 2,285)    |
| HIV/AIDS                                                          | 23,321<br>(19,787 - 27,956) | 774<br>(518 - 1,020)        | 1,575<br>(1,254 - 1,884) | 14,915<br>(12,447 - 17,911) | 5,264<br>(3,252 - 7,200)    | 793<br>(469 - 1,284)        |
| HIV/AIDS resulting in mycobacterial infection                     | 1,700<br>(1,309 - 2,203)    | 53<br>(34 - 75)             | 100<br>(76 - 130)        | 1,081<br>(830 - 1,422)      | 402<br>(247 - 594)          | 64<br>(37 - 105)            |
| HIV/AIDS resulting in other diseases                              | 21,621<br>(18,257 - 25,866) | 721<br>(482 - 945)          | 1,475<br>(1,171 - 1,753) | 13,834<br>(11,526 - 16,671) | 4,861<br>(3,011 - 6,642)    | 730<br>(435 - 1,170)        |
| Diarrhea, lower respiratory, and other common infectious diseases | 15,053<br>(12,242 - 18,339) | 6,698<br>(4,904 - 8,886)    | 382<br>(252 - 612)       | 4,065<br>(2,909 - 5,358)    | 1,374<br>(843 - 2,112)      | 2,535<br>(1,807 - 3,376)    |
| Diarrheal diseases                                                | 5,733<br>(4,003 - 7,691)    | 3,938<br>(2,425 - 5,728)    | 138<br>(65 - 273)        | 799<br>(519 - 1,151)        | 297<br>(155 - 514)          | 561<br>(329 - 901)          |
| Intestinal infectious diseases                                    | 249<br>(122 - 449)          | 87<br>(37 - 162)            | 52<br>(21 - 103)         | 97<br>(37 - 196)            | 8<br>(3 - 17)               | 6<br>(2 - 12)               |
| Typhoid fever                                                     | 172<br>(76 - 322)           | 56<br>(21 - 112)            | 38<br>(15 - 76)          | 69<br>(24 - 142)            | 5<br>(2 - 12)               | 4<br>(1 - 9)                |
| Paratyphoid fever                                                 | 61<br>(27 - 118)            | 21<br>(8 - 45)              | 13<br>(5 - 27)           | 24<br>(7 - 56)              | 2<br>(1 - 4)                | 1<br>(0 - 3)                |
| Other intestinal infectious diseases                              | 17<br>(8 - 30)              | 10<br>(3 - 20)              | 1<br>(0 - 4)             | 4<br>(1 - 11)               | 1<br>(0 - 4)                | 1<br>(0 - 5)                |
| Lower respiratory infections                                      | 7,625<br>(5,781 - 9,604)    | 2,061<br>(1,263 - 3,109)    | 114<br>(60 - 197)        | 2,574<br>(1,680 - 3,621)    | 989<br>(591 - 1,545)        | 1,886<br>(1,273 - 2,645)    |
| Upper respiratory infections                                      | 15<br>(5 - 30)              | 3<br>(0 - 11)               | 0<br>(0 - 1)             | 7<br>(1 - 20)               | 2<br>(0 - 5)                | 2<br>(0 - 8)                |
| Otitis media                                                      | 3<br>(3 - 5)                | 2<br>(1 - 2)                | 0<br>(0 - 0)             | 1<br>(1 - 2)                | 0<br>(0 - 0)                | 0<br>(0 - 0)                |
| Meningitis                                                        | 1,083<br>(693 - 1,554)      | 365<br>(148 - 715)          | 57<br>(28 - 108)         | 533<br>(295 - 862)          | 65<br>(34 - 113)            | 63<br>(32 - 109)            |
| Pneumococcal meningitis                                           | 150<br>(89 - 236)           | 34<br>(12 - 72)             | 8<br>(3 - 16)            | 86<br>(42 - 148)            | 11<br>(5 - 22)              | 11<br>(5 - 21)              |
| H influenzae type B meningitis                                    | 229<br>(131 - 370)          | 133<br>(53 - 256)           | 15<br>(6 - 29)           | 68<br>(34 - 135)            | 6<br>(3 - 13)               | 7<br>(3 - 13)               |
| Meningococcal meningitis                                          | 363<br>(218 - 541)          | 109<br>(38 - 236)           | 21<br>(10 - 40)          | 188<br>(87 - 322)           | 21<br>(10 - 42)             | 24<br>(11 - 44)             |
| Other meningitis                                                  | 341<br>(209 - 504)          | 89<br>(36 - 182)            | 13<br>(6 - 27)           | 191<br>(97 - 327)           | 26<br>(11 - 47)             | 22<br>(9 - 44)              |
| Encephalitis                                                      | 99<br>(46 - 158)            | 25<br>(8 - 58)              | 6<br>(2 - 12)            | 45<br>(18 - 80)             | 11<br>(4 - 19)              | 12<br>(5 - 20)              |
| Diphtheria                                                        | 5<br>(0 - 26)               | 3<br>(0 - 25)               | 1<br>(0 - 4)             | 1<br>(0 - 5)                | 0<br>(0 - 0)                | --<br>(0 - 0)               |
| Whooping cough                                                    | 95<br>(0 - 455)             | 91<br>(0 - 437)             | 3<br>(0 - 15)            | 1<br>(0 - 5)                | 0<br>(0 - 0)                | --<br>(0 - 0)               |
| Tetanus                                                           | 7<br>(4 - 18)               | 0<br>(0 - 1)                | 0<br>(0 - 1)             | 3<br>(2 - 8)                | 2<br>(1 - 5)                | 2<br>(1 - 5)                |
| Measles                                                           | 133<br>(39 - 341)           | 121<br>(35 - 303)           | 10<br>(3 - 26)           | 2<br>(1 - 4)                | 0<br>(0 - 0)                | --<br>(0 - 0)               |
| Varicella and herpes zoster                                       | 6<br>(2 - 17)               | 2<br>(0 - 9)                | 0<br>(0 - 1)             | 1<br>(0 - 5)                | 0<br>(0 - 1)                | 2<br>(0 - 9)                |
| Neglected tropical diseases and malaria                           | 1,563<br>(1,092 - 2,197)    | 288<br>(124 - 560)          | 153<br>(79 - 284)        | 938<br>(601 - 1,460)        | 110<br>(62 - 188)           | 75<br>(44 - 130)            |
| Malaria                                                           | 1,272<br>(858 - 1,885)      | 224<br>(81 - 486)           | 134<br>(62 - 259)        | 778<br>(457 - 1,290)        | 85<br>(40 - 162)            | 51<br>(23 - 106)            |
| Leishmaniasis                                                     | 48<br>(29 - 72)             | 17<br>(7 - 31)              | 9<br>(3 - 17)            | 19<br>(8 - 32)              | 1<br>(1 - 3)                | 2<br>(1 - 3)                |
| Visceral leishmaniasis                                            | 48<br>(29 - 72)             | 17<br>(7 - 31)              | 9<br>(3 - 17)            | 19<br>(8 - 32)              | 1<br>(1 - 3)                | 2<br>(1 - 3)                |
| African trypanosomiasis                                           | 10<br>(5 - 18)              | 1<br>(0 - 1)                | 1<br>(0 - 2)             | 8<br>(3 - 14)               | 1<br>(0 - 2)                | 0<br>(0 - 1)                |
| Schistosomiasis                                                   | 42<br>(27 - 63)             | 0<br>(0 - 1)                | 0<br>(0 - 1)             | 26<br>(14 - 43)             | 9<br>(4 - 16)               | 7<br>(3 - 11)               |
| Cysticercosis                                                     | 5<br>(3 - 6)                | 0<br>(0 - 0)                | 0<br>(0 - 0)             | 4<br>(3 - 5)                | 0<br>(0 - 1)                | 0<br>(0 - 0)                |
| Cystic echinococcosis                                             | 3<br>(2 - 4)                | 0<br>(0 - 0)                | 0<br>(0 - 0)             | 2<br>(2 - 3)                | 0<br>(0 - 0)                | 0<br>(0 - 0)                |
| Dengue                                                            | 1<br>(0 - 2)                | 0<br>(0 - 0)                | 0<br>(0 - 0)             | 0<br>(0 - 1)                | 0<br>(0 - 0)                | 0<br>(0 - 0)                |
| Rabies                                                            | 8<br>(6 - 15)               | 1<br>(0 - 2)                | 3<br>(1 - 7)             | 3<br>(2 - 4)                | 2<br>(1 - 4)                | 0<br>(0 - 0)                |
| Intestinal nematode infections                                    | 8<br>(2 - 20)               | 6<br>(1 - 16)               | 1<br>(0 - 4)             | 1<br>(0 - 7)                | 0<br>(0 - 2)                | 0<br>(0 - 2)                |
| Ascariasis                                                        | 8<br>(2 - 20)               | 6<br>(1 - 16)               | 1<br>(0 - 4)             | 1<br>(0 - 7)                | 0<br>(0 - 2)                | 0<br>(0 - 2)                |
| Other neglected tropical diseases                                 | 166<br>(99 - 261)           | 39<br>(15 - 86)             | 4<br>(2 - 9)             | 96<br>(47 - 171)            | 11<br>(5 - 19)              | 14<br>(7 - 25)              |

Web Table 31- Zimbabwe deaths with 95% UI by age, sex, and cause in 2013

| Cause                                                            | Males, All Ages             | Males, 0-4 Years         | Males, 5-14 Years  | Males, 15-49 Years       | Males, 50-69 Years       | Males, 70-84 Years        |
|------------------------------------------------------------------|-----------------------------|--------------------------|--------------------|--------------------------|--------------------------|---------------------------|
| Maternal disorders                                               | --                          | --                       | --                 | --                       | --                       | --                        |
| Maternal hemorrhage                                              | --                          | --                       | --                 | --                       | --                       | --                        |
| Maternal sepsis and other maternal infections                    | --                          | --                       | --                 | --                       | --                       | --                        |
| Maternal hypertensive disorders                                  | --                          | --                       | --                 | --                       | --                       | --                        |
| Maternal obstructed labor                                        | --                          | --                       | --                 | --                       | --                       | --                        |
| Maternal abortive outcome                                        | --                          | --                       | --                 | --                       | --                       | --                        |
| Indirect maternal deaths                                         | --                          | --                       | --                 | --                       | --                       | --                        |
| Late maternal deaths                                             | --                          | --                       | --                 | --                       | --                       | --                        |
| Maternal deaths aggravated by HIV/AIDS                           | --                          | --                       | --                 | --                       | --                       | --                        |
| Other maternal disorders                                         | --                          | --                       | --                 | --                       | --                       | --                        |
| Neonatal disorders                                               | 5,169<br>(4,416 - 6,143)    | 5,169<br>(4,416 - 6,143) | --                 | --                       | --                       | --                        |
| Neonatal preterm birth complications                             | 2,101<br>(1,117 - 3,259)    | 2,101<br>(1,117 - 3,259) | --                 | --                       | --                       | --                        |
| Neonatal encephalopathy due to birth asphyxia and trauma         | 1,841<br>(841 - 2,930)      | 1,841<br>(841 - 2,930)   | --                 | --                       | --                       | --                        |
| Neonatal sepsis and other neonatal infections                    | 867<br>(276 - 1,730)        | 867<br>(276 - 1,730)     | --                 | --                       | --                       | --                        |
| Hemolytic disease and other neonatal jaundice                    | 46<br>(9 - 144)             | 46<br>(9 - 144)          | --                 | --                       | --                       | --                        |
| Other neonatal disorders                                         | 313<br>(86 - 1,101)         | 313<br>(86 - 1,101)      | --                 | --                       | --                       | --                        |
| Nutritional deficiencies                                         | 2,062<br>(1,295 - 2,966)    | 959<br>(497 - 1,611)     | 44<br>(24 - 80)    | 282<br>(151 - 404)       | 224<br>(110 - 379)       | 552<br>(275 - 834)        |
| Protein-energy malnutrition                                      | 1,563<br>(935 - 2,373)      | 901<br>(465 - 1,543)     | 34<br>(16 - 64)    | 102<br>(38 - 182)        | 133<br>(59 - 241)        | 394<br>(185 - 623)        |
| Iodine deficiency                                                | 1<br>(0 - 4)                | 0<br>(0 - 2)             | 0<br>(0 - 0)       | 0<br>(0 - 3)             | 0<br>(0 - 1)             | 0<br>(0 - 1)              |
| Iron-deficiency anemia                                           | 435<br>(162 - 755)          | 51<br>(10 - 140)         | 10<br>(3 - 25)     | 162<br>(67 - 260)        | 80<br>(25 - 170)         | 132<br>(39 - 272)         |
| Other nutritional deficiencies                                   | 62<br>(24 - 128)            | 7<br>(2 - 22)            | 1<br>(0 - 2)       | 17<br>(6 - 36)           | 11<br>(3 - 24)           | 26<br>(8 - 58)            |
| Other communicable, maternal, neonatal, and nutritional diseases | 581<br>(379 - 826)          | 360<br>(185 - 600)       | 24<br>(14 - 41)    | 118<br>(63 - 178)        | 34<br>(17 - 60)          | 46<br>(22 - 89)           |
| Sexually transmitted diseases excluding HIV                      | 361<br>(185 - 611)          | 322<br>(154 - 560)       | 15<br>(7 - 28)     | 17<br>(4 - 37)           | 4<br>(1 - 11)            | 1<br>(0 - 3)              |
| Syphilis                                                         | 351<br>(175 - 604)          | 322<br>(154 - 560)       | 15<br>(7 - 28)     | 9<br>(2 - 20)            | 3<br>(1 - 8)             | 1<br>(0 - 3)              |
| Chlamydial infection                                             | --                          | --                       | --                 | --                       | --                       | --                        |
| Gonococcal infection                                             | 5<br>(1 - 11)               | --                       | 0<br>(0 - 0)       | 4<br>(1 - 9)             | 1<br>(0 - 2)             | 0<br>(0 - 0)              |
| Other sexually transmitted diseases                              | 4<br>(1 - 8)                | --                       | 0<br>(0 - 0)       | 3<br>(1 - 8)             | 0<br>(0 - 1)             | 0<br>(0 - 0)              |
| Hepatitis                                                        | 80<br>(33 - 129)            | 11<br>(4 - 24)           | 4<br>(2 - 8)       | 45<br>(15 - 78)          | 12<br>(5 - 22)           | 8<br>(4 - 14)             |
| Acute hepatitis A                                                | 11<br>(3 - 25)              | 5<br>(1 - 13)            | 2<br>(1 - 4)       | 4<br>(1 - 11)            | 0<br>(0 - 0)             | 0<br>(0 - 0)              |
| Acute hepatitis B                                                | 43<br>(17 - 73)             | 6<br>(2 - 13)            | 2<br>(1 - 4)       | 19<br>(6 - 38)           | 10<br>(4 - 19)           | 7<br>(3 - 13)             |
| Acute hepatitis C                                                | 3<br>(0 - 7)                | --                       | 0<br>(0 - 0)       | 2<br>(0 - 5)             | 0<br>(0 - 1)             | 0<br>(0 - 1)              |
| Acute hepatitis E                                                | 24<br>(8 - 47)              | 0<br>(0 - 1)             | 1<br>(0 - 2)       | 21<br>(6 - 43)           | 2<br>(0 - 4)             | 1<br>(0 - 2)              |
| Other infectious diseases                                        | 141<br>(87 - 224)           | 27<br>(10 - 63)          | 4<br>(2 - 9)       | 55<br>(29 - 101)         | 18<br>(7 - 37)           | 37<br>(15 - 80)           |
| Non-communicable diseases                                        | 18,247<br>(14,484 - 22,525) | 1,488<br>(997 - 2,118)   | 215<br>(148 - 341) | 4,102<br>(3,045 - 5,195) | 4,122<br>(2,650 - 5,879) | 8,320<br>(6,676 - 10,271) |
| Neoplasms                                                        | 3,009<br>(2,270 - 4,009)    | 42<br>(24 - 70)          | 34<br>(22 - 56)    | 457<br>(330 - 583)       | 913<br>(587 - 1,332)     | 1,564<br>(1,165 - 2,133)  |
| Esophageal cancer                                                | 710<br>(471 - 1,114)        | --                       | --                 | 34<br>(22 - 54)          | 278<br>(158 - 467)       | 397<br>(262 - 608)        |
| Stomach cancer                                                   | 174<br>(124 - 236)          | --                       | --                 | 18<br>(13 - 25)          | 61<br>(38 - 91)          | 94<br>(66 - 131)          |
| Liver cancer                                                     | 302<br>(216 - 406)          | --                       | 1<br>(1 - 2)       | 83<br>(50 - 119)         | 105<br>(63 - 164)        | 113<br>(75 - 167)         |
| Liver cancer due to hepatitis B                                  | 97<br>(54 - 150)            | --                       | 1<br>(0 - 1)       | 39<br>(21 - 61)          | 31<br>(11 - 56)          | 27<br>(13 - 46)           |
| Liver cancer due to hepatitis C                                  | 116<br>(63 - 182)           | --                       | 0<br>(0 - 0)       | 22<br>(11 - 37)          | 45<br>(21 - 79)          | 49<br>(26 - 83)           |

Web Table 31- Zimbabwe deaths with 95% UI by age, sex, and cause in 2013

| Cause                                | Males, All Ages          | Males, 0-4 Years   | Males, 5-14 Years | Males, 15-49 Years       | Males, 50-69 Years     | Males, 70-80 Years       |
|--------------------------------------|--------------------------|--------------------|-------------------|--------------------------|------------------------|--------------------------|
| Liver cancer due to alcohol use      | 60<br>(34 - 97)          | --                 | --                | 9<br>(4 - 16)            | 21<br>(11 - 39)        | 29<br>(15 - 50)          |
| Liver cancer due to other causes     | 29<br>(15 - 48)          | --                 | 0<br>(0 - 1)      | 12<br>(6 - 22)           | 9<br>(3 - 18)          | 8<br>(3 - 14)            |
| Larynx cancer                        | 46<br>(29 - 96)          | --                 | --                | 4<br>(2 - 8)             | 22<br>(12 - 46)        | 21<br>(13 - 42)          |
| Tracheal, bronchus and lung cancer   | 152<br>(111 - 205)       | --                 | --                | 14<br>(9 - 20)           | 63<br>(40 - 92)        | 76<br>(55 - 103)         |
| Breast cancer                        | 17<br>(11 - 25)          | --                 | --                | 4<br>(2 - 7)             | 5<br>(2 - 9)           | 8<br>(4 - 14)            |
| Cervical cancer                      | --                       | --                 | --                | --                       | --                     | --                       |
| Uterine cancer                       | --                       | --                 | --                | --                       | --                     | --                       |
| Prostate cancer                      | 464<br>(281 - 858)       | --                 | --                | 2<br>(1 - 4)             | 81<br>(43 - 157)       | 380<br>(228 - 697)       |
| Colon and rectum cancer              | 175<br>(130 - 227)       | --                 | --                | 36<br>(26 - 48)          | 48<br>(30 - 70)        | 91<br>(66 - 121)         |
| Lip and oral cavity cancer           | 26<br>(17 - 41)          | --                 | --                | 7<br>(5 - 11)            | 10<br>(6 - 17)         | 9<br>(5 - 14)            |
| Nasopharynx cancer                   | 11<br>(8 - 16)           | --                 | 0<br>(0 - 1)      | 4<br>(3 - 6)             | 3<br>(2 - 6)           | 4<br>(2 - 6)             |
| Other pharynx cancer                 | 23<br>(15 - 35)          | --                 | --                | 4<br>(2 - 6)             | 13<br>(8 - 23)         | 6<br>(4 - 9)             |
| Gallbladder and biliary tract cancer | 14<br>(9 - 26)           | --                 | --                | 2<br>(2 - 4)             | 5<br>(2 - 8)           | 7<br>(4 - 14)            |
| Pancreatic cancer                    | 63<br>(45 - 86)          | --                 | --                | 7<br>(5 - 9)             | 25<br>(16 - 38)        | 31<br>(22 - 44)          |
| Malignant skin melanoma              | 18<br>(10 - 37)          | --                 | --                | 3<br>(2 - 6)             | 5<br>(2 - 11)          | 10<br>(5 - 21)           |
| Non-melanoma skin cancer             | 9<br>(5 - 15)            | --                 | --                | 7<br>(4 - 11)            | 1<br>(1 - 3)           | 1<br>(0 - 2)             |
| Ovarian cancer                       | --                       | --                 | --                | --                       | --                     | --                       |
| Testicular cancer                    | 11<br>(7 - 16)           | --                 | --                | 7<br>(4 - 11)            | 2<br>(1 - 4)           | 2<br>(1 - 4)             |
| Kidney cancer                        | 26<br>(19 - 36)          | 3<br>(1 - 7)       | 1<br>(1 - 2)      | 5<br>(3 - 7)             | 10<br>(6 - 16)         | 7<br>(5 - 11)            |
| Bladder cancer                       | 137<br>(93 - 251)        | --                 | --                | 8<br>(5 - 15)            | 46<br>(26 - 95)        | 82<br>(54 - 137)         |
| Brain and nervous system cancer      | 31<br>(21 - 61)          | 2<br>(1 - 5)       | 3<br>(1 - 6)      | 11<br>(6 - 20)           | 6<br>(4 - 13)          | 9<br>(5 - 20)            |
| Thyroid cancer                       | 9<br>(6 - 15)            | --                 | 0<br>(0 - 0)      | 1<br>(1 - 2)             | 4<br>(2 - 8)           | 4<br>(2 - 6)             |
| Mesothelioma                         | 4<br>(2 - 5)             | --                 | --                | 1<br>(1 - 2)             | 1<br>(1 - 2)           | 1<br>(1 - 2)             |
| Hodgkin lymphoma                     | 11<br>(6 - 23)           | 1<br>(0 - 2)       | 1<br>(0 - 3)      | 5<br>(3 - 10)            | 2<br>(1 - 5)           | 2<br>(1 - 6)             |
| Non-Hodgkin lymphoma                 | 132<br>(90 - 196)        | 6<br>(2 - 12)      | 5<br>(2 - 9)      | 70<br>(44 - 104)         | 31<br>(17 - 56)        | 20<br>(13 - 32)          |
| Multiple myeloma                     | 26<br>(16 - 46)          | --                 | --                | 4<br>(2 - 6)             | 9<br>(5 - 16)          | 14<br>(8 - 24)           |
| Leukemia                             | 53<br>(39 - 68)          | 3<br>(1 - 6)       | 5<br>(3 - 9)      | 23<br>(16 - 33)          | 10<br>(6 - 15)         | 12<br>(8 - 17)           |
| Other neoplasms                      | 364<br>(222 - 510)       | 28<br>(15 - 52)    | 18<br>(10 - 33)   | 92<br>(55 - 137)         | 64<br>(34 - 105)       | 162<br>(92 - 249)        |
| Cardiovascular diseases              | 6,158<br>(4,816 - 7,765) | 273<br>(158 - 432) | 61<br>(38 - 107)  | 1,493<br>(1,075 - 1,970) | 1,423<br>(916 - 2,046) | 2,908<br>(2,277 - 3,654) |
| Rheumatic heart disease              | 209<br>(135 - 369)       | 6<br>(2 - 13)      | 13<br>(7 - 29)    | 119<br>(70 - 216)        | 23<br>(12 - 45)        | 48<br>(30 - 83)          |
| Ischemic heart disease               | 1,697<br>(1,227 - 2,304) | 3<br>(1 - 8)       | 2<br>(1 - 4)      | 434<br>(287 - 599)       | 412<br>(245 - 639)     | 846<br>(595 - 1,229)     |
| Cerebrovascular disease              | 2,736<br>(1,799 - 3,745) | 91<br>(45 - 159)   | 25<br>(13 - 44)   | 560<br>(359 - 793)       | 655<br>(379 - 998)     | 1,405<br>(889 - 1,946)   |
| Ischemic stroke                      | 1,231<br>(790 - 1,714)   | 0<br>(0 - 1)       | 1<br>(0 - 2)      | 80<br>(44 - 132)         | 270<br>(145 - 445)     | 879<br>(566 - 1,227)     |
| Hemorrhagic stroke                   | 1,505<br>(920 - 2,070)   | 90<br>(45 - 159)   | 25<br>(12 - 43)   | 480<br>(302 - 694)       | 385<br>(207 - 595)     | 526<br>(273 - 756)       |
| Hypertensive heart disease           | 449<br>(261 - 749)       | 1<br>(1 - 4)       | 1<br>(0 - 2)      | 105<br>(60 - 171)        | 112<br>(53 - 210)      | 229<br>(122 - 397)       |
| Cardiomyopathy and myocarditis       | 462<br>(321 - 661)       | 97<br>(47 - 171)   | 11<br>(5 - 20)    | 106<br>(66 - 159)        | 109<br>(61 - 176)      | 140<br>(81 - 235)        |
| Atrial fibrillation and flutter      | 0<br>(0 - 0)             | --                 | --                | 0<br>(0 - 0)             | 0<br>(0 - 0)           | 0<br>(0 - 0)             |
| Aortic aneurysm                      | 74<br>(48 - 112)         | --                 | --                | 7<br>(5 - 12)            | 25<br>(14 - 45)        | 41<br>(26 - 64)          |
| Peripheral vascular disease          | 1<br>(1 - 1)             | --                 | --                | 0<br>(0 - 0)             | 0<br>(0 - 0)           | 0<br>(0 - 1)             |
| Endocarditis                         | 55<br>(28 - 84)          | 9<br>(3 - 19)      | 2<br>(1 - 4)      | 30<br>(14 - 49)          | 5<br>(2 - 9)           | 9<br>(5 - 16)            |

Web Table 31- Zimbabwe deaths with 95% UI by age, sex, and cause in 2013

| Cause                                               | Males, All Ages          | Males, 0-4 Years | Males, 5-14 Years | Males, 15-49 Years | Males, 50-69 Years | Males, 70-80 Years     |
|-----------------------------------------------------|--------------------------|------------------|-------------------|--------------------|--------------------|------------------------|
| Other cardiovascular and circulatory diseases       | 475<br>(325 - 819)       | 66<br>(31 - 123) | 7<br>(3 - 14)     | 131<br>(79 - 243)  | 82<br>(44 - 160)   | 189<br>(116 - 323)     |
| Chronic respiratory diseases                        | 1,703<br>(1,215 - 2,755) | 60<br>(31 - 106) | 11<br>(7 - 17)    | 226<br>(156 - 328) | 396<br>(236 - 731) | 1,009<br>(705 - 1,650) |
| Chronic obstructive pulmonary disease               | 718<br>(468 - 1,358)     | 11<br>(4 - 28)   | 1<br>(0 - 2)      | 26<br>(16 - 54)    | 141<br>(75 - 282)  | 539<br>(357 - 1,005)   |
| Pneumoconiosis                                      | 213<br>(128 - 347)       | 0<br>(0 - 1)     | 0<br>(0 - 0)      | 57<br>(35 - 90)    | 50<br>(25 - 92)    | 106<br>(60 - 180)      |
| Silicosis                                           | 31<br>(19 - 52)          | 0<br>(0 - 0)     | 0<br>(0 - 0)      | 5<br>(3 - 9)       | 6<br>(3 - 11)      | 20<br>(11 - 34)        |
| Asbestosis                                          | 45<br>(27 - 75)          | 0<br>(0 - 0)     | 0<br>(0 - 0)      | 12<br>(7 - 21)     | 10<br>(5 - 18)     | 23<br>(13 - 39)        |
| Coal workers pneumoconiosis                         | 46<br>(28 - 77)          | 0<br>(0 - 0)     | 0<br>(0 - 0)      | 12<br>(7 - 20)     | 12<br>(6 - 22)     | 22<br>(13 - 38)        |
| Other pneumoconiosis                                | 90<br>(54 - 143)         | 0<br>(0 - 0)     | 0<br>(0 - 0)      | 27<br>(16 - 43)    | 22<br>(11 - 40)    | 40<br>(23 - 72)        |
| Asthma                                              | 588<br>(415 - 894)       | 25<br>(9 - 53)   | 8<br>(5 - 13)     | 127<br>(85 - 182)  | 156<br>(91 - 274)  | 273<br>(179 - 441)     |
| Interstitial lung disease and pulmonary sarcoidosis | 89<br>(51 - 159)         | 0<br>(0 - 1)     | 0<br>(0 - 0)      | 7<br>(3 - 14)      | 32<br>(15 - 67)    | 50<br>(27 - 90)        |
| Other chronic respiratory diseases                  | 94<br>(65 - 142)         | 24<br>(13 - 45)  | 1<br>(1 - 3)      | 10<br>(6 - 17)     | 16<br>(8 - 30)     | 42<br>(24 - 70)        |
| Cirrhosis                                           | 568<br>(419 - 747)       | 7<br>(3 - 15)    | 3<br>(2 - 4)      | 187<br>(132 - 252) | 179<br>(108 - 266) | 191<br>(134 - 264)     |
| Cirrhosis due to hepatitis B                        | 87<br>(45 - 134)         | 0<br>(0 - 0)     | 0<br>(0 - 1)      | 29<br>(14 - 48)    | 28<br>(12 - 49)    | 30<br>(13 - 50)        |
| Cirrhosis due to hepatitis C                        | 60<br>(35 - 93)          | 0<br>(0 - 1)     | 0<br>(0 - 0)      | 14<br>(7 - 24)     | 18<br>(9 - 33)     | 27<br>(14 - 43)        |
| Cirrhosis due to alcohol use                        | 335<br>(231 - 465)       | --               | --                | 99<br>(63 - 145)   | 114<br>(67 - 173)  | 121<br>(81 - 178)      |
| Cirrhosis due to other causes                       | 85<br>(48 - 125)         | 7<br>(2 - 14)    | 2<br>(1 - 4)      | 46<br>(24 - 72)    | 18<br>(8 - 32)     | 13<br>(6 - 21)         |
| Digestive diseases                                  | 1,272<br>(940 - 1,641)   | 52<br>(23 - 100) | 18<br>(11 - 31)   | 354<br>(252 - 490) | 271<br>(165 - 413) | 576<br>(395 - 778)     |
| Peptic ulcer disease                                | 156<br>(85 - 284)        | 1<br>(0 - 2)     | 0<br>(0 - 1)      | 42<br>(21 - 83)    | 35<br>(16 - 69)    | 78<br>(37 - 148)       |
| Gastritis and duodenitis                            | 26<br>(12 - 44)          | 1<br>(0 - 1)     | 0<br>(0 - 0)      | 5<br>(3 - 10)      | 6<br>(2 - 11)      | 14<br>(6 - 26)         |
| Appendicitis                                        | 20<br>(6 - 43)           | 1<br>(0 - 2)     | 1<br>(0 - 4)      | 6<br>(2 - 15)      | 3<br>(1 - 7)       | 9<br>(3 - 19)          |
| Paralytic ileus and intestinal obstruction          | 535<br>(299 - 755)       | 18<br>(6 - 40)   | 10<br>(5 - 18)    | 115<br>(63 - 179)  | 119<br>(63 - 198)  | 273<br>(132 - 407)     |
| Inguinal, femoral, and abdominal hernia             | 27<br>(15 - 60)          | 0<br>(0 - 1)     | 0<br>(0 - 0)      | 6<br>(3 - 14)      | 6<br>(3 - 14)      | 14<br>(7 - 33)         |
| Inflammatory bowel disease                          | 256<br>(155 - 350)       | 27<br>(11 - 56)  | 4<br>(2 - 8)      | 123<br>(75 - 179)  | 41<br>(19 - 67)    | 62<br>(32 - 102)       |
| Vascular intestinal disorders                       | 1<br>(0 - 3)             | 0<br>(0 - 0)     | 0<br>(0 - 0)      | 1<br>(0 - 1)       | 0<br>(0 - 0)       | 0<br>(0 - 1)           |
| Gallbladder and biliary diseases                    | 27<br>(15 - 47)          | 0<br>(0 - 0)     | 0<br>(0 - 0)      | 2<br>(1 - 3)       | 5<br>(2 - 10)      | 20<br>(10 - 36)        |
| Pancreatitis                                        | 45<br>(25 - 73)          | 0<br>(0 - 1)     | 0<br>(0 - 0)      | 19<br>(10 - 37)    | 11<br>(5 - 21)     | 14<br>(7 - 24)         |
| Other digestive diseases                            | 179<br>(98 - 261)        | 4<br>(1 - 10)    | 1<br>(0 - 2)      | 36<br>(21 - 60)    | 46<br>(23 - 78)    | 91<br>(41 - 147)       |
| Neurological disorders                              | 841<br>(635 - 1,070)     | 24<br>(10 - 51)  | 15<br>(7 - 30)    | 196<br>(117 - 296) | 86<br>(50 - 137)   | 521<br>(379 - 684)     |
| Alzheimer disease and other dementias               | 484<br>(346 - 648)       | --               | --                | 0<br>(0 - 0)       | 28<br>(16 - 43)    | 456<br>(327 - 610)     |
| Parkinson disease                                   | 10<br>(5 - 24)           | --               | --                | 1<br>(0 - 1)       | 2<br>(1 - 6)       | 7<br>(3 - 17)          |
| Epilepsy                                            | 336<br>(226 - 472)       | 23<br>(9 - 50)   | 15<br>(7 - 29)    | 191<br>(114 - 291) | 54<br>(28 - 94)    | 54<br>(31 - 85)        |
| Multiple sclerosis                                  | 1<br>(0 - 3)             | --               | --                | 0<br>(0 - 1)       | 0<br>(0 - 1)       | 0<br>(0 - 1)           |
| Other neurological disorders                        | 10<br>(7 - 19)           | 1<br>(1 - 3)     | 0<br>(0 - 1)      | 4<br>(2 - 8)       | 1<br>(1 - 2)       | 3<br>(2 - 6)           |
| Mental and substance use disorders                  | 464<br>(313 - 626)       | 20<br>(10 - 32)  | 0<br>(0 - 0)      | 345<br>(218 - 489) | 38<br>(22 - 60)    | 61<br>(42 - 85)        |
| Schizophrenia                                       | 26<br>(15 - 52)          | --               | --                | 13<br>(7 - 25)     | 4<br>(2 - 8)       | 9<br>(4 - 22)          |
| Alcohol use disorders                               | 81<br>(50 - 139)         | --               | --                | 45<br>(27 - 86)    | 22<br>(12 - 39)    | 14<br>(7 - 22)         |
| Drug use disorders                                  | 356<br>(234 - 498)       | 20<br>(10 - 32)  | --                | 287<br>(174 - 421) | 12<br>(7 - 19)     | 37<br>(23 - 54)        |
| Opioid use disorders                                | 39<br>(24 - 56)          | 2<br>(1 - 4)     | --                | 31<br>(18 - 47)    | 1<br>(1 - 2)       | 4<br>(2 - 6)           |
| Cocaine use disorders                               | 1<br>(1 - 2)             | 0<br>(0 - 0)     | --                | 1<br>(1 - 2)       | 0<br>(0 - 0)       | 0<br>(0 - 0)           |
| Amphetamine use disorders                           | 1<br>(1 - 1)             | 0<br>(0 - 0)     | --                | 1<br>(0 - 1)       | 0<br>(0 - 0)       | 0<br>(0 - 0)           |

Web Table 31- Zimbabwe deaths with 95% UI by age, sex, and cause in 2013

| Cause                                               | Males, All Ages          | Males, 0-4 Years     | Males, 5-14 Years | Males, 15-49 Years | Males, 50-69 Years   | Males, 70-80 Years       |
|-----------------------------------------------------|--------------------------|----------------------|-------------------|--------------------|----------------------|--------------------------|
| Other drug use disorders                            | 315<br>(207 - 439)       | 18<br>(9 - 28)       | --                | 254<br>(154 - 373) | 11<br>(6 - 17)       | 33<br>(20 - 48)          |
| Eating disorders                                    | 0<br>(0 - 0)             | --                   | 0<br>(0 - 0)      | 0<br>(0 - 0)       | --                   | --                       |
| Anorexia nervosa                                    | 0<br>(0 - 0)             | --                   | 0<br>(0 - 0)      | 0<br>(0 - 0)       | --                   | --                       |
| Diabetes, urogenital, blood, and endocrine diseases | 3,147<br>(2,400 - 4,046) | 208<br>(110 - 448)   | 41<br>(24 - 86)   | 742<br>(536 - 987) | 770<br>(494 - 1,148) | 1,386<br>(1,035 - 1,767) |
| Diabetes mellitus                                   | 1,168<br>(834 - 1,545)   | 7<br>(4 - 13)        | 3<br>(2 - 6)      | 161<br>(113 - 212) | 398<br>(246 - 592)   | 598<br>(428 - 794)       |
| Acute glomerulonephritis                            | 1<br>(1 - 1)             | 0<br>(0 - 0)         | 0<br>(0 - 0)      | 0<br>(0 - 1)       | 0<br>(0 - 0)         | 0<br>(0 - 0)             |
| Chronic kidney disease                              | 1,205<br>(908 - 1,553)   | 33<br>(19 - 56)      | 12<br>(8 - 20)    | 366<br>(258 - 513) | 256<br>(157 - 391)   | 538<br>(370 - 741)       |
| Chronic kidney disease due to diabetes mellitus     | 4<br>(1 - 6)             | 1<br>(0 - 1)         | 0<br>(0 - 0)      | 2<br>(1 - 3)       | 0<br>(0 - 1)         | 1<br>(0 - 1)             |
| Chronic kidney disease due to hypertension          | 310<br>(171 - 612)       | 2<br>(1 - 5)         | 1<br>(0 - 3)      | 130<br>(69 - 248)  | 78<br>(36 - 170)     | 98<br>(42 - 218)         |
| Chronic kidney disease due to glomerulonephritis    | 510<br>(217 - 798)       | 17<br>(7 - 31)       | 6<br>(3 - 10)     | 133<br>(56 - 211)  | 98<br>(31 - 187)     | 257<br>(98 - 428)        |
| Chronic kidney disease due to other causes          | 382<br>(231 - 643)       | 14<br>(5 - 30)       | 5<br>(2 - 10)     | 101<br>(53 - 180)  | 79<br>(36 - 156)     | 182<br>(87 - 337)        |
| Urinary diseases and male infertility               | 323<br>(232 - 429)       | 16<br>(8 - 32)       | 2<br>(1 - 3)      | 75<br>(50 - 110)   | 65<br>(38 - 102)     | 165<br>(107 - 238)       |
| Interstitial nephritis and urinary tract infections | 64<br>(39 - 109)         | 4<br>(1 - 9)         | 1<br>(0 - 1)      | 20<br>(11 - 36)    | 12<br>(6 - 23)       | 27<br>(13 - 50)          |
| Urolithiasis                                        | 4<br>(3 - 8)             | --                   | 0<br>(0 - 0)      | 2<br>(1 - 4)       | 1<br>(0 - 2)         | 1<br>(1 - 3)             |
| Other urinary diseases                              | 254<br>(175 - 350)       | 12<br>(6 - 25)       | 1<br>(1 - 2)      | 52<br>(34 - 78)    | 52<br>(30 - 84)      | 136<br>(87 - 201)        |
| Gynecological diseases                              | --                       | --                   | --                | --                 | --                   | --                       |
| Uterine fibroids                                    | --                       | --                   | --                | --                 | --                   | --                       |
| Polycystic ovarian syndrome                         | --                       | --                   | --                | --                 | --                   | --                       |
| Endometriosis                                       | --                       | --                   | --                | --                 | --                   | --                       |
| Genital prolapse                                    | --                       | --                   | --                | --                 | --                   | --                       |
| Other gynecological diseases                        | --                       | --                   | --                | --                 | --                   | --                       |
| Hemoglobinopathies and hemolytic anemias            | 212<br>(81 - 594)        | 47<br>(17 - 143)     | 13<br>(4 - 41)    | 84<br>(33 - 208)   | 24<br>(7 - 81)       | 45<br>(13 - 147)         |
| Thalassemias                                        | 18<br>(7 - 51)           | 13<br>(5 - 39)       | 2<br>(1 - 7)      | 2<br>(1 - 6)       | 0<br>(0 - 0)         | 0<br>(0 - 0)             |
| Sickle cell disorders                               | 82<br>(32 - 206)         | 19<br>(7 - 55)       | 7<br>(2 - 22)     | 49<br>(19 - 121)   | 6<br>(2 - 21)        | 0<br>(0 - 1)             |
| G6PD deficiency                                     | 9<br>(4 - 23)            | 3<br>(1 - 9)         | 1<br>(0 - 3)      | 4<br>(2 - 10)      | 1<br>(0 - 3)         | 0<br>(0 - 2)             |
| Other hemoglobinopathies and hemolytic anemias      | 104<br>(37 - 319)        | 12<br>(4 - 40)       | 3<br>(1 - 10)     | 29<br>(11 - 71)    | 16<br>(5 - 57)       | 44<br>(13 - 144)         |
| Endocrine, metabolic, blood, and immune disorders   | 238<br>(149 - 538)       | 104<br>(45 - 288)    | 10<br>(4 - 31)    | 56<br>(33 - 97)    | 27<br>(14 - 56)      | 41<br>(23 - 82)          |
| Musculoskeletal disorders                           | 60<br>(39 - 81)          | --                   | 2<br>(1 - 3)      | 23<br>(14 - 34)    | 13<br>(8 - 22)       | 22<br>(13 - 31)          |
| Rheumatoid arthritis                                | 27<br>(16 - 42)          | --                   | 1<br>(0 - 1)      | 7<br>(3 - 12)      | 7<br>(3 - 13)        | 13<br>(7 - 21)           |
| Other musculoskeletal disorders                     | 33<br>(19 - 49)          | --                   | 1<br>(1 - 2)      | 16<br>(10 - 24)    | 7<br>(3 - 12)        | 9<br>(4 - 17)            |
| Other non-communicable diseases                     | 1,027<br>(730 - 1,434)   | 802<br>(519 - 1,193) | 30<br>(16 - 57)   | 79<br>(54 - 112)   | 33<br>(20 - 51)      | 83<br>(55 - 120)         |
| Congenital anomalies                                | 846<br>(560 - 1,243)     | 768<br>(492 - 1,149) | 28<br>(15 - 53)   | 29<br>(18 - 46)    | 6<br>(4 - 11)        | 14<br>(9 - 22)           |
| Neural tube defects                                 | 55<br>(14 - 156)         | 54<br>(13 - 155)     | 0<br>(0 - 1)      | 0<br>(0 - 2)       | 0<br>(0 - 0)         | 0<br>(0 - 0)             |
| Congenital heart anomalies                          | 346<br>(205 - 561)       | 302<br>(167 - 506)   | 20<br>(11 - 39)   | 16<br>(10 - 25)    | 2<br>(1 - 4)         | 6<br>(4 - 11)            |
| Cleft lip and cleft palate                          | 3<br>(1 - 9)             | 3<br>(1 - 9)         | --                | --                 | --                   | --                       |
| Down syndrome                                       | 68<br>(29 - 143)         | 61<br>(23 - 135)     | 2<br>(1 - 4)      | 4<br>(2 - 8)       | 1<br>(0 - 2)         | 0<br>(0 - 1)             |
| Chromosomal unbalanced rearrangements               | 65<br>(33 - 120)         | 62<br>(30 - 116)     | 0<br>(0 - 1)      | 2<br>(1 - 3)       | 0<br>(0 - 1)         | 1<br>(0 - 2)             |
| Other congenital anomalies                          | 309<br>(152 - 500)       | 287<br>(141 - 474)   | 6<br>(2 - 12)     | 8<br>(3 - 13)      | 3<br>(1 - 5)         | 6<br>(3 - 10)            |
| Skin and subcutaneous diseases                      | 160<br>(116 - 211)       | 13<br>(7 - 24)       | 2<br>(1 - 4)      | 49<br>(32 - 75)    | 27<br>(15 - 42)      | 69<br>(43 - 103)         |
| Cellulitis                                          | 53<br>(33 - 77)          | 5<br>(2 - 9)         | 0<br>(0 - 1)      | 15<br>(9 - 25)     | 10<br>(5 - 16)       | 24<br>(12 - 39)          |

Web Table 31- Zimbabwe deaths with 95% UI by age, sex, and cause in 2013

| Cause                                           | Males, All Ages          | Males, 0-4 Years   | Males, 5-14 Years  | Males, 15-49 Years       | Males, 50-69 Years   | Males, 70-80 Years     |
|-------------------------------------------------|--------------------------|--------------------|--------------------|--------------------------|----------------------|------------------------|
| Pyoderma                                        | 64<br>(44 - 88)          | 7<br>(3 - 13)      | 1<br>(1 - 2)       | 19<br>(12 - 30)          | 11<br>(6 - 19)       | 25<br>(14 - 41)        |
| Decubitus ulcer                                 | 21<br>(12 - 50)          | 0<br>(0 - 0)       | 0<br>(0 - 0)       | 5<br>(3 - 14)            | 3<br>(1 - 6)         | 13<br>(6 - 30)         |
| Other skin and subcutaneous diseases            | 22<br>(12 - 32)          | 2<br>(1 - 3)       | 0<br>(0 - 1)       | 10<br>(5 - 16)           | 3<br>(1 - 6)         | 7<br>(2 - 13)          |
| Sudden infant death syndrome                    | 20<br>(5 - 54)           | 20<br>(5 - 54)     | --                 | --                       | --                   | --                     |
| Injuries                                        | 6,752<br>(5,095 - 8,901) | 509<br>(283 - 824) | 189<br>(114 - 320) | 3,874<br>(2,603 - 5,742) | 851<br>(548 - 1,242) | 1,330<br>(917 - 1,753) |
| Transport injuries                              | 2,088<br>(1,554 - 2,774) | 167<br>(88 - 297)  | 77<br>(46 - 137)   | 1,224<br>(829 - 1,851)   | 298<br>(181 - 454)   | 321<br>(194 - 453)     |
| Road injuries                                   | 1,821<br>(1,331 - 2,491) | 145<br>(76 - 257)  | 68<br>(41 - 122)   | 1,075<br>(723 - 1,689)   | 263<br>(159 - 410)   | 271<br>(173 - 394)     |
| Pedestrian road injuries                        | 399<br>(257 - 571)       | 52<br>(23 - 100)   | 23<br>(11 - 42)    | 167<br>(95 - 273)        | 69<br>(35 - 117)     | 87<br>(46 - 143)       |
| Cyclist road injuries                           | 220<br>(153 - 321)       | 10<br>(3 - 22)     | 7<br>(4 - 13)      | 110<br>(67 - 182)        | 43<br>(24 - 71)      | 50<br>(28 - 79)        |
| Motorcyclist road injuries                      | 169<br>(97 - 296)        | 6<br>(2 - 13)      | 3<br>(1 - 8)       | 128<br>(71 - 238)        | 18<br>(8 - 37)       | 13<br>(6 - 26)         |
| Motor vehicle road injuries                     | 880<br>(630 - 1,212)     | 70<br>(34 - 132)   | 29<br>(16 - 54)    | 569<br>(363 - 859)       | 110<br>(65 - 173)    | 102<br>(60 - 153)      |
| Other road injuries                             | 153<br>(81 - 378)        | 7<br>(2 - 20)      | 5<br>(2 - 15)      | 101<br>(46 - 266)        | 23<br>(10 - 55)      | 18<br>(8 - 46)         |
| Other transport injuries                        | 266<br>(153 - 374)       | 22<br>(8 - 49)     | 9<br>(4 - 18)      | 149<br>(89 - 222)        | 35<br>(15 - 61)      | 51<br>(15 - 88)        |
| Unintentional injuries                          | 2,198<br>(1,675 - 2,896) | 315<br>(165 - 548) | 95<br>(47 - 177)   | 781<br>(527 - 1,115)     | 318<br>(198 - 478)   | 690<br>(433 - 963)     |
| Falls                                           | 635<br>(284 - 926)       | 22<br>(10 - 44)    | 6<br>(3 - 12)      | 159<br>(78 - 260)        | 110<br>(49 - 188)    | 338<br>(123 - 553)     |
| Drowning                                        | 518<br>(333 - 818)       | 96<br>(43 - 192)   | 52<br>(19 - 114)   | 249<br>(140 - 433)       | 53<br>(29 - 92)      | 68<br>(40 - 103)       |
| Fire, heat, and hot substances                  | 246<br>(143 - 456)       | 64<br>(19 - 151)   | 12<br>(4 - 28)     | 79<br>(35 - 162)         | 22<br>(11 - 45)      | 70<br>(45 - 109)       |
| Poisonings                                      | 110<br>(73 - 238)        | 32<br>(12 - 94)    | 3<br>(2 - 8)       | 39<br>(21 - 89)          | 13<br>(6 - 28)       | 23<br>(13 - 38)        |
| Exposure to mechanical forces                   | 191<br>(136 - 340)       | 26<br>(13 - 55)    | 7<br>(4 - 13)      | 123<br>(80 - 226)        | 24<br>(14 - 41)      | 11<br>(8 - 16)         |
| Unintentional firearm injuries                  | 37<br>(18 - 55)          | 5<br>(2 - 9)       | 1<br>(0 - 2)       | 24<br>(11 - 40)          | 5<br>(2 - 8)         | 3<br>(1 - 4)           |
| Unintentional suffocation                       | 28<br>(16 - 63)          | 8<br>(2 - 29)      | 1<br>(0 - 2)       | 17<br>(9 - 29)           | 2<br>(1 - 3)         | 2<br>(1 - 3)           |
| Other exposure to mechanical forces             | 126<br>(84 - 261)        | 14<br>(6 - 28)     | 6<br>(3 - 11)      | 83<br>(49 - 181)         | 17<br>(9 - 32)       | 7<br>(4 - 11)          |
| Adverse effects of medical treatment            | 148<br>(101 - 208)       | 27<br>(13 - 54)    | 4<br>(2 - 7)       | 38<br>(23 - 62)          | 24<br>(13 - 42)      | 55<br>(31 - 90)        |
| Animal contact                                  | 64<br>(37 - 90)          | 9<br>(4 - 19)      | 5<br>(2 - 10)      | 25<br>(13 - 41)          | 10<br>(5 - 18)       | 14<br>(7 - 24)         |
| Venomous animal contact                         | 29<br>(16 - 42)          | 8<br>(3 - 15)      | 3<br>(1 - 7)       | 6<br>(3 - 11)            | 5<br>(2 - 9)         | 7<br>(3 - 12)          |
| Non-venomous animal contact                     | 34<br>(19 - 52)          | 2<br>(1 - 4)       | 2<br>(1 - 4)       | 18<br>(10 - 32)          | 5<br>(2 - 10)        | 7<br>(3 - 13)          |
| Foreign body                                    | 88<br>(52 - 182)         | 30<br>(14 - 70)    | 3<br>(1 - 8)       | 17<br>(9 - 36)           | 15<br>(7 - 33)       | 23<br>(13 - 45)        |
| Pulmonary aspiration and foreign body in airway | 83<br>(47 - 179)         | 29<br>(13 - 70)    | 3<br>(1 - 8)       | 14<br>(7 - 34)           | 14<br>(6 - 32)       | 22<br>(12 - 45)        |
| Foreign body in other body part                 | 5<br>(2 - 8)             | 1<br>(0 - 1)       | 0<br>(0 - 0)       | 2<br>(1 - 3)             | 1<br>(0 - 2)         | 1<br>(0 - 2)           |
| Other unintentional injuries                    | 199<br>(147 - 263)       | 8<br>(4 - 12)      | 2<br>(1 - 4)       | 53<br>(35 - 77)          | 47<br>(27 - 75)      | 89<br>(61 - 128)       |
| Self-harm and interpersonal violence            | 2,424<br>(1,620 - 3,919) | 27<br>(12 - 65)    | 15<br>(7 - 35)     | 1,838<br>(1,124 - 3,255) | 227<br>(133 - 366)   | 316<br>(185 - 465)     |
| Self-harm                                       | 1,201<br>(802 - 2,077)   | --                 | 5<br>(1 - 12)      | 696<br>(388 - 1,429)     | 195<br>(111 - 313)   | 306<br>(176 - 454)     |
| Interpersonal violence                          | 1,223<br>(709 - 2,273)   | 27<br>(12 - 65)    | 10<br>(5 - 26)     | 1,142<br>(651 - 2,101)   | 33<br>(15 - 71)      | 11<br>(5 - 23)         |
| Assault by firearm                              | 330<br>(151 - 649)       | 2<br>(0 - 5)       | 1<br>(0 - 1)       | 312<br>(137 - 621)       | 13<br>(5 - 27)       | 3<br>(1 - 6)           |
| Assault by sharp object                         | 480<br>(242 - 944)       | 6<br>(2 - 15)      | 3<br>(1 - 7)       | 461<br>(225 - 911)       | 8<br>(3 - 17)        | 2<br>(1 - 5)           |
| Assault by other means                          | 414<br>(210 - 960)       | 19<br>(8 - 50)     | 7<br>(3 - 17)      | 370<br>(177 - 869)       | 12<br>(5 - 32)       | 6<br>(3 - 13)          |
| Forces of nature, war, and legal intervention   | 42<br>(18 - 95)          | 0<br>(0 - 0)       | 2<br>(1 - 5)       | 31<br>(13 - 69)          | 7<br>(3 - 18)        | 2<br>(1 - 4)           |
| Exposure to forces of nature                    | 42<br>(18 - 95)          | 0<br>(0 - 0)       | 2<br>(1 - 5)       | 31<br>(13 - 69)          | 7<br>(3 - 18)        | 2<br>(1 - 4)           |

Web Table 31- Zimbabwe deaths with 95% UI by age, sex, and cause in 2013

| Cause                                                             | Females, All Ages           | Females, 0-4 Years          | Females, 5-14 Years      | Females, 15-49 Years        | Females, 50-69 Years       | Females, 70-80 Years        |
|-------------------------------------------------------------------|-----------------------------|-----------------------------|--------------------------|-----------------------------|----------------------------|-----------------------------|
| All causes                                                        | 74,839<br>(64,293 - 87,110) | 13,773<br>(11,108 - 18,059) | 2,372<br>(2,027 - 2,920) | 30,412<br>(24,786 - 35,320) | 11,097<br>(8,166 - 14,420) | 17,186<br>(13,630 - 22,128) |
| Communicable, maternal, neonatal, and nutritional diseases        | 50,653<br>(44,765 - 57,042) | 12,208<br>(9,849 - 15,703)  | 2,120<br>(1,799 - 2,567) | 25,595<br>(21,413 - 29,302) | 6,032<br>(4,608 - 7,619)   | 4,699<br>(3,519 - 6,130)    |
| HIV/AIDS and tuberculosis                                         | 25,155<br>(21,016 - 28,996) | 997<br>(713 - 1,299)        | 1,644<br>(1,324 - 1,952) | 16,678<br>(14,001 - 19,240) | 4,688<br>(3,219 - 6,354)   | 1,147<br>(781 - 1,594)      |
| Tuberculosis                                                      | 3,280<br>(2,078 - 4,815)    | 222<br>(115 - 396)          | 57<br>(30 - 104)         | 1,757<br>(987 - 2,800)      | 657<br>(348 - 1,092)       | 589<br>(354 - 924)          |
| HIV/AIDS                                                          | 21,874<br>(17,670 - 25,549) | 775<br>(518 - 1,012)        | 1,588<br>(1,270 - 1,895) | 14,922<br>(12,259 - 17,331) | 4,032<br>(2,595 - 5,813)   | 558<br>(285 - 948)          |
| HIV/AIDS resulting in mycobacterial infection                     | 1,196<br>(891 - 1,536)      | 41<br>(27 - 58)             | 78<br>(60 - 102)         | 815<br>(617 - 1,040)        | 229<br>(137 - 347)         | 33<br>(16 - 55)             |
| HIV/AIDS resulting in other diseases                              | 20,679<br>(16,737 - 24,196) | 734<br>(490 - 961)          | 1,509<br>(1,203 - 1,800) | 14,107<br>(11,603 - 16,374) | 3,803<br>(2,430 - 5,462)   | 525<br>(268 - 889)          |
| Diarrhea, lower respiratory, and other common infectious diseases | 15,079<br>(11,874 - 18,765) | 5,733<br>(4,081 - 7,604)    | 303<br>(188 - 512)       | 5,295<br>(3,359 - 7,265)    | 1,041<br>(576 - 1,673)     | 2,707<br>(1,790 - 3,859)    |
| Diarrheal diseases                                                | 5,055<br>(3,532 - 6,880)    | 3,188<br>(1,877 - 4,719)    | 93<br>(43 - 179)         | 909<br>(509 - 1,462)        | 253<br>(116 - 478)         | 612<br>(344 - 982)          |
| Intestinal infectious diseases                                    | 247<br>(119 - 446)          | 102<br>(46 - 199)           | 44<br>(18 - 94)          | 85<br>(37 - 173)            | 9<br>(3 - 21)              | 6<br>(2 - 14)               |
| Typhoid fever                                                     | 180<br>(81 - 340)           | 71<br>(29 - 141)            | 34<br>(13 - 74)          | 64<br>(27 - 132)            | 7<br>(2 - 16)              | 4<br>(1 - 10)               |
| Paratyphoid fever                                                 | 54<br>(24 - 102)            | 24<br>(9 - 51)              | 10<br>(3 - 23)           | 18<br>(6 - 41)              | 2<br>(0 - 5)               | 1<br>(0 - 3)                |
| Other intestinal infectious diseases                              | 12<br>(6 - 23)              | 7<br>(2 - 15)               | 1<br>(0 - 3)             | 3<br>(0 - 9)                | 1<br>(0 - 3)               | 1<br>(0 - 4)                |
| Lower respiratory infections                                      | 8,282<br>(6,034 - 10,834)   | 1,825<br>(1,103 - 2,817)    | 104<br>(56 - 185)        | 3,630<br>(2,222 - 5,189)    | 715<br>(379 - 1,175)       | 2,007<br>(1,232 - 2,982)    |
| Upper respiratory infections                                      | 13<br>(4 - 32)              | 3<br>(0 - 11)               | 0<br>(0 - 1)             | 7<br>(1 - 22)               | 1<br>(0 - 5)               | 2<br>(0 - 9)                |
| Otitis media                                                      | 11<br>(7 - 16)              | 1<br>(1 - 2)                | 0<br>(0 - 1)             | 1<br>(1 - 1)                | 3<br>(2 - 5)               | 5<br>(3 - 8)                |
| Meningitis                                                        | 1,098<br>(677 - 1,560)      | 332<br>(178 - 560)          | 41<br>(19 - 81)          | 615<br>(301 - 987)          | 50<br>(21 - 90)            | 60<br>(28 - 101)            |
| Pneumococcal meningitis                                           | 157<br>(85 - 265)           | 32<br>(15 - 59)             | 6<br>(2 - 12)            | 102<br>(42 - 200)           | 8<br>(3 - 16)              | 9<br>(4 - 17)               |
| H influenzae type B meningitis                                    | 221<br>(133 - 335)          | 118<br>(60 - 207)           | 11<br>(5 - 22)           | 83<br>(33 - 162)            | 5<br>(2 - 10)              | 6<br>(2 - 11)               |
| Meningococcal meningitis                                          | 389<br>(239 - 566)          | 112<br>(57 - 197)           | 16<br>(7 - 32)           | 221<br>(110 - 383)          | 18<br>(6 - 36)             | 23<br>(10 - 41)             |
| Other meningitis                                                  | 330<br>(171 - 543)          | 71<br>(32 - 135)            | 9<br>(3 - 20)            | 209<br>(87 - 409)           | 19<br>(8 - 38)             | 22<br>(9 - 40)              |
| Encephalitis                                                      | 99<br>(33 - 179)            | 31<br>(8 - 69)              | 5<br>(2 - 11)            | 42<br>(10 - 92)             | 9<br>(3 - 19)              | 11<br>(3 - 21)              |
| Diphtheria                                                        | 6<br>(0 - 39)               | 4<br>(0 - 37)               | 0<br>(0 - 3)             | 1<br>(0 - 5)                | 0<br>(0 - 0)               | --                          |
| Whooping cough                                                    | 120<br>(0 - 557)            | 114<br>(0 - 535)            | 4<br>(0 - 18)            | 1<br>(0 - 5)                | 0<br>(0 - 0)               | --                          |
| Tetanus                                                           | 2<br>(0 - 7)                | 0<br>(0 - 1)                | 0<br>(0 - 1)             | 1<br>(0 - 4)                | 0<br>(0 - 1)               | 0<br>(0 - 1)                |
| Measles                                                           | 141<br>(40 - 348)           | 128<br>(36 - 320)           | 10<br>(3 - 27)           | 3<br>(1 - 7)                | 0<br>(0 - 0)               | --                          |
| Varicella and herpes zoster                                       | 7<br>(2 - 19)               | 2<br>(0 - 9)                | 0<br>(0 - 1)             | 1<br>(0 - 4)                | 0<br>(0 - 2)               | 3<br>(0 - 13)               |
| Neglected tropical diseases and malaria                           | 1,456<br>(924 - 2,277)      | 312<br>(136 - 649)          | 119<br>(52 - 247)        | 873<br>(462 - 1,490)        | 83<br>(38 - 166)           | 69<br>(36 - 131)            |
| Malaria                                                           | 1,073<br>(595 - 1,857)      | 234<br>(80 - 572)           | 99<br>(35 - 221)         | 632<br>(277 - 1,249)        | 62<br>(22 - 145)           | 45<br>(17 - 109)            |
| Leishmaniasis                                                     | 59<br>(33 - 87)             | 22<br>(9 - 40)              | 11<br>(4 - 21)           | 22<br>(8 - 40)              | 2<br>(1 - 5)               | 1<br>(0 - 2)                |
| Visceral leishmaniasis                                            | 59<br>(33 - 87)             | 22<br>(9 - 40)              | 11<br>(4 - 21)           | 22<br>(8 - 40)              | 2<br>(1 - 5)               | 1<br>(0 - 2)                |
| African trypanosomiasis                                           | 10<br>(5 - 18)              | 1<br>(0 - 1)                | 1<br>(0 - 1)             | 7<br>(3 - 13)               | 1<br>(0 - 2)               | 1<br>(0 - 1)                |
| Schistosomiasis                                                   | 34<br>(20 - 52)             | 0<br>(0 - 1)                | 0<br>(0 - 1)             | 22<br>(11 - 36)             | 6<br>(3 - 11)              | 6<br>(3 - 11)               |
| Cysticercosis                                                     | 6<br>(4 - 8)                | 0<br>(0 - 0)                | 0<br>(0 - 0)             | 5<br>(4 - 7)                | 0<br>(0 - 1)               | 0<br>(0 - 0)                |
| Cystic echinococcosis                                             | 4<br>(3 - 6)                | 0<br>(0 - 0)                | 0<br>(0 - 0)             | 3<br>(2 - 4)                | 0<br>(0 - 0)               | 0<br>(0 - 0)                |
| Dengue                                                            | 1<br>(0 - 2)                | 0<br>(0 - 1)                | 0<br>(0 - 0)             | 0<br>(0 - 1)                | 0<br>(0 - 0)               | 0<br>(0 - 0)                |
| Rabies                                                            | 5<br>(3 - 8)                | 1<br>(0 - 2)                | 1<br>(1 - 2)             | 1<br>(1 - 2)                | 1<br>(0 - 2)               | 0<br>(0 - 1)                |
| Intestinal nematode infections                                    | 9<br>(3 - 21)               | 7<br>(1 - 17)               | 1<br>(0 - 3)             | 2<br>(0 - 7)                | 0<br>(0 - 2)               | 0<br>(0 - 3)                |
| Ascariasis                                                        | 9<br>(3 - 21)               | 7<br>(1 - 17)               | 1<br>(0 - 3)             | 2<br>(0 - 7)                | 0<br>(0 - 2)               | 0<br>(0 - 3)                |
| Other neglected tropical diseases                                 | 254<br>(143 - 413)          | 46<br>(19 - 100)            | 5<br>(2 - 13)            | 177<br>(88 - 313)           | 10<br>(4 - 20)             | 15<br>(7 - 28)              |



Web Table 31- Zimbabwe deaths with 95% UI by age, sex, and cause in 2013

| Cause                                                            | Females, All Ages           | Females, 0-4 Years       | Females, 5-14 Years | Females, 15-49 Years     | Females, 50-69 Years     | Females, 70-80 Years       |
|------------------------------------------------------------------|-----------------------------|--------------------------|---------------------|--------------------------|--------------------------|----------------------------|
| Maternal disorders                                               | 2,306<br>(1,388 - 3,481)    | --                       | 3<br>(1 - 6)        | 2,303<br>(1,387 - 3,480) | --                       | --                         |
| Maternal hemorrhage                                              | 285<br>(162 - 451)          | --                       | 0<br>(0 - 1)        | 285<br>(162 - 451)       | --                       | --                         |
| Maternal sepsis and other maternal infections                    | 400<br>(232 - 650)          | --                       | 1<br>(0 - 1)        | 400<br>(231 - 650)       | --                       | --                         |
| Maternal hypertensive disorders                                  | 243<br>(125 - 395)          | --                       | 0<br>(0 - 1)        | 243<br>(125 - 395)       | --                       | --                         |
| Maternal obstructed labor                                        | 149<br>(83 - 253)           | --                       | 0<br>(0 - 0)        | 149<br>(83 - 253)        | --                       | --                         |
| Maternal abortive outcome                                        | 429<br>(241 - 697)          | --                       | 0<br>(0 - 1)        | 429<br>(241 - 697)       | --                       | --                         |
| Indirect maternal deaths                                         | 231<br>(122 - 392)          | --                       | 0<br>(0 - 1)        | 231<br>(122 - 392)       | --                       | --                         |
| Late maternal deaths                                             | 261<br>(109 - 489)          | --                       | 0<br>(0 - 1)        | 261<br>(109 - 489)       | --                       | --                         |
| Maternal deaths aggravated by HIV/AIDS                           | 127<br>(66 - 204)           | --                       | --                  | 127<br>(66 - 204)        | --                       | --                         |
| Other maternal disorders                                         | 175<br>(90 - 295)           | --                       | 0<br>(0 - 0)        | 175<br>(90 - 295)        | --                       | --                         |
| Neonatal disorders                                               | 3,943<br>(3,205 - 5,001)    | 3,943<br>(3,205 - 5,001) | --                  | --                       | --                       | --                         |
| Neonatal preterm birth complications                             | 1,676<br>(924 - 2,558)      | 1,676<br>(924 - 2,558)   | --                  | --                       | --                       | --                         |
| Neonatal encephalopathy due to birth asphyxia and trauma         | 1,339<br>(632 - 2,175)      | 1,339<br>(632 - 2,175)   | --                  | --                       | --                       | --                         |
| Neonatal sepsis and other neonatal infections                    | 671<br>(208 - 1,303)        | 671<br>(208 - 1,303)     | --                  | --                       | --                       | --                         |
| Hemolytic disease and other neonatal jaundice                    | 18<br>(4 - 58)              | 18<br>(4 - 58)           | --                  | --                       | --                       | --                         |
| Other neonatal disorders                                         | 240<br>(79 - 781)           | 240<br>(79 - 781)        | --                  | --                       | --                       | --                         |
| Nutritional deficiencies                                         | 2,160<br>(1,562 - 2,914)    | 859<br>(481 - 1,420)     | 29<br>(16 - 53)     | 345<br>(205 - 516)       | 196<br>(102 - 330)       | 730<br>(424 - 1,112)       |
| Protein-energy malnutrition                                      | 1,412<br>(948 - 2,036)      | 777<br>(430 - 1,314)     | 20<br>(10 - 37)     | 81<br>(33 - 170)         | 91<br>(39 - 180)         | 443<br>(215 - 743)         |
| Iodine deficiency                                                | 2<br>(0 - 8)                | 0<br>(0 - 4)             | 0<br>(0 - 1)        | 1<br>(0 - 4)             | 0<br>(0 - 1)             | 0<br>(0 - 3)               |
| Iron-deficiency anemia                                           | 650<br>(328 - 1,022)        | 73<br>(13 - 201)         | 9<br>(3 - 19)       | 238<br>(124 - 375)       | 90<br>(35 - 172)         | 239<br>(88 - 450)          |
| Other nutritional deficiencies                                   | 96<br>(34 - 201)            | 8<br>(2 - 23)            | 1<br>(0 - 2)        | 25<br>(8 - 56)           | 15<br>(4 - 35)           | 48<br>(12 - 112)           |
| Other communicable, maternal, neonatal, and nutritional diseases | 554<br>(348 - 850)          | 364<br>(183 - 617)       | 21<br>(11 - 39)     | 100<br>(53 - 171)        | 22<br>(10 - 45)          | 46<br>(19 - 98)            |
| Sexually transmitted diseases excluding HIV                      | 408<br>(218 - 683)          | 332<br>(158 - 588)       | 17<br>(8 - 32)      | 47<br>(9 - 101)          | 5<br>(1 - 14)            | 7<br>(2 - 18)              |
| Syphilis                                                         | 376<br>(189 - 646)          | 332<br>(158 - 588)       | 17<br>(7 - 32)      | 19<br>(3 - 41)           | 3<br>(1 - 8)             | 5<br>(1 - 14)              |
| Chlamydial infection                                             | 11<br>(2 - 22)              | --                       | 0<br>(0 - 0)        | 9<br>(2 - 20)            | 1<br>(0 - 2)             | 0<br>(0 - 1)               |
| Gonococcal infection                                             | 11<br>(2 - 23)              | --                       | 0<br>(0 - 0)        | 10<br>(2 - 21)           | 1<br>(0 - 2)             | 1<br>(0 - 2)               |
| Other sexually transmitted diseases                              | 10<br>(2 - 21)              | --                       | 0<br>(0 - 0)        | 9<br>(2 - 20)            | 1<br>(0 - 2)             | 0<br>(0 - 1)               |
| Hepatitis                                                        | 20<br>(11 - 37)             | 3<br>(1 - 6)             | 1<br>(0 - 1)        | 10<br>(5 - 19)           | 3<br>(1 - 6)             | 3<br>(2 - 7)               |
| Acute hepatitis A                                                | 3<br>(1 - 7)                | 2<br>(1 - 4)             | 0<br>(0 - 1)        | 1<br>(0 - 2)             | 0<br>(0 - 0)             | 0<br>(0 - 0)               |
| Acute hepatitis B                                                | 9<br>(4 - 18)               | 1<br>(0 - 3)             | 0<br>(0 - 0)        | 2<br>(1 - 5)             | 2<br>(1 - 5)             | 3<br>(1 - 6)               |
| Acute hepatitis C                                                | 0<br>(0 - 1)                | --                       | 0<br>(0 - 0)        | 0<br>(0 - 1)             | 0<br>(0 - 0)             | 0<br>(0 - 1)               |
| Acute hepatitis E                                                | 8<br>(4 - 15)               | 0<br>(0 - 0)             | 0<br>(0 - 0)        | 7<br>(3 - 14)            | 0<br>(0 - 1)             | 0<br>(0 - 1)               |
| Other infectious diseases                                        | 126<br>(72 - 216)           | 29<br>(11 - 68)          | 4<br>(1 - 10)       | 43<br>(18 - 86)          | 15<br>(6 - 32)           | 36<br>(12 - 86)            |
| Non-communicable diseases                                        | 20,658<br>(15,002 - 27,730) | 1,189<br>(799 - 1,778)   | 152<br>(94 - 254)   | 3,325<br>(2,165 - 4,801) | 4,693<br>(2,746 - 7,392) | 11,299<br>(8,475 - 14,949) |
| Neoplasms                                                        | 3,906<br>(2,585 - 5,638)    | 35<br>(20 - 58)          | 19<br>(11 - 31)     | 560<br>(384 - 735)       | 1,536<br>(852 - 2,421)   | 1,756<br>(1,124 - 2,477)   |
| Esophageal cancer                                                | 173<br>(107 - 261)          | --                       | --                  | 12<br>(7 - 17)           | 65<br>(34 - 110)         | 96<br>(59 - 149)           |
| Stomach cancer                                                   | 149<br>(94 - 225)           | --                       | --                  | 9<br>(6 - 12)            | 51<br>(28 - 85)          | 89<br>(57 - 137)           |
| Liver cancer                                                     | 197<br>(126 - 288)          | --                       | 1<br>(0 - 1)        | 29<br>(15 - 48)          | 61<br>(32 - 106)         | 106<br>(61 - 166)          |
| Liver cancer due to hepatitis B                                  | 44<br>(17 - 77)             | --                       | 0<br>(0 - 0)        | 10<br>(3 - 19)           | 16<br>(6 - 30)           | 19<br>(7 - 33)             |
| Liver cancer due to hepatitis C                                  | 89<br>(48 - 143)            | --                       | 0<br>(0 - 0)        | 9<br>(4 - 17)            | 27<br>(11 - 50)          | 53<br>(26 - 87)            |

Web Table 31- Zimbabwe deaths with 95% UI by age, sex, and cause in 2013

| Cause                                | Females, All Ages         | Females, 0-4 Years | Females, 5-14 Years | Females, 15-49 Years   | Females, 50-69 Years   | Females, 70-80 Years     |
|--------------------------------------|---------------------------|--------------------|---------------------|------------------------|------------------------|--------------------------|
| Liver cancer due to alcohol use      | 27<br>(13 - 47)           | --                 | --                  | 1<br>(1 - 3)           | 7<br>(3 - 14)          | 18<br>(9 - 34)           |
| Liver cancer due to other causes     | 37<br>(20 - 61)           | --                 | 0<br>(0 - 1)        | 8<br>(4 - 15)          | 11<br>(5 - 23)         | 17<br>(7 - 31)           |
| Larynx cancer                        | 7<br>(2 - 18)             | --                 | --                  | 1<br>(0 - 2)           | 3<br>(1 - 8)           | 4<br>(1 - 8)             |
| Tracheal, bronchus and lung cancer   | 81<br>(52 - 130)          | --                 | --                  | 7<br>(4 - 14)          | 31<br>(17 - 54)        | 43<br>(28 - 68)          |
| Breast cancer                        | 339<br>(229 - 488)        | --                 | --                  | 78<br>(45 - 109)       | 127<br>(71 - 205)      | 134<br>(90 - 192)        |
| Cervical cancer                      | 1,562<br>(848 - 2,401)    | --                 | --                  | 129<br>(86 - 192)      | 801<br>(392 - 1,323)   | 633<br>(280 - 986)       |
| Uterine cancer                       | 61<br>(36 - 103)          | --                 | --                  | 4<br>(2 - 7)           | 19<br>(9 - 37)         | 38<br>(22 - 64)          |
| Prostate cancer                      | --                        | --                 | --                  | --                     | --                     | --                       |
| Colon and rectum cancer              | 318<br>(210 - 459)        | --                 | --                  | 32<br>(22 - 44)        | 87<br>(49 - 139)       | 199<br>(128 - 297)       |
| Lip and oral cavity cancer           | 28<br>(17 - 48)           | --                 | --                  | 4<br>(2 - 8)           | 9<br>(4 - 16)          | 15<br>(9 - 26)           |
| Nasopharynx cancer                   | 5<br>(3 - 11)             | --                 | 0<br>(0 - 1)        | 2<br>(1 - 5)           | 2<br>(1 - 4)           | 1<br>(0 - 2)             |
| Other pharynx cancer                 | 3<br>(2 - 4)              | --                 | --                  | 1<br>(0 - 1)           | 1<br>(1 - 2)           | 1<br>(1 - 1)             |
| Gallbladder and biliary tract cancer | 31<br>(18 - 55)           | --                 | --                  | 4<br>(3 - 6)           | 10<br>(5 - 20)         | 17<br>(9 - 31)           |
| Pancreatic cancer                    | 88<br>(57 - 129)          | --                 | --                  | 5<br>(3 - 6)           | 32<br>(17 - 53)        | 51<br>(33 - 77)          |
| Malignant skin melanoma              | 18<br>(11 - 26)           | --                 | --                  | 2<br>(1 - 3)           | 5<br>(3 - 9)           | 10<br>(6 - 15)           |
| Non-melanoma skin cancer             | 40<br>(11 - 104)          | --                 | --                  | 35<br>(9 - 93)         | 2<br>(1 - 7)           | 3<br>(1 - 9)             |
| Ovarian cancer                       | 133<br>(88 - 190)         | --                 | --                  | 35<br>(20 - 56)        | 52<br>(28 - 88)        | 46<br>(28 - 71)          |
| Testicular cancer                    | --                        | --                 | --                  | --                     | --                     | --                       |
| Kidney cancer                        | 19<br>(12 - 28)           | 2<br>(1 - 5)       | 1<br>(0 - 1)        | 2<br>(1 - 4)           | 8<br>(4 - 15)          | 6<br>(3 - 9)             |
| Bladder cancer                       | 99<br>(53 - 196)          | --                 | --                  | 13<br>(6 - 26)         | 35<br>(14 - 82)        | 51<br>(29 - 92)          |
| Brain and nervous system cancer      | 24<br>(16 - 39)           | 1<br>(1 - 3)       | 2<br>(1 - 3)        | 6<br>(4 - 9)           | 7<br>(4 - 13)          | 7<br>(4 - 12)            |
| Thyroid cancer                       | 29<br>(16 - 55)           | --                 | 0<br>(0 - 0)        | 2<br>(1 - 3)           | 14<br>(6 - 30)         | 14<br>(8 - 24)           |
| Mesothelioma                         | 2<br>(1 - 4)              | --                 | --                  | 1<br>(0 - 2)           | 1<br>(0 - 2)           | 0<br>(0 - 1)             |
| Hodgkin lymphoma                     | 9<br>(5 - 16)             | 1<br>(0 - 2)       | 0<br>(0 - 1)        | 4<br>(2 - 8)           | 1<br>(0 - 3)           | 2<br>(1 - 5)             |
| Non-Hodgkin lymphoma                 | 103<br>(64 - 162)         | 3<br>(1 - 6)       | 3<br>(1 - 6)        | 47<br>(25 - 76)        | 27<br>(14 - 52)        | 23<br>(14 - 40)          |
| Multiple myeloma                     | 37<br>(18 - 70)           | --                 | --                  | 2<br>(1 - 3)           | 16<br>(7 - 34)         | 19<br>(9 - 35)           |
| Leukemia                             | 40<br>(28 - 56)           | 2<br>(1 - 4)       | 3<br>(2 - 6)        | 16<br>(9 - 22)         | 8<br>(4 - 14)          | 10<br>(6 - 15)           |
| Other neoplasms                      | 312<br>(158 - 484)        | 25<br>(13 - 47)    | 9<br>(4 - 18)       | 78<br>(34 - 143)       | 61<br>(30 - 109)       | 138<br>(66 - 231)        |
| Cardiovascular diseases              | 9,343<br>(6,489 - 13,981) | 316<br>(130 - 564) | 61<br>(35 - 113)    | 1,368<br>(809 - 2,363) | 1,803<br>(986 - 3,235) | 5,796<br>(4,116 - 8,503) |
| Rheumatic heart disease              | 272<br>(165 - 531)        | 1<br>(0 - 3)       | 8<br>(2 - 28)       | 115<br>(53 - 299)      | 25<br>(11 - 57)        | 123<br>(70 - 189)        |
| Ischemic heart disease               | 2,032<br>(1,232 - 3,999)  | 3<br>(1 - 8)       | 0<br>(0 - 1)        | 112<br>(53 - 275)      | 251<br>(115 - 609)     | 1,665<br>(1,029 - 3,147) |
| Cerebrovascular disease              | 4,281<br>(2,972 - 6,230)  | 200<br>(44 - 397)  | 32<br>(11 - 66)     | 553<br>(327 - 848)     | 867<br>(457 - 1,552)   | 2,628<br>(1,817 - 3,811) |
| Ischemic stroke                      | 2,127<br>(1,384 - 3,218)  | 2<br>(0 - 7)       | 0<br>(0 - 2)        | 56<br>(24 - 119)       | 313<br>(151 - 550)     | 1,756<br>(1,173 - 2,586) |
| Hemorrhagic stroke                   | 2,154<br>(1,468 - 3,140)  | 198<br>(42 - 394)  | 32<br>(11 - 65)     | 498<br>(293 - 743)     | 554<br>(288 - 1,076)   | 872<br>(557 - 1,326)     |
| Hypertensive heart disease           | 1,024<br>(584 - 1,827)    | 1<br>(0 - 2)       | 1<br>(0 - 2)        | 121<br>(57 - 245)      | 194<br>(83 - 405)      | 708<br>(404 - 1,240)     |
| Cardiomyopathy and myocarditis       | 733<br>(455 - 1,200)      | 57<br>(25 - 136)   | 10<br>(4 - 26)      | 337<br>(175 - 681)     | 106<br>(51 - 187)      | 222<br>(117 - 377)       |
| Atrial fibrillation and flutter      | 0<br>(0 - 0)              | --                 | --                  | 0<br>(0 - 0)           | 0<br>(0 - 0)           | 0<br>(0 - 0)             |
| Aortic aneurysm                      | 78<br>(38 - 151)          | --                 | --                  | 9<br>(4 - 19)          | 21<br>(8 - 45)         | 48<br>(23 - 91)          |
| Peripheral vascular disease          | 1<br>(0 - 1)              | --                 | --                  | 0<br>(0 - 0)           | 0<br>(0 - 0)           | 1<br>(0 - 1)             |
| Endocarditis                         | 43<br>(25 - 78)           | 11<br>(4 - 22)     | 1<br>(1 - 3)        | 17<br>(8 - 36)         | 2<br>(1 - 5)           | 12<br>(6 - 21)           |

Web Table 31- Zimbabwe deaths with 95% UI by age, sex, and cause in 2013

| Cause                                               | Females, All Ages      | Females, 0-4 Years | Females, 5-14 Years | Females, 15-49 Years | Females, 50-69 Years | Females, 70-80 Years |
|-----------------------------------------------------|------------------------|--------------------|---------------------|----------------------|----------------------|----------------------|
| Other cardiovascular and circulatory diseases       | 881<br>(569 - 1,362)   | 43<br>(19 - 90)    | 8<br>(3 - 20)       | 102<br>(52 - 239)    | 337<br>(175 - 577)   | 390<br>(242 - 597)   |
| Chronic respiratory diseases                        | 1,226<br>(844 - 1,842) | 43<br>(23 - 72)    | 6<br>(3 - 10)       | 211<br>(137 - 337)   | 254<br>(138 - 448)   | 712<br>(478 - 1,099) |
| Chronic obstructive pulmonary disease               | 543<br>(335 - 879)     | 7<br>(3 - 15)      | 1<br>(1 - 2)        | 45<br>(24 - 74)      | 100<br>(49 - 183)    | 390<br>(243 - 628)   |
| Pneumoconiosis                                      | 11<br>(6 - 17)         | 1<br>(0 - 1)       | 0<br>(0 - 0)        | 2<br>(1 - 4)         | 2<br>(1 - 4)         | 6<br>(3 - 11)        |
| Silicosis                                           | 0<br>(0 - 1)           | 0<br>(0 - 0)       | 0<br>(0 - 0)        | 0<br>(0 - 0)         | 0<br>(0 - 0)         | 0<br>(0 - 0)         |
| Asbestosis                                          | 0<br>(0 - 1)           | 0<br>(0 - 0)       | 0<br>(0 - 0)        | 0<br>(0 - 0)         | 0<br>(0 - 0)         | 0<br>(0 - 0)         |
| Coal workers pneumoconiosis                         | 0<br>(0 - 0)           | 0<br>(0 - 0)       | 0<br>(0 - 0)        | 0<br>(0 - 0)         | 0<br>(0 - 0)         | 0<br>(0 - 0)         |
| Other pneumoconiosis                                | 10<br>(5 - 16)         | 0<br>(0 - 0)       | 0<br>(0 - 0)        | 2<br>(1 - 4)         | 2<br>(1 - 3)         | 6<br>(3 - 10)        |
| Asthma                                              | 540<br>(337 - 920)     | 24<br>(11 - 46)    | 4<br>(2 - 7)        | 135<br>(86 - 216)    | 135<br>(69 - 251)    | 242<br>(136 - 450)   |
| Interstitial lung disease and pulmonary sarcoidosis | 58<br>(28 - 122)       | 1<br>(0 - 3)       | 0<br>(0 - 0)        | 3<br>(1 - 8)         | 9<br>(3 - 19)        | 45<br>(19 - 99)      |
| Other chronic respiratory diseases                  | 74<br>(46 - 115)       | 10<br>(5 - 17)     | 0<br>(0 - 1)        | 26<br>(14 - 46)      | 8<br>(4 - 15)        | 30<br>(15 - 56)      |
| Cirrhosis                                           | 338<br>(228 - 479)     | 5<br>(2 - 9)       | 1<br>(1 - 2)        | 82<br>(53 - 120)     | 102<br>(56 - 165)    | 148<br>(94 - 223)    |
| Cirrhosis due to hepatitis B                        | 68<br>(34 - 119)       | 0<br>(0 - 0)       | 0<br>(0 - 0)        | 18<br>(9 - 33)       | 22<br>(9 - 42)       | 28<br>(12 - 52)      |
| Cirrhosis due to hepatitis C                        | 104<br>(62 - 158)      | 0<br>(0 - 1)       | 0<br>(0 - 0)        | 23<br>(10 - 38)      | 32<br>(15 - 56)      | 49<br>(27 - 81)      |
| Cirrhosis due to alcohol use                        | 114<br>(63 - 181)      | --                 | --                  | 16<br>(7 - 26)       | 37<br>(18 - 65)      | 61<br>(31 - 102)     |
| Cirrhosis due to other causes                       | 52<br>(31 - 80)        | 4<br>(2 - 8)       | 1<br>(1 - 2)        | 26<br>(14 - 43)      | 11<br>(5 - 22)       | 10<br>(5 - 18)       |
| Digestive diseases                                  | 1,025<br>(699 - 1,417) | 43<br>(22 - 77)    | 9<br>(6 - 16)       | 203<br>(127 - 296)   | 179<br>(95 - 297)    | 591<br>(379 - 841)   |
| Peptic ulcer disease                                | 160<br>(89 - 281)      | 3<br>(1 - 7)       | 1<br>(0 - 1)        | 26<br>(12 - 50)      | 31<br>(14 - 62)      | 100<br>(50 - 180)    |
| Gastritis and duodenitis                            | 34<br>(13 - 65)        | 1<br>(0 - 2)       | 0<br>(0 - 0)        | 2<br>(1 - 5)         | 5<br>(2 - 10)        | 26<br>(10 - 52)      |
| Appendicitis                                        | 36<br>(19 - 69)        | 2<br>(1 - 6)       | 2<br>(1 - 5)        | 9<br>(4 - 24)        | 5<br>(2 - 11)        | 17<br>(7 - 30)       |
| Paralytic ileus and intestinal obstruction          | 399<br>(190 - 628)     | 13<br>(4 - 30)     | 4<br>(2 - 7)        | 61<br>(21 - 112)     | 70<br>(30 - 132)     | 252<br>(121 - 416)   |
| Inguinal, femoral, and abdominal hernia             | 23<br>(11 - 47)        | 0<br>(0 - 1)       | 0<br>(0 - 0)        | 1<br>(0 - 2)         | 7<br>(3 - 14)        | 15<br>(7 - 31)       |
| Inflammatory bowel disease                          | 177<br>(87 - 387)      | 20<br>(7 - 41)     | 1<br>(0 - 3)        | 87<br>(41 - 169)     | 23<br>(8 - 66)       | 46<br>(16 - 128)     |
| Vascular intestinal disorders                       | 1<br>(0 - 3)           | 0<br>(0 - 0)       | 0<br>(0 - 0)        | 0<br>(0 - 1)         | 0<br>(0 - 0)         | 1<br>(0 - 2)         |
| Gallbladder and biliary diseases                    | 17<br>(8 - 35)         | 0<br>(0 - 0)       | 0<br>(0 - 0)        | 0<br>(0 - 1)         | 3<br>(1 - 7)         | 14<br>(6 - 27)       |
| Pancreatitis                                        | 26<br>(11 - 47)        | 0<br>(0 - 1)       | 0<br>(0 - 0)        | 2<br>(1 - 6)         | 7<br>(3 - 15)        | 16<br>(7 - 30)       |
| Other digestive diseases                            | 150<br>(71 - 241)      | 4<br>(1 - 11)      | 1<br>(0 - 2)        | 13<br>(5 - 24)       | 27<br>(11 - 53)      | 105<br>(47 - 179)    |
| Neurological disorders                              | 793<br>(554 - 1,072)   | 17<br>(7 - 34)     | 8<br>(4 - 16)       | 151<br>(79 - 254)    | 51<br>(28 - 83)      | 567<br>(398 - 787)   |
| Alzheimer disease and other dementias               | 543<br>(366 - 769)     | --                 | --                  | 0<br>(0 - 0)         | 28<br>(14 - 46)      | 515<br>(349 - 729)   |
| Parkinson disease                                   | 7<br>(2 - 32)          | --                 | --                  | 1<br>(0 - 2)         | 0<br>(0 - 1)         | 6<br>(2 - 29)        |
| Epilepsy                                            | 232<br>(138 - 357)     | 16<br>(7 - 33)     | 8<br>(4 - 16)       | 148<br>(76 - 251)    | 21<br>(10 - 38)      | 39<br>(20 - 67)      |
| Multiple sclerosis                                  | 1<br>(0 - 3)           | --                 | --                  | 0<br>(0 - 1)         | 0<br>(0 - 1)         | 0<br>(0 - 1)         |
| Other neurological disorders                        | 10<br>(7 - 15)         | 1<br>(0 - 1)       | 0<br>(0 - 0)        | 1<br>(1 - 2)         | 2<br>(1 - 3)         | 6<br>(4 - 9)         |
| Mental and substance use disorders                  | 65<br>(41 - 109)       | 1<br>(1 - 2)       | 0<br>(0 - 0)        | 37<br>(21 - 66)      | 17<br>(9 - 32)       | 10<br>(6 - 15)       |
| Schizophrenia                                       | 13<br>(8 - 21)         | --                 | --                  | 3<br>(2 - 6)         | 5<br>(2 - 8)         | 6<br>(3 - 9)         |
| Alcohol use disorders                               | 22<br>(11 - 55)        | --                 | --                  | 14<br>(7 - 33)       | 8<br>(3 - 20)        | 1<br>(0 - 2)         |
| Drug use disorders                                  | 29<br>(17 - 45)        | 1<br>(1 - 2)       | --                  | 20<br>(11 - 34)      | 5<br>(2 - 8)         | 4<br>(2 - 6)         |
| Opioid use disorders                                | 3<br>(2 - 5)           | 0<br>(0 - 0)       | --                  | 2<br>(1 - 4)         | 0<br>(0 - 1)         | 0<br>(0 - 1)         |
| Cocaine use disorders                               | 0<br>(0 - 0)           | 0<br>(0 - 0)       | --                  | 0<br>(0 - 0)         | 0<br>(0 - 0)         | 0<br>(0 - 0)         |
| Amphetamine use disorders                           | 0<br>(0 - 0)           | 0<br>(0 - 0)       | --                  | 0<br>(0 - 0)         | 0<br>(0 - 0)         | 0<br>(0 - 0)         |

Web Table 31- Zimbabwe deaths with 95% UI by age, sex, and cause in 2013

| Cause                                               | Females, All Ages        | Females, 0-4 Years   | Females, 5-14 Years | Females, 15-49 Years | Females, 50-69 Years | Females, 70-80 Years     |
|-----------------------------------------------------|--------------------------|----------------------|---------------------|----------------------|----------------------|--------------------------|
| Other drug use disorders                            | 26<br>(15 - 40)          | 1<br>(1 - 2)         | --                  | 17<br>(9 - 30)       | 4<br>(2 - 7)         | 3<br>(2 - 5)             |
| Eating disorders                                    | 0<br>(0 - 1)             | --                   | 0<br>(0 - 0)        | 0<br>(0 - 1)         | --                   | --                       |
| Anorexia nervosa                                    | 0<br>(0 - 1)             | --                   | 0<br>(0 - 0)        | 0<br>(0 - 1)         | --                   | --                       |
| Diabetes, urogenital, blood, and endocrine diseases | 3,083<br>(2,169 - 4,314) | 140<br>(77 - 252)    | 32<br>(16 - 75)     | 639<br>(414 - 981)   | 716<br>(404 - 1,186) | 1,556<br>(1,053 - 2,198) |
| Diabetes mellitus                                   | 1,448<br>(960 - 2,117)   | 9<br>(4 - 18)        | 3<br>(1 - 6)        | 136<br>(88 - 200)    | 459<br>(252 - 781)   | 842<br>(557 - 1,229)     |
| Acute glomerulonephritis                            | 1<br>(0 - 1)             | 0<br>(0 - 0)         | 0<br>(0 - 0)        | 0<br>(0 - 1)         | 0<br>(0 - 0)         | 0<br>(0 - 0)             |
| Chronic kidney disease                              | 854<br>(580 - 1,166)     | 22<br>(12 - 37)      | 7<br>(4 - 13)       | 212<br>(122 - 361)   | 166<br>(88 - 274)    | 447<br>(264 - 666)       |
| Chronic kidney disease due to diabetes mellitus     | 3<br>(2 - 6)             | 1<br>(0 - 1)         | 0<br>(0 - 0)        | 1<br>(0 - 2)         | 0<br>(0 - 1)         | 1<br>(0 - 2)             |
| Chronic kidney disease due to hypertension          | 274<br>(131 - 499)       | 2<br>(0 - 4)         | 1<br>(0 - 1)        | 116<br>(59 - 213)    | 68<br>(27 - 137)     | 87<br>(24 - 191)         |
| Chronic kidney disease due to glomerulonephritis    | 292<br>(129 - 536)       | 10<br>(5 - 18)       | 3<br>(2 - 6)        | 40<br>(17 - 75)      | 45<br>(13 - 104)     | 193<br>(79 - 377)        |
| Chronic kidney disease due to other causes          | 285<br>(159 - 466)       | 9<br>(4 - 19)        | 3<br>(1 - 6)        | 55<br>(20 - 131)     | 52<br>(20 - 109)     | 166<br>(78 - 309)        |
| Urinary diseases and male infertility               | 209<br>(111 - 326)       | 11<br>(5 - 23)       | 2<br>(1 - 3)        | 49<br>(24 - 93)      | 33<br>(14 - 60)      | 115<br>(55 - 196)        |
| Interstitial nephritis and urinary tract infections | 71<br>(29 - 121)         | 5<br>(2 - 11)        | 1<br>(0 - 2)        | 20<br>(8 - 39)       | 10<br>(4 - 21)       | 35<br>(12 - 70)          |
| Urolithiasis                                        | 1<br>(0 - 1)             | --                   | 0<br>(0 - 0)        | 0<br>(0 - 1)         | 0<br>(0 - 0)         | 0<br>(0 - 1)             |
| Other urinary diseases                              | 138<br>(75 - 226)        | 6<br>(3 - 13)        | 1<br>(0 - 1)        | 28<br>(14 - 60)      | 22<br>(10 - 42)      | 80<br>(39 - 142)         |
| Gynecological diseases                              | 4<br>(2 - 8)             | --                   | --                  | 4<br>(2 - 7)         | 0<br>(0 - 0)         | 0<br>(0 - 0)             |
| Uterine fibroids                                    | 1<br>(0 - 1)             | --                   | --                  | 0<br>(0 - 1)         | 0<br>(0 - 0)         | 0<br>(0 - 0)             |
| Polycystic ovarian syndrome                         | 0<br>(0 - 1)             | --                   | --                  | 0<br>(0 - 1)         | 0<br>(0 - 0)         | --                       |
| Endometriosis                                       | 1<br>(0 - 1)             | --                   | --                  | 1<br>(0 - 1)         | 0<br>(0 - 0)         | --                       |
| Genital prolapse                                    | 1<br>(0 - 1)             | --                   | --                  | 1<br>(0 - 1)         | 0<br>(0 - 0)         | 0<br>(0 - 0)             |
| Other gynecological diseases                        | 2<br>(1 - 4)             | --                   | --                  | 2<br>(1 - 4)         | 0<br>(0 - 0)         | 0<br>(0 - 0)             |
| Hemoglobinopathies and hemolytic anemias            | 341<br>(118 - 790)       | 50<br>(17 - 135)     | 12<br>(4 - 39)      | 175<br>(65 - 370)    | 29<br>(7 - 77)       | 75<br>(17 - 212)         |
| Thalassemias                                        | 12<br>(5 - 30)           | 8<br>(3 - 21)        | 1<br>(0 - 5)        | 3<br>(1 - 6)         | 0<br>(0 - 0)         | 0<br>(0 - 0)             |
| Sickle cell disorders                               | 155<br>(59 - 342)        | 20<br>(6 - 52)       | 7<br>(2 - 22)       | 118<br>(44 - 250)    | 9<br>(2 - 23)        | 1<br>(0 - 3)             |
| G6PD deficiency                                     | 9<br>(3 - 21)            | 2<br>(1 - 5)         | 0<br>(0 - 2)        | 6<br>(2 - 13)        | 1<br>(0 - 1)         | 0<br>(0 - 1)             |
| Other hemoglobinopathies and hemolytic anemias      | 166<br>(52 - 421)        | 21<br>(7 - 59)       | 3<br>(1 - 11)       | 48<br>(18 - 102)     | 19<br>(5 - 51)       | 74<br>(17 - 207)         |
| Endocrine, metabolic, blood, and immune disorders   | 226<br>(139 - 425)       | 47<br>(24 - 88)      | 8<br>(2 - 30)       | 63<br>(31 - 122)     | 30<br>(14 - 62)      | 77<br>(42 - 146)         |
| Musculoskeletal disorders                           | 46<br>(29 - 72)          | --                   | 0<br>(0 - 1)        | 10<br>(5 - 20)       | 8<br>(4 - 14)        | 29<br>(16 - 47)          |
| Rheumatoid arthritis                                | 26<br>(15 - 41)          | --                   | 0<br>(0 - 0)        | 4<br>(2 - 9)         | 4<br>(2 - 8)         | 17<br>(9 - 30)           |
| Other musculoskeletal disorders                     | 21<br>(13 - 33)          | --                   | 0<br>(0 - 1)        | 5<br>(3 - 12)        | 4<br>(2 - 7)         | 12<br>(6 - 20)           |
| Other non-communicable diseases                     | 832<br>(580 - 1,363)     | 589<br>(363 - 1,057) | 16<br>(7 - 31)      | 64<br>(38 - 104)     | 28<br>(15 - 49)      | 135<br>(86 - 203)        |
| Congenital anomalies                                | 641<br>(407 - 1,154)     | 569<br>(346 - 1,038) | 14<br>(6 - 29)      | 24<br>(14 - 48)      | 4<br>(2 - 8)         | 28<br>(18 - 48)          |
| Neural tube defects                                 | 94<br>(26 - 235)         | 94<br>(26 - 234)     | 0<br>(0 - 0)        | 0<br>(0 - 2)         | 0<br>(0 - 0)         | 0<br>(0 - 0)             |
| Congenital heart anomalies                          | 234<br>(125 - 438)       | 194<br>(92 - 383)    | 7<br>(3 - 15)       | 11<br>(6 - 20)       | 2<br>(1 - 4)         | 19<br>(11 - 32)          |
| Cleft lip and cleft palate                          | 4<br>(1 - 14)            | 4<br>(1 - 14)        | --                  | --                   | --                   | --                       |
| Down syndrome                                       | 48<br>(23 - 96)          | 43<br>(18 - 87)      | 3<br>(1 - 6)        | 2<br>(1 - 3)         | 0<br>(0 - 1)         | 0<br>(0 - 1)             |
| Chromosomal unbalanced rearrangements               | 60<br>(28 - 116)         | 56<br>(25 - 111)     | 1<br>(0 - 1)        | 3<br>(1 - 9)         | 0<br>(0 - 0)         | 0<br>(0 - 1)             |
| Other congenital anomalies                          | 200<br>(70 - 389)        | 179<br>(62 - 361)    | 3<br>(1 - 8)        | 8<br>(3 - 16)        | 2<br>(1 - 3)         | 8<br>(3 - 16)            |
| Skin and subcutaneous diseases                      | 182<br>(119 - 261)       | 11<br>(6 - 22)       | 1<br>(1 - 3)        | 39<br>(21 - 64)      | 24<br>(12 - 42)      | 106<br>(63 - 170)        |
| Cellulitis                                          | 65<br>(38 - 104)         | 4<br>(2 - 10)        | 1<br>(0 - 2)        | 17<br>(8 - 31)       | 9<br>(4 - 16)        | 34<br>(17 - 61)          |

Web Table 31- Zimbabwe deaths with 95% UI by age, sex, and cause in 2013

| Cause                                           | Females, All Ages        | Females, 0-4 Years | Females, 5-14 Years | Females, 15-49 Years   | Females, 50-69 Years | Females, 70-80 Years   |
|-------------------------------------------------|--------------------------|--------------------|---------------------|------------------------|----------------------|------------------------|
| Pyoderma                                        | 68<br>(42 - 105)         | 5<br>(3 - 11)      | 0<br>(0 - 1)        | 14<br>(8 - 23)         | 10<br>(5 - 19)       | 38<br>(20 - 65)        |
| Decubitus ulcer                                 | 21<br>(11 - 49)          | 0<br>(0 - 0)       | 0<br>(0 - 0)        | 1<br>(1 - 2)           | 2<br>(1 - 5)         | 17<br>(8 - 40)         |
| Other skin and subcutaneous diseases            | 29<br>(15 - 47)          | 1<br>(0 - 3)       | 0<br>(0 - 0)        | 8<br>(3 - 14)          | 3<br>(1 - 6)         | 17<br>(6 - 31)         |
| Sudden infant death syndrome                    | 9<br>(1 - 34)            | 9<br>(1 - 34)      | --                  | --                     | --                   | --                     |
| Injuries                                        | 3,528<br>(2,449 - 4,910) | 376<br>(215 - 620) | 101<br>(53 - 190)   | 1,492<br>(849 - 2,508) | 372<br>(211 - 597)   | 1,187<br>(782 - 1,719) |
| Transport injuries                              | 975<br>(675 - 1,378)     | 117<br>(63 - 203)  | 42<br>(23 - 75)     | 489<br>(281 - 824)     | 145<br>(79 - 239)    | 183<br>(100 - 287)     |
| Road injuries                                   | 885<br>(614 - 1,291)     | 107<br>(58 - 185)  | 38<br>(20 - 69)     | 454<br>(258 - 770)     | 125<br>(68 - 206)    | 161<br>(92 - 251)      |
| Pedestrian road injuries                        | 241<br>(160 - 346)       | 38<br>(18 - 70)    | 12<br>(6 - 23)      | 76<br>(40 - 139)       | 40<br>(20 - 68)      | 75<br>(38 - 122)       |
| Cyclist road injuries                           | 67<br>(42 - 108)         | 4<br>(2 - 10)      | 2<br>(1 - 5)        | 28<br>(14 - 54)        | 15<br>(8 - 28)       | 16<br>(9 - 28)         |
| Motorcyclist road injuries                      | 30<br>(14 - 74)          | 2<br>(1 - 6)       | 1<br>(0 - 4)        | 19<br>(7 - 51)         | 3<br>(1 - 9)         | 4<br>(2 - 10)          |
| Motor vehicle road injuries                     | 512<br>(336 - 772)       | 59<br>(31 - 106)   | 19<br>(9 - 37)      | 311<br>(173 - 539)     | 62<br>(33 - 108)     | 61<br>(31 - 105)       |
| Other road injuries                             | 36<br>(19 - 76)          | 4<br>(1 - 9)       | 3<br>(1 - 8)        | 19<br>(8 - 47)         | 4<br>(2 - 9)         | 6<br>(3 - 14)          |
| Other transport injuries                        | 91<br>(38 - 136)         | 10<br>(3 - 21)     | 4<br>(1 - 7)        | 35<br>(18 - 57)        | 21<br>(6 - 39)       | 22<br>(5 - 41)         |
| Unintentional injuries                          | 1,533<br>(1,059 - 2,195) | 236<br>(120 - 429) | 50<br>(21 - 106)    | 320<br>(174 - 521)     | 154<br>(83 - 265)    | 773<br>(481 - 1,178)   |
| Falls                                           | 507<br>(249 - 839)       | 12<br>(6 - 23)     | 2<br>(1 - 5)        | 28<br>(14 - 51)        | 22<br>(10 - 41)      | 442<br>(208 - 748)     |
| Drowning                                        | 161<br>(84 - 311)        | 62<br>(24 - 130)   | 22<br>(6 - 56)      | 33<br>(14 - 66)        | 22<br>(9 - 49)       | 22<br>(12 - 39)        |
| Fire, heat, and hot substances                  | 291<br>(146 - 550)       | 55<br>(18 - 124)   | 11<br>(3 - 28)      | 86<br>(34 - 181)       | 32<br>(12 - 67)      | 107<br>(53 - 199)      |
| Poisonings                                      | 99<br>(57 - 208)         | 27<br>(9 - 82)     | 2<br>(1 - 5)        | 28<br>(12 - 71)        | 11<br>(5 - 22)       | 31<br>(17 - 52)        |
| Exposure to mechanical forces                   | 64<br>(45 - 96)          | 16<br>(9 - 32)     | 4<br>(2 - 8)        | 25<br>(15 - 43)        | 10<br>(5 - 19)       | 8<br>(5 - 13)          |
| Unintentional firearm injuries                  | 28<br>(18 - 44)          | 3<br>(1 - 6)       | 0<br>(0 - 1)        | 13<br>(7 - 26)         | 8<br>(4 - 16)        | 4<br>(2 - 7)           |
| Unintentional suffocation                       | 10<br>(5 - 23)           | 4<br>(1 - 14)      | 0<br>(0 - 1)        | 2<br>(1 - 4)           | 0<br>(0 - 0)         | 2<br>(1 - 4)           |
| Other exposure to mechanical forces             | 27<br>(17 - 45)          | 9<br>(4 - 19)      | 4<br>(2 - 7)        | 10<br>(5 - 18)         | 2<br>(1 - 3)         | 3<br>(1 - 5)           |
| Adverse effects of medical treatment            | 206<br>(127 - 325)       | 28<br>(12 - 52)    | 4<br>(2 - 8)        | 76<br>(37 - 134)       | 30<br>(15 - 57)      | 68<br>(36 - 128)       |
| Animal contact                                  | 19<br>(10 - 55)          | 4<br>(1 - 14)      | 2<br>(0 - 5)        | 5<br>(2 - 15)          | 3<br>(1 - 9)         | 6<br>(2 - 16)          |
| Venomous animal contact                         | 13<br>(5 - 39)           | 3<br>(1 - 10)      | 1<br>(0 - 4)        | 2<br>(1 - 6)           | 2<br>(1 - 7)         | 4<br>(2 - 14)          |
| Non-venomous animal contact                     | 7<br>(3 - 19)            | 1<br>(0 - 4)       | 0<br>(0 - 1)        | 3<br>(1 - 9)           | 1<br>(0 - 3)         | 1<br>(0 - 3)           |
| Foreign body                                    | 52<br>(24 - 111)         | 23<br>(9 - 55)     | 2<br>(0 - 4)        | 10<br>(4 - 24)         | 5<br>(2 - 12)        | 11<br>(6 - 23)         |
| Pulmonary aspiration and foreign body in airway | 49<br>(22 - 109)         | 23<br>(8 - 55)     | 1<br>(0 - 4)        | 10<br>(3 - 22)         | 5<br>(2 - 12)        | 10<br>(5 - 22)         |
| Foreign body in other body part                 | 2<br>(1 - 4)             | 0<br>(0 - 1)       | 0<br>(0 - 0)        | 1<br>(0 - 2)           | 0<br>(0 - 0)         | 1<br>(0 - 2)           |
| Other unintentional injuries                    | 135<br>(50 - 199)        | 9<br>(5 - 16)      | 2<br>(1 - 4)        | 28<br>(14 - 51)        | 17<br>(6 - 32)       | 78<br>(17 - 128)       |
| Self-harm and interpersonal violence            | 992<br>(593 - 1,719)     | 22<br>(10 - 48)    | 8<br>(4 - 17)       | 664<br>(325 - 1,302)   | 68<br>(32 - 130)     | 229<br>(135 - 369)     |
| Self-harm                                       | 549<br>(323 - 1,160)     | --                 | 3<br>(1 - 7)        | 263<br>(119 - 803)     | 59<br>(27 - 117)     | 224<br>(131 - 362)     |
| Interpersonal violence                          | 443<br>(219 - 843)       | 22<br>(10 - 48)    | 6<br>(3 - 13)       | 401<br>(188 - 801)     | 9<br>(4 - 18)        | 5<br>(2 - 10)          |
| Assault by firearm                              | 51<br>(22 - 103)         | 5<br>(1 - 10)      | 1<br>(0 - 3)        | 41<br>(15 - 91)        | 3<br>(1 - 6)         | 2<br>(1 - 3)           |
| Assault by sharp object                         | 165<br>(79 - 293)        | 5<br>(2 - 11)      | 1<br>(1 - 3)        | 156<br>(71 - 281)      | 2<br>(1 - 5)         | 1<br>(0 - 2)           |
| Assault by other means                          | 227<br>(91 - 502)        | 13<br>(5 - 30)     | 3<br>(1 - 8)        | 204<br>(76 - 469)      | 3<br>(1 - 8)         | 2<br>(1 - 5)           |
| Forces of nature, war, and legal intervention   | 27<br>(12 - 66)          | 0<br>(0 - 0)       | 1<br>(0 - 2)        | 20<br>(8 - 48)         | 5<br>(2 - 12)        | 2<br>(1 - 4)           |
| Exposure to forces of nature                    | 27<br>(12 - 66)          | 0<br>(0 - 0)       | 1<br>(0 - 2)        | 20<br>(8 - 48)         | 5<br>(2 - 12)        | 2<br>(1 - 4)           |

## **Section 10. Data citation list by country**

**Web Table 32: Data citation list by country for causes of death and mortality data excluding studies on LRI and diarrhea etiologies**

**Web Table 32 - Comprehensive citation list**

| Country     | Citation                                                                                                                                                                                                                                                      | Year*                                                                          | New for GBD 2013 (*) |
|-------------|---------------------------------------------------------------------------------------------------------------------------------------------------------------------------------------------------------------------------------------------------------------|--------------------------------------------------------------------------------|----------------------|
| Afghanistan | Centre for Research on the Epidemiology of Disasters (CRED). EM-DAT: The OFDA/CRED International Disaster Database. Brussels, Belgium: Catholic University of Leuven.                                                                                         | 1954, 1956, 1963, 1971-1972, 1976, 1978, 1982-1984, 1987, 1991-2007, 2009-2013 |                      |
| Afghanistan | University of Buffalo. Afghanistan National Demographic and Family Guidance Survey 1972-1973.                                                                                                                                                                 | 1972-1973                                                                      |                      |
| Afghanistan | Dyson T. Infant, child and maternal mortality and associated conditions of health in the Greater Kabul region of Afghanistan. World Health Stat Q. 1981; 34(1): 14-43.                                                                                        | 1973                                                                           |                      |
| Afghanistan | Peace Research Institute Oslo (PRIO). Battle Deaths Dataset Version 3, 2009. Oslo, Norway: Peace Research Institute Oslo (PRIO), 2009.                                                                                                                        | 1978-1988                                                                      |                      |
| Afghanistan | Afghanistan Population and Housing Census 1979 as it appears in United Nations Statistics Division (UNSD). United Nations Demographic Yearbook. New York City, United States: United Nations Statistics Division (UNSD).                                      | 1979                                                                           |                      |
| Afghanistan | Institute for Health Metrics and Evaluation (IHME), Joint United Nations Program on HIV/AIDS (UNAIDS). Institute for Health Metrics and Evaluation HIV Mortality Estimates Based on the UNAIDS Spectrum Model Framework.                                      | 1980-2013                                                                      | *                    |
| Afghanistan | United Nations Children's Fund (UNICEF), World Health Organization (WHO). WHO and UNICEF Reported Disease Incidence Time Series - Pertussis. Geneva, Switzerland: World Health Organization (WHO).                                                            | 1980-1991, 1998-2000, 2002, 2004-2013                                          |                      |
| Afghanistan | United Nations Children's Fund (UNICEF), World Health Organization (WHO). WHO and UNICEF Reported Disease Incidence Time Series - Measles. Geneva, Switzerland: World Health Organization (WHO).                                                              | 1980-1991, 1998-2013                                                           |                      |
| Afghanistan | Department of Peace and Conflict Research, Uppsala University. UCDP Battle-Related Deaths Database Version 5, 2013. Uppsala, Sweden: Department of Peace and Conflict Research, Uppsala University, 2013.                                                     | 1989-2012                                                                      | *                    |
| Afghanistan | Department of Peace and Conflict Research, Uppsala University. UCDP Nonstate Conflict Database Version 2.5, 2013. Uppsala, Sweden: Department of Peace and Conflict Research, Uppsala University, 2013.                                                       | 1989-2011                                                                      | *                    |
| Afghanistan | Weatherall D. Sickle Cell and Thalassemias Prevalence Data, Personal Correspondence with David Weatherall. [Unpublished].                                                                                                                                     | 1990-2009                                                                      |                      |
| Afghanistan | Centre for Health Informatics and Multiprofessional Education, University College London. Modell's Haemoglobinopathologist's Almanac. London, United Kingdom: Centre for Health Informatics and Multiprofessional Education, University College London, 2008. | 1990-2003                                                                      |                      |
| Afghanistan | Measles Supplementary Immunization Activity Data as provided by the World Health Organization. [Unpublished].                                                                                                                                                 | 1994-1996, 1999                                                                |                      |
| Afghanistan | Department of Peace and Conflict Research, Uppsala University. UCDP One-Sided Violence Database Version 1.4, 2013. Uppsala, Sweden: Department of Peace and Conflict Research, Uppsala University, 2013.                                                      | 1997-2012                                                                      | *                    |
| Afghanistan | World Health Organization (WHO). Yellow Fever Reported Cases, WHO Vaccine-Preventable Diseases: Monitoring System. Geneva, Switzerland: World Health Organization (WHO).                                                                                      | 1998-1999                                                                      |                      |
| Afghanistan | Central Statistics Office (Afghanistan), UNICEF Afghanistan Country Office, German Technical Cooperation Agency (GTZ). Afghanistan Multiple Indicator Cluster Survey 2000. New York, United States: United Nations Children's Fund (UNICEF).                  | 2000                                                                           |                      |
| Afghanistan | Bartlett LA, Mawji S, Whitehead S, Crouse C, Dalil S, Ionete D, Salama P. Where giving birth is a forecast of death: maternal mortality in four districts of Afghanistan, 1999-2002. Lancet. 2005; 365(9462): 864-70.                                         | 2000                                                                           |                      |
| Afghanistan | Centers for Disease Control and Prevention (CDC), Ministry of Public Health (Afghanistan). Afghanistan Centers for Disease Control and Prevention Country Report 2003.                                                                                        | 2002                                                                           |                      |

**Web Table 32 - Comprehensive citation list**

| Country     | Citation                                                                                                                                                                                                                                                                                              | Year*                                 | New for GBD 2013 (*) |
|-------------|-------------------------------------------------------------------------------------------------------------------------------------------------------------------------------------------------------------------------------------------------------------------------------------------------------|---------------------------------------|----------------------|
| Afghanistan | Centers for Disease Control and Prevention (CDC), United Nations Children's Fund (UNICEF). Afghanistan - Badghis Nutrition and Health Survey 2002.                                                                                                                                                    | 2002                                  |                      |
| Afghanistan | World Health Organization (WHO). Retrospective Measles Data on Supplementary Immunization Activities. Geneva, Switzerland: World Health Organization (WHO).                                                                                                                                           | 2002-2003, 2006-2007, 2009, 2011-2013 |                      |
| Afghanistan | Central Statistics Organization (Afghanistan), United Nations Children's Fund (UNICEF). Afghanistan Multiple Indicator Cluster Survey 2003.                                                                                                                                                           | 2003                                  |                      |
| Afghanistan | Indian Institute of Health Management Research (IIHMR), Johns Hopkins University (JHU), Ministry of Public Health (Afghanistan). Afghanistan Health Survey 2006.                                                                                                                                      | 2006                                  |                      |
| Afghanistan | Abu-Raddad LJ, Akala FA, Semini I, Riedner G, Wilson D, Tawil O, World Bank. Characterizing the HIV/AIDS Epidemic in the Middle East and North Africa. Washington DC, United States: World Bank, 2010.                                                                                                | 2006, 2008                            |                      |
| Afghanistan | Central Statistics Organization (Afghanistan), Ministry of Rural Rehabilitation and Development (Afghanistan). Afghanistan National Risk and Vulnerability Assessment 2007-2008.                                                                                                                      | 2007-2008                             | *                    |
| Afghanistan | Joint United Nations Program on HIV/AIDS (UNAIDS), Ministry of Public Health (Afghanistan). Afghanistan UNGASS Country Progress Report 2010. Geneva, Switzerland: Joint United Nations Program on HIV/AIDS (UNAIDS), 2010.                                                                            | 2008-2009                             |                      |
| Afghanistan | Central Statistics Organization (Afghanistan), ICF Macro, Indian Institute of Health Management Research (IIHMR), Ministry of Public Health (Afghanistan), WHO Regional Office for the Eastern Mediterranean. Afghanistan Special Demographic and Health Survey 2010. Claverton, Maryland: ICF Macro. | 2010                                  |                      |
| Afghanistan | World Health Organization (WHO). Afghanistan WHO Leishmaniasis Country Profile.                                                                                                                                                                                                                       | 2010                                  | *                    |
| Afghanistan | Central Statistics Organization (Afghanistan), United Nations Children's Fund (UNICEF). Afghanistan Multiple Indicator Cluster Survey 2010-2011. New York, United States: United Nations Children's Fund (UNICEF), 2013.                                                                              | 2010-2011                             |                      |
| Albania     | Albania Vital Registration Death Data 1950 as it appears in United Nations Statistics Division (UNSD). United Nations Demographic Yearbook. New York City, United States: United Nations Statistics Division (UNSD).                                                                                  | 1950                                  |                      |
| Albania     | Albania Vital Registration Death Data 1955 as it appears in United Nations Statistics Division (UNSD). United Nations Demographic Yearbook. New York City, United States: United Nations Statistics Division (UNSD).                                                                                  | 1955                                  |                      |
| Albania     | Albania Vital Registration Death Data 1957 as it appears in United Nations Statistics Division (UNSD). United Nations Demographic Yearbook. New York City, United States: United Nations Statistics Division (UNSD).                                                                                  | 1957                                  |                      |
| Albania     | Albania Vital Registration Death Data 1958 as it appears in United Nations Statistics Division (UNSD). United Nations Demographic Yearbook. New York City, United States: United Nations Statistics Division (UNSD).                                                                                  | 1958                                  |                      |
| Albania     | Albania Vital Registration Death Data 1959 as it appears in United Nations Statistics Division (UNSD). United Nations Demographic Yearbook. New York City, United States: United Nations Statistics Division (UNSD).                                                                                  | 1959                                  |                      |
| Albania     | Albania Vital Registration Death Data 1960 as it appears in United Nations Statistics Division (UNSD). United Nations Demographic Yearbook. New York City, United States: United Nations Statistics Division (UNSD).                                                                                  | 1960                                  |                      |



**Web Table 32 - Comprehensive citation list**

| Country | Citation                                                                                                                                                                                                                                  | Year*                                          | New for GBD 2013 (*) |
|---------|-------------------------------------------------------------------------------------------------------------------------------------------------------------------------------------------------------------------------------------------|------------------------------------------------|----------------------|
| Albania | Albania Vital Registration Death Data 1961 as it appears in United Nations Statistics Division (UNSD). United Nations Demographic Yearbook. New York City, United States: United Nations Statistics Division (UNSD).                      | 1961                                           |                      |
| Albania | Fraser GR, Defaranas B, Kattamis CA, Race RR, Sanger R, Stamatoyannopoulos G. Glucose-6-phosphate dehydrogenase, colour vision and XG blood groups in Greece: linkage and population data. Ann Hum Genet. 1964; 395-403.                  | 1962                                           |                      |
| Albania | Albania Vital Registration Death Data 1962 as it appears in United Nations Statistics Division (UNSD). United Nations Demographic Yearbook. New York City, United States: United Nations Statistics Division (UNSD).                      | 1962                                           |                      |
| Albania | Albania Vital Registration Death Data 1963 as it appears in United Nations Statistics Division (UNSD). United Nations Demographic Yearbook. New York City, United States: United Nations Statistics Division (UNSD).                      | 1963                                           |                      |
| Albania | Albania Vital Registration Death Data 1964 as it appears in United Nations Statistics Division (UNSD). United Nations Demographic Yearbook. New York City, United States: United Nations Statistics Division (UNSD).                      | 1964                                           |                      |
| Albania | Centre for Research on the Epidemiology of Disasters (CRED). EM-DAT: The OFDA/CRED International Disaster Database. Brussels, Belgium: Catholic University of Leuven.                                                                     | 1967, 1979, 1982, 1985, 1992, 1995, 2002, 2005 |                      |
| Albania | Institute for Health Metrics and Evaluation (IHME), Joint United Nations Program on HIV/AIDS (UNAIDS). Institute for Health Metrics and Evaluation HIV Mortality Estimates Based on the UNAIDS Spectrum Model Framework.                  | 1980-2013                                      | *                    |
| Albania | United Nations Children's Fund (UNICEF), World Health Organization (WHO). WHO and UNICEF Reported Disease Incidence Time Series - Pertussis. Geneva, Switzerland: World Health Organization (WHO).                                        | 1980-2010, 2012-2013                           |                      |
| Albania | United Nations Children's Fund (UNICEF), World Health Organization (WHO). WHO and UNICEF Reported Disease Incidence Time Series - Measles. Geneva, Switzerland: World Health Organization (WHO).                                          | 1982-1989, 1991-2007, 2009-2010, 2012-2013     |                      |
| Albania | Albania Vital Registration - Deaths 1987 ICD9 as it appears in World Health Organization (WHO). WHO Mortality Database Version February 2014. Geneva, Switzerland: World Health Organization (WHO), 2014.                                 | 1987                                           |                      |
| Albania | Albania Vital Registration - Deaths 1988 ICD9 as it appears in World Health Organization (WHO). WHO Mortality Database Version February 2014. Geneva, Switzerland: World Health Organization (WHO), 2014.                                 | 1988                                           |                      |
| Albania | Albania Vital Registration - Deaths 1989 ICD9 as it appears in World Health Organization (WHO). WHO Mortality Database Version February 2014. Geneva, Switzerland: World Health Organization (WHO), 2014.                                 | 1989                                           |                      |
| Albania | Albania Vital Registration Death Data 1990 as it appears in United Nations Statistics Division (UNSD). United Nations Demographic Yearbook. New York City, United States: United Nations Statistics Division (UNSD).                      | 1990                                           |                      |
| Albania | Modell B, Darlison M, Birgens H, Cario H, Faustino P, Giordano PC, Gulbis B, Hopmeier P, Lena-Russo D, Romao L, Theodorsson E. Epidemiology of haemoglobin disorders in Europe: an overview. Scand J Clin Lab Invest. 2007; 67(1): 39-69. | 1990-2006                                      |                      |
| Albania | Weatherall D. Sickle Cell and Thalassemias Prevalence Data, Personal Correspondence with David Weatherall. [Unpublished].                                                                                                                 | 1990-2009                                      |                      |

**Web Table 32 - Comprehensive citation list**

| Country | Citation                                                                                                                                                                                                                                                      | Year*     | New for GBD 2013 (*) |
|---------|---------------------------------------------------------------------------------------------------------------------------------------------------------------------------------------------------------------------------------------------------------------|-----------|----------------------|
| Albania | Centre for Health Informatics and Multiprofessional Education, University College London. Modell's Haemoglobinopathologist's Almanac. London, United Kingdom: Centre for Health Informatics and Multiprofessional Education, University College London, 2008. | 1990-2006 |                      |
| Albania | Albania Vital Registration Death Data 1991 as it appears in United Nations Statistics Division (UNSD). United Nations Demographic Yearbook. New York City, United States: United Nations Statistics Division (UNSD).                                          | 1991      |                      |
| Albania | Santantonio T, Lo Caputo S, Germinario C, Squarcione S, Greco D, Laddago V, Pastore G. Prevalence of hepatitis virus infections in Albanian refugees. Eur J Epidemiol. 1993; 9(5): 537-40.                                                                    | 1991      |                      |
| Albania | Albania Vital Registration - Deaths 1992 ICD9 as it appears in World Health Organization (WHO). WHO Mortality Database Version February 2014. Geneva, Switzerland: World Health Organization (WHO), 2014.                                                     | 1992      |                      |
| Albania | Albania Vital Registration - Deaths 1993 ICD9 as it appears in World Health Organization (WHO). WHO Mortality Database Version February 2014. Geneva, Switzerland: World Health Organization (WHO), 2014.                                                     | 1993      |                      |
| Albania | Albania Institute of Statistics (INSTAT). Albania Vital Registration - Causes of Death 1993-2010. [Unpublished].                                                                                                                                              | 1993-2010 |                      |
| Albania | Albania Vital Registration - Deaths 1994 ICD9 as it appears in World Health Organization (WHO). WHO Mortality Database Version February 2014. Geneva, Switzerland: World Health Organization (WHO), 2014.                                                     | 1994      |                      |
| Albania | World Health Organization (WHO). Albania WHO Leishmaniasis Country Profile.                                                                                                                                                                                   | 1994-2008 | *                    |
| Albania | Albania Vital Registration - Deaths 1995 ICD9 as it appears in World Health Organization (WHO). WHO Mortality Database Version February 2014. Geneva, Switzerland: World Health Organization (WHO), 2014.                                                     | 1995      |                      |
| Albania | Malamitsi-Puchner A, Papacharitonos S, Sotos D, Tzala L, Psychogiou M, Hatzakis A, Evangelopoulou A, Michalas S. Prevalence study of different hepatitis markers among pregnant Albanian refugees in Greece. Eur J Epidemiol. 1996; 12(3): 297-301.           | 1995      |                      |
| Albania | Albania Vital Registration - Deaths 1996 ICD9 as it appears in World Health Organization (WHO). WHO Mortality Database Version February 2014. Geneva, Switzerland: World Health Organization (WHO), 2014.                                                     | 1996      |                      |
| Albania | Albania Vital Registration - Deaths 1997 ICD9 as it appears in World Health Organization (WHO). WHO Mortality Database Version February 2014. Geneva, Switzerland: World Health Organization (WHO), 2014.                                                     | 1997      |                      |
| Albania | Chironna M, Tosatti MA, Di Gangi IM, Sallustio A, Germinario C, Coluzzi M, Quarto M, Chieco-Bianchi L, Calabrò ML. High human herpesvirus 8 seroprevalence in populations from Western Balkan countries. J Med Virol. 2006; 78(7): 933-7.                     | 1997-1999 |                      |
| Albania | Albania Vital Registration - Deaths 1998 ICD9 as it appears in World Health Organization (WHO). WHO Mortality Database Version February 2014. Geneva, Switzerland: World Health Organization (WHO), 2014.                                                     | 1998      |                      |
| Albania | Albania Vital Registration - Deaths 1999 ICD9 as it appears in World Health Organization (WHO). WHO Mortality Database Version February 2014. Geneva, Switzerland: World Health Organization (WHO), 2014.                                                     | 1999      |                      |
| Albania | Chironna M, Germinario C, Lopalco PL, Carrozzini F, Quarto M. Prevalence of hepatitis virus infections in Kosovar refugees. Int J Infect Dis. 2001; 5(4): 209-13.                                                                                             | 1999      |                      |

**Web Table 32 - Comprehensive citation list**

| Country | Citation                                                                                                                                                                                                                                                                                            | Year*           | New for GBD 2013 (*) |
|---------|-----------------------------------------------------------------------------------------------------------------------------------------------------------------------------------------------------------------------------------------------------------------------------------------------------|-----------------|----------------------|
| Albania | National Institute of Statistics (Albania), United Nations Children's Fund (UNICEF). Albania Multiple Indicator Cluster Survey 2000. New York, United States: United Nations Children's Fund (UNICEF).                                                                                              | 2000            |                      |
| Albania | Albania Vital Registration - Deaths 2000 ICD9 as it appears in World Health Organization (WHO). WHO Mortality Database Version February 2014. Geneva, Switzerland: World Health Organization (WHO), 2014.                                                                                           | 2000            |                      |
| Albania | Ventura MT, Munno G, Giannoccaro F, Accettura F, Chironna M, Lama R, Hoxha M, Panetta V, Ferrigno L, Rosmini F, Matricardi PM, Barbuti S, Priftanji A, Bonini S, Tursi A. Allergy, asthma and markers of infections among Albanian migrants to Southern Italy. <i>Allergy</i> . 2004; 59(6): 632-6. | 2000            |                      |
| Albania | World Health Organization (WHO). Retrospective Measles Data on Supplementary Immunization Activities. Geneva, Switzerland: World Health Organization (WHO).                                                                                                                                         | 2000, 2002-2003 |                      |
| Albania | Albania Vital Registration - Deaths 2001 ICD9 as it appears in World Health Organization (WHO). WHO Mortality Database Version February 2014. Geneva, Switzerland: World Health Organization (WHO), 2014.                                                                                           | 2001            |                      |
| Albania | World Health Organization (WHO). Yellow Fever Reported Cases, WHO Vaccine-Preventable Diseases: Monitoring System. Geneva, Switzerland: World Health Organization (WHO).                                                                                                                            | 2001-2008       |                      |
| Albania | Albania Vital Registration - Deaths 2002 ICD9 as it appears in World Health Organization (WHO). WHO Mortality Database Version February 2014. Geneva, Switzerland: World Health Organization (WHO), 2014.                                                                                           | 2002            |                      |
| Albania | Albania Institute of Public Health (IPH), Ministry of Health (Albania), National Institute of Statistics (Albania), and Centers for Disease Control and Prevention. (2005) Albania Reproductive Health Survey 2001. Atlanta, United States: Centers for Disease Control and Prevention (CDC).       | 2002            |                      |
| Albania | Albania Vital Registration - Deaths 2003 ICD9 as it appears in World Health Organization (WHO). WHO Mortality Database Version February 2014. Geneva, Switzerland: World Health Organization (WHO), 2014.                                                                                           | 2003            |                      |
| Albania | Albania Vital Registration - Deaths 2004 ICD9 as it appears in World Health Organization (WHO). WHO Mortality Database Version February 2014. Geneva, Switzerland: World Health Organization (WHO), 2014.                                                                                           | 2004            |                      |
| Albania | National Institute of Statistics (Albania), United Nations Children's Fund (UNICEF). Albania Multiple Indicator Cluster Survey 2005. New York, United States: United Nations Children's Fund (UNICEF).                                                                                              | 2005            |                      |
| Albania | General Directorate of Civil Status (Albania). Albania Vital Statistics - Deaths 2005. [Unpublished].                                                                                                                                                                                               | 2005            |                      |
| Albania | Albania Vital Statistics - Deaths 2005 as it appears in TransMonEE 2013 Database, UNICEF Regional Office for CEE/CIS.                                                                                                                                                                               | 2005            |                      |
| Albania | World Health Organization (WHO). Global Status Report on Road Safety 2009. Geneva, Switzerland: World Health Organization (WHO), 2009.                                                                                                                                                              | 2007            |                      |
| Albania | ICF Macro, Institute of Public Health (Albania), Institute of Statistics (Albania). Albania Demographic and Health Survey 2008-2009. Claverton, Maryland: ICF Macro, 2009.                                                                                                                          | 2008-2009       |                      |
| Albania | Joint United Nations Program on HIV/AIDS (UNAIDS), Ministry of Health (Albania). Albania UNGASS Country Progress Report 2010. Geneva, Switzerland: Joint United Nations Program on HIV/AIDS (UNAIDS), 2010.                                                                                         | 2008-2010       |                      |
| Albania | European Union (EU), Government of Albania, Institute of Statistics (Albania). Albania Census 2011.                                                                                                                                                                                                 | 2011            | *                    |

**Web Table 32 - Comprehensive citation list**

| Country | Citation                                                                                                                                                                                                                                                                                         | Year*                                                                                                           | New for GBD 2013 (*) |
|---------|--------------------------------------------------------------------------------------------------------------------------------------------------------------------------------------------------------------------------------------------------------------------------------------------------|-----------------------------------------------------------------------------------------------------------------|----------------------|
| Albania | European Renal Association-European Dialysis and Transplant Association (ERA-EDTA). European Renal Association-European Dialysis and Transplant Association Registry Annual Report 2011. Parma, Italy: European Renal Association-European Dialysis and Transplant Association (ERA-EDTA), 2013. | 2011                                                                                                            | *                    |
| Algeria | Algeria Vital Registration Death Data 1950 as it appears in United Nations Statistics Division (UNSD). United Nations Demographic Yearbook. New York City, United States: United Nations Statistics Division (UNSD).                                                                             | 1950                                                                                                            |                      |
| Algeria | Algeria Vital Registration Death Data 1951 as it appears in United Nations Statistics Division (UNSD). United Nations Demographic Yearbook. New York City, United States: United Nations Statistics Division (UNSD).                                                                             | 1951                                                                                                            |                      |
| Algeria | Algeria Vital Registration Death Data 1952 as it appears in United Nations Statistics Division (UNSD). United Nations Demographic Yearbook. New York City, United States: United Nations Statistics Division (UNSD).                                                                             | 1952                                                                                                            |                      |
| Algeria | Centre for Research on the Epidemiology of Disasters (CRED). EM-DAT: The OFDA/CRED International Disaster Database. Brussels, Belgium: Catholic University of Leuven.                                                                                                                            | 1952, 1954, 1960, 1965-1967, 1969, 1973-1974, 1980-1982, 1984-1985, 1987, 1989, 1992-1994, 1996-1997, 1999-2012 |                      |
| Algeria | Algeria Vital Registration Death Data 1953 as it appears in United Nations Statistics Division (UNSD). United Nations Demographic Yearbook. New York City, United States: United Nations Statistics Division (UNSD).                                                                             | 1953                                                                                                            |                      |
| Algeria | Algeria Vital Registration Death Data 1954 as it appears in United Nations Statistics Division (UNSD). United Nations Demographic Yearbook. New York City, United States: United Nations Statistics Division (UNSD).                                                                             | 1954                                                                                                            |                      |
| Algeria | Peace Research Institute Oslo (PRIO). Battle Deaths Dataset Version 3, 2009. Oslo, Norway: Peace Research Institute Oslo (PRIO), 2009.                                                                                                                                                           | 1954-1988                                                                                                       |                      |
| Algeria | Algeria Vital Registration Death Data 1955 as it appears in United Nations Statistics Division (UNSD). United Nations Demographic Yearbook. New York City, United States: United Nations Statistics Division (UNSD).                                                                             | 1955                                                                                                            |                      |
| Algeria | Algeria Vital Registration Death Data 1956 as it appears in United Nations Statistics Division (UNSD). United Nations Demographic Yearbook. New York City, United States: United Nations Statistics Division (UNSD).                                                                             | 1956                                                                                                            |                      |
| Algeria | Algeria Vital Registration Death Data 1964 as it appears in United Nations Statistics Division (UNSD). United Nations Demographic Yearbook. New York City, United States: United Nations Statistics Division (UNSD).                                                                             | 1964                                                                                                            |                      |
| Algeria | Algeria Vital Registration Death Data 1965 as it appears in United Nations Statistics Division (UNSD). United Nations Demographic Yearbook. New York City, United States: United Nations Statistics Division (UNSD).                                                                             | 1965                                                                                                            |                      |
| Algeria | Statistics Department (Algeria). Algeria Fertility Survey 1970.                                                                                                                                                                                                                                  | 1970                                                                                                            |                      |
| Algeria | United Nations Office on Drugs and Crime (UNODC). United Nations Surveys on Crime Trends and the Operations of Criminal Justice Systems 1970-2006 as provided by Kavi Bhalla. [Unpublished].                                                                                                     | 1970-1975                                                                                                       |                      |
| Algeria | Richard F, Belhani M, Colonna P. G-6PD deficiency in newborns in Algiers (author's transl). Nouv Rev Fr Hematol. 1974; 14(4): 453-9.                                                                                                                                                             | 1972-1973                                                                                                       |                      |

**Web Table 32 - Comprehensive citation list**

| Country | Citation                                                                                                                                                                                                                                                      | Year*                            | New for GBD 2013 (*) |
|---------|---------------------------------------------------------------------------------------------------------------------------------------------------------------------------------------------------------------------------------------------------------------|----------------------------------|----------------------|
| Algeria | Algeria Vital Registration Death Data 1980 as it appears in United Nations Statistics Division (UNSD). United Nations Demographic Yearbook. New York City, United States: United Nations Statistics Division (UNSD).                                          | 1980                             |                      |
| Algeria | Institute for Health Metrics and Evaluation (IHME), Joint United Nations Program on HIV/AIDS (UNAIDS). Institute for Health Metrics and Evaluation HIV Mortality Estimates Based on the UNAIDS Spectrum Model Framework.                                      | 1980-2013                        | *                    |
| Algeria | United Nations Children's Fund (UNICEF), World Health Organization (WHO). WHO and UNICEF Reported Disease Incidence Time Series - Pertussis. Geneva, Switzerland: World Health Organization (WHO).                                                            | 1980-1994, 1996-1999, 2001-2013  |                      |
| Algeria | United Nations Children's Fund (UNICEF), World Health Organization (WHO). WHO and UNICEF Reported Disease Incidence Time Series - Measles. Geneva, Switzerland: World Health Organization (WHO).                                                              | 1980-1999, 2001-2013             |                      |
| Algeria | Algeria Vital Registration Death Data 1981 as it appears in United Nations Statistics Division (UNSD). United Nations Demographic Yearbook. New York City, United States: United Nations Statistics Division (UNSD).                                          | 1981                             |                      |
| Algeria | Algeria Vital Registration Death Data 1982 as it appears in United Nations Statistics Division (UNSD). United Nations Demographic Yearbook. New York City, United States: United Nations Statistics Division (UNSD).                                          | 1982                             |                      |
| Algeria | Hamdi-Cherif M, Touabti A, Belabbes EH. [Prevalence of hepatitis virus A in the city of Sétif]. Arch Inst Pasteur Alger. 1986; 285-7.                                                                                                                         | 1983-1985                        |                      |
| Algeria | Algeria Vital Registration Death Data 1985 as it appears in United Nations Statistics Division (UNSD). United Nations Demographic Yearbook. New York City, United States: United Nations Statistics Division (UNSD).                                          | 1985                             |                      |
| Algeria | National Center for Studies and Analysis for Planning (Algeria). Algeria National Fertility Survey 1986.                                                                                                                                                      | 1986                             |                      |
| Algeria | Algeria Vital Registration Death Data 1986 as it appears in United Nations Statistics Division (UNSD). United Nations Demographic Yearbook. New York City, United States: United Nations Statistics Division (UNSD).                                          | 1986                             |                      |
| Algeria | Parkin DM, International Agency for Research on Cancer, International Association of Cancer Registries. Cancer incidence in five continents. Volumes I to VIII. Lyon, France, IARC Press, 2005.                                                               | 1987, 1991, 1995                 |                      |
| Algeria | Parkin DM, International Agency for Research on Cancer, International Association of Cancer Registries. Cancer Incidence in Five Continents. Vol. I to VIII. Lyon, France, IARC Press, 2005.                                                                  | 1987, 1991, 1995                 |                      |
| Algeria | Department of Peace and Conflict Research, Uppsala University. UCDP Battle-Related Deaths Database Version 5, 2013. Uppsala, Sweden: Department of Peace and Conflict Research, Uppsala University, 2013.                                                     | 1989-2012                        | *                    |
| Algeria | National Office of Statistics (Algeria). Algeria Vital Statistics - Deaths 1990. [Unpublished].                                                                                                                                                               | 1990                             |                      |
| Algeria | Weatherall D. Sickle Cell and Thalassemias Prevalence Data, Personal Correspondence with David Weatherall. [Unpublished].                                                                                                                                     | 1990-2009                        |                      |
| Algeria | National Office of Statistics (Algeria). Algeria Demography 2011. Alger, Algeria: National Office of Statistics (Algeria).                                                                                                                                    | 1990-2011                        | *                    |
| Algeria | Centre for Health Informatics and Multiprofessional Education, University College London. Modell's Haemoglobinopathologist's Almanac. London, United Kingdom: Centre for Health Informatics and Multiprofessional Education, University College London, 2008. | 1990-2003                        |                      |
| Algeria | World Health Organization (WHO). Yellow Fever Reported Cases, WHO Vaccine-Preventable Diseases: Monitoring System. Geneva, Switzerland: World Health Organization (WHO).                                                                                      | 1991-1994, 1997, 2000, 2008-2009 |                      |
| Algeria | National Office of Statistics (Algeria), League of Arab States. Algeria Maternal and Child Health Survey 1992.                                                                                                                                                | 1992                             |                      |

**Web Table 32 - Comprehensive citation list**

| Country | Citation                                                                                                                                                                                                                                                                                                                               | Year*            | New for GBD 2013 (*) |
|---------|----------------------------------------------------------------------------------------------------------------------------------------------------------------------------------------------------------------------------------------------------------------------------------------------------------------------------------------|------------------|----------------------|
| Algeria | Department of Peace and Conflict Research, Uppsala University. UCDP One-Sided Violence Database Version 1.4, 2013. Uppsala, Sweden: Department of Peace and Conflict Research, Uppsala University, 2013.                                                                                                                               | 1993-2009        | *                    |
| Algeria | Ministry of Health and Population (Algeria), United Nations Children's Fund (UNICEF). Algeria Multiple Indicator Cluster Survey 1995.                                                                                                                                                                                                  | 1995             | *                    |
| Algeria | Department of Peace and Conflict Research, Uppsala University. UCDP Nonstate Conflict Database Version 2.5, 2013. Uppsala, Sweden: Department of Peace and Conflict Research, Uppsala University, 2013.                                                                                                                                | 1995-1998        | *                    |
| Algeria | Measles Supplementary Immunization Activity Data as provided by the World Health Organization. [Unpublished].                                                                                                                                                                                                                          | 1996             |                      |
| Algeria | World Health Organization (WHO). Algeria WHO Leishmaniasis Country Profile.                                                                                                                                                                                                                                                            | 1997-2008        | *                    |
| Algeria | National Office of Statistics (Algeria). Algeria Population and Housing Census 1998.                                                                                                                                                                                                                                                   | 1998             |                      |
| Algeria | Algeria Vital Registration Death Data 1998 as it appears in United Nations Statistics Division (UNSD). United Nations Demographic Yearbook. New York City, United States: United Nations Statistics Division (UNSD).                                                                                                                   | 1998             |                      |
| Algeria | Ministry of Health and Population (Algeria), National Institute of Public Health (Algeria), National Office of Statistics (Algeria), United Nations Children's Fund (UNICEF). Algeria Multiple Indicator Cluster Survey 2000.                                                                                                          | 2000             | *                    |
| Algeria | National Office of Statistics (Algeria). Algeria Vital Statistics - Deaths 2000. [Unpublished].                                                                                                                                                                                                                                        | 2000             |                      |
| Algeria | Curado MP, Edwards B, Shin HR, Storm H, Ferlay J, Heanue M and Boyle P, eds (2007). Cancer Incidence in Five Continents, Vol. IX Periodic Data (electronic version). Lyon, IARC. <a href="http://ci5.iarc.fr">http://ci5.iarc.fr</a>                                                                                                   | 2000             |                      |
| Algeria | Ministry of Health, Population and Hospital Reform (Algeria), University Hospital of Batna. Algeria - Batna Cancer Registry Report 2000-2006. Batna, Algeria: University Hospital of Batna.                                                                                                                                            | 2000-2006        |                      |
| Algeria | National Institute of Public Health (Algeria). Study of Causes of Death, Transition and Health Impact in North Africa (TAHINA) Project 2002.                                                                                                                                                                                           | 2002             |                      |
| Algeria | National Office of Statistics (Algeria), Ministry of Health, Population and Hospital Reform (Algeria), League of Arab States. Algeria Family Health Survey 2002-2003.                                                                                                                                                                  | 2002-2003        |                      |
| Algeria | Bahri O, Ezzikouri S, Alaya-Bouafif NB, Iguer F, Feydi AEE, Mestiri H, Benazzouz M, Khalfallah T, Afifi R, Elkihal L, Berkane S, Marchio A, Debzi N, Dejean A, Pineau P, Triki H, Benjelloun S. First multicenter study for risk factors for hepatocellular carcinoma development in North Africa. World J Hepatol. 2011; 3(1): 24-30. | 2002-2005        |                      |
| Algeria | United Nations Office on Drugs and Crime (UNODC). United Nations Office on Drugs and Crime Global Study on Homicides 2011. Vienna, Austria: United Nations Office on Drugs and Crime (UNODC), 2011.                                                                                                                                    | 2003-2007        |                      |
| Algeria | World Health Organization (WHO). Retrospective Measles Data on Supplementary Immunization Activities. Geneva, Switzerland: World Health Organization (WHO).                                                                                                                                                                            | 2003, 2007, 2011 |                      |
| Algeria | Forman D, Bray F, Brewster DH, Gombe Mbalawa C, Kohler B, Piñeros M, Steliarova-Foucher E, Swaminathan R and Ferlay J, eds (2013). Cancer Incidence in Five Continents, Vol. X Summary Database (electronic version). Lyon, IARC. <a href="http://ci5.iarc.fr">http://ci5.iarc.fr</a>                                                  | 2005             |                      |
| Algeria | Oran Cancer Registry (Algeria). Algeria - Oran Cancer Registry Report 2005. Oran, Algeria: Oran Cancer Registry (Algeria), 2006.                                                                                                                                                                                                       | 2005             |                      |
| Algeria | Oran Cancer Registry (Algeria). Algeria - Oran Cancer Registry Report 2006. Oran, Algeria: Oran Cancer Registry (Algeria), 2007.                                                                                                                                                                                                       | 2006             |                      |
| Algeria | National Office of Statistics (Algeria). Algeria Vital Statistics - Deaths 2007. [Unpublished].                                                                                                                                                                                                                                        | 2007             |                      |



**Web Table 32 - Comprehensive citation list**

| Country | Citation                                                                                                                                                                                                                                                                                                                                                                                                                                                                                                                                                                                                                                                                                                               | Year*                      | New for GBD 2013 (*) |
|---------|------------------------------------------------------------------------------------------------------------------------------------------------------------------------------------------------------------------------------------------------------------------------------------------------------------------------------------------------------------------------------------------------------------------------------------------------------------------------------------------------------------------------------------------------------------------------------------------------------------------------------------------------------------------------------------------------------------------------|----------------------------|----------------------|
| Algeria | Belamri S, Aouba A, Pavillon G, Jougla E. Connaissance des causes de décès en Algérie. Étude des décès enregistrés par l'INSP. Méthodes et premiers résultats. Rev Epidemiol Sante Publique. 2010; 58(3): 226-30.                                                                                                                                                                                                                                                                                                                                                                                                                                                                                                      | 2007                       |                      |
| Algeria | National Office of Statistics (Algeria). Algeria Vital Statistics - Deaths 2008. [Unpublished].                                                                                                                                                                                                                                                                                                                                                                                                                                                                                                                                                                                                                        | 2008                       |                      |
| Algeria | Abu-Raddad LJ, Akala FA, Semini I, Riedner G, Wilson D, Tawil O, World Bank. Characterizing the HIV/AIDS Epidemic in the Middle East and North Africa. Washington DC, United States: World Bank, 2010.                                                                                                                                                                                                                                                                                                                                                                                                                                                                                                                 | 2008-2009                  |                      |
| Algeria | National Office of Statistics (Algeria). Algeria Vital Statistics - Deaths 2009. [Unpublished].                                                                                                                                                                                                                                                                                                                                                                                                                                                                                                                                                                                                                        | 2009                       |                      |
| Algeria | National Office of Statistics (Algeria). Algeria Vital Statistics - Deaths 2010. [Unpublished].                                                                                                                                                                                                                                                                                                                                                                                                                                                                                                                                                                                                                        | 2010                       |                      |
| Andorra | Andorra Vital Registration Death Data 1950 as it appears in United Nations Statistics Division (UNSD). United Nations Demographic Yearbook. New York City, United States: United Nations Statistics Division (UNSD).                                                                                                                                                                                                                                                                                                                                                                                                                                                                                                   | 1950                       |                      |
| Andorra | Andorra Vital Registration Death Data 1951 as it appears in United Nations Statistics Division (UNSD). United Nations Demographic Yearbook. New York City, United States: United Nations Statistics Division (UNSD).                                                                                                                                                                                                                                                                                                                                                                                                                                                                                                   | 1951                       |                      |
| Andorra | Andorra Vital Registration Death Data 1952 as it appears in United Nations Statistics Division (UNSD). United Nations Demographic Yearbook. New York City, United States: United Nations Statistics Division (UNSD).                                                                                                                                                                                                                                                                                                                                                                                                                                                                                                   | 1952                       |                      |
| Andorra | Andorra Vital Registration Death Data 1953 as it appears in United Nations Statistics Division (UNSD). United Nations Demographic Yearbook. New York City, United States: United Nations Statistics Division (UNSD).                                                                                                                                                                                                                                                                                                                                                                                                                                                                                                   | 1953                       |                      |
| Andorra | Andorra Vital Registration Death Data 1954 as it appears in United Nations Statistics Division (UNSD). United Nations Demographic Yearbook. New York City, United States: United Nations Statistics Division (UNSD).                                                                                                                                                                                                                                                                                                                                                                                                                                                                                                   | 1954                       |                      |
| Andorra | Institute for Health Metrics and Evaluation (IHME), Joint United Nations Program on HIV/AIDS (UNAIDS). Institute for Health Metrics and Evaluation HIV Mortality Estimates Based on the UNAIDS Spectrum Model Framework.                                                                                                                                                                                                                                                                                                                                                                                                                                                                                               | 1980-2013                  | *                    |
| Andorra | Andorra Vital Registration Death Data 1992 as it appears in United Nations Statistics Division (UNSD). United Nations Demographic Yearbook. New York City, United States: United Nations Statistics Division (UNSD).                                                                                                                                                                                                                                                                                                                                                                                                                                                                                                   | 1992                       |                      |
| Andorra | Trichopoulos D, Bamia C, Laggiou P, Fedirko V, Trepo E, Jenab M, Pischon T, Nöthlings U, Overved K, Tjønneland A, Outzen M, Clavel-Chapelon F, Kaaks R, Lukanova A, Boeing H, Aleksandrova K, Benetou V, Zylis D, Palli D, Pala V, Panico S, Tumino R, Sacerdote C, Bueno-De-Mesquita HB, Van Kranen HJ, Peeters PHM, Lund E, Quirós JR, González CA, Sanchez Perez M-J, Navarro C, Dorronsoro M, Barricarte A, Lindkvist B, Regnér S, Werner M, Hallmans G, Khaw K-T, Wareham N, Key T, Romieu I, Chuang S-C, Murphy N, Boffetta P, Trichopoulou A, Riboli E. Hepatocellular carcinoma risk factors and disease burden in a European cohort: a nested case-control study. J Natl Cancer Inst. 2011; 103(22): 1686-95. | 1992-2005                  | *                    |
| Andorra | Andorra Vital Registration Death Data 1994 as it appears in United Nations Statistics Division (UNSD). United Nations Demographic Yearbook. New York City, United States: United Nations Statistics Division (UNSD).                                                                                                                                                                                                                                                                                                                                                                                                                                                                                                   | 1994                       |                      |
| Andorra | United Nations Children's Fund (UNICEF), World Health Organization (WHO). WHO and UNICEF Reported Disease Incidence Time Series - Pertussis. Geneva, Switzerland: World Health Organization (WHO).                                                                                                                                                                                                                                                                                                                                                                                                                                                                                                                     | 1997, 1999-2004, 2008-2013 |                      |

**Web Table 32 - Comprehensive citation list**

| Country | Citation                                                                                                                                                                                                                 | Year*                      | New for GBD 2013 (*) |
|---------|--------------------------------------------------------------------------------------------------------------------------------------------------------------------------------------------------------------------------|----------------------------|----------------------|
| Andorra | United Nations Children's Fund (UNICEF), World Health Organization (WHO). WHO and UNICEF Reported Disease Incidence Time Series - Measles. Geneva, Switzerland: World Health Organization (WHO).                         | 1997, 1999-2013            |                      |
| Andorra | World Health Organization (WHO). Yellow Fever Reported Cases, WHO Vaccine-Preventable Diseases: Monitoring System. Geneva, Switzerland: World Health Organization (WHO).                                                 | 1999-2009                  |                      |
| Andorra | Andorra Vital Registration Death Data 2002 as it appears in United Nations Statistics Division (UNSD). United Nations Demographic Yearbook. New York City, United States: United Nations Statistics Division (UNSD).     | 2002                       |                      |
| Andorra | Andorra Vital Registration Death Data 2003 as it appears in United Nations Statistics Division (UNSD). United Nations Demographic Yearbook. New York City, United States: United Nations Statistics Division (UNSD).     | 2003                       |                      |
| Andorra | Andorra Vital Registration Death Data 2004 as it appears in United Nations Statistics Division (UNSD). United Nations Demographic Yearbook. New York City, United States: United Nations Statistics Division (UNSD).     | 2004                       |                      |
| Andorra | Andorra Vital Registration Death Data 2005 as it appears in United Nations Statistics Division (UNSD). United Nations Demographic Yearbook. New York City, United States: United Nations Statistics Division (UNSD).     | 2005                       |                      |
| Andorra | Andorra Vital Registration Death Data 2007 as it appears in United Nations Statistics Division (UNSD). United Nations Demographic Yearbook. New York City, United States: United Nations Statistics Division (UNSD).     | 2007                       |                      |
| Andorra | Andorra Vital Registration Death Data 2008 as it appears in United Nations Statistics Division (UNSD). United Nations Demographic Yearbook. New York City, United States: United Nations Statistics Division (UNSD).     | 2008                       |                      |
| Andorra | Andorra Vital Registration Death Data 2009 as it appears in United Nations Statistics Division (UNSD). United Nations Demographic Yearbook. New York City, United States: United Nations Statistics Division (UNSD).     | 2009                       |                      |
| Andorra | Andorra Vital Registration Death Data 2010 as it appears in United Nations Statistics Division (UNSD). United Nations Demographic Yearbook. New York City, United States: United Nations Statistics Division (UNSD).     | 2010                       |                      |
| Angola  | Peace Research Institute Oslo (PRIO). Battle Deaths Dataset Version 3, 2009. Oslo, Norway: Peace Research Institute Oslo (PRIO), 2009.                                                                                   | 1961-1988                  |                      |
| Angola  | Institute for Health Metrics and Evaluation (IHME), Joint United Nations Program on HIV/AIDS (UNAIDS). Institute for Health Metrics and Evaluation HIV Mortality Estimates Based on the UNAIDS Spectrum Model Framework. | 1980-2013                  | *                    |
| Angola  | United Nations Children's Fund (UNICEF), World Health Organization (WHO). WHO and UNICEF Reported Disease Incidence Time Series - Pertussis. Geneva, Switzerland: World Health Organization (WHO).                       | 1980-1991, 1993, 2000-2013 |                      |
| Angola  | United Nations Children's Fund (UNICEF), World Health Organization (WHO). WHO and UNICEF Reported Disease Incidence Time Series - Measles. Geneva, Switzerland: World Health Organization (WHO).                         | 1980-2013                  |                      |
| Angola  | WHO Department of Communicable Disease Surveillance and Response. WHO Report on Global Surveillance of Epidemic-prone Infectious Diseases 2000.                                                                          | 1988                       |                      |
| Angola  | Department of Peace and Conflict Research, Uppsala University. UCDP Battle-Related Deaths Database Version 5, 2013. Uppsala, Sweden: Department of Peace and Conflict Research, Uppsala University, 2013.                | 1989-2009                  | *                    |



**Web Table 32 - Comprehensive citation list**

| Country             | Citation                                                                                                                                                                                                                                                      | Year*                             | New for GBD 2013 (*) |
|---------------------|---------------------------------------------------------------------------------------------------------------------------------------------------------------------------------------------------------------------------------------------------------------|-----------------------------------|----------------------|
| Angola              | World Health Organization (WHO). Yellow Fever Reported Cases, WHO Vaccine-Preventable Diseases: Monitoring System. Geneva, Switzerland: World Health Organization (WHO).                                                                                      | 1989-1991, 1997, 2000-2007        |                      |
| Angola              | Department of Peace and Conflict Research, Uppsala University. UCDP One-Sided Violence Database Version 1.4, 2013. Uppsala, Sweden: Department of Peace and Conflict Research, Uppsala University, 2013.                                                      | 1989-2003                         | *                    |
| Angola              | Weatherall D. Sickle Cell and Thalassemias Prevalence Data, Personal Correspondence with David Weatherall. [Unpublished].                                                                                                                                     | 1990-2009                         |                      |
| Angola              | Centre for Health Informatics and Multiprofessional Education, University College London. Modell's Haemoglobinopathologist's Almanac. London, United Kingdom: Centre for Health Informatics and Multiprofessional Education, University College London, 2008. | 1990-2003                         |                      |
| Angola              | Living Conditions Monitoring Office (Angola), National Statistics Office (Angola), United Nations Children's Fund (UNICEF). Angola Multiple Indicator Cluster Survey 1996. New York, United States: United Nations Children's Fund (UNICEF).                  | 1996                              | *                    |
| Angola              | Measles Supplementary Immunization Activity Data as provided by the World Health Organization. [Unpublished].                                                                                                                                                 | 1997, 1999                        |                      |
| Angola              | Centre for Research on the Epidemiology of Disasters (CRED). EM-DAT: The OFDA/CRED International Disaster Database. Brussels, Belgium: Catholic University of Leuven.                                                                                         | 2000-2004, 2007-2011, 2013        |                      |
| Angola              | World Health Organization Regional Office for Africa. HIV/AIDS Epidemiological Surveillance Update for the WHO African Region. World Health Organization Regional Office for Africa, 2003.                                                                    | 2000-2002                         |                      |
| Angola              | National Institute of Statistics (Angola), United Nations Children's Fund (UNICEF). Angola Multiple Indicator Cluster Survey 2001. New York, United States: United Nations Children's Fund (UNICEF).                                                          | 2001                              |                      |
| Angola              | World Health Organization (WHO). Retrospective Measles Data on Supplementary Immunization Activities. Geneva, Switzerland: World Health Organization (WHO).                                                                                                   | 2003, 2006, 2009, 2011            |                      |
| Angola              | United Nations Office on Drugs and Crime (UNODC). United Nations Office on Drugs and Crime Global Study on Homicides 2011. Vienna, Austria: United Nations Office on Drugs and Crime (UNODC), 2011.                                                           | 2004                              |                      |
| Angola              | Macro International, Inc, Ministry of Health (Angola). Angola Malaria Indicator Survey 2006-2007. Calverton, United States: Macro International, Inc.                                                                                                         | 2006-2007                         |                      |
| Angola              | National Institute of Statistics (Angola), Oxford Policy Management, United Nations Children's Fund (UNICEF). Angola Integrated Inquiry into People's Well-Being 2008-2009.                                                                                   | 2008-2009                         |                      |
| Angola              | COSEP-Consulting Ltd., Consaúde Ltd., ICF International, National Malaria Control (Angola), President's Malaria Initiative (PMI). Angola Malaria Indicator Survey 2011.                                                                                       | 2011                              |                      |
| Antigua and Barbuda | Antigua and Barbuda Vital Registration Death Data 1950 as it appears in United Nations Statistics Division (UNSD). United Nations Demographic Yearbook. New York City, United States: United Nations Statistics Division (UNSD).                              | 1950                              |                      |
| Antigua and Barbuda | Centre for Research on the Epidemiology of Disasters (CRED). EM-DAT: The OFDA/CRED International Disaster Database. Brussels, Belgium: Catholic University of Leuven.                                                                                         | 1950, 1960, 1989, 1995, 1998-1999 |                      |
| Antigua and Barbuda | Antigua and Barbuda Vital Registration Death Data 1951 as it appears in United Nations Statistics Division (UNSD). United Nations Demographic Yearbook. New York City, United States: United Nations Statistics Division (UNSD).                              | 1951                              |                      |
| Antigua and Barbuda | Antigua and Barbuda Vital Registration Death Data 1952 as it appears in United Nations Statistics Division (UNSD). United Nations Demographic Yearbook. New York City, United States: United Nations Statistics Division (UNSD).                              | 1952                              |                      |

**Web Table 32 - Comprehensive citation list**

| Country             | Citation                                                                                                                                                                                                                         | Year* | New for GBD 2013 (*) |
|---------------------|----------------------------------------------------------------------------------------------------------------------------------------------------------------------------------------------------------------------------------|-------|----------------------|
| Antigua and Barbuda | Antigua and Barbuda Vital Registration Death Data 1953 as it appears in United Nations Statistics Division (UNSD). United Nations Demographic Yearbook. New York City, United States: United Nations Statistics Division (UNSD). | 1953  |                      |
| Antigua and Barbuda | Antigua and Barbuda Vital Registration Death Data 1954 as it appears in United Nations Statistics Division (UNSD). United Nations Demographic Yearbook. New York City, United States: United Nations Statistics Division (UNSD). | 1954  |                      |
| Antigua and Barbuda | Antigua and Barbuda Vital Registration Death Data 1955 as it appears in United Nations Statistics Division (UNSD). United Nations Demographic Yearbook. New York City, United States: United Nations Statistics Division (UNSD). | 1955  |                      |
| Antigua and Barbuda | Antigua and Barbuda Vital Registration Death Data 1956 as it appears in United Nations Statistics Division (UNSD). United Nations Demographic Yearbook. New York City, United States: United Nations Statistics Division (UNSD). | 1956  |                      |
| Antigua and Barbuda | Antigua and Barbuda Vital Registration Death Data 1957 as it appears in United Nations Statistics Division (UNSD). United Nations Demographic Yearbook. New York City, United States: United Nations Statistics Division (UNSD). | 1957  |                      |
| Antigua and Barbuda | Antigua and Barbuda Vital Registration Death Data 1958 as it appears in United Nations Statistics Division (UNSD). United Nations Demographic Yearbook. New York City, United States: United Nations Statistics Division (UNSD). | 1958  |                      |
| Antigua and Barbuda | Antigua and Barbuda Vital Registration Death Data 1959 as it appears in United Nations Statistics Division (UNSD). United Nations Demographic Yearbook. New York City, United States: United Nations Statistics Division (UNSD). | 1959  |                      |
| Antigua and Barbuda | Antigua and Barbuda Vital Registration Death Data 1960 as it appears in United Nations Statistics Division (UNSD). United Nations Demographic Yearbook. New York City, United States: United Nations Statistics Division (UNSD). | 1960  |                      |
| Antigua and Barbuda | Antigua and Barbuda Vital Registration - Deaths 1961 ICD7 as it appears in World Health Organization (WHO). WHO Mortality Database Version February 2014. Geneva, Switzerland: World Health Organization (WHO), 2014.            | 1961  |                      |
| Antigua and Barbuda | Antigua and Barbuda Vital Registration - Deaths 1962 ICD7 as it appears in World Health Organization (WHO). WHO Mortality Database Version February 2014. Geneva, Switzerland: World Health Organization (WHO), 2014.            | 1962  |                      |
| Antigua and Barbuda | Antigua and Barbuda Vital Registration - Deaths 1963 ICD7 as it appears in World Health Organization (WHO). WHO Mortality Database Version February 2014. Geneva, Switzerland: World Health Organization (WHO), 2014.            | 1963  |                      |
| Antigua and Barbuda | Antigua and Barbuda Vital Registration - Deaths 1964 ICD7 as it appears in World Health Organization (WHO). WHO Mortality Database Version February 2014. Geneva, Switzerland: World Health Organization (WHO), 2014.            | 1964  |                      |
| Antigua and Barbuda | Antigua and Barbuda Vital Registration Death Data 1965 as it appears in United Nations Statistics Division (UNSD). United Nations Demographic Yearbook. New York City, United States: United Nations Statistics Division (UNSD). | 1965  |                      |
| Antigua and Barbuda | Antigua and Barbuda Vital Registration - Deaths 1966 ICD7 as it appears in World Health Organization (WHO). WHO Mortality Database Version February 2014. Geneva, Switzerland: World Health Organization (WHO), 2014.            | 1966  |                      |

**Web Table 32 - Comprehensive citation list**

| Country             | Citation                                                                                                                                                                                                                 | Year*     | New for GBD 2013 (*) |
|---------------------|--------------------------------------------------------------------------------------------------------------------------------------------------------------------------------------------------------------------------|-----------|----------------------|
| Antigua and Barbuda | Antigua and Barbuda Vital Registration - Deaths 1969 ICD8 as it appears in World Health Organization (WHO). WHO Mortality Database Version February 2014. Geneva, Switzerland: World Health Organization (WHO), 2014.    | 1969      |                      |
| Antigua and Barbuda | Antigua and Barbuda Vital Registration - Deaths 1970 ICD8 as it appears in World Health Organization (WHO). WHO Mortality Database Version February 2014. Geneva, Switzerland: World Health Organization (WHO), 2014.    | 1970      |                      |
| Antigua and Barbuda | Antigua and Barbuda Vital Registration - Deaths 1971 ICD8 as it appears in World Health Organization (WHO). WHO Mortality Database Version February 2014. Geneva, Switzerland: World Health Organization (WHO), 2014.    | 1971      |                      |
| Antigua and Barbuda | Antigua and Barbuda Vital Registration - Deaths 1972 ICD8 as it appears in World Health Organization (WHO). WHO Mortality Database Version February 2014. Geneva, Switzerland: World Health Organization (WHO), 2014.    | 1972      |                      |
| Antigua and Barbuda | Antigua and Barbuda Vital Registration - Deaths 1973 ICD8 as it appears in World Health Organization (WHO). WHO Mortality Database Version February 2014. Geneva, Switzerland: World Health Organization (WHO), 2014.    | 1973      |                      |
| Antigua and Barbuda | Antigua and Barbuda Vital Registration - Deaths 1974 ICD8 as it appears in World Health Organization (WHO). WHO Mortality Database Version February 2014. Geneva, Switzerland: World Health Organization (WHO), 2014.    | 1974      |                      |
| Antigua and Barbuda | Antigua and Barbuda Vital Registration - Deaths 1975 ICD8 as it appears in World Health Organization (WHO). WHO Mortality Database Version February 2014. Geneva, Switzerland: World Health Organization (WHO), 2014.    | 1975      |                      |
| Antigua and Barbuda | Antigua and Barbuda Vital Registration - Deaths 1976 ICD8 as it appears in World Health Organization (WHO). WHO Mortality Database Version February 2014. Geneva, Switzerland: World Health Organization (WHO), 2014.    | 1976      |                      |
| Antigua and Barbuda | Antigua and Barbuda Vital Registration - Deaths 1977 ICD8 as it appears in World Health Organization (WHO). WHO Mortality Database Version February 2014. Geneva, Switzerland: World Health Organization (WHO), 2014.    | 1977      |                      |
| Antigua and Barbuda | Antigua and Barbuda Vital Registration - Deaths 1978 ICD8 as it appears in World Health Organization (WHO). WHO Mortality Database Version February 2014. Geneva, Switzerland: World Health Organization (WHO), 2014.    | 1978      |                      |
| Antigua and Barbuda | Institute for Health Metrics and Evaluation (IHME), Joint United Nations Program on HIV/AIDS (UNAIDS). Institute for Health Metrics and Evaluation HIV Mortality Estimates Based on the UNAIDS Spectrum Model Framework. | 1980-2013 | *                    |
| Antigua and Barbuda | United Nations Children's Fund (UNICEF), World Health Organization (WHO). WHO and UNICEF Reported Disease Incidence Time Series - Pertussis. Geneva, Switzerland: World Health Organization (WHO).                       | 1980-2013 |                      |
| Antigua and Barbuda | United Nations Children's Fund (UNICEF), World Health Organization (WHO). WHO and UNICEF Reported Disease Incidence Time Series - Measles. Geneva, Switzerland: World Health Organization (WHO).                         | 1980-2013 |                      |
| Antigua and Barbuda | Antigua and Barbuda Vital Registration - Deaths 1983 ICD9 as it appears in World Health Organization (WHO). WHO Mortality Database Version February 2014. Geneva, Switzerland: World Health Organization (WHO), 2014.    | 1983      |                      |
| Antigua and Barbuda | Antigua and Barbuda Vital Registration - Deaths 1985 ICD9 as it appears in World Health Organization (WHO). WHO Mortality Database Version February 2014. Geneva, Switzerland: World Health Organization (WHO), 2014.    | 1985      |                      |

**Web Table 32 - Comprehensive citation list**

| Country             | Citation                                                                                                                                                                                                                                                      | Year*      | New for GBD 2013 (*) |
|---------------------|---------------------------------------------------------------------------------------------------------------------------------------------------------------------------------------------------------------------------------------------------------------|------------|----------------------|
| Antigua and Barbuda | United Nations Office on Drugs and Crime (UNODC). United Nations Surveys on Crime Trends and the Operations of Criminal Justice Systems 1970-2006 as provided by Kavi Bhalla. [Unpublished].                                                                  | 1985-1986  |                      |
| Antigua and Barbuda | Antigua and Barbuda Vital Registration - Deaths 1986 ICD9 as it appears in World Health Organization (WHO). WHO Mortality Database Version February 2014. Geneva, Switzerland: World Health Organization (WHO), 2014.                                         | 1986       |                      |
| Antigua and Barbuda | Antigua and Barbuda Vital Registration - Deaths 1987 ICD9 as it appears in World Health Organization (WHO). WHO Mortality Database Version February 2014. Geneva, Switzerland: World Health Organization (WHO), 2014.                                         | 1987       |                      |
| Antigua and Barbuda | Antigua and Barbuda Vital Registration - Deaths 1988 ICD9 as it appears in World Health Organization (WHO). WHO Mortality Database Version February 2014. Geneva, Switzerland: World Health Organization (WHO), 2014.                                         | 1988       |                      |
| Antigua and Barbuda | Antigua and Barbuda Vital Registration - Deaths 1989 ICD9 as it appears in World Health Organization (WHO). WHO Mortality Database Version February 2014. Geneva, Switzerland: World Health Organization (WHO), 2014.                                         | 1989       |                      |
| Antigua and Barbuda | Antigua and Barbuda Vital Registration - Deaths 1990 ICD9 as it appears in World Health Organization (WHO). WHO Mortality Database Version February 2014. Geneva, Switzerland: World Health Organization (WHO), 2014.                                         | 1990       |                      |
| Antigua and Barbuda | Centre for Health Informatics and Multiprofessional Education, University College London. Modell's Haemoglobinopathologist's Almanac. London, United Kingdom: Centre for Health Informatics and Multiprofessional Education, University College London, 2008. | 1990-2003  |                      |
| Antigua and Barbuda | Antigua and Barbuda Vital Registration - Deaths 1991 ICD9 as it appears in World Health Organization (WHO). WHO Mortality Database Version February 2014. Geneva, Switzerland: World Health Organization (WHO), 2014.                                         | 1991       |                      |
| Antigua and Barbuda | Measles Supplementary Immunization Activity Data as provided by the World Health Organization. [Unpublished].                                                                                                                                                 | 1991, 1996 |                      |
| Antigua and Barbuda | Antigua and Barbuda Vital Registration - Deaths 1992 ICD9 as it appears in World Health Organization (WHO). WHO Mortality Database Version February 2014. Geneva, Switzerland: World Health Organization (WHO), 2014.                                         | 1992       |                      |
| Antigua and Barbuda | Antigua and Barbuda Vital Registration - Deaths 1993 ICD9 as it appears in World Health Organization (WHO). WHO Mortality Database Version February 2014. Geneva, Switzerland: World Health Organization (WHO), 2014.                                         | 1993       |                      |
| Antigua and Barbuda | Antigua and Barbuda Vital Registration - Deaths 1994 ICD9 as it appears in World Health Organization (WHO). WHO Mortality Database Version February 2014. Geneva, Switzerland: World Health Organization (WHO), 2014.                                         | 1994       |                      |
| Antigua and Barbuda | Antigua and Barbuda Vital Registration - Deaths 1995 ICD9 as it appears in World Health Organization (WHO). WHO Mortality Database Version February 2014. Geneva, Switzerland: World Health Organization (WHO), 2014.                                         | 1995       |                      |
| Antigua and Barbuda | United Nations Office on Drugs and Crime (UNODC). United Nations Office on Drugs and Crime Global Study on Homicides 2011. Vienna, Austria: United Nations Office on Drugs and Crime (UNODC), 2011.                                                           | 1995-2010  |                      |
| Antigua and Barbuda | Antigua and Barbuda Vital Registration - Deaths 1998 ICD10 as it appears in World Health Organization (WHO). WHO Mortality Database Version February 2014. Geneva, Switzerland: World Health Organization (WHO), 2014.                                        | 1998       |                      |

**Web Table 32 - Comprehensive citation list**

| Country             | Citation                                                                                                                                                                                                                                                                                                                                                                                                                               | Year*                      | New for GBD 2013 (*) |
|---------------------|----------------------------------------------------------------------------------------------------------------------------------------------------------------------------------------------------------------------------------------------------------------------------------------------------------------------------------------------------------------------------------------------------------------------------------------|----------------------------|----------------------|
| Antigua and Barbuda | World Health Organization (WHO). Yellow Fever Reported Cases, WHO Vaccine-Preventable Diseases: Monitoring System. Geneva, Switzerland: World Health Organization (WHO).                                                                                                                                                                                                                                                               | 1998, 2000-2002, 2004-2009 |                      |
| Antigua and Barbuda | Antigua and Barbuda Vital Registration - Deaths 1999 ICD10 as it appears in World Health Organization (WHO). WHO Mortality Database Version February 2014. Geneva, Switzerland: World Health Organization (WHO), 2014.                                                                                                                                                                                                                 | 1999                       |                      |
| Antigua and Barbuda | Antigua and Barbuda Vital Registration - Deaths 2000 ICD10 as it appears in World Health Organization (WHO). WHO Mortality Database Version February 2014. Geneva, Switzerland: World Health Organization (WHO), 2014.                                                                                                                                                                                                                 | 2000                       |                      |
| Antigua and Barbuda | Antigua and Barbuda Vital Registration - Deaths 2001 ICD10 as it appears in World Health Organization (WHO). WHO Mortality Database Version February 2014. Geneva, Switzerland: World Health Organization (WHO), 2014.                                                                                                                                                                                                                 | 2001                       |                      |
| Antigua and Barbuda | Antigua and Barbuda Vital Registration - Deaths 2002 ICD10 as it appears in World Health Organization (WHO). WHO Mortality Database Version February 2014. Geneva, Switzerland: World Health Organization (WHO), 2014.                                                                                                                                                                                                                 | 2002                       |                      |
| Antigua and Barbuda | Antigua and Barbuda Vital Registration - Deaths 2003 ICD10 as it appears in World Health Organization (WHO). WHO Mortality Database Version February 2014. Geneva, Switzerland: World Health Organization (WHO), 2014.                                                                                                                                                                                                                 | 2003                       |                      |
| Antigua and Barbuda | Antigua and Barbuda Vital Registration - Deaths 2004 ICD10 as it appears in World Health Organization (WHO). WHO Mortality Database Version February 2014. Geneva, Switzerland: World Health Organization (WHO), 2014.                                                                                                                                                                                                                 | 2004                       |                      |
| Antigua and Barbuda | Antigua and Barbuda Vital Registration - Deaths 2005 ICD10 as it appears in World Health Organization (WHO). WHO Mortality Database Version February 2014. Geneva, Switzerland: World Health Organization (WHO), 2014.                                                                                                                                                                                                                 | 2005                       |                      |
| Antigua and Barbuda | Antigua and Barbuda Vital Registration - Deaths 2006 ICD10 as it appears in World Health Organization (WHO). WHO Mortality Database Version February 2014. Geneva, Switzerland: World Health Organization (WHO), 2014.                                                                                                                                                                                                                 | 2006                       |                      |
| Antigua and Barbuda | Fassio E, Díaz S, Santa C, Reig ME, Martínez Artola Y, Alves de Mattos A, Míguez C, Galizzi J, Zapata R, Ridruejo E, de Souza FC, Hernández N, Pinchuk L, Multicenter Group for Study of Hepatocarcinoma in Latin America, Asociación Latinoamericana para el Estudio del Hígado (ALEH). Etiology of hepatocellular carcinoma in Latin America: a prospective, multicenter, international study. <i>Ann Hepatol.</i> 2010; 9(1): 63-9. | 2006-2008                  | *                    |
| Antigua and Barbuda | Antigua and Barbuda Vital Registration - Deaths 2007 ICD10 as it appears in World Health Organization (WHO). WHO Mortality Database Version February 2014. Geneva, Switzerland: World Health Organization (WHO), 2014.                                                                                                                                                                                                                 | 2007                       |                      |
| Antigua and Barbuda | Antigua and Barbuda Vital Registration - Deaths 2008 ICD10 as it appears in World Health Organization (WHO). WHO Mortality Database Version February 2014. Geneva, Switzerland: World Health Organization (WHO), 2014.                                                                                                                                                                                                                 | 2008                       |                      |
| Antigua and Barbuda | Antigua and Barbuda Vital Registration - Deaths 2009 ICD10 as it appears in World Health Organization (WHO). WHO Mortality Database Version February 2014. Geneva, Switzerland: World Health Organization (WHO), 2014.                                                                                                                                                                                                                 | 2009                       |                      |

**Web Table 32 - Comprehensive citation list**

| Country             | Citation                                                                                                                                                                                                                                                                         | Year*                                                                                                                 | New for GBD 2013 (*) |
|---------------------|----------------------------------------------------------------------------------------------------------------------------------------------------------------------------------------------------------------------------------------------------------------------------------|-----------------------------------------------------------------------------------------------------------------------|----------------------|
| Antigua and Barbuda | Joint United Nations Program on HIV/AIDS (UNAIDS), Ministry of Health, Social Transformation, and Consumer Affairs (Antigua and Barbuda). Antigua and Barbuda UNGASS Country Progress Report 2010. Geneva, Switzerland: Joint United Nations Program on HIV/AIDS (UNAIDS), 2010. | 2009                                                                                                                  |                      |
| Argentina           | Argentina Vital Registration Death Data 1950 as it appears in United Nations Statistics Division (UNSD). United Nations Demographic Yearbook. New York City, United States: United Nations Statistics Division (UNSD).                                                           | 1950                                                                                                                  |                      |
| Argentina           | Argentina Vital Registration Death Data 1951 as it appears in United Nations Statistics Division (UNSD). United Nations Demographic Yearbook. New York City, United States: United Nations Statistics Division (UNSD).                                                           | 1951                                                                                                                  |                      |
| Argentina           | Argentina Vital Registration Death Data 1952 as it appears in United Nations Statistics Division (UNSD). United Nations Demographic Yearbook. New York City, United States: United Nations Statistics Division (UNSD).                                                           | 1952                                                                                                                  |                      |
| Argentina           | Argentina Vital Registration Death Data 1953 as it appears in United Nations Statistics Division (UNSD). United Nations Demographic Yearbook. New York City, United States: United Nations Statistics Division (UNSD).                                                           | 1953                                                                                                                  |                      |
| Argentina           | Argentina Vital Registration Death Data 1954 as it appears in United Nations Statistics Division (UNSD). United Nations Demographic Yearbook. New York City, United States: United Nations Statistics Division (UNSD).                                                           | 1954                                                                                                                  |                      |
| Argentina           | Argentina Vital Registration Death Data 1955 as it appears in United Nations Statistics Division (UNSD). United Nations Demographic Yearbook. New York City, United States: United Nations Statistics Division (UNSD).                                                           | 1955                                                                                                                  |                      |
| Argentina           | Peace Research Institute Oslo (PRIO). Battle Deaths Dataset Version 3, 2009. Oslo, Norway: Peace Research Institute Oslo (PRIO), 2009.                                                                                                                                           | 1955-1982                                                                                                             |                      |
| Argentina           | Argentina Vital Registration Death Data 1956 as it appears in United Nations Statistics Division (UNSD). United Nations Demographic Yearbook. New York City, United States: United Nations Statistics Division (UNSD).                                                           | 1956                                                                                                                  |                      |
| Argentina           | Argentina Vital Registration Death Data 1957 as it appears in United Nations Statistics Division (UNSD). United Nations Demographic Yearbook. New York City, United States: United Nations Statistics Division (UNSD).                                                           | 1957                                                                                                                  |                      |
| Argentina           | Argentina Vital Registration Death Data 1958 as it appears in United Nations Statistics Division (UNSD). United Nations Demographic Yearbook. New York City, United States: United Nations Statistics Division (UNSD).                                                           | 1958                                                                                                                  |                      |
| Argentina           | Centre for Research on the Epidemiology of Disasters (CRED). EM-DAT: The OFDA/CRED International Disaster Database. Brussels, Belgium: Catholic University of Leuven.                                                                                                            | 1958, 1965-1967, 1970, 1973-1975, 1977-1978, 1980, 1984-1988, 1990, 1992-1995, 1998, 2000-2005, 2007, 2009, 2012-2013 |                      |
| Argentina           | Argentina Vital Registration Death Data 1959 as it appears in United Nations Statistics Division (UNSD). United Nations Demographic Yearbook. New York City, United States: United Nations Statistics Division (UNSD).                                                           | 1959                                                                                                                  |                      |
| Argentina           | Argentina Vital Registration Death Data 1960 as it appears in United Nations Statistics Division (UNSD). United Nations Demographic Yearbook. New York City, United States: United Nations Statistics Division (UNSD).                                                           | 1960                                                                                                                  |                      |



**Web Table 32 - Comprehensive citation list**

| Country   | Citation                                                                                                                                                                                                                                                                                  | Year*     | New for GBD 2013 (*) |
|-----------|-------------------------------------------------------------------------------------------------------------------------------------------------------------------------------------------------------------------------------------------------------------------------------------------|-----------|----------------------|
| Argentina | Argentina Vital Registration Death Data 1961 as it appears in United Nations Statistics Division (UNSD). United Nations Demographic Yearbook. New York City, United States: United Nations Statistics Division (UNSD).                                                                    | 1961      |                      |
| Argentina | Argentina Vital Registration Death Data 1962 as it appears in United Nations Statistics Division (UNSD). United Nations Demographic Yearbook. New York City, United States: United Nations Statistics Division (UNSD).                                                                    | 1962      |                      |
| Argentina | Argentina Vital Registration Death Data 1963 as it appears in United Nations Statistics Division (UNSD). United Nations Demographic Yearbook. New York City, United States: United Nations Statistics Division (UNSD).                                                                    | 1963      |                      |
| Argentina | Argentina Vital Registration Death Data 1964 as it appears in United Nations Statistics Division (UNSD). United Nations Demographic Yearbook. New York City, United States: United Nations Statistics Division (UNSD).                                                                    | 1964      |                      |
| Argentina | Argentina Vital Registration Death Data 1965 as it appears in United Nations Statistics Division (UNSD). United Nations Demographic Yearbook. New York City, United States: United Nations Statistics Division (UNSD).                                                                    | 1965      |                      |
| Argentina | Argentina Vital Registration Death Data 1966 as it appears in United Nations Statistics Division (UNSD). United Nations Demographic Yearbook. New York City, United States: United Nations Statistics Division (UNSD).                                                                    | 1966      |                      |
| Argentina | Argentina Vital Registration Death Data 1967 as it appears in United Nations Statistics Division (UNSD). United Nations Demographic Yearbook. New York City, United States: United Nations Statistics Division (UNSD).                                                                    | 1967      |                      |
| Argentina | Argentina Vital Registration - Deaths 1968 ICD7 as it appears in World Health Organization (WHO). WHO Mortality Database Version February 2014. Geneva, Switzerland: World Health Organization (WHO), 2014.                                                                               | 1968      |                      |
| Argentina | Argentina Vital Registration - Deaths 1969 ICD8 as it appears in World Health Organization (WHO). WHO Mortality Database Version February 2014. Geneva, Switzerland: World Health Organization (WHO), 2014.                                                                               | 1969      |                      |
| Argentina | Argentina Vital Registration - Deaths 1970 ICD8 as it appears in World Health Organization (WHO). WHO Mortality Database Version February 2014. Geneva, Switzerland: World Health Organization (WHO), 2014.                                                                               | 1970      |                      |
| Argentina | National Institute of Statistics and Censuses (Argentina), Minnesota Population Center. Argentina National Population, Family, and Housing Census 1970 from the Integrated Public Use Microdata Series, International. [Machine-readable database]. Minneapolis: University of Minnesota. | 1970      |                      |
| Argentina | United Nations Office on Drugs and Crime (UNODC). United Nations Surveys on Crime Trends and the Operations of Criminal Justice Systems 1970-2006 as provided by Kavi Bhalla. [Unpublished].                                                                                              | 1970-1980 |                      |
| Argentina | Argentina Vital Registration Death Data 1976 as it appears in United Nations Statistics Division (UNSD). United Nations Demographic Yearbook. New York City, United States: United Nations Statistics Division (UNSD).                                                                    | 1976      |                      |
| Argentina | Argentina Vital Registration - Deaths 1977 ICD8 as it appears in World Health Organization (WHO). WHO Mortality Database Version February 2014. Geneva, Switzerland: World Health Organization (WHO), 2014.                                                                               | 1977      |                      |

**Web Table 32 - Comprehensive citation list**

| Country   | Citation                                                                                                                                                                                                                                                                         | Year*     | New for GBD 2013 (*) |
|-----------|----------------------------------------------------------------------------------------------------------------------------------------------------------------------------------------------------------------------------------------------------------------------------------|-----------|----------------------|
| Argentina | Argentina Vital Registration - Deaths 1978 ICD8 as it appears in World Health Organization (WHO). WHO Mortality Database Version February 2014. Geneva, Switzerland: World Health Organization (WHO), 2014.                                                                      | 1978      |                      |
| Argentina | Argentina Vital Registration - Deaths 1979 ICD9 as it appears in World Health Organization (WHO). WHO Mortality Database Version February 2014. Geneva, Switzerland: World Health Organization (WHO), 2014.                                                                      | 1979      |                      |
| Argentina | Argentina Vital Registration - Deaths 1980 ICD9 as it appears in World Health Organization (WHO). WHO Mortality Database Version February 2014. Geneva, Switzerland: World Health Organization (WHO), 2014.                                                                      | 1980      |                      |
| Argentina | National Institute of Statistics and Censuses (Argentina), Minnesota Population Center. Argentina National Population and Housing Census 1980 from the Integrated Public Use Microdata Series, International. [Machine-readable database]. Minneapolis: University of Minnesota. | 1980      |                      |
| Argentina | Institute for Health Metrics and Evaluation (IHME), Joint United Nations Program on HIV/AIDS (UNAIDS). Institute for Health Metrics and Evaluation HIV Mortality Estimates Based on the UNAIDS Spectrum Model Framework.                                                         | 1980-2013 | *                    |
| Argentina | United Nations Children's Fund (UNICEF), World Health Organization (WHO). WHO and UNICEF Reported Disease Incidence Time Series - Pertussis. Geneva, Switzerland: World Health Organization (WHO).                                                                               | 1980-2013 |                      |
| Argentina | United Nations Children's Fund (UNICEF), World Health Organization (WHO). WHO and UNICEF Reported Disease Incidence Time Series - Measles. Geneva, Switzerland: World Health Organization (WHO).                                                                                 | 1980-2013 |                      |
| Argentina | Argentina Vital Registration - Deaths 1981 ICD9 as it appears in World Health Organization (WHO). WHO Mortality Database Version February 2014. Geneva, Switzerland: World Health Organization (WHO), 2014.                                                                      | 1981      |                      |
| Argentina | Argentina Vital Registration - Deaths 1982 ICD9 as it appears in World Health Organization (WHO). WHO Mortality Database Version February 2014. Geneva, Switzerland: World Health Organization (WHO), 2014.                                                                      | 1982      |                      |
| Argentina | Argentina Vital Registration - Deaths 1983 ICD9 as it appears in World Health Organization (WHO). WHO Mortality Database Version February 2014. Geneva, Switzerland: World Health Organization (WHO), 2014.                                                                      | 1983      |                      |
| Argentina | Argentina Vital Registration - Deaths 1984 ICD9 as it appears in World Health Organization (WHO). WHO Mortality Database Version February 2014. Geneva, Switzerland: World Health Organization (WHO), 2014.                                                                      | 1984      |                      |
| Argentina | Argentina Vital Registration - Deaths 1985 ICD9 as it appears in World Health Organization (WHO). WHO Mortality Database Version February 2014. Geneva, Switzerland: World Health Organization (WHO), 2014.                                                                      | 1985      |                      |
| Argentina | Argentina Vital Registration - Deaths 1986 ICD9 as it appears in World Health Organization (WHO). WHO Mortality Database Version February 2014. Geneva, Switzerland: World Health Organization (WHO), 2014.                                                                      | 1986      |                      |
| Argentina | Argentina Vital Registration - Deaths 1987 ICD9 as it appears in World Health Organization (WHO). WHO Mortality Database Version February 2014. Geneva, Switzerland: World Health Organization (WHO), 2014.                                                                      | 1987      |                      |
| Argentina | Argentina Vital Registration - Deaths 1988 ICD9 as it appears in World Health Organization (WHO). WHO Mortality Database Version February 2014. Geneva, Switzerland: World Health Organization (WHO), 2014.                                                                      | 1988      |                      |



**Web Table 32 - Comprehensive citation list**

| Country   | Citation                                                                                                                                                                                                                                                                             | Year*      | New for GBD 2013 (*) |
|-----------|--------------------------------------------------------------------------------------------------------------------------------------------------------------------------------------------------------------------------------------------------------------------------------------|------------|----------------------|
| Argentina | Argentina Vital Registration - Deaths 1989 ICD9 as it appears in World Health Organization (WHO). WHO Mortality Database Version February 2014. Geneva, Switzerland: World Health Organization (WHO), 2014.                                                                          | 1989       |                      |
| Argentina | Argentina Vital Registration - Deaths 1990 ICD9 as it appears in World Health Organization (WHO). WHO Mortality Database Version February 2014. Geneva, Switzerland: World Health Organization (WHO), 2014.                                                                          | 1990       |                      |
| Argentina | Weatherall D. Sickle Cell and Thalassemias Prevalence Data, Personal Correspondence with David Weatherall. [Unpublished].                                                                                                                                                            | 1990-2009  |                      |
| Argentina | Centre for Health Informatics and Multiprofessional Education, University College London. Modell's Haemoglobinopathologist's Almanac. London, United Kingdom: Centre for Health Informatics and Multiprofessional Education, University College London, 2008.                        | 1990-2003  |                      |
| Argentina | National Institute of Statistics and Censuses (Argentina), Minnesota Population Center. Argentina National Population and Housing Census 1991 from the Integrated Public Use Microdata Series, International. [Machine-readable database]. Minneapolis: University of Minnesota.     | 1991       |                      |
| Argentina | Argentina Vital Registration - Deaths 1991 ICD9 as it appears in World Health Organization (WHO). WHO Mortality Database Version February 2014. Geneva, Switzerland: World Health Organization (WHO), 2014.                                                                          | 1991       |                      |
| Argentina | Ferrer JF, Del Pino N, Esteban E, Sherman MP, Dube S, Dube DK, Basombrio MA, Pimentel E, Segovia A, Quirulas S, Poiesz BJ. High Rate of Infection with the Human T-Cell Leukemia Retrovirus Type II in Four Indian Populations of Argentina. <i>Virology</i> . 1993; 197(2): 576-84. | 1991       |                      |
| Argentina | Del Pino N, Martínez Peralta L, Pampuro S, Pimentel E, Libonatti O. HTLV-II seroprevalence and coinfection with other pathogens in blood donors in Buenos Aires. <i>J Acquir Immune Defic Syndr</i> . 1994; 7(2): 206-7.                                                             | 1991-1992  |                      |
| Argentina | Argentina Vital Registration - Deaths 1992 ICD9 as it appears in World Health Organization (WHO). WHO Mortality Database Version February 2014. Geneva, Switzerland: World Health Organization (WHO), 2014.                                                                          | 1992       |                      |
| Argentina | Parkin DM, International Agency for Research on Cancer, International Association of Cancer Registries. Cancer incidence in five continents. Volumes I to VIII. Lyon, France, IARC Press, 2005.                                                                                      | 1992, 1995 |                      |
| Argentina | Parkin DM, International Agency for Research on Cancer, International Association of Cancer Registries. Cancer Incidence in Five Continents. Vol. I to VIII. Lyon, France, IARC Press, 2005.                                                                                         | 1992, 1995 |                      |
| Argentina | Argentina Vital Registration - Deaths 1993 ICD9 as it appears in World Health Organization (WHO). WHO Mortality Database Version February 2014. Geneva, Switzerland: World Health Organization (WHO), 2014.                                                                          | 1993       |                      |
| Argentina | Measles Supplementary Immunization Activity Data as provided by the World Health Organization. [Unpublished].                                                                                                                                                                        | 1993, 1998 |                      |
| Argentina | Argentina Vital Registration - Deaths 1994 ICD9 as it appears in World Health Organization (WHO). WHO Mortality Database Version February 2014. Geneva, Switzerland: World Health Organization (WHO), 2014.                                                                          | 1994       |                      |
| Argentina | Argentina Vital Registration - Deaths 1995 ICD9 as it appears in World Health Organization (WHO). WHO Mortality Database Version February 2014. Geneva, Switzerland: World Health Organization (WHO), 2014.                                                                          | 1995       |                      |
| Argentina | López H, Zitto T, Baré P, Vidal G, Vukasovic J, Gómez R. Prevalence of anti-hepatitis A antibodies in an urban middle class area of Argentina: some associated factors. <i>Int J Infect Dis</i> . 2000; 4(1): 34-7.                                                                  | 1995-1996  |                      |

**Web Table 32 - Comprehensive citation list**

| Country   | Citation                                                                                                                                                                                                                                                                                                                        | Year*                 | New for GBD 2013 (*) |
|-----------|---------------------------------------------------------------------------------------------------------------------------------------------------------------------------------------------------------------------------------------------------------------------------------------------------------------------------------|-----------------------|----------------------|
| Argentina | Argentina Vital Registration - Deaths 1996 ICD9 as it appears in World Health Organization (WHO). WHO Mortality Database Version February 2014. Geneva, Switzerland: World Health Organization (WHO), 2014.                                                                                                                     | 1996                  |                      |
| Argentina | Gonzalez J, Fay O, Canero-Velasco MC, Fernandez E, Carchio E, Moreiro R, Weller C, Taborda M, Mutti J, Degaetano S, Flores I, Auvieux C, Cavo M, Sosa A, Nucifora S, Marchesini N, Castro R, Cisaruk E. [Hepatitis A virus infection in children in Argentina: a pilot study]. Acta Gastroenterol Latinoam. 1997; 27(5): 331-4. | 1996                  |                      |
| Argentina | Argentina Vital Registration - Deaths 1997 ICD10 as it appears in World Health Organization (WHO). WHO Mortality Database Version February 2014. Geneva, Switzerland: World Health Organization (WHO), 2014.                                                                                                                    | 1997                  |                      |
| Argentina | United Nations Office on Drugs and Crime (UNODC). United Nations Office on Drugs and Crime Global Study on Homicides 2011. Vienna, Austria: United Nations Office on Drugs and Crime (UNODC), 2011.                                                                                                                             | 1997-2007             |                      |
| Argentina | World Health Organization (WHO). The Global Elimination of Congenital Syphilis: Rationale and Strategy for Action. Geneva, Switzerland: World Health Organization (WHO), 2007.                                                                                                                                                  | 1997-2003             |                      |
| Argentina | Joint United Nations Program on HIV/AIDS (UNAIDS), Pan American Health Organization (PAHO), United Nations Children's Fund (UNICEF), World Health Organization (WHO). Argentina Epidemiological Fact Sheet on HIV/AIDS and STIs 2004.                                                                                           | 1997-1999             |                      |
| Argentina | Argentina Vital Registration - Deaths 1998 ICD10 as it appears in World Health Organization (WHO). WHO Mortality Database Version February 2014. Geneva, Switzerland: World Health Organization (WHO), 2014.                                                                                                                    | 1998                  |                      |
| Argentina | Argentina Vital Registration - Deaths 1999 ICD10 as it appears in World Health Organization (WHO). WHO Mortality Database Version February 2014. Geneva, Switzerland: World Health Organization (WHO), 2014.                                                                                                                    | 1999                  |                      |
| Argentina | World Health Organization (WHO). Yellow Fever Reported Cases, WHO Vaccine-Preventable Diseases: Monitoring System. Geneva, Switzerland: World Health Organization (WHO).                                                                                                                                                        | 1999, 2001, 2004-2009 |                      |
| Argentina | Argentina Vital Registration - Deaths 2000 ICD10 as it appears in World Health Organization (WHO). WHO Mortality Database Version February 2014. Geneva, Switzerland: World Health Organization (WHO), 2014.                                                                                                                    | 2000                  |                      |
| Argentina | Curado MP, Edwards B, Shin HR, Storm H, Ferlay J, Heanue M and Boyle P, eds (2007). Cancer Incidence in Five Continents, Vol. IX Periodic Data (electronic version). Lyon, IARC. <a href="http://ci5.iarc.fr">http://ci5.iarc.fr</a>                                                                                            | 2000                  |                      |
| Argentina | World Health Organization (WHO). Argentina WHO Leishmaniasis Country Profile.                                                                                                                                                                                                                                                   | 2000-2010             | *                    |
| Argentina | Argentina Vital Registration - Deaths 2001 ICD10 as it appears in World Health Organization (WHO). WHO Mortality Database Version February 2014. Geneva, Switzerland: World Health Organization (WHO), 2014.                                                                                                                    | 2001                  |                      |
| Argentina | Foussal MD, Picón C, Sorrentino A. [Hepatitis A in childhood. The tip of an infectious disease iceberg]. Acta Gastroenterol Latinoam. 2002; 32(2): 101-5.                                                                                                                                                                       | 2001                  |                      |
| Argentina | Argentina Vital Registration - Deaths 2002 ICD10 as it appears in World Health Organization (WHO). WHO Mortality Database Version February 2014. Geneva, Switzerland: World Health Organization (WHO), 2014.                                                                                                                    | 2002                  |                      |
| Argentina | Rosenstein MG, Romero M, Ramos S. Maternal Mortality in Argentina: A Closer Look at Women Who Die Outside of the Health System. Matern Child Health J. 12(4): 519-24.                                                                                                                                                           | 2002                  |                      |

**Web Table 32 - Comprehensive citation list**

| Country   | Citation                                                                                                                                                                                                                                                                                                                                                                                                                                | Year*                      | New for GBD 2013 (*) |
|-----------|-----------------------------------------------------------------------------------------------------------------------------------------------------------------------------------------------------------------------------------------------------------------------------------------------------------------------------------------------------------------------------------------------------------------------------------------|----------------------------|----------------------|
| Argentina | Lumbiganon P, Piaggio G, Villar J, Pinol A, Bakketeig L, Bergsjø P, Al-Mazrou Y, Ba'aqeel H, Belizán JM, Farnot U, Carroli G, Berendes H, WHO Antenatal Care Trial Research Group. The epidemiology of syphilis in pregnancy. <i>Int J STD AIDS</i> . 2002; 13(7): 486-94.                                                                                                                                                              | 2002                       |                      |
| Argentina | Soria SM, Katz SL, Alvarez DF, Rodríguez RR, González MG, D'Angelo PJ, Bulacio PA, Sixto MI, Abdelnur IGJ, Garay ME, Bianchi AM, Leguina MI, Véliz MA, Villamil FG. [Prevalence of liver diseases in a small rural community isolated in the mountain heights: clinical, biochemical and ultrasonographic study]. <i>Acta Gastroenterol Latinoam</i> . 2006; 36(4): 174-81.                                                             | 2002                       |                      |
| Argentina | World Health Organization (WHO). Retrospective Measles Data on Supplementary Immunization Activities. Geneva, Switzerland: World Health Organization (WHO).                                                                                                                                                                                                                                                                             | 2002, 2005-2006, 2008-2009 |                      |
| Argentina | Argentina Vital Registration - Deaths 2003 ICD10 as it appears in World Health Organization (WHO). WHO Mortality Database Version February 2014. Geneva, Switzerland: World Health Organization (WHO), 2014.                                                                                                                                                                                                                            | 2003                       |                      |
| Argentina | Argentina Vital Registration - Deaths 2004 ICD10 as it appears in World Health Organization (WHO). WHO Mortality Database Version February 2014. Geneva, Switzerland: World Health Organization (WHO), 2014.                                                                                                                                                                                                                            | 2004                       |                      |
| Argentina | Argentina Vital Registration - Deaths 2005 ICD10 as it appears in World Health Organization (WHO). WHO Mortality Database Version February 2014. Geneva, Switzerland: World Health Organization (WHO), 2014.                                                                                                                                                                                                                            | 2005                       |                      |
| Argentina | Souza JP, Cecatti JG, Faundes A, Morais SS, Villar J, Carroli G, Gulmezoglu M, Wojdyla D, Zavaleta N, Donner A, Velazco A, Bataglia V, Valladares E, Kublickas M, Acosta A. Maternal near miss and maternal death in the World Health Organization's 2005 global survey on maternal and perinatal health. <i>Bull World Health Organ</i> . 2010; 88(2): 113-9.                                                                          | 2005                       |                      |
| Argentina | Forman D, Bray F, Brewster DH, Gombe Mbalawa C, Kohler B, Piñeros M, Steliarova-Foucher E, Swaminathan R and Ferlay J, eds (2013). <i>Cancer Incidence in Five Continents, Vol. X Summary Database</i> (electronic version). Lyon, IARC. <a href="http://ci5.iarc.fr">http://ci5.iarc.fr</a>                                                                                                                                            | 2005                       |                      |
| Argentina | Argentina Vital Registration - Deaths 2006 ICD10 as it appears in World Health Organization (WHO). WHO Mortality Database Version February 2014. Geneva, Switzerland: World Health Organization (WHO), 2014.                                                                                                                                                                                                                            | 2006                       |                      |
| Argentina | Argentina Vital Registration Death Data 2006 as it appears in United Nations Statistics Division (UNSD). <i>United Nations Demographic Yearbook</i> . New York City, United States: United Nations Statistics Division (UNSD).                                                                                                                                                                                                          | 2006                       |                      |
| Argentina | Fassio E, Míguez C, Soria S, Palazzo F, Gadano A, Adrover R, Landeira G, Fernández N, García D, Barbero R, Perelstein G, Ríos B, Isla R, Civetta E, Pérez Ravier R, Barzola S, Curciarello J, Colombato LA, Jmeniltzky A. Etiology of hepatocellular carcinoma in Argentina: results of a multicenter retrospective study. <i>Acta Gastroenterol Latinoam</i> . 2009; 39(1): 47-52.                                                     | 2006-2008                  |                      |
| Argentina | Fassio E, Díaz S, Santa C, Reig ME, Martínez Artola Y, Alves de Mattos A, Míguez C, Galizzi J, Zapata R, Ridruejo E, de Souza FC, Hernández N, Pinchuk L, Multicenter Group for Study of Hepatocarcinoma in Latin America, Asociación Latinoamericana para el Estudio del Hígado (ALEH). Etiology of hepatocellular carcinoma in Latin America: a prospective, multicenter, international study. <i>Ann Hepatol</i> . 2010; 9(1): 63-9. | 2006-2008                  | *                    |

**Web Table 32 - Comprehensive citation list**

| Country   | Citation                                                                                                                                                                                                                              | Year*     | New for GBD 2013 (*) |
|-----------|---------------------------------------------------------------------------------------------------------------------------------------------------------------------------------------------------------------------------------------|-----------|----------------------|
| Argentina | Argentina Vital Registration - Deaths 2007 ICD10 as it appears in World Health Organization (WHO). WHO Mortality Database Version February 2014. Geneva, Switzerland: World Health Organization (WHO), 2014.                          | 2007      |                      |
| Argentina | Argentina Vital Registration - Deaths 2008 ICD10 as it appears in World Health Organization (WHO). WHO Mortality Database Version February 2014. Geneva, Switzerland: World Health Organization (WHO), 2014.                          | 2008      |                      |
| Argentina | Argentina Vital Registration - Deaths 2009 ICD10 as it appears in World Health Organization (WHO). WHO Mortality Database Version February 2014. Geneva, Switzerland: World Health Organization (WHO), 2014.                          | 2009      |                      |
| Argentina | Joint United Nations Program on HIV/AIDS (UNAIDS), Ministry of Health (Argentina). Argentina National Progress Report on Implementation of UNGASS 2010. Geneva, Switzerland: Joint United Nations Program on HIV/AIDS (UNAIDS), 2010. | 2009      |                      |
| Argentina | Argentina Vital Registration - Deaths 2010 ICD10 as it appears in World Health Organization (WHO). WHO Mortality Database Version February 2014. Geneva, Switzerland: World Health Organization (WHO), 2014.                          | 2010      |                      |
| Argentina | Argentina Vital Registration Death Data 2011 as it appears in United Nations Statistics Division (UNSD). United Nations Demographic Yearbook. New York City, United States: United Nations Statistics Division (UNSD).                | 2011      | *                    |
| Armenia   | Institute for Health Metrics and Evaluation (IHME), Joint United Nations Program on HIV/AIDS (UNAIDS). Institute for Health Metrics and Evaluation HIV Mortality Estimates Based on the UNAIDS Spectrum Model Framework.              | 1980-2013 | *                    |
| Armenia   | Armenia Vital Registration - Deaths 1981 ICD9 as it appears in World Health Organization (WHO). WHO Mortality Database Version February 2014. Geneva, Switzerland: World Health Organization (WHO), 2014.                             | 1981      |                      |
| Armenia   | Armenia Vital Registration - Deaths 1982 ICD9 as it appears in World Health Organization (WHO). WHO Mortality Database Version February 2014. Geneva, Switzerland: World Health Organization (WHO), 2014.                             | 1982      |                      |
| Armenia   | Armenia Vital Registration Death Data 1983 as it appears in United Nations Statistics Division (UNSD). United Nations Demographic Yearbook. New York City, United States: United Nations Statistics Division (UNSD).                  | 1983      |                      |
| Armenia   | Armenia Vital Registration Death Data 1984 as it appears in United Nations Statistics Division (UNSD). United Nations Demographic Yearbook. New York City, United States: United Nations Statistics Division (UNSD).                  | 1984      |                      |
| Armenia   | Armenia Vital Registration - Deaths 1985 ICD9 as it appears in World Health Organization (WHO). WHO Mortality Database Version February 2014. Geneva, Switzerland: World Health Organization (WHO), 2014.                             | 1985      |                      |
| Armenia   | Armenia Vital Registration - Deaths 1986 ICD9 as it appears in World Health Organization (WHO). WHO Mortality Database Version February 2014. Geneva, Switzerland: World Health Organization (WHO), 2014.                             | 1986      |                      |
| Armenia   | United Nations Office on Drugs and Crime (UNODC). United Nations Surveys on Crime Trends and the Operations of Criminal Justice Systems 1970-2006 as provided by Kavi Bhalla. [Unpublished].                                          | 1986-1988 |                      |

**Web Table 32 - Comprehensive citation list**

| Country | Citation                                                                                                                                                                                                                                                      | Year*                       | New for GBD 2013 (*) |
|---------|---------------------------------------------------------------------------------------------------------------------------------------------------------------------------------------------------------------------------------------------------------------|-----------------------------|----------------------|
| Armenia | Armenia Vital Registration - Deaths 1987 ICD9 as it appears in World Health Organization (WHO). WHO Mortality Database Version February 2014. Geneva, Switzerland: World Health Organization (WHO), 2014.                                                     | 1987                        |                      |
| Armenia | Armenia Vital Registration - Deaths 1988 ICD9 as it appears in World Health Organization (WHO). WHO Mortality Database Version February 2014. Geneva, Switzerland: World Health Organization (WHO), 2014.                                                     | 1988                        |                      |
| Armenia | Armenia Vital Registration - Deaths 1989 ICD9 as it appears in World Health Organization (WHO). WHO Mortality Database Version February 2014. Geneva, Switzerland: World Health Organization (WHO), 2014.                                                     | 1989                        |                      |
| Armenia | Armenia Vital Registration - Deaths 1990 ICD9 as it appears in World Health Organization (WHO). WHO Mortality Database Version February 2014. Geneva, Switzerland: World Health Organization (WHO), 2014.                                                     | 1990                        |                      |
| Armenia | United Nations Children's Fund (UNICEF), World Health Organization (WHO). WHO and UNICEF Reported Disease Incidence Time Series - Pertussis. Geneva, Switzerland: World Health Organization (WHO).                                                            | 1990-2013                   |                      |
| Armenia | United Nations Children's Fund (UNICEF), World Health Organization (WHO). WHO and UNICEF Reported Disease Incidence Time Series - Measles. Geneva, Switzerland: World Health Organization (WHO).                                                              | 1990-2013                   |                      |
| Armenia | Centre for Health Informatics and Multiprofessional Education, University College London. Modell's Haemoglobinopathologist's Almanac. London, United Kingdom: Centre for Health Informatics and Multiprofessional Education, University College London, 2008. | 1990-2003                   |                      |
| Armenia | Ministry of Health (Armenia), National Statistical Service of the Republic of Armenia. Armenia Health and Health Care 2009. Yerevan, Armenia: National Health Information Analytic Center, National Institute of Health (Armenia), 2010.                      | 1990, 1995, 2000, 2002-2009 | *                    |
| Armenia | Armenia Vital Registration - Deaths 1991 ICD9 as it appears in World Health Organization (WHO). WHO Mortality Database Version February 2014. Geneva, Switzerland: World Health Organization (WHO), 2014.                                                     | 1991                        |                      |
| Armenia | Armenia Vital Registration - Deaths 1992 ICD9 as it appears in World Health Organization (WHO). WHO Mortality Database Version February 2014. Geneva, Switzerland: World Health Organization (WHO), 2014.                                                     | 1992                        |                      |
| Armenia | Armenia Vital Registration - Deaths 1993 ICD9 as it appears in World Health Organization (WHO). WHO Mortality Database Version February 2014. Geneva, Switzerland: World Health Organization (WHO), 2014.                                                     | 1993                        |                      |
| Armenia | Armenia Vital Registration - Deaths 1994 ICD9 as it appears in World Health Organization (WHO). WHO Mortality Database Version February 2014. Geneva, Switzerland: World Health Organization (WHO), 2014.                                                     | 1994                        |                      |
| Armenia | Armenia Vital Registration - Deaths 1995 ICD9 as it appears in World Health Organization (WHO). WHO Mortality Database Version February 2014. Geneva, Switzerland: World Health Organization (WHO), 2014.                                                     | 1995                        |                      |
| Armenia | Armenia Vital Registration - Deaths 1996 ICD9 as it appears in World Health Organization (WHO). WHO Mortality Database Version February 2014. Geneva, Switzerland: World Health Organization (WHO), 2014.                                                     | 1996                        |                      |
| Armenia | Armenia Vital Registration - Deaths 1997 ICD9 as it appears in World Health Organization (WHO). WHO Mortality Database Version February 2014. Geneva, Switzerland: World Health Organization (WHO), 2014.                                                     | 1997                        |                      |

**Web Table 32 - Comprehensive citation list**

| Country | Citation                                                                                                                                                                                                                                                            | Year*           | New for GBD 2013 (*) |
|---------|---------------------------------------------------------------------------------------------------------------------------------------------------------------------------------------------------------------------------------------------------------------------|-----------------|----------------------|
| Armenia | Asratian AA, Melik-Andreasian GG, Mkhitarian IL, Aleksanian IT, Shmavonian MV, Kazarian SM, Mkhitarian RG, Kozhevnikova LK. [Seroepidemiological characterization of virus hepatitis in the Republic of Armenia]. Zh Mikrobiol Epidemiol Immunobiol. 2005; 93-6.    | 1997-2002       |                      |
| Armenia | Centre for Research on the Epidemiology of Disasters (CRED). EM-DAT: The OFDA/CRED International Disaster Database. Brussels, Belgium: Catholic University of Leuven.                                                                                               | 1997, 2004      |                      |
| Armenia | Armenia Vital Registration - Deaths 1998 ICD9 as it appears in World Health Organization (WHO). WHO Mortality Database Version February 2014. Geneva, Switzerland: World Health Organization (WHO), 2014.                                                           | 1998            |                      |
| Armenia | Armenia Vital Registration - Deaths 1999 ICD9 as it appears in World Health Organization (WHO). WHO Mortality Database Version February 2014. Geneva, Switzerland: World Health Organization (WHO), 2014.                                                           | 1999            |                      |
| Armenia | World Health Organization (WHO). Armenia WHO Leishmaniasis Country Profile.                                                                                                                                                                                         | 1999-2008       | *                    |
| Armenia | World Health Organization (WHO). Yellow Fever Reported Cases, WHO Vaccine-Preventable Diseases: Monitoring System. Geneva, Switzerland: World Health Organization (WHO).                                                                                            | 1999, 2001-2005 |                      |
| Armenia | Armenia Vital Registration - Deaths 2000 ICD9 as it appears in World Health Organization (WHO). WHO Mortality Database Version February 2014. Geneva, Switzerland: World Health Organization (WHO), 2014.                                                           | 2000            |                      |
| Armenia | Ministry of Health (Armenia), National Statistical Service (NSS), ORC Macro. Armenia Demographic and Health Survey 2000. Calverton, United States: Macro International, Inc.                                                                                        | 2000            |                      |
| Armenia | National Statistical Service of the Republic of Armenia, Minnesota Population Center. Armenia Population and Housing Census 2001 from the Integrated Public Use Microdata Series, International. [Machine-readable database]. Minneapolis: University of Minnesota. | 2001            |                      |
| Armenia | Armenia Vital Registration - Deaths 2001 ICD9 as it appears in World Health Organization (WHO). WHO Mortality Database Version February 2014. Geneva, Switzerland: World Health Organization (WHO), 2014.                                                           | 2001            |                      |
| Armenia | Armenia Vital Registration - Deaths 2002 ICD9 as it appears in World Health Organization (WHO). WHO Mortality Database Version February 2014. Geneva, Switzerland: World Health Organization (WHO), 2014.                                                           | 2002            |                      |
| Armenia | Armenia Vital Registration - Deaths 2003 ICD9 as it appears in World Health Organization (WHO). WHO Mortality Database Version February 2014. Geneva, Switzerland: World Health Organization (WHO), 2014.                                                           | 2003            |                      |
| Armenia | Armenia Vital Registration Death Data 2004 as it appears in United Nations Statistics Division (UNSD). United Nations Demographic Yearbook. New York City, United States: United Nations Statistics Division (UNSD).                                                | 2004            |                      |
| Armenia | MOH Center for Health Information and Statistics, Macro International, Inc, National Statistical Service (NSS). Armenia Demographic and Health Survey 2005. Calverton, United States: Macro International, Inc.                                                     | 2005            |                      |
| Armenia | Armenia Vital Registration Death Data 2005 as it appears in United Nations Statistics Division (UNSD). United Nations Demographic Yearbook. New York City, United States: United Nations Statistics Division (UNSD).                                                | 2005            |                      |
| Armenia | Armenia Vital Registration - Deaths 2006 ICD10 as it appears in World Health Organization (WHO). WHO Mortality Database Version February 2014. Geneva, Switzerland: World Health Organization (WHO), 2014.                                                          | 2006            |                      |



**Web Table 32 - Comprehensive citation list**

| Country   | Citation                                                                                                                                                                                                             | Year*      | New for GBD 2013 (*) |
|-----------|----------------------------------------------------------------------------------------------------------------------------------------------------------------------------------------------------------------------|------------|----------------------|
| Armenia   | World Health Organization (WHO). Global Status Report on Road Safety 2009. Geneva, Switzerland: World Health Organization (WHO), 2009.                                                                               | 2007       |                      |
| Armenia   | Armenia Vital Registration Death Data 2007 as it appears in United Nations Statistics Division (UNSD). United Nations Demographic Yearbook. New York City, United States: United Nations Statistics Division (UNSD). | 2007       |                      |
| Armenia   | World Health Organization (WHO). Retrospective Measles Data on Supplementary Immunization Activities. Geneva, Switzerland: World Health Organization (WHO).                                                          | 2007, 2009 |                      |
| Armenia   | Armenia Vital Registration - Deaths 2008 ICD10 as it appears in World Health Organization (WHO). WHO Mortality Database Version February 2014. Geneva, Switzerland: World Health Organization (WHO), 2014.           | 2008       |                      |
| Armenia   | Armenia Vital Registration - Deaths 2009 ICD10 as it appears in World Health Organization (WHO). WHO Mortality Database Version February 2014. Geneva, Switzerland: World Health Organization (WHO), 2014.           | 2009       |                      |
| Armenia   | ICF Macro, Ministry of Health (Armenia), National Statistical Service of the Republic of Armenia. Armenia Demographic and Health Survey 2010. Claverton, Maryland: ICF Macro.                                        | 2010       |                      |
| Armenia   | Armenia Vital Registration - Deaths 2010 ICD10 as it appears in World Health Organization (WHO). WHO Mortality Database Version February 2014. Geneva, Switzerland: World Health Organization (WHO), 2014.           | 2010       | *                    |
| Armenia   | Armenia Vital Registration - Deaths 2011 ICD10 as it appears in World Health Organization (WHO). WHO Mortality Database Version February 2014. Geneva, Switzerland: World Health Organization (WHO), 2014.           | 2011       | *                    |
| Armenia   | Armenia Vital Registration - Deaths 2012 ICD10 as it appears in World Health Organization (WHO). WHO Mortality Database Version February 2014. Geneva, Switzerland: World Health Organization (WHO), 2014.           | 2012       | *                    |
| Australia | Australia Vital Registration - Deaths 1950 ICD7 as it appears in World Health Organization (WHO). WHO Mortality Database Version February 2014. Geneva, Switzerland: World Health Organization (WHO), 2014.          | 1950       |                      |
| Australia | Department of Health (Australia). Notifiable diseases surveillance, 1917 to 1991. Commun Dis Intell. 1993; 17: 226-36.                                                                                               | 1950-1991  |                      |
| Australia | Max Planck Institute for Demographic Research, University of California. Human Mortality Database. Berkeley, USA: University of California; Rostock, Germany: Max Planck Institute for Demographic Research.         | 1950-2006  |                      |
| Australia | Australia Vital Registration - Deaths 1951 ICD7 as it appears in World Health Organization (WHO). WHO Mortality Database Version February 2014. Geneva, Switzerland: World Health Organization (WHO), 2014.          | 1951       |                      |
| Australia | Australia Vital Registration - Deaths 1952 ICD7 as it appears in World Health Organization (WHO). WHO Mortality Database Version February 2014. Geneva, Switzerland: World Health Organization (WHO), 2014.          | 1952       |                      |
| Australia | Australia Vital Registration - Deaths 1953 ICD7 as it appears in World Health Organization (WHO). WHO Mortality Database Version February 2014. Geneva, Switzerland: World Health Organization (WHO), 2014.          | 1953       |                      |
| Australia | Australia Vital Registration - Deaths 1954 ICD7 as it appears in World Health Organization (WHO). WHO Mortality Database Version February 2014. Geneva, Switzerland: World Health Organization (WHO), 2014.          | 1954       |                      |

**Web Table 32 - Comprehensive citation list**

| Country   | Citation                                                                                                                                                                                                    | Year*                                                       | New for GBD 2013 (*) |
|-----------|-------------------------------------------------------------------------------------------------------------------------------------------------------------------------------------------------------------|-------------------------------------------------------------|----------------------|
| Australia | Australia Vital Registration - Deaths 1955 ICD7 as it appears in World Health Organization (WHO). WHO Mortality Database Version February 2014. Geneva, Switzerland: World Health Organization (WHO), 2014. | 1955                                                        |                      |
| Australia | Centre for Research on the Epidemiology of Disasters (CRED). EM-DAT: The OFDA/CRED International Disaster Database. Brussels, Belgium: Catholic University of Leuven.                                       | 1955, 1967-1971, 1973-1974, 1977-1979, 1981-1986, 1988-2013 |                      |
| Australia | Australia Vital Registration - Deaths 1956 ICD7 as it appears in World Health Organization (WHO). WHO Mortality Database Version February 2014. Geneva, Switzerland: World Health Organization (WHO), 2014. | 1956                                                        |                      |
| Australia | Australia Vital Registration - Deaths 1957 ICD7 as it appears in World Health Organization (WHO). WHO Mortality Database Version February 2014. Geneva, Switzerland: World Health Organization (WHO), 2014. | 1957                                                        |                      |
| Australia | Australia Vital Registration - Deaths 1958 ICD7 as it appears in World Health Organization (WHO). WHO Mortality Database Version February 2014. Geneva, Switzerland: World Health Organization (WHO), 2014. | 1958                                                        |                      |
| Australia | Australia Vital Registration - Deaths 1959 ICD7 as it appears in World Health Organization (WHO). WHO Mortality Database Version February 2014. Geneva, Switzerland: World Health Organization (WHO), 2014. | 1959                                                        |                      |
| Australia | Budtz-Olsen O, Kidson C. Absence of red cell enzyme deficiency in Australian Aborigines. Nature. 1961; 192: 765.                                                                                            | 1959-1961                                                   |                      |
| Australia | Australia Vital Registration - Deaths 1960 ICD7 as it appears in World Health Organization (WHO). WHO Mortality Database Version February 2014. Geneva, Switzerland: World Health Organization (WHO), 2014. | 1960                                                        |                      |
| Australia | Australia Vital Registration - Deaths 1961 ICD7 as it appears in World Health Organization (WHO). WHO Mortality Database Version February 2014. Geneva, Switzerland: World Health Organization (WHO), 2014. | 1961                                                        |                      |
| Australia | Cowan J, Kerr C. Incidence of homozygous beta-thalassaemia in New South Wales, 1961-1976. Med J Aust. 1982; 1(13): 554-6.                                                                                   | 1961-1976                                                   |                      |
| Australia | Australia Vital Registration - Deaths 1962 ICD7 as it appears in World Health Organization (WHO). WHO Mortality Database Version February 2014. Geneva, Switzerland: World Health Organization (WHO), 2014. | 1962                                                        |                      |
| Australia | Australia Vital Registration - Deaths 1963 ICD7 as it appears in World Health Organization (WHO). WHO Mortality Database Version February 2014. Geneva, Switzerland: World Health Organization (WHO), 2014. | 1963                                                        |                      |
| Australia | Australia Vital Registration - Deaths 1964 ICD7 as it appears in World Health Organization (WHO). WHO Mortality Database Version February 2014. Geneva, Switzerland: World Health Organization (WHO), 2014. | 1964                                                        |                      |
| Australia | Australia Vital Registration - Deaths 1965 ICD7 as it appears in World Health Organization (WHO). WHO Mortality Database Version February 2014. Geneva, Switzerland: World Health Organization (WHO), 2014. | 1965                                                        |                      |
| Australia | Australia Vital Registration - Deaths 1966 ICD7 as it appears in World Health Organization (WHO). WHO Mortality Database Version February 2014. Geneva, Switzerland: World Health Organization (WHO), 2014. | 1966                                                        |                      |



**Web Table 32 - Comprehensive citation list**

| Country   | Citation                                                                                                                                                                                                    | Year*     | New for GBD 2013 (*) |
|-----------|-------------------------------------------------------------------------------------------------------------------------------------------------------------------------------------------------------------|-----------|----------------------|
| Australia | Australia Vital Registration - Deaths 1967 ICD7 as it appears in World Health Organization (WHO). WHO Mortality Database Version February 2014. Geneva, Switzerland: World Health Organization (WHO), 2014. | 1967      |                      |
| Australia | Australia Vital Registration - Deaths 1968 ICD8 as it appears in World Health Organization (WHO). WHO Mortality Database Version February 2014. Geneva, Switzerland: World Health Organization (WHO), 2014. | 1968      |                      |
| Australia | Australia Vital Registration - Deaths 1969 ICD8 as it appears in World Health Organization (WHO). WHO Mortality Database Version February 2014. Geneva, Switzerland: World Health Organization (WHO), 2014. | 1969      |                      |
| Australia | Australia Vital Registration - Deaths 1970 ICD8 as it appears in World Health Organization (WHO). WHO Mortality Database Version February 2014. Geneva, Switzerland: World Health Organization (WHO), 2014. | 1970      |                      |
| Australia | Australia Vital Registration - Deaths 1971 ICD8 as it appears in World Health Organization (WHO). WHO Mortality Database Version February 2014. Geneva, Switzerland: World Health Organization (WHO), 2014. | 1971      |                      |
| Australia | Boughton CR, Hawkes RA, Ferguson V. Viral hepatitis A and B: a seroepidemiological study of a non-hepatitic Sydney population. Med J Aust. 1980; 1(4): 177-80.                                              | 1971-1974 |                      |
| Australia | Australia Vital Registration - Deaths 1972 ICD8 as it appears in World Health Organization (WHO). WHO Mortality Database Version February 2014. Geneva, Switzerland: World Health Organization (WHO), 2014. | 1972      |                      |
| Australia | Smith MB. The incidence of glucose-6-phosphate dehydrogenase deficiency in a population of Greek, Italian and Yugoslav origin in Australia. Med J Aust. 1976; 2(13): 485-6.                                 | 1972-1976 |                      |
| Australia | Australia Vital Registration - Deaths 1973 ICD8 as it appears in World Health Organization (WHO). WHO Mortality Database Version February 2014. Geneva, Switzerland: World Health Organization (WHO), 2014. | 1973      |                      |
| Australia | Australia Vital Registration - Deaths 1974 ICD8 as it appears in World Health Organization (WHO). WHO Mortality Database Version February 2014. Geneva, Switzerland: World Health Organization (WHO), 2014. | 1974      |                      |
| Australia | Australia Vital Registration - Deaths 1975 ICD8 as it appears in World Health Organization (WHO). WHO Mortality Database Version February 2014. Geneva, Switzerland: World Health Organization (WHO), 2014. | 1975      |                      |
| Australia | Australia Vital Registration - Deaths 1976 ICD8 as it appears in World Health Organization (WHO). WHO Mortality Database Version February 2014. Geneva, Switzerland: World Health Organization (WHO), 2014. | 1976      |                      |
| Australia | Australia Vital Registration - Deaths 1977 ICD8 as it appears in World Health Organization (WHO). WHO Mortality Database Version February 2014. Geneva, Switzerland: World Health Organization (WHO), 2014. | 1977      |                      |
| Australia | Wilkinson T. Haemoglobinopathies in Australia and New Zealand. Hemoglobin. 1981; 5(5): 525-30.                                                                                                              | 1977-1980 |                      |
| Australia | Australia Vital Registration - Deaths 1978 ICD8 as it appears in World Health Organization (WHO). WHO Mortality Database Version February 2014. Geneva, Switzerland: World Health Organization (WHO), 2014. | 1978      |                      |

**Web Table 32 - Comprehensive citation list**

| Country   | Citation                                                                                                                                                                                                                                                                                              | Year*                | New for GBD 2013 (*) |
|-----------|-------------------------------------------------------------------------------------------------------------------------------------------------------------------------------------------------------------------------------------------------------------------------------------------------------|----------------------|----------------------|
| Australia | Australia Vital Registration - Deaths 1979 ICD9 as it appears in World Health Organization (WHO). WHO Mortality Database Version February 2014. Geneva, Switzerland: World Health Organization (WHO), 2014.                                                                                           | 1979                 |                      |
| Australia | Australia Vital Registration - Deaths 1980 ICD9 as it appears in World Health Organization (WHO). WHO Mortality Database Version February 2014. Geneva, Switzerland: World Health Organization (WHO), 2014.                                                                                           | 1980                 |                      |
| Australia | Institute for Health Metrics and Evaluation. Institute for Health Metrics and Evaluation Cancer Registry Database. [Unpublished].                                                                                                                                                                     | 1980-2009            |                      |
| Australia | United Nations Children's Fund (UNICEF), World Health Organization (WHO). WHO and UNICEF Reported Disease Incidence Time Series - Pertussis. Geneva, Switzerland: World Health Organization (WHO).                                                                                                    | 1980-2005, 2007-2009 |                      |
| Australia | Ferlay J, Parkin DM, Curado MP, Bray F, Edwards B, Shin HR and Forman D. Cancer Incidence in Five Continents, Volumes I to IX: IARC CancerBase No. 9 [Internet]. Lyon, France: International Agency for Research on Cancer; 2010. Available from: <a href="http://ci5.iarc.fr">http://ci5.iarc.fr</a> | 1980-1981            |                      |
| Australia | Hanna JN, Faoagali JL, Buda PJ, Sheridan JW. Further observations on the immune response to recombinant hepatitis B vaccine after administration to aboriginal and Torres Strait Island children. J Paediatr Child Health. 1997; 33(1): 67-70.                                                        | 1980-1999            |                      |
| Australia | Institute for Health Metrics and Evaluation (IHME), Joint United Nations Program on HIV/AIDS (UNAIDS). Institute for Health Metrics and Evaluation HIV Mortality Estimates Based on the UNAIDS Spectrum Model Framework.                                                                              | 1980-2013            | *                    |
| Australia | United Nations Children's Fund (UNICEF), World Health Organization (WHO). WHO and UNICEF Reported Disease Incidence Time Series - Pertussis. Geneva, Switzerland: World Health Organization (WHO).                                                                                                    | 1980-2005, 2007-2013 |                      |
| Australia | Parkin DM, International Agency for Research on Cancer, International Association of Cancer Registries. Cancer Incidence in Five Continents. Vol. I to VIII. Lyon, France, IARC Press, 2005.                                                                                                          | 1980, 1982, 1995     |                      |
| Australia | Australia Vital Registration - Deaths 1981 ICD9 as it appears in World Health Organization (WHO). WHO Mortality Database Version February 2014. Geneva, Switzerland: World Health Organization (WHO), 2014.                                                                                           | 1981                 |                      |
| Australia | Makhseed M, Musini VM. Eclampsia in Kuwait 1981-1993. Aust N Z J Obstet Gynaecol. 1996; 36(3): 258-63.                                                                                                                                                                                                | 1981-1994            |                      |
| Australia | Australia Vital Registration - Deaths 1982 ICD9 as it appears in World Health Organization (WHO). WHO Mortality Database Version February 2014. Geneva, Switzerland: World Health Organization (WHO), 2014.                                                                                           | 1982                 |                      |
| Australia | Australasian Association of Cancer Registries, Australian Institute of Health and Welfare. Australia Cancer Incidence and Mortality Books 2012. Canberra, Australia: Australian Institute of Health and Welfare, 2012.                                                                                | 1982-2009            |                      |
| Australia | Kay DWK, Henderson AS, Scott R, Wilson J, Rickwood D, Grayson DA. Dementia and depression among the elderly living in the Hobart community: the effect of the diagnostic criteria on the prevalence rates. Psychol Med. 1985; 15(04): 771-88.                                                         | 1982-1983            |                      |
| Australia | Australia Vital Registration - Deaths 1983 ICD9 as it appears in World Health Organization (WHO). WHO Mortality Database Version February 2014. Geneva, Switzerland: World Health Organization (WHO), 2014.                                                                                           | 1983                 |                      |
| Australia | Moore DJ, Bucens MR, Holman CD, Ott AK, Wells JI. Prenatal screening for markers of hepatitis B in aboriginal mothers resident in non-metropolitan Western Australia. Med J Aust. 1987; 147(11-12): 557-8.                                                                                            | 1983-1985            |                      |

**Web Table 32 - Comprehensive citation list**

| Country   | Citation                                                                                                                                                                                                                                                      | Year*                      | New for GBD 2013 (*) |
|-----------|---------------------------------------------------------------------------------------------------------------------------------------------------------------------------------------------------------------------------------------------------------------|----------------------------|----------------------|
| Australia | Australia Vital Registration - Deaths 1984 ICD9 as it appears in World Health Organization (WHO). WHO Mortality Database Version February 2014. Geneva, Switzerland: World Health Organization (WHO), 2014.                                                   | 1984                       |                      |
| Australia | Ashwell MJ, Cossart YE. An autopsy survey of hepatitis B in Sydney. Pathology. 1995; 27(1): 43-7.                                                                                                                                                             | 1984                       |                      |
| Australia | Australia Vital Registration - Deaths 1985 ICD9 as it appears in World Health Organization (WHO). WHO Mortality Database Version February 2014. Geneva, Switzerland: World Health Organization (WHO), 2014.                                                   | 1985                       |                      |
| Australia | Australia Vital Registration - Deaths 1986 ICD9 as it appears in World Health Organization (WHO). WHO Mortality Database Version February 2014. Geneva, Switzerland: World Health Organization (WHO), 2014.                                                   | 1986                       |                      |
| Australia | Australia Vital Registration - Deaths 1987 ICD9 as it appears in World Health Organization (WHO). WHO Mortality Database Version February 2014. Geneva, Switzerland: World Health Organization (WHO), 2014.                                                   | 1987                       |                      |
| Australia | Patterson F, Bumak J, Batey R. Changing prevalence of hepatitis B virus in urbanized Australian Aborigines. J Gastroenterol Hepatol. 1993; 8(5): 410-3.                                                                                                       | 1987-1988                  |                      |
| Australia | Australia Vital Registration - Deaths 1988 ICD9 as it appears in World Health Organization (WHO). WHO Mortality Database Version February 2014. Geneva, Switzerland: World Health Organization (WHO), 2014.                                                   | 1988                       |                      |
| Australia | Heywood AE, Newall AT, Gao Z, Wood JG, Breschkin A, Nicholson S, Gidding HF, Dwyer DE, Gilbert GL, Macintyre CR. Changes in seroprevalence to hepatitis A in Victoria, Australia: a comparison of three time points. Vaccine. 2012; 30(42): 6020-6.           | 1988-1989, 1997-1998, 2008 |                      |
| Australia | United Nations Children's Fund (UNICEF), World Health Organization (WHO). WHO and UNICEF Reported Disease Incidence Time Series - Measles. Geneva, Switzerland: World Health Organization (WHO).                                                              | 1988-2005, 2007-2013       |                      |
| Australia | Australia Vital Registration - Deaths 1989 ICD9 as it appears in World Health Organization (WHO). WHO Mortality Database Version February 2014. Geneva, Switzerland: World Health Organization (WHO), 2014.                                                   | 1989                       |                      |
| Australia | Campbell DH, Sargent JW, Plant AJ. The prevalence of markers of infection with hepatitis B virus in a mixed-race Australian community. Med J Aust. 1989; 150(9): 489-92.                                                                                      | 1989                       |                      |
| Australia | Australia Vital Registration - Deaths 1990 ICD9 as it appears in World Health Organization (WHO). WHO Mortality Database Version February 2014. Geneva, Switzerland: World Health Organization (WHO), 2014.                                                   | 1990                       |                      |
| Australia | Australia Dementia Data 1990-1991 from literature review, as provided by the Global Burden of Disease 2010 dementia expert group.                                                                                                                             | 1990-1991                  |                      |
| Australia | Centre for Health Informatics and Multiprofessional Education, University College London. Modell's Haemoglobinopathologist's Almanac. London, United Kingdom: Centre for Health Informatics and Multiprofessional Education, University College London, 2008. | 1990-2003                  |                      |
| Australia | Australia Vital Registration - Deaths 1991 ICD9 as it appears in World Health Organization (WHO). WHO Mortality Database Version February 2014. Geneva, Switzerland: World Health Organization (WHO), 2014.                                                   | 1991                       |                      |
| Australia | Campbell DH, Plant AJ, Sargent JW, Mock PA, Barrett ER, Archer KH. Hepatitis B infection of children in a mixed-race community in western New South Wales. Med J Aust. 1991; 154(4): 253-6.                                                                   | 1991                       |                      |

**Web Table 32 - Comprehensive citation list**

| Country   | Citation                                                                                                                                                                                                                     | Year*     | New for GBD 2013 (*) |
|-----------|------------------------------------------------------------------------------------------------------------------------------------------------------------------------------------------------------------------------------|-----------|----------------------|
| Australia | Waite LM, Broe GA, Grayson DA, Creasey H. The incidence of dementia in an Australian community population: the Sydney Older Persons Study. <i>Int J Geriatr Psychiatry</i> . 2001; 16(7): 680-9.                             | 1991-1994 |                      |
| Australia | Department of Health (Australia). Australia National Notifiable Diseases Surveillance System. Canberra, Australia: Department of Health (Australia).                                                                         | 1991-2011 |                      |
| Australia | Australia Vital Registration - Deaths 1992 ICD9 as it appears in World Health Organization (WHO). WHO Mortality Database Version February 2014. Geneva, Switzerland: World Health Organization (WHO), 2014.                  | 1992      |                      |
| Australia | Australia Vital Registration - Deaths 1993 ICD9 as it appears in World Health Organization (WHO). WHO Mortality Database Version February 2014. Geneva, Switzerland: World Health Organization (WHO), 2014.                  | 1993      |                      |
| Australia | Australia Vital Registration - Deaths 1994 ICD9 as it appears in World Health Organization (WHO). WHO Mortality Database Version February 2014. Geneva, Switzerland: World Health Organization (WHO), 2014.                  | 1994      |                      |
| Australia | Australia Vital Registration - Deaths 1995 ICD9 as it appears in World Health Organization (WHO). WHO Mortality Database Version February 2014. Geneva, Switzerland: World Health Organization (WHO), 2014.                  | 1995      |                      |
| Australia | Crofts N, Cooper G, Stewart T, Kiely P, Coghlan P, Hearne P, Hocking J. Exposure to hepatitis A virus among blood donors, injecting drug users and prison entrants in Victoria. <i>J Viral Hepat</i> . 1997; 4(5): 333-8.    | 1995      |                      |
| Australia | Roberts SK, Kemp W. Hepatocellular carcinoma in an Australian tertiary referral hospital 1975-2002: change in epidemiology and clinical presentation. <i>J Gastroenterol Hepatol</i> . 2007; 22(2): 191-6.                   | 1995-2002 |                      |
| Australia | Amin J, Gidding H, Gilbert G, Backhouse J, Kaldor J, Dore G, Burgess M. Hepatitis C prevalence - a nationwide survey. <i>Commun Dis Intell</i> . 2004; 28(4): 517-21.                                                        | 1995-1998 |                      |
| Australia | Australia Vital Registration - Deaths 1996 ICD9 as it appears in World Health Organization (WHO). WHO Mortality Database Version February 2014. Geneva, Switzerland: World Health Organization (WHO), 2014.                  | 1996      |                      |
| Australia | Department of Health and Ageing (Australia), Joint United Nations Program on HIV/AIDS (UNAIDS). Australia UNGASS Country Progress Report 2010. Geneva, Switzerland: Joint United Nations Program on HIV/AIDS (UNAIDS), 2010. | 1996-1999 |                      |
| Australia | Garner JJ, Gaughwin M, Dodding J, Wilson K. Prevalence of hepatitis C infection in pregnant women in South Australia. <i>Med J Aust</i> . 1997; 167(9): 470-2.                                                               | 1996-1998 |                      |
| Australia | O'Sullivan BG, Gidding HF, Law M, Kaldor JM, Gilbert GL, Dore GJ. Estimates of chronic hepatitis B virus infection in Australia, 2000. <i>Aust N Z J Public Health</i> . 2004; 28(3): 212-6.                                 | 1996-1999 |                      |
| Australia | Australia Vital Registration - Deaths 1997 ICD9 as it appears in World Health Organization (WHO). WHO Mortality Database Version February 2014. Geneva, Switzerland: World Health Organization (WHO), 2014.                  | 1997      |                      |
| Australia | Australia Vital Registration - Deaths 1998 ICD10 as it appears in World Health Organization (WHO). WHO Mortality Database Version February 2014. Geneva, Switzerland: World Health Organization (WHO), 2014.                 | 1998      |                      |
| Australia | Amin J, Gilbert GL, Escott RG, Heath TC, Burgess MA. Hepatitis A epidemiology in Australia: national seroprevalence and notifications. <i>Med J Aust</i> . 2001; 174(7): 338-41.                                             | 1998      |                      |
| Australia | Measles Supplementary Immunization Activity Data as provided by the World Health Organization. [Unpublished].                                                                                                                | 1998      |                      |

**Web Table 32 - Comprehensive citation list**

| Country   | Citation                                                                                                                                                                                                                                                      | Year*                      | New for GBD 2013 (*) |
|-----------|---------------------------------------------------------------------------------------------------------------------------------------------------------------------------------------------------------------------------------------------------------------|----------------------------|----------------------|
| Australia | World Health Organization (WHO). Yellow Fever Reported Cases, WHO Vaccine-Preventable Diseases: Monitoring System. Geneva, Switzerland: World Health Organization (WHO).                                                                                      | 1998, 2001-2005, 2007-2009 |                      |
| Australia | Australia Vital Registration - Deaths 1999 ICD10 as it appears in World Health Organization (WHO). WHO Mortality Database Version February 2014. Geneva, Switzerland: World Health Organization (WHO), 2014.                                                  | 1999                       |                      |
| Australia | Tawk HM, Vickery K, Bisset L, Selby W, Cossart YE, Infection in Endoscopy Study Group. The impact of hepatitis B vaccination in a Western country: recall of vaccination and serological status in Australian adults. <i>Vaccine</i> . 2006; 24(8): 1095-106. | 1999-2001                  |                      |
| Australia | Australia Vital Registration - Deaths 2000 ICD10 as it appears in World Health Organization (WHO). WHO Mortality Database Version February 2014. Geneva, Switzerland: World Health Organization (WHO), 2014.                                                  | 2000                       |                      |
| Australia | Australia Dementia Data 2000-2003 from literature review, as provided by the Global Burden of Disease 2010 dementia expert group.                                                                                                                             | 2000-2003                  |                      |
| Australia | Australia Vital Registration - Deaths 2001 ICD10 as it appears in World Health Organization (WHO). WHO Mortality Database Version February 2014. Geneva, Switzerland: World Health Organization (WHO), 2014.                                                  | 2001                       |                      |
| Australia | Australia Vital Registration - Deaths 2002 ICD10 as it appears in World Health Organization (WHO). WHO Mortality Database Version February 2014. Geneva, Switzerland: World Health Organization (WHO), 2014.                                                  | 2002                       |                      |
| Australia | Gidding HF, Warlow M, MacIntyre CR, Backhouse J, Gilbert GL, Quinn HE, McIntyre PB. The impact of a new universal infant and school-based adolescent hepatitis B vaccination program in Australia. <i>Vaccine</i> . 2007; 25(51): 8637-41.                    | 2002                       |                      |
| Australia | Australia Vital Registration - Deaths 2003 ICD10 as it appears in World Health Organization (WHO). WHO Mortality Database Version February 2014. Geneva, Switzerland: World Health Organization (WHO), 2014.                                                  | 2003                       |                      |
| Australia | Australia Vital Registration - Deaths 2004 ICD10 as it appears in World Health Organization (WHO). WHO Mortality Database Version February 2014. Geneva, Switzerland: World Health Organization (WHO), 2014.                                                  | 2004                       |                      |
| Australia | Australian Bureau of Statistics. Australia Vital Registration - Deaths 2005. [Unpublished].                                                                                                                                                                   | 2005                       |                      |
| Australia | Australia Vital Registration - Deaths 2006 ICD10 as it appears in World Health Organization (WHO). WHO Mortality Database Version February 2014. Geneva, Switzerland: World Health Organization (WHO), 2014.                                                  | 2006                       |                      |
| Australia | Australia Vital Registration - Deaths 2007 ICD10 as it appears in World Health Organization (WHO). WHO Mortality Database Version February 2014. Geneva, Switzerland: World Health Organization (WHO), 2014.                                                  | 2007                       |                      |
| Australia | Australia Vital Registration - Deaths 2008 ICD10 as it appears in World Health Organization (WHO). WHO Mortality Database Version February 2014. Geneva, Switzerland: World Health Organization (WHO), 2014.                                                  | 2008                       |                      |
| Australia | Australia Vital Registration - Deaths 2009 ICD10 as it appears in World Health Organization (WHO). WHO Mortality Database Version February 2014. Geneva, Switzerland: World Health Organization (WHO), 2014.                                                  | 2009                       |                      |
| Australia | Weatherall D. Sickle Cell and Thalassemias Prevalence Data, Personal Correspondence with David Weatherall. [Unpublished].                                                                                                                                     | 2009                       |                      |

**Web Table 32 - Comprehensive citation list**

| Country   | Citation                                                                                                                                                                                                     | Year*                                                                                            | New for GBD 2013 (*) |
|-----------|--------------------------------------------------------------------------------------------------------------------------------------------------------------------------------------------------------------|--------------------------------------------------------------------------------------------------|----------------------|
| Australia | Australia Vital Registration - Deaths 2010 ICD10 as it appears in World Health Organization (WHO). WHO Mortality Database Version February 2014. Geneva, Switzerland: World Health Organization (WHO), 2014. | 2010                                                                                             |                      |
| Australia | Australia Vital Registration - Deaths 2011 ICD10 as it appears in World Health Organization (WHO). WHO Mortality Database Version February 2014. Geneva, Switzerland: World Health Organization (WHO), 2014. | 2011                                                                                             | *                    |
| Austria   | Max Planck Institute for Demographic Research, University of California. Human Mortality Database. Berkeley, USA: University of California; Rostock, Germany: Max Planck Institute for Demographic Research. | 1950-1954                                                                                        |                      |
| Austria   | Centre for Research on the Epidemiology of Disasters (CRED). EM-DAT: The OFDA/CRED International Disaster Database. Brussels, Belgium: Catholic University of Leuven.                                        | 1952, 1954, 1975, 1982, 1984-1985, 1990-1991, 1995, 1997, 1999-2000, 2002, 2005, 2008-2009, 2013 |                      |
| Austria   | Austria Vital Registration - Deaths 1955 ICD7 as it appears in World Health Organization (WHO). WHO Mortality Database Version February 2014. Geneva, Switzerland: World Health Organization (WHO), 2014.    | 1955                                                                                             |                      |
| Austria   | Austria Vital Registration - Deaths 1956 ICD7 as it appears in World Health Organization (WHO). WHO Mortality Database Version February 2014. Geneva, Switzerland: World Health Organization (WHO), 2014.    | 1956                                                                                             |                      |
| Austria   | Austria Vital Registration - Deaths 1957 ICD7 as it appears in World Health Organization (WHO). WHO Mortality Database Version February 2014. Geneva, Switzerland: World Health Organization (WHO), 2014.    | 1957                                                                                             |                      |
| Austria   | Austria Vital Registration - Deaths 1958 ICD7 as it appears in World Health Organization (WHO). WHO Mortality Database Version February 2014. Geneva, Switzerland: World Health Organization (WHO), 2014.    | 1958                                                                                             |                      |
| Austria   | Austria Vital Registration - Deaths 1959 ICD7 as it appears in World Health Organization (WHO). WHO Mortality Database Version February 2014. Geneva, Switzerland: World Health Organization (WHO), 2014.    | 1959                                                                                             |                      |
| Austria   | Austria Vital Registration - Deaths 1960 ICD7 as it appears in World Health Organization (WHO). WHO Mortality Database Version February 2014. Geneva, Switzerland: World Health Organization (WHO), 2014.    | 1960                                                                                             |                      |
| Austria   | Austria Vital Registration - Deaths 1961 ICD7 as it appears in World Health Organization (WHO). WHO Mortality Database Version February 2014. Geneva, Switzerland: World Health Organization (WHO), 2014.    | 1961                                                                                             |                      |
| Austria   | Austria Vital Registration - Deaths 1962 ICD7 as it appears in World Health Organization (WHO). WHO Mortality Database Version February 2014. Geneva, Switzerland: World Health Organization (WHO), 2014.    | 1962                                                                                             |                      |
| Austria   | Austria Vital Registration - Deaths 1963 ICD7 as it appears in World Health Organization (WHO). WHO Mortality Database Version February 2014. Geneva, Switzerland: World Health Organization (WHO), 2014.    | 1963                                                                                             |                      |
| Austria   | Austria Vital Registration - Deaths 1964 ICD7 as it appears in World Health Organization (WHO). WHO Mortality Database Version February 2014. Geneva, Switzerland: World Health Organization (WHO), 2014.    | 1964                                                                                             |                      |



**Web Table 32 - Comprehensive citation list**

| Country | Citation                                                                                                                                                                                                  | Year* | New for GBD 2013 (*) |
|---------|-----------------------------------------------------------------------------------------------------------------------------------------------------------------------------------------------------------|-------|----------------------|
| Austria | Austria Vital Registration - Deaths 1965 ICD7 as it appears in World Health Organization (WHO). WHO Mortality Database Version February 2014. Geneva, Switzerland: World Health Organization (WHO), 2014. | 1965  |                      |
| Austria | Austria Vital Registration - Deaths 1966 ICD7 as it appears in World Health Organization (WHO). WHO Mortality Database Version February 2014. Geneva, Switzerland: World Health Organization (WHO), 2014. | 1966  |                      |
| Austria | Austria Vital Registration - Deaths 1967 ICD7 as it appears in World Health Organization (WHO). WHO Mortality Database Version February 2014. Geneva, Switzerland: World Health Organization (WHO), 2014. | 1967  |                      |
| Austria | Austria Vital Registration - Deaths 1968 ICD7 as it appears in World Health Organization (WHO). WHO Mortality Database Version February 2014. Geneva, Switzerland: World Health Organization (WHO), 2014. | 1968  |                      |
| Austria | Austria Vital Registration - Deaths 1969 ICD8 as it appears in World Health Organization (WHO). WHO Mortality Database Version February 2014. Geneva, Switzerland: World Health Organization (WHO), 2014. | 1969  |                      |
| Austria | Austria Vital Registration - Deaths 1970 ICD8 as it appears in World Health Organization (WHO). WHO Mortality Database Version February 2014. Geneva, Switzerland: World Health Organization (WHO), 2014. | 1970  |                      |
| Austria | Austria Vital Registration - Deaths 1971 ICD8 as it appears in World Health Organization (WHO). WHO Mortality Database Version February 2014. Geneva, Switzerland: World Health Organization (WHO), 2014. | 1971  |                      |
| Austria | Austria Vital Registration - Deaths 1972 ICD8 as it appears in World Health Organization (WHO). WHO Mortality Database Version February 2014. Geneva, Switzerland: World Health Organization (WHO), 2014. | 1972  |                      |
| Austria | Austria Vital Registration - Deaths 1973 ICD8 as it appears in World Health Organization (WHO). WHO Mortality Database Version February 2014. Geneva, Switzerland: World Health Organization (WHO), 2014. | 1973  |                      |
| Austria | Austria Vital Registration - Deaths 1974 ICD8 as it appears in World Health Organization (WHO). WHO Mortality Database Version February 2014. Geneva, Switzerland: World Health Organization (WHO), 2014. | 1974  |                      |
| Austria | Austria Vital Registration - Deaths 1975 ICD8 as it appears in World Health Organization (WHO). WHO Mortality Database Version February 2014. Geneva, Switzerland: World Health Organization (WHO), 2014. | 1975  |                      |
| Austria | Austria Vital Registration - Deaths 1976 ICD8 as it appears in World Health Organization (WHO). WHO Mortality Database Version February 2014. Geneva, Switzerland: World Health Organization (WHO), 2014. | 1976  |                      |
| Austria | Austria Vital Registration - Deaths 1977 ICD8 as it appears in World Health Organization (WHO). WHO Mortality Database Version February 2014. Geneva, Switzerland: World Health Organization (WHO), 2014. | 1977  |                      |
| Austria | Austria Vital Registration - Deaths 1978 ICD8 as it appears in World Health Organization (WHO). WHO Mortality Database Version February 2014. Geneva, Switzerland: World Health Organization (WHO), 2014. | 1978  |                      |

**Web Table 32 - Comprehensive citation list**

| Country | Citation                                                                                                                                                                                                                                  | Year*      | New for GBD 2013 (*) |
|---------|-------------------------------------------------------------------------------------------------------------------------------------------------------------------------------------------------------------------------------------------|------------|----------------------|
| Austria | Austria Vital Registration - Deaths 1979 ICD8 as it appears in World Health Organization (WHO). WHO Mortality Database Version February 2014. Geneva, Switzerland: World Health Organization (WHO), 2014.                                 | 1979       |                      |
| Austria | Austria Vital Registration - Deaths 1980 ICD9 as it appears in World Health Organization (WHO). WHO Mortality Database Version February 2014. Geneva, Switzerland: World Health Organization (WHO), 2014.                                 | 1980       |                      |
| Austria | Institute for Health Metrics and Evaluation (IHME), Joint United Nations Program on HIV/AIDS (UNAIDS). Institute for Health Metrics and Evaluation HIV Mortality Estimates Based on the UNAIDS Spectrum Model Framework.                  | 1980-2013  | *                    |
| Austria | United Nations Children's Fund (UNICEF), World Health Organization (WHO). WHO and UNICEF Reported Disease Incidence Time Series - Pertussis. Geneva, Switzerland: World Health Organization (WHO).                                        | 1980-2012  |                      |
| Austria | Austria Vital Registration - Deaths 1981 ICD9 as it appears in World Health Organization (WHO). WHO Mortality Database Version February 2014. Geneva, Switzerland: World Health Organization (WHO), 2014.                                 | 1981       |                      |
| Austria | Austria Vital Registration - Deaths 1982 ICD9 as it appears in World Health Organization (WHO). WHO Mortality Database Version February 2014. Geneva, Switzerland: World Health Organization (WHO), 2014.                                 | 1982       |                      |
| Austria | Austria Vital Registration - Deaths 1983 ICD9 as it appears in World Health Organization (WHO). WHO Mortality Database Version February 2014. Geneva, Switzerland: World Health Organization (WHO), 2014.                                 | 1983       |                      |
| Austria | Austria Vital Registration - Deaths 1984 ICD9 as it appears in World Health Organization (WHO). WHO Mortality Database Version February 2014. Geneva, Switzerland: World Health Organization (WHO), 2014.                                 | 1984       |                      |
| Austria | Austria Vital Registration - Deaths 1985 ICD9 as it appears in World Health Organization (WHO). WHO Mortality Database Version February 2014. Geneva, Switzerland: World Health Organization (WHO), 2014.                                 | 1985       |                      |
| Austria | Austria Vital Registration - Deaths 1986 ICD9 as it appears in World Health Organization (WHO). WHO Mortality Database Version February 2014. Geneva, Switzerland: World Health Organization (WHO), 2014.                                 | 1986       |                      |
| Austria | Austria Vital Registration - Deaths 1987 ICD9 as it appears in World Health Organization (WHO). WHO Mortality Database Version February 2014. Geneva, Switzerland: World Health Organization (WHO), 2014.                                 | 1987       |                      |
| Austria | Austria Vital Registration - Deaths 1988 ICD9 as it appears in World Health Organization (WHO). WHO Mortality Database Version February 2014. Geneva, Switzerland: World Health Organization (WHO), 2014.                                 | 1988       |                      |
| Austria | Modell B, Darlison M, Birgens H, Cario H, Faustino P, Giordano PC, Gulbis B, Hopmeier P, Lena-Russo D, Romao L, Theodorsson E. Epidemiology of haemoglobin disorders in Europe: an overview. Scand J Clin Lab Invest. 2007; 67(1): 39-69. | 1988, 2006 |                      |
| Austria | Austria Vital Registration - Deaths 1989 ICD9 as it appears in World Health Organization (WHO). WHO Mortality Database Version February 2014. Geneva, Switzerland: World Health Organization (WHO), 2014.                                 | 1989       |                      |
| Austria | Federal Ministry of Health (Austria), Statistics Austria. Austria Hospital Inpatient Discharges 1989. Vienna, Austria: Statistics Austria.                                                                                                | 1989       | *                    |



**Web Table 32 - Comprehensive citation list**

| Country | Citation                                                                                                                                                                                                                                                                                                                                                                                                                                                                                                                                                                                                                                                                                                              | Year*                            | New for GBD 2013 (*) |
|---------|-----------------------------------------------------------------------------------------------------------------------------------------------------------------------------------------------------------------------------------------------------------------------------------------------------------------------------------------------------------------------------------------------------------------------------------------------------------------------------------------------------------------------------------------------------------------------------------------------------------------------------------------------------------------------------------------------------------------------|----------------------------------|----------------------|
| Austria | Austria Vital Registration - Deaths 1990 ICD9 as it appears in World Health Organization (WHO). WHO Mortality Database Version February 2014. Geneva, Switzerland: World Health Organization (WHO), 2014.                                                                                                                                                                                                                                                                                                                                                                                                                                                                                                             | 1990                             |                      |
| Austria | Federal Ministry of Health (Austria), Statistics Austria. Austria Hospital Inpatient Discharges 1990. Vienna, Austria: Statistics Austria.                                                                                                                                                                                                                                                                                                                                                                                                                                                                                                                                                                            | 1990                             | *                    |
| Austria | Centre for Health Informatics and Multiprofessional Education, University College London. Modell's Haemoglobinopathologist's Almanac. London, United Kingdom: Centre for Health Informatics and Multiprofessional Education, University College London, 2008.                                                                                                                                                                                                                                                                                                                                                                                                                                                         | 1990-2006                        |                      |
| Austria | Austria Vital Registration - Deaths 1991 ICD9 as it appears in World Health Organization (WHO). WHO Mortality Database Version February 2014. Geneva, Switzerland: World Health Organization (WHO), 2014.                                                                                                                                                                                                                                                                                                                                                                                                                                                                                                             | 1991                             |                      |
| Austria | Prodinger WM, Larcher C, Sölder BM, Geissler D, Dierich MP. Hepatitis A in Western Austria--the epidemiological situation before the introduction of active immunisation. Infection. 1994; 22(1): 53-5.                                                                                                                                                                                                                                                                                                                                                                                                                                                                                                               | 1991                             |                      |
| Austria | Federal Ministry of Health (Austria), Statistics Austria. Austria Hospital Inpatient Discharges 1991. Vienna, Austria: Statistics Austria.                                                                                                                                                                                                                                                                                                                                                                                                                                                                                                                                                                            | 1991                             | *                    |
| Austria | Austria Vital Registration - Deaths 1992 ICD9 as it appears in World Health Organization (WHO). WHO Mortality Database Version February 2014. Geneva, Switzerland: World Health Organization (WHO), 2014.                                                                                                                                                                                                                                                                                                                                                                                                                                                                                                             | 1992                             |                      |
| Austria | Federal Ministry of Health (Austria), Statistics Austria. Austria Hospital Inpatient Discharges 1992. Vienna, Austria: Statistics Austria.                                                                                                                                                                                                                                                                                                                                                                                                                                                                                                                                                                            | 1992                             | *                    |
| Austria | Trichopoulos D, Bamia C, Lagiou P, Fedirko V, Trepo E, Jenab M, Pischon T, Nöthlings U, Overved K, Tjønneland A, Outzen M, Clavel-Chapelon F, Kaaks R, Lukanova A, Boeing H, Aleksandrova K, Benetou V, Zylis D, Palli D, Pala V, Panico S, Tumino R, Sacerdote C, Bueno-De-Mesquita HB, Van Kranen HJ, Peeters PHM, Lund E, Quirós JR, González CA, Sanchez Perez M-J, Navarro C, Dorronsoro M, Barricarte A, Lindkvist B, Regnér S, Werner M, Hallmans G, Khaw K-T, Wareham N, Key T, Romieu I, Chuang S-C, Murphy N, Boffetta P, Trichopoulou A, Riboli E. Hepatocellular carcinoma risk factors and disease burden in a European cohort: a nested case-control study. J Natl Cancer Inst. 2011; 103(22): 1686-95. | 1992-2006                        | *                    |
| Austria | Austria Vital Registration - Deaths 1993 ICD9 as it appears in World Health Organization (WHO). WHO Mortality Database Version February 2014. Geneva, Switzerland: World Health Organization (WHO), 2014.                                                                                                                                                                                                                                                                                                                                                                                                                                                                                                             | 1993                             |                      |
| Austria | Federal Ministry of Health (Austria), Statistics Austria. Austria Hospital Inpatient Discharges 1993. Vienna, Austria: Statistics Austria.                                                                                                                                                                                                                                                                                                                                                                                                                                                                                                                                                                            | 1993                             | *                    |
| Austria | United Nations Children's Fund (UNICEF), World Health Organization (WHO). WHO and UNICEF Reported Disease Incidence Time Series - Measles. Geneva, Switzerland: World Health Organization (WHO).                                                                                                                                                                                                                                                                                                                                                                                                                                                                                                                      | 1993, 1997-1999, 2001, 2003-2012 |                      |
| Austria | Austria Vital Registration - Deaths 1994 ICD9 as it appears in World Health Organization (WHO). WHO Mortality Database Version February 2014. Geneva, Switzerland: World Health Organization (WHO), 2014.                                                                                                                                                                                                                                                                                                                                                                                                                                                                                                             | 1994                             |                      |
| Austria | Federal Ministry of Health (Austria), Statistics Austria. Austria Hospital Inpatient Discharges 1994. Vienna, Austria: Statistics Austria.                                                                                                                                                                                                                                                                                                                                                                                                                                                                                                                                                                            | 1994                             | *                    |
| Austria | Austria Vital Registration - Deaths 1995 ICD9 as it appears in World Health Organization (WHO). WHO Mortality Database Version February 2014. Geneva, Switzerland: World Health Organization (WHO), 2014.                                                                                                                                                                                                                                                                                                                                                                                                                                                                                                             | 1995                             |                      |
| Austria | Federal Ministry of Health (Austria), Statistics Austria. Austria Hospital Inpatient Discharges 1995. Vienna, Austria: Statistics Austria.                                                                                                                                                                                                                                                                                                                                                                                                                                                                                                                                                                            | 1995                             | *                    |

**Web Table 32 - Comprehensive citation list**

| Country | Citation                                                                                                                                                                                                   | Year*                      | New for GBD 2013 (*) |
|---------|------------------------------------------------------------------------------------------------------------------------------------------------------------------------------------------------------------|----------------------------|----------------------|
| Austria | Austria Vital Registration - Deaths 1996 ICD9 as it appears in World Health Organization (WHO). WHO Mortality Database Version February 2014. Geneva, Switzerland: World Health Organization (WHO), 2014.  | 1996                       |                      |
| Austria | Federal Ministry of Health (Austria), Statistics Austria. Austria Hospital Inpatient Discharges 1996. Vienna, Austria: Statistics Austria.                                                                 | 1996                       | *                    |
| Austria | Austria Vital Registration - Deaths 1997 ICD9 as it appears in World Health Organization (WHO). WHO Mortality Database Version February 2014. Geneva, Switzerland: World Health Organization (WHO), 2014.  | 1997                       |                      |
| Austria | Federal Ministry of Health (Austria), Statistics Austria. Austria Hospital Inpatient Discharges 1997. Vienna, Austria: Statistics Austria.                                                                 | 1997                       | *                    |
| Austria | Austria Vital Registration - Deaths 1998 ICD9 as it appears in World Health Organization (WHO). WHO Mortality Database Version February 2014. Geneva, Switzerland: World Health Organization (WHO), 2014.  | 1998                       |                      |
| Austria | Federal Ministry of Health (Austria), Statistics Austria. Austria Hospital Inpatient Discharges 1998. Vienna, Austria: Statistics Austria.                                                                 | 1998                       | *                    |
| Austria | Austria Vital Registration - Deaths 1999 ICD9 as it appears in World Health Organization (WHO). WHO Mortality Database Version February 2014. Geneva, Switzerland: World Health Organization (WHO), 2014.  | 1999                       |                      |
| Austria | Federal Ministry of Health (Austria), Statistics Austria. Austria Hospital Inpatient Discharges 1999. Vienna, Austria: Statistics Austria.                                                                 | 1999                       | *                    |
| Austria | Austria Vital Registration - Deaths 2000 ICD9 as it appears in World Health Organization (WHO). WHO Mortality Database Version February 2014. Geneva, Switzerland: World Health Organization (WHO), 2014.  | 2000                       |                      |
| Austria | Federal Ministry of Health (Austria), Statistics Austria. Austria Hospital Inpatient Discharges 2000. Vienna, Austria: Statistics Austria.                                                                 | 2000                       | *                    |
| Austria | Austria Vital Registration - Deaths 2001 ICD9 as it appears in World Health Organization (WHO). WHO Mortality Database Version February 2014. Geneva, Switzerland: World Health Organization (WHO), 2014.  | 2001                       |                      |
| Austria | Federal Ministry of Health (Austria), Statistics Austria. Austria Hospital Inpatient Discharges 2001. Vienna, Austria: Statistics Austria.                                                                 | 2001                       | *                    |
| Austria | WHO Regional Office for Europe (EURO-WHO). European Hospital Morbidity Database. Copenhagen, Denmark: WHO Regional Office for Europe (EURO-WHO).                                                           | 2001-2006, 2010            |                      |
| Austria | World Health Organization (WHO). Yellow Fever Reported Cases, WHO Vaccine-Preventable Diseases: Monitoring System. Geneva, Switzerland: World Health Organization (WHO).                                   | 2001, 2003-2005, 2007-2009 |                      |
| Austria | Austria Vital Registration - Deaths 2002 ICD10 as it appears in World Health Organization (WHO). WHO Mortality Database Version February 2014. Geneva, Switzerland: World Health Organization (WHO), 2014. | 2002                       |                      |
| Austria | Federal Ministry of Health (Austria), Statistics Austria. Austria Hospital Inpatient Discharges 2002. Vienna, Austria: Statistics Austria.                                                                 | 2002                       | *                    |
| Austria | Austria Vital Registration - Deaths 2003 ICD10 as it appears in World Health Organization (WHO). WHO Mortality Database Version February 2014. Geneva, Switzerland: World Health Organization (WHO), 2014. | 2003                       |                      |
| Austria | EUVAC-NET. EUVAC-NET Pertussis Surveillance Report 2003-2007. Stockholm, Sweden: European Centre for Disease Prevention and Control, 2009.                                                                 | 2003-2007                  |                      |

**Web Table 32 - Comprehensive citation list**

| Country | Citation                                                                                                                                                                                                                                                                                         | Year* | New for GBD 2013 (*) |
|---------|--------------------------------------------------------------------------------------------------------------------------------------------------------------------------------------------------------------------------------------------------------------------------------------------------|-------|----------------------|
| Austria | Austria Vital Registration - Deaths 2004 ICD10 as it appears in World Health Organization (WHO). WHO Mortality Database Version February 2014. Geneva, Switzerland: World Health Organization (WHO), 2014.                                                                                       | 2004  |                      |
| Austria | Federal Ministry of Health (Austria), Statistics Austria. Austria Hospital Inpatient Discharges 2004. Vienna, Austria: Statistics Austria.                                                                                                                                                       | 2004  | *                    |
| Austria | Austria Vital Registration - Deaths 2005 ICD10 as it appears in World Health Organization (WHO). WHO Mortality Database Version February 2014. Geneva, Switzerland: World Health Organization (WHO), 2014.                                                                                       | 2005  |                      |
| Austria | Federal Ministry of Health (Austria), Statistics Austria. Austria Hospital Inpatient Discharges 2005. Vienna, Austria: Statistics Austria.                                                                                                                                                       | 2005  | *                    |
| Austria | Austria Vital Registration - Deaths 2006 ICD10 as it appears in World Health Organization (WHO). WHO Mortality Database Version February 2014. Geneva, Switzerland: World Health Organization (WHO), 2014.                                                                                       | 2006  |                      |
| Austria | Federal Ministry of Health (Austria), Statistics Austria. Austria Hospital Inpatient Discharges 2006. Vienna, Austria: Statistics Austria.                                                                                                                                                       | 2006  | *                    |
| Austria | Austria Vital Registration - Deaths 2007 ICD10 as it appears in World Health Organization (WHO). WHO Mortality Database Version February 2014. Geneva, Switzerland: World Health Organization (WHO), 2014.                                                                                       | 2007  |                      |
| Austria | Federal Ministry of Health (Austria), Statistics Austria. Austria Hospital Inpatient Discharges 2007. Vienna, Austria: Statistics Austria.                                                                                                                                                       | 2007  |                      |
| Austria | Austria Vital Registration - Deaths 2008 ICD10 as it appears in World Health Organization (WHO). WHO Mortality Database Version February 2014. Geneva, Switzerland: World Health Organization (WHO), 2014.                                                                                       | 2008  |                      |
| Austria | Federal Ministry of Health (Austria), Statistics Austria. Austria Hospital Inpatient Discharges 2008. Vienna, Austria: Statistics Austria.                                                                                                                                                       | 2008  |                      |
| Austria | Austria Vital Registration - Deaths 2009 ICD10 as it appears in World Health Organization (WHO). WHO Mortality Database Version February 2014. Geneva, Switzerland: World Health Organization (WHO), 2014.                                                                                       | 2009  |                      |
| Austria | EUVAC-NET. EUVAC-NET Pertussis Surveillance Report 2009. Stockholm, Sweden: European Centre for Disease Prevention and Control, 2010.                                                                                                                                                            | 2009  |                      |
| Austria | Federal Ministry of Health (Austria), Statistics Austria. Austria Hospital Inpatient Discharges 2009. Vienna, Austria: Statistics Austria.                                                                                                                                                       | 2009  |                      |
| Austria | Austria Vital Registration - Deaths 2010 ICD10 as it appears in World Health Organization (WHO). WHO Mortality Database Version February 2014. Geneva, Switzerland: World Health Organization (WHO), 2014.                                                                                       | 2010  |                      |
| Austria | European Renal Association-European Dialysis and Transplant Association (ERA-EDTA). European Renal Association-European Dialysis and Transplant Association Registry Annual Report 2010. Parma, Italy: European Renal Association-European Dialysis and Transplant Association (ERA-EDTA), 2012. | 2010  | *                    |
| Austria | EUVAC-NET. EUVAC-NET Measles Surveillance Report 2010. Stockholm, Sweden: European Centre for Disease Prevention and Control, 2011.                                                                                                                                                              | 2010  |                      |
| Austria | Federal Ministry of Health (Austria), Statistics Austria. Austria Hospital Inpatient Discharges 2010. Vienna, Austria: Statistics Austria.                                                                                                                                                       | 2010  |                      |
| Austria | Austria Vital Registration - Deaths 2011 ICD10 as it appears in World Health Organization (WHO). WHO Mortality Database Version February 2014. Geneva, Switzerland: World Health Organization (WHO), 2014.                                                                                       | 2011  | *                    |

**Web Table 32 - Comprehensive citation list**

| Country    | Citation                                                                                                                                                                                                                                                                                         | Year*                | New for GBD 2013 (*) |
|------------|--------------------------------------------------------------------------------------------------------------------------------------------------------------------------------------------------------------------------------------------------------------------------------------------------|----------------------|----------------------|
| Austria    | European Renal Association-European Dialysis and Transplant Association (ERA-EDTA). European Renal Association-European Dialysis and Transplant Association Registry Annual Report 2011. Parma, Italy: European Renal Association-European Dialysis and Transplant Association (ERA-EDTA), 2013. | 2011                 | *                    |
| Azerbaijan | Institute for Health Metrics and Evaluation (IHME), Joint United Nations Program on HIV/AIDS (UNAIDS). Institute for Health Metrics and Evaluation HIV Mortality Estimates Based on the UNAIDS Spectrum Model Framework.                                                                         | 1980-2013            | *                    |
| Azerbaijan | Azerbaijan Vital Registration - Deaths 1981 ICD9 as it appears in World Health Organization (WHO). WHO Mortality Database Version February 2014. Geneva, Switzerland: World Health Organization (WHO), 2014.                                                                                     | 1981                 |                      |
| Azerbaijan | Azerbaijan Vital Registration - Deaths 1982 ICD9 as it appears in World Health Organization (WHO). WHO Mortality Database Version February 2014. Geneva, Switzerland: World Health Organization (WHO), 2014.                                                                                     | 1982                 |                      |
| Azerbaijan | Azerbaijan Vital Registration Death Data 1983 as it appears in United Nations Statistics Division (UNSD). United Nations Demographic Yearbook. New York City, United States: United Nations Statistics Division (UNSD).                                                                          | 1983                 |                      |
| Azerbaijan | Azerbaijan Vital Registration Death Data 1984 as it appears in United Nations Statistics Division (UNSD). United Nations Demographic Yearbook. New York City, United States: United Nations Statistics Division (UNSD).                                                                          | 1984                 |                      |
| Azerbaijan | Azerbaijan Vital Registration - Deaths 1985 ICD9 as it appears in World Health Organization (WHO). WHO Mortality Database Version February 2014. Geneva, Switzerland: World Health Organization (WHO), 2014.                                                                                     | 1985                 |                      |
| Azerbaijan | Azerbaijan Vital Registration - Deaths 1986 ICD9 as it appears in World Health Organization (WHO). WHO Mortality Database Version February 2014. Geneva, Switzerland: World Health Organization (WHO), 2014.                                                                                     | 1986                 |                      |
| Azerbaijan | Azerbaijan Vital Registration - Deaths 1987 ICD9 as it appears in World Health Organization (WHO). WHO Mortality Database Version February 2014. Geneva, Switzerland: World Health Organization (WHO), 2014.                                                                                     | 1987                 |                      |
| Azerbaijan | Azerbaijan Vital Registration - Deaths 1988 ICD9 as it appears in World Health Organization (WHO). WHO Mortality Database Version February 2014. Geneva, Switzerland: World Health Organization (WHO), 2014.                                                                                     | 1988                 |                      |
| Azerbaijan | Azerbaijan Vital Registration - Deaths 1989 ICD9 as it appears in World Health Organization (WHO). WHO Mortality Database Version February 2014. Geneva, Switzerland: World Health Organization (WHO), 2014.                                                                                     | 1989                 |                      |
| Azerbaijan | Azerbaijan Vital Registration - Deaths 1990 ICD9 as it appears in World Health Organization (WHO). WHO Mortality Database Version February 2014. Geneva, Switzerland: World Health Organization (WHO), 2014.                                                                                     | 1990                 |                      |
| Azerbaijan | Weatherall D. Sickle Cell and Thalassemias Prevalence Data, Personal Correspondence with David Weatherall. [Unpublished].                                                                                                                                                                        | 1990-2009            |                      |
| Azerbaijan | United Nations Children's Fund (UNICEF), World Health Organization (WHO). WHO and UNICEF Reported Disease Incidence Time Series - Pertussis. Geneva, Switzerland: World Health Organization (WHO).                                                                                               | 1990-2013            |                      |
| Azerbaijan | United Nations Children's Fund (UNICEF), World Health Organization (WHO). WHO and UNICEF Reported Disease Incidence Time Series - Measles. Geneva, Switzerland: World Health Organization (WHO).                                                                                                 | 1990-2008, 2010-2013 |                      |

**Web Table 32 - Comprehensive citation list**

| Country    | Citation                                                                                                                                                                                                                                                      | Year*                 | New for GBD 2013 (*) |
|------------|---------------------------------------------------------------------------------------------------------------------------------------------------------------------------------------------------------------------------------------------------------------|-----------------------|----------------------|
| Azerbaijan | Centre for Health Informatics and Multiprofessional Education, University College London. Modell's Haemoglobinopathologist's Almanac. London, United Kingdom: Centre for Health Informatics and Multiprofessional Education, University College London, 2008. | 1990-2003             |                      |
| Azerbaijan | Azerbaijan Vital Registration - Deaths 1991 ICD9 as it appears in World Health Organization (WHO). WHO Mortality Database Version February 2014. Geneva, Switzerland: World Health Organization (WHO), 2014.                                                  | 1991                  |                      |
| Azerbaijan | Department of Peace and Conflict Research, Uppsala University. UCDP Battle-Related Deaths Database Version 5, 2013. Uppsala, Sweden: Department of Peace and Conflict Research, Uppsala University, 2013.                                                     | 1991-2012             | *                    |
| Azerbaijan | Azerbaijan Vital Registration - Deaths 1992 ICD9 as it appears in World Health Organization (WHO). WHO Mortality Database Version February 2014. Geneva, Switzerland: World Health Organization (WHO), 2014.                                                  | 1992                  |                      |
| Azerbaijan | Department of Peace and Conflict Research, Uppsala University. UCDP One-Sided Violence Database Version 1.4, 2013. Uppsala, Sweden: Department of Peace and Conflict Research, Uppsala University, 2013.                                                      | 1992                  | *                    |
| Azerbaijan | Azerbaijan Vital Registration - Deaths 1993 ICD9 as it appears in World Health Organization (WHO). WHO Mortality Database Version February 2014. Geneva, Switzerland: World Health Organization (WHO), 2014.                                                  | 1993                  |                      |
| Azerbaijan | Azerbaijan Vital Registration - Deaths 1994 ICD9 as it appears in World Health Organization (WHO). WHO Mortality Database Version February 2014. Geneva, Switzerland: World Health Organization (WHO), 2014.                                                  | 1994                  |                      |
| Azerbaijan | World Health Organization (WHO). Azerbaijan WHO Leishmaniasis Country Profile.                                                                                                                                                                                | 1994-2010             | *                    |
| Azerbaijan | Azerbaijan Vital Registration - Deaths 1995 ICD9 as it appears in World Health Organization (WHO). WHO Mortality Database Version February 2014. Geneva, Switzerland: World Health Organization (WHO), 2014.                                                  | 1995                  |                      |
| Azerbaijan | Centre for Research on the Epidemiology of Disasters (CRED). EM-DAT: The OFDA/CRED International Disaster Database. Brussels, Belgium: Catholic University of Leuven.                                                                                         | 1995, 1997-2000, 2010 |                      |
| Azerbaijan | Azerbaijan Vital Registration - Deaths 1996 ICD9 as it appears in World Health Organization (WHO). WHO Mortality Database Version February 2014. Geneva, Switzerland: World Health Organization (WHO), 2014.                                                  | 1996                  |                      |
| Azerbaijan | Azerbaijan Vital Registration - Deaths 1997 ICD9 as it appears in World Health Organization (WHO). WHO Mortality Database Version February 2014. Geneva, Switzerland: World Health Organization (WHO), 2014.                                                  | 1997                  |                      |
| Azerbaijan | World Health Organization (WHO). The Global Elimination of Congenital Syphilis: Rationale and Strategy for Action. Geneva, Switzerland: World Health Organization (WHO), 2007.                                                                                | 1997-2003             |                      |
| Azerbaijan | Azerbaijan Vital Registration - Deaths 1998 ICD9 as it appears in World Health Organization (WHO). WHO Mortality Database Version February 2014. Geneva, Switzerland: World Health Organization (WHO), 2014.                                                  | 1998                  |                      |
| Azerbaijan | Azerbaijan Vital Registration - Deaths 1999 ICD9 as it appears in World Health Organization (WHO). WHO Mortality Database Version February 2014. Geneva, Switzerland: World Health Organization (WHO), 2014.                                                  | 1999                  |                      |
| Azerbaijan | State Statistics Committee of Azerbaijan, United Nations Children's Fund (UNICEF). Azerbaijan Multiple Indicator Cluster Survey 2000. New York, United States: United Nations Children's Fund (UNICEF).                                                       | 2000                  |                      |

**Web Table 32 - Comprehensive citation list**

| Country    | Citation                                                                                                                                                                                                                                                                                                     | Year*                | New for GBD 2013 (*) |
|------------|--------------------------------------------------------------------------------------------------------------------------------------------------------------------------------------------------------------------------------------------------------------------------------------------------------------|----------------------|----------------------|
| Azerbaijan | Azerbaijan Vital Registration - Deaths 2000 ICD9 as it appears in World Health Organization (WHO). WHO Mortality Database Version February 2014. Geneva, Switzerland: World Health Organization (WHO), 2014.                                                                                                 | 2000                 |                      |
| Azerbaijan | Azerbaijan Vital Registration - Deaths 2001 ICD10 as it appears in World Health Organization (WHO). WHO Mortality Database Version February 2014. Geneva, Switzerland: World Health Organization (WHO), 2014.                                                                                                | 2001                 |                      |
| Azerbaijan | Adventist Development and Relief Agency (ADRA), Azerbaijan Ministry of Health, State Statistical Committee of Azerbaijan, and Centers for Disease Control and Prevention (CDC). (2003) Azerbaijan Reproductive Health Survey 2001. Atlanta, United States: Centers for Disease Control and Prevention (CDC). | 2001                 |                      |
| Azerbaijan | World Health Organization (WHO). Yellow Fever Reported Cases, WHO Vaccine-Preventable Diseases: Monitoring System. Geneva, Switzerland: World Health Organization (WHO).                                                                                                                                     | 2001-2005, 2007-2008 |                      |
| Azerbaijan | Azerbaijan Vital Registration - Deaths 2002 ICD10 as it appears in World Health Organization (WHO). WHO Mortality Database Version February 2014. Geneva, Switzerland: World Health Organization (WHO), 2014.                                                                                                | 2002                 |                      |
| Azerbaijan | Azerbaijan Vital Registration - Deaths 2003 ICD10 as it appears in World Health Organization (WHO). WHO Mortality Database Version February 2014. Geneva, Switzerland: World Health Organization (WHO), 2014.                                                                                                | 2003                 |                      |
| Azerbaijan | Azerbaijan Vital Registration - Deaths 2004 ICD10 as it appears in World Health Organization (WHO). WHO Mortality Database Version February 2014. Geneva, Switzerland: World Health Organization (WHO), 2014.                                                                                                | 2004                 |                      |
| Azerbaijan | World Health Organization (WHO). Retrospective Measles Data on Supplementary Immunization Activities. Geneva, Switzerland: World Health Organization (WHO).                                                                                                                                                  | 2004, 2006           |                      |
| Azerbaijan | Azerbaijan Vital Registration Death Data 2005 as it appears in TransMonEE 2013 Database, UNICEF Regional Office for CEE/CIS.                                                                                                                                                                                 | 2005                 |                      |
| Azerbaijan | Macro International, Inc, State Statistical Committee of Azerbaijan. Azerbaijan Demographic and Health Survey 2006. Calverton, United States: Macro International, Inc.                                                                                                                                      | 2006                 |                      |
| Azerbaijan | Azerbaijan Vital Registration Death Data 2006 as it appears in TransMonEE 2013 Database, UNICEF Regional Office for CEE/CIS.                                                                                                                                                                                 | 2006                 |                      |
| Azerbaijan | Azerbaijan Vital Registration - Deaths 2007 ICD10 as it appears in World Health Organization (WHO). WHO Mortality Database Version February 2014. Geneva, Switzerland: World Health Organization (WHO), 2014.                                                                                                | 2007                 |                      |
| Azerbaijan | United Nations Office on Drugs and Crime (UNODC). United Nations Office on Drugs and Crime Global Study on Homicides 2011. Vienna, Austria: United Nations Office on Drugs and Crime (UNODC), 2011.                                                                                                          | 2007                 |                      |
| Azerbaijan | Azerbaijan Vital Registration Death Data 2008 as it appears in United Nations Statistics Division (UNSD). United Nations Demographic Yearbook. New York City, United States: United Nations Statistics Division (UNSD).                                                                                      | 2008                 |                      |
| Azerbaijan | Azerbaijan Vital Registration Death Data 2009 as it appears in United Nations Statistics Division (UNSD). United Nations Demographic Yearbook. New York City, United States: United Nations Statistics Division (UNSD).                                                                                      | 2009                 |                      |
| Azerbaijan | Azerbaijan Vital Registration Death Data 2010 as it appears in United Nations Statistics Division (UNSD). United Nations Demographic Yearbook. New York City, United States: United Nations Statistics Division (UNSD).                                                                                      | 2010                 |                      |



**Web Table 32 - Comprehensive citation list**

| Country | Citation                                                                                                                                                                                                                                          | Year*                      | New for GBD 2013 (*) |
|---------|---------------------------------------------------------------------------------------------------------------------------------------------------------------------------------------------------------------------------------------------------|----------------------------|----------------------|
| Bahrain | United Nations Office on Drugs and Crime (UNODC). United Nations Surveys on Crime Trends and the Operations of Criminal Justice Systems 1970-2006 as provided by Kavi Bhalla. [Unpublished].                                                      | 1970-1980                  |                      |
| Bahrain | Bahrain Population and Housing Census 1971 as it appears in United Nations Statistics Division (UNSD). United Nations Demographic Yearbook. New York City, United States: United Nations Statistics Division (UNSD).                              | 1971                       |                      |
| Bahrain | Bahrain Vital Registration Death Data 1980 as it appears in United Nations Statistics Division (UNSD). United Nations Demographic Yearbook. New York City, United States: United Nations Statistics Division (UNSD).                              | 1980                       |                      |
| Bahrain | Institute for Health Metrics and Evaluation (IHME), Joint United Nations Program on HIV/AIDS (UNAIDS). Institute for Health Metrics and Evaluation HIV Mortality Estimates Based on the UNAIDS Spectrum Model Framework.                          | 1980-2013                  | *                    |
| Bahrain | United Nations Children's Fund (UNICEF), World Health Organization (WHO). WHO and UNICEF Reported Disease Incidence Time Series - Pertussis. Geneva, Switzerland: World Health Organization (WHO).                                                | 1980-2002, 2004, 2006-2013 |                      |
| Bahrain | United Nations Children's Fund (UNICEF), World Health Organization (WHO). WHO and UNICEF Reported Disease Incidence Time Series - Measles. Geneva, Switzerland: World Health Organization (WHO).                                                  | 1980-2012                  |                      |
| Bahrain | Central Statistics Organization (Bahrain). Bahrain Population and Housing Census 1981.                                                                                                                                                            | 1981                       |                      |
| Bahrain | Bahrain Vital Registration Death Data 1981 as it appears in United Nations Statistics Division (UNSD). United Nations Demographic Yearbook. New York City, United States: United Nations Statistics Division (UNSD).                              | 1981                       |                      |
| Bahrain | Bahrain Vital Registration Death Data 1982 as it appears in United Nations Statistics Division (UNSD). United Nations Demographic Yearbook. New York City, United States: United Nations Statistics Division (UNSD).                              | 1982                       |                      |
| Bahrain | Bahrain Vital Registration Death Data 1984 as it appears in United Nations Statistics Division (UNSD). United Nations Demographic Yearbook. New York City, United States: United Nations Statistics Division (UNSD).                              | 1984                       |                      |
| Bahrain | Bahrain Vital Registration - Deaths 1985 ICD9 as it appears in World Health Organization (WHO). WHO Mortality Database Version February 2014. Geneva, Switzerland: World Health Organization (WHO), 2014.                                         | 1985                       |                      |
| Bahrain | Thalassaemia International Federation, World Health Organization (WHO). Management of Haemoglobin Disorders: Report of a Joint WHO-TIF Meeting, Nicosia, Cyprus, 16-18 November 2007. Geneva, Switzerland: World Health Organization (WHO), 2008. | 1985, 2002, 2007           |                      |
| Bahrain | Bahrain Vital Registration Death Data 1986 as it appears in United Nations Statistics Division (UNSD). United Nations Demographic Yearbook. New York City, United States: United Nations Statistics Division (UNSD).                              | 1986                       |                      |
| Bahrain | Bahrain Vital Registration - Deaths 1987 ICD9 as it appears in World Health Organization (WHO). WHO Mortality Database Version February 2014. Geneva, Switzerland: World Health Organization (WHO), 2014.                                         | 1987                       |                      |
| Bahrain | Bahrain Vital Registration - Deaths 1988 ICD9 as it appears in World Health Organization (WHO). WHO Mortality Database Version February 2014. Geneva, Switzerland: World Health Organization (WHO), 2014.                                         | 1988                       |                      |
| Bahrain | Ministry of Health (Bahrain). Bahrain Child Health Survey 1989.                                                                                                                                                                                   | 1989                       |                      |

**Web Table 32 - Comprehensive citation list**

| Country | Citation                                                                                                                                                                                                                                                                                                                                                                                                                                                 | Year*     | New for GBD 2013 (*) |
|---------|----------------------------------------------------------------------------------------------------------------------------------------------------------------------------------------------------------------------------------------------------------------------------------------------------------------------------------------------------------------------------------------------------------------------------------------------------------|-----------|----------------------|
| Bahrain | Bahrain Vital Registration Death Data 1989 as it appears in United Nations Statistics Division (UNSD). United Nations Demographic Yearbook. New York City, United States: United Nations Statistics Division (UNSD).                                                                                                                                                                                                                                     | 1989      |                      |
| Bahrain | Bahrain Vital Registration Death Data 1990 as it appears in United Nations Statistics Division (UNSD). United Nations Demographic Yearbook. New York City, United States: United Nations Statistics Division (UNSD).                                                                                                                                                                                                                                     | 1990      |                      |
| Bahrain | Weatherall D. Sickle Cell and Thalassemias Prevalence Data, Personal Correspondence with David Weatherall. [Unpublished].                                                                                                                                                                                                                                                                                                                                | 1990-2009 |                      |
| Bahrain | Centre for Health Informatics and Multiprofessional Education, University College London. Modell's Haemoglobinopathologist's Almanac. London, United Kingdom: Centre for Health Informatics and Multiprofessional Education, University College London, 2008.                                                                                                                                                                                            | 1990-2003 |                      |
| Bahrain | Bahrain Population and Housing Census 1991 as it appears in United Nations Statistics Division (UNSD). United Nations Demographic Yearbook. New York City, United States: United Nations Statistics Division (UNSD).                                                                                                                                                                                                                                     | 1991      |                      |
| Bahrain | Bahrain Vital Registration Death Data 1991 as it appears in United Nations Statistics Division (UNSD). United Nations Demographic Yearbook. New York City, United States: United Nations Statistics Division (UNSD).                                                                                                                                                                                                                                     | 1991      |                      |
| Bahrain | Angastiniotis M, Modell B, Englezos P, Boulyjenkov V. Prevention and control of haemoglobinopathies. Bull World Health Organ. 1995; 73(3): 375-86.                                                                                                                                                                                                                                                                                                       | 1991-1993 |                      |
| Bahrain | Bahrain Vital Registration Death Data 1992 as it appears in United Nations Statistics Division (UNSD). United Nations Demographic Yearbook. New York City, United States: United Nations Statistics Division (UNSD).                                                                                                                                                                                                                                     | 1992      |                      |
| Bahrain | al-Mahroos FT, Ebrahim A. Prevalence of hepatitis B, hepatitis C and human immune deficiency virus markers among patients with hereditary haemolytic anaemias. Ann Trop Paediatr. 1995; 15(2): 121-8.                                                                                                                                                                                                                                                    | 1992      |                      |
| Bahrain | Bahrain Vital Registration Death Data 1993 as it appears in United Nations Statistics Division (UNSD). United Nations Demographic Yearbook. New York City, United States: United Nations Statistics Division (UNSD).                                                                                                                                                                                                                                     | 1993      |                      |
| Bahrain | Ministry of Health (Bahrain), Council of Health Ministers of GCC States. Bahrain Family Health Survey 1995. Manama, Bahrain: Ministry of Health (Bahrain).                                                                                                                                                                                                                                                                                               | 1995      |                      |
| Bahrain | University of Central Arkansas - UCA [Internet]. Conway (AR), United States: University of Central Arkansas; [updated 2014]. Bahrain DADM Project Intrastate Dispute Narrative 1971-Present. Available from: <a href="http://uca.edu/politicalscience/dadm-project/middle-eastnorth-africapersian-gulf-region/lebanon-1943-present/">http://uca.edu/politicalscience/dadm-project/middle-eastnorth-africapersian-gulf-region/lebanon-1943-present/</a> . | 1995      | *                    |
| Bahrain | Bahrain Vital Registration Death Data 1995 as it appears in United Nations Statistics Division (UNSD). United Nations Demographic Yearbook. New York City, United States: United Nations Statistics Division (UNSD).                                                                                                                                                                                                                                     | 1995      |                      |
| Bahrain | Joint United Nations Program on HIV/AIDS (UNAIDS), United Nations Children's Fund (UNICEF), World Health Organization (WHO). Bahrain Epidemiological Fact Sheet on HIV/AIDS and STIs 2004.                                                                                                                                                                                                                                                               | 1995-2000 |                      |
| Bahrain | Bahrain Vital Registration Death Data 1996 as it appears in United Nations Statistics Division (UNSD). United Nations Demographic Yearbook. New York City, United States: United Nations Statistics Division (UNSD).                                                                                                                                                                                                                                     | 1996      |                      |



**Web Table 32 - Comprehensive citation list**

| Country | Citation                                                                                                                                                                                                                                                                              | Year*                      | New for GBD 2013 (*) |
|---------|---------------------------------------------------------------------------------------------------------------------------------------------------------------------------------------------------------------------------------------------------------------------------------------|----------------------------|----------------------|
| Bahrain | Bahrain Vital Registration - Deaths 1997 ICD10 as it appears in World Health Organization (WHO). WHO Mortality Database Version February 2014. Geneva, Switzerland: World Health Organization (WHO), 2014.                                                                            | 1997                       |                      |
| Bahrain | United Nations Office on Drugs and Crime (UNODC). United Nations Office on Drugs and Crime Global Study on Homicides 2011. Vienna, Austria: United Nations Office on Drugs and Crime (UNODC), 2011.                                                                                   | 1997                       |                      |
| Bahrain | Bahrain Vital Registration - Deaths 1998 ICD10 as it appears in World Health Organization (WHO). WHO Mortality Database Version February 2014. Geneva, Switzerland: World Health Organization (WHO), 2014.                                                                            | 1998                       |                      |
| Bahrain | World Health Organization (WHO). Yellow Fever Reported Cases, WHO Vaccine-Preventable Diseases: Monitoring System. Geneva, Switzerland: World Health Organization (WHO).                                                                                                              | 1998-2002, 2004, 2006-2009 |                      |
| Bahrain | Measles Supplementary Immunization Activity Data as provided by the World Health Organization. [Unpublished].                                                                                                                                                                         | 1998-1999                  |                      |
| Bahrain | Bahrain Vital Registration - Deaths 1999 ICD10 as it appears in World Health Organization (WHO). WHO Mortality Database Version February 2014. Geneva, Switzerland: World Health Organization (WHO), 2014.                                                                            | 1999                       |                      |
| Bahrain | Bahrain Vital Registration - Deaths 2000 ICD10 as it appears in World Health Organization (WHO). WHO Mortality Database Version February 2014. Geneva, Switzerland: World Health Organization (WHO), 2014.                                                                            | 2000                       |                      |
| Bahrain | Curado MP, Edwards B, Shin HR, Storm H, Ferlay J, Heanue M and Boyle P, eds (2007). Cancer Incidence in Five Continents, Vol. IX Periodic Data (electronic version). Lyon, IARC. <a href="http://ci5.iarc.fr">http://ci5.iarc.fr</a>                                                  | 2000                       |                      |
| Bahrain | Bahrain Vital Registration - Deaths 2001 ICD10 as it appears in World Health Organization (WHO). WHO Mortality Database Version February 2014. Geneva, Switzerland: World Health Organization (WHO), 2014.                                                                            | 2001                       |                      |
| Bahrain | Bahrain Population, Housing, Buildings, and Establishments Census 2001 as it appears in United Nations Statistics Division (UNSD). United Nations Demographic Yearbook. New York City, United States: United Nations Statistics Division (UNSD).                                      | 2001                       |                      |
| Bahrain | Bahrain Vital Registration - Deaths 2002 ICD10 as it appears in World Health Organization (WHO). WHO Mortality Database Version February 2014. Geneva, Switzerland: World Health Organization (WHO), 2014.                                                                            | 2002                       |                      |
| Bahrain | Dash S. Hemoglobinopathies, G6PD deficiency, and hereditary elliptocytosis in Bahrain. Hum Biol. 2004; 76(5): 779-83.                                                                                                                                                                 | 2002-2004                  |                      |
| Bahrain | Bahrain Vital Registration - Deaths 2003 ICD10 as it appears in World Health Organization (WHO). WHO Mortality Database Version February 2014. Geneva, Switzerland: World Health Organization (WHO), 2014.                                                                            | 2003                       |                      |
| Bahrain | Bahrain Vital Registration - Deaths 2004 ICD10 as it appears in World Health Organization (WHO). WHO Mortality Database Version February 2014. Geneva, Switzerland: World Health Organization (WHO), 2014.                                                                            | 2004                       |                      |
| Bahrain | Bahrain Vital Registration - Deaths 2005 ICD10 as it appears in World Health Organization (WHO). WHO Mortality Database Version February 2014. Geneva, Switzerland: World Health Organization (WHO), 2014.                                                                            | 2005                       |                      |
| Bahrain | Forman D, Bray F, Brewster DH, Gombe Mbalawa C, Kohler B, Piñeros M, Steliarova-Foucher E, Swaminathan R and Ferlay J, eds (2013). Cancer Incidence in Five Continents, Vol. X Summary Database (electronic version). Lyon, IARC. <a href="http://ci5.iarc.fr">http://ci5.iarc.fr</a> | 2005                       |                      |

**Web Table 32 - Comprehensive citation list**

| Country    | Citation                                                                                                                                                                                                                                                                                                                                                 | Year*                                                  | New for GBD 2013 (*) |
|------------|----------------------------------------------------------------------------------------------------------------------------------------------------------------------------------------------------------------------------------------------------------------------------------------------------------------------------------------------------------|--------------------------------------------------------|----------------------|
| Bahrain    | Bahrain Vital Registration - Deaths 2006 ICD10 as it appears in World Health Organization (WHO). WHO Mortality Database Version February 2014. Geneva, Switzerland: World Health Organization (WHO), 2014.                                                                                                                                               | 2006                                                   |                      |
| Bahrain    | Bahrain Vital Registration - Deaths 2007 ICD10 as it appears in World Health Organization (WHO). WHO Mortality Database Version February 2014. Geneva, Switzerland: World Health Organization (WHO), 2014.                                                                                                                                               | 2007                                                   |                      |
| Bahrain    | World Health Organization (WHO). Global Status Report on Road Safety 2009. Geneva, Switzerland: World Health Organization (WHO), 2009.                                                                                                                                                                                                                   | 2007                                                   |                      |
| Bahrain    | Bahrain Vital Registration - Deaths 2008 ICD10 as it appears in World Health Organization (WHO). WHO Mortality Database Version February 2014. Geneva, Switzerland: World Health Organization (WHO), 2014.                                                                                                                                               | 2008                                                   |                      |
| Bahrain    | Bahrain Vital Registration - Deaths 2009 ICD10 as it appears in World Health Organization (WHO). WHO Mortality Database Version February 2014. Geneva, Switzerland: World Health Organization (WHO), 2014.                                                                                                                                               | 2009                                                   |                      |
| Bahrain    | Department of Peace and Conflict Research, Uppsala University. UCDP One-Sided Violence Database Version 1.4, 2013. Uppsala, Sweden: Department of Peace and Conflict Research, Uppsala University, 2013.                                                                                                                                                 | 2011                                                   | *                    |
| Bahrain    | Bahrain Center for Human Rights [Internet]. Manama, Bahrain: Bahrain Center for Human Rights; [updated 2014]. Individuals Killed By Government's Excessive Use of Force Since 14 February 2011; [published 2011 Apr 4; updated 2014 Apr 18]. Available from: <a href="http://bahrainrights.org/en/node/3864">http://bahrainrights.org/en/node/3864</a> . | 2011                                                   | *                    |
| Bahrain    | International Crisis Group. Bahrain - CrisisWatch Database. Brussels, Belgium: International Crisis Group.                                                                                                                                                                                                                                               | 2012                                                   | *                    |
| Bahrain    | Bahrain Vital Registration Death Data 2012 as it appears in United Nations Statistics Division (UNSD). United Nations Demographic Yearbook. New York City, United States: United Nations Statistics Division (UNSD).                                                                                                                                     | 2012                                                   | *                    |
| Bangladesh | Centre for Research on the Epidemiology of Disasters (CRED). EM-DAT: The OFDA/CRED International Disaster Database. Brussels, Belgium: Catholic University of Leuven.                                                                                                                                                                                    | 1951, 1958, 1960-1961, 1963-1974, 1976-1981, 1983-2013 |                      |
| Bangladesh | Central Statistical Office (Pakistan), Pakistan Institute of Development Economics. Pakistan Population Growth Estimation Experiment 1962-1965.                                                                                                                                                                                                          | 1962-1965                                              |                      |
| Bangladesh | Catholic University of Leuven, Organization for Economic Co-operation and Development (OECD), United Nations Population Division. Mortality in Developing Countries: Tome I Data Bank. Organization for Economic Co-operation and Development (OECD), 1980.                                                                                              | 1962-1965                                              |                      |
| Bangladesh | INDEPTH, International Centre for Diarrhoeal Disease Research (Bangladesh). Bangladesh - Matlab Health and Demographic Surveillance System. Dhaka, Bangladesh: International Centre for Diarrhoeal Disease Research (Bangladesh).                                                                                                                        | 1970-2012                                              |                      |
| Bangladesh | Papiha SS, Roberts DF, Ali SG, Islam MM. Some hereditary blood factors of the Bengali Muslim of Bangladesh (red cell enzymes, haemoglobins, and serum proteins). Humangenetik. 1975; 28(4): 285-93.                                                                                                                                                      | 1973-1975                                              |                      |
| Bangladesh | Bangladesh Retrospective Survey of Fertility and Mortality 1974 as it appears in United Nations Statistics Division (UNSD). United Nations Demographic Yearbook Special Census Topic, 2000 Round. New York City, United States: United Nations Statistics Division (UNSD).                                                                               | 1974                                                   |                      |
| Bangladesh | National Institute of Population Research and Training (Bangladesh), International Statistical Institute. Bangladesh World Fertility Survey 1975-1976. Voorburg, Netherlands: International Statistical Institute.                                                                                                                                       | 1975-1976                                              |                      |

**Web Table 32 - Comprehensive citation list**

| Country    | Citation                                                                                                                                                                                                                   | Year*     | New for GBD 2013 (*) |
|------------|----------------------------------------------------------------------------------------------------------------------------------------------------------------------------------------------------------------------------|-----------|----------------------|
| Bangladesh | Peace Research Institute Oslo (PRIO). Battle Deaths Dataset Version 3, 2009. Oslo, Norway: Peace Research Institute Oslo (PRIO), 2009.                                                                                     | 1975-1988 |                      |
| Bangladesh | Koster FT, Curlin GC, Aziz KM, Haque A. Synergistic impact of measles and diarrhoea on nutrition and mortality in Bangladesh. Bull World Health Organ. 1981; 59(6): 901-8.                                                 | 1975-1976 |                      |
| Bangladesh | United Nations Office on Drugs and Crime (UNODC). United Nations Surveys on Crime Trends and the Operations of Criminal Justice Systems 1970-2006 as provided by Kavi Bhalla. [Unpublished].                               | 1976-1986 |                      |
| Bangladesh | Bangladesh Sample Vital Registration System 1980 as it appears in United Nations Statistics Division (UNSD). United Nations Demographic Yearbook. New York City, United States: United Nations Statistics Division (UNSD). | 1980      |                      |
| Bangladesh | Bhuiya A, Wojtyniak B, D'Souza S, Nahar L, Shaikh K. Measles case fatality among the under-fives: A multivariate analysis of risk factors in a rural area of Bangladesh. Soc Sci Med. 1987; 24(5): 439-43.                 | 1980      |                      |
| Bangladesh | Shahid NS, Clauquin P, Shaikh K, Zimicki S. Long-term complication of measles in rural Bangladesh. J Trop Med Hyg. 1983; 86(2): 77-80.                                                                                     | 1980      |                      |
| Bangladesh | Fauveau V, Chakraborty J, Sarder AM, Khan MA, Koenig MA. Measles among under-9-month-olds in rural Bangladesh: Its significance for age at immunization. Bull World Health Organ. 1991; 69(1): 67-72.                      | 1980-1981 |                      |
| Bangladesh | Institute for Health Metrics and Evaluation (IHME), Joint United Nations Program on HIV/AIDS (UNAIDS). Institute for Health Metrics and Evaluation HIV Mortality Estimates Based on the UNAIDS Spectrum Model Framework.   | 1980-2013 | *                    |
| Bangladesh | United Nations Children's Fund (UNICEF), World Health Organization (WHO). WHO and UNICEF Reported Disease Incidence Time Series - Pertussis. Geneva, Switzerland: World Health Organization (WHO).                         | 1980-2013 |                      |
| Bangladesh | United Nations Children's Fund (UNICEF), World Health Organization (WHO). WHO and UNICEF Reported Disease Incidence Time Series - Measles. Geneva, Switzerland: World Health Organization (WHO).                           | 1980-2013 |                      |
| Bangladesh | Ministry of Health and Population Control (Bangladesh). Bangladesh Contraceptive Prevalence Survey 1981.                                                                                                                   | 1981      |                      |
| Bangladesh | Bangladesh Sample Vital Registration System 1981 as it appears in United Nations Statistics Division (UNSD). United Nations Demographic Yearbook. New York City, United States: United Nations Statistics Division (UNSD). | 1981      |                      |
| Bangladesh | Alauddin M. Maternal mortality in rural Bangladesh: the Tangail District. Stud Fam Plann. 1986; 17(1): 13-21.                                                                                                              | 1982      |                      |
| Bangladesh | Khan AR, Jahan FA, Begum SF. Maternal mortality in rural Bangladesh: the Jamalpur District. Stud Fam Plann. 1986; 17(1): 7-12.                                                                                             | 1982      |                      |
| Bangladesh | Bangladesh Sample Vital Registration System 1982 as it appears in United Nations Statistics Division (UNSD). United Nations Demographic Yearbook. New York City, United States: United Nations Statistics Division (UNSD). | 1982      |                      |
| Bangladesh | Bangladesh Sample Vital Registration System 1984 as it appears in United Nations Statistics Division (UNSD). United Nations Demographic Yearbook. New York City, United States: United Nations Statistics Division (UNSD). | 1984      |                      |
| Bangladesh | World Health Organization (WHO). Expanded programme on immunization. Public health importance of measles: Bangladesh. Wkly Epidemiol Rec. 1986; 61(12): 85-90.                                                             | 1984      |                      |
| Bangladesh | Rahman S, Nessa F. Neo-natal mortality patterns in rural Bangladesh. J Trop Pediatr. 1989; 35(4): 199-202.                                                                                                                 | 1985      |                      |
| Bangladesh | Bangladesh Sample Vital Registration System 1985 as it appears in United Nations Statistics Division (UNSD). United Nations Demographic Yearbook. New York City, United States: United Nations Statistics Division (UNSD). | 1985      |                      |

**Web Table 32 - Comprehensive citation list**

| Country    | Citation                                                                                                                                                                                                                                                                                                  | Year*     | New for GBD 2013 (*) |
|------------|-----------------------------------------------------------------------------------------------------------------------------------------------------------------------------------------------------------------------------------------------------------------------------------------------------------|-----------|----------------------|
| Bangladesh | Ministry of Health and Family Welfare (Bangladesh), Mitra and Associates. Bangladesh Contraceptive Prevalence Survey 1985-1986.                                                                                                                                                                           | 1985-1986 |                      |
| Bangladesh | Fauveau V, Wojtyniak B, Chakraborty J, Sarder AM, Briend A. The effect of maternal and child health and family planning services on mortality: Is prevention enough?. <i>BMJ</i> . 1990; 301(6743): 103-7.                                                                                                | 1986      |                      |
| Bangladesh | Bangladesh Sample Vital Registration System 1986 as it appears in United Nations Statistics Division (UNSD). United Nations Demographic Yearbook. New York City, United States: United Nations Statistics Division (UNSD).                                                                                | 1986      |                      |
| Bangladesh | Saha SK, Rikitomi N, Ruhulamin M, Watanabe K, Ahmed K, Biswas D, Hanif M, Khan WA, Islam M, Matsumoto K. The increasing burden of disease in Bangladeshi children due to Haemophilus influenzae type b meningitis. <i>Ann Trop Paediatr</i> . 1997; 17(1): 5-8.                                           | 1987-1994 |                      |
| Bangladesh | Victora CG, Huttly SR, Fuchs SC, Barros FC, Garenne M, Leroy O, Fontaine O, Beau JP, Fauveau V, Chowdhury HR. International differences in clinical patterns of diarrhoeal deaths: a comparison of children from Brazil, Senegal, Bangladesh, and India. <i>J Diarrhoeal Dis Res</i> . 1993; 11(1): 25-9. | 1988      |                      |
| Bangladesh | National Institute of Population Research and Training (NIPORT). Bangladesh Fertility Survey 1988-1989.                                                                                                                                                                                                   | 1988-1989 |                      |
| Bangladesh | Department of Peace and Conflict Research, Uppsala University. UCDP Battle-Related Deaths Database Version 5, 2013. Uppsala, Sweden: Department of Peace and Conflict Research, Uppsala University, 2013.                                                                                                 | 1989-2006 | *                    |
| Bangladesh | Department of Peace and Conflict Research, Uppsala University. UCDP One-Sided Violence Database Version 1.4, 2013. Uppsala, Sweden: Department of Peace and Conflict Research, Uppsala University, 2013.                                                                                                  | 1989-2004 | *                    |
| Bangladesh | De Francisco A, Fauveau V, Sarder AM, Chowdhury HR, Chakraborty J, Yunus MD. Measles in rural Bangladesh: issues of validation and age distribution. <i>Int J Epidemiol</i> . 1994; 23(2): 393-9.                                                                                                         | 1989-1990 |                      |
| Bangladesh | Salway, S., Nasim SM. Levels, Trends and Causes of Mortality in Children Below 5 Years of Age in Bangladesh: Findings from a national survey. <i>Journal of Diarrhoeal Disease Research</i> . 1994; 12(3): 187-193.                                                                                       | 1990      |                      |
| Bangladesh | Weatherall D. Sick Cell and Thalassemias Prevalence Data, Personal Correspondence with David Weatherall. [Unpublished].                                                                                                                                                                                   | 1990-2009 |                      |
| Bangladesh | Centre for Health Informatics and Multiprofessional Education, University College London. Modell's Haemoglobinopathologist's Almanac. London, United Kingdom: Centre for Health Informatics and Multiprofessional Education, University College London, 2008.                                             | 1990-2003 |                      |
| Bangladesh | Shahidullah M. A comparison of sisterhood information on causes of maternal death with the registration causes of maternal death in Matlab, Bangladesh. <i>Int J Epidemiol</i> . 1995; 24(5): 937-42.                                                                                                     | 1991      |                      |
| Bangladesh | Baqi AH, Sabir AA, Begum N, Arifeen SE, Mitra SN, Black RE. Causes of childhood deaths in Bangladesh: an update. <i>Acta Paediatr</i> . 2001; 90(6): 682-90.                                                                                                                                              | 1991-1994 |                      |
| Bangladesh | Chowdhury ME, Akhter HH, Chongsuvivatwong V, Geater AF. Neonatal mortality in rural Bangladesh: an exploratory study. <i>J Health Popul Nutr</i> . 2005; 23(1): 16-24.                                                                                                                                    | 1992      |                      |
| Bangladesh | Hussain A, Ali SM, Kvåle G. Determinants of mortality among children in the urban slums of Dhaka city, Bangladesh. <i>Trop Med Int Health</i> . 1999; 4(11): 758-64.                                                                                                                                      | 1992      |                      |
| Bangladesh | Zaman S, Khan M, Alam K, Williams R. Primary hepatocellular carcinoma and viral hepatitis B and C infection in Bangladeshi subjects. <i>J Trop Med Hyg</i> . 1995; 98(1): 64-8.                                                                                                                           | 1992      |                      |
| Bangladesh | Baqi AH, Black RE, Arifeen SE, Hill K, Mitra SN, al Sabir A. Causes of childhood deaths in Bangladesh: results of a nationwide verbal autopsy study. <i>Bull World Health Organ</i> . 1998; 76(2): 161-71.                                                                                                | 1993      |                      |

**Web Table 32 - Comprehensive citation list**

| Country    | Citation                                                                                                                                                                                                                                                                             | Year*      | New for GBD 2013 (*) |
|------------|--------------------------------------------------------------------------------------------------------------------------------------------------------------------------------------------------------------------------------------------------------------------------------------|------------|----------------------|
| Bangladesh | Macro International, Inc, Mitra and Associates, National Institute of Population Research and Training (NIPORT). Bangladesh Demographic and Health Survey 1993-1994. Calverton, United States: Macro International, Inc                                                              | 1993-1994  |                      |
| Bangladesh | Department of Peace and Conflict Research, Uppsala University. UCDP Nonstate Conflict Database Version 2.5, 2013. Uppsala, Sweden: Department of Peace and Conflict Research, Uppsala University, 2013.                                                                              | 1993-2006  | *                    |
| Bangladesh | Arifeen S, Black RE, Antelman G, Baqui A, Caulfield L, Becker S. Exclusive breastfeeding reduces acute respiratory infection and diarrhea deaths among infants in Dhaka slums. <i>Pediatrics</i> . 2001; 108(4): E67.                                                                | 1994       |                      |
| Bangladesh | Sheikh A, Sugitani M, Kinukawa N, Moriyama M, Arakawa Y, Komiyama K, Li T-C, Takeda N, Ishaque SM, Hasan M, Suzuki K. Hepatitis e virus infection in fulminant hepatitis patients and an apparently healthy population in Bangladesh. <i>Am J Trop Med Hyg</i> . 2002; 66(6): 721-4. | 1995-1996  |                      |
| Bangladesh | Measles Supplementary Immunization Activity Data as provided by the World Health Organization. [Unpublished].                                                                                                                                                                        | 1995, 1999 |                      |
| Bangladesh | Yusuf HR, Akhter HH, Rahman MH, Chowdhury ME, Roach RW. Injury-related deaths among women aged 10-50 years in Bangladesh, 1996-97. <i>Lancet</i> . 2000; 355(9211): 1220-4.                                                                                                          | 1996       |                      |
| Bangladesh | Macro International, Inc, Mitra and Associates, National Institute of Population Research and Training (NIPORT). Bangladesh Demographic and Health Survey 1996-1997. Calverton, United States: Macro International, Inc.                                                             | 1996-1997  |                      |
| Bangladesh | Razzaque A, Da Vanzo J, Rahman M, Gausia K, Hale L, Khan MA, Mustafa AHMG. Pregnancy spacing and maternal morbidity in Matlab, Bangladesh. <i>Int J Gynaecol Obstet</i> . 2005; 89(Suppl 1): S41-49.                                                                                 | 1996-2002  |                      |
| Bangladesh | Bogaerts J, Ahmed J, Akhter N, Begum N, Rahman M, Nahar S, Van Ranst M, Verhaegen J. Sexually transmitted infections among married women in Dhaka, Bangladesh: unexpected high prevalence of herpes simplex type 2 infection. <i>Sex Transm Infect</i> . 2001; 77(2): 114-9.         | 1996-1998  |                      |
| Bangladesh | INDEPTH. Bangladesh - AMK Health and Demographic Surveillance System.                                                                                                                                                                                                                | 1997-2010  |                      |
| Bangladesh | World Health Organization (WHO). The Global Elimination of Congenital Syphilis: Rationale and Strategy for Action. Geneva, Switzerland: World Health Organization (WHO), 2007.                                                                                                       | 1997-2003  |                      |
| Bangladesh | Zaki H, Darmstadt GL, Baten A, Ahsan CR, Saha SK. Seroepidemiology of hepatitis B and delta virus infections in Bangladesh. <i>J Trop Pediatr</i> . 2003; 49(6): 371-4.                                                                                                              | 1997-1998  |                      |
| Bangladesh | Joint United Nations Program on HIV/AIDS (UNAIDS), United Nations Children's Fund (UNICEF), World Health Organization (WHO). Bangladesh Epidemiological Fact Sheet on HIV/AIDS and STIs 2004.                                                                                        | 1997-1999  |                      |
| Bangladesh | Macro Systems, Inc, Mitra and Associates, National Institute of Population Research and Training (NIPORT). Bangladesh Demographic and Health Survey 1999-2000. Calverton, United States: Macro International, Inc.                                                                   | 1999-2000  |                      |
| Bangladesh | World Health Organization (WHO). Bangladesh WHO Leishmaniasis Country Profile.                                                                                                                                                                                                       | 1999-2010  | *                    |
| Bangladesh | United Nations Office on Drugs and Crime (UNODC). United Nations Office on Drugs and Crime Global Study on Homicides 2011. Vienna, Austria: United Nations Office on Drugs and Crime (UNODC), 2011.                                                                                  | 2000-2010  |                      |
| Bangladesh | Brooks WA, Hossain A, Goswami D, Sharmeen AT, Nahar K, Alam K, Ahmed N, Naheed A, Nair GB, Luby S, Breiman RF. Bacteremic Typhoid Fever in Children in an Urban Slum, Bangladesh. <i>Emerg Infect Dis</i> . 2005; 11(2): 326-9.                                                      | 2000-2001  | *                    |
| Bangladesh | Mollah AH, Nahar N, Siddique MA, Anwar KS, Hassan T, Azam MG. Common transfusion-transmitted infectious agents among thalassaemic children in Bangladesh. <i>J Health Popul Nutr</i> . 2003; 21(1): 67-71.                                                                           | 2000-2001  |                      |

**Web Table 32 - Comprehensive citation list**

| Country    | Citation                                                                                                                                                                                                                                                                                                                                                                                                            | Year*                 | New for GBD 2013 (*) |
|------------|---------------------------------------------------------------------------------------------------------------------------------------------------------------------------------------------------------------------------------------------------------------------------------------------------------------------------------------------------------------------------------------------------------------------|-----------------------|----------------------|
| Bangladesh | Associates for Community and Population Research (ACPR), International Centre for Diarrhoeal Disease Research, Bangladesh (ICDDR,B), Johns Hopkins University (JHU), Mitra and Associates, National Institute of Population Research and Training (NIPORT), ORC Macro. Bangladesh Special Demographic and Health Survey 2001. Calverton, United States: ORC Macro.                                                  | 2001                  |                      |
| Bangladesh | World Health Organization (WHO). Retrospective Measles Data on Supplementary Immunization Activities. Geneva, Switzerland: World Health Organization (WHO).                                                                                                                                                                                                                                                         | 2001, 2005-2006, 2010 |                      |
| Bangladesh | Labrique AB, Zaman K, Hossain Z, Saha P, Yunus M, Hossain A, Ticehurst J, Nelson KE. Population seroprevalence of hepatitis E virus antibodies in rural Bangladesh. <i>Am J Trop Med Hyg.</i> 2009; 81(5): 875-81.                                                                                                                                                                                                  | 2003-2004             |                      |
| Bangladesh | Naheed A, Ram PK, Brooks WA, Hossain MA, Parsons MB, Talukder KA, Mintz E, Luby S, Breiman RF. Burden of typhoid and paratyphoid fever in a densely populated urban community, Dhaka, Bangladesh. <i>Int J Infect Dis.</i> 2010; e93-e99.                                                                                                                                                                           | 2003-2004             | *                    |
| Bangladesh | Mitra and Associates, ORC Macro. Bangladesh Demographic and Health Survey 2004. Calverton, United States: ORC Macro.                                                                                                                                                                                                                                                                                                | 2004                  |                      |
| Bangladesh | Halder AK, Gurley ES, Naheed A, Saha SK., Brooks WA, Arifeen SE, Sazzad HMS, Kenah E, Luby SP. Causes of early childhood deaths in urban Dhaka, Bangladesh. <i>PLoS One.</i> 2009; 4(12): e8145.                                                                                                                                                                                                                    | 2004                  |                      |
| Bangladesh | West KP Jr, Christian P, Labrique AB, Rashid M, Shamim AA, Klemm RD, Massie AB, Mehra S, Schulze KJ, Ali H, Ullah B, Wu LS, Katz J, Banu H, Akhter HH, Sommer A. Effects of vitamin A or beta carotene supplementation on pregnancy-related mortality and infant mortality in rural Bangladesh: a cluster randomized trial. <i>JAMA.</i> 2011; 305(19): 1986-95.                                                    | 2004                  |                      |
| Bangladesh | Ahmed M, Munshi SU, Nessa A, Ullah MS, Tabassum S, Islam MN. High prevalence of hepatitis A virus antibody among Bangladeshi children and young adults warrants pre-immunization screening of antibody in HAV vaccination strategy. <i>Indian J Med Microbiol.</i> 2009; 27(1): 48-50.                                                                                                                              | 2005                  |                      |
| Bangladesh | Saha SK, Saha S, Shakur S, Hanif M, Habib MA, Datta SK, Bock HL. Community-based cross-sectional seroprevalence study of hepatitis A in Bangladesh. <i>World J Gastroenterol.</i> 2009; 15(39): 4932-7.                                                                                                                                                                                                             | 2005-2006             |                      |
| Bangladesh | Ashraf H, Alam NH, Rothermundt C, Brooks A, Bardhan P, Hossain L, Salam MA, Hassan MS, Beglinger C, Gyr N. Prevalence and risk factors of hepatitis B and C virus infections in an impoverished urban community in Dhaka, Bangladesh. <i>BMC Infect Dis.</i> 2010; 10(1): 208.                                                                                                                                      | 2005-2006             |                      |
| Bangladesh | Moisi JC, Saha SK, Falade AG, Njanpop-Lafourcade B-M, Oundo J, Zaidi AKM, Afroj S, Bakare RA, Buss JK, Lasi R, Mueller J, Odekanmi AA, Sangare L, Scott JAG, Knoll MD, Levine OS, Gessner BD. Enhanced diagnosis of pneumococcal meningitis with use of the binax NOW immunochromatographic test of <i>Streptococcus pneumoniae</i> antigen: A multisite study. <i>Clin Infect Dis.</i> 2009; 48(Suppl 2): S49-S56. | 2006-2007             |                      |
| Bangladesh | Macro International, Inc, Mitra and Associates, National Institute of Population Research and Training (NIPORT). Bangladesh Demographic and Health Survey 2007. Calverton, United States: Macro International, Inc, 2009.                                                                                                                                                                                           | 2007                  |                      |
| Bangladesh | World Health Organization (WHO). Global Status Report on Road Safety 2009. Geneva, Switzerland: World Health Organization (WHO), 2009.                                                                                                                                                                                                                                                                              | 2007                  |                      |
| Bangladesh | Nahar S, Mostafa OA, Farheen A. Verbal autopsy for neonatal mortality: a community-based study. <i>Med J Cairo Univ.</i> 2012; 80(2): 25-9.                                                                                                                                                                                                                                                                         | 2007                  |                      |
| Bangladesh | Khan M, Mustafa MG, Ahmad N, Alam MS, Baig RH, Chowdhry ZR, Ahmed M. Seroprevalence of hepatitis C virus in rural population of Bangladesh. <i>Indian J Gastroenterol.</i> 2010; 29(1): 38-9.                                                                                                                                                                                                                       | 2007-2008             |                      |



**Web Table 32 - Comprehensive citation list**

| Country    | Citation                                                                                                                                                                                                                                                                                                                                                       | Year*            | New for GBD 2013 (*) |
|------------|----------------------------------------------------------------------------------------------------------------------------------------------------------------------------------------------------------------------------------------------------------------------------------------------------------------------------------------------------------------|------------------|----------------------|
| Bangladesh | Bangladesh Rural Advancement Committee (BRAC), International Centre for Diarrhoeal Disease Research (Bangladesh). Bangladesh - Dhaka Causes of Maternal, Neonatal and Child Deaths: An Exploratory Study of Dhaka's Slum Dwellers 2008. Dhaka, Bangladesh: International Centre for Diarrhoeal Disease Research (Bangladesh), 2009.                            | 2008             |                      |
| Bangladesh | Khatun F, Rasheed S, Moran AC, Alam AM, Shomik MS, Sultana M, Choudhury N, Iqbal M, Bhuiya A. Causes of neonatal and maternal deaths in Dhaka slums: implications for service delivery. BMC Public Health. 2012; 12(84): 84.                                                                                                                                   | 2008             |                      |
| Bangladesh | Joint United Nations Program on HIV/AIDS (UNAIDS), Ministry of Health and Family Welfare (Bangladesh). Bangladesh UNGASS Country Progress Report 2010. Geneva, Switzerland: Joint United Nations Program on HIV/AIDS (UNAIDS), 2010.                                                                                                                           | 2009             |                      |
| Bangladesh | Bangladesh Bureau of Statistics. Bangladesh Sample Vital Registration System 2010.                                                                                                                                                                                                                                                                             | 2010             |                      |
| Bangladesh | Australian Agency for International Development (AusAID), International Centre for Diarrhoeal Disease Research (Bangladesh), Ministry of Health and Family Welfare (Bangladesh), National Institute of Population Research and Training (NIPORT), USAID, United Nations Population Fund (UNFPA). Bangladesh Maternal Mortality and Health Service Survey 2010. | 2010             |                      |
| Bangladesh | ICF Macro, Mitra and Associates, National Institute of Population Research and Training (NIPORT). Bangladesh Demographic and Health Survey 2011-2012. Claverton, Maryland: ICF Macro.                                                                                                                                                                          | 2011-2012        | *                    |
| Barbados   | Barbados Vital Registration Death Data 1950 as it appears in United Nations Statistics Division (UNSD). United Nations Demographic Yearbook. New York City, United States: United Nations Statistics Division (UNSD).                                                                                                                                          | 1950             |                      |
| Barbados   | Barbados Vital Registration Death Data 1951 as it appears in United Nations Statistics Division (UNSD). United Nations Demographic Yearbook. New York City, United States: United Nations Statistics Division (UNSD).                                                                                                                                          | 1951             |                      |
| Barbados   | Barbados Vital Registration Death Data 1952 as it appears in United Nations Statistics Division (UNSD). United Nations Demographic Yearbook. New York City, United States: United Nations Statistics Division (UNSD).                                                                                                                                          | 1952             |                      |
| Barbados   | Barbados Vital Registration Death Data 1953 as it appears in United Nations Statistics Division (UNSD). United Nations Demographic Yearbook. New York City, United States: United Nations Statistics Division (UNSD).                                                                                                                                          | 1953             |                      |
| Barbados   | Barbados Vital Registration Death Data 1954 as it appears in United Nations Statistics Division (UNSD). United Nations Demographic Yearbook. New York City, United States: United Nations Statistics Division (UNSD).                                                                                                                                          | 1954             |                      |
| Barbados   | Barbados Vital Registration - Deaths 1955 ICD7 as it appears in World Health Organization (WHO). WHO Mortality Database Version February 2014. Geneva, Switzerland: World Health Organization (WHO), 2014.                                                                                                                                                     | 1955             |                      |
| Barbados   | Centre for Research on the Epidemiology of Disasters (CRED). EM-DAT: The OFDA/CRED International Disaster Database. Brussels, Belgium: Catholic University of Leuven.                                                                                                                                                                                          | 1955, 1970, 2004 |                      |
| Barbados   | Barbados Vital Registration - Deaths 1956 ICD7 as it appears in World Health Organization (WHO). WHO Mortality Database Version February 2014. Geneva, Switzerland: World Health Organization (WHO), 2014.                                                                                                                                                     | 1956             |                      |

**Web Table 32 - Comprehensive citation list**

| Country  | Citation                                                                                                                                                                                                   | Year* | New for GBD 2013 (*) |
|----------|------------------------------------------------------------------------------------------------------------------------------------------------------------------------------------------------------------|-------|----------------------|
| Barbados | Barbados Vital Registration - Deaths 1957 ICD7 as it appears in World Health Organization (WHO). WHO Mortality Database Version February 2014. Geneva, Switzerland: World Health Organization (WHO), 2014. | 1957  |                      |
| Barbados | Barbados Vital Registration - Deaths 1958 ICD7 as it appears in World Health Organization (WHO). WHO Mortality Database Version February 2014. Geneva, Switzerland: World Health Organization (WHO), 2014. | 1958  |                      |
| Barbados | Barbados Vital Registration - Deaths 1959 ICD7 as it appears in World Health Organization (WHO). WHO Mortality Database Version February 2014. Geneva, Switzerland: World Health Organization (WHO), 2014. | 1959  |                      |
| Barbados | Barbados Vital Registration - Deaths 1960 ICD7 as it appears in World Health Organization (WHO). WHO Mortality Database Version February 2014. Geneva, Switzerland: World Health Organization (WHO), 2014. | 1960  |                      |
| Barbados | Barbados Vital Registration - Deaths 1961 ICD7 as it appears in World Health Organization (WHO). WHO Mortality Database Version February 2014. Geneva, Switzerland: World Health Organization (WHO), 2014. | 1961  |                      |
| Barbados | Barbados Vital Registration - Deaths 1962 ICD7 as it appears in World Health Organization (WHO). WHO Mortality Database Version February 2014. Geneva, Switzerland: World Health Organization (WHO), 2014. | 1962  |                      |
| Barbados | Barbados Vital Registration - Deaths 1963 ICD7 as it appears in World Health Organization (WHO). WHO Mortality Database Version February 2014. Geneva, Switzerland: World Health Organization (WHO), 2014. | 1963  |                      |
| Barbados | Barbados Vital Registration - Deaths 1964 ICD7 as it appears in World Health Organization (WHO). WHO Mortality Database Version February 2014. Geneva, Switzerland: World Health Organization (WHO), 2014. | 1964  |                      |
| Barbados | Barbados Vital Registration - Deaths 1965 ICD7 as it appears in World Health Organization (WHO). WHO Mortality Database Version February 2014. Geneva, Switzerland: World Health Organization (WHO), 2014. | 1965  |                      |
| Barbados | Barbados Vital Registration - Deaths 1966 ICD7 as it appears in World Health Organization (WHO). WHO Mortality Database Version February 2014. Geneva, Switzerland: World Health Organization (WHO), 2014. | 1966  |                      |
| Barbados | Barbados Vital Registration - Deaths 1967 ICD7 as it appears in World Health Organization (WHO). WHO Mortality Database Version February 2014. Geneva, Switzerland: World Health Organization (WHO), 2014. | 1967  |                      |
| Barbados | Barbados Vital Registration - Deaths 1968 ICD8 as it appears in World Health Organization (WHO). WHO Mortality Database Version February 2014. Geneva, Switzerland: World Health Organization (WHO), 2014. | 1968  |                      |
| Barbados | Barbados Vital Registration - Deaths 1969 ICD8 as it appears in World Health Organization (WHO). WHO Mortality Database Version February 2014. Geneva, Switzerland: World Health Organization (WHO), 2014. | 1969  |                      |
| Barbados | Barbados Vital Registration - Deaths 1970 ICD8 as it appears in World Health Organization (WHO). WHO Mortality Database Version February 2014. Geneva, Switzerland: World Health Organization (WHO), 2014. | 1970  |                      |



**Web Table 32 - Comprehensive citation list**

| Country  | Citation                                                                                                                                                                                                                 | Year*     | New for GBD 2013 (*) |
|----------|--------------------------------------------------------------------------------------------------------------------------------------------------------------------------------------------------------------------------|-----------|----------------------|
| Barbados | United Nations Office on Drugs and Crime (UNODC). United Nations Surveys on Crime Trends and the Operations of Criminal Justice Systems 1970-2006 as provided by Kavi Bhalla. [Unpublished].                             | 1970-1986 |                      |
| Barbados | Barbados Vital Registration - Deaths 1971 ICD8 as it appears in World Health Organization (WHO). WHO Mortality Database Version February 2014. Geneva, Switzerland: World Health Organization (WHO), 2014.               | 1971      |                      |
| Barbados | Barbados Vital Registration - Deaths 1972 ICD8 as it appears in World Health Organization (WHO). WHO Mortality Database Version February 2014. Geneva, Switzerland: World Health Organization (WHO), 2014.               | 1972      |                      |
| Barbados | Barbados Vital Registration - Deaths 1973 ICD8 as it appears in World Health Organization (WHO). WHO Mortality Database Version February 2014. Geneva, Switzerland: World Health Organization (WHO), 2014.               | 1973      |                      |
| Barbados | Barbados Vital Registration - Deaths 1974 ICD8 as it appears in World Health Organization (WHO). WHO Mortality Database Version February 2014. Geneva, Switzerland: World Health Organization (WHO), 2014.               | 1974      |                      |
| Barbados | Barbados Vital Registration - Deaths 1975 ICD8 as it appears in World Health Organization (WHO). WHO Mortality Database Version February 2014. Geneva, Switzerland: World Health Organization (WHO), 2014.               | 1975      |                      |
| Barbados | Barbados Vital Registration - Deaths 1976 ICD8 as it appears in World Health Organization (WHO). WHO Mortality Database Version February 2014. Geneva, Switzerland: World Health Organization (WHO), 2014.               | 1976      |                      |
| Barbados | Barbados Vital Registration - Deaths 1977 ICD8 as it appears in World Health Organization (WHO). WHO Mortality Database Version February 2014. Geneva, Switzerland: World Health Organization (WHO), 2014.               | 1977      |                      |
| Barbados | Barbados Vital Registration - Deaths 1978 ICD8 as it appears in World Health Organization (WHO). WHO Mortality Database Version February 2014. Geneva, Switzerland: World Health Organization (WHO), 2014.               | 1978      |                      |
| Barbados | Barbados Vital Registration - Deaths 1979 ICD9 as it appears in World Health Organization (WHO). WHO Mortality Database Version February 2014. Geneva, Switzerland: World Health Organization (WHO), 2014.               | 1979      |                      |
| Barbados | Barbados Vital Registration - Deaths 1980 ICD9 as it appears in World Health Organization (WHO). WHO Mortality Database Version February 2014. Geneva, Switzerland: World Health Organization (WHO), 2014.               | 1980      |                      |
| Barbados | Institute for Health Metrics and Evaluation (IHME), Joint United Nations Program on HIV/AIDS (UNAIDS). Institute for Health Metrics and Evaluation HIV Mortality Estimates Based on the UNAIDS Spectrum Model Framework. | 1980-2013 | *                    |
| Barbados | United Nations Children's Fund (UNICEF), World Health Organization (WHO). WHO and UNICEF Reported Disease Incidence Time Series - Pertussis. Geneva, Switzerland: World Health Organization (WHO).                       | 1980-2012 |                      |
| Barbados | United Nations Children's Fund (UNICEF), World Health Organization (WHO). WHO and UNICEF Reported Disease Incidence Time Series - Measles. Geneva, Switzerland: World Health Organization (WHO).                         | 1980-2012 |                      |
| Barbados | Barbados Vital Registration - Deaths 1981 ICD9 as it appears in World Health Organization (WHO). WHO Mortality Database Version February 2014. Geneva, Switzerland: World Health Organization (WHO), 2014.               | 1981      |                      |

**Web Table 32 - Comprehensive citation list**

| Country  | Citation                                                                                                                                                                                                                                                      | Year*      | New for GBD 2013 (*) |
|----------|---------------------------------------------------------------------------------------------------------------------------------------------------------------------------------------------------------------------------------------------------------------|------------|----------------------|
| Barbados | Barbados Vital Registration - Deaths 1982 ICD9 as it appears in World Health Organization (WHO). WHO Mortality Database Version February 2014. Geneva, Switzerland: World Health Organization (WHO), 2014.                                                    | 1982       |                      |
| Barbados | Barbados Vital Registration - Deaths 1983 ICD9 as it appears in World Health Organization (WHO). WHO Mortality Database Version February 2014. Geneva, Switzerland: World Health Organization (WHO), 2014.                                                    | 1983       |                      |
| Barbados | Barbados Vital Registration - Deaths 1984 ICD9 as it appears in World Health Organization (WHO). WHO Mortality Database Version February 2014. Geneva, Switzerland: World Health Organization (WHO), 2014.                                                    | 1984       |                      |
| Barbados | Barbados Vital Registration - Deaths 1985 ICD9 as it appears in World Health Organization (WHO). WHO Mortality Database Version February 2014. Geneva, Switzerland: World Health Organization (WHO), 2014.                                                    | 1985       |                      |
| Barbados | Barbados Vital Registration - Deaths 1986 ICD9 as it appears in World Health Organization (WHO). WHO Mortality Database Version February 2014. Geneva, Switzerland: World Health Organization (WHO), 2014.                                                    | 1986       |                      |
| Barbados | Barbados Vital Registration - Deaths 1987 ICD9 as it appears in World Health Organization (WHO). WHO Mortality Database Version February 2014. Geneva, Switzerland: World Health Organization (WHO), 2014.                                                    | 1987       |                      |
| Barbados | Barbados Vital Registration - Deaths 1988 ICD9 as it appears in World Health Organization (WHO). WHO Mortality Database Version February 2014. Geneva, Switzerland: World Health Organization (WHO), 2014.                                                    | 1988       |                      |
| Barbados | Barbados Vital Registration - Deaths 1989 ICD9 as it appears in World Health Organization (WHO). WHO Mortality Database Version February 2014. Geneva, Switzerland: World Health Organization (WHO), 2014.                                                    | 1989       |                      |
| Barbados | Barbados Vital Registration - Deaths 1990 ICD9 as it appears in World Health Organization (WHO). WHO Mortality Database Version February 2014. Geneva, Switzerland: World Health Organization (WHO), 2014.                                                    | 1990       |                      |
| Barbados | Centre for Health Informatics and Multiprofessional Education, University College London. Modell's Haemoglobinopathologist's Almanac. London, United Kingdom: Centre for Health Informatics and Multiprofessional Education, University College London, 2008. | 1990-2003  |                      |
| Barbados | Barbados Vital Registration - Deaths 1991 ICD9 as it appears in World Health Organization (WHO). WHO Mortality Database Version February 2014. Geneva, Switzerland: World Health Organization (WHO), 2014.                                                    | 1991       |                      |
| Barbados | Measles Supplementary Immunization Activity Data as provided by the World Health Organization. [Unpublished].                                                                                                                                                 | 1991, 1996 |                      |
| Barbados | Barbados Vital Registration - Deaths 1992 ICD9 as it appears in World Health Organization (WHO). WHO Mortality Database Version February 2014. Geneva, Switzerland: World Health Organization (WHO), 2014.                                                    | 1992       |                      |
| Barbados | Barbados Vital Registration - Deaths 1993 ICD9 as it appears in World Health Organization (WHO). WHO Mortality Database Version February 2014. Geneva, Switzerland: World Health Organization (WHO), 2014.                                                    | 1993       |                      |
| Barbados | Barbados Vital Registration - Deaths 1994 ICD9 as it appears in World Health Organization (WHO). WHO Mortality Database Version February 2014. Geneva, Switzerland: World Health Organization (WHO), 2014.                                                    | 1994       |                      |

**Web Table 32 - Comprehensive citation list**

| Country  | Citation                                                                                                                                                                                                                                                                                                                                                                                                                        | Year*                      | New for GBD 2013 (*) |
|----------|---------------------------------------------------------------------------------------------------------------------------------------------------------------------------------------------------------------------------------------------------------------------------------------------------------------------------------------------------------------------------------------------------------------------------------|----------------------------|----------------------|
| Barbados | Barbados Vital Registration - Deaths 1995 ICD9 as it appears in World Health Organization (WHO). WHO Mortality Database Version February 2014. Geneva, Switzerland: World Health Organization (WHO), 2014.                                                                                                                                                                                                                      | 1995                       |                      |
| Barbados | World Health Organization (WHO). Country Mortality Data 1980-1999. [Unpublished].                                                                                                                                                                                                                                                                                                                                               | 1996-1997                  |                      |
| Barbados | United Nations Office on Drugs and Crime (UNODC). United Nations Office on Drugs and Crime Global Study on Homicides 2011. Vienna, Austria: United Nations Office on Drugs and Crime (UNODC), 2011.                                                                                                                                                                                                                             | 1998-2010                  |                      |
| Barbados | Barbados Vital Registration - Deaths 2000 ICD10 as it appears in World Health Organization (WHO). WHO Mortality Database Version February 2014. Geneva, Switzerland: World Health Organization (WHO), 2014.                                                                                                                                                                                                                     | 2000                       |                      |
| Barbados | World Health Organization (WHO). Yellow Fever Reported Cases, WHO Vaccine-Preventable Diseases: Monitoring System. Geneva, Switzerland: World Health Organization (WHO).                                                                                                                                                                                                                                                        | 2000-2001, 2004, 2006-2009 |                      |
| Barbados | Barbados Vital Registration - Deaths 2001 ICD10 as it appears in World Health Organization (WHO). WHO Mortality Database Version February 2014. Geneva, Switzerland: World Health Organization (WHO), 2014.                                                                                                                                                                                                                     | 2001                       |                      |
| Barbados | Barbados Vital Registration - Deaths 2002 ICD10 as it appears in World Health Organization (WHO). WHO Mortality Database Version February 2014. Geneva, Switzerland: World Health Organization (WHO), 2014.                                                                                                                                                                                                                     | 2002                       |                      |
| Barbados | Barbados Vital Registration - Deaths 2003 ICD10 as it appears in World Health Organization (WHO). WHO Mortality Database Version February 2014. Geneva, Switzerland: World Health Organization (WHO), 2014.                                                                                                                                                                                                                     | 2003                       |                      |
| Barbados | Barbados Vital Registration - Deaths 2004 ICD10 as it appears in World Health Organization (WHO). WHO Mortality Database Version February 2014. Geneva, Switzerland: World Health Organization (WHO), 2014.                                                                                                                                                                                                                     | 2004                       |                      |
| Barbados | Barbados Vital Registration - Deaths 2005 ICD10 as it appears in World Health Organization (WHO). WHO Mortality Database Version February 2014. Geneva, Switzerland: World Health Organization (WHO), 2014.                                                                                                                                                                                                                     | 2005                       |                      |
| Barbados | Barbados Vital Registration - Deaths 2006 ICD10 as it appears in World Health Organization (WHO). WHO Mortality Database Version February 2014. Geneva, Switzerland: World Health Organization (WHO), 2014.                                                                                                                                                                                                                     | 2006                       |                      |
| Barbados | Soyibo AK, Barton EN. Report from the Caribbean renal registry, 2006. West Indian Med J. 2007; 56(4): 355-63.                                                                                                                                                                                                                                                                                                                   | 2006                       |                      |
| Barbados | Fassio E, Díaz S, Santa C, Reig ME, Martínez Artola Y, Alves de Mattos A, Míguez C, Galizzi J, Zapata R, Ridruejo E, de Souza FC, Hernández N, Pinchuk L, Multicenter Group for Study of Hepatocarcinoma in Latin America, Asociación Latinoamericana para el Estudio del Hígado (ALEH). Etiology of hepatocellular carcinoma in Latin America: a prospective, multicenter, international study. Ann Hepatol. 2010; 9(1): 63-9. | 2006-2008                  | *                    |
| Barbados | World Health Organization (WHO). Global Status Report on Road Safety 2009. Geneva, Switzerland: World Health Organization (WHO), 2009.                                                                                                                                                                                                                                                                                          | 2007                       |                      |
| Barbados | Barbados Vital Registration - Deaths 2007 ICD10 as it appears in World Health Organization (WHO). WHO Mortality Database Version February 2014. Geneva, Switzerland: World Health Organization (WHO), 2014.                                                                                                                                                                                                                     | 2007                       |                      |
| Barbados | World Health Organization (WHO). Retrospective Measles Data on Supplementary Immunization Activities. Geneva, Switzerland: World Health Organization (WHO).                                                                                                                                                                                                                                                                     | 2007                       |                      |

**Web Table 32 - Comprehensive citation list**

| Country  | Citation                                                                                                                                                                                                                 | Year*            | New for GBD 2013 (*) |
|----------|--------------------------------------------------------------------------------------------------------------------------------------------------------------------------------------------------------------------------|------------------|----------------------|
| Barbados | Barbados Vital Registration - Deaths 2008 ICD10 as it appears in World Health Organization (WHO). WHO Mortality Database Version February 2014. Geneva, Switzerland: World Health Organization (WHO), 2014.              | 2008             |                      |
| Belarus  | Max Planck Institute for Demographic Research, University of California. Human Mortality Database. Berkeley, USA: University of California; Rostock, Germany: Max Planck Institute for Demographic Research.             | 1959-2010        |                      |
| Belarus  | Joint United Nations Program on HIV/AIDS (UNAIDS), World Health Organization (WHO). Belarus Epidemiological Fact Sheet on HIV/AIDS and STIs 2000.                                                                        | 1980-1990, 1995  |                      |
| Belarus  | Institute for Health Metrics and Evaluation (IHME), Joint United Nations Program on HIV/AIDS (UNAIDS). Institute for Health Metrics and Evaluation HIV Mortality Estimates Based on the UNAIDS Spectrum Model Framework. | 1980-2013        | *                    |
| Belarus  | Belarus Vital Registration - Deaths 1981 ICD9 as it appears in World Health Organization (WHO). WHO Mortality Database Version February 2014. Geneva, Switzerland: World Health Organization (WHO), 2014.                | 1981             |                      |
| Belarus  | Belarus Vital Registration - Deaths 1982 ICD9 as it appears in World Health Organization (WHO). WHO Mortality Database Version February 2014. Geneva, Switzerland: World Health Organization (WHO), 2014.                | 1982             |                      |
| Belarus  | Belarus Vital Registration - Deaths 1985 ICD9 as it appears in World Health Organization (WHO). WHO Mortality Database Version February 2014. Geneva, Switzerland: World Health Organization (WHO), 2014.                | 1985             |                      |
| Belarus  | Institute for Health Metrics and Evaluation. Institute for Health Metrics and Evaluation Cancer Registry Database. [Unpublished].                                                                                        | 1985-2005        |                      |
| Belarus  | Parkin DM, International Agency for Research on Cancer, International Association of Cancer Registries. Cancer Incidence in Five Continents. Vol. I to VIII. Lyon, France, IARC Press, 2005.                             | 1985, 1990, 1995 |                      |
| Belarus  | Belarus Vital Registration - Deaths 1986 ICD9 as it appears in World Health Organization (WHO). WHO Mortality Database Version February 2014. Geneva, Switzerland: World Health Organization (WHO), 2014.                | 1986             |                      |
| Belarus  | Gudkov VG, Tomal' LS, Rytik PG, Shket VA, Moroz AG. [Status of collective immunity to hepatitis A virus in urban residents in Byelorussia]. Zh Mikrobiol Epidemiol Immunobiol. 1992; 60-2.                               | 1986-1990        |                      |
| Belarus  | Belarus Vital Registration - Deaths 1987 ICD9 as it appears in World Health Organization (WHO). WHO Mortality Database Version February 2014. Geneva, Switzerland: World Health Organization (WHO), 2014.                | 1987             |                      |
| Belarus  | Belarus Vital Registration - Deaths 1988 ICD9 as it appears in World Health Organization (WHO). WHO Mortality Database Version February 2014. Geneva, Switzerland: World Health Organization (WHO), 2014.                | 1988             |                      |
| Belarus  | USSR Census 1989 as it appears in United Nations Statistics Division (UNSD). United Nations Demographic Yearbook. New York City, United States: United Nations Statistics Division (UNSD).                               | 1989             |                      |
| Belarus  | Belarus Vital Registration - Deaths 1989 ICD9 as it appears in World Health Organization (WHO). WHO Mortality Database Version February 2014. Geneva, Switzerland: World Health Organization (WHO), 2014.                | 1989             |                      |
| Belarus  | Belarus Vital Registration - Deaths 1990 ICD9 as it appears in World Health Organization (WHO). WHO Mortality Database Version February 2014. Geneva, Switzerland: World Health Organization (WHO), 2014.                | 1990             |                      |

**Web Table 32 - Comprehensive citation list**

| Country | Citation                                                                                                                                                                                                                                                       | Year*      | New for GBD 2013 (*) |
|---------|----------------------------------------------------------------------------------------------------------------------------------------------------------------------------------------------------------------------------------------------------------------|------------|----------------------|
| Belarus | World Health Organization (WHO). Global Prevalence and Incidence of Selected Curable Sexually Transmitted Infections: Overviews and Estimates 2001. Geneva, Switzerland: World Health Organization (WHO), 2001.                                                | 1990-1996  |                      |
| Belarus | United Nations Children's Fund (UNICEF), World Health Organization (WHO). WHO and UNICEF Reported Disease Incidence Time Series - Pertussis. Geneva, Switzerland: World Health Organization (WHO).                                                             | 1990-2013  |                      |
| Belarus | United Nations Children's Fund (UNICEF), World Health Organization (WHO). WHO and UNICEF Reported Disease Incidence Time Series - Measles. Geneva, Switzerland: World Health Organization (WHO).                                                               | 1990-2013  |                      |
| Belarus | Centre for Health Informatics and Multiprofessional Education, University College London. Modell's Haemoglobinopathologist's Almanac. London, United Kingdom: Centre for Health Informatics and Multiprofessional Education, University College London, 2008.  | 1990-2003  |                      |
| Belarus | Belarus Vital Registration - Deaths 1991 ICD9 as it appears in World Health Organization (WHO). WHO Mortality Database Version February 2014. Geneva, Switzerland: World Health Organization (WHO), 2014.                                                      | 1991       |                      |
| Belarus | Belarus Vital Registration - Deaths 1992 ICD9 as it appears in World Health Organization (WHO). WHO Mortality Database Version February 2014. Geneva, Switzerland: World Health Organization (WHO), 2014.                                                      | 1992       |                      |
| Belarus | Belarus Vital Registration - Deaths 1993 ICD9 as it appears in World Health Organization (WHO). WHO Mortality Database Version February 2014. Geneva, Switzerland: World Health Organization (WHO), 2014.                                                      | 1993       |                      |
| Belarus | Belarus Vital Registration - Deaths 1994 ICD9 as it appears in World Health Organization (WHO). WHO Mortality Database Version February 2014. Geneva, Switzerland: World Health Organization (WHO), 2014.                                                      | 1994       |                      |
| Belarus | Belarus Vital Registration - Deaths 1995 ICD9 as it appears in World Health Organization (WHO). WHO Mortality Database Version February 2014. Geneva, Switzerland: World Health Organization (WHO), 2014.                                                      | 1995       |                      |
| Belarus | Belarus Vital Registration - Deaths 1997 ICD9 as it appears in World Health Organization (WHO). WHO Mortality Database Version February 2014. Geneva, Switzerland: World Health Organization (WHO), 2014.                                                      | 1997       |                      |
| Belarus | Centre for Research on the Epidemiology of Disasters (CRED). EM-DAT: The OFDA/CRED International Disaster Database. Brussels, Belgium: Catholic University of Leuven.                                                                                          | 1997, 1999 |                      |
| Belarus | Belarus Vital Registration - Deaths 1998 ICD9 as it appears in World Health Organization (WHO). WHO Mortality Database Version February 2014. Geneva, Switzerland: World Health Organization (WHO), 2014.                                                      | 1998       |                      |
| Belarus | Ministry of Statistics and Analysis of the Republic of Belarus, Minnesota Population Center. Belarus Population Census 1999 from the Integrated Public Use Microdata Series, International. [Machine-readable database]. Minneapolis: University of Minnesota. | 1999       |                      |
| Belarus | Belarus Vital Registration - Deaths 1999 ICD9 as it appears in World Health Organization (WHO). WHO Mortality Database Version February 2014. Geneva, Switzerland: World Health Organization (WHO), 2014.                                                      | 1999       |                      |
| Belarus | Belarus Vital Registration - Deaths 2000 ICD9 as it appears in World Health Organization (WHO). WHO Mortality Database Version February 2014. Geneva, Switzerland: World Health Organization (WHO), 2014.                                                      | 2000       |                      |

**Web Table 32 - Comprehensive citation list**

| Country | Citation                                                                                                                                                                                                                                                                              | Year*                      | New for GBD 2013 (*) |
|---------|---------------------------------------------------------------------------------------------------------------------------------------------------------------------------------------------------------------------------------------------------------------------------------------|----------------------------|----------------------|
| Belarus | Curado MP, Edwards B, Shin HR, Storm H, Ferlay J, Heanue M and Boyle P, eds (2007). Cancer Incidence in Five Continents, Vol. IX Periodic Data (electronic version). Lyon, IARC. <a href="http://ci5.iarc.fr">http://ci5.iarc.fr</a>                                                  | 2000                       |                      |
| Belarus | World Health Organization (WHO). Yellow Fever Reported Cases, WHO Vaccine-Preventable Diseases: Monitoring System. Geneva, Switzerland: World Health Organization (WHO).                                                                                                              | 2000-2002, 2005, 2007-2009 |                      |
| Belarus | Belarus Vital Registration - Deaths 2001 ICD9 as it appears in World Health Organization (WHO). WHO Mortality Database Version February 2014. Geneva, Switzerland: World Health Organization (WHO), 2014.                                                                             | 2001                       |                      |
| Belarus | Belarus Vital Registration - Deaths 2002 ICD10 as it appears in World Health Organization (WHO). WHO Mortality Database Version February 2014. Geneva, Switzerland: World Health Organization (WHO), 2014.                                                                            | 2002                       |                      |
| Belarus | Belarus Vital Registration - Deaths 2003 ICD10 as it appears in World Health Organization (WHO). WHO Mortality Database Version February 2014. Geneva, Switzerland: World Health Organization (WHO), 2014.                                                                            | 2003                       |                      |
| Belarus | Ministry of Statistics and Analysis of the Republic of Belarus, United Nations Children's Fund (UNICEF). Belarus Multiple Indicator Cluster Survey 2005. New York, United States: United Nations Children's Fund (UNICEF).                                                            | 2005                       |                      |
| Belarus | Forman D, Bray F, Brewster DH, Gombe Mbalawa C, Kohler B, Piñeros M, Steliarova-Foucher E, Swaminathan R and Ferlay J, eds (2013). Cancer Incidence in Five Continents, Vol. X Summary Database (electronic version). Lyon, IARC. <a href="http://ci5.iarc.fr">http://ci5.iarc.fr</a> | 2005                       |                      |
| Belarus | Belarus Vital Registration - Deaths 2007 ICD10 as it appears in World Health Organization (WHO). WHO Mortality Database Version February 2014. Geneva, Switzerland: World Health Organization (WHO), 2014.                                                                            | 2007                       |                      |
| Belarus | Fisenka EG, Germanovich FA, Glinskaya IN, Lyabis OI, Rasuli AM. Effectiveness of universal hepatitis A immunization of children in Minsk City, Belarus: four-year follow-up. J Viral Hepat. 2008; 57-61.                                                                              | 2007                       |                      |
| Belarus | Belarus Vital Registration - Deaths 2008 ICD10 as it appears in World Health Organization (WHO). WHO Mortality Database Version February 2014. Geneva, Switzerland: World Health Organization (WHO), 2014.                                                                            | 2008                       |                      |
| Belarus | Belarus Vital Registration - Deaths 2009 ICD10 as it appears in World Health Organization (WHO). WHO Mortality Database Version February 2014. Geneva, Switzerland: World Health Organization (WHO), 2014.                                                                            | 2009                       |                      |
| Belarus | Joint United Nations Program on HIV/AIDS (UNAIDS), Ministry of Health of the Republic of Belarus. Belarus National Report on the implementation of the Declaration of Commitment on HIV/AIDS 2010. Geneva, Switzerland: Joint United Nations Program on HIV/AIDS (UNAIDS), 2010.      | 2009                       |                      |
| Belarus | Belarus Vital Registration Death Data 2011 as it appears in United Nations Statistics Division (UNSD). United Nations Demographic Yearbook. New York City, United States: United Nations Statistics Division (UNSD).                                                                  | 2011                       | *                    |
| Belarus | World Health Organization (WHO). Retrospective Measles Data on Supplementary Immunization Activities. Geneva, Switzerland: World Health Organization (WHO).                                                                                                                           | 2012                       |                      |
| Belgium | Max Planck Institute for Demographic Research, University of California. Human Mortality Database. Berkeley, USA: University of California; Rostock, Germany: Max Planck Institute for Demographic Research.                                                                          | 1950-2009                  |                      |



**Web Table 32 - Comprehensive citation list**

| Country | Citation                                                                                                                                                                                                             | Year*                                                          | New for GBD 2013 (*) |
|---------|----------------------------------------------------------------------------------------------------------------------------------------------------------------------------------------------------------------------|----------------------------------------------------------------|----------------------|
| Belgium | Centre for Research on the Epidemiology of Disasters (CRED). EM-DAT: The OFDA/CRED International Disaster Database. Brussels, Belgium: Catholic University of Leuven.                                                | 1953, 1956, 1983, 1990, 1995, 1998-1999, 2002, 2007, 2010-2011 |                      |
| Belgium | Belgium Population and Housing Census 1961 as it appears in United Nations Statistics Division (UNSD). United Nations Demographic Yearbook. New York City, United States: United Nations Statistics Division (UNSD). | 1961                                                           |                      |
| Belgium | Belgium Vital Registration - Deaths 1968 ICD8 as it appears in World Health Organization (WHO). WHO Mortality Database Version February 2014. Geneva, Switzerland: World Health Organization (WHO), 2014.            | 1968                                                           |                      |
| Belgium | Belgium Vital Registration - Deaths 1969 ICD8 as it appears in World Health Organization (WHO). WHO Mortality Database Version February 2014. Geneva, Switzerland: World Health Organization (WHO), 2014.            | 1969                                                           |                      |
| Belgium | Belgium Population and Housing Census 1970 as it appears in United Nations Statistics Division (UNSD). United Nations Demographic Yearbook. New York City, United States: United Nations Statistics Division (UNSD). | 1970                                                           |                      |
| Belgium | Belgium Vital Registration - Deaths 1970 ICD8 as it appears in World Health Organization (WHO). WHO Mortality Database Version February 2014. Geneva, Switzerland: World Health Organization (WHO), 2014.            | 1970                                                           |                      |
| Belgium | Belgium Vital Registration - Deaths 1971 ICD8 as it appears in World Health Organization (WHO). WHO Mortality Database Version February 2014. Geneva, Switzerland: World Health Organization (WHO), 2014.            | 1971                                                           |                      |
| Belgium | Belgium Vital Registration - Deaths 1972 ICD8 as it appears in World Health Organization (WHO). WHO Mortality Database Version February 2014. Geneva, Switzerland: World Health Organization (WHO), 2014.            | 1972                                                           |                      |
| Belgium | Belgium Vital Registration - Deaths 1973 ICD8 as it appears in World Health Organization (WHO). WHO Mortality Database Version February 2014. Geneva, Switzerland: World Health Organization (WHO), 2014.            | 1973                                                           |                      |
| Belgium | Belgium Vital Registration - Deaths 1974 ICD8 as it appears in World Health Organization (WHO). WHO Mortality Database Version February 2014. Geneva, Switzerland: World Health Organization (WHO), 2014.            | 1974                                                           |                      |
| Belgium | Belgium Vital Registration - Deaths 1975 ICD8 as it appears in World Health Organization (WHO). WHO Mortality Database Version February 2014. Geneva, Switzerland: World Health Organization (WHO), 2014.            | 1975                                                           |                      |
| Belgium | Belgium Vital Registration - Deaths 1976 ICD8 as it appears in World Health Organization (WHO). WHO Mortality Database Version February 2014. Geneva, Switzerland: World Health Organization (WHO), 2014.            | 1976                                                           |                      |
| Belgium | Belgium Vital Registration - Deaths 1977 ICD8 as it appears in World Health Organization (WHO). WHO Mortality Database Version February 2014. Geneva, Switzerland: World Health Organization (WHO), 2014.            | 1977                                                           |                      |
| Belgium | Belgium Vital Registration - Deaths 1978 ICD8 as it appears in World Health Organization (WHO). WHO Mortality Database Version February 2014. Geneva, Switzerland: World Health Organization (WHO), 2014.            | 1978                                                           |                      |

**Web Table 32 - Comprehensive citation list**

| Country | Citation                                                                                                                                                                                                                 | Year*                                            | New for GBD 2013 (*) |
|---------|--------------------------------------------------------------------------------------------------------------------------------------------------------------------------------------------------------------------------|--------------------------------------------------|----------------------|
| Belgium | Belgium Vital Registration - Deaths 1979 ICD9 as it appears in World Health Organization (WHO). WHO Mortality Database Version February 2014. Geneva, Switzerland: World Health Organization (WHO), 2014.                | 1979                                             |                      |
| Belgium | Vranckx R, Muylle L. Hepatitis A virus antibodies in Belgium: relationship between prevalence and age. <i>Infection</i> . 1990; 18(6): 364-6.                                                                            | 1979, 1989                                       |                      |
| Belgium | Belgium Vital Registration - Deaths 1980 ICD9 as it appears in World Health Organization (WHO). WHO Mortality Database Version February 2014. Geneva, Switzerland: World Health Organization (WHO), 2014.                | 1980                                             |                      |
| Belgium | Institute for Health Metrics and Evaluation (IHME), Joint United Nations Program on HIV/AIDS (UNAIDS). Institute for Health Metrics and Evaluation HIV Mortality Estimates Based on the UNAIDS Spectrum Model Framework. | 1980-2013                                        | *                    |
| Belgium | Belgium Vital Registration - Deaths 1981 ICD9 as it appears in World Health Organization (WHO). WHO Mortality Database Version February 2014. Geneva, Switzerland: World Health Organization (WHO), 2014.                | 1981                                             |                      |
| Belgium | Belgium Vital Registration - Deaths 1982 ICD9 as it appears in World Health Organization (WHO). WHO Mortality Database Version February 2014. Geneva, Switzerland: World Health Organization (WHO), 2014.                | 1982                                             |                      |
| Belgium | Vranckx R, Muylle L, Cole J. In Belgium, viral hepatitis A is predominantly childhood disease. <i>Rev Epidemiol Sante Publique</i> . 1984; 32(6): 366-9.                                                                 | 1982                                             |                      |
| Belgium | Belgium Vital Registration - Deaths 1983 ICD9 as it appears in World Health Organization (WHO). WHO Mortality Database Version February 2014. Geneva, Switzerland: World Health Organization (WHO), 2014.                | 1983                                             |                      |
| Belgium | Belgium Vital Registration - Deaths 1984 ICD9 as it appears in World Health Organization (WHO). WHO Mortality Database Version February 2014. Geneva, Switzerland: World Health Organization (WHO), 2014.                | 1984                                             |                      |
| Belgium | Belgium Vital Registration - Deaths 1985 ICD9 as it appears in World Health Organization (WHO). WHO Mortality Database Version February 2014. Geneva, Switzerland: World Health Organization (WHO), 2014.                | 1985                                             |                      |
| Belgium | United Nations Children's Fund (UNICEF), World Health Organization (WHO). WHO and UNICEF Reported Disease Incidence Time Series - Pertussis. Geneva, Switzerland: World Health Organization (WHO).                       | 1985-1989, 1991, 1993-1997, 2001-2008, 2010-2012 |                      |
| Belgium | Belgium Vital Registration - Deaths 1986 ICD9 as it appears in World Health Organization (WHO). WHO Mortality Database Version February 2014. Geneva, Switzerland: World Health Organization (WHO), 2014.                | 1986                                             |                      |
| Belgium | Belgium Vital Registration - Deaths 1987 ICD9 as it appears in World Health Organization (WHO). WHO Mortality Database Version February 2014. Geneva, Switzerland: World Health Organization (WHO), 2014.                | 1987                                             |                      |
| Belgium | Belgium Vital Registration - Deaths 1988 ICD9 as it appears in World Health Organization (WHO). WHO Mortality Database Version February 2014. Geneva, Switzerland: World Health Organization (WHO), 2014.                | 1988                                             |                      |
| Belgium | Van Hoeck KJ, Mahieu LM, Vaerenberg MH, van Acker KJ. A retrospective epidemiological study of bacterial meningitis in an urban area in Belgium. <i>Eur J Pediatr</i> . 1997; 156(4): 288-91.                            | 1988-1993                                        |                      |
| Belgium | Castillo Taucher S. [Services for the care and prevention of birth defects. Reduced report of a World Health Organization and March of Dimes Foundation meeting]. <i>Rev Med Chil</i> . 2007; 135(6): 806-13.            | 1988-1998, 2005                                  |                      |



**Web Table 32 - Comprehensive citation list**

| Country | Citation                                                                                                                                                                                                                                                                                                                                                                                                                                                                                                                                                                                                                                                                                                              | Year*                                 | New for GBD 2013 (*) |
|---------|-----------------------------------------------------------------------------------------------------------------------------------------------------------------------------------------------------------------------------------------------------------------------------------------------------------------------------------------------------------------------------------------------------------------------------------------------------------------------------------------------------------------------------------------------------------------------------------------------------------------------------------------------------------------------------------------------------------------------|---------------------------------------|----------------------|
| Belgium | United Nations Children's Fund (UNICEF), World Health Organization (WHO). WHO and UNICEF Reported Disease Incidence Time Series - Measles. Geneva, Switzerland: World Health Organization (WHO).                                                                                                                                                                                                                                                                                                                                                                                                                                                                                                                      | 1988-1989, 1991-1998, 2001, 2003-2012 |                      |
| Belgium | Modell B, Darlison M, Birgens H, Cario H, Faustino P, Giordano PC, Gulbis B, Hopmeier P, Lena-Russo D, Romao L, Theodorsson E. Epidemiology of haemoglobin disorders in Europe: an overview. Scand J Clin Lab Invest. 2007; 67(1): 39-69.                                                                                                                                                                                                                                                                                                                                                                                                                                                                             | 1988, 2006                            |                      |
| Belgium | Belgium Vital Registration - Deaths 1989 ICD9 as it appears in World Health Organization (WHO). WHO Mortality Database Version February 2014. Geneva, Switzerland: World Health Organization (WHO), 2014.                                                                                                                                                                                                                                                                                                                                                                                                                                                                                                             | 1989                                  |                      |
| Belgium | Belgium Vital Registration - Deaths 1990 ICD9 as it appears in World Health Organization (WHO). WHO Mortality Database Version February 2014. Geneva, Switzerland: World Health Organization (WHO), 2014.                                                                                                                                                                                                                                                                                                                                                                                                                                                                                                             | 1990                                  |                      |
| Belgium | Roelands M, Wostyn P, Dom H, Baro F. The prevalence of dementia in Belgium: a population-based door-to-door survey in a rural community. Neuroepidemiology. 1994; 13(4): 155-61.                                                                                                                                                                                                                                                                                                                                                                                                                                                                                                                                      | 1990-1992                             |                      |
| Belgium | Vranckx R. Hepatitis A virus infections in Belgian children. Infection. 1993; 21(3): 168-70.                                                                                                                                                                                                                                                                                                                                                                                                                                                                                                                                                                                                                          | 1990-1992                             |                      |
| Belgium | Centre for Health Informatics and Multiprofessional Education, University College London. Modell's Haemoglobinopathologist's Almanac. London, United Kingdom: Centre for Health Informatics and Multiprofessional Education, University College London, 2008.                                                                                                                                                                                                                                                                                                                                                                                                                                                         | 1990-2006                             |                      |
| Belgium | Belgium Vital Registration - Deaths 1991 ICD9 as it appears in World Health Organization (WHO). WHO Mortality Database Version February 2014. Geneva, Switzerland: World Health Organization (WHO), 2014.                                                                                                                                                                                                                                                                                                                                                                                                                                                                                                             | 1991                                  |                      |
| Belgium | Jacques P, Moens G, Van Damme P, Goubau P, Vranckx R, Steeno J, Muylle L, Desmyter J. Increased risk for hepatitis A among female day nursery workers in Belgium. Occup Med (Lond). 1994; 44(5): 259-61.                                                                                                                                                                                                                                                                                                                                                                                                                                                                                                              | 1991                                  |                      |
| Belgium | Belgium Vital Registration - Deaths 1992 ICD9 as it appears in World Health Organization (WHO). WHO Mortality Database Version February 2014. Geneva, Switzerland: World Health Organization (WHO), 2014.                                                                                                                                                                                                                                                                                                                                                                                                                                                                                                             | 1992                                  |                      |
| Belgium | Trichopoulos D, Bamia C, Lagiou P, Fedirko V, Trepo E, Jenab M, Pischon T, Nöthlings U, Overved K, Tjønneland A, Outzen M, Clavel-Chapelon F, Kaaks R, Lukanova A, Boeing H, Aleksandrova K, Benetou V, Zylis D, Palli D, Pala V, Panico S, Tumino R, Sacerdote C, Bueno-De-Mesquita HB, Van Kranen HJ, Peeters PHM, Lund E, Quirós JR, González CA, Sanchez Perez M-J, Navarro C, Dorronsoro M, Barricarte A, Lindkvist B, Regnér S, Werner M, Hallmans G, Khaw K-T, Wareham N, Key T, Romieu I, Chuang S-C, Murphy N, Boffetta P, Trichopoulou A, Riboli E. Hepatocellular carcinoma risk factors and disease burden in a European cohort: a nested case-control study. J Natl Cancer Inst. 2011; 103(22): 1686-95. | 1992-2006                             | *                    |
| Belgium | Belgium Vital Registration - Deaths 1993 ICD9 as it appears in World Health Organization (WHO). WHO Mortality Database Version February 2014. Geneva, Switzerland: World Health Organization (WHO), 2014.                                                                                                                                                                                                                                                                                                                                                                                                                                                                                                             | 1993                                  |                      |
| Belgium | Beutels M, Van Damme P, Vranckx R, Meheus A. The shift in prevalence of hepatitis A immunity in Flanders, Belgium. Acta Gastroenterol Belg. 1998; 4-7.                                                                                                                                                                                                                                                                                                                                                                                                                                                                                                                                                                | 1993-1994                             |                      |
| Belgium | Beutels M, Van Damme P, Aelvoet W, Desmyter J, Dondeyne F, Goilav C, Mak R, Muylle L, Pierard D, Stroobant A, Van Loock F, Waumans P, Vranckx R. Prevalence of hepatitis A, B and C in the Flemish population. Eur J Epidemiol. 1997; 13(3): 275-80.                                                                                                                                                                                                                                                                                                                                                                                                                                                                  | 1993-1994                             |                      |

**Web Table 32 - Comprehensive citation list**

| Country | Citation                                                                                                                                                                                                                                                                                                                   | Year*     | New for GBD 2013 (*) |
|---------|----------------------------------------------------------------------------------------------------------------------------------------------------------------------------------------------------------------------------------------------------------------------------------------------------------------------------|-----------|----------------------|
| Belgium | Van Damme P, Thyssen A, Van Loock F. Epidemiology of hepatitis C in Belgium: present and future. <i>Acta Gastroenterol Belg.</i> 2002; 65(2): 78-9.                                                                                                                                                                        | 1993-1994 |                      |
| Belgium | Belgium Vital Registration - Deaths 1994 ICD9 as it appears in World Health Organization (WHO). WHO Mortality Database Version February 2014. Geneva, Switzerland: World Health Organization (WHO), 2014.                                                                                                                  | 1994      |                      |
| Belgium | Gulbis B, Cotton F, Ferster A, Ketelslegers O, Dresse MF, Rongé-Collard E, Minon JM, Lé PQ, Vertongen F. Neonatal haemoglobinopathy screening in Belgium. <i>J Clin Pathol.</i> 2009; 62(1): 49-52.                                                                                                                        | 1994-2007 |                      |
| Belgium | Gulbis B, Ferster A, Cotton F, Lebourchard M, Cochaux P, Vertongen F. Neonatal haemoglobinopathy screening: review of a 10-year programme in Brussels. <i>J Med Screen.</i> 2006; 13(2): 76-78.                                                                                                                            | 1994-2004 |                      |
| Belgium | Belgium Vital Registration - Deaths 1995 ICD9 as it appears in World Health Organization (WHO). WHO Mortality Database Version February 2014. Geneva, Switzerland: World Health Organization (WHO), 2014.                                                                                                                  | 1995      |                      |
| Belgium | Henrion J, Libon E, De Maeght S, Schapira M, Ghilain JM, Maisin JM, Heller FR. Surveillance for hepatocellular carcinoma: compliance and results according to the aetiology of cirrhosis in a cohort of 141 patients. <i>Acta Gastroenterol Belg.</i> 2000; 63(1): 5-9.                                                    | 1995      |                      |
| Belgium | Belgium Vital Registration - Deaths 1996 ICD9 as it appears in World Health Organization (WHO). WHO Mortality Database Version February 2014. Geneva, Switzerland: World Health Organization (WHO), 2014.                                                                                                                  | 1996      |                      |
| Belgium | Vranckx R, Jacques P, Moens G. Prevalence of hepatitis A antibodies in a large sample of Belgian health care workers. <i>Infection.</i> 1999; 27(4-5): 256-8.                                                                                                                                                              | 1996-1997 |                      |
| Belgium | Belgium Vital Registration - Deaths 1997 ICD9 as it appears in World Health Organization (WHO). WHO Mortality Database Version February 2014. Geneva, Switzerland: World Health Organization (WHO), 2014.                                                                                                                  | 1997      |                      |
| Belgium | Parkin DM, International Agency for Research on Cancer, International Association of Cancer Registries. <i>Cancer Incidence in Five Continents. Vol. I to VIII.</i> Lyon, France, IARC Press, 2005.                                                                                                                        | 1997      |                      |
| Belgium | Institute for Health Metrics and Evaluation. Institute for Health Metrics and Evaluation Cancer Registry Database. [Unpublished].                                                                                                                                                                                          | 1997-2010 |                      |
| Belgium | Belgium Vital Registration - Deaths 1998 ICD10 as it appears in World Health Organization (WHO). WHO Mortality Database Version February 2014. Geneva, Switzerland: World Health Organization (WHO), 2014.                                                                                                                 | 1998      |                      |
| Belgium | Belgium Vital Registration - Deaths 1999 ICD10 as it appears in World Health Organization (WHO). WHO Mortality Database Version February 2014. Geneva, Switzerland: World Health Organization (WHO), 2014.                                                                                                                 | 1999      |                      |
| Belgium | Curado MP, Edwards B, Shin HR, Storm H, Ferlay J, Heanue M and Boyle P, eds (2007). <i>Cancer Incidence in Five Continents, Vol. IX Periodic Data (electronic version).</i> Lyon, IARC. <a href="http://ci5.iarc.fr">http://ci5.iarc.fr</a>                                                                                | 1999-2000 |                      |
| Belgium | EUVAC-NET. EUVAC-NET Measles Surveillance Report 2001. Stockholm, Sweden: European Centre for Disease Prevention and Control, 2003.                                                                                                                                                                                        | 2001      |                      |
| Belgium | World Health Organization (WHO). <i>Yellow Fever Reported Cases, WHO Vaccine-Preventable Diseases: Monitoring System.</i> Geneva, Switzerland: World Health Organization (WHO).                                                                                                                                            | 2001-2009 |                      |
| Belgium | Knight M, Callaghan WM, Berg C, Alexander S, Bouvier-Colle MH, Ford JB, Joseph KS, Lewis G, Liston RM, Roberts CL, Oats J, Walker J. Trends in postpartum hemorrhage in high resource countries: a review and recommendations from the International Postpartum Hemorrhage . <i>BMC Pregnancy Childbirth.</i> 2009; 9(55). | 2002-2007 |                      |

**Web Table 32 - Comprehensive citation list**

| Country | Citation                                                                                                                                                                                                                                                                            | Year*      | New for GBD 2013 (*) |
|---------|-------------------------------------------------------------------------------------------------------------------------------------------------------------------------------------------------------------------------------------------------------------------------------------|------------|----------------------|
| Belgium | De Schrijver K, Maes I, Van Damme P, Tersago J, Moës E, Van Ranst M. An outbreak of nosocomial hepatitis B virus infection in a nursing home for the elderly in Antwerp (Belgium). <i>Acta Clin Belg.</i> 2005; 60(2): 63-9.                                                        | 2002-2003  |                      |
| Belgium | Belgium Vital Registration - Deaths 2003 ICD10 as it appears in World Health Organization (WHO). WHO Mortality Database Version February 2014. Geneva, Switzerland: World Health Organization (WHO), 2014.                                                                          | 2003       |                      |
| Belgium | EUVAC-NET. EUVAC-NET Measles Surveillance Report 2003. Stockholm, Sweden: European Centre for Disease Prevention and Control, 2005.                                                                                                                                                 | 2003       |                      |
| Belgium | Quoilin S, Hutse V, Vandenberghe H, Claeys F, Verhaegen E, De Cock L, Van Look F, Top G, Van Damme P, Vranckx R, Van Oyen H. A population-based prevalence study of hepatitis A, B and C virus using oral fluid in Flanders, Belgium. <i>Eur J Epidemiol.</i> 2007; 22(3): 195-202. | 2003       |                      |
| Belgium | WHO Regional Office for Europe (EURO-WHO). European Hospital Morbidity Database. Copenhagen, Denmark: WHO Regional Office for Europe (EURO-WHO).                                                                                                                                    | 2003-2009  |                      |
| Belgium | Belgian Cancer Registry. Belgium Cancer Registry - Incidence. Brussels, Belgium: Belgian Cancer Registry.                                                                                                                                                                           | 2003-2010  | *                    |
| Belgium | Belgium Vital Registration - Deaths 2004 ICD10 as it appears in World Health Organization (WHO). WHO Mortality Database Version February 2014. Geneva, Switzerland: World Health Organization (WHO), 2014.                                                                          | 2004       |                      |
| Belgium | EUVAC-NET. EUVAC-NET Measles Surveillance Report 2004. Stockholm, Sweden: European Centre for Disease Prevention and Control, 2005.                                                                                                                                                 | 2004       |                      |
| Belgium | Thalassaemia International Federation, World Health Organization (WHO). Management of Haemoglobin Disorders: Report of a Joint WHO-TIF Meeting, Nicosia, Cyprus, 16-18 November 2007. Geneva, Switzerland: World Health Organization (WHO), 2008.                                   | 2004, 2006 |                      |
| Belgium | Belgium Vital Registration - Deaths 2005 ICD10 as it appears in World Health Organization (WHO). WHO Mortality Database Version February 2014. Geneva, Switzerland: World Health Organization (WHO), 2014.                                                                          | 2005       |                      |
| Belgium | Belgium Vital Registration - Deaths 2006 ICD10 as it appears in World Health Organization (WHO). WHO Mortality Database Version February 2014. Geneva, Switzerland: World Health Organization (WHO), 2014.                                                                          | 2006       |                      |
| Belgium | Belgium Vital Registration - Deaths 2007 ICD10 as it appears in World Health Organization (WHO). WHO Mortality Database Version February 2014. Geneva, Switzerland: World Health Organization (WHO), 2014.                                                                          | 2007       |                      |
| Belgium | Belgium Vital Registration - Deaths 2008 ICD10 as it appears in World Health Organization (WHO). WHO Mortality Database Version February 2014. Geneva, Switzerland: World Health Organization (WHO), 2014.                                                                          | 2008       |                      |
| Belgium | EUVAC-NET. EUVAC-NET Measles Surveillance Report 2008. Stockholm, Sweden: European Centre for Disease Prevention and Control, 2009.                                                                                                                                                 | 2008       |                      |
| Belgium | Belgium Vital Registration - Deaths 2009 ICD10 as it appears in World Health Organization (WHO). WHO Mortality Database Version February 2014. Geneva, Switzerland: World Health Organization (WHO), 2014.                                                                          | 2009       |                      |
| Belgium | EUVAC-NET. EUVAC-NET Measles Surveillance Report 2009. Stockholm, Sweden: European Centre for Disease Prevention and Control, 2010.                                                                                                                                                 | 2009       |                      |

**Web Table 32 - Comprehensive citation list**

| Country | Citation                                                                                                                                                                                                                                                                                         | Year*                                         | New for GBD 2013 (*) |
|---------|--------------------------------------------------------------------------------------------------------------------------------------------------------------------------------------------------------------------------------------------------------------------------------------------------|-----------------------------------------------|----------------------|
| Belgium | Belgium Vital Registration - Deaths 2010 ICD10 as it appears in World Health Organization (WHO). WHO Mortality Database Version February 2014. Geneva, Switzerland: World Health Organization (WHO), 2014.                                                                                       | 2010                                          |                      |
| Belgium | Belgium Vital Registration Death Data 2010 as it appears in United Nations Statistics Division (UNSD). United Nations Demographic Yearbook. New York City, United States: United Nations Statistics Division (UNSD).                                                                             | 2010                                          |                      |
| Belgium | European Renal Association-European Dialysis and Transplant Association (ERA-EDTA). European Renal Association-European Dialysis and Transplant Association Registry Annual Report 2010. Parma, Italy: European Renal Association-European Dialysis and Transplant Association (ERA-EDTA), 2012. | 2010                                          | *                    |
| Belgium | EUVAC-NET. EUVAC-NET Measles Surveillance Report 2010. Stockholm, Sweden: European Centre for Disease Prevention and Control, 2011.                                                                                                                                                              | 2010                                          |                      |
| Belgium | European Renal Association-European Dialysis and Transplant Association (ERA-EDTA). European Renal Association-European Dialysis and Transplant Association Registry Annual Report 2011. Parma, Italy: European Renal Association-European Dialysis and Transplant Association (ERA-EDTA), 2013. | 2011                                          | *                    |
| Belgium | Van Hoecke F, Van Maerken T, De Boule M, Geerts A, Vlierberghe V, Colle I, Padalko HE. Hepatitis E seroprevalence in east and west Flanders, Belgium. Acta Gastroenterol Belg. 2012; 75(3): 322-4.                                                                                               | 2011                                          | *                    |
| Belize  | Belize Vital Registration Death Data 1950 as it appears in United Nations Statistics Division (UNSD). United Nations Demographic Yearbook. New York City, United States: United Nations Statistics Division (UNSD).                                                                              | 1950                                          |                      |
| Belize  | Belize Vital Registration Death Data 1951 as it appears in United Nations Statistics Division (UNSD). United Nations Demographic Yearbook. New York City, United States: United Nations Statistics Division (UNSD).                                                                              | 1951                                          |                      |
| Belize  | Belize Vital Registration Death Data 1952 as it appears in United Nations Statistics Division (UNSD). United Nations Demographic Yearbook. New York City, United States: United Nations Statistics Division (UNSD).                                                                              | 1952                                          |                      |
| Belize  | Belize Vital Registration Death Data 1953 as it appears in United Nations Statistics Division (UNSD). United Nations Demographic Yearbook. New York City, United States: United Nations Statistics Division (UNSD).                                                                              | 1953                                          |                      |
| Belize  | Belize Vital Registration Death Data 1954 as it appears in United Nations Statistics Division (UNSD). United Nations Demographic Yearbook. New York City, United States: United Nations Statistics Division (UNSD).                                                                              | 1954                                          |                      |
| Belize  | Belize Vital Registration Death Data 1955 as it appears in United Nations Statistics Division (UNSD). United Nations Demographic Yearbook. New York City, United States: United Nations Statistics Division (UNSD).                                                                              | 1955                                          |                      |
| Belize  | Centre for Research on the Epidemiology of Disasters (CRED). EM-DAT: The OFDA/CRED International Disaster Database. Brussels, Belgium: Catholic University of Leuven.                                                                                                                            | 1955, 1961, 1978, 1998, 2000-2001, 2005, 2008 |                      |
| Belize  | Belize Vital Registration Death Data 1956 as it appears in United Nations Statistics Division (UNSD). United Nations Demographic Yearbook. New York City, United States: United Nations Statistics Division (UNSD).                                                                              | 1956                                          |                      |

**Web Table 32 - Comprehensive citation list**

| Country | Citation                                                                                                                                                                                                            | Year* | New for<br>GBD 2013<br>(*) |
|---------|---------------------------------------------------------------------------------------------------------------------------------------------------------------------------------------------------------------------|-------|----------------------------|
| Belize  | Belize Vital Registration Death Data 1957 as it appears in United Nations Statistics Division (UNSD). United Nations Demographic Yearbook. New York City, United States: United Nations Statistics Division (UNSD). | 1957  |                            |
| Belize  | Belize Vital Registration Death Data 1958 as it appears in United Nations Statistics Division (UNSD). United Nations Demographic Yearbook. New York City, United States: United Nations Statistics Division (UNSD). | 1958  |                            |
| Belize  | Belize Vital Registration Death Data 1959 as it appears in United Nations Statistics Division (UNSD). United Nations Demographic Yearbook. New York City, United States: United Nations Statistics Division (UNSD). | 1959  |                            |
| Belize  | Belize Vital Registration Death Data 1960 as it appears in United Nations Statistics Division (UNSD). United Nations Demographic Yearbook. New York City, United States: United Nations Statistics Division (UNSD). | 1960  |                            |
| Belize  | Belize Vital Registration Death Data 1961 as it appears in United Nations Statistics Division (UNSD). United Nations Demographic Yearbook. New York City, United States: United Nations Statistics Division (UNSD). | 1961  |                            |
| Belize  | Belize Vital Registration Death Data 1962 as it appears in United Nations Statistics Division (UNSD). United Nations Demographic Yearbook. New York City, United States: United Nations Statistics Division (UNSD). | 1962  |                            |
| Belize  | Belize Vital Registration Death Data 1963 as it appears in United Nations Statistics Division (UNSD). United Nations Demographic Yearbook. New York City, United States: United Nations Statistics Division (UNSD). | 1963  |                            |
| Belize  | Belize Vital Registration - Deaths 1964 ICD7 as it appears in World Health Organization (WHO). WHO Mortality Database Version February 2014. Geneva, Switzerland: World Health Organization (WHO), 2014.            | 1964  |                            |
| Belize  | Belize Vital Registration - Deaths 1965 ICD7 as it appears in World Health Organization (WHO). WHO Mortality Database Version February 2014. Geneva, Switzerland: World Health Organization (WHO), 2014.            | 1965  |                            |
| Belize  | Belize Vital Registration - Deaths 1966 ICD7 as it appears in World Health Organization (WHO). WHO Mortality Database Version February 2014. Geneva, Switzerland: World Health Organization (WHO), 2014.            | 1966  |                            |
| Belize  | Belize Vital Registration - Deaths 1967 ICD7 as it appears in World Health Organization (WHO). WHO Mortality Database Version February 2014. Geneva, Switzerland: World Health Organization (WHO), 2014.            | 1967  |                            |
| Belize  | Belize Vital Registration - Deaths 1968 ICD8 as it appears in World Health Organization (WHO). WHO Mortality Database Version February 2014. Geneva, Switzerland: World Health Organization (WHO), 2014.            | 1968  |                            |
| Belize  | Belize Vital Registration - Deaths 1969 ICD8 as it appears in World Health Organization (WHO). WHO Mortality Database Version February 2014. Geneva, Switzerland: World Health Organization (WHO), 2014.            | 1969  |                            |
| Belize  | Belize Vital Registration - Deaths 1970 ICD8 as it appears in World Health Organization (WHO). WHO Mortality Database Version February 2014. Geneva, Switzerland: World Health Organization (WHO), 2014.            | 1970  |                            |

**Web Table 32 - Comprehensive citation list**

| Country | Citation                                                                                                                                                                                                                 | Year*     | New for GBD 2013 (*) |
|---------|--------------------------------------------------------------------------------------------------------------------------------------------------------------------------------------------------------------------------|-----------|----------------------|
| Belize  | Belize Vital Registration - Deaths 1971 ICD8 as it appears in World Health Organization (WHO). WHO Mortality Database Version February 2014. Geneva, Switzerland: World Health Organization (WHO), 2014.                 | 1971      |                      |
| Belize  | Belize Vital Registration - Deaths 1972 ICD8 as it appears in World Health Organization (WHO). WHO Mortality Database Version February 2014. Geneva, Switzerland: World Health Organization (WHO), 2014.                 | 1972      |                      |
| Belize  | Belize Vital Registration - Deaths 1973 ICD8 as it appears in World Health Organization (WHO). WHO Mortality Database Version February 2014. Geneva, Switzerland: World Health Organization (WHO), 2014.                 | 1973      |                      |
| Belize  | Belize Vital Registration - Deaths 1974 ICD8 as it appears in World Health Organization (WHO). WHO Mortality Database Version February 2014. Geneva, Switzerland: World Health Organization (WHO), 2014.                 | 1974      |                      |
| Belize  | Belize Vital Registration - Deaths 1975 ICD8 as it appears in World Health Organization (WHO). WHO Mortality Database Version February 2014. Geneva, Switzerland: World Health Organization (WHO), 2014.                 | 1975      |                      |
| Belize  | Belize Vital Registration - Deaths 1976 ICD8 as it appears in World Health Organization (WHO). WHO Mortality Database Version February 2014. Geneva, Switzerland: World Health Organization (WHO), 2014.                 | 1976      |                      |
| Belize  | United Nations Office on Drugs and Crime (UNODC). United Nations Surveys on Crime Trends and the Operations of Criminal Justice Systems 1970-2006 as provided by Kavi Bhalla. [Unpublished].                             | 1976-1980 |                      |
| Belize  | Belize Vital Registration - Deaths 1977 ICD8 as it appears in World Health Organization (WHO). WHO Mortality Database Version February 2014. Geneva, Switzerland: World Health Organization (WHO), 2014.                 | 1977      |                      |
| Belize  | Belize Vital Registration - Deaths 1978 ICD8 as it appears in World Health Organization (WHO). WHO Mortality Database Version February 2014. Geneva, Switzerland: World Health Organization (WHO), 2014.                 | 1978      |                      |
| Belize  | Belize Vital Registration - Deaths 1979 ICD8 as it appears in World Health Organization (WHO). WHO Mortality Database Version February 2014. Geneva, Switzerland: World Health Organization (WHO), 2014.                 | 1979      |                      |
| Belize  | Belize Vital Registration - Deaths 1980 ICD9 as it appears in World Health Organization (WHO). WHO Mortality Database Version February 2014. Geneva, Switzerland: World Health Organization (WHO), 2014.                 | 1980      |                      |
| Belize  | Institute for Health Metrics and Evaluation (IHME), Joint United Nations Program on HIV/AIDS (UNAIDS). Institute for Health Metrics and Evaluation HIV Mortality Estimates Based on the UNAIDS Spectrum Model Framework. | 1980-2013 | *                    |
| Belize  | United Nations Children's Fund (UNICEF), World Health Organization (WHO). WHO and UNICEF Reported Disease Incidence Time Series - Pertussis. Geneva, Switzerland: World Health Organization (WHO).                       | 1980-2013 |                      |
| Belize  | United Nations Children's Fund (UNICEF), World Health Organization (WHO). WHO and UNICEF Reported Disease Incidence Time Series - Measles. Geneva, Switzerland: World Health Organization (WHO).                         | 1980-2013 |                      |
| Belize  | Belize Vital Registration - Deaths 1981 ICD9 as it appears in World Health Organization (WHO). WHO Mortality Database Version February 2014. Geneva, Switzerland: World Health Organization (WHO), 2014.                 | 1981      | *                    |



**Web Table 32 - Comprehensive citation list**

| Country | Citation                                                                                                                                                                                                                                                                                            | Year*     | New for GBD 2013 (*) |
|---------|-----------------------------------------------------------------------------------------------------------------------------------------------------------------------------------------------------------------------------------------------------------------------------------------------------|-----------|----------------------|
| Belize  | Belize Vital Registration - Deaths 1982 ICD9 as it appears in World Health Organization (WHO). WHO Mortality Database Version February 2014. Geneva, Switzerland: World Health Organization (WHO), 2014.                                                                                            | 1982      |                      |
| Belize  | Belize Vital Registration - Deaths 1983 ICD9 as it appears in World Health Organization (WHO). WHO Mortality Database Version February 2014. Geneva, Switzerland: World Health Organization (WHO), 2014.                                                                                            | 1983      |                      |
| Belize  | Belize Vital Registration - Deaths 1984 ICD9 as it appears in World Health Organization (WHO). WHO Mortality Database Version February 2014. Geneva, Switzerland: World Health Organization (WHO), 2014.                                                                                            | 1984      |                      |
| Belize  | Belize Vital Registration Death Data 1985 as it appears in United Nations Statistics Division (UNSD). United Nations Demographic Yearbook. New York City, United States: United Nations Statistics Division (UNSD).                                                                                 | 1985      |                      |
| Belize  | Belize Vital Registration - Deaths 1986 ICD9 as it appears in World Health Organization (WHO). WHO Mortality Database Version February 2014. Geneva, Switzerland: World Health Organization (WHO), 2014.                                                                                            | 1986      |                      |
| Belize  | Belize Vital Registration - Deaths 1987 ICD9 as it appears in World Health Organization (WHO). WHO Mortality Database Version February 2014. Geneva, Switzerland: World Health Organization (WHO), 2014.                                                                                            | 1987      |                      |
| Belize  | Belize Vital Registration Death Data 1988 as it appears in United Nations Statistics Division (UNSD). United Nations Demographic Yearbook. New York City, United States: United Nations Statistics Division (UNSD).                                                                                 | 1988      |                      |
| Belize  | Belize Vital Registration - Deaths 1989 ICD9 as it appears in World Health Organization (WHO). WHO Mortality Database Version February 2014. Geneva, Switzerland: World Health Organization (WHO), 2014.                                                                                            | 1989      |                      |
| Belize  | Belize Vital Registration - Deaths 1990 ICD9 as it appears in World Health Organization (WHO). WHO Mortality Database Version February 2014. Geneva, Switzerland: World Health Organization (WHO), 2014.                                                                                            | 1990      |                      |
| Belize  | Centre for Health Informatics and Multiprofessional Education, University College London. Modell's Haemoglobinopathologist's Almanac. London, United Kingdom: Centre for Health Informatics and Multiprofessional Education, University College London, 2008.                                       | 1990-2003 |                      |
| Belize  | Statistical Institute of Belize. Belize Population and Housing Census 1991. Belmopan, Statistical Institute of Belize.                                                                                                                                                                              | 1991      | *                    |
| Belize  | Belize Vital Registration - Deaths 1991 ICD9 as it appears in World Health Organization (WHO). WHO Mortality Database Version February 2014. Geneva, Switzerland: World Health Organization (WHO), 2014.                                                                                            | 1991      |                      |
| Belize  | Belize Central Statistical Office (CSO), Belize Family Life Association, Division of Reproductive Health-Centers for Disease Control and Prevention (CDC), Ministry of Health (Belize). Belize Family Health Survey 1991. Atlanta, United States: Centers for Disease Control and Prevention (CDC). | 1991      |                      |
| Belize  | Belize Vital Registration Death Data 1992 as it appears in United Nations Statistics Division (UNSD). United Nations Demographic Yearbook. New York City, United States: United Nations Statistics Division (UNSD).                                                                                 | 1992      |                      |
| Belize  | Craig PG, Bryan JP, Miller RE, Reyes L, Hakre S, Jaramillo R, Krieg RE. The prevalence of hepatitis A, B and C infection among different ethnic groups in Belize. Am J Trop Med Hyg. 1993; 49(4): 430-4.                                                                                            | 1992      |                      |

**Web Table 32 - Comprehensive citation list**

| Country | Citation                                                                                                                                                                                                                | Year*                  | New for GBD 2013 (*) |
|---------|-------------------------------------------------------------------------------------------------------------------------------------------------------------------------------------------------------------------------|------------------------|----------------------|
| Belize  | Belize Vital Registration - Deaths 1993 ICD9 as it appears in World Health Organization (WHO). WHO Mortality Database Version February 2014. Geneva, Switzerland: World Health Organization (WHO), 2014.                | 1993                   |                      |
| Belize  | Measles Supplementary Immunization Activity Data as provided by the World Health Organization. [Unpublished].                                                                                                           | 1993, 1995             |                      |
| Belize  | Belize Vital Registration - Deaths 1994 ICD9 as it appears in World Health Organization (WHO). WHO Mortality Database Version February 2014. Geneva, Switzerland: World Health Organization (WHO), 2014.                | 1994                   |                      |
| Belize  | Belize Vital Registration - Deaths 1995 ICD9 as it appears in World Health Organization (WHO). WHO Mortality Database Version February 2014. Geneva, Switzerland: World Health Organization (WHO), 2014.                | 1995                   |                      |
| Belize  | Chamberlin J, Bryan JP, Jones DL, Reyes L, Hakre S. Seroprevalence of hepatitis B virus among school-age children in the Stann Creek District of Belize, Central America. <i>Am J Trop Med Hyg.</i> 1996; 55(4): 452-5. | 1995                   |                      |
| Belize  | Belize Vital Registration - Deaths 1996 ICD9 as it appears in World Health Organization (WHO). WHO Mortality Database Version February 2014. Geneva, Switzerland: World Health Organization (WHO), 2014.                | 1996                   |                      |
| Belize  | Belize Vital Registration - Deaths 1997 ICD10 as it appears in World Health Organization (WHO). WHO Mortality Database Version February 2014. Geneva, Switzerland: World Health Organization (WHO), 2014.               | 1997                   |                      |
| Belize  | Belize Vital Registration - Deaths 1998 ICD10 as it appears in World Health Organization (WHO). WHO Mortality Database Version February 2014. Geneva, Switzerland: World Health Organization (WHO), 2014.               | 1998                   |                      |
| Belize  | United Nations Office on Drugs and Crime (UNODC). United Nations Office on Drugs and Crime Global Study on Homicides 2011. Vienna, Austria: United Nations Office on Drugs and Crime (UNODC), 2011.                     | 1998-2010              |                      |
| Belize  | World Health Organization (WHO). Yellow Fever Reported Cases, WHO Vaccine-Preventable Diseases: Monitoring System. Geneva, Switzerland: World Health Organization (WHO).                                                | 1998, 2002-2009        |                      |
| Belize  | Belize Vital Registration - Deaths 1999 ICD10 as it appears in World Health Organization (WHO). WHO Mortality Database Version February 2014. Geneva, Switzerland: World Health Organization (WHO), 2014.               | 1999                   |                      |
| Belize  | Belize Central Statistical Office. Belize Family Health Survey 1999. Belmopan, Belize: Belize Central Statistical Office.                                                                                               | 1999                   |                      |
| Belize  | Belize Population and Housing Census 2000 as it appears in United Nations Statistics Division (UNSD). United Nations Demographic Yearbook. New York City, United States: United Nations Statistics Division (UNSD).     | 2000                   |                      |
| Belize  | Belize Vital Registration - Deaths 2000 ICD10 as it appears in World Health Organization (WHO). WHO Mortality Database Version February 2014. Geneva, Switzerland: World Health Organization (WHO), 2014.               | 2000                   |                      |
| Belize  | World Health Organization (WHO). Retrospective Measles Data on Supplementary Immunization Activities. Geneva, Switzerland: World Health Organization (WHO).                                                             | 2000, 2004, 2008, 2010 |                      |
| Belize  | Belize Vital Registration - Deaths 2001 ICD10 as it appears in World Health Organization (WHO). WHO Mortality Database Version February 2014. Geneva, Switzerland: World Health Organization (WHO), 2014.               | 2001                   |                      |



**Web Table 32 - Comprehensive citation list**

| Country | Citation                                                                                                                                                                                                                                                                                                                                                                                                                               | Year*                                                       | New for GBD 2013 (*) |
|---------|----------------------------------------------------------------------------------------------------------------------------------------------------------------------------------------------------------------------------------------------------------------------------------------------------------------------------------------------------------------------------------------------------------------------------------------|-------------------------------------------------------------|----------------------|
| Belize  | Belize Vital Registration - Deaths 2002 ICD10 as it appears in World Health Organization (WHO). WHO Mortality Database Version February 2014. Geneva, Switzerland: World Health Organization (WHO), 2014.                                                                                                                                                                                                                              | 2002                                                        |                      |
| Belize  | Belize Vital Registration - Deaths 2003 ICD10 as it appears in World Health Organization (WHO). WHO Mortality Database Version February 2014. Geneva, Switzerland: World Health Organization (WHO), 2014.                                                                                                                                                                                                                              | 2003                                                        |                      |
| Belize  | Belize Vital Registration - Deaths 2004 ICD10 as it appears in World Health Organization (WHO). WHO Mortality Database Version February 2014. Geneva, Switzerland: World Health Organization (WHO), 2014.                                                                                                                                                                                                                              | 2004                                                        |                      |
| Belize  | Belize Vital Registration - Deaths 2005 ICD10 as it appears in World Health Organization (WHO). WHO Mortality Database Version February 2014. Geneva, Switzerland: World Health Organization (WHO), 2014.                                                                                                                                                                                                                              | 2005                                                        |                      |
| Belize  | Statistical Institute of Belize, United Nations Children's Fund (UNICEF). Belize Multiple Indicator Cluster Survey 2006. New York, United States: United Nations Children's Fund (UNICEF).                                                                                                                                                                                                                                             | 2006                                                        |                      |
| Belize  | Belize Vital Registration - Deaths 2006 ICD10 as it appears in World Health Organization (WHO). WHO Mortality Database Version February 2014. Geneva, Switzerland: World Health Organization (WHO), 2014.                                                                                                                                                                                                                              | 2006                                                        |                      |
| Belize  | Fassio E, Díaz S, Santa C, Reig ME, Martínez Artola Y, Alves de Mattos A, Míguez C, Galizzi J, Zapata R, Ridruejo E, de Souza FC, Hernández N, Pinchuk L, Multicenter Group for Study of Hepatocarcinoma in Latin America, Asociación Latinoamericana para el Estudio del Hígado (ALEH). Etiology of hepatocellular carcinoma in Latin America: a prospective, multicenter, international study. <i>Ann Hepatol.</i> 2010; 9(1): 63-9. | 2006-2008                                                   | *                    |
| Belize  | Belize Vital Registration - Deaths 2007 ICD10 as it appears in World Health Organization (WHO). WHO Mortality Database Version February 2014. Geneva, Switzerland: World Health Organization (WHO), 2014.                                                                                                                                                                                                                              | 2007                                                        |                      |
| Belize  | Belize Vital Registration - Deaths 2008 ICD10 as it appears in World Health Organization (WHO). WHO Mortality Database Version February 2014. Geneva, Switzerland: World Health Organization (WHO), 2014.                                                                                                                                                                                                                              | 2008                                                        |                      |
| Belize  | Belize Vital Registration - Deaths 2009 ICD10 as it appears in World Health Organization (WHO). WHO Mortality Database Version February 2014. Geneva, Switzerland: World Health Organization (WHO), 2014.                                                                                                                                                                                                                              | 2009                                                        |                      |
| Belize  | Statistical Institute of Belize, United Nations Children's Fund (UNICEF). Belize Multiple Indicator Cluster Survey 2011. New York, United States: United Nations Children's Fund (UNICEF), 2013.                                                                                                                                                                                                                                       | 2011                                                        | *                    |
| Benin   | Centre for Research on the Epidemiology of Disasters (CRED). EM-DAT: The OFDA/CRED International Disaster Database. Brussels, Belgium: Catholic University of Leuven.                                                                                                                                                                                                                                                                  | 1978, 1985, 1991, 1995-1996, 1999, 2007-2010, 2012-2013     |                      |
| Benin   | Institute for Health Metrics and Evaluation (IHME), Joint United Nations Program on HIV/AIDS (UNAIDS). Institute for Health Metrics and Evaluation HIV Mortality Estimates Based on the UNAIDS Spectrum Model Framework.                                                                                                                                                                                                               | 1980-2013                                                   | *                    |
| Benin   | United Nations Children's Fund (UNICEF), World Health Organization (WHO). WHO and UNICEF Reported Disease Incidence Time Series - Pertussis. Geneva, Switzerland: World Health Organization (WHO).                                                                                                                                                                                                                                     | 1980-1989, 1991, 1995-1996, 1999-2000, 2004-2008, 2010-2013 |                      |

**Web Table 32 - Comprehensive citation list**

| Country | Citation                                                                                                                                                                                                                                                      | Year*                        | New for GBD 2013 (*) |
|---------|---------------------------------------------------------------------------------------------------------------------------------------------------------------------------------------------------------------------------------------------------------------|------------------------------|----------------------|
| Benin   | United Nations Children's Fund (UNICEF), World Health Organization (WHO). WHO and UNICEF Reported Disease Incidence Time Series - Measles. Geneva, Switzerland: World Health Organization (WHO).                                                              | 1980-1989, 1991-2013         |                      |
| Benin   | National Institute of Statistics and Economic Analysis (INSAE) (Benin). Benin Multiround Demographic Survey 1981-1983.                                                                                                                                        | 1981-1983                    |                      |
| Benin   | National Institute of Statistics and Economic Analysis (INSAE) (Benin), International Statistical Institute. Benin World Fertility Survey 1981-1982. Voorburg, Netherlands: International Statistical Institute.                                              | 1981-1982                    |                      |
| Benin   | Alihonou EM, Guedeme A, Comlan G, Issifou S, Soton A. Incidence de décès de 0 à 1 an dans une cohorte de 802 enfants en milieu rural au sud du Bénin. Médecine d'Afrique Noire. 1997; 44(10): 542-5.                                                          | 1989                         |                      |
| Benin   | Centre for Health Informatics and Multiprofessional Education, University College London. Modell's Haemoglobinopathologist's Almanac. London, United Kingdom: Centre for Health Informatics and Multiprofessional Education, University College London, 2008. | 1990-2003                    |                      |
| Benin   | National Institute of Statistics and Economic Analysis (INSAE) (Benin). Benin General Census of Population and Housing 1992.                                                                                                                                  | 1992                         |                      |
| Benin   | Rahimy MC, Gangbo A, Ahouignan G, Alihonou E. Newborn screening for sickle cell disease in the Republic of Benin. J Clin Pathol. 2009; 62(1): 46-8.                                                                                                           | 1993-1996                    |                      |
| Benin   | World Health Organization (WHO). Yellow Fever Reported Cases, WHO Vaccine-Preventable Diseases: Monitoring System. Geneva, Switzerland: World Health Organization (WHO).                                                                                      | 1995-1997, 1999-2009         |                      |
| Benin   | Filippi V, Alihonou E, Mukantaganda S, Graham WJ, Ronsmans C. Near misses: maternal morbidity and mortality. Lancet. 1998; 351(9096): 145-6.                                                                                                                  | 1995-1996                    |                      |
| Benin   | Macro International, Inc, National Institute of Statistics and Economic Analysis (INSAE) (Benin). Benin Demographic and Health Survey 1996. Calverton, United States: Macro International, Inc.                                                               | 1996                         |                      |
| Benin   | Mutebi J-P, Barrett ADT. The epidemiology of yellow fever in Africa. Microbes Infect. 2002; 4(14): 1459-68.                                                                                                                                                   | 1996                         |                      |
| Benin   | WHO Department of Communicable Disease Surveillance and Response. WHO Report on Global Surveillance of Epidemic-prone Infectious Diseases 2000.                                                                                                               | 1996-1998                    |                      |
| Benin   | World Health Organization Regional Office for Africa. HIV/AIDS Epidemiological Surveillance Update for the WHO African Region. World Health Organization Regional Office for Africa, 2003.                                                                    | 1997-1998, 2000-2002         |                      |
| Benin   | World Health Organization (WHO). The Global Elimination of Congenital Syphilis: Rationale and Strategy for Action. Geneva, Switzerland: World Health Organization (WHO), 2007.                                                                                | 1997-2003                    |                      |
| Benin   | Joint United Nations Program on HIV/AIDS (UNAIDS), United Nations Children's Fund (UNICEF), World Health Organization (WHO). Benin Epidemiological Fact Sheet on HIV/AIDS and STIs 2004.                                                                      | 1997-1999, 2002-2003         |                      |
| Benin   | Measles Supplementary Immunization Activity Data as provided by the World Health Organization. [Unpublished].                                                                                                                                                 | 1999                         |                      |
| Benin   | Filippi V, Ronsmans C, Gohou V, Goufodji S, Lardi M, Sahel A, Saizonou J, De Brouwere V. Maternity wards or emergency obstetric rooms? Incidence of near-miss events in African hospitals. Acta Obstet Gynecol Scand. 2005; 84(1): 11-6.                      | 1999-2001                    |                      |
| Benin   | National Institute of Statistics and Economic Analysis (INSAE) (Benin), ORC Macro. Benin Demographic and Health Survey 2001. Calverton, United States: ORC Macro.                                                                                             | 2001                         |                      |
| Benin   | World Health Organization (WHO). Retrospective Measles Data on Supplementary Immunization Activities. Geneva, Switzerland: World Health Organization (WHO).                                                                                                   | 2001, 2003, 2005, 2008, 2011 |                      |
| Benin   | Dovonou A, Adoukonou T, Sanni A, Gandaho P. [Major salmonellosis in Benin]. Med Trop (Mars). 2011; 71(6): 634-5.                                                                                                                                              | 2005-2007                    | *                    |

**Web Table 32 - Comprehensive citation list**

| Country | Citation                                                                                                                                                                                                                                                      | Year*                  | New for GBD 2013 (*) |
|---------|---------------------------------------------------------------------------------------------------------------------------------------------------------------------------------------------------------------------------------------------------------------|------------------------|----------------------|
| Benin   | Macro International, Inc, National Institute of Statistics and Economic Analysis (INSAE) (Benin), National Program Against AIDS (PNLS) (Benin). Benin Demographic and Health Survey 2006. Calverton, United States: Macro International, Inc.                 | 2006                   |                      |
| Benin   | Guerchet M, Houinato D, Paraiso MN, von Ahsen N, Nubukpo P, Otto M, Clément J-P, Preux P-M, Dartigues J-F. Cognitive impairment and dementia in elderly people living in rural Benin, west Africa. <i>Dement Geriatr Cogn Disord</i> . 2009; 27(1): 34-41.    | 2007                   |                      |
| Benin   | Paraiso MN, Guerchet M, Saizonou J, Cowppli-Bony P, Mouanga AM, Nubukpo P, Preux P-M, Houinato DS. Prevalence of dementia among elderly people living in Cotonou, an urban area of Benin (West Africa). <i>Neuroepidemiology</i> . 2011; 36(4): 245-51.       | 2008                   |                      |
| Benin   | Weatherall D. Sickle Cell and Thalassemias Prevalence Data, Personal Correspondence with David Weatherall. [Unpublished].                                                                                                                                     | 2009                   |                      |
| Benin   | Joint United Nations Program on HIV/AIDS (UNAIDS), National Program Against AIDS (PNLS) (Benin). Benin National Status Report for UNGASS 2010. Geneva, Switzerland: Joint United Nations Program on HIV/AIDS (UNAIDS), 2010.                                  | 2009                   |                      |
| Benin   | ICF International, National Institute of Statistics and Economic Analysis (INSAE) (Benin), National Program Against AIDS (PNLS) (Benin). Benin Demographic and Health Survey 2011-2012. Fairfax, United States: ICF International, 2014.                      | 2011-2012              | *                    |
| Bermuda | Bermuda Population and Housing Census 1960 as it appears in United Nations Statistics Division (UNSD). United Nations Demographic Yearbook. New York City, United States: United Nations Statistics Division (UNSD).                                          | 1960                   |                      |
| Bermuda | Parkin DM, International Agency for Research on Cancer, International Association of Cancer Registries. <i>Cancer Incidence in Five Continents</i> . Vol. I to VIII. Lyon, France, IARC Press, 2005.                                                          | 1985                   |                      |
| Bermuda | Centre for Research on the Epidemiology of Disasters (CRED). EM-DAT: The OFDA/CRED International Disaster Database. Brussels, Belgium: Catholic University of Leuven.                                                                                         | 2003                   |                      |
| Bhutan  | Institute for Health Metrics and Evaluation (IHME), Joint United Nations Program on HIV/AIDS (UNAIDS). Institute for Health Metrics and Evaluation HIV Mortality Estimates Based on the UNAIDS Spectrum Model Framework.                                      | 1980-2013              | *                    |
| Bhutan  | United Nations Children's Fund (UNICEF), World Health Organization (WHO). WHO and UNICEF Reported Disease Incidence Time Series - Pertussis. Geneva, Switzerland: World Health Organization (WHO).                                                            | 1980-2001, 2003-2013   |                      |
| Bhutan  | United Nations Children's Fund (UNICEF), World Health Organization (WHO). WHO and UNICEF Reported Disease Incidence Time Series - Measles. Geneva, Switzerland: World Health Organization (WHO).                                                              | 1980-2013              |                      |
| Bhutan  | National Statistics Bureau (Bhutan). Bhutan Demographic Sample Survey 1984.                                                                                                                                                                                   | 1984                   |                      |
| Bhutan  | Centre for Health Informatics and Multiprofessional Education, University College London. Modell's Haemoglobinopathologist's Almanac. London, United Kingdom: Centre for Health Informatics and Multiprofessional Education, University College London, 2008. | 1990-2003              |                      |
| Bhutan  | Ministry of Health and Education (Bhutan). Bhutan Health Survey 1994.                                                                                                                                                                                         | 1994                   |                      |
| Bhutan  | Centre for Research on the Epidemiology of Disasters (CRED). EM-DAT: The OFDA/CRED International Disaster Database. Brussels, Belgium: Catholic University of Leuven.                                                                                         | 1994, 2000, 2009, 2011 |                      |
| Bhutan  | Ministry of Health and Education (Bhutan). Bhutan Annual Health Bulletin 2002.                                                                                                                                                                                | 1995-2002              |                      |
| Bhutan  | Da Villa G, Andjaparidze A, Cauletti M, Franco E, Roggendorf M, Sepe A, Zaratti L. Viral hepatitis in the Bhutanese population: preliminary results of a seroepidemiological investigation. <i>Res Virol</i> . 1997; 148(2): 115-7.                           | 1995-1997              |                      |

**Web Table 32 - Comprehensive citation list**

| Country | Citation                                                                                                                                                                                                                               | Year*      | New for GBD 2013 (*) |
|---------|----------------------------------------------------------------------------------------------------------------------------------------------------------------------------------------------------------------------------------------|------------|----------------------|
| Bhutan  | Measles Supplementary Immunization Activity Data as provided by the World Health Organization. [Unpublished].                                                                                                                          | 1995-1996  |                      |
| Bhutan  | Ministry of Health and Education (Bhutan). Bhutan Annual Health Bulletin 2000.                                                                                                                                                         | 1996-2000  |                      |
| Bhutan  | Ministry of Health and Education (Bhutan). Bhutan Annual Health Bulletin 2001.                                                                                                                                                         | 1997-2001  |                      |
| Bhutan  | Joint United Nations Program on HIV/AIDS (UNAIDS), United Nations Children's Fund (UNICEF), World Health Organization (WHO). Bhutan Epidemiological Fact Sheet on HIV/AIDS and STIs 2004.                                              | 1997-1999  |                      |
| Bhutan  | Ministry of Health and Education (Bhutan). Bhutan Health Survey 2000.                                                                                                                                                                  | 2000       |                      |
| Bhutan  | United Nations Office on Drugs and Crime (UNODC). United Nations Office on Drugs and Crime Global Study on Homicides 2011. Vienna, Austria: United Nations Office on Drugs and Crime (UNODC), 2011.                                    | 2000-2007  |                      |
| Bhutan  | World Health Organization (WHO). Yellow Fever Reported Cases, WHO Vaccine-Preventable Diseases: Monitoring System. Geneva, Switzerland: World Health Organization (WHO).                                                               | 2000, 2009 |                      |
| Bhutan  | World Health Organization (WHO). Retrospective Measles Data on Supplementary Immunization Activities. Geneva, Switzerland: World Health Organization (WHO).                                                                            | 2000, 2006 |                      |
| Bhutan  | Ministry of Health (Bhutan). Bhutan Annual Health Bulletin 2007. Thimphu, Bhutan: Ministry of Health (Bhutan), 2007.                                                                                                                   | 2003-2006  |                      |
| Bhutan  | Office of the Census Commissioner (Bhutan). Bhutan Population and Housing Census 2005. Thimphu, Bhutan: Office of the Census Commissioner (Bhutan), 2006.                                                                              | 2005       |                      |
| Bhutan  | Bhutan Population and Housing Census 2005 as it appears in United Nations Statistical Division (UNSTAT). United Nations Demographic Yearbook 2011. United Nations Statistical Division (UNSTAT), 2012.                                 | 2005       |                      |
| Bhutan  | Ministry of Health (Bhutan). Bhutan Annual Health Bulletin 2010. Thimphu, Bhutan: Ministry of Health (Bhutan), 2010.                                                                                                                   | 2005-2009  |                      |
| Bhutan  | World Health Organization (WHO). Bhutan WHO Leishmaniasis Country Profile.                                                                                                                                                             | 2005-2010  | *                    |
| Bhutan  | National Statistics Bureau (Bhutan), United Nations Children's Fund (UNICEF), United Nations Population Fund (UNFPA). Bhutan Multiple Indicator Cluster Survey 2010. New York, United States: United Nations Children's Fund (UNICEF). | 2010       |                      |
| Bolivia | Bolivia Vital Registration Death Data 1951 as it appears in United Nations Statistics Division (UNSD). United Nations Demographic Yearbook. New York City, United States: United Nations Statistics Division (UNSD).                   | 1951       |                      |
| Bolivia | Bolivia Vital Registration Death Data 1952 as it appears in United Nations Statistics Division (UNSD). United Nations Demographic Yearbook. New York City, United States: United Nations Statistics Division (UNSD).                   | 1952       |                      |
| Bolivia | Peace Research Institute Oslo (PRIO). Battle Deaths Dataset Version 3, 2009. Oslo, Norway: Peace Research Institute Oslo (PRIO), 2009.                                                                                                 | 1952-1988  |                      |
| Bolivia | Peace Research Institute Oslo (PRIO). Battle Deaths Dataset Version 3, 2009. Oslo, Norway: Peace Research Institute Oslo (PRIO), 2009.                                                                                                 | 1952-1967  |                      |
| Bolivia | Bolivia Vital Registration Death Data 1953 as it appears in United Nations Statistics Division (UNSD). United Nations Demographic Yearbook. New York City, United States: United Nations Statistics Division (UNSD).                   | 1953       |                      |
| Bolivia | Bolivia Vital Registration Death Data 1954 as it appears in United Nations Statistics Division (UNSD). United Nations Demographic Yearbook. New York City, United States: United Nations Statistics Division (UNSD).                   | 1954       |                      |

**Web Table 32 - Comprehensive citation list**

| Country | Citation                                                                                                                                                                                                                                                           | Year*                                                                                               | New for GBD 2013 (*) |
|---------|--------------------------------------------------------------------------------------------------------------------------------------------------------------------------------------------------------------------------------------------------------------------|-----------------------------------------------------------------------------------------------------|----------------------|
| Bolivia | Bolivia Vital Registration Death Data 1955 as it appears in United Nations Statistics Division (UNSD). United Nations Demographic Yearbook. New York City, United States: United Nations Statistics Division (UNSD).                                               | 1955                                                                                                |                      |
| Bolivia | Bolivia Vital Registration Death Data 1956 as it appears in United Nations Statistics Division (UNSD). United Nations Demographic Yearbook. New York City, United States: United Nations Statistics Division (UNSD).                                               | 1956                                                                                                |                      |
| Bolivia | Bolivia Vital Registration Death Data 1957 as it appears in United Nations Statistics Division (UNSD). United Nations Demographic Yearbook. New York City, United States: United Nations Statistics Division (UNSD).                                               | 1957                                                                                                |                      |
| Bolivia | Bolivia Vital Registration Death Data 1958 as it appears in United Nations Statistics Division (UNSD). United Nations Demographic Yearbook. New York City, United States: United Nations Statistics Division (UNSD).                                               | 1958                                                                                                |                      |
| Bolivia | Bolivia Vital Registration Death Data 1965 as it appears in United Nations Statistics Division (UNSD). United Nations Demographic Yearbook. New York City, United States: United Nations Statistics Division (UNSD).                                               | 1965                                                                                                |                      |
| Bolivia | Centre for Research on the Epidemiology of Disasters (CRED). EM-DAT: The OFDA/CRED International Disaster Database. Brussels, Belgium: Catholic University of Leuven.                                                                                              | 1965-1966, 1968, 1974, 1977-1978, 1982-1983, 1986-1987, 1992, 1994, 1996-2004, 2006-2008, 2010-2013 |                      |
| Bolivia | Vergnes H, Larrouy G. G6PD deficiency in populations of the Bolivian Andes. Nouv Rev Fr Hematol. 1967; 7(1): 124-8.                                                                                                                                                | 1965-1967                                                                                           |                      |
| Bolivia | Bolivia Vital Registration Death Data 1966 as it appears in United Nations Statistics Division (UNSD). United Nations Demographic Yearbook. New York City, United States: United Nations Statistics Division (UNSD).                                               | 1966                                                                                                |                      |
| Bolivia | Latin American and Caribbean Demographic Center (CELADE), National Institute of Statistics (Bolivia). Bolivia National Demographic Survey 1975.                                                                                                                    | 1975                                                                                                |                      |
| Bolivia | National Institute of Statistics (Bolivia), Minnesota Population Center. Bolivia National Census of Population and Housing 1976 from the Integrated Public Use Microdata Series, International. [Machine-readable database]. Minneapolis: University of Minnesota. | 1976                                                                                                |                      |
| Bolivia | Bolivia Vital Registration Death Data 1976 as it appears in United Nations Statistics Division (UNSD). United Nations Demographic Yearbook. New York City, United States: United Nations Statistics Division (UNSD).                                               | 1976                                                                                                |                      |
| Bolivia | Bolivia Vital Registration Death Data 1977 as it appears in United Nations Statistics Division (UNSD). United Nations Demographic Yearbook. New York City, United States: United Nations Statistics Division (UNSD).                                               | 1977                                                                                                |                      |
| Bolivia | University of North Carolina at Chapel Hill. Bolivia National Demographic Survey 1980.                                                                                                                                                                             | 1980                                                                                                |                      |
| Bolivia | WHO Department of Communicable Disease Surveillance and Response. WHO Report on Global Surveillance of Epidemic-prone Infectious Diseases 2000.                                                                                                                    | 1980-1998                                                                                           |                      |
| Bolivia | Vasconcelos PF da C. Febre amarela. Rev Soc Bras Med Trop. 2003; 36(2): 275-93.                                                                                                                                                                                    | 1980-2001                                                                                           |                      |
| Bolivia | Institute for Health Metrics and Evaluation (IHME), Joint United Nations Program on HIV/AIDS (UNAIDS). Institute for Health Metrics and Evaluation HIV Mortality Estimates Based on the UNAIDS Spectrum Model Framework.                                           | 1980-2013                                                                                           | *                    |

**Web Table 32 - Comprehensive citation list**

| Country | Citation                                                                                                                                                                                                                                                           | Year*                           | New for GBD 2013 (*) |
|---------|--------------------------------------------------------------------------------------------------------------------------------------------------------------------------------------------------------------------------------------------------------------------|---------------------------------|----------------------|
| Bolivia | United Nations Children's Fund (UNICEF), World Health Organization (WHO). WHO and UNICEF Reported Disease Incidence Time Series - Pertussis. Geneva, Switzerland: World Health Organization (WHO).                                                                 | 1980-2013                       |                      |
| Bolivia | United Nations Children's Fund (UNICEF), World Health Organization (WHO). WHO and UNICEF Reported Disease Incidence Time Series - Measles. Geneva, Switzerland: World Health Organization (WHO).                                                                   | 1980-2013                       |                      |
| Bolivia | World Health Organization (WHO). Yellow Fever Reported Cases, WHO Vaccine-Preventable Diseases: Monitoring System. Geneva, Switzerland: World Health Organization (WHO).                                                                                           | 1985-1986, 2004-2005, 2008-2009 |                      |
| Bolivia | Pan American Health Organization (PAHO). Update on yellow fever in the Americas. Epidemiol Bull. 2000; 21(2):13.                                                                                                                                                   | 1985, 2000                      |                      |
| Bolivia | Bartoloni A, Aquilini D, Roselli M, Parri F, de Majo E, Nunez LE, Nicoletti P, Corti G, Paradisi F. Prevalence of antibody to hepatitis A virus in the Santa Cruz region of Bolivia. J Trop Med Hyg. 1989; 92(4): 279-81.                                          | 1987                            |                      |
| Bolivia | Bolivia National Survey of Population and Housing 1988 as it appears in United Nations Statistics Division (UNSD). United Nations Demographic Yearbook. New York City, United States: United Nations Statistics Division (UNSD).                                   | 1988                            |                      |
| Bolivia | Gandolfo GM, Ferri GM, Conti L, Antenucci A, Marrone R, Frasca AM, Vitelli G. Prevalence of infections by hepatitis A, B, C and E viruses in two different socioeconomic groups of children from Santa Cruz, Bolivia. Med Clin (Barc). 2003; 120(19): 725-7.       | 1988                            |                      |
| Bolivia | National Institute of Statistics (Bolivia), Macro Systems, Inc.; Institute for Resource Development. Bolivia Demographic and Health Survey 1989. Columbia, United States: Macro Systems, Inc.                                                                      | 1989                            |                      |
| Bolivia | Weatherall D. Sickle Cell and Thalassemias Prevalence Data, Personal Correspondence with David Weatherall. [Unpublished].                                                                                                                                          | 1990-2009                       |                      |
| Bolivia | Centre for Health Informatics and Multiprofessional Education, University College London. Modell's Haemoglobinopathologist's Almanac. London, United Kingdom: Centre for Health Informatics and Multiprofessional Education, University College London, 2008.      | 1990-2003                       |                      |
| Bolivia | National Institute of Statistics (Bolivia), Minnesota Population Center. Bolivia National Census of Population and Housing 1992 from the Integrated Public Use Microdata Series, International. [Machine-readable database]. Minneapolis: University of Minnesota. | 1992                            |                      |
| Bolivia | Konomi N, Miyoshi C, La Fuente Zerain C, Li TC, Arakawa Y, Abe K. Epidemiology of hepatitis B, C, E, and G virus infections and molecular analysis of hepatitis G virus isolates in Bolivia. J Clin Microbiol. 1999; 37(10): 3291-5.                               | 1992-1998                       | *                    |
| Bolivia | Macro International, Inc, National Institute of Statistics (Bolivia). Bolivia Demographic and Health Survey 1993-1994. Calverton, United States: Macro International, Inc.                                                                                         | 1993-1994                       |                      |
| Bolivia | Measles Supplementary Immunization Activity Data as provided by the World Health Organization. [Unpublished].                                                                                                                                                      | 1994, 1998                      |                      |
| Bolivia | Southwick KL, Blanco S, Santander A, Estenssoro M, Torrico F, Seoane G, Brady W, Fears M, Lewis J, Pope V, Guarner J, Levine WC. Maternal and congenital syphilis in Bolivia, 1996: prevalence and risk factors. Bull World Health Organ. 2001; 79(1): 33-42.      | 1996                            |                      |
| Bolivia | Bartoloni A, Bartalesi F, Roselli M, Mantella A, Caceres Arce C, Paradisi F, Hall AJ. Prevalence of antibodies against hepatitis A and E viruses among rural populations of the Chaco region, south-eastern Bolivia. Trop Med Int Health. 1999; 4(9): 596-601.     | 1997                            |                      |
| Bolivia | Macro International, Inc, National Institute of Statistics (Bolivia). Bolivia Demographic and Health Survey 1998. Calverton, United States: Macro International, Inc.                                                                                              | 1998                            |                      |
| Bolivia | Sylvatic yellow fever outbreak in Bolivia. EPI Newsl. 1999; 1(21): 1-3.                                                                                                                                                                                            | 1999                            |                      |



**Web Table 32 - Comprehensive citation list**

| Country | Citation                                                                                                                                                                                                                                                                                                                                                                                                                        | Year*           | New for GBD 2013 (*) |
|---------|---------------------------------------------------------------------------------------------------------------------------------------------------------------------------------------------------------------------------------------------------------------------------------------------------------------------------------------------------------------------------------------------------------------------------------|-----------------|----------------------|
| Bolivia | National Institute of Statistics (Bolivia), World Bank (WB), Inter-American Development Bank (IDB), United Nations Economic Commission for Latin America and the Caribbean (CEPAL). Bolivia Household Survey 2000. La Paz, Bolivia: National Institute of Statistics (Bolivia).                                                                                                                                                 | 2000            | *                    |
| Bolivia | Population Development and Environment (PODEMA), National Directorate of Epidemiology (Bolivia), United Nations Children's Fund (UNICEF). Bolivia Multiple Indicator Cluster Survey 2000. New York, United States: United Nations Children's Fund (UNICEF).                                                                                                                                                                     | 2000            |                      |
| Bolivia | Department of Peace and Conflict Research, Uppsala University. UCDP Nonstate Conflict Database Version 2.5, 2013. Uppsala, Sweden: Department of Peace and Conflict Research, Uppsala University, 2013.                                                                                                                                                                                                                         | 2000            | *                    |
| Bolivia | Bolivia Vital Registration - Deaths 2000 ICD10 as it appears in World Health Organization (WHO). WHO Mortality Database Version February 2014. Geneva, Switzerland: World Health Organization (WHO), 2014.                                                                                                                                                                                                                      | 2000            |                      |
| Bolivia | World Health Organization (WHO). Retrospective Measles Data on Supplementary Immunization Activities. Geneva, Switzerland: World Health Organization (WHO).                                                                                                                                                                                                                                                                     | 2000, 2002-2007 |                      |
| Bolivia | National Institute of Statistics (Bolivia), Minnesota Population Center. Bolivia National Census of Population and Housing 2001 from the Integrated Public Use Microdata Series, International. [Machine-readable database]. Minneapolis: University of Minnesota.                                                                                                                                                              | 2001            |                      |
| Bolivia | National Institute of Statistics (Bolivia). Bolivia Census 2001.                                                                                                                                                                                                                                                                                                                                                                | 2001            |                      |
| Bolivia | Bolivia Vital Registration - Deaths 2001 ICD10 as it appears in World Health Organization (WHO). WHO Mortality Database Version February 2014. Geneva, Switzerland: World Health Organization (WHO), 2014.                                                                                                                                                                                                                      | 2001            |                      |
| Bolivia | Bolivia Vital Registration - Deaths 2002 ICD10 as it appears in World Health Organization (WHO). WHO Mortality Database Version February 2014. Geneva, Switzerland: World Health Organization (WHO), 2014.                                                                                                                                                                                                                      | 2002            |                      |
| Bolivia | Bolivia Vital Registration - Deaths 2003 ICD10 as it appears in World Health Organization (WHO). WHO Mortality Database Version February 2014. Geneva, Switzerland: World Health Organization (WHO), 2014.                                                                                                                                                                                                                      | 2003            |                      |
| Bolivia | Macro International, Inc, Ministry of Health and Sports (Bolivia), National Institute of Statistics (Bolivia). Bolivia Demographic and Health Survey 2003-2004. Calverton, United States: Macro International, Inc.                                                                                                                                                                                                             | 2003-2004       |                      |
| Bolivia | United Nations Office on Drugs and Crime (UNODC). United Nations Office on Drugs and Crime Global Study on Homicides 2011. Vienna, Austria: United Nations Office on Drugs and Crime (UNODC), 2011.                                                                                                                                                                                                                             | 2005-2010       |                      |
| Bolivia | World Health Organization (WHO). Yellow fever in Africa and South America, 2006. Wkly Epidemiol Rec. 2008; 83(8): 60-76.                                                                                                                                                                                                                                                                                                        | 2006            |                      |
| Bolivia | Rööst M, Altamirano V, Liljestrand J, Essén B. Priorities in emergency obstetric care in Bolivia – maternal mortality and near-miss morbidity in metropolitan La Paz. BJOG. 2009; 116(9): 1210-7.                                                                                                                                                                                                                               | 2006-2007       |                      |
| Bolivia | Fassio E, Díaz S, Santa C, Reig ME, Martínez Artola Y, Alves de Mattos A, Míguez C, Galizzi J, Zapata R, Ridruejo E, de Souza FC, Hernández N, Pinchuk L, Multicenter Group for Study of Hepatocarcinoma in Latin America, Asociación Latinoamericana para el Estudio del Hígado (ALEH). Etiology of hepatocellular carcinoma in Latin America: a prospective, multicenter, international study. Ann Hepatol. 2010; 9(1): 63-9. | 2006-2008       | *                    |
| Bolivia | World Health Organization (WHO). Global Status Report on Road Safety 2009. Geneva, Switzerland: World Health Organization (WHO), 2009.                                                                                                                                                                                                                                                                                          | 2007            |                      |

**Web Table 32 - Comprehensive citation list**

| Country                | Citation                                                                                                                                                                                                                                                      | Year*                           | New for GBD 2013 (*) |
|------------------------|---------------------------------------------------------------------------------------------------------------------------------------------------------------------------------------------------------------------------------------------------------------|---------------------------------|----------------------|
| Bolivia                | Pan American Health Organization (PAHO). Yellow Fever: Number of Cases and Deaths, 1960-2007. Washington, D.C., United States: Pan American Health Organization (PAHO), 2007.                                                                                 | 2007                            |                      |
| Bolivia                | World Health Organization (WHO). Yellow fever in Africa and South America, 2007. Wkly Epidemiol Rec. 2009; 84(13): 97-104.                                                                                                                                    | 2007                            |                      |
| Bolivia                | Macro International, Inc, Ministry of Health and Sports (Bolivia), National Institute of Statistics (Bolivia). Bolivia Demographic and Health Survey 2008. Calverton, United States: Macro International, Inc.                                                | 2008                            |                      |
| Bosnia and Herzegovina | Fraser GR, Defaranas B, Kattamis CA, Race RR, Sanger R, Stamatoyannopoulos G. Glucose-6-phosphate dehydrogenase, colour vision and XG blood groups in Greece: linkage and population data. Ann Hum Genet. 1964; 395-403.                                      | 1962                            |                      |
| Bosnia and Herzegovina | Institute for Health Metrics and Evaluation (IHME), Joint United Nations Program on HIV/AIDS (UNAIDS). Institute for Health Metrics and Evaluation HIV Mortality Estimates Based on the UNAIDS Spectrum Model Framework.                                      | 1980-2013                       | *                    |
| Bosnia and Herzegovina | Yugoslavia - Bosnia and Herzegovina Vital Registration - Deaths 1985 ICD9 as it appears in World Health Organization (WHO). WHO Mortality Database Version February 2014. Geneva, Switzerland: World Health Organization (WHO), 2014.                         | 1985                            |                      |
| Bosnia and Herzegovina | Yugoslavia - Bosnia and Herzegovina Vital Registration - Deaths 1986 ICD9 as it appears in World Health Organization (WHO). WHO Mortality Database Version February 2014. Geneva, Switzerland: World Health Organization (WHO), 2014.                         | 1986                            |                      |
| Bosnia and Herzegovina | Yugoslavia - Bosnia and Herzegovina Vital Registration - Deaths 1987 ICD9 as it appears in World Health Organization (WHO). WHO Mortality Database Version February 2014. Geneva, Switzerland: World Health Organization (WHO), 2014.                         | 1987                            |                      |
| Bosnia and Herzegovina | Yugoslavia - Bosnia and Herzegovina Vital Registration - Deaths 1988 ICD9 as it appears in World Health Organization (WHO). WHO Mortality Database Version February 2014. Geneva, Switzerland: World Health Organization (WHO), 2014.                         | 1988                            |                      |
| Bosnia and Herzegovina | Yugoslavia - Bosnia and Herzegovina Vital Registration - Deaths 1989 ICD9 as it appears in World Health Organization (WHO). WHO Mortality Database Version February 2014. Geneva, Switzerland: World Health Organization (WHO), 2014.                         | 1989                            |                      |
| Bosnia and Herzegovina | Yugoslavia - Bosnia and Herzegovina Vital Registration - Deaths 1990 ICD9 as it appears in World Health Organization (WHO). WHO Mortality Database Version February 2014. Geneva, Switzerland: World Health Organization (WHO), 2014.                         | 1990                            |                      |
| Bosnia and Herzegovina | United Nations Children's Fund (UNICEF), World Health Organization (WHO). WHO and UNICEF Reported Disease Incidence Time Series - Pertussis. Geneva, Switzerland: World Health Organization (WHO).                                                            | 1990-1995, 1998-2000, 2002-2012 |                      |
| Bosnia and Herzegovina | United Nations Children's Fund (UNICEF), World Health Organization (WHO). WHO and UNICEF Reported Disease Incidence Time Series - Measles. Geneva, Switzerland: World Health Organization (WHO).                                                              | 1990-1995, 1997-2000, 2002-2012 |                      |
| Bosnia and Herzegovina | Centre for Health Informatics and Multiprofessional Education, University College London. Modell's Haemoglobinopathologist's Almanac. London, United Kingdom: Centre for Health Informatics and Multiprofessional Education, University College London, 2008. | 1990-2003                       |                      |
| Bosnia and Herzegovina | Bosnia and Herzegovina Vital Registration - Deaths 1991 ICD9 as it appears in World Health Organization (WHO). WHO Mortality Database Version February 2014. Geneva, Switzerland: World Health Organization (WHO), 2014.                                      | 1991                            |                      |
| Bosnia and Herzegovina | Department of Peace and Conflict Research, Uppsala University. UCDP One-Sided Violence Database Version 1.4, 2013. Uppsala, Sweden: Department of Peace and Conflict Research, Uppsala University, 2013.                                                      | 1992-1995                       | *                    |



**Web Table 32 - Comprehensive citation list**

| Country                | Citation                                                                                                                                                                                                                            | Year*                      | New for GBD 2013 (*) |
|------------------------|-------------------------------------------------------------------------------------------------------------------------------------------------------------------------------------------------------------------------------------|----------------------------|----------------------|
| Bosnia and Herzegovina | Department of Peace and Conflict Research, Uppsala University. UCDP Battle-Related Deaths Database Version 5, 2013. Uppsala, Sweden: Department of Peace and Conflict Research, Uppsala University, 2013.                           | 1992-1995                  | *                    |
| Bosnia and Herzegovina | Bosnia and Herzegovina Vital Registration Death Data 1998 as it appears in United Nations Statistics Division (UNSD). United Nations Demographic Yearbook. New York City, United States: United Nations Statistics Division (UNSD). | 1998                       |                      |
| Bosnia and Herzegovina | World Health Organization (WHO). Yellow Fever Reported Cases, WHO Vaccine-Preventable Diseases: Monitoring System. Geneva, Switzerland: World Health Organization (WHO).                                                            | 1998-1999, 2002, 2007-2008 |                      |
| Bosnia and Herzegovina | World Health Organization (WHO). Country Mortality Data 1980-1999. [Unpublished].                                                                                                                                                   | 1999                       |                      |
| Bosnia and Herzegovina | Bosnia and Herzegovina Vital Statistics - Deaths 2000 as it appears in TransMonEE 2013 Database, UNICEF Regional Office for CEE/CIS.                                                                                                | 2000                       |                      |
| Bosnia and Herzegovina | Centre for Research on the Epidemiology of Disasters (CRED). EM-DAT: The OFDA/CRED International Disaster Database. Brussels, Belgium: Catholic University of Leuven.                                                               | 2000, 2005, 2010           |                      |
| Bosnia and Herzegovina | Bosnia and Herzegovina Vital Statistics - Deaths 2001 as it appears in TransMonEE 2013 Database, UNICEF Regional Office for CEE/CIS.                                                                                                | 2001                       |                      |
| Bosnia and Herzegovina | Bosnia and Herzegovina Vital Statistics - Deaths 2002 as it appears in TransMonEE 2013 Database, UNICEF Regional Office for CEE/CIS.                                                                                                | 2002                       |                      |
| Bosnia and Herzegovina | World Health Organization (WHO). Bosnia and Herzegovina WHO Leishmaniasis Country Profile.                                                                                                                                          | 2002-2005                  | *                    |
| Bosnia and Herzegovina | World Health Organization (WHO). Bosnia and Herzegovina World Health Survey 2003. Geneva, Switzerland: World Health Organization (WHO), 2005.                                                                                       | 2003                       |                      |
| Bosnia and Herzegovina | Bosnia and Herzegovina Vital Registration Death Data 2003 as it appears in United Nations Statistics Division (UNSD). United Nations Demographic Yearbook. New York City, United States: United Nations Statistics Division (UNSD). | 2003                       |                      |
| Bosnia and Herzegovina | Bosnia and Herzegovina Vital Registration Death Data 2004 as it appears in United Nations Statistics Division (UNSD). United Nations Demographic Yearbook. New York City, United States: United Nations Statistics Division (UNSD). | 2004                       |                      |
| Bosnia and Herzegovina | Bosnia and Herzegovina Vital Registration Death Data 2005 as it appears in United Nations Statistics Division (UNSD). United Nations Demographic Yearbook. New York City, United States: United Nations Statistics Division (UNSD). | 2005                       |                      |
| Bosnia and Herzegovina | Bosnia and Herzegovina Vital Registration Death Data 2006 as it appears in United Nations Statistics Division (UNSD). United Nations Demographic Yearbook. New York City, United States: United Nations Statistics Division (UNSD). | 2006                       |                      |
| Bosnia and Herzegovina | Bosnia and Herzegovina Vital Registration Death Data 2007 as it appears in United Nations Statistics Division (UNSD). United Nations Demographic Yearbook. New York City, United States: United Nations Statistics Division (UNSD). | 2007                       |                      |
| Bosnia and Herzegovina | Bosnia and Herzegovina Vital Registration Death Data 2008 as it appears in United Nations Statistics Division (UNSD). United Nations Demographic Yearbook. New York City, United States: United Nations Statistics Division (UNSD). | 2008                       |                      |
| Bosnia and Herzegovina | Bosnia and Herzegovina Vital Registration Death Data 2009 as it appears in United Nations Statistics Division (UNSD). United Nations Demographic Yearbook. New York City, United States: United Nations Statistics Division (UNSD). | 2009                       |                      |
| Bosnia and Herzegovina | Bosnia and Herzegovina Vital Registration Death Data 2010 as it appears in United Nations Statistics Division (UNSD). United Nations Demographic Yearbook. New York City, United States: United Nations Statistics Division (UNSD). | 2010                       |                      |

**Web Table 32 - Comprehensive citation list**

| Country                | Citation                                                                                                                                                                                                                                                                                                                                                                                                                          | Year*                      | New for GBD 2013 (*) |
|------------------------|-----------------------------------------------------------------------------------------------------------------------------------------------------------------------------------------------------------------------------------------------------------------------------------------------------------------------------------------------------------------------------------------------------------------------------------|----------------------------|----------------------|
| Bosnia and Herzegovina | European Renal Association-European Dialysis and Transplant Association (ERA-EDTA). European Renal Association-European Dialysis and Transplant Association Registry Annual Report 2010. Parma, Italy: European Renal Association-European Dialysis and Transplant Association (ERA-EDTA), 2012.                                                                                                                                  | 2010                       | *                    |
| Bosnia and Herzegovina | Bosnia and Herzegovina Vital Registration - Deaths 2011 ICD10 as it appears in World Health Organization (WHO). WHO Mortality Database Version February 2014. Geneva, Switzerland: World Health Organization (WHO), 2014.                                                                                                                                                                                                         | 2011                       | *                    |
| Bosnia and Herzegovina | European Renal Association-European Dialysis and Transplant Association (ERA-EDTA). European Renal Association-European Dialysis and Transplant Association Registry Annual Report 2011. Parma, Italy: European Renal Association-European Dialysis and Transplant Association (ERA-EDTA), 2013.                                                                                                                                  | 2011                       | *                    |
| Bosnia and Herzegovina | Agency for Statistics (Bosnia and Herzegovina), Federal Ministry of Health (Bosnia and Herzegovina), Ministry of Health and Social Welfare (Republic of Srpska), Public Health Institute of Federation of Bosnia and Herzegovina, United Nations Children's Fund (UNICEF), United Nations Entity for Gender Equality and the Empowerment of Women (UN Women). Bosnia and Herzegovina Multiple Indicator Cluster Survey 2011-2012. | 2011-2012                  | *                    |
| Botswana               | Central Statistics Office (Botswana). Botswana Population Census 1971.                                                                                                                                                                                                                                                                                                                                                            | 1971                       |                      |
| Botswana               | Institute for Health Metrics and Evaluation (IHME), Joint United Nations Program on HIV/AIDS (UNAIDS). Institute for Health Metrics and Evaluation HIV Mortality Estimates Based on the UNAIDS Spectrum Model Framework.                                                                                                                                                                                                          | 1980-2013                  | *                    |
| Botswana               | United Nations Children's Fund (UNICEF), World Health Organization (WHO). WHO and UNICEF Reported Disease Incidence Time Series - Pertussis. Geneva, Switzerland: World Health Organization (WHO).                                                                                                                                                                                                                                | 1980-2003, 2005, 2007-2013 |                      |
| Botswana               | United Nations Children's Fund (UNICEF), World Health Organization (WHO). WHO and UNICEF Reported Disease Incidence Time Series - Measles. Geneva, Switzerland: World Health Organization (WHO).                                                                                                                                                                                                                                  | 1980-2013                  |                      |
| Botswana               | Central Statistics Office (Botswana). Botswana Population and Housing Census 1981.                                                                                                                                                                                                                                                                                                                                                | 1981                       |                      |
| Botswana               | United Nations Office on Drugs and Crime (UNODC). United Nations Surveys on Crime Trends and the Operations of Criminal Justice Systems 1970-2006 as provided by Kavi Bhalla. [Unpublished].                                                                                                                                                                                                                                      | 1982-1990                  |                      |
| Botswana               | Ministry of Health (Botswana), United States Agency for International Development (USAID), Westinghouse Public Applied Systems. Botswana Contraceptive Prevalence Survey 1984.                                                                                                                                                                                                                                                    | 1984                       |                      |
| Botswana               | Central Statistics Office (Botswana), Macro Systems, Inc.; Institute for Resource Development, Ministry of Health (Botswana). Botswana Demographic and Health Survey 1988. Columbia, United States: Macro Systems, Inc.; Institute for Resource Development.                                                                                                                                                                      | 1988                       |                      |
| Botswana               | Centre for Research on the Epidemiology of Disasters (CRED). EM-DAT: The OFDA/CRED International Disaster Database. Brussels, Belgium: Catholic University of Leuven.                                                                                                                                                                                                                                                             | 1988, 1995, 2000           |                      |
| Botswana               | Department of Peace and Conflict Research, Uppsala University. UCDP One-Sided Violence Database Version 1.4, 2013. Uppsala, Sweden: Department of Peace and Conflict Research, Uppsala University, 2013.                                                                                                                                                                                                                          | 1990                       | *                    |
| Botswana               | Weatherall D. Sickle Cell and Thalassemias Prevalence Data, Personal Correspondence with David Weatherall. [Unpublished].                                                                                                                                                                                                                                                                                                         | 1990-2009                  |                      |
| Botswana               | Centre for Health Informatics and Multiprofessional Education, University College London. Modell's Haemoglobinopathologist's Almanac. London, United Kingdom: Centre for Health Informatics and Multiprofessional Education, University College London, 2008.                                                                                                                                                                     | 1990-2003                  |                      |

**Web Table 32 - Comprehensive citation list**

| Country  | Citation                                                                                                                                                                                                              | Year*                                                                  | New for GBD 2013 (*) |
|----------|-----------------------------------------------------------------------------------------------------------------------------------------------------------------------------------------------------------------------|------------------------------------------------------------------------|----------------------|
| Botswana | Botswana Population and Housing Census 1991 as it appears in United Nations Statistics Division (UNSD). United Nations Demographic Yearbook. New York City, United States: United Nations Statistics Division (UNSD). | 1991                                                                   |                      |
| Botswana | Creek TL, Thuku H, Kolou B, Rahman M, Kilmarx PH. Declining syphilis prevalence among pregnant women in northern Botswana: an encouraging sign for the HIV epidemic? Sex Transm Infect. 2005; 81(6): 453-5.           | 1992, 2003                                                             |                      |
| Botswana | Central Statistics Office (Botswana). Botswana Family Health Survey 1996. Gaborone, Botswana: Central Statistics Office (Botswana).                                                                                   | 1996                                                                   |                      |
| Botswana | World Health Organization (WHO). Yellow Fever Reported Cases, WHO Vaccine-Preventable Diseases: Monitoring System. Geneva, Switzerland: World Health Organization (WHO).                                              | 1996-1997, 2002, 2005, 2007                                            |                      |
| Botswana | Measles Supplementary Immunization Activity Data as provided by the World Health Organization. [Unpublished].                                                                                                         | 1997-1998                                                              |                      |
| Botswana | Central Statistics Office (Botswana), United Nations Children's Fund (UNICEF). Botswana Multiple Indicator Cluster Survey 2000. New York, United States: United Nations Children's Fund (UNICEF).                     | 2000                                                                   | *                    |
| Botswana | World Health Organization Regional Office for Africa. HIV/AIDS Epidemiological Surveillance Update for the WHO African Region. World Health Organization Regional Office for Africa, 2003.                            | 2000-2002                                                              |                      |
| Botswana | Botswana Population and Housing Census 2001 as it appears in United Nations Statistics Division (UNSD). United Nations Demographic Yearbook. New York City, United States: United Nations Statistics Division (UNSD). | 2001                                                                   |                      |
| Botswana | Central Statistics Office (Botswana). Botswana Population and Housing Census 2001.                                                                                                                                    | 2001                                                                   |                      |
| Botswana | World Health Organization (WHO). Retrospective Measles Data on Supplementary Immunization Activities. Geneva, Switzerland: World Health Organization (WHO).                                                           | 2001, 2005, 2009, 2013                                                 |                      |
| Botswana | Central Statistics Office (Botswana). Botswana AIDS Impact Survey 2004. Gaborone, Botswana: Central Statistics Office (Botswana).                                                                                     | 2004                                                                   |                      |
| Botswana | United Nations Office on Drugs and Crime (UNODC). United Nations Office on Drugs and Crime Global Study on Homicides 2011. Vienna, Austria: United Nations Office on Drugs and Crime (UNODC), 2011.                   | 2005-2009                                                              |                      |
| Botswana | Central Statistics Office (Botswana). Botswana Demographic Survey 2006. Gaborone, Botswana: Central Statistics Office (Botswana).                                                                                     | 2006                                                                   | *                    |
| Botswana | Botswana Family Health Survey 2007-2008 as it appears in United Nations Statistical Division (UNSTAT). United Nations Demographic Yearbook 2011. United Nations Statistical Division (UNSTAT), 2012.                  | 2007-2008                                                              | *                    |
| Botswana | Central Statistics Office (Botswana). Botswana Family Health Survey 2007-2008. Gaborone, Botswana: Central Statistics Office (Botswana), 2009.                                                                        | 2007-2008                                                              | *                    |
| Botswana | Central Statistics Office (Botswana), National AIDS Coordinating Agency (Botswana). Botswana AIDS Impact Survey 2008. Gaborone, Botswana: Central Statistics Office (Botswana).                                       | 2008                                                                   |                      |
| Botswana | Central Statistics Office (Botswana), Ministry of Health (Botswana). Botswana Health Statistics Report 2008. Gaborone, Botswana: Central Statistics Office (Botswana), 2012.                                          | 2008                                                                   |                      |
| Botswana | Joint United Nations Program on HIV/AIDS (UNAIDS), National AIDS Coordinating Agency (Botswana). Botswana UNGASS Country Report 2010. Geneva, Switzerland: Joint United Nations Program on HIV/AIDS (UNAIDS), 2010.   | 2009                                                                   |                      |
| Brazil   | Centre for Research on the Epidemiology of Disasters (CRED). EM-DAT: The OFDA/CRED International Disaster Database. Brussels, Belgium: Catholic University of Leuven.                                                 | 1956-1957, 1959, 1964-1967, 1969-1971, 1973-1975, 1977-1992, 1995-2013 |                      |

**Web Table 32 - Comprehensive citation list**

| Country | Citation                                                                                                                                                                                                                                                                                   | Year*      | New for GBD 2013 (*) |
|---------|--------------------------------------------------------------------------------------------------------------------------------------------------------------------------------------------------------------------------------------------------------------------------------------------|------------|----------------------|
| Brazil  | Brazilian Institute of Geography and Statistics (IBGE), National Census Service (Brazil), Minnesota Population Center. Brazil General Census 1960 from the Integrated Public Use Microdata Series, International. [Machine-readable database]. Minneapolis: University of Minnesota.       | 1960       |                      |
| Brazil  | Salzano FM. Incidence, effects, and management of sickle cell disease in Brazil. <i>Am J Pediatr Hematol Oncol.</i> 1985; 3(7): 240-4.                                                                                                                                                     | 1964-1968  |                      |
| Brazil  | Saldanha PH, Nóbrega FG, Maia JC. Distribution and heredity of erythrocyte G6PD activity and electrophoretic variants among different racial groups at São Paulo, Brazil. <i>J Med Genet.</i> 1969; 6(1): 48-54.                                                                           | 1967-1969  |                      |
| Brazil  | Barreto OCO. Erythrocyte glucose-6-phosphate dehydrogenase deficiency in São Paulo, Brazil. <i>Braz J Med Biol Res.</i> 1970; 3(1/2): 61-5.                                                                                                                                                | 1968-1970  |                      |
| Brazil  | Brazilian Institute of Geography and Statistics (IBGE), Minnesota Population Center. Brazil General Census 1970 from the Integrated Public Use Microdata Series, International. [Machine-readable database]. Minneapolis: University of Minnesota.                                         | 1970       |                      |
| Brazil  | Brazil Vital Registration Death Data 1974 as it appears in United Nations Statistics Division (UNSD). <i>United Nations Demographic Yearbook.</i> New York City, United States: United Nations Statistics Division (UNSD).                                                                 | 1974       |                      |
| Brazil  | Brazil Vital Registration Death Data 1975 as it appears in United Nations Statistics Division (UNSD). <i>United Nations Demographic Yearbook.</i> New York City, United States: United Nations Statistics Division (UNSD).                                                                 | 1975       |                      |
| Brazil  | Brazil Vital Registration Death Data 1976 as it appears in United Nations Statistics Division (UNSD). <i>United Nations Demographic Yearbook.</i> New York City, United States: United Nations Statistics Division (UNSD).                                                                 | 1976       |                      |
| Brazil  | Brazil Vital Registration Death Data 1977 as it appears in United Nations Statistics Division (UNSD). <i>United Nations Demographic Yearbook.</i> New York City, United States: United Nations Statistics Division (UNSD).                                                                 | 1977       |                      |
| Brazil  | Brazil Vital Registration Death Data 1978 as it appears in United Nations Statistics Division (UNSD). <i>United Nations Demographic Yearbook.</i> New York City, United States: United Nations Statistics Division (UNSD).                                                                 | 1978       |                      |
| Brazil  | Vitral CL, Yoshida CF, Lemos ER, Teixeira CS, Gaspar AM. Age-specific prevalence of antibodies to hepatitis A in children and adolescents from Rio de Janeiro, Brazil, 1978 and 1995. Relationship of prevalence to environmental factors. <i>Mem Inst Oswaldo Cruz.</i> 1998; 93(1): 1-5. | 1978, 1995 |                      |
| Brazil  | Brazil Vital Registration Death Data 1979 as it appears in United Nations Statistics Division (UNSD). <i>United Nations Demographic Yearbook.</i> New York City, United States: United Nations Statistics Division (UNSD).                                                                 | 1979       |                      |
| Brazil  | Brazilian Institute of Geography and Statistics (IBGE), Minnesota Population Center. Brazil General Census 1980 from the Integrated Public Use Microdata Series, International. [Machine-readable database]. Minneapolis: University of Minnesota.                                         | 1980       |                      |
| Brazil  | Brazil Vital Registration Death Data 1980 as it appears in United Nations Statistics Division (UNSD). <i>United Nations Demographic Yearbook.</i> New York City, United States: United Nations Statistics Division (UNSD).                                                                 | 1980       |                      |
| Brazil  | Sutmoller F, Gaspar AM, Cynamon SE, Richa N, Mercadante LA, Schatzmayr HG. A water-borne hepatitis A outbreak in Rio de Janeiro. <i>Mem Inst Oswaldo Cruz.</i> 1982; 77(1): 9-17.                                                                                                          | 1980       |                      |
| Brazil  | WHO Department of Communicable Disease Surveillance and Response. WHO Report on Global Surveillance of Epidemic-prone Infectious Diseases 2000.                                                                                                                                            | 1980-1981  |                      |

**Web Table 32 - Comprehensive citation list**

| Country | Citation                                                                                                                                                                                                                                                                                                                                                    | Year*                       | New for GBD 2013 (*) |
|---------|-------------------------------------------------------------------------------------------------------------------------------------------------------------------------------------------------------------------------------------------------------------------------------------------------------------------------------------------------------------|-----------------------------|----------------------|
| Brazil  | Vasconcelos PF da C. Febre amarela. Rev Soc Bras Med Trop. 2003; 36(2): 275-93.                                                                                                                                                                                                                                                                             | 1980-2001                   |                      |
| Brazil  | Vasconcelos PF, Costa ZG, Travassos Da Rosa ES, Luna E, Rodrigues SG, Barros VL, Dias JP, Monteiro HA, Oliva OF, Vasconcelos HB, Oliveira RC, Sousa MR, Barbosa Da Silva J, Cruz AC, Martins EC, Travassos Da Rosa JF. Epidemic of jungle yellow fever in Brazil, 2000: implications of climatic alterations in disease spread. J Med Virol. 2001; 598-604. | 1980-2000                   |                      |
| Brazil  | Institute for Health Metrics and Evaluation (IHME), Joint United Nations Program on HIV/AIDS (UNAIDS). Institute for Health Metrics and Evaluation HIV Mortality Estimates Based on the UNAIDS Spectrum Model Framework.                                                                                                                                    | 1980-2013                   | *                    |
| Brazil  | United Nations Children's Fund (UNICEF), World Health Organization (WHO). WHO and UNICEF Reported Disease Incidence Time Series - Pertussis. Geneva, Switzerland: World Health Organization (WHO).                                                                                                                                                          | 1980-2013                   |                      |
| Brazil  | United Nations Children's Fund (UNICEF), World Health Organization (WHO). WHO and UNICEF Reported Disease Incidence Time Series - Measles. Geneva, Switzerland: World Health Organization (WHO).                                                                                                                                                            | 1980-2013                   |                      |
| Brazil  | Parkin DM, International Agency for Research on Cancer, International Association of Cancer Registries. Cancer Incidence in Five Continents. Vol. I to VIII. Lyon, France, IARC Press, 2005.                                                                                                                                                                | 1980, 1987, 1993, 1990-1991 |                      |
| Brazil  | Brazil Vital Registration - Deaths 1981 ICD9 as it appears in World Health Organization (WHO). WHO Mortality Database Version February 2014. Geneva, Switzerland: World Health Organization (WHO), 2014.                                                                                                                                                    | 1981                        |                      |
| Brazil  | Brazil Vital Registration - Deaths 1982 ICD9 as it appears in World Health Organization (WHO). WHO Mortality Database Version February 2014. Geneva, Switzerland: World Health Organization (WHO), 2014.                                                                                                                                                    | 1982                        |                      |
| Brazil  | Cotrim H, Mota E, Leite L, Silva L, Lyra L. A case-control study on the association of hepatitis B virus infection and hepatocellular carcinoma in northeast Brazil. Rev Saude Publica. 1992; 26(5): 301-5.                                                                                                                                                 | 1982-1987                   |                      |
| Brazil  | Brazil Vital Registration - Deaths 1983 ICD9 as it appears in World Health Organization (WHO). WHO Mortality Database Version February 2014. Geneva, Switzerland: World Health Organization (WHO), 2014.                                                                                                                                                    | 1983                        |                      |
| Brazil  | Black FL, Jacobson DL. Hepatitis A antibody in an isolated Amerindian tribe fifty years after exposure. J Med Virol. 1986; 19(1): 19-21.                                                                                                                                                                                                                    | 1983-1984                   |                      |
| Brazil  | Santos AK, Ishak MO, Santos SE, Guerreiro JF, Ishak R. A possible correlation between the host genetic background in the epidemiology of hepatitis B virus in the Amazon region of Brazil. Mem Inst Oswaldo Cruz. 1995; 90(4): 435-42.                                                                                                                      | 1983-1991                   |                      |
| Brazil  | Brazil Vital Registration - Deaths 1984 ICD9 as it appears in World Health Organization (WHO). WHO Mortality Database Version February 2014. Geneva, Switzerland: World Health Organization (WHO), 2014.                                                                                                                                                    | 1984                        |                      |
| Brazil  | Victoria CG, Barros FC, Huttly SR, Teixeira AM, Vaughan JP. Early childhood mortality in a Brazilian cohort: the roles of birthweight and socioeconomic status. Int J Epidemiol. 1992; 21(5): 911-5.                                                                                                                                                        | 1984                        |                      |
| Brazil  | Victoria CG, Smith PG, Vaughan JP, Nobre LC, Lombardi C, Teixeira AM, Fuchs SM, Moreira LB, Gigante LP, Barros FC. Evidence for protection by breast-feeding against infant deaths from infectious diseases in Brazil. Lancet. 1987; 2(8554): 319-22.                                                                                                       | 1984                        |                      |
| Brazil  | Brazilian Institute of Geography and Statistics. Brazil National Household Sample Survey 1984.                                                                                                                                                                                                                                                              | 1984                        |                      |
| Brazil  | World Health Organization (WHO). Brazil WHO Leishmaniasis Country Profile.                                                                                                                                                                                                                                                                                  | 1984-2010                   | *                    |

**Web Table 32 - Comprehensive citation list**

| Country | Citation                                                                                                                                                                                                                                                                                              | Year*           | New for GBD 2013 (*) |
|---------|-------------------------------------------------------------------------------------------------------------------------------------------------------------------------------------------------------------------------------------------------------------------------------------------------------|-----------------|----------------------|
| Brazil  | Brazil Vital Registration - Deaths 1985 ICD9 as it appears in World Health Organization (WHO). WHO Mortality Database Version February 2014. Geneva, Switzerland: World Health Organization (WHO), 2014.                                                                                              | 1985            |                      |
| Brazil  | Bailey P, Tsui AO, Janowitz B, Dominik R, Araujo L. A study of infant mortality and causes of death in a rural north-east Brazilian community. J Biosoc Sci. 1990; 22(3): 349-63.                                                                                                                     | 1985            |                      |
| Brazil  | Victoria CG, Huttly SR, Fuchs SC, Barros FC, Garenne M, Leroy O, Fontaine O, Beau JP, Fauveau V, Chowdhury HR. International differences in clinical patterns of diarrhoeal deaths: a comparison of children from Brazil, Senegal, Bangladesh, and India. J Diarrhoeal Dis Res. 1993; 11(1): 25-9.    | 1985            |                      |
| Brazil  | Pan American Health Organization (PAHO). Update on yellow fever in the Americas. Epidemiol Bull. 2000; 21(2):13.                                                                                                                                                                                      | 1985, 2000      |                      |
| Brazil  | Brazil Vital Registration - Deaths 1986 ICD9 as it appears in World Health Organization (WHO). WHO Mortality Database Version February 2014. Geneva, Switzerland: World Health Organization (WHO), 2014.                                                                                              | 1986            |                      |
| Brazil  | Brazilian Society for Family Welfare (BEMFAM), Westinghouse; Institute for Resource Development. Brazil Demographic and Health Survey 1986. Columbia, United States: Westinghouse; Institute for Resource Development.                                                                                | 1986            |                      |
| Brazil  | Abuzwaida AR, Sidoni M, Yoshida CF, Schatzmayr HG. Seroepidemiology of hepatitis A and B in two urban communities of Rio de Janeiro, Brazil. Rev Inst Med Trop Sao Paulo. 1987; 29(4): 219-23.                                                                                                        | 1986            |                      |
| Brazil  | Brazilian Institute of Geography and Statistics. Brazil National Household Sample Survey 1986.                                                                                                                                                                                                        | 1986            |                      |
| Brazil  | Campos Gde J, dos Reis Filho SA, da Silva AA, Novochadlo MA, da Silva RA, Galvão CE. Morbimortalidade infantil por diarreia aguda em área metropolitana da região Nordeste do Brasil, 1986-1989. Rev Saude Publica. 1995; 29(2): 132-9.                                                               | 1986-1989       |                      |
| Brazil  | Escosteguy CC, Medronho R de A, Madruga R, Dias HG, Braga RC, Azevedo OP. Epidemiologic surveillance and evaluation of meningitis hospital care. Rev Saude Publica. 2004; 38(5): 657-63.                                                                                                              | 1986-2002       |                      |
| Brazil  | Brazil Vital Registration - Deaths 1987 ICD9 as it appears in World Health Organization (WHO). WHO Mortality Database Version February 2014. Geneva, Switzerland: World Health Organization (WHO), 2014.                                                                                              | 1987            |                      |
| Brazil  | Brazil Vital Registration - Deaths 1988 ICD9 as it appears in World Health Organization (WHO). WHO Mortality Database Version February 2014. Geneva, Switzerland: World Health Organization (WHO), 2014.                                                                                              | 1988            |                      |
| Brazil  | Nascimento-Carvalho CM, Moreno-Carvalho OA. [Etiology of bacterial meningitis in a cohort from Salvador, Bahia]. Arq Neuropsiquiatr. 1998; 56(1): 83-7.                                                                                                                                               | 1988-1995       |                      |
| Brazil  | Ferlay J, Parkin DM, Curado MP, Bray F, Edwards B, Shin HR and Forman D. Cancer Incidence in Five Continents, Volumes I to IX: IARC CancerBase No. 9 [Internet]. Lyon, France: International Agency for Research on Cancer; 2010. Available from: <a href="http://ci5.iarc.fr">http://ci5.iarc.fr</a> | 1988-2002       |                      |
| Brazil  | Sylvatic yellow fever outbreak in Bolivia. EPI Newsl. 1999; 1(21): 1-3.                                                                                                                                                                                                                               | 1988, 1993-1994 |                      |
| Brazil  | Brazil Vital Registration - Deaths 1989 ICD9 as it appears in World Health Organization (WHO). WHO Mortality Database Version February 2014. Geneva, Switzerland: World Health Organization (WHO), 2014.                                                                                              | 1989            |                      |
| Brazil  | Brazil Vital Registration - Deaths 1990 ICD9 as it appears in World Health Organization (WHO). WHO Mortality Database Version February 2014. Geneva, Switzerland: World Health Organization (WHO), 2014.                                                                                              | 1990            |                      |



**Web Table 32 - Comprehensive citation list**

| Country | Citation                                                                                                                                                                                                                                                                                           | Year*                            | New for GBD 2013 (*) |
|---------|----------------------------------------------------------------------------------------------------------------------------------------------------------------------------------------------------------------------------------------------------------------------------------------------------|----------------------------------|----------------------|
| Brazil  | Coimbra Júnior CE, Santos RV, Yoshida CF, Baptista ML, Flowers NM, do Valle AC. Hepatitis B epidemiology and cultural practices in Amerindian populations of Amazonia: the Tupí-Mondé and the Xavánte from Brazil. <i>Soc Sci Med</i> . 1996; 42(12): 1735-43.                                     | 1990                             |                      |
| Brazil  | Weatherall D. Sickle Cell and Thalassemias Prevalence Data, Personal Correspondence with David Weatherall. [Unpublished].                                                                                                                                                                          | 1990-2009                        |                      |
| Brazil  | Lucena R, Gomes I, Ferreira A, Góes J, Araújo I, Veiga M, Melo A. Características clínicas e laboratoriais de meningites bacterianas em crianças. <i>Arq Neuropsiquiatr</i> . 1996; 54(4): 571-6.                                                                                                  | 1990-1992                        |                      |
| Brazil  | Dos Santos JI, Lopes MA, Delière-Vasconcelos E, Couto-Fernandez JC, Patel BN, Barreto ML, Ferreira Júnior OC, Galvão-Castro B. Seroprevalence of HIV, HTLV-I/II and other perinatally-transmitted pathogens in Salvador, Bahia. <i>Rev Inst Med Trop Sao Paulo</i> . 1995; 37(4): 343-8.           | 1990-1991                        |                      |
| Brazil  | Martins RM, Porto SO, Vanderborcht BO, Rouzere CD, Queiroz DA, Cardoso DD, Yoshida CF. Short report: prevalence of hepatitis C viral antibody among Brazilian children, adolescents, and street youths. <i>Am J Trop Med Hyg</i> . 1995; 53(6): 654-5.                                             | 1990-1993                        |                      |
| Brazil  | Martins RM, Vanderborcht BO, Rouzere C, Cardoso DD, Azevedo MS, Yoshida CF. Anti-HCV prevalence and risk factors analysis in pregnant women in central Brazil. <i>Mem Inst Oswaldo Cruz</i> . 1995; 90(1): 11.                                                                                     | 1990-1992                        |                      |
| Brazil  | Centre for Health Informatics and Multiprofessional Education, University College London. <i>Modell's Haemoglobinopathologist's Almanac</i> . London, United Kingdom: Centre for Health Informatics and Multiprofessional Education, University College London, 2008.                              | 1990-2003                        |                      |
| Brazil  | World Health Organization (WHO). <i>Yellow Fever Reported Cases, WHO Vaccine-Preventable Diseases: Monitoring System</i> . Geneva, Switzerland: World Health Organization (WHO).                                                                                                                   | 1990, 1999, 2003-2005, 2008-2009 |                      |
| Brazil  | Brazil Vital Registration - Deaths 1991 ICD9 as it appears in World Health Organization (WHO). WHO Mortality Database Version February 2014. Geneva, Switzerland: World Health Organization (WHO), 2014.                                                                                           | 1991                             |                      |
| Brazil  | Brazilian Society for Family Welfare (BEMFAM), Macro International, Inc. <i>Brazil Demographic and Health Survey 1991</i> . Calverton, United States: Macro International, Inc.                                                                                                                    | 1991                             |                      |
| Brazil  | Brazilian Institute of Geography and Statistics (IBGE) and Minnesota Population Center. <i>Brazil General Census 1991 from the Integrated Public Use Microdata Series, International</i> . [Machine-readable database]. Minneapolis: University of Minnesota.                                      | 1991                             |                      |
| Brazil  | Queiróz DA, Cardoso DD, Martelli CM, Martins RM, Porto SO, Borges AM, Azevedo MS, Daher RR. Risk factors and prevalence of antibodies against hepatitis A virus (HAV) in children from day-care centers, in Goiania, Brazil. <i>Rev Inst Med Trop Sao Paulo</i> . 1995; 37(5): 427-33.             | 1991-1992                        |                      |
| Brazil  | Brazil Vital Registration - Deaths 1992 ICD9 as it appears in World Health Organization (WHO). WHO Mortality Database Version February 2014. Geneva, Switzerland: World Health Organization (WHO), 2014.                                                                                           | 1992                             |                      |
| Brazil  | Brandelise S, Pinheiro V, Gabetta CS, Hambleton I, Serjeant B, Serjeant G. Newborn screening for sickle cell disease in Brazil: the Campinas experience. <i>Clin Lab Haematol</i> . 2004; 1(26): 15-9.                                                                                             | 1992-2000                        |                      |
| Brazil  | Gonçalves CS, Pereira FE, Gayotto LC. Hepatocellular carcinoma in Brazil: report of a national survey (Florianópolis, SC, 1995). <i>Rev Inst Med Trop Sao Paulo</i> . 1997; 39(3): 165-70.                                                                                                         | 1992-1994                        |                      |
| Brazil  | Miranda ECBM, Moia L de JP, Amaral I do SA, Barbosa MS de B, Conde SRS da S, de Araújo MTF, da Cruz E do RM, Demachki S, Bensabath G, Soares M do CP. [Hepatitis B and C virus infection and the hepatocellular carcinoma in the East Amazon, Brazil]. <i>Rev Soc Bras Med Trop</i> . 2004; 47-51. | 1992-1999                        |                      |

**Web Table 32 - Comprehensive citation list**

| Country | Citation                                                                                                                                                                                                                                                                                                 | Year*            | New for GBD 2013 (*) |
|---------|----------------------------------------------------------------------------------------------------------------------------------------------------------------------------------------------------------------------------------------------------------------------------------------------------------|------------------|----------------------|
| Brazil  | Carvalho MB, Hamerschlak N, Vaz RS, Ferreira OC Jr. Risk factor analysis and serological diagnosis of HIV-1/HIV-2 infection in a Brazilian blood donor population: validation of the World Health Organization strategy for HIV testing. <i>AIDS</i> . 1996; 10(10): 1135-40.                            | 1992-1993        |                      |
| Brazil  | Parana R, Cotrim HP, Cortey-Boennec ML, Trepo C, Lyra L. Prevalence of hepatitis E virus IgG antibodies in patients from a referral unit of liver diseases in Salvador, Bahia, Brazil. <i>J Trop Med Hyg</i> . 1997; 57(1): 60-1.                                                                        | 1992-1994        | *                    |
| Brazil  | Measles Supplementary Immunization Activity Data as provided by the World Health Organization. [Unpublished].                                                                                                                                                                                            | 1992, 1995, 1997 |                      |
| Brazil  | Brazil Vital Registration - Deaths 1993 ICD9 as it appears in World Health Organization (WHO). WHO Mortality Database Version February 2014. Geneva, Switzerland: World Health Organization (WHO), 2014.                                                                                                 | 1993             |                      |
| Brazil  | Barrêto IC, Kerr Pontes L, Corrêa L. Surveillance of infant deaths in local health systems: assessment of verbal autopsy reports and of information gathered from health agents. <i>Rev Panam Salud Publica</i> . 2000; 79(5): 303-12.                                                                   | 1993             |                      |
| Brazil  | Menezes AMB, Victora CG, Barros FC, Albernaz E, Menezes FS, Jannke HA, Alves C, Rocha C. Infant mortality in two population-based cohorts in southern Brazil: trends and differentials. <i>Cad Saude Publica</i> . 1996; 12(Supp 1): 79-86.                                                              | 1993             |                      |
| Brazil  | Barrêto IC, Kerr Pontes L, Corrêa L. Vigilancia de obitos infantis em sistemas locais de saude: avaliacao da autopsia verbal e das informacoes de agentes de saude. <i>Rev Panam Salud Publica</i> . 2000; 7(5): 303-12.                                                                                 | 1993             |                      |
| Brazil  | Vasconcelos PF, Rodrigues SG, Degallier N, Moraes MA, Da Rosa JF, Da Rosa ES, Mondet B, Barros VL, Da Rosa AP. An epidemic of sylvatic yellow fever in the southeast region of Maranhao State, Brazil, 1993-1994: epidemiologic and entomologic findings. <i>Am J Trop Med Hyg</i> . 1997; 57(2): 132-7. | 1993-1994        |                      |
| Brazil  | Department of Peace and Conflict Research, Uppsala University. UCDP One-Sided Violence Database Version 1.4, 2013. Uppsala, Sweden: Department of Peace and Conflict Research, Uppsala University, 2013.                                                                                                 | 1993-2005        | *                    |
| Brazil  | Brazil Vital Registration - Deaths 1994 ICD9 as it appears in World Health Organization (WHO). WHO Mortality Database Version February 2014. Geneva, Switzerland: World Health Organization (WHO), 2014.                                                                                                 | 1994             |                      |
| Brazil  | Ferrari JO, Ferreira MU, Tanaka A, Mizokami M. The seroprevalence of hepatitis B and C in an Amerindian population in the southwestern Brazilian Amazon. <i>Rev Soc Bras Med Trop</i> . 1999; 32(3): 299-302.                                                                                            | 1994             |                      |
| Brazil  | Trinta KS, Liberto MI, de Paula VS, Yoshida CF, Gaspar AM. Hepatitis E virus infection in selected Brazilian populations. <i>Mem Inst Oswaldo Cruz</i> . 2001; 96(1): 25-9.                                                                                                                              | 1994-1998        |                      |
| Brazil  | Lima MP, Pedro RJ, Rocha MD. Prevalence and risk factors for hepatitis C virus (HCV) infection among pregnant Brazilian women. <i>Int J Gynaecol Obstet</i> . 2000; 70(3): 319-26.                                                                                                                       | 1994-1998        |                      |
| Brazil  | Rey JA, Findor JA, Daruich JR, Velazco CC, Igartua EB, Schmee E, Kohan AI. Prevalence of IgG Anti-HEV in Buenos Aires, a Nonendemic Area for Hepatitis E. <i>J Travel Med</i> . 1997; 4(2): 100-1.                                                                                                       | 1994-1995        | *                    |
| Brazil  | Brazil Vital Registration - Deaths 1995 ICD9 as it appears in World Health Organization (WHO). WHO Mortality Database Version February 2014. Geneva, Switzerland: World Health Organization (WHO), 2014.                                                                                                 | 1995             |                      |
| Brazil  | Simões LLP, Andrade ALSS, Laval CA, Oliveira RM, Silva SA, Martelli CMT, Alves SL de A, Almeida RM, Andrade JG. Impact of Haemophilus influenzae b (Hib) vaccination on meningitis in Central Brazil. <i>Rev Saude Publica</i> . 2004; 38(5): 664-70.                                                    | 1995-1999        |                      |



**Web Table 32 - Comprehensive citation list**

| Country | Citation                                                                                                                                                                                                                                                                                                                                         | Year*     | New for GBD 2013 (*) |
|---------|--------------------------------------------------------------------------------------------------------------------------------------------------------------------------------------------------------------------------------------------------------------------------------------------------------------------------------------------------|-----------|----------------------|
| Brazil  | Compri MB, Saad ST, Ramalho AS. Genetico-epidemiological and molecular investigation of G-6-PD deficiency in a Brazilian community. <i>Cad Saude Publica</i> . 2000; 16(2): 335-42.                                                                                                                                                              | 1995-1998 |                      |
| Brazil  | Pinho JR, Sumita LM, Moreira RC, de Souza VA, Saraceni CP, Oba IT, Carvalho MC, Pannuti CS. Duality of patterns in hepatitis A epidemiology: a study involving two socioeconomically distinct populations in Campinas, São Paulo State, Brazil. <i>Rev Inst Med Trop Sao Paulo</i> . 1998; 40(2): 105-6.                                         | 1995-1996 |                      |
| Brazil  | Brazil Vital Registration - Deaths 1996 ICD10 as it appears in World Health Organization (WHO). WHO Mortality Database Version February 2014. Geneva, Switzerland: World Health Organization (WHO), 2014.                                                                                                                                        | 1996      |                      |
| Brazil  | Brazilian Society for Family Welfare (BEMFAM), Macro International, Inc. Brazil Demographic and Health Survey 1996. Calverton, United States: Macro International, Inc.                                                                                                                                                                          | 1996      |                      |
| Brazil  | Souto FJ, Fontes CJ. Prevalence of IgG-class antibodies against hepatitis E virus in a community of the southern Amazon: a randomized survey. <i>Ann Trop Med Parasitol</i> . 1998; 92(5): 623-5.                                                                                                                                                | 1996      | *                    |
| Brazil  | Brazilian Institute of Geography and Statistics (IBGE), World Bank (WB). Brazil Living Standards Measurement Survey 1996-1997. Washington DC, United States: World Bank (WB).                                                                                                                                                                    | 1996-1997 |                      |
| Brazil  | Brazil Vital Registration - Deaths 1997 ICD10 as it appears in World Health Organization (WHO). WHO Mortality Database Version February 2014. Geneva, Switzerland: World Health Organization (WHO), 2014.                                                                                                                                        | 1997      |                      |
| Brazil  | Prevots DR, Parise MS, Segatto TC, Siqueira MM, dos Santos ED, Ganter B, Perreira MC, Domingues CA, Lanzieri T, Da Silva JB Jr. Interruption of measles transmission in Brazil, 2000-2001. <i>J Infect Dis</i> . 2003; 187(Suppl 1): S111-20.                                                                                                    | 1997      |                      |
| Brazil  | Ferreira CT, Pereira-Lima J, Barros FC. Hepatitis A antibodies in two socioeconomically distinct populations of Porto Alegre, Southern Brazil. <i>J Trop Pediatr</i> . 1998; 44(3): 184-5.                                                                                                                                                       | 1997      |                      |
| Brazil  | Luiz RR, Almeida RM, Almeida RT, de Almeida LM. The relation between anti-hepatitis A virus antibodies and residence water access in Rio de Janeiro, Brazil. <i>Int J Hyg Environ Health</i> . 2003; 206(6): 575-82.                                                                                                                             | 1997      |                      |
| Brazil  | Almeida LM, Werneck GL, Cairncross S, Coeli CM, Costa MC, Coletty PE. The epidemiology of hepatitis A in Rio de Janeiro: environmental and domestic risk factors. <i>Epidemiol Infect</i> . 2001; 127(2): 327-33.                                                                                                                                | 1997      |                      |
| Brazil  | Weiss DP, Coplan P, Guess H. Epidemiology of bacterial meningitis among children in Brazil, 1997-1998. <i>Rev Saude Publica</i> . 2001; 35(3): 249-55.                                                                                                                                                                                           | 1997-1998 |                      |
| Brazil  | Herrera E Jr, Caramelli P, Silveira ASB, Nitrini R. Epidemiologic survey of dementia in a community-dwelling Brazilian population. <i>Alzheimer Dis Assoc Disord</i> . 2002; 16(2): 103-8.                                                                                                                                                       | 1997-1998 |                      |
| Brazil  | Nitrini R, Caramelli P, Herrera E Jr, Bahia VS, Caixeta LF, Radanovic M, Anghinah R, Charchat-Fichman H, Porto CS, Carthery MT, Hartmann APJ, Huang N, Smid J, Lima EP, Takada LT, Takahashi DY. Incidence of dementia in a community-dwelling Brazilian population. <i>Alzheimer Dis Assoc Disord</i> . 2004; 18(4): 241-6.                     | 1997-2000 |                      |
| Brazil  | Nitrini R, Caramelli P, Herrera E Jr, de Castro I, Bahia VS, Anghinah R, Caixeta LF, Radanovic M, Charchat-Fichman H, Porto CS, Teresa Carthery M, Hartmann APJ, Huang N, Smid J, Lima EP, Takahashi DY, Takada LT. Mortality from dementia in a community-dwelling Brazilian population. <i>Int J Geriatr Psychiatry</i> . 2005; 20(3): 247-53. | 1997-2000 |                      |
| Brazil  | Neto EC, Portal L, Ferreira LF. G6PD deficiency in an unselected Brazilian population. <i>Southeast Asian J Trop Med Public Health</i> . 1998; 30(Suppl 2): 87.                                                                                                                                                                                  | 1997-1999 |                      |

**Web Table 32 - Comprehensive citation list**

| Country | Citation                                                                                                                                                                                                                                          | Year*     | New for GBD 2013 (*) |
|---------|---------------------------------------------------------------------------------------------------------------------------------------------------------------------------------------------------------------------------------------------------|-----------|----------------------|
| Brazil  | World Health Organization (WHO). The Global Elimination of Congenital Syphilis: Rationale and Strategy for Action. Geneva, Switzerland: World Health Organization (WHO), 2007.                                                                    | 1997-2003 |                      |
| Brazil  | Saback FL, Gomes SA, de Paula VS, da Silva RR, Lewis-Ximenez LL, Niel C. Age-specific prevalence and transmission of TT virus. <i>J Med Virol</i> . 1999; 59(3): 318-22.                                                                          | 1997-2998 |                      |
| Brazil  | Brazil Vital Registration - Deaths 1998 ICD10 as it appears in World Health Organization (WHO). WHO Mortality Database Version February 2014. Geneva, Switzerland: World Health Organization (WHO), 2014.                                         | 1998      |                      |
| Brazil  | Thalassaemia International Federation, World Health Organization (WHO). Management of Haemoglobin Disorders: Report of a Joint WHO-TIF Meeting, Nicosia, Cyprus, 16-18 November 2007. Geneva, Switzerland: World Health Organization (WHO), 2008. | 1998      |                      |
| Brazil  | Assis SB, Souto FJ, Fontes CJ, Gaspar AM. Prevalência da infecção pelos vírus das hepatites A e E em escolares de município da Amazônia Matogrossense. <i>Rev Soc Bras Med Trop</i> . 2002; 35(2): 155-8.                                         | 1998      | *                    |
| Brazil  | Gaze R, Carvalho DM de, Werneck GL. [Hepatitis A and B seroprevalence in Macaé, Rio de Janeiro State, Brazil]. <i>Cad Saude Publica</i> . 2002; 18(5): 1251-9.                                                                                    | 1998      |                      |
| Brazil  | Lewis-Ximenez LL, Gaspar AMC, D'Oro ACC, Mercadante LAC, Ginuino CF, Yoshida CFT. Viral hepatitis markers in antepartum and postpartum women in Rio de Janeiro, Brazil. <i>Mem Inst Oswaldo Cruz</i> . 2002; 97(2): 203-4.                        | 1998      |                      |
| Brazil  | Zarife MAS, Silva LK, Silva MBS, Lopes GB, Barreto ML, Teixeira M da G, Dourado I, Reis MG. Prevalence of hepatitis C virus infection in north-eastern Brazil: a population-based study. <i>Trans R Soc Trop Med Hyg</i> . 2006; 100(7): 663-8.   | 1998      |                      |
| Brazil  | Fernandes APPC, Januário JN, Cangussu CB, Macedo DL de, Viana MB. Mortality of children with sickle cell disease: a population study. <i>J Pediatr (Rio J)</i> . 2010; 86(4): 279-84.                                                             | 1998-2005 |                      |
| Brazil  | Soares VMN, de Souza KV, Freygang TC, Correa V, Saito MR. [Maternal mortality due to pre-eclampsia/eclampsia in a state in southern Brazil]. <i>Rev Bras Ginecol Obstet</i> . 2009; 31(11): 566-73.                                               | 1998-2004 |                      |
| Brazil  | De Paula VS, Arruda ME, Vitral CL, Gaspar AM. Seroprevalence of viral hepatitis in riverine communities from the Western Region of the Brazilian Amazon Basin. <i>Mem Inst Oswaldo Cruz</i> . 2001; 96(8): 1123-8.                                | 1998-1999 |                      |
| Brazil  | Osório FMF, Lauer GM, Lima AS, Vidigal PVT, Ferrari TCA, Couto CA. Epidemiological aspects of hepatocellular carcinoma in a referral center of Minas Gerais, Brazil. <i>Arq Gastroenterol</i> . 2013; 50(2): 97-100.                              | 1998-2010 | *                    |
| Brazil  | Andrade AFB, Oliveira-Silva M, Silva SGC, Motta IJF, Bonvicino CR. Seroprevalence of hepatitis B and C virus markers among blood donors in Rio de Janeiro, Brazil, 1998-2005. <i>Mem Inst Oswaldo Cruz</i> . 2006; 101(6): 673-6.                 | 1998-2005 |                      |
| Brazil  | Bertolini DA, Pinho JRR, Saraceni CP, Moreira RC, Granato CFH, Carrilho FJ. Prevalence of serological markers of hepatitis B virus in pregnant women from Paraná State, Brazil. <i>Braz J Med Biol Res</i> . 2006; 39(8): 1083-90.                | 1998-2002 |                      |
| Brazil  | De Nishioka SA, Gyorkos TW, Joseph L, Collet JP, MacLean JD. Tattooing and transfusion-transmitted diseases in Brazil: a hospital-based cross-sectional matched study. <i>Eur J Epidemiol</i> . 2003; 18(5): 441-9.                               | 1998-2000 |                      |
| Brazil  | Tuboi SH, Costa ZG, da Costa Vasconcelos PF, Hatch D. Clinical and Epidemiological Characteristics of Yellow Fever in Brazil: Analysis of Reported Cases 1998–2002. <i>Trans R Soc Trop Med Hyg</i> . 2007; 101(2): 169-75.                       | 1998-2002 | *                    |

**Web Table 32 - Comprehensive citation list**

| Country | Citation                                                                                                                                                                                                                                                                                        | Year*     | New for GBD 2013 (*) |
|---------|-------------------------------------------------------------------------------------------------------------------------------------------------------------------------------------------------------------------------------------------------------------------------------------------------|-----------|----------------------|
| Brazil  | Brazil Vital Registration - Deaths 1999 ICD10 as it appears in World Health Organization (WHO). WHO Mortality Database Version February 2014. Geneva, Switzerland: World Health Organization (WHO), 2014.                                                                                       | 1999      |                      |
| Brazil  | Bortoliero AL, Bonametti AM, Morimoto HK, Matsuo T, Reiche EMV. Seroprevalence for hepatitis E virus (HEV) infection among volunteer blood donors of the Regional Blood Bank of Londrina, State of Paraná, Brazil. Rev Inst Med Trop Sao Paulo. 2006; 48(2): 87-92.                             | 1999      |                      |
| Brazil  | Morais LM, de Paula VS, Arantes MR, Oliveira MLA, Gaspar AMC. Early infection and asymptomatic spread of hepatitis A virus in a public child care center in Rio de Janeiro, Brazil: should attending children under two years of age be vaccinated? Mem Inst Oswaldo Cruz. 2006; 101(4): 401-5. | 1999      |                      |
| Brazil  | Almeida D, Tavares-Neto J, Vitvitski L, Almeida A, Mello C, Santana D, Tatsch F, Paraná R. Serological markers of hepatitis A, B and C viruses in rural communities of the semi-arid Brazilian northeast. Braz J Infect Dis. 2006; 10(5): 317-21.                                               | 1999      |                      |
| Brazil  | Santos DCM dos, Souto FJD, Santos DRL dos, Vitral CL, Gaspar AMC. Seroepidemiological markers of enterically transmitted viral hepatitis A and E in individuals living in a community located in the North Area of Rio de Janeiro, RJ, Brazil. Mem Inst Oswaldo Cruz. 2002; 97(5): 637-40.      | 1999      |                      |
| Brazil  | Saback FL, Palmer TE, Sabino RR, Carvalho SM, Amorim LM, Gaspar AM, Oliveira ML, Yoshida CF, Niel C. Infection with hepatitis A and TT viruses and socioeconomic status in Rio de Janeiro, Brazil. Scand J Infect Dis. 2001; 33(2): 121-5.                                                      | 1999      |                      |
| Brazil  | Aguiar JL, de Souza JA, Aguiar ES, Oliveira JM, de Lemos ERS, Yoshida CFT. Low prevalence of hepatitis B and C markers in non-amazonian indigenous population. Braz J Infect Dis. 2002; 6(5): 269-70.                                                                                           | 1999      |                      |
| Brazil  | Miranda AE, Alves MC, Neto RL, Areal KR, Gerbase AC. Seroprevalence of HIV, hepatitis B virus, and syphilis in women at their first visit to public antenatal clinics in Vitória, Brazil. Sex Transm Dis. 2001; 28(12): 710-3.                                                                  | 1999      |                      |
| Brazil  | Curado MP, Edwards B, Shin HR, Storm H, Ferlay J, Heanue M and Boyle P, eds (2007). Cancer Incidence in Five Continents, Vol. IX Periodic Data (electronic version). Lyon, IARC. <a href="http://ci5.iarc.fr">http://ci5.iarc.fr</a>                                                            | 1999-2001 |                      |
| Brazil  | Ferreira CT, Leite JC, Tanaguchi ANR, Vieira SMG, Pereira-Lima J, da Silveira TR. Seroprevalence of hepatitis A antibodies in a group of normal and Down syndrome children in Porto Alegre, southern Brazil. Braz J Infect Dis. 2002; 6(5): 225-31.                                             | 1999-2000 |                      |
| Brazil  | Blal CA, Passos SRL, Horn C, Georg I, Bonecini-Almeida MG, Rolla VC, De Castro L. High prevalence of hepatitis B virus infection among tuberculosis patients with and without HIV in Rio de Janeiro, Brazil. Eur J Clin Microbiol Infect Dis. 2005; 24(1): 41-3.                                | 1999-2000 |                      |
| Brazil  | Motta-Castro ARC, Yoshida CFT, Lemos ERS, Oliveira JM, Cunha RV, Lewis-Ximenez LL, Cabello PH, Lima KMB, Martins RMB. Seroprevalence of Hepatitis B virus infection among an Afro-descendant community in Brazil. Mem Inst Oswaldo Cruz. 2003; 98(1): 13-7.                                     | 1999-2000 |                      |
| Brazil  | Brazilian Institute of Geography and Statistics. Brazil Census 2000.                                                                                                                                                                                                                            | 2000      |                      |
| Brazil  | Brazil Vital Registration - Deaths 2000 ICD10 as it appears in World Health Organization (WHO). WHO Mortality Database Version February 2014. Geneva, Switzerland: World Health Organization (WHO), 2014.                                                                                       | 2000      |                      |
| Brazil  | Brazilian Institute of Geography and Statistics (IBGE), Minnesota Population Center. Brazil General Census 2000 from the Integrated Public Use Microdata Series, International. [Machine-readable database]. Minneapolis: University of Minnesota.                                              | 2000      |                      |
| Brazil  | Niel C, Lampe E. High detection rates of TTV-like mini virus sequences in sera from Brazilian blood donors. J Med Virol. 2001; 65(1): 199-205.                                                                                                                                                  | 2000      |                      |

**Web Table 32 - Comprehensive citation list**

| Country | Citation                                                                                                                                                                                                                                                                                                                           | Year*                       | New for GBD 2013 (*) |
|---------|------------------------------------------------------------------------------------------------------------------------------------------------------------------------------------------------------------------------------------------------------------------------------------------------------------------------------------|-----------------------------|----------------------|
| Brazil  | Kiesslich D, Rocha júnior JE, Crispim MA. Prevalence of hepatitis E virus antibodies among different groups in the Amazonian basin. <i>Trans R Soc Trop Med Hyg.</i> 2002; 96(2): 215.                                                                                                                                             | 2000                        | *                    |
| Brazil  | Lobo CL de C, Bueno LM, Moura P, Ogeda LL, Castilho S, de Carvalho SMF. Neonatal screening for hemoglobinopathies in Rio de Janeiro, Brazil. <i>Rev Panam Salud Publica.</i> 2003; 13(2-3): 154-9.                                                                                                                                 | 2000-2001                   |                      |
| Brazil  | Lobo CL de C, Pinto JFC, Nascimento EM, Moura PG, Cardoso GP, Hankins JS. The effect of hydroxycarbamide therapy on survival of children with sickle cell disease. <i>Br J Haematol.</i> 2013; 161(6): 852-60.                                                                                                                     | 2000-2009                   | *                    |
| Brazil  | World Health Organization (WHO). Retrospective Measles Data on Supplementary Immunization Activities. Geneva, Switzerland: World Health Organization (WHO).                                                                                                                                                                        | 2000-2002, 2004, 2008, 2011 |                      |
| Brazil  | Brazil Vital Registration - Deaths 2001 ICD10 as it appears in World Health Organization (WHO). WHO Mortality Database Version February 2014. Geneva, Switzerland: World Health Organization (WHO), 2014.                                                                                                                          | 2001                        |                      |
| Brazil  | De Araújo MCPE, Serafim ESS, de Castro Jr WAP, de Medeiros TMD. Prevalence of abnormal hemoglobins in newborns in Natal, Rio Grande do Norte, Brazil. <i>Cad Saude Publica.</i> 2004; 1(20): 123-8.                                                                                                                                | 2001                        |                      |
| Brazil  | De Filippis AMB, Nogueira RMR, Schatzmayr HG, Tavares DS, Jabor AV, Diniz SCM, Oliveira JC, Moreira E, Miagostovich MP, Costa EV, Galler R. Outbreak of jaundice and hemorrhagic fever in the Southeast of Brazil in 2001: detection and molecular characterization of yellow fever virus. <i>J Med Virol.</i> 2002; 68(4): 620-7. | 2001                        |                      |
| Brazil  | Lafer MM, de Moraes-Pinto MI, Weckx LY. Prevalence of antibodies against hepatitis A virus among the Kuikuro and Kaiabi Indians of Xingu National Park, Brazil. <i>Rev Inst Med Trop Sao Paulo.</i> 2007; 49(3): 155-7.                                                                                                            | 2001                        |                      |
| Brazil  | Dinelli MIS, Fisberg M, Moraes-Pinto MI de. Anti-hepatitis A virus frequency in adolescents at an outpatient clinic in São Paulo, Brazil. <i>Rev Inst Med Trop Sao Paulo.</i> 2006; 48(1): 43-4.                                                                                                                                   | 2001                        |                      |
| Brazil  | El Khouri M, Duarte LS, Ribeiro RB, da Silva LFF, Camargo LMA, dos Santos VA, Burattini MN, Corbett CEP. Seroprevalence of hepatitis B virus and hepatitis C virus in Monte Negro in the Brazilian western Amazon region. <i>Clinics (Sao Paulo).</i> 2005; 60(1): 29-36.                                                          | 2001                        |                      |
| Brazil  | Department of Peace and Conflict Research, Uppsala University. UCDP Nonstate Conflict Database Version 2.5, 2013. Uppsala, Sweden: Department of Peace and Conflict Research, Uppsala University, 2013.                                                                                                                            | 2001-2004                   | *                    |
| Brazil  | Moreira ED Jr, Nassri VB, Santos RS, Matos JF, de Carvalho WA, Silvani CS, Santana e Sant'ana C. Association of <i>Helicobacter pylori</i> infection and giardiasis: results from a study of surrogate markers for fecal exposure among children. <i>World J Gastroenterol.</i> 2005; 11(18): 2759-63.                             | 2001-2002                   |                      |
| Brazil  | Brazil Vital Registration - Deaths 2002 ICD10 as it appears in World Health Organization (WHO). WHO Mortality Database Version February 2014. Geneva, Switzerland: World Health Organization (WHO), 2014.                                                                                                                          | 2002                        |                      |
| Brazil  | Viana S, Paraná R, Moreira RC, Compri AP, Macedo V. High prevalence of hepatitis B virus and hepatitis D virus in the western Brazilian Amazon. <i>Am J Trop Med Hyg.</i> 2005; 73(4): 808-14.                                                                                                                                     | 2002                        |                      |
| Brazil  | Hototian S, Lopes M, Bustamante S, Azevedo D, Tatsch M, Bazzarella M, Litvoc J, Bottino C. Identification of dementia subjects in three districts of São Paulo city, Brazil. <i>Int Psychogeriatr.</i> 2005; 17(Suppl. 2): 271-2.                                                                                                  | 2002                        |                      |
| Brazil  | Ribeiro M, Antunes CM de F. Yellow fever: study of an outbreak. <i>Rev Soc Bras Med Trop.</i> 2009; 42(5): 523-31.                                                                                                                                                                                                                 | 2002-2003                   |                      |
| Brazil  | Bottino CMC, Azevedo D Jr, Tatsch M, Hototian SR, Moscoso MA, Folquitto J, Scalco AZ, Bazzarella MC, Lopes MA, Litvoc J. Estimate of dementia prevalence in a community sample from São Paulo, Brazil. <i>Dement Geriatr Cogn Disord.</i> 2008; 26(4): 291-9.                                                                      | 2002-2003                   |                      |

**Web Table 32 - Comprehensive citation list**

| Country | Citation                                                                                                                                                                                                                                                                                                                                               | Year*     | New for GBD 2013 (*) |
|---------|--------------------------------------------------------------------------------------------------------------------------------------------------------------------------------------------------------------------------------------------------------------------------------------------------------------------------------------------------------|-----------|----------------------|
| Brazil  | Aquino JA, Pegado KA, Barros LP, Machado LFA. Soroprevalência de infecções por vírus da hepatite B e vírus da hepatite C em indivíduos do Estado do Pará. Rev Soc Bras Med Trop. 2008; 334-7.                                                                                                                                                          | 2002-2005 |                      |
| Brazil  | Kozlowski AG, Motta-Castro ARC, Nascimento LB, Silva AMC, Teles SA, Villar LM, Gaspar AMC, Martins RMB. Prevalence of hepatitis A virus infection in Afro-Brazilian isolated communities in Central Brazil. Mem Inst Oswaldo Cruz. 2007; 102(1): 121-3.                                                                                                | 2002-2003 |                      |
| Brazil  | De Souza NCN, Botelho CAO, Honer MR. Retrospective study of a pioneer antenatal screening program with 8,477 pregnant women in Brazil. Clin Exp Obstet Gynecol. 2004; 31(3): 217-20.                                                                                                                                                                   | 2002-2003 |                      |
| Brazil  | Brazil Vital Registration - Deaths 2003 ICD10 as it appears in World Health Organization (WHO). WHO Mortality Database Version February 2014. Geneva, Switzerland: World Health Organization (WHO), 2014.                                                                                                                                              | 2003      |                      |
| Brazil  | Correia RA, Araújo HC, Furtado BMA, Bonfim C. [Epidemiological features of maternal deaths occurred in Recife, PE, Brazil (2000-2006)]. Rev Bras Enferm. 2011; 64(1): 91-7.                                                                                                                                                                            | 2003      |                      |
| Brazil  | Castro S, Weber R, Dadalt V, Tavares V, Giugliani R. Prevalence of G6PD deficiency in newborns in the south of Brazil. J Med Screen. 2006; 13(2): 85-6.                                                                                                                                                                                                | 2003      |                      |
| Brazil  | Souza JP, Cecatti JG, Faundes A, Morais SS, Villar J, Carroli G, Gulmezoglu M, Wojdyla D, Zavaleta N, Donner A, Velazco A, Bataglia V, Valladares E, Kublickas M, Acosta A. Maternal near miss and maternal death in the World Health Organization's 2005 global survey on maternal and perinatal health. Bull World Health Organ. 2010; 88(2): 113-9. | 2003-2005 |                      |
| Brazil  | Scazufca M, Menezes PR, Vallada HP, Crepaldi AL, Pastor-Valero M, Coutinho LMS, Di Rienzo VD, Almeida OP. High prevalence of dementia among older adults from poor socioeconomic backgrounds in São Paulo, Brazil. Int Psychogeriatr. 2008; 20(2): 394-405.                                                                                            | 2003-2005 |                      |
| Brazil  | Antoniuk SA, Zanon França M, Tannous Tahan T, Oliveira Rossoni AM, Dal-Ri Moreira S, Rodrigues Cruz C, Dal-Pra Ducci R, Hamdar F, Tiekó Frare Kira A. Study of 312 children with meningitis treated at a University Hospital in the South of Brazil. Medicina (B Aires). 2009; 69(1 Pt 1): 127-32.                                                     | 2003-2007 |                      |
| Brazil  | Souza JP, Cecatti JG, Parpinelli MA, Serruya SJ, Amaral E. Appropriate criteria for identification of near-miss maternal morbidity in tertiary care facilities: a cross sectional study. BMC Pregnancy Childbirth. 2007; 7(20): 1-8.                                                                                                                   | 2003-2004 |                      |
| Brazil  | Oliveira MD da S, Martins RMB, Matos MA, Ferreira RC, Dias MA, Carneiro MAS, Junqueira ALN, Teles SA. Seroepidemiology of hepatitis B virus infection and high rate of response to hepatitis B virus Butang vaccine in adolescents from low income families in Central Brazil. Mem Inst Oswaldo Cruz. 2006; 101(3): 251-6.                             | 2003-2004 |                      |
| Brazil  | Brazilian Institute of Geography and Statistics. Brazil National Household Sample Survey 2004. Rio de Janeiro, Brazil: Brazilian Institute of Geography and Statistics.                                                                                                                                                                                | 2004      |                      |
| Brazil  | Brazil Vital Registration - Deaths 2004 ICD10 as it appears in World Health Organization (WHO). WHO Mortality Database Version February 2014. Geneva, Switzerland: World Health Organization (WHO), 2014.                                                                                                                                              | 2004      |                      |
| Brazil  | Matos MAD, Reis NRS, Kozlowski AG, Teles SA, Motta-Castro ARC, Mello FCA, Gomes SA, Martins RMB. Epidemiological study of hepatitis A, B and C in the largest Afro-Brazilian isolated community. Trans R Soc Trop Med Hyg. 2009; 103(9): 899-905.                                                                                                      | 2004      |                      |

**Web Table 32 - Comprehensive citation list**

| Country | Citation                                                                                                                                                                                                                                                                                                                                                                                | Year*     | New for GBD 2013 (*) |
|---------|-----------------------------------------------------------------------------------------------------------------------------------------------------------------------------------------------------------------------------------------------------------------------------------------------------------------------------------------------------------------------------------------|-----------|----------------------|
| Brazil  | Zago-Gomes MP, Stantolin GC, Perazzio S, Aikawa KH, Gonçalves CS, Pereira FEL. Prevalence of anti-hepatitis A antibodies in children of different socioeconomic conditions in Vila Velha, ES. <i>Rev Soc Bras Med Trop.</i> 2005; 38(4): 285-9.                                                                                                                                         | 2004      |                      |
| Brazil  | Gonzalez TT, Sabino EC, Murphy EL, Chen S, Chamone DAF, McFarland W. Human immunodeficiency virus test-seeking motivation in blood donors, São Paulo, Brazil. <i>Vox Sang.</i> 2006; 90(3): 170-6.                                                                                                                                                                                      | 2004      |                      |
| Brazil  | Diniz D, Guedes C, Barbosa L, Tauil PL, Magalhães I. Prevalence of sickle cell trait and sickle cell anemia among newborns in the Federal District, Brazil, 2004 to 2006. <i>Cad Saude Publica.</i> 2009; 1(25): 188-94.                                                                                                                                                                | 2004-2006 |                      |
| Brazil  | Wagner SC, de Castro SM, Gonzalez TP, Santin AP, Zaleski CF, Azevedo LA, Dreau H, Henderson S, Old J, Hutz MH. Neonatal screening for hemoglobinopathies: results of a public health system in South Brazil. <i>Genet Test Mol Biomarkers.</i> 2010; 14(4): 565-9.                                                                                                                      | 2004-2007 | *                    |
| Brazil  | Forman D, Bray F, Brewster DH, Gombe Mbalawa C, Kohler B, Piñeros M, Steliarova-Foucher E, Swaminathan R and Ferlay J, eds (2013). <i>Cancer Incidence in Five Continents, Vol. X Summary Database (electronic version)</i> . Lyon, IARC. <a href="http://ci5.iarc.fr">http://ci5.iarc.fr</a>                                                                                           | 2004-2005 |                      |
| Brazil  | Souza SF de, Costa M da CN, Paim JS, Natividade MS da, Pereira SM, Andrade AM de S, Teixeira MG. Bacterial meningitis and living conditions. <i>Rev Soc Bras Med Trop.</i> 2012; 45(3): 323-8.                                                                                                                                                                                          | 2004-2009 | *                    |
| Brazil  | Carrilho FJ, Kikuchi L, Branco F, Goncalves CS, Mattos AA de, Brazilian HCC Study Group. Clinical and epidemiological aspects of hepatocellular carcinoma in Brazil. <i>Clinics (Sao Paulo).</i> 2010; 65(12): 1285-90.                                                                                                                                                                 | 2004-2009 |                      |
| Brazil  | De Alencar Ximenes RA, Martelli CMT, Merchán-Hamann E, Montarroyos UR, Braga MC, de Lima MLC, Cardoso MRA, Turchi MD, Costa MA, de Alencar LCA, Moreira RC, Figueiredo GM, Pereira LMMA. Multilevel analysis of hepatitis A infection in children and adolescents: a household survey in the Northeast and Central-west regions of Brazil. <i>Int J Epidemiol.</i> 2008; 37(4): 852-61. | 2004-2005 |                      |
| Brazil  | Brazil Vital Registration - Deaths 2005 ICD10 as it appears in World Health Organization (WHO). WHO Mortality Database Version February 2014. Geneva, Switzerland: World Health Organization (WHO), 2014.                                                                                                                                                                               | 2005      |                      |
| Brazil  | Brazilian Institute of Geography and Statistics. Brazil National Household Sample Survey 2005. Rio de Janeiro, Brazil: Brazilian Institute of Geography and Statistics.                                                                                                                                                                                                                 | 2005      |                      |
| Brazil  | Braga WSM, Castilho M da C, Borges FG, Martinho AC de S, Rodrigues IS, Azevedo EP de, Scazufca M, Menezes PR. Prevalence of hepatitis B virus infection and carriage after nineteen years of vaccination program in the Western Brazilian Amazon. <i>Rev Soc Bras Med Trop.</i> 2012; 45(1): 13-7.                                                                                      | 2005-2006 |                      |
| Brazil  | Pereira LMMA, Martelli CMT, Moreira RC, Merchán-Hamann E, Stein AT, Cardoso MRA, Figueiredo GM, Montarroyos UR, Braga C, Turchi MD, Coral G, Crespo D, Lima MLC, Alencar LCA, Costa M, dos Santos AA, Ximenes RAA. Prevalence and risk factors of Hepatitis C virus infection in Brazil, 2005 through 2009: a cross-sectional study. <i>BMC Infect Dis.</i> 2013; 60.                   | 2005-2009 |                      |
| Brazil  | Brazil Vital Registration - Deaths 2006 ICD10 as it appears in World Health Organization (WHO). WHO Mortality Database Version February 2014. Geneva, Switzerland: World Health Organization (WHO), 2014.                                                                                                                                                                               | 2006      |                      |
| Brazil  | Ministry of Health (Brazil). Brazil Hospital Information System 2006. Rio de Janeiro, Brazil: Ministry of Health (Brazil).                                                                                                                                                                                                                                                              | 2006      |                      |
| Brazil  | Brazilian Institute of Geography and Statistics. Brazil National Household Sample Survey 2006. Rio de Janeiro, Brazil: Brazilian Institute of Geography and Statistics.                                                                                                                                                                                                                 | 2006      |                      |



**Web Table 32 - Comprehensive citation list**

| Country | Citation                                                                                                                                                                                                                                                                                                                                                                                                                        | Year*     | New for GBD 2013 (*) |
|---------|---------------------------------------------------------------------------------------------------------------------------------------------------------------------------------------------------------------------------------------------------------------------------------------------------------------------------------------------------------------------------------------------------------------------------------|-----------|----------------------|
| Brazil  | World Health Organization (WHO). Yellow fever in Africa and South America, 2006. Wkly Epidemiol Rec. 2008; 83(8): 60-76.                                                                                                                                                                                                                                                                                                        | 2006      |                      |
| Brazil  | Markus JR, Cruz CR, Maluf EMCP, Tahan TT, Hoffmann MM. Seroprevalence of hepatitis A in children and adolescents. J Pediatr (Rio J). 2011; 87(5): 419-24.                                                                                                                                                                                                                                                                       | 2006      |                      |
| Brazil  | Fonseca GHH, Souza R, Salemi VMC, Jardim CVP, Gualandro SFM. Pulmonary hypertension diagnosed by right heart catheterisation in sickle cell disease. Eur Respir J. 2012; 39(1): 112-8.                                                                                                                                                                                                                                          | 2006-2009 | *                    |
| Brazil  | Fassio E, Díaz S, Santa C, Reig ME, Martínez Artola Y, Alves de Mattos A, Míguez C, Galizzi J, Zapata R, Ridruejo E, de Souza FC, Hernández N, Pinchuk L, Multicenter Group for Study of Hepatocarcinoma in Latin America, Asociación Latinoamericana para el Estudio del Hígado (ALEH). Etiology of hepatocellular carcinoma in Latin America: a prospective, multicenter, international study. Ann Hepatol. 2010; 9(1): 63-9. | 2006-2008 | *                    |
| Brazil  | Brazil Vital Registration - Deaths 2007 ICD10 as it appears in World Health Organization (WHO). WHO Mortality Database Version February 2014. Geneva, Switzerland: World Health Organization (WHO), 2014.                                                                                                                                                                                                                       | 2007      |                      |
| Brazil  | Ministry of Health (Brazil). Brazil Hospital Information System 2007. Rio de Janeiro, Brazil: Ministry of Health (Brazil).                                                                                                                                                                                                                                                                                                      | 2007      |                      |
| Brazil  | Brazilian Institute of Geography and Statistics. Brazil National Household Sample Survey 2007. Rio de Janeiro, Brazil: Brazilian Institute of Geography and Statistics.                                                                                                                                                                                                                                                         | 2007      |                      |
| Brazil  | Pan American Health Organization (PAHO). Yellow Fever: Number of Cases and Deaths, 1960-2007. Washington, D.C., United States: Pan American Health Organization (PAHO), 2007.                                                                                                                                                                                                                                                   | 2007      |                      |
| Brazil  | World Health Organization (WHO). Yellow fever in Africa and South America, 2007. Wkly Epidemiol Rec. 2009; 84(13): 97-104.                                                                                                                                                                                                                                                                                                      | 2007      |                      |
| Brazil  | Cardoso MA, Scopel KKG, Muniz PT, Villamor E, Ferreira MU. Underlying factors associated with anemia in Amazonian children: a population-based, cross-sectional study. PLoS One. 2012; 7(5): e36341.                                                                                                                                                                                                                            | 2007      | *                    |
| Brazil  | El Khouri M, Cordeiro Q, Luz DABP da, Duarte LS, Gama MEA, Corbett CEP. Endemic hepatitis B and C virus infection in a Brazilian Eastern Amazon region. Arq Gastroenterol. 2010; 47(1): 35-41.                                                                                                                                                                                                                                  | 2007-2008 |                      |
| Brazil  | Livramento A do, Cordova CMM de, Spada C, Treitinger A. Seroprevalence of hepatitis B and C infection markers among children and adolescents in the southern Brazilian region. Rev Inst Med Trop Sao Paulo. 2011; 53(1): 13-7.                                                                                                                                                                                                  | 2007-2008 |                      |
| Brazil  | Voigt AR, Strazer Neto M, Spada C, Treitinger A. Seroprevalence of hepatitis B and hepatitis C markers among children and adolescents in the south Brazilian region: metropolitan area of Florianópolis, Santa Catarina. Braz J Infect Dis. 2010; 14(1): 60-5.                                                                                                                                                                  | 2007-2008 |                      |
| Brazil  | Brazil Vital Registration - Deaths 2008 ICD10 as it appears in World Health Organization (WHO). WHO Mortality Database Version February 2014. Geneva, Switzerland: World Health Organization (WHO), 2014.                                                                                                                                                                                                                       | 2008      |                      |
| Brazil  | Ministry of Health (Brazil). Brazil Hospital Information System 2008. Rio de Janeiro, Brazil: Ministry of Health (Brazil).                                                                                                                                                                                                                                                                                                      | 2008      |                      |
| Brazil  | Brazilian Institute of Geography and Statistics. Brazil National Household Sample Survey 2008. Rio de Janeiro, Brazil: Brazilian Institute of Geography and Statistics.                                                                                                                                                                                                                                                         | 2008      |                      |
| Brazil  | World Health Organization (WHO). Yellow fever, Brazil. Wkly Epidemiol Rec. 2008; 83(7): 61-2.                                                                                                                                                                                                                                                                                                                                   | 2008      |                      |
| Brazil  | Scaraveli NG, Passos AM, Voigt AR, Livramento A do, Tonial G, Treitinger A, Spada C. Seroprevalence of hepatitis B and hepatitis C markers in adolescents in Southern Brazil. Cad Saude Publica. 2011; 27(4): 753-8.                                                                                                                                                                                                            | 2008      |                      |

**Web Table 32 - Comprehensive citation list**

| Country | Citation                                                                                                                                                                                                                                                                                                            | Year*     | New for GBD 2013 (*) |
|---------|---------------------------------------------------------------------------------------------------------------------------------------------------------------------------------------------------------------------------------------------------------------------------------------------------------------------|-----------|----------------------|
| Brazil  | Tonial GC, Passos AM, Livramento A do, Scaraveli NG, Batschauer AP de B, Bueno EC, Largura A, Spada C, Treitinger A. Hepatitis B marker seroprevalence and vaccination coverage in adolescents in the City of Itajaí, State of Santa Catarina, Southern Brazil, in 2008. Rev Soc Bras Med Trop. 2011; 44(4): 416-9. | 2008      |                      |
| Brazil  | Joint United Nations Program on HIV/AIDS (UNAIDS), Ministry of Health (Brazil). Brazil UNGASS Country Progress Report 2010. Geneva, Switzerland: Joint United Nations Program on HIV/AIDS (UNAIDS), 2010.                                                                                                           | 2008-2009 |                      |
| Brazil  | Ministry of Health (Brazil). Brazil Hospital Information System 2009. Rio de Janeiro, Brazil: Ministry of Health (Brazil).                                                                                                                                                                                          | 2009      |                      |
| Brazil  | Brazilian Institute of Geography and Statistics. Brazil National Household Sample Survey 2009.                                                                                                                                                                                                                      | 2009      |                      |
| Brazil  | Brazil Vital Registration - Deaths 2009 ICD10 as it appears in World Health Organization (WHO). WHO Mortality Database Version February 2014. Geneva, Switzerland: World Health Organization (WHO), 2014.                                                                                                           | 2009      |                      |
| Brazil  | Centers for Disease Control and Prevention (CDC). Update: mumps outbreak - New York and New Jersey, June 2009-January 2010. Morb Mortal Wkly Rep. 2010; 59(5): 125-9.                                                                                                                                               | 2009      |                      |
| Brazil  | Moraes APP, Barreto SM, Passos VMA, Golino PS, Costa JA, Vasconcelos MX. Incidence and main causes of severe maternal morbidity in São Luís, Maranhão, Brazil: a longitudinal study. Sao Paulo Med J. 2011; 129(3): 146-52.                                                                                         | 2009-2010 |                      |
| Brazil  | Lopes MA, Ferrioli E, Nakano EY, Litvoc J, Bottino CMC. High prevalence of dementia in a community-based survey of older people from Brazil: association with intellectual activity rather than education. J Alzheimers Dis. 2012; 32(2): 307-16.                                                                   | 2009-2011 |                      |
| Brazil  | Brazilian Institute of Geography and Statistics. Brazil Demographic Census 2010. Rio de Janeiro, Brazil: Brazilian Institute of Geography and Statistics, 2012.                                                                                                                                                     | 2010      | *                    |
| Brazil  | Brazil Vital Registration - Deaths 2010 ICD10 as it appears in World Health Organization (WHO). WHO Mortality Database Version February 2014. Geneva, Switzerland: World Health Organization (WHO), 2014.                                                                                                           | 2010      |                      |
| Brazil  | Brazil Vital Registration Death Data 2011 as it appears in United Nations Statistics Division (UNSD). United Nations Demographic Yearbook. New York City, United States: United Nations Statistics Division (UNSD).                                                                                                 | 2011      | *                    |
| Brunei  | Brunei Vital Registration Death Data 1950 as it appears in United Nations Statistics Division (UNSD). United Nations Demographic Yearbook. New York City, United States: United Nations Statistics Division (UNSD).                                                                                                 | 1950      |                      |
| Brunei  | Brunei Vital Registration Death Data 1951 as it appears in United Nations Statistics Division (UNSD). United Nations Demographic Yearbook. New York City, United States: United Nations Statistics Division (UNSD).                                                                                                 | 1951      |                      |
| Brunei  | Brunei Vital Registration Death Data 1952 as it appears in United Nations Statistics Division (UNSD). United Nations Demographic Yearbook. New York City, United States: United Nations Statistics Division (UNSD).                                                                                                 | 1952      |                      |
| Brunei  | Brunei Vital Registration Death Data 1953 as it appears in United Nations Statistics Division (UNSD). United Nations Demographic Yearbook. New York City, United States: United Nations Statistics Division (UNSD).                                                                                                 | 1953      |                      |



**Web Table 32 - Comprehensive citation list**

| Country | Citation                                                                                                                                                                                                            | Year*     | New for GBD 2013 (*) |
|---------|---------------------------------------------------------------------------------------------------------------------------------------------------------------------------------------------------------------------|-----------|----------------------|
| Brunei  | Brunei Vital Registration Death Data 1954 as it appears in United Nations Statistics Division (UNSD). United Nations Demographic Yearbook. New York City, United States: United Nations Statistics Division (UNSD). | 1954      |                      |
| Brunei  | Brunei Vital Registration Death Data 1955 as it appears in United Nations Statistics Division (UNSD). United Nations Demographic Yearbook. New York City, United States: United Nations Statistics Division (UNSD). | 1955      |                      |
| Brunei  | Brunei Vital Registration Death Data 1956 as it appears in United Nations Statistics Division (UNSD). United Nations Demographic Yearbook. New York City, United States: United Nations Statistics Division (UNSD). | 1956      |                      |
| Brunei  | Brunei Vital Registration Death Data 1957 as it appears in United Nations Statistics Division (UNSD). United Nations Demographic Yearbook. New York City, United States: United Nations Statistics Division (UNSD). | 1957      |                      |
| Brunei  | Brunei Vital Registration Death Data 1958 as it appears in United Nations Statistics Division (UNSD). United Nations Demographic Yearbook. New York City, United States: United Nations Statistics Division (UNSD). | 1958      |                      |
| Brunei  | Brunei Vital Registration Death Data 1959 as it appears in United Nations Statistics Division (UNSD). United Nations Demographic Yearbook. New York City, United States: United Nations Statistics Division (UNSD). | 1959      |                      |
| Brunei  | Brunei Population and Housing Census 1960 as it appears in United Nations Statistics Division (UNSD). United Nations Demographic Yearbook. New York City, United States: United Nations Statistics Division (UNSD). | 1960      |                      |
| Brunei  | Peace Research Institute Oslo (PRIO). Battle Deaths Dataset Version 3, 2009. Oslo, Norway: Peace Research Institute Oslo (PRIO), 2009.                                                                              | 1962      |                      |
| Brunei  | Lie-Injo LE, Chin J, Ti TS. Glucose-6-phosphate dehydrogenase deficiency in Brunei, Sabah and Sarawak. Ann Hum Genet. 1964; 173-6.                                                                                  | 1962-1964 |                      |
| Brunei  | Brunei Vital Registration Death Data 1964 as it appears in United Nations Statistics Division (UNSD). United Nations Demographic Yearbook. New York City, United States: United Nations Statistics Division (UNSD). | 1964      |                      |
| Brunei  | Brunei Vital Registration Death Data 1965 as it appears in United Nations Statistics Division (UNSD). United Nations Demographic Yearbook. New York City, United States: United Nations Statistics Division (UNSD). | 1965      |                      |
| Brunei  | Brunei Vital Registration Death Data 1966 as it appears in United Nations Statistics Division (UNSD). United Nations Demographic Yearbook. New York City, United States: United Nations Statistics Division (UNSD). | 1966      |                      |
| Brunei  | Brunei Vital Registration Death Data 1967 as it appears in United Nations Statistics Division (UNSD). United Nations Demographic Yearbook. New York City, United States: United Nations Statistics Division (UNSD). | 1967      |                      |
| Brunei  | Brunei Vital Registration Death Data 1968 as it appears in United Nations Statistics Division (UNSD). United Nations Demographic Yearbook. New York City, United States: United Nations Statistics Division (UNSD). | 1968      |                      |
| Brunei  | Brunei Vital Registration Death Data 1969 as it appears in United Nations Statistics Division (UNSD). United Nations Demographic Yearbook. New York City, United States: United Nations Statistics Division (UNSD). | 1969      |                      |

**Web Table 32 - Comprehensive citation list**

| Country | Citation                                                                                                                                                                                                                 | Year*                                                 | New for GBD 2013 (*) |
|---------|--------------------------------------------------------------------------------------------------------------------------------------------------------------------------------------------------------------------------|-------------------------------------------------------|----------------------|
| Brunei  | Brunei Vital Registration Death Data 1970 as it appears in United Nations Statistics Division (UNSD). United Nations Demographic Yearbook. New York City, United States: United Nations Statistics Division (UNSD).      | 1970                                                  |                      |
| Brunei  | Brunei Vital Registration Death Data 1971 as it appears in United Nations Statistics Division (UNSD). United Nations Demographic Yearbook. New York City, United States: United Nations Statistics Division (UNSD).      | 1971                                                  |                      |
| Brunei  | Brunei Vital Registration Death Data 1972 as it appears in United Nations Statistics Division (UNSD). United Nations Demographic Yearbook. New York City, United States: United Nations Statistics Division (UNSD).      | 1972                                                  |                      |
| Brunei  | Brunei Vital Registration Death Data 1973 as it appears in United Nations Statistics Division (UNSD). United Nations Demographic Yearbook. New York City, United States: United Nations Statistics Division (UNSD).      | 1973                                                  |                      |
| Brunei  | Brunei Vital Registration Death Data 1974 as it appears in United Nations Statistics Division (UNSD). United Nations Demographic Yearbook. New York City, United States: United Nations Statistics Division (UNSD).      | 1974                                                  |                      |
| Brunei  | Brunei Vital Registration Death Data 1975 as it appears in United Nations Statistics Division (UNSD). United Nations Demographic Yearbook. New York City, United States: United Nations Statistics Division (UNSD).      | 1975                                                  |                      |
| Brunei  | Brunei Vital Registration Death Data 1976 as it appears in United Nations Statistics Division (UNSD). United Nations Demographic Yearbook. New York City, United States: United Nations Statistics Division (UNSD).      | 1976                                                  |                      |
| Brunei  | Brunei Vital Registration Death Data 1977 as it appears in United Nations Statistics Division (UNSD). United Nations Demographic Yearbook. New York City, United States: United Nations Statistics Division (UNSD).      | 1977                                                  |                      |
| Brunei  | Brunei Vital Registration Death Data 1978 as it appears in United Nations Statistics Division (UNSD). United Nations Demographic Yearbook. New York City, United States: United Nations Statistics Division (UNSD).      | 1978                                                  |                      |
| Brunei  | Institute for Health Metrics and Evaluation (IHME), Joint United Nations Program on HIV/AIDS (UNAIDS). Institute for Health Metrics and Evaluation HIV Mortality Estimates Based on the UNAIDS Spectrum Model Framework. | 1980-2013                                             | *                    |
| Brunei  | United Nations Children's Fund (UNICEF), World Health Organization (WHO). WHO and UNICEF Reported Disease Incidence Time Series - Pertussis. Geneva, Switzerland: World Health Organization (WHO).                       | 1980-1990, 1992, 1997-2001, 2003-2005, 2008-2012      |                      |
| Brunei  | United Nations Children's Fund (UNICEF), World Health Organization (WHO). WHO and UNICEF Reported Disease Incidence Time Series - Measles. Geneva, Switzerland: World Health Organization (WHO).                         | 1980-1990, 1992-1993, 1997-2001, 2003-2005, 2008-2012 |                      |
| Brunei  | Brunei Vital Registration Death Data 1982 as it appears in United Nations Statistics Division (UNSD). United Nations Demographic Yearbook. New York City, United States: United Nations Statistics Division (UNSD).      | 1982                                                  |                      |
| Brunei  | Brunei Vital Registration Death Data 1983 as it appears in United Nations Statistics Division (UNSD). United Nations Demographic Yearbook. New York City, United States: United Nations Statistics Division (UNSD).      | 1983                                                  |                      |

**Web Table 32 - Comprehensive citation list**

| Country | Citation                                                                                                                                                                                                                                                      | Year*     | New for GBD 2013 (*) |
|---------|---------------------------------------------------------------------------------------------------------------------------------------------------------------------------------------------------------------------------------------------------------------|-----------|----------------------|
| Brunei  | Brunei Vital Registration Death Data 1984 as it appears in United Nations Statistics Division (UNSD). United Nations Demographic Yearbook. New York City, United States: United Nations Statistics Division (UNSD).                                           | 1984      |                      |
| Brunei  | Brunei Vital Registration Death Data 1985 as it appears in United Nations Statistics Division (UNSD). United Nations Demographic Yearbook. New York City, United States: United Nations Statistics Division (UNSD).                                           | 1985      |                      |
| Brunei  | Brunei Vital Registration Death Data 1986 as it appears in United Nations Statistics Division (UNSD). United Nations Demographic Yearbook. New York City, United States: United Nations Statistics Division (UNSD).                                           | 1986      |                      |
| Brunei  | Brunei Vital Registration Death Data 1987 as it appears in United Nations Statistics Division (UNSD). United Nations Demographic Yearbook. New York City, United States: United Nations Statistics Division (UNSD).                                           | 1987      |                      |
| Brunei  | Brunei Vital Registration Death Data 1988 as it appears in United Nations Statistics Division (UNSD). United Nations Demographic Yearbook. New York City, United States: United Nations Statistics Division (UNSD).                                           | 1988      |                      |
| Brunei  | Brunei Vital Registration Death Data 1989 as it appears in United Nations Statistics Division (UNSD). United Nations Demographic Yearbook. New York City, United States: United Nations Statistics Division (UNSD).                                           | 1989      |                      |
| Brunei  | Brunei Vital Registration Death Data 1990 as it appears in United Nations Statistics Division (UNSD). United Nations Demographic Yearbook. New York City, United States: United Nations Statistics Division (UNSD).                                           | 1990      |                      |
| Brunei  | Weatherall D. Sickle Cell and Thalassemias Prevalence Data, Personal Correspondence with David Weatherall. [Unpublished].                                                                                                                                     | 1990-2009 |                      |
| Brunei  | Centre for Health Informatics and Multiprofessional Education, University College London. Modell's Haemoglobinopathologist's Almanac. London, United Kingdom: Centre for Health Informatics and Multiprofessional Education, University College London, 2008. | 1990-2003 |                      |
| Brunei  | Brunei Vital Registration Death Data 1991 as it appears in United Nations Statistics Division (UNSD). United Nations Demographic Yearbook. New York City, United States: United Nations Statistics Division (UNSD).                                           | 1991      |                      |
| Brunei  | Brunei Vital Registration Death Data 1992 as it appears in United Nations Statistics Division (UNSD). United Nations Demographic Yearbook. New York City, United States: United Nations Statistics Division (UNSD).                                           | 1992      |                      |
| Brunei  | World Health Organization (WHO). Country Mortality Data 1980-1999. [Unpublished].                                                                                                                                                                             | 1995      |                      |
| Brunei  | Brunei Vital Registration - Deaths 1996 ICD10 as it appears in World Health Organization (WHO). WHO Mortality Database Version February 2014. Geneva, Switzerland: World Health Organization (WHO), 2014.                                                     | 1996      |                      |
| Brunei  | United Nations Office on Drugs and Crime (UNODC). United Nations Office on Drugs and Crime Global Study on Homicides 2011. Vienna, Austria: United Nations Office on Drugs and Crime (UNODC), 2011.                                                           | 1996-2006 |                      |
| Brunei  | Brunei Vital Registration - Deaths 1997 ICD10 as it appears in World Health Organization (WHO). WHO Mortality Database Version February 2014. Geneva, Switzerland: World Health Organization (WHO), 2014.                                                     | 1997      |                      |

**Web Table 32 - Comprehensive citation list**

| Country | Citation                                                                                                                                                                                                             | Year*                           | New for GBD 2013 (*) |
|---------|----------------------------------------------------------------------------------------------------------------------------------------------------------------------------------------------------------------------|---------------------------------|----------------------|
| Brunei  | Brunei Vital Registration - Deaths 1998 ICD10 as it appears in World Health Organization (WHO). WHO Mortality Database Version February 2014. Geneva, Switzerland: World Health Organization (WHO), 2014.            | 1998                            |                      |
| Brunei  | World Health Organization (WHO). Yellow Fever Reported Cases, WHO Vaccine-Preventable Diseases: Monitoring System. Geneva, Switzerland: World Health Organization (WHO).                                             | 1998-2000, 2003-2005, 2008-2009 |                      |
| Brunei  | Brunei Vital Registration - Deaths 1999 ICD10 as it appears in World Health Organization (WHO). WHO Mortality Database Version February 2014. Geneva, Switzerland: World Health Organization (WHO), 2014.            | 1999                            |                      |
| Brunei  | Brunei Vital Registration - Deaths 2000 ICD10 as it appears in World Health Organization (WHO). WHO Mortality Database Version February 2014. Geneva, Switzerland: World Health Organization (WHO), 2014.            | 2000                            |                      |
| Brunei  | Brunei Darussalam Vital Registration - Deaths 2001 ICD10 as it appears in World Health Organization (WHO). WHO Mortality Database Version February 2014. Geneva, Switzerland: World Health Organization (WHO), 2014. | 2001                            |                      |
| Brunei  | Brunei Darussalam Vital Registration - Deaths 2002 ICD10 as it appears in World Health Organization (WHO). WHO Mortality Database Version February 2014. Geneva, Switzerland: World Health Organization (WHO), 2014. | 2002                            |                      |
| Brunei  | Joint United Nations Program on HIV/AIDS (UNAIDS), United Nations Children's Fund (UNICEF), World Health Organization (WHO). Brunei Epidemiological Fact Sheet on HIV/AIDS and STIs 2004.                            | 2002                            |                      |
| Brunei  | Brunei Darussalam Vital Registration - Deaths 2003 ICD10 as it appears in World Health Organization (WHO). WHO Mortality Database Version February 2014. Geneva, Switzerland: World Health Organization (WHO), 2014. | 2003                            |                      |
| Brunei  | Brunei Vital Registration Death Data 2003 as it appears in United Nations Statistics Division (UNSD). United Nations Demographic Yearbook. New York City, United States: United Nations Statistics Division (UNSD).  | 2003                            |                      |
| Brunei  | Brunei Darussalam Vital Registration - Deaths 2004 ICD10 as it appears in World Health Organization (WHO). WHO Mortality Database Version February 2014. Geneva, Switzerland: World Health Organization (WHO), 2014. | 2004                            |                      |
| Brunei  | Brunei Vital Registration Death Data 2004 as it appears in United Nations Statistics Division (UNSD). United Nations Demographic Yearbook. New York City, United States: United Nations Statistics Division (UNSD).  | 2004                            |                      |
| Brunei  | Brunei Darussalam Vital Registration - Deaths 2005 ICD10 as it appears in World Health Organization (WHO). WHO Mortality Database Version February 2014. Geneva, Switzerland: World Health Organization (WHO), 2014. | 2005                            |                      |
| Brunei  | Brunei Darussalam Vital Registration - Deaths 2006 ICD10 as it appears in World Health Organization (WHO). WHO Mortality Database Version February 2014. Geneva, Switzerland: World Health Organization (WHO), 2014. | 2006                            |                      |
| Brunei  | Brunei Vital Registration - Deaths 2007 ICD10 as it appears in World Health Organization (WHO). WHO Mortality Database Version February 2014. Geneva, Switzerland: World Health Organization (WHO), 2014.            | 2007                            |                      |
| Brunei  | World Health Organization (WHO). Global Status Report on Road Safety 2009. Geneva, Switzerland: World Health Organization (WHO), 2009.                                                                               | 2007                            |                      |

**Web Table 32 - Comprehensive citation list**

| Country  | Citation                                                                                                                                                                                                                 | Year*                                               | New for GBD 2013 (*) |
|----------|--------------------------------------------------------------------------------------------------------------------------------------------------------------------------------------------------------------------------|-----------------------------------------------------|----------------------|
| Brunei   | Brunei Vital Registration - Deaths 2008 ICD10 as it appears in World Health Organization (WHO). WHO Mortality Database Version February 2014. Geneva, Switzerland: World Health Organization (WHO), 2014.                | 2008                                                |                      |
| Brunei   | Brunei Vital Registration - Deaths 2009 ICD10 as it appears in World Health Organization (WHO). WHO Mortality Database Version February 2014. Geneva, Switzerland: World Health Organization (WHO), 2014.                | 2009                                                |                      |
| Brunei   | Brunei Darussalam Vital Registration - Deaths 2010 ICD10 as it appears in World Health Organization (WHO). WHO Mortality Database Version February 2014. Geneva, Switzerland: World Health Organization (WHO), 2014.     | 2010                                                |                      |
| Brunei   | Brunei Vital Registration - Deaths 2011 ICD10 as it appears in World Health Organization (WHO). WHO Mortality Database Version February 2014. Geneva, Switzerland: World Health Organization (WHO), 2014.                | 2011                                                | *                    |
| Bulgaria | Max Planck Institute for Demographic Research, University of California. Human Mortality Database. Berkeley, USA: University of California; Rostock, Germany: Max Planck Institute for Demographic Research.             | 1950-1963                                           |                      |
| Bulgaria | Fraser GR, Defaranas B, Kattamis CA, Race RR, Sanger R, Stamatoyannopoulos G. Glucose-6-phosphate dehydrogenase, colour vision and XG blood groups in Greece: linkage and population data. Ann Hum Genet. 1964; 395-403. | 1962                                                |                      |
| Bulgaria | Bulgaria Census 1965 as it appears in United Nations Statistics Division (UNSD). United Nations Demographic Yearbook. New York City, United States: United Nations Statistics Division (UNSD).                           | 1965                                                |                      |
| Bulgaria | Bulgaria Vital Registration - Deaths 1965 ICD7 as it appears in World Health Organization (WHO). WHO Mortality Database Version February 2014. Geneva, Switzerland: World Health Organization (WHO), 2014.               | 1965                                                |                      |
| Bulgaria | Centre for Research on the Epidemiology of Disasters (CRED). EM-DAT: The OFDA/CRED International Disaster Database. Brussels, Belgium: Catholic University of Leuven.                                                    | 1965, 1977, 1986, 1990, 2000-2002, 2005, 2007, 2012 |                      |
| Bulgaria | Bulgaria Vital Registration - Deaths 1966 ICD7 as it appears in World Health Organization (WHO). WHO Mortality Database Version February 2014. Geneva, Switzerland: World Health Organization (WHO), 2014.               | 1966                                                |                      |
| Bulgaria | Bulgaria Vital Registration - Deaths 1967 ICD7 as it appears in World Health Organization (WHO). WHO Mortality Database Version February 2014. Geneva, Switzerland: World Health Organization (WHO), 2014.               | 1967                                                |                      |
| Bulgaria | Bulgaria Vital Registration - Deaths 1968 ICD8 as it appears in World Health Organization (WHO). WHO Mortality Database Version February 2014. Geneva, Switzerland: World Health Organization (WHO), 2014.               | 1968                                                |                      |
| Bulgaria | Bulgaria Vital Registration - Deaths 1969 ICD8 as it appears in World Health Organization (WHO). WHO Mortality Database Version February 2014. Geneva, Switzerland: World Health Organization (WHO), 2014.               | 1969                                                |                      |
| Bulgaria | Bulgaria Vital Registration - Deaths 1970 ICD8 as it appears in World Health Organization (WHO). WHO Mortality Database Version February 2014. Geneva, Switzerland: World Health Organization (WHO), 2014.               | 1970                                                |                      |
| Bulgaria | Bulgaria Vital Registration - Deaths 1971 ICD8 as it appears in World Health Organization (WHO). WHO Mortality Database Version February 2014. Geneva, Switzerland: World Health Organization (WHO), 2014.               | 1971                                                |                      |

**Web Table 32 - Comprehensive citation list**

| Country  | Citation                                                                                                                                                                                                                 | Year*     | New for GBD 2013 (*) |
|----------|--------------------------------------------------------------------------------------------------------------------------------------------------------------------------------------------------------------------------|-----------|----------------------|
| Bulgaria | Bulgaria Vital Registration - Deaths 1972 ICD8 as it appears in World Health Organization (WHO). WHO Mortality Database Version February 2014. Geneva, Switzerland: World Health Organization (WHO), 2014.               | 1972      |                      |
| Bulgaria | Bulgaria Vital Registration - Deaths 1973 ICD8 as it appears in World Health Organization (WHO). WHO Mortality Database Version February 2014. Geneva, Switzerland: World Health Organization (WHO), 2014.               | 1973      |                      |
| Bulgaria | Bulgaria Vital Registration - Deaths 1974 ICD8 as it appears in World Health Organization (WHO). WHO Mortality Database Version February 2014. Geneva, Switzerland: World Health Organization (WHO), 2014.               | 1974      |                      |
| Bulgaria | Bulgaria Census 1975 as it appears in United Nations Statistics Division (UNSD). United Nations Demographic Yearbook. New York City, United States: United Nations Statistics Division (UNSD).                           | 1975      |                      |
| Bulgaria | Bulgaria Vital Registration - Deaths 1975 ICD8 as it appears in World Health Organization (WHO). WHO Mortality Database Version February 2014. Geneva, Switzerland: World Health Organization (WHO), 2014.               | 1975      |                      |
| Bulgaria | Bulgaria Vital Registration - Deaths 1976 ICD8 as it appears in World Health Organization (WHO). WHO Mortality Database Version February 2014. Geneva, Switzerland: World Health Organization (WHO), 2014.               | 1976      |                      |
| Bulgaria | Bulgaria Vital Registration - Deaths 1977 ICD8 as it appears in World Health Organization (WHO). WHO Mortality Database Version February 2014. Geneva, Switzerland: World Health Organization (WHO), 2014.               | 1977      |                      |
| Bulgaria | Bulgaria Vital Registration - Deaths 1978 ICD8 as it appears in World Health Organization (WHO). WHO Mortality Database Version February 2014. Geneva, Switzerland: World Health Organization (WHO), 2014.               | 1978      |                      |
| Bulgaria | Bulgaria Vital Registration - Deaths 1979 ICD8 as it appears in World Health Organization (WHO). WHO Mortality Database Version February 2014. Geneva, Switzerland: World Health Organization (WHO), 2014.               | 1979      |                      |
| Bulgaria | Bulgaria Vital Registration - Deaths 1980 ICD9 as it appears in World Health Organization (WHO). WHO Mortality Database Version February 2014. Geneva, Switzerland: World Health Organization (WHO), 2014.               | 1980      |                      |
| Bulgaria | Institute for Health Metrics and Evaluation (IHME), Joint United Nations Program on HIV/AIDS (UNAIDS). Institute for Health Metrics and Evaluation HIV Mortality Estimates Based on the UNAIDS Spectrum Model Framework. | 1980-2013 | *                    |
| Bulgaria | United Nations Children's Fund (UNICEF), World Health Organization (WHO). WHO and UNICEF Reported Disease Incidence Time Series - Pertussis. Geneva, Switzerland: World Health Organization (WHO).                       | 1980-2012 |                      |
| Bulgaria | United Nations Children's Fund (UNICEF), World Health Organization (WHO). WHO and UNICEF Reported Disease Incidence Time Series - Measles. Geneva, Switzerland: World Health Organization (WHO).                         | 1980-2012 |                      |
| Bulgaria | Bulgaria Vital Registration - Deaths 1981 ICD9 as it appears in World Health Organization (WHO). WHO Mortality Database Version February 2014. Geneva, Switzerland: World Health Organization (WHO), 2014.               | 1981      |                      |
| Bulgaria | Bulgaria Vital Registration - Deaths 1982 ICD9 as it appears in World Health Organization (WHO). WHO Mortality Database Version February 2014. Geneva, Switzerland: World Health Organization (WHO), 2014.               | 1982      |                      |



**Web Table 32 - Comprehensive citation list**

| Country  | Citation                                                                                                                                                                                                                                                      | Year*     | New for GBD 2013 (*) |
|----------|---------------------------------------------------------------------------------------------------------------------------------------------------------------------------------------------------------------------------------------------------------------|-----------|----------------------|
| Bulgaria | Bulgaria Vital Registration - Deaths 1983 ICD9 as it appears in World Health Organization (WHO). WHO Mortality Database Version February 2014. Geneva, Switzerland: World Health Organization (WHO), 2014.                                                    | 1983      |                      |
| Bulgaria | Bulgaria Vital Registration - Deaths 1984 ICD9 as it appears in World Health Organization (WHO). WHO Mortality Database Version February 2014. Geneva, Switzerland: World Health Organization (WHO), 2014.                                                    | 1984      |                      |
| Bulgaria | Bulgaria Vital Registration - Deaths 1985 ICD9 as it appears in World Health Organization (WHO). WHO Mortality Database Version February 2014. Geneva, Switzerland: World Health Organization (WHO), 2014.                                                    | 1985      |                      |
| Bulgaria | Tasheva ES, Toshkov SA, Dobreva AM. Hemoglobinopathies in Bulgaria. Hemoglobin. 1987; 11(5): 523-9.                                                                                                                                                           | 1985      |                      |
| Bulgaria | Bulgaria Vital Registration - Deaths 1986 ICD9 as it appears in World Health Organization (WHO). WHO Mortality Database Version February 2014. Geneva, Switzerland: World Health Organization (WHO), 2014.                                                    | 1986      |                      |
| Bulgaria | Bulgaria Vital Registration - Deaths 1987 ICD9 as it appears in World Health Organization (WHO). WHO Mortality Database Version February 2014. Geneva, Switzerland: World Health Organization (WHO), 2014.                                                    | 1987      |                      |
| Bulgaria | Bulgaria Vital Registration - Deaths 1988 ICD9 as it appears in World Health Organization (WHO). WHO Mortality Database Version February 2014. Geneva, Switzerland: World Health Organization (WHO), 2014.                                                    | 1988      |                      |
| Bulgaria | Bulgaria Vital Registration - Deaths 1989 ICD9 as it appears in World Health Organization (WHO). WHO Mortality Database Version February 2014. Geneva, Switzerland: World Health Organization (WHO), 2014.                                                    | 1989      |                      |
| Bulgaria | Bulgaria Vital Registration - Deaths 1990 ICD9 as it appears in World Health Organization (WHO). WHO Mortality Database Version February 2014. Geneva, Switzerland: World Health Organization (WHO), 2014.                                                    | 1990      |                      |
| Bulgaria | Modell B, Darlison M, Birgens H, Cario H, Faustino P, Giordano PC, Gulbis B, Hopmeier P, Lena-Russo D, Romao L, Theodorsson E. Epidemiology of haemoglobin disorders in Europe: an overview. Scand J Clin Lab Invest. 2007; 67(1): 39-69.                     | 1990-2006 |                      |
| Bulgaria | Centre for Health Informatics and Multiprofessional Education, University College London. Modell's Haemoglobinopathologist's Almanac. London, United Kingdom: Centre for Health Informatics and Multiprofessional Education, University College London, 2008. | 1990-2006 |                      |
| Bulgaria | Bulgaria Vital Registration - Deaths 1991 ICD9 as it appears in World Health Organization (WHO). WHO Mortality Database Version February 2014. Geneva, Switzerland: World Health Organization (WHO), 2014.                                                    | 1991      |                      |
| Bulgaria | Bulgaria Vital Registration - Deaths 1992 ICD9 as it appears in World Health Organization (WHO). WHO Mortality Database Version February 2014. Geneva, Switzerland: World Health Organization (WHO), 2014.                                                    | 1992      |                      |
| Bulgaria | Bulgaria Vital Registration - Deaths 1993 ICD9 as it appears in World Health Organization (WHO). WHO Mortality Database Version February 2014. Geneva, Switzerland: World Health Organization (WHO), 2014.                                                    | 1993      |                      |
| Bulgaria | Bulgaria Vital Registration - Deaths 1994 ICD9 as it appears in World Health Organization (WHO). WHO Mortality Database Version February 2014. Geneva, Switzerland: World Health Organization (WHO), 2014.                                                    | 1994      |                      |

**Web Table 32 - Comprehensive citation list**

| Country  | Citation                                                                                                                                                                                                                                                                                    | Year*           | New for GBD 2013 (*) |
|----------|---------------------------------------------------------------------------------------------------------------------------------------------------------------------------------------------------------------------------------------------------------------------------------------------|-----------------|----------------------|
| Bulgaria | Gallup International, World Bank (WB). Bulgaria Living Standards Measurement Survey 1995. Washington, DC, United States: World Bank (WB).                                                                                                                                                   | 1995            | *                    |
| Bulgaria | Bulgaria Vital Registration - Deaths 1995 ICD9 as it appears in World Health Organization (WHO). WHO Mortality Database Version February 2014. Geneva, Switzerland: World Health Organization (WHO), 2014.                                                                                  | 1995            |                      |
| Bulgaria | Mircescu G, Capsa D, Covic M, Caprioara MG, Gluhovschi G, Golea O, Ursea N, Gârmeata L, Cepoi V, Constantinovici N, Covic A. Nephrology and renal replacement therapy in Romania – transition still continues (Cinderella story revisited). Nephrol Dial Transplant. 2004; 19(12): 2971-80. | 1995, 2001      |                      |
| Bulgaria | Bulgaria Vital Registration - Deaths 1996 ICD9 as it appears in World Health Organization (WHO). WHO Mortality Database Version February 2014. Geneva, Switzerland: World Health Organization (WHO), 2014.                                                                                  | 1996            |                      |
| Bulgaria | World Health Organization (WHO). Bulgaria WHO Leishmaniasis Country Profile.                                                                                                                                                                                                                | 1996-2008       | *                    |
| Bulgaria | Gallup International, World Bank (WB). Bulgaria Living Standards Measurement Survey 1997. Washington, DC, United States: World Bank (WB).                                                                                                                                                   | 1997            | *                    |
| Bulgaria | Bulgaria Vital Registration - Deaths 1997 ICD9 as it appears in World Health Organization (WHO). WHO Mortality Database Version February 2014. Geneva, Switzerland: World Health Organization (WHO), 2014.                                                                                  | 1997            |                      |
| Bulgaria | Kojouharova M, Gatcheva N, Setchanova L, Robertson SE, Wenger JD. Epidemiology of meningitis due to Haemophilus influenzae type b in children in Bulgaria: a prospective, population-based surveillance study. Bull World Health Organ. 2002; 80(9): 690-5.                                 | 1997-1999       |                      |
| Bulgaria | Bulgaria Vital Registration - Deaths 1998 ICD9 as it appears in World Health Organization (WHO). WHO Mortality Database Version February 2014. Geneva, Switzerland: World Health Organization (WHO), 2014.                                                                                  | 1998            |                      |
| Bulgaria | Bulgaria Vital Registration - Deaths 1999 ICD9 as it appears in World Health Organization (WHO). WHO Mortality Database Version February 2014. Geneva, Switzerland: World Health Organization (WHO), 2014.                                                                                  | 1999            |                      |
| Bulgaria | Atanasova MV, Haydouchka IA, Zlatev SP, Stoilova YD, Iliev YT, Mateva NG. Prevalence of antibodies against hepatitis C virus and hepatitis B coinfection in healthy population in Bulgaria. A seroepidemiological study. Minerva Gastroenterol Dietol. 2004; 50(1): 89-96.                  | 1999-2000       |                      |
| Bulgaria | Bulgaria Vital Registration - Deaths 2000 ICD9 as it appears in World Health Organization (WHO). WHO Mortality Database Version February 2014. Geneva, Switzerland: World Health Organization (WHO), 2014.                                                                                  | 2000            |                      |
| Bulgaria | Curado MP, Edwards B, Shin HR, Storm H, Ferlay J, Heanue M and Boyle P, eds (2007). Cancer Incidence in Five Continents, Vol. IX Periodic Data (electronic version). Lyon, IARC. <a href="http://ci5.iarc.fr">http://ci5.iarc.fr</a>                                                        | 2000            |                      |
| Bulgaria | Institute for Health Metrics and Evaluation. Institute for Health Metrics and Evaluation Cancer Registry Database. [Unpublished].                                                                                                                                                           | 2000-2006       |                      |
| Bulgaria | World Health Organization (WHO). Yellow Fever Reported Cases, WHO Vaccine-Preventable Diseases: Monitoring System. Geneva, Switzerland: World Health Organization (WHO).                                                                                                                    | 2000, 2002-2009 |                      |
| Bulgaria | Bulgaria Vital Registration - Deaths 2001 ICD9 as it appears in World Health Organization (WHO). WHO Mortality Database Version February 2014. Geneva, Switzerland: World Health Organization (WHO), 2014.                                                                                  | 2001            |                      |



**Web Table 32 - Comprehensive citation list**

| Country  | Citation                                                                                                                                                                                                    | Year*     | New for GBD 2013 (*) |
|----------|-------------------------------------------------------------------------------------------------------------------------------------------------------------------------------------------------------------|-----------|----------------------|
| Bulgaria | Bulgaria Vital Registration - Deaths 2002 ICD9 as it appears in World Health Organization (WHO). WHO Mortality Database Version February 2014. Geneva, Switzerland: World Health Organization (WHO), 2014.  | 2002      |                      |
| Bulgaria | Bulgaria Vital Registration - Deaths 2003 ICD9 as it appears in World Health Organization (WHO). WHO Mortality Database Version February 2014. Geneva, Switzerland: World Health Organization (WHO), 2014.  | 2003      |                      |
| Bulgaria | EUVAC-NET. EUVAC-NET Pertussis Surveillance Report 2003-2007. Stockholm, Sweden: European Centre for Disease Prevention and Control, 2009.                                                                  | 2003-2007 |                      |
| Bulgaria | Bulgaria Vital Registration - Deaths 2004 ICD9 as it appears in World Health Organization (WHO). WHO Mortality Database Version February 2014. Geneva, Switzerland: World Health Organization (WHO), 2014.  | 2004      |                      |
| Bulgaria | Tzoneva M, Mavrudieva M, Toncheva D, Lalchev S. Glucose-6-phosphate dehydrogenase deficiency and Rh factor. Haematologia (Budap). 1984; 17(3): 399-403.                                                     | 2004-2006 |                      |
| Bulgaria | Bulgaria Vital Registration - Deaths 2005 ICD10 as it appears in World Health Organization (WHO). WHO Mortality Database Version February 2014. Geneva, Switzerland: World Health Organization (WHO), 2014. | 2005      |                      |
| Bulgaria | Bulgaria Vital Registration - Deaths 2006 ICD10 as it appears in World Health Organization (WHO). WHO Mortality Database Version February 2014. Geneva, Switzerland: World Health Organization (WHO), 2014. | 2006      |                      |
| Bulgaria | Bulgarian National Cancer Registry. Bulgaria Cancer Incidence Report 2006. Sofia, Bulgaria: "Avis 24" Ltd, 2008.                                                                                            | 2006      |                      |
| Bulgaria | Bulgaria Vital Registration - Deaths 2007 ICD10 as it appears in World Health Organization (WHO). WHO Mortality Database Version February 2014. Geneva, Switzerland: World Health Organization (WHO), 2014. | 2007      |                      |
| Bulgaria | World Health Organization (WHO). Global Status Report on Road Safety 2009. Geneva, Switzerland: World Health Organization (WHO), 2009.                                                                      | 2007      |                      |
| Bulgaria | Bulgaria Vital Registration - Deaths 2008 ICD10 as it appears in World Health Organization (WHO). WHO Mortality Database Version February 2014. Geneva, Switzerland: World Health Organization (WHO), 2014. | 2008      |                      |
| Bulgaria | EUVAC-NET. EUVAC-NET Pertussis Surveillance Report 2008. Stockholm, Sweden: European Centre for Disease Prevention and Control, 2009.                                                                       | 2008      |                      |
| Bulgaria | EUVAC-NET. EUVAC-NET Measles Surveillance Report 2008. Stockholm, Sweden: European Centre for Disease Prevention and Control, 2009.                                                                         | 2008      |                      |
| Bulgaria | Bulgaria Vital Registration - Deaths 2009 ICD10 as it appears in World Health Organization (WHO). WHO Mortality Database Version February 2014. Geneva, Switzerland: World Health Organization (WHO), 2014. | 2009      |                      |
| Bulgaria | EUVAC-NET. EUVAC-NET Measles Surveillance Report 2009. Stockholm, Sweden: European Centre for Disease Prevention and Control, 2010.                                                                         | 2009      |                      |
| Bulgaria | World Health Organization (WHO). Retrospective Measles Data on Supplementary Immunization Activities. Geneva, Switzerland: World Health Organization (WHO).                                                 | 2009-2010 |                      |
| Bulgaria | Bulgaria Vital Registration - Deaths 2010 ICD10 as it appears in World Health Organization (WHO). WHO Mortality Database Version February 2014. Geneva, Switzerland: World Health Organization (WHO), 2014. | 2010      |                      |

**Web Table 32 - Comprehensive citation list**

| Country      | Citation                                                                                                                                                                                                                                                                              | Year*                | New for GBD 2013 (*) |
|--------------|---------------------------------------------------------------------------------------------------------------------------------------------------------------------------------------------------------------------------------------------------------------------------------------|----------------------|----------------------|
| Bulgaria     | EUVAC-NET. EUVAC-NET Measles Surveillance Report 2010. Stockholm, Sweden: European Centre for Disease Prevention and Control, 2011.                                                                                                                                                   | 2010                 |                      |
| Bulgaria     | Bulgaria Vital Registration - Deaths 2011 ICD10 as it appears in World Health Organization (WHO). WHO Mortality Database Version February 2014. Geneva, Switzerland: World Health Organization (WHO), 2014.                                                                           | 2011                 | *                    |
| Bulgaria     | Bulgaria Vital Registration - Deaths 2012 ICD10 as it appears in World Health Organization (WHO). WHO Mortality Database Version February 2014. Geneva, Switzerland: World Health Organization (WHO), 2014.                                                                           | 2012                 | *                    |
| Burkina Faso | Catholic University of Leuven, Organization for Economic Co-operation and Development (OECD), United Nations Population Division. Mortality in Developing Countries: Tome I Data Bank. Organization for Economic Co-operation and Development (OECD), 1980.                           | 1960                 |                      |
| Burkina Faso | Directorate of Statistics and Office Equipment (Burkina Faso), National Institute of Statistics and Economic Studies (INSEE) (France). Upper Volta Demographic Sample Survey 1960-1961.                                                                                               | 1960-1961            |                      |
| Burkina Faso | National Institute of Statistics and Demography (Upper Volta). Upper Volta Post-Censal Survey 1976.                                                                                                                                                                                   | 1976                 |                      |
| Burkina Faso | Institute for Health Metrics and Evaluation (IHME), Joint United Nations Program on HIV/AIDS (UNAIDS). Institute for Health Metrics and Evaluation HIV Mortality Estimates Based on the UNAIDS Spectrum Model Framework.                                                              | 1980-2013            | *                    |
| Burkina Faso | United Nations Children's Fund (UNICEF), World Health Organization (WHO). WHO and UNICEF Reported Disease Incidence Time Series - Pertussis. Geneva, Switzerland: World Health Organization (WHO).                                                                                    | 1980-1996, 1999-2013 |                      |
| Burkina Faso | United Nations Children's Fund (UNICEF), World Health Organization (WHO). WHO and UNICEF Reported Disease Incidence Time Series - Measles. Geneva, Switzerland: World Health Organization (WHO).                                                                                      | 1980-1997, 1999-2013 |                      |
| Burkina Faso | Labie D, Richin C, Pagnier J, Gentilini M, Nagel RL. Hemoglobins S and C in Upper Volta. Hum Genet. 1984; 65(3): 300-2.                                                                                                                                                               | 1981-1983            | *                    |
| Burkina Faso | Baudon D, Robert V, Roux J, Lhuillier M, Saluzzo JF, Sarthou JL, Cornet M, Stanghellini A, Gazin P, Molez JF. The 1983 yellow fever epidemic in Burkina Faso. Bull World Health Organ. 1986; 64(6): 873-82.                                                                           | 1983                 |                      |
| Burkina Faso | Tomori O. Yellow fever in Africa: public health impact and prospects for control in the 21st century. Biomedica. 2002; 22(2): 178-210.                                                                                                                                                | 1983                 |                      |
| Burkina Faso | WHO Department of Communicable Disease Surveillance and Response. WHO Report on Global Surveillance of Epidemic-prone Infectious Diseases 2000.                                                                                                                                       | 1983-1985            |                      |
| Burkina Faso | Rowe AK, Rowe SY, Snow RW, Korenromp EL, Schellenberg JR, Stein C, Nahlen BL, Bryce J, Black RE, Steketee RW. The burden of malaria mortality among African children in the year 2000. Int J Epidemiol. 2006; 35(3): 691-704.                                                         | 1984                 |                      |
| Burkina Faso | Burkina Faso Population and Housing Census 1985 as it appears in United Nations Statistics Division (UNSD). United Nations Demographic Yearbook. New York City, United States: United Nations Statistics Division (UNSD).                                                             | 1985                 |                      |
| Burkina Faso | Minnesota Population Center, National Institute of Statistics and Demography (Burkina Faso). Burkina Faso Population and Housing Census 1985 from the Integrated Public Use Microdata Series, International. [Machine-readable database]. Minneapolis: University of Minnesota, 2013. | 1985                 |                      |
| Burkina Faso | Office of Scientific and Technical Research Overseas (France). Burkina Faso - Pissila Analysis of Mortality in Childhood after Three Years of Observation 1985-1987. Office of Scientific and Technical Research Overseas (France), 1988.                                             | 1985-1987            |                      |

**Web Table 32 - Comprehensive citation list**

| Country      | Citation                                                                                                                                                                                                                                                                                                                                                                          | Year*                             | New for GBD 2013 (*) |
|--------------|-----------------------------------------------------------------------------------------------------------------------------------------------------------------------------------------------------------------------------------------------------------------------------------------------------------------------------------------------------------------------------------|-----------------------------------|----------------------|
| Burkina Faso | Peace Research Institute Oslo (PRIO). Battle Deaths Dataset Version 3, 2009. Oslo, Norway: Peace Research Institute Oslo (PRIO), 2009.                                                                                                                                                                                                                                            | 1985-1988                         |                      |
| Burkina Faso | Office of Scientific and Technical Research Overseas (France). Burkina Faso - Niangoloko Childhood Mortality 1986-1988.                                                                                                                                                                                                                                                           | 1986-1988                         |                      |
| Burkina Faso | Centre for Research on the Epidemiology of Disasters (CRED). EM-DAT: The OFDA/CRED International Disaster Database. Brussels, Belgium: Catholic University of Leuven.                                                                                                                                                                                                             | 1988, 1994, 1999, 2007-2010, 2012 |                      |
| Burkina Faso | Department of Peace and Conflict Research, Uppsala University. UCDP Battle-Related Deaths Database Version 5, 2013. Uppsala, Sweden: Department of Peace and Conflict Research, Uppsala University, 2013.                                                                                                                                                                         | 1989-1987                         | *                    |
| Burkina Faso | Kafando E, Sawadogo M, Cotton F, Vertongen F, Gulbis B. Neonatal screening for sickle cell disorders in Ouagadougou, Burkina Faso: a pilot study. J Med Screen. 2005; 12(3): 112-4.                                                                                                                                                                                               | 1990-2004                         |                      |
| Burkina Faso | Weatherall D. Sickle Cell and Thalassemias Prevalence Data, Personal Correspondence with David Weatherall. [Unpublished].                                                                                                                                                                                                                                                         | 1990-2009                         |                      |
| Burkina Faso | World Health Organization (WHO). Global Prevalence and Incidence of Selected Curable Sexually Transmitted Infections: Overviews and Estimates 2001. Geneva, Switzerland: World Health Organization (WHO), 2001.                                                                                                                                                                   | 1990-1999                         |                      |
| Burkina Faso | Centre for Health Informatics and Multiprofessional Education, University College London. Modell's Haemoglobinopathologist's Almanac. London, United Kingdom: Centre for Health Informatics and Multiprofessional Education, University College London, 2008.                                                                                                                     | 1990-2003                         |                      |
| Burkina Faso | INDEPTH, Nouna Health Research Center (Burkina Faso). Burkina Faso - Nouna Health and Demographic Surveillance System.                                                                                                                                                                                                                                                            | 1992-2010                         |                      |
| Burkina Faso | Macro International, Inc, National Institute of Statistics and Demography (Burkina Faso). Burkina Faso Demographic and Health Survey 1992-1993. Calverton, United States: Macro International, Inc.                                                                                                                                                                               | 1992-1993                         |                      |
| Burkina Faso | Modiano D, Luoni G, Sirima BS, Lanfrancotti A, Petrarca V, Cruciani F, Simporé J, Ciminelli BM, Foglietta E, Grisanti P, Bianco I, Modiano G, Coluzzi M. The lower susceptibility to Plasmodium falciparum malaria of Fulani of Burkina Faso (west Africa) is associated with low frequencies of classic malaria-resistance genes. Trans R Soc Trop Med Hyg. 2001; 95(2): 149-52. | 1993-1994                         |                      |
| Burkina Faso | World Health Organization (WHO). Yellow Fever Reported Cases, WHO Vaccine-Preventable Diseases: Monitoring System. Geneva, Switzerland: World Health Organization (WHO).                                                                                                                                                                                                          | 1995-1997, 1999-2006, 2008-2009   |                      |
| Burkina Faso | World Health Organization Regional Office for Africa. HIV/AIDS Epidemiological Surveillance Update for the WHO African Region. World Health Organization Regional Office for Africa, 2003.                                                                                                                                                                                        | 1995-1999                         |                      |
| Burkina Faso | National Institute of Statistics and Demography (INSD) (Burkina Faso), United Nations Population Fund (UNFPA), United Nations Children's Fund (UNICEF), United Nations Development Programme (UNDP), European Union (EU), African Development Bank (AfDB). Burkina Faso Population and Housing Census 1996.                                                                       | 1996                              |                      |
| Burkina Faso | Sombié I, Meda N, Cartoux M, Tiendrébéogo S, Ouangré A, Yaro S, Ky-Zerbo O, Dao B, Van de Perre P, Mandelbrot L, Dabis F. Seroprevalence of syphilis among women attending urban antenatal clinics in Burkina Faso, 1995-8. The DITRAME Study Group. DIminuation de la TRAnsmiSSion Mère-Enfant. Sex Transm Infect. 2000; 76(4): 314-6.                                           | 1997                              |                      |
| Burkina Faso | World Health Organization (WHO). The Global Elimination of Congenital Syphilis: Rationale and Strategy for Action. Geneva, Switzerland: World Health Organization (WHO), 2007.                                                                                                                                                                                                    | 1997-2003                         |                      |
| Burkina Faso | Joint United Nations Program on HIV/AIDS (UNAIDS), United Nations Children's Fund (UNICEF), World Health Organization (WHO). Burkina Faso Epidemiological Fact Sheet on HIV/AIDS and STIs 2004.                                                                                                                                                                                   | 1997-1999                         |                      |

**Web Table 32 - Comprehensive citation list**

| Country      | Citation                                                                                                                                                                                                                                                                                        | Year*                             | New for GBD 2013 (*) |
|--------------|-------------------------------------------------------------------------------------------------------------------------------------------------------------------------------------------------------------------------------------------------------------------------------------------------|-----------------------------------|----------------------|
| Burkina Faso | Würthwein R, Gbangou A, Sauerborn R, Schmidt CM. Measuring the local burden of disease. A study of years of life lost in sub-Saharan Africa. <i>Int J Epidemiol.</i> 2001; 30(3): 501-8.                                                                                                        | 1998                              |                      |
| Burkina Faso | Mutebi J-P, Barrett ADT. The epidemiology of yellow fever in Africa. <i>Microbes Infect.</i> 2002; 4(14): 1459-68.                                                                                                                                                                              | 1998                              |                      |
| Burkina Faso | Macro International, Inc, National Institute of Statistics and Demography (Burkina Faso). Burkina Faso Demographic and Health Survey 1998-1999. Calverton, United States: Macro International, Inc.                                                                                             | 1998-1999                         |                      |
| Burkina Faso | Measles Supplementary Immunization Activity Data as provided by the World Health Organization. [Unpublished].                                                                                                                                                                                   | 1998-1999                         |                      |
| Burkina Faso | Simpore J, Ilboudo D, Damintoti K, Sawadogo L, Maria E, Binet S, Nitiema H, Ouedraogo P, Pignatelli S, Nikiema J-B. Glucose-6-phosphate dehydrogenase deficiency and sickle cell disease in Burkina Faso. <i>Pak J Biol Sci.</i> 2007; 10(3): 409-14.                                           | 1999-2005                         |                      |
| Burkina Faso | Simpore J, Pignatelli S, Barlati S, Musumeci S. Modification in the frequency of Hb C and Hb S in Burkina Faso: an influence of migratory fluxes and improvement of patient health care. <i>Hemoglobin.</i> 2002; 26(2): 113-20.                                                                | 1999-2001                         | *                    |
| Burkina Faso | Kambiré C, Konde MK, Yaméogo A, Tiendrébéogo SR, Ouédraogo RT, Otten MW Jr, Cairns KL, Zuber PL. Measles incidence before and after mass vaccination campaigns in Burkina Faso. <i>J Infect Dis.</i> 2003; 187(Suppl 1): S80-5.                                                                 | 2000                              |                      |
| Burkina Faso | Sombie I, Kambou T, Conombo SG, Sankara O, Ouedraogo L, Zougrana T, Hounton S, Meda N. [Retrospective study of urogenital fistula in Burkina Faso from 2001 to 2003]. <i>Med Trop (Mars).</i> 2007; 67(1): 48-52.                                                                               | 2001-2003                         |                      |
| Burkina Faso | World Health Organization (WHO). Retrospective Measles Data on Supplementary Immunization Activities. Geneva, Switzerland: World Health Organization (WHO).                                                                                                                                     | 2001, 2004, 2007, 2009, 2011-2012 |                      |
| Burkina Faso | Abdullah S, Adazu K, Masanja H, Diallo D, Hodgson A, Ilboudo-Sanogo E, Nhalo A, Owusu-Agyei S, Thompson R, Smith T, Binka FN. Patterns of age-specific mortality in children in endemic areas of sub-Saharan Africa. <i>Am J Trop Med Hyg.</i> 2007; 77(6 Suppl): 99-105.                       | 2002                              |                      |
| Burkina Faso | Ramroth H, Lorenz E, Rankin JC, Fottrell E, Yé M, Neuhann F, Ssenono M, Sié A, Byass P, Becher H. Causas de la distribución de muerte con el modelo InterVA y la codificación de médicos en un área rural de Burkina Faso. <i>Trop Med Int Health.</i> 2012; 17(7): 904-13.                     | 2002                              |                      |
| Burkina Faso | World Health Organization (WHO). Measles mortality reduction in West Africa, 1996-2002. <i>Wkly Epidemiol Rec.</i> 2003; 78(45): 390-2.                                                                                                                                                         | 2002                              |                      |
| Burkina Faso | United Nations Office on Drugs and Crime (UNODC). United Nations Office on Drugs and Crime Global Study on Homicides 2011. Vienna, Austria: United Nations Office on Drugs and Crime (UNODC), 2011.                                                                                             | 2002-2007                         |                      |
| Burkina Faso | Parent du Château I, Traore Y, Gessner BD, Antignac A, Naccro B, Njanpop-Lafourcade BM, Ouedraogo MS, Tiendrebéogo SR, Varon E, Taha MK. Bacterial meningitis in Burkina Faso: surveillance using field-based polymerase chain reaction testing. <i>Clin Infect Dis.</i> 2005; 40(1): 17-25.    | 2002-2003                         |                      |
| Burkina Faso | Yaro S, Lourd M, Naccro B, Njanpop-Lafourcade BM, Hien A, Ouedraogo MS, Traore Y, Schouls LM, Parent du Château I, Gessner BD, Clinical Group, Laboratory Group. The epidemiology of Haemophilus influenzae type b meningitis in Burkina Faso. <i>Pediatr Infect Dis J.</i> 2006; 25(5): 415-9. | 2002-2005                         |                      |
| Burkina Faso | Macro International, Inc, National Institute of Statistics and Demography (Burkina Faso). Burkina Faso Demographic and Health Survey 2003. Calverton, United States: Macro International, Inc.                                                                                                  | 2003                              |                      |

**Web Table 32 - Comprehensive citation list**

| Country      | Citation                                                                                                                                                                                                                                                                                                                                                                                                                                                | Year*     | New for GBD 2013 (*) |
|--------------|---------------------------------------------------------------------------------------------------------------------------------------------------------------------------------------------------------------------------------------------------------------------------------------------------------------------------------------------------------------------------------------------------------------------------------------------------------|-----------|----------------------|
| Burkina Faso | Meissner PE, Coulibaly B, Mandi G, Mansmann U, Witte S, Schiek W, Müller O, Schirmer RH, Mockenhaupt FP, Bienzle U. Diagnosis of red cell G6PD deficiency in rural Burkina Faso: comparison of a rapid fluorescent enzyme test on filter paper with polymerase chain reaction based genotyping. <i>Br J Haematol.</i> 2005; 131(3): 395-9.                                                                                                              | 2003      |                      |
| Burkina Faso | Kirakoya-Samadoulougou F, Defer M-C, Yaro S, Fao P, Ilboudo F, Langani Y, Meda N, Robert A, Nagot N. Low seroprevalence of syphilis in Burkina Faso. <i>Sex Transm Infect.</i> 2011; 87(1): 35-7.                                                                                                                                                                                                                                                       | 2003      |                      |
| Burkina Faso | Bell JS, Ouédraogo M, Ganaba R, Sombié I, Byass P, Baggaley RF, Filippi V, Fitzmaurice AE, Graham WJ. The epidemiology of pregnancy outcomes in rural Burkina Faso. <i>Trop Med Int Health.</i> 2008; 13 Suppl 1: 31-43.                                                                                                                                                                                                                                | 2004      |                      |
| Burkina Faso | United Nations Children's Fund (UNICEF), National Institute of Statistics and Demography (INSD) (Burkina Faso). Burkina Faso Multiple Indicator Cluster Survey 2006. New York, United States: United Nations Children's Fund (UNICEF).                                                                                                                                                                                                                  | 2006      |                      |
| Burkina Faso | National Institute of Statistics and Demography (INSD) (Burkina Faso), Government of Burkina Faso, United Nations Population Fund (UNFPA), United Nations Children's Fund (UNICEF), European Union (EU), National Census Committee (Burkina Faso), Central Census Bureau (Burkina Faso), World Bank Development of The National Statistical System Project, Kingdom of Denmark, Kingdom of Luxembourg. Burkina Faso Population and Housing Census 2006. | 2006      | *                    |
| Burkina Faso | Ministry of Health (Burkina Faso). Burkina Faso Health Statistical Yearbook 2006. Ouagadougou, Burkina Faso: Ministry of Health (Burkina Faso), 2007.                                                                                                                                                                                                                                                                                                   | 2006      |                      |
| Burkina Faso | Minnesota Population Center, National Institute of Statistics and Demography (Burkina Faso). Burkina Faso Population and Housing Census 2006 from the Integrated Public Use Microdata Series, International. [Machine-readable database]. Minneapolis: University of Minnesota, 2013.                                                                                                                                                                   | 2006      |                      |
| Burkina Faso | Moisi JC, Saha SK, Falade AG, Njanpop-Lafourcade B-M, Oundo J, Zaidi AKM, Afroj S, Bakare RA, Buss JK, Lasi R, Mueller J, Odekanmi AA, Sangare L, Scott JAG, Knoll MD, Levine OS, Gessner BD. Enhanced diagnosis of pneumococcal meningitis with use of the binax NOW immunochromatographic test of <i>Streptococcus pneumoniae</i> antigen: A multisite study. <i>Clin Infect Dis.</i> 2009; 48(Suppl 2): S49-S56.                                     | 2006-2007 |                      |
| Burkina Faso | World Health Organization (WHO). Global Status Report on Road Safety 2009. Geneva, Switzerland: World Health Organization (WHO), 2009.                                                                                                                                                                                                                                                                                                                  | 2007      |                      |
| Burkina Faso | World Health Organization (WHO). Yellow fever in Africa and South America, 2007. <i>Wkly Epidemiol Rec.</i> 2009; 84(13): 97-104.                                                                                                                                                                                                                                                                                                                       | 2007      |                      |
| Burkina Faso | Diallo AH, Meda N, Sommerfelt H, Traore GS, Cousens S, Tylleskar T. The high burden of infant deaths in rural Burkina Faso: a prospective community-based cohort study. <i>BMC Public Health.</i> 2012; 12(739).                                                                                                                                                                                                                                        | 2007      |                      |
| Burkina Faso | Mueller JE, Yaro S, Ouédraogo MS, Levina N, Njanpop-Lafourcade B-M, Tall H, Idohou RS, Sanou O, Kroman SS, Drabo A, Nacro B, Millogo A, van der Linden M, Gessner BD. Pneumococci in the African meningitis belt: meningitis incidence and carriage prevalence in children and adults. <i>PLoS One.</i> 2012; 7(12): e52464.                                                                                                                            | 2007-2009 | *                    |
| Burkina Faso | Novak RT, Kambou JL, Diomandé FV, Tarbangdo TF, Ouédraogo-Traoré R, Sangaré L, Lingani C, Martin SW, Hatcher C, Mayer LW, Laforce FM, Avokey F, Djingarey MH, Messonnier NE, Tiendrébéogo SR, Clark TA. Serogroup A meningococcal conjugate vaccination in Burkina Faso: analysis of national surveillance data. <i>Lancet Infect Dis.</i> 2012; 12(10): 757-64.                                                                                        | 2007-2011 | *                    |

**Web Table 32 - Comprehensive citation list**

| Country      | Citation                                                                                                                                                                                                                                                                                                    | Year*                                       | New for GBD 2013 (*) |
|--------------|-------------------------------------------------------------------------------------------------------------------------------------------------------------------------------------------------------------------------------------------------------------------------------------------------------------|---------------------------------------------|----------------------|
| Burkina Faso | Yé M, Diboulo E, Niamba L, Sié A, Coulibaly B, Bagagnan C, Dembélé J, Ramroth H. An improved method for physician-certified verbal autopsy reduces the rate of discrepancy: experiences in the Nouna Health and Demographic Surveillance Site (NHDSS), Burkina Faso. <i>Popul Health Metr.</i> 2011; 9: 34. | 2009                                        |                      |
| Burkina Faso | Joint United Nations Program on HIV/AIDS (UNAIDS), National Committee for the Fight Against AIDS (Burkina Faso). Burkina Faso UNGASS Report 2010. Geneva, Switzerland: Joint United Nations Program on HIV/AIDS (UNAIDS), 2010.                                                                             | 2009                                        |                      |
| Burkina Faso | ICF Macro, Ministry of Health (Burkina Faso), National Institute of Statistics and Demography (Burkina Faso). Burkina Faso Demographic and Health Survey 2010-2011. Claverton, Maryland: ICF Macro.                                                                                                         | 2010-2011                                   | *                    |
| Burundi      | Peace Research Institute Oslo (PRIO). Battle Deaths Dataset Version 3, 2009. Oslo, Norway: Peace Research Institute Oslo (PRIO), 2009.                                                                                                                                                                      | 1965-1988                                   |                      |
| Burundi      | Ministry of Planning, Department of Statistics (Burundi). Burundi National Demographic Survey 1970-1971.                                                                                                                                                                                                    | 1970-1971                                   |                      |
| Burundi      | Central Bureau of Census (Burundi). Burundi Population and Housing Census 1979.                                                                                                                                                                                                                             | 1979                                        |                      |
| Burundi      | Institute for Health Metrics and Evaluation (IHME), Joint United Nations Program on HIV/AIDS (UNAIDS). Institute for Health Metrics and Evaluation HIV Mortality Estimates Based on the UNAIDS Spectrum Model Framework.                                                                                    | 1980-2013                                   | *                    |
| Burundi      | United Nations Children's Fund (UNICEF), World Health Organization (WHO). WHO and UNICEF Reported Disease Incidence Time Series - Pertussis. Geneva, Switzerland: World Health Organization (WHO).                                                                                                          | 1980-1995, 1998-2000, 2002, 2004, 2006-2012 |                      |
| Burundi      | United Nations Children's Fund (UNICEF), World Health Organization (WHO). WHO and UNICEF Reported Disease Incidence Time Series - Measles. Geneva, Switzerland: World Health Organization (WHO).                                                                                                            | 1980-2000, 2002-2013                        |                      |
| Burundi      | United Nations Office on Drugs and Crime (UNODC). United Nations Surveys on Crime Trends and the Operations of Criminal Justice Systems 1970-2006 as provided by Kavi Bhalla. [Unpublished]                                                                                                                 | 1981-1986                                   |                      |
| Burundi      | Population Department, Ministry of the Interior (Burundi), Westinghouse; Institute for Resource Development. Burundi Demographic and Health Survey 1987. Columbia, United States: Westinghouse; Institute for Resource Development.                                                                         | 1987                                        |                      |
| Burundi      | Chen RT, Weierbach R, Bisoffi Z, Cutts F, Rhodes P, Ramaroson S, Ntembagara C, Bizimana F. A 'post-honeymoon period' measles outbreak in Muyinga sector, Burundi. <i>Int J Epidemiol.</i> 1994; 23(1): 185-93.                                                                                              | 1988-1989                                   |                      |
| Burundi      | Department of Peace and Conflict Research, Uppsala University. UCDP Battle-Related Deaths Database Version 5, 2013. Uppsala, Sweden: Department of Peace and Conflict Research, Uppsala University, 2013.                                                                                                   | 1989-2008                                   | *                    |
| Burundi      | Centre for Research on the Epidemiology of Disasters (CRED). EM-DAT: The OFDA/CRED International Disaster Database. Brussels, Belgium: Catholic University of Leuven.                                                                                                                                       | 1989, 1999-2001, 2004-2008, 2010-2011       |                      |
| Burundi      | Burundi Population and Housing Census 1990 as it appears in United Nations Statistics Division (UNSD). United Nations Demographic Yearbook. New York City, United States: United Nations Statistics Division (UNSD).                                                                                        | 1990                                        |                      |
| Burundi      | Delacollette C, Barutwanayo M. Mortality and morbidity at young ages in a stable hyperendemic malaria region, community Nyanza-Lac, Imbo South, Burundi. <i>Bull Soc Pathol Exot.</i> 1993; 86(5): 373-9.                                                                                                   | 1990                                        |                      |
| Burundi      | Weatherall D. Sickle Cell and Thalassemias Prevalence Data, Personal Correspondence with David Weatherall. [Unpublished].                                                                                                                                                                                   | 1990-2009                                   |                      |
| Burundi      | Centre for Health Informatics and Multiprofessional Education, University College London. Modell's Haemoglobinopathologist's Almanac. London, United Kingdom: Centre for Health Informatics and Multiprofessional Education, University College London, 2008.                                               | 1990-2003                                   |                      |



**Web Table 32 - Comprehensive citation list**

| Country  | Citation                                                                                                                                                                                                                                                                 | Year*                            | New for GBD 2013 (*) |
|----------|--------------------------------------------------------------------------------------------------------------------------------------------------------------------------------------------------------------------------------------------------------------------------|----------------------------------|----------------------|
| Burundi  | Burundi Institute of Statistics and Economic Studies. Burundi - Bujumbura Household Expenditure Survey 1991.                                                                                                                                                             | 1991                             |                      |
| Burundi  | Aubry P, Niel L, Niyongabo T, Kerguelen S, Larouze B. Seroprevalence of hepatitis E virus in an adult urban population from Burundi. <i>Am J Trop Med Hyg.</i> 1997; 57(3): 272-3.                                                                                       | 1992-1993                        |                      |
| Burundi  | Department of Peace and Conflict Research, Uppsala University. UCDP One-Sided Violence Database Version 1.4, 2013. Uppsala, Sweden: Department of Peace and Conflict Research, Uppsala University, 2013.                                                                 | 1994-2006                        | *                    |
| Burundi  | World Health Organization (WHO). Yellow Fever Reported Cases, WHO Vaccine-Preventable Diseases: Monitoring System. Geneva, Switzerland: World Health Organization (WHO).                                                                                                 | 1995, 1997-1999, 2004, 2006-2009 |                      |
| Burundi  | Department of Peace and Conflict Research, Uppsala University. UCDP Nonstate Conflict Database Version 2.5, 2013. Uppsala, Sweden: Department of Peace and Conflict Research, Uppsala University, 2013.                                                                  | 1997-2007                        | *                    |
| Burundi  | World Health Organization Regional Office for Africa. HIV/AIDS Epidemiological Surveillance Update for the WHO African Region. World Health Organization Regional Office for Africa, 2003.                                                                               | 1997-2001                        |                      |
| Burundi  | Burundi Institute of Statistics and Economic Studies, United Nations Children's Fund (UNICEF). Burundi Multiple Indicator Cluster Survey 2000. New York, United States: United Nations Children's Fund (UNICEF).                                                         | 2000                             |                      |
| Burundi  | World Health Organization (WHO). Retrospective Measles Data on Supplementary Immunization Activities. Geneva, Switzerland: World Health Organization (WHO).                                                                                                              | 2001-2006, 2009-2012             |                      |
| Burundi  | United Nations Children's Fund (UNICEF), Burundi Institute of Statistics and Economic Studies, United Nations Population Fund (UNFPA). Burundi Multiple Indicator Cluster Survey 2005. New York, United States: United Nations Children's Fund (UNICEF).                 | 2005                             |                      |
| Burundi  | Joint United Nations Program on HIV/AIDS (UNAIDS), National Council for the Fight Against AIDS (CNLS) (Burundi). Burundi Implementation of the Declaration of Commitment on HIV/AIDS 2010. Geneva, Switzerland: Joint United Nations Program on HIV/AIDS (UNAIDS), 2010. | 2009                             |                      |
| Burundi  | Burundi Institute of Statistics and Economic Studies, ICF International, Ministry of Public Health and the Fight against AIDS (Burundi). Burundi Demographic and Health Survey 2010-2011. Fairfax, United States: ICF International, 2012.                               | 2010-2011                        |                      |
| Burundi  | Burundi Institute of Statistics and Economic Studies, ICF Macro, Ministry of Public Health and the Fight against AIDS (Burundi), National Institute of Public Health (Burundi). Burundi Malaria Indicator Survey 2012-2013. ICF Macro, 2013.                             | 2012-2013                        | *                    |
| Cambodia | Peace Research Institute Oslo (PRIO). Battle Deaths Dataset Version 3, 2009. Oslo, Norway: Peace Research Institute Oslo (PRIO), 2009.                                                                                                                                   | 1950-1988                        |                      |
| Cambodia | Cambodia Sample Survey 1959 as it appears in United Nations Statistics Division (UNSD). United Nations Demographic Yearbook - Historical Supplement 1997. New York City, United States: United Nations Statistics Division (UNSD).                                       | 1959                             |                      |
| Cambodia | Institute for Health Metrics and Evaluation (IHME), Joint United Nations Program on HIV/AIDS (UNAIDS). Institute for Health Metrics and Evaluation HIV Mortality Estimates Based on the UNAIDS Spectrum Model Framework.                                                 | 1980-2013                        | *                    |
| Cambodia | United Nations Children's Fund (UNICEF), World Health Organization (WHO). WHO and UNICEF Reported Disease Incidence Time Series - Pertussis. Geneva, Switzerland: World Health Organization (WHO).                                                                       | 1980-1994, 1997-2010, 2012-2013  |                      |
| Cambodia | United Nations Children's Fund (UNICEF), World Health Organization (WHO). WHO and UNICEF Reported Disease Incidence Time Series - Measles. Geneva, Switzerland: World Health Organization (WHO).                                                                         | 1980-2013                        |                      |

**Web Table 32 - Comprehensive citation list**

| Country  | Citation                                                                                                                                                                                                                                                      | Year*                                                  | New for GBD 2013 (*) |
|----------|---------------------------------------------------------------------------------------------------------------------------------------------------------------------------------------------------------------------------------------------------------------|--------------------------------------------------------|----------------------|
| Cambodia | Department of Peace and Conflict Research, Uppsala University. UCDP Battle-Related Deaths Database Version 5, 2013. Uppsala, Sweden: Department of Peace and Conflict Research, Uppsala University, 2013.                                                     | 1989-2011                                              | *                    |
| Cambodia | Weatherall D. Sickle Cell and Thalassemias Prevalence Data, Personal Correspondence with David Weatherall. [Unpublished].                                                                                                                                     | 1990-2009                                              |                      |
| Cambodia | Department of Peace and Conflict Research, Uppsala University. UCDP One-Sided Violence Database Version 1.4, 2013. Uppsala, Sweden: Department of Peace and Conflict Research, Uppsala University, 2013.                                                      | 1990-1998                                              | *                    |
| Cambodia | Thüring EG, Joller-Jemelka HI, Sareth H, Sokhan U, Reth C, Grob P. Prevalence of markers of hepatitis viruses A, B, C and of HIV in healthy individuals and patients of a Cambodian province. Southeast Asian J Trop Med Public Health. 1993; 24(2): 239-49.  | 1990-1991                                              |                      |
| Cambodia | Centre for Health Informatics and Multiprofessional Education, University College London. Modell's Haemoglobinopathologist's Almanac. London, United Kingdom: Centre for Health Informatics and Multiprofessional Education, University College London, 2008. | 1990-2003                                              |                      |
| Cambodia | Centre for Research on the Epidemiology of Disasters (CRED). EM-DAT: The OFDA/CRED International Disaster Database. Brussels, Belgium: Catholic University of Leuven.                                                                                         | 1991, 1994, 1996-1997, 1999-2002, 2005-2007, 2009-2013 |                      |
| Cambodia | United Nations Office on Drugs and Crime (UNODC). United Nations Office on Drugs and Crime Global Study on Homicides 2011. Vienna, Austria: United Nations Office on Drugs and Crime (UNODC), 2011.                                                           | 1995-2005                                              |                      |
| Cambodia | National Institute of Statistics (Cambodia), World Bank. Cambodia Socioeconomic Survey 1997. Phnom Penh, Cambodia: National Institute of Statistics (Cambodia).                                                                                               | 1997                                                   | *                    |
| Cambodia | Joint United Nations Program on HIV/AIDS (UNAIDS), World Health Organization (WHO). Cambodia Epidemiological Fact Sheet on HIV/AIDS and STIs 2000.                                                                                                            | 1997                                                   |                      |
| Cambodia | Ministry of Health (Cambodia), National Institute of Public Health (Cambodia). Cambodia Special Demographic and Health Survey 1998. Phnom Penh, Cambodia: National Institute of Public Health (Cambodia).                                                     | 1998                                                   |                      |
| Cambodia | National Institute of Statistics (Cambodia), Minnesota Population Center. Cambodia General Population Census 1998 from the Integrated Public Use Microdata Series, International. [Machine-readable database]. Minneapolis: University of Minnesota.          | 1998                                                   |                      |
| Cambodia | World Health Organization (WHO). Yellow Fever Reported Cases, WHO Vaccine-Preventable Diseases: Monitoring System. Geneva, Switzerland: World Health Organization (WHO).                                                                                      | 1998, 2002                                             |                      |
| Cambodia | National Institute of Statistics (Cambodia), World Bank. Cambodia Socioeconomic Survey 1999. Phnom Penh, Cambodia: National Institute of Statistics (Cambodia).                                                                                               | 1999                                                   | *                    |
| Cambodia | Centers for Disease Control and Prevention (CDC). Accelerated measles control--Cambodia, 1999-2002. MMWR Morb Mortal Wkly Rep. 2003; 52(1): 4-6.                                                                                                              | 1999                                                   |                      |
| Cambodia | World Health Organization (WHO). Global Prevalence and Incidence of Selected Curable Sexually Transmitted Infections: Overviews and Estimates 2001. Geneva, Switzerland: World Health Organization (WHO), 2001.                                               | 1999                                                   |                      |
| Cambodia | Macro International, Inc, Ministry of Health (Cambodia), National Institute of Statistics (Cambodia). Cambodia Demographic and Health Survey 2000. Calverton, United States: Macro International, Inc.                                                        | 2000                                                   |                      |
| Cambodia | Oum S, Chandramohan D, Cairncross S. Community-based surveillance: a pilot study from rural Cambodia. Trop Med Int Health. 2005; 10(7): 689-97.                                                                                                               | 2000-2002                                              |                      |
| Cambodia | World Health Organization (WHO). Retrospective Measles Data on Supplementary Immunization Activities. Geneva, Switzerland: World Health Organization (WHO).                                                                                                   | 2000-2005, 2007, 2011, 2013                            |                      |



**Web Table 32 - Comprehensive citation list**

| Country  | Citation                                                                                                                                                                                                                                                                                                                                                                                                       | Year*     | New for GBD 2013 (*) |
|----------|----------------------------------------------------------------------------------------------------------------------------------------------------------------------------------------------------------------------------------------------------------------------------------------------------------------------------------------------------------------------------------------------------------------|-----------|----------------------|
| Cambodia | Monchy D, Babin FX, Srey CT, Ing PN, von Xylander S, Ly V, Busch Hallen J. Frequency of G6PD deficiency in a group of preschool-aged children in a centrally located area of Cambodia. <i>Med Trop (Mars)</i> . 2004; 64(4): 355-8.                                                                                                                                                                            | 2002      |                      |
| Cambodia | Louichareon C, Nuchprayoon I. G6PD Viangchan (871G>A) is the most common G6PD-deficient variant in the Cambodian population. <i>J Hum Genet</i> . 2005; 50(9): 448-52.                                                                                                                                                                                                                                         | 2002-2003 |                      |
| Cambodia | National Institute of Statistics (Cambodia), Statistics Sweden. Cambodia Socioeconomic Survey 2003-2005. Phnom Penh, Cambodia: National Institute of Statistics (Cambodia).                                                                                                                                                                                                                                    | 2003-2005 | *                    |
| Cambodia | National Institute of Statistics (Cambodia). Cambodia Intercensal Population Survey 2004.                                                                                                                                                                                                                                                                                                                      | 2004      |                      |
| Cambodia | Chandy H, Heng YV, Samol H, Husum H. Comparing two survey methods for estimating maternal and perinatal mortality in rural Cambodia. <i>Women and Birth</i> . 2008; 21(1): 9-12.                                                                                                                                                                                                                               | 2004      |                      |
| Cambodia | Macro International, Inc, National Institute of Public Health (Cambodia), National Institute of Statistics (Cambodia). Cambodia Demographic and Health Survey 2005-2006. Calverton, United States: Macro International, Inc.                                                                                                                                                                                   | 2005-2006 |                      |
| Cambodia | Soeung SC, Rani M, Huong V, Sarath S, Kimly C, Kohei T. Results from nationwide hepatitis B serosurvey in Cambodia using simple and rapid laboratory test: implications for National Immunization Program. <i>Am J Trop Med Hyg</i> . 2009; 81(2): 252-7.                                                                                                                                                      | 2006      |                      |
| Cambodia | Lumbiganon P, Laopaiboon M, Gülmezoglu AM, Souza JP, Taneepanichskul S, Ruyan P, Attygalle DE, Shrestha N, Mori R, Hinh ND, Bang HT, Rathavy T, Chuyun K, Cheang K, Festin M, Udomprasertgul V, Germar MJV, Yanqiu G, Roy M, Carroli G, Ba-Thike K. Method of delivery and pregnancy outcomes in Asia: the WHO global survey on maternal and perinatal health 2007-08. <i>Lancet</i> . 2010; 375(9713): 490-9. | 2007-2008 |                      |
| Cambodia | National Institute of Statistics (Cambodia). Cambodia Census 2008.                                                                                                                                                                                                                                                                                                                                             | 2008      |                      |
| Cambodia | National Institute of Statistics (Cambodia), Minnesota Population Center. Cambodia General Population Census 2008 from the Integrated Public Use Microdata Series, International. [Machine-readable database]. Minneapolis: University of Minnesota, 2011.                                                                                                                                                     | 2008      |                      |
| Cambodia | Joint United Nations Program on HIV/AIDS (UNAIDS), National Aids Authority (Cambodia). Cambodia UNGASS Country Progress Report 2010. Geneva, Switzerland: Joint United Nations Program on HIV/AIDS (UNAIDS), 2010.                                                                                                                                                                                             | 2009      |                      |
| Cambodia | National Institute of Statistics (Cambodia), Ministry of Health (Cambodia) and ICF Macro. Cambodia Demographic and Health Survey 2010-2011. Calverton, United States: ICF Macro, 2011.                                                                                                                                                                                                                         | 2010-2011 |                      |
| Cameroon | Peace Research Institute Oslo (PRIO). Battle Deaths Dataset Version 3, 2009. Oslo, Norway: Peace Research Institute Oslo (PRIO), 2009.                                                                                                                                                                                                                                                                         | 1957-1988 |                      |
| Cameroon | Minnesota Population Center, National Institute of Statistics (Cameroon), Central Bureau of the Census and Population Studies (Cameroon). Cameroon Population and Housing Census 1976 from the Integrated Public Use Microdata Series, International. [Machine-readable database]. Minneapolis: University of Minnesota, 2013.                                                                                 | 1976      | *                    |
| Cameroon | Bernstein SC, Bowman JE, Kaptue Noche L. Population studies in Cameroon: hemoglobin S, glucose-6-phosphate dehydrogenase deficiency and falciparum malaria. <i>Hum Hered</i> . 1980; 30(4): 251-8.                                                                                                                                                                                                             | 1977-1979 | *                    |
| Cameroon | Minister of the Economy and Planning (Cameroon), International Statistical Institute. Cameroon World Fertility Survey 1978. Voorburg, Netherlands: International Statistical Institute.                                                                                                                                                                                                                        | 1978      |                      |

**Web Table 32 - Comprehensive citation list**

| Country  | Citation                                                                                                                                                                                                                                                      | Year*                                                                      | New for GBD 2013 (*) |
|----------|---------------------------------------------------------------------------------------------------------------------------------------------------------------------------------------------------------------------------------------------------------------|----------------------------------------------------------------------------|----------------------|
| Cameroon | Institute for Health Metrics and Evaluation (IHME), Joint United Nations Program on HIV/AIDS (UNAIDS). Institute for Health Metrics and Evaluation HIV Mortality Estimates Based on the UNAIDS Spectrum Model Framework.                                      | 1980-2013                                                                  | *                    |
| Cameroon | WHO Department of Communicable Disease Surveillance and Response. WHO Report on Global Surveillance of Epidemic-prone Infectious Diseases 2000.                                                                                                               | 1980, 1984, 1990, 1994                                                     |                      |
| Cameroon | Tomori O. Yellow fever in Africa: public health impact and prospects for control in the 21st century. <i>Biomedica</i> . 2002; 22(2): 178-210.                                                                                                                | 1981                                                                       |                      |
| Cameroon | United Nations Children's Fund (UNICEF), World Health Organization (WHO). WHO and UNICEF Reported Disease Incidence Time Series - Measles. Geneva, Switzerland: World Health Organization (WHO).                                                              | 1981-2013                                                                  |                      |
| Cameroon | United Nations Children's Fund (UNICEF), World Health Organization (WHO). WHO and UNICEF Reported Disease Incidence Time Series - Pertussis. Geneva, Switzerland: World Health Organization (WHO).                                                            | 1983-1993, 1995, 1997                                                      |                      |
| Cameroon | Centre for Research on the Epidemiology of Disasters (CRED). EM-DAT: The OFDA/CRED International Disaster Database. Brussels, Belgium: Catholic University of Leuven.                                                                                         | 1984, 1986, 1988, 1991, 1994, 1999-2001, 2003, 2005, 2007-2008, 2010, 2012 |                      |
| Cameroon | Ministry of the Plan and Regional Development (Cameroon), National Directorate of the Census (Cameroon). Cameroon Population and Housing Census 1987. [Unpublished].                                                                                          | 1987                                                                       |                      |
| Cameroon | Mencarini P, De Luca A, Antinori A, Maiuro G, Spedini G, Bailly C, Tamburrini E. Prevalence of anti-HCV antibodies in Cameroon. <i>Trans R Soc Trop Med Hyg</i> . 1991; 85(5): 654-5.                                                                         | 1987-1990                                                                  |                      |
| Cameroon | Ndumbe PM, Njie TK. Hepatitis A and B infections in Yaoundé, Cameroon. <i>Res Virol</i> . 1989; 140(3): 253-61.                                                                                                                                               | 1988                                                                       |                      |
| Cameroon | World Health Organization (WHO). Yellow Fever Reported Cases, WHO Vaccine-Preventable Diseases: Monitoring System. Geneva, Switzerland: World Health Organization (WHO).                                                                                      | 1988-1989, 1991, 1997, 2001-2004, 2007-2009                                |                      |
| Cameroon | Rapicetta M, Stroffolini T, Ngatchu T, Chionne P, Ciccaglione AR, Lantum D, Chiamonte M. Age- and sex-related study of HBV-DNA in HBsAg asymptomatic children from an endemic area (Cameroon). <i>Ann Trop Paediatr</i> . 1991; 11(4): 325-9.                 | 1989                                                                       |                      |
| Cameroon | Stroffolini T, Chiamonte M, Ngatchu T, Rapicetta M, Sarrecchia B, Chionne P, Lantum D, Naccarato R. A high degree of exposure to hepatitis A virus infection in urban children in Cameroon. <i>Microbiologica</i> . 1991; 14(3): 199-203.                     | 1989                                                                       |                      |
| Cameroon | Department of Peace and Conflict Research, Uppsala University. UCDP Battle-Related Deaths Database Version 5, 2013. Uppsala, Sweden: Department of Peace and Conflict Research, Uppsala University, 2013.                                                     | 1989-1996                                                                  | *                    |
| Cameroon | Wysonge CS, Nomo E, Mawo J, Ofal J, Mimbouga J, Ticha J, Ndumbe PM. Yellow fever epidemic in the extreme North of Cameroon in 1990: first yellow fever virus isolation in Cameroon. <i>BMC Med</i> . 2008; 6: 3.                                              | 1990                                                                       |                      |
| Cameroon | Weatherall D. Sickle Cell and Thalassemias Prevalence Data, Personal Correspondence with David Weatherall. [Unpublished].                                                                                                                                     | 1990-2009                                                                  |                      |
| Cameroon | World Health Organization (WHO). Global Prevalence and Incidence of Selected Curable Sexually Transmitted Infections: Overviews and Estimates 2001. Geneva, Switzerland: World Health Organization (WHO), 2001.                                               | 1990-1999                                                                  |                      |
| Cameroon | Skalsky JA, Joller-Jemelka HI, Bianchi L, Knoblauch M. Liver pathology in rural south-west Cameroon. <i>Trans R Soc Trop Med Hyg</i> . 1995; 89(4): 411-4.                                                                                                    | 1990-1992                                                                  |                      |
| Cameroon | Centre for Health Informatics and Multiprofessional Education, University College London. Modell's Haemoglobinopathologist's Almanac. London, United Kingdom: Centre for Health Informatics and Multiprofessional Education, University College London, 2008. | 1990-2003                                                                  |                      |

**Web Table 32 - Comprehensive citation list**

| Country  | Citation                                                                                                                                                                                                                                                                                                                       | Year*                           | New for GBD 2013 (*) |
|----------|--------------------------------------------------------------------------------------------------------------------------------------------------------------------------------------------------------------------------------------------------------------------------------------------------------------------------------|---------------------------------|----------------------|
| Cameroon | Macro International, Inc, Ministry of Economy, Planning and Regional Development (Cameroon). Cameroon Demographic and Health Survey 1991. Calverton, United States: Macro International, Inc.                                                                                                                                  | 1991                            |                      |
| Cameroon | Department of Peace and Conflict Research, Uppsala University. UCDP Nonstate Conflict Database Version 2.5, 2013. Uppsala, Sweden: Department of Peace and Conflict Research, Uppsala University, 2013.                                                                                                                        | 1991-1998                       | *                    |
| Cameroon | Ndumbe PM, Skalsky J, Joller-Jemelka HI. Seroprevalence of hepatitis and HIV infection among rural pregnant women in Cameroon. APMIS. 1994; 102(9): 662-6.                                                                                                                                                                     | 1991-1992                       |                      |
| Cameroon | Ngatchu T, Stroffolini T, Rapicetta M, Chionne P, Lantum D, Chiaramonte M. Seroprevalence of anti-HCV in an urban child population: a pilot survey in a developing area, Cameroon. J Trop Med Hyg. 1992; 95(1): 57-61.                                                                                                         | 1992                            |                      |
| Cameroon | World Health Organization Regional Office for Africa. HIV/AIDS Epidemiological Surveillance Update for the WHO African Region. World Health Organization Regional Office for Africa, 2003.                                                                                                                                     | 1992-1995, 1997-1998, 2000-2002 |                      |
| Cameroon | Department of Peace and Conflict Research, Uppsala University. UCDP One-Sided Violence Database Version 1.4, 2013. Uppsala, Sweden: Department of Peace and Conflict Research, Uppsala University, 2013.                                                                                                                       | 1994                            | *                    |
| Cameroon | World Health Organization (WHO). The Global Elimination of Congenital Syphilis: Rationale and Strategy for Action. Geneva, Switzerland: World Health Organization (WHO), 2007.                                                                                                                                                 | 1997-2003                       |                      |
| Cameroon | Central Bureau of the Census and Population Studies (Cameroon), Macro International, Inc. Cameroon Demographic and Health Survey 1998. Calverton, United States: Macro International, Inc.                                                                                                                                     | 1998                            |                      |
| Cameroon | Measles Supplementary Immunization Activity Data as provided by the World Health Organization. [Unpublished].                                                                                                                                                                                                                  | 1999                            |                      |
| Cameroon | Department of Statistics and Accounting, Ministry of the Economy and Finance (Cameroon) and United Nations Children's Fund (UNICEF). Cameroon Multiple Indicator Cluster Survey 2000. New York, United States: United Nations Children's Fund (UNICEF).                                                                        | 2000                            |                      |
| Cameroon | Joint United Nations Program on HIV/AIDS (UNAIDS), United Nations Children's Fund (UNICEF), World Health Organization (WHO). Cameroon Epidemiological Fact Sheet on HIV/AIDS and STIs 2004.                                                                                                                                    | 2000-2001                       |                      |
| Cameroon | World Health Organization (WHO). Retrospective Measles Data on Supplementary Immunization Activities. Geneva, Switzerland: World Health Organization (WHO).                                                                                                                                                                    | 2001-2002, 2006-2007, 2009-2012 |                      |
| Cameroon | Wysong CS, Nomo E, Mawo J, Ofal J, Mimbouga J, Ticha J, Ndumbe PM. Yellow fever control in Cameroon: where are we now and where are we going? BMC Med. 2008; 6: 3.                                                                                                                                                             | 2003-2006                       |                      |
| Cameroon | Macro International, Inc, National Institute of Statistics (Cameroon). Cameroon Demographic and Health Survey 2004. Calverton, United States: Macro International, Inc.                                                                                                                                                        | 2004                            |                      |
| Cameroon | Minnesota Population Center, National Institute of Statistics (Cameroon), Central Bureau of the Census and Population Studies (Cameroon). Cameroon Population and Housing Census 2005 from the Integrated Public Use Microdata Series, International. [Machine-readable database]. Minneapolis: University of Minnesota, 2013. | 2005                            |                      |
| Cameroon | United Nations Office on Drugs and Crime (UNODC). United Nations Office on Drugs and Crime Global Study on Homicides 2011. Vienna, Austria: United Nations Office on Drugs and Crime (UNODC), 2011.                                                                                                                            | 2006-2007                       |                      |
| Cameroon | World Health Organization (WHO). Global Status Report on Road Safety 2009. Geneva, Switzerland: World Health Organization (WHO), 2009.                                                                                                                                                                                         | 2007                            |                      |
| Cameroon | World Health Organization (WHO). Yellow fever in Africa and South America, 2007. Wkly Epidemiol Rec. 2009; 84(13): 97-104.                                                                                                                                                                                                     | 2007                            |                      |

**Web Table 32 - Comprehensive citation list**

| Country  | Citation                                                                                                                                                                                                                                                                                     | Year*                                                                                                             | New for GBD 2013 (*) |
|----------|----------------------------------------------------------------------------------------------------------------------------------------------------------------------------------------------------------------------------------------------------------------------------------------------|-------------------------------------------------------------------------------------------------------------------|----------------------|
| Cameroon | Joint United Nations Program on HIV/AIDS (UNAIDS), National AIDS Control Committee (Cameroon). Cameroon Progress Report on the Declaration of Commitment on HIV/AIDS UNGASS 2010. Geneva, Switzerland: Joint United Nations Program on HIV/AIDS (UNAIDS), 2010.                              | 2009                                                                                                              |                      |
| Cameroon | ICF International, Ministry of Economy, Planning and Regional Development (Cameroon), Ministry of Public Health (Cameroon), National Institute of Statistics (Cameroon), Pasteur Center of Cameroon. Cameroon Demographic and Health Survey 2011. Fairfax, United States: ICF International. | 2011                                                                                                              |                      |
| Canada   | Canada Vital Registration - Deaths 1950 ICD7 as it appears in World Health Organization (WHO). WHO Mortality Database Version February 2014. Geneva, Switzerland: World Health Organization (WHO), 2014.                                                                                     | 1950                                                                                                              |                      |
| Canada   | Centre for Research on the Epidemiology of Disasters (CRED). EM-DAT: The OFDA/CRED International Disaster Database. Brussels, Belgium: Catholic University of Leuven.                                                                                                                        | 1950, 1954-1955, 1959, 1962, 1965, 1970-1971, 1975, 1985, 1987-1990, 1995-2001, 2003, 2005-2007, 2009, 2011, 2013 |                      |
| Canada   | Canada Vital Registration - Deaths 1951 ICD7 as it appears in World Health Organization (WHO). WHO Mortality Database Version February 2014. Geneva, Switzerland: World Health Organization (WHO), 2014.                                                                                     | 1951                                                                                                              |                      |
| Canada   | Canada Vital Registration - Deaths 1952 ICD7 as it appears in World Health Organization (WHO). WHO Mortality Database Version February 2014. Geneva, Switzerland: World Health Organization (WHO), 2014.                                                                                     | 1952                                                                                                              |                      |
| Canada   | Canada Vital Registration - Deaths 1953 ICD7 as it appears in World Health Organization (WHO). WHO Mortality Database Version February 2014. Geneva, Switzerland: World Health Organization (WHO), 2014.                                                                                     | 1953                                                                                                              |                      |
| Canada   | Canada Vital Registration - Deaths 1954 ICD7 as it appears in World Health Organization (WHO). WHO Mortality Database Version February 2014. Geneva, Switzerland: World Health Organization (WHO), 2014.                                                                                     | 1954                                                                                                              |                      |
| Canada   | Canada Vital Registration - Deaths 1955 ICD7 as it appears in World Health Organization (WHO). WHO Mortality Database Version February 2014. Geneva, Switzerland: World Health Organization (WHO), 2014.                                                                                     | 1955                                                                                                              |                      |
| Canada   | Canada Vital Registration - Deaths 1956 ICD7 as it appears in World Health Organization (WHO). WHO Mortality Database Version February 2014. Geneva, Switzerland: World Health Organization (WHO), 2014.                                                                                     | 1956                                                                                                              |                      |
| Canada   | Canada Vital Registration - Deaths 1957 ICD7 as it appears in World Health Organization (WHO). WHO Mortality Database Version February 2014. Geneva, Switzerland: World Health Organization (WHO), 2014.                                                                                     | 1957                                                                                                              |                      |
| Canada   | Canada Vital Registration - Deaths 1958 ICD7 as it appears in World Health Organization (WHO). WHO Mortality Database Version February 2014. Geneva, Switzerland: World Health Organization (WHO), 2014.                                                                                     | 1958                                                                                                              |                      |
| Canada   | Canada Vital Registration - Deaths 1959 ICD7 as it appears in World Health Organization (WHO). WHO Mortality Database Version February 2014. Geneva, Switzerland: World Health Organization (WHO), 2014.                                                                                     | 1959                                                                                                              |                      |

**Web Table 32 - Comprehensive citation list**

| Country | Citation                                                                                                                                                                                                 | Year* | New for GBD 2013 (*) |
|---------|----------------------------------------------------------------------------------------------------------------------------------------------------------------------------------------------------------|-------|----------------------|
| Canada  | Canada Vital Registration - Deaths 1960 ICD7 as it appears in World Health Organization (WHO). WHO Mortality Database Version February 2014. Geneva, Switzerland: World Health Organization (WHO), 2014. | 1960  |                      |
| Canada  | Canada Vital Registration - Deaths 1961 ICD7 as it appears in World Health Organization (WHO). WHO Mortality Database Version February 2014. Geneva, Switzerland: World Health Organization (WHO), 2014. | 1961  |                      |
| Canada  | Canada Vital Registration - Deaths 1962 ICD7 as it appears in World Health Organization (WHO). WHO Mortality Database Version February 2014. Geneva, Switzerland: World Health Organization (WHO), 2014. | 1962  |                      |
| Canada  | Canada Vital Registration - Deaths 1963 ICD7 as it appears in World Health Organization (WHO). WHO Mortality Database Version February 2014. Geneva, Switzerland: World Health Organization (WHO), 2014. | 1963  |                      |
| Canada  | Canada Vital Registration - Deaths 1964 ICD7 as it appears in World Health Organization (WHO). WHO Mortality Database Version February 2014. Geneva, Switzerland: World Health Organization (WHO), 2014. | 1964  |                      |
| Canada  | Canada Vital Registration - Deaths 1965 ICD7 as it appears in World Health Organization (WHO). WHO Mortality Database Version February 2014. Geneva, Switzerland: World Health Organization (WHO), 2014. | 1965  |                      |
| Canada  | Canada Vital Registration - Deaths 1966 ICD7 as it appears in World Health Organization (WHO). WHO Mortality Database Version February 2014. Geneva, Switzerland: World Health Organization (WHO), 2014. | 1966  |                      |
| Canada  | Canada Vital Registration - Deaths 1967 ICD7 as it appears in World Health Organization (WHO). WHO Mortality Database Version February 2014. Geneva, Switzerland: World Health Organization (WHO), 2014. | 1967  |                      |
| Canada  | Canada Vital Registration - Deaths 1968 ICD7 as it appears in World Health Organization (WHO). WHO Mortality Database Version February 2014. Geneva, Switzerland: World Health Organization (WHO), 2014. | 1968  |                      |
| Canada  | Canada Vital Registration - Deaths 1969 ICD8 as it appears in World Health Organization (WHO). WHO Mortality Database Version February 2014. Geneva, Switzerland: World Health Organization (WHO), 2014. | 1969  |                      |
| Canada  | Canada Vital Registration - Deaths 1970 ICD8 as it appears in World Health Organization (WHO). WHO Mortality Database Version February 2014. Geneva, Switzerland: World Health Organization (WHO), 2014. | 1970  |                      |
| Canada  | Canada Vital Registration - Deaths 1971 ICD8 as it appears in World Health Organization (WHO). WHO Mortality Database Version February 2014. Geneva, Switzerland: World Health Organization (WHO), 2014. | 1971  |                      |
| Canada  | Canada Vital Registration - Deaths 1972 ICD8 as it appears in World Health Organization (WHO). WHO Mortality Database Version February 2014. Geneva, Switzerland: World Health Organization (WHO), 2014. | 1972  |                      |
| Canada  | Canada Vital Registration - Deaths 1973 ICD8 as it appears in World Health Organization (WHO). WHO Mortality Database Version February 2014. Geneva, Switzerland: World Health Organization (WHO), 2014. | 1973  |                      |

**Web Table 32 - Comprehensive citation list**

| Country | Citation                                                                                                                                                                                                                                                                                              | Year*                        | New for GBD 2013 (*) |
|---------|-------------------------------------------------------------------------------------------------------------------------------------------------------------------------------------------------------------------------------------------------------------------------------------------------------|------------------------------|----------------------|
| Canada  | Canada Vital Registration - Deaths 1974 ICD8 as it appears in World Health Organization (WHO). WHO Mortality Database Version February 2014. Geneva, Switzerland: World Health Organization (WHO), 2014.                                                                                              | 1974                         |                      |
| Canada  | Canada Vital Registration - Deaths 1975 ICD8 as it appears in World Health Organization (WHO). WHO Mortality Database Version February 2014. Geneva, Switzerland: World Health Organization (WHO), 2014.                                                                                              | 1975                         |                      |
| Canada  | Canada Vital Registration - Deaths 1976 ICD8 as it appears in World Health Organization (WHO). WHO Mortality Database Version February 2014. Geneva, Switzerland: World Health Organization (WHO), 2014.                                                                                              | 1976                         |                      |
| Canada  | Canada Vital Registration - Deaths 1977 ICD8 as it appears in World Health Organization (WHO). WHO Mortality Database Version February 2014. Geneva, Switzerland: World Health Organization (WHO), 2014.                                                                                              | 1977                         |                      |
| Canada  | Canada Vital Registration - Deaths 1978 ICD8 as it appears in World Health Organization (WHO). WHO Mortality Database Version February 2014. Geneva, Switzerland: World Health Organization (WHO), 2014.                                                                                              | 1978                         |                      |
| Canada  | Canada Vital Registration - Deaths 1979 ICD9 as it appears in World Health Organization (WHO). WHO Mortality Database Version February 2014. Geneva, Switzerland: World Health Organization (WHO), 2014.                                                                                              | 1979                         |                      |
| Canada  | McFarlane ES, Embil JA, Manuel FR, Gorelick M. Prevalence of antibodies to hepatitis A antigen in patients attending a clinic for treatment of sexually transmitted diseases. Sex Transm Dis. 1980; 7(2): 87-9.                                                                                       | 1979                         |                      |
| Canada  | Canada Vital Registration - Deaths 1980 ICD9 as it appears in World Health Organization (WHO). WHO Mortality Database Version February 2014. Geneva, Switzerland: World Health Organization (WHO), 2014.                                                                                              | 1980                         |                      |
| Canada  | Institute for Health Metrics and Evaluation. Institute for Health Metrics and Evaluation Cancer Registry Database. [Unpublished].                                                                                                                                                                     | 1980-2005                    |                      |
| Canada  | Institute for Health Metrics and Evaluation (IHME), Joint United Nations Program on HIV/AIDS (UNAIDS). Institute for Health Metrics and Evaluation HIV Mortality Estimates Based on the UNAIDS Spectrum Model Framework.                                                                              | 1980-2013                    | *                    |
| Canada  | United Nations Children's Fund (UNICEF), World Health Organization (WHO). WHO and UNICEF Reported Disease Incidence Time Series - Pertussis. Geneva, Switzerland: World Health Organization (WHO).                                                                                                    | 1980-2013                    |                      |
| Canada  | United Nations Children's Fund (UNICEF), World Health Organization (WHO). WHO and UNICEF Reported Disease Incidence Time Series - Measles. Geneva, Switzerland: World Health Organization (WHO).                                                                                                      | 1980-2013                    |                      |
| Canada  | Parkin DM, International Agency for Research on Cancer, International Association of Cancer Registries. Cancer Incidence in Five Continents. Vol. I to VIII. Lyon, France, IARC Press, 2005.                                                                                                          | 1980, 1985, 1987, 1990, 1995 |                      |
| Canada  | Canada Vital Registration - Deaths 1981 ICD9 as it appears in World Health Organization (WHO). WHO Mortality Database Version February 2014. Geneva, Switzerland: World Health Organization (WHO), 2014.                                                                                              | 1981                         |                      |
| Canada  | Wong SC, Ali MA. Hemoglobinopathies in Canada. Hemoglobin. 1982; 6(3): 235-41.                                                                                                                                                                                                                        | 1981                         |                      |
| Canada  | Ferlay J, Parkin DM, Curado MP, Bray F, Edwards B, Shin HR and Forman D. Cancer Incidence in Five Continents, Volumes I to IX: IARC CancerBase No. 9 [Internet]. Lyon, France: International Agency for Research on Cancer; 2010. Available from: <a href="http://ci5.iarc.fr">http://ci5.iarc.fr</a> | 1981-2002                    |                      |



**Web Table 32 - Comprehensive citation list**

| Country | Citation                                                                                                                                                                                                                                | Year*     | New for GBD 2013 (*) |
|---------|-----------------------------------------------------------------------------------------------------------------------------------------------------------------------------------------------------------------------------------------|-----------|----------------------|
| Canada  | Crewe MD, Embil JA, Garner JB. Prevalence of antibodies to hepatitis A virus in Nova Scotia children. <i>Can Med Assoc J.</i> 1983; 128(10): 1195-7.                                                                                    | 1981-1982 |                      |
| Canada  | Embil JA, Manley K, White LA. Hepatitis A: a serological study in the Canadian Armed Forces. <i>Mil Med.</i> 1989; 154(9): 461-5.                                                                                                       | 1981-1983 |                      |
| Canada  | Canada Vital Registration - Deaths 1982 ICD9 as it appears in World Health Organization (WHO). WHO Mortality Database Version February 2014. Geneva, Switzerland: World Health Organization (WHO), 2014.                                | 1982      |                      |
| Canada  | Canada Vital Registration - Deaths 1983 ICD9 as it appears in World Health Organization (WHO). WHO Mortality Database Version February 2014. Geneva, Switzerland: World Health Organization (WHO), 2014.                                | 1983      |                      |
| Canada  | Larke RP, Froese GJ, Devine RD, Petruk MW. Extension of the epidemiology of hepatitis B in circumpolar regions through a comprehensive serologic study in the Northwest Territories of Canada. <i>J Med Virol.</i> 1987; 22(3): 269-76. | 1983-1985 |                      |
| Canada  | Canada Vital Registration - Deaths 1984 ICD9 as it appears in World Health Organization (WHO). WHO Mortality Database Version February 2014. Geneva, Switzerland: World Health Organization (WHO), 2014.                                | 1984      |                      |
| Canada  | Marion SA, Tomm Pastore M, Pi DW, Mathias RG. Long-term follow-up of hepatitis B vaccine in infants of carrier mothers. <i>Am J Epidemiol.</i> 1994; 140(8): 734-46.                                                                    | 1984-1989 |                      |
| Canada  | Canada Vital Registration - Deaths 1985 ICD9 as it appears in World Health Organization (WHO). WHO Mortality Database Version February 2014. Geneva, Switzerland: World Health Organization (WHO), 2014.                                | 1985      |                      |
| Canada  | Canada Vital Registration - Deaths 1986 ICD9 as it appears in World Health Organization (WHO). WHO Mortality Database Version February 2014. Geneva, Switzerland: World Health Organization (WHO), 2014.                                | 1986      |                      |
| Canada  | Canada Vital Registration - Deaths 1987 ICD9 as it appears in World Health Organization (WHO). WHO Mortality Database Version February 2014. Geneva, Switzerland: World Health Organization (WHO), 2014.                                | 1987      |                      |
| Canada  | Canada Vital Registration - Deaths 1988 ICD9 as it appears in World Health Organization (WHO). WHO Mortality Database Version February 2014. Geneva, Switzerland: World Health Organization (WHO), 2014.                                | 1988      |                      |
| Canada  | Robitaille N, Delvin EE, Hume HA. Newborn screening for sickle cell disease: A 1988-2003 Quebec experience. <i>Paediatr Child Health.</i> 2006; 11(4): 223-7.                                                                           | 1988-2003 |                      |
| Canada  | Robitaille N, Delvin EE, Hume HA. A 1988-2003 Quebec experience. <i>Paediatr Child Health.</i> 2006; 4(11): 223-7.                                                                                                                      | 1988-2003 |                      |
| Canada  | Canada Vital Registration - Deaths 1989 ICD9 as it appears in World Health Organization (WHO). WHO Mortality Database Version February 2014. Geneva, Switzerland: World Health Organization (WHO), 2014.                                | 1989      |                      |
| Canada  | Canada Vital Registration - Deaths 1990 ICD9 as it appears in World Health Organization (WHO). WHO Mortality Database Version February 2014. Geneva, Switzerland: World Health Organization (WHO), 2014.                                | 1990      |                      |
| Canada  | Louie M, Low DE, Feinman SV, McLaughlin B, Simor AE. Prevalence of bloodborne infective agents among people admitted to a Canadian hospital. <i>CMAJ.</i> 1992; 146(8): 1331-4.                                                         | 1990      |                      |
| Canada  | Morris BA, Sabetti L. Prenatal screening for hepatitis B surface antigen. Is universal screening necessary?. <i>Can Fam Physician.</i> 1993; 61-4.                                                                                      | 1990      |                      |

**Web Table 32 - Comprehensive citation list**

| Country | Citation                                                                                                                                                                                                                                          | Year*     | New for GBD 2013 (*) |
|---------|---------------------------------------------------------------------------------------------------------------------------------------------------------------------------------------------------------------------------------------------------|-----------|----------------------|
| Canada  | Yorke D, Mitchell J, Clow C, Nuguid E, Cadogan R, Sinclair D, Luscombe S, Rozen R, Meredith P, Esseltine D. Newborn screening for sickle cell and other hemoglobinopathies: a Canadian pilot study. <i>Clin Invest Med</i> . 1992; 15(4): 376-83. | 1990-1992 |                      |
| Canada  | Canada Vital Registration - Deaths 1991 ICD9 as it appears in World Health Organization (WHO). WHO Mortality Database Version February 2014. Geneva, Switzerland: World Health Organization (WHO), 2014.                                          | 1991      |                      |
| Canada  | Wen SW, Huang L, Liston R, Heaman M, al et. Severe maternal morbidity in Canada, 1991-2001. <i>Can Med Assoc J</i> . 2005; 173(7): 759-64.                                                                                                        | 1991-2001 |                      |
| Canada  | The Canadian Study of Health and Aging Working Group. The incidence of dementia in Canada. <i>Neurology</i> . 2000; 55(1): 66-73.                                                                                                                 | 1991-1999 |                      |
| Canada  | Tyas SL, Tate RB, Wooldrage K, Manfreda J, Strain LA. Estimating the incidence of dementia: the impact of adjusting for subject attrition using health care utilization data. <i>Ann Epidemiol</i> . 2006; 16(6): 477-84.                         | 1991-1997 |                      |
| Canada  | Kocuiptych FR, Lightfoot PJ, Stout I, Devine RD. Seroprevalence of hepatitis A antibodies in travellers at the Edmonton Travellers' Health Clinic--Alberta. <i>Can Commun Dis Rep</i> . 1995; 21(8): 65-71.                                       | 1991-1992 |                      |
| Canada  | Canada Vital Registration - Deaths 1992 ICD9 as it appears in World Health Organization (WHO). WHO Mortality Database Version February 2014. Geneva, Switzerland: World Health Organization (WHO), 2014.                                          | 1992      |                      |
| Canada  | Martin JD, Mathias RG, Sarin C, Byrne SE. HIV and hepatitis B surveillance in First Nations alcohol and drug treatment centres in British Columbia, Canada, 1992-2000. <i>Int J Circumpolar Health</i> . 2002; 61(2): 104-9.                      | 1992-2000 |                      |
| Canada  | Martin JD, Mathias RG. HIV and hepatitis B surveillance in First Nations alcohol and drug treatment centers in British Columbia, Canada. <i>Int J Circumpolar Health</i> . 1998; 280-4.                                                           | 1992-1995 |                      |
| Canada  | Canada Vital Registration - Deaths 1993 ICD9 as it appears in World Health Organization (WHO). WHO Mortality Database Version February 2014. Geneva, Switzerland: World Health Organization (WHO), 2014.                                          | 1993      |                      |
| Canada  | Glasgow KW, Schabas R, Williams DC, Wallace E, Nalezty LA. A population-based hepatitis B seroprevalence and risk factor study in a northern Ontario town. <i>Can J Public Health</i> . 1997; 88(2): 87-90.                                       | 1993      |                      |
| Canada  | Armstrong SA, Gangam N, Chipman ML, Rootman DS. The prevalence of positive hepatitis B, hepatitis C, and HIV serology in cornea donors prescreened by medical and social history in Ontario, Canada. <i>Cornea</i> . 1997; 16(5): 512-6.          | 1993-1996 |                      |
| Canada  | Canada Vital Registration - Deaths 1994 ICD9 as it appears in World Health Organization (WHO). WHO Mortality Database Version February 2014. Geneva, Switzerland: World Health Organization (WHO), 2014.                                          | 1994      |                      |
| Canada  | Canada Vital Registration - Deaths 1995 ICD9 as it appears in World Health Organization (WHO). WHO Mortality Database Version February 2014. Geneva, Switzerland: World Health Organization (WHO), 2014.                                          | 1995      |                      |
| Canada  | United Nations Office on Drugs and Crime (UNODC). United Nations Office on Drugs and Crime Global Study on Homicides 2011. Vienna, Austria: United Nations Office on Drugs and Crime (UNODC), 2011.                                               | 1995-2009 |                      |
| Canada  | Department of Peace and Conflict Research, Uppsala University. UCDP Nonstate Conflict Database Version 2.5, 2013. Uppsala, Sweden: Department of Peace and Conflict Research, Uppsala University, 2013.                                           | 1995-1998 | *                    |
| Canada  | Ochnio JJ, Scheifele DW, Ho M. Hepatitis A virus infections in urban children--are preventive opportunities being missed? <i>J Infect Dis</i> . 1997; 176(6): 1610-3.                                                                             | 1995-1996 |                      |



**Web Table 32 - Comprehensive citation list**

| Country | Citation                                                                                                                                                                                                                                             | Year*           | New for GBD 2013 (*) |
|---------|------------------------------------------------------------------------------------------------------------------------------------------------------------------------------------------------------------------------------------------------------|-----------------|----------------------|
| Canada  | Roy E, Haley N, Leclerc P, Cédras L, Bédard L, Allard R. Seroprevalence and risk factors for hepatitis A among Montreal street youth. <i>Can J Public Health</i> . 2002; 93(1): 52-3.                                                                | 1995-1996       |                      |
| Canada  | Canada Vital Registration - Deaths 1996 ICD9 as it appears in World Health Organization (WHO). WHO Mortality Database Version February 2014. Geneva, Switzerland: World Health Organization (WHO), 2014.                                             | 1996            |                      |
| Canada  | Grossman DW, Hans LM, Glazier R. Geographic origin and risk for congenital infection in a Canadian inner city: findings and implications for policy. <i>Can J Public Health</i> . 1999; 90(6): 385-8.                                                | 1996-1997       |                      |
| Canada  | Canada Vital Registration - Deaths 1997 ICD9 as it appears in World Health Organization (WHO). WHO Mortality Database Version February 2014. Geneva, Switzerland: World Health Organization (WHO), 2014.                                             | 1997            |                      |
| Canada  | Levy I, Chen D, Sherman M, Smith D, Krajden M. Hepatitis A virus seroprevalence in 1,000 university students in Toronto. <i>Can Commun Dis Rep</i> . 2001; 27(11): 93-6.                                                                             | 1997            |                      |
| Canada  | Canada Vital Registration - Deaths 1998 ICD9 as it appears in World Health Organization (WHO). WHO Mortality Database Version February 2014. Geneva, Switzerland: World Health Organization (WHO), 2014.                                             | 1998            |                      |
| Canada  | Ochnio JJ, Patrick D, Ho M, Talling DN, Dobson SR. Past infection with hepatitis A virus among Vancouver street youth, injection drug users and men who have sex with men: implications for vaccination programs. <i>CMAJ</i> . 2001; 165(3): 293-7. | 1998            |                      |
| Canada  | Houston S, Rowe BH, Mashinter L, Preiksaitis J, Joffe M, Mackey D, Galbraith J, Wiebe N. Sentinel surveillance of HIV and hepatitis C virus in two urban emergency departments. <i>CJEM</i> . 2004; 6(2): 89-96.                                     | 1998            |                      |
| Canada  | Zahariadis G, Plitt SS, O'Brien S, Yi Q-L, Fan W, Preiksaitis JK. Prevalence and estimated incidence of blood-borne viral pathogen infection in organ and tissue donors from northern Alberta. <i>Am J Transplant</i> . 2007; 7(1): 226-34.          | 1998-2004       |                      |
| Canada  | Canada Vital Registration - Deaths 1999 ICD9 as it appears in World Health Organization (WHO). WHO Mortality Database Version February 2014. Geneva, Switzerland: World Health Organization (WHO), 2014.                                             | 1999            |                      |
| Canada  | Dawar M, Patrick DM, Bigham M, Cook D, Krajden M, Ng H. Impact of universal preadolescent vaccination against hepatitis B on antenatal seroprevalence of hepatitis B markers in British Columbia women. <i>CMAJ</i> . 2003; 168(6): 703-4.           | 1999            |                      |
| Canada  | Minuk GY, Zhang M, Wong SGM, Uhanova J, Bernstein CN, Martin B, Dawood MR, Vardy L, Giulvi A. Viral hepatitis in a Canadian First Nations community. <i>Can J Gastroenterol</i> . 2003; 17(10): 593-6.                                               | 1999            |                      |
| Canada  | Canada Vital Registration - Deaths 2000 ICD10 as it appears in World Health Organization (WHO). WHO Mortality Database Version February 2014. Geneva, Switzerland: World Health Organization (WHO), 2014.                                            | 2000            |                      |
| Canada  | Curado MP, Edwards B, Shin HR, Storm H, Ferlay J, Heanue M and Boyle P, eds (2007). <i>Cancer Incidence in Five Continents, Vol. IX Periodic Data</i> (electronic version). Lyon, IARC. <a href="http://ci5.iarc.fr">http://ci5.iarc.fr</a>          | 2000            |                      |
| Canada  | Ochnio JJ, Scheifele DW, Fyfe M, Bigham M, Bowering D, Martiquet P, Ho M, Talling DN. The prevalence of hepatitis A in children in British Columbia. <i>Can J Infect Dis Med Microbiol</i> . 2005; 16(3): 175-9.                                     | 2000            |                      |
| Canada  | World Health Organization (WHO). Yellow Fever Reported Cases, WHO Vaccine-Preventable Diseases: Monitoring System. Geneva, Switzerland: World Health Organization (WHO).                                                                             | 2000, 2002-2009 |                      |

**Web Table 32 - Comprehensive citation list**

| Country | Citation                                                                                                                                                                                                                                                                                                           | Year*     | New for GBD 2013 (*) |
|---------|--------------------------------------------------------------------------------------------------------------------------------------------------------------------------------------------------------------------------------------------------------------------------------------------------------------------|-----------|----------------------|
| Canada  | Canada Vital Registration - Deaths 2001 ICD10 as it appears in World Health Organization (WHO). WHO Mortality Database Version February 2014. Geneva, Switzerland: World Health Organization (WHO), 2014.                                                                                                          | 2001      |                      |
| Canada  | Canada Vital Registration - Deaths 2002 ICD10 as it appears in World Health Organization (WHO). WHO Mortality Database Version February 2014. Geneva, Switzerland: World Health Organization (WHO), 2014.                                                                                                          | 2002      |                      |
| Canada  | Canada Vital Registration - Deaths 2003 ICD10 as it appears in World Health Organization (WHO). WHO Mortality Database Version February 2014. Geneva, Switzerland: World Health Organization (WHO), 2014.                                                                                                          | 2003      |                      |
| Canada  | Duval B, De Serres G, Ochnio J, Scheifele D, Gilca V. Nationwide canadian study of hepatitis a antibody prevalence among children eight to thirteen years old. <i>Pediatr Infect Dis J.</i> 2005; 24(6): 514-9.                                                                                                    | 2003      |                      |
| Canada  | Centre for Health Informatics and Multiprofessional Education, University College London. <i>Modell's Haemoglobinopathologist's Almanac.</i> London, United Kingdom: Centre for Health Informatics and Multiprofessional Education, University College London, 2008.                                               | 2003      |                      |
| Canada  | Saskatchewan Cancer Agency. Canada - Saskatchewan Cancer Control Report, Profiling Cancer Prevalence 1984-2003. Regina, Canada: Saskatchewan Cancer Agency, 2008.                                                                                                                                                  | 2003-2004 |                      |
| Canada  | Canada Vital Registration - Deaths 2004 ICD10 as it appears in World Health Organization (WHO). WHO Mortality Database Version February 2014. Geneva, Switzerland: World Health Organization (WHO), 2014.                                                                                                          | 2004      |                      |
| Canada  | New Brunswick Cancer Network, Department of Health. Canada - New Brunswick Cancer Registry Report 2002-2006. Fredericton, Canada: New Brunswick Cancer Network, Department of Health, 2010.                                                                                                                        | 2004      |                      |
| Canada  | Canada Vital Registration - Deaths 2005 ICD10 as it appears in World Health Organization (WHO). WHO Mortality Database Version February 2014. Geneva, Switzerland: World Health Organization (WHO), 2014.                                                                                                          | 2005      |                      |
| Canada  | Forman D, Bray F, Brewster DH, Gombe Mbalawa C, Kohler B, Piñeros M, Steliarova-Foucher E, Swaminathan R and Ferlay J, eds (2013). <i>Cancer Incidence in Five Continents, Vol. X Summary Database (electronic version).</i> Lyon, IARC. <a href="http://ci5.iarc.fr">http://ci5.iarc.fr</a>                       | 2005      |                      |
| Canada  | Canada Vital Registration - Deaths 2006 ICD10 as it appears in World Health Organization (WHO). WHO Mortality Database Version February 2014. Geneva, Switzerland: World Health Organization (WHO), 2014.                                                                                                          | 2006      |                      |
| Canada  | Ochnio JJ, Scheifele DW, Marion SA, Bigham M, Patrick DM, Ho M, Mozel M. Participant-collected, mail-delivered oral fluid specimens can replace traditional serosurveys: a demonstration-of-feasibility survey of hepatitis A virus-specific antibodies in adults. <i>Can J Public Health.</i> 2007; 98(1): 37-40. | 2006      |                      |
| Canada  | O'Leary JD, Odame I, Pehora C, Chakraborty P, Crawford MW. Effectiveness of preoperative screening for sickle cell disease in a population with a newborn screening program: a cohort study. <i>Can J Anaesth.</i> 2013; 60(1): 54-9.                                                                              | 2006-2010 | *                    |
| Canada  | World Health Organization (WHO). <i>Global Status Report on Road Safety 2009.</i> Geneva, Switzerland: World Health Organization (WHO), 2009.                                                                                                                                                                      | 2007      |                      |
| Canada  | Canada Vital Registration - Deaths 2007 ICD10 as it appears in World Health Organization (WHO). WHO Mortality Database Version February 2014. Geneva, Switzerland: World Health Organization (WHO), 2014.                                                                                                          | 2007      |                      |

**Web Table 32 - Comprehensive citation list**

| Country    | Citation                                                                                                                                                                                                                | Year*     | New for GBD 2013 (*) |
|------------|-------------------------------------------------------------------------------------------------------------------------------------------------------------------------------------------------------------------------|-----------|----------------------|
| Canada     | Health Canada, Public Health Agency of Canada, Statistics Canada. Canada Health Measures Survey 2007-2009. Ottawa, Canada: Statistics Canada.                                                                           | 2007-2009 | *                    |
| Canada     | Canada Vital Registration - Deaths 2008 ICD10 as it appears in World Health Organization (WHO). WHO Mortality Database Version February 2014. Geneva, Switzerland: World Health Organization (WHO), 2014.               | 2008      |                      |
| Canada     | Canada Vital Registration - Deaths 2009 ICD10 as it appears in World Health Organization (WHO). WHO Mortality Database Version February 2014. Geneva, Switzerland: World Health Organization (WHO), 2014.               | 2009      |                      |
| Canada     | Weatherall D. Sickle Cell and Thalassemias Prevalence Data, Personal Correspondence with David Weatherall. [Unpublished].                                                                                               | 2009      |                      |
| Canada     | Statistics Canada. Canada CANSIM Database Annual Deaths by Age, Sex, Provinces and Territories.                                                                                                                         | 2010-2011 | *                    |
| Cape Verde | Cape Verde Vital Registration Death Data 1955 as it appears in United Nations Statistics Division (UNSD). United Nations Demographic Yearbook. New York City, United States: United Nations Statistics Division (UNSD). | 1955      |                      |
| Cape Verde | Cape Verde Vital Registration Death Data 1956 as it appears in United Nations Statistics Division (UNSD). United Nations Demographic Yearbook. New York City, United States: United Nations Statistics Division (UNSD). | 1956      |                      |
| Cape Verde | Cape Verde Vital Registration Death Data 1957 as it appears in United Nations Statistics Division (UNSD). United Nations Demographic Yearbook. New York City, United States: United Nations Statistics Division (UNSD). | 1957      |                      |
| Cape Verde | Cape Verde Vital Registration Death Data 1959 as it appears in United Nations Statistics Division (UNSD). United Nations Demographic Yearbook. New York City, United States: United Nations Statistics Division (UNSD). | 1959      |                      |
| Cape Verde | Cape Verde Vital Registration Death Data 1960 as it appears in United Nations Statistics Division (UNSD). United Nations Demographic Yearbook. New York City, United States: United Nations Statistics Division (UNSD). | 1960      |                      |
| Cape Verde | Cape Verde Vital Registration Death Data 1966 as it appears in United Nations Statistics Division (UNSD). United Nations Demographic Yearbook. New York City, United States: United Nations Statistics Division (UNSD). | 1966      |                      |
| Cape Verde | Cape Verde Vital Registration Death Data 1967 as it appears in United Nations Statistics Division (UNSD). United Nations Demographic Yearbook. New York City, United States: United Nations Statistics Division (UNSD). | 1967      |                      |
| Cape Verde | Cape Verde Vital Registration Death Data 1968 as it appears in United Nations Statistics Division (UNSD). United Nations Demographic Yearbook. New York City, United States: United Nations Statistics Division (UNSD). | 1968      |                      |
| Cape Verde | Cape Verde Vital Registration Death Data 1969 as it appears in United Nations Statistics Division (UNSD). United Nations Demographic Yearbook. New York City, United States: United Nations Statistics Division (UNSD). | 1969      |                      |
| Cape Verde | Cape Verde Vital Registration Death Data 1970 as it appears in United Nations Statistics Division (UNSD). United Nations Demographic Yearbook. New York City, United States: United Nations Statistics Division (UNSD). | 1970      |                      |

**Web Table 32 - Comprehensive citation list**

| Country    | Citation                                                                                                                                                                                                                 | Year*                                                       | New for GBD 2013 (*) |
|------------|--------------------------------------------------------------------------------------------------------------------------------------------------------------------------------------------------------------------------|-------------------------------------------------------------|----------------------|
| Cape Verde | Cape Verde Vital Registration Death Data 1971 as it appears in United Nations Statistics Division (UNSD). United Nations Demographic Yearbook. New York City, United States: United Nations Statistics Division (UNSD).  | 1971                                                        |                      |
| Cape Verde | Cape Verde Vital Registration Death Data 1972 as it appears in United Nations Statistics Division (UNSD). United Nations Demographic Yearbook. New York City, United States: United Nations Statistics Division (UNSD).  | 1972                                                        |                      |
| Cape Verde | Cape Verde Vital Registration Death Data 1973 as it appears in United Nations Statistics Division (UNSD). United Nations Demographic Yearbook. New York City, United States: United Nations Statistics Division (UNSD).  | 1973                                                        |                      |
| Cape Verde | Cape Verde Vital Registration Death Data 1974 as it appears in United Nations Statistics Division (UNSD). United Nations Demographic Yearbook. New York City, United States: United Nations Statistics Division (UNSD).  | 1974                                                        |                      |
| Cape Verde | Cape Verde Vital Registration Death Data 1975 as it appears in United Nations Statistics Division (UNSD). United Nations Demographic Yearbook. New York City, United States: United Nations Statistics Division (UNSD).  | 1975                                                        |                      |
| Cape Verde | United Nations Office on Drugs and Crime (UNODC). United Nations Surveys on Crime Trends and the Operations of Criminal Justice Systems 1970-2006 as provided by Kavi Bhalla. [Unpublished]                              | 1979                                                        |                      |
| Cape Verde | Cape Verde Vital Registration Death Data 1979 as it appears in United Nations Statistics Division (UNSD). United Nations Demographic Yearbook. New York City, United States: United Nations Statistics Division (UNSD).  | 1979                                                        |                      |
| Cape Verde | Cape Verde Vital Registration - Deaths 1980 ICD8 as it appears in World Health Organization (WHO). WHO Mortality Database Version February 2014. Geneva, Switzerland: World Health Organization (WHO), 2014.             | 1980                                                        |                      |
| Cape Verde | Institute for Health Metrics and Evaluation (IHME), Joint United Nations Program on HIV/AIDS (UNAIDS). Institute for Health Metrics and Evaluation HIV Mortality Estimates Based on the UNAIDS Spectrum Model Framework. | 1980-2013                                                   | *                    |
| Cape Verde | United Nations Children's Fund (UNICEF), World Health Organization (WHO). WHO and UNICEF Reported Disease Incidence Time Series - Pertussis. Geneva, Switzerland: World Health Organization (WHO).                       | 1980-1985, 1987-1995, 1997-1998, 2000-2003, 2005, 2007-2013 |                      |
| Cape Verde | United Nations Children's Fund (UNICEF), World Health Organization (WHO). WHO and UNICEF Reported Disease Incidence Time Series - Measles. Geneva, Switzerland: World Health Organization (WHO).                         | 1980-1985, 1987-2013                                        |                      |
| Cape Verde | Centre for Research on the Epidemiology of Disasters (CRED). EM-DAT: The OFDA/CRED International Disaster Database. Brussels, Belgium: Catholic University of Leuven.                                                    | 1982, 1984, 2009                                            |                      |
| Cape Verde | Cape Verde Vital Registration Death Data 1983 as it appears in United Nations Statistics Division (UNSD). United Nations Demographic Yearbook. New York City, United States: United Nations Statistics Division (UNSD).  | 1983                                                        |                      |
| Cape Verde | Cape Verde Vital Registration Death Data 1984 as it appears in United Nations Statistics Division (UNSD). United Nations Demographic Yearbook. New York City, United States: United Nations Statistics Division (UNSD).  | 1984                                                        |                      |
| Cape Verde | Cape Verde Vital Registration Death Data 1985 as it appears in United Nations Statistics Division (UNSD). United Nations Demographic Yearbook. New York City, United States: United Nations Statistics Division (UNSD).  | 1985                                                        |                      |

**Web Table 32 - Comprehensive citation list**

| Country                  | Citation                                                                                                                                                                                                                                                      | Year*                                            | New for GBD 2013 (*) |
|--------------------------|---------------------------------------------------------------------------------------------------------------------------------------------------------------------------------------------------------------------------------------------------------------|--------------------------------------------------|----------------------|
| Cape Verde               | World Health Organization Regional Office for Africa. HIV/AIDS Epidemiological Surveillance Update for the WHO African Region. World Health Organization Regional Office for Africa, 2003.                                                                    | 1988, 1997                                       |                      |
| Cape Verde               | Cape Verde Vital Registration Death Data 1990 as it appears in United Nations Statistics Division (UNSD). United Nations Demographic Yearbook. New York City, United States: United Nations Statistics Division (UNSD).                                       | 1990                                             |                      |
| Cape Verde               | Weatherall D. Sickle Cell and Thalassemias Prevalence Data, Personal Correspondence with David Weatherall. [Unpublished].                                                                                                                                     | 1990-2009                                        |                      |
| Cape Verde               | Centre for Health Informatics and Multiprofessional Education, University College London. Modell's Haemoglobinopathologist's Almanac. London, United Kingdom: Centre for Health Informatics and Multiprofessional Education, University College London, 2008. | 1990-2003                                        |                      |
| Cape Verde               | Cape Verde Vital Registration Death Data 1991 as it appears in United Nations Statistics Division (UNSD). United Nations Demographic Yearbook. New York City, United States: United Nations Statistics Division (UNSD).                                       | 1991                                             |                      |
| Cape Verde               | Wessel H, Reitmaier P, Dupret A, Rocha E, Cnattingius S, Bergström S. Deaths among women of reproductive age in Cape Verde: causes and avoidability. Acta Obstet Gynecol Scand. 1999; 78(3): 225-32.                                                          | 1992                                             |                      |
| Cape Verde               | World Health Organization (WHO). Yellow Fever Reported Cases, WHO Vaccine-Preventable Diseases: Monitoring System. Geneva, Switzerland: World Health Organization (WHO).                                                                                      | 1997-1998, 2000-2009                             |                      |
| Cape Verde               | Cape Verde National Statistics Institute (INE) Division of Reproductive Health-Centers for Disease Control and Prevention (CDC). (2000) Cape Verde Reproductive Health Survey 1998. Atlanta, United States: Centers for Disease Control and Prevention (CDC). | 1998                                             |                      |
| Cape Verde               | National Institute of Statistics (Cape Verde). Cape Verde Population and Housing Census 2000.                                                                                                                                                                 | 2000                                             |                      |
| Cape Verde               | Macro International, Inc, Ministry of Health (Cape Verde), National Institute of Statistics (Cape Verde). Cape Verde Demographic and Health Survey 2005. Calverton, United States: Macro International, Inc.                                                  | 2005                                             | *                    |
| Cape Verde               | World Health Organization (WHO). Retrospective Measles Data on Supplementary Immunization Activities. Geneva, Switzerland: World Health Organization (WHO).                                                                                                   | 2005, 2009, 2013                                 |                      |
| Cape Verde               | United Nations Office on Drugs and Crime (UNODC). United Nations Office on Drugs and Crime Global Study on Homicides 2011. Vienna, Austria: United Nations Office on Drugs and Crime (UNODC), 2011.                                                           | 2007                                             |                      |
| Central African Republic | Central African Republic Population and Housing Census 1975 as it appears in United Nations Statistics Division (UNSD). United Nations Demographic Yearbook. New York City, United States: United Nations Statistics Division (UNSD).                         | 1975                                             |                      |
| Central African Republic | Meheus A, Widy-Wirski R, D'Costa J, Van Dyck E, Delgadillo R, Piot P. Treatment of gonorrhoea in males in the Central African Republic with spectinomycin and procaine penicillin. Bull World Health Organ. 1984; 62(1): 89-94.                               | 1980                                             |                      |
| Central African Republic | Institute for Health Metrics and Evaluation (IHME), Joint United Nations Program on HIV/AIDS (UNAIDS). Institute for Health Metrics and Evaluation HIV Mortality Estimates Based on the UNAIDS Spectrum Model Framework.                                      | 1980-2013                                        | *                    |
| Central African Republic | United Nations Children's Fund (UNICEF), World Health Organization (WHO). WHO and UNICEF Reported Disease Incidence Time Series - Pertussis. Geneva, Switzerland: World Health Organization (WHO).                                                            | 1980-1990, 1995, 1997-1999, 2001-2007, 2009-2013 |                      |
| Central African Republic | United Nations Children's Fund (UNICEF), World Health Organization (WHO). WHO and UNICEF Reported Disease Incidence Time Series - Measles. Geneva, Switzerland: World Health Organization (WHO).                                                              | 1980-1993, 1995-2013                             |                      |
| Central African Republic | Weatherall D. Sickle Cell and Thalassemias Prevalence Data, Personal Correspondence with David Weatherall. [Unpublished].                                                                                                                                     | 1990-2009                                        |                      |

**Web Table 32 - Comprehensive citation list**

| Country                  | Citation                                                                                                                                                                                                                                                                                                  | Year*                                       | New for GBD 2013 (*) |
|--------------------------|-----------------------------------------------------------------------------------------------------------------------------------------------------------------------------------------------------------------------------------------------------------------------------------------------------------|---------------------------------------------|----------------------|
| Central African Republic | World Health Organization (WHO). Global Prevalence and Incidence of Selected Curable Sexually Transmitted Infections: Overviews and Estimates 2001. Geneva, Switzerland: World Health Organization (WHO), 2001.                                                                                           | 1990-1999                                   |                      |
| Central African Republic | Centre for Health Informatics and Multiprofessional Education, University College London. Modell's Haemoglobinopathologist's Almanac. London, United Kingdom: Centre for Health Informatics and Multiprofessional Education, University College London, 2008.                                             | 1990-2003                                   |                      |
| Central African Republic | Pawlotsky JM, Bléc L, Gr̄senguët G, Deforges L, Bouvier M, Duval J, Dhumeaux D. High prevalence of hepatitis B, C, and E markers in young sexually active adults from the Central African Republic. J Med Virol. 1995; 46(3): 269-72.                                                                     | 1993, 1995                                  |                      |
| Central African Republic | Division of Statistics and Economic Studies (Central African Republic), Macro International, Inc. Central African Republic Demographic and Health Survey 1994-1995. Calverton, United States: Macro International, Inc.                                                                                   | 1994-1995                                   |                      |
| Central African Republic | Department of Peace and Conflict Research, Uppsala University. UCDP Battle-Related Deaths Database Version 5, 2013. Uppsala, Sweden: Department of Peace and Conflict Research, Uppsala University, 2013.                                                                                                 | 1996-2012                                   | *                    |
| Central African Republic | Centre for Research on the Epidemiology of Disasters (CRED). EM-DAT: The OFDA/CRED International Disaster Database. Brussels, Belgium: Catholic University of Leuven.                                                                                                                                     | 1996, 2001-2002, 2004-2005, 2007, 2009-2011 |                      |
| Central African Republic | World Health Organization (WHO). Yellow Fever Reported Cases, WHO Vaccine-Preventable Diseases: Monitoring System. Geneva, Switzerland: World Health Organization (WHO).                                                                                                                                  | 1997-2005, 2007-2009                        |                      |
| Central African Republic | Division of Statistics and Economic Studies (Central African Republic), Ministry of Economy, Planning and International Cooperation (Central African Republic). Central African Republic General Population Census 1988.                                                                                  | 1998                                        |                      |
| Central African Republic | Measles Supplementary Immunization Activity Data as provided by the World Health Organization. [Unpublished].                                                                                                                                                                                             | 1998                                        |                      |
| Central African Republic | United Nations Children's Fund (UNICEF). Central African Republic Multiple Indicator Cluster Survey 2000. New York, United States: United Nations Children's Fund (UNICEF).                                                                                                                               | 2000                                        |                      |
| Central African Republic | Department of Peace and Conflict Research, Uppsala University. UCDP One-Sided Violence Database Version 1.4, 2013. Uppsala, Sweden: Department of Peace and Conflict Research, Uppsala University, 2013.                                                                                                  | 2001-2012                                   | *                    |
| Central African Republic | World Health Organization (WHO). Retrospective Measles Data on Supplementary Immunization Activities. Geneva, Switzerland: World Health Organization (WHO).                                                                                                                                               | 2005-2006, 2008, 2011, 2013                 |                      |
| Central African Republic | United Nations Children's Fund (UNICEF). Central African Republic Multiple Indicator Cluster Survey 2006. New York, United States: United Nations Children's Fund (UNICEF).                                                                                                                               | 2006                                        |                      |
| Central African Republic | World Health Organization (WHO). Yellow fever in Africa and South America, 2006. Wkly Epidemiol Rec. 2008; 83(8): 60-76.                                                                                                                                                                                  | 2006                                        |                      |
| Central African Republic | Bekondi C, Mobima T, Ouavènè JO, Koffi B, Konamna X, Béré A, Le Faou A. Étiopathologie du carcinome hépatocellulaire à Bangui, République centrafricaine : caractéristiques cliniques, biologiques et aspects virologiques des patients. Pathol Biol. 2010; 58(2): 152-5.                                 | 2006-2009                                   | *                    |
| Central African Republic | Guerchet M, M'belesso P, Mouanga AM, Bandzouzi B, Tabo A, Houinato DS, Paraiso MN, Cowpli-Bony P, Nubukpo P, Abovans V, Clément J-P, Dartigues J-F, Preux P-M. Prevalence of dementia in elderly living in two cities of Central Africa: the EDAC survey. Dement Geriatr Cogn Disord. 2010; 30(3): 261-8. | 2008-2009                                   |                      |



**Web Table 32 - Comprehensive citation list**

| Country                  | Citation                                                                                                                                                                                                                                                                                                   | Year*                                                               | New for GBD 2013 (*) |
|--------------------------|------------------------------------------------------------------------------------------------------------------------------------------------------------------------------------------------------------------------------------------------------------------------------------------------------------|---------------------------------------------------------------------|----------------------|
| Central African Republic | Mbelesso P, Tabo A, Guerchet M, Mouanga AM, Bandzouzi B, Houinato D, Paraiso MN, Cowppli-Bony P, Aboyans V, Nubukpo P, Preux PM, Dartigues JF, Clément JP. Epidemiology of dementia in elderly living in the 3rd borough of Bangui (Central African Republic). Bull Soc Pathol Exot. 2012; 105(5): 388-95. | 2008-2009                                                           |                      |
| Central African Republic | Joint United Nations Program on HIV/AIDS (UNAIDS), National Committee for the Fight Against AIDS (CNLS) (Central African Republic). Central African Republic UNGASS Report 2010. Geneva, Switzerland: Joint United Nations Program on HIV/AIDS (UNAIDS), 2010.                                             | 2009                                                                |                      |
| Central African Republic | Central African Institute of Statistics, Economic and Social Studies (ICASEES) (Central African Republic), ICF International. Central African Republic Multiple Indicator Cluster Survey 2010-2011. Fairfax, United States: ICF International, 2013.                                                       | 2010-2011                                                           | *                    |
| Central African Republic | Department of Peace and Conflict Research, Uppsala University. UCDP Nonstate Conflict Database Version 2.5, 2013. Uppsala, Sweden: Department of Peace and Conflict Research, Uppsala University, 2013.                                                                                                    | 2011                                                                | *                    |
| Chad                     | Peace Research Institute Oslo (PRIO). Battle Deaths Dataset Version 3, 2009. Oslo, Norway: Peace Research Institute Oslo (PRIO), 2009.                                                                                                                                                                     | 1966-1988                                                           |                      |
| Chad                     | Centre for Research on the Epidemiology of Disasters (CRED). EM-DAT: The OFDA/CRED International Disaster Database. Brussels, Belgium: Catholic University of Leuven.                                                                                                                                      | 1977, 1981-1985, 1988, 1991, 1995, 2001, 2006-2007, 2009-2010, 2012 |                      |
| Chad                     | Institute for Health Metrics and Evaluation (IHME), Joint United Nations Program on HIV/AIDS (UNAIDS). Institute for Health Metrics and Evaluation HIV Mortality Estimates Based on the UNAIDS Spectrum Model Framework.                                                                                   | 1980-2013                                                           | *                    |
| Chad                     | United Nations Children's Fund (UNICEF), World Health Organization (WHO). WHO and UNICEF Reported Disease Incidence Time Series - Measles. Geneva, Switzerland: World Health Organization (WHO).                                                                                                           | 1981-2013                                                           |                      |
| Chad                     | United Nations Children's Fund (UNICEF), World Health Organization (WHO). WHO and UNICEF Reported Disease Incidence Time Series - Pertussis. Geneva, Switzerland: World Health Organization (WHO).                                                                                                         | 1982-1986, 1995-1998                                                |                      |
| Chad                     | Department of Peace and Conflict Research, Uppsala University. UCDP Battle-Related Deaths Database Version 5, 2013. Uppsala, Sweden: Department of Peace and Conflict Research, Uppsala University, 2013.                                                                                                  | 1989-2010                                                           | *                    |
| Chad                     | Department of Peace and Conflict Research, Uppsala University. UCDP One-Sided Violence Database Version 1.4, 2013. Uppsala, Sweden: Department of Peace and Conflict Research, Uppsala University, 2013.                                                                                                   | 1989-2007                                                           | *                    |
| Chad                     | Weatherall D. Sickle Cell and Thalassemias Prevalence Data, Personal Correspondence with David Weatherall. [Unpublished].                                                                                                                                                                                  | 1990-2009                                                           |                      |
| Chad                     | Centre for Health Informatics and Multiprofessional Education, University College London. Modell's Haemoglobinopathologist's Almanac. London, United Kingdom: Centre for Health Informatics and Multiprofessional Education, University College London, 2008.                                              | 1990-2003                                                           |                      |
| Chad                     | Census Bureau (Chad). Chad Population and Housing Census 1993.                                                                                                                                                                                                                                             | 1993                                                                |                      |
| Chad                     | Ndikuyeze A, Cook A, Cutts FT, Bennett S. Priorities in global measles control: report of an outbreak in N'Djamena, Chad. Epidemiol Infect. 1995; 115(2): 309-14.                                                                                                                                          | 1993                                                                |                      |
| Chad                     | Census Bureau (Chad), Macro International, Inc, National Institute of Statistical, Economic and Demographic Studies (Chad). Chad Demographic and Health Survey 1996-1997. Calverton, United States: Macro International, Inc.                                                                              | 1996-1997                                                           |                      |
| Chad                     | World Health Organization (WHO). Yellow Fever Reported Cases, WHO Vaccine-Preventable Diseases: Monitoring System. Geneva, Switzerland: World Health Organization (WHO).                                                                                                                                   | 1997, 1999, 2001, 2003-2006, 2008-2009                              |                      |
| Chad                     | Measles Supplementary Immunization Activity Data as provided by the World Health Organization. [Unpublished].                                                                                                                                                                                              | 1997, 1999                                                          |                      |

**Web Table 32 - Comprehensive citation list**

| Country | Citation                                                                                                                                                                                                                                                                                                                    | Year*                                                                                                                  | New for GBD 2013 (*) |
|---------|-----------------------------------------------------------------------------------------------------------------------------------------------------------------------------------------------------------------------------------------------------------------------------------------------------------------------------|------------------------------------------------------------------------------------------------------------------------|----------------------|
| Chad    | Department of Peace and Conflict Research, Uppsala University. UCDP Nonstate Conflict Database Version 2.5, 2013. Uppsala, Sweden: Department of Peace and Conflict Research, Uppsala University, 2013.                                                                                                                     | 1999-2007                                                                                                              | *                    |
| Chad    | World Health Organization Regional Office for Africa. HIV/AIDS Epidemiological Surveillance Update for the WHO African Region. World Health Organization Regional Office for Africa, 2003.                                                                                                                                  | 1999-2000, 2002                                                                                                        |                      |
| Chad    | United Nations Children's Fund (UNICEF), Census Bureau (Chad), National Institute of Statistical, Economic and Demographic Studies (Chad). Chad Multiple Indicator Cluster Survey 2000. New York, United States: United Nations Children's Fund (UNICEF).                                                                   | 2000                                                                                                                   |                      |
| Chad    | Grais RF, Dubray C, Gerstl S, Guthmann JP, Djibo A, Nargaye KD, Coker J, Alberti KP, Cochet A, Ihekweazu C, Nathan N, Payne L, Porten K, Sauvageot D, Schimmer B, Fermon F, Burny ME, Hersh BS, Guerin PJ. Unacceptably high mortality related to measles epidemics in Niger, Nigeria, and Chad. PLoS Med. 2007; 4(1): e16. | 2003-2004                                                                                                              |                      |
| Chad    | Macro International, Inc, National Institute of Statistical, Economic and Demographic Studies (Chad). Chad Demographic and Health Survey 2004. Calverton, United States: Macro International, Inc.                                                                                                                          | 2004                                                                                                                   |                      |
| Chad    | World Health Organization (WHO). Retrospective Measles Data on Supplementary Immunization Activities. Geneva, Switzerland: World Health Organization (WHO).                                                                                                                                                                 | 2005-2006, 2008-2009, 2011-2012                                                                                        |                      |
| Chad    | Joint United Nations Program on HIV/AIDS (UNAIDS), National Council for the Fight against AIDS (Chad). Chad UNGASS Report of the National Situation 2010. Geneva, Switzerland: Joint United Nations Program on HIV/AIDS (UNAIDS), 2010.                                                                                     | 2009                                                                                                                   |                      |
| Chad    | Ministry of Planning, Economy, and International Cooperation (Chad), National Institute of Statistical, Economic and Demographic Studies (Chad), United Nations Children's Fund (UNICEF). Chad Multiple Indicator Cluster Survey 2010. New York, United States: United Nations Children's Fund (UNICEF), 2014.              | 2010                                                                                                                   | *                    |
| Chile   | Chile Vital Registration Death Data 1950 as it appears in United Nations Statistics Division (UNSD). United Nations Demographic Yearbook. New York City, United States: United Nations Statistics Division (UNSD).                                                                                                          | 1950                                                                                                                   |                      |
| Chile   | Chile Vital Registration Death Data 1951 as it appears in United Nations Statistics Division (UNSD). United Nations Demographic Yearbook. New York City, United States: United Nations Statistics Division (UNSD).                                                                                                          | 1951                                                                                                                   |                      |
| Chile   | Chile Vital Registration Death Data 1952 as it appears in United Nations Statistics Division (UNSD). United Nations Demographic Yearbook. New York City, United States: United Nations Statistics Division (UNSD).                                                                                                          | 1952                                                                                                                   |                      |
| Chile   | Chile Vital Registration Death Data 1953 as it appears in United Nations Statistics Division (UNSD). United Nations Demographic Yearbook. New York City, United States: United Nations Statistics Division (UNSD).                                                                                                          | 1953                                                                                                                   |                      |
| Chile   | Centre for Research on the Epidemiology of Disasters (CRED). EM-DAT: The OFDA/CRED International Disaster Database. Brussels, Belgium: Catholic University of Leuven.                                                                                                                                                       | 1953, 1960, 1963-1966, 1971, 1974, 1977-1979, 1983-1987, 1989, 1991, 1993, 1995, 1997, 2000-2002, 2004-2008, 2010-2012 |                      |
| Chile   | Chile Vital Registration - Deaths 1954 ICD7 as it appears in World Health Organization (WHO). WHO Mortality Database Version February 2014. Geneva, Switzerland: World Health Organization (WHO), 2014.                                                                                                                     | 1954                                                                                                                   |                      |



**Web Table 32 - Comprehensive citation list**

| Country | Citation                                                                                                                                                                                                | Year* | New for GBD 2013 (*) |
|---------|---------------------------------------------------------------------------------------------------------------------------------------------------------------------------------------------------------|-------|----------------------|
| Chile   | Chile Vital Registration - Deaths 1955 ICD7 as it appears in World Health Organization (WHO). WHO Mortality Database Version February 2014. Geneva, Switzerland: World Health Organization (WHO), 2014. | 1955  |                      |
| Chile   | Chile Vital Registration - Deaths 1956 ICD7 as it appears in World Health Organization (WHO). WHO Mortality Database Version February 2014. Geneva, Switzerland: World Health Organization (WHO), 2014. | 1956  |                      |
| Chile   | Chile Vital Registration - Deaths 1957 ICD7 as it appears in World Health Organization (WHO). WHO Mortality Database Version February 2014. Geneva, Switzerland: World Health Organization (WHO), 2014. | 1957  |                      |
| Chile   | Chile Vital Registration - Deaths 1958 ICD7 as it appears in World Health Organization (WHO). WHO Mortality Database Version February 2014. Geneva, Switzerland: World Health Organization (WHO), 2014. | 1958  |                      |
| Chile   | Chile Vital Registration - Deaths 1959 ICD7 as it appears in World Health Organization (WHO). WHO Mortality Database Version February 2014. Geneva, Switzerland: World Health Organization (WHO), 2014. | 1959  |                      |
| Chile   | Chile Vital Registration - Deaths 1960 ICD7 as it appears in World Health Organization (WHO). WHO Mortality Database Version February 2014. Geneva, Switzerland: World Health Organization (WHO), 2014. | 1960  |                      |
| Chile   | Chile Vital Registration - Deaths 1961 ICD7 as it appears in World Health Organization (WHO). WHO Mortality Database Version February 2014. Geneva, Switzerland: World Health Organization (WHO), 2014. | 1961  |                      |
| Chile   | Chile Vital Registration - Deaths 1962 ICD7 as it appears in World Health Organization (WHO). WHO Mortality Database Version February 2014. Geneva, Switzerland: World Health Organization (WHO), 2014. | 1962  |                      |
| Chile   | Chile Vital Registration - Deaths 1963 ICD7 as it appears in World Health Organization (WHO). WHO Mortality Database Version February 2014. Geneva, Switzerland: World Health Organization (WHO), 2014. | 1963  |                      |
| Chile   | Chile Vital Registration - Deaths 1964 ICD7 as it appears in World Health Organization (WHO). WHO Mortality Database Version February 2014. Geneva, Switzerland: World Health Organization (WHO), 2014. | 1964  |                      |
| Chile   | Chile Vital Registration - Deaths 1965 ICD7 as it appears in World Health Organization (WHO). WHO Mortality Database Version February 2014. Geneva, Switzerland: World Health Organization (WHO), 2014. | 1965  |                      |
| Chile   | Chile Vital Registration - Deaths 1966 ICD7 as it appears in World Health Organization (WHO). WHO Mortality Database Version February 2014. Geneva, Switzerland: World Health Organization (WHO), 2014. | 1966  |                      |
| Chile   | Chile Vital Registration - Deaths 1967 ICD7 as it appears in World Health Organization (WHO). WHO Mortality Database Version February 2014. Geneva, Switzerland: World Health Organization (WHO), 2014. | 1967  |                      |
| Chile   | Chile Vital Registration - Deaths 1968 ICD8 as it appears in World Health Organization (WHO). WHO Mortality Database Version February 2014. Geneva, Switzerland: World Health Organization (WHO), 2014. | 1968  |                      |

**Web Table 32 - Comprehensive citation list**

| Country | Citation                                                                                                                                                                                                                                                               | Year*     | New for GBD 2013 (*) |
|---------|------------------------------------------------------------------------------------------------------------------------------------------------------------------------------------------------------------------------------------------------------------------------|-----------|----------------------|
| Chile   | Chile Vital Registration - Deaths 1969 ICD8 as it appears in World Health Organization (WHO). WHO Mortality Database Version February 2014. Geneva, Switzerland: World Health Organization (WHO), 2014.                                                                | 1969      |                      |
| Chile   | Statistics and Censuses, Ministry of Economy (Chile), Minnesota Population Center. Chile General Population and Housing Census 1970 from the Integrated Public Use Microdata Series, International. [Machine-readable database]. Minneapolis: University of Minnesota. | 1970      |                      |
| Chile   | Chile Vital Registration - Deaths 1970 ICD8 as it appears in World Health Organization (WHO). WHO Mortality Database Version February 2014. Geneva, Switzerland: World Health Organization (WHO), 2014.                                                                | 1970      |                      |
| Chile   | United Nations Office on Drugs and Crime (UNODC). United Nations Surveys on Crime Trends and the Operations of Criminal Justice Systems 1970-2006 as provided by Kavi Bhalla. [Unpublished]                                                                            | 1970-1979 |                      |
| Chile   | Chile Vital Registration - Deaths 1971 ICD8 as it appears in World Health Organization (WHO). WHO Mortality Database Version February 2014. Geneva, Switzerland: World Health Organization (WHO), 2014.                                                                | 1971      |                      |
| Chile   | Chile Vital Registration - Deaths 1972 ICD8 as it appears in World Health Organization (WHO). WHO Mortality Database Version February 2014. Geneva, Switzerland: World Health Organization (WHO), 2014.                                                                | 1972      |                      |
| Chile   | Chile Vital Registration - Deaths 1973 ICD8 as it appears in World Health Organization (WHO). WHO Mortality Database Version February 2014. Geneva, Switzerland: World Health Organization (WHO), 2014.                                                                | 1973      |                      |
| Chile   | Peace Research Institute Oslo (PRIO). Battle Deaths Dataset Version 3, 2009. Oslo, Norway: Peace Research Institute Oslo (PRIO), 2009.                                                                                                                                 | 1973      |                      |
| Chile   | Chile Vital Registration - Deaths 1974 ICD8 as it appears in World Health Organization (WHO). WHO Mortality Database Version February 2014. Geneva, Switzerland: World Health Organization (WHO), 2014.                                                                | 1974      |                      |
| Chile   | Chile Vital Registration - Deaths 1975 ICD8 as it appears in World Health Organization (WHO). WHO Mortality Database Version February 2014. Geneva, Switzerland: World Health Organization (WHO), 2014.                                                                | 1975      |                      |
| Chile   | Chile Vital Registration - Deaths 1976 ICD8 as it appears in World Health Organization (WHO). WHO Mortality Database Version February 2014. Geneva, Switzerland: World Health Organization (WHO), 2014.                                                                | 1976      |                      |
| Chile   | Chile Vital Registration - Deaths 1977 ICD8 as it appears in World Health Organization (WHO). WHO Mortality Database Version February 2014. Geneva, Switzerland: World Health Organization (WHO), 2014.                                                                | 1977      |                      |
| Chile   | Chile Vital Registration - Deaths 1978 ICD8 as it appears in World Health Organization (WHO). WHO Mortality Database Version February 2014. Geneva, Switzerland: World Health Organization (WHO), 2014.                                                                | 1978      |                      |
| Chile   | Chile Vital Registration - Deaths 1979 ICD8 as it appears in World Health Organization (WHO). WHO Mortality Database Version February 2014. Geneva, Switzerland: World Health Organization (WHO), 2014.                                                                | 1979      |                      |
| Chile   | Chile Vital Registration - Deaths 1980 ICD9 as it appears in World Health Organization (WHO). WHO Mortality Database Version February 2014. Geneva, Switzerland: World Health Organization (WHO), 2014.                                                                | 1980      |                      |

**Web Table 32 - Comprehensive citation list**

| Country | Citation                                                                                                                                                                                                                                                         | Year*     | New for GBD 2013 (*) |
|---------|------------------------------------------------------------------------------------------------------------------------------------------------------------------------------------------------------------------------------------------------------------------|-----------|----------------------|
| Chile   | Zacarias J, Rakela J, Riveros C, Brinck P. [Anti hepatitis A antibodies in healthy children and in patients with hepatitis]. Rev Med Chil. 1981; 109(9): 833-6.                                                                                                  | 1980      |                      |
| Chile   | Institute for Health Metrics and Evaluation (IHME), Joint United Nations Program on HIV/AIDS (UNAIDS). Institute for Health Metrics and Evaluation HIV Mortality Estimates Based on the UNAIDS Spectrum Model Framework.                                         | 1980-2013 | *                    |
| Chile   | United Nations Children's Fund (UNICEF), World Health Organization (WHO). WHO and UNICEF Reported Disease Incidence Time Series - Pertussis. Geneva, Switzerland: World Health Organization (WHO).                                                               | 1980-2013 |                      |
| Chile   | United Nations Children's Fund (UNICEF), World Health Organization (WHO). WHO and UNICEF Reported Disease Incidence Time Series - Measles. Geneva, Switzerland: World Health Organization (WHO).                                                                 | 1980-2013 |                      |
| Chile   | Chile Vital Registration - Deaths 1981 ICD9 as it appears in World Health Organization (WHO). WHO Mortality Database Version February 2014. Geneva, Switzerland: World Health Organization (WHO), 2014.                                                          | 1981      |                      |
| Chile   | National Institute of Statistics (INE) (Chile), Minnesota Population Center. Chile General Population and Housing Census 1982 from the Integrated Public Use Microdata Series, International. [Machine-readable database]. Minneapolis: University of Minnesota. | 1982      |                      |
| Chile   | Chile Vital Registration - Deaths 1982 ICD9 as it appears in World Health Organization (WHO). WHO Mortality Database Version February 2014. Geneva, Switzerland: World Health Organization (WHO), 2014.                                                          | 1982      |                      |
| Chile   | Black RE, Levine MM, Ferreccio C, Clements ML, Lanata C, Rooney J, Germanier R, Chilean Typhoid Committee. Efficacy of one or two doses of Ty21a Salmonella typhi vaccine in enteric-coated capsules in a controlled field trial. Vaccine. 1990; 8(1): 81-4.     | 1982-1987 | *                    |
| Chile   | Chile Vital Registration - Deaths 1983 ICD9 as it appears in World Health Organization (WHO). WHO Mortality Database Version February 2014. Geneva, Switzerland: World Health Organization (WHO), 2014.                                                          | 1983      |                      |
| Chile   | Riedemann S, Hochstein-Mintzel V, Reinhardt G. [Prevalence of hepatitis A and B in the population of Valdivia: a seroepidemiological study]. Rev Med Chil. 1984; 112(7): 672-4.                                                                                  | 1983      |                      |
| Chile   | Chavez P A, Rojas A C, Rakela R S, Chadid S J, Fischer S C. Meningitis bacteriana aguda: experiencia de 10 anos. Rev Chil Infectol. 1994; 11(2): 92-8.                                                                                                           | 1983-1992 |                      |
| Chile   | Chile Vital Registration - Deaths 1984 ICD9 as it appears in World Health Organization (WHO). WHO Mortality Database Version February 2014. Geneva, Switzerland: World Health Organization (WHO), 2014.                                                          | 1984      |                      |
| Chile   | Riedemann S, Ibarra H, Hochstein-Mintzel V, Reinhardt G, Niedda M, Froesner G. [Viral hepatitis in a rural area in Chile]. Rev Med Chil. 1987; 115(1): 16-8.                                                                                                     | 1984-1985 |                      |
| Chile   | Chile Vital Registration - Deaths 1985 ICD9 as it appears in World Health Organization (WHO). WHO Mortality Database Version February 2014. Geneva, Switzerland: World Health Organization (WHO), 2014.                                                          | 1985      |                      |
| Chile   | Ministry of Health (Chile), National Institute of Statistics (Chile). Chile Vital Registration - Deaths 1985. [Unpublished].                                                                                                                                     | 1985      |                      |
| Chile   | Chile Vital Registration - Deaths 1986 ICD9 as it appears in World Health Organization (WHO). WHO Mortality Database Version February 2014. Geneva, Switzerland: World Health Organization (WHO), 2014.                                                          | 1986      |                      |

**Web Table 32 - Comprehensive citation list**

| Country | Citation                                                                                                                                                                                                                                                         | Year*            | New for GBD 2013 (*) |
|---------|------------------------------------------------------------------------------------------------------------------------------------------------------------------------------------------------------------------------------------------------------------------|------------------|----------------------|
| Chile   | Chile Vital Registration - Deaths 1987 ICD9 as it appears in World Health Organization (WHO). WHO Mortality Database Version February 2014. Geneva, Switzerland: World Health Organization (WHO), 2014.                                                          | 1987             |                      |
| Chile   | Chile Vital Registration - Deaths 1988 ICD9 as it appears in World Health Organization (WHO). WHO Mortality Database Version February 2014. Geneva, Switzerland: World Health Organization (WHO), 2014.                                                          | 1988             |                      |
| Chile   | Chile Vital Registration - Deaths 1989 ICD9 as it appears in World Health Organization (WHO). WHO Mortality Database Version February 2014. Geneva, Switzerland: World Health Organization (WHO), 2014.                                                          | 1989             |                      |
| Chile   | Díaz JM, Catalán L, Urrutia MT, Prado V, Ledermann W, Mendoza C, Topelberg S. Trends of etiology of acute bacterial meningitis in Chilean children from 1989 to 1998. Impact of the anti-H influenzae type b vaccine. Rev Med Chil. 2001; 129(7): 719-26.        | 1989-1998        |                      |
| Chile   | Chile Vital Registration - Deaths 1990 ICD9 as it appears in World Health Organization (WHO). WHO Mortality Database Version February 2014. Geneva, Switzerland: World Health Organization (WHO), 2014.                                                          | 1990             |                      |
| Chile   | Weatherall D. Sickle Cell and Thalassemias Prevalence Data, Personal Correspondence with David Weatherall. [Unpublished].                                                                                                                                        | 1990-2009        |                      |
| Chile   | Centre for Health Informatics and Multiprofessional Education, University College London. Modell's Haemoglobinopathologist's Almanac. London, United Kingdom: Centre for Health Informatics and Multiprofessional Education, University College London, 2008.    | 1990-2003        |                      |
| Chile   | Chile Vital Registration - Deaths 1991 ICD9 as it appears in World Health Organization (WHO). WHO Mortality Database Version February 2014. Geneva, Switzerland: World Health Organization (WHO), 2014.                                                          | 1991             |                      |
| Chile   | Riedemann GS, Ibarra VH, Reinhardt VG, Frosner G, Safary A. Prevalencia de anticuerpos anti-hepatitis A en escolares en la década actual. Rev Med Chil. 1998; 126(10): 1161-4.                                                                                   | 1991-1992        |                      |
| Chile   | Quiroga P. Dementia Prevalence in Concepción Chile. Dementia Project-WHO-Chile. In: World Congress of Geriatrics and Gerontology; 1997; Adelaide, Australia.                                                                                                     | 1991-1994        |                      |
| Chile   | National Institute of Statistics (INE) (Chile), Minnesota Population Center. Chile General Population and Housing Census 1992 from the Integrated Public Use Microdata Series, International. [Machine-readable database]. Minneapolis: University of Minnesota. | 1992             |                      |
| Chile   | Chile Vital Registration - Deaths 1992 ICD9 as it appears in World Health Organization (WHO). WHO Mortality Database Version February 2014. Geneva, Switzerland: World Health Organization (WHO), 2014.                                                          | 1992             |                      |
| Chile   | Ibarra HV, Riedemann SG, Siegel FG, Reinhardt GV, Toledo CA, Frösner G. Hepatitis E virus in Chile. Lancet. 1994; 344(8935): 1501.                                                                                                                               | 1992             | *                    |
| Chile   | Measles Supplementary Immunization Activity Data as provided by the World Health Organization. [Unpublished].                                                                                                                                                    | 1992, 1996, 1999 |                      |
| Chile   | Chile Vital Registration - Deaths 1993 ICD9 as it appears in World Health Organization (WHO). WHO Mortality Database Version February 2014. Geneva, Switzerland: World Health Organization (WHO), 2014.                                                          | 1993             |                      |
| Chile   | Brahm J, Hurtado C, Moraga M, Gil LC, Velasco M, Alegría S, Pagliero B. [Hepatitis E virus infection in Chile: preliminary report]. Rev Med Chil. 1996; 124(8): 947-9.                                                                                           | 1993-1994        | *                    |

**Web Table 32 - Comprehensive citation list**

| Country | Citation                                                                                                                                                                                                                                             | Year*                | New for GBD 2013 (*) |
|---------|------------------------------------------------------------------------------------------------------------------------------------------------------------------------------------------------------------------------------------------------------|----------------------|----------------------|
| Chile   | Chile Vital Registration - Deaths 1994 ICD9 as it appears in World Health Organization (WHO). WHO Mortality Database Version February 2014. Geneva, Switzerland: World Health Organization (WHO), 2014.                                              | 1994                 |                      |
| Chile   | Ibarra H, Riedemann S, Reinhardt G, Friek P, Siegel F, Toledo C, Calvo M, Froösner G. [Prevalence of hepatitis E virus antibodies in blood donors and other population groups in southern Chile]. Rev Med Chil. 1997; 125(3): 275-8.                 | 1994                 | *                    |
| Chile   | Chile Vital Registration - Deaths 1995 ICD9 as it appears in World Health Organization (WHO). WHO Mortality Database Version February 2014. Geneva, Switzerland: World Health Organization (WHO), 2014.                                              | 1995                 |                      |
| Chile   | Chile Vital Registration - Deaths 1996 ICD9 as it appears in World Health Organization (WHO). WHO Mortality Database Version February 2014. Geneva, Switzerland: World Health Organization (WHO), 2014.                                              | 1996                 |                      |
| Chile   | Lagos R, Potin M, Muñoz A, Abrego P, San Martín OS, Ureta AM, Bustamante C. [Serum antibodies against hepatitis A virus among subjects of middle and low socioeconomic levels in urban area of Santiago, Chile]. Rev Med Chil. 1999; 127(4): 429-36. | 1996                 |                      |
| Chile   | Tapia-Conyer R, Santos JI, Cavalcanti AM, Urdaneta E, Rivera L, Manterola A, Potin M, Ruttiman R, Tanaka Kido J. Hepatitis A in Latin America: A Changing Epidemiologic Pattern. Am J Trop Med Hyg. 1999; 61(5): 825-9.                              | 1996-1997            |                      |
| Chile   | Ibarra H, Riedemann S, Prado V, Reinhardt G, Vega I, Potin M, Frick P. [Current status of immunity to hepatitis A virus in various adult groups]. Rev Med Chil. 1999; 127(10): 1165-8.                                                               | 1996-1997            |                      |
| Chile   | Chile Vital Registration - Deaths 1997 ICD10 as it appears in World Health Organization (WHO). WHO Mortality Database Version February 2014. Geneva, Switzerland: World Health Organization (WHO), 2014.                                             | 1997                 |                      |
| Chile   | Ibarra H, Riedemann S, Reinhardt G, Hochsteinmintzel V, Froesner G. Prevalence of anti hepatitis A antibody in 2 areas with different ruralism in Chile. Rev Med Chil. 1988; 116(11): 1115-8.                                                        | 1997                 |                      |
| Chile   | World Health Organization (WHO). Yellow Fever Reported Cases, WHO Vaccine-Preventable Diseases: Monitoring System. Geneva, Switzerland: World Health Organization (WHO).                                                                             | 1997-2001, 2003-2009 |                      |
| Chile   | Chile Vital Registration - Deaths 1998 ICD10 as it appears in World Health Organization (WHO). WHO Mortality Database Version February 2014. Geneva, Switzerland: World Health Organization (WHO), 2014.                                             | 1998                 |                      |
| Chile   | Fix AD, Martin OS, Gallicchio L, Vial PA, Lagos R. Age-specific prevalence of antibodies to hepatitis A in Santiago, Chile: risk factors and shift in age of infection among children and young adults. Am J Trop Med Hyg. 2002; 66(5): 628-32.      | 1998                 |                      |
| Chile   | Chile Vital Registration - Deaths 1999 ICD10 as it appears in World Health Organization (WHO). WHO Mortality Database Version February 2014. Geneva, Switzerland: World Health Organization (WHO), 2014.                                             | 1999                 |                      |
| Chile   | Ibarra H, Riedemann S, Toledo C. [Hepatitis A and E virus antibodies in Chilean children of low socioeconomic status: a one year follow-up study]. Rev Med Chil. 2006; 134(2): 139-44.                                                               | 1999-2000            |                      |
| Chile   | Chile Vital Registration - Deaths 2000 ICD10 as it appears in World Health Organization (WHO). WHO Mortality Database Version February 2014. Geneva, Switzerland: World Health Organization (WHO), 2014.                                             | 2000                 |                      |

**Web Table 32 - Comprehensive citation list**

| Country | Citation                                                                                                                                                                                                                                                                              | Year*            | New for GBD 2013 (*) |
|---------|---------------------------------------------------------------------------------------------------------------------------------------------------------------------------------------------------------------------------------------------------------------------------------------|------------------|----------------------|
| Chile   | Curado MP, Edwards B, Shin HR, Storm H, Ferlay J, Heanue M and Boyle P, eds (2007). Cancer Incidence in Five Continents, Vol. IX Periodic Data (electronic version). Lyon, IARC. <a href="http://ci5.iarc.fr">http://ci5.iarc.fr</a>                                                  | 2000             |                      |
| Chile   | Gonzalez R, Soza A, Hernández V, Préz RM, Alvarez M, Morales A, Arellano M, Riquelme A, Viviani P, Covarrubias C, Arrese M, Miquel JF, Nervi F. Incidence and prevalence of hepatitis C virus infection in Chile. <i>Ann Hepatol.</i> 2005; 4(2): 127-30.                             | 2000             |                      |
| Chile   | United Nations Office on Drugs and Crime (UNODC). United Nations Office on Drugs and Crime Global Study on Homicides 2011. Vienna, Austria: United Nations Office on Drugs and Crime (UNODC), 2011.                                                                                   | 2000-2009        |                      |
| Chile   | Chile Vital Registration - Deaths 2001 ICD10 as it appears in World Health Organization (WHO). WHO Mortality Database Version February 2014. Geneva, Switzerland: World Health Organization (WHO), 2014.                                                                              | 2001             |                      |
| Chile   | World Health Organization (WHO). Retrospective Measles Data on Supplementary Immunization Activities. Geneva, Switzerland: World Health Organization (WHO).                                                                                                                           | 2001, 2005, 2007 |                      |
| Chile   | National Institute of Statistics (INE) (Chile), Minnesota Population Center. Chile General Population and Housing Census 2002 from the Integrated Public Use Microdata Series, International. [Machine-readable database]. Minneapolis: University of Minnesota.                      | 2002             |                      |
| Chile   | Chile Vital Registration - Deaths 2002 ICD10 as it appears in World Health Organization (WHO). WHO Mortality Database Version February 2014. Geneva, Switzerland: World Health Organization (WHO), 2014.                                                                              | 2002             |                      |
| Chile   | Chile Vital Registration - Deaths 2003 ICD10 as it appears in World Health Organization (WHO). WHO Mortality Database Version February 2014. Geneva, Switzerland: World Health Organization (WHO), 2014.                                                                              | 2003             |                      |
| Chile   | Joint United Nations Program on HIV/AIDS (UNAIDS), Pan American Health Organization (PAHO), United Nations Children's Fund (UNICEF), World Health Organization (WHO). Chile Epidemiological Fact Sheet on HIV/AIDS and STIs 2004.                                                     | 2003             |                      |
| Chile   | Ministry of Health (Chile). Chile First Report of Population Cancer Registries 2003-2007. Santiago, Chile: Ministry of Health (Chile), 2012.                                                                                                                                          | 2003-2007        |                      |
| Chile   | Chile Vital Registration - Deaths 2004 ICD10 as it appears in World Health Organization (WHO). WHO Mortality Database Version February 2014. Geneva, Switzerland: World Health Organization (WHO), 2014.                                                                              | 2004             |                      |
| Chile   | Chile Vital Registration - Deaths 2005 ICD10 as it appears in World Health Organization (WHO). WHO Mortality Database Version February 2014. Geneva, Switzerland: World Health Organization (WHO), 2014.                                                                              | 2005             |                      |
| Chile   | Ministry of Health (Chile). Chile First Report of Population Cancer Registries 2003-2007. Santiago, Chile: Ministry of Health (Chile), 2012.                                                                                                                                          | 2005             |                      |
| Chile   | Forman D, Bray F, Brewster DH, Gombe Mbalawa C, Kohler B, Piñeros M, Steliarova-Foucher E, Swaminathan R and Ferlay J, eds (2013). Cancer Incidence in Five Continents, Vol. X Summary Database (electronic version). Lyon, IARC. <a href="http://ci5.iarc.fr">http://ci5.iarc.fr</a> | 2005             |                      |
| Chile   | Chile Vital Registration - Deaths 2006 ICD10 as it appears in World Health Organization (WHO). WHO Mortality Database Version February 2014. Geneva, Switzerland: World Health Organization (WHO), 2014.                                                                              | 2006             |                      |

**Web Table 32 - Comprehensive citation list**

| Country | Citation                                                                                                                                                                                                                                                                                                                                                                                                                               | Year*                                                 | New for GBD 2013 (*) |
|---------|----------------------------------------------------------------------------------------------------------------------------------------------------------------------------------------------------------------------------------------------------------------------------------------------------------------------------------------------------------------------------------------------------------------------------------------|-------------------------------------------------------|----------------------|
| Chile   | Fassio E, Díaz S, Santa C, Reig ME, Martínez Artola Y, Alves de Mattos A, Míguez C, Galizzi J, Zapata R, Ridruejo E, de Souza FC, Hernández N, Pinchuk L, Multicenter Group for Study of Hepatocarcinoma in Latin America, Asociación Latinoamericana para el Estudio del Hígado (ALEH). Etiology of hepatocellular carcinoma in Latin America: a prospective, multicenter, international study. <i>Ann Hepatol.</i> 2010; 9(1): 63-9. | 2006-2008                                             | *                    |
| Chile   | Chile Vital Registration - Deaths 2007 ICD10 as it appears in World Health Organization (WHO). WHO Mortality Database Version February 2014. Geneva, Switzerland: World Health Organization (WHO), 2014.                                                                                                                                                                                                                               | 2007                                                  |                      |
| Chile   | Chile Vital Registration - Deaths 2008 ICD10 as it appears in World Health Organization (WHO). WHO Mortality Database Version February 2014. Geneva, Switzerland: World Health Organization (WHO), 2014.                                                                                                                                                                                                                               | 2008                                                  |                      |
| Chile   | Chile Vital Registration - Deaths 2009 ICD10 as it appears in World Health Organization (WHO). WHO Mortality Database Version February 2014. Geneva, Switzerland: World Health Organization (WHO), 2014.                                                                                                                                                                                                                               | 2009                                                  |                      |
| Chile   | Joint United Nations Program on HIV/AIDS (UNAIDS), Ministry of Health (Chile). Chile UNGASS Report 2010. Geneva, Switzerland: Joint United Nations Program on HIV/AIDS (UNAIDS), 2010.                                                                                                                                                                                                                                                 | 2009                                                  |                      |
| Chile   | Department of Statistics and Health Information, Ministry of Health (Chile), National Institute of Statistics (Chile). Chile Vital Statistics - Deaths 2010. Santiago, Chile: Department of Statistics and Health Information, Ministry of Health (Chile).                                                                                                                                                                             | 2010                                                  | *                    |
| Chile   | Chile Vital Registration Death Data 2010 as it appears in United Nations Statistics Division (UNSD). United Nations Demographic Yearbook. New York City, United States: United Nations Statistics Division (UNSD).                                                                                                                                                                                                                     | 2010                                                  |                      |
| Chile   | Department of Statistics and Health Information, Ministry of Health (Chile), National Institute of Statistics (Chile). Chile Vital Statistics - Deaths 2011. Santiago, Chile: Department of Statistics and Health Information, Ministry of Health (Chile).                                                                                                                                                                             | 2011                                                  | *                    |
| China   | United Kingdom - Hong Kong Vital Registration Death Data 1950 as it appears in United Nations Statistics Division (UNSD). United Nations Demographic Yearbook. New York City, United States: United Nations Statistics Division (UNSD).                                                                                                                                                                                                | 1950                                                  |                      |
| China   | Centre for Research on the Epidemiology of Disasters (CRED). EM-DAT: The OFDA/CRED International Disaster Database. Brussels, Belgium: Catholic University of Leuven.                                                                                                                                                                                                                                                                  | 1950-1951, 1954-1957, 1959-1962, 1964-1966, 1968-2013 |                      |
| China   | Peace Research Institute Oslo (PRIO). Battle Deaths Dataset Version 3, 2009. Oslo, Norway: Peace Research Institute Oslo (PRIO), 2009.                                                                                                                                                                                                                                                                                                 | 1950-1988                                             |                      |
| China   | United Kingdom - Hong Kong Vital Registration Death Data 1951 as it appears in United Nations Statistics Division (UNSD). United Nations Demographic Yearbook. New York City, United States: United Nations Statistics Division (UNSD).                                                                                                                                                                                                | 1951                                                  |                      |
| China   | United Kingdom - Hong Kong Vital Registration Death Data 1952 as it appears in United Nations Statistics Division (UNSD). United Nations Demographic Yearbook. New York City, United States: United Nations Statistics Division (UNSD).                                                                                                                                                                                                | 1952                                                  |                      |
| China   | United Kingdom - Hong Kong Vital Registration Death Data 1953 as it appears in United Nations Statistics Division (UNSD). United Nations Demographic Yearbook. New York City, United States: United Nations Statistics Division (UNSD).                                                                                                                                                                                                | 1953                                                  |                      |



**Web Table 32 - Comprehensive citation list**

| Country | Citation                                                                                                                                                                                                                                | Year* | New for GBD 2013 (*) |
|---------|-----------------------------------------------------------------------------------------------------------------------------------------------------------------------------------------------------------------------------------------|-------|----------------------|
| China   | United Kingdom - Hong Kong Vital Registration Death Data 1954 as it appears in United Nations Statistics Division (UNSD). United Nations Demographic Yearbook. New York City, United States: United Nations Statistics Division (UNSD). | 1954  |                      |
| China   | Portugal - Macao Vital Registration Death Data 1954 as it appears in United Nations Statistics Division (UNSD). United Nations Demographic Yearbook. New York City, United States: United Nations Statistics Division (UNSD).           | 1954  |                      |
| China   | Hong Kong Vital Registration - Deaths 1955 ICD7 as it appears in World Health Organization (WHO). WHO Mortality Database Version February 2014. Geneva, Switzerland: World Health Organization (WHO), 2014.                             | 1955  |                      |
| China   | Portugal - Macao Vital Registration Death Data 1955 as it appears in United Nations Statistics Division (UNSD). United Nations Demographic Yearbook. New York City, United States: United Nations Statistics Division (UNSD).           | 1955  |                      |
| China   | Hong Kong Vital Registration - Deaths 1956 ICD7 as it appears in World Health Organization (WHO). WHO Mortality Database Version February 2014. Geneva, Switzerland: World Health Organization (WHO), 2014.                             | 1956  |                      |
| China   | Portugal - Macao Vital Registration Death Data 1956 as it appears in United Nations Statistics Division (UNSD). United Nations Demographic Yearbook. New York City, United States: United Nations Statistics Division (UNSD).           | 1956  |                      |
| China   | Hong Kong Vital Registration - Deaths 1957 ICD7 as it appears in World Health Organization (WHO). WHO Mortality Database Version February 2014. Geneva, Switzerland: World Health Organization (WHO), 2014.                             | 1957  |                      |
| China   | Portugal - Macao Vital Registration Death Data 1957 as it appears in United Nations Statistics Division (UNSD). United Nations Demographic Yearbook. New York City, United States: United Nations Statistics Division (UNSD).           | 1957  |                      |
| China   | Hong Kong Vital Registration - Deaths 1958 ICD7 as it appears in World Health Organization (WHO). WHO Mortality Database Version February 2014. Geneva, Switzerland: World Health Organization (WHO), 2014.                             | 1958  |                      |
| China   | Portugal - Macao Vital Registration Death Data 1958 as it appears in United Nations Statistics Division (UNSD). United Nations Demographic Yearbook. New York City, United States: United Nations Statistics Division (UNSD).           | 1958  |                      |
| China   | Hong Kong Vital Registration - Deaths 1959 ICD7 as it appears in World Health Organization (WHO). WHO Mortality Database Version February 2014. Geneva, Switzerland: World Health Organization (WHO), 2014.                             | 1959  |                      |
| China   | Portugal - Macao Vital Registration Death Data 1959 as it appears in United Nations Statistics Division (UNSD). United Nations Demographic Yearbook. New York City, United States: United Nations Statistics Division (UNSD).           | 1959  |                      |
| China   | Hong Kong Vital Registration - Deaths 1960 ICD7 as it appears in World Health Organization (WHO). WHO Mortality Database Version February 2014. Geneva, Switzerland: World Health Organization (WHO), 2014.                             | 1960  |                      |
| China   | Portugal - Macao Vital Registration Death Data 1960 as it appears in United Nations Statistics Division (UNSD). United Nations Demographic Yearbook. New York City, United States: United Nations Statistics Division (UNSD).           | 1960  |                      |



**Web Table 32 - Comprehensive citation list**

| Country | Citation                                                                                                                                                                                                                           | Year*               | New for GBD 2013 (*) |
|---------|------------------------------------------------------------------------------------------------------------------------------------------------------------------------------------------------------------------------------------|---------------------|----------------------|
| China   | Hong Kong Vital Registration - Deaths 1961 ICD7 as it appears in World Health Organization (WHO). WHO Mortality Database Version February 2014. Geneva, Switzerland: World Health Organization (WHO), 2014.                        | 1961                |                      |
| China   | Portugal - Macao Vital Registration Death Data 1961 as it appears in United Nations Statistics Division (UNSD). United Nations Demographic Yearbook. New York City, United States: United Nations Statistics Division (UNSD).      | 1961                |                      |
| China   | Hong Kong Vital Registration - Deaths 1962 ICD7 as it appears in World Health Organization (WHO). WHO Mortality Database Version February 2014. Geneva, Switzerland: World Health Organization (WHO), 2014.                        | 1962                |                      |
| China   | Portugal - Macao Vital Registration Death Data 1962 as it appears in United Nations Statistics Division (UNSD). United Nations Demographic Yearbook. New York City, United States: United Nations Statistics Division (UNSD).      | 1962                |                      |
| China   | Lai HC, Lai MP, Leung KS. Glucose-6-phosphate dehydrogenase deficiency in Chinese. J Clin Pathol. 1968; 21(1): 44-7.                                                                                                               | 1962-1964,1966-1968 |                      |
| China   | Hong Kong Vital Registration - Deaths 1963 ICD7 as it appears in World Health Organization (WHO). WHO Mortality Database Version February 2014. Geneva, Switzerland: World Health Organization (WHO), 2014.                        | 1963                |                      |
| China   | Portugal - Macao Vital Registration Death Data 1963 as it appears in United Nations Statistics Division (UNSD). United Nations Demographic Yearbook. New York City, United States: United Nations Statistics Division (UNSD).      | 1963                |                      |
| China   | Yue PC, Strickland M. Glucose-6-phosphate-dehydrogenase deficiency and neonatal jaundice in Chinese male infants in Hong Kong. Lancet. 1965; 1(7381): 350-1.                                                                       | 1963-1965           |                      |
| China   | Hong Kong Vital Registration - Deaths 1964 ICD7 as it appears in World Health Organization (WHO). WHO Mortality Database Version February 2014. Geneva, Switzerland: World Health Organization (WHO), 2014.                        | 1964                |                      |
| China   | Portugal - Macao Vital Registration Death Data 1964 as it appears in United Nations Statistics Division (UNSD). United Nations Demographic Yearbook. New York City, United States: United Nations Statistics Division (UNSD).      | 1964                |                      |
| China   | Hong Kong Vital Registration - Deaths 1965 ICD7 as it appears in World Health Organization (WHO). WHO Mortality Database Version February 2014. Geneva, Switzerland: World Health Organization (WHO), 2014.                        | 1965                |                      |
| China   | Portugal - Macao Vital Registration Death Data 1965 as it appears in United Nations Statistics Division (UNSD). United Nations Demographic Yearbook. New York City, United States: United Nations Statistics Division (UNSD).      | 1965                |                      |
| China   | Hong Kong Vital Registration - Deaths 1966 ICD7 as it appears in World Health Organization (WHO). WHO Mortality Database Version February 2014. Geneva, Switzerland: World Health Organization (WHO), 2014.                        | 1966                |                      |
| China   | United Kingdom - Hong Kong Sample Population Census 1966 as it appears in United Nations Statistics Division (UNSD). United Nations Demographic Yearbook. New York City, United States: United Nations Statistics Division (UNSD). | 1966                |                      |
| China   | Portugal - Macao Vital Registration Death Data 1966 as it appears in United Nations Statistics Division (UNSD). United Nations Demographic Yearbook. New York City, United States: United Nations Statistics Division (UNSD).      | 1966                |                      |

**Web Table 32 - Comprehensive citation list**

| Country | Citation                                                                                                                                                                                                                      | Year* | New for GBD 2013 (*) |
|---------|-------------------------------------------------------------------------------------------------------------------------------------------------------------------------------------------------------------------------------|-------|----------------------|
| China   | Hong Kong Vital Registration - Deaths 1967 ICD7 as it appears in World Health Organization (WHO). WHO Mortality Database Version February 2014. Geneva, Switzerland: World Health Organization (WHO), 2014.                   | 1967  |                      |
| China   | Portugal - Macao Vital Registration Death Data 1967 as it appears in United Nations Statistics Division (UNSD). United Nations Demographic Yearbook. New York City, United States: United Nations Statistics Division (UNSD). | 1967  |                      |
| China   | Hong Kong Vital Registration - Deaths 1968 ICD7 as it appears in World Health Organization (WHO). WHO Mortality Database Version February 2014. Geneva, Switzerland: World Health Organization (WHO), 2014.                   | 1968  |                      |
| China   | Fung RH, Keung YK, Chung GS. Screening of pyruvate kinase deficiency and G6PD deficiency in Chinese newborn in Hong Kong. Arch Dis Child. 1969; 44(235): 373-6.                                                               | 1968  |                      |
| China   | Portugal - Macao Vital Registration Death Data 1968 as it appears in United Nations Statistics Division (UNSD). United Nations Demographic Yearbook. New York City, United States: United Nations Statistics Division (UNSD). | 1968  |                      |
| China   | Hong Kong Vital Registration - Deaths 1969 ICD8 as it appears in World Health Organization (WHO). WHO Mortality Database Version February 2014. Geneva, Switzerland: World Health Organization (WHO), 2014.                   | 1969  |                      |
| China   | Portugal - Macao Vital Registration Death Data 1969 as it appears in United Nations Statistics Division (UNSD). United Nations Demographic Yearbook. New York City, United States: United Nations Statistics Division (UNSD). | 1969  |                      |
| China   | Hong Kong Vital Registration - Deaths 1970 ICD8 as it appears in World Health Organization (WHO). WHO Mortality Database Version February 2014. Geneva, Switzerland: World Health Organization (WHO), 2014.                   | 1970  |                      |
| China   | Portugal - Macao Vital Registration Death Data 1970 as it appears in United Nations Statistics Division (UNSD). United Nations Demographic Yearbook. New York City, United States: United Nations Statistics Division (UNSD). | 1970  |                      |
| China   | Hong Kong Vital Registration - Deaths 1971 ICD8 as it appears in World Health Organization (WHO). WHO Mortality Database Version February 2014. Geneva, Switzerland: World Health Organization (WHO), 2014.                   | 1971  |                      |
| China   | United Kingdom - Hong Kong Census 1971 as it appears in United Nations Statistics Division (UNSD). United Nations Demographic Yearbook. New York City, United States: United Nations Statistics Division (UNSD).              | 1971  |                      |
| China   | Portugal - Macao Vital Registration Death Data 1971 as it appears in United Nations Statistics Division (UNSD). United Nations Demographic Yearbook. New York City, United States: United Nations Statistics Division (UNSD). | 1971  |                      |
| China   | Hong Kong Vital Registration - Deaths 1972 ICD8 as it appears in World Health Organization (WHO). WHO Mortality Database Version February 2014. Geneva, Switzerland: World Health Organization (WHO), 2014.                   | 1972  |                      |
| China   | Portugal - Macao Vital Registration Death Data 1972 as it appears in United Nations Statistics Division (UNSD). United Nations Demographic Yearbook. New York City, United States: United Nations Statistics Division (UNSD). | 1972  |                      |

**Web Table 32 - Comprehensive citation list**

| Country | Citation                                                                                                                                                                                                                      | Year* | New for GBD 2013 (*) |
|---------|-------------------------------------------------------------------------------------------------------------------------------------------------------------------------------------------------------------------------------|-------|----------------------|
| China   | Hong Kong Vital Registration - Deaths 1973 ICD8 as it appears in World Health Organization (WHO). WHO Mortality Database Version February 2014. Geneva, Switzerland: World Health Organization (WHO), 2014.                   | 1973  |                      |
| China   | Portugal - Macao Vital Registration Death Data 1973 as it appears in United Nations Statistics Division (UNSD). United Nations Demographic Yearbook. New York City, United States: United Nations Statistics Division (UNSD). | 1973  |                      |
| China   | Hong Kong Vital Registration - Deaths 1974 ICD8 as it appears in World Health Organization (WHO). WHO Mortality Database Version February 2014. Geneva, Switzerland: World Health Organization (WHO), 2014.                   | 1974  |                      |
| China   | Portugal - Macao Vital Registration Death Data 1974 as it appears in United Nations Statistics Division (UNSD). United Nations Demographic Yearbook. New York City, United States: United Nations Statistics Division (UNSD). | 1974  |                      |
| China   | Hong Kong Vital Registration - Deaths 1975 ICD8 as it appears in World Health Organization (WHO). WHO Mortality Database Version February 2014. Geneva, Switzerland: World Health Organization (WHO), 2014.                   | 1975  |                      |
| China   | National Bureau of Statistics of China. China Cancer Epidemiology Survey 1975.                                                                                                                                                | 1975  |                      |
| China   | Portugal - Macao Vital Registration Death Data 1975 as it appears in United Nations Statistics Division (UNSD). United Nations Demographic Yearbook. New York City, United States: United Nations Statistics Division (UNSD). | 1975  |                      |
| China   | Hong Kong Vital Registration - Deaths 1976 ICD8 as it appears in World Health Organization (WHO). WHO Mortality Database Version February 2014. Geneva, Switzerland: World Health Organization (WHO), 2014.                   | 1976  |                      |
| China   | Portugal - Macao Vital Registration Death Data 1976 as it appears in United Nations Statistics Division (UNSD). United Nations Demographic Yearbook. New York City, United States: United Nations Statistics Division (UNSD). | 1976  |                      |
| China   | Hong Kong Vital Registration - Deaths 1977 ICD8 as it appears in World Health Organization (WHO). WHO Mortality Database Version February 2014. Geneva, Switzerland: World Health Organization (WHO), 2014.                   | 1977  |                      |
| China   | Portugal - Macao Vital Registration Death Data 1977 as it appears in United Nations Statistics Division (UNSD). United Nations Demographic Yearbook. New York City, United States: United Nations Statistics Division (UNSD). | 1977  |                      |
| China   | Hong Kong Vital Registration - Deaths 1978 ICD8 as it appears in World Health Organization (WHO). WHO Mortality Database Version February 2014. Geneva, Switzerland: World Health Organization (WHO), 2014.                   | 1978  |                      |
| China   | Portugal - Macao Vital Registration Death Data 1978 as it appears in United Nations Statistics Division (UNSD). United Nations Demographic Yearbook. New York City, United States: United Nations Statistics Division (UNSD). | 1978  |                      |
| China   | Hong Kong Vital Registration - Deaths 1979 ICD9 as it appears in World Health Organization (WHO). WHO Mortality Database Version February 2014. Geneva, Switzerland: World Health Organization (WHO), 2014.                   | 1979  |                      |
| China   | Hong Kong Vital Registration - Deaths 1980 ICD9 as it appears in World Health Organization (WHO). WHO Mortality Database Version February 2014. Geneva, Switzerland: World Health Organization (WHO), 2014.                   | 1980  |                      |

**Web Table 32 - Comprehensive citation list**

| Country | Citation                                                                                                                                                                                                                                      | Year*                           | New for GBD 2013 (*) |
|---------|-----------------------------------------------------------------------------------------------------------------------------------------------------------------------------------------------------------------------------------------------|---------------------------------|----------------------|
| China   | Sun YD. [A sero-epidemiological study of viral hepatitis A in a village]. Chin J Prev Med. 1985; 19(3): 140-2.                                                                                                                                | 1980                            |                      |
| China   | Hu M, Schenzle D, Deinhardt F, Scheid R. Prevalence of markers of hepatitis A and B in the Shanghai area. J Infect Dis. 1983; 147(2): 360.                                                                                                    | 1980                            |                      |
| China   | Hu MD, Schenzle D, Deinhardt F, Scheid R. Epidemiology of hepatitis A and B in the Shanghai area: prevalence of serum markers. Am J Epidemiol. 1984; 120(3): 404-13.                                                                          | 1980                            |                      |
| China   | Yang TY, Yang XY, Ch'en WC, Qi SL, Jin YJ, Gan WJ, Qu Q. Thalassemia in China. Ann N Y Acad Sci. 1985; 445: 92-105.                                                                                                                           | 1980-1981                       |                      |
| China   | Institute for Health Metrics and Evaluation (IHME), Joint United Nations Program on HIV/AIDS (UNAIDS). Institute for Health Metrics and Evaluation HIV Mortality Estimates Based on the UNAIDS Spectrum Model Framework.                      | 1980-2013                       | *                    |
| China   | United Nations Children's Fund (UNICEF), World Health Organization (WHO). WHO and UNICEF Reported Disease Incidence Time Series - Pertussis. Geneva, Switzerland: World Health Organization (WHO).                                            | 1980-1995, 1997-2006, 2008-2013 |                      |
| China   | United Nations Children's Fund (UNICEF), World Health Organization (WHO). WHO and UNICEF Reported Disease Incidence Time Series - Measles. Geneva, Switzerland: World Health Organization (WHO).                                              | 1980-2013                       |                      |
| China   | Hong Kong Vital Registration - Deaths 1981 ICD9 as it appears in World Health Organization (WHO). WHO Mortality Database Version February 2014. Geneva, Switzerland: World Health Organization (WHO), 2014.                                   | 1981                            |                      |
| China   | Portugal - Macao Vital Registration Death Data 1981 as it appears in United Nations Statistics Division (UNSD). United Nations Demographic Yearbook. New York City, United States: United Nations Statistics Division (UNSD).                 | 1981                            |                      |
| China   | Xu DZ. [Epidemiologic study of viral hepatitis A in kindergartens and nurseries]. Nat Med J Chin. 1985; 65(3): 148-50.                                                                                                                        | 1981-1982                       |                      |
| China   | State Family Planning Commission of China (SFPC), International Statistical Institute. China World Fertility Survey 1982. Voorburg, Netherlands: International Statistical Institute.                                                         | 1982                            |                      |
| China   | Hong Kong Vital Registration - Deaths 1982 ICD9 as it appears in World Health Organization (WHO). WHO Mortality Database Version February 2014. Geneva, Switzerland: World Health Organization (WHO), 2014.                                   | 1982                            |                      |
| China   | National Bureau of Statistics of China, Minnesota Population Center. China National Population Census 1982 from the Integrated Public Use Microdata Series, International. [Machine-readable database]. Minneapolis: University of Minnesota. | 1982                            |                      |
| China   | China Population Information and Research Center, National Bureau of Statistics of China. China Census 1982 - China Data Center.                                                                                                              | 1982                            |                      |
| China   | National Bureau of Statistics of China. China Census 1982.                                                                                                                                                                                    | 1982                            |                      |
| China   | Portugal - Macao Vital Registration Death Data 1982 as it appears in United Nations Statistics Division (UNSD). United Nations Demographic Yearbook. New York City, United States: United Nations Statistics Division (UNSD).                 | 1982                            |                      |
| China   | Wang HT. [An epidemiological study of viral hepatitis A in Beijing suburb]. Chin J Prev Med. 1985; 19(1): 8-10.                                                                                                                               | 1982-1983                       |                      |
| China   | Hong Kong Vital Registration - Deaths 1983 ICD9 as it appears in World Health Organization (WHO). WHO Mortality Database Version February 2014. Geneva, Switzerland: World Health Organization (WHO), 2014.                                   | 1983                            |                      |
| China   | Xu Y. Investigation of RBC-G6PD deficiency gene frequency in 9 nationality populations in 7 provinces (autonomous regions). Heredity Dis. 1985; 2: 67-71.                                                                                     | 1983                            |                      |
| China   | Zou QH. [A seroepidemiological study of hepatitis A viral infection]. Chin J Epidemiol. 1984; 5(6): 329-31.                                                                                                                                   | 1983                            |                      |

**Web Table 32 - Comprehensive citation list**

| Country | Citation                                                                                                                                                                                                                                                                                              | Year*           | New for GBD 2013 (*) |
|---------|-------------------------------------------------------------------------------------------------------------------------------------------------------------------------------------------------------------------------------------------------------------------------------------------------------|-----------------|----------------------|
| China   | Ferlay J, Parkin DM, Curado MP, Bray F, Edwards B, Shin HR and Forman D. Cancer Incidence in Five Continents, Volumes I to IX: IARC CancerBase No. 9 [Internet]. Lyon, France: International Agency for Research on Cancer; 2010. Available from: <a href="http://ci5.iarc.fr">http://ci5.iarc.fr</a> | 1983-2002       |                      |
| China   | Song E, Kew MC, Hwang LY, Beasley RP. Epidemiology of hepatitis B virus infection in South African Chinese. <i>Am J Epidemiol.</i> 1988; 128(4): 828-38.                                                                                                                                              | 1983-1985       |                      |
| China   | China Dementia Data 1983-1986 from literature review, as provided by the Global Burden of Disease 2010 dementia expert group.                                                                                                                                                                         | 1983-1986       |                      |
| China   | Hong Kong Vital Registration - Deaths 1984 ICD9 as it appears in World Health Organization (WHO). WHO Mortality Database Version February 2014. Geneva, Switzerland: World Health Organization (WHO), 2014.                                                                                           | 1984            |                      |
| China   | Portugal - Macao Vital Registration Death Data 1984 as it appears in United Nations Statistics Division (UNSD). United Nations Demographic Yearbook. New York City, United States: United Nations Statistics Division (UNSD).                                                                         | 1984            |                      |
| China   | Sung RY, Senok AC, Ho A, Oppenheimer SJ, Davies DP. Meningitis in Hong Kong children, with special reference to the infrequency of haemophilus and meningococcal infection. <i>J Paediatr Child Health.</i> 1997; 33(4): 296-9.                                                                       | 1984-1993       |                      |
| China   | Lam STS, Cheng ML. Neonatal screening in Hong Kong and Macau. <i>Southeast Asian J Trop Med Public Health.</i> 2003; 73-5.                                                                                                                                                                            | 1984-2000       |                      |
| China   | Tsen YJ, Chang MH, Hsu HY, Lee CY, Sung JL, Chen DS. Seroprevalence of hepatitis B virus infection in children in Taipei, 1989: five years after a mass hepatitis B vaccination program. <i>J Med Virol.</i> 1991; 34(2): 96-9.                                                                       | 1984, 1989      |                      |
| China   | Hong Kong Vital Registration - Deaths 1985 ICD9 as it appears in World Health Organization (WHO). WHO Mortality Database Version February 2014. Geneva, Switzerland: World Health Organization (WHO), 2014.                                                                                           | 1985            |                      |
| China   | Li G, Shen YC, Chen CH, Zhau YW, Li SR, Lu M. A three-year follow-up study of age-related dementia in an urban area of Beijing. <i>Acta Psychiatr Scand.</i> 1991; 83(2): 99-104.                                                                                                                     | 1985-1989       |                      |
| China   | Parkin DM, International Agency for Research on Cancer, International Association of Cancer Registries. Cancer incidence in five continents. Volumes I to VIII. Lyon, France, IARC Press, 2005.                                                                                                       | 1985, 1980-1981 |                      |
| China   | Parkin DM, International Agency for Research on Cancer, International Association of Cancer Registries. Cancer Incidence in Five Continents. Vol. I to VIII. Lyon, France, IARC Press, 2005.                                                                                                          | 1985, 1980-1981 |                      |
| China   | Hong Kong Vital Registration - Deaths 1986 ICD9 as it appears in World Health Organization (WHO). WHO Mortality Database Version February 2014. Geneva, Switzerland: World Health Organization (WHO), 2014.                                                                                           | 1986            |                      |
| China   | Huang W, Yu H, Wang F, Li G. Infant mortality among various nationalities in the middle part of Guizhou, China. <i>Soc Sci Med.</i> 1997; 45(7): 1031-40.                                                                                                                                             | 1986            |                      |
| China   | Li G, Shen YC, Chen CH, Zhao YW, Li SR, Lu M. An epidemiological survey of age-related dementia in an urban area of Beijing. <i>Acta Psychiatr Scand.</i> 1989; 79(6): 557-63.                                                                                                                        | 1986            |                      |
| China   | Portugal - Macao Vital Registration Death Data 1986 as it appears in United Nations Statistics Division (UNSD). United Nations Demographic Yearbook. New York City, United States: United Nations Statistics Division (UNSD).                                                                         | 1986            |                      |
| China   | Li L. [The relationship between changing of anti-HAV in population and prevalence of hepatitis A]. <i>Chin J Prev Med.</i> 1989; 23(3): 139-40.                                                                                                                                                       | 1986            |                      |

**Web Table 32 - Comprehensive citation list**

| Country | Citation                                                                                                                                                                                                                            | Year*     | New for GBD 2013 (*) |
|---------|-------------------------------------------------------------------------------------------------------------------------------------------------------------------------------------------------------------------------------------|-----------|----------------------|
| China   | Chinese Academy of Preventive Medicine. Adult Mortality in China: Levels, Patterns, and Causes. Beijing, China: Huaxia Publishing House, 1991.                                                                                      | 1986-1988 |                      |
| China   | Shen YC, Li G, Li YT, Chen CH, Li SR, Zhao YW, Zhang WX. Epidemiology of age-related dementia in China. Chin Med J (Engl). 1994; 107(1): 60-4.                                                                                      | 1986-1989 |                      |
| China   | National Bureau of Statistics of China. China In Depth Fertility Sample Survey 1987.                                                                                                                                                | 1987      |                      |
| China   | China Vital Registration - Deaths 1987 ICD9 as it appears in World Health Organization (WHO). WHO Mortality Database Version February 2014. Geneva, Switzerland: World Health Organization (WHO), 2014.                             | 1987      |                      |
| China   | Hong Kong Vital Registration - Deaths 1987 ICD9 as it appears in World Health Organization (WHO). WHO Mortality Database Version February 2014. Geneva, Switzerland: World Health Organization (WHO), 2014.                         | 1987      |                      |
| China   | National Bureau of Statistics of China. China 1% National Population Sample Survey 1987.                                                                                                                                            | 1987      |                      |
| China   | Portugal - Macao Vital Registration Death Data 1987 as it appears in United Nations Statistics Division (UNSD). United Nations Demographic Yearbook. New York City, United States: United Nations Statistics Division (UNSD).       | 1987      |                      |
| China   | Zhang MY, Katzman R, Salmon D, Jin H, Cai GJ, Wang ZY, Qu GY, Grant I, Yu E, Levy P. The prevalence of dementia and Alzheimer's disease in Shanghai, China: impact of age, gender, and education. Ann Neurol. 1990; 27(4): 428-37.  | 1987-1988 |                      |
| China   | China Vital Registration - Deaths 1988 ICD9 as it appears in World Health Organization (WHO). WHO Mortality Database Version February 2014. Geneva, Switzerland: World Health Organization (WHO), 2014.                             | 1988      |                      |
| China   | Hong Kong Vital Registration - Deaths 1988 ICD9 as it appears in World Health Organization (WHO). WHO Mortality Database Version February 2014. Geneva, Switzerland: World Health Organization (WHO), 2014.                         | 1988      |                      |
| China   | Yen TS. Regular dialysis in the Republic of China. Dialysis Surveillance Group. Contrib Nephrol. 1990; 82: 15-24.                                                                                                                   | 1988      |                      |
| China   | Portugal - Macao Vital Registration Death Data 1988 as it appears in United Nations Statistics Division (UNSD). United Nations Demographic Yearbook. New York City, United States: United Nations Statistics Division (UNSD).       | 1988      |                      |
| China   | Song Y. [The investigation of anti-hepatitis A virus antibody rate in Guangzhou population]. Chin J Epidemiol. 1991; 12(5): 265-8.                                                                                                  | 1988      |                      |
| China   | Seiji K, Inoue O, Liu SJ, Xu XP, Jin C, Cai SX, Nakatsuka H, Watanabe T, Uchida Y, Ikeda M. Prevalence of hepatitis B virus infection markers among factory workers in Beijing, China. Asia Pac J Public Health. 1991; 5(4): 345-9. | 1988-1989 |                      |
| China   | Tao QM, Wang Y, Wang H, Chen WR, Sun Y, Meng Q, Watanabe J, Nishioka K. Seroepidemiology of HCV and HBV infection in northern China. Gastroenterol Jpn. 1991; 156-8.                                                                | 1988-1990 |                      |
| China   | China Vital Registration - Deaths 1989 ICD9 as it appears in World Health Organization (WHO). WHO Mortality Database Version February 2014. Geneva, Switzerland: World Health Organization (WHO), 2014.                             | 1989      |                      |
| China   | Hong Kong Vital Registration - Deaths 1989 ICD9 as it appears in World Health Organization (WHO). WHO Mortality Database Version February 2014. Geneva, Switzerland: World Health Organization (WHO), 2014.                         | 1989      |                      |



**Web Table 32 - Comprehensive citation list**

| Country | Citation                                                                                                                                                                                                                                                      | Year*     | New for GBD 2013 (*) |
|---------|---------------------------------------------------------------------------------------------------------------------------------------------------------------------------------------------------------------------------------------------------------------|-----------|----------------------|
| China   | Portugal - Macao Vital Registration Death Data 1989 as it appears in United Nations Statistics Division (UNSD). United Nations Demographic Yearbook. New York City, United States: United Nations Statistics Division (UNSD).                                 | 1989      |                      |
| China   | Department of Peace and Conflict Research, Uppsala University. UCDP One-Sided Violence Database Version 1.4, 2013. Uppsala, Sweden: Department of Peace and Conflict Research, Uppsala University, 2013.                                                      | 1989-2008 | *                    |
| China   | Department of Peace and Conflict Research, Uppsala University. UCDP Battle-Related Deaths Database Version 5, 2013. Uppsala, Sweden: Department of Peace and Conflict Research, Uppsala University, 2013.                                                     | 1989-2008 | *                    |
| China   | National Bureau of Statistics of China and Minnesota Population Center. China National Population Census 1990 from the Integrated Public Use Microdata Series, International. [Machine-readable database]. Minneapolis: University of Minnesota.              | 1990      |                      |
| China   | China Vital Registration - Deaths 1990 ICD9 as it appears in World Health Organization (WHO). WHO Mortality Database Version February 2014. Geneva, Switzerland: World Health Organization (WHO), 2014.                                                       | 1990      |                      |
| China   | Hong Kong Vital Registration - Deaths 1990 ICD9 as it appears in World Health Organization (WHO). WHO Mortality Database Version February 2014. Geneva, Switzerland: World Health Organization (WHO), 2014.                                                   | 1990      |                      |
| China   | China Population and Housing Census 1990 as it appears in United Nations Statistics Division (UNSD). United Nations Demographic Yearbook - Historical Supplement 1997. New York City, United States: United Nations Statistics Division (UNSD).               | 1990      |                      |
| China   | National Bureau of Statistics of China. China Population and Housing Census 1990.                                                                                                                                                                             | 1990      |                      |
| China   | By Gao ZX, Xie B, Fang YS, Pan JX. The Prevalence of Dementia Among Elderly in Shanghai Area, China- A Survey in City, Town and Countryside. Hong Kong J Psychiatry. 1999; 9(1): 12-4.                                                                        | 1990      |                      |
| China   | National Bureau of Statistics of China. China Population and Housing Census 1990 - China CDC. [Unpublished].                                                                                                                                                  | 1990      | *                    |
| China   | Portugal - Macao Vital Registration Death Data 1990 as it appears in United Nations Statistics Division (UNSD). United Nations Demographic Yearbook. New York City, United States: United Nations Statistics Division (UNSD).                                 | 1990      |                      |
| China   | Geng J, Xu D, Gong J, Li W. Assessing hepatitis A virus epidemic stochastic process in eight cities in China in 1990. Int J Epidemiol. 1998; 27(2): 320-2.                                                                                                    | 1990      |                      |
| China   | Weatherall D. Sickle Cell and Thalassemias Prevalence Data, Personal Correspondence with David Weatherall. [Unpublished].                                                                                                                                     | 1990-2009 |                      |
| China   | National Central Cancer Registry (China). China Cancer Registry Incidence and Mortality 1990-2009. [Unpublished].                                                                                                                                             | 1990-2009 | *                    |
| China   | Centre for Health Informatics and Multiprofessional Education, University College London. Modell's Haemoglobinopathologist's Almanac. London, United Kingdom: Centre for Health Informatics and Multiprofessional Education, University College London, 2008. | 1990-2003 |                      |
| China   | Portugal - Macao Census 1991 as it appears in United Nations Statistics Division (UNSD). United Nations Demographic Yearbook - Historical Supplement 1997. New York City, United States: United Nations Statistics Division (UNSD).                           | 1991      |                      |
| China   | China Vital Registration - Deaths 1991 ICD9 as it appears in World Health Organization (WHO). WHO Mortality Database Version February 2014. Geneva, Switzerland: World Health Organization (WHO), 2014.                                                       | 1991      |                      |

**Web Table 32 - Comprehensive citation list**

| Country | Citation                                                                                                                                                                                                                                                                                                    | Year*          | New for GBD 2013 (*) |
|---------|-------------------------------------------------------------------------------------------------------------------------------------------------------------------------------------------------------------------------------------------------------------------------------------------------------------|----------------|----------------------|
| China   | Hong Kong Vital Registration - Deaths 1991 ICD9 as it appears in World Health Organization (WHO). WHO Mortality Database Version February 2014. Geneva, Switzerland: World Health Organization (WHO), 2014.                                                                                                 | 1991           |                      |
| China   | National Collaborative Group for Survey of Deaths of Under 5 Children (China). China Sample Survey on Child Mortality 1991.                                                                                                                                                                                 | 1991           |                      |
| China   | Chinese Center for Disease Control and Prevention (CCDC). China Disease Surveillance Points 1991 - China CDC. [Unpublished].                                                                                                                                                                                | 1991           | *                    |
| China   | Portugal - Macao Vital Registration Death Data 1991 as it appears in United Nations Statistics Division (UNSD). United Nations Demographic Yearbook. New York City, United States: United Nations Statistics Division (UNSD).                                                                               | 1991           |                      |
| China   | Reynolds K, Gu D, Muntner P, Kusek JW, Chen J, Wu X, Duan X, Chen CS, Klag MJ, Whelton PK, He J. A population-based, prospective study of blood pressure and risk for end-stage renal disease in China. <i>J Am Soc Nephrol.</i> 2007; 18(6): 1928-35.                                                      | 1991-2000      |                      |
| China   | Ito S, Yao DF, Nii C, Hibino S, Kamamura M, Nisikado T, Honda H, Shimizu I, Meng XY. Epidemiological characteristics of the incidence of hepatitis C virus (C100-3) antibodies in patients with liver diseases in the inshore area of the Yangtze River. <i>J Gastroenterol Hepatol.</i> 1993; 8(3): 232-7. | 1991-1992      |                      |
| China   | Ministry of Health (China). China - Henan Maternal and Child Health Surveillance System Under-5 Mortality Rate 1991-1996. [Unpublished].                                                                                                                                                                    | 1991-1996      |                      |
| China   | State Family Planning Commission (China). China Fertility and Family Planning Survey 1992.                                                                                                                                                                                                                  | 1992           |                      |
| China   | China Vital Registration - Deaths 1992 ICD9 as it appears in World Health Organization (WHO). WHO Mortality Database Version February 2014. Geneva, Switzerland: World Health Organization (WHO), 2014.                                                                                                     | 1992           |                      |
| China   | Hong Kong Vital Registration - Deaths 1992 ICD9 as it appears in World Health Organization (WHO). WHO Mortality Database Version February 2014. Geneva, Switzerland: World Health Organization (WHO), 2014.                                                                                                 | 1992           |                      |
| China   | Chinese Center for Disease Control and Prevention (CCDC). China Disease Surveillance Points 1992 - China CDC. [Unpublished]                                                                                                                                                                                 | 1992           | *                    |
| China   | Portugal - Macao Vital Registration Death Data 1992 as it appears in United Nations Statistics Division (UNSD). United Nations Demographic Yearbook. New York City, United States: United Nations Statistics Division (UNSD).                                                                               | 1992           |                      |
| China   | Wang Y, Tao QM, Zhao HY, Tsuda F, Nagayama R, Yamamoto K, Tanaka T, Tokita H, Okamoto H, Miyakawa Y. Hepatitis C virus RNA and antibodies among blood donors in Beijing. <i>J Hepatol.</i> 1994; 21(4): 634-40.                                                                                             | 1992           |                      |
| China   | Zhuo J, Tao G, Ebrahim SH, Wang S, Luo Z, Wang H. The relationship of hepatitis B virus infection between adults and their children in Guangxi Province, China. <i>J Hepatol.</i> 2000; 33(4): 628-31.                                                                                                      | 1992           |                      |
| China   | Hui AC, Ng K, Tong P, Mok V, Chow K, Wu A, Wong LK. Bacterial meningitis in Hong Kong: 10-years experience. <i>Clin Neurol Neurosurg.</i> 2005; 107(5): 366-70.                                                                                                                                             | 1992-2001      |                      |
| China   | Chen G, Lin W, Shen F, Iloeje UH, London WT, Evans AA. Chronic hepatitis B virus infection and mortality from non-liver causes: results from the Haimen City cohort study. <i>Int J Epidemiol.</i> 2005; 34(1): 132-7.                                                                                      | 1992-1993      |                      |
| China   | Ma Z, Feng R, Zhao C, Harrison TJ, Li M, Qiao Z, Feng Y, Wang Y. Seroprevalence and distribution of hepatitis E virus in various ethnic groups in Gansu province, China. <i>Infect Genet Evol.</i> 2010; 10(5): 614-9.                                                                                      | 1992-2000      |                      |
| China   | Li L, He J, Zhao L. [Epidemiologic features of viral hepatitis in Fujian]. <i>Chin J Epidemiol.</i> 1998; 19(2): 89-92.                                                                                                                                                                                     | 1992,1995-1997 |                      |



**Web Table 32 - Comprehensive citation list**

| Country | Citation                                                                                                                                                                                                                                                                                       | Year*     | New for GBD 2013 (*) |
|---------|------------------------------------------------------------------------------------------------------------------------------------------------------------------------------------------------------------------------------------------------------------------------------------------------|-----------|----------------------|
| China   | China Vital Registration - Deaths 1993 ICD9 as it appears in World Health Organization (WHO). WHO Mortality Database Version February 2014. Geneva, Switzerland: World Health Organization (WHO), 2014.                                                                                        | 1993      |                      |
| China   | Hong Kong Vital Registration - Deaths 1993 ICD9 as it appears in World Health Organization (WHO). WHO Mortality Database Version February 2014. Geneva, Switzerland: World Health Organization (WHO), 2014.                                                                                    | 1993      |                      |
| China   | Chinese Center for Disease Control and Prevention (CCDC). China Disease Surveillance Points 1993 - China CDC. [Unpublished].                                                                                                                                                                   | 1993      | *                    |
| China   | Portugal - Macao Vital Registration Death Data 1993 as it appears in United Nations Statistics Division (UNSD). United Nations Demographic Yearbook. New York City, United States: United Nations Statistics Division (UNSD).                                                                  | 1993      |                      |
| China   | Hazell SL, Mitchell HM, Hedges M, Shi X, Hu PJ, Li YY, Lee A, Reiss-Levy E. Hepatitis A and evidence against the community dissemination of Helicobacter pylori via feces. J Infect Dis. 1994; 170(3): 686-9.                                                                                  | 1993      |                      |
| China   | Jiang W, Yu G, Liu P, Geng Q, Chen L, Lin Q, Ren X, Ye W, He Y, Guo Y, Duan S, Wen J, Li H, Qi Y, Jiang C, Zheng Y, Liu C, Si E, Zhang Q, Tian Q, Du C. Structure and function of glucose-6-phosphate dehydrogenase-deficient variants in Chinese population. Hum Genet. 2006; 119(5): 463-78. | 1993-2004 |                      |
| China   | China Dementia Data 1993-1996 from literature review, as provided by the Global Burden of Disease 2010 dementia expert group.                                                                                                                                                                  | 1993-1996 |                      |
| China   | China Vital Registration - Deaths 1994 ICD9 as it appears in World Health Organization (WHO). WHO Mortality Database Version February 2014. Geneva, Switzerland: World Health Organization (WHO), 2014.                                                                                        | 1994      |                      |
| China   | Hong Kong Vital Registration - Deaths 1994 ICD9 as it appears in World Health Organization (WHO). WHO Mortality Database Version February 2014. Geneva, Switzerland: World Health Organization (WHO), 2014.                                                                                    | 1994      |                      |
| China   | Macau Vital Registration - Deaths 1994 ICD9 as it appears in World Health Organization (WHO). WHO Mortality Database Version February 2014. Geneva, Switzerland: World Health Organization (WHO), 2014.                                                                                        | 1994      |                      |
| China   | National Bureau of Statistics of China. China Sample Survey on Population Changes 1994.                                                                                                                                                                                                        | 1994      |                      |
| China   | Chinese Center for Disease Control and Prevention (CCDC). China Disease Surveillance Points 1994 - China CDC. [Unpublished].                                                                                                                                                                   | 1994      | *                    |
| China   | Mizuki N, Inoko H, Ando H, Kiyosawa K, Seki T, Geng Z, Geng L, Li G, Ishihara M, Shindo Y, Onishi H, Onoe K, Ohno S. Seroepidemiological studies on Silk Road ethnic groups. Tokai J Exp Clin Med. 1996; 21(3): 117-20.                                                                        | 1994      |                      |
| China   | Wang W, Wu S, Cheng X, Dai H, Ross K, Du X, Yin W. Prevalence of Alzheimer's disease and other dementing disorders in an urban community of Beijing, China. Neuroepidemiology. 2000; 19(4): 194-200.                                                                                           | 1994-1995 |                      |
| China   | China Vital Registration - Deaths 1995 ICD9 as it appears in World Health Organization (WHO). WHO Mortality Database Version February 2014. Geneva, Switzerland: World Health Organization (WHO), 2014.                                                                                        | 1995      |                      |
| China   | Hong Kong Vital Registration - Deaths 1995 ICD9 as it appears in World Health Organization (WHO). WHO Mortality Database Version February 2014. Geneva, Switzerland: World Health Organization (WHO), 2014.                                                                                    | 1995      |                      |

**Web Table 32 - Comprehensive citation list**

| Country | Citation                                                                                                                                                                                                                                                           | Year*     | New for GBD 2013 (*) |
|---------|--------------------------------------------------------------------------------------------------------------------------------------------------------------------------------------------------------------------------------------------------------------------|-----------|----------------------|
| China   | National Bureau of Statistics of China. China 1% National Population Sample Survey 1995. Ann Arbor, United States: China Data Center, University of Michigan.                                                                                                      | 1995      |                      |
| China   | Chinese Center for Disease Control and Prevention (CCDC). China Disease Surveillance Points 1995 - China CDC. [Unpublished].                                                                                                                                       | 1995      | *                    |
| China   | Portugal - Macao Vital Registration Death Data 1995 as it appears in United Nations Statistics Division (UNSD). United Nations Demographic Yearbook. New York City, United States: United Nations Statistics Division (UNSD).                                      | 1995      |                      |
| China   | Ivić I, Banović I, Bradarić N. Hepatitis B virus infection among pregnant women in Split region. Eur J Epidemiol. 1999; 15(6): 589-90.                                                                                                                             | 1995      |                      |
| China   | Liu P, Shi ZX, Zhang YC, Xu ZC, Shu HS, Zhang XY. A prospective study of a serum-pooling strategy in screening blood donors for antibody to hepatitis C virus. Transfusion. 1997; 37(7): 732-6.                                                                    | 1995      |                      |
| China   | Chiu HFK, Lam LCW, Chi I, Leung T, Li SW, Law WT, Chung DWS, Fung HHL, Kan PS, Lum CM, Ng J, Lau J. Prevalence of dementia in Chinese elderly in Hong Kong. Neurology. 1998; 50(4): 1002-9.                                                                        | 1995      |                      |
| China   | Shi J, Zhu L, Liu S, Xie W-F. A meta-analysis of case-control studies on the combined effect of hepatitis B and C virus infections in causing hepatocellular carcinoma in China. Br J Cancer. 2005; 92(3): 607-12.                                                 | 1995-2004 |                      |
| China   | China Vital Registration - Deaths 1996 ICD9 as it appears in World Health Organization (WHO). WHO Mortality Database Version February 2014. Geneva, Switzerland: World Health Organization (WHO), 2014.                                                            | 1996      |                      |
| China   | Hong Kong Vital Registration - Deaths 1996 ICD9 as it appears in World Health Organization (WHO). WHO Mortality Database Version February 2014. Geneva, Switzerland: World Health Organization (WHO), 2014.                                                        | 1996      |                      |
| China   | National Bureau of Statistics of China. China Sample Survey on Population Changes 1996.                                                                                                                                                                            | 1996      |                      |
| China   | United Nations Office on Drugs and Crime (UNODC). United Nations Office on Drugs and Crime Global Study on Homicides 2011. Vienna, Austria: United Nations Office on Drugs and Crime (UNODC), 2011.                                                                | 1996      |                      |
| China   | Chinese Center for Disease Control and Prevention (CCDC). China Disease Surveillance Points 1996 - China CDC. [Unpublished].                                                                                                                                       | 1996      | *                    |
| China   | Portugal - Macao Vital Registration Death Data 1996 as it appears in United Nations Statistics Division (UNSD). United Nations Demographic Yearbook. New York City, United States: United Nations Statistics Division (UNSD).                                      | 1996      |                      |
| China   | Shimbo S, Zhang ZW, Qu JB, Wang JJ, Zhang CL, Song LH, Watanabe T, Higashikawa K, Ikeda M. Urban-rural comparison of HBV and HCV infection prevalence among adult women in Shandong Province, China. Southeast Asian J Trop Med Public Health. 1997; 28(3): 500-6. | 1996      |                      |
| China   | Ministry of Health (China). China Maternal and Child Mortality Data 1996-2012 - China CDC. [Unpublished].                                                                                                                                                          | 1996-2012 | *                    |
| China   | Ministry of Health (China). China National Maternal and Child Health Surveillance System Child Mortality 1996-2012 - MCHS. [Unpublished].                                                                                                                          | 1996-2012 | *                    |
| China   | China National Maternal and Child Health Surveillance System Maternal Mortality By Cause 1996-2005 - MCHS. [Unpublished].                                                                                                                                          | 1996-2005 | *                    |
| China   | Ministry of Health (China). China National Maternal and Child Health Surveillance System Child Mortality Data By Cause 1996-2012 - MCHS. [Unpublished].                                                                                                            | 1996-2012 | *                    |
| China   | China National Maternal and Child Health Surveillance System Under-5 Mortality 1996-2013 - MCHS. [Unpublished].                                                                                                                                                    | 1996-2013 | *                    |
| China   | China Vital Registration - Deaths 1997 ICD9 as it appears in World Health Organization (WHO). WHO Mortality Database Version February 2014. Geneva, Switzerland: World Health Organization (WHO), 2014.                                                            | 1997      |                      |

**Web Table 32 - Comprehensive citation list**

| Country | Citation                                                                                                                                                                                                                                                                                     | Year*     | New for GBD 2013 (*) |
|---------|----------------------------------------------------------------------------------------------------------------------------------------------------------------------------------------------------------------------------------------------------------------------------------------------|-----------|----------------------|
| China   | Hong Kong Vital Registration - Deaths 1997 ICD9 as it appears in World Health Organization (WHO). WHO Mortality Database Version February 2014. Geneva, Switzerland: World Health Organization (WHO), 2014.                                                                                  | 1997      |                      |
| China   | National Bureau of Statistics of China. China Sample Survey on Population Changes 1997.                                                                                                                                                                                                      | 1997      |                      |
| China   | Zhe, Tang, Chen, Meng, Donghui Qing. [Beijing urban and rural senile dementia prevalence study 1]. Chin J Gerontol. 2002; 22(04): 244-8.                                                                                                                                                     | 1997      |                      |
| China   | Chinese Center for Disease Control and Prevention (CCDC). China Disease Surveillance Points 1997 - China CDC. [Unpublished].                                                                                                                                                                 | 1997      | *                    |
| China   | Portugal - Macao Vital Registration Death Data 1997 as it appears in United Nations Statistics Division (UNSD). United Nations Demographic Yearbook Database. [Unpublished].                                                                                                                 | 1997      |                      |
| China   | Zhao Q, Zhou B, Ding D, Guo Q, Hong Z. Prevalence, mortality, and predictive factors on survival of dementia in Shanghai, China. Alzheimer Dis Assoc Disord. 2010; 24(2): 151-8.                                                                                                             | 1997-2001 |                      |
| China   | Li S, Yan F, Li G, Chen C, Zhang W, Liu J, Jia X, Shen Y. Is the dementia rate increasing in Beijing? Prevalence and incidence of dementia 10 years later in an urban elderly population. Acta Psychiatr Scand. 2007; 115(1): 73-9.                                                          | 1997-1999 |                      |
| China   | Wen H, Zhang Z, Huang J, Duan L, Wang Q. Mortality of dementia and its major subtypes in urban and rural communities of Beijing. Biomed Environ Sci. 2011; 24(5): 483-90.                                                                                                                    | 1997-2001 |                      |
| China   | World Health Organization (WHO). The Global Elimination of Congenital Syphilis: Rationale and Strategy for Action. Geneva, Switzerland: World Health Organization (WHO), 2007.                                                                                                               | 1997-2003 |                      |
| China   | Measles Supplementary Immunization Activity Data as provided by the World Health Organization. [Unpublished].                                                                                                                                                                                | 1997-1999 |                      |
| China   | China Vital Registration - Deaths 1998 ICD9 as it appears in World Health Organization (WHO). WHO Mortality Database Version February 2014. Geneva, Switzerland: World Health Organization (WHO), 2014.                                                                                      | 1998      |                      |
| China   | Hong Kong Vital Registration - Deaths 1998 ICD9 as it appears in World Health Organization (WHO). WHO Mortality Database Version February 2014. Geneva, Switzerland: World Health Organization (WHO), 2014.                                                                                  | 1998      |                      |
| China   | National Bureau of Statistics of China. China Sample Survey on Population Changes 1998.                                                                                                                                                                                                      | 1998      |                      |
| China   | Chinese Center for Disease Control and Prevention (CCDC). China Disease Surveillance Points 1998 - China CDC. [Unpublished].                                                                                                                                                                 | 1998      | *                    |
| China   | Portugal - Macao Vital Registration Death Data 1998 as it appears in United Nations Statistics Division (UNSD). United Nations Demographic Yearbook Database. [Unpublished].                                                                                                                 | 1998      |                      |
| China   | Dai S, Shen Z, Zha Z, Leng R, Qin W, Wang C, Chen L, Tian M, Huang Z, Chen G, Cen H, Xue L, Wang J, Lu Y, Cao B, Ye D. Seroprevalence of HIV, syphilis, and hepatitis C virus in the general population of the Liangshan Prefecture, Sichuan Province, China. J Med Virol. 2012; 84(1): 1-5. | 1998-2004 |                      |
| China   | Zhenxin Zhang, Jing Wei, Xia Hong. Prevalence of dementia and major subtypes in urban and rural communities of Beijing. Chin J Neurol. 2001; 34(4): 199-203.                                                                                                                                 | 1998-1999 |                      |
| China   | Wang CS, Wang ST, Chou P. Using the prevalence of an elevated serum alanine aminotransferase level for identifying communities with a high prevalence of hepatitis C virus infection. Arch Intern Med. 2001; 161(3): 392-4.                                                                  | 1998-2000 |                      |

**Web Table 32 - Comprehensive citation list**

| Country | Citation                                                                                                                                                                                                                                                                                                                           | Year*     | New for GBD 2013 (*) |
|---------|------------------------------------------------------------------------------------------------------------------------------------------------------------------------------------------------------------------------------------------------------------------------------------------------------------------------------------|-----------|----------------------|
| China   | China Vital Registration - Deaths 1999 ICD9 as it appears in World Health Organization (WHO). WHO Mortality Database Version February 2014. Geneva, Switzerland: World Health Organization (WHO), 2014.                                                                                                                            | 1999      |                      |
| China   | Hong Kong Vital Registration - Deaths 1999 ICD9 as it appears in World Health Organization (WHO). WHO Mortality Database Version February 2014. Geneva, Switzerland: World Health Organization (WHO), 2014.                                                                                                                        | 1999      |                      |
| China   | National Bureau of Statistics of China. China Sample Survey on Population Changes 1999.                                                                                                                                                                                                                                            | 1999      |                      |
| China   | Guo-Chuan Zhang, Bao-Long Zhao. [A survey of prevalence of senile dementia and parkinson disease]. J Clin Psychol Med. 2001; 143-5.                                                                                                                                                                                                | 1999      |                      |
| China   | Chinese Center for Disease Control and Prevention (CCDC). China Disease Surveillance Points 1999 - China CDC. [Unpublished].                                                                                                                                                                                                       | 1999      | *                    |
| China   | China - Macao Vital Registration Death Data 1999 as it appears in United Nations Statistics Division (UNSD). United Nations Demographic Yearbook Database. [Unpublished].                                                                                                                                                          | 1999      |                      |
| China   | Clift A, Morgan C, Anderson D, Toole M. Alarming levels of hepatitis B virus detected among rural Tibetans. Trop Doct. 2004; 34(3): 156-7.                                                                                                                                                                                         | 1999      |                      |
| China   | Zhang ZW, Shimbo S, Qu JB, Liu ZM, Cai XC, Wang LQ, Watanabe T, Nakatsuka H, Matsuda-Inoguchi N, Higashikawa K, Ikeda M. Hepatitis B and C virus infection among adult women in Jilin Province, China: an urban-rural comparison in prevalence of infection markers. Southeast Asian J Trop Med Public Health. 2000; 31(3): 530-6. | 1999      |                      |
| China   | Yao Q, Zhang W, Qian J. Dialysis status in China: a report from the Shanghai Dialysis Registry (2000-2005). Ethn Dis. 2009; 19(1 Suppl 1): S23-6.                                                                                                                                                                                  | 1999-2005 |                      |
| China   | Xiu J, Qi X-L, Shan K-R, Xie Y, He Y, Wu C-X, Li Y, Wu X-L, Ren X-L. G6PD Gene Mutations in Shui people in Sandu of Guizhou. J Experiment Hematol. 2005; 13(1): 147-50.                                                                                                                                                            | 1999-2001 |                      |
| China   | China Vital Registration - Deaths 2000 ICD9 as it appears in World Health Organization (WHO). WHO Mortality Database Version February 2014. Geneva, Switzerland: World Health Organization (WHO), 2014.                                                                                                                            | 2000      |                      |
| China   | Hong Kong Vital Registration - Deaths 2000 ICD9 as it appears in World Health Organization (WHO). WHO Mortality Database Version February 2014. Geneva, Switzerland: World Health Organization (WHO), 2014.                                                                                                                        | 2000      |                      |
| China   | China Data Center, University of Michigan, National Bureau of Statistics of China. China Census 2000 - China Data Center.                                                                                                                                                                                                          | 2000      |                      |
| China   | National Bureau of Statistics of China. China Population and Housing Census 2000.                                                                                                                                                                                                                                                  | 2000      |                      |
| China   | Chinese Center for Disease Control and Prevention (CCDC). China Disease Surveillance Points 2000 - China CDC. [Unpublished].                                                                                                                                                                                                       | 2000      | *                    |
| China   | China - Macao Vital Registration Death Data 2000 as it appears in United Nations Statistics Division (UNSD). United Nations Demographic Yearbook. New York City, United States: United Nations Statistics Division (UNSD).                                                                                                         | 2000      |                      |
| China   | Zhang M, Sun X-D, Mark SD, Chen W, Wong L, Dawsey SM, Qiao Y-L, Fraumeni JF Jr, Taylor PR, O'Brien TR. Hepatitis C virus infection, Linxian, China. Emerg Infect Dis. 2005; 11(1): 17-21.                                                                                                                                          | 2000      |                      |
| China   | Ministry of Health (China). China National Maternal and Child Health Surveillance System 2000-2010 - MCHS. [Unpublished].                                                                                                                                                                                                          | 2000-2010 | *                    |
| China   | Chen Y, Tian DY, Xia NS. Epidemiology and genotypes of HEV in Wuhan. Chin J Dig Dis. 2005; 6(4): 182-8.                                                                                                                                                                                                                            | 2000-2004 | *                    |

**Web Table 32 - Comprehensive citation list**

| Country | Citation                                                                                                                                                                                                                                                                                                                          | Year*     | New for GBD 2013 (*) |
|---------|-----------------------------------------------------------------------------------------------------------------------------------------------------------------------------------------------------------------------------------------------------------------------------------------------------------------------------------|-----------|----------------------|
| China   | Hong Kong Vital Registration - Deaths 2001 ICD10 as it appears in World Health Organization (WHO). WHO Mortality Database Version February 2014. Geneva, Switzerland: World Health Organization (WHO), 2014.                                                                                                                      | 2001      |                      |
| China   | National Bureau of Statistics of China. China Statistical Yearbook 2003. Beijing, China: National Bureau of Statistics of China.                                                                                                                                                                                                  | 2001      |                      |
| China   | National Bureau of Statistics of China. China Sample Survey on Population Changes 2001.                                                                                                                                                                                                                                           | 2001      |                      |
| China   | Chinese Center for Disease Control and Prevention (CCDC). China Disease Surveillance Points 2001 - China CDC. [Unpublished].                                                                                                                                                                                                      | 2001      | *                    |
| China   | China - Macao Vital Registration Death Data 2001 as it appears in United Nations Statistics Division (UNSD). United Nations Demographic Yearbook. New York City, United States: United Nations Statistics Division (UNSD).                                                                                                        | 2001      |                      |
| China   | Aiqiang X, Zijian F, Wenbo X, Lixia W, Wanshen G, Qing X, Haijun S, Lee LA, Xiaofeng L. Active case-based surveillance for measles in China: lessons learned from Shandong and Henan provinces. <i>J Infect Dis.</i> 2003; 187(Suppl 1): S258-63.                                                                                 | 2001      |                      |
| China   | Wong KH, Liu YM, Ng PSP, Young BWY, Lee SS. Epidemiology of hepatitis A and hepatitis E infection and their determinants in adult Chinese community in Hong Kong. <i>J Med Virol.</i> 2004; 72(4): 538-44.                                                                                                                        | 2001      | *                    |
| China   | Toole MJ, Claridge F, Anderson DA, Zhuang H, Morgan C, Otto B, Stewart T. Hepatitis E virus infection as a marker for contaminated community drinking water sources in Tibetan villages. <i>Am J Trop Med Hyg.</i> 2006; 74(2): 250-4.                                                                                            | 2001      | *                    |
| China   | Ochiai RL, Wang X, von Seidlein L, Yang J, Bhutta ZA, Bhattacharya SK, Agtini M, Deen JL, Wain J, Kim DR, Ali M, Acosta CJ, Jodar L, Clemens JD. Salmonella Paratyphi A Rates, Asia. <i>Emerg Infect Dis.</i> 2005; 11(11): 1764-6.                                                                                               | 2001-2002 | *                    |
| China   | Hong Kong Vital Registration - Deaths 2002 ICD10 as it appears in World Health Organization (WHO). WHO Mortality Database Version February 2014. Geneva, Switzerland: World Health Organization (WHO), 2014.                                                                                                                      | 2002      |                      |
| China   | National Bureau of Statistics of China. China Sample Survey on Population Changes 2002.                                                                                                                                                                                                                                           | 2002      |                      |
| China   | Chen Y-D, Liu M-Y, Yu W-L, Li J-Q, Peng M, Dai Q, Liu X, Zhou Z-Q. Hepatitis C virus infections and genotypes in China. <i>HBPD Int.</i> 2002; 1(2): 194-201.                                                                                                                                                                     | 2002      |                      |
| China   | Wang B-E, Ma W-M, Sulaiman A, Noer S, Sumoharjo S, Sumarsidi D, Tandon BN, Nakao K, Mishiro S, Miyakawa Y, Akahane Y, Suzuki H. Demographic, clinical, and virological characteristics of hepatocellular carcinoma in Asia: survey of 414 patients from four countries. <i>J Med Virol.</i> 2002; 67(3): 394-400.                 | 2002      |                      |
| China   | Chinese Center for Disease Control and Prevention (CCDC). China Disease Surveillance Points 2002 - China CDC. [Unpublished].                                                                                                                                                                                                      | 2002      | *                    |
| China   | China - Macao Vital Registration Death Data 2002 as it appears in United Nations Statistics Division (UNSD). United Nations Demographic Yearbook. New York City, United States: United Nations Statistics Division (UNSD).                                                                                                        | 2002      |                      |
| China   | Au W-Y, Ma ESK, Lam VMS, Chan JLC, Pang A, Kwong Y-L. Glucose 6-phosphate dehydrogenase (G6PD) deficiency in elderly Chinese women heterozygous for G6PD variants. <i>Am J Med Genet A.</i> 2004; 129A(2): 208-11.                                                                                                                | 2002-2004 |                      |
| China   | Yan T, Cai R, Mo O, Zhu D, Ouyang H, Huang L, Zhao M, Huang F, Li L, Liang X, Xu X. Incidence and complete molecular characterization of glucose-6-phosphate dehydrogenase deficiency in the Guangxi Zhuang autonomous region of southern China: description of four novel mutations. <i>Haematologica.</i> 2006; 91(10): 1321-8. | 2002-2003 |                      |

**Web Table 32 - Comprehensive citation list**

| Country | Citation                                                                                                                                                                                                                                                                                                                                                                                         | Year*     | New for GBD 2013 (*) |
|---------|--------------------------------------------------------------------------------------------------------------------------------------------------------------------------------------------------------------------------------------------------------------------------------------------------------------------------------------------------------------------------------------------------|-----------|----------------------|
| China   | Tong D-Y, Wang X-H, Xu C-F, Yang Y-Z, Xiong S-D. Hepatitis B virus infection and coronary atherosclerosis: results from a population with relatively high prevalence of hepatitis B virus. <i>World J Gastroenterol.</i> 2005; 11(9): 1292-6.                                                                                                                                                    | 2002-2004 |                      |
| China   | Wang L-Y, Hu C-T, Ho T-Y, Lin HH. Geographic and ethnic variations of long-term efficacy and immunogenicity of hepatitis B vaccination in Hualien, a HBV hyperendemic area. <i>Vaccine.</i> 2006; 24(20): 4427-32.                                                                                                                                                                               | 2002-2004 |                      |
| China   | Hong Kong Vital Registration - Deaths 2003 ICD10 as it appears in World Health Organization (WHO). WHO Mortality Database Version February 2014. Geneva, Switzerland: World Health Organization (WHO), 2014.                                                                                                                                                                                     | 2003      |                      |
| China   | National Bureau of Statistics of China. China Sample Survey on Population Changes 2003.                                                                                                                                                                                                                                                                                                          | 2003      |                      |
| China   | Wan X, Zhou M, Tao Z, Ding D, Yang G. Epidemiologic application of verbal autopsy to investigate the high occurrence of cancer along Huai River Basin, China. <i>Popul Health Metr.</i> 2011; 37.                                                                                                                                                                                                | 2003      |                      |
| China   | China - Macao Vital Registration Death Data 2003 as it appears in United Nations Statistics Division (UNSD). United Nations Demographic Yearbook. New York City, United States: United Nations Statistics Division (UNSD).                                                                                                                                                                       | 2003      |                      |
| China   | Chen H-F, Li C-Y, Chen P, See T-T, Lee H-Y. Seroprevalence of hepatitis B and C in type 2 diabetic patients. <i>J Chin Med Assoc.</i> 2006; 69(4): 146-52.                                                                                                                                                                                                                                       | 2003      |                      |
| China   | Prince M, Acosta D, Ferri CP, Guerra M, Huang Y, Llibre Rodriguez JJ, Salas A, Sosa AL, Williams JD, Dewey ME, Acosta I, Jotheeswaran AT, Liu Z. Dementia incidence and mortality in middle-income countries, and associations with indicators of cognitive reserve: a 10/66 Dementia Research Group population-based cohort study. <i>Lancet.</i> 2012; 380(9836): 50-8.                        | 2003-2010 |                      |
| China   | Sousa RM, Ferri CP, Acosta D, Albanese E, Guerra M, Huang Y, Jacob KS, Jotheeswaran AT, Rodriguez JLL, Pichardo GR, Rodriguez MC, Salas A, Sosa AL, Williams J, Zuniga T, Prince M. Contribution of chronic diseases to disability in elderly people in countries with low and middle incomes: a 10/66 Dementia Research Group population-based survey. <i>Lancet.</i> 2009; 374(9704): 1821-30. | 2003-2005 |                      |
| China   | Lui P. Glucose-6-phosphate dehydrogenase gene mutations in She nationality, Fujian province. <i>Chin J Hematol.</i> 2005; 26(10): 612-5.                                                                                                                                                                                                                                                         | 2003-2005 |                      |
| China   | Zuo L, Wang M, Beijing Hemodialysis Quality Control and Improvement Center. Current status of hemodialysis treatment in Beijing, China. <i>Ethn Dis.</i> 2006; 16(2 Suppl 2): 31-4.                                                                                                                                                                                                              | 2003-2004 |                      |
| China   | Li R-C, Ge S-X, Li Y-P, Zheng Y-J, Nong Y, Guo Q-S, Zhang J, Ng M-H, Xia N-S. Seroprevalence of hepatitis E virus infection, rural southern People's Republic of China. <i>Emerg Infect Dis.</i> 2006; 12(11): 1682-8.                                                                                                                                                                           | 2003-2005 | *                    |
| China   | Zhu G, Qu Y, Jin N, Sun Z, Liu T, Lee H, Tian M, Wang T. Seroepidemiology and molecular characterization of hepatitis E virus in Jilin, China. <i>Infection.</i> 2008; 36(2): 140-6.                                                                                                                                                                                                             | 2003-2006 |                      |
| China   | World Health Organization (WHO). Retrospective Measles Data on Supplementary Immunization Activities. Geneva, Switzerland: World Health Organization (WHO).                                                                                                                                                                                                                                      | 2003-2010 |                      |
| China   | Hong Kong Vital Registration - Deaths 2004 ICD10 as it appears in World Health Organization (WHO). WHO Mortality Database Version February 2014. Geneva, Switzerland: World Health Organization (WHO), 2014.                                                                                                                                                                                     | 2004      |                      |
| China   | National Bureau of Statistics of China. China Sample Survey on Population Changes 2004.                                                                                                                                                                                                                                                                                                          | 2004      |                      |
| China   | Chinese Center for Disease Control and Prevention (CCDC). China Notifiable Infectious Diseases 2004. [Unpublished].                                                                                                                                                                                                                                                                              | 2004      | *                    |

**Web Table 32 - Comprehensive citation list**

| Country | Citation                                                                                                                                                                                                                                                                                                                                                                                               | Year*     | New for GBD 2013 (*) |
|---------|--------------------------------------------------------------------------------------------------------------------------------------------------------------------------------------------------------------------------------------------------------------------------------------------------------------------------------------------------------------------------------------------------------|-----------|----------------------|
| China   | World Health Organization (WHO). Yellow Fever Reported Cases, WHO Vaccine-Preventable Diseases: Monitoring System. Geneva, Switzerland: World Health Organization (WHO).                                                                                                                                                                                                                               | 2004      |                      |
| China   | Chinese Center for Disease Control and Prevention (CCDC). China Disease Surveillance Points 2004 - China CDC. [Unpublished].                                                                                                                                                                                                                                                                           | 2004      | *                    |
| China   | Libre Rodriguez JJ, Ferri CP, Acosta D, Guerra M, Huang Y, Jacob KS, Krishnamoorthy ES, Salas A, Sosa AL, Acosta I, Dewey ME, Gaona C, Jotheeswaran AT, Li S, Rodriguez D, Rodriguez G, Kumar PS, Valhuerdi A, Prince M, 10/66 Dementia Research Group. Prevalence of dementia in Latin America, India, and China: a population-based cross-sectional survey. <i>Lancet</i> . 2008; 372(9637): 464-74. | 2004      |                      |
| China   | China - Macao Vital Registration Death Data 2004 as it appears in United Nations Statistics Division (UNSD). United Nations Demographic Yearbook. New York City, United States: United Nations Statistics Division (UNSD).                                                                                                                                                                             | 2004      |                      |
| China   | Yu X, Wang S, Guan J, Mahemuti, Purhati, Gou A, Liu Q, Jin X, Ghildyal R. Analysis of the cause of increased measles incidence in Xinjiang, China in 2004. <i>Pediatr Infect Dis J</i> . 2007; 26(6): 513-8.                                                                                                                                                                                           | 2004      |                      |
| China   | Ministry of Health (China). China National Cause of Death Sample Survey 2004-2005.                                                                                                                                                                                                                                                                                                                     | 2004-2005 |                      |
| China   | National Bureau of Statistics. China 1% National Population Sample Survey 2005. Ann Arbor, United States: China Data Center, University of Michigan.                                                                                                                                                                                                                                                   | 2005      |                      |
| China   | Hong Kong Vital Registration - Deaths 2005 ICD10 as it appears in World Health Organization (WHO). WHO Mortality Database Version February 2014. Geneva, Switzerland: World Health Organization (WHO), 2014.                                                                                                                                                                                           | 2005      |                      |
| China   | Chinese Center for Disease Control and Prevention (CCDC). China Notifiable Infectious Diseases 2005. [Unpublished].                                                                                                                                                                                                                                                                                    | 2005      | *                    |
| China   | Huang W, Yang X, Yang JY. Investigation on prevalence of dementia among elderly in urban communities of Guiyang city. <i>Chin J Public Health</i> . 2007; 23(8): 983-6.                                                                                                                                                                                                                                | 2005      |                      |
| China   | Chinese Center for Disease Control and Prevention (CCDC). China Disease Surveillance Points 2005 - China CDC. [Unpublished].                                                                                                                                                                                                                                                                           | 2005      | *                    |
| China   | China - Macao Vital Registration Death Data 2005 as it appears in United Nations Statistics Division (UNSD). United Nations Demographic Yearbook. New York City, United States: United Nations Statistics Division (UNSD).                                                                                                                                                                             | 2005      |                      |
| China   | Zhang S, Lu Z, Liu H, Xiao X, Zhao Z, Bao G, Han J, Jing T, Chen G. Incidence of Japanese encephalitis, visceral leishmaniasis and malaria before and after the Wenchuan earthquake, in China. <i>Acta Trop</i> . 2013; 128(1): 85-9.                                                                                                                                                                  | 2005-2011 | *                    |
| China   | Yang Y, Zhu Y, Li D, Li Z, Lü H, Wu J, Tang J, Tong S. Characterization of glucose-6-phosphate dehydrogenase deficiency and identification of a novel haplotype 487G>A/IVS5-612(G>C) in the Achang population of Southwestern China. <i>Sci China C Life Sci</i> . 2007; 50(4): 479-85.                                                                                                                | 2005-2007 |                      |
| China   | Jiang Y, Lu J, Zhang L, Tian R, Liu Q, Bi S. [Antibody detection and sequencing analysis of hepatitis E virus in human population, swine and chicken in Sichuan region in China]. <i>Chin J Exper Clin Virol</i> . 2008; 22(6): 468-71.                                                                                                                                                                | 2005-2007 |                      |
| China   | Taniguchi M, Kim SR, Mishiro S, Takahashi K, Shin MH, Yun H, Park MS, Li ZM, Kim MK, Fang J, Hayashi Y. Epidemiology of hepatitis E in Northeastern China, South Korea and Japan. <i>J Infect</i> . 2009; 58(3): 232-7.                                                                                                                                                                                | 2005-2008 |                      |



**Web Table 32 - Comprehensive citation list**

| Country | Citation                                                                                                                                                                                                                                                                                                                                                                                              | Year*     | New for GBD 2013 (*) |
|---------|-------------------------------------------------------------------------------------------------------------------------------------------------------------------------------------------------------------------------------------------------------------------------------------------------------------------------------------------------------------------------------------------------------|-----------|----------------------|
| China   | Hong Kong Vital Registration - Deaths 2006 ICD10 as it appears in World Health Organization (WHO). WHO Mortality Database Version February 2014. Geneva, Switzerland: World Health Organization (WHO), 2014.                                                                                                                                                                                          | 2006      |                      |
| China   | National Bureau of Statistics of China. China Sample Survey on Population Changes 2006.                                                                                                                                                                                                                                                                                                               | 2006      |                      |
| China   | Chinese Center for Disease Control and Prevention (CCDC). China Notifiable Infectious Diseases 2006. [Unpublished].                                                                                                                                                                                                                                                                                   | 2006      | *                    |
| China   | Chinese Center for Disease Control and Prevention (CCDC). China Disease Surveillance Points 2006 - China CDC. [Unpublished].                                                                                                                                                                                                                                                                          | 2006      | *                    |
| China   | China - Macao Vital Registration Death Data 2006 as it appears in United Nations Statistics Division (UNSD). United Nations Demographic Yearbook. New York City, United States: United Nations Statistics Division (UNSD).                                                                                                                                                                            | 2006      |                      |
| China   | Dong C, Dai X, Shao J-S, Hu K, Meng J-H. Identification of genetic diversity of hepatitis E virus (HEV) and determination of the seroprevalence of HEV in eastern China. Arch Virol. 2007; 152(4): 739-46.                                                                                                                                                                                            | 2006      | *                    |
| China   | China National Maternal and Child Health Surveillance System Maternal Mortality By Cause 2006-2012 - MCHS. [Unpublished].                                                                                                                                                                                                                                                                             | 2006-2012 | *                    |
| China   | Dong C, Dai X, Liang J, Dong M, Meng J. Seroprevalence of Hepatitis E virus varies considerably among Chinese provinces. Hepat Mon. 2012; 12(6): 386-90.                                                                                                                                                                                                                                              | 2006-2008 | *                    |
| China   | Tian R-G, Lu J, Zhang B-C, Jiang Y-Z, Bi S-L. [Antibody detection of hepatitis E virus in some human population, swine and chicken in Beijing in China]. Chin J Exper Clin Virol. 2009; 23(1): 14-6.                                                                                                                                                                                                  | 2006-2007 |                      |
| China   | Hong Kong Vital Registration - Deaths 2007 ICD10 as it appears in World Health Organization (WHO). WHO Mortality Database Version February 2014. Geneva, Switzerland: World Health Organization (WHO), 2014.                                                                                                                                                                                          | 2007      |                      |
| China   | National Bureau of Statistics of China. China Sample Survey on Population Changes 2007.                                                                                                                                                                                                                                                                                                               | 2007      |                      |
| China   | World Health Organization (WHO). Global Status Report on Road Safety 2009. Geneva, Switzerland: World Health Organization (WHO), 2009.                                                                                                                                                                                                                                                                | 2007      |                      |
| China   | Chinese Center for Disease Control and Prevention (CCDC). China Notifiable Infectious Diseases 2007. [Unpublished].                                                                                                                                                                                                                                                                                   | 2007      | *                    |
| China   | Chinese Center for Disease Control and Prevention (CCDC). China Disease Surveillance Points 2007 - China CDC. [Unpublished].                                                                                                                                                                                                                                                                          | 2007      | *                    |
| China   | China - Macao Vital Registration Death Data 2007 as it appears in United Nations Statistics Division (UNSD). United Nations Demographic Yearbook. New York City, United States: United Nations Statistics Division (UNSD).                                                                                                                                                                            | 2007      |                      |
| China   | Zhao SM, Jiang TL, Gao FX, Lu L, Zheng HQ, Hu J, Fan YH, Li B, Xiao RR, Yury K. Analysis of true voluntary blood donors with anti-HCV prevalence and implications for donor management in Chongqing, China. Transfus Med. 2007; 17(3): 210-1.                                                                                                                                                         | 2007      |                      |
| China   | Lumbiganon P, Laopaiboon M, Gülmezoglu AM, Souza JP, Taneepanichkul S, Ruyan P, Attygalle DE, Shrestha N, Mori R, Hinh ND, Bang HT, Rathavy T, Chuyun K, Cheang K, Festin M, Udomprasertgul V, Germar MJV, Yanqiu G, Roy M, Carroli G, Ba-Thike K. Method of delivery and pregnancy outcomes in Asia: the WHO global survey on maternal and perinatal health 2007-08. Lancet. 2010; 375(9713): 490-9. | 2007-2008 |                      |
| China   | Hong Kong Vital Registration - Deaths 2008 ICD10 as it appears in World Health Organization (WHO). WHO Mortality Database Version February 2014. Geneva, Switzerland: World Health Organization (WHO), 2014.                                                                                                                                                                                          | 2008      |                      |



**Web Table 32 - Comprehensive citation list**

| Country | Citation                                                                                                                                                                                                                   | Year* | New for GBD 2013 (*) |
|---------|----------------------------------------------------------------------------------------------------------------------------------------------------------------------------------------------------------------------------|-------|----------------------|
| China   | National Bureau of Statistics of China. China Sample Survey on Population Changes 2008.                                                                                                                                    | 2008  |                      |
| China   | Chinese Center for Disease Control and Prevention (CCDC). China Notifiable Infectious Diseases 2008. [Unpublished].                                                                                                        | 2008  | *                    |
| China   | Li LL, Ma Y, Chen R, Liu ZM, Qin X, et al. Prevalence of dementia among the elderly in rural community of Anhui. Chin J Dis Control Prev. 2011; 15(4): 292-4.                                                              | 2008  |                      |
| China   | Qing-Hua Fan. Study and Analysis of Impact Factors and Health Service of Dementia in Shanxi Province [dissertation]. Shanxi, China: Shanxi Medical University; 2012. 115 p.                                                | 2008  |                      |
| China   | Chinese Center for Disease Control and Prevention (CCDC). China Mortality Registration and Reporting System 2008 - China CDC. [Unpublished].                                                                               | 2008  | *                    |
| China   | China - Macao Vital Registration Death Data 2008 as it appears in United Nations Statistics Division (UNSD). United Nations Demographic Yearbook. New York City, United States: United Nations Statistics Division (UNSD). | 2008  |                      |
| China   | Lu J, Li H, Tian R, Jiang Y, Xu Y, Yu D, Jiang J, Bi S. [Hepatitis viruses infection situation in human population of the Gansu province]. Chin J Exper Clin Virol. 2009; 23(5): 349-51.                                   | 2008  |                      |
| China   | Ma Z, Feng R, Zhao C, Harrison TJ, Li M, Qiao Z, Feng Y, Wang Y. Seroprevalence and distribution of hepatitis E virus in various ethnic groups in Gansu province, China. Infect Genet Evol. 2010; 10(5): 614-9.            | 2008  |                      |
| China   | Ministry of Health (China). China National Maternal and Child Health Surveillance System 2009.                                                                                                                             | 2009  |                      |
| China   | Hong Kong Vital Registration - Deaths 2009 ICD10 as it appears in World Health Organization (WHO). WHO Mortality Database Version February 2014. Geneva, Switzerland: World Health Organization (WHO), 2014.               | 2009  |                      |
| China   | National Bureau of Statistics of China. China Sample Survey on Population Changes 2009.                                                                                                                                    | 2009  |                      |
| China   | Chinese Center for Disease Control and Prevention (CCDC). China Notifiable Infectious Diseases 2009. [Unpublished].                                                                                                        | 2009  | *                    |
| China   | Chinese Center for Disease Control and Prevention (CCDC). China Mortality Registration and Reporting System 2009 - China CDC. [Unpublished].                                                                               | 2009  | *                    |
| China   | China - Macao Vital Registration Death Data 2009 as it appears in United Nations Statistics Division (UNSD). United Nations Demographic Yearbook. New York City, United States: United Nations Statistics Division (UNSD). | 2009  |                      |
| China   | Joint United Nations Program on HIV/AIDS (UNAIDS), Ministry of Health (China). China UNGASS Country Progress Report 2010. Geneva, Switzerland: Joint United Nations Program on HIV/AIDS (UNAIDS), 2010.                    | 2009  |                      |
| China   | National Bureau of Statistics of China. China Population and Housing Census 2010.                                                                                                                                          | 2010  |                      |
| China   | Hong Kong Vital Registration - Deaths 2010 ICD10 as it appears in World Health Organization (WHO). WHO Mortality Database Version February 2014. Geneva, Switzerland: World Health Organization (WHO), 2014.               | 2010  | *                    |
| China   | Chinese Center for Disease Control and Prevention (CCDC). China Notifiable Infectious Diseases 2010. [Unpublished].                                                                                                        | 2010  | *                    |
| China   | Kang M, Gao YM, Huo HQ. Prevalence of Alzheimer's disease and its related factors among elderly people in Hebei province. Chin J Public Health. 2011; 27(9): 1123-5.                                                       | 2010  |                      |
| China   | Li Keqing, Jiang Qinpu, Cui Lijun. Epidemiological Investigation of Alzheimer Disease and Rural Areas in Hebei Province. Chin J Health Psychol. 2008; 16(11): 1251-3.                                                      | 2010  |                      |

**Web Table 32 - Comprehensive citation list**

| Country  | Citation                                                                                                                                                                                                                                              | Year*                                                                     | New for GBD 2013 (*) |
|----------|-------------------------------------------------------------------------------------------------------------------------------------------------------------------------------------------------------------------------------------------------------|---------------------------------------------------------------------------|----------------------|
| China    | Wang Feng, Xu Pin, Zhu Sihui. Survey on the awareness rate and prevalence of Alzheimer's disease in the urban area of Zaozhuang City. <i>Chin J Practical Nerv Dis.</i> 2010; 13(23): 9-11.                                                           | 2010                                                                      |                      |
| China    | Chinese Center for Disease Control and Prevention (CCDC). China Mortality Registration and Reporting System 2010 - China CDC. [Unpublished].                                                                                                          | 2010                                                                      | *                    |
| China    | China - Macao Vital Registration Death Data 2010 as it appears in United Nations Statistics Division (UNSD). United Nations Demographic Yearbook. New York City, United States: United Nations Statistics Division (UNSD).                            | 2010                                                                      |                      |
| China    | Hong Kong Vital Registration - Deaths 2011 ICD10 as it appears in World Health Organization (WHO). WHO Mortality Database Version February 2014. Geneva, Switzerland: World Health Organization (WHO), 2014.                                          | 2011                                                                      | *                    |
| China    | Chinese Center for Disease Control and Prevention (CCDC). China Notifiable Infectious Diseases 2011. [Unpublished].                                                                                                                                   | 2011                                                                      | *                    |
| China    | Shen Y, Tang M. The epidemiologic survey of mild cognitive impairment and dementia among residents aged 65 years and over in the urban and the rural areas in Guangzhou [dissertation]. [Guangzhou, China]: Guangzhou Medical University; 2011. 72 p. | 2011                                                                      |                      |
| China    | Xiu-Shan He. Analysis of the Status and Influence of Alzheimer's Disease in Rural Communities. <i>J Jiujiang Univ Natural Sci.</i> 2012; 29-32.                                                                                                       | 2011                                                                      |                      |
| China    | Guo-ying Ye, Jian-er Chen, Kai-Zhong Shen. Dementia in people over 60 years old and related risk factors. <i>Chin Rural Health Serv Adm.</i> 2011; 31(2): 152.                                                                                        | 2011                                                                      |                      |
| China    | Chinese Center for Disease Control and Prevention (CCDC). China Mortality Registration and Reporting System 2011 - China CDC. [Unpublished].                                                                                                          | 2011                                                                      | *                    |
| China    | Li D, Long Y, Wang T, Xiao D, Zhang J, Guo Z, Wang B, Yan Y. Epidemiology of Hepatitis C Virus Infection in Highly Endemic HBV Areas in China. <i>PLoS One.</i> 2013; 8(1): e54815.                                                                   | 2011                                                                      |                      |
| China    | Chinese Center for Disease Control and Prevention (CCDC). China Notifiable Infectious Diseases 2012. [Unpublished].                                                                                                                                   | 2012                                                                      | *                    |
| China    | Chinese Center for Disease Control and Prevention (CCDC). China Mortality Registration and Reporting System 2012 - China CDC. [Unpublished].                                                                                                          | 2012                                                                      | *                    |
| China    | Ministry of Health (China). China Maternal and Child Health Surveillance System 2013 - MCHS. [Unpublished].                                                                                                                                           | 2013                                                                      | *                    |
| Colombia | Colombia Vital Registration Death Data 1950 as it appears in United Nations Statistics Division (UNSD). United Nations Demographic Yearbook. New York City, United States: United Nations Statistics Division (UNSD).                                 | 1950                                                                      |                      |
| Colombia | Centre for Research on the Epidemiology of Disasters (CRED). EM-DAT: The OFDA/CRED International Disaster Database. Brussels, Belgium: Catholic University of Leuven.                                                                                 | 1950, 1954, 1959, 1962, 1965, 1967, 1970-1974, 1976, 1979-1983, 1985-2012 |                      |
| Colombia | Colombia Vital Registration Death Data 1951 as it appears in United Nations Statistics Division (UNSD). United Nations Demographic Yearbook. New York City, United States: United Nations Statistics Division (UNSD).                                 | 1951                                                                      |                      |
| Colombia | Colombia Vital Registration Death Data 1952 as it appears in United Nations Statistics Division (UNSD). United Nations Demographic Yearbook. New York City, United States: United Nations Statistics Division (UNSD).                                 | 1952                                                                      |                      |

**Web Table 32 - Comprehensive citation list**

| Country  | Citation                                                                                                                                                                                                   | Year*     | New for GBD 2013 (*) |
|----------|------------------------------------------------------------------------------------------------------------------------------------------------------------------------------------------------------------|-----------|----------------------|
| Colombia | Colombia Vital Registration - Deaths 1953 ICD7 as it appears in World Health Organization (WHO). WHO Mortality Database Version February 2014. Geneva, Switzerland: World Health Organization (WHO), 2014. | 1953      |                      |
| Colombia | Colombia Vital Registration - Deaths 1954 ICD7 as it appears in World Health Organization (WHO). WHO Mortality Database Version February 2014. Geneva, Switzerland: World Health Organization (WHO), 2014. | 1954      |                      |
| Colombia | Colombia Vital Registration - Deaths 1955 ICD7 as it appears in World Health Organization (WHO). WHO Mortality Database Version February 2014. Geneva, Switzerland: World Health Organization (WHO), 2014. | 1955      |                      |
| Colombia | Colombia Vital Registration - Deaths 1956 ICD7 as it appears in World Health Organization (WHO). WHO Mortality Database Version February 2014. Geneva, Switzerland: World Health Organization (WHO), 2014. | 1956      |                      |
| Colombia | Colombia Vital Registration - Deaths 1957 ICD7 as it appears in World Health Organization (WHO). WHO Mortality Database Version February 2014. Geneva, Switzerland: World Health Organization (WHO), 2014. | 1957      |                      |
| Colombia | Colombia Vital Registration - Deaths 1958 ICD7 as it appears in World Health Organization (WHO). WHO Mortality Database Version February 2014. Geneva, Switzerland: World Health Organization (WHO), 2014. | 1958      |                      |
| Colombia | Colombia Vital Registration - Deaths 1959 ICD7 as it appears in World Health Organization (WHO). WHO Mortality Database Version February 2014. Geneva, Switzerland: World Health Organization (WHO), 2014. | 1959      |                      |
| Colombia | Colombia Vital Registration - Deaths 1960 ICD7 as it appears in World Health Organization (WHO). WHO Mortality Database Version February 2014. Geneva, Switzerland: World Health Organization (WHO), 2014. | 1960      |                      |
| Colombia | Colombia Vital Registration - Deaths 1961 ICD7 as it appears in World Health Organization (WHO). WHO Mortality Database Version February 2014. Geneva, Switzerland: World Health Organization (WHO), 2014. | 1961      |                      |
| Colombia | Colombia Vital Registration - Deaths 1962 ICD7 as it appears in World Health Organization (WHO). WHO Mortality Database Version February 2014. Geneva, Switzerland: World Health Organization (WHO), 2014. | 1962      |                      |
| Colombia | Colombia Vital Registration - Deaths 1963 ICD7 as it appears in World Health Organization (WHO). WHO Mortality Database Version February 2014. Geneva, Switzerland: World Health Organization (WHO), 2014. | 1963      |                      |
| Colombia | Colombia Vital Registration - Deaths 1964 ICD7 as it appears in World Health Organization (WHO). WHO Mortality Database Version February 2014. Geneva, Switzerland: World Health Organization (WHO), 2014. | 1964      |                      |
| Colombia | Peace Research Institute Oslo (PRIO). Battle Deaths Dataset Version 3, 2009. Oslo, Norway: Peace Research Institute Oslo (PRIO), 2009.                                                                     | 1964-1988 |                      |
| Colombia | Colombia Vital Registration - Deaths 1965 ICD7 as it appears in World Health Organization (WHO). WHO Mortality Database Version February 2014. Geneva, Switzerland: World Health Organization (WHO), 2014. | 1965      |                      |
| Colombia | Colombia Vital Registration - Deaths 1966 ICD7 as it appears in World Health Organization (WHO). WHO Mortality Database Version February 2014. Geneva, Switzerland: World Health Organization (WHO), 2014. | 1966      |                      |

**Web Table 32 - Comprehensive citation list**

| Country  | Citation                                                                                                                                                                                                                                                                                                                     | Year*     | New for GBD 2013 (*) |
|----------|------------------------------------------------------------------------------------------------------------------------------------------------------------------------------------------------------------------------------------------------------------------------------------------------------------------------------|-----------|----------------------|
| Colombia | Alberto Restrepo M, Gutierrez E. The frequency of glucose-6-phosphate dehydrogenase deficiency in Colombia. <i>Am J Hum Genet.</i> 1968; 20(1): 82-5.                                                                                                                                                                        | 1966-1968 |                      |
| Colombia | Colombia Vital Registration - Deaths 1967 ICD7 as it appears in World Health Organization (WHO). WHO Mortality Database Version February 2014. Geneva, Switzerland: World Health Organization (WHO), 2014.                                                                                                                   | 1967      |                      |
| Colombia | Colombia Vital Registration - Deaths 1968 ICD8 as it appears in World Health Organization (WHO). WHO Mortality Database Version February 2014. Geneva, Switzerland: World Health Organization (WHO), 2014.                                                                                                                   | 1968      |                      |
| Colombia | Colombia Vital Registration - Deaths 1969 ICD8 as it appears in World Health Organization (WHO). WHO Mortality Database Version February 2014. Geneva, Switzerland: World Health Organization (WHO), 2014.                                                                                                                   | 1969      |                      |
| Colombia | Colombia Vital Registration - Deaths 1970 ICD8 as it appears in World Health Organization (WHO). WHO Mortality Database Version February 2014. Geneva, Switzerland: World Health Organization (WHO), 2014.                                                                                                                   | 1970      |                      |
| Colombia | Colombia Vital Registration Death Data 1971 as it appears in United Nations Statistics Division (UNSD). United Nations Demographic Yearbook. New York City, United States: United Nations Statistics Division (UNSD).                                                                                                        | 1971      |                      |
| Colombia | Colombia Vital Registration - Deaths 1972 ICD8 as it appears in World Health Organization (WHO). WHO Mortality Database Version February 2014. Geneva, Switzerland: World Health Organization (WHO), 2014.                                                                                                                   | 1972      |                      |
| Colombia | National Administrative Department of Statistics (DANE) (Colombia), University of the Andes (Colombia), Minnesota Population Center. Colombia National Population and Housing Census 1973 from the Integrated Public Use Microdata Series, International. [Machine-readable database]. Minneapolis: University of Minnesota. | 1973      |                      |
| Colombia | Colombia Vital Registration Death Data 1973 as it appears in United Nations Statistics Division (UNSD). United Nations Demographic Yearbook. New York City, United States: United Nations Statistics Division (UNSD).                                                                                                        | 1973      |                      |
| Colombia | Colombia Vital Registration - Deaths 1974 ICD8 as it appears in World Health Organization (WHO). WHO Mortality Database Version February 2014. Geneva, Switzerland: World Health Organization (WHO), 2014.                                                                                                                   | 1974      |                      |
| Colombia | Colombia Vital Registration - Deaths 1975 ICD8 as it appears in World Health Organization (WHO). WHO Mortality Database Version February 2014. Geneva, Switzerland: World Health Organization (WHO), 2014.                                                                                                                   | 1975      |                      |
| Colombia | Regional Population Center Corporation (Colombia), International Statistical Institute. Colombia World Fertility Survey 1976. Voorburg, Netherlands: International Statistical Institute.                                                                                                                                    | 1976      |                      |
| Colombia | Colombia Vital Registration - Deaths 1976 ICD8 as it appears in World Health Organization (WHO). WHO Mortality Database Version February 2014. Geneva, Switzerland: World Health Organization (WHO), 2014.                                                                                                                   | 1976      |                      |
| Colombia | United Nations Office on Drugs and Crime (UNODC). United Nations Surveys on Crime Trends and the Operations of Criminal Justice Systems 1970-2006 as provided by Kavi Bhalla. [Unpublished].                                                                                                                                 | 1976-1991 |                      |
| Colombia | Colombia Vital Registration - Deaths 1977 ICD8 as it appears in World Health Organization (WHO). WHO Mortality Database Version February 2014. Geneva, Switzerland: World Health Organization (WHO), 2014.                                                                                                                   | 1977      |                      |

**Web Table 32 - Comprehensive citation list**

| Country  | Citation                                                                                                                                                                                                                                                                                              | Year*                 | New for GBD 2013 (*) |
|----------|-------------------------------------------------------------------------------------------------------------------------------------------------------------------------------------------------------------------------------------------------------------------------------------------------------|-----------------------|----------------------|
| Colombia | Colombia Vital Registration - Deaths 1979 ICD9 as it appears in World Health Organization (WHO). WHO Mortality Database Version February 2014. Geneva, Switzerland: World Health Organization (WHO), 2014.                                                                                            | 1979                  |                      |
| Colombia | WHO Department of Communicable Disease Surveillance and Response. WHO Report on Global Surveillance of Epidemic-prone Infectious Diseases 2000.                                                                                                                                                       | 1980-1998             |                      |
| Colombia | Vasconcelos PF da C. Febre amarela. Rev Soc Bras Med Trop. 2003; 36(2): 275-93.                                                                                                                                                                                                                       | 1980-2001             |                      |
| Colombia | Institute for Health Metrics and Evaluation (IHME), Joint United Nations Program on HIV/AIDS (UNAIDS). Institute for Health Metrics and Evaluation HIV Mortality Estimates Based on the UNAIDS Spectrum Model Framework.                                                                              | 1980-2013             | *                    |
| Colombia | United Nations Children's Fund (UNICEF), World Health Organization (WHO). WHO and UNICEF Reported Disease Incidence Time Series - Pertussis. Geneva, Switzerland: World Health Organization (WHO).                                                                                                    | 1980-2013             |                      |
| Colombia | United Nations Children's Fund (UNICEF), World Health Organization (WHO). WHO and UNICEF Reported Disease Incidence Time Series - Measles. Geneva, Switzerland: World Health Organization (WHO).                                                                                                      | 1980-2013             |                      |
| Colombia | Ministry of Social Protection (Colombia), National Administrative Department of Statistics (Colombia). Colombia Vital Registration 1980-2005.                                                                                                                                                         | 1980, 1982-1983, 2003 |                      |
| Colombia | Ferlay J, Parkin DM, Curado MP, Bray F, Edwards B, Shin HR and Forman D. Cancer Incidence in Five Continents, Volumes I to IX: IARC CancerBase No. 9 [Internet]. Lyon, France: International Agency for Research on Cancer; 2010. Available from: <a href="http://ci5.iarc.fr">http://ci5.iarc.fr</a> | 1983-2002             |                      |
| Colombia | Colombia Vital Registration - Deaths 1984 ICD9 as it appears in World Health Organization (WHO). WHO Mortality Database Version February 2014. Geneva, Switzerland: World Health Organization (WHO), 2014.                                                                                            | 1984                  |                      |
| Colombia | Ljunggren KE, Patarroyo ME, Engle R, Purcell RH, Gerin JL. Viral hepatitis in Colombia: a study of the "hepatitis of the Sierra Nevada de Santa Marta. Hepatology. 1985; 5(2): 299-304.                                                                                                               | 1984                  |                      |
| Colombia | Colombia Vital Registration - Deaths 1985 ICD9 as it appears in World Health Organization (WHO). WHO Mortality Database Version February 2014. Geneva, Switzerland: World Health Organization (WHO), 2014.                                                                                            | 1985                  |                      |
| Colombia | National Administrative Department of Statistics (DANE) (Colombia), Minnesota Population Center. Colombia National Population and Housing Census 1985-1986 from the Integrated Public Use Microdata Series, International. [Machine-readable database]. Minneapolis: University of Minnesota.         | 1985-1986             |                      |
| Colombia | Pan American Health Organization (PAHO). Update on yellow fever in the Americas. Epidemiol Bull. 2000; 21(2):13.                                                                                                                                                                                      | 1985, 1997-1998       |                      |
| Colombia | Colombia Vital Registration - Deaths 1986 ICD9 as it appears in World Health Organization (WHO). WHO Mortality Database Version February 2014. Geneva, Switzerland: World Health Organization (WHO), 2014.                                                                                            | 1986                  |                      |
| Colombia | Regional Population Center (CCRP) (Colombia), Ministry of Health (Colombia), Westinghouse; Institute for Resource Development. Colombia Demographic and Health Survey 1986. Columbia, United States: Westinghouse; Institute for Resource Development.                                                | 1986                  |                      |
| Colombia | Colombia Vital Registration - Deaths 1987 ICD9 as it appears in World Health Organization (WHO). WHO Mortality Database Version February 2014. Geneva, Switzerland: World Health Organization (WHO), 2014.                                                                                            | 1987                  |                      |

**Web Table 32 - Comprehensive citation list**

| Country  | Citation                                                                                                                                                                                                                                                                                      | Year*      | New for GBD 2013 (*) |
|----------|-----------------------------------------------------------------------------------------------------------------------------------------------------------------------------------------------------------------------------------------------------------------------------------------------|------------|----------------------|
| Colombia | Colombia Vital Registration - Deaths 1988 ICD9 as it appears in World Health Organization (WHO). WHO Mortality Database Version February 2014. Geneva, Switzerland: World Health Organization (WHO), 2014.                                                                                    | 1988       |                      |
| Colombia | Colombia Vital Registration - Deaths 1989 ICD9 as it appears in World Health Organization (WHO). WHO Mortality Database Version February 2014. Geneva, Switzerland: World Health Organization (WHO), 2014.                                                                                    | 1989       |                      |
| Colombia | Department of Peace and Conflict Research, Uppsala University. UCDP Battle-Related Deaths Database Version 5, 2013. Uppsala, Sweden: Department of Peace and Conflict Research, Uppsala University, 2013.                                                                                     | 1989-2012  | *                    |
| Colombia | Department of Peace and Conflict Research, Uppsala University. UCDP One-Sided Violence Database Version 1.4, 2013. Uppsala, Sweden: Department of Peace and Conflict Research, Uppsala University, 2013.                                                                                      | 1989-2010  | *                    |
| Colombia | Colombia Vital Registration - Deaths 1990 ICD9 as it appears in World Health Organization (WHO). WHO Mortality Database Version February 2014. Geneva, Switzerland: World Health Organization (WHO), 2014.                                                                                    | 1990       |                      |
| Colombia | Macro International, Inc.; Institute for Resource Development, Profamilia. Colombia Demographic and Health Survey 1990. Columbia, United States: Macro International, Inc.; Institute for Resource Development.                                                                               | 1990       |                      |
| Colombia | Weatherall D. Sickle Cell and Thalassemias Prevalence Data, Personal Correspondence with David Weatherall. [Unpublished].                                                                                                                                                                     | 1990-2009  |                      |
| Colombia | Department of Peace and Conflict Research, Uppsala University. UCDP Nonstate Conflict Database Version 2.5, 2013. Uppsala, Sweden: Department of Peace and Conflict Research, Uppsala University, 2013.                                                                                       | 1990-2005  | *                    |
| Colombia | Centre for Health Informatics and Multiprofessional Education, University College London. Modell's Haemoglobinopathologist's Almanac. London, United Kingdom: Centre for Health Informatics and Multiprofessional Education, University College London, 2008.                                 | 1990-2003  |                      |
| Colombia | Colombia Vital Registration - Deaths 1991 ICD9 as it appears in World Health Organization (WHO). WHO Mortality Database Version February 2014. Geneva, Switzerland: World Health Organization (WHO), 2014.                                                                                    | 1991       |                      |
| Colombia | Colombia Vital Registration - Deaths 1992 ICD9 as it appears in World Health Organization (WHO). WHO Mortality Database Version February 2014. Geneva, Switzerland: World Health Organization (WHO), 2014.                                                                                    | 1992       |                      |
| Colombia | Colombia Vital Registration - Deaths 1993 ICD9 as it appears in World Health Organization (WHO). WHO Mortality Database Version February 2014. Geneva, Switzerland: World Health Organization (WHO), 2014.                                                                                    | 1993       |                      |
| Colombia | National Administrative Department of Statistics (DANE) (Colombia), Minnesota Population Center. Colombia National Population and Housing Census 1993-1994 from the Integrated Public Use Microdata Series, International. [Machine-readable database]. Minneapolis: University of Minnesota. | 1993-1994  |                      |
| Colombia | Conde-Agudelo A, Kafury-Goeta AC. Epidemiology of eclampsia in Colombia. Int J Gynaecol Obstet. 1998; 61(1): 1-8.                                                                                                                                                                             | 1993-1995  |                      |
| Colombia | Measles Supplementary Immunization Activity Data as provided by the World Health Organization. [Unpublished].                                                                                                                                                                                 | 1993, 1995 |                      |
| Colombia | Colombia Vital Registration - Deaths 1994 ICD9 as it appears in World Health Organization (WHO). WHO Mortality Database Version February 2014. Geneva, Switzerland: World Health Organization (WHO), 2014.                                                                                    | 1994       |                      |



**Web Table 32 - Comprehensive citation list**

| Country  | Citation                                                                                                                                                                                                                                                                                                                                                                                                                  | Year*                | New for GBD 2013 (*) |
|----------|---------------------------------------------------------------------------------------------------------------------------------------------------------------------------------------------------------------------------------------------------------------------------------------------------------------------------------------------------------------------------------------------------------------------------|----------------------|----------------------|
| Colombia | Colombia Vital Registration - Deaths 1995 ICD9 as it appears in World Health Organization (WHO). WHO Mortality Database Version February 2014. Geneva, Switzerland: World Health Organization (WHO), 2014.                                                                                                                                                                                                                | 1995                 |                      |
| Colombia | Macro International, Inc. Profamilia. Colombia Demographic and Health Survey 1995. Calverton, United States: Macro International, Inc.                                                                                                                                                                                                                                                                                    | 1995                 |                      |
| Colombia | United Nations Office on Drugs and Crime (UNODC). United Nations Office on Drugs and Crime Global Study on Homicides 2011. Vienna, Austria: United Nations Office on Drugs and Crime (UNODC), 2011.                                                                                                                                                                                                                       | 1995-2010            |                      |
| Colombia | Colombia Vital Registration - Deaths 1996 ICD9 as it appears in World Health Organization (WHO). WHO Mortality Database Version February 2014. Geneva, Switzerland: World Health Organization (WHO), 2014.                                                                                                                                                                                                                | 1996                 |                      |
| Colombia | Colombia Vital Registration - Deaths 1997 ICD10 as it appears in World Health Organization (WHO). WHO Mortality Database Version February 2014. Geneva, Switzerland: World Health Organization (WHO), 2014.                                                                                                                                                                                                               | 1997                 |                      |
| Colombia | Colombia Vital Registration - Deaths 1998 ICD10 as it appears in World Health Organization (WHO). WHO Mortality Database Version February 2014. Geneva, Switzerland: World Health Organization (WHO), 2014.                                                                                                                                                                                                               | 1998                 |                      |
| Colombia | Joint United Nations Program on HIV/AIDS (UNAIDS), Ministry of Social Protection (Colombia). Colombia Report UNGASS 2010. Geneva, Switzerland: Joint United Nations Program on HIV/AIDS (UNAIDS), 2010.                                                                                                                                                                                                                   | 1998, 2008           |                      |
| Colombia | Colombia Vital Registration - Deaths 1999 ICD10 as it appears in World Health Organization (WHO). WHO Mortality Database Version February 2014. Geneva, Switzerland: World Health Organization (WHO), 2014.                                                                                                                                                                                                               | 1999                 |                      |
| Colombia | Colombia Vital Registration - Deaths 2000 ICD10 as it appears in World Health Organization (WHO). WHO Mortality Database Version February 2014. Geneva, Switzerland: World Health Organization (WHO), 2014.                                                                                                                                                                                                               | 2000                 |                      |
| Colombia | Macro International, Inc. Profamilia. Colombia Demographic and Health Survey 2000. Calverton, United States: Macro International, Inc.                                                                                                                                                                                                                                                                                    | 2000                 |                      |
| Colombia | Navas M-C, Suarez I, Carreño A, Uribe D, Rios WA, Cortes-Mancera F, Martel G, Vieco B, Lozano D, Jimenez C, Gouas D, Osorio G, Hoyos S, Restrepo JC, Correa G, Jaramillo S, Lopez R, Bravo LE, Arbelaez MP, Scoazec J-Y, Abedi-Ardekani B, Santella RM, Chemin I, Hainaut P. Hepatitis B and Hepatitis C Infection Biomarkers and TP53 Mutations in Hepatocellular Carcinomas from Colombia. Hepat Res Treat. 2011; 1-10. | 2000-2007            |                      |
| Colombia | Colombia Vital Registration - Deaths 2001 ICD10 as it appears in World Health Organization (WHO). WHO Mortality Database Version February 2014. Geneva, Switzerland: World Health Organization (WHO), 2014.                                                                                                                                                                                                               | 2001                 |                      |
| Colombia | Moyano M, Méndez F. Erythrocyte defects and parasitemia density in patients with Plasmodium falciparum malaria in Buenaventura, Colombia. Rev Panam Salud Publica. 2005; 18(1): 25-32.                                                                                                                                                                                                                                    | 2001                 |                      |
| Colombia | Colombia Vital Registration - Deaths 2002 ICD10 as it appears in World Health Organization (WHO). WHO Mortality Database Version February 2014. Geneva, Switzerland: World Health Organization (WHO), 2014.                                                                                                                                                                                                               | 2002                 |                      |
| Colombia | World Health Organization (WHO). Yellow Fever Reported Cases, WHO Vaccine-Preventable Diseases: Monitoring System. Geneva, Switzerland: World Health Organization (WHO).                                                                                                                                                                                                                                                  | 2002-2005, 2007-2009 |                      |

**Web Table 32 - Comprehensive citation list**

| Country  | Citation                                                                                                                                                                                                                                                                                                                                                                                                                        | Year*                           | New for GBD 2013 (*) |
|----------|---------------------------------------------------------------------------------------------------------------------------------------------------------------------------------------------------------------------------------------------------------------------------------------------------------------------------------------------------------------------------------------------------------------------------------|---------------------------------|----------------------|
| Colombia | World Health Organization (WHO). Retrospective Measles Data on Supplementary Immunization Activities. Geneva, Switzerland: World Health Organization (WHO).                                                                                                                                                                                                                                                                     | 2002-2003, 2005-2006, 2010-2011 |                      |
| Colombia | Joint United Nations Program on HIV/AIDS (UNAIDS), Pan American Health Organization (PAHO), United Nations Children's Fund (UNICEF), World Health Organization (WHO). Colombia Epidemiological Fact Sheet on HIV/AIDS and STIs 2004.                                                                                                                                                                                            | 2003                            |                      |
| Colombia | World Health Organization (WHO). Colombia WHO Leishmaniasis Country Profile.                                                                                                                                                                                                                                                                                                                                                    | 2003-2010                       | *                    |
| Colombia | Colombia Vital Registration - Deaths 2004 ICD10 as it appears in World Health Organization (WHO). WHO Mortality Database Version February 2014. Geneva, Switzerland: World Health Organization (WHO), 2014.                                                                                                                                                                                                                     | 2004                            |                      |
| Colombia | Macro International, Inc, Profamilia. Colombia Demographic and Health Survey 2004-2005. Calverton, United States: Macro International, Inc.                                                                                                                                                                                                                                                                                     | 2004-2005                       |                      |
| Colombia | Colombia Vital Registration - Deaths 2005 ICD10 as it appears in World Health Organization (WHO). WHO Mortality Database Version February 2014. Geneva, Switzerland: World Health Organization (WHO), 2014.                                                                                                                                                                                                                     | 2005                            |                      |
| Colombia | National Administrative Department of Statistics (DANE) (Colombia), Minnesota Population Center. Colombia General Census 2005-2006 from the Integrated Public Use Microdata Series, International. [Machine-readable database]. Minneapolis: University of Minnesota.                                                                                                                                                           | 2005-2006                       |                      |
| Colombia | Colombia Vital Registration - Deaths 2006 ICD10 as it appears in World Health Organization (WHO). WHO Mortality Database Version February 2014. Geneva, Switzerland: World Health Organization (WHO), 2014.                                                                                                                                                                                                                     | 2006                            |                      |
| Colombia | World Health Organization (WHO). Yellow fever in Africa and South America, 2006. Wkly Epidemiol Rec. 2008; 83(8): 60-76.                                                                                                                                                                                                                                                                                                        | 2006                            |                      |
| Colombia | Fassio E, Díaz S, Santa C, Reig ME, Martínez Artola Y, Alves de Mattos A, Míguez C, Galizzi J, Zapata R, Ridruejo E, de Souza FC, Hernández N, Pinchuk L, Multicenter Group for Study of Hepatocarcinoma in Latin America, Asociación Latinoamericana para el Estudio del Hígado (ALEH). Etiology of hepatocellular carcinoma in Latin America: a prospective, multicenter, international study. Ann Hepatol. 2010; 9(1): 63-9. | 2006-2008                       | *                    |
| Colombia | Colombia Vital Registration - Deaths 2007 ICD10 as it appears in World Health Organization (WHO). WHO Mortality Database Version February 2014. Geneva, Switzerland: World Health Organization (WHO), 2014.                                                                                                                                                                                                                     | 2007                            |                      |
| Colombia | World Health Organization (WHO). Yellow fever in Africa and South America, 2007. Wkly Epidemiol Rec. 2009; 84(13): 97-104.                                                                                                                                                                                                                                                                                                      | 2007                            |                      |
| Colombia | National Administrative Department of Statistics (Colombia). Colombia Vital Statistics - Deaths 2008. Bogotá, Colombia: National Administrative Department of Statistics (Colombia).                                                                                                                                                                                                                                            | 2008                            |                      |
| Colombia | Colombia Vital Registration - Deaths 2008 ICD10 as it appears in World Health Organization (WHO). WHO Mortality Database Version February 2014. Geneva, Switzerland: World Health Organization (WHO), 2014.                                                                                                                                                                                                                     | 2008                            |                      |
| Colombia | Alvarado-Mora MV, Gutierrez Fernandez MF, Gomes-Gouvêa MS, de Azevedo Neto RS, Carrilho FJ, Pinho JRR. Hepatitis B (HBV), Hepatitis C (HCV) and Hepatitis Delta (HDV) Viruses in the Colombian Population-How Is the Epidemiological Situation?. PLoS One. 2011; 6(4): e18888.                                                                                                                                                  | 2008-2009                       |                      |



**Web Table 32 - Comprehensive citation list**

| Country  | Citation                                                                                                                                                                                                                                                      | Year*                                            | New for GBD 2013 (*) |
|----------|---------------------------------------------------------------------------------------------------------------------------------------------------------------------------------------------------------------------------------------------------------------|--------------------------------------------------|----------------------|
| Colombia | Colombia Vital Registration - Deaths 2009 ICD10 as it appears in World Health Organization (WHO). WHO Mortality Database Version February 2014. Geneva, Switzerland: World Health Organization (WHO), 2014.                                                   | 2009                                             |                      |
| Colombia | Joint United Nations Program on HIV/AIDS (UNAIDS), Ministry of Social Protection (Colombia). Colombia UNGASS Report 2010. Geneva, Switzerland: Joint United Nations Program on HIV/AIDS (UNAIDS), 2010.                                                       | 2009                                             |                      |
| Colombia | ICF Macro, Profamilia. Colombia Demographic and Health Survey 2009-2010. Claverton, Maryland: ICF Macro, 2011.                                                                                                                                                | 2009-2010                                        |                      |
| Colombia | Colombia Vital Registration Death Data 2011 as it appears in United Nations Statistics Division (UNSD). United Nations Demographic Yearbook. New York City, United States: United Nations Statistics Division (UNSD).                                         | 2011                                             | *                    |
| Comoros  | Centre for Research on the Epidemiology of Disasters (CRED). EM-DAT: The OFDA/CRED International Disaster Database. Brussels, Belgium: Catholic University of Leuven.                                                                                         | 1951, 1977, 1983, 1985, 1987, 2005, 2009, 2012   |                      |
| Comoros  | Madagascar Statistical Service (SSG), National Institute of Statistics and Economic Studies (INSEE) (France), Office of Scientific and Technical Research Overseas (France). Comoros Population and Housing Census 1958.                                      | 1958                                             |                      |
| Comoros  | Central Office of the Census (Comoros). Comoros Population and Housing Census 1980.                                                                                                                                                                           | 1980                                             |                      |
| Comoros  | Institute for Health Metrics and Evaluation (IHME), Joint United Nations Program on HIV/AIDS (UNAIDS). Institute for Health Metrics and Evaluation HIV Mortality Estimates Based on the UNAIDS Spectrum Model Framework.                                      | 1980-2013                                        | *                    |
| Comoros  | United Nations Children's Fund (UNICEF), World Health Organization (WHO). WHO and UNICEF Reported Disease Incidence Time Series - Measles. Geneva, Switzerland: World Health Organization (WHO).                                                              | 1980-1999, 2002-2013                             |                      |
| Comoros  | Weatherall D. Sickle Cell and Thalassemias Prevalence Data, Personal Correspondence with David Weatherall. [Unpublished].                                                                                                                                     | 1990-2009                                        |                      |
| Comoros  | United Nations Children's Fund (UNICEF), World Health Organization (WHO). WHO and UNICEF Reported Disease Incidence Time Series - Pertussis. Geneva, Switzerland: World Health Organization (WHO).                                                            | 1990-1991, 1996-1999, 2002-2007, 2009-2010, 2013 |                      |
| Comoros  | Centre for Health Informatics and Multiprofessional Education, University College London. Modell's Haemoglobinopathologist's Almanac. London, United Kingdom: Centre for Health Informatics and Multiprofessional Education, University College London, 2008. | 1990-2003                                        |                      |
| Comoros  | Badens C, Martinez di Montemuros F, Thuret I, Michel G, Mattei JF, Cappellini MD, Lena-Russo D. Molecular basis of haemoglobinopathies and G6PD deficiency in the Comorian population. Hematol J. 2000; 1(4): 264-8.                                          | 1993-1995                                        |                      |
| Comoros  | World Health Organization Regional Office for Africa. HIV/AIDS Epidemiological Surveillance Update for the WHO African Region. World Health Organization Regional Office for Africa, 2003.                                                                    | 1994                                             |                      |
| Comoros  | Joint United Nations Program on HIV/AIDS (UNAIDS), United Nations Children's Fund (UNICEF), World Health Organization (WHO). Comoros Epidemiological Fact Sheet on HIV/AIDS and STIs 2004.                                                                    | 1994                                             |                      |
| Comoros  | Macro International, Inc, National Centre of Documentation and Scientific Research (Comoros). Comoros Demographic and Health Survey 1996. Calverton, United States: Macro International, Inc.                                                                 | 1996                                             |                      |
| Comoros  | Department of Peace and Conflict Research, Uppsala University. UCDP Battle-Related Deaths Database Version 5, 2013. Uppsala, Sweden: Department of Peace and Conflict Research, Uppsala University, 2013.                                                     | 1997                                             | *                    |
| Comoros  | World Health Organization (WHO). Yellow Fever Reported Cases, WHO Vaccine-Preventable Diseases: Monitoring System. Geneva, Switzerland: World Health Organization (WHO).                                                                                      | 1997, 1999, 2003-2009                            |                      |

**Web Table 32 - Comprehensive citation list**

| Country | Citation                                                                                                                                                                                                                                                      | Year*                                      | New for GBD 2013 (*) |
|---------|---------------------------------------------------------------------------------------------------------------------------------------------------------------------------------------------------------------------------------------------------------------|--------------------------------------------|----------------------|
| Comoros | Department of Peace and Conflict Research, Uppsala University. UCDP Nonstate Conflict Database Version 2.5, 2013. Uppsala, Sweden: Department of Peace and Conflict Research, Uppsala University, 2013.                                                       | 1998                                       | *                    |
| Comoros | United Nations Development Programme (UNDP), United Nations Children's Fund (UNICEF). Comoros Multiple Indicator Cluster Survey 2000. New York, United States: United Nations Children's Fund (UNICEF).                                                       | 2000                                       |                      |
| Comoros | World Health Organization (WHO). Retrospective Measles Data on Supplementary Immunization Activities. Geneva, Switzerland: World Health Organization (WHO).                                                                                                   | 2003, 2005-2007, 2010, 2013                |                      |
| Comoros | World Health Organization (WHO). Global Status Report on Road Safety 2009. Geneva, Switzerland: World Health Organization (WHO), 2009.                                                                                                                        | 2007                                       |                      |
| Comoros | General Directorate of Statistics and Forecasting (Comoros), ICF International. Comoros Demographic and Health Survey 2012-2013. Fairfax, United States: ICF International, 2014.                                                                             | 2012-2013                                  | *                    |
| Congo   | Centre for Research on the Epidemiology of Disasters (CRED). EM-DAT: The OFDA/CRED International Disaster Database. Brussels, Belgium: Catholic University of Leuven.                                                                                         | 1967, 1999, 2005-2006, 2012                |                      |
| Congo   | Congo, Rep. Population and Housing Census 1974 as it appears in United Nations Statistics Division (UNSD). United Nations Demographic Yearbook Special Census Topic, 2000 Round. New York City, United States: United Nations Statistics Division (UNSD).     | 1974                                       |                      |
| Congo   | Influence of measles vaccination on survival pattern of 7--35-month-old children in Kasongo, Zaire. The Kasongo Project Team. Lancet. 1981; 1(8223): 764-7.                                                                                                   | 1974-1978                                  |                      |
| Congo   | Institute for Health Metrics and Evaluation (IHME), Joint United Nations Program on HIV/AIDS (UNAIDS). Institute for Health Metrics and Evaluation HIV Mortality Estimates Based on the UNAIDS Spectrum Model Framework.                                      | 1980-2013                                  | *                    |
| Congo   | United Nations Children's Fund (UNICEF), World Health Organization (WHO). WHO and UNICEF Reported Disease Incidence Time Series - Pertussis. Geneva, Switzerland: World Health Organization (WHO).                                                            | 1980-1991, 1995-1997, 1999-2003, 2006-2013 |                      |
| Congo   | United Nations Children's Fund (UNICEF), World Health Organization (WHO). WHO and UNICEF Reported Disease Incidence Time Series - Measles. Geneva, Switzerland: World Health Organization (WHO).                                                              | 1980-2013                                  |                      |
| Congo   | Jäger H, Nseka K, Goussard B, Kabeya C-M, Rauhaus G, Peyerl G, Salaun J-J, Korte R. Voluntary blood donor recruitment: a strategy to reduce transmission of HIV-1, hepatitis-B and syphilis in Kinshasa, Zaire. Infusionstherapie. 1990; 17(4): 224-6.        | 1989                                       |                      |
| Congo   | Weatherall D. Sickle Cell and Thalassemias Prevalence Data, Personal Correspondence with David Weatherall. [Unpublished].                                                                                                                                     | 1990-2009                                  |                      |
| Congo   | Centre for Health Informatics and Multiprofessional Education, University College London. Modell's Haemoglobinopathologist's Almanac. London, United Kingdom: Centre for Health Informatics and Multiprofessional Education, University College London, 2008. | 1990-2003                                  |                      |
| Congo   | Department of Peace and Conflict Research, Uppsala University. UCDP One-Sided Violence Database Version 1.4, 2013. Uppsala, Sweden: Department of Peace and Conflict Research, Uppsala University, 2013.                                                      | 1993-2002                                  | *                    |
| Congo   | Department of Peace and Conflict Research, Uppsala University. UCDP Battle-Related Deaths Database Version 5, 2013. Uppsala, Sweden: Department of Peace and Conflict Research, Uppsala University, 2013.                                                     | 1993-2002                                  | *                    |
| Congo   | Pictet G, Le Coeur S, M'Pelé P, Brouard N, Lallemand M. Contribution of AIDS to the general mortality in Central Africa: evidence from a morgue-based study in Brazzaville, Congo. AIDS. 1998; 12(16): 2217-23.                                               | 1996                                       |                      |
| Congo   | World Health Organization (WHO). Yellow Fever Reported Cases, WHO Vaccine-Preventable Diseases: Monitoring System. Geneva, Switzerland: World Health Organization (WHO).                                                                                      | 1996-1997, 1999, 2001, 2003-2009           |                      |

**Web Table 32 - Comprehensive citation list**

| Country      | Citation                                                                                                                                                                                                                                                                                                   | Year*                 | New for GBD 2013 (*) |
|--------------|------------------------------------------------------------------------------------------------------------------------------------------------------------------------------------------------------------------------------------------------------------------------------------------------------------|-----------------------|----------------------|
| Congo        | World Health Organization (WHO). Retrospective Measles Data on Supplementary Immunization Activities. Geneva, Switzerland: World Health Organization (WHO).                                                                                                                                                | 2004, 2007, 2010-2013 |                      |
| Congo        | Macro International, Inc, National Center for Statistics and Economic Studies (Congo, Rep.). Congo, Rep. Demographic and Health Survey 2005. Calverton, United States: Macro International, Inc.                                                                                                           | 2005                  |                      |
| Congo        | Guerchet M, M'belesso P, Mouanga AM, Bandzouzi B, Tabo A, Houinato DS, Paraïso MN, Cowppli-Bony P, Nubukpo P, Aboyans V, Clément J-P, Dartigues J-F, Preux P-M. Prevalence of dementia in elderly living in two cities of Central Africa: the EDAC survey. Dement Geriatr Cogn Disord. 2010; 30(3): 261-8. | 2008-2009             |                      |
| Congo        | ICF Macro, National Center for Statistics and Economic Studies (Congo, Rep.). Congo, Rep. AIDS Indicator Survey 2009. ICF Macro.                                                                                                                                                                           | 2009                  |                      |
| Congo        | World Health Organization (WHO). Yellow fever, Republic of the Congo. Wkly Epidemiol Rec. 2009; 84(19): 161.                                                                                                                                                                                               | 2009                  |                      |
| Congo        | ICF International, Ministry of Health (Congo, Rep.), National Center for Statistics and Economic Studies (Congo, Rep.). Congo, Rep. Demographic and Health Survey 2011-2012. Fairfax, United States: ICF International, 2013.                                                                              | 2011-2012             | *                    |
| Cook Islands | United Nations Children's Fund (UNICEF), World Health Organization (WHO). WHO and UNICEF Reported Disease Incidence Time Series - Pertussis. Geneva, Switzerland: World Health Organization (WHO).                                                                                                         | 1980-2012             |                      |
| Cook Islands | United Nations Children's Fund (UNICEF), World Health Organization (WHO). WHO and UNICEF Reported Disease Incidence Time Series - Measles. Geneva, Switzerland: World Health Organization (WHO).                                                                                                           | 1980-2012             |                      |
| Cook Islands | World Health Organization (WHO). Retrospective Measles Data on Supplementary Immunization Activities. Geneva, Switzerland: World Health Organization (WHO).                                                                                                                                                | 2006-2007             |                      |
| Costa Rica   | Costa Rica Vital Registration Death Data 1950 as it appears in United Nations Statistics Division (UNSD). United Nations Demographic Yearbook. New York City, United States: United Nations Statistics Division (UNSD).                                                                                    | 1950                  |                      |
| Costa Rica   | Costa Rica Vital Registration Death Data 1952 as it appears in United Nations Statistics Division (UNSD). United Nations Demographic Yearbook. New York City, United States: United Nations Statistics Division (UNSD).                                                                                    | 1952                  |                      |
| Costa Rica   | Costa Rica Vital Registration Death Data 1953 as it appears in United Nations Statistics Division (UNSD). United Nations Demographic Yearbook. New York City, United States: United Nations Statistics Division (UNSD).                                                                                    | 1953                  |                      |
| Costa Rica   | Costa Rica Vital Registration Death Data 1954 as it appears in United Nations Statistics Division (UNSD). United Nations Demographic Yearbook. New York City, United States: United Nations Statistics Division (UNSD).                                                                                    | 1954                  |                      |
| Costa Rica   | Costa Rica Vital Registration Death Data 1955 as it appears in United Nations Statistics Division (UNSD). United Nations Demographic Yearbook. New York City, United States: United Nations Statistics Division (UNSD).                                                                                    | 1955                  |                      |
| Costa Rica   | Costa Rica Vital Registration - Deaths 1956 ICD7 as it appears in World Health Organization (WHO). WHO Mortality Database Version February 2014. Geneva, Switzerland: World Health Organization (WHO), 2014.                                                                                               | 1956                  |                      |
| Costa Rica   | Costa Rica Vital Registration - Deaths 1957 ICD7 as it appears in World Health Organization (WHO). WHO Mortality Database Version February 2014. Geneva, Switzerland: World Health Organization (WHO), 2014.                                                                                               | 1957                  |                      |

**Web Table 32 - Comprehensive citation list**

| Country    | Citation                                                                                                                                                                                                     | Year*                                                                                                      | New for GBD 2013 (*) |
|------------|--------------------------------------------------------------------------------------------------------------------------------------------------------------------------------------------------------------|------------------------------------------------------------------------------------------------------------|----------------------|
| Costa Rica | Costa Rica Vital Registration - Deaths 1958 ICD7 as it appears in World Health Organization (WHO). WHO Mortality Database Version February 2014. Geneva, Switzerland: World Health Organization (WHO), 2014. | 1958                                                                                                       |                      |
| Costa Rica | Costa Rica Vital Registration - Deaths 1959 ICD7 as it appears in World Health Organization (WHO). WHO Mortality Database Version February 2014. Geneva, Switzerland: World Health Organization (WHO), 2014. | 1959                                                                                                       |                      |
| Costa Rica | Costa Rica Vital Registration - Deaths 1960 ICD7 as it appears in World Health Organization (WHO). WHO Mortality Database Version February 2014. Geneva, Switzerland: World Health Organization (WHO), 2014. | 1960                                                                                                       |                      |
| Costa Rica | Costa Rica Vital Registration - Deaths 1961 ICD7 as it appears in World Health Organization (WHO). WHO Mortality Database Version February 2014. Geneva, Switzerland: World Health Organization (WHO), 2014. | 1961                                                                                                       |                      |
| Costa Rica | Costa Rica Vital Registration - Deaths 1962 ICD7 as it appears in World Health Organization (WHO). WHO Mortality Database Version February 2014. Geneva, Switzerland: World Health Organization (WHO), 2014. | 1962                                                                                                       |                      |
| Costa Rica | Costa Rica Vital Registration - Deaths 1963 ICD7 as it appears in World Health Organization (WHO). WHO Mortality Database Version February 2014. Geneva, Switzerland: World Health Organization (WHO), 2014. | 1963                                                                                                       |                      |
| Costa Rica | Centre for Research on the Epidemiology of Disasters (CRED). EM-DAT: The OFDA/CRED International Disaster Database. Brussels, Belgium: Catholic University of Leuven.                                        | 1963, 1968-1970, 1973, 1975, 1980, 1983, 1988, 1990-1991, 1993-1994, 1996, 1998-2000, 2002-2005, 2007-2012 |                      |
| Costa Rica | Costa Rica Vital Registration - Deaths 1964 ICD7 as it appears in World Health Organization (WHO). WHO Mortality Database Version February 2014. Geneva, Switzerland: World Health Organization (WHO), 2014. | 1964                                                                                                       |                      |
| Costa Rica | Costa Rica Vital Registration - Deaths 1965 ICD7 as it appears in World Health Organization (WHO). WHO Mortality Database Version February 2014. Geneva, Switzerland: World Health Organization (WHO), 2014. | 1965                                                                                                       |                      |
| Costa Rica | Costa Rica Vital Registration - Deaths 1966 ICD7 as it appears in World Health Organization (WHO). WHO Mortality Database Version February 2014. Geneva, Switzerland: World Health Organization (WHO), 2014. | 1966                                                                                                       |                      |
| Costa Rica | Costa Rica Vital Registration - Deaths 1967 ICD7 as it appears in World Health Organization (WHO). WHO Mortality Database Version February 2014. Geneva, Switzerland: World Health Organization (WHO), 2014. | 1967                                                                                                       |                      |
| Costa Rica | Costa Rica Vital Registration - Deaths 1968 ICD8 as it appears in World Health Organization (WHO). WHO Mortality Database Version February 2014. Geneva, Switzerland: World Health Organization (WHO), 2014. | 1968                                                                                                       |                      |
| Costa Rica | Costa Rica Vital Registration - Deaths 1969 ICD8 as it appears in World Health Organization (WHO). WHO Mortality Database Version February 2014. Geneva, Switzerland: World Health Organization (WHO), 2014. | 1969                                                                                                       |                      |

**Web Table 32 - Comprehensive citation list**

| Country    | Citation                                                                                                                                                                                                                                                                   | Year*     | New for GBD 2013 (*) |
|------------|----------------------------------------------------------------------------------------------------------------------------------------------------------------------------------------------------------------------------------------------------------------------------|-----------|----------------------|
| Costa Rica | Costa Rica Vital Registration - Deaths 1970 ICD8 as it appears in World Health Organization (WHO). WHO Mortality Database Version February 2014. Geneva, Switzerland: World Health Organization (WHO), 2014.                                                               | 1970      |                      |
| Costa Rica | United Nations Office on Drugs and Crime (UNODC). United Nations Surveys on Crime Trends and the Operations of Criminal Justice Systems 1970-2006 as provided by Kavi Bhalla. [Unpublished].                                                                               | 1970-1985 |                      |
| Costa Rica | Costa Rica Vital Registration - Deaths 1971 ICD8 as it appears in World Health Organization (WHO). WHO Mortality Database Version February 2014. Geneva, Switzerland: World Health Organization (WHO), 2014.                                                               | 1971      |                      |
| Costa Rica | Costa Rica Vital Registration - Deaths 1972 ICD8 as it appears in World Health Organization (WHO). WHO Mortality Database Version February 2014. Geneva, Switzerland: World Health Organization (WHO), 2014.                                                               | 1972      |                      |
| Costa Rica | Department of Statistics and Censuses (Costa Rica), Minnesota Population Center. Costa Rica National Population and Housing Census 1973 from the Integrated Public Use Microdata Series, International. [Machine-readable database]. Minneapolis: University of Minnesota. | 1973      |                      |
| Costa Rica | Costa Rica Vital Registration - Deaths 1973 ICD8 as it appears in World Health Organization (WHO). WHO Mortality Database Version February 2014. Geneva, Switzerland: World Health Organization (WHO), 2014.                                                               | 1973      |                      |
| Costa Rica | Costa Rica Vital Registration - Deaths 1974 ICD8 as it appears in World Health Organization (WHO). WHO Mortality Database Version February 2014. Geneva, Switzerland: World Health Organization (WHO), 2014.                                                               | 1974      |                      |
| Costa Rica | Costa Rica Vital Registration - Deaths 1975 ICD8 as it appears in World Health Organization (WHO). WHO Mortality Database Version February 2014. Geneva, Switzerland: World Health Organization (WHO), 2014.                                                               | 1975      |                      |
| Costa Rica | Department of Statistics and Censuses (Costa Rica), International Statistical Institute. Costa Rica World Fertility Survey 1976. Voorburg, Netherlands: International Statistical Institute.                                                                               | 1976      |                      |
| Costa Rica | Costa Rica Vital Registration - Deaths 1976 ICD8 as it appears in World Health Organization (WHO). WHO Mortality Database Version February 2014. Geneva, Switzerland: World Health Organization (WHO), 2014.                                                               | 1976      |                      |
| Costa Rica | Villarejos VM, Serra J, Anderson-Visona K, Mosley JW. Hepatitis A virus infection in households. Am J Epidemiol. 1982; 115(4): 577-86.                                                                                                                                     | 1976-1978 |                      |
| Costa Rica | Costa Rica Vital Registration - Deaths 1977 ICD8 as it appears in World Health Organization (WHO). WHO Mortality Database Version February 2014. Geneva, Switzerland: World Health Organization (WHO), 2014.                                                               | 1977      |                      |
| Costa Rica | Costa Rica Vital Registration - Deaths 1978 ICD8 as it appears in World Health Organization (WHO). WHO Mortality Database Version February 2014. Geneva, Switzerland: World Health Organization (WHO), 2014.                                                               | 1978      |                      |
| Costa Rica | Costa Rica Vital Registration - Deaths 1979 ICD8 as it appears in World Health Organization (WHO). WHO Mortality Database Version February 2014. Geneva, Switzerland: World Health Organization (WHO), 2014.                                                               | 1979      |                      |
| Costa Rica | Costa Rica Vital Registration - Deaths 1980 ICD9 as it appears in World Health Organization (WHO). WHO Mortality Database Version February 2014. Geneva, Switzerland: World Health Organization (WHO), 2014.                                                               | 1980      |                      |

**Web Table 32 - Comprehensive citation list**

| Country    | Citation                                                                                                                                                                                                                                                                                              | Year*                  | New for GBD 2013 (*) |
|------------|-------------------------------------------------------------------------------------------------------------------------------------------------------------------------------------------------------------------------------------------------------------------------------------------------------|------------------------|----------------------|
| Costa Rica | Ferlay J, Parkin DM, Curado MP, Bray F, Edwards B, Shin HR and Forman D. Cancer Incidence in Five Continents, Volumes I to IX: IARC CancerBase No. 9 [Internet]. Lyon, France: International Agency for Research on Cancer; 2010. Available from: <a href="http://ci5.iarc.fr">http://ci5.iarc.fr</a> | 1980-2002              |                      |
| Costa Rica | Institute for Health Metrics and Evaluation (IHME), Joint United Nations Program on HIV/AIDS (UNAIDS). Institute for Health Metrics and Evaluation HIV Mortality Estimates Based on the UNAIDS Spectrum Model Framework.                                                                              | 1980-2013              | *                    |
| Costa Rica | United Nations Children's Fund (UNICEF), World Health Organization (WHO). WHO and UNICEF Reported Disease Incidence Time Series - Pertussis. Geneva, Switzerland: World Health Organization (WHO).                                                                                                    | 1980-2013              |                      |
| Costa Rica | United Nations Children's Fund (UNICEF), World Health Organization (WHO). WHO and UNICEF Reported Disease Incidence Time Series - Measles. Geneva, Switzerland: World Health Organization (WHO).                                                                                                      | 1980-2005, 2007-2013   |                      |
| Costa Rica | Costa Rica Vital Registration - Deaths 1981 ICD9 as it appears in World Health Organization (WHO). WHO Mortality Database Version February 2014. Geneva, Switzerland: World Health Organization (WHO), 2014.                                                                                          | 1981                   |                      |
| Costa Rica | Costa Rican Demographic Association, Westinghouse Health Systems, Inc.. Costa Rica Contraceptive Prevalence Survey 1981.                                                                                                                                                                              | 1981                   |                      |
| Costa Rica | Parkin DM, International Agency for Research on Cancer, International Association of Cancer Registries. Cancer Incidence in Five Continents. Vol. I to VIII. Lyon, France, IARC Press, 2005.                                                                                                          | 1981, 1985, 1990, 1995 |                      |
| Costa Rica | Costa Rica Vital Registration - Deaths 1982 ICD9 as it appears in World Health Organization (WHO). WHO Mortality Database Version February 2014. Geneva, Switzerland: World Health Organization (WHO), 2014.                                                                                          | 1982                   |                      |
| Costa Rica | Costa Rica Vital Registration - Deaths 1983 ICD9 as it appears in World Health Organization (WHO). WHO Mortality Database Version February 2014. Geneva, Switzerland: World Health Organization (WHO), 2014.                                                                                          | 1983                   |                      |
| Costa Rica | Department of Statistics and Censuses (Costa Rica), Minnesota Population Center. Costa Rica National Population and Housing Census 1984 from the Integrated Public Use Microdata Series, International. [Machine-readable database]. Minneapolis: University of Minnesota.                            | 1984                   |                      |
| Costa Rica | Costa Rica Vital Registration - Deaths 1984 ICD9 as it appears in World Health Organization (WHO). WHO Mortality Database Version February 2014. Geneva, Switzerland: World Health Organization (WHO), 2014.                                                                                          | 1984                   |                      |
| Costa Rica | Costa Rica Vital Registration - Deaths 1985 ICD9 as it appears in World Health Organization (WHO). WHO Mortality Database Version February 2014. Geneva, Switzerland: World Health Organization (WHO), 2014.                                                                                          | 1985                   |                      |
| Costa Rica | Costa Rica Vital Registration - Deaths 1986 ICD9 as it appears in World Health Organization (WHO). WHO Mortality Database Version February 2014. Geneva, Switzerland: World Health Organization (WHO), 2014.                                                                                          | 1986                   |                      |
| Costa Rica | Costa Rican Demographic Association. Costa Rica Family Planning/Maternal and Child Health Survey 1986. San Jose, Costa Rica: Costa Rican Demographic Association, 1987.                                                                                                                               | 1986                   |                      |
| Costa Rica | Chaves M, Sáenz GF, Quintana E, Montero A, Jiménez J. Polymorphism of erythrocytic glucose-6-phosphate dehydrogenase in Costa Rica. Sangre (Barc). 1988; 33(1): 12-4.                                                                                                                                 | 1986-1988              |                      |
| Costa Rica | Costa Rica Vital Registration - Deaths 1987 ICD9 as it appears in World Health Organization (WHO). WHO Mortality Database Version February 2014. Geneva, Switzerland: World Health Organization (WHO), 2014.                                                                                          | 1987                   |                      |



**Web Table 32 - Comprehensive citation list**

| Country    | Citation                                                                                                                                                                                                                                                      | Year*                | New for GBD 2013 (*) |
|------------|---------------------------------------------------------------------------------------------------------------------------------------------------------------------------------------------------------------------------------------------------------------|----------------------|----------------------|
| Costa Rica | Costa Rica Vital Registration - Deaths 1988 ICD9 as it appears in World Health Organization (WHO). WHO Mortality Database Version February 2014. Geneva, Switzerland: World Health Organization (WHO), 2014.                                                  | 1988                 |                      |
| Costa Rica | Costa Rica Vital Registration - Deaths 1989 ICD9 as it appears in World Health Organization (WHO). WHO Mortality Database Version February 2014. Geneva, Switzerland: World Health Organization (WHO), 2014.                                                  | 1989                 |                      |
| Costa Rica | Costa Rica Vital Registration - Deaths 1990 ICD9 as it appears in World Health Organization (WHO). WHO Mortality Database Version February 2014. Geneva, Switzerland: World Health Organization (WHO), 2014.                                                  | 1990                 |                      |
| Costa Rica | Centre for Health Informatics and Multiprofessional Education, University College London. Modell's Haemoglobinopathologist's Almanac. London, United Kingdom: Centre for Health Informatics and Multiprofessional Education, University College London, 2008. | 1990-2003            |                      |
| Costa Rica | Costa Rica Vital Registration - Deaths 1991 ICD9 as it appears in World Health Organization (WHO). WHO Mortality Database Version February 2014. Geneva, Switzerland: World Health Organization (WHO), 2014.                                                  | 1991                 |                      |
| Costa Rica | Costa Rica Vital Registration - Deaths 1992 ICD9 as it appears in World Health Organization (WHO). WHO Mortality Database Version February 2014. Geneva, Switzerland: World Health Organization (WHO), 2014.                                                  | 1992                 |                      |
| Costa Rica | Costa Rica Social Security Institute and Division of Reproductive Health-Centers for Disease Control and Prevention (CDC). Costa Rica 1993 Reproductive Health Survey. Atlanta, United States: Centers for Disease Control and Prevention (CDC).              | 1992-1993            |                      |
| Costa Rica | Costa Rica Vital Registration - Deaths 1993 ICD9 as it appears in World Health Organization (WHO). WHO Mortality Database Version February 2014. Geneva, Switzerland: World Health Organization (WHO), 2014.                                                  | 1993                 |                      |
| Costa Rica | Measles Supplementary Immunization Activity Data as provided by the World Health Organization. [Unpublished].                                                                                                                                                 | 1993, 1997           |                      |
| Costa Rica | Costa Rica Vital Registration - Deaths 1994 ICD9 as it appears in World Health Organization (WHO). WHO Mortality Database Version February 2014. Geneva, Switzerland: World Health Organization (WHO), 2014.                                                  | 1994                 |                      |
| Costa Rica | Costa Rica Vital Registration - Deaths 1995 ICD9 as it appears in World Health Organization (WHO). WHO Mortality Database Version February 2014. Geneva, Switzerland: World Health Organization (WHO), 2014.                                                  | 1995                 |                      |
| Costa Rica | Costa Rica Vital Registration - Deaths 1996 ICD9 as it appears in World Health Organization (WHO). WHO Mortality Database Version February 2014. Geneva, Switzerland: World Health Organization (WHO), 2014.                                                  | 1996                 |                      |
| Costa Rica | Costa Rica Vital Registration - Deaths 1997 ICD10 as it appears in World Health Organization (WHO). WHO Mortality Database Version February 2014. Geneva, Switzerland: World Health Organization (WHO), 2014.                                                 | 1997                 |                      |
| Costa Rica | United Nations Office on Drugs and Crime (UNODC). United Nations Office on Drugs and Crime Global Study on Homicides 2011. Vienna, Austria: United Nations Office on Drugs and Crime (UNODC), 2011.                                                           | 1997-2010            |                      |
| Costa Rica | World Health Organization (WHO). Yellow Fever Reported Cases, WHO Vaccine-Preventable Diseases: Monitoring System. Geneva, Switzerland: World Health Organization (WHO).                                                                                      | 1997-2001, 2003-2009 |                      |

**Web Table 32 - Comprehensive citation list**

| Country    | Citation                                                                                                                                                                                                                                                                                     | Year*     | New for GBD 2013 (*) |
|------------|----------------------------------------------------------------------------------------------------------------------------------------------------------------------------------------------------------------------------------------------------------------------------------------------|-----------|----------------------|
| Costa Rica | Costa Rica Vital Registration - Deaths 1998 ICD10 as it appears in World Health Organization (WHO). WHO Mortality Database Version February 2014. Geneva, Switzerland: World Health Organization (WHO), 2014.                                                                                | 1998      |                      |
| Costa Rica | Costa Rica Vital Registration - Deaths 1999 ICD10 as it appears in World Health Organization (WHO). WHO Mortality Database Version February 2014. Geneva, Switzerland: World Health Organization (WHO), 2014.                                                                                | 1999      |                      |
| Costa Rica | National Institute of Statistics and Censuses (INEC) (Costa Rica), Minnesota Population Center. Costa Rica National Population and Housing Census 2000 from the Integrated Public Use Microdata Series, International. [Machine-readable database]. Minneapolis: University of Minnesota.    | 2000      |                      |
| Costa Rica | Costa Rica Vital Registration - Deaths 2000 ICD10 as it appears in World Health Organization (WHO). WHO Mortality Database Version February 2014. Geneva, Switzerland: World Health Organization (WHO), 2014.                                                                                | 2000      |                      |
| Costa Rica | Cerdas M. Chronic kidney disease in Costa Rica. <i>Kidney Int Suppl.</i> 2005; 97(Suppl): S31-3.                                                                                                                                                                                             | 2000      |                      |
| Costa Rica | Curado MP, Edwards B, Shin HR, Storm H, Ferlay J, Heanue M and Boyle P, eds (2007). <i>Cancer Incidence in Five Continents, Vol. IX Periodic Data</i> (electronic version). Lyon, IARC. <a href="http://ci5.iarc.fr">http://ci5.iarc.fr</a>                                                  | 2000      |                      |
| Costa Rica | Costa Rica Vital Registration - Deaths 2001 ICD10 as it appears in World Health Organization (WHO). WHO Mortality Database Version February 2014. Geneva, Switzerland: World Health Organization (WHO), 2014.                                                                                | 2001      |                      |
| Costa Rica | World Health Organization (WHO). <i>Retrospective Measles Data on Supplementary Immunization Activities</i> . Geneva, Switzerland: World Health Organization (WHO).                                                                                                                          | 2001-2002 |                      |
| Costa Rica | Costa Rica Vital Registration - Deaths 2002 ICD10 as it appears in World Health Organization (WHO). WHO Mortality Database Version February 2014. Geneva, Switzerland: World Health Organization (WHO), 2014.                                                                                | 2002      |                      |
| Costa Rica | Costa Rica Vital Registration - Deaths 2003 ICD10 as it appears in World Health Organization (WHO). WHO Mortality Database Version February 2014. Geneva, Switzerland: World Health Organization (WHO), 2014.                                                                                | 2003      |                      |
| Costa Rica | Costa Rica Vital Registration - Deaths 2004 ICD10 as it appears in World Health Organization (WHO). WHO Mortality Database Version February 2014. Geneva, Switzerland: World Health Organization (WHO), 2014.                                                                                | 2004      |                      |
| Costa Rica | Costa Rica Vital Registration - Deaths 2005 ICD10 as it appears in World Health Organization (WHO). WHO Mortality Database Version February 2014. Geneva, Switzerland: World Health Organization (WHO), 2014.                                                                                | 2005      |                      |
| Costa Rica | Forman D, Bray F, Brewster DH, Gombe Mbalawa C, Kohler B, Piñeros M, Steliarova-Foucher E, Swaminathan R and Ferlay J, eds (2013). <i>Cancer Incidence in Five Continents, Vol. X Summary Database</i> (electronic version). Lyon, IARC. <a href="http://ci5.iarc.fr">http://ci5.iarc.fr</a> | 2005      |                      |
| Costa Rica | Abarca G, Navarrete M, Trejos R, de Céspedes C, Saborío M. Abnormal haemoglobins in the newborn human population of Costa Rica. <i>Rev Biol Trop.</i> 2008; 56(3): 995-1001.                                                                                                                 | 2005-2006 | *                    |
| Costa Rica | Costa Rica Vital Registration - Deaths 2006 ICD10 as it appears in World Health Organization (WHO). WHO Mortality Database Version February 2014. Geneva, Switzerland: World Health Organization (WHO), 2014.                                                                                | 2006      |                      |



**Web Table 32 - Comprehensive citation list**

| Country       | Citation                                                                                                                                                                                                                                                                                                                                                                                                                               | Year*                                 | New for GBD 2013 (*) |
|---------------|----------------------------------------------------------------------------------------------------------------------------------------------------------------------------------------------------------------------------------------------------------------------------------------------------------------------------------------------------------------------------------------------------------------------------------------|---------------------------------------|----------------------|
| Costa Rica    | Fassio E, Díaz S, Santa C, Reig ME, Martínez Artola Y, Alves de Mattos A, Míguez C, Galizzi J, Zapata R, Ridruejo E, de Souza FC, Hernández N, Pinchuk L, Multicenter Group for Study of Hepatocarcinoma in Latin America, Asociación Latinoamericana para el Estudio del Hígado (ALEH). Etiology of hepatocellular carcinoma in Latin America: a prospective, multicenter, international study. <i>Ann Hepatol.</i> 2010; 9(1): 63-9. | 2006-2008                             | *                    |
| Costa Rica    | Costa Rica Vital Registration - Deaths 2007 ICD10 as it appears in World Health Organization (WHO). WHO Mortality Database Version February 2014. Geneva, Switzerland: World Health Organization (WHO), 2014.                                                                                                                                                                                                                          | 2007                                  |                      |
| Costa Rica    | Costa Rica Vital Registration - Deaths 2008 ICD10 as it appears in World Health Organization (WHO). WHO Mortality Database Version February 2014. Geneva, Switzerland: World Health Organization (WHO), 2014.                                                                                                                                                                                                                          | 2008                                  |                      |
| Costa Rica    | Costa Rica Vital Registration - Deaths 2009 ICD10 as it appears in World Health Organization (WHO). WHO Mortality Database Version February 2014. Geneva, Switzerland: World Health Organization (WHO), 2014.                                                                                                                                                                                                                          | 2009                                  |                      |
| Costa Rica    | Costa Rica Vital Registration - Deaths 2010 ICD10 as it appears in World Health Organization (WHO). WHO Mortality Database Version February 2014. Geneva, Switzerland: World Health Organization (WHO), 2014.                                                                                                                                                                                                                          | 2010                                  |                      |
| Costa Rica    | United Nations Statistics Division (UNSD). <i>UNSD Demographic Statistics - Deaths by Age, Sex, and Urban/Rural Residence.</i> New York City, United States: United Nations Statistics Division (UNSD).                                                                                                                                                                                                                                | 2011                                  | *                    |
| Costa Rica    | National Institute of Statistics and Censuses (Costa Rica). <i>Costa Rica Census 2011.</i>                                                                                                                                                                                                                                                                                                                                             | 2011                                  | *                    |
| Costa Rica    | Costa Rica Vital Registration - Deaths 2011 ICD10 as it appears in World Health Organization (WHO). WHO Mortality Database Version February 2014. Geneva, Switzerland: World Health Organization (WHO), 2014.                                                                                                                                                                                                                          | 2011                                  | *                    |
| Côte d'Ivoire | Department of Statistics (Côte d'Ivoire). <i>Côte d'Ivoire Demographic Survey 1978-1979.</i>                                                                                                                                                                                                                                                                                                                                           | 1978-1979                             |                      |
| Côte d'Ivoire | Department of Statistics (Côte d'Ivoire), International Statistical Institute. <i>Côte d'Ivoire World Fertility Survey 1980-1981.</i> International Statistical Institute.                                                                                                                                                                                                                                                             | 1980-1981                             |                      |
| Côte d'Ivoire | Institute for Health Metrics and Evaluation (IHME), Joint United Nations Program on HIV/AIDS (UNAIDS). Institute for Health Metrics and Evaluation <i>HIV Mortality Estimates Based on the UNAIDS Spectrum Model Framework.</i>                                                                                                                                                                                                        | 1980-2013                             | *                    |
| Côte d'Ivoire | United Nations Children's Fund (UNICEF), World Health Organization (WHO). WHO and UNICEF Reported Disease Incidence Time Series - Measles. Geneva, Switzerland: World Health Organization (WHO).                                                                                                                                                                                                                                       | 1980-1993, 1995-2013                  |                      |
| Côte d'Ivoire | Lhuillier M, Sarthou JL, Cordellier R, Gershy-Damet GM, MONTENY N, Bouchite B, Calen P. Rural epidemic of yellow fever with interhuman transmission in the Ivory Coast in 1982. <i>Bull World Health Organ.</i> 1985; 63(3): 527-36.                                                                                                                                                                                                   | 1982                                  |                      |
| Côte d'Ivoire | WHO Department of Communicable Disease Surveillance and Response. WHO Report on Global Surveillance of Epidemic-prone Infectious Diseases 2000.                                                                                                                                                                                                                                                                                        | 1982, 1997                            |                      |
| Côte d'Ivoire | United Nations Children's Fund (UNICEF), World Health Organization (WHO). WHO and UNICEF Reported Disease Incidence Time Series - Pertussis. Geneva, Switzerland: World Health Organization (WHO).                                                                                                                                                                                                                                     | 1986-1990, 1992, 1995-1997, 2001-2003 |                      |
| Côte d'Ivoire | Messou E, Sangaré SV, Josseran R, Le Corre C, Guélain J. Effet de l'observance des d'approvisionnement en eau et de la therapie par voie orale sur les diarrhees chez les enfants de moins de 5 de la Cote d'Ivoire. <i>Bull Soc Pathol Exot.</i> 1997; 90(1): 44-7.                                                                                                                                                                   | 1988-1992                             |                      |

**Web Table 32 - Comprehensive citation list**

| Country       | Citation                                                                                                                                                                                                                                                                                      | Year*                      | New for GBD 2013 (*) |
|---------------|-----------------------------------------------------------------------------------------------------------------------------------------------------------------------------------------------------------------------------------------------------------------------------------------------|----------------------------|----------------------|
| Côte d'Ivoire | Weatherall D. Sickle Cell and Thalassemias Prevalence Data, Personal Correspondence with David Weatherall. [Unpublished].                                                                                                                                                                     | 1990-2009                  |                      |
| Côte d'Ivoire | Centre for Health Informatics and Multiprofessional Education, University College London. Modell's Haemoglobinopathologist's Almanac. London, United Kingdom: Centre for Health Informatics and Multiprofessional Education, University College London, 2008.                                 | 1990-2003                  |                      |
| Côte d'Ivoire | Department of Peace and Conflict Research, Uppsala University. UCDP One-Sided Violence Database Version 1.4, 2013. Uppsala, Sweden: Department of Peace and Conflict Research, Uppsala University, 2013.                                                                                      | 1993-2011                  | *                    |
| Côte d'Ivoire | Macro International, Inc, National Institute of Statistics (Côte d'Ivoire). Côte d'Ivoire Demographic and Health Survey 1994. Calverton, United States: Macro International, Inc.                                                                                                             | 1994                       |                      |
| Côte d'Ivoire | Department of Peace and Conflict Research, Uppsala University. UCDP Nonstate Conflict Database Version 2.5, 2013. Uppsala, Sweden: Department of Peace and Conflict Research, Uppsala University, 2013.                                                                                       | 1995-2011                  | *                    |
| Côte d'Ivoire | Echimane AK, Ahnou AA, Adoubi I, Hien S, M'Bra K, D'Horpock A, Diomande M, Anongba D, Mensah-Adoh I, Parkin DM. Cancer Incidence in Abidjan, Ivory Coast 1995-1997. <i>Cancer</i> . 2000; 89(3): 653-63.                                                                                      | 1996                       |                      |
| Côte d'Ivoire | Centre for Research on the Epidemiology of Disasters (CRED). EM-DAT: The OFDA/CRED International Disaster Database. Brussels, Belgium: Catholic University of Leuven.                                                                                                                         | 1996, 2008-2010            |                      |
| Côte d'Ivoire | World Health Organization (WHO). Yellow Fever Reported Cases, WHO Vaccine-Preventable Diseases: Monitoring System. Geneva, Switzerland: World Health Organization (WHO).                                                                                                                      | 1996, 1998-1999, 2001-2009 |                      |
| Côte d'Ivoire | Joint United Nations Program on HIV/AIDS (UNAIDS), World Health Organization (WHO). Cote D'Ivoire Epidemiological Fact Sheet on HIV/AIDS and STIs 2000.                                                                                                                                       | 1997                       |                      |
| Côte d'Ivoire | World Health Organization (WHO). The Global Elimination of Congenital Syphilis: Rationale and Strategy for Action. Geneva, Switzerland: World Health Organization (WHO), 2007.                                                                                                                | 1997-2003                  |                      |
| Côte d'Ivoire | World Health Organization Regional Office for Africa. HIV/AIDS Epidemiological Surveillance Update for the WHO African Region. World Health Organization Regional Office for Africa, 2003.                                                                                                    | 1997, 2000-2002            |                      |
| Côte d'Ivoire | National Institute of Statistics (Côte d'Ivoire). Côte d'Ivoire General Population and Housing Census 1998. [Unpublished].                                                                                                                                                                    | 1998                       |                      |
| Côte d'Ivoire | Macro International, Inc, National Institute of Statistics (Côte d'Ivoire). Côte d'Ivoire Demographic and Health Survey 1998-1999. Calverton, United States: Macro International, Inc.                                                                                                        | 1998-1999                  |                      |
| Côte d'Ivoire | Coulibaly FH, Koffi G, Touré HA, Bouanga JC, Allangba O, Tolo A, Sawadogo D, Sanogo I, Konaté S, Préhu C, Sangaré A, Galacteros F. Molecular genetics of glucose-6-phosphate dehydrogenase deficiency in a population of newborns from Ivory Coast. <i>Clin Biochem</i> . 2000; 33(5): 411-3. | 1998-2000                  |                      |
| Côte d'Ivoire | Filippi V, Ronsmans C, Gohou V, Goufodji S, Lardi M, Sahel A, Saizonou J, De Brouwere V. Maternity wards or emergency obstetric rooms? Incidence of near-miss events in African hospitals. <i>Acta Obstet Gynecol Scand</i> . 2005; 84(1): 11-6.                                              | 1999-2001                  |                      |
| Côte d'Ivoire | Mutebi J-P, Barrett ADT. The epidemiology of yellow fever in Africa. <i>Microbes Infect</i> . 2002; 4(14): 1459-68.                                                                                                                                                                           | 2001                       |                      |
| Côte d'Ivoire | Department of Peace and Conflict Research, Uppsala University. UCDP Battle-Related Deaths Database Version 5, 2013. Uppsala, Sweden: Department of Peace and Conflict Research, Uppsala University, 2013.                                                                                     | 2002-2011                  | *                    |
| Côte d'Ivoire | World Health Organization (WHO). Retrospective Measles Data on Supplementary Immunization Activities. Geneva, Switzerland: World Health Organization (WHO).                                                                                                                                   | 2003, 2005, 2008, 2011     |                      |

**Web Table 32 - Comprehensive citation list**

| Country       | Citation                                                                                                                                                                                                                        | Year*      | New for GBD 2013 (*) |
|---------------|---------------------------------------------------------------------------------------------------------------------------------------------------------------------------------------------------------------------------------|------------|----------------------|
| Côte d'Ivoire | CDC Retro-CI, Ministry of the Fight Against AIDS (Côte d'Ivoire), National Institute of Statistics (Côte d'Ivoire), ORC Macro. Côte d'Ivoire AIDS Indicator Survey 2005. Calverton, United States: ORC Macro.                   | 2005       |                      |
| Côte d'Ivoire | World Health Organization (WHO). Yellow fever in Africa and South America, 2006. Wkly Epidemiol Rec. 2008; 83(8): 60-76.                                                                                                        | 2006       |                      |
| Côte d'Ivoire | World Health Organization (WHO). Yellow fever, Côte d'Ivoire. Wkly Epidemiol Rec. 2006; 81(43): 410.                                                                                                                            | 2006       |                      |
| Côte d'Ivoire | United Nations Office on Drugs and Crime (UNODC). United Nations Office on Drugs and Crime Global Study on Homicides 2011. Vienna, Austria: United Nations Office on Drugs and Crime (UNODC), 2011.                             | 2007       |                      |
| Côte d'Ivoire | Joint United Nations Program on HIV/AIDS (UNAIDS), Ministry of the Fight Against AIDS (Côte d'Ivoire). Côte d'Ivoire National Report UNGASS 2010. Geneva, Switzerland: Joint United Nations Program on HIV/AIDS (UNAIDS), 2010. | 2009       |                      |
| Côte d'Ivoire | ICF International, Ministry of the Fight Against AIDS (Côte d'Ivoire), National Institute of Statistics (Côte d'Ivoire). Côte d'Ivoire Demographic and Health Survey 2011-2012. Fairfax, United States: ICF International, 2013 | 2011-2012  | *                    |
| Croatia       | Fraser GR, Defaranas B, Kattamis CA, Race RR, Sanger R, Stamatoyannopoulos G. Glucose-6-phosphate dehydrogenase, colour vision and XG blood groups in Greece: linkage and population data. Ann Hum Genet. 1964; 395-403.        | 1962       |                      |
| Croatia       | Burek V, Baće A, Kacić M, Belosević D, Mravunac B. Prevalence of antibodies to hepatitis A virus among urban children aged 0-7 years in Yugoslavia. J Infect. 1985; 10(1): 71-5.                                                | 1979       |                      |
| Croatia       | Institute for Health Metrics and Evaluation (IHME), Joint United Nations Program on HIV/AIDS (UNAIDS). Institute for Health Metrics and Evaluation HIV Mortality Estimates Based on the UNAIDS Spectrum Model Framework.        | 1980-2013  | *                    |
| Croatia       | Yugoslavia - Croatia Vital Registration - Deaths 1985 ICD9 as it appears in World Health Organization (WHO). WHO Mortality Database Version February 2014. Geneva, Switzerland: World Health Organization (WHO), 2014.          | 1985       |                      |
| Croatia       | Yugoslavia - Croatia Vital Registration - Deaths 1986 ICD9 as it appears in World Health Organization (WHO). WHO Mortality Database Version February 2014. Geneva, Switzerland: World Health Organization (WHO), 2014.          | 1986       |                      |
| Croatia       | Yugoslavia - Croatia Vital Registration - Deaths 1987 ICD9 as it appears in World Health Organization (WHO). WHO Mortality Database Version February 2014. Geneva, Switzerland: World Health Organization (WHO), 2014.          | 1987       |                      |
| Croatia       | Yugoslavia - Croatia Vital Registration - Deaths 1988 ICD9 as it appears in World Health Organization (WHO). WHO Mortality Database Version February 2014. Geneva, Switzerland: World Health Organization (WHO), 2014.          | 1988       |                      |
| Croatia       | Yugoslavia - Croatia Vital Registration - Deaths 1989 ICD9 as it appears in World Health Organization (WHO). WHO Mortality Database Version February 2014. Geneva, Switzerland: World Health Organization (WHO), 2014.          | 1989       |                      |
| Croatia       | Puntarić D, Vodopija I, Baklaić Z, Ljubicić M. [Immunity against hepatitis A in younger age groups and the basis for an immunization program]. Lijec Vjesn. 1995; 117(7-8): 167-72.                                             | 1989       |                      |
| Croatia       | Institute for Health Metrics and Evaluation. Institute for Health Metrics and Evaluation Cancer Registry Database. [Unpublished].                                                                                               | 1989-2005  |                      |
| Croatia       | Parkin DM, International Agency for Research on Cancer, International Association of Cancer Registries. Cancer Incidence in Five Continents. Vol. I to VIII. Lyon, France, IARC Press, 2005.                                    | 1989, 1995 |                      |

**Web Table 32 - Comprehensive citation list**

| Country | Citation                                                                                                                                                                                                                                                      | Year*      | New for GBD 2013 (*) |
|---------|---------------------------------------------------------------------------------------------------------------------------------------------------------------------------------------------------------------------------------------------------------------|------------|----------------------|
| Croatia | Kaic B, Borcic B, Ljubicic M, Brkic I, Mihaljevic I. Hepatitis A control in a refugee camp by active immunization. <i>Vaccine</i> . 2001; 19(27): 3615-9.                                                                                                     | 1989, 1999 |                      |
| Croatia | Yugoslavia - Croatia Vital Registration - Deaths 1990 ICD9 as it appears in World Health Organization (WHO). WHO Mortality Database Version February 2014. Geneva, Switzerland: World Health Organization (WHO), 2014.                                        | 1990       |                      |
| Croatia | Lepur D, Barsic B. Community-acquired bacterial meningitis in adults: antibiotic timing in disease course and outcome. <i>Infection</i> . 2007; 35(4): 225-31.                                                                                                | 1990-2004  |                      |
| Croatia | Jelic O, Jelic D, Balen I, Jelic A, Jelic N, Mihaljevic I. Prevalence of markers of hepatitis B virus infection among the general population of the municipality of Slavonski Brod. <i>Acta Med Croatica</i> . 1993; 48(3): 111-6.                            | 1990-1991  |                      |
| Croatia | United Nations Children's Fund (UNICEF), World Health Organization (WHO). WHO and UNICEF Reported Disease Incidence Time Series - Pertussis. Geneva, Switzerland: World Health Organization (WHO).                                                            | 1990-2013  |                      |
| Croatia | United Nations Children's Fund (UNICEF), World Health Organization (WHO). WHO and UNICEF Reported Disease Incidence Time Series - Measles. Geneva, Switzerland: World Health Organization (WHO).                                                              | 1990-2013  |                      |
| Croatia | Centre for Health Informatics and Multiprofessional Education, University College London. Modell's Haemoglobinopathologist's Almanac. London, United Kingdom: Centre for Health Informatics and Multiprofessional Education, University College London, 2008. | 1990-2003  |                      |
| Croatia | Croatia Vital Registration - Deaths 1991 ICD9 as it appears in World Health Organization (WHO). WHO Mortality Database Version February 2014. Geneva, Switzerland: World Health Organization (WHO), 2014.                                                     | 1991       |                      |
| Croatia | Croatia Vital Registration - Deaths 1992 ICD9 as it appears in World Health Organization (WHO). WHO Mortality Database Version February 2014. Geneva, Switzerland: World Health Organization (WHO), 2014.                                                     | 1992       |                      |
| Croatia | Department of Peace and Conflict Research, Uppsala University. UCDP Battle-Related Deaths Database Version 5, 2013. Uppsala, Sweden: Department of Peace and Conflict Research, Uppsala University, 2013.                                                     | 1992-1995  | *                    |
| Croatia | Croatia Vital Registration - Deaths 1993 ICD9 as it appears in World Health Organization (WHO). WHO Mortality Database Version February 2014. Geneva, Switzerland: World Health Organization (WHO), 2014.                                                     | 1993       |                      |
| Croatia | Department of Peace and Conflict Research, Uppsala University. UCDP One-Sided Violence Database Version 1.4, 2013. Uppsala, Sweden: Department of Peace and Conflict Research, Uppsala University, 2013.                                                      | 1993-1995  | *                    |
| Croatia | Croatia Vital Registration - Deaths 1994 ICD9 as it appears in World Health Organization (WHO). WHO Mortality Database Version February 2014. Geneva, Switzerland: World Health Organization (WHO), 2014.                                                     | 1994       |                      |
| Croatia | Croatia Vital Registration - Deaths 1995 ICD10 as it appears in World Health Organization (WHO). WHO Mortality Database Version February 2014. Geneva, Switzerland: World Health Organization (WHO), 2014.                                                    | 1995       |                      |
| Croatia | Croatia Vital Registration - Deaths 1996 ICD10 as it appears in World Health Organization (WHO). WHO Mortality Database Version February 2014. Geneva, Switzerland: World Health Organization (WHO), 2014.                                                    | 1996       |                      |
| Croatia | Croatia Vital Registration - Deaths 1997 ICD10 as it appears in World Health Organization (WHO). WHO Mortality Database Version February 2014. Geneva, Switzerland: World Health Organization (WHO), 2014.                                                    | 1997       |                      |

**Web Table 32 - Comprehensive citation list**

| Country | Citation                                                                                                                                                                                                                                                                              | Year*            | New for GBD 2013 (*) |
|---------|---------------------------------------------------------------------------------------------------------------------------------------------------------------------------------------------------------------------------------------------------------------------------------------|------------------|----------------------|
| Croatia | Croatia Vital Registration - Deaths 1998 ICD10 as it appears in World Health Organization (WHO). WHO Mortality Database Version February 2014. Geneva, Switzerland: World Health Organization (WHO), 2014.                                                                            | 1998             |                      |
| Croatia | Croatia Vital Registration - Deaths 1999 ICD10 as it appears in World Health Organization (WHO). WHO Mortality Database Version February 2014. Geneva, Switzerland: World Health Organization (WHO), 2014.                                                                            | 1999             |                      |
| Croatia | World Health Organization (WHO). Yellow Fever Reported Cases, WHO Vaccine-Preventable Diseases: Monitoring System. Geneva, Switzerland: World Health Organization (WHO).                                                                                                              | 1999-2009        |                      |
| Croatia | Krzelj V, Zlodre S, Terzic J, Mestrovic M, Jaksic J, Pavlov N. Prevalence of G-6-PD deficiency in the Croatian Adriatic Coast population. Arch Med Res. 2001; 32(5): 454-7.                                                                                                           | 1999-2001        |                      |
| Croatia | Croatia Vital Registration - Deaths 2000 ICD10 as it appears in World Health Organization (WHO). WHO Mortality Database Version February 2014. Geneva, Switzerland: World Health Organization (WHO), 2014.                                                                            | 2000             |                      |
| Croatia | Curado MP, Edwards B, Shin HR, Storm H, Ferlay J, Heanue M and Boyle P, eds (2007). Cancer Incidence in Five Continents, Vol. IX Periodic Data (electronic version). Lyon, IARC. <a href="http://ci5.iarc.fr">http://ci5.iarc.fr</a>                                                  | 2000             |                      |
| Croatia | World Health Organization (WHO). Croatia WHO Leishmaniasis Country Profile.                                                                                                                                                                                                           | 2000-2009        | *                    |
| Croatia | Centre for Research on the Epidemiology of Disasters (CRED). EM-DAT: The OFDA/CRED International Disaster Database. Brussels, Belgium: Catholic University of Leuven.                                                                                                                 | 2000, 2005, 2007 |                      |
| Croatia | Croatia Vital Registration - Deaths 2001 ICD10 as it appears in World Health Organization (WHO). WHO Mortality Database Version February 2014. Geneva, Switzerland: World Health Organization (WHO), 2014.                                                                            | 2001             |                      |
| Croatia | Croatia Vital Registration - Deaths 2002 ICD10 as it appears in World Health Organization (WHO). WHO Mortality Database Version February 2014. Geneva, Switzerland: World Health Organization (WHO), 2014.                                                                            | 2002             |                      |
| Croatia | Markić J, Krzelj V, Markotić A, Marusić E, Stricević L, Zanchi J, Bosnjak N, Sapunar A. High incidence of glucose-6-phosphate dehydrogenase deficiency in Croatian island isolate: example from Vis island, Croatia. <i>Croat Med J</i> . 2006; 47(4): 556-70.                        | 2002-2003        |                      |
| Croatia | Croatia Vital Registration - Deaths 2003 ICD10 as it appears in World Health Organization (WHO). WHO Mortality Database Version February 2014. Geneva, Switzerland: World Health Organization (WHO), 2014.                                                                            | 2003             |                      |
| Croatia | Croatia Vital Registration - Deaths 2004 ICD10 as it appears in World Health Organization (WHO). WHO Mortality Database Version February 2014. Geneva, Switzerland: World Health Organization (WHO), 2014.                                                                            | 2004             |                      |
| Croatia | Croatia Vital Registration - Deaths 2005 ICD10 as it appears in World Health Organization (WHO). WHO Mortality Database Version February 2014. Geneva, Switzerland: World Health Organization (WHO), 2014.                                                                            | 2005             |                      |
| Croatia | Forman D, Bray F, Brewster DH, Gombe Mbalawa C, Kohler B, Piñeros M, Steliarova-Foucher E, Swaminathan R and Ferlay J, eds (2013). Cancer Incidence in Five Continents, Vol. X Summary Database (electronic version). Lyon, IARC. <a href="http://ci5.iarc.fr">http://ci5.iarc.fr</a> | 2005             |                      |
| Croatia | Croatia Vital Registration - Deaths 2006 ICD10 as it appears in World Health Organization (WHO). WHO Mortality Database Version February 2014. Geneva, Switzerland: World Health Organization (WHO), 2014.                                                                            | 2006             |                      |

**Web Table 32 - Comprehensive citation list**

| Country | Citation                                                                                                                                                                                                                                                                                         | Year*     | New for GBD 2013 (*) |
|---------|--------------------------------------------------------------------------------------------------------------------------------------------------------------------------------------------------------------------------------------------------------------------------------------------------|-----------|----------------------|
| Croatia | Croatia Vital Registration - Deaths 2007 ICD10 as it appears in World Health Organization (WHO). WHO Mortality Database Version February 2014. Geneva, Switzerland: World Health Organization (WHO), 2014.                                                                                       | 2007      |                      |
| Croatia | World Health Organization (WHO). Global Status Report on Road Safety 2009. Geneva, Switzerland: World Health Organization (WHO), 2009.                                                                                                                                                           | 2007      |                      |
| Croatia | Croatia Vital Registration - Deaths 2008 ICD10 as it appears in World Health Organization (WHO). WHO Mortality Database Version February 2014. Geneva, Switzerland: World Health Organization (WHO), 2014.                                                                                       | 2008      |                      |
| Croatia | EUVAC-NET. EUVAC-NET Pertussis Surveillance Report 2008. Stockholm, Sweden: European Centre for Disease Prevention and Control, 2009.                                                                                                                                                            | 2008      |                      |
| Croatia | Croatia Vital Registration - Deaths 2009 ICD10 as it appears in World Health Organization (WHO). WHO Mortality Database Version February 2014. Geneva, Switzerland: World Health Organization (WHO), 2014.                                                                                       | 2009      |                      |
| Croatia | WHO Regional Office for Europe (EURO-WHO). European Hospital Morbidity Database. Copenhagen, Denmark: WHO Regional Office for Europe (EURO-WHO).                                                                                                                                                 | 2010      | *                    |
| Croatia | Croatia Vital Registration - Deaths 2010 ICD10 as it appears in World Health Organization (WHO). WHO Mortality Database Version February 2014. Geneva, Switzerland: World Health Organization (WHO), 2014.                                                                                       | 2010      |                      |
| Croatia | European Renal Association-European Dialysis and Transplant Association (ERA-EDTA). European Renal Association-European Dialysis and Transplant Association Registry Annual Report 2010. Parma, Italy: European Renal Association-European Dialysis and Transplant Association (ERA-EDTA), 2012. | 2010      | *                    |
| Croatia | EUVAC-NET. EUVAC-NET Measles Surveillance Report 2010. Stockholm, Sweden: European Centre for Disease Prevention and Control, 2011.                                                                                                                                                              | 2010      |                      |
| Croatia | Croatia Vital Registration - Deaths 2011 ICD10 as it appears in World Health Organization (WHO). WHO Mortality Database Version February 2014. Geneva, Switzerland: World Health Organization (WHO), 2014.                                                                                       | 2011      | *                    |
| Croatia | European Renal Association-European Dialysis and Transplant Association (ERA-EDTA). European Renal Association-European Dialysis and Transplant Association Registry Annual Report 2011. Parma, Italy: European Renal Association-European Dialysis and Transplant Association (ERA-EDTA), 2013. | 2011      | *                    |
| Croatia | Croatia Vital Registration - Deaths 2012 ICD10 as it appears in World Health Organization (WHO). WHO Mortality Database Version February 2014. Geneva, Switzerland: World Health Organization (WHO), 2014.                                                                                       | 2012      | *                    |
| Cuba    | Peace Research Institute Oslo (PRIO). Battle Deaths Dataset Version 3, 2009. Oslo, Norway: Peace Research Institute Oslo (PRIO), 2009.                                                                                                                                                           | 1953-1961 |                      |
| Cuba    | Cuba Vital Registration - Deaths 1959 ICD7 as it appears in World Health Organization (WHO). WHO Mortality Database Version February 2014. Geneva, Switzerland: World Health Organization (WHO), 2014.                                                                                           | 1959      |                      |
| Cuba    | Cuba Vital Registration Death Data 1960 as it appears in United Nations Statistics Division (UNSD). United Nations Demographic Yearbook. New York City, United States: United Nations Statistics Division (UNSD).                                                                                | 1960      |                      |



**Web Table 32 - Comprehensive citation list**

| Country | Citation                                                                                                                                                                                                                                                    | Year*                                                                                                 | New for GBD 2013 (*) |
|---------|-------------------------------------------------------------------------------------------------------------------------------------------------------------------------------------------------------------------------------------------------------------|-------------------------------------------------------------------------------------------------------|----------------------|
| Cuba    | Cuba Vital Registration Death Data 1961 as it appears in United Nations Statistics Division (UNSD). United Nations Demographic Yearbook. New York City, United States: United Nations Statistics Division (UNSD).                                           | 1961                                                                                                  |                      |
| Cuba    | Cuba Vital Registration Death Data 1962 as it appears in United Nations Statistics Division (UNSD). United Nations Demographic Yearbook. New York City, United States: United Nations Statistics Division (UNSD).                                           | 1962                                                                                                  |                      |
| Cuba    | Cuba Vital Registration Death Data 1963 as it appears in United Nations Statistics Division (UNSD). United Nations Demographic Yearbook. New York City, United States: United Nations Statistics Division (UNSD).                                           | 1963                                                                                                  |                      |
| Cuba    | Centre for Research on the Epidemiology of Disasters (CRED). EM-DAT: The OFDA/CRED International Disaster Database. Brussels, Belgium: Catholic University of Leuven.                                                                                       | 1963, 1966, 1970, 1976-1978, 1980, 1982-1983, 1985, 1988, 1990, 1993-1996, 1998-2002, 2004-2008, 2012 |                      |
| Cuba    | Cuba Vital Registration - Deaths 1964 ICD7 as it appears in World Health Organization (WHO). WHO Mortality Database Version February 2014. Geneva, Switzerland: World Health Organization (WHO), 2014.                                                      | 1964                                                                                                  |                      |
| Cuba    | Cuba Vital Registration - Deaths 1965 ICD7 as it appears in World Health Organization (WHO). WHO Mortality Database Version February 2014. Geneva, Switzerland: World Health Organization (WHO), 2014.                                                      | 1965                                                                                                  |                      |
| Cuba    | Catholic University of Leuven, Organization for Economic Co-operation and Development (OECD), United Nations Population Division. Mortality in Developing Countries: Tome I Data Bank. Organization for Economic Co-operation and Development (OECD), 1980. | 1966-1967                                                                                             |                      |
| Cuba    | Cuba Vital Registration - Deaths 1968 ICD8 as it appears in World Health Organization (WHO). WHO Mortality Database Version February 2014. Geneva, Switzerland: World Health Organization (WHO), 2014.                                                      | 1968                                                                                                  |                      |
| Cuba    | Cuba Vital Registration - Deaths 1969 ICD8 as it appears in World Health Organization (WHO). WHO Mortality Database Version February 2014. Geneva, Switzerland: World Health Organization (WHO), 2014.                                                      | 1969                                                                                                  |                      |
| Cuba    | Cuba Vital Registration - Deaths 1970 ICD8 as it appears in World Health Organization (WHO). WHO Mortality Database Version February 2014. Geneva, Switzerland: World Health Organization (WHO), 2014.                                                      | 1970                                                                                                  |                      |
| Cuba    | United Nations Office on Drugs and Crime (UNODC). United Nations Surveys on Crime Trends and the Operations of Criminal Justice Systems 1970-2006 as provided by Kavi Bhalla. [Unpublished].                                                                | 1970-1973                                                                                             |                      |
| Cuba    | Cuba Vital Registration - Deaths 1971 ICD8 as it appears in World Health Organization (WHO). WHO Mortality Database Version February 2014. Geneva, Switzerland: World Health Organization (WHO), 2014.                                                      | 1971                                                                                                  |                      |
| Cuba    | Cuba Vital Registration - Deaths 1972 ICD8 as it appears in World Health Organization (WHO). WHO Mortality Database Version February 2014. Geneva, Switzerland: World Health Organization (WHO), 2014.                                                      | 1972                                                                                                  |                      |
| Cuba    | Cuba Vital Registration - Deaths 1973 ICD8 as it appears in World Health Organization (WHO). WHO Mortality Database Version February 2014. Geneva, Switzerland: World Health Organization (WHO), 2014.                                                      | 1973                                                                                                  |                      |

**Web Table 32 - Comprehensive citation list**

| Country | Citation                                                                                                                                                                                                                              | Year*      | New for GBD 2013 (*) |
|---------|---------------------------------------------------------------------------------------------------------------------------------------------------------------------------------------------------------------------------------------|------------|----------------------|
| Cuba    | González R, Estrada M, Colombo B. G-6-PD polymorphism and racial admixture in the Cuban population. <i>Humangenetik</i> . 1975; 26(1): 75-8.                                                                                          | 1973-1977  |                      |
| Cuba    | State Statistics Committee (Cuba). Cuba Income and Expenditure Survey 1974.                                                                                                                                                           | 1974       |                      |
| Cuba    | Cuba Vital Registration - Deaths 1974 ICD8 as it appears in World Health Organization (WHO). WHO Mortality Database Version February 2014. Geneva, Switzerland: World Health Organization (WHO), 2014.                                | 1974       |                      |
| Cuba    | González R, Ballester JM, Estrada M, Lima F, Martínez G, Wade M, Colombo B, Vento R. A study of the genetical structure of the Cuban population: red cell and serum biochemical markers. <i>Am J Hum Genet</i> . 1976; 28(6): 585-96. | 1974-1978  |                      |
| Cuba    | Cuba Vital Registration - Deaths 1975 ICD8 as it appears in World Health Organization (WHO). WHO Mortality Database Version February 2014. Geneva, Switzerland: World Health Organization (WHO), 2014.                                | 1975       |                      |
| Cuba    | Cuba Vital Registration - Deaths 1976 ICD8 as it appears in World Health Organization (WHO). WHO Mortality Database Version February 2014. Geneva, Switzerland: World Health Organization (WHO), 2014.                                | 1976       |                      |
| Cuba    | Cuba Vital Registration - Deaths 1977 ICD8 as it appears in World Health Organization (WHO). WHO Mortality Database Version February 2014. Geneva, Switzerland: World Health Organization (WHO), 2014.                                | 1977       |                      |
| Cuba    | Cuba Vital Registration - Deaths 1978 ICD8 as it appears in World Health Organization (WHO). WHO Mortality Database Version February 2014. Geneva, Switzerland: World Health Organization (WHO), 2014.                                | 1978       |                      |
| Cuba    | Cuba Vital Registration - Deaths 1979 ICD9 as it appears in World Health Organization (WHO). WHO Mortality Database Version February 2014. Geneva, Switzerland: World Health Organization (WHO), 2014.                                | 1979       |                      |
| Cuba    | Cuba Vital Registration - Deaths 1980 ICD9 as it appears in World Health Organization (WHO). WHO Mortality Database Version February 2014. Geneva, Switzerland: World Health Organization (WHO), 2014.                                | 1980       |                      |
| Cuba    | Institute for Health Metrics and Evaluation (IHME), Joint United Nations Program on HIV/AIDS (UNAIDS). Institute for Health Metrics and Evaluation HIV Mortality Estimates Based on the UNAIDS Spectrum Model Framework.              | 1980-2013  | *                    |
| Cuba    | United Nations Children's Fund (UNICEF), World Health Organization (WHO). WHO and UNICEF Reported Disease Incidence Time Series - Pertussis. Geneva, Switzerland: World Health Organization (WHO).                                    | 1980-2012  |                      |
| Cuba    | United Nations Children's Fund (UNICEF), World Health Organization (WHO). WHO and UNICEF Reported Disease Incidence Time Series - Measles. Geneva, Switzerland: World Health Organization (WHO).                                      | 1980-2012  |                      |
| Cuba    | Cuba Population and Housing Census 1981 as it appears in United Nations Statistics Division (UNSD). United Nations Demographic Yearbook. New York City, United States: United Nations Statistics Division (UNSD).                     | 1981       |                      |
| Cuba    | Cuba Vital Registration - Deaths 1981 ICD9 as it appears in World Health Organization (WHO). WHO Mortality Database Version February 2014. Geneva, Switzerland: World Health Organization (WHO), 2014.                                | 1981       |                      |
| Cuba    | Hereadero-Baute L. Community-based program for the diagnosis and prevention of genetic disorders in Cuba Twenty years of experience. <i>Community Genet</i> . 2004; 2-3(7): 130-6.                                                    | 1981, 2002 |                      |



**Web Table 32 - Comprehensive citation list**

| Country | Citation                                                                                                                                                                                                                                                      | Year*      | New for GBD 2013 (*) |
|---------|---------------------------------------------------------------------------------------------------------------------------------------------------------------------------------------------------------------------------------------------------------------|------------|----------------------|
| Cuba    | Cuba Vital Registration - Deaths 1982 ICD9 as it appears in World Health Organization (WHO). WHO Mortality Database Version February 2014. Geneva, Switzerland: World Health Organization (WHO), 2014.                                                        | 1982       |                      |
| Cuba    | Kano M, Opolsky AF. Distribution and frequency of glucose-6-phosphate deficiency in the central region of Cuba. Genetika. 1984; 20: 864-7.                                                                                                                    | 1982-1984  |                      |
| Cuba    | Cuba Vital Registration - Deaths 1983 ICD9 as it appears in World Health Organization (WHO). WHO Mortality Database Version February 2014. Geneva, Switzerland: World Health Organization (WHO), 2014.                                                        | 1983       |                      |
| Cuba    | Cuba Vital Registration - Deaths 1984 ICD9 as it appears in World Health Organization (WHO). WHO Mortality Database Version February 2014. Geneva, Switzerland: World Health Organization (WHO), 2014.                                                        | 1984       |                      |
| Cuba    | Cuba Vital Registration - Deaths 1985 ICD9 as it appears in World Health Organization (WHO). WHO Mortality Database Version February 2014. Geneva, Switzerland: World Health Organization (WHO), 2014.                                                        | 1985       |                      |
| Cuba    | Cuba Vital Registration - Deaths 1986 ICD9 as it appears in World Health Organization (WHO). WHO Mortality Database Version February 2014. Geneva, Switzerland: World Health Organization (WHO), 2014.                                                        | 1986       |                      |
| Cuba    | Parkin DM, International Agency for Research on Cancer, International Association of Cancer Registries. Cancer Incidence in Five Continents. Vol. I to VIII. Lyon, France, IARC Press, 2005.                                                                  | 1986, 1996 |                      |
| Cuba    | State Statistics Committee (Cuba). Cuba National Fertility Survey 1987.                                                                                                                                                                                       | 1987       |                      |
| Cuba    | Cuba Vital Registration - Deaths 1987 ICD9 as it appears in World Health Organization (WHO). WHO Mortality Database Version February 2014. Geneva, Switzerland: World Health Organization (WHO), 2014.                                                        | 1987       |                      |
| Cuba    | Measles Supplementary Immunization Activity Data as provided by the World Health Organization. [Unpublished].                                                                                                                                                 | 1987, 1993 |                      |
| Cuba    | Cuba Vital Registration - Deaths 1988 ICD9 as it appears in World Health Organization (WHO). WHO Mortality Database Version February 2014. Geneva, Switzerland: World Health Organization (WHO), 2014.                                                        | 1988       |                      |
| Cuba    | Cuba Vital Registration - Deaths 1989 ICD9 as it appears in World Health Organization (WHO). WHO Mortality Database Version February 2014. Geneva, Switzerland: World Health Organization (WHO), 2014.                                                        | 1989       |                      |
| Cuba    | Cuba Vital Registration - Deaths 1990 ICD9 as it appears in World Health Organization (WHO). WHO Mortality Database Version February 2014. Geneva, Switzerland: World Health Organization (WHO), 2014.                                                        | 1990       |                      |
| Cuba    | Weatherall D. Sickle Cell and Thalassemias Prevalence Data, Personal Correspondence with David Weatherall. [Unpublished].                                                                                                                                     | 1990-2009  |                      |
| Cuba    | Centre for Health Informatics and Multiprofessional Education, University College London. Modell's Haemoglobinopathologist's Almanac. London, United Kingdom: Centre for Health Informatics and Multiprofessional Education, University College London, 2008. | 1990-2003  |                      |
| Cuba    | Cuba Vital Registration - Deaths 1991 ICD9 as it appears in World Health Organization (WHO). WHO Mortality Database Version February 2014. Geneva, Switzerland: World Health Organization (WHO), 2014.                                                        | 1991       |                      |

**Web Table 32 - Comprehensive citation list**

| Country | Citation                                                                                                                                                                                                                                                           | Year*     | New for GBD 2013 (*) |
|---------|--------------------------------------------------------------------------------------------------------------------------------------------------------------------------------------------------------------------------------------------------------------------|-----------|----------------------|
| Cuba    | Cuba Vital Registration - Deaths 1992 ICD9 as it appears in World Health Organization (WHO). WHO Mortality Database Version February 2014. Geneva, Switzerland: World Health Organization (WHO), 2014.                                                             | 1992      |                      |
| Cuba    | Cuba Vital Registration - Deaths 1993 ICD9 as it appears in World Health Organization (WHO). WHO Mortality Database Version February 2014. Geneva, Switzerland: World Health Organization (WHO), 2014.                                                             | 1993      |                      |
| Cuba    | Cuba Vital Registration - Deaths 1994 ICD9 as it appears in World Health Organization (WHO). WHO Mortality Database Version February 2014. Geneva, Switzerland: World Health Organization (WHO), 2014.                                                             | 1994      |                      |
| Cuba    | Cuba Vital Registration - Deaths 1995 ICD9 as it appears in World Health Organization (WHO). WHO Mortality Database Version February 2014. Geneva, Switzerland: World Health Organization (WHO), 2014.                                                             | 1995      |                      |
| Cuba    | United Nations Office on Drugs and Crime (UNODC). United Nations Office on Drugs and Crime Global Study on Homicides 2011. Vienna, Austria: United Nations Office on Drugs and Crime (UNODC), 2011.                                                                | 1995-2007 |                      |
| Cuba    | Cuba Dementia Data 1995-1998 from literature review, as provided by the Global Burden of Disease 2010 dementia expert group.                                                                                                                                       | 1995-1998 |                      |
| Cuba    | Cuba Vital Registration - Deaths 1996 ICD9 as it appears in World Health Organization (WHO). WHO Mortality Database Version February 2014. Geneva, Switzerland: World Health Organization (WHO), 2014.                                                             | 1996      |                      |
| Cuba    | Cuba Vital Registration - Deaths 1997 ICD9 as it appears in World Health Organization (WHO). WHO Mortality Database Version February 2014. Geneva, Switzerland: World Health Organization (WHO), 2014.                                                             | 1997      |                      |
| Cuba    | World Health Organization (WHO). Yellow Fever Reported Cases, WHO Vaccine-Preventable Diseases: Monitoring System. Geneva, Switzerland: World Health Organization (WHO).                                                                                           | 1997-2009 |                      |
| Cuba    | Cuba Vital Registration - Deaths 1998 ICD9 as it appears in World Health Organization (WHO). WHO Mortality Database Version February 2014. Geneva, Switzerland: World Health Organization (WHO), 2014.                                                             | 1998      |                      |
| Cuba    | Pérez AE, Dickinson FO, Rodríguez M. Community acquired bacterial meningitis in Cuba: a follow up of a decade. BMC Infect Dis. 2010; 130.                                                                                                                          | 1998-2007 | *                    |
| Cuba    | Cuba Vital Registration - Deaths 1999 ICD9 as it appears in World Health Organization (WHO). WHO Mortality Database Version February 2014. Geneva, Switzerland: World Health Organization (WHO), 2014.                                                             | 1999      |                      |
| Cuba    | Cuba Vital Registration - Deaths 2000 ICD9 as it appears in World Health Organization (WHO). WHO Mortality Database Version February 2014. Geneva, Switzerland: World Health Organization (WHO), 2014.                                                             | 2000      |                      |
| Cuba    | Cuba Vital Registration - Deaths 2001 ICD10 as it appears in World Health Organization (WHO). WHO Mortality Database Version February 2014. Geneva, Switzerland: World Health Organization (WHO), 2014.                                                            | 2001      |                      |
| Cuba    | Cuba Vital Registration - Deaths 2002 ICD10 as it appears in World Health Organization (WHO). WHO Mortality Database Version February 2014. Geneva, Switzerland: World Health Organization (WHO), 2014.                                                            | 2002      |                      |
| Cuba    | Lumbiganon P, Piaggio G, Villar J, Pinol A, Bakketeig L, Bergsjø P, Al-Mazrou Y, Ba'aqeel H, Belizán JM, Farnot U, Carroli G, Berendes H, WHO Antenatal Care Trial Research Group. The epidemiology of syphilis in pregnancy. Int J STD AIDS. 2002; 13(7): 486-94. | 2002      |                      |

**Web Table 32 - Comprehensive citation list**

| Country | Citation                                                                                                                                                                                                                                                                                                                                                                                               | Year*      | New for GBD 2013 (*) |
|---------|--------------------------------------------------------------------------------------------------------------------------------------------------------------------------------------------------------------------------------------------------------------------------------------------------------------------------------------------------------------------------------------------------------|------------|----------------------|
| Cuba    | Quintana A, Sanchez L, Larralde O, Anderson D. Prevalence of antibodies to hepatitis E virus in residents of a district in Havana, Cuba. <i>J Med Virol.</i> 2005; 76(1): 69-70.                                                                                                                                                                                                                       | 2002-2004  |                      |
| Cuba    | World Health Organization (WHO). Retrospective Measles Data on Supplementary Immunization Activities. Geneva, Switzerland: World Health Organization (WHO).                                                                                                                                                                                                                                            | 2002, 2007 |                      |
| Cuba    | Cuba Vital Registration - Deaths 2003 ICD10 as it appears in World Health Organization (WHO). WHO Mortality Database Version February 2014. Geneva, Switzerland: World Health Organization (WHO), 2014.                                                                                                                                                                                                | 2003       |                      |
| Cuba    | Villalba MC, Guan M, Pérez A, Corredor MB, Frometa SS, Moreno AG, Hu WP, Howard T, Lay LA, Anderson D. Seroprevalence of antibodies to hepatitis E virus in two large communities in Havana, Cuba. <i>Trans R Soc Trop Med Hyg.</i> 2010; 104(12): 772-6.                                                                                                                                              | 2003       |                      |
| Cuba    | Llibre J de J, Fernández Y, Marcheco B, Contreras N, López AM, Otero M, Gil I, Guerra M, García M, Bayarre H. Prevalence of Dementia and Alzheimer's Disease in a Havana Municipality: A Community-Based Study among Elderly Residents. <i>MEDICC Rev.</i> 2009; 11(2): 29-35.                                                                                                                         | 2003       |                      |
| Cuba    | Prince M, Acosta D, Ferri CP, Guerra M, Huang Y, Llibre Rodriguez JJ, Salas A, Sosa AL, Williams JD, Dewey ME, Acosta I, Jotheeswaran AT, Liu Z. Dementia incidence and mortality in middle-income countries, and associations with indicators of cognitive reserve: a 10/66 Dementia Research Group population-based cohort study. <i>Lancet.</i> 2012; 380(9836): 50-8.                              | 2003-2010  |                      |
| Cuba    | Sousa RM, Ferri CP, Acosta D, Albanese E, Guerra M, Huang Y, Jacob KS, Jotheeswaran AT, Rodriguez JLL, Pichardo GR, Rodriguez MC, Salas A, Sosa AL, Williams J, Zuniga T, Prince M. Contribution of chronic diseases to disability in elderly people in countries with low and middle incomes: a 10/66 Dementia Research Group population-based survey. <i>Lancet.</i> 2009; 374(9704): 1821-30.       | 2003-2005  |                      |
| Cuba    | Llibre Rodriguez JJ, Ferri CP, Acosta D, Guerra M, Huang Y, Jacob KS, Krishnamoorthy ES, Salas A, Sosa AL, Acosta I, Dewey ME, Gaona C, Jotheeswaran AT, Li S, Rodriguez D, Rodriguez G, Kumar PS, Valhuerdi A, Prince M, 10/66 Dementia Research Group. Prevalence of dementia in Latin America, India, and China: a population-based cross-sectional survey. <i>Lancet.</i> 2008; 372(9637): 464-74. | 2003-2004  |                      |
| Cuba    | Cuba Vital Registration - Deaths 2004 ICD10 as it appears in World Health Organization (WHO). WHO Mortality Database Version February 2014. Geneva, Switzerland: World Health Organization (WHO), 2014.                                                                                                                                                                                                | 2004       |                      |
| Cuba    | Cuba Vital Registration - Deaths 2005 ICD10 as it appears in World Health Organization (WHO). WHO Mortality Database Version February 2014. Geneva, Switzerland: World Health Organization (WHO), 2014.                                                                                                                                                                                                | 2005       |                      |
| Cuba    | Souza JP, Cecatti JG, Faundes A, Morais SS, Villar J, Carroli G, Gulmezoglu M, Wojdyla D, Zavaleta N, Donner A, Velazco A, Bataglia V, Valladares E, Kublickas M, Acosta A. Maternal near miss and maternal death in the World Health Organization's 2005 global survey on maternal and perinatal health. <i>Bull World Health Organ.</i> 2010; 88(2): 113-9.                                          | 2005       |                      |
| Cuba    | Forman D, Bray F, Brewster DH, Gombe Mbalawa C, Kohler B, Piñeros M, Steliarova-Foucher E, Swaminathan R and Ferlay J, eds (2013). <i>Cancer Incidence in Five Continents, Vol. X Summary Database (electronic version)</i> . Lyon, IARC. <a href="http://ci5.iarc.fr">http://ci5.iarc.fr</a>                                                                                                          | 2005       |                      |
| Cuba    | Llibre Rodríguez J, Valhuerdi A, Sanchez II, Reyna C, Guerra MA, Copeland JRM, McKeigue P, Ferri CP, Prince MJ. The prevalence, correlates and impact of dementia in Cuba. A 10/66 group population-based survey. <i>Neuroepidemiology.</i> 2008; 31(4): 243-51.                                                                                                                                       | 2005-2007  |                      |

**Web Table 32 - Comprehensive citation list**

| Country | Citation                                                                                                                                                                                                                                                                                                                                                                                                                        | Year*            | New for GBD 2013 (*) |
|---------|---------------------------------------------------------------------------------------------------------------------------------------------------------------------------------------------------------------------------------------------------------------------------------------------------------------------------------------------------------------------------------------------------------------------------------|------------------|----------------------|
| Cuba    | Cuba Vital Registration - Deaths 2006 ICD10 as it appears in World Health Organization (WHO). WHO Mortality Database Version February 2014. Geneva, Switzerland: World Health Organization (WHO), 2014.                                                                                                                                                                                                                         | 2006             |                      |
| Cuba    | Fassio E, Díaz S, Santa C, Reig ME, Martínez Artola Y, Alves de Mattos A, Míguez C, Galizzi J, Zapata R, Ridruejo E, de Souza FC, Hernández N, Pinchuk L, Multicenter Group for Study of Hepatocarcinoma in Latin America, Asociación Latinoamericana para el Estudio del Hígado (ALEH). Etiology of hepatocellular carcinoma in Latin America: a prospective, multicenter, international study. Ann Hepatol. 2010; 9(1): 63-9. | 2006-2008        | *                    |
| Cuba    | Cuba Vital Registration - Deaths 2007 ICD10 as it appears in World Health Organization (WHO). WHO Mortality Database Version February 2014. Geneva, Switzerland: World Health Organization (WHO), 2014.                                                                                                                                                                                                                         | 2007             |                      |
| Cuba    | Cuba Vital Registration - Deaths 2008 ICD10 as it appears in World Health Organization (WHO). WHO Mortality Database Version February 2014. Geneva, Switzerland: World Health Organization (WHO), 2014.                                                                                                                                                                                                                         | 2008             |                      |
| Cuba    | Cuba Vital Registration - Deaths 2009 ICD10 as it appears in World Health Organization (WHO). WHO Mortality Database Version February 2014. Geneva, Switzerland: World Health Organization (WHO), 2014.                                                                                                                                                                                                                         | 2009             |                      |
| Cuba    | Joint United Nations Program on HIV/AIDS (UNAIDS), Ministry of Public Health (Cuba). Cuba UNGASS National Progress Report 2010. Geneva, Switzerland: Joint United Nations Program on HIV/AIDS (UNAIDS), 2010.                                                                                                                                                                                                                   | 2009             |                      |
| Cuba    | Cuba Vital Registration - Deaths 2010 ICD10 as it appears in World Health Organization (WHO). WHO Mortality Database Version February 2014. Geneva, Switzerland: World Health Organization (WHO), 2014.                                                                                                                                                                                                                         | 2010             |                      |
| Cuba    | Ministry of Public Health (Cuba), United Nations Children's Fund (UNICEF). Cuba Multiple Indicator Cluster Survey 2010-2011. New York, United States: United Nations Children's Fund (UNICEF).                                                                                                                                                                                                                                  | 2010-2011        | *                    |
| Cyprus  | Centre for Research on the Epidemiology of Disasters (CRED). EM-DAT: The OFDA/CRED International Disaster Database. Brussels, Belgium: Catholic University of Leuven.                                                                                                                                                                                                                                                           | 1953, 1969, 1995 |                      |
| Cyprus  | Peace Research Institute Oslo (PRIO). Battle Deaths Dataset Version 3, 2009. Oslo, Norway: Peace Research Institute Oslo (PRIO), 2009.                                                                                                                                                                                                                                                                                          | 1955-1974        |                      |
| Cyprus  | Cyprus Census 1960 as it appears in United Nations Statistics Division (UNSD). United Nations Demographic Yearbook. New York City, United States: United Nations Statistics Division (UNSD).                                                                                                                                                                                                                                    | 1960             |                      |
| Cyprus  | Plato CC, Rucknagel DL, Gershowitz H. Studies on the distribution of Glucose-6-phosphate dehydrogenase deficiency, thalassemia, and other genetic traits in the coastal and mountain villages of Cyprus. Am J Hum Genet. 1964; 267-83.                                                                                                                                                                                          | 1962-1964        |                      |
| Cyprus  | Cyprus Population and Housing Census 1973 as it appears in United Nations Statistics Division (UNSD). United Nations Demographic Yearbook. New York City, United States: United Nations Statistics Division (UNSD).                                                                                                                                                                                                             | 1973             |                      |
| Cyprus  | Cyprus Vital Registration Death Data 1974 as it appears in United Nations Statistics Division (UNSD). United Nations Demographic Yearbook. New York City, United States: United Nations Statistics Division (UNSD).                                                                                                                                                                                                             | 1974             |                      |
| Cyprus  | World Health Orgn. Community control of hereditary anaemias: memorandum from a WHO meeting. Bull World Health Organ. 1983; 61(1): 63-80.                                                                                                                                                                                                                                                                                        | 1974-1979        |                      |

**Web Table 32 - Comprehensive citation list**

| Country | Citation                                                                                                                                                                                                                                                        | Year*                | New for GBD 2013 (*) |
|---------|-----------------------------------------------------------------------------------------------------------------------------------------------------------------------------------------------------------------------------------------------------------------|----------------------|----------------------|
| Cyprus  | Telfer P, Coen PG, Christou S, Hadjigavriel M, Kolnakou A, Pangalou E, Pavlides N, Psiloinis M, Simamonian K, Skordos G, Sitarou M, Angastiniotis M. Survival of medically treated thalassemia patients in Cyprus. <i>Haematologica</i> . 2006; 91(9): 1187-92. | 1974-2004            |                      |
| Cyprus  | Cyprus Vital Registration Death Data 1975 as it appears in United Nations Statistics Division (UNSD). United Nations Demographic Yearbook. New York City, United States: United Nations Statistics Division (UNSD).                                             | 1975                 |                      |
| Cyprus  | Cyprus Vital Registration Death Data 1976 as it appears in United Nations Statistics Division (UNSD). United Nations Demographic Yearbook. New York City, United States: United Nations Statistics Division (UNSD).                                             | 1976                 |                      |
| Cyprus  | Cyprus Vital Registration Death Data 1977 as it appears in United Nations Statistics Division (UNSD). United Nations Demographic Yearbook. New York City, United States: United Nations Statistics Division (UNSD).                                             | 1977                 |                      |
| Cyprus  | Cyprus Vital Registration Death Data 1978 as it appears in United Nations Statistics Division (UNSD). United Nations Demographic Yearbook. New York City, United States: United Nations Statistics Division (UNSD).                                             | 1978                 |                      |
| Cyprus  | Cyprus Vital Registration Death Data 1979 as it appears in United Nations Statistics Division (UNSD). United Nations Demographic Yearbook. New York City, United States: United Nations Statistics Division (UNSD).                                             | 1979                 |                      |
| Cyprus  | Cyprus Vital Registration Death Data 1980 as it appears in United Nations Statistics Division (UNSD). United Nations Demographic Yearbook. New York City, United States: United Nations Statistics Division (UNSD).                                             | 1980                 |                      |
| Cyprus  | Institute for Health Metrics and Evaluation (IHME), Joint United Nations Program on HIV/AIDS (UNAIDS). Institute for Health Metrics and Evaluation HIV Mortality Estimates Based on the UNAIDS Spectrum Model Framework.                                        | 1980-2013            | *                    |
| Cyprus  | United Nations Children's Fund (UNICEF), World Health Organization (WHO). WHO and UNICEF Reported Disease Incidence Time Series - Pertussis. Geneva, Switzerland: World Health Organization (WHO).                                                              | 1980-2000, 2002-2013 |                      |
| Cyprus  | United Nations Children's Fund (UNICEF), World Health Organization (WHO). WHO and UNICEF Reported Disease Incidence Time Series - Measles. Geneva, Switzerland: World Health Organization (WHO).                                                                | 1980-2000, 2002-2013 |                      |
| Cyprus  | Cyprus Vital Registration Death Data 1981 as it appears in United Nations Statistics Division (UNSD). United Nations Demographic Yearbook. New York City, United States: United Nations Statistics Division (UNSD).                                             | 1981                 |                      |
| Cyprus  | Cyprus Vital Registration Death Data 1982 as it appears in United Nations Statistics Division (UNSD). United Nations Demographic Yearbook. New York City, United States: United Nations Statistics Division (UNSD).                                             | 1982                 |                      |
| Cyprus  | Cin S, Akar N, Arcasoy A, Dedeoğlu S, Cavdar AO. Prevalence of thalassemia and G6PD deficiency in North Cyprus. <i>Acta Haematol</i> . 1984; 71(1): 69-70.                                                                                                      | 1982-1984            |                      |
| Cyprus  | Cyprus Vital Registration Death Data 1983 as it appears in United Nations Statistics Division (UNSD). United Nations Demographic Yearbook. New York City, United States: United Nations Statistics Division (UNSD).                                             | 1983                 |                      |
| Cyprus  | Cyprus Vital Registration Death Data 1984 as it appears in United Nations Statistics Division (UNSD). United Nations Demographic Yearbook. New York City, United States: United Nations Statistics Division (UNSD).                                             | 1984                 |                      |

**Web Table 32 - Comprehensive citation list**

| Country | Citation                                                                                                                                                                                                                                                      | Year*           | New for GBD 2013 (*) |
|---------|---------------------------------------------------------------------------------------------------------------------------------------------------------------------------------------------------------------------------------------------------------------|-----------------|----------------------|
| Cyprus  | Cyprus Vital Registration Death Data 1985 as it appears in United Nations Statistics Division (UNSD). United Nations Demographic Yearbook. New York City, United States: United Nations Statistics Division (UNSD).                                           | 1985            |                      |
| Cyprus  | Cyprus Vital Registration Death Data 1986 as it appears in United Nations Statistics Division (UNSD). United Nations Demographic Yearbook. New York City, United States: United Nations Statistics Division (UNSD).                                           | 1986            |                      |
| Cyprus  | Eleftheriou A, Teloni F, Ioannou P. HDV infection in Cyprus. Prog Clin Biol Res. 1992; 277-85.                                                                                                                                                                | 1986-1992       |                      |
| Cyprus  | Cyprus Vital Registration Death Data 1987 as it appears in United Nations Statistics Division (UNSD). United Nations Demographic Yearbook. New York City, United States: United Nations Statistics Division (UNSD).                                           | 1987            |                      |
| Cyprus  | Papaevangelou G, Róumeliotou A, Chatziminias M, Kotsianopoulou M, Ioannou P, Trichopoulou E, Nestoridou A. Epidemiological characteristics of hepatitis B virus infection in cyprus. Eur J Epidemiol. 1988; 4(2): 150-3.                                      | 1987            |                      |
| Cyprus  | Cyprus Vital Registration Death Data 1988 as it appears in United Nations Statistics Division (UNSD). United Nations Demographic Yearbook. New York City, United States: United Nations Statistics Division (UNSD).                                           | 1988            |                      |
| Cyprus  | Cyprus Vital Registration Death Data 1989 as it appears in United Nations Statistics Division (UNSD). United Nations Demographic Yearbook. New York City, United States: United Nations Statistics Division (UNSD).                                           | 1989            |                      |
| Cyprus  | Cyprus Vital Registration Death Data 1990 as it appears in United Nations Statistics Division (UNSD). United Nations Demographic Yearbook. New York City, United States: United Nations Statistics Division (UNSD).                                           | 1990            |                      |
| Cyprus  | Modell B, Darlison M, Birgens H, Cario H, Faustino P, Giordano PC, Gulbis B, Hopmeier P, Lena-Russo D, Romao L, Theodorsson E. Epidemiology of haemoglobin disorders in Europe: an overview. Scand J Clin Lab Invest. 2007; 67(1): 39-69.                     | 1990-2006       |                      |
| Cyprus  | Centre for Health Informatics and Multiprofessional Education, University College London. Modell's Haemoglobinopathologist's Almanac. London, United Kingdom: Centre for Health Informatics and Multiprofessional Education, University College London, 2008. | 1990-2003, 2006 |                      |
| Cyprus  | Angastiniotis M, Modell B, Englezos P, Boulyjenkov V. Prevention and control of haemoglobinopathies. Bull World Health Organ. 1995; 73(3): 375-86.                                                                                                            | 1991            |                      |
| Cyprus  | Cyprus Vital Registration Death Data 1991 as it appears in United Nations Statistics Division (UNSD). United Nations Demographic Yearbook. New York City, United States: United Nations Statistics Division (UNSD).                                           | 1991            |                      |
| Cyprus  | Cyprus Census 1992 as it appears in United Nations Statistics Division (UNSD). United Nations Demographic Yearbook. New York City, United States: United Nations Statistics Division (UNSD).                                                                  | 1992            |                      |
| Cyprus  | Cyprus Vital Registration Death Data 1992 as it appears in United Nations Statistics Division (UNSD). United Nations Demographic Yearbook. New York City, United States: United Nations Statistics Division (UNSD).                                           | 1992            |                      |



**Web Table 32 - Comprehensive citation list**

| Country | Citation                                                                                                                                                                                                                                                                                                                                                                                                                                                                                                                                                                                                                                                                                                              | Year*           | New for GBD 2013 (*) |
|---------|-----------------------------------------------------------------------------------------------------------------------------------------------------------------------------------------------------------------------------------------------------------------------------------------------------------------------------------------------------------------------------------------------------------------------------------------------------------------------------------------------------------------------------------------------------------------------------------------------------------------------------------------------------------------------------------------------------------------------|-----------------|----------------------|
| Cyprus  | Trichopoulos D, Bamia C, Lagiou P, Fedirko V, Trepo E, Jenab M, Pischon T, Nöthlings U, Overved K, Tjønneland A, Outzen M, Clavel-Chapelon F, Kaaks R, Lukanova A, Boeing H, Aleksandrova K, Benetou V, Zylis D, Palli D, Pala V, Panico S, Tumino R, Sacerdote C, Bueno-De-Mesquita HB, Van Kranen HJ, Peeters PHM, Lund E, Quirós JR, González CA, Sanchez Perez M-J, Navarro C, Dorronsoro M, Barricarte A, Lindkvist B, Regnér S, Werner M, Hallmans G, Khaw K-T, Wareham N, Key T, Romieu I, Chuang S-C, Murphy N, Boffetta P, Trichopoulou A, Riboli E. Hepatocellular carcinoma risk factors and disease burden in a European cohort: a nested case-control study. J Natl Cancer Inst. 2011; 103(22): 1686-95. | 1992-2006       | *                    |
| Cyprus  | Cyprus Vital Registration Death Data 1993 as it appears in United Nations Statistics Division (UNSD). United Nations Demographic Yearbook. New York City, United States: United Nations Statistics Division (UNSD).                                                                                                                                                                                                                                                                                                                                                                                                                                                                                                   | 1993            |                      |
| Cyprus  | Cyprus Vital Registration Death Data 1994 as it appears in United Nations Statistics Division (UNSD). United Nations Demographic Yearbook. New York City, United States: United Nations Statistics Division (UNSD).                                                                                                                                                                                                                                                                                                                                                                                                                                                                                                   | 1994            |                      |
| Cyprus  | Cyprus Vital Registration Death Data 1995 as it appears in United Nations Statistics Division (UNSD). United Nations Demographic Yearbook. New York City, United States: United Nations Statistics Division (UNSD).                                                                                                                                                                                                                                                                                                                                                                                                                                                                                                   | 1995            |                      |
| Cyprus  | Cyprus Vital Registration Death Data 1996 as it appears in United Nations Statistics Division (UNSD). United Nations Demographic Yearbook. New York City, United States: United Nations Statistics Division (UNSD).                                                                                                                                                                                                                                                                                                                                                                                                                                                                                                   | 1996            |                      |
| Cyprus  | Cyprus Vital Registration Death Data 1997 as it appears in United Nations Statistics Division (UNSD). United Nations Demographic Yearbook. New York City, United States: United Nations Statistics Division (UNSD).                                                                                                                                                                                                                                                                                                                                                                                                                                                                                                   | 1997            |                      |
| Cyprus  | Cyprus Vital Registration Death Data 1998 as it appears in United Nations Statistics Division (UNSD). United Nations Demographic Yearbook. New York City, United States: United Nations Statistics Division (UNSD).                                                                                                                                                                                                                                                                                                                                                                                                                                                                                                   | 1998            |                      |
| Cyprus  | Hadjipanayis A, Hadjichristodoulou C, Kallias M, Sava K, Petsa A, Demetriadou K, Christodoulou C, Constantinou A, Sidera M. Prevalence of antibodies to hepatitis A among children and adolescents in Larnaca area, Cyprus. Eur J Epidemiol. 1999; 15(10): 903-5.                                                                                                                                                                                                                                                                                                                                                                                                                                                     | 1998            |                      |
| Cyprus  | Cyprus Vital Registration - Deaths 1999 ICD10 as it appears in World Health Organization (WHO). WHO Mortality Database Version February 2014. Geneva, Switzerland: World Health Organization (WHO), 2014.                                                                                                                                                                                                                                                                                                                                                                                                                                                                                                             | 1999            |                      |
| Cyprus  | Cyprus Vital Registration - Deaths 2000 ICD10 as it appears in World Health Organization (WHO). WHO Mortality Database Version February 2014. Geneva, Switzerland: World Health Organization (WHO), 2014.                                                                                                                                                                                                                                                                                                                                                                                                                                                                                                             | 2000            |                      |
| Cyprus  | Curado MP, Edwards B, Shin HR, Storm H, Ferlay J, Heanue M and Boyle P, eds (2007). Cancer Incidence in Five Continents, Vol. IX Periodic Data (electronic version). Lyon, IARC. <a href="http://ci5.iarc.fr">http://ci5.iarc.fr</a>                                                                                                                                                                                                                                                                                                                                                                                                                                                                                  | 2000            |                      |
| Cyprus  | Institute for Health Metrics and Evaluation. Institute for Health Metrics and Evaluation Cancer Registry Database. [Unpublished].                                                                                                                                                                                                                                                                                                                                                                                                                                                                                                                                                                                     | 2000-2005       |                      |
| Cyprus  | World Health Organization (WHO). Yellow Fever Reported Cases, WHO Vaccine-Preventable Diseases: Monitoring System. Geneva, Switzerland: World Health Organization (WHO).                                                                                                                                                                                                                                                                                                                                                                                                                                                                                                                                              | 2000, 2002-2009 |                      |

**Web Table 32 - Comprehensive citation list**

| Country | Citation                                                                                                                                                                                                                                                                              | Year*                      | New for GBD 2013 (*) |
|---------|---------------------------------------------------------------------------------------------------------------------------------------------------------------------------------------------------------------------------------------------------------------------------------------|----------------------------|----------------------|
| Cyprus  | Cyprus Vital Registration Death Data 2001 as it appears in United Nations Statistics Division (UNSD). United Nations Demographic Yearbook. New York City, United States: United Nations Statistics Division (UNSD).                                                                   | 2001                       |                      |
| Cyprus  | Cyprus Vital Registration Death Data 2002 as it appears in United Nations Statistics Division (UNSD). United Nations Demographic Yearbook. New York City, United States: United Nations Statistics Division (UNSD).                                                                   | 2002                       |                      |
| Cyprus  | WHO Regional Office for Europe (EURO-WHO). European Hospital Morbidity Database. Copenhagen, Denmark: WHO Regional Office for Europe (EURO-WHO).                                                                                                                                      | 2002-2006                  |                      |
| Cyprus  | Drousiotou A, Touma EH, Andreou N, Loiselet J, Angastiniotis M, Verrelli BC, Tishkoff SA. Molecular characterization of G6PD deficiency in Cyprus. Blood Cells Mol Dis. 2004; 33(1): 25-30.                                                                                           | 2002-2004                  |                      |
| Cyprus  | Cyprus Vital Registration Death Data 2003 as it appears in United Nations Statistics Division (UNSD). United Nations Demographic Yearbook. New York City, United States: United Nations Statistics Division (UNSD).                                                                   | 2003                       |                      |
| Cyprus  | Cyprus Vital Registration - Deaths 2004 ICD10 as it appears in World Health Organization (WHO). WHO Mortality Database Version February 2014. Geneva, Switzerland: World Health Organization (WHO), 2014.                                                                             | 2004                       |                      |
| Cyprus  | World Health Organization (WHO). Retrospective Measles Data on Supplementary Immunization Activities. Geneva, Switzerland: World Health Organization (WHO).                                                                                                                           | 2004, 2006-2007, 2010-2012 |                      |
| Cyprus  | Cyprus Vital Registration - Deaths 2005 ICD10 as it appears in World Health Organization (WHO). WHO Mortality Database Version February 2014. Geneva, Switzerland: World Health Organization (WHO), 2014.                                                                             | 2005                       |                      |
| Cyprus  | Forman D, Bray F, Brewster DH, Gombe Mbalawa C, Kohler B, Piñeros M, Steliarova-Foucher E, Swaminathan R and Ferlay J, eds (2013). Cancer Incidence in Five Continents, Vol. X Summary Database (electronic version). Lyon, IARC. <a href="http://ci5.iarc.fr">http://ci5.iarc.fr</a> | 2005                       |                      |
| Cyprus  | Cyprus Vital Registration - Deaths 2006 ICD10 as it appears in World Health Organization (WHO). WHO Mortality Database Version February 2014. Geneva, Switzerland: World Health Organization (WHO), 2014.                                                                             | 2006                       |                      |
| Cyprus  | Cyprus Vital Registration - Deaths 2007 ICD10 as it appears in World Health Organization (WHO). WHO Mortality Database Version February 2014. Geneva, Switzerland: World Health Organization (WHO), 2014.                                                                             | 2007                       |                      |
| Cyprus  | World Health Organization (WHO). Global Status Report on Road Safety 2009. Geneva, Switzerland: World Health Organization (WHO), 2009.                                                                                                                                                | 2007                       |                      |
| Cyprus  | Cyprus Vital Registration - Deaths 2008 ICD10 as it appears in World Health Organization (WHO). WHO Mortality Database Version February 2014. Geneva, Switzerland: World Health Organization (WHO), 2014.                                                                             | 2008                       |                      |
| Cyprus  | Cyprus Vital Registration - Deaths 2009 ICD10 as it appears in World Health Organization (WHO). WHO Mortality Database Version February 2014. Geneva, Switzerland: World Health Organization (WHO), 2014.                                                                             | 2009                       |                      |
| Cyprus  | Cyprus Vital Registration - Deaths 2010 ICD10 as it appears in World Health Organization (WHO). WHO Mortality Database Version February 2014. Geneva, Switzerland: World Health Organization (WHO), 2014.                                                                             | 2010                       |                      |
| Cyprus  | EUVAC-NET. EUVAC-NET Measles Surveillance Report 2010. Stockholm, Sweden: European Centre for Disease Prevention and Control, 2011.                                                                                                                                                   | 2010                       |                      |



**Web Table 32 - Comprehensive citation list**

| Country        | Citation                                                                                                                                                                                                                                                                                              | Year*      | New for GBD 2013 (*) |
|----------------|-------------------------------------------------------------------------------------------------------------------------------------------------------------------------------------------------------------------------------------------------------------------------------------------------------|------------|----------------------|
| Cyprus         | Cyprus Vital Registration - Deaths 2011 ICD10 as it appears in World Health Organization (WHO). WHO Mortality Database Version February 2014. Geneva, Switzerland: World Health Organization (WHO), 2014.                                                                                             | 2011       | *                    |
| Czech Republic | Max Planck Institute for Demographic Research, University of California. Human Mortality Database. Berkeley, USA: University of California; Rostock, Germany: Max Planck Institute for Demographic Research.                                                                                          | 1950-1985  |                      |
| Czech Republic | Fraser GR, Defaranas B, Kattamis CA, Race RR, Sanger R, Stamatoyannopoulos G. Glucose-6-phosphate dehydrogenase, colour vision and XG blood groups in Greece: linkage and population data. Ann Hum Genet. 1964; 395-403.                                                                              | 1962       |                      |
| Czech Republic | Institute for Health Metrics and Evaluation (IHME), Joint United Nations Program on HIV/AIDS (UNAIDS). Institute for Health Metrics and Evaluation HIV Mortality Estimates Based on the UNAIDS Spectrum Model Framework.                                                                              | 1980-2013  | *                    |
| Czech Republic | Institute for Health Metrics and Evaluation. Institute for Health Metrics and Evaluation Cancer Registry Database. [Unpublished].                                                                                                                                                                     | 1983-2009  |                      |
| Czech Republic | Ferlay J, Parkin DM, Curado MP, Bray F, Edwards B, Shin HR and Forman D. Cancer Incidence in Five Continents, Volumes I to IX: IARC CancerBase No. 9 [Internet]. Lyon, France: International Agency for Research on Cancer; 2010. Available from: <a href="http://ci5.iarc.fr">http://ci5.iarc.fr</a> | 1983-2002  |                      |
| Czech Republic | Czechoslovakia - Czech Republic Vital Registration - Deaths 1986 ICD9 as it appears in World Health Organization (WHO). WHO Mortality Database Version February 2014. Geneva, Switzerland: World Health Organization (WHO), 2014.                                                                     | 1986       |                      |
| Czech Republic | Czechoslovakia - Czech Republic Vital Registration - Deaths 1987 ICD9 as it appears in World Health Organization (WHO). WHO Mortality Database Version February 2014. Geneva, Switzerland: World Health Organization (WHO), 2014.                                                                     | 1987       |                      |
| Czech Republic | Czechoslovakia - Czech Republic Vital Registration - Deaths 1988 ICD9 as it appears in World Health Organization (WHO). WHO Mortality Database Version February 2014. Geneva, Switzerland: World Health Organization (WHO), 2014.                                                                     | 1988       |                      |
| Czech Republic | Czechoslovakia - Czech Republic Vital Registration - Deaths 1989 ICD9 as it appears in World Health Organization (WHO). WHO Mortality Database Version February 2014. Geneva, Switzerland: World Health Organization (WHO), 2014.                                                                     | 1989       |                      |
| Czech Republic | Czechoslovakia - Czech Republic Vital Registration - Deaths 1990 ICD9 as it appears in World Health Organization (WHO). WHO Mortality Database Version February 2014. Geneva, Switzerland: World Health Organization (WHO), 2014.                                                                     | 1990       |                      |
| Czech Republic | United Nations Children's Fund (UNICEF), World Health Organization (WHO). WHO and UNICEF Reported Disease Incidence Time Series - Pertussis. Geneva, Switzerland: World Health Organization (WHO).                                                                                                    | 1990-2013  |                      |
| Czech Republic | United Nations Children's Fund (UNICEF), World Health Organization (WHO). WHO and UNICEF Reported Disease Incidence Time Series - Measles. Geneva, Switzerland: World Health Organization (WHO).                                                                                                      | 1990-2013  |                      |
| Czech Republic | Centre for Health Informatics and Multiprofessional Education, University College London. Modell's Haemoglobinopathologist's Almanac. London, United Kingdom: Centre for Health Informatics and Multiprofessional Education, University College London, 2008.                                         | 1990-2003  |                      |
| Czech Republic | Parkin DM, International Agency for Research on Cancer, International Association of Cancer Registries. Cancer Incidence in Five Continents. Vol. I to VIII. Lyon, France, IARC Press, 2005.                                                                                                          | 1990, 1995 |                      |

**Web Table 32 - Comprehensive citation list**

| Country        | Citation                                                                                                                                                                                                                                                                                                                                             | Year*                            | New for GBD 2013 (*) |
|----------------|------------------------------------------------------------------------------------------------------------------------------------------------------------------------------------------------------------------------------------------------------------------------------------------------------------------------------------------------------|----------------------------------|----------------------|
| Czech Republic | Slovakia Population and Housing Census 1991 as it appears in United Nations Statistics Division (UNSD). United Nations Demographic Yearbook. New York City, United States: United Nations Statistics Division (UNSD).                                                                                                                                | 1991                             |                      |
| Czech Republic | Czechoslovakia - Czech Republic Vital Registration - Deaths 1991 ICD9 as it appears in World Health Organization (WHO). WHO Mortality Database Version February 2014. Geneva, Switzerland: World Health Organization (WHO), 2014.                                                                                                                    | 1991                             |                      |
| Czech Republic | Stránský J, Horejsová M, Chlumská A, Honzáková E, Vandasová J, Němeček V. Prevalence of anti-HCV antibodies in chronic liver disease in the Czech Republic. Infection. 1997; 25(1): 49-50.                                                                                                                                                           | 1991-1993                        |                      |
| Czech Republic | Beran J, Douša P, Prymula R, Gál P, Rychlý R, Splino M. Hepatitis A vaccination by Havrix in the Czech U.N. Troops according to data of seroprevalence in 1991-1995. Cent Eur J Public Health. 1996; 4(2): 87-90.                                                                                                                                    | 1991-1995                        |                      |
| Czech Republic | Czechoslovakia - Czech Republic Vital Registration - Deaths 1992 ICD9 as it appears in World Health Organization (WHO). WHO Mortality Database Version February 2014. Geneva, Switzerland: World Health Organization (WHO), 2014.                                                                                                                    | 1992                             |                      |
| Czech Republic | Czech Republic Vital Registration - Deaths 1993 ICD9 as it appears in World Health Organization (WHO). WHO Mortality Database Version February 2014. Geneva, Switzerland: World Health Organization (WHO), 2014.                                                                                                                                     | 1993                             |                      |
| Czech Republic | Czech Republic Statistical Office, World Health Organization (WHO) Collaborating Center for Perinatal Medicine/Institute for the Care of Mother and Child, Prague, Centers for Disease Control and Prevention (CDC). Czech Republic Reproductive Health Survey 1993. Atlanta, United States: Centers for Disease Control and Prevention (CDC), 1995. | 1993                             |                      |
| Czech Republic | Czech Republic Vital Registration - Deaths 1994 ICD10 as it appears in World Health Organization (WHO). WHO Mortality Database Version February 2014. Geneva, Switzerland: World Health Organization (WHO), 2014.                                                                                                                                    | 1994                             |                      |
| Czech Republic | Czech Republic Vital Registration - Deaths 1995 ICD10 as it appears in World Health Organization (WHO). WHO Mortality Database Version February 2014. Geneva, Switzerland: World Health Organization (WHO), 2014.                                                                                                                                    | 1995                             |                      |
| Czech Republic | Mircescu G, Capsa D, Covic M, Caprioara MG, Gluhovschi G, Golea O, Ursea N, Gârmeata L, Cepoi V, Constantinovici N, Covic A. Nephrology and renal replacement therapy in Romania – transition still continues (Cinderella story revisited). Nephrol Dial Transplant. 2004; 19(12): 2971-80.                                                          | 1995, 2003                       |                      |
| Czech Republic | Czech Republic Vital Registration - Deaths 1996 ICD10 as it appears in World Health Organization (WHO). WHO Mortality Database Version February 2014. Geneva, Switzerland: World Health Organization (WHO), 2014.                                                                                                                                    | 1996                             |                      |
| Czech Republic | Centre for Research on the Epidemiology of Disasters (CRED). EM-DAT: The OFDA/CRED International Disaster Database. Brussels, Belgium: Catholic University of Leuven.                                                                                                                                                                                | 1996-1998, 2002, 2005-2010, 2013 |                      |
| Czech Republic | Czech Republic Vital Registration - Deaths 1997 ICD10 as it appears in World Health Organization (WHO). WHO Mortality Database Version February 2014. Geneva, Switzerland: World Health Organization (WHO), 2014.                                                                                                                                    | 1997                             |                      |
| Czech Republic | Czech Republic Vital Registration - Deaths 1998 ICD10 as it appears in World Health Organization (WHO). WHO Mortality Database Version February 2014. Geneva, Switzerland: World Health Organization (WHO), 2014.                                                                                                                                    | 1998                             |                      |

**Web Table 32 - Comprehensive citation list**

| Country        | Citation                                                                                                                                                                                                                                                                              | Year*     | New for GBD 2013 (*) |
|----------------|---------------------------------------------------------------------------------------------------------------------------------------------------------------------------------------------------------------------------------------------------------------------------------------|-----------|----------------------|
| Czech Republic | Czech Republic Vital Registration - Deaths 1999 ICD10 as it appears in World Health Organization (WHO). WHO Mortality Database Version February 2014. Geneva, Switzerland: World Health Organization (WHO), 2014.                                                                     | 1999      |                      |
| Czech Republic | Czech Republic Vital Registration - Deaths 2000 ICD10 as it appears in World Health Organization (WHO). WHO Mortality Database Version February 2014. Geneva, Switzerland: World Health Organization (WHO), 2014.                                                                     | 2000      |                      |
| Czech Republic | Curado MP, Edwards B, Shin HR, Storm H, Ferlay J, Heanue M and Boyle P, eds (2007). Cancer Incidence in Five Continents, Vol. IX Periodic Data (electronic version). Lyon, IARC. <a href="http://ci5.iarc.fr">http://ci5.iarc.fr</a>                                                  | 2000      |                      |
| Czech Republic | Czech Republic Vital Registration - Deaths 2001 ICD10 as it appears in World Health Organization (WHO). WHO Mortality Database Version February 2014. Geneva, Switzerland: World Health Organization (WHO), 2014.                                                                     | 2001      |                      |
| Czech Republic | World Health Organization (WHO). Yellow Fever Reported Cases, WHO Vaccine-Preventable Diseases: Monitoring System. Geneva, Switzerland: World Health Organization (WHO).                                                                                                              | 2001-2009 |                      |
| Czech Republic | Czech Republic Vital Registration - Deaths 2002 ICD10 as it appears in World Health Organization (WHO). WHO Mortality Database Version February 2014. Geneva, Switzerland: World Health Organization (WHO), 2014.                                                                     | 2002      |                      |
| Czech Republic | Czech Republic Vital Registration - Deaths 2003 ICD10 as it appears in World Health Organization (WHO). WHO Mortality Database Version February 2014. Geneva, Switzerland: World Health Organization (WHO), 2014.                                                                     | 2003      |                      |
| Czech Republic | Czech National Cancer Registry. Czech Republic Cancer Incidence Report 2003. Prague, Czech Republic: Institute of Health Information and Statistics of the Czech Republic, 2006.                                                                                                      | 2003      |                      |
| Czech Republic | WHO Regional Office for Europe (EURO-WHO). European Hospital Morbidity Database. Copenhagen, Denmark: WHO Regional Office for Europe (EURO-WHO).                                                                                                                                      | 2003-2006 |                      |
| Czech Republic | EUVAC-NET. EUVAC-NET Pertussis Surveillance Report 2003-2007. Stockholm, Sweden: European Centre for Disease Prevention and Control, 2009.                                                                                                                                            | 2003-2007 |                      |
| Czech Republic | Chlábek R, Cecetková B, Smetana J, Prymula R, Kohl I. [Seroprevalence of antibodies against hepatitis A virus and hepatitis B virus in nonvaccinated adult population over 40 years of age]. Epidemiol Mikrobiol Imunol. 2006; 55(3): 99-104.                                         | 2003-2004 |                      |
| Czech Republic | Czech Republic Vital Registration - Deaths 2004 ICD10 as it appears in World Health Organization (WHO). WHO Mortality Database Version February 2014. Geneva, Switzerland: World Health Organization (WHO), 2014.                                                                     | 2004      |                      |
| Czech Republic | Czech National Cancer Registry. Czech Republic Cancer Incidence Report 2004. Prague, Czech Republic: Institute of Health Information and Statistics of the Czech Republic, 2007.                                                                                                      | 2004      |                      |
| Czech Republic | Czech Republic Vital Registration - Deaths 2005 ICD10 as it appears in World Health Organization (WHO). WHO Mortality Database Version February 2014. Geneva, Switzerland: World Health Organization (WHO), 2014.                                                                     | 2005      |                      |
| Czech Republic | Forman D, Bray F, Brewster DH, Gombe Mbalawa C, Kohler B, Piñeros M, Steliarova-Foucher E, Swaminathan R and Ferlay J, eds (2013). Cancer Incidence in Five Continents, Vol. X Summary Database (electronic version). Lyon, IARC. <a href="http://ci5.iarc.fr">http://ci5.iarc.fr</a> | 2005      |                      |
| Czech Republic | Czech Republic Vital Registration - Deaths 2006 ICD10 as it appears in World Health Organization (WHO). WHO Mortality Database Version February 2014. Geneva, Switzerland: World Health Organization (WHO), 2014.                                                                     | 2006      |                      |

**Web Table 32 - Comprehensive citation list**

| Country                          | Citation                                                                                                                                                                                                                                                                        | Year*     | New for GBD 2013 (*) |
|----------------------------------|---------------------------------------------------------------------------------------------------------------------------------------------------------------------------------------------------------------------------------------------------------------------------------|-----------|----------------------|
| Czech Republic                   | Czech National Cancer Registry. Czech Republic Cancer Incidence Report 2006. Prague, Czech Republic: Institute of Health Information and Statistics of the Czech Republic, 2009.                                                                                                | 2006      |                      |
| Czech Republic                   | Czech Republic Vital Registration - Deaths 2007 ICD10 as it appears in World Health Organization (WHO). WHO Mortality Database Version February 2014. Geneva, Switzerland: World Health Organization (WHO), 2014.                                                               | 2007      |                      |
| Czech Republic                   | World Health Organization (WHO). Global Status Report on Road Safety 2009. Geneva, Switzerland: World Health Organization (WHO), 2009.                                                                                                                                          | 2007      |                      |
| Czech Republic                   | Czech National Cancer Registry. Czech Republic Cancer Incidence Report 2007. Prague, Czech Republic: Institute of Health Information and Statistics of the Czech Republic, 2010.                                                                                                | 2007      |                      |
| Czech Republic                   | Czech Republic Vital Registration - Deaths 2008 ICD10 as it appears in World Health Organization (WHO). WHO Mortality Database Version February 2014. Geneva, Switzerland: World Health Organization (WHO), 2014.                                                               | 2008      |                      |
| Czech Republic                   | Czech National Cancer Registry. Czech Republic Cancer Incidence Report 2008. Prague, Czech Republic: Institute of Health Information and Statistics of the Czech Republic, 2011.                                                                                                | 2008      |                      |
| Czech Republic                   | EUVAC-NET. EUVAC-NET Pertussis Surveillance Report 2008. Stockholm, Sweden: European Centre for Disease Prevention and Control, 2009.                                                                                                                                           | 2008      |                      |
| Czech Republic                   | Czech Republic Vital Registration - Deaths 2009 ICD10 as it appears in World Health Organization (WHO). WHO Mortality Database Version February 2014. Geneva, Switzerland: World Health Organization (WHO), 2014.                                                               | 2009      |                      |
| Czech Republic                   | Czech National Cancer Registry. Czech Republic Cancer Incidence Report 2009. Prague, Czech Republic: Institute of Health Information and Statistics of the Czech Republic, 2012.                                                                                                | 2009      | *                    |
| Czech Republic                   | EUVAC-NET. EUVAC-NET Pertussis Surveillance Report 2009. Stockholm, Sweden: European Centre for Disease Prevention and Control, 2010.                                                                                                                                           | 2009      |                      |
| Czech Republic                   | EUVAC-NET. EUVAC-NET Measles Surveillance Report 2009. Stockholm, Sweden: European Centre for Disease Prevention and Control, 2010.                                                                                                                                             | 2009      |                      |
| Czech Republic                   | Joint United Nations Program on HIV/AIDS (UNAIDS), Ministry of Health (Czech Republic), National Institute of Public Health (Czech Republic). Czech Republic UNGASS Country Progress Report 2010. Geneva, Switzerland: Joint United Nations Program on HIV/AIDS (UNAIDS), 2010. | 2009      |                      |
| Czech Republic                   | Czech Republic Vital Registration - Deaths 2010 ICD10 as it appears in World Health Organization (WHO). WHO Mortality Database Version February 2014. Geneva, Switzerland: World Health Organization (WHO), 2014.                                                               | 2010      |                      |
| Czech Republic                   | Czech Republic Vital Registration - Deaths 2011 ICD10 as it appears in World Health Organization (WHO). WHO Mortality Database Version February 2014. Geneva, Switzerland: World Health Organization (WHO), 2014.                                                               | 2011      | *                    |
| Czech Republic                   | Czech Republic Vital Registration - Deaths 2012 ICD10 as it appears in World Health Organization (WHO). WHO Mortality Database Version February 2014. Geneva, Switzerland: World Health Organization (WHO), 2014.                                                               | 2012      | *                    |
| Democratic Republic of the Congo | Sonnet J, Michaux JL. Glucose-6-Phosphate Dehydrogenase Deficiency, Haptoglobin Groups, Blood Groups and Sickle Cell Trait in the Bantus of West Belgian Congo. Nature. 1960; 188(5): 504-5.                                                                                    | 1958-1960 |                      |
| Democratic Republic of the Congo | Motulsky AG, Vandepitte J, Fraser GR. Population genetic studies in the Congo. I. Glucose-6-phosphate dehydrogenase deficiency, hemoglobin S, and malaria. Am J Hum Genet. 1966; 18(6): 514-37.                                                                                 | 1964-1966 |                      |

**Web Table 32 - Comprehensive citation list**

| Country                          | Citation                                                                                                                                                                                                                                                            | Year*                                                                      | New for GBD 2013 (*) |
|----------------------------------|---------------------------------------------------------------------------------------------------------------------------------------------------------------------------------------------------------------------------------------------------------------------|----------------------------------------------------------------------------|----------------------|
| Democratic Republic of the Congo | Centre for Research on the Epidemiology of Disasters (CRED). EM-DAT: The OFDA/CRED International Disaster Database. Brussels, Belgium: Catholic University of Leuven.                                                                                               | 1966, 1968, 1977, 1990, 1992, 1994, 1999, 2001-2003, 2005-2008, 2010, 2012 |                      |
| Democratic Republic of the Congo | Van Ros G. The African variant of glucose-6-phosphate dehydrogenase deficiency as a factor favoring anemia: comparative study of 157 deficient adults and 300 non-deficient adults. <i>Ann Soc Belg Med Trop.</i> 1977; 57(1): 39-49.                               | 1975-1977                                                                  |                      |
| Democratic Republic of the Congo | Institute for Health Metrics and Evaluation (IHME), Joint United Nations Program on HIV/AIDS (UNAIDS). Institute for Health Metrics and Evaluation HIV Mortality Estimates Based on the UNAIDS Spectrum Model Framework.                                            | 1980-2013                                                                  | *                    |
| Democratic Republic of the Congo | United Nations Children's Fund (UNICEF), World Health Organization (WHO). WHO and UNICEF Reported Disease Incidence Time Series - Pertussis. Geneva, Switzerland: World Health Organization (WHO).                                                                  | 1980-1989, 1998-2001, 2003-2013                                            |                      |
| Democratic Republic of the Congo | United Nations Children's Fund (UNICEF), World Health Organization (WHO). WHO and UNICEF Reported Disease Incidence Time Series - Measles. Geneva, Switzerland: World Health Organization (WHO).                                                                    | 1980-1990, 1992-2013                                                       |                      |
| Democratic Republic of the Congo | Kakiesse, M. La Syphilis à Kinshasa [Syphilis in Kinshasa] [Thesis]. Kinshasa, Zaire: National University of Zaire; 1983.                                                                                                                                           | 1983                                                                       |                      |
| Democratic Republic of the Congo | Werner GT, Frösner GG, Fresenius K. Prevalence of serological hepatitis A and B markers in a rural area of northern Zaire. <i>Am J Trop Med Hyg.</i> 1985; 34(3): 620-4.                                                                                            | 1983                                                                       |                      |
| Democratic Republic of the Congo | National Institute of Statistics (Zaire). Zaire Scientific Population Census 1984.                                                                                                                                                                                  | 1984                                                                       |                      |
| Democratic Republic of the Congo | Delacollette C, Van der Stuyft P, Molima K, Delacollette-Lebrun C, Wery M. Etude de la mortalité globale et de la mortalité liée au paludisme dans le Kivu montagneux, Zaïre. <i>Rev Epidemiol Sante Publique.</i> 1989; 37(2): 161-6.                              | 1986                                                                       |                      |
| Democratic Republic of the Congo | Garenne M, Willie D, Maire B, Fontaine O, Eeckels R, Briend A, Van den Broeck J. Incidence and duration of severe wasting in two African populations. <i>Public Health Nutr.</i> 2009; 12(11): 1974-82.                                                             | 1990                                                                       |                      |
| Democratic Republic of the Congo | Van Den Broeck J, Eeckels R, Vuylsteke J. Influence of nutritional status on child mortality in rural Zaire. <i>Lancet.</i> 1993; 341(8859): 1491-5.                                                                                                                | 1990                                                                       |                      |
| Democratic Republic of the Congo | Thalassaemia International Federation, World Health Organization (WHO). Management of Haemoglobin Disorders: Report of a Joint WHO-TIF Meeting, Nicosia, Cyprus, 16-18 November 2007. Geneva, Switzerland: World Health Organization (WHO), 2008.                   | 1990-2006                                                                  |                      |
| Democratic Republic of the Congo | Tshilolo L, Aissi LM, Lukusa D, Kinsiama C, Wembonyama S, Gulbis B, Vertongen F. Neonatal screening for sickle cell anaemia in the Democratic Republic of the Congo: experience from a pioneer project on 31,204 newborns. <i>J Clin Pathol.</i> 2009; 62(1): 35-8. | 1990-2008                                                                  |                      |
| Democratic Republic of the Congo | Weatherall D. Sickle Cell and Thalassemias Prevalence Data, Personal Correspondence with David Weatherall. [Unpublished].                                                                                                                                           | 1990-2009                                                                  |                      |
| Democratic Republic of the Congo | Agasa B, Bosunga K, Opara A, Tshilumba K, Dupont E, Vertongen F, Cotton F, Gulbis B. Prevalence of sickle cell disease in a northeastern region of the Democratic Republic of Congo: what impact on transfusion policy?. <i>Transfus Med.</i> 2010; 20(1): 62-5.    | 1990-2007                                                                  |                      |
| Democratic Republic of the Congo | Centre for Health Informatics and Multiprofessional Education, University College London. Modell's Haemoglobinopathologist's Almanac. London, United Kingdom: Centre for Health Informatics and Multiprofessional Education, University College London, 2008.       | 1990-2003                                                                  |                      |

**Web Table 32 - Comprehensive citation list**

| Country                          | Citation                                                                                                                                                                                                                                                                                                                    | Year*                      | New for GBD 2013 (*) |
|----------------------------------|-----------------------------------------------------------------------------------------------------------------------------------------------------------------------------------------------------------------------------------------------------------------------------------------------------------------------------|----------------------------|----------------------|
| Democratic Republic of the Congo | United Nations Children's Fund (UNICEF). Zaire Multiple Indicator Cluster Survey 1995. New York, United States: United Nations Children's Fund (UNICEF).                                                                                                                                                                    | 1995                       | *                    |
| Democratic Republic of the Congo | Measles Supplementary Immunization Activity Data as provided by the World Health Organization. [Unpublished].                                                                                                                                                                                                               | 1996-1997, 1999            |                      |
| Democratic Republic of the Congo | World Health Organization Regional Office for Africa. HIV/AIDS Epidemiological Surveillance Update for the WHO African Region. World Health Organization Regional Office for Africa, 2003.                                                                                                                                  | 1997                       |                      |
| Democratic Republic of the Congo | World Health Organization (WHO). Yellow Fever Reported Cases, WHO Vaccine-Preventable Diseases: Monitoring System. Geneva, Switzerland: World Health Organization (WHO).                                                                                                                                                    | 1997-1999, 2001, 2003-2009 |                      |
| Democratic Republic of the Congo | Coghlan B, Brennan RJ, Ngoy P, Dofara D, Otto B, Clements M, Stewart T. Mortality in the Democratic Republic of Congo: a nationwide survey. <i>Lancet</i> . 2006; 367(9504): 44-51.                                                                                                                                         | 2000-2003                  |                      |
| Democratic Republic of the Congo | World Health Organization (WHO). Retrospective Measles Data on Supplementary Immunization Activities. Geneva, Switzerland: World Health Organization (WHO).                                                                                                                                                                 | 2000, 2002-2013            |                      |
| Democratic Republic of the Congo | Ministry of Planning and Reconstruction (Congo, DR), United Nations Children's Fund (UNICEF). Congo, DR Multiple Indicator Cluster Survey 2001. New York, United States: United Nations Children's Fund (UNICEF).                                                                                                           | 2001                       |                      |
| Democratic Republic of the Congo | Sumaili EK, Krzesinski JM, Cohen EP, Nseka NM. Epidemiology of chronic kidney disease in the Democratic Republic of Congo: review of cross-sectional studies from Kinshasa, the capital. <i>Nephrol Ther</i> . 2010; 6(4): 232-9.                                                                                           | 2001-2004                  |                      |
| Democratic Republic of the Congo | Kinoshita-Moleka R, Smith JS, Atibu J, Tshetu A, Hemingway-Foday J, Hobbs M, Bartz J, Koch MA, Rimoin AW, Ryder RW. Low prevalence of HIV and other selected sexually transmitted infections in 2004 in pregnant women from Kinshasa, the Democratic Republic of the Congo. <i>Epidemiol Infect</i> . 2008; 136(9): 1290-6. | 2004                       |                      |
| Democratic Republic of the Congo | United Nations Office on Drugs and Crime (UNODC). United Nations Office on Drugs and Crime Global Study on Homicides 2011. Vienna, Austria: United Nations Office on Drugs and Crime (UNODC), 2011.                                                                                                                         | 2004-2010                  |                      |
| Democratic Republic of the Congo | Macro International, Inc, Ministry of Planning (Congo, DR). Congo, DR Demographic and Health Survey 2007. Calverton, United States: Macro International, Inc.                                                                                                                                                               | 2007                       |                      |
| Democratic Republic of the Congo | World Health Organization (WHO). Global Status Report on Road Safety 2009. Geneva, Switzerland: World Health Organization (WHO), 2009.                                                                                                                                                                                      | 2007                       |                      |
| Democratic Republic of the Congo | Joint United Nations Program on HIV/AIDS (UNAIDS), National Multisectoral Program for the Fight Against AIDS (Congo, DR). Congo, DR Report UNGASS 2010. Geneva, Switzerland: Joint United Nations Program on HIV/AIDS (UNAIDS), 2010.                                                                                       | 2009                       |                      |
| Democratic Republic of the Congo | National Statistical Institute (Congo, DR), Ministry of Planning (Congo, DR), United Nations Children's Fund (UNICEF). Congo, DR Multiple Indicator Cluster Survey 2010. New York, United States: United Nations Children's Fund (UNICEF).                                                                                  | 2010                       |                      |
| Democratic Republic of the Congo | Grout L, Minetti A, Hurtado N, François G, Fermon F, Chatelain A, Harczy G, Ngoie J de DI, N'Goran A, Luquero FJ, Grais RF, Porten K. Measles in Democratic Republic of Congo: an outbreak description from Katanga, 2010-2011. <i>BMC Infect Dis</i> . 2013; 13(1): 232.                                                   | 2010-2011                  | *                    |
| Democratic Republic of the Congo | N'Goran AA, Ilunga N, Coldiron ME, Grais RF, Porten K. Community-based measles mortality surveillance in two districts of Katanga Province, Democratic Republic of Congo. <i>BMC Res Notes</i> . 2013; 6(1): 537.                                                                                                           | 2011                       | *                    |



**Web Table 32 - Comprehensive citation list**

| Country                          | Citation                                                                                                                                                                                                     | Year*     | New for GBD 2013 (*) |
|----------------------------------|--------------------------------------------------------------------------------------------------------------------------------------------------------------------------------------------------------------|-----------|----------------------|
| Democratic Republic of the Congo | Peace Research Institute Oslo (PRIO). Battle Deaths Dataset Version 3, 2009. Oslo, Norway: Peace Research Institute Oslo (PRIO), 2009.                                                                       | 1960-1988 |                      |
| Democratic Republic of the Congo | Department of Peace and Conflict Research, Uppsala University. UCDP Battle-Related Deaths Database Version 5, 2013. Uppsala, Sweden: Department of Peace and Conflict Research, Uppsala University, 2013.    | 1989-2012 | *                    |
| Democratic Republic of the Congo | Department of Peace and Conflict Research, Uppsala University. UCDP One-Sided Violence Database Version 1.4, 2013. Uppsala, Sweden: Department of Peace and Conflict Research, Uppsala University, 2013.     | 1989-2012 | *                    |
| Democratic Republic of the Congo | Department of Peace and Conflict Research, Uppsala University. UCDP Nonstate Conflict Database Version 2.5, 2013. Uppsala, Sweden: Department of Peace and Conflict Research, Uppsala University, 2013.      | 1993-2012 | *                    |
| Denmark                          | Max Planck Institute for Demographic Research, University of California. Human Mortality Database. Berkeley, USA: University of California; Rostock, Germany: Max Planck Institute for Demographic Research. | 1950      |                      |
| Denmark                          | Denmark Vital Registration - Deaths 1951 ICD7 as it appears in World Health Organization (WHO). WHO Mortality Database Version February 2014. Geneva, Switzerland: World Health Organization (WHO), 2014.    | 1951      |                      |
| Denmark                          | Denmark Vital Registration - Deaths 1952 ICD7 as it appears in World Health Organization (WHO). WHO Mortality Database Version February 2014. Geneva, Switzerland: World Health Organization (WHO), 2014.    | 1952      |                      |
| Denmark                          | Denmark Vital Registration - Deaths 1953 ICD7 as it appears in World Health Organization (WHO). WHO Mortality Database Version February 2014. Geneva, Switzerland: World Health Organization (WHO), 2014.    | 1953      |                      |
| Denmark                          | Denmark Vital Registration - Deaths 1954 ICD7 as it appears in World Health Organization (WHO). WHO Mortality Database Version February 2014. Geneva, Switzerland: World Health Organization (WHO), 2014.    | 1954      |                      |
| Denmark                          | Denmark Vital Registration - Deaths 1955 ICD7 as it appears in World Health Organization (WHO). WHO Mortality Database Version February 2014. Geneva, Switzerland: World Health Organization (WHO), 2014.    | 1955      |                      |
| Denmark                          | Denmark Vital Registration - Deaths 1956 ICD7 as it appears in World Health Organization (WHO). WHO Mortality Database Version February 2014. Geneva, Switzerland: World Health Organization (WHO), 2014.    | 1956      |                      |
| Denmark                          | Denmark Vital Registration - Deaths 1957 ICD7 as it appears in World Health Organization (WHO). WHO Mortality Database Version February 2014. Geneva, Switzerland: World Health Organization (WHO), 2014.    | 1957      |                      |
| Denmark                          | Denmark Vital Registration - Deaths 1958 ICD7 as it appears in World Health Organization (WHO). WHO Mortality Database Version February 2014. Geneva, Switzerland: World Health Organization (WHO), 2014.    | 1958      |                      |
| Denmark                          | Denmark Vital Registration - Deaths 1959 ICD7 as it appears in World Health Organization (WHO). WHO Mortality Database Version February 2014. Geneva, Switzerland: World Health Organization (WHO), 2014.    | 1959      |                      |
| Denmark                          | Denmark Vital Registration - Deaths 1960 ICD7 as it appears in World Health Organization (WHO). WHO Mortality Database Version February 2014. Geneva, Switzerland: World Health Organization (WHO), 2014.    | 1960      |                      |

**Web Table 32 - Comprehensive citation list**

| Country | Citation                                                                                                                                                                                                  | Year* | New for GBD 2013 (*) |
|---------|-----------------------------------------------------------------------------------------------------------------------------------------------------------------------------------------------------------|-------|----------------------|
| Denmark | Denmark Vital Registration - Deaths 1961 ICD7 as it appears in World Health Organization (WHO). WHO Mortality Database Version February 2014. Geneva, Switzerland: World Health Organization (WHO), 2014. | 1961  |                      |
| Denmark | Denmark Vital Registration - Deaths 1962 ICD7 as it appears in World Health Organization (WHO). WHO Mortality Database Version February 2014. Geneva, Switzerland: World Health Organization (WHO), 2014. | 1962  |                      |
| Denmark | Denmark Vital Registration - Deaths 1963 ICD7 as it appears in World Health Organization (WHO). WHO Mortality Database Version February 2014. Geneva, Switzerland: World Health Organization (WHO), 2014. | 1963  |                      |
| Denmark | Denmark Vital Registration - Deaths 1964 ICD7 as it appears in World Health Organization (WHO). WHO Mortality Database Version February 2014. Geneva, Switzerland: World Health Organization (WHO), 2014. | 1964  |                      |
| Denmark | Denmark Vital Registration - Deaths 1965 ICD7 as it appears in World Health Organization (WHO). WHO Mortality Database Version February 2014. Geneva, Switzerland: World Health Organization (WHO), 2014. | 1965  |                      |
| Denmark | Denmark Vital Registration - Deaths 1966 ICD7 as it appears in World Health Organization (WHO). WHO Mortality Database Version February 2014. Geneva, Switzerland: World Health Organization (WHO), 2014. | 1966  |                      |
| Denmark | Denmark Vital Registration - Deaths 1967 ICD7 as it appears in World Health Organization (WHO). WHO Mortality Database Version February 2014. Geneva, Switzerland: World Health Organization (WHO), 2014. | 1967  |                      |
| Denmark | Denmark Vital Registration - Deaths 1968 ICD7 as it appears in World Health Organization (WHO). WHO Mortality Database Version February 2014. Geneva, Switzerland: World Health Organization (WHO), 2014. | 1968  |                      |
| Denmark | Denmark Vital Registration - Deaths 1969 ICD8 as it appears in World Health Organization (WHO). WHO Mortality Database Version February 2014. Geneva, Switzerland: World Health Organization (WHO), 2014. | 1969  |                      |
| Denmark | Denmark Vital Registration - Deaths 1970 ICD8 as it appears in World Health Organization (WHO). WHO Mortality Database Version February 2014. Geneva, Switzerland: World Health Organization (WHO), 2014. | 1970  |                      |
| Denmark | Denmark Vital Registration - Deaths 1971 ICD8 as it appears in World Health Organization (WHO). WHO Mortality Database Version February 2014. Geneva, Switzerland: World Health Organization (WHO), 2014. | 1971  |                      |
| Denmark | Denmark Vital Registration - Deaths 1972 ICD8 as it appears in World Health Organization (WHO). WHO Mortality Database Version February 2014. Geneva, Switzerland: World Health Organization (WHO), 2014. | 1972  |                      |
| Denmark | Denmark Vital Registration - Deaths 1973 ICD8 as it appears in World Health Organization (WHO). WHO Mortality Database Version February 2014. Geneva, Switzerland: World Health Organization (WHO), 2014. | 1973  |                      |
| Denmark | Denmark Vital Registration - Deaths 1974 ICD8 as it appears in World Health Organization (WHO). WHO Mortality Database Version February 2014. Geneva, Switzerland: World Health Organization (WHO), 2014. | 1974  |                      |



**Web Table 32 - Comprehensive citation list**

| Country | Citation                                                                                                                                                                                                                                                                                              | Year*                              | New for GBD 2013 (*) |
|---------|-------------------------------------------------------------------------------------------------------------------------------------------------------------------------------------------------------------------------------------------------------------------------------------------------------|------------------------------------|----------------------|
| Denmark | Denmark Vital Registration - Deaths 1975 ICD8 as it appears in World Health Organization (WHO). WHO Mortality Database Version February 2014. Geneva, Switzerland: World Health Organization (WHO), 2014.                                                                                             | 1975                               |                      |
| Denmark | Denmark Vital Registration - Deaths 1976 ICD8 as it appears in World Health Organization (WHO). WHO Mortality Database Version February 2014. Geneva, Switzerland: World Health Organization (WHO), 2014.                                                                                             | 1976                               |                      |
| Denmark | Skinhøj P, Aldershvile J, Black F, Kjersem H, Kryger P, Mathiesen L. Viral hepatitis in southeast Asian refugees. J Med Virol. 1981; 7(2): 149-55.                                                                                                                                                    | 1976                               |                      |
| Denmark | Denmark Vital Registration - Deaths 1977 ICD8 as it appears in World Health Organization (WHO). WHO Mortality Database Version February 2014. Geneva, Switzerland: World Health Organization (WHO), 2014.                                                                                             | 1977                               |                      |
| Denmark | Mathiesen LR, Skinhøj P, Balstrup F. Antibody to hepatitis A virus in plasma of Danish blood donors and in immune serum globulin produced in Denmark. Scand J Infect Dis. 1980; 12(2): 81-3.                                                                                                          | 1977                               |                      |
| Denmark | Denmark Vital Registration - Deaths 1978 ICD8 as it appears in World Health Organization (WHO). WHO Mortality Database Version February 2014. Geneva, Switzerland: World Health Organization (WHO), 2014.                                                                                             | 1978                               |                      |
| Denmark | Denmark Vital Registration - Deaths 1979 ICD8 as it appears in World Health Organization (WHO). WHO Mortality Database Version February 2014. Geneva, Switzerland: World Health Organization (WHO), 2014.                                                                                             | 1979                               |                      |
| Denmark | Denmark Vital Registration - Deaths 1980 ICD8 as it appears in World Health Organization (WHO). WHO Mortality Database Version February 2014. Geneva, Switzerland: World Health Organization (WHO), 2014.                                                                                             | 1980                               |                      |
| Denmark | Institute for Health Metrics and Evaluation. Institute for Health Metrics and Evaluation Cancer Registry Database. [Unpublished].                                                                                                                                                                     | 1980-2011                          |                      |
| Denmark | Ferlay J, Parkin DM, Curado MP, Bray F, Edwards B, Shin HR and Forman D. Cancer Incidence in Five Continents, Volumes I to IX: IARC CancerBase No. 9 [Internet]. Lyon, France: International Agency for Research on Cancer; 2010. Available from: <a href="http://ci5.iarc.fr">http://ci5.iarc.fr</a> | 1980-2002                          |                      |
| Denmark | Institute for Health Metrics and Evaluation (IHME), Joint United Nations Program on HIV/AIDS (UNAIDS). Institute for Health Metrics and Evaluation HIV Mortality Estimates Based on the UNAIDS Spectrum Model Framework.                                                                              | 1980-2013                          | *                    |
| Denmark | United Nations Children's Fund (UNICEF), World Health Organization (WHO). WHO and UNICEF Reported Disease Incidence Time Series - Pertussis. Geneva, Switzerland: World Health Organization (WHO).                                                                                                    | 1980-1997, 2000-2013               |                      |
| Denmark | United Nations Children's Fund (UNICEF), World Health Organization (WHO). WHO and UNICEF Reported Disease Incidence Time Series - Measles. Geneva, Switzerland: World Health Organization (WHO).                                                                                                      | 1980-1997, 2000-2013               |                      |
| Denmark | Parkin DM, International Agency for Research on Cancer, International Association of Cancer Registries. Cancer Incidence in Five Continents. Vol. I to VIII. Lyon, France, IARC Press, 2005.                                                                                                          | 1980, 1985, 1990, 1995             |                      |
| Denmark | Denmark Vital Registration - Deaths 1981 ICD8 as it appears in World Health Organization (WHO). WHO Mortality Database Version February 2014. Geneva, Switzerland: World Health Organization (WHO), 2014.                                                                                             | 1981                               |                      |
| Denmark | Centre for Research on the Epidemiology of Disasters (CRED). EM-DAT: The OFDA/CRED International Disaster Database. Brussels, Belgium: Catholic University of Leuven.                                                                                                                                 | 1981, 1983, 1990, 1999, 2002, 2005 |                      |

**Web Table 32 - Comprehensive citation list**

| Country | Citation                                                                                                                                                                                                                                                                | Year*      | New for GBD 2013 (*) |
|---------|-------------------------------------------------------------------------------------------------------------------------------------------------------------------------------------------------------------------------------------------------------------------------|------------|----------------------|
| Denmark | Denmark Vital Registration - Deaths 1982 ICD8 as it appears in World Health Organization (WHO). WHO Mortality Database Version February 2014. Geneva, Switzerland: World Health Organization (WHO), 2014.                                                               | 1982       |                      |
| Denmark | Denmark Vital Registration - Deaths 1983 ICD8 as it appears in World Health Organization (WHO). WHO Mortality Database Version February 2014. Geneva, Switzerland: World Health Organization (WHO), 2014.                                                               | 1983       |                      |
| Denmark | Skinhøj P, Vinterberg H, Aldershvile J, Kryger P. Hepatitis A, B, and non-A, non-B in Danish hospital nursing staff. <i>J Clin Pathol.</i> 1984; 37(7): 763-6.                                                                                                          | 1983       |                      |
| Denmark | Denmark Vital Registration - Deaths 1984 ICD8 as it appears in World Health Organization (WHO). WHO Mortality Database Version February 2014. Geneva, Switzerland: World Health Organization (WHO), 2014.                                                               | 1984       |                      |
| Denmark | Scheutz F. Viral hepatitis among Danish oral surgeons. <i>Int J Oral Surg.</i> 1985; 14(6): 459-65.                                                                                                                                                                     | 1984       |                      |
| Denmark | Denmark Vital Registration - Deaths 1985 ICD8 as it appears in World Health Organization (WHO). WHO Mortality Database Version February 2014. Geneva, Switzerland: World Health Organization (WHO), 2014.                                                               | 1985       |                      |
| Denmark | Denmark Vital Registration - Deaths 1986 ICD8 as it appears in World Health Organization (WHO). WHO Mortality Database Version February 2014. Geneva, Switzerland: World Health Organization (WHO), 2014.                                                               | 1986       |                      |
| Denmark | Denmark Vital Registration - Deaths 1987 ICD8 as it appears in World Health Organization (WHO). WHO Mortality Database Version February 2014. Geneva, Switzerland: World Health Organization (WHO), 2014.                                                               | 1987       |                      |
| Denmark | Denmark Vital Registration - Deaths 1988 ICD8 as it appears in World Health Organization (WHO). WHO Mortality Database Version February 2014. Geneva, Switzerland: World Health Organization (WHO), 2014.                                                               | 1988       |                      |
| Denmark | Modell B, Darlison M, Birgens H, Cario H, Faustino P, Giordano PC, Gulbis B, Hopmeier P, Lena-Russo D, Romao L, Theodorsson E. Epidemiology of haemoglobin disorders in Europe: an overview. <i>Scand J Clin Lab Invest.</i> 2007; 67(1): 39-69.                        | 1988, 2006 |                      |
| Denmark | Denmark Vital Registration - Deaths 1989 ICD8 as it appears in World Health Organization (WHO). WHO Mortality Database Version February 2014. Geneva, Switzerland: World Health Organization (WHO), 2014.                                                               | 1989       |                      |
| Denmark | Denmark Vital Registration - Deaths 1990 ICD8 as it appears in World Health Organization (WHO). WHO Mortality Database Version February 2014. Geneva, Switzerland: World Health Organization (WHO), 2014.                                                               | 1990       |                      |
| Denmark | Linneberg A, Ostergaard C, Tvede M, Andersen LP, Nielsen NH, Madsen F, Frølund L, Dirksen A, Jørgensen T. IgG antibodies against microorganisms and atopic disease in Danish adults: the Copenhagen Allergy Study. <i>J Allergy Clin Immunol.</i> 2003; 111(4): 847-53. | 1990-1991  |                      |
| Denmark | Denmark Vital Registration - Deaths 1991 ICD8 as it appears in World Health Organization (WHO). WHO Mortality Database Version February 2014. Geneva, Switzerland: World Health Organization (WHO), 2014.                                                               | 1991       |                      |
| Denmark | Andersen K, Lolk A, Nielsen H, Andersen J, Olsen C, Kragh-Sørensen P. Prevalence of very mild to severe dementia in Denmark. <i>Acta Neurol Scand.</i> 1997; 96(2): 82-7.                                                                                               | 1991-1995  |                      |

**Web Table 32 - Comprehensive citation list**

| Country | Citation                                                                                                                                                                                                                                                                                                                                                                                                                                                                                                                                                                                                                                                                                                                     | Year*     | New for GBD 2013 (*) |
|---------|------------------------------------------------------------------------------------------------------------------------------------------------------------------------------------------------------------------------------------------------------------------------------------------------------------------------------------------------------------------------------------------------------------------------------------------------------------------------------------------------------------------------------------------------------------------------------------------------------------------------------------------------------------------------------------------------------------------------------|-----------|----------------------|
| Denmark | Denmark Vital Registration - Deaths 1992 ICD8 as it appears in World Health Organization (WHO). WHO Mortality Database Version February 2014. Geneva, Switzerland: World Health Organization (WHO), 2014.                                                                                                                                                                                                                                                                                                                                                                                                                                                                                                                    | 1992      |                      |
| Denmark | Trichopoulos D, Bamia C, Lagiou P, Fedirko V, Trepo E, Jenab M, Pischon T, Nöthlings U, Overved K, Tjønneland A, Outzen M, Clavel-Chapelon F, Kaaks R, Lukanova A, Boeing H, Aleksandrova K, Benetou V, Zylis D, Palli D, Pala V, Panico S, Tumino R, Sacerdote C, Bueno-De-Mesquita HB, Van Kranen HJ, Peeters PHM, Lund E, Quirós JR, González CA, Sanchez Perez M-J, Navarro C, Dorronsoro M, Barricarte A, Lindkvist B, Regnér S, Werner M, Hallmans G, Khaw K-T, Wareham N, Key T, Romieu I, Chuang S-C, Murphy N, Boffetta P, Trichopoulou A, Riboli E. Hepatocellular carcinoma risk factors and disease burden in a European cohort: a nested case-control study. <i>J Natl Cancer Inst.</i> 2011; 103(22): 1686-95. | 1992-2006 | *                    |
| Denmark | Andersen-Ranberg K, Schroll M, Jeune B. Healthy centenarians do not exist, but autonomous centenarians do: a population-based study of morbidity among Danish centenarians. <i>J Am Geriatr Soc.</i> 2001; 49(7): 900-8.                                                                                                                                                                                                                                                                                                                                                                                                                                                                                                     | 1992-1995 |                      |
| Denmark | Denmark Vital Registration - Deaths 1993 ICD8 as it appears in World Health Organization (WHO). WHO Mortality Database Version February 2014. Geneva, Switzerland: World Health Organization (WHO), 2014.                                                                                                                                                                                                                                                                                                                                                                                                                                                                                                                    | 1993      |                      |
| Denmark | Denmark Vital Registration - Deaths 1994 ICD10 as it appears in World Health Organization (WHO). WHO Mortality Database Version February 2014. Geneva, Switzerland: World Health Organization (WHO), 2014.                                                                                                                                                                                                                                                                                                                                                                                                                                                                                                                   | 1994      |                      |
| Denmark | Denmark Vital Registration - Deaths 1995 ICD10 as it appears in World Health Organization (WHO). WHO Mortality Database Version February 2014. Geneva, Switzerland: World Health Organization (WHO), 2014.                                                                                                                                                                                                                                                                                                                                                                                                                                                                                                                   | 1995      |                      |
| Denmark | Andersen K, Nielsen H, Lolk A, Andersen J, Becker I, Kragh-Sørensen P. Incidence of very mild to severe dementia and Alzheimer's disease in Denmark: the Odense Study. <i>Neurology.</i> 1999; 52(1): 85-90.                                                                                                                                                                                                                                                                                                                                                                                                                                                                                                                 | 1995-1998 |                      |
| Denmark | Andersen-Ranberg K, Vasegaard L, Jeune B. Dementia is not inevitable: a population-based study of Danish centenarians. <i>J Gerontol B Psychol Sci Soc Sci.</i> 2001; 56(3): P152-159.                                                                                                                                                                                                                                                                                                                                                                                                                                                                                                                                       | 1995-1996 |                      |
| Denmark | Denmark Vital Registration - Deaths 1996 ICD10 as it appears in World Health Organization (WHO). WHO Mortality Database Version February 2014. Geneva, Switzerland: World Health Organization (WHO), 2014.                                                                                                                                                                                                                                                                                                                                                                                                                                                                                                                   | 1996      |                      |
| Denmark | Denmark Vital Registration - Deaths 1997 ICD10 as it appears in World Health Organization (WHO). WHO Mortality Database Version February 2014. Geneva, Switzerland: World Health Organization (WHO), 2014.                                                                                                                                                                                                                                                                                                                                                                                                                                                                                                                   | 1997      |                      |
| Denmark | Denmark Vital Registration - Deaths 1998 ICD10 as it appears in World Health Organization (WHO). WHO Mortality Database Version February 2014. Geneva, Switzerland: World Health Organization (WHO), 2014.                                                                                                                                                                                                                                                                                                                                                                                                                                                                                                                   | 1998      |                      |
| Denmark | EUVAC-NET. EUVAC-NET Pertussis Surveillance Report 1998-2002. Stockholm, Sweden: European Centre for Disease Prevention and Control.                                                                                                                                                                                                                                                                                                                                                                                                                                                                                                                                                                                         | 1998-2002 |                      |
| Denmark | Denmark Vital Registration - Deaths 1999 ICD10 as it appears in World Health Organization (WHO). WHO Mortality Database Version February 2014. Geneva, Switzerland: World Health Organization (WHO), 2014.                                                                                                                                                                                                                                                                                                                                                                                                                                                                                                                   | 1999      |                      |

**Web Table 32 - Comprehensive citation list**

| Country | Citation                                                                                                                                                                                                                                                                                             | Year*      | New for GBD 2013 (*) |
|---------|------------------------------------------------------------------------------------------------------------------------------------------------------------------------------------------------------------------------------------------------------------------------------------------------------|------------|----------------------|
| Denmark | Denmark Vital Registration - Deaths 2000 ICD10 as it appears in World Health Organization (WHO). WHO Mortality Database Version February 2014. Geneva, Switzerland: World Health Organization (WHO), 2014.                                                                                           | 2000       |                      |
| Denmark | Curado MP, Edwards B, Shin HR, Storm H, Ferlay J, Heanue M and Boyle P, eds (2007). Cancer Incidence in Five Continents, Vol. IX Periodic Data (electronic version). Lyon, IARC. <a href="http://ci5.iarc.fr">http://ci5.iarc.fr</a>                                                                 | 2000       |                      |
| Denmark | Fisker N, Georgsen J, Stolborg T, Khalil MR, Christensen PB. Low hepatitis B prevalence among pre-school children in Denmark: saliva anti-HBc screening in day care centres. J Med Virol. 2002; 68(4): 500-4.                                                                                        | 2000       |                      |
| Denmark | Jensen L, Heilmann C, Smith E, Wantzin P, Peitersen B, Weber T, Krogsgaard K. Efficacy of selective antenatal screening for hepatitis B among pregnant women in Denmark: is selective screening still an acceptable strategy in a low-endemicity country? Scand J Infect Dis. 2003; 35(6-7): 378-82. | 2000-2001  |                      |
| Denmark | Denmark Vital Registration - Deaths 2001 ICD10 as it appears in World Health Organization (WHO). WHO Mortality Database Version February 2014. Geneva, Switzerland: World Health Organization (WHO), 2014.                                                                                           | 2001       |                      |
| Denmark | Denmark Vital Registration - Deaths 2002 ICD10 as it appears in World Health Organization (WHO). WHO Mortality Database Version February 2014. Geneva, Switzerland: World Health Organization (WHO), 2014.                                                                                           | 2002       |                      |
| Denmark | World Health Organization (WHO). Yellow Fever Reported Cases, WHO Vaccine-Preventable Diseases: Monitoring System. Geneva, Switzerland: World Health Organization (WHO).                                                                                                                             | 2002-2003  |                      |
| Denmark | Denmark Vital Registration - Deaths 2003 ICD10 as it appears in World Health Organization (WHO). WHO Mortality Database Version February 2014. Geneva, Switzerland: World Health Organization (WHO), 2014.                                                                                           | 2003       |                      |
| Denmark | Christensen PB, Homburg KM, Sørensen LT, Georgsen J. Hepatitis A infection and vaccination among Danish blood donors. Scand J Infect Dis. 2005; 37(2): 127-30.                                                                                                                                       | 2003       |                      |
| Denmark | WHO Regional Office for Europe (EURO-WHO). European Hospital Morbidity Database. Copenhagen, Denmark: WHO Regional Office for Europe (EURO-WHO).                                                                                                                                                     | 2003-2006  |                      |
| Denmark | Association of Nordic Cancer Registries (ANCR). Denmark NORDCAN Cancer Incidence Data Tables, Age-Specific by Countries. Copenhagen, Denmark: Association of Nordic Cancer Registries (ANCR).                                                                                                        | 2003-2011  | *                    |
| Denmark | Centre for Health Informatics and Multiprofessional Education, University College London. Modell's Haemoglobinopathologist's Almanac. London, United Kingdom: Centre for Health Informatics and Multiprofessional Education, University College London, 2008.                                        | 2003, 2006 |                      |
| Denmark | Denmark Vital Registration - Deaths 2004 ICD10 as it appears in World Health Organization (WHO). WHO Mortality Database Version February 2014. Geneva, Switzerland: World Health Organization (WHO), 2014.                                                                                           | 2004       |                      |
| Denmark | Denmark Vital Registration - Deaths 2005 ICD10 as it appears in World Health Organization (WHO). WHO Mortality Database Version February 2014. Geneva, Switzerland: World Health Organization (WHO), 2014.                                                                                           | 2005       |                      |
| Denmark | Denmark Vital Registration - Deaths 2006 ICD10 as it appears in World Health Organization (WHO). WHO Mortality Database Version February 2014. Geneva, Switzerland: World Health Organization (WHO), 2014.                                                                                           | 2006       |                      |

**Web Table 32 - Comprehensive citation list**

| Country  | Citation                                                                                                                                                                                                                                                                                         | Year*                                                 | New for GBD 2013 (*) |
|----------|--------------------------------------------------------------------------------------------------------------------------------------------------------------------------------------------------------------------------------------------------------------------------------------------------|-------------------------------------------------------|----------------------|
| Denmark  | Bouva MJ, Mohrmann K, Brinkman HBJM, Kemper-Proper EA, Elvers B, Loeber JG, Verheul FEAM, Giordano PC. Implementing neonatal screening for haemoglobinopathies in the Netherlands. <i>J Med Screen</i> . 2010; 17(2): 58-65.                                                                     | 2006                                                  | *                    |
| Denmark  | Denmark Vital Registration - Deaths 2007 ICD10 as it appears in World Health Organization (WHO). WHO Mortality Database Version February 2014. Geneva, Switzerland: World Health Organization (WHO), 2014.                                                                                       | 2007                                                  |                      |
| Denmark  | Denmark Vital Registration - Deaths 2008 ICD10 as it appears in World Health Organization (WHO). WHO Mortality Database Version February 2014. Geneva, Switzerland: World Health Organization (WHO), 2014.                                                                                       | 2008                                                  |                      |
| Denmark  | EUVAC-NET. EUVAC-NET Pertussis Surveillance Report 2008. Stockholm, Sweden: European Centre for Disease Prevention and Control, 2009.                                                                                                                                                            | 2008                                                  |                      |
| Denmark  | Denmark Vital Registration - Deaths 2009 ICD10 as it appears in World Health Organization (WHO). WHO Mortality Database Version February 2014. Geneva, Switzerland: World Health Organization (WHO), 2014.                                                                                       | 2009                                                  |                      |
| Denmark  | EUVAC-NET. EUVAC-NET Pertussis Surveillance Report 2009. Stockholm, Sweden: European Centre for Disease Prevention and Control, 2010.                                                                                                                                                            | 2009                                                  |                      |
| Denmark  | Denmark Vital Registration - Deaths 2010 ICD10 as it appears in World Health Organization (WHO). WHO Mortality Database Version February 2014. Geneva, Switzerland: World Health Organization (WHO), 2014.                                                                                       | 2010                                                  |                      |
| Denmark  | European Renal Association-European Dialysis and Transplant Association (ERA-EDTA). European Renal Association-European Dialysis and Transplant Association Registry Annual Report 2010. Parma, Italy: European Renal Association-European Dialysis and Transplant Association (ERA-EDTA), 2012. | 2010                                                  | *                    |
| Denmark  | EUVAC-NET. EUVAC-NET Measles Surveillance Report 2010. Stockholm, Sweden: European Centre for Disease Prevention and Control, 2011.                                                                                                                                                              | 2010                                                  |                      |
| Denmark  | Denmark Vital Registration - Deaths 2011 ICD10 as it appears in World Health Organization (WHO). WHO Mortality Database Version February 2014. Geneva, Switzerland: World Health Organization (WHO), 2014.                                                                                       | 2011                                                  | *                    |
| Denmark  | European Renal Association-European Dialysis and Transplant Association (ERA-EDTA). European Renal Association-European Dialysis and Transplant Association Registry Annual Report 2011. Parma, Italy: European Renal Association-European Dialysis and Transplant Association (ERA-EDTA), 2013. | 2011                                                  | *                    |
| Denmark  | World Health Organization (WHO). Retrospective Measles Data on Supplementary Immunization Activities. Geneva, Switzerland: World Health Organization (WHO).                                                                                                                                      | 2012                                                  |                      |
| Djibouti | Institute for Health Metrics and Evaluation (IHME), Joint United Nations Program on HIV/AIDS (UNAIDS). Institute for Health Metrics and Evaluation HIV Mortality Estimates Based on the UNAIDS Spectrum Model Framework.                                                                         | 1980-2013                                             | *                    |
| Djibouti | United Nations Children's Fund (UNICEF), World Health Organization (WHO). WHO and UNICEF Reported Disease Incidence Time Series - Pertussis. Geneva, Switzerland: World Health Organization (WHO).                                                                                               | 1981-1985, 1987-1993, 1995-1996, 2000-2004, 2008-2010 |                      |
| Djibouti | United Nations Children's Fund (UNICEF), World Health Organization (WHO). WHO and UNICEF Reported Disease Incidence Time Series - Measles. Geneva, Switzerland: World Health Organization (WHO).                                                                                                 | 1981-1982, 1984-1985, 1987-1993, 1995-1996, 1998-2013 |                      |

**Web Table 32 - Comprehensive citation list**

| Country  | Citation                                                                                                                                                                                                                                                                            | Year*                           | New for GBD 2013 (*) |
|----------|-------------------------------------------------------------------------------------------------------------------------------------------------------------------------------------------------------------------------------------------------------------------------------------|---------------------------------|----------------------|
| Djibouti | Centre for Research on the Epidemiology of Disasters (CRED). EM-DAT: The OFDA/CRED International Disaster Database. Brussels, Belgium: Catholic University of Leuven.                                                                                                               | 1981, 1989, 1994, 2004          |                      |
| Djibouti | Fox E, Abbatte EA, Said-Salah, Constantine NT, Wassef HH, Woody JN. Viral hepatitis markers in Djibouti: an epidemiological survey. <i>Trans R Soc Trop Med Hyg.</i> 1988; 82(5): 750-2.                                                                                            | 1987                            |                      |
| Djibouti | Centre for Health Informatics and Multiprofessional Education, University College London. <i>Modell's Haemoglobinopathologist's Almanac.</i> London, United Kingdom: Centre for Health Informatics and Multiprofessional Education, University College London, 2008.                | 1990-2003                       |                      |
| Djibouti | Department of Peace and Conflict Research, Uppsala University. UCDP Battle-Related Deaths Database Version 5, 2013. Uppsala, Sweden: Department of Peace and Conflict Research, Uppsala University, 2013.                                                                           | 1991-2008                       | *                    |
| Djibouti | Department of Peace and Conflict Research, Uppsala University. UCDP Nonstate Conflict Database Version 2.5, 2013. Uppsala, Sweden: Department of Peace and Conflict Research, Uppsala University, 2013.                                                                             | 1995                            | *                    |
| Djibouti | World Health Organization (WHO). <i>Global Prevalence and Incidence of Selected Curable Sexually Transmitted Infections: Overviews and Estimates 2001.</i> Geneva, Switzerland: World Health Organization (WHO), 2001.                                                              | 1997                            |                      |
| Djibouti | Abu-Raddad LJ, Akala FA, Semini I, Riedner G, Wilson D, Tawil O, World Bank. <i>Characterizing the HIV/AIDS Epidemic in the Middle East and North Africa.</i> Washington DC, United States: World Bank, 2010.                                                                       | 1997-1998, 2002, 2007           |                      |
| Djibouti | World Health Organization (WHO). <i>Yellow Fever Reported Cases, WHO Vaccine-Preventable Diseases: Monitoring System.</i> Geneva, Switzerland: World Health Organization (WHO).                                                                                                     | 1998, 2001, 2007-2009           |                      |
| Djibouti | Department of Statistics and Demographic Studies (Djibouti), League of Arab States, Ministry of Health (Djibouti), Pan Arab Project for Family Health (PAPFAM). <i>Djibouti Family Health Survey 2002.</i>                                                                          | 2002                            |                      |
| Djibouti | World Health Organization (WHO). <i>Retrospective Measles Data on Supplementary Immunization Activities.</i> Geneva, Switzerland: World Health Organization (WHO).                                                                                                                  | 2002-2005, 2007-2008, 2011-2012 |                      |
| Djibouti | Ministry of Economy, Finance, and Planning in charge of Privatization (Djibouti), Ministry of Health (Djibouti), United Nations Children's Fund (UNICEF). <i>Djibouti Multiple Indicator Cluster Survey 2006.</i> New York, United States: United Nations Children's Fund (UNICEF). | 2006                            |                      |
| Djibouti | Intersectoral Technical Committee to Fight AIDS, Tuberculosis and Malaria (Djibouti), Joint United Nations Program on HIV/AIDS (UNAIDS). <i>Djibouti UNGASS Monitoring Report 2010.</i> Geneva, Switzerland: Joint United Nations Program on HIV/AIDS (UNAIDS), 2010.               | 2009                            |                      |
| Dominica | Dominica Vital Registration Death Data 1950 as it appears in United Nations Statistics Division (UNSD). <i>United Nations Demographic Yearbook.</i> New York City, United States: United Nations Statistics Division (UNSD).                                                        | 1950                            |                      |
| Dominica | Dominica Vital Registration Death Data 1951 as it appears in United Nations Statistics Division (UNSD). <i>United Nations Demographic Yearbook.</i> New York City, United States: United Nations Statistics Division (UNSD).                                                        | 1951                            |                      |
| Dominica | Dominica Vital Registration Death Data 1952 as it appears in United Nations Statistics Division (UNSD). <i>United Nations Demographic Yearbook.</i> New York City, United States: United Nations Statistics Division (UNSD).                                                        | 1952                            |                      |
| Dominica | Dominica Vital Registration Death Data 1953 as it appears in United Nations Statistics Division (UNSD). <i>United Nations Demographic Yearbook.</i> New York City, United States: United Nations Statistics Division (UNSD).                                                        | 1953                            |                      |



**Web Table 32 - Comprehensive citation list**

| Country  | Citation                                                                                                                                                                                                              | Year* | New for GBD 2013 (*) |
|----------|-----------------------------------------------------------------------------------------------------------------------------------------------------------------------------------------------------------------------|-------|----------------------|
| Dominica | Dominica Vital Registration Death Data 1954 as it appears in United Nations Statistics Division (UNSD). United Nations Demographic Yearbook. New York City, United States: United Nations Statistics Division (UNSD). | 1954  |                      |
| Dominica | Dominica Vital Registration Death Data 1955 as it appears in United Nations Statistics Division (UNSD). United Nations Demographic Yearbook. New York City, United States: United Nations Statistics Division (UNSD). | 1955  |                      |
| Dominica | Dominica Vital Registration Death Data 1956 as it appears in United Nations Statistics Division (UNSD). United Nations Demographic Yearbook. New York City, United States: United Nations Statistics Division (UNSD). | 1956  |                      |
| Dominica | Dominica Vital Registration Death Data 1957 as it appears in United Nations Statistics Division (UNSD). United Nations Demographic Yearbook. New York City, United States: United Nations Statistics Division (UNSD). | 1957  |                      |
| Dominica | Dominica Vital Registration Death Data 1958 as it appears in United Nations Statistics Division (UNSD). United Nations Demographic Yearbook. New York City, United States: United Nations Statistics Division (UNSD). | 1958  |                      |
| Dominica | Dominica Vital Registration Death Data 1959 as it appears in United Nations Statistics Division (UNSD). United Nations Demographic Yearbook. New York City, United States: United Nations Statistics Division (UNSD). | 1959  |                      |
| Dominica | Dominica Vital Registration Death Data 1960 as it appears in United Nations Statistics Division (UNSD). United Nations Demographic Yearbook. New York City, United States: United Nations Statistics Division (UNSD). | 1960  |                      |
| Dominica | Dominica Vital Registration - Deaths 1961 ICD7 as it appears in World Health Organization (WHO). WHO Mortality Database Version February 2014. Geneva, Switzerland: World Health Organization (WHO), 2014.            | 1961  |                      |
| Dominica | Dominica Vital Registration - Deaths 1962 ICD7 as it appears in World Health Organization (WHO). WHO Mortality Database Version February 2014. Geneva, Switzerland: World Health Organization (WHO), 2014.            | 1962  |                      |
| Dominica | Dominica Vital Registration Death Data 1963 as it appears in United Nations Statistics Division (UNSD). United Nations Demographic Yearbook. New York City, United States: United Nations Statistics Division (UNSD). | 1963  |                      |
| Dominica | Dominica Vital Registration Death Data 1966 as it appears in United Nations Statistics Division (UNSD). United Nations Demographic Yearbook. New York City, United States: United Nations Statistics Division (UNSD). | 1966  |                      |
| Dominica | Dominica Vital Registration - Deaths 1967 ICD7 as it appears in World Health Organization (WHO). WHO Mortality Database Version February 2014. Geneva, Switzerland: World Health Organization (WHO), 2014.            | 1967  |                      |
| Dominica | Dominica Vital Registration - Deaths 1968 ICD7 as it appears in World Health Organization (WHO). WHO Mortality Database Version February 2014. Geneva, Switzerland: World Health Organization (WHO), 2014.            | 1968  |                      |
| Dominica | Dominica Vital Registration - Deaths 1969 ICD8 as it appears in World Health Organization (WHO). WHO Mortality Database Version February 2014. Geneva, Switzerland: World Health Organization (WHO), 2014.            | 1969  |                      |

**Web Table 32 - Comprehensive citation list**

| Country  | Citation                                                                                                                                                                                                                 | Year*                        | New for GBD 2013 (*) |
|----------|--------------------------------------------------------------------------------------------------------------------------------------------------------------------------------------------------------------------------|------------------------------|----------------------|
| Dominica | Dominica Vital Registration - Deaths 1970 ICD8 as it appears in World Health Organization (WHO). WHO Mortality Database Version February 2014. Geneva, Switzerland: World Health Organization (WHO), 2014.               | 1970                         |                      |
| Dominica | Dominica Vital Registration - Deaths 1971 ICD8 as it appears in World Health Organization (WHO). WHO Mortality Database Version February 2014. Geneva, Switzerland: World Health Organization (WHO), 2014.               | 1971                         |                      |
| Dominica | Dominica Vital Registration - Deaths 1972 ICD8 as it appears in World Health Organization (WHO). WHO Mortality Database Version February 2014. Geneva, Switzerland: World Health Organization (WHO), 2014.               | 1972                         |                      |
| Dominica | Dominica Vital Registration - Deaths 1973 ICD8 as it appears in World Health Organization (WHO). WHO Mortality Database Version February 2014. Geneva, Switzerland: World Health Organization (WHO), 2014.               | 1973                         |                      |
| Dominica | Dominica Vital Registration - Deaths 1974 ICD8 as it appears in World Health Organization (WHO). WHO Mortality Database Version February 2014. Geneva, Switzerland: World Health Organization (WHO), 2014.               | 1974                         |                      |
| Dominica | Dominica Vital Registration - Deaths 1975 ICD8 as it appears in World Health Organization (WHO). WHO Mortality Database Version February 2014. Geneva, Switzerland: World Health Organization (WHO), 2014.               | 1975                         |                      |
| Dominica | Dominica Vital Registration - Deaths 1976 ICD8 as it appears in World Health Organization (WHO). WHO Mortality Database Version February 2014. Geneva, Switzerland: World Health Organization (WHO), 2014.               | 1976                         |                      |
| Dominica | Dominica Vital Registration - Deaths 1977 ICD8 as it appears in World Health Organization (WHO). WHO Mortality Database Version February 2014. Geneva, Switzerland: World Health Organization (WHO), 2014.               | 1977                         |                      |
| Dominica | Dominica Vital Registration - Deaths 1978 ICD8 as it appears in World Health Organization (WHO). WHO Mortality Database Version February 2014. Geneva, Switzerland: World Health Organization (WHO), 2014.               | 1978                         |                      |
| Dominica | Dominica Vital Registration - Deaths 1979 ICD9 as it appears in World Health Organization (WHO). WHO Mortality Database Version February 2014. Geneva, Switzerland: World Health Organization (WHO), 2014.               | 1979                         |                      |
| Dominica | Centre for Research on the Epidemiology of Disasters (CRED). EM-DAT: The OFDA/CRED International Disaster Database. Brussels, Belgium: Catholic University of Leuven.                                                    | 1979, 1984, 1995, 2001, 2007 |                      |
| Dominica | Dominica Vital Registration - Deaths 1980 ICD9 as it appears in World Health Organization (WHO). WHO Mortality Database Version February 2014. Geneva, Switzerland: World Health Organization (WHO), 2014.               | 1980                         |                      |
| Dominica | Institute for Health Metrics and Evaluation (IHME), Joint United Nations Program on HIV/AIDS (UNAIDS). Institute for Health Metrics and Evaluation HIV Mortality Estimates Based on the UNAIDS Spectrum Model Framework. | 1980-2013                    | *                    |
| Dominica | United Nations Children's Fund (UNICEF), World Health Organization (WHO). WHO and UNICEF Reported Disease Incidence Time Series - Pertussis. Geneva, Switzerland: World Health Organization (WHO).                       | 1980-2013                    |                      |
| Dominica | United Nations Children's Fund (UNICEF), World Health Organization (WHO). WHO and UNICEF Reported Disease Incidence Time Series - Measles. Geneva, Switzerland: World Health Organization (WHO).                         | 1980-2013                    |                      |



**Web Table 32 - Comprehensive citation list**

| Country  | Citation                                                                                                                                                                                                                                                      | Year*      | New for GBD 2013 (*) |
|----------|---------------------------------------------------------------------------------------------------------------------------------------------------------------------------------------------------------------------------------------------------------------|------------|----------------------|
| Dominica | Dominica Vital Registration - Deaths 1981 ICD9 as it appears in World Health Organization (WHO). WHO Mortality Database Version February 2014. Geneva, Switzerland: World Health Organization (WHO), 2014.                                                    | 1981       |                      |
| Dominica | Dominica Vital Registration - Deaths 1982 ICD9 as it appears in World Health Organization (WHO). WHO Mortality Database Version February 2014. Geneva, Switzerland: World Health Organization (WHO), 2014.                                                    | 1982       |                      |
| Dominica | United Nations Office on Drugs and Crime (UNODC). United Nations Surveys on Crime Trends and the Operations of Criminal Justice Systems 1970-2006 as provided by Kavi Bhalla. [Unpublished].                                                                  | 1982-1986  |                      |
| Dominica | Dominica Vital Registration - Deaths 1983 ICD9 as it appears in World Health Organization (WHO). WHO Mortality Database Version February 2014. Geneva, Switzerland: World Health Organization (WHO), 2014.                                                    | 1983       |                      |
| Dominica | Dominica Vital Registration - Deaths 1984 ICD9 as it appears in World Health Organization (WHO). WHO Mortality Database Version February 2014. Geneva, Switzerland: World Health Organization (WHO), 2014.                                                    | 1984       |                      |
| Dominica | Dominica Vital Registration - Deaths 1985 ICD9 as it appears in World Health Organization (WHO). WHO Mortality Database Version February 2014. Geneva, Switzerland: World Health Organization (WHO), 2014.                                                    | 1985       |                      |
| Dominica | Dominica Vital Registration - Deaths 1986 ICD9 as it appears in World Health Organization (WHO). WHO Mortality Database Version February 2014. Geneva, Switzerland: World Health Organization (WHO), 2014.                                                    | 1986       |                      |
| Dominica | Dominica Vital Registration - Deaths 1987 ICD9 as it appears in World Health Organization (WHO). WHO Mortality Database Version February 2014. Geneva, Switzerland: World Health Organization (WHO), 2014.                                                    | 1987       |                      |
| Dominica | Dominica Vital Registration - Deaths 1988 ICD9 as it appears in World Health Organization (WHO). WHO Mortality Database Version February 2014. Geneva, Switzerland: World Health Organization (WHO), 2014.                                                    | 1988       |                      |
| Dominica | Dominica Vital Registration - Deaths 1989 ICD9 as it appears in World Health Organization (WHO). WHO Mortality Database Version February 2014. Geneva, Switzerland: World Health Organization (WHO), 2014.                                                    | 1989       |                      |
| Dominica | Dominica Vital Registration - Deaths 1990 ICD9 as it appears in World Health Organization (WHO). WHO Mortality Database Version February 2014. Geneva, Switzerland: World Health Organization (WHO), 2014.                                                    | 1990       |                      |
| Dominica | Centre for Health Informatics and Multiprofessional Education, University College London. Modell's Haemoglobinopathologist's Almanac. London, United Kingdom: Centre for Health Informatics and Multiprofessional Education, University College London, 2008. | 1990-2003  |                      |
| Dominica | Dominica Vital Registration - Deaths 1991 ICD9 as it appears in World Health Organization (WHO). WHO Mortality Database Version February 2014. Geneva, Switzerland: World Health Organization (WHO), 2014.                                                    | 1991       |                      |
| Dominica | Measles Supplementary Immunization Activity Data as provided by the World Health Organization. [Unpublished].                                                                                                                                                 | 1991, 1996 |                      |
| Dominica | Dominica Vital Registration - Deaths 1992 ICD9 as it appears in World Health Organization (WHO). WHO Mortality Database Version February 2014. Geneva, Switzerland: World Health Organization (WHO), 2014.                                                    | 1992       |                      |

**Web Table 32 - Comprehensive citation list**

| Country  | Citation                                                                                                                                                                                                    | Year*                      | New for GBD 2013 (*) |
|----------|-------------------------------------------------------------------------------------------------------------------------------------------------------------------------------------------------------------|----------------------------|----------------------|
| Dominica | Dominica Vital Registration - Deaths 1993 ICD9 as it appears in World Health Organization (WHO). WHO Mortality Database Version February 2014. Geneva, Switzerland: World Health Organization (WHO), 2014.  | 1993                       |                      |
| Dominica | Dominica Vital Registration - Deaths 1994 ICD9 as it appears in World Health Organization (WHO). WHO Mortality Database Version February 2014. Geneva, Switzerland: World Health Organization (WHO), 2014.  | 1994                       |                      |
| Dominica | Dominica Vital Registration - Deaths 1995 ICD9 as it appears in World Health Organization (WHO). WHO Mortality Database Version February 2014. Geneva, Switzerland: World Health Organization (WHO), 2014.  | 1995                       |                      |
| Dominica | Dominica Vital Registration - Deaths 1996 ICD9 as it appears in World Health Organization (WHO). WHO Mortality Database Version February 2014. Geneva, Switzerland: World Health Organization (WHO), 2014.  | 1996                       |                      |
| Dominica | Dominica Vital Registration - Deaths 1997 ICD9 as it appears in World Health Organization (WHO). WHO Mortality Database Version February 2014. Geneva, Switzerland: World Health Organization (WHO), 2014.  | 1997                       |                      |
| Dominica | Dominica Vital Registration - Deaths 1998 ICD9 as it appears in World Health Organization (WHO). WHO Mortality Database Version February 2014. Geneva, Switzerland: World Health Organization (WHO), 2014.  | 1998                       |                      |
| Dominica | Dominica Vital Registration - Deaths 1999 ICD9 as it appears in World Health Organization (WHO). WHO Mortality Database Version February 2014. Geneva, Switzerland: World Health Organization (WHO), 2014.  | 1999                       |                      |
| Dominica | United Nations Office on Drugs and Crime (UNODC). United Nations Office on Drugs and Crime Global Study on Homicides 2011. Vienna, Austria: United Nations Office on Drugs and Crime (UNODC), 2011.         | 1999-2010                  |                      |
| Dominica | Dominica Vital Registration - Deaths 2000 ICD9 as it appears in World Health Organization (WHO). WHO Mortality Database Version February 2014. Geneva, Switzerland: World Health Organization (WHO), 2014.  | 2000                       |                      |
| Dominica | World Health Organization (WHO). Yellow Fever Reported Cases, WHO Vaccine-Preventable Diseases: Monitoring System. Geneva, Switzerland: World Health Organization (WHO).                                    | 2000-2001, 2004, 2006-2009 |                      |
| Dominica | Dominica Vital Registration - Deaths 2001 ICD10 as it appears in World Health Organization (WHO). WHO Mortality Database Version February 2014. Geneva, Switzerland: World Health Organization (WHO), 2014. | 2001                       |                      |
| Dominica | Dominica Vital Registration - Deaths 2002 ICD10 as it appears in World Health Organization (WHO). WHO Mortality Database Version February 2014. Geneva, Switzerland: World Health Organization (WHO), 2014. | 2002                       |                      |
| Dominica | Dominica Vital Registration - Deaths 2003 ICD10 as it appears in World Health Organization (WHO). WHO Mortality Database Version February 2014. Geneva, Switzerland: World Health Organization (WHO), 2014. | 2003                       |                      |
| Dominica | Dominica Vital Registration - Deaths 2004 ICD10 as it appears in World Health Organization (WHO). WHO Mortality Database Version February 2014. Geneva, Switzerland: World Health Organization (WHO), 2014. | 2004                       |                      |
| Dominica | Dominica Vital Registration - Deaths 2005 ICD10 as it appears in World Health Organization (WHO). WHO Mortality Database Version February 2014. Geneva, Switzerland: World Health Organization (WHO), 2014. | 2005                       |                      |

**Web Table 32 - Comprehensive citation list**

| Country            | Citation                                                                                                                                                                                                                                                                                                                                                                                                                        | Year*     | New for GBD 2013 (*) |
|--------------------|---------------------------------------------------------------------------------------------------------------------------------------------------------------------------------------------------------------------------------------------------------------------------------------------------------------------------------------------------------------------------------------------------------------------------------|-----------|----------------------|
| Dominica           | Dominica Vital Registration - Deaths 2006 ICD10 as it appears in World Health Organization (WHO). WHO Mortality Database Version February 2014. Geneva, Switzerland: World Health Organization (WHO), 2014.                                                                                                                                                                                                                     | 2006      |                      |
| Dominica           | Fassio E, Díaz S, Santa C, Reig ME, Martínez Artola Y, Alves de Mattos A, Míguez C, Galizzi J, Zapata R, Ridruejo E, de Souza FC, Hernández N, Pinchuk L, Multicenter Group for Study of Hepatocarcinoma in Latin America, Asociación Latinoamericana para el Estudio del Hígado (ALEH). Etiology of hepatocellular carcinoma in Latin America: a prospective, multicenter, international study. Ann Hepatol. 2010; 9(1): 63-9. | 2006-2008 | *                    |
| Dominica           | Dominica Vital Registration - Deaths 2007 ICD10 as it appears in World Health Organization (WHO). WHO Mortality Database Version February 2014. Geneva, Switzerland: World Health Organization (WHO), 2014.                                                                                                                                                                                                                     | 2007      |                      |
| Dominica           | Dominica Vital Registration - Deaths 2008 ICD10 as it appears in World Health Organization (WHO). WHO Mortality Database Version February 2014. Geneva, Switzerland: World Health Organization (WHO), 2014.                                                                                                                                                                                                                     | 2008      |                      |
| Dominica           | Dominica Vital Registration - Deaths 2009 ICD10 as it appears in World Health Organization (WHO). WHO Mortality Database Version February 2014. Geneva, Switzerland: World Health Organization (WHO), 2014.                                                                                                                                                                                                                     | 2009      |                      |
| Dominica           | Joint United Nations Program on HIV/AIDS (UNAIDS), National HIV and AIDS Response Programme, Ministry of Health (Dominica). Dominica UNGASS Narrative Report 2010. Geneva, Switzerland: Joint United Nations Program on HIV/AIDS (UNAIDS), 2010.                                                                                                                                                                                | 2009      |                      |
| Dominica           | Dominica Vital Registration - Deaths 2010 ICD10 as it appears in World Health Organization (WHO). WHO Mortality Database Version February 2014. Geneva, Switzerland: World Health Organization (WHO), 2014.                                                                                                                                                                                                                     | 2010      |                      |
| Dominican Republic | Dominican Republic Vital Registration Death Data 1950 as it appears in United Nations Statistics Division (UNSD). United Nations Demographic Yearbook. New York City, United States: United Nations Statistics Division (UNSD).                                                                                                                                                                                                 | 1950      |                      |
| Dominican Republic | Dominican Republic Vital Registration Death Data 1951 as it appears in United Nations Statistics Division (UNSD). United Nations Demographic Yearbook. New York City, United States: United Nations Statistics Division (UNSD).                                                                                                                                                                                                 | 1951      |                      |
| Dominican Republic | Dominican Republic Vital Registration Death Data 1952 as it appears in United Nations Statistics Division (UNSD). United Nations Demographic Yearbook. New York City, United States: United Nations Statistics Division (UNSD).                                                                                                                                                                                                 | 1952      |                      |
| Dominican Republic | Dominican Republic Vital Registration Death Data 1953 as it appears in United Nations Statistics Division (UNSD). United Nations Demographic Yearbook. New York City, United States: United Nations Statistics Division (UNSD).                                                                                                                                                                                                 | 1953      |                      |
| Dominican Republic | Dominican Republic Vital Registration Death Data 1954 as it appears in United Nations Statistics Division (UNSD). United Nations Demographic Yearbook. New York City, United States: United Nations Statistics Division (UNSD).                                                                                                                                                                                                 | 1954      |                      |
| Dominican Republic | Dominican Republic Vital Registration Death Data 1955 as it appears in United Nations Statistics Division (UNSD). United Nations Demographic Yearbook. New York City, United States: United Nations Statistics Division (UNSD).                                                                                                                                                                                                 | 1955      |                      |

**Web Table 32 - Comprehensive citation list**

| Country            | Citation                                                                                                                                                                                                                                                     | Year*                                                                                    | New for GBD 2013 (*) |
|--------------------|--------------------------------------------------------------------------------------------------------------------------------------------------------------------------------------------------------------------------------------------------------------|------------------------------------------------------------------------------------------|----------------------|
| Dominican Republic | Dominican Republic Vital Registration - Deaths 1956 ICD7 as it appears in World Health Organization (WHO). WHO Mortality Database Version February 2014. Geneva, Switzerland: World Health Organization (WHO), 2014.                                         | 1956                                                                                     |                      |
| Dominican Republic | Dominican Republic Vital Registration - Deaths 1957 ICD7 as it appears in World Health Organization (WHO). WHO Mortality Database Version February 2014. Geneva, Switzerland: World Health Organization (WHO), 2014.                                         | 1957                                                                                     |                      |
| Dominican Republic | Dominican Republic Vital Registration - Deaths 1958 ICD7 as it appears in World Health Organization (WHO). WHO Mortality Database Version February 2014. Geneva, Switzerland: World Health Organization (WHO), 2014.                                         | 1958                                                                                     |                      |
| Dominican Republic | Dominican Republic Vital Registration - Deaths 1959 ICD7 as it appears in World Health Organization (WHO). WHO Mortality Database Version February 2014. Geneva, Switzerland: World Health Organization (WHO), 2014.                                         | 1959                                                                                     |                      |
| Dominican Republic | Dominican Republic Vital Registration - Deaths 1960 ICD7 as it appears in World Health Organization (WHO). WHO Mortality Database Version February 2014. Geneva, Switzerland: World Health Organization (WHO), 2014.                                         | 1960                                                                                     |                      |
| Dominican Republic | Dominican Republic Vital Registration - Deaths 1961 ICD7 as it appears in World Health Organization (WHO). WHO Mortality Database Version February 2014. Geneva, Switzerland: World Health Organization (WHO), 2014.                                         | 1961                                                                                     |                      |
| Dominican Republic | Dominican Republic Vital Registration - Deaths 1962 ICD7 as it appears in World Health Organization (WHO). WHO Mortality Database Version February 2014. Geneva, Switzerland: World Health Organization (WHO), 2014.                                         | 1962                                                                                     |                      |
| Dominican Republic | Dominican Republic Vital Registration - Deaths 1963 ICD7 as it appears in World Health Organization (WHO). WHO Mortality Database Version February 2014. Geneva, Switzerland: World Health Organization (WHO), 2014.                                         | 1963                                                                                     |                      |
| Dominican Republic | Centre for Research on the Epidemiology of Disasters (CRED). EM-DAT: The OFDA/CRED International Disaster Database. Brussels, Belgium: Catholic University of Leuven.                                                                                        | 1963-1964, 1966, 1979-1981, 1985-1987, 1991, 1993, 1995-1996, 1998, 2001-2005, 2007-2012 |                      |
| Dominican Republic | Dominican Republic Vital Registration Death Data 1964 as it appears in United Nations Statistics Division (UNSD). United Nations Demographic Yearbook - Historical Supplement 1997. New York City, United States: United Nations Statistics Division (UNSD). | 1964                                                                                     |                      |
| Dominican Republic | Dominican Republic Vital Registration - Deaths 1965 ICD7 as it appears in World Health Organization (WHO). WHO Mortality Database Version February 2014. Geneva, Switzerland: World Health Organization (WHO), 2014.                                         | 1965                                                                                     |                      |
| Dominican Republic | Peace Research Institute Oslo (PRIO). Battle Deaths Dataset Version 3, 2009. Oslo, Norway: Peace Research Institute Oslo (PRIO), 2009.                                                                                                                       | 1965                                                                                     |                      |
| Dominican Republic | Dominican Republic Vital Registration - Deaths 1966 ICD7 as it appears in World Health Organization (WHO). WHO Mortality Database Version February 2014. Geneva, Switzerland: World Health Organization (WHO), 2014.                                         | 1966                                                                                     |                      |
| Dominican Republic | Dominican Republic Vital Registration - Deaths 1967 ICD7 as it appears in World Health Organization (WHO). WHO Mortality Database Version February 2014. Geneva, Switzerland: World Health Organization (WHO), 2014.                                         | 1967                                                                                     |                      |

**Web Table 32 - Comprehensive citation list**

| Country            | Citation                                                                                                                                                                                                                        | Year* | New for GBD 2013 (*) |
|--------------------|---------------------------------------------------------------------------------------------------------------------------------------------------------------------------------------------------------------------------------|-------|----------------------|
| Dominican Republic | Dominican Republic Vital Registration - Deaths 1968 ICD8 as it appears in World Health Organization (WHO). WHO Mortality Database Version February 2014. Geneva, Switzerland: World Health Organization (WHO), 2014.            | 1968  |                      |
| Dominican Republic | Dominican Republic Vital Registration - Deaths 1969 ICD8 as it appears in World Health Organization (WHO). WHO Mortality Database Version February 2014. Geneva, Switzerland: World Health Organization (WHO), 2014.            | 1969  |                      |
| Dominican Republic | Dominican Republic Population and Housing Census 1970 as it appears in United Nations Statistics Division (UNSD). United Nations Demographic Yearbook. New York City, United States: United Nations Statistics Division (UNSD). | 1970  |                      |
| Dominican Republic | Dominican Republic Vital Registration - Deaths 1970 ICD8 as it appears in World Health Organization (WHO). WHO Mortality Database Version February 2014. Geneva, Switzerland: World Health Organization (WHO), 2014.            | 1970  |                      |
| Dominican Republic | Dominican Republic Vital Registration - Deaths 1971 ICD8 as it appears in World Health Organization (WHO). WHO Mortality Database Version February 2014. Geneva, Switzerland: World Health Organization (WHO), 2014.            | 1971  |                      |
| Dominican Republic | Dominican Republic Vital Registration - Deaths 1972 ICD8 as it appears in World Health Organization (WHO). WHO Mortality Database Version February 2014. Geneva, Switzerland: World Health Organization (WHO), 2014.            | 1972  |                      |
| Dominican Republic | Dominican Republic Vital Registration - Deaths 1973 ICD8 as it appears in World Health Organization (WHO). WHO Mortality Database Version February 2014. Geneva, Switzerland: World Health Organization (WHO), 2014.            | 1973  |                      |
| Dominican Republic | Dominican Republic Vital Registration - Deaths 1974 ICD8 as it appears in World Health Organization (WHO). WHO Mortality Database Version February 2014. Geneva, Switzerland: World Health Organization (WHO), 2014.            | 1974  |                      |
| Dominican Republic | National Council for Population and Family (CONAPOFA) (Dominican Republic), International Statistical Institute. Dominican Republic World Fertility Survey 1975. Voorburg, Netherlands: International Statistical Institute.    | 1975  |                      |
| Dominican Republic | Dominican Republic Vital Registration - Deaths 1975 ICD8 as it appears in World Health Organization (WHO). WHO Mortality Database Version February 2014. Geneva, Switzerland: World Health Organization (WHO), 2014.            | 1975  |                      |
| Dominican Republic | Dominican Republic Vital Registration - Deaths 1976 ICD8 as it appears in World Health Organization (WHO). WHO Mortality Database Version February 2014. Geneva, Switzerland: World Health Organization (WHO), 2014.            | 1976  |                      |
| Dominican Republic | Dominican Republic Vital Registration - Deaths 1977 ICD8 as it appears in World Health Organization (WHO). WHO Mortality Database Version February 2014. Geneva, Switzerland: World Health Organization (WHO), 2014.            | 1977  |                      |
| Dominican Republic | Dominican Republic Vital Registration - Deaths 1978 ICD8 as it appears in World Health Organization (WHO). WHO Mortality Database Version February 2014. Geneva, Switzerland: World Health Organization (WHO), 2014.            | 1978  |                      |
| Dominican Republic | Dominican Republic Vital Registration - Deaths 1979 ICD8 as it appears in World Health Organization (WHO). WHO Mortality Database Version February 2014. Geneva, Switzerland: World Health Organization (WHO), 2014.            | 1979  |                      |

**Web Table 32 - Comprehensive citation list**

| Country            | Citation                                                                                                                                                                                                                                                        | Year*     | New for GBD 2013 (*) |
|--------------------|-----------------------------------------------------------------------------------------------------------------------------------------------------------------------------------------------------------------------------------------------------------------|-----------|----------------------|
| Dominican Republic | International Statistical Institute, National Council for Population and Family (Dominican Republic). Dominican Republic World Fertility Survey 1980. International Statistical Institute.                                                                      | 1980      |                      |
| Dominican Republic | Dominican Republic Vital Registration - Deaths 1980 ICD9 as it appears in World Health Organization (WHO). WHO Mortality Database Version February 2014. Geneva, Switzerland: World Health Organization (WHO), 2014.                                            | 1980      |                      |
| Dominican Republic | Institute for Health Metrics and Evaluation (IHME), Joint United Nations Program on HIV/AIDS (UNAIDS). Institute for Health Metrics and Evaluation HIV Mortality Estimates Based on the UNAIDS Spectrum Model Framework.                                        | 1980-2013 | *                    |
| Dominican Republic | National Statistics Office (Dominican Republic). Dominican Republic Population and Housing Census 1981.                                                                                                                                                         | 1981      |                      |
| Dominican Republic | Dominican Republic Vital Registration - Deaths 1981 ICD9 as it appears in World Health Organization (WHO). WHO Mortality Database Version February 2014. Geneva, Switzerland: World Health Organization (WHO), 2014.                                            | 1981      |                      |
| Dominican Republic | Dominican Republic Vital Registration - Deaths 1982 ICD9 as it appears in World Health Organization (WHO). WHO Mortality Database Version February 2014. Geneva, Switzerland: World Health Organization (WHO), 2014.                                            | 1982      |                      |
| Dominican Republic | National Council for Population and Family (Dominican Republic), Westinghouse Health Systems, Inc.. Dominican Republic Contraceptive Prevalence Survey 1983.                                                                                                    | 1983      |                      |
| Dominican Republic | Dominican Republic Vital Registration - Deaths 1983 ICD9 as it appears in World Health Organization (WHO). WHO Mortality Database Version February 2014. Geneva, Switzerland: World Health Organization (WHO), 2014.                                            | 1983      |                      |
| Dominican Republic | Dominican Republic Vital Registration - Deaths 1984 ICD9 as it appears in World Health Organization (WHO). WHO Mortality Database Version February 2014. Geneva, Switzerland: World Health Organization (WHO), 2014.                                            | 1984      |                      |
| Dominican Republic | Dominican Republic Vital Registration - Deaths 1985 ICD9 as it appears in World Health Organization (WHO). WHO Mortality Database Version February 2014. Geneva, Switzerland: World Health Organization (WHO), 2014.                                            | 1985      |                      |
| Dominican Republic | Dominican Republic Vital Registration - Deaths 1986 ICD9 as it appears in World Health Organization (WHO). WHO Mortality Database Version February 2014. Geneva, Switzerland: World Health Organization (WHO), 2014.                                            | 1986      |                      |
| Dominican Republic | National Council for Population and Family (CONAPOFA) (Dominican Republic), Westinghouse; Institute for Resource Development. Dominican Republic Demographic and Health Survey 1986. Columbia, United States: Westinghouse; Institute for Resource Development. | 1986      |                      |
| Dominican Republic | Westhoff WW, Calcano ER, McDermott RJ, Trudnak TE, Lopez GE. Estimating Maternal Mortality in Monseñor Nouel Province, Dominican Republic. <i>Matern Child Health J.</i> 2009; 13(5): 707-14.                                                                   | 1986      |                      |
| Dominican Republic | Dominican Republic Vital Registration - Deaths 1987 ICD9 as it appears in World Health Organization (WHO). WHO Mortality Database Version February 2014. Geneva, Switzerland: World Health Organization (WHO), 2014.                                            | 1987      |                      |
| Dominican Republic | Dominican Republic Vital Registration - Deaths 1988 ICD9 as it appears in World Health Organization (WHO). WHO Mortality Database Version February 2014. Geneva, Switzerland: World Health Organization (WHO), 2014.                                            | 1988      |                      |



**Web Table 32 - Comprehensive citation list**

| Country            | Citation                                                                                                                                                                                                                                                      | Year*           | New for GBD 2013 (*) |
|--------------------|---------------------------------------------------------------------------------------------------------------------------------------------------------------------------------------------------------------------------------------------------------------|-----------------|----------------------|
| Dominican Republic | Dominican Republic Vital Registration - Deaths 1989 ICD9 as it appears in World Health Organization (WHO). WHO Mortality Database Version February 2014. Geneva, Switzerland: World Health Organization (WHO), 2014.                                          | 1989            |                      |
| Dominican Republic | Dominican Republic Vital Registration - Deaths 1990 ICD9 as it appears in World Health Organization (WHO). WHO Mortality Database Version February 2014. Geneva, Switzerland: World Health Organization (WHO), 2014.                                          | 1990            |                      |
| Dominican Republic | Weatherall D. Sickle Cell and Thalassemias Prevalence Data, Personal Correspondence with David Weatherall. [Unpublished].                                                                                                                                     | 1990-2009       |                      |
| Dominican Republic | Centre for Health Informatics and Multiprofessional Education, University College London. Modell's Haemoglobinopathologist's Almanac. London, United Kingdom: Centre for Health Informatics and Multiprofessional Education, University College London, 2008. | 1990-2003       |                      |
| Dominican Republic | Dominican Republic Vital Registration - Deaths 1991 ICD9 as it appears in World Health Organization (WHO). WHO Mortality Database Version February 2014. Geneva, Switzerland: World Health Organization (WHO), 2014.                                          | 1991            |                      |
| Dominican Republic | Macro International, Inc.; Institute for Resource Development, National Planning Office (Dominican Republic), Profamilia. Dominican Republic Demographic and Health Survey 1991. Calverton, United States: Macro International, Inc.                          | 1991            |                      |
| Dominican Republic | Dominican Republic Vital Registration - Deaths 1992 ICD9 as it appears in World Health Organization (WHO). WHO Mortality Database Version February 2014. Geneva, Switzerland: World Health Organization (WHO), 2014.                                          | 1992            |                      |
| Dominican Republic | Measles Supplementary Immunization Activity Data as provided by the World Health Organization. [Unpublished].                                                                                                                                                 | 1993, 1998-1999 |                      |
| Dominican Republic | Dominican Republic Vital Registration - Deaths 1994 ICD9 as it appears in World Health Organization (WHO). WHO Mortality Database Version February 2014. Geneva, Switzerland: World Health Organization (WHO), 2014.                                          | 1994            |                      |
| Dominican Republic | Dominican Republic Vital Registration - Deaths 1995 ICD9 as it appears in World Health Organization (WHO). WHO Mortality Database Version February 2014. Geneva, Switzerland: World Health Organization (WHO), 2014.                                          | 1995            |                      |
| Dominican Republic | Dominican Republic Vital Registration - Deaths 1996 ICD10 as it appears in World Health Organization (WHO). WHO Mortality Database Version February 2014. Geneva, Switzerland: World Health Organization (WHO), 2014.                                         | 1996            |                      |
| Dominican Republic | Center for Social and Demographic Studies (CESDEM), Macro International, Inc, National Planning Office (Dominican Republic), Profamilia. Dominican Republic Demographic and Health Survey 1996. Calverton, United States: Macro International, Inc.           | 1996            |                      |
| Dominican Republic | United Nations Office on Drugs and Crime (UNODC). United Nations Office on Drugs and Crime Global Study on Homicides 2011. Vienna, Austria: United Nations Office on Drugs and Crime (UNODC), 2011.                                                           | 1996-2010       |                      |
| Dominican Republic | Tapia-Conyer R, Santos JI, Cavalcanti AM, Urdaneta E, Rivera L, Manterola A, Potin M, Ruttiman R, Tanaka Kido J. Hepatitis A in Latin America: A Changing Epidemiologic Pattern. Am J Trop Med Hyg. 1999; 61(5): 825-9.                                       | 1996-1997       |                      |
| Dominican Republic | Dominican Republic Vital Registration - Deaths 1997 ICD10 as it appears in World Health Organization (WHO). WHO Mortality Database Version February 2014. Geneva, Switzerland: World Health Organization (WHO), 2014.                                         | 1997            |                      |

**Web Table 32 - Comprehensive citation list**

| Country            | Citation                                                                                                                                                                                                                                                                                                                                                                                  | Year*                           | New for GBD 2013 (*) |
|--------------------|-------------------------------------------------------------------------------------------------------------------------------------------------------------------------------------------------------------------------------------------------------------------------------------------------------------------------------------------------------------------------------------------|---------------------------------|----------------------|
| Dominican Republic | Dominican Republic Vital Registration - Deaths 1998 ICD10 as it appears in World Health Organization (WHO). WHO Mortality Database Version February 2014. Geneva, Switzerland: World Health Organization (WHO), 2014.                                                                                                                                                                     | 1998                            |                      |
| Dominican Republic | Gomez E, Peguero M, Sanchez J, Castellanos PL, Feris J, Peña C, Brudzinski-Laclair L, Levine OS. Population-Based Surveillance for Bacterial Meningitis in the Dominican Republic: Implications for Control by Vaccination. Environ Res. 2000; 125(3): 549-54.                                                                                                                            | 1998                            |                      |
| Dominican Republic | Lee EH, Flannery B, Corcino M, Moore A, Garib Z, Pena C, Sanchez J, Fernandez J, Feris-Iglesias JM. Impact of Haemophilus influenzae type b conjugate vaccine on bacterial meningitis in the Dominican Republic. Rev Panam Salud Publica. 2008; 24(3): 161-8.                                                                                                                             | 1998-2004                       |                      |
| Dominican Republic | Dominican Republic Vital Registration - Deaths 1999 ICD10 as it appears in World Health Organization (WHO). WHO Mortality Database Version February 2014. Geneva, Switzerland: World Health Organization (WHO), 2014.                                                                                                                                                                     | 1999                            |                      |
| Dominican Republic | Center for Social and Demographic Studies (CESDEM), Macro International, Inc. Dominican Republic Demographic and Health Survey 1999. Calverton, United States: Macro International, Inc.                                                                                                                                                                                                  | 1999                            |                      |
| Dominican Republic | World Health Organization (WHO). Yellow Fever Reported Cases, WHO Vaccine-Preventable Diseases: Monitoring System. Geneva, Switzerland: World Health Organization (WHO).                                                                                                                                                                                                                  | 1999-2000, 2002-2004, 2007-2009 |                      |
| Dominican Republic | Dominican Republic Vital Registration - Deaths 2000 ICD10 as it appears in World Health Organization (WHO). WHO Mortality Database Version February 2014. Geneva, Switzerland: World Health Organization (WHO), 2014.                                                                                                                                                                     | 2000                            |                      |
| Dominican Republic | Dominican Republic Vital Registration - Deaths 2001 ICD10 as it appears in World Health Organization (WHO). WHO Mortality Database Version February 2014. Geneva, Switzerland: World Health Organization (WHO), 2014.                                                                                                                                                                     | 2001                            |                      |
| Dominican Republic | World Health Organization (WHO). Retrospective Measles Data on Supplementary Immunization Activities. Geneva, Switzerland: World Health Organization (WHO).                                                                                                                                                                                                                               | 2001, 2003-2004, 2006, 2010     |                      |
| Dominican Republic | Center for Social and Demographic Studies (CESDEM), Macro International, Inc. Dominican Republic Demographic and Health Survey 2002. Calverton, United States: Macro International, Inc.                                                                                                                                                                                                  | 2002                            |                      |
| Dominican Republic | Dominican Republic Vital Registration - Deaths 2003 ICD10 as it appears in World Health Organization (WHO). WHO Mortality Database Version February 2014. Geneva, Switzerland: World Health Organization (WHO), 2014.                                                                                                                                                                     | 2003                            |                      |
| Dominican Republic | World Health Organization (WHO). Dominican Republic World Health Survey 2003. Geneva, Switzerland: World Health Organization (WHO), 2005.                                                                                                                                                                                                                                                 | 2003                            |                      |
| Dominican Republic | Prince M, Acosta D, Ferri CP, Guerra M, Huang Y, Libre Rodriguez JJ, Salas A, Sosa AL, Williams JD, Dewey ME, Acosta I, Jotheeswaran AT, Liu Z. Dementia incidence and mortality in middle-income countries, and associations with indicators of cognitive reserve: a 10/66 Dementia Research Group population-based cohort study. Lancet. 2012; 380(9836): 50-8.                         | 2003-2010                       |                      |
| Dominican Republic | Sousa RM, Ferri CP, Acosta D, Albanese E, Guerra M, Huang Y, Jacob KS, Jotheeswaran AT, Rodriguez JLL, Pichardo GR, Rodriguez MC, Salas A, Sosa AL, Williams J, Zuniga T, Prince M. Contribution of chronic diseases to disability in elderly people in countries with low and middle incomes: a 10/66 Dementia Research Group population-based survey. Lancet. 2009; 374(9704): 1821-30. | 2003-2005                       |                      |



**Web Table 32 - Comprehensive citation list**

| Country            | Citation                                                                                                                                                                                                                                                                                                                                                                                                                                | Year*     | New for GBD 2013 (*) |
|--------------------|-----------------------------------------------------------------------------------------------------------------------------------------------------------------------------------------------------------------------------------------------------------------------------------------------------------------------------------------------------------------------------------------------------------------------------------------|-----------|----------------------|
| Dominican Republic | Llibre Rodriguez JJ, Ferri CP, Acosta D, Guerra M, Huang Y, Jacob KS, Krishnamoorthy ES, Salas A, Sosa AL, Acosta I, Dewey ME, Gaona C, Jotheeswaran AT, Li S, Rodriguez D, Rodriguez G, Kumar PS, Valhuerdi A, Prince M, 10/66 Dementia Research Group. Prevalence of dementia in Latin America, India, and China: a population-based cross-sectional survey. <i>Lancet</i> . 2008; 372(9637): 464-74.                                 | 2003-2004 |                      |
| Dominican Republic | Dominican Republic Vital Registration - Deaths 2004 ICD10 as it appears in World Health Organization (WHO). WHO Mortality Database Version February 2014. Geneva, Switzerland: World Health Organization (WHO), 2014.                                                                                                                                                                                                                   | 2004      |                      |
| Dominican Republic | Dominican Republic Vital Registration - Deaths 2005 ICD10 as it appears in World Health Organization (WHO). WHO Mortality Database Version February 2014. Geneva, Switzerland: World Health Organization (WHO), 2014.                                                                                                                                                                                                                   | 2005      |                      |
| Dominican Republic | National Statistics Office (Dominican Republic), United Nations Children's Fund (UNICEF). Dominican Republic National Multipurpose Household Survey 2006. Santo Domingo, Dominican Republic: National Statistics Office (Dominican Republic).                                                                                                                                                                                           | 2006      |                      |
| Dominican Republic | Fassio E, Díaz S, Santa C, Reig ME, Martínez Artola Y, Alves de Mattos A, Míguez C, Galizzi J, Zapata R, Ridruejo E, de Souza FC, Hernández N, Pinchuk L, Multicenter Group for Study of Hepatocarcinoma in Latin America, Asociación Latinoamericana para el Estudio del Hígado (ALEH). Etiology of hepatocellular carcinoma in Latin America: a prospective, multicenter, international study. <i>Ann Hepatol</i> . 2010; 9(1): 63-9. | 2006-2008 | *                    |
| Dominican Republic | Center for Social and Demographic Studies (CESDEM), Macro International, Inc. Dominican Republic Demographic and Health Survey 2007. Calverton, United States: Macro International, Inc.                                                                                                                                                                                                                                                | 2007      | *                    |
| Dominican Republic | Center for Social and Demographic Studies (CESDEM), United Nations Children's Fund (UNICEF). Dominican Republic Multiple Indicator Cluster Survey 2000. New York, United States: United Nations Children's Fund (UNICEF).                                                                                                                                                                                                               | 2007      |                      |
| Dominican Republic | Dominican Republic Vital Registration Death Data 2007 as it appears in United Nations Statistics Division (UNSD). United Nations Demographic Yearbook. New York City, United States: United Nations Statistics Division (UNSD).                                                                                                                                                                                                         | 2007      |                      |
| Dominican Republic | Acosta D, Rottbeck R, Rodríguez JG, González LM, Almánzar MR, Minaya SN, Ortiz M del C, Ferri CP, Prince MJ. The prevalence and social patterning of chronic diseases among older people in a population undergoing health transition. A 10/66 Group cross-sectional population-based survey in the Dominican Republic. <i>BMC Public Health</i> . 2010; 344.                                                                           | 2007-2009 |                      |
| Dominican Republic | Dominican Republic Vital Registration Death Data 2008 as it appears in United Nations Statistics Division (UNSD). United Nations Demographic Yearbook. New York City, United States: United Nations Statistics Division (UNSD).                                                                                                                                                                                                         | 2008      |                      |
| Dominican Republic | Dominican Republic Vital Registration Death Data 2009 as it appears in United Nations Statistics Division (UNSD). United Nations Demographic Yearbook. New York City, United States: United Nations Statistics Division (UNSD).                                                                                                                                                                                                         | 2009      |                      |
| Dominican Republic | Joint United Nations Program on HIV/AIDS (UNAIDS). Dominican Republic National Report on the Progress of the Country 2010. Geneva, Switzerland: Joint United Nations Program on HIV/AIDS (UNAIDS), 2010.                                                                                                                                                                                                                                | 2009      |                      |
| Dominican Republic | Dominican Republic Vital Registration - Deaths 2010 ICD10 as it appears in World Health Organization (WHO). WHO Mortality Database Version February 2014. Geneva, Switzerland: World Health Organization (WHO), 2014.                                                                                                                                                                                                                   | 2010      |                      |

**Web Table 32 - Comprehensive citation list**

| Country            | Citation                                                                                                                                                                                                                                   | Year*                                                                                                                       | New for GBD 2013 (*) |
|--------------------|--------------------------------------------------------------------------------------------------------------------------------------------------------------------------------------------------------------------------------------------|-----------------------------------------------------------------------------------------------------------------------------|----------------------|
| Dominican Republic | Dominican Republic Vital Registration Death Data 2010 as it appears in United Nations Statistics Division (UNSD). United Nations Demographic Yearbook. New York City, United States: United Nations Statistics Division (UNSD).            | 2010                                                                                                                        |                      |
| Dominican Republic | Dominican Republic Vital Registration Death Data 2011 as it appears in United Nations Statistics Division (UNSD). United Nations Demographic Yearbook 2012. New York City, United States: United Nations Statistics Division (UNSD), 2013. | 2011                                                                                                                        | *                    |
| Dominican Republic | Center for Social and Demographic Studies (CESDEM), ICF International, Ministry of Public Health and Social Assistance (Dominican Republic). Dominican Republic Demographic and Health Survey 2013.                                        | 2013                                                                                                                        | *                    |
| Dominican Republic | United Nations Children's Fund (UNICEF), World Health Organization (WHO). WHO and UNICEF Reported Disease Incidence Time Series - Pertussis. Geneva, Switzerland: World Health Organization (WHO).                                         | 1980-2013                                                                                                                   |                      |
| Dominican Republic | United Nations Children's Fund (UNICEF), World Health Organization (WHO). WHO and UNICEF Reported Disease Incidence Time Series - Measles. Geneva, Switzerland: World Health Organization (WHO).                                           | 1980-2013                                                                                                                   |                      |
| Ecuador            | Centre for Research on the Epidemiology of Disasters (CRED). EM-DAT: The OFDA/CRED International Disaster Database. Brussels, Belgium: Catholic University of Leuven.                                                                      | 1950, 1953, 1966, 1970-1971, 1973, 1976, 1980, 1982-1983, 1987, 1989-1990, 1992-1993, 1995-1998, 2000-2002, 2006, 2008-2013 |                      |
| Ecuador            | Ecuador Vital Registration Death Data 1954 as it appears in United Nations Statistics Division (UNSD). United Nations Demographic Yearbook. New York City, United States: United Nations Statistics Division (UNSD).                       | 1954                                                                                                                        |                      |
| Ecuador            | Ecuador Vital Registration Death Data 1955 as it appears in United Nations Statistics Division (UNSD). United Nations Demographic Yearbook. New York City, United States: United Nations Statistics Division (UNSD).                       | 1955                                                                                                                        |                      |
| Ecuador            | Ecuador Vital Registration Death Data 1956 as it appears in United Nations Statistics Division (UNSD). United Nations Demographic Yearbook. New York City, United States: United Nations Statistics Division (UNSD).                       | 1956                                                                                                                        |                      |
| Ecuador            | Ecuador Vital Registration Death Data 1957 as it appears in United Nations Statistics Division (UNSD). United Nations Demographic Yearbook. New York City, United States: United Nations Statistics Division (UNSD).                       | 1957                                                                                                                        |                      |
| Ecuador            | Ecuador Vital Registration Death Data 1958 as it appears in United Nations Statistics Division (UNSD). United Nations Demographic Yearbook. New York City, United States: United Nations Statistics Division (UNSD).                       | 1958                                                                                                                        |                      |
| Ecuador            | Ecuador Vital Registration Death Data 1959 as it appears in United Nations Statistics Division (UNSD). United Nations Demographic Yearbook. New York City, United States: United Nations Statistics Division (UNSD).                       | 1959                                                                                                                        |                      |
| Ecuador            | Ecuador Vital Registration Death Data 1960 as it appears in United Nations Statistics Division (UNSD). United Nations Demographic Yearbook. New York City, United States: United Nations Statistics Division (UNSD).                       | 1960                                                                                                                        |                      |
| Ecuador            | Ecuador Vital Registration - Deaths 1961 ICD7 as it appears in World Health Organization (WHO). WHO Mortality Database Version February 2014. Geneva, Switzerland: World Health Organization (WHO), 2014.                                  | 1961                                                                                                                        |                      |

**Web Table 32 - Comprehensive citation list**

| Country | Citation                                                                                                                                                                                                                                                                             | Year*     | New for GBD 2013 (*) |
|---------|--------------------------------------------------------------------------------------------------------------------------------------------------------------------------------------------------------------------------------------------------------------------------------------|-----------|----------------------|
| Ecuador | Ecuador Vital Registration Death Data 1962 as it appears in United Nations Statistics Division (UNSD). United Nations Demographic Yearbook. New York City, United States: United Nations Statistics Division (UNSD).                                                                 | 1962      |                      |
| Ecuador | Ecuador Vital Registration - Deaths 1963 ICD7 as it appears in World Health Organization (WHO). WHO Mortality Database Version February 2014. Geneva, Switzerland: World Health Organization (WHO), 2014.                                                                            | 1963      |                      |
| Ecuador | Ecuador Vital Registration - Deaths 1964 ICD7 as it appears in World Health Organization (WHO). WHO Mortality Database Version February 2014. Geneva, Switzerland: World Health Organization (WHO), 2014.                                                                            | 1964      |                      |
| Ecuador | Ecuador Vital Registration - Deaths 1965 ICD7 as it appears in World Health Organization (WHO). WHO Mortality Database Version February 2014. Geneva, Switzerland: World Health Organization (WHO), 2014.                                                                            | 1965      |                      |
| Ecuador | Ecuador Vital Registration - Deaths 1966 ICD7 as it appears in World Health Organization (WHO). WHO Mortality Database Version February 2014. Geneva, Switzerland: World Health Organization (WHO), 2014.                                                                            | 1966      |                      |
| Ecuador | Ecuador Vital Registration - Deaths 1967 ICD7 as it appears in World Health Organization (WHO). WHO Mortality Database Version February 2014. Geneva, Switzerland: World Health Organization (WHO), 2014.                                                                            | 1967      |                      |
| Ecuador | Ecuador Vital Registration - Deaths 1968 ICD8 as it appears in World Health Organization (WHO). WHO Mortality Database Version February 2014. Geneva, Switzerland: World Health Organization (WHO), 2014.                                                                            | 1968      |                      |
| Ecuador | Ecuador Vital Registration - Deaths 1969 ICD8 as it appears in World Health Organization (WHO). WHO Mortality Database Version February 2014. Geneva, Switzerland: World Health Organization (WHO), 2014.                                                                            | 1969      |                      |
| Ecuador | Ecuador Vital Registration - Deaths 1970 ICD8 as it appears in World Health Organization (WHO). WHO Mortality Database Version February 2014. Geneva, Switzerland: World Health Organization (WHO), 2014.                                                                            | 1970      |                      |
| Ecuador | Ecuador Vital Registration - Deaths 1971 ICD8 as it appears in World Health Organization (WHO). WHO Mortality Database Version February 2014. Geneva, Switzerland: World Health Organization (WHO), 2014.                                                                            | 1971      |                      |
| Ecuador | Ecuador Vital Registration - Deaths 1972 ICD8 as it appears in World Health Organization (WHO). WHO Mortality Database Version February 2014. Geneva, Switzerland: World Health Organization (WHO), 2014.                                                                            | 1972      |                      |
| Ecuador | United Nations Office on Drugs and Crime (UNODC). United Nations Surveys on Crime Trends and the Operations of Criminal Justice Systems 1970-2006 as provided by Kavi Bhalla. [Unpublished].                                                                                         | 1972-1991 |                      |
| Ecuador | Ecuador Vital Registration - Deaths 1973 ICD8 as it appears in World Health Organization (WHO). WHO Mortality Database Version February 2014. Geneva, Switzerland: World Health Organization (WHO), 2014.                                                                            | 1973      |                      |
| Ecuador | Office of National Censuses (Ecuador), National Planning Board (Ecuador), Minnesota Population Center. Ecuador Population and Housing Census 1974 from the Integrated Public Use Microdata Series, International. [Machine-readable database]. Minneapolis: University of Minnesota. | 1974      |                      |

**Web Table 32 - Comprehensive citation list**

| Country | Citation                                                                                                                                                                                                                                                            | Year*                                      | New for GBD 2013 (*) |
|---------|---------------------------------------------------------------------------------------------------------------------------------------------------------------------------------------------------------------------------------------------------------------------|--------------------------------------------|----------------------|
| Ecuador | Ecuador Vital Registration - Deaths 1974 ICD8 as it appears in World Health Organization (WHO). WHO Mortality Database Version February 2014. Geneva, Switzerland: World Health Organization (WHO), 2014.                                                           | 1974                                       |                      |
| Ecuador | Ecuador Vital Registration - Deaths 1975 ICD8 as it appears in World Health Organization (WHO). WHO Mortality Database Version February 2014. Geneva, Switzerland: World Health Organization (WHO), 2014.                                                           | 1975                                       |                      |
| Ecuador | Ecuador Vital Registration Death Data 1976 as it appears in United Nations Statistics Division (UNSD). United Nations Demographic Yearbook. New York City, United States: United Nations Statistics Division (UNSD).                                                | 1976                                       |                      |
| Ecuador | Ecuador Vital Registration - Deaths 1977 ICD8 as it appears in World Health Organization (WHO). WHO Mortality Database Version February 2014. Geneva, Switzerland: World Health Organization (WHO), 2014.                                                           | 1977                                       |                      |
| Ecuador | Ecuador Vital Registration - Deaths 1978 ICD8 as it appears in World Health Organization (WHO). WHO Mortality Database Version February 2014. Geneva, Switzerland: World Health Organization (WHO), 2014.                                                           | 1978                                       |                      |
| Ecuador | Ecuador Vital Registration - Deaths 1979 ICD9 as it appears in World Health Organization (WHO). WHO Mortality Database Version February 2014. Geneva, Switzerland: World Health Organization (WHO), 2014.                                                           | 1979                                       |                      |
| Ecuador | International Statistical Institute, National Institute of Statistics and Censuses (Ecuador). Ecuador World Fertility Survey 1979-1980. International Statistical Institute.                                                                                        | 1979-1980                                  |                      |
| Ecuador | Ecuador Vital Registration - Deaths 1980 ICD9 as it appears in World Health Organization (WHO). WHO Mortality Database Version February 2014. Geneva, Switzerland: World Health Organization (WHO), 2014.                                                           | 1980                                       |                      |
| Ecuador | WHO Department of Communicable Disease Surveillance and Response. WHO Report on Global Surveillance of Epidemic-prone Infectious Diseases 2000.                                                                                                                     | 1980-1981, 1983-1986, 1990-1993, 1995-1998 |                      |
| Ecuador | Vasconcelos PF da C. Febre amarela. Rev Soc Bras Med Trop. 2003; 36(2): 275-93.                                                                                                                                                                                     | 1980-2001                                  |                      |
| Ecuador | Institute for Health Metrics and Evaluation (IHME), Joint United Nations Program on HIV/AIDS (UNAIDS). Institute for Health Metrics and Evaluation HIV Mortality Estimates Based on the UNAIDS Spectrum Model Framework.                                            | 1980-2013                                  | *                    |
| Ecuador | United Nations Children's Fund (UNICEF), World Health Organization (WHO). WHO and UNICEF Reported Disease Incidence Time Series - Pertussis. Geneva, Switzerland: World Health Organization (WHO).                                                                  | 1980-2004, 2006-2013                       |                      |
| Ecuador | United Nations Children's Fund (UNICEF), World Health Organization (WHO). WHO and UNICEF Reported Disease Incidence Time Series - Measles. Geneva, Switzerland: World Health Organization (WHO).                                                                    | 1980-2013                                  |                      |
| Ecuador | Ecuador Vital Registration - Deaths 1981 ICD9 as it appears in World Health Organization (WHO). WHO Mortality Database Version February 2014. Geneva, Switzerland: World Health Organization (WHO), 2014.                                                           | 1981                                       |                      |
| Ecuador | National Institute of Statistics and Censuses (Ecuador), Minnesota Population Center. Ecuador Population and Housing Census 1982 from the Integrated Public Use Microdata Series, International. [Machine-readable database]. Minneapolis: University of Minnesota. | 1982                                       |                      |
| Ecuador | Ecuador Vital Registration - Deaths 1982 ICD9 as it appears in World Health Organization (WHO). WHO Mortality Database Version February 2014. Geneva, Switzerland: World Health Organization (WHO), 2014.                                                           | 1982                                       |                      |

**Web Table 32 - Comprehensive citation list**

| Country | Citation                                                                                                                                                                                                                                                                                                                                                     | Year*                                 | New for GBD 2013 (*) |
|---------|--------------------------------------------------------------------------------------------------------------------------------------------------------------------------------------------------------------------------------------------------------------------------------------------------------------------------------------------------------------|---------------------------------------|----------------------|
| Ecuador | Ecuador Vital Registration - Deaths 1983 ICD9 as it appears in World Health Organization (WHO). WHO Mortality Database Version February 2014. Geneva, Switzerland: World Health Organization (WHO), 2014.                                                                                                                                                    | 1983                                  |                      |
| Ecuador | Ecuador Vital Registration - Deaths 1984 ICD9 as it appears in World Health Organization (WHO). WHO Mortality Database Version February 2014. Geneva, Switzerland: World Health Organization (WHO), 2014.                                                                                                                                                    | 1984                                  |                      |
| Ecuador | Ecuador Vital Registration - Deaths 1985 ICD9 as it appears in World Health Organization (WHO). WHO Mortality Database Version February 2014. Geneva, Switzerland: World Health Organization (WHO), 2014.                                                                                                                                                    | 1985                                  |                      |
| Ecuador | Ferlay J, Parkin DM, Curado MP, Bray F, Edwards B, Shin HR and Forman D. Cancer Incidence in Five Continents, Volumes I to IX: IARC CancerBase No. 9 [Internet]. Lyon, France: International Agency for Research on Cancer; 2010. Available from: <a href="http://ci5.iarc.fr">http://ci5.iarc.fr</a>                                                        | 1985-2002                             |                      |
| Ecuador | Pan American Health Organization (PAHO). Update on yellow fever in the Americas. Epidemiol Bull. 2000; 21(2):13.                                                                                                                                                                                                                                             | 1985, 1999                            |                      |
| Ecuador | Ecuador Vital Registration - Deaths 1986 ICD9 as it appears in World Health Organization (WHO). WHO Mortality Database Version February 2014. Geneva, Switzerland: World Health Organization (WHO), 2014.                                                                                                                                                    | 1986                                  |                      |
| Ecuador | World Health Organization (WHO). Yellow Fever Reported Cases, WHO Vaccine-Preventable Diseases: Monitoring System. Geneva, Switzerland: World Health Organization (WHO).                                                                                                                                                                                     | 1986-1989, 1994, 1998-2003, 2005-2009 |                      |
| Ecuador | Ecuador Vital Registration - Deaths 1987 ICD9 as it appears in World Health Organization (WHO). WHO Mortality Database Version February 2014. Geneva, Switzerland: World Health Organization (WHO), 2014.                                                                                                                                                    | 1987                                  |                      |
| Ecuador | Center for Population Studies and Responsible Parenthood (CEPAR) (El Salvador), Westinghouse; Institute for Resource Development. Ecuador Demographic and Health Survey 1987. Columbia, United States: Westinghouse; Institute for Resource Development.                                                                                                     | 1987                                  |                      |
| Ecuador | Ecuador Vital Registration - Deaths 1988 ICD9 as it appears in World Health Organization (WHO). WHO Mortality Database Version February 2014. Geneva, Switzerland: World Health Organization (WHO), 2014.                                                                                                                                                    | 1988                                  |                      |
| Ecuador | Center for Studies of Population and Social Development (CEPAR), Ecuador Ministry of Health (MSP), Division of Reproductive Health-Centers for Disease Control and Prevention (CDC). English Language Report (1992) Ecuador Family Planning/Maternal and Child Health Survey 1989. Atlanta, United States: Centers for Disease Control and Prevention (CDC). | 1989                                  |                      |
| Ecuador | Ecuador Vital Registration - Deaths 1989 ICD9 as it appears in World Health Organization (WHO). WHO Mortality Database Version February 2014. Geneva, Switzerland: World Health Organization (WHO), 2014.                                                                                                                                                    | 1989                                  |                      |
| Ecuador | National Institute of Statistics and Censuses (Ecuador), Minnesota Population Center. Ecuador Population and Housing Census 1990 from the Integrated Public Use Microdata Series, International. [Machine-readable database]. Minneapolis: University of Minnesota.                                                                                          | 1990                                  |                      |
| Ecuador | Ecuador Vital Registration - Deaths 1990 ICD9 as it appears in World Health Organization (WHO). WHO Mortality Database Version February 2014. Geneva, Switzerland: World Health Organization (WHO), 2014.                                                                                                                                                    | 1990                                  |                      |
| Ecuador | Weatherall D. Sickle Cell and Thalassemias Prevalence Data, Personal Correspondence with David Weatherall. [Unpublished].                                                                                                                                                                                                                                    | 1990-2009                             |                      |

**Web Table 32 - Comprehensive citation list**

| Country | Citation                                                                                                                                                                                                                                                                     | Year*      | New for GBD 2013 (*) |
|---------|------------------------------------------------------------------------------------------------------------------------------------------------------------------------------------------------------------------------------------------------------------------------------|------------|----------------------|
| Ecuador | Centre for Health Informatics and Multiprofessional Education, University College London. Modell's Haemoglobinopathologist's Almanac. London, United Kingdom: Centre for Health Informatics and Multiprofessional Education, University College London, 2008.                | 1990-2003  |                      |
| Ecuador | Ecuador Vital Registration - Deaths 1991 ICD9 as it appears in World Health Organization (WHO). WHO Mortality Database Version February 2014. Geneva, Switzerland: World Health Organization (WHO), 2014.                                                                    | 1991       |                      |
| Ecuador | Ecuador Vital Registration - Deaths 1992 ICD9 as it appears in World Health Organization (WHO). WHO Mortality Database Version February 2014. Geneva, Switzerland: World Health Organization (WHO), 2014.                                                                    | 1992       |                      |
| Ecuador | Ecuador Vital Registration - Deaths 1993 ICD9 as it appears in World Health Organization (WHO). WHO Mortality Database Version February 2014. Geneva, Switzerland: World Health Organization (WHO), 2014.                                                                    | 1993       |                      |
| Ecuador | Ecuador Vital Registration - Deaths 1994 ICD9 as it appears in World Health Organization (WHO). WHO Mortality Database Version February 2014. Geneva, Switzerland: World Health Organization (WHO), 2014.                                                                    | 1994       |                      |
| Ecuador | Center for Studies of Population and Social Development (CEPAR), Division of Reproductive Health-Centers for Disease Control and Prevention (CDC). (1995) Ecuador Reproductive Health Survey 1994. Atlanta, United States: Centers for Disease Control and Prevention (CDC). | 1994       |                      |
| Ecuador | Measles Supplementary Immunization Activity Data as provided by the World Health Organization. [Unpublished].                                                                                                                                                                | 1994, 1998 |                      |
| Ecuador | Ecuador Vital Registration - Deaths 1995 ICD9 as it appears in World Health Organization (WHO). WHO Mortality Database Version February 2014. Geneva, Switzerland: World Health Organization (WHO), 2014.                                                                    | 1995       |                      |
| Ecuador | National Institute of Statistics and Censuses (Ecuador), World Bank. Ecuador Living Standards Measurement Survey 1995.                                                                                                                                                       | 1995       |                      |
| Ecuador | Department of Peace and Conflict Research, Uppsala University. UCDP Battle-Related Deaths Database Version 5, 2013. Uppsala, Sweden: Department of Peace and Conflict Research, Uppsala University, 2013.                                                                    | 1995       | *                    |
| Ecuador | Ecuador Vital Registration - Deaths 1996 ICD9 as it appears in World Health Organization (WHO). WHO Mortality Database Version February 2014. Geneva, Switzerland: World Health Organization (WHO), 2014.                                                                    | 1996       |                      |
| Ecuador | United Nations Office on Drugs and Crime (UNODC). United Nations Office on Drugs and Crime Global Study on Homicides 2011. Vienna, Austria: United Nations Office on Drugs and Crime (UNODC), 2011.                                                                          | 1996-2009  |                      |
| Ecuador | Ecuador Vital Registration - Deaths 1997 ICD10 as it appears in World Health Organization (WHO). WHO Mortality Database Version February 2014. Geneva, Switzerland: World Health Organization (WHO), 2014.                                                                   | 1997       |                      |
| Ecuador | National Institute of Statistics and Censuses (Ecuador). Ecuador Hospital Inpatient Discharges 1997. Quito, Ecuador: National Institute of Statistics and Censuses (Ecuador).                                                                                                | 1997       |                      |
| Ecuador | Izurietta RO, Macaluso M, Watts DM, Tesh RB, Guerra B, Cruz LM, Galwankar S, Vermund SH. Assessing yellow Fever risk in the ecuadorian Amazon. J Glob Infect Dis. 2009; 1(1): 7-13.                                                                                          | 1997       |                      |
| Ecuador | Ecuador Vital Registration - Deaths 1998 ICD10 as it appears in World Health Organization (WHO). WHO Mortality Database Version February 2014. Geneva, Switzerland: World Health Organization (WHO), 2014.                                                                   | 1998       |                      |



**Web Table 32 - Comprehensive citation list**

| Country | Citation                                                                                                                                                                                                                                                                              | Year*                           | New for GBD 2013 (*) |
|---------|---------------------------------------------------------------------------------------------------------------------------------------------------------------------------------------------------------------------------------------------------------------------------------------|---------------------------------|----------------------|
| Ecuador | National Institute of Statistics and Censuses (Ecuador), World Bank. Ecuador Living Standards Measurement Survey 1998. Washington DC, United States: World Bank.                                                                                                                      | 1998                            |                      |
| Ecuador | National Institute of Statistics and Censuses (Ecuador). Ecuador Hospital Inpatient Discharges 1998. Quito, Ecuador: National Institute of Statistics and Censuses (Ecuador).                                                                                                         | 1998                            |                      |
| Ecuador | Ecuador Vital Registration - Deaths 1999 ICD10 as it appears in World Health Organization (WHO). WHO Mortality Database Version February 2014. Geneva, Switzerland: World Health Organization (WHO), 2014.                                                                            | 1999                            |                      |
| Ecuador | Center for Studies of Population and Social Development (CEPAR) (Ecuador), Division of Reproductive Health-Centers for Disease Control and Prevention (CDC). Ecuador Reproductive Health Survey 1999. Atlanta, United States: Centers for Disease Control and Prevention (CDC), 2001. | 1999                            |                      |
| Ecuador | Ecuador Vital Registration - Deaths 2000 ICD10 as it appears in World Health Organization (WHO). WHO Mortality Database Version February 2014. Geneva, Switzerland: World Health Organization (WHO), 2014.                                                                            | 2000                            |                      |
| Ecuador | National Institute of Statistics and Censuses (Ecuador). Ecuador Hospital Inpatient Discharges 2000. Quito, Ecuador: National Institute of Statistics and Censuses (Ecuador).                                                                                                         | 2000                            | *                    |
| Ecuador | National Institute of Statistics and Censuses (Ecuador), Minnesota Population Center. Ecuador Population and Housing Census 2001 from the Integrated Public Use Microdata Series, International. [Machine-readable database]. Minneapolis: University of Minnesota.                   | 2001                            |                      |
| Ecuador | Ecuador Vital Registration - Deaths 2001 ICD10 as it appears in World Health Organization (WHO). WHO Mortality Database Version February 2014. Geneva, Switzerland: World Health Organization (WHO), 2014.                                                                            | 2001                            |                      |
| Ecuador | Ecuador Vital Registration - Deaths 2002 ICD10 as it appears in World Health Organization (WHO). WHO Mortality Database Version February 2014. Geneva, Switzerland: World Health Organization (WHO), 2014.                                                                            | 2002                            |                      |
| Ecuador | World Health Organization (WHO). Retrospective Measles Data on Supplementary Immunization Activities. Geneva, Switzerland: World Health Organization (WHO).                                                                                                                           | 2002-2004, 2008-2009, 2011-2012 |                      |
| Ecuador | Ecuador Vital Registration - Deaths 2003 ICD10 as it appears in World Health Organization (WHO). WHO Mortality Database Version February 2014. Geneva, Switzerland: World Health Organization (WHO), 2014.                                                                            | 2003                            |                      |
| Ecuador | National Institute of Statistics and Censuses (Ecuador). Ecuador Hospital Inpatient Discharges 2003. Quito, Ecuador: National Institute of Statistics and Censuses (Ecuador).                                                                                                         | 2003                            | *                    |
| Ecuador | Department of Peace and Conflict Research, Uppsala University. UCDP Nonstate Conflict Database Version 2.5, 2013. Uppsala, Sweden: Department of Peace and Conflict Research, Uppsala University, 2013.                                                                               | 2003                            | *                    |
| Ecuador | Ecuador Vital Registration - Deaths 2004 ICD10 as it appears in World Health Organization (WHO). WHO Mortality Database Version February 2014. Geneva, Switzerland: World Health Organization (WHO), 2014.                                                                            | 2004                            |                      |
| Ecuador | Center for Studies of Population and Social Development (CEPAR) (Ecuador) and Division of Reproductive Health-Centers for Disease Control and Prevention (CDC). (2005) Ecuador Reproductive Health Survey 2004. Quito, Ecuador: CEPAR.                                                | 2004                            |                      |

**Web Table 32 - Comprehensive citation list**

| Country | Citation                                                                                                                                                                                                                                                                                                                                                                                                                        | Year*     | New for GBD 2013 (*) |
|---------|---------------------------------------------------------------------------------------------------------------------------------------------------------------------------------------------------------------------------------------------------------------------------------------------------------------------------------------------------------------------------------------------------------------------------------|-----------|----------------------|
| Ecuador | Ecuador Vital Registration - Deaths 2005 ICD10 as it appears in World Health Organization (WHO). WHO Mortality Database Version February 2014. Geneva, Switzerland: World Health Organization (WHO), 2014.                                                                                                                                                                                                                      | 2005      |                      |
| Ecuador | National Institute of Statistics and Censuses (Ecuador). Ecuador Hospital Inpatient Discharges 2005. Quito, Ecuador: National Institute of Statistics and Censuses (Ecuador).                                                                                                                                                                                                                                                   | 2005      | *                    |
| Ecuador | Souza JP, Cecatti JG, Faundes A, Morais SS, Villar J, Carroli G, Gulmezoglu M, Wojdyla D, Zavaleta N, Donner A, Velazco A, Bataglia V, Valladares E, Kublickas M, Acosta A. Maternal near miss and maternal death in the World Health Organization's 2005 global survey on maternal and perinatal health. Bull World Health Organ. 2010; 88(2): 113-9.                                                                          | 2005      |                      |
| Ecuador | Forman D, Bray F, Brewster DH, Gombe Mbalawa C, Kohler B, Piñeros M, Steliarova-Foucher E, Swaminathan R and Ferlay J, eds (2013). Cancer Incidence in Five Continents, Vol. X Summary Database (electronic version). Lyon, IARC. <a href="http://ci5.iarc.fr">http://ci5.iarc.fr</a>                                                                                                                                           | 2005      |                      |
| Ecuador | Ecuador Vital Registration - Deaths 2006 ICD10 as it appears in World Health Organization (WHO). WHO Mortality Database Version February 2014. Geneva, Switzerland: World Health Organization (WHO), 2014.                                                                                                                                                                                                                      | 2006      |                      |
| Ecuador | National Institute of Statistics and Censuses (Ecuador). Ecuador Hospital Inpatient Discharges 2006. Quito, Ecuador: National Institute of Statistics and Censuses (Ecuador).                                                                                                                                                                                                                                                   | 2006      | *                    |
| Ecuador | Fassio E, Díaz S, Santa C, Reig ME, Martínez Artola Y, Alves de Mattos A, Míguez C, Galizzi J, Zapata R, Ridruejo E, de Souza FC, Hernández N, Pinchuk L, Multicenter Group for Study of Hepatocarcinoma in Latin America, Asociación Latinoamericana para el Estudio del Hígado (ALEH). Etiology of hepatocellular carcinoma in Latin America: a prospective, multicenter, international study. Ann Hepatol. 2010; 9(1): 63-9. | 2006-2008 | *                    |
| Ecuador | Ecuador Vital Registration - Deaths 2007 ICD10 as it appears in World Health Organization (WHO). WHO Mortality Database Version February 2014. Geneva, Switzerland: World Health Organization (WHO), 2014.                                                                                                                                                                                                                      | 2007      |                      |
| Ecuador | National Institute of Statistics and Censuses (Ecuador). Ecuador Hospital Inpatient Discharges 2007. Quito, Ecuador: National Institute of Statistics and Censuses (Ecuador).                                                                                                                                                                                                                                                   | 2007      | *                    |
| Ecuador | Ecuador Vital Registration - Deaths 2008 ICD10 as it appears in World Health Organization (WHO). WHO Mortality Database Version February 2014. Geneva, Switzerland: World Health Organization (WHO), 2014.                                                                                                                                                                                                                      | 2008      |                      |
| Ecuador | Ecuador Vital Registration - Deaths 2009 ICD10 as it appears in World Health Organization (WHO). WHO Mortality Database Version February 2014. Geneva, Switzerland: World Health Organization (WHO), 2014.                                                                                                                                                                                                                      | 2009      |                      |
| Ecuador | National Institute of Statistics and Censuses (Ecuador). Ecuador Hospital Inpatient Discharges 2009. Quito, Ecuador: National Institute of Statistics and Censuses (Ecuador).                                                                                                                                                                                                                                                   | 2009      | *                    |
| Ecuador | National Institute of Statistics and Censuses (Ecuador). Ecuador Hospital Inpatient Discharges 2010. Quito, Ecuador: National Institute of Statistics and Censuses (Ecuador).                                                                                                                                                                                                                                                   | 2010      | *                    |
| Ecuador | Ecuador Vital Registration - Deaths 2010 ICD10 as it appears in World Health Organization (WHO). WHO Mortality Database Version February 2014. Geneva, Switzerland: World Health Organization (WHO), 2014.                                                                                                                                                                                                                      | 2010      |                      |



**Web Table 32 - Comprehensive citation list**

| Country | Citation                                                                                                                                                                                                           | Year*                                                     | New for GBD 2013 (*) |
|---------|--------------------------------------------------------------------------------------------------------------------------------------------------------------------------------------------------------------------|-----------------------------------------------------------|----------------------|
| Ecuador | National Institute of Statistics and Censuses (Ecuador). Ecuador Population and Housing Census 2010. Quito, Ecuador: National Institute of Statistics and Censuses (Ecuador).                                      | 2010                                                      |                      |
| Egypt   | Egypt Vital Registration Death Data 1950 as it appears in United Nations Statistics Division (UNSD). United Nations Demographic Yearbook. New York City, United States: United Nations Statistics Division (UNSD). | 1950                                                      |                      |
| Egypt   | Egypt Vital Registration Death Data 1951 as it appears in United Nations Statistics Division (UNSD). United Nations Demographic Yearbook. New York City, United States: United Nations Statistics Division (UNSD). | 1951                                                      |                      |
| Egypt   | Peace Research Institute Oslo (PRIO). Battle Deaths Dataset Version 3, 2009. Oslo, Norway: Peace Research Institute Oslo (PRIO), 2009.                                                                             | 1951-1988                                                 |                      |
| Egypt   | Egypt Vital Registration Death Data 1952 as it appears in United Nations Statistics Division (UNSD). United Nations Demographic Yearbook. New York City, United States: United Nations Statistics Division (UNSD). | 1952                                                      |                      |
| Egypt   | Egypt Vital Registration Death Data 1953 as it appears in United Nations Statistics Division (UNSD). United Nations Demographic Yearbook. New York City, United States: United Nations Statistics Division (UNSD). | 1953                                                      |                      |
| Egypt   | Egypt Vital Registration - Deaths 1954 ICD7 as it appears in World Health Organization (WHO). WHO Mortality Database Version February 2014. Geneva, Switzerland: World Health Organization (WHO), 2014.            | 1954                                                      |                      |
| Egypt   | Egypt Vital Registration - Deaths 1955 ICD7 as it appears in World Health Organization (WHO). WHO Mortality Database Version February 2014. Geneva, Switzerland: World Health Organization (WHO), 2014.            | 1955                                                      |                      |
| Egypt   | Centre for Research on the Epidemiology of Disasters (CRED). EM-DAT: The OFDA/CRED International Disaster Database. Brussels, Belgium: Catholic University of Leuven.                                              | 1955, 1975, 1979, 1987, 1991-1997, 2002, 2004, 2008, 2010 |                      |
| Egypt   | Egypt Vital Registration - Deaths 1956 ICD7 as it appears in World Health Organization (WHO). WHO Mortality Database Version February 2014. Geneva, Switzerland: World Health Organization (WHO), 2014.            | 1956                                                      |                      |
| Egypt   | Egypt Vital Registration - Deaths 1957 ICD7 as it appears in World Health Organization (WHO). WHO Mortality Database Version February 2014. Geneva, Switzerland: World Health Organization (WHO), 2014.            | 1957                                                      |                      |
| Egypt   | Egypt Vital Registration - Deaths 1958 ICD7 as it appears in World Health Organization (WHO). WHO Mortality Database Version February 2014. Geneva, Switzerland: World Health Organization (WHO), 2014.            | 1958                                                      |                      |
| Egypt   | Egypt Vital Registration - Deaths 1959 ICD7 as it appears in World Health Organization (WHO). WHO Mortality Database Version February 2014. Geneva, Switzerland: World Health Organization (WHO), 2014.            | 1959                                                      |                      |
| Egypt   | Egypt Vital Registration - Deaths 1960 ICD7 as it appears in World Health Organization (WHO). WHO Mortality Database Version February 2014. Geneva, Switzerland: World Health Organization (WHO), 2014.            | 1960                                                      |                      |
| Egypt   | Egypt Vital Registration - Deaths 1961 ICD7 as it appears in World Health Organization (WHO). WHO Mortality Database Version February 2014. Geneva, Switzerland: World Health Organization (WHO), 2014.            | 1961                                                      |                      |

**Web Table 32 - Comprehensive citation list**

| Country | Citation                                                                                                                                                                                                           | Year*     | New for GBD 2013 (*) |
|---------|--------------------------------------------------------------------------------------------------------------------------------------------------------------------------------------------------------------------|-----------|----------------------|
| Egypt   | Egypt Vital Registration - Deaths 1962 ICD7 as it appears in World Health Organization (WHO). WHO Mortality Database Version February 2014. Geneva, Switzerland: World Health Organization (WHO), 2014.            | 1962      |                      |
| Egypt   | Egypt Vital Registration - Deaths 1963 ICD7 as it appears in World Health Organization (WHO). WHO Mortality Database Version February 2014. Geneva, Switzerland: World Health Organization (WHO), 2014.            | 1963      |                      |
| Egypt   | Egypt Vital Registration - Deaths 1964 ICD7 as it appears in World Health Organization (WHO). WHO Mortality Database Version February 2014. Geneva, Switzerland: World Health Organization (WHO), 2014.            | 1964      |                      |
| Egypt   | Ragab AH, el-Alfi OS, Abboud MA. Incidence of glucose-6-phosphate dehydrogenase deficiency in Egypt. Am J Hum Genet. 1966; 18(1): 21-5.                                                                            | 1964-1966 |                      |
| Egypt   | Egypt Vital Registration - Deaths 1965 ICD7 as it appears in World Health Organization (WHO). WHO Mortality Database Version February 2014. Geneva, Switzerland: World Health Organization (WHO), 2014.            | 1965      |                      |
| Egypt   | Egypt Vital Registration - Deaths 1966 ICD7 as it appears in World Health Organization (WHO). WHO Mortality Database Version February 2014. Geneva, Switzerland: World Health Organization (WHO), 2014.            | 1966      |                      |
| Egypt   | Egypt Vital Registration - Deaths 1967 ICD7 as it appears in World Health Organization (WHO). WHO Mortality Database Version February 2014. Geneva, Switzerland: World Health Organization (WHO), 2014.            | 1967      |                      |
| Egypt   | Egypt Vital Registration Death Data 1968 as it appears in United Nations Statistics Division (UNSD). United Nations Demographic Yearbook. New York City, United States: United Nations Statistics Division (UNSD). | 1968      |                      |
| Egypt   | Egypt Vital Registration Death Data 1969 as it appears in United Nations Statistics Division (UNSD). United Nations Demographic Yearbook. New York City, United States: United Nations Statistics Division (UNSD). | 1969      |                      |
| Egypt   | Egypt Vital Registration - Deaths 1970 ICD8 as it appears in World Health Organization (WHO). WHO Mortality Database Version February 2014. Geneva, Switzerland: World Health Organization (WHO), 2014.            | 1970      |                      |
| Egypt   | United Nations Office on Drugs and Crime (UNODC). United Nations Surveys on Crime Trends and the Operations of Criminal Justice Systems 1970-2006 as provided by Kavi Bhalla. [Unpublished].                       | 1970-1994 |                      |
| Egypt   | Egypt Vital Registration - Deaths 1971 ICD8 as it appears in World Health Organization (WHO). WHO Mortality Database Version February 2014. Geneva, Switzerland: World Health Organization (WHO), 2014.            | 1971      |                      |
| Egypt   | Egypt Vital Registration - Deaths 1972 ICD8 as it appears in World Health Organization (WHO). WHO Mortality Database Version February 2014. Geneva, Switzerland: World Health Organization (WHO), 2014.            | 1972      |                      |
| Egypt   | Egypt Vital Registration - Deaths 1973 ICD8 as it appears in World Health Organization (WHO). WHO Mortality Database Version February 2014. Geneva, Switzerland: World Health Organization (WHO), 2014.            | 1973      |                      |
| Egypt   | Egypt Vital Registration - Deaths 1974 ICD8 as it appears in World Health Organization (WHO). WHO Mortality Database Version February 2014. Geneva, Switzerland: World Health Organization (WHO), 2014.            | 1974      |                      |

**Web Table 32 - Comprehensive citation list**

| Country | Citation                                                                                                                                                                                                                                  | Year*     | New for GBD 2013 (*) |
|---------|-------------------------------------------------------------------------------------------------------------------------------------------------------------------------------------------------------------------------------------------|-----------|----------------------|
| Egypt   | Egypt Vital Registration - Deaths 1975 ICD8 as it appears in World Health Organization (WHO). WHO Mortality Database Version February 2014. Geneva, Switzerland: World Health Organization (WHO), 2014.                                   | 1975      |                      |
| Egypt   | Egypt Population and Housing Census 1976 as it appears in United Nations Statistics Division (UNSD). United Nations Demographic Yearbook. New York City, United States: United Nations Statistics Division (UNSD).                        | 1976      |                      |
| Egypt   | Egypt Vital Registration - Deaths 1976 ICD8 as it appears in World Health Organization (WHO). WHO Mortality Database Version February 2014. Geneva, Switzerland: World Health Organization (WHO), 2014.                                   | 1976      |                      |
| Egypt   | Egypt Vital Registration - Deaths 1977 ICD8 as it appears in World Health Organization (WHO). WHO Mortality Database Version February 2014. Geneva, Switzerland: World Health Organization (WHO), 2014.                                   | 1977      |                      |
| Egypt   | Egypt Vital Registration - Deaths 1978 ICD8 as it appears in World Health Organization (WHO). WHO Mortality Database Version February 2014. Geneva, Switzerland: World Health Organization (WHO), 2014.                                   | 1978      |                      |
| Egypt   | Egypt Vital Registration - Deaths 1979 ICD8 as it appears in World Health Organization (WHO). WHO Mortality Database Version February 2014. Geneva, Switzerland: World Health Organization (WHO), 2014.                                   | 1979      |                      |
| Egypt   | Tekce B. Oral rehydration therapy: an assessment of mortality effects in rural Egypt. Stud Fam Plann. 1982; 13(11): 315-27.                                                                                                               | 1979      |                      |
| Egypt   | Central Agency for Public Mobilisation and Statistics (CAPMAS) (Egypt), International Statistical Institute. Egypt World Fertility Survey 1980. Voorburg, Netherlands: International Statistical Institute.                               | 1980      |                      |
| Egypt   | Egypt Vital Registration - Deaths 1980 ICD9 as it appears in World Health Organization (WHO). WHO Mortality Database Version February 2014. Geneva, Switzerland: World Health Organization (WHO), 2014.                                   | 1980      |                      |
| Egypt   | Institute for Health Metrics and Evaluation (IHME), Joint United Nations Program on HIV/AIDS (UNAIDS). Institute for Health Metrics and Evaluation HIV Mortality Estimates Based on the UNAIDS Spectrum Model Framework.                  | 1980-2013 | *                    |
| Egypt   | United Nations Children's Fund (UNICEF), World Health Organization (WHO). WHO and UNICEF Reported Disease Incidence Time Series - Pertussis. Geneva, Switzerland: World Health Organization (WHO).                                        | 1980-2013 |                      |
| Egypt   | United Nations Children's Fund (UNICEF), World Health Organization (WHO). WHO and UNICEF Reported Disease Incidence Time Series - Measles. Geneva, Switzerland: World Health Organization (WHO).                                          | 1980-2013 |                      |
| Egypt   | Grubb GS, Fortney JA, Saleh S, Gadalla S, el-Baz A, Feldblum P, Rogers SM. A comparison of two cause-of-death classification systems for deaths among women of reproductive age in Menoufia, Egypt. Int J Epidemiol. 1988; 17(2): 385-91. | 1981      |                      |
| Egypt   | Egypt Vital Registration Death Data 1981 as it appears in United Nations Statistics Division (UNSD). United Nations Demographic Yearbook. New York City, United States: United Nations Statistics Division (UNSD).                        | 1981      |                      |
| Egypt   | Egypt Vital Registration Death Data 1983 as it appears in United Nations Statistics Division (UNSD). United Nations Demographic Yearbook. New York City, United States: United Nations Statistics Division (UNSD).                        | 1983      |                      |
| Egypt   | National Population Council (Egypt), Westinghouse Public Applied Systems. Egypt Contraceptive Prevalence Survey 1984.                                                                                                                     | 1984      |                      |

**Web Table 32 - Comprehensive citation list**

| Country | Citation                                                                                                                                                                                                                                                      | Year*     | New for GBD 2013 (*) |
|---------|---------------------------------------------------------------------------------------------------------------------------------------------------------------------------------------------------------------------------------------------------------------|-----------|----------------------|
| Egypt   | Egypt Vital Registration Death Data 1984 as it appears in United Nations Statistics Division (UNSD). United Nations Demographic Yearbook. New York City, United States: United Nations Statistics Division (UNSD).                                            | 1984      |                      |
| Egypt   | Kane TT, el-Kady AA, Saleh S, Hage M, Stanback J, Potter L. Maternal mortality in Giza, Egypt: magnitude, causes, and prevention. Stud Fam Plann. 1992; 23(1): 45-57.                                                                                         | 1985      |                      |
| Egypt   | Egypt Vital Registration Death Data 1985 as it appears in United Nations Statistics Division (UNSD). United Nations Demographic Yearbook. New York City, United States: United Nations Statistics Division (UNSD).                                            | 1985      |                      |
| Egypt   | Central Agency for Public Mobilization and Statistics (Egypt). Egypt Population, Housing, and Establishment Census 1986.                                                                                                                                      | 1986      |                      |
| Egypt   | Egypt Vital Registration Death Data 1986 as it appears in United Nations Statistics Division (UNSD). United Nations Demographic Yearbook. New York City, United States: United Nations Statistics Division (UNSD).                                            | 1986      |                      |
| Egypt   | Egypt Vital Registration - Deaths 1987 ICD9 as it appears in World Health Organization (WHO). WHO Mortality Database Version February 2014. Geneva, Switzerland: World Health Organization (WHO), 2014.                                                       | 1987      |                      |
| Egypt   | Egypt Vital Registration Death Data 1988 as it appears in United Nations Statistics Division (UNSD). United Nations Demographic Yearbook. New York City, United States: United Nations Statistics Division (UNSD).                                            | 1988      |                      |
| Egypt   | National Population Council (Egypt), Macro Systems, Inc.; Institute for Resource Development. Egypt, Arab Rep. Demographic and Health Survey 1988-1989. Columbia, United States: Macro Systems, Inc.                                                          | 1988-1989 |                      |
| Egypt   | Egypt Vital Registration Death Data 1989 as it appears in United Nations Statistics Division (UNSD). United Nations Demographic Yearbook. New York City, United States: United Nations Statistics Division (UNSD).                                            | 1989      |                      |
| Egypt   | Department of Peace and Conflict Research, Uppsala University. UCDP Battle-Related Deaths Database Version 5, 2013. Uppsala, Sweden: Department of Peace and Conflict Research, Uppsala University, 2013.                                                     | 1989-1998 | *                    |
| Egypt   | Langsten, R., Hill, K.. Diarrhoeal Disease, Oral Rehydration, and Childhood Mortality in Rural Egypt. J Trop Pediatr. 1994; 40(5): 272-8.                                                                                                                     | 1990      |                      |
| Egypt   | Egypt Vital Registration Death Data 1990 as it appears in United Nations Statistics Division (UNSD). United Nations Demographic Yearbook. New York City, United States: United Nations Statistics Division (UNSD).                                            | 1990      |                      |
| Egypt   | Weatherall D. Sickle Cell and Thalassemias Prevalence Data, Personal Correspondence with David Weatherall. [Unpublished].                                                                                                                                     | 1990-2009 |                      |
| Egypt   | Hussein L, Yamamah G, Saleh A. Glucose-6-phosphate dehydrogenase deficiency and sulfadimidin acetylation phenotypes in Egyptian oases. Biochem Genet. 1992; 30(3-4): 113-21.                                                                                  | 1990-1992 |                      |
| Egypt   | Armed Conflict Location and Event Data Project (ACLED). Armed Conflict Location and Event Dataset, Realtime - Robert S. Strauss Center.                                                                                                                       | 1990-2013 | *                    |
| Egypt   | Centre for Health Informatics and Multiprofessional Education, University College London. Modell's Haemoglobinopathologist's Almanac. London, United Kingdom: Centre for Health Informatics and Multiprofessional Education, University College London, 2008. | 1990-2003 |                      |
| Egypt   | Central Agency for Public Mobilization and Statistics (Egypt), League of Arab States. Egypt Maternal and Child Health Survey 1991.                                                                                                                            | 1991      |                      |

**Web Table 32 - Comprehensive citation list**

| Country | Citation                                                                                                                                                                                                                                                 | Year*     | New for GBD 2013 (*) |
|---------|----------------------------------------------------------------------------------------------------------------------------------------------------------------------------------------------------------------------------------------------------------|-----------|----------------------|
| Egypt   | Egypt Vital Registration - Deaths 1991 ICD9 as it appears in World Health Organization (WHO). WHO Mortality Database Version February 2014. Geneva, Switzerland: World Health Organization (WHO), 2014.                                                  | 1991      |                      |
| Egypt   | Egypt Vital Registration - Deaths 1992 ICD9 as it appears in World Health Organization (WHO). WHO Mortality Database Version February 2014. Geneva, Switzerland: World Health Organization (WHO), 2014.                                                  | 1992      |                      |
| Egypt   | Waked IA, Saleh SM, Moustafa MS, Raouf AA, Thomas DL, Strickland GT. High prevalence of hepatitis C in Egyptian patients with chronic liver disease. Gut. 1995; 37(1): 105-7.                                                                            | 1992      |                      |
| Egypt   | Kamel MA, Troonen H, Kapprell HP, el-Ayady A, Miller FD. Seroepidemiology of hepatitis E virus in the Egyptian Nile Delta. J Med Virol. 1995; 47(4): 399-403.                                                                                            | 1992      |                      |
| Egypt   | Macro International, Inc, National Population Council (Egypt). Egypt Demographic and Health Survey 1992-1993. Calverton, United States: Macro International, Inc.                                                                                        | 1992-1993 |                      |
| Egypt   | Campbell O, Gipson R, Issa AH, Matta N, El Deeb B, El Mohandes A, Alwen A, Mansour E. National maternal mortality ratio in Egypt halved between 1992-93 and 2000. Bull World Health Organ. 2005; 83(6): 462-71.                                          | 1992-2000 |                      |
| Egypt   | Quinti I, Hassan NF, El Salman D, Shalaby H, El Zimatty D, Monier MK, Arthur RR. Hepatitis C virus-specific B cell activation: IgG and IgM detection in acute and chronic hepatitis C. J Hepatol. 1995; 23(6): 640-7.                                    | 1992-1994 |                      |
| Egypt   | Egypt Vital Registration Death Data 1993 as it appears in United Nations Statistics Division (UNSD). United Nations Demographic Yearbook. New York City, United States: United Nations Statistics Division (UNSD).                                       | 1993      |                      |
| Egypt   | Farrag A, Farwiz HM, Khedr EH, Mahfouz RM, Omran SM. Prevalence of Alzheimer's disease and other dementing disorders: Assiut-Upper Egypt study. Dement Geriatr Cogn Disord. 1998; 9(6): 323-8.                                                           | 1993-1994 |                      |
| Egypt   | el-Zayadi A-R, Badran HM, Barakat EMF, Attia M el-D, Shawky S, Mohamed MK, Selim O, Saeid A. Hepatocellular carcinoma in Egypt: a single center study over a decade. World J Gastroenterol. 2005; 11(33): 5193-8.                                        | 1993-2002 |                      |
| Egypt   | Yassin KM. Indices and sociodemographic determinants of childhood mortality in rural Upper Egypt. Soc Sci Med. 2000; 51(2): 185-97.                                                                                                                      | 1994      |                      |
| Egypt   | Egypt Vital Registration Death Data 1994 as it appears in United Nations Statistics Division (UNSD). United Nations Demographic Yearbook. New York City, United States: United Nations Statistics Division (UNSD).                                       | 1994      |                      |
| Egypt   | Darwish MA, Faris R, Darwish N, Shouman A, Gadallah M, El-Sharkawy MS, Edelman R, Grumbach K, Rao MR, Clemens JD. Hepatitis C and cirrhotic liver disease in the Nile delta of Egypt: a community-based study. Am J Trop Med Hyg. 2001; 64(3-4): 147-53. | 1994-1995 |                      |
| Egypt   | Darwish MA, Faris R, Clemens JD, Rao MR, Edelman R. High seroprevalence of hepatitis A, B, C, and E viruses in residents in an Egyptian village in The Nile Delta: a pilot study. Am J Trop Med Hyg. 1996; 54(6): 554-8.                                 | 1994-1995 |                      |
| Egypt   | Egypt Vital Registration Death Data 1995 as it appears in United Nations Statistics Division (UNSD). United Nations Demographic Yearbook. New York City, United States: United Nations Statistics Division (UNSD).                                       | 1995      |                      |
| Egypt   | Amer AF, Zaki SA, Nagati AM, Darwish MA. Hepatitis E antibodies in Egyptian adolescent females: their prevalence and possible relevance. J Egypt Public Health Assoc. 1996; 71(3-4): 273-84.                                                             | 1995      |                      |

**Web Table 32 - Comprehensive citation list**

| Country | Citation                                                                                                                                                                                                                                                                                                          | Year*            | New for GBD 2013 (*) |
|---------|-------------------------------------------------------------------------------------------------------------------------------------------------------------------------------------------------------------------------------------------------------------------------------------------------------------------|------------------|----------------------|
| Egypt   | Macro International, Inc, National Population Council (Egypt). Egypt Demographic and Health Survey 1995-1996. Calverton, United States: Macro International, Inc.                                                                                                                                                 | 1995-1996        |                      |
| Egypt   | Hassan MM, Zaghoul AS, El-Serag HB, Soliman O, Patt YZ, Chappell CL, Beasley RP, Hwang LY. The role of hepatitis C in hepatocellular carcinoma: a case control study among Egyptian patients. J Clin Gastroenterol. 2001; 33(2): 123-6.                                                                           | 1995-1996        |                      |
| Egypt   | Mabrouk GM. Prevalence of hepatitis C infection and schistosomiasis in Egyptian patients with hepatocellular carcinoma. Dis Markers. 1997; 13(3): 177-82.                                                                                                                                                         | 1995-1996        |                      |
| Egypt   | Department of Peace and Conflict Research, Uppsala University. UCDP One-Sided Violence Database Version 1.4, 2013. Uppsala, Sweden: Department of Peace and Conflict Research, Uppsala University, 2013.                                                                                                          | 1995-2005        | *                    |
| Egypt   | Family Health International. The base of the iceberg: prevalence and perceptions of maternal morbidity in four developing countries. Durham, North Carolina: Family Health International, 1997.                                                                                                                   | 1996             |                      |
| Egypt   | Egypt Vital Registration Death Data 1996 as it appears in United Nations Statistics Division (UNSD). United Nations Demographic Yearbook. New York City, United States: United Nations Statistics Division (UNSD).                                                                                                | 1996             |                      |
| Egypt   | Usanga EA, Ameen R. Glucose-6-phosphate dehydrogenase deficiency in Kuwait, Syria, Egypt, Iran, Jordan and Lebanon. Hum Hered. 2000; 50(3): 158-61.                                                                                                                                                               | 1996-1997        |                      |
| Egypt   | Abu-Raddad LJ, Akala FA, Semini I, Riedner G, Wilson D, Tawil O, World Bank. Characterizing the HIV/AIDS Epidemic in the Middle East and North Africa. Washington DC, United States: World Bank, 2010.                                                                                                            | 1996, 2002, 2006 |                      |
| Egypt   | Egypt Vital Registration Death Data 1997 as it appears in United Nations Statistics Division (UNSD). United Nations Demographic Yearbook. New York City, United States: United Nations Statistics Division (UNSD).                                                                                                | 1997             |                      |
| Egypt   | Omar AA, Hashish MH. Screening for hepatitis A virus antibodies among a disadvantaged group of preschool children in Alexandria. J Egypt Public Health Assoc. 2000; 75(5-6): 529-39.                                                                                                                              | 1997             |                      |
| Egypt   | Fix AD, Abdel-Hamid M, Purcell RH, Shehata MH, Abdel-Aziz F, Mikhail N, el Sebai H, Nafeh M, Habib M, Arthur RR, Emerson SU, Strickland GT. Prevalence of antibodies to hepatitis E in two rural Egyptian communities. Am J Trop Med Hyg. 2000; 62(4): 519-23.                                                    | 1997             |                      |
| Egypt   | Habib M, Mohamed MK, Abdel-Aziz F, Magder LS, Abdel-Hamid M, Gamil F, Madkour S, Mikhail NN, Anwar W, Strickland GT, Fix AD, Sallam I. Hepatitis C virus infection in a community in the Nile Delta: risk factors for seropositivity. Hepatology. 2001; 33(1): 248-53.                                            | 1997             |                      |
| Egypt   | El-Zanaty and Associates, Macro International, Inc. Egypt Interim Demographic and Health Survey 1997-1998.                                                                                                                                                                                                        | 1997-1998        | *                    |
| Egypt   | Stoszek SK, Abdel-Hamid M, Narooz S, El Daly M, Saleh DA, Mikhail N, Kassem E, Hawash Y, El Kafrawy S, Said A, El Batanony M, Shebl FM, Sayed M, Sharaf S, Fix AD, Strickland GT. Prevalence of and risk factors for hepatitis C in rural pregnant Egyptian women. Trans R Soc Trop Med Hyg. 2006; 100(2): 102-7. | 1997-2003        |                      |
| Egypt   | El-Zanaty and Associates, Macro International, Inc. Egypt Interim Demographic and Health Survey 1998. Calverton, United States: Macro International, Inc.                                                                                                                                                         | 1998             | *                    |
| Egypt   | Egypt Vital Registration Death Data 1998 as it appears in United Nations Statistics Division (UNSD). United Nations Demographic Yearbook. New York City, United States: United Nations Statistics Division (UNSD).                                                                                                | 1998             |                      |
| Egypt   | Measles Supplementary Immunization Activity Data as provided by the World Health Organization. [Unpublished].                                                                                                                                                                                                     | 1998             |                      |



**Web Table 32 - Comprehensive citation list**

| Country | Citation                                                                                                                                                                                                                                                                                                                                                                                                                                   | Year*                 | New for GBD 2013 (*) |
|---------|--------------------------------------------------------------------------------------------------------------------------------------------------------------------------------------------------------------------------------------------------------------------------------------------------------------------------------------------------------------------------------------------------------------------------------------------|-----------------------|----------------------|
| Egypt   | World Health Organization (WHO). Yellow Fever Reported Cases, WHO Vaccine-Preventable Diseases: Monitoring System. Geneva, Switzerland: World Health Organization (WHO).                                                                                                                                                                                                                                                                   | 1998-1999             |                      |
| Egypt   | Egypt Vital Registration Death Data 1999 as it appears in United Nations Statistics Division (UNSD). United Nations Demographic Yearbook. New York City, United States: United Nations Statistics Division (UNSD).                                                                                                                                                                                                                         | 1999                  |                      |
| Egypt   | Yates SC, Hafez M, Beld M, Lukashov VV, Hassan Z, Carboni G, Khaled H, McMorrow M, Attia M, Goudsmit J. Hepatocellular carcinoma in Egyptians with and without a history of hepatitis B virus infection: association with hepatitis C virus (HCV) infection but not with (HCV) RNA level. <i>Am J Trop Med Hyg.</i> 1999; 60(4): 714-20.                                                                                                   | 1999                  |                      |
| Egypt   | Egypt Vital Registration - Deaths 2000 ICD10 as it appears in World Health Organization (WHO). WHO Mortality Database Version February 2014. Geneva, Switzerland: World Health Organization (WHO), 2014.                                                                                                                                                                                                                                   | 2000                  |                      |
| Egypt   | Macro International, Inc, National Population Council (Egypt). Egypt Demographic and Health Survey 2000. Calverton, United States: Macro International, Inc.                                                                                                                                                                                                                                                                               | 2000                  |                      |
| Egypt   | Curado MP, Edwards B, Shin HR, Storm H, Ferlay J, Heanue M and Boyle P, eds (2007). Cancer Incidence in Five Continents, Vol. IX Periodic Data (electronic version). Lyon, IARC. <a href="http://ci5.iarc.fr">http://ci5.iarc.fr</a>                                                                                                                                                                                                       | 2000                  |                      |
| Egypt   | Nafeh MA, Medhat A, Shehata M, Mikhail NN, Swifee Y, Abdel-Hamid M, Watts S, Fix AD, Strickland GT, Anwar W, Sallam I. Hepatitis C in a community in Upper Egypt: I. Cross-sectional survey. <i>Am J Trop Med Hyg.</i> 2000; 63(5-6): 236-41.                                                                                                                                                                                              | 2000                  |                      |
| Egypt   | World Health Organization (WHO). Retrospective Measles Data on Supplementary Immunization Activities. Geneva, Switzerland: World Health Organization (WHO).                                                                                                                                                                                                                                                                                | 2000, 2002, 2008-2009 |                      |
| Egypt   | Egypt Vital Registration - Deaths 2001 ICD10 as it appears in World Health Organization (WHO). WHO Mortality Database Version February 2014. Geneva, Switzerland: World Health Organization (WHO), 2014.                                                                                                                                                                                                                                   | 2001                  |                      |
| Egypt   | Reda AA, Arafa MA, Youssry AA, Wandan EH, Ati MA de, Daebees H. Epidemiologic evaluation of the immunity against hepatitis B in Alexandria, Egypt. <i>Eur J Epidemiol.</i> 2003; 18(10): 1007-11.                                                                                                                                                                                                                                          | 2001                  |                      |
| Egypt   | el-Sadawy M, Ragab H, el-Toukhy H, el-Mor A el-L, Mangoud AM, Eissa MH, Afefy AF, el-Shorbagy E, Ibrahim IA, Mahrous S, Abdel-Monem A, Sabee EI, Ismail A, Morsy TA, Etewa S, Nor Edin E, Mostafa Y, Abouel-Magd Y, Hassan MI, Lakouz K, Abdel-Aziz K, el-Hady G, Saber M. Hepatitis C virus infection at Sharkia Governorate, Egypt: seroprevalence and associated risk factors. <i>J Egypt Soc Parasitol.</i> 2004; 34(1 Suppl): 367-84. | 2001-2002             |                      |
| Egypt   | Egypt Vital Registration - Deaths 2002 ICD10 as it appears in World Health Organization (WHO). WHO Mortality Database Version February 2014. Geneva, Switzerland: World Health Organization (WHO), 2014.                                                                                                                                                                                                                                   | 2002                  |                      |
| Egypt   | Al-Aziz AMA, Awad MAM. Seroprevalence of hepatitis A virus antibodies among a sample of Egyptian children. <i>East Mediterr Health J.</i> 2008; 14(5): 1028-35.                                                                                                                                                                                                                                                                            | 2002-2003             |                      |
| Egypt   | El-Zanaty and Associates, Macro International, Inc, Ministry of Health and Population (Egypt), National Population Council (Egypt). Egypt Interim Demographic and Health Survey 2003. Calverton, United States: Macro International, Inc.                                                                                                                                                                                                  | 2003                  |                      |
| Egypt   | Egypt Vital Registration - Deaths 2003 ICD10 as it appears in World Health Organization (WHO). WHO Mortality Database Version February 2014. Geneva, Switzerland: World Health Organization (WHO), 2014.                                                                                                                                                                                                                                   | 2003                  |                      |

**Web Table 32 - Comprehensive citation list**

| Country | Citation                                                                                                                                                                                                                                                                                                                   | Year*     | New for GBD 2013 (*) |
|---------|----------------------------------------------------------------------------------------------------------------------------------------------------------------------------------------------------------------------------------------------------------------------------------------------------------------------------|-----------|----------------------|
| Egypt   | Sayed HA, El Ayyat A, El Dusoki H, Zoheiry M, Mohamed S, Hassan M, El Assaly N, Awad A, El Ansary M, Saad A, El Karim AA. A cross sectional study of hepatitis B, C, some trace elements, heavy metals, aflatoxin B1 and schistosomiasis in a rural population, Egypt. J Egypt Public Health Assoc. 2005; 80(3-4): 355-88. | 2003      |                      |
| Egypt   | Salama II, Samy SM, Shaaban FA, Hassanine AI, Abou Ismail LA. Seroprevalence of hepatitis A among children of different socioeconomic status in Cairo. East Mediterr Health J. 2007; 13(6): 1256-64.                                                                                                                       | 2003-2004 |                      |
| Egypt   | Egypt Vital Registration - Deaths 2004 ICD10 as it appears in World Health Organization (WHO). WHO Mortality Database Version February 2014. Geneva, Switzerland: World Health Organization (WHO), 2014.                                                                                                                   | 2004      |                      |
| Egypt   | Ministry of Health and Population (Egypt), United States Agency for International Development (USAID). Egypt National Maternal Mortality Surveillance System 2004-2006.                                                                                                                                                    | 2004-2006 |                      |
| Egypt   | Egypt Vital Registration - Deaths 2005 ICD10 as it appears in World Health Organization (WHO). WHO Mortality Database Version February 2014. Geneva, Switzerland: World Health Organization (WHO), 2014.                                                                                                                   | 2005      |                      |
| Egypt   | El-Zanaty and Associates, Macro International, Inc, Ministry of Health and Population (Egypt), National Population Council (Egypt). Egypt Demographic and Health Survey 2005. Calverton, United States: Macro International, Inc.                                                                                          | 2005      |                      |
| Egypt   | Barakat SH, El-Bashir N. Hepatitis C virus infection among healthy Egyptian children: prevalence and risk factors. J Viral Hepat. 2011; 18(11): 779-84.                                                                                                                                                                    | 2005      |                      |
| Egypt   | Forman D, Bray F, Brewster DH, Gombe Mbalawa C, Kohler B, Piñeros M, Steliarova-Foucher E, Swaminathan R and Ferlay J, eds (2013). Cancer Incidence in Five Continents, Vol. X Summary Database (electronic version). Lyon, IARC. <a href="http://ci5.iarc.fr">http://ci5.iarc.fr</a>                                      | 2005      |                      |
| Egypt   | El Tallawy HN, Farghly WMA, Shehata GA, Rageh TA, Hakeem NA, Abo-Elfetoh N, Hegazy AM, Rayan I, El-Moselhy EA. Prevalence of dementia in Al Kharga District, New Valley Governorate, Egypt. Neuroepidemiology. 2012; 38(3): 130-7.                                                                                         | 2005-2008 |                      |
| Egypt   | Egypt Vital Registration - Deaths 2006 ICD10 as it appears in World Health Organization (WHO). WHO Mortality Database Version February 2014. Geneva, Switzerland: World Health Organization (WHO), 2014.                                                                                                                   | 2006      |                      |
| Egypt   | Agha S, El-Mashad N, El-Malky M, El-Shony H, El-Sherif MZ, El-Hasan MA, Tanaka Y, Mizokami M. Prevalence of low positive anti-HCV antibodies in blood donors?: Schistosoma mansoni co-infection and possible role of autoantibodies. Microbiol Immunol. 50(6): 447-52.                                                     | 2006      |                      |
| Egypt   | Egypt Vital Registration - Deaths 2007 ICD10 as it appears in World Health Organization (WHO). WHO Mortality Database Version February 2014. Geneva, Switzerland: World Health Organization (WHO), 2014.                                                                                                                   | 2007      |                      |
| Egypt   | Egypt Vital Registration - Deaths 2008 ICD10 as it appears in World Health Organization (WHO). WHO Mortality Database Version February 2014. Geneva, Switzerland: World Health Organization (WHO), 2014.                                                                                                                   | 2008      |                      |
| Egypt   | El-Zanaty and Associates, Macro International, Inc, Ministry of Health and Population (Egypt). Egypt Demographic and Health Survey 2008. Calverton, United States: Macro International, Inc, 2009.                                                                                                                         | 2008      |                      |
| Egypt   | Ministry of Health and Population (Egypt), National Cancer Registry Program of Egypt. Egypt - Aswan National Cancer Registry Report 2008. Cairo, Egypt: National Cancer Registry Program of Egypt, 2010.                                                                                                                   | 2008      |                      |



**Web Table 32 - Comprehensive citation list**

| Country     | Citation                                                                                                                                                                                                                                                                                           | Year*                                                                          | New for GBD 2013 (*) |
|-------------|----------------------------------------------------------------------------------------------------------------------------------------------------------------------------------------------------------------------------------------------------------------------------------------------------|--------------------------------------------------------------------------------|----------------------|
| Egypt       | Egypt Vital Registration - Deaths 2009 ICD10 as it appears in World Health Organization (WHO). WHO Mortality Database Version February 2014. Geneva, Switzerland: World Health Organization (WHO), 2014.                                                                                           | 2009                                                                           |                      |
| Egypt       | Ministry of Health and Population (Egypt), National Cancer Registry Program of Egypt. Egypt - Damietta National Cancer Registry Report 2009. Cairo, Egypt: National Cancer Registry Program of Egypt, 2011.                                                                                        | 2009                                                                           |                      |
| Egypt       | El-Minia Cancer Center, Ministry of Communications and Information Technology (Egypt), Ministry of Health and Population (Egypt), National Cancer Registry Program of Egypt. Egypt - El-Minia National Cancer Registry Report 2009. Cairo, Egypt: National Cancer Registry Program of Egypt, 2011. | 2009                                                                           |                      |
| Egypt       | United Nations Office on Drugs and Crime (UNODC). United Nations Office on Drugs and Crime Global Study on Homicides 2011. Vienna, Austria: United Nations Office on Drugs and Crime (UNODC), 2011.                                                                                                | 2009                                                                           |                      |
| Egypt       | Egypt Vital Registration - Deaths 2010 ICD10 as it appears in World Health Organization (WHO). WHO Mortality Database Version February 2014. Geneva, Switzerland: World Health Organization (WHO), 2014.                                                                                           | 2010                                                                           |                      |
| Egypt       | Egypt Vital Registration - Deaths 2011 ICD10 as it appears in World Health Organization (WHO). WHO Mortality Database Version February 2014. Geneva, Switzerland: World Health Organization (WHO), 2014.                                                                                           | 2011                                                                           | *                    |
| Egypt       | Department of Peace and Conflict Research, Uppsala University. UCDP Nonstate Conflict Database Version 2.5, 2013. Uppsala, Sweden: Department of Peace and Conflict Research, Uppsala University, 2013.                                                                                            | 2011-2012                                                                      | *                    |
| El Salvador | El Salvador Vital Registration - Deaths 1950 ICD7 as it appears in World Health Organization (WHO). WHO Mortality Database Version February 2014. Geneva, Switzerland: World Health Organization (WHO), 2014.                                                                                      | 1950                                                                           |                      |
| El Salvador | El Salvador Vital Registration - Deaths 1951 ICD7 as it appears in World Health Organization (WHO). WHO Mortality Database Version February 2014. Geneva, Switzerland: World Health Organization (WHO), 2014.                                                                                      | 1951                                                                           |                      |
| El Salvador | Centre for Research on the Epidemiology of Disasters (CRED). EM-DAT: The OFDA/CRED International Disaster Database. Brussels, Belgium: Catholic University of Leuven.                                                                                                                              | 1951, 1965, 1969, 1982, 1986, 1988-1989, 1992-1993, 1995-2002, 2005, 2007-2011 |                      |
| El Salvador | El Salvador Vital Registration - Deaths 1952 ICD7 as it appears in World Health Organization (WHO). WHO Mortality Database Version February 2014. Geneva, Switzerland: World Health Organization (WHO), 2014.                                                                                      | 1952                                                                           |                      |
| El Salvador | El Salvador Vital Registration - Deaths 1953 ICD7 as it appears in World Health Organization (WHO). WHO Mortality Database Version February 2014. Geneva, Switzerland: World Health Organization (WHO), 2014.                                                                                      | 1953                                                                           |                      |
| El Salvador | El Salvador Vital Registration - Deaths 1954 ICD7 as it appears in World Health Organization (WHO). WHO Mortality Database Version February 2014. Geneva, Switzerland: World Health Organization (WHO), 2014.                                                                                      | 1954                                                                           |                      |
| El Salvador | El Salvador Vital Registration - Deaths 1955 ICD7 as it appears in World Health Organization (WHO). WHO Mortality Database Version February 2014. Geneva, Switzerland: World Health Organization (WHO), 2014.                                                                                      | 1955                                                                           |                      |

**Web Table 32 - Comprehensive citation list**

| Country     | Citation                                                                                                                                                                                                      | Year* | New for GBD 2013 (*) |
|-------------|---------------------------------------------------------------------------------------------------------------------------------------------------------------------------------------------------------------|-------|----------------------|
| El Salvador | El Salvador Vital Registration - Deaths 1956 ICD7 as it appears in World Health Organization (WHO). WHO Mortality Database Version February 2014. Geneva, Switzerland: World Health Organization (WHO), 2014. | 1956  |                      |
| El Salvador | El Salvador Vital Registration - Deaths 1957 ICD7 as it appears in World Health Organization (WHO). WHO Mortality Database Version February 2014. Geneva, Switzerland: World Health Organization (WHO), 2014. | 1957  |                      |
| El Salvador | El Salvador Vital Registration - Deaths 1958 ICD7 as it appears in World Health Organization (WHO). WHO Mortality Database Version February 2014. Geneva, Switzerland: World Health Organization (WHO), 2014. | 1958  |                      |
| El Salvador | El Salvador Vital Registration - Deaths 1959 ICD7 as it appears in World Health Organization (WHO). WHO Mortality Database Version February 2014. Geneva, Switzerland: World Health Organization (WHO), 2014. | 1959  |                      |
| El Salvador | El Salvador Vital Registration - Deaths 1960 ICD7 as it appears in World Health Organization (WHO). WHO Mortality Database Version February 2014. Geneva, Switzerland: World Health Organization (WHO), 2014. | 1960  |                      |
| El Salvador | El Salvador Vital Registration - Deaths 1961 ICD7 as it appears in World Health Organization (WHO). WHO Mortality Database Version February 2014. Geneva, Switzerland: World Health Organization (WHO), 2014. | 1961  |                      |
| El Salvador | El Salvador Vital Registration - Deaths 1962 ICD7 as it appears in World Health Organization (WHO). WHO Mortality Database Version February 2014. Geneva, Switzerland: World Health Organization (WHO), 2014. | 1962  |                      |
| El Salvador | El Salvador Vital Registration - Deaths 1963 ICD7 as it appears in World Health Organization (WHO). WHO Mortality Database Version February 2014. Geneva, Switzerland: World Health Organization (WHO), 2014. | 1963  |                      |
| El Salvador | El Salvador Vital Registration - Deaths 1964 ICD7 as it appears in World Health Organization (WHO). WHO Mortality Database Version February 2014. Geneva, Switzerland: World Health Organization (WHO), 2014. | 1964  |                      |
| El Salvador | El Salvador Vital Registration - Deaths 1965 ICD7 as it appears in World Health Organization (WHO). WHO Mortality Database Version February 2014. Geneva, Switzerland: World Health Organization (WHO), 2014. | 1965  |                      |
| El Salvador | El Salvador Vital Registration - Deaths 1966 ICD7 as it appears in World Health Organization (WHO). WHO Mortality Database Version February 2014. Geneva, Switzerland: World Health Organization (WHO), 2014. | 1966  |                      |
| El Salvador | El Salvador Vital Registration - Deaths 1967 ICD7 as it appears in World Health Organization (WHO). WHO Mortality Database Version February 2014. Geneva, Switzerland: World Health Organization (WHO), 2014. | 1967  |                      |
| El Salvador | El Salvador Vital Registration - Deaths 1968 ICD8 as it appears in World Health Organization (WHO). WHO Mortality Database Version February 2014. Geneva, Switzerland: World Health Organization (WHO), 2014. | 1968  |                      |
| El Salvador | El Salvador Vital Registration - Deaths 1969 ICD8 as it appears in World Health Organization (WHO). WHO Mortality Database Version February 2014. Geneva, Switzerland: World Health Organization (WHO), 2014. | 1969  |                      |

**Web Table 32 - Comprehensive citation list**

| Country     | Citation                                                                                                                                                                                                                 | Year*     | New for GBD 2013 (*) |
|-------------|--------------------------------------------------------------------------------------------------------------------------------------------------------------------------------------------------------------------------|-----------|----------------------|
| El Salvador | El Salvador Vital Registration - Deaths 1970 ICD8 as it appears in World Health Organization (WHO). WHO Mortality Database Version February 2014. Geneva, Switzerland: World Health Organization (WHO), 2014.            | 1970      |                      |
| El Salvador | United Nations Office on Drugs and Crime (UNODC). United Nations Surveys on Crime Trends and the Operations of Criminal Justice Systems 1970-2006 as provided by Kavi Bhalla. [Unpublished].                             | 1970-1973 |                      |
| El Salvador | El Salvador Population and Housing Census 1971 as it appears in United Nations Statistics Division (UNSD). United Nations Demographic Yearbook. New York City, United States: United Nations Statistics Division (UNSD). | 1971      |                      |
| El Salvador | El Salvador Vital Registration - Deaths 1971 ICD8 as it appears in World Health Organization (WHO). WHO Mortality Database Version February 2014. Geneva, Switzerland: World Health Organization (WHO), 2014.            | 1971      |                      |
| El Salvador | El Salvador Vital Registration - Deaths 1972 ICD8 as it appears in World Health Organization (WHO). WHO Mortality Database Version February 2014. Geneva, Switzerland: World Health Organization (WHO), 2014.            | 1972      |                      |
| El Salvador | Peace Research Institute Oslo (PRIO). Battle Deaths Dataset Version 3, 2009. Oslo, Norway: Peace Research Institute Oslo (PRIO), 2009.                                                                                   | 1972-1988 |                      |
| El Salvador | El Salvador Vital Registration - Deaths 1973 ICD8 as it appears in World Health Organization (WHO). WHO Mortality Database Version February 2014. Geneva, Switzerland: World Health Organization (WHO), 2014.            | 1973      |                      |
| El Salvador | El Salvador Vital Registration - Deaths 1974 ICD8 as it appears in World Health Organization (WHO). WHO Mortality Database Version February 2014. Geneva, Switzerland: World Health Organization (WHO), 2014.            | 1974      |                      |
| El Salvador | El Salvador Vital Registration Death Data 1975 as it appears in United Nations Statistics Division (UNSD). United Nations Demographic Yearbook. New York City, United States: United Nations Statistics Division (UNSD). | 1975      |                      |
| El Salvador | El Salvador Vital Registration Death Data 1976 as it appears in United Nations Statistics Division (UNSD). United Nations Demographic Yearbook. New York City, United States: United Nations Statistics Division (UNSD). | 1976      |                      |
| El Salvador | El Salvador Vital Registration Death Data 1977 as it appears in United Nations Statistics Division (UNSD). United Nations Demographic Yearbook. New York City, United States: United Nations Statistics Division (UNSD). | 1977      |                      |
| El Salvador | El Salvador Vital Registration Death Data 1978 as it appears in United Nations Statistics Division (UNSD). United Nations Demographic Yearbook. New York City, United States: United Nations Statistics Division (UNSD). | 1978      |                      |
| El Salvador | El Salvador Vital Registration Death Data 1979 as it appears in United Nations Statistics Division (UNSD). United Nations Demographic Yearbook. New York City, United States: United Nations Statistics Division (UNSD). | 1979      |                      |
| El Salvador | El Salvador Vital Registration Death Data 1980 as it appears in United Nations Statistics Division (UNSD). United Nations Demographic Yearbook. New York City, United States: United Nations Statistics Division (UNSD). | 1980      |                      |
| El Salvador | Institute for Health Metrics and Evaluation (IHME), Joint United Nations Program on HIV/AIDS (UNAIDS). Institute for Health Metrics and Evaluation HIV Mortality Estimates Based on the UNAIDS Spectrum Model Framework. | 1980-2013 | *                    |

**Web Table 32 - Comprehensive citation list**

| Country     | Citation                                                                                                                                                                                                                                                      | Year*     | New for GBD 2013 (*) |
|-------------|---------------------------------------------------------------------------------------------------------------------------------------------------------------------------------------------------------------------------------------------------------------|-----------|----------------------|
| El Salvador | United Nations Children's Fund (UNICEF), World Health Organization (WHO). WHO and UNICEF Reported Disease Incidence Time Series - Pertussis. Geneva, Switzerland: World Health Organization (WHO).                                                            | 1980-2013 |                      |
| El Salvador | United Nations Children's Fund (UNICEF), World Health Organization (WHO). WHO and UNICEF Reported Disease Incidence Time Series - Measles. Geneva, Switzerland: World Health Organization (WHO).                                                              | 1980-2013 |                      |
| El Salvador | El Salvador Vital Registration - Deaths 1981 ICD9 as it appears in World Health Organization (WHO). WHO Mortality Database Version February 2014. Geneva, Switzerland: World Health Organization (WHO), 2014.                                                 | 1981      |                      |
| El Salvador | El Salvador Vital Registration - Deaths 1982 ICD9 as it appears in World Health Organization (WHO). WHO Mortality Database Version February 2014. Geneva, Switzerland: World Health Organization (WHO), 2014.                                                 | 1982      |                      |
| El Salvador | El Salvador Vital Registration - Deaths 1983 ICD9 as it appears in World Health Organization (WHO). WHO Mortality Database Version February 2014. Geneva, Switzerland: World Health Organization (WHO), 2014.                                                 | 1983      |                      |
| El Salvador | El Salvador Vital Registration - Deaths 1984 ICD9 as it appears in World Health Organization (WHO). WHO Mortality Database Version February 2014. Geneva, Switzerland: World Health Organization (WHO), 2014.                                                 | 1984      |                      |
| El Salvador | Salvadoran Demographic Association (ADS), Westinghouse; Institute for Resource Development. El Salvador Demographic and Health Survey 1985. Columbia, United States: Westinghouse; Institute for Resource Development.                                        | 1985      |                      |
| El Salvador | El Salvador Vital Registration Death Data 1985 as it appears in United Nations Statistics Division (UNSD). United Nations Demographic Yearbook. New York City, United States: United Nations Statistics Division (UNSD).                                      | 1985      |                      |
| El Salvador | El Salvador Vital Registration Death Data 1986 as it appears in United Nations Statistics Division (UNSD). United Nations Demographic Yearbook. New York City, United States: United Nations Statistics Division (UNSD).                                      | 1986      |                      |
| El Salvador | El Salvador Vital Registration Death Data 1987 as it appears in United Nations Statistics Division (UNSD). United Nations Demographic Yearbook. New York City, United States: United Nations Statistics Division (UNSD).                                      | 1987      |                      |
| El Salvador | Division of Reproductive Health-Centers for Disease Control and Prevention (CDC). El Salvador Family Planning/Maternal and Child Health Survey 1988. Final English Language Report. Atlanta, United States: Centers for Disease Control and Prevention (CDC). | 1988      |                      |
| El Salvador | El Salvador Vital Registration Death Data 1988 as it appears in United Nations Statistics Division (UNSD). United Nations Demographic Yearbook. New York City, United States: United Nations Statistics Division (UNSD).                                      | 1988      |                      |
| El Salvador | El Salvador Vital Registration Death Data 1989 as it appears in United Nations Statistics Division (UNSD). United Nations Demographic Yearbook. New York City, United States: United Nations Statistics Division (UNSD).                                      | 1989      |                      |
| El Salvador | Department of Peace and Conflict Research, Uppsala University. UCDP Battle-Related Deaths Database Version 5, 2013. Uppsala, Sweden: Department of Peace and Conflict Research, Uppsala University, 2013.                                                     | 1989-1991 | *                    |
| El Salvador | El Salvador Vital Registration - Deaths 1990 ICD9 as it appears in World Health Organization (WHO). WHO Mortality Database Version February 2014. Geneva, Switzerland: World Health Organization (WHO), 2014.                                                 | 1990      |                      |

**Web Table 32 - Comprehensive citation list**

| Country     | Citation                                                                                                                                                                                                                                                                                                                 | Year*                | New for GBD 2013 (*) |
|-------------|--------------------------------------------------------------------------------------------------------------------------------------------------------------------------------------------------------------------------------------------------------------------------------------------------------------------------|----------------------|----------------------|
| El Salvador | Centre for Health Informatics and Multiprofessional Education, University College London. Modell's Haemoglobinopathologist's Almanac. London, United Kingdom: Centre for Health Informatics and Multiprofessional Education, University College London, 2008.                                                            | 1990-2003            |                      |
| El Salvador | El Salvador Vital Registration - Deaths 1991 ICD9 as it appears in World Health Organization (WHO). WHO Mortality Database Version February 2014. Geneva, Switzerland: World Health Organization (WHO), 2014.                                                                                                            | 1991                 |                      |
| El Salvador | General Administration of Statistics and Censuses (El Salvador). El Salvador Multipurpose Household Survey 1992.                                                                                                                                                                                                         | 1992                 |                      |
| El Salvador | El Salvador Vital Registration - Deaths 1992 ICD9 as it appears in World Health Organization (WHO). WHO Mortality Database Version February 2014. Geneva, Switzerland: World Health Organization (WHO), 2014.                                                                                                            | 1992                 |                      |
| El Salvador | Minnesota Population Center, General Administration of Statistics and Censuses (El Salvador), Ministry of Economy (El Salvador). El Salvador Population and Housing Census 1992 from the Integrated Public Use Microdata Series, International. [Machine-readable database]. Minneapolis: University of Minnesota, 2012. | 1992                 |                      |
| El Salvador | General Administration of Statistics and Censuses (El Salvador). El Salvador Multipurpose Household Survey 1993.                                                                                                                                                                                                         | 1993                 |                      |
| El Salvador | El Salvador Vital Registration - Deaths 1993 ICD9 as it appears in World Health Organization (WHO). WHO Mortality Database Version February 2014. Geneva, Switzerland: World Health Organization (WHO), 2014.                                                                                                            | 1993                 |                      |
| El Salvador | El Salvador Demographic Association (ADS), Division of Reproductive Health-Centers for Disease Control and Prevention (CDC). El Salvador Family Planning/Maternal and Child Survey 1993. Atlanta, United States: Centers for Disease Control and Prevention (CDC).                                                       | 1993                 |                      |
| El Salvador | Measles Supplementary Immunization Activity Data as provided by the World Health Organization. [Unpublished].                                                                                                                                                                                                            | 1993, 1996           |                      |
| El Salvador | El Salvador Vital Registration Death Data 1994 as it appears in United Nations Statistics Division (UNSD). United Nations Demographic Yearbook. New York City, United States: United Nations Statistics Division (UNSD).                                                                                                 | 1994                 |                      |
| El Salvador | El Salvador Vital Registration - Deaths 1995 ICD9 as it appears in World Health Organization (WHO). WHO Mortality Database Version February 2014. Geneva, Switzerland: World Health Organization (WHO), 2014.                                                                                                            | 1995                 |                      |
| El Salvador | United Nations Office on Drugs and Crime (UNODC). United Nations Office on Drugs and Crime Global Study on Homicides 2011. Vienna, Austria: United Nations Office on Drugs and Crime (UNODC), 2011.                                                                                                                      | 1995-2010            |                      |
| El Salvador | El Salvador Vital Registration - Deaths 1996 ICD9 as it appears in World Health Organization (WHO). WHO Mortality Database Version February 2014. Geneva, Switzerland: World Health Organization (WHO), 2014.                                                                                                            | 1996                 |                      |
| El Salvador | El Salvador Vital Registration - Deaths 1997 ICD10 as it appears in World Health Organization (WHO). WHO Mortality Database Version February 2014. Geneva, Switzerland: World Health Organization (WHO), 2014.                                                                                                           | 1997                 |                      |
| El Salvador | World Health Organization (WHO). Yellow Fever Reported Cases, WHO Vaccine-Preventable Diseases: Monitoring System. Geneva, Switzerland: World Health Organization (WHO).                                                                                                                                                 | 1997-2001, 2003-2009 |                      |
| El Salvador | El Salvador Vital Registration - Deaths 1998 ICD10 as it appears in World Health Organization (WHO). WHO Mortality Database Version February 2014. Geneva, Switzerland: World Health Organization (WHO), 2014.                                                                                                           | 1998                 |                      |

**Web Table 32 - Comprehensive citation list**

| Country     | Citation                                                                                                                                                                                                                                                                                                                                                                                                                               | Year*                 | New for GBD 2013 (*) |
|-------------|----------------------------------------------------------------------------------------------------------------------------------------------------------------------------------------------------------------------------------------------------------------------------------------------------------------------------------------------------------------------------------------------------------------------------------------|-----------------------|----------------------|
| El Salvador | El Salvador Demographic Association (ADS), Division of Reproductive Health-Centers for Disease Control and Prevention (CDC). El Salvador Reproductive Health Survey 1998. Atlanta, United States: Centers for Disease Control and Prevention (CDC).                                                                                                                                                                                    | 1998                  |                      |
| El Salvador | El Salvador Vital Registration - Deaths 1999 ICD10 as it appears in World Health Organization (WHO). WHO Mortality Database Version February 2014. Geneva, Switzerland: World Health Organization (WHO), 2014.                                                                                                                                                                                                                         | 1999                  |                      |
| El Salvador | El Salvador Vital Registration - Deaths 2000 ICD10 as it appears in World Health Organization (WHO). WHO Mortality Database Version February 2014. Geneva, Switzerland: World Health Organization (WHO), 2014.                                                                                                                                                                                                                         | 2000                  |                      |
| El Salvador | El Salvador Vital Registration - Deaths 2001 ICD10 as it appears in World Health Organization (WHO). WHO Mortality Database Version February 2014. Geneva, Switzerland: World Health Organization (WHO), 2014.                                                                                                                                                                                                                         | 2001                  |                      |
| El Salvador | World Health Organization (WHO). Retrospective Measles Data on Supplementary Immunization Activities. Geneva, Switzerland: World Health Organization (WHO).                                                                                                                                                                                                                                                                            | 2001, 2004-2008, 2012 |                      |
| El Salvador | El Salvador Vital Registration - Deaths 2002 ICD10 as it appears in World Health Organization (WHO). WHO Mortality Database Version February 2014. Geneva, Switzerland: World Health Organization (WHO), 2014.                                                                                                                                                                                                                         | 2002                  |                      |
| El Salvador | Asociación Demográfica Salvadoreña (ADS), Division of Reproductive Health-Centers for Disease Control and Prevention (CDC). (2004) El Salvador Reproductive Health Survey 2002-2003. San Salvador, El Salvador: ADS.                                                                                                                                                                                                                   | 2002-2003             |                      |
| El Salvador | El Salvador Vital Registration - Deaths 2003 ICD10 as it appears in World Health Organization (WHO). WHO Mortality Database Version February 2014. Geneva, Switzerland: World Health Organization (WHO), 2014.                                                                                                                                                                                                                         | 2003                  |                      |
| El Salvador | El Salvador Vital Registration - Deaths 2004 ICD10 as it appears in World Health Organization (WHO). WHO Mortality Database Version February 2014. Geneva, Switzerland: World Health Organization (WHO), 2014.                                                                                                                                                                                                                         | 2004                  |                      |
| El Salvador | El Salvador Vital Registration - Deaths 2005 ICD10 as it appears in World Health Organization (WHO). WHO Mortality Database Version February 2014. Geneva, Switzerland: World Health Organization (WHO), 2014.                                                                                                                                                                                                                         | 2005                  |                      |
| El Salvador | El Salvador Vital Registration - Deaths 2006 ICD10 as it appears in World Health Organization (WHO). WHO Mortality Database Version February 2014. Geneva, Switzerland: World Health Organization (WHO), 2014.                                                                                                                                                                                                                         | 2006                  |                      |
| El Salvador | Ministry of Health (El Salvador). El Salvador Maternal Mortality Data 2006-2010. [Unpublished].                                                                                                                                                                                                                                                                                                                                        | 2006-2010             |                      |
| El Salvador | Fassio E, Díaz S, Santa C, Reig ME, Martínez Artola Y, Alves de Mattos A, Míguez C, Galizzi J, Zapata R, Ridruejo E, de Souza FC, Hernández N, Pinchuk L, Multicenter Group for Study of Hepatocarcinoma in Latin America, Asociación Latinoamericana para el Estudio del Hígado (ALEH). Etiology of hepatocellular carcinoma in Latin America: a prospective, multicenter, international study. <i>Ann Hepatol.</i> 2010; 9(1): 63-9. | 2006-2008             | *                    |
| El Salvador | El Salvador Population and Housing Census 2007 as it appears in United Nations Statistics Division (UNSD). United Nations Demographic Yearbook. New York City, United States: United Nations Statistics Division (UNSD).                                                                                                                                                                                                               | 2007                  |                      |



**Web Table 32 - Comprehensive citation list**

| Country           | Citation                                                                                                                                                                                                                                                                                                                 | Year*                                      | New for GBD 2013 (*) |
|-------------------|--------------------------------------------------------------------------------------------------------------------------------------------------------------------------------------------------------------------------------------------------------------------------------------------------------------------------|--------------------------------------------|----------------------|
| El Salvador       | El Salvador Vital Registration - Deaths 2007 ICD10 as it appears in World Health Organization (WHO). WHO Mortality Database Version February 2014. Geneva, Switzerland: World Health Organization (WHO), 2014.                                                                                                           | 2007                                       |                      |
| El Salvador       | Minnesota Population Center, General Administration of Statistics and Censuses (El Salvador), Ministry of Economy (El Salvador). El Salvador Population and Housing Census 2007 from the Integrated Public Use Microdata Series, International. [Machine-readable database]. Minneapolis: University of Minnesota, 2012. | 2007                                       |                      |
| El Salvador       | Asociación Demográfica Salvadoreña (ADS), Division of Reproductive Health-Centers for Disease Control and Prevention (CDC). (2009) El Salvador Reproductive Health Survey 2008. San Salvador, El Salvador: ADS.                                                                                                          | 2008                                       |                      |
| El Salvador       | El Salvador Vital Registration - Deaths 2008 ICD10 as it appears in World Health Organization (WHO). WHO Mortality Database Version February 2014. Geneva, Switzerland: World Health Organization (WHO), 2014.                                                                                                           | 2008                                       |                      |
| El Salvador       | El Salvador Vital Registration - Deaths 2009 ICD10 as it appears in World Health Organization (WHO). WHO Mortality Database Version February 2014. Geneva, Switzerland: World Health Organization (WHO), 2014.                                                                                                           | 2009                                       |                      |
| El Salvador       | Joint United Nations Program on HIV/AIDS (UNAIDS), Ministry of Public Health and Social Assistance (El Salvador). El Salvador UNGASS Report 2010. Geneva, Switzerland: Joint United Nations Program on HIV/AIDS (UNAIDS), 2010.                                                                                          | 2009                                       |                      |
| El Salvador       | El Salvador Vital Registration Death Data 2011 as it appears in United Nations Statistics Division (UNSD). United Nations Demographic Yearbook 2012. New York City, United States: United Nations Statistics Division (UNSD), 2013.                                                                                      | 2011                                       | *                    |
| Equatorial Guinea | Peace Research Institute Oslo (PRIO). Battle Deaths Dataset Version 3, 2009. Oslo, Norway: Peace Research Institute Oslo (PRIO), 2009.                                                                                                                                                                                   | 1979                                       |                      |
| Equatorial Guinea | Institute for Health Metrics and Evaluation (IHME), Joint United Nations Program on HIV/AIDS (UNAIDS). Institute for Health Metrics and Evaluation HIV Mortality Estimates Based on the UNAIDS Spectrum Model Framework.                                                                                                 | 1980-2013                                  | *                    |
| Equatorial Guinea | United Nations Children's Fund (UNICEF), World Health Organization (WHO). WHO and UNICEF Reported Disease Incidence Time Series - Pertussis. Geneva, Switzerland: World Health Organization (WHO).                                                                                                                       | 1984-1990, 1996-1997, 2001-2002, 2011-2013 |                      |
| Equatorial Guinea | United Nations Children's Fund (UNICEF), World Health Organization (WHO). WHO and UNICEF Reported Disease Incidence Time Series - Measles. Geneva, Switzerland: World Health Organization (WHO).                                                                                                                         | 1984-1997, 2001-2004, 2006-2013            |                      |
| Equatorial Guinea | Weatherall D. Sickle Cell and Thalassemias Prevalence Data, Personal Correspondence with David Weatherall. [Unpublished].                                                                                                                                                                                                | 1990-2009                                  |                      |
| Equatorial Guinea | Centre for Health Informatics and Multiprofessional Education, University College London. Modell's Haemoglobinopathologist's Almanac. London, United Kingdom: Centre for Health Informatics and Multiprofessional Education, University College London, 2008.                                                            | 1990-2003                                  |                      |
| Equatorial Guinea | World Health Organization (WHO). Yellow Fever Reported Cases, WHO Vaccine-Preventable Diseases: Monitoring System. Geneva, Switzerland: World Health Organization (WHO).                                                                                                                                                 | 1997, 2001-2005, 2008-2009                 |                      |
| Equatorial Guinea | Ministry of Planning, Economic Development and Public Investment (Equatorial Guinea), United Nations Children's Fund (UNICEF). Equatorial Guinea Multiple Indicator Cluster Survey 2000. New York, United States: United Nations Children's Fund (UNICEF).                                                               | 2000                                       |                      |
| Equatorial Guinea | World Health Organization (WHO). Retrospective Measles Data on Supplementary Immunization Activities. Geneva, Switzerland: World Health Organization (WHO).                                                                                                                                                              | 2003, 2005, 2009, 2011-2012                |                      |

**Web Table 32 - Comprehensive citation list**

| Country           | Citation                                                                                                                                                                                                                                                      | Year*                                  | New for GBD 2013 (*) |
|-------------------|---------------------------------------------------------------------------------------------------------------------------------------------------------------------------------------------------------------------------------------------------------------|----------------------------------------|----------------------|
| Equatorial Guinea | Joint United Nations Program on HIV/AIDS (UNAIDS), National AIDS Control Program (Equatorial Guinea). Equatorial Guinea Declaration of Commitment on HIV/AIDS, UNGASS 2010. Geneva, Switzerland: Joint United Nations Program on HIV/AIDS (UNAIDS), 2010.     | 2008                                   |                      |
| Equatorial Guinea | ICF International, Ministry of Health and Social Welfare (Equatorial Guinea), Ministry of Planning, Economic Development and Public Investment (Equatorial Guinea). Equatorial Guinea Demographic and Health Survey 2011.                                     | 2011                                   | *                    |
| Eritrea           | Institute for Health Metrics and Evaluation (IHME), Joint United Nations Program on HIV/AIDS (UNAIDS). Institute for Health Metrics and Evaluation HIV Mortality Estimates Based on the UNAIDS Spectrum Model Framework.                                      | 1980-2013                              | *                    |
| Eritrea           | Tsega E, Mengesha B, Nordenfelt E, Hansson BG, Lindberg J. Prevalence of hepatitis B virus markers among Ethiopian blood donors: is HBsAg screening necessary? Trop Geogr Med. 1987; 39(4): 336-40.                                                           | 1984-1985                              |                      |
| Eritrea           | Centre for Health Informatics and Multiprofessional Education, University College London. Modell's Haemoglobinopathologist's Almanac. London, United Kingdom: Centre for Health Informatics and Multiprofessional Education, University College London, 2008. | 1990-2003                              |                      |
| Eritrea           | Centre for Research on the Epidemiology of Disasters (CRED). EM-DAT: The OFDA/CRED International Disaster Database. Brussels, Belgium: Catholic University of Leuven.                                                                                         | 1993                                   |                      |
| Eritrea           | United Nations Children's Fund (UNICEF), World Health Organization (WHO). WHO and UNICEF Reported Disease Incidence Time Series - Measles. Geneva, Switzerland: World Health Organization (WHO).                                                              | 1993-2013                              |                      |
| Eritrea           | Macro International, Inc, National Statistics Office (Eritrea). Eritrea Demographic and Health Survey 1995-1996. Calverton, United States: Macro International, Inc.                                                                                          | 1995-1996                              |                      |
| Eritrea           | World Health Organization (WHO). Yellow Fever Reported Cases, WHO Vaccine-Preventable Diseases: Monitoring System. Geneva, Switzerland: World Health Organization (WHO).                                                                                      | 1995-1997, 2004                        |                      |
| Eritrea           | United Nations Children's Fund (UNICEF), World Health Organization (WHO). WHO and UNICEF Reported Disease Incidence Time Series - Pertussis. Geneva, Switzerland: World Health Organization (WHO).                                                            | 1995-1996, 1998-2006, 2008-2013        |                      |
| Eritrea           | Department of Peace and Conflict Research, Uppsala University. UCDP Battle-Related Deaths Database Version 5, 2013. Uppsala, Sweden: Department of Peace and Conflict Research, Uppsala University, 2013.                                                     | 1997-2008                              | *                    |
| Eritrea           | Measles Supplementary Immunization Activity Data as provided by the World Health Organization. [Unpublished].                                                                                                                                                 | 1997-1999                              |                      |
| Eritrea           | World Health Organization Regional Office for Africa. HIV/AIDS Epidemiological Surveillance Update for the WHO African Region. World Health Organization Regional Office for Africa, 2003.                                                                    | 1999                                   |                      |
| Eritrea           | World Health Organization (WHO). Retrospective Measles Data on Supplementary Immunization Activities. Geneva, Switzerland: World Health Organization (WHO).                                                                                                   | 2000-2001, 2003-2004, 2006, 2009, 2012 |                      |
| Eritrea           | Macro International, Inc, National Statistics and Evaluation Office (Eritrea). Eritrea Demographic and Health Survey 2002. Calverton, United States: Macro International, Inc.                                                                                | 2002                                   |                      |
| Eritrea           | Ministry of Health (Eritrea). Eritrea HIV and Syphilis Sentinel Surveillance Survey in ANC Attendee Women 2007.                                                                                                                                               | 2003, 2005, 2007                       |                      |
| Estonia           | Max Planck Institute for Demographic Research, University of California. Human Mortality Database. Berkeley, USA: University of California; Rostock, Germany: Max Planck Institute for Demographic Research.                                                  | 1959-1984                              |                      |
| Estonia           | Institute for Health Metrics and Evaluation. Institute for Health Metrics and Evaluation Cancer Registry Database. [Unpublished].                                                                                                                             | 1980-2008                              |                      |



**Web Table 32 - Comprehensive citation list**

| Country | Citation                                                                                                                                                                                                                                                                                              | Year*     | New for GBD 2013 (*) |
|---------|-------------------------------------------------------------------------------------------------------------------------------------------------------------------------------------------------------------------------------------------------------------------------------------------------------|-----------|----------------------|
| Estonia | Ferlay J, Parkin DM, Curado MP, Bray F, Edwards B, Shin HR and Forman D. Cancer Incidence in Five Continents, Volumes I to IX: IARC CancerBase No. 9 [Internet]. Lyon, France: International Agency for Research on Cancer; 2010. Available from: <a href="http://ci5.iarc.fr">http://ci5.iarc.fr</a> | 1980-2002 |                      |
| Estonia | Institute for Health Metrics and Evaluation (IHME), Joint United Nations Program on HIV/AIDS (UNAIDS). Institute for Health Metrics and Evaluation HIV Mortality Estimates Based on the UNAIDS Spectrum Model Framework.                                                                              | 1980-2013 | *                    |
| Estonia | Estonia Vital Registration - Deaths 1981 ICD9 as it appears in World Health Organization (WHO). WHO Mortality Database Version February 2014. Geneva, Switzerland: World Health Organization (WHO), 2014.                                                                                             | 1981      |                      |
| Estonia | Estonia Vital Registration - Deaths 1982 ICD9 as it appears in World Health Organization (WHO). WHO Mortality Database Version February 2014. Geneva, Switzerland: World Health Organization (WHO), 2014.                                                                                             | 1982      |                      |
| Estonia | Kompaniets AA, Doroshenko NV, Stakhanova VM, Dardik FG, Reinaru IK. [Patterns of the epidemic process in viral hepatitis A and B in territories with different morbidity levels. I. Hepatitis A]. Zh Mikrobiol Epidemiol Immunobiol. 1984; 70-4.                                                      | 1983      |                      |
| Estonia | Estonia Vital Registration - Deaths 1985 ICD9 as it appears in World Health Organization (WHO). WHO Mortality Database Version February 2014. Geneva, Switzerland: World Health Organization (WHO), 2014.                                                                                             | 1985      |                      |
| Estonia | Estonia Vital Registration - Deaths 1986 ICD9 as it appears in World Health Organization (WHO). WHO Mortality Database Version February 2014. Geneva, Switzerland: World Health Organization (WHO), 2014.                                                                                             | 1986      |                      |
| Estonia | Estonia Vital Registration - Deaths 1987 ICD9 as it appears in World Health Organization (WHO). WHO Mortality Database Version February 2014. Geneva, Switzerland: World Health Organization (WHO), 2014.                                                                                             | 1987      |                      |
| Estonia | Estonia Vital Registration - Deaths 1988 ICD9 as it appears in World Health Organization (WHO). WHO Mortality Database Version February 2014. Geneva, Switzerland: World Health Organization (WHO), 2014.                                                                                             | 1988      |                      |
| Estonia | Estonia Population and Housing Census 1989 as it appears in United Nations Statistics Division (UNSD). United Nations Demographic Yearbook. New York City, United States: United Nations Statistics Division (UNSD).                                                                                  | 1989      |                      |
| Estonia | Estonia Vital Registration - Deaths 1989 ICD9 as it appears in World Health Organization (WHO). WHO Mortality Database Version February 2014. Geneva, Switzerland: World Health Organization (WHO), 2014.                                                                                             | 1989      |                      |
| Estonia | Estonia Vital Registration - Deaths 1990 ICD9 as it appears in World Health Organization (WHO). WHO Mortality Database Version February 2014. Geneva, Switzerland: World Health Organization (WHO), 2014.                                                                                             | 1990      |                      |
| Estonia | World Health Organization (WHO). Global Prevalence and Incidence of Selected Curable Sexually Transmitted Infections: Overviews and Estimates 2001. Geneva, Switzerland: World Health Organization (WHO), 2001.                                                                                       | 1990-1996 |                      |
| Estonia | United Nations Children's Fund (UNICEF), World Health Organization (WHO). WHO and UNICEF Reported Disease Incidence Time Series - Pertussis. Geneva, Switzerland: World Health Organization (WHO).                                                                                                    | 1990-2013 |                      |
| Estonia | United Nations Children's Fund (UNICEF), World Health Organization (WHO). WHO and UNICEF Reported Disease Incidence Time Series - Measles. Geneva, Switzerland: World Health Organization (WHO).                                                                                                      | 1990-2013 |                      |

**Web Table 32 - Comprehensive citation list**

| Country | Citation                                                                                                                                                                                                                                                      | Year*     | New for GBD 2013 (*) |
|---------|---------------------------------------------------------------------------------------------------------------------------------------------------------------------------------------------------------------------------------------------------------------|-----------|----------------------|
| Estonia | Centre for Health Informatics and Multiprofessional Education, University College London. Modell's Haemoglobinopathologist's Almanac. London, United Kingdom: Centre for Health Informatics and Multiprofessional Education, University College London, 2008. | 1990-2003 |                      |
| Estonia | Estonia Vital Registration - Deaths 1991 ICD9 as it appears in World Health Organization (WHO). WHO Mortality Database Version February 2014. Geneva, Switzerland: World Health Organization (WHO), 2014.                                                     | 1991      |                      |
| Estonia | Estonia Vital Registration - Deaths 1992 ICD9 as it appears in World Health Organization (WHO). WHO Mortality Database Version February 2014. Geneva, Switzerland: World Health Organization (WHO), 2014.                                                     | 1992      |                      |
| Estonia | Estonia Vital Registration - Deaths 1993 ICD9 as it appears in World Health Organization (WHO). WHO Mortality Database Version February 2014. Geneva, Switzerland: World Health Organization (WHO), 2014.                                                     | 1993      |                      |
| Estonia | Estonia Vital Registration - Deaths 1994 ICD9 as it appears in World Health Organization (WHO). WHO Mortality Database Version February 2014. Geneva, Switzerland: World Health Organization (WHO), 2014.                                                     | 1994      |                      |
| Estonia | Estonia Vital Registration - Deaths 1995 ICD9 as it appears in World Health Organization (WHO). WHO Mortality Database Version February 2014. Geneva, Switzerland: World Health Organization (WHO), 2014.                                                     | 1995      |                      |
| Estonia | Estonia Vital Registration - Deaths 1996 ICD9 as it appears in World Health Organization (WHO). WHO Mortality Database Version February 2014. Geneva, Switzerland: World Health Organization (WHO), 2014.                                                     | 1996      |                      |
| Estonia | Estonia Vital Registration - Deaths 1997 ICD10 as it appears in World Health Organization (WHO). WHO Mortality Database Version February 2014. Geneva, Switzerland: World Health Organization (WHO), 2014.                                                    | 1997      |                      |
| Estonia | Estonia Vital Registration - Deaths 1998 ICD10 as it appears in World Health Organization (WHO). WHO Mortality Database Version February 2014. Geneva, Switzerland: World Health Organization (WHO), 2014.                                                    | 1998      |                      |
| Estonia | Estonia Vital Registration - Deaths 1999 ICD10 as it appears in World Health Organization (WHO). WHO Mortality Database Version February 2014. Geneva, Switzerland: World Health Organization (WHO), 2014.                                                    | 1999      |                      |
| Estonia | Estonia Vital Registration - Deaths 2000 ICD10 as it appears in World Health Organization (WHO). WHO Mortality Database Version February 2014. Geneva, Switzerland: World Health Organization (WHO), 2014.                                                    | 2000      |                      |
| Estonia | World Health Organization (WHO). Yellow Fever Reported Cases, WHO Vaccine-Preventable Diseases: Monitoring System. Geneva, Switzerland: World Health Organization (WHO).                                                                                      | 2000-2009 |                      |
| Estonia | Estonia Vital Registration - Deaths 2001 ICD10 as it appears in World Health Organization (WHO). WHO Mortality Database Version February 2014. Geneva, Switzerland: World Health Organization (WHO), 2014.                                                    | 2001      |                      |
| Estonia | Estonia Vital Registration - Deaths 2002 ICD10 as it appears in World Health Organization (WHO). WHO Mortality Database Version February 2014. Geneva, Switzerland: World Health Organization (WHO), 2014.                                                    | 2002      |                      |

**Web Table 32 - Comprehensive citation list**

| Country | Citation                                                                                                                                                                                                                                                                                         | Year*     | New for GBD 2013 (*) |
|---------|--------------------------------------------------------------------------------------------------------------------------------------------------------------------------------------------------------------------------------------------------------------------------------------------------|-----------|----------------------|
| Estonia | Estonia Vital Registration - Deaths 2003 ICD10 as it appears in World Health Organization (WHO). WHO Mortality Database Version February 2014. Geneva, Switzerland: World Health Organization (WHO), 2014.                                                                                       | 2003      |                      |
| Estonia | World Health Organization (WHO). Estonia World Health Survey 2003. Geneva, Switzerland: World Health Organization (WHO), 2005.                                                                                                                                                                   | 2003      |                      |
| Estonia | National Institute for Health Development (Estonia). Estonia New Cases of Malignant Neoplasms by Specified Site, Gender, and Age Group - Health Statistics and Health Research Database.                                                                                                         | 2003-2008 |                      |
| Estonia | EUVAC-NET. EUVAC-NET Pertussis Surveillance Report 2003-2007. Stockholm, Sweden: European Centre for Disease Prevention and Control, 2009.                                                                                                                                                       | 2003-2007 |                      |
| Estonia | Estonia Vital Registration - Deaths 2004 ICD10 as it appears in World Health Organization (WHO). WHO Mortality Database Version February 2014. Geneva, Switzerland: World Health Organization (WHO), 2014.                                                                                       | 2004      |                      |
| Estonia | Estonia Vital Registration - Deaths 2005 ICD10 as it appears in World Health Organization (WHO). WHO Mortality Database Version February 2014. Geneva, Switzerland: World Health Organization (WHO), 2014.                                                                                       | 2005      |                      |
| Estonia | Forman D, Bray F, Brewster DH, Gombe Mbalawa C, Kohler B, Piñeros M, Steliarova-Foucher E, Swaminathan R and Ferlay J, eds (2013). Cancer Incidence in Five Continents, Vol. X Summary Database (electronic version). Lyon, IARC. <a href="http://ci5.iarc.fr">http://ci5.iarc.fr</a>            | 2005      |                      |
| Estonia | Estonia Vital Registration - Deaths 2006 ICD10 as it appears in World Health Organization (WHO). WHO Mortality Database Version February 2014. Geneva, Switzerland: World Health Organization (WHO), 2014.                                                                                       | 2006      |                      |
| Estonia | Estonia Vital Registration - Deaths 2007 ICD10 as it appears in World Health Organization (WHO). WHO Mortality Database Version February 2014. Geneva, Switzerland: World Health Organization (WHO), 2014.                                                                                       | 2007      |                      |
| Estonia | EUVAC-NET. EUVAC-NET Measles Surveillance Report 2007. Stockholm, Sweden: European Centre for Disease Prevention and Control, 2008.                                                                                                                                                              | 2007      |                      |
| Estonia | Estonia Vital Registration - Deaths 2008 ICD10 as it appears in World Health Organization (WHO). WHO Mortality Database Version February 2014. Geneva, Switzerland: World Health Organization (WHO), 2014.                                                                                       | 2008      |                      |
| Estonia | EUVAC-NET. EUVAC-NET Pertussis Surveillance Report 2008. Stockholm, Sweden: European Centre for Disease Prevention and Control, 2009.                                                                                                                                                            | 2008      |                      |
| Estonia | Estonia Vital Registration - Deaths 2009 ICD10 as it appears in World Health Organization (WHO). WHO Mortality Database Version February 2014. Geneva, Switzerland: World Health Organization (WHO), 2014.                                                                                       | 2009      |                      |
| Estonia | Estonia Vital Registration - Deaths 2010 ICD10 as it appears in World Health Organization (WHO). WHO Mortality Database Version February 2014. Geneva, Switzerland: World Health Organization (WHO), 2014.                                                                                       | 2010      |                      |
| Estonia | European Renal Association-European Dialysis and Transplant Association (ERA-EDTA). European Renal Association-European Dialysis and Transplant Association Registry Annual Report 2010. Parma, Italy: European Renal Association-European Dialysis and Transplant Association (ERA-EDTA), 2012. | 2010      | *                    |

**Web Table 32 - Comprehensive citation list**

| Country  | Citation                                                                                                                                                                                                                                                                                                         | Year*                                                                                         | New for GBD 2013 (*) |
|----------|------------------------------------------------------------------------------------------------------------------------------------------------------------------------------------------------------------------------------------------------------------------------------------------------------------------|-----------------------------------------------------------------------------------------------|----------------------|
| Estonia  | Estonia Vital Registration - Deaths 2011 ICD10 as it appears in World Health Organization (WHO). WHO Mortality Database Version February 2014. Geneva, Switzerland: World Health Organization (WHO), 2014.                                                                                                       | 2011                                                                                          | *                    |
| Estonia  | European Renal Association-European Dialysis and Transplant Association (ERA-EDTA). European Renal Association-European Dialysis and Transplant Association Registry Annual Report 2011. Parma, Italy: European Renal Association-European Dialysis and Transplant Association (ERA-EDTA), 2013.                 | 2011                                                                                          | *                    |
| Estonia  | Estonia Vital Registration - Deaths 2012 ICD10 as it appears in World Health Organization (WHO). WHO Mortality Database Version February 2014. Geneva, Switzerland: World Health Organization (WHO), 2014.                                                                                                       | 2012                                                                                          | *                    |
| Ethiopia | Sheba C, Adam A, Bat-Miriam M. A survey of some genetical characters in Ethiopian tribes. Introduction. Purpose of expedition. Survey of glutathione-instability in red blood cells. Am J Phys Anthropol. 1962; 20: 168-71.                                                                                      | 1960-1962                                                                                     |                      |
| Ethiopia | Peace Research Institute Oslo (PRIO). Battle Deaths Dataset Version 3, 2009. Oslo, Norway: Peace Research Institute Oslo (PRIO), 2009.                                                                                                                                                                           | 1960-1988                                                                                     |                      |
| Ethiopia | Centre for Research on the Epidemiology of Disasters (CRED). EM-DAT: The OFDA/CRED International Disaster Database. Brussels, Belgium: Catholic University of Leuven.                                                                                                                                            | 1965, 1968-1969, 1973-1978, 1983-1985, 1987-1988, 1991, 1993-1997, 1999-2003, 2005-2008, 2010 |                      |
| Ethiopia | Frischer H, Bowman JE, Carson PE, Rieckmann KH, Willerson D Jr, Colwell EJ. Erythrocytic glutathione reductase, glucose-6-phosphate dehydrogenase, and 6-phosphogluconic dehydrogenase deficiencies in populations of the United States, South Vietnam, Iran, and Ethiopia. J Lab Clin Med. 1973; 81(4): 603-12. | 1971-1973                                                                                     |                      |
| Ethiopia | Institute for Health Metrics and Evaluation (IHME), Joint United Nations Program on HIV/AIDS (UNAIDS). Institute for Health Metrics and Evaluation HIV Mortality Estimates Based on the UNAIDS Spectrum Model Framework.                                                                                         | 1980-2013                                                                                     | *                    |
| Ethiopia | United Nations Children's Fund (UNICEF), World Health Organization (WHO). WHO and UNICEF Reported Disease Incidence Time Series - Pertussis. Geneva, Switzerland: World Health Organization (WHO).                                                                                                               | 1980-1990, 1992, 1995-1996, 1998-1999                                                         |                      |
| Ethiopia | United Nations Children's Fund (UNICEF), World Health Organization (WHO). WHO and UNICEF Reported Disease Incidence Time Series - Measles. Geneva, Switzerland: World Health Organization (WHO).                                                                                                                 | 1980-2013                                                                                     |                      |
| Ethiopia | Lindtjörn B. Severe measles in the Gardulla area of southwest Ethiopia. J Trop Pediatr. 1986; 32(5): 234-9.                                                                                                                                                                                                      | 1981-1982                                                                                     |                      |
| Ethiopia | Kwast BE, Rochat RW, Kidane-Mariam W. Maternal mortality in Addis Ababa, Ethiopia. Stud Fam Plann. 1986; 17(6 (Pt 1)): 288-301.                                                                                                                                                                                  | 1982                                                                                          |                      |
| Ethiopia | Gebreselassie L. Prevalence of specific markers of viral hepatitis A and B among an Ethiopian population. Bull World Health Organ. 1983; 61(6): 991-6.                                                                                                                                                           | 1983                                                                                          |                      |
| Ethiopia | Ethiopia Population and Housing Census 1984 as it appears in United Nations Statistics Division (UNSD). United Nations Demographic Yearbook. New York City, United States: United Nations Statistics Division (UNSD).                                                                                            | 1984                                                                                          |                      |
| Ethiopia | Tsega E, Mengesha B, Hansson BG, Lindberg J, Nordenfelt E. Hepatitis A, B, and delta infection in Ethiopia: a serologic survey with demographic data. Am J Epidemiol. 1986; 123(2): 344-51.                                                                                                                      | 1984                                                                                          |                      |
| Ethiopia | Kefene H, Rapicetta M, Rossi GB, Bisanti L, Bekura D, Morace G, Palladino P, Di Rienzo A, Conti S, Bassani F, Bertolaso G, Pasquini P. Ethiopian national hepatitis B study. J Med Virol. 1988; 24(1): 75-84.                                                                                                    | 1985-1986                                                                                     |                      |

**Web Table 32 - Comprehensive citation list**

| Country  | Citation                                                                                                                                                                                                                                                          | Year*     | New for GBD 2013 (*) |
|----------|-------------------------------------------------------------------------------------------------------------------------------------------------------------------------------------------------------------------------------------------------------------------|-----------|----------------------|
| Ethiopia | Shamebo D, Muhe L, Sandström A, Wall S. The Butajira rural health project in Ethiopia: mortality pattern of the under fives. <i>J Trop Pediatr</i> . 1991; 37(5): 254-61.                                                                                         | 1987      |                      |
| Ethiopia | INDEPTH. Ethiopia - Butajira Health and Demographic Surveillance System. [Unpublished].                                                                                                                                                                           | 1987-1996 |                      |
| Ethiopia | Tsega E, Nordenfelt E, Mengesha B, Hansson BG, Tsega M, Lindberg J. Age-specific prevalence of hepatitis A virus antibody in Ethiopian children. <i>Scand J Infect Dis</i> . 1990; 22(2): 145-8.                                                                  | 1989      |                      |
| Ethiopia | Department of Peace and Conflict Research, Uppsala University. UCDP Battle-Related Deaths Database Version 5, 2013. Uppsala, Sweden: Department of Peace and Conflict Research, Uppsala University, 2013.                                                         | 1989-2012 | *                    |
| Ethiopia | Department of Peace and Conflict Research, Uppsala University. UCDP One-Sided Violence Database Version 1.4, 2013. Uppsala, Sweden: Department of Peace and Conflict Research, Uppsala University, 2013.                                                          | 1989-2008 | *                    |
| Ethiopia | Mersha A, Jira C, Demessie S. Community based study on maternal mortality in Jimma town, south western Ethiopia. <i>Indian J Public Health</i> . 1996; 40(2): 30-4.                                                                                               | 1990      |                      |
| Ethiopia | Central Statistical Agency (Ethiopia). Ethiopia National Fertility and Family Survey 1990-1991. Addis Ababa, Ethiopia: Central Statistical Agency (Ethiopia).                                                                                                     | 1990-1991 |                      |
| Ethiopia | Weatherall D. Sickle Cell and Thalassemias Prevalence Data, Personal Correspondence with David Weatherall. [Unpublished].                                                                                                                                         | 1990-2009 |                      |
| Ethiopia | Gedlu E, Rahlenbeck SI. Pyogenic meningitis in children in north-western Ethiopia. <i>Ann Trop Paediatr</i> . 1995; 15(3): 243-7.                                                                                                                                 | 1990-1994 |                      |
| Ethiopia | Centre for Health Informatics and Multiprofessional Education, University College London. Modell's Haemoglobinopathologist's Almanac. London, United Kingdom: Centre for Health Informatics and Multiprofessional Education, University College London, 2008.     | 1990-2003 |                      |
| Ethiopia | Alkan ML, Maayan S, Belmaker I, Arbeli Y, Mani N, Ben-Yshai F. Serological markers for hepatitis B and treponemal infection among HIV carriers from Ethiopia. <i>Isr J Med Sci</i> . 1993; 29(6-7): 390-2.                                                        | 1991      |                      |
| Ethiopia | Department of Peace and Conflict Research, Uppsala University. UCDP Nonstate Conflict Database Version 2.5, 2013. Uppsala, Sweden: Department of Peace and Conflict Research, Uppsala University, 2013.                                                           | 1991-2009 | *                    |
| Ethiopia | Fantahun M. Patterns of childhood mortality in three districts of north Gondar Administrative Zone. A community based study using the verbal autopsy method. <i>Ethiop Med J</i> . 1998; 36(2): 71-81.                                                            | 1992      |                      |
| Ethiopia | Tsega E, Nordenfelt E, Hansson BG. Hepatitis C virus infection and chronic liver disease in Ethiopia where hepatitis B infection is hyperendemic. <i>Trans R Soc Trop Med Hyg</i> . 1995; 89(2): 171-4.                                                           | 1992-1994 |                      |
| Ethiopia | Muhe L, Klugman KP. Pneumococcal and Haemophilus influenzae meningitis in a children's hospital in Ethiopia: serotypes and susceptibility patterns. <i>Trop Med Int Health</i> . 1999; 4(6): 421-7.                                                               | 1993-1995 |                      |
| Ethiopia | Gessesew A. Maternal complications – in a zonal hospital. <i>Ethiop Med J</i> . 2007; 45(1): 47-54.                                                                                                                                                               | 1993-2003 |                      |
| Ethiopia | Central Statistical Agency (Ethiopia), United Nations Population Fund (UNFPA), United States Agency for International Development (USAID). Ethiopia Population and Housing Census 1994.                                                                           | 1994      |                      |
| Ethiopia | Ayele W, Nokes DJ, Abebe A, Messele T, Dejene A, Enquselassie F, Rinke de Wit TF, Fontanet AL. Higher prevalence of anti-HCV antibodies among HIV-positive compared to HIV-negative inhabitants of Addis Ababa, Ethiopia. <i>J Med Virol</i> . 2002; 68(1): 12-7. | 1994      |                      |
| Ethiopia | Joint United Nations Program on HIV/AIDS (UNAIDS), World Health Organization (WHO). Ethiopia Epidemiological Fact Sheet on HIV/AIDS and STIs 2000.                                                                                                                | 1994      |                      |
| Ethiopia | Rahlenbeck SI, Yohannes G, Molla K, Reifen R, Assefa A. Infection with HIV, syphilis and hepatitis B in Ethiopia: a survey in blood donors. <i>Int J STD AIDS</i> . 1997; 8(4): 261-4.                                                                            | 1994-1995 |                      |

**Web Table 32 - Comprehensive citation list**

| Country  | Citation                                                                                                                                                                                                                                                                                                                        | Year*                      | New for GBD 2013 (*) |
|----------|---------------------------------------------------------------------------------------------------------------------------------------------------------------------------------------------------------------------------------------------------------------------------------------------------------------------------------|----------------------------|----------------------|
| Ethiopia | Aseffa A, Ishak A, Stevens R, Fergusson E, Giles M, Yohannes G, Kidan KG. Prevalence of HIV, syphilis and genital chlamydial infection among women in north-west Ethiopia. <i>Epidemiol Infect.</i> 1998; 120(2): 171-7.                                                                                                        | 1995                       |                      |
| Ethiopia | World Health Organization Regional Office for Africa. HIV/AIDS Epidemiological Surveillance Update for the WHO African Region. World Health Organization Regional Office for Africa, 2003.                                                                                                                                      | 1995-2002                  |                      |
| Ethiopia | World Health Organization (WHO). Yellow Fever Reported Cases, WHO Vaccine-Preventable Diseases: Monitoring System. Geneva, Switzerland: World Health Organization (WHO).                                                                                                                                                        | 1995, 1997-2003, 2005-2008 |                      |
| Ethiopia | Scrivener S, Yemaneberhan H, Zebenigus M, Tilahun D, Girma S, Ali S, McElroy P, Custovic A, Woodcock A, Pritchard D, Venn A, Britton J. Independent effects of intestinal parasite infection and domestic allergen exposure on risk of wheeze in Ethiopia: a nested case-control study. <i>Lancet.</i> 2001; 358(9292): 1493-9. | 1996                       |                      |
| Ethiopia | Lulu K, Berhane Y. The use of simplified verbal autopsy in identifying causes of adult death in a predominantly rural population in Ethiopia. <i>BMC Public Health.</i> 2005; 5: 58.                                                                                                                                            | 1997                       |                      |
| Ethiopia | Kebede E, Chamiso B. Prevalence of syphilis in pregnancy in Addis Ababa. <i>East Afr Med J.</i> 2000; 77(4): 212-6.                                                                                                                                                                                                             | 1997                       |                      |
| Ethiopia | World Health Organization (WHO). The Global Elimination of Congenital Syphilis: Rationale and Strategy for Action. Geneva, Switzerland: World Health Organization (WHO), 2007.                                                                                                                                                  | 1997-2003                  |                      |
| Ethiopia | Joint United Nations Program on HIV/AIDS (UNAIDS), United Nations Children's Fund (UNICEF), World Health Organization (WHO). Ethiopia Epidemiological Fact Sheet on HIV/AIDS and STIs 2004.                                                                                                                                     | 1997-2001                  |                      |
| Ethiopia | Measles Supplementary Immunization Activity Data as provided by the World Health Organization. [Unpublished].                                                                                                                                                                                                                   | 1998-1999                  |                      |
| Ethiopia | Central Statistical Agency (Ethiopia), ORC Macro. Ethiopia Demographic and Health Survey 2000. Calverton, United States: ORC Macro, 2001.                                                                                                                                                                                       | 2000                       |                      |
| Ethiopia | World Health Organization (WHO). Retrospective Measles Data on Supplementary Immunization Activities. Geneva, Switzerland: World Health Organization (WHO).                                                                                                                                                                     | 2000-2011, 2013            |                      |
| Ethiopia | Reniers G, Araya T, Schaap A, Kumie A, Kebede D, Nagelkerke N, Coutinho R, Sanders EJ. Monitoring cause-specific adult mortality in developing countries: a comparison of data sources for Addis Ababa and its implications for policy and research. <i>Soc Sci Med.</i> 2005; 61(9): 1952-7.                                   | 2001-2006                  |                      |
| Ethiopia | Araya T, Tensou B, Davey G, Berhane Y. La vigilancia de entierros detectó una reducción significativa en las muertes relacionadas con el VIH en Addis Ababa, Etiopía. <i>Trop Med Int Health.</i> 2011; 16(12): 1483-9.                                                                                                         | 2001-2003                  |                      |
| Ethiopia | World Health Organization (WHO). Ethiopia World Health Survey 2003. Geneva, Switzerland: World Health Organization (WHO), 2005.                                                                                                                                                                                                 | 2003                       |                      |
| Ethiopia | Fantahun M, Fottrell E, Berhane Y, Wall S, Högberg U, Byass P. Assessing a new approach to verbal autopsy interpretation in a rural Ethiopian community: the InterVA model. <i>Bull World Health Organ.</i> 2006; 84(3): 204-10.                                                                                                | 2003                       |                      |
| Ethiopia | Deribew A, Tessema F, Girma B. Determinants of under-five mortality in Gilgel Gibe Field Research Center, Southwest Ethiopia. <i>Ethiopian Journal of Health Development.</i> 2007; 21(2): 117-24.                                                                                                                              | 2004                       |                      |
| Ethiopia | United Nations Office on Drugs and Crime (UNODC). United Nations Office on Drugs and Crime Global Study on Homicides 2011. Vienna, Austria: United Nations Office on Drugs and Crime (UNODC), 2011.                                                                                                                             | 2004                       |                      |
| Ethiopia | World Health Organization (WHO). Ethiopia WHO Leishmaniasis Country Profile.                                                                                                                                                                                                                                                    | 2004-2010                  | *                    |



**Web Table 32 - Comprehensive citation list**

| Country                        | Citation                                                                                                                                                                                                                                                                                                                                | Year*                                            | New for GBD 2013 (*) |
|--------------------------------|-----------------------------------------------------------------------------------------------------------------------------------------------------------------------------------------------------------------------------------------------------------------------------------------------------------------------------------------|--------------------------------------------------|----------------------|
| Ethiopia                       | Macro International, Inc. Population and Housing Census Commissions Office (PHCCO). Ethiopia Demographic and Health Survey 2005. Calverton, United States: Macro International, Inc.                                                                                                                                                    | 2005                                             |                      |
| Ethiopia                       | Mulu A, Kassu A, Tessema B, Yismaw G, Tiruneh M, Moges F, Wondmikun Y, Nishikawa T, Ota F. Seroprevalence of syphilis and HIV-1 during pregnancy in a teaching hospital in northwest Ethiopia. <i>Jpn J Infect Dis.</i> 2007; 60(4): 193-5.                                                                                             | 2005                                             |                      |
| Ethiopia                       | Ministry of Health (Ethiopia). AIDS in Ethiopia Sixth Report. Addis Ababa, Ethiopia: Ministry of Health (Ethiopia).                                                                                                                                                                                                                     | 2005                                             |                      |
| Ethiopia                       | World Health Organization (WHO). Deployment of artemetherlumefantrine with rapid diagnostic tests at community level, Raya Valley, Tigray, Ethiopia. Geneva, Switzerland: World Health Organization (WHO), 2009.                                                                                                                        | 2005-2007                                        |                      |
| Ethiopia                       | Muleta M, Fantahun M, Tafesse B, Hamlin EC, Kennedy RC. Obstetric fistula in rural Ethiopia. <i>East Afr Med J.</i> 2007; 84(11): 525-33.                                                                                                                                                                                               | 2006                                             |                      |
| Ethiopia                       | Tsegaye F, Abdella K, Ahmed E, Tadesse T, Bartolomeos K. Pattern of Fatal Injuries in Addis Ababa, Ethiopia: A One-year Audit. <i>East and Central African Journal of Surgery.</i> 2010; 15(2): 10-17.                                                                                                                                  | 2006-2007                                        |                      |
| Ethiopia                       | Central Statistical Agency (Ethiopia), Government of Ethiopia, United Nations Population Fund (UNFPA), United Nations Development Programme (UNDP). Ethiopia Population and Housing Census 2007. Addis Ababa, Ethiopia: Central Statistical Agency (Ethiopia).                                                                          | 2007                                             |                      |
| Ethiopia                       | World Health Organization (WHO). Global Status Report on Road Safety 2009. Geneva, Switzerland: World Health Organization (WHO), 2009.                                                                                                                                                                                                  | 2007                                             |                      |
| Ethiopia                       | Anteneh A, Araya T, Misganaw A. Factors associated with place of death in Addis Ababa, Ethiopia. <i>BMC Palliat Care.</i> 2013; 12(14): 14.                                                                                                                                                                                             | 2008                                             |                      |
| Ethiopia                       | Weldearegawi B, Ashebir Y, Gebeye E, Gebregziabihier T, Yohannes M, Mussa S, Berhe H, Abebe Z. Emerging chronic non-communicable diseases in rural communities of Northern Ethiopia: evidence using population-based verbal autopsy method in Kilite Awlaleo surveillance site. <i>Health Policy Plan.</i> 2013. [Epub ahead of print]. | 2010                                             |                      |
| Ethiopia                       | Central Statistical Agency (Ethiopia), ICF Macro, Ministry of Health (Ethiopia). Ethiopia Demographic and Health Survey 2010-2011. Calverton, United States: ICF Macro.                                                                                                                                                                 | 2010-2011                                        |                      |
| Ethiopia                       | Yaya Y, Lindtjörn B. High maternal mortality in rural south-west Ethiopia: estimate by using the sisterhood method. <i>BMC Pregnancy Childbirth.</i> 2012; 12(1): 136.                                                                                                                                                                  | 2011                                             | *                    |
| Federated States of Micronesia | High Commissioner of the Trust Territory of the Pacific Islands, South Pacific Commission. Trust Territory of the Pacific Islands Census 1973.                                                                                                                                                                                          | 1973                                             | *                    |
| Federated States of Micronesia | Institute for Health Metrics and Evaluation (IHME), Joint United Nations Program on HIV/AIDS (UNAIDS). Institute for Health Metrics and Evaluation HIV Mortality Estimates Based on the UNAIDS Spectrum Model Framework.                                                                                                                | 1980-2013                                        | *                    |
| Federated States of Micronesia | Hill AV, Bowden DK, O'Shaughnessy DF, Weatherall DJ, Clegg JB. Beta thalassemia in Melanesia: association with malaria and characterization of a common variant (IVS-1 nt 5 G---C). <i>Blood.</i> 1988; 72(1): 9-14.                                                                                                                    | 1985-1987                                        |                      |
| Federated States of Micronesia | United Nations Children's Fund (UNICEF), World Health Organization (WHO). WHO and UNICEF Reported Disease Incidence Time Series - Measles. Geneva, Switzerland: World Health Organization (WHO).                                                                                                                                        | 1987-1995, 1997-2001, 2003-2007, 2009, 2011-2013 |                      |
| Federated States of Micronesia | Centre for Research on the Epidemiology of Disasters (CRED). EM-DAT: The OFDA/CRED International Disaster Database. Brussels, Belgium: Catholic University of Leuven.                                                                                                                                                                   | 1987, 2002, 2004                                 |                      |
| Federated States of Micronesia | United Nations Children's Fund (UNICEF), World Health Organization (WHO). WHO and UNICEF Reported Disease Incidence Time Series - Pertussis. Geneva, Switzerland: World Health Organization (WHO).                                                                                                                                      | 1987, 1989-1995, 1997-2001, 2004-2007, 2009      |                      |

**Web Table 32 - Comprehensive citation list**

| Country                        | Citation                                                                                                                                                                                                                                                      | Year*                                                                                                                | New for GBD 2013 (*) |
|--------------------------------|---------------------------------------------------------------------------------------------------------------------------------------------------------------------------------------------------------------------------------------------------------------|----------------------------------------------------------------------------------------------------------------------|----------------------|
| Federated States of Micronesia | Centre for Health Informatics and Multiprofessional Education, University College London. Modell's Haemoglobinopathologist's Almanac. London, United Kingdom: Centre for Health Informatics and Multiprofessional Education, University College London, 2008. | 1990-2003                                                                                                            |                      |
| Federated States of Micronesia | Güris D, Auerbach SB, Vitek C, Maes E, McCready J, Durand M, Cruz K, Iohp K, Haddock R, Rota J, Rota P, Heath J, Redd SC. Measles outbreaks in Micronesia, 1991 to 1994. <i>Pediatr Infect Dis J.</i> 1998; 17(1): 33-9.                                      | 1991-1994                                                                                                            |                      |
| Federated States of Micronesia | Micronesia Population and Housing Census 1994 as it appears in United Nations Statistics Division (UNSD). United Nations Demographic Yearbook. New York City, United States: United Nations Statistics Division (UNSD).                                       | 1994                                                                                                                 |                      |
| Federated States of Micronesia | Federated States of Micronesia Division of Statistics. Micronesia Census 1994 - Pacificweb.org.                                                                                                                                                               | 1994                                                                                                                 | *                    |
| Federated States of Micronesia | World Health Organization (WHO). Yellow Fever Reported Cases, WHO Vaccine-Preventable Diseases: Monitoring System. Geneva, Switzerland: World Health Organization (WHO).                                                                                      | 1998-2001, 2003, 2006-2007, 2009                                                                                     |                      |
| Federated States of Micronesia | Federated States of Micronesia Division of Statistics, Secretariat of the Pacific Community (SPC), US Census Bureau. Micronesia Population and Housing Census 2000.                                                                                           | 2000                                                                                                                 | *                    |
| Federated States of Micronesia | Fischer GE, Thompson N, Chaves SS, Bower W, Goldstein S, Armstrong G, Williams I, Bialek S. The epidemiology of hepatitis A virus infections in four Pacific Island nations, 1995-2008. <i>Trans R Soc Trop Med Hyg.</i> 2009; 103(9): 906-10.                | 2000, 2005                                                                                                           |                      |
| Federated States of Micronesia | Micronesia Vital Registration Death Data 2003 as it appears in United Nations Statistics Division (UNSD). United Nations Demographic Yearbook. New York City, United States: United Nations Statistics Division (UNSD).                                       | 2003                                                                                                                 |                      |
| Federated States of Micronesia | World Health Organization (WHO). Retrospective Measles Data on Supplementary Immunization Activities. Geneva, Switzerland: World Health Organization (WHO).                                                                                                   | 2004, 2010-2011, 2013                                                                                                |                      |
| Federated States of Micronesia | World Health Organization (WHO). Global Status Report on Road Safety 2009. Geneva, Switzerland: World Health Organization (WHO), 2009.                                                                                                                        | 2007                                                                                                                 |                      |
| Fiji                           | Fiji Vital Registration Death Data 1950 as it appears in United Nations Statistics Division (UNSD). United Nations Demographic Yearbook. New York City, United States: United Nations Statistics Division (UNSD).                                             | 1950                                                                                                                 |                      |
| Fiji                           | Fiji Vital Registration Death Data 1951 as it appears in United Nations Statistics Division (UNSD). United Nations Demographic Yearbook. New York City, United States: United Nations Statistics Division (UNSD).                                             | 1951                                                                                                                 |                      |
| Fiji                           | Fiji Vital Registration Death Data 1952 as it appears in United Nations Statistics Division (UNSD). United Nations Demographic Yearbook. New York City, United States: United Nations Statistics Division (UNSD).                                             | 1952                                                                                                                 |                      |
| Fiji                           | Centre for Research on the Epidemiology of Disasters (CRED). EM-DAT: The OFDA/CRED International Disaster Database. Brussels, Belgium: Catholic University of Leuven.                                                                                         | 1952, 1964-1965, 1972-1973, 1979-1980, 1983, 1985-1987, 1989, 1992-1993, 1997, 1999-2001, 2003-2004, 2006-2010, 2012 |                      |
| Fiji                           | Fiji Vital Registration Death Data 1953 as it appears in United Nations Statistics Division (UNSD). United Nations Demographic Yearbook. New York City, United States: United Nations Statistics Division (UNSD).                                             | 1953                                                                                                                 |                      |



**Web Table 32 - Comprehensive citation list**

| Country | Citation                                                                                                                                                                                                          | Year* | New for GBD 2013 (*) |
|---------|-------------------------------------------------------------------------------------------------------------------------------------------------------------------------------------------------------------------|-------|----------------------|
| Fiji    | Fiji Vital Registration Death Data 1954 as it appears in United Nations Statistics Division (UNSD). United Nations Demographic Yearbook. New York City, United States: United Nations Statistics Division (UNSD). | 1954  |                      |
| Fiji    | Fiji Vital Registration Death Data 1955 as it appears in United Nations Statistics Division (UNSD). United Nations Demographic Yearbook. New York City, United States: United Nations Statistics Division (UNSD). | 1955  |                      |
| Fiji    | Fiji Population and Housing Census 1956 as it appears in United Nations Statistics Division (UNSD). United Nations Demographic Yearbook. New York City, United States: United Nations Statistics Division (UNSD). | 1956  |                      |
| Fiji    | Fiji Vital Registration Death Data 1956 as it appears in United Nations Statistics Division (UNSD). United Nations Demographic Yearbook. New York City, United States: United Nations Statistics Division (UNSD). | 1956  |                      |
| Fiji    | Fiji Vital Registration Death Data 1957 as it appears in United Nations Statistics Division (UNSD). United Nations Demographic Yearbook. New York City, United States: United Nations Statistics Division (UNSD). | 1957  |                      |
| Fiji    | Fiji Vital Registration Death Data 1958 as it appears in United Nations Statistics Division (UNSD). United Nations Demographic Yearbook. New York City, United States: United Nations Statistics Division (UNSD). | 1958  |                      |
| Fiji    | Fiji Vital Registration Death Data 1959 as it appears in United Nations Statistics Division (UNSD). United Nations Demographic Yearbook. New York City, United States: United Nations Statistics Division (UNSD). | 1959  |                      |
| Fiji    | Fiji Vital Registration Death Data 1960 as it appears in United Nations Statistics Division (UNSD). United Nations Demographic Yearbook. New York City, United States: United Nations Statistics Division (UNSD). | 1960  |                      |
| Fiji    | Fiji Vital Registration Death Data 1961 as it appears in United Nations Statistics Division (UNSD). United Nations Demographic Yearbook. New York City, United States: United Nations Statistics Division (UNSD). | 1961  |                      |
| Fiji    | Fiji Vital Registration Death Data 1962 as it appears in United Nations Statistics Division (UNSD). United Nations Demographic Yearbook. New York City, United States: United Nations Statistics Division (UNSD). | 1962  |                      |
| Fiji    | Fiji Vital Registration Death Data 1963 as it appears in United Nations Statistics Division (UNSD). United Nations Demographic Yearbook. New York City, United States: United Nations Statistics Division (UNSD). | 1963  |                      |
| Fiji    | Fiji Vital Registration Death Data 1964 as it appears in United Nations Statistics Division (UNSD). United Nations Demographic Yearbook. New York City, United States: United Nations Statistics Division (UNSD). | 1964  |                      |
| Fiji    | Fiji Vital Registration Death Data 1965 as it appears in United Nations Statistics Division (UNSD). United Nations Demographic Yearbook. New York City, United States: United Nations Statistics Division (UNSD). | 1965  |                      |
| Fiji    | Fiji Population and Housing Census 1966 as it appears in United Nations Statistics Division (UNSD). United Nations Demographic Yearbook. New York City, United States: United Nations Statistics Division (UNSD). | 1966  |                      |

**Web Table 32 - Comprehensive citation list**

| Country | Citation                                                                                                                                                                                                          | Year*     | New for GBD 2013 (*) |
|---------|-------------------------------------------------------------------------------------------------------------------------------------------------------------------------------------------------------------------|-----------|----------------------|
| Fiji    | Fiji Vital Registration Death Data 1966 as it appears in United Nations Statistics Division (UNSD). United Nations Demographic Yearbook. New York City, United States: United Nations Statistics Division (UNSD). | 1966      |                      |
| Fiji    | Fiji Vital Registration Death Data 1967 as it appears in United Nations Statistics Division (UNSD). United Nations Demographic Yearbook. New York City, United States: United Nations Statistics Division (UNSD). | 1967      |                      |
| Fiji    | Fiji Vital Registration Death Data 1968 as it appears in United Nations Statistics Division (UNSD). United Nations Demographic Yearbook. New York City, United States: United Nations Statistics Division (UNSD). | 1968      |                      |
| Fiji    | Fiji Vital Registration Death Data 1969 as it appears in United Nations Statistics Division (UNSD). United Nations Demographic Yearbook. New York City, United States: United Nations Statistics Division (UNSD). | 1969      |                      |
| Fiji    | Fiji Vital Registration Death Data 1970 as it appears in United Nations Statistics Division (UNSD). United Nations Demographic Yearbook. New York City, United States: United Nations Statistics Division (UNSD). | 1970      |                      |
| Fiji    | United Nations Office on Drugs and Crime (UNODC). United Nations Surveys on Crime Trends and the Operations of Criminal Justice Systems 1970-2006 as provided by Kavi Bhalla. [Unpublished].                      | 1970-1994 |                      |
| Fiji    | Fiji Vital Registration Death Data 1971 as it appears in United Nations Statistics Division (UNSD). United Nations Demographic Yearbook. New York City, United States: United Nations Statistics Division (UNSD). | 1971      |                      |
| Fiji    | Buchanan JG, Wilson FS, Nixon AD. Survey for erythrocyte glucose-6-phosphate dehydrogenase deficiency in Fiji. Am J Hum Genet. 1973; 25(1): 36-41.                                                                | 1971-1973 |                      |
| Fiji    | Fiji Vital Registration Death Data 1972 as it appears in United Nations Statistics Division (UNSD). United Nations Demographic Yearbook. New York City, United States: United Nations Statistics Division (UNSD). | 1972      |                      |
| Fiji    | Fiji Vital Registration Death Data 1973 as it appears in United Nations Statistics Division (UNSD). United Nations Demographic Yearbook. New York City, United States: United Nations Statistics Division (UNSD). | 1973      |                      |
| Fiji    | Bureau of Statistics (Fiji) , International Statistical Institute. Fiji World Fertility Survey 1974. Voorburg, Netherlands: International Statistical Institute.                                                  | 1974      |                      |
| Fiji    | Fiji Vital Registration Death Data 1974 as it appears in United Nations Statistics Division (UNSD). United Nations Demographic Yearbook. New York City, United States: United Nations Statistics Division (UNSD). | 1974      |                      |
| Fiji    | Fiji Vital Registration Death Data 1975 as it appears in United Nations Statistics Division (UNSD). United Nations Demographic Yearbook. New York City, United States: United Nations Statistics Division (UNSD). | 1975      |                      |
| Fiji    | Fiji Vital Registration Death Data 1976 as it appears in United Nations Statistics Division (UNSD). United Nations Demographic Yearbook. New York City, United States: United Nations Statistics Division (UNSD). | 1976      |                      |
| Fiji    | Fiji Vital Registration Death Data 1977 as it appears in United Nations Statistics Division (UNSD). United Nations Demographic Yearbook. New York City, United States: United Nations Statistics Division (UNSD). | 1977      |                      |

**Web Table 32 - Comprehensive citation list**

| Country | Citation                                                                                                                                                                                                                 | Year*                                            | New for GBD 2013 (*) |
|---------|--------------------------------------------------------------------------------------------------------------------------------------------------------------------------------------------------------------------------|--------------------------------------------------|----------------------|
| Fiji    | Fiji Vital Registration - Deaths 1978 ICD8 as it appears in World Health Organization (WHO). WHO Mortality Database Version February 2014. Geneva, Switzerland: World Health Organization (WHO), 2014.                   | 1978                                             |                      |
| Fiji    | Fiji Vital Registration Death Data 1979 as it appears in United Nations Statistics Division (UNSD). United Nations Demographic Yearbook. New York City, United States: United Nations Statistics Division (UNSD).        | 1979                                             |                      |
| Fiji    | Fiji Vital Registration Death Data 1980 as it appears in United Nations Statistics Division (UNSD). United Nations Demographic Yearbook. New York City, United States: United Nations Statistics Division (UNSD).        | 1980                                             |                      |
| Fiji    | Zhuang H, Coulepis AG, Zimmet P, Taylor R, Ram P, Banuve S, Gust ID. Seroepidemiology of infection with hepatitis B virus in Fiji. Am J Epidemiol. 1982; 116(4): 608-16.                                                 | 1980-1981                                        |                      |
| Fiji    | Institute for Health Metrics and Evaluation (IHME), Joint United Nations Program on HIV/AIDS (UNAIDS). Institute for Health Metrics and Evaluation HIV Mortality Estimates Based on the UNAIDS Spectrum Model Framework. | 1980-2013                                        | *                    |
| Fiji    | United Nations Children's Fund (UNICEF), World Health Organization (WHO). WHO and UNICEF Reported Disease Incidence Time Series - Pertussis. Geneva, Switzerland: World Health Organization (WHO).                       | 1980-1990, 1992-1997, 2001-2010                  |                      |
| Fiji    | United Nations Children's Fund (UNICEF), World Health Organization (WHO). WHO and UNICEF Reported Disease Incidence Time Series - Measles. Geneva, Switzerland: World Health Organization (WHO).                         | 1980-1990, 1992-1997, 2001-2004, 2006-2010, 2012 |                      |
| Fiji    | Fiji Vital Registration Death Data 1981 as it appears in United Nations Statistics Division (UNSD). United Nations Demographic Yearbook. New York City, United States: United Nations Statistics Division (UNSD).        | 1981                                             |                      |
| Fiji    | Fiji Vital Registration Death Data 1982 as it appears in United Nations Statistics Division (UNSD). United Nations Demographic Yearbook. New York City, United States: United Nations Statistics Division (UNSD).        | 1982                                             |                      |
| Fiji    | Fiji Vital Registration Death Data 1983 as it appears in United Nations Statistics Division (UNSD). United Nations Demographic Yearbook. New York City, United States: United Nations Statistics Division (UNSD).        | 1983                                             |                      |
| Fiji    | Fiji Vital Registration Death Data 1984 as it appears in United Nations Statistics Division (UNSD). United Nations Demographic Yearbook. New York City, United States: United Nations Statistics Division (UNSD).        | 1984                                             |                      |
| Fiji    | Fiji Vital Registration Death Data 1985 as it appears in United Nations Statistics Division (UNSD). United Nations Demographic Yearbook. New York City, United States: United Nations Statistics Division (UNSD).        | 1985                                             |                      |
| Fiji    | Hill AV, Bowden DK, O'Shaughnessy DF, Weatherall DJ, Clegg JB. Beta thalassemia in Melanesia: association with malaria and characterization of a common variant (IVS-1 nt 5 G----C). Blood. 1988; 72(1): 9-14.           | 1985-1987                                        |                      |
| Fiji    | Fiji Population and Housing Census 1986 as it appears in United Nations Statistics Division (UNSD). United Nations Demographic Yearbook. New York City, United States: United Nations Statistics Division (UNSD).        | 1986                                             |                      |
| Fiji    | Fiji Vital Registration Death Data 1986 as it appears in United Nations Statistics Division (UNSD). United Nations Demographic Yearbook. New York City, United States: United Nations Statistics Division (UNSD).        | 1986                                             |                      |

**Web Table 32 - Comprehensive citation list**

| Country | Citation                                                                                                                                                                                                                                                      | Year*                | New for GBD 2013 (*) |
|---------|---------------------------------------------------------------------------------------------------------------------------------------------------------------------------------------------------------------------------------------------------------------|----------------------|----------------------|
| Fiji    | Fiji Vital Registration Death Data 1987 as it appears in United Nations Statistics Division (UNSD). United Nations Demographic Yearbook. New York City, United States: United Nations Statistics Division (UNSD).                                             | 1987                 |                      |
| Fiji    | Centre for Health Informatics and Multiprofessional Education, University College London. Modell's Haemoglobinopathologist's Almanac. London, United Kingdom: Centre for Health Informatics and Multiprofessional Education, University College London, 2008. | 1990-2003            |                      |
| Fiji    | Measles Supplementary Immunization Activity Data as provided by the World Health Organization. [Unpublished].                                                                                                                                                 | 1997                 |                      |
| Fiji    | Wilson N, Ruff TA, Rana BJ, Leydon J, Locarnini S. The effectiveness of the infant hepatitis B immunisation program in Fiji, Kiribati, Tonga and Vanuatu. <i>Vaccine</i> . 2000; 18(26): 3059-66.                                                             | 1998                 |                      |
| Fiji    | Fiji Vital Registration - Deaths 1999 ICD9 as it appears in World Health Organization (WHO). WHO Mortality Database Version February 2014. Geneva, Switzerland: World Health Organization (WHO), 2014.                                                        | 1999                 |                      |
| Fiji    | World Health Organization (WHO). Yellow Fever Reported Cases, WHO Vaccine-Preventable Diseases: Monitoring System. Geneva, Switzerland: World Health Organization (WHO).                                                                                      | 2001-2004, 2006-2009 |                      |
| Fiji    | United Nations Office on Drugs and Crime (UNODC). United Nations Office on Drugs and Crime Global Study on Homicides 2011. Vienna, Austria: United Nations Office on Drugs and Crime (UNODC), 2011.                                                           | 2003-2004            |                      |
| Fiji    | Biaukula VL, Tikoduadua L, Azzopardi K, Seduadua A, Temple B, Richmond P, Robins-Browne R, Mulholland EK, Russell FM. Meningitis in children in Fiji: etiology, epidemiology, and neurological sequelae. <i>Int J Infect Dis</i> . 2012; 16(4): e289-295.     | 2004-2007            | *                    |
| Fiji    | Joint United Nations Program on HIV/AIDS (UNAIDS), Ministry of Health (Fiji). Fiji UNGASS Report 2010. Geneva, Switzerland: Joint United Nations Program on HIV/AIDS (UNAIDS), 2010.                                                                          | 2004-2005, 2008      |                      |
| Fiji    | World Health Organization (WHO). Retrospective Measles Data on Supplementary Immunization Activities. Geneva, Switzerland: World Health Organization (WHO).                                                                                                   | 2006, 2011           |                      |
| Fiji    | World Health Organization (WHO). Global Status Report on Road Safety 2009. Geneva, Switzerland: World Health Organization (WHO), 2009.                                                                                                                        | 2007                 |                      |
| Fiji    | Minnesota Population Center, Bureau of Statistics (Fiji). Fiji Population and Housing Census 2007 from the Integrated Public Use Microdata Series, International. [Machine-readable database]. Minneapolis: University of Minnesota, 2013.                    | 2007                 | *                    |
| Fiji    | Fiji Vital Registration - Deaths 2009 ICD10 as it appears in World Health Organization (WHO). WHO Mortality Database Version February 2014. Geneva, Switzerland: World Health Organization (WHO), 2014.                                                       | 2009                 |                      |
| Fiji    | Fiji Vital Registration - Deaths 2011 ICD10 as it appears in World Health Organization (WHO). WHO Mortality Database Version February 2014. Geneva, Switzerland: World Health Organization (WHO), 2014.                                                       | 2011                 | *                    |
| Finland | Max Planck Institute for Demographic Research, University of California. Human Mortality Database. Berkeley, USA: University of California; Rostock, Germany: Max Planck Institute for Demographic Research.                                                  | 1950-1951            |                      |
| Finland | Finland Vital Registration - Deaths 1952 ICD7 as it appears in World Health Organization (WHO). WHO Mortality Database Version February 2014. Geneva, Switzerland: World Health Organization (WHO), 2014.                                                     | 1952                 |                      |
| Finland | Finland Vital Registration - Deaths 1953 ICD7 as it appears in World Health Organization (WHO). WHO Mortality Database Version February 2014. Geneva, Switzerland: World Health Organization (WHO), 2014.                                                     | 1953                 |                      |

**Web Table 32 - Comprehensive citation list**

| Country | Citation                                                                                                                                                                                                  | Year* | New for GBD 2013 (*) |
|---------|-----------------------------------------------------------------------------------------------------------------------------------------------------------------------------------------------------------|-------|----------------------|
| Finland | Finland Vital Registration - Deaths 1954 ICD7 as it appears in World Health Organization (WHO). WHO Mortality Database Version February 2014. Geneva, Switzerland: World Health Organization (WHO), 2014. | 1954  |                      |
| Finland | Finland Vital Registration - Deaths 1955 ICD7 as it appears in World Health Organization (WHO). WHO Mortality Database Version February 2014. Geneva, Switzerland: World Health Organization (WHO), 2014. | 1955  |                      |
| Finland | Finland Vital Registration - Deaths 1956 ICD7 as it appears in World Health Organization (WHO). WHO Mortality Database Version February 2014. Geneva, Switzerland: World Health Organization (WHO), 2014. | 1956  |                      |
| Finland | Finland Vital Registration - Deaths 1957 ICD7 as it appears in World Health Organization (WHO). WHO Mortality Database Version February 2014. Geneva, Switzerland: World Health Organization (WHO), 2014. | 1957  |                      |
| Finland | Finland Vital Registration - Deaths 1958 ICD7 as it appears in World Health Organization (WHO). WHO Mortality Database Version February 2014. Geneva, Switzerland: World Health Organization (WHO), 2014. | 1958  |                      |
| Finland | Finland Vital Registration - Deaths 1959 ICD7 as it appears in World Health Organization (WHO). WHO Mortality Database Version February 2014. Geneva, Switzerland: World Health Organization (WHO), 2014. | 1959  |                      |
| Finland | Finland Vital Registration - Deaths 1960 ICD7 as it appears in World Health Organization (WHO). WHO Mortality Database Version February 2014. Geneva, Switzerland: World Health Organization (WHO), 2014. | 1960  |                      |
| Finland | Finland Vital Registration - Deaths 1961 ICD7 as it appears in World Health Organization (WHO). WHO Mortality Database Version February 2014. Geneva, Switzerland: World Health Organization (WHO), 2014. | 1961  |                      |
| Finland | Finland Vital Registration - Deaths 1962 ICD7 as it appears in World Health Organization (WHO). WHO Mortality Database Version February 2014. Geneva, Switzerland: World Health Organization (WHO), 2014. | 1962  |                      |
| Finland | Finland Vital Registration - Deaths 1963 ICD7 as it appears in World Health Organization (WHO). WHO Mortality Database Version February 2014. Geneva, Switzerland: World Health Organization (WHO), 2014. | 1963  |                      |
| Finland | Finland Vital Registration - Deaths 1964 ICD7 as it appears in World Health Organization (WHO). WHO Mortality Database Version February 2014. Geneva, Switzerland: World Health Organization (WHO), 2014. | 1964  |                      |
| Finland | Finland Vital Registration - Deaths 1965 ICD7 as it appears in World Health Organization (WHO). WHO Mortality Database Version February 2014. Geneva, Switzerland: World Health Organization (WHO), 2014. | 1965  |                      |
| Finland | Finland Vital Registration - Deaths 1966 ICD7 as it appears in World Health Organization (WHO). WHO Mortality Database Version February 2014. Geneva, Switzerland: World Health Organization (WHO), 2014. | 1966  |                      |
| Finland | Finland Vital Registration - Deaths 1967 ICD7 as it appears in World Health Organization (WHO). WHO Mortality Database Version February 2014. Geneva, Switzerland: World Health Organization (WHO), 2014. | 1967  |                      |

**Web Table 32 - Comprehensive citation list**

| Country | Citation                                                                                                                                                                                                  | Year*          | New for GBD 2013 (*) |
|---------|-----------------------------------------------------------------------------------------------------------------------------------------------------------------------------------------------------------|----------------|----------------------|
| Finland | Finland Vital Registration - Deaths 1968 ICD7 as it appears in World Health Organization (WHO). WHO Mortality Database Version February 2014. Geneva, Switzerland: World Health Organization (WHO), 2014. | 1968           |                      |
| Finland | Finland Vital Registration - Deaths 1969 ICD8 as it appears in World Health Organization (WHO). WHO Mortality Database Version February 2014. Geneva, Switzerland: World Health Organization (WHO), 2014. | 1969           |                      |
| Finland | Finland Vital Registration - Deaths 1970 ICD8 as it appears in World Health Organization (WHO). WHO Mortality Database Version February 2014. Geneva, Switzerland: World Health Organization (WHO), 2014. | 1970           |                      |
| Finland | Pohjanpelto P, Lahdensivu R. Rapid decline of hepatitis A in Finland. Scand J Infect Dis. 1984; 16(3): 229-33.                                                                                            | 1970,1982-1983 |                      |
| Finland | Finland Vital Registration - Deaths 1971 ICD8 as it appears in World Health Organization (WHO). WHO Mortality Database Version February 2014. Geneva, Switzerland: World Health Organization (WHO), 2014. | 1971           |                      |
| Finland | Finland Vital Registration - Deaths 1972 ICD8 as it appears in World Health Organization (WHO). WHO Mortality Database Version February 2014. Geneva, Switzerland: World Health Organization (WHO), 2014. | 1972           |                      |
| Finland | Finland Vital Registration - Deaths 1973 ICD8 as it appears in World Health Organization (WHO). WHO Mortality Database Version February 2014. Geneva, Switzerland: World Health Organization (WHO), 2014. | 1973           |                      |
| Finland | Finland Vital Registration - Deaths 1974 ICD8 as it appears in World Health Organization (WHO). WHO Mortality Database Version February 2014. Geneva, Switzerland: World Health Organization (WHO), 2014. | 1974           |                      |
| Finland | Finland Vital Registration - Deaths 1975 ICD8 as it appears in World Health Organization (WHO). WHO Mortality Database Version February 2014. Geneva, Switzerland: World Health Organization (WHO), 2014. | 1975           |                      |
| Finland | Finland Vital Registration - Deaths 1976 ICD8 as it appears in World Health Organization (WHO). WHO Mortality Database Version February 2014. Geneva, Switzerland: World Health Organization (WHO), 2014. | 1976           |                      |
| Finland | Finland Vital Registration - Deaths 1977 ICD8 as it appears in World Health Organization (WHO). WHO Mortality Database Version February 2014. Geneva, Switzerland: World Health Organization (WHO), 2014. | 1977           |                      |
| Finland | Finland Vital Registration - Deaths 1978 ICD8 as it appears in World Health Organization (WHO). WHO Mortality Database Version February 2014. Geneva, Switzerland: World Health Organization (WHO), 2014. | 1978           |                      |
| Finland | Finland Vital Registration - Deaths 1979 ICD8 as it appears in World Health Organization (WHO). WHO Mortality Database Version February 2014. Geneva, Switzerland: World Health Organization (WHO), 2014. | 1979           |                      |
| Finland | Finland Vital Registration - Deaths 1980 ICD8 as it appears in World Health Organization (WHO). WHO Mortality Database Version February 2014. Geneva, Switzerland: World Health Organization (WHO), 2014. | 1980           |                      |
| Finland | Institute for Health Metrics and Evaluation. Institute for Health Metrics and Evaluation Cancer Registry Database. [Unpublished].                                                                         | 1980-2011      |                      |

**Web Table 32 - Comprehensive citation list**

| Country | Citation                                                                                                                                                                                                                                                                                              | Year*                      | New for GBD 2013 (*) |
|---------|-------------------------------------------------------------------------------------------------------------------------------------------------------------------------------------------------------------------------------------------------------------------------------------------------------|----------------------------|----------------------|
| Finland | Ferlay J, Parkin DM, Curado MP, Bray F, Edwards B, Shin HR and Forman D. Cancer Incidence in Five Continents, Volumes I to IX: IARC CancerBase No. 9 [Internet]. Lyon, France: International Agency for Research on Cancer; 2010. Available from: <a href="http://ci5.iarc.fr">http://ci5.iarc.fr</a> | 1980-2002                  |                      |
| Finland | Institute for Health Metrics and Evaluation (IHME), Joint United Nations Program on HIV/AIDS (UNAIDS). Institute for Health Metrics and Evaluation HIV Mortality Estimates Based on the UNAIDS Spectrum Model Framework.                                                                              | 1980-2013                  | *                    |
| Finland | United Nations Children's Fund (UNICEF), World Health Organization (WHO). WHO and UNICEF Reported Disease Incidence Time Series - Pertussis. Geneva, Switzerland: World Health Organization (WHO).                                                                                                    | 1980-1998, 2001-2011, 2013 |                      |
| Finland | United Nations Children's Fund (UNICEF), World Health Organization (WHO). WHO and UNICEF Reported Disease Incidence Time Series - Measles. Geneva, Switzerland: World Health Organization (WHO).                                                                                                      | 1980-1998, 2001-2011, 2013 |                      |
| Finland | Finland Vital Registration - Deaths 1981 ICD8 as it appears in World Health Organization (WHO). WHO Mortality Database Version February 2014. Geneva, Switzerland: World Health Organization (WHO), 2014.                                                                                             | 1981                       |                      |
| Finland | Finland Vital Registration - Deaths 1982 ICD8 as it appears in World Health Organization (WHO). WHO Mortality Database Version February 2014. Geneva, Switzerland: World Health Organization (WHO), 2014.                                                                                             | 1982                       |                      |
| Finland | Finland Vital Registration - Deaths 1983 ICD8 as it appears in World Health Organization (WHO). WHO Mortality Database Version February 2014. Geneva, Switzerland: World Health Organization (WHO), 2014.                                                                                             | 1983                       |                      |
| Finland | Finland Vital Registration - Deaths 1984 ICD8 as it appears in World Health Organization (WHO). WHO Mortality Database Version February 2014. Geneva, Switzerland: World Health Organization (WHO), 2014.                                                                                             | 1984                       |                      |
| Finland | Parkin DM, International Agency for Research on Cancer, International Association of Cancer Registries. Cancer Incidence in Five Continents. Vol. I to VIII. Lyon, France, IARC Press, 2005.                                                                                                          | 1984, 1989, 1995           |                      |
| Finland | Finland Vital Registration - Deaths 1985 ICD8 as it appears in World Health Organization (WHO). WHO Mortality Database Version February 2014. Geneva, Switzerland: World Health Organization (WHO), 2014.                                                                                             | 1985                       |                      |
| Finland | Finland Vital Registration - Deaths 1986 ICD8 as it appears in World Health Organization (WHO). WHO Mortality Database Version February 2014. Geneva, Switzerland: World Health Organization (WHO), 2014.                                                                                             | 1986                       |                      |
| Finland | Finland Dementia Data 1986-1989 from literature review, as provided by the Global Burden of Disease 2010 dementia expert group.                                                                                                                                                                       | 1986-1989                  |                      |
| Finland | Finland Vital Registration - Deaths 1987 ICD9 as it appears in World Health Organization (WHO). WHO Mortality Database Version February 2014. Geneva, Switzerland: World Health Organization (WHO), 2014.                                                                                             | 1987                       |                      |
| Finland | Finland Vital Registration - Deaths 1988 ICD9 as it appears in World Health Organization (WHO). WHO Mortality Database Version February 2014. Geneva, Switzerland: World Health Organization (WHO), 2014.                                                                                             | 1988                       |                      |
| Finland | Modell B, Darlison M, Birgens H, Cario H, Faustino P, Giordano PC, Gulbis B, Hopmeier P, Lena-Russo D, Romao L, Theodorsson E. Epidemiology of haemoglobin disorders in Europe: an overview. Scand J Clin Lab Invest. 2007; 67(1): 39-69.                                                             | 1988, 2006                 |                      |



**Web Table 32 - Comprehensive citation list**

| Country | Citation                                                                                                                                                                                                                                                                                                                                                                                                                                                                                                                                                                                                                                                                                                              | Year*            | New for GBD 2013 (*) |
|---------|-----------------------------------------------------------------------------------------------------------------------------------------------------------------------------------------------------------------------------------------------------------------------------------------------------------------------------------------------------------------------------------------------------------------------------------------------------------------------------------------------------------------------------------------------------------------------------------------------------------------------------------------------------------------------------------------------------------------------|------------------|----------------------|
| Finland | Centre for Health Informatics and Multiprofessional Education, University College London. Modell's Haemoglobinopathologist's Almanac. London, United Kingdom: Centre for Health Informatics and Multiprofessional Education, University College London, 2008.                                                                                                                                                                                                                                                                                                                                                                                                                                                         | 1988, 2003, 2006 |                      |
| Finland | Finland Vital Registration - Deaths 1989 ICD9 as it appears in World Health Organization (WHO). WHO Mortality Database Version February 2014. Geneva, Switzerland: World Health Organization (WHO), 2014.                                                                                                                                                                                                                                                                                                                                                                                                                                                                                                             | 1989             |                      |
| Finland | Juva K, Sulkava R, Erkinjuntti T, Valvanne J, Tilvis R. Prevalence of dementia in the city of Helsinki. Acta Neurol Scand. 1993; 87(2): 106-10.                                                                                                                                                                                                                                                                                                                                                                                                                                                                                                                                                                       | 1989-1990        |                      |
| Finland | Finland Vital Registration - Deaths 1990 ICD9 as it appears in World Health Organization (WHO). WHO Mortality Database Version February 2014. Geneva, Switzerland: World Health Organization (WHO), 2014.                                                                                                                                                                                                                                                                                                                                                                                                                                                                                                             | 1990             |                      |
| Finland | Finland Vital Registration - Deaths 1991 ICD9 as it appears in World Health Organization (WHO). WHO Mortality Database Version February 2014. Geneva, Switzerland: World Health Organization (WHO), 2014.                                                                                                                                                                                                                                                                                                                                                                                                                                                                                                             | 1991             |                      |
| Finland | Polvikoski T, Sulkava R, Rastas S, Sutela A, Niinistö L, Notkola I-L, Verkkoniemi A, Viramo P, Juva K, Haltia M. Incidence of dementia in very elderly individuals: a clinical, neuropathological and molecular genetic study. Neuroepidemiology. 2006; 26(2): 76-82.                                                                                                                                                                                                                                                                                                                                                                                                                                                 | 1991-2001        |                      |
| Finland | Finland Vital Registration - Deaths 1992 ICD9 as it appears in World Health Organization (WHO). WHO Mortality Database Version February 2014. Geneva, Switzerland: World Health Organization (WHO), 2014.                                                                                                                                                                                                                                                                                                                                                                                                                                                                                                             | 1992             |                      |
| Finland | Trichopoulos D, Bamia C, Lagiou P, Fedirko V, Trepo E, Jenab M, Pischon T, Nöthlings U, Overved K, Tjønneland A, Outzen M, Clavel-Chapelon F, Kaaks R, Lukanova A, Boeing H, Aleksandrova K, Benetou V, Zylis D, Palli D, Pala V, Panico S, Tumino R, Sacerdote C, Bueno-De-Mesquita HB, Van Kranen HJ, Peeters PHM, Lund E, Quirós JR, González CA, Sanchez Perez M-J, Navarro C, Dorronsoro M, Barricarte A, Lindkvist B, Regnér S, Werner M, Hallmans G, Khaw K-T, Wareham N, Key T, Romieu I, Chuang S-C, Murphy N, Boffetta P, Trichopoulou A, Riboli E. Hepatocellular carcinoma risk factors and disease burden in a European cohort: a nested case-control study. J Natl Cancer Inst. 2011; 103(22): 1686-95. | 1992-2006        | *                    |
| Finland | Finland Vital Registration - Deaths 1993 ICD9 as it appears in World Health Organization (WHO). WHO Mortality Database Version February 2014. Geneva, Switzerland: World Health Organization (WHO), 2014.                                                                                                                                                                                                                                                                                                                                                                                                                                                                                                             | 1993             |                      |
| Finland | Finland Vital Registration - Deaths 1994 ICD9 as it appears in World Health Organization (WHO). WHO Mortality Database Version February 2014. Geneva, Switzerland: World Health Organization (WHO), 2014.                                                                                                                                                                                                                                                                                                                                                                                                                                                                                                             | 1994             |                      |
| Finland | Finland Vital Registration - Deaths 1995 ICD9 as it appears in World Health Organization (WHO). WHO Mortality Database Version February 2014. Geneva, Switzerland: World Health Organization (WHO), 2014.                                                                                                                                                                                                                                                                                                                                                                                                                                                                                                             | 1995             |                      |
| Finland | Finland Vital Registration - Deaths 1996 ICD10 as it appears in World Health Organization (WHO). WHO Mortality Database Version February 2014. Geneva, Switzerland: World Health Organization (WHO), 2014.                                                                                                                                                                                                                                                                                                                                                                                                                                                                                                            | 1996             |                      |
| Finland | Finland Vital Registration - Deaths 1997 ICD10 as it appears in World Health Organization (WHO). WHO Mortality Database Version February 2014. Geneva, Switzerland: World Health Organization (WHO), 2014.                                                                                                                                                                                                                                                                                                                                                                                                                                                                                                            | 1997             |                      |



**Web Table 32 - Comprehensive citation list**

| Country | Citation                                                                                                                                                                                                                                                                              | Year*                | New for GBD 2013 (*) |
|---------|---------------------------------------------------------------------------------------------------------------------------------------------------------------------------------------------------------------------------------------------------------------------------------------|----------------------|----------------------|
| Finland | Von Hertzen LC, Laatikainen T, Mäkelä MJ, Jousilahti P, Kosunen TU, Petays T, Pussinen PJ, Haahtela T, Vartiainen E. Infectious burden as a determinant of atopy-- a comparison between adults in Finnish and Russian Karelia. <i>Int Arch Allergy Immunol.</i> 2006; 140(2): 89-95.  | 1997                 |                      |
| Finland | World Health Organization (WHO). The Global Elimination of Congenital Syphilis: Rationale and Strategy for Action. Geneva, Switzerland: World Health Organization (WHO), 2007.                                                                                                        | 1997-2003            |                      |
| Finland | Finland Vital Registration - Deaths 1998 ICD10 as it appears in World Health Organization (WHO). WHO Mortality Database Version February 2014. Geneva, Switzerland: World Health Organization (WHO), 2014.                                                                            | 1998                 |                      |
| Finland | Finland Vital Registration - Deaths 1999 ICD10 as it appears in World Health Organization (WHO). WHO Mortality Database Version February 2014. Geneva, Switzerland: World Health Organization (WHO), 2014.                                                                            | 1999                 |                      |
| Finland | Finland Vital Registration - Deaths 2000 ICD10 as it appears in World Health Organization (WHO). WHO Mortality Database Version February 2014. Geneva, Switzerland: World Health Organization (WHO), 2014.                                                                            | 2000                 |                      |
| Finland | Curado MP, Edwards B, Shin HR, Storm H, Ferlay J, Heanue M and Boyle P, eds (2007). Cancer Incidence in Five Continents, Vol. IX Periodic Data (electronic version). Lyon, IARC. <a href="http://ci5.iarc.fr">http://ci5.iarc.fr</a>                                                  | 2000                 |                      |
| Finland | Finland Vital Registration - Deaths 2001 ICD10 as it appears in World Health Organization (WHO). WHO Mortality Database Version February 2014. Geneva, Switzerland: World Health Organization (WHO), 2014.                                                                            | 2001                 |                      |
| Finland | World Health Organization (WHO). Yellow Fever Reported Cases, WHO Vaccine-Preventable Diseases: Monitoring System. Geneva, Switzerland: World Health Organization (WHO).                                                                                                              | 2001-2003, 2005-2009 |                      |
| Finland | Finland Vital Registration - Deaths 2002 ICD10 as it appears in World Health Organization (WHO). WHO Mortality Database Version February 2014. Geneva, Switzerland: World Health Organization (WHO), 2014.                                                                            | 2002                 |                      |
| Finland | WHO Regional Office for Europe (EURO-WHO). European Hospital Morbidity Database. Copenhagen, Denmark: WHO Regional Office for Europe (EURO-WHO).                                                                                                                                      | 2002-2006            |                      |
| Finland | Finland Vital Registration - Deaths 2003 ICD10 as it appears in World Health Organization (WHO). WHO Mortality Database Version February 2014. Geneva, Switzerland: World Health Organization (WHO), 2014.                                                                            | 2003                 |                      |
| Finland | Association of Nordic Cancer Registries (ANCR). Finland NORDCAN Cancer Incidence Data Tables, Age-Specific by Countries. Copenhagen, Denmark: Association of Nordic Cancer Registries (ANCR).                                                                                         | 2003-2011            | *                    |
| Finland | Finland Vital Registration - Deaths 2004 ICD10 as it appears in World Health Organization (WHO). WHO Mortality Database Version February 2014. Geneva, Switzerland: World Health Organization (WHO), 2014.                                                                            | 2004                 |                      |
| Finland | Finland Vital Registration - Deaths 2005 ICD10 as it appears in World Health Organization (WHO). WHO Mortality Database Version February 2014. Geneva, Switzerland: World Health Organization (WHO), 2014.                                                                            | 2005                 |                      |
| Finland | Forman D, Bray F, Brewster DH, Gombe Mbalawa C, Kohler B, Piñeros M, Steliarova-Foucher E, Swaminathan R and Ferlay J, eds (2013). Cancer Incidence in Five Continents, Vol. X Summary Database (electronic version). Lyon, IARC. <a href="http://ci5.iarc.fr">http://ci5.iarc.fr</a> | 2005                 |                      |

**Web Table 32 - Comprehensive citation list**

| Country | Citation                                                                                                                                                                                                                                                                                         | Year*                                                                                               | New for GBD 2013 (*) |
|---------|--------------------------------------------------------------------------------------------------------------------------------------------------------------------------------------------------------------------------------------------------------------------------------------------------|-----------------------------------------------------------------------------------------------------|----------------------|
| Finland | Finland Vital Registration - Deaths 2006 ICD10 as it appears in World Health Organization (WHO). WHO Mortality Database Version February 2014. Geneva, Switzerland: World Health Organization (WHO), 2014.                                                                                       | 2006                                                                                                |                      |
| Finland | Finland Vital Registration - Deaths 2007 ICD10 as it appears in World Health Organization (WHO). WHO Mortality Database Version February 2014. Geneva, Switzerland: World Health Organization (WHO), 2014.                                                                                       | 2007                                                                                                |                      |
| Finland | Finland Vital Registration - Deaths 2008 ICD10 as it appears in World Health Organization (WHO). WHO Mortality Database Version February 2014. Geneva, Switzerland: World Health Organization (WHO), 2014.                                                                                       | 2008                                                                                                |                      |
| Finland | Finland Vital Registration - Deaths 2009 ICD10 as it appears in World Health Organization (WHO). WHO Mortality Database Version February 2014. Geneva, Switzerland: World Health Organization (WHO), 2014.                                                                                       | 2009                                                                                                |                      |
| Finland | Finland Vital Registration - Deaths 2010 ICD10 as it appears in World Health Organization (WHO). WHO Mortality Database Version February 2014. Geneva, Switzerland: World Health Organization (WHO), 2014.                                                                                       | 2010                                                                                                |                      |
| Finland | European Renal Association-European Dialysis and Transplant Association (ERA-EDTA). European Renal Association-European Dialysis and Transplant Association Registry Annual Report 2010. Parma, Italy: European Renal Association-European Dialysis and Transplant Association (ERA-EDTA), 2012. | 2010                                                                                                | *                    |
| Finland | EUVAC-NET. EUVAC-NET Measles Surveillance Report 2010. Stockholm, Sweden: European Centre for Disease Prevention and Control, 2011.                                                                                                                                                              | 2010                                                                                                |                      |
| Finland | Finland Vital Registration - Deaths 2011 ICD10 as it appears in World Health Organization (WHO). WHO Mortality Database Version February 2014. Geneva, Switzerland: World Health Organization (WHO), 2014.                                                                                       | 2011                                                                                                | *                    |
| Finland | European Renal Association-European Dialysis and Transplant Association (ERA-EDTA). European Renal Association-European Dialysis and Transplant Association Registry Annual Report 2011. Parma, Italy: European Renal Association-European Dialysis and Transplant Association (ERA-EDTA), 2013. | 2011                                                                                                | *                    |
| France  | France Vital Registration - Deaths 1950 ICD7 as it appears in World Health Organization (WHO). WHO Mortality Database Version February 2014. Geneva, Switzerland: World Health Organization (WHO), 2014.                                                                                         | 1950                                                                                                |                      |
| France  | Max Planck Institute for Demographic Research, University of California. Human Mortality Database. Berkeley, USA: University of California; Rostock, Germany: Max Planck Institute for Demographic Research.                                                                                     | 1950-1951                                                                                           |                      |
| France  | Centre for Research on the Epidemiology of Disasters (CRED). EM-DAT: The OFDA/CRED International Disaster Database. Brussels, Belgium: Catholic University of Leuven.                                                                                                                            | 1951, 1955, 1958, 1963-1964, 1966-1967, 1969-1970, 1977-1980, 1982-1990, 1992-1996, 1998-2011, 2013 |                      |
| France  | France Vital Registration - Deaths 1952 ICD7 as it appears in World Health Organization (WHO). WHO Mortality Database Version February 2014. Geneva, Switzerland: World Health Organization (WHO), 2014.                                                                                         | 1952                                                                                                |                      |

**Web Table 32 - Comprehensive citation list**

| Country | Citation                                                                                                                                                                                                 | Year*     | New for GBD 2013 (*) |
|---------|----------------------------------------------------------------------------------------------------------------------------------------------------------------------------------------------------------|-----------|----------------------|
| France  | France Vital Registration - Deaths 1953 ICD7 as it appears in World Health Organization (WHO). WHO Mortality Database Version February 2014. Geneva, Switzerland: World Health Organization (WHO), 2014. | 1953      |                      |
| France  | France Vital Registration - Deaths 1954 ICD7 as it appears in World Health Organization (WHO). WHO Mortality Database Version February 2014. Geneva, Switzerland: World Health Organization (WHO), 2014. | 1954      |                      |
| France  | France Vital Registration - Deaths 1955 ICD7 as it appears in World Health Organization (WHO). WHO Mortality Database Version February 2014. Geneva, Switzerland: World Health Organization (WHO), 2014. | 1955      |                      |
| France  | France Vital Registration - Deaths 1956 ICD7 as it appears in World Health Organization (WHO). WHO Mortality Database Version February 2014. Geneva, Switzerland: World Health Organization (WHO), 2014. | 1956      |                      |
| France  | France Vital Registration - Deaths 1957 ICD7 as it appears in World Health Organization (WHO). WHO Mortality Database Version February 2014. Geneva, Switzerland: World Health Organization (WHO), 2014. | 1957      |                      |
| France  | France Vital Registration - Deaths 1958 ICD7 as it appears in World Health Organization (WHO). WHO Mortality Database Version February 2014. Geneva, Switzerland: World Health Organization (WHO), 2014. | 1958      |                      |
| France  | France Vital Registration - Deaths 1959 ICD7 as it appears in World Health Organization (WHO). WHO Mortality Database Version February 2014. Geneva, Switzerland: World Health Organization (WHO), 2014. | 1959      |                      |
| France  | France Vital Registration - Deaths 1960 ICD7 as it appears in World Health Organization (WHO). WHO Mortality Database Version February 2014. Geneva, Switzerland: World Health Organization (WHO), 2014. | 1960      |                      |
| France  | France Vital Registration - Deaths 1961 ICD7 as it appears in World Health Organization (WHO). WHO Mortality Database Version February 2014. Geneva, Switzerland: World Health Organization (WHO), 2014. | 1961      |                      |
| France  | Peace Research Institute Oslo (PRIO). Battle Deaths Dataset Version 3, 2009. Oslo, Norway: Peace Research Institute Oslo (PRIO), 2009.                                                                   | 1961-1962 |                      |
| France  | France Vital Registration - Deaths 1962 ICD7 as it appears in World Health Organization (WHO). WHO Mortality Database Version February 2014. Geneva, Switzerland: World Health Organization (WHO), 2014. | 1962      |                      |
| France  | France Vital Registration - Deaths 1963 ICD7 as it appears in World Health Organization (WHO). WHO Mortality Database Version February 2014. Geneva, Switzerland: World Health Organization (WHO), 2014. | 1963      |                      |
| France  | France Vital Registration - Deaths 1964 ICD7 as it appears in World Health Organization (WHO). WHO Mortality Database Version February 2014. Geneva, Switzerland: World Health Organization (WHO), 2014. | 1964      |                      |
| France  | France Vital Registration - Deaths 1965 ICD7 as it appears in World Health Organization (WHO). WHO Mortality Database Version February 2014. Geneva, Switzerland: World Health Organization (WHO), 2014. | 1965      |                      |
| France  | France Vital Registration - Deaths 1966 ICD7 as it appears in World Health Organization (WHO). WHO Mortality Database Version February 2014. Geneva, Switzerland: World Health Organization (WHO), 2014. | 1966      |                      |

**Web Table 32 - Comprehensive citation list**

| Country | Citation                                                                                                                                                                                                                   | Year*     | New for GBD 2013 (*) |
|---------|----------------------------------------------------------------------------------------------------------------------------------------------------------------------------------------------------------------------------|-----------|----------------------|
| France  | France Vital Registration - Deaths 1967 ICD7 as it appears in World Health Organization (WHO). WHO Mortality Database Version February 2014. Geneva, Switzerland: World Health Organization (WHO), 2014.                   | 1967      |                      |
| France  | France Vital Registration - Deaths 1968 ICD8 as it appears in World Health Organization (WHO). WHO Mortality Database Version February 2014. Geneva, Switzerland: World Health Organization (WHO), 2014.                   | 1968      |                      |
| France  | France Vital Registration - Deaths 1969 ICD8 as it appears in World Health Organization (WHO). WHO Mortality Database Version February 2014. Geneva, Switzerland: World Health Organization (WHO), 2014.                   | 1969      |                      |
| France  | France Vital Registration - Deaths 1970 ICD8 as it appears in World Health Organization (WHO). WHO Mortality Database Version February 2014. Geneva, Switzerland: World Health Organization (WHO), 2014.                   | 1970      |                      |
| France  | France Vital Registration - Deaths 1971 ICD8 as it appears in World Health Organization (WHO). WHO Mortality Database Version February 2014. Geneva, Switzerland: World Health Organization (WHO), 2014.                   | 1971      |                      |
| France  | France Vital Registration - Deaths 1972 ICD8 as it appears in World Health Organization (WHO). WHO Mortality Database Version February 2014. Geneva, Switzerland: World Health Organization (WHO), 2014.                   | 1972      |                      |
| France  | France Vital Registration - Deaths 1973 ICD8 as it appears in World Health Organization (WHO). WHO Mortality Database Version February 2014. Geneva, Switzerland: World Health Organization (WHO), 2014.                   | 1973      |                      |
| France  | France Vital Registration - Deaths 1974 ICD8 as it appears in World Health Organization (WHO). WHO Mortality Database Version February 2014. Geneva, Switzerland: World Health Organization (WHO), 2014.                   | 1974      |                      |
| France  | France Vital Registration - Deaths 1975 ICD8 as it appears in World Health Organization (WHO). WHO Mortality Database Version February 2014. Geneva, Switzerland: World Health Organization (WHO), 2014.                   | 1975      |                      |
| France  | France Vital Registration - Deaths 1976 ICD8 as it appears in World Health Organization (WHO). WHO Mortality Database Version February 2014. Geneva, Switzerland: World Health Organization (WHO), 2014.                   | 1976      |                      |
| France  | France Vital Registration - Deaths 1977 ICD8 as it appears in World Health Organization (WHO). WHO Mortality Database Version February 2014. Geneva, Switzerland: World Health Organization (WHO), 2014.                   | 1977      |                      |
| France  | Orsini A, Vovan L, Lena-Russo D, Maarouf I, Merono F, Jaujou M, Nebbia D, Fruitet B. School screening of hemoglobinopathies in the Marseilles area An analytic study of 35,289 tests. Arch Fr Pediatr. 1987; 44(6): 455-9. | 1977-1985 |                      |
| France  | France Vital Registration - Deaths 1978 ICD8 as it appears in World Health Organization (WHO). WHO Mortality Database Version February 2014. Geneva, Switzerland: World Health Organization (WHO), 2014.                   | 1978      |                      |
| France  | France Vital Registration - Deaths 1979 ICD9 as it appears in World Health Organization (WHO). WHO Mortality Database Version February 2014. Geneva, Switzerland: World Health Organization (WHO), 2014.                   | 1979      |                      |

**Web Table 32 - Comprehensive citation list**

| Country | Citation                                                                                                                                                                                                                                                                                                     | Year*                                             | New for GBD 2013 (*) |
|---------|--------------------------------------------------------------------------------------------------------------------------------------------------------------------------------------------------------------------------------------------------------------------------------------------------------------|---------------------------------------------------|----------------------|
| France  | Lemaire JM, Brunel D, Rieu D, Lepeu G, Bertrand A. [Antivirus antibodies in hepatitis A (anti-HAV) in southern France]. <i>Nouv Presse Med.</i> 1980; 9(6): 380.                                                                                                                                             | 1979                                              |                      |
| France  | France Vital Registration - Deaths 1980 ICD9 as it appears in World Health Organization (WHO). WHO Mortality Database Version February 2014. Geneva, Switzerland: World Health Organization (WHO), 2014.                                                                                                     | 1980                                              |                      |
| France  | Institute for Health Metrics and Evaluation. Institute for Health Metrics and Evaluation Cancer Registry Database. [Unpublished].                                                                                                                                                                            | 1980-2005                                         |                      |
| France  | Ferlay J, Parkin DM, Curado MP, Bray F, Edwards B, Shin HR and Forman D. <i>Cancer Incidence in Five Continents, Volumes I to IX: IARC CancerBase No. 9</i> [Internet]. Lyon, France: International Agency for Research on Cancer; 2010. Available from: <a href="http://ci5.iarc.fr">http://ci5.iarc.fr</a> | 1980-2002                                         |                      |
| France  | Institute for Health Metrics and Evaluation (IHME), Joint United Nations Program on HIV/AIDS (UNAIDS). Institute for Health Metrics and Evaluation HIV Mortality Estimates Based on the UNAIDS Spectrum Model Framework.                                                                                     | 1980-2013                                         | *                    |
| France  | United Nations Children's Fund (UNICEF), World Health Organization (WHO). WHO and UNICEF Reported Disease Incidence Time Series - Pertussis. Geneva, Switzerland: World Health Organization (WHO).                                                                                                           | 1980-1985, 1996, 2006                             |                      |
| France  | United Nations Children's Fund (UNICEF), World Health Organization (WHO). WHO and UNICEF Reported Disease Incidence Time Series - Measles. Geneva, Switzerland: World Health Organization (WHO).                                                                                                             | 1980-1986, 1991-1997, 2000, 2002, 2004-2011, 2013 |                      |
| France  | France Vital Registration - Deaths 1981 ICD9 as it appears in World Health Organization (WHO). WHO Mortality Database Version February 2014. Geneva, Switzerland: World Health Organization (WHO), 2014.                                                                                                     | 1981                                              |                      |
| France  | Parkin DM, International Agency for Research on Cancer, International Association of Cancer Registries. <i>Cancer Incidence in Five Continents. Vol. I to VIII.</i> Lyon, France, IARC Press, 2005.                                                                                                          | 1981, 1985, 1990, 1993-1995                       |                      |
| France  | France Vital Registration - Deaths 1982 ICD9 as it appears in World Health Organization (WHO). WHO Mortality Database Version February 2014. Geneva, Switzerland: World Health Organization (WHO), 2014.                                                                                                     | 1982                                              |                      |
| France  | France Vital Registration - Deaths 1983 ICD9 as it appears in World Health Organization (WHO). WHO Mortality Database Version February 2014. Geneva, Switzerland: World Health Organization (WHO), 2014.                                                                                                     | 1983                                              |                      |
| France  | France Vital Registration - Deaths 1984 ICD9 as it appears in World Health Organization (WHO). WHO Mortality Database Version February 2014. Geneva, Switzerland: World Health Organization (WHO), 2014.                                                                                                     | 1984                                              |                      |
| France  | Denis F, Ranger-Rogez S, Alain S, Mounier M, Debrock C, Wagner A, Delpyroux C, Tabaste JL, Aubard Y, Preux P-M. Screening of pregnant women for hepatitis B markers in a French Provincial University Hospital (Limoges) during 15 years. <i>Eur J Epidemiol.</i> 2004; 19(10): 973-8.                       | 1984-1998                                         |                      |
| France  | France Vital Registration - Deaths 1985 ICD9 as it appears in World Health Organization (WHO). WHO Mortality Database Version February 2014. Geneva, Switzerland: World Health Organization (WHO), 2014.                                                                                                     | 1985                                              |                      |
| France  | Joussemet M, Rouvin B, Deloince R, Esnault D, Fabre G. Prevalence of hepatitis A antibodies in French recruits in 1985. <i>Eur J Epidemiol.</i> 1987; 3(1): 10-3.                                                                                                                                            | 1985                                              |                      |
| France  | France Vital Registration - Deaths 1986 ICD9 as it appears in World Health Organization (WHO). WHO Mortality Database Version February 2014. Geneva, Switzerland: World Health Organization (WHO), 2014.                                                                                                     | 1986                                              |                      |

**Web Table 32 - Comprehensive citation list**

| Country | Citation                                                                                                                                                                                                                                                                                                                   | Year*            | New for GBD 2013 (*) |
|---------|----------------------------------------------------------------------------------------------------------------------------------------------------------------------------------------------------------------------------------------------------------------------------------------------------------------------------|------------------|----------------------|
| France  | France Vital Registration - Deaths 1987 ICD9 as it appears in World Health Organization (WHO). WHO Mortality Database Version February 2014. Geneva, Switzerland: World Health Organization (WHO), 2014.                                                                                                                   | 1987             |                      |
| France  | France Vital Registration - Deaths 1988 ICD9 as it appears in World Health Organization (WHO). WHO Mortality Database Version February 2014. Geneva, Switzerland: World Health Organization (WHO), 2014.                                                                                                                   | 1988             |                      |
| France  | Ritchie K, Robine JM, Letenneur L, Dartigues JF. Dementia-free life expectancy in France. <i>Am J Public Health</i> . 1994; 84(2): 232-6.                                                                                                                                                                                  | 1988             |                      |
| France  | Helmer C, Joly P, Letenneur L, Commenges D, Dartigues JF. Mortality with dementia: results from a French prospective community-based cohort. <i>Am J Epidemiol</i> . 2001; 154(7): 642-8.                                                                                                                                  | 1988-1998        |                      |
| France  | Modell B, Darlison M, Birgens H, Cario H, Faustino P, Giordano PC, Gulbis B, Hopmeier P, Lena-Russo D, Romao L, Theodorsson E. Epidemiology of haemoglobin disorders in Europe: an overview. <i>Scand J Clin Lab Invest</i> . 2007; 67(1): 39-69.                                                                          | 1988, 2006       |                      |
| France  | Centre for Health Informatics and Multiprofessional Education, University College London. Modell's Haemoglobinopathologist's Almanac. London, United Kingdom: Centre for Health Informatics and Multiprofessional Education, University College London, 2008.                                                              | 1988, 2003, 2006 |                      |
| France  | France Vital Registration - Deaths 1989 ICD9 as it appears in World Health Organization (WHO). WHO Mortality Database Version February 2014. Geneva, Switzerland: World Health Organization (WHO), 2014.                                                                                                                   | 1989             |                      |
| France  | Zmirou D, Benhamou PY, Cordonnier D, Borgel F, Balducci F, Papoz L, Halimi S. Diabetes mellitus prevalence among dialysed patients in France (UREMIDIAB study). <i>Nephrol Dial Transplant</i> . 1992; 7(11): 1092-7.                                                                                                      | 1989             |                      |
| France  | Letenneur L, Gilleron V, Commenges D, Helmer C, Orgogozo J, Dartigues J. Are sex and educational level independent predictors of dementia and Alzheimer's disease? Incidence data from the PAQUID project. <i>J Neurol Neurosurg Psychiatry</i> . 1999; 66(2): 177-83.                                                     | 1989-1995        |                      |
| France  | Joussemet M, Bourin P, Lebot O, Fabre G, Deloince R. Evolution of hepatitis A antibodies prevalence in young French military recruits. <i>Eur J Epidemiol</i> . 1992; 8(2): 289-91.                                                                                                                                        | 1989-1990        |                      |
| France  | France Vital Registration - Deaths 1990 ICD9 as it appears in World Health Organization (WHO). WHO Mortality Database Version February 2014. Geneva, Switzerland: World Health Organization (WHO), 2014.                                                                                                                   | 1990             |                      |
| France  | Castillo Taucher S. [Services for the care and prevention of birth defects. Reduced report of a World Health Organization and March of Dimes Foundation meeting]. <i>Rev Med Chil</i> . 2007; 135(6): 806-13.                                                                                                              | 1990-2006        |                      |
| France  | France Vital Registration - Deaths 1991 ICD9 as it appears in World Health Organization (WHO). WHO Mortality Database Version February 2014. Geneva, Switzerland: World Health Organization (WHO), 2014.                                                                                                                   | 1991             |                      |
| France  | Obadia Y, Rotily M, Degrand-Guillaud A, Guelain J, Ceccaldi M, Severo C, Poncet M, Alperovitch A. The PREMAP Study: prevalence and risk factors of dementia and clinically diagnosed Alzheimer's disease in Provence, France. Prevalence of Alzheimer's Disease in Provence. <i>Eur J Epidemiol</i> . 1997; 13(3): 247-53. | 1991             |                      |
| France  | Dubois F, Thevenas C, Caces E, Vol S, Doctorena A, Ecault JL, Goudeau A, Tichet J. [Seroepidemiology of hepatitis A in six departments in West-Central France in 1991]. <i>Gastroenterol Clin Biol</i> . 1992; 16(8-9): 674-9.                                                                                             | 1991             |                      |
| France  | Germanaud J, Barthez JP, Causse X. [Prevalence of hepatitis A virus antibodies in the personnel of a hospital]. <i>Gastroenterol Clin Biol</i> . 1992; 16(10): 816-7.                                                                                                                                                      | 1991             |                      |



**Web Table 32 - Comprehensive citation list**

| Country | Citation                                                                                                                                                                                                                                                                                   | Year*     | New for GBD 2013 (*) |
|---------|--------------------------------------------------------------------------------------------------------------------------------------------------------------------------------------------------------------------------------------------------------------------------------------------|-----------|----------------------|
| France  | Bouvier-Colle MH, Ancel PY, Varnoux N, Salanave B, Fernandez H, Papiernik E, Bréart G. Intensive care of pregnant and puerperal women. Characteristics of patients and health management structures. <i>J Gynecol Obstet Biol Reprod (Paris)</i> . 1997; 26(1): 47-56.                     | 1991-1992 |                      |
| France  | Letenneur L, Commenges D, Dartigues JF, Barberger-Gateau P. Incidence of dementia and Alzheimer's disease in elderly community residents of south-western France. <i>Int J Epidemiol</i> . 1994; 23(6): 1256-61.                                                                           | 1991-1993 |                      |
| France  | France Vital Registration - Deaths 1992 ICD9 as it appears in World Health Organization (WHO). WHO Mortality Database Version February 2014. Geneva, Switzerland: World Health Organization (WHO), 2014.                                                                                   | 1992      |                      |
| France  | Lagarde E, Joussemet M, Lataillade JJ, Fabre G. Risk factors for hepatitis A infection in France: drinking tap water may be of importance. <i>Eur J Epidemiol</i> . 1995; 11(2): 145-8.                                                                                                    | 1992-1993 |                      |
| France  | France Vital Registration - Deaths 1993 ICD9 as it appears in World Health Organization (WHO). WHO Mortality Database Version February 2014. Geneva, Switzerland: World Health Organization (WHO), 2014.                                                                                   | 1993      |                      |
| France  | Cadilhac P, Roudot-Thoraval F. Seroprevalence of hepatitis A virus infection among sewage workers in the Parisian area, France. <i>Eur J Epidemiol</i> . 1996; 12(3): 237-40.                                                                                                              | 1993      |                      |
| France  | Djeriri K, Fontana L, Laurichesse H, Peigue-Lafeuille H, Henquell C, Chamoux A, Beytout J, Catilina P, Rey M. [Seroprevalence of markers of viral hepatitis A, B and C in hospital personnel at the Clermont-Ferrand University Hospital Center]. <i>Presse Med</i> . 1996; 25(4): 145-50. | 1993-1994 |                      |
| France  | France Vital Registration - Deaths 1994 ICD9 as it appears in World Health Organization (WHO). WHO Mortality Database Version February 2014. Geneva, Switzerland: World Health Organization (WHO), 2014.                                                                                   | 1994      |                      |
| France  | Nguyen-Khac E, Delcenserie R, Capron D, Duverlie G, Liénard J, Capron JP. [Seroprevalence of viral hepatitis A in at the Amiens University Hospital]. <i>Gastroenterol Clin Biol</i> . 1996; 20(1): 36-41.                                                                                 | 1994      |                      |
| France  | Dubois F, Desenclos JC, Mariotte N, Goudeau A. Hepatitis C in a French population-based survey, 1994: seroprevalence, frequency of viremia, genotype distribution, and risk factors. The Collaborative Study Group. <i>Hepatology</i> . 1997; 25(6): 1490-6.                               | 1994      |                      |
| France  | Nalpas B, Zylberberg H, Dubois F, Presles MA, Gillant JC, Lienard M, Delemotte B, Bréchet C. [Prevalence of infection by hepatitis viruses in a rural area. Analysis according to risk factors and alcohol consumption]. <i>Gastroenterol Clin Biol</i> . 2000; 24(5): 536-40.             | 1994-1996 |                      |
| France  | Denis F, Delpeyroux C, Debrock C, Rogez S, Alain S. [Seroprevalence of hepatitis A in hospitalized patients in Limoges University Hospital]. <i>Gastroenterol Clin Biol</i> . 2003; 27(8-9): 727-31.                                                                                       | 1994-2002 |                      |
| France  | France Vital Registration - Deaths 1995 ICD9 as it appears in World Health Organization (WHO). WHO Mortality Database Version February 2014. Geneva, Switzerland: World Health Organization (WHO), 2014.                                                                                   | 1995      |                      |
| France  | Girard F, Bulet G, Bayoumeu F, Fresson J, Bouvier-Colle MH, Boutroy JL. Severe complications of pregnancy and delivery: the situation in Lorraine based on the European investigation. <i>J Gynecol Obstet Biol Reprod (Paris)</i> . 2001; 30(6 Suppl): S10-17.                            | 1995      |                      |
| France  | Lucht F, Berthelot P, Job P, Bonneval L, Dignonnet C, Fresard A, Chabert B, Cabal C, Pozzetto B. [Seroprevalence of viral hepatitis A in France in homosexuals and intravenous drug users]. <i>Presse Med</i> . 1996; 25(25): 1141-3.                                                      | 1995      |                      |

**Web Table 32 - Comprehensive citation list**

| Country | Citation                                                                                                                                                                                                                                                                 | Year*     | New for GBD 2013 (*) |
|---------|--------------------------------------------------------------------------------------------------------------------------------------------------------------------------------------------------------------------------------------------------------------------------|-----------|----------------------|
| France  | France Vital Registration - Deaths 1996 ICD9 as it appears in World Health Organization (WHO). WHO Mortality Database Version February 2014. Geneva, Switzerland: World Health Organization (WHO), 2014.                                                                 | 1996      |                      |
| France  | Alemy-Carreau M, Durbec JP, Giordanella J, Rousseau S, Blanc G, Monges D, Perreard M, Harle JR, Weiller PJ, Gerolami A. Lack of interaction between hepatitis C virus and alcohol in the pathogenesis of cirrhosis. A statistical study. J Hepatol. 1996; 25(5): 627-32. | 1996      |                      |
| France  | France Vital Registration - Deaths 1997 ICD9 as it appears in World Health Organization (WHO). WHO Mortality Database Version February 2014. Geneva, Switzerland: World Health Organization (WHO), 2014.                                                                 | 1997      |                      |
| France  | Pradat P, Caillat-Vallet E, Sahajian F, Bailly F, Excler G, Sepetjan M, Trépo C, Fabry J. Prevalence of hepatitis C infection among general practice patients in the Lyon area, France. Eur J Epidemiol. 2001; 17(1): 47-51.                                             | 1997      |                      |
| France  | Joussemet M, Depaquit J, Nicand E, Mac Nab C, Meynard JB, Teyssou R, Fabre G, Buisson Y. [Fall in the seroprevalence of hepatitis A in French youth]. Gastroenterol Clin Biol. 1999; 23(4): 447-445.                                                                     | 1997      |                      |
| France  | France Vital Registration - Deaths 1998 ICD9 as it appears in World Health Organization (WHO). WHO Mortality Database Version February 2014. Geneva, Switzerland: World Health Organization (WHO), 2014.                                                                 | 1998      |                      |
| France  | Domart M, Mlika-Cabanne N, Henzel D, Pouliquen A, Florentin A, Marande JL, Xerri B, Aufrere A, Larouze B. Hepatitis A among health workers in Paris hospitals. Occupational Health Physicians of Paris Hospital (AP-HP). J Med Virol. 1999; 58(4): 321-4.                | 1998      |                      |
| France  | Bardakdjian-Michau J, Bahuau M, Hurtrel D, Godart C, Riou J, Mathis M, Goossens M, Badens C, Ducrocq R, Elion J, Perini JM. Neonatal screening for sickle cell disease in France. J Clin Pathol. 2009; 62(1): 31-3.                                                      | 1998-2007 |                      |
| France  | France Vital Registration - Deaths 1999 ICD9 as it appears in World Health Organization (WHO). WHO Mortality Database Version February 2014. Geneva, Switzerland: World Health Organization (WHO), 2014.                                                                 | 1999      |                      |
| France  | Badens C, Martinez di Montemuros F, Thuret I, Michel G, Mattei JF, Cappellini MD, Lena-Russo D. Molecular basis of haemoglobinopathies and G6PD deficiency in the Comorian population. Hematol J. 2000; 1(4): 264-8.                                                     | 1999-2001 |                      |
| France  | World Health Organization (WHO). France WHO Leishmaniasis Country Profile.                                                                                                                                                                                               | 1999-2010 | *                    |
| France  | MiéDougé M, Chatelut M, Mansuy J-M, Rostaing L, Malecaze F, Sandres-Sauné K, Boudet F, Puel J, Abbal M, Izopet J. Screening of blood from potential organ and cornea donors for viruses. J Med Virol. 2002; 66(4): 571-5.                                                | 1999-2001 |                      |
| France  | France Vital Registration - Deaths 2000 ICD10 as it appears in World Health Organization (WHO). WHO Mortality Database Version February 2014. Geneva, Switzerland: World Health Organization (WHO), 2014.                                                                | 2000      |                      |
| France  | Curado MP, Edwards B, Shin HR, Storm H, Ferlay J, Heanue M and Boyle P, eds (2007). Cancer Incidence in Five Continents, Vol. IX Periodic Data (electronic version). Lyon, IARC. <a href="http://ci5.iarc.fr">http://ci5.iarc.fr</a>                                     | 2000      |                      |
| France  | Berthet S, Monpoux F, Soummer A-M, Bérard E, Sarles J, Badens C. Neonatal screening for sickle cell disease at the Nice University Hospital: the last 8 years. Arch Pediatr. 2010; 17(12): 1652-6.                                                                       | 2000-2008 | *                    |



**Web Table 32 - Comprehensive citation list**

| Country | Citation                                                                                                                                                                                                                                                                                     | Year*                | New for GBD 2013 (*) |
|---------|----------------------------------------------------------------------------------------------------------------------------------------------------------------------------------------------------------------------------------------------------------------------------------------------|----------------------|----------------------|
| France  | France Vital Registration - Deaths 2001 ICD10 as it appears in World Health Organization (WHO). WHO Mortality Database Version February 2014. Geneva, Switzerland: World Health Organization (WHO), 2014.                                                                                    | 2001                 |                      |
| France  | Gaschignard J, Levy C, Romain O, Cohen R, Bingen E, Aujard Y, Boileau P. Neonatal Bacterial Meningitis: 444 Cases in 7 Years. <i>Pediatr Infect Dis J.</i> 2011; 30(3): 212-7.                                                                                                               | 2001-2007            |                      |
| France  | Gaudy C, Thevenas C, Tichet J, Mariotte N, Goudeau A, Dubois F. Usefulness of the hepatitis C virus core antigen assay for screening of a population undergoing routine medical checkup. <i>J Clin Microbiol.</i> 2005; 43(4): 1722-6.                                                       | 2001-2002            |                      |
| France  | France Vital Registration - Deaths 2002 ICD10 as it appears in World Health Organization (WHO). WHO Mortality Database Version February 2014. Geneva, Switzerland: World Health Organization (WHO), 2014.                                                                                    | 2002                 |                      |
| France  | World Health Organization (WHO). Yellow Fever Reported Cases, WHO Vaccine-Preventable Diseases: Monitoring System. Geneva, Switzerland: World Health Organization (WHO).                                                                                                                     | 2002-2003, 2005-2009 |                      |
| France  | France Vital Registration - Deaths 2003 ICD10 as it appears in World Health Organization (WHO). WHO Mortality Database Version February 2014. Geneva, Switzerland: World Health Organization (WHO), 2014.                                                                                    | 2003                 |                      |
| France  | France Vital Registration - Deaths 2004 ICD10 as it appears in World Health Organization (WHO). WHO Mortality Database Version February 2014. Geneva, Switzerland: World Health Organization (WHO), 2014.                                                                                    | 2004                 |                      |
| France  | Thalassaemia International Federation, World Health Organization (WHO). Management of Haemoglobin Disorders: Report of a Joint WHO-TIF Meeting, Nicosia, Cyprus, 16-18 November 2007. Geneva, Switzerland: World Health Organization (WHO), 2008.                                            | 2004                 |                      |
| France  | Boutrouille A, Bakkali-Kassimi L, Crucière C, Pavio N. Prevalence of anti-hepatitis E virus antibodies in French blood donors. <i>J Clin Microbiol.</i> 2007; 45(6): 2009-10.                                                                                                                | 2004-2006            | *                    |
| France  | France Vital Registration - Deaths 2005 ICD10 as it appears in World Health Organization (WHO). WHO Mortality Database Version February 2014. Geneva, Switzerland: World Health Organization (WHO), 2014.                                                                                    | 2005                 |                      |
| France  | Forman D, Bray F, Brewster DH, Gombe Mbalawa C, Kohler B, Piñeros M, Steliarova-Foucher E, Swaminathan R and Ferlay J, eds (2013). <i>Cancer Incidence in Five Continents, Vol. X Summary Database</i> (electronic version). Lyon, IARC. <a href="http://ci5.iarc.fr">http://ci5.iarc.fr</a> | 2005                 |                      |
| France  | France Vital Registration - Deaths 2005 ICD10 as it appears in World Health Organization (WHO). WHO Mortality Database Version February 2014. Geneva, Switzerland: World Health Organization (WHO), 2014.                                                                                    | 2005                 |                      |
| France  | France Vital Registration - Deaths 2006 ICD10 as it appears in World Health Organization (WHO). WHO Mortality Database Version February 2014. Geneva, Switzerland: World Health Organization (WHO), 2014.                                                                                    | 2006                 |                      |
| France  | Chantry AA, Deneux-Tharoux C, Cans C, Ego A, Quantin C, Bouvier-Colle M-H. Hospital discharge data can be used for monitoring procedures and intensive care related to severe maternal morbidity. <i>J Clin Epidemiol.</i> 2011; 64(9): 1014-22.                                             | 2006-2007            |                      |
| France  | France Vital Registration - Deaths 2007 ICD10 as it appears in World Health Organization (WHO). WHO Mortality Database Version February 2014. Geneva, Switzerland: World Health Organization (WHO), 2014.                                                                                    | 2007                 |                      |

**Web Table 32 - Comprehensive citation list**

| Country | Citation                                                                                                                                                                                                                                                                                                                                                                                                                                                                                                                                                                                                                                                                                                              | Year*                                            | New for GBD 2013 (*) |
|---------|-----------------------------------------------------------------------------------------------------------------------------------------------------------------------------------------------------------------------------------------------------------------------------------------------------------------------------------------------------------------------------------------------------------------------------------------------------------------------------------------------------------------------------------------------------------------------------------------------------------------------------------------------------------------------------------------------------------------------|--------------------------------------------------|----------------------|
| France  | France Vital Registration - Deaths 2008 ICD10 as it appears in World Health Organization (WHO). WHO Mortality Database Version February 2014. Geneva, Switzerland: World Health Organization (WHO), 2014.                                                                                                                                                                                                                                                                                                                                                                                                                                                                                                             | 2008                                             |                      |
| France  | EUVAC-NET. EUVAC-NET Measles Surveillance Report 2008. Stockholm, Sweden: European Centre for Disease Prevention and Control, 2009.                                                                                                                                                                                                                                                                                                                                                                                                                                                                                                                                                                                   | 2008                                             |                      |
| France  | France Vital Registration - Deaths 2009 ICD10 as it appears in World Health Organization (WHO). WHO Mortality Database Version February 2014. Geneva, Switzerland: World Health Organization (WHO), 2014.                                                                                                                                                                                                                                                                                                                                                                                                                                                                                                             | 2009                                             |                      |
| France  | Weatherall D. Sickle Cell and Thalassemias Prevalence Data, Personal Correspondence with David Weatherall. [Unpublished].                                                                                                                                                                                                                                                                                                                                                                                                                                                                                                                                                                                             | 2009                                             |                      |
| France  | EUVAC-NET. EUVAC-NET Measles Surveillance Report 2009. Stockholm, Sweden: European Centre for Disease Prevention and Control, 2010.                                                                                                                                                                                                                                                                                                                                                                                                                                                                                                                                                                                   | 2009                                             |                      |
| France  | EUVAC-NET. EUVAC-NET Measles Surveillance Report 2010. Stockholm, Sweden: European Centre for Disease Prevention and Control, 2011.                                                                                                                                                                                                                                                                                                                                                                                                                                                                                                                                                                                   | 2010                                             |                      |
| France  | France Vital Registration - Deaths 2010 ICD10 as it appears in World Health Organization (WHO). WHO Mortality Database Version February 2014. Geneva, Switzerland: World Health Organization (WHO), 2014.                                                                                                                                                                                                                                                                                                                                                                                                                                                                                                             | 2010                                             |                      |
| France  | France Vital Registration Death Data 2011 as it appears in United Nations Statistics Division (UNSD). United Nations Demographic Yearbook. New York City, United States: United Nations Statistics Division (UNSD).                                                                                                                                                                                                                                                                                                                                                                                                                                                                                                   | 2011                                             | *                    |
| France  | European Renal Association-European Dialysis and Transplant Association (ERA-EDTA). European Renal Association-European Dialysis and Transplant Association Registry Annual Report 2011. Parma, Italy: European Renal Association-European Dialysis and Transplant Association (ERA-EDTA), 2013.                                                                                                                                                                                                                                                                                                                                                                                                                      | 2011                                             | *                    |
| France  | Trichopoulos D, Bamia C, Lagiou P, Fedirko V, Trepo E, Jenab M, Pischon T, Nöthlings U, Overved K, Tjønneland A, Outzen M, Clavel-Chapelon F, Kaaks R, Lukanova A, Boeing H, Aleksandrova K, Benetou V, Zylis D, Palli D, Pala V, Panico S, Tumino R, Sacerdote C, Bueno-De-Mesquita HB, Van Kranen HJ, Peeters PHM, Lund E, Quirós JR, González CA, Sanchez Perez M-J, Navarro C, Dorronsoro M, Barricarte A, Lindkvist B, Regnér S, Werner M, Hallmans G, Khaw K-T, Wareham N, Key T, Romieu I, Chuang S-C, Murphy N, Boffetta P, Trichopoulou A, Riboli E. Hepatocellular carcinoma risk factors and disease burden in a European cohort: a nested case-control study. J Natl Cancer Inst. 2011; 103(22): 1686-95. | 1992-2006                                        | *                    |
| Gabon   | Peace Research Institute Oslo (PRIO). Battle Deaths Dataset Version 3, 2009. Oslo, Norway: Peace Research Institute Oslo (PRIO), 2009.                                                                                                                                                                                                                                                                                                                                                                                                                                                                                                                                                                                | 1964                                             |                      |
| Gabon   | Institute for Health Metrics and Evaluation (IHME), Joint United Nations Program on HIV/AIDS (UNAIDS). Institute for Health Metrics and Evaluation HIV Mortality Estimates Based on the UNAIDS Spectrum Model Framework.                                                                                                                                                                                                                                                                                                                                                                                                                                                                                              | 1980-2013                                        | *                    |
| Gabon   | United Nations Children's Fund (UNICEF), World Health Organization (WHO). WHO and UNICEF Reported Disease Incidence Time Series - Pertussis. Geneva, Switzerland: World Health Organization (WHO).                                                                                                                                                                                                                                                                                                                                                                                                                                                                                                                    | 1980-1989, 1992-1993, 1996, 2001-2002            |                      |
| Gabon   | United Nations Children's Fund (UNICEF), World Health Organization (WHO). WHO and UNICEF Reported Disease Incidence Time Series - Measles. Geneva, Switzerland: World Health Organization (WHO).                                                                                                                                                                                                                                                                                                                                                                                                                                                                                                                      | 1980-1990, 1992-1993, 1996, 2000-2002, 2004-2013 |                      |

**Web Table 32 - Comprehensive citation list**

| Country | Citation                                                                                                                                                                                                                                                              | Year*                                 | New for GBD 2013 (*) |
|---------|-----------------------------------------------------------------------------------------------------------------------------------------------------------------------------------------------------------------------------------------------------------------------|---------------------------------------|----------------------|
| Gabon   | Dupont A, Delaporte E, Jego JM, Schrijvers D, Merlin M, Josse R. Prevalence of hepatitis B antigen among randomized representative urban and rural populations in Gabon. <i>Ann Soc Belg Med Trop.</i> 1988; 68(2): 157-8.                                            | 1986-1987                             |                      |
| Gabon   | Goeman J, Piot P. The epidemiology of sexually transmitted diseases in Africa and Latin America. <i>Semin Dermatol.</i> 1990; 9(2): 105-8.                                                                                                                            | 1988                                  |                      |
| Gabon   | Koko J, Batsielili S, Dufillot D, Kani F, Gahouma D, Moussavou A. Les méningites bactériennes de l'enfant à Libreville, Gabon. <i>Med Mal Infect.</i> 2000; 30(1): 50-6.                                                                                              | 1989-1993                             |                      |
| Gabon   | Weatherall D. Sickle Cell and Thalassemias Prevalence Data, Personal Correspondence with David Weatherall. [Unpublished].                                                                                                                                             | 1990-2009                             |                      |
| Gabon   | Perret J-L, Moussavou-Kombila J-B, Delaporte E, Pemba L-F, Boguikouma J-B, Matton T, Larouze B. [HBs Ag and antibodies to hepatitis C virus in complicated chronic liver disease in Gabon. A case control study]. <i>Gastroenterol Clin Biol.</i> 2002; 26(2): 131-5. | 1990-1998                             |                      |
| Gabon   | Centre for Health Informatics and Multiprofessional Education, University College London. <i>Modell's Haemoglobinopathologist's Almanac.</i> London, United Kingdom: Centre for Health Informatics and Multiprofessional Education, University College London, 2008.  | 1990-2003                             |                      |
| Gabon   | Richard-Lenoble D, Traore O, Kombila M, Roingard P, Dubois F, Goudeau A. Hepatitis B, C, D, and E markers in rural equatorial African villages (Gabon). <i>Am J Trop Med Hyg.</i> 1995; 53(4): 338-41.                                                                | 1991-1992                             | *                    |
| Gabon   | World Health Organization (WHO). <i>Yellow Fever Reported Cases, WHO Vaccine-Preventable Diseases: Monitoring System.</i> Geneva, Switzerland: World Health Organization (WHO).                                                                                       | 1992-1993, 1996, 2001-2002, 2005-2009 |                      |
| Gabon   | WHO Department of Communicable Disease Surveillance and Response. <i>WHO Report on Global Surveillance of Epidemic-prone Infectious Diseases 2000.</i>                                                                                                                | 1994-1995                             |                      |
| Gabon   | Mombo L-E, Ntoui F, Bisseye C, Ossari S, Lu CY, Nagel RL, Krishnamoorthy R. Human genetic polymorphisms and asymptomatic Plasmodium falciparum malaria in Gabonese schoolchildren. <i>Am J Trop Med Hyg.</i> 2003; 68(2): 186-90.                                     | 1995                                  |                      |
| Gabon   | Migot-Nabias F, Mombo LE, Luty AJ, Dubois B, Nabias R, Bisseye C, Millet P, Lu CY, Deloron P. Human genetic factors related to susceptibility to mild malaria in Gabon. <i>Genes Immun.</i> 2000; 1(7): 435-41.                                                       | 1995-1996                             |                      |
| Gabon   | World Health Organization Regional Office for Africa. <i>HIV/AIDS Epidemiological Surveillance Update for the WHO African Region.</i> World Health Organization Regional Office for Africa, 2003.                                                                     | 1996                                  |                      |
| Gabon   | Bertherat E, Georges-Courbot MC, Nabias R, Georges AJ, Renaut A. Seroprevalence of four sexually transmitted diseases in a semi-urban population of Gabon. <i>Int J STD AIDS.</i> 1998; 9(1): 31-6.                                                                   | 1996                                  |                      |
| Gabon   | Domarle O, Migot-Nabias F, Mvoukani JL, Lu CY, Nabias R, Mayombo J, Tiga H, Deloron P. Factors influencing resistance to reinfection with Plasmodium falciparum. <i>Am J Trop Med Hyg.</i> 1999; 61(6): 926-31.                                                       | 1998                                  |                      |
| Gabon   | General Directorate of Statistics and Economic Studies (Gabon), Macro International, Inc. <i>Gabon Demographic and Health Survey 2000-2001.</i> Calverton, United States: Macro International, Inc.                                                                   | 2000-2001                             |                      |
| Gabon   | Makuwa M, Souquifé S, Telfer P, Apetrei C, Vray M, Bedjabaga I, Mouinga-Ondeme A, Onanga R, Marx PA, Kazanji M, Roques P, Simon F. Identification of hepatitis B virus subgenotype A3 in rural Gabon. <i>J Med Virol.</i> 2006; 78(9): 1175-84.                       | 2001                                  |                      |
| Gabon   | World Health Organization (WHO). <i>Retrospective Measles Data on Supplementary Immunization Activities.</i> Geneva, Switzerland: World Health Organization (WHO).                                                                                                    | 2004, 2007, 2012                      |                      |

**Web Table 32 - Comprehensive citation list**

| Country | Citation                                                                                                                                                                                                                                                  | Year*     | New for GBD 2013 (*) |
|---------|-----------------------------------------------------------------------------------------------------------------------------------------------------------------------------------------------------------------------------------------------------------|-----------|----------------------|
| Gabon   | Njouom R, Caron M, Besson G, Ndong-Atome G-R, Makuwa M, Pouillot R, Nkoghé D, Leroy E, Kazanji M. Phylogeography, risk factors and genetic history of hepatitis C virus in Gabon, central Africa. PLoS One. 2012; 7(8): e42002.                           | 2005-2008 |                      |
| Gabon   | Caron M, Kazanji M. Hepatitis E virus is highly prevalent among pregnant women in Gabon, central Africa, with different patterns between rural and urban areas. Virol J. 2008; 158.                                                                       | 2005-2007 |                      |
| Gabon   | Mayi-Tsonga S, Meyé J-F, Tagne A, Ndombi I, Diallo T, Oksana L, Mendome G, Mounanga M. Audit de la morbidité obstétricale grave (near miss) au Gabon. Sante. 2007; 17(2): 111-5.                                                                          | 2006      |                      |
| Gabon   | Joint United Nations Program on HIV/AIDS (UNAIDS), Ministry of Health (Gabon). Gabon UNGASS Report 2010. Geneva, Switzerland: Joint United Nations Program on HIV/AIDS (UNAIDS), 2010.                                                                    | 2009      |                      |
| Gabon   | Centre for Research on the Epidemiology of Disasters (CRED). EM-DAT: The OFDA/CRED International Disaster Database. Brussels, Belgium: Catholic University of Leuven.                                                                                     | 2012      |                      |
| Gabon   | General Directorate of Statistics (Gabon), ICF International, Ministry of Economy, Employment and Sustainable Development (Gabon), Ministry of Health (Gabon). Gabon Demographic and Health Survey 2012. Fairfax, United States: ICF International, 2013. | 2012      | *                    |
| Georgia | Institute for Health Metrics and Evaluation (IHME), Joint United Nations Program on HIV/AIDS (UNAIDS). Institute for Health Metrics and Evaluation HIV Mortality Estimates Based on the UNAIDS Spectrum Model Framework.                                  | 1980-2013 | *                    |
| Georgia | Georgia Vital Registration - Deaths 1981 ICD9 as it appears in World Health Organization (WHO). WHO Mortality Database Version February 2014. Geneva, Switzerland: World Health Organization (WHO), 2014.                                                 | 1981      |                      |
| Georgia | Georgia Vital Registration - Deaths 1982 ICD9 as it appears in World Health Organization (WHO). WHO Mortality Database Version February 2014. Geneva, Switzerland: World Health Organization (WHO), 2014.                                                 | 1982      |                      |
| Georgia | Civil Registry Agency, Ministry of Justice (Georgia). Georgia Vital Statistics - Deaths 1983. [Unpublished].                                                                                                                                              | 1983      |                      |
| Georgia | World Health Organization (WHO). Country Mortality Data 1980-1999. [Unpublished].                                                                                                                                                                         | 1983      |                      |
| Georgia | Georgia Vital Registration - Deaths 1985 ICD9 as it appears in World Health Organization (WHO). WHO Mortality Database Version February 2014. Geneva, Switzerland: World Health Organization (WHO), 2014.                                                 | 1985      |                      |
| Georgia | Georgia Vital Registration - Deaths 1986 ICD9 as it appears in World Health Organization (WHO). WHO Mortality Database Version February 2014. Geneva, Switzerland: World Health Organization (WHO), 2014.                                                 | 1986      |                      |
| Georgia | Georgia Vital Registration - Deaths 1987 ICD9 as it appears in World Health Organization (WHO). WHO Mortality Database Version February 2014. Geneva, Switzerland: World Health Organization (WHO), 2014.                                                 | 1987      |                      |
| Georgia | Georgia Vital Registration - Deaths 1988 ICD9 as it appears in World Health Organization (WHO). WHO Mortality Database Version February 2014. Geneva, Switzerland: World Health Organization (WHO), 2014.                                                 | 1988      |                      |
| Georgia | Georgia Vital Registration - Deaths 1989 ICD9 as it appears in World Health Organization (WHO). WHO Mortality Database Version February 2014. Geneva, Switzerland: World Health Organization (WHO), 2014.                                                 | 1989      |                      |

**Web Table 32 - Comprehensive citation list**

| Country | Citation                                                                                                                                                                                                                                                      | Year*                                        | New for GBD 2013 (*) |
|---------|---------------------------------------------------------------------------------------------------------------------------------------------------------------------------------------------------------------------------------------------------------------|----------------------------------------------|----------------------|
| Georgia | Georgia Vital Registration - Deaths 1990 ICD9 as it appears in World Health Organization (WHO). WHO Mortality Database Version February 2014. Geneva, Switzerland: World Health Organization (WHO), 2014.                                                     | 1990                                         |                      |
| Georgia | United Nations Office on Drugs and Crime (UNODC). United Nations Surveys on Crime Trends and the Operations of Criminal Justice Systems 1970-2006 as provided by Kavi Bhalla. [Unpublished].                                                                  | 1990-1994                                    |                      |
| Georgia | Weatherall D. Sickle Cell and Thalassemias Prevalence Data, Personal Correspondence with David Weatherall. [Unpublished].                                                                                                                                     | 1990-2009                                    |                      |
| Georgia | Centre for Health Informatics and Multiprofessional Education, University College London. Modell's Haemoglobinopathologist's Almanac. London, United Kingdom: Centre for Health Informatics and Multiprofessional Education, University College London, 2008. | 1990-2003                                    |                      |
| Georgia | Georgia Vital Registration - Deaths 1991 ICD9 as it appears in World Health Organization (WHO). WHO Mortality Database Version February 2014. Geneva, Switzerland: World Health Organization (WHO), 2014.                                                     | 1991                                         |                      |
| Georgia | Centre for Research on the Epidemiology of Disasters (CRED). EM-DAT: The OFDA/CRED International Disaster Database. Brussels, Belgium: Catholic University of Leuven.                                                                                         | 1991-1992, 1995, 1997, 2002, 2004, 2011-2012 |                      |
| Georgia | Department of Peace and Conflict Research, Uppsala University. UCDP Battle-Related Deaths Database Version 5, 2013. Uppsala, Sweden: Department of Peace and Conflict Research, Uppsala University, 2013.                                                     | 1991-2008                                    | *                    |
| Georgia | United Nations Children's Fund (UNICEF), World Health Organization (WHO). WHO and UNICEF Reported Disease Incidence Time Series - Pertussis. Geneva, Switzerland: World Health Organization (WHO).                                                            | 1991-2013                                    |                      |
| Georgia | United Nations Children's Fund (UNICEF), World Health Organization (WHO). WHO and UNICEF Reported Disease Incidence Time Series - Measles. Geneva, Switzerland: World Health Organization (WHO).                                                              | 1991-2013                                    |                      |
| Georgia | Georgia Vital Registration - Deaths 1992 ICD9 as it appears in World Health Organization (WHO). WHO Mortality Database Version February 2014. Geneva, Switzerland: World Health Organization (WHO), 2014.                                                     | 1992                                         |                      |
| Georgia | Georgia Vital Statistics - Deaths 1993 as it appears in TransMonEE 2013 Database, UNICEF Regional Office for CEE/CIS.                                                                                                                                         | 1993                                         |                      |
| Georgia | Department of Peace and Conflict Research, Uppsala University. UCDP One-Sided Violence Database Version 1.4, 2013. Uppsala, Sweden: Department of Peace and Conflict Research, Uppsala University, 2013.                                                      | 1993-1995                                    | *                    |
| Georgia | Georgia Vital Registration - Deaths 1994 ICD9 as it appears in World Health Organization (WHO). WHO Mortality Database Version February 2014. Geneva, Switzerland: World Health Organization (WHO), 2014.                                                     | 1994                                         |                      |
| Georgia | World Health Organization (WHO). Georgia WHO Leishmaniasis Country Profile.                                                                                                                                                                                   | 1994-2008                                    | *                    |
| Georgia | Georgia Vital Registration - Deaths 1995 ICD9 as it appears in World Health Organization (WHO). WHO Mortality Database Version February 2014. Geneva, Switzerland: World Health Organization (WHO), 2014.                                                     | 1995                                         |                      |
| Georgia | United Nations Office on Drugs and Crime (UNODC). United Nations Office on Drugs and Crime Global Study on Homicides 2011. Vienna, Austria: United Nations Office on Drugs and Crime (UNODC), 2011.                                                           | 1995-2010                                    |                      |
| Georgia | Georgia Vital Registration - Deaths 1996 ICD9 as it appears in World Health Organization (WHO). WHO Mortality Database Version February 2014. Geneva, Switzerland: World Health Organization (WHO), 2014.                                                     | 1996                                         |                      |

**Web Table 32 - Comprehensive citation list**

| Country | Citation                                                                                                                                                                                                                                                                                                                   | Year*                 | New for GBD 2013 (*) |
|---------|----------------------------------------------------------------------------------------------------------------------------------------------------------------------------------------------------------------------------------------------------------------------------------------------------------------------------|-----------------------|----------------------|
| Georgia | Georgia Vital Registration - Deaths 1997 ICD9 as it appears in World Health Organization (WHO). WHO Mortality Database Version February 2014. Geneva, Switzerland: World Health Organization (WHO), 2014.                                                                                                                  | 1997                  |                      |
| Georgia | Department of Peace and Conflict Research, Uppsala University. UCDP Nonstate Conflict Database Version 2.5, 2013. Uppsala, Sweden: Department of Peace and Conflict Research, Uppsala University, 2013.                                                                                                                    | 1997-1998             | *                    |
| Georgia | Georgia Vital Registration - Deaths 1998 ICD10 as it appears in World Health Organization (WHO). WHO Mortality Database Version February 2014. Geneva, Switzerland: World Health Organization (WHO), 2014.                                                                                                                 | 1998                  |                      |
| Georgia | Georgia Vital Registration - Deaths 1999 ICD10 as it appears in World Health Organization (WHO). WHO Mortality Database Version February 2014. Geneva, Switzerland: World Health Organization (WHO), 2014.                                                                                                                 | 1999                  |                      |
| Georgia | Georgia Center for Disease Control (NCDC), Georgia Ministry of Labor, Health and Social Affairs (MOLHSA), Division of Reproductive Health-Centers for Disease Control and Prevention (CDC). (2001) Georgia Reproductive Health Survey 1999-2000. Atlanta, United States: Centers for Disease Control and Prevention (CDC). | 1999-2000             |                      |
| Georgia | Georgia Vital Registration - Deaths 2000 ICD10 as it appears in World Health Organization (WHO). WHO Mortality Database Version February 2014. Geneva, Switzerland: World Health Organization (WHO), 2014.                                                                                                                 | 2000                  |                      |
| Georgia | Georgia Vital Registration - Deaths 2001 ICD10 as it appears in World Health Organization (WHO). WHO Mortality Database Version February 2014. Geneva, Switzerland: World Health Organization (WHO), 2014.                                                                                                                 | 2001                  |                      |
| Georgia | World Health Organization (WHO). Yellow Fever Reported Cases, WHO Vaccine-Preventable Diseases: Monitoring System. Geneva, Switzerland: World Health Organization (WHO).                                                                                                                                                   | 2001-2009             |                      |
| Georgia | Georgia Vital Statistics - Deaths 2002 as it appears in TransMonEE 2013 Database, UNICEF Regional Office for CEE/CIS.                                                                                                                                                                                                      | 2002                  |                      |
| Georgia | Georgia Vital Registration Death Data 2003 as it appears in United Nations Statistics Division (UNSD). United Nations Demographic Yearbook. New York City, United States: United Nations Statistics Division (UNSD).                                                                                                       | 2003                  |                      |
| Georgia | Civil Registry Agency, Ministry of Justice (Georgia). Georgia Vital Statistics - Deaths 2004. [Unpublished].                                                                                                                                                                                                               | 2004                  |                      |
| Georgia | Georgia Vital Registration - Deaths 2004 ICD10 as it appears in World Health Organization (WHO). WHO Mortality Database Version February 2014. Geneva, Switzerland: World Health Organization (WHO), 2014.                                                                                                                 | 2004                  |                      |
| Georgia | World Health Organization (WHO). Retrospective Measles Data on Supplementary Immunization Activities. Geneva, Switzerland: World Health Organization (WHO).                                                                                                                                                                | 2004-2005, 2008, 2013 |                      |
| Georgia | State Department of Statistics of Georgia, National Centre for Disease Control of Georgia and United Nations Children's Fund (UNICEF). Georgia Multiple Indicator Cluster Survey 2005. New York, United States: United Nations Children's Fund (UNICEF).                                                                   | 2005                  |                      |
| Georgia | Georgia Center for Disease Control (NCDC), Georgian Ministry of Labor Health and Social Affairs (MOLHSA), Division of Reproductive Health, Centers for Disease Control and Prevention (CDC). Georgia Reproductive Health Survey 2005. Atlanta, United States: Centers for Disease Control and Prevention (CDC).            | 2005                  |                      |



**Web Table 32 - Comprehensive citation list**

| Country | Citation                                                                                                                                                                                                                                                                                       | Year*     | New for GBD 2013 (*) |
|---------|------------------------------------------------------------------------------------------------------------------------------------------------------------------------------------------------------------------------------------------------------------------------------------------------|-----------|----------------------|
| Georgia | Georgia Vital Registration - Deaths 2005 ICD10 as it appears in World Health Organization (WHO). WHO Mortality Database Version February 2014. Geneva, Switzerland: World Health Organization (WHO), 2014.                                                                                     | 2005      |                      |
| Georgia | Georgia Vital Registration - Deaths 2006 ICD10 as it appears in World Health Organization (WHO). WHO Mortality Database Version February 2014. Geneva, Switzerland: World Health Organization (WHO), 2014.                                                                                     | 2006      |                      |
| Georgia | Georgia Vital Registration - Deaths 2007 ICD10 as it appears in World Health Organization (WHO). WHO Mortality Database Version February 2014. Geneva, Switzerland: World Health Organization (WHO), 2014.                                                                                     | 2007      |                      |
| Georgia | Georgia Vital Registration Death Data 2008 as it appears in United Nations Statistics Division (UNSD). United Nations Demographic Yearbook. New York City, United States: United Nations Statistics Division (UNSD).                                                                           | 2008      |                      |
| Georgia | Georgia Vital Registration - Deaths 2009 ICD10 as it appears in World Health Organization (WHO). WHO Mortality Database Version February 2014. Geneva, Switzerland: World Health Organization (WHO), 2014.                                                                                     | 2009      |                      |
| Georgia | Georgia Vital Registration - Deaths 2010 ICD10 as it appears in World Health Organization (WHO). WHO Mortality Database Version February 2014. Geneva, Switzerland: World Health Organization (WHO), 2014.                                                                                     | 2010      |                      |
| Georgia | Division of Reproductive Health, Centers for Disease Control and Prevention (CDC), Georgia Ministry of Labor, Health and Social Affairs, National Center for Disease Control and Public Health (Georgia), National Statistics Office of Georgia. Georgia Reproductive Health Survey 2010-2011. | 2010-2011 | *                    |
| Georgia | Georgia Vital Registration Death Data 2012 as it appears in United Nations Statistics Division (UNSD). United Nations Demographic Yearbook. New York City, United States: United Nations Statistics Division (UNSD).                                                                           | 2012      | *                    |
| Germany | Max Planck Institute for Demographic Research, University of California. Human Mortality Database. Berkeley, USA: University of California; Rostock, Germany: Max Planck Institute for Demographic Research.                                                                                   | 1956-2010 |                      |
| Germany | Germany, West Berlin Vital Registration - Deaths 1970 ICD8 as it appears in World Health Organization (WHO). WHO Mortality Database Version February 2014. Geneva, Switzerland: World Health Organization (WHO), 2014.                                                                         | 1970      |                      |
| Germany | Frösner GG, Weiss M, Scheid R, Deinhardt F, Gathof GA, Bäcker U, Gossrau E, Bär A. [Prevalence of serological hepatitis A and B markers in Bavarian blood donors]. MMW Munch Med Wochenschr. 1980; 122(7): 231-3.                                                                              | 1977      |                      |
| Germany | Germany, Former Democratic Republic Vital Registration - Deaths 1980 ICD9 as it appears in World Health Organization (WHO). WHO Mortality Database Version February 2014. Geneva, Switzerland: World Health Organization (WHO), 2014.                                                          | 1980      |                      |
| Germany | Germany, Former Federal Republic Vital Registration - Deaths 1980 ICD9 as it appears in World Health Organization (WHO). WHO Mortality Database Version February 2014. Geneva, Switzerland: World Health Organization (WHO), 2014.                                                             | 1980      |                      |
| Germany | Institute for Health Metrics and Evaluation. Institute for Health Metrics and Evaluation Cancer Registry Database. [Unpublished].                                                                                                                                                              | 1980-2008 |                      |

**Web Table 32 - Comprehensive citation list**

| Country | Citation                                                                                                                                                                                                                                                                                              | Year*                | New for GBD 2013 (*) |
|---------|-------------------------------------------------------------------------------------------------------------------------------------------------------------------------------------------------------------------------------------------------------------------------------------------------------|----------------------|----------------------|
| Germany | Ferlay J, Parkin DM, Curado MP, Bray F, Edwards B, Shin HR and Forman D. Cancer Incidence in Five Continents, Volumes I to IX: IARC CancerBase No. 9 [Internet]. Lyon, France: International Agency for Research on Cancer; 2010. Available from: <a href="http://ci5.iarc.fr">http://ci5.iarc.fr</a> | 1980-2002            |                      |
| Germany | Lasius D, Lange W, Stück B. [Seroepidemiologic studies on hepatitis A infections in German and foreign children living in Berlin (West)]. Monatsschr Kinderheilkd. 1983; 131(2): 93-5.                                                                                                                | 1980-1982            |                      |
| Germany | Ebell H, Schaaf W. [Hepatitis antibodies in anesthesiologists and anesthesia personnel in a University clinic]. Anasth Intensivther Notfallmed. 1983; 18(3): 111-5.                                                                                                                                   | 1980-1982            |                      |
| Germany | Institute for Health Metrics and Evaluation (IHME), Joint United Nations Program on HIV/AIDS (UNAIDS). Institute for Health Metrics and Evaluation HIV Mortality Estimates Based on the UNAIDS Spectrum Model Framework.                                                                              | 1980-2013            | *                    |
| Germany | United Nations Children's Fund (UNICEF), World Health Organization (WHO). WHO and UNICEF Reported Disease Incidence Time Series - Pertussis. Geneva, Switzerland: World Health Organization (WHO).                                                                                                    | 1980-1989            |                      |
| Germany | United Nations Children's Fund (UNICEF), World Health Organization (WHO). WHO and UNICEF Reported Disease Incidence Time Series - Measles. Geneva, Switzerland: World Health Organization (WHO).                                                                                                      | 1980-1989, 2001-2013 |                      |
| Germany | Parkin DM, International Agency for Research on Cancer, International Association of Cancer Registries. Cancer Incidence in Five Continents. Vol. I to VIII. Lyon, France, IARC Press, 2005.                                                                                                          | 1980, 1985, 1988     |                      |
| Germany | Germany, Former Democratic Republic Vital Registration - Deaths 1981 ICD9 as it appears in World Health Organization (WHO). WHO Mortality Database Version February 2014. Geneva, Switzerland: World Health Organization (WHO), 2014.                                                                 | 1981                 |                      |
| Germany | Germany, Former Federal Republic Vital Registration - Deaths 1981 ICD9 as it appears in World Health Organization (WHO). WHO Mortality Database Version February 2014. Geneva, Switzerland: World Health Organization (WHO), 2014.                                                                    | 1981                 |                      |
| Germany | Germany, Former Democratic Republic Vital Registration - Deaths 1982 ICD9 as it appears in World Health Organization (WHO). WHO Mortality Database Version February 2014. Geneva, Switzerland: World Health Organization (WHO), 2014.                                                                 | 1982                 |                      |
| Germany | Germany, Former Federal Republic Vital Registration - Deaths 1982 ICD9 as it appears in World Health Organization (WHO). WHO Mortality Database Version February 2014. Geneva, Switzerland: World Health Organization (WHO), 2014.                                                                    | 1982                 |                      |
| Germany | Germany, Former Democratic Republic Vital Registration - Deaths 1983 ICD9 as it appears in World Health Organization (WHO). WHO Mortality Database Version February 2014. Geneva, Switzerland: World Health Organization (WHO), 2014.                                                                 | 1983                 |                      |
| Germany | Germany, Former Federal Republic Vital Registration - Deaths 1983 ICD9 as it appears in World Health Organization (WHO). WHO Mortality Database Version February 2014. Geneva, Switzerland: World Health Organization (WHO), 2014.                                                                    | 1983                 |                      |
| Germany | Germany, Former Democratic Republic Vital Registration - Deaths 1984 ICD9 as it appears in World Health Organization (WHO). WHO Mortality Database Version February 2014. Geneva, Switzerland: World Health Organization (WHO), 2014.                                                                 | 1984                 |                      |
| Germany | Germany, Former Federal Republic Vital Registration - Deaths 1984 ICD9 as it appears in World Health Organization (WHO). WHO Mortality Database Version February 2014. Geneva, Switzerland: World Health Organization (WHO), 2014.                                                                    | 1984                 |                      |



**Web Table 32 - Comprehensive citation list**

| Country | Citation                                                                                                                                                                                                                                                      | Year*            | New for GBD 2013 (*) |
|---------|---------------------------------------------------------------------------------------------------------------------------------------------------------------------------------------------------------------------------------------------------------------|------------------|----------------------|
| Germany | Germany, Former Democratic Republic Vital Registration - Deaths 1985 ICD9 as it appears in World Health Organization (WHO). WHO Mortality Database Version February 2014. Geneva, Switzerland: World Health Organization (WHO), 2014.                         | 1985             |                      |
| Germany | Germany, Former Federal Republic Vital Registration - Deaths 1985 ICD9 as it appears in World Health Organization (WHO). WHO Mortality Database Version February 2014. Geneva, Switzerland: World Health Organization (WHO), 2014.                            | 1985             |                      |
| Germany | Germany, Former Democratic Republic Vital Registration - Deaths 1986 ICD9 as it appears in World Health Organization (WHO). WHO Mortality Database Version February 2014. Geneva, Switzerland: World Health Organization (WHO), 2014.                         | 1986             |                      |
| Germany | Germany, Former Federal Republic Vital Registration - Deaths 1986 ICD9 as it appears in World Health Organization (WHO). WHO Mortality Database Version February 2014. Geneva, Switzerland: World Health Organization (WHO), 2014.                            | 1986             |                      |
| Germany | Germany, Former Democratic Republic Vital Registration - Deaths 1987 ICD9 as it appears in World Health Organization (WHO). WHO Mortality Database Version February 2014. Geneva, Switzerland: World Health Organization (WHO), 2014.                         | 1987             |                      |
| Germany | Germany, Former Federal Republic Vital Registration - Deaths 1987 ICD9 as it appears in World Health Organization (WHO). WHO Mortality Database Version February 2014. Geneva, Switzerland: World Health Organization (WHO), 2014.                            | 1987             |                      |
| Germany | Bölke E, Flehmig B. New epidemiological patterns of hepatitis A and B infections in Germany. Zentralbl Hyg Umweltmed. 1995; 196(6): 511-4.                                                                                                                    | 1987-1988        |                      |
| Germany | Germany, Former Democratic Republic Vital Registration - Deaths 1988 ICD9 as it appears in World Health Organization (WHO). WHO Mortality Database Version February 2014. Geneva, Switzerland: World Health Organization (WHO), 2014.                         | 1988             |                      |
| Germany | Germany, Former Federal Republic Vital Registration - Deaths 1988 ICD9 as it appears in World Health Organization (WHO). WHO Mortality Database Version February 2014. Geneva, Switzerland: World Health Organization (WHO), 2014.                            | 1988             |                      |
| Germany | Modell B, Darlison M, Birgens H, Cario H, Faustino P, Giordano PC, Gulbis B, Hopmeier P, Lena-Russo D, Romao L, Theodorsson E. Epidemiology of haemoglobin disorders in Europe: an overview. Scand J Clin Lab Invest. 2007; 67(1): 39-69.                     | 1988, 2006       |                      |
| Germany | Centre for Health Informatics and Multiprofessional Education, University College London. Modell's Haemoglobinopathologist's Almanac. London, United Kingdom: Centre for Health Informatics and Multiprofessional Education, University College London, 2008. | 1988, 2003, 2006 |                      |
| Germany | Germany, Former Democratic Republic Vital Registration - Deaths 1989 ICD9 as it appears in World Health Organization (WHO). WHO Mortality Database Version February 2014. Geneva, Switzerland: World Health Organization (WHO), 2014.                         | 1989             |                      |
| Germany | Germany, Former Federal Republic Vital Registration - Deaths 1989 ICD9 as it appears in World Health Organization (WHO). WHO Mortality Database Version February 2014. Geneva, Switzerland: World Health Organization (WHO), 2014.                            | 1989             |                      |
| Germany | Köster D, Hofmann F, Berthold H. Hepatitis A immunity in food-handling occupations. Eur J Clin Microbiol Infect Dis. 1990; 9(4): 304-5.                                                                                                                       | 1989             |                      |
| Germany | Germany Vital Registration - Deaths 1990 ICD9 as it appears in World Health Organization (WHO). WHO Mortality Database Version February 2014. Geneva, Switzerland: World Health Organization (WHO), 2014.                                                     | 1990             |                      |

**Web Table 32 - Comprehensive citation list**

| Country | Citation                                                                                                                                                                                                                                                                                                                                                                                                                                                                                                                                                                                                                                                                                                              | Year*                                       | New for GBD 2013 (*) |
|---------|-----------------------------------------------------------------------------------------------------------------------------------------------------------------------------------------------------------------------------------------------------------------------------------------------------------------------------------------------------------------------------------------------------------------------------------------------------------------------------------------------------------------------------------------------------------------------------------------------------------------------------------------------------------------------------------------------------------------------|---------------------------------------------|----------------------|
| Germany | Meller I, Fichter M, Schröppel H, Beck-Eichinger M. Mental and somatic health and need for care in octo- and nonagenarians. An epidemiological community study. Eur Arch Psychiatry Clin Neurosci. 1993; 242(5): 286-92.                                                                                                                                                                                                                                                                                                                                                                                                                                                                                              | 1990                                        |                      |
| Germany | Hofmann F, Wehrle G, Berthold H, Köster D. Hepatitis A as an occupational hazard. Vaccine. 1992; 10 (Suppl 1): S82-S84.                                                                                                                                                                                                                                                                                                                                                                                                                                                                                                                                                                                               | 1990                                        |                      |
| Germany | Petry W, Heintges T, Hensel F, Erhardt A, Wenning M, Niederau C, Häussinger D. [Hepatocellular carcinoma in Germany. Epidemiology, etiology, clinical aspects and prognosis in 100 consecutive patients of a university clinic]. Z Gastroenterol. 1997; 35(12): 1059-67.                                                                                                                                                                                                                                                                                                                                                                                                                                              | 1990-1995                                   |                      |
| Germany | Fichter MM, Schröppel H, Meller I. Incidence of dementia in a Munich community sample of the oldest old. Eur Arch Psychiatry Clin Neurosci. 1996; 246(6): 320-8.                                                                                                                                                                                                                                                                                                                                                                                                                                                                                                                                                      | 1990-1991                                   |                      |
| Germany | Centre for Research on the Epidemiology of Disasters (CRED). EM-DAT: The OFDA/CRED International Disaster Database. Brussels, Belgium: Catholic University of Leuven.                                                                                                                                                                                                                                                                                                                                                                                                                                                                                                                                                 | 1990, 1992-1995, 1998-1999, 2001-2011, 2013 |                      |
| Germany | Germany Vital Registration - Deaths 1991 ICD9 as it appears in World Health Organization (WHO). WHO Mortality Database Version February 2014. Geneva, Switzerland: World Health Organization (WHO), 2014.                                                                                                                                                                                                                                                                                                                                                                                                                                                                                                             | 1991                                        |                      |
| Germany | Bienzle U, Bock H, Meister W, Clemens R, Kruppenbacher J. Anti-HAV seroprevalence in German travellers and hepatitis A vaccination in immune subjects. Lancet. 1993.                                                                                                                                                                                                                                                                                                                                                                                                                                                                                                                                                  | 1991                                        |                      |
| Germany | Wernicke TF, Reischies FM. Prevalence of dementia in old age: clinical diagnoses in subjects aged 95 years and older. Neurology. 1994; 44(2): 250-3.                                                                                                                                                                                                                                                                                                                                                                                                                                                                                                                                                                  | 1991-1992                                   |                      |
| Germany | Germany Vital Registration - Deaths 1992 ICD9 as it appears in World Health Organization (WHO). WHO Mortality Database Version February 2014. Geneva, Switzerland: World Health Organization (WHO), 2014.                                                                                                                                                                                                                                                                                                                                                                                                                                                                                                             | 1992                                        |                      |
| Germany | Trichopoulos D, Bamia C, Lagiou P, Fedirko V, Trepo E, Jenab M, Pischon T, Nöthlings U, Overved K, Tjønneland A, Outzen M, Clavel-Chapelon F, Kaaks R, Lukanova A, Boeing H, Aleksandrova K, Benetou V, Zylis D, Palli D, Pala V, Panico S, Tumino R, Sacerdote C, Bueno-De-Mesquita HB, Van Kranen HJ, Peeters PHM, Lund E, Quirós JR, González CA, Sanchez Perez M-J, Navarro C, Dorronsoro M, Barricarte A, Lindkvist B, Regnér S, Werner M, Hallmans G, Khaw K-T, Wareham N, Key T, Romieu I, Chuang S-C, Murphy N, Boffetta P, Trichopoulou A, Riboli E. Hepatocellular carcinoma risk factors and disease burden in a European cohort: a nested case-control study. J Natl Cancer Inst. 2011; 103(22): 1686-95. | 1992-2006                                   | *                    |
| Germany | Germany Vital Registration - Deaths 1993 ICD9 as it appears in World Health Organization (WHO). WHO Mortality Database Version February 2014. Geneva, Switzerland: World Health Organization (WHO), 2014.                                                                                                                                                                                                                                                                                                                                                                                                                                                                                                             | 1993                                        |                      |
| Germany | Abb J. [Prevalence of hepatitis A virus antibodies in hospital personnel]. Gesundheitswesen. 1994; 56(7): 377-9.                                                                                                                                                                                                                                                                                                                                                                                                                                                                                                                                                                                                      | 1993                                        |                      |
| Germany | Kubicka S, Rudolph KL, Hanke M, Tietze MK, Tillmann HL, Trautwein C, Manns M. Hepatocellular carcinoma in Germany: a retrospective epidemiological study from a low-endemic area. Liver. 2000; 20(4): 312-8.                                                                                                                                                                                                                                                                                                                                                                                                                                                                                                          | 1993-1997                                   |                      |
| Germany | Germany Vital Registration - Deaths 1994 ICD9 as it appears in World Health Organization (WHO). WHO Mortality Database Version February 2014. Geneva, Switzerland: World Health Organization (WHO), 2014.                                                                                                                                                                                                                                                                                                                                                                                                                                                                                                             | 1994                                        |                      |

**Web Table 32 - Comprehensive citation list**

| Country | Citation                                                                                                                                                                                                                                                                          | Year*     | New for GBD 2013 (*) |
|---------|-----------------------------------------------------------------------------------------------------------------------------------------------------------------------------------------------------------------------------------------------------------------------------------|-----------|----------------------|
| Germany | Hellerbrand C, Hartmann A, Richter G, Knöll A, Wiest R, Schölmerich J, Lock G. Hepatocellular carcinoma in southern Germany: epidemiological and clinicopathological characteristics and risk factors. <i>Dig Dis.</i> 2001; 19(4): 345-51.                                       | 1994-2000 |                      |
| Germany | Kirchner G, Kirovski G, Hebestreit A, Schölmerich J, Schlitt HJ, Stoeltzing O, Hellerbrand C. Epidemiology and survival of patients with hepatocellular carcinoma in Southern Germany. <i>Int J Clin Exp Med.</i> 2010; 3(2): 169-79.                                             | 1994-2008 |                      |
| Germany | Germany Vital Registration - Deaths 1995 ICD9 as it appears in World Health Organization (WHO). WHO Mortality Database Version February 2014. Geneva, Switzerland: World Health Organization (WHO), 2014.                                                                         | 1995      |                      |
| Germany | Germany Vital Registration - Deaths 1996 ICD9 as it appears in World Health Organization (WHO). WHO Mortality Database Version February 2014. Geneva, Switzerland: World Health Organization (WHO), 2014.                                                                         | 1996      |                      |
| Germany | Rudi J, Töppe H, Marx N, Zuna I, Theilmann L, Stremmel W, Raedsch R. Risk of infection with <i>Helicobacter pylori</i> and hepatitis A virus in different groups of hospital workers. <i>Am J Gastroenterol.</i> 1997; 92(2): 258-62.                                             | 1996      |                      |
| Germany | Germany Vital Registration - Deaths 1997 ICD9 as it appears in World Health Organization (WHO). WHO Mortality Database Version February 2014. Geneva, Switzerland: World Health Organization (WHO), 2014.                                                                         | 1997      |                      |
| Germany | Riedel-Heller SG, Busse A, Aurich C, Matschinger H, Angermeyer MC. Incidence of dementia according to DSM-III-R and ICD-10: results of the Leipzig Longitudinal Study of the Aged (LEILA75+), Part 2. <i>Br J Psychiatry.</i> 2001; 255-60.                                       | 1997-1999 |                      |
| Germany | Riedel-Heller SG, Busse A, Aurich C, Matschinger H, Angermeyer MC. Prevalence of dementia according to DSM-III-R and ICD-10: results of the Leipzig Longitudinal Study of the Aged (LEILA75+) Part 1. <i>Br J Psychiatry.</i> 2001; 250-4.                                        | 1997-1998 |                      |
| Germany | Rabe C, Pilz T, Klostermann C, Berna M, Schild HH, Sauerbruch T, Caselmann WH. Clinical characteristics and outcome of a cohort of 101 patients with hepatocellular carcinoma. <i>World J Gastroenterol.</i> 2001; 7(2): 208-15.                                                  | 1997-1999 |                      |
| Germany | Bommer J. Prevalence and socio-economic aspects of chronic kidney disease. <i>Nephrol Dial Transplant.</i> 2002; 17(Suppl 11): 8-12.                                                                                                                                              | 1997-2000 |                      |
| Germany | Germany Vital Registration - Deaths 1998 ICD10 as it appears in World Health Organization (WHO). WHO Mortality Database Version February 2014. Geneva, Switzerland: World Health Organization (WHO), 2014.                                                                        | 1998      |                      |
| Germany | Thierfelder W, Hellenbrand W, Meisel H, Schreier E, Dortschy R. Prevalence of markers for hepatitis A, B and C in the German population. Results of the German National Health Interview and Examination Survey 1998. <i>Eur J Epidemiol.</i> 2001; 17(5): 429-35.                | 1998      |                      |
| Germany | Ongey M, Brenner H, Thefeld W, Rothenbacher D. <i>Helicobacter pylori</i> and hepatitis A virus infections and the cardiovascular risk profile in patients with diabetes mellitus: results of a population-based study. <i>Eur J Cardiovasc Prev Rehabil.</i> 2004; 11(6): 471-6. | 1998      |                      |
| Germany | Guhne U, Matschinger H, Angermeyer MC, Riedel-Heller SG. Incident dementia cases and mortality. Results of the Leipzig Longitudinal Study of the Aged (LEILA75+). <i>Dement Geriatr Cogn Disord.</i> 2006; 22(3): 185-93.                                                         | 1998-1999 |                      |

**Web Table 32 - Comprehensive citation list**

| Country | Citation                                                                                                                                                                                                                                                                                                                                                                                 | Year*                | New for GBD 2013 (*) |
|---------|------------------------------------------------------------------------------------------------------------------------------------------------------------------------------------------------------------------------------------------------------------------------------------------------------------------------------------------------------------------------------------------|----------------------|----------------------|
| Germany | op den Winkel M, Nagel D, Sappl J, op den Winkel P, Lamerz R, Zech CJ, Straub G, Nickel T, Rentsch M, Stieber P, Göke B, Kolligs FT. Prognosis of patients with hepatocellular carcinoma. Validation and ranking of established staging-systems in a large western HCC-cohort. PLoS One. 2012; 7(10): e45066.                                                                            | 1998-2009            | *                    |
| Germany | Germany Vital Registration - Deaths 1999 ICD10 as it appears in World Health Organization (WHO). WHO Mortality Database Version February 2014. Geneva, Switzerland: World Health Organization (WHO), 2014.                                                                                                                                                                               | 1999                 |                      |
| Germany | Jilg W, Hottenträger B, Weinberger K, Schlottmann K, Frick E, Holstege A, Schölmerich J, Palitzsch KD. Prevalence of markers of hepatitis B in the adult German population. J Med Virol. 2001; 63(2): 96-102.                                                                                                                                                                            | 1999                 |                      |
| Germany | Hafner S, Timmer A, Herfarth H, Rogler G, Schölmerich J, Schäffler A, Ehrenstein B, Jilg W, Ott C, Strauch UG, Obermeier F. The role of domestic hygiene in inflammatory bowel diseases: hepatitis A and worm infestations. Eur J Gastroenterol Hepatol. 2008; 20(6): 561-6.                                                                                                             | 1999-2003            |                      |
| Germany | Germany Vital Registration - Deaths 2000 ICD10 as it appears in World Health Organization (WHO). WHO Mortality Database Version February 2014. Geneva, Switzerland: World Health Organization (WHO), 2014.                                                                                                                                                                               | 2000                 |                      |
| Germany | Curado MP, Edwards B, Shin HR, Storm H, Ferlay J, Heanue M and Boyle P, eds (2007). Cancer Incidence in Five Continents, Vol. IX Periodic Data (electronic version). Lyon, IARC. <a href="http://ci5.iarc.fr">http://ci5.iarc.fr</a>                                                                                                                                                     | 2000                 |                      |
| Germany | World Health Organization (WHO). Yellow Fever Reported Cases, WHO Vaccine-Preventable Diseases: Monitoring System. Geneva, Switzerland: World Health Organization (WHO).                                                                                                                                                                                                                 | 2000-2004, 2006-2008 |                      |
| Germany | Germany Vital Registration - Deaths 2001 ICD10 as it appears in World Health Organization (WHO). WHO Mortality Database Version February 2014. Geneva, Switzerland: World Health Organization (WHO), 2014.                                                                                                                                                                               | 2001                 |                      |
| Germany | EUVAC-NET. EUVAC-NET Measles Surveillance Report 2001. Stockholm, Sweden: European Centre for Disease Prevention and Control, 2003.                                                                                                                                                                                                                                                      | 2001                 |                      |
| Germany | Nübling M, Hofmann F, Tiller FW. Occupational risk for hepatitis A and hepatitis E among health care professionals? Infection. 2002; 30(2): 94-7.                                                                                                                                                                                                                                        | 2001                 |                      |
| Germany | Germany Vital Registration - Deaths 2002 ICD10 as it appears in World Health Organization (WHO). WHO Mortality Database Version February 2014. Geneva, Switzerland: World Health Organization (WHO), 2014.                                                                                                                                                                               | 2002                 |                      |
| Germany | Germany Vital Registration - Deaths 2003 ICD10 as it appears in World Health Organization (WHO). WHO Mortality Database Version February 2014. Geneva, Switzerland: World Health Organization (WHO), 2014.                                                                                                                                                                               | 2003                 |                      |
| Germany | Rheinland-Pfalz Cancer Registry (Germany). Germany - Rheinland-Pfalz Cancer Incidence and Mortality 2003. Mainz, Germany: Rheinland-Pfalz Cancer Registry (Germany), 2006.                                                                                                                                                                                                               | 2003                 |                      |
| Germany | Hamburg Cancer Registry (Germany). Germany - Hamburg Cancer Registry Incidence Tables. Hamburg, Germany: Hamburg Cancer Registry (Germany).                                                                                                                                                                                                                                              | 2003-2007            |                      |
| Germany | Common Cancer Registry of the states of Berlin, Brandenburg, Mecklenburg-Western Pomerania, Saxony-Anhalt and the Free States of Saxony and Thuringia. Germany Common Cancer Registry Incidence 2003-2004. Berlin, Germany: Common Cancer Registry of the states of Berlin, Brandenburg, Mecklenburg-Western Pomerania, Saxony-Anhalt and the Free States of Saxony and Thuringia, 2008. | 2003-2004            |                      |

**Web Table 32 - Comprehensive citation list**

| Country | Citation                                                                                                                                                                                                                                                                                                                                                                                               | Year*     | New for GBD 2013 (*) |
|---------|--------------------------------------------------------------------------------------------------------------------------------------------------------------------------------------------------------------------------------------------------------------------------------------------------------------------------------------------------------------------------------------------------------|-----------|----------------------|
| Germany | Germany Vital Registration - Deaths 2004 ICD10 as it appears in World Health Organization (WHO). WHO Mortality Database Version February 2014. Geneva, Switzerland: World Health Organization (WHO), 2014.                                                                                                                                                                                             | 2004      |                      |
| Germany | Thalassaemia International Federation, World Health Organization (WHO). Management of Haemoglobin Disorders: Report of a Joint WHO-TIF Meeting, Nicosia, Cyprus, 16-18 November 2007. Geneva, Switzerland: World Health Organization (WHO), 2008.                                                                                                                                                      | 2004      |                      |
| Germany | Saarland Cancer Registry (Germany). Germany - Saarland 40 Years of the Epidemiological Cancer Registry 2007. Saarbrücken, Germany: Saarland Ministry of Justice, 2007.                                                                                                                                                                                                                                 | 2004      |                      |
| Germany | Bavaria Population-Based Cancer Registry. Germany - Bayern Population-Based Cancer Registry Report 2004. Erlangen, Germany: Bavaria Population-Based Cancer Registry, 2007.                                                                                                                                                                                                                            | 2004      |                      |
| Germany | EUVAC-NET. EUVAC-NET Measles Surveillance Report 2004. Stockholm, Sweden: European Centre for Disease Prevention and Control, 2005.                                                                                                                                                                                                                                                                    | 2004      |                      |
| Germany | Germany Vital Registration - Deaths 2005 ICD10 as it appears in World Health Organization (WHO). WHO Mortality Database Version February 2014. Geneva, Switzerland: World Health Organization (WHO), 2014.                                                                                                                                                                                             | 2005      |                      |
| Germany | Forman D, Bray F, Brewster DH, Gombe Mbalawa C, Kohler B, Piñeros M, Steliarova-Foucher E, Swaminathan R and Ferlay J, eds (2013). Cancer Incidence in Five Continents, Vol. X Summary Database (electronic version). Lyon, IARC. <a href="http://ci5.iarc.fr">http://ci5.iarc.fr</a>                                                                                                                  | 2005      |                      |
| Germany | EUVAC-NET. EUVAC-NET Measles Surveillance Report 2005. Stockholm, Sweden: European Centre for Disease Prevention and Control, 2006.                                                                                                                                                                                                                                                                    | 2005      |                      |
| Germany | Germany Vital Registration - Deaths 2006 ICD10 as it appears in World Health Organization (WHO). WHO Mortality Database Version February 2014. Geneva, Switzerland: World Health Organization (WHO), 2014.                                                                                                                                                                                             | 2006      |                      |
| Germany | Common Cancer Registry of the states of Berlin, Brandenburg, Mecklenburg-Western Pomerania, Saxony-Anhalt and the Free States of Saxony and Thuringia. Germany Common Cancer Registry Incidence and Mortality 2005-2006. Berlin, Germany: Common Cancer Registry of the states of Berlin, Brandenburg, Mecklenburg-Western Pomerania, Saxony-Anhalt and the Free States of Saxony and Thuringia, 2009. | 2006      |                      |
| Germany | EUVAC-NET. EUVAC-NET Measles Surveillance Report 2006. Stockholm, Sweden: European Centre for Disease Prevention and Control, 2007.                                                                                                                                                                                                                                                                    | 2006      |                      |
| Germany | Germany Vital Registration - Deaths 2007 ICD10 as it appears in World Health Organization (WHO). WHO Mortality Database Version February 2014. Geneva, Switzerland: World Health Organization (WHO), 2014.                                                                                                                                                                                             | 2007      |                      |
| Germany | Ertle J, Dechêne A, Sowa J-P, Penndorf V, Herzer K, Kaiser G, Schlaak JF, Gerken G, Syn W-K, Canbay A. Non-alcoholic fatty liver disease progresses to hepatocellular carcinoma in the absence of apparent cirrhosis. <i>Int J Cancer</i> . 2011; 128(10): 2436-43.                                                                                                                                    | 2007-2008 | *                    |
| Germany | Common Cancer Registry of the states of Berlin, Brandenburg, Mecklenburg-Western Pomerania, Saxony-Anhalt and the Free States of Saxony and Thuringia. Germany Common Cancer Registry Incidence and Mortality 2007-2008. Berlin, Germany: Common Cancer Registry of the states of Berlin, Brandenburg, Mecklenburg-Western Pomerania, Saxony-Anhalt and the Free States of Saxony and Thuringia, 2012. | 2007-2008 |                      |

**Web Table 32 - Comprehensive citation list**

| Country | Citation                                                                                                                                                                                                                                                                         | Year*     | New for GBD 2013 (*) |
|---------|----------------------------------------------------------------------------------------------------------------------------------------------------------------------------------------------------------------------------------------------------------------------------------|-----------|----------------------|
| Germany | Germany Vital Registration - Deaths 2008 ICD10 as it appears in World Health Organization (WHO). WHO Mortality Database Version February 2014. Geneva, Switzerland: World Health Organization (WHO), 2014.                                                                       | 2008      |                      |
| Germany | Dickerhoff R, Genzel-Boroviczeny O, Kohne E. Haemoglobinopathies and newborn haemoglobinopathy screening in Germany. J Clin Pathol. 2009; 1(62): 34.                                                                                                                             | 2008      |                      |
| Germany | Faber MS, Wenzel JJ, Jilg W, Thamm M, Höhle M, Stark K. Hepatitis E Virus Seroprevalence among Adults, Germany. Emerg Infect Dis. 2012; 18(10): 1654-7.                                                                                                                          | 2008-2011 | *                    |
| Germany | Poethko-Müller C, Zimmermann R, Hamouda O, Faber M, Stark K, Ross RS, Thamm M. [Epidemiology of hepatitis A, B, and C among adults in Germany: results of the German Health Interview and Examination Survey for Adults (DEGS1)]. Bundesgesundheitsblatt. 2013; 56(5-6): 707-15. | 2008-2011 |                      |
| Germany | Germany Vital Registration - Deaths 2009 ICD10 as it appears in World Health Organization (WHO). WHO Mortality Database Version February 2014. Geneva, Switzerland: World Health Organization (WHO), 2014.                                                                       | 2009      |                      |
| Germany | Weatherall D. Sickle Cell and Thalassemias Prevalence Data, Personal Correspondence with David Weatherall. [Unpublished].                                                                                                                                                        | 2009      |                      |
| Germany | Federal Ministry of Health (Germany), Joint United Nations Program on HIV/AIDS (UNAIDS). Germany UNGASS Country Progress Report 2010. Geneva, Switzerland: Joint United Nations Program on HIV/AIDS (UNAIDS), 2010.                                                              | 2009      |                      |
| Germany | Germany Vital Registration - Deaths 2010 ICD10 as it appears in World Health Organization (WHO). WHO Mortality Database Version February 2014. Geneva, Switzerland: World Health Organization (WHO), 2014.                                                                       | 2010      |                      |
| Germany | EUVAC-NET. EUVAC-NET Measles Surveillance Report 2010. Stockholm, Sweden: European Centre for Disease Prevention and Control, 2011.                                                                                                                                              | 2010      |                      |
| Germany | Germany Vital Registration - Deaths 2011 ICD10 as it appears in World Health Organization (WHO). WHO Mortality Database Version February 2014. Geneva, Switzerland: World Health Organization (WHO), 2014.                                                                       | 2011      | *                    |
| Germany | Federal Statistical Office (Germany). Germany Deaths by Sex and Single Year Age Groups 1970-2012. Wiesbaden, Germany: Federal Statistical Office (Germany), 2014.                                                                                                                | 2012      | *                    |
| Germany | Germany Vital Registration - Deaths 2012 ICD10 as it appears in World Health Organization (WHO). WHO Mortality Database Version February 2014. Geneva, Switzerland: World Health Organization (WHO), 2014.                                                                       | 2012      | *                    |
| Ghana   | Edington GM, Lehmann H. Expression of the sickle-cell gene in Africa. Br Med J. 1955; 4925(1): 1308-11.                                                                                                                                                                          | 1953      |                      |
| Ghana   | Allison AC, Charles LJ, McGregor IA. Erythrocyte Glucose-6-Phosphate Dehydrogenase Deficiency in West Africa. Nature. 1961; 190(4782): 1198-9.                                                                                                                                   | 1959-1961 |                      |
| Ghana   | Lewis RA, Hathorn M. Correlation of S hemoglobin with glucose-6-phosphate dehydrogenase deficiency and its significance. Blood. 1965; 26: 176-80.                                                                                                                                | 1963-1965 |                      |
| Ghana   | Peace Research Institute Oslo (PRIO). Battle Deaths Dataset Version 3, 2009. Oslo, Norway: Peace Research Institute Oslo (PRIO), 2009.                                                                                                                                           | 1966-1983 |                      |
| Ghana   | Central Bureau of Statistics (Ghana). Ghana Population and Housing Census 1970.                                                                                                                                                                                                  | 1970      |                      |
| Ghana   | Acquaye CT, Oldham JH. Variants of haemoglobin and glucose-6-phosphate dehydrogenase-I. distribution in Southern Ghana. Ghana Med J. 1973; 12(4): 412-8.                                                                                                                         | 1971-1973 |                      |



**Web Table 32 - Comprehensive citation list**

| Country | Citation                                                                                                                                                                                                                                                      | Year*                                                          | New for GBD 2013 (*) |
|---------|---------------------------------------------------------------------------------------------------------------------------------------------------------------------------------------------------------------------------------------------------------------|----------------------------------------------------------------|----------------------|
| Ghana   | Agadzi VK, Boatın BA, Appawu MA, Mingle JA, Addy PA. Yellow fever in Ghana, 1977-80. Bull World Health Organ. 1984; 62(4): 577-83.                                                                                                                            | 1977-1980                                                      |                      |
| Ghana   | Danso KA, Martey JO, Wall LL, Elkins TE. The epidemiology of genitourinary fistulae in Kumasi, Ghana, 1977-1992. Int Urogynecol J Pelvic Floor Dysfunct. 1996; 7(3): 117-20.                                                                                  | 1977-1992                                                      |                      |
| Ghana   | Central Bureau of Statistics (Ghana), International Statistical Institute. Ghana World Fertility Survey 1979-1980. International Statistical Institute.                                                                                                       | 1979-1980                                                      |                      |
| Ghana   | WHO Department of Communicable Disease Surveillance and Response. WHO Report on Global Surveillance of Epidemic-prone Infectious Diseases 2000.                                                                                                               | 1980-1983, 1993-1994, 1997                                     |                      |
| Ghana   | Institute for Health Metrics and Evaluation (IHME), Joint United Nations Program on HIV/AIDS (UNAIDS). Institute for Health Metrics and Evaluation HIV Mortality Estimates Based on the UNAIDS Spectrum Model Framework.                                      | 1980-2013                                                      | *                    |
| Ghana   | United Nations Children's Fund (UNICEF), World Health Organization (WHO). WHO and UNICEF Reported Disease Incidence Time Series - Pertussis. Geneva, Switzerland: World Health Organization (WHO).                                                            | 1980-1996, 1998-2003, 2006-2008, 2010, 2013                    |                      |
| Ghana   | United Nations Children's Fund (UNICEF), World Health Organization (WHO). WHO and UNICEF Reported Disease Incidence Time Series - Measles. Geneva, Switzerland: World Health Organization (WHO).                                                              | 1980-2013                                                      |                      |
| Ghana   | Addy PA, Minami K, Agadzi VK. Recent yellow fever epidemics in Ghana (1969-1983). East Afr Med J. 1986; 63(6): 422-34.                                                                                                                                        | 1983                                                           |                      |
| Ghana   | Tomori O. Yellow fever in Africa: public health impact and prospects for control in the 21st century. Biomedica. 2002; 22(2): 178-210.                                                                                                                        | 1983                                                           |                      |
| Ghana   | Centre for Research on the Epidemiology of Disasters (CRED). EM-DAT: The OFDA/CRED International Disaster Database. Brussels, Belgium: Catholic University of Leuven.                                                                                         | 1985, 1989, 1991, 1995, 1999, 2001-2002, 2007, 2009-2011, 2013 |                      |
| Ghana   | Ghana Statistical Service, Macro Systems, Inc.; Institute for Resource Development. Ghana Demographic and Health Survey 1988. Columbia, United States: Macro Systems, Inc.                                                                                    | 1988                                                           |                      |
| Ghana   | World Health Organization (WHO). Yellow Fever Reported Cases, WHO Vaccine-Preventable Diseases: Monitoring System. Geneva, Switzerland: World Health Organization (WHO).                                                                                      | 1988-1992, 1995-1996, 1998-2009                                |                      |
| Ghana   | Ngom P, Akweongo P, Adongo P, Bawah AA, Binka F. Maternal mortality among the Kassena-Nankana of northern Ghana. Stud Fam Plann. 1999; 30(2): 142-7.                                                                                                          | 1989                                                           |                      |
| Ghana   | Dollimore N, Cutts F, Binka FN, Ross DA, Morris SS, Smith PG. Measles incidence, case fatality, and delayed mortality in children with or without vitamin A supplementation in rural Ghana. Am J Epidemiol. 1997; 146(8): 646-54.                             | 1989-1991                                                      |                      |
| Ghana   | Ghana VAST Study Team. Vitamin A supplementation in northern Ghana: effects on clinic attendances, hospital admissions, and child mortality. Lancet. 1993; 342(8862): 7-12.                                                                                   | 1990                                                           |                      |
| Ghana   | Commey JO, Dekyem P. Measles in southern Ghana: 1985-1993. West Afr J Med. 1994; 13(4): 223-6.                                                                                                                                                                | 1990                                                           |                      |
| Ghana   | Weatherall D. Sickle Cell and Thalassemias Prevalence Data, Personal Correspondence with David Weatherall. [Unpublished].                                                                                                                                     | 1990-2009                                                      |                      |
| Ghana   | Centre for Health Informatics and Multiprofessional Education, University College London. Modell's Haemoglobinopathologist's Almanac. London, United Kingdom: Centre for Health Informatics and Multiprofessional Education, University College London, 2008. | 1990-2003                                                      |                      |
| Ghana   | Department of Peace and Conflict Research, Uppsala University. UCDP Nonstate Conflict Database Version 2.5, 2013. Uppsala, Sweden: Department of Peace and Conflict Research, Uppsala University, 2013.                                                       | 1991-2008                                                      | *                    |
| Ghana   | Acquaye JK, Mingle JA. Hepatitis B viral markers in Ghanaian pregnant women. West Afr J Med. 1994; 13(3): 134-7.                                                                                                                                              | 1992                                                           |                      |

**Web Table 32 - Comprehensive citation list**

| Country | Citation                                                                                                                                                                                                                                                                                     | Year*     | New for GBD 2013 (*) |
|---------|----------------------------------------------------------------------------------------------------------------------------------------------------------------------------------------------------------------------------------------------------------------------------------------------|-----------|----------------------|
| Ghana   | Martinson FE, Marfo VY, Degraaf J. Hepatitis E virus seroprevalence in children living in rural Ghana. <i>West Afr J Med</i> . 1999; 18(2): 76-9.                                                                                                                                            | 1993      |                      |
| Ghana   | INDEPTH. Ghana - Navrongo Health and Demographic Surveillance System. [Unpublished].                                                                                                                                                                                                         | 1993-2010 |                      |
| Ghana   | Ghana Statistical Service, Macro International, Inc. Ghana Demographic and Health Survey 1993-1994. Calverton, United States: Macro International, Inc.                                                                                                                                      | 1993-1994 |                      |
| Ghana   | Martinson FE, Weigle KA, Mushahwar IK, Weber DJ, Royce R, Lemon SM. Seroepidemiological survey of hepatitis B and C virus infections in Ghanaian children. <i>J Med Virol</i> . 1996; 48(3): 278-83.                                                                                         | 1993-1995 |                      |
| Ghana   | Binka FN, Kubaje A, Adjuik M, Williams LA, Lengeler C, Maude GH, Armah GE, Kajihara B, Adiamah JH, Smith PG. Impact of permethrin impregnated bednets on child mortality in Kassena-Nankana district, Ghana: a randomized controlled trial. <i>Trop Med Int Health</i> . 1996; 1(2): 147-54. | 1994      |                      |
| Ghana   | Bawah AA, Binka FN. How many years of life could be saved if malaria were eliminated from a hyperendemic area of northern Ghana? <i>Am J Trop Med Hyg</i> . 2007; 77(6 Suppl): 145-52.                                                                                                       | 1995      |                      |
| Ghana   | Thalassaemia International Federation, World Health Organization (WHO). Management of Haemoglobin Disorders: Report of a Joint WHO-TIF Meeting, Nicosia, Cyprus, 16-18 November 2007. Geneva, Switzerland: World Health Organization (WHO), 2008.                                            | 1995-2006 |                      |
| Ghana   | Ohene-Frempong K, Oduro J, Tetteh H, Nkrumah F. Screening newborns for sickle cell disease in Ghana. <i>Pediatrics</i> . 2008; 121(Supplement): S120-S121.                                                                                                                                   | 1995-2005 | *                    |
| Ghana   | Mutebi J-P, Barrett ADT. The epidemiology of yellow fever in Africa. <i>Microbes Infect</i> . 2002; 4(14): 1459-68.                                                                                                                                                                          | 1996      |                      |
| Ghana   | Baird JK, Owusu Agyei S, Utz GC, Koram K, Barcus MJ, Jones TR, Fryauff DJ, Binka FN, Hoffman SL, Nkrumah FN. Seasonal malaria attack rates in infants and young children in northern Ghana. <i>Am J Trop Med Hyg</i> . 2002; 66(3): 280-6.                                                   | 1996-1997 |                      |
| Ghana   | Bosu WK, Odoom S, Deiter P, Essel-Ahun M. Epidemiology of measles in the central region of Ghana: a five-year case review in three district hospitals. <i>East Afr Med J</i> . 2003; 80(6): 312-7.                                                                                           | 1996-2000 |                      |
| Ghana   | World Health Organization (WHO). The Global Elimination of Congenital Syphilis: Rationale and Strategy for Action. Geneva, Switzerland: World Health Organization (WHO), 2007.                                                                                                               | 1997-2003 |                      |
| Ghana   | Baiden F, Hodgson A, Adjuik M, Adongo P, Ayaga B, Binka F. Trend and causes of neonatal mortality in the Kassena-Nankana district of northern Ghana, 1995-2002. <i>Trop Med Int Health</i> . 2006; 11(4): 532-9.                                                                             | 1998      |                      |
| Ghana   | Burchard GD, Browne EN, Sievertsen J, May J, Meyer CG. Spleen size determined by ultrasound in patients with sickle cell trait, HbAC trait and glucose-6-phosphate-dehydrogenase deficiency in a malaria hyperendemic area (Ashanti Region, Ghana). <i>Acta Trop</i> . 2001; 80(2): 103-9.   | 1998      |                      |
| Ghana   | Ghana Statistical Service. Ghana Living Standards Survey 1998-1999.                                                                                                                                                                                                                          | 1998-1999 |                      |
| Ghana   | Ghana Statistical Service, Macro International, Inc. Ghana Demographic and Health Survey 1998-1999. Calverton, United States: Macro International, Inc.                                                                                                                                      | 1998-1999 |                      |
| Ghana   | World Health Organization Regional Office for Africa. HIV/AIDS Epidemiological Surveillance Update for the WHO African Region. World Health Organization Regional Office for Africa, 2003.                                                                                                   | 1999-2002 |                      |
| Ghana   | Ghana Statistical Service, Minnesota Population Center. Ghana Population and Housing Census 2000 from the Integrated Public Use Microdata Series, International. [Machine-readable database]. Minneapolis: University of Minnesota.                                                          | 2000      |                      |



**Web Table 32 - Comprehensive citation list**

| Country | Citation                                                                                                                                                                                                                                                                                                                                                    | Year*                       | New for GBD 2013 (*) |
|---------|-------------------------------------------------------------------------------------------------------------------------------------------------------------------------------------------------------------------------------------------------------------------------------------------------------------------------------------------------------------|-----------------------------|----------------------|
| Ghana   | Debpuur C, Welaga P, Wak G, Hodgson A. Self-reported health and functional limitations among older people in the Kassena-Nankana District, Ghana. <i>Glob Health Action</i> . 2010; 3(Supp. 2): 54-63.                                                                                                                                                      | 2000                        | *                    |
| Ghana   | Births and Deaths Registry (Ghana). Ghana - Accra Births and Deaths Registry - Deaths 2000-2007. [Unpublished].                                                                                                                                                                                                                                             | 2000-2007                   |                      |
| Ghana   | Apea-Kubi KA, Yamaguchi S, Sakyi B, Ofori-Adjei D. HTLV-1 and other viral sexually transmitted infections in antenatal and gynaecological patients in Ghana. <i>West Afr J Med</i> . 2006; 25(1): 17-21.                                                                                                                                                    | 2000-2001                   |                      |
| Ghana   | Lassey AT, Damale NK, Bekoe V, Klufio CA. Hepatitis C virus seroprevalence among mothers delivering at the Korle-Bu Teaching Hospital, Ghana. <i>East Afr Med J</i> . 2004; 81(4): 198-201.                                                                                                                                                                 | 2001                        |                      |
| Ghana   | World Health Organization (WHO). Retrospective Measles Data on Supplementary Immunization Activities. Geneva, Switzerland: World Health Organization (WHO).                                                                                                                                                                                                 | 2001-2002, 2006, 2010, 2013 |                      |
| Ghana   | Danquah I, Ziniel P, Eggelte TA, Ehrhardt S, Mockenhaupt FP. Influence of haemoglobins S and C on predominantly asymptomatic Plasmodium infections in northern Ghana. <i>Trans R Soc Trop Med Hyg</i> . 2010; 104(11): 713-9.                                                                                                                               | 2002                        | *                    |
| Ghana   | Joint United Nations Program on HIV/AIDS (UNAIDS), United Nations Children's Fund (UNICEF), World Health Organization (WHO). Ghana Epidemiological Fact Sheet on HIV/AIDS and STIs 2004.                                                                                                                                                                    | 2002-2003                   |                      |
| Ghana   | Ghana Statistical Service, Macro International, Inc. Ghana Demographic and Health Survey 2003. Calverton, United States: Macro International, Inc.                                                                                                                                                                                                          | 2003                        |                      |
| Ghana   | Edmond KM, Quigley MA, Zandoh C, Danso S, Hurt C, Owusu Agyei S, Kirkwood BR. Aetiology of stillbirths and neonatal deaths in rural Ghana: implications for health programming in developing countries. <i>Paediatr Perinat Epidemiol</i> . 2008; 22(5): 430-7.                                                                                             | 2003                        |                      |
| Ghana   | Mills S, Williams JE, Wak G, Hodgson A. Maternal mortality decline in the Kassena-Nankana district of northern Ghana. <i>Matern Child Health J</i> . 2008; 12(5): 577-85.                                                                                                                                                                                   | 2003                        |                      |
| Ghana   | Edmond KM, Kirkwood BR, Amenga-Etego S, Owusu-Agyei S, Hurt LS. Effect of early infant feeding practices on infection-specific neonatal mortality: an investigation of the causal links with observational data from rural Ghana. <i>Am J Clin Nutr</i> . 2007; 86(4): 1126-31.                                                                             | 2003                        |                      |
| Ghana   | Adjei AA, Kudzi W, Armah H, Adiku T, Amoah AG, Ansah J. Prevalence of antibodies to syphilis among blood donors in Accra, Ghana. <i>Jpn J Infect Dis</i> . 2003; 56(4): 165-7.                                                                                                                                                                              | 2003                        |                      |
| Ghana   | Damale NKR, Lassey AT, Bekoe V. Hepatitis B virus seroprevalence among parturients in Accra, Ghana. <i>Int J Gynaecol Obstet</i> . 2005; 90(3): 240-1.                                                                                                                                                                                                      | 2003                        |                      |
| Ghana   | Kreuels B, Kreuzberg C, Kobbe R, Ayim-Akonor M, Apiah-Thompson P, Thompson B, Ehmen C, Adjei S, Langefeld I, Adjei O, May J. Differing effects of HbS and HbC traits on uncomplicated falciparum malaria, anemia, and child growth. <i>Blood</i> . 2010; 115(22): 4551-8.                                                                                   | 2003-2005                   | *                    |
| Ghana   | Hurt L, ten Asbroek A, Amenga-Etego S, Zandoh C, Danso S, Edmond K, Hurt C, Tawiah C, Hill Z, Fenty J, Owusu-Agyei S, Campbell OM, Kirkwood BR. Effect of vitamin A supplementation on cause-specific mortality in women of reproductive age in Ghana: a secondary analysis from the ObaapaVitA trial. <i>Bull World Health Organ</i> . 2013; 91(1): 19-27. | 2004                        |                      |
| Ghana   | Ghana Statistical Service. Ghana Living Standards Measurement Survey 2005-2006. Accra, Ghana Statistical Service.                                                                                                                                                                                                                                           | 2005-2006                   |                      |
| Ghana   | Ministry of Health (MOH) (Ghana). Ghana Statistical Service and United Nations Children's Fund (UNICEF). Ghana Multiple Indicator Cluster Survey 2006. New York, United States: United Nations Children's Fund (UNICEF).                                                                                                                                    | 2006                        |                      |

**Web Table 32 - Comprehensive citation list**

| Country | Citation                                                                                                                                                                                                                                                                                                                                                                     | Year*                                                                                                           | New for GBD 2013 (*) |
|---------|------------------------------------------------------------------------------------------------------------------------------------------------------------------------------------------------------------------------------------------------------------------------------------------------------------------------------------------------------------------------------|-----------------------------------------------------------------------------------------------------------------|----------------------|
| Ghana   | Welaga P, Moyer CA, Aborigo R, Adongo P, Williams J, Hodgson A, Oduro A, Engmann C. Why are babies dying in the first month after birth? A 7-year study of neonatal mortality in northern Ghana. PLoS One. 2013; 8(3): e58924.                                                                                                                                               | 2006                                                                                                            |                      |
| Ghana   | World Health Organization (WHO). Yellow fever in Africa and South America, 2006. Wkly Epidemiol Rec. 2008; 83(8): 60-76.                                                                                                                                                                                                                                                     | 2006                                                                                                            |                      |
| Ghana   | World Health Organization (WHO). Global Status Report on Road Safety 2009. Geneva, Switzerland: World Health Organization (WHO), 2009.                                                                                                                                                                                                                                       | 2007                                                                                                            |                      |
| Ghana   | Manortney S, Carey A, Ansong D, Harvey R, Good B, Boaheng J, Crookston B, Dickerson T. Verbal autopsy: an analysis of the common causes of childhood death in the Barekese sub-district of Ghana. Journal of Public Health in Africa. 2011; 2(e18): 73-7.                                                                                                                    | 2007                                                                                                            |                      |
| Ghana   | Ghana Health Service, Ghana Statistical Service, Macro International, Inc. Ghana Special Demographic and Health Survey 2007-2008. Calverton, United States: Macro International, Inc, 2010.                                                                                                                                                                                  | 2007-2008                                                                                                       |                      |
| Ghana   | Ghana Statistical Service, Macro International, Inc, Ministry of Health (Ghana). Ghana Demographic and Health Survey 2008. Calverton, United States: Macro International, Inc.                                                                                                                                                                                               | 2008                                                                                                            |                      |
| Ghana   | Adjei AA, Tettey Y, Aviyase JT, Adu-Gyamfi C, Obed S, Mingle JAA, Ayeh-Kumi PF, Dickerson T. Hepatitis E virus infection is highly prevalent among pregnant women in Accra, Ghana. Virol J. 2009; 108.                                                                                                                                                                       | 2008                                                                                                            |                      |
| Ghana   | United Nations Office on Drugs and Crime (UNODC). United Nations Office on Drugs and Crime Global Study on Homicides 2011. Vienna, Austria: United Nations Office on Drugs and Crime (UNODC), 2011.                                                                                                                                                                          | 2009                                                                                                            |                      |
| Ghana   | Ghana AIDS Commission, Joint United Nations Program on HIV/AIDS (UNAIDS). Ghana's Progress Report on the United Nations General Assembly Special Session (UNGASS) Declaration of Commitment on HIV and AIDS 2010. Geneva, Switzerland: Joint United Nations Program on HIV/AIDS (UNAIDS), 2010.                                                                              | 2009                                                                                                            |                      |
| Ghana   | Centers for Disease Control and Prevention (CDC), Ghana Statistical Service, Government of Japan, Ministry of Health (Ghana), Navrongo Health Research Centre, USAID, United Nations Children's Fund (UNICEF), United Nations Population Fund (UNFPA). Ghana Multiple Indicator Cluster Survey 2011. New York, United States: United Nations Children's Fund (UNICEF), 2013. | 2011                                                                                                            | *                    |
| Greece  | Greece Vital Registration Death Data 1951 as it appears in United Nations Statistics Division (UNSD). United Nations Demographic Yearbook. New York City, United States: United Nations Statistics Division (UNSD).                                                                                                                                                          | 1951                                                                                                            |                      |
| Greece  | Greece Vital Registration Death Data 1952 as it appears in United Nations Statistics Division (UNSD). United Nations Demographic Yearbook. New York City, United States: United Nations Statistics Division (UNSD).                                                                                                                                                          | 1952                                                                                                            |                      |
| Greece  | Choremis C, Fessas P, Kattamis C, Stamatoyannopoulos G, Zannos-Mariolea L, Karaklis A, Belios G. Three inherited red-cell abnormalities in a district of Greece. Thalassaemia, sickling, and glucose-6-phosphate-dehydrogenase deficiency. Lancet. 1963; 1(7287): 907-9.                                                                                                     | 1952-1962                                                                                                       |                      |
| Greece  | Greece Vital Registration Death Data 1953 as it appears in United Nations Statistics Division (UNSD). United Nations Demographic Yearbook. New York City, United States: United Nations Statistics Division (UNSD).                                                                                                                                                          | 1953                                                                                                            |                      |
| Greece  | Centre for Research on the Epidemiology of Disasters (CRED). EM-DAT: The OFDA/CRED International Disaster Database. Brussels, Belgium: Catholic University of Leuven.                                                                                                                                                                                                        | 1953-1954, 1956, 1961, 1965-1968, 1977-1981, 1983, 1985-1987, 1990, 1993-1995, 1997-2002, 2006-2008, 2010, 2012 |                      |

**Web Table 32 - Comprehensive citation list**

| Country | Citation                                                                                                                                                                                                                      | Year*                | New for GBD 2013 (*) |
|---------|-------------------------------------------------------------------------------------------------------------------------------------------------------------------------------------------------------------------------------|----------------------|----------------------|
| Greece  | Greece Vital Registration Death Data 1954 as it appears in United Nations Statistics Division (UNSD). United Nations Demographic Yearbook. New York City, United States: United Nations Statistics Division (UNSD).           | 1954                 |                      |
| Greece  | Greece Vital Registration Death Data 1955 as it appears in United Nations Statistics Division (UNSD). United Nations Demographic Yearbook. New York City, United States: United Nations Statistics Division (UNSD).           | 1955                 |                      |
| Greece  | Greece Vital Registration - Deaths 1956 ICD7 as it appears in World Health Organization (WHO). WHO Mortality Database Version February 2014. Geneva, Switzerland: World Health Organization (WHO), 2014.                      | 1956                 |                      |
| Greece  | Greece Vital Registration - Deaths 1957 ICD7 as it appears in World Health Organization (WHO). WHO Mortality Database Version February 2014. Geneva, Switzerland: World Health Organization (WHO), 2014.                      | 1957                 |                      |
| Greece  | Greece Vital Registration - Deaths 1958 ICD7 as it appears in World Health Organization (WHO). WHO Mortality Database Version February 2014. Geneva, Switzerland: World Health Organization (WHO), 2014.                      | 1958                 |                      |
| Greece  | Ladis V, Chouliaras G, Berdousi H, Kanavakis E, Kattamis C. Longitudinal study of survival and causes of death in patients with thalassemia major in Greece. Ann N Y Acad Sci. 2005; 1054: 445-50.                            | 1958-1996,1998-2004  |                      |
| Greece  | Greece Vital Registration - Deaths 1959 ICD7 as it appears in World Health Organization (WHO). WHO Mortality Database Version February 2014. Geneva, Switzerland: World Health Organization (WHO), 2014.                      | 1959                 |                      |
| Greece  | Greece Vital Registration - Deaths 1960 ICD7 as it appears in World Health Organization (WHO). WHO Mortality Database Version February 2014. Geneva, Switzerland: World Health Organization (WHO), 2014.                      | 1960                 |                      |
| Greece  | Greece Vital Registration - Deaths 1961 ICD7 as it appears in World Health Organization (WHO). WHO Mortality Database Version February 2014. Geneva, Switzerland: World Health Organization (WHO), 2014.                      | 1961                 |                      |
| Greece  | Allison AC, Askonas BA, Barnicot NA, Blumberg BS, Krimbas C. Deficiency of erythrocyte glucose-6-phosphate dehydrogenase in Greek populations. Ann Hum Genet. 1963; 26(3): 237-42.                                            | 1961-1963            |                      |
| Greece  | Stamatoyannopoulos G, Fessas P. Thalassaemia, glucose-6-phosphate dehydrogenase deficiency, sickling, and malarial endemicity in Greece: a study of five areas. Br Med J. 1964; 1(5387): 875-9.                               | 1961-1962, 1964-1966 |                      |
| Greece  | Greece Vital Registration - Deaths 1962 ICD7 as it appears in World Health Organization (WHO). WHO Mortality Database Version February 2014. Geneva, Switzerland: World Health Organization (WHO), 2014.                      | 1962                 |                      |
| Greece  | Fraser GR, Grunwald P, Stamatoyannopoulos G. Glucose-6-phosphate dehydrogenase (G6PD) deficiency, abnormal haemoglobins, and thalassaemia in Yugoslavia. J Med Genet. 1966; 3(1): 35-41.                                      | 1962                 |                      |
| Greece  | Valaes T, Karaklis A, Stravarakakis D, Bavela-Stravarakakis K, Perakis A, Doxiadis SA. Incidence and mechanism of neonatal jaundice related to glucose-6-phosphate dehydrogenase deficiency. Pediatr Res. 1969; 3(5): 448-58. | 1962-1966            |                      |
| Greece  | Greece Vital Registration - Deaths 1963 ICD7 as it appears in World Health Organization (WHO). WHO Mortality Database Version February 2014. Geneva, Switzerland: World Health Organization (WHO), 2014.                      | 1963                 |                      |

**Web Table 32 - Comprehensive citation list**

| Country | Citation                                                                                                                                                                                                                                                  | Year*     | New for GBD 2013 (*) |
|---------|-----------------------------------------------------------------------------------------------------------------------------------------------------------------------------------------------------------------------------------------------------------|-----------|----------------------|
| Greece  | Kirimlidis S, Politis E, Drossos C, Scaloumbakas N, Papaioannou M. Glucose-6-phosphate-dehydrogenase deficiency in Greece. Study by using a modification of Beutler and Fair-banks spot test. <i>Helv Paediatr Acta</i> . 1965; 20(5): 490.               | 1963-1965 |                      |
| Greece  | Greece Vital Registration - Deaths 1964 ICD7 as it appears in World Health Organization (WHO). WHO Mortality Database Version February 2014. Geneva, Switzerland: World Health Organization (WHO), 2014.                                                  | 1964      |                      |
| Greece  | Greece Vital Registration - Deaths 1965 ICD7 as it appears in World Health Organization (WHO). WHO Mortality Database Version February 2014. Geneva, Switzerland: World Health Organization (WHO), 2014.                                                  | 1965      |                      |
| Greece  | Greece Vital Registration - Deaths 1966 ICD7 as it appears in World Health Organization (WHO). WHO Mortality Database Version February 2014. Geneva, Switzerland: World Health Organization (WHO), 2014.                                                  | 1966      |                      |
| Greece  | Greece Vital Registration - Deaths 1967 ICD7 as it appears in World Health Organization (WHO). WHO Mortality Database Version February 2014. Geneva, Switzerland: World Health Organization (WHO), 2014.                                                  | 1967      |                      |
| Greece  | Greece Vital Registration - Deaths 1968 ICD8 as it appears in World Health Organization (WHO). WHO Mortality Database Version February 2014. Geneva, Switzerland: World Health Organization (WHO), 2014.                                                  | 1968      |                      |
| Greece  | Greece Vital Registration - Deaths 1969 ICD8 as it appears in World Health Organization (WHO). WHO Mortality Database Version February 2014. Geneva, Switzerland: World Health Organization (WHO), 2014.                                                  | 1969      |                      |
| Greece  | Greece Vital Registration - Deaths 1970 ICD8 as it appears in World Health Organization (WHO). WHO Mortality Database Version February 2014. Geneva, Switzerland: World Health Organization (WHO), 2014.                                                  | 1970      |                      |
| Greece  | Greece Vital Registration - Deaths 1971 ICD8 as it appears in World Health Organization (WHO). WHO Mortality Database Version February 2014. Geneva, Switzerland: World Health Organization (WHO), 2014.                                                  | 1971      |                      |
| Greece  | Greece Vital Registration - Deaths 1972 ICD8 as it appears in World Health Organization (WHO). WHO Mortality Database Version February 2014. Geneva, Switzerland: World Health Organization (WHO), 2014.                                                  | 1972      |                      |
| Greece  | Greece Vital Registration - Deaths 1973 ICD8 as it appears in World Health Organization (WHO). WHO Mortality Database Version February 2014. Geneva, Switzerland: World Health Organization (WHO), 2014.                                                  | 1973      |                      |
| Greece  | Greece Vital Registration - Deaths 1974 ICD8 as it appears in World Health Organization (WHO). WHO Mortality Database Version February 2014. Geneva, Switzerland: World Health Organization (WHO), 2014.                                                  | 1974      |                      |
| Greece  | Vasilopoulou VA, Karanika M, Theodoridou K, Katsioulis AT, Theodoridou MN, Hadjichristodoulou CS. Prognostic factors related to sequelae in childhood bacterial meningitis: data from a Greek meningitis registry. <i>BMC Infect Dis</i> . 2011; 11: 214. | 1974-2005 |                      |
| Greece  | Greece Vital Registration - Deaths 1975 ICD8 as it appears in World Health Organization (WHO). WHO Mortality Database Version February 2014. Geneva, Switzerland: World Health Organization (WHO), 2014.                                                  | 1975      |                      |

**Web Table 32 - Comprehensive citation list**

| Country | Citation                                                                                                                                                                                                                 | Year*                           | New for GBD 2013 (*) |
|---------|--------------------------------------------------------------------------------------------------------------------------------------------------------------------------------------------------------------------------|---------------------------------|----------------------|
| Greece  | Greece Vital Registration - Deaths 1976 ICD8 as it appears in World Health Organization (WHO). WHO Mortality Database Version February 2014. Geneva, Switzerland: World Health Organization (WHO), 2014.                 | 1976                            |                      |
| Greece  | Greece Vital Registration - Deaths 1977 ICD8 as it appears in World Health Organization (WHO). WHO Mortality Database Version February 2014. Geneva, Switzerland: World Health Organization (WHO), 2014.                 | 1977                            |                      |
| Greece  | Missiou-Tsagaraki S. Screening for glucose-6-phosphate dehydrogenase deficiency as a preventive measure: prevalence among 1,286,000 Greek newborn infants. J Pediatr. 1991; 119(2): 293-9.                               | 1977-1989                       |                      |
| Greece  | Greece Vital Registration - Deaths 1978 ICD8 as it appears in World Health Organization (WHO). WHO Mortality Database Version February 2014. Geneva, Switzerland: World Health Organization (WHO), 2014.                 | 1978                            |                      |
| Greece  | Papaevangelou GJ, Gourgouli-Fotiou KP, Vissoulis HG. Epidemiologic characteristics of hepatitis A virus infections in Greece. Am J Epidemiol. 1980; 112(4): 482-6.                                                       | 1978                            |                      |
| Greece  | Greece Vital Registration - Deaths 1979 ICD9 as it appears in World Health Organization (WHO). WHO Mortality Database Version February 2014. Geneva, Switzerland: World Health Organization (WHO), 2014.                 | 1979                            |                      |
| Greece  | Greece Vital Registration - Deaths 1980 ICD9 as it appears in World Health Organization (WHO). WHO Mortality Database Version February 2014. Geneva, Switzerland: World Health Organization (WHO), 2014.                 | 1980                            |                      |
| Greece  | Kremastinou J, Kalapothaki V, Trichopoulos D. The changing epidemiologic pattern of hepatitis A infection in urban Greece. Am J Epidemiol. 1984; 120(5): 703-6.                                                          | 1980-1982                       |                      |
| Greece  | Institute for Health Metrics and Evaluation (IHME), Joint United Nations Program on HIV/AIDS (UNAIDS). Institute for Health Metrics and Evaluation HIV Mortality Estimates Based on the UNAIDS Spectrum Model Framework. | 1980-2013                       | *                    |
| Greece  | United Nations Children's Fund (UNICEF), World Health Organization (WHO). WHO and UNICEF Reported Disease Incidence Time Series - Pertussis. Geneva, Switzerland: World Health Organization (WHO).                       | 1980-2002, 2004-2005, 2007-2013 |                      |
| Greece  | United Nations Children's Fund (UNICEF), World Health Organization (WHO). WHO and UNICEF Reported Disease Incidence Time Series - Measles. Geneva, Switzerland: World Health Organization (WHO).                         | 1980-2002, 2004-2005, 2007-2013 |                      |
| Greece  | Greece Vital Registration - Deaths 1981 ICD9 as it appears in World Health Organization (WHO). WHO Mortality Database Version February 2014. Geneva, Switzerland: World Health Organization (WHO), 2014.                 | 1981                            |                      |
| Greece  | Greece Vital Registration - Deaths 1982 ICD9 as it appears in World Health Organization (WHO). WHO Mortality Database Version February 2014. Geneva, Switzerland: World Health Organization (WHO), 2014.                 | 1982                            |                      |
| Greece  | Greece Vital Registration - Deaths 1983 ICD9 as it appears in World Health Organization (WHO). WHO Mortality Database Version February 2014. Geneva, Switzerland: World Health Organization (WHO), 2014.                 | 1983                            |                      |
| Greece  | Greece Vital Registration - Deaths 1984 ICD9 as it appears in World Health Organization (WHO). WHO Mortality Database Version February 2014. Geneva, Switzerland: World Health Organization (WHO), 2014.                 | 1984                            |                      |

**Web Table 32 - Comprehensive citation list**

| Country | Citation                                                                                                                                                                                                                                                      | Year*            | New for GBD 2013 (*) |
|---------|---------------------------------------------------------------------------------------------------------------------------------------------------------------------------------------------------------------------------------------------------------------|------------------|----------------------|
| Greece  | Greece Vital Registration - Deaths 1985 ICD9 as it appears in World Health Organization (WHO). WHO Mortality Database Version February 2014. Geneva, Switzerland: World Health Organization (WHO), 2014.                                                      | 1985             |                      |
| Greece  | Greece Vital Registration - Deaths 1986 ICD9 as it appears in World Health Organization (WHO). WHO Mortality Database Version February 2014. Geneva, Switzerland: World Health Organization (WHO), 2014.                                                      | 1986             |                      |
| Greece  | Alexopoulos CG, Vaslamatzis M, Hatzidimitriou G. Prevalence of hepatitis B virus marker positivity and evolution of hepatitis B virus profile, during chemotherapy, in patients with solid tumours. Br J Cancer. 1999; 81(1): 69-74.                          | 1986-1995        |                      |
| Greece  | Greece Vital Registration - Deaths 1987 ICD9 as it appears in World Health Organization (WHO). WHO Mortality Database Version February 2014. Geneva, Switzerland: World Health Organization (WHO), 2014.                                                      | 1987             |                      |
| Greece  | Greece Vital Registration - Deaths 1988 ICD9 as it appears in World Health Organization (WHO). WHO Mortality Database Version February 2014. Geneva, Switzerland: World Health Organization (WHO), 2014.                                                      | 1988             |                      |
| Greece  | Modell B, Darlison M, Birgens H, Cario H, Faustino P, Giordano PC, Gulbis B, Hopmeier P, Lena-Russo D, Romao L, Theodorsson E. Epidemiology of haemoglobin disorders in Europe: an overview. Scand J Clin Lab Invest. 2007; 67(1): 39-69.                     | 1988, 2006       |                      |
| Greece  | Centre for Health Informatics and Multiprofessional Education, University College London. Modell's Haemoglobinopathologist's Almanac. London, United Kingdom: Centre for Health Informatics and Multiprofessional Education, University College London, 2008. | 1988, 2003, 2006 |                      |
| Greece  | Greece Vital Registration - Deaths 1989 ICD9 as it appears in World Health Organization (WHO). WHO Mortality Database Version February 2014. Geneva, Switzerland: World Health Organization (WHO), 2014.                                                      | 1989             |                      |
| Greece  | Greece Vital Registration - Deaths 1990 ICD9 as it appears in World Health Organization (WHO). WHO Mortality Database Version February 2014. Geneva, Switzerland: World Health Organization (WHO), 2014.                                                      | 1990             |                      |
| Greece  | Institute for Health Metrics and Evaluation. Institute for Health Metrics and Evaluation Cancer Registry Database. [Unpublished].                                                                                                                             | 1990             |                      |
| Greece  | Greek Cancer Registry, Ministry of Health and Welfare (Greece). Greece Cancer Morbidity Report 1990-1991. Ministry of Health and Welfare (Greece), 1997.                                                                                                      | 1990             |                      |
| Greece  | Greece Vital Registration - Deaths 1991 ICD9 as it appears in World Health Organization (WHO). WHO Mortality Database Version February 2014. Geneva, Switzerland: World Health Organization (WHO), 2014.                                                      | 1991             |                      |
| Greece  | National Statistical Service of Greece, Minnesota Population Center. Greece Population and Housing Census 1991 from the Integrated Public Use Microdata Series, International. [Machine-readable database]. Minneapolis: University of Minnesota.             | 1991             |                      |
| Greece  | Kyriakis KP, Foudoulaki LE, Papoulia EI, Sofroniadou KE. Seroprevalence of hepatitis B surface antigen (HBsAg) among first-time and sporadic blood donors in Greece: 1991-1996. Transfus Med. 2000; 10(3): 175-80.                                            | 1991-1996        |                      |
| Greece  | Greece Vital Registration - Deaths 1992 ICD9 as it appears in World Health Organization (WHO). WHO Mortality Database Version February 2014. Geneva, Switzerland: World Health Organization (WHO), 2014.                                                      | 1992             |                      |



**Web Table 32 - Comprehensive citation list**

| Country | Citation                                                                                                                                                                                                                                                                                                                                                                                                                                                                                                                                                                                                                                                                                                                     | Year*                | New for GBD 2013 (*) |
|---------|------------------------------------------------------------------------------------------------------------------------------------------------------------------------------------------------------------------------------------------------------------------------------------------------------------------------------------------------------------------------------------------------------------------------------------------------------------------------------------------------------------------------------------------------------------------------------------------------------------------------------------------------------------------------------------------------------------------------------|----------------------|----------------------|
| Greece  | Zacharakis G, Kotsiou S, Papoutselis M, Vafiadis N, Tzara F, Pouliou E, Maltezos E, Koskinas J, Papoutselis K. Changes in the epidemiology of hepatitis B virus infection following the implementation of immunisation programmes in northeastern Greece. <i>Euro Surveill.</i> 2009; 14(32).                                                                                                                                                                                                                                                                                                                                                                                                                                | 1992-1994, 1998-2006 |                      |
| Greece  | Trichopoulos D, Bamia C, Lagiou P, Fedirko V, Trepo E, Jenab M, Pischon T, Nöthlings U, Overved K, Tjønneland A, Outzen M, Clavel-Chapelon F, Kaaks R, Lukanova A, Boeing H, Aleksandrova K, Benetou V, Zylis D, Palli D, Pala V, Panico S, Tumino R, Sacerdote C, Bueno-De-Mesquita HB, Van Kranen HJ, Peeters PHM, Lund E, Quirós JR, González CA, Sanchez Perez M-J, Navarro C, Dorronsoro M, Barricarte A, Lindkvist B, Regnér S, Werner M, Hallmans G, Khaw K-T, Wareham N, Key T, Romieu I, Chuang S-C, Murphy N, Boffetta P, Trichopoulou A, Riboli E. Hepatocellular carcinoma risk factors and disease burden in a European cohort: a nested case-control study. <i>J Natl Cancer Inst.</i> 2011; 103(22): 1686-95. | 1992-2006            | *                    |
| Greece  | Greece Vital Registration - Deaths 1993 ICD9 as it appears in World Health Organization (WHO). WHO Mortality Database Version February 2014. Geneva, Switzerland: World Health Organization (WHO), 2014.                                                                                                                                                                                                                                                                                                                                                                                                                                                                                                                     | 1993                 |                      |
| Greece  | Psichogiou M, Vaindirli E, Tzala E, Voudiclaris S, Boletis J, Vosnidis G, Moutafis S, Skoutelis G, Hadjiconstantinou V, Troonen H, Hatzakis A. Hepatitis E virus (HEV) infection in haemodialysis patients. The Multicentre Haemodialysis Cohort Study on Viral Hepatitis. <i>Nephrol Dial Transplant.</i> 1996; 11(6): 1093-5.                                                                                                                                                                                                                                                                                                                                                                                              | 1993-1995            | *                    |
| Greece  | Lionis C, Koulentaki M, Biziagos E, Kouroumalis E. Current prevalence of hepatitis A, B and C in a well-defined area in rural Crete, Greece. <i>J Viral Hepat.</i> 1997; 4(1): 55-61.                                                                                                                                                                                                                                                                                                                                                                                                                                                                                                                                        | 1993-1995            |                      |
| Greece  | Lionis C, Frangoulis E, Koulentakis M, Biziagos E, Kouroumalis E. Prevalence of hepatitis A, B, and C markers in school children of a rural area of Crete, Greece. <i>Eur J Epidemiol.</i> 1997; 13(4): 417-20.                                                                                                                                                                                                                                                                                                                                                                                                                                                                                                              | 1993-1995            |                      |
| Greece  | Dalekos GN, Zervou E, Merkouropoulos MH, Tsianos EV. Prevalence of hepatitis B and C viruses infection in chronic alcoholics with or without liver disease in Ioannina, Greece: low incidence of HCV infection. <i>Eur J Epidemiol.</i> 1996; 12(1): 21-5.                                                                                                                                                                                                                                                                                                                                                                                                                                                                   | 1993-1995            |                      |
| Greece  | Greece Vital Registration - Deaths 1994 ICD9 as it appears in World Health Organization (WHO). WHO Mortality Database Version February 2014. Geneva, Switzerland: World Health Organization (WHO), 2014.                                                                                                                                                                                                                                                                                                                                                                                                                                                                                                                     | 1994                 |                      |
| Greece  | Dalekos GN, Zervou E, Karabini F, Tsianos EV. Prevalence of viral markers among refugees from southern Albania: increased incidence of infection with hepatitis A, B and D viruses. <i>Eur J Gastroenterol Hepatol.</i> 1995; 7(6): 553-8.                                                                                                                                                                                                                                                                                                                                                                                                                                                                                   | 1994                 |                      |
| Greece  | Dalekos GN, Zervou E, Elisaf M, Germanos N, Galanakis E, Bourantas K, Siamopoulos KC, Tsianos EV. Antibodies to hepatitis E virus among several populations in Greece: increased prevalence in an hemodialysis unit. <i>Transfusion.</i> 1998; 38(6): 589-95.                                                                                                                                                                                                                                                                                                                                                                                                                                                                | 1994-1996            | *                    |
| Greece  | Greece Vital Registration - Deaths 1995 ICD9 as it appears in World Health Organization (WHO). WHO Mortality Database Version February 2014. Geneva, Switzerland: World Health Organization (WHO), 2014.                                                                                                                                                                                                                                                                                                                                                                                                                                                                                                                     | 1995                 |                      |
| Greece  | Greece Vital Registration - Deaths 1996 ICD9 as it appears in World Health Organization (WHO). WHO Mortality Database Version February 2014. Geneva, Switzerland: World Health Organization (WHO), 2014.                                                                                                                                                                                                                                                                                                                                                                                                                                                                                                                     | 1996                 |                      |

**Web Table 32 - Comprehensive citation list**

| Country | Citation                                                                                                                                                                                                                                                                                  | Year*                      | New for GBD 2013 (*) |
|---------|-------------------------------------------------------------------------------------------------------------------------------------------------------------------------------------------------------------------------------------------------------------------------------------------|----------------------------|----------------------|
| Greece  | Raptis I, Koskinas J, Emmanouil T, Hadziyannis S. Changing relative roles of hepatitis B and C viruses in the aetiology of hepatocellular carcinoma in Greece. Epidemiological and clinical observations. <i>J Viral Hepat.</i> 2003; 10(6): 450-4.                                       | 1996-2000                  |                      |
| Greece  | Greece Vital Registration - Deaths 1997 ICD9 as it appears in World Health Organization (WHO). WHO Mortality Database Version February 2014. Geneva, Switzerland: World Health Organization (WHO), 2014.                                                                                  | 1997                       |                      |
| Greece  | Goritsas C, Plerou I, Agaliotis S, Spinthaki R, Mimidis K, Velissaris D, Lazarou N, Labropoulou-Karatzas C. HCV infection in the general population of a Greek island: prevalence and risk factors. <i>Hepatogastroenterology.</i> 2000; 47(33): 782-5.                                   | 1997                       |                      |
| Greece  | Gogos CA, Fouka KP, Nikiforidis G, Avgeridis K, Sakellaropoulos G, Bassaris H, Maniatis A, Skoutelis A. Prevalence of hepatitis B and C virus infection in the general population and selected groups in South-Western Greece. <i>Eur J Epidemiol.</i> 2003; 18(6): 551-7.                | 1997-1998                  |                      |
| Greece  | Stamouli M, Gizaris V, Totos G, Papaevangelou G. Decline of hepatitis B infection in Greece. <i>Eur J Epidemiol.</i> 1999; 15(5): 447-9.                                                                                                                                                  | 1997-1998                  |                      |
| Greece  | Greece Vital Registration - Deaths 1998 ICD9 as it appears in World Health Organization (WHO). WHO Mortality Database Version February 2014. Geneva, Switzerland: World Health Organization (WHO), 2014.                                                                                  | 1998                       |                      |
| Greece  | Mazokopakis EE, Ganotakis ES, Lionis CD. The Greek armed forces are vulnerable to HAV infection. <i>Mil Med.</i> 2003; 168(5): v.                                                                                                                                                         | 1998                       |                      |
| Greece  | Mazokopakis E, Vlachonikolis J, Philalithis A, Lionis C. Seroprevalence of hepatitis A, B and C markers in Greek warship personnel. <i>Eur J Epidemiol.</i> 2000; 16(11): 1069-72.                                                                                                        | 1998                       |                      |
| Greece  | Menounos P, Zervas C, Garinis G, Doukas C, Kolokithopoulos D, Tegos C, Patrinos GP. Molecular heterogeneity of the glucose-6-phosphate dehydrogenase deficiency in the Hellenic population. <i>Hum Hered.</i> 2000; 50(4): 237-41.                                                        | 1998-2000                  |                      |
| Greece  | Greece Vital Registration - Deaths 1999 ICD9 as it appears in World Health Organization (WHO). WHO Mortality Database Version February 2014. Geneva, Switzerland: World Health Organization (WHO), 2014.                                                                                  | 1999                       |                      |
| Greece  | Dounias G, Kypraiou E, Rachiotis G, Tsovili E, Kostopoulos S. Prevalence of hepatitis B virus markers in municipal solid waste workers in Keratsini (Greece). <i>Occup Med (Lond).</i> 2005; 55(1): 60-3.                                                                                 | 1999-2001                  |                      |
| Greece  | Greece Vital Registration - Deaths 2000 ICD9 as it appears in World Health Organization (WHO). WHO Mortality Database Version February 2014. Geneva, Switzerland: World Health Organization (WHO), 2014.                                                                                  | 2000                       |                      |
| Greece  | World Health Organization (WHO). Yellow Fever Reported Cases, WHO Vaccine-Preventable Diseases: Monitoring System. Geneva, Switzerland: World Health Organization (WHO).                                                                                                                  | 2000-2002, 2005, 2008-2009 |                      |
| Greece  | Papavasileiou K, Papavasileiou E, Tzanakaki G, Voyatzi A, Kremastinou J, Chatzipanagiotou S. Acute bacterial meningitis cases diagnosed by culture and PCR in a children's hospital throughout a 9-Year period (2000-2008) in Athens, Greece. <i>Mol Diagn Ther.</i> 2011; 15(2): 109-13. | 2000-2008                  | *                    |
| Greece  | Greece Vital Registration - Deaths 2001 ICD9 as it appears in World Health Organization (WHO). WHO Mortality Database Version February 2014. Geneva, Switzerland: World Health Organization (WHO), 2014.                                                                                  | 2001                       |                      |
| Greece  | Reclos GJ, Schulpis KH, Gavrioli S, Vlachos G. Evaluation of glucose-6-phosphate dehydrogenase activity in two different ethnic groups using a kit employing the haemoglobin normalization procedure. <i>Clin Biochem.</i> 2003; 36(5): 393-5.                                            | 2001-2003                  |                      |



**Web Table 32 - Comprehensive citation list**

| Country | Citation                                                                                                                                                                                                                                                                                                                                        | Year*     | New for GBD 2013 (*) |
|---------|-------------------------------------------------------------------------------------------------------------------------------------------------------------------------------------------------------------------------------------------------------------------------------------------------------------------------------------------------|-----------|----------------------|
| Greece  | Greece Vital Registration - Deaths 2002 ICD9 as it appears in World Health Organization (WHO). WHO Mortality Database Version February 2014. Geneva, Switzerland: World Health Organization (WHO), 2014.                                                                                                                                        | 2002      |                      |
| Greece  | Greece Vital Registration - Deaths 2003 ICD9 as it appears in World Health Organization (WHO). WHO Mortality Database Version February 2014. Geneva, Switzerland: World Health Organization (WHO), 2014.                                                                                                                                        | 2003      |                      |
| Greece  | Elefsiniotis IS, Glynou I, Brokalaki H, Magaziotou I, Pantazis KD, Fotiou A, Liosis G, Kada H, Saroglou G. Serological and virological profile of chronic HBV infected women at reproductive age in Greece. A two-year single center study. Eur J Obstet Gynecol Reprod Biol. 2007; 132(2): 200-3.                                              | 2003-2005 |                      |
| Greece  | Elefsiniotis IS, Glynou I, Pantazis KD, Fotos NV, Magaziotou I, Kada H. Prevalence of chronic HBV infection among 13,581 women at reproductive age in Greece. A prospective single center study. J Clin Virol. 2005; 32(2): 179-80.                                                                                                             | 2003-2004 |                      |
| Greece  | Greece Vital Registration - Deaths 2004 ICD9 as it appears in World Health Organization (WHO). WHO Mortality Database Version February 2014. Geneva, Switzerland: World Health Organization (WHO), 2014.                                                                                                                                        | 2004      |                      |
| Greece  | World Health Organization (WHO). Greece WHO Leishmaniasis Country Profile.                                                                                                                                                                                                                                                                      | 2004-2008 | *                    |
| Greece  | Greece Vital Registration - Deaths 2005 ICD9 as it appears in World Health Organization (WHO). WHO Mortality Database Version February 2014. Geneva, Switzerland: World Health Organization (WHO), 2014.                                                                                                                                        | 2005      |                      |
| Greece  | Greece Vital Registration - Deaths 2006 ICD9 as it appears in World Health Organization (WHO). WHO Mortality Database Version February 2014. Geneva, Switzerland: World Health Organization (WHO), 2014.                                                                                                                                        | 2006      |                      |
| Greece  | Kyrka A, Tragiannidis A, Cassimos D, Pantelaki K, Tzoufi M, Mavrokosta M, Pedeli X, Athanassiadou F, Hatzimichael A, Konstantopoulos A, Kafetzis D, Papaevangelou V. Seroepidemiology of hepatitis A among Greek children indicates that the virus is still prevalent: Implications for universal vaccination. J Med Virol. 2009; 81(4): 582-7. | 2006-2007 |                      |
| Greece  | Greece Vital Registration - Deaths 2007 ICD9 as it appears in World Health Organization (WHO). WHO Mortality Database Version February 2014. Geneva, Switzerland: World Health Organization (WHO), 2014.                                                                                                                                        | 2007      |                      |
| Greece  | Greece Vital Registration - Deaths 2008 ICD9 as it appears in World Health Organization (WHO). WHO Mortality Database Version February 2014. Geneva, Switzerland: World Health Organization (WHO), 2014.                                                                                                                                        | 2008      |                      |
| Greece  | EUVAC-NET. EUVAC-NET Pertussis Surveillance Report 2009. Stockholm, Sweden: European Centre for Disease Prevention and Control, 2010.                                                                                                                                                                                                           | 2008-2009 |                      |
| Greece  | Greece Vital Registration - Deaths 2009 ICD9 as it appears in World Health Organization (WHO). WHO Mortality Database Version February 2014. Geneva, Switzerland: World Health Organization (WHO), 2014.                                                                                                                                        | 2009      |                      |
| Greece  | Weatherall D. Sickle Cell and Thalassemias Prevalence Data, Personal Correspondence with David Weatherall. [Unpublished].                                                                                                                                                                                                                       | 2009      |                      |
| Greece  | Greece Vital Registration - Deaths 2010 ICD9 as it appears in World Health Organization (WHO). WHO Mortality Database Version February 2014. Geneva, Switzerland: World Health Organization (WHO), 2014.                                                                                                                                        | 2010      | *                    |

**Web Table 32 - Comprehensive citation list**

| Country | Citation                                                                                                                                                                                                                                                                                         | Year* | New for GBD 2013 (*) |
|---------|--------------------------------------------------------------------------------------------------------------------------------------------------------------------------------------------------------------------------------------------------------------------------------------------------|-------|----------------------|
| Greece  | European Renal Association-European Dialysis and Transplant Association (ERA-EDTA). European Renal Association-European Dialysis and Transplant Association Registry Annual Report 2010. Parma, Italy: European Renal Association-European Dialysis and Transplant Association (ERA-EDTA), 2012. | 2010  | *                    |
| Greece  | EUVAC-NET. EUVAC-NET Measles Surveillance Report 2010. Stockholm, Sweden: European Centre for Disease Prevention and Control, 2011.                                                                                                                                                              | 2010  |                      |
| Greece  | Greece Vital Registration - Deaths 2011 ICD9 as it appears in World Health Organization (WHO). WHO Mortality Database Version February 2014. Geneva, Switzerland: World Health Organization (WHO), 2014.                                                                                         | 2011  | *                    |
| Greece  | European Renal Association-European Dialysis and Transplant Association (ERA-EDTA). European Renal Association-European Dialysis and Transplant Association Registry Annual Report 2011. Parma, Italy: European Renal Association-European Dialysis and Transplant Association (ERA-EDTA), 2013. | 2011  | *                    |
| Grenada | Grenada Vital Registration Death Data 1950 as it appears in United Nations Statistics Division (UNSD). United Nations Demographic Yearbook. New York City, United States: United Nations Statistics Division (UNSD).                                                                             | 1950  |                      |
| Grenada | Grenada Vital Registration Death Data 1951 as it appears in United Nations Statistics Division (UNSD). United Nations Demographic Yearbook. New York City, United States: United Nations Statistics Division (UNSD).                                                                             | 1951  |                      |
| Grenada | Grenada Vital Registration Death Data 1952 as it appears in United Nations Statistics Division (UNSD). United Nations Demographic Yearbook. New York City, United States: United Nations Statistics Division (UNSD).                                                                             | 1952  |                      |
| Grenada | Grenada Vital Registration Death Data 1953 as it appears in United Nations Statistics Division (UNSD). United Nations Demographic Yearbook. New York City, United States: United Nations Statistics Division (UNSD).                                                                             | 1953  |                      |
| Grenada | Grenada Vital Registration Death Data 1954 as it appears in United Nations Statistics Division (UNSD). United Nations Demographic Yearbook. New York City, United States: United Nations Statistics Division (UNSD).                                                                             | 1954  |                      |
| Grenada | Grenada Vital Registration Death Data 1955 as it appears in United Nations Statistics Division (UNSD). United Nations Demographic Yearbook. New York City, United States: United Nations Statistics Division (UNSD).                                                                             | 1955  |                      |
| Grenada | Grenada Vital Registration Death Data 1956 as it appears in United Nations Statistics Division (UNSD). United Nations Demographic Yearbook. New York City, United States: United Nations Statistics Division (UNSD).                                                                             | 1956  |                      |
| Grenada | Grenada Vital Registration Death Data 1957 as it appears in United Nations Statistics Division (UNSD). United Nations Demographic Yearbook. New York City, United States: United Nations Statistics Division (UNSD).                                                                             | 1957  |                      |
| Grenada | Grenada Vital Registration Death Data 1958 as it appears in United Nations Statistics Division (UNSD). United Nations Demographic Yearbook. New York City, United States: United Nations Statistics Division (UNSD).                                                                             | 1958  |                      |
| Grenada | Grenada Vital Registration Death Data 1959 as it appears in United Nations Statistics Division (UNSD). United Nations Demographic Yearbook. New York City, United States: United Nations Statistics Division (UNSD).                                                                             | 1959  |                      |

**Web Table 32 - Comprehensive citation list**

| Country | Citation                                                                                                                                                                                                             | Year*           | New for GBD 2013 (*) |
|---------|----------------------------------------------------------------------------------------------------------------------------------------------------------------------------------------------------------------------|-----------------|----------------------|
| Grenada | Grenada Vital Registration Death Data 1960 as it appears in United Nations Statistics Division (UNSD). United Nations Demographic Yearbook. New York City, United States: United Nations Statistics Division (UNSD). | 1960            |                      |
| Grenada | Grenada Vital Registration Death Data 1961 as it appears in United Nations Statistics Division (UNSD). United Nations Demographic Yearbook. New York City, United States: United Nations Statistics Division (UNSD). | 1961            |                      |
| Grenada | Grenada Vital Registration Death Data 1962 as it appears in United Nations Statistics Division (UNSD). United Nations Demographic Yearbook. New York City, United States: United Nations Statistics Division (UNSD). | 1962            |                      |
| Grenada | Grenada Vital Registration Death Data 1963 as it appears in United Nations Statistics Division (UNSD). United Nations Demographic Yearbook. New York City, United States: United Nations Statistics Division (UNSD). | 1963            |                      |
| Grenada | Centre for Research on the Epidemiology of Disasters (CRED). EM-DAT: The OFDA/CRED International Disaster Database. Brussels, Belgium: Catholic University of Leuven.                                                | 1963, 2004-2005 |                      |
| Grenada | Grenada Vital Registration Death Data 1964 as it appears in United Nations Statistics Division (UNSD). United Nations Demographic Yearbook. New York City, United States: United Nations Statistics Division (UNSD). | 1964            |                      |
| Grenada | Grenada Vital Registration Death Data 1965 as it appears in United Nations Statistics Division (UNSD). United Nations Demographic Yearbook. New York City, United States: United Nations Statistics Division (UNSD). | 1965            |                      |
| Grenada | Grenada Vital Registration Death Data 1966 as it appears in United Nations Statistics Division (UNSD). United Nations Demographic Yearbook. New York City, United States: United Nations Statistics Division (UNSD). | 1966            |                      |
| Grenada | Grenada Vital Registration Death Data 1967 as it appears in United Nations Statistics Division (UNSD). United Nations Demographic Yearbook. New York City, United States: United Nations Statistics Division (UNSD). | 1967            |                      |
| Grenada | Grenada Vital Registration Death Data 1968 as it appears in United Nations Statistics Division (UNSD). United Nations Demographic Yearbook. New York City, United States: United Nations Statistics Division (UNSD). | 1968            |                      |
| Grenada | Grenada Vital Registration Death Data 1969 as it appears in United Nations Statistics Division (UNSD). United Nations Demographic Yearbook. New York City, United States: United Nations Statistics Division (UNSD). | 1969            |                      |
| Grenada | Grenada Vital Registration - Deaths 1974 ICD8 as it appears in World Health Organization (WHO). WHO Mortality Database Version February 2014. Geneva, Switzerland: World Health Organization (WHO), 2014.            | 1974            | *                    |
| Grenada | Grenada Vital Registration - Deaths 1975 ICD8 as it appears in World Health Organization (WHO). WHO Mortality Database Version February 2014. Geneva, Switzerland: World Health Organization (WHO), 2014.            | 1975            | *                    |
| Grenada | Grenada Vital Registration - Deaths 1976 ICD8 as it appears in World Health Organization (WHO). WHO Mortality Database Version February 2014. Geneva, Switzerland: World Health Organization (WHO), 2014.            | 1976            | *                    |

**Web Table 32 - Comprehensive citation list**

| Country | Citation                                                                                                                                                                                                                                                      | Year*      | New for GBD 2013 (*) |
|---------|---------------------------------------------------------------------------------------------------------------------------------------------------------------------------------------------------------------------------------------------------------------|------------|----------------------|
| Grenada | Grenada Vital Registration - Deaths 1977 ICD8 as it appears in World Health Organization (WHO). WHO Mortality Database Version February 2014. Geneva, Switzerland: World Health Organization (WHO), 2014.                                                     | 1977       | *                    |
| Grenada | Grenada Vital Registration - Deaths 1978 ICD8 as it appears in World Health Organization (WHO). WHO Mortality Database Version February 2014. Geneva, Switzerland: World Health Organization (WHO), 2014.                                                     | 1978       | *                    |
| Grenada | Institute for Health Metrics and Evaluation (IHME), Joint United Nations Program on HIV/AIDS (UNAIDS). Institute for Health Metrics and Evaluation HIV Mortality Estimates Based on the UNAIDS Spectrum Model Framework.                                      | 1980-2013  | *                    |
| Grenada | United Nations Children's Fund (UNICEF), World Health Organization (WHO). WHO and UNICEF Reported Disease Incidence Time Series - Pertussis. Geneva, Switzerland: World Health Organization (WHO).                                                            | 1980-2013  |                      |
| Grenada | United Nations Children's Fund (UNICEF), World Health Organization (WHO). WHO and UNICEF Reported Disease Incidence Time Series - Measles. Geneva, Switzerland: World Health Organization (WHO).                                                              | 1980-2013  |                      |
| Grenada | Grenada Vital Registration - Deaths 1984 ICD9 as it appears in World Health Organization (WHO). WHO Mortality Database Version February 2014. Geneva, Switzerland: World Health Organization (WHO), 2014.                                                     | 1984       | *                    |
| Grenada | Grenada Vital Registration - Deaths 1985 ICD9 as it appears in World Health Organization (WHO). WHO Mortality Database Version February 2014. Geneva, Switzerland: World Health Organization (WHO), 2014.                                                     | 1985       |                      |
| Grenada | Grenada Vital Registration - Deaths 1988 ICD9 as it appears in World Health Organization (WHO). WHO Mortality Database Version February 2014. Geneva, Switzerland: World Health Organization (WHO), 2014.                                                     | 1988       |                      |
| Grenada | Grenada Vital Registration - Deaths 1989 ICD9 as it appears in World Health Organization (WHO). WHO Mortality Database Version February 2014. Geneva, Switzerland: World Health Organization (WHO), 2014.                                                     | 1989       |                      |
| Grenada | Grenada Vital Registration - Deaths 1990 ICD9 as it appears in World Health Organization (WHO). WHO Mortality Database Version February 2014. Geneva, Switzerland: World Health Organization (WHO), 2014.                                                     | 1990       |                      |
| Grenada | Centre for Health Informatics and Multiprofessional Education, University College London. Modell's Haemoglobinopathologist's Almanac. London, United Kingdom: Centre for Health Informatics and Multiprofessional Education, University College London, 2008. | 1990-2003  |                      |
| Grenada | Grenada Vital Registration - Deaths 1991 ICD9 as it appears in World Health Organization (WHO). WHO Mortality Database Version February 2014. Geneva, Switzerland: World Health Organization (WHO), 2014.                                                     | 1991       |                      |
| Grenada | Measles Supplementary Immunization Activity Data as provided by the World Health Organization. [Unpublished].                                                                                                                                                 | 1991, 1996 |                      |
| Grenada | Grenada Vital Registration - Deaths 1992 ICD9 as it appears in World Health Organization (WHO). WHO Mortality Database Version February 2014. Geneva, Switzerland: World Health Organization (WHO), 2014.                                                     | 1992       |                      |
| Grenada | Grenada Vital Registration - Deaths 1993 ICD9 as it appears in World Health Organization (WHO). WHO Mortality Database Version February 2014. Geneva, Switzerland: World Health Organization (WHO), 2014.                                                     | 1993       |                      |

**Web Table 32 - Comprehensive citation list**

| Country | Citation                                                                                                                                                                                                             | Year*     | New for GBD 2013 (*) |
|---------|----------------------------------------------------------------------------------------------------------------------------------------------------------------------------------------------------------------------|-----------|----------------------|
| Grenada | Grenada Vital Registration - Deaths 1994 ICD9 as it appears in World Health Organization (WHO). WHO Mortality Database Version February 2014. Geneva, Switzerland: World Health Organization (WHO), 2014.            | 1994      |                      |
| Grenada | Grenada Vital Registration - Deaths 1995 ICD9 as it appears in World Health Organization (WHO). WHO Mortality Database Version February 2014. Geneva, Switzerland: World Health Organization (WHO), 2014.            | 1995      |                      |
| Grenada | Grenada Vital Registration - Deaths 1996 ICD9 as it appears in World Health Organization (WHO). WHO Mortality Database Version February 2014. Geneva, Switzerland: World Health Organization (WHO), 2014.            | 1996      |                      |
| Grenada | Grenada Vital Registration Death Data 1997 as it appears in United Nations Statistics Division (UNSD). United Nations Demographic Yearbook. New York City, United States: United Nations Statistics Division (UNSD). | 1997      |                      |
| Grenada | Grenada Vital Registration Death Data 1998 as it appears in United Nations Statistics Division (UNSD). United Nations Demographic Yearbook. New York City, United States: United Nations Statistics Division (UNSD). | 1998      |                      |
| Grenada | Grenada Vital Registration Death Data 1999 as it appears in United Nations Statistics Division (UNSD). United Nations Demographic Yearbook. New York City, United States: United Nations Statistics Division (UNSD). | 1999      |                      |
| Grenada | Grenada Vital Registration Death Data 2000 as it appears in United Nations Statistics Division (UNSD). United Nations Demographic Yearbook. New York City, United States: United Nations Statistics Division (UNSD). | 2000      |                      |
| Grenada | United Nations Office on Drugs and Crime (UNODC). United Nations Office on Drugs and Crime Global Study on Homicides 2011. Vienna, Austria: United Nations Office on Drugs and Crime (UNODC), 2011.                  | 2000-2010 |                      |
| Grenada | World Health Organization (WHO). Yellow Fever Reported Cases, WHO Vaccine-Preventable Diseases: Monitoring System. Geneva, Switzerland: World Health Organization (WHO).                                             | 2000-2009 |                      |
| Grenada | Grenada Vital Registration - Deaths 2001 ICD10 as it appears in World Health Organization (WHO). WHO Mortality Database Version February 2014. Geneva, Switzerland: World Health Organization (WHO), 2014.           | 2001      |                      |
| Grenada | Grenada Vital Registration - Deaths 2002 ICD10 as it appears in World Health Organization (WHO). WHO Mortality Database Version February 2014. Geneva, Switzerland: World Health Organization (WHO), 2014.           | 2002      |                      |
| Grenada | Grenada Vital Registration - Deaths 2003 ICD10 as it appears in World Health Organization (WHO). WHO Mortality Database Version February 2014. Geneva, Switzerland: World Health Organization (WHO), 2014.           | 2003      |                      |
| Grenada | Grenada Vital Registration - Deaths 2004 ICD10 as it appears in World Health Organization (WHO). WHO Mortality Database Version February 2014. Geneva, Switzerland: World Health Organization (WHO), 2014.           | 2004      |                      |
| Grenada | Grenada Vital Registration - Deaths 2005 ICD10 as it appears in World Health Organization (WHO). WHO Mortality Database Version February 2014. Geneva, Switzerland: World Health Organization (WHO), 2014.           | 2005      |                      |
| Grenada | Grenada Vital Registration - Deaths 2006 ICD10 as it appears in World Health Organization (WHO). WHO Mortality Database Version February 2014. Geneva, Switzerland: World Health Organization (WHO), 2014.           | 2006      |                      |

**Web Table 32 - Comprehensive citation list**

| Country   | Citation                                                                                                                                                                                                                                                                                                                                                                                                                               | Year*     | New for GBD 2013 (*) |
|-----------|----------------------------------------------------------------------------------------------------------------------------------------------------------------------------------------------------------------------------------------------------------------------------------------------------------------------------------------------------------------------------------------------------------------------------------------|-----------|----------------------|
| Grenada   | Fassio E, Díaz S, Santa C, Reig ME, Martínez Artola Y, Alves de Mattos A, Míguez C, Galizzi J, Zapata R, Ridruejo E, de Souza FC, Hernández N, Pinchuk L, Multicenter Group for Study of Hepatocarcinoma in Latin America, Asociación Latinoamericana para el Estudio del Hígado (ALEH). Etiology of hepatocellular carcinoma in Latin America: a prospective, multicenter, international study. <i>Ann Hepatol.</i> 2010; 9(1): 63-9. | 2006-2008 | *                    |
| Grenada   | Grenada Vital Registration - Deaths 2007 ICD10 as it appears in World Health Organization (WHO). WHO Mortality Database Version February 2014. Geneva, Switzerland: World Health Organization (WHO), 2014.                                                                                                                                                                                                                             | 2007      |                      |
| Grenada   | Grenada Vital Registration - Deaths 2008 ICD10 as it appears in World Health Organization (WHO). WHO Mortality Database Version February 2014. Geneva, Switzerland: World Health Organization (WHO), 2014.                                                                                                                                                                                                                             | 2008      |                      |
| Grenada   | Grenada Vital Registration - Deaths 2009 ICD10 as it appears in World Health Organization (WHO). WHO Mortality Database Version February 2014. Geneva, Switzerland: World Health Organization (WHO), 2014.                                                                                                                                                                                                                             | 2009      |                      |
| Grenada   | Joint United Nations Program on HIV/AIDS (UNAIDS), National Infectious Disease Control Unit, Ministry of Health (Grenada). Grenada UNGASS Country Progress Report 2010. Geneva, Switzerland: Joint United Nations Program on HIV/AIDS (UNAIDS), 2010.                                                                                                                                                                                  | 2009      |                      |
| Grenada   | Grenada Vital Registration - Deaths 2010 ICD10 as it appears in World Health Organization (WHO). WHO Mortality Database Version February 2014. Geneva, Switzerland: World Health Organization (WHO), 2014.                                                                                                                                                                                                                             | 2010      |                      |
| Guatemala | Guatemala Vital Registration Death Data 1950 as it appears in United Nations Statistics Division (UNSD). United Nations Demographic Yearbook. New York City, United States: United Nations Statistics Division (UNSD).                                                                                                                                                                                                                 | 1950      |                      |
| Guatemala | Guatemala Vital Registration Death Data 1951 as it appears in United Nations Statistics Division (UNSD). United Nations Demographic Yearbook. New York City, United States: United Nations Statistics Division (UNSD).                                                                                                                                                                                                                 | 1951      |                      |
| Guatemala | Guatemala Vital Registration Death Data 1952 as it appears in United Nations Statistics Division (UNSD). United Nations Demographic Yearbook. New York City, United States: United Nations Statistics Division (UNSD).                                                                                                                                                                                                                 | 1952      |                      |
| Guatemala | Guatemala Vital Registration Death Data 1953 as it appears in United Nations Statistics Division (UNSD). United Nations Demographic Yearbook. New York City, United States: United Nations Statistics Division (UNSD).                                                                                                                                                                                                                 | 1953      |                      |
| Guatemala | Guatemala Vital Registration Death Data 1954 as it appears in United Nations Statistics Division (UNSD). United Nations Demographic Yearbook. New York City, United States: United Nations Statistics Division (UNSD).                                                                                                                                                                                                                 | 1954      |                      |
| Guatemala | Peace Research Institute Oslo (PRIO). Battle Deaths Dataset Version 3, 2009. Oslo, Norway: Peace Research Institute Oslo (PRIO), 2009.                                                                                                                                                                                                                                                                                                 | 1954-1988 |                      |
| Guatemala | Guatemala Vital Registration Death Data 1955 as it appears in United Nations Statistics Division (UNSD). United Nations Demographic Yearbook. New York City, United States: United Nations Statistics Division (UNSD).                                                                                                                                                                                                                 | 1955      |                      |
| Guatemala | Guatemala Vital Registration Death Data 1956 as it appears in United Nations Statistics Division (UNSD). United Nations Demographic Yearbook. New York City, United States: United Nations Statistics Division (UNSD).                                                                                                                                                                                                                 | 1956      |                      |



**Web Table 32 - Comprehensive citation list**

| Country   | Citation                                                                                                                                                                                                               | Year*                                                                          | New for GBD 2013 (*) |
|-----------|------------------------------------------------------------------------------------------------------------------------------------------------------------------------------------------------------------------------|--------------------------------------------------------------------------------|----------------------|
| Guatemala | Guatemala Vital Registration Death Data 1957 as it appears in United Nations Statistics Division (UNSD). United Nations Demographic Yearbook. New York City, United States: United Nations Statistics Division (UNSD). | 1957                                                                           |                      |
| Guatemala | Guatemala Vital Registration - Deaths 1958 ICD7 as it appears in World Health Organization (WHO). WHO Mortality Database Version February 2014. Geneva, Switzerland: World Health Organization (WHO), 2014.            | 1958                                                                           |                      |
| Guatemala | Guatemala Vital Registration - Deaths 1959 ICD7 as it appears in World Health Organization (WHO). WHO Mortality Database Version February 2014. Geneva, Switzerland: World Health Organization (WHO), 2014.            | 1959                                                                           |                      |
| Guatemala | Guatemala Vital Registration - Deaths 1960 ICD7 as it appears in World Health Organization (WHO). WHO Mortality Database Version February 2014. Geneva, Switzerland: World Health Organization (WHO), 2014.            | 1960                                                                           |                      |
| Guatemala | Guatemala Vital Registration - Deaths 1961 ICD7 as it appears in World Health Organization (WHO). WHO Mortality Database Version February 2014. Geneva, Switzerland: World Health Organization (WHO), 2014.            | 1961                                                                           |                      |
| Guatemala | Guatemala Vital Registration - Deaths 1962 ICD7 as it appears in World Health Organization (WHO). WHO Mortality Database Version February 2014. Geneva, Switzerland: World Health Organization (WHO), 2014.            | 1962                                                                           |                      |
| Guatemala | Guatemala Vital Registration - Deaths 1963 ICD7 as it appears in World Health Organization (WHO). WHO Mortality Database Version February 2014. Geneva, Switzerland: World Health Organization (WHO), 2014.            | 1963                                                                           |                      |
| Guatemala | Guatemala Vital Registration - Deaths 1964 ICD7 as it appears in World Health Organization (WHO). WHO Mortality Database Version February 2014. Geneva, Switzerland: World Health Organization (WHO), 2014.            | 1964                                                                           |                      |
| Guatemala | Guatemala Vital Registration - Deaths 1965 ICD7 as it appears in World Health Organization (WHO). WHO Mortality Database Version February 2014. Geneva, Switzerland: World Health Organization (WHO), 2014.            | 1965                                                                           |                      |
| Guatemala | Guatemala Vital Registration - Deaths 1966 ICD7 as it appears in World Health Organization (WHO). WHO Mortality Database Version February 2014. Geneva, Switzerland: World Health Organization (WHO), 2014.            | 1966                                                                           |                      |
| Guatemala | Guatemala Vital Registration - Deaths 1967 ICD7 as it appears in World Health Organization (WHO). WHO Mortality Database Version February 2014. Geneva, Switzerland: World Health Organization (WHO), 2014.            | 1967                                                                           |                      |
| Guatemala | Guatemala Vital Registration - Deaths 1968 ICD7 as it appears in World Health Organization (WHO). WHO Mortality Database Version February 2014. Geneva, Switzerland: World Health Organization (WHO), 2014.            | 1968                                                                           |                      |
| Guatemala | Guatemala Vital Registration - Deaths 1969 ICD8 as it appears in World Health Organization (WHO). WHO Mortality Database Version February 2014. Geneva, Switzerland: World Health Organization (WHO), 2014.            | 1969                                                                           |                      |
| Guatemala | Centre for Research on the Epidemiology of Disasters (CRED). EM-DAT: The OFDA/CRED International Disaster Database. Brussels, Belgium: Catholic University of Leuven.                                                  | 1969, 1973, 1976, 1982, 1987-1989, 1991, 1994-1995, 1998-2003, 2005, 2007-2012 |                      |

**Web Table 32 - Comprehensive citation list**

| Country   | Citation                                                                                                                                                                                                                          | Year*     | New for GBD 2013 (*) |
|-----------|-----------------------------------------------------------------------------------------------------------------------------------------------------------------------------------------------------------------------------------|-----------|----------------------|
| Guatemala | Guatemala Vital Registration - Deaths 1970 ICD8 as it appears in World Health Organization (WHO). WHO Mortality Database Version February 2014. Geneva, Switzerland: World Health Organization (WHO), 2014.                       | 1970      |                      |
| Guatemala | Guatemala Vital Registration - Deaths 1971 ICD8 as it appears in World Health Organization (WHO). WHO Mortality Database Version February 2014. Geneva, Switzerland: World Health Organization (WHO), 2014.                       | 1971      |                      |
| Guatemala | Guatemala Vital Registration Death Data 1972 as it appears in United Nations Statistics Division (UNSD). United Nations Demographic Yearbook. New York City, United States: United Nations Statistics Division (UNSD).            | 1972      |                      |
| Guatemala | Guatemala Vital Registration - Deaths 1974 ICD8 as it appears in World Health Organization (WHO). WHO Mortality Database Version February 2014. Geneva, Switzerland: World Health Organization (WHO), 2014.                       | 1974      |                      |
| Guatemala | Guatemala Vital Registration - Deaths 1975 ICD8 as it appears in World Health Organization (WHO). WHO Mortality Database Version February 2014. Geneva, Switzerland: World Health Organization (WHO), 2014.                       | 1975      |                      |
| Guatemala | Guatemala Vital Registration - Deaths 1976 ICD8 as it appears in World Health Organization (WHO). WHO Mortality Database Version February 2014. Geneva, Switzerland: World Health Organization (WHO), 2014.                       | 1976      |                      |
| Guatemala | Guatemala Vital Registration - Deaths 1977 ICD8 as it appears in World Health Organization (WHO). WHO Mortality Database Version February 2014. Geneva, Switzerland: World Health Organization (WHO), 2014.                       | 1977      |                      |
| Guatemala | Guatemala Vital Registration - Deaths 1978 ICD8 as it appears in World Health Organization (WHO). WHO Mortality Database Version February 2014. Geneva, Switzerland: World Health Organization (WHO), 2014.                       | 1978      |                      |
| Guatemala | Association for Family Welfare of Guatemala (APROFAM) and Division of Reproductive Health-Centers for Disease Control and Prevention (CDC). Guatemala Contraceptive Prevalence Survey 1978-1979. Guatemala City, Guatemala. 1979. | 1978-1979 |                      |
| Guatemala | Guatemala Vital Registration - Deaths 1979 ICD9 as it appears in World Health Organization (WHO). WHO Mortality Database Version February 2014. Geneva, Switzerland: World Health Organization (WHO), 2014.                       | 1979      |                      |
| Guatemala | Guatemala Vital Registration - Deaths 1980 ICD9 as it appears in World Health Organization (WHO). WHO Mortality Database Version February 2014. Geneva, Switzerland: World Health Organization (WHO), 2014.                       | 1980      |                      |
| Guatemala | Institute for Health Metrics and Evaluation (IHME), Joint United Nations Program on HIV/AIDS (UNAIDS). Institute for Health Metrics and Evaluation HIV Mortality Estimates Based on the UNAIDS Spectrum Model Framework.          | 1980-2013 | *                    |
| Guatemala | United Nations Children's Fund (UNICEF), World Health Organization (WHO). WHO and UNICEF Reported Disease Incidence Time Series - Pertussis. Geneva, Switzerland: World Health Organization (WHO).                                | 1980-2012 |                      |
| Guatemala | United Nations Children's Fund (UNICEF), World Health Organization (WHO). WHO and UNICEF Reported Disease Incidence Time Series - Measles. Geneva, Switzerland: World Health Organization (WHO).                                  | 1980-2012 |                      |
| Guatemala | Guatemala Population and Housing Census 1981 as it appears in United Nations Statistics Division (UNSD). United Nations Demographic Yearbook. New York City, United States: United Nations Statistics Division (UNSD).            | 1981      |                      |



**Web Table 32 - Comprehensive citation list**

| Country   | Citation                                                                                                                                                                                                                                                      | Year*     | New for GBD 2013 (*) |
|-----------|---------------------------------------------------------------------------------------------------------------------------------------------------------------------------------------------------------------------------------------------------------------|-----------|----------------------|
| Guatemala | Guatemala Vital Registration - Deaths 1981 ICD9 as it appears in World Health Organization (WHO). WHO Mortality Database Version February 2014. Geneva, Switzerland: World Health Organization (WHO), 2014.                                                   | 1981      |                      |
| Guatemala | Guatemala Vital Registration Death Data 1983 as it appears in United Nations Statistics Division (UNSD). United Nations Demographic Yearbook. New York City, United States: United Nations Statistics Division (UNSD).                                        | 1983      |                      |
| Guatemala | Guatemala Vital Registration - Deaths 1984 ICD9 as it appears in World Health Organization (WHO). WHO Mortality Database Version February 2014. Geneva, Switzerland: World Health Organization (WHO), 2014.                                                   | 1984      |                      |
| Guatemala | Guatemala Vital Registration Death Data 1985 as it appears in United Nations Statistics Division (UNSD). United Nations Demographic Yearbook. New York City, United States: United Nations Statistics Division (UNSD).                                        | 1985      |                      |
| Guatemala | Guatemala Vital Registration - Deaths 1986 ICD9 as it appears in World Health Organization (WHO). WHO Mortality Database Version February 2014. Geneva, Switzerland: World Health Organization (WHO), 2014.                                                   | 1986      |                      |
| Guatemala | Guatemala Vital Registration - Deaths 1987 ICD9 as it appears in World Health Organization (WHO). WHO Mortality Database Version February 2014. Geneva, Switzerland: World Health Organization (WHO), 2014.                                                   | 1987      |                      |
| Guatemala | Institute of Nutrition of Central America and Panama, Westinghouse; Institute for Resource Development. Guatemala Demographic and Health Survey 1987. Westinghouse; Institute for Resource Development.                                                       | 1987      |                      |
| Guatemala | Guatemala Vital Registration - Deaths 1988 ICD9 as it appears in World Health Organization (WHO). WHO Mortality Database Version February 2014. Geneva, Switzerland: World Health Organization (WHO), 2014.                                                   | 1988      |                      |
| Guatemala | Guatemala Vital Registration - Deaths 1989 ICD9 as it appears in World Health Organization (WHO). WHO Mortality Database Version February 2014. Geneva, Switzerland: World Health Organization (WHO), 2014.                                                   | 1989      |                      |
| Guatemala | Department of Peace and Conflict Research, Uppsala University. UCDP Battle-Related Deaths Database Version 5, 2013. Uppsala, Sweden: Department of Peace and Conflict Research, Uppsala University, 2013.                                                     | 1989-1995 | *                    |
| Guatemala | Department of Peace and Conflict Research, Uppsala University. UCDP One-Sided Violence Database Version 1.4, 2013. Uppsala, Sweden: Department of Peace and Conflict Research, Uppsala University, 2013.                                                      | 1989-2011 | *                    |
| Guatemala | Guatemala Vital Registration - Deaths 1990 ICD9 as it appears in World Health Organization (WHO). WHO Mortality Database Version February 2014. Geneva, Switzerland: World Health Organization (WHO), 2014.                                                   | 1990      |                      |
| Guatemala | Centre for Health Informatics and Multiprofessional Education, University College London. Modell's Haemoglobinopathologist's Almanac. London, United Kingdom: Centre for Health Informatics and Multiprofessional Education, University College London, 2008. | 1990-2003 |                      |
| Guatemala | Guatemala Vital Registration - Deaths 1991 ICD9 as it appears in World Health Organization (WHO). WHO Mortality Database Version February 2014. Geneva, Switzerland: World Health Organization (WHO), 2014.                                                   | 1991      |                      |
| Guatemala | Guatemala Vital Registration - Deaths 1992 ICD9 as it appears in World Health Organization (WHO). WHO Mortality Database Version February 2014. Geneva, Switzerland: World Health Organization (WHO), 2014.                                                   | 1992      |                      |

**Web Table 32 - Comprehensive citation list**

| Country   | Citation                                                                                                                                                                                                                                                                                                                                           | Year*      | New for GBD 2013 (*) |
|-----------|----------------------------------------------------------------------------------------------------------------------------------------------------------------------------------------------------------------------------------------------------------------------------------------------------------------------------------------------------|------------|----------------------|
| Guatemala | Guatemala Vital Registration - Deaths 1993 ICD9 as it appears in World Health Organization (WHO). WHO Mortality Database Version February 2014. Geneva, Switzerland: World Health Organization (WHO), 2014.                                                                                                                                        | 1993       |                      |
| Guatemala | United Nations Office on Drugs and Crime (UNODC). United Nations Surveys on Crime Trends and the Operations of Criminal Justice Systems 1970-2006 as provided by Kavi Bhalla. [Unpublished].                                                                                                                                                       | 1993-1994  |                      |
| Guatemala | Measles Supplementary Immunization Activity Data as provided by the World Health Organization. [Unpublished].                                                                                                                                                                                                                                      | 1993, 1996 |                      |
| Guatemala | Guatemala Vital Registration - Deaths 1994 ICD9 as it appears in World Health Organization (WHO). WHO Mortality Database Version February 2014. Geneva, Switzerland: World Health Organization (WHO), 2014.                                                                                                                                        | 1994       |                      |
| Guatemala | Guatemala Vital Registration - Deaths 1995 ICD9 as it appears in World Health Organization (WHO). WHO Mortality Database Version February 2014. Geneva, Switzerland: World Health Organization (WHO), 2014.                                                                                                                                        | 1995       |                      |
| Guatemala | Macro International, Inc, National Statistics Institute (Guatemala). Guatemala Demographic and Health Survey 1995. Calverton, United States: Macro International, Inc.                                                                                                                                                                             | 1995       |                      |
| Guatemala | Guatemala Vital Registration - Deaths 1996 ICD9 as it appears in World Health Organization (WHO). WHO Mortality Database Version February 2014. Geneva, Switzerland: World Health Organization (WHO), 2014.                                                                                                                                        | 1996       |                      |
| Guatemala | Asturias EJ, Soto M, Menendez R, Ramirez PL, Recinos F, Gordillo R, Holt E, Halsey NA. Meningitis and pneumonia in Guatemalan children: the importance of Haemophilus influenzae type b and Streptococcus pneumoniae. Rev Panam Salud Publica. 2003; 14(6): 377-84.                                                                                | 1996-1999  |                      |
| Guatemala | Guatemala Vital Registration - Deaths 1997 ICD9 as it appears in World Health Organization (WHO). WHO Mortality Database Version February 2014. Geneva, Switzerland: World Health Organization (WHO), 2014.                                                                                                                                        | 1997       |                      |
| Guatemala | World Health Organization (WHO). The Global Elimination of Congenital Syphilis: Rationale and Strategy for Action. Geneva, Switzerland: World Health Organization (WHO), 2007.                                                                                                                                                                     | 1997-2003  |                      |
| Guatemala | Guatemala Vital Registration - Deaths 1998 ICD9 as it appears in World Health Organization (WHO). WHO Mortality Database Version February 2014. Geneva, Switzerland: World Health Organization (WHO), 2014.                                                                                                                                        | 1998       |                      |
| Guatemala | Macro International, Inc, National Statistics Institute (Guatemala). Guatemala Interim Demographic and Health Survey 1998-1999. Calverton, United States: Macro International, Inc.                                                                                                                                                                | 1998-1999  |                      |
| Guatemala | Guatemala Vital Registration - Deaths 1999 ICD9 as it appears in World Health Organization (WHO). WHO Mortality Database Version February 2014. Geneva, Switzerland: World Health Organization (WHO), 2014.                                                                                                                                        | 1999       |                      |
| Guatemala | Steinberg EB, Mendoza CE, Glass R, Arana B, Lopez MB, Mejia M, Gold BD, Priest JW, Bibb W, Monroe SS, Bern C, Bell BP, Hoekstra RM, Klein R, Mintz ED, Luby S. Prevalence of infection with waterborne pathogens: a seroepidemiologic study in children 6-36 months old in San Juan Sacatepequez, Guatemala. Am J Trop Med Hyg. 2004; 70(1): 83-8. | 1999       |                      |
| Guatemala | Guatemala Vital Registration - Deaths 2000 ICD9 as it appears in World Health Organization (WHO). WHO Mortality Database Version February 2014. Geneva, Switzerland: World Health Organization (WHO), 2014.                                                                                                                                        | 2000       |                      |
| Guatemala | Inter-American Development Bank (IDB), National Statistics Institute (Guatemala), World Bank. Guatemala Living Standards Measurement Survey 2000. Washington DC, United States: World Bank.                                                                                                                                                        | 2000       |                      |

**Web Table 32 - Comprehensive citation list**

| Country   | Citation                                                                                                                                                                                                                                                                                                                                                                                                                        | Year*                | New for GBD 2013 (*) |
|-----------|---------------------------------------------------------------------------------------------------------------------------------------------------------------------------------------------------------------------------------------------------------------------------------------------------------------------------------------------------------------------------------------------------------------------------------|----------------------|----------------------|
| Guatemala | Guatemala Vital Registration - Deaths 2001 ICD9 as it appears in World Health Organization (WHO). WHO Mortality Database Version February 2014. Geneva, Switzerland: World Health Organization (WHO), 2014.                                                                                                                                                                                                                     | 2001                 |                      |
| Guatemala | United Nations Office on Drugs and Crime (UNODC). United Nations Office on Drugs and Crime Global Study on Homicides 2011. Vienna, Austria: United Nations Office on Drugs and Crime (UNODC), 2011.                                                                                                                                                                                                                             | 2001-2010            |                      |
| Guatemala | World Health Organization (WHO). Yellow Fever Reported Cases, WHO Vaccine-Preventable Diseases: Monitoring System. Geneva, Switzerland: World Health Organization (WHO).                                                                                                                                                                                                                                                        | 2001-2005, 2008-2009 |                      |
| Guatemala | Guatemala Vital Registration - Deaths 2002 ICD9 as it appears in World Health Organization (WHO). WHO Mortality Database Version February 2014. Geneva, Switzerland: World Health Organization (WHO), 2014.                                                                                                                                                                                                                     | 2002                 |                      |
| Guatemala | Guatemala Ministry of Health and Social Assistance, University of Valle, Division of Reproductive Health-Centers for Disease Control and Prevention (CDC). (2003) Guatemala Reproductive Health Survey 2002. Atlanta, United States: Centers for Disease Control and Prevention (CDC).                                                                                                                                          | 2002                 |                      |
| Guatemala | World Health Organization (WHO). Retrospective Measles Data on Supplementary Immunization Activities. Geneva, Switzerland: World Health Organization (WHO).                                                                                                                                                                                                                                                                     | 2002-2003, 2007-2008 |                      |
| Guatemala | Guatemala Vital Registration - Deaths 2003 ICD9 as it appears in World Health Organization (WHO). WHO Mortality Database Version February 2014. Geneva, Switzerland: World Health Organization (WHO), 2014.                                                                                                                                                                                                                     | 2003                 |                      |
| Guatemala | World Health Organization (WHO). Guatemala World Health Survey 2003. Geneva, Switzerland: World Health Organization (WHO), 2005.                                                                                                                                                                                                                                                                                                | 2003                 |                      |
| Guatemala | Guatemala Vital Registration - Deaths 2004 ICD9 as it appears in World Health Organization (WHO). WHO Mortality Database Version February 2014. Geneva, Switzerland: World Health Organization (WHO), 2014.                                                                                                                                                                                                                     | 2004                 |                      |
| Guatemala | Guatemala Vital Registration - Deaths 2005 ICD10 as it appears in World Health Organization (WHO). WHO Mortality Database Version February 2014. Geneva, Switzerland: World Health Organization (WHO), 2014.                                                                                                                                                                                                                    | 2005                 |                      |
| Guatemala | Department of Peace and Conflict Research, Uppsala University. UCDP Nonstate Conflict Database Version 2.5, 2013. Uppsala, Sweden: Department of Peace and Conflict Research, Uppsala University, 2013.                                                                                                                                                                                                                         | 2005-2008            | *                    |
| Guatemala | Guatemala Vital Registration - Deaths 2006 ICD10 as it appears in World Health Organization (WHO). WHO Mortality Database Version February 2014. Geneva, Switzerland: World Health Organization (WHO), 2014.                                                                                                                                                                                                                    | 2006                 |                      |
| Guatemala | Fassio E, Díaz S, Santa C, Reig ME, Martínez Artola Y, Alves de Mattos A, Míguez C, Galizzi J, Zapata R, Ridruejo E, de Souza FC, Hernández N, Pinchuk L, Multicenter Group for Study of Hepatocarcinoma in Latin America, Asociación Latinoamericana para el Estudio del Hígado (ALEH). Etiology of hepatocellular carcinoma in Latin America: a prospective, multicenter, international study. Ann Hepatol. 2010; 9(1): 63-9. | 2006-2008            | *                    |
| Guatemala | Guatemala Vital Registration - Deaths 2007 ICD10 as it appears in World Health Organization (WHO). WHO Mortality Database Version February 2014. Geneva, Switzerland: World Health Organization (WHO), 2014.                                                                                                                                                                                                                    | 2007                 |                      |
| Guatemala | Guatemala Vital Registration - Deaths 2008 ICD10 as it appears in World Health Organization (WHO). WHO Mortality Database Version February 2014. Geneva, Switzerland: World Health Organization (WHO), 2014.                                                                                                                                                                                                                    | 2008                 |                      |

**Web Table 32 - Comprehensive citation list**

| Country   | Citation                                                                                                                                                                                                                                                                                                                      | Year*                            | New for GBD 2013 (*) |
|-----------|-------------------------------------------------------------------------------------------------------------------------------------------------------------------------------------------------------------------------------------------------------------------------------------------------------------------------------|----------------------------------|----------------------|
| Guatemala | Guatemala Ministry of Health and Social Assistance, University of Valle and Division of Reproductive Health-Centers for Disease Control and Prevention (CDC). Guatemala Reproductive Health Survey 2008-2009. Atlanta, United States: Centers for Disease Control and Prevention (CDC).                                       | 2008-2009                        |                      |
| Guatemala | World Health Organization (WHO). Guatemala WHO Leishmaniasis Country Profile.                                                                                                                                                                                                                                                 | 2008-2009                        | *                    |
| Guatemala | Guatemala Vital Registration - Deaths 2009 ICD10 as it appears in World Health Organization (WHO). WHO Mortality Database Version February 2014. Geneva, Switzerland: World Health Organization (WHO), 2014.                                                                                                                  | 2009                             |                      |
| Guatemala | Guatemala Ministry of Health and Social Assistance, Joint United Nations Program on HIV/AIDS (UNAIDS). Guatemala UNGASS Report 2010. Geneva, Switzerland: Joint United Nations Program on HIV/AIDS (UNAIDS), 2010.                                                                                                            | 2009                             |                      |
| Guatemala | Guatemala Vital Registration Death Data 2011 as it appears in United Nations Statistics Division (UNSD). United Nations Demographic Yearbook. New York City, United States: United Nations Statistics Division (UNSD).                                                                                                        | 2011                             | *                    |
| Guinea    | Institute for Health Metrics and Evaluation (IHME), Joint United Nations Program on HIV/AIDS (UNAIDS). Institute for Health Metrics and Evaluation HIV Mortality Estimates Based on the UNAIDS Spectrum Model Framework.                                                                                                      | 1980-2013                        | *                    |
| Guinea    | United Nations Children's Fund (UNICEF), World Health Organization (WHO). WHO and UNICEF Reported Disease Incidence Time Series - Pertussis. Geneva, Switzerland: World Health Organization (WHO).                                                                                                                            | 1980-1990, 1996-2010, 2013       |                      |
| Guinea    | United Nations Children's Fund (UNICEF), World Health Organization (WHO). WHO and UNICEF Reported Disease Incidence Time Series - Measles. Geneva, Switzerland: World Health Organization (WHO).                                                                                                                              | 1980-2013                        |                      |
| Guinea    | Directorate General of Planning and Statistics (Guinea), Ministry of the Interior and Security (Guinea), Minnesota Population Center. Guinea General Census of Population and Housing 1983 from the Integrated Public Use Microdata Series, International. [Machine-readable database]. Minneapolis: University of Minnesota. | 1983                             |                      |
| Guinea    | Centre for Research on the Epidemiology of Disasters (CRED). EM-DAT: The OFDA/CRED International Disaster Database. Brussels, Belgium: Catholic University of Leuven.                                                                                                                                                         | 1983, 1998, 2000-2001, 2009-2010 |                      |
| Guinea    | WHO Department of Communicable Disease Surveillance and Response. WHO Report on Global Surveillance of Epidemic-prone Infectious Diseases 2000.                                                                                                                                                                               | 1987                             |                      |
| Guinea    | Centre for Health Informatics and Multiprofessional Education, University College London. Modell's Haemoglobinopathologist's Almanac. London, United Kingdom: Centre for Health Informatics and Multiprofessional Education, University College London, 2008.                                                                 | 1990-2003                        |                      |
| Guinea    | Macro International, Inc, National Statistics Directorate (Guinea). Guinea Demographic and Health Survey 1992.                                                                                                                                                                                                                | 1992                             | *                    |
| Guinea    | Koulibaly M, Kabba IS, Cissé A, Diallo SB, Diallo MB, Keita N, Camara ND, Diallo MS, Sylla BS, Parkin DM. Cancer incidence in Conakry, Guinea: first results from the Cancer Registry 1992-1995. Int J Cancer. 1997; 70(1): 39-45.                                                                                            | 1993                             |                      |
| Guinea    | National Statistics Directorate (Guinea), Ministry of Economy, Finance, and Planning (Guinea), Minnesota Population Center. Guinea General Census of Population and Housing 1996 from the Integrated Public Use Microdata Series, International. [Machine-readable database]. Minneapolis: University of Minnesota.           | 1996                             |                      |
| Guinea    | World Health Organization (WHO). Yellow Fever Reported Cases, WHO Vaccine-Preventable Diseases: Monitoring System. Geneva, Switzerland: World Health Organization (WHO).                                                                                                                                                      | 1996-2009                        |                      |

**Web Table 32 - Comprehensive citation list**

| Country       | Citation                                                                                                                                                                                                                                                                                  | Year*                       | New for GBD 2013 (*) |
|---------------|-------------------------------------------------------------------------------------------------------------------------------------------------------------------------------------------------------------------------------------------------------------------------------------------|-----------------------------|----------------------|
| Guinea        | Department of Peace and Conflict Research, Uppsala University. UCDP One-Sided Violence Database Version 1.4, 2013. Uppsala, Sweden: Department of Peace and Conflict Research, Uppsala University, 2013.                                                                                  | 1996-2009                   | *                    |
| Guinea        | Basic Support for Institutionalizing Child Survival (BASICS), Save the Children USA. Guinea - Mandiana Mortality Study 1998-1999.                                                                                                                                                         | 1998-1999                   |                      |
| Guinea        | Macro International, Inc, National Statistics Directorate (Guinea). Guinea Demographic and Health Survey 1999. Calverton, United States: Macro International, Inc.                                                                                                                        | 1999                        |                      |
| Guinea        | Nathan N, Barry M, Van Herp M, Zeller H. Shortage of vaccines during a yellow fever outbreak in Guinea. Lancet. 2001; 358(9299): 2129-30.                                                                                                                                                 | 2000-2001                   |                      |
| Guinea        | Mutebi J-P, Barrett ADT. The epidemiology of yellow fever in Africa. Microbes Infect. 2002; 4(14): 1459-68.                                                                                                                                                                               | 2000-2001                   |                      |
| Guinea        | Department of Peace and Conflict Research, Uppsala University. UCDP Nonstate Conflict Database Version 2.5, 2013. Uppsala, Sweden: Department of Peace and Conflict Research, Uppsala University, 2013.                                                                                   | 2000-2011                   | *                    |
| Guinea        | Department of Peace and Conflict Research, Uppsala University. UCDP Battle-Related Deaths Database Version 5, 2013. Uppsala, Sweden: Department of Peace and Conflict Research, Uppsala University, 2013.                                                                                 | 2000-2001                   | *                    |
| Guinea        | World Health Organization Regional Office for Africa. HIV/AIDS Epidemiological Surveillance Update for the WHO African Region. World Health Organization Regional Office for Africa, 2003.                                                                                                | 2001                        |                      |
| Guinea        | World Health Organization (WHO). Retrospective Measles Data on Supplementary Immunization Activities. Geneva, Switzerland: World Health Organization (WHO).                                                                                                                               | 2002-2003, 2006, 2009, 2012 |                      |
| Guinea        | Macro International, Inc, National Statistics Directorate (Guinea). Guinea Demographic and Health Survey 2005. Calverton, United States: Macro International, Inc.                                                                                                                        | 2005                        |                      |
| Guinea        | World Health Organization (WHO). Yellow fever in Africa and South America, 2006. Wkly Epidemiol Rec. 2008; 83(8): 60-76.                                                                                                                                                                  | 2006                        |                      |
| Guinea        | World Health Organization (WHO). Yellow fever, Guinea. Wkly Epidemiol Rec. 2008; 83(40): 358-9.                                                                                                                                                                                           | 2008                        |                      |
| Guinea        | Millimono TS, Loua KM, Rath SL, Relvas L, Bento C, Diakite M, Jarvis M, Daries N, Ribeiro LM, Manco L, Kaeda JS. High prevalence of hemoglobin disorders and glucose-6-phosphate dehydrogenase (G6PD) deficiency in the Republic of Guinea (West Africa). Hemoglobin. 2012; 36(1): 25-37. | 2008-2010                   | *                    |
| Guinea        | Joint United Nations Program on HIV/AIDS (UNAIDS), National Committee for the Fight Against AIDS (Guinea). Guinea UNGASS Report 2010. Geneva, Switzerland: Joint United Nations Program on HIV/AIDS (UNAIDS), 2010.                                                                       | 2009                        |                      |
| Guinea        | ICF Macro, Ministry of Health and Public Hygiene (Guinea), National Institute of Statistics (Guinea). Guinea Demographic and Health Survey 2012. Claverton, Maryland: ICF Macro, 2014.                                                                                                    | 2012                        | *                    |
| Guinea-Bissau | Peace Research Institute Oslo (PRIO). Battle Deaths Dataset Version 3, 2009. Oslo, Norway: Peace Research Institute Oslo (PRIO), 2009.                                                                                                                                                    | 1963-1988                   |                      |
| Guinea-Bissau | Smedman L, Aaby P, Lindeberg A, Zetterstrom R. Survival 0-6 years of age in a periurban community in Guinea-Bissau: a longitudinal assessment. Ann Trop Paediatr. 1986; 6(1): 67-72.                                                                                                      | 1978                        |                      |
| Guinea-Bissau | Aaby P, Bukh J, Lisse IM, Smits AJ, Gomes J, Fernandes MA, Indi F, Soares M. Determinants of measles mortality in a rural area of Guinea-Bissau: crowding, age, and malnutrition. J Trop Pediatr. 1984; 30(3): 164-8.                                                                     | 1979-1982                   |                      |
| Guinea-Bissau | Aaby P, Bukh J, Lisse IM, da Silva MC. Decline in measles mortality: nutrition, age at infection, or exposure? Br Med J (Clin Res Ed). 1988; 296(6631): 1225-8.                                                                                                                           | 1979-1984                   |                      |

**Web Table 32 - Comprehensive citation list**

| Country       | Citation                                                                                                                                                                                                                                                        | Year*                                            | New for GBD 2013 (*) |
|---------------|-----------------------------------------------------------------------------------------------------------------------------------------------------------------------------------------------------------------------------------------------------------------|--------------------------------------------------|----------------------|
| Guinea-Bissau | Institute for Health Metrics and Evaluation (IHME), Joint United Nations Program on HIV/AIDS (UNAIDS). Institute for Health Metrics and Evaluation HIV Mortality Estimates Based on the UNAIDS Spectrum Model Framework.                                        | 1980-2013                                        | *                    |
| Guinea-Bissau | United Nations Children's Fund (UNICEF), World Health Organization (WHO). WHO and UNICEF Reported Disease Incidence Time Series - Pertussis. Geneva, Switzerland: World Health Organization (WHO).                                                              | 1980-1991, 1996-1997, 1999, 2001-2004, 2006-2013 |                      |
| Guinea-Bissau | United Nations Children's Fund (UNICEF), World Health Organization (WHO). WHO and UNICEF Reported Disease Incidence Time Series - Measles. Geneva, Switzerland: World Health Organization (WHO).                                                                | 1980-1997, 1999, 2001-2013                       |                      |
| Guinea-Bissau | Aaby P, Knudsen K, Jensen TG, Thårup J, Poulsen A, Sodemann M, da Silva MC, Whittle H. Measles incidence, vaccine efficacy, and mortality in two urban African areas with high vaccination coverage. <i>J Infect Dis.</i> 1990; 162(5): 1043-8.                 | 1985-1987                                        |                      |
| Guinea-Bissau | Centre for Research on the Epidemiology of Disasters (CRED). EM-DAT: The OFDA/CRED International Disaster Database. Brussels, Belgium: Catholic University of Leuven.                                                                                           | 1987, 1998, 2004, 2010                           |                      |
| Guinea-Bissau | Mølbak K, Aaby P, Ingholt L, Højlyng N, Gottschau A, Andersen H, Brink L, Gansted U, Permin A, Vollmer A. Persistent and acute diarrhoea as the leading causes of child mortality in urban Guinea Bissau. <i>Trans R Soc Trop Med Hyg.</i> 1992; 86(2): 216-20. | 1989                                             |                      |
| Guinea-Bissau | Department of Peace and Conflict Research, Uppsala University. UCDP Battle-Related Deaths Database Version 5, 2013. Uppsala, Sweden: Department of Peace and Conflict Research, Uppsala University, 2013.                                                       | 1989-1999                                        | *                    |
| Guinea-Bissau | Weatherall D. Sick Cell and Thalassemias Prevalence Data, Personal Correspondence with David Weatherall. [Unpublished].                                                                                                                                         | 1990-2009                                        |                      |
| Guinea-Bissau | Centre for Health Informatics and Multiprofessional Education, University College London. Modell's Haemoglobinopathologist's Almanac. London, United Kingdom: Centre for Health Informatics and Multiprofessional Education, University College London, 2008.   | 1990-2003                                        |                      |
| Guinea-Bissau | Høj L, Stensballe J, Aaby P. Maternal mortality in Guinea-Bissau: the use of verbal autopsy in a multi-ethnic population. <i>Int J Epidemiol.</i> 1999; 28(1): 70-6.                                                                                            | 1992                                             |                      |
| Guinea-Bissau | Roth A, Gustafson P, Nhaga A, Djana Q, Poulsen A, Garly ML, Jensen H, Sodemann M, Rodrigues A, Aaby P. BCG vaccination scar associated with better childhood survival in Guinea-Bissau. <i>Int J Epidemiol.</i> 2005; 34(3): 540-7.                             | 1995                                             |                      |
| Guinea-Bissau | World Health Organization (WHO). Yellow Fever Reported Cases, WHO Vaccine-Preventable Diseases: Monitoring System. Geneva, Switzerland: World Health Organization (WHO).                                                                                        | 1996-1997, 1999, 2001-2009                       |                      |
| Guinea-Bissau | Measles Supplementary Immunization Activity Data as provided by the World Health Organization. [Unpublished].                                                                                                                                                   | 1999                                             |                      |
| Guinea-Bissau | Secretary State of Planning, National Institute of Statistics and Census (INEC), United Nations Children's Fund (UNICEF). Guinea-Bissau Multiple Indicator Cluster Survey 2000. New York, United States: United Nations Children's Fund (UNICEF).               | 2000                                             |                      |
| Guinea-Bissau | Masmas TN, Garly M-L, Lisse IM, Rodrigues A, Petersen PT, Birgens H. Inherited hemoglobin disorders in Guinea-Bissau, West Africa: a population study. <i>Hemoglobin.</i> 2006; 3(30): 355-64.                                                                  | 2002-2003                                        |                      |
| Guinea-Bissau | Martins CL, Garly ML, Balé C, Rodrigues A, Ravn H, Whittle HC, Lisse IM, Aaby P. Protective efficacy of standard Edmonston-Zagreb measles vaccination in infants aged 4.5 months: Interim analysis of a randomised clinical trial. <i>BMJ.</i> 2008; 337: a661. | 2003-2004                                        |                      |
| Guinea-Bissau | World Health Organization (WHO). Retrospective Measles Data on Supplementary Immunization Activities. Geneva, Switzerland: World Health Organization (WHO).                                                                                                     | 2003, 2006, 2009, 2012                           |                      |



**Web Table 32 - Comprehensive citation list**

| Country       | Citation                                                                                                                                                                                                            | Year* | New for GBD 2013 (*) |
|---------------|---------------------------------------------------------------------------------------------------------------------------------------------------------------------------------------------------------------------|-------|----------------------|
| Guinea-Bissau | United Nations Children's Fund (UNICEF), Government of Guinea-Bissau. Guinea-Bissau Multiple Indicator Cluster Survey 2006. New York, United States: United Nations Children's Fund (UNICEF).                       | 2006  |                      |
| Guinea-Bissau | World Health Organization (WHO). Global Status Report on Road Safety 2009. Geneva, Switzerland: World Health Organization (WHO), 2009.                                                                              | 2007  |                      |
| Guinea-Bissau | Centers for Disease Control and Prevention (CDC), National Statistics Institute (Guinea-Bissau), United Nations Children's Fund (UNICEF). Guinea-Bissau Multiple Indicator Cluster Survey 2010.                     | 2010  |                      |
| Guyana        | Guyana Vital Registration Death Data 1950 as it appears in United Nations Statistics Division (UNSD). United Nations Demographic Yearbook. New York City, United States: United Nations Statistics Division (UNSD). | 1950  |                      |
| Guyana        | Guyana Vital Registration Death Data 1951 as it appears in United Nations Statistics Division (UNSD). United Nations Demographic Yearbook. New York City, United States: United Nations Statistics Division (UNSD). | 1951  |                      |
| Guyana        | Guyana Vital Registration Death Data 1952 as it appears in United Nations Statistics Division (UNSD). United Nations Demographic Yearbook. New York City, United States: United Nations Statistics Division (UNSD). | 1952  |                      |
| Guyana        | Guyana Vital Registration Death Data 1953 as it appears in United Nations Statistics Division (UNSD). United Nations Demographic Yearbook. New York City, United States: United Nations Statistics Division (UNSD). | 1953  |                      |
| Guyana        | Guyana Vital Registration Death Data 1954 as it appears in United Nations Statistics Division (UNSD). United Nations Demographic Yearbook. New York City, United States: United Nations Statistics Division (UNSD). | 1954  |                      |
| Guyana        | Guyana Vital Registration Death Data 1955 as it appears in United Nations Statistics Division (UNSD). United Nations Demographic Yearbook. New York City, United States: United Nations Statistics Division (UNSD). | 1955  |                      |
| Guyana        | Guyana Vital Registration Death Data 1956 as it appears in United Nations Statistics Division (UNSD). United Nations Demographic Yearbook. New York City, United States: United Nations Statistics Division (UNSD). | 1956  |                      |
| Guyana        | Guyana Vital Registration Death Data 1957 as it appears in United Nations Statistics Division (UNSD). United Nations Demographic Yearbook. New York City, United States: United Nations Statistics Division (UNSD). | 1957  |                      |
| Guyana        | Guyana Vital Registration Death Data 1958 as it appears in United Nations Statistics Division (UNSD). United Nations Demographic Yearbook. New York City, United States: United Nations Statistics Division (UNSD). | 1958  |                      |
| Guyana        | Guyana Vital Registration Death Data 1959 as it appears in United Nations Statistics Division (UNSD). United Nations Demographic Yearbook. New York City, United States: United Nations Statistics Division (UNSD). | 1959  |                      |
| Guyana        | Guyana Vital Registration Death Data 1960 as it appears in United Nations Statistics Division (UNSD). United Nations Demographic Yearbook. New York City, United States: United Nations Statistics Division (UNSD). | 1960  |                      |
| Guyana        | Guyana Vital Registration Death Data 1961 as it appears in United Nations Statistics Division (UNSD). United Nations Demographic Yearbook. New York City, United States: United Nations Statistics Division (UNSD). | 1961  |                      |

**Web Table 32 - Comprehensive citation list**

| Country | Citation                                                                                                                                                                                                                 | Year*     | New for GBD 2013 (*) |
|---------|--------------------------------------------------------------------------------------------------------------------------------------------------------------------------------------------------------------------------|-----------|----------------------|
| Guyana  | Guyana Vital Registration Death Data 1969 as it appears in United Nations Statistics Division (UNSD). United Nations Demographic Yearbook. New York City, United States: United Nations Statistics Division (UNSD).      | 1969      |                      |
| Guyana  | Guyana Vital Registration Death Data 1970 as it appears in United Nations Statistics Division (UNSD). United Nations Demographic Yearbook. New York City, United States: United Nations Statistics Division (UNSD).      | 1970      |                      |
| Guyana  | United Nations Office on Drugs and Crime (UNODC). United Nations Surveys on Crime Trends and the Operations of Criminal Justice Systems 1970-2006 as provided by Kavi Bhalla. [Unpublished].                             | 1970-1993 |                      |
| Guyana  | Guyana Vital Registration Death Data 1971 as it appears in United Nations Statistics Division (UNSD). United Nations Demographic Yearbook. New York City, United States: United Nations Statistics Division (UNSD).      | 1971      |                      |
| Guyana  | Guyana Vital Registration Death Data 1974 as it appears in United Nations Statistics Division (UNSD). United Nations Demographic Yearbook. New York City, United States: United Nations Statistics Division (UNSD).      | 1974      |                      |
| Guyana  | Bureau of Statistics (Guyana), International Statistical Institute. Guyana World Fertility Survey 1975. Voorburg, Netherlands: International Statistical Institute.                                                      | 1975      |                      |
| Guyana  | Guyana Vital Registration - Deaths 1977 ICD8 as it appears in World Health Organization (WHO). WHO Mortality Database Version February 2014. Geneva, Switzerland: World Health Organization (WHO), 2014.                 | 1977      |                      |
| Guyana  | Guyana Vital Registration - Deaths 1979 ICD9 as it appears in World Health Organization (WHO). WHO Mortality Database Version February 2014. Geneva, Switzerland: World Health Organization (WHO), 2014.                 | 1979      |                      |
| Guyana  | Institute for Health Metrics and Evaluation (IHME), Joint United Nations Program on HIV/AIDS (UNAIDS). Institute for Health Metrics and Evaluation HIV Mortality Estimates Based on the UNAIDS Spectrum Model Framework. | 1980-2013 | *                    |
| Guyana  | United Nations Children's Fund (UNICEF), World Health Organization (WHO). WHO and UNICEF Reported Disease Incidence Time Series - Pertussis. Geneva, Switzerland: World Health Organization (WHO).                       | 1980-2013 |                      |
| Guyana  | United Nations Children's Fund (UNICEF), World Health Organization (WHO). WHO and UNICEF Reported Disease Incidence Time Series - Measles. Geneva, Switzerland: World Health Organization (WHO).                         | 1980-2013 |                      |
| Guyana  | Guyana Vital Registration - Deaths 1984 ICD9 as it appears in World Health Organization (WHO). WHO Mortality Database Version February 2014. Geneva, Switzerland: World Health Organization (WHO), 2014.                 | 1984      |                      |
| Guyana  | Guyana Vital Registration - Deaths 1988 ICD9 as it appears in World Health Organization (WHO). WHO Mortality Database Version February 2014. Geneva, Switzerland: World Health Organization (WHO), 2014.                 | 1988      |                      |
| Guyana  | Guyana Vital Registration - Deaths 1989 ICD9 as it appears in World Health Organization (WHO). WHO Mortality Database Version February 2014. Geneva, Switzerland: World Health Organization (WHO), 2014.                 | 1989      |                      |
| Guyana  | Guyana Vital Registration - Deaths 1990 ICD9 as it appears in World Health Organization (WHO). WHO Mortality Database Version February 2014. Geneva, Switzerland: World Health Organization (WHO), 2014.                 | 1990      |                      |



**Web Table 32 - Comprehensive citation list**

| Country | Citation                                                                                                                                                                                                                                                      | Year*                           | New for GBD 2013 (*) |
|---------|---------------------------------------------------------------------------------------------------------------------------------------------------------------------------------------------------------------------------------------------------------------|---------------------------------|----------------------|
| Guyana  | Centre for Health Informatics and Multiprofessional Education, University College London. Modell's Haemoglobinopathologist's Almanac. London, United Kingdom: Centre for Health Informatics and Multiprofessional Education, University College London, 2008. | 1990-2003                       |                      |
| Guyana  | Guyana Vital Registration - Deaths 1991 ICD9 as it appears in World Health Organization (WHO). WHO Mortality Database Version February 2014. Geneva, Switzerland: World Health Organization (WHO), 2014.                                                      | 1991                            |                      |
| Guyana  | Measles Supplementary Immunization Activity Data as provided by the World Health Organization. [Unpublished].                                                                                                                                                 | 1991, 1996                      |                      |
| Guyana  | Guyana Vital Registration - Deaths 1992 ICD9 as it appears in World Health Organization (WHO). WHO Mortality Database Version February 2014. Geneva, Switzerland: World Health Organization (WHO), 2014.                                                      | 1992                            |                      |
| Guyana  | Bureau of Statistics (Guyana), World Bank. Guyana Living Standards Measurement Survey 1992-1993.                                                                                                                                                              | 1992-1993                       | *                    |
| Guyana  | Guyana Vital Registration - Deaths 1993 ICD9 as it appears in World Health Organization (WHO). WHO Mortality Database Version February 2014. Geneva, Switzerland: World Health Organization (WHO), 2014.                                                      | 1993                            |                      |
| Guyana  | Guyana Vital Registration - Deaths 1994 ICD9 as it appears in World Health Organization (WHO). WHO Mortality Database Version February 2014. Geneva, Switzerland: World Health Organization (WHO), 2014.                                                      | 1994                            |                      |
| Guyana  | Guyana Vital Registration - Deaths 1995 ICD9 as it appears in World Health Organization (WHO). WHO Mortality Database Version February 2014. Geneva, Switzerland: World Health Organization (WHO), 2014.                                                      | 1995                            |                      |
| Guyana  | Guyana Vital Registration - Deaths 1996 ICD9 as it appears in World Health Organization (WHO). WHO Mortality Database Version February 2014. Geneva, Switzerland: World Health Organization (WHO), 2014.                                                      | 1996                            |                      |
| Guyana  | Guyana Vital Registration - Deaths 1997 ICD9 as it appears in World Health Organization (WHO). WHO Mortality Database Version February 2014. Geneva, Switzerland: World Health Organization (WHO), 2014.                                                      | 1997                            |                      |
| Guyana  | World Health Organization (WHO). Yellow Fever Reported Cases, WHO Vaccine-Preventable Diseases: Monitoring System. Geneva, Switzerland: World Health Organization (WHO).                                                                                      | 1997-1998, 2000-2001, 2003-2009 |                      |
| Guyana  | Guyana Vital Registration - Deaths 1998 ICD9 as it appears in World Health Organization (WHO). WHO Mortality Database Version February 2014. Geneva, Switzerland: World Health Organization (WHO), 2014.                                                      | 1998                            |                      |
| Guyana  | Guyana Vital Registration - Deaths 1999 ICD9 as it appears in World Health Organization (WHO). WHO Mortality Database Version February 2014. Geneva, Switzerland: World Health Organization (WHO), 2014.                                                      | 1999                            |                      |
| Guyana  | Bureau of Statistics (Guyana), United Nations Children's Fund (UNICEF). Guyana Multiple Indicator Cluster Survey 2000. New York, United States: United Nations Children's Fund (UNICEF).                                                                      | 2000                            |                      |
| Guyana  | Centre for Research on the Epidemiology of Disasters (CRED). EM-DAT: The OFDA/CRED International Disaster Database. Brussels, Belgium: Catholic University of Leuven.                                                                                         | 2000, 2005                      |                      |
| Guyana  | World Health Organization (WHO). Retrospective Measles Data on Supplementary Immunization Activities. Geneva, Switzerland: World Health Organization (WHO).                                                                                                   | 2000, 2007                      |                      |

**Web Table 32 - Comprehensive citation list**

| Country | Citation                                                                                                                                                                                                                                                                                                                                                                                                                        | Year*     | New for GBD 2013 (*) |
|---------|---------------------------------------------------------------------------------------------------------------------------------------------------------------------------------------------------------------------------------------------------------------------------------------------------------------------------------------------------------------------------------------------------------------------------------|-----------|----------------------|
| Guyana  | Guyana Vital Registration - Deaths 2001 ICD10 as it appears in World Health Organization (WHO). WHO Mortality Database Version February 2014. Geneva, Switzerland: World Health Organization (WHO), 2014.                                                                                                                                                                                                                       | 2001      |                      |
| Guyana  | Guyana Vital Registration - Deaths 2002 ICD10 as it appears in World Health Organization (WHO). WHO Mortality Database Version February 2014. Geneva, Switzerland: World Health Organization (WHO), 2014.                                                                                                                                                                                                                       | 2002      |                      |
| Guyana  | United Nations Office on Drugs and Crime (UNODC). United Nations Office on Drugs and Crime Global Study on Homicides 2011. Vienna, Austria: United Nations Office on Drugs and Crime (UNODC), 2011.                                                                                                                                                                                                                             | 2002-2010 |                      |
| Guyana  | Guyana Vital Registration - Deaths 2003 ICD10 as it appears in World Health Organization (WHO). WHO Mortality Database Version February 2014. Geneva, Switzerland: World Health Organization (WHO), 2014.                                                                                                                                                                                                                       | 2003      |                      |
| Guyana  | Guyana Vital Registration - Deaths 2004 ICD10 as it appears in World Health Organization (WHO). WHO Mortality Database Version February 2014. Geneva, Switzerland: World Health Organization (WHO), 2014.                                                                                                                                                                                                                       | 2004      |                      |
| Guyana  | Guyana Responsible Parenthood Association (GRPA), Macro International, Inc. Guyana AIDS Indicator Survey 2005. Calverton, United States: Macro International, Inc.                                                                                                                                                                                                                                                              | 2005      |                      |
| Guyana  | Guyana Vital Registration - Deaths 2005 ICD10 as it appears in World Health Organization (WHO). WHO Mortality Database Version February 2014. Geneva, Switzerland: World Health Organization (WHO), 2014.                                                                                                                                                                                                                       | 2005      |                      |
| Guyana  | Guyana Vital Registration - Deaths 2006 ICD10 as it appears in World Health Organization (WHO). WHO Mortality Database Version February 2014. Geneva, Switzerland: World Health Organization (WHO), 2014.                                                                                                                                                                                                                       | 2006      |                      |
| Guyana  | United Nations Children's Fund (UNICEF), Bureau of Statistics (Guyana). Guyana Multiple Indicator Cluster Survey 2006. New York, United States: United Nations Children's Fund (UNICEF).                                                                                                                                                                                                                                        | 2006-2007 |                      |
| Guyana  | Fassio E, Díaz S, Santa C, Reig ME, Martínez Artola Y, Alves de Mattos A, Míguez C, Galizzi J, Zapata R, Ridruejo E, de Souza FC, Hernández N, Pinchuk L, Multicenter Group for Study of Hepatocarcinoma in Latin America, Asociación Latinoamericana para el Estudio del Hígado (ALEH). Etiology of hepatocellular carcinoma in Latin America: a prospective, multicenter, international study. Ann Hepatol. 2010; 9(1): 63-9. | 2006-2008 | *                    |
| Guyana  | Guyana Vital Registration - Deaths 2007 ICD10 as it appears in World Health Organization (WHO). WHO Mortality Database Version February 2014. Geneva, Switzerland: World Health Organization (WHO), 2014.                                                                                                                                                                                                                       | 2007      |                      |
| Guyana  | Guyana Vital Registration - Deaths 2008 ICD10 as it appears in World Health Organization (WHO). WHO Mortality Database Version February 2014. Geneva, Switzerland: World Health Organization (WHO), 2014.                                                                                                                                                                                                                       | 2008      |                      |
| Guyana  | Department of Peace and Conflict Research, Uppsala University. UCDP One-Sided Violence Database Version 1.4, 2013. Uppsala, Sweden: Department of Peace and Conflict Research, Uppsala University, 2013.                                                                                                                                                                                                                        | 2008      | *                    |
| Guyana  | Bureau of Statistics (Guyana), Ministry of Health (Guyana), ICF Macro. Guyana Demographic and Health Survey 2009. Calverton, United States: ICF Macro, 2011.                                                                                                                                                                                                                                                                    | 2009      |                      |
| Guyana  | Guyana Vital Registration - Deaths 2009 ICD10 as it appears in World Health Organization (WHO). WHO Mortality Database Version February 2014. Geneva, Switzerland: World Health Organization (WHO), 2014.                                                                                                                                                                                                                       | 2009      |                      |

**Web Table 32 - Comprehensive citation list**

| Country | Citation                                                                                                                                                                                                                                                      | Year*                                                                                     | New for GBD 2013 (*) |
|---------|---------------------------------------------------------------------------------------------------------------------------------------------------------------------------------------------------------------------------------------------------------------|-------------------------------------------------------------------------------------------|----------------------|
| Guyana  | Joint United Nations Program on HIV/AIDS (UNAIDS), Presidential Commission on HIV and AIDS (Guyana). Guyana UNGASS Country Progress Report 2010. Geneva, Switzerland: Joint United Nations Program on HIV/AIDS (UNAIDS), 2010.                                | 2009                                                                                      |                      |
| Haiti   | Centre for Research on the Epidemiology of Disasters (CRED). EM-DAT: The OFDA/CRED International Disaster Database. Brussels, Belgium: Catholic University of Leuven.                                                                                         | 1952, 1954, 1959, 1962-1964, 1966, 1972, 1979-1980, 1986-1988, 1993-1994, 1996, 1998-2013 |                      |
| Haiti   | Institute of Statistics (Haiti). Haiti Population and Housing Census 1971.                                                                                                                                                                                    | 1971                                                                                      |                      |
| Haiti   | Haiti Multi Round Demographic Survey 1971-1975 as it appears in United Nations Statistics Division (UNSD). United Nations Demographic Yearbook. New York City, United States: United Nations Statistics Division (UNSD).                                      | 1971-1975                                                                                 |                      |
| Haiti   | Haitian Institute of Statistics and Informatics, International Statistical Institute. Haiti World Fertility Survey 1977. Voorburg, Netherlands: International Statistical Institute.                                                                          | 1977                                                                                      |                      |
| Haiti   | Haiti Vital Registration - Deaths 1980 ICD9 as it appears in World Health Organization (WHO). WHO Mortality Database Version February 2014. Geneva, Switzerland: World Health Organization (WHO), 2014.                                                       | 1980                                                                                      |                      |
| Haiti   | Institute for Health Metrics and Evaluation (IHME), Joint United Nations Program on HIV/AIDS (UNAIDS). Institute for Health Metrics and Evaluation HIV Mortality Estimates Based on the UNAIDS Spectrum Model Framework.                                      | 1980-2013                                                                                 | *                    |
| Haiti   | United Nations Children's Fund (UNICEF), World Health Organization (WHO). WHO and UNICEF Reported Disease Incidence Time Series - Pertussis. Geneva, Switzerland: World Health Organization (WHO).                                                            | 1980-1990, 1995, 1997, 1999-2005, 2007-2013                                               |                      |
| Haiti   | United Nations Children's Fund (UNICEF), World Health Organization (WHO). WHO and UNICEF Reported Disease Incidence Time Series - Measles. Geneva, Switzerland: World Health Organization (WHO).                                                              | 1980-1990, 1996-2013                                                                      |                      |
| Haiti   | Haiti Vital Registration - Deaths 1981 ICD9 as it appears in World Health Organization (WHO). WHO Mortality Database Version February 2014. Geneva, Switzerland: World Health Organization (WHO), 2014.                                                       | 1981                                                                                      |                      |
| Haiti   | Haiti Child Health Institute (CHI). Haiti Mortality, Morbidity, and Utilization of Services Survey 1987.                                                                                                                                                      | 1987                                                                                      |                      |
| Haiti   | Allain JP, Hodges W, Einstein MH, Geisler J, Neilly C, Delaney S, Hodges B, Lee H. Antibody to HIV-1, HTLV-I, and HCV in three populations of rural Haitians. J Acquir Immune Defic Syndr. 1992; 5(12): 1230-6.                                               | 1988-1990                                                                                 |                      |
| Haiti   | Dowell SF, Davis HL, Holt EA, Ruff AJ, Kissinger PJ, Bijoux J, Boulos R, Boulos C, Halsey NA. The utility of verbal autopsies for identifying HIV-1-related deaths in Haitian children. AIDS. 1993; 7(9): 1255-9.                                             | 1989                                                                                      |                      |
| Haiti   | Weatherall D. Sickle Cell and Thalassemias Prevalence Data, Personal Correspondence with David Weatherall. [Unpublished].                                                                                                                                     | 1990-2009                                                                                 |                      |
| Haiti   | Centre for Health Informatics and Multiprofessional Education, University College London. Modell's Haemoglobinopathologist's Almanac. London, United Kingdom: Centre for Health Informatics and Multiprofessional Education, University College London, 2008. | 1990-2003                                                                                 |                      |
| Haiti   | Department of Peace and Conflict Research, Uppsala University. UCDP Nonstate Conflict Database Version 2.5, 2013. Uppsala, Sweden: Department of Peace and Conflict Research, Uppsala University, 2013.                                                       | 1991                                                                                      | *                    |
| Haiti   | Department of Peace and Conflict Research, Uppsala University. UCDP One-Sided Violence Database Version 1.4, 2013. Uppsala, Sweden: Department of Peace and Conflict Research, Uppsala University, 2013.                                                      | 1991-2005                                                                                 | *                    |

**Web Table 32 - Comprehensive citation list**

| Country | Citation                                                                                                                                                                                                                          | Year*                            | New for GBD 2013 (*) |
|---------|-----------------------------------------------------------------------------------------------------------------------------------------------------------------------------------------------------------------------------------|----------------------------------|----------------------|
| Haiti   | Department of Peace and Conflict Research, Uppsala University. UCDP Battle-Related Deaths Database Version 5, 2013. Uppsala, Sweden: Department of Peace and Conflict Research, Uppsala University, 2013.                         | 1991-2004                        | *                    |
| Haiti   | Désinor OY, Ferrus A, Deverson A, Bréa P, Desmangles B, Lerebours G, Cayemittes M, Augustin A. Survey on Infant mortality in Mirebalais, Haiti. Santé (Montrouge, France). 2000; 10(6): 407-412.                                  | 1994                             |                      |
| Haiti   | Haiti Child Health Institute (CHI), Macro International, Inc. Haiti Demographic and Health Survey 1994-1995. Calverton, United States: Macro International, Inc.                                                                  | 1994-1995                        |                      |
| Haiti   | Measles Supplementary Immunization Activity Data as provided by the World Health Organization. [Unpublished].                                                                                                                     | 1994, 1999                       |                      |
| Haiti   | Fitzgerald DW, Behets FM, Lucet C, Roberfroid D. Prevalence, burden, and control of syphilis in Haiti's rural Artibonite region. Int J Infect Dis. 1998; 2(3): 127-31.                                                            | 1996                             |                      |
| Haiti   | Haiti Vital Registration - Deaths 1997 ICD10 as it appears in World Health Organization (WHO). WHO Mortality Database Version February 2014. Geneva, Switzerland: World Health Organization (WHO), 2014.                          | 1997                             |                      |
| Haiti   | Perry HB, Ross AG, Fernand F. Assessing the causes of under-five mortality in the Albert Schweitzer Hospital service area of rural Haiti. Rev Panam Salud Publica. 2005; 18(3): 178-86.                                           | 1997                             |                      |
| Haiti   | World Health Organization (WHO). The Global Elimination of Congenital Syphilis: Rationale and Strategy for Action. Geneva, Switzerland: World Health Organization (WHO), 2007.                                                    | 1997-2003                        |                      |
| Haiti   | Haiti Vital Registration - Deaths 1999 ICD10 as it appears in World Health Organization (WHO). WHO Mortality Database Version February 2014. Geneva, Switzerland: World Health Organization (WHO), 2014.                          | 1999                             |                      |
| Haiti   | Haiti Child Health Institute (CHI), Macro International, Inc. Haiti Demographic and Health Survey 2000. Calverton, United States: Macro International, Inc.                                                                       | 2000                             |                      |
| Haiti   | Hepburn MJ, Lawitz EJ. Seroprevalence of hepatitis C and associated risk factors among an urban population in Haiti. BMC Gastroenterol. 2004; 31.                                                                                 | 2000                             |                      |
| Haiti   | Joint United Nations Program on HIV/AIDS (UNAIDS), Pan American Health Organization (PAHO), United Nations Children's Fund (UNICEF), World Health Organization (WHO). Haiti Epidemiological Fact Sheet on HIV/AIDS and STIs 2004. | 2000-2001                        |                      |
| Haiti   | Haiti Vital Registration - Deaths 2001 ICD10 as it appears in World Health Organization (WHO). WHO Mortality Database Version February 2014. Geneva, Switzerland: World Health Organization (WHO), 2014.                          | 2001                             |                      |
| Haiti   | United Nations Office on Drugs and Crime (UNODC). United Nations Office on Drugs and Crime Global Study on Homicides 2011. Vienna, Austria: United Nations Office on Drugs and Crime (UNODC), 2011.                               | 2001-2010                        |                      |
| Haiti   | World Health Organization (WHO). Retrospective Measles Data on Supplementary Immunization Activities. Geneva, Switzerland: World Health Organization (WHO).                                                                       | 2001-2004, 2006-2008, 2010, 2012 |                      |
| Haiti   | Haiti Vital Registration - Deaths 2002 ICD10 as it appears in World Health Organization (WHO). WHO Mortality Database Version February 2014. Geneva, Switzerland: World Health Organization (WHO), 2014.                          | 2002                             |                      |
| Haiti   | World Health Organization (WHO). Yellow Fever Reported Cases, WHO Vaccine-Preventable Diseases: Monitoring System. Geneva, Switzerland: World Health Organization (WHO).                                                          | 2002, 2009                       |                      |

**Web Table 32 - Comprehensive citation list**

| Country  | Citation                                                                                                                                                                                                                                                                                                                                                                                                                        | Year*     | New for GBD 2013 (*) |
|----------|---------------------------------------------------------------------------------------------------------------------------------------------------------------------------------------------------------------------------------------------------------------------------------------------------------------------------------------------------------------------------------------------------------------------------------|-----------|----------------------|
| Haiti    | Haiti Vital Registration - Deaths 2003 ICD10 as it appears in World Health Organization (WHO). WHO Mortality Database Version February 2014. Geneva, Switzerland: World Health Organization (WHO), 2014.                                                                                                                                                                                                                        | 2003      |                      |
| Haiti    | Haiti Vital Registration - Deaths 2004 ICD10 as it appears in World Health Organization (WHO). WHO Mortality Database Version February 2014. Geneva, Switzerland: World Health Organization (WHO), 2014.                                                                                                                                                                                                                        | 2004      |                      |
| Haiti    | Haiti Child Health Institute (CHI), Haitian Institute of Statistics and Informatics, Macro International, Inc. Haiti Demographic and Health Survey 2005-2006. Calverton, United States: Macro International, Inc.                                                                                                                                                                                                               | 2005-2006 |                      |
| Haiti    | Fassio E, Díaz S, Santa C, Reig ME, Martínez Artola Y, Alves de Mattos A, Míguez C, Galizzi J, Zapata R, Ridruejo E, de Souza FC, Hernández N, Pinchuk L, Multicenter Group for Study of Hepatocarcinoma in Latin America, Asociación Latinoamericana para el Estudio del Hígado (ALEH). Etiology of hepatocellular carcinoma in Latin America: a prospective, multicenter, international study. Ann Hepatol. 2010; 9(1): 63-9. | 2006-2008 | *                    |
| Haiti    | Global Fund to Fight Aids Tuberculosis and Malaria (GFATM). Haiti Global Fund Household Survey 2008.                                                                                                                                                                                                                                                                                                                            | 2008      |                      |
| Haiti    | Centers for Disease Control and Prevention (CDC), Haiti Child Health Institute (CHI), Haitian Institute of Statistics and Informatics, Macro International, Inc. Haiti Demographic and Health Survey 2012. Fairfax, United States: ICF International, 2013.                                                                                                                                                                     | 2012      | *                    |
| Honduras | Honduras Vital Registration Death Data 1950 as it appears in United Nations Statistics Division (UNSD). United Nations Demographic Yearbook. New York City, United States: United Nations Statistics Division (UNSD).                                                                                                                                                                                                           | 1950      |                      |
| Honduras | Honduras Vital Registration Death Data 1951 as it appears in United Nations Statistics Division (UNSD). United Nations Demographic Yearbook. New York City, United States: United Nations Statistics Division (UNSD).                                                                                                                                                                                                           | 1951      |                      |
| Honduras | Honduras Vital Registration Death Data 1952 as it appears in United Nations Statistics Division (UNSD). United Nations Demographic Yearbook. New York City, United States: United Nations Statistics Division (UNSD).                                                                                                                                                                                                           | 1952      |                      |
| Honduras | Honduras Vital Registration Death Data 1953 as it appears in United Nations Statistics Division (UNSD). United Nations Demographic Yearbook. New York City, United States: United Nations Statistics Division (UNSD).                                                                                                                                                                                                           | 1953      |                      |
| Honduras | Honduras Vital Registration Death Data 1954 as it appears in United Nations Statistics Division (UNSD). United Nations Demographic Yearbook. New York City, United States: United Nations Statistics Division (UNSD).                                                                                                                                                                                                           | 1954      |                      |
| Honduras | Honduras Vital Registration Death Data 1955 as it appears in United Nations Statistics Division (UNSD). United Nations Demographic Yearbook. New York City, United States: United Nations Statistics Division (UNSD).                                                                                                                                                                                                           | 1955      |                      |
| Honduras | Honduras Vital Registration Death Data 1956 as it appears in United Nations Statistics Division (UNSD). United Nations Demographic Yearbook. New York City, United States: United Nations Statistics Division (UNSD).                                                                                                                                                                                                           | 1956      |                      |
| Honduras | Honduras Vital Registration Death Data 1957 as it appears in United Nations Statistics Division (UNSD). United Nations Demographic Yearbook. New York City, United States: United Nations Statistics Division (UNSD).                                                                                                                                                                                                           | 1957      |                      |

**Web Table 32 - Comprehensive citation list**

| Country  | Citation                                                                                                                                                                                                              | Year*                                                                                         | New for GBD 2013 (*) |
|----------|-----------------------------------------------------------------------------------------------------------------------------------------------------------------------------------------------------------------------|-----------------------------------------------------------------------------------------------|----------------------|
| Honduras | Honduras Vital Registration Death Data 1958 as it appears in United Nations Statistics Division (UNSD). United Nations Demographic Yearbook. New York City, United States: United Nations Statistics Division (UNSD). | 1958                                                                                          |                      |
| Honduras | Honduras Vital Registration Death Data 1959 as it appears in United Nations Statistics Division (UNSD). United Nations Demographic Yearbook. New York City, United States: United Nations Statistics Division (UNSD). | 1959                                                                                          |                      |
| Honduras | Honduras Vital Registration Death Data 1960 as it appears in United Nations Statistics Division (UNSD). United Nations Demographic Yearbook. New York City, United States: United Nations Statistics Division (UNSD). | 1960                                                                                          |                      |
| Honduras | Honduras Vital Registration Death Data 1961 as it appears in United Nations Statistics Division (UNSD). United Nations Demographic Yearbook. New York City, United States: United Nations Statistics Division (UNSD). | 1961                                                                                          |                      |
| Honduras | Centre for Research on the Epidemiology of Disasters (CRED). EM-DAT: The OFDA/CRED International Disaster Database. Brussels, Belgium: Catholic University of Leuven.                                                 | 1961, 1973-1974, 1976, 1979-1980, 1982, 1988-1990, 1993-1996, 1998-1999, 2001-2003, 2005-2011 |                      |
| Honduras | Honduras Vital Registration Death Data 1962 as it appears in United Nations Statistics Division (UNSD). United Nations Demographic Yearbook. New York City, United States: United Nations Statistics Division (UNSD). | 1962                                                                                          |                      |
| Honduras | Honduras Vital Registration Death Data 1963 as it appears in United Nations Statistics Division (UNSD). United Nations Demographic Yearbook. New York City, United States: United Nations Statistics Division (UNSD). | 1963                                                                                          |                      |
| Honduras | Honduras Vital Registration Death Data 1964 as it appears in United Nations Statistics Division (UNSD). United Nations Demographic Yearbook. New York City, United States: United Nations Statistics Division (UNSD). | 1964                                                                                          |                      |
| Honduras | Honduras Vital Registration Death Data 1965 as it appears in United Nations Statistics Division (UNSD). United Nations Demographic Yearbook. New York City, United States: United Nations Statistics Division (UNSD). | 1965                                                                                          |                      |
| Honduras | Honduras Vital Registration - Deaths 1966 ICD7 as it appears in World Health Organization (WHO). WHO Mortality Database Version February 2014. Geneva, Switzerland: World Health Organization (WHO), 2014.            | 1966                                                                                          |                      |
| Honduras | Honduras Vital Registration Death Data 1967 as it appears in United Nations Statistics Division (UNSD). United Nations Demographic Yearbook. New York City, United States: United Nations Statistics Division (UNSD). | 1967                                                                                          |                      |
| Honduras | Honduras Vital Registration - Deaths 1968 ICD8 as it appears in World Health Organization (WHO). WHO Mortality Database Version February 2014. Geneva, Switzerland: World Health Organization (WHO), 2014.            | 1968                                                                                          |                      |
| Honduras | Honduras Vital Registration - Deaths 1969 ICD8 as it appears in World Health Organization (WHO). WHO Mortality Database Version February 2014. Geneva, Switzerland: World Health Organization (WHO), 2014.            | 1969                                                                                          |                      |
| Honduras | Honduras Vital Registration - Deaths 1970 ICD8 as it appears in World Health Organization (WHO). WHO Mortality Database Version February 2014. Geneva, Switzerland: World Health Organization (WHO), 2014.            | 1970                                                                                          |                      |



**Web Table 32 - Comprehensive citation list**

| Country  | Citation                                                                                                                                                                                                                 | Year*     | New for GBD 2013 (*) |
|----------|--------------------------------------------------------------------------------------------------------------------------------------------------------------------------------------------------------------------------|-----------|----------------------|
| Honduras | Department of Statistics and Censuses (Honduras), Latin American and Caribbean Demographic Center (CELADE). Honduras National Demographic Survey 1970-1972.                                                              | 1970-1972 |                      |
| Honduras | Honduras Vital Registration - Deaths 1971 ICD8 as it appears in World Health Organization (WHO). WHO Mortality Database Version February 2014. Geneva, Switzerland: World Health Organization (WHO), 2014.               | 1971      |                      |
| Honduras | Honduras Vital Registration - Deaths 1972 ICD8 as it appears in World Health Organization (WHO). WHO Mortality Database Version February 2014. Geneva, Switzerland: World Health Organization (WHO), 2014.               | 1972      |                      |
| Honduras | Honduras Vital Registration - Deaths 1973 ICD8 as it appears in World Health Organization (WHO). WHO Mortality Database Version February 2014. Geneva, Switzerland: World Health Organization (WHO), 2014.               | 1973      |                      |
| Honduras | Department of Statistics and Censuses (Honduras). Honduras Population and Housing Census 1974.                                                                                                                           | 1974      |                      |
| Honduras | Honduras Vital Registration - Deaths 1974 ICD8 as it appears in World Health Organization (WHO). WHO Mortality Database Version February 2014. Geneva, Switzerland: World Health Organization (WHO), 2014.               | 1974      |                      |
| Honduras | Honduras Vital Registration - Deaths 1975 ICD8 as it appears in World Health Organization (WHO). WHO Mortality Database Version February 2014. Geneva, Switzerland: World Health Organization (WHO), 2014.               | 1975      |                      |
| Honduras | Grimaldi G Jr, Tesh RB, McMahon-Pratt D. A review of the geographic distribution and epidemiology of leishmaniasis in the New World. Am J Trop Med Hyg. 1989; 41(6): 687-725.                                            | 1975-1983 |                      |
| Honduras | Honduras Vital Registration - Deaths 1976 ICD8 as it appears in World Health Organization (WHO). WHO Mortality Database Version February 2014. Geneva, Switzerland: World Health Organization (WHO), 2014.               | 1976      |                      |
| Honduras | United Nations Office on Drugs and Crime (UNODC). United Nations Surveys on Crime Trends and the Operations of Criminal Justice Systems 1970-2006 as provided by Kavi Bhalla. [Unpublished].                             | 1976-1986 |                      |
| Honduras | Honduras Vital Registration - Deaths 1977 ICD8 as it appears in World Health Organization (WHO). WHO Mortality Database Version February 2014. Geneva, Switzerland: World Health Organization (WHO), 2014.               | 1977      |                      |
| Honduras | Honduras Vital Registration - Deaths 1978 ICD8 as it appears in World Health Organization (WHO). WHO Mortality Database Version February 2014. Geneva, Switzerland: World Health Organization (WHO), 2014.               | 1978      |                      |
| Honduras | Honduras Vital Registration - Deaths 1979 ICD9 as it appears in World Health Organization (WHO). WHO Mortality Database Version February 2014. Geneva, Switzerland: World Health Organization (WHO), 2014.               | 1979      |                      |
| Honduras | Honduras Vital Registration - Deaths 1980 ICD9 as it appears in World Health Organization (WHO). WHO Mortality Database Version February 2014. Geneva, Switzerland: World Health Organization (WHO), 2014.               | 1980      |                      |
| Honduras | Institute for Health Metrics and Evaluation (IHME), Joint United Nations Program on HIV/AIDS (UNAIDS). Institute for Health Metrics and Evaluation HIV Mortality Estimates Based on the UNAIDS Spectrum Model Framework. | 1980-2013 | *                    |
| Honduras | United Nations Children's Fund (UNICEF), World Health Organization (WHO). WHO and UNICEF Reported Disease Incidence Time Series - Pertussis. Geneva, Switzerland: World Health Organization (WHO).                       | 1980-2013 |                      |

**Web Table 32 - Comprehensive citation list**

| Country  | Citation                                                                                                                                                                                                                                                      | Year*      | New for GBD 2013 (*) |
|----------|---------------------------------------------------------------------------------------------------------------------------------------------------------------------------------------------------------------------------------------------------------------|------------|----------------------|
| Honduras | United Nations Children's Fund (UNICEF), World Health Organization (WHO). WHO and UNICEF Reported Disease Incidence Time Series - Measles. Geneva, Switzerland: World Health Organization (WHO).                                                              | 1980-2013  |                      |
| Honduras | Honduras Vital Registration - Deaths 1981 ICD9 as it appears in World Health Organization (WHO). WHO Mortality Database Version February 2014. Geneva, Switzerland: World Health Organization (WHO), 2014.                                                    | 1981       |                      |
| Honduras | Honduras Vital Registration - Deaths 1982 ICD9 as it appears in World Health Organization (WHO). WHO Mortality Database Version February 2014. Geneva, Switzerland: World Health Organization (WHO), 2014.                                                    | 1982       | *                    |
| Honduras | Department of Statistics and Censuses (Honduras), Latin American and Caribbean Demographic Center (CELADE). Honduras National Demographic Survey 1983.                                                                                                        | 1983       |                      |
| Honduras | Honduras Vital Registration - Deaths 1983 ICD9 as it appears in World Health Organization (WHO). WHO Mortality Database Version February 2014. Geneva, Switzerland: World Health Organization (WHO), 2014.                                                    | 1983       | *                    |
| Honduras | Family Health International, Honduras Family Planning Association (ASHONPLAFA), Management Sciences for Health (MSH), Ministry of Health (Honduras). Honduras National Survey of Maternal and Child Health 1984.                                              | 1984       |                      |
| Honduras | Honduras Family Planning Association (ASHOPLAFA), Ministry of Health (Honduras), Family Health International (FHI). (1989): Honduras Epidemiology and Family Health Survey 1987. Tegucigalpa, Honduras: ASHONPLAFA.                                           | 1987       |                      |
| Honduras | Honduras Vital Registration - Deaths 1987 ICD9 as it appears in World Health Organization (WHO). WHO Mortality Database Version February 2014. Geneva, Switzerland: World Health Organization (WHO), 2014.                                                    | 1987       |                      |
| Honduras | Department of Statistics and Censuses (Honduras). Honduras Population and Housing Census 1988.                                                                                                                                                                | 1988       |                      |
| Honduras | Honduras Vital Registration - Deaths 1988 ICD9 as it appears in World Health Organization (WHO). WHO Mortality Database Version February 2014. Geneva, Switzerland: World Health Organization (WHO), 2014.                                                    | 1988       |                      |
| Honduras | Honduras Vital Registration - Deaths 1989 ICD9 as it appears in World Health Organization (WHO). WHO Mortality Database Version February 2014. Geneva, Switzerland: World Health Organization (WHO), 2014.                                                    | 1989       |                      |
| Honduras | Honduras Vital Registration - Deaths 1990 ICD9 as it appears in World Health Organization (WHO). WHO Mortality Database Version February 2014. Geneva, Switzerland: World Health Organization (WHO), 2014.                                                    | 1990       |                      |
| Honduras | Centre for Health Informatics and Multiprofessional Education, University College London. Modell's Haemoglobinopathologist's Almanac. London, United Kingdom: Centre for Health Informatics and Multiprofessional Education, University College London, 2008. | 1990-2003  |                      |
| Honduras | Honduras Family Planning Association (ASHONPLAFA), Ministry of Health (Honduras), Family Health International (FHI). (1992): Honduras Family Planning/Maternal and Child Survey 1991-1992. Tegucigalpa, Honduras: ASHONPLAFA.                                 | 1991-1992  |                      |
| Honduras | Measles Supplementary Immunization Activity Data as provided by the World Health Organization. [Unpublished].                                                                                                                                                 | 1993, 1996 |                      |
| Honduras | Ministry of Health (Honduras), Honduras Family Planning Association (ASHONPLAFA) and Division of Reproductive Health-Centers for Disease Control and Prevention (CDC). (1997) Honduras Reproductive Health Survey 1996. Tegucigalpa, Honduras: ASHONPLAFA.    | 1996       |                      |



**Web Table 32 - Comprehensive citation list**

| Country  | Citation                                                                                                                                                                                                                                                                                                                                                                                                                        | Year*                       | New for GBD 2013 (*) |
|----------|---------------------------------------------------------------------------------------------------------------------------------------------------------------------------------------------------------------------------------------------------------------------------------------------------------------------------------------------------------------------------------------------------------------------------------|-----------------------------|----------------------|
| Honduras | World Health Organization (WHO). Yellow Fever Reported Cases, WHO Vaccine-Preventable Diseases: Monitoring System. Geneva, Switzerland: World Health Organization (WHO).                                                                                                                                                                                                                                                        | 1997-2009                   |                      |
| Honduras | United Nations Office on Drugs and Crime (UNODC). United Nations Office on Drugs and Crime Global Study on Homicides 2011. Vienna, Austria: United Nations Office on Drugs and Crime (UNODC), 2011.                                                                                                                                                                                                                             | 1999-2010                   |                      |
| Honduras | World Health Organization (WHO). Retrospective Measles Data on Supplementary Immunization Activities. Geneva, Switzerland: World Health Organization (WHO).                                                                                                                                                                                                                                                                     | 2000, 2002-2004, 2008, 2012 |                      |
| Honduras | National Institute of Statistics (Honduras). Honduras Population and Housing Census 2001.                                                                                                                                                                                                                                                                                                                                       | 2001                        |                      |
| Honduras | Honduras Family Planning Association (ASHONPLAFA), Ministry of Health (Honduras), and Division of Reproductive Health-Centers for Disease Control and Prevention (CDC). Honduras Reproductive Health Survey 2001. Tegucigalpa, Honduras: Honduras Family Planning Association (ASHONPLAFA).                                                                                                                                     | 2001                        |                      |
| Honduras | World Health Organization (WHO). Honduras WHO Leishmaniasis Country Profile.                                                                                                                                                                                                                                                                                                                                                    | 2003-2010                   | *                    |
| Honduras | National Institute of Statistics (Honduras). Honduras Survey of Living Conditions 2004. Tegucigalpa, Honduras: National Institute of Statistics (Honduras).                                                                                                                                                                                                                                                                     | 2004                        | *                    |
| Honduras | Department of Peace and Conflict Research, Uppsala University. UCDP One-Sided Violence Database Version 1.4, 2013. Uppsala, Sweden: Department of Peace and Conflict Research, Uppsala University, 2013.                                                                                                                                                                                                                        | 2004                        | *                    |
| Honduras | Macro International, Inc, National Institute of Statistics (Honduras), Secretary of Health (Honduras). Honduras Demographic and Health Survey 2005-2006. Calverton, United States: Macro International, Inc.                                                                                                                                                                                                                    | 2005-2006                   |                      |
| Honduras | Fassio E, Díaz S, Santa C, Reig ME, Martínez Artola Y, Alves de Mattos A, Míguez C, Galizzi J, Zapata R, Ridruejo E, de Souza FC, Hernández N, Pinchuk L, Multicenter Group for Study of Hepatocarcinoma in Latin America, Asociación Latinoamericana para el Estudio del Hígado (ALEH). Etiology of hepatocellular carcinoma in Latin America: a prospective, multicenter, international study. Ann Hepatol. 2010; 9(1): 63-9. | 2006-2008                   | *                    |
| Honduras | Joint United Nations Program on HIV/AIDS (UNAIDS), Secretary of Health (Honduras). Honduras National Report on Progress in Implementing the UNGASS 2010. Geneva, Switzerland: Joint United Nations Program on HIV/AIDS (UNAIDS), 2010.                                                                                                                                                                                          | 2009                        |                      |
| Honduras | Ministry of Health (Honduras). Honduras Maternal Mortality Ratio Update 2010. Ministry of Health (Honduras), 2013.                                                                                                                                                                                                                                                                                                              | 2010                        |                      |
| Honduras | Department of Peace and Conflict Research, Uppsala University. UCDP Nonstate Conflict Database Version 2.5, 2013. Uppsala, Sweden: Department of Peace and Conflict Research, Uppsala University, 2013.                                                                                                                                                                                                                         | 2010                        | *                    |
| Honduras | ICF International, National Institute of Statistics (Honduras). Honduras Demographic and Health Survey 2011-2012. Claverton, Maryland: ICF Macro, 2013.                                                                                                                                                                                                                                                                         | 2011-2012                   | *                    |
| Hungary  | Max Planck Institute for Demographic Research, University of California. Human Mortality Database. Berkeley, USA: University of California; Rostock, Germany: Max Planck Institute for Demographic Research.                                                                                                                                                                                                                    | 1950-1954                   |                      |
| Hungary  | Hungary Vital Registration - Deaths 1955 ICD7 as it appears in World Health Organization (WHO). WHO Mortality Database Version February 2014. Geneva, Switzerland: World Health Organization (WHO), 2014.                                                                                                                                                                                                                       | 1955                        |                      |
| Hungary  | Hungary Vital Registration - Deaths 1956 ICD7 as it appears in World Health Organization (WHO). WHO Mortality Database Version February 2014. Geneva, Switzerland: World Health Organization (WHO), 2014.                                                                                                                                                                                                                       | 1956                        |                      |

**Web Table 32 - Comprehensive citation list**

| Country | Citation                                                                                                                                                                                                                 | Year* | New for GBD 2013 (*) |
|---------|--------------------------------------------------------------------------------------------------------------------------------------------------------------------------------------------------------------------------|-------|----------------------|
| Hungary | Peace Research Institute Oslo (PRIO). Battle Deaths Dataset Version 3, 2009. Oslo, Norway: Peace Research Institute Oslo (PRIO), 2009.                                                                                   | 1956  |                      |
| Hungary | Hungary Vital Registration - Deaths 1957 ICD7 as it appears in World Health Organization (WHO). WHO Mortality Database Version February 2014. Geneva, Switzerland: World Health Organization (WHO), 2014.                | 1957  |                      |
| Hungary | Hungary Vital Registration - Deaths 1958 ICD7 as it appears in World Health Organization (WHO). WHO Mortality Database Version February 2014. Geneva, Switzerland: World Health Organization (WHO), 2014.                | 1958  |                      |
| Hungary | Hungary Vital Registration - Deaths 1959 ICD7 as it appears in World Health Organization (WHO). WHO Mortality Database Version February 2014. Geneva, Switzerland: World Health Organization (WHO), 2014.                | 1959  |                      |
| Hungary | Hungary Census 1960 as it appears in United Nations Statistics Division (UNSD). United Nations Demographic Yearbook. New York City, United States: United Nations Statistics Division (UNSD).                            | 1960  |                      |
| Hungary | Hungary Vital Registration - Deaths 1960 ICD7 as it appears in World Health Organization (WHO). WHO Mortality Database Version February 2014. Geneva, Switzerland: World Health Organization (WHO), 2014.                | 1960  |                      |
| Hungary | Hungary Vital Registration - Deaths 1961 ICD7 as it appears in World Health Organization (WHO). WHO Mortality Database Version February 2014. Geneva, Switzerland: World Health Organization (WHO), 2014.                | 1961  |                      |
| Hungary | Hungary Vital Registration - Deaths 1962 ICD7 as it appears in World Health Organization (WHO). WHO Mortality Database Version February 2014. Geneva, Switzerland: World Health Organization (WHO), 2014.                | 1962  |                      |
| Hungary | Fraser GR, Defaranas B, Kattamis CA, Race RR, Sanger R, Stamatoyannopoulos G. Glucose-6-phosphate dehydrogenase, colour vision and XG blood groups in Greece: linkage and population data. Ann Hum Genet. 1964; 395-403. | 1962  |                      |
| Hungary | Hungary Vital Registration - Deaths 1963 ICD7 as it appears in World Health Organization (WHO). WHO Mortality Database Version February 2014. Geneva, Switzerland: World Health Organization (WHO), 2014.                | 1963  |                      |
| Hungary | Hungary Vital Registration - Deaths 1964 ICD7 as it appears in World Health Organization (WHO). WHO Mortality Database Version February 2014. Geneva, Switzerland: World Health Organization (WHO), 2014.                | 1964  |                      |
| Hungary | Hungary Vital Registration - Deaths 1965 ICD7 as it appears in World Health Organization (WHO). WHO Mortality Database Version February 2014. Geneva, Switzerland: World Health Organization (WHO), 2014.                | 1965  |                      |
| Hungary | Hungary Vital Registration - Deaths 1966 ICD7 as it appears in World Health Organization (WHO). WHO Mortality Database Version February 2014. Geneva, Switzerland: World Health Organization (WHO), 2014.                | 1966  |                      |
| Hungary | Hungary Vital Registration - Deaths 1967 ICD7 as it appears in World Health Organization (WHO). WHO Mortality Database Version February 2014. Geneva, Switzerland: World Health Organization (WHO), 2014.                | 1967  |                      |
| Hungary | Hungary Vital Registration - Deaths 1968 ICD7 as it appears in World Health Organization (WHO). WHO Mortality Database Version February 2014. Geneva, Switzerland: World Health Organization (WHO), 2014.                | 1968  |                      |

**Web Table 32 - Comprehensive citation list**

| Country | Citation                                                                                                                                                                                                                 | Year*                                        | New for GBD 2013 (*) |
|---------|--------------------------------------------------------------------------------------------------------------------------------------------------------------------------------------------------------------------------|----------------------------------------------|----------------------|
| Hungary | Hungary Vital Registration - Deaths 1969 ICD8 as it appears in World Health Organization (WHO). WHO Mortality Database Version February 2014. Geneva, Switzerland: World Health Organization (WHO), 2014.                | 1969                                         |                      |
| Hungary | Hungary Vital Registration - Deaths 1970 ICD8 as it appears in World Health Organization (WHO). WHO Mortality Database Version February 2014. Geneva, Switzerland: World Health Organization (WHO), 2014.                | 1970                                         |                      |
| Hungary | Centre for Research on the Epidemiology of Disasters (CRED). EM-DAT: The OFDA/CRED International Disaster Database. Brussels, Belgium: Catholic University of Leuven.                                                    | 1970, 1984, 1999-2000, 2003, 2005-2006, 2010 |                      |
| Hungary | Hungary Vital Registration 1971 ICD8 as it appears in World Health Organization (WHO). WHO Mortality Database Version February 2014. Geneva, Switzerland: World Health Organization (WHO), 2014.                         | 1971                                         |                      |
| Hungary | Hungary Vital Registration 1972 ICD8 as it appears in World Health Organization (WHO). WHO Mortality Database Version February 2014. Geneva, Switzerland: World Health Organization (WHO), 2014.                         | 1972                                         |                      |
| Hungary | Hungary Vital Registration - Deaths 1973 ICD8 as it appears in World Health Organization (WHO). WHO Mortality Database Version February 2014. Geneva, Switzerland: World Health Organization (WHO), 2014.                | 1973                                         |                      |
| Hungary | Hungary Vital Registration - Deaths 1974 ICD8 as it appears in World Health Organization (WHO). WHO Mortality Database Version February 2014. Geneva, Switzerland: World Health Organization (WHO), 2014.                | 1974                                         |                      |
| Hungary | Hungary Vital Registration - Deaths 1975 ICD8 as it appears in World Health Organization (WHO). WHO Mortality Database Version February 2014. Geneva, Switzerland: World Health Organization (WHO), 2014.                | 1975                                         |                      |
| Hungary | Hungary Vital Registration - Deaths 1976 ICD8 as it appears in World Health Organization (WHO). WHO Mortality Database Version February 2014. Geneva, Switzerland: World Health Organization (WHO), 2014.                | 1976                                         |                      |
| Hungary | Hungary Vital Registration - Deaths 1977 ICD8 as it appears in World Health Organization (WHO). WHO Mortality Database Version February 2014. Geneva, Switzerland: World Health Organization (WHO), 2014.                | 1977                                         |                      |
| Hungary | Hungary Vital Registration - Deaths 1978 ICD8 as it appears in World Health Organization (WHO). WHO Mortality Database Version February 2014. Geneva, Switzerland: World Health Organization (WHO), 2014.                | 1978                                         |                      |
| Hungary | Hungary Vital Registration - Deaths 1979 ICD9 as it appears in World Health Organization (WHO). WHO Mortality Database Version February 2014. Geneva, Switzerland: World Health Organization (WHO), 2014.                | 1979                                         |                      |
| Hungary | Hungary Vital Registration - Deaths 1980 ICD9 as it appears in World Health Organization (WHO). WHO Mortality Database Version February 2014. Geneva, Switzerland: World Health Organization (WHO), 2014.                | 1980                                         |                      |
| Hungary | Institute for Health Metrics and Evaluation. Institute for Health Metrics and Evaluation Cancer Registry Database. [Unpublished].                                                                                        | 1980-2011                                    |                      |
| Hungary | Parkin DM, International Agency for Research on Cancer, International Association of Cancer Registries. Cancer Incidence in Five Continents. Vol. I to VIII. Lyon, France, IARC Press, 2005.                             | 1980-1982, 1985, 1990-1991, 1994-1995        |                      |
| Hungary | Institute for Health Metrics and Evaluation (IHME), Joint United Nations Program on HIV/AIDS (UNAIDS). Institute for Health Metrics and Evaluation HIV Mortality Estimates Based on the UNAIDS Spectrum Model Framework. | 1980-2013                                    | *                    |

**Web Table 32 - Comprehensive citation list**

| Country | Citation                                                                                                                                                                                                                                                                                                       | Year*                | New for GBD 2013 (*) |
|---------|----------------------------------------------------------------------------------------------------------------------------------------------------------------------------------------------------------------------------------------------------------------------------------------------------------------|----------------------|----------------------|
| Hungary | United Nations Children's Fund (UNICEF), World Health Organization (WHO). WHO and UNICEF Reported Disease Incidence Time Series - Pertussis. Geneva, Switzerland: World Health Organization (WHO).                                                                                                             | 1980-2013            |                      |
| Hungary | United Nations Children's Fund (UNICEF), World Health Organization (WHO). WHO and UNICEF Reported Disease Incidence Time Series - Measles. Geneva, Switzerland: World Health Organization (WHO).                                                                                                               | 1980-1988, 1990-2013 |                      |
| Hungary | Hungary Vital Registration - Deaths 1981 ICD9 as it appears in World Health Organization (WHO). WHO Mortality Database Version February 2014. Geneva, Switzerland: World Health Organization (WHO), 2014.                                                                                                      | 1981                 |                      |
| Hungary | Hungary Vital Registration - Deaths 1982 ICD9 as it appears in World Health Organization (WHO). WHO Mortality Database Version February 2014. Geneva, Switzerland: World Health Organization (WHO), 2014.                                                                                                      | 1982                 |                      |
| Hungary | Pohl O, Brojnás J, Rusvai E, Ordög K, Siska I, Faludi G, Kapusinszky B, Csohán A, Lendvai K, Lengyel A, Mezey I, Berencsi G. Retrospective detection of a subclinical hepatitis A virus (HAV) epidemic affecting juvenile cohorts of the Hungarian population. FEMS Immunol Med Microbiol. 2003; 38(1): 85-91. | 1982,1987,1994,1999  |                      |
| Hungary | Hungary Vital Registration - Deaths 1983 ICD9 as it appears in World Health Organization (WHO). WHO Mortality Database Version February 2014. Geneva, Switzerland: World Health Organization (WHO), 2014.                                                                                                      | 1983                 |                      |
| Hungary | Hungary Vital Registration - Deaths 1984 ICD9 as it appears in World Health Organization (WHO). WHO Mortality Database Version February 2014. Geneva, Switzerland: World Health Organization (WHO), 2014.                                                                                                      | 1984                 |                      |
| Hungary | Hungary Vital Registration - Deaths 1985 ICD9 as it appears in World Health Organization (WHO). WHO Mortality Database Version February 2014. Geneva, Switzerland: World Health Organization (WHO), 2014.                                                                                                      | 1985                 |                      |
| Hungary | Hungary Vital Registration - Deaths 1986 ICD9 as it appears in World Health Organization (WHO). WHO Mortality Database Version February 2014. Geneva, Switzerland: World Health Organization (WHO), 2014.                                                                                                      | 1986                 |                      |
| Hungary | Kassas AL, Mihály I. Seroepidemiologic study of anti-HAV IgG in health-care workers. Acta Microbiol Immunol Hung. 1995; 42(4): 351-4.                                                                                                                                                                          | 1986-1993            |                      |
| Hungary | Hungary Vital Registration - Deaths 1987 ICD9 as it appears in World Health Organization (WHO). WHO Mortality Database Version February 2014. Geneva, Switzerland: World Health Organization (WHO), 2014.                                                                                                      | 1987                 |                      |
| Hungary | Hungary Vital Registration - Deaths 1988 ICD9 as it appears in World Health Organization (WHO). WHO Mortality Database Version February 2014. Geneva, Switzerland: World Health Organization (WHO), 2014.                                                                                                      | 1988                 |                      |
| Hungary | Hungary Vital Registration - Deaths 1989 ICD9 as it appears in World Health Organization (WHO). WHO Mortality Database Version February 2014. Geneva, Switzerland: World Health Organization (WHO), 2014.                                                                                                      | 1989                 |                      |
| Hungary | Hungary Vital Registration - Deaths 1990 ICD9 as it appears in World Health Organization (WHO). WHO Mortality Database Version February 2014. Geneva, Switzerland: World Health Organization (WHO), 2014.                                                                                                      | 1990                 |                      |
| Hungary | Centre for Health Informatics and Multiprofessional Education, University College London. Modell's Haemoglobinopathologist's Almanac. London, United Kingdom: Centre for Health Informatics and Multiprofessional Education, University College London, 2008.                                                  | 1990-2003            |                      |

**Web Table 32 - Comprehensive citation list**

| Country | Citation                                                                                                                                                                                                                                                                                   | Year*           | New for GBD 2013 (*) |
|---------|--------------------------------------------------------------------------------------------------------------------------------------------------------------------------------------------------------------------------------------------------------------------------------------------|-----------------|----------------------|
| Hungary | Hungary Vital Registration - Deaths 1991 ICD9 as it appears in World Health Organization (WHO). WHO Mortality Database Version February 2014. Geneva, Switzerland: World Health Organization (WHO), 2014.                                                                                  | 1991            |                      |
| Hungary | Dávid K, Halmy L. [The hepatitis A virus antibody (anti-HAV) in chronic diffuse liver diseases]. Orv Hetil. 1983; 124(21): 1241-3.                                                                                                                                                         | 1991-1995       |                      |
| Hungary | Hungary Vital Registration - Deaths 1992 ICD9 as it appears in World Health Organization (WHO). WHO Mortality Database Version February 2014. Geneva, Switzerland: World Health Organization (WHO), 2014.                                                                                  | 1992            |                      |
| Hungary | Hungary Vital Registration - Deaths 1993 ICD9 as it appears in World Health Organization (WHO). WHO Mortality Database Version February 2014. Geneva, Switzerland: World Health Organization (WHO), 2014.                                                                                  | 1993            |                      |
| Hungary | Hungary Vital Registration - Deaths 1994 ICD9 as it appears in World Health Organization (WHO). WHO Mortality Database Version February 2014. Geneva, Switzerland: World Health Organization (WHO), 2014.                                                                                  | 1994            |                      |
| Hungary | Hungary Vital Registration - Deaths 1995 ICD9 as it appears in World Health Organization (WHO). WHO Mortality Database Version February 2014. Geneva, Switzerland: World Health Organization (WHO), 2014.                                                                                  | 1995            |                      |
| Hungary | Mircescu G, Capsa D, Covic M, Caprioara MG, Gluhovschi G, Golea O, Ursea N, Gâmeata L, Cepoi V, Constantinovici N, Covic A. Nephrology and renal replacement therapy in Romania – transition still continues (Cinderella story revisited). Nephrol Dial Transplant. 2004; 19(12): 2971-80. | 1995, 2001      |                      |
| Hungary | Hungary Vital Registration - Deaths 1996 ICD10 as it appears in World Health Organization (WHO). WHO Mortality Database Version February 2014. Geneva, Switzerland: World Health Organization (WHO), 2014.                                                                                 | 1996            |                      |
| Hungary | Hungary Vital Registration - Deaths 1997 ICD10 as it appears in World Health Organization (WHO). WHO Mortality Database Version February 2014. Geneva, Switzerland: World Health Organization (WHO), 2014.                                                                                 | 1997            |                      |
| Hungary | Hungary Vital Registration - Deaths 1998 ICD10 as it appears in World Health Organization (WHO). WHO Mortality Database Version February 2014. Geneva, Switzerland: World Health Organization (WHO), 2014.                                                                                 | 1998            |                      |
| Hungary | Hungary Vital Registration - Deaths 1999 ICD10 as it appears in World Health Organization (WHO). WHO Mortality Database Version February 2014. Geneva, Switzerland: World Health Organization (WHO), 2014.                                                                                 | 1999            |                      |
| Hungary | Hungary Vital Registration - Deaths 2000 ICD10 as it appears in World Health Organization (WHO). WHO Mortality Database Version February 2014. Geneva, Switzerland: World Health Organization (WHO), 2014.                                                                                 | 2000            |                      |
| Hungary | Hungary Vital Registration - Deaths 2001 ICD10 as it appears in World Health Organization (WHO). WHO Mortality Database Version February 2014. Geneva, Switzerland: World Health Organization (WHO), 2014.                                                                                 | 2001            |                      |
| Hungary | National Cancer Registry (Hungary). Hungary National Cancer Registry - Incidence 2001.                                                                                                                                                                                                     | 2001            |                      |
| Hungary | World Health Organization (WHO). Yellow Fever Reported Cases, WHO Vaccine-Preventable Diseases: Monitoring System. Geneva, Switzerland: World Health Organization (WHO).                                                                                                                   | 2001, 2003-2009 |                      |

**Web Table 32 - Comprehensive citation list**

| Country | Citation                                                                                                                                                                                                   | Year*     | New for GBD 2013 (*) |
|---------|------------------------------------------------------------------------------------------------------------------------------------------------------------------------------------------------------------|-----------|----------------------|
| Hungary | Hungary Vital Registration - Deaths 2002 ICD10 as it appears in World Health Organization (WHO). WHO Mortality Database Version February 2014. Geneva, Switzerland: World Health Organization (WHO), 2014. | 2002      |                      |
| Hungary | National Cancer Registry (Hungary). Hungary National Cancer Registry - Incidence 2002.                                                                                                                     | 2002      |                      |
| Hungary | Hungary Vital Registration - Deaths 2003 ICD10 as it appears in World Health Organization (WHO). WHO Mortality Database Version February 2014. Geneva, Switzerland: World Health Organization (WHO), 2014. | 2003      |                      |
| Hungary | National Cancer Registry (Hungary). Hungary National Cancer Registry - Incidence 2003.                                                                                                                     | 2003      |                      |
| Hungary | EUVAC-NET. EUVAC-NET Pertussis Surveillance Report 2003-2007. Stockholm, Sweden: European Centre for Disease Prevention and Control, 2009.                                                                 | 2003-2007 |                      |
| Hungary | Hungary Vital Registration - Deaths 2004 ICD10 as it appears in World Health Organization (WHO). WHO Mortality Database Version February 2014. Geneva, Switzerland: World Health Organization (WHO), 2014. | 2004      |                      |
| Hungary | National Cancer Registry (Hungary). Hungary National Cancer Registry - Incidence 2004.                                                                                                                     | 2004      |                      |
| Hungary | Hungary Vital Registration - Deaths 2005 ICD10 as it appears in World Health Organization (WHO). WHO Mortality Database Version February 2014. Geneva, Switzerland: World Health Organization (WHO), 2014. | 2005      |                      |
| Hungary | National Cancer Registry (Hungary). Hungary National Cancer Registry - Incidence 2005.                                                                                                                     | 2005      |                      |
| Hungary | Hungary Vital Registration - Deaths 2006 ICD10 as it appears in World Health Organization (WHO). WHO Mortality Database Version February 2014. Geneva, Switzerland: World Health Organization (WHO), 2014. | 2006      |                      |
| Hungary | National Cancer Registry (Hungary). Hungary National Cancer Registry - Incidence 2006.                                                                                                                     | 2006      |                      |
| Hungary | Hungary Vital Registration - Deaths 2007 ICD10 as it appears in World Health Organization (WHO). WHO Mortality Database Version February 2014. Geneva, Switzerland: World Health Organization (WHO), 2014. | 2007      |                      |
| Hungary | World Health Organization (WHO). Global Status Report on Road Safety 2009. Geneva, Switzerland: World Health Organization (WHO), 2009.                                                                     | 2007      |                      |
| Hungary | National Cancer Registry (Hungary). Hungary National Cancer Registry - Incidence 2007.                                                                                                                     | 2007      |                      |
| Hungary | Hungary Vital Registration - Deaths 2008 ICD10 as it appears in World Health Organization (WHO). WHO Mortality Database Version February 2014. Geneva, Switzerland: World Health Organization (WHO), 2014. | 2008      |                      |
| Hungary | National Cancer Registry (Hungary). Hungary National Cancer Registry - Incidence 2008.                                                                                                                     | 2008      |                      |
| Hungary | EUVAC-NET. EUVAC-NET Pertussis Surveillance Report 2009. Stockholm, Sweden: European Centre for Disease Prevention and Control, 2010.                                                                      | 2008-2009 |                      |
| Hungary | Hungary Vital Registration - Deaths 2009 ICD10 as it appears in World Health Organization (WHO). WHO Mortality Database Version February 2014. Geneva, Switzerland: World Health Organization (WHO), 2014. | 2009      |                      |
| Hungary | National Cancer Registry (Hungary). Hungary National Cancer Registry - Incidence 2009.                                                                                                                     | 2009      |                      |



**Web Table 32 - Comprehensive citation list**

| Country | Citation                                                                                                                                                                                                     | Year*     | New for GBD 2013 (*) |
|---------|--------------------------------------------------------------------------------------------------------------------------------------------------------------------------------------------------------------|-----------|----------------------|
| Hungary | EUVAC-NET. EUVAC-NET Measles Surveillance Report 2009. Stockholm, Sweden: European Centre for Disease Prevention and Control, 2010.                                                                          | 2009      |                      |
| Hungary | Hungary Vital Registration - Deaths 2010 ICD10 as it appears in World Health Organization (WHO). WHO Mortality Database Version February 2014. Geneva, Switzerland: World Health Organization (WHO), 2014.   | 2010      |                      |
| Hungary | National Cancer Registry (Hungary). Hungary National Cancer Registry - Incidence 2010.                                                                                                                       | 2010      |                      |
| Hungary | Hungary Vital Registration - Deaths 2011 ICD10 as it appears in World Health Organization (WHO). WHO Mortality Database Version February 2014. Geneva, Switzerland: World Health Organization (WHO), 2014.   | 2011      | *                    |
| Hungary | National Cancer Registry (Hungary). Hungary National Cancer Registry - Incidence 2011.                                                                                                                       | 2011      |                      |
| Hungary | Hungary Vital Registration - Deaths 2012 ICD10 as it appears in World Health Organization (WHO). WHO Mortality Database Version February 2014. Geneva, Switzerland: World Health Organization (WHO), 2014.   | 2012      | *                    |
| Iceland | Max Planck Institute for Demographic Research, University of California. Human Mortality Database. Berkeley, USA: University of California; Rostock, Germany: Max Planck Institute for Demographic Research. | 1950-2010 |                      |
| Iceland | Iceland Vital Registration - Deaths 1951 ICD7 as it appears in World Health Organization (WHO). WHO Mortality Database Version February 2014. Geneva, Switzerland: World Health Organization (WHO), 2014.    | 1951      |                      |
| Iceland | Iceland Vital Registration - Deaths 1952 ICD7 as it appears in World Health Organization (WHO). WHO Mortality Database Version February 2014. Geneva, Switzerland: World Health Organization (WHO), 2014.    | 1952      |                      |
| Iceland | Iceland Vital Registration - Deaths 1953 ICD7 as it appears in World Health Organization (WHO). WHO Mortality Database Version February 2014. Geneva, Switzerland: World Health Organization (WHO), 2014.    | 1953      |                      |
| Iceland | Iceland Vital Registration - Deaths 1954 ICD7 as it appears in World Health Organization (WHO). WHO Mortality Database Version February 2014. Geneva, Switzerland: World Health Organization (WHO), 2014.    | 1954      |                      |
| Iceland | Iceland Vital Registration - Deaths 1955 ICD7 as it appears in World Health Organization (WHO). WHO Mortality Database Version February 2014. Geneva, Switzerland: World Health Organization (WHO), 2014.    | 1955      |                      |
| Iceland | Iceland Vital Registration - Deaths 1956 ICD7 as it appears in World Health Organization (WHO). WHO Mortality Database Version February 2014. Geneva, Switzerland: World Health Organization (WHO), 2014.    | 1956      |                      |
| Iceland | Iceland Vital Registration - Deaths 1957 ICD7 as it appears in World Health Organization (WHO). WHO Mortality Database Version February 2014. Geneva, Switzerland: World Health Organization (WHO), 2014.    | 1957      |                      |
| Iceland | Iceland Vital Registration - Deaths 1958 ICD7 as it appears in World Health Organization (WHO). WHO Mortality Database Version February 2014. Geneva, Switzerland: World Health Organization (WHO), 2014.    | 1958      |                      |

**Web Table 32 - Comprehensive citation list**

| Country | Citation                                                                                                                                                                                                  | Year* | New for GBD 2013 (*) |
|---------|-----------------------------------------------------------------------------------------------------------------------------------------------------------------------------------------------------------|-------|----------------------|
| Iceland | Iceland Vital Registration - Deaths 1959 ICD7 as it appears in World Health Organization (WHO). WHO Mortality Database Version February 2014. Geneva, Switzerland: World Health Organization (WHO), 2014. | 1959  |                      |
| Iceland | Iceland Vital Registration - Deaths 1960 ICD7 as it appears in World Health Organization (WHO). WHO Mortality Database Version February 2014. Geneva, Switzerland: World Health Organization (WHO), 2014. | 1960  |                      |
| Iceland | Iceland Vital Registration - Deaths 1961 ICD7 as it appears in World Health Organization (WHO). WHO Mortality Database Version February 2014. Geneva, Switzerland: World Health Organization (WHO), 2014. | 1961  |                      |
| Iceland | Iceland Vital Registration - Deaths 1962 ICD7 as it appears in World Health Organization (WHO). WHO Mortality Database Version February 2014. Geneva, Switzerland: World Health Organization (WHO), 2014. | 1962  |                      |
| Iceland | Iceland Vital Registration - Deaths 1963 ICD7 as it appears in World Health Organization (WHO). WHO Mortality Database Version February 2014. Geneva, Switzerland: World Health Organization (WHO), 2014. | 1963  |                      |
| Iceland | Iceland Vital Registration - Deaths 1964 ICD7 as it appears in World Health Organization (WHO). WHO Mortality Database Version February 2014. Geneva, Switzerland: World Health Organization (WHO), 2014. | 1964  |                      |
| Iceland | Iceland Vital Registration - Deaths 1965 ICD7 as it appears in World Health Organization (WHO). WHO Mortality Database Version February 2014. Geneva, Switzerland: World Health Organization (WHO), 2014. | 1965  |                      |
| Iceland | Iceland Vital Registration - Deaths 1966 ICD7 as it appears in World Health Organization (WHO). WHO Mortality Database Version February 2014. Geneva, Switzerland: World Health Organization (WHO), 2014. | 1966  |                      |
| Iceland | Iceland Vital Registration - Deaths 1967 ICD7 as it appears in World Health Organization (WHO). WHO Mortality Database Version February 2014. Geneva, Switzerland: World Health Organization (WHO), 2014. | 1967  |                      |
| Iceland | Iceland Vital Registration - Deaths 1968 ICD7 as it appears in World Health Organization (WHO). WHO Mortality Database Version February 2014. Geneva, Switzerland: World Health Organization (WHO), 2014. | 1968  |                      |
| Iceland | Iceland Vital Registration - Deaths 1969 ICD7 as it appears in World Health Organization (WHO). WHO Mortality Database Version February 2014. Geneva, Switzerland: World Health Organization (WHO), 2014. | 1969  |                      |
| Iceland | Iceland Vital Registration - Deaths 1970 ICD7 as it appears in World Health Organization (WHO). WHO Mortality Database Version February 2014. Geneva, Switzerland: World Health Organization (WHO), 2014. | 1970  |                      |
| Iceland | Iceland Vital Registration - Deaths 1971 ICD8 as it appears in World Health Organization (WHO). WHO Mortality Database Version February 2014. Geneva, Switzerland: World Health Organization (WHO), 2014. | 1971  |                      |
| Iceland | Iceland Vital Registration - Deaths 1972 ICD8 as it appears in World Health Organization (WHO). WHO Mortality Database Version February 2014. Geneva, Switzerland: World Health Organization (WHO), 2014. | 1972  |                      |



**Web Table 32 - Comprehensive citation list**

| Country | Citation                                                                                                                                                                                                                                                                                              | Year*                           | New for GBD 2013 (*) |
|---------|-------------------------------------------------------------------------------------------------------------------------------------------------------------------------------------------------------------------------------------------------------------------------------------------------------|---------------------------------|----------------------|
| Iceland | Iceland Vital Registration - Deaths 1973 ICD8 as it appears in World Health Organization (WHO). WHO Mortality Database Version February 2014. Geneva, Switzerland: World Health Organization (WHO), 2014.                                                                                             | 1973                            |                      |
| Iceland | Iceland Vital Registration - Deaths 1974 ICD8 as it appears in World Health Organization (WHO). WHO Mortality Database Version February 2014. Geneva, Switzerland: World Health Organization (WHO), 2014.                                                                                             | 1974                            |                      |
| Iceland | Centre for Research on the Epidemiology of Disasters (CRED). EM-DAT: The OFDA/CRED International Disaster Database. Brussels, Belgium: Catholic University of Leuven.                                                                                                                                 | 1974, 1976, 1983, 1995          |                      |
| Iceland | Iceland Vital Registration - Deaths 1975 ICD8 as it appears in World Health Organization (WHO). WHO Mortality Database Version February 2014. Geneva, Switzerland: World Health Organization (WHO), 2014.                                                                                             | 1975                            |                      |
| Iceland | Iceland Vital Registration - Deaths 1976 ICD8 as it appears in World Health Organization (WHO). WHO Mortality Database Version February 2014. Geneva, Switzerland: World Health Organization (WHO), 2014.                                                                                             | 1976                            |                      |
| Iceland | Iceland Vital Registration - Deaths 1977 ICD8 as it appears in World Health Organization (WHO). WHO Mortality Database Version February 2014. Geneva, Switzerland: World Health Organization (WHO), 2014.                                                                                             | 1977                            |                      |
| Iceland | Iceland Vital Registration - Deaths 1978 ICD8 as it appears in World Health Organization (WHO). WHO Mortality Database Version February 2014. Geneva, Switzerland: World Health Organization (WHO), 2014.                                                                                             | 1978                            |                      |
| Iceland | Iceland Vital Registration - Deaths 1979 ICD8 as it appears in World Health Organization (WHO). WHO Mortality Database Version February 2014. Geneva, Switzerland: World Health Organization (WHO), 2014.                                                                                             | 1979                            |                      |
| Iceland | Briem H, Weiland O, Fridriksson I, Berg R. Prevalence of antibody to hepatitis A in Iceland in relation to age, sex, and number of notified cases of hepatitis. Am J Epidemiol. 1982; 116(3): 451-5.                                                                                                  | 1979                            |                      |
| Iceland | Briem H. Declining prevalence of antibodies to hepatitis A virus infection in Iceland. Scand J Infect Dis. 1991; 23(2): 135-8.                                                                                                                                                                        | 1979, 1987                      |                      |
| Iceland | Iceland Vital Registration - Deaths 1980 ICD8 as it appears in World Health Organization (WHO). WHO Mortality Database Version February 2014. Geneva, Switzerland: World Health Organization (WHO), 2014.                                                                                             | 1980                            |                      |
| Iceland | Institute for Health Metrics and Evaluation. Institute for Health Metrics and Evaluation Cancer Registry Database. [Unpublished].                                                                                                                                                                     | 1980-2011                       |                      |
| Iceland | Ferlay J, Parkin DM, Curado MP, Bray F, Edwards B, Shin HR and Forman D. Cancer Incidence in Five Continents, Volumes I to IX: IARC CancerBase No. 9 [Internet]. Lyon, France: International Agency for Research on Cancer; 2010. Available from: <a href="http://ci5.iarc.fr">http://ci5.iarc.fr</a> | 1980-2002                       |                      |
| Iceland | Institute for Health Metrics and Evaluation (IHME), Joint United Nations Program on HIV/AIDS (UNAIDS). Institute for Health Metrics and Evaluation HIV Mortality Estimates Based on the UNAIDS Spectrum Model Framework.                                                                              | 1980-2013                       | *                    |
| Iceland | United Nations Children's Fund (UNICEF), World Health Organization (WHO). WHO and UNICEF Reported Disease Incidence Time Series - Pertussis. Geneva, Switzerland: World Health Organization (WHO).                                                                                                    | 1980-1997, 2000-2001, 2003-2013 |                      |
| Iceland | United Nations Children's Fund (UNICEF), World Health Organization (WHO). WHO and UNICEF Reported Disease Incidence Time Series - Measles. Geneva, Switzerland: World Health Organization (WHO).                                                                                                      | 1980-1997, 2000-2001, 2003-2013 |                      |

**Web Table 32 - Comprehensive citation list**

| Country | Citation                                                                                                                                                                                                                                                      | Year*            | New for GBD 2013 (*) |
|---------|---------------------------------------------------------------------------------------------------------------------------------------------------------------------------------------------------------------------------------------------------------------|------------------|----------------------|
| Iceland | Iceland Vital Registration - Deaths 1981 ICD9 as it appears in World Health Organization (WHO). WHO Mortality Database Version February 2014. Geneva, Switzerland: World Health Organization (WHO), 2014.                                                     | 1981             |                      |
| Iceland | Iceland Vital Registration - Deaths 1982 ICD9 as it appears in World Health Organization (WHO). WHO Mortality Database Version February 2014. Geneva, Switzerland: World Health Organization (WHO), 2014.                                                     | 1982             |                      |
| Iceland | Iceland Vital Registration - Deaths 1983 ICD9 as it appears in World Health Organization (WHO). WHO Mortality Database Version February 2014. Geneva, Switzerland: World Health Organization (WHO), 2014.                                                     | 1983             |                      |
| Iceland | Iceland Vital Registration - Deaths 1984 ICD9 as it appears in World Health Organization (WHO). WHO Mortality Database Version February 2014. Geneva, Switzerland: World Health Organization (WHO), 2014.                                                     | 1984             |                      |
| Iceland | Iceland Vital Registration - Deaths 1985 ICD9 as it appears in World Health Organization (WHO). WHO Mortality Database Version February 2014. Geneva, Switzerland: World Health Organization (WHO), 2014.                                                     | 1985             |                      |
| Iceland | Parkin DM, International Agency for Research on Cancer, International Association of Cancer Registries. Cancer Incidence in Five Continents. Vol. I to VIII. Lyon, France, IARC Press, 2005.                                                                  | 1985, 1990, 1995 |                      |
| Iceland | Iceland Vital Registration - Deaths 1986 ICD9 as it appears in World Health Organization (WHO). WHO Mortality Database Version February 2014. Geneva, Switzerland: World Health Organization (WHO), 2014.                                                     | 1986             |                      |
| Iceland | Iceland Vital Registration - Deaths 1987 ICD9 as it appears in World Health Organization (WHO). WHO Mortality Database Version February 2014. Geneva, Switzerland: World Health Organization (WHO), 2014.                                                     | 1987             |                      |
| Iceland | Iceland Vital Registration - Deaths 1988 ICD9 as it appears in World Health Organization (WHO). WHO Mortality Database Version February 2014. Geneva, Switzerland: World Health Organization (WHO), 2014.                                                     | 1988             |                      |
| Iceland | Iceland Vital Registration - Deaths 1989 ICD9 as it appears in World Health Organization (WHO). WHO Mortality Database Version February 2014. Geneva, Switzerland: World Health Organization (WHO), 2014.                                                     | 1989             |                      |
| Iceland | Iceland Vital Registration - Deaths 1990 ICD9 as it appears in World Health Organization (WHO). WHO Mortality Database Version February 2014. Geneva, Switzerland: World Health Organization (WHO), 2014.                                                     | 1990             |                      |
| Iceland | Statistics Iceland. Iceland Deaths by Sex, Age, and Main Causes of Death. Reykjavik, Iceland: Statistics Iceland.                                                                                                                                             | 1990-2001        |                      |
| Iceland | Centre for Health Informatics and Multiprofessional Education, University College London. Modell's Haemoglobinopathologist's Almanac. London, United Kingdom: Centre for Health Informatics and Multiprofessional Education, University College London, 2008. | 1990-2003        |                      |
| Iceland | Iceland Vital Registration - Deaths 1991 ICD9 as it appears in World Health Organization (WHO). WHO Mortality Database Version February 2014. Geneva, Switzerland: World Health Organization (WHO), 2014.                                                     | 1991             |                      |
| Iceland | Iceland Vital Registration - Deaths 1992 ICD9 as it appears in World Health Organization (WHO). WHO Mortality Database Version February 2014. Geneva, Switzerland: World Health Organization (WHO), 2014.                                                     | 1992             |                      |

**Web Table 32 - Comprehensive citation list**

| Country | Citation                                                                                                                                                                                                                                                                                                                                                                                                                                                                                                                                                                                                                                                                                                              | Year*     | New for GBD 2013 (*) |
|---------|-----------------------------------------------------------------------------------------------------------------------------------------------------------------------------------------------------------------------------------------------------------------------------------------------------------------------------------------------------------------------------------------------------------------------------------------------------------------------------------------------------------------------------------------------------------------------------------------------------------------------------------------------------------------------------------------------------------------------|-----------|----------------------|
| Iceland | Trichopoulos D, Bamia C, Lagiou P, Fedirko V, Trepo E, Jenab M, Pischon T, Nöthlings U, Overved K, Tjønneland A, Outzen M, Clavel-Chapelon F, Kaaks R, Lukanova A, Boeing H, Aleksandrova K, Benetou V, Zylis D, Palli D, Pala V, Panico S, Tumino R, Sacerdote C, Bueno-De-Mesquita HB, Van Kranen HJ, Peeters PHM, Lund E, Quirós JR, González CA, Sanchez Perez M-J, Navarro C, Dorronsoro M, Barricarte A, Lindkvist B, Regnér S, Werner M, Hallmans G, Khaw K-T, Wareham N, Key T, Romieu I, Chuang S-C, Murphy N, Boffetta P, Trichopoulou A, Riboli E. Hepatocellular carcinoma risk factors and disease burden in a European cohort: a nested case-control study. J Natl Cancer Inst. 2011; 103(22): 1686-95. | 1992-2006 | *                    |
| Iceland | Iceland Vital Registration - Deaths 1993 ICD9 as it appears in World Health Organization (WHO). WHO Mortality Database Version February 2014. Geneva, Switzerland: World Health Organization (WHO), 2014.                                                                                                                                                                                                                                                                                                                                                                                                                                                                                                             | 1993      |                      |
| Iceland | Iceland Vital Registration - Deaths 1994 ICD9 as it appears in World Health Organization (WHO). WHO Mortality Database Version February 2014. Geneva, Switzerland: World Health Organization (WHO), 2014.                                                                                                                                                                                                                                                                                                                                                                                                                                                                                                             | 1994      |                      |
| Iceland | Iceland Vital Registration - Deaths 1995 ICD9 as it appears in World Health Organization (WHO). WHO Mortality Database Version February 2014. Geneva, Switzerland: World Health Organization (WHO), 2014.                                                                                                                                                                                                                                                                                                                                                                                                                                                                                                             | 1995      |                      |
| Iceland | Iceland Vital Registration - Deaths 1996 ICD10 as it appears in World Health Organization (WHO). WHO Mortality Database Version February 2014. Geneva, Switzerland: World Health Organization (WHO), 2014.                                                                                                                                                                                                                                                                                                                                                                                                                                                                                                            | 1996      |                      |
| Iceland | Iceland Vital Registration - Deaths 1997 ICD10 as it appears in World Health Organization (WHO). WHO Mortality Database Version February 2014. Geneva, Switzerland: World Health Organization (WHO), 2014.                                                                                                                                                                                                                                                                                                                                                                                                                                                                                                            | 1997      |                      |
| Iceland | Iceland Vital Registration - Deaths 1998 ICD10 as it appears in World Health Organization (WHO). WHO Mortality Database Version February 2014. Geneva, Switzerland: World Health Organization (WHO), 2014.                                                                                                                                                                                                                                                                                                                                                                                                                                                                                                            | 1998      |                      |
| Iceland | EUVAC-NET. EUVAC-NET Pertussis Surveillance Report 2008. Stockholm, Sweden: European Centre for Disease Prevention and Control, 2009.                                                                                                                                                                                                                                                                                                                                                                                                                                                                                                                                                                                 | 1998-2008 |                      |
| Iceland | Iceland Vital Registration - Deaths 1999 ICD10 as it appears in World Health Organization (WHO). WHO Mortality Database Version February 2014. Geneva, Switzerland: World Health Organization (WHO), 2014.                                                                                                                                                                                                                                                                                                                                                                                                                                                                                                            | 1999      |                      |
| Iceland | Asbjørnsdóttir H, Sigurjónsd Ttir RB, Sveinsd Ttir SV, Birgisd Ttir A, Cook E, Gíslason D, Jansson C, Olafsson I, Gíslason T, Thornjóethleifsson B. [Foodborne infections in Iceland. Relationship to allergy and lung function]. Laeknabladid. 2006; 92(6): 437-44.                                                                                                                                                                                                                                                                                                                                                                                                                                                  | 1999-2001 |                      |
| Iceland | Iceland Vital Registration - Deaths 2000 ICD10 as it appears in World Health Organization (WHO). WHO Mortality Database Version February 2014. Geneva, Switzerland: World Health Organization (WHO), 2014.                                                                                                                                                                                                                                                                                                                                                                                                                                                                                                            | 2000      |                      |
| Iceland | Curado MP, Edwards B, Shin HR, Storm H, Ferlay J, Heanue M and Boyle P, eds (2007). Cancer Incidence in Five Continents, Vol. IX Periodic Data (electronic version). Lyon, IARC. <a href="http://ci5.iarc.fr">http://ci5.iarc.fr</a>                                                                                                                                                                                                                                                                                                                                                                                                                                                                                  | 2000      |                      |
| Iceland | WHO Regional Office for Europe (EURO-WHO). European Hospital Morbidity Database. Copenhagen, Denmark: WHO Regional Office for Europe (EURO-WHO).                                                                                                                                                                                                                                                                                                                                                                                                                                                                                                                                                                      | 2000-2006 |                      |

**Web Table 32 - Comprehensive citation list**

| Country | Citation                                                                                                                                                                                                                                                                                         | Year*                | New for GBD 2013 (*) |
|---------|--------------------------------------------------------------------------------------------------------------------------------------------------------------------------------------------------------------------------------------------------------------------------------------------------|----------------------|----------------------|
| Iceland | World Health Organization (WHO). Yellow Fever Reported Cases, WHO Vaccine-Preventable Diseases: Monitoring System. Geneva, Switzerland: World Health Organization (WHO).                                                                                                                         | 2000-2001, 2003-2009 |                      |
| Iceland | Iceland Vital Registration - Deaths 2001 ICD10 as it appears in World Health Organization (WHO). WHO Mortality Database Version February 2014. Geneva, Switzerland: World Health Organization (WHO), 2014.                                                                                       | 2001                 |                      |
| Iceland | Iceland Vital Registration - Deaths 2002 ICD10 as it appears in World Health Organization (WHO). WHO Mortality Database Version February 2014. Geneva, Switzerland: World Health Organization (WHO), 2014.                                                                                       | 2002                 |                      |
| Iceland | Iceland Vital Registration - Deaths 2003 ICD10 as it appears in World Health Organization (WHO). WHO Mortality Database Version February 2014. Geneva, Switzerland: World Health Organization (WHO), 2014.                                                                                       | 2003                 |                      |
| Iceland | Association of Nordic Cancer Registries (ANCR). Iceland NORDCAN Cancer Incidence Data Tables, Age-Specific by Countries. Copenhagen, Denmark: Association of Nordic Cancer Registries (ANCR).                                                                                                    | 2003-2011            | *                    |
| Iceland | Iceland Vital Registration - Deaths 2004 ICD10 as it appears in World Health Organization (WHO). WHO Mortality Database Version February 2014. Geneva, Switzerland: World Health Organization (WHO), 2014.                                                                                       | 2004                 |                      |
| Iceland | Iceland Vital Registration - Deaths 2005 ICD10 as it appears in World Health Organization (WHO). WHO Mortality Database Version February 2014. Geneva, Switzerland: World Health Organization (WHO), 2014.                                                                                       | 2005                 |                      |
| Iceland | Iceland Vital Registration - Deaths 2006 ICD10 as it appears in World Health Organization (WHO). WHO Mortality Database Version February 2014. Geneva, Switzerland: World Health Organization (WHO), 2014.                                                                                       | 2006                 |                      |
| Iceland | Iceland Vital Registration - Deaths 2007 ICD10 as it appears in World Health Organization (WHO). WHO Mortality Database Version February 2014. Geneva, Switzerland: World Health Organization (WHO), 2014.                                                                                       | 2007                 |                      |
| Iceland | Iceland Vital Registration - Deaths 2008 ICD10 as it appears in World Health Organization (WHO). WHO Mortality Database Version February 2014. Geneva, Switzerland: World Health Organization (WHO), 2014.                                                                                       | 2008                 |                      |
| Iceland | Iceland Vital Registration - Deaths 2009 ICD10 as it appears in World Health Organization (WHO). WHO Mortality Database Version February 2014. Geneva, Switzerland: World Health Organization (WHO), 2014.                                                                                       | 2009                 |                      |
| Iceland | European Renal Association-European Dialysis and Transplant Association (ERA-EDTA). European Renal Association-European Dialysis and Transplant Association Registry Annual Report 2010. Parma, Italy: European Renal Association-European Dialysis and Transplant Association (ERA-EDTA), 2012. | 2010                 | *                    |
| Iceland | Iceland Vital Registration Death Data 2011 as it appears in United Nations Statistics Division (UNSD). United Nations Demographic Yearbook. New York City, United States: United Nations Statistics Division (UNSD).                                                                             | 2011                 | *                    |
| Iceland | European Renal Association-European Dialysis and Transplant Association (ERA-EDTA). European Renal Association-European Dialysis and Transplant Association Registry Annual Report 2011. Parma, Italy: European Renal Association-European Dialysis and Transplant Association (ERA-EDTA), 2013. | 2011                 | *                    |

**Web Table 32 - Comprehensive citation list**

| Country | Citation                                                                                                                                                                                                           | Year*                      | New for GBD 2013 (*) |
|---------|--------------------------------------------------------------------------------------------------------------------------------------------------------------------------------------------------------------------|----------------------------|----------------------|
| India   | India Vital Registration Death Data 1950 as it appears in United Nations Statistics Division (UNSD). United Nations Demographic Yearbook. New York City, United States: United Nations Statistics Division (UNSD). | 1950                       |                      |
| India   | Peace Research Institute Oslo (PRIO). Battle Deaths Dataset Version 3, 2009. Oslo, Norway: Peace Research Institute Oslo (PRIO), 2009.                                                                             | 1950-1988                  |                      |
| India   | Centre for Research on the Epidemiology of Disasters (CRED). EM-DAT: The OFDA/CRED International Disaster Database. Brussels, Belgium: Catholic University of Leuven.                                              | 1950, 1952-1972, 1974-2013 |                      |
| India   | India Vital Registration Death Data 1951 as it appears in United Nations Statistics Division (UNSD). United Nations Demographic Yearbook. New York City, United States: United Nations Statistics Division (UNSD). | 1951                       |                      |
| India   | India Vital Registration Death Data 1952 as it appears in United Nations Statistics Division (UNSD). United Nations Demographic Yearbook. New York City, United States: United Nations Statistics Division (UNSD). | 1952                       |                      |
| India   | India Vital Registration Death Data 1953 as it appears in United Nations Statistics Division (UNSD). United Nations Demographic Yearbook. New York City, United States: United Nations Statistics Division (UNSD). | 1953                       |                      |
| India   | India Vital Registration Death Data 1954 as it appears in United Nations Statistics Division (UNSD). United Nations Demographic Yearbook. New York City, United States: United Nations Statistics Division (UNSD). | 1954                       |                      |
| India   | India Vital Registration Death Data 1955 as it appears in United Nations Statistics Division (UNSD). United Nations Demographic Yearbook. New York City, United States: United Nations Statistics Division (UNSD). | 1955                       |                      |
| India   | India Vital Registration Death Data 1956 as it appears in United Nations Statistics Division (UNSD). United Nations Demographic Yearbook. New York City, United States: United Nations Statistics Division (UNSD). | 1956                       |                      |
| India   | India Vital Registration Death Data 1957 as it appears in United Nations Statistics Division (UNSD). United Nations Demographic Yearbook. New York City, United States: United Nations Statistics Division (UNSD). | 1957                       |                      |
| India   | India Vital Registration Death Data 1958 as it appears in United Nations Statistics Division (UNSD). United Nations Demographic Yearbook. New York City, United States: United Nations Statistics Division (UNSD). | 1958                       |                      |
| India   | India Vital Registration Death Data 1959 as it appears in United Nations Statistics Division (UNSD). United Nations Demographic Yearbook. New York City, United States: United Nations Statistics Division (UNSD). | 1959                       |                      |
| India   | Baxi AJ, Balakrishnan V, Sanghvi LD. Deficiency of glucose-6-phosphate dehydrogenase. Observations on a sample from Bombay. Curr Sci. 1961; 30(1): 16-7.                                                           | 1959-1963                  |                      |
| India   | India Vital Registration Death Data 1960 as it appears in United Nations Statistics Division (UNSD). United Nations Demographic Yearbook. New York City, United States: United Nations Statistics Division (UNSD). | 1960                       |                      |
| India   | India Vital Registration Death Data 1961 as it appears in United Nations Statistics Division (UNSD). United Nations Demographic Yearbook. New York City, United States: United Nations Statistics Division (UNSD). | 1961                       |                      |

**Web Table 32 - Comprehensive citation list**

| Country | Citation                                                                                                                                                                                                                                          | Year*     | New for GBD 2013 (*) |
|---------|---------------------------------------------------------------------------------------------------------------------------------------------------------------------------------------------------------------------------------------------------|-----------|----------------------|
| India   | India Vital Registration Death Data 1962 as it appears in United Nations Statistics Division (UNSD). United Nations Demographic Yearbook. New York City, United States: United Nations Statistics Division (UNSD).                                | 1962      |                      |
| India   | India Vital Registration Death Data 1963 as it appears in United Nations Statistics Division (UNSD). United Nations Demographic Yearbook. New York City, United States: United Nations Statistics Division (UNSD).                                | 1963      |                      |
| India   | India Vital Registration Death Data 1964 as it appears in United Nations Statistics Division (UNSD). United Nations Demographic Yearbook. New York City, United States: United Nations Statistics Division (UNSD).                                | 1964      |                      |
| India   | Chatterjea JB. Haemoglobinopathies, glucose-6-phosphate dehydrogenase deficiency and allied problems in the Indian subcontinent. Bull World Health Organ. 1966; 35(6): 837-56.                                                                    | 1964-1966 |                      |
| India   | World Bank. Child and Maternal Health Services in Rural India: The Narangwal Experiment, Volume 1: Integrated Nutrition and Health Care. Washington DC, United States: World Bank, 1983.                                                          | 1965-1973 |                      |
| India   | Deshmukh VV, Sharma KD. Deficiency of erythrocyte glucose-6-phosphate dehydrogenase and sickle cell trait: a survey of Mahar students at Aurangabad, Maharashtra. Indian J Med Res. 1968; 56(6): 821-5.                                           | 1966-1968 |                      |
| India   | D'Sa JA. Epidemiology of pertussis. Prog Drug Res. 1975; 19: 257-262.                                                                                                                                                                             | 1968-1972 |                      |
| India   | Operations Research Group (India). India National Family Planning Survey 1969.                                                                                                                                                                    | 1969      |                      |
| India   | Office of the Registrar General and Census Commissioner (India). India Sample Registration System Age-Specific Death Rates 1970-2006.                                                                                                             | 1970-2006 |                      |
| India   | Office of the Registrar General Census Commissioner (India). India SRS Compendium of Fertility and Mortality Indicators 1971-1997. New Delhi, India: Office of the Registrar General Census Commissioner (India).                                 | 1971-1997 |                      |
| India   | Office of the Registrar General Census Commissioner (India). India SRS Compendium of Fertility and Mortality Indicators 1971-2007. New Delhi, India: Office of the Registrar General Census Commissioner (India).                                 | 1971-2007 |                      |
| India   | United Nations Office on Drugs and Crime (UNODC). United Nations Surveys on Crime Trends and the Operations of Criminal Justice Systems 1970-2006 as provided by Kavi Bhalla. [Unpublished].                                                      | 1972-1994 |                      |
| India   | Anand K, Kant S, Kumar G, Kapoor SK. "Development" is not essential to reduce infant mortality rate in India: experience from the Ballabgarh project. J Epidemiol Community Health. 2000; 54(4): 247-53.                                          | 1973-1993 |                      |
| India   | Kate SL, Mukherjee BN, Malhotra KC, Phadke MA, Mutalik GS, Sainani GS. Red cell glucose-6-phosphate dehydrogenase deficiency and haemoglobin variants among ten endogamous groups of Maharashtra and West Bengal. Hum Genet. 1978; 44(3): 339-43. | 1974-1975 |                      |
| India   | Bhat PN, Navaneetham K, Rajan SI. Maternal mortality in India: estimates from a regression model. Stud Fam Plann. 1995; 26(4): 217-32.                                                                                                            | 1974-1984 |                      |
| India   | Chand P, Rai RN, Chawla U, Tripathi KC, Datta KK. Epidemiology of measles--a thirteen years prospective study in a village. J Commun Dis. 1989; 21(3): 190-9.                                                                                     | 1974-1986 |                      |
| India   | Garai R, Chakraborty AK. Measles in a rural community. Indian J Public Health. 1981; 24(3): 150-3.                                                                                                                                                | 1976-1978 |                      |
| India   | John TJ, Joseph A, George T, Radhakrishnan J, Singh RPD, George K. Epidemiology and prevention of measles in rural south India. Indian J Med Res. 1980; 72: 153-8.                                                                                | 1977-1978 |                      |
| India   | Shah U, Pratinidhi AK, Bhatlawande PV. Perinatal mortality in rural India intervention through primary health care. J Epidemiol Community Health. 1984; 38(2): 138-42.                                                                            | 1978      |                      |



**Web Table 32 - Comprehensive citation list**

| Country | Citation                                                                                                                                                                                                                                                                                                     | Year*                | New for GBD 2013 (*) |
|---------|--------------------------------------------------------------------------------------------------------------------------------------------------------------------------------------------------------------------------------------------------------------------------------------------------------------|----------------------|----------------------|
| India   | Dhanoa J, Cowan B. Measles in the community: A study in non-hospitalised young children in Punjab. <i>J Trop Pediatr</i> . 1982; 28(2): 59-61.                                                                                                                                                               | 1978-1979            |                      |
| India   | Ghosh U, Banerjee T, Banerjee PK, Saha N. Distribution of haemoglobin and glucose-6-phosphate dehydrogenase phenotypes among different caste groups of Bengal. <i>Hum Hered</i> . 1981; 31(2): 119-21.                                                                                                       | 1979-1983            |                      |
| India   | Cherian T, Joseph A, John TJ. Low antibody response in infants with measles and children with subclinical measles virus infection. <i>J Trop Med Hyg</i> . 1984; 87(1): 27-31.                                                                                                                               | 1979-1980            |                      |
| India   | Office of the Registrar General and Census Commissioner (India). <i>India Vital Statistics 1980</i> . New Delhi, India: Office of the Registrar General and Census Commissioner (India).                                                                                                                     | 1980                 |                      |
| India   | Vasudev JP, Nandan D, Chandra R, Srivastava BC. Post measles complications in a rural population. <i>J Commun Dis</i> . 1983; 15(4): 249-52.                                                                                                                                                                 | 1980                 |                      |
| India   | Tandon BN, Gandhi BM, Joshi YK. Etiological spectrum of viral hepatitis and prevalence of markers of hepatitis A and B virus infection in north India. <i>Bull World Health Organ</i> . 1984; 62(1): 67-73.                                                                                                  | 1980                 |                      |
| India   | Institute of Health Systems (India). <i>India Cause of Death Dataset Version 1.3 1980-1998</i> . Hyderabad, India: Institute of Health Systems (India), 2002.                                                                                                                                                | 1980-1998            |                      |
| India   | Ferlay J, Parkin DM, Curado MP, Bray F, Edwards B, Shin HR and Forman D. <i>Cancer Incidence in Five Continents, Volumes I to IX: IARC CancerBase No. 9</i> [Internet]. Lyon, France: International Agency for Research on Cancer; 2010. Available from: <a href="http://ci5.iarc.fr">http://ci5.iarc.fr</a> | 1980-2002            |                      |
| India   | Swami SS, Chandra S, Dudani IU, Sharma R, Mathur MM. Epidemiology of measles in western Rajasthan. <i>J Commun Dis</i> . 1987; 19(4): 370-2.                                                                                                                                                                 | 1980-1981            |                      |
| India   | Institute for Health Metrics and Evaluation (IHME), Joint United Nations Program on HIV/AIDS (UNAIDS). <i>Institute for Health Metrics and Evaluation HIV Mortality Estimates Based on the UNAIDS Spectrum Model Framework</i> .                                                                             | 1980-2013            | *                    |
| India   | United Nations Children's Fund (UNICEF), World Health Organization (WHO). <i>WHO and UNICEF Reported Disease Incidence Time Series - Pertussis</i> . Geneva, Switzerland: World Health Organization (WHO).                                                                                                   | 1980-1995, 1997-2013 |                      |
| India   | United Nations Children's Fund (UNICEF), World Health Organization (WHO). <i>WHO and UNICEF Reported Disease Incidence Time Series - Measles</i> . Geneva, Switzerland: World Health Organization (WHO).                                                                                                     | 1980-2013            |                      |
| India   | Parkin DM. <i>International Agency for Research on Cancer, International Association of Cancer Registries. Cancer Incidence in Five Continents. Vol. I to VIII</i> . Lyon, France, IARC Press, 2005.                                                                                                         | 1980, 1985-1995      |                      |
| India   | India Census 1981 as it appears in United Nations Statistics Division (UNSD). <i>United Nations Demographic Yearbook</i> . New York City, United States: United Nations Statistics Division (UNSD).                                                                                                          | 1981                 |                      |
| India   | Office of the Registrar General and Census Commissioner (India). <i>India Vital Statistics 1981</i> . New Delhi, India: Office of the Registrar General and Census Commissioner (India).                                                                                                                     | 1981                 |                      |
| India   | Office of the Registrar General and Census Commissioner (India). <i>India Vital Statistics 1982</i> . New Delhi, India: Office of the Registrar General and Census Commissioner (India).                                                                                                                     | 1982                 |                      |
| India   | Sharma RS, Kaushic VK, Johri SP, Ray SN. An epidemiological investigation of measles outbreak in Alwar--Rajasthan. <i>J Commun Dis</i> . 1984; 16(4): 299-303.                                                                                                                                               | 1982                 |                      |
| India   | Jajoo UN, Chhabra S, Gupta OP, Jain AP. Measles epidemic in a rural community near Sevagram (Vidarbha). <i>Indian J Public Health</i> . 1984; 28(4): 204-7.                                                                                                                                                  | 1982                 |                      |
| India   | Lakhanpal U, Rathore MS. Epidemiology of measles in rural area of Punjab. <i>J Commun Dis</i> . 1986; 18(3): 185-8.                                                                                                                                                                                          | 1982-1983            |                      |

**Web Table 32 - Comprehensive citation list**

| Country | Citation                                                                                                                                                                                                                        | Year*          | New for GBD 2013 (*) |
|---------|---------------------------------------------------------------------------------------------------------------------------------------------------------------------------------------------------------------------------------|----------------|----------------------|
| India   | Arankalle VA, Tsarev SA, Chadha MS, Alling DW, Emerson SU, Banerjee K, Purcell RH. Age-specific prevalence of antibodies to hepatitis A and E viruses in Pune, India, 1982 and 1992. <i>J Infect Dis.</i> 1995; 171(2): 447-50. | 1982, 1992     |                      |
| India   | Office of the Registrar General and Census Commissioner (India). <i>India Vital Statistics 1983.</i> New Delhi, India: Office of the Registrar General and Census Commissioner (India).                                         | 1983           |                      |
| India   | Singhal PK, Mathur GP, Mathur S, Singh YD. Neonatal morbidity and mortality in ICDS Urban Slums. <i>Indian Pediatr.</i> 1990; 27(5): 485-8.                                                                                     | 1983           |                      |
| India   | Kumar V, Datta N, Wadhwa SS, Singhi S. Morbidity and mortality in diarrhea in rural Haryana Indian. <i>Indian J Pediatr.</i> 1985; 52(418): 455-61.                                                                             | 1983           |                      |
| India   | Singhal PK, Mathur GP, Mathur S, Singh YD. Mortality patterns in under six children in I.C.D.S. urban slum. <i>Indian Pediatr.</i> 1986; 23(8): 617-22.                                                                         | 1983           |                      |
| India   | Agarwal D. Natural history of measles in rural and urban community of Varanasi. <i>J Commun Dis.</i> 1986; 8: 289-98.                                                                                                           | 1983           |                      |
| India   | Phaneendra Rao RS, Kumari J, Krishna Rao TS, Narasimham VL. Measles in a rural community. <i>J Commun Dis.</i> 1988; 20(2): 131-5.                                                                                              | 1983           |                      |
| India   | Bhatia R. Measles outbreak in village Tophema in Nagaland. <i>J Commun Dis.</i> 1985; 17(2).                                                                                                                                    | 1983           |                      |
| India   | Office of the Registrar General and Census Commissioner (India). <i>India Sample Registration System Age- and Sex-Specific Death Rates 1983-1995.</i>                                                                           | 1983-1995      |                      |
| India   | Chitambar SD, Chadha MS, Joshi MS, Arankalle VA. Prevalence of hepatitis a antibodies in western Indian population: changing pattern. <i>Southeast Asian J Trop Med Public Health.</i> 1999; 30(2): 273-6.                      | 1983,1987,1995 |                      |
| India   | Bhatia JC. Levels and causes of maternal mortality in southern India. <i>Stud Fam Plann.</i> 1993; 24(5): 310-8.                                                                                                                | 1984           |                      |
| India   | Sharma R. An epidemiological study of measles epidemic in district Bhilwara, Rajasthan. <i>J Commun Dis.</i> 1988; 20(4): 301-11.                                                                                               | 1984           |                      |
| India   | Lobo J, Reddaiah V, Kapoor S, Nath L. Epidemiology of measles in a rural community. <i>Indian J Pediatr.</i> 1987; 54(2): 261-5.                                                                                                | 1984           |                      |
| India   | Reddaiah VP, Kapoor SK. Socio-biological factors in underfive deaths in a rural area. <i>Indian J Pediatr.</i> 1992; 59(5): 567-71.                                                                                             | 1985           |                      |
| India   | Kumar R, Sharma AK, Barik S, Kumar V. Maternal mortality inquiry in a rural community of north India. <i>Int J Gynaecol Obstet.</i> 1989; 29(4): 313-9.                                                                         | 1985           |                      |
| India   | United Nations Statistics Division (UNSD). <i>United Nations Demographic Yearbook Special Census Topic, 2000 Round.</i> New York City, United States: United Nations Statistics Division (UNSD).                                | 1985-2004      |                      |
| India   | Mangal N, Shah K, Sitaraman S. Epidemiological study of measles in urban (slum) area of Jaipur. <i>Indian Pediatr.</i> 1990; 27(11): 1216-7.                                                                                    | 1985-1986      |                      |
| India   | Werner GT, Frosner GG, Sareen DK. Prevalence of hepatitis A, B and HIV markers in Punjab. <i>J Indian Med Assoc.</i> 1990; 88(10): 293-4.                                                                                       | 1985-1988      |                      |
| India   | Makroo RN, Hassain G, Koul A, Shah GN. Prevalence of hepatitis B surface antigen in Kashmiri blood donors. <i>Indian J Med Res.</i> 1989; 310-3.                                                                                | 1985-1989      |                      |
| India   | Office of the Registrar General and Census Commissioner (India). <i>India Vital Statistics 1986.</i> New Delhi, India: Office of the Registrar General and Census Commissioner (India).                                         | 1986           |                      |
| India   | Satpathy SK, Chakraborty AK. Epidemiological study of measles in Singur, West Bengal. <i>J Commun Dis.</i> 1990; 22(1): 23-6.                                                                                                   | 1986           |                      |
| India   | Gupta BP, Swami HM, Bhardwaj AK, Vaidya NK, Sharma CD, Kaushal RK. An outbreak of measles in a remote tribal area of Himachal Pradesh. <i>Indian J Community Health.</i> 1985; 5: 25-28.                                        | 1986           |                      |
| India   | Anand AC, Nagpal AK, Seth AK, Dhot PS. Should one vaccinate patients with chronic liver disease for hepatitis A virus in India? <i>J Assoc Physicians India.</i> 2004; 785-7.                                                   | 1986-1999      |                      |



**Web Table 32 - Comprehensive citation list**

| Country | Citation                                                                                                                                                                                                                                                                                           | Year*     | New for GBD 2013 (*) |
|---------|----------------------------------------------------------------------------------------------------------------------------------------------------------------------------------------------------------------------------------------------------------------------------------------------------|-----------|----------------------|
| India   | Singhvi A, Pulimood RB, John TJ, Babu PG, Samuel BU, Padankatti T, Carman RH. The prevalence of markers for hepatitis B and human immunodeficiency viruses, malarial parasites and microfilaria in blood donors in a large hospital in south India. J Trop Med Hyg. 1990; 93(3): 178-82.           | 1986-1988 |                      |
| India   | Office of the Registrar General and Census Commissioner (India). India Vital Statistics 1987. New Delhi, India: Office of the Registrar General and Census Commissioner (India).                                                                                                                   | 1987      |                      |
| India   | Choudhary SR, Jayaswal ON. Infant and early childhood mortality in urban slums under ICDS scheme - a prospective study. Indian Pediatr. 1989; 26(6): 544-9.                                                                                                                                        | 1987      |                      |
| India   | Thakur TS, Goyal A, Sharma V, Gupta ML, Singh S. Incidence of australia antigen (HBs Ag) in Himachal Pradesh. J Commun Dis. 1990; 22(3): 173-7.                                                                                                                                                    | 1987-1989 |                      |
| India   | Thakur TS, Sharma V, Goyal A, Gupta ML. Seroprevalence of HIV antibodies, Australia antigen and VDRL reactivity in Himachal Pradesh. Indian J Med Sci. 1991; 45(12): 332-5.                                                                                                                        | 1987-1990 |                      |
| India   | Office of the Registrar General and Census Commissioner (India). India Vital Statistics 1988. New Delhi, India: Office of the Registrar General and Census Commissioner (India).                                                                                                                   | 1988      |                      |
| India   | Rahmathullah L, Underwood BA, Thulasiraj RD, Milton RC, Ramaswamy K, Rahmathullah R, Babu G. Reduced mortality among children in southern India receiving a small weekly dose of vitamin A. N Engl J Med. 1990; 323(14): 929-35.                                                                   | 1988      |                      |
| India   | Bang AT, Bang RA, Tale O, Sontakke P, Solanki J, Wargantiwar R, Kelzarkar P. Reduction in pneumonia mortality and total childhood mortality by means of community-based intervention trial in Gadchiroli, India. Lancet. 1990; 336(8709): 201-6.                                                   | 1988      |                      |
| India   | Victoria CG, Huttly SR, Fuchs SC, Barros FC, Garenne M, Leroy O, Fontaine O, Beau JP, Fauveau V, Chowdhury HR. International differences in clinical patterns of diarrhoeal deaths: a comparison of children from Brazil, Senegal, Bangladesh, and India. J Diarrhoeal Dis Res. 1993; 11(1): 25-9. | 1988      |                      |
| India   | Graham DY, Adam E, Reddy GT, Agarwal JP, Agarwal R, Evans DJ Jr, Malaty HM, Evans DG. Seroepidemiology of Helicobacter pylori infection in India. Comparison of developing and developed countries. Dig Dis Sci. 1991; 36(8): 1084-8.                                                              | 1988-1990 |                      |
| India   | Vas CJ, Pinto C, Panikker D, Noronha S, Deshpande N, Kulkarni L, Sachdeva S. Prevalence of Dementia in an Urban Indian Population. Int Psychogeriatr. 2001; 13(04): 439-50.                                                                                                                        | 1988-1991 |                      |
| India   | Office of the Registrar General and Census Commissioner (India). India Vital Statistics 1989. New Delhi, India: Office of the Registrar General and Census Commissioner (India).                                                                                                                   | 1989      |                      |
| India   | Khalique N, Sinha SN, Yunus M, Malik A. Early childhood mortality - a rural study. J R Soc Health. 1993; 113(5): 247-9.                                                                                                                                                                            | 1989      |                      |
| India   | Gupta N, Kumar S, Saxena NC, Nandan D, Saxena BN. Maternal mortality in seven districts of Uttar Pradesh - an ICMR task force study. Indian J Public Health. 2006; 50(3): 173-8.                                                                                                                   | 1989      |                      |
| India   | Department of Peace and Conflict Research, Uppsala University. UCDP Battle-Related Deaths Database Version 5, 2013. Uppsala, Sweden: Department of Peace and Conflict Research, Uppsala University, 2013.                                                                                          | 1989-2012 | *                    |
| India   | Department of Peace and Conflict Research, Uppsala University. UCDP Nonstate Conflict Database Version 2.5, 2013. Uppsala, Sweden: Department of Peace and Conflict Research, Uppsala University, 2013.                                                                                            | 1989-2012 | *                    |
| India   | Department of Peace and Conflict Research, Uppsala University. UCDP One-Sided Violence Database Version 1.4, 2013. Uppsala, Sweden: Department of Peace and Conflict Research, Uppsala University, 2013.                                                                                           | 1989-2012 | *                    |

**Web Table 32 - Comprehensive citation list**

| Country | Citation                                                                                                                                                                                                                                                                                         | Year*      | New for GBD 2013 (*) |
|---------|--------------------------------------------------------------------------------------------------------------------------------------------------------------------------------------------------------------------------------------------------------------------------------------------------|------------|----------------------|
| India   | Kapur S, Mittal A. Incidence of HIV infection & its predictors in blood donors in Delhi. <i>Indian J Med Res.</i> 1998; 45-50.                                                                                                                                                                   | 1989-1997  |                      |
| India   | Murhekar MV, Sehgal SC, Murhekar KM, Padbhidri SP, Chitambar SD, Arankalle VA. Changing scenario of hepatitis A virus and hepatitis E virus exposure among the primitive tribes of Andaman and Nicobar Islands, India over the 10-year period 1989-99. <i>J Viral Hepat.</i> 2002; 9(4): 315-21. | 1989, 1999 |                      |
| India   | Hirve S, Ganatra B. A prospective cohort study on the survival experience of under five children in rural western India. <i>Indian Pediatr.</i> 1997; 34(11): 995-1001.                                                                                                                          | 1990       |                      |
| India   | Satoskar A, Ray V. Prevalence of hepatitis B surface antigen (HBsAg) in blood donors from Bombay. <i>Trop Geogr Med.</i> 1992; 44(1-2): 119-21.                                                                                                                                                  | 1990       |                      |
| India   | Office of the Registrar General and Census Commissioner (India). India Medical Certification of Cause of Death Vital Statistics 1990-1998. [Unpublished].                                                                                                                                        | 1990-1998  |                      |
| India   | Weatherall D. Sickle Cell and Thalassemias Prevalence Data, Personal Correspondence with David Weatherall. [Unpublished].                                                                                                                                                                        | 1990-2009  |                      |
| India   | Shaji S, Promodu K, Abraham T, Roy KJ, Verghese A. An epidemiological study of dementia in a rural community in Kerala, India. <i>Br J Psychiatry.</i> 1996; 168(6): 745-9.                                                                                                                      | 1990-1993  |                      |
| India   | World Health Organization (WHO). India WHO Leishmaniasis Country Profile.                                                                                                                                                                                                                        | 1990-2010  | *                    |
| India   | Centre for Health Informatics and Multiprofessional Education, University College London. Modell's Haemoglobinopathologist's Almanac. London, United Kingdom: Centre for Health Informatics and Multiprofessional Education, University College London, 2008.                                    | 1990-2003  |                      |
| India   | Office of the Registrar General and Census Commissioner (India). India Population and Housing Census 1991. New Delhi, India: Office of the Registrar General and Census Commissioner (India).                                                                                                    | 1991       |                      |
| India   | Office of the Registrar General and Census Commissioner (India). India SRS Statistical Report 1991. New Delhi, India: Office of the Registrar General and Census Commissioner (India).                                                                                                           | 1991       |                      |
| India   | Kakrani VA, Pratinidhi AK, Gupte AM. A study of registration of deaths at primary health centre--with special reference to verbal autopsy method. <i>Indian J Med Sci.</i> 1996; 50(6): 196-200.                                                                                                 | 1991       |                      |
| India   | Chandra V, Ganguli M, Pandav R, Johnston J, Belle S, DeKosky ST. Prevalence of Alzheimer's disease and other dementias in rural India: the Indo-US study. <i>Neurology.</i> 1998; 51(4): 1000-8.                                                                                                 | 1991-1994  |                      |
| India   | Kumar R, Saraswat MK, Sharma BC, Sakhuja P, Sarin SK. Characteristics of hepatocellular carcinoma in India: a retrospective analysis of 191 cases. <i>QJM.</i> 2008; 101(6): 479-85.                                                                                                             | 1991-2003  |                      |
| India   | Risbud AR, Prasad SR, Mehendale SM, Mawar N, Shaikh N, Umrani UB, Bedekar SS, Banerjee K. Measles outbreak in a tribal population of Thane district, Maharashtra. <i>Indian Pediatr.</i> 1994; 31(5): 543-51.                                                                                    | 1991-1992  |                      |
| India   | Chadha MS, Chitambar SD, Shaikh NJ, Arankalle VA. Exposure of Indian children to hepatitis A virus & vaccination age. <i>Indian J Med Res.</i> 1999; 11-5.                                                                                                                                       | 1991-1995  |                      |
| India   | Benara SK, Singh P. Validity of causes of infant death by verbal autopsy. <i>Indian Pediatr.</i> 1999; 66(5): 647-50.                                                                                                                                                                            | 1992       |                      |
| India   | Kapoor RK, Srivastava AK, Misra PK, Sharma B, Thakur S, Srivastava KI, Singh GK. Perinatal mortality in urban slums in Lucknow. <i>Indian Pediatr.</i> 1996; 33(1): 19-23.                                                                                                                       | 1992       |                      |
| India   | Jain DC, Jain RK, Ichhpujani RL, Sharma RS. Prevalence of hepatitis B virus in pregnant women. <i>J Commun Dis.</i> 1994; 26(4): 233-4.                                                                                                                                                          | 1992       |                      |
| India   | Nandi J, Bhawalkar V, Mody H, Elavia A, Desai PK, Banerjee K. Detection of HIV-1, HBV and HCV antibodies in blood donors from Surat, western India. <i>Vox Sang.</i> 1994; 67(4): 406-7.                                                                                                         | 1992       |                      |

**Web Table 32 - Comprehensive citation list**

| Country | Citation                                                                                                                                                                                                                                                                                             | Year*     | New for GBD 2013 (*) |
|---------|------------------------------------------------------------------------------------------------------------------------------------------------------------------------------------------------------------------------------------------------------------------------------------------------------|-----------|----------------------|
| India   | International Institute for Population Sciences (IIPS). India Demographic and Health Survey 1992-1993. Bombay, India: International Institute for Population Sciences (IIPS).                                                                                                                        | 1992-1993 |                      |
| India   | Office of the Registrar General and Census Commissioner (India). India SRS Statistical Reports 1992-1994, 1996, 1998-1999.                                                                                                                                                                           | 1992-1999 |                      |
| India   | Verma IC. Burden of genetic disorders in India. <i>Indian Pediatr.</i> 2000; 67(12): 893-8.                                                                                                                                                                                                          | 1992-1995 |                      |
| India   | Singh J, Kumar A, Rai RN, Khare S, Jain DC, Bhatia R, Datta KK. Widespread outbreaks of measles in rural Uttar Pradesh, India, 1996: high risk areas and groups. <i>Indian Pediatr.</i> 1999; 36(3): 249-56.                                                                                         | 1992-1996 |                      |
| India   | Sarin SK, Thakur V, Guptan RC, Saigal S, Malhotra V, Thyagarajan SP, Das BC. Profile of hepatocellular carcinoma in India: an insight into the possible etiologic associations. <i>J Gastroenterol Hepatol.</i> 2001; 16(6): 666-73.                                                                 | 1993-1999 |                      |
| India   | Jain RC, Soni SB. Detection of HBsAg and HIV carriage among blood donors or rural population of Loni areas. <i>J Assoc Physicians India.</i> 1995; 43(5): 378.                                                                                                                                       | 1993-1994 |                      |
| India   | Choudhury N, Ramesh V, Saraswat S, Naik S. Effectiveness of mandatory transmissible diseases screening in Indian blood donors. <i>Indian J Med Res.</i> 1995; 229-32.                                                                                                                                | 1993,1997 |                      |
| India   | Awasthi S, Pande VK. Cause-specific mortality in under fives in the urban slums of Lucknow, north India. <i>J Trop Pediatr.</i> 1998; 44(6): 358-61.                                                                                                                                                 | 1994      |                      |
| India   | Berry N, Chakravarti A, Kar P, Das BC, Santhanam, Mathur MD. Association of Hepatitis C virus and Hepatitis B virus in chronic liver disease. <i>Indian J Med Res.</i> 1998; 108(6): 255-9.                                                                                                          | 1994-1995 |                      |
| India   | Sawant P, Rathi PM, Upadhyaya A. Hepatitis B subtypes and hepatitis C genotypes in cirrhosis in western India: results of a pilot study. <i>J Assoc Physicians India.</i> 1999; 47(6): 580-3.                                                                                                        | 1994-1995 |                      |
| India   | Kumar M, Kumar R, Hissar SS, Saraswat MK, Sharma BC, Sakhuja P, Sarin SK. Risk factors analysis for hepatocellular carcinoma in patients with and without cirrhosis: a case-control study of 213 hepatocellular carcinoma patients from India. <i>J Gastroenterol Hepatol.</i> 2007; 22(7): 1104-11. | 1994-2005 |                      |
| India   | Office of the Registrar General and Census Commissioner (India). India SRS Statistical Report 1995. New Delhi, India: Office of the Registrar General and Census Commissioner (India).                                                                                                               | 1995      |                      |
| India   | Bhandari N, Bahl R, Taneja S, Martinez J, Bhan MK. Pathways to infant mortality in urban slums of Delhi, India: implications for improving the quality of community- and hospital-based programmes. <i>J Health Popul Nutr.</i> 2002; 20(2): 148-55.                                                 | 1995      |                      |
| India   | Shrivastava SP, Kumar A, Kumar Ojha A. Verbal autopsy determined causes of neonatal deaths. <i>Indian Pediatr.</i> 2001; 38(9): 1022-5.                                                                                                                                                              | 1995      |                      |
| India   | Thapa BR, Singh K, Singh V, Broor S, Singh V, Nain CK. Pattern of hepatitis A and hepatitis B virus markers in cases of acute sporadic hepatitis and in healthy school children from north west India. <i>J Trop Pediatr.</i> 1995; 41(6): 328-9.                                                    | 1995      |                      |
| India   | United Nations Office on Drugs and Crime (UNODC). United Nations Office on Drugs and Crime Global Study on Homicides 2011. Vienna, Austria: United Nations Office on Drugs and Crime (UNODC), 2011.                                                                                                  | 1995-2009 |                      |
| India   | Dhawan PS, Shah SS, Alvares JF, Kher A, Shankaran, Kandoth PW, Sheth PN, Kamath H, Kamath A, Koppikar GV, Kalro RH. Seroprevalence of hepatitis A virus in Mumbai, and immunogenicity and safety of hepatitis A vaccine. <i>Indian J Gastroenterol.</i> 1998; 17(1): 16-8.                           | 1995-1996 |                      |
| India   | Das K, Kar P, Chakraborty A, Gupta S, Das BC. Is a vaccination program against hepatitis A needed in India? <i>Indian J Gastroenterol.</i> 1998; 17(4): 158.                                                                                                                                         | 1995-1996 |                      |

**Web Table 32 - Comprehensive citation list**

| Country | Citation                                                                                                                                                                                                                                                                                                                                                   | Year*      | New for GBD 2013 (*) |
|---------|------------------------------------------------------------------------------------------------------------------------------------------------------------------------------------------------------------------------------------------------------------------------------------------------------------------------------------------------------------|------------|----------------------|
| India   | Measles Supplementary Immunization Activity Data as provided by the World Health Organization. [Unpublished].                                                                                                                                                                                                                                              | 1995, 1997 |                      |
| India   | Office of the Registrar General and Census Commissioner (India). India SRS Statistical Report 1996. New Delhi, India: Office of the Registrar General and Census Commissioner (India), 1998.                                                                                                                                                               | 1996       |                      |
| India   | Aaron R, Joseph A, Abraham S, Muliylil J, George K, Prasad J, Minz S, Abraham VJ, Bose A. Suicides in young people in rural southern India. <i>Lancet</i> . 2004; 363(9415): 1117-8.                                                                                                                                                                       | 1996       |                      |
| India   | Gajalakshmi V, Peto R, Kanaka S, Balasubramanian S. Verbal autopsy of 48 000 adult deaths attributable to medical causes in Chennai (formerly Madras), India. <i>BMC Public Health</i> . 2002; 2: 7.                                                                                                                                                       | 1996       |                      |
| India   | Family Health International. The base of the iceberg: prevalence and perceptions of maternal morbidity in four developing countries. Durham, North Carolina: Family Health International, 1997.                                                                                                                                                            | 1996       |                      |
| India   | Mohan D, Tsimhoni O, Sivak M, Flannagan MJ. Road safety in India: Challenges and opportunities. University of Michigan Transportation Research Institute. 2009; 1-57.                                                                                                                                                                                      | 1996-2007  |                      |
| India   | Sethi S, Sharma K, Dhaliwal LK, Banga SS, Sharma M. Declining trends in syphilis prevalence among antenatal women in northern India: a 10-year analysis from a tertiary healthcare centre. <i>Sex Transm Infect</i> . 2007; 83(7): 592.                                                                                                                    | 1996-2005  |                      |
| India   | Bhalla P, Garg S, Kakkar M, Sharma VK. Community-based study of hepatitis B markers in women of reproductive age. <i>Indian J Gastroenterol</i> . 2003; 22(1): 33-4.                                                                                                                                                                                       | 1996-2000  |                      |
| India   | Sharma RR, Cheema R, Vajpayee M, Rao U, Kumar S, Marwaha N, Agnihotri SK. Prevalence of markers of transfusion transmissible diseases in voluntary and replacement blood donors. <i>Natl Med J India</i> . 2004; 17(1): 19-21.                                                                                                                             | 1996-2002  |                      |
| India   | Sonwane BR, Birare SD, Kulkarni PV. Prevalence of seroreactivity among blood donors in rural population. <i>Indian J Med Sci</i> . 2003; 57(9): 405-7.                                                                                                                                                                                                     | 1996-2001  |                      |
| India   | Office of the Registrar General and Census Commissioner (India). India SRS Bulletin 1997. New Delhi, India: Office of the Registrar General and Census Commissioner (India), 1999.                                                                                                                                                                         | 1997       |                      |
| India   | Office of the Registrar General and Census Commissioner (India). India SRS Statistical Report 1997. New Delhi, India: Office of the Registrar General and Census Commissioner (India), 2001.                                                                                                                                                               | 1997       |                      |
| India   | Mittal SK, Rastogi A, Rastogi A, Kumar N, Talukdar B, Kar P. Seroprevalence of hepatitis A in children--implications for hepatitis A vaccine. <i>Trop Gastroenterol</i> . 1998; 19(3): 120-1.                                                                                                                                                              | 1997       |                      |
| India   | Office of the Registrar General Census Commissioner (India), Centre for Global Health Research, University of Toronto (Canada). India SRS Maternal Mortality: Trends, Causes and Risk Factors 1997-2003. New Delhi, India: Office of the Registrar General Census Commissioner (India), Centre for Global Health Research, University of Toronto (Canada). | 1997-2003  |                      |
| India   | Office of the Registrar General and Census Commissioner (India). India SRS Statistical Report 1997, 2000-2006.                                                                                                                                                                                                                                             | 1997-2006  |                      |
| India   | Agarwal N, Naik S, Aggarwal R, Singh H, Somani SK, Kini D, Pandey R, Choudhuri G, Saraswat VA, Naik SR. Occult hepatitis B virus infection as a cause of cirrhosis of liver in a region with intermediate endemicity. <i>Indian J Gastroenterol</i> . 2003; 22(4): 127-31.                                                                                 | 1997-1999  |                      |
| India   | Balvir RS. Do tribal communities show an inverse relationship between sickle cell disorders and glucose-6-phosphate dehydrogenase deficiency in malaria endemic areas of Central-Eastern India?. <i>Homo</i> . 2006; 57(2): 163-76.                                                                                                                        | 1997-2003  |                      |

**Web Table 32 - Comprehensive citation list**

| Country | Citation                                                                                                                                                                                                                                                                                                 | Year*     | New for GBD 2013 (*) |
|---------|----------------------------------------------------------------------------------------------------------------------------------------------------------------------------------------------------------------------------------------------------------------------------------------------------------|-----------|----------------------|
| India   | World Health Organization (WHO). The Global Elimination of Congenital Syphilis: Rationale and Strategy for Action. Geneva, Switzerland: World Health Organization (WHO), 2007.                                                                                                                           | 1997-2003 |                      |
| India   | Acharya SK, Batra Y, Bhatkal B, Ojha B, Kaur K, Hazari S, Saraya A, Panda SK. Seroepidemiology of hepatitis A virus infection among school children in Delhi and north Indian patients with chronic liver disease: implications for HAV vaccination. <i>J Gastroenterol Hepatol.</i> 2003; 18(7): 822-7. | 1997-2001 |                      |
| India   | Cariappa M, Jayaram J, Bhalwar R, Praharaj A, Mehta V, Kapur L. Epidemiological differentials of Hepatitis B carrier state in the Army: A community based sero-epidemiological study. <i>Med J Armed Forces India.</i> 2004; 60(3): 251-4.                                                               | 1997-1999 |                      |
| India   | Garg S, Mathur DR, Garg DK. Comparison of seropositivity of HIV, HBV, HCV and syphilis in replacement and voluntary blood donors in western India. <i>Indian J Pathol Microbiol.</i> 2001; 44(4): 409-12.                                                                                                | 1997-1999 |                      |
| India   | Mohite BJ, Rath S, Bal V, Kamat SA, Marathe SN, Zuckerman AJ, Kamat RS. Mechanisms of liver cell damage in acute hepatitis B. <i>J Med Virol.</i> 1987; 22(3): 199-210.                                                                                                                                  | 1997-1998 |                      |
| India   | Office of the Registrar General and Census Commissioner (India). <i>India SRS Bulletin 1998.</i> New Delhi, India: Office of the Registrar General and Census Commissioner (India), 2000.                                                                                                                | 1998      |                      |
| India   | Office of the Registrar General and Census Commissioner (India). <i>India SRS Statistical Report 1998.</i> New Delhi, India: Office of the Registrar General and Census Commissioner (India), 2000.                                                                                                      | 1998      |                      |
| India   | Anand K, Patro BK, Paul E, Kapoor SK. Management of Sick Children by Health Workers in Ballabgarh: Lessons for Implementation of IMCI in India. <i>J Trop Pediatr.</i> 2004; 50(1): 41-7.                                                                                                                | 1998      |                      |
| India   | Khosla AH, Dahija K, Sangwan K. Maternal mortality and 'near-miss' in rural north India. <i>Int J Gynaecol Obstet.</i> 2000; 68(2): 163-4.                                                                                                                                                               | 1998      |                      |
| India   | Aggarwal R, Naik S, Yachha SK, Naik SR. Seroprevalence of antibodies to hepatitis A virus among children in Northern India. <i>Indian Pediatr.</i> 1999; 36(12): 1248-50.                                                                                                                                | 1998      |                      |
| India   | Mall ML, Rai RR, Philip M, Naik G, Parekh P, Bhawnani SC, Olowokure B, Shamanna M, Weil J. Seroepidemiology of hepatitis A infection in India: changing pattern. <i>Indian J Gastroenterol.</i> 2001; 20(4): 132-5.                                                                                      | 1998      |                      |
| India   | Arankalle VA, Chadha MS, Chitambar SD, Walimbe AM, Chobe LP, Gandhe SS. Changing epidemiology of hepatitis A and hepatitis E in urban and rural India (1982-98). <i>J Viral Hepat.</i> 2001; 8(4): 293-303.                                                                                              | 1998      |                      |
| India   | Das PK, Harris VK, Shoma B, Bose YN, Annie S. Trend of hepatitis B virus infection in southern Indian blood donors. <i>Indian J Gastroenterol.</i> 1999; 18(4): 182.                                                                                                                                     | 1998      |                      |
| India   | Banerjee A, Chakravarty R, Mondal PN, Chakraborty MS. Hepatitis B virus genotype D infection among antenatal patients attending a maternity hospital in Calcutta, India: assessment of infectivity status. <i>Southeast Asian J Trop Med Public Health.</i> 2005; 36(1): 203-6.                          | 1998      |                      |
| India   | Kurien T, Thyagarajan SP, Jeyaseelan L, Peedicayil A, Rajendran P, Sivaram S, Hansdak SG, Renu G, Krishnamurthy P, Sudhakar K, Varghese JC, STD Study Group. Community prevalence of hepatitis B infection and modes of transmission in Tamil Nadu, India. <i>Indian J Med Res.</i> 2005; 121(5): 670-5. | 1998      |                      |
| India   | International Institute for Population Sciences (India), Macro International, Inc. <i>India Demographic and Health Survey 1998-2000.</i> Calverton, United States: Macro International, Inc.                                                                                                             | 1998-2000 |                      |
| India   | International Institute for Population Sciences (IIPS) (India), Ministry of Health and Family Welfare (India). <i>India District Level Household Survey 1998-1999 (DLHS).</i> Mumbai, India: International Institute for Population Sciences (IIPS) (India).                                             | 1998-1999 |                      |

**Web Table 32 - Comprehensive citation list**

| Country | Citation                                                                                                                                                                                                                                                                                                                                        | Year*     | New for GBD 2013 (*) |
|---------|-------------------------------------------------------------------------------------------------------------------------------------------------------------------------------------------------------------------------------------------------------------------------------------------------------------------------------------------------|-----------|----------------------|
| India   | Shaji S, Bose S, Verghese A. Prevalence of dementia in an urban population in Kerala, India. <i>Br J Psychiatry</i> . 2005; 136-40.                                                                                                                                                                                                             | 1998-2001 |                      |
| India   | Thakur JS, Ratho RK, Bhatia SP, Grover R, Issaivanan M, Ahmed B, Parmar V, Swami HM. Measles outbreak in a periurban area of Chandigarh: need for improving vaccine coverage and strengthening surveillance. <i>Indian J Pediatr</i> . 2002; 69(1): 33-7.                                                                                       | 1998-1999 |                      |
| India   | Ganju SA, Goel A. Sero-surveillance of HIV, HBV and HCV infections in antenatal and STD clinic attendees. <i>J Commun Dis</i> . 2004; 36(1): 60-2.                                                                                                                                                                                              | 1998-1999 |                      |
| India   | Murhekar MV, Murhekar KM, Das D, Arankalle VA, Sehgal SC. Prevalence of hepatitis B infection among the primitive tribes of Andaman & Nicobar Islands. <i>Indian J Med Res</i> . 2000; 199-203.                                                                                                                                                 | 1998-1999 |                      |
| India   | Office of the Registrar General and Census Commissioner (India). <i>India SRS Statistical Report 1999</i> . New Delhi, India: Office of the Registrar General and Census Commissioner (India).                                                                                                                                                  | 1999      |                      |
| India   | Khanna R, Kumar A, Vaghela JF, Sreenivas V, Puliye JM. Community based retrospective study of sex in infant mortality in India. <i>BMJ</i> . 2003; 327(7407): 126.                                                                                                                                                                              | 1999      |                      |
| India   | Saha R, Nath A, Sharma N, Badhan SK, Ingle GK. Changing profile of disease contributing to mortality in a resettlement colony of Delhi. <i>National Medical Journal of India</i> . 2007; 20(3): 125-7.                                                                                                                                          | 1999      |                      |
| India   | Vaid A, Mammen A, Primrose B, Kang G. Infant mortality in an urban slum. <i>Indian J Pediatr</i> . 2007; 74(5): 449-53.                                                                                                                                                                                                                         | 1999      |                      |
| India   | Dutta AK, Aggarwal A, Kapoor AK, Ray GN, Batra S. Seroepidemiology of hepatitis A in Delhi. <i>Indian J Pediatr</i> . 2000; 67(2): 77-9.                                                                                                                                                                                                        | 1999      |                      |
| India   | Joshi N, Yr NK, Kumar A. Age related seroprevalence of antibodies to hepatitis A virus in Hyderabad, India. <i>Trop Gastroenterol</i> . 2000; 21(2): 63-5.                                                                                                                                                                                      | 1999      |                      |
| India   | Jindal M, Rana SS, Gupta RK, Das K, Kar P. Serological study of hepatitis A virus infection amongst the students of a medical college in Delhi & evaluation of the need of vaccination. <i>Indian J Med Res</i> . 2002; 1-4.                                                                                                                    | 1999      |                      |
| India   | Kalaivani V, Rajendran P, Thyagarajan SP, Rajesh PK, Hari R, Selvakumar C, Ramkumar S, Anbalagan S, Senthil Kumar K. The seroprevalence of hepatitis B and C viruses and the associated risk factors in the Kolli hills tribal population of Tamilnadu. <i>Biomedicine</i> . 2001; 21(1): 7-13.                                                 | 1999      |                      |
| India   | Office of the Registrar General and Census Commissioner (India). <i>India Medical Certification of Cause of Death Vital Statistics 1999-2001</i> . [Unpublished].                                                                                                                                                                               | 1999-2001 |                      |
| India   | Vivek R, Chandy GM, Brown DW, Kang G. Seroprevalence of IgG antibodies to hepatitis E in urban and rural southern India. <i>Trans R Soc Trop Med Hyg</i> . 2010; 104(4): 307-9.                                                                                                                                                                 | 1999-2000 |                      |
| India   | Joshi SR, Patel RZ, Patel HR, Sukumar S, Colah RB. High prevalence of G6PD deficiency in Vataliya Prajapati community in western India. <i>Haematologia (Budap)</i> . 2001; 31(1): 57-60.                                                                                                                                                       | 1999-2001 |                      |
| India   | Murhekar KM, Murhekar MV, Mukherjee MB, Gorakshakar AC, Surve R, Wadia M, Phanasgaonkar S, Shridevi S, Colah RB, Mohanty D. Red cell genetic abnormalities, beta-globin gene haplotypes, and APOB polymorphism in the Great Andamanese, a primitive Negrito tribe of Andaman and Nicobar Islands, India. <i>Hum Biol</i> . 2001; 73(5): 739-44. | 1999-2001 |                      |
| India   | Gupte SC, Patel PU, Ranat JM. G6PD deficiency in Vataliya Prajapati community settled in Surat. <i>Indian J Med Sci</i> . 2005; 59(2): 51-6.                                                                                                                                                                                                    | 1999-2004 |                      |
| India   | John S, Sanghi S, Prasad S, Bose A, George K. Two doses of measles vaccine: are some states in India ready for it? <i>J Trop Pediatr</i> . 2009; 55(4): 253-6.                                                                                                                                                                                  | 1999-2006 |                      |
| India   | Ray S, Mallik S, Munsia A, Mitra S, Baur B, Kumar S. Epidemiological study of measles in slum areas of Kolkata. <i>Indian J Pediatr</i> . 2004; 71(7): 583-6.                                                                                                                                                                                   | 1999-2000 |                      |



**Web Table 32 - Comprehensive citation list**

| Country | Citation                                                                                                                                                                                                                                                                                              | Year*                | New for GBD 2013 (*) |
|---------|-------------------------------------------------------------------------------------------------------------------------------------------------------------------------------------------------------------------------------------------------------------------------------------------------------|----------------------|----------------------|
| India   | Hussain T, Kulshreshtha KK, Sinha S, Yadav VS, Katoch VM. HIV, HBV, HCV, and syphilis co-infections among patients attending the STD clinics of district hospitals in Northern India. <i>Int J Infect Dis.</i> 2006; 10(5): 358-63.                                                                   | 1999-2004            |                      |
| India   | Office of the Registrar General and Census Commissioner (India). India SRS Bulletin 2000. New Delhi, India: Office of the Registrar General and Census Commissioner (India).                                                                                                                          | 2000                 |                      |
| India   | Office of the Registrar General and Census Commissioner (India). India SRS Statistical Report 2000. New Delhi, India: Office of the Registrar General and Census Commissioner (India).                                                                                                                | 2000                 |                      |
| India   | Singh RB, Fedacko J, Vargova V, Kumar A, Mohan V, Pella D, De Meester F, Wilson D. Singh's verbal autopsy questionnaire for the assessment of causes of death, social autopsy, tobacco autopsy and dietary autopsy, based on medical records and interview. <i>Acta Cardiol.</i> 2011; 66(4): 471-81. | 2000                 |                      |
| India   | Curado MP, Edwards B, Shin HR, Storm H, Ferlay J, Heanue M and Boyle P, eds (2007). Cancer Incidence in Five Continents, Vol. IX Periodic Data (electronic version). Lyon, IARC. <a href="http://ci5.iarc.fr">http://ci5.iarc.fr</a>                                                                  | 2000                 |                      |
| India   | Kothari A, Ramachandran VG, Gupta P, Singh B, Talwar V. Seroprevalence of cytomegalovirus among voluntary blood donors in Delhi, India. <i>J Health Popul Nutr.</i> 2002; 20(4): 348-51.                                                                                                              | 2000                 |                      |
| India   | World Health Organization (WHO). Retrospective Measles Data on Supplementary Immunization Activities. Geneva, Switzerland: World Health Organization (WHO).                                                                                                                                           | 2000-2001, 2010-2013 |                      |
| India   | Office of the Registrar General and Census Commissioner (India). India Population and Housing Census 2001. New Delhi, India: Office of the Registrar General and Census Commissioner (India).                                                                                                         | 2001                 |                      |
| India   | Office of the Registrar General and Census Commissioner (India). India SRS Statistical Report 2001. New Delhi, India: Office of the Registrar General and Census Commissioner (India), 2005.                                                                                                          | 2001                 |                      |
| India   | World Health Organization (WHO). Yellow Fever Reported Cases, WHO Vaccine-Preventable Diseases: Monitoring System. Geneva, Switzerland: World Health Organization (WHO).                                                                                                                              | 2001                 |                      |
| India   | Batra Y, Bhatkal B, Ojha B, Kaur K, Saraya A, Panda SK, Acharya SK. Vaccination against hepatitis A virus may not be required for schoolchildren in northern India: results of a seroepidemiological survey. <i>Bull World Health Organ.</i> 2002; 80(9): 728-31.                                     | 2001                 |                      |
| India   | Chaudhuri V, Nanu A, Panda SK, Chand P. Evaluation of serologic screening of blood donors in India reveals a lack of correlation between anti-HBc titer and PCR-amplified HBV DNA. <i>Transfusion.</i> 2003; 43(10): 1442-8.                                                                          | 2001                 |                      |
| India   | Jagnoor J, Suraweera W, Keay L, Ivers RQ, Thakur J, Jha P. Unintentional injury mortality in India, 2005: Nationally representative mortality survey of 1.1 million homes. <i>BMC Public Health.</i> 2012; 487.                                                                                       | 2001-2003            |                      |
| India   | Mathuranath PS, Cherian PJ, Mathew R, Kumar S, George A, Alexander A, Ranjith N, Sarma PS. Dementia in Kerala, South India: prevalence and influence of age, education and gender. <i>Int J Geriatr Psychiatry.</i> 2010; 25(3): 290-7.                                                               | 2001-2004            |                      |
| India   | Morris SK, Awasthi S, Kumar R, Shet A, Khera A, Nakhaee F, Ram U, Brandao JRM, Jha P. Measles mortality in high and low burden districts of India: Estimates from a nationally representative study of over 12,000 child deaths. <i>Vaccine.</i> 2013; 31(41): 4655-61.                               | 2001-2003, 2005      | *                    |
| India   | Ramachandran J, Eapen CE, Kang G, Abraham P, Hubert DDJ, Kurian G, Hephzibah J, Mukhopadhyaya A, Chandu GM. Hepatitis E superinfection produces severe decompensation in patients with chronic liver disease. <i>J Gastroenterol Hepatol.</i> 2004; 19(2): 134-8.                                     | 2001-2002            |                      |

**Web Table 32 - Comprehensive citation list**

| Country | Citation                                                                                                                                                                                                                                                                                                                                                                   | Year*     | New for GBD 2013 (*) |
|---------|----------------------------------------------------------------------------------------------------------------------------------------------------------------------------------------------------------------------------------------------------------------------------------------------------------------------------------------------------------------------------|-----------|----------------------|
| India   | Chowdhury A, Santra A, Chakravorty R, Banerji A, Pal S, Dhali GK, Datta S, Banerji S, Manna B, Chowdhury SR, Bhattacharya SK, Mazumder DG. Community-based epidemiology of hepatitis B virus infection in West Bengal, India: prevalence of hepatitis B e antigen-negative infection and associated viral variants. <i>J Gastroenterol Hepatol.</i> 2005; 20(11): 1712-20. | 2001-2002 |                      |
| India   | Gupta N, Kumar V, Kaur A. Seroprevalence of HIV, HBV, HCV and syphilis in voluntary blood donors. <i>Indian J Med Sci.</i> 2004; 58(6): 255-7.                                                                                                                                                                                                                             | 2001-2003 |                      |
| India   | Office of the Registrar General and Census Commissioner (India). India SRS Statistical Report 2002. New Delhi, India: Office of the Registrar General and Census Commissioner (India), 2005.                                                                                                                                                                               | 2002      |                      |
| India   | ICMR Young Infant Study Group. Age profile of neonatal deaths. <i>Indian Pediatr.</i> 2008; 45(12): 991-4.                                                                                                                                                                                                                                                                 | 2002      |                      |
| India   | Iyengar K, Iyengar SD, Suhalka V, Dashora K. Pregnancy-related deaths in rural Rajasthan, India: exploring causes, context, and care-seeking through verbal autopsy. <i>J Health Popul Nutr.</i> 2009; 27(2): 293-302.                                                                                                                                                     | 2002      |                      |
| India   | Bassani DG, Kumar R, Awasthi S, Morris SK, Paul VK, Shet A, Ram U, Gaffey MF, Black RE, Jha P. Causes of neonatal and child mortality in India: a nationally representative mortality survey. <i>Lancet.</i> 2010; 376(9755): 1853-60.                                                                                                                                     | 2002      |                      |
| India   | Morris SK, Bassani DG, Awasthi S, Kumar R, Shet A, Suraweera W, Jha P. Diarrhea, Pneumonia, and Infectious Disease Mortality in Children Aged 5 to 14 Years in India. <i>PLoS One.</i> 2011; 6(5): e20119.                                                                                                                                                                 | 2002      |                      |
| India   | Suraweera W, Morris SK, Kumar R, Warrell DA, Warrell MJ, Jha P. Deaths from Symptomatically Identifiable Furious Rabies in India: A Nationally Representative Mortality Survey. <i>PLoS Negl Trop Dis.</i> 2012; 6(10): e1847.                                                                                                                                             | 2002      |                      |
| India   | Office of the Registrar General and Census Commissioner (India). India Medical Certification of Cause of Death Report 2002. New Delhi, India: Office of the Registrar General and Census Commissioner (India), 2009.                                                                                                                                                       | 2002      |                      |
| India   | Patel V, Ramasundarhettige C, Vijayakumar L, Thakur J, Gajalakshmi V, Gururaj G, Suraweera W, Jha P. Suicide mortality in India: a nationally representative survey. <i>Lancet.</i> 2012; 379(9834): 2343-51.                                                                                                                                                              | 2002      |                      |
| India   | Wang B-E, Ma W-M, Sulaiman A, Noer S, Sumoharjo S, Sumarsidi D, Tandon BN, Nakao K, Mishiro S, Miyakawa Y, Akahane Y, Suzuki H. Demographic, clinical, and virological characteristics of hepatocellular carcinoma in Asia: survey of 414 patients from four countries. <i>J Med Virol.</i> 2002; 67(3): 394-400.                                                          | 2002      |                      |
| India   | Dhingra N, Jha P, Sharma VP, Cohen AA, Jotkar RM, Rodriguez PS, Bassani DG, Suraweera W, Laxminarayan R, Peto R. Adult and child malaria mortality in India: a nationally representative mortality survey. <i>Lancet.</i> 2010; 376(9754): 1768-74.                                                                                                                        | 2002      |                      |
| India   | Mohanavalli B, Dhevahi E, Menon T, Malathi S, Thyagarajan SP. Prevalence of antibodies to hepatitis A and hepatitis E virus in urban school children in Chennai. <i>Indian Pediatr.</i> 2003; 40(4): 328-31.                                                                                                                                                               | 2002      |                      |
| India   | Xavier S, Anish K. Is hepatitis A vaccination necessary in Indian patients with cirrhosis of liver?. <i>Indian J Gastroenterol.</i> 2003; 22(2): 54-5.                                                                                                                                                                                                                     | 2002      |                      |
| India   | Murhekar MV, Murhekar KM, Sehgal SC. Age-specific prevalence of hepatitis B infection among the Karen in the Andaman and Nicobar Islands, India. <i>Trop Doct.</i> 2004; 34(2): 117-8.                                                                                                                                                                                     | 2002      |                      |
| India   | Murhekar MV, Murhekar KM, Sehgal SC. Seroepidemiology of hepatitis B infection among tribal school children in Andaman and Nicobar Islands, India. <i>Ann Trop Paediatr.</i> 2004; 24(1): 85-8.                                                                                                                                                                            | 2002      |                      |
| India   | Singh H, Aggarwal R, Singh RL, Naik SR, Naik S. Frequency of infection by hepatitis B virus and its surface mutants in a northern Indian population. <i>Indian J Gastroenterol.</i> 2003; 22(4): 132-7.                                                                                                                                                                    | 2002      |                      |



**Web Table 32 - Comprehensive citation list**

| Country | Citation                                                                                                                                                                                                                                                                                               | Year*           | New for GBD 2013 (*) |
|---------|--------------------------------------------------------------------------------------------------------------------------------------------------------------------------------------------------------------------------------------------------------------------------------------------------------|-----------------|----------------------|
| India   | International Institute for Population Sciences (India). India District Level Household Survey 2002-2005 . Mumbai, India: International Institute for Population Sciences (India).                                                                                                                     | 2002-2005       |                      |
| India   | Salve H, Kumar R, Sinha S, Krishnan A. Suicide an emerging public health problem: evidence from rural Haryana, India. <i>Indian J Public Health</i> . 2013; 57(1): 40-2.                                                                                                                               | 2002-2009       |                      |
| India   | Banerjee TK, Mukherjee CS, Dutt A, Shekhar A, Hazra A. Cognitive dysfunction in an urban Indian population – some observations. <i>Neuroepidemiology</i> . 2008; 31(2): 109-14.                                                                                                                        | 2002-2003       |                      |
| India   | Patra S, Singh B, Reddaiah V. Maternal morbidity during postpartum period in a village in North India. <i>Trop Doct</i> . 2008; 38(4): 204-8.                                                                                                                                                          | 2002-2003       |                      |
| India   | Derman RJ, Kodkany BS, Goudar SS, Geller SE, Naik VA, Bellad MB, Patted SS, Patel A, Edlavitch SA, Hartwell T, Chakraborty H, Moss N. Oral misoprostol in preventing postpartum haemorrhage in resource-poor communities: a randomised controlled trial. <i>Lancet</i> . 2006; 368(9543): 1248-53.     | 2002-2005       |                      |
| India   | Sukumar S, Mukherjee MB, Colah RB, Mohanty D. Molecular basis of G6PD deficiency in India. <i>Blood Cells Mol Dis</i> . 2004; 33(2): 141-5.                                                                                                                                                            | 2002-2004       |                      |
| India   | Pahuja S, Sharma M, Baitha B, Jain M. Prevalence and trends of markers of hepatitis C virus, hepatitis B virus and human immunodeficiency virus in Delhi blood donors: a hospital based study. <i>Jpn J Infect Dis</i> . 2007; 60(6): 389-91.                                                          | 2002-2005       |                      |
| India   | Qamer S, Shahab T, Alam S, Malik A, Afzal K. Age-specific prevalence of hepatitis B surface antigen in pediatric population of Aligarh, North India. <i>Indian J Pediatr</i> . 2004; 71(11): 965-7.                                                                                                    | 2002-2003       |                      |
| India   | Sandesh K, Varghese T, Harikumar R, Beena P, Sasidharan VP, Bindu CS, Tony J, Harish K, Sunilkumar K, Ramachandran TM. Prevalence of Hepatitis B and C in the normal population and high risk groups in north Kerala. <i>Trop Gastroenterol</i> . 2006; 27(2): 80-3.                                   | 2002-2004       |                      |
| India   | Gadgil PS, Fadnis RS, Joshi MS, Rao PS, Chitambar SD. Seroepidemiology of hepatitis A in voluntary blood donors from Pune, western India (2002 and 2004-2005). <i>Epidemiol Infect</i> . 2008; 136(3): 406-9.                                                                                          | 2002, 2004-2005 |                      |
| India   | International Institute for Population Sciences (India), World Health Organization (WHO). India World Health Survey 2003. Geneva, Switzerland: World Health Organization (WHO), 2005.                                                                                                                  | 2003            |                      |
| India   | Office of the Registrar General and Census Commissioner (India). India SRS Statistical Report 2003. New Delhi, India: Office of the Registrar General and Census Commissioner (India), 2005.                                                                                                           | 2003            |                      |
| India   | Indian Council of Medical Research (ICMR). India Study on Causes of Death by Verbal Autopsy 2003.                                                                                                                                                                                                      | 2003            |                      |
| India   | Joshi R, Cardona M, Iyengar S, Sukumar A, Raju CR, Raju KR, Raju K, Reddy KS, Lopez A, Neal B. Chronic diseases now a leading cause of death in rural India – mortality data from the Andhra Pradesh Rural Health Initiative. <i>Int J Epidemiol</i> . 2006; 35(6): 1522-9.                            | 2003            |                      |
| India   | Office of the Registrar General and Census Commissioner (India). India Medical Certification of Cause of Death Report 2003. New Delhi, India: Office of the Registrar General and Census Commissioner (India).                                                                                         | 2003            |                      |
| India   | Kanungo S, Tsuzuki A, Deen JL, Lopez AL, Rajendran K, Manna B, Sur D, Kim DR, Gupta VK, Ochiai RL, Ali M, von Seidlein L, Bhattacharya SK, Clemens JD. Use of verbal autopsy to determine mortality patterns in an urban slum in Kolkata, India. <i>Bull World Health Organ</i> . 2010; 88(9): 667-74. | 2003            |                      |
| India   | Gupta SD, Khanna A, Gupta R, Sharma NK, Sharma ND. Maternal mortality ratio and predictors of maternal deaths in selected desert districts in rajasthan a community-based survey and case control study. <i>Womens Health Issues</i> . 2010; 20(1): 80-5.                                              | 2003            |                      |

**Web Table 32 - Comprehensive citation list**

| Country | Citation                                                                                                                                                                                                                                                                                                                                                                                               | Year*     | New for GBD 2013 (*) |
|---------|--------------------------------------------------------------------------------------------------------------------------------------------------------------------------------------------------------------------------------------------------------------------------------------------------------------------------------------------------------------------------------------------------------|-----------|----------------------|
| India   | Sharma MK, Bhatia V, Swami H. Outbreak of measles amongst vaccinated children in a slum of Chandigarh. <i>Indian J Med Sci.</i> 2004; 58(2): 47-53.                                                                                                                                                                                                                                                    | 2003      |                      |
| India   | Ratho R, Mishra B, Singh T, Rao P, Kumar R. Measles outbreak in a migrant population. <i>Indian J Pediatr.</i> 2005; 72(10): 893-4.                                                                                                                                                                                                                                                                    | 2003      |                      |
| India   | Kumar D, Arora A, Singh NP, Kohli R, Kar P, Das BC. Hepatitis G virus infection in hemodialysis patients from urban Delhi. <i>Ren Fail.</i> 2005; 27(1): 87-93.                                                                                                                                                                                                                                        | 2003      |                      |
| India   | Pazhanivel M, Jayanthi V. Diabetes mellitus and cirrhosis liver. <i>Minerva Gastroenterol Dietol.</i> 2010; 56(1): 7-11.                                                                                                                                                                                                                                                                               | 2003-2007 | *                    |
| India   | Prince M, Acosta D, Ferri CP, Guerra M, Huang Y, Llibre Rodriguez JJ, Salas A, Sosa AL, Williams JD, Dewey ME, Acosta I, Jotheeswaran AT, Liu Z. Dementia incidence and mortality in middle-income countries, and associations with indicators of cognitive reserve: a 10/66 Dementia Research Group population-based cohort study. <i>Lancet.</i> 2012; 380(9836): 50-8.                              | 2003-2007 |                      |
| India   | Byrraju Foundation, Centre for Chronic Disease Control (India), Cooperative for Assistance and Relief Everywhere (CARE), School of Population Health, University of Queensland (Australia). India - Andhra Pradesh Rural Health Initiative Mortality Surveillance 2003-2007. [Unpublished].                                                                                                            | 2003-2007 |                      |
| India   | Gupta V, Kaur J, Chander J. An increase in enteric fever cases due to <i>Salmonella Paratyphi A</i> in and around Chandigarh. <i>Indian J Med Res.</i> 2009; 129(1): 95-8.                                                                                                                                                                                                                             | 2003-2006 | *                    |
| India   | Jog S, Soman R, Singhal T, Rodrigues C, Mehta A, Dastur FD. Enteric fever in Mumbai – clinical profile, sensitivity patterns and response to antimicrobials. <i>J Assoc Physicians India.</i> 2008; 237-40.                                                                                                                                                                                            | 2003-2005 | *                    |
| India   | Ochiai RL, Wang X, von Seidlein L, Yang J, Bhutta ZA, Bhattacharya SK, Agtini M, Deen JL, Wain J, Kim DR, Ali M, Acosta CJ, Jodar L, Clemens JD. <i>Salmonella Paratyphi A</i> Rates, Asia. <i>Emerg Infect Dis.</i> 2005; 11(11): 1764-6.                                                                                                                                                             | 2003-2004 | *                    |
| India   | Llibre Rodriguez JJ, Ferri CP, Acosta D, Guerra M, Huang Y, Jacob KS, Krishnamoorthy ES, Salas A, Sosa AL, Acosta I, Dewey ME, Gaona C, Jotheeswaran AT, Li S, Rodriguez D, Rodriguez G, Kumar PS, Valhuerdi A, Prince M, 10/66 Dementia Research Group. Prevalence of dementia in Latin America, India, and China: a population-based cross-sectional survey. <i>Lancet.</i> 2008; 372(9637): 464-74. | 2003-2005 |                      |
| India   | Ministry of Health and Family Welfare (India), Office of the Registrar General and Census Commissioner (India). India Special Survey of Deaths 2004.                                                                                                                                                                                                                                                   | 2004      |                      |
| India   | Office of the Registrar General and Census Commissioner (India). India SRS Statistical Report 2004. New Delhi, India: Office of the Registrar General and Census Commissioner (India), 2006.                                                                                                                                                                                                           | 2004      |                      |
| India   | Office of the Registrar General and Census Commissioner (India). India Medical Certification of Cause of Death Report 2004. New Delhi, India: Office of the Registrar General and Census Commissioner (India).                                                                                                                                                                                         | 2004      |                      |
| India   | Palanivel C, Yadav K, Gupta V, Rai S, Misra P, Krishnan A. Causes of death in rural adult population of North India (2002-2007), using verbal autopsy tool. <i>Indian J Public Health.</i> 2013; 57(2): 78-83.                                                                                                                                                                                         | 2004      |                      |
| India   | Soman CR, Kutty VR, Safraj S, Vijayakumar K, Rajamohan K, Ajayan K. All-cause mortality and cardiovascular mortality in Kerala state of India: results from a 5-year follow-up of 161,942 rural community dwelling adults. <i>Asia Pac J Public Health.</i> 2011; 23(6): 896-903.                                                                                                                      | 2004      |                      |
| India   | Mishra A, Mishra S, Jain P, Bhadoriya R, Mishra R, Lahariya C. Measles related complications and the role of vitamin A supplementation. <i>Indian J Pediatr.</i> 2008; 75(9): 887-90.                                                                                                                                                                                                                  | 2004      |                      |
| India   | Gupta B, Sharma S. Measles Outbreak in a rural area near Shimla. <i>Indian J Community Med.</i> 2006; 31(2): 106.                                                                                                                                                                                                                                                                                      | 2004      |                      |

**Web Table 32 - Comprehensive citation list**

| Country | Citation                                                                                                                                                                                                                                                                                                                                                              | Year*     | New for GBD 2013 (*) |
|---------|-----------------------------------------------------------------------------------------------------------------------------------------------------------------------------------------------------------------------------------------------------------------------------------------------------------------------------------------------------------------------|-----------|----------------------|
| India   | Desai, Sonalde, Reeve Vanneman, and National Council of Applied Economic Research, New Delhi. India Human Development Survey (IHDS), 2005. ICPSR22626-v8. Ann Arbor, MI: Inter-university Consortium for Political and Social Research [distributor], 2010-06-29. doi:10.3886/ICPSR22626.v8.                                                                          | 2004-2005 |                      |
| India   | National Cancer Registry Programme (India). India Consolidated Report of Population Based Cancer Registries 2004-2005. New Delhi, India: Indian Council of Medical Research (ICMR), 2008.                                                                                                                                                                             | 2004-2005 |                      |
| India   | Bhattacharya P, Chandra P-K, Datta S, Banerjee A, Chakraborty S, Rajendran K, Basu S-K, Bhattacharya S-K, Chakravarty R. Significant increase in HBV, HCV, HIV and syphilis infections among blood donors in West Bengal, Eastern India 2004-2005: exploratory screening reveals high frequency of occult HBV infection. World J Gastroenterol. 2007; 13(27): 3730-3. | 2004-2005 |                      |
| India   | Office of the Registrar General and Census Commissioner (India). India SRS Bulletin 2005. New Delhi, India: Office of the Registrar General and Census Commissioner (India), 2006.                                                                                                                                                                                    | 2005      |                      |
| India   | Office of the Registrar General and Census Commissioner (India). India SRS Statistical Report 2005. New Delhi, India: Office of the Registrar General and Census Commissioner (India), 2006.                                                                                                                                                                          | 2005      |                      |
| India   | Dongre A, Singh A, Deshmukh P, Garg B. A community based cross sectional study on feasibility of lay interviewers in ascertaining causes of adult deaths by using verbal autopsy in rural Wardha. Online Journal of Health and Allied Sciences. 2008; 7(4): 4.                                                                                                        | 2005      |                      |
| India   | Office of the Registrar General and Census Commissioner (India). India Medical Certification of Cause of Death Report 2005. New Delhi, India: Office of the Registrar General and Census Commissioner (India).                                                                                                                                                        | 2005      |                      |
| India   | Shah MS, Khaliq N, Khan Z. Determinants of childhood mortality. Indian J Prev Soc Med. 2011; 42(2): 118-22.                                                                                                                                                                                                                                                           | 2005      |                      |
| India   | Barnett S, Nair N, Tripathy P, Borghi J, Rath S, Costello A. A prospective key informant surveillance system to measure maternal mortality -- findings from indigenous populations in Jharkhand and Orissa, India. BMC Pregnancy Childbirth. 2008; 8(6): 6.                                                                                                           | 2005      |                      |
| India   | National Cancer Registry Programme (India). India - North East Population Based Cancer Registries Report 2005-2006. New Delhi, India: Indian Council of Medical Research (ICMR), 2008.                                                                                                                                                                                | 2005      |                      |
| India   | International Institute for Population Sciences (India), Macro International, Inc. India Demographic and Health Survey 2005-2006. Calverton, United States: Macro International, Inc.                                                                                                                                                                                 | 2005-2006 |                      |
| India   | Forman D, Bray F, Brewster DH, Gombe Mbalawa C, Kohler B, Piñeros M, Steliarova-Foucher E, Swaminathan R and Ferlay J, eds (2013). Cancer Incidence in Five Continents, Vol. X Summary Database (electronic version). Lyon, IARC. <a href="http://ci5.iarc.fr">http://ci5.iarc.fr</a>                                                                                 | 2005-2006 |                      |
| India   | Bhattacharya SS, Das U, Choudhury BK. Occurrence and antibiogram of Salmonella Typhi and S. Paratyphi A isolated from Rourkela, Orissa. Indian J Med Res. 2011; 431-3.                                                                                                                                                                                                | 2005-2008 | *                    |
| India   | Vidyalakshmi K, Yashavanth R, Chakrapani M, Shrikala B, Bharathi B, Suchitra U, Dhanashree B, Dominic RMS. Epidemiological shift, seasonal variation and antimicrobial susceptibility patterns among enteric fever pathogens in South India. Trop Doct. 2008; 38(2): 89-91.                                                                                           | 2005-2006 | *                    |
| India   | Office of the Registrar General and Census Commissioner (India). India SRS Statistical Report 2006. New Delhi, India: Office of the Registrar General and Census Commissioner (India), 2008.                                                                                                                                                                          | 2006      |                      |
| India   | Baqui AH, Darmstadt GL, Williams EK, Kumar V, Kiran TU, Panwar D, Srivastava VK, Ahuja R, Black RE, Santosham M. Rates, timing and causes of neonatal deaths in rural India: implications for neonatal health programmes. Bull World Health Organ. 2006; 84(9): 706-13.                                                                                               | 2006      |                      |

**Web Table 32 - Comprehensive citation list**

| Country | Citation                                                                                                                                                                                                                                                                                                                                                                                                       | Year*     | New for GBD 2013 (*) |
|---------|----------------------------------------------------------------------------------------------------------------------------------------------------------------------------------------------------------------------------------------------------------------------------------------------------------------------------------------------------------------------------------------------------------------|-----------|----------------------|
| India   | Tripathy P, Nair N, Barnett S, Mahapatra R, Borghi J, Rath S, Rath S, Gope R, Mahto D, Sinha R, Lakshminarayana R, Patel V, Pagel C, Prost A, Costello A. Effect of a participatory intervention with women's groups on birth outcomes and maternal depression in Jharkhand and Orissa, India: a cluster-randomised controlled trial. <i>Lancet</i> . 2010; 375(9721): 1182-92.                                | 2006      |                      |
| India   | Bapat U, Alcock G, More NS, Das S, Joshi W, Osrin D. Stillbirths and newborn deaths in slum settlements in Mumbai, India: a prospective verbal autopsy study. <i>BMC Pregnancy Childbirth</i> . 2012; 12(39).                                                                                                                                                                                                  | 2006      |                      |
| India   | Joshi R, Praveen D, Chow C, Neal B. Effects on the estimated cause-specific mortality fraction of providing physician reviewers with different formats of verbal autopsy data. <i>Popul Health Metr</i> . 2011; 9(33): 33.                                                                                                                                                                                     | 2006      |                      |
| India   | Office of the Registrar General and Census Commissioner (India). India Medical Certification of Cause of Death Report 2006. New Delhi, India: Office of the Registrar General and Census Commissioner (India).                                                                                                                                                                                                 | 2006      |                      |
| India   | Saravanan S, Velu V, Nandakumar S, Madhavan V, Shanmugasundaram U, Murugavel KG, Balakrishnan P, Kumarasamy N, Solomon S, Thyagarajan SP. Hepatitis B virus and hepatitis C virus dual infection among patients with chronic liver disease. <i>J Microbiol Immunol Infect</i> . 2009; 42(2): 122-8.                                                                                                            | 2006      |                      |
| India   | National Cancer Registry Programme (India). India Three-Year Report of Population Based Cancer Registries 2006-2008. New Delhi, India: Indian Council of Medical Research (ICMR), 2010.                                                                                                                                                                                                                        | 2006      |                      |
| India   | Nishank SS, Chhotray GP, Kar SK, Ranjit MR. Molecular variants of G6PD deficiency among certain tribal communities of Orissa, India. <i>Ann Hum Biol</i> . 2008; 35(3): 355-61.                                                                                                                                                                                                                                | 2006-2008 |                      |
| India   | Begum N, Devi SG, Husain SA, Ashok Kumar, Kar P. Seroprevalence of subclinical HEV infection in pregnant women from north India: a hospital based study. <i>Indian J Med Res</i> . 2009; 130(6): 709-13.                                                                                                                                                                                                       | 2006-2007 |                      |
| India   | Office of the Registrar General and Census Commissioner (India). India SRS Statistical Report 2007. New Delhi, India: Office of the Registrar General and Census Commissioner (India), 2008.                                                                                                                                                                                                                   | 2007      |                      |
| India   | World Health Organization (WHO). Global Status Report on Road Safety 2009. Geneva, Switzerland: World Health Organization (WHO), 2009.                                                                                                                                                                                                                                                                         | 2007      |                      |
| India   | International Institute for Population Sciences (India). India District Level Household Survey 2007-2008. Mumbai, India: International Institute for Population Sciences (India), 2010.                                                                                                                                                                                                                        | 2007-2008 |                      |
| India   | Office of the Registrar General Census Commissioner (India). India SRS Special Bulletin on Maternal Mortality 2007-2009. New Delhi, India: Office of the Registrar General Census Commissioner (India).                                                                                                                                                                                                        | 2007-2009 |                      |
| India   | Office of the Registrar General and Census Commissioner (India). India SRS Statistical Report 2007-2008.                                                                                                                                                                                                                                                                                                       | 2007-2008 |                      |
| India   | Lumbiganon P, Laopaiboon M, Gülmezoglu AM, Souza JP, Taneepanichskul S, Ruyan P, Attygalle DE, Shrestha N, Mori R, Hinh ND, Bang HT, Rathavy T, Chuyun K, Cheang K, Festin M, Udomprasertgul V, Germar MJV, Yanqiu G, Roy M, Carroli G, Ba-Thike K. Method of delivery and pregnancy outcomes in Asia: the WHO global survey on maternal and perinatal health 2007-08. <i>Lancet</i> . 2010; 375(9713): 490-9. | 2007-2008 |                      |
| India   | Office of the Registrar General and Census Commissioner (India). India SRS Statistical Report 2008. New Delhi, India: Office of the Registrar General and Census Commissioner (India), 2010.                                                                                                                                                                                                                   | 2008      |                      |
| India   | Ghosh R, Sharma AK. Determinants of tetanus and sepsis among the last neonatal deaths at household level in a peri-urban area of India. <i>Postgrad Med J</i> . 2011; 87(1026): 257-63.                                                                                                                                                                                                                        | 2008      |                      |

**Web Table 32 - Comprehensive citation list**

| Country   | Citation                                                                                                                                                                                                                                                               | Year*                                                        | New for GBD 2013 (*) |
|-----------|------------------------------------------------------------------------------------------------------------------------------------------------------------------------------------------------------------------------------------------------------------------------|--------------------------------------------------------------|----------------------|
| India     | Krishnan A, Kumar R, Nongkynrih B, Misra P, Srivastava R, Kapoor SK. Adult mortality surveillance by routine health workers using a short verbal autopsy tool in rural north India. <i>J Epidemiol Community Health</i> . 2012; 66(6): 501-6.                          | 2008                                                         |                      |
| India     | Kumar R, Kapoor SK, Krishnan A. Performance of cause-specific childhood mortality surveillance by health workers using a short verbal autopsy tool. <i>WHO South-East Asia Journal of Public Health</i> . 2012; 1(2): 151-158.                                         | 2008                                                         |                      |
| India     | Shah BD, Dwivedi LK. Causes of neonatal deaths among tribal women in Gujarat, India. <i>Popul Res Policy Rev</i> . 2011; 30(4): 517-36.                                                                                                                                | 2008                                                         |                      |
| India     | Office of the Registrar General and Census Commissioner (India). <i>India Medical Certification of Cause of Death Report 2008</i> . New Delhi, India: Office of the Registrar General and Census Commissioner (India).                                                 | 2008                                                         |                      |
| India     | Hasker E, Singh SP, Malaviya P, Picado A, Gidwani K, Singh RP, Menten J, Boelaert M, Sundar S. Visceral leishmaniasis in rural Bihar, India. <i>Emerg Infect Dis</i> . 2012; 18(10): 1662-4.                                                                           | 2008-2010                                                    | *                    |
| India     | National Cancer Registry Programme (India). <i>India Population Based Cancer Registries 2009-2011</i> . New Delhi, India: Indian Council of Medical Research (ICMR), 2013.                                                                                             | 2008-2010                                                    |                      |
| India     | Office of the Registrar General and Census Commissioner (India). <i>India SRS Statistical Report 2009</i> . New Delhi, India: Office of the Registrar General and Census Commissioner (India).                                                                         | 2009                                                         |                      |
| India     | Joint United Nations Program on HIV/AIDS (UNAIDS), National AIDS Control Organisation, Ministry of Health and Family Welfare (India). <i>India UNGASS Country Progress Report 2010</i> . Geneva, Switzerland: Joint United Nations Program on HIV/AIDS (UNAIDS), 2010. | 2009                                                         |                      |
| India     | Office of the Registrar General & Census Commissioner (India). <i>India SRS Bulletin 2010</i> . New Delhi, India: Office of the Registrar General & Census Commissioner (India), 2011.                                                                                 | 2010                                                         |                      |
| India     | Office of the Registrar General and Census Commissioner (India). <i>India SRS Statistical Report 2010</i> . New Delhi, India: Office of the Registrar General and Census Commissioner (India), 2012.                                                                   | 2010                                                         | *                    |
| India     | Office of the Registrar General and Census Commissioner (India). <i>India SRS Statistical Report 2011</i> . New Delhi, India: Office of the Registrar General and Census Commissioner (India), 2013.                                                                   | 2011                                                         | *                    |
| India     | Upadhyaya S, Shettyb S, Kumarc SS, Dongred A, Deshmukhe P. Institutionalizing district level infant death review: an experience from southern India. <i>WHO South-East Asia Journal of Public Health</i> . 2012; 1(4): 446-56.                                         | 2011                                                         | *                    |
| India     | National Vector Borne Disease Control Programme, Ministry of Health and Family Welfare (India). <i>India Visceral Leishmaniasis Cases and Deaths</i> . Delhi, India: National Vector Borne Disease Control Programme, Ministry of Health and Family Welfare (India).   | 2011-2012                                                    | *                    |
| India     | Office of the Registrar General and Census Commissioner (India). <i>India SRS Statistical Report 2012</i> . New Delhi, India: Office of the Registrar General and Census Commissioner (India), 2014.                                                                   | 2012                                                         | *                    |
| Indonesia | Peace Research Institute Oslo (PRIO). <i>Battle Deaths Dataset Version 3, 2009</i> . Oslo, Norway: Peace Research Institute Oslo (PRIO), 2009.                                                                                                                         | 1950-1988                                                    |                      |
| Indonesia | Centre for Research on the Epidemiology of Disasters (CRED). <i>EM-DAT: The OFDA/CRED International Disaster Database</i> . Brussels, Belgium: Catholic University of Leuven.                                                                                          | 1951, 1953-1956, 1958, 1963, 1965-1970, 1973-1974, 1976-2013 |                      |
| Indonesia | Castillo Taucher S. [Services for the care and prevention of birth defects. Reduced report of a World Health Organization and March of Dimes Foundation meeting]. <i>Rev Med Chil</i> . 2007; 135(6): 806-13.                                                          | 1955-2000                                                    |                      |
| Indonesia | Eng L-IL, Giok P-OH. Glucose-6-phosphate dehydrogenase deficiency in Indonesia. <i>Nature</i> . 1964; 204(4953): 88-9.                                                                                                                                                 | 1962-1964                                                    |                      |

**Web Table 32 - Comprehensive citation list**

| Country   | Citation                                                                                                                                                                                                                                                     | Year*                                  | New for GBD 2013 (*) |
|-----------|--------------------------------------------------------------------------------------------------------------------------------------------------------------------------------------------------------------------------------------------------------------|----------------------------------------|----------------------|
| Indonesia | Indonesia National Socioeconomic Survey 1964-1965 as it appears in United Nations Statistics Division (UNSD). United Nations Demographic Yearbook. New York City, United States: United Nations Statistics Division (UNSD).                                  | 1964-1965                              |                      |
| Indonesia | United Nations Office on Drugs and Crime (UNODC). United Nations Surveys on Crime Trends and the Operations of Criminal Justice Systems 1970-2006 as provided by Kavi Bhalla. [Unpublished].                                                                 | 1970-1986                              |                      |
| Indonesia | Central Bureau of Statistics (Indonesia). Indonesia Population and Housing Census 1971.                                                                                                                                                                      | 1971                                   |                      |
| Indonesia | Minnesota Population Center, Central Bureau of Statistics (Indonesia). Indonesia Population Census 1971 from the Integrated Public Use Microdata Series, International. [Machine-readable database]. Minneapolis: University of Minnesota, 2012.             | 1971                                   |                      |
| Indonesia | Central Bureau of Statistics (Indonesia). Indonesia Intercensal Population Survey 1976 .                                                                                                                                                                     | 1976                                   |                      |
| Indonesia | Central Bureau of Statistics (Indonesia), International Statistical Institute. Indonesia World Fertility Survey 1976. Voorburg, Netherlands: International Statistical Institute.                                                                            | 1976                                   |                      |
| Indonesia | Minnesota Population Center, Central Bureau of Statistics (Indonesia). Indonesia Intercensal Population Survey 1976 from the Integrated Public Use Microdata Series, International. [Machine-readable database]. Minneapolis: University of Minnesota, 2012. | 1976                                   |                      |
| Indonesia | Brown P, Breguet G, Smallwood L, Ney R, Moerdowo RM, Gerety RJ. Serologic markers of hepatitis A and B in the population of Bali, Indonesia. Am J Trop Med Hyg. 1985; 34(3): 616-9.                                                                          | 1978-1991                              |                      |
| Indonesia | Central Bureau of Statistics (Indonesia). Indonesia Population and Housing Census 1980.                                                                                                                                                                      | 1980                                   |                      |
| Indonesia | Institute for Health Metrics and Evaluation (IHME), Joint United Nations Program on HIV/AIDS (UNAIDS). Institute for Health Metrics and Evaluation HIV Mortality Estimates Based on the UNAIDS Spectrum Model Framework.                                     | 1980-2013                              | *                    |
| Indonesia | United Nations Children's Fund (UNICEF), World Health Organization (WHO). WHO and UNICEF Reported Disease Incidence Time Series - Pertussis. Geneva, Switzerland: World Health Organization (WHO).                                                           | 1980-1997, 1999-2006, 2009, 2011, 2013 |                      |
| Indonesia | United Nations Children's Fund (UNICEF), World Health Organization (WHO). WHO and UNICEF Reported Disease Incidence Time Series - Measles. Geneva, Switzerland: World Health Organization (WHO).                                                             | 1980-2013                              |                      |
| Indonesia | Fortney JA, Susanti I, Gadalla S, Saleh S, Rogers SM, Potts M. Reproductive Mortality in Two Developing Countries. Am J Public Health. 1986; 76(2): 134-8.                                                                                                   | 1981                                   |                      |
| Indonesia | Nazir M, Pardede N, Ismail R. The incidence of diarrhoeal diseases and diarrhoeal diseases related mortality in rural swampy low-land area of south Sumatra, Indonesia. J Trop Pediatr. 1990; 31(5): 268-72.                                                 | 1983                                   |                      |
| Indonesia | Anwar Z, Djamil H, Pardede N, Ismail R. The pattern of the causes of death in children in rural swampy area of South Sumatra, Indonesia. Paediatr Indones. 1987; 27(6-May): 93-8.                                                                            | 1984                                   |                      |
| Indonesia | Central Bureau of Statistics (Indonesia). Indonesia Intercensal Population Survey 1985.                                                                                                                                                                      | 1985                                   |                      |
| Indonesia | Central Bureau of Statistics (Indonesia). Indonesia National Socioeconomic Survey 1985.                                                                                                                                                                      | 1985                                   |                      |
| Indonesia | Simanjuntak CH, Totosudirjo H, Haryanto P, Suprijanto E, Paleologo FP, Punjabi NH, Witham ND, Darmowigoto R, Soeprawoto, Hoffman SL. Oral immunisation against typhoid fever in Indonesia with Ty21a vaccine. Lancet. 1991; 338(8774): 1055-9.               | 1986                                   | *                    |



**Web Table 32 - Comprehensive citation list**

| Country   | Citation                                                                                                                                                                                                                                                                      | Year*     | New for GBD 2013 (*) |
|-----------|-------------------------------------------------------------------------------------------------------------------------------------------------------------------------------------------------------------------------------------------------------------------------------|-----------|----------------------|
| Indonesia | Central Bureau of Statistics (Indonesia), National Family Planning Coordinating Board (Indonesia), Westinghouse; Institute for Resource Development. Indonesia Demographic and Health Survey 1987. Columbia, United States: Westinghouse; Institute for Resource Development. | 1987      |                      |
| Indonesia | Wolff AP, Ruys AH, Dolmans WM, Van Loon AM, Pangalila PF. Hepatitis B virus infection in patients with chronic liver disease and healthy controls in north-Sulawesi, Indonesia. <i>Trop Geogr Med</i> . 1990; 42(3): 221-5.                                                   | 1988      |                      |
| Indonesia | Department of Peace and Conflict Research, Uppsala University. UCDP Battle-Related Deaths Database Version 5, 2013. Uppsala, Sweden: Department of Peace and Conflict Research, Uppsala University, 2013.                                                                     | 1989-2005 | *                    |
| Indonesia | Central Bureau of Statistics (Indonesia). Indonesia Population and Housing Census 1990.                                                                                                                                                                                       | 1990      |                      |
| Indonesia | Amirudin R, Akil H, Akahane Y, Suzuki H. Hepatitis B and C virus infection in Ujung Pandang, Indonesia. <i>Gastroenterol Jpn</i> . 1991; 184-8.                                                                                                                               | 1990      |                      |
| Indonesia | Weatherall D. Sickle Cell and Thalassemias Prevalence Data, Personal Correspondence with David Weatherall. [Unpublished].                                                                                                                                                     | 1990-2009 |                      |
| Indonesia | Centre for Health Informatics and Multiprofessional Education, University College London. Modell's Haemoglobinopathologist's Almanac. London, United Kingdom: Centre for Health Informatics and Multiprofessional Education, University College London, 2008.                 | 1990-2003 |                      |
| Indonesia | Central Bureau of Statistics (Indonesia), Macro International, Inc, Ministry of Health (Indonesia), National Family Planning Coordinating Board (Indonesia). Indonesia Demographic and Health Survey 1991. Calverton, United States: Macro International, Inc.                | 1991      |                      |
| Indonesia | Central Bureau of Statistics (Indonesia), National Family Planning Coordinating Board (Indonesia), Ministry of Health (Indonesia), Macro International, Inc. Indonesia Demographic and Health Survey 1991. Columbia, United States: Macro International, Inc.                 | 1991      |                      |
| Indonesia | Sutrisna B, Reingold A, Kresno S, Harrison G, Utomo B.. Care-seeking for fatal illnesses in young children in Indramayu, West Java, Indonesia. <i>Lancet</i> . 1993; 342(8874): 787-89.                                                                                       | 1991      |                      |
| Indonesia | Department of Peace and Conflict Research, Uppsala University. UCDP One-Sided Violence Database Version 1.4, 2013. Uppsala, Sweden: Department of Peace and Conflict Research, Uppsala University, 2013.                                                                      | 1991-2004 | *                    |
| Indonesia | Central Bureau of Statistics (Indonesia). Indonesia National Socioeconomic Survey 1992.                                                                                                                                                                                       | 1992      |                      |
| Indonesia | Central Bureau of Statistics (Indonesia). Indonesia National Socioeconomic Survey 1993.                                                                                                                                                                                       | 1993      |                      |
| Indonesia | Corwin A, Jarot K, Lubis I, Nasution K, Suparmawo S, Sumardiati A, Widodo S, Nazir S, Orndorff G, Choi Y. Two years' investigation of epidemic hepatitis E virus transmission in West Kalimantan (Borneo), Indonesia. <i>Trans R Soc Trop Med Hyg</i> . 1995; 89(3): 262-5.   | 1993      | *                    |
| Indonesia | RAND Corporation, University of Indonesia. Indonesia Family Life Survey 1993-1994. RAND Corporation.                                                                                                                                                                          | 1993-1994 |                      |
| Indonesia | Soemantri AG, Saha S, Saha N, Tay JS. Molecular variants of red cell glucose-6-phosphate dehydrogenase deficiency in Central Java, Indonesia. <i>Hum Hered</i> . 1995; 45(6): 346-50.                                                                                         | 1993-1995 |                      |
| Indonesia | Central Bureau of Statistics (Indonesia). Indonesia National Socioeconomic Survey 1994.                                                                                                                                                                                       | 1994      |                      |
| Indonesia | Central Bureau of Statistics (Indonesia), Macro International, Inc, Ministry of Health (Indonesia), National Family Planning Coordinating Board (Indonesia). Indonesia Demographic and Health Survey 1994. Calverton, United States: Macro International, Inc.                | 1994      |                      |

**Web Table 32 - Comprehensive citation list**

| Country   | Citation                                                                                                                                                                                                                                                                                                                 | Year*     | New for GBD 2013 (*) |
|-----------|--------------------------------------------------------------------------------------------------------------------------------------------------------------------------------------------------------------------------------------------------------------------------------------------------------------------------|-----------|----------------------|
| Indonesia | Hadiwandowo S, Tsuda F, Okamoto H, Tokita H, Wang Y, Tanaka T, Miyakawa Y, Mayumi M. Hepatitis B virus subtypes and hepatitis C virus genotypes in patients with chronic liver disease or on maintenance hemodialysis in Indonesia. <i>J Med Virol.</i> 1994; 43(2): 182-6.                                              | 1994      |                      |
| Indonesia | Corwin A, Putri MP, Winarno J, Lubis I, Suparmanto S, Sumardiati A, Laras K, Tan R, Master J, Warner G, Wignall FS, Graham R, Hyams KC. Epidemic and sporadic hepatitis E virus transmission in West Kalimantan (Borneo), Indonesia. <i>Am J Trop Med Hyg.</i> 1997; 57(1): 62-5.                                        | 1994      |                      |
| Indonesia | Akbar N, Basuki B, Mulyanto, Garabrant DH, Sulaiman A, Noer HM. Ethnicity, socioeconomic status, transfusions and risk of hepatitis B and hepatitis C infection. <i>J Gastroenterol Hepatol.</i> 1997; 12(11): 752-7.                                                                                                    | 1994      |                      |
| Indonesia | Central Bureau of Statistics (Indonesia). Indonesia Intercensal Population Survey 1995.                                                                                                                                                                                                                                  | 1995      |                      |
| Indonesia | Central Bureau of Statistics (Indonesia), Ministry of Health (Indonesia), United Nations Children's Fund (UNICEF). Indonesia National Socioeconomic Survey 1995.                                                                                                                                                         | 1995      |                      |
| Indonesia | Juffrie M, Graham RR, Tan RI, Widjaja S, Mulyadi S, Weil J, Bock HL. Seroprevalence of hepatitis A virus and varicella zoster antibodies in a Javanese community (Yogyakarta, Indonesia). <i>Southeast Asian J Trop Med Public Health.</i> 2000; 31(1): 21-4.                                                            | 1995-1996 |                      |
| Indonesia | Boland GJ, Cnossen N, van Bommel T, Rulos-van den Berg A, van den Berg JPB, van Loon AM, van Hattum J. Molecular diversity of hepatitis C virus in the Batam region. <i>Adv Exp Med Biol.</i> 2003; 211-7.                                                                                                               | 1995-1997 |                      |
| Indonesia | Central Bureau of Statistics (Indonesia), Ministry of Health (Indonesia), United Nations Children's Fund (UNICEF). Indonesia National Socioeconomic Survey 1996.                                                                                                                                                         | 1996      |                      |
| Indonesia | Suryantoro P. Glucose-6-phosphate dehydrogenase (G6PD) deficiency in Yogyakarta and its surrounding areas. <i>Southeast Asian J Trop Med Public Health.</i> 2003; 138-9.                                                                                                                                                 | 1996      |                      |
| Indonesia | Family Health International. The base of the iceberg: prevalence and perceptions of maternal morbidity in four developing countries. Durham, North Carolina: Family Health International, 1997.                                                                                                                          | 1996      |                      |
| Indonesia | Wibawa IDN, Muljono DH, Mulyanto, Suryadarma IGA, Tsuda F, Takahashi M, Nishizawa T, Okamoto H. Prevalence of antibodies to hepatitis E virus among apparently healthy humans and pigs in Bali, Indonesia: Identification of a pig infected with a genotype 4 hepatitis E virus. <i>J Med Virol.</i> 2004; 73(1): 38-44. | 1996      |                      |
| Indonesia | Macro International, Inc, RAND Corporation, University of California, Los Angeles (UCLA), University of Indonesia. Indonesia Family Life Survey 1997.                                                                                                                                                                    | 1997      | *                    |
| Indonesia | Central Bureau of Statistics (Indonesia), Ministry of Health (Indonesia), United Nations Children's Fund (UNICEF). Indonesia National Socioeconomic Survey 1997.                                                                                                                                                         | 1997      |                      |
| Indonesia | Central Bureau of Statistics (Indonesia), Macro International, Inc, Ministry of Health (Indonesia), National Family Planning Coordinating Board (Indonesia). Indonesia Demographic and Health Survey 1997. Calverton, United States: Macro International, Inc.                                                           | 1997      |                      |
| Indonesia | Nelson CM, Sutanto A, Gessner BD, Suradana IG, Steinhoff MC, Arjoso S. Age- and cause-specific childhood mortality in Lombok, Indonesia, as a factor for determining the appropriateness of introducing Haemophilus influenzae type b and pneumococcal vaccines. <i>J Health Popul Nutr.</i> 2000; 18(3): 131-8.         | 1997      |                      |
| Indonesia | Supratikto G, Wirth ME, Achadi E, Cohen S, Ronsmans C. A district-based audit of the causes and circumstances of maternal deaths in South Kalimantan, Indonesia. <i>Bull World Health Organ.</i> 2002; 80(3): 228-34.                                                                                                    | 1997      |                      |



**Web Table 32 - Comprehensive citation list**

| Country   | Citation                                                                                                                                                                                                                                                                                                                                  | Year*           | New for GBD 2013 (*) |
|-----------|-------------------------------------------------------------------------------------------------------------------------------------------------------------------------------------------------------------------------------------------------------------------------------------------------------------------------------------------|-----------------|----------------------|
| Indonesia | Van Hattum J, Boland GJ, Jansen KGJJ, Kleinpenning AS, van Bommel T, van Loon AM, Abdurachman SA, Yusuf H, Rulos-van den Berg A, van den Berg J. Transmission profile of hepatitis B virus infection in the Batam region, Indonesia. Evidence for a predominantly horizontal transmission profile. <i>Adv Exp Med Biol.</i> 2003; 177-83. | 1997            |                      |
| Indonesia | Measles Supplementary Immunization Activity Data as provided by the World Health Organization. [Unpublished].                                                                                                                                                                                                                             | 1997            |                      |
| Indonesia | Tantular IS, Iwai K, Lin K, Basuki S, Horie T, Htay HH, Matsuoka H, Marwoto H, Wongsrichanalai C, Dachlan YP, Kojima S, Ishii A, Kawamoto F. Field trials of a rapid test for G6PD deficiency in combination with a rapid diagnosis of malaria. <i>Trop Med Int Health.</i> 1999; 4(4): 245-50.                                           | 1997-1998       |                      |
| Indonesia | Iwai K, Hirono A, Matsuoka H, Kawamoto F, Horie T, Lin K, Tantular IS, Dachlan YP, Notopuro H, Hidayah NI, Salim AM, Fujii H, Miwa S, Ishii A. Distribution of glucose-6-phosphate dehydrogenase mutations in Southeast Asia. <i>Hum Genet.</i> 2001; 108(6): 445-9.                                                                      | 1997-1998       |                      |
| Indonesia | Department of Peace and Conflict Research, Uppsala University. UCDP Nonstate Conflict Database Version 2.5, 2013. Uppsala, Sweden: Department of Peace and Conflict Research, Uppsala University, 2013.                                                                                                                                   | 1997-2001       | *                    |
| Indonesia | World Health Organization (WHO). The Global Elimination of Congenital Syphilis: Rationale and Strategy for Action. Geneva, Switzerland: World Health Organization (WHO), 2007.                                                                                                                                                            | 1997-2003       |                      |
| Indonesia | Joint United Nations Program on HIV/AIDS (UNAIDS), United Nations Children's Fund (UNICEF), World Health Organization (WHO). Indonesia Epidemiological Fact Sheet on HIV/AIDS and STIs 2004.                                                                                                                                              | 1997-1999       |                      |
| Indonesia | Central Bureau of Statistics (Indonesia), Ministry of Health (Indonesia), World Bank. Indonesia National Socioeconomic Survey 1998.                                                                                                                                                                                                       | 1998            |                      |
| Indonesia | World Health Organization (WHO). Yellow Fever Reported Cases, WHO Vaccine-Preventable Diseases: Monitoring System. Geneva, Switzerland: World Health Organization (WHO).                                                                                                                                                                  | 1998, 2006-2009 |                      |
| Indonesia | Central Bureau of Statistics (Indonesia), Ministry of Health (Indonesia), World Bank. Indonesia National Socioeconomic Survey 1999.                                                                                                                                                                                                       | 1999            |                      |
| Indonesia | Center for Population and Policy Studies, Gadjah Mada University (Indonesia), RAND Corporation. Indonesia Family Life Survey 2000. RAND Corporation.                                                                                                                                                                                      | 2000            | *                    |
| Indonesia | Central Bureau of Statistics (Indonesia), Ministry of Health (Indonesia), World Bank. Indonesia National Socioeconomic Survey 2000.                                                                                                                                                                                                       | 2000            |                      |
| Indonesia | Statistics Indonesia. Indonesia Population and Housing Census 2000.                                                                                                                                                                                                                                                                       | 2000            | *                    |
| Indonesia | Minnesota Population Center, Statistics Indonesia. Indonesia Population Census 2000 from the Integrated Public Use Microdata Series, International. [Machine-readable database]. Minneapolis: University of Minnesota, 2012.                                                                                                              | 2000            |                      |
| Indonesia | World Health Organization (WHO). Retrospective Measles Data on Supplementary Immunization Activities. Geneva, Switzerland: World Health Organization (WHO).                                                                                                                                                                               | 2000, 2002-2011 |                      |
| Indonesia | Central Bureau of Statistics (Indonesia), Ministry of Health (Indonesia), World Bank. Indonesia National Socioeconomic Survey 2001.                                                                                                                                                                                                       | 2001            |                      |
| Indonesia | Matsuoka H, Arai M, Yoshida S, Tantular IS, Pularawati S, Kerong H, Kawamoto F. Five different glucose-6-phosphate [correction phosphate]dehydrogenase (G6PD) variants found among 11 G6PD-deficient persons in Flores Island, Indonesia. <i>J Hum Genet.</i> 2003; 48(10): 541-4.                                                        | 2001-2003       |                      |
| Indonesia | Vollaard AM, Ali S, Widjaja S, Asten HAGH van, Visser LG, Surjadi C, Dissel JT van. Identification of typhoid fever and paratyphoid fever cases at presentation in outpatient clinics in Jakarta, Indonesia. <i>Trans R Soc Trop Med Hyg.</i> 2005; 99(6): 440-50.                                                                        | 2001-2003       | *                    |
| Indonesia | Statistics Indonesia. Indonesia National Socioeconomic Survey 2002.                                                                                                                                                                                                                                                                       | 2002            |                      |

**Web Table 32 - Comprehensive citation list**

| Country   | Citation                                                                                                                                                                                                                                                                                                                           | Year*     | New for GBD 2013 (*) |
|-----------|------------------------------------------------------------------------------------------------------------------------------------------------------------------------------------------------------------------------------------------------------------------------------------------------------------------------------------|-----------|----------------------|
| Indonesia | Wang B-E, Ma W-M, Sulaiman A, Noer S, Sumoharjo S, Sumarsidi D, Tandon BN, Nakao K, Mishiro S, Miyakawa Y, Akahane Y, Suzuki H. Demographic, clinical, and virological characteristics of hepatocellular carcinoma in Asia: survey of 414 patients from four countries. <i>J Med Virol.</i> 2002; 67(3): 394-400.                  | 2002      |                      |
| Indonesia | Macro International, Inc, Ministry of Health (Indonesia), National Family Planning Coordinating Board (Indonesia), Statistics Indonesia. <i>Indonesia Demographic and Health Survey 2002-2003.</i> Calverton, United States: Macro International, Inc.                                                                             | 2002-2003 |                      |
| Indonesia | Jalloh A, Tantular IS, Pusrarwati S, Kawilarang AP, Kerong H, Lin K, Ferreira MU, Matsuoaka H, Arai M, Kita K, Kawamoto F. Rapid epidemiologic assessment of glucose-6-phosphate dehydrogenase deficiency in malaria-endemic areas in Southeast Asia using a novel diagnostic kit. <i>Trop Med Int Health.</i> 2004; 9(5): 615-23. | 2002-2003 |                      |
| Indonesia | Ochiai RL, Wang X, von Seidlein L, Yang J, Bhutta ZA, Bhattacharya SK, Agtini M, Deen JL, Wain J, Kim DR, Ali M, Acosta CJ, Jodar L, Clemens JD. Salmonella Paratyphi A Rates, Asia. <i>Emerg Infect Dis.</i> 2005; 11(11): 1764-6.                                                                                                | 2002-2003 | *                    |
| Indonesia | Statistics Indonesia. <i>Indonesia National Socioeconomic Survey 2003.</i>                                                                                                                                                                                                                                                         | 2003      |                      |
| Indonesia | United Nations Office on Drugs and Crime (UNODC). <i>United Nations Office on Drugs and Crime Global Study on Homicides 2011.</i> Vienna, Austria: United Nations Office on Drugs and Crime (UNODC), 2011.                                                                                                                         | 2003-2004 |                      |
| Indonesia | Adisasmita A, Deviany PE, Nandiaty F, Stanton C, Ronsmans C. Obstetric near miss and deaths in public and private hospitals in Indonesia. <i>BMC Pregnancy Childbirth.</i> 2008; 8(10): 10.                                                                                                                                        | 2003-2004 |                      |
| Indonesia | Shimizu H, Tamam M, Soemantri A, Ishida T. Glucose-6-phosphate dehydrogenase deficiency and Southeast Asian ovalocytosis in asymptomatic Plasmodium carriers in Sumba island, Indonesia. <i>J Hum Genet.</i> 2005; 50(8): 420-4.                                                                                                   | 2003-2005 |                      |
| Indonesia | Statistics Indonesia. <i>Indonesia National Socioeconomic Survey 2004.</i>                                                                                                                                                                                                                                                         | 2004      |                      |
| Indonesia | Kawamoto F, Matsuoaka H, Kanbe T, Tantular IS, Pusrarwati S, Kerong HI, Damianus W, Mere D, Dachlan YP. Further investigations of glucose-6-phosphate dehydrogenase variants in Flores Island, eastern Indonesia. <i>J Hum Genet.</i> 2006; 51(11): 952-7.                                                                         | 2004-2005 |                      |
| Indonesia | Statistics Indonesia. <i>Indonesia National Socioeconomic Survey 2005.</i>                                                                                                                                                                                                                                                         | 2005      |                      |
| Indonesia | Statistics Indonesia. <i>Indonesia Intercensal Population Survey 2005.</i>                                                                                                                                                                                                                                                         | 2005      | *                    |
| Indonesia | Achwan WA, Muttaqin Z, Zakaria E, Depamede SA, Mulyanto, Sumoharjo S, Tsuda F, Takahashi K, Abe N, Mishiro S. Epidemiology of hepatitis B, C, and E viruses and human immunodeficiency virus infections in Tahuna, Sangihe-Talaud Archipelago, Indonesia. <i>Intervirology.</i> 2007; 50(6): 408-11.                               | 2005      |                      |
| Indonesia | Ronsmans C, Scott S, Adisasmita A, Deviany P, Nandiaty F. Estimation of population-based incidence of pregnancy-related illness and mortality (PRIAM) in two districts in West Java, Indonesia. <i>BJOG.</i> 2009; 116(1): 82-90.                                                                                                  | 2005-2006 |                      |
| Indonesia | Statistics Indonesia. <i>Indonesia National Socioeconomic Survey 2006.</i>                                                                                                                                                                                                                                                         | 2006      |                      |
| Indonesia | Statistics Indonesia. <i>Indonesia National Socioeconomic Survey 2007.</i>                                                                                                                                                                                                                                                         | 2007      |                      |
| Indonesia | Macro International, Inc, Ministry of Health (Indonesia), National Family Planning Coordinating Board (Indonesia), Statistics Indonesia. <i>Indonesia Demographic and Health Survey 2007.</i> Calverton, United States: Macro International, Inc.                                                                                  | 2007      |                      |
| Indonesia | World Health Organization (WHO). <i>Global Status Report on Road Safety 2009.</i> Geneva, Switzerland: World Health Organization (WHO), 2009.                                                                                                                                                                                      | 2007      |                      |
| Indonesia | Center for Population and Policy Studies, Gadjah Mada University (Indonesia), RAND Corporation, SurveyMETER. <i>Indonesia Family Life Survey 2007-2008.</i> RAND Corporation.                                                                                                                                                      | 2007-2008 |                      |

**Web Table 32 - Comprehensive citation list**

| Country   | Citation                                                                                                                                                                                                                                                                                                         | Year*                                                                                                          | New for GBD 2013 (*) |
|-----------|------------------------------------------------------------------------------------------------------------------------------------------------------------------------------------------------------------------------------------------------------------------------------------------------------------------|----------------------------------------------------------------------------------------------------------------|----------------------|
| Indonesia | National Institute of Health Research and Development (NIHRD), Ministry of Health (Indonesia). Indonesia Basic Health Research 2007-2008.                                                                                                                                                                        | 2007-2008                                                                                                      | *                    |
| Indonesia | Joint United Nations Program on HIV/AIDS (UNAIDS), National AIDS Commission (Indonesia). Indonesia Country Report on the Follow up to the Declaration of Commitment on HIV/AIDS (UNGASS) 2010. Geneva, Switzerland: Joint United Nations Program on HIV/AIDS (UNAIDS), 2010.                                     | 2007, 2009                                                                                                     |                      |
| Indonesia | Statistics Indonesia. Indonesia National Socioeconomic Survey 2008.                                                                                                                                                                                                                                              | 2008                                                                                                           | *                    |
| Indonesia | Statistics Indonesia. Indonesia National Socioeconomic Survey 2009.                                                                                                                                                                                                                                              | 2009                                                                                                           |                      |
| Indonesia | National Institute of Health Research and Development (NIHRD), Ministry of Health (Indonesia). Indonesia Mortality Registration System Strengthening Project. [Unpublished].                                                                                                                                     | 2009-2011                                                                                                      | *                    |
| Indonesia | Statistics Indonesia. Indonesia National Socioeconomic Survey 2010.                                                                                                                                                                                                                                              | 2010                                                                                                           |                      |
| Indonesia | Minnesota Population Center, Statistics Indonesia. Indonesia Population Census 2010 from the Integrated Public Use Microdata Series, International. [Machine-readable database]. Minneapolis: University of Minnesota, 2012.                                                                                     | 2010                                                                                                           |                      |
| Indonesia | Statistics Indonesia. Indonesia Population Census 2010.                                                                                                                                                                                                                                                          | 2010                                                                                                           | *                    |
| Indonesia | National Institute of Health Research and Development (NIHRD), Ministry of Health (Indonesia). Indonesia Sample Registration System 2012, Indonesia Cause of Death Survey 2010-2011, Indonesia Mortality Registration System Strengthening Project (IMRSSP), and Indonesia Basic Health Research 2007-2008.      | 2010                                                                                                           |                      |
| Indonesia | Statistics Indonesia. Indonesia National Socioeconomic Survey 2011.                                                                                                                                                                                                                                              | 2011                                                                                                           | *                    |
| Indonesia | ICF International, Ministry of Health (Indonesia), National Population and Family Planning Board (Indonesia), Statistics Indonesia. Indonesia Demographic and Health Survey 2012. Fairfax, United States: ICF International, 2013.                                                                               | 2012                                                                                                           | *                    |
| Indonesia | Ministry of Health (Indonesia). Indonesia Sample Registration System - Deaths 2012. [Unpublished].                                                                                                                                                                                                               | 2012                                                                                                           | *                    |
| Iran      | Centre for Research on the Epidemiology of Disasters (CRED). EM-DAT: The OFDA/CRED International Disaster Database. Brussels, Belgium: Catholic University of Leuven.                                                                                                                                            | 1950-1951, 1953-1954, 1956-1958, 1960-1962, 1966, 1968-1970, 1972, 1975-1981, 1983, 1985-2008, 2010, 2012-2013 |                      |
| Iran      | Bowman JE, Walker DG. Virtual Absence of Glutathione Instability of the Erythrocytes among Armenians in Iran. Nature. 1961; 191(4785): 221-2.                                                                                                                                                                    | 1959-1961                                                                                                      |                      |
| Iran      | Peace Research Institute Oslo (PRIO). Battle Deaths Dataset Version 3, 2009. Oslo, Norway: Peace Research Institute Oslo (PRIO), 2009.                                                                                                                                                                           | 1966-1988                                                                                                      |                      |
| Iran      | Frischer H, Bowman JE, Carson PE, Rieckmann KH, Willerson D Jr, Colwell EJ. Erythrocytic glutathione reductase, glucose-6-phosphate dehydrogenase, and 6-phosphogluconic dehydrogenase deficiencies in populations of the United States, South Vietnam, Iran, and Ethiopia. J Lab Clin Med. 1973; 81(4): 603-12. | 1971-1973                                                                                                      |                      |
| Iran      | Statistical Centre of Iran. Iran Population Growth Survey 1973-1976.                                                                                                                                                                                                                                             | 1973-1976                                                                                                      |                      |
| Iran      | Iran Vital Registration - Deaths 1974 ICD8 as it appears in World Health Organization (WHO). WHO Mortality Database Version February 2014. Geneva, Switzerland: World Health Organization (WHO), 2014.                                                                                                           | 1974                                                                                                           |                      |
| Iran      | National Institute of Health Research, Ministry of Health and Medical Education (Iran), Tehran University. Iran Population and Health Sample Survey 1974.                                                                                                                                                        | 1974                                                                                                           |                      |

**Web Table 32 - Comprehensive citation list**

| Country | Citation                                                                                                                                                                                                                 | Year*     | New for GBD 2013 (*) |
|---------|--------------------------------------------------------------------------------------------------------------------------------------------------------------------------------------------------------------------------|-----------|----------------------|
| Iran    | Iran Vital Registration - Deaths 1975 ICD8 as it appears in World Health Organization (WHO). WHO Mortality Database Version February 2014. Geneva, Switzerland: World Health Organization (WHO), 2014.                   | 1975      |                      |
| Iran    | Iran Vital Registration - Deaths 1978 ICD8 as it appears in World Health Organization (WHO). WHO Mortality Database Version February 2014. Geneva, Switzerland: World Health Organization (WHO), 2014.                   | 1978      |                      |
| Iran    | Iran Vital Registration - Deaths 1979 ICD8 as it appears in World Health Organization (WHO). WHO Mortality Database Version February 2014. Geneva, Switzerland: World Health Organization (WHO), 2014.                   | 1979      |                      |
| Iran    | Farzadegan H, Shamszad M, Noori-Arya K. Epidemiology of viral hepatitis among Iranian population--a viral marker study. Ann Acad Med Singapore. 1980; 9(2): 144-8.                                                       | 1979      |                      |
| Iran    | Iran Vital Registration - Deaths 1980 ICD8 as it appears in World Health Organization (WHO). WHO Mortality Database Version February 2014. Geneva, Switzerland: World Health Organization (WHO), 2014.                   | 1980      |                      |
| Iran    | Institute for Health Metrics and Evaluation (IHME), Joint United Nations Program on HIV/AIDS (UNAIDS). Institute for Health Metrics and Evaluation HIV Mortality Estimates Based on the UNAIDS Spectrum Model Framework. | 1980-2013 | *                    |
| Iran    | United Nations Children's Fund (UNICEF), World Health Organization (WHO). WHO and UNICEF Reported Disease Incidence Time Series - Pertussis. Geneva, Switzerland: World Health Organization (WHO).                       | 1980-2013 |                      |
| Iran    | United Nations Children's Fund (UNICEF), World Health Organization (WHO). WHO and UNICEF Reported Disease Incidence Time Series - Measles. Geneva, Switzerland: World Health Organization (WHO).                         | 1980-2013 |                      |
| Iran    | Iran Vital Registration - Deaths 1981 ICD8 as it appears in World Health Organization (WHO). WHO Mortality Database Version February 2014. Geneva, Switzerland: World Health Organization (WHO), 2014.                   | 1981      |                      |
| Iran    | Iran Vital Registration - Deaths 1982 ICD8 as it appears in World Health Organization (WHO). WHO Mortality Database Version February 2014. Geneva, Switzerland: World Health Organization (WHO), 2014.                   | 1982      |                      |
| Iran    | Iran Vital Registration - Deaths 1983 ICD8 as it appears in World Health Organization (WHO). WHO Mortality Database Version February 2014. Geneva, Switzerland: World Health Organization (WHO), 2014.                   | 1983      |                      |
| Iran    | Haghighi B, Suzangar M, Yazdani A, Mehnat M. A genetic variant of human erythrocyte glucose 6-phosphate dehydrogenase. Biochem Biophys Res Commun. 1985; 132(3): 1151-9.                                                 | 1983-1985 |                      |
| Iran    | Iran Vital Registration - Deaths 1984 ICD8 as it appears in World Health Organization (WHO). WHO Mortality Database Version February 2014. Geneva, Switzerland: World Health Organization (WHO), 2014.                   | 1984      |                      |
| Iran    | Ministry of Health and Medical Education (Iran). Iran Mortality and Fertility Survey 1984.                                                                                                                               | 1984      |                      |
| Iran    | Iran Vital Registration - Deaths 1985 ICD8 as it appears in World Health Organization (WHO). WHO Mortality Database Version February 2014. Geneva, Switzerland: World Health Organization (WHO), 2014.                   | 1985      |                      |
| Iran    | Ardabil University of Medical Sciences, Digestive Diseases Research Center (Iran). Iran - Ardabil Cancer Registry Extracts 1985-2008.                                                                                    | 1985-2008 |                      |

**Web Table 32 - Comprehensive citation list**

| Country | Citation                                                                                                                                                                                                                                                                                                           | Year*           | New for GBD 2013 (*) |
|---------|--------------------------------------------------------------------------------------------------------------------------------------------------------------------------------------------------------------------------------------------------------------------------------------------------------------------|-----------------|----------------------|
| Iran    | Ardabil University of Medical Sciences, Digestive Diseases Research Center (Iran), International Agency for Research on Cancer (IARC). Iran - Ardabil Cancer Registry Extracts 1985-2008.                                                                                                                          | 1985, 2006-2008 |                      |
| Iran    | Statistical Centre of Iran. Iran Population and Housing Census 1986.                                                                                                                                                                                                                                               | 1986            |                      |
| Iran    | Iran Vital Registration Death Data 1986 as it appears in United Nations Statistics Division (UNSD). United Nations Demographic Yearbook. New York City, United States: United Nations Statistics Division (UNSD).                                                                                                  | 1986            |                      |
| Iran    | Iran Vital Registration - Deaths 1987 ICD8 as it appears in World Health Organization (WHO). WHO Mortality Database Version February 2014. Geneva, Switzerland: World Health Organization (WHO), 2014.                                                                                                             | 1987            |                      |
| Iran    | Amini S, Mahmoodi MF, Andalibi S, Solati AA. Seroepidemiology of hepatitis B, delta and human immunodeficiency virus infections in Hamadan province, Iran: a population based study. J Trop Med Hyg. 1993; 96(5): 277-87.                                                                                          | 1989            |                      |
| Iran    | Department of Peace and Conflict Research, Uppsala University. UCDP Battle-Related Deaths Database Version 5, 2013. Uppsala, Sweden: Department of Peace and Conflict Research, Uppsala University, 2013.                                                                                                          | 1989-2011       | *                    |
| Iran    | Weatherall D. Sickle Cell and Thalassemias Prevalence Data, Personal Correspondence with David Weatherall. [Unpublished].                                                                                                                                                                                          | 1990-2009       |                      |
| Iran    | Centre for Health Informatics and Multiprofessional Education, University College London. Modell's Haemoglobinopathologist's Almanac. London, United Kingdom: Centre for Health Informatics and Multiprofessional Education, University College London, 2008.                                                      | 1990-2003       |                      |
| Iran    | Statistical Centre of Iran. Iran Multi-Round Population Survey 1991.                                                                                                                                                                                                                                               | 1991            |                      |
| Iran    | Iran Vital Registration Death Data 1991 as it appears in United Nations Statistics Division (UNSD). United Nations Demographic Yearbook. New York City, United States: United Nations Statistics Division (UNSD).                                                                                                  | 1991            |                      |
| Iran    | Zali MR, Mohammad K, Noorbala AA, Noorimayer B, Shahraz S, Sahraz S. Rate of hepatitis B seropositivity following mass vaccination in the Islamic Republic of Iran. East Mediterr Health J. 2005; 11(1-2): 62-7.                                                                                                   | 1991,1999       |                      |
| Iran    | Ministry of Health and Medical Education (Iran). Iran Mortality and Fertility Survey 1996.                                                                                                                                                                                                                         | 1996            |                      |
| Iran    | Statistical Centre of Iran. Iran Population and Housing Census 1996.                                                                                                                                                                                                                                               | 1996            |                      |
| Iran    | Naghavi M. National Estimates for Maternal Mortality: An Analysis Based on Reproductive Age Mortality Study (RAMOS) in Iran. Tehran, Iran: Ministry of Health and Medical Education (Iran), 1996.                                                                                                                  | 1996            |                      |
| Iran    | Measles Supplementary Immunization Activity Data as provided by the World Health Organization. [Unpublished].                                                                                                                                                                                                      | 1996            |                      |
| Iran    | Usanga EA, Ameen R. Glucose-6-phosphate dehydrogenase deficiency in Kuwait, Syria, Egypt, Iran, Jordan and Lebanon. Hum Hered. 2000; 50(3): 158-61.                                                                                                                                                                | 1996-1997       |                      |
| Iran    | Joint United Nations Program on HIV/AIDS (UNAIDS), United Nations Children's Fund (UNICEF), World Health Organization (WHO). Iran Epidemiological Fact Sheet on HIV/AIDS and STIs 2004.                                                                                                                            | 1996-2003       |                      |
| Iran    | Iran Vital Registration - Deaths 1996-2001. [Unpublished].                                                                                                                                                                                                                                                         | 1996-2001       |                      |
| Iran    | Sadjadi A, Malekzadeh R, Derakhshan MH, Sepehr A, Nourai M, Sotoudeh M, Yazdanbod A, Shokooi B, Mashayekhi A, Arshi S, Majidpour A, Babaei M, Mosavi A, Mohagheghi MMA, Alimohammadian M. Cancer Occurrence in Ardabil: Results of a Population-Based Cancer Registry from Iran. Int J Cancer. 2003; 107: 113-118. | 1997            |                      |
| Iran    | Aghighi M, Mahdavi-Mazdeh M, Zamyadi M, Heidary Rouchi A, Rajolani H, Nourozi S. Changing epidemiology of end-stage renal disease in last 10 years in Iran. Iran J Kidney Dis. 2009; 3(4): 192-6.                                                                                                                  | 1997-2006       |                      |
| Iran    | Statistical Centre of Iran. Iran Population Growth Survey 1998.                                                                                                                                                                                                                                                    | 1998            |                      |

**Web Table 32 - Comprehensive citation list**

| Country | Citation                                                                                                                                                                                                                                                                                                             | Year*                  | New for GBD 2013 (*) |
|---------|----------------------------------------------------------------------------------------------------------------------------------------------------------------------------------------------------------------------------------------------------------------------------------------------------------------------|------------------------|----------------------|
| Iran    | Institute for Health Metrics and Evaluation. Institute for Health Metrics and Evaluation Cancer Registry Database. [Unpublished].                                                                                                                                                                                    | 1998                   |                      |
| Iran    | Semnani S, Sadjadi A, Fahimi S, Nouraie M, Naeimi M, Kabir J, Fakheri H, Saadatnia H, Ghavamnasiri MR, Malekzadeh R. Declining incidence of esophageal cancer in the Turkmen Plain, eastern part of the Caspian Littoral of Iran: A retrospective cancer surveillance. <i>Cancer Detect Prev.</i> 2006; 30: 14-19.   | 1998                   |                      |
| Iran    | World Health Organization (WHO). Iran WHO Leishmaniasis Country Profile.                                                                                                                                                                                                                                             | 1998-2010              | *                    |
| Iran    | World Health Organization (WHO). Yellow Fever Reported Cases, WHO Vaccine-Preventable Diseases: Monitoring System. Geneva, Switzerland: World Health Organization (WHO).                                                                                                                                             | 1998, 2000-2002        |                      |
| Iran    | Abolghasemi H, Mehrani H, Amid A. An update on the prevalence of glucose-6-phosphate dehydrogenase deficiency and neonatal jaundice in Tehran neonates. <i>Clin Biochem.</i> 2004; 37(3): 241-4.                                                                                                                     | 1999                   |                      |
| Iran    | Hajiani E, Masjedizadeh R, Hashemi J, Azmi M, Rajabi T. Risk factors for hepatocellular carcinoma in Southern Iran. <i>Saudi Med J.</i> 2005; 26(6): 974-7.                                                                                                                                                          | 1999-2004              |                      |
| Iran    | Karimi M, Ghavanini AA. Seroprevalence of HBsAg, anti-HCV, and anti-HIV among haemophiliac patients in Shiraz, Iran. <i>Haematologia (Budap).</i> 2001; 31(3): 251-5.                                                                                                                                                | 1999-2000              |                      |
| Iran    | Ministry of Health and Medical Education (Iran), Statistical Centre of Iran. Iran Demographic and Health Survey 2000.                                                                                                                                                                                                | 2000                   |                      |
| Iran    | Ministry of Health and Medical Education (Iran). Iran Vital Statistics - Deaths 2000-2006. [Unpublished].                                                                                                                                                                                                            | 2000-2006              |                      |
| Iran    | Sanaei-Zadeh H, Amoei M, Taghaddosinejad F. Seroprevalence of HIV, HBV and HCV in forensic autopsies, of presumed low risk, in Tehran, the capital of Iran. <i>J Clin Forensic Med.</i> 2002; 9(4): 179-81.                                                                                                          | 2000-2001              |                      |
| Iran    | Sanaei-Zadeh H, Taghaddosinejad F, Amoei M, Bayatmakou K, Fahim P. Autopsies on bodies without antemortem risk factors for HCV, HBV and HIV infections: are they safe? <i>Pathology.</i> 2002; 34(6): 582-3.                                                                                                         | 2000-2001              |                      |
| Iran    | Yousefi-Mashouf R, Moshtaghi AA. Frequency of Typhoidal and Non-Typhoidal Salmonella Species and Detection of Their Drugs Resistance Patterns. <i>J Res Health Sci.</i> 2007; 7(1): 49-56.                                                                                                                           | 2001-2004              | *                    |
| Iran    | Mehr AJ, Ardakani MJE, Hedayati M, Shahraz S, Mehr EJ, Zali MR. Age-specific seroprevalence of hepatitis A infection among children visited in pediatric hospitals of Tehran, Iran. <i>Eur J Epidemiol.</i> 2004; 19(3): 275-8.                                                                                      | 2002                   |                      |
| Iran    | Ministry of Health and Medical Education (Iran). Iran Maternal Mortality Report 2012-2013.                                                                                                                                                                                                                           | 2002-2012              | *                    |
| Iran    | Center for Disease Control and Prevention, Ministry of Health and Medical Education (Iran). Iran National Cancer Registry Report 2003-2004.                                                                                                                                                                          | 2003                   |                      |
| Iran    | Alizadeh AHM, Ranjbar M, Ansari S, MirArab A, Alavian SM, Mohammad K, Adibi P, Sadri GH, Keramat F, Ardalan A, Arabi M, Gharekhani S, Ataei A, Amraei GR, Hosseinzadeh M, Hatami S, Zali M. Seroprevalence of hepatitis B in Nahavand, Islamic Republic of Iran. <i>East Mediterr Health J.</i> 2006; 12(5): 528-37. | 2003                   |                      |
| Iran    | Taremi M, Mohammad Alizadeh AH, Ardalan A, Ansari S, Zali MR. Seroprevalence of hepatitis E in Nahavand, Islamic Republic of Iran: a population-based study. <i>East Mediterr Health J.</i> 2008; 14(1): 157-62.                                                                                                     | 2003                   |                      |
| Iran    | Saffar MJ, Farhadi R, Ajami A, Khalilian AR, Babamahmodi F, Saffar H. Seroprevalence of hepatitis E virus infection in 2-25-year-olds in Sari district, Islamic Republic of Iran. <i>East Mediterr Health J.</i> 2009; 15(1): 136-42.                                                                                | 2003, 2008             |                      |
| Iran    | World Health Organization (WHO). Retrospective Measles Data on Supplementary Immunization Activities. Geneva, Switzerland: World Health Organization (WHO).                                                                                                                                                          | 2003, 2007, 2010, 2012 |                      |



**Web Table 32 - Comprehensive citation list**

| Country | Citation                                                                                                                                                                                                                                                                              | Year*     | New for GBD 2013 (*) |
|---------|---------------------------------------------------------------------------------------------------------------------------------------------------------------------------------------------------------------------------------------------------------------------------------------|-----------|----------------------|
| Iran    | Ministry of Health and Medical Education (Iran). Iran National Cancer Registry Report 2004-2005.                                                                                                                                                                                      | 2004      |                      |
| Iran    | Sharifzadeh G, Namakin K, Mehrjoofard H.. An Epidemiological Study on Infant Mortality and Factors Affecting it in Rural Areas of Birjand, Iran. Iranian Journal of Pediatrics. 2008; 18(4): 335-42.                                                                                  | 2004      |                      |
| Iran    | Ministry of Health and Medical Education (Iran). Iran National Cancer Registry Report 2004-2005.                                                                                                                                                                                      | 2004-2005 |                      |
| Iran    | Center for Disease Control and Prevention, Ministry of Health and Medical Education (Iran), Ministry of Health and Medical Education (Iran). Iran National Cancer Registry 2005-2006.                                                                                                 | 2005      |                      |
| Iran    | Center for Disease Control and Prevention, Ministry of Health and Medical Education (Iran). Iran National Cancer Registry Report 2005-2006.                                                                                                                                           | 2005      |                      |
| Iran    | Ataei B, Nokhodian Z, Javadi AA, Kassaian N, Shoaie P, Farajzadegan Z, Adibi P. Hepatitis E virus in Isfahan Province: a population-based study. Int J Infect Dis. 2009; 13(1): 67-71.                                                                                                | 2005      |                      |
| Iran    | Karimi M, Yavarian M, Afrasiabi A, Dehbozorgian J, Rachmilewitz E. Prevalence of beta-thalassemia trait and glucose-6-phosphate dehydrogenase deficiency in Iranian Jews. Arch Med Res. 2008; 39(2): 212-4.                                                                           | 2005      |                      |
| Iran    | Monfared A, Safaei A, Panahandeh Z, Nemati L. Incidence of end-stage renal disease in Guilan Province, Iran, 2005 to 2007. Iran J Kidney Dis. 2009; 3(4): 239-41.                                                                                                                     | 2005-2007 |                      |
| Iran    | Abu-Raddad LJ, Akala FA, Semini I, Riedner G, Wilson D, Tawil O, World Bank. Characterizing the HIV/AIDS Epidemic in the Middle East and North Africa. Washington DC, United States: World Bank, 2010.                                                                                | 2005-2007 |                      |
| Iran    | Statistical Centre of Iran, Minnesota Population Center. Iran General Census of Population and Housing 2006 from the Integrated Public Use Microdata Series, International. [Machine-readable database]. Minneapolis: University of Minnesota, 2011.                                  | 2006      |                      |
| Iran    | Statistical Centre of Iran. Iran General Census of Population and Housing 2006. Tehran, Iran: Statistical Centre of Iran.                                                                                                                                                             | 2006      |                      |
| Iran    | Center for Disease Control and Prevention, Ministry of Health and Medical Education (Iran), Ministry of Health and Medical Education (Iran). Iran National Cancer Registry 2006-2007.                                                                                                 | 2006      |                      |
| Iran    | Center for Disease Control and Prevention, Ministry of Health and Medical Education (Iran). Iran National Cancer Registry Report 2006-2007.                                                                                                                                           | 2006      |                      |
| Iran    | Merat S, Rezvan H, Nourai M, Jafari E, Abolghasemi H, Radmard AR, Zaer-rezaii H, Amini-Kafiabad S, Maghsudlu M, Pourshams A, Malekzadeh R, Esmaili S. Seroprevalence of hepatitis C virus: the first population-based study from Iran. Int J Infect Dis. 2010; e113-116.              | 2006      |                      |
| Iran    | Forman D, Bray F, Brewster DH, Gombe Mbalawa C, Kohler B, Piñeros M, Steliarova-Foucher E, Swaminathan R and Ferlay J, eds (2013). Cancer Incidence in Five Continents, Vol. X Summary Database (electronic version). Lyon, IARC. <a href="http://ci5.iarc.fr">http://ci5.iarc.fr</a> | 2006      |                      |
| Iran    | Iranpour R, Hashemipour M, Talaei S-M, Soroshnia M, Amini A. Newborn screening for glucose-6-phosphate dehydrogenase deficiency in Isfahan, Iran: a quantitative assay. J Med Screen. 2008; 15(2): 62-4.                                                                              | 2006      |                      |
| Iran    | Ataei B, Javadi AA, Nokhodian Z, Kassaieian N, Shoaie P, Farajzadegan Z, Adibi P. HAV in Isfahan province: a population-based study. Trop Gastroenterol. 2008; 29(3): 160-2.                                                                                                          | 2006      |                      |
| Iran    | Mohebbi SR, Rostami Nejad M, Tahaei SME, Pourhoseingholi MA, Habibi M, Azimzadeh P, Naghoosi H, Karayiannis P, Zali MR. Seroepidemiology of hepatitis A and E virus infections in Tehran, Iran: a population based study. Trans R Soc Trop Med Hyg. 2012; 106(9): 528-31.             | 2006-2007 |                      |

**Web Table 32 - Comprehensive citation list**

| Country | Citation                                                                                                                                                                                                                                                                                                                                                                | Year*     | New for GBD 2013 (*) |
|---------|-------------------------------------------------------------------------------------------------------------------------------------------------------------------------------------------------------------------------------------------------------------------------------------------------------------------------------------------------------------------------|-----------|----------------------|
| Iran    | Ministry of Health and Medical Education (Iran). Iran Vital Registration - Deaths 2007. [Unpublished].                                                                                                                                                                                                                                                                  | 2007      |                      |
| Iran    | Alian S, Ajami A, Ghasemian R, Yadegarinia D. Age-specific seroprevalence of hepatitis A in Sari, northern Islamic Republic of Iran. <i>East Mediterr Health J.</i> 2011; 17(10): 754-8.                                                                                                                                                                                | 2007      |                      |
| Iran    | United Press International. Iran surveys damage after cyclone. United Press International [Internet]. 2007 Jun 9; Top News; [about 1 screen]. Available from: <a href="http://www.upi.com/Top_News/2007/06/09/Iran-surveys-damage-after-cyclone/UPI-75861181409342/">http://www.upi.com/Top_News/2007/06/09/Iran-surveys-damage-after-cyclone/UPI-75861181409342/</a> . | 2007      | *                    |
| Iran    | Ministry of Health and Medical Education (Iran). Iran Vital Registration - Deaths 2008. [Unpublished].                                                                                                                                                                                                                                                                  | 2008      |                      |
| Iran    | Postigo JAR. Leishmaniasis in the World Health Organization Eastern Mediterranean Region. <i>Int J Antimicrob Agents.</i> 2010; S62-65.                                                                                                                                                                                                                                 | 2008      |                      |
| Iran    | Abedi F, Madani H, Asadi A, Nejatizadeh A. Significance of blood-related high-risk behaviors and horizontal transmission of hepatitis B virus in Iran. <i>Arch Virol.</i> 2011; 156(4): 629-35.                                                                                                                                                                         | 2008-2009 |                      |
| Iran    | Ansari-Moghaddam A, Ostovaneh MR, Sharifi Mood B, Sanei-Moghaddam E, Modabbernia A, Poustchi H. Seroprevalence of hepatitis B surface antigen and anti hepatitis C antibody in zahedan city, iran: a population-based study. <i>Hepat Mon.</i> 2012; 12(9): e6618.                                                                                                      | 2008-2009 |                      |
| Iran    | Ministry of Health and Medical Education (Iran). Iran Vital Registration - Deaths 2009. [Unpublished].                                                                                                                                                                                                                                                                  | 2009      |                      |
| Iran    | United Nations Office on Drugs and Crime (UNODC). United Nations Office on Drugs and Crime Global Study on Homicides 2011. Vienna, Austria: United Nations Office on Drugs and Crime (UNODC), 2011.                                                                                                                                                                     | 2009      |                      |
| Iran    | Sofian M, Aghakhani A, Farazi A-A, Banifazl M, Etemadi G, Azad-Armaki S, Ziazarifi A, Abhari Z, Eslamifar A, Khadem-Sadegh A, Izadi N, Ramezani A. Seroprevalence of hepatitis A virus in children of different age groups in Tehran, Iran: implications for health policy. <i>Travel Med Infect Dis.</i> 2010; 8(3): 176-9.                                            | 2009      |                      |
| Iran    | Ministry of Health and Medical Education (Iran), Statistical Centre of Iran. Iran Multiple Indicator Demographic and Health Survey 2010. Tehran, Iran: Ministry of Health and Medical Education (Iran), 2010.                                                                                                                                                           | 2010      | *                    |
| Iran    | Ministry of Health and Medical Education (Iran). Iran Vital Registration - Deaths 2010. [Unpublished].                                                                                                                                                                                                                                                                  | 2010      |                      |
| Iran    | Shakeri MT, Nomani H, Ghayour Mobarhan M, Sima HR, Gerayli S, Shahbazi S, Rostami S, Meshkat Z. The prevalence of hepatitis C virus in mashhad, iran: a population-based study. <i>Hepat Mon.</i> 2013; 13(3): e7723.                                                                                                                                                   | 2010-2011 |                      |
| Iraq    | Iraq Vital Registration Death Data 1955 as it appears in United Nations Statistics Division (UNSD). United Nations Demographic Yearbook. New York City, United States: United Nations Statistics Division (UNSD).                                                                                                                                                       | 1955      |                      |
| Iraq    | Iraq Vital Registration Death Data 1958 as it appears in United Nations Statistics Division (UNSD). United Nations Demographic Yearbook. New York City, United States: United Nations Statistics Division (UNSD).                                                                                                                                                       | 1958      |                      |
| Iraq    | Peace Research Institute Oslo (PRIO). Battle Deaths Dataset Version 3, 2009. Oslo, Norway: Peace Research Institute Oslo (PRIO), 2009.                                                                                                                                                                                                                                  | 1958-1988 |                      |
| Iraq    | Iraq Vital Registration Death Data 1959 as it appears in United Nations Statistics Division (UNSD). United Nations Demographic Yearbook. New York City, United States: United Nations Statistics Division (UNSD).                                                                                                                                                       | 1959      |                      |
| Iraq    | Iraq Vital Registration Death Data 1960 as it appears in United Nations Statistics Division (UNSD). United Nations Demographic Yearbook. New York City, United States: United Nations Statistics Division (UNSD).                                                                                                                                                       | 1960      |                      |



**Web Table 32 - Comprehensive citation list**

| Country | Citation                                                                                                                                                                                                          | Year*     | New for GBD 2013 (*) |
|---------|-------------------------------------------------------------------------------------------------------------------------------------------------------------------------------------------------------------------|-----------|----------------------|
| Iraq    | Iraq Vital Registration Death Data 1960 as it appears in United Nations Statistics Division (UNSD). United Nations Demographic Yearbook. New York City, United States: United Nations Statistics Division (UNSD). | 1961      |                      |
| Iraq    | Iraq Vital Registration Death Data 1962 as it appears in United Nations Statistics Division (UNSD). United Nations Demographic Yearbook. New York City, United States: United Nations Statistics Division (UNSD). | 1962      |                      |
| Iraq    | Iraq Vital Registration Death Data 1963 as it appears in United Nations Statistics Division (UNSD). United Nations Demographic Yearbook. New York City, United States: United Nations Statistics Division (UNSD). | 1963      |                      |
| Iraq    | Iraq Vital Registration Death Data 1964 as it appears in United Nations Statistics Division (UNSD). United Nations Demographic Yearbook. New York City, United States: United Nations Statistics Division (UNSD). | 1964      |                      |
| Iraq    | Iraq Vital Registration Death Data 1965 as it appears in United Nations Statistics Division (UNSD). United Nations Demographic Yearbook. New York City, United States: United Nations Statistics Division (UNSD). | 1965      |                      |
| Iraq    | Iraq Vital Registration Death Data 1966 as it appears in United Nations Statistics Division (UNSD). United Nations Demographic Yearbook. New York City, United States: United Nations Statistics Division (UNSD). | 1966      |                      |
| Iraq    | Iraq Vital Registration Death Data 1967 as it appears in United Nations Statistics Division (UNSD). United Nations Demographic Yearbook. New York City, United States: United Nations Statistics Division (UNSD). | 1967      |                      |
| Iraq    | Iraq Vital Registration Death Data 1968 as it appears in United Nations Statistics Division (UNSD). United Nations Demographic Yearbook. New York City, United States: United Nations Statistics Division (UNSD). | 1968      |                      |
| Iraq    | Iraq Vital Registration Death Data 1969 as it appears in United Nations Statistics Division (UNSD). United Nations Demographic Yearbook. New York City, United States: United Nations Statistics Division (UNSD). | 1969      |                      |
| Iraq    | United Nations Office on Drugs and Crime (UNODC). United Nations Surveys on Crime Trends and the Operations of Criminal Justice Systems 1970-2006 as provided by Kavi Bhalla. [Unpublished].                      | 1970-1994 |                      |
| Iraq    | Amin-Zaki L, el-Din ST, Kubba K. Glucose-6-phosphate dehydrogenase deficiency among ethnic groups in Iraq. Bull World Health Organ. 1972; 47(1): 1-5.                                                             | 1970-1972 |                      |
| Iraq    | Central Statistical Organization (Iraq). Iraq Demographic Sample Survey and Sample Registration System 1973-1975.                                                                                                 | 1973-1975 |                      |
| Iraq    | Kohli K. L. Current Life Tables for Iraq and its Rural Urban Areas 1973-1974. Egypt Popul Fam Plann Rev. 1977; 9(1): 15-25.                                                                                       | 1973-1975 |                      |
| Iraq    | Central Statistical Organization (Iraq). Iraq Fertility Survey 1974.                                                                                                                                              | 1974      |                      |
| Iraq    | Iraq Vital Registration Death Data 1976 as it appears in United Nations Statistics Division (UNSD). United Nations Demographic Yearbook. New York City, United States: United Nations Statistics Division (UNSD). | 1976      |                      |
| Iraq    | Iraq Vital Registration Death Data 1977 as it appears in United Nations Statistics Division (UNSD). United Nations Demographic Yearbook. New York City, United States: United Nations Statistics Division (UNSD). | 1977      |                      |

**Web Table 32 - Comprehensive citation list**

| Country | Citation                                                                                                                                                                                                                                                      | Year*                            | New for GBD 2013 (*) |
|---------|---------------------------------------------------------------------------------------------------------------------------------------------------------------------------------------------------------------------------------------------------------------|----------------------------------|----------------------|
| Iraq    | Institute for Health Metrics and Evaluation (IHME), Joint United Nations Program on HIV/AIDS (UNAIDS). Institute for Health Metrics and Evaluation HIV Mortality Estimates Based on the UNAIDS Spectrum Model Framework.                                      | 1980-2013                        | *                    |
| Iraq    | United Nations Children's Fund (UNICEF), World Health Organization (WHO). WHO and UNICEF Reported Disease Incidence Time Series - Pertussis. Geneva, Switzerland: World Health Organization (WHO).                                                            | 1980-2001, 2004-2013             |                      |
| Iraq    | United Nations Children's Fund (UNICEF), World Health Organization (WHO). WHO and UNICEF Reported Disease Incidence Time Series - Measles. Geneva, Switzerland: World Health Organization (WHO).                                                              | 1980-2001, 2004-2013             |                      |
| Iraq    | Iraq Population and Housing Census 1987 as it appears in United Nations Statistics Division (UNSD). United Nations Demographic Yearbook. New York City, United States: United Nations Statistics Division (UNSD).                                             | 1987                             |                      |
| Iraq    | Iraq Vital Registration Death Data 1987 as it appears in United Nations Statistics Division (UNSD). United Nations Demographic Yearbook. New York City, United States: United Nations Statistics Division (UNSD).                                             | 1987                             |                      |
| Iraq    | Iraq Vital Registration Death Data 1988 as it appears in United Nations Statistics Division (UNSD). United Nations Demographic Yearbook. New York City, United States: United Nations Statistics Division (UNSD).                                             | 1988                             |                      |
| Iraq    | Ministry of Health (Iraq). Iraq National Child Health Survey 1989.                                                                                                                                                                                            | 1989                             |                      |
| Iraq    | Iraq Vital Registration Death Data 1989 as it appears in United Nations Statistics Division (UNSD). United Nations Demographic Yearbook. New York City, United States: United Nations Statistics Division (UNSD).                                             | 1989                             |                      |
| Iraq    | Department of Peace and Conflict Research, Uppsala University. UCDP Battle-Related Deaths Database Version 5, 2013. Uppsala, Sweden: Department of Peace and Conflict Research, Uppsala University, 2013.                                                     | 1989-2012                        | *                    |
| Iraq    | World Health Organization (WHO). Iraq WHO Leishmaniasis Country Profile.                                                                                                                                                                                      | 1989-2008                        | *                    |
| Iraq    | Ministry of Health (Iraq), Ministry of Planning (Iraq), United Nations Children's Fund (UNICEF). Iraq Immunization, Diarrheal Disease, Maternal and Childhood Mortality Survey 1990.                                                                          | 1990                             |                      |
| Iraq    | Weatherall D. Sickle Cell and Thalassemias Prevalence Data, Personal Correspondence with David Weatherall. [Unpublished].                                                                                                                                     | 1990-2009                        |                      |
| Iraq    | Hassan MK, Taha JY, Al-Naama LM, Widad NM, Jasim SN. Frequency of haemoglobinopathies and glucose-6-phosphate dehydrogenase deficiency in Basra. East Mediterr Health J. 2003; 1-2(9): 45-54.                                                                 | 1990-2001                        |                      |
| Iraq    | Department of Peace and Conflict Research, Uppsala University. UCDP One-Sided Violence Database Version 1.4, 2013. Uppsala, Sweden: Department of Peace and Conflict Research, Uppsala University, 2013.                                                      | 1990-2012                        | *                    |
| Iraq    | Centre for Health Informatics and Multiprofessional Education, University College London. Modell's Haemoglobinopathologist's Almanac. London, United Kingdom: Centre for Health Informatics and Multiprofessional Education, University College London, 2008. | 1990-2003                        |                      |
| Iraq    | Center for Economic and Social Rights (CESR). Iraq Infant and Child Mortality and Nutrition Survey 1991.                                                                                                                                                      | 1991                             |                      |
| Iraq    | Centre for Research on the Epidemiology of Disasters (CRED). EM-DAT: The OFDA/CRED International Disaster Database. Brussels, Belgium: Catholic University of Leuven.                                                                                         | 1991, 2006, 2008-2009, 2011-2012 |                      |
| Iraq    | Department of Peace and Conflict Research, Uppsala University. UCDP Nonstate Conflict Database Version 2.5, 2013. Uppsala, Sweden: Department of Peace and Conflict Research, Uppsala University, 2013.                                                       | 1992-2007                        | *                    |
| Iraq    | Measles Supplementary Immunization Activity Data as provided by the World Health Organization. [Unpublished].                                                                                                                                                 | 1995                             |                      |

**Web Table 32 - Comprehensive citation list**

| Country | Citation                                                                                                                                                                                                                                                                                              | Year*                 | New for GBD 2013 (*) |
|---------|-------------------------------------------------------------------------------------------------------------------------------------------------------------------------------------------------------------------------------------------------------------------------------------------------------|-----------------------|----------------------|
| Iraq    | Central Statistical Organization (Iraq), Minnesota Population Center. Iraq Population and Housing Census 1997 from the Integrated Public Use Microdata Series, International. [Machine-readable database]. Minneapolis: University of Minnesota.                                                      | 1997                  |                      |
| Iraq    | Ali HYM. Hepatitis B infection among Iraqi children: the impact of sanctions. East Mediterr Health J. 2004; 10(1-2): 6-11.                                                                                                                                                                            | 1997                  |                      |
| Iraq    | Central Organization for Statistics and Information Technology (Iraq), Ministry of Health (Iraq), United Nations Children's Fund (UNICEF), World Health Organization (WHO). Iraq Child and Maternal Mortality Survey 1999.                                                                            | 1999                  |                      |
| Iraq    | Hilmi FA, Al-Allawi NA, Rassam M, Al-Shamma G, Al-Hashimi A. Red cell glucose-6-phosphate dehydrogenase phenotypes in Iraq. East Mediterr Health J. 2002; 8(1): 42-8.                                                                                                                                 | 2000-2004             |                      |
| Iraq    | World Health Organization (WHO). Yellow Fever Reported Cases, WHO Vaccine-Preventable Diseases: Monitoring System. Geneva, Switzerland: World Health Organization (WHO).                                                                                                                              | 2001, 2005, 2007-2008 |                      |
| Iraq    | Al-Kubaisy WA, Niazi AD, Kubba K. History of miscarriage as a risk factor for hepatitis C virus infection in pregnant Iraqi women. East Mediterr Health J. 2002; 8(2-3): 239-44.                                                                                                                      | 2002                  |                      |
| Iraq    | World Health Organization (WHO). Retrospective Measles Data on Supplementary Immunization Activities. Geneva, Switzerland: World Health Organization (WHO).                                                                                                                                           | 2002, 2004-2012       |                      |
| Iraq    | University Collaborative Iraq Mortality Study. Mortality in Iraq Associated with the 2003-2011 Invasion and Occupation.                                                                                                                                                                               | 2003-2011             | *                    |
| Iraq    | Central Organization for Statistics and Information Technology (Iraq), The Fafu Research Foundation. Iraq Multiple Indicator Rapid Assessment 2004.                                                                                                                                                   | 2004                  | *                    |
| Iraq    | United Nations Children's Fund (UNICEF), Central Organization for Statistics and Information Technology (Iraq), Kurdistan Regional Statistics Office. Iraq Multiple Indicator Cluster Survey 2006. New York, United States: United Nations Children's Fund (UNICEF).                                  | 2006                  |                      |
| Iraq    | Al-Allawi NA, Al-Dousky AA. Frequency of haemoglobinopathies at premarital health screening in Dohuk, Iraq: implications for a regional prevention programme. East Mediterr Health J. 2010; 16(4): 381-5.                                                                                             | 2006                  | *                    |
| Iraq    | Ministry of Health (Iraq), Central Organization for Statistics and Information Technology (Iraq), Kurdistan Regional Statistics Office, World Health Organization (WHO), Ministry of Health (Kurdistan). Iraq Family Health Survey 2006-2007.                                                         | 2006-2007             |                      |
| Iraq    | Iraq Vital Registration - Deaths 2008 ICD10 as it appears in World Health Organization (WHO). WHO Mortality Database Version February 2014. Geneva, Switzerland: World Health Organization (WHO), 2014.                                                                                               | 2008                  |                      |
| Iraq    | Central Organization for Statistics and Information Technology (Iraq), Kurdistan Regional Statistics Office, Ministry of Health (Iraq), United Nations Children's Fund (UNICEF). Iraq Multiple Indicator Cluster Survey 2011. New York, United States: United Nations Children's Fund (UNICEF), 2013. | 2011                  | *                    |
| Ireland | Ireland Vital Registration - Deaths 1950 ICD7 as it appears in World Health Organization (WHO). WHO Mortality Database Version February 2014. Geneva, Switzerland: World Health Organization (WHO), 2014.                                                                                             | 1950                  |                      |
| Ireland | Ireland Vital Registration - Deaths 1951 ICD7 as it appears in World Health Organization (WHO). WHO Mortality Database Version February 2014. Geneva, Switzerland: World Health Organization (WHO), 2014.                                                                                             | 1951                  |                      |

**Web Table 32 - Comprehensive citation list**

| Country | Citation                                                                                                                                                                                                  | Year* | New for GBD 2013 (*) |
|---------|-----------------------------------------------------------------------------------------------------------------------------------------------------------------------------------------------------------|-------|----------------------|
| Ireland | Ireland Vital Registration - Deaths 1952 ICD7 as it appears in World Health Organization (WHO). WHO Mortality Database Version February 2014. Geneva, Switzerland: World Health Organization (WHO), 2014. | 1952  |                      |
| Ireland | Ireland Vital Registration - Deaths 1953 ICD7 as it appears in World Health Organization (WHO). WHO Mortality Database Version February 2014. Geneva, Switzerland: World Health Organization (WHO), 2014. | 1953  |                      |
| Ireland | Ireland Vital Registration - Deaths 1954 ICD7 as it appears in World Health Organization (WHO). WHO Mortality Database Version February 2014. Geneva, Switzerland: World Health Organization (WHO), 2014. | 1954  |                      |
| Ireland | Ireland Vital Registration - Deaths 1955 ICD7 as it appears in World Health Organization (WHO). WHO Mortality Database Version February 2014. Geneva, Switzerland: World Health Organization (WHO), 2014. | 1955  |                      |
| Ireland | Ireland Vital Registration - Deaths 1956 ICD7 as it appears in World Health Organization (WHO). WHO Mortality Database Version February 2014. Geneva, Switzerland: World Health Organization (WHO), 2014. | 1956  |                      |
| Ireland | Ireland Vital Registration - Deaths 1957 ICD7 as it appears in World Health Organization (WHO). WHO Mortality Database Version February 2014. Geneva, Switzerland: World Health Organization (WHO), 2014. | 1957  |                      |
| Ireland | Ireland Vital Registration - Deaths 1958 ICD7 as it appears in World Health Organization (WHO). WHO Mortality Database Version February 2014. Geneva, Switzerland: World Health Organization (WHO), 2014. | 1958  |                      |
| Ireland | Ireland Vital Registration - Deaths 1959 ICD7 as it appears in World Health Organization (WHO). WHO Mortality Database Version February 2014. Geneva, Switzerland: World Health Organization (WHO), 2014. | 1959  |                      |
| Ireland | Ireland Vital Registration - Deaths 1960 ICD7 as it appears in World Health Organization (WHO). WHO Mortality Database Version February 2014. Geneva, Switzerland: World Health Organization (WHO), 2014. | 1960  |                      |
| Ireland | Ireland Vital Registration - Deaths 1961 ICD7 as it appears in World Health Organization (WHO). WHO Mortality Database Version February 2014. Geneva, Switzerland: World Health Organization (WHO), 2014. | 1961  |                      |
| Ireland | Ireland Vital Registration - Deaths 1962 ICD7 as it appears in World Health Organization (WHO). WHO Mortality Database Version February 2014. Geneva, Switzerland: World Health Organization (WHO), 2014. | 1962  |                      |
| Ireland | Ireland Vital Registration - Deaths 1963 ICD7 as it appears in World Health Organization (WHO). WHO Mortality Database Version February 2014. Geneva, Switzerland: World Health Organization (WHO), 2014. | 1963  |                      |
| Ireland | Ireland Vital Registration - Deaths 1964 ICD7 as it appears in World Health Organization (WHO). WHO Mortality Database Version February 2014. Geneva, Switzerland: World Health Organization (WHO), 2014. | 1964  |                      |
| Ireland | Ireland Vital Registration - Deaths 1965 ICD7 as it appears in World Health Organization (WHO). WHO Mortality Database Version February 2014. Geneva, Switzerland: World Health Organization (WHO), 2014. | 1965  |                      |

**Web Table 32 - Comprehensive citation list**

| Country | Citation                                                                                                                                                                                                  | Year* | New for GBD 2013 (*) |
|---------|-----------------------------------------------------------------------------------------------------------------------------------------------------------------------------------------------------------|-------|----------------------|
| Ireland | Ireland Vital Registration - Deaths 1966 ICD7 as it appears in World Health Organization (WHO). WHO Mortality Database Version February 2014. Geneva, Switzerland: World Health Organization (WHO), 2014. | 1966  |                      |
| Ireland | Ireland Vital Registration - Deaths 1967 ICD7 as it appears in World Health Organization (WHO). WHO Mortality Database Version February 2014. Geneva, Switzerland: World Health Organization (WHO), 2014. | 1967  |                      |
| Ireland | Ireland Vital Registration - Deaths 1968 ICD8 as it appears in World Health Organization (WHO). WHO Mortality Database Version February 2014. Geneva, Switzerland: World Health Organization (WHO), 2014. | 1968  |                      |
| Ireland | Ireland Vital Registration - Deaths 1969 ICD8 as it appears in World Health Organization (WHO). WHO Mortality Database Version February 2014. Geneva, Switzerland: World Health Organization (WHO), 2014. | 1969  |                      |
| Ireland | Ireland Vital Registration - Deaths 1970 ICD8 as it appears in World Health Organization (WHO). WHO Mortality Database Version February 2014. Geneva, Switzerland: World Health Organization (WHO), 2014. | 1970  |                      |
| Ireland | Ireland Vital Registration - Deaths 1971 ICD8 as it appears in World Health Organization (WHO). WHO Mortality Database Version February 2014. Geneva, Switzerland: World Health Organization (WHO), 2014. | 1971  |                      |
| Ireland | Ireland Vital Registration - Deaths 1972 ICD8 as it appears in World Health Organization (WHO). WHO Mortality Database Version February 2014. Geneva, Switzerland: World Health Organization (WHO), 2014. | 1972  |                      |
| Ireland | Ireland Vital Registration - Deaths 1973 ICD8 as it appears in World Health Organization (WHO). WHO Mortality Database Version February 2014. Geneva, Switzerland: World Health Organization (WHO), 2014. | 1973  |                      |
| Ireland | Ireland Vital Registration - Deaths 1974 ICD8 as it appears in World Health Organization (WHO). WHO Mortality Database Version February 2014. Geneva, Switzerland: World Health Organization (WHO), 2014. | 1974  |                      |
| Ireland | Ireland Vital Registration - Deaths 1975 ICD8 as it appears in World Health Organization (WHO). WHO Mortality Database Version February 2014. Geneva, Switzerland: World Health Organization (WHO), 2014. | 1975  |                      |
| Ireland | Ireland Vital Registration - Deaths 1976 ICD8 as it appears in World Health Organization (WHO). WHO Mortality Database Version February 2014. Geneva, Switzerland: World Health Organization (WHO), 2014. | 1976  |                      |
| Ireland | Ireland Vital Registration - Deaths 1977 ICD8 as it appears in World Health Organization (WHO). WHO Mortality Database Version February 2014. Geneva, Switzerland: World Health Organization (WHO), 2014. | 1977  |                      |
| Ireland | Ireland Vital Registration - Deaths 1978 ICD8 as it appears in World Health Organization (WHO). WHO Mortality Database Version February 2014. Geneva, Switzerland: World Health Organization (WHO), 2014. | 1978  |                      |
| Ireland | Ireland Vital Registration - Deaths 1979 ICD9 as it appears in World Health Organization (WHO). WHO Mortality Database Version February 2014. Geneva, Switzerland: World Health Organization (WHO), 2014. | 1979  |                      |

**Web Table 32 - Comprehensive citation list**

| Country | Citation                                                                                                                                                                                                                 | Year*                                         | New for GBD 2013 (*) |
|---------|--------------------------------------------------------------------------------------------------------------------------------------------------------------------------------------------------------------------------|-----------------------------------------------|----------------------|
| Ireland | Ireland Vital Registration - Deaths 1980 ICD9 as it appears in World Health Organization (WHO). WHO Mortality Database Version February 2014. Geneva, Switzerland: World Health Organization (WHO), 2014.                | 1980                                          |                      |
| Ireland | Institute for Health Metrics and Evaluation (IHME), Joint United Nations Program on HIV/AIDS (UNAIDS). Institute for Health Metrics and Evaluation HIV Mortality Estimates Based on the UNAIDS Spectrum Model Framework. | 1980-2013                                     | *                    |
| Ireland | United Nations Children's Fund (UNICEF), World Health Organization (WHO). WHO and UNICEF Reported Disease Incidence Time Series - Pertussis. Geneva, Switzerland: World Health Organization (WHO).                       | 1980-1999, 2001-2012                          |                      |
| Ireland | United Nations Children's Fund (UNICEF), World Health Organization (WHO). WHO and UNICEF Reported Disease Incidence Time Series - Measles. Geneva, Switzerland: World Health Organization (WHO).                         | 1980-1999, 2001-2012                          |                      |
| Ireland | Ireland Vital Registration - Deaths 1981 ICD9 as it appears in World Health Organization (WHO). WHO Mortality Database Version February 2014. Geneva, Switzerland: World Health Organization (WHO), 2014.                | 1981                                          |                      |
| Ireland | Institute for Health Metrics and Evaluation. Institute for Health Metrics and Evaluation Cancer Registry Database. [Unpublished].                                                                                        | 1981-2010                                     |                      |
| Ireland | Parkin DM, International Agency for Research on Cancer, International Association of Cancer Registries. Cancer Incidence in Five Continents. Vol. I to VIII. Lyon, France, IARC Press, 2005.                             | 1981, 1984, 1990, 1995                        |                      |
| Ireland | Ireland Vital Registration - Deaths 1982 ICD9 as it appears in World Health Organization (WHO). WHO Mortality Database Version February 2014. Geneva, Switzerland: World Health Organization (WHO), 2014.                | 1982                                          |                      |
| Ireland | Ireland Vital Registration - Deaths 1983 ICD9 as it appears in World Health Organization (WHO). WHO Mortality Database Version February 2014. Geneva, Switzerland: World Health Organization (WHO), 2014.                | 1983                                          |                      |
| Ireland | Centre for Research on the Epidemiology of Disasters (CRED). EM-DAT: The OFDA/CRED International Disaster Database. Brussels, Belgium: Catholic University of Leuven.                                                    | 1983, 1986, 1990, 1993, 1996, 1998-2000, 2011 |                      |
| Ireland | Ireland Vital Registration - Deaths 1984 ICD9 as it appears in World Health Organization (WHO). WHO Mortality Database Version February 2014. Geneva, Switzerland: World Health Organization (WHO), 2014.                | 1984                                          |                      |
| Ireland | Ireland Vital Registration - Deaths 1985 ICD9 as it appears in World Health Organization (WHO). WHO Mortality Database Version February 2014. Geneva, Switzerland: World Health Organization (WHO), 2014.                | 1985                                          |                      |
| Ireland | Ireland Vital Registration - Deaths 1986 ICD9 as it appears in World Health Organization (WHO). WHO Mortality Database Version February 2014. Geneva, Switzerland: World Health Organization (WHO), 2014.                | 1986                                          |                      |
| Ireland | Fry G, Kenny JV, Quinn M, Campion J, Gallagher E. Prevalence of hepatitis A IgG in Irish international travellers. Ir Med J. 1993; 86(4): 137-8.                                                                         | 1986-1991                                     |                      |
| Ireland | Ireland Vital Registration - Deaths 1987 ICD9 as it appears in World Health Organization (WHO). WHO Mortality Database Version February 2014. Geneva, Switzerland: World Health Organization (WHO), 2014.                | 1987                                          |                      |
| Ireland | Ireland Vital Registration - Deaths 1988 ICD9 as it appears in World Health Organization (WHO). WHO Mortality Database Version February 2014. Geneva, Switzerland: World Health Organization (WHO), 2014.                | 1988                                          |                      |

**Web Table 32 - Comprehensive citation list**

| Country | Citation                                                                                                                                                                                                                                                                                                                                                                                                                                                                                                                                                                                                                                                                                                                     | Year*     | New for GBD 2013 (*) |
|---------|------------------------------------------------------------------------------------------------------------------------------------------------------------------------------------------------------------------------------------------------------------------------------------------------------------------------------------------------------------------------------------------------------------------------------------------------------------------------------------------------------------------------------------------------------------------------------------------------------------------------------------------------------------------------------------------------------------------------------|-----------|----------------------|
| Ireland | Ireland Vital Registration - Deaths 1989 ICD9 as it appears in World Health Organization (WHO). WHO Mortality Database Version February 2014. Geneva, Switzerland: World Health Organization (WHO), 2014.                                                                                                                                                                                                                                                                                                                                                                                                                                                                                                                    | 1989      |                      |
| Ireland | Ireland Vital Registration - Deaths 1990 ICD9 as it appears in World Health Organization (WHO). WHO Mortality Database Version February 2014. Geneva, Switzerland: World Health Organization (WHO), 2014.                                                                                                                                                                                                                                                                                                                                                                                                                                                                                                                    | 1990      |                      |
| Ireland | Centre for Health Informatics and Multiprofessional Education, University College London. Modell's Haemoglobinopathologist's Almanac. London, United Kingdom: Centre for Health Informatics and Multiprofessional Education, University College London, 2008.                                                                                                                                                                                                                                                                                                                                                                                                                                                                | 1990-2003 |                      |
| Ireland | Ireland Vital Registration - Deaths 1991 ICD9 as it appears in World Health Organization (WHO). WHO Mortality Database Version February 2014. Geneva, Switzerland: World Health Organization (WHO), 2014.                                                                                                                                                                                                                                                                                                                                                                                                                                                                                                                    | 1991      |                      |
| Ireland | Ireland Vital Registration - Deaths 1992 ICD9 as it appears in World Health Organization (WHO). WHO Mortality Database Version February 2014. Geneva, Switzerland: World Health Organization (WHO), 2014.                                                                                                                                                                                                                                                                                                                                                                                                                                                                                                                    | 1992      |                      |
| Ireland | Trichopoulos D, Bamia C, Lagiou P, Fedirko V, Trepo E, Jenab M, Pischon T, Nöthlings U, Overved K, Tjønneland A, Outzen M, Clavel-Chapelon F, Kaaks R, Lukanova A, Boeing H, Aleksandrova K, Benetou V, Zylis D, Palli D, Pala V, Panico S, Tumino R, Sacerdote C, Bueno-De-Mesquita HB, Van Kranen HJ, Peeters PHM, Lund E, Quirós JR, González CA, Sanchez Perez M-J, Navarro C, Dorronsoro M, Barricarte A, Lindkvist B, Regnér S, Werner M, Hallmans G, Khaw K-T, Wareham N, Key T, Romieu I, Chuang S-C, Murphy N, Boffetta P, Trichopoulou A, Riboli E. Hepatocellular carcinoma risk factors and disease burden in a European cohort: a nested case-control study. <i>J Natl Cancer Inst.</i> 2011; 103(22): 1686-95. | 1992-2006 | *                    |
| Ireland | Ireland Vital Registration - Deaths 1993 ICD9 as it appears in World Health Organization (WHO). WHO Mortality Database Version February 2014. Geneva, Switzerland: World Health Organization (WHO), 2014.                                                                                                                                                                                                                                                                                                                                                                                                                                                                                                                    | 1993      |                      |
| Ireland | Rajan E, O'Farrell B, Shattock AG, Fielding JF. Hepatitis A in urban Ireland. <i>Ir J Med Sci.</i> 1998; 167(4): 231-3.                                                                                                                                                                                                                                                                                                                                                                                                                                                                                                                                                                                                      | 1993-1996 |                      |
| Ireland | Ireland Vital Registration - Deaths 1994 ICD9 as it appears in World Health Organization (WHO). WHO Mortality Database Version February 2014. Geneva, Switzerland: World Health Organization (WHO), 2014.                                                                                                                                                                                                                                                                                                                                                                                                                                                                                                                    | 1994      |                      |
| Ireland | National Cancer Registry Ireland. Ireland National Cancer Registry - Incidence. Cork, Ireland: National Cancer Registry Ireland.                                                                                                                                                                                                                                                                                                                                                                                                                                                                                                                                                                                             | 1994-2010 |                      |
| Ireland | Ireland Vital Registration - Deaths 1995 ICD9 as it appears in World Health Organization (WHO). WHO Mortality Database Version February 2014. Geneva, Switzerland: World Health Organization (WHO), 2014.                                                                                                                                                                                                                                                                                                                                                                                                                                                                                                                    | 1995      |                      |
| Ireland | Ireland Vital Registration - Deaths 1996 ICD9 as it appears in World Health Organization (WHO). WHO Mortality Database Version February 2014. Geneva, Switzerland: World Health Organization (WHO), 2014.                                                                                                                                                                                                                                                                                                                                                                                                                                                                                                                    | 1996      |                      |
| Ireland | Ryan M, Hamilton V, Bowen M, McKenna P. The role of a high-dependency unit in a regional obstetric hospital. <i>Anaesthesia.</i> 2000; 55(12): 1155-8.                                                                                                                                                                                                                                                                                                                                                                                                                                                                                                                                                                       | 1996-1998 |                      |
| Ireland | Ireland Vital Registration - Deaths 1997 ICD9 as it appears in World Health Organization (WHO). WHO Mortality Database Version February 2014. Geneva, Switzerland: World Health Organization (WHO), 2014.                                                                                                                                                                                                                                                                                                                                                                                                                                                                                                                    | 1997      |                      |



**Web Table 32 - Comprehensive citation list**

| Country | Citation                                                                                                                                                                                                                             | Year*     | New for GBD 2013 (*) |
|---------|--------------------------------------------------------------------------------------------------------------------------------------------------------------------------------------------------------------------------------------|-----------|----------------------|
| Ireland | Ireland Vital Registration - Deaths 1998 ICD9 as it appears in World Health Organization (WHO). WHO Mortality Database Version February 2014. Geneva, Switzerland: World Health Organization (WHO), 2014.                            | 1998      |                      |
| Ireland | Ireland Vital Registration - Deaths 1999 ICD9 as it appears in World Health Organization (WHO). WHO Mortality Database Version February 2014. Geneva, Switzerland: World Health Organization (WHO), 2014.                            | 1999      |                      |
| Ireland | Ireland Vital Registration - Deaths 2000 ICD9 as it appears in World Health Organization (WHO). WHO Mortality Database Version February 2014. Geneva, Switzerland: World Health Organization (WHO), 2014.                            | 2000      |                      |
| Ireland | Curado MP, Edwards B, Shin HR, Storm H, Ferlay J, Heanue M and Boyle P, eds (2007). Cancer Incidence in Five Continents, Vol. IX Periodic Data (electronic version). Lyon, IARC. <a href="http://ci5.iarc.fr">http://ci5.iarc.fr</a> | 2000      |                      |
| Ireland | Ireland Vital Registration - Deaths 2001 ICD9 as it appears in World Health Organization (WHO). WHO Mortality Database Version February 2014. Geneva, Switzerland: World Health Organization (WHO), 2014.                            | 2001      |                      |
| Ireland | World Health Organization (WHO). Yellow Fever Reported Cases, WHO Vaccine-Preventable Diseases: Monitoring System. Geneva, Switzerland: World Health Organization (WHO).                                                             | 2001-2009 |                      |
| Ireland | Ireland Vital Registration - Deaths 2002 ICD9 as it appears in World Health Organization (WHO). WHO Mortality Database Version February 2014. Geneva, Switzerland: World Health Organization (WHO), 2014.                            | 2002      |                      |
| Ireland | Ireland Vital Registration - Deaths 2003 ICD9 as it appears in World Health Organization (WHO). WHO Mortality Database Version February 2014. Geneva, Switzerland: World Health Organization (WHO), 2014.                            | 2003      |                      |
| Ireland | EUVAC-NET. EUVAC-NET Pertussis Surveillance Report 2003-2007. Stockholm, Sweden: European Centre for Disease Prevention and Control, 2009.                                                                                           | 2003-2007 |                      |
| Ireland | Ireland Vital Registration - Deaths 2004 ICD9 as it appears in World Health Organization (WHO). WHO Mortality Database Version February 2014. Geneva, Switzerland: World Health Organization (WHO), 2014.                            | 2004      |                      |
| Ireland | Ireland Vital Registration - Deaths 2005 ICD9 as it appears in World Health Organization (WHO). WHO Mortality Database Version February 2014. Geneva, Switzerland: World Health Organization (WHO), 2014.                            | 2005      |                      |
| Ireland | Lutomski JE, Morrison JJ, Greene RA, Lydon-Rochelle MT. Maternal morbidity during hospitalization for delivery. <i>Obstet Gynecol.</i> 2011; 117(3): 596-602.                                                                        | 2005-2008 |                      |
| Ireland | Ireland Vital Registration - Deaths 2006 ICD9 as it appears in World Health Organization (WHO). WHO Mortality Database Version February 2014. Geneva, Switzerland: World Health Organization (WHO), 2014.                            | 2006      |                      |
| Ireland | Ireland Vital Registration - Deaths 2007 ICD10 as it appears in World Health Organization (WHO). WHO Mortality Database Version February 2014. Geneva, Switzerland: World Health Organization (WHO), 2014.                           | 2007      |                      |
| Ireland | Ireland Vital Registration - Deaths 2008 ICD10 as it appears in World Health Organization (WHO). WHO Mortality Database Version February 2014. Geneva, Switzerland: World Health Organization (WHO), 2014.                           | 2008      |                      |



**Web Table 32 - Comprehensive citation list**

| Country | Citation                                                                                                                                                                                                            | Year*     | New for GBD 2013 (*) |
|---------|---------------------------------------------------------------------------------------------------------------------------------------------------------------------------------------------------------------------|-----------|----------------------|
| Ireland | EUVAC-NET. EUVAC-NET Pertussis Surveillance Report 2008. Stockholm, Sweden: European Centre for Disease Prevention and Control, 2009.                                                                               | 2008      |                      |
| Ireland | Ireland Vital Registration - Deaths 2009 ICD10 as it appears in World Health Organization (WHO). WHO Mortality Database Version February 2014. Geneva, Switzerland: World Health Organization (WHO), 2014.          | 2009      |                      |
| Ireland | Johnson S, Khalid S, Varadkar S, Fleming J, Fanning R, Flynn C. Quality of care in the management of major obstetric hemorrhage. Ir Med J. 2011; 104(4): 119-21.                                                    | 2009      |                      |
| Ireland | EUVAC-NET. EUVAC-NET Pertussis Surveillance Report 2009. Stockholm, Sweden: European Centre for Disease Prevention and Control, 2010.                                                                               | 2009      |                      |
| Ireland | World Health Organization (WHO). Retrospective Measles Data on Supplementary Immunization Activities. Geneva, Switzerland: World Health Organization (WHO).                                                         | 2009      |                      |
| Ireland | Ireland Vital Registration - Deaths 2010 ICD10 as it appears in World Health Organization (WHO). WHO Mortality Database Version February 2014. Geneva, Switzerland: World Health Organization (WHO), 2014.          | 2010      |                      |
| Ireland | EUVAC-NET. EUVAC-NET Measles Surveillance Report 2010. Stockholm, Sweden: European Centre for Disease Prevention and Control, 2011.                                                                                 | 2010      |                      |
| Ireland | Ireland Census 2011 as it appears in United Nations Statistics Division (UNSD). United Nations Demographic Yearbook 2012. New York City, United States: United Nations Statistics Division (UNSD), 2013.            | 2011      | *                    |
| Israel  | Israel Vital Registration - Deaths 1950 ICD7 as it appears in World Health Organization (WHO). WHO Mortality Database Version February 2014. Geneva, Switzerland: World Health Organization (WHO), 2014.            | 1950      |                      |
| Israel  | Peace Research Institute Oslo (PRIO). Battle Deaths Dataset Version 3, 2009. Oslo, Norway: Peace Research Institute Oslo (PRIO), 2009.                                                                              | 1950-1988 |                      |
| Israel  | Israel Vital Registration - Deaths 1951 ICD7 as it appears in World Health Organization (WHO). WHO Mortality Database Version February 2014. Geneva, Switzerland: World Health Organization (WHO), 2014.            | 1951      |                      |
| Israel  | Israel Vital Registration - Deaths 1952 ICD7 as it appears in World Health Organization (WHO). WHO Mortality Database Version February 2014. Geneva, Switzerland: World Health Organization (WHO), 2014.            | 1952      |                      |
| Israel  | Israel Vital Registration - Deaths 1953 ICD7 as it appears in World Health Organization (WHO). WHO Mortality Database Version February 2014. Geneva, Switzerland: World Health Organization (WHO), 2014.            | 1953      |                      |
| Israel  | Israel Vital Registration Death Data 1953 as it appears in United Nations Statistics Division (UNSD). United Nations Demographic Yearbook. New York City, United States: United Nations Statistics Division (UNSD). | 1953      |                      |
| Israel  | Israel Vital Registration - Deaths 1954 ICD7 as it appears in World Health Organization (WHO). WHO Mortality Database Version February 2014. Geneva, Switzerland: World Health Organization (WHO), 2014.            | 1954      |                      |
| Israel  | Israel Vital Registration Death Data 1954 as it appears in United Nations Statistics Division (UNSD). United Nations Demographic Yearbook. New York City, United States: United Nations Statistics Division (UNSD). | 1954      |                      |

**Web Table 32 - Comprehensive citation list**

| Country | Citation                                                                                                                                                                                                            | Year* | New for GBD 2013 (*) |
|---------|---------------------------------------------------------------------------------------------------------------------------------------------------------------------------------------------------------------------|-------|----------------------|
| Israel  | Israel Vital Registration - Deaths 1955 ICD7 as it appears in World Health Organization (WHO). WHO Mortality Database Version February 2014. Geneva, Switzerland: World Health Organization (WHO), 2014.            | 1955  |                      |
| Israel  | Israel Vital Registration Death Data 1955 as it appears in United Nations Statistics Division (UNSD). United Nations Demographic Yearbook. New York City, United States: United Nations Statistics Division (UNSD). | 1955  |                      |
| Israel  | Israel Vital Registration - Deaths 1956 ICD7 as it appears in World Health Organization (WHO). WHO Mortality Database Version February 2014. Geneva, Switzerland: World Health Organization (WHO), 2014.            | 1956  |                      |
| Israel  | Israel Vital Registration Death Data 1956 as it appears in United Nations Statistics Division (UNSD). United Nations Demographic Yearbook. New York City, United States: United Nations Statistics Division (UNSD). | 1956  |                      |
| Israel  | Israel Vital Registration - Deaths 1957 ICD7 as it appears in World Health Organization (WHO). WHO Mortality Database Version February 2014. Geneva, Switzerland: World Health Organization (WHO), 2014.            | 1957  |                      |
| Israel  | Israel Vital Registration Death Data 1957 as it appears in United Nations Statistics Division (UNSD). United Nations Demographic Yearbook. New York City, United States: United Nations Statistics Division (UNSD). | 1957  |                      |
| Israel  | Israel Vital Registration - Deaths 1958 ICD7 as it appears in World Health Organization (WHO). WHO Mortality Database Version February 2014. Geneva, Switzerland: World Health Organization (WHO), 2014.            | 1958  |                      |
| Israel  | Israel Vital Registration Death Data 1958 as it appears in United Nations Statistics Division (UNSD). United Nations Demographic Yearbook. New York City, United States: United Nations Statistics Division (UNSD). | 1958  |                      |
| Israel  | Israel Vital Registration - Deaths 1959 ICD7 as it appears in World Health Organization (WHO). WHO Mortality Database Version February 2014. Geneva, Switzerland: World Health Organization (WHO), 2014.            | 1959  |                      |
| Israel  | Israel Vital Registration Death Data 1959 as it appears in United Nations Statistics Division (UNSD). United Nations Demographic Yearbook. New York City, United States: United Nations Statistics Division (UNSD). | 1959  |                      |
| Israel  | Israel Vital Registration - Deaths 1960 ICD7 as it appears in World Health Organization (WHO). WHO Mortality Database Version February 2014. Geneva, Switzerland: World Health Organization (WHO), 2014.            | 1960  |                      |
| Israel  | Israel Vital Registration Death Data 1960 as it appears in United Nations Statistics Division (UNSD). United Nations Demographic Yearbook. New York City, United States: United Nations Statistics Division (UNSD). | 1960  |                      |
| Israel  | Israel Vital Registration Death Data 1961 as it appears in United Nations Statistics Division (UNSD). United Nations Demographic Yearbook. New York City, United States: United Nations Statistics Division (UNSD). | 1961  |                      |
| Israel  | Israel Vital Registration Death Data 1962 as it appears in United Nations Statistics Division (UNSD). United Nations Demographic Yearbook. New York City, United States: United Nations Statistics Division (UNSD). | 1962  |                      |

**Web Table 32 - Comprehensive citation list**

| Country | Citation                                                                                                                                                                                                            | Year*                        | New for GBD 2013 (*) |
|---------|---------------------------------------------------------------------------------------------------------------------------------------------------------------------------------------------------------------------|------------------------------|----------------------|
| Israel  | Israel Vital Registration Death Data 1963 as it appears in United Nations Statistics Division (UNSD). United Nations Demographic Yearbook. New York City, United States: United Nations Statistics Division (UNSD). | 1963                         |                      |
| Israel  | Israel Vital Registration Death Data 1964 as it appears in United Nations Statistics Division (UNSD). United Nations Demographic Yearbook. New York City, United States: United Nations Statistics Division (UNSD). | 1964                         |                      |
| Israel  | Israel Vital Registration Death Data 1965 as it appears in United Nations Statistics Division (UNSD). United Nations Demographic Yearbook. New York City, United States: United Nations Statistics Division (UNSD). | 1965                         |                      |
| Israel  | Israel Vital Registration Death Data 1966 as it appears in United Nations Statistics Division (UNSD). United Nations Demographic Yearbook. New York City, United States: United Nations Statistics Division (UNSD). | 1966                         |                      |
| Israel  | Israel Vital Registration Death Data 1967 as it appears in United Nations Statistics Division (UNSD). United Nations Demographic Yearbook. New York City, United States: United Nations Statistics Division (UNSD). | 1967                         |                      |
| Israel  | Israel Vital Registration Death Data 1968 as it appears in United Nations Statistics Division (UNSD). United Nations Demographic Yearbook. New York City, United States: United Nations Statistics Division (UNSD). | 1968                         |                      |
| Israel  | Israel Vital Registration Death Data 1969 as it appears in United Nations Statistics Division (UNSD). United Nations Demographic Yearbook. New York City, United States: United Nations Statistics Division (UNSD). | 1969                         |                      |
| Israel  | Israel Vital Registration - Deaths 1970 ICD8 as it appears in World Health Organization (WHO). WHO Mortality Database Version February 2014. Geneva, Switzerland: World Health Organization (WHO), 2014.            | 1970                         |                      |
| Israel  | Israel Vital Registration Death Data 1970 as it appears in United Nations Statistics Division (UNSD). United Nations Demographic Yearbook. New York City, United States: United Nations Statistics Division (UNSD). | 1970                         |                      |
| Israel  | Zaidman JL, Leiba H, Scharf S, Steinman I. Red cell glucose-6-phosphate dehydrogenase deficiency in ethnic groups in Israel. Clin Genet. 1976; 9(2): 131-3.                                                         | 1970-1974                    |                      |
| Israel  | Centre for Research on the Epidemiology of Disasters (CRED). EM-DAT: The OFDA/CRED International Disaster Database. Brussels, Belgium: Catholic University of Leuven.                                               | 1970, 1991, 1997, 2000, 2010 |                      |
| Israel  | Israel Vital Registration - Deaths 1971 ICD8 as it appears in World Health Organization (WHO). WHO Mortality Database Version February 2014. Geneva, Switzerland: World Health Organization (WHO), 2014.            | 1971                         |                      |
| Israel  | Israel Vital Registration Death Data 1971 as it appears in United Nations Statistics Division (UNSD). United Nations Demographic Yearbook. New York City, United States: United Nations Statistics Division (UNSD). | 1971                         |                      |
| Israel  | Israel Vital Registration - Deaths 1972 ICD8 as it appears in World Health Organization (WHO). WHO Mortality Database Version February 2014. Geneva, Switzerland: World Health Organization (WHO), 2014.            | 1972                         |                      |
| Israel  | Israel Vital Registration Death Data 1972 as it appears in United Nations Statistics Division (UNSD). United Nations Demographic Yearbook. New York City, United States: United Nations Statistics Division (UNSD). | 1972                         |                      |

**Web Table 32 - Comprehensive citation list**

| Country | Citation                                                                                                                                                                                                                                                                     | Year*      | New for GBD 2013 (*) |
|---------|------------------------------------------------------------------------------------------------------------------------------------------------------------------------------------------------------------------------------------------------------------------------------|------------|----------------------|
| Israel  | Israel Vital Registration - Deaths 1973 ICD8 as it appears in World Health Organization (WHO). WHO Mortality Database Version February 2014. Geneva, Switzerland: World Health Organization (WHO), 2014.                                                                     | 1973       |                      |
| Israel  | Israel Vital Registration Death Data 1973 as it appears in United Nations Statistics Division (UNSD). United Nations Demographic Yearbook. New York City, United States: United Nations Statistics Division (UNSD).                                                          | 1973       |                      |
| Israel  | The Knesset [Internet]. Jerusalem, Israel: The Knesset; 2013. The Yom Kippur War; [reviewed 2014 Apr 11]; [about 2 screens].                                                                                                                                                 | 1973       | *                    |
| Israel  | Israel Vital Registration - Deaths 1974 ICD8 as it appears in World Health Organization (WHO). WHO Mortality Database Version February 2014. Geneva, Switzerland: World Health Organization (WHO), 2014.                                                                     | 1974       |                      |
| Israel  | Israel Vital Registration Death Data 1974 as it appears in United Nations Statistics Division (UNSD). United Nations Demographic Yearbook. New York City, United States: United Nations Statistics Division (UNSD).                                                          | 1974       |                      |
| Israel  | Israel Vital Registration - Deaths 1975 ICD8 as it appears in World Health Organization (WHO). WHO Mortality Database Version February 2014. Geneva, Switzerland: World Health Organization (WHO), 2014.                                                                     | 1975       |                      |
| Israel  | Israel Vital Registration Death Data 1975 as it appears in United Nations Statistics Division (UNSD). United Nations Demographic Yearbook. New York City, United States: United Nations Statistics Division (UNSD).                                                          | 1975       |                      |
| Israel  | Israel Vital Registration - Deaths 1976 ICD8 as it appears in World Health Organization (WHO). WHO Mortality Database Version February 2014. Geneva, Switzerland: World Health Organization (WHO), 2014.                                                                     | 1976       |                      |
| Israel  | Israel Vital Registration Death Data 1976 as it appears in United Nations Statistics Division (UNSD). United Nations Demographic Yearbook. New York City, United States: United Nations Statistics Division (UNSD).                                                          | 1976       |                      |
| Israel  | Israel Vital Registration - Deaths 1977 ICD8 as it appears in World Health Organization (WHO). WHO Mortality Database Version February 2014. Geneva, Switzerland: World Health Organization (WHO), 2014.                                                                     | 1977       |                      |
| Israel  | Israel Vital Registration Death Data 1977 as it appears in United Nations Statistics Division (UNSD). United Nations Demographic Yearbook. New York City, United States: United Nations Statistics Division (UNSD).                                                          | 1977       |                      |
| Israel  | Kark JD, Bar-Shany S, Shor S, Merlinski L, Nili E. Serological hepatitis A virus infections and ratio of clinical to serological infections in a controlled trial of pre-exposure prophylaxis with immune serum globulin. J Epidemiol Community Health. 1985; 39(2): 117-22. | 1977       |                      |
| Israel  | Kark JD, Camhy NA, Shany SB. Reduction in hepatitis A antibody prevalence among young adults in Israel. Public Health Rev. 1992; 20(1-2): 31-40.                                                                                                                             | 1977, 1984 |                      |
| Israel  | Israel Vital Registration - Deaths 1978 ICD8 as it appears in World Health Organization (WHO). WHO Mortality Database Version February 2014. Geneva, Switzerland: World Health Organization (WHO), 2014.                                                                     | 1978       |                      |
| Israel  | Israel Vital Registration Death Data 1978 as it appears in United Nations Statistics Division (UNSD). United Nations Demographic Yearbook. New York City, United States: United Nations Statistics Division (UNSD).                                                          | 1978       |                      |

**Web Table 32 - Comprehensive citation list**

| Country | Citation                                                                                                                                                                                                                 | Year*                  | New for GBD 2013 (*) |
|---------|--------------------------------------------------------------------------------------------------------------------------------------------------------------------------------------------------------------------------|------------------------|----------------------|
| Israel  | Israel Vital Registration - Deaths 1979 ICD9 as it appears in World Health Organization (WHO). WHO Mortality Database Version February 2014. Geneva, Switzerland: World Health Organization (WHO), 2014.                 | 1979                   |                      |
| Israel  | Israel Vital Registration Death Data 1979 as it appears in United Nations Statistics Division (UNSD). United Nations Demographic Yearbook. New York City, United States: United Nations Statistics Division (UNSD).      | 1979                   |                      |
| Israel  | Israel Vital Registration - Deaths 1980 ICD9 as it appears in World Health Organization (WHO). WHO Mortality Database Version February 2014. Geneva, Switzerland: World Health Organization (WHO), 2014.                 | 1980                   |                      |
| Israel  | Israel Vital Registration Death Data 1980 as it appears in United Nations Statistics Division (UNSD). United Nations Demographic Yearbook. New York City, United States: United Nations Statistics Division (UNSD).      | 1980                   |                      |
| Israel  | Elkana Y, Barkay A. Antibodies to hepatitis A in young Israeli children. J Infect. 1982; 4(1): 57-62.                                                                                                                    | 1980                   |                      |
| Israel  | Institute for Health Metrics and Evaluation. Institute for Health Metrics and Evaluation Cancer Registry Database. [Unpublished].                                                                                        | 1980-2010              |                      |
| Israel  | Morag A, Margalith M, Shuval HI, Fattal B. Acquisition of antibodies to various Coxsackie and Echo viruses and hepatitis A virus in agricultural communal settlements in Israel. J Med Virol. 1984; 14(1): 39-47.        | 1980-1981              |                      |
| Israel  | Institute for Health Metrics and Evaluation (IHME), Joint United Nations Program on HIV/AIDS (UNAIDS). Institute for Health Metrics and Evaluation HIV Mortality Estimates Based on the UNAIDS Spectrum Model Framework. | 1980-2013              | *                    |
| Israel  | United Nations Children's Fund (UNICEF), World Health Organization (WHO). WHO and UNICEF Reported Disease Incidence Time Series - Pertussis. Geneva, Switzerland: World Health Organization (WHO).                       | 1980-2013              |                      |
| Israel  | United Nations Children's Fund (UNICEF), World Health Organization (WHO). WHO and UNICEF Reported Disease Incidence Time Series - Measles. Geneva, Switzerland: World Health Organization (WHO).                         | 1980-2013              |                      |
| Israel  | Parkin DM, International Agency for Research on Cancer, International Association of Cancer Registries. Cancer Incidence in Five Continents. Vol. I to VIII. Lyon, France, IARC Press, 2005.                             | 1980, 1985, 1990, 1995 |                      |
| Israel  | Israel Vital Registration - Deaths 1981 ICD9 as it appears in World Health Organization (WHO). WHO Mortality Database Version February 2014. Geneva, Switzerland: World Health Organization (WHO), 2014.                 | 1981                   |                      |
| Israel  | Israel Vital Registration Death Data 1981 as it appears in United Nations Statistics Division (UNSD). United Nations Demographic Yearbook. New York City, United States: United Nations Statistics Division (UNSD).      | 1981                   |                      |
| Israel  | Israel Vital Registration - Deaths 1982 ICD9 as it appears in World Health Organization (WHO). WHO Mortality Database Version February 2014. Geneva, Switzerland: World Health Organization (WHO), 2014.                 | 1982                   |                      |
| Israel  | Israel Vital Registration Death Data 1982 as it appears in United Nations Statistics Division (UNSD). United Nations Demographic Yearbook. New York City, United States: United Nations Statistics Division (UNSD).      | 1982                   |                      |
| Israel  | Israel Vital Registration - Deaths 1983 ICD9 as it appears in World Health Organization (WHO). WHO Mortality Database Version February 2014. Geneva, Switzerland: World Health Organization (WHO), 2014.                 | 1983                   |                      |

**Web Table 32 - Comprehensive citation list**

| Country | Citation                                                                                                                                                                                                               | Year* | New for GBD 2013 (*) |
|---------|------------------------------------------------------------------------------------------------------------------------------------------------------------------------------------------------------------------------|-------|----------------------|
| Israel  | Israel Vital Registration Death Data 1983 as it appears in United Nations Statistics Division (UNSD). United Nations Demographic Yearbook. New York City, United States: United Nations Statistics Division (UNSD).    | 1983  |                      |
| Israel  | Israel Vital Registration - Deaths 1984 ICD9 as it appears in World Health Organization (WHO). WHO Mortality Database Version February 2014. Geneva, Switzerland: World Health Organization (WHO), 2014.               | 1984  |                      |
| Israel  | Israel Vital Registration Death Data 1984 as it appears in United Nations Statistics Division (UNSD). United Nations Demographic Yearbook. New York City, United States: United Nations Statistics Division (UNSD).    | 1984  |                      |
| Israel  | Israel Vital Registration - Deaths 1985 ICD9 as it appears in World Health Organization (WHO). WHO Mortality Database Version February 2014. Geneva, Switzerland: World Health Organization (WHO), 2014.               | 1985  |                      |
| Israel  | Israel Vital Registration Death Data 1985 as it appears in United Nations Statistics Division (UNSD). United Nations Demographic Yearbook. New York City, United States: United Nations Statistics Division (UNSD).    | 1985  |                      |
| Israel  | Israel Vital Registration - Deaths 1986 ICD9 as it appears in World Health Organization (WHO). WHO Mortality Database Version February 2014. Geneva, Switzerland: World Health Organization (WHO), 2014.               | 1986  |                      |
| Israel  | Israel Vital Registration Death Data 1986 as it appears in United Nations Statistics Division (UNSD). United Nations Demographic Yearbook. New York City, United States: United Nations Statistics Division (UNSD).    | 1986  |                      |
| Israel  | Kahana E, Galper Y, Zilber N, Korczyn AD. Epidemiology of dementia in Ashkelon: the influence of education. <i>J Neurol</i> . 2003; 250(4): 424-8.                                                                     | 1986  |                      |
| Israel  | Israel Vital Registration - Deaths 1987 ICD9 as it appears in World Health Organization (WHO). WHO Mortality Database Version February 2014. Geneva, Switzerland: World Health Organization (WHO), 2014.               | 1987  |                      |
| Israel  | Israel Vital Registration Death Data 1987 as it appears in United Nations Statistics Division (UNSD). United Nations Demographic Yearbook. New York City, United States: United Nations Statistics Division (UNSD).    | 1987  |                      |
| Israel  | Green MS, Melnick JL, Cohen D, Slepson R, Danon YL. Response to trivalent oral poliovirus vaccine with and without immune serum globulin in young adults in Israel in 1988. <i>J Infect Dis</i> . 1990; 162(4): 971-4. | 1987  |                      |
| Israel  | Green MS, Zaaide Y. Sibship size as a risk factor for hepatitis A infection. <i>Am J Epidemiol</i> . 1989; 129(4): 800-5.                                                                                              | 1987  |                      |
| Israel  | Israel Vital Registration - Deaths 1988 ICD9 as it appears in World Health Organization (WHO). WHO Mortality Database Version February 2014. Geneva, Switzerland: World Health Organization (WHO), 2014.               | 1988  |                      |
| Israel  | Israel Vital Registration Death Data 1988 as it appears in United Nations Statistics Division (UNSD). United Nations Demographic Yearbook. New York City, United States: United Nations Statistics Division (UNSD).    | 1988  |                      |
| Israel  | Israel Vital Registration - Deaths 1989 ICD9 as it appears in World Health Organization (WHO). WHO Mortality Database Version February 2014. Geneva, Switzerland: World Health Organization (WHO), 2014.               | 1989  |                      |

**Web Table 32 - Comprehensive citation list**

| Country | Citation                                                                                                                                                                                                                                                                                                                                                                                                                                                                                                                                                                                                                                                                                                              | Year*     | New for GBD 2013 (*) |
|---------|-----------------------------------------------------------------------------------------------------------------------------------------------------------------------------------------------------------------------------------------------------------------------------------------------------------------------------------------------------------------------------------------------------------------------------------------------------------------------------------------------------------------------------------------------------------------------------------------------------------------------------------------------------------------------------------------------------------------------|-----------|----------------------|
| Israel  | Israel Vital Registration Death Data 1989 as it appears in United Nations Statistics Division (UNSD). United Nations Demographic Yearbook. New York City, United States: United Nations Statistics Division (UNSD).                                                                                                                                                                                                                                                                                                                                                                                                                                                                                                   | 1989      |                      |
| Israel  | Department of Peace and Conflict Research, Uppsala University. UCDP Battle-Related Deaths Database Version 5, 2013. Uppsala, Sweden: Department of Peace and Conflict Research, Uppsala University, 2013.                                                                                                                                                                                                                                                                                                                                                                                                                                                                                                             | 1989-2012 | *                    |
| Israel  | Koren A, Zalman L, Palmor H, Zamir RB, Levin C, Openheim A, Daniel-Spiegel E, Shalev S, Filon D. Sickle cell anemia in northern Israel: screening and prevention. Isr Med Assoc J. 2009; 4(11): 229-34.                                                                                                                                                                                                                                                                                                                                                                                                                                                                                                               | 1989-2006 |                      |
| Israel  | Department of Peace and Conflict Research, Uppsala University. UCDP One-Sided Violence Database Version 1.4, 2013. Uppsala, Sweden: Department of Peace and Conflict Research, Uppsala University, 2013.                                                                                                                                                                                                                                                                                                                                                                                                                                                                                                              | 1989-2006 | *                    |
| Israel  | Israel Vital Registration - Deaths 1990 ICD9 as it appears in World Health Organization (WHO). WHO Mortality Database Version February 2014. Geneva, Switzerland: World Health Organization (WHO), 2014.                                                                                                                                                                                                                                                                                                                                                                                                                                                                                                              | 1990      |                      |
| Israel  | Israel Vital Registration Death Data 1990 as it appears in United Nations Statistics Division (UNSD). United Nations Demographic Yearbook. New York City, United States: United Nations Statistics Division (UNSD).                                                                                                                                                                                                                                                                                                                                                                                                                                                                                                   | 1990      |                      |
| Israel  | Weatherall D. Sickle Cell and Thalassemias Prevalence Data, Personal Correspondence with David Weatherall. [Unpublished].                                                                                                                                                                                                                                                                                                                                                                                                                                                                                                                                                                                             | 1990-2009 |                      |
| Israel  | Tulchinsky TH, Belmaker I, Raabi S, Acker C, Arbeli Y, Lobel R, Abed Y, Toubassi N, Goldberg E, Slater PE. Measles during the Gulf War: a public health threat in Israel, the West Bank, and Gaza. Public Health Rev. 1993; 20(4-Mar): 285-96.                                                                                                                                                                                                                                                                                                                                                                                                                                                                        | 1990-1991 |                      |
| Israel  | Israel Vital Registration - Deaths 1991 ICD9 as it appears in World Health Organization (WHO). WHO Mortality Database Version February 2014. Geneva, Switzerland: World Health Organization (WHO), 2014.                                                                                                                                                                                                                                                                                                                                                                                                                                                                                                              | 1991      |                      |
| Israel  | Israel Vital Registration Death Data 1991 as it appears in United Nations Statistics Division (UNSD). United Nations Demographic Yearbook. New York City, United States: United Nations Statistics Division (UNSD).                                                                                                                                                                                                                                                                                                                                                                                                                                                                                                   | 1991      |                      |
| Israel  | Israel Vital Registration - Deaths 1992 ICD9 as it appears in World Health Organization (WHO). WHO Mortality Database Version February 2014. Geneva, Switzerland: World Health Organization (WHO), 2014.                                                                                                                                                                                                                                                                                                                                                                                                                                                                                                              | 1992      |                      |
| Israel  | Israel Vital Registration Death Data 1992 as it appears in United Nations Statistics Division (UNSD). United Nations Demographic Yearbook. New York City, United States: United Nations Statistics Division (UNSD).                                                                                                                                                                                                                                                                                                                                                                                                                                                                                                   | 1992      |                      |
| Israel  | Trichopoulos D, Bamia C, Lagiou P, Fedirko V, Trepo E, Jenab M, Pischon T, Nöthlings U, Overved K, Tjønneland A, Outzen M, Clavel-Chapelon F, Kaaks R, Lukanova A, Boeing H, Aleksandrova K, Benetou V, Zylis D, Palli D, Pala V, Panico S, Tumino R, Sacerdote C, Bueno-De-Mesquita HB, Van Kranen HJ, Peeters PHM, Lund E, Quirós JR, González CA, Sanchez Perez M-J, Navarro C, Dorronsoro M, Barricarte A, Lindkvist B, Regnér S, Werner M, Hallmans G, Khaw K-T, Wareham N, Key T, Romieu I, Chuang S-C, Murphy N, Boffetta P, Trichopoulou A, Riboli E. Hepatocellular carcinoma risk factors and disease burden in a European cohort: a nested case-control study. J Natl Cancer Inst. 2011; 103(22): 1686-95. | 1992-2006 | *                    |
| Israel  | Karetnyi YV, Mendelson E, Shlyakhov E, Rubinstein E, Golubev N, Levin R, Sandler M, Schreiber M, Rubinstein U, Shif I. Prevalence of antibodies against hepatitis A virus among new immigrants in Israel. J Med Virol. 1995; 46(1): 61-5.                                                                                                                                                                                                                                                                                                                                                                                                                                                                             | 1992-1993 |                      |



**Web Table 32 - Comprehensive citation list**

| Country | Citation                                                                                                                                                                                                                                                                                                                                                 | Year*     | New for GBD 2013 (*) |
|---------|----------------------------------------------------------------------------------------------------------------------------------------------------------------------------------------------------------------------------------------------------------------------------------------------------------------------------------------------------------|-----------|----------------------|
| Israel  | Almog R, Low M, Cohen D, Robin G, Ashkenazi S, Bercovier H, Gdalevich M, Samuels Y, Ashkenazi I, Shemer J, Eldad A, Green MS. Prevalence of anti-hepatitis A antibodies, hepatitis B viral markers, and anti-hepatitis C antibodies among immigrants from the former USSR who arrived in Israel during 1990-1991. <i>Infection</i> . 1999; 27(3): 212-7. | 1992-1993 |                      |
| Israel  | Bowirrat A, Treves TA, Friedland RP, Korczyn AD. Prevalence of Alzheimer's type dementia in an elderly Arab population. <i>Eur J Neurol</i> . 2001; 8(2): 119-23.                                                                                                                                                                                        | 1992-1995 |                      |
| Israel  | Israel Vital Registration - Deaths 1993 ICD9 as it appears in World Health Organization (WHO). WHO Mortality Database Version February 2014. Geneva, Switzerland: World Health Organization (WHO), 2014.                                                                                                                                                 | 1993      |                      |
| Israel  | Israel Vital Registration Death Data 1993 as it appears in United Nations Statistics Division (UNSD). United Nations Demographic Yearbook. New York City, United States: United Nations Statistics Division (UNSD).                                                                                                                                      | 1993      |                      |
| Israel  | Schwartz E, Raveh D. The prevalence of hepatitis A antibodies among Israeli travellers and the economic feasibility of screening before vaccination. <i>Int J Epidemiol</i> . 1998; 27(1): 118-20.                                                                                                                                                       | 1993-1995 |                      |
| Israel  | Israel Vital Registration - Deaths 1994 ICD9 as it appears in World Health Organization (WHO). WHO Mortality Database Version February 2014. Geneva, Switzerland: World Health Organization (WHO), 2014.                                                                                                                                                 | 1994      |                      |
| Israel  | Israel Vital Registration Death Data 1994 as it appears in United Nations Statistics Division (UNSD). United Nations Demographic Yearbook. New York City, United States: United Nations Statistics Division (UNSD).                                                                                                                                      | 1994      |                      |
| Israel  | Karetnyi YV, Favorov MO, Khudyakova NS, Weiss P, Bar-Shani S, Handsheer R, Aboudy Y, Varsano N, Schwartz E, Levin E. Serological evidence for hepatitis E virus infection in Israel. <i>J Med Virol</i> . 1995; 45(3): 316-20.                                                                                                                           | 1994      |                      |
| Israel  | World Health Organization (WHO). Israel WHO Leishmaniasis Country Profile.                                                                                                                                                                                                                                                                               | 1994-2007 | *                    |
| Israel  | Israel Vital Registration - Deaths 1995 ICD9 as it appears in World Health Organization (WHO). WHO Mortality Database Version February 2014. Geneva, Switzerland: World Health Organization (WHO), 2014.                                                                                                                                                 | 1995      |                      |
| Israel  | Israel Vital Registration Death Data 1995 as it appears in United Nations Statistics Division (UNSD). United Nations Demographic Yearbook. New York City, United States: United Nations Statistics Division (UNSD).                                                                                                                                      | 1995      |                      |
| Israel  | Meltzer E, Yossepowitch O, Sadik C, Dan M, Schwartz E. Epidemiology and Clinical Aspects of Enteric Fever in Israel. <i>Am J Trop Med Hyg</i> . 2006; 74(4): 540-5.                                                                                                                                                                                      | 1995-2003 | *                    |
| Israel  | Gdalevich M, Grotto I, Mandel Y, Mimouni D, Shemer J, Ashkenazi I. Hepatitis A antibody prevalence among young adults in Israel--the decline continues. <i>Epidemiol Infect</i> . 1998; 121(2): 477-9.                                                                                                                                                   | 1995-1996 |                      |
| Israel  | Israel Vital Registration - Deaths 1996 ICD9 as it appears in World Health Organization (WHO). WHO Mortality Database Version February 2014. Geneva, Switzerland: World Health Organization (WHO), 2014.                                                                                                                                                 | 1996      |                      |
| Israel  | Kaplan M, Beutler E, Vreman HJ, Hammerman C, Levy-Lahad E, Renbaum P, Stevenson DK. Neonatal hyperbilirubinemia in glucose-6-phosphate dehydrogenase-deficient heterozygotes. <i>Pediatrics</i> . 1999; 104(1 Pt 1): 68-74.                                                                                                                              | 1996      |                      |



**Web Table 32 - Comprehensive citation list**

| Country | Citation                                                                                                                                                                                                                                    | Year*     | New for GBD 2013 (*) |
|---------|---------------------------------------------------------------------------------------------------------------------------------------------------------------------------------------------------------------------------------------------|-----------|----------------------|
| Israel  | Israel Vital Registration Death Data 1996 as it appears in United Nations Statistics Division (UNSD). United Nations Demographic Yearbook. New York City, United States: United Nations Statistics Division (UNSD).                         | 1996      |                      |
| Israel  | Hasin T, Dagan R, Boutboul G, Derazne E, Atias O, Cohen D. Socioeconomic correlates of antibody levels to enteric pathogens among Israeli adolescents. <i>Epidemiol Infect.</i> 2007; 135(1): 118-25.                                       | 1996      |                      |
| Israel  | Katz J, Gdalevich M, Ashkenazi I, Chaushu G, Shemer J. Association in the seroprevalence of hepatitis A and herpes simplex-1 viruses in young adults in Israel. <i>Infection.</i> 2000; 28(4): 231-3.                                       | 1996      |                      |
| Israel  | Israel Vital Registration - Deaths 1997 ICD9 as it appears in World Health Organization (WHO). WHO Mortality Database Version February 2014. Geneva, Switzerland: World Health Organization (WHO), 2014.                                    | 1997      |                      |
| Israel  | Israel Vital Registration Death Data 1997 as it appears in United Nations Statistics Division (UNSD). United Nations Demographic Yearbook. New York City, United States: United Nations Statistics Division (UNSD).                         | 1997      |                      |
| Israel  | Livni G, Plotkin S, Yuhaz Y, Chodik G, Aloni H, Lerman Y, Ashkenazi S. Seroepidemiology of hepatitis A antibodies among children's hospital staff. <i>Pediatr Infect Dis J.</i> 2002; 21(7): 618-22.                                        | 1997-1999 |                      |
| Israel  | Israel Vital Registration - Deaths 1998 ICD10 as it appears in World Health Organization (WHO). WHO Mortality Database Version February 2014. Geneva, Switzerland: World Health Organization (WHO), 2014.                                   | 1998      |                      |
| Israel  | Israel Vital Registration Death Data 1998 as it appears in United Nations Statistics Division (UNSD). United Nations Demographic Yearbook. New York City, United States: United Nations Statistics Division (UNSD).                         | 1998      |                      |
| Israel  | Gillis D, Grotto I, Mimouni D, Huerta M, Gdalevich M, Shpilberg O. Adult infection with hepatitis A despite declining endemicity; in favor of adult vaccination. <i>Vaccine.</i> 2002; 20(17-18): 2243-8.                                   | 1998-1999 |                      |
| Israel  | Samuels N. Routine testing for IgG antibodies against hepatitis A virus in Israel. <i>BMC Public Health.</i> 2005; 60.                                                                                                                      | 1998-2003 |                      |
| Israel  | Israel Vital Registration - Deaths 1999 ICD10 as it appears in World Health Organization (WHO). WHO Mortality Database Version February 2014. Geneva, Switzerland: World Health Organization (WHO), 2014.                                   | 1999      |                      |
| Israel  | Israel Vital Registration Death Data 1999 as it appears in United Nations Statistics Division (UNSD). United Nations Demographic Yearbook. New York City, United States: United Nations Statistics Division (UNSD).                         | 1999      |                      |
| Israel  | WHO Regional Office for Europe (EURO-WHO). European Hospital Morbidity Database. Copenhagen, Denmark: WHO Regional Office for Europe (EURO-WHO).                                                                                            | 1999-2005 |                      |
| Israel  | Israel Vital Registration - Deaths 2000 ICD10 as it appears in World Health Organization (WHO). WHO Mortality Database Version February 2014. Geneva, Switzerland: World Health Organization (WHO), 2014.                                   | 2000      |                      |
| Israel  | Curado MP, Edwards B, Shin HR, Storm H, Ferlay J, Heanue M and Boyle P, eds (2007). <i>Cancer Incidence in Five Continents, Vol. IX Periodic Data</i> (electronic version). Lyon, IARC. <a href="http://ci5.iarc.fr">http://ci5.iarc.fr</a> | 2000      |                      |
| Israel  | Israel Vital Registration Death Data 2000 as it appears in United Nations Statistics Division (UNSD). United Nations Demographic Yearbook. New York City, United States: United Nations Statistics Division (UNSD).                         | 2000      |                      |

**Web Table 32 - Comprehensive citation list**

| Country | Citation                                                                                                                                                                                                                                                                                     | Year*     | New for GBD 2013 (*) |
|---------|----------------------------------------------------------------------------------------------------------------------------------------------------------------------------------------------------------------------------------------------------------------------------------------------|-----------|----------------------|
| Israel  | Chironna M, Germinario C, Lopalco PL, Carrozzini F, Barbuti S, Quarto M. Prevalence rates of viral hepatitis infections in refugee Kurds from Iraq and Turkey. <i>Infection</i> . 2003; 31(2): 70-4.                                                                                         | 2000      |                      |
| Israel  | Ashkenazi M, Chodik G, Littner M, Aloni H, Lerman Y. The presence of hepatitis A antibodies in dental workers. A seroepidemiologic study. <i>J Am Dent Assoc</i> . 2001; 132(4): 492-8.                                                                                                      | 2000      |                      |
| Israel  | World Health Organization (WHO). Yellow Fever Reported Cases, WHO Vaccine-Preventable Diseases: Monitoring System. Geneva, Switzerland: World Health Organization (WHO).                                                                                                                     | 2000-2009 |                      |
| Israel  | Israel Vital Registration - Deaths 2001 ICD10 as it appears in World Health Organization (WHO). WHO Mortality Database Version February 2014. Geneva, Switzerland: World Health Organization (WHO), 2014.                                                                                    | 2001      |                      |
| Israel  | Israel Vital Registration Death Data 2001 as it appears in United Nations Statistics Division (UNSD). United Nations Demographic Yearbook. New York City, United States: United Nations Statistics Division (UNSD).                                                                          | 2001      |                      |
| Israel  | Israel Vital Registration - Deaths 2002 ICD10 as it appears in World Health Organization (WHO). WHO Mortality Database Version February 2014. Geneva, Switzerland: World Health Organization (WHO), 2014.                                                                                    | 2002      |                      |
| Israel  | Israel Vital Registration Death Data 2002 as it appears in United Nations Statistics Division (UNSD). United Nations Demographic Yearbook. New York City, United States: United Nations Statistics Division (UNSD).                                                                          | 2002      |                      |
| Israel  | Israel Vital Registration - Deaths 2003 ICD10 as it appears in World Health Organization (WHO). WHO Mortality Database Version February 2014. Geneva, Switzerland: World Health Organization (WHO), 2014.                                                                                    | 2003      |                      |
| Israel  | Israel Vital Registration Death Data 2003 as it appears in United Nations Statistics Division (UNSD). United Nations Demographic Yearbook. New York City, United States: United Nations Statistics Division (UNSD).                                                                          | 2003      |                      |
| Israel  | Israel Vital Registration - Deaths 2004 ICD10 as it appears in World Health Organization (WHO). WHO Mortality Database Version February 2014. Geneva, Switzerland: World Health Organization (WHO), 2014.                                                                                    | 2004      |                      |
| Israel  | Israel Vital Registration Death Data 2004 as it appears in United Nations Statistics Division (UNSD). United Nations Demographic Yearbook. New York City, United States: United Nations Statistics Division (UNSD).                                                                          | 2004      |                      |
| Israel  | Chodick G, Ashkenazi S, Aloni H, Peled T, Lerman Y. Hepatitis A virus seropositivity among hospital and community healthcare workers in Israel-the role of occupation, demography and socioeconomic background. <i>J Hosp Infect</i> . 2003; 54(2): 135-40.                                  | 2004      |                      |
| Israel  | Israel Vital Registration - Deaths 2005 ICD10 as it appears in World Health Organization (WHO). WHO Mortality Database Version February 2014. Geneva, Switzerland: World Health Organization (WHO), 2014.                                                                                    | 2005      |                      |
| Israel  | Forman D, Bray F, Brewster DH, Gombe Mbalawa C, Kohler B, Piñeros M, Steliarova-Foucher E, Swaminathan R and Ferlay J, eds (2013). <i>Cancer Incidence in Five Continents, Vol. X Summary Database</i> (electronic version). Lyon, IARC. <a href="http://ci5.iarc.fr">http://ci5.iarc.fr</a> | 2005      |                      |
| Israel  | Israel Vital Registration Death Data 2005 as it appears in United Nations Statistics Division (UNSD). United Nations Demographic Yearbook. New York City, United States: United Nations Statistics Division (UNSD).                                                                          | 2005      |                      |

**Web Table 32 - Comprehensive citation list**

| Country | Citation                                                                                                                                                                                                                                                                                         | Year*     | New for GBD 2013 (*) |
|---------|--------------------------------------------------------------------------------------------------------------------------------------------------------------------------------------------------------------------------------------------------------------------------------------------------|-----------|----------------------|
| Israel  | Israel Vital Registration - Deaths 2006 ICD10 as it appears in World Health Organization (WHO). WHO Mortality Database Version February 2014. Geneva, Switzerland: World Health Organization (WHO), 2014.                                                                                        | 2006      |                      |
| Israel  | Israel Vital Registration Death Data 2006 as it appears in United Nations Statistics Division (UNSD). United Nations Demographic Yearbook. New York City, United States: United Nations Statistics Division (UNSD).                                                                              | 2006      |                      |
| Israel  | Department of Peace and Conflict Research, Uppsala University. UCDP Nonstate Conflict Database Version 2.5, 2013. Uppsala, Sweden: Department of Peace and Conflict Research, Uppsala University, 2013.                                                                                          | 2006-2007 | *                    |
| Israel  | Israel Vital Registration - Deaths 2007 ICD10 as it appears in World Health Organization (WHO). WHO Mortality Database Version February 2014. Geneva, Switzerland: World Health Organization (WHO), 2014.                                                                                        | 2007      |                      |
| Israel  | World Health Organization (WHO). Global Status Report on Road Safety 2009. Geneva, Switzerland: World Health Organization (WHO), 2009.                                                                                                                                                           | 2007      |                      |
| Israel  | Israel Vital Registration Death Data 2007 as it appears in United Nations Statistics Division (UNSD). United Nations Demographic Yearbook. New York City, United States: United Nations Statistics Division (UNSD).                                                                              | 2007      |                      |
| Israel  | Israel Vital Registration - Deaths 2008 ICD10 as it appears in World Health Organization (WHO). WHO Mortality Database Version February 2014. Geneva, Switzerland: World Health Organization (WHO), 2014.                                                                                        | 2008      |                      |
| Israel  | Israel National Cancer Registry. Israel Cancer Incidence Tables 2008.                                                                                                                                                                                                                            | 2008      |                      |
| Israel  | Israel Vital Registration Death Data 2008 as it appears in United Nations Statistics Division (UNSD). United Nations Demographic Yearbook. New York City, United States: United Nations Statistics Division (UNSD).                                                                              | 2008      |                      |
| Israel  | Israel Vital Registration - Deaths 2009 ICD10 as it appears in World Health Organization (WHO). WHO Mortality Database Version February 2014. Geneva, Switzerland: World Health Organization (WHO), 2014.                                                                                        | 2009      |                      |
| Israel  | Israel National Cancer Registry. Israel Cancer Incidence Tables 2009. Jerusalem, Israel: Ministry of Health (Israel).                                                                                                                                                                            | 2009      |                      |
| Israel  | Israel Vital Registration Death Data 2009 as it appears in United Nations Statistics Division (UNSD). United Nations Demographic Yearbook. New York City, United States: United Nations Statistics Division (UNSD).                                                                              | 2009      |                      |
| Israel  | Israel Vital Registration - Deaths 2010 ICD10 as it appears in World Health Organization (WHO). WHO Mortality Database Version February 2014. Geneva, Switzerland: World Health Organization (WHO), 2014.                                                                                        | 2010      |                      |
| Israel  | Israel National Cancer Registry. Israel Cancer Incidence Tables 2010. Jerusalem, Israel: Ministry of Health (Israel).                                                                                                                                                                            | 2010      |                      |
| Israel  | Israel Vital Registration Death Data 2010 as it appears in United Nations Statistics Division (UNSD). United Nations Demographic Yearbook. New York City, United States: United Nations Statistics Division (UNSD).                                                                              | 2010      |                      |
| Israel  | European Renal Association-European Dialysis and Transplant Association (ERA-EDTA). European Renal Association-European Dialysis and Transplant Association Registry Annual Report 2010. Parma, Italy: European Renal Association-European Dialysis and Transplant Association (ERA-EDTA), 2012. | 2010      | *                    |

**Web Table 32 - Comprehensive citation list**

| Country | Citation                                                                                                                                                                                                                                                                                         | Year*                                                                                                                | New for GBD 2013 (*) |
|---------|--------------------------------------------------------------------------------------------------------------------------------------------------------------------------------------------------------------------------------------------------------------------------------------------------|----------------------------------------------------------------------------------------------------------------------|----------------------|
| Israel  | Israel Vital Registration - Deaths 2011 ICD10 as it appears in World Health Organization (WHO). WHO Mortality Database Version February 2014. Geneva, Switzerland: World Health Organization (WHO), 2014.                                                                                        | 2011                                                                                                                 | *                    |
| Israel  | European Renal Association-European Dialysis and Transplant Association (ERA-EDTA). European Renal Association-European Dialysis and Transplant Association Registry Annual Report 2011. Parma, Italy: European Renal Association-European Dialysis and Transplant Association (ERA-EDTA), 2013. | 2011                                                                                                                 | *                    |
| Israel  | Israel Vital Registration Death Data 2012 as it appears in United Nations Statistics Division (UNSD). United Nations Demographic Yearbook. New York City, United States: United Nations Statistics Division (UNSD).                                                                              | 2012                                                                                                                 | *                    |
| Italy   | Max Planck Institute for Demographic Research, University of California. Human Mortality Database. Berkeley, USA: University of California; Rostock, Germany: Max Planck Institute for Demographic Research.                                                                                     | 1950-2005                                                                                                            |                      |
| Italy   | Italy Vital Registration - Deaths 1951 ICD7 as it appears in World Health Organization (WHO). WHO Mortality Database Version February 2014. Geneva, Switzerland: World Health Organization (WHO), 2014.                                                                                          | 1951                                                                                                                 |                      |
| Italy   | Centre for Research on the Epidemiology of Disasters (CRED). EM-DAT: The OFDA/CRED International Disaster Database. Brussels, Belgium: Catholic University of Leuven.                                                                                                                            | 1951, 1953-1954, 1960, 1963, 1965-1966, 1968, 1970-1973, 1975-1981, 1983-1987, 1990, 1992-1994, 1996-2004, 2006-2012 |                      |
| Italy   | Italy Vital Registration - Deaths 1952 ICD7 as it appears in World Health Organization (WHO). WHO Mortality Database Version February 2014. Geneva, Switzerland: World Health Organization (WHO), 2014.                                                                                          | 1952                                                                                                                 |                      |
| Italy   | Italy Vital Registration - Deaths 1953 ICD7 as it appears in World Health Organization (WHO). WHO Mortality Database Version February 2014. Geneva, Switzerland: World Health Organization (WHO), 2014.                                                                                          | 1953                                                                                                                 |                      |
| Italy   | Italy Vital Registration - Deaths 1954 ICD7 as it appears in World Health Organization (WHO). WHO Mortality Database Version February 2014. Geneva, Switzerland: World Health Organization (WHO), 2014.                                                                                          | 1954                                                                                                                 |                      |
| Italy   | Italy Vital Registration - Deaths 1955 ICD7 as it appears in World Health Organization (WHO). WHO Mortality Database Version February 2014. Geneva, Switzerland: World Health Organization (WHO), 2014.                                                                                          | 1955                                                                                                                 |                      |
| Italy   | Italy Vital Registration - Deaths 1956 ICD7 as it appears in World Health Organization (WHO). WHO Mortality Database Version February 2014. Geneva, Switzerland: World Health Organization (WHO), 2014.                                                                                          | 1956                                                                                                                 |                      |
| Italy   | Italy Vital Registration - Deaths 1957 ICD7 as it appears in World Health Organization (WHO). WHO Mortality Database Version February 2014. Geneva, Switzerland: World Health Organization (WHO), 2014.                                                                                          | 1957                                                                                                                 |                      |
| Italy   | Italy Vital Registration - Deaths 1958 ICD7 as it appears in World Health Organization (WHO). WHO Mortality Database Version February 2014. Geneva, Switzerland: World Health Organization (WHO), 2014.                                                                                          | 1958                                                                                                                 |                      |

**Web Table 32 - Comprehensive citation list**

| Country | Citation                                                                                                                                                                                                                                                                                          | Year*            | New for GBD 2013 (*) |
|---------|---------------------------------------------------------------------------------------------------------------------------------------------------------------------------------------------------------------------------------------------------------------------------------------------------|------------------|----------------------|
| Italy   | Zanetti AR, Romanò L, Tanzi E, Andreassi A, Pozzi A, Panuccio A, Stroffolini T. Decline in anti-HAV prevalence in the Milan area between 1958 and 1992. Eur J Epidemiol. 1994; 10(5): 633-5.                                                                                                      | 1958, 1977, 1992 |                      |
| Italy   | Italy Vital Registration - Deaths 1959 ICD7 as it appears in World Health Organization (WHO). WHO Mortality Database Version February 2014. Geneva, Switzerland: World Health Organization (WHO), 2014.                                                                                           | 1959             |                      |
| Italy   | Italy Vital Registration - Deaths 1960 ICD7 as it appears in World Health Organization (WHO). WHO Mortality Database Version February 2014. Geneva, Switzerland: World Health Organization (WHO), 2014.                                                                                           | 1960             |                      |
| Italy   | Italy Vital Registration - Deaths 1961 ICD7 as it appears in World Health Organization (WHO). WHO Mortality Database Version February 2014. Geneva, Switzerland: World Health Organization (WHO), 2014.                                                                                           | 1961             |                      |
| Italy   | Italy Vital Registration - Deaths 1962 ICD7 as it appears in World Health Organization (WHO). WHO Mortality Database Version February 2014. Geneva, Switzerland: World Health Organization (WHO), 2014.                                                                                           | 1962             |                      |
| Italy   | Italy Vital Registration - Deaths 1963 ICD7 as it appears in World Health Organization (WHO). WHO Mortality Database Version February 2014. Geneva, Switzerland: World Health Organization (WHO), 2014.                                                                                           | 1963             |                      |
| Italy   | Modiano BG, Benerecetti-Santachiara AS, Gonano F, Zei G, Capaldo A, Cavalli-Sforza L.I. An analysis of ABO, MN, Rh, Hp, Tf and G-6-PD types in a sample from the human population of the Lecce province. Ann Hum Genet. 1965; 29(1): 19-32.                                                       | 1963-1965        |                      |
| Italy   | Italy Vital Registration - Deaths 1964 ICD7 as it appears in World Health Organization (WHO). WHO Mortality Database Version February 2014. Geneva, Switzerland: World Health Organization (WHO), 2014.                                                                                           | 1964             |                      |
| Italy   | Siniscalco M, Bernini L, Filippi G, Latte B, Meera Khan P, Piomelli S, Rattazzi M. Population genetics of haemoglobin variants, thalassaemia and glucose-6-phosphate dehydrogenase deficiency, with particular reference to the malaria hypothesis. Bull World Health Organ. 1966; 34(3): 379-93. | 1964-1966        |                      |
| Italy   | Italy Vital Registration - Deaths 1965 ICD7 as it appears in World Health Organization (WHO). WHO Mortality Database Version February 2014. Geneva, Switzerland: World Health Organization (WHO), 2014.                                                                                           | 1965             |                      |
| Italy   | Italy Vital Registration - Deaths 1966 ICD7 as it appears in World Health Organization (WHO). WHO Mortality Database Version February 2014. Geneva, Switzerland: World Health Organization (WHO), 2014.                                                                                           | 1966             |                      |
| Italy   | Italy Vital Registration - Deaths 1967 ICD7 as it appears in World Health Organization (WHO). WHO Mortality Database Version February 2014. Geneva, Switzerland: World Health Organization (WHO), 2014.                                                                                           | 1967             |                      |
| Italy   | Italy Vital Registration - Deaths 1968 ICD8 as it appears in World Health Organization (WHO). WHO Mortality Database Version February 2014. Geneva, Switzerland: World Health Organization (WHO), 2014.                                                                                           | 1968             |                      |
| Italy   | Italy Vital Registration - Deaths 1969 ICD8 as it appears in World Health Organization (WHO). WHO Mortality Database Version February 2014. Geneva, Switzerland: World Health Organization (WHO), 2014.                                                                                           | 1969             |                      |
| Italy   | Corrias L, Melis L. Erythrocyte G-6-PD deficiency in blood donors of Oristano. Quad Sclavo Diagn. 1971; 7(2): 595-9.                                                                                                                                                                              | 1969-1971        |                      |

**Web Table 32 - Comprehensive citation list**

| Country | Citation                                                                                                                                                                                                                                             | Year*     | New for GBD 2013 (*) |
|---------|------------------------------------------------------------------------------------------------------------------------------------------------------------------------------------------------------------------------------------------------------|-----------|----------------------|
| Italy   | Italy Vital Registration - Deaths 1970 ICD8 as it appears in World Health Organization (WHO). WHO Mortality Database Version February 2014. Geneva, Switzerland: World Health Organization (WHO), 2014.                                              | 1970      |                      |
| Italy   | World Health Orgn. Community control of hereditary anaemias: memorandum from a WHO meeting. Bull World Health Organ. 1983; 61(1): 63-80.                                                                                                             | 1970-1980 |                      |
| Italy   | Italy Vital Registration - Deaths 1971 ICD8 as it appears in World Health Organization (WHO). WHO Mortality Database Version February 2014. Geneva, Switzerland: World Health Organization (WHO), 2014.                                              | 1971      |                      |
| Italy   | Italy Vital Registration - Deaths 1972 ICD8 as it appears in World Health Organization (WHO). WHO Mortality Database Version February 2014. Geneva, Switzerland: World Health Organization (WHO), 2014.                                              | 1972      |                      |
| Italy   | Italy Vital Registration - Deaths 1973 ICD8 as it appears in World Health Organization (WHO). WHO Mortality Database Version February 2014. Geneva, Switzerland: World Health Organization (WHO), 2014.                                              | 1973      |                      |
| Italy   | Italy Vital Registration - Deaths 1974 ICD8 as it appears in World Health Organization (WHO). WHO Mortality Database Version February 2014. Geneva, Switzerland: World Health Organization (WHO), 2014.                                              | 1974      |                      |
| Italy   | Italy Vital Registration - Deaths 1975 ICD8 as it appears in World Health Organization (WHO). WHO Mortality Database Version February 2014. Geneva, Switzerland: World Health Organization (WHO), 2014.                                              | 1975      |                      |
| Italy   | Bottini E, Palmarino R, Lucarelli P, Lista F, Bottini N. ACP1 and human adaptability: association with past malarial morbidity in the Sardinian population. Am J Hum Biol. 2001; 13(6): 753-60.                                                      | 1975      |                      |
| Italy   | Italy Vital Registration - Deaths 1976 ICD8 as it appears in World Health Organization (WHO). WHO Mortality Database Version February 2014. Geneva, Switzerland: World Health Organization (WHO), 2014.                                              | 1976      |                      |
| Italy   | Italy Vital Registration - Deaths 1977 ICD8 as it appears in World Health Organization (WHO). WHO Mortality Database Version February 2014. Geneva, Switzerland: World Health Organization (WHO), 2014.                                              | 1977      |                      |
| Italy   | Schiliro G, Russo A, Curreri R, Marino S, Sciotto A, Russo G. Glucose-6-phosphate dehydrogenase deficiency in Sicily. Incidence, biochemical characteristics and clinical implications. Clin Genet. 1979; 15(2): 183-8.                              | 1977-1979 |                      |
| Italy   | Italy Vital Registration - Deaths 1978 ICD8 as it appears in World Health Organization (WHO). WHO Mortality Database Version February 2014. Geneva, Switzerland: World Health Organization (WHO), 2014.                                              | 1978      |                      |
| Italy   | Gualandri V, Orsini GB, Porta E, Gerli GC. Glucose-6-phosphate dehydrogenase deficiency among the student population of Milan. J Genet Hum. 1983; 31(3): 201-9.                                                                                      | 1978-1981 |                      |
| Italy   | Meloni C, Belloni E, Giorgi A, Marchetti R, Pelissero G, Zecca E, Rondanelli EG, Carosi G, Corridori S, De Franchis R. [Epidemiological research on human viral hepatitis in the province of Pavia]. Nuovi Ann Ig Microbiol. 1982; 33(4-6): 697-724. | 1978-1980 |                      |
| Italy   | Italy Vital Registration - Deaths 1979 ICD9 as it appears in World Health Organization (WHO). WHO Mortality Database Version February 2014. Geneva, Switzerland: World Health Organization (WHO), 2014.                                              | 1979      |                      |

**Web Table 32 - Comprehensive citation list**

| Country | Citation                                                                                                                                                                                                                                                                                                     | Year*                | New for GBD 2013 (*) |
|---------|--------------------------------------------------------------------------------------------------------------------------------------------------------------------------------------------------------------------------------------------------------------------------------------------------------------|----------------------|----------------------|
| Italy   | Federico G, Pizzigallo E, Nervo P, Ranno O, Ortona L. [Detection of virus A antibody through epidemiology and diagnosis of hepatitis A]. <i>Boll Ist Sieroter Milan</i> . 1980; 58(6): 445-52.                                                                                                               | 1979                 |                      |
| Italy   | Vendramini R, Fiaschi E, Naccarato R, Chiara-Monte M, Renzulli G, Canazza S, Trivello R. [Viral hepatitis type A. Seroepidemiological study in Padova and its district]. <i>Boll Ist Sieroter Milan</i> . 1980; 59(4): 338-47.                                                                               | 1979                 |                      |
| Italy   | Merletti L, Frongillo R. [Prevalence of antibody to hepatitis A virus in healthy Umbrian population (author's transl)]. <i>Ann Sclavo</i> . 1980; 22(2): 165-8.                                                                                                                                              | 1979                 |                      |
| Italy   | Chiaromonte M, Floreani A, Silvan C, Zampieri L, Trivello R, Renzulli G, Moschen M, Naccarato R. Hepatitis A and hepatitis B virus infection in children and adolescents in north-east Italy. <i>J Med Virol</i> . 1983; 12(3): 179-86.                                                                      | 1979-1980            |                      |
| Italy   | Uttili R, Galanti B, Da Villa G, Andreana A, Felaco FM, Filippini P, Galante D, Nardiello S, Pasquale G, Piccinino F. Hyperendemicity of viral hepatitis in the Neapolitan area: an epidemiological study. <i>Boll Ist Sieroter Milan</i> . 1983; 62(2): 145-52.                                             | 1979-1980            |                      |
| Italy   | Italy Vital Registration - Deaths 1980 ICD9 as it appears in World Health Organization (WHO). WHO Mortality Database Version February 2014. Geneva, Switzerland: World Health Organization (WHO), 2014.                                                                                                      | 1980                 |                      |
| Italy   | Tarsitani G, Mancinelli S, Pasquini P, Laurenzi M, Pileggi D. [Spread of type A viral hepatitis in Rome: study of anti-HAV antibodies in a group of students]. <i>Nuovi Ann Ig Microbiol</i> . 1981; 32(6): 363-7.                                                                                           | 1980                 |                      |
| Italy   | Romano G, Ginanneschi R, Mura I, Spano E. [Anti-HA antibodies in a sample of an apparently healthy population of the province of Sassari]. <i>Nuovi Ann Ig Microbiol</i> . 1981; 32(4): 239-46.                                                                                                              | 1980                 |                      |
| Italy   | Pasquini P, Laurenzi M, Panà A, Maddaluno R, Perroni L, Pileggi D, Menichella D. [Distribution of anti-HAV antibodies in hospital personnel in the Lazio region]. <i>Ann Sclavo</i> . 1982; 24(2): 123-8.                                                                                                    | 1980                 |                      |
| Italy   | Biglino A, Vercellotti E, Caramello P, Pischredda P, Gioannini P. ['Markers' of infection with hepatitis A and B viruses among office workers in a heavy industry]. <i>Minerva Med</i> . 1980; 71(39): 2833-6.                                                                                               | 1980                 |                      |
| Italy   | Chiaromonte M, Floreani A, Naccarato R. Hepatitis B virus infection in homes for the aged. <i>J Med Virol</i> . 1982; 9(4): 247-55.                                                                                                                                                                          | 1980                 |                      |
| Italy   | Institute for Health Metrics and Evaluation. Institute for Health Metrics and Evaluation Cancer Registry Database. [Unpublished].                                                                                                                                                                            | 1980-2008            |                      |
| Italy   | Tarchini R, Segoloni GP, Gentile MG, Lupo A, Cancarini G, Salomone M, D'Amico G, Mioli V, Vercellone A, Zucchelli P. Long-term results of CAPD in Italy: a report from the Italian CAPD Study Group. <i>Clin Nephrol</i> . 1988; 30(Suppl 1): S68-70.                                                        | 1980-1985            |                      |
| Italy   | Parkin DM, International Agency for Research on Cancer, International Association of Cancer Registries. <i>Cancer Incidence in Five Continents</i> . Vol. I to VIII. Lyon, France, IARC Press, 2005.                                                                                                         | 1980-1996            |                      |
| Italy   | Ferlay J, Parkin DM, Curado MP, Bray F, Edwards B, Shin HR and Forman D. <i>Cancer Incidence in Five Continents, Volumes I to IX: IARC CancerBase No. 9</i> [Internet]. Lyon, France: International Agency for Research on Cancer; 2010. Available from: <a href="http://ci5.iarc.fr">http://ci5.iarc.fr</a> | 1980-2001            |                      |
| Italy   | Institute for Health Metrics and Evaluation (IHME), Joint United Nations Program on HIV/AIDS (UNAIDS). Institute for Health Metrics and Evaluation HIV Mortality Estimates Based on the UNAIDS Spectrum Model Framework.                                                                                     | 1980-2013            | *                    |
| Italy   | United Nations Children's Fund (UNICEF), World Health Organization (WHO). WHO and UNICEF Reported Disease Incidence Time Series - Pertussis. Geneva, Switzerland: World Health Organization (WHO).                                                                                                           | 1980-2000, 2002-2012 |                      |
| Italy   | United Nations Children's Fund (UNICEF), World Health Organization (WHO). WHO and UNICEF Reported Disease Incidence Time Series - Measles. Geneva, Switzerland: World Health Organization (WHO).                                                                                                             | 1980-2000, 2002-2012 |                      |



**Web Table 32 - Comprehensive citation list**

| Country | Citation                                                                                                                                                                                                                                                                                             | Year*      | New for GBD 2013 (*) |
|---------|------------------------------------------------------------------------------------------------------------------------------------------------------------------------------------------------------------------------------------------------------------------------------------------------------|------------|----------------------|
| Italy   | D'Argenio P, Esposito D, Mele A, Ortolani G, Adamo B, Rapicetta M, Forte P, Pisani A, Soldo L, Sarrecchia B. Decline in the exposure to hepatitis A and B infections in children in Naples, Italy. <i>Public Health</i> . 1989; 103(5): 385-9.                                                       | 1980, 1988 |                      |
| Italy   | Italy Vital Registration - Deaths 1981 ICD9 as it appears in World Health Organization (WHO). WHO Mortality Database Version February 2014. Geneva, Switzerland: World Health Organization (WHO), 2014.                                                                                              | 1981       |                      |
| Italy   | Pasquini P, Kahn HA, Pileggi D, Panà A, Terzi J, D'Arca T. Prevalence of hepatitis A antibodies in Italy. <i>Int J Epidemiol</i> . 1984; 13(1): 83-6.                                                                                                                                                | 1981       |                      |
| Italy   | Cocco P. Occupational lead exposure and screening of glucose-6-phosphate dehydrogenase polymorphism: useful prevention or nonvoluntary discrimination? <i>Int Arch Occup Environ Health</i> . 1998; 71(2): 148-50.                                                                                   | 1981-1992  |                      |
| Italy   | D'Amelio R, Matricardi PM, Biselli R, Stroffolini T, Mele A, Spada E, Chionne P, Rapicetta M, Ferrigno L, Pasquini P. Changing epidemiology of hepatitis B in Italy: public health implications. <i>Am J Epidemiol</i> . 1992; 135(9): 1012-8.                                                       | 1981, 1990 |                      |
| Italy   | Italy Vital Registration - Deaths 1982 ICD9 as it appears in World Health Organization (WHO). WHO Mortality Database Version February 2014. Geneva, Switzerland: World Health Organization (WHO), 2014.                                                                                              | 1982       |                      |
| Italy   | Italy Vital Registration - Deaths 1983 ICD9 as it appears in World Health Organization (WHO). WHO Mortality Database Version February 2014. Geneva, Switzerland: World Health Organization (WHO), 2014.                                                                                              | 1983       |                      |
| Italy   | Martuzzi Veronesi F, Stangoni A, Cuccuru GB, Mulas G, Marogna G, Cossu G, Pettener D. Glucose-6-phosphate dehydrogenase deficiency and blood groups in northern Sardinia. <i>Hum Hered</i> . 1985; 35(6): 399-402.                                                                                   | 1983-1985  |                      |
| Italy   | Kondili LA, Chionne P, Costantino A, Villano U, Lo Noce C, PannoZZo F, Mele A, Giampaoli S, Rapicetta M. Infection rate and spontaneous seroreversion of anti-hepatitis C virus during the natural course of hepatitis C virus infection in the general population. <i>Gut</i> . 2002; 50(5): 693-6. | 1983-1987  |                      |
| Italy   | Italy Vital Registration - Deaths 1984 ICD9 as it appears in World Health Organization (WHO). WHO Mortality Database Version February 2014. Geneva, Switzerland: World Health Organization (WHO), 2014.                                                                                              | 1984       |                      |
| Italy   | D'Alessandro R, Gallassi R, Benassi G, Morreale A, Lugaresi E. Dementia in subjects over 65 years of age in the Republic of San Marino. <i>Br J Psychiatry</i> . 1988; 182-6.                                                                                                                        | 1984       |                      |
| Italy   | Rocca WA, Bonaiuto S, Lippi A, Luciani P, Turtù F, Cavarzeran F, Amaducci L. Prevalence of clinically diagnosed Alzheimer's disease and other dementing disorders: a door-to-door survey in Appignano, Macerata Province, Italy. <i>Neurology</i> . 1990; 40(4): 626-31.                             | 1984-1987  |                      |
| Italy   | Italy Vital Registration - Deaths 1985 ICD9 as it appears in World Health Organization (WHO). WHO Mortality Database Version February 2014. Geneva, Switzerland: World Health Organization (WHO), 2014.                                                                                              | 1985       |                      |
| Italy   | Ticca F, Catania S, Ranno O, Timpano C, Rivosecchi MR, Graziani MC, Lancella L, Comparcola D, Nicolosi L. [Haemophilus influenzae type b in meningitis: antibiotic resistance in pediatric patients]. <i>Infez Med</i> . 1997; 5(2): 96-9.                                                           | 1985-1994  |                      |
| Italy   | Borgna-Pignatti C, Cappellini MD, De Stefano P, Del Vecchio GC, Forni GL, Gamberini MR, Ghilardi R, Origa R, Piga A, Romeo MA, Zhao H, Cnaan A. Survival and Complications in Thalassemia. <i>Ann N Y Acad Sci</i> . 2005; 1054(1): 40-7.                                                            | 1985-1996  |                      |



**Web Table 32 - Comprehensive citation list**

| Country | Citation                                                                                                                                                                                                                                                                                                                          | Year*     | New for GBD 2013 (*) |
|---------|-----------------------------------------------------------------------------------------------------------------------------------------------------------------------------------------------------------------------------------------------------------------------------------------------------------------------------------|-----------|----------------------|
| Italy   | Italy Vital Registration - Deaths 1986 ICD9 as it appears in World Health Organization (WHO). WHO Mortality Database Version February 2014. Geneva, Switzerland: World Health Organization (WHO), 2014.                                                                                                                           | 1986      |                      |
| Italy   | Leonardi MS, Gazzara D, Zummo S, Mastroeni P. [Evaluation of anti-HAV IgG on 2 samples of closed populations]. G Bacteriol Virol Immunol. 1985; 78(7-12): 217-23.                                                                                                                                                                 | 1986      |                      |
| Italy   | Patti AM, Zaratti L, Santi AL, De Filippis P, Paroli E, Panà A. Indirect immunofluorescence application in the epidemiological study of hepatitis A. Boll Ist Sieroter Milan. 1987; 66(4): 278-81.                                                                                                                                | 1986      |                      |
| Italy   | Italy Acute Hepatitis C Prevalence Data 1986 from Global Burden of Disease 2010. [Primary source undocumented].                                                                                                                                                                                                                   | 1986      |                      |
| Italy   | Italy Vital Registration - Deaths 1987 ICD9 as it appears in World Health Organization (WHO). WHO Mortality Database Version February 2014. Geneva, Switzerland: World Health Organization (WHO), 2014.                                                                                                                           | 1987      |                      |
| Italy   | Catalano C, Postorino M, Kelly PJ, Fabrizi F, Enia G, Goodship TH, Fulcher GR, Maggiore Q. Diabetes mellitus and renal replacement therapy in Italy: prevalence, main characteristics and complications. Nephrol Dial Transplant. 1990; 5(9): 788-96.                                                                             | 1987      |                      |
| Italy   | Franco E, Patti AM, Zaratti L, Cauletti M, Vellucci L, Panà A. [Sero-epidemiologic study of hepatitis A virus infection in childhood]. Nuovi Ann Ig Microbiol. 1988; 39(2): 103-7.                                                                                                                                                | 1987      |                      |
| Italy   | Stroffolini T, Franco E, Romano G, Uccheddu P, Zaratti L, Pasquini P, Panà A, Maida A, Scarpa B. Hepatitis A virus infection in children in Sardinia, Italy. Community Med. 1989; 11(4): 336-41.                                                                                                                                  | 1987      |                      |
| Italy   | Mazzei C, Imberciadori G, Saccone F, Durante C, Mattiauda M, Lavagna G, Barberis G, Cavagnaro G. Infectious disease markers in autologous blood. Transfusion. 1989; 29(9): 829-30.                                                                                                                                                | 1987      |                      |
| Italy   | Bonaiuto S, Mele M, Galluzzo L, Giannandrea E. Survival and dementia: a 7-year follow-up of an Italian elderly population. Arch Gerontol Geriatr. 1995; 20(1): 105-13.                                                                                                                                                            | 1987-1995 |                      |
| Italy   | Santi V, Buccione D, Di Micoli A, Fatti G, Frigerio M, Farinati F, Del Poggio P, Rapaccini G, Di Nolfo MA, Benvegnù L, Zoli M, Borzio F, Giannini EG, Caturelli E, Chiaramonte M, Bernardi M, Trevisani F. The changing scenario of hepatocellular carcinoma over the last two decades in Italy. J Hepatol. 2012; 56(2): 397-405. | 1987-2008 | *                    |
| Italy   | Masia G, Martignetti G, Contu P. [Epidemiology of hepatitis A in Sardinia: prevalence of anti-HAV in a sample of workers required to obtain health certificates]. Ann Ig. 1989; 1(5): 1125-31.                                                                                                                                    | 1987-1988 |                      |
| Italy   | Stroffolini T, Chiaramonte M, Franco E, Rapicetta M, De Mattia D, Mura I, Trivello R, Giammanco A, Rigo G, Scarpa B. Baseline seroepidemiology of hepatitis A virus infection among children and teenagers in Italy. Infection. 1991; 19(2): 97-100.                                                                              | 1987-1989 |                      |
| Italy   | Romanò L, Azara A, Chiaramonte M, De Mattia D, Giammanco A, Moschen ME, Scarpa B, Stroffolini T, Zanetti AR. Low prevalence of anti-HCV antibody among Italian children. Infection. 1994; 22(5): 350-2.                                                                                                                           | 1987-1989 |                      |
| Italy   | Italy Vital Registration - Deaths 1988 ICD9 as it appears in World Health Organization (WHO). WHO Mortality Database Version February 2014. Geneva, Switzerland: World Health Organization (WHO), 2014.                                                                                                                           | 1988      |                      |
| Italy   | Stroffolini T, De Crescenzo L, Giammanco A, Intonazzo V, La Rosa G, Cascio A, Sarzana A, Chiarini A, Dardanoni L. Changing patterns of hepatitis A virus infection in children in Palermo, Italy. Eur J Epidemiol. 1990; 6(1): 84-7.                                                                                              | 1988      |                      |

**Web Table 32 - Comprehensive citation list**

| Country | Citation                                                                                                                                                                                                                                                                                    | Year*            | New for GBD 2013 (*) |
|---------|---------------------------------------------------------------------------------------------------------------------------------------------------------------------------------------------------------------------------------------------------------------------------------------------|------------------|----------------------|
| Italy   | Contu P, Uccheddu P, Dodero G, Masia G. [Epidemiology of hepatitis A in Sardinia: prevalence of anti-HAV in a sample of junior and senior high school students]. <i>Ann Ig.</i> 1989; 1(5): 1119-24.                                                                                        | 1988             |                      |
| Italy   | De Ronchi D, Berardi D, Menchetti M, Ferrari G, Serretti A, Dalmonte E, Fratiglioni L. Occurrence of Cognitive Impairment and Dementia after the Age of 60: A Population-Based Study from Northern Italy. <i>Dement Geriatr Cogn Disord.</i> 2005; 19(2-3): 97-105.                         | 1988-1991        |                      |
| Italy   | Modell B, Darlison M, Birgens H, Cario H, Faustino P, Giordano PC, Gulbis B, Hopmeier P, Lena-Russo D, Romao L, Theodorsson E. Epidemiology of haemoglobin disorders in Europe: an overview. <i>Scand J Clin Lab Invest.</i> 2007; 67(1): 39-69.                                            | 1988, 2006       |                      |
| Italy   | Centre for Health Informatics and Multiprofessional Education, University College London. Modell's Haemoglobinopathologist's Almanac. London, United Kingdom: Centre for Health Informatics and Multiprofessional Education, University College London, 2008.                               | 1988, 2003, 2006 |                      |
| Italy   | Italy Vital Registration - Deaths 1989 ICD9 as it appears in World Health Organization (WHO). WHO Mortality Database Version February 2014. Geneva, Switzerland: World Health Organization (WHO), 2014.                                                                                     | 1989             |                      |
| Italy   | Stroffolini T, Franco E, Mura I, Uccheddu P, Cauletti M, Azara A, Scarpa B. Age-specific prevalence of hepatitis A virus infection among teenagers in Sardinia. <i>Microbiologica.</i> 1991; 14(1): 21-4.                                                                                   | 1989             |                      |
| Italy   | Di Nardo V, Petrosillo N, Ippolito G, Bonaventura ME, Puro V, Chiaretti B, Tosoni M. Prevalence and incidence of hepatitis B virus, hepatitis C virus and human immunodeficiency virus among personnel and patients of a psychiatric hospital. <i>Eur J Epidemiol.</i> 1995; 11(2): 239-42. | 1989             |                      |
| Italy   | Italy Acute Hepatitis C Prevalence Data 1989 from Global Burden of Disease 2010. [Primary source undocumented].                                                                                                                                                                             | 1989             |                      |
| Italy   | Corrao G, Zambon A, Torchio P, Aricò S, La Vecchia C, di Orio F. Attributable risk for symptomatic liver cirrhosis in Italy. Collaborative Groups for the Study of Liver Diseases in Italy. <i>J Hepatol.</i> 1998; 28(4): 608-14.                                                          | 1989-1996        |                      |
| Italy   | Tagarelli A, Bastone L, Cittadella R, Calabrò V, Bria M, Brancati C. Glucose-6-phosphate dehydrogenase (G6PD) deficiency in southern Italy: a study on the population of the Cosenza province. <i>Gene Geogr.</i> 1991; 5(3): 141-50.                                                       | 1989-1992        |                      |
| Italy   | Stroffolini T, D'Amelio R, Matricardi PM, Chionne P, Napoli A, Rapicetta M, Crateri S, Pasquini P. The changing epidemiology of hepatitis A in Italy. <i>Ital J Gastroenterol.</i> 1993; 25(7): 372-4.                                                                                      | 1989-1990        |                      |
| Italy   | Brevi A, Naldi L, Cainelli T, Parazzini F. Prevalence and awareness of hepatitis B virus carrier status in Italy. <i>Genitourin Med.</i> 1993; 69(3): 241.                                                                                                                                  | 1989-1990        |                      |
| Italy   | Puro V, Girardi E, Ippolito G, Lo Presti E, Benedetto A, Zaniratti S, Giannini V, Gioia C, Natili S, Tossini G. Prevalence of hepatitis B and C viruses and human immunodeficiency virus infections in women of reproductive age. <i>Br J Obstet Gynaecol.</i> 1992; 99(7): 598-600.        | 1989-1990        |                      |
| Italy   | Italy Vital Registration - Deaths 1990 ICD9 as it appears in World Health Organization (WHO). WHO Mortality Database Version February 2014. Geneva, Switzerland: World Health Organization (WHO), 2014.                                                                                     | 1990             |                      |
| Italy   | Stratta P, Segoloni GP, Canavese C, Sandri L, Mazzucco G, Roccatello D, Manganaro M, Vercellone A. Incidence of biopsy-proven primary glomerulonephritis in an Italian province. <i>Am J Kidney Dis.</i> 1996; 27(5): 631-9.                                                                | 1990-1994        | *                    |

**Web Table 32 - Comprehensive citation list**

| Country | Citation                                                                                                                                                                                                                                                                                       | Year*     | New for GBD 2013 (*) |
|---------|------------------------------------------------------------------------------------------------------------------------------------------------------------------------------------------------------------------------------------------------------------------------------------------------|-----------|----------------------|
| Italy   | Matricardi PM, Rosmini F, Ferrigno L, Nisini R, Rapicetta M, Chionne P, Stroffolini T, Pasquini P, D'Amelio R. Cross sectional retrospective study of prevalence of atopy among Italian military students with antibodies against hepatitis A virus. <i>BMJ</i> . 1997; 314(7086): 999-1003.   | 1990-1991 |                      |
| Italy   | Caccamo L, Colledan M, Gridelli B, Rossi G, Doglia M, Gatti S, Ghidoni P, Lucianetti A, Lunghi G, Maggi U. Hepatitis C virus infection in liver allograft recipients. <i>Arch Virol Suppl</i> . 1993; 291-304.                                                                                 | 1990-1992 |                      |
| Italy   | Rapicetta M, Kondili LA, Pretolani S, Stroffolini T, Chionne P, Villano U, Madonna E, Casali F, Gasbarrini G. Seroprevalence and anti-HEV persistence in the general population of the Republic of San Marino. <i>J Med Virol</i> . 1999; 58(1): 49-53.                                        | 1990-1991 |                      |
| Italy   | Italy Vital Registration - Deaths 1991 ICD9 as it appears in World Health Organization (WHO). WHO Mortality Database Version February 2014. Geneva, Switzerland: World Health Organization (WHO), 2014.                                                                                        | 1991      |                      |
| Italy   | De Ronchi D, Fratiglioni L, Rucci P, Paternicò A, Graziani S, Dalmonte E. The effect of education on dementia occurrence in an Italian population with middle to high socioeconomic status. <i>Neurology</i> . 1998; 50(5): 1231-8.                                                            | 1991      |                      |
| Italy   | Ferini-Strambi L, Marcone A, Garancini P, Danelon F, Zamboni M, Massussi P, Tedesi B, Smirne S. Dementing disorders in north Italy: prevalence study in Vescovato, Cremona Province. <i>Eur J Epidemiol</i> . 1997; 13(2): 201-4.                                                              | 1991      |                      |
| Italy   | Gessoni G, Manoni F. Prevalence of anti-hepatitis C virus antibodies among teenagers in the Venetian area: a seroepidemiological study. <i>Eur J Med</i> . 1993; 2(2): 79-82.                                                                                                                  | 1991      |                      |
| Italy   | Italy Vital Registration - Deaths 1992 ICD9 as it appears in World Health Organization (WHO). WHO Mortality Database Version February 2014. Geneva, Switzerland: World Health Organization (WHO), 2014.                                                                                        | 1992      |                      |
| Italy   | Nuti M, Amaddeo D, Caprilli F, Crescimbeni E, Antoniazzi G, Lalli C, Prignano G, Franco E, Cristaldi M. [Tiber environment and infections: antibodies to hantaviruses, Leptospira, Borrelia and hepatitis A virus in subjects active on the river banks]. <i>Ann Ig</i> . 1993; 5(4): 259-65.  | 1992      |                      |
| Italy   | Malaguti M, Capece R, Marciano M, Arena G, Luciani MP, Striano M, Biagini M. Antibodies to hepatitis C virus (anti-HCV): prevalence in the same geographical area in dialysis patients, staff members, and blood donors. <i>Nephron</i> . 1992; 61(3): 346.                                    | 1992      |                      |
| Italy   | Marranconi F, Fabris P, Stecca C, Zampieri L, Bettini MC, Di Fabrizio N, de Lalla F. Prevalence of anti-HCV and risk factors for hepatitis C virus infection in healthy pregnant women. <i>Infection</i> . 1994; 22(5): 333-7.                                                                 | 1992      |                      |
| Italy   | Gentile C, Alberini I, Manini I, Rossi S, Montomoli E, Pozzi T, Rizzo C, Alfonsi V. Hepatitis A seroprevalence in Tuscany, Italy. <i>Euro Surveill</i> . 2009; 14(10): 1-4.                                                                                                                    | 1992-2004 |                      |
| Italy   | Azzimondi G, D'Alessandro R, Pandolfo G, Feruglio FS. Comparative study of the prevalence of dementia in two Sicilian communities with different psychosocial backgrounds. <i>Neuroepidemiology</i> . 1998; 17(4): 199-209.                                                                    | 1992-1994 |                      |
| Italy   | Di Carlo A, Baldereschi M, Amaducci L, Lepore V, Bracco L, Maggi S, Bonaiuto S, Perissinotto E, Scarlato G, Farchi G, Inzitari D, ILSA Working Group. Incidence of dementia, Alzheimer's disease, and vascular dementia in Italy. The ILSA Study. <i>J Am Geriatr Soc</i> . 2002; 50(1): 41-8. | 1992-1996 |                      |
| Italy   | Prencipe M, Casini AR, Ferretti C, Lattanzio MT, Fiorelli M, Culasso F. Prevalence of dementia in an elderly rural population: effects of age, sex, and education. <i>J Neurol Neurosurg Psychiatry</i> . 1996; 60(6): 628-33.                                                                 | 1992-1993 |                      |

**Web Table 32 - Comprehensive citation list**

| Country | Citation                                                                                                                                                                                                                                                                                                                                                                                                                                                                                                                                                                                                                                                                                                                      | Year*     | New for GBD 2013 (*) |
|---------|-------------------------------------------------------------------------------------------------------------------------------------------------------------------------------------------------------------------------------------------------------------------------------------------------------------------------------------------------------------------------------------------------------------------------------------------------------------------------------------------------------------------------------------------------------------------------------------------------------------------------------------------------------------------------------------------------------------------------------|-----------|----------------------|
| Italy   | Cristina S, Nicolosi A, Hauser WA, Leite ML, Gerosa E, Nappi G. The prevalence of dementia and cognitive deficit in a rural population of 2442 residents in northern Italy. A door-to-door survey. <i>Eur J Neurol</i> . 2001; 8(6): 595-600.                                                                                                                                                                                                                                                                                                                                                                                                                                                                                 | 1992-1993 |                      |
| Italy   | Baldereschi M, Di Carlo A, Maggi S, Grigoletto F, Scarlato G, Amaducci L, Inzitari D. Dementia is a major predictor of death among the Italian elderly. ILSA Working Group. Italian Longitudinal Study on Aging. <i>Neurology</i> . 1999; 52(4): 709-13.                                                                                                                                                                                                                                                                                                                                                                                                                                                                      | 1992-1995 |                      |
| Italy   | The Italian Longitudinal Study on Aging Working Group. Prevalence of chronic diseases in older Italians: comparing self-reported and clinical diagnoses. <i>Int J Epidemiol</i> . 1997; 26(5): 995-1002.                                                                                                                                                                                                                                                                                                                                                                                                                                                                                                                      | 1992-1993 |                      |
| Italy   | Trichopoulos D, Bamia C, Lagiou P, Fedirko V, Trepo E, Jenab M, Pischon T, Nöthlings U, Overved K, Tjønneland A, Outzen M, Clavel-Chapelon F, Kaaks R, Lukanova A, Boeing H, Aleksandrova K, Benetou V, Zylis D, Palli D, Pala V, Panico S, Tumino R, Sacerdote C, Bueno-De-Mesquita HB, Van Kranen HJ, Peeters PHM, Lund E, Quirós JR, González CA, Sanchez Perez M-J, Navarro C, Dorronsoro M, Barricarte A, Lindkvist B, Regnér S, Werner M, Hallmans G, Khaw K-T, Wareham N, Key T, Romieu I, Chuang S-C, Murphy N, Boffetta P, Trichopoulou A, Riboli E. Hepatocellular carcinoma risk factors and disease burden in a European cohort: a nested case-control study. <i>J Natl Cancer Inst</i> . 2011; 103(22): 1686-95. | 1992-2006 | *                    |
| Italy   | De Mercato R, Cantiello JP, Celentano U, Giani U, Romano A, Guarnaccia D, D'Antonio A. Hepatitis C virus in prisoners. <i>Minerva Med</i> . 1995; 86(3): 89-91.                                                                                                                                                                                                                                                                                                                                                                                                                                                                                                                                                               | 1992-1994 |                      |
| Italy   | Italy Vital Registration - Deaths 1993 ICD9 as it appears in World Health Organization (WHO). WHO Mortality Database Version February 2014. Geneva, Switzerland: World Health Organization (WHO), 2014.                                                                                                                                                                                                                                                                                                                                                                                                                                                                                                                       | 1993      |                      |
| Italy   | Benedetti MD, Salviati A, Filipponi S, Manfredi M, De Togni L, Gomez Lira M, Stenta G, Fincati E, Pampanin M, Rizzuto N, Danti G. Prevalence of dementia and apolipoprotein e genotype distribution in the elderly of Buttapietra, Verona province, Italy. <i>Neuroepidemiology</i> . 2002; 21(2): 74-80.                                                                                                                                                                                                                                                                                                                                                                                                                     | 1993      |                      |
| Italy   | Pavia M, Iiritano E, Veratti MA, Angelillo IF. Prevalence of hepatitis E antibodies in healthy persons in southern Italy. <i>Infection</i> . 1998; 26(1): 32-5.                                                                                                                                                                                                                                                                                                                                                                                                                                                                                                                                                               | 1993-1995 | *                    |
| Italy   | Baldo V, Floreani A, Menegon T, Grella P, Paternoster DM, Trivello R. Hepatitis C virus, hepatitis B virus and human immunodeficiency virus infection in pregnant women in North-East Italy: a seroepidemiological study. <i>Eur J Epidemiol</i> . 2000; 16(1): 87-91.                                                                                                                                                                                                                                                                                                                                                                                                                                                        | 1993-1994 |                      |
| Italy   | Gessoni G, Manoni F. Hepatitis E virus infection in north-east Italy: serological study in the open population and groups at risk. <i>J Viral Hepat</i> . 1996; 3(4): 197-202.                                                                                                                                                                                                                                                                                                                                                                                                                                                                                                                                                | 1993-1995 |                      |
| Italy   | Italy Vital Registration - Deaths 1994 ICD9 as it appears in World Health Organization (WHO). WHO Mortality Database Version February 2014. Geneva, Switzerland: World Health Organization (WHO), 2014.                                                                                                                                                                                                                                                                                                                                                                                                                                                                                                                       | 1994      |                      |
| Italy   | Salmaso S, Mastrantonio P, Scuderi G, Congiu ME, Stroffolini T, Pompa MG, Squarcione S. Pattern of Bacterial Meningitis in Italy, 1994. <i>Eur J Epidemiol</i> . 1997; 13(3): 317-21.                                                                                                                                                                                                                                                                                                                                                                                                                                                                                                                                         | 1994      |                      |
| Italy   | Stroffolini T, Menchinelli M, Dambruoso V, Menniti Ippolito F, Costantino A, Rapicetta M, Lecce R, Taliani G. Prevalence of hepatitis E in a central Italian town at high endemicity for hepatitis C virus. <i>Ital J Gastroenterol</i> . 1996; 28(9): 523-5.                                                                                                                                                                                                                                                                                                                                                                                                                                                                 | 1994      | *                    |
| Italy   | Moschen ME, Floreani A, Zamparo E, Baldo V, Majori S, Gasparini V, Trivello R. Hepatitis A infection: a seroepidemiological study in young adults in North-East Italy. <i>Eur J Epidemiol</i> . 1997; 13(8): 875-8.                                                                                                                                                                                                                                                                                                                                                                                                                                                                                                           | 1994      |                      |

**Web Table 32 - Comprehensive citation list**

| Country | Citation                                                                                                                                                                                                                                                                                              | Year*      | New for GBD 2013 (*) |
|---------|-------------------------------------------------------------------------------------------------------------------------------------------------------------------------------------------------------------------------------------------------------------------------------------------------------|------------|----------------------|
| Italy   | Ripabelli G, Sammarco ML, Campo T, Montanaro C, D'Ascenzo E, Grasso GM. Prevalence of antibodies against enterically transmitted viral hepatitis (HAV and HEV) among adolescents in an inland territory of central Italy. <i>Eur J Epidemiol.</i> 1997; 13(1): 45-7.                                  | 1994       |                      |
| Italy   | Castelli, Carosi, Tebaldi, Pizzocolo, Pisani, Rossitto, Boffelli, Crevatin, Pettoello, Fausti, Messino, Brunelli, Costa, Ronca. Age-Specific Anti-Hepatitis A Virus Seroepidemiology in Italian Travelers: Indications for Anti-Hepatitis A Vaccination. <i>J Travel Med.</i> 1996; 3(4): 214-8.      | 1994       |                      |
| Italy   | Adamo B, Stroffolini T, Sagliocca L, Simonetti A, Iadanza F, Fossi E, Tancredi F, Mele A. Ad hoc survey of hepatitis B vaccination campaign in newborns of HBsAg positive mothers and in 12-year-old subjects in southern Italy. <i>Vaccine.</i> 1998; 16(8): 775-7.                                  | 1994       |                      |
| Italy   | Stroffolini T, Menchinelli M, Taliani G, Dambruoso V, Poliandri G, Bozza A, Lecce R, Clementi C, Ippolito FM, Compagnoni A. High prevalence of hepatitis C virus infection in a small central Italian town: lack of evidence of parenteral exposure. <i>Ital J Gastroenterol.</i> 1995; 27(5): 235-8. | 1994       |                      |
| Italy   | Chironna M, Quarto M, Biasio LR, Barbuti S. Haemophilus influenzae type b meningitis in Apulia Retrospective study from the years 1994-1995. <i>Ann Ig.</i> 1998; 10(3): 131-6.                                                                                                                       | 1994-1995  |                      |
| Italy   | Ravaglia G, Forti P, De Ronchi D, Maioli F, Nesi B, Cucinotta D, Bernardi M, Cavalli G. Prevalence and severity of dementia among northern Italian centenarians. <i>Neurology.</i> 1999; 53(2): 416-8.                                                                                                | 1994-1995  |                      |
| Italy   | World Health Organization (WHO). Italy WHO Leishmaniasis Country Profile.                                                                                                                                                                                                                             | 1994-2009  | *                    |
| Italy   | Campello C, Poli A, Dal MG, Besozzi-Valentini F. Seroprevalence, viremia and genotype distribution of hepatitis C virus: a community-based population study in northern Italy. <i>Infection.</i> 2002; 30(1): 7-12.                                                                                   | 1994-1995  |                      |
| Italy   | Coppola RC, Masia G, Pradat P, Trepò C, Carboni G, Argiolas F, Rizzetto M. Impact of hepatitis C virus infection on healthy subjects on an Italian island. <i>J Viral Hepat.</i> 2000; 7(2): 130-7.                                                                                                   | 1994-1995  |                      |
| Italy   | Corrao G, Zambon A, Bagnardi V, Aricò S, Loguercio C, D'Amicis A, Collaborative SIDECIR Group. Nutrient intakes, nutritional patterns and the risk of liver cirrhosis: an explorative case-control study. <i>Eur J Epidemiol.</i> 2004; 19(9): 861-9.                                                 | 1994-1998  |                      |
| Italy   | Russo-Mancuso G, La Spina M, Schilirò G. The changing profile of sickle cell disease in Italy. <i>Eur J Epidemiol.</i> 2003; 9(18): 923-4.                                                                                                                                                            | 1994, 2001 |                      |
| Italy   | Italy Vital Registration - Deaths 1995 ICD9 as it appears in World Health Organization (WHO). WHO Mortality Database Version February 2014. Geneva, Switzerland: World Health Organization (WHO), 2014.                                                                                               | 1995       |                      |
| Italy   | Montalto G, Soresi M, Tripi S, Carroccio A, Bascone F, Di Martino D, Bonfissuto G, Notarbartolo A. [Incidence of anti-HCV positivity in a Sicilian population with liver diseases]. <i>Ann Ital Med Int.</i> 1995; 10(2): 89-92.                                                                      | 1995       |                      |
| Italy   | Catania S, Ajassa C, Tzantzoglou S, Bellagamba R, Berardelli G, Catania N. [Seroepidemiologic study of the prevalence of anti-HAV antibodies in children in Rome]. <i>Riv Eur Sci Med Farmacol.</i> 1996; 18(1): 7-9.                                                                                 | 1995       |                      |
| Italy   | Luzza F, Imeneo M, Maletta M, Paluccio G, Giancotti A, Perticone F, Focà A, Pallone F. Seroepidemiology of Helicobacter pylori infection and hepatitis A in a rural area: evidence against a common mode of transmission. <i>Gut.</i> 1997; 41(2): 164-8.                                             | 1995       |                      |
| Italy   | Romano F, Bassani T, Capuani MA, Scopinaro E, Staniscia T, Schioppa F. [Prevalence of hepatitis A virus antibodies in food handlers]. <i>Ann Ig.</i> 1996; 8(4): 419-23.                                                                                                                              | 1995       |                      |

**Web Table 32 - Comprehensive citation list**

| Country | Citation                                                                                                                                                                                                                                                                                                                                            | Year*     | New for GBD 2013 (*) |
|---------|-----------------------------------------------------------------------------------------------------------------------------------------------------------------------------------------------------------------------------------------------------------------------------------------------------------------------------------------------------|-----------|----------------------|
| Italy   | Chiesa R, Donato F, Tagger A, Favret M, Ribero ML, Nardi G, Gelatti U, Bucella E, Tomasi E, Portolani N, Bonetti M, Bettini L, Pelizzari G, Salmi A, Savio A, Garatti M, Callea F. Etiology of hepatocellular carcinoma in Italian patients with and without cirrhosis. <i>Cancer Epidemiol Biomarkers Prev.</i> 2000; 9(2): 213-6.                 | 1995-1997 |                      |
| Italy   | Donato F, Tagger A, Chiesa R, Ribero ML, Tomasoni V, Fasola M, Gelatti U, Portera G, Boffetta P, Nardi G. Hepatitis B and C virus infection, alcohol drinking, and hepatocellular carcinoma: a case-control study in Italy. <i>Brescia HCC Study. Hepatology.</i> 1997; 26(3): 579-84.                                                              | 1995-1996 |                      |
| Italy   | Gelatti U, Donato F, Tagger A, Fantoni C, Portolani N, Ribero ML, Martelli C, Trevisi P, Covolo L, Simonati C, Nardi G, Brescia HCC Study. Etiology of hepatocellular carcinoma influences clinical and pathologic features but not patient survival. <i>Am J Gastroenterol.</i> 2003; 98(4): 907-14.                                               | 1995-2001 |                      |
| Italy   | Tagger A, Donato F, Ribero ML, Chiesa R, Portera G, Gelatti U, Albertini A, Fasola M, Boffetta P, Nardi G. Case-control study on hepatitis C virus (HCV) as a risk factor for hepatocellular carcinoma: the role of HCV genotypes and the synergism with hepatitis B virus and alcohol. <i>Brescia HCC Study. Int J Cancer.</i> 1999; 81(5): 695-9. | 1995-1998 |                      |
| Italy   | Gessoni G, Rusca A, Valverde S. Circulating anti-HEV antibodies: An Italian retrospective seroepidemiological study. <i>Eur J Lab Med.</i> 1998; 42-6.                                                                                                                                                                                              | 1995-1997 | *                    |
| Italy   | Italy Vital Registration - Deaths 1996 ICD9 as it appears in World Health Organization (WHO). WHO Mortality Database Version February 2014. Geneva, Switzerland: World Health Organization (WHO), 2014.                                                                                                                                             | 1996      |                      |
| Italy   | Russo R, Zotti C, Tappi E, Siliquini R, Bauducci M, Ditommaso S, Moiraghi Ruggenini A. Epidemiology of HAV infection in Piedmont, Italy. <i>Ann Ig.</i> 1997; 9(1): 3-8.                                                                                                                                                                            | 1996      |                      |
| Italy   | Stroffolini T, Guadagnino V, Chionne P, Procopio B, Mazzuca EG, Quintieri F, Scerbo P, Giancotti A, Nisticò S, Focà A, Tosti ME, Rapicetta M. A population based survey of hepatitis B virus infection in a southern Italian town. <i>Ital J Gastroenterol Hepatol.</i> 1997; 29(5): 415-8.                                                         | 1996      |                      |
| Italy   | Ansaldi F, Bruzzone B, Salmaso S, Rota MC, Durando P, Gasparini R, Icardi G. Different seroprevalence and molecular epidemiology patterns of hepatitis C virus infection in Italy. <i>J Med Virol.</i> 2005; 76(3): 327-32.                                                                                                                         | 1996-1997 |                      |
| Italy   | Ansaldi F, Bruzzone B, Rota MC, Bella A, Ciofi degli Atti M, Durando P, Gasparini R, Icardi G. Hepatitis A incidence and hospital-based seroprevalence in Italy: a nationwide study. <i>Eur J Epidemiol.</i> 2008; 23(1): 45-53.                                                                                                                    | 1996-1997 |                      |
| Italy   | Cattaneo C, Nuttall PA, Molendini LO, Pellegrinelli M, Grandi M, Sokol RJ. Prevalence of HIV and hepatitis C markers among a cadaver population in Milan. <i>J Clin Pathol.</i> 1999; 52(4): 267-70.                                                                                                                                                | 1996-1997 |                      |
| Italy   | Italy Dementia Data 1996-1999 from literature review, as provided by the Global Burden of Disease 2010 dementia expert group.                                                                                                                                                                                                                       | 1996-1999 |                      |
| Italy   | Italy Vital Registration - Deaths 1997 ICD9 as it appears in World Health Organization (WHO). WHO Mortality Database Version February 2014. Geneva, Switzerland: World Health Organization (WHO), 2014.                                                                                                                                             | 1997      |                      |
| Italy   | Noale M, Maggi S, Minicuci N, Marzari C, Destro C, Farchi G, Scafato E, Baldereschi M, Di Carlo A, Crepaldi G, ILSA Working Group. Dementia and disability: impact on mortality. <i>The Italian Longitudinal Study on Aging. Dement Geriatr Cogn Disord.</i> 2003; 16(1): 7-14.                                                                     | 1997      |                      |
| Italy   | Raffaele A, Valenti M, Iovenitti M, Matani A, Bruno ML, Altobelli E, D'Alessandro A, Barnabei R, Leonardi B, Taglieri G. High prevalence of HCV infection among the general population in a rural area of central Italy. <i>Eur J Epidemiol.</i> 2001; 17(1): 41-6.                                                                                 | 1997      |                      |

**Web Table 32 - Comprehensive citation list**

| Country | Citation                                                                                                                                                                                                                                                                                                      | Year*          | New for GBD 2013 (*) |
|---------|---------------------------------------------------------------------------------------------------------------------------------------------------------------------------------------------------------------------------------------------------------------------------------------------------------------|----------------|----------------------|
| Italy   | Maio G, d' Argenio P, Stroffolini T, Bozza A, Sacco L, Tosti ME, Intorcia M, Fossi E, d' Alessio G, Kondili LA, Rapicetta M, Mele A. Hepatitis C virus infection and alanine transaminase levels in the general population: a survey in a southern Italian town. <i>J Hepatol.</i> 2000; 33(1): 116-20.       | 1997,1999-2000 |                      |
| Italy   | Italy Vital Registration - Deaths 1998 ICD9 as it appears in World Health Organization (WHO). WHO Mortality Database Version February 2014. Geneva, Switzerland: World Health Organization (WHO), 2014.                                                                                                       | 1998           |                      |
| Italy   | Patti AM, Santi AL, Bellucci C, Ciapetti C, Vulcano A, Giustini C, Mastroeni I, Adorasio E, Fara GM. Seroprevalence of hepatitis A virus infection in general population of Latium. <i>Ann Ig.</i> 1999; 11(5): 391-5.                                                                                        | 1998           |                      |
| Italy   | Calabri GB, Santini MG, Genovese F, Bambi F, Salvi G, Calabri G. [Prevalence of anti-HAV antibodies (hepatitis A virus) in 18-year-old males from the Florence area]. <i>Pediatr Med Chir.</i> 1999; 21(5 Suppl): 219-20.                                                                                     | 1998           |                      |
| Italy   | Trevisan A, Stocco E, Fanelli G, Bicciato F, Paruzzolo P. Seroprevalence of hepatitis A markers in subjects exposed to biological risk. <i>Int Arch Occup Environ Health.</i> 1999; 72(2): 125-7.                                                                                                             | 1998           |                      |
| Italy   | Baldo V, Floreani A, Menegon T, Angiolelli G, Trivello R. Prevalence of antibodies against hepatitis C virus in the elderly: a seroepidemiological study in a nursing home and in an open population. <i>The Collaborative Group. Gerontology.</i> 2000; 46(4): 194-8.                                        | 1998-2002      |                      |
| Italy   | Floreani A, Rizzotto ER, Ferrara F, Carderi I, Caroli D, Blasone L, Baldo V. Clinical course and outcome of autoimmune hepatitis/primary sclerosing cholangitis overlap syndrome. <i>Am J Gastroenterol.</i> 2005; 100(7): 1516-22.                                                                           | 1998-2001      |                      |
| Italy   | Italy Dementia Data 1998-1999 from literature review, as provided by the Global Burden of Disease 2010 dementia expert group.                                                                                                                                                                                 | 1998-1999      |                      |
| Italy   | Italy Vital Registration - Deaths 1999 ICD9 as it appears in World Health Organization (WHO). WHO Mortality Database Version February 2014. Geneva, Switzerland: World Health Organization (WHO), 2014.                                                                                                       | 1999           |                      |
| Italy   | Di Ciommo V, Ferrario F, Spina G, La Spesa F, Rubino S. Prevalence of hepatitis B virus (HBV) in Italian adolescents. <i>Boll Ist Sieroter Milan.</i> 1990; 69(2): 437-9.                                                                                                                                     | 1999           |                      |
| Italy   | Ravaglia G, Forti P, Maioli F, Sacchetti L, Mariani E, Nativio V, Talerico T, Vettori C, Macini PL. Education, occupation, and prevalence of dementia: findings from the Conselice study. <i>Dement Geriatr Cogn Disord.</i> 2002; 14(2): 90-100.                                                             | 1999-2000      |                      |
| Italy   | Ravaglia G, Forti P, Maioli F, Martelli M, Servadei L, Brunetti N, Dalmonte E, Bianchin M, Mariani E. Incidence and etiology of dementia in a large elderly Italian population. <i>Neurology.</i> 2005; 64(9): 1525-30.                                                                                       | 1999-2004      |                      |
| Italy   | Mannocci A, La Torre G, Chiaradia G, De Waure C, Mainelli MT, Cernigliaro A, Bruno S, Ricciardi W. Epidemiology and direct medical costs of human leishmaniasis in Italy. <i>J Prev Med Hyg.</i> 2007; 48(1): 27-36.                                                                                          | 1999-2003      |                      |
| Italy   | Franceschi S, Montella M, Polesel J, La Vecchia C, Crispo A, Dal Maso L, Casarin P, Izzo F, Tommasi LG, Chemin I, Trépo C, Crovatto M, Talamini R. Hepatitis viruses, alcohol, and tobacco in the etiology of hepatocellular carcinoma in Italy. <i>Cancer Epidemiol Biomarkers Prev.</i> 2006; 15(4): 683-9. | 1999-2002      |                      |
| Italy   | Curado MP, Edwards B, Shin HR, Storm H, Ferlay J, Heanue M and Boyle P, eds (2007). <i>Cancer Incidence in Five Continents, Vol. IX Periodic Data</i> (electronic version). Lyon, IARC. <a href="http://ci5.iarc.fr">http://ci5.iarc.fr</a>                                                                   | 1999-2000      |                      |
| Italy   | De Silvestri A, Avanzini MA, Terulla V, Zucca S, Polatti F, Belloni C. Decline of maternal hepatitis A virus antibody levels in infants. <i>Acta Paediatr.</i> 2002; 91(8): 882-4.                                                                                                                            | 1999-2000      |                      |



**Web Table 32 - Comprehensive citation list**

| Country | Citation                                                                                                                                                                                                                                                                             | Year*           | New for GBD 2013 (*) |
|---------|--------------------------------------------------------------------------------------------------------------------------------------------------------------------------------------------------------------------------------------------------------------------------------------|-----------------|----------------------|
| Italy   | Italy Vital Registration - Deaths 2000 ICD9 as it appears in World Health Organization (WHO). WHO Mortality Database Version February 2014. Geneva, Switzerland: World Health Organization (WHO), 2014.                                                                              | 2000            |                      |
| Italy   | Tognoni G, Ceravolo R, Nucciarone B, Bianchi F, Dell'Agnello G, Ghicopulos I, Siciliano G, Murri L. From mild cognitive impairment to dementia: a prevalence study in a district of Tuscany, Italy. <i>Acta Neurol Scand.</i> 2005; 112(2): 65-71.                                   | 2000            |                      |
| Italy   | Bongiorno MR, Pistone G, Aricò G. Hepatitis B and hepatitis C virus infections in dermatological patients in west Sicily: a seroepidemiological study. <i>J Eur Acad Dermatol Venereol.</i> 2002; 16(1): 43-6.                                                                       | 2000            |                      |
| Italy   | Zani C, Pasquale L, Bressanelli M, Puoti M, Paris B, Coccaglio R, Lascioli I, Pieriacci G, Donato F. The epidemiological pattern of chronic liver diseases in a community undergoing voluntary screening for hepatitis B and C. <i>Dig Liver Dis.</i> 2011; 43(8): 653-8.            | 2000-2009       |                      |
| Italy   | Zaffanello M, Rugolotto S, Zamboni G, Gaudino R, Tatò L. Neonatal screening for glucose-6-phosphate dehydrogenase deficiency fails to detect heterozygote females. <i>Eur J Epidemiol.</i> 2004; 19(3): 255-7.                                                                       | 2000-2001       |                      |
| Italy   | Montella M, Crispo A, Grimaldi M, Angeletti C, Amore A, Ronga D, Sabbatini M, Sabbatici M, Pisani A, Spiteri D, Serraino D. Prevalence of hepatitis C virus infection in different population groups in southern Italy. <i>Infection.</i> 2005; 33(1): 9-12.                         | 2000-2002       |                      |
| Italy   | De Donno A, Chironna M, Craca R, Paiano A, Zizza A, Guido M, Carrozzini F, Germinario C, Gabutti G. [Anti-HEV seroprevalence in the area of Lecce]. <i>Ann Ig.</i> 2003; 15(3): 199-205.                                                                                             | 2000-2002       | *                    |
| Italy   | Montella M, Crispo A, Serraino D, Rezza G, Franceschi S. Is the spread of HCV in Southern Italy attributable to iatrogenic transmission through unsterile injections?. <i>Eur J Cancer Prev.</i> 2003; 12(1): 85-6.                                                                  | 2000-2001       |                      |
| Italy   | Montella M, Serraino D, Crispo A, Romano N, Fusco M, Goedert JJ. Infection with human herpes virus type 8 in an area at high prevalence for hepatitis C virus infection in southern Italy. <i>J Viral Hepat.</i> 2004; 11(3): 268-70.                                                | 2000-2001       |                      |
| Italy   | Italy Vital Registration - Deaths 2001 ICD9 as it appears in World Health Organization (WHO). WHO Mortality Database Version February 2014. Geneva, Switzerland: World Health Organization (WHO), 2014.                                                                              | 2001            |                      |
| Italy   | Stroffolini T, Sagnelli E, Almasio P, Ferrigno L, Craxi A, Mele A, Italian Hospitals Collaborating Groups. Characteristics of liver cirrhosis in Italy: results from a multicenter national study. <i>Dig Liver Dis.</i> 2004; 36(1): 56-60.                                         | 2001            |                      |
| Italy   | Sagnelli E, Stroffolini T, Mele A, Almasio P, Coppola N, Ferrigno L, Scolastico C, Onofrio M, Imparato M, Filippini P. The importance of HCV on the burden of chronic liver disease in Italy: a multicenter prevalence study of 9,997 cases. <i>J Med Virol.</i> 2005; 75(4): 522-7. | 2001            |                      |
| Italy   | Picerno I, Di Pietro A, Spataro P, Di Benedetto A, Romano G, Scoglio ME. Is diabetes mellitus a risk factor for HCV infection? <i>Ann Ig.</i> 2002; 14(6): 473-7.                                                                                                                    | 2001            |                      |
| Italy   | Bonura F, Sorgi M, Perna AM, Puccio G, Tramuto F, Cajozzo C, Romano N, Vitale F. Pregnant women as a sentinel population to target and implement hepatitis B virus (HBV) vaccine coverage: a three-year survey in Palermo, Sicily. <i>Vaccine.</i> 2005; 23(25): 3243-6.             | 2001-2003       |                      |
| Italy   | Italy Vital Registration - Deaths 2002 ICD9 as it appears in World Health Organization (WHO). WHO Mortality Database Version February 2014. Geneva, Switzerland: World Health Organization (WHO), 2014.                                                                              | 2002            |                      |
| Italy   | WHO Regional Office for Europe (EURO-WHO). European Hospital Morbidity Database. Copenhagen, Denmark: WHO Regional Office for Europe (EURO-WHO).                                                                                                                                     | 2002-2006, 2010 |                      |



**Web Table 32 - Comprehensive citation list**

| Country | Citation                                                                                                                                                                                                                                                                                                                                                                                                                                                     | Year*           | New for GBD 2013 (*) |
|---------|--------------------------------------------------------------------------------------------------------------------------------------------------------------------------------------------------------------------------------------------------------------------------------------------------------------------------------------------------------------------------------------------------------------------------------------------------------------|-----------------|----------------------|
| Italy   | World Health Organization (WHO). Yellow Fever Reported Cases, WHO Vaccine-Preventable Diseases: Monitoring System. Geneva, Switzerland: World Health Organization (WHO).                                                                                                                                                                                                                                                                                     | 2002-2007, 2009 |                      |
| Italy   | Italy Vital Registration - Deaths 2003 ICD10 as it appears in World Health Organization (WHO). WHO Mortality Database Version February 2014. Geneva, Switzerland: World Health Organization (WHO), 2014.                                                                                                                                                                                                                                                     | 2003            |                      |
| Italy   | D'Amelio R, Mele A, Mariano A, Romanò L, Biselli R, Lista F, Zanetti A, Stroffolini T. Hepatitis A, Italy. <i>Emerg Infect Dis</i> . 2005; 11(7): 1155-6.                                                                                                                                                                                                                                                                                                    | 2003            |                      |
| Italy   | Lodi G, Giuliani M, Majorana A, Sardella A, Bez C, Demarosi F, Carrassi A. Lichen planus and hepatitis C virus: a multicentre study of patients with oral lesions and a systematic review. <i>Br J Dermatol</i> . 2004; 151(6): 1172-81.                                                                                                                                                                                                                     | 2004            |                      |
| Italy   | Cozzolongo R, Osella AR, Elba S, Petruzzini J, Buongiorno G, Giannuzzi V, Leone G, Bonfiglio C, Lanzilotta E, Manghisi OG, Leandro G, NUTRIHEP Collaborating Group, Donnaloia R, Fanelli V, Mirizzi F, Parziale L, Crupi G, Detomaso P, Labbate A, Zizzari S, Depalma M, Polignano A, Lopinto D, Daprile G. Epidemiology of HCV infection in the general population: a survey in a southern Italian town. <i>Am J Gastroenterol</i> . 2009; 104(11): 2740-6. | 2005-2007       |                      |
| Italy   | Vulcano A, Angelucci M, Candelori E, Martini V, Patti AM, Mancini C, Santi AL, Calvani A, Casagni L, Lamberti A. HEV prevalence in the general population and among workers at zoonotic risk in Latium Region. <i>Ann Ig</i> . 2007; 19(3): 181-6.                                                                                                                                                                                                           | 2005-2006       | *                    |
| Italy   | Italy Vital Registration - Deaths 2006 ICD10 as it appears in World Health Organization (WHO). WHO Mortality Database Version February 2014. Geneva, Switzerland: World Health Organization (WHO), 2014.                                                                                                                                                                                                                                                     | 2006            |                      |
| Italy   | Italian Society of Nephrology. Italian Society of Nephrology Register of Dialysis and Transplant (SIN-RIDT) Annual Report 2006. Italy: Italian Society of Nephrology, 2008.                                                                                                                                                                                                                                                                                  | 2006            |                      |
| Italy   | Gambaro G, Yabarek T, Graziani MS, Gemelli A, Abaterusso C, Frigo AC, Marchionna N, Citron L, Bonfante L, Grigoletto F, Tata S, Ferraro PM, Legnaro A, Meneghel G, Conz P, Rizzotti P, D'Angelo A, Lupo A; INCIPE Study Group. Prevalence of CKD in northeastern Italy: results of the INCIPE study and comparison with NHANES. <i>Clin J Am Soc Nephrol</i> . 2010; 5(11): 1946-53.                                                                         | 2006            |                      |
| Italy   | Lauder A, Schieppati A, Conte F, Remuzzi G, Battlè D. Low mortality and key aspects of delivery of care for end-stage renal disease in Italy. <i>ScientificWorldJournal</i> . 2009; 9: 349-59.                                                                                                                                                                                                                                                               | 2006            |                      |
| Italy   | EUVAC-NET. EUVAC-NET Measles Surveillance Report 2006. Stockholm, Sweden: European Centre for Disease Prevention and Control, 2007.                                                                                                                                                                                                                                                                                                                          | 2006            |                      |
| Italy   | Beggio M, Giraldo M, Borella-Venturini M, Mongillo M, Zanetti E, Bruno A, Davanzo E, Trevisan A. [Prevalence of hepatitis virus A, B, and C markers according to the geographic origin of medical students]. <i>G Ital Med Lav Ergon</i> . 2007; 29(3 Suppl): 745-7.                                                                                                                                                                                         | 2006            |                      |
| Italy   | Italy Vital Registration - Deaths 2007 ICD10 as it appears in World Health Organization (WHO). WHO Mortality Database Version February 2014. Geneva, Switzerland: World Health Organization (WHO), 2014.                                                                                                                                                                                                                                                     | 2007            |                      |
| Italy   | EUVAC-NET. EUVAC-NET Measles Surveillance Report 2007. Stockholm, Sweden: European Centre for Disease Prevention and Control, 2008.                                                                                                                                                                                                                                                                                                                          | 2007            |                      |
| Italy   | World Health Organization (WHO). Retrospective Measles Data on Supplementary Immunization Activities. Geneva, Switzerland: World Health Organization (WHO).                                                                                                                                                                                                                                                                                                  | 2007            |                      |

**Web Table 32 - Comprehensive citation list**

| Country | Citation                                                                                                                                                                                                                                                                                         | Year*                                                                                     | New for GBD 2013 (*) |
|---------|--------------------------------------------------------------------------------------------------------------------------------------------------------------------------------------------------------------------------------------------------------------------------------------------------|-------------------------------------------------------------------------------------------|----------------------|
| Italy   | Italy Vital Registration - Deaths 2008 ICD10 as it appears in World Health Organization (WHO). WHO Mortality Database Version February 2014. Geneva, Switzerland: World Health Organization (WHO), 2014.                                                                                         | 2008                                                                                      |                      |
| Italy   | EUVAC-NET. EUVAC-NET Pertussis Surveillance Report 2008. Stockholm, Sweden: European Centre for Disease Prevention and Control, 2009.                                                                                                                                                            | 2008                                                                                      |                      |
| Italy   | Italy Vital Registration - Deaths 2009 ICD10 as it appears in World Health Organization (WHO). WHO Mortality Database Version February 2014. Geneva, Switzerland: World Health Organization (WHO), 2014.                                                                                         | 2009                                                                                      |                      |
| Italy   | Weatherall D. Sickle Cell and Thalassemias Prevalence Data, Personal Correspondence with David Weatherall. [Unpublished].                                                                                                                                                                        | 2009                                                                                      |                      |
| Italy   | Italy Vital Registration - Deaths 2010 ICD10 as it appears in World Health Organization (WHO). WHO Mortality Database Version February 2014. Geneva, Switzerland: World Health Organization (WHO), 2014.                                                                                         | 2010                                                                                      | *                    |
| Italy   | European Renal Association-European Dialysis and Transplant Association (ERA-EDTA). European Renal Association-European Dialysis and Transplant Association Registry Annual Report 2010. Parma, Italy: European Renal Association-European Dialysis and Transplant Association (ERA-EDTA), 2012. | 2010                                                                                      | *                    |
| Italy   | EUVAC-NET. EUVAC-NET Measles Surveillance Report 2010. Stockholm, Sweden: European Centre for Disease Prevention and Control, 2011.                                                                                                                                                              | 2010                                                                                      |                      |
| Jamaica | Jamaica Vital Registration Death Data 1950 as it appears in United Nations Statistics Division (UNSD). United Nations Demographic Yearbook. New York City, United States: United Nations Statistics Division (UNSD).                                                                             | 1950                                                                                      |                      |
| Jamaica | Jamaica Vital Registration Death Data 1951 as it appears in United Nations Statistics Division (UNSD). United Nations Demographic Yearbook. New York City, United States: United Nations Statistics Division (UNSD).                                                                             | 1951                                                                                      |                      |
| Jamaica | Centre for Research on the Epidemiology of Disasters (CRED). EM-DAT: The OFDA/CRED International Disaster Database. Brussels, Belgium: Catholic University of Leuven.                                                                                                                            | 1951, 1963, 1973, 1979-1980, 1985-1988, 1991, 1993-1994, 2001-2002, 2004-2008, 2010, 2012 |                      |
| Jamaica | Jamaica Vital Registration Death Data 1952 as it appears in United Nations Statistics Division (UNSD). United Nations Demographic Yearbook. New York City, United States: United Nations Statistics Division (UNSD).                                                                             | 1952                                                                                      |                      |
| Jamaica | Jamaica Vital Registration Death Data 1953 as it appears in United Nations Statistics Division (UNSD). United Nations Demographic Yearbook. New York City, United States: United Nations Statistics Division (UNSD).                                                                             | 1953                                                                                      |                      |
| Jamaica | Jamaica Vital Registration Death Data 1954 as it appears in United Nations Statistics Division (UNSD). United Nations Demographic Yearbook. New York City, United States: United Nations Statistics Division (UNSD).                                                                             | 1954                                                                                      |                      |
| Jamaica | Jamaica Vital Registration Death Data 1955 as it appears in United Nations Statistics Division (UNSD). United Nations Demographic Yearbook. New York City, United States: United Nations Statistics Division (UNSD).                                                                             | 1955                                                                                      |                      |

**Web Table 32 - Comprehensive citation list**

| Country | Citation                                                                                                                                                                                                             | Year*     | New for GBD 2013 (*) |
|---------|----------------------------------------------------------------------------------------------------------------------------------------------------------------------------------------------------------------------|-----------|----------------------|
| Jamaica | Jamaica Vital Registration Death Data 1956 as it appears in United Nations Statistics Division (UNSD). United Nations Demographic Yearbook. New York City, United States: United Nations Statistics Division (UNSD). | 1956      |                      |
| Jamaica | Jamaica Vital Registration Death Data 1957 as it appears in United Nations Statistics Division (UNSD). United Nations Demographic Yearbook. New York City, United States: United Nations Statistics Division (UNSD). | 1957      |                      |
| Jamaica | Jamaica Vital Registration Death Data 1958 as it appears in United Nations Statistics Division (UNSD). United Nations Demographic Yearbook. New York City, United States: United Nations Statistics Division (UNSD). | 1958      |                      |
| Jamaica | Jamaica Vital Registration Death Data 1959 as it appears in United Nations Statistics Division (UNSD). United Nations Demographic Yearbook. New York City, United States: United Nations Statistics Division (UNSD). | 1959      |                      |
| Jamaica | Jamaica Vital Registration - Deaths 1960 ICD7 as it appears in World Health Organization (WHO). WHO Mortality Database Version February 2014. Geneva, Switzerland: World Health Organization (WHO), 2014.            | 1960      |                      |
| Jamaica | Jamaica Vital Registration - Deaths 1961 ICD7 as it appears in World Health Organization (WHO). WHO Mortality Database Version February 2014. Geneva, Switzerland: World Health Organization (WHO), 2014.            | 1961      |                      |
| Jamaica | Jamaica Vital Registration Death Data 1962 as it appears in United Nations Statistics Division (UNSD). United Nations Demographic Yearbook. New York City, United States: United Nations Statistics Division (UNSD). | 1962      |                      |
| Jamaica | Jamaica Vital Registration Death Data 1963 as it appears in United Nations Statistics Division (UNSD). United Nations Demographic Yearbook. New York City, United States: United Nations Statistics Division (UNSD). | 1963      |                      |
| Jamaica | Jamaica Vital Registration - Deaths 1964 ICD7 as it appears in World Health Organization (WHO). WHO Mortality Database Version February 2014. Geneva, Switzerland: World Health Organization (WHO), 2014.            | 1964      |                      |
| Jamaica | Miall WE, Milner PF, Lovell HG, Standard KL. Haematological investigations of population samples in Jamaica. Br J Prev Soc Med. 1967; 21(2): 45-55.                                                                  | 1964-1966 |                      |
| Jamaica | Jamaica Vital Registration - Deaths 1965 ICD7 as it appears in World Health Organization (WHO). WHO Mortality Database Version February 2014. Geneva, Switzerland: World Health Organization (WHO), 2014.            | 1965      |                      |
| Jamaica | Jamaica Vital Registration - Deaths 1967 ICD7 as it appears in World Health Organization (WHO). WHO Mortality Database Version February 2014. Geneva, Switzerland: World Health Organization (WHO), 2014.            | 1967      |                      |
| Jamaica | Jamaica Vital Registration - Deaths 1968 ICD8 as it appears in World Health Organization (WHO). WHO Mortality Database Version February 2014. Geneva, Switzerland: World Health Organization (WHO), 2014.            | 1968      | *                    |
| Jamaica | Jamaica Vital Registration - Deaths 1969 ICD8 as it appears in World Health Organization (WHO). WHO Mortality Database Version February 2014. Geneva, Switzerland: World Health Organization (WHO), 2014.            | 1969      | *                    |

**Web Table 32 - Comprehensive citation list**

| Country | Citation                                                                                                                                                                                                                                          | Year*     | New for GBD 2013 (*) |
|---------|---------------------------------------------------------------------------------------------------------------------------------------------------------------------------------------------------------------------------------------------------|-----------|----------------------|
| Jamaica | Jamaica Vital Registration - Deaths 1970 ICD8 as it appears in World Health Organization (WHO). WHO Mortality Database Version February 2014. Geneva, Switzerland: World Health Organization (WHO), 2014.                                         | 1970      | *                    |
| Jamaica | Gibbs WN, Ottey F, Dyer H. Distribution of glucose-6-phosphate dehydrogenase phenotypes in Jamaica. Am J Hum Genet. 1972; 24(1): 18-23.                                                                                                           | 1970-1974 |                      |
| Jamaica | Jamaica Vital Registration - Deaths 1971 ICD8 as it appears in World Health Organization (WHO). WHO Mortality Database Version February 2014. Geneva, Switzerland: World Health Organization (WHO), 2014.                                         | 1971      | *                    |
| Jamaica | United Nations Office on Drugs and Crime (UNODC). United Nations Surveys on Crime Trends and the Operations of Criminal Justice Systems 1970-2006 as provided by Kavi Bhalla. [Unpublished].                                                      | 1971-1994 |                      |
| Jamaica | Thalassaemia International Federation, World Health Organization (WHO). Management of Haemoglobin Disorders: Report of a Joint WHO-TIF Meeting, Nicosia, Cyprus, 16-18 November 2007. Geneva, Switzerland: World Health Organization (WHO), 2008. | 1973-1981 |                      |
| Jamaica | Serjeant GR. Observations on the epidemiology of sickle cell disease. Trans R Soc Trop Med Hyg. 1981; 75(2): 228-33.                                                                                                                              | 1973-1979 |                      |
| Jamaica | Lee A, Thomas P, Cupidore L, Serjeant B, Serjeant G. Improved survival in homozygous sickle cell disease: lessons from a cohort study. BMJ. 1995; 7020(311): 1600-2.                                                                              | 1973-1992 |                      |
| Jamaica | Wierenga KJ, Hambleton IR, Lewis NA, Unit SC. Survival estimates for patients with homozygous sickle-cell disease in Jamaica: a clinic-based population study. Lancet. 2001; 9257(357): 680-3.                                                    | 1973-1996 |                      |
| Jamaica | Jamaica Vital Registration - Deaths 1975 ICD8 as it appears in World Health Organization (WHO). WHO Mortality Database Version February 2014. Geneva, Switzerland: World Health Organization (WHO), 2014.                                         | 1975      | *                    |
| Jamaica | Jamaica Statistical Institute (STATIN), International Statistical Institute. Jamaica World Fertility Survey 1976. Voorburg, Netherlands: International Statistical Institute.                                                                     | 1975-1976 |                      |
| Jamaica | Jamaica Vital Registration - Deaths 1977 ICD8 as it appears in World Health Organization (WHO). WHO Mortality Database Version February 2014. Geneva, Switzerland: World Health Organization (WHO), 2014.                                         | 1977      |                      |
| Jamaica | Jamaica Vital Registration - Deaths 1980 ICD9 as it appears in World Health Organization (WHO). WHO Mortality Database Version February 2014. Geneva, Switzerland: World Health Organization (WHO), 2014.                                         | 1980      |                      |
| Jamaica | Brooks SE, Wolff C. Age- specific incidence of cancer in Kingston and St. Andrew, Jamaica. Part I: 1978-1982. West Indian Med J. 1991; 40(3): 127-8.                                                                                              | 1980      |                      |
| Jamaica | Institute for Health Metrics and Evaluation (IHME), Joint United Nations Program on HIV/AIDS (UNAIDS). Institute for Health Metrics and Evaluation HIV Mortality Estimates Based on the UNAIDS Spectrum Model Framework.                          | 1980-2013 | *                    |
| Jamaica | United Nations Children's Fund (UNICEF), World Health Organization (WHO). WHO and UNICEF Reported Disease Incidence Time Series - Pertussis. Geneva, Switzerland: World Health Organization (WHO).                                                | 1980-2013 |                      |
| Jamaica | United Nations Children's Fund (UNICEF), World Health Organization (WHO). WHO and UNICEF Reported Disease Incidence Time Series - Measles. Geneva, Switzerland: World Health Organization (WHO).                                                  | 1980-2013 |                      |
| Jamaica | Jamaica Vital Registration - Deaths 1981 ICD9 as it appears in World Health Organization (WHO). WHO Mortality Database Version February 2014. Geneva, Switzerland: World Health Organization (WHO), 2014.                                         | 1981      |                      |

**Web Table 32 - Comprehensive citation list**

| Country | Citation                                                                                                                                                                                                                                                      | Year*     | New for GBD 2013 (*) |
|---------|---------------------------------------------------------------------------------------------------------------------------------------------------------------------------------------------------------------------------------------------------------------|-----------|----------------------|
| Jamaica | Jamaica Vital Registration - Deaths 1982 ICD9 as it appears in World Health Organization (WHO). WHO Mortality Database Version February 2014. Geneva, Switzerland: World Health Organization (WHO), 2014.                                                     | 1982      |                      |
| Jamaica | Department of Statistics (Jamaica), Minnesota Population Center. Jamaica Population Census 1982 from the Integrated Public Use Microdata Series, International. [Machine-readable database]. Minneapolis: University of Minnesota, 2011.                      | 1982      |                      |
| Jamaica | Jamaica Vital Registration - Deaths 1983 ICD9 as it appears in World Health Organization (WHO). WHO Mortality Database Version February 2014. Geneva, Switzerland: World Health Organization (WHO), 2014.                                                     | 1983      |                      |
| Jamaica | Jamaica Vital Registration - Deaths 1984 ICD9 as it appears in World Health Organization (WHO). WHO Mortality Database Version February 2014. Geneva, Switzerland: World Health Organization (WHO), 2014.                                                     | 1984      |                      |
| Jamaica | Jamaica Vital Registration - Deaths 1985 ICD9 as it appears in World Health Organization (WHO). WHO Mortality Database Version February 2014. Geneva, Switzerland: World Health Organization (WHO), 2014.                                                     | 1985      |                      |
| Jamaica | Jamaica Vital Registration - Deaths 1986 ICD9 as it appears in World Health Organization (WHO). WHO Mortality Database Version February 2014. Geneva, Switzerland: World Health Organization (WHO), 2014.                                                     | 1986      |                      |
| Jamaica | Jamaica Vital Registration - Deaths 1987 ICD9 as it appears in World Health Organization (WHO). WHO Mortality Database Version February 2014. Geneva, Switzerland: World Health Organization (WHO), 2014.                                                     | 1987      |                      |
| Jamaica | Samms-Vaughan ME, McCaw-Binns AM, Ashley DC, Foster-Williams K. Neonatal mortality determinants in Jamaica. <i>J Trop Pediatr</i> . 1990; 36(4): 171-5.                                                                                                       | 1987      |                      |
| Jamaica | Jamaica Vital Registration - Deaths 1988 ICD9 as it appears in World Health Organization (WHO). WHO Mortality Database Version February 2014. Geneva, Switzerland: World Health Organization (WHO), 2014.                                                     | 1988      |                      |
| Jamaica | World Health Organization (WHO). Measles surveillance. Measles in the Caribbean prior to the elimination campaign. <i>Wkly Epidemiol Rec</i> . 1991; 66(40): 291-4.                                                                                           | 1988-1990 |                      |
| Jamaica | Jamaica Vital Registration - Deaths 1989 ICD9 as it appears in World Health Organization (WHO). WHO Mortality Database Version February 2014. Geneva, Switzerland: World Health Organization (WHO), 2014.                                                     | 1989      |                      |
| Jamaica | Tollefson JE, Hospedales CJ, White FM. Epidemiological indicators and the epidemiology of measles in the English-speaking Caribbean and Suriname. <i>West Indian Med J</i> . 1992; 41(1): 2-7.                                                                | 1989-1990 |                      |
| Jamaica | Jamaica Vital Registration - Deaths 1990 ICD9 as it appears in World Health Organization (WHO). WHO Mortality Database Version February 2014. Geneva, Switzerland: World Health Organization (WHO), 2014.                                                     | 1990      |                      |
| Jamaica | Brooks SE, Hanchard B, Wolff C, Samuels E, Allen J. Age-specific incidence of cancer in Kingston and St. Andrew, Jamaica, 1988-1992. <i>West Indian Med J</i> . 1995; 44(3): 102-5.                                                                           | 1990      |                      |
| Jamaica | Weatherall D. Sickle Cell and Thalassemias Prevalence Data, Personal Correspondence with David Weatherall. [Unpublished].                                                                                                                                     | 1990-2009 |                      |
| Jamaica | Centre for Health Informatics and Multiprofessional Education, University College London. Modell's Haemoglobinopathologist's Almanac. London, United Kingdom: Centre for Health Informatics and Multiprofessional Education, University College London, 2008. | 1990-2003 |                      |

**Web Table 32 - Comprehensive citation list**

| Country | Citation                                                                                                                                                                                                                                        | Year*                | New for GBD 2013 (*) |
|---------|-------------------------------------------------------------------------------------------------------------------------------------------------------------------------------------------------------------------------------------------------|----------------------|----------------------|
| Jamaica | Jamaica Vital Registration - Deaths 1991 ICD9 as it appears in World Health Organization (WHO). WHO Mortality Database Version February 2014. Geneva, Switzerland: World Health Organization (WHO), 2014.                                       | 1991                 |                      |
| Jamaica | King SD, Dodd RY, Haynes G, Wynter HH, Sullivan MT, Serjeant GR, Choo-Kang E, Michael E. Prevalence of antibodies to hepatitis C virus and other markers in Jamaica. West Indian Med J. 1995; 44(2): 55-7.                                      | 1991                 |                      |
| Jamaica | Measles Supplementary Immunization Activity Data as provided by the World Health Organization. [Unpublished].                                                                                                                                   | 1991, 1995           |                      |
| Jamaica | Hanchard B, Blake G, Wolff C, Samuels E, Waugh N, Simpson D, Ramjit C, Mitchell K. Age-specific incidence of cancer in Kingston and St. Andrew, Jamaica, 1993-1997. West Indian Med J. 2001; 50(2): 123-9.                                      | 1995                 |                      |
| Jamaica | King L, Fraser R, Forbes M, Grindley M, Ali S, Reid M. Newborn sickle cell disease screening: the Jamaican experience (1995-2006). J Med Screen. 2007; 14(3): 117-22.                                                                           | 1995-2006            |                      |
| Jamaica | United Nations Office on Drugs and Crime (UNODC). United Nations Office on Drugs and Crime Global Study on Homicides 2011. Vienna, Austria: United Nations Office on Drugs and Crime (UNODC), 2011.                                             | 1995-2010            |                      |
| Jamaica | Brown MG, Lindo JF, King SD. Investigations of the epidemiology of infections with hepatitis A virus in Jamaica. Ann Trop Med Parasitol. 2000; 94(5): 497-502.                                                                                  | 1995-1998            |                      |
| Jamaica | Brady-West DC, Buchner LM. Retrospective audit of blood donation at a hospital-based blood centre. Implications for blood product supply and safety. West Indian Med J. 2000; 49(3): 226-8.                                                     | 1995-1998            |                      |
| Jamaica | Barton EN, King SD, Douglas LL. The seroprevalence of hepatitis and retroviral infection in Jamaican haemodialysis patients. West Indian Med J. 1998; 47(3): 105-7.                                                                             | 1996, 1998           |                      |
| Jamaica | World Health Organization (WHO). Yellow Fever Reported Cases, WHO Vaccine-Preventable Diseases: Monitoring System. Geneva, Switzerland: World Health Organization (WHO).                                                                        | 1997-1998, 2000-2009 |                      |
| Jamaica | Joint United Nations Program on HIV/AIDS (UNAIDS), Pan American Health Organization (PAHO), United Nations Children's Fund (UNICEF), World Health Organization (WHO). Jamaica Epidemiological Fact Sheet on HIV/AIDS and STIs 2004.             | 1997-1999            |                      |
| Jamaica | Ministry of Health (Jamaica). Jamaica Maternal Mortality Surveillance System 1998-2008. [Unpublished].                                                                                                                                          | 1998-2008            |                      |
| Jamaica | Vickers IE, Brathwaite AR, Levy M, Figueroa JP. Seroprevalence of sexually transmitted infections among accepted and deferred blood donors in Jamaica. West Indian Med J. 2006; 55(2): 89-94.                                                   | 1998-1999            |                      |
| Jamaica | Registrar General's Department (Jamaica). Jamaica Vital Statistics - Deaths 1999. [Unpublished].                                                                                                                                                | 1999                 |                      |
| Jamaica | World Health Organization (WHO). Country Mortality Data 1980-1999. [Unpublished].                                                                                                                                                               | 1999                 |                      |
| Jamaica | United Nations Children's Fund (UNICEF). Jamaica Multiple Indicator Cluster Survey 2000.                                                                                                                                                        | 2000                 |                      |
| Jamaica | Jamaica Vital Registration - Deaths 2000 ICD10 as it appears in World Health Organization (WHO). WHO Mortality Database Version February 2014. Geneva, Switzerland: World Health Organization (WHO), 2014.                                      | 2000                 |                      |
| Jamaica | World Health Organization (WHO). Retrospective Measles Data on Supplementary Immunization Activities. Geneva, Switzerland: World Health Organization (WHO).                                                                                     | 2000, 2003-2007      |                      |
| Jamaica | Statistical Institute of Jamaica (STATIN), Minnesota Population Center. Jamaica Population Census 2001 from the Integrated Public Use Microdata Series, International. [Machine-readable database]. Minneapolis: University of Minnesota, 2011. | 2001                 |                      |



**Web Table 32 - Comprehensive citation list**

| Country | Citation                                                                                                                                                                                                                                                                                                                                                                                                                        | Year*                | New for GBD 2013 (*) |
|---------|---------------------------------------------------------------------------------------------------------------------------------------------------------------------------------------------------------------------------------------------------------------------------------------------------------------------------------------------------------------------------------------------------------------------------------|----------------------|----------------------|
| Jamaica | Department of Peace and Conflict Research, Uppsala University. UCDP Nonstate Conflict Database Version 2.5, 2013. Uppsala, Sweden: Department of Peace and Conflict Research, Uppsala University, 2013.                                                                                                                                                                                                                         | 2001                 | *                    |
| Jamaica | Jamaica Vital Registration - Deaths 2001 ICD10 as it appears in World Health Organization (WHO). WHO Mortality Database Version February 2014. Geneva, Switzerland: World Health Organization (WHO), 2014.                                                                                                                                                                                                                      | 2001                 |                      |
| Jamaica | Knight-Madden JM, Barton-Gooden A, Weaver SR, Reid M, Greenough A. Mortality, asthma, smoking and acute chest syndrome in young adults with sickle cell disease. Lung. 2013; 191(1): 95-100.                                                                                                                                                                                                                                    | 2001-2011            | *                    |
| Jamaica | Jamaica Vital Registration - Deaths 2002 ICD10 as it appears in World Health Organization (WHO). WHO Mortality Database Version February 2014. Geneva, Switzerland: World Health Organization (WHO), 2014.                                                                                                                                                                                                                      | 2002                 |                      |
| Jamaica | Jamaica Vital Registration - Deaths 2003 ICD10 as it appears in World Health Organization (WHO). WHO Mortality Database Version February 2014. Geneva, Switzerland: World Health Organization (WHO), 2014.                                                                                                                                                                                                                      | 2003                 |                      |
| Jamaica | Jamaica Vital Registration - Deaths 2004 ICD10 as it appears in World Health Organization (WHO). WHO Mortality Database Version February 2014. Geneva, Switzerland: World Health Organization (WHO), 2014.                                                                                                                                                                                                                      | 2004                 |                      |
| Jamaica | Statistical Institute of Jamaica (STATIN) and United Nations Children's Fund (UNICEF). Jamaica Multiple Indicator Cluster Survey 2005. New York, United States: United Nations Children's Fund (UNICEF).                                                                                                                                                                                                                        | 2005                 |                      |
| Jamaica | Forman D, Bray F, Brewster DH, Gombe Mbalawa C, Kohler B, Piñeros M, Steliarova-Foucher E, Swaminathan R and Ferlay J, eds (2013). Cancer Incidence in Five Continents, Vol. X Summary Database (electronic version). Lyon, IARC. <a href="http://ci5.iarc.fr">http://ci5.iarc.fr</a>                                                                                                                                           | 2005                 |                      |
| Jamaica | Jamaica Vital Registration - Deaths 2005 ICD10 as it appears in World Health Organization (WHO). WHO Mortality Database Version February 2014. Geneva, Switzerland: World Health Organization (WHO), 2014.                                                                                                                                                                                                                      | 2005                 |                      |
| Jamaica | Jamaica Vital Registration - Deaths 2006 ICD10 as it appears in World Health Organization (WHO). WHO Mortality Database Version February 2014. Geneva, Switzerland: World Health Organization (WHO), 2014.                                                                                                                                                                                                                      | 2006                 |                      |
| Jamaica | Soyibo AK, Barton EN. Report from the Caribbean renal registry, 2006. West Indian Med J. 2007; 56(4): 355-63.                                                                                                                                                                                                                                                                                                                   | 2006                 |                      |
| Jamaica | Fassio E, Díaz S, Santa C, Reig ME, Martínez Artola Y, Alves de Mattos A, Míguez C, Galizzi J, Zapata R, Ridruejo E, de Souza FC, Hernández N, Pinchuk L, Multicenter Group for Study of Hepatocarcinoma in Latin America, Asociación Latinoamericana para el Estudio del Hígado (ALEH). Etiology of hepatocellular carcinoma in Latin America: a prospective, multicenter, international study. Ann Hepatol. 2010; 9(1): 63-9. | 2006-2008            | *                    |
| Jamaica | Jamaica Family Planning Board, Jamaica Division of Reproductive Health-Centers for Disease Control and Prevention (CDC). Jamaica Reproductive Health Survey 2008. Atlanta, United States: Centers for Disease Control and Prevention (CDC).                                                                                                                                                                                     | 2008-2009            | *                    |
| Japan   | Japan Vital Registration - Deaths 1950 ICD7 as it appears in World Health Organization (WHO). WHO Mortality Database Version February 2014. Geneva, Switzerland: World Health Organization (WHO), 2014.                                                                                                                                                                                                                         | 1950                 |                      |
| Japan   | Centre for Research on the Epidemiology of Disasters (CRED). EM-DAT: The OFDA/CRED International Disaster Database. Brussels, Belgium: Catholic University of Leuven.                                                                                                                                                                                                                                                           | 1950-1969, 1971-2013 |                      |

**Web Table 32 - Comprehensive citation list**

| Country | Citation                                                                                                                                                                                                                  | Year*     | New for GBD 2013 (*) |
|---------|---------------------------------------------------------------------------------------------------------------------------------------------------------------------------------------------------------------------------|-----------|----------------------|
| Japan   | Japan Vital Registration - Deaths 1951 ICD7 as it appears in World Health Organization (WHO). WHO Mortality Database Version February 2014. Geneva, Switzerland: World Health Organization (WHO), 2014.                   | 1951      |                      |
| Japan   | Japan Vital Registration - Deaths 1952 ICD7 as it appears in World Health Organization (WHO). WHO Mortality Database Version February 2014. Geneva, Switzerland: World Health Organization (WHO), 2014.                   | 1952      |                      |
| Japan   | Japan Vital Registration - Deaths 1953 ICD7 as it appears in World Health Organization (WHO). WHO Mortality Database Version February 2014. Geneva, Switzerland: World Health Organization (WHO), 2014.                   | 1953      |                      |
| Japan   | Shibata S. Hemoglobinopathies in Japan. Hemoglobin. 1981; 5(5): 509-15.                                                                                                                                                   | 1953-1976 |                      |
| Japan   | Japan Vital Registration - Deaths 1954 ICD7 as it appears in World Health Organization (WHO). WHO Mortality Database Version February 2014. Geneva, Switzerland: World Health Organization (WHO), 2014.                   | 1954      |                      |
| Japan   | Japan Vital Registration - Deaths 1955 ICD7 as it appears in World Health Organization (WHO). WHO Mortality Database Version February 2014. Geneva, Switzerland: World Health Organization (WHO), 2014.                   | 1955      |                      |
| Japan   | Japan Vital Registration - Deaths 1956 ICD7 as it appears in World Health Organization (WHO). WHO Mortality Database Version February 2014. Geneva, Switzerland: World Health Organization (WHO), 2014.                   | 1956      |                      |
| Japan   | Japan Vital Registration - Deaths 1957 ICD7 as it appears in World Health Organization (WHO). WHO Mortality Database Version February 2014. Geneva, Switzerland: World Health Organization (WHO), 2014.                   | 1957      |                      |
| Japan   | Japan Vital Registration - Deaths 1958 ICD7 as it appears in World Health Organization (WHO). WHO Mortality Database Version February 2014. Geneva, Switzerland: World Health Organization (WHO), 2014.                   | 1958      |                      |
| Japan   | Japan - Ryu Kyu Islands Vital Registration - Deaths 1958 ICD7 as it appears in World Health Organization (WHO). WHO Mortality Database Version February 2014. Geneva, Switzerland: World Health Organization (WHO), 2014. | 1958      |                      |
| Japan   | Japan Vital Registration - Deaths 1959 ICD7 as it appears in World Health Organization (WHO). WHO Mortality Database Version February 2014. Geneva, Switzerland: World Health Organization (WHO), 2014.                   | 1959      |                      |
| Japan   | Japan - Ryu Kyu Islands Vital Registration - Deaths 1959 ICD7 as it appears in World Health Organization (WHO). WHO Mortality Database Version February 2014. Geneva, Switzerland: World Health Organization (WHO), 2014. | 1959      |                      |
| Japan   | Japan Vital Registration - Deaths 1960 ICD7 as it appears in World Health Organization (WHO). WHO Mortality Database Version February 2014. Geneva, Switzerland: World Health Organization (WHO), 2014.                   | 1960      |                      |
| Japan   | Japan - Ryu Kyu Islands Vital Registration - Deaths 1960 ICD7 as it appears in World Health Organization (WHO). WHO Mortality Database Version February 2014. Geneva, Switzerland: World Health Organization (WHO), 2014. | 1960      |                      |
| Japan   | Japan Vital Registration - Deaths 1961 ICD7 as it appears in World Health Organization (WHO). WHO Mortality Database Version February 2014. Geneva, Switzerland: World Health Organization (WHO), 2014.                   | 1961      |                      |



**Web Table 32 - Comprehensive citation list**

| Country | Citation                                                                                                                                                                                                                  | Year*     | New for GBD 2013 (*) |
|---------|---------------------------------------------------------------------------------------------------------------------------------------------------------------------------------------------------------------------------|-----------|----------------------|
| Japan   | Japan - Ryu Kyu Islands Vital Registration - Deaths 1961 ICD7 as it appears in World Health Organization (WHO). WHO Mortality Database Version February 2014. Geneva, Switzerland: World Health Organization (WHO), 2014. | 1961      |                      |
| Japan   | Japan Vital Registration - Deaths 1962 ICD7 as it appears in World Health Organization (WHO). WHO Mortality Database Version February 2014. Geneva, Switzerland: World Health Organization (WHO), 2014.                   | 1962      |                      |
| Japan   | Japan Vital Registration - Deaths 1963 ICD7 as it appears in World Health Organization (WHO). WHO Mortality Database Version February 2014. Geneva, Switzerland: World Health Organization (WHO), 2014.                   | 1963      |                      |
| Japan   | Japan - Ryu Kyu Islands Vital Registration - Deaths 1963 ICD7 as it appears in World Health Organization (WHO). WHO Mortality Database Version February 2014. Geneva, Switzerland: World Health Organization (WHO), 2014. | 1963      |                      |
| Japan   | Miwa S, Teramura K, Irisawa K, Ohyama H. Glucose-6-phosphate dehydrogenase (G-6-PD) deficiency. II. Incidence of G-6-PD deficiency in Japanese. J Jpn Haematol Soc. 1965; 28(5): 590-2.                                   | 1963-1965 |                      |
| Japan   | Japan Vital Registration - Deaths 1964 ICD7 as it appears in World Health Organization (WHO). WHO Mortality Database Version February 2014. Geneva, Switzerland: World Health Organization (WHO), 2014.                   | 1964      |                      |
| Japan   | Japan - Ryu Kyu Islands Vital Registration - Deaths 1964 ICD7 as it appears in World Health Organization (WHO). WHO Mortality Database Version February 2014. Geneva, Switzerland: World Health Organization (WHO), 2014. | 1964      |                      |
| Japan   | Japan Vital Registration - Deaths 1965 ICD7 as it appears in World Health Organization (WHO). WHO Mortality Database Version February 2014. Geneva, Switzerland: World Health Organization (WHO), 2014.                   | 1965      |                      |
| Japan   | Japan - Ryu Kyu Islands Vital Registration - Deaths 1965 ICD7 as it appears in World Health Organization (WHO). WHO Mortality Database Version February 2014. Geneva, Switzerland: World Health Organization (WHO), 2014. | 1965      |                      |
| Japan   | Japan Vital Registration - Deaths 1966 ICD7 as it appears in World Health Organization (WHO). WHO Mortality Database Version February 2014. Geneva, Switzerland: World Health Organization (WHO), 2014.                   | 1966      |                      |
| Japan   | Japan - Ryu Kyu Islands Vital Registration - Deaths 1966 ICD7 as it appears in World Health Organization (WHO). WHO Mortality Database Version February 2014. Geneva, Switzerland: World Health Organization (WHO), 2014. | 1966      |                      |
| Japan   | Japan Vital Registration - Deaths 1967 ICD7 as it appears in World Health Organization (WHO). WHO Mortality Database Version February 2014. Geneva, Switzerland: World Health Organization (WHO), 2014.                   | 1967      |                      |
| Japan   | Japan - Ryu Kyu Islands Vital Registration - Deaths 1967 ICD7 as it appears in World Health Organization (WHO). WHO Mortality Database Version February 2014. Geneva, Switzerland: World Health Organization (WHO), 2014. | 1967      |                      |
| Japan   | Japan Vital Registration - Deaths 1968 ICD8 as it appears in World Health Organization (WHO). WHO Mortality Database Version February 2014. Geneva, Switzerland: World Health Organization (WHO), 2014.                   | 1968      |                      |

**Web Table 32 - Comprehensive citation list**

| Country | Citation                                                                                                                                                                                                                                                               | Year*                | New for GBD 2013 (*) |
|---------|------------------------------------------------------------------------------------------------------------------------------------------------------------------------------------------------------------------------------------------------------------------------|----------------------|----------------------|
| Japan   | Japan - Ryu Kyu Islands Vital Registration - Deaths 1968 ICD7 as it appears in World Health Organization (WHO). WHO Mortality Database Version February 2014. Geneva, Switzerland: World Health Organization (WHO), 2014.                                              | 1968                 |                      |
| Japan   | Ikematsu H, Kashiwagi S, Hayashi J, Nomura H, Kajiyama W, Tani S, Urugari Y, Goto M. A seroepidemiologic study of hepatitis A virus infections: statistical analysis of two independent cross-sectional surveys in Okinawa, Japan. Am J Epidemiol. 1987; 126(1): 50-4. | 1968-1973, 1980-1981 |                      |
| Japan   | Matsuo A, Kusumoto Y, Ohtsuka E, Ohtsuru A, Nakamura Y, Tajima H, Shima M, Nakata K, Muro T, Satoh A. Changes in HBsAg carrier rate in Goto Islands, Nagasaki Prefecture, Japan. Lancet. 1990; 335(8695): 955-7.                                                       | 1968-1985            |                      |
| Japan   | Japan Vital Registration - Deaths 1969 ICD8 as it appears in World Health Organization (WHO). WHO Mortality Database Version February 2014. Geneva, Switzerland: World Health Organization (WHO), 2014.                                                                | 1969                 |                      |
| Japan   | Japan - Ryu Kyu Islands Vital Registration - Deaths 1969 ICD7 as it appears in World Health Organization (WHO). WHO Mortality Database Version February 2014. Geneva, Switzerland: World Health Organization (WHO), 2014.                                              | 1969                 |                      |
| Japan   | Japan Vital Registration - Deaths 1970 ICD8 as it appears in World Health Organization (WHO). WHO Mortality Database Version February 2014. Geneva, Switzerland: World Health Organization (WHO), 2014.                                                                | 1970                 |                      |
| Japan   | Japan - Ryu Kyu Islands Vital Registration - Deaths 1970 ICD7 as it appears in World Health Organization (WHO). WHO Mortality Database Version February 2014. Geneva, Switzerland: World Health Organization (WHO), 2014.                                              | 1970                 |                      |
| Japan   | Imamura T, Sugihara J, Matsuo T, Maruyama T, Ohta Y, Sumida I, Yamaoka K, Yanase T. Frequency and distribution of structural variants of hemoglobin and thalassemic states in Western Japan. Hemoglobin. 1980; 4(3-4): 409-15.                                         | 1970-1978            |                      |
| Japan   | Tanaka R, Itoshima T, Nagashima H. Follow-up study of 582 liver cirrhosis patients for 26 years in Japan. Liver. 1987; 7(6): 316-24.                                                                                                                                   | 1970-1984            |                      |
| Japan   | Furusyo N, Hayashi J, Sawayama Y, Kawakami Y, Kishihara Y, Kashiwagi S. The elimination of hepatitis B virus infection: changing seroepidemiology of hepatitis A and B virus infection in Okinawa, Japan over a 26-year period. Am J Trop Med Hyg. 1998; 59(5): 693-8. | 1970,1988,1996       |                      |
| Japan   | Japan Vital Registration - Deaths 1971 ICD8 as it appears in World Health Organization (WHO). WHO Mortality Database Version February 2014. Geneva, Switzerland: World Health Organization (WHO), 2014.                                                                | 1971                 |                      |
| Japan   | Japan - Ryu Kyu Islands Vital Registration - Deaths 1971 ICD8 as it appears in World Health Organization (WHO). WHO Mortality Database Version February 2014. Geneva, Switzerland: World Health Organization (WHO), 2014.                                              | 1971                 |                      |
| Japan   | Japan Vital Registration - Deaths 1972 ICD8 as it appears in World Health Organization (WHO). WHO Mortality Database Version February 2014. Geneva, Switzerland: World Health Organization (WHO), 2014.                                                                | 1972                 |                      |
| Japan   | Japan Vital Registration - Deaths 1973 ICD8 as it appears in World Health Organization (WHO). WHO Mortality Database Version February 2014. Geneva, Switzerland: World Health Organization (WHO), 2014.                                                                | 1973                 |                      |
| Japan   | Taylor-Wiedeman J, Moritsugu Y, Miyamura K, Yamazaki S. Seroepidemiology of hepatitis A virus in Japan. Jpn J Med Sci Biol. 1987; 40(3): 119-30.                                                                                                                       | 1973,1984            |                      |

**Web Table 32 - Comprehensive citation list**

| Country | Citation                                                                                                                                                                                                                                                                                              | Year*                                                   | New for GBD 2013 (*) |
|---------|-------------------------------------------------------------------------------------------------------------------------------------------------------------------------------------------------------------------------------------------------------------------------------------------------------|---------------------------------------------------------|----------------------|
| Japan   | Japan Vital Registration - Deaths 1974 ICD8 as it appears in World Health Organization (WHO). WHO Mortality Database Version February 2014. Geneva, Switzerland: World Health Organization (WHO), 2014.                                                                                               | 1974                                                    |                      |
| Japan   | Fujisawa T, Kumagai T, Akamatsu T, Kiyosawa K, Matsunaga Y. Changes in seroepidemiological pattern of Helicobacter pylori and hepatitis A virus over the last 20 years in Japan. Am J Gastroenterol. 1999; 94(8): 2094-9.                                                                             | 1974,1984,1994                                          |                      |
| Japan   | Tanaka E, Matsumoto A, Takeda N, Li T-C, Umemura T, Yoshizawa K, Miyakawa Y, Miyamura T, Kiyosawa K. Age-specific antibody to hepatitis E virus has remained constant during the past 20 years in Japan. J Viral Hepat. 2005; 12(4): 439-42.                                                          | 1974, 1984, 1994                                        |                      |
| Japan   | Japan Vital Registration - Deaths 1975 ICD8 as it appears in World Health Organization (WHO). WHO Mortality Database Version February 2014. Geneva, Switzerland: World Health Organization (WHO), 2014.                                                                                               | 1975                                                    |                      |
| Japan   | Japan Vital Registration - Deaths 1976 ICD8 as it appears in World Health Organization (WHO). WHO Mortality Database Version February 2014. Geneva, Switzerland: World Health Organization (WHO), 2014.                                                                                               | 1976                                                    |                      |
| Japan   | Japan Vital Registration - Deaths 1977 ICD8 as it appears in World Health Organization (WHO). WHO Mortality Database Version February 2014. Geneva, Switzerland: World Health Organization (WHO), 2014.                                                                                               | 1977                                                    |                      |
| Japan   | Nakatsuji T, Miwa S. Incidence and characteristics of glucose-6-phosphate dehydrogenase variants in Japan. Hum Genet. 1979; 51(3): 297-305.                                                                                                                                                           | 1977-1979                                               |                      |
| Japan   | Maeda Y, Matsushita K, Tokudome S, Tsuji N, Ikeda M, Fujii M. Time trends of HBsAg prevalence among blood donors in Fukuoka, Japan. Eur J Epidemiol. 1992; 8(1): 88-92.                                                                                                                               | 1977, 1980, 1983, 1986, 1988                            |                      |
| Japan   | Japan Vital Registration - Deaths 1978 ICD8 as it appears in World Health Organization (WHO). WHO Mortality Database Version February 2014. Geneva, Switzerland: World Health Organization (WHO), 2014.                                                                                               | 1978                                                    |                      |
| Japan   | Japan Vital Registration - Deaths 1979 ICD9 as it appears in World Health Organization (WHO). WHO Mortality Database Version February 2014. Geneva, Switzerland: World Health Organization (WHO), 2014.                                                                                               | 1979                                                    |                      |
| Japan   | Japan Vital Registration - Deaths 1980 ICD9 as it appears in World Health Organization (WHO). WHO Mortality Database Version February 2014. Geneva, Switzerland: World Health Organization (WHO), 2014.                                                                                               | 1980                                                    |                      |
| Japan   | Institute for Health Metrics and Evaluation. Institute for Health Metrics and Evaluation Cancer Registry Database. [Unpublished].                                                                                                                                                                     | 1980-2006                                               |                      |
| Japan   | United Nations Children's Fund (UNICEF), World Health Organization (WHO). WHO and UNICEF Reported Disease Incidence Time Series - Pertussis. Geneva, Switzerland: World Health Organization (WHO).                                                                                                    | 1980-1991, 1993, 1996, 1998, 2000-2004, 2006, 2008-2010 |                      |
| Japan   | Ferlay J, Parkin DM, Curado MP, Bray F, Edwards B, Shin HR and Forman D. Cancer Incidence in Five Continents, Volumes I to IX: IARC CancerBase No. 9 [Internet]. Lyon, France: International Agency for Research on Cancer; 2010. Available from: <a href="http://ci5.iarc.fr">http://ci5.iarc.fr</a> | 1980-2002                                               |                      |
| Japan   | Kashiwagi S, Hayashi J, Ikematsu H, Nomura H, Kajiyama W, Ikematsu W, Shingu T, Hayashida K, Kaji M. Prevalence of immunologic markers of hepatitis A and B infection in hospital personnel in Miyazaki Prefecture, Japan. Am J Epidemiol. 1985; 122(6): 960-9.                                       | 1980-1983                                               |                      |

**Web Table 32 - Comprehensive citation list**

| Country | Citation                                                                                                                                                                                                                                                                                                      | Year*                                                   | New for GBD 2013 (*) |
|---------|---------------------------------------------------------------------------------------------------------------------------------------------------------------------------------------------------------------------------------------------------------------------------------------------------------------|---------------------------------------------------------|----------------------|
| Japan   | Institute for Health Metrics and Evaluation (IHME), Joint United Nations Program on HIV/AIDS (UNAIDS). Institute for Health Metrics and Evaluation HIV Mortality Estimates Based on the UNAIDS Spectrum Model Framework.                                                                                      | 1980-2013                                               | *                    |
| Japan   | United Nations Children's Fund (UNICEF), World Health Organization (WHO). WHO and UNICEF Reported Disease Incidence Time Series - Pertussis. Geneva, Switzerland: World Health Organization (WHO).                                                                                                            | 1980-1991, 1993, 1996, 1998, 2000-2004, 2006, 2008-2013 |                      |
| Japan   | United Nations Children's Fund (UNICEF), World Health Organization (WHO). WHO and UNICEF Reported Disease Incidence Time Series - Measles. Geneva, Switzerland: World Health Organization (WHO).                                                                                                              | 1980-1991, 1993, 1996, 1998, 2000-2004, 2006, 2008-2013 |                      |
| Japan   | Parkin DM, International Agency for Research on Cancer, International Association of Cancer Registries. Cancer Incidence in Five Continents. Vol. I to VIII. Lyon, France, IARC Press, 2005.                                                                                                                  | 1980, 1983, 1985, 1988, 1990, 1993, 1995                |                      |
| Japan   | Noguchi A, Hayashi J, Nakashima K, Ikematsu H, Hirata M, Kashiwagi S. Decrease of hepatitis A and B virus infections in the population of Okinawa, Japan. J Infect. 1991; 23(3): 255-62.                                                                                                                      | 1980, 1988                                              |                      |
| Japan   | Japan Vital Registration - Deaths 1981 ICD9 as it appears in World Health Organization (WHO). WHO Mortality Database Version February 2014. Geneva, Switzerland: World Health Organization (WHO), 2014.                                                                                                       | 1981                                                    |                      |
| Japan   | Ichida F, Suzuki S, Furuta S, Takahashi Y, Yamamoto M, Tanaka M, Yano M. Age specific prevalence of anti HA in Japan--from multi-institutional analysis. Gastroenterol Jpn. 1981; 16(4): 384-8.                                                                                                               | 1981                                                    |                      |
| Japan   | Japan Vital Registration - Deaths 1982 ICD9 as it appears in World Health Organization (WHO). WHO Mortality Database Version February 2014. Geneva, Switzerland: World Health Organization (WHO), 2014.                                                                                                       | 1982                                                    |                      |
| Japan   | Akahoshi H, Taura N, Ichikawa T, Miyaaki H, Akiyama M, Miuma S, Ozawa E, Takeshita S, Muraoka T, Matsuzaki T, Ohtani M, Isomoto H, Matsumoto T, Takeshima F, Nakao K. Differences in prognostic factors according to viral status in patients with hepatocellular carcinoma. Oncol Rep. 2010; 23(5): 1317-23. | 1982-2007                                               | *                    |
| Japan   | Kimura M, Kuno-Sakai H. Current epidemiology of pertussis in Japan. Pediatr Infect Dis J. 1990; 9(10): 705-9.                                                                                                                                                                                                 | 1982-1989                                               |                      |
| Japan   | Fujiyama S, Odoh K, Kuramoto I, Mizuno K, Tsurusaki R, Sato T. Current seroepidemiological status of hepatitis A with a comparison of antibody titers after infection and vaccination. J Hepatol. 1994; 21(4): 641-5.                                                                                         | 1982,1991                                               |                      |
| Japan   | Japan Vital Registration - Deaths 1983 ICD9 as it appears in World Health Organization (WHO). WHO Mortality Database Version February 2014. Geneva, Switzerland: World Health Organization (WHO), 2014.                                                                                                       | 1983                                                    |                      |
| Japan   | Kageoka T, Satoh C, Goriki K, Fujita M, Neriishi S, Yamamura K, Kaneko J, Masunari N. Electrophoretic variants of blood proteins in Japanese. IV. Prevalence and enzymologic characteristics of glucose-6-phosphate dehydrogenase variants in Hiroshima and Nagasaki. Hum Genet. 1985; 70(2): 101-8.          | 1983-1985                                               |                      |
| Japan   | Yamagata K, Takahashi H, Suzuki S, Mase K, Hagiwara M, Shimizu Y, Hirayama K, Kobayashi M, Narita M, Koyama A. Age distribution and yearly changes in the incidence of ESRD in Japan. Am J Kidney Dis. 2004; 43(3): 433-43.                                                                                   | 1983, 1999                                              |                      |
| Japan   | Japan Vital Registration - Deaths 1984 ICD9 as it appears in World Health Organization (WHO). WHO Mortality Database Version February 2014. Geneva, Switzerland: World Health Organization (WHO), 2014.                                                                                                       | 1984                                                    |                      |

**Web Table 32 - Comprehensive citation list**

| Country | Citation                                                                                                                                                                                                                                                                             | Year*     | New for GBD 2013 (*) |
|---------|--------------------------------------------------------------------------------------------------------------------------------------------------------------------------------------------------------------------------------------------------------------------------------------|-----------|----------------------|
| Japan   | Kanno A, Ohori H, Nagatsuka Y, Sekino H, Tateda A, Goto Y, Ishida N. Seroepidemiological studies on a non-A, non-B hepatitis specific antigen/antibody system (SO-antigen/anti-SO). <i>J Med Virol</i> . 1986; 18(1): 1-10.                                                          | 1984      |                      |
| Japan   | Ishikawa T, Asano Y, Morishima T, Nagashima M, Sobue G, Watanabe K, Yamaguchi H. Epidemiology of bacterial meningitis in children: Aichi Prefecture, Japan, 1984-1993. <i>Pediatr Neurol</i> . 1996; 14(3): 244-50.                                                                  | 1984-1993 |                      |
| Japan   | Kuriki M, Fujihira N, Hasegawa S, Fujioka M. [Acute encephalitis and bacterial meningitis in children in Aichi Prefecture (1984-1993)]. <i>Jpn J Public Health</i> . 1995; 42(5): 338-45.                                                                                            | 1984-1993 |                      |
| Japan   | Japan Vital Registration - Deaths 1985 ICD9 as it appears in World Health Organization (WHO). WHO Mortality Database Version February 2014. Geneva, Switzerland: World Health Organization (WHO), 2014.                                                                              | 1985      |                      |
| Japan   | Ueda K, Kawano H, Hasuo Y, Fujishima M. Prevalence and etiology of dementia in a Japanese community. <i>Stroke</i> . 1992; 23(6): 798-803.                                                                                                                                           | 1985      |                      |
| Japan   | Matsui Y, Tanizaki Y, Arima H, Yonemoto K, Doi Y, Ninomiya T, Sasaki K, Iida M, Iwaki T, Kanba S, Kiyohara Y. Incidence and survival of dementia in a general population of Japanese elderly: the Hisayama study. <i>J Neurol Neurosurg Psychiatry</i> . 2009; 80(4): 366-70.        | 1985-2002 |                      |
| Japan   | Japan Vital Registration - Deaths 1986 ICD9 as it appears in World Health Organization (WHO). WHO Mortality Database Version February 2014. Geneva, Switzerland: World Health Organization (WHO), 2014.                                                                              | 1986      |                      |
| Japan   | Malaty HM, Tanaka E, Kumagai T, Ota H, Kiyosawa K, Graham DY, Katsuyama T. Seroepidemiology of <i>Helicobacter pylori</i> and hepatitis A virus and the mode of transmission of infection: a 9-year cohort study in rural Japan. <i>Clin Infect Dis</i> . 2003; 37(8): 1067-72.      | 1986      |                      |
| Japan   | Japan Acute Hepatitis C Prevalence Data 1986 from Global Burden of Disease 2010. [Primary source undocumented].                                                                                                                                                                      | 1986      |                      |
| Japan   | Tanaka E, Kiyosawa K, Sodeyama T, Hayata T, Ohike Y, Nakano Y, Yoshizawa K, Furuta S, Watanabe Y, Watanabe J, Nishioka K. Prevalence of antibody to hepatitis C virus in Japanese schoolchildren: comparison with adult blood donors. <i>Am J Trop Med Hyg</i> . 1992; 46(4): 460-4. | 1986-1990 |                      |
| Japan   | Japan Vital Registration - Deaths 1987 ICD9 as it appears in World Health Organization (WHO). WHO Mortality Database Version February 2014. Geneva, Switzerland: World Health Organization (WHO), 2014.                                                                              | 1987      |                      |
| Japan   | Takaoka Y. The occurrence of HBs antigen, anti-HBs antibodies and liver function disorder in Japanese seamen. <i>Bull Inst Marit Trop Med Gdynia</i> . 1989; 40(3-4): 205-9.                                                                                                         | 1987      |                      |
| Japan   | Fukunishi I, Hayabara T, Hosokawa K. Epidemiological surveys of senile dementia in Japan. <i>Int J Soc Psychiatry</i> . 1991; 37(1): 51-6.                                                                                                                                           | 1987-1988 |                      |
| Japan   | Japan Vital Registration - Deaths 1988 ICD9 as it appears in World Health Organization (WHO). WHO Mortality Database Version February 2014. Geneva, Switzerland: World Health Organization (WHO), 2014.                                                                              | 1988      |                      |
| Japan   | Kiyosawa K, Oofusa H, Saitoh H, Sodeyama T, Tanaka E, Furuta S, Itoh S, Ogata H, Kobuchi H, Kameko M. Seroepidemiology of hepatitis A, B, and D viruses and human T-lymphocyte tropic viruses in Japanese drug abusers. <i>J Med Virol</i> . 1989; 29(3): 160-3.                     | 1988      |                      |
| Japan   | Asakura T, Tachibana K, Watanabe S, Teshima D, Ikeda M, Tokudome S. Concomitant carriage of hepatitis B virus and human T-lymphotropic virus type I among blood donors in Kitakyushu, Japan. <i>J Infect</i> . 1991; 23(1): 33-7.                                                    | 1988      |                      |

**Web Table 32 - Comprehensive citation list**

| Country | Citation                                                                                                                                                                                                                                                                                                             | Year*     | New for GBD 2013 (*) |
|---------|----------------------------------------------------------------------------------------------------------------------------------------------------------------------------------------------------------------------------------------------------------------------------------------------------------------------|-----------|----------------------|
| Japan   | Japan Vital Registration - Deaths 1989 ICD9 as it appears in World Health Organization (WHO). WHO Mortality Database Version February 2014. Geneva, Switzerland: World Health Organization (WHO), 2014.                                                                                                              | 1989      |                      |
| Japan   | Ito S, Ito M, Cho MJ, Shimotohno K, Tajima K. Massive sero-epidemiological survey of hepatitis C virus: clustering of carriers on the southwest coast of Tsushima, Japan. <i>Jpn J Cancer Res.</i> 1991; 82(1): 1-3.                                                                                                 | 1989      |                      |
| Japan   | Nakashima K, Kashiwagi S, Hayashi J, Noguchi A, Hirata M, Kajiyama W, Urabe K, Minami K, Maeda Y. Sexual transmission of hepatitis C virus among female prostitutes and patients with sexually transmitted diseases in Fukuoka, Kyushu, Japan. <i>Am J Epidemiol.</i> 1992; 136(9): 1132-7.                          | 1989      |                      |
| Japan   | Watanabe J, Minegishi K, Mitsumori T, Ishifuji M, Oguchi T, Ueda M, Tokunaga E, Tanaka E, Kiyosawa K, Furuta S. Prevalence of anti-HCV antibody in blood donors in the Tokyo area. <i>Vox Sang.</i> 1990; 59(2): 86-8.                                                                                               | 1989      |                      |
| Japan   | Komahashi T, Ohmori K, Nakano T, Fujinuma H, Higashimoto T, Nakaya M, Kuroda J, Asahi H, Yoshikawa J, Matsumura S. Epidemiological survey of dementia and depression among the aged living in the community in Japan. <i>Jpn J Psychiatry Neurol.</i> 1994; 48(3): 517-26.                                           | 1989-1990 |                      |
| Japan   | Akbar SM, Onji M, Kanaoka M, Horiike N, Michitaka K, Masumoto T, Nonaka T, Kanda K, Kajino K, Kumamoto I. The seroepidemiology of hepatitis A and B in a Japanese town. <i>Asia Pac J Public Health.</i> 1992; 6(2): 26-9.                                                                                           | 1989-1990 |                      |
| Japan   | Nishioka K. Hepatitis C virus infection in Japan. <i>Gastroenterol Jpn.</i> 1991; 152-5.                                                                                                                                                                                                                             | 1989-1990 |                      |
| Japan   | Japan Vital Registration - Deaths 1990 ICD9 as it appears in World Health Organization (WHO). WHO Mortality Database Version February 2014. Geneva, Switzerland: World Health Organization (WHO), 2014.                                                                                                              | 1990      |                      |
| Japan   | Nakano H, Sata M, Hino K, Aritaka T, Maruyama N, Hino T, Abe H, Tanikawa K, Mizokami M. Incidence of anti-HTLV-1 antibody in liver disease. <i>Gastroenterol Jpn.</i> 1992; 27(1): 37-42.                                                                                                                            | 1990      |                      |
| Japan   | Ochi S, Onji M, Shiraishi K, Ohtu K, Akao T, Yano Y, Takei N, Matsui H, Ohta Y, Umeda M. Prevalence of hepatitis C virus antibody in an area endemic for hepatitis B virus and human T cell leukaemia virus. <i>J Gastroenterol Hepatol.</i> 1991; 6(6): 599-602.                                                    | 1990      |                      |
| Japan   | Sata M, Nakano H, Suzuki H, Noguchi S, Yamakawa Y, Tanaka E, Fukuizumi K, Tanaka K, Yoshida H, Tanikawa K. Sero-epidemiologic study of hepatitis C virus infection in Fukuoka, Japan. <i>J Gastroenterol.</i> 1998; 33(2): 218-22.                                                                                   | 1990      |                      |
| Japan   | Weatherall D. Sickle Cell and Thalassemias Prevalence Data, Personal Correspondence with David Weatherall. [Unpublished].                                                                                                                                                                                            | 1990-2009 |                      |
| Japan   | Tanaka H, Imai Y, Hiramatsu N, Ito Y, Imanaka K, Oshita M, Hijioka T, Katayama K, Yabuuchi I, Yoshihara H, Inoue A, Kato M, Takehara T, Tamura S, Kasahara A, Hayashi N, Tsukuma H. Declining incidence of hepatocellular carcinoma in Osaka, Japan, from 1990 to 2003. <i>Ann Intern Med.</i> 2008; 148(11): 820-6. | 1990-2003 | *                    |
| Japan   | Kubo S, Nishiguchi S, Hirohashi K, Tanaka H, Tsukamoto T, Hamba H, Shuto T, Okuda T, Tamori A, Kuroki T, Kinoshita H. High prevalence of infection with hepatitis B and C viruses in patients with hepatocellular carcinoma in Japan. <i>Hepatogastroenterology.</i> 1999; 46(25): 357-9.                            | 1990-1997 |                      |
| Japan   | Centre for Health Informatics and Multiprofessional Education, University College London. <i>Modell's Haemoglobinopathologist's Almanac.</i> London, United Kingdom: Centre for Health Informatics and Multiprofessional Education, University College London, 2008.                                                 | 1990-2003 |                      |



**Web Table 32 - Comprehensive citation list**

| Country | Citation                                                                                                                                                                                                                                                                                                                           | Year*      | New for GBD 2013 (*) |
|---------|------------------------------------------------------------------------------------------------------------------------------------------------------------------------------------------------------------------------------------------------------------------------------------------------------------------------------------|------------|----------------------|
| Japan   | Fukuizumi K, Sata M, Suzuki H, Nakano H, Tanikawa K. Hepatitis C virus seroconversion rate in a hyperendemic area of HCV in Japan: a prospective study. <i>Scand J Infect Dis.</i> 1997; 29(4): 345-7.                                                                                                                             | 1990,1995  |                      |
| Japan   | Japan Vital Registration - Deaths 1991 ICD9 as it appears in World Health Organization (WHO). WHO Mortality Database Version February 2014. Geneva, Switzerland: World Health Organization (WHO), 2014.                                                                                                                            | 1991       |                      |
| Japan   | Yoshikawa M, Tsujii T, Fukui H, Yamao J, Tsukamoto N, Nishimura N, Kyo M, Takaya A, Tsujii H, Nakano H. Hepatitis C virus infection in patients with chronic liver diseases. <i>Gastroenterol Jpn.</i> 1991; 202-5.                                                                                                                | 1991       |                      |
| Japan   | Ogura C, Nakamoto H, Uema T, Yamamoto K, Yonemori T, Yoshimura T. Prevalence of senile dementia in Okinawa, Japan. COSEPO Group. Study Group of Epidemiology for Psychiatry in Okinawa. <i>Int J Epidemiol.</i> 1995; 24(2): 373-80.                                                                                               | 1991-1992  |                      |
| Japan   | Fukuda S, Ishikawa M, Ochiai N, Suzuki Y, Sunaga J, Shinohara N, Nozawa K, Tsuda F, Takahashi M, Okamoto H. Unchanged high prevalence of antibodies to hepatitis E virus (HEV) and HEV RNA among blood donors with an elevated alanine aminotransferase level in Japan during 1991-2006. <i>Arch Virol.</i> 2007; 152(9): 1623-35. | 1991-2006  | *                    |
| Japan   | Michitaka K, Nishiguchi S, Aoyagi Y, Hiasa Y, Tokumoto Y, Onji M, Japan Etiology of Liver Cirrhosis Study Group. Etiology of liver cirrhosis in Japan: a nationwide survey. <i>J Gastroenterol.</i> 2010; 45(1): 86-94.                                                                                                            | 1991, 2008 |                      |
| Japan   | Japan Vital Registration - Deaths 1992 ICD9 as it appears in World Health Organization (WHO). WHO Mortality Database Version February 2014. Geneva, Switzerland: World Health Organization (WHO), 2014.                                                                                                                            | 1992       |                      |
| Japan   | Akaogi, Yotsuyanagi, Sugata, Matsuda, Hino. Hepatitis viral infection in Behçet's disease. <i>Hepato Res.</i> 2000; 17(2): 126-38.                                                                                                                                                                                                 | 1992       |                      |
| Japan   | Hayashi J, Yoshimura E, Nabeshima A, Kishihara Y, Ikematsu H, Hirata M, Maeda Y, Kashiwagi S. Seroepidemiology of hepatitis C virus infection in hemodialysis patients and the general population in Fukuoka and Okinawa, Japan. <i>J Gastroenterol.</i> 1994; 29(3): 276-81.                                                      | 1992       |                      |
| Japan   | Koyama T, Tsuda F, Ishikawa K, Oishi H, Tazawa M, Yoshizawa H, Sato S, Okamoto H. Antibodies to hepatitis C virus and elevated transaminase levels in a town of hyperendemicity in Iwate, Japan. <i>J Gastroenterol Hepatol.</i> 1997; 12(1): 67-72.                                                                               | 1992       |                      |
| Japan   | Sakugawa H, Nakasone H, Nakayoshi T, Kawakami Y, Yamashiro T, Maeshiro T, Kobashigawa K, Kinjo F, Saito A. Clinical characteristics of patients with cryptogenic liver cirrhosis in Okinawa, Japan. <i>Hepatogastroenterology.</i> 2003; 50(54): 2005-8.                                                                           | 1992-2000  |                      |
| Japan   | Tanaka E, Takeda N, Tian-Chen L, Orii K, Ichijo T, Matsumoto A, Yoshizawa K, Iijima T, Takayama T, Miyamura T, Kiyosawa K. Seroepidemiological study of hepatitis E virus infection in Japan using a newly developed antibody assay. <i>J Gastroenterol.</i> 2001; 36(5): 317-21.                                                  | 1992-1993  | *                    |
| Japan   | Goto K, Ito K, Sugiura T, Ando T, Mizutani F, Miyake Y, Kawabe Y, Sugiyama K, Togari H. Prevalence of hepatitis E virus infection in Japanese children. <i>J Pediatr Gastroenterol Nutr.</i> 2006; 42(1): 89-92.                                                                                                                   | 1992-2003  |                      |
| Japan   | Okamoto M, Nagata I, Murakami J, Kaji S, Iitsuka T, Hoshika T, Matsuda R, Tazawa Y, Shiraki K, Hino S. Prospective reevaluation of risk factors in mother-to-child transmission of hepatitis C virus: high virus load, vaginal delivery, and negative anti-NS4 antibody. <i>J Infect Dis.</i> 2000; 182(5): 1511-4.                | 1992-1998  |                      |
| Japan   | Shiba M, Shimogaito J, Kose A, Fujiuchi S, Nishiyama H, Yoshimasu F, Asai T, Rocca WA. Prevalence of dementia in the rural village of Hanazono-mura, Japan. <i>Neuroepidemiology.</i> 1999; 18(1): 32-6.                                                                                                                           | 1992-1995  |                      |

**Web Table 32 - Comprehensive citation list**

| Country | Citation                                                                                                                                                                                                                                                                                                                                                         | Year*     | New for GBD 2013 (*) |
|---------|------------------------------------------------------------------------------------------------------------------------------------------------------------------------------------------------------------------------------------------------------------------------------------------------------------------------------------------------------------------|-----------|----------------------|
| Japan   | Japan Vital Registration - Deaths 1993 ICD9 as it appears in World Health Organization (WHO). WHO Mortality Database Version February 2014. Geneva, Switzerland: World Health Organization (WHO), 2014.                                                                                                                                                          | 1993      |                      |
| Japan   | Yoshida T, Katsurashima T, Abe K, Kato A, Suzuki K, Sasaki S, Ikuta T, Narita T, Isogai K, Moriai O, Murakami A, Ono M, Watanabe T, Abe H, Ueda S, Saito Y, Takahashi T, Kooka F, Chiba T, Katsura Y, Ono Y, Kosaka Y, Yasumi S, Kawata T, Sato S. [Regional difference in the etiology of liver cirrhosis in Iwate]. Jpn J Gastroenterol. 1997; 94(12): 826-33. | 1993-1995 |                      |
| Japan   | Watabe H, Shiratori Y, Tateishi R, Fujishima T, Akamatsu M, Koike Y, Obi S, Hamamura K, Sato S, Teratani T, Shiina S, Omata M. Clinical features of patients with HCC who are negative for both HBV and HCV markers. Hepatogastroenterology. 2003; 50(54): 2157-60.                                                                                              | 1993-1999 |                      |
| Japan   | Japan Vital Registration - Deaths 1994 ICD9 as it appears in World Health Organization (WHO). WHO Mortality Database Version February 2014. Geneva, Switzerland: World Health Organization (WHO), 2014.                                                                                                                                                          | 1994      |                      |
| Japan   | Kamiya H, Uehara S, Kato T, Shiraki K, Togashi T, Morishima T, Goto Y, Satoh O, Standaert SM. Childhood bacterial meningitis in Japan. Pediatr Infect Dis J. 1998; 17(9): 183-5.                                                                                                                                                                                 | 1994      |                      |
| Japan   | Koide T, Ohno T, Huang XE, Iijima Y, Sugihara K, Mizokami M, Xiang J, Tokudome S. HBV/HCV Infection, Alcohol, Tobacco and Genetic Polymorphisms for Hepatocellular Carcinoma in Nagoya, Japan. Asian Pac J Cancer Prev. 2000; 1(3): 237-43.                                                                                                                      | 1994      |                      |
| Japan   | Kiyohara T, Satoh T, Yamamoto H, Totsuka A, Moritsugu Y. The latest seroepidemiological pattern of hepatitis A in Japan. Jpn J Med Sci Biol. 1997; 50(3): 123-31.                                                                                                                                                                                                | 1994      |                      |
| Japan   | Sakata H. [A study of bacterial meningitis in Hokkaido between 1999 and 2003]. J Jpn Assoc Infec Dis. 2005; 79(9): 680-7.                                                                                                                                                                                                                                        | 1994-1998 |                      |
| Japan   | Sakata H, Maruyama S. A study of bacterial meningitis in Hokkaido between 1994 and 1998. J Jpn Assoc Infec Dis. 2000; 74(4): 339-44.                                                                                                                                                                                                                             | 1994-1998 |                      |
| Japan   | Ishizaka N, Ishizaka Y, Takahashi E, Tooda E ichi, Hashimoto H, Nagai R, Yamakado M. Association between hepatitis C virus seropositivity, carotid-artery plaque, and intima-media thickening. Lancet. 2002; 359(9301): 133-5.                                                                                                                                   | 1994-2000 |                      |
| Japan   | Sakugawa H, Nakasone H, Shokita H, Kawakami Y, Nakachi N, Adaniya H, Mizushima T, Nakayoshi T, Kinjo F, Saito A, Taira M, Takaesu H, Onga N. Seroepidemiological study on hepatitis delta virus infection in the Irapu Islands, Okinawa, Japan. J Gastroenterol Hepatol. 1997; 12(4): 299-304.                                                                   | 1994-1995 |                      |
| Japan   | Japan Vital Registration - Deaths 1995 ICD10 as it appears in World Health Organization (WHO). WHO Mortality Database Version February 2014. Geneva, Switzerland: World Health Organization (WHO), 2014.                                                                                                                                                         | 1995      |                      |
| Japan   | Hatada K, Okazaki Y, Yoshitake K, Takada K, Nakane Y. Further evidence of westernization of dementia prevalence in Nagasaki, Japan, and family recognition. Int Psychogeriatr. 1999; 11(2): 123-38.                                                                                                                                                              | 1995      |                      |
| Japan   | Nagaoki Y, Hyogo H, Aikata H, Tanaka M, Naeshiro N, Nakahara T, Honda Y, Miyaki D, Kawaoka T, Takaki S, Hiramatsu A, Waki K, Imamura M, Kawakami Y, Takahashi S, Chayama K. Recent trend of clinical features in patients with hepatocellular carcinoma. Hepatol Res. 2012; 42(4): 368-75.                                                                       | 1995-2009 |                      |
| Japan   | Tanaka J, Kumagai J, Katayama K, Komiya Y, Mizui M, Yamanaka R, Suzuki K, Miyakawa Y, Yoshizawa H. Sex- and age-specific carriers of hepatitis B and C viruses in Japan estimated by the prevalence in the 3,485,648 first-time blood donors during 1995-2000. Intervirology. 2004; 47(1): 32-40.                                                                | 1995-2000 |                      |



**Web Table 32 - Comprehensive citation list**

| Country | Citation                                                                                                                                                                                                                                                                                                                                                                    | Year*                            | New for GBD 2013 (*) |
|---------|-----------------------------------------------------------------------------------------------------------------------------------------------------------------------------------------------------------------------------------------------------------------------------------------------------------------------------------------------------------------------------|----------------------------------|----------------------|
| Japan   | Teragaki M, Nishiguchi S, Takeuchi K, Yoshiyama M, Akioka K, Yoshikawa J. Prevalence of hepatitis C virus infection among patients with hypertrophic cardiomyopathy. <i>Heart Vessels</i> . 2003; 18(4): 167-70.                                                                                                                                                            | 1995-2000                        |                      |
| Japan   | Japan Dementia Data 1995-1998 from literature review, as provided by the Global Burden of Disease 2010 dementia expert group.                                                                                                                                                                                                                                               | 1995-1998                        |                      |
| Japan   | Japan Vital Registration - Deaths 1996 ICD10 as it appears in World Health Organization (WHO). WHO Mortality Database Version February 2014. Geneva, Switzerland: World Health Organization (WHO), 2014.                                                                                                                                                                    | 1996                             |                      |
| Japan   | Wakai K, Nakai S, Shinzato T, Kawamura T, Tamakoshi A, Aoki R, Kojima M, Lin Y, Nakayama T, Maeda K, Ohno Y. Estimated number of patients with chronic renal failure but not with end-stage renal disease in Japan: comparisons between two estimation methods. <i>J Epidemiol</i> . 1998; 8(5): 278-84.                                                                    | 1996                             |                      |
| Japan   | Research Group on Progressive Chronic Renal Disease. Nationwide and long-term survey of primary glomerulonephritis in Japan as observed in 1,850 biopsied cases. Research Group on Progressive Chronic Renal Disease. <i>Nephron</i> . 1999; 82(3): 205-13.                                                                                                                 | 1996                             |                      |
| Japan   | Furuta T, Kamata T, Takashima M, Futami H, Arai H, Hanai H, Kaneko E. Study of transmission routes of <i>Helicobacter pylori</i> in relation to seroprevalence of hepatitis A virus. <i>J Clin Microbiol</i> . 1997; 35(7): 1891-3.                                                                                                                                         | 1996                             |                      |
| Japan   | Furusyo N, Hayashi J, Ariyama I, Sawayama Y, Etoh Y, Kashiwagi S. Lower hepatitis G virus infection prevalence compared to hepatitis B and C virus infection prevalences. <i>Dig Dis Sci</i> . 2000; 45(1): 188-95.                                                                                                                                                         | 1996                             |                      |
| Japan   | Kitano M, Sakaguchi K, Miyashita M, Mouri H, Senoh T, Nishimura M, Ohta T, Fujio K, Shimomura H, Tsuji T. Prevalence of hepatitis G virus (HGV) infection in an endemic area of hepatitis C virus (HCV) infection. <i>Hepatogastroenterology</i> . 2000; 47(35): 1340-2.                                                                                                    | 1996                             |                      |
| Japan   | Nirei K, Kaneko M, Moriyama M, Arakawa Y. The clinical features of chronic hepatitis C are not affected by the coexistence of hepatitis B virus DNA in patients negative for hepatitis B surface antigen. <i>Intervirology</i> . 2000; 43(2): 95-101.                                                                                                                       | 1996                             |                      |
| Japan   | Ohshima S, Komatsu M, Nakane K, Meng XW, Goto T, Fujii T, Yoneyama K, Wada Y, Tabori F, Mukaide M, Masamune O, Watanabe S. Iatrogenic GB virus C/hepatitis G virus infection in an area endemic for hepatitis C virus. <i>J Hosp Infect</i> . 2000; 44(3): 179-85.                                                                                                          | 1996                             |                      |
| Japan   | Taura N, Fukushima N, Yastuhashi H, Takami Y, Seike M, Watanabe H, Mizuta T, Sasaki Y, Nagata K, Tabara A, Komorizono Y, Taketomi A, Matsumoto S, Tamai T, Muro T, Nakao K, Fukuizumi K, Maeshiro T, Inoue O, Sata M. The incidence of hepatocellular carcinoma associated with hepatitis C infection decreased in Kyushu area. <i>Med Sci Monit</i> . 2011; 17(2): PH7-11. | 1996-2007                        | *                    |
| Japan   | Yoshida K, Nakano H, Yoshitomi F, Oshika T. Prevalence of seropositivity for hepatitis C virus in cataract patients and the general population. <i>J Cataract Refract Surg</i> . 2002; 28(10): 1789-92.                                                                                                                                                                     | 1996-1999                        |                      |
| Japan   | World Health Organization (WHO). Yellow Fever Reported Cases, WHO Vaccine-Preventable Diseases: Monitoring System. Geneva, Switzerland: World Health Organization (WHO).                                                                                                                                                                                                    | 1996, 1998, 2000-2003, 2007-2009 |                      |
| Japan   | Japan Vital Registration - Deaths 1997 ICD10 as it appears in World Health Organization (WHO). WHO Mortality Database Version February 2014. Geneva, Switzerland: World Health Organization (WHO), 2014.                                                                                                                                                                    | 1997                             |                      |
| Japan   | Japan Vital Registration - Deaths 1998 ICD10 as it appears in World Health Organization (WHO). WHO Mortality Database Version February 2014. Geneva, Switzerland: World Health Organization (WHO), 2014.                                                                                                                                                                    | 1998                             |                      |

**Web Table 32 - Comprehensive citation list**

| Country | Citation                                                                                                                                                                                                                                                                                                        | Year*      | New for GBD 2013 (*) |
|---------|-----------------------------------------------------------------------------------------------------------------------------------------------------------------------------------------------------------------------------------------------------------------------------------------------------------------|------------|----------------------|
| Japan   | Yamada T, Hattori H, Miura A, Tanabe M, Yamori Y. Prevalence of Alzheimer's disease, vascular dementia and dementia with Lewy bodies in a Japanese population. <i>Psychiatry Clin Neurosci.</i> 2001; 55(1): 21-5.                                                                                              | 1998       |                      |
| Japan   | Sekita A, Ninomiya T, Tanizaki Y, Doi Y, Hata J, Yonemoto K, Arima H, Sasaki K, Iida M, Iwaki T, Kanba S, Kiyohara Y. Trends in prevalence of Alzheimer's disease and vascular dementia in a Japanese community: the Hisayama Study. <i>Acta Psychiatr Scand.</i> 2010; 122(4): 319-25.                         | 1998, 2005 |                      |
| Japan   | Curado MP, Edwards B, Shin HR, Storm H, Ferlay J, Heanue M and Boyle P, eds (2007). <i>Cancer Incidence in Five Continents, Vol. IX Periodic Data</i> (electronic version). Lyon, IARC. <a href="http://ci5.iarc.fr">http://ci5.iarc.fr</a>                                                                     | 1998, 2000 |                      |
| Japan   | Japan Vital Registration - Deaths 1999 ICD10 as it appears in World Health Organization (WHO). WHO Mortality Database Version February 2014. Geneva, Switzerland: World Health Organization (WHO), 2014.                                                                                                        | 1999       |                      |
| Japan   | Sugauchi F, Mizokami M, Orito E, Ohno T, Kato H, Maki M, Suzuki H, Ojika K, Ueda R. Hepatitis B virus infection among residents of a nursing home for the elderly: seroepidemiological study and molecular evolutionary analysis. <i>J Med Virol.</i> 2000; 62(4): 456-62.                                      | 1999       |                      |
| Japan   | Ishi K, Suzuku F, Saito A, Yoshimoto S, Kubota T. Prevalence of human immunodeficiency virus, hepatitis B and hepatitis C virus antibodies and hepatitis B antigen among commercial sex workers in Japan. <i>Infect Dis Obstet Gynecol.</i> 2001; 9(4): 215-9.                                                  | 1999, 2001 |                      |
| Japan   | Japan Vital Registration - Deaths 2000 ICD10 as it appears in World Health Organization (WHO). WHO Mortality Database Version February 2014. Geneva, Switzerland: World Health Organization (WHO), 2014.                                                                                                        | 2000       |                      |
| Japan   | Ding X, Li TC, Hayashi S, Masaki N, Tran T-TH, Hirano M, Yamaguchi M, Usui M, Takeda N, Abe K. Present state of hepatitis E virus epidemiology in Tokyo, Japan. <i>Hepato Res.</i> 2003; 27(3): 169-73.                                                                                                         | 2000-2002  | *                    |
| Japan   | Nishise Y, Fukao A, Takahashi T. Risk factors for Helicobacter pylori infection among a rural population in Japan: relation to living environment and medical history. <i>J Epidemiol.</i> 2003; 13(5): 266-73.                                                                                                 | 2000-2001  |                      |
| Japan   | Japan Vital Registration - Deaths 2001 ICD10 as it appears in World Health Organization (WHO). WHO Mortality Database Version February 2014. Geneva, Switzerland: World Health Organization (WHO), 2014.                                                                                                        | 2001       |                      |
| Japan   | Japan Vital Registration - Deaths 2002 ICD10 as it appears in World Health Organization (WHO). WHO Mortality Database Version February 2014. Geneva, Switzerland: World Health Organization (WHO), 2014.                                                                                                        | 2002       |                      |
| Japan   | Fukuda S, Sunaga J, Saito N, Fujimura K, Itoh Y, Sasaki M, Tsuda F, Takahashi M, Nishizawa T, Okamoto H. Prevalence of antibodies to hepatitis E virus among Japanese blood donors: identification of three blood donors infected with a genotype 3 hepatitis E virus. <i>J Med Virol.</i> 2004; 73(4): 554-61. | 2002-2003  | *                    |
| Japan   | Japan Vital Registration - Deaths 2003 ICD10 as it appears in World Health Organization (WHO). WHO Mortality Database Version February 2014. Geneva, Switzerland: World Health Organization (WHO), 2014.                                                                                                        | 2003       |                      |
| Japan   | Kiyohara T, Sato T, Totsuka A, Miyamura T, Ito T, Yoneyama T. Shifting seroepidemiology of hepatitis A in Japan, 1973-2003. <i>Microbiol Immunol.</i> 2007; 51(2): 185-91.                                                                                                                                      | 2003       |                      |
| Japan   | Gotanda Y, Iwata A, Ohnuma H, Yoshikawa A, Mizoguchi H, Endo K, Takahashi M, Okamoto H. Ongoing subclinical infection of hepatitis E virus among blood donors with an elevated alanine aminotransferase level in Japan. <i>J Med Virol.</i> 2007; 79(6): 734-42.                                                | 2003-2006  | *                    |

**Web Table 32 - Comprehensive citation list**

| Country | Citation                                                                                                                                                                                                                                                                                                                                                                                                      | Year*     | New for GBD 2013 (*) |
|---------|---------------------------------------------------------------------------------------------------------------------------------------------------------------------------------------------------------------------------------------------------------------------------------------------------------------------------------------------------------------------------------------------------------------|-----------|----------------------|
| Japan   | Japan Vital Registration - Deaths 2004 ICD10 as it appears in World Health Organization (WHO). WHO Mortality Database Version February 2014. Geneva, Switzerland: World Health Organization (WHO), 2014.                                                                                                                                                                                                      | 2004      |                      |
| Japan   | Mitsui T, Tsukamoto Y, Hirose A, Suzuki S, Yamazaki C, Masuko K, Tsuda F, Endo K, Takahashi M, Okamoto H. Distinct changing profiles of hepatitis A and E virus infection among patients with acute hepatitis, patients on maintenance hemodialysis and healthy individuals in Japan. <i>J Med Virol.</i> 2006; 78(8): 1015-24.                                                                               | 2004      |                      |
| Japan   | Japan Vital Registration - Deaths 2005 ICD10 as it appears in World Health Organization (WHO). WHO Mortality Database Version February 2014. Geneva, Switzerland: World Health Organization (WHO), 2014.                                                                                                                                                                                                      | 2005      |                      |
| Japan   | Forman D, Bray F, Brewster DH, Gombe Mbalawa C, Kohler B, Piñeros M, Steliarova-Foucher E, Swaminathan R and Ferlay J, eds (2013). <i>Cancer Incidence in Five Continents, Vol. X Summary Database (electronic version)</i> . Lyon, IARC. <a href="http://ci5.iarc.fr">http://ci5.iarc.fr</a>                                                                                                                 | 2005      |                      |
| Japan   | Taniguchi M, Kim SR, Mishiro S, Takahashi K, Shin MH, Yun H, Park MS, Li ZM, Kim MK, Fang J, Hayashi Y. Epidemiology of hepatitis E in Northeastern China, South Korea and Japan. <i>J Infect.</i> 2009; 58(3): 232-7.                                                                                                                                                                                        | 2005-2008 |                      |
| Japan   | Japan Vital Registration - Deaths 2006 ICD10 as it appears in World Health Organization (WHO). WHO Mortality Database Version February 2014. Geneva, Switzerland: World Health Organization (WHO), 2014.                                                                                                                                                                                                      | 2006      |                      |
| Japan   | Aichi Cancer Center Research Institute. Japan Aichi Cancer Registry Report 2006.                                                                                                                                                                                                                                                                                                                              | 2006      |                      |
| Japan   | Tokushige K, Hashimoto E, Horie Y, Tani M, Higuchi S. Hepatocellular carcinoma in Japanese patients with nonalcoholic fatty liver disease, alcoholic liver disease, and chronic liver disease of unknown etiology: report of the nationwide survey. <i>J Gastroenterol.</i> 2011; 46(10): 1230-7.                                                                                                             | 2006-2009 |                      |
| Japan   | Japan Vital Registration - Deaths 2007 ICD10 as it appears in World Health Organization (WHO). WHO Mortality Database Version February 2014. Geneva, Switzerland: World Health Organization (WHO), 2014.                                                                                                                                                                                                      | 2007      |                      |
| Japan   | World Health Organization (WHO). <i>Global Status Report on Road Safety 2009</i> . Geneva, Switzerland: World Health Organization (WHO), 2009.                                                                                                                                                                                                                                                                | 2007      |                      |
| Japan   | Lumbiganon P, Laopaiboon M, Gülmezoglu AM, Souza JP, Taneepanichskul S, Ruyan P, Attygalle DE, Shrestha N, Mori R, Hinh ND, Bang HT, Rathavy T, Chuyun K, Cheang K, Festin M, Udomprasertgul V, Germar MJV, Yanqiu G, Roy M, Carroli G, Ba-Thike K. Method of delivery and pregnancy outcomes in Asia: the WHO global survey on maternal and perinatal health 2007-08. <i>Lancet.</i> 2010; 375(9713): 490-9. | 2007-2008 |                      |
| Japan   | Japan Vital Registration - Deaths 2008 ICD10 as it appears in World Health Organization (WHO). WHO Mortality Database Version February 2014. Geneva, Switzerland: World Health Organization (WHO), 2014.                                                                                                                                                                                                      | 2008      |                      |
| Japan   | Wada-Isoe K, Uemura Y, Suto Y, Doi K, Imamura K, Hayashi A, Kitayama M, Watanabe Y, Adachi Y, Nakashima K. Prevalence of dementia in the rural island town of Ama-cho, Japan. <i>Neuroepidemiology.</i> 2009; 32(2): 101-6.                                                                                                                                                                                   | 2008      |                      |
| Japan   | Meguro K, Tanaka N, Kasai M, Nakamura K, Ishikawa H, Nakatsuka M, Satoh M, Ouchi Y. Prevalence of dementia and dementing diseases in the old-old population in Japan: the Kurihara Project. Implications for Long-Term Care Insurance data. <i>Psychogeriatrics.</i> 2012; 12(4): 226-34.                                                                                                                     | 2008-2010 |                      |

**Web Table 32 - Comprehensive citation list**

| Country | Citation                                                                                                                                                                                                                                                                                   | Year*     | New for GBD 2013 (*) |
|---------|--------------------------------------------------------------------------------------------------------------------------------------------------------------------------------------------------------------------------------------------------------------------------------------------|-----------|----------------------|
| Japan   | Japan Vital Registration - Deaths 2009 ICD10 as it appears in World Health Organization (WHO). WHO Mortality Database Version February 2014. Geneva, Switzerland: World Health Organization (WHO), 2014.                                                                                   | 2009      |                      |
| Japan   | Shinjoh M, Iwata S, Sato Y, Akita H, Sunakawa K. Childhood bacterial meningitis trends in Japan from 2009 to 2010. J Jpn Assoc Infec Dis. 2012; 86(5): 582-91.                                                                                                                             | 2009-2010 | *                    |
| Japan   | Ikejima C, Hisanaga A, Meguro K, Yamada T, Ouma S, Kawamuro Y, Hyouki K, Nakashima K, Wada K, Yamada S, Watanabe I, Kakuma T, Aoyama Y, Mizukami K, Asada T. Multicentre population-based dementia prevalence survey in Japan: a preliminary report. Psychogeriatrics. 2012; 12(2): 120-3. | 2009-2010 |                      |
| Japan   | Japan Vital Registration - Deaths 2010 ICD10 as it appears in World Health Organization (WHO). WHO Mortality Database Version February 2014. Geneva, Switzerland: World Health Organization (WHO), 2014.                                                                                   | 2010      |                      |
| Japan   | Japan Vital Registration - Deaths 2011 ICD10 as it appears in World Health Organization (WHO). WHO Mortality Database Version February 2014. Geneva, Switzerland: World Health Organization (WHO), 2014.                                                                                   | 2011      | *                    |
| Jordan  | Jordan Vital Registration Death Data 1953 as it appears in United Nations Statistics Division (UNSD). United Nations Demographic Yearbook. New York City, United States: United Nations Statistics Division (UNSD).                                                                        | 1953      |                      |
| Jordan  | Jordan Vital Registration Death Data 1954 as it appears in United Nations Statistics Division (UNSD). United Nations Demographic Yearbook. New York City, United States: United Nations Statistics Division (UNSD).                                                                        | 1954      |                      |
| Jordan  | Jordan Vital Registration Death Data 1955 as it appears in United Nations Statistics Division (UNSD). United Nations Demographic Yearbook. New York City, United States: United Nations Statistics Division (UNSD).                                                                        | 1955      |                      |
| Jordan  | Jordan Vital Registration Death Data 1956 as it appears in United Nations Statistics Division (UNSD). United Nations Demographic Yearbook. New York City, United States: United Nations Statistics Division (UNSD).                                                                        | 1956      |                      |
| Jordan  | Jordan Vital Registration Death Data 1957 as it appears in United Nations Statistics Division (UNSD). United Nations Demographic Yearbook. New York City, United States: United Nations Statistics Division (UNSD).                                                                        | 1957      |                      |
| Jordan  | Jordan Vital Registration - Deaths 1959 ICD7 as it appears in World Health Organization (WHO). WHO Mortality Database Version February 2014. Geneva, Switzerland: World Health Organization (WHO), 2014.                                                                                   | 1959      |                      |
| Jordan  | Jordan Vital Registration - Deaths 1960 ICD7 as it appears in World Health Organization (WHO). WHO Mortality Database Version February 2014. Geneva, Switzerland: World Health Organization (WHO), 2014.                                                                                   | 1960      |                      |
| Jordan  | Jordan Vital Registration Death Data 1961 as it appears in United Nations Statistics Division (UNSD). United Nations Demographic Yearbook. New York City, United States: United Nations Statistics Division (UNSD).                                                                        | 1961      |                      |
| Jordan  | Jordan Vital Registration - Deaths 1962 ICD7 as it appears in World Health Organization (WHO). WHO Mortality Database Version February 2014. Geneva, Switzerland: World Health Organization (WHO), 2014.                                                                                   | 1962      |                      |

**Web Table 32 - Comprehensive citation list**

| Country | Citation                                                                                                                                                                                                            | Year*                                         | New for GBD 2013 (*) |
|---------|---------------------------------------------------------------------------------------------------------------------------------------------------------------------------------------------------------------------|-----------------------------------------------|----------------------|
| Jordan  | Jordan Vital Registration - Deaths 1963 ICD7 as it appears in World Health Organization (WHO). WHO Mortality Database Version February 2014. Geneva, Switzerland: World Health Organization (WHO), 2014.            | 1963                                          |                      |
| Jordan  | Centre for Research on the Epidemiology of Disasters (CRED). EM-DAT: The OFDA/CRED International Disaster Database. Brussels, Belgium: Catholic University of Leuven.                                               | 1963, 1965-1966, 1987, 1991, 1997, 2000, 2002 |                      |
| Jordan  | Jordan Vital Registration - Deaths 1964 ICD7 as it appears in World Health Organization (WHO). WHO Mortality Database Version February 2014. Geneva, Switzerland: World Health Organization (WHO), 2014.            | 1964                                          |                      |
| Jordan  | Jordan Vital Registration - Deaths 1965 ICD7 as it appears in World Health Organization (WHO). WHO Mortality Database Version February 2014. Geneva, Switzerland: World Health Organization (WHO), 2014.            | 1965                                          |                      |
| Jordan  | Jordan Vital Registration - Deaths 1966 ICD7 as it appears in World Health Organization (WHO). WHO Mortality Database Version February 2014. Geneva, Switzerland: World Health Organization (WHO), 2014.            | 1966                                          |                      |
| Jordan  | Jordan Vital Registration Death Data 1967 as it appears in United Nations Statistics Division (UNSD). United Nations Demographic Yearbook. New York City, United States: United Nations Statistics Division (UNSD). | 1967                                          |                      |
| Jordan  | Jordan Vital Registration - Deaths 1968 ICD7 as it appears in World Health Organization (WHO). WHO Mortality Database Version February 2014. Geneva, Switzerland: World Health Organization (WHO), 2014.            | 1968                                          |                      |
| Jordan  | Jordan Vital Registration Death Data 1969 as it appears in United Nations Statistics Division (UNSD). United Nations Demographic Yearbook. New York City, United States: United Nations Statistics Division (UNSD). | 1969                                          |                      |
| Jordan  | Jordan Vital Registration - Deaths 1970 ICD8 as it appears in World Health Organization (WHO). WHO Mortality Database Version February 2014. Geneva, Switzerland: World Health Organization (WHO), 2014.            | 1970                                          |                      |
| Jordan  | Jordan Vital Registration - Deaths 1971 ICD8 as it appears in World Health Organization (WHO). WHO Mortality Database Version February 2014. Geneva, Switzerland: World Health Organization (WHO), 2014.            | 1971                                          |                      |
| Jordan  | Department of Statistics (Jordan). Jordan National Fertility Survey 1972.                                                                                                                                           | 1972                                          |                      |
| Jordan  | Jordan Vital Registration - Deaths 1972 ICD8 as it appears in World Health Organization (WHO). WHO Mortality Database Version February 2014. Geneva, Switzerland: World Health Organization (WHO), 2014.            | 1972                                          |                      |
| Jordan  | Jordan Vital Registration - Deaths 1973 ICD8 as it appears in World Health Organization (WHO). WHO Mortality Database Version February 2014. Geneva, Switzerland: World Health Organization (WHO), 2014.            | 1973                                          |                      |
| Jordan  | Jordan Vital Registration - Deaths 1974 ICD8 as it appears in World Health Organization (WHO). WHO Mortality Database Version February 2014. Geneva, Switzerland: World Health Organization (WHO), 2014.            | 1974                                          |                      |
| Jordan  | Jordan Vital Registration - Deaths 1975 ICD8 as it appears in World Health Organization (WHO). WHO Mortality Database Version February 2014. Geneva, Switzerland: World Health Organization (WHO), 2014.            | 1975                                          |                      |

**Web Table 32 - Comprehensive citation list**

| Country | Citation                                                                                                                                                                                                                                                             | Year*     | New for GBD 2013 (*) |
|---------|----------------------------------------------------------------------------------------------------------------------------------------------------------------------------------------------------------------------------------------------------------------------|-----------|----------------------|
| Jordan  | Department of Statistics (Jordan), International Statistical Institute. Jordan World Fertility Survey 1976. Voorburg, Netherlands: International Statistical Institute.                                                                                              | 1976      |                      |
| Jordan  | Jordan Vital Registration Death Data 1976 as it appears in United Nations Statistics Division (UNSD). United Nations Demographic Yearbook. New York City, United States: United Nations Statistics Division (UNSD).                                                  | 1976      |                      |
| Jordan  | United Nations Office on Drugs and Crime (UNODC). United Nations Surveys on Crime Trends and the Operations of Criminal Justice Systems 1970-2006 as provided by Kavi Bhalla. [Unpublished].                                                                         | 1976-1994 |                      |
| Jordan  | Jordan Vital Registration Death Data 1977 as it appears in United Nations Statistics Division (UNSD). United Nations Demographic Yearbook. New York City, United States: United Nations Statistics Division (UNSD).                                                  | 1977      |                      |
| Jordan  | Jordan Vital Registration - Deaths 1978 ICD8 as it appears in World Health Organization (WHO). WHO Mortality Database Version February 2014. Geneva, Switzerland: World Health Organization (WHO), 2014.                                                             | 1978      |                      |
| Jordan  | Jordan Housing and Population Census 1979 as it appears in United Nations Statistics Division (UNSD). United Nations Demographic Yearbook. New York City, United States: United Nations Statistics Division (UNSD).                                                  | 1979      |                      |
| Jordan  | Jordan Vital Registration - Deaths 1979 ICD8 as it appears in World Health Organization (WHO). WHO Mortality Database Version February 2014. Geneva, Switzerland: World Health Organization (WHO), 2014.                                                             | 1979      |                      |
| Jordan  | Jordan Vital Registration Death Data 1980 as it appears in United Nations Statistics Division (UNSD). United Nations Demographic Yearbook. New York City, United States: United Nations Statistics Division (UNSD).                                                  | 1980      |                      |
| Jordan  | Institute for Health Metrics and Evaluation (IHME), Joint United Nations Program on HIV/AIDS (UNAIDS). Institute for Health Metrics and Evaluation HIV Mortality Estimates Based on the UNAIDS Spectrum Model Framework.                                             | 1980-2013 | *                    |
| Jordan  | United Nations Children's Fund (UNICEF), World Health Organization (WHO). WHO and UNICEF Reported Disease Incidence Time Series - Pertussis. Geneva, Switzerland: World Health Organization (WHO).                                                                   | 1980-2013 |                      |
| Jordan  | United Nations Children's Fund (UNICEF), World Health Organization (WHO). WHO and UNICEF Reported Disease Incidence Time Series - Measles. Geneva, Switzerland: World Health Organization (WHO).                                                                     | 1980-2013 |                      |
| Jordan  | Carolina Population Center, University of North Carolina at Chapel Hill, Department of Statistics (Jordan). Jordan Demographic Survey 1981.                                                                                                                          | 1981      |                      |
| Jordan  | Jordan Department of Statistics and Division of Reproductive Health-Centers for Disease Control and Prevention (CDC). (1984) Jordan Family Planning/Maternal and Child Health Survey 1983. Atlanta, United States: Centers for Disease Control and Prevention (CDC). | 1983      | *                    |
| Jordan  | Karadsheh NS. Pyruvate kinase (PK) deficiency in Jordan. Haematologica. 1993; 78(2): 80-3.                                                                                                                                                                           | 1983-1985 |                      |
| Jordan  | Toukan AU, Sharaiha ZK, Abu-el -Rub OA, Hmoud MK, Dahbour SS, Abu-Hassan H, Yacoub SM, Hadler SC, Margolis HS, Coleman PJ. The epidemiology of hepatitis B virus among family members in the Middle East. Am J Epidemiol. 1990; 132(2): 220-32.                      | 1985      |                      |
| Jordan  | Toukan AU, Sharaiha ZK, Abu-el -Rob OA, Hmoud MK, Dahbour SS, Abu-Hassan H, Yacoub SM, Margolis HS. The seroepidemiology of hepatitis A virus infection in Jordan. Trop Gastroenterol. 1988; 9(2): 76-9.                                                             | 1987      |                      |



**Web Table 32 - Comprehensive citation list**

| Country | Citation                                                                                                                                                                                                                                                      | Year*                      | New for GBD 2013 (*) |
|---------|---------------------------------------------------------------------------------------------------------------------------------------------------------------------------------------------------------------------------------------------------------------|----------------------------|----------------------|
| Jordan  | Ministry of Health (Jordan), United Nations Children's Fund (UNICEF). Jordan Child Mortality Survey 1988.                                                                                                                                                     | 1988                       |                      |
| Jordan  | Ministry of Health (Jordan), United Nations Children's Fund (UNICEF). Jordan EPI/CDD and Child Mortality Survey 1990.                                                                                                                                         | 1990                       | *                    |
| Jordan  | Department of Statistics (Jordan), Macro International, Inc.; Institute for Resource Development, Ministry of Planning (Jordan). Jordan Demographic and Health Survey 1990. Calverton, United States: Macro International, Inc.                               | 1990                       |                      |
| Jordan  | Weatherall D. Sickle Cell and Thalassemias Prevalence Data, Personal Correspondence with David Weatherall. [Unpublished].                                                                                                                                     | 1990-2009                  |                      |
| Jordan  | Centre for Health Informatics and Multiprofessional Education, University College London. Modell's Haemoglobinopathologist's Almanac. London, United Kingdom: Centre for Health Informatics and Multiprofessional Education, University College London, 2008. | 1990-2003                  |                      |
| Jordan  | Joint United Nations Program on HIV/AIDS (UNAIDS), United Nations Children's Fund (UNICEF), World Health Organization (WHO). Jordan Epidemiological Fact Sheet on HIV/AIDS and STIs 2004.                                                                     | 1991, 1997                 |                      |
| Jordan  | Department of Peace and Conflict Research, Uppsala University. UCDP One-Sided Violence Database Version 1.4, 2013. Uppsala, Sweden: Department of Peace and Conflict Research, Uppsala University, 2013.                                                      | 1992-2005                  | *                    |
| Jordan  | Department of Statistics (Jordan). Jordan General Population and Housing Census 1994. Amman, Jordan: Department of Statistics (Jordan).                                                                                                                       | 1994                       |                      |
| Jordan  | Khoury SA, Massad D, Fardous T. Mortality and causes of death in Jordan 1995-96: assessment by verbal autopsy. Bull World Health Organ. 1999; 77(8): 641-50.                                                                                                  | 1995                       |                      |
| Jordan  | Department of Statistics (Jordan), University of Jordan. Jordan Verbal Autopsy Study 1995-1996.                                                                                                                                                               | 1995-1996                  |                      |
| Jordan  | Usanga EA, Ameen R. Glucose-6-phosphate dehydrogenase deficiency in Kuwait, Syria, Egypt, Iran, Jordan and Lebanon. Hum Hered. 2000; 50(3): 158-61.                                                                                                           | 1996-1997                  |                      |
| Jordan  | Department of Statistics (Jordan), Macro International, Inc. Jordan Demographic and Health Survey 1997. Calverton, United States: Macro International, Inc.                                                                                                   | 1997                       |                      |
| Jordan  | Measles Supplementary Immunization Activity Data as provided by the World Health Organization. [Unpublished].                                                                                                                                                 | 1997, 1999                 |                      |
| Jordan  | World Health Organization (WHO). Yellow Fever Reported Cases, WHO Vaccine-Preventable Diseases: Monitoring System. Geneva, Switzerland: World Health Organization (WHO).                                                                                      | 1998, 2000-2003, 2005-2009 |                      |
| Jordan  | Department of Statistics (Jordan), US Census Bureau. Jordan Annual Fertility Survey 1999.                                                                                                                                                                     | 1999                       |                      |
| Jordan  | Jordan Cancer Registry, Middle East Cancer Consortium, National Cancer Institute (United States). Jordan Cancer Incidence Report 2001. Amman, Jordan: Ministry of Health (Jordan).                                                                            | 2001                       |                      |
| Jordan  | Department of Statistics (Jordan), Macro International, Inc. Jordan Demographic and Health Survey 2002. Calverton, United States: Macro International, Inc.                                                                                                   | 2002                       |                      |
| Jordan  | Jordan Cancer Registry, Middle East Cancer Consortium, National Cancer Institute (United States). Jordan Cancer Incidence Report 2002. Amman, Jordan: Ministry of Health (Jordan).                                                                            | 2002                       |                      |
| Jordan  | Batieha A, Abdallah S, Maghaireh M, Awad Z, Al-Akash N, Batieneh A, Ajlouni KA. Epidemiology and cost of haemodialysis in Jordan. East Mediterr Health J. 2007; 13(3): 654-63.                                                                                | 2003                       |                      |
| Jordan  | Jordan Cancer Registry, Middle East Cancer Consortium, National Cancer Institute (United States). Jordan Cancer Incidence Report 2003. Amman, Jordan: Ministry of Health (Jordan).                                                                            | 2003                       |                      |
| Jordan  | Karadsheh NS, Moses L, Ismail SI, Devaney JM, Hoffman E. Molecular heterogeneity of glucose-6-phosphate dehydrogenase deficiency in Jordan. Haematologica. 2005; 90(12): 1693-4.                                                                              | 2003-2005                  |                      |

**Web Table 32 - Comprehensive citation list**

| Country    | Citation                                                                                                                                                                                                                                                                                                                     | Year*                | New for GBD 2013 (*) |
|------------|------------------------------------------------------------------------------------------------------------------------------------------------------------------------------------------------------------------------------------------------------------------------------------------------------------------------------|----------------------|----------------------|
| Jordan     | Jbara I, Abu Alshiekh NK, Almomani AM, Khasawneh RH, Omari AK. Prevalence of Hepatitis C Virus Antibodies among Blood Donors at Prince Hashem Hospital, Zarka - Jordan. <i>Jordan Med J.</i> 2006; 40(3): 190-3.                                                                                                             | 2003-2005            |                      |
| Jordan     | World Health Organization (WHO). Retrospective Measles Data on Supplementary Immunization Activities. Geneva, Switzerland: World Health Organization (WHO).                                                                                                                                                                  | 2003-2005, 2012-2013 |                      |
| Jordan     | Jordan Cancer Registry, Middle East Cancer Consortium, National Cancer Institute (United States). <i>Jordan Cancer Incidence Report 2004</i> . Amman, Jordan: Ministry of Health (Jordan).                                                                                                                                   | 2004                 |                      |
| Jordan     | Ministry of Health (Jordan). <i>Jordan Vital Registration - Deaths 2004-2006</i> . [Unpublished].                                                                                                                                                                                                                            | 2004-2006            |                      |
| Jordan     | Abu-Raddad LJ, Akala FA, Semini I, Riedner G, Wilson D, Tawil O, World Bank. <i>Characterizing the HIV/AIDS Epidemic in the Middle East and North Africa</i> . Washington DC, United States: World Bank, 2010.                                                                                                               | 2004, 2008           |                      |
| Jordan     | Jordan Cancer Registry, Middle East Cancer Consortium, National Cancer Institute (United States). <i>Jordan Cancer Incidence Report 2005</i> . Amman, Jordan: Ministry of Health (Jordan).                                                                                                                                   | 2005                 |                      |
| Jordan     | Jordan Cancer Registry, Middle East Cancer Consortium, National Cancer Institute (United States). <i>Jordan Cancer Incidence Report 2006</i> . Amman, Jordan: Ministry of Health (Jordan).                                                                                                                                   | 2006                 |                      |
| Jordan     | Department of Statistics (Jordan), Macro International, Inc. <i>Jordan Demographic and Health Survey 2007</i> . Calverton, United States: Macro International, Inc.                                                                                                                                                          | 2007                 |                      |
| Jordan     | Jordan Cancer Registry, Middle East Cancer Consortium, National Cancer Institute (United States). <i>Jordan Cancer Incidence Report 2007</i> . Amman, Jordan: Ministry of Health (Jordan).                                                                                                                                   | 2007                 |                      |
| Jordan     | <i>Jordan Vital Registration - Deaths 2008 ICD10 as it appears in World Health Organization (WHO)</i> . WHO Mortality Database Version February 2014. Geneva, Switzerland: World Health Organization (WHO), 2014.                                                                                                            | 2008                 |                      |
| Jordan     | Higher Population Council (Jordan), Ministry of Health (Jordan), Royal Medical Services (Jordan), United Nations Relief and Works Agency (UNRWA). <i>Jordan National Maternal Mortality Study 2008</i> .                                                                                                                     | 2008                 |                      |
| Jordan     | Jordan Cancer Registry, Middle East Cancer Consortium, National Cancer Institute (United States). <i>Jordan Cancer Incidence Report 2008</i> . Amman, Jordan: Ministry of Health (Jordan).                                                                                                                                   | 2008                 |                      |
| Jordan     | Department of Statistics (Jordan), ICF Macro. <i>Jordan Interim Demographic and Health Survey 2009</i> . Calverton, United States: ICF Macro.                                                                                                                                                                                | 2009                 |                      |
| Jordan     | <i>Jordan Vital Registration - Deaths 2009 ICD10 as it appears in World Health Organization (WHO)</i> . WHO Mortality Database Version February 2014. Geneva, Switzerland: World Health Organization (WHO), 2014.                                                                                                            | 2009                 | *                    |
| Jordan     | Joint United Nations Program on HIV/AIDS (UNAIDS), Ministry of Health (Jordan). <i>Jordan Country Progress Report to the Secretary General of the United Nations on the United Nations General Assembly Special Session on HIV/AIDS 2010</i> . Geneva, Switzerland: Joint United Nations Program on HIV/AIDS (UNAIDS), 2010. | 2009                 |                      |
| Jordan     | Ministry of Health (Jordan). <i>Jordan Vital Registration - Deaths 2010</i> . [Unpublished].                                                                                                                                                                                                                                 | 2010                 |                      |
| Jordan     | Department of Statistics (Jordan), ICF International. <i>Jordan Demographic and Health Survey 2012</i> . Fairfax, United States: ICF International, 2013.                                                                                                                                                                    | 2012                 | *                    |
| Kazakhstan | Institute for Health Metrics and Evaluation (IHME), Joint United Nations Program on HIV/AIDS (UNAIDS). <i>Institute for Health Metrics and Evaluation HIV Mortality Estimates Based on the UNAIDS Spectrum Model Framework</i> .                                                                                             | 1980-2013            | *                    |



**Web Table 32 - Comprehensive citation list**

| Country    | Citation                                                                                                                                                                                                                                                      | Year*     | New for GBD 2013 (*) |
|------------|---------------------------------------------------------------------------------------------------------------------------------------------------------------------------------------------------------------------------------------------------------------|-----------|----------------------|
| Kazakhstan | Kazakhstan Vital Registration - Deaths 1981 ICD9 as it appears in World Health Organization (WHO). WHO Mortality Database Version February 2014. Geneva, Switzerland: World Health Organization (WHO), 2014.                                                  | 1981      |                      |
| Kazakhstan | Kazakhstan Vital Registration - Deaths 1982 ICD9 as it appears in World Health Organization (WHO). WHO Mortality Database Version February 2014. Geneva, Switzerland: World Health Organization (WHO), 2014.                                                  | 1982      |                      |
| Kazakhstan | Kompaniets AA, Doroshenko NV, Stakhanova VM, Dardik FG, Reĭnaru IK. [Patterns of the epidemic process in viral hepatitis A and B in territories with different morbidity levels. I. Hepatitis A]. Zh Mikrobiol Epidemiol Immunobiol. 1984; 70-4.              | 1983      |                      |
| Kazakhstan | Kazakhstan Vital Registration - Deaths 1985 ICD9 as it appears in World Health Organization (WHO). WHO Mortality Database Version February 2014. Geneva, Switzerland: World Health Organization (WHO), 2014.                                                  | 1985      |                      |
| Kazakhstan | Kazakhstan Vital Registration - Deaths 1986 ICD9 as it appears in World Health Organization (WHO). WHO Mortality Database Version February 2014. Geneva, Switzerland: World Health Organization (WHO), 2014.                                                  | 1986      |                      |
| Kazakhstan | Kazakhstan Vital Registration - Deaths 1987 ICD9 as it appears in World Health Organization (WHO). WHO Mortality Database Version February 2014. Geneva, Switzerland: World Health Organization (WHO), 2014.                                                  | 1987      |                      |
| Kazakhstan | Kazakhstan Vital Registration - Deaths 1988 ICD9 as it appears in World Health Organization (WHO). WHO Mortality Database Version February 2014. Geneva, Switzerland: World Health Organization (WHO), 2014.                                                  | 1988      |                      |
| Kazakhstan | USSR Census 1989 as it appears in United Nations Statistics Division (UNSD). United Nations Demographic Yearbook. New York City, United States: United Nations Statistics Division (UNSD).                                                                    | 1989      |                      |
| Kazakhstan | Kazakhstan Vital Registration - Deaths 1989 ICD9 as it appears in World Health Organization (WHO). WHO Mortality Database Version February 2014. Geneva, Switzerland: World Health Organization (WHO), 2014.                                                  | 1989      |                      |
| Kazakhstan | Kazakhstan Vital Registration - Deaths 1990 ICD9 as it appears in World Health Organization (WHO). WHO Mortality Database Version February 2014. Geneva, Switzerland: World Health Organization (WHO), 2014.                                                  | 1990      |                      |
| Kazakhstan | World Health Organization (WHO). Global Prevalence and Incidence of Selected Curable Sexually Transmitted Infections: Overviews and Estimates 2001. Geneva, Switzerland: World Health Organization (WHO), 2001.                                               | 1990-1996 |                      |
| Kazakhstan | United Nations Children's Fund (UNICEF), World Health Organization (WHO). WHO and UNICEF Reported Disease Incidence Time Series - Pertussis. Geneva, Switzerland: World Health Organization (WHO).                                                            | 1990-2013 |                      |
| Kazakhstan | United Nations Children's Fund (UNICEF), World Health Organization (WHO). WHO and UNICEF Reported Disease Incidence Time Series - Measles. Geneva, Switzerland: World Health Organization (WHO).                                                              | 1990-2013 |                      |
| Kazakhstan | Centre for Health Informatics and Multiprofessional Education, University College London. Modell's Haemoglobinopathologist's Almanac. London, United Kingdom: Centre for Health Informatics and Multiprofessional Education, University College London, 2008. | 1990-2003 |                      |
| Kazakhstan | Kazakhstan Vital Registration - Deaths 1991 ICD9 as it appears in World Health Organization (WHO). WHO Mortality Database Version February 2014. Geneva, Switzerland: World Health Organization (WHO), 2014.                                                  | 1991      |                      |

**Web Table 32 - Comprehensive citation list**

| Country    | Citation                                                                                                                                                                                                                                                      | Year*                                  | New for GBD 2013 (*) |
|------------|---------------------------------------------------------------------------------------------------------------------------------------------------------------------------------------------------------------------------------------------------------------|----------------------------------------|----------------------|
| Kazakhstan | Kazakhstan Vital Registration - Deaths 1992 ICD9 as it appears in World Health Organization (WHO). WHO Mortality Database Version February 2014. Geneva, Switzerland: World Health Organization (WHO), 2014.                                                  | 1992                                   |                      |
| Kazakhstan | Kazakhstan Vital Registration - Deaths 1993 ICD9 as it appears in World Health Organization (WHO). WHO Mortality Database Version February 2014. Geneva, Switzerland: World Health Organization (WHO), 2014.                                                  | 1993                                   |                      |
| Kazakhstan | Centre for Research on the Epidemiology of Disasters (CRED). EM-DAT: The OFDA/CRED International Disaster Database. Brussels, Belgium: Catholic University of Leuven.                                                                                         | 1993, 1995, 2003-2004, 2008, 2010-2011 |                      |
| Kazakhstan | Kazakhstan Vital Registration - Deaths 1994 ICD9 as it appears in World Health Organization (WHO). WHO Mortality Database Version February 2014. Geneva, Switzerland: World Health Organization (WHO), 2014.                                                  | 1994                                   |                      |
| Kazakhstan | Kazakhstan Vital Registration - Deaths 1995 ICD9 as it appears in World Health Organization (WHO). WHO Mortality Database Version February 2014. Geneva, Switzerland: World Health Organization (WHO), 2014.                                                  | 1995                                   |                      |
| Kazakhstan | Macro International, Inc, National Institute of Nutrition (Kazakhstan). Kazakhstan Demographic and Health Survey 1995. Calverton, United States: Macro International, Inc.                                                                                    | 1995                                   |                      |
| Kazakhstan | United Nations Office on Drugs and Crime (UNODC). United Nations Office on Drugs and Crime Global Study on Homicides 2011. Vienna, Austria: United Nations Office on Drugs and Crime (UNODC), 2011.                                                           | 1995-1999                              |                      |
| Kazakhstan | Agency of the Republic of Kazakhstan on Statistics, World Bank. Kazakhstan Living Standards Measurement Survey 1996. Washington DC, United States: World Bank.                                                                                                | 1996                                   | *                    |
| Kazakhstan | Kazakhstan Vital Registration - Deaths 1996 ICD9 as it appears in World Health Organization (WHO). WHO Mortality Database Version February 2014. Geneva, Switzerland: World Health Organization (WHO), 2014.                                                  | 1996                                   |                      |
| Kazakhstan | Kazakhstan Vital Registration - Deaths 1997 ICD9 as it appears in World Health Organization (WHO). WHO Mortality Database Version February 2014. Geneva, Switzerland: World Health Organization (WHO), 2014.                                                  | 1997                                   |                      |
| Kazakhstan | Kazakhstan Vital Registration - Deaths 1998 ICD9 as it appears in World Health Organization (WHO). WHO Mortality Database Version February 2014. Geneva, Switzerland: World Health Organization (WHO), 2014.                                                  | 1998                                   |                      |
| Kazakhstan | Agency of the Republic of Kazakhstan on Statistics. Kazakhstan Population and Housing Census 1999.                                                                                                                                                            | 1999                                   |                      |
| Kazakhstan | Kazakhstan Vital Registration - Deaths 1999 ICD9 as it appears in World Health Organization (WHO). WHO Mortality Database Version February 2014. Geneva, Switzerland: World Health Organization (WHO), 2014.                                                  | 1999                                   |                      |
| Kazakhstan | Academy of Preventive Medicine (Kazakhstan), Macro International, Inc. Kazakhstan Demographic and Health Survey 1999. Calverton, United States: Macro International, Inc.                                                                                     | 1999                                   |                      |
| Kazakhstan | Nurgalieva ZZ, Malaty HM, Graham DY, Almuchambetova R, Machmudova A, Kapsultanova D, Osato MS, Hollinger FB, Zhangabylov A. Helicobacter pylori infection in Kazakhstan: effect of water source and household hygiene. Am J Trop Med Hyg. 2002; 67(2): 201-6. | 1999                                   |                      |
| Kazakhstan | World Health Organization (WHO). Yellow Fever Reported Cases, WHO Vaccine-Preventable Diseases: Monitoring System. Geneva, Switzerland: World Health Organization (WHO).                                                                                      | 1999, 2002-2009                        |                      |

**Web Table 32 - Comprehensive citation list**

| Country    | Citation                                                                                                                                                                                                                           | Year*     | New for GBD 2013 (*) |
|------------|------------------------------------------------------------------------------------------------------------------------------------------------------------------------------------------------------------------------------------|-----------|----------------------|
| Kazakhstan | Kazakhstan Vital Registration - Deaths 2000 ICD9 as it appears in World Health Organization (WHO). WHO Mortality Database Version February 2014. Geneva, Switzerland: World Health Organization (WHO), 2014.                       | 2000      |                      |
| Kazakhstan | Kazakhstan Vital Registration - Deaths 2001 ICD9 as it appears in World Health Organization (WHO). WHO Mortality Database Version February 2014. Geneva, Switzerland: World Health Organization (WHO), 2014.                       | 2001      |                      |
| Kazakhstan | Victor JC, Surdina TY, Suleimeova SZ, Favorov MO, Bell BP, Monto AS. The increasing prominence of household transmission of hepatitis A in an area undergoing a shift in endemicity. <i>Epidemiol Infect.</i> 2006; 134(3): 492-7. | 2001      |                      |
| Kazakhstan | World Health Organization (WHO). Kazakhstan WHO Leishmaniasis Country Profile.                                                                                                                                                     | 2001-2008 | *                    |
| Kazakhstan | Kazakhstan Vital Registration - Deaths 2002 ICD9 as it appears in World Health Organization (WHO). WHO Mortality Database Version February 2014. Geneva, Switzerland: World Health Organization (WHO), 2014.                       | 2002      |                      |
| Kazakhstan | Kazakhstan Vital Registration - Deaths 2003 ICD9 as it appears in World Health Organization (WHO). WHO Mortality Database Version February 2014. Geneva, Switzerland: World Health Organization (WHO), 2014.                       | 2003      |                      |
| Kazakhstan | Kazakhstan Vital Registration - Deaths 2004 ICD10 as it appears in World Health Organization (WHO). WHO Mortality Database Version February 2014. Geneva, Switzerland: World Health Organization (WHO), 2014.                      | 2004      |                      |
| Kazakhstan | Kazakhstan Vital Registration - Deaths 2005 ICD10 as it appears in World Health Organization (WHO). WHO Mortality Database Version February 2014. Geneva, Switzerland: World Health Organization (WHO), 2014.                      | 2005      |                      |
| Kazakhstan | World Health Organization (WHO). Retrospective Measles Data on Supplementary Immunization Activities. Geneva, Switzerland: World Health Organization (WHO).                                                                        | 2005      |                      |
| Kazakhstan | Agency of the Republic of Kazakhstan on Statistics and United Nations Children's Fund (UNICEF). Kazakhstan Multiple Indicator Cluster Survey 2006. New York, United States: United Nations Children's Fund (UNICEF).               | 2006      |                      |
| Kazakhstan | Kazakhstan Vital Registration - Deaths 2006 ICD10 as it appears in World Health Organization (WHO). WHO Mortality Database Version February 2014. Geneva, Switzerland: World Health Organization (WHO), 2014.                      | 2006      |                      |
| Kazakhstan | Kazakhstan Vital Registration - Deaths 2007 ICD10 as it appears in World Health Organization (WHO). WHO Mortality Database Version February 2014. Geneva, Switzerland: World Health Organization (WHO), 2014.                      | 2007      |                      |
| Kazakhstan | Kazakhstan Vital Registration - Deaths 2008 ICD10 as it appears in World Health Organization (WHO). WHO Mortality Database Version February 2014. Geneva, Switzerland: World Health Organization (WHO), 2014.                      | 2008      |                      |
| Kazakhstan | Kazakhstan Vital Registration - Deaths 2009 ICD10 as it appears in World Health Organization (WHO). WHO Mortality Database Version February 2014. Geneva, Switzerland: World Health Organization (WHO), 2014.                      | 2009      |                      |
| Kazakhstan | Agency of the Republic of Kazakhstan on Statistics. Kazakhstan Census 2009.                                                                                                                                                        | 2009      | *                    |

**Web Table 32 - Comprehensive citation list**

| Country    | Citation                                                                                                                                                                                                                                         | Year*                             | New for GBD 2013 (*) |
|------------|--------------------------------------------------------------------------------------------------------------------------------------------------------------------------------------------------------------------------------------------------|-----------------------------------|----------------------|
| Kazakhstan | Joint United Nations Program on HIV/AIDS (UNAIDS), Ministry of Health of the Republic of Kazakhstan. Kazakhstan National Progress Report for UNGASS 2010. Geneva, Switzerland: Joint United Nations Program on HIV/AIDS (UNAIDS), 2010.          | 2009                              |                      |
| Kazakhstan | Kazakhstan Vital Registration - Deaths 2010 ICD10 as it appears in World Health Organization (WHO). WHO Mortality Database Version February 2014. Geneva, Switzerland: World Health Organization (WHO), 2014.                                    | 2010                              | *                    |
| Kazakhstan | Agency of the Republic of Kazakhstan on Statistics, United Nations Children's Fund (UNICEF). Kazakhstan Multiple Indicator Cluster Survey 2010-2011. New York, United States: United Nations Children's Fund (UNICEF), 2013.                     | 2010-2011                         | *                    |
| Kenya      | Peace Research Institute Oslo (PRIO). Battle Deaths Dataset Version 3, 2009. Oslo, Norway: Peace Research Institute Oslo (PRIO), 2009.                                                                                                           | 1952-1982                         |                      |
| Kenya      | Allison AC. Glucose-6-phosphate dehydrogenase deficiency in red blood cells of East Africans. <i>Nature</i> . 1960; 531-2.                                                                                                                       | 1958-1960                         |                      |
| Kenya      | Kenya Population Census 1969 as it appears in United Nations Statistics Division (UNSD). United Nations Demographic Yearbook. New York City, United States: United Nations Statistics Division (UNSD).                                           | 1969                              |                      |
| Kenya      | Mahieu JM, Muller AS, Voorhoeve AM, Dikken H. Pertussis in a rural area of Kenya: epidemiology and a preliminary report on a vaccine trial. <i>Bull World Health Organ</i> . 1978; 56(5): 773-80.                                                | 1974-1976                         |                      |
| Kenya      | Voorhoeve AM, Muller AS, Schulpel TW, t' Mannetje W, van Rens M. Machakos project studies. Agents affecting health of mother and child in a rural area of Kenya. IV: The epidemiology of pertussis. <i>Trop Geogr Med</i> . 1978; 30(1): 125-39. | 1974-1977                         |                      |
| Kenya      | Muller AS, Leeuwenburg J, Voorhoeve AM. Pertussis in a rural area of Kenya: epidemiology and results of a vaccine trial. <i>Bull World Health Organ</i> . 1984; 62(6): 899-908.                                                                  | 1976-1981                         |                      |
| Kenya      | Central Bureau of Statistics (Kenya). Kenya National Demographic Survey 1977.                                                                                                                                                                    | 1977                              |                      |
| Kenya      | Central Bureau of Statistics (Kenya), International Statistical Institute. Kenya World Fertility Survey 1977-1978. International Statistical Institute.                                                                                          | 1977-1978                         |                      |
| Kenya      | Centre for Research on the Epidemiology of Disasters (CRED). EM-DAT: The OFDA/CRED International Disaster Database. Brussels, Belgium: Catholic University of Leuven.                                                                            | 1977, 1982, 1988, 1990, 1997-2013 |                      |
| Kenya      | Central Bureau of Statistics (Kenya). Kenya Population Census 1979. Nairobi, Kenya: Central Bureau of Statistics (Kenya).                                                                                                                        | 1979                              |                      |
| Kenya      | Willcox MC, Beckman L. Haemoglobin variants, beta-thalassaemia and G-6-PD types in Liberia. <i>Hum Hered</i> . 1981; 31(6): 339-47.                                                                                                              | 1979-1981                         |                      |
| Kenya      | Institute for Health Metrics and Evaluation (IHME), Joint United Nations Program on HIV/AIDS (UNAIDS). Institute for Health Metrics and Evaluation HIV Mortality Estimates Based on the UNAIDS Spectrum Model Framework.                         | 1980-2013                         | *                    |
| Kenya      | United Nations Children's Fund (UNICEF), World Health Organization (WHO). WHO and UNICEF Reported Disease Incidence Time Series - Pertussis. Geneva, Switzerland: World Health Organization (WHO).                                               | 1980-1991, 1995, 1997-2003        |                      |
| Kenya      | United Nations Children's Fund (UNICEF), World Health Organization (WHO). WHO and UNICEF Reported Disease Incidence Time Series - Measles. Geneva, Switzerland: World Health Organization (WHO).                                                 | 1980-2011, 2013                   |                      |
| Kenya      | Mati JK, Aggarwal VP, Lucas S, Sanghvi HC, Corkhill R. The Nairobi Birth Survey 1. the study design, the population and outline results. <i>J Obstet Gynaecol East Cent Africa</i> . 1982; 1(4): 132-9.                                          | 1981                              |                      |
| Kenya      | Bowry TR, Pade J, Omari M, Chemtai A. A pilot study of hepatitis B virus seroepidemiology suggests widespread immunosuppression in the nomadic inhabitants of Turkana District of Kenya. <i>East Afr Med J</i> . 1985; 62(7): 501-6.             | 1983                              |                      |

**Web Table 32 - Comprehensive citation list**

| Country | Citation                                                                                                                                                                                                                                                      | Year*     | New for GBD 2013 (*) |
|---------|---------------------------------------------------------------------------------------------------------------------------------------------------------------------------------------------------------------------------------------------------------------|-----------|----------------------|
| Kenya   | Boerma JT, Mati JK. Identifying maternal mortality through networking: results from coastal Kenya. <i>Stud Fam Plann.</i> 1989; 20(5): 245-53.                                                                                                                | 1985      |                      |
| Kenya   | Burström B, Aaby P, Mutie DM, Kimani G, Bjerregaard P. Severe measles outbreak in western Kenya. <i>East Afr Med J.</i> 1992; 69(8): 419-23.                                                                                                                  | 1985-1986 |                      |
| Kenya   | Mirza NM, Macharia WM, Wafula EM, Agwanda R, Onyango FE. Mortality patterns in a rural Kenyan community. <i>East Afr Med J.</i> 1990; 67(11): 823-9.                                                                                                          | 1986      |                      |
| Kenya   | Temmerman M, Plummer FA, Mirza NB, Ndinya-Achola JO, Wamola IA, Nagelkerke N, Brunham RC, Piot P. Infection with HIV as a risk factor for adverse obstetrical outcome. <i>AIDS.</i> 1990; 4(11): 1087-93.                                                     | 1986      |                      |
| Kenya   | Burström B, Aaby P, Mutie DM. Validity of measles mortality data using hospital registers and community surveys. <i>Int J Epidemiol.</i> 1995; 24(3): 625-9.                                                                                                  | 1986-1988 |                      |
| Kenya   | Okoth FA, Kobayashi M, Kaptich DC, Kaiguri PM, Tukei PM, Takayanagi T, Yamanaka T. Seroepidemiological study for HBV markers and anti-delta in Kenya. <i>East Afr Med J.</i> 1991; 68(7): 515-25.                                                             | 1986-1987 |                      |
| Kenya   | Burström B, Aaby P, Mutie DM. Child mortality impact of a measles outbreak in a partially vaccinated rural African community. <i>Scand J Infect Dis.</i> 1993; 25(6): 763-9.                                                                                  | 1987-1988 |                      |
| Kenya   | National Council for Population Development (NCPD), Macro Systems, Inc.; Institute for Resource Development. Kenya Demographic and Health Survey 1988-1989. Columbia, United States: Macro Systems, Inc.                                                      | 1988-1989 |                      |
| Kenya   | Central Bureau of Statistics (CBS) (Kenya), Minnesota Population Center. Kenya Population and Housing Census 1989 from the Integrated Public Use Microdata Series, International. [Machine-readable database]. Minneapolis: University of Minnesota.          | 1989      |                      |
| Kenya   | Department of Peace and Conflict Research, Uppsala University. UCDP Nonstate Conflict Database Version 2.5, 2013. Uppsala, Sweden: Department of Peace and Conflict Research, Uppsala University, 2013.                                                       | 1989-2012 | *                    |
| Kenya   | Weatherall D. Sickle Cell and Thalassemias Prevalence Data, Personal Correspondence with David Weatherall. [Unpublished].                                                                                                                                     | 1990-2009 |                      |
| Kenya   | Centre for Health Informatics and Multiprofessional Education, University College London. Modell's Haemoglobinopathologist's Almanac. London, United Kingdom: Centre for Health Informatics and Multiprofessional Education, University College London, 2008. | 1990-2003 |                      |
| Kenya   | Onyango CO, Ofula VO, Sang RC, Konongoi SL, Sow A, De Cock KM, Tukei PM, Okoth FA, Swanepoel R, Burt FJ, Waters NC, Coldren RL. Yellow fever outbreak, Imatong, southern Sudan. <i>Emerg Infect Dis.</i> 2004; 10:63-8.                                       | 1992      |                      |
| Kenya   | Temmerman M, Mohamedali F, Fransen L. Syphilis prevention in pregnancy: an opportunity to improve reproductive and child health in Kenya. <i>Health Policy Plan.</i> 1993; 8(2): 122-7.                                                                       | 1992      |                      |
| Kenya   | Aidoo M, Terlouw DJ, Kolczak MS, McElroy PD, ter Kuile FO, Kariuki S, Nahlen BL, Lal AA, Udhayakumar V. Protective effects of the sickle cell gene against malaria morbidity and mortality. <i>Lancet.</i> 2002; 359(9242): 1311-2.                           | 1992-1994 |                      |
| Kenya   | WHO Department of Communicable Disease Surveillance and Response. WHO Report on Global Surveillance of Epidemic-prone Infectious Diseases 2000.                                                                                                               | 1992-1995 |                      |
| Kenya   | Sanders EJ, Tukei PM. Yellow fever: an emerging threat for Kenya and other east African countries. <i>East Afr Med J.</i> 1996; 73(1): 10-2.                                                                                                                  | 1992-1993 |                      |
| Kenya   | Williams TN, Mwangi TW, Wambua S, Alexander ND, Kortok M, Snow RW, Marsh K. Sickle cell trait and the risk of Plasmodium falciparum malaria and other childhood diseases. <i>J Infect Dis.</i> 2005; 192(1): 178-86.                                          | 1992-2000 | *                    |

**Web Table 32 - Comprehensive citation list**

| Country | Citation                                                                                                                                                                                                                                                                                                        | Year*                | New for GBD 2013 (*) |
|---------|-----------------------------------------------------------------------------------------------------------------------------------------------------------------------------------------------------------------------------------------------------------------------------------------------------------------|----------------------|----------------------|
| Kenya   | Sanders EJ, Marfin AA, Tukei PM, Kuria G, Ademba G, Agata NN, Ouma JO, Cropp CB, Karabatsos N, Reiter P, Moore PS, Gubler DJ. First Recorded Outbreak of Yellow Fever in Kenya, 1992-1993. <i>Am J Trop Med Hyg</i> . 1998; 59(4): 644-9.                                                                       | 1992-1993            | *                    |
| Kenya   | Central Bureau of Statistics (Kenya), Macro International, Inc, National Council for Population Development (NCPD). Kenya Demographic and Health Survey 1993. Calverton, United States: Macro International, Inc.                                                                                               | 1993                 |                      |
| Kenya   | Menge I, Esamai F, van Reken D, Anabwani G. Paediatric morbidity and mortality at the Eldoret District Hospital, Kenya. <i>East Afr Med J</i> . 1995; 72(3): 165-9.                                                                                                                                             | 1993                 |                      |
| Kenya   | Measles Supplementary Immunization Activity Data as provided by the World Health Organization. [Unpublished].                                                                                                                                                                                                   | 1994, 1999           |                      |
| Kenya   | Ilako FM, McLigeyo SO, Riyat MS, Lule GN, Okoth FA, Kaptich D. The prevalence of hepatitis C virus antibodies in renal patients, blood donors and patients with chronic liver disease in Kenya. <i>East Afr Med J</i> . 1995; 72(6): 362-4.                                                                     | 1995                 |                      |
| Kenya   | World Health Organization (WHO). Yellow Fever Reported Cases, WHO Vaccine-Preventable Diseases: Monitoring System. Geneva, Switzerland: World Health Organization (WHO).                                                                                                                                        | 1995-1998, 2000-2008 |                      |
| Kenya   | Mwangi JW. Viral markers in a blood donor population. <i>East Afr Med J</i> . 1999; 76(1): 35-7.                                                                                                                                                                                                                | 1995-1998            |                      |
| Kenya   | Rowe AK, Rowe SY, Snow RW, Korenromp EL, Schellenberg JR, Stein C, Nahlen BL, Bryce J, Black RE, Steketee RW. The burden of malaria mortality among African children in the year 2000. <i>Int J Epidemiol</i> . 2006; 35(3): 691-704.                                                                           | 1997                 |                      |
| Kenya   | Siekmann JH, Allen LH, Watnik MR, Nestel P, Neumann CG, Shoenfeld Y, Peter JB, Patnik M, Ansari AA, Coppel RL, Gershwin ME. Titers of antibody to common pathogens: relation to food-based interventions in rural Kenyan schoolchildren. <i>Am J Clin Nutr</i> . 2003; 77(1): 242-9.                            | 1997                 |                      |
| Kenya   | World Health Organization Regional Office for Africa. HIV/AIDS Epidemiological Surveillance Update for the WHO African Region. World Health Organization Regional Office for Africa, 2003.                                                                                                                      | 1997-1998, 2000      |                      |
| Kenya   | World Health Organization (WHO). The Global Elimination of Congenital Syphilis: Rationale and Strategy for Action. Geneva, Switzerland: World Health Organization (WHO), 2007.                                                                                                                                  | 1997-2003            |                      |
| Kenya   | Temmerman M, Gichangi P, Fonck K, Apers L, Claeys P, Van Renterghem L, Kiragu D, Karanja G, Ndinya-Achola J, Bwayo J. Effect of a syphilis control programme on pregnancy outcome in Nairobi, Kenya. <i>Sex Transm Infect</i> . 2000; 76(2): 117-21.                                                            | 1997-1998            |                      |
| Kenya   | Central Bureau of Statistics (Kenya), Macro International, Inc, National Council for Population Development (NCPD). Kenya Demographic and Health Survey 1998. Calverton, United States: Macro International, Inc.                                                                                               | 1998                 |                      |
| Kenya   | Central Bureau of Statistics (CBS) (Kenya), Minnesota Population Center. Kenya Population and Housing Census 1999 from the Integrated Public Use Microdata Series, International. [Machine-readable database]. Minneapolis: University of Minnesota.                                                            | 1999                 |                      |
| Kenya   | Scott JAG, Berkley JA, Mwangi I, Ochola L, Uyoga S, Macharia A, Ndila C, Lowe BS, Mwarumba S, Bauni E, Marsh K, Williams TN. Relation between falciparum malaria and bacteraemia in Kenyan children: a population-based, case-control study and a longitudinal study. <i>Lancet</i> . 2011; 378(9799): 1316-23. | 1999-2002            | *                    |
| Kenya   | Central Bureau of Statistics (Kenya), United Nations Children's Fund (UNICEF). Kenya Multiple Indicator Cluster Survey 2000. New York, United States: United Nations Children's Fund (UNICEF).                                                                                                                  | 2000                 |                      |
| Kenya   | Kenya Medical Research Institute (KEMRI). Kenya - Nairobi Cancer Incidence Report 2000-2002. Kenya Medical Research Institute (KEMRI), 2006.                                                                                                                                                                    | 2000-2002            |                      |



**Web Table 32 - Comprehensive citation list**

| Country | Citation                                                                                                                                                                                                                                                                                                                                                                                                            | Year*                       | New for GBD 2013 (*) |
|---------|---------------------------------------------------------------------------------------------------------------------------------------------------------------------------------------------------------------------------------------------------------------------------------------------------------------------------------------------------------------------------------------------------------------------|-----------------------------|----------------------|
| Kenya   | World Health Organization (WHO). Kenya WHO Leishmaniasis Country Profile.                                                                                                                                                                                                                                                                                                                                           | 2000-2009                   | *                    |
| Kenya   | Joint United Nations Program on HIV/AIDS (UNAIDS), United Nations Children's Fund (UNICEF), World Health Organization (WHO). Kenya Epidemiological Fact Sheet on HIV/AIDS and STIs 2004.                                                                                                                                                                                                                            | 2000-2001                   |                      |
| Kenya   | Talbert AWA, Mwaniki M, Mwarumba S, Newton CRJC, Berkley JA. Invasive bacterial infections in neonates and young infants born outside hospital admitted to a rural hospital in Kenya. <i>Pediatr Infect Dis J.</i> 2010; 29(10): 945-9.                                                                                                                                                                             | 2001-2009                   |                      |
| Kenya   | Okoth F, Mbutia J, Gatheru Z, Murila F, Kanyingi F, Mugo F, Esamai F, Alavi Z, Otieno J, Kiambati H, Wanjuki N. Seroprevalence of hepatitis B markers in pregnant women in Kenya. <i>East Afr Med J.</i> 2006; 83(9): 485-93.                                                                                                                                                                                       | 2001-2002                   |                      |
| Kenya   | African Population and Health Research Center, INDEPTH. Kenya - Nairobi Urban Health and Demographic Surveillance System.                                                                                                                                                                                                                                                                                           | 2002                        |                      |
| Kenya   | INDEPTH. Kenya - Kisumu Health and Demographic Surveillance System. [Unpublished].                                                                                                                                                                                                                                                                                                                                  | 2002                        |                      |
| Kenya   | World Health Organization (WHO). Retrospective Measles Data on Supplementary Immunization Activities. Geneva, Switzerland: World Health Organization (WHO).                                                                                                                                                                                                                                                         | 2002, 2004-2006, 2009, 2012 |                      |
| Kenya   | Centers for Disease Control and Prevention (CDC), Central Bureau of Statistics (Kenya), Macro International, Inc, Ministry of Health (Kenya), National Council for Population and Development (Kenya). Kenya Demographic and Health Survey 2003. Calverton, United States: Macro International, Inc.                                                                                                                | 2003                        |                      |
| Kenya   | van Eijk AM, Adazu K, Ofware P, Vulule J, Hamel M, Slutsker L. Causes of deaths using verbal autopsy among adolescents and adults in rural western Kenya. <i>Trop Med Int Health.</i> 2008; 13(10): 1314-24.                                                                                                                                                                                                        | 2003                        |                      |
| Kenya   | Hamel MJ, Adazu K, Obor D, Sewe M, Vulule J, Williamson JM, Slutsker L, Feikin DR, Laserson KF. A reversal in reductions of child mortality in western Kenya, 2003-2009. <i>Am J Trop Med Hyg.</i> 2011; 85(4): 597-605.                                                                                                                                                                                            | 2003-2008                   |                      |
| Kenya   | Sadarangani M, Makani J, Komba AN, Ajala-Agbo T, Newton CR, Marsh K, Williams TN. An observational study of children with sickle cell disease in Kilifi, Kenya. <i>Br J Haematol.</i> 2009; 146(6): 675-82.                                                                                                                                                                                                         | 2003-2004                   | *                    |
| Kenya   | World Health Organization (WHO). Kenya World Health Survey 2004. Geneva, Switzerland: World Health Organization (WHO), 2005.                                                                                                                                                                                                                                                                                        | 2004                        |                      |
| Kenya   | Gichangi P, Renterghem LV, Karanja J, Bwayo J, Kiragu D, Temmerman M. Congenital syphilis in a Nairobi maternity hospital. <i>East Afr Med J.</i> 2004; 81(11): 589-93.                                                                                                                                                                                                                                             | 2004                        |                      |
| Kenya   | United Nations Office on Drugs and Crime (UNODC). United Nations Office on Drugs and Crime Global Study on Homicides 2011. Vienna, Austria: United Nations Office on Drugs and Crime (UNODC), 2011.                                                                                                                                                                                                                 | 2004-2010                   |                      |
| Kenya   | Oti SO, Kyobutungi C. Verbal autopsy interpretation: a comparative analysis of the InterVA model versus physician review in determining causes of death in the Nairobi DSS. <i>Popul Health Metr.</i> 2010; 8: 21.                                                                                                                                                                                                  | 2005                        |                      |
| Kenya   | Gargano JW, Laserson K, Muttai H, Odhiambo F, Orimba V, Adamu-Zeh M, Williamson J, Sewe M, Nyabiage L, Owuor K, Broz D, Marston B, Ackers M. The adult population impact of HIV care and antiretroviral therapy in a resource poor setting, 2003-2008. <i>AIDS.</i> 2012; 26(12): 1545-54.                                                                                                                          | 2005-2007                   |                      |
| Kenya   | Moisi JC, Saha SK, Falade AG, Njanpop-Lafourcade B-M, Oundo J, Zaidi AKM, Afroj S, Bakare RA, Buss JK, Lasi R, Mueller J, Odekanmi AA, Sangare L, Scott JAG, Knoll MD, Levine OS, Gessner BD. Enhanced diagnosis of pneumococcal meningitis with use of the binax NOW immunochromatographic test of <i>Streptococcus pneumoniae</i> antigen: A multisite study. <i>Clin Infect Dis.</i> 2009; 48(Suppl 2): S49-S56. | 2006-2007                   |                      |

**Web Table 32 - Comprehensive citation list**

| Country  | Citation                                                                                                                                                                                                                                                                                                                                                                          | Year*                           | New for GBD 2013 (*) |
|----------|-----------------------------------------------------------------------------------------------------------------------------------------------------------------------------------------------------------------------------------------------------------------------------------------------------------------------------------------------------------------------------------|---------------------------------|----------------------|
| Kenya    | Breiman RF, Cosmas L, Njuguna H, Audi A, Olack B, Ochieng JB, Wamola N, Bigogo GM, Awiti G, Tabu CW, Burke H, Williamson J, Oundo JO, Mintz ED, Feikin DR. Population-based incidence of typhoid fever in an urban informal settlement and a rural area in Kenya: implications for typhoid vaccine use in Africa. PLoS One. 2012; 7(1): e29119.                                   | 2007-2009                       | *                    |
| Kenya    | Department of Peace and Conflict Research, Uppsala University. UCDP One-Sided Violence Database Version 1.4, 2013. Uppsala, Sweden: Department of Peace and Conflict Research, Uppsala University, 2013.                                                                                                                                                                          | 2007-2012                       | *                    |
| Kenya    | Joint United Nations Program on HIV/AIDS (UNAIDS), National AIDS Control Council (Kenya). Kenya UNGASS Country Report 2010. Geneva, Switzerland: Joint United Nations Program on HIV/AIDS (UNAIDS), 2010.                                                                                                                                                                         | 2007-2009                       |                      |
| Kenya    | Kenya National Bureau of Statistics, ICF Macro, Ministry of Public Health and Sanitation (Kenya), National Aids Control Council (NACC), National AIDS and STI Control Program, Kenya Medical Research Institute (KEMRI), National Coordinating Agency for Population and Development (Kenya). Kenya Demographic and Health Survey 2008-2009. Calverton, United States: ICF Macro. | 2008-2009                       |                      |
| Kenya    | Kenya National Bureau of Statistics, US Census Bureau, USAID, United Nations Population Fund (UNFPA). Kenya Population and Housing Census 2009.                                                                                                                                                                                                                                   | 2009                            | *                    |
| Kenya    | Minnesota Population Center, Kenya National Bureau of Statistics. Kenya Population Census 2009 from the Integrated Public Use Microdata Series, International. [Machine-readable database]. Minneapolis: University of Minnesota, 2013.                                                                                                                                           | 2009                            |                      |
| Kenya    | Foote EM, Sullivan KM, Ruth LJ, Oremo J, Sadumah I, Williams TN, Suchdev PS. Determinants of anemia among preschool children in rural, western Kenya. Am J Trop Med Hyg. 2013; 88(4): 757-64.                                                                                                                                                                                     | 2010                            | *                    |
| Kiribati | United Kingdom - Gilbert and Ellice Islands Population and Housing Census 1963 as it appears in United Nations Statistics Division (UNSD). United Nations Demographic Yearbook - Historical Supplement 1997. New York City, United States: United Nations Statistics Division (UNSD).                                                                                             | 1963                            |                      |
| Kiribati | United Kingdom - Gilbert and Ellice Islands Population and Housing Census 1968 as it appears in United Nations Statistics Division (UNSD). United Nations Demographic Yearbook - Historical Supplement 1997. New York City, United States: United Nations Statistics Division (UNSD).                                                                                             | 1968                            |                      |
| Kiribati | Centre for Research on the Epidemiology of Disasters (CRED). EM-DAT: The OFDA/CRED International Disaster Database. Brussels, Belgium: Catholic University of Leuven.                                                                                                                                                                                                             | 1972                            |                      |
| Kiribati | Census Commissioner (Gilbert and Ellice Islands Colony). United Kingdom - Gilbert and Ellice Islands Population and Housing Census 1973.                                                                                                                                                                                                                                          | 1973                            |                      |
| Kiribati | Ministry of Home Affairs and Decentralisation (Kiribati). Kiribati Population and Housing Census 1978.                                                                                                                                                                                                                                                                            | 1978                            |                      |
| Kiribati | Institute for Health Metrics and Evaluation (IHME), Joint United Nations Program on HIV/AIDS (UNAIDS). Institute for Health Metrics and Evaluation HIV Mortality Estimates Based on the UNAIDS Spectrum Model Framework.                                                                                                                                                          | 1980-2013                       | *                    |
| Kiribati | United Nations Children's Fund (UNICEF), World Health Organization (WHO). WHO and UNICEF Reported Disease Incidence Time Series - Pertussis. Geneva, Switzerland: World Health Organization (WHO).                                                                                                                                                                                | 1980-2002, 2004-2005, 2007-2013 |                      |
| Kiribati | United Nations Children's Fund (UNICEF), World Health Organization (WHO). WHO and UNICEF Reported Disease Incidence Time Series - Measles. Geneva, Switzerland: World Health Organization (WHO).                                                                                                                                                                                  | 1980-2002, 2004-2005, 2007-2013 |                      |



**Web Table 32 - Comprehensive citation list**

| Country  | Citation                                                                                                                                                                                                                                                      | Year*                | New for GBD 2013 (*) |
|----------|---------------------------------------------------------------------------------------------------------------------------------------------------------------------------------------------------------------------------------------------------------------|----------------------|----------------------|
| Kiribati | Hill AV, Bowden DK, O'Shaughnessy DF, Weatherall DJ, Clegg JB. Beta thalassemia in Melanesia: association with malaria and characterization of a common variant (IVS-1 nt 5 G---C). Blood. 1988; 72(1): 9-14.                                                 | 1985-1987            |                      |
| Kiribati | United Nations Office on Drugs and Crime (UNODC). United Nations Surveys on Crime Trends and the Operations of Criminal Justice Systems 1970-2006 as provided by Kavi Bhalla. [Unpublished].                                                                  | 1986                 |                      |
| Kiribati | Centre for Health Informatics and Multiprofessional Education, University College London. Modell's Haemoglobinopathologist's Almanac. London, United Kingdom: Centre for Health Informatics and Multiprofessional Education, University College London, 2008. | 1990-2003            |                      |
| Kiribati | Kiribati Vital Registration - Deaths 1991 ICD9 as it appears in World Health Organization (WHO). WHO Mortality Database Version February 2014. Geneva, Switzerland: World Health Organization (WHO), 2014.                                                    | 1991                 |                      |
| Kiribati | Kiribati Vital Registration - Deaths 1992 ICD9 as it appears in World Health Organization (WHO). WHO Mortality Database Version February 2014. Geneva, Switzerland: World Health Organization (WHO), 2014.                                                    | 1992                 |                      |
| Kiribati | Kiribati Vital Registration - Deaths 1993 ICD9 as it appears in World Health Organization (WHO). WHO Mortality Database Version February 2014. Geneva, Switzerland: World Health Organization (WHO), 2014.                                                    | 1993                 |                      |
| Kiribati | Kiribati Vital Registration - Deaths 1994 ICD9 as it appears in World Health Organization (WHO). WHO Mortality Database Version February 2014. Geneva, Switzerland: World Health Organization (WHO), 2014.                                                    | 1994                 |                      |
| Kiribati | Kiribati Vital Registration - Deaths 1995 ICD9 as it appears in World Health Organization (WHO). WHO Mortality Database Version February 2014. Geneva, Switzerland: World Health Organization (WHO), 2014.                                                    | 1995                 |                      |
| Kiribati | Kiribati Vital Registration - Deaths 1996 ICD9 as it appears in World Health Organization (WHO). WHO Mortality Database Version February 2014. Geneva, Switzerland: World Health Organization (WHO), 2014.                                                    | 1996                 |                      |
| Kiribati | Kiribati Vital Registration - Deaths 1997 ICD9 as it appears in World Health Organization (WHO). WHO Mortality Database Version February 2014. Geneva, Switzerland: World Health Organization (WHO), 2014.                                                    | 1997                 |                      |
| Kiribati | Kiribati Vital Registration - Deaths 1998 ICD9 as it appears in World Health Organization (WHO). WHO Mortality Database Version February 2014. Geneva, Switzerland: World Health Organization (WHO), 2014.                                                    | 1998                 |                      |
| Kiribati | Measles Supplementary Immunization Activity Data as provided by the World Health Organization. [Unpublished].                                                                                                                                                 | 1998                 |                      |
| Kiribati | World Health Organization (WHO). Yellow Fever Reported Cases, WHO Vaccine-Preventable Diseases: Monitoring System. Geneva, Switzerland: World Health Organization (WHO).                                                                                      | 1998-2002, 2007-2009 |                      |
| Kiribati | Kiribati Vital Registration - Deaths 1999 ICD10 as it appears in World Health Organization (WHO). WHO Mortality Database Version February 2014. Geneva, Switzerland: World Health Organization (WHO), 2014.                                                   | 1999                 |                      |
| Kiribati | Kiribati Vital Registration - Deaths 2000 ICD10 as it appears in World Health Organization (WHO). WHO Mortality Database Version February 2014. Geneva, Switzerland: World Health Organization (WHO), 2014.                                                   | 2000                 |                      |

**Web Table 32 - Comprehensive citation list**

| Country  | Citation                                                                                                                                                                                                            | Year*            | New for GBD 2013 (*) |
|----------|---------------------------------------------------------------------------------------------------------------------------------------------------------------------------------------------------------------------|------------------|----------------------|
| Kiribati | Kiribati Vital Registration - Deaths 2001 ICD10 as it appears in World Health Organization (WHO). WHO Mortality Database Version February 2014. Geneva, Switzerland: World Health Organization (WHO), 2014.         | 2001             |                      |
| Kiribati | World Health Organization (WHO). Retrospective Measles Data on Supplementary Immunization Activities. Geneva, Switzerland: World Health Organization (WHO).                                                         | 2002, 2006, 2009 |                      |
| Kiribati | Kiribati National Statistics Office, Secretariat of the Pacific Community (SPC). Kiribati Population and Housing Census 2005.                                                                                       | 2005             |                      |
| Kiribati | World Health Organization (WHO). Global Status Report on Road Safety 2009. Geneva, Switzerland: World Health Organization (WHO), 2009.                                                                              | 2007             |                      |
| Kiribati | Kiribati National Statistics Office, Secretariat of the Pacific Community (SPC). Kiribati Demographic and Health Survey 2009.                                                                                       | 2009             | *                    |
| Kuwait   | Kuwait Vital Registration Death Data 1962 as it appears in United Nations Statistics Division (UNSD). United Nations Demographic Yearbook. New York City, United States: United Nations Statistics Division (UNSD). | 1962             |                      |
| Kuwait   | Kuwait Vital Registration Death Data 1963 as it appears in United Nations Statistics Division (UNSD). United Nations Demographic Yearbook. New York City, United States: United Nations Statistics Division (UNSD). | 1963             |                      |
| Kuwait   | Kuwait Vital Registration Death Data 1964 as it appears in United Nations Statistics Division (UNSD). United Nations Demographic Yearbook. New York City, United States: United Nations Statistics Division (UNSD). | 1964             |                      |
| Kuwait   | Kuwait Vital Registration Death Data 1965 as it appears in United Nations Statistics Division (UNSD). United Nations Demographic Yearbook. New York City, United States: United Nations Statistics Division (UNSD). | 1965             |                      |
| Kuwait   | Kuwait Vital Registration Death Data 1966 as it appears in United Nations Statistics Division (UNSD). United Nations Demographic Yearbook. New York City, United States: United Nations Statistics Division (UNSD). | 1966             |                      |
| Kuwait   | Kuwait Vital Registration Death Data 1967 as it appears in United Nations Statistics Division (UNSD). United Nations Demographic Yearbook. New York City, United States: United Nations Statistics Division (UNSD). | 1967             |                      |
| Kuwait   | Kuwait Vital Registration Death Data 1968 as it appears in United Nations Statistics Division (UNSD). United Nations Demographic Yearbook. New York City, United States: United Nations Statistics Division (UNSD). | 1968             |                      |
| Kuwait   | Kuwait Vital Registration Death Data 1969 as it appears in United Nations Statistics Division (UNSD). United Nations Demographic Yearbook. New York City, United States: United Nations Statistics Division (UNSD). | 1969             |                      |
| Kuwait   | Kuwait Vital Registration Death Data 1970 as it appears in United Nations Statistics Division (UNSD). United Nations Demographic Yearbook. New York City, United States: United Nations Statistics Division (UNSD). | 1970             |                      |
| Kuwait   | United Nations Office on Drugs and Crime (UNODC). United Nations Surveys on Crime Trends and the Operations of Criminal Justice Systems 1970-2006 as provided by Kavi Bhalla. [Unpublished].                        | 1970-1994        |                      |
| Kuwait   | Kuwait Vital Registration Death Data 1971 as it appears in United Nations Statistics Division (UNSD). United Nations Demographic Yearbook. New York City, United States: United Nations Statistics Division (UNSD). | 1971             |                      |

**Web Table 32 - Comprehensive citation list**

| Country | Citation                                                                                                                                                                                                                 | Year*                           | New for GBD 2013 (*) |
|---------|--------------------------------------------------------------------------------------------------------------------------------------------------------------------------------------------------------------------------|---------------------------------|----------------------|
| Kuwait  | Kuwait Vital Registration - Deaths 1972 ICD8 as it appears in World Health Organization (WHO). WHO Mortality Database Version February 2014. Geneva, Switzerland: World Health Organization (WHO), 2014.                 | 1972                            |                      |
| Kuwait  | Kuwait Vital Registration Death Data 1973 as it appears in United Nations Statistics Division (UNSD). United Nations Demographic Yearbook. New York City, United States: United Nations Statistics Division (UNSD).      | 1973                            |                      |
| Kuwait  | Kuwait Vital Registration Death Data 1974 as it appears in United Nations Statistics Division (UNSD). United Nations Demographic Yearbook. New York City, United States: United Nations Statistics Division (UNSD).      | 1974                            |                      |
| Kuwait  | Kuwait Population and Housing Census 1975 as it appears in United Nations Statistics Division (UNSD). United Nations Demographic Yearbook. New York City, United States: United Nations Statistics Division (UNSD).      | 1975                            |                      |
| Kuwait  | Kuwait Vital Registration - Deaths 1975 ICD8 as it appears in World Health Organization (WHO). WHO Mortality Database Version February 2014. Geneva, Switzerland: World Health Organization (WHO), 2014.                 | 1975                            |                      |
| Kuwait  | Kuwait Vital Registration - Deaths 1976 ICD8 as it appears in World Health Organization (WHO). WHO Mortality Database Version February 2014. Geneva, Switzerland: World Health Organization (WHO), 2014.                 | 1976                            |                      |
| Kuwait  | Kuwait Vital Registration - Deaths 1977 ICD8 as it appears in World Health Organization (WHO). WHO Mortality Database Version February 2014. Geneva, Switzerland: World Health Organization (WHO), 2014.                 | 1977                            |                      |
| Kuwait  | Kuwait Vital Registration - Deaths 1978 ICD8 as it appears in World Health Organization (WHO). WHO Mortality Database Version February 2014. Geneva, Switzerland: World Health Organization (WHO), 2014.                 | 1978                            |                      |
| Kuwait  | Kuwait Vital Registration - Deaths 1979 ICD9 as it appears in World Health Organization (WHO). WHO Mortality Database Version February 2014. Geneva, Switzerland: World Health Organization (WHO), 2014.                 | 1979                            |                      |
| Kuwait  | Kuwait Population and Housing Census 1980 as it appears in United Nations Statistics Division (UNSD). United Nations Demographic Yearbook. New York City, United States: United Nations Statistics Division (UNSD).      | 1980                            |                      |
| Kuwait  | Kuwait Vital Registration - Deaths 1980 ICD9 as it appears in World Health Organization (WHO). WHO Mortality Database Version February 2014. Geneva, Switzerland: World Health Organization (WHO), 2014.                 | 1980                            |                      |
| Kuwait  | Institute for Health Metrics and Evaluation (IHME), Joint United Nations Program on HIV/AIDS (UNAIDS). Institute for Health Metrics and Evaluation HIV Mortality Estimates Based on the UNAIDS Spectrum Model Framework. | 1980-2013                       | *                    |
| Kuwait  | United Nations Children's Fund (UNICEF), World Health Organization (WHO). WHO and UNICEF Reported Disease Incidence Time Series - Pertussis. Geneva, Switzerland: World Health Organization (WHO).                       | 1980-2000, 2004-2005, 2010-2012 |                      |
| Kuwait  | United Nations Children's Fund (UNICEF), World Health Organization (WHO). WHO and UNICEF Reported Disease Incidence Time Series - Measles. Geneva, Switzerland: World Health Organization (WHO).                         | 1980-2000, 2004-2005, 2010-2012 |                      |
| Kuwait  | Parkin DM, International Agency for Research on Cancer, International Association of Cancer Registries. Cancer Incidence in Five Continents. Vol. I to VIII. Lyon, France, IARC Press, 2005.                             | 1980, 1985                      |                      |

**Web Table 32 - Comprehensive citation list**

| Country | Citation                                                                                                                                                                                                                                                      | Year*     | New for GBD 2013 (*) |
|---------|---------------------------------------------------------------------------------------------------------------------------------------------------------------------------------------------------------------------------------------------------------------|-----------|----------------------|
| Kuwait  | Kuwait Vital Registration - Deaths 1981 ICD9 as it appears in World Health Organization (WHO). WHO Mortality Database Version February 2014. Geneva, Switzerland: World Health Organization (WHO), 2014.                                                      | 1981      |                      |
| Kuwait  | Makhseed M, Musini VM. Eclampsia in Kuwait 1981-1993. Aust N Z J Obstet Gynaecol. 1996; 36(3): 258-63.                                                                                                                                                        | 1981-1994 |                      |
| Kuwait  | Kuwait Vital Registration - Deaths 1982 ICD9 as it appears in World Health Organization (WHO). WHO Mortality Database Version February 2014. Geneva, Switzerland: World Health Organization (WHO), 2014.                                                      | 1982      |                      |
| Kuwait  | Kuwait Vital Registration - Deaths 1983 ICD9 as it appears in World Health Organization (WHO). WHO Mortality Database Version February 2014. Geneva, Switzerland: World Health Organization (WHO), 2014.                                                      | 1983      |                      |
| Kuwait  | Kuwait Vital Registration - Deaths 1984 ICD9 as it appears in World Health Organization (WHO). WHO Mortality Database Version February 2014. Geneva, Switzerland: World Health Organization (WHO), 2014.                                                      | 1984      |                      |
| Kuwait  | Kuwait Vital Registration - Deaths 1985 ICD9 as it appears in World Health Organization (WHO). WHO Mortality Database Version February 2014. Geneva, Switzerland: World Health Organization (WHO), 2014.                                                      | 1985      |                      |
| Kuwait  | Kuwait Vital Registration - Deaths 1986 ICD9 as it appears in World Health Organization (WHO). WHO Mortality Database Version February 2014. Geneva, Switzerland: World Health Organization (WHO), 2014.                                                      | 1986      |                      |
| Kuwait  | Council of Health Ministers of GCC States, Ministry of Health (Kuwait). Kuwait Child Health Survey 1987.                                                                                                                                                      | 1987      | *                    |
| Kuwait  | Kuwait Vital Registration - Deaths 1987 ICD9 as it appears in World Health Organization (WHO). WHO Mortality Database Version February 2014. Geneva, Switzerland: World Health Organization (WHO), 2014.                                                      | 1987      |                      |
| Kuwait  | Kuwait Vital Registration Death Data 1988 as it appears in United Nations Statistics Division (UNSD). United Nations Demographic Yearbook. New York City, United States: United Nations Statistics Division (UNSD).                                           | 1988      |                      |
| Kuwait  | Kuwait Vital Registration Death Data 1989 as it appears in United Nations Statistics Division (UNSD). United Nations Demographic Yearbook. New York City, United States: United Nations Statistics Division (UNSD).                                           | 1989      |                      |
| Kuwait  | Weatherall D. Sickle Cell and Thalassemias Prevalence Data, Personal Correspondence with David Weatherall. [Unpublished].                                                                                                                                     | 1990-2009 |                      |
| Kuwait  | Department of Peace and Conflict Research, Uppsala University. UCDP One-Sided Violence Database Version 1.4, 2013. Uppsala, Sweden: Department of Peace and Conflict Research, Uppsala University, 2013.                                                      | 1990-1991 | *                    |
| Kuwait  | Centre for Health Informatics and Multiprofessional Education, University College London. Modell's Haemoglobinopathologist's Almanac. London, United Kingdom: Centre for Health Informatics and Multiprofessional Education, University College London, 2008. | 1990-2003 |                      |
| Kuwait  | Kuwait Vital Registration Death Data 1991 as it appears in United Nations Statistics Division (UNSD). United Nations Demographic Yearbook. New York City, United States: United Nations Statistics Division (UNSD).                                           | 1991      |                      |
| Kuwait  | Kuwait Vital Registration Death Data 1992 as it appears in United Nations Statistics Division (UNSD). United Nations Demographic Yearbook. New York City, United States: United Nations Statistics Division (UNSD).                                           | 1992      |                      |

**Web Table 32 - Comprehensive citation list**

| Country | Citation                                                                                                                                                                                                                             | Year*           | New for GBD 2013 (*) |
|---------|--------------------------------------------------------------------------------------------------------------------------------------------------------------------------------------------------------------------------------------|-----------------|----------------------|
| Kuwait  | Kuwait Vital Registration - Deaths 1993 ICD9 as it appears in World Health Organization (WHO). WHO Mortality Database Version February 2014. Geneva, Switzerland: World Health Organization (WHO), 2014.                             | 1993            |                      |
| Kuwait  | Kuwait Vital Registration - Deaths 1994 ICD9 as it appears in World Health Organization (WHO). WHO Mortality Database Version February 2014. Geneva, Switzerland: World Health Organization (WHO), 2014.                             | 1994            |                      |
| Kuwait  | Measles Supplementary Immunization Activity Data as provided by the World Health Organization. [Unpublished].                                                                                                                        | 1994, 1998      |                      |
| Kuwait  | Kuwait Vital Registration - Deaths 1995 ICD10 as it appears in World Health Organization (WHO). WHO Mortality Database Version February 2014. Geneva, Switzerland: World Health Organization (WHO), 2014.                            | 1995            |                      |
| Kuwait  | United Nations Office on Drugs and Crime (UNODC). United Nations Office on Drugs and Crime Global Study on Homicides 2011. Vienna, Austria: United Nations Office on Drugs and Crime (UNODC), 2011.                                  | 1995-2009       |                      |
| Kuwait  | Council of Health Ministers of GCC States, Ministry of Health (Kuwait), United Nations Statistics Division (UNSD). Kuwait Family Health Survey 1996.                                                                                 | 1996            |                      |
| Kuwait  | Kuwait Vital Registration - Deaths 1996 ICD10 as it appears in World Health Organization (WHO). WHO Mortality Database Version February 2014. Geneva, Switzerland: World Health Organization (WHO), 2014.                            | 1996            |                      |
| Kuwait  | Usanga EA, Ameen R. Glucose-6-phosphate dehydrogenase deficiency in Kuwait, Syria, Egypt, Iran, Jordan and Lebanon. Hum Hered. 2000; 50(3): 158-61.                                                                                  | 1996-1997       |                      |
| Kuwait  | Centre for Research on the Epidemiology of Disasters (CRED). EM-DAT: The OFDA/CRED International Disaster Database. Brussels, Belgium: Catholic University of Leuven.                                                                | 1997            |                      |
| Kuwait  | Kuwait Vital Registration - Deaths 1997 ICD10 as it appears in World Health Organization (WHO). WHO Mortality Database Version February 2014. Geneva, Switzerland: World Health Organization (WHO), 2014.                            | 1997            |                      |
| Kuwait  | Samilchuk E, D'Souza B, Al-Awadi S. Population study of common glucose-6-phosphate dehydrogenase mutations in Kuwait. Hum Hered. 1999; 49(1): 41-4.                                                                                  | 1997-1999       |                      |
| Kuwait  | Kuwait Vital Registration - Deaths 1998 ICD10 as it appears in World Health Organization (WHO). WHO Mortality Database Version February 2014. Geneva, Switzerland: World Health Organization (WHO), 2014.                            | 1998            |                      |
| Kuwait  | World Health Organization (WHO). Yellow Fever Reported Cases, WHO Vaccine-Preventable Diseases: Monitoring System. Geneva, Switzerland: World Health Organization (WHO).                                                             | 1998-2000, 2005 |                      |
| Kuwait  | Kuwait Vital Registration - Deaths 1999 ICD10 as it appears in World Health Organization (WHO). WHO Mortality Database Version February 2014. Geneva, Switzerland: World Health Organization (WHO), 2014.                            | 1999            |                      |
| Kuwait  | Kuwait Vital Registration - Deaths 2000 ICD10 as it appears in World Health Organization (WHO). WHO Mortality Database Version February 2014. Geneva, Switzerland: World Health Organization (WHO), 2014.                            | 2000            |                      |
| Kuwait  | Curado MP, Edwards B, Shin HR, Storm H, Ferlay J, Heanue M and Boyle P, eds (2007). Cancer Incidence in Five Continents, Vol. IX Periodic Data (electronic version). Lyon, IARC. <a href="http://ci5.iarc.fr">http://ci5.iarc.fr</a> | 2000            |                      |

**Web Table 32 - Comprehensive citation list**

| Country | Citation                                                                                                                                                                                                                                                                              | Year*     | New for GBD 2013 (*) |
|---------|---------------------------------------------------------------------------------------------------------------------------------------------------------------------------------------------------------------------------------------------------------------------------------------|-----------|----------------------|
| Kuwait  | Kuwait Vital Registration - Deaths 2001 ICD10 as it appears in World Health Organization (WHO). WHO Mortality Database Version February 2014. Geneva, Switzerland: World Health Organization (WHO), 2014.                                                                             | 2001      |                      |
| Kuwait  | Kuwait Vital Registration - Deaths 2002 ICD10 as it appears in World Health Organization (WHO). WHO Mortality Database Version February 2014. Geneva, Switzerland: World Health Organization (WHO), 2014.                                                                             | 2002      |                      |
| Kuwait  | Kuwait Vital Registration - Deaths 2003 ICD10 as it appears in World Health Organization (WHO). WHO Mortality Database Version February 2014. Geneva, Switzerland: World Health Organization (WHO), 2014.                                                                             | 2003      |                      |
| Kuwait  | Alfadhli S, Kaaba S, Elshafey A, Salim M, AlAwadi A, Bastaki L. Molecular characterization of glucose-6-phosphate dehydrogenase gene defect in the Kuwaiti population. Arch Pathol Lab Med. 2005; 129(9): 1144-7.                                                                     | 2003-2005 |                      |
| Kuwait  | Alkhalidi J, Alenezi B, Al-Mufti S, Hussain E, Askar H, Kemmer N, Neff GW. Seroepidemiology of hepatitis A virus in Kuwait. World J Gastroenterol. 2009; 15(1): 102-5.                                                                                                                | 2003-2004 |                      |
| Kuwait  | Kuwait Vital Registration - Deaths 2004 ICD10 as it appears in World Health Organization (WHO). WHO Mortality Database Version February 2014. Geneva, Switzerland: World Health Organization (WHO), 2014.                                                                             | 2004      |                      |
| Kuwait  | Kuwait Vital Registration - Deaths 2005 ICD10 as it appears in World Health Organization (WHO). WHO Mortality Database Version February 2014. Geneva, Switzerland: World Health Organization (WHO), 2014.                                                                             | 2005      |                      |
| Kuwait  | Forman D, Bray F, Brewster DH, Gombe Mbalawa C, Kohler B, Piñeros M, Steliarova-Foucher E, Swaminathan R and Ferlay J, eds (2013). Cancer Incidence in Five Continents, Vol. X Summary Database (electronic version). Lyon, IARC. <a href="http://ci5.iarc.fr">http://ci5.iarc.fr</a> | 2005      |                      |
| Kuwait  | Kuwait Vital Registration - Deaths 2006 ICD10 as it appears in World Health Organization (WHO). WHO Mortality Database Version February 2014. Geneva, Switzerland: World Health Organization (WHO), 2014.                                                                             | 2006      |                      |
| Kuwait  | Kuwait Vital Registration - Deaths 2007 ICD10 as it appears in World Health Organization (WHO). WHO Mortality Database Version February 2014. Geneva, Switzerland: World Health Organization (WHO), 2014.                                                                             | 2007      |                      |
| Kuwait  | Kuwait Vital Registration - Deaths 2008 ICD10 as it appears in World Health Organization (WHO). WHO Mortality Database Version February 2014. Geneva, Switzerland: World Health Organization (WHO), 2014.                                                                             | 2008      |                      |
| Kuwait  | Kuwait Vital Registration - Deaths 2009 ICD10 as it appears in World Health Organization (WHO). WHO Mortality Database Version February 2014. Geneva, Switzerland: World Health Organization (WHO), 2014.                                                                             | 2009      |                      |
| Kuwait  | Kuwait Vital Registration - Deaths 2010 ICD10 as it appears in World Health Organization (WHO). WHO Mortality Database Version February 2014. Geneva, Switzerland: World Health Organization (WHO), 2014.                                                                             | 2010      |                      |
| Kuwait  | World Health Organization (WHO). Retrospective Measles Data on Supplementary Immunization Activities. Geneva, Switzerland: World Health Organization (WHO).                                                                                                                           | 2010      |                      |
| Kuwait  | Kuwait Vital Registration - Deaths 2011 ICD10 as it appears in World Health Organization (WHO). WHO Mortality Database Version February 2014. Geneva, Switzerland: World Health Organization (WHO), 2014.                                                                             | 2011      | *                    |



**Web Table 32 - Comprehensive citation list**

| Country    | Citation                                                                                                                                                                                                                 | Year*     | New for GBD 2013 (*) |
|------------|--------------------------------------------------------------------------------------------------------------------------------------------------------------------------------------------------------------------------|-----------|----------------------|
| Kyrgyzstan | Institute for Health Metrics and Evaluation (IHME), Joint United Nations Program on HIV/AIDS (UNAIDS). Institute for Health Metrics and Evaluation HIV Mortality Estimates Based on the UNAIDS Spectrum Model Framework. | 1980-2013 | *                    |
| Kyrgyzstan | Kyrgyzstan Vital Registration - Deaths 1981 ICD9 as it appears in World Health Organization (WHO). WHO Mortality Database Version February 2014. Geneva, Switzerland: World Health Organization (WHO), 2014.             | 1981      |                      |
| Kyrgyzstan | Kyrgyzstan Vital Registration - Deaths 1982 ICD9 as it appears in World Health Organization (WHO). WHO Mortality Database Version February 2014. Geneva, Switzerland: World Health Organization (WHO), 2014.             | 1982      |                      |
| Kyrgyzstan | Kyrgyzstan Vital Registration Death Data 1983 as it appears in United Nations Statistics Division (UNSD). United Nations Demographic Yearbook. New York City, United States: United Nations Statistics Division (UNSD).  | 1983      |                      |
| Kyrgyzstan | Kyrgyzstan Vital Registration Death Data 1984 as it appears in United Nations Statistics Division (UNSD). United Nations Demographic Yearbook. New York City, United States: United Nations Statistics Division (UNSD).  | 1984      |                      |
| Kyrgyzstan | Kyrgyzstan Vital Registration - Deaths 1985 ICD9 as it appears in World Health Organization (WHO). WHO Mortality Database Version February 2014. Geneva, Switzerland: World Health Organization (WHO), 2014.             | 1985      |                      |
| Kyrgyzstan | Kyrgyzstan Vital Registration - Deaths 1986 ICD9 as it appears in World Health Organization (WHO). WHO Mortality Database Version February 2014. Geneva, Switzerland: World Health Organization (WHO), 2014.             | 1986      |                      |
| Kyrgyzstan | Parkin DM, International Agency for Research on Cancer, International Association of Cancer Registries. Cancer Incidence in Five Continents. Vol. I to VIII. Lyon, France, IARC Press, 2005.                             | 1986      |                      |
| Kyrgyzstan | Kyrgyzstan Vital Registration - Deaths 1987 ICD9 as it appears in World Health Organization (WHO). WHO Mortality Database Version February 2014. Geneva, Switzerland: World Health Organization (WHO), 2014.             | 1987      |                      |
| Kyrgyzstan | Kyrgyzstan Vital Registration - Deaths 1988 ICD9 as it appears in World Health Organization (WHO). WHO Mortality Database Version February 2014. Geneva, Switzerland: World Health Organization (WHO), 2014.             | 1988      |                      |
| Kyrgyzstan | Kyrgyzstan Vital Registration - Deaths 1989 ICD9 as it appears in World Health Organization (WHO). WHO Mortality Database Version February 2014. Geneva, Switzerland: World Health Organization (WHO), 2014.             | 1989      |                      |
| Kyrgyzstan | Kyrgyzstan Vital Registration - Deaths 1990 ICD9 as it appears in World Health Organization (WHO). WHO Mortality Database Version February 2014. Geneva, Switzerland: World Health Organization (WHO), 2014.             | 1990      |                      |
| Kyrgyzstan | World Health Organization (WHO). Global Prevalence and Incidence of Selected Curable Sexually Transmitted Infections: Overviews and Estimates 2001. Geneva, Switzerland: World Health Organization (WHO), 2001.          | 1990-1996 |                      |
| Kyrgyzstan | United Nations Children's Fund (UNICEF), World Health Organization (WHO). WHO and UNICEF Reported Disease Incidence Time Series - Pertussis. Geneva, Switzerland: World Health Organization (WHO).                       | 1990-2013 |                      |
| Kyrgyzstan | United Nations Children's Fund (UNICEF), World Health Organization (WHO). WHO and UNICEF Reported Disease Incidence Time Series - Measles. Geneva, Switzerland: World Health Organization (WHO).                         | 1990-2013 |                      |

**Web Table 32 - Comprehensive citation list**

| Country    | Citation                                                                                                                                                                                                                                                          | Year*                             | New for GBD 2013 (*) |
|------------|-------------------------------------------------------------------------------------------------------------------------------------------------------------------------------------------------------------------------------------------------------------------|-----------------------------------|----------------------|
| Kyrgyzstan | Centre for Health Informatics and Multiprofessional Education, University College London. Modell's Haemoglobinopathologist's Almanac. London, United Kingdom: Centre for Health Informatics and Multiprofessional Education, University College London, 2008.     | 1990-2003                         |                      |
| Kyrgyzstan | Kyrgyzstan Vital Registration - Deaths 1991 ICD9 as it appears in World Health Organization (WHO). WHO Mortality Database Version February 2014. Geneva, Switzerland: World Health Organization (WHO), 2014.                                                      | 1991                              |                      |
| Kyrgyzstan | Kyrgyzstan Vital Registration - Deaths 1992 ICD9 as it appears in World Health Organization (WHO). WHO Mortality Database Version February 2014. Geneva, Switzerland: World Health Organization (WHO), 2014.                                                      | 1992                              |                      |
| Kyrgyzstan | Centre for Research on the Epidemiology of Disasters (CRED). EM-DAT: The OFDA/CRED International Disaster Database. Brussels, Belgium: Catholic University of Leuven.                                                                                             | 1992, 1994, 1998, 2003-2006, 2008 |                      |
| Kyrgyzstan | Institute of Sociology, Russian Academy of Sciences, Paragon Research, University of North Carolina, World Bank. Kyrgyzstan Living Standards Measurement Survey 1993. Washington DC, United States: World Bank.                                                   | 1993                              |                      |
| Kyrgyzstan | Kyrgyzstan Vital Registration - Deaths 1993 ICD9 as it appears in World Health Organization (WHO). WHO Mortality Database Version February 2014. Geneva, Switzerland: World Health Organization (WHO), 2014.                                                      | 1993                              |                      |
| Kyrgyzstan | Kyrgyzstan Vital Registration - Deaths 1994 ICD9 as it appears in World Health Organization (WHO). WHO Mortality Database Version February 2014. Geneva, Switzerland: World Health Organization (WHO), 2014.                                                      | 1994                              |                      |
| Kyrgyzstan | Kyrgyzstan Vital Registration - Deaths 1995 ICD9 as it appears in World Health Organization (WHO). WHO Mortality Database Version February 2014. Geneva, Switzerland: World Health Organization (WHO), 2014.                                                      | 1995                              |                      |
| Kyrgyzstan | United Nations Office on Drugs and Crime (UNODC). United Nations Office on Drugs and Crime Global Study on Homicides 2011. Vienna, Austria: United Nations Office on Drugs and Crime (UNODC), 2011.                                                               | 1995-2009                         |                      |
| Kyrgyzstan | Kyrgyzstan Vital Registration - Deaths 1996 ICD9 as it appears in World Health Organization (WHO). WHO Mortality Database Version February 2014. Geneva, Switzerland: World Health Organization (WHO), 2014.                                                      | 1996                              |                      |
| Kyrgyzstan | Kyrgyzstan Vital Registration - Deaths 1997 ICD9 as it appears in World Health Organization (WHO). WHO Mortality Database Version February 2014. Geneva, Switzerland: World Health Organization (WHO), 2014.                                                      | 1997                              |                      |
| Kyrgyzstan | Macro International, Inc, Ministry of Health (Kyrgyzstan), Research Institute of Obstetrics and Pediatrics (Kyrgyzstan). Kyrgyzstan Demographic and Health Survey 1997. Calverton, United States: Macro International, Inc.                                       | 1997                              |                      |
| Kyrgyzstan | Kyrgyzstan Vital Registration - Deaths 1998 ICD9 as it appears in World Health Organization (WHO). WHO Mortality Database Version February 2014. Geneva, Switzerland: World Health Organization (WHO), 2014.                                                      | 1998                              |                      |
| Kyrgyzstan | Kyrgyzstan Vital Registration - Deaths 1999 ICD9 as it appears in World Health Organization (WHO). WHO Mortality Database Version February 2014. Geneva, Switzerland: World Health Organization (WHO), 2014.                                                      | 1999                              |                      |
| Kyrgyzstan | National Statistical Committee of the Kyrgyz Republic, Minnesota Population Center. Kyrgyzstan National Population Census 1999 from the Integrated Public Use Microdata Series, International. [Machine-readable database]. Minneapolis: University of Minnesota. | 1999                              |                      |



**Web Table 32 - Comprehensive citation list**

| Country    | Citation                                                                                                                                                                                                                                         | Year*           | New for GBD 2013 (*) |
|------------|--------------------------------------------------------------------------------------------------------------------------------------------------------------------------------------------------------------------------------------------------|-----------------|----------------------|
| Kyrgyzstan | Kyrgyzstan Vital Registration - Deaths 2000 ICD10 as it appears in World Health Organization (WHO). WHO Mortality Database Version February 2014. Geneva, Switzerland: World Health Organization (WHO), 2014.                                    | 2000            |                      |
| Kyrgyzstan | Kyrgyzstan Vital Registration - Deaths 2001 ICD10 as it appears in World Health Organization (WHO). WHO Mortality Database Version February 2014. Geneva, Switzerland: World Health Organization (WHO), 2014.                                    | 2001            |                      |
| Kyrgyzstan | World Health Organization (WHO). Retrospective Measles Data on Supplementary Immunization Activities. Geneva, Switzerland: World Health Organization (WHO).                                                                                      | 2001-2002       |                      |
| Kyrgyzstan | Kyrgyzstan Vital Registration - Deaths 2002 ICD10 as it appears in World Health Organization (WHO). WHO Mortality Database Version February 2014. Geneva, Switzerland: World Health Organization (WHO), 2014.                                    | 2002            |                      |
| Kyrgyzstan | Joint United Nations Program on HIV/AIDS (UNAIDS), United Nations Children's Fund (UNICEF), World Health Organization (WHO). Kyrgyzstan Epidemiological Fact Sheet on HIV/AIDS and STIs 2004.                                                    | 2002            |                      |
| Kyrgyzstan | World Health Organization (WHO). Yellow Fever Reported Cases, WHO Vaccine-Preventable Diseases: Monitoring System. Geneva, Switzerland: World Health Organization (WHO).                                                                         | 2002-2003, 2008 |                      |
| Kyrgyzstan | Kyrgyzstan Vital Registration - Deaths 2003 ICD10 as it appears in World Health Organization (WHO). WHO Mortality Database Version February 2014. Geneva, Switzerland: World Health Organization (WHO), 2014.                                    | 2003            |                      |
| Kyrgyzstan | Kyrgyzstan Vital Registration - Deaths 2004 ICD10 as it appears in World Health Organization (WHO). WHO Mortality Database Version February 2014. Geneva, Switzerland: World Health Organization (WHO), 2014.                                    | 2004            |                      |
| Kyrgyzstan | Kyrgyzstan Vital Registration - Deaths 2005 ICD10 as it appears in World Health Organization (WHO). WHO Mortality Database Version February 2014. Geneva, Switzerland: World Health Organization (WHO), 2014.                                    | 2005            |                      |
| Kyrgyzstan | United Nations Children's Fund (UNICEF), National Statistical Committee of the Kyrgyz Republic. Kyrgyzstan Multiple Indicator Cluster Survey 2005-2006. New York, United States: United Nations Children's Fund (UNICEF).                        | 2005-2006       |                      |
| Kyrgyzstan | Kyrgyzstan Vital Registration - Deaths 2006 ICD10 as it appears in World Health Organization (WHO). WHO Mortality Database Version February 2014. Geneva, Switzerland: World Health Organization (WHO), 2014.                                    | 2006            |                      |
| Kyrgyzstan | Kyrgyzstan Vital Registration - Deaths 2007 ICD10 as it appears in World Health Organization (WHO). WHO Mortality Database Version February 2014. Geneva, Switzerland: World Health Organization (WHO), 2014.                                    | 2007            |                      |
| Kyrgyzstan | Joint United Nations Program on HIV/AIDS (UNAIDS), Ministry of Health (Kyrgyzstan). Kyrgyzstan Declaration of Commitment on HIV/AIDS (UNGASS) Country Report 2010. Geneva, Switzerland: Joint United Nations Program on HIV/AIDS (UNAIDS), 2010. | 2007, 2009      |                      |
| Kyrgyzstan | Kyrgyzstan Vital Registration - Deaths 2008 ICD10 as it appears in World Health Organization (WHO). WHO Mortality Database Version February 2014. Geneva, Switzerland: World Health Organization (WHO), 2014.                                    | 2008            |                      |
| Kyrgyzstan | Kyrgyzstan Vital Registration - Deaths 2009 ICD10 as it appears in World Health Organization (WHO). WHO Mortality Database Version February 2014. Geneva, Switzerland: World Health Organization (WHO), 2014.                                    | 2009            |                      |

**Web Table 32 - Comprehensive citation list**

| Country    | Citation                                                                                                                                                                                                                                                                   | Year*                                                                                 | New for GBD 2013 (*) |
|------------|----------------------------------------------------------------------------------------------------------------------------------------------------------------------------------------------------------------------------------------------------------------------------|---------------------------------------------------------------------------------------|----------------------|
| Kyrgyzstan | Minnesota Population Center, National Statistical Committee of the Kyrgyz Republic. Kyrgyzstan Population and Housing Census 2009 from the Integrated Public Use Microdata Series, International. [Machine-readable database]. Minneapolis: University of Minnesota, 2013. | 2009                                                                                  | *                    |
| Kyrgyzstan | Joint United Nations Program on HIV/AIDS (UNAIDS), Ministry of Health (Kyrgyzstan). Kyrgyzstan Performance Report in the Fight Against HIV/AIDS (UNGASS) 2010 . Geneva, Switzerland: Joint United Nations Program on HIV/AIDS (UNAIDS), 2010.                              | 2009                                                                                  |                      |
| Kyrgyzstan | Kyrgyzstan Vital Registration - Deaths 2010 ICD10 as it appears in World Health Organization (WHO). WHO Mortality Database Version February 2014. Geneva, Switzerland: World Health Organization (WHO), 2014.                                                              | 2010                                                                                  |                      |
| Kyrgyzstan | Department of Peace and Conflict Research, Uppsala University. UCDP Nonstate Conflict Database Version 2.5, 2013. Uppsala, Sweden: Department of Peace and Conflict Research, Uppsala University, 2013.                                                                    | 2010                                                                                  | *                    |
| Kyrgyzstan | Kyrgyzstan Vital Registration Death Data 2011 as it appears in United Nations Statistics Division (UNSD). United Nations Demographic Yearbook. New York City, United States: United Nations Statistics Division (UNSD).                                                    | 2011                                                                                  | *                    |
| Kyrgyzstan | ICF International, Ministry of Health (Kyrgyzstan), National Statistical Committee of the Kyrgyz Republic. Kyrgyzstan Demographic and Health Survey 2012. Fairfax, United States: ICF International, 2014.                                                                 | 2012                                                                                  | *                    |
| Laos       | Peace Research Institute Oslo (PRIO). Battle Deaths Dataset Version 3, 2009. Oslo, Norway: Peace Research Institute Oslo (PRIO), 2009.                                                                                                                                     | 1950-1988                                                                             |                      |
| Laos       | Centre for Research on the Epidemiology of Disasters (CRED). EM-DAT: The OFDA/CRED International Disaster Database. Brussels, Belgium: Catholic University of Leuven.                                                                                                      | 1966, 1968, 1971, 1978, 1984, 1992-1993, 1995-1996, 2000, 2002, 2008-2009, 2011, 2013 |                      |
| Laos       | Institute for Health Metrics and Evaluation (IHME), Joint United Nations Program on HIV/AIDS (UNAIDS). Institute for Health Metrics and Evaluation HIV Mortality Estimates Based on the UNAIDS Spectrum Model Framework.                                                   | 1980-2013                                                                             | *                    |
| Laos       | United Nations Children's Fund (UNICEF), World Health Organization (WHO). WHO and UNICEF Reported Disease Incidence Time Series - Pertussis. Geneva, Switzerland: World Health Organization (WHO).                                                                         | 1980, 1982-2001, 2003-2013                                                            |                      |
| Laos       | United Nations Children's Fund (UNICEF), World Health Organization (WHO). WHO and UNICEF Reported Disease Incidence Time Series - Measles. Geneva, Switzerland: World Health Organization (WHO).                                                                           | 1980, 1982-2013                                                                       |                      |
| Laos       | Fauveau VA. The Lao People's Democratic Republic: maternal mortality and female mortality: determining causes of deaths. World Health Stat Q. 1995; 48(1): 44-6.                                                                                                           | 1989                                                                                  |                      |
| Laos       | Department of Peace and Conflict Research, Uppsala University. UCDP Battle-Related Deaths Database Version 5, 2013. Uppsala, Sweden: Department of Peace and Conflict Research, Uppsala University, 2013.                                                                  | 1989-1990                                                                             | *                    |
| Laos       | Weatherall D. Sickle Cell and Thalassemias Prevalence Data, Personal Correspondence with David Weatherall. [Unpublished].                                                                                                                                                  | 1990-2009                                                                             |                      |
| Laos       | Centre for Health Informatics and Multiprofessional Education, University College London. Modell's Haemoglobinopathologist's Almanac. London, United Kingdom: Centre for Health Informatics and Multiprofessional Education, University College London, 2008.              | 1990-2003                                                                             |                      |
| Laos       | National Statistical Center (Laos). Laos Expenditure and Consumption Survey 1992-1993.                                                                                                                                                                                     | 1992-1993                                                                             |                      |
| Laos       | Ministry of Health (Laos). Laos Social Indicator Survey 1993.                                                                                                                                                                                                              | 1993                                                                                  |                      |
| Laos       | Laos Census 1995 as it appears in United Nations Statistics Division (UNSD). United Nations Demographic Yearbook. New York City, United States: United Nations Statistics Division (UNSD).                                                                                 | 1995                                                                                  |                      |

**Web Table 32 - Comprehensive citation list**

| Country | Citation                                                                                                                                                                                                                                                      | Year*                      | New for GBD 2013 (*) |
|---------|---------------------------------------------------------------------------------------------------------------------------------------------------------------------------------------------------------------------------------------------------------------|----------------------------|----------------------|
| Laos    | Lao Women's Union, National Statistical Center (Laos), United Nations Population Fund (UNFPA). Laos Fertility and Birth Spacing Survey 1995.                                                                                                                  | 1995                       |                      |
| Laos    | Iwai K, Hirono A, Matsuoka H, Kawamoto F, Horie T, Lin K, Tantular IS, Dachlan YP, Notopuro H, Hidayah NI, Salim AM, Fujii H, Miwa S, Ishii A. Distribution of glucose-6-phosphate dehydrogenase mutations in Southeast Asia. Hum Genet. 2001; 108(6): 445-9. | 1997-1998                  |                      |
| Laos    | World Health Organization (WHO). Yellow Fever Reported Cases, WHO Vaccine-Preventable Diseases: Monitoring System. Geneva, Switzerland: World Health Organization (WHO).                                                                                      | 1998-1999, 2006            |                      |
| Laos    | Joint United Nations Program on HIV/AIDS (UNAIDS), United Nations Children's Fund (UNICEF), World Health Organization (WHO). Laos Epidemiological Fact Sheet on HIV/AIDS and STIs 2004.                                                                       | 1999                       |                      |
| Laos    | Kuroiwa C, Vongphrachanh P, Xayyavong P, Southalack K, Hashizume M, Nakamura S. Measles epidemiology and outbreak investigation using IgM test in Laos. J Epidemiol. 2001; 11(6): 255-62.                                                                     | 1999-2000                  |                      |
| Laos    | National Statistical Center (Laos). Laos Reproductive Health Survey 2000 .                                                                                                                                                                                    | 2000                       |                      |
| Laos    | World Health Organization (WHO). Retrospective Measles Data on Supplementary Immunization Activities. Geneva, Switzerland: World Health Organization (WHO).                                                                                                   | 2000-2001, 2007, 2011-2012 |                      |
| Laos    | Jutavijittum P, Yousukh A, Samounry B, Samounry K, Ounavong A, Thammavong T, Keokhamphue J, Toriyama K. Seroprevalence of hepatitis B and C virus infections among Lao blood donors. Southeast Asian J Trop Med Public Health. 2007; 38(4): 674-9.            | 2003-2005                  |                      |
| Laos    | Department of Peace and Conflict Research, Uppsala University. UCDP One-Sided Violence Database Version 1.4, 2013. Uppsala, Sweden: Department of Peace and Conflict Research, Uppsala University, 2013.                                                      | 2006                       | *                    |
| Laos    | Joint United Nations Program on HIV/AIDS (UNAIDS), National Committee for the Control of AIDS (Laos). Laos UNGASS Country Progress Report 2010. Geneva, Switzerland: Joint United Nations Program on HIV/AIDS (UNAIDS), 2010.                                 | 2009                       |                      |
| Laos    | United Nations Office on Drugs and Crime (UNODC). United Nations Office on Drugs and Crime Global Study on Homicides 2011. Vienna, Austria: United Nations Office on Drugs and Crime (UNODC), 2011.                                                           | 2010                       |                      |
| Laos    | Ministry of Education and Sports (Laos), Ministry of Health (Laos), Ministry of Planning and Investment (Laos). Laos Multiple Indicator Cluster Survey 2011-2012. New York, United States: United Nations Children's Fund (UNICEF), 2013.                     | 2011-2012                  | *                    |
| Latvia  | Max Planck Institute for Demographic Research, University of California. Human Mortality Database. Berkeley, USA: University of California; Rostock, Germany: Max Planck Institute for Demographic Research.                                                  | 1959-1979                  |                      |
| Latvia  | Latvia Vital Registration - Deaths 1980 ICD9 as it appears in World Health Organization (WHO). WHO Mortality Database Version February 2014. Geneva, Switzerland: World Health Organization (WHO), 2014.                                                      | 1980                       |                      |
| Latvia  | Institute for Health Metrics and Evaluation (IHME), Joint United Nations Program on HIV/AIDS (UNAIDS). Institute for Health Metrics and Evaluation HIV Mortality Estimates Based on the UNAIDS Spectrum Model Framework.                                      | 1980-2013                  | *                    |
| Latvia  | Latvia Vital Registration - Deaths 1981 ICD9 as it appears in World Health Organization (WHO). WHO Mortality Database Version February 2014. Geneva, Switzerland: World Health Organization (WHO), 2014.                                                      | 1981                       |                      |

**Web Table 32 - Comprehensive citation list**

| Country | Citation                                                                                                                                                                                                                                                                                              | Year*                | New for GBD 2013 (*) |
|---------|-------------------------------------------------------------------------------------------------------------------------------------------------------------------------------------------------------------------------------------------------------------------------------------------------------|----------------------|----------------------|
| Latvia  | Latvia Vital Registration - Deaths 1982 ICD9 as it appears in World Health Organization (WHO). WHO Mortality Database Version February 2014. Geneva, Switzerland: World Health Organization (WHO), 2014.                                                                                              | 1982                 |                      |
| Latvia  | Latvia Vital Registration - Deaths 1983 ICD9 as it appears in World Health Organization (WHO). WHO Mortality Database Version February 2014. Geneva, Switzerland: World Health Organization (WHO), 2014.                                                                                              | 1983                 |                      |
| Latvia  | Latvia Vital Registration - Deaths 1984 ICD9 as it appears in World Health Organization (WHO). WHO Mortality Database Version February 2014. Geneva, Switzerland: World Health Organization (WHO), 2014.                                                                                              | 1984                 |                      |
| Latvia  | Latvia Vital Registration - Deaths 1985 ICD9 as it appears in World Health Organization (WHO). WHO Mortality Database Version February 2014. Geneva, Switzerland: World Health Organization (WHO), 2014.                                                                                              | 1985                 |                      |
| Latvia  | Latvia Vital Registration - Deaths 1986 ICD9 as it appears in World Health Organization (WHO). WHO Mortality Database Version February 2014. Geneva, Switzerland: World Health Organization (WHO), 2014.                                                                                              | 1986                 |                      |
| Latvia  | Latvia Vital Registration - Deaths 1987 ICD9 as it appears in World Health Organization (WHO). WHO Mortality Database Version February 2014. Geneva, Switzerland: World Health Organization (WHO), 2014.                                                                                              | 1987                 |                      |
| Latvia  | Latvia Vital Registration - Deaths 1988 ICD9 as it appears in World Health Organization (WHO). WHO Mortality Database Version February 2014. Geneva, Switzerland: World Health Organization (WHO), 2014.                                                                                              | 1988                 |                      |
| Latvia  | Institute for Health Metrics and Evaluation. Institute for Health Metrics and Evaluation Cancer Registry Database. [Unpublished].                                                                                                                                                                     | 1988-2005            |                      |
| Latvia  | Ferlay J, Parkin DM, Curado MP, Bray F, Edwards B, Shin HR and Forman D. Cancer Incidence in Five Continents, Volumes I to IX: IARC CancerBase No. 9 [Internet]. Lyon, France: International Agency for Research on Cancer; 2010. Available from: <a href="http://ci5.iarc.fr">http://ci5.iarc.fr</a> | 1988-2002            |                      |
| Latvia  | Latvia Population and Housing Census 1989 as it appears in United Nations Statistics Division (UNSD). United Nations Demographic Yearbook - Historical Supplement 1997. New York City, United States: United Nations Statistics Division (UNSD).                                                      | 1989                 |                      |
| Latvia  | Latvia Vital Registration - Deaths 1989 ICD9 as it appears in World Health Organization (WHO). WHO Mortality Database Version February 2014. Geneva, Switzerland: World Health Organization (WHO), 2014.                                                                                              | 1989                 |                      |
| Latvia  | Latvia Vital Registration - Deaths 1990 ICD9 as it appears in World Health Organization (WHO). WHO Mortality Database Version February 2014. Geneva, Switzerland: World Health Organization (WHO), 2014.                                                                                              | 1990                 |                      |
| Latvia  | World Health Organization (WHO). Global Prevalence and Incidence of Selected Curable Sexually Transmitted Infections: Overviews and Estimates 2001. Geneva, Switzerland: World Health Organization (WHO), 2001.                                                                                       | 1990-1996            |                      |
| Latvia  | United Nations Children's Fund (UNICEF), World Health Organization (WHO). WHO and UNICEF Reported Disease Incidence Time Series - Pertussis. Geneva, Switzerland: World Health Organization (WHO).                                                                                                    | 1990-2013            |                      |
| Latvia  | United Nations Children's Fund (UNICEF), World Health Organization (WHO). WHO and UNICEF Reported Disease Incidence Time Series - Measles. Geneva, Switzerland: World Health Organization (WHO).                                                                                                      | 1990-2001, 2004-2013 |                      |

**Web Table 32 - Comprehensive citation list**

| Country | Citation                                                                                                                                                                                                                                                      | Year*      | New for GBD 2013 (*) |
|---------|---------------------------------------------------------------------------------------------------------------------------------------------------------------------------------------------------------------------------------------------------------------|------------|----------------------|
| Latvia  | Centre for Health Informatics and Multiprofessional Education, University College London. Modell's Haemoglobinopathologist's Almanac. London, United Kingdom: Centre for Health Informatics and Multiprofessional Education, University College London, 2008. | 1990-2003  |                      |
| Latvia  | Parkin DM, International Agency for Research on Cancer, International Association of Cancer Registries. Cancer Incidence in Five Continents. Vol. I to VIII. Lyon, France, IARC Press, 2005.                                                                  | 1990, 1995 |                      |
| Latvia  | Latvia Vital Registration - Deaths 1991 ICD9 as it appears in World Health Organization (WHO). WHO Mortality Database Version February 2014. Geneva, Switzerland: World Health Organization (WHO), 2014.                                                      | 1991       |                      |
| Latvia  | Latvia Vital Registration - Deaths 1992 ICD9 as it appears in World Health Organization (WHO). WHO Mortality Database Version February 2014. Geneva, Switzerland: World Health Organization (WHO), 2014.                                                      | 1992       |                      |
| Latvia  | Latvia Vital Registration - Deaths 1993 ICD9 as it appears in World Health Organization (WHO). WHO Mortality Database Version February 2014. Geneva, Switzerland: World Health Organization (WHO), 2014.                                                      | 1993       |                      |
| Latvia  | Latvia Vital Registration - Deaths 1994 ICD9 as it appears in World Health Organization (WHO). WHO Mortality Database Version February 2014. Geneva, Switzerland: World Health Organization (WHO), 2014.                                                      | 1994       |                      |
| Latvia  | Latvia Vital Registration - Deaths 1995 ICD9 as it appears in World Health Organization (WHO). WHO Mortality Database Version February 2014. Geneva, Switzerland: World Health Organization (WHO), 2014.                                                      | 1995       |                      |
| Latvia  | Latvia Vital Registration - Deaths 1996 ICD10 as it appears in World Health Organization (WHO). WHO Mortality Database Version February 2014. Geneva, Switzerland: World Health Organization (WHO), 2014.                                                     | 1996       |                      |
| Latvia  | Latvia Vital Registration - Deaths 1997 ICD10 as it appears in World Health Organization (WHO). WHO Mortality Database Version February 2014. Geneva, Switzerland: World Health Organization (WHO), 2014.                                                     | 1997       |                      |
| Latvia  | Latvia Vital Registration - Deaths 1998 ICD10 as it appears in World Health Organization (WHO). WHO Mortality Database Version February 2014. Geneva, Switzerland: World Health Organization (WHO), 2014.                                                     | 1998       |                      |
| Latvia  | Centre for Research on the Epidemiology of Disasters (CRED). EM-DAT: The OFDA/CRED International Disaster Database. Brussels, Belgium: Catholic University of Leuven.                                                                                         | 1999       |                      |
| Latvia  | Latvia Vital Registration - Deaths 1999 ICD10 as it appears in World Health Organization (WHO). WHO Mortality Database Version February 2014. Geneva, Switzerland: World Health Organization (WHO), 2014.                                                     | 1999       |                      |
| Latvia  | Latvia Vital Registration - Deaths 2000 ICD10 as it appears in World Health Organization (WHO). WHO Mortality Database Version February 2014. Geneva, Switzerland: World Health Organization (WHO), 2014.                                                     | 2000       |                      |
| Latvia  | Curado MP, Edwards B, Shin HR, Storm H, Ferlay J, Heanue M and Boyle P, eds (2007). Cancer Incidence in Five Continents, Vol. IX Periodic Data (electronic version). Lyon, IARC. <a href="http://ci5.iarc.fr">http://ci5.iarc.fr</a>                          | 2000       |                      |
| Latvia  | Latvia Vital Registration - Deaths 2001 ICD10 as it appears in World Health Organization (WHO). WHO Mortality Database Version February 2014. Geneva, Switzerland: World Health Organization (WHO), 2014.                                                     | 2001       |                      |

**Web Table 32 - Comprehensive citation list**

| Country | Citation                                                                                                                                                                                                                                                                              | Year*                | New for GBD 2013 (*) |
|---------|---------------------------------------------------------------------------------------------------------------------------------------------------------------------------------------------------------------------------------------------------------------------------------------|----------------------|----------------------|
| Latvia  | World Health Organization (WHO). Yellow Fever Reported Cases, WHO Vaccine-Preventable Diseases: Monitoring System. Geneva, Switzerland: World Health Organization (WHO).                                                                                                              | 2001-2002, 2004-2009 |                      |
| Latvia  | Latvia Vital Registration - Deaths 2002 ICD10 as it appears in World Health Organization (WHO). WHO Mortality Database Version February 2014. Geneva, Switzerland: World Health Organization (WHO), 2014.                                                                             | 2002                 |                      |
| Latvia  | Latvia Vital Registration - Deaths 2003 ICD10 as it appears in World Health Organization (WHO). WHO Mortality Database Version February 2014. Geneva, Switzerland: World Health Organization (WHO), 2014.                                                                             | 2003                 |                      |
| Latvia  | EUVAC-NET. EUVAC-NET Pertussis Surveillance Report 2003-2007. Stockholm, Sweden: European Centre for Disease Prevention and Control, 2009.                                                                                                                                            | 2003-2007            |                      |
| Latvia  | Latvia Vital Registration - Deaths 2004 ICD10 as it appears in World Health Organization (WHO). WHO Mortality Database Version February 2014. Geneva, Switzerland: World Health Organization (WHO), 2014.                                                                             | 2004                 |                      |
| Latvia  | WHO Regional Office for Europe (EURO-WHO). European Hospital Morbidity Database. Copenhagen, Denmark: WHO Regional Office for Europe (EURO-WHO).                                                                                                                                      | 2004-2007            |                      |
| Latvia  | Latvia Vital Registration - Deaths 2005 ICD10 as it appears in World Health Organization (WHO). WHO Mortality Database Version February 2014. Geneva, Switzerland: World Health Organization (WHO), 2014.                                                                             | 2005                 |                      |
| Latvia  | Forman D, Bray F, Brewster DH, Gombe Mbalawa C, Kohler B, Piñeros M, Steliarova-Foucher E, Swaminathan R and Ferlay J, eds (2013). Cancer Incidence in Five Continents, Vol. X Summary Database (electronic version). Lyon, IARC. <a href="http://ci5.iarc.fr">http://ci5.iarc.fr</a> | 2005                 |                      |
| Latvia  | Latvia Vital Registration - Deaths 2006 ICD10 as it appears in World Health Organization (WHO). WHO Mortality Database Version February 2014. Geneva, Switzerland: World Health Organization (WHO), 2014.                                                                             | 2006                 |                      |
| Latvia  | Latvia Vital Registration - Deaths 2007 ICD10 as it appears in World Health Organization (WHO). WHO Mortality Database Version February 2014. Geneva, Switzerland: World Health Organization (WHO), 2014.                                                                             | 2007                 |                      |
| Latvia  | Latvia Vital Registration - Deaths 2008 ICD10 as it appears in World Health Organization (WHO). WHO Mortality Database Version February 2014. Geneva, Switzerland: World Health Organization (WHO), 2014.                                                                             | 2008                 |                      |
| Latvia  | EUVAC-NET. EUVAC-NET Measles Surveillance Report 2008. Stockholm, Sweden: European Centre for Disease Prevention and Control, 2009.                                                                                                                                                   | 2008                 |                      |
| Latvia  | EUVAC-NET. EUVAC-NET Pertussis Surveillance Report 2009. Stockholm, Sweden: European Centre for Disease Prevention and Control, 2010.                                                                                                                                                 | 2008-2009            |                      |
| Latvia  | Latvia Vital Registration - Deaths 2009 ICD10 as it appears in World Health Organization (WHO). WHO Mortality Database Version February 2014. Geneva, Switzerland: World Health Organization (WHO), 2014.                                                                             | 2009                 |                      |
| Latvia  | Latvia Vital Registration - Deaths 2010 ICD10 as it appears in World Health Organization (WHO). WHO Mortality Database Version February 2014. Geneva, Switzerland: World Health Organization (WHO), 2014.                                                                             | 2010                 |                      |



**Web Table 32 - Comprehensive citation list**

| Country | Citation                                                                                                                                                                                                                                                                                                                                                                                                                                 | Year*                       | New for GBD 2013 (*) |
|---------|------------------------------------------------------------------------------------------------------------------------------------------------------------------------------------------------------------------------------------------------------------------------------------------------------------------------------------------------------------------------------------------------------------------------------------------|-----------------------------|----------------------|
| Latvia  | European Renal Association-European Dialysis and Transplant Association (ERA-EDTA). European Renal Association-European Dialysis and Transplant Association Registry Annual Report 2010. Parma, Italy: European Renal Association-European Dialysis and Transplant Association (ERA-EDTA), 2012.                                                                                                                                         | 2010                        | *                    |
| Latvia  | Latvia Vital Registration - Deaths 2011 ICD10 as it appears in World Health Organization (WHO). WHO Mortality Database Version February 2014. Geneva, Switzerland: World Health Organization (WHO), 2014.                                                                                                                                                                                                                                | 2011                        | *                    |
| Latvia  | European Renal Association-European Dialysis and Transplant Association (ERA-EDTA). European Renal Association-European Dialysis and Transplant Association Registry Annual Report 2011. Parma, Italy: European Renal Association-European Dialysis and Transplant Association (ERA-EDTA), 2013.                                                                                                                                         | 2011                        | *                    |
| Latvia  | Latvia Vital Registration - Deaths 2012 ICD10 as it appears in World Health Organization (WHO). WHO Mortality Database Version February 2014. Geneva, Switzerland: World Health Organization (WHO), 2014.                                                                                                                                                                                                                                | 2012                        | *                    |
| Lebanon | Centre for Research on the Epidemiology of Disasters (CRED). EM-DAT: The OFDA/CRED International Disaster Database. Brussels, Belgium: Catholic University of Leuven.                                                                                                                                                                                                                                                                    | 1955-1956, 1983, 1992, 2007 |                      |
| Lebanon | Peace Research Institute Oslo (PRIO). Battle Deaths Dataset Version 3, 2009. Oslo, Norway: Peace Research Institute Oslo (PRIO), 2009.                                                                                                                                                                                                                                                                                                   | 1958-1988                   |                      |
| Lebanon | Taleb N, Loiselet J, Guorra F, Sfeir H. On glucose-6-phosphate dehydrogenase deficiency in autochthonous populations of Lebanon. C R Hebd Seances Acad Sci. 1964; 5749-51.                                                                                                                                                                                                                                                               | 1962-1964                   |                      |
| Lebanon | United Nations Office on Drugs and Crime (UNODC). United Nations Surveys on Crime Trends and the Operations of Criminal Justice Systems 1970-2006 as provided by Kavi Bhalla. [Unpublished].                                                                                                                                                                                                                                             | 1970-1994                   |                      |
| Lebanon | Charafeddine K, Ismael H, Charafeddine M, Inati A, Koussa S, Naja M, Taher A. Survival and Complications of Beta-Thalassemia in Lebanon. Acta Haematol. 2008; 120(2): 112-6.                                                                                                                                                                                                                                                             | 1970-2002                   |                      |
| Lebanon | Lebanon Family Planning Association (LFPA). Lebanon National Fertility and Family Planning Survey 1971.                                                                                                                                                                                                                                                                                                                                  | 1971                        |                      |
| Lebanon | University of Central Arkansas - UCA [Internet]. Conway, AR: University of Central Arkansas; [updated 2014]. Lebanon DADM Project Intrastate Dispute Narrative 1943-Present. Available from: <a href="http://uca.edu/politicalscience/dadm-project/middle-eastnorth-africapersian-gulf-region/lebanon-1943-present/">http://uca.edu/politicalscience/dadm-project/middle-eastnorth-africapersian-gulf-region/lebanon-1943-present/</a> . | 1973                        | *                    |
| Lebanon | Mothi ZM. The Lebanese Civil War (1975-1990): Causes and Costs of Conflict [master's thesis]. [Lawrence (KS)]: University of Kansas; 2010. 99 p.                                                                                                                                                                                                                                                                                         | 1975-1990                   | *                    |
| Lebanon | Makdisi S, Sadaka R. The Lebanese Civil War, 1975-1990. Beirut, Lebanon: American University of Beirut; 2003. (American University of Beirut, Institute of Financial Economics Lecture and Working Papers, Series No. 3, 2003).                                                                                                                                                                                                          | 1975-1990                   | *                    |
| Lebanon | al-Hout BN. Sabra and Shatila: September 1982. London, United Kingdom: Pluto Press; 2004. 560 p.                                                                                                                                                                                                                                                                                                                                         | 1976-1990                   | *                    |
| Lebanon | Castillo Taucher S. [Services for the care and prevention of birth defects. Reduced report of a World Health Organization and March of Dimes Foundation meeting]. Rev Med Chil. 2007; 135(6): 806-13.                                                                                                                                                                                                                                    | 1977-1985, 1990-2002        |                      |
| Lebanon | Institute for Health Metrics and Evaluation (IHME), Joint United Nations Program on HIV/AIDS (UNAIDS). Institute for Health Metrics and Evaluation HIV Mortality Estimates Based on the UNAIDS Spectrum Model Framework.                                                                                                                                                                                                                 | 1980-2013                   | *                    |
| Lebanon | United Nations Children's Fund (UNICEF), World Health Organization (WHO). WHO and UNICEF Reported Disease Incidence Time Series - Measles. Geneva, Switzerland: World Health Organization (WHO).                                                                                                                                                                                                                                         | 1981, 1983, 1992-2013       |                      |

**Web Table 32 - Comprehensive citation list**

| Country | Citation                                                                                                                                                                                                                                                                                      | Year*           | New for GBD 2013 (*) |
|---------|-----------------------------------------------------------------------------------------------------------------------------------------------------------------------------------------------------------------------------------------------------------------------------------------------|-----------------|----------------------|
| Lebanon | United Nations Children's Fund (UNICEF), World Health Organization (WHO). WHO and UNICEF Reported Disease Incidence Time Series - Pertussis. Geneva, Switzerland: World Health Organization (WHO).                                                                                            | 1983, 1992-2013 |                      |
| Lebanon | Inati A, Jradi O, Tarabay H, Moallem H, Rachkidi Y, El Accaoui R, Isma'eel H, Wehbe R, Mfarrej BG, Dabbous I, Taher A. Sick cell disease: the Lebanese experience. <i>Int J Lab Hematol.</i> 2007; 6(29): 399-408.                                                                            | 1985-2005       |                      |
| Lebanon | Sibai AM, Fletcher A, Hills M, Campbell O. Non-communicable disease mortality rates using the verbal autopsy in a cohort of middle aged and older populations in Beirut during wartime, 1983-93. <i>J Epidemiol Community Health.</i> 2001; 55(4): 271-6.                                     | 1988            |                      |
| Lebanon | Department of Peace and Conflict Research, Uppsala University. UCDP Battle-Related Deaths Database Version 5, 2013. Uppsala, Sweden: Department of Peace and Conflict Research, Uppsala University, 2013.                                                                                     | 1989-1990       | *                    |
| Lebanon | Department of Peace and Conflict Research, Uppsala University. UCDP Nonstate Conflict Database Version 2.5, 2013. Uppsala, Sweden: Department of Peace and Conflict Research, Uppsala University, 2013.                                                                                       | 1989-2012       | *                    |
| Lebanon | Weatherall D. Sick Cell and Thalassemias Prevalence Data, Personal Correspondence with David Weatherall. [Unpublished].                                                                                                                                                                       | 1990-2009       |                      |
| Lebanon | Centre for Health Informatics and Multiprofessional Education, University College London. Modell's Haemoglobinopathologist's Almanac. London, United Kingdom: Centre for Health Informatics and Multiprofessional Education, University College London, 2008.                                 | 1990-2003       |                      |
| Lebanon | Department of Peace and Conflict Research, Uppsala University. UCDP One-Sided Violence Database Version 1.4, 2013. Uppsala, Sweden: Department of Peace and Conflict Research, Uppsala University, 2013.                                                                                      | 1994-2006       | *                    |
| Lebanon | Irani Hakime N, Feghali Haibeh R. [Hepatitis E virus: detection of antibodies in blood donors in Lebanon]. <i>J Med Liban.</i> 1998; 46(2): 60-2.                                                                                                                                             | 1995            | *                    |
| Lebanon | Ministry of Public Health (Lebanon), League of Arab States. Lebanon Maternal and Child Health Survey 1996.                                                                                                                                                                                    | 1996            |                      |
| Lebanon | Usanga EA, Ameen R. Glucose-6-phosphate dehydrogenase deficiency in Kuwait, Syria, Egypt, Iran, Jordan and Lebanon. <i>Hum Hered.</i> 2000; 50(3): 158-61.                                                                                                                                    | 1996-1997       |                      |
| Lebanon | Shamma'a MH, Abu-Samra S, Salameh V, Nassar NT. The significance of anti-HAV in different population sectors in Lebanon: a comparative seroepidemiologic study. <i>Int J Epidemiol.</i> 1982; 11(4): 406-9.                                                                                   | 1997            |                      |
| Lebanon | Shamseddine A, Sibai A-M, Gehchan N, Rahal B, El-Saghir N, Ghosn M, Aftimos G, Chamseddine N, Seoud M, Lebanese Cancer Epidemiology Group. Cancer Incidence in Postwar Lebanon: Findings from the First National Population-based Registry, 1998. <i>Ann Epidemiol.</i> 2004; 14(9): 663-8.   | 1998            |                      |
| Lebanon | World Health Organization (WHO). Yellow Fever Reported Cases, WHO Vaccine-Preventable Diseases: Monitoring System. Geneva, Switzerland: World Health Organization (WHO).                                                                                                                      | 1998-2009       |                      |
| Lebanon | Yaghi C, Sharara A-I, Rassam P, Moucari R, Honein K, BouJaoude J, Slim R, Noun R, Abdul-Baki H, Khalifeh M, Ramia S, Sayegh R. Hepatocellular carcinoma in Lebanon: Etiology and prognostic factors associated with short-term survival. <i>World J Gastroenterol.</i> 2006; 12(22): 3575-80. | 1998-2003       |                      |
| Lebanon | Sacy RG, Haddad M, Baasiri G, Khoriaty A, Gerbaka BJ, Abu-Elyazeed R. Hepatitis a in Lebanon: a changing epidemiological pattern. <i>Am J Trop Med Hyg.</i> 2005; 73(2): 453-6.                                                                                                               | 1999-2000       |                      |
| Lebanon | Bizri ARN, Nuwayhid IA, Hamadeh GN, Steitieh SW, Choukair AM, Musharrafieh UM. Association between hepatitis A virus and <i>Helicobacter pylori</i> in a developing country: the saga continues. <i>J Gastroenterol Hepatol.</i> 2006; 21(10): 1615-21.                                       | 1999-2000       |                      |



**Web Table 32 - Comprehensive citation list**

| Country | Citation                                                                                                                                                                                                                                                                                                                                    | Year*            | New for GBD 2013 (*) |
|---------|---------------------------------------------------------------------------------------------------------------------------------------------------------------------------------------------------------------------------------------------------------------------------------------------------------------------------------------------|------------------|----------------------|
| Lebanon | Central Administration of Statistics (Lebanon), United Nations Children's Fund (UNICEF). Lebanon Multiple Indicator Cluster Survey 2000. New York, United States: United Nations Children's Fund (UNICEF).                                                                                                                                  | 2000             |                      |
| Lebanon | Osman H, Campbell OM, Sinno D, Zarwi R, Nassar AH. Facility-based audit of maternal mortality in Lebanon: A feasibility study. Acta Obstet Gynecol Scand. 2009; 88(12): 1338-44.                                                                                                                                                            | 2000             |                      |
| Lebanon | World Health Organization (WHO). Retrospective Measles Data on Supplementary Immunization Activities. Geneva, Switzerland: World Health Organization (WHO).                                                                                                                                                                                 | 2000, 2008, 2013 |                      |
| Lebanon | International Crisis Group. CrisisWatch Database - Lebanon. Brussels, Belgium: International Crisis Group.                                                                                                                                                                                                                                  | 2003             | *                    |
| Lebanon | Abu-Raddad LJ, Akala FA, Semini I, Riedner G, Wilson D, Tawil O, World Bank. Characterizing the HIV/AIDS Epidemic in the Middle East and North Africa. Washington DC, United States: World Bank, 2010.                                                                                                                                      | 2003             |                      |
| Lebanon | Central Administration of Statistics (Lebanon), League of Arab States, Ministry of Social Affairs (Lebanon), Pan Arab Project for Family Health (PAPFAM). Lebanon Family Health Survey 2004.                                                                                                                                                | 2004             |                      |
| Lebanon | United Nations Office on Drugs and Crime (UNODC). United Nations Office on Drugs and Crime Global Study on Homicides 2011. Vienna, Austria: United Nations Office on Drugs and Crime (UNODC), 2011.                                                                                                                                         | 2004-2010        |                      |
| Lebanon | Khneisser I, Adib SM, Loiselet J, Mégarbané A. Prevalence of G6PD deficiency and knowledge of diagnosis in a sample of previously unscreened Lebanese males: clinical implications. J Med Screen. 2006; 13(1): 26-8.                                                                                                                        | 2004-2006        |                      |
| Lebanon | Ministry of Public Health (Lebanon). Lebanon National Cancer Registry Tables 2005. Beirut, Lebanon: Ministry of Public Health (Lebanon).                                                                                                                                                                                                    | 2005             |                      |
| Lebanon | Ministry of Public Health (Lebanon). Lebanon National Cancer Registry Tables 2006. Beirut, Lebanon: Ministry of Public Health (Lebanon).                                                                                                                                                                                                    | 2006             |                      |
| Lebanon | BBC - Homepage [Internet]. London, United Kingdom: British Broadcasting Corporation (BBC); [updated 2014]. BBC News Profile: Fatah al-Islam; 2010 Aug 15; [about 2 screens]. Available at: <a href="http://www.bbc.co.uk/news/world-middle-east-10979788">http://www.bbc.co.uk/news/world-middle-east-10979788</a> .                        | 2006             | *                    |
| Lebanon | United Nations Human Rights Council, Office of the United Nations High Commissioner for Human Rights. Report of the Commission of Inquiry on Lebanon Pursuant to Human Rights Council Resolution S-2/1. New York, United States: United Nations (UN), 2006.                                                                                 | 2006             | *                    |
| Lebanon | Human Rights Watch. Why They Died: Civilian Casualties in Lebanon during the 2006 War. New York, United States: Human Rights Watch, 2007.                                                                                                                                                                                                   | 2006             | *                    |
| Lebanon | Ministry of Public Health (Lebanon). Lebanon National Cancer Registry Tables 2007. Beirut, Lebanon: Ministry of Public Health (Lebanon).                                                                                                                                                                                                    | 2007             |                      |
| Lebanon | United Press International. Lebanon: Jihadists rebuild and eye Israel. Lebanonwire [Internet]. 2009 Jun 18; Emerging Threats; [about 1 screen]. Available from: <a href="http://www.lebanonwire.com/0906MLN/09061801UP.asp">http://www.lebanonwire.com/0906MLN/09061801UP.asp</a> .                                                         | 2007-2008        | *                    |
| Lebanon | Ministry of Public Health (Lebanon), Saint Joseph University (Lebanon). Lebanon Reproductive Age Mortality Survey 2008.                                                                                                                                                                                                                     | 2008             | *                    |
| Lebanon | Vick, K. Beirut Bombing: Is Lebanon Edging Back Toward Civil War? Time [Internet]. 2013 Dec 27; World; [about 2 screens]. Available from: <a href="http://world.time.com/2013/12/27/beirut-bombing-is-lebanon-edging-back-toward-civil-war/">http://world.time.com/2013/12/27/beirut-bombing-is-lebanon-edging-back-toward-civil-war/</a> . | 2013             | *                    |
| Lesotho | Bureau of Statistics (Lesotho). Lesotho Demographic Survey 1971-1973.                                                                                                                                                                                                                                                                       | 1971-1973        |                      |
| Lesotho | Bureau of Statistics (Lesotho). Lesotho Population and Housing Census 1976.                                                                                                                                                                                                                                                                 | 1976             |                      |
| Lesotho | Bureau of Statistics (Lesotho), International Statistical Institute. Lesotho World Fertility Survey 1977. Voorburg, Netherlands: International Statistical Institute.                                                                                                                                                                       | 1977             |                      |

**Web Table 32 - Comprehensive citation list**

| Country | Citation                                                                                                                                                                                                                                                      | Year*                                       | New for GBD 2013 (*) |
|---------|---------------------------------------------------------------------------------------------------------------------------------------------------------------------------------------------------------------------------------------------------------------|---------------------------------------------|----------------------|
| Lesotho | Institute for Health Metrics and Evaluation (IHME), Joint United Nations Program on HIV/AIDS (UNAIDS). Institute for Health Metrics and Evaluation HIV Mortality Estimates Based on the UNAIDS Spectrum Model Framework.                                      | 1980-2013                                   | *                    |
| Lesotho | United Nations Children's Fund (UNICEF), World Health Organization (WHO). WHO and UNICEF Reported Disease Incidence Time Series - Pertussis. Geneva, Switzerland: World Health Organization (WHO).                                                            | 1980-1990, 1999, 2001-2002, 2004, 2006-2013 |                      |
| Lesotho | United Nations Children's Fund (UNICEF), World Health Organization (WHO). WHO and UNICEF Reported Disease Incidence Time Series - Measles. Geneva, Switzerland: World Health Organization (WHO).                                                              | 1980-1995, 1997, 1999-2004, 2006-2013       |                      |
| Lesotho | Bureau of Statistics (Lesotho). Lesotho Population and Housing Census 1986.                                                                                                                                                                                   | 1986                                        |                      |
| Lesotho | United Nations Office on Drugs and Crime (UNODC). United Nations Surveys on Crime Trends and the Operations of Criminal Justice Systems 1970-2006 as provided by Kavi Bhalla. [Unpublished].                                                                  | 1986-1994                                   |                      |
| Lesotho | Centre for Research on the Epidemiology of Disasters (CRED). EM-DAT: The OFDA/CRED International Disaster Database. Brussels, Belgium: Catholic University of Leuven.                                                                                         | 1987, 1990, 2001, 2011                      |                      |
| Lesotho | Centre for Health Informatics and Multiprofessional Education, University College London. Modell's Haemoglobinopathologist's Almanac. London, United Kingdom: Centre for Health Informatics and Multiprofessional Education, University College London, 2008. | 1990-2003                                   |                      |
| Lesotho | World Health Organization Regional Office for Africa. HIV/AIDS Epidemiological Surveillance Update for the WHO African Region. World Health Organization Regional Office for Africa, 2003.                                                                    | 1995, 2000-2002                             |                      |
| Lesotho | Bureau of Statistics (Lesotho). Lesotho Population and Housing Census 1996.                                                                                                                                                                                   | 1996                                        |                      |
| Lesotho | Department of Peace and Conflict Research, Uppsala University. UCDP Battle-Related Deaths Database Version 5, 2013. Uppsala, Sweden: Department of Peace and Conflict Research, Uppsala University, 2013.                                                     | 1998                                        | *                    |
| Lesotho | Measles Supplementary Immunization Activity Data as provided by the World Health Organization. [Unpublished].                                                                                                                                                 | 1999                                        |                      |
| Lesotho | Bureau of Statistics (Lesotho), United Nations Children's Fund (UNICEF). Lesotho Multiple Indicator Cluster Survey 2000. New York, United States: United Nations Children's Fund (UNICEF).                                                                    | 2000                                        |                      |
| Lesotho | World Health Organization (WHO). Yellow Fever Reported Cases, WHO Vaccine-Preventable Diseases: Monitoring System. Geneva, Switzerland: World Health Organization (WHO).                                                                                      | 2000, 2006-2009                             |                      |
| Lesotho | World Health Organization (WHO). Retrospective Measles Data on Supplementary Immunization Activities. Geneva, Switzerland: World Health Organization (WHO).                                                                                                   | 2000, 2003, 2007, 2010, 2013                |                      |
| Lesotho | Bureau of Statistics (Lesotho), United Nations Population Fund (UNFPA). Lesotho Demographic Survey 2001.                                                                                                                                                      | 2001                                        |                      |
| Lesotho | Joint United Nations Program on HIV/AIDS (UNAIDS), United Nations Children's Fund (UNICEF), World Health Organization (WHO). Lesotho Epidemiological Fact Sheet on HIV/AIDS and STIs 2004.                                                                    | 2003                                        |                      |
| Lesotho | Bureau of Statistics (Lesotho), Macro International, Inc, Ministry of Health and Social Welfare (Lesotho). Lesotho Demographic and Health Survey 2004-2005. Calverton, United States: Macro International, Inc.                                               | 2004-2005                                   |                      |
| Lesotho | Bureau of Statistics (Lesotho). Lesotho Population and Housing Census 2006.                                                                                                                                                                                   | 2006                                        | *                    |
| Lesotho | United Nations Office on Drugs and Crime (UNODC). United Nations Office on Drugs and Crime Global Study on Homicides 2011. Vienna, Austria: United Nations Office on Drugs and Crime (UNODC), 2011.                                                           | 2009                                        |                      |
| Lesotho | Ministry of Health and Social Welfare (Lesotho), ICF Macro. Lesotho Demographic and Health Survey 2009-2010. Calverton, United States: ICF Macro.                                                                                                             | 2009-2010                                   |                      |

**Web Table 32 - Comprehensive citation list**

| Country | Citation                                                                                                                                                                                                                                                      | Year*                                                        | New for GBD 2013 (*) |
|---------|---------------------------------------------------------------------------------------------------------------------------------------------------------------------------------------------------------------------------------------------------------------|--------------------------------------------------------------|----------------------|
| Liberia | Liberia Population Growth Survey 1969-1970 as it appears in United Nations Statistics Division (UNSD). United Nations Demographic Yearbook. New York City, United States: United Nations Statistics Division (UNSD).                                          | 1969-1970                                                    |                      |
| Liberia | Ministry of Planning and Economic Affairs (Liberia). Liberia Population Growth Survey 1969-1970.                                                                                                                                                              | 1969-1970                                                    |                      |
| Liberia | Ministry of Planning and Economic Affairs (Liberia). Liberia Population Growth Survey 1970-1971.                                                                                                                                                              | 1970-1971                                                    |                      |
| Liberia | Ministry of Planning and Economic Affairs (Liberia). Liberia Population and Housing Census 1974.                                                                                                                                                              | 1974                                                         |                      |
| Liberia | Prince AM, Brotman B, Richardson L, White T, Pollock N, Riddle J. Incidence of hepatitis A virus (HAV) infection in rural Liberia. J Med Virol. 1985; 15(4): 421-8.                                                                                           | 1978-1979                                                    |                      |
| Liberia | Peace Research Institute Oslo (PRIO). Battle Deaths Dataset Version 3, 2009. Oslo, Norway: Peace Research Institute Oslo (PRIO), 2009.                                                                                                                        | 1980-1988                                                    |                      |
| Liberia | Institute for Health Metrics and Evaluation (IHME), Joint United Nations Program on HIV/AIDS (UNAIDS). Institute for Health Metrics and Evaluation HIV Mortality Estimates Based on the UNAIDS Spectrum Model Framework.                                      | 1980-2013                                                    | *                    |
| Liberia | United Nations Children's Fund (UNICEF), World Health Organization (WHO). WHO and UNICEF Reported Disease Incidence Time Series - Pertussis. Geneva, Switzerland: World Health Organization (WHO).                                                            | 1980-1989, 1993, 1996, 1998-2002, 2004-2005, 2009, 2011-2013 |                      |
| Liberia | United Nations Children's Fund (UNICEF), World Health Organization (WHO). WHO and UNICEF Reported Disease Incidence Time Series - Measles. Geneva, Switzerland: World Health Organization (WHO).                                                              | 1980-1989, 1992-2013                                         |                      |
| Liberia | United Nations Office on Drugs and Crime (UNODC). United Nations Surveys on Crime Trends and the Operations of Criminal Justice Systems 1970-2006 as provided by Kavi Bhalla. [Unpublished].                                                                  | 1982-1985                                                    |                      |
| Liberia | Centre for Research on the Epidemiology of Disasters (CRED). EM-DAT: The OFDA/CRED International Disaster Database. Brussels, Belgium: Catholic University of Leuven.                                                                                         | 1982, 1998, 2007, 2009-2010                                  |                      |
| Liberia | Becker SR, Diop F, Thornton JN. Infant and child mortality in two counties of Liberia: results of a survey in 1988 and trends since 1984. Int J Epidemiol. 1993; 22(Supp 1): S56-63.                                                                          | 1984-1987                                                    |                      |
| Liberia | Ministry of Planning and Economic Affairs, Westinghouse; Institute for Resource Development. Liberia Demographic and Health Survey 1986. Columbia, United States: Westinghouse; Institute for Resource Development.                                           | 1986                                                         |                      |
| Liberia | Department of Peace and Conflict Research, Uppsala University. UCDP Battle-Related Deaths Database Version 5, 2013. Uppsala, Sweden: Department of Peace and Conflict Research, Uppsala University, 2013.                                                     | 1989-2003                                                    | *                    |
| Liberia | Pacqué-Margolis S, Pacqué M, Dukuly Z, Boateng J, Taylor HR.. Application of the verbal autopsy during a clinical trial. Soc Sci Med. 1990; 31(5): 585-91.                                                                                                    | 1990                                                         |                      |
| Liberia | Weatherall D. Sickle Cell and Thalassemias Prevalence Data, Personal Correspondence with David Weatherall. [Unpublished].                                                                                                                                     | 1990-2009                                                    |                      |
| Liberia | Department of Peace and Conflict Research, Uppsala University. UCDP Nonstate Conflict Database Version 2.5, 2013. Uppsala, Sweden: Department of Peace and Conflict Research, Uppsala University, 2013.                                                       | 1990-1996                                                    | *                    |
| Liberia | Department of Peace and Conflict Research, Uppsala University. UCDP One-Sided Violence Database Version 1.4, 2013. Uppsala, Sweden: Department of Peace and Conflict Research, Uppsala University, 2013.                                                      | 1990-2003                                                    | *                    |
| Liberia | Centre for Health Informatics and Multiprofessional Education, University College London. Modell's Haemoglobinopathologist's Almanac. London, United Kingdom: Centre for Health Informatics and Multiprofessional Education, University College London, 2008. | 1990-2003                                                    |                      |

**Web Table 32 - Comprehensive citation list**

| Country | Citation                                                                                                                                                                                                                                                                              | Year*                      | New for GBD 2013 (*) |
|---------|---------------------------------------------------------------------------------------------------------------------------------------------------------------------------------------------------------------------------------------------------------------------------------------|----------------------------|----------------------|
| Liberia | Mutebi J-P, Barrett ADT. The epidemiology of yellow fever in Africa. <i>Microbes Infect.</i> 2002; 4(14): 1459-68.                                                                                                                                                                    | 1995-1997, 2000-2001       |                      |
| Liberia | WHO Department of Communicable Disease Surveillance and Response. WHO Report on Global Surveillance of Epidemic-prone Infectious Diseases 2000.                                                                                                                                       | 1995, 1997-1998            |                      |
| Liberia | World Health Organization (WHO). Yellow Fever Reported Cases, WHO Vaccine-Preventable Diseases: Monitoring System. Geneva, Switzerland: World Health Organization (WHO).                                                                                                              | 2000-2009                  |                      |
| Liberia | Moormann AM, Embury PE, Opondo J, Sumba OP, Ouma JH, Kazura JW, John CC. Frequencies of sickle cell trait and glucose-6-phosphate dehydrogenase deficiency differ in highland and nearby lowland malaria-endemic areas of Kenya. <i>Trans R Soc Trop Med Hyg.</i> 2003; 97(5): 513-4. | 2000-2001                  |                      |
| Liberia | World Health Organization (WHO). Retrospective Measles Data on Supplementary Immunization Activities. Geneva, Switzerland: World Health Organization (WHO).                                                                                                                           | 2004, 2007-2008, 2010-2011 |                      |
| Liberia | Liberia Institute for Statistics and Geo-information Services (LISGIS), Macro International, Inc. Liberia Demographic and Health Survey 2006-2007. Calverton, United States: Macro International, Inc.                                                                                | 2006-2007                  |                      |
| Liberia | United Nations Office on Drugs and Crime (UNODC). United Nations Office on Drugs and Crime Global Study on Homicides 2011. Vienna, Austria: United Nations Office on Drugs and Crime (UNODC), 2011.                                                                                   | 2007-2010                  |                      |
| Liberia | WHO Global Alert and Response (GAR). Yellow Fever in Liberia - Update 25 April 2008. Geneva, Switzerland: World Health Organization (WHO), 2008.                                                                                                                                      | 2008                       |                      |
| Liberia | National Malaria Control Program (Liberia), Liberia Institute for Statistics and Geo-information Services (LISGIS), ICF Macro. Liberia Malaria Indicator Survey 2008-2009. Calverton, United States: ICF Macro.                                                                       | 2008-2009                  |                      |
| Liberia | WHO Global Alert and Response (GAR). Yellow Fever in Liberia - Update 06 May 2009. Geneva, Switzerland: World Health Organization (WHO), 2009.                                                                                                                                        | 2009                       |                      |
| Liberia | ICF International, Liberia Institute for Statistics and Geo-information Services (LISGIS), National Malaria Control Program (Liberia). Liberia Malaria Indicator Survey 2011. ICF International, 2012.                                                                                | 2011                       |                      |
| Liberia | ICF International, Liberia Institute for Statistics and Geo-information Services (LISGIS), National AIDS and STI Control Program (NACP), Ministry of Health and Social Welfare (Liberia). Liberia Demographic and Health Survey 2013.                                                 | 2013                       | *                    |
| Libya   | Centre for Research on the Epidemiology of Disasters (CRED). EM-DAT: The OFDA/CRED International Disaster Database. Brussels, Belgium: Catholic University of Leuven.                                                                                                                 | 1963                       |                      |
| Libya   | Libya Vital Registration Death Data 1972 as it appears in United Nations Statistics Division (UNSD). United Nations Demographic Yearbook. New York City, United States: United Nations Statistics Division (UNSD).                                                                    | 1972                       |                      |
| Libya   | Libya Population and Housing Census 1973 as it appears in United Nations Statistics Division (UNSD). United Nations Demographic Yearbook. New York City, United States: United Nations Statistics Division (UNSD).                                                                    | 1973                       |                      |
| Libya   | Libya Vital Registration Death Data 1973 as it appears in United Nations Statistics Division (UNSD). United Nations Demographic Yearbook. New York City, United States: United Nations Statistics Division (UNSD).                                                                    | 1973                       |                      |
| Libya   | Libya Vital Registration Death Data 1974 as it appears in United Nations Statistics Division (UNSD). United Nations Demographic Yearbook. New York City, United States: United Nations Statistics Division (UNSD).                                                                    | 1974                       |                      |

**Web Table 32 - Comprehensive citation list**

| Country | Citation                                                                                                                                                                                                                                                                                                                                                                                                                           | Year*                                            | New for GBD 2013 (*) |
|---------|------------------------------------------------------------------------------------------------------------------------------------------------------------------------------------------------------------------------------------------------------------------------------------------------------------------------------------------------------------------------------------------------------------------------------------|--------------------------------------------------|----------------------|
| Libya   | Libya Vital Registration Death Data 1975 as it appears in United Nations Statistics Division (UNSD). United Nations Demographic Yearbook. New York City, United States: United Nations Statistics Division (UNSD).                                                                                                                                                                                                                 | 1975                                             |                      |
| Libya   | Federal Research Division, Library of Congress (United States). Libya: A Country Study. Washington, D.C., United States: Library of Congress (United States), 1989.                                                                                                                                                                                                                                                                | 1975-1987                                        | *                    |
| Libya   | University of Central Arkansas - UCA [Internet]. Conway, AR: University of Central Arkansas; [updated 2014]. Libya DADM Project Intrastate Dispute Narrative 1951-Present. Available from: <a href="http://uca.edu/politicalscience/dadm-project/middle-eastnorth-africapersian-gulf-region/libya-1951-present/">http://uca.edu/politicalscience/dadm-project/middle-eastnorth-africapersian-gulf-region/libya-1951-present/</a> . | 1976                                             | *                    |
| Libya   | Libya Vital Registration Death Data 1976 as it appears in United Nations Statistics Division (UNSD). United Nations Demographic Yearbook. New York City, United States: United Nations Statistics Division (UNSD).                                                                                                                                                                                                                 | 1976                                             |                      |
| Libya   | Aames A. The Rape of Libya: Four Decades of Suffering Under Muammar Gaddafi. Seattle (WA), United States: CreateSpace; 2012. 202 p.                                                                                                                                                                                                                                                                                                | 1977                                             | *                    |
| Libya   | Jain RC. Abnormal haemoglobin, thalassaemia and G-6-PD deficiency in Libya. Br J Haematol. 1983; 1(54): 154-5.                                                                                                                                                                                                                                                                                                                     | 1978-1979                                        |                      |
| Libya   | Institute for Health Metrics and Evaluation (IHME), Joint United Nations Program on HIV/AIDS (UNAIDS). Institute for Health Metrics and Evaluation HIV Mortality Estimates Based on the UNAIDS Spectrum Model Framework.                                                                                                                                                                                                           | 1980-2013                                        | *                    |
| Libya   | United Nations Children's Fund (UNICEF), World Health Organization (WHO). WHO and UNICEF Reported Disease Incidence Time Series - Pertussis. Geneva, Switzerland: World Health Organization (WHO).                                                                                                                                                                                                                                 | 1980-1994, 1997-1998, 2004-2009, 2012            |                      |
| Libya   | United Nations Children's Fund (UNICEF), World Health Organization (WHO). WHO and UNICEF Reported Disease Incidence Time Series - Measles. Geneva, Switzerland: World Health Organization (WHO).                                                                                                                                                                                                                                   | 1980-1994, 1997-1998, 2001-2002, 2004-2009, 2012 |                      |
| Libya   | Libya Vital Registration Death Data 1981 as it appears in United Nations Statistics Division (UNSD). United Nations Demographic Yearbook. New York City, United States: United Nations Statistics Division (UNSD).                                                                                                                                                                                                                 | 1981                                             |                      |
| Libya   | Fearon J, Laitin D, Kasara K. Chad Random Narrative (ChadRN2.6) [Internet]. 2006 Jul 7. 28 p. Author manuscript; part of Fearon/Laitin research project Ethnicity Insurgency, and Civil War. Available from: <a href="http://www.stanford.edu/group/ethnic/Random%20Narratives/ChadRN2.6.pdf">http://www.stanford.edu/group/ethnic/Random%20Narratives/ChadRN2.6.pdf</a> .                                                         | 1987                                             | *                    |
| Libya   | Hudson L. Car wars: Roadmaps to Libya's ground conflict. Al Jazeera [Internet]. 2011 Apr 25; Opinion; [about 5 screens]. Available from: <a href="http://www.aljazeera.com/indepth/opinion/2011/04/2011421122738383699.html">http://www.aljazeera.com/indepth/opinion/2011/04/2011421122738383699.html</a> .                                                                                                                       | 1987                                             | *                    |
| Libya   | Centre for Health Informatics and Multiprofessional Education, University College London. Modell's Haemoglobinopathologist's Almanac. London, United Kingdom: Centre for Health Informatics and Multiprofessional Education, University College London, 2008.                                                                                                                                                                      | 1990-2003                                        |                      |
| Libya   | General Information Authority (Libya). Libya Vital Statistics 2006. Tripoli, Libya: General Information Authority (Libya).                                                                                                                                                                                                                                                                                                         | 1991-2006                                        |                      |
| Libya   | Armed Conflict Location and Event Data Project (ACLED). Armed Conflict Location and Event Dataset, Realtime - Robert S. Strauss Center.                                                                                                                                                                                                                                                                                            | 1992-2013                                        | *                    |
| Libya   | Committee for Health and Social Insurance (Libya), League of Arab States. Libya Maternal and Child Health Survey 1995.                                                                                                                                                                                                                                                                                                             | 1995                                             |                      |

**Web Table 32 - Comprehensive citation list**

| Country | Citation                                                                                                                                                                                                                                                                                                                                          | Year*                 | New for GBD 2013 (*) |
|---------|---------------------------------------------------------------------------------------------------------------------------------------------------------------------------------------------------------------------------------------------------------------------------------------------------------------------------------------------------|-----------------------|----------------------|
| Libya   | Human Rights Watch [Internet]. New York City, United States: Human Rights Watch; [updated 2014]. Libya: June 1996 killings at Abu Salim Prison. 2006 Jun 28; [about 5 screens]. Available from: <a href="http://www.hrw.org/legacy/english/docs/2006/06/28/libya13636.htm">http://www.hrw.org/legacy/english/docs/2006/06/28/libya13636.htm</a> . | 1996                  | *                    |
| Libya   | British Broadcasting Corporation (BBC). Libyans in first Abu Salim jail massacre remembrance. BBC [Internet]. 2012 Jun 29; World - Africa; [about 2 screens]. Available from: <a href="http://www.bbc.com/news/world-africa-18641761">http://www.bbc.com/news/world-africa-18641761</a> .                                                         | 1996                  | *                    |
| Libya   | Libya Vital Registration Death Data 1996 as it appears in United Nations Statistics Division (UNSD). United Nations Demographic Yearbook. New York City, United States: United Nations Statistics Division (UNSD).                                                                                                                                | 1996                  |                      |
| Libya   | International Institute for Strategic Studies. International Institute for Strategic Studies Armed Conflict Database. London, United Kingdom: International Institute for Strategic Studies.                                                                                                                                                      | 1997                  | *                    |
| Libya   | World Health Organization (WHO). Yellow Fever Reported Cases, WHO Vaccine-Preventable Diseases: Monitoring System. Geneva, Switzerland: World Health Organization (WHO).                                                                                                                                                                          | 1998, 2001, 2005-2009 |                      |
| Libya   | Libya Vital Registration Death Data 2000 as it appears in United Nations Statistics Division (UNSD). United Nations Demographic Yearbook. New York City, United States: United Nations Statistics Division (UNSD).                                                                                                                                | 2000                  |                      |
| Libya   | Libya Vital Registration Death Data 2002 as it appears in United Nations Statistics Division (UNSD). United Nations Demographic Yearbook. New York City, United States: United Nations Statistics Division (UNSD).                                                                                                                                | 2002                  |                      |
| Libya   | United Nations Office on Drugs and Crime (UNODC). United Nations Office on Drugs and Crime Global Study on Homicides 2011. Vienna, Austria: United Nations Office on Drugs and Crime (UNODC), 2011.                                                                                                                                               | 2003                  |                      |
| Libya   | Forman D, Bray F, Brewster DH, Gombe Mbalawa C, Kohler B, Piñeros M, Steliarova-Foucher E, Swaminathan R and Ferlay J, eds (2013). Cancer Incidence in Five Continents, Vol. X Summary Database (electronic version). Lyon, IARC. <a href="http://ci5.iarc.fr">http://ci5.iarc.fr</a>                                                             | 2004                  |                      |
| Libya   | World Health Organization (WHO). Retrospective Measles Data on Supplementary Immunization Activities. Geneva, Switzerland: World Health Organization (WHO).                                                                                                                                                                                       | 2005, 2008-2009       |                      |
| Libya   | International Crisis Group. CrisisWatch Database - Libya. Brussels, Belgium: International Crisis Group.                                                                                                                                                                                                                                          | 2006                  | *                    |
| Libya   | General Information Authority (Libya). Libya Vital Statistics 2007. Tripoli, Libya: General Information Authority (Libya).                                                                                                                                                                                                                        | 2007                  |                      |
| Libya   | World Health Organization (WHO). Libya WHO Leishmaniasis Country Profile.                                                                                                                                                                                                                                                                         | 2007-2008             | *                    |
| Libya   | General Information Authority (Libya). Libya Vital Statistics 2008. Tripoli, Libya: General Information Authority (Libya).                                                                                                                                                                                                                        | 2008                  |                      |
| Libya   | Weatherall D. Sickle Cell and Thalassemias Prevalence Data, Personal Correspondence with David Weatherall. [Unpublished].                                                                                                                                                                                                                         | 2009                  |                      |
| Libya   | Rettig J. Death toll of 'Arab Spring'. U.S. News and World Report [Internet]. 2011 Nov 8; News; [about 7 screens]. Available from: <a href="http://www.usnews.com/news/slideshows/death-toll-of-arab-spring/1">http://www.usnews.com/news/slideshows/death-toll-of-arab-spring/1</a> .                                                            | 2010-2011             | *                    |
| Libya   | Department of Peace and Conflict Research, Uppsala University. UCDP One-Sided Violence Database Version 1.4, 2013. Uppsala, Sweden: Department of Peace and Conflict Research, Uppsala University, 2013.                                                                                                                                          | 2011                  | *                    |
| Libya   | Department of Peace and Conflict Research, Uppsala University. UCDP Battle-Related Deaths Database Version 5, 2013. Uppsala, Sweden: Department of Peace and Conflict Research, Uppsala University, 2013.                                                                                                                                         | 2011                  | *                    |



**Web Table 32 - Comprehensive citation list**

| Country   | Citation                                                                                                                                                                                                                                                                                                                                                                                                                                              | Year*     | New for GBD 2013 (*) |
|-----------|-------------------------------------------------------------------------------------------------------------------------------------------------------------------------------------------------------------------------------------------------------------------------------------------------------------------------------------------------------------------------------------------------------------------------------------------------------|-----------|----------------------|
| Libya     | Pisa N. Libya: '800 refugees drowned' trying to escape Gaddafi. The Telegraph [Internet]. 2011 May 10; World - Africa; [about 2 screens]. Available from: <a href="http://www.telegraph.co.uk/news/worldnews/africaandindianocean/libya/8505936/Libya-800-refugees-drowned-trying-to-escape-Gaddafi.html">http://www.telegraph.co.uk/news/worldnews/africaandindianocean/libya/8505936/Libya-800-refugees-drowned-trying-to-escape-Gaddafi.html</a> . | 2011      | *                    |
| Libya     | Human Rights Watch [Internet]. New York City, United States: Human Rights Watch; [updated 2014]. Libya: Candidates should address torture, illegal detention. 2012 Jun 18; [about 4 screens]. Available from: <a href="http://www.hrw.org/news/2012/06/18/libya-candidates-should-address-torture-illegal-detention">http://www.hrw.org/news/2012/06/18/libya-candidates-should-address-torture-illegal-detention</a> .                               | 2011-2012 | *                    |
| Libya     | Department of Peace and Conflict Research, Uppsala University. UCDP Nonstate Conflict Database Version 2.5, 2013. Uppsala, Sweden: Department of Peace and Conflict Research, Uppsala University, 2013.                                                                                                                                                                                                                                               | 2012      | *                    |
| Libya     | Leman D. Ambassador died in smoke while agents searched for him. Bloomberg [Internet]. 2012 Oct 9; News; [about 5 screens]. Available from: <a href="http://www.bloomberg.com/news/2012-10-10/ambassador-died-in-smoke-while-agents-searched-for-him.html">http://www.bloomberg.com/news/2012-10-10/ambassador-died-in-smoke-while-agents-searched-for-him.html</a> .                                                                                 | 2012      | *                    |
| Libya     | Human Rights Watch [Internet]. New York City, United States: Human Rights Watch; [updated 2014]. Libya: No impunity for 'Black Saturday' Benghazi deaths. 2013 Jun 14; [about 3 screens]. Available from: <a href="http://www.hrw.org/news/2013/06/13/libya-no-impunity-black-saturday-benghazi-deaths">http://www.hrw.org/news/2013/06/13/libya-no-impunity-black-saturday-benghazi-deaths</a> .                                                     | 2013      | *                    |
| Lithuania | Max Planck Institute for Demographic Research, University of California. Human Mortality Database. Berkeley, USA: University of California; Rostock, Germany: Max Planck Institute for Demographic Research.                                                                                                                                                                                                                                          | 1959-1984 |                      |
| Lithuania | Institute for Health Metrics and Evaluation. Institute for Health Metrics and Evaluation Cancer Registry Database. [Unpublished].                                                                                                                                                                                                                                                                                                                     | 1980-2005 |                      |
| Lithuania | Ferlay J, Parkin DM, Curado MP, Bray F, Edwards B, Shin HR and Forman D. Cancer Incidence in Five Continents, Volumes I to IX: IARC CancerBase No. 9 [Internet]. Lyon, France: International Agency for Research on Cancer; 2010. Available from: <a href="http://ci5.iarc.fr">http://ci5.iarc.fr</a>                                                                                                                                                 | 1980-2002 |                      |
| Lithuania | Institute for Health Metrics and Evaluation (IHME), Joint United Nations Program on HIV/AIDS (UNAIDS). Institute for Health Metrics and Evaluation HIV Mortality Estimates Based on the UNAIDS Spectrum Model Framework.                                                                                                                                                                                                                              | 1980-2013 | *                    |
| Lithuania | Lithuania Vital Registration - Deaths 1981 ICD9 as it appears in World Health Organization (WHO). WHO Mortality Database Version February 2014. Geneva, Switzerland: World Health Organization (WHO), 2014.                                                                                                                                                                                                                                           | 1981      |                      |
| Lithuania | Lithuania Vital Registration - Deaths 1982 ICD9 as it appears in World Health Organization (WHO). WHO Mortality Database Version February 2014. Geneva, Switzerland: World Health Organization (WHO), 2014.                                                                                                                                                                                                                                           | 1982      |                      |
| Lithuania | Lithuania Vital Registration - Deaths 1985 ICD9 as it appears in World Health Organization (WHO). WHO Mortality Database Version February 2014. Geneva, Switzerland: World Health Organization (WHO), 2014.                                                                                                                                                                                                                                           | 1985      |                      |
| Lithuania | Lithuania Vital Registration - Deaths 1986 ICD9 as it appears in World Health Organization (WHO). WHO Mortality Database Version February 2014. Geneva, Switzerland: World Health Organization (WHO), 2014.                                                                                                                                                                                                                                           | 1986      |                      |
| Lithuania | Lithuania Vital Registration - Deaths 1987 ICD9 as it appears in World Health Organization (WHO). WHO Mortality Database Version February 2014. Geneva, Switzerland: World Health Organization (WHO), 2014.                                                                                                                                                                                                                                           | 1987      |                      |

**Web Table 32 - Comprehensive citation list**

| Country   | Citation                                                                                                                                                                                                                                                      | Year*            | New for GBD 2013 (*) |
|-----------|---------------------------------------------------------------------------------------------------------------------------------------------------------------------------------------------------------------------------------------------------------------|------------------|----------------------|
| Lithuania | Lithuania Vital Registration - Deaths 1988 ICD9 as it appears in World Health Organization (WHO). WHO Mortality Database Version February 2014. Geneva, Switzerland: World Health Organization (WHO), 2014.                                                   | 1988             |                      |
| Lithuania | Lithuania Vital Registration - Deaths 1989 ICD9 as it appears in World Health Organization (WHO). WHO Mortality Database Version February 2014. Geneva, Switzerland: World Health Organization (WHO), 2014.                                                   | 1989             |                      |
| Lithuania | Lithuania Vital Registration - Deaths 1990 ICD9 as it appears in World Health Organization (WHO). WHO Mortality Database Version February 2014. Geneva, Switzerland: World Health Organization (WHO), 2014.                                                   | 1990             |                      |
| Lithuania | World Health Organization (WHO). Global Prevalence and Incidence of Selected Curable Sexually Transmitted Infections: Overviews and Estimates 2001. Geneva, Switzerland: World Health Organization (WHO), 2001.                                               | 1990-1996        |                      |
| Lithuania | Centre for Health Informatics and Multiprofessional Education, University College London. Modell's Haemoglobinopathologist's Almanac. London, United Kingdom: Centre for Health Informatics and Multiprofessional Education, University College London, 2008. | 1990-2003        |                      |
| Lithuania | Lithuania Vital Registration - Deaths 1991 ICD9 as it appears in World Health Organization (WHO). WHO Mortality Database Version February 2014. Geneva, Switzerland: World Health Organization (WHO), 2014.                                                   | 1991             |                      |
| Lithuania | United Nations Children's Fund (UNICEF), World Health Organization (WHO). WHO and UNICEF Reported Disease Incidence Time Series - Pertussis. Geneva, Switzerland: World Health Organization (WHO).                                                            | 1991-2013        |                      |
| Lithuania | United Nations Children's Fund (UNICEF), World Health Organization (WHO). WHO and UNICEF Reported Disease Incidence Time Series - Measles. Geneva, Switzerland: World Health Organization (WHO).                                                              | 1991-2013        |                      |
| Lithuania | Lithuania Vital Registration - Deaths 1992 ICD9 as it appears in World Health Organization (WHO). WHO Mortality Database Version February 2014. Geneva, Switzerland: World Health Organization (WHO), 2014.                                                   | 1992             |                      |
| Lithuania | Lithuania Vital Registration - Deaths 1993 ICD9 as it appears in World Health Organization (WHO). WHO Mortality Database Version February 2014. Geneva, Switzerland: World Health Organization (WHO), 2014.                                                   | 1993             |                      |
| Lithuania | Centre for Research on the Epidemiology of Disasters (CRED). EM-DAT: The OFDA/CRED International Disaster Database. Brussels, Belgium: Catholic University of Leuven.                                                                                         | 1993, 1999, 2010 |                      |
| Lithuania | Lithuania Vital Registration - Deaths 1994 ICD9 as it appears in World Health Organization (WHO). WHO Mortality Database Version February 2014. Geneva, Switzerland: World Health Organization (WHO), 2014.                                                   | 1994             |                      |
| Lithuania | Lithuania Vital Registration - Deaths 1995 ICD9 as it appears in World Health Organization (WHO). WHO Mortality Database Version February 2014. Geneva, Switzerland: World Health Organization (WHO), 2014.                                                   | 1995             |                      |
| Lithuania | Parkin DM, International Agency for Research on Cancer, International Association of Cancer Registries. Cancer Incidence in Five Continents. Vol. I to VIII. Lyon, France, IARC Press, 2005.                                                                  | 1995             |                      |
| Lithuania | Lithuania Vital Registration - Deaths 1996 ICD9 as it appears in World Health Organization (WHO). WHO Mortality Database Version February 2014. Geneva, Switzerland: World Health Organization (WHO), 2014.                                                   | 1996             |                      |



**Web Table 32 - Comprehensive citation list**

| Country   | Citation                                                                                                                                                                                                                                                                              | Year*     | New for GBD 2013 (*) |
|-----------|---------------------------------------------------------------------------------------------------------------------------------------------------------------------------------------------------------------------------------------------------------------------------------------|-----------|----------------------|
| Lithuania | Lithuania Vital Registration - Deaths 1997 ICD9 as it appears in World Health Organization (WHO). WHO Mortality Database Version February 2014. Geneva, Switzerland: World Health Organization (WHO), 2014.                                                                           | 1997      |                      |
| Lithuania | Lithuania Vital Registration - Deaths 1998 ICD10 as it appears in World Health Organization (WHO). WHO Mortality Database Version February 2014. Geneva, Switzerland: World Health Organization (WHO), 2014.                                                                          | 1998      |                      |
| Lithuania | Lithuania Vital Registration - Deaths 1999 ICD10 as it appears in World Health Organization (WHO). WHO Mortality Database Version February 2014. Geneva, Switzerland: World Health Organization (WHO), 2014.                                                                          | 1999      |                      |
| Lithuania | Lithuania Vital Registration - Deaths 2000 ICD10 as it appears in World Health Organization (WHO). WHO Mortality Database Version February 2014. Geneva, Switzerland: World Health Organization (WHO), 2014.                                                                          | 2000      |                      |
| Lithuania | Curado MP, Edwards B, Shin HR, Storm H, Ferlay J, Heanue M and Boyle P, eds (2007). Cancer Incidence in Five Continents, Vol. IX Periodic Data (electronic version). Lyon, IARC. <a href="http://ci5.iarc.fr">http://ci5.iarc.fr</a>                                                  | 2000      |                      |
| Lithuania | World Health Organization (WHO). Yellow Fever Reported Cases, WHO Vaccine-Preventable Diseases: Monitoring System. Geneva, Switzerland: World Health Organization (WHO).                                                                                                              | 2000-2009 |                      |
| Lithuania | Lithuania Vital Registration - Deaths 2001 ICD10 as it appears in World Health Organization (WHO). WHO Mortality Database Version February 2014. Geneva, Switzerland: World Health Organization (WHO), 2014.                                                                          | 2001      |                      |
| Lithuania | WHO Regional Office for Europe (EURO-WHO). European Hospital Morbidity Database. Copenhagen, Denmark: WHO Regional Office for Europe (EURO-WHO).                                                                                                                                      | 2001-2007 |                      |
| Lithuania | Lithuania Vital Registration - Deaths 2002 ICD10 as it appears in World Health Organization (WHO). WHO Mortality Database Version February 2014. Geneva, Switzerland: World Health Organization (WHO), 2014.                                                                          | 2002      |                      |
| Lithuania | Lithuania Vital Registration - Deaths 2003 ICD10 as it appears in World Health Organization (WHO). WHO Mortality Database Version February 2014. Geneva, Switzerland: World Health Organization (WHO), 2014.                                                                          | 2003      |                      |
| Lithuania | EUVAC-NET. EUVAC-NET Pertussis Surveillance Report 2003-2007. Stockholm, Sweden: European Centre for Disease Prevention and Control, 2009.                                                                                                                                            | 2003-2007 |                      |
| Lithuania | Lithuania Vital Registration - Deaths 2004 ICD10 as it appears in World Health Organization (WHO). WHO Mortality Database Version February 2014. Geneva, Switzerland: World Health Organization (WHO), 2014.                                                                          | 2004      |                      |
| Lithuania | Lithuania Vital Registration - Deaths 2005 ICD10 as it appears in World Health Organization (WHO). WHO Mortality Database Version February 2014. Geneva, Switzerland: World Health Organization (WHO), 2014.                                                                          | 2005      |                      |
| Lithuania | Minkauskiene M, Nadisauskiene RJ, Padaiga Z. Severe and acute maternal morbidity: Lithuanian experience and review. Int J Fertil Womens Med. 2006; 51(1): 39-46.                                                                                                                      | 2005      |                      |
| Lithuania | Forman D, Bray F, Brewster DH, Gombe Mbalawa C, Kohler B, Piñeros M, Steliarova-Foucher E, Swaminathan R and Ferlay J, eds (2013). Cancer Incidence in Five Continents, Vol. X Summary Database (electronic version). Lyon, IARC. <a href="http://ci5.iarc.fr">http://ci5.iarc.fr</a> | 2005      |                      |

**Web Table 32 - Comprehensive citation list**

| Country    | Citation                                                                                                                                                                                                                | Year* | New for GBD 2013 (*) |
|------------|-------------------------------------------------------------------------------------------------------------------------------------------------------------------------------------------------------------------------|-------|----------------------|
| Lithuania  | Lithuania Vital Registration - Deaths 2006 ICD10 as it appears in World Health Organization (WHO). WHO Mortality Database Version February 2014. Geneva, Switzerland: World Health Organization (WHO), 2014.            | 2006  |                      |
| Lithuania  | Lithuania Vital Registration - Deaths 2007 ICD10 as it appears in World Health Organization (WHO). WHO Mortality Database Version February 2014. Geneva, Switzerland: World Health Organization (WHO), 2014.            | 2007  |                      |
| Lithuania  | World Health Organization (WHO). Global Status Report on Road Safety 2009. Geneva, Switzerland: World Health Organization (WHO), 2009.                                                                                  | 2007  |                      |
| Lithuania  | Lithuania Vital Registration - Deaths 2008 ICD10 as it appears in World Health Organization (WHO). WHO Mortality Database Version February 2014. Geneva, Switzerland: World Health Organization (WHO), 2014.            | 2008  |                      |
| Lithuania  | EUVAC-NET. EUVAC-NET Pertussis Surveillance Report 2008. Stockholm, Sweden: European Centre for Disease Prevention and Control, 2009.                                                                                   | 2008  |                      |
| Lithuania  | Lithuania Vital Registration - Deaths 2009 ICD10 as it appears in World Health Organization (WHO). WHO Mortality Database Version February 2014. Geneva, Switzerland: World Health Organization (WHO), 2014.            | 2009  |                      |
| Lithuania  | EUVAC-NET. EUVAC-NET Pertussis Surveillance Report 2009. Stockholm, Sweden: European Centre for Disease Prevention and Control, 2010.                                                                                   | 2009  |                      |
| Lithuania  | Lithuania Vital Registration - Deaths 2010 ICD10 as it appears in World Health Organization (WHO). WHO Mortality Database Version February 2014. Geneva, Switzerland: World Health Organization (WHO), 2014.            | 2010  |                      |
| Lithuania  | Liakina V, Valantinas J. Anti-HCV prevalence in the general population of Lithuania. Med Sci Monit. 2012; 18(3): PH28-35.                                                                                               | 2010  |                      |
| Lithuania  | EUVAC-NET. EUVAC-NET Measles Surveillance Report 2010. Stockholm, Sweden: European Centre for Disease Prevention and Control, 2011.                                                                                     | 2010  |                      |
| Lithuania  | Lithuania Vital Registration Death Data 2011 as it appears in United Nations Statistics Division (UNSD). United Nations Demographic Yearbook. New York City, United States: United Nations Statistics Division (UNSD).  | 2011  | *                    |
| Lithuania  | Institute of Hygiene, Ministry of Health of the Lithuanian Republic. Lithuania Causes of Death 2012.                                                                                                                    | 2012  | *                    |
| Luxembourg | Luxembourg Vital Registration Death Data 1950 as it appears in United Nations Statistics Division (UNSD). United Nations Demographic Yearbook. New York City, United States: United Nations Statistics Division (UNSD). | 1950  |                      |
| Luxembourg | Luxembourg Vital Registration Death Data 1951 as it appears in United Nations Statistics Division (UNSD). United Nations Demographic Yearbook. New York City, United States: United Nations Statistics Division (UNSD). | 1951  |                      |
| Luxembourg | Luxembourg Vital Registration Death Data 1952 as it appears in United Nations Statistics Division (UNSD). United Nations Demographic Yearbook. New York City, United States: United Nations Statistics Division (UNSD). | 1952  |                      |
| Luxembourg | Luxembourg Vital Registration Death Data 1953 as it appears in United Nations Statistics Division (UNSD). United Nations Demographic Yearbook. New York City, United States: United Nations Statistics Division (UNSD). | 1953  |                      |

**Web Table 32 - Comprehensive citation list**

| Country    | Citation                                                                                                                                                                                                                | Year*     | New for GBD 2013 (*) |
|------------|-------------------------------------------------------------------------------------------------------------------------------------------------------------------------------------------------------------------------|-----------|----------------------|
| Luxembourg | Luxembourg Vital Registration Death Data 1954 as it appears in United Nations Statistics Division (UNSD). United Nations Demographic Yearbook. New York City, United States: United Nations Statistics Division (UNSD). | 1954      |                      |
| Luxembourg | Luxembourg Vital Registration - Deaths 1956 ICD7 as it appears in World Health Organization (WHO). WHO Mortality Database Version February 2014. Geneva, Switzerland: World Health Organization (WHO), 2014.            | 1956      |                      |
| Luxembourg | Luxembourg Vital Registration - Deaths 1957 ICD7 as it appears in World Health Organization (WHO). WHO Mortality Database Version February 2014. Geneva, Switzerland: World Health Organization (WHO), 2014.            | 1957      |                      |
| Luxembourg | Luxembourg Vital Registration - Deaths 1958 ICD7 as it appears in World Health Organization (WHO). WHO Mortality Database Version February 2014. Geneva, Switzerland: World Health Organization (WHO), 2014.            | 1958      |                      |
| Luxembourg | Luxembourg Vital Registration - Deaths 1959 ICD7 as it appears in World Health Organization (WHO). WHO Mortality Database Version February 2014. Geneva, Switzerland: World Health Organization (WHO), 2014.            | 1959      |                      |
| Luxembourg | Luxembourg Vital Registration - Deaths 1960 ICD7 as it appears in World Health Organization (WHO). WHO Mortality Database Version February 2014. Geneva, Switzerland: World Health Organization (WHO), 2014.            | 1960      |                      |
| Luxembourg | Luxembourg Vital Registration - Deaths 1961 ICD7 as it appears in World Health Organization (WHO). WHO Mortality Database Version February 2014. Geneva, Switzerland: World Health Organization (WHO), 2014.            | 1961      |                      |
| Luxembourg | Luxembourg Vital Registration - Deaths 1962 ICD7 as it appears in World Health Organization (WHO). WHO Mortality Database Version February 2014. Geneva, Switzerland: World Health Organization (WHO), 2014.            | 1962      |                      |
| Luxembourg | Max Planck Institute for Demographic Research, University of California. Human Mortality Database. Berkeley, USA: University of California; Rostock, Germany: Max Planck Institute for Demographic Research.            | 1963-1964 |                      |
| Luxembourg | Luxembourg Vital Registration - Deaths 1965 ICD7 as it appears in World Health Organization (WHO). WHO Mortality Database Version February 2014. Geneva, Switzerland: World Health Organization (WHO), 2014.            | 1965      |                      |
| Luxembourg | Luxembourg Vital Registration - Deaths 1966 ICD7 as it appears in World Health Organization (WHO). WHO Mortality Database Version February 2014. Geneva, Switzerland: World Health Organization (WHO), 2014.            | 1966      |                      |
| Luxembourg | Luxembourg Vital Registration - Deaths 1967 ICD7 as it appears in World Health Organization (WHO). WHO Mortality Database Version February 2014. Geneva, Switzerland: World Health Organization (WHO), 2014.            | 1967      |                      |
| Luxembourg | Luxembourg Vital Registration - Deaths 1968 ICD7 as it appears in World Health Organization (WHO). WHO Mortality Database Version February 2014. Geneva, Switzerland: World Health Organization (WHO), 2014.            | 1968      |                      |
| Luxembourg | Luxembourg Vital Registration - Deaths 1969 ICD7 as it appears in World Health Organization (WHO). WHO Mortality Database Version February 2014. Geneva, Switzerland: World Health Organization (WHO), 2014.            | 1969      |                      |

**Web Table 32 - Comprehensive citation list**

| Country    | Citation                                                                                                                                                                                                                 | Year*                                 | New for GBD 2013 (*) |
|------------|--------------------------------------------------------------------------------------------------------------------------------------------------------------------------------------------------------------------------|---------------------------------------|----------------------|
| Luxembourg | Luxembourg Vital Registration - Deaths 1970 ICD7 as it appears in World Health Organization (WHO). WHO Mortality Database Version February 2014. Geneva, Switzerland: World Health Organization (WHO), 2014.             | 1970                                  |                      |
| Luxembourg | Luxembourg Vital Registration - Deaths 1971 ICD8 as it appears in World Health Organization (WHO). WHO Mortality Database Version February 2014. Geneva, Switzerland: World Health Organization (WHO), 2014.             | 1971                                  |                      |
| Luxembourg | Luxembourg Vital Registration - Deaths 1972 ICD8 as it appears in World Health Organization (WHO). WHO Mortality Database Version February 2014. Geneva, Switzerland: World Health Organization (WHO), 2014.             | 1972                                  |                      |
| Luxembourg | Luxembourg Vital Registration - Deaths 1973 ICD8 as it appears in World Health Organization (WHO). WHO Mortality Database Version February 2014. Geneva, Switzerland: World Health Organization (WHO), 2014.             | 1973                                  |                      |
| Luxembourg | Luxembourg Vital Registration - Deaths 1974 ICD8 as it appears in World Health Organization (WHO). WHO Mortality Database Version February 2014. Geneva, Switzerland: World Health Organization (WHO), 2014.             | 1974                                  |                      |
| Luxembourg | Luxembourg Vital Registration - Deaths 1975 ICD8 as it appears in World Health Organization (WHO). WHO Mortality Database Version February 2014. Geneva, Switzerland: World Health Organization (WHO), 2014.             | 1975                                  |                      |
| Luxembourg | Luxembourg Vital Registration - Deaths 1976 ICD8 as it appears in World Health Organization (WHO). WHO Mortality Database Version February 2014. Geneva, Switzerland: World Health Organization (WHO), 2014.             | 1976                                  |                      |
| Luxembourg | Luxembourg Vital Registration - Deaths 1977 ICD8 as it appears in World Health Organization (WHO). WHO Mortality Database Version February 2014. Geneva, Switzerland: World Health Organization (WHO), 2014.             | 1977                                  |                      |
| Luxembourg | Luxembourg Vital Registration - Deaths 1978 ICD8 as it appears in World Health Organization (WHO). WHO Mortality Database Version February 2014. Geneva, Switzerland: World Health Organization (WHO), 2014.             | 1978                                  |                      |
| Luxembourg | Luxembourg Vital Registration - Deaths 1979 ICD9 as it appears in World Health Organization (WHO). WHO Mortality Database Version February 2014. Geneva, Switzerland: World Health Organization (WHO), 2014.             | 1979                                  |                      |
| Luxembourg | Luxembourg Vital Registration - Deaths 1980 ICD9 as it appears in World Health Organization (WHO). WHO Mortality Database Version February 2014. Geneva, Switzerland: World Health Organization (WHO), 2014.             | 1980                                  |                      |
| Luxembourg | Institute for Health Metrics and Evaluation (IHME), Joint United Nations Program on HIV/AIDS (UNAIDS). Institute for Health Metrics and Evaluation HIV Mortality Estimates Based on the UNAIDS Spectrum Model Framework. | 1980-2013                             | *                    |
| Luxembourg | United Nations Children's Fund (UNICEF), World Health Organization (WHO). WHO and UNICEF Reported Disease Incidence Time Series - Pertussis. Geneva, Switzerland: World Health Organization (WHO).                       | 1980-1997, 2000, 2003-2004, 2006-2013 |                      |
| Luxembourg | United Nations Children's Fund (UNICEF), World Health Organization (WHO). WHO and UNICEF Reported Disease Incidence Time Series - Measles. Geneva, Switzerland: World Health Organization (WHO).                         | 1980-1997, 2000, 2003-2004, 2006-2013 |                      |
| Luxembourg | Luxembourg Vital Registration - Deaths 1981 ICD9 as it appears in World Health Organization (WHO). WHO Mortality Database Version February 2014. Geneva, Switzerland: World Health Organization (WHO), 2014.             | 1981                                  |                      |

**Web Table 32 - Comprehensive citation list**

| Country    | Citation                                                                                                                                                                                                                                                      | Year*           | New for GBD 2013 (*) |
|------------|---------------------------------------------------------------------------------------------------------------------------------------------------------------------------------------------------------------------------------------------------------------|-----------------|----------------------|
| Luxembourg | Luxembourg Vital Registration - Deaths 1982 ICD9 as it appears in World Health Organization (WHO). WHO Mortality Database Version February 2014. Geneva, Switzerland: World Health Organization (WHO), 2014.                                                  | 1982            |                      |
| Luxembourg | Luxembourg Vital Registration - Deaths 1983 ICD9 as it appears in World Health Organization (WHO). WHO Mortality Database Version February 2014. Geneva, Switzerland: World Health Organization (WHO), 2014.                                                  | 1983            |                      |
| Luxembourg | Luxembourg Vital Registration - Deaths 1984 ICD9 as it appears in World Health Organization (WHO). WHO Mortality Database Version February 2014. Geneva, Switzerland: World Health Organization (WHO), 2014.                                                  | 1984            |                      |
| Luxembourg | Luxembourg Vital Registration - Deaths 1985 ICD9 as it appears in World Health Organization (WHO). WHO Mortality Database Version February 2014. Geneva, Switzerland: World Health Organization (WHO), 2014.                                                  | 1985            |                      |
| Luxembourg | Luxembourg Vital Registration - Deaths 1986 ICD9 as it appears in World Health Organization (WHO). WHO Mortality Database Version February 2014. Geneva, Switzerland: World Health Organization (WHO), 2014.                                                  | 1986            |                      |
| Luxembourg | Luxembourg Vital Registration - Deaths 1987 ICD9 as it appears in World Health Organization (WHO). WHO Mortality Database Version February 2014. Geneva, Switzerland: World Health Organization (WHO), 2014.                                                  | 1987            |                      |
| Luxembourg | Luxembourg Vital Registration - Deaths 1988 ICD9 as it appears in World Health Organization (WHO). WHO Mortality Database Version February 2014. Geneva, Switzerland: World Health Organization (WHO), 2014.                                                  | 1988            |                      |
| Luxembourg | Modell B, Darlison M, Birgens H, Cario H, Faustino P, Giordano PC, Gulbis B, Hopmeier P, Lena-Russo D, Romao L, Theodorsson E. Epidemiology of haemoglobin disorders in Europe: an overview. Scand J Clin Lab Invest. 2007; 67(1): 39-69.                     | 1988, 2006      |                      |
| Luxembourg | Centre for Health Informatics and Multiprofessional Education, University College London. Modell's Haemoglobinopathologist's Almanac. London, United Kingdom: Centre for Health Informatics and Multiprofessional Education, University College London, 2008. | 1988, 1990-2006 |                      |
| Luxembourg | Luxembourg Vital Registration - Deaths 1989 ICD9 as it appears in World Health Organization (WHO). WHO Mortality Database Version February 2014. Geneva, Switzerland: World Health Organization (WHO), 2014.                                                  | 1989            |                      |
| Luxembourg | Luxembourg Vital Registration - Deaths 1990 ICD9 as it appears in World Health Organization (WHO). WHO Mortality Database Version February 2014. Geneva, Switzerland: World Health Organization (WHO), 2014.                                                  | 1990            |                      |
| Luxembourg | Luxembourg Vital Registration - Deaths 1991 ICD9 as it appears in World Health Organization (WHO). WHO Mortality Database Version February 2014. Geneva, Switzerland: World Health Organization (WHO), 2014.                                                  | 1991            |                      |
| Luxembourg | Luxembourg Vital Registration - Deaths 1992 ICD9 as it appears in World Health Organization (WHO). WHO Mortality Database Version February 2014. Geneva, Switzerland: World Health Organization (WHO), 2014.                                                  | 1992            |                      |

**Web Table 32 - Comprehensive citation list**

| Country    | Citation                                                                                                                                                                                                                                                                                                                                                                                                                                                                                                                                                                                                                                                                                                              | Year*     | New for GBD 2013 (*) |
|------------|-----------------------------------------------------------------------------------------------------------------------------------------------------------------------------------------------------------------------------------------------------------------------------------------------------------------------------------------------------------------------------------------------------------------------------------------------------------------------------------------------------------------------------------------------------------------------------------------------------------------------------------------------------------------------------------------------------------------------|-----------|----------------------|
| Luxembourg | Trichopoulos D, Bamia C, Lagiou P, Fedirko V, Trepo E, Jenab M, Pischon T, Nöthlings U, Overved K, Tjønneland A, Outzen M, Clavel-Chapelon F, Kaaks R, Lukanova A, Boeing H, Aleksandrova K, Benetou V, Zylis D, Palli D, Pala V, Panico S, Tumino R, Sacerdote C, Bueno-De-Mesquita HB, Van Kranen HJ, Peeters PHM, Lund E, Quirós JR, González CA, Sanchez Perez M-J, Navarro C, Dorronsoro M, Barricarte A, Lindkvist B, Regnér S, Werner M, Hallmans G, Khaw K-T, Wareham N, Key T, Romieu I, Chuang S-C, Murphy N, Boffetta P, Trichopoulou A, Riboli E. Hepatocellular carcinoma risk factors and disease burden in a European cohort: a nested case-control study. J Natl Cancer Inst. 2011; 103(22): 1686-95. | 1992-2006 | *                    |
| Luxembourg | Luxembourg Vital Registration - Deaths 1993 ICD9 as it appears in World Health Organization (WHO). WHO Mortality Database Version February 2014. Geneva, Switzerland: World Health Organization (WHO), 2014.                                                                                                                                                                                                                                                                                                                                                                                                                                                                                                          | 1993      |                      |
| Luxembourg | Luxembourg Vital Registration - Deaths 1994 ICD9 as it appears in World Health Organization (WHO). WHO Mortality Database Version February 2014. Geneva, Switzerland: World Health Organization (WHO), 2014.                                                                                                                                                                                                                                                                                                                                                                                                                                                                                                          | 1994      |                      |
| Luxembourg | Luxembourg Vital Registration - Deaths 1995 ICD9 as it appears in World Health Organization (WHO). WHO Mortality Database Version February 2014. Geneva, Switzerland: World Health Organization (WHO), 2014.                                                                                                                                                                                                                                                                                                                                                                                                                                                                                                          | 1995      |                      |
| Luxembourg | Luxembourg Vital Registration - Deaths 1996 ICD9 as it appears in World Health Organization (WHO). WHO Mortality Database Version February 2014. Geneva, Switzerland: World Health Organization (WHO), 2014.                                                                                                                                                                                                                                                                                                                                                                                                                                                                                                          | 1996      |                      |
| Luxembourg | Luxembourg Vital Registration - Deaths 1997 ICD9 as it appears in World Health Organization (WHO). WHO Mortality Database Version February 2014. Geneva, Switzerland: World Health Organization (WHO), 2014.                                                                                                                                                                                                                                                                                                                                                                                                                                                                                                          | 1997      |                      |
| Luxembourg | Luxembourg Vital Registration - Deaths 1998 ICD10 as it appears in World Health Organization (WHO). WHO Mortality Database Version February 2014. Geneva, Switzerland: World Health Organization (WHO), 2014.                                                                                                                                                                                                                                                                                                                                                                                                                                                                                                         | 1998      |                      |
| Luxembourg | Luxembourg Vital Registration - Deaths 1999 ICD10 as it appears in World Health Organization (WHO). WHO Mortality Database Version February 2014. Geneva, Switzerland: World Health Organization (WHO), 2014.                                                                                                                                                                                                                                                                                                                                                                                                                                                                                                         | 1999      |                      |
| Luxembourg | Luxembourg Vital Registration - Deaths 2000 ICD10 as it appears in World Health Organization (WHO). WHO Mortality Database Version February 2014. Geneva, Switzerland: World Health Organization (WHO), 2014.                                                                                                                                                                                                                                                                                                                                                                                                                                                                                                         | 2000      |                      |
| Luxembourg | Mossong J, Putz L, Patiny S, Schneider F. Seroepidemiology of hepatitis A and hepatitis B virus in Luxembourg. Epidemiol Infect. 2006; 134(4): 808-13.                                                                                                                                                                                                                                                                                                                                                                                                                                                                                                                                                                | 2000-2001 |                      |
| Luxembourg | Luxembourg Vital Registration - Deaths 2001 ICD10 as it appears in World Health Organization (WHO). WHO Mortality Database Version February 2014. Geneva, Switzerland: World Health Organization (WHO), 2014.                                                                                                                                                                                                                                                                                                                                                                                                                                                                                                         | 2001      |                      |
| Luxembourg | Luxembourg Vital Registration - Deaths 2002 ICD10 as it appears in World Health Organization (WHO). WHO Mortality Database Version February 2014. Geneva, Switzerland: World Health Organization (WHO), 2014.                                                                                                                                                                                                                                                                                                                                                                                                                                                                                                         | 2002      |                      |
| Luxembourg | Luxembourg Vital Registration - Deaths 2003 ICD10 as it appears in World Health Organization (WHO). WHO Mortality Database Version February 2014. Geneva, Switzerland: World Health Organization (WHO), 2014.                                                                                                                                                                                                                                                                                                                                                                                                                                                                                                         | 2003      |                      |



**Web Table 32 - Comprehensive citation list**

| Country    | Citation                                                                                                                                                                                                                 | Year*                | New for GBD 2013 (*) |
|------------|--------------------------------------------------------------------------------------------------------------------------------------------------------------------------------------------------------------------------|----------------------|----------------------|
| Luxembourg | EUVAC-NET. EUVAC-NET Measles Surveillance Report 2003. Stockholm, Sweden: European Centre for Disease Prevention and Control, 2005.                                                                                      | 2003                 |                      |
| Luxembourg | World Health Organization (WHO). Yellow Fever Reported Cases, WHO Vaccine-Preventable Diseases: Monitoring System. Geneva, Switzerland: World Health Organization (WHO).                                                 | 2003-2004, 2006-2009 |                      |
| Luxembourg | Luxembourg Vital Registration - Deaths 2004 ICD10 as it appears in World Health Organization (WHO). WHO Mortality Database Version February 2014. Geneva, Switzerland: World Health Organization (WHO), 2014.            | 2004                 |                      |
| Luxembourg | Luxembourg Vital Registration - Deaths 2005 ICD10 as it appears in World Health Organization (WHO). WHO Mortality Database Version February 2014. Geneva, Switzerland: World Health Organization (WHO), 2014.            | 2005                 |                      |
| Luxembourg | Luxembourg Vital Registration - Deaths 2006 ICD10 as it appears in World Health Organization (WHO). WHO Mortality Database Version February 2014. Geneva, Switzerland: World Health Organization (WHO), 2014.            | 2006                 |                      |
| Luxembourg | EUVAC-NET. EUVAC-NET Measles Surveillance Report 2006. Stockholm, Sweden: European Centre for Disease Prevention and Control, 2007.                                                                                      | 2006                 |                      |
| Luxembourg | Luxembourg Vital Registration - Deaths 2007 ICD10 as it appears in World Health Organization (WHO). WHO Mortality Database Version February 2014. Geneva, Switzerland: World Health Organization (WHO), 2014.            | 2007                 |                      |
| Luxembourg | Luxembourg Vital Registration - Deaths 2008 ICD10 as it appears in World Health Organization (WHO). WHO Mortality Database Version February 2014. Geneva, Switzerland: World Health Organization (WHO), 2014.            | 2008                 |                      |
| Luxembourg | EUVAC-NET. EUVAC-NET Pertussis Surveillance Report 2009. Stockholm, Sweden: European Centre for Disease Prevention and Control, 2010.                                                                                    | 2008-2009            |                      |
| Luxembourg | Luxembourg Vital Registration - Deaths 2009 ICD10 as it appears in World Health Organization (WHO). WHO Mortality Database Version February 2014. Geneva, Switzerland: World Health Organization (WHO), 2014.            | 2009                 |                      |
| Luxembourg | Luxembourg Vital Registration - Deaths 2010 ICD10 as it appears in World Health Organization (WHO). WHO Mortality Database Version February 2014. Geneva, Switzerland: World Health Organization (WHO), 2014.            | 2010                 |                      |
| Luxembourg | Luxembourg Vital Registration - Deaths 2011 ICD10 as it appears in World Health Organization (WHO). WHO Mortality Database Version February 2014. Geneva, Switzerland: World Health Organization (WHO), 2014.            | 2011                 | *                    |
| Macedonia  | Fraser GR, Defaranas B, Kattamis CA, Race RR, Sanger R, Stamatoyannopoulos G. Glucose-6-phosphate dehydrogenase, colour vision and XG blood groups in Greece: linkage and population data. Ann Hum Genet. 1964; 395-403. | 1962                 |                      |
| Macedonia  | Institute for Health Metrics and Evaluation (IHME), Joint United Nations Program on HIV/AIDS (UNAIDS). Institute for Health Metrics and Evaluation HIV Mortality Estimates Based on the UNAIDS Spectrum Model Framework. | 1980-2013            | *                    |
| Macedonia  | World Health Organization (WHO). Country Mortality Data 1980-1999. [Unpublished].                                                                                                                                        | 1982                 |                      |
| Macedonia  | Yugoslavia - Macedonia Vital Registration Death Data 1989 as it appears in TransMonEE 2013 Database, UNICEF Regional Office for CEE/CIS.                                                                                 | 1989                 |                      |

**Web Table 32 - Comprehensive citation list**

| Country   | Citation                                                                                                                                                                                                                                                      | Year*                | New for GBD 2013 (*) |
|-----------|---------------------------------------------------------------------------------------------------------------------------------------------------------------------------------------------------------------------------------------------------------------|----------------------|----------------------|
| Macedonia | Macedonia Vital Registration Death Data 1990 as it appears in United Nations Statistics Division (UNSD). United Nations Demographic Yearbook. New York City, United States: United Nations Statistics Division (UNSD).                                        | 1990                 |                      |
| Macedonia | Centre for Health Informatics and Multiprofessional Education, University College London. Modell's Haemoglobinopathologist's Almanac. London, United Kingdom: Centre for Health Informatics and Multiprofessional Education, University College London, 2008. | 1990-2003            |                      |
| Macedonia | Macedonia Vital Registration - Deaths 1991 ICD9 as it appears in World Health Organization (WHO). WHO Mortality Database Version February 2014. Geneva, Switzerland: World Health Organization (WHO), 2014.                                                   | 1991                 |                      |
| Macedonia | United Nations Children's Fund (UNICEF), World Health Organization (WHO). WHO and UNICEF Reported Disease Incidence Time Series - Pertussis. Geneva, Switzerland: World Health Organization (WHO).                                                            | 1991-1997, 1999-2013 |                      |
| Macedonia | United Nations Children's Fund (UNICEF), World Health Organization (WHO). WHO and UNICEF Reported Disease Incidence Time Series - Measles. Geneva, Switzerland: World Health Organization (WHO).                                                              | 1991-1997, 1999-2013 |                      |
| Macedonia | Macedonia Vital Registration - Deaths 1992 ICD9 as it appears in World Health Organization (WHO). WHO Mortality Database Version February 2014. Geneva, Switzerland: World Health Organization (WHO), 2014.                                                   | 1992                 |                      |
| Macedonia | Macedonia Vital Registration - Deaths 1993 ICD9 as it appears in World Health Organization (WHO). WHO Mortality Database Version February 2014. Geneva, Switzerland: World Health Organization (WHO), 2014.                                                   | 1993                 |                      |
| Macedonia | Macedonia Vital Registration - Deaths 1994 ICD9 as it appears in World Health Organization (WHO). WHO Mortality Database Version February 2014. Geneva, Switzerland: World Health Organization (WHO), 2014.                                                   | 1994                 |                      |
| Macedonia | Macedonia Vital Registration - Deaths 1995 ICD9 as it appears in World Health Organization (WHO). WHO Mortality Database Version February 2014. Geneva, Switzerland: World Health Organization (WHO), 2014.                                                   | 1995                 |                      |
| Macedonia | Macedonia Vital Registration - Deaths 1996 ICD9 as it appears in World Health Organization (WHO). WHO Mortality Database Version February 2014. Geneva, Switzerland: World Health Organization (WHO), 2014.                                                   | 1996                 |                      |
| Macedonia | Macedonia Vital Registration - Deaths 1997 ICD9 as it appears in World Health Organization (WHO). WHO Mortality Database Version February 2014. Geneva, Switzerland: World Health Organization (WHO), 2014.                                                   | 1997                 |                      |
| Macedonia | Macedonia Vital Registration - Deaths 1998 ICD9 as it appears in World Health Organization (WHO). WHO Mortality Database Version February 2014. Geneva, Switzerland: World Health Organization (WHO), 2014.                                                   | 1998                 |                      |
| Macedonia | Macedonia Vital Registration - Deaths 1999 ICD9 as it appears in World Health Organization (WHO). WHO Mortality Database Version February 2014. Geneva, Switzerland: World Health Organization (WHO), 2014.                                                   | 1999                 |                      |
| Macedonia | World Health Organization (WHO). Yellow Fever Reported Cases, WHO Vaccine-Preventable Diseases: Monitoring System. Geneva, Switzerland: World Health Organization (WHO).                                                                                      | 1999, 2001-2009      |                      |
| Macedonia | Macedonia Vital Registration - Deaths 2000 ICD9 as it appears in World Health Organization (WHO). WHO Mortality Database Version February 2014. Geneva, Switzerland: World Health Organization (WHO), 2014.                                                   | 2000                 |                      |



**Web Table 32 - Comprehensive citation list**

| Country   | Citation                                                                                                                                                                                                                                                                                         | Year*                  | New for GBD 2013 (*) |
|-----------|--------------------------------------------------------------------------------------------------------------------------------------------------------------------------------------------------------------------------------------------------------------------------------------------------|------------------------|----------------------|
| Macedonia | Macedonia Vital Registration - Deaths 2001 ICD9 as it appears in World Health Organization (WHO). WHO Mortality Database Version February 2014. Geneva, Switzerland: World Health Organization (WHO), 2014.                                                                                      | 2001                   |                      |
| Macedonia | Macedonia Vital Registration - Deaths 2002 ICD9 as it appears in World Health Organization (WHO). WHO Mortality Database Version February 2014. Geneva, Switzerland: World Health Organization (WHO), 2014.                                                                                      | 2002                   |                      |
| Macedonia | Macedonia Vital Registration - Deaths 2003 ICD9 as it appears in World Health Organization (WHO). WHO Mortality Database Version February 2014. Geneva, Switzerland: World Health Organization (WHO), 2014.                                                                                      | 2003                   |                      |
| Macedonia | Centre for Research on the Epidemiology of Disasters (CRED). EM-DAT: The OFDA/CRED International Disaster Database. Brussels, Belgium: Catholic University of Leuven.                                                                                                                            | 2003, 2005, 2007, 2013 |                      |
| Macedonia | Macedonia Vital Registration - Deaths 2004 ICD9 as it appears in World Health Organization (WHO). WHO Mortality Database Version February 2014. Geneva, Switzerland: World Health Organization (WHO), 2014.                                                                                      | 2004                   |                      |
| Macedonia | State Statistical Office (Macedonia) and United Nations Children's Fund (UNICEF). Macedonia Multiple Indicator Cluster Survey 2005. New York, United States: United Nations Children's Fund (UNICEF).                                                                                            | 2005                   |                      |
| Macedonia | Macedonia Vital Registration - Deaths 2005 ICD9 as it appears in World Health Organization (WHO). WHO Mortality Database Version February 2014. Geneva, Switzerland: World Health Organization (WHO), 2014.                                                                                      | 2005                   |                      |
| Macedonia | Macedonia Vital Registration - Deaths 2006 ICD10 as it appears in World Health Organization (WHO). WHO Mortality Database Version February 2014. Geneva, Switzerland: World Health Organization (WHO), 2014.                                                                                     | 2006                   |                      |
| Macedonia | Macedonia Vital Registration - Deaths 2007 ICD10 as it appears in World Health Organization (WHO). WHO Mortality Database Version February 2014. Geneva, Switzerland: World Health Organization (WHO), 2014.                                                                                     | 2007                   |                      |
| Macedonia | Macedonia Vital Registration - Deaths 2008 ICD10 as it appears in World Health Organization (WHO). WHO Mortality Database Version February 2014. Geneva, Switzerland: World Health Organization (WHO), 2014.                                                                                     | 2008                   |                      |
| Macedonia | Macedonia Vital Registration - Deaths 2009 ICD10 as it appears in World Health Organization (WHO). WHO Mortality Database Version February 2014. Geneva, Switzerland: World Health Organization (WHO), 2014.                                                                                     | 2009                   |                      |
| Macedonia | World Health Organization (WHO). Retrospective Measles Data on Supplementary Immunization Activities. Geneva, Switzerland: World Health Organization (WHO).                                                                                                                                      | 2009                   |                      |
| Macedonia | Macedonia Vital Registration - Deaths 2010 ICD10 as it appears in World Health Organization (WHO). WHO Mortality Database Version February 2014. Geneva, Switzerland: World Health Organization (WHO), 2014.                                                                                     | 2010                   |                      |
| Macedonia | European Renal Association-European Dialysis and Transplant Association (ERA-EDTA). European Renal Association-European Dialysis and Transplant Association Registry Annual Report 2010. Parma, Italy: European Renal Association-European Dialysis and Transplant Association (ERA-EDTA), 2012. | 2010                   | *                    |

**Web Table 32 - Comprehensive citation list**

| Country    | Citation                                                                                                                                                                                                                                                                                                                         | Year*     | New for GBD 2013 (*) |
|------------|----------------------------------------------------------------------------------------------------------------------------------------------------------------------------------------------------------------------------------------------------------------------------------------------------------------------------------|-----------|----------------------|
| Macedonia  | Institute of Public Health (Macedonia), Ipsos Strategic Puls, Ministry of Education and Science (Macedonia), Ministry of Labor and Social Policy (Macedonia), United Nations Children's Fund (UNICEF). Macedonia Multiple Indicator Cluster Survey 2011. New York, United States: United Nations Children's Fund (UNICEF), 2013. | 2011      | *                    |
| Macedonia  | Macedonia Vital Registration Death Data 2011 as it appears in United Nations Statistics Division (UNSD). United Nations Demographic Yearbook. New York City, United States: United Nations Statistics Division (UNSD).                                                                                                           | 2011      | *                    |
| Macedonia  | European Renal Association-European Dialysis and Transplant Association (ERA-EDTA). European Renal Association-European Dialysis and Transplant Association Registry Annual Report 2011. Parma, Italy: European Renal Association-European Dialysis and Transplant Association (ERA-EDTA), 2013.                                 | 2011      | *                    |
| Madagascar | Madagascar Vital Registration Death Data 1955 as it appears in United Nations Statistics Division (UNSD). United Nations Demographic Yearbook. New York City, United States: United Nations Statistics Division (UNSD).                                                                                                          | 1955      |                      |
| Madagascar | Madagascar Vital Registration Death Data 1957 as it appears in United Nations Statistics Division (UNSD). United Nations Demographic Yearbook. New York City, United States: United Nations Statistics Division (UNSD).                                                                                                          | 1957      |                      |
| Madagascar | Madagascar Vital Registration Death Data 1958 as it appears in United Nations Statistics Division (UNSD). United Nations Demographic Yearbook. New York City, United States: United Nations Statistics Division (UNSD).                                                                                                          | 1958      |                      |
| Madagascar | Madagascar Vital Registration Death Data 1959 as it appears in United Nations Statistics Division (UNSD). United Nations Demographic Yearbook. New York City, United States: United Nations Statistics Division (UNSD).                                                                                                          | 1959      |                      |
| Madagascar | Madagascar Vital Registration Death Data 1960 as it appears in United Nations Statistics Division (UNSD). United Nations Demographic Yearbook. New York City, United States: United Nations Statistics Division (UNSD).                                                                                                          | 1960      |                      |
| Madagascar | Madagascar Vital Registration Death Data 1961 as it appears in United Nations Statistics Division (UNSD). United Nations Demographic Yearbook. New York City, United States: United Nations Statistics Division (UNSD).                                                                                                          | 1961      |                      |
| Madagascar | Dodin A. Deficit en glucose 6 phosphate deshydrogenase. Arch Inst Pasteur Madagascar. 1965; 33: 233-7.                                                                                                                                                                                                                           | 1963-1965 |                      |
| Madagascar | Madagascar Vital Registration Death Data 1964 as it appears in United Nations Statistics Division (UNSD). United Nations Demographic Yearbook. New York City, United States: United Nations Statistics Division (UNSD).                                                                                                          | 1964      |                      |
| Madagascar | Madagascar Vital Registration Death Data 1965 as it appears in United Nations Statistics Division (UNSD). United Nations Demographic Yearbook. New York City, United States: United Nations Statistics Division (UNSD).                                                                                                          | 1965      |                      |
| Madagascar | National Institute of Statistics and Economic Research (Madagascar). Madagascar Demographic Survey 1966.                                                                                                                                                                                                                         | 1966      |                      |
| Madagascar | Madagascar Vital Registration Death Data 1966 as it appears in United Nations Statistics Division (UNSD). United Nations Demographic Yearbook. New York City, United States: United Nations Statistics Division (UNSD).                                                                                                          | 1966      |                      |
| Madagascar | Madagascar Vital Registration Death Data 1967 as it appears in United Nations Statistics Division (UNSD). United Nations Demographic Yearbook. New York City, United States: United Nations Statistics Division (UNSD).                                                                                                          | 1967      |                      |

**Web Table 32 - Comprehensive citation list**

| Country    | Citation                                                                                                                                                                                                                                                      | Year*                                                                                    | New for GBD 2013 (*) |
|------------|---------------------------------------------------------------------------------------------------------------------------------------------------------------------------------------------------------------------------------------------------------------|------------------------------------------------------------------------------------------|----------------------|
| Madagascar | Madagascar Vital Registration Death Data 1968 as it appears in United Nations Statistics Division (UNSD). United Nations Demographic Yearbook. New York City, United States: United Nations Statistics Division (UNSD).                                       | 1968                                                                                     |                      |
| Madagascar | Centre for Research on the Epidemiology of Disasters (CRED). EM-DAT: The OFDA/CRED International Disaster Database. Brussels, Belgium: Catholic University of Leuven.                                                                                         | 1968-1970, 1972, 1975-1978, 1981-1984, 1986, 1988-1992, 1994, 1996-1997, 2000, 2002-2013 |                      |
| Madagascar | Madagascar Vital Registration Death Data 1970 as it appears in United Nations Statistics Division (UNSD). United Nations Demographic Yearbook. New York City, United States: United Nations Statistics Division (UNSD).                                       | 1970                                                                                     |                      |
| Madagascar | Peace Research Institute Oslo (PRIO). Battle Deaths Dataset Version 3, 2009. Oslo, Norway: Peace Research Institute Oslo (PRIO), 2009.                                                                                                                        | 1971                                                                                     |                      |
| Madagascar | Madagascar Vital Registration Death Data 1971 as it appears in United Nations Statistics Division (UNSD). United Nations Demographic Yearbook. New York City, United States: United Nations Statistics Division (UNSD).                                       | 1971                                                                                     |                      |
| Madagascar | Madagascar Vital Registration Death Data 1972 as it appears in United Nations Statistics Division (UNSD). United Nations Demographic Yearbook. New York City, United States: United Nations Statistics Division (UNSD).                                       | 1972                                                                                     |                      |
| Madagascar | United Nations Office on Drugs and Crime (UNODC). United Nations Surveys on Crime Trends and the Operations of Criminal Justice Systems 1970-2006 as provided by Kavi Bhalla. [Unpublished].                                                                  | 1976-1994                                                                                |                      |
| Madagascar | Institute for Health Metrics and Evaluation (IHME), Joint United Nations Program on HIV/AIDS (UNAIDS). Institute for Health Metrics and Evaluation HIV Mortality Estimates Based on the UNAIDS Spectrum Model Framework.                                      | 1980-2013                                                                                | *                    |
| Madagascar | United Nations Children's Fund (UNICEF), World Health Organization (WHO). WHO and UNICEF Reported Disease Incidence Time Series - Pertussis. Geneva, Switzerland: World Health Organization (WHO).                                                            | 1980-1990, 1995-2004, 2006-2007, 2009-2013                                               |                      |
| Madagascar | United Nations Children's Fund (UNICEF), World Health Organization (WHO). WHO and UNICEF Reported Disease Incidence Time Series - Measles. Geneva, Switzerland: World Health Organization (WHO).                                                              | 1980-2004, 2006-2013                                                                     |                      |
| Madagascar | Waltisperger D, Cantrelle P, Ralijaona J, Population and Development Research Center (CEPED) (France). Madagascar - Antananorivo Mortality Report 1984-1995. Paris, France: Population and Development Research Center (CEPED) (France), 1998.                | 1984-1995                                                                                |                      |
| Madagascar | Weatherall D. Sickle Cell and Thalassemias Prevalence Data, Personal Correspondence with David Weatherall. [Unpublished].                                                                                                                                     | 1990-2009                                                                                |                      |
| Madagascar | Centre for Health Informatics and Multiprofessional Education, University College London. Modell's Haemoglobinopathologist's Almanac. London, United Kingdom: Centre for Health Informatics and Multiprofessional Education, University College London, 2008. | 1990-2003                                                                                |                      |
| Madagascar | Department of Applied Research for Development (Madagascar), Macro International, Inc. Madagascar Demographic and Health Survey 1992. Calverton, United States: Macro International, Inc.                                                                     | 1992                                                                                     |                      |
| Madagascar | Madagascar General Population and Housing Census 1993 as it appears in United Nations Statistics Division (UNSD). United Nations Demographic Yearbook. New York City, United States: United Nations Statistics Division (UNSD).                               | 1993                                                                                     |                      |
| Madagascar | Morvan JM, Boisier P, Andrianimanana D, Razainirina J, Rakoto-Andrianarivelo M, Roux JF. [Serological markers for hepatitis A, B and C in Madagascar. First investigation in a rural area]. Bull Soc Pathol Exot. 1994; 87(3): 138-42.                        | 1993                                                                                     |                      |

**Web Table 32 - Comprehensive citation list**

| Country    | Citation                                                                                                                                                                                                                                                                                                                                      | Year*                       | New for GBD 2013 (*) |
|------------|-----------------------------------------------------------------------------------------------------------------------------------------------------------------------------------------------------------------------------------------------------------------------------------------------------------------------------------------------|-----------------------------|----------------------|
| Madagascar | Boisier P, Rabarijaona L, Piollet M, Roux JF, Zeller HG. Hepatitis B virus infection in general population in Madagascar: evidence for different epidemiological patterns in urban and in rural areas. <i>Epidemiol Infect.</i> 1996; 117(1): 133-7.                                                                                          | 1993                        |                      |
| Madagascar | World Health Organization Regional Office for Africa. HIV/AIDS Epidemiological Surveillance Update for the WHO African Region. World Health Organization Regional Office for Africa, 2003.                                                                                                                                                    | 1995, 1997, 2000-2002       |                      |
| Madagascar | Macro International, Inc, National Institute of Statistics (Madagascar). Madagascar Demographic and Health Survey 1997. Calverton, United States: Macro International, Inc.                                                                                                                                                                   | 1997                        |                      |
| Madagascar | World Health Organization (WHO). Yellow Fever Reported Cases, WHO Vaccine-Preventable Diseases: Monitoring System. Geneva, Switzerland: World Health Organization (WHO).                                                                                                                                                                      | 1997, 1999, 2001-2002, 2009 |                      |
| Madagascar | Measles Supplementary Immunization Activity Data as provided by the World Health Organization. [Unpublished].                                                                                                                                                                                                                                 | 1998                        |                      |
| Madagascar | Migliani R, Clouzeau J, Decousser J, Ravelomanana N, Rasamoelisoa J, Rabijaona H, Dromigny J, Pfister P, Roux J. Les méningites bactériennes non tuberculeuses de l'enfant à Antananarivo, Madagascar. <i>Arch Pediatr.</i> 2002; 9(9): 892-7.                                                                                                | 1998-2000                   |                      |
| Madagascar | Razafindralambo M, Ravelomanana N, Randriamiharisoa FA, Migliani R, Clouzeau J, Raobijaona H, Rasamoelisoa J, Pfister P. Haemophilus influenzae, the second cause of bacterial meningitis in children in Madagascar. <i>Bull Soc Pathol Exot.</i> 2004; 97(2): 100-3.                                                                         | 1998-2000                   |                      |
| Madagascar | Demographic and Social Statistics Directorate, National Institute of Statistics (Madagascar), United Nations Children's Fund (UNICEF). Madagascar Multiple Indicator Cluster Survey 2000. New York, United States: United Nations Children's Fund (UNICEF).                                                                                   | 2000                        |                      |
| Madagascar | United Nations Office on Drugs and Crime (UNODC). United Nations Office on Drugs and Crime Global Study on Homicides 2011. Vienna, Austria: United Nations Office on Drugs and Crime (UNODC), 2011.                                                                                                                                           | 2000                        |                      |
| Madagascar | Department of Peace and Conflict Research, Uppsala University. UCDP Nonstate Conflict Database Version 2.5, 2013. Uppsala, Sweden: Department of Peace and Conflict Research, Uppsala University, 2013.                                                                                                                                       | 2002-2009                   | *                    |
| Madagascar | Macro International, Inc, National Institute of Statistics (Madagascar). Madagascar Demographic and Health Survey 2003-2004. Calverton, United States: Macro International, Inc.                                                                                                                                                              | 2003-2004                   |                      |
| Madagascar | Ramarokoto CE, Rakotomanana F, Ratsitorahina M, Raharimanga V, Razafindratsimandresy R, Rendremanana R, Rakoto-Andrianarivelo M, Rousset D, Andrianaja V, Richard V, Soares J-L, Rabarijaona LP. Seroprevalence of hepatitis C and associated risk factors in urban areas of Antananarivo, Madagascar. <i>BMC Infect Dis.</i> 2008; 8(1): 25. | 2004                        |                      |
| Madagascar | Raharimanga V, Carod J-F, Ramarokoto C-E, Chrétien J-B, Rakotomanana F, Talarmin A, Richard V. Age-specific seroprevalence of hepatitis A in Antananarivo (Madagascar). <i>BMC Infect Dis.</i> 2008; 78.                                                                                                                                      | 2004                        |                      |
| Madagascar | World Health Organization (WHO). Retrospective Measles Data on Supplementary Immunization Activities. Geneva, Switzerland: World Health Organization (WHO).                                                                                                                                                                                   | 2004, 2007, 2010, 2013      |                      |
| Madagascar | Joint United Nations Program on HIV/AIDS (UNAIDS), National Committee for the Fight Against AIDS (Madagascar). Madagascar UNGASS Country Progress Report 2010. Geneva, Switzerland: Joint United Nations Program on HIV/AIDS (UNAIDS), 2010.                                                                                                  | 2007, 2009                  |                      |
| Madagascar | National Institute of Statistics (Madagascar), ICF Macro. Madagascar Demographic and Health Survey 2008-2009. Calverton, United States: ICF Macro, 2010.                                                                                                                                                                                      | 2008-2009                   |                      |
| Madagascar | Department of Peace and Conflict Research, Uppsala University. UCDP One-Sided Violence Database Version 1.4, 2013. Uppsala, Sweden: Department of Peace and Conflict Research, Uppsala University, 2013.                                                                                                                                      | 2009                        | *                    |

**Web Table 32 - Comprehensive citation list**

| Country    | Citation                                                                                                                                                                                                                                                               | Year*                                                         | New for GBD 2013 (*) |
|------------|------------------------------------------------------------------------------------------------------------------------------------------------------------------------------------------------------------------------------------------------------------------------|---------------------------------------------------------------|----------------------|
| Madagascar | ICF International, National Institute of Statistics (Madagascar), National Program for the Fight Against Malaria (PNLP) (Madagascar), Pasteur Institute (IPM) (Madagascar). Madagascar Malaria Indicator Survey 2011. Fairfax, United States: ICF International.       | 2011                                                          |                      |
| Madagascar | ICF International, National Institute of Statistics (Madagascar), National Program for the Fight Against Malaria (PNLP) (Madagascar), Pasteur Institute (IPM) (Madagascar). Madagascar Malaria Indicator Survey 2013. Fairfax, United States: ICF International, 2013. | 2013                                                          | *                    |
| Malawi     | National Statistical Office of Malawi. Malawi Population Change Survey 1970-1972.                                                                                                                                                                                      | 1970-1972                                                     |                      |
| Malawi     | Malawi Population and Housing Census 1977 as it appears in United Nations Statistics Division (UNSD). United Nations Demographic Yearbook. New York City, United States: United Nations Statistics Division (UNSD).                                                    | 1977                                                          |                      |
| Malawi     | Institute for Health Metrics and Evaluation (IHME), Joint United Nations Program on HIV/AIDS (UNAIDS). Institute for Health Metrics and Evaluation HIV Mortality Estimates Based on the UNAIDS Spectrum Model Framework.                                               | 1980-2013                                                     | *                    |
| Malawi     | United Nations Children's Fund (UNICEF), World Health Organization (WHO). WHO and UNICEF Reported Disease Incidence Time Series - Pertussis. Geneva, Switzerland: World Health Organization (WHO).                                                                     | 1980-1987, 1991, 1993-1996, 1998, 2000-2010, 2013             |                      |
| Malawi     | United Nations Children's Fund (UNICEF), World Health Organization (WHO). WHO and UNICEF Reported Disease Incidence Time Series - Measles. Geneva, Switzerland: World Health Organization (WHO).                                                                       | 1980-1989, 1991-2013                                          |                      |
| Malawi     | United Nations Office on Drugs and Crime (UNODC). United Nations Surveys on Crime Trends and the Operations of Criminal Justice Systems 1970-2006 as provided by Kavi Bhalla. [Unpublished].                                                                           | 1981-1985                                                     |                      |
| Malawi     | National Statistical Office of Malawi. Malawi Demographic Survey 1982.                                                                                                                                                                                                 | 1982                                                          |                      |
| Malawi     | National Statistical Office (Malawi), Minnesota Population Center. Malawi Population and Housing Census 1987 from the Integrated Public Use Microdata Series, International. [Machine-readable database]. Minneapolis: University of Minnesota, 2011.                  | 1987                                                          |                      |
| Malawi     | Slutsker L, Bloland P, Steketee RW, Wirima JJ, Heymann DL, Breman JG. Infant and second-year mortality in rural Malawi: causes and descriptive epidemiology. Am J Trop Med Hyg. 1996; 55(1 Suppl): 77-81.                                                              | 1988                                                          |                      |
| Malawi     | McDermott J, Steketee R, Larsen S, Wirima J. Syphilis-associated perinatal and infant mortality in rural Malawi. Bull World Health Organ. 1993; 71(6): 773-80.                                                                                                         | 1989                                                          |                      |
| Malawi     | Centre for Research on the Epidemiology of Disasters (CRED). EM-DAT: The OFDA/CRED International Disaster Database. Brussels, Belgium: Catholic University of Leuven.                                                                                                  | 1989, 1991, 1995, 1998, 2001-2003, 2005-2007, 2009, 2011-2013 |                      |
| Malawi     | Weatherall D. Sickle Cell and Thalassemias Prevalence Data, Personal Correspondence with David Weatherall. [Unpublished].                                                                                                                                              | 1990-2009                                                     |                      |
| Malawi     | Centre for Health Informatics and Multiprofessional Education, University College London. Modell's Haemoglobinopathologist's Almanac. London, United Kingdom: Centre for Health Informatics and Multiprofessional Education, University College London, 2008.          | 1990-2003                                                     |                      |
| Malawi     | Macro International, Inc, National Statistical Office of Malawi. Malawi Demographic and Health Survey 1992. Calverton, United States: Macro International, Inc.                                                                                                        | 1992                                                          |                      |
| Malawi     | Brabin BJ, Prinsen-Geerligs PD, Verhoeff FH, Fletcher KA, Chimsuku LHE, Ngwira BM, Leich OJ, Broadhead RL. Haematological profiles of the people of rural southern Malawi: an overview. Ann Trop Med Parasitol. 2004; 98(1): 71-83.                                    | 1994                                                          |                      |

**Web Table 32 - Comprehensive citation list**

| Country | Citation                                                                                                                                                                                                                                                           | Year*                        | New for GBD 2013 (*) |
|---------|--------------------------------------------------------------------------------------------------------------------------------------------------------------------------------------------------------------------------------------------------------------------|------------------------------|----------------------|
| Malawi  | World Health Organization Regional Office for Africa. HIV/AIDS Epidemiological Surveillance Update for the WHO African Region. World Health Organization Regional Office for Africa, 2003.                                                                         | 1994-2001                    |                      |
| Malawi  | National Statistical Office of Malawi, United Nations Children's Fund (UNICEF). Malawi Multiple Indicator Cluster Survey 1995.                                                                                                                                     | 1995                         | *                    |
| Malawi  | Ministry of Health (Malawi), National AIDS Commission (Malawi). Malawi HIV and Syphilis Sero-Survey and National HIV Prevalence Estimates Report 2010. Lilongwe, Malawi: Ministry of Health (Malawi), 2011.                                                        | 1995-2007                    |                      |
| Malawi  | Joint United Nations Program on HIV/AIDS (UNAIDS), National AIDS Commission (Malawi). Malawi HIV and AIDS Monitoring and Evaluation Report 2010. Geneva, Switzerland: Joint United Nations Program on HIV/AIDS (UNAIDS), 2010.                                     | 1995-2007, 2009              |                      |
| Malawi  | Banda LT, Parkin DM, Dzamalala CP, Liomba NG. Cancer incidence in Blantyre, Malawi 1994-1998. Trop Med Int Health. 2001; 6(4): 296-304.                                                                                                                            | 1996                         |                      |
| Malawi  | Molyneux E, Walsh A, Phiri A, Molyneux M. Acute bacterial meningitis in children admitted to the Queen Elizabeth Central Hospital, Blantyre, Malawi in 1996-97. Trop Med Int Health. 1998; 3(8): 610-8.                                                            | 1996-1997                    |                      |
| Malawi  | World Health Organization (WHO). Yellow Fever Reported Cases, WHO Vaccine-Preventable Diseases: Monitoring System. Geneva, Switzerland: World Health Organization (WHO).                                                                                           | 1996-1999, 2004              |                      |
| Malawi  | Yamaguchi S, Dunga A, Broadhead RL, Brabin BJ. Epidemiology of measles in Blantyre, Malawi: Analyses of passive surveillance data from 1996 to 1998. Epidemiol Infect. 2002; 129(2): 361-9.                                                                        | 1996-1998                    |                      |
| Malawi  | World Health Organization (WHO). The Global Elimination of Congenital Syphilis: Rationale and Strategy for Action. Geneva, Switzerland: World Health Organization (WHO), 2007.                                                                                     | 1997-2003                    |                      |
| Malawi  | Joint United Nations Program on HIV/AIDS (UNAIDS), United Nations Children's Fund (UNICEF), World Health Organization (WHO). Malawi Epidemiological Fact Sheet on HIV/AIDS and STIs 2004.                                                                          | 1997-2001                    |                      |
| Malawi  | National Statistical Office (Malawi), Minnesota Population Center. Malawi Population and Housing Census 1998 from the Integrated Public Use Microdata Series, International. [Machine-readable database]. Minneapolis: University of Minnesota, 2011.              | 1998                         | *                    |
| Malawi  | Measles Supplementary Immunization Activity Data as provided by the World Health Organization. [Unpublished].                                                                                                                                                      | 1998-1999                    |                      |
| Malawi  | Doctor HV, Weinreb AA. Estimation of AIDS adult mortality by verbal autopsy in rural Malawi. AIDS. 2003; 17(17): 2509-13.                                                                                                                                          | 1999                         |                      |
| Malawi  | Candotti D, Mundy C, Kadewele G, Nkhoma W, Bates I, Allain JP. Serological and molecular screening for viruses in blood donors from Ntcheu, Malawi: high prevalence of HIV-1 subtype C and of markers of hepatitis B and C viruses. J Med Virol. 2001; 65(1): 1-5. | 1999                         |                      |
| Malawi  | National AIDS Commission (Malawi). Malawi Triangulation Project Report. Lilongwe, Malawi: National AIDS Commission (Malawi), 2006.                                                                                                                                 | 1999, 2000-2001, 2003        |                      |
| Malawi  | Macro International, Inc, National Statistical Office of Malawi. Malawi Demographic and Health Survey 2000. Calverton, United States: Macro International, Inc.                                                                                                    | 2000                         |                      |
| Malawi  | World Health Organization (WHO). Retrospective Measles Data on Supplementary Immunization Activities. Geneva, Switzerland: World Health Organization (WHO).                                                                                                        | 2002, 2005, 2008, 2010, 2013 |                      |
| Malawi  | Jahn A, Floyd S, Crampin AC, Mvula H, Mwinuka V, Mwaiyeghele E, McGrath N, Zaba B, Fine PEM, Glynn JR. Declining child mortality in northern Malawi despite high rates of infection with HIV. Bull World Health Organ. 2010; 88: 746-53.                           | 2004                         |                      |
| Malawi  | Macro International, Inc, National Statistical Office of Malawi. Malawi Demographic and Health Survey 2004-2005. Calverton, United States: Macro International, Inc.                                                                                               | 2004-2005                    |                      |



**Web Table 32 - Comprehensive citation list**

| Country  | Citation                                                                                                                                                                                                                                                                                     | Year*     | New for GBD 2013 (*) |
|----------|----------------------------------------------------------------------------------------------------------------------------------------------------------------------------------------------------------------------------------------------------------------------------------------------|-----------|----------------------|
| Malawi   | Chihana M, Floyd S, Molesworth A, Crampin AC, Kayuni N, Price A, Zaba B, Jahn A, Mvula H, Dube A, Ngwira B, Glynn JR, French N. Adult mortality and probable cause of death in rural northern Malawi in the era of HIV treatment. <i>Trop Med Int Health</i> . 2012; 17(8): E74-83.          | 2004-2008 |                      |
| Malawi   | Forman D, Bray F, Brewster DH, Gombe Mbalawa C, Kohler B, Piñeros M, Steliarova-Foucher E, Swaminathan R and Ferlay J, eds (2013). <i>Cancer Incidence in Five Continents, Vol. X Summary Database</i> (electronic version). Lyon, IARC. <a href="http://ci5.iarc.fr">http://ci5.iarc.fr</a> | 2005      |                      |
| Malawi   | Ministry of Health (Malawi), National AIDS Commission (Malawi). <i>Malawi HIV and Syphilis Sentinel Surveillance of Antenatal Clinic Attendees 2005</i> .                                                                                                                                    | 2005      |                      |
| Malawi   | United Nations Children's Fund (UNICEF), National Statistics Office (Malawi). <i>Malawi Multiple Indicator Cluster Survey 2006</i> . New York, United States: United Nations Children's Fund (UNICEF).                                                                                       | 2006      |                      |
| Malawi   | Van den Akker T, van Rhenen J, Mwangomba B, Lommerse K, Vinkhumbo S, van Roosmalen J. Reduction of Severe Acute Maternal Morbidity and Maternal Mortality in Thyolo District, Malawi: The Impact of Obstetric Audit. <i>PLoS One</i> . 2011; 6(6): e20776.                                   | 2007-2009 |                      |
| Malawi   | National Statistical Office of Malawi. <i>Malawi Population and Housing Census 2008</i> .                                                                                                                                                                                                    | 2008      |                      |
| Malawi   | National Statistical Office of Malawi. <i>Malawi Global Fund Household Health Coverage Survey 2008</i> .                                                                                                                                                                                     | 2008      |                      |
| Malawi   | National Statistical Office (Malawi), Minnesota Population Center. <i>Malawi Population and Housing Census 2008 from the Integrated Public Use Microdata Series, International</i> . [Machine-readable database]. Minneapolis: University of Minnesota, 2011.                                | 2008      |                      |
| Malawi   | Checchi F, Nyasulu P, Chandramohan D, Roberts B. Rates and causes of death in Chiradzulu District, Malawi, 2008: a key informant study. <i>Trop Med Int Health</i> . 2011; 16(3): 375-8.                                                                                                     | 2008      |                      |
| Malawi   | Kalilani-Phiri LV, Umar E, Lazaro D, Lunguzi J, Chilungo A. Prevalence of obstetric fistula in Malawi. <i>Int J Gynaecol Obstet</i> . 2010; 109(3): 204-8.                                                                                                                                   | 2008      |                      |
| Malawi   | ICF Macro, National Statistical Office of Malawi. <i>Malawi Demographic and Health Survey 2010</i> . Claverton, Maryland: ICF Macro.                                                                                                                                                         | 2010      |                      |
| Malawi   | ICF International, National Malaria Control Program (Malawi). <i>Malawi Malaria Indicator Survey 2012</i> . Fairfax, United States: ICF International, 2013.                                                                                                                                 | 2012      | *                    |
| Malaysia | Peace Research Institute Oslo (PRIO). <i>Battle Deaths Dataset Version 3, 2009</i> . Oslo, Norway: Peace Research Institute Oslo (PRIO), 2009.                                                                                                                                               | 1950-1981 |                      |
| Malaysia | Malaysia Vital Registration Death Data 1952 as it appears in United Nations Statistics Division (UNSD). <i>United Nations Demographic Yearbook</i> . New York City, United States: United Nations Statistics Division (UNSD).                                                                | 1952      |                      |
| Malaysia | Malaysia Vital Registration Death Data 1953 as it appears in United Nations Statistics Division (UNSD). <i>United Nations Demographic Yearbook</i> . New York City, United States: United Nations Statistics Division (UNSD).                                                                | 1953      |                      |
| Malaysia | Malaysia Vital Registration Death Data 1954 as it appears in United Nations Statistics Division (UNSD). <i>United Nations Demographic Yearbook</i> . New York City, United States: United Nations Statistics Division (UNSD).                                                                | 1954      |                      |
| Malaysia | Malaysia Vital Registration Death Data 1955 as it appears in United Nations Statistics Division (UNSD). <i>United Nations Demographic Yearbook</i> . New York City, United States: United Nations Statistics Division (UNSD).                                                                | 1955      |                      |

**Web Table 32 - Comprehensive citation list**

| Country  | Citation                                                                                                                                                                                                              | Year*                                                                    | New for GBD 2013 (*) |
|----------|-----------------------------------------------------------------------------------------------------------------------------------------------------------------------------------------------------------------------|--------------------------------------------------------------------------|----------------------|
| Malaysia | Malaysia Vital Registration Death Data 1956 as it appears in United Nations Statistics Division (UNSD). United Nations Demographic Yearbook. New York City, United States: United Nations Statistics Division (UNSD). | 1956                                                                     |                      |
| Malaysia | Malaysia Vital Registration Death Data 1957 as it appears in United Nations Statistics Division (UNSD). United Nations Demographic Yearbook. New York City, United States: United Nations Statistics Division (UNSD). | 1957                                                                     |                      |
| Malaysia | Malaysia Vital Registration Death Data 1958 as it appears in United Nations Statistics Division (UNSD). United Nations Demographic Yearbook. New York City, United States: United Nations Statistics Division (UNSD). | 1958                                                                     |                      |
| Malaysia | Malaysia Vital Registration Death Data 1959 as it appears in United Nations Statistics Division (UNSD). United Nations Demographic Yearbook. New York City, United States: United Nations Statistics Division (UNSD). | 1959                                                                     |                      |
| Malaysia | Malaysia Vital Registration Death Data 1960 as it appears in United Nations Statistics Division (UNSD). United Nations Demographic Yearbook. New York City, United States: United Nations Statistics Division (UNSD). | 1960                                                                     |                      |
| Malaysia | Malaysia Vital Registration Death Data 1961 as it appears in United Nations Statistics Division (UNSD). United Nations Demographic Yearbook. New York City, United States: United Nations Statistics Division (UNSD). | 1961                                                                     |                      |
| Malaysia | Malaysia Vital Registration Death Data 1962 as it appears in United Nations Statistics Division (UNSD). United Nations Demographic Yearbook. New York City, United States: United Nations Statistics Division (UNSD). | 1962                                                                     |                      |
| Malaysia | Lie-Injoluan EN, Chin J. Abnormal haemoglobin and glucose-6-phosphate dehydrogenase in Malayan Aborigines. Nature. 1964; 204: 291-2.                                                                                  | 1962-1964                                                                |                      |
| Malaysia | Malaysia Vital Registration Death Data 1963 as it appears in United Nations Statistics Division (UNSD). United Nations Demographic Yearbook. New York City, United States: United Nations Statistics Division (UNSD). | 1963                                                                     |                      |
| Malaysia | Malaysia Vital Registration Death Data 1964 as it appears in United Nations Statistics Division (UNSD). United Nations Demographic Yearbook. New York City, United States: United Nations Statistics Division (UNSD). | 1964                                                                     |                      |
| Malaysia | Malaysia Vital Registration Death Data 1965 as it appears in United Nations Statistics Division (UNSD). United Nations Demographic Yearbook. New York City, United States: United Nations Statistics Division (UNSD). | 1965                                                                     |                      |
| Malaysia | Centre for Research on the Epidemiology of Disasters (CRED). EM-DAT: The OFDA/CRED International Disaster Database. Brussels, Belgium: Catholic University of Leuven.                                                 | 1965, 1967-1968, 1970, 1983, 1986-1988, 1993, 1995-1997, 1999-2007, 2011 |                      |
| Malaysia | Malaysia Vital Registration Death Data 1966 as it appears in United Nations Statistics Division (UNSD). United Nations Demographic Yearbook. New York City, United States: United Nations Statistics Division (UNSD). | 1966                                                                     |                      |
| Malaysia | Malaysia Vital Registration Death Data 1967 as it appears in United Nations Statistics Division (UNSD). United Nations Demographic Yearbook. New York City, United States: United Nations Statistics Division (UNSD). | 1967                                                                     |                      |



**Web Table 32 - Comprehensive citation list**

| Country  | Citation                                                                                                                                                                                                                                         | Year*     | New for GBD 2013 (*) |
|----------|--------------------------------------------------------------------------------------------------------------------------------------------------------------------------------------------------------------------------------------------------|-----------|----------------------|
| Malaysia | Malaysia Vital Registration Death Data 1968 as it appears in United Nations Statistics Division (UNSD). United Nations Demographic Yearbook. New York City, United States: United Nations Statistics Division (UNSD).                            | 1968      |                      |
| Malaysia | Department of Statistics (Malaysia). Malaysia - Peninsular Vital Statistics 1969. Putrajaya, Malaysia: Department of Statistics (Malaysia), 1971.                                                                                                | 1969      |                      |
| Malaysia | Malaysia Vital Registration Death Data 1969 as it appears in United Nations Statistics Division (UNSD). United Nations Demographic Yearbook. New York City, United States: United Nations Statistics Division (UNSD).                            | 1969      |                      |
| Malaysia | Department of Statistics (Malaysia), Minnesota Population Center. Malaysia Population and Housing Census 1970 from the Integrated Public Use Microdata Series, International. [Machine-readable database]. Minneapolis: University of Minnesota. | 1970      |                      |
| Malaysia | Malaysia Vital Registration Death Data 1970 as it appears in United Nations Statistics Division (UNSD). United Nations Demographic Yearbook. New York City, United States: United Nations Statistics Division (UNSD).                            | 1970      |                      |
| Malaysia | United Nations Office on Drugs and Crime (UNODC). United Nations Surveys on Crime Trends and the Operations of Criminal Justice Systems 1970-2006 as provided by Kavi Bhalla. [Unpublished].                                                     | 1970-1994 |                      |
| Malaysia | Malaysia Vital Registration Death Data 1971 as it appears in United Nations Statistics Division (UNSD). United Nations Demographic Yearbook. New York City, United States: United Nations Statistics Division (UNSD).                            | 1971      |                      |
| Malaysia | Malaysia Vital Registration Death Data 1972 as it appears in United Nations Statistics Division (UNSD). United Nations Demographic Yearbook. New York City, United States: United Nations Statistics Division (UNSD).                            | 1972      |                      |
| Malaysia | Ganesan J, Lie-Injo LE, Ong Beng P. Abnormal hemoglobins, glucose-6-phosphate dehydrogenase deficiency and hereditary ovalocytosis in the Dayaks of Sarawak. Hum Hered. 1975; 25(4): 258-62.                                                     | 1973-1975 |                      |
| Malaysia | National Population and Family Development Board (Malaysia), International Statistical Institute. Malaysia World Fertility Survey 1974. Voorburg, Netherlands: International Statistical Institute.                                              | 1974      |                      |
| Malaysia | Malaysia Vital Registration Death Data 1976 as it appears in United Nations Statistics Division (UNSD). United Nations Demographic Yearbook. New York City, United States: United Nations Statistics Division (UNSD).                            | 1976      |                      |
| Malaysia | Malaysia Vital Registration Death Data 1977 as it appears in United Nations Statistics Division (UNSD). United Nations Demographic Yearbook. New York City, United States: United Nations Statistics Division (UNSD).                            | 1977      |                      |
| Malaysia | Malaysia Vital Registration Death Data 1978 as it appears in United Nations Statistics Division (UNSD). United Nations Demographic Yearbook. New York City, United States: United Nations Statistics Division (UNSD).                            | 1978      |                      |
| Malaysia | Department of Statistics (Malaysia). Vital Statistics: Peninsular Malaysia 1979. Kuala Lumpur, Malaysia: Department of Statistics (Malaysia), 1981.                                                                                              | 1979      |                      |
| Malaysia | Department of Statistics (Malaysia). Vital Statistics: Peninsular Malaysia 1980. Kuala Lumpur, Malaysia: Department of Statistics (Malaysia), 1983.                                                                                              | 1980      |                      |
| Malaysia | Department of Statistics (Malaysia), Minnesota Population Center. Malaysia Population and Housing Census 1980 from the Integrated Public Use Microdata Series, International. [Machine-readable database]. Minneapolis: University of Minnesota. | 1980      |                      |

**Web Table 32 - Comprehensive citation list**

| Country  | Citation                                                                                                                                                                                                                                                      | Year*      | New for GBD 2013 (*) |
|----------|---------------------------------------------------------------------------------------------------------------------------------------------------------------------------------------------------------------------------------------------------------------|------------|----------------------|
| Malaysia | Institute for Health Metrics and Evaluation (IHME), Joint United Nations Program on HIV/AIDS (UNAIDS). Institute for Health Metrics and Evaluation HIV Mortality Estimates Based on the UNAIDS Spectrum Model Framework.                                      | 1980-2013  | *                    |
| Malaysia | United Nations Children's Fund (UNICEF), World Health Organization (WHO). WHO and UNICEF Reported Disease Incidence Time Series - Pertussis. Geneva, Switzerland: World Health Organization (WHO).                                                            | 1980-2013  |                      |
| Malaysia | United Nations Children's Fund (UNICEF), World Health Organization (WHO). WHO and UNICEF Reported Disease Incidence Time Series - Measles. Geneva, Switzerland: World Health Organization (WHO).                                                              | 1980-2013  |                      |
| Malaysia | Department of Statistics (Malaysia). Vital Statistics: Peninsular Malaysia 1981. Kuala Lumpur, Malaysia: Department of Statistics (Malaysia), 1983.                                                                                                           | 1981       |                      |
| Malaysia | Department of Statistics (Malaysia). Vital Statistics: Peninsular Malaysia 1982. Kuala Lumpur, Malaysia: Department of Statistics (Malaysia), 1984.                                                                                                           | 1982       |                      |
| Malaysia | Singh H. Glucose-6-phosphate dehydrogenase deficiency: a preventable cause of mental retardation. Br Med J (Clin Res Ed). 1986; 292(6517): 397-8.                                                                                                             | 1983-1984  |                      |
| Malaysia | Malaysia Vital Registration Death Data 1984 as it appears in United Nations Statistics Division (UNSD). United Nations Demographic Yearbook. New York City, United States: United Nations Statistics Division (UNSD).                                         | 1984       |                      |
| Malaysia | Malaysia Vital Registration Death Data 1985 as it appears in United Nations Statistics Division (UNSD). United Nations Demographic Yearbook. New York City, United States: United Nations Statistics Division (UNSD).                                         | 1985       |                      |
| Malaysia | Ton SH, Thiruselvam A, Lopez CG, Noriah R. Prevalence of hepatitis A virus infection in normal individuals and hospital patients in Kuala Lumpur. Med J Malaysia. 1983; 38(4): 279-81.                                                                        | 1985       |                      |
| Malaysia | Tan DS, Fang R, Collett D, Ooi BG. A seroepidemiologic study of hepatitis A in Malaysia. Southeast Asian J Trop Med Public Health. 1986; 17(2): 201-4.                                                                                                        | 1985       |                      |
| Malaysia | Malaysia Vital Registration Death Data 1986 as it appears in United Nations Statistics Division (UNSD). United Nations Demographic Yearbook. New York City, United States: United Nations Statistics Division (UNSD).                                         | 1986       |                      |
| Malaysia | Malaysia Vital Registration Death Data 1990 as it appears in United Nations Statistics Division (UNSD). United Nations Demographic Yearbook. New York City, United States: United Nations Statistics Division (UNSD).                                         | 1990       |                      |
| Malaysia | Khoo A, Ho CK, Ong TK, Khairul A. Measles--an experience in Sandakan Hospital, Sabah, 1990. Singapore Med J. 1994; 35(6): 595-8.                                                                                                                              | 1990       |                      |
| Malaysia | Weatherall D. Sick Cell and Thalassemias Prevalence Data, Personal Correspondence with David Weatherall. [Unpublished].                                                                                                                                       | 1990-2009  |                      |
| Malaysia | Centre for Health Informatics and Multiprofessional Education, University College London. Modell's Haemoglobinopathologist's Almanac. London, United Kingdom: Centre for Health Informatics and Multiprofessional Education, University College London, 2008. | 1990-2003  |                      |
| Malaysia | Malaysia Dialysis and Transplant Registry data as it appears in the GBD 2010 Chronic Kidney Disease Expert Group dataset. Provided by Dr. Yudisthra M. Ganeshadeva, Dr. Loh Cheh Loong and SRN Lee Day Guat. [Unpublished].                                   | 1990, 2005 |                      |
| Malaysia | Malaysia Vital Registration Death Data 1991 as it appears in United Nations Statistics Division (UNSD). United Nations Demographic Yearbook. New York City, United States: United Nations Statistics Division (UNSD).                                         | 1991       |                      |

**Web Table 32 - Comprehensive citation list**

| Country  | Citation                                                                                                                                                                                                                   | Year*     | New for GBD 2013 (*) |
|----------|----------------------------------------------------------------------------------------------------------------------------------------------------------------------------------------------------------------------------|-----------|----------------------|
| Malaysia | Malaysia Vital Registration Death Data 1992 as it appears in United Nations Statistics Division (UNSD). United Nations Demographic Yearbook. New York City, United States: United Nations Statistics Division (UNSD).      | 1992      |                      |
| Malaysia | Malaysia Vital Registration Death Data 1993 as it appears in United Nations Statistics Division (UNSD). United Nations Demographic Yearbook. New York City, United States: United Nations Statistics Division (UNSD).      | 1993      |                      |
| Malaysia | Malaysia Vital Registration Death Data 1994 as it appears in United Nations Statistics Division (UNSD). United Nations Demographic Yearbook. New York City, United States: United Nations Statistics Division (UNSD).      | 1994      |                      |
| Malaysia | Malaysia Vital Registration Death Data 1995 as it appears in United Nations Statistics Division (UNSD). United Nations Demographic Yearbook. New York City, United States: United Nations Statistics Division (UNSD).      | 1995      |                      |
| Malaysia | Ali RA, Mathews S. Prevalence of dementia among elderly Malays in an urban settlement in Malaysia. <i>Neurol J Southeast Asia</i> . 1997; 159-62.                                                                          | 1995      |                      |
| Malaysia | United Nations Office on Drugs and Crime (UNODC). United Nations Office on Drugs and Crime Global Study on Homicides 2011. Vienna, Austria: United Nations Office on Drugs and Crime (UNODC), 2011.                        | 1995-1996 |                      |
| Malaysia | Malaysia Vital Registration Death Data 1996 as it appears in United Nations Statistics Division (UNSD). United Nations Demographic Yearbook. New York City, United States: United Nations Statistics Division (UNSD).      | 1996      |                      |
| Malaysia | Malaysia Vital Registration - Deaths 1997 ICD9 as it appears in World Health Organization (WHO). WHO Mortality Database Version February 2014. Geneva, Switzerland: World Health Organization (WHO), 2014.                 | 1997      |                      |
| Malaysia | Malaysia Vital Registration Death Data 1997 as it appears in United Nations Statistics Division (UNSD). United Nations Demographic Yearbook. New York City, United States: United Nations Statistics Division (UNSD).      | 1997      |                      |
| Malaysia | World Health Organization (WHO). The Global Elimination of Congenital Syphilis: Rationale and Strategy for Action. Geneva, Switzerland: World Health Organization (WHO), 2007.                                             | 1997-2003 |                      |
| Malaysia | Ng KP, Saw TL, Baki A, Rozainah K, Pang KW, Ramanathan M. Impact of the Expanded Program of Immunization against hepatitis B infection in school children in Malaysia. <i>Med Microbiol Immunol</i> . 2005; 194(3): 163-8. | 1997-2003 |                      |
| Malaysia | Joint United Nations Program on HIV/AIDS (UNAIDS), United Nations Children's Fund (UNICEF), World Health Organization (WHO). Malaysia Epidemiological Fact Sheet on HIV/AIDS and STIs 2004.                                | 1997-1999 |                      |
| Malaysia | Malaysia Vital Registration Death Data 1998 as it appears in United Nations Statistics Division (UNSD). United Nations Demographic Yearbook. New York City, United States: United Nations Statistics Division (UNSD).      | 1998      |                      |
| Malaysia | World Health Organization (WHO). Yellow Fever Reported Cases, WHO Vaccine-Preventable Diseases: Monitoring System. Geneva, Switzerland: World Health Organization (WHO).                                                   | 1998-2009 |                      |
| Malaysia | Ainoon O, Yu YH, Amir Muhriz AL, Boo NY, Cheong SK, Hamidah NH. Glucose-6-phosphate dehydrogenase (G6PD) variants in Malaysian Malays. <i>Hum Mutat</i> . 2003; 21(1): 101.                                                | 1999-2000 |                      |
| Malaysia | Lee WS, Ng KP. Seroprevalence of anti-HCV in an urban child population: a preliminary study from Kuala Lumpur. <i>Singapore Med J</i> . 2001; 42(3): 100-1.                                                                | 1999-2000 |                      |

**Web Table 32 - Comprehensive citation list**

| Country  | Citation                                                                                                                                                                                                                                                | Year*           | New for GBD 2013 (*) |
|----------|---------------------------------------------------------------------------------------------------------------------------------------------------------------------------------------------------------------------------------------------------------|-----------------|----------------------|
| Malaysia | Malaysia Vital Registration - Deaths 2000 ICD10 as it appears in World Health Organization (WHO). WHO Mortality Database Version February 2014. Geneva, Switzerland: World Health Organization (WHO), 2014.                                             | 2000            |                      |
| Malaysia | Curado. M. P., Edwards, B., Shin. H.R., Storm. H., Ferlay. J., Heanue. M. and Boyle. P., eds (2007). Cancer Incidence in Five Continents, Vol. IX Periodic Data (electronic version). Lyon, IARC. <a href="http://ci5.iarc.fr">http://ci5.iarc.fr</a> . | 2000            |                      |
| Malaysia | Curado MP, Edwards B, Shin HR, Storm H, Ferlay J, Heanue M and Boyle P, eds (2007). Cancer Incidence in Five Continents, Vol. IX Periodic Data (electronic version). Lyon, IARC. <a href="http://ci5.iarc.fr">http://ci5.iarc.fr</a>                    | 2000            |                      |
| Malaysia | Malaysia Vital Registration Death Data 2000 as it appears in United Nations Statistics Division (UNSD). United Nations Demographic Yearbook. New York City, United States: United Nations Statistics Division (UNSD).                                   | 2000            |                      |
| Malaysia | Malaysia Vital Registration - Deaths 2001 ICD10 as it appears in World Health Organization (WHO). WHO Mortality Database Version February 2014. Geneva, Switzerland: World Health Organization (WHO), 2014.                                             | 2001            |                      |
| Malaysia | Malaysia Vital Registration Death Data 2001 as it appears in United Nations Statistics Division (UNSD). United Nations Demographic Yearbook. New York City, United States: United Nations Statistics Division (UNSD).                                   | 2001            |                      |
| Malaysia | Malaysia Vital Registration - Deaths 2002 ICD10 as it appears in World Health Organization (WHO). WHO Mortality Database Version February 2014. Geneva, Switzerland: World Health Organization (WHO), 2014.                                             | 2002            |                      |
| Malaysia | Malaysia Vital Registration Death Data 2002 as it appears in United Nations Statistics Division (UNSD). United Nations Demographic Yearbook. New York City, United States: United Nations Statistics Division (UNSD).                                   | 2002            |                      |
| Malaysia | Malaysia Vital Registration - Deaths 2003 ICD10 as it appears in World Health Organization (WHO). WHO Mortality Database Version February 2014. Geneva, Switzerland: World Health Organization (WHO), 2014.                                             | 2003            |                      |
| Malaysia | World Health Organization (WHO). Malaysia World Health Survey 2003. Geneva, Switzerland: World Health Organization (WHO), 2005.                                                                                                                         | 2003            |                      |
| Malaysia | National Cancer Registry, Ministry of Health (Malaysia). Malaysia Cancer Incidence Report 2003. Kuala Lumpur, Malaysia: National Cancer Registry, Ministry of Health (Malaysia), 2004.                                                                  | 2003            |                      |
| Malaysia | Malaysia Vital Registration Death Data 2003 as it appears in United Nations Statistics Division (UNSD). United Nations Demographic Yearbook. New York City, United States: United Nations Statistics Division (UNSD).                                   | 2003            |                      |
| Malaysia | Malaysia Vital Registration - Deaths 2004 ICD10 as it appears in World Health Organization (WHO). WHO Mortality Database Version February 2014. Geneva, Switzerland: World Health Organization (WHO), 2014.                                             | 2004            |                      |
| Malaysia | Malaysia Vital Registration Death Data 2004 as it appears in United Nations Statistics Division (UNSD). United Nations Demographic Yearbook. New York City, United States: United Nations Statistics Division (UNSD).                                   | 2004            |                      |
| Malaysia | Hamid TA, Krishnaswamy S, Abdullah SS, Momtaz YA. Sociodemographic risk factors and correlates of dementia in older Malaysians. <i>Dement Geriatr Cogn Disord</i> . 2010; 30(6): 533-9.                                                                 | 2004-2005       |                      |
| Malaysia | World Health Organization (WHO). Retrospective Measles Data on Supplementary Immunization Activities. Geneva, Switzerland: World Health Organization (WHO).                                                                                             | 2004-2005, 2012 |                      |

**Web Table 32 - Comprehensive citation list**

| Country  | Citation                                                                                                                                                                                                                                                                                                      | Year*     | New for GBD 2013 (*) |
|----------|---------------------------------------------------------------------------------------------------------------------------------------------------------------------------------------------------------------------------------------------------------------------------------------------------------------|-----------|----------------------|
| Malaysia | Malaysia Vital Registration - Deaths 2005 ICD10 as it appears in World Health Organization (WHO). WHO Mortality Database Version February 2014. Geneva, Switzerland: World Health Organization (WHO), 2014.                                                                                                   | 2005      |                      |
| Malaysia | Forman D, Bray F, Brewster DH, Gombe Mbalawa C, Kohler B, Piñeros M, Steliarova-Foucher E, Swaminathan R and Ferlay J, eds (2013). Cancer Incidence in Five Continents, Vol. X Summary Database (electronic version). Lyon, IARC. <a href="http://ci5.iarc.fr">http://ci5.iarc.fr</a>                         | 2005      |                      |
| Malaysia | United States Renal Data System Coordinating Center. USRDS 2010 Annual Data Report: Atlas of Chronic Kidney Disease and End-Stage Renal Disease in the United States. Bethesda, United States: National Institute of Diabetes and Digestive and Kidney Diseases (NIDDK), National Institutes of Health, 2010. | 2005      |                      |
| Malaysia | Malaysia Vital Registration Death Data 2005 as it appears in United Nations Statistics Division (UNSD). United Nations Demographic Yearbook. New York City, United States: United Nations Statistics Division (UNSD).                                                                                         | 2005      |                      |
| Malaysia | Malaysia Vital Registration - Deaths 2006 ICD10 as it appears in World Health Organization (WHO). WHO Mortality Database Version February 2014. Geneva, Switzerland: World Health Organization (WHO), 2014.                                                                                                   | 2006      |                      |
| Malaysia | Malaysia Vital Registration Death Data 2006 as it appears in United Nations Statistics Division (UNSD). United Nations Demographic Yearbook. New York City, United States: United Nations Statistics Division (UNSD).                                                                                         | 2006      |                      |
| Malaysia | Qua C-S, Goh K-L. Liver cirrhosis in Malaysia: peculiar epidemiology in a multiracial Asian country. J Gastroenterol Hepatol. 2011; 26(8): 1333-7.                                                                                                                                                            | 2006-2009 |                      |
| Malaysia | Malaysia Vital Registration - Deaths 2007 ICD10 as it appears in World Health Organization (WHO). WHO Mortality Database Version February 2014. Geneva, Switzerland: World Health Organization (WHO), 2014.                                                                                                   | 2007      |                      |
| Malaysia | Malaysia Vital Registration Death Data 2007 as it appears in United Nations Statistics Division (UNSD). United Nations Demographic Yearbook. New York City, United States: United Nations Statistics Division (UNSD).                                                                                         | 2007      |                      |
| Malaysia | Malaysia Vital Registration - Deaths 2008 ICD10 as it appears in World Health Organization (WHO). WHO Mortality Database Version February 2014. Geneva, Switzerland: World Health Organization (WHO), 2014.                                                                                                   | 2008      |                      |
| Malaysia | Malaysia Vital Registration Death Data 2008 as it appears in United Nations Statistics Division (UNSD). United Nations Demographic Yearbook. New York City, United States: United Nations Statistics Division (UNSD).                                                                                         | 2008      |                      |
| Malaysia | Malaysia Vital Registration Death Data 2009 as it appears in United Nations Statistics Division (UNSD). United Nations Demographic Yearbook. New York City, United States: United Nations Statistics Division (UNSD).                                                                                         | 2009      |                      |
| Malaysia | Joint United Nations Program on HIV/AIDS (UNAIDS), Ministry of Health (Malaysia). Malaysia UNGASS Country Progress Report 2010. Geneva, Switzerland: Joint United Nations Program on HIV/AIDS (UNAIDS), 2010.                                                                                                 | 2009      |                      |
| Maldives | United Nations Office on Drugs and Crime (UNODC). United Nations Surveys on Crime Trends and the Operations of Criminal Justice Systems 1970-2006 as provided by Kavi Bhalla. [Unpublished].                                                                                                                  | 1972-1990 |                      |

**Web Table 32 - Comprehensive citation list**

| Country  | Citation                                                                                                                                                                                                                 | Year*                      | New for GBD 2013 (*) |
|----------|--------------------------------------------------------------------------------------------------------------------------------------------------------------------------------------------------------------------------|----------------------------|----------------------|
| Maldives | Maldives Vital Registration Death Data 1974 as it appears in United Nations Statistics Division (UNSD). United Nations Demographic Yearbook. New York City, United States: United Nations Statistics Division (UNSD).    | 1974                       |                      |
| Maldives | Maldives Vital Registration Death Data 1975 as it appears in United Nations Statistics Division (UNSD). United Nations Demographic Yearbook. New York City, United States: United Nations Statistics Division (UNSD).    | 1975                       |                      |
| Maldives | Maldives Vital Registration Death Data 1976 as it appears in United Nations Statistics Division (UNSD). United Nations Demographic Yearbook. New York City, United States: United Nations Statistics Division (UNSD).    | 1976                       |                      |
| Maldives | Maldives Population and Housing Census 1977 as it appears in United Nations Statistics Division (UNSD). United Nations Demographic Yearbook. New York City, United States: United Nations Statistics Division (UNSD).    | 1977                       |                      |
| Maldives | Maldives Vital Registration Death Data 1978 as it appears in United Nations Statistics Division (UNSD). United Nations Demographic Yearbook. New York City, United States: United Nations Statistics Division (UNSD).    | 1978                       |                      |
| Maldives | Maldives Vital Registration Death Data 1979 as it appears in United Nations Statistics Division (UNSD). United Nations Demographic Yearbook. New York City, United States: United Nations Statistics Division (UNSD).    | 1979                       |                      |
| Maldives | Maldives Vital Registration Death Data 1980 as it appears in United Nations Statistics Division (UNSD). United Nations Demographic Yearbook. New York City, United States: United Nations Statistics Division (UNSD).    | 1980                       |                      |
| Maldives | Institute for Health Metrics and Evaluation (IHME), Joint United Nations Program on HIV/AIDS (UNAIDS). Institute for Health Metrics and Evaluation HIV Mortality Estimates Based on the UNAIDS Spectrum Model Framework. | 1980-2013                  | *                    |
| Maldives | United Nations Children's Fund (UNICEF), World Health Organization (WHO). WHO and UNICEF Reported Disease Incidence Time Series - Pertussis. Geneva, Switzerland: World Health Organization (WHO).                       | 1980-1998, 2001, 2005-2013 |                      |
| Maldives | Maldives Vital Registration Death Data 1981 as it appears in United Nations Statistics Division (UNSD). United Nations Demographic Yearbook. New York City, United States: United Nations Statistics Division (UNSD).    | 1981                       |                      |
| Maldives | United Nations Children's Fund (UNICEF), World Health Organization (WHO). WHO and UNICEF Reported Disease Incidence Time Series - Measles. Geneva, Switzerland: World Health Organization (WHO).                         | 1981-1996, 1998, 2000-2013 |                      |
| Maldives | Maldives Vital Registration Death Data 1982 as it appears in United Nations Statistics Division (UNSD). United Nations Demographic Yearbook. New York City, United States: United Nations Statistics Division (UNSD).    | 1982                       |                      |
| Maldives | Maldives Vital Registration Death Data 1983 as it appears in United Nations Statistics Division (UNSD). United Nations Demographic Yearbook. New York City, United States: United Nations Statistics Division (UNSD).    | 1983                       |                      |
| Maldives | Maldives Vital Registration Death Data 1984 as it appears in United Nations Statistics Division (UNSD). United Nations Demographic Yearbook. New York City, United States: United Nations Statistics Division (UNSD).    | 1984                       |                      |
| Maldives | Maldives Population and Housing Census 1985 as it appears in United Nations Statistics Division (UNSD). United Nations Demographic Yearbook. New York City, United States: United Nations Statistics Division (UNSD).    | 1985                       |                      |



**Web Table 32 - Comprehensive citation list**

| Country  | Citation                                                                                                                                                                                                                                                      | Year*     | New for GBD 2013 (*) |
|----------|---------------------------------------------------------------------------------------------------------------------------------------------------------------------------------------------------------------------------------------------------------------|-----------|----------------------|
| Maldives | Maldives Vital Registration Death Data 1985 as it appears in United Nations Statistics Division (UNSD). United Nations Demographic Yearbook. New York City, United States: United Nations Statistics Division (UNSD).                                         | 1985      |                      |
| Maldives | Maldives Vital Registration Death Data 1986 as it appears in United Nations Statistics Division (UNSD). United Nations Demographic Yearbook. New York City, United States: United Nations Statistics Division (UNSD).                                         | 1986      |                      |
| Maldives | Maldives Vital Registration Death Data 1987 as it appears in United Nations Statistics Division (UNSD). United Nations Demographic Yearbook. New York City, United States: United Nations Statistics Division (UNSD).                                         | 1987      |                      |
| Maldives | Maldives Vital Registration Death Data 1988 as it appears in United Nations Statistics Division (UNSD). United Nations Demographic Yearbook. New York City, United States: United Nations Statistics Division (UNSD).                                         | 1988      |                      |
| Maldives | Modell B, Razzak A, Hindley N. Thalassaemia in the Maldives. Lancet. 1990; 335(8698): 1169-70.                                                                                                                                                                | 1988-1997 |                      |
| Maldives | Maldives Vital Registration Death Data 1989 as it appears in United Nations Statistics Division (UNSD). United Nations Demographic Yearbook. New York City, United States: United Nations Statistics Division (UNSD).                                         | 1989      |                      |
| Maldives | Ministry of Planning and Environment (Maldives). Maldives Population and Housing Census 1990.                                                                                                                                                                 | 1990      |                      |
| Maldives | Maldives Vital Registration Death Data 1990 as it appears in United Nations Statistics Division (UNSD). United Nations Demographic Yearbook. New York City, United States: United Nations Statistics Division (UNSD).                                         | 1990      |                      |
| Maldives | Weatherall D. Sickle Cell and Thalassemias Prevalence Data, Personal Correspondence with David Weatherall. [Unpublished].                                                                                                                                     | 1990-2009 |                      |
| Maldives | Centre for Health Informatics and Multiprofessional Education, University College London. Modell's Haemoglobinopathologist's Almanac. London, United Kingdom: Centre for Health Informatics and Multiprofessional Education, University College London, 2008. | 1990-2003 |                      |
| Maldives | Maldives Vital Registration Death Data 1991 as it appears in United Nations Statistics Division (UNSD). United Nations Demographic Yearbook. New York City, United States: United Nations Statistics Division (UNSD).                                         | 1991      |                      |
| Maldives | Maldives Vital Registration Death Data 1992 as it appears in United Nations Statistics Division (UNSD). United Nations Demographic Yearbook. New York City, United States: United Nations Statistics Division (UNSD).                                         | 1992      |                      |
| Maldives | Maldives Vital Registration Death Data 1993 as it appears in United Nations Statistics Division (UNSD). United Nations Demographic Yearbook. New York City, United States: United Nations Statistics Division (UNSD).                                         | 1993      |                      |
| Maldives | Ministry of Planning, Human Resources and Environment (Maldives). Maldives Population and Housing Census 1995.                                                                                                                                                | 1995      |                      |
| Maldives | United Nations Office on Drugs and Crime (UNODC). United Nations Office on Drugs and Crime Global Study on Homicides 2011. Vienna, Austria: United Nations Office on Drugs and Crime (UNODC), 2011.                                                           | 1995-2007 |                      |
| Maldives | Measles Supplementary Immunization Activity Data as provided by the World Health Organization. [Unpublished].                                                                                                                                                 | 1995-1997 |                      |
| Maldives | Maldives Vital Registration Death Data 1996 as it appears in United Nations Statistics Division (UNSD). United Nations Demographic Yearbook. New York City, United States: United Nations Statistics Division (UNSD).                                         | 1996      |                      |

**Web Table 32 - Comprehensive citation list**

| Country  | Citation                                                                                                                                                                                                              | Year*                 | New for GBD 2013 (*) |
|----------|-----------------------------------------------------------------------------------------------------------------------------------------------------------------------------------------------------------------------|-----------------------|----------------------|
| Maldives | Maldives Vital Registration Death Data 1998 as it appears in United Nations Statistics Division (UNSD). United Nations Demographic Yearbook. New York City, United States: United Nations Statistics Division (UNSD). | 1998                  |                      |
| Maldives | World Health Organization (WHO). Yellow Fever Reported Cases, WHO Vaccine-Preventable Diseases: Monitoring System. Geneva, Switzerland: World Health Organization (WHO).                                              | 1998, 2001, 2005-2009 |                      |
| Maldives | Maldives Vital Registration Death Data 1999 as it appears in UNSD Demographic Statistics - Deaths by Age, Sex, and Urban/Rural Residence. New York City, United States: United Nations Statistics Division (UNSD).    | 1999                  |                      |
| Maldives | Maldives Population and Housing Census 2000 as it appears in United Nations Statistics Division (UNSD). United Nations Demographic Yearbook. New York City, United States: United Nations Statistics Division (UNSD). | 2000                  |                      |
| Maldives | Maldives Vital Registration - Deaths 2000 ICD10 as it appears in World Health Organization (WHO). WHO Mortality Database Version February 2014. Geneva, Switzerland: World Health Organization (WHO), 2014.           | 2000                  |                      |
| Maldives | Maldives Vital Registration - Deaths 2001 ICD10 as it appears in World Health Organization (WHO). WHO Mortality Database Version February 2014. Geneva, Switzerland: World Health Organization (WHO), 2014.           | 2001                  |                      |
| Maldives | Maldives Vital Registration - Deaths 2002 ICD10 as it appears in World Health Organization (WHO). WHO Mortality Database Version February 2014. Geneva, Switzerland: World Health Organization (WHO), 2014.           | 2002                  |                      |
| Maldives | Joint United Nations Program on HIV/AIDS (UNAIDS), United Nations Children's Fund (UNICEF), World Health Organization (WHO). Maldives Epidemiological Fact Sheet on HIV/AIDS and STIs 2004.                           | 2002                  |                      |
| Maldives | Maldives Vital Registration - Deaths 2003 ICD10 as it appears in World Health Organization (WHO). WHO Mortality Database Version February 2014. Geneva, Switzerland: World Health Organization (WHO), 2014.           | 2003                  |                      |
| Maldives | Centre for Research on the Epidemiology of Disasters (CRED). EM-DAT: The OFDA/CRED International Disaster Database. Brussels, Belgium: Catholic University of Leuven.                                                 | 2004                  |                      |
| Maldives | Maldives Vital Registration - Deaths 2004 ICD10 as it appears in World Health Organization (WHO). WHO Mortality Database Version February 2014. Geneva, Switzerland: World Health Organization (WHO), 2014.           | 2004                  |                      |
| Maldives | Maldives Vital Registration - Deaths 2005 ICD10 as it appears in World Health Organization (WHO). WHO Mortality Database Version February 2014. Geneva, Switzerland: World Health Organization (WHO), 2014.           | 2005                  |                      |
| Maldives | World Health Organization (WHO). Retrospective Measles Data on Supplementary Immunization Activities. Geneva, Switzerland: World Health Organization (WHO).                                                           | 2005-2007             |                      |
| Maldives | Maldives Vital Registration Death Data 2006 as it appears in United Nations Statistics Division (UNSD). United Nations Demographic Yearbook. New York City, United States: United Nations Statistics Division (UNSD). | 2006                  |                      |
| Maldives | World Health Organization (WHO). Global Status Report on Road Safety 2009. Geneva, Switzerland: World Health Organization (WHO), 2009.                                                                                | 2007                  |                      |
| Maldives | Maldives Vital Registration - Deaths 2007 ICD10 as it appears in World Health Organization (WHO). WHO Mortality Database Version February 2014. Geneva, Switzerland: World Health Organization (WHO), 2014.           | 2007                  |                      |



**Web Table 32 - Comprehensive citation list**

| Country  | Citation                                                                                                                                                                                                                                      | Year*                                             | New for GBD 2013 (*) |
|----------|-----------------------------------------------------------------------------------------------------------------------------------------------------------------------------------------------------------------------------------------------|---------------------------------------------------|----------------------|
| Maldives | Maldives Vital Registration - Deaths 2008 ICD10 as it appears in World Health Organization (WHO). WHO Mortality Database Version February 2014. Geneva, Switzerland: World Health Organization (WHO), 2014.                                   | 2008                                              |                      |
| Maldives | Joint United Nations Program on HIV/AIDS (UNAIDS), Ministry of Health and Family (Maldives). Maldives UNGASS Country Progress Report 2010. Geneva, Switzerland: Joint United Nations Program on HIV/AIDS (UNAIDS), 2010.                      | 2008-2009                                         |                      |
| Maldives | Ministry of Health (Maldives), ICF Macro. Maldives Demographic and Health Survey 2009. Calverton, United States: ICF Macro.                                                                                                                   | 2009                                              |                      |
| Maldives | Maldives Vital Registration Death Data 2009 as it appears in United Nations Statistics Division (UNSD). United Nations Demographic Yearbook. New York City, United States: United Nations Statistics Division (UNSD).                         | 2009                                              |                      |
| Maldives | Maldives Vital Registration - Deaths 2010 ICD10 as it appears in World Health Organization (WHO). WHO Mortality Database Version February 2014. Geneva, Switzerland: World Health Organization (WHO), 2014.                                   | 2010                                              |                      |
| Maldives | Maldives Vital Registration - Deaths 2011 ICD10 as it appears in World Health Organization (WHO). WHO Mortality Database Version February 2014. Geneva, Switzerland: World Health Organization (WHO), 2014.                                   | 2011                                              | *                    |
| Mali     | National Institute for Demographic Studies (France), Sahel Institute. Mali Twelve Years of Urban Mortality in the Sahel 1974-1985.                                                                                                            | 1974-1985                                         |                      |
| Mali     | Mali Population and Housing Census 1976 as it appears in United Nations Statistics Division (UNSD). United Nations Demographic Yearbook. New York City, United States: United Nations Statistics Division (UNSD).                             | 1976                                              |                      |
| Mali     | Institute for Health Metrics and Evaluation (IHME), Joint United Nations Program on HIV/AIDS (UNAIDS). Institute for Health Metrics and Evaluation HIV Mortality Estimates Based on the UNAIDS Spectrum Model Framework.                      | 1980-2013                                         | *                    |
| Mali     | United Nations Children's Fund (UNICEF), World Health Organization (WHO). WHO and UNICEF Reported Disease Incidence Time Series - Pertussis. Geneva, Switzerland: World Health Organization (WHO).                                            | 1980-1991, 1995-1996, 1999-2002, 2004-2006, 2008  |                      |
| Mali     | United Nations Children's Fund (UNICEF), World Health Organization (WHO). WHO and UNICEF Reported Disease Incidence Time Series - Measles. Geneva, Switzerland: World Health Organization (WHO).                                              | 1980-2013                                         |                      |
| Mali     | Sahel Institute, Westinghouse; Institute for Resource Development. Mali Demographic and Health Survey 1987. Columbia, United States: Westinghouse; Institute for Resource Development.                                                        | 1987                                              |                      |
| Mali     | Central Census Bureau (Mali), Minnesota Population Center. Mali General Population and Housing Census 1987 from the Integrated Public Use Microdata Series, International. [Machine-readable database]. Minneapolis: University of Minnesota. | 1987                                              |                      |
| Mali     | WHO Department of Communicable Disease Surveillance and Response. WHO Report on Global Surveillance of Epidemic-prone Infectious Diseases 2000.                                                                                               | 1987                                              |                      |
| Mali     | Meunier DM, Aron N, Mazzariol MJ. The 1987 yellow fever epidemic in Mali: viral and immunological diagnosis. Trans R Soc Trop Med Hyg. 1988; 82(5): 767.                                                                                      | 1987                                              |                      |
| Mali     | Tomori O. Yellow fever in Africa: public health impact and prospects for control in the 21st century. Biomedica. 2002; 22(2): 178-210.                                                                                                        | 1987                                              |                      |
| Mali     | World Health Organization (WHO). Update on progress controlling yellow fever in Africa. Wkly Epidemiol Rec. 2008; 83(50): 450-8.                                                                                                              | 1987-2005                                         |                      |
| Mali     | Centre for Research on the Epidemiology of Disasters (CRED). EM-DAT: The OFDA/CRED International Disaster Database. Brussels, Belgium: Catholic University of Leuven.                                                                         | 1988-1989, 1998-2002, 2006-2007, 2009, 2011, 2013 |                      |

**Web Table 32 - Comprehensive citation list**

| Country | Citation                                                                                                                                                                                                                                                                      | Year*                       | New for GBD 2013 (*) |
|---------|-------------------------------------------------------------------------------------------------------------------------------------------------------------------------------------------------------------------------------------------------------------------------------|-----------------------------|----------------------|
| Mali    | Parkin DM, International Agency for Research on Cancer, International Association of Cancer Registries. Cancer Incidence in Five Continents. Vol. I to VIII. Lyon, France, IARC Press, 2005.                                                                                  | 1988, 1990, 1995            |                      |
| Mali    | Etard JF, Kodio B, Traoré S. Assessment of maternal mortality and late maternal mortality among a cohort of pregnant women in Bamako, Mali. Br J Obstet Gynaecol. 1999; 106(1): 60-5.                                                                                         | 1990                        |                      |
| Mali    | Weatherall D. Sickle Cell and Thalassemias Prevalence Data, Personal Correspondence with David Weatherall. [Unpublished].                                                                                                                                                     | 1990-2009                   |                      |
| Mali    | Department of Peace and Conflict Research, Uppsala University. UCDP One-Sided Violence Database Version 1.4, 2013. Uppsala, Sweden: Department of Peace and Conflict Research, Uppsala University, 2013.                                                                      | 1990-2009                   | *                    |
| Mali    | Department of Peace and Conflict Research, Uppsala University. UCDP Battle-Related Deaths Database Version 5, 2013. Uppsala, Sweden: Department of Peace and Conflict Research, Uppsala University, 2013.                                                                     | 1990-2012                   | *                    |
| Mali    | Centre for Health Informatics and Multiprofessional Education, University College London. Modell's Haemoglobinopathologist's Almanac. London, United Kingdom: Centre for Health Informatics and Multiprofessional Education, University College London, 2008.                 | 1990-2003                   |                      |
| Mali    | Department of Peace and Conflict Research, Uppsala University. UCDP Nonstate Conflict Database Version 2.5, 2013. Uppsala, Sweden: Department of Peace and Conflict Research, Uppsala University, 2013.                                                                       | 1994-2012                   | *                    |
| Mali    | Macro International, Inc, National Directorate of Statistics and Informatics (Mali), Planning and Statistics Unit, Ministry of Health (Mali). Mali Demographic and Health Survey 1995-1996. Calverton, United States: Macro International, Inc.                               | 1995-1996                   |                      |
| Mali    | World Health Organization (WHO). Yellow Fever Reported Cases, WHO Vaccine-Preventable Diseases: Monitoring System. Geneva, Switzerland: World Health Organization (WHO).                                                                                                      | 1996-2006, 2008-2009        |                      |
| Mali    | World Health Organization (WHO). The Global Elimination of Congenital Syphilis: Rationale and Strategy for Action. Geneva, Switzerland: World Health Organization (WHO), 2007.                                                                                                | 1997-2003                   |                      |
| Mali    | Joint United Nations Program on HIV/AIDS (UNAIDS), United Nations Children's Fund (UNICEF), World Health Organization (WHO). Mali Epidemiological Fact Sheet on HIV/AIDS and STIs 2004.                                                                                       | 1997-1999                   |                      |
| Mali    | World Health Organization Regional Office for Africa. HIV/AIDS Epidemiological Surveillance Update for the WHO African Region. World Health Organization Regional Office for Africa, 2003.                                                                                    | 1997, 2002                  |                      |
| Mali    | Central Census Bureau (Mali), Minnesota Population Center. Mali General Population and Housing Census 1998 from the Integrated Public Use Microdata Series, International. [Machine-readable database]. Minneapolis: University of Minnesota.                                 | 1998                        |                      |
| Mali    | Dembele M, Maïga I, Minta D, Konate A, Diarra M, Sangare D, Traore HA, Maïga MY, Tounkara A, Payan C, Lunel E, Carbonnelle B, Cales P. [Study of antigen HBs and antiviral antibodies of hepatitis C during hepatopathies in Mali]. Bull Soc Pathol Exot. 2004; 97(3): 161-4. | 1998-1999                   |                      |
| Mali    | Measles Supplementary Immunization Activity Data as provided by the World Health Organization. [Unpublished].                                                                                                                                                                 | 1998-1999                   |                      |
| Mali    | Sangare A. Evolution of HIV and syphilis prevalence in the pregnant women from 2003 to 2009 in Mali. Presented at: 6th IAS Conference on HIV Pathogenesis, Treatment and Prevention; 2011 Jul 17-20; Rome, Italy. (Poster: Abstract no. CDC032.)                              | 2000, 2003, 2005, 2007      |                      |
| Mali    | Macro International, Inc, National Directorate of Statistics and Informatics (Mali), Planning and Statistics Unit, Ministry of Health (Mali). Mali Demographic and Health Survey 2001. Calverton, United States: Macro International, Inc.                                    | 2001                        |                      |
| Mali    | World Health Organization (WHO). Retrospective Measles Data on Supplementary Immunization Activities. Geneva, Switzerland: World Health Organization (WHO).                                                                                                                   | 2001, 2004, 2007, 2011-2012 |                      |

**Web Table 32 - Comprehensive citation list**

| Country | Citation                                                                                                                                                                                                                                                                                                 | Year*     | New for GBD 2013 (*) |
|---------|----------------------------------------------------------------------------------------------------------------------------------------------------------------------------------------------------------------------------------------------------------------------------------------------------------|-----------|----------------------|
| Mali    | World Health Organization (WHO). Measles mortality reduction in West Africa, 1996-2002. <i>Wkly Epidemiol Rec.</i> 2003; 78(45): 390-2.                                                                                                                                                                  | 2002      |                      |
| Mali    | Sow SO, Diallo S, Campbell JD, Tapia MD, Keita T, Keita MM, Murray P, Kotloff KL, Levine MM. Burden of invasive disease caused by <i>Haemophilus influenzae</i> type b in Bamako, Mali: impetus for routine infant immunization with conjugate vaccine. <i>Pediatr Infect Dis J.</i> 2005; 24(6): 533-7. | 2002-2004 |                      |
| Mali    | Maïga I, Le Faou A, Muller CP, Venard V. Unexpected high prevalence of hepatitis B and HIV infections in Malian medical students. <i>Eur J Clin Microbiol Infect Dis.</i> 2005; 24(7): 501-2.                                                                                                            | 2003      |                      |
| Mali    | Macro International, Inc, Ministry of Health (Mali), National Directorate of Statistics and Informatics (Mali). <i>Mali Demographic and Health Survey 2006.</i> Calverton, United States: Macro International, Inc                                                                                       | 2006      |                      |
| Mali    | World Health Organization (WHO). Yellow fever in Africa and South America, 2006. <i>Wkly Epidemiol Rec.</i> 2008; 83(8): 60-76.                                                                                                                                                                          | 2006      |                      |
| Mali    | World Health Organization (WHO). Yellow fever in Africa and South America, 2007. <i>Wkly Epidemiol Rec.</i> 2009; 84(13): 97-104.                                                                                                                                                                        | 2007      |                      |
| Mali    | Aa I, Grove MA, Haugsjå AH, Hinderaker SG. High maternal mortality estimated by the sisterhood method in a rural area of Mali. <i>BMC Pregnancy Childbirth.</i> 2011; 11(1): 56.                                                                                                                         | 2007      |                      |
| Mali    | Central Census Bureau (Mali), National Institute of Statistics (INSTAT) (Mali). <i>Mali Population and Housing Census 2009.</i>                                                                                                                                                                          | 2009      |                      |
| Mali    | Joint United Nations Program on HIV/AIDS (UNAIDS), National AIDS Council (Mali). <i>Mali National UNGASS Report 2010.</i> Geneva, Switzerland: Joint United Nations Program on HIV/AIDS (UNAIDS), 2010.                                                                                                  | 2009      |                      |
| Mali    | ICF International, National Institute of Statistics (INSTAT) (Mali), Planning and Statistics Unit, Ministry of Health (Mali). <i>Mali Demographic and Health Survey 2012-2013.</i>                                                                                                                       | 2012-2013 | *                    |
| Malta   | Malta Vital Registration Death Data 1950 as it appears in United Nations Statistics Division (UNSD). <i>United Nations Demographic Yearbook.</i> New York City, United States: United Nations Statistics Division (UNSD).                                                                                | 1950      |                      |
| Malta   | Malta Vital Registration Death Data 1951 as it appears in United Nations Statistics Division (UNSD). <i>United Nations Demographic Yearbook.</i> New York City, United States: United Nations Statistics Division (UNSD).                                                                                | 1951      |                      |
| Malta   | Malta Vital Registration Death Data 1952 as it appears in United Nations Statistics Division (UNSD). <i>United Nations Demographic Yearbook.</i> New York City, United States: United Nations Statistics Division (UNSD).                                                                                | 1952      |                      |
| Malta   | Malta Vital Registration Death Data 1953 as it appears in United Nations Statistics Division (UNSD). <i>United Nations Demographic Yearbook.</i> New York City, United States: United Nations Statistics Division (UNSD).                                                                                | 1953      |                      |
| Malta   | Malta Vital Registration Death Data 1954 as it appears in United Nations Statistics Division (UNSD). <i>United Nations Demographic Yearbook.</i> New York City, United States: United Nations Statistics Division (UNSD).                                                                                | 1954      |                      |
| Malta   | Malta Vital Registration - Deaths 1955 ICD7 as it appears in World Health Organization (WHO). <i>WHO Mortality Database Version February 2014.</i> Geneva, Switzerland: World Health Organization (WHO), 2014.                                                                                           | 1955      |                      |
| Malta   | Malta Vital Registration - Deaths 1956 ICD7 as it appears in World Health Organization (WHO). <i>WHO Mortality Database Version February 2014.</i> Geneva, Switzerland: World Health Organization (WHO), 2014.                                                                                           | 1956      |                      |

**Web Table 32 - Comprehensive citation list**

| Country | Citation                                                                                                                                                                                                | Year* | New for GBD 2013 (*) |
|---------|---------------------------------------------------------------------------------------------------------------------------------------------------------------------------------------------------------|-------|----------------------|
| Malta   | Malta Vital Registration - Deaths 1957 ICD7 as it appears in World Health Organization (WHO). WHO Mortality Database Version February 2014. Geneva, Switzerland: World Health Organization (WHO), 2014. | 1957  |                      |
| Malta   | Malta Vital Registration - Deaths 1958 ICD7 as it appears in World Health Organization (WHO). WHO Mortality Database Version February 2014. Geneva, Switzerland: World Health Organization (WHO), 2014. | 1958  |                      |
| Malta   | Malta Vital Registration - Deaths 1959 ICD7 as it appears in World Health Organization (WHO). WHO Mortality Database Version February 2014. Geneva, Switzerland: World Health Organization (WHO), 2014. | 1959  |                      |
| Malta   | Malta Vital Registration - Deaths 1960 ICD7 as it appears in World Health Organization (WHO). WHO Mortality Database Version February 2014. Geneva, Switzerland: World Health Organization (WHO), 2014. | 1960  |                      |
| Malta   | Malta Vital Registration - Deaths 1961 ICD7 as it appears in World Health Organization (WHO). WHO Mortality Database Version February 2014. Geneva, Switzerland: World Health Organization (WHO), 2014. | 1961  |                      |
| Malta   | Malta Vital Registration - Deaths 1962 ICD7 as it appears in World Health Organization (WHO). WHO Mortality Database Version February 2014. Geneva, Switzerland: World Health Organization (WHO), 2014. | 1962  |                      |
| Malta   | Malta Vital Registration - Deaths 1963 ICD7 as it appears in World Health Organization (WHO). WHO Mortality Database Version February 2014. Geneva, Switzerland: World Health Organization (WHO), 2014. | 1963  |                      |
| Malta   | Malta Vital Registration - Deaths 1964 ICD7 as it appears in World Health Organization (WHO). WHO Mortality Database Version February 2014. Geneva, Switzerland: World Health Organization (WHO), 2014. | 1964  |                      |
| Malta   | Malta Vital Registration - Deaths 1965 ICD7 as it appears in World Health Organization (WHO). WHO Mortality Database Version February 2014. Geneva, Switzerland: World Health Organization (WHO), 2014. | 1965  |                      |
| Malta   | Malta Vital Registration - Deaths 1966 ICD7 as it appears in World Health Organization (WHO). WHO Mortality Database Version February 2014. Geneva, Switzerland: World Health Organization (WHO), 2014. | 1966  |                      |
| Malta   | Malta Vital Registration - Deaths 1967 ICD7 as it appears in World Health Organization (WHO). WHO Mortality Database Version February 2014. Geneva, Switzerland: World Health Organization (WHO), 2014. | 1967  |                      |
| Malta   | Malta Vital Registration - Deaths 1968 ICD8 as it appears in World Health Organization (WHO). WHO Mortality Database Version February 2014. Geneva, Switzerland: World Health Organization (WHO), 2014. | 1968  |                      |
| Malta   | Malta Vital Registration - Deaths 1969 ICD8 as it appears in World Health Organization (WHO). WHO Mortality Database Version February 2014. Geneva, Switzerland: World Health Organization (WHO), 2014. | 1969  |                      |
| Malta   | Malta Vital Registration - Deaths 1970 ICD8 as it appears in World Health Organization (WHO). WHO Mortality Database Version February 2014. Geneva, Switzerland: World Health Organization (WHO), 2014. | 1970  |                      |

**Web Table 32 - Comprehensive citation list**

| Country | Citation                                                                                                                                                                                                                 | Year*     | New for GBD 2013 (*) |
|---------|--------------------------------------------------------------------------------------------------------------------------------------------------------------------------------------------------------------------------|-----------|----------------------|
| Malta   | Malta Vital Registration - Deaths 1971 ICD8 as it appears in World Health Organization (WHO). WHO Mortality Database Version February 2014. Geneva, Switzerland: World Health Organization (WHO), 2014.                  | 1971      |                      |
| Malta   | Malta Vital Registration - Deaths 1972 ICD8 as it appears in World Health Organization (WHO). WHO Mortality Database Version February 2014. Geneva, Switzerland: World Health Organization (WHO), 2014.                  | 1972      |                      |
| Malta   | Malta Vital Registration - Deaths 1973 ICD8 as it appears in World Health Organization (WHO). WHO Mortality Database Version February 2014. Geneva, Switzerland: World Health Organization (WHO), 2014.                  | 1973      |                      |
| Malta   | Malta Vital Registration - Deaths 1974 ICD8 as it appears in World Health Organization (WHO). WHO Mortality Database Version February 2014. Geneva, Switzerland: World Health Organization (WHO), 2014.                  | 1974      |                      |
| Malta   | Malta Vital Registration - Deaths 1975 ICD8 as it appears in World Health Organization (WHO). WHO Mortality Database Version February 2014. Geneva, Switzerland: World Health Organization (WHO), 2014.                  | 1975      |                      |
| Malta   | Malta Vital Registration - Deaths 1976 ICD8 as it appears in World Health Organization (WHO). WHO Mortality Database Version February 2014. Geneva, Switzerland: World Health Organization (WHO), 2014.                  | 1976      |                      |
| Malta   | Malta Vital Registration - Deaths 1977 ICD8 as it appears in World Health Organization (WHO). WHO Mortality Database Version February 2014. Geneva, Switzerland: World Health Organization (WHO), 2014.                  | 1977      |                      |
| Malta   | Malta Vital Registration - Deaths 1978 ICD8 as it appears in World Health Organization (WHO). WHO Mortality Database Version February 2014. Geneva, Switzerland: World Health Organization (WHO), 2014.                  | 1978      |                      |
| Malta   | Malta Vital Registration - Deaths 1979 ICD9 as it appears in World Health Organization (WHO). WHO Mortality Database Version February 2014. Geneva, Switzerland: World Health Organization (WHO), 2014.                  | 1979      |                      |
| Malta   | Malta Vital Registration - Deaths 1980 ICD9 as it appears in World Health Organization (WHO). WHO Mortality Database Version February 2014. Geneva, Switzerland: World Health Organization (WHO), 2014.                  | 1980      |                      |
| Malta   | Institute for Health Metrics and Evaluation (IHME), Joint United Nations Program on HIV/AIDS (UNAIDS). Institute for Health Metrics and Evaluation HIV Mortality Estimates Based on the UNAIDS Spectrum Model Framework. | 1980-2013 | *                    |
| Malta   | United Nations Children's Fund (UNICEF), World Health Organization (WHO). WHO and UNICEF Reported Disease Incidence Time Series - Pertussis. Geneva, Switzerland: World Health Organization (WHO).                       | 1980-2011 |                      |
| Malta   | United Nations Children's Fund (UNICEF), World Health Organization (WHO). WHO and UNICEF Reported Disease Incidence Time Series - Measles. Geneva, Switzerland: World Health Organization (WHO).                         | 1980-2011 |                      |
| Malta   | Malta Vital Registration - Deaths 1981 ICD9 as it appears in World Health Organization (WHO). WHO Mortality Database Version February 2014. Geneva, Switzerland: World Health Organization (WHO), 2014.                  | 1981      |                      |
| Malta   | Malta Vital Registration - Deaths 1982 ICD9 as it appears in World Health Organization (WHO). WHO Mortality Database Version February 2014. Geneva, Switzerland: World Health Organization (WHO), 2014.                  | 1982      |                      |

**Web Table 32 - Comprehensive citation list**

| Country | Citation                                                                                                                                                                                                                                                      | Year*     | New for GBD 2013 (*) |
|---------|---------------------------------------------------------------------------------------------------------------------------------------------------------------------------------------------------------------------------------------------------------------|-----------|----------------------|
| Malta   | Malta Vital Registration - Deaths 1983 ICD9 as it appears in World Health Organization (WHO). WHO Mortality Database Version February 2014. Geneva, Switzerland: World Health Organization (WHO), 2014.                                                       | 1983      |                      |
| Malta   | Malta Vital Registration - Deaths 1984 ICD9 as it appears in World Health Organization (WHO). WHO Mortality Database Version February 2014. Geneva, Switzerland: World Health Organization (WHO), 2014.                                                       | 1984      |                      |
| Malta   | Malta Vital Registration - Deaths 1985 ICD9 as it appears in World Health Organization (WHO). WHO Mortality Database Version February 2014. Geneva, Switzerland: World Health Organization (WHO), 2014.                                                       | 1985      |                      |
| Malta   | Malta Vital Registration - Deaths 1986 ICD9 as it appears in World Health Organization (WHO). WHO Mortality Database Version February 2014. Geneva, Switzerland: World Health Organization (WHO), 2014.                                                       | 1986      |                      |
| Malta   | Malta Vital Registration - Deaths 1987 ICD9 as it appears in World Health Organization (WHO). WHO Mortality Database Version February 2014. Geneva, Switzerland: World Health Organization (WHO), 2014.                                                       | 1987      |                      |
| Malta   | Malta Vital Registration - Deaths 1988 ICD9 as it appears in World Health Organization (WHO). WHO Mortality Database Version February 2014. Geneva, Switzerland: World Health Organization (WHO), 2014.                                                       | 1988      |                      |
| Malta   | Malta Vital Registration - Deaths 1989 ICD9 as it appears in World Health Organization (WHO). WHO Mortality Database Version February 2014. Geneva, Switzerland: World Health Organization (WHO), 2014.                                                       | 1989      |                      |
| Malta   | Malta Vital Registration - Deaths 1990 ICD9 as it appears in World Health Organization (WHO). WHO Mortality Database Version February 2014. Geneva, Switzerland: World Health Organization (WHO), 2014.                                                       | 1990      |                      |
| Malta   | Modell B, Darlison M, Birgens H, Cario H, Faustino P, Giordano PC, Gulbis B, Hopmeier P, Lena-Russo D, Romao L, Theodorsson E. Epidemiology of haemoglobin disorders in Europe: an overview. Scand J Clin Lab Invest. 2007; 67(1): 39-69.                     | 1990-2006 |                      |
| Malta   | Centre for Health Informatics and Multiprofessional Education, University College London. Modell's Haemoglobinopathologist's Almanac. London, United Kingdom: Centre for Health Informatics and Multiprofessional Education, University College London, 2008. | 1990-2006 |                      |
| Malta   | Malta Vital Registration - Deaths 1991 ICD9 as it appears in World Health Organization (WHO). WHO Mortality Database Version February 2014. Geneva, Switzerland: World Health Organization (WHO), 2014.                                                       | 1991      |                      |
| Malta   | Malta Vital Registration - Deaths 1992 ICD9 as it appears in World Health Organization (WHO). WHO Mortality Database Version February 2014. Geneva, Switzerland: World Health Organization (WHO), 2014.                                                       | 1992      |                      |
| Malta   | Institute for Health Metrics and Evaluation. Institute for Health Metrics and Evaluation Cancer Registry Database. [Unpublished].                                                                                                                             | 1992-2010 |                      |



**Web Table 32 - Comprehensive citation list**

| Country | Citation                                                                                                                                                                                                                                                                                                                                                                                                                                                                                                                                                                                                                                                                                                              | Year*                | New for GBD 2013 (*) |
|---------|-----------------------------------------------------------------------------------------------------------------------------------------------------------------------------------------------------------------------------------------------------------------------------------------------------------------------------------------------------------------------------------------------------------------------------------------------------------------------------------------------------------------------------------------------------------------------------------------------------------------------------------------------------------------------------------------------------------------------|----------------------|----------------------|
| Malta   | Trichopoulos D, Bamia C, Lagiou P, Fedirko V, Trepo E, Jenab M, Pischon T, Nöthlings U, Overved K, Tjønneland A, Outzen M, Clavel-Chapelon F, Kaaks R, Lukanova A, Boeing H, Aleksandrova K, Benetou V, Zylis D, Palli D, Pala V, Panico S, Tumino R, Sacerdote C, Bueno-De-Mesquita HB, Van Kranen HJ, Peeters PHM, Lund E, Quirós JR, González CA, Sanchez Perez M-J, Navarro C, Dorronsoro M, Barricarte A, Lindkvist B, Regnér S, Werner M, Hallmans G, Khaw K-T, Wareham N, Key T, Romieu I, Chuang S-C, Murphy N, Boffetta P, Trichopoulou A, Riboli E. Hepatocellular carcinoma risk factors and disease burden in a European cohort: a nested case-control study. J Natl Cancer Inst. 2011; 103(22): 1686-95. | 1992-2006            | *                    |
| Malta   | Parkin DM, International Agency for Research on Cancer, International Association of Cancer Registries. Cancer Incidence in Five Continents. Vol. I to VIII. Lyon, France, IARC Press, 2005.                                                                                                                                                                                                                                                                                                                                                                                                                                                                                                                          | 1992, 1995           |                      |
| Malta   | Malta Vital Registration - Deaths 1993 ICD9 as it appears in World Health Organization (WHO). WHO Mortality Database Version February 2014. Geneva, Switzerland: World Health Organization (WHO), 2014.                                                                                                                                                                                                                                                                                                                                                                                                                                                                                                               | 1993                 |                      |
| Malta   | Malta Vital Registration - Deaths 1994 ICD9 as it appears in World Health Organization (WHO). WHO Mortality Database Version February 2014. Geneva, Switzerland: World Health Organization (WHO), 2014.                                                                                                                                                                                                                                                                                                                                                                                                                                                                                                               | 1994                 |                      |
| Malta   | Malta Vital Registration - Deaths 1995 ICD10 as it appears in World Health Organization (WHO). WHO Mortality Database Version February 2014. Geneva, Switzerland: World Health Organization (WHO), 2014.                                                                                                                                                                                                                                                                                                                                                                                                                                                                                                              | 1995                 |                      |
| Malta   | Malta Vital Registration - Deaths 1996 ICD10 as it appears in World Health Organization (WHO). WHO Mortality Database Version February 2014. Geneva, Switzerland: World Health Organization (WHO), 2014.                                                                                                                                                                                                                                                                                                                                                                                                                                                                                                              | 1996                 |                      |
| Malta   | Malta Vital Registration - Deaths 1997 ICD10 as it appears in World Health Organization (WHO). WHO Mortality Database Version February 2014. Geneva, Switzerland: World Health Organization (WHO), 2014.                                                                                                                                                                                                                                                                                                                                                                                                                                                                                                              | 1997                 |                      |
| Malta   | Malta Vital Registration - Deaths 1998 ICD10 as it appears in World Health Organization (WHO). WHO Mortality Database Version February 2014. Geneva, Switzerland: World Health Organization (WHO), 2014.                                                                                                                                                                                                                                                                                                                                                                                                                                                                                                              | 1998                 |                      |
| Malta   | Borg MA, Portelli A. Hospital laundry workers--an at-risk group for hepatitis A? Occup Med (Lond). 1999; 49(7): 448-50.                                                                                                                                                                                                                                                                                                                                                                                                                                                                                                                                                                                               | 1998                 |                      |
| Malta   | Malta Vital Registration - Deaths 1999 ICD10 as it appears in World Health Organization (WHO). WHO Mortality Database Version February 2014. Geneva, Switzerland: World Health Organization (WHO), 2014.                                                                                                                                                                                                                                                                                                                                                                                                                                                                                                              | 1999                 |                      |
| Malta   | Malta National Cancer Registry. Malta Cancer Incidence and Mortality 1999-2010. Valletta, Malta: Department of Health Information and Information Research, Ministry for Health (Malta), 2012.                                                                                                                                                                                                                                                                                                                                                                                                                                                                                                                        | 1999-2010            | *                    |
| Malta   | Malta Vital Registration - Deaths 2000 ICD10 as it appears in World Health Organization (WHO). WHO Mortality Database Version February 2014. Geneva, Switzerland: World Health Organization (WHO), 2014.                                                                                                                                                                                                                                                                                                                                                                                                                                                                                                              | 2000                 |                      |
| Malta   | Curado MP, Edwards B, Shin HR, Storm H, Ferlay J, Heanue M and Boyle P, eds (2007). Cancer Incidence in Five Continents, Vol. IX Periodic Data (electronic version). Lyon, IARC. <a href="http://ci5.iarc.fr">http://ci5.iarc.fr</a>                                                                                                                                                                                                                                                                                                                                                                                                                                                                                  | 2000                 |                      |
| Malta   | World Health Organization (WHO). Yellow Fever Reported Cases, WHO Vaccine-Preventable Diseases: Monitoring System. Geneva, Switzerland: World Health Organization (WHO).                                                                                                                                                                                                                                                                                                                                                                                                                                                                                                                                              | 2000-2005, 2007-2009 |                      |

**Web Table 32 - Comprehensive citation list**

| Country | Citation                                                                                                                                                                                                                                                                              | Year*     | New for GBD 2013 (*) |
|---------|---------------------------------------------------------------------------------------------------------------------------------------------------------------------------------------------------------------------------------------------------------------------------------------|-----------|----------------------|
| Malta   | Malta Vital Registration - Deaths 2001 ICD10 as it appears in World Health Organization (WHO). WHO Mortality Database Version February 2014. Geneva, Switzerland: World Health Organization (WHO), 2014.                                                                              | 2001      |                      |
| Malta   | Malta Vital Registration - Deaths 2002 ICD10 as it appears in World Health Organization (WHO). WHO Mortality Database Version February 2014. Geneva, Switzerland: World Health Organization (WHO), 2014.                                                                              | 2002      |                      |
| Malta   | Malta Vital Registration - Deaths 2003 ICD10 as it appears in World Health Organization (WHO). WHO Mortality Database Version February 2014. Geneva, Switzerland: World Health Organization (WHO), 2014.                                                                              | 2003      |                      |
| Malta   | EUVAC-NET. EUVAC-NET Pertussis Surveillance Report 2008. Stockholm, Sweden: European Centre for Disease Prevention and Control, 2009.                                                                                                                                                 | 2003-2008 |                      |
| Malta   | Malta Vital Registration - Deaths 2004 ICD10 as it appears in World Health Organization (WHO). WHO Mortality Database Version February 2014. Geneva, Switzerland: World Health Organization (WHO), 2014.                                                                              | 2004      |                      |
| Malta   | Malta Vital Registration - Deaths 2005 ICD10 as it appears in World Health Organization (WHO). WHO Mortality Database Version February 2014. Geneva, Switzerland: World Health Organization (WHO), 2014.                                                                              | 2005      |                      |
| Malta   | Forman D, Bray F, Brewster DH, Gombe Mbalawa C, Kohler B, Piñeros M, Steliarova-Foucher E, Swaminathan R and Ferlay J, eds (2013). Cancer Incidence in Five Continents, Vol. X Summary Database (electronic version). Lyon, IARC. <a href="http://ci5.iarc.fr">http://ci5.iarc.fr</a> | 2005      |                      |
| Malta   | Malta Vital Registration - Deaths 2006 ICD10 as it appears in World Health Organization (WHO). WHO Mortality Database Version February 2014. Geneva, Switzerland: World Health Organization (WHO), 2014.                                                                              | 2006      |                      |
| Malta   | Malta Vital Registration - Deaths 2007 ICD10 as it appears in World Health Organization (WHO). WHO Mortality Database Version February 2014. Geneva, Switzerland: World Health Organization (WHO), 2014.                                                                              | 2007      |                      |
| Malta   | World Health Organization (WHO). Global Status Report on Road Safety 2009. Geneva, Switzerland: World Health Organization (WHO), 2009.                                                                                                                                                | 2007      |                      |
| Malta   | Malta Vital Registration - Deaths 2008 ICD10 as it appears in World Health Organization (WHO). WHO Mortality Database Version February 2014. Geneva, Switzerland: World Health Organization (WHO), 2014.                                                                              | 2008      |                      |
| Malta   | Malta Vital Registration - Deaths 2009 ICD10 as it appears in World Health Organization (WHO). WHO Mortality Database Version February 2014. Geneva, Switzerland: World Health Organization (WHO), 2014.                                                                              | 2009      |                      |
| Malta   | EUVAC-NET. EUVAC-NET Measles Surveillance Report 2009. Stockholm, Sweden: European Centre for Disease Prevention and Control, 2010.                                                                                                                                                   | 2009      |                      |
| Malta   | Malta Vital Registration - Deaths 2010 ICD10 as it appears in World Health Organization (WHO). WHO Mortality Database Version February 2014. Geneva, Switzerland: World Health Organization (WHO), 2014.                                                                              | 2010      |                      |
| Malta   | Malta Vital Registration - Deaths 2011 ICD10 as it appears in World Health Organization (WHO). WHO Mortality Database Version February 2014. Geneva, Switzerland: World Health Organization (WHO), 2014.                                                                              | 2011      | *                    |



**Web Table 32 - Comprehensive citation list**

| Country          | Citation                                                                                                                                                                                                                                                      | Year*     | New for GBD 2013 (*) |
|------------------|---------------------------------------------------------------------------------------------------------------------------------------------------------------------------------------------------------------------------------------------------------------|-----------|----------------------|
| Marshall Islands | McIntyre RC, Preblud SR, Polloi A, Korean M. Measles and measles vaccine efficacy in a remote island population. Bull World Health Organ. 1982; 60(5).                                                                                                        | 1977-1978 |                      |
| Marshall Islands | Institute for Health Metrics and Evaluation (IHME), Joint United Nations Program on HIV/AIDS (UNAIDS). Institute for Health Metrics and Evaluation HIV Mortality Estimates Based on the UNAIDS Spectrum Model Framework.                                      | 1980-2013 | *                    |
| Marshall Islands | Hill AV, Bowden DK, O'Shaughnessy DF, Weatherall DJ, Clegg JB. Beta thalassemia in Melanesia: association with malaria and characterization of a common variant (IVS-1 nt 5 G----C). Blood. 1988; 72(1): 9-14.                                                | 1985-1987 |                      |
| Marshall Islands | Marshall Islands Vital Registration Death Data 1986 as it appears in United Nations Statistics Division (UNSD). United Nations Demographic Yearbook. New York City, United States: United Nations Statistics Division (UNSD).                                 | 1986      |                      |
| Marshall Islands | Marshall Islands Vital Registration Death Data 1987 as it appears in United Nations Statistics Division (UNSD). United Nations Demographic Yearbook. New York City, United States: United Nations Statistics Division (UNSD).                                 | 1987      |                      |
| Marshall Islands | Marshall Islands Vital Registration Death Data 1988 as it appears in United Nations Statistics Division (UNSD). United Nations Demographic Yearbook. New York City, United States: United Nations Statistics Division (UNSD).                                 | 1988      |                      |
| Marshall Islands | Marshall Islands Vital Registration Death Data 1989 as it appears in United Nations Statistics Division (UNSD). United Nations Demographic Yearbook. New York City, United States: United Nations Statistics Division (UNSD).                                 | 1989      |                      |
| Marshall Islands | Marshall Islands Vital Registration Death Data 1990 as it appears in United Nations Statistics Division (UNSD). United Nations Demographic Yearbook. New York City, United States: United Nations Statistics Division (UNSD).                                 | 1990      |                      |
| Marshall Islands | Centre for Health Informatics and Multiprofessional Education, University College London. Modell's Haemoglobinopathologist's Almanac. London, United Kingdom: Centre for Health Informatics and Multiprofessional Education, University College London, 2008. | 1990-2003 |                      |
| Marshall Islands | Marshall Islands Vital Registration Death Data 1991 as it appears in United Nations Statistics Division (UNSD). United Nations Demographic Yearbook. New York City, United States: United Nations Statistics Division (UNSD).                                 | 1991      |                      |
| Marshall Islands | United Nations Office on Drugs and Crime (UNODC). United Nations Surveys on Crime Trends and the Operations of Criminal Justice Systems 1970-2006 as provided by Kavi Bhalla. [Unpublished].                                                                  | 1991-1994 |                      |
| Marshall Islands | Marshall Islands Vital Registration Death Data 1992 as it appears in United Nations Statistics Division (UNSD). United Nations Demographic Yearbook. New York City, United States: United Nations Statistics Division (UNSD).                                 | 1992      |                      |
| Marshall Islands | Marshall Islands Vital Registration Death Data 1993 as it appears in United Nations Statistics Division (UNSD). United Nations Demographic Yearbook. New York City, United States: United Nations Statistics Division (UNSD).                                 | 1993      |                      |
| Marshall Islands | Marshall Islands Vital Registration Death Data 1994 as it appears in United Nations Statistics Division (UNSD). United Nations Demographic Yearbook. New York City, United States: United Nations Statistics Division (UNSD).                                 | 1994      |                      |
| Marshall Islands | Marshall Islands Vital Registration Death Data 1995 as it appears in United Nations Statistics Division (UNSD). United Nations Demographic Yearbook. New York City, United States: United Nations Statistics Division (UNSD).                                 | 1995      |                      |

**Web Table 32 - Comprehensive citation list**

| Country          | Citation                                                                                                                                                                                                                                                                                       | Year*                                      | New for GBD 2013 (*) |
|------------------|------------------------------------------------------------------------------------------------------------------------------------------------------------------------------------------------------------------------------------------------------------------------------------------------|--------------------------------------------|----------------------|
| Marshall Islands | Marshall Islands Vital Registration Death Data 1996 as it appears in United Nations Statistics Division (UNSD). United Nations Demographic Yearbook. New York City, United States: United Nations Statistics Division (UNSD).                                                                  | 1996                                       |                      |
| Marshall Islands | Marshall Islands Vital Registration Death Data 1997 as it appears in United Nations Statistics Division (UNSD). United Nations Demographic Yearbook. New York City, United States: United Nations Statistics Division (UNSD).                                                                  | 1997                                       |                      |
| Marshall Islands | Marshall Islands Population and Housing Census 1999 as it appears in United Nations Statistics Division (UNSD). United Nations Demographic Yearbook. New York City, United States: United Nations Statistics Division (UNSD).                                                                  | 1999                                       |                      |
| Marshall Islands | World Health Organization (WHO). Yellow Fever Reported Cases, WHO Vaccine-Preventable Diseases: Monitoring System. Geneva, Switzerland: World Health Organization (WHO).                                                                                                                       | 1999-2001, 2003-2004, 2006-2007, 2009      |                      |
| Marshall Islands | World Health Organization (WHO). Retrospective Measles Data on Supplementary Immunization Activities. Geneva, Switzerland: World Health Organization (WHO).                                                                                                                                    | 2002-2003                                  |                      |
| Marshall Islands | Hyde TB, Dayan GH, Langidrik JR, Nandy R, Edwards R, Briand K, Konelios M, Marin M, Nguyen HQ, Khalifah AP, O'leary MJ, Williams NJ, Bellini WJ, Bi D, Brown CJ, Seward JF, Papania MJ. Measles outbreak in the Republic of the Marshall Islands, 2003. Int J Epidemiol. 2006; 35(2): 299-306. | 2003                                       |                      |
| Marshall Islands | Ministry of Health (Marshall Islands). Marshall Islands Ministry of Health Annual Report 2004.                                                                                                                                                                                                 | 2004                                       |                      |
| Marshall Islands | Marshall Islands Vital Registration Death Data 2005 as it appears in United Nations Statistics Division (UNSD). United Nations Demographic Yearbook. New York City, United States: United Nations Statistics Division (UNSD).                                                                  | 2005                                       |                      |
| Marshall Islands | Marshall Islands Vital Registration Death Data 2006 as it appears in United Nations Statistics Division (UNSD). United Nations Demographic Yearbook. New York City, United States: United Nations Statistics Division (UNSD).                                                                  | 2006                                       |                      |
| Marshall Islands | Economic Policy, Planning and Statistics Office (Marshall Islands), Secretariat of the Pacific Community (SPC). Marshall Islands Demographic and Health Survey 2007.                                                                                                                           | 2007                                       |                      |
| Marshall Islands | World Health Organization (WHO). Global Status Report on Road Safety 2009. Geneva, Switzerland: World Health Organization (WHO), 2009.                                                                                                                                                         | 2007                                       |                      |
| Marshall Islands | Fischer GE, Thompson N, Chaves SS, Bower W, Goldstein S, Armstrong G, Williams I, Bialek S. The epidemiology of hepatitis A virus infections in four Pacific Island nations, 1995-2008. Trans R Soc Trop Med Hyg. 2009; 103(9): 906-10.                                                        | 2007                                       |                      |
| Marshall Islands | United Nations Children's Fund (UNICEF), World Health Organization (WHO). WHO and UNICEF Reported Disease Incidence Time Series - Pertussis. Geneva, Switzerland: World Health Organization (WHO).                                                                                             | 1980-1994, 1996-2003, 2005-2007, 2009-2012 |                      |
| Marshall Islands | United Nations Children's Fund (UNICEF), World Health Organization (WHO). WHO and UNICEF Reported Disease Incidence Time Series - Measles. Geneva, Switzerland: World Health Organization (WHO).                                                                                               | 1980-1987, 1989-1994, 1996-2007, 2009-2012 |                      |
| Mauritania       | Peace Research Institute Oslo (PRIO). Battle Deaths Dataset Version 3, 2009. Oslo, Norway: Peace Research Institute Oslo (PRIO), 2009.                                                                                                                                                         | 1957-1988                                  |                      |
| Mauritania       | Institute for Health Metrics and Evaluation (IHME), Joint United Nations Program on HIV/AIDS (UNAIDS). Institute for Health Metrics and Evaluation HIV Mortality Estimates Based on the UNAIDS Spectrum Model Framework.                                                                       | 1980-2013                                  | *                    |
| Mauritania       | United Nations Children's Fund (UNICEF), World Health Organization (WHO). WHO and UNICEF Reported Disease Incidence Time Series - Pertussis. Geneva, Switzerland: World Health Organization (WHO).                                                                                             | 1980-1991, 2005, 2007-2008, 2012           |                      |

**Web Table 32 - Comprehensive citation list**

| Country    | Citation                                                                                                                                                                                                                                                      | Year*                                        | New for GBD 2013 (*) |
|------------|---------------------------------------------------------------------------------------------------------------------------------------------------------------------------------------------------------------------------------------------------------------|----------------------------------------------|----------------------|
| Mauritania | United Nations Children's Fund (UNICEF), World Health Organization (WHO). WHO and UNICEF Reported Disease Incidence Time Series - Measles. Geneva, Switzerland: World Health Organization (WHO).                                                              | 1980-1995, 1997-1999, 2001-2013              |                      |
| Mauritania | Department of Statistics and National Accounts (Mauritania), International Statistical Institute. Mauritania World Fertility Survey 1981. Voorburg, Netherlands: International Statistical Institute.                                                         | 1981                                         |                      |
| Mauritania | WHO Department of Communicable Disease Surveillance and Response. WHO Report on Global Surveillance of Epidemic-prone Infectious Diseases 2000.                                                                                                               | 1987                                         |                      |
| Mauritania | Department of Statistics and National Accounts (Mauritania). Mauritania Population and Housing Census 1988.                                                                                                                                                   | 1988                                         |                      |
| Mauritania | Department of Peace and Conflict Research, Uppsala University. UCDP Nonstate Conflict Database Version 2.5, 2013. Uppsala, Sweden: Department of Peace and Conflict Research, Uppsala University, 2013.                                                       | 1989                                         | *                    |
| Mauritania | Department of Peace and Conflict Research, Uppsala University. UCDP Battle-Related Deaths Database Version 5, 2013. Uppsala, Sweden: Department of Peace and Conflict Research, Uppsala University, 2013.                                                     | 1989-2011                                    | *                    |
| Mauritania | Department of Peace and Conflict Research, Uppsala University. UCDP One-Sided Violence Database Version 1.4, 2013. Uppsala, Sweden: Department of Peace and Conflict Research, Uppsala University, 2013.                                                      | 1989-2009                                    | *                    |
| Mauritania | National Office of Statistics (Mauritania), League of Arab States. Mauritania Maternal and Child Health Survey 1990-1991.                                                                                                                                     | 1990-1991                                    |                      |
| Mauritania | Weatherall D. Sickle Cell and Thalassemias Prevalence Data, Personal Correspondence with David Weatherall. [Unpublished].                                                                                                                                     | 1990-2009                                    |                      |
| Mauritania | Centre for Health Informatics and Multiprofessional Education, University College London. Modell's Haemoglobinopathologist's Almanac. London, United Kingdom: Centre for Health Informatics and Multiprofessional Education, University College London, 2008. | 1990-2003                                    |                      |
| Mauritania | Centre for Research on the Epidemiology of Disasters (CRED). EM-DAT: The OFDA/CRED International Disaster Database. Brussels, Belgium: Catholic University of Leuven.                                                                                         | 1991, 1999, 2002-2003, 2006-2007, 2009, 2013 |                      |
| Mauritania | Measles Supplementary Immunization Activity Data as provided by the World Health Organization. [Unpublished].                                                                                                                                                 | 1995, 1997-1999                              |                      |
| Mauritania | World Health Organization (WHO). Yellow Fever Reported Cases, WHO Vaccine-Preventable Diseases: Monitoring System. Geneva, Switzerland: World Health Organization (WHO).                                                                                      | 1997-1998, 2001-2004, 2006-2008              |                      |
| Mauritania | Macro International, Inc, National Office of Statistics (Mauritania). Mauritania Demographic and Health Survey 2000-2001. Calverton, United States: Macro International, Inc.                                                                                 | 2000-2001                                    |                      |
| Mauritania | World Health Organization (WHO). Retrospective Measles Data on Supplementary Immunization Activities. Geneva, Switzerland: World Health Organization (WHO).                                                                                                   | 2000, 2004, 2008, 2011-2012                  |                      |
| Mauritania | Macro International, Inc, Ministry of Health and Social Affairs (Mauritania), National Office of Statistics (Mauritania). Mauritania Special Demographic and Health Survey 2003-2004. Calverton, United States: Macro International, Inc.                     | 2003-2004                                    |                      |
| Mauritania | United Nations Children's Fund (UNICEF), National Office of Statistics (Mauritania). Mauritania Multiple Indicator Cluster Survey 2007. New York, United States: United Nations Children's Fund (UNICEF).                                                     | 2007                                         |                      |
| Mauritania | World Health Organization (WHO). Global Status Report on Road Safety 2009. Geneva, Switzerland: World Health Organization (WHO), 2009.                                                                                                                        | 2007                                         |                      |
| Mauritius  | Mauritius Vital Registration Death Data 1950 as it appears in United Nations Statistics Division (UNSD). United Nations Demographic Yearbook. New York City, United States: United Nations Statistics Division (UNSD).                                        | 1950                                         |                      |

**Web Table 32 - Comprehensive citation list**

| Country   | Citation                                                                                                                                                                                                               | Year*                                                            | New for GBD 2013 (*) |
|-----------|------------------------------------------------------------------------------------------------------------------------------------------------------------------------------------------------------------------------|------------------------------------------------------------------|----------------------|
| Mauritius | Mauritius Vital Registration Death Data 1951 as it appears in United Nations Statistics Division (UNSD). United Nations Demographic Yearbook. New York City, United States: United Nations Statistics Division (UNSD). | 1951                                                             |                      |
| Mauritius | Mauritius Vital Registration Death Data 1952 as it appears in United Nations Statistics Division (UNSD). United Nations Demographic Yearbook. New York City, United States: United Nations Statistics Division (UNSD). | 1952                                                             |                      |
| Mauritius | Mauritius Vital Registration Death Data 1953 as it appears in United Nations Statistics Division (UNSD). United Nations Demographic Yearbook. New York City, United States: United Nations Statistics Division (UNSD). | 1953                                                             |                      |
| Mauritius | Mauritius Vital Registration Death Data 1954 as it appears in United Nations Statistics Division (UNSD). United Nations Demographic Yearbook. New York City, United States: United Nations Statistics Division (UNSD). | 1954                                                             |                      |
| Mauritius | Mauritius Vital Registration Death Data 1955 as it appears in United Nations Statistics Division (UNSD). United Nations Demographic Yearbook. New York City, United States: United Nations Statistics Division (UNSD). | 1955                                                             |                      |
| Mauritius | Mauritius Vital Registration Death Data 1956 as it appears in United Nations Statistics Division (UNSD). United Nations Demographic Yearbook. New York City, United States: United Nations Statistics Division (UNSD). | 1956                                                             |                      |
| Mauritius | Mauritius Vital Registration - Deaths 1957 ICD7 as it appears in World Health Organization (WHO). WHO Mortality Database Version February 2014. Geneva, Switzerland: World Health Organization (WHO), 2014.            | 1957                                                             |                      |
| Mauritius | Mauritius Vital Registration - Deaths 1958 ICD7 as it appears in World Health Organization (WHO). WHO Mortality Database Version February 2014. Geneva, Switzerland: World Health Organization (WHO), 2014.            | 1958                                                             |                      |
| Mauritius | Mauritius Vital Registration - Deaths 1959 ICD7 as it appears in World Health Organization (WHO). WHO Mortality Database Version February 2014. Geneva, Switzerland: World Health Organization (WHO), 2014.            | 1959                                                             |                      |
| Mauritius | Mauritius Vital Registration - Deaths 1960 ICD7 as it appears in World Health Organization (WHO). WHO Mortality Database Version February 2014. Geneva, Switzerland: World Health Organization (WHO), 2014.            | 1960                                                             |                      |
| Mauritius | Centre for Research on the Epidemiology of Disasters (CRED). EM-DAT: The OFDA/CRED International Disaster Database. Brussels, Belgium: Catholic University of Leuven.                                                  | 1960, 1972, 1975, 1979, 1983, 1989, 1994, 1996, 2002, 2007, 2013 |                      |
| Mauritius | Mauritius Vital Registration - Deaths 1961 ICD7 as it appears in World Health Organization (WHO). WHO Mortality Database Version February 2014. Geneva, Switzerland: World Health Organization (WHO), 2014.            | 1961                                                             |                      |
| Mauritius | Mauritius Vital Registration - Deaths 1962 ICD7 as it appears in World Health Organization (WHO). WHO Mortality Database Version February 2014. Geneva, Switzerland: World Health Organization (WHO), 2014.            | 1962                                                             |                      |
| Mauritius | Mauritius Vital Registration - Deaths 1963 ICD7 as it appears in World Health Organization (WHO). WHO Mortality Database Version February 2014. Geneva, Switzerland: World Health Organization (WHO), 2014.            | 1963                                                             |                      |

**Web Table 32 - Comprehensive citation list**

| Country   | Citation                                                                                                                                                                                                    | Year*     | New for GBD 2013 (*) |
|-----------|-------------------------------------------------------------------------------------------------------------------------------------------------------------------------------------------------------------|-----------|----------------------|
| Mauritius | Mauritius Vital Registration - Deaths 1964 ICD7 as it appears in World Health Organization (WHO). WHO Mortality Database Version February 2014. Geneva, Switzerland: World Health Organization (WHO), 2014. | 1964      |                      |
| Mauritius | Mauritius Vital Registration - Deaths 1965 ICD7 as it appears in World Health Organization (WHO). WHO Mortality Database Version February 2014. Geneva, Switzerland: World Health Organization (WHO), 2014. | 1965      |                      |
| Mauritius | Mauritius Vital Registration - Deaths 1966 ICD7 as it appears in World Health Organization (WHO). WHO Mortality Database Version February 2014. Geneva, Switzerland: World Health Organization (WHO), 2014. | 1966      |                      |
| Mauritius | Mauritius Vital Registration - Deaths 1967 ICD7 as it appears in World Health Organization (WHO). WHO Mortality Database Version February 2014. Geneva, Switzerland: World Health Organization (WHO), 2014. | 1967      |                      |
| Mauritius | Mauritius Vital Registration - Deaths 1968 ICD7 as it appears in World Health Organization (WHO). WHO Mortality Database Version February 2014. Geneva, Switzerland: World Health Organization (WHO), 2014. | 1968      |                      |
| Mauritius | Mauritius Vital Registration - Deaths 1969 ICD8 as it appears in World Health Organization (WHO). WHO Mortality Database Version February 2014. Geneva, Switzerland: World Health Organization (WHO), 2014. | 1969      |                      |
| Mauritius | Mauritius Vital Registration - Deaths 1970 ICD8 as it appears in World Health Organization (WHO). WHO Mortality Database Version February 2014. Geneva, Switzerland: World Health Organization (WHO), 2014. | 1970      |                      |
| Mauritius | United Nations Office on Drugs and Crime (UNODC). United Nations Surveys on Crime Trends and the Operations of Criminal Justice Systems 1970-2006 as provided by Kavi Bhalla. [Unpublished].                | 1970-1994 |                      |
| Mauritius | Mauritius Vital Registration - Deaths 1971 ICD8 as it appears in World Health Organization (WHO). WHO Mortality Database Version February 2014. Geneva, Switzerland: World Health Organization (WHO), 2014. | 1971      |                      |
| Mauritius | Mauritius Vital Registration - Deaths 1972 ICD8 as it appears in World Health Organization (WHO). WHO Mortality Database Version February 2014. Geneva, Switzerland: World Health Organization (WHO), 2014. | 1972      |                      |
| Mauritius | Mauritius Vital Registration - Deaths 1973 ICD8 as it appears in World Health Organization (WHO). WHO Mortality Database Version February 2014. Geneva, Switzerland: World Health Organization (WHO), 2014. | 1973      |                      |
| Mauritius | Mauritius Vital Registration - Deaths 1974 ICD8 as it appears in World Health Organization (WHO). WHO Mortality Database Version February 2014. Geneva, Switzerland: World Health Organization (WHO), 2014. | 1974      |                      |
| Mauritius | Mauritius Vital Registration - Deaths 1975 ICD8 as it appears in World Health Organization (WHO). WHO Mortality Database Version February 2014. Geneva, Switzerland: World Health Organization (WHO), 2014. | 1975      |                      |
| Mauritius | Mauritius Vital Registration - Deaths 1976 ICD8 as it appears in World Health Organization (WHO). WHO Mortality Database Version February 2014. Geneva, Switzerland: World Health Organization (WHO), 2014. | 1976      |                      |

**Web Table 32 - Comprehensive citation list**

| Country   | Citation                                                                                                                                                                                                                   | Year*                                 | New for GBD 2013 (*) |
|-----------|----------------------------------------------------------------------------------------------------------------------------------------------------------------------------------------------------------------------------|---------------------------------------|----------------------|
| Mauritius | Mauritius Vital Registration - Deaths 1977 ICD8 as it appears in World Health Organization (WHO). WHO Mortality Database Version February 2014. Geneva, Switzerland: World Health Organization (WHO), 2014.                | 1977                                  |                      |
| Mauritius | Mauritius Vital Registration - Deaths 1978 ICD8 as it appears in World Health Organization (WHO). WHO Mortality Database Version February 2014. Geneva, Switzerland: World Health Organization (WHO), 2014.                | 1978                                  |                      |
| Mauritius | Mauritius Vital Registration - Deaths 1979 ICD8 as it appears in World Health Organization (WHO). WHO Mortality Database Version February 2014. Geneva, Switzerland: World Health Organization (WHO), 2014.                | 1979                                  |                      |
| Mauritius | Mauritius Vital Registration - Deaths 1980 ICD8 as it appears in World Health Organization (WHO). WHO Mortality Database Version February 2014. Geneva, Switzerland: World Health Organization (WHO), 2014.                | 1980                                  |                      |
| Mauritius | Institute for Health Metrics and Evaluation (IHME), Joint United Nations Program on HIV/AIDS (UNAIDS). Institute for Health Metrics and Evaluation HIV Mortality Estimates Based on the UNAIDS Spectrum Model Framework.   | 1980-2013                             | *                    |
| Mauritius | United Nations Children's Fund (UNICEF), World Health Organization (WHO). WHO and UNICEF Reported Disease Incidence Time Series - Pertussis. Geneva, Switzerland: World Health Organization (WHO).                         | 1980-1991, 1996, 1999-2001, 2003-2013 |                      |
| Mauritius | United Nations Children's Fund (UNICEF), World Health Organization (WHO). WHO and UNICEF Reported Disease Incidence Time Series - Measles. Geneva, Switzerland: World Health Organization (WHO).                           | 1980-1997, 1999-2001, 2003-2013       |                      |
| Mauritius | Mauritius Vital Registration - Deaths 1981 ICD9 as it appears in World Health Organization (WHO). WHO Mortality Database Version February 2014. Geneva, Switzerland: World Health Organization (WHO), 2014.                | 1981                                  |                      |
| Mauritius | Mauritius Vital Registration - Deaths 1982 ICD9 as it appears in World Health Organization (WHO). WHO Mortality Database Version February 2014. Geneva, Switzerland: World Health Organization (WHO), 2014.                | 1982                                  |                      |
| Mauritius | Mauritius Vital Registration - Deaths 1983 ICD9 as it appears in World Health Organization (WHO). WHO Mortality Database Version February 2014. Geneva, Switzerland: World Health Organization (WHO), 2014.                | 1983                                  |                      |
| Mauritius | Mauritius Vital Registration - Deaths 1984 ICD9 as it appears in World Health Organization (WHO). WHO Mortality Database Version February 2014. Geneva, Switzerland: World Health Organization (WHO), 2014.                | 1984                                  |                      |
| Mauritius | Mauritius Vital Registration - Deaths 1985 ICD9 as it appears in World Health Organization (WHO). WHO Mortality Database Version February 2014. Geneva, Switzerland: World Health Organization (WHO), 2014.                | 1985                                  |                      |
| Mauritius | Mauritius Vital Registration - Deaths 1986 ICD9 as it appears in World Health Organization (WHO). WHO Mortality Database Version February 2014. Geneva, Switzerland: World Health Organization (WHO), 2014.                | 1986                                  |                      |
| Mauritius | Mauritius Vital Registration - Deaths 1987 ICD9 as it appears in World Health Organization (WHO). WHO Mortality Database Version February 2014. Geneva, Switzerland: World Health Organization (WHO), 2014.                | 1987                                  |                      |
| Mauritius | Schwarz TF, Kam CC, Min GL, Jilg W, Wilske B, Gürtler L, Deinhardt F. Prevalence of antibodies against hepatitis A virus, hepatitis B virus, and Treponema pallidum in Mauritius. Scand J Infect Dis. 1991; 23(5): 535-41. | 1987                                  |                      |



**Web Table 32 - Comprehensive citation list**

| Country   | Citation                                                                                                                                                                                                                                                                           | Year*                           | New for GBD 2013 (*) |
|-----------|------------------------------------------------------------------------------------------------------------------------------------------------------------------------------------------------------------------------------------------------------------------------------------|---------------------------------|----------------------|
| Mauritius | Mauritius Vital Registration - Deaths 1988 ICD9 as it appears in World Health Organization (WHO). WHO Mortality Database Version February 2014. Geneva, Switzerland: World Health Organization (WHO), 2014.                                                                        | 1988                            |                      |
| Mauritius | Mauritius Vital Registration - Deaths 1989 ICD9 as it appears in World Health Organization (WHO). WHO Mortality Database Version February 2014. Geneva, Switzerland: World Health Organization (WHO), 2014.                                                                        | 1989                            |                      |
| Mauritius | Mauritius Vital Registration - Deaths 1990 ICD9 as it appears in World Health Organization (WHO). WHO Mortality Database Version February 2014. Geneva, Switzerland: World Health Organization (WHO), 2014.                                                                        | 1990                            |                      |
| Mauritius | Mauritius Vital Registration - Deaths 1991 ICD9 as it appears in World Health Organization (WHO). WHO Mortality Database Version February 2014. Geneva, Switzerland: World Health Organization (WHO), 2014.                                                                        | 1991                            |                      |
| Mauritius | Mauritius Vital Registration - Deaths 1992 ICD9 as it appears in World Health Organization (WHO). WHO Mortality Database Version February 2014. Geneva, Switzerland: World Health Organization (WHO), 2014.                                                                        | 1992                            |                      |
| Mauritius | Mauritius Vital Registration - Deaths 1993 ICD9 as it appears in World Health Organization (WHO). WHO Mortality Database Version February 2014. Geneva, Switzerland: World Health Organization (WHO), 2014.                                                                        | 1993                            |                      |
| Mauritius | Mauritius Vital Registration - Deaths 1994 ICD9 as it appears in World Health Organization (WHO). WHO Mortality Database Version February 2014. Geneva, Switzerland: World Health Organization (WHO), 2014.                                                                        | 1994                            |                      |
| Mauritius | Mauritius Vital Registration - Deaths 1995 ICD9 as it appears in World Health Organization (WHO). WHO Mortality Database Version February 2014. Geneva, Switzerland: World Health Organization (WHO), 2014.                                                                        | 1995                            |                      |
| Mauritius | United Nations Office on Drugs and Crime (UNODC). United Nations Office on Drugs and Crime Global Study on Homicides 2011. Vienna, Austria: United Nations Office on Drugs and Crime (UNODC), 2011.                                                                                | 1995-2009                       |                      |
| Mauritius | Mauritius Vital Registration - Deaths 1996 ICD9 as it appears in World Health Organization (WHO). WHO Mortality Database Version February 2014. Geneva, Switzerland: World Health Organization (WHO), 2014.                                                                        | 1996                            |                      |
| Mauritius | World Health Organization (WHO). Yellow Fever Reported Cases, WHO Vaccine-Preventable Diseases: Monitoring System. Geneva, Switzerland: World Health Organization (WHO).                                                                                                           | 1996-1997, 1999-2001, 2003-2009 |                      |
| Mauritius | Mauritius Vital Registration - Deaths 1997 ICD9 as it appears in World Health Organization (WHO). WHO Mortality Database Version February 2014. Geneva, Switzerland: World Health Organization (WHO), 2014.                                                                        | 1997                            |                      |
| Mauritius | Kotea R, Kaeda JS, Yan SL, Sem Fa N, Beeson S, Jankee S, Ramasawmy R, Vulliamy T, Bradnock RW, Bautista J, Luzzatto L, Krishnamoorthy R, Mason PJ. Three major G6PD-deficient polymorphic variants identified among the Mauritian population. Br J Haematol. 1999; 104(4): 849-54. | 1997-1999                       |                      |
| Mauritius | Mauritius Vital Registration - Deaths 1998 ICD9 as it appears in World Health Organization (WHO). WHO Mortality Database Version February 2014. Geneva, Switzerland: World Health Organization (WHO), 2014.                                                                        | 1998                            |                      |
| Mauritius | Measles Supplementary Immunization Activity Data as provided by the World Health Organization. [Unpublished].                                                                                                                                                                      | 1998                            |                      |

**Web Table 32 - Comprehensive citation list**

| Country   | Citation                                                                                                                                                                                                                                        | Year* | New for GBD 2013 (*) |
|-----------|-------------------------------------------------------------------------------------------------------------------------------------------------------------------------------------------------------------------------------------------------|-------|----------------------|
| Mauritius | Mauritius Vital Registration - Deaths 1999 ICD9 as it appears in World Health Organization (WHO). WHO Mortality Database Version February 2014. Geneva, Switzerland: World Health Organization (WHO), 2014.                                     | 1999  |                      |
| Mauritius | World Health Organization Regional Office for Africa. HIV/AIDS Epidemiological Surveillance Update for the WHO African Region. World Health Organization Regional Office for Africa, 2003.                                                      | 1999  |                      |
| Mauritius | Mauritius Vital Registration - Deaths 2000 ICD9 as it appears in World Health Organization (WHO). WHO Mortality Database Version February 2014. Geneva, Switzerland: World Health Organization (WHO), 2014.                                     | 2000  |                      |
| Mauritius | Mauritius Vital Registration - Deaths 2001 ICD9 as it appears in World Health Organization (WHO). WHO Mortality Database Version February 2014. Geneva, Switzerland: World Health Organization (WHO), 2014.                                     | 2001  |                      |
| Mauritius | Mauritius Vital Registration - Deaths 2002 ICD9 as it appears in World Health Organization (WHO). WHO Mortality Database Version February 2014. Geneva, Switzerland: World Health Organization (WHO), 2014.                                     | 2002  |                      |
| Mauritius | Mauritius Vital Registration - Deaths 2003 ICD9 as it appears in World Health Organization (WHO). WHO Mortality Database Version February 2014. Geneva, Switzerland: World Health Organization (WHO), 2014.                                     | 2003  |                      |
| Mauritius | World Health Organization (WHO). Retrospective Measles Data on Supplementary Immunization Activities. Geneva, Switzerland: World Health Organization (WHO).                                                                                     | 2003  |                      |
| Mauritius | Mauritius Vital Registration - Deaths 2004 ICD9 as it appears in World Health Organization (WHO). WHO Mortality Database Version February 2014. Geneva, Switzerland: World Health Organization (WHO), 2014.                                     | 2004  |                      |
| Mauritius | Mauritius Vital Registration - Deaths 2005 ICD10 as it appears in World Health Organization (WHO). WHO Mortality Database Version February 2014. Geneva, Switzerland: World Health Organization (WHO), 2014.                                    | 2005  |                      |
| Mauritius | Mauritius Vital Registration - Deaths 2006 ICD10 as it appears in World Health Organization (WHO). WHO Mortality Database Version February 2014. Geneva, Switzerland: World Health Organization (WHO), 2014.                                    | 2006  |                      |
| Mauritius | Mauritius Vital Registration - Deaths 2007 ICD10 as it appears in World Health Organization (WHO). WHO Mortality Database Version February 2014. Geneva, Switzerland: World Health Organization (WHO), 2014.                                    | 2007  |                      |
| Mauritius | Mauritius Vital Registration - Deaths 2008 ICD10 as it appears in World Health Organization (WHO). WHO Mortality Database Version February 2014. Geneva, Switzerland: World Health Organization (WHO), 2014.                                    | 2008  |                      |
| Mauritius | Mauritius Vital Registration - Deaths 2009 ICD10 as it appears in World Health Organization (WHO). WHO Mortality Database Version February 2014. Geneva, Switzerland: World Health Organization (WHO), 2014.                                    | 2009  |                      |
| Mauritius | Joint United Nations Program on HIV/AIDS (UNAIDS), National AIDS Secretariat, Prime Minister's Office (Mauritius). Mauritius UNGASS Country Progress Report 2010. Geneva, Switzerland: Joint United Nations Program on HIV/AIDS (UNAIDS), 2010. | 2009  |                      |
| Mauritius | Mauritius Vital Registration - Deaths 2010 ICD10 as it appears in World Health Organization (WHO). WHO Mortality Database Version February 2014. Geneva, Switzerland: World Health Organization (WHO), 2014.                                    | 2010  |                      |



**Web Table 32 - Comprehensive citation list**

| Country   | Citation                                                                                                                                                                                                                                  | Year*                                                        | New for GBD 2013 (*) |
|-----------|-------------------------------------------------------------------------------------------------------------------------------------------------------------------------------------------------------------------------------------------|--------------------------------------------------------------|----------------------|
| Mauritius | Mauritius Vital Registration - Deaths 2011 ICD10 as it appears in World Health Organization (WHO). WHO Mortality Database Version February 2014. Geneva, Switzerland: World Health Organization (WHO), 2014.                              | 2011                                                         | *                    |
| Mexico    | Mexico Vital Registration Death Data 1950 as it appears in United Nations Statistics Division (UNSD). United Nations Demographic Yearbook. New York City, United States: United Nations Statistics Division (UNSD).                       | 1950                                                         |                      |
| Mexico    | Mexico Vital Registration Death Data 1951 as it appears in United Nations Statistics Division (UNSD). United Nations Demographic Yearbook. New York City, United States: United Nations Statistics Division (UNSD).                       | 1951                                                         |                      |
| Mexico    | Centre for Research on the Epidemiology of Disasters (CRED). EM-DAT: The OFDA/CRED International Disaster Database. Brussels, Belgium: Catholic University of Leuven.                                                                     | 1951-1952, 1954-1955, 1957, 1959, 1961, 1964-1993, 1995-2013 |                      |
| Mexico    | Mexico Vital Registration Death Data 1952 as it appears in United Nations Statistics Division (UNSD). United Nations Demographic Yearbook. New York City, United States: United Nations Statistics Division (UNSD).                       | 1952                                                         |                      |
| Mexico    | Mexico Vital Registration Death Data 1953 as it appears in United Nations Statistics Division (UNSD). United Nations Demographic Yearbook. New York City, United States: United Nations Statistics Division (UNSD).                       | 1953                                                         |                      |
| Mexico    | Mexico Vital Registration Death Data 1954 as it appears in United Nations Statistics Division (UNSD). United Nations Demographic Yearbook. New York City, United States: United Nations Statistics Division (UNSD).                       | 1954                                                         |                      |
| Mexico    | Mexico Vital Registration - Deaths 1955 ICD7 as it appears in World Health Organization (WHO). WHO Mortality Database Version February 2014. Geneva, Switzerland: World Health Organization (WHO), 2014.                                  | 1955                                                         |                      |
| Mexico    | Mexico Vital Registration - Deaths 1956 ICD7 as it appears in World Health Organization (WHO). WHO Mortality Database Version February 2014. Geneva, Switzerland: World Health Organization (WHO), 2014.                                  | 1956                                                         |                      |
| Mexico    | Mexico Vital Registration - Deaths 1957 ICD7 as it appears in World Health Organization (WHO). WHO Mortality Database Version February 2014. Geneva, Switzerland: World Health Organization (WHO), 2014.                                  | 1957                                                         |                      |
| Mexico    | Mexico Vital Registration - Deaths 1958 ICD7 as it appears in World Health Organization (WHO). WHO Mortality Database Version February 2014. Geneva, Switzerland: World Health Organization (WHO), 2014.                                  | 1958                                                         |                      |
| Mexico    | Mexico Vital Registration - Deaths 1959 ICD7 as it appears in World Health Organization (WHO). WHO Mortality Database Version February 2014. Geneva, Switzerland: World Health Organization (WHO), 2014.                                  | 1959                                                         |                      |
| Mexico    | Mexico Vital Registration - Deaths 1960 ICD7 as it appears in World Health Organization (WHO). WHO Mortality Database Version February 2014. Geneva, Switzerland: World Health Organization (WHO), 2014.                                  | 1960                                                         |                      |
| Mexico    | Lisker R, Loria A, Gonzales Llaven J, Guttman S, Ruiz Reyes G. Preliminary note on the incidence of abnormal hemoglobulins and glucose-6-phosphate dehydrogenase deficiency in the Mexican population. Rev Fr Etud Clin Biol. 1962; 76-8. | 1960-1965                                                    |                      |

**Web Table 32 - Comprehensive citation list**

| Country | Citation                                                                                                                                                                                                                            | Year*     | New for GBD 2013 (*) |
|---------|-------------------------------------------------------------------------------------------------------------------------------------------------------------------------------------------------------------------------------------|-----------|----------------------|
| Mexico  | Mexico Vital Registration - Deaths 1961 ICD7 as it appears in World Health Organization (WHO). WHO Mortality Database Version February 2014. Geneva, Switzerland: World Health Organization (WHO), 2014.                            | 1961      |                      |
| Mexico  | Alvar Loria P. Studies on some hereditary hematologic characteristics in the Mexican population. III. Erythrocytic glucose-6-phosphate dehydrogenase deficiency in 7 indigenous and mestizo groups. Gac Med Mex. 1963; 299-303.     | 1961-1963 |                      |
| Mexico  | Mexico Vital Registration - Deaths 1962 ICD7 as it appears in World Health Organization (WHO). WHO Mortality Database Version February 2014. Geneva, Switzerland: World Health Organization (WHO), 2014.                            | 1962      |                      |
| Mexico  | Mexico Vital Registration - Deaths 1963 ICD7 as it appears in World Health Organization (WHO). WHO Mortality Database Version February 2014. Geneva, Switzerland: World Health Organization (WHO), 2014.                            | 1963      |                      |
| Mexico  | Mexico Vital Registration - Deaths 1964 ICD7 as it appears in World Health Organization (WHO). WHO Mortality Database Version February 2014. Geneva, Switzerland: World Health Organization (WHO), 2014.                            | 1964      |                      |
| Mexico  | Lisker R, Zarate G, Loria A. Studies on several genetic hematologic traits of Mexicans IX. Abnormal hemoglobins and erythrocytic glucose-6-phosphate dehydrogenase deficiency in several Indian tribes. Blood. 1966; 27(6): 824-30. | 1964-1966 |                      |
| Mexico  | Mexico Vital Registration - Deaths 1965 ICD7 as it appears in World Health Organization (WHO). WHO Mortality Database Version February 2014. Geneva, Switzerland: World Health Organization (WHO), 2014.                            | 1965      |                      |
| Mexico  | Mexico Vital Registration - Deaths 1966 ICD7 as it appears in World Health Organization (WHO). WHO Mortality Database Version February 2014. Geneva, Switzerland: World Health Organization (WHO), 2014.                            | 1966      |                      |
| Mexico  | Mexico Vital Registration - Deaths 1967 ICD7 as it appears in World Health Organization (WHO). WHO Mortality Database Version February 2014. Geneva, Switzerland: World Health Organization (WHO), 2014.                            | 1967      |                      |
| Mexico  | Mexico Vital Registration - Deaths 1968 ICD8 as it appears in World Health Organization (WHO). WHO Mortality Database Version February 2014. Geneva, Switzerland: World Health Organization (WHO), 2014.                            | 1968      |                      |
| Mexico  | Mexico Vital Registration - Deaths 1969 ICD8 as it appears in World Health Organization (WHO). WHO Mortality Database Version February 2014. Geneva, Switzerland: World Health Organization (WHO), 2014.                            | 1969      |                      |
| Mexico  | Mexico Vital Registration - Deaths 1970 ICD8 as it appears in World Health Organization (WHO). WHO Mortality Database Version February 2014. Geneva, Switzerland: World Health Organization (WHO), 2014.                            | 1970      |                      |
| Mexico  | Mexico Vital Registration - Deaths 1971 ICD8 as it appears in World Health Organization (WHO). WHO Mortality Database Version February 2014. Geneva, Switzerland: World Health Organization (WHO), 2014.                            | 1971      |                      |
| Mexico  | Mexico Vital Registration - Deaths 1972 ICD8 as it appears in World Health Organization (WHO). WHO Mortality Database Version February 2014. Geneva, Switzerland: World Health Organization (WHO), 2014.                            | 1972      |                      |

**Web Table 32 - Comprehensive citation list**

| Country | Citation                                                                                                                                                                                                                                                 | Year*     | New for GBD 2013 (*) |
|---------|----------------------------------------------------------------------------------------------------------------------------------------------------------------------------------------------------------------------------------------------------------|-----------|----------------------|
| Mexico  | Mexico Vital Registration - Deaths 1973 ICD8 as it appears in World Health Organization (WHO). WHO Mortality Database Version February 2014. Geneva, Switzerland: World Health Organization (WHO), 2014.                                                 | 1973      |                      |
| Mexico  | Kumate J, Alvizouri AM, Isibasi A. Serologic survey of hepatitis A antibodies in Mexican children. Bull Pan Am Health Organ. 1982; 16(2): 156-60.                                                                                                        | 1973      |                      |
| Mexico  | Mexico Vital Registration - Deaths 1974 ICD8 as it appears in World Health Organization (WHO). WHO Mortality Database Version February 2014. Geneva, Switzerland: World Health Organization (WHO), 2014.                                                 | 1974      |                      |
| Mexico  | Lisker R, Pérez Briceño R, Sosa R, Shein M. Hereditary and epidemiological aspects of erythrocyte glucose-6-phosphate dehydrogenase deficiency in Mexico. Gac Med Mex. 1976; 111(6): 454-8.                                                              | 1974-1976 |                      |
| Mexico  | Mexico Vital Registration - Deaths 1975 ICD8 as it appears in World Health Organization (WHO). WHO Mortality Database Version February 2014. Geneva, Switzerland: World Health Organization (WHO), 2014.                                                 | 1975      |                      |
| Mexico  | Mexico Vital Registration - Deaths 1976 ICD8 as it appears in World Health Organization (WHO). WHO Mortality Database Version February 2014. Geneva, Switzerland: World Health Organization (WHO), 2014.                                                 | 1976      |                      |
| Mexico  | Department of Statistics (Mexico), International Statistical Institute. Mexico World Fertility Survey 1976-1977. International Statistical Institute.                                                                                                    | 1976-1977 |                      |
| Mexico  | Mexico Vital Registration - Deaths 1977 ICD8 as it appears in World Health Organization (WHO). WHO Mortality Database Version February 2014. Geneva, Switzerland: World Health Organization (WHO), 2014.                                                 | 1977      |                      |
| Mexico  | Mexico Vital Registration - Deaths 1978 ICD8 as it appears in World Health Organization (WHO). WHO Mortality Database Version February 2014. Geneva, Switzerland: World Health Organization (WHO), 2014.                                                 | 1978      |                      |
| Mexico  | Mexico Vital Registration - Deaths 1979 ICD9 as it appears in World Health Organization (WHO). WHO Mortality Database Version February 2014. Geneva, Switzerland: World Health Organization (WHO), 2014.                                                 | 1979      |                      |
| Mexico  | National Family Planning Program (Mexico). Mexico Contraceptive Prevalence Survey 1979.                                                                                                                                                                  | 1979      |                      |
| Mexico  | Ministry of Health (Mexico), National Institute of Statistics and Geography (Mexico). Mexico Vital Registration - Deaths 1979. [Unpublished].                                                                                                            | 1979      | *                    |
| Mexico  | Mexico General Population and Housing Census 1980 as it appears in United Nations Statistics Division (UNSD). United Nations Demographic Yearbook - Historical Supplement 1997. New York City, United States: United Nations Statistics Division (UNSD). | 1980      |                      |
| Mexico  | Mexico Vital Registration - Deaths 1980 ICD9 as it appears in World Health Organization (WHO). WHO Mortality Database Version February 2014. Geneva, Switzerland: World Health Organization (WHO), 2014.                                                 | 1980      |                      |
| Mexico  | Ministry of Health (Mexico), National Institute of Statistics and Geography (Mexico). Mexico Vital Registration - Deaths 1980. [Unpublished].                                                                                                            | 1980      |                      |
| Mexico  | Institute for Health Metrics and Evaluation (IHME), Joint United Nations Program on HIV/AIDS (UNAIDS). Institute for Health Metrics and Evaluation HIV Mortality Estimates Based on the UNAIDS Spectrum Model Framework.                                 | 1980-2013 | *                    |

**Web Table 32 - Comprehensive citation list**

| Country | Citation                                                                                                                                                                                                                                                                                                  | Year*     | New for GBD 2013 (*) |
|---------|-----------------------------------------------------------------------------------------------------------------------------------------------------------------------------------------------------------------------------------------------------------------------------------------------------------|-----------|----------------------|
| Mexico  | United Nations Children's Fund (UNICEF), World Health Organization (WHO). WHO and UNICEF Reported Disease Incidence Time Series - Pertussis. Geneva, Switzerland: World Health Organization (WHO).                                                                                                        | 1980-2013 |                      |
| Mexico  | United Nations Children's Fund (UNICEF), World Health Organization (WHO). WHO and UNICEF Reported Disease Incidence Time Series - Measles. Geneva, Switzerland: World Health Organization (WHO).                                                                                                          | 1980-2013 |                      |
| Mexico  | Mexico Vital Registration - Deaths 1981 ICD9 as it appears in World Health Organization (WHO). WHO Mortality Database Version February 2014. Geneva, Switzerland: World Health Organization (WHO), 2014.                                                                                                  | 1981      |                      |
| Mexico  | Ministry of Health (Mexico), National Institute of Statistics and Geography (Mexico). Mexico Vital Registration - Deaths 1981 . [Unpublished].                                                                                                                                                            | 1981      |                      |
| Mexico  | Mexico Vital Registration - Deaths 1982 ICD9 as it appears in World Health Organization (WHO). WHO Mortality Database Version February 2014. Geneva, Switzerland: World Health Organization (WHO), 2014.                                                                                                  | 1982      |                      |
| Mexico  | Ministry of Health (Mexico), National Institute of Statistics and Geography (Mexico). Mexico Vital Registration - Deaths 1982. [Unpublished].                                                                                                                                                             | 1982      |                      |
| Mexico  | Mexico Vital Registration - Deaths 1983 ICD9 as it appears in World Health Organization (WHO). WHO Mortality Database Version February 2014. Geneva, Switzerland: World Health Organization (WHO), 2014.                                                                                                  | 1983      |                      |
| Mexico  | Ministry of Health (Mexico), National Institute of Statistics and Geography (Mexico). Mexico Vital Registration - Deaths 1983. [Unpublished].                                                                                                                                                             | 1983      |                      |
| Mexico  | Mexico Vital Registration - Deaths 1984 ICD9 as it appears in World Health Organization (WHO). WHO Mortality Database Version February 2014. Geneva, Switzerland: World Health Organization (WHO), 2014.                                                                                                  | 1984      |                      |
| Mexico  | Ministry of Health (Mexico), National Institute of Statistics and Geography (Mexico). Mexico Vital Registration - Deaths 1984. [Unpublished].                                                                                                                                                             | 1984      |                      |
| Mexico  | Bustamante-Calvillo ME, Velázquez-Castillo FR, Padilla-Noriega L, Alvarez y Muñoz MT, Moreno-Altamirano L, Martínez-García MC, Guiscafré-Gallardo H, Muñoz-Hernández O. Hepatitis A antibodies: prevalence and persistence in a group of Mexican children. Bol Med Hosp Infant Mex. 1986; 43(12): 735-41. | 1984-1985 |                      |
| Mexico  | Mexico Vital Registration - Deaths 1985 ICD9 as it appears in World Health Organization (WHO). WHO Mortality Database Version February 2014. Geneva, Switzerland: World Health Organization (WHO), 2014.                                                                                                  | 1985      |                      |
| Mexico  | Ministry of Health (Mexico), National Institute of Statistics and Geography (Mexico). Mexico Vital Registration - Deaths 1985. [Unpublished].                                                                                                                                                             | 1985      |                      |
| Mexico  | Arámbula E, Aguilar L JC, Vaca G. Glucose-6-phosphate dehydrogenase mutations and haplotypes in Mexican Mestizos. Blood Cells Mol Dis. 2000; 26(4): 387-94.                                                                                                                                               | 1985      |                      |
| Mexico  | Mexico Vital Registration - Deaths 1986 ICD9 as it appears in World Health Organization (WHO). WHO Mortality Database Version February 2014. Geneva, Switzerland: World Health Organization (WHO), 2014.                                                                                                  | 1986      |                      |
| Mexico  | Ministry of Health (Mexico), National Institute of Statistics and Geography (Mexico). Mexico Vital Registration - Deaths 1986. [Unpublished].                                                                                                                                                             | 1986      |                      |

**Web Table 32 - Comprehensive citation list**

| Country | Citation                                                                                                                                                                                                                                                                                 | Year*      | New for GBD 2013 (*) |
|---------|------------------------------------------------------------------------------------------------------------------------------------------------------------------------------------------------------------------------------------------------------------------------------------------|------------|----------------------|
| Mexico  | Mexico Vital Registration - Deaths 1987 ICD9 as it appears in World Health Organization (WHO). WHO Mortality Database Version February 2014. Geneva, Switzerland: World Health Organization (WHO), 2014.                                                                                 | 1987       |                      |
| Mexico  | Macro Systems, Inc.; Institute for Resource Development, Ministry of Health (Mexico). Mexico Demographic and Health Survey 1987. Columbia, United States: Macro Systems, Inc.                                                                                                            | 1987       |                      |
| Mexico  | Ministry of Health (Mexico), National Institute of Statistics and Geography (Mexico). Mexico Vital Registration - Deaths 1987. [Unpublished].                                                                                                                                            | 1987       |                      |
| Mexico  | Alvarez-Muñoz MT, Torres J, Damasio L, Gómez A, Tapia-Conyer R, Muñoz O. Seroepidemiology of hepatitis E virus infection in Mexican subjects 1 to 29 years of age. Arch Med Res. 1999; 30(3): 251-4.                                                                                     | 1987-1988  |                      |
| Mexico  | Mexico Vital Registration - Deaths 1988 ICD9 as it appears in World Health Organization (WHO). WHO Mortality Database Version February 2014. Geneva, Switzerland: World Health Organization (WHO), 2014.                                                                                 | 1988       |                      |
| Mexico  | Ministry of Health (Mexico), National Institute of Statistics and Geography (Mexico). Mexico Vital Registration - Deaths 1988. [Unpublished].                                                                                                                                            | 1988       |                      |
| Mexico  | Mexico Vital Registration - Deaths 1989 ICD9 as it appears in World Health Organization (WHO). WHO Mortality Database Version February 2014. Geneva, Switzerland: World Health Organization (WHO), 2014.                                                                                 | 1989       |                      |
| Mexico  | Ministry of Health (Mexico), National Institute of Statistics and Geography (Mexico). Mexico Vital Registration - Deaths 1989. [Unpublished].                                                                                                                                            | 1989       |                      |
| Mexico  | Mexico Vital Registration - Deaths 1990 ICD9 as it appears in World Health Organization (WHO). WHO Mortality Database Version February 2014. Geneva, Switzerland: World Health Organization (WHO), 2014.                                                                                 | 1990       |                      |
| Mexico  | National Institute of Statistics, Geography, and Informatics (Mexico), Minnesota Population Center. Mexico General Population and Housing Census 1990 from the Integrated Public Use Microdata Series, International. [Machine-readable database]. Minneapolis: University of Minnesota. | 1990       |                      |
| Mexico  | Ministry of Health (Mexico), National Institute of Statistics and Geography (Mexico). Mexico Vital Registration - Deaths 1990. [Unpublished].                                                                                                                                            | 1990       |                      |
| Mexico  | Weatherall D. Sickle Cell and Thalassemias Prevalence Data, Personal Correspondence with David Weatherall. [Unpublished].                                                                                                                                                                | 1990-2009  |                      |
| Mexico  | Centre for Health Informatics and Multiprofessional Education, University College London. Modell's Haemoglobinopathologist's Almanac. London, United Kingdom: Centre for Health Informatics and Multiprofessional Education, University College London, 2008.                            | 1990-2003  |                      |
| Mexico  | Juarez F, Singh S, Garcia SG, Olavarrieta CD. Estimates of induced abortion in Mexico: what's changed between 1990 and 2006? Int Fam Plan Perspect. 2008; 34(4): 158-68.                                                                                                                 | 1990, 2006 |                      |
| Mexico  | Mexico Vital Registration - Deaths 1991 ICD9 as it appears in World Health Organization (WHO). WHO Mortality Database Version February 2014. Geneva, Switzerland: World Health Organization (WHO), 2014.                                                                                 | 1991       |                      |
| Mexico  | Ministry of Health (Mexico), National Institute of Statistics and Geography (Mexico). Mexico Vital Registration - Deaths 1991. [Unpublished].                                                                                                                                            | 1991       |                      |
| Mexico  | García-Juárez I, Solórzano Santos F, Alvarez-y-Muñoz MT, Vázquez-Rosales JG. [Is there a shift in the epidemiology of hepatitis A in Mexican children?]. Rev Invest Clin. 2008; 60(4): 292-6.                                                                                            | 1991-2005  |                      |

**Web Table 32 - Comprehensive citation list**

| Country | Citation                                                                                                                                                                                                                                                                                                      | Year*     | New for GBD 2013 (*) |
|---------|---------------------------------------------------------------------------------------------------------------------------------------------------------------------------------------------------------------------------------------------------------------------------------------------------------------|-----------|----------------------|
| Mexico  | National Institute of Statistics, Geography, and Informatics (Mexico). Mexico National Survey of Demographic Dynamics 1992. Aguascalientes, Mexico: National Institute of Statistics, Geography, and Informatics (Mexico).                                                                                    | 1992      |                      |
| Mexico  | Mexico Vital Registration - Deaths 1992 ICD9 as it appears in World Health Organization (WHO). WHO Mortality Database Version February 2014. Geneva, Switzerland: World Health Organization (WHO), 2014.                                                                                                      | 1992      |                      |
| Mexico  | Ministry of Health (Mexico), National Institute of Statistics and Geography (Mexico). Mexico Vital Registration - Deaths 1992. [Unpublished].                                                                                                                                                                 | 1992      |                      |
| Mexico  | Mondragón-Sánchez R, Garduño-López AL, Hernández-Castillo E, Gómez-Gómez E, Ruiz-Molina JM. Hepatocellular carcinoma and hepatitis C in Mexico. <i>Hepatogastroenterology</i> . 2005; 52(64): 1159-62.                                                                                                        | 1992-2002 |                      |
| Mexico  | Ramírez Mayans JA, Cervantes Bustamante R, Jiron Castro R, Oyervides Garcia CI, Mata Rivera N, Navarrete Delgadillo Natividad MA, Sosa Martínez MC. [Prevalence of antibodies against hepatitis A virus (HAV) in a population of Mexican children]. <i>Acta Gastroenterol Latinoam</i> . 1997; 27(2): 99-102. | 1992-1993 |                      |
| Mexico  | Ramírez-Mayans J, Cervantes-Bustamante R, Zárate-Mondragón F, Mata-Rivera N, Tello M, Navarrete N, de Martínez CS. Hepatitis C virus antibodies in a Mexican population. <i>Pediatr Infect Dis J</i> . 1998; 17(2): 169-70.                                                                                   | 1992-1993 |                      |
| Mexico  | Mexico Vital Registration - Deaths 1993 ICD9 as it appears in World Health Organization (WHO). WHO Mortality Database Version February 2014. Geneva, Switzerland: World Health Organization (WHO), 2014.                                                                                                      | 1993      |                      |
| Mexico  | Tomé P, Reyes H, Piña C, Rodríguez L, Gutiérrez G. Characteristics associated with under-registration of children's deaths in the state of Guerrero, Mexico. <i>Salud Publica Mex</i> . 1997; 39(6): 523-9.                                                                                                   | 1993      |                      |
| Mexico  | Ministry of Health (Mexico), National Institute of Statistics and Geography (Mexico). Mexico Vital Registration - Deaths 1993. [Unpublished].                                                                                                                                                                 | 1993      |                      |
| Mexico  | Measles Supplementary Immunization Activity Data as provided by the World Health Organization. [Unpublished].                                                                                                                                                                                                 | 1993      |                      |
| Mexico  | Department of Peace and Conflict Research, Uppsala University. UCDP Nonstate Conflict Database Version 2.5, 2013. Uppsala, Sweden: Department of Peace and Conflict Research, Uppsala University, 2013.                                                                                                       | 1993-1995 | *                    |
| Mexico  | Bernal Reyes R, Licon Solís JE. [Seroepidemiology of hepatitis E in the State of Hidalgo]. <i>Rev Gastroenterol Mex</i> . 1996; 61(3): 233-8.                                                                                                                                                                 | 1993-1995 | *                    |
| Mexico  | Mexico Vital Registration - Deaths 1994 ICD9 as it appears in World Health Organization (WHO). WHO Mortality Database Version February 2014. Geneva, Switzerland: World Health Organization (WHO), 2014.                                                                                                      | 1994      |                      |
| Mexico  | Ministry of Health (Mexico), National Institute of Statistics and Geography (Mexico). Mexico Vital Registration - Deaths 1994. [Unpublished].                                                                                                                                                                 | 1994      |                      |
| Mexico  | Department of Peace and Conflict Research, Uppsala University. UCDP Battle-Related Deaths Database Version 5, 2013. Uppsala, Sweden: Department of Peace and Conflict Research, Uppsala University, 2013.                                                                                                     | 1994-1996 | *                    |
| Mexico  | World Health Organization (WHO). Mexico WHO Leishmaniasis Country Profile.                                                                                                                                                                                                                                    | 1994-2010 | *                    |
| Mexico  | Mexico Vital Registration - Deaths 1995 ICD9 as it appears in World Health Organization (WHO). WHO Mortality Database Version February 2014. Geneva, Switzerland: World Health Organization (WHO), 2014.                                                                                                      | 1995      |                      |



**Web Table 32 - Comprehensive citation list**

| Country | Citation                                                                                                                                                                                                                                                                                                                     | Year*                                      | New for GBD 2013 (*) |
|---------|------------------------------------------------------------------------------------------------------------------------------------------------------------------------------------------------------------------------------------------------------------------------------------------------------------------------------|--------------------------------------------|----------------------|
| Mexico  | Ministry of Health (Mexico), National Institute of Statistics and Geography (Mexico). Mexico Vital Registration - Deaths 1995. [Unpublished].                                                                                                                                                                                | 1995                                       |                      |
| Mexico  | Ortiz-Ibarra FJ, Figueroa-Damián R, Lara-Sánchez J, Arredondo-García JL, Ahued-Ahued JR. [Prevalence of serologic markers of hepatitis A, B, C, and D viruses in pregnant women]. Salud Publica Mex. 1996; 38(5): 317-22.                                                                                                    | 1995                                       |                      |
| Mexico  | United Nations Office on Drugs and Crime (UNODC). United Nations Office on Drugs and Crime Global Study on Homicides 2011. Vienna, Austria: United Nations Office on Drugs and Crime (UNODC), 2011.                                                                                                                          | 1995-2010                                  |                      |
| Mexico  | Vaca G, Arámbula E, Esparza A. Molecular heterogeneity of glucose-6-phosphate dehydrogenase deficiency in Mexico: overall results of a 7-year project. Blood Cells Mol Dis. 2002; 28(3): 436-44.                                                                                                                             | 1995-2002                                  |                      |
| Mexico  | Mexico Vital Registration - Deaths 1996 ICD9 as it appears in World Health Organization (WHO). WHO Mortality Database Version February 2014. Geneva, Switzerland: World Health Organization (WHO), 2014.                                                                                                                     | 1996                                       |                      |
| Mexico  | Ministry of Health (Mexico), National Institute of Statistics and Geography (Mexico). Mexico Vital Registration - Deaths 1996. [Unpublished].                                                                                                                                                                                | 1996                                       |                      |
| Mexico  | Redlinger T, O'Rourke K, Nickey L, Martinez G. Elevated hepatitis A and E seroprevalence rates in a Texas/Mexico border community. Tex Med. 1998; 94(5): 68-71.                                                                                                                                                              | 1996                                       |                      |
| Mexico  | Tapia-Conyer R, Santos JI, Cavalcanti AM, Urdaneta E, Rivera L, Manterola A, Potin M, Ruttiman R, Tanaka Kido J. Hepatitis A in Latin America: A Changing Epidemiologic Pattern. Am J Trop Med Hyg. 1999; 61(5): 825-9.                                                                                                      | 1996-1997                                  |                      |
| Mexico  | Mexico Vital Registration - Deaths 1997 ICD9 as it appears in World Health Organization (WHO). WHO Mortality Database Version February 2014. Geneva, Switzerland: World Health Organization (WHO), 2014.                                                                                                                     | 1997                                       |                      |
| Mexico  | Ministry of Health (Mexico), National Institute of Statistics and Geography (Mexico). Mexico Vital Registration - Deaths 1997. [Unpublished].                                                                                                                                                                                | 1997                                       |                      |
| Mexico  | Department of Peace and Conflict Research, Uppsala University. UCDP One-Sided Violence Database Version 1.4, 2013. Uppsala, Sweden: Department of Peace and Conflict Research, Uppsala University, 2013.                                                                                                                     | 1997                                       | *                    |
| Mexico  | Cisneros-Castolo M, Hernández-Ruiz L, Ibarra-Robles IE, Fernández-Gárate RH, Escobedo-De La Peña J. Prevalence of hepatitis B virus infection and related risk factors in a rural community of Mexico. Am J Trop Med Hyg. 2001; 65(6): 759-63.                                                                               | 1997                                       |                      |
| Mexico  | World Health Organization (WHO). Yellow Fever Reported Cases, WHO Vaccine-Preventable Diseases: Monitoring System. Geneva, Switzerland: World Health Organization (WHO).                                                                                                                                                     | 1997-1998, 2000-2001, 2003-2005, 2008-2009 |                      |
| Mexico  | Mexico Vital Registration - Deaths 1998 ICD10 as it appears in World Health Organization (WHO). WHO Mortality Database Version February 2014. Geneva, Switzerland: World Health Organization (WHO), 2014.                                                                                                                    | 1998                                       |                      |
| Mexico  | Ministry of Health (Mexico), National Institute of Statistics and Geography (Mexico). Mexico Vital Registration - Deaths 1998. [Unpublished].                                                                                                                                                                                | 1998                                       |                      |
| Mexico  | Villasís-Keever MA, Peña LA, Miranda-Novales G, Alvarez y Muñoz T, Damasio-Santana L, López-Fuentes G, Girón-Carrillo JL. Prevalence of serological markers against measles, rubella, varicella, hepatitis B, hepatitis C, and human immunodeficiency virus among medical residents in Mexico. Prev Med. 2001; 32(5): 424-8. | 1998                                       |                      |

**Web Table 32 - Comprehensive citation list**

| Country | Citation                                                                                                                                                                                                                                                                                                                                                                                                                                                             | Year*     | New for GBD 2013 (*) |
|---------|----------------------------------------------------------------------------------------------------------------------------------------------------------------------------------------------------------------------------------------------------------------------------------------------------------------------------------------------------------------------------------------------------------------------------------------------------------------------|-----------|----------------------|
| Mexico  | Góngora-Biachi RA, Castro-Sansores CJ, González-Martínez P, Lara-Perera DM, Garrido-Palma J, Lara-Perera V. Frequency of antibodies against the hepatitis C virus in patients with hepatic cirrhosis in Yucatan, Mexico. <i>Salud Publica Mex.</i> 2003; 45(5): 346-50.                                                                                                                                                                                              | 1998-1999 |                      |
| Mexico  | Mexico Vital Registration - Deaths 1999 ICD10 as it appears in World Health Organization (WHO). WHO Mortality Database Version February 2014. Geneva, Switzerland: World Health Organization (WHO), 2014.                                                                                                                                                                                                                                                            | 1999      |                      |
| Mexico  | Ministry of Health (Mexico), National Institute of Statistics and Geography (Mexico). Mexico Vital Registration - Deaths 1999. [Unpublished].                                                                                                                                                                                                                                                                                                                        | 1999      |                      |
| Mexico  | Chiquete E, Sánchez LV, Becerra G, Quintero A, Maldonado M, Panduro A. Performance of the serologic and molecular screening of blood donations for the hepatitis B and C viruses in a Mexican Transfusion Center. <i>Ann Hepatol.</i> 2005; 4(4): 275-8.                                                                                                                                                                                                             | 1999-2005 |                      |
| Mexico  | Mexico Vital Registration - Deaths 2000 ICD10 as it appears in World Health Organization (WHO). WHO Mortality Database Version February 2014. Geneva, Switzerland: World Health Organization (WHO), 2014.                                                                                                                                                                                                                                                            | 2000      |                      |
| Mexico  | National Institute of Statistics, Geography, and Informatics (Mexico), Minnesota Population Center. Mexico Population and Housing Census 2000 from the Integrated Public Use Microdata Series, International. [Machine-readable database]. Minneapolis: University of Minnesota.                                                                                                                                                                                     | 2000      |                      |
| Mexico  | Ministry of Health (Mexico). Mexico Ministry of Health Hospital Discharges 2000. Mexico City, Mexico: Ministry of Health (Mexico).                                                                                                                                                                                                                                                                                                                                   | 2000      |                      |
| Mexico  | Ministry of Health (Mexico), National Institute of Statistics and Geography (Mexico). Mexico Vital Registration - Deaths 2000. [Unpublished].                                                                                                                                                                                                                                                                                                                        | 2000      |                      |
| Mexico  | García-García G, Monteón-Ramos JF, García-Bejarano H, Gómez-Navarro B, Reyes IH, Lomeli AM, Palomeque M, Cortes-Sanabria L, Breien-Alcaraz H, Ruiz-Morales NM. Renal replacement therapy among disadvantaged populations in Mexico: a report from the Jalisco Dialysis and Transplant Registry (REDTJAL). <i>Kidney Int Suppl.</i> 2005; 97: S58-61.                                                                                                                 | 2000      |                      |
| Mexico  | Méndez-Sánchez N, Aguilar-Ramírez JR, Reyes A, Dehesa M, Juárez A, Castañeda B, Sánchez-Avila F, Poo JL, Guevara González L, Lizardi J, Valdovinos MA, Uribe M, Contreras AM, Tirado P, Aguirre J, Rivera-Benítez C, Santiago-Santiago R, Bosques-Padilla F, Muñoz L, Guerrero A, Ramos M, Rodríguez-Hernández H, Jacobo-Karam J, Grupo de Estudio, Asociación Mexicana de Hepatología. Etiology of liver cirrhosis in Mexico. <i>Ann Hepatol.</i> 2004; 3(1): 30-3. | 2000-2002 |                      |
| Mexico  | Mexico Vital Registration - Deaths 2001 ICD10 as it appears in World Health Organization (WHO). WHO Mortality Database Version February 2014. Geneva, Switzerland: World Health Organization (WHO), 2014.                                                                                                                                                                                                                                                            | 2001      |                      |
| Mexico  | Ministry of Health (Mexico). Mexico Ministry of Health Hospital Discharges 2001. Mexico City, México: Ministry of Health (Mexico).                                                                                                                                                                                                                                                                                                                                   | 2001      |                      |
| Mexico  | Ministry of Health (Mexico), National Institute of Statistics and Geography (Mexico). Mexico Vital Registration - Deaths 2001. [Unpublished].                                                                                                                                                                                                                                                                                                                        | 2001      |                      |
| Mexico  | Mejía-Arango S, Gutierrez LM. Prevalence and incidence rates of dementia and cognitive impairment no dementia in the Mexican population: data from the Mexican Health and Aging Study. <i>J Aging Health.</i> 2011; 23(7): 1050-74.                                                                                                                                                                                                                                  | 2001-2004 |                      |
| Mexico  | Mexico Vital Registration - Deaths 2002 ICD10 as it appears in World Health Organization (WHO). WHO Mortality Database Version February 2014. Geneva, Switzerland: World Health Organization (WHO), 2014.                                                                                                                                                                                                                                                            | 2002      |                      |



**Web Table 32 - Comprehensive citation list**

| Country | Citation                                                                                                                                                                                                                                                                                                                                                                                  | Year*                            | New for GBD 2013 (*) |
|---------|-------------------------------------------------------------------------------------------------------------------------------------------------------------------------------------------------------------------------------------------------------------------------------------------------------------------------------------------------------------------------------------------|----------------------------------|----------------------|
| Mexico  | Ministry of Health (Mexico). Mexico Ministry of Health Hospital Discharges 2002. Mexico City, México: Ministry of Health (Mexico).                                                                                                                                                                                                                                                        | 2002                             |                      |
| Mexico  | Ministry of Health (Mexico), National Institute of Statistics and Geography (Mexico). Mexico Vital Registration - Deaths 2002. [Unpublished].                                                                                                                                                                                                                                             | 2002                             |                      |
| Mexico  | World Health Organization (WHO). Mexico World Health Survey 2002-2003. Geneva, Switzerland: World Health Organization (WHO), 2005.                                                                                                                                                                                                                                                        | 2002-2003                        |                      |
| Mexico  | Sousa A, Lozano R, Gakidou E. Exploring the determinants of unsafe abortion: improving the evidence base in Mexico. Health Policy Plan. 2010; 25(4): 300-10.                                                                                                                                                                                                                              | 2002-2006                        |                      |
| Mexico  | World Health Organization (WHO). Retrospective Measles Data on Supplementary Immunization Activities. Geneva, Switzerland: World Health Organization (WHO).                                                                                                                                                                                                                               | 2002, 2004-2006, 2008, 2010-2012 |                      |
| Mexico  | Ministry of Health (Mexico), Regional Multidisciplinary Research Center (CRIM), National Autonomous University of Mexico (UNAM). Mexico National Reproductive Health Survey 2003. Mexico City, Mexico: Ministry of Health (Mexico), 2004.                                                                                                                                                 | 2003                             |                      |
| Mexico  | Mexico Vital Registration - Deaths 2003 ICD10 as it appears in World Health Organization (WHO). WHO Mortality Database Version February 2014. Geneva, Switzerland: World Health Organization (WHO), 2014.                                                                                                                                                                                 | 2003                             |                      |
| Mexico  | Ministry of Health (Mexico). Mexico Ministry of Health Hospital Discharges 2003. Mexico City, México: Ministry of Health (Mexico).                                                                                                                                                                                                                                                        | 2003                             |                      |
| Mexico  | Ministry of Health (Mexico), National Institute of Statistics and Geography (Mexico). Mexico Vital Registration - Deaths 2003. [Unpublished].                                                                                                                                                                                                                                             | 2003                             |                      |
| Mexico  | Gomez AR, Ruiz MAC, Lopez GAP, Padierna J. Cirrosis. Dolor. 2009; 4-9.                                                                                                                                                                                                                                                                                                                    | 2003                             |                      |
| Mexico  | Prince M, Acosta D, Ferri CP, Guerra M, Huang Y, Llibre Rodriguez JJ, Salas A, Sosa AL, Williams JD, Dewey ME, Acosta I, Jotheeswaran AT, Liu Z. Dementia incidence and mortality in middle-income countries, and associations with indicators of cognitive reserve: a 10/66 Dementia Research Group population-based cohort study. Lancet. 2012; 380(9836): 50-8.                        | 2003-2010                        |                      |
| Mexico  | Sousa RM, Ferri CP, Acosta D, Albanese E, Guerra M, Huang Y, Jacob KS, Jotheeswaran AT, Rodriguez JLL, Pichardo GR, Rodriguez MC, Salas A, Sosa AL, Williams J, Zuniga T, Prince M. Contribution of chronic diseases to disability in elderly people in countries with low and middle incomes: a 10/66 Dementia Research Group population-based survey. Lancet. 2009; 374(9704): 1821-30. | 2003-2005                        |                      |
| Mexico  | Mexico Vital Registration - Deaths 2004 ICD10 as it appears in World Health Organization (WHO). WHO Mortality Database Version February 2014. Geneva, Switzerland: World Health Organization (WHO), 2014.                                                                                                                                                                                 | 2004                             |                      |
| Mexico  | Ministry of Health (Mexico). Mexico Ministry of Health Hospital Discharges 2004. Mexico City, México: Ministry of Health (Mexico).                                                                                                                                                                                                                                                        | 2004                             |                      |
| Mexico  | Ministry of Health (Mexico), National Institute of Statistics and Geography (Mexico). Mexico Vital Registration - Deaths 2004. [Unpublished].                                                                                                                                                                                                                                             | 2004                             |                      |
| Mexico  | Juárez-Figueroa LA, Uribe-Salas FJ, Conde-González CJ, Sánchez-Alemán MÁ. Marcadores serológicos de hepatitis B y C, y VIH en La Calera y Cuambio, Guerrero, México. Salud Publica Mex. 2011; S32-S36.                                                                                                                                                                                    | 2004                             |                      |
| Mexico  | Ladrón de Guevara L, Rojas-Macuil P, Sánchez-Chávez X, Rossano-García A, Gorraez-de-la-Mora MT, Cervantes-Sánchez G, Orozco-Vázquez J, Lemus-Velázquez M, Rosas-Zúñiga L, Erazo-Valle A, Di-Silvio M. Hepatocellular carcinoma: epidemiological profile from a cohort of federal employees in Mexico. Ann Hepatol. 2009; 8(3): 212-9.                                                     | 2004-2007                        | *                    |

**Web Table 32 - Comprehensive citation list**

| Country | Citation                                                                                                                                                                                                                                                                                                                                                                                                                        | Year*     | New for GBD 2013 (*) |
|---------|---------------------------------------------------------------------------------------------------------------------------------------------------------------------------------------------------------------------------------------------------------------------------------------------------------------------------------------------------------------------------------------------------------------------------------|-----------|----------------------|
| Mexico  | National Institute of Statistics, Geography, and Informatics. Mexico Population and Housing Census 2005. Aguascalientes, Mexico: National Institute of Statistics, Geography, and Informatics (Mexico).                                                                                                                                                                                                                         | 2005      |                      |
| Mexico  | Mexico Vital Registration - Deaths 2005 ICD10 as it appears in World Health Organization (WHO). WHO Mortality Database Version February 2014. Geneva, Switzerland: World Health Organization (WHO), 2014.                                                                                                                                                                                                                       | 2005      |                      |
| Mexico  | National Institute of Statistics, Geography, and Informatics (Mexico), Minnesota Population Center. Mexico Population and Housing Census 2005 from the Integrated Public Use Microdata Series, International. [Machine-readable database]. Minneapolis: University of Minnesota.                                                                                                                                                | 2005      |                      |
| Mexico  | Ministry of Health (Mexico). Mexico Ministry of Health Hospital Discharges 2005. Mexico City, México: Ministry of Health (Mexico).                                                                                                                                                                                                                                                                                              | 2005      |                      |
| Mexico  | Souza JP, Cecatti JG, Faundes A, Morais SS, Villar J, Carroli G, Gulmezoglu M, Wojdyla D, Zavaleta N, Donner A, Velazco A, Bataglia V, Valladares E, Kublickas M, Acosta A. Maternal near miss and maternal death in the World Health Organization's 2005 global survey on maternal and perinatal health. Bull World Health Organ. 2010; 88(2): 113-9.                                                                          | 2005      |                      |
| Mexico  | Ministry of Health (Mexico), National Institute of Statistics and Geography (Mexico). Mexico Vital Registration - Deaths 2005. [Unpublished].                                                                                                                                                                                                                                                                                   | 2005      |                      |
| Mexico  | Llibre Rodriguez JJ, Ferri CP, Acosta D, Guerra M, Huang Y, Jacob KS, Krishnamoorthy ES, Salas A, Sosa AL, Acosta I, Dewey ME, Gaona C, Jotheeswaran AT, Li S, Rodriguez D, Rodriguez G, Kumar PS, Valhuerdi A, Prince M, 10/66 Dementia Research Group. Prevalence of dementia in Latin America, India, and China: a population-based cross-sectional survey. Lancet. 2008; 372(9637): 464-74.                                 | 2005-2006 |                      |
| Mexico  | Mexico Vital Registration - Deaths 2006 ICD10 as it appears in World Health Organization (WHO). WHO Mortality Database Version February 2014. Geneva, Switzerland: World Health Organization (WHO), 2014.                                                                                                                                                                                                                       | 2006      |                      |
| Mexico  | National Institute of Statistics, Geography, and Informatics (Mexico), National Institute for Public Health (Mexico), National Population Council (Mexico). Mexico National Survey of Demographic Dynamics 2006. Aguascalientes, Mexico: National Institute of Statistics, Geography, and Informatics (Mexico).                                                                                                                 | 2006      | *                    |
| Mexico  | Ministry of Health (Mexico). Mexico Ministry of Health Hospital Discharges 2006. Mexico City, México: Ministry of Health (Mexico).                                                                                                                                                                                                                                                                                              | 2006      |                      |
| Mexico  | Ministry of Health (Mexico), National Institute of Statistics and Geography (Mexico). Mexico Vital Registration - Deaths 2006. [Unpublished].                                                                                                                                                                                                                                                                                   | 2006      |                      |
| Mexico  | Fassio E, Díaz S, Santa C, Reig ME, Martínez Artola Y, Alves de Mattos A, Míguez C, Galizzi J, Zapata R, Ridruejo E, de Souza FC, Hernández N, Pinchuk L, Multicenter Group for Study of Hepatocarcinoma in Latin America, Asociación Latinoamericana para el Estudio del Hígado (ALEH). Etiology of hepatocellular carcinoma in Latin America: a prospective, multicenter, international study. Ann Hepatol. 2010; 9(1): 63-9. | 2006-2008 | *                    |
| Mexico  | Mexico Vital Registration - Deaths 2007 ICD10 as it appears in World Health Organization (WHO). WHO Mortality Database Version February 2014. Geneva, Switzerland: World Health Organization (WHO), 2014.                                                                                                                                                                                                                       | 2007      |                      |
| Mexico  | Ministry of Health (Mexico). Mexico Ministry of Health Hospital Discharges 2007. Mexico City, México: Ministry of Health (Mexico).                                                                                                                                                                                                                                                                                              | 2007      |                      |
| Mexico  | Ministry of Health (Mexico), National Institute of Statistics and Geography (Mexico). Mexico Vital Registration - Deaths 2007. [Unpublished].                                                                                                                                                                                                                                                                                   | 2007      |                      |

**Web Table 32 - Comprehensive citation list**

| Country | Citation                                                                                                                                                                                                                                                                 | Year*     | New for GBD 2013 (*) |
|---------|--------------------------------------------------------------------------------------------------------------------------------------------------------------------------------------------------------------------------------------------------------------------------|-----------|----------------------|
| Mexico  | Mexico Vital Registration - Deaths 2008 ICD10 as it appears in World Health Organization (WHO). WHO Mortality Database Version February 2014. Geneva, Switzerland: World Health Organization (WHO), 2014.                                                                | 2008      |                      |
| Mexico  | Ministry of Health (Mexico). Mexico Ministry of Health Hospital Discharges 2008. Mexico City, México: Ministry of Health (Mexico).                                                                                                                                       | 2008      |                      |
| Mexico  | Ministry of Health (Mexico), National Institute of Statistics and Geography (Mexico). Mexico Vital Registration - Deaths 2008. [Unpublished].                                                                                                                            | 2008      |                      |
| Mexico  | Abdo-Francis M, Torre A, Tenorio C, Ornelas E, Villasis A. [Prevalence of hepatitis B in patients with liver cirrhosis in Mexico]. Rev Med Hosp Gen. 2011; 74(01).                                                                                                       | 2008      |                      |
| Mexico  | National Institute of Statistics and Geography (Mexico). Mexico National Survey of Demographic Dynamics 2009.                                                                                                                                                            | 2009      | *                    |
| Mexico  | National Institute of Statistics and Geography (Mexico). Mexico Vital Statistics - Deaths 2009. [Unpublished].                                                                                                                                                           | 2009      | *                    |
| Mexico  | Ministry of Health (Mexico). Mexico Ministry of Health Hospital Discharges 2009. Mexico City, México: Ministry of Health (Mexico).                                                                                                                                       | 2009      |                      |
| Mexico  | Ministry of Health (Mexico), National Institute of Statistics and Geography (Mexico). Mexico Vital Registration - Deaths 2009. [Unpublished].                                                                                                                            | 2009      |                      |
| Mexico  | Joint United Nations Program on HIV/AIDS (UNAIDS), Ministry of Health (Mexico). Mexico National Report on Progress in Implementing the UNGASS 2010. Geneva, Switzerland: Joint United Nations Program on HIV/AIDS (UNAIDS), 2010.                                        | 2009      |                      |
| Mexico  | National Institute of Statistics and Geography (Mexico). Mexico Population and Housing Census 2010. Aguascalientes, Mexico: National Institute of Statistics and Geography (Mexico), 2011.                                                                               | 2010      |                      |
| Mexico  | Minnesota Population Center, National Institute of Statistics and Geography (Mexico). Mexico Population and Housing Census 2010 from the Integrated Public Use Microdata Series, International. [Machine-readable database]. Minneapolis: University of Minnesota, 2012. | 2010      |                      |
| Mexico  | National Institute of Statistics and Geography (Mexico). Mexico Household Income and Expenditure Survey 2010. Mexico City, Mexico: National Institute of Statistics and Geography (Mexico).                                                                              | 2010      | *                    |
| Mexico  | Ministry of Health (Mexico). Mexico Ministry of Health Hospital Discharges 2010. Mexico City, México: Ministry of Health (Mexico).                                                                                                                                       | 2010      | *                    |
| Mexico  | Mexico Vital Registration - Deaths 2010 ICD10 as it appears in World Health Organization (WHO). WHO Mortality Database Version February 2014. Geneva, Switzerland: World Health Organization (WHO), 2014.                                                                | 2010      |                      |
| Mexico  | Ministry of Health (Mexico), National Institute of Statistics and Geography (Mexico). Mexico Vital Registration - Deaths 2010. [Unpublished].                                                                                                                            | 2010      |                      |
| Mexico  | Hernández B, Ortiz-Panozo E, Pérez-Cuevas R. Facility-based care for delivery and management of complications related to pregnancy and childbirth in Mexico. Salud Publica Mex. 2012; 54(5): 496-505.                                                                    | 2010      |                      |
| Mexico  | Ministry of Health (Mexico). Mexico Ministry of Health Hospital Discharges 2011. Mexico City, México: Ministry of Health (Mexico).                                                                                                                                       | 2011      | *                    |
| Mexico  | Ministry of Health (Mexico), National Institute of Statistics and Geography (Mexico). Mexico Vital Registration - Deaths 2011. [Unpublished].                                                                                                                            | 2011      | *                    |
| Mexico  | National Institute of Statistics and Geography (Mexico). Mexico Vital Registration - Deaths 2012.                                                                                                                                                                        | 2012      | *                    |
| Moldova | Institute for Health Metrics and Evaluation (IHME), Joint United Nations Program on HIV/AIDS (UNAIDS). Institute for Health Metrics and Evaluation HIV Mortality Estimates Based on the UNAIDS Spectrum Model Framework.                                                 | 1980-2013 | *                    |

**Web Table 32 - Comprehensive citation list**

| Country | Citation                                                                                                                                                                                                                                                      | Year*           | New for GBD 2013 (*) |
|---------|---------------------------------------------------------------------------------------------------------------------------------------------------------------------------------------------------------------------------------------------------------------|-----------------|----------------------|
| Moldova | Republic of Moldova Vital Registration - Deaths 1981 ICD9 as it appears in World Health Organization (WHO). WHO Mortality Database Version February 2014. Geneva, Switzerland: World Health Organization (WHO), 2014.                                         | 1981            |                      |
| Moldova | Republic of Moldova Vital Registration - Deaths 1982 ICD9 as it appears in World Health Organization (WHO). WHO Mortality Database Version February 2014. Geneva, Switzerland: World Health Organization (WHO), 2014.                                         | 1982            |                      |
| Moldova | Republic of Moldova Vital Registration - Deaths 1985 ICD9 as it appears in World Health Organization (WHO). WHO Mortality Database Version February 2014. Geneva, Switzerland: World Health Organization (WHO), 2014.                                         | 1985            |                      |
| Moldova | Republic of Moldova Vital Registration - Deaths 1986 ICD9 as it appears in World Health Organization (WHO). WHO Mortality Database Version February 2014. Geneva, Switzerland: World Health Organization (WHO), 2014.                                         | 1986            |                      |
| Moldova | Republic of Moldova Vital Registration - Deaths 1987 ICD9 as it appears in World Health Organization (WHO). WHO Mortality Database Version February 2014. Geneva, Switzerland: World Health Organization (WHO), 2014.                                         | 1987            |                      |
| Moldova | Republic of Moldova Vital Registration - Deaths 1988 ICD9 as it appears in World Health Organization (WHO). WHO Mortality Database Version February 2014. Geneva, Switzerland: World Health Organization (WHO), 2014.                                         | 1988            |                      |
| Moldova | USSR Census 1989 as it appears in United Nations Statistics Division (UNSD). United Nations Demographic Yearbook. New York City, United States: United Nations Statistics Division (UNSD).                                                                    | 1989            |                      |
| Moldova | Republic of Moldova Vital Registration - Deaths 1989 ICD9 as it appears in World Health Organization (WHO). WHO Mortality Database Version February 2014. Geneva, Switzerland: World Health Organization (WHO), 2014.                                         | 1989            |                      |
| Moldova | Republic of Moldova Vital Registration - Deaths 1990 ICD9 as it appears in World Health Organization (WHO). WHO Mortality Database Version February 2014. Geneva, Switzerland: World Health Organization (WHO), 2014.                                         | 1990            |                      |
| Moldova | World Health Organization (WHO). Global Prevalence and Incidence of Selected Curable Sexually Transmitted Infections: Overviews and Estimates 2001. Geneva, Switzerland: World Health Organization (WHO), 2001.                                               | 1990-1994, 1996 |                      |
| Moldova | United Nations Children's Fund (UNICEF), World Health Organization (WHO). WHO and UNICEF Reported Disease Incidence Time Series - Pertussis. Geneva, Switzerland: World Health Organization (WHO).                                                            | 1990-2013       |                      |
| Moldova | United Nations Children's Fund (UNICEF), World Health Organization (WHO). WHO and UNICEF Reported Disease Incidence Time Series - Measles. Geneva, Switzerland: World Health Organization (WHO).                                                              | 1990-2013       |                      |
| Moldova | Centre for Health Informatics and Multiprofessional Education, University College London. Modell's Haemoglobinopathologist's Almanac. London, United Kingdom: Centre for Health Informatics and Multiprofessional Education, University College London, 2008. | 1990-2003       |                      |
| Moldova | Republic of Moldova Vital Registration - Deaths 1991 ICD9 as it appears in World Health Organization (WHO). WHO Mortality Database Version February 2014. Geneva, Switzerland: World Health Organization (WHO), 2014.                                         | 1991            |                      |
| Moldova | Republic of Moldova Vital Registration - Deaths 1992 ICD9 as it appears in World Health Organization (WHO). WHO Mortality Database Version February 2014. Geneva, Switzerland: World Health Organization (WHO), 2014.                                         | 1992            |                      |

**Web Table 32 - Comprehensive citation list**

| Country | Citation                                                                                                                                                                                                                                   | Year*                              | New for GBD 2013 (*) |
|---------|--------------------------------------------------------------------------------------------------------------------------------------------------------------------------------------------------------------------------------------------|------------------------------------|----------------------|
| Moldova | Department of Peace and Conflict Research, Uppsala University. UCDP Battle-Related Deaths Database Version 5, 2013. Uppsala, Sweden: Department of Peace and Conflict Research, Uppsala University, 2013.                                  | 1992                               | *                    |
| Moldova | Republic of Moldova Vital Registration - Deaths 1993 ICD9 as it appears in World Health Organization (WHO). WHO Mortality Database Version February 2014. Geneva, Switzerland: World Health Organization (WHO), 2014.                      | 1993                               |                      |
| Moldova | Republic of Moldova Vital Registration - Deaths 1994 ICD9 as it appears in World Health Organization (WHO). WHO Mortality Database Version February 2014. Geneva, Switzerland: World Health Organization (WHO), 2014.                      | 1994                               |                      |
| Moldova | Centre for Research on the Epidemiology of Disasters (CRED). EM-DAT: The OFDA/CRED International Disaster Database. Brussels, Belgium: Catholic University of Leuven.                                                                      | 1994, 1997, 2000, 2002, 2008, 2010 |                      |
| Moldova | Republic of Moldova Vital Registration - Deaths 1995 ICD9 as it appears in World Health Organization (WHO). WHO Mortality Database Version February 2014. Geneva, Switzerland: World Health Organization (WHO), 2014.                      | 1995                               |                      |
| Moldova | Republic of Moldova Vital Registration - Deaths 1996 ICD10 as it appears in World Health Organization (WHO). WHO Mortality Database Version February 2014. Geneva, Switzerland: World Health Organization (WHO), 2014.                     | 1996                               |                      |
| Moldova | Division of Reproductive Health-Centers for Disease Control and Prevention (CDC) and Moldova Ministry of Health. (1998) Moldova Reproductive Health Survey 1997. Atlanta, United States: Centers for Disease Control and Prevention (CDC). | 1997                               |                      |
| Moldova | Republic of Moldova Vital Registration - Deaths 1997 ICD10 as it appears in World Health Organization (WHO). WHO Mortality Database Version February 2014. Geneva, Switzerland: World Health Organization (WHO), 2014.                     | 1997                               |                      |
| Moldova | Drobeniuc J, Favorov MO, Shapiro CN, Bell BP, Mast EE, Dadu A, Culver D, Iarvoi P, Robertson BH, Margolis HS. Hepatitis E Virus Antibody Prevalence among Persons Who Work with Swine. J Infect Dis. 2001; 184(12): 1594-7.                | 1997-1998                          | *                    |
| Moldova | Republic of Moldova Vital Registration - Deaths 1998 ICD10 as it appears in World Health Organization (WHO). WHO Mortality Database Version February 2014. Geneva, Switzerland: World Health Organization (WHO), 2014.                     | 1998                               |                      |
| Moldova | Moldova Dialysis and Transplant Registry data as it appears in the GBD 2010 Chronic Kidney Disease Expert Group dataset. Provided by Igor Codreanu and Sergiu Gaibu. [Unpublished].                                                        | 1998                               |                      |
| Moldova | Republic of Moldova Vital Registration - Deaths 1999 ICD10 as it appears in World Health Organization (WHO). WHO Mortality Database Version February 2014. Geneva, Switzerland: World Health Organization (WHO), 2014.                     | 1999                               |                      |
| Moldova | World Health Organization (WHO). Yellow Fever Reported Cases, WHO Vaccine-Preventable Diseases: Monitoring System. Geneva, Switzerland: World Health Organization (WHO).                                                                   | 1999, 2001, 2003-2008              |                      |
| Moldova | Republic of Moldova Vital Registration - Deaths 2000 ICD10 as it appears in World Health Organization (WHO). WHO Mortality Database Version February 2014. Geneva, Switzerland: World Health Organization (WHO), 2014.                     | 2000                               |                      |
| Moldova | Republic of Moldova Vital Registration - Deaths 2001 ICD10 as it appears in World Health Organization (WHO). WHO Mortality Database Version February 2014. Geneva, Switzerland: World Health Organization (WHO), 2014.                     | 2001                               |                      |

**Web Table 32 - Comprehensive citation list**

| Country  | Citation                                                                                                                                                                                                               | Year*                                                        | New for GBD 2013 (*) |
|----------|------------------------------------------------------------------------------------------------------------------------------------------------------------------------------------------------------------------------|--------------------------------------------------------------|----------------------|
| Moldova  | Republic of Moldova Vital Registration - Deaths 2002 ICD10 as it appears in World Health Organization (WHO). WHO Mortality Database Version February 2014. Geneva, Switzerland: World Health Organization (WHO), 2014. | 2002                                                         |                      |
| Moldova  | World Health Organization (WHO). Retrospective Measles Data on Supplementary Immunization Activities. Geneva, Switzerland: World Health Organization (WHO).                                                            | 2002                                                         |                      |
| Moldova  | Republic of Moldova Vital Registration - Deaths 2003 ICD10 as it appears in World Health Organization (WHO). WHO Mortality Database Version February 2014. Geneva, Switzerland: World Health Organization (WHO), 2014. | 2003                                                         |                      |
| Moldova  | Republic of Moldova Vital Registration - Deaths 2004 ICD10 as it appears in World Health Organization (WHO). WHO Mortality Database Version February 2014. Geneva, Switzerland: World Health Organization (WHO), 2014. | 2004                                                         |                      |
| Moldova  | Republic of Moldova Vital Registration - Deaths 2005 ICD10 as it appears in World Health Organization (WHO). WHO Mortality Database Version February 2014. Geneva, Switzerland: World Health Organization (WHO), 2014. | 2005                                                         |                      |
| Moldova  | Macro International, Inc, National Scientific and Applied Center for Preventive Medicine (Moldova). Moldova Demographic and Health Survey 2005. Calverton, United States: Macro International, Inc.                    | 2005                                                         |                      |
| Moldova  | Republic of Moldova Vital Registration - Deaths 2006 ICD10 as it appears in World Health Organization (WHO). WHO Mortality Database Version February 2014. Geneva, Switzerland: World Health Organization (WHO), 2014. | 2006                                                         |                      |
| Moldova  | Republic of Moldova Vital Registration - Deaths 2007 ICD10 as it appears in World Health Organization (WHO). WHO Mortality Database Version February 2014. Geneva, Switzerland: World Health Organization (WHO), 2014. | 2007                                                         |                      |
| Moldova  | Republic of Moldova Vital Registration - Deaths 2008 ICD10 as it appears in World Health Organization (WHO). WHO Mortality Database Version February 2014. Geneva, Switzerland: World Health Organization (WHO), 2014. | 2008                                                         |                      |
| Moldova  | Republic of Moldova Vital Registration - Deaths 2009 ICD10 as it appears in World Health Organization (WHO). WHO Mortality Database Version February 2014. Geneva, Switzerland: World Health Organization (WHO), 2014. | 2009                                                         |                      |
| Moldova  | Moldova Vital Registration - Deaths 2010 ICD10 as it appears in World Health Organization (WHO). WHO Mortality Database Version February 2014. Geneva, Switzerland: World Health Organization (WHO), 2014.             | 2010                                                         |                      |
| Moldova  | Moldova Vital Registration - Deaths 2011 ICD10 as it appears in World Health Organization (WHO). WHO Mortality Database Version February 2014. Geneva, Switzerland: World Health Organization (WHO), 2014.             | 2011                                                         | *                    |
| Moldova  | Moldova Vital Registration - Deaths 2012 ICD10 as it appears in World Health Organization (WHO). WHO Mortality Database Version February 2014. Geneva, Switzerland: World Health Organization (WHO), 2014.             | 2012                                                         | *                    |
| Mongolia | Centre for Research on the Epidemiology of Disasters (CRED). EM-DAT: The OFDA/CRED International Disaster Database. Brussels, Belgium: Catholic University of Leuven.                                                  | 1957, 1966, 1990-1991, 1993-1994, 1996, 2000-2003, 2008-2009 |                      |
| Mongolia | Mongolia Vital Registration Death Data 1965 as it appears in United Nations Statistics Division (UNSD). United Nations Demographic Yearbook Database. [Unpublished].                                                   | 1965                                                         |                      |



**Web Table 32 - Comprehensive citation list**

| Country  | Citation                                                                                                                                                                                                                                                      | Year*            | New for GBD 2013 (*) |
|----------|---------------------------------------------------------------------------------------------------------------------------------------------------------------------------------------------------------------------------------------------------------------|------------------|----------------------|
| Mongolia | Mongolia Vital Registration Death Data 1970 as it appears in United Nations Statistics Division (UNSD). United Nations Demographic Yearbook Database. [Unpublished].                                                                                          | 1970             |                      |
| Mongolia | Mongolia Vital Registration Death Data 1975 as it appears in United Nations Statistics Division (UNSD). United Nations Demographic Yearbook Database. [Unpublished].                                                                                          | 1975             |                      |
| Mongolia | Mongolia Vital Registration Death Data 1980 as it appears in United Nations Statistics Division (UNSD). United Nations Demographic Yearbook Database. [Unpublished].                                                                                          | 1980             |                      |
| Mongolia | Institute for Health Metrics and Evaluation (IHME), Joint United Nations Program on HIV/AIDS (UNAIDS). Institute for Health Metrics and Evaluation HIV Mortality Estimates Based on the UNAIDS Spectrum Model Framework.                                      | 1980-2013        | *                    |
| Mongolia | United Nations Children's Fund (UNICEF), World Health Organization (WHO). WHO and UNICEF Reported Disease Incidence Time Series - Pertussis. Geneva, Switzerland: World Health Organization (WHO).                                                            | 1980-2013        |                      |
| Mongolia | United Nations Children's Fund (UNICEF), World Health Organization (WHO). WHO and UNICEF Reported Disease Incidence Time Series - Measles. Geneva, Switzerland: World Health Organization (WHO).                                                              | 1980-2013        |                      |
| Mongolia | World Health Organization (WHO). Global Prevalence and Incidence of Selected Curable Sexually Transmitted Infections: Overviews and Estimates 2001. Geneva, Switzerland: World Health Organization (WHO), 2001.                                               | 1983, 1993, 1995 |                      |
| Mongolia | Mongolia Vital Registration Death Data 1985 as it appears in United Nations Statistics Division (UNSD). United Nations Demographic Yearbook. New York City, United States: United Nations Statistics Division (UNSD).                                         | 1985             |                      |
| Mongolia | Mongolia Vital Registration Death Data 1987 as it appears in United Nations Statistics Division (UNSD). United Nations Demographic Yearbook. New York City, United States: United Nations Statistics Division (UNSD).                                         | 1987             |                      |
| Mongolia | Mongolia Vital Registration Death Data 1988 as it appears in United Nations Statistics Division (UNSD). United Nations Demographic Yearbook. New York City, United States: United Nations Statistics Division (UNSD).                                         | 1988             |                      |
| Mongolia | National Statistical Office of Mongolia, Minnesota Population Center. Mongolia Population and Housing Census 1989 from the Integrated Public Use Microdata Series, International. [Machine-readable database]. Minneapolis: University of Minnesota.          | 1989             |                      |
| Mongolia | Mongolia Vital Registration Death Data 1989 as it appears in United Nations Statistics Division (UNSD). United Nations Demographic Yearbook. New York City, United States: United Nations Statistics Division (UNSD).                                         | 1989             |                      |
| Mongolia | Mongolia Vital Registration Death Data 1990 as it appears in United Nations Statistics Division (UNSD). United Nations Demographic Yearbook. New York City, United States: United Nations Statistics Division (UNSD).                                         | 1990             |                      |
| Mongolia | Centre for Health Informatics and Multiprofessional Education, University College London. Modell's Haemoglobinopathologist's Almanac. London, United Kingdom: Centre for Health Informatics and Multiprofessional Education, University College London, 2008. | 1990-2003        |                      |
| Mongolia | Population Training and Research Center, National University of Mongolia. Mongolia Demographic Survey 1994.                                                                                                                                                   | 1994             |                      |
| Mongolia | Mongolia Vital Registration - Deaths 1994 ICD9 as it appears in World Health Organization (WHO). WHO Mortality Database Version February 2014. Geneva, Switzerland: World Health Organization (WHO), 2014.                                                    | 1994             |                      |

**Web Table 32 - Comprehensive citation list**

| Country  | Citation                                                                                                                                                                                                                                                                                                                                                                 | Year*                 | New for GBD 2013 (*) |
|----------|--------------------------------------------------------------------------------------------------------------------------------------------------------------------------------------------------------------------------------------------------------------------------------------------------------------------------------------------------------------------------|-----------------------|----------------------|
| Mongolia | Measles Supplementary Immunization Activity Data as provided by the World Health Organization. [Unpublished].                                                                                                                                                                                                                                                            | 1994, 1996            |                      |
| Mongolia | Mongolia Vital Registration Death Data 1995 as it appears in United Nations Statistics Division (UNSD). United Nations Demographic Yearbook. New York City, United States: United Nations Statistics Division (UNSD).                                                                                                                                                    | 1995                  |                      |
| Mongolia | Mongolia Vital Registration Death Data 1996 as it appears in United Nations Statistics Division (UNSD). United Nations Demographic Yearbook. New York City, United States: United Nations Statistics Division (UNSD).                                                                                                                                                    | 1996                  |                      |
| Mongolia | Mongolia Vital Registration Death Data 1997 as it appears in United Nations Statistics Division (UNSD). United Nations Demographic Yearbook. New York City, United States: United Nations Statistics Division (UNSD).                                                                                                                                                    | 1997                  |                      |
| Mongolia | Ministry of Health and Social Welfare (Mongolia), National Statistical Office of Mongolia, United Nations Statistics Division (UNSD). Mongolia Reproductive Health Survey 1998.                                                                                                                                                                                          | 1998                  | *                    |
| Mongolia | Mongolia Vital Registration Death Data 1998 as it appears in United Nations Statistics Division (UNSD). United Nations Demographic Yearbook. New York City, United States: United Nations Statistics Division (UNSD).                                                                                                                                                    | 1998                  |                      |
| Mongolia | National Statistical Office of Mongolia. Mongolia Multiple Indicator Cluster Survey 2000. New York, United States: United Nations Children's Fund (UNICEF).                                                                                                                                                                                                              | 2000                  |                      |
| Mongolia | Mongolia Vital Registration Death Data 2000 as it appears in United Nations Statistics Division (UNSD). United Nations Demographic Yearbook. New York City, United States: United Nations Statistics Division (UNSD).                                                                                                                                                    | 2000                  |                      |
| Mongolia | World Health Organization (WHO). Yellow Fever Reported Cases, WHO Vaccine-Preventable Diseases: Monitoring System. Geneva, Switzerland: World Health Organization (WHO).                                                                                                                                                                                                 | 2000-2005, 2007-2009  |                      |
| Mongolia | Dondog B, Lise M, Dondov O, Baldandorj B, Franceschi S. Hepatitis B and C virus infections in hepatocellular carcinoma and cirrhosis in Mongolia. Eur J Cancer Prev. 2011; 20(1): 33-9.                                                                                                                                                                                  | 2000-2009             |                      |
| Mongolia | World Health Organization (WHO). Retrospective Measles Data on Supplementary Immunization Activities. Geneva, Switzerland: World Health Organization (WHO).                                                                                                                                                                                                              | 2000-2001, 2007, 2012 |                      |
| Mongolia | National Statistical Office of Mongolia. Mongolia Statistical Yearbook 2001. Ulaanbaatar, Mongolia: National Statistical Office of Mongolia, 2002.                                                                                                                                                                                                                       | 2001                  |                      |
| Mongolia | Mongolia Vital Registration Death Data 2001 as it appears in United Nations Statistics Division (UNSD). United Nations Demographic Yearbook. New York City, United States: United Nations Statistics Division (UNSD).                                                                                                                                                    | 2001                  |                      |
| Mongolia | National Statistical Office of Mongolia. Mongolia Statistical Yearbook 2002. Ulaanbaatar, Mongolia: National Statistical Office of Mongolia.                                                                                                                                                                                                                             | 2002                  |                      |
| Mongolia | Takahashi M, Nishizawa T, Gotanda Y, Tsuda F, Komatsu F, Kawabata T, Hasegawa K, Altankhuu M, Chimedregzen U, Narantuya L, Hoshino H, Hino K, Kagawa Y, Okamoto H. High prevalence of antibodies to hepatitis A and E viruses and viremia of hepatitis B, C, and D viruses among apparently healthy populations in Mongolia. Clin Diagn Lab Immunol. 2004; 11(2): 392-8. | 2002                  |                      |
| Mongolia | Mendsaikhan J, Watt JP, Mansoor O, Suvdmaa N, Edmond K, Litt DJ, Nymadawa P, Yang Baoping, Altantsetseg D, Slack M. Childhood Bacterial Meningitis in Ulaanbaatar, Mongolia, 2002-2004. Clin Infect Dis. 2009; 48 Suppl 2(Suppl 2): S141-6.                                                                                                                              | 2002-2005             |                      |



**Web Table 32 - Comprehensive citation list**

| Country  | Citation                                                                                                                                                                                                                                                                      | Year*                | New for GBD 2013 (*) |
|----------|-------------------------------------------------------------------------------------------------------------------------------------------------------------------------------------------------------------------------------------------------------------------------------|----------------------|----------------------|
| Mongolia | National Statistical Office of Mongolia. Mongolia Statistical Yearbook 2005. Ulaanbaatar, Mongolia: National Statistical Office of Mongolia, 2006.                                                                                                                            | 2002-2005            |                      |
| Mongolia | Shizuma T. [Prevalence of hepatitis B and C virus markers in patients with hepatocellular carcinoma and outpatients with liver dysfunction in Mongolia]. J Jpn Assoc Infec Dis. 2005; 79(10): 824-5.                                                                          | 2002-2004            | *                    |
| Mongolia | Joint United Nations Program on HIV/AIDS (UNAIDS), National Committee on HIV and AIDS (Mongolia). Mongolia UNGASS Country Progress Report 2010. Geneva, Switzerland: Joint United Nations Program on HIV/AIDS (UNAIDS), 2010.                                                 | 2002-2005, 2007-2009 |                      |
| Mongolia | Ministry of Health (Mongolia), National Statistical Office of Mongolia, United Nations Population Fund (UNFPA). Mongolia Reproductive Health Survey 2003.                                                                                                                     | 2003                 | *                    |
| Mongolia | National Statistical Office of Mongolia. Mongolia Statistical Yearbook 2003.                                                                                                                                                                                                  | 2003                 |                      |
| Mongolia | Joint United Nations Program on HIV/AIDS (UNAIDS), United Nations Children's Fund (UNICEF), World Health Organization (WHO). Mongolia Epidemiological Fact Sheet on HIV/AIDS and STIs 2004.                                                                                   | 2003                 |                      |
| Mongolia | Tsatsralt-Od B, Takahashi M, Nishizawa T, Endo K, Inoue J, Okamoto H. High prevalence of dual or triple infection of hepatitis B, C, and delta viruses among patients with chronic liver disease in Mongolia. J Med Virol. 2005; 77(4): 491-9.                                | 2004                 |                      |
| Mongolia | National Statistical Office of Mongolia. Mongolia Statistical Yearbook 2004. Ulaanbaatar, Mongolia: National Statistical Office of Mongolia, 2005.                                                                                                                            | 2004                 |                      |
| Mongolia | Davaalkham D, Ojima T, Nymadawa P, Tsend N, Lkhagvasuren T, Wiersma S, Uehara R, Watanabe M, Oki I, Nakamura Y. Seroepidemiology of hepatitis B virus infection among children in Mongolia: results of a nationwide survey. Pediatr Int. 2007; 49(3): 368-74.                 | 2004                 |                      |
| Mongolia | United Nations Office on Drugs and Crime (UNODC). United Nations Office on Drugs and Crime Global Study on Homicides 2011. Vienna, Austria: United Nations Office on Drugs and Crime (UNODC), 2011.                                                                           | 2004-2009            |                      |
| Mongolia | National Statistical Office of Mongolia, United Nations Children's Fund (UNICEF). Mongolia Multiple Indicator Cluster Survey 2005. New York, United States: United Nations Children's Fund (UNICEF).                                                                          | 2005                 |                      |
| Mongolia | State Center for Civil Registration and Information (Mongolia). Mongolia Vital Statistics - Deaths 2005. [Unpublished].                                                                                                                                                       | 2005                 |                      |
| Mongolia | Oyunsuren T, Kurbanov F, Tanaka Y, Elkady A, Sanduijav R, Khajidsuren O, Dagvadorj B, Mizokami M. High frequency of hepatocellular carcinoma in Mongolia; association with mono-, or co-infection with hepatitis C, B, and delta viruses. J Med Virol. 2006; 78(12): 1688-95. | 2005                 |                      |
| Mongolia | Sandagdorj T, Sanjaajamts E, Tudev U, Oyunchimeg D, Ochir C, Roder D. Cancer Incidence and Mortality in Mongolia - National Registry Data. Asian Pac. J. Cancer Prev. 2010; 11(6): 1509-14.                                                                                   | 2005                 |                      |
| Mongolia | Sandagdorj T, Sanjaajamts E, Tudev U, Oyunchimeg D, Ochir C, Roder D. Cancer Incidence and Mortality in Mongolia - National Registry Data. Asian Pac J Cancer Prev. 2010; 11(6): 1509-14.                                                                                     | 2005                 |                      |
| Mongolia | Tsatsralt-Od B, Takahashi M, Endo K, Agiimaa D, Buyankhuu O, Okamoto H. Comparison of hepatitis A and E virus infections among healthy children in Mongolia: evidence for infection with a subgenotype IA HAV in children. J Med Virol. 2007; 79(1): 18-25.                   | 2005-2006            |                      |
| Mongolia | Mongolia Vital Registration Death Data 2006 as it appears in United Nations Statistics Division (UNSD). United Nations Demographic Yearbook. New York City, United States: United Nations Statistics Division (UNSD).                                                         | 2006                 |                      |

**Web Table 32 - Comprehensive citation list**

| Country    | Citation                                                                                                                                                                                                                                     | Year*     | New for GBD 2013 (*) |
|------------|----------------------------------------------------------------------------------------------------------------------------------------------------------------------------------------------------------------------------------------------|-----------|----------------------|
| Mongolia   | Mongolia Vital Registration Death Data 2007 as it appears in United Nations Statistics Division (UNSD). United Nations Demographic Yearbook. New York City, United States: United Nations Statistics Division (UNSD).                        | 2007      |                      |
| Mongolia   | Ministry of Health (Mongolia), National Statistical Office of Mongolia. Mongolia Reproductive Health Survey 2008. Ulaanbaatar, Mongolia: National Statistical Office of Mongolia.                                                            | 2008      | *                    |
| Mongolia   | Mongolia Vital Registration Death Data 2008 as it appears in United Nations Statistics Division (UNSD). United Nations Demographic Yearbook. New York City, United States: United Nations Statistics Division (UNSD).                        | 2008      |                      |
| Mongolia   | Mongolia Vital Registration Death Data 2009 as it appears in United Nations Statistics Division (UNSD). United Nations Demographic Yearbook. New York City, United States: United Nations Statistics Division (UNSD).                        | 2009      |                      |
| Mongolia   | National Statistical Office of Mongolia, United Nations Children's Fund (UNICEF). Mongolia Multiple Indicator Cluster Survey 2010. New York, United States: United Nations Children's Fund (UNICEF), 2013.                                   | 2010      |                      |
| Montenegro | Yugoslavia - Montenegro Census 1961 as it appears in United Nations Statistics Division (UNSD). United Nations Demographic Yearbook Database. [Unpublished].                                                                                 | 1961      |                      |
| Montenegro | Fraser GR, Defaranas B, Kattamis CA, Race RR, Sanger R, Stamatoyannopoulos G. Glucose-6-phosphate dehydrogenase, colour vision and XG blood groups in Greece: linkage and population data. Ann Hum Genet. 1964; 395-403.                     | 1962      |                      |
| Montenegro | Yugoslavia - Montenegro Census 1971 as it appears in United Nations Statistics Division (UNSD). United Nations Demographic Yearbook Database. [Unpublished].                                                                                 | 1971      |                      |
| Montenegro | Institute for Health Metrics and Evaluation (IHME), Joint United Nations Program on HIV/AIDS (UNAIDS). Institute for Health Metrics and Evaluation HIV Mortality Estimates Based on the UNAIDS Spectrum Model Framework.                     | 1980-2013 | *                    |
| Montenegro | Yugoslavia - Montenegro Census 1981 as it appears in United Nations Statistics Division (UNSD). United Nations Demographic Yearbook Database. [Unpublished].                                                                                 | 1981      |                      |
| Montenegro | Yugoslavia - Montenegro Census 1991 as it appears in United Nations Statistics Division (UNSD). United Nations Demographic Yearbook. New York City, United States: United Nations Statistics Division (UNSD).                                | 1991      |                      |
| Montenegro | World Health Organization (WHO). Montenegro WHO Leishmaniasis Country Profile.                                                                                                                                                               | 1992-2009 | *                    |
| Montenegro | World Health Organization (WHO). Country Mortality Data 1980-1999. [Unpublished].                                                                                                                                                            | 1995-1999 |                      |
| Montenegro | Yugoslavia, Federal Republic - Montenegro Vital Registration - Deaths 2000 ICD10 as it appears in World Health Organization (WHO). WHO Mortality Database Version February 2014. Geneva, Switzerland: World Health Organization (WHO), 2014. | 2000      |                      |
| Montenegro | Montenegro Vital Registration Death Data 2001 as it appears in United Nations Statistics Division (UNSD). United Nations Demographic Yearbook. New York City, United States: United Nations Statistics Division (UNSD).                      | 2001      |                      |
| Montenegro | Montenegro Vital Registration Death Data 2002 as it appears in United Nations Statistics Division (UNSD). United Nations Demographic Yearbook. New York City, United States: United Nations Statistics Division (UNSD).                      | 2002      |                      |

**Web Table 32 - Comprehensive citation list**

| Country    | Citation                                                                                                                                                                                                                                                                                         | Year*     | New for GBD 2013 (*) |
|------------|--------------------------------------------------------------------------------------------------------------------------------------------------------------------------------------------------------------------------------------------------------------------------------------------------|-----------|----------------------|
| Montenegro | Montenegro Vital Registration Death Data 2003 as it appears in United Nations Statistics Division (UNSD). United Nations Demographic Yearbook. New York City, United States: United Nations Statistics Division (UNSD).                                                                          | 2003      |                      |
| Montenegro | Montenegro Vital Registration Death Data 2004 as it appears in United Nations Statistics Division (UNSD). United Nations Demographic Yearbook. New York City, United States: United Nations Statistics Division (UNSD).                                                                          | 2004      |                      |
| Montenegro | Serbia and Montenegro - Montenegro Vital Registration - Deaths 2005 ICD10 as it appears in World Health Organization (WHO). WHO Mortality Database Version February 2014. Geneva, Switzerland: World Health Organization (WHO), 2014.                                                            | 2005      |                      |
| Montenegro | Montenegro Vital Registration - Deaths 2006 ICD10 as it appears in World Health Organization (WHO). WHO Mortality Database Version February 2014. Geneva, Switzerland: World Health Organization (WHO), 2014.                                                                                    | 2006      |                      |
| Montenegro | World Health Organization (WHO). Yellow Fever Reported Cases, WHO Vaccine-Preventable Diseases: Monitoring System. Geneva, Switzerland: World Health Organization (WHO).                                                                                                                         | 2006-2009 |                      |
| Montenegro | United Nations Children's Fund (UNICEF), World Health Organization (WHO). WHO and UNICEF Reported Disease Incidence Time Series - Pertussis. Geneva, Switzerland: World Health Organization (WHO).                                                                                               | 2006-2012 |                      |
| Montenegro | United Nations Children's Fund (UNICEF), World Health Organization (WHO). WHO and UNICEF Reported Disease Incidence Time Series - Measles. Geneva, Switzerland: World Health Organization (WHO).                                                                                                 | 2006-2012 |                      |
| Montenegro | Montenegro Vital Registration - Deaths 2007 ICD10 as it appears in World Health Organization (WHO). WHO Mortality Database Version February 2014. Geneva, Switzerland: World Health Organization (WHO), 2014.                                                                                    | 2007      |                      |
| Montenegro | World Health Organization (WHO). Global Status Report on Road Safety 2009. Geneva, Switzerland: World Health Organization (WHO), 2009.                                                                                                                                                           | 2007      |                      |
| Montenegro | Montenegro Vital Registration - Deaths 2008 ICD10 as it appears in World Health Organization (WHO). WHO Mortality Database Version February 2014. Geneva, Switzerland: World Health Organization (WHO), 2014.                                                                                    | 2008      |                      |
| Montenegro | Montenegro Vital Registration - Deaths 2009 ICD10 as it appears in World Health Organization (WHO). WHO Mortality Database Version February 2014. Geneva, Switzerland: World Health Organization (WHO), 2014.                                                                                    | 2009      |                      |
| Montenegro | European Renal Association-European Dialysis and Transplant Association (ERA-EDTA). European Renal Association-European Dialysis and Transplant Association Registry Annual Report 2010. Parma, Italy: European Renal Association-European Dialysis and Transplant Association (ERA-EDTA), 2012. | 2010      | *                    |
| Montenegro | Montenegro Vital Registration Death Data 2011 as it appears in United Nations Statistics Division (UNSD). United Nations Demographic Yearbook. New York City, United States: United Nations Statistics Division (UNSD).                                                                          | 2011      | *                    |
| Montenegro | European Renal Association-European Dialysis and Transplant Association (ERA-EDTA). European Renal Association-European Dialysis and Transplant Association Registry Annual Report 2011. Parma, Italy: European Renal Association-European Dialysis and Transplant Association (ERA-EDTA), 2013. | 2011      | *                    |

**Web Table 32 - Comprehensive citation list**

| Country | Citation                                                                                                                                                                                                                                                      | Year*                                                                                      | New for GBD 2013 (*) |
|---------|---------------------------------------------------------------------------------------------------------------------------------------------------------------------------------------------------------------------------------------------------------------|--------------------------------------------------------------------------------------------|----------------------|
| Morocco | Centre for Research on the Epidemiology of Disasters (CRED). EM-DAT: The OFDA/CRED International Disaster Database. Brussels, Belgium: Catholic University of Leuven.                                                                                         | 1951, 1954, 1960, 1963-1965, 1970, 1975, 1979, 1982, 1988, 1995-1997, 2000-2006, 2008-2010 |                      |
| Morocco | Peace Research Institute Oslo (PRIO). Battle Deaths Dataset Version 3, 2009. Oslo, Norway: Peace Research Institute Oslo (PRIO), 2009.                                                                                                                        | 1953-1988                                                                                  |                      |
| Morocco | United Nations Office on Drugs and Crime (UNODC). United Nations Surveys on Crime Trends and the Operations of Criminal Justice Systems 1970-2006 as provided by Kavi Bhalla. [Unpublished].                                                                  | 1970-1994                                                                                  |                      |
| Morocco | Ministry of Public Health (Morocco), International Statistical Institute. Morocco World Fertility Survey 1980. Voorburg, Netherlands: International Statistical Institute.                                                                                    | 1980                                                                                       |                      |
| Morocco | Institute for Health Metrics and Evaluation (IHME), Joint United Nations Program on HIV/AIDS (UNAIDS). Institute for Health Metrics and Evaluation HIV Mortality Estimates Based on the UNAIDS Spectrum Model Framework.                                      | 1980-2013                                                                                  | *                    |
| Morocco | United Nations Children's Fund (UNICEF), World Health Organization (WHO). WHO and UNICEF Reported Disease Incidence Time Series - Pertussis. Geneva, Switzerland: World Health Organization (WHO).                                                            | 1980-2004, 2006-2013                                                                       |                      |
| Morocco | United Nations Children's Fund (UNICEF), World Health Organization (WHO). WHO and UNICEF Reported Disease Incidence Time Series - Measles. Geneva, Switzerland: World Health Organization (WHO).                                                              | 1980-2004, 2006-2013                                                                       |                      |
| Morocco | Nejmi S, Coursaget P, D'Khissy D, Barres JL, Chiron JP. [Prevalence of infections caused by hepatitis A and B viruses in Morocco]. Presse Med. 1984; 13(29): 1786-7.                                                                                          | 1981-1983                                                                                  |                      |
| Morocco | Minnesota Population Center, Statistics Directorate (Morocco). Morocco Population and Housing Census 1982 from the Integrated Public Use Microdata Series, International. [Machine-readable database]. Minneapolis: University of Minnesota, 2012.            | 1982                                                                                       |                      |
| Morocco | Ministry of Public Health (Morocco). Morocco Contraceptive Prevalence Survey 1983-1984.                                                                                                                                                                       | 1983-1984                                                                                  |                      |
| Morocco | Ministry of Public Health (Morocco), Westinghouse; Institute for Resource Development. Morocco Demographic and Health Survey 1987. Columbia, United States: Westinghouse; Institute for Resource Development.                                                 | 1987                                                                                       |                      |
| Morocco | Ministry of Public Health (Morocco). Morocco National Survey on Causes and Circumstances of Infant and Child Deaths 1988-1989.                                                                                                                                | 1988-1989                                                                                  |                      |
| Morocco | Morocco Vital Registration Death Data 1989 as it appears in United Nations Statistics Division (UNSD). United Nations Demographic Yearbook. New York City, United States: United Nations Statistics Division (UNSD).                                          | 1989                                                                                       |                      |
| Morocco | Morocco Vital Registration Death Data 1990 as it appears in United Nations Statistics Division (UNSD). United Nations Demographic Yearbook. New York City, United States: United Nations Statistics Division (UNSD).                                          | 1990                                                                                       |                      |
| Morocco | Weatherall D. Sickle Cell and Thalassemias Prevalence Data, Personal Correspondence with David Weatherall. [Unpublished].                                                                                                                                     | 1990-2009                                                                                  |                      |
| Morocco | Centre for Health Informatics and Multiprofessional Education, University College London. Modell's Haemoglobinopathologist's Almanac. London, United Kingdom: Centre for Health Informatics and Multiprofessional Education, University College London, 2008. | 1990-2003                                                                                  |                      |
| Morocco | Morocco Vital Registration Death Data 1991 as it appears in United Nations Statistics Division (UNSD). United Nations Demographic Yearbook. New York City, United States: United Nations Statistics Division (UNSD).                                          | 1991                                                                                       |                      |

**Web Table 32 - Comprehensive citation list**

| Country | Citation                                                                                                                                                                                                                                           | Year*                 | New for GBD 2013 (*) |
|---------|----------------------------------------------------------------------------------------------------------------------------------------------------------------------------------------------------------------------------------------------------|-----------------------|----------------------|
| Morocco | Macro International, Inc, Ministry of Public Health (Morocco). Morocco Demographic and Health Survey 1992. Calverton, United States: Macro International, Inc.                                                                                     | 1992                  |                      |
| Morocco | Morocco Vital Registration Death Data 1993 as it appears in United Nations Statistics Division (UNSD). United Nations Demographic Yearbook. New York City, United States: United Nations Statistics Division (UNSD).                               | 1993                  |                      |
| Morocco | Bourquia A. Current status of treatment for chronic renal insufficiency in Morocco. <i>Nephrologie</i> . 1999; 20(2): 75-80.                                                                                                                       | 1993-1996             |                      |
| Morocco | Minnesota Population Center, Statistics Directorate (Morocco). Morocco Population and Housing Census 1994 from the Integrated Public Use Microdata Series, International. [Machine-readable database]. Minneapolis: University of Minnesota, 2012. | 1994                  |                      |
| Morocco | Ministry of Health (Morocco). Morocco Health in Figures 2004.                                                                                                                                                                                      | 1994-2003             |                      |
| Morocco | Ministry of Health (Morocco). Morocco Health in Figures 2001.                                                                                                                                                                                      | 1994-2000             |                      |
| Morocco | Ministry of Health (Morocco). Morocco Health in Figures 2002.                                                                                                                                                                                      | 1994-2001             |                      |
| Morocco | Ministry of Health (Morocco). Morocco Health in Figures 2003.                                                                                                                                                                                      | 1994-2002             |                      |
| Morocco | World Health Organization (WHO). Morocco WHO Leishmaniasis Country Profile.                                                                                                                                                                        | 1994-2010             | *                    |
| Morocco | Macro International, Inc, Ministry of Public Health (Morocco). Morocco Special Demographic and Health Survey 1995. Calverton, United States: Macro International, Inc.                                                                             | 1995                  |                      |
| Morocco | Morocco Vital Registration Death Data 1995 as it appears in United Nations Statistics Division (UNSD). United Nations Demographic Yearbook. New York City, United States: United Nations Statistics Division (UNSD).                               | 1995                  |                      |
| Morocco | Morocco Vital Registration Death Data 1996 as it appears in United Nations Statistics Division (UNSD). United Nations Demographic Yearbook. New York City, United States: United Nations Statistics Division (UNSD).                               | 1996                  |                      |
| Morocco | Ministry of Health (Morocco), League of Arab States. Morocco Maternal and Child Health Survey 1996-1997.                                                                                                                                           | 1996-1997             |                      |
| Morocco | World Health Organization (WHO). Country Mortality Data 1980-1999. [Unpublished].                                                                                                                                                                  | 1997                  |                      |
| Morocco | World Health Organization (WHO). Global Prevalence and Incidence of Selected Curable Sexually Transmitted Infections: Overviews and Estimates 2001. Geneva, Switzerland: World Health Organization (WHO), 2001.                                    | 1997                  |                      |
| Morocco | Ministry of Health (Morocco). Morocco Health in Figures 2008.                                                                                                                                                                                      | 1997-2009             |                      |
| Morocco | World Health Organization (WHO). Yellow Fever Reported Cases, WHO Vaccine-Preventable Diseases: Monitoring System. Geneva, Switzerland: World Health Organization (WHO).                                                                           | 1998, 2000, 2006-2007 |                      |
| Morocco | Abu-Raddad LJ, Akala FA, Semini I, Riedner G, Wilson D, Tawil O, World Bank. Characterizing the HIV/AIDS Epidemic in the Middle East and North Africa. Washington DC, United States: World Bank, 2010.                                             | 1998, 2005-2007       |                      |
| Morocco | Morocco Vital Registration Death Data 1999 as it appears in United Nations Statistics Division (UNSD). United Nations Demographic Yearbook. New York City, United States: United Nations Statistics Division (UNSD).                               | 1999                  |                      |
| Morocco | United Nations Office on Drugs and Crime (UNODC). United Nations Office on Drugs and Crime Global Study on Homicides 2011. Vienna, Austria: United Nations Office on Drugs and Crime (UNODC), 2011.                                                | 1999-2010             |                      |
| Morocco | Filippi V, Ronsmans C, Gohou V, Goufodji S, Lardi M, Sahel A, Saizonou J, De Brouwere V. Maternity wards or emergency obstetric rooms? Incidence of near-miss events in African hospitals. <i>Acta Obstet Gynecol Scand</i> . 2005; 84(1): 11-6.   | 1999-2001             |                      |

**Web Table 32 - Comprehensive citation list**

| Country | Citation                                                                                                                                                                                                                                                                                                                                                                                                           | Year*      | New for GBD 2013 (*) |
|---------|--------------------------------------------------------------------------------------------------------------------------------------------------------------------------------------------------------------------------------------------------------------------------------------------------------------------------------------------------------------------------------------------------------------------|------------|----------------------|
| Morocco | Morocco Vital Registration Death Data 2001 as it appears in United Nations Statistics Division (UNSD). United Nations Demographic Yearbook. New York City, United States: United Nations Statistics Division (UNSD).                                                                                                                                                                                               | 2001       |                      |
| Morocco | Bahri O, Ezzikouri S, Alaya-Bouafif NB, Iguer F, Feydi AEE, Mestiri H, Benazzouz M, Khalfallah T, Afifi R, Elkihal L, Berkane S, Marchio A, Debzi N, Dejean A, Pineau P, Triki H, Benjelloun S. First multicenter study for risk factors for hepatocellular carcinoma development in North Africa. World J Hepatol. 2011; 3(1): 24-30.                                                                             | 2002-2005  |                      |
| Morocco | World Health Organization (WHO). Morocco World Health Survey 2003. Geneva, Switzerland: World Health Organization (WHO), 2005.                                                                                                                                                                                                                                                                                     | 2003       |                      |
| Morocco | Department of Peace and Conflict Research, Uppsala University. UCDP One-Sided Violence Database Version 1.4, 2013. Uppsala, Sweden: Department of Peace and Conflict Research, Uppsala University, 2013.                                                                                                                                                                                                           | 2003       | *                    |
| Morocco | League of Arab States, Macro International, Inc, Ministry of Health (Morocco). Morocco Demographic and Health Survey 2003-2004. Calverton, United States: Macro International, Inc.                                                                                                                                                                                                                                | 2003-2004  |                      |
| Morocco | Minnesota Population Center, High Commission for Planning (Morocco). Morocco Population and Housing Census 2004 from the Integrated Public Use Microdata Series, International. [Machine-readable database]. Minneapolis: University of Minnesota, 2012.                                                                                                                                                           | 2004       |                      |
| Morocco | Casablanca Ministry of Health (Morocco), Faculty of Medicine and Pharmacy of Casablanca (Morocco), Ibn Rochd University Hospital (Morocco), Lalla Salma Association to Fight Against Cancer (Morocco), National Institute of Oncology Sidi Mohamed Ben Abdellah Rabat (Morocco). Morocco - Grand Casablanca Cancer Registry 2004. Rabat, Morocco: Lalla Salma Association to Fight Against Cancer (Morocco), 2007. | 2004       |                      |
| Morocco | Braikat M, Barkia A, El Mdaghri N, Rainey JJ, Cohen AL, Teleb N. Vaccination with Haemophilus influenzae type b conjugate vaccine reduces bacterial meningitis in Morocco. Vaccine. 2012; 30(15): 2594-9.                                                                                                                                                                                                          | 2004-2009  | *                    |
| Morocco | Ministry of Health (Morocco). Morocco Cause of Death Data 2005. [Unpublished].                                                                                                                                                                                                                                                                                                                                     | 2005       |                      |
| Morocco | Morocco Vital Registration Death Data 2007 as it appears in United Nations Statistics Division (UNSD). United Nations Demographic Yearbook. New York City, United States: United Nations Statistics Division (UNSD).                                                                                                                                                                                               | 2007       |                      |
| Morocco | Morocco Vital Registration - Deaths 2008 ICD10 as it appears in World Health Organization (WHO). WHO Mortality Database Version February 2014. Geneva, Switzerland: World Health Organization (WHO), 2014.                                                                                                                                                                                                         | 2008       |                      |
| Morocco | Postigo JAR. Leishmaniasis in the World Health Organization Eastern Mediterranean Region. Int J Antimicrob Agents. 2010; S62-65.                                                                                                                                                                                                                                                                                   | 2008       |                      |
| Morocco | World Health Organization (WHO). Retrospective Measles Data on Supplementary Immunization Activities. Geneva, Switzerland: World Health Organization (WHO).                                                                                                                                                                                                                                                        | 2008, 2013 |                      |
| Morocco | Abouchadi S, Belghiti Alaoui A, Meski FZ, De Brouwere V. Implementing a maternal mortality surveillance system in Morocco - challenges and opportunities. Trop Med Int Health. 2013; 18(3): 357-65.                                                                                                                                                                                                                | 2009       |                      |
| Morocco | High Commission for Planning (Morocco). Morocco National Multiround Demographic Survey 2009-2010.                                                                                                                                                                                                                                                                                                                  | 2009-2010  | *                    |
| Morocco | Ministry of Health (Morocco), Pan Arab Project for Family Health (PAPFAM), United Nations Children's Fund (UNICEF), United Nations Population Fund (UNFPA), World Health Organization (WHO). Morocco National Survey on Population and Family Health 2010-2011.                                                                                                                                                    | 2010-2011  | *                    |



**Web Table 32 - Comprehensive citation list**

| Country    | Citation                                                                                                                                                                                                                                                      | Year*                                                                         | New for GBD 2013 (*) |
|------------|---------------------------------------------------------------------------------------------------------------------------------------------------------------------------------------------------------------------------------------------------------------|-------------------------------------------------------------------------------|----------------------|
| Morocco    | Morocco Vital Registration - Deaths 2011 ICD10 as it appears in World Health Organization (WHO). WHO Mortality Database Version February 2014. Geneva, Switzerland: World Health Organization (WHO), 2014.                                                    | 2011                                                                          | *                    |
| Mozambique | Centre for Research on the Epidemiology of Disasters (CRED). EM-DAT: The OFDA/CRED International Disaster Database. Brussels, Belgium: Catholic University of Leuven.                                                                                         | 1956, 1971, 1975, 1977-1978, 1981-1985, 1987-1989, 1994, 1996-2003, 2005-2013 |                      |
| Mozambique | Peace Research Institute Oslo (PRIO). Battle Deaths Dataset Version 3, 2009. Oslo, Norway: Peace Research Institute Oslo (PRIO), 2009.                                                                                                                        | 1964-1988                                                                     |                      |
| Mozambique | Provincial Directorate of Statistical Offices (Mozambique). Mozambique Population and Housing Census 1970.                                                                                                                                                    | 1970                                                                          |                      |
| Mozambique | Council of Census Coordinator (Mozambique). Mozambique Population and Housing Census 1980.                                                                                                                                                                    | 1980                                                                          |                      |
| Mozambique | Institute for Health Metrics and Evaluation (IHME), Joint United Nations Program on HIV/AIDS (UNAIDS). Institute for Health Metrics and Evaluation HIV Mortality Estimates Based on the UNAIDS Spectrum Model Framework.                                      | 1980-2013                                                                     | *                    |
| Mozambique | United Nations Children's Fund (UNICEF), World Health Organization (WHO). WHO and UNICEF Reported Disease Incidence Time Series - Measles. Geneva, Switzerland: World Health Organization (WHO).                                                              | 1980-2013                                                                     |                      |
| Mozambique | Nieuwenhuis F, Wolf B, Bomba A, De Graaf P. Haematological study in Cabo Delgado province, Mozambique; sickle cell trait and G6PD deficiency. Trop Geogr Med. 1986; 38(2): 183-7.                                                                             | 1984-1986                                                                     |                      |
| Mozambique | United Nations Children's Fund (UNICEF), World Health Organization (WHO). WHO and UNICEF Reported Disease Incidence Time Series - Pertussis. Geneva, Switzerland: World Health Organization (WHO).                                                            | 1985-1994, 1996-2005, 2008, 2010                                              |                      |
| Mozambique | Department of Peace and Conflict Research, Uppsala University. UCDP Battle-Related Deaths Database Version 5, 2013. Uppsala, Sweden: Department of Peace and Conflict Research, Uppsala University, 2013.                                                     | 1989-1992                                                                     | *                    |
| Mozambique | Department of Peace and Conflict Research, Uppsala University. UCDP One-Sided Violence Database Version 1.4, 2013. Uppsala, Sweden: Department of Peace and Conflict Research, Uppsala University, 2013.                                                      | 1989-1992                                                                     | *                    |
| Mozambique | Weatherall D. Sickle Cell and Thalassemias Prevalence Data, Personal Correspondence with David Weatherall. [Unpublished].                                                                                                                                     | 1990-2009                                                                     |                      |
| Mozambique | Centre for Health Informatics and Multiprofessional Education, University College London. Modell's Haemoglobinopathologist's Almanac. London, United Kingdom: Centre for Health Informatics and Multiprofessional Education, University College London, 2008. | 1990-2003                                                                     |                      |
| Mozambique | Department of Peace and Conflict Research, Uppsala University. UCDP Nonstate Conflict Database Version 2.5, 2013. Uppsala, Sweden: Department of Peace and Conflict Research, Uppsala University, 2013.                                                       | 1991                                                                          | *                    |
| Mozambique | Dazza MC, Trebucq A, Gaudebout C, Jarretou A, Le Hesran JY, Josse R, Delaporte E, Bréchet C, Larouze B. Population-based study of serum hepatitis B virus DNA in Gabon. Trans R Soc Trop Med Hyg. 1993; 87(5): 539-40.                                        | 1991                                                                          |                      |
| Mozambique | Cliff J, Simango A, Augusto O, Van Der Paal L, Biellik R. Failure of targeted urban supplemental measles vaccination campaigns (1997-1999) to prevent measles epidemics in Mozambique (1998-2001). J Infect Dis. 2003; 187(Suppl 1): S51-7.                   | 1993-1999                                                                     |                      |
| Mozambique | United Nations Children's Fund (UNICEF), National Department of Statistics (Mozambique), Ministry of Health (Mozambique). Mozambique Multiple Indicator Cluster Survey 1995. New York, United States: United Nations Children's Fund (UNICEF).                | 1995                                                                          | *                    |
| Mozambique | Songane FF, Bergström S. Quality of registration of maternal deaths in Mozambique: a community-based study in rural and urban areas. Soc Sci Med. 2002; 54(1): 23-31.                                                                                         | 1996                                                                          |                      |

**Web Table 32 - Comprehensive citation list**

| Country    | Citation                                                                                                                                                                                                                                                                                                                                            | Year*                        | New for GBD 2013 (*) |
|------------|-----------------------------------------------------------------------------------------------------------------------------------------------------------------------------------------------------------------------------------------------------------------------------------------------------------------------------------------------------|------------------------------|----------------------|
| Mozambique | Joint United Nations Program on HIV/AIDS (UNAIDS), World Health Organization (WHO). Mozambique Epidemiological Fact Sheet on HIV/AIDS and STIs 2000.                                                                                                                                                                                                | 1996                         |                      |
| Mozambique | Mozambique Population and Housing Census 1997 as it appears in United Nations Statistics Division (UNSD). United Nations Demographic Yearbook. New York City, United States: United Nations Statistics Division (UNSD).                                                                                                                             | 1997                         |                      |
| Mozambique | Macro International, Inc, National Statistics Institute (Mozambique). Mozambique Demographic and Health Survey 1997. Calverton, United States: Macro International, Inc.                                                                                                                                                                            | 1997                         |                      |
| Mozambique | Measles Supplementary Immunization Activity Data as provided by the World Health Organization. [Unpublished].                                                                                                                                                                                                                                       | 1997-1999                    |                      |
| Mozambique | World Health Organization (WHO). Yellow Fever Reported Cases, WHO Vaccine-Preventable Diseases: Monitoring System. Geneva, Switzerland: World Health Organization (WHO).                                                                                                                                                                            | 1997, 2000-2001, 2007-2008   |                      |
| Mozambique | World Health Organization Regional Office for Africa. HIV/AIDS Epidemiological Surveillance Update for the WHO African Region. World Health Organization Regional Office for Africa, 2003.                                                                                                                                                          | 1998, 2000                   |                      |
| Mozambique | United Nations Office on Drugs and Crime (UNODC). United Nations Office on Drugs and Crime Global Study on Homicides 2011. Vienna, Austria: United Nations Office on Drugs and Crime (UNODC), 2011.                                                                                                                                                 | 1999-2007                    |                      |
| Mozambique | Menéndez C, Castellsagué X, Renom M, Sacarlal J, Quintó L, Lloveras B, Klaustermeier J, Kornegay JR, Sigauque B, Bosch FX, Alonso PL. Prevalence and risk factors of sexually transmitted infections and cervical neoplasia in women from a rural area of southern Mozambique. <i>Infect Dis Obstet Gynecol</i> . 2010; 2010.                       | 2000                         |                      |
| Mozambique | Sacarlal J, Nhacolo AQ, Sigauque B, Nhalungo DA, Abacassamo F, Sacoor CN, Aide P, Machevo S, Nhampossa T, Macete EV, Bassat Q, David C, Bardají A, Letang E, Saúte F, Aponte JJ, Thompson R, Alonso PL. A 10 year study of the cause of death in children under 15 years in Manhica, Mozambique. <i>BioMed Central Public Health</i> . 2009; 9: 67. | 2001                         |                      |
| Mozambique | INDEPTH, Manhica Health Research Center (CISM). Mozambique - Manhica Health and Demographic Surveillance System. [Unpublished].                                                                                                                                                                                                                     | 2002                         |                      |
| Mozambique | Manhica Health Research Center (CISM). Manhica Health Research Centre Activity Report 2009-2010. Maputo, Mozambique: Manhica Foundation (Mozambique), 2011.                                                                                                                                                                                         | 2002                         | *                    |
| Mozambique | Macro International, Inc, National Statistics Institute (Mozambique). Mozambique Demographic and Health Survey 2003. Calverton, United States: Macro International, Inc.                                                                                                                                                                            | 2003                         |                      |
| Mozambique | Renzaho AMN. Mortality rates, prevalence of malnutrition, and prevalence of lost pregnancies among the drought-ravaged population of Tete Province, Mozambique. <i>Prehospital and Disaster Medicine</i> . 2007; 22(1): 26-34.                                                                                                                      | 2003                         |                      |
| Mozambique | World Health Organization (WHO). Retrospective Measles Data on Supplementary Immunization Activities. Geneva, Switzerland: World Health Organization (WHO).                                                                                                                                                                                         | 2003, 2005, 2008, 2011, 2013 |                      |
| Mozambique | Cunha L, Plouzeau C, Ingrand P, Gudo JPS, Ingrand I, Mondlane J, Beauchant M, Agius G. Use of replacement blood donors to study the epidemiology of major blood-borne viruses in the general population of Maputo, Mozambique. <i>J Med Virol</i> . 2007; 79(12): 1832-40.                                                                          | 2004                         |                      |
| Mozambique | National Statistics Institute (Mozambique). Mozambique Population and Housing Census 2007.                                                                                                                                                                                                                                                          | 2007                         |                      |
| Mozambique | World Health Organization (WHO). Global Status Report on Road Safety 2009. Geneva, Switzerland: World Health Organization (WHO), 2009.                                                                                                                                                                                                              | 2007                         |                      |



**Web Table 32 - Comprehensive citation list**

| Country    | Citation                                                                                                                                                                                                                                                                                            | Year*                                                                                                | New for GBD 2013 (*) |
|------------|-----------------------------------------------------------------------------------------------------------------------------------------------------------------------------------------------------------------------------------------------------------------------------------------------------|------------------------------------------------------------------------------------------------------|----------------------|
| Mozambique | Centers for Disease Control and Prevention (CDC), MEASURE Evaluation Project, Carolina Population Center, University of North Carolina, Ministry of Health (Mozambique), National Statistics Institute (Mozambique), US Census Bureau. Mozambique National Survey on the Causes of Death 2007-2008. | 2007-2008                                                                                            |                      |
| Mozambique | United Nations Children's Fund (UNICEF), National Statistics Institute (Mozambique). Mozambique Multiple Indicator Cluster Survey 2008-2009. New York, United States: United Nations Children's Fund (UNICEF).                                                                                      | 2008-2009                                                                                            |                      |
| Mozambique | Ministry of Health (Mozambique), National Statistical Institute (INE) (Mozambique), and ICF Macro. Mozambique AIDS Indicator Survey 2009. Calverton, USA: ICF Macro, 2010.                                                                                                                          | 2009                                                                                                 |                      |
| Mozambique | Joint United Nations Program on HIV/AIDS (UNAIDS), National AIDS Council (Mozambique). Mozambique UNGASS Progress Report 2010. Geneva, Switzerland: Joint United Nations Program on HIV/AIDS (UNAIDS), 2010.                                                                                        | 2009                                                                                                 |                      |
| Mozambique | ICF Macro, Manhica Health Research Center (CISM), Ministry of Health (Mozambique), National Statistics Institute (Mozambique). Mozambique Demographic and Health Survey 2011. Claverton, Maryland: ICF Macro, 2013.                                                                                 | 2011                                                                                                 |                      |
| Myanmar    | Peace Research Institute Oslo (PRIO). Battle Deaths Dataset Version 3, 2009. Oslo, Norway: Peace Research Institute Oslo (PRIO), 2009.                                                                                                                                                              | 1950-1988                                                                                            |                      |
| Myanmar    | Centre for Research on the Epidemiology of Disasters (CRED). EM-DAT: The OFDA/CRED International Disaster Database. Brussels, Belgium: Catholic University of Leuven.                                                                                                                               | 1965, 1967-1968, 1970, 1975, 1977, 1981-1982, 1991-1992, 1994-1995, 1997, 1999, 2001-2002, 2004-2013 |                      |
| Myanmar    | Chin J, Thaug UM. The unchanging epidemiology and toll of measles in Burma. Bull World Health Organ. 1985; 63(3): 551-8.                                                                                                                                                                            | 1966-1983                                                                                            |                      |
| Myanmar    | Institute for Health Metrics and Evaluation (IHME), Joint United Nations Program on HIV/AIDS (UNAIDS). Institute for Health Metrics and Evaluation HIV Mortality Estimates Based on the UNAIDS Spectrum Model Framework.                                                                            | 1980-2013                                                                                            | *                    |
| Myanmar    | United Nations Children's Fund (UNICEF), World Health Organization (WHO). WHO and UNICEF Reported Disease Incidence Time Series - Pertussis. Geneva, Switzerland: World Health Organization (WHO).                                                                                                  | 1980-2000, 2002-2013                                                                                 |                      |
| Myanmar    | United Nations Children's Fund (UNICEF), World Health Organization (WHO). WHO and UNICEF Reported Disease Incidence Time Series - Measles. Geneva, Switzerland: World Health Organization (WHO).                                                                                                    | 1980-2013                                                                                            |                      |
| Myanmar    | Myanmar Population and Housing Census 1983 as it appears in United Nations Statistics Division (UNSD). United Nations Demographic Yearbook. New York City, United States: United Nations Statistics Division (UNSD).                                                                                | 1983                                                                                                 |                      |
| Myanmar    | Department of Peace and Conflict Research, Uppsala University. UCDP Battle-Related Deaths Database Version 5, 2013. Uppsala, Sweden: Department of Peace and Conflict Research, Uppsala University, 2013.                                                                                           | 1989-2012                                                                                            | *                    |
| Myanmar    | Weatherall D. Sickle Cell and Thalassemias Prevalence Data, Personal Correspondence with David Weatherall. [Unpublished].                                                                                                                                                                           | 1990-2009                                                                                            |                      |
| Myanmar    | Department of Peace and Conflict Research, Uppsala University. UCDP Nonstate Conflict Database Version 2.5, 2013. Uppsala, Sweden: Department of Peace and Conflict Research, Uppsala University, 2013.                                                                                             | 1990-2012                                                                                            | *                    |
| Myanmar    | Centre for Health Informatics and Multiprofessional Education, University College London. Modell's Haemoglobinopathologist's Almanac. London, United Kingdom: Centre for Health Informatics and Multiprofessional Education, University College London, 2008.                                       | 1990-2003                                                                                            |                      |

**Web Table 32 - Comprehensive citation list**

| Country | Citation                                                                                                                                                                                                                                                                                                                           | Year*                 | New for GBD 2013 (*) |
|---------|------------------------------------------------------------------------------------------------------------------------------------------------------------------------------------------------------------------------------------------------------------------------------------------------------------------------------------|-----------------------|----------------------|
| Myanmar | Ministry of Immigration and Population (Myanmar), United Nations Population Fund (UNFPA). Myanmar Population Change and Fertility Survey 1991.                                                                                                                                                                                     | 1991                  |                      |
| Myanmar | Department of Peace and Conflict Research, Uppsala University. UCDP One-Sided Violence Database Version 1.4, 2013. Uppsala, Sweden: Department of Peace and Conflict Research, Uppsala University, 2013.                                                                                                                           | 1991-2012             | *                    |
| Myanmar | United Nations Office on Drugs and Crime (UNODC). United Nations Office on Drugs and Crime Global Study on Homicides 2011. Vienna, Austria: United Nations Office on Drugs and Crime (UNODC), 2011.                                                                                                                                | 1995-2007             |                      |
| Myanmar | Measles Supplementary Immunization Activity Data as provided by the World Health Organization. [Unpublished].                                                                                                                                                                                                                      | 1995-1997             |                      |
| Myanmar | Okada S, Taketa K, Ishikawa T, Koji T, Swe T, Win N, Win KM, Mra R, Myint TT. High prevalence of hepatitis C in patients with thalassemia and patients with liver diseases in Myanmar (Burma). <i>Acta Med Okayama</i> . 2000; 54(3): 137-8.                                                                                       | 1996-1998             |                      |
| Myanmar | Ministry of Immigration and Population (Myanmar), United Nations Population Fund (UNFPA). Myanmar Fertility and Reproductive Health Survey 1997.                                                                                                                                                                                   | 1997                  |                      |
| Myanmar | Tantular IS, Iwai K, Lin K, Basuki S, Horie T, Htay HH, Matsuoka H, Marwoto H, Wongsrichanalai C, Dachlan YP, Kojima S, Ishii A, Kawamoto F. Field trials of a rapid test for G6PD deficiency in combination with a rapid diagnosis of malaria. <i>Trop Med Int Health</i> . 1999; 4(4): 245-50.                                   | 1997                  |                      |
| Myanmar | Iwai K, Hirono A, Matsuoka H, Kawamoto F, Horie T, Lin K, Tantular IS, Dachlan YP, Notopuro H, Hidayah NI, Salim AM, Fujii H, Miwa S, Ishii A. Distribution of glucose-6-phosphate dehydrogenase mutations in Southeast Asia. <i>Hum Genet</i> . 2001; 108(6): 445-9.                                                              | 1997-1998             |                      |
| Myanmar | Ministry of Health (Myanmar), United Nations Children's Fund (UNICEF). Myanmar National Mortality Survey 1999.                                                                                                                                                                                                                     | 1999                  |                      |
| Myanmar | Ministry of Immigration and Population (Myanmar), United Nations Population Fund (UNFPA). Myanmar Fertility and Reproductive Health Survey 2001.                                                                                                                                                                                   | 2001                  |                      |
| Myanmar | World Health Organization (WHO). Yellow Fever Reported Cases, WHO Vaccine-Preventable Diseases: Monitoring System. Geneva, Switzerland: World Health Organization (WHO).                                                                                                                                                           | 2001, 2005-2006       |                      |
| Myanmar | Ministry of Health (Myanmar), United Nations Children's Fund (UNICEF). Myanmar Overall and Cause Specific Under-Five Mortality Survey 2002-2003.                                                                                                                                                                                   | 2002-2003             |                      |
| Myanmar | Jalloh A, Tantular IS, Pusarawati S, Kawilarang AP, Kerong H, Lin K, Ferreira MU, Matsuoka H, Arai M, Kita K, Kawamoto F. Rapid epidemiologic assessment of glucose-6-phosphate dehydrogenase deficiency in malaria-endemic areas in Southeast Asia using a novel diagnostic kit. <i>Trop Med Int Health</i> . 2004; 9(5): 615-23. | 2002-2003             |                      |
| Myanmar | World Health Organization (WHO). Retrospective Measles Data on Supplementary Immunization Activities. Geneva, Switzerland: World Health Organization (WHO).                                                                                                                                                                        | 2002-2004, 2007, 2012 |                      |
| Myanmar | Than AM, Harano T, Harano K, Myint AA, Ogino T, Okadaa S. High incidence of 3-thalassemia, hemoglobin E, and glucose-6-phosphate dehydrogenase deficiency in populations of malaria-endemic southern Shan State, Myanmar. <i>Int J Hematol</i> . 2005; 82(2): 119-23.                                                              | 2003-2005             |                      |
| Myanmar | Myanmar Vital Registration Death Data 2005 as it appears in United Nations Statistics Division (UNSD). United Nations Demographic Yearbook. New York City, United States: United Nations Statistics Division (UNSD).                                                                                                               | 2005                  |                      |
| Myanmar | Nuchprayoon I, Louicharoen C, Charoenvej W. Glucose-6-phosphate dehydrogenase mutations in Mon and Burmese of southern Myanmar. <i>J Hum Genet</i> . 2008; 53(1): 48-54.                                                                                                                                                           | 2006-2008             |                      |

**Web Table 32 - Comprehensive citation list**

| Country | Citation                                                                                                                                                                                                                                                      | Year*                            | New for GBD 2013 (*) |
|---------|---------------------------------------------------------------------------------------------------------------------------------------------------------------------------------------------------------------------------------------------------------------|----------------------------------|----------------------|
| Myanmar | Ministry of Immigration and Population (Myanmar), United Nations Population Fund (UNFPA). Myanmar Fertility and Reproductive Health Survey 2007.                                                                                                              | 2007                             |                      |
| Myanmar | Myint, S. Cause of death verification study in Myanmar. Presentation at: World Health Organization Regional Office for South East Asia. Regional Consultation on Mortality Statistics. 2007; New Delhi, India.                                                | 2007                             |                      |
| Myanmar | Ohnmar, Tun-Min, San-Shwe, Than-Win, Chongsuvivatwong V. Effects of malaria volunteer training on coverage and timeliness of diagnosis: a cluster randomized controlled trial in Myanmar. Malar J. 2012; 309.                                                 | 2009                             |                      |
| Myanmar | Joint United Nations Program on HIV/AIDS (UNAIDS), Ministry of Health (Myanmar). Myanmar UNGASS Country Progress Report 2010. Geneva, Switzerland: Joint United Nations Program on HIV/AIDS (UNAIDS), 2010.                                                   | 2009                             |                      |
| Myanmar | Ministry of Health (Myanmar), Ministry of National Planning and Economic Development (Myanmar), United Nations Children's Fund (UNICEF). Myanmar Multiple Indicator Cluster Survey 2009-2010.                                                                 | 2009-2010                        | *                    |
| Namibia | Institute for Health Metrics and Evaluation (IHME), Joint United Nations Program on HIV/AIDS (UNAIDS). Institute for Health Metrics and Evaluation HIV Mortality Estimates Based on the UNAIDS Spectrum Model Framework.                                      | 1980-2013                        | *                    |
| Namibia | Joubert JJ, Prozesky OW, Lourens JG, van Straten AM, Theron JW, Swanevelder C, Meenehan GM, van der Merwe CA. Prevalence of hepatitis virus and some arbovirus infections in Kavango, northern SWA/Namibia. S Afr Med J. 1985; 67(13): 500-2.                 | 1983                             |                      |
| Namibia | United Nations Children's Fund (UNICEF), World Health Organization (WHO). WHO and UNICEF Reported Disease Incidence Time Series - Measles. Geneva, Switzerland: World Health Organization (WHO).                                                              | 1987-1988, 1992-2013             |                      |
| Namibia | Department of Peace and Conflict Research, Uppsala University. UCDP One-Sided Violence Database Version 1.4, 2013. Uppsala, Sweden: Department of Peace and Conflict Research, Uppsala University, 2013.                                                      | 1989-2002                        | *                    |
| Namibia | Centre for Health Informatics and Multiprofessional Education, University College London. Modell's Haemoglobinopathologist's Almanac. London, United Kingdom: Centre for Health Informatics and Multiprofessional Education, University College London, 2008. | 1990-2003                        |                      |
| Namibia | Namibia Population and Housing Census 1991 as it appears in United Nations Statistics Division (UNSD). United Nations Demographic Yearbook. New York City, United States: United Nations Statistics Division (UNSD).                                          | 1991                             |                      |
| Namibia | Central Statistics Office (Namibia), Macro International, Inc, Ministry of Health and Social Services (Namibia). Namibia Demographic and Health Survey 1992. Calverton, United States: Macro International, Inc.                                              | 1992                             |                      |
| Namibia | Aspinall S, Joubert JJ, Evans AC, Joseph S, Steele AD, Lecatsas G. Prevalence of hepatitis B in !Kung (San) children from Bushmanland, Namibia. Ann Trop Paediatr. 1994; 14(2): 163-7.                                                                        | 1992                             |                      |
| Namibia | United Nations Children's Fund (UNICEF), World Health Organization (WHO). WHO and UNICEF Reported Disease Incidence Time Series - Pertussis. Geneva, Switzerland: World Health Organization (WHO).                                                            | 1992, 1996-2005, 2007-2013       |                      |
| Namibia | Steele AD, Bos P, Joubert JJ, Bafort JM, Lecatsas G, Aspinall S. Serologic markers for hepatitis B virus and hepatitis A virus in Bushmen in West Caprivi, Namibia. East Afr Med J. 1995; 72(1): 30-2.                                                        | 1993                             |                      |
| Namibia | World Health Organization (WHO). Yellow Fever Reported Cases, WHO Vaccine-Preventable Diseases: Monitoring System. Geneva, Switzerland: World Health Organization (WHO).                                                                                      | 1997-1999, 2001, 2004, 2007-2009 |                      |
| Namibia | Measles Supplementary Immunization Activity Data as provided by the World Health Organization. [Unpublished].                                                                                                                                                 | 1997-1998                        |                      |
| Namibia | World Health Organization Regional Office for Africa. HIV/AIDS Epidemiological Surveillance Update for the WHO African Region. World Health Organization Regional Office for Africa, 2003.                                                                    | 1998, 2000-2002                  |                      |

**Web Table 32 - Comprehensive citation list**

| Country | Citation                                                                                                                                                                                                                                                                 | Year*                                                                        | New for GBD 2013 (*) |
|---------|--------------------------------------------------------------------------------------------------------------------------------------------------------------------------------------------------------------------------------------------------------------------------|------------------------------------------------------------------------------|----------------------|
| Namibia | Macro International, Inc, Ministry of Health and Social Services (Namibia), National Planning Commission (Namibia). Namibia Demographic and Health Survey 2000. Calverton, United States: Macro International, Inc.                                                      | 2000                                                                         |                      |
| Namibia | Cancer Association of Namibia, Namibian Cancer Registry. Namibian Cancer Registry Report 2000-2005. Windhoek, Namibia: Cancer Association of Namibia, 2009.                                                                                                              | 2000-2005                                                                    |                      |
| Namibia | Joint United Nations Program on HIV/AIDS (UNAIDS), United Nations Children's Fund (UNICEF), World Health Organization (WHO). Namibia Epidemiological Fact Sheet on HIV/AIDS and STIs 2004.                                                                               | 2000-2001                                                                    |                      |
| Namibia | World Health Organization (WHO). Retrospective Measles Data on Supplementary Immunization Activities. Geneva, Switzerland: World Health Organization (WHO).                                                                                                              | 2000, 2003, 2006, 2009, 2012                                                 |                      |
| Namibia | Namibia Population and Housing Census 2001 as it appears in United Nations Statistics Division (UNSD). United Nations Demographic Yearbook. New York City, United States: United Nations Statistics Division (UNSD).                                                     | 2001                                                                         |                      |
| Namibia | Cancer Association of Namibia, Namibian Cancer Registry. Namibia Cancer Registry Report 2000-2005. Windhoek, Namibia: Cancer Association of Namibia, 2009.                                                                                                               | 2002                                                                         |                      |
| Namibia | Centre for Research on the Epidemiology of Disasters (CRED). EM-DAT: The OFDA/CRED International Disaster Database. Brussels, Belgium: Catholic University of Leuven.                                                                                                    | 2003, 2006-2011                                                              |                      |
| Namibia | United Nations Office on Drugs and Crime (UNODC). United Nations Office on Drugs and Crime Global Study on Homicides 2011. Vienna, Austria: United Nations Office on Drugs and Crime (UNODC), 2011.                                                                      | 2004                                                                         |                      |
| Namibia | Joint United Nations Program on HIV/AIDS (UNAIDS), Ministry of Health and Social Services (Namibia). Namibia United Nations General Assembly Special Session (UNGASS) Country Report 2010. Geneva, Switzerland: Joint United Nations Program on HIV/AIDS (UNAIDS), 2010. | 2004-2009                                                                    |                      |
| Namibia | Macro International, Inc, Ministry of Health and Social Services (Namibia). Namibia Demographic and Health Survey 2006-2007. Calverton, United States: Macro International, Inc.                                                                                         | 2006-2007                                                                    |                      |
| Nauru   | United Nations Children's Fund (UNICEF), World Health Organization (WHO). WHO and UNICEF Reported Disease Incidence Time Series - Pertussis. Geneva, Switzerland: World Health Organization (WHO).                                                                       | 1980-1984, 1986-1990, 1995, 1997, 1999-2002, 2004-2011                       |                      |
| Nauru   | United Nations Children's Fund (UNICEF), World Health Organization (WHO). WHO and UNICEF Reported Disease Incidence Time Series - Measles. Geneva, Switzerland: World Health Organization (WHO).                                                                         | 1980-1982, 1986-1987, 1989-1990, 1995, 1997, 1999-2002, 2004-2009, 2011-2012 |                      |
| Nepal   | Centre for Research on the Epidemiology of Disasters (CRED). EM-DAT: The OFDA/CRED International Disaster Database. Brussels, Belgium: Catholic University of Leuven.                                                                                                    | 1954, 1963, 1966, 1968, 1970, 1972, 1975-1976, 1978, 1980-1993, 1995-2013    |                      |
| Nepal   | Peace Research Institute Oslo (PRIO). Battle Deaths Dataset Version 3, 2009. Oslo, Norway: Peace Research Institute Oslo (PRIO), 2009.                                                                                                                                   | 1960-1988                                                                    |                      |
| Nepal   | United Nations Office on Drugs and Crime (UNODC). United Nations Surveys on Crime Trends and the Operations of Criminal Justice Systems 1970-2006 as provided by Kavi Bhalla. [Unpublished].                                                                             | 1970-1986                                                                    |                      |
| Nepal   | Nepal Census 1971 as it appears in United Nations Statistics Division (UNSD). United Nations Demographic Yearbook. New York City, United States: United Nations Statistics Division (UNSD).                                                                              | 1971                                                                         |                      |

**Web Table 32 - Comprehensive citation list**

| Country | Citation                                                                                                                                                                                                                                                      | Year*                | New for GBD 2013 (*) |
|---------|---------------------------------------------------------------------------------------------------------------------------------------------------------------------------------------------------------------------------------------------------------------|----------------------|----------------------|
| Nepal   | Family Planning and MCH Project, Ministry of Health and Population (Nepal), International Statistical Institute. Nepal World Fertility Survey 1976. Voorburg, Netherlands: International Statistical Institute.                                               | 1976                 |                      |
| Nepal   | Institute for Health Metrics and Evaluation (IHME), Joint United Nations Program on HIV/AIDS (UNAIDS). Institute for Health Metrics and Evaluation HIV Mortality Estimates Based on the UNAIDS Spectrum Model Framework.                                      | 1980-2013            | *                    |
| Nepal   | United Nations Children's Fund (UNICEF), World Health Organization (WHO). WHO and UNICEF Reported Disease Incidence Time Series - Pertussis. Geneva, Switzerland: World Health Organization (WHO).                                                            | 1980-1998, 2000-2013 |                      |
| Nepal   | United Nations Children's Fund (UNICEF), World Health Organization (WHO). WHO and UNICEF Reported Disease Incidence Time Series - Measles. Geneva, Switzerland: World Health Organization (WHO).                                                              | 1980-1998, 2000-2013 |                      |
| Nepal   | Nepal Census 1981 as it appears in United Nations Statistics Division (UNSD). United Nations Demographic Yearbook. New York City, United States: United Nations Statistics Division (UNSD).                                                                   | 1981                 |                      |
| Nepal   | Pandey MR, Sharma PR, Gubhaju BB, Shakya GM, Neupane RP, Gautam A, Shrestha IB. Impact of a pilot acute respiratory infection (ARI) control programme in a rural community of the hill region of Nepal. <i>Ann Trop Paediatr</i> . 1989; 9(4): 212-20.        | 1984                 |                      |
| Nepal   | Ministry of Health and Population (Nepal). Nepal Fertility and Family Planning Survey 1985-1986.                                                                                                                                                              | 1985-1986            |                      |
| Nepal   | Pandey MR, Daulaire NM, Starbuck ES, Houston RM, McPherson K. Reduction in total under-five mortality in western Nepal through community-based antimicrobial treatment of pneumonia. <i>Lancet</i> . 1991; 338(8773): 993-7.                                  | 1987                 |                      |
| Nepal   | Nakashima K, Kashiwagi S, Noguchi A, Hirata M, Hayashi J, Kawasaki T, Uezono K, Itoh K, Acharya GP, Ogata M. Human T-lymphotropic virus type-I, and hepatitis A, B and C viruses in Nepal: a serological survey. <i>J Trop Med Hyg</i> . 1995; 98(5): 347-50. | 1987                 |                      |
| Nepal   | Shrestha SM. Seroepidemiology of hepatitis B in Nepal. <i>J Commun Dis</i> . 1990; 22(1): 27-32.                                                                                                                                                              | 1988                 |                      |
| Nepal   | Geetha T, Chenoy R, Stevens D, Johanson RB. A multicentre study of perinatal mortality in Nepal. <i>Paediatr Perinat Epidemiol</i> . 1995; 9(1): 74-89.                                                                                                       | 1989                 |                      |
| Nepal   | Department of Peace and Conflict Research, Uppsala University. UCDP Battle-Related Deaths Database Version 5, 2013. Uppsala, Sweden: Department of Peace and Conflict Research, Uppsala University, 2013.                                                     | 1989-2006            | *                    |
| Nepal   | Shrestha SM, Tsuda F, Okamoto H, Tokita H, Horikita M, Tanaka T, Miyakawa Y, Mayumi M. Hepatitis B virus subtypes and hepatitis C virus genotypes in patients with chronic liver disease in Nepal. <i>Hepatology</i> . 1994; 19(4): 805-9.                    | 1989-1992            |                      |
| Nepal   | Weatherall D. Sickle Cell and Thalassemias Prevalence Data, Personal Correspondence with David Weatherall. [Unpublished].                                                                                                                                     | 1990-2009            |                      |
| Nepal   | Centre for Health Informatics and Multiprofessional Education, University College London. Modell's Haemoglobinopathologist's Almanac. London, United Kingdom: Centre for Health Informatics and Multiprofessional Education, University College London, 2008. | 1990-2003            |                      |
| Nepal   | Nepal Census 1991 as it appears in United Nations Statistics Division (UNSD). United Nations Demographic Yearbook. New York City, United States: United Nations Statistics Division (UNSD).                                                                   | 1991                 |                      |
| Nepal   | Ministry of Health (Nepal). Nepal Fertility, Family Planning, and Health Survey 1991-1992.                                                                                                                                                                    | 1991-1992            |                      |
| Nepal   | Rai SK, Shibata H, Satoh M, Murakoso K, Sumi K, Kubo T, Matsuoka A. Seroprevalence of hepatitis B and C viruses in eastern Nepal. <i>J Jpn Assoc Infec Dis</i> . 1994; 68(12): 1492-7.                                                                        | 1991-1993            |                      |

**Web Table 32 - Comprehensive citation list**

| Country | Citation                                                                                                                                                                                                                                                                                                               | Year*     | New for GBD 2013 (*) |
|---------|------------------------------------------------------------------------------------------------------------------------------------------------------------------------------------------------------------------------------------------------------------------------------------------------------------------------|-----------|----------------------|
| Nepal   | Maskey AP, Basnyat B, Thwaites GE, Campbell JI, Farrar JJ, Zimmerman MD. Emerging trends in enteric fever in Nepal: 9124 cases confirmed by blood culture 1993-2003. <i>Trans R Soc Trop Med Hyg.</i> 2008; 102(1): 91-5.                                                                                              | 1993-2003 | *                    |
| Nepal   | World Health Organization (WHO). Nepal WHO Leishmaniasis Country Profile.                                                                                                                                                                                                                                              | 1994-2010 | *                    |
| Nepal   | Shrestha SM, Subedi NB, Shrestha S, Maharjan KG, Tsuda F, Okamoto H. Epidemiology of hepatitis C virus infection in Nepal. <i>Trop Gastroenterol.</i> 1998; 19(3): 102-4.                                                                                                                                              | 1994-1996 |                      |
| Nepal   | Measles Supplementary Immunization Activity Data as provided by the World Health Organization. [Unpublished].                                                                                                                                                                                                          | 1995      |                      |
| Nepal   | Macro International, Inc, Ministry of Health and Population (Nepal), New ERA. Nepal Demographic and Health Survey 1996. Calverton, United States: Macro International, Inc.                                                                                                                                            | 1996      |                      |
| Nepal   | Sawayama Y, Hayashi J, Ariyama I, Furusyo N, Kawasaki T, Kawasaki M, Itoh K, Acharya GP, Kashiwagi S. A ten year serological survey of hepatitis A, B and C viruses infections in Nepal. <i>J Epidemiol.</i> 1999; 9(5): 350-4.                                                                                        | 1996      |                      |
| Nepal   | Department of Peace and Conflict Research, Uppsala University. UCDP One-Sided Violence Database Version 1.4, 2013. Uppsala, Sweden: Department of Peace and Conflict Research, Uppsala University, 2013.                                                                                                               | 1996-2006 | *                    |
| Nepal   | Kitson MM, Connor MP. The requirement for hepatitis A vaccine in Gurkha soldiers. <i>J R Army Med Corps.</i> 145(2): 84-5.                                                                                                                                                                                             | 1997      |                      |
| Nepal   | United Nations Office on Drugs and Crime (UNODC). United Nations Office on Drugs and Crime Global Study on Homicides 2011. Vienna, Austria: United Nations Office on Drugs and Crime (UNODC), 2011.                                                                                                                    | 1997-2009 |                      |
| Nepal   | Suzuki A, Hamano S, Shirakawa T, Watanabe K, Endo T, Sharma S, Jha B, Acharya GP, Nishiyama K, Fukumaki Y, Kobayashi S. The distribution of hereditary erythrocytic disorders associated with malaria, in a lowland area of Nepal: a micro-epidemiological study. <i>Ann Trop Med Parasitol.</i> 2007; 101(2): 113-22. | 1998-2002 |                      |
| Nepal   | Freeman JV, Christian P, Khatry SK, Adhikari RK, LeClerq SC, Katz J, Darmstadt GL. Evaluation of neonatal verbal autopsy using physician review versus algorithm-based cause-of-death assignment in rural Nepal. <i>Paediatr Perinat Epidemiol.</i> 2005; 19(4): 323-31.                                               | 1999      |                      |
| Nepal   | Bern C, Joshi AB, Jha SN, Das ML, Hightower A, Thakur GD, Bista MB. Factors associated with visceral leishmaniasis in Nepal: bed-net use is strongly protective. <i>Am J Trop Med Hyg.</i> 2000; 63(3-4): 184-8.                                                                                                       | 1999      |                      |
| Nepal   | Malla T, Malla KK, Thapalial A, Shaw C. Enteric fever: a retrospective 6-year analysis of 82 paediatric cases in a teaching hospital. <i>Kathmandu Univ Med J.</i> 2007; 5(2): 181-7.                                                                                                                                  | 2000-2005 | *                    |
| Nepal   | Macro International, Inc, Ministry of Health and Population (Nepal), New ERA. Nepal Demographic and Health Survey 2001. Calverton, United States: Macro International, Inc.                                                                                                                                            | 2001      |                      |
| Nepal   | Central Bureau of Statistics (Nepal), Minnesota Population Center. Nepal National Population Census 2001 from the Integrated Public Use Microdata Series, International. [Machine-readable database]. Minneapolis: University of Minnesota.                                                                            | 2001      |                      |
| Nepal   | Bhatta CP, Thapa B, Rana BB. Seroprevalence of hepatitis "B" in Kathmandu Medical College Teaching Hospital (KMCTH). <i>Kathmandu Univ Med J.</i> 2003; 1(2): 113-6.                                                                                                                                                   | 2001      |                      |
| Nepal   | Sharma G, Shrestha PK, Wasti H, Kadel T, Ghimire P, Dhungana S. A review of violent and traumatic deaths in Kathmandu, Nepal. <i>International Journal of Injury Control and Safety Promotion.</i> 2006; 13(3): 197-199.                                                                                               | 2002      |                      |



**Web Table 32 - Comprehensive citation list**

| Country | Citation                                                                                                                                                                                                                                                                                                                                                                                                      | Year*                 | New for GBD 2013 (*) |
|---------|---------------------------------------------------------------------------------------------------------------------------------------------------------------------------------------------------------------------------------------------------------------------------------------------------------------------------------------------------------------------------------------------------------------|-----------------------|----------------------|
| Nepal   | Blacksell SD, Sharma NP, Phumratanaprapin W, Jenjaroen K, Peacock SJ, White NJ, Pukrittayakamee S, Day NPJ. Serological and blood culture investigations of Nepalese fever patients. <i>Trans R Soc Trop Med Hyg.</i> 2007; 101(7): 686-90.                                                                                                                                                                   | 2002-2004             | *                    |
| Nepal   | Tielsch JM, Khattry SK, Stoltzfus RJ, Katz J, LeClerq SC, Adhikari R, Mullany LC, Black R, Shrestha S. Effect of daily zinc supplementation on child mortality in southern Nepal: a community-based, cluster randomised, placebo-controlled trial. <i>Lancet.</i> 2007; 370(9594): 1230-9.                                                                                                                    | 2003                  |                      |
| Nepal   | Maskey MK, Baral KP, Shah R, Shrestha BD, Lang J, Rothman KJ. Field test results of the motherhood method to measure maternal mortality. <i>Indian J Med Res.</i> 2011; 64-9.                                                                                                                                                                                                                                 | 2003-2005             |                      |
| Nepal   | World Health Organization (WHO). Yellow Fever Reported Cases, WHO Vaccine-Preventable Diseases: Monitoring System. Geneva, Switzerland: World Health Organization (WHO).                                                                                                                                                                                                                                      | 2004                  |                      |
| Nepal   | Chiba H, Takezaki T, Neupani D, Kim J, Yoshida S, Mizoguchi E, Takeuchi J, Suzuki J, Tanaka Y, Ito K, Kitamura T, Kuriki K, Wakai K, Samejima K, Sonoda S, Tajima K. An epidemiological study of HBV, HCV and HTLV-I in Sherpas of Nepal. <i>Asian Pac J Cancer Prev.</i> 2004; 5(4): 370-3.                                                                                                                  | 2004                  |                      |
| Nepal   | World Health Organization (WHO). Retrospective Measles Data on Supplementary Immunization Activities. Geneva, Switzerland: World Health Organization (WHO).                                                                                                                                                                                                                                                   | 2004-2005, 2008, 2012 |                      |
| Nepal   | Khanal S, Ge VS, Dawson P, Houston R. Verbal autopsy to ascertain causes of neonatal deaths in a community setting: a study from Morang, Nepal. <i>JNMA J Nepal Med Assoc.</i> 2011; 51(181): 21-7.                                                                                                                                                                                                           | 2005                  |                      |
| Nepal   | Baker S, Holt KE, Clements ACA, Karkey A, Arjyal A, Boni MF, Dongol S, Hammond N, Koirala S, Duy PT, Nga TVT, Campbell JI, Dolecek C, Basnyat B, Dougan G, Farrar JJ. Combined high-resolution genotyping and geospatial analysis reveals modes of endemic urban typhoid fever transmission. <i>Open Biol.</i> 2011; 1(2): 110008.                                                                            | 2005-2009             | *                    |
| Nepal   | Karkey A, Arjyal A, Anders KL, Boni MF, Dongol S, Koirala S, My PVT, Nga TVT, Clements ACA, Holt KE, Duy PT, Day JN, Campbell JI, Dougan G, Dolecek C, Farrar J, Basnyat B, Baker S. The Burden and Characteristics of Enteric Fever at a Healthcare Facility in a Densely Populated Area of Kathmandu. <i>PLoS One.</i> 2010; 5(11).                                                                         | 2005-2009             | *                    |
| Nepal   | Macro International, Inc, Ministry of Health and Population (Nepal), New ERA. Nepal Demographic and Health Survey 2006. Calverton, United States: Macro International, Inc.                                                                                                                                                                                                                                   | 2006                  |                      |
| Nepal   | Shah R, Maskey MK. Maternal and infant mortality in Mahottari district of Nepal. <i>J Nepal Health Res Council.</i> 2010; 8(1): 35-9.                                                                                                                                                                                                                                                                         | 2007                  |                      |
| Nepal   | Department of Peace and Conflict Research, Uppsala University. UCDP Nonstate Conflict Database Version 2.5, 2013. Uppsala, Sweden: Department of Peace and Conflict Research, Uppsala University, 2013.                                                                                                                                                                                                       | 2007                  | *                    |
| Nepal   | Lumbiganon P, Laopaiboon M, Gülmezoglu AM, Souza JP, Taneepanichskul S, Ruyan P, Attygalle DE, Shrestha N, Mori R, Hinh ND, Bang HT, Rathavy T, Chuyun K, Cheang K, Festin M, Udomprasertgul V, Germar MJV, Yanqiu G, Roy M, Carroli G, Ba-Thike K. Method of delivery and pregnancy outcomes in Asia: the WHO global survey on maternal and perinatal health 2007-08. <i>Lancet.</i> 2010; 375(9713): 490-9. | 2007-2008             |                      |
| Nepal   | Prajapati B, Rai GK, Rai SK, Upreti HC, Thapa M, Singh G, Shrestha RM. Prevalence of Salmonella typhi and paratyphi infection in children: a hospital based study. <i>Nepal Med Coll J.</i> 2008; 10(4): 238-41.                                                                                                                                                                                              | 2007-2008             | *                    |
| Nepal   | Mishra A, Shrestha P, Bista N, Bhurtel P, Bhattarai S, Thakali K, Banthia P, Pathak S. Pattern of Liver Diseases. <i>J Nepal Health Res Council.</i> 2009; 7(14): 14-8.                                                                                                                                                                                                                                       | 2008                  |                      |

**Web Table 32 - Comprehensive citation list**

| Country     | Citation                                                                                                                                                                                                          | Year*                                                | New for GBD 2013 (*) |
|-------------|-------------------------------------------------------------------------------------------------------------------------------------------------------------------------------------------------------------------|------------------------------------------------------|----------------------|
| Nepal       | Ministry of Health (Nepal), New ERA, Options UK, Safe Motherhood Network Federation (Nepal). Nepal Maternal Mortality and Morbidity Study 2008-2009.                                                              | 2008-2009                                            |                      |
| Nepal       | Pokharel P, Rai SK, Karki G, Katuwal A, Vitrakoti R, Shrestha SK. Study of enteric fever and antibiogram of Salmonella isolates at a teaching hospital in Kathmandu Valley. Nepal Med Coll J. 2009; 11(3): 176-8. | 2008-2009                                            | *                    |
| Nepal       | ICF Macro, Ministry of Health and Population (Nepal), New ERA. Nepal Demographic and Health Survey 2011. Claverton, Maryland: ICF Macro.                                                                          | 2011                                                 |                      |
| Netherlands | Netherlands Vital Registration - Deaths 1950 ICD7 as it appears in World Health Organization (WHO). WHO Mortality Database Version February 2014. Geneva, Switzerland: World Health Organization (WHO), 2014.     | 1950                                                 |                      |
| Netherlands | Netherlands Vital Registration - Deaths 1951 ICD7 as it appears in World Health Organization (WHO). WHO Mortality Database Version February 2014. Geneva, Switzerland: World Health Organization (WHO), 2014.     | 1951                                                 |                      |
| Netherlands | Netherlands Vital Registration - Deaths 1952 ICD7 as it appears in World Health Organization (WHO). WHO Mortality Database Version February 2014. Geneva, Switzerland: World Health Organization (WHO), 2014.     | 1952                                                 |                      |
| Netherlands | Netherlands Vital Registration - Deaths 1953 ICD7 as it appears in World Health Organization (WHO). WHO Mortality Database Version February 2014. Geneva, Switzerland: World Health Organization (WHO), 2014.     | 1953                                                 |                      |
| Netherlands | Centre for Research on the Epidemiology of Disasters (CRED). EM-DAT: The OFDA/CRED International Disaster Database. Brussels, Belgium: Catholic University of Leuven.                                             | 1953, 1987, 1987, 1990, 1993, 1995, 1997, 2002, 2007 |                      |
| Netherlands | Netherlands Vital Registration - Deaths 1954 ICD7 as it appears in World Health Organization (WHO). WHO Mortality Database Version February 2014. Geneva, Switzerland: World Health Organization (WHO), 2014.     | 1954                                                 |                      |
| Netherlands | Netherlands Vital Registration - Deaths 1955 ICD7 as it appears in World Health Organization (WHO). WHO Mortality Database Version February 2014. Geneva, Switzerland: World Health Organization (WHO), 2014.     | 1955                                                 |                      |
| Netherlands | Netherlands Vital Registration - Deaths 1956 ICD7 as it appears in World Health Organization (WHO). WHO Mortality Database Version February 2014. Geneva, Switzerland: World Health Organization (WHO), 2014.     | 1956                                                 |                      |
| Netherlands | Netherlands Vital Registration - Deaths 1957 ICD7 as it appears in World Health Organization (WHO). WHO Mortality Database Version February 2014. Geneva, Switzerland: World Health Organization (WHO), 2014.     | 1957                                                 |                      |
| Netherlands | Netherlands Vital Registration - Deaths 1958 ICD7 as it appears in World Health Organization (WHO). WHO Mortality Database Version February 2014. Geneva, Switzerland: World Health Organization (WHO), 2014.     | 1958                                                 |                      |
| Netherlands | Netherlands Vital Registration - Deaths 1959 ICD7 as it appears in World Health Organization (WHO). WHO Mortality Database Version February 2014. Geneva, Switzerland: World Health Organization (WHO), 2014.     | 1959                                                 |                      |
| Netherlands | Netherlands Vital Registration - Deaths 1960 ICD7 as it appears in World Health Organization (WHO). WHO Mortality Database Version February 2014. Geneva, Switzerland: World Health Organization (WHO), 2014.     | 1960                                                 |                      |



**Web Table 32 - Comprehensive citation list**

| Country     | Citation                                                                                                                                                                                                      | Year* | New for GBD 2013 (*) |
|-------------|---------------------------------------------------------------------------------------------------------------------------------------------------------------------------------------------------------------|-------|----------------------|
| Netherlands | Netherlands Vital Registration - Deaths 1961 ICD7 as it appears in World Health Organization (WHO). WHO Mortality Database Version February 2014. Geneva, Switzerland: World Health Organization (WHO), 2014. | 1961  |                      |
| Netherlands | Netherlands Vital Registration - Deaths 1962 ICD7 as it appears in World Health Organization (WHO). WHO Mortality Database Version February 2014. Geneva, Switzerland: World Health Organization (WHO), 2014. | 1962  |                      |
| Netherlands | Netherlands Vital Registration - Deaths 1963 ICD7 as it appears in World Health Organization (WHO). WHO Mortality Database Version February 2014. Geneva, Switzerland: World Health Organization (WHO), 2014. | 1963  |                      |
| Netherlands | Netherlands Vital Registration - Deaths 1964 ICD7 as it appears in World Health Organization (WHO). WHO Mortality Database Version February 2014. Geneva, Switzerland: World Health Organization (WHO), 2014. | 1964  |                      |
| Netherlands | Netherlands Vital Registration - Deaths 1965 ICD7 as it appears in World Health Organization (WHO). WHO Mortality Database Version February 2014. Geneva, Switzerland: World Health Organization (WHO), 2014. | 1965  |                      |
| Netherlands | Netherlands Vital Registration - Deaths 1966 ICD7 as it appears in World Health Organization (WHO). WHO Mortality Database Version February 2014. Geneva, Switzerland: World Health Organization (WHO), 2014. | 1966  |                      |
| Netherlands | Netherlands Vital Registration - Deaths 1967 ICD7 as it appears in World Health Organization (WHO). WHO Mortality Database Version February 2014. Geneva, Switzerland: World Health Organization (WHO), 2014. | 1967  |                      |
| Netherlands | Netherlands Vital Registration - Deaths 1968 ICD7 as it appears in World Health Organization (WHO). WHO Mortality Database Version February 2014. Geneva, Switzerland: World Health Organization (WHO), 2014. | 1968  |                      |
| Netherlands | Netherlands Vital Registration - Deaths 1969 ICD8 as it appears in World Health Organization (WHO). WHO Mortality Database Version February 2014. Geneva, Switzerland: World Health Organization (WHO), 2014. | 1969  |                      |
| Netherlands | Netherlands Vital Registration - Deaths 1970 ICD8 as it appears in World Health Organization (WHO). WHO Mortality Database Version February 2014. Geneva, Switzerland: World Health Organization (WHO), 2014. | 1970  |                      |
| Netherlands | Netherlands Vital Registration - Deaths 1971 ICD8 as it appears in World Health Organization (WHO). WHO Mortality Database Version February 2014. Geneva, Switzerland: World Health Organization (WHO), 2014. | 1971  |                      |
| Netherlands | Netherlands Vital Registration - Deaths 1972 ICD8 as it appears in World Health Organization (WHO). WHO Mortality Database Version February 2014. Geneva, Switzerland: World Health Organization (WHO), 2014. | 1972  |                      |
| Netherlands | Netherlands Vital Registration - Deaths 1973 ICD8 as it appears in World Health Organization (WHO). WHO Mortality Database Version February 2014. Geneva, Switzerland: World Health Organization (WHO), 2014. | 1973  |                      |
| Netherlands | Netherlands Vital Registration - Deaths 1974 ICD8 as it appears in World Health Organization (WHO). WHO Mortality Database Version February 2014. Geneva, Switzerland: World Health Organization (WHO), 2014. | 1974  |                      |

**Web Table 32 - Comprehensive citation list**

| Country     | Citation                                                                                                                                                                                                                                                                                              | Year*                  | New for GBD 2013 (*) |
|-------------|-------------------------------------------------------------------------------------------------------------------------------------------------------------------------------------------------------------------------------------------------------------------------------------------------------|------------------------|----------------------|
| Netherlands | Netherlands Vital Registration - Deaths 1975 ICD8 as it appears in World Health Organization (WHO). WHO Mortality Database Version February 2014. Geneva, Switzerland: World Health Organization (WHO), 2014.                                                                                         | 1975                   |                      |
| Netherlands | Netherlands Vital Registration - Deaths 1976 ICD8 as it appears in World Health Organization (WHO). WHO Mortality Database Version February 2014. Geneva, Switzerland: World Health Organization (WHO), 2014.                                                                                         | 1976                   |                      |
| Netherlands | Netherlands Vital Registration - Deaths 1977 ICD8 as it appears in World Health Organization (WHO). WHO Mortality Database Version February 2014. Geneva, Switzerland: World Health Organization (WHO), 2014.                                                                                         | 1977                   |                      |
| Netherlands | Netherlands Vital Registration - Deaths 1978 ICD8 as it appears in World Health Organization (WHO). WHO Mortality Database Version February 2014. Geneva, Switzerland: World Health Organization (WHO), 2014.                                                                                         | 1978                   |                      |
| Netherlands | Netherlands Vital Registration - Deaths 1979 ICD9 as it appears in World Health Organization (WHO). WHO Mortality Database Version February 2014. Geneva, Switzerland: World Health Organization (WHO), 2014.                                                                                         | 1979                   |                      |
| Netherlands | Netherlands Vital Registration - Deaths 1980 ICD9 as it appears in World Health Organization (WHO). WHO Mortality Database Version February 2014. Geneva, Switzerland: World Health Organization (WHO), 2014.                                                                                         | 1980                   |                      |
| Netherlands | Institute for Health Metrics and Evaluation. Institute for Health Metrics and Evaluation Cancer Registry Database. [Unpublished].                                                                                                                                                                     | 1980-2007              |                      |
| Netherlands | Ferlay J, Parkin DM, Curado MP, Bray F, Edwards B, Shin HR and Forman D. Cancer Incidence in Five Continents, Volumes I to IX: IARC CancerBase No. 9 [Internet]. Lyon, France: International Agency for Research on Cancer; 2010. Available from: <a href="http://ci5.iarc.fr">http://ci5.iarc.fr</a> | 1980-2002              |                      |
| Netherlands | Institute for Health Metrics and Evaluation (IHME), Joint United Nations Program on HIV/AIDS (UNAIDS). Institute for Health Metrics and Evaluation HIV Mortality Estimates Based on the UNAIDS Spectrum Model Framework.                                                                              | 1980-2013              | *                    |
| Netherlands | Parkin DM, International Agency for Research on Cancer, International Association of Cancer Registries. Cancer Incidence in Five Continents. Vol. I to VIII. Lyon, France, IARC Press, 2005.                                                                                                          | 1980, 1987, 1990, 1995 |                      |
| Netherlands | Netherlands Vital Registration - Deaths 1981 ICD9 as it appears in World Health Organization (WHO). WHO Mortality Database Version February 2014. Geneva, Switzerland: World Health Organization (WHO), 2014.                                                                                         | 1981                   |                      |
| Netherlands | Netherlands Vital Registration - Deaths 1982 ICD9 as it appears in World Health Organization (WHO). WHO Mortality Database Version February 2014. Geneva, Switzerland: World Health Organization (WHO), 2014.                                                                                         | 1982                   |                      |
| Netherlands | Grosheide PM, Wladimiroff JW, Heijntink RA, Mazel JA, Christiaens GC, Nuijten AS, Schalm SW. Proposal for routine antenatal screening at 14 weeks for hepatitis B surface antigen. Dutch Study Group on Prevention of Neonatal Hepatitis. BMJ. 1995; 311(7014): 1197-9.                               | 1982-1989              |                      |
| Netherlands | Netherlands Vital Registration - Deaths 1983 ICD9 as it appears in World Health Organization (WHO). WHO Mortality Database Version February 2014. Geneva, Switzerland: World Health Organization (WHO), 2014.                                                                                         | 1983                   |                      |
| Netherlands | Netherlands Vital Registration - Deaths 1984 ICD9 as it appears in World Health Organization (WHO). WHO Mortality Database Version February 2014. Geneva, Switzerland: World Health Organization (WHO), 2014.                                                                                         | 1984                   |                      |

**Web Table 32 - Comprehensive citation list**

| Country     | Citation                                                                                                                                                                                                                                                                                                                          | Year*            | New for GBD 2013 (*) |
|-------------|-----------------------------------------------------------------------------------------------------------------------------------------------------------------------------------------------------------------------------------------------------------------------------------------------------------------------------------|------------------|----------------------|
| Netherlands | Netherlands Vital Registration - Deaths 1985 ICD9 as it appears in World Health Organization (WHO). WHO Mortality Database Version February 2014. Geneva, Switzerland: World Health Organization (WHO), 2014.                                                                                                                     | 1985             |                      |
| Netherlands | Netherlands Vital Registration - Deaths 1986 ICD9 as it appears in World Health Organization (WHO). WHO Mortality Database Version February 2014. Geneva, Switzerland: World Health Organization (WHO), 2014.                                                                                                                     | 1986             |                      |
| Netherlands | Gussekloo J, Heeren TJ, Izaks GJ, Ligthart GJ, Rooijmans HG. A community based study of the incidence of dementia in subjects aged 85 years and over. J Neurol Neurosurg Psychiatry. 1995; 59(5): 507-10.                                                                                                                         | 1986-1992        |                      |
| Netherlands | Heeren TJ, Lagaay AM, Hijmans W, Rooymans HG. Prevalence of dementia in the "oldest old" of a Dutch community. J Am Geriatr Soc. 1991; 39(8): 755-9.                                                                                                                                                                              | 1986-1989        |                      |
| Netherlands | Netherlands Vital Registration - Deaths 1987 ICD9 as it appears in World Health Organization (WHO). WHO Mortality Database Version February 2014. Geneva, Switzerland: World Health Organization (WHO), 2014.                                                                                                                     | 1987             |                      |
| Netherlands | Van Doornum GJJ, Hooykaas C, Cuypers MT, Van Der Linden MMD, Coutinho RA. Prevalence of hepatitis C virus infections among heterosexuals with multiple partners. J Med Virol. 1991; 35(1): 22-7.                                                                                                                                  | 1987-1989        |                      |
| Netherlands | Netherlands Vital Registration - Deaths 1988 ICD9 as it appears in World Health Organization (WHO). WHO Mortality Database Version February 2014. Geneva, Switzerland: World Health Organization (WHO), 2014.                                                                                                                     | 1988             |                      |
| Netherlands | Modell B, Darlison M, Birgens H, Cario H, Faustino P, Giordano PC, Gulbis B, Hopmeier P, Lena-Russo D, Romao L, Theodorsson E. Epidemiology of haemoglobin disorders in Europe: an overview. Scand J Clin Lab Invest. 2007; 67(1): 39-69.                                                                                         | 1988, 2006       |                      |
| Netherlands | Centre for Health Informatics and Multiprofessional Education, University College London. Modell's Haemoglobinopathologist's Almanac. London, United Kingdom: Centre for Health Informatics and Multiprofessional Education, University College London, 2008.                                                                     | 1988, 2003, 2006 |                      |
| Netherlands | Netherlands Vital Registration - Deaths 1989 ICD9 as it appears in World Health Organization (WHO). WHO Mortality Database Version February 2014. Geneva, Switzerland: World Health Organization (WHO), 2014.                                                                                                                     | 1989             |                      |
| Netherlands | Zaaijer HL, Yin MF, Lelie PN. Seroprevalence of hepatitis E in The Netherlands. Lancet. 1992; 340(8820): 681.                                                                                                                                                                                                                     | 1989-1991        | *                    |
| Netherlands | Grosheide PM, Klokman-Houweling JM, Conyn-van Spaendonck MA. Programme for preventing perinatal hepatitis B infection through screening of pregnant women and immunisation of infants of infected mothers in The Netherlands, 1989-92. National Hepatitis B Steering Committee. BMJ. 1995; 311(7014): 1200-2.                     | 1989-1992        |                      |
| Netherlands | Netherlands Vital Registration - Deaths 1990 ICD9 as it appears in World Health Organization (WHO). WHO Mortality Database Version February 2014. Geneva, Switzerland: World Health Organization (WHO), 2014.                                                                                                                     | 1990             |                      |
| Netherlands | Schrijvers EMC, Verhaaren BFJ, Koudstaal PJ, Hofman A, Ikram MA, Breteler MMB. Is dementia incidence declining?: Trends in dementia incidence since 1990 in the Rotterdam Study. Neurology. 2012; 78(19): 1456-63.                                                                                                                | 1990-2010        |                      |
| Netherlands | Bais MJM, Eskes M, Pel M, Bonsel GJ, Bleker OP. Postpartum haemorrhage in nulliparous women: incidence and risk factors in low and high risk women. A Dutch population-based cohort study on standard (> or = 500 ml) and severe (> or = 1000 ml) postpartum haemorrhage. Eur J Obstet Gynecol Reprod Biol. 2004; 115(2): 166-72. | 1990-1994        |                      |

**Web Table 32 - Comprehensive citation list**

| Country     | Citation                                                                                                                                                                                                                                                                                                                                                                                                                                                                                                                                                                                                                                                                                                                      | Year*     | New for GBD 2013 (*) |
|-------------|-------------------------------------------------------------------------------------------------------------------------------------------------------------------------------------------------------------------------------------------------------------------------------------------------------------------------------------------------------------------------------------------------------------------------------------------------------------------------------------------------------------------------------------------------------------------------------------------------------------------------------------------------------------------------------------------------------------------------------|-----------|----------------------|
| Netherlands | Ott A, Breteler MM, van Harskamp F, Stijnen T, Hofman A. Incidence and risk of dementia. The Rotterdam Study. <i>Am J Epidemiol</i> . 1998; 147(6): 574-80.                                                                                                                                                                                                                                                                                                                                                                                                                                                                                                                                                                   | 1990-1994 |                      |
| Netherlands | Ott A, Breteler MM, van Harskamp F, Claus JJ, van der Cammen TJ, Grobbee DE, Hofman A. Prevalence of Alzheimer's disease and vascular dementia: association with education. The Rotterdam study. <i>BMJ</i> . 1995; 310(6985): 970-3.                                                                                                                                                                                                                                                                                                                                                                                                                                                                                         | 1990-1991 |                      |
| Netherlands | Netherlands Vital Registration - Deaths 1991 ICD9 as it appears in World Health Organization (WHO). WHO Mortality Database Version February 2014. Geneva, Switzerland: World Health Organization (WHO), 2014.                                                                                                                                                                                                                                                                                                                                                                                                                                                                                                                 | 1991      |                      |
| Netherlands | Boersma F, Eefsting JA, van den Brink W, Koeter M, van Tilburg W. Prevalence of dementia in a rural Netherlands population and the influence of DSM-III-R and CAMDEX criteria for the prevalence of mild and more severe forms. <i>J Clin Epidemiol</i> . 1998; 51(3): 189-97.                                                                                                                                                                                                                                                                                                                                                                                                                                                | 1991-1992 |                      |
| Netherlands | Netherlands Vital Registration - Deaths 1992 ICD9 as it appears in World Health Organization (WHO). WHO Mortality Database Version February 2014. Geneva, Switzerland: World Health Organization (WHO), 2014.                                                                                                                                                                                                                                                                                                                                                                                                                                                                                                                 | 1992      |                      |
| Netherlands | Trichopoulos D, Bamia C, Lagiou P, Fedirko V, Trepo E, Jenab M, Pischon T, Nöthlings U, Overved K, Tjønneland A, Outzen M, Clavel-Chapelon F, Kaaks R, Lukanova A, Boeing H, Aleksandrova K, Benetou V, Zylis D, Palli D, Pala V, Panico S, Tumino R, Sacerdote C, Bueno-De-Mesquita HB, Van Kranen HJ, Peeters PHM, Lund E, Quirós JR, González CA, Sanchez Perez M-J, Navarro C, Dorronsoro M, Barricarte A, Lindkvist B, Regnér S, Werner M, Hallmans G, Khaw K-T, Wareham N, Key T, Romieu I, Chuang S-C, Murphy N, Boffetta P, Trichopoulou A, Riboli E. Hepatocellular carcinoma risk factors and disease burden in a European cohort: a nested case-control study. <i>J Natl Cancer Inst</i> . 2011; 103(22): 1686-95. | 1992-2006 | *                    |
| Netherlands | Zaaijer HL, Mauser-Bunschoten EP, ten Veen JH, Kapprell HP, Kok M, van den Berg HM, Lelie PN. Hepatitis E virus antibodies among patients with hemophilia, blood donors, and hepatitis patients. <i>J Med Virol</i> . 1995; 46(3): 244-6.                                                                                                                                                                                                                                                                                                                                                                                                                                                                                     | 1992-1994 | *                    |
| Netherlands | Molijn MH, van der Linden JM, Ko LK, Gorgels J, Hop W, van Rhenen DJ. Risk factors and anti-HBc reactivity among first time blood donors. <i>Vox Sang</i> . 1997; 72(4): 207-10.                                                                                                                                                                                                                                                                                                                                                                                                                                                                                                                                              | 1992-1995 |                      |
| Netherlands | Netherlands Vital Registration - Deaths 1993 ICD9 as it appears in World Health Organization (WHO). WHO Mortality Database Version February 2014. Geneva, Switzerland: World Health Organization (WHO), 2014.                                                                                                                                                                                                                                                                                                                                                                                                                                                                                                                 | 1993      |                      |
| Netherlands | Van Steenberghe JE, Leentvaar-Kuijpers A, Baayen D, Dukers HT, van Doornum GJ, van den Hoek JA, Coutinho RA. Evaluation of the hepatitis B antenatal screening and neonatal immunization program in Amsterdam, 1993-1998. <i>Vaccine</i> . 2001; 20(1-2): 7-11.                                                                                                                                                                                                                                                                                                                                                                                                                                                               | 1993-1998 |                      |
| Netherlands | Netherlands Vital Registration - Deaths 1994 ICD9 as it appears in World Health Organization (WHO). WHO Mortality Database Version February 2014. Geneva, Switzerland: World Health Organization (WHO), 2014.                                                                                                                                                                                                                                                                                                                                                                                                                                                                                                                 | 1994      |                      |
| Netherlands | Netherlands Vital Registration - Deaths 1995 ICD9 as it appears in World Health Organization (WHO). WHO Mortality Database Version February 2014. Geneva, Switzerland: World Health Organization (WHO), 2014.                                                                                                                                                                                                                                                                                                                                                                                                                                                                                                                 | 1995      |                      |
| Netherlands | Termorshuizen F, Dorigo-Zetsma JW, de Melker HE, van den Hof S, Conyn-Van Spaendonck MA. The prevalence of antibodies to hepatitis A virus and its determinants in The Netherlands: a population-based survey. <i>Epidemiol Infect</i> . 2000; 124(3): 459-66.                                                                                                                                                                                                                                                                                                                                                                                                                                                                | 1995-1996 |                      |

**Web Table 32 - Comprehensive citation list**

| Country     | Citation                                                                                                                                                                                                                                                                 | Year*     | New for GBD 2013 (*) |
|-------------|--------------------------------------------------------------------------------------------------------------------------------------------------------------------------------------------------------------------------------------------------------------------------|-----------|----------------------|
| Netherlands | Netherlands Vital Registration - Deaths 1996 ICD10 as it appears in World Health Organization (WHO). WHO Mortality Database Version February 2014. Geneva, Switzerland: World Health Organization (WHO), 2014.                                                           | 1996      |                      |
| Netherlands | Netherlands Vital Registration - Deaths 1997 ICD10 as it appears in World Health Organization (WHO). WHO Mortality Database Version February 2014. Geneva, Switzerland: World Health Organization (WHO), 2014.                                                           | 1997      |                      |
| Netherlands | National Institute for Public Health and the Environment (Netherlands). The National Immunisation Programme in the Netherlands: Developments in 2013. Bilthoven, Netherlands: National Institute for Public Health and the Environment (Netherlands), 2013.              | 1997-2012 | *                    |
| Netherlands | Netherlands Vital Registration - Deaths 1998 ICD10 as it appears in World Health Organization (WHO). WHO Mortality Database Version February 2014. Geneva, Switzerland: World Health Organization (WHO), 2014.                                                           | 1998      |                      |
| Netherlands | EUVAC-NET. EUVAC-NET Pertussis Surveillance Report 1998-2002. Stockholm, Sweden: European Centre for Disease Prevention and Control.                                                                                                                                     | 1998-2002 |                      |
| Netherlands | Netherlands Vital Registration - Deaths 1999 ICD10 as it appears in World Health Organization (WHO). WHO Mortality Database Version February 2014. Geneva, Switzerland: World Health Organization (WHO), 2014.                                                           | 1999      |                      |
| Netherlands | Centers for Disease Control and Prevention (CDC). Netherlands Measles Outbreak 1999-2000. Atlanta, United States: Centers for Disease Control and Prevention (CDC), 2000.                                                                                                | 1999-2000 |                      |
| Netherlands | Netherlands Vital Registration - Deaths 2000 ICD10 as it appears in World Health Organization (WHO). WHO Mortality Database Version February 2014. Geneva, Switzerland: World Health Organization (WHO), 2014.                                                           | 2000      |                      |
| Netherlands | Curado MP, Edwards B, Shin HR, Storm H, Ferlay J, Heanue M and Boyle P, eds (2007). Cancer Incidence in Five Continents, Vol. IX Periodic Data (electronic version). Lyon, IARC. <a href="http://ci5.iarc.fr">http://ci5.iarc.fr</a>                                     | 2000      |                      |
| Netherlands | Waar K, Herremans MMPT, Vennema H, Koopmans MPG, Benne CA. Hepatitis E is a cause of unexplained hepatitis in The Netherlands. J Clin Virol. 2005; 33(2): 145-9.                                                                                                         | 2000-2002 |                      |
| Netherlands | Netherlands Vital Registration - Deaths 2001 ICD10 as it appears in World Health Organization (WHO). WHO Mortality Database Version February 2014. Geneva, Switzerland: World Health Organization (WHO), 2014.                                                           | 2001      |                      |
| Netherlands | Richardus JH, Vos D, Veldhuijzen IK, Groen J. Seroprevalence of hepatitis A virus antibodies in Turkish and Moroccan children in Rotterdam. J Med Virol. 2004; 72(2): 197-202.                                                                                           | 2001      |                      |
| Netherlands | Netherlands Vital Registration - Deaths 2002 ICD10 as it appears in World Health Organization (WHO). WHO Mortality Database Version February 2014. Geneva, Switzerland: World Health Organization (WHO), 2014.                                                           | 2002      |                      |
| Netherlands | World Health Organization (WHO). Yellow Fever Reported Cases, WHO Vaccine-Preventable Diseases: Monitoring System. Geneva, Switzerland: World Health Organization (WHO).                                                                                                 | 2002-2008 |                      |
| Netherlands | Herremans M, Vennema H, Bakker J, van der Veer B, Duizer E, Benne CA, Waar K, Hendrixks B, Schneeberger P, Blaauw G, Kooiman M, Koopmans MPG. Swine-like hepatitis E viruses are a cause of unexplained hepatitis in the Netherlands. J Viral Hepat. 2007; 14(2): 140-6. | 2002-2004 | *                    |

**Web Table 32 - Comprehensive citation list**

| Country     | Citation                                                                                                                                                                                                                                                                    | Year*     | New for GBD 2013 (*) |
|-------------|-----------------------------------------------------------------------------------------------------------------------------------------------------------------------------------------------------------------------------------------------------------------------------|-----------|----------------------|
| Netherlands | Netherlands Vital Registration - Deaths 2003 ICD10 as it appears in World Health Organization (WHO). WHO Mortality Database Version February 2014. Geneva, Switzerland: World Health Organization (WHO), 2014.                                                              | 2003      |                      |
| Netherlands | Netherlands Cancer Registry. Netherlands Cancer Registry Statistics - Incidence. Amsterdam, Netherlands: Comprehensive Cancer Center of the Netherlands (IKNL).                                                                                                             | 2003-2007 |                      |
| Netherlands | Netherlands Vital Registration - Deaths 2004 ICD10 as it appears in World Health Organization (WHO). WHO Mortality Database Version February 2014. Geneva, Switzerland: World Health Organization (WHO), 2014.                                                              | 2004      |                      |
| Netherlands | Veldhuijzen IK, van Driel HF, Vos D, de Zwart O, van Doornum GJJ, de Man RA, Richardus JH. Viral hepatitis in a multi-ethnic neighborhood in the Netherlands: results of a community-based study in a low prevalence country. <i>Int J Infect Dis.</i> 2009; 13(1): e9-e13. | 2004      |                      |
| Netherlands | Baaten GGG, Sonder GJB, Dukers NHTM, Coutinho RA, Van den Hoek JAR. Population-based study on the seroprevalence of hepatitis A, B, and C virus infection in Amsterdam, 2004. <i>J Med Virol.</i> 2007; 79(12): 1802-10.                                                    | 2004      |                      |
| Netherlands | WHO Regional Office for Europe (EURO-WHO). European Hospital Morbidity Database. Copenhagen, Denmark: WHO Regional Office for Europe (EURO-WHO).                                                                                                                            | 2004-2005 |                      |
| Netherlands | Van Hanegem N, Miltenburg AS, Zwart JJ, Bloemenkamp KW m, Van Roosmalen J. Severe acute maternal morbidity in asylum seekers: a two-year nationwide cohort study in the Netherlands. <i>Acta Obstet Gynecol Scand.</i> 2011; 90(9): 1010-6.                                 | 2004-2006 |                      |
| Netherlands | Kramer HMC, Schutte JM, Zwart JJ, Schuitemaker NWE, Steegers EAP, van Roosmalen J. Maternal mortality and severe morbidity from sepsis in the Netherlands. <i>Acta Obstet Gynecol Scand.</i> 2009; 88(6): 647-53.                                                           | 2004-2006 |                      |
| Netherlands | Netherlands Vital Registration - Deaths 2005 ICD10 as it appears in World Health Organization (WHO). WHO Mortality Database Version February 2014. Geneva, Switzerland: World Health Organization (WHO), 2014.                                                              | 2005      |                      |
| Netherlands | Netherlands Vital Registration - Deaths 2006 ICD10 as it appears in World Health Organization (WHO). WHO Mortality Database Version February 2014. Geneva, Switzerland: World Health Organization (WHO), 2014.                                                              | 2006      |                      |
| Netherlands | Slavenburg S, Verduyn-Lunel FM, Hermsen JT, Melchers WJG, te Morsche RHM, Drenth JPH. Prevalence of hepatitis C in the general population in the Netherlands. <i>Neth J Med.</i> 2008; 66(1): 13-7.                                                                         | 2006      |                      |
| Netherlands | Verhoef L, Boot HJ, Koopmans M, Mollema L, Van Der Klis F, Reimerink J, Van Pelt W. Changing risk profile of hepatitis A in The Netherlands: a comparison of seroprevalence in 1995-1996 and 2006-2007. <i>Epidemiol Infect.</i> 2011; 139(8): 1172-80.                     | 2006-2009 |                      |
| Netherlands | Verhoef L, Koopmans M, Duizer E, Bakker J, Reimerink J, Van Pelt W. Seroprevalence of hepatitis E antibodies and risk profile of HEV seropositivity in The Netherlands, 2006-2007. <i>Epidemiol Infect.</i> 2012; 140(10): 1838-47.                                         | 2006-2007 | *                    |
| Netherlands | Vriend HJ, Van Veen MG, Prins M, Urbanus AT, Boot HJ, Op De Coul ELM. Hepatitis C virus prevalence in The Netherlands: migrants account for most infections. <i>Epidemiol Infect.</i> 2013; 141(6): 1310-7.                                                                 | 2006-2007 |                      |
| Netherlands | Netherlands Vital Registration - Deaths 2007 ICD10 as it appears in World Health Organization (WHO). WHO Mortality Database Version February 2014. Geneva, Switzerland: World Health Organization (WHO), 2014.                                                              | 2007      |                      |
| Netherlands | Giordano PC. Starting neonatal screening for haemoglobinopathies in The Netherlands. <i>J Clin Pathol.</i> 2009; 1(62): 18-21.                                                                                                                                              | 2007      |                      |



**Web Table 32 - Comprehensive citation list**

| Country     | Citation                                                                                                                                                                                                                                                                                         | Year*                      | New for GBD 2013 (*) |
|-------------|--------------------------------------------------------------------------------------------------------------------------------------------------------------------------------------------------------------------------------------------------------------------------------------------------|----------------------------|----------------------|
| Netherlands | Netherlands Vital Registration - Deaths 2008 ICD10 as it appears in World Health Organization (WHO). WHO Mortality Database Version February 2014. Geneva, Switzerland: World Health Organization (WHO), 2014.                                                                                   | 2008                       |                      |
| Netherlands | EUVAC-NET. EUVAC-NET Pertussis Surveillance Report 2008. Stockholm, Sweden: European Centre for Disease Prevention and Control, 2009.                                                                                                                                                            | 2008                       |                      |
| Netherlands | EUVAC-NET. EUVAC-NET Measles Surveillance Report 2008. Stockholm, Sweden: European Centre for Disease Prevention and Control, 2009.                                                                                                                                                              | 2008                       |                      |
| Netherlands | Netherlands Vital Registration - Deaths 2009 ICD10 as it appears in World Health Organization (WHO). WHO Mortality Database Version February 2014. Geneva, Switzerland: World Health Organization (WHO), 2014.                                                                                   | 2009                       |                      |
| Netherlands | EUVAC-NET. EUVAC-NET Pertussis Surveillance Report 2009. Stockholm, Sweden: European Centre for Disease Prevention and Control, 2010.                                                                                                                                                            | 2009                       |                      |
| Netherlands | EUVAC-NET. EUVAC-NET Measles Surveillance Report 2009. Stockholm, Sweden: European Centre for Disease Prevention and Control, 2010.                                                                                                                                                              | 2009                       |                      |
| Netherlands | Netherlands Vital Registration - Deaths 2010 ICD10 as it appears in World Health Organization (WHO). WHO Mortality Database Version February 2014. Geneva, Switzerland: World Health Organization (WHO), 2014.                                                                                   | 2010                       |                      |
| Netherlands | European Renal Association-European Dialysis and Transplant Association (ERA-EDTA). European Renal Association-European Dialysis and Transplant Association Registry Annual Report 2010. Parma, Italy: European Renal Association-European Dialysis and Transplant Association (ERA-EDTA), 2012. | 2010                       | *                    |
| Netherlands | EUVAC-NET. EUVAC-NET Measles Surveillance Report 2010. Stockholm, Sweden: European Centre for Disease Prevention and Control, 2011.                                                                                                                                                              | 2010                       |                      |
| Netherlands | Netherlands Vital Registration - Deaths 2011 ICD10 as it appears in World Health Organization (WHO). WHO Mortality Database Version February 2014. Geneva, Switzerland: World Health Organization (WHO), 2014.                                                                                   | 2011                       | *                    |
| Netherlands | European Renal Association-European Dialysis and Transplant Association (ERA-EDTA). European Renal Association-European Dialysis and Transplant Association Registry Annual Report 2011. Parma, Italy: European Renal Association-European Dialysis and Transplant Association (ERA-EDTA), 2013. | 2011                       | *                    |
| Netherlands | United Nations Children's Fund (UNICEF), World Health Organization (WHO). WHO and UNICEF Reported Disease Incidence Time Series - Pertussis. Geneva, Switzerland: World Health Organization (WHO).                                                                                               | 1980-2000, 2002, 2004-2013 |                      |
| Netherlands | United Nations Children's Fund (UNICEF), World Health Organization (WHO). WHO and UNICEF Reported Disease Incidence Time Series - Measles. Geneva, Switzerland: World Health Organization (WHO).                                                                                                 | 1980-2000, 2002-2013       |                      |
| New Zealand | New Zealand Vital Registration - Deaths 1950 ICD7 as it appears in World Health Organization (WHO). WHO Mortality Database Version February 2014. Geneva, Switzerland: World Health Organization (WHO), 2014.                                                                                    | 1950                       |                      |
| New Zealand | New Zealand Vital Registration - Deaths 1951 ICD7 as it appears in World Health Organization (WHO). WHO Mortality Database Version February 2014. Geneva, Switzerland: World Health Organization (WHO), 2014.                                                                                    | 1951                       |                      |

**Web Table 32 - Comprehensive citation list**

| Country     | Citation                                                                                                                                                                                                      | Year*                                                  | New for GBD 2013 (*) |
|-------------|---------------------------------------------------------------------------------------------------------------------------------------------------------------------------------------------------------------|--------------------------------------------------------|----------------------|
| New Zealand | New Zealand Vital Registration - Deaths 1952 ICD7 as it appears in World Health Organization (WHO). WHO Mortality Database Version February 2014. Geneva, Switzerland: World Health Organization (WHO), 2014. | 1952                                                   |                      |
| New Zealand | New Zealand Vital Registration - Deaths 1953 ICD7 as it appears in World Health Organization (WHO). WHO Mortality Database Version February 2014. Geneva, Switzerland: World Health Organization (WHO), 2014. | 1953                                                   |                      |
| New Zealand | Centre for Research on the Epidemiology of Disasters (CRED). EM-DAT: The OFDA/CRED International Disaster Database. Brussels, Belgium: Catholic University of Leuven.                                         | 1953, 1968, 1985-1988, 1996-1997, 2003-2004, 2011-2012 |                      |
| New Zealand | New Zealand Vital Registration - Deaths 1954 ICD7 as it appears in World Health Organization (WHO). WHO Mortality Database Version February 2014. Geneva, Switzerland: World Health Organization (WHO), 2014. | 1954                                                   |                      |
| New Zealand | New Zealand Vital Registration - Deaths 1955 ICD7 as it appears in World Health Organization (WHO). WHO Mortality Database Version February 2014. Geneva, Switzerland: World Health Organization (WHO), 2014. | 1955                                                   |                      |
| New Zealand | New Zealand Vital Registration - Deaths 1956 ICD7 as it appears in World Health Organization (WHO). WHO Mortality Database Version February 2014. Geneva, Switzerland: World Health Organization (WHO), 2014. | 1956                                                   |                      |
| New Zealand | New Zealand Vital Registration - Deaths 1957 ICD7 as it appears in World Health Organization (WHO). WHO Mortality Database Version February 2014. Geneva, Switzerland: World Health Organization (WHO), 2014. | 1957                                                   |                      |
| New Zealand | New Zealand Vital Registration - Deaths 1958 ICD7 as it appears in World Health Organization (WHO). WHO Mortality Database Version February 2014. Geneva, Switzerland: World Health Organization (WHO), 2014. | 1958                                                   |                      |
| New Zealand | New Zealand Vital Registration - Deaths 1959 ICD7 as it appears in World Health Organization (WHO). WHO Mortality Database Version February 2014. Geneva, Switzerland: World Health Organization (WHO), 2014. | 1959                                                   |                      |
| New Zealand | New Zealand Vital Registration - Deaths 1960 ICD7 as it appears in World Health Organization (WHO). WHO Mortality Database Version February 2014. Geneva, Switzerland: World Health Organization (WHO), 2014. | 1960                                                   |                      |
| New Zealand | New Zealand Vital Registration - Deaths 1961 ICD7 as it appears in World Health Organization (WHO). WHO Mortality Database Version February 2014. Geneva, Switzerland: World Health Organization (WHO), 2014. | 1961                                                   |                      |
| New Zealand | New Zealand Vital Registration - Deaths 1962 ICD7 as it appears in World Health Organization (WHO). WHO Mortality Database Version February 2014. Geneva, Switzerland: World Health Organization (WHO), 2014. | 1962                                                   |                      |
| New Zealand | New Zealand Vital Registration - Deaths 1963 ICD7 as it appears in World Health Organization (WHO). WHO Mortality Database Version February 2014. Geneva, Switzerland: World Health Organization (WHO), 2014. | 1963                                                   |                      |
| New Zealand | New Zealand Vital Registration - Deaths 1964 ICD7 as it appears in World Health Organization (WHO). WHO Mortality Database Version February 2014. Geneva, Switzerland: World Health Organization (WHO), 2014. | 1964                                                   |                      |



**Web Table 32 - Comprehensive citation list**

| Country     | Citation                                                                                                                                                                                                      | Year*     | New for GBD 2013 (*) |
|-------------|---------------------------------------------------------------------------------------------------------------------------------------------------------------------------------------------------------------|-----------|----------------------|
| New Zealand | New Zealand Vital Registration - Deaths 1965 ICD7 as it appears in World Health Organization (WHO). WHO Mortality Database Version February 2014. Geneva, Switzerland: World Health Organization (WHO), 2014. | 1965      |                      |
| New Zealand | New Zealand Vital Registration - Deaths 1966 ICD7 as it appears in World Health Organization (WHO). WHO Mortality Database Version February 2014. Geneva, Switzerland: World Health Organization (WHO), 2014. | 1966      |                      |
| New Zealand | New Zealand Vital Registration - Deaths 1967 ICD7 as it appears in World Health Organization (WHO). WHO Mortality Database Version February 2014. Geneva, Switzerland: World Health Organization (WHO), 2014. | 1967      |                      |
| New Zealand | Nixon AD, Buchanan JG. Survey for erythrocyte glucose-6-phosphate dehydrogenase deficiency in Polynesians. Am J Hum Genet. 1969; 21(3): 305-9.                                                                | 1967-1969 |                      |
| New Zealand | New Zealand Vital Registration - Deaths 1968 ICD8 as it appears in World Health Organization (WHO). WHO Mortality Database Version February 2014. Geneva, Switzerland: World Health Organization (WHO), 2014. | 1968      |                      |
| New Zealand | New Zealand Vital Registration - Deaths 1969 ICD8 as it appears in World Health Organization (WHO). WHO Mortality Database Version February 2014. Geneva, Switzerland: World Health Organization (WHO), 2014. | 1969      |                      |
| New Zealand | New Zealand Vital Registration - Deaths 1970 ICD8 as it appears in World Health Organization (WHO). WHO Mortality Database Version February 2014. Geneva, Switzerland: World Health Organization (WHO), 2014. | 1970      |                      |
| New Zealand | New Zealand Vital Registration - Deaths 1971 ICD8 as it appears in World Health Organization (WHO). WHO Mortality Database Version February 2014. Geneva, Switzerland: World Health Organization (WHO), 2014. | 1971      |                      |
| New Zealand | New Zealand Vital Registration - Deaths 1972 ICD8 as it appears in World Health Organization (WHO). WHO Mortality Database Version February 2014. Geneva, Switzerland: World Health Organization (WHO), 2014. | 1972      |                      |
| New Zealand | New Zealand Vital Registration - Deaths 1973 ICD8 as it appears in World Health Organization (WHO). WHO Mortality Database Version February 2014. Geneva, Switzerland: World Health Organization (WHO), 2014. | 1973      |                      |
| New Zealand | Austin FJ, Maguire T, Jennings LC, MacDiarmid RD. The prevalence of antibodies to hepatitis A and B viruses in Port Chalmers residents. N Z Med J. 1982; 95(701): 72-3.                                       | 1973-1975 |                      |
| New Zealand | New Zealand Vital Registration - Deaths 1974 ICD8 as it appears in World Health Organization (WHO). WHO Mortality Database Version February 2014. Geneva, Switzerland: World Health Organization (WHO), 2014. | 1974      |                      |
| New Zealand | New Zealand Vital Registration - Deaths 1975 ICD8 as it appears in World Health Organization (WHO). WHO Mortality Database Version February 2014. Geneva, Switzerland: World Health Organization (WHO), 2014. | 1975      |                      |
| New Zealand | New Zealand Vital Registration - Deaths 1976 ICD8 as it appears in World Health Organization (WHO). WHO Mortality Database Version February 2014. Geneva, Switzerland: World Health Organization (WHO), 2014. | 1976      |                      |
| New Zealand | New Zealand Vital Registration - Deaths 1977 ICD8 as it appears in World Health Organization (WHO). WHO Mortality Database Version February 2014. Geneva, Switzerland: World Health Organization (WHO), 2014. | 1977      |                      |

**Web Table 32 - Comprehensive citation list**

| Country     | Citation                                                                                                                                                                                                                                                                                              | Year*                                            | New for GBD 2013 (*) |
|-------------|-------------------------------------------------------------------------------------------------------------------------------------------------------------------------------------------------------------------------------------------------------------------------------------------------------|--------------------------------------------------|----------------------|
| New Zealand | Wilkinson T. Haemoglobinopathies in Australia and New Zealand. Hemoglobin. 1981; 5(5): 525-30.                                                                                                                                                                                                        | 1977-1980                                        |                      |
| New Zealand | Campbell AJ, McCosh LM, Reinken J, Allan BC. Dementia in Old Age and the Need for Services. Age Ageing. 1983; 12(1): 11-6.                                                                                                                                                                            | 1977-1980                                        |                      |
| New Zealand | New Zealand Vital Registration - Deaths 1978 ICD8 as it appears in World Health Organization (WHO). WHO Mortality Database Version February 2014. Geneva, Switzerland: World Health Organization (WHO), 2014.                                                                                         | 1978                                             |                      |
| New Zealand | Tobias MI, Miller J, Mushahwar IK. Hepatitis A infection in New Zealand children. N Z Med J. 1986; 99(805): 488-90.                                                                                                                                                                                   | 1978-1979                                        |                      |
| New Zealand | New Zealand Vital Registration - Deaths 1979 ICD9 as it appears in World Health Organization (WHO). WHO Mortality Database Version February 2014. Geneva, Switzerland: World Health Organization (WHO), 2014.                                                                                         | 1979                                             |                      |
| New Zealand | New Zealand Vital Registration - Deaths 1980 ICD9 as it appears in World Health Organization (WHO). WHO Mortality Database Version February 2014. Geneva, Switzerland: World Health Organization (WHO), 2014.                                                                                         | 1980                                             |                      |
| New Zealand | Institute for Health Metrics and Evaluation (IHME), Joint United Nations Program on HIV/AIDS (UNAIDS). Institute for Health Metrics and Evaluation HIV Mortality Estimates Based on the UNAIDS Spectrum Model Framework.                                                                              | 1980-2013                                        | *                    |
| New Zealand | United Nations Children's Fund (UNICEF), World Health Organization (WHO). WHO and UNICEF Reported Disease Incidence Time Series - Pertussis. Geneva, Switzerland: World Health Organization (WHO).                                                                                                    | 1980, 1982-1984, 1990-1995, 1997-2007, 2009-2013 |                      |
| New Zealand | New Zealand Vital Registration - Deaths 1981 ICD9 as it appears in World Health Organization (WHO). WHO Mortality Database Version February 2014. Geneva, Switzerland: World Health Organization (WHO), 2014.                                                                                         | 1981                                             |                      |
| New Zealand | New Zealand Vital Registration - Deaths 1982 ICD9 as it appears in World Health Organization (WHO). WHO Mortality Database Version February 2014. Geneva, Switzerland: World Health Organization (WHO), 2014.                                                                                         | 1982                                             |                      |
| New Zealand | New Zealand Vital Registration - Deaths 1983 ICD9 as it appears in World Health Organization (WHO). WHO Mortality Database Version February 2014. Geneva, Switzerland: World Health Organization (WHO), 2014.                                                                                         | 1983                                             |                      |
| New Zealand | Institute for Health Metrics and Evaluation. Institute for Health Metrics and Evaluation Cancer Registry Database. [Unpublished].                                                                                                                                                                     | 1983-2007                                        |                      |
| New Zealand | Ferlay J, Parkin DM, Curado MP, Bray F, Edwards B, Shin HR and Forman D. Cancer Incidence in Five Continents, Volumes I to IX: IARC CancerBase No. 9 [Internet]. Lyon, France: International Agency for Research on Cancer; 2010. Available from: <a href="http://ci5.iarc.fr">http://ci5.iarc.fr</a> | 1983-2002                                        |                      |
| New Zealand | New Zealand Vital Registration - Deaths 1984 ICD9 as it appears in World Health Organization (WHO). WHO Mortality Database Version February 2014. Geneva, Switzerland: World Health Organization (WHO), 2014.                                                                                         | 1984                                             |                      |
| New Zealand | Lucas CR, Milne A, Hopkirk N. Kawerau revisited: hepatitis A and B seroprevalence in 1984 and 1993. N Z Med J. 1994; 107(981): 266-8.                                                                                                                                                                 | 1984, 1993                                       |                      |
| New Zealand | New Zealand Vital Registration - Deaths 1985 ICD9 as it appears in World Health Organization (WHO). WHO Mortality Database Version February 2014. Geneva, Switzerland: World Health Organization (WHO), 2014.                                                                                         | 1985                                             |                      |
| New Zealand | Tobias MI, Miller JA, Clements CJ, Patel AC. Hepatitis B in New Zealand children: the 1985 national immunisation survey. N Z Med J. 1987; 100(821): 203-6.                                                                                                                                            | 1985                                             |                      |

**Web Table 32 - Comprehensive citation list**

| Country     | Citation                                                                                                                                                                                                                                                      | Year*                                       | New for GBD 2013 (*) |
|-------------|---------------------------------------------------------------------------------------------------------------------------------------------------------------------------------------------------------------------------------------------------------------|---------------------------------------------|----------------------|
| New Zealand | Milne A, Allwood GK, Moyes CD, Pearce NE, Newell K. A seroepidemiological study of the prevalence of hepatitis B infections in a hyperendemic New Zealand community. <i>Int J Epidemiol.</i> 1987; 16(1): 84-90.                                              | 1985                                        |                      |
| New Zealand | New Zealand Vital Registration - Deaths 1986 ICD9 as it appears in World Health Organization (WHO). WHO Mortality Database Version February 2014. Geneva, Switzerland: World Health Organization (WHO), 2014.                                                 | 1986                                        |                      |
| New Zealand | New Zealand Vital Registration - Deaths 1987 ICD9 as it appears in World Health Organization (WHO). WHO Mortality Database Version February 2014. Geneva, Switzerland: World Health Organization (WHO), 2014.                                                 | 1987                                        |                      |
| New Zealand | New Zealand Vital Registration - Deaths 1988 ICD9 as it appears in World Health Organization (WHO). WHO Mortality Database Version February 2014. Geneva, Switzerland: World Health Organization (WHO), 2014.                                                 | 1988                                        |                      |
| New Zealand | New Zealand Vital Registration - Deaths 1989 ICD9 as it appears in World Health Organization (WHO). WHO Mortality Database Version February 2014. Geneva, Switzerland: World Health Organization (WHO), 2014.                                                 | 1989                                        |                      |
| New Zealand | United Nations Children's Fund (UNICEF), World Health Organization (WHO). WHO and UNICEF Reported Disease Incidence Time Series - Measles. Geneva, Switzerland: World Health Organization (WHO).                                                              | 1989, 1991, 1993-1994, 1997-2007, 2009-2013 |                      |
| New Zealand | New Zealand Vital Registration - Deaths 1990 ICD9 as it appears in World Health Organization (WHO). WHO Mortality Database Version February 2014. Geneva, Switzerland: World Health Organization (WHO), 2014.                                                 | 1990                                        |                      |
| New Zealand | Gibbons S, Faed JM, Fong R, Pullon HW, Corbett GM, Woodfield G. Seroprevalence of hepatitis C antibody in New Zealand blood donors. <i>N Z Med J.</i> 1990; 103(899): 490.                                                                                    | 1990                                        |                      |
| New Zealand | Weatherall D. Sickle Cell and Thalassemias Prevalence Data, Personal Correspondence with David Weatherall. [Unpublished].                                                                                                                                     | 1990-2009                                   |                      |
| New Zealand | Centre for Health Informatics and Multiprofessional Education, University College London. Modell's Haemoglobinopathologist's Almanac. London, United Kingdom: Centre for Health Informatics and Multiprofessional Education, University College London, 2008. | 1990-2003                                   |                      |
| New Zealand | New Zealand Vital Registration - Deaths 1991 ICD9 as it appears in World Health Organization (WHO). WHO Mortality Database Version February 2014. Geneva, Switzerland: World Health Organization (WHO), 2014.                                                 | 1991                                        |                      |
| New Zealand | New Zealand Vital Registration - Deaths 1992 ICD9 as it appears in World Health Organization (WHO). WHO Mortality Database Version February 2014. Geneva, Switzerland: World Health Organization (WHO), 2014.                                                 | 1992                                        |                      |
| New Zealand | New Zealand Vital Registration - Deaths 1993 ICD9 as it appears in World Health Organization (WHO). WHO Mortality Database Version February 2014. Geneva, Switzerland: World Health Organization (WHO), 2014.                                                 | 1993                                        |                      |
| New Zealand | New Zealand Vital Registration - Deaths 1994 ICD9 as it appears in World Health Organization (WHO). WHO Mortality Database Version February 2014. Geneva, Switzerland: World Health Organization (WHO), 2014.                                                 | 1994                                        |                      |
| New Zealand | New Zealand Vital Registration - Deaths 1995 ICD9 as it appears in World Health Organization (WHO). WHO Mortality Database Version February 2014. Geneva, Switzerland: World Health Organization (WHO), 2014.                                                 | 1995                                        |                      |

**Web Table 32 - Comprehensive citation list**

| Country     | Citation                                                                                                                                                                                                                            | Year*          | New for GBD 2013 (*) |
|-------------|-------------------------------------------------------------------------------------------------------------------------------------------------------------------------------------------------------------------------------------|----------------|----------------------|
| New Zealand | New Zealand Vital Registration - Deaths 1996 ICD9 as it appears in World Health Organization (WHO). WHO Mortality Database Version February 2014. Geneva, Switzerland: World Health Organization (WHO), 2014.                       | 1996           |                      |
| New Zealand | Chapman BA, Burt MJ, Frampton CM, Collett JA, Yeo KH, Wilkinson ID, Cook HB, Barclay MJ, Ross AG, George PM. The prevalence of viral hepatitis (HAV, HBV and HCV) in the Christchurch community. N Z Med J. 2000; 113(1118): 394-6. | 1996, 1998     |                      |
| New Zealand | New Zealand Vital Registration - Deaths 1997 ICD9 as it appears in World Health Organization (WHO). WHO Mortality Database Version February 2014. Geneva, Switzerland: World Health Organization (WHO), 2014.                       | 1997           |                      |
| New Zealand | Measles Supplementary Immunization Activity Data as provided by the World Health Organization. [Unpublished].                                                                                                                       | 1997-1998      |                      |
| New Zealand | New Zealand Vital Registration - Deaths 1998 ICD9 as it appears in World Health Organization (WHO). WHO Mortality Database Version February 2014. Geneva, Switzerland: World Health Organization (WHO), 2014.                       | 1998           |                      |
| New Zealand | World Health Organization (WHO). Yellow Fever Reported Cases, WHO Vaccine-Preventable Diseases: Monitoring System. Geneva, Switzerland: World Health Organization (WHO).                                                            | 1998-2007,2009 |                      |
| New Zealand | New Zealand Vital Registration - Deaths 1999 ICD9 as it appears in World Health Organization (WHO). WHO Mortality Database Version February 2014. Geneva, Switzerland: World Health Organization (WHO), 2014.                       | 1999           |                      |
| New Zealand | Robinson T, Bullen C, Humphries W, Hornell J, Moyes C. The New Zealand Hepatitis B Screening Programme: screening coverage and prevalence of chronic hepatitis B infection. N Z Med J. 2005; 118(1211): U1345.                      | 1999-2002      |                      |
| New Zealand | New Zealand Vital Registration - Deaths 2000 ICD10 as it appears in World Health Organization (WHO). WHO Mortality Database Version February 2014. Geneva, Switzerland: World Health Organization (WHO), 2014.                      | 2000           |                      |
| New Zealand | New Zealand Vital Registration - Deaths 2001 ICD10 as it appears in World Health Organization (WHO). WHO Mortality Database Version February 2014. Geneva, Switzerland: World Health Organization (WHO), 2014.                      | 2001           |                      |
| New Zealand | New Zealand Vital Registration - Deaths 2002 ICD10 as it appears in World Health Organization (WHO). WHO Mortality Database Version February 2014. Geneva, Switzerland: World Health Organization (WHO), 2014.                      | 2002           |                      |
| New Zealand | New Zealand Vital Registration - Deaths 2003 ICD10 as it appears in World Health Organization (WHO). WHO Mortality Database Version February 2014. Geneva, Switzerland: World Health Organization (WHO), 2014.                      | 2003           |                      |
| New Zealand | Ministry of Health (New Zealand), New Zealand Cancer Registry. New Zealand Cancer: New Registrations and Deaths 2003. Wellington, New Zealand: Ministry of Health (New Zealand), 2007.                                              | 2003           |                      |
| New Zealand | New Zealand Vital Registration - Deaths 2004 ICD10 as it appears in World Health Organization (WHO). WHO Mortality Database Version February 2014. Geneva, Switzerland: World Health Organization (WHO), 2014.                      | 2004           |                      |
| New Zealand | Ministry of Health (New Zealand), New Zealand Cancer Registry. New Zealand Cancer: New Registrations and Deaths 2004. Wellington, New Zealand: Ministry of Health (New Zealand), 2007.                                              | 2004           |                      |

**Web Table 32 - Comprehensive citation list**

| Country     | Citation                                                                                                                                                                                                                                                                              | Year*                                                                                                           | New for GBD 2013 (*) |
|-------------|---------------------------------------------------------------------------------------------------------------------------------------------------------------------------------------------------------------------------------------------------------------------------------------|-----------------------------------------------------------------------------------------------------------------|----------------------|
| New Zealand | New Zealand Vital Registration - Deaths 2005 ICD10 as it appears in World Health Organization (WHO). WHO Mortality Database Version February 2014. Geneva, Switzerland: World Health Organization (WHO), 2014.                                                                        | 2005                                                                                                            |                      |
| New Zealand | Forman D, Bray F, Brewster DH, Gombe Mbalawa C, Kohler B, Piñeros M, Steliarova-Foucher E, Swaminathan R and Ferlay J, eds (2013). Cancer Incidence in Five Continents, Vol. X Summary Database (electronic version). Lyon, IARC. <a href="http://ci5.iarc.fr">http://ci5.iarc.fr</a> | 2005                                                                                                            |                      |
| New Zealand | New Zealand Vital Registration - Deaths 2006 ICD10 as it appears in World Health Organization (WHO). WHO Mortality Database Version February 2014. Geneva, Switzerland: World Health Organization (WHO), 2014.                                                                        | 2006                                                                                                            |                      |
| New Zealand | Ministry of Health (New Zealand), New Zealand Cancer Registry. New Zealand Cancer: New Registrations and Deaths 2006. Wellington, New Zealand: Ministry of Health (New Zealand), 2010.                                                                                                | 2006                                                                                                            |                      |
| New Zealand | New Zealand Vital Registration - Deaths 2007 ICD10 as it appears in World Health Organization (WHO). WHO Mortality Database Version February 2014. Geneva, Switzerland: World Health Organization (WHO), 2014.                                                                        | 2007                                                                                                            |                      |
| New Zealand | Ministry of Health (New Zealand), New Zealand Cancer Registry. New Zealand Cancer: New Registrations and Deaths 2007. Wellington, New Zealand: Ministry of Health (New Zealand), 2010.                                                                                                | 2007                                                                                                            |                      |
| New Zealand | New Zealand Vital Registration - Deaths 2008 ICD10 as it appears in World Health Organization (WHO). WHO Mortality Database Version February 2014. Geneva, Switzerland: World Health Organization (WHO), 2014.                                                                        | 2008                                                                                                            |                      |
| New Zealand | New Zealand Vital Registration - Deaths 2009 ICD10 as it appears in World Health Organization (WHO). WHO Mortality Database Version February 2014. Geneva, Switzerland: World Health Organization (WHO), 2014.                                                                        | 2009                                                                                                            |                      |
| New Zealand | New Zealand Vital Registration Death Data 2010 as it appears in United Nations Statistics Division (UNSD). United Nations Demographic Yearbook. New York City, United States: United Nations Statistics Division (UNSD).                                                              | 2010                                                                                                            |                      |
| New Zealand | United Nations Statistics Division (UNSD). UNSD Demographic Statistics - Deaths by Age, Sex, and Urban/Rural Residence. New York City, United States: United Nations Statistics Division (UNSD).                                                                                      | 2011                                                                                                            | *                    |
| New Zealand | New Zealand Vital Registration Death Data 2011 as it appears in United Nations Statistics Division (UNSD). United Nations Demographic Yearbook. New York City, United States: United Nations Statistics Division (UNSD).                                                              | 2011                                                                                                            | *                    |
| Nicaragua   | Nicaragua Vital Registration Death Data 1950 as it appears in United Nations Statistics Division (UNSD). United Nations Demographic Yearbook. New York City, United States: United Nations Statistics Division (UNSD).                                                                | 1950                                                                                                            |                      |
| Nicaragua   | Nicaragua Vital Registration Death Data 1951 as it appears in United Nations Statistics Division (UNSD). United Nations Demographic Yearbook. New York City, United States: United Nations Statistics Division (UNSD).                                                                | 1951                                                                                                            |                      |
| Nicaragua   | Centre for Research on the Epidemiology of Disasters (CRED). EM-DAT: The OFDA/CRED International Disaster Database. Brussels, Belgium: Catholic University of Leuven.                                                                                                                 | 1951, 1960, 1971-1972, 1976, 1982, 1988, 1990, 1992-1993, 1995-1996, 1998-2002, 2004-2005, 2007-2008, 2010-2013 |                      |

**Web Table 32 - Comprehensive citation list**

| Country   | Citation                                                                                                                                                                                                               | Year* | New for GBD 2013 (*) |
|-----------|------------------------------------------------------------------------------------------------------------------------------------------------------------------------------------------------------------------------|-------|----------------------|
| Nicaragua | Nicaragua Vital Registration Death Data 1952 as it appears in United Nations Statistics Division (UNSD). United Nations Demographic Yearbook. New York City, United States: United Nations Statistics Division (UNSD). | 1952  |                      |
| Nicaragua | Nicaragua Vital Registration Death Data 1953 as it appears in United Nations Statistics Division (UNSD). United Nations Demographic Yearbook. New York City, United States: United Nations Statistics Division (UNSD). | 1953  |                      |
| Nicaragua | Nicaragua Vital Registration Death Data 1954 as it appears in United Nations Statistics Division (UNSD). United Nations Demographic Yearbook. New York City, United States: United Nations Statistics Division (UNSD). | 1954  |                      |
| Nicaragua | Nicaragua Vital Registration Death Data 1955 as it appears in United Nations Statistics Division (UNSD). United Nations Demographic Yearbook. New York City, United States: United Nations Statistics Division (UNSD). | 1955  |                      |
| Nicaragua | Nicaragua Vital Registration Death Data 1956 as it appears in United Nations Statistics Division (UNSD). United Nations Demographic Yearbook. New York City, United States: United Nations Statistics Division (UNSD). | 1956  |                      |
| Nicaragua | Nicaragua Vital Registration Death Data 1957 as it appears in United Nations Statistics Division (UNSD). United Nations Demographic Yearbook. New York City, United States: United Nations Statistics Division (UNSD). | 1957  |                      |
| Nicaragua | Nicaragua Vital Registration Death Data 1958 as it appears in United Nations Statistics Division (UNSD). United Nations Demographic Yearbook. New York City, United States: United Nations Statistics Division (UNSD). | 1958  |                      |
| Nicaragua | Nicaragua Vital Registration - Deaths 1959 ICD7 as it appears in World Health Organization (WHO). WHO Mortality Database Version February 2014. Geneva, Switzerland: World Health Organization (WHO), 2014.            | 1959  |                      |
| Nicaragua | Nicaragua Vital Registration Death Data 1960 as it appears in United Nations Statistics Division (UNSD). United Nations Demographic Yearbook. New York City, United States: United Nations Statistics Division (UNSD). | 1960  |                      |
| Nicaragua | Nicaragua Vital Registration - Deaths 1961 ICD7 as it appears in World Health Organization (WHO). WHO Mortality Database Version February 2014. Geneva, Switzerland: World Health Organization (WHO), 2014.            | 1961  |                      |
| Nicaragua | Nicaragua Vital Registration - Deaths 1962 ICD7 as it appears in World Health Organization (WHO). WHO Mortality Database Version February 2014. Geneva, Switzerland: World Health Organization (WHO), 2014.            | 1962  |                      |
| Nicaragua | Nicaragua Vital Registration - Deaths 1963 ICD7 as it appears in World Health Organization (WHO). WHO Mortality Database Version February 2014. Geneva, Switzerland: World Health Organization (WHO), 2014.            | 1963  |                      |
| Nicaragua | Nicaragua Vital Registration - Deaths 1964 ICD7 as it appears in World Health Organization (WHO). WHO Mortality Database Version February 2014. Geneva, Switzerland: World Health Organization (WHO), 2014.            | 1964  |                      |
| Nicaragua | Nicaragua Vital Registration - Deaths 1965 ICD7 as it appears in World Health Organization (WHO). WHO Mortality Database Version February 2014. Geneva, Switzerland: World Health Organization (WHO), 2014.            | 1965  |                      |



**Web Table 32 - Comprehensive citation list**

| Country   | Citation                                                                                                                                                                                                                                                | Year*     | New for GBD 2013 (*) |
|-----------|---------------------------------------------------------------------------------------------------------------------------------------------------------------------------------------------------------------------------------------------------------|-----------|----------------------|
| Nicaragua | Nicaragua Vital Registration - Deaths 1968 ICD8 as it appears in World Health Organization (WHO). WHO Mortality Database Version February 2014. Geneva, Switzerland: World Health Organization (WHO), 2014.                                             | 1968      |                      |
| Nicaragua | Nicaragua Vital Registration - Deaths 1969 ICD8 as it appears in World Health Organization (WHO). WHO Mortality Database Version February 2014. Geneva, Switzerland: World Health Organization (WHO), 2014.                                             | 1969      |                      |
| Nicaragua | Minnesota Population Center, Executive Census Office (Nicaragua). Nicaragua Population and Housing Census 1971 from the Integrated Public Use Microdata Series, International. [Machine-readable database]. Minneapolis: University of Minnesota, 2012. | 1971      |                      |
| Nicaragua | Nicaragua Vital Registration - Deaths 1973 ICD8 as it appears in World Health Organization (WHO). WHO Mortality Database Version February 2014. Geneva, Switzerland: World Health Organization (WHO), 2014.                                             | 1973      |                      |
| Nicaragua | Nicaragua Vital Registration - Deaths 1974 ICD8 as it appears in World Health Organization (WHO). WHO Mortality Database Version February 2014. Geneva, Switzerland: World Health Organization (WHO), 2014.                                             | 1974      |                      |
| Nicaragua | Nicaragua Vital Registration - Deaths 1975 ICD8 as it appears in World Health Organization (WHO). WHO Mortality Database Version February 2014. Geneva, Switzerland: World Health Organization (WHO), 2014.                                             | 1975      |                      |
| Nicaragua | Nicaragua Vital Registration - Deaths 1976 ICD8 as it appears in World Health Organization (WHO). WHO Mortality Database Version February 2014. Geneva, Switzerland: World Health Organization (WHO), 2014.                                             | 1976      |                      |
| Nicaragua | Executive Office of Surveys and Censuses (Nicaragua). Nicaragua National Retrospective Demographic Survey 1976-1978.                                                                                                                                    | 1976-1978 |                      |
| Nicaragua | Nicaragua Vital Registration - Deaths 1977 ICD8 as it appears in World Health Organization (WHO). WHO Mortality Database Version February 2014. Geneva, Switzerland: World Health Organization (WHO), 2014.                                             | 1977      |                      |
| Nicaragua | Nicaragua Vital Registration - Deaths 1978 ICD8 as it appears in World Health Organization (WHO). WHO Mortality Database Version February 2014. Geneva, Switzerland: World Health Organization (WHO), 2014.                                             | 1978      |                      |
| Nicaragua | Peace Research Institute Oslo (PRIO). Battle Deaths Dataset Version 3, 2009. Oslo, Norway: Peace Research Institute Oslo (PRIO), 2009.                                                                                                                  | 1978-1988 |                      |
| Nicaragua | Institute for Health Metrics and Evaluation (IHME), Joint United Nations Program on HIV/AIDS (UNAIDS). Institute for Health Metrics and Evaluation HIV Mortality Estimates Based on the UNAIDS Spectrum Model Framework.                                | 1980-2013 | *                    |
| Nicaragua | United Nations Children's Fund (UNICEF), World Health Organization (WHO). WHO and UNICEF Reported Disease Incidence Time Series - Pertussis. Geneva, Switzerland: World Health Organization (WHO).                                                      | 1980-2013 |                      |
| Nicaragua | United Nations Children's Fund (UNICEF), World Health Organization (WHO). WHO and UNICEF Reported Disease Incidence Time Series - Measles. Geneva, Switzerland: World Health Organization (WHO).                                                        | 1980-2013 |                      |
| Nicaragua | National Institute of Statistics and Censuses (Nicaragua). Nicaragua Socio-Demographic Survey 1985-1986.                                                                                                                                                | 1985-1986 |                      |
| Nicaragua | Nicaragua Vital Registration Death Data 1987 as it appears in United Nations Statistics Division (UNSD). United Nations Demographic Yearbook. New York City, United States: United Nations Statistics Division (UNSD).                                  | 1987      |                      |

**Web Table 32 - Comprehensive citation list**

| Country   | Citation                                                                                                                                                                                                                                                                      | Year*            | New for GBD 2013 (*) |
|-----------|-------------------------------------------------------------------------------------------------------------------------------------------------------------------------------------------------------------------------------------------------------------------------------|------------------|----------------------|
| Nicaragua | Nicaragua Vital Registration - Deaths 1988 ICD9 as it appears in World Health Organization (WHO). WHO Mortality Database Version February 2014. Geneva, Switzerland: World Health Organization (WHO), 2014.                                                                   | 1988             |                      |
| Nicaragua | Nicaragua Vital Registration - Deaths 1989 ICD9 as it appears in World Health Organization (WHO). WHO Mortality Database Version February 2014. Geneva, Switzerland: World Health Organization (WHO), 2014.                                                                   | 1989             |                      |
| Nicaragua | Department of Peace and Conflict Research, Uppsala University. UCDP Battle-Related Deaths Database Version 5, 2013. Uppsala, Sweden: Department of Peace and Conflict Research, Uppsala University, 2013.                                                                     | 1989-1990        | *                    |
| Nicaragua | Nicaragua Vital Registration - Deaths 1990 ICD9 as it appears in World Health Organization (WHO). WHO Mortality Database Version February 2014. Geneva, Switzerland: World Health Organization (WHO), 2014.                                                                   | 1990             |                      |
| Nicaragua | United Nations Office on Drugs and Crime (UNODC). United Nations Surveys on Crime Trends and the Operations of Criminal Justice Systems 1970-2006 as provided by Kavi Bhalla. [Unpublished]                                                                                   | 1990-1994        |                      |
| Nicaragua | Perez OM, Morales W, Paniagua M, Strannegard O. Prevalence of antibodies to hepatitis A, B, C, and E viruses in a healthy population in Leon, Nicaragua. Am J Trop Med Hyg. 1996; 55(1): 17-21.                                                                               | 1990-1992        |                      |
| Nicaragua | Centre for Health Informatics and Multiprofessional Education, University College London. Modell's Haemoglobinopathologist's Almanac. London, United Kingdom: Centre for Health Informatics and Multiprofessional Education, University College London, 2008.                 | 1990-2003        |                      |
| Nicaragua | Nicaragua Vital Registration - Deaths 1991 ICD9 as it appears in World Health Organization (WHO). WHO Mortality Database Version February 2014. Geneva, Switzerland: World Health Organization (WHO), 2014.                                                                   | 1991             |                      |
| Nicaragua | Nicaragua Vital Registration - Deaths 1992 ICD9 as it appears in World Health Organization (WHO). WHO Mortality Database Version February 2014. Geneva, Switzerland: World Health Organization (WHO), 2014.                                                                   | 1992             |                      |
| Nicaragua | Profamilia and Division of Reproductive Health-Centers for Disease Control and Prevention (CDC). (1993) Nicaragua Reproductive Health Survey 1992-1993. Profamilia, Managua, Nicaragua.                                                                                       | 1992-1993        |                      |
| Nicaragua | National Institute of Statistics and Censuses (Nicaragua), World Bank. Nicaragua Living Standards Measurement Survey 1993.                                                                                                                                                    | 1993             |                      |
| Nicaragua | Nicaragua Vital Registration - Deaths 1993 ICD9 as it appears in World Health Organization (WHO). WHO Mortality Database Version February 2014. Geneva, Switzerland: World Health Organization (WHO), 2014.                                                                   | 1993             |                      |
| Nicaragua | Measles Supplementary Immunization Activity Data as provided by the World Health Organization. [Unpublished].                                                                                                                                                                 | 1993, 1996, 1998 |                      |
| Nicaragua | Nicaragua Vital Registration - Deaths 1994 ICD9 as it appears in World Health Organization (WHO). WHO Mortality Database Version February 2014. Geneva, Switzerland: World Health Organization (WHO), 2014.                                                                   | 1994             |                      |
| Nicaragua | Minnesota Population Center, National Institute of Statistics and Censuses (Nicaragua). Nicaragua Population and Housing Census 1995 from the Integrated Public Use Microdata Series, International. [Machine-readable database]. Minneapolis: University of Minnesota, 2012. | 1995             |                      |
| Nicaragua | United Nations Office on Drugs and Crime (UNODC). United Nations Office on Drugs and Crime Global Study on Homicides 2011. Vienna, Austria: United Nations Office on Drugs and Crime (UNODC), 2011.                                                                           | 1995-2010        |                      |



**Web Table 32 - Comprehensive citation list**

| Country   | Citation                                                                                                                                                                                                                    | Year*                            | New for GBD 2013 (*) |
|-----------|-----------------------------------------------------------------------------------------------------------------------------------------------------------------------------------------------------------------------------|----------------------------------|----------------------|
| Nicaragua | Nicaragua Vital Registration - Deaths 1996 ICD9 as it appears in World Health Organization (WHO). WHO Mortality Database Version February 2014. Geneva, Switzerland: World Health Organization (WHO), 2014.                 | 1996                             |                      |
| Nicaragua | Nicaragua Vital Registration - Deaths 1997 ICD10 as it appears in World Health Organization (WHO). WHO Mortality Database Version February 2014. Geneva, Switzerland: World Health Organization (WHO), 2014.                | 1997                             |                      |
| Nicaragua | Macro International, Inc, Ministry of Health (Nicaragua), National Institute of Statistics and Censuses (Nicaragua). Nicaragua Demographic and Health Survey 1997-1998. Calverton, United States: Macro International, Inc. | 1997-1998                        |                      |
| Nicaragua | World Health Organization (WHO). Yellow Fever Reported Cases, WHO Vaccine-Preventable Diseases: Monitoring System. Geneva, Switzerland: World Health Organization (WHO).                                                    | 1997-2009                        |                      |
| Nicaragua | Nicaragua Vital Registration - Deaths 1998 ICD10 as it appears in World Health Organization (WHO). WHO Mortality Database Version February 2014. Geneva, Switzerland: World Health Organization (WHO), 2014.                | 1998                             |                      |
| Nicaragua | Nicaragua Vital Registration - Deaths 1999 ICD10 as it appears in World Health Organization (WHO). WHO Mortality Database Version February 2014. Geneva, Switzerland: World Health Organization (WHO), 2014.                | 1999                             |                      |
| Nicaragua | Nicaragua Vital Registration - Deaths 2000 ICD10 as it appears in World Health Organization (WHO). WHO Mortality Database Version February 2014. Geneva, Switzerland: World Health Organization (WHO), 2014.                | 2000                             |                      |
| Nicaragua | World Health Organization (WHO). Retrospective Measles Data on Supplementary Immunization Activities. Geneva, Switzerland: World Health Organization (WHO).                                                                 | 2000, 2002-2006, 2008, 2011-2012 |                      |
| Nicaragua | National Institute of Statistics and Censuses (Nicaragua), World Bank. Nicaragua Living Standards Measurement Survey 2001.                                                                                                  | 2001                             |                      |
| Nicaragua | Nicaragua Vital Registration - Deaths 2001 ICD10 as it appears in World Health Organization (WHO). WHO Mortality Database Version February 2014. Geneva, Switzerland: World Health Organization (WHO), 2014.                | 2001                             |                      |
| Nicaragua | Macro International, Inc, Ministry of Health (Nicaragua), National Institute of Statistics and Censuses (Nicaragua). Nicaragua Demographic and Health Survey 2001. Calverton, United States: Macro International, Inc.      | 2001                             |                      |
| Nicaragua | Nicaragua Vital Registration - Deaths 2002 ICD10 as it appears in World Health Organization (WHO). WHO Mortality Database Version February 2014. Geneva, Switzerland: World Health Organization (WHO), 2014.                | 2002                             |                      |
| Nicaragua | Nicaragua Vital Registration - Deaths 2003 ICD10 as it appears in World Health Organization (WHO). WHO Mortality Database Version February 2014. Geneva, Switzerland: World Health Organization (WHO), 2014.                | 2003                             |                      |
| Nicaragua | World Health Organization (WHO). Nicaragua WHO Leishmaniasis Country Profile.                                                                                                                                               | 2003-2010                        | *                    |
| Nicaragua | Nicaragua Vital Registration - Deaths 2004 ICD10 as it appears in World Health Organization (WHO). WHO Mortality Database Version February 2014. Geneva, Switzerland: World Health Organization (WHO), 2014.                | 2004                             |                      |
| Nicaragua | National Institute of Statistics and Censuses (Nicaragua). Nicaragua Population and Housing Census 2005.                                                                                                                    | 2005                             |                      |

**Web Table 32 - Comprehensive citation list**

| Country   | Citation                                                                                                                                                                                                                                                                                                                                                                                                                        | Year*     | New for GBD 2013 (*) |
|-----------|---------------------------------------------------------------------------------------------------------------------------------------------------------------------------------------------------------------------------------------------------------------------------------------------------------------------------------------------------------------------------------------------------------------------------------|-----------|----------------------|
| Nicaragua | Nicaragua Vital Registration - Deaths 2005 ICD10 as it appears in World Health Organization (WHO). WHO Mortality Database Version February 2014. Geneva, Switzerland: World Health Organization (WHO), 2014.                                                                                                                                                                                                                    | 2005      |                      |
| Nicaragua | National Institute of Statistics and Censuses (Nicaragua), World Bank. Nicaragua Living Standards Measurement Survey 2005.                                                                                                                                                                                                                                                                                                      | 2005      |                      |
| Nicaragua | Minnesota Population Center, National Institute of Statistics and Censuses (Nicaragua). Nicaragua Population and Housing Census 2005 from the Integrated Public Use Microdata Series, International. [Machine-readable database]. Minneapolis: University of Minnesota, 2012.                                                                                                                                                   | 2005      |                      |
| Nicaragua | Souza JP, Cecatti JG, Faundes A, Morais SS, Villar J, Carroli G, Gulmezoglu M, Wojdyla D, Zavaleta N, Donner A, Velazco A, Bataglia V, Valladares E, Kublickas M, Acosta A. Maternal near miss and maternal death in the World Health Organization's 2005 global survey on maternal and perinatal health. Bull World Health Organ. 2010; 88(2): 113-9.                                                                          | 2005      |                      |
| Nicaragua | Nicaragua Vital Registration - Deaths 2006 ICD10 as it appears in World Health Organization (WHO). WHO Mortality Database Version February 2014. Geneva, Switzerland: World Health Organization (WHO), 2014.                                                                                                                                                                                                                    | 2006      |                      |
| Nicaragua | Division of Reproductive Health-Centers for Disease Control and Prevention (CDC), National Institute for Development Information (Nicaragua). Nicaragua Reproductive Health Survey 2006-2007. Managua, Nicaragua: National Institute for Development Information (Nicaragua).                                                                                                                                                   | 2006-2007 |                      |
| Nicaragua | Fassio E, Díaz S, Santa C, Reig ME, Martínez Artola Y, Alves de Mattos A, Míguez C, Galizzi J, Zapata R, Ridruejo E, de Souza FC, Hernández N, Pinchuk L, Multicenter Group for Study of Hepatocarcinoma in Latin America, Asociación Latinoamericana para el Estudio del Hígado (ALEH). Etiology of hepatocellular carcinoma in Latin America: a prospective, multicenter, international study. Ann Hepatol. 2010; 9(1): 63-9. | 2006-2008 | *                    |
| Nicaragua | World Health Organization (WHO). Global Status Report on Road Safety 2009. Geneva, Switzerland: World Health Organization (WHO), 2009.                                                                                                                                                                                                                                                                                          | 2007      |                      |
| Nicaragua | Nicaragua Vital Registration - Deaths 2007 ICD10 as it appears in World Health Organization (WHO). WHO Mortality Database Version February 2014. Geneva, Switzerland: World Health Organization (WHO), 2014.                                                                                                                                                                                                                    | 2007      |                      |
| Nicaragua | Nicaragua Vital Registration - Deaths 2008 ICD10 as it appears in World Health Organization (WHO). WHO Mortality Database Version February 2014. Geneva, Switzerland: World Health Organization (WHO), 2014.                                                                                                                                                                                                                    | 2008      |                      |
| Nicaragua | Nicaragua Vital Registration - Deaths 2009 ICD10 as it appears in World Health Organization (WHO). WHO Mortality Database Version February 2014. Geneva, Switzerland: World Health Organization (WHO), 2014.                                                                                                                                                                                                                    | 2009      |                      |
| Nicaragua | Joint United Nations Program on HIV/AIDS (UNAIDS), Ministry of Health (Nicaragua). Nicaragua National Report on the Progress in the UNGASS Application 2010. Geneva, Switzerland: Joint United Nations Program on HIV/AIDS (UNAIDS), 2010.                                                                                                                                                                                      | 2009      |                      |
| Nicaragua | Nicaragua Vital Registration - Deaths 2010 ICD10 as it appears in World Health Organization (WHO). WHO Mortality Database Version February 2014. Geneva, Switzerland: World Health Organization (WHO), 2014.                                                                                                                                                                                                                    | 2010      |                      |

**Web Table 32 - Comprehensive citation list**

| Country   | Citation                                                                                                                                                                                                                                                      | Year*                                              | New for GBD 2013 (*) |
|-----------|---------------------------------------------------------------------------------------------------------------------------------------------------------------------------------------------------------------------------------------------------------------|----------------------------------------------------|----------------------|
| Nicaragua | Nicaragua Vital Registration - Deaths 2011 ICD10 as it appears in World Health Organization (WHO). WHO Mortality Database Version February 2014. Geneva, Switzerland: World Health Organization (WHO), 2014.                                                  | 2011                                               | *                    |
| Niger     | Institute for Health Metrics and Evaluation (IHME), Joint United Nations Program on HIV/AIDS (UNAIDS). Institute for Health Metrics and Evaluation HIV Mortality Estimates Based on the UNAIDS Spectrum Model Framework.                                      | 1980-2013                                          | *                    |
| Niger     | Campagne G, Schuchat A, Djibo S, Ousséini A, Cissé L, Chippaux JP. Epidemiology of bacterial meningitis in Niamey, Niger, 1981-96. Bull World Health Organ. 1999; 77(6): 499-508.                                                                             | 1981-1996                                          |                      |
| Niger     | World Health Organization (WHO). Yellow Fever Reported Cases, WHO Vaccine-Preventable Diseases: Monitoring System. Geneva, Switzerland: World Health Organization (WHO).                                                                                      | 1987, 1989, 1991, 1995, 1997-2004, 2006, 2008-2009 |                      |
| Niger     | Centre for Research on the Epidemiology of Disasters (CRED). EM-DAT: The OFDA/CRED International Disaster Database. Brussels, Belgium: Catholic University of Leuven.                                                                                         | 1988, 1994, 1999-2003, 2006-2013                   |                      |
| Niger     | Department of Peace and Conflict Research, Uppsala University. UCDP One-Sided Violence Database Version 1.4, 2013. Uppsala, Sweden: Department of Peace and Conflict Research, Uppsala University, 2013.                                                      | 1989-1998                                          | *                    |
| Niger     | Weatherall D. Sickle Cell and Thalassemias Prevalence Data, Personal Correspondence with David Weatherall. [Unpublished].                                                                                                                                     | 1990-2009                                          |                      |
| Niger     | Malfait P, Jataou IM, Jollet MC, Margot A, De Benoist AC, Moren A. Measles epidemic in the urban community of Niamey: transmission patterns, vaccine efficacy and immunization strategies, Niger, 1990 to 1991. Pediatr Infect Dis J. 1994; 13(1): 38-45.     | 1990-1991                                          |                      |
| Niger     | Centre for Health Informatics and Multiprofessional Education, University College London. Modell's Haemoglobinopathologist's Almanac. London, United Kingdom: Centre for Health Informatics and Multiprofessional Education, University College London, 2008. | 1990-2003                                          |                      |
| Niger     | Department of Peace and Conflict Research, Uppsala University. UCDP Battle-Related Deaths Database Version 5, 2013. Uppsala, Sweden: Department of Peace and Conflict Research, Uppsala University, 2013.                                                     | 1991-2008                                          | *                    |
| Niger     | World Health Organization (WHO). Expanded programme on immunization. High measles case-fatality rates during an outbreak in a rural area. Wkly Epidemiol Rec. 1993; 68(20): 142-5.                                                                            | 1991-1992                                          |                      |
| Niger     | Department of Statistics and National Accounts (Niger), Macro International, Inc. Niger Demographic and Health Survey 1992. Calverton, United States: Macro International, Inc.                                                                               | 1992                                               |                      |
| Niger     | Kaninda AV, Legros D, Jataou IM, Malfait P, Maisonneuve M, Paquet C, Moren A. Measles vaccine effectiveness in standard and early immunization strategies, Niger, 1995. Pediatr Infect Dis J. 1998; 17(11): 1034-9.                                           | 1995                                               |                      |
| Niger     | Centers for Disease Control and Prevention (CDC), Government of Niger, United Nations Children's Fund (UNICEF), United Nations Population Fund (UNFPA). Niger Multiple Indicator Cluster Survey 1996.                                                         | 1996                                               | *                    |
| Niger     | Pruel A, Huguet D, Garbin O, Rabé G. Severe obstetric morbidity of the third trimester, delivery and early puerperium in Niamey (Niger). Afr J Reprod Health. 1998; 2(1): 10-9.                                                                               | 1997                                               |                      |
| Niger     | Department of Peace and Conflict Research, Uppsala University. UCDP Nonstate Conflict Database Version 2.5, 2013. Uppsala, Sweden: Department of Peace and Conflict Research, Uppsala University, 2013.                                                       | 1997                                               | *                    |
| Niger     | Measles Supplementary Immunization Activity Data as provided by the World Health Organization. [Unpublished].                                                                                                                                                 | 1997                                               |                      |
| Niger     | CARE International, Macro International, Inc. Niger Demographic and Health Survey 1998. Calverton, United States: Macro International, Inc.                                                                                                                   | 1998                                               |                      |

**Web Table 32 - Comprehensive citation list**

| Country | Citation                                                                                                                                                                                                                                                                                                                    | Year*                       | New for GBD 2013 (*) |
|---------|-----------------------------------------------------------------------------------------------------------------------------------------------------------------------------------------------------------------------------------------------------------------------------------------------------------------------------|-----------------------------|----------------------|
| Niger   | Government of Niger, Macro International, Inc, United Nations Children's Fund (UNICEF). Niger Multiple Indicator Cluster Survey 2000. New York, United States: United Nations Children's Fund (UNICEF).                                                                                                                     | 2000                        |                      |
| Niger   | Nandy R, Handzel T, Zaneidou M, Biey J, Cuddy RZ, Perry R, Strebel P, Cairns L. Case-fatality rate during a measles outbreak in eastern Niger in 2003. Clin Infect Dis. 2006; 42(3): 322.                                                                                                                                   | 2003                        |                      |
| Niger   | Grais RF, Dubray C, Gerstl S, Guthmann JP, Djibo A, Nargaye KD, Coker J, Alberti KP, Cochet A, Ihekweazu C, Nathan N, Payne L, Porten K, Sauvageot D, Schimmer B, Fermon F, Burny ME, Hersh BS, Guerin PJ. Unacceptably high mortality related to measles epidemics in Niger, Nigeria, and Chad. PLoS Med. 2007; 4(1): e16. | 2003-2004                   |                      |
| Niger   | World Health Organization (WHO). Retrospective Measles Data on Supplementary Immunization Activities. Geneva, Switzerland: World Health Organization (WHO).                                                                                                                                                                 | 2004-2005, 2008, 2010, 2012 |                      |
| Niger   | Reza A, Tomczyk B, Aguayo VM, Zagré NM, Goumbi K, Blanton C, Talley L. Retrospective determination of whether famine existed in Niger, 2005: two stage cluster survey. Br Med J. 2008; 337: a1622.                                                                                                                          | 2005                        |                      |
| Niger   | Department of Statistics and National Accounts (Niger), Macro International, Inc. Niger Demographic and Health Survey 2006. Calverton, United States: Macro International, Inc.                                                                                                                                             | 2006                        |                      |
| Niger   | World Health Organization (WHO). Global Status Report on Road Safety 2009. Geneva, Switzerland: World Health Organization (WHO), 2009.                                                                                                                                                                                      | 2007                        |                      |
| Niger   | Joint United Nations Program on HIV/AIDS (UNAIDS), Ministry of Health (Niger). Niger National UNGASS Report 2010. Geneva, Switzerland: Joint United Nations Program on HIV/AIDS (UNAIDS), 2010.                                                                                                                             | 2009                        |                      |
| Niger   | ICF International, Ministry of Public Health (Niger), National Institute of Statistics (Niger). Niger Demographic and Health Survey 2012. Fairfax, United States: ICF International, 2014.                                                                                                                                  | 2012                        | *                    |
| Niger   | United Nations Children's Fund (UNICEF), World Health Organization (WHO). WHO and UNICEF Reported Disease Incidence Time Series - Pertussis. Geneva, Switzerland: World Health Organization (WHO).                                                                                                                          | 1980-1991, 1995, 1997-2013  |                      |
| Niger   | United Nations Children's Fund (UNICEF), World Health Organization (WHO). WHO and UNICEF Reported Disease Incidence Time Series - Measles. Geneva, Switzerland: World Health Organization (WHO).                                                                                                                            | 1980-2013                   |                      |
| Nigeria | Harris R, Gilles HM. Glucose-6-phosphate dehydrogenase deficiency in the peoples of the Niger Delta. Ann Hum Genet. 1961; 199-206.                                                                                                                                                                                          | 1959-1961                   |                      |
| Nigeria | Gilles HM, Taylor BG. The existence of the glucose-6-phosphate dehydrogenase deficiency trait in Nigeria and its clinical implications. Ann Trop Med Parasitol. 1961; 64-9.                                                                                                                                                 | 1959-1963                   |                      |
| Nigeria | Allison AC, Charles LJ, McGregor IA. Erythrocyte Glucose-6-Phosphate Dehydrogenase Deficiency in West Africa. Nature. 1961; 190(4782): 1198-9.                                                                                                                                                                              | 1959-1961                   |                      |
| Nigeria | Capps FP, Gilles HM, Jolly H, Worledge SM. Glucose-6-phosphate dehydrogenase deficiency and neonatal jaundice in Nigeria: their relation to the use of prophylactic vitamin K. Lancet. 1963; 2(7304): 379-83.                                                                                                               | 1961-1963                   |                      |
| Nigeria | Porter IH, Boyer SH. Variation of glucose-6-phosphate dehydrogenase in different populations. Lancet. 1964; 2(7367): 1016.                                                                                                                                                                                                  | 1962-1964                   |                      |
| Nigeria | Nance WE. Quantitative studies of glucose-6-phosphate dehydrogenase. Am J Hum Genet. 1977; 29(5): 537-44.                                                                                                                                                                                                                   | 1963                        |                      |
| Nigeria | Luzzatto L, Allan NC. Relationship between the genes for glucose-6-phosphate dehydrogenase and for haemoglobin in a Nigerian population. Nature. 1968; 219(5158): 1041-2.                                                                                                                                                   | 1966-1968                   |                      |
| Nigeria | Peace Research Institute Oslo (PRIO). Battle Deaths Dataset Version 3, 2009. Oslo, Norway: Peace Research Institute Oslo (PRIO), 2009.                                                                                                                                                                                      | 1966-1988                   |                      |

**Web Table 32 - Comprehensive citation list**

| Country | Citation                                                                                                                                                                                                                                                           | Year*                                                  | New for GBD 2013 (*) |
|---------|--------------------------------------------------------------------------------------------------------------------------------------------------------------------------------------------------------------------------------------------------------------------|--------------------------------------------------------|----------------------|
| Nigeria | Fleming AF, Storey J, Molineaux L, Iroko EA, Attai ED. Abnormal haemoglobins in the Sudan savanna of Nigeria. I. Prevalence of haemoglobins and relationships between sickle cell trait, malaria and survival. <i>Ann Trop Med Parasitol.</i> 1979; 73(2): 161-72. | 1970-1974                                              |                      |
| Nigeria | Bradley AK, Gilles HM. Malumfashi Endemic Diseases Research Project, XXI. Pointers to causes of death in the Malumfashi area, northern Nigeria. <i>Ann Trop Med Parasitol.</i> 1984; 78(3): 265-71.                                                                | 1977                                                   |                      |
| Nigeria | Akinyanju OO. A profile of sickle cell disease in Nigeria. <i>Ann N Y Acad Sci.</i> 1989; 565(565): 126-36.                                                                                                                                                        | 1978-1980,1983-1985                                    |                      |
| Nigeria | Bamgboye EA, Familusi JB. Mortality pattern at a children's emergency ward, University College Hospital, Ibadan, Nigeria. <i>Afr J Med Med Sci.</i> 1990; 19(2): 127-32.                                                                                           | 1978-1986                                              |                      |
| Nigeria | World Health Organization (WHO). Global burden of obstructed labour in the year 2000.                                                                                                                                                                              | 1978-1991, 1996                                        |                      |
| Nigeria | Centre for Research on the Epidemiology of Disasters (CRED). EM-DAT: The OFDA/CRED International Disaster Database. Brussels, Belgium: Catholic University of Leuven.                                                                                              | 1978, 1988, 1994, 1998-2001, 2003-2007, 2009-2013      |                      |
| Nigeria | Adetoro OO. A 15-year study of illegally induced abortion mortality at Ilorin, Nigeria. <i>Int J Gynaecol Obstet.</i> 1989; 29(1): 65-72.                                                                                                                          | 1980-1986                                              |                      |
| Nigeria | Institute for Health Metrics and Evaluation (IHME), Joint United Nations Program on HIV/AIDS (UNAIDS). Institute for Health Metrics and Evaluation HIV Mortality Estimates Based on the UNAIDS Spectrum Model Framework.                                           | 1980-2013                                              | *                    |
| Nigeria | United Nations Children's Fund (UNICEF), World Health Organization (WHO). WHO and UNICEF Reported Disease Incidence Time Series - Pertussis. Geneva, Switzerland: World Health Organization (WHO).                                                                 | 1980-1994, 1996, 1998, 2000-2002, 2004-2009, 2011-2013 |                      |
| Nigeria | United Nations Children's Fund (UNICEF), World Health Organization (WHO). WHO and UNICEF Reported Disease Incidence Time Series - Measles. Geneva, Switzerland: World Health Organization (WHO).                                                                   | 1980-2013                                              |                      |
| Nigeria | WHO Department of Communicable Disease Surveillance and Response. WHO Report on Global Surveillance of Epidemic-prone Infectious Diseases 2000.                                                                                                                    | 1980, 1983-1994, 1997                                  |                      |
| Nigeria | Ayoola EA. Antibody to hepatitis A virus in healthy Nigerians. <i>J Natl Med Assoc.</i> 1982; 74(5): 465-8.                                                                                                                                                        | 1981                                                   |                      |
| Nigeria | International Statistical Institute, National Population Bureau (Nigeria). Nigeria World Fertility Survey 1981-1982. International Statistical Institute.                                                                                                          | 1981-1982                                              |                      |
| Nigeria | Ogunniyi SO, Sanusi YO, Faleyimu BL. Forceps delivery at Wesley Guild Hospital, Ilesa, Nigeria: a ten year review. <i>West Afr J Med.</i> 1997; 16(1): 30-5.                                                                                                       | 1981-1990                                              |                      |
| Nigeria | Nasidi A, Harry TO, Vyazov SO, Munube GM, Azzan BB, Ananiev VA. Prevalence of hepatitis B infection markers in representative areas of Nigeria. <i>Int J Epidemiol.</i> 1986; 15(2): 274-6.                                                                        | 1984                                                   |                      |
| Nigeria | Akpede O, Abiodun PO, Sykes M, Salami CE. Childhood bacterial meningitis beyond the neonatal period in southern Nigeria: changes in organisms/antibiotic susceptibility. <i>East Afr Med J.</i> 1994; 71(1): 14-20.                                                | 1985-1990                                              |                      |
| Nigeria | Kurz X. The yellow fever epidemic in Western Mali, September-November 1987: Why did epidemiological surveillance fail? <i>Disasters.</i> 1990; 14(1): 46-54.                                                                                                       | 1986                                                   |                      |
| Nigeria | Jinadu MK, Olusi SO, Agun JI, Fabiyi AK. Childhood diarrhoea in rural Nigeria. I. Studies on prevalence, mortality and socio-environmental factors. <i>J Diarrhoeal Dis Res.</i> 1991; 9(4): 323-7.                                                                | 1987                                                   |                      |
| Nigeria | Olaleye OD, Omilabu SA, Faseru O, Fagbami AH. Nigeria: a survey for yellow fever virus haemagglutination inhibiting antibody in residents of two communities before and after the epidemics. <i>Virologie.</i> 1988; 39(4): 261-6.                                 | 1987                                                   |                      |

**Web Table 32 - Comprehensive citation list**

| Country | Citation                                                                                                                                                                                                                                                                                                                   | Year*     | New for GBD 2013 (*) |
|---------|----------------------------------------------------------------------------------------------------------------------------------------------------------------------------------------------------------------------------------------------------------------------------------------------------------------------------|-----------|----------------------|
| Nigeria | Emele F. Etiologic spectrum and pattern of antimicrobial drug susceptibility in bacterial meningitis in Sokoto, Nigeria. <i>Acta Paediatr.</i> 2000; 89(8): 942-6.                                                                                                                                                         | 1987-1992 |                      |
| Nigeria | Amazigo UO, Chime AB. Hepatitis-B virus infection in rural and urban populations of eastern Nigeria: prevalence of serological markers. <i>East Afr Med J.</i> 1990; 67(8): 539-44.                                                                                                                                        | 1988      |                      |
| Nigeria | Department of Peace and Conflict Research, Uppsala University. UCDP Battle-Related Deaths Database Version 5, 2013. Uppsala, Sweden: Department of Peace and Conflict Research, Uppsala University, 2013.                                                                                                                  | 1989-2012 | *                    |
| Nigeria | Ozumba UC. Acute bacterial meningitis in Enugu, Nigeria. <i>Cent Afr J Med.</i> 1995; 41(2): 54-9.                                                                                                                                                                                                                         | 1989-1993 |                      |
| Nigeria | Ijaiya MA, Aboyeji PA. Obstetric urogenital fistula: the Ilorin experience, Nigeria. <i>West Afr J Med.</i> 2004; 23(1): 7-9.                                                                                                                                                                                              | 1989-1998 |                      |
| Nigeria | Federal Office of Statistics (Nigeria), Macro International, Inc.; Institute for Resource Development. Nigeria Demographic and Health Survey 1990. Calverton, United States: Macro International, Inc.                                                                                                                     | 1990      |                      |
| Nigeria | Ekenna O, Chikwem JO, Mohammed I, Durojaiye SO. Epidemic yellow fever in Borno State of Nigeria: characterisation of hospitalised patients. <i>West Afr J Med.</i> 2010; 29(2): 91-7.                                                                                                                                      | 1990      |                      |
| Nigeria | Adebajo AO, Smith DJ, Hazleman BL, Wreghitt TG. Seroepidemiological associations between tuberculosis, malaria, hepatitis B, and AIDS in West Africa. <i>J Med Virol.</i> 1994; 42(4): 366-8.                                                                                                                              | 1990      |                      |
| Nigeria | United Nations Office on Drugs and Crime (UNODC). United Nations Surveys on Crime Trends and the Operations of Criminal Justice Systems 1970-2006 as provided by Kavi Bhalla. [Unpublished].                                                                                                                               | 1990-1994 |                      |
| Nigeria | Weatherall D. Sickle Cell and Thalassemias Prevalence Data, Personal Correspondence with David Weatherall. [Unpublished].                                                                                                                                                                                                  | 1990-2009 |                      |
| Nigeria | Onwudiegwu U. The effect of a depressed economy of the utilisation of maternal health services: the Nigerian Experience II. <i>J Obstet Gynaecol.</i> 1997; 17(2): 143-8.                                                                                                                                                  | 1990-1994 |                      |
| Nigeria | Department of Peace and Conflict Research, Uppsala University. UCDP One-Sided Violence Database Version 1.4, 2013. Uppsala, Sweden: Department of Peace and Conflict Research, Uppsala University, 2013.                                                                                                                   | 1990-2012 | *                    |
| Nigeria | Centre for Health Informatics and Multiprofessional Education, University College London. Modell's Haemoglobinopathologist's Almanac. London, United Kingdom: Centre for Health Informatics and Multiprofessional Education, University College London, 2008.                                                              | 1990-2003 |                      |
| Nigeria | Ekanem EE, Asindi AA, Okoi OU. Community-based surveillance of paediatric deaths in Cross River State, Nigeria. <i>Tropical and Geographical Medicine.</i> 1994; 46(5): 305-8.                                                                                                                                             | 1991      |                      |
| Nigeria | Tomori O. Yellow fever in Africa: public health impact and prospects for control in the 21st century. <i>Biomedica.</i> 2002; 22(2): 178-210.                                                                                                                                                                              | 1991      |                      |
| Nigeria | Obi CL, Anyiwo CE, Nnatu SN, Agbonlahor DE, Esumeh FI, Karpas A. A comparison of human immunodeficiency virus (HIV) seropositivity and hepatitis B surface antigenemia (HBs Ag) among the same group of apparently healthy pregnant women in Lagos, Nigeria: a preliminary report. <i>Viral Immunol.</i> 1993; 6(1): 43-7. | 1991      |                      |
| Nigeria | Olubuyide IO, Maxwell SM, Akinyinka OO, Hart CA, Neal GE, Hendrickse RG. HBsAg and aflatoxins in sera of rural (Igbo-Ora) and urban (Ibadan) populations in Nigeria. <i>Afr J Med Med Sci.</i> 1993; 22(4): 77-80.                                                                                                         | 1991      |                      |
| Nigeria | Angastiniotis M, Modell B, Englezos P, Boulyjenkov V. Prevention and control of haemoglobinopathies. <i>Bull World Health Organ.</i> 1995; 73(3): 375-86.                                                                                                                                                                  | 1991-1993 |                      |
| Nigeria | Oladapo OT, Ariba AJ, Odusoga OL. Changing patterns of emergency obstetric care at a Nigerian University hospital. <i>West Afr J Med.</i> 2007; 98(3): 278-84.                                                                                                                                                             | 1991-2001 |                      |



**Web Table 32 - Comprehensive citation list**

| Country | Citation                                                                                                                                                                                                                                                                                                                          | Year*     | New for GBD 2013 (*) |
|---------|-----------------------------------------------------------------------------------------------------------------------------------------------------------------------------------------------------------------------------------------------------------------------------------------------------------------------------------|-----------|----------------------|
| Nigeria | Department of Peace and Conflict Research, Uppsala University. UCDP Nonstate Conflict Database Version 2.5, 2013. Uppsala, Sweden: Department of Peace and Conflict Research, Uppsala University, 2013.                                                                                                                           | 1991-2012 | *                    |
| Nigeria | Chikwem JO, Mohammed I, Okara GC, Ukwandu NC, Ola TO. Prevalence of transmissible blood infections among blood donors at the University of Maiduguri Teaching Hospital, Maiduguri, Nigeria. <i>East Afr Med J.</i> 1997; 74(4): 213-6.                                                                                            | 1992      |                      |
| Nigeria | Harry TO, Bajani MD, Moses AE. Hepatitis B virus infection among blood donors and pregnant women in Maiduguri, Nigeria. <i>East Afr Med J.</i> 1994; 71(9): 596-7.                                                                                                                                                                | 1992      |                      |
| Nigeria | Perkins AJ, Hui SL, Ogunniyi A, Gureje O, Baiyewu O, Unverzagt FW, Gao S, Hall KS, Musick BS, Hendrie HC. Risk of mortality for dementia in a developing country: the Yoruba in Nigeria. <i>Int J Geriatr Psychiatry.</i> 2002; 17(6): 566-73.                                                                                    | 1992-1997 |                      |
| Nigeria | Hendrie HC, Ogunniyi A, Hall KS, Baiyewu O, Unverzagt FW, Gureje O, Gao S, Evans RM, Ogunseyinde AO, Adeyinka AO, Musick B, Hui SL. Incidence of dementia and Alzheimer disease in 2 communities: Yoruba residing in Ibadan, Nigeria, and African Americans residing in Indianapolis, Indiana. <i>JAMA.</i> 2001; 285(6): 739-47. | 1992-1995 |                      |
| Nigeria | Byass P, Adedeji MD, Mongdem JG, Zwandor AC, Brew-Graves SH, Clements CJ. Assessment and possible control of endemic measles in urban Nigeria. <i>J Public Health Med.</i> 1995; 17(2): 140-5.                                                                                                                                    | 1992-1993 |                      |
| Nigeria | Ogunniyi A, Baiyewu O, Gureje O, Hall KS, Unverzagt F, Siu SH, Gao S, Farlow M, Oluwole OSA, Komolafe O, Hendrie HC. Epidemiology of dementia in Nigeria: results from the Indianapolis-Ibadan study. <i>Eur J Neurol.</i> 2000; 7(5): 485-90.                                                                                    | 1992-1994 |                      |
| Nigeria | Ojo OS, Thursz M, Thomas HC, Ndububa DA, Adeodu OO, Rotimi O, Lawal AA, Durosinmi MA, Akonai AK, Fatusi AO. Hepatitis B virus markers, hepatitis D virus antigen and hepatitis C virus antibodies in Nigerian patients with chronic liver disease. <i>East Afr Med J.</i> 1995; 72(11): 719-21.                                   | 1993-1994 |                      |
| Nigeria | Asuzu MC, Johnson OO, Owoaje ET, Kaufman JS, Rotimi C, Cooper RS. The Idikan adult mortality study. <i>Afr J Med Med Sci.</i> 2000; 29(2): 115-8.                                                                                                                                                                                 | 1994      |                      |
| Nigeria | Bada AS, Olatunji PO, Adewuyi JO, Iseniyi JO, Onile BA. Hepatitis B surface antigenaemia in Ilorin, Kwara State, Nigeria. <i>Cent Afr J Med.</i> 1996; 42(5): 139-41.                                                                                                                                                             | 1994      |                      |
| Nigeria | Joint United Nations Program on HIV/AIDS (UNAIDS), World Health Organization (WHO). Nigeria Epidemiological Fact Sheet on HIV/AIDS and STIs 2000.                                                                                                                                                                                 | 1994      |                      |
| Nigeria | National Population Commission of Nigeria, United Nations Children's Fund (UNICEF). Nigeria Report of Livebirths, Deaths and Stillbirths 1994-2007. Abuja, Nigeria: National Population Commission of Nigeria, 2008.                                                                                                              | 1994-2007 |                      |
| Nigeria | World Health Organization (WHO). Nigeria WHO Leishmaniasis Country Profile.                                                                                                                                                                                                                                                       | 1994-2008 | *                    |
| Nigeria | Lawoyin TO. Infant and maternal deaths in rural south west Nigeria: a prospective study. <i>Afr J Med Med Sci.</i> 2007; 36(3): 235-41.                                                                                                                                                                                           | 1995      |                      |
| Nigeria | Olubuyide IO, Aliyu B, Olaleye OA, Ola SO, Olawuyi F, Malabu UH, Odemuyiwa SO, Odaibo GN, Cook GC. Hepatitis B and C virus and hepatocellular carcinoma. <i>Trans R Soc Trop Med Hyg.</i> 1997; 91(1): 38-41.                                                                                                                     | 1995      |                      |
| Nigeria | Halim NK, Madukwe U, Saheeb BD, Airauhi LU. Hepatitis B surface antigen and antibody to hepatitis C virus among accident and emergency patients. <i>East Afr Med J.</i> 2001; 78(9): 480-3.                                                                                                                                       | 1995      |                      |
| Nigeria | United Nations Office on Drugs and Crime (UNODC). United Nations Office on Drugs and Crime Global Study on Homicides 2011. Vienna, Austria: United Nations Office on Drugs and Crime (UNODC), 2011.                                                                                                                               | 1995-2007 |                      |

**Web Table 32 - Comprehensive citation list**

| Country | Citation                                                                                                                                                                                                                                                              | Year*                            | New for GBD 2013 (*) |
|---------|-----------------------------------------------------------------------------------------------------------------------------------------------------------------------------------------------------------------------------------------------------------------------|----------------------------------|----------------------|
| Nigeria | Ojo OS, Akonai AK, Thursz M, Ndububa DA, Durosinmi MA, Adeodu OO, Fatusi OA, Goldin RD. Hepatitis D virus antigen in HBsAg positive chronic liver disease in Nigeria. <i>East Afr Med J.</i> 1998; 75(6): 329-31.                                                     | 1995-1997                        |                      |
| Nigeria | World Health Organization (WHO). Yellow Fever Reported Cases, WHO Vaccine-Preventable Diseases: Monitoring System. Geneva, Switzerland: World Health Organization (WHO).                                                                                              | 1996, 1998, 2000-2002, 2007-2009 |                      |
| Nigeria | Akang EEU, Akinremi T, Oje EM, Oluwasola AO, Ipadeola TO. Pattern of coroners' autopsies at Ring Road State Hospital, Ibadan, Nigeria: a retrospective study (1994-2000). <i>Medicine, Science and the Law.</i> 2009; 49(2): 117-22.                                  | 1997                             |                      |
| Nigeria | Mockenhaupt FP, May J, Stark K, Falusi AG, Meyer CG, Bienzle U. Serum transferrin receptor levels are increased in asymptomatic and mild Plasmodium falciparum-infection. <i>Haematologica.</i> 1999; 84(10): 869-73.                                                 | 1997-1999                        |                      |
| Nigeria | World Health Organization (WHO). The Global Elimination of Congenital Syphilis: Rationale and Strategy for Action. Geneva, Switzerland: World Health Organization (WHO), 2007.                                                                                        | 1997-2003                        |                      |
| Nigeria | Onakewhor JU, Offor E, Okonofua FE. Maternal and neonatal seroprevalence of hepatitis B surface antigen (HBsAg) in Benin City, Nigeria. <i>J Obstet Gynaecol.</i> 2001; 21(6): 583-6.                                                                                 | 1997-1998                        |                      |
| Nigeria | Joint United Nations Program on HIV/AIDS (UNAIDS), United Nations Children's Fund (UNICEF), World Health Organization (WHO). Nigeria Epidemiological Fact Sheet on HIV/AIDS and STIs 2004.                                                                            | 1997-2001                        |                      |
| Nigeria | Belo AC. Prevalence of hepatitis B virus markers in surgeons in Lagos, Nigeria. <i>East Afr Med J.</i> 2000; 77(5): 283-5.                                                                                                                                            | 1998                             |                      |
| Nigeria | Halim NK, Ajayi OI. Risk factors and seroprevalence of hepatitis C antibody in blood donors in Nigeria. <i>East Afr Med J.</i> 2000; 77(8): 410-2.                                                                                                                    | 1998                             |                      |
| Nigeria | May J, Meyer CG, Grossterlinden L, Ademowo OG, Mockenhaupt FP, Olumese PE, Falusi AG, Luzzatto L, Bienzle U. Red cell glucose-6-phosphate dehydrogenase status and pyruvate kinase activity in a Nigerian population. <i>Trop Med Int Health.</i> 2000; 5(2): 119-23. | 1998-2000                        |                      |
| Nigeria | Macro International, Inc, National Population Commission of Nigeria. Nigeria Demographic and Health Survey 1999. Calverton, United States: Macro International, Inc.                                                                                                  | 1999                             | *                    |
| Nigeria | Tsui AO, Creanga AA, Ahmed S. The role of delayed childbearing in the prevention of obstetric fistulas. <i>Int J Gynaecol Obstet.</i> 2007; S98-107.                                                                                                                  | 1999                             |                      |
| Nigeria | Sirisen ND, Njoku MO, Idoko JA, Isamade E, Barau C, Jelpo D, Zamani A, Otowo S. Carriage rate of hepatitis-B surface antigen (HBsAg) in an urban community in Jos, Plateau State, Nigeria. <i>Niger Postgrad Med J.</i> 2002; 9(1): 7-10.                             | 1999                             |                      |
| Nigeria | Nwokediuko SC, Ijoma UN, Obienu O. Liver Cancer in Enugu, South East Nigeria. <i>Insight Bioinforma.</i> 2011; 1(1): 1-5.                                                                                                                                             | 1999-2005                        |                      |
| Nigeria | Alikor EA, Erhabor ON. Seroprevalence of hepatitis B surface antigenaemia in children in a tertiary health institution in the Niger Delta of Nigeria. <i>Niger J Med.</i> 2007; 16(3): 250-1.                                                                         | 1999-2004                        |                      |
| Nigeria | Uneke CJ, Ogbu O, Inyama PU, Anyanwu GI, Njoku MO, Idoko JH. Prevalence of hepatitis-B surface antigen among blood donors and human immunodeficiency virus-infected patients in Jos, Nigeria. <i>Mem Inst Oswaldo Cruz.</i> 2005; 100(1): 13-6.                       | 1999-2002                        |                      |
| Nigeria | Bukar M, Audu BM, Takai UI, Ajayi BB, Kullima AA. Is routine antenatal screening for syphilis in Nigeria still justified clinically and economically? <i>Saudi Med J.</i> 2009; 30(10): 1311-5.                                                                       | 1999, 2008                       |                      |
| Nigeria | World Health Organization Regional Office for Africa. HIV/AIDS Epidemiological Surveillance Update for the WHO African Region. World Health Organization Regional Office for Africa, 2003.                                                                            | 1999, 2000-2002                  |                      |
| Nigeria | Ochicha O, Mohammed AZ, Nwokedi EE, Umar AB. A review of medico-legal deaths in Kano. <i>Niger Postgrad Med J.</i> 2003; 10(1): 16-8.                                                                                                                                 | 2000                             |                      |
| Nigeria | Odunvbun ME, Okolo AA, Rahimy CM. Newborn screening for sickle cell disease in a Nigerian hospital. <i>Public Health.</i> 2008; 122(10): 1111-6.                                                                                                                      | 2000                             |                      |



**Web Table 32 - Comprehensive citation list**

| Country | Citation                                                                                                                                                                                                                                                                                                                           | Year*     | New for GBD 2013 (*) |
|---------|------------------------------------------------------------------------------------------------------------------------------------------------------------------------------------------------------------------------------------------------------------------------------------------------------------------------------------|-----------|----------------------|
| Nigeria | Mutebi J-P, Barrett ADT. The epidemiology of yellow fever in Africa. <i>Microbes Infect.</i> 2002; 4(14): 1459-68.                                                                                                                                                                                                                 | 2000      |                      |
| Nigeria | Ademowo OG, Falusi AG. Molecular epidemiology and activity of erythrocyte G6PD variants in a homogeneous Nigerian population. <i>East Afr Med J.</i> 2002; 79(1): 42-4.                                                                                                                                                            | 2000-2002 |                      |
| Nigeria | Lagunju IA, Orimadegun AE, Oyedemi DG. Measles in Ibadan: a continuous scourge. <i>Afr J Med Med Sci.</i> 2005; 34(4): 383-7.                                                                                                                                                                                                      | 2000-2004 |                      |
| Nigeria | Ikeme AC, Ezegwui HU, Ogbonna C. Sero prevalence of hepatitis B surface antigen (HBsAg) in pregnant women in Southeast Nigeria. <i>Trop Doct.</i> 2006; 36(2): 128.                                                                                                                                                                | 2000-2004 |                      |
| Nigeria | Otegbayo JA, Fasola FA, Abja A. Prevalence of hepatitis B surface and e antigens, risk factors for viral acquisition and serum transaminase among blood donors in Ibadan, Nigeria. <i>Trop Gastroenterol.</i> 2003; 24(4): 196-7.                                                                                                  | 2001      |                      |
| Nigeria | Johnson AW, Adedoyin OT, Abdul-Karim AA, Olanrewaju AW. Childhood pyogenic meningitis: clinical and investigative indicators of etiology and outcome. <i>J Natl Med Assoc.</i> 2007; 99(8): 937-47.                                                                                                                                | 2001-2005 |                      |
| Nigeria | Ejele OA, Nwauche CA, Erhabor O. Seroprevalence of hepatitis C virus in the Niger Delta of Nigeria. <i>Niger Postgrad Med J.</i> 2006; 13(2): 103-6.                                                                                                                                                                               | 2001-2003 |                      |
| Nigeria | Daramola OOM, George AO, Ogunbiyi AO, Otegbayo JA. Hepatitis B virus in Nigerians with lichen planus. <i>West Afr J Med.</i> 2004; 23(2): 104-6.                                                                                                                                                                                   | 2002      |                      |
| Nigeria | Oladapo OT, Sule-Odu AO, Olatunji AO, Daniel OJ. "Near Miss" obstetric events and maternal deaths in Sagamu, Nigeria: a retrospective study. <i>Reprod Health.</i> 2005; 2(9): 1-9.                                                                                                                                                | 2002-2004 |                      |
| Nigeria | National Population Commission of Nigeria, ORC Macro, UK Department for International Development (DFID), United Nations Children's Fund (UNICEF), United Nations Population Fund (UNFPA). Nigeria Demographic and Health Survey 2003. Calverton, United States: ORC Macro.                                                        | 2003      |                      |
| Nigeria | Thalassaemia International Federation, World Health Organization (WHO). Management of Haemoglobin Disorders: Report of a Joint WHO-TIF Meeting, Nicosia, Cyprus, 16-18 November 2007. Geneva, Switzerland: World Health Organization (WHO), 2008.                                                                                  | 2003      |                      |
| Nigeria | Umolu PI, Okoror LE, Orhue P. Human immunodeficiency virus (HIV) seropositivity and hepatitis B surface antigenemia (HBSAG) among blood donors in Benin city, Edo state, Nigeria. <i>Afr Health Sci.</i> 2005; 5(1): 55-8.                                                                                                         | 2003      |                      |
| Nigeria | Umoh AV, Abah GM, Ekanem TI, Essien EM. Haemoglobin genotypes: a prevalence study and implications for reproductive health in Uyo, Nigeria. <i>Niger J Med.</i> 2010; 19(1): 36-41.                                                                                                                                                | 2003-2007 |                      |
| Nigeria | Grais RF, Dubray C, Gerstl S, Guthmann JP, Djibo A, Nargaye KD, Coker J, Alberti KP, Cochet A, Ihekweazu C, Nathan N, Payne L, Porten K, Sauvageot D, Schimmer B, Fermon F, Burny ME, Hersh BS, Guerin PJ. Unacceptably high mortality related to measles epidemics in Niger, Nigeria, and Chad. <i>PLoS Med.</i> 2007; 4(1): e16. | 2003-2004 |                      |
| Nigeria | Salawu L, Murainah HA. Pre-donation screening of intending blood donors for antibodies to infectious agents in a Nigerian tertiary health institution: a pilot study. <i>Afr J Med Med Sci.</i> 2006; 35(4): 453-6.                                                                                                                | 2003-2004 |                      |
| Nigeria | Balogun WO, Adeleye JO, Akinlade KS, Kuti M, Otegbayo JA. Low prevalence of hepatitis-C viral seropositivity among patients with type-2 diabetes mellitus in a tertiary hospital. <i>J Natl Med Assoc.</i> 2006; 98(11): 1805-8.                                                                                                   | 2004      |                      |
| Nigeria | Gureje O, Ogunniyi A, Kola L, Abiona T. Incidence of and risk factors for dementia in the Ibadan study of aging. <i>J Am Geriatr Soc.</i> 2011; 59(5): 869-74.                                                                                                                                                                     | 2004-2007 |                      |

**Web Table 32 - Comprehensive citation list**

| Country | Citation                                                                                                                                                                                                                                                                                                                                                                                                     | Year*                 | New for GBD 2013 (*) |
|---------|--------------------------------------------------------------------------------------------------------------------------------------------------------------------------------------------------------------------------------------------------------------------------------------------------------------------------------------------------------------------------------------------------------------|-----------------------|----------------------|
| Nigeria | Akinyemi KO, Bamiro BS, Coker AO. Salmonellosis in Lagos, Nigeria: Incidence of Plasmodium falciparum-associated Co-infection, Patterns of Antimicrobial Resistance, and Emergence of Reduced Susceptibility to Fluoroquinolones. <i>J Health Popul Nutr.</i> 2007; 25(3): 351-8.                                                                                                                            | 2004-2005             | *                    |
| Nigeria | Mabayoje VO, Oparinde DP, Akanni EO, Taiwo SS, Muhibi MA, Adebayo TO. Seroprevalence of hepatitis B and C and of human immunodeficiency virus among blood donors in south-west Nigeria. <i>Br J Biomed Sci.</i> 2007; 64(4): 177-9.                                                                                                                                                                          | 2004-2005             |                      |
| Nigeria | Adegoke AA, Campbell M, Ogundeji MO, Lawoyin TO, Thomson AM. Community Study of Maternal Mortality in South West Nigeria: How Applicable is the Sisterhood Method. <i>Matern Child Health J.</i> 2013; 17(2): 319-29.                                                                                                                                                                                        | 2005                  |                      |
| Nigeria | Taiwo SS, Adesiji YO, Adekanle DA. Screening for syphilis during pregnancy in Nigeria: a practice that must continue. <i>Sex Transm Infect.</i> 2007; 83(5): 357-8.                                                                                                                                                                                                                                          | 2005                  |                      |
| Nigeria | Ministry of Health (Nigeria). Nigeria National HIV/Syphilis Seroprevalence Sentinel Survey 2005.                                                                                                                                                                                                                                                                                                             | 2005                  |                      |
| Nigeria | Koate BBD, Buseri FI, Jeremiah ZA. Seroprevalence of hepatitis C virus among blood donors in Rivers State, Nigeria. <i>Transfus Med.</i> 2005; 15(5): 449-51.                                                                                                                                                                                                                                                | 2005                  |                      |
| Nigeria | Mutihir JT, Utoo BT. Postpartum maternal morbidity in Jos, north-central Nigeria. <i>Niger J Clin Pract.</i> 2011; 14(1): 38-42.                                                                                                                                                                                                                                                                             | 2005-2008             |                      |
| Nigeria | World Health Organization (WHO). Retrospective Measles Data on Supplementary Immunization Activities. Geneva, Switzerland: World Health Organization (WHO).                                                                                                                                                                                                                                                  | 2005-2008, 2011, 2013 |                      |
| Nigeria | Ojo DA, Oyetunji IAO. Sero-prevalence of syphilis among pregnant women in Osogbo in southwestern Nigeria. <i>ASSET Series B.</i> 2007; 6(1): 61-5.                                                                                                                                                                                                                                                           | 2006                  |                      |
| Nigeria | Moisi JC, Saha SK, Falade AG, Njanpop-Lafourcade B-M, Oundo J, Zaidi AKM, Afroj S, Bakare RA, Buss JK, Lasi R, Mueller J, Odekanmi AA, Sangare L, Scott JAG, Knoll MD, Levine OS, Gessner BD. Enhanced diagnosis of pneumococcal meningitis with use of the binax NOW immunochromatographic test of Streptococcus pneumoniae antigen: A multisite study. <i>Clin Infect Dis.</i> 2009; 48(Suppl 2): S49-S56. | 2006-2007             |                      |
| Nigeria | United Nations Children's Fund (UNICEF), National Bureau of Statistics (Nigeria). Nigeria Multiple Indicator Cluster Survey 2007. New York, United States: United Nations Children's Fund (UNICEF).                                                                                                                                                                                                          | 2007                  |                      |
| Nigeria | Central Bank of Nigeria, National Bureau of Statistics (Nigeria), Nigerian Communications Commission (NCC). Nigeria General Household Survey 2007. Abuja, Nigeria: National Bureau of Statistics (Nigeria).                                                                                                                                                                                                  | 2007                  | *                    |
| Nigeria | Okonkwo UC, Nwosu MN, Ukah C, Okpala OC, Ahaneku JI. The clinical and pathological features of hepatocellular carcinoma in Nnewi, Nigeria. <i>Niger J Med.</i> 2011; 20(3): 366-71.                                                                                                                                                                                                                          | 2007-2008             | *                    |
| Nigeria | Macro International, Inc, National Population Commission of Nigeria. Nigeria Demographic and Health Survey 2008. Calverton, United States: Macro International, Inc, 2009.                                                                                                                                                                                                                                   | 2008                  |                      |
| Nigeria | Oye-Adeniran BA, Odeyemi KA, Gbadegesin A, Ekanem EE, Osilaja OK, Akin-Adenekan O, Umoh AV. The use of the sisterhood method for estimating maternal mortality ratio in Lagos state, Nigeria. <i>J Obstet Gynaecol.</i> 2011; 31(4): 315-9.                                                                                                                                                                  | 2008                  |                      |
| Nigeria | Joint United Nations Program on HIV/AIDS (UNAIDS), National Agency for the Control of AIDS (Nigeria). Nigeria United Nations General Assembly Special Session (UNGASS) Country Progress Report 2010. Geneva, Switzerland: Joint United Nations Program on HIV/AIDS (UNAIDS), 2010.                                                                                                                           | 2009                  |                      |
| Nigeria | Garba JA, Umar S. Aetiology of maternal mortality using verbal autopsy at Sokoto, North-Western Nigeria. <i>Afr J Prim Health Care Fam Med.</i> 2013; 5(1).                                                                                                                                                                                                                                                  | 2009-2011             | *                    |

**Web Table 32 - Comprehensive citation list**

| Country     | Citation                                                                                                                                                                                                                                                      | Year*                                       | New for GBD 2013 (*) |
|-------------|---------------------------------------------------------------------------------------------------------------------------------------------------------------------------------------------------------------------------------------------------------------|---------------------------------------------|----------------------|
| Nigeria     | IA Onwuezobea, EA Ochanga, A Umoyiohob, EA Basseyb, EM Umoffiaa. Prevalence of syphilis seropositivity in antenatal clinic clients in a teaching hospital in South-South region of Nigeria. <i>Asian Pac J Trop Dis.</i> 2011; 1(1): 21-3.                    | 2009-2010                                   |                      |
| Nigeria     | ICF Macro, National Malaria Control Program (Nigeria), National Population Commission of Nigeria. Nigeria Malaria Indicator Survey 2010. ICF Macro.                                                                                                           | 2010                                        |                      |
| Nigeria     | National Bureau of Statistics (Nigeria), United Nations Children's Fund (UNICEF). Nigeria Multiple Indicator Cluster Survey 2011. New York, United States: United Nations Children's Fund (UNICEF), 2013.                                                     | 2011                                        | *                    |
| Nigeria     | ICF International, National Population Commission of Nigeria. Nigeria Demographic and Health Survey 2013.                                                                                                                                                     | 2013                                        | *                    |
| North Korea | Peace Research Institute Oslo (PRIO). Battle Deaths Dataset Version 3, 2009. Oslo, Norway: Peace Research Institute Oslo (PRIO), 2009.                                                                                                                        | 1950-1953                                   |                      |
| North Korea | Institute for Health Metrics and Evaluation (IHME), Joint United Nations Program on HIV/AIDS (UNAIDS). Institute for Health Metrics and Evaluation HIV Mortality Estimates Based on the UNAIDS Spectrum Model Framework.                                      | 1980-2013                                   | *                    |
| North Korea | United Nations Children's Fund (UNICEF), World Health Organization (WHO). WHO and UNICEF Reported Disease Incidence Time Series - Pertussis. Geneva, Switzerland: World Health Organization (WHO).                                                            | 1980-1992, 1994-2013                        |                      |
| North Korea | United Nations Children's Fund (UNICEF), World Health Organization (WHO). WHO and UNICEF Reported Disease Incidence Time Series - Measles. Geneva, Switzerland: World Health Organization (WHO).                                                              | 1980-1999, 2001-2013                        |                      |
| North Korea | Centre for Research on the Epidemiology of Disasters (CRED). EM-DAT: The OFDA/CRED International Disaster Database. Brussels, Belgium: Catholic University of Leuven.                                                                                         | 1987, 1993, 1995-2002, 2004-2007, 2010-2013 |                      |
| North Korea | Centre for Health Informatics and Multiprofessional Education, University College London. Modell's Haemoglobinopathologist's Almanac. London, United Kingdom: Centre for Health Informatics and Multiprofessional Education, University College London, 2008. | 1990-2003                                   |                      |
| North Korea | US Census Bureau. Korea, North Population Census 1993. Washington, D.C., United States: US Census Bureau, 1997.                                                                                                                                               | 1993                                        |                      |
| North Korea | Measles Supplementary Immunization Activity Data as provided by the World Health Organization. [Unpublished].                                                                                                                                                 | 1995, 1999                                  |                      |
| North Korea | World Health Organization (WHO). Yellow Fever Reported Cases, WHO Vaccine-Preventable Diseases: Monitoring System. Geneva, Switzerland: World Health Organization (WHO).                                                                                      | 1999, 2003-2009                             |                      |
| North Korea | Joint United Nations Program on HIV/AIDS (UNAIDS), United Nations Children's Fund (UNICEF), World Health Organization (WHO). Korea, North Epidemiological Fact Sheet on HIV/AIDS and STIs 2004.                                                               | 2000-2001                                   |                      |
| North Korea | World Health Organization (WHO). Retrospective Measles Data on Supplementary Immunization Activities. Geneva, Switzerland: World Health Organization (WHO).                                                                                                   | 2007                                        |                      |
| North Korea | Central Bureau of Statistics (North Korea). Korea, North Population Census 2008.                                                                                                                                                                              | 2008                                        |                      |
| North Korea | Korea, North Population Census 2008 as it appears in United Nations Statistics Division (UNSD). United Nations Demographic Yearbook. New York City, United States: United Nations Statistics Division (UNSD).                                                 | 2008                                        |                      |
| Norway      | Max Planck Institute for Demographic Research, University of California. Human Mortality Database. Berkeley, USA: University of California; Rostock, Germany: Max Planck Institute for Demographic Research.                                                  | 1950                                        |                      |
| Norway      | Norway Vital Registration - Deaths 1951 ICD7 as it appears in World Health Organization (WHO). WHO Mortality Database Version February 2014. Geneva, Switzerland: World Health Organization (WHO), 2014.                                                      | 1951                                        |                      |

**Web Table 32 - Comprehensive citation list**

| Country | Citation                                                                                                                                                                                                 | Year* | New for GBD 2013 (*) |
|---------|----------------------------------------------------------------------------------------------------------------------------------------------------------------------------------------------------------|-------|----------------------|
| Norway  | Norway Vital Registration - Deaths 1952 ICD7 as it appears in World Health Organization (WHO). WHO Mortality Database Version February 2014. Geneva, Switzerland: World Health Organization (WHO), 2014. | 1952  |                      |
| Norway  | Norway Vital Registration - Deaths 1953 ICD7 as it appears in World Health Organization (WHO). WHO Mortality Database Version February 2014. Geneva, Switzerland: World Health Organization (WHO), 2014. | 1953  |                      |
| Norway  | Norway Vital Registration - Deaths 1954 ICD7 as it appears in World Health Organization (WHO). WHO Mortality Database Version February 2014. Geneva, Switzerland: World Health Organization (WHO), 2014. | 1954  |                      |
| Norway  | Norway Vital Registration - Deaths 1955 ICD7 as it appears in World Health Organization (WHO). WHO Mortality Database Version February 2014. Geneva, Switzerland: World Health Organization (WHO), 2014. | 1955  |                      |
| Norway  | Norway Vital Registration - Deaths 1956 ICD7 as it appears in World Health Organization (WHO). WHO Mortality Database Version February 2014. Geneva, Switzerland: World Health Organization (WHO), 2014. | 1956  |                      |
| Norway  | Norway Vital Registration - Deaths 1957 ICD7 as it appears in World Health Organization (WHO). WHO Mortality Database Version February 2014. Geneva, Switzerland: World Health Organization (WHO), 2014. | 1957  |                      |
| Norway  | Norway Vital Registration - Deaths 1958 ICD7 as it appears in World Health Organization (WHO). WHO Mortality Database Version February 2014. Geneva, Switzerland: World Health Organization (WHO), 2014. | 1958  |                      |
| Norway  | Norway Vital Registration - Deaths 1959 ICD7 as it appears in World Health Organization (WHO). WHO Mortality Database Version February 2014. Geneva, Switzerland: World Health Organization (WHO), 2014. | 1959  |                      |
| Norway  | Norway Vital Registration - Deaths 1960 ICD7 as it appears in World Health Organization (WHO). WHO Mortality Database Version February 2014. Geneva, Switzerland: World Health Organization (WHO), 2014. | 1960  |                      |
| Norway  | Norway Vital Registration - Deaths 1961 ICD7 as it appears in World Health Organization (WHO). WHO Mortality Database Version February 2014. Geneva, Switzerland: World Health Organization (WHO), 2014. | 1961  |                      |
| Norway  | Norway Vital Registration - Deaths 1962 ICD7 as it appears in World Health Organization (WHO). WHO Mortality Database Version February 2014. Geneva, Switzerland: World Health Organization (WHO), 2014. | 1962  |                      |
| Norway  | Norway Vital Registration - Deaths 1963 ICD7 as it appears in World Health Organization (WHO). WHO Mortality Database Version February 2014. Geneva, Switzerland: World Health Organization (WHO), 2014. | 1963  |                      |
| Norway  | Norway Vital Registration - Deaths 1964 ICD7 as it appears in World Health Organization (WHO). WHO Mortality Database Version February 2014. Geneva, Switzerland: World Health Organization (WHO), 2014. | 1964  |                      |
| Norway  | Norway Vital Registration - Deaths 1965 ICD7 as it appears in World Health Organization (WHO). WHO Mortality Database Version February 2014. Geneva, Switzerland: World Health Organization (WHO), 2014. | 1965  |                      |

**Web Table 32 - Comprehensive citation list**

| Country | Citation                                                                                                                                                                                                 | Year*     | New for GBD 2013 (*) |
|---------|----------------------------------------------------------------------------------------------------------------------------------------------------------------------------------------------------------|-----------|----------------------|
| Norway  | Norway Vital Registration - Deaths 1966 ICD7 as it appears in World Health Organization (WHO). WHO Mortality Database Version February 2014. Geneva, Switzerland: World Health Organization (WHO), 2014. | 1966      |                      |
| Norway  | Norway Vital Registration - Deaths 1967 ICD7 as it appears in World Health Organization (WHO). WHO Mortality Database Version February 2014. Geneva, Switzerland: World Health Organization (WHO), 2014. | 1967      |                      |
| Norway  | Norway Vital Registration - Deaths 1968 ICD7 as it appears in World Health Organization (WHO). WHO Mortality Database Version February 2014. Geneva, Switzerland: World Health Organization (WHO), 2014. | 1968      |                      |
| Norway  | Norway Vital Registration - Deaths 1969 ICD8 as it appears in World Health Organization (WHO). WHO Mortality Database Version February 2014. Geneva, Switzerland: World Health Organization (WHO), 2014. | 1969      |                      |
| Norway  | Norway Vital Registration - Deaths 1970 ICD8 as it appears in World Health Organization (WHO). WHO Mortality Database Version February 2014. Geneva, Switzerland: World Health Organization (WHO), 2014. | 1970      |                      |
| Norway  | Norway Vital Registration - Deaths 1971 ICD8 as it appears in World Health Organization (WHO). WHO Mortality Database Version February 2014. Geneva, Switzerland: World Health Organization (WHO), 2014. | 1971      |                      |
| Norway  | Norway Vital Registration - Deaths 1972 ICD8 as it appears in World Health Organization (WHO). WHO Mortality Database Version February 2014. Geneva, Switzerland: World Health Organization (WHO), 2014. | 1972      |                      |
| Norway  | Norway Vital Registration - Deaths 1973 ICD8 as it appears in World Health Organization (WHO). WHO Mortality Database Version February 2014. Geneva, Switzerland: World Health Organization (WHO), 2014. | 1973      |                      |
| Norway  | Norway Vital Registration - Deaths 1974 ICD8 as it appears in World Health Organization (WHO). WHO Mortality Database Version February 2014. Geneva, Switzerland: World Health Organization (WHO), 2014. | 1974      |                      |
| Norway  | Norway Vital Registration - Deaths 1975 ICD8 as it appears in World Health Organization (WHO). WHO Mortality Database Version February 2014. Geneva, Switzerland: World Health Organization (WHO), 2014. | 1975      |                      |
| Norway  | Norway Vital Registration - Deaths 1976 ICD8 as it appears in World Health Organization (WHO). WHO Mortality Database Version February 2014. Geneva, Switzerland: World Health Organization (WHO), 2014. | 1976      |                      |
| Norway  | Norway Vital Registration - Deaths 1977 ICD8 as it appears in World Health Organization (WHO). WHO Mortality Database Version February 2014. Geneva, Switzerland: World Health Organization (WHO), 2014. | 1977      |                      |
| Norway  | Norway Vital Registration - Deaths 1978 ICD8 as it appears in World Health Organization (WHO). WHO Mortality Database Version February 2014. Geneva, Switzerland: World Health Organization (WHO), 2014. | 1978      |                      |
| Norway  | Siebke JC, Degré M, Ritland S, Enger SC. Prevalence of hepatitis A antibodies in a normal population and some selected groups of patients in Norway. Am J Epidemiol. 1982; 115(2): 185-91.               | 1978-1979 |                      |

**Web Table 32 - Comprehensive citation list**

| Country | Citation                                                                                                                                                                                                                                                                                              | Year*                           | New for GBD 2013 (*) |
|---------|-------------------------------------------------------------------------------------------------------------------------------------------------------------------------------------------------------------------------------------------------------------------------------------------------------|---------------------------------|----------------------|
| Norway  | Norway Vital Registration - Deaths 1979 ICD8 as it appears in World Health Organization (WHO). WHO Mortality Database Version February 2014. Geneva, Switzerland: World Health Organization (WHO), 2014.                                                                                              | 1979                            |                      |
| Norway  | Hurlen B, Jonsen J, Aas E. Viral hepatitis in dentists in Norway. Acta Odontol Scand. 1980; 38(5): 321-4.                                                                                                                                                                                             | 1979                            |                      |
| Norway  | Norway Vital Registration - Deaths 1980 ICD8 as it appears in World Health Organization (WHO). WHO Mortality Database Version February 2014. Geneva, Switzerland: World Health Organization (WHO), 2014.                                                                                              | 1980                            |                      |
| Norway  | Institute for Health Metrics and Evaluation. Institute for Health Metrics and Evaluation Cancer Registry Database. [Unpublished].                                                                                                                                                                     | 1980-2010                       |                      |
| Norway  | Ferlay J, Parkin DM, Curado MP, Bray F, Edwards B, Shin HR and Forman D. Cancer Incidence in Five Continents, Volumes I to IX: IARC CancerBase No. 9 [Internet]. Lyon, France: International Agency for Research on Cancer; 2010. Available from: <a href="http://ci5.iarc.fr">http://ci5.iarc.fr</a> | 1980-2002                       |                      |
| Norway  | Institute for Health Metrics and Evaluation (IHME), Joint United Nations Program on HIV/AIDS (UNAIDS). Institute for Health Metrics and Evaluation HIV Mortality Estimates Based on the UNAIDS Spectrum Model Framework.                                                                              | 1980-2013                       | *                    |
| Norway  | United Nations Children's Fund (UNICEF), World Health Organization (WHO). WHO and UNICEF Reported Disease Incidence Time Series - Pertussis. Geneva, Switzerland: World Health Organization (WHO).                                                                                                    | 1980-1997, 2000-2006, 2008-2013 |                      |
| Norway  | United Nations Children's Fund (UNICEF), World Health Organization (WHO). WHO and UNICEF Reported Disease Incidence Time Series - Measles. Geneva, Switzerland: World Health Organization (WHO).                                                                                                      | 1980-1997, 2000-2006, 2008-2013 |                      |
| Norway  | Parkin DM, International Agency for Research on Cancer, International Association of Cancer Registries. Cancer Incidence in Five Continents. Vol. I to VIII. Lyon, France, IARC Press, 2005.                                                                                                          | 1980, 1985, 1990, 1995          |                      |
| Norway  | Norway Vital Registration - Deaths 1981 ICD8 as it appears in World Health Organization (WHO). WHO Mortality Database Version February 2014. Geneva, Switzerland: World Health Organization (WHO), 2014.                                                                                              | 1981                            |                      |
| Norway  | Norway Vital Registration - Deaths 1982 ICD8 as it appears in World Health Organization (WHO). WHO Mortality Database Version February 2014. Geneva, Switzerland: World Health Organization (WHO), 2014.                                                                                              | 1982                            |                      |
| Norway  | Norway Vital Registration - Deaths 1983 ICD8 as it appears in World Health Organization (WHO). WHO Mortality Database Version February 2014. Geneva, Switzerland: World Health Organization (WHO), 2014.                                                                                              | 1983                            |                      |
| Norway  | Norway Vital Registration - Deaths 1984 ICD8 as it appears in World Health Organization (WHO). WHO Mortality Database Version February 2014. Geneva, Switzerland: World Health Organization (WHO), 2014.                                                                                              | 1984                            |                      |
| Norway  | Engedal K, Haugen PK. The Prevalence of Dementia in a Sample of Elderly Norwegians. Int J Geriatr Psychiatry. 1993; 8(7): 565-70.                                                                                                                                                                     | 1984-1985                       |                      |
| Norway  | Norway Vital Registration - Deaths 1985 ICD8 as it appears in World Health Organization (WHO). WHO Mortality Database Version February 2014. Geneva, Switzerland: World Health Organization (WHO), 2014.                                                                                              | 1985                            |                      |
| Norway  | Siebke JC, Wessel N, Kvandal P, Lie T. The prevalence of hepatitis A and B in Norwegian merchant seamen--a serological study. Infection. 1989; 17(2): 77-80.                                                                                                                                          | 1985-1986                       |                      |
| Norway  | Norway Vital Registration - Deaths 1986 ICD9 as it appears in World Health Organization (WHO). WHO Mortality Database Version February 2014. Geneva, Switzerland: World Health Organization (WHO), 2014.                                                                                              | 1986                            |                      |



**Web Table 32 - Comprehensive citation list**

| Country | Citation                                                                                                                                                                                                                                                                                                                                                                                                                                                                                                                                                                                                                                                                                                              | Year*            | New for GBD 2013 (*) |
|---------|-----------------------------------------------------------------------------------------------------------------------------------------------------------------------------------------------------------------------------------------------------------------------------------------------------------------------------------------------------------------------------------------------------------------------------------------------------------------------------------------------------------------------------------------------------------------------------------------------------------------------------------------------------------------------------------------------------------------------|------------------|----------------------|
| Norway  | Norway Vital Registration - Deaths 1987 ICD9 as it appears in World Health Organization (WHO). WHO Mortality Database Version February 2014. Geneva, Switzerland: World Health Organization (WHO), 2014.                                                                                                                                                                                                                                                                                                                                                                                                                                                                                                              | 1987             |                      |
| Norway  | Norway Vital Registration - Deaths 1988 ICD9 as it appears in World Health Organization (WHO). WHO Mortality Database Version February 2014. Geneva, Switzerland: World Health Organization (WHO), 2014.                                                                                                                                                                                                                                                                                                                                                                                                                                                                                                              | 1988             |                      |
| Norway  | Modell B, Darlison M, Birgens H, Cario H, Faustino P, Giordano PC, Gulbis B, Hopmeier P, Lena-Russo D, Romao L, Theodorsson E. Epidemiology of haemoglobin disorders in Europe: an overview. Scand J Clin Lab Invest. 2007; 67(1): 39-69.                                                                                                                                                                                                                                                                                                                                                                                                                                                                             | 1988, 2006       |                      |
| Norway  | Centre for Health Informatics and Multiprofessional Education, University College London. Modell's Haemoglobinopathologist's Almanac. London, United Kingdom: Centre for Health Informatics and Multiprofessional Education, University College London, 2008.                                                                                                                                                                                                                                                                                                                                                                                                                                                         | 1988, 2003, 2006 |                      |
| Norway  | Norway Vital Registration - Deaths 1989 ICD9 as it appears in World Health Organization (WHO). WHO Mortality Database Version February 2014. Geneva, Switzerland: World Health Organization (WHO), 2014.                                                                                                                                                                                                                                                                                                                                                                                                                                                                                                              | 1989             |                      |
| Norway  | Norway Vital Registration - Deaths 1990 ICD9 as it appears in World Health Organization (WHO). WHO Mortality Database Version February 2014. Geneva, Switzerland: World Health Organization (WHO), 2014.                                                                                                                                                                                                                                                                                                                                                                                                                                                                                                              | 1990             |                      |
| Norway  | Norway Vital Registration - Deaths 1991 ICD9 as it appears in World Health Organization (WHO). WHO Mortality Database Version February 2014. Geneva, Switzerland: World Health Organization (WHO), 2014.                                                                                                                                                                                                                                                                                                                                                                                                                                                                                                              | 1991             |                      |
| Norway  | Norway Vital Registration - Deaths 1992 ICD9 as it appears in World Health Organization (WHO). WHO Mortality Database Version February 2014. Geneva, Switzerland: World Health Organization (WHO), 2014.                                                                                                                                                                                                                                                                                                                                                                                                                                                                                                              | 1992             |                      |
| Norway  | Trichopoulos D, Bamia C, Lagiou P, Fedirko V, Trepo E, Jenab M, Pischon T, Nöthlings U, Overved K, Tjønneland A, Outzen M, Clavel-Chapelon F, Kaaks R, Lukanova A, Boeing H, Aleksandrova K, Benetou V, Zylis D, Palli D, Pala V, Panico S, Tumino R, Sacerdote C, Bueno-De-Mesquita HB, Van Kranen HJ, Peeters PHM, Lund E, Quirós JR, González CA, Sanchez Perez M-J, Navarro C, Dorronsoro M, Barricarte A, Lindkvist B, Regnér S, Werner M, Hallmans G, Khaw K-T, Wareham N, Key T, Romieu I, Chuang S-C, Murphy N, Boffetta P, Trichopoulou A, Riboli E. Hepatocellular carcinoma risk factors and disease burden in a European cohort: a nested case-control study. J Natl Cancer Inst. 2011; 103(22): 1686-95. | 1992-2006        | *                    |
| Norway  | Norway Vital Registration - Deaths 1993 ICD9 as it appears in World Health Organization (WHO). WHO Mortality Database Version February 2014. Geneva, Switzerland: World Health Organization (WHO), 2014.                                                                                                                                                                                                                                                                                                                                                                                                                                                                                                              | 1993             |                      |
| Norway  | Norway Vital Registration - Deaths 1994 ICD9 as it appears in World Health Organization (WHO). WHO Mortality Database Version February 2014. Geneva, Switzerland: World Health Organization (WHO), 2014.                                                                                                                                                                                                                                                                                                                                                                                                                                                                                                              | 1994             |                      |
| Norway  | Norway Vital Registration - Deaths 1995 ICD9 as it appears in World Health Organization (WHO). WHO Mortality Database Version February 2014. Geneva, Switzerland: World Health Organization (WHO), 2014.                                                                                                                                                                                                                                                                                                                                                                                                                                                                                                              | 1995             |                      |
| Norway  | Andenaes S, Lie A, Degré M. Prevalence of hepatitis A, B, C, and E antibody in flying airline personnel. Aviat Space Environ Med. 2000; 71(12): 1178-80.                                                                                                                                                                                                                                                                                                                                                                                                                                                                                                                                                              | 1995-1996        |                      |

**Web Table 32 - Comprehensive citation list**

| Country | Citation                                                                                                                                                                                                                             | Year*                | New for GBD 2013 (*) |
|---------|--------------------------------------------------------------------------------------------------------------------------------------------------------------------------------------------------------------------------------------|----------------------|----------------------|
| Norway  | Centre for Research on the Epidemiology of Disasters (CRED). EM-DAT: The OFDA/CRED International Disaster Database. Brussels, Belgium: Catholic University of Leuven.                                                                | 1995, 2011           |                      |
| Norway  | Norway Vital Registration - Deaths 1996 ICD10 as it appears in World Health Organization (WHO). WHO Mortality Database Version February 2014. Geneva, Switzerland: World Health Organization (WHO), 2014.                            | 1996                 |                      |
| Norway  | Norway Vital Registration - Deaths 1997 ICD10 as it appears in World Health Organization (WHO). WHO Mortality Database Version February 2014. Geneva, Switzerland: World Health Organization (WHO), 2014.                            | 1997                 |                      |
| Norway  | Norway Vital Registration - Deaths 1998 ICD10 as it appears in World Health Organization (WHO). WHO Mortality Database Version February 2014. Geneva, Switzerland: World Health Organization (WHO), 2014.                            | 1998                 |                      |
| Norway  | EUVAC-NET. EUVAC-NET Pertussis Surveillance Report 1998-2002. Stockholm, Sweden: European Centre for Disease Prevention and Control.                                                                                                 | 1998-2002            |                      |
| Norway  | Norway Vital Registration - Deaths 1999 ICD10 as it appears in World Health Organization (WHO). WHO Mortality Database Version February 2014. Geneva, Switzerland: World Health Organization (WHO), 2014.                            | 1999                 |                      |
| Norway  | Norway Vital Registration - Deaths 2000 ICD10 as it appears in World Health Organization (WHO). WHO Mortality Database Version February 2014. Geneva, Switzerland: World Health Organization (WHO), 2014.                            | 2000                 |                      |
| Norway  | Curado MP, Edwards B, Shin HR, Storm H, Ferlay J, Heanue M and Boyle P, eds (2007). Cancer Incidence in Five Continents, Vol. IX Periodic Data (electronic version). Lyon, IARC. <a href="http://ci5.iarc.fr">http://ci5.iarc.fr</a> | 2000                 |                      |
| Norway  | Norway Vital Registration - Deaths 2001 ICD10 as it appears in World Health Organization (WHO). WHO Mortality Database Version February 2014. Geneva, Switzerland: World Health Organization (WHO), 2014.                            | 2001                 |                      |
| Norway  | World Health Organization (WHO). Yellow Fever Reported Cases, WHO Vaccine-Preventable Diseases: Monitoring System. Geneva, Switzerland: World Health Organization (WHO).                                                             | 2001-2006, 2008-2009 |                      |
| Norway  | Tveitnes D, Natås OB, Skadberg Ø, Øymar K. Lyme meningitis, the major cause of childhood meningitis in an endemic area: a population based study. Arch Dis Child. 2012; 97(3): 215-20.                                               | 2001-2009            | *                    |
| Norway  | Norway Vital Registration - Deaths 2002 ICD10 as it appears in World Health Organization (WHO). WHO Mortality Database Version February 2014. Geneva, Switzerland: World Health Organization (WHO), 2014.                            | 2002                 |                      |
| Norway  | WHO Regional Office for Europe (EURO-WHO). European Hospital Morbidity Database. Copenhagen, Denmark: WHO Regional Office for Europe (EURO-WHO).                                                                                     | 2002-2005            |                      |
| Norway  | Norway Vital Registration - Deaths 2003 ICD10 as it appears in World Health Organization (WHO). WHO Mortality Database Version February 2014. Geneva, Switzerland: World Health Organization (WHO), 2014.                            | 2003                 |                      |
| Norway  | Association of Nordic Cancer Registries (ANCR). Norway NORDCAN Cancer Incidence Data Tables, Age-Specific by Countries. Copenhagen, Denmark: Association of Nordic Cancer Registries (ANCR).                                         | 2003-2010            | *                    |
| Norway  | EUVAC-NET. EUVAC-NET Pertussis Surveillance Report 2003-2007. Stockholm, Sweden: European Centre for Disease Prevention and Control, 2009.                                                                                           | 2003-2007            |                      |



**Web Table 32 - Comprehensive citation list**

| Country | Citation                                                                                                                                                                                                                                                                                         | Year* | New for GBD 2013 (*) |
|---------|--------------------------------------------------------------------------------------------------------------------------------------------------------------------------------------------------------------------------------------------------------------------------------------------------|-------|----------------------|
| Norway  | Norway Vital Registration - Deaths 2004 ICD10 as it appears in World Health Organization (WHO). WHO Mortality Database Version February 2014. Geneva, Switzerland: World Health Organization (WHO), 2014.                                                                                        | 2004  |                      |
| Norway  | Norway Vital Registration - Deaths 2005 ICD10 as it appears in World Health Organization (WHO). WHO Mortality Database Version February 2014. Geneva, Switzerland: World Health Organization (WHO), 2014.                                                                                        | 2005  |                      |
| Norway  | Forman D, Bray F, Brewster DH, Gombe Mbalawa C, Kohler B, Piñeros M, Steliarova-Foucher E, Swaminathan R and Ferlay J, eds (2013). Cancer Incidence in Five Continents, Vol. X Summary Database (electronic version). Lyon, IARC. <a href="http://ci5.iarc.fr">http://ci5.iarc.fr</a>            | 2005  |                      |
| Norway  | Norway Vital Registration - Deaths 2006 ICD10 as it appears in World Health Organization (WHO). WHO Mortality Database Version February 2014. Geneva, Switzerland: World Health Organization (WHO), 2014.                                                                                        | 2006  |                      |
| Norway  | Norway Vital Registration - Deaths 2007 ICD10 as it appears in World Health Organization (WHO). WHO Mortality Database Version February 2014. Geneva, Switzerland: World Health Organization (WHO), 2014.                                                                                        | 2007  |                      |
| Norway  | Norway Vital Registration - Deaths 2008 ICD10 as it appears in World Health Organization (WHO). WHO Mortality Database Version February 2014. Geneva, Switzerland: World Health Organization (WHO), 2014.                                                                                        | 2008  |                      |
| Norway  | EUVAC-NET. EUVAC-NET Pertussis Surveillance Report 2008. Stockholm, Sweden: European Centre for Disease Prevention and Control, 2009.                                                                                                                                                            | 2008  |                      |
| Norway  | Norway Vital Registration - Deaths 2009 ICD10 as it appears in World Health Organization (WHO). WHO Mortality Database Version February 2014. Geneva, Switzerland: World Health Organization (WHO), 2014.                                                                                        | 2009  |                      |
| Norway  | EUVAC-NET. EUVAC-NET Pertussis Surveillance Report 2009. Stockholm, Sweden: European Centre for Disease Prevention and Control, 2010.                                                                                                                                                            | 2009  |                      |
| Norway  | Norway Vital Registration - Deaths 2010 ICD10 as it appears in World Health Organization (WHO). WHO Mortality Database Version February 2014. Geneva, Switzerland: World Health Organization (WHO), 2014.                                                                                        | 2010  |                      |
| Norway  | European Renal Association-European Dialysis and Transplant Association (ERA-EDTA). European Renal Association-European Dialysis and Transplant Association Registry Annual Report 2010. Parma, Italy: European Renal Association-European Dialysis and Transplant Association (ERA-EDTA), 2012. | 2010  | *                    |
| Norway  | EUVAC-NET. EUVAC-NET Measles Surveillance Report 2010. Stockholm, Sweden: European Centre for Disease Prevention and Control, 2011.                                                                                                                                                              | 2010  |                      |
| Norway  | Norway Vital Registration - Deaths 2011 ICD10 as it appears in World Health Organization (WHO). WHO Mortality Database Version February 2014. Geneva, Switzerland: World Health Organization (WHO), 2014.                                                                                        | 2011  | *                    |
| Norway  | European Renal Association-European Dialysis and Transplant Association (ERA-EDTA). European Renal Association-European Dialysis and Transplant Association Registry Annual Report 2011. Parma, Italy: European Renal Association-European Dialysis and Transplant Association (ERA-EDTA), 2013. | 2011  | *                    |

**Web Table 32 - Comprehensive citation list**

| Country | Citation                                                                                                                                                                                                                                                      | Year*                                  | New for GBD 2013 (*) |
|---------|---------------------------------------------------------------------------------------------------------------------------------------------------------------------------------------------------------------------------------------------------------------|----------------------------------------|----------------------|
| Norway  | Norway Vital Registration - Deaths 2012 ICD10 as it appears in World Health Organization (WHO). WHO Mortality Database Version February 2014. Geneva, Switzerland: World Health Organization (WHO), 2014.                                                     | 2012                                   | *                    |
| Oman    | Peace Research Institute Oslo (PRIO). Battle Deaths Dataset Version 3, 2009. Oslo, Norway: Peace Research Institute Oslo (PRIO), 2009.                                                                                                                        | 1957-1975                              |                      |
| Oman    | United Nations Office on Drugs and Crime (UNODC). United Nations Surveys on Crime Trends and the Operations of Criminal Justice Systems 1970-2006 as provided by Kavi Bhalla. [Unpublished].                                                                  | 1971-1975                              |                      |
| Oman    | Directorate General of National Statistics (Oman). Oman Sociodemographic Survey 1975.                                                                                                                                                                         | 1975                                   |                      |
| Oman    | Directorate General of National Statistics (Oman). Oman Sociodemographic Survey 1977-1979.                                                                                                                                                                    | 1977-1979                              |                      |
| Oman    | Centre for Research on the Epidemiology of Disasters (CRED). EM-DAT: The OFDA/CRED International Disaster Database. Brussels, Belgium: Catholic University of Leuven.                                                                                         | 1977, 1981, 2002-2003, 2007, 2010-2011 |                      |
| Oman    | Institute for Health Metrics and Evaluation (IHME), Joint United Nations Program on HIV/AIDS (UNAIDS). Institute for Health Metrics and Evaluation HIV Mortality Estimates Based on the UNAIDS Spectrum Model Framework.                                      | 1980-2013                              | *                    |
| Oman    | United Nations Children's Fund (UNICEF), World Health Organization (WHO). WHO and UNICEF Reported Disease Incidence Time Series - Pertussis. Geneva, Switzerland: World Health Organization (WHO).                                                            | 1980-2013                              |                      |
| Oman    | United Nations Children's Fund (UNICEF), World Health Organization (WHO). WHO and UNICEF Reported Disease Incidence Time Series - Measles. Geneva, Switzerland: World Health Organization (WHO).                                                              | 1980-2013                              |                      |
| Oman    | White JM, Byrne M, Richards R, Buchanan T, Katsoulis E, Weerasingh K. Red cell genetic abnormalities in Peninsular Arabs: sickle haemoglobin, G6PD deficiency, and alpha and beta thalassaemia. J Med Genet. 1986; 3(23): 245-51.                             | 1984-1986                              |                      |
| Oman    | Ministry of Health (Oman). Oman Child Health Survey 1988-1989.                                                                                                                                                                                                | 1988-1989                              |                      |
| Oman    | Weatherall D. Sickle Cell and Thalassemias Prevalence Data, Personal Correspondence with David Weatherall. [Unpublished].                                                                                                                                     | 1990-2009                              |                      |
| Oman    | Centre for Health Informatics and Multiprofessional Education, University College London. Modell's Haemoglobinopathologist's Almanac. London, United Kingdom: Centre for Health Informatics and Multiprofessional Education, University College London, 2008. | 1990-2003                              |                      |
| Oman    | World Health Organization (WHO). Expanded programme on immunization. Measles outbreak. Wkly Epidemiol Rec. 1993; 68(7): 45-7.                                                                                                                                 | 1991-1992                              |                      |
| Oman    | Ministry of Development (Oman). Oman General Census of Population, Housing, and Establishments 1993. Muscat, Oman: Ministry of Development (Oman).                                                                                                            | 1993                                   |                      |
| Oman    | Measles Supplementary Immunization Activity Data as provided by the World Health Organization. [Unpublished].                                                                                                                                                 | 1994                                   |                      |
| Oman    | World Health Organization (WHO). Oman WHO Leishmaniasis Country Profile.                                                                                                                                                                                      | 1994-2010                              | *                    |
| Oman    | Council of Health Ministers of GCC States, Ministry of Health (Oman). Oman Family Health Survey 1995.                                                                                                                                                         | 1995                                   |                      |
| Oman    | Parkin DM, International Agency for Research on Cancer, International Association of Cancer Registries. Cancer Incidence in Five Continents. Vol. I to VIII. Lyon, France, IARC Press, 2005.                                                                  | 1995                                   |                      |
| Oman    | Al-Riyami A, Ebrahim GJ. Genetic Blood Disorders Survey in the Sultanate of Oman. J Trop Pediatr. 2003; Suppl 1(49): 1-20.                                                                                                                                    | 1995, 2000-2001                        |                      |
| Oman    | World Health Organization (WHO). Yellow Fever Reported Cases, WHO Vaccine-Preventable Diseases: Monitoring System. Geneva, Switzerland: World Health Organization (WHO).                                                                                      | 1998-2003, 2005-2009                   |                      |

**Web Table 32 - Comprehensive citation list**

| Country  | Citation                                                                                                                                                                                                                                                                                  | Year*                                                                         | New for GBD 2013 (*) |
|----------|-------------------------------------------------------------------------------------------------------------------------------------------------------------------------------------------------------------------------------------------------------------------------------------------|-------------------------------------------------------------------------------|----------------------|
| Oman     | Curado MP, Edwards B, Shin HR, Storm H, Ferlay J, Heanue M and Boyle P, eds (2007). Cancer Incidence in Five Continents, Vol. IX Periodic Data (electronic version). Lyon, IARC. <a href="http://ci5.iarc.fr">http://ci5.iarc.fr</a>                                                      | 1999                                                                          |                      |
| Oman     | Ministry of Health (Oman), Oman National Cancer Registry. Oman Cancer Incidence 2001. Muscat, Oman: Ministry of Health (Oman).                                                                                                                                                            | 2001                                                                          |                      |
| Oman     | Oman Vital Registration Death Data 2001 as it appears in United Nations Statistics Division (UNSD). United Nations Demographic Yearbook 2002. New York City, United States: United Nations Statistics Division (UNSD), 2005.                                                              | 2001                                                                          |                      |
| Oman     | United Nations Office on Drugs and Crime (UNODC). United Nations Office on Drugs and Crime Global Study on Homicides 2011. Vienna, Austria: United Nations Office on Drugs and Crime (UNODC), 2011.                                                                                       | 2001-2002                                                                     |                      |
| Oman     | Ministry of Health (Oman), Oman National Cancer Registry. Oman Cancer Incidence 2002. Muscat, Oman: Ministry of Health (Oman).                                                                                                                                                            | 2002                                                                          |                      |
| Oman     | Ministry of Health (Oman), Oman National Cancer Registry. Oman Cancer Incidence 2003. Muscat, Oman: Ministry of Health (Oman).                                                                                                                                                            | 2003                                                                          |                      |
| Oman     | Oman Vital Registration Death Data 2003 as it appears in United Nations Statistics Division (UNSD). United Nations Demographic Yearbook 2003. New York City, United States: United Nations Statistics Division (UNSD), 2006.                                                              | 2003                                                                          |                      |
| Oman     | Ministry of Health (Oman), Oman National Cancer Registry. Oman Cancer Incidence 2004. Muscat, Oman: Ministry of Health (Oman).                                                                                                                                                            | 2004                                                                          |                      |
| Oman     | Oman Vital Registration Death Data 2004 as it appears in United Nations Statistics Division (UNSD). United Nations Demographic Yearbook 2004. New York City, United States: United Nations Statistics Division (UNSD), 2007.                                                              | 2004                                                                          |                      |
| Oman     | Ministry of Health (Oman), Oman National Cancer Registry. Oman Cancer Incidence 2005. Muscat, Oman: Ministry of Health (Oman).                                                                                                                                                            | 2005                                                                          |                      |
| Oman     | Ministry of Health (Oman), Oman National Cancer Registry. Oman Cancer Incidence 2006. Muscat, Oman: Ministry of Health (Oman).                                                                                                                                                            | 2006                                                                          |                      |
| Oman     | Ministry of Health (Oman), Oman National Cancer Registry. Oman Cancer Incidence 2007. Muscat, Oman: Ministry of Health (Oman).                                                                                                                                                            | 2007                                                                          |                      |
| Oman     | Oman Vital Registration Death Data 2007 as it appears in United Nations Statistics Division (UNSD). United Nations Demographic Yearbook. New York City, United States: United Nations Statistics Division (UNSD).                                                                         | 2007                                                                          |                      |
| Oman     | Ministry of Health (Oman), Oman National Cancer Registry. Oman Cancer Incidence 2008. Muscat, Oman: Ministry of Health (Oman).                                                                                                                                                            | 2008                                                                          |                      |
| Oman     | Oman Vital Registration - Deaths 2009 ICD10 as it appears in World Health Organization (WHO). WHO Mortality Database Version February 2014. Geneva, Switzerland: World Health Organization (WHO), 2014.                                                                                   | 2009                                                                          |                      |
| Oman     | Joint United Nations Program on HIV/AIDS (UNAIDS), National AIDS Program, Department of Communicable Disease Surveillance and Control, Ministry of Health (Oman). Oman UNGASS Country Progress Report 2010. Geneva, Switzerland: Joint United Nations Program on HIV/AIDS (UNAIDS), 2010. | 2009                                                                          |                      |
| Oman     | Oman Vital Registration - Deaths 2010 ICD10 as it appears in World Health Organization (WHO). WHO Mortality Database Version February 2014. Geneva, Switzerland: World Health Organization (WHO), 2014.                                                                                   | 2010                                                                          |                      |
| Pakistan | Centre for Research on the Epidemiology of Disasters (CRED). EM-DAT: The OFDA/CRED International Disaster Database. Brussels, Belgium: Catholic University of Leuven.                                                                                                                     | 1950, 1954, 1956-1957, 1959, 1964-1965, 1967, 1973-1974, 1976-1986, 1988-2013 |                      |

**Web Table 32 - Comprehensive citation list**

| Country  | Citation                                                                                                                                                                                                                                                           | Year*     | New for GBD 2013 (*) |
|----------|--------------------------------------------------------------------------------------------------------------------------------------------------------------------------------------------------------------------------------------------------------------------|-----------|----------------------|
| Pakistan | Central Statistical Office (Pakistan), Pakistan Institute of Development Economics. Pakistan Population Growth Estimation Experiment 1962-1965.                                                                                                                    | 1962-1965 |                      |
| Pakistan | Catholic University of Leuven, Organization for Economic Co-operation and Development (OECD), United Nations Population Division. Mortality in Developing Countries: Tome I Data Bank. Organization for Economic Co-operation and Development (OECD), 1980.        | 1962-1964 |                      |
| Pakistan | Ronald AR, Underwood BA, Woodward TE. Glucose-6-phosphate dehydrogenase deficiency in Pakistani males. Trans R Soc Trop Med Hyg. 1968; 62(4): 531-3.                                                                                                               | 1966-1968 |                      |
| Pakistan | Pakistan Sample Registration System 1968 as it appears in United Nations Statistics Division (UNSD). United Nations Demographic Yearbook. New York City, United States: United Nations Statistics Division (UNSD).                                                 | 1968      |                      |
| Pakistan | United Nations Office on Drugs and Crime (UNODC). United Nations Surveys on Crime Trends and the Operations of Criminal Justice Systems 1970-2006 as provided by Kavi Bhalla. [Unpublished].                                                                       | 1970-1980 |                      |
| Pakistan | Peace Research Institute Oslo (PRIO). Battle Deaths Dataset Version 3, 2009. Oslo, Norway: Peace Research Institute Oslo (PRIO), 2009.                                                                                                                             | 1971-1988 |                      |
| Pakistan | Population Census Organization (Pakistan), Minnesota Population Center. Pakistan Housing, Economic, and Demographic Survey 1973 from the Integrated Public Use Microdata Series, International. [Machine-readable database]. Minneapolis: University of Minnesota. | 1973      |                      |
| Pakistan | Population Welfare Division, Ministry of Planning and Development (Pakistan), International Statistical Institute. Pakistan World Fertility Survey 1975. Voorburg, Netherlands: International Statistical Institute.                                               | 1975      |                      |
| Pakistan | Pakistan Population Growth Survey 1976-1979 as it appears in United Nations Statistics Division (UNSD). United Nations Demographic Yearbook. New York City, United States: United Nations Statistics Division (UNSD).                                              | 1976-1979 |                      |
| Pakistan | Institute for Health Metrics and Evaluation (IHME), Joint United Nations Program on HIV/AIDS (UNAIDS). Institute for Health Metrics and Evaluation HIV Mortality Estimates Based on the UNAIDS Spectrum Model Framework.                                           | 1980-2013 | *                    |
| Pakistan | United Nations Children's Fund (UNICEF), World Health Organization (WHO). WHO and UNICEF Reported Disease Incidence Time Series - Pertussis. Geneva, Switzerland: World Health Organization (WHO).                                                                 | 1980-2013 |                      |
| Pakistan | United Nations Children's Fund (UNICEF), World Health Organization (WHO). WHO and UNICEF Reported Disease Incidence Time Series - Measles. Geneva, Switzerland: World Health Organization (WHO).                                                                   | 1980-2013 |                      |
| Pakistan | Population Census Organization (Pakistan). Pakistan Population and Housing Census 1981.                                                                                                                                                                            | 1981      |                      |
| Pakistan | Population Census Organization (Pakistan), Minnesota Population Center. Pakistan Housing and Population Census 1981 from the Integrated Public Use Microdata Series, International. [Machine-readable database]. Minneapolis: University of Minnesota.             | 1981      |                      |
| Pakistan | Pakistan Demographic Survey 1984 as it appears in United Nations Statistics Division (UNSD). United Nations Demographic Yearbook. New York City, United States: United Nations Statistics Division (UNSD).                                                         | 1984      |                      |
| Pakistan | Ministry of Planning and Development (Pakistan). Pakistan Contraceptive Prevalence Survey 1984-1985.                                                                                                                                                               | 1984-1985 |                      |
| Pakistan | Malik IA, Legters LJ, Luqman M, Ahmed A, Qamar MA, Akhtar KA, Quraishi MS, Duncan F, Redfield RR. The serological markers of hepatitis A and B in healthy population in northern Pakistan. J Pak Med Assoc. 1988; 38(3): 69-72.                                    | 1984-1986 |                      |

**Web Table 32 - Comprehensive citation list**

| Country  | Citation                                                                                                                                                                                                                  | Year*     | New for GBD 2013 (*) |
|----------|---------------------------------------------------------------------------------------------------------------------------------------------------------------------------------------------------------------------------|-----------|----------------------|
| Pakistan | Pakistan Demographic Survey 1985 as it appears in United Nations Statistics Division (UNSD). United Nations Demographic Yearbook. New York City, United States: United Nations Statistics Division (UNSD).                | 1985      |                      |
| Pakistan | Khan SR, Jalil F, Zaman S, Lindblad BS, Karlberg J. Early child health in Lahore, Pakistan: X. Mortality. Acta Paediatr Suppl. 1993; 82(390): 109-17.                                                                     | 1985      |                      |
| Pakistan | Khan AJ, Khan JA, Akbar M, Addiss DG. Acute respiratory infections in children: a case management intervention in Abbottabad District, Pakistan. Bull World Health Organ. 1990; 68(5): 577-85.                            | 1985-1986 |                      |
| Pakistan | Pakistan Demographic Survey 1986 as it appears in United Nations Statistics Division (UNSD). United Nations Demographic Yearbook. New York City, United States: United Nations Statistics Division (UNSD).                | 1986      |                      |
| Pakistan | Pakistan Demographic Survey 1987 as it appears in United Nations Statistics Division (UNSD). United Nations Demographic Yearbook. New York City, United States: United Nations Statistics Division (UNSD).                | 1987      |                      |
| Pakistan | Pakistan Demographic Survey 1988 as it appears in United Nations Statistics Division (UNSD). United Nations Demographic Yearbook. New York City, United States: United Nations Statistics Division (UNSD).                | 1988      |                      |
| Pakistan | Pakistan Demographic Survey 1989 as it appears in United Nations Statistics Division (UNSD). United Nations Demographic Yearbook. New York City, United States: United Nations Statistics Division (UNSD).                | 1989      |                      |
| Pakistan | Marsh D, Majid N, Rasmussen Z, Mateen K, Khan AA. Cause-specific child mortality in a mountainous community in Pakistan by verbal autopsy. J Pak Med Assoc. 1993; 43(11): 226-9.                                          | 1989      |                      |
| Pakistan | Department of Peace and Conflict Research, Uppsala University. UCDP Battle-Related Deaths Database Version 5, 2013. Uppsala, Sweden: Department of Peace and Conflict Research, Uppsala University, 2013.                 | 1989-2012 | *                    |
| Pakistan | Pakistan Demographic Survey 1990 as it appears in United Nations Statistics Division (UNSD). United Nations Demographic Yearbook. New York City, United States: United Nations Statistics Division (UNSD).                | 1990      |                      |
| Pakistan | Fikree FF, Midhet F, Sadruddin S, Berendes WH. Maternal mortality in different Pakistani sites: ratios, clinical causes and determinants. Acta Obstet Gynecol Scand. 1997; 76(7): 637-645.                                | 1990      |                      |
| Pakistan | Murray M, Rasmussen Z. Measles outbreak in a northern Pakistani village: epidemiology and vaccine effectiveness. Am J Epidemiol. 2000; 151(8): 811.                                                                       | 1990      |                      |
| Pakistan | Macro International, Inc.; Institute for Resource Development, National Institute of Population Studies (Pakistan). Pakistan Demographic and Health Survey 1990-1991. Calverton, United States: Macro International, Inc. | 1990-1991 |                      |
| Pakistan | Fikree FF, Azam SI, Berendes HW. Time to focus child survival programmes on the newborn: assessment of levels and causes of infant mortality in rural Pakistan. Bull World Health Organ. 2002; 80(4): 271-6.              | 1990-1994 |                      |
| Pakistan | Weatherall D. Sickle Cell and Thalassemias Prevalence Data, Personal Correspondence with David Weatherall. [Unpublished].                                                                                                 | 1990-2009 |                      |
| Pakistan | Agboatwalla M, Isomura S, Miyake K, Yamashita T, Morishita T, Akram D. Hepatitis A, B and C seroprevalence in Pakistan. Indian J Pediatr. 1994; 61(5): 545-9.                                                             | 1990-1991 |                      |

**Web Table 32 - Comprehensive citation list**

| Country  | Citation                                                                                                                                                                                                                                                        | Year*     | New for GBD 2013 (*) |
|----------|-----------------------------------------------------------------------------------------------------------------------------------------------------------------------------------------------------------------------------------------------------------------|-----------|----------------------|
| Pakistan | Centre for Health Informatics and Multiprofessional Education, University College London. Modell's Haemoglobinopathologist's Almanac. London, United Kingdom: Centre for Health Informatics and Multiprofessional Education, University College London, 2008.   | 1990-2003 |                      |
| Pakistan | Federal Bureau of Statistics (Pakistan) and World Bank. Pakistan Living Standards Measurement Survey 1991. Islamabad, Pakistan: Federal Bureau of Statistics (Pakistan).                                                                                        | 1991      |                      |
| Pakistan | Pakistan Demographic Survey 1991 as it appears in United Nations Statistics Division (UNSD). United Nations Demographic Yearbook. New York City, United States: United Nations Statistics Division (UNSD).                                                      | 1991      | *                    |
| Pakistan | Pakistan Demographic Survey 1992 as it appears in United Nations Statistics Division (UNSD). United Nations Demographic Yearbook. New York City, United States: United Nations Statistics Division (UNSD).                                                      | 1992      | *                    |
| Pakistan | Malik IA, Ahmad N, Luqman M, Legters LJ, Khalil-Ullah, Zaheeruddin, Ahmed A, Bukhtiar N, Nabi S, Mubarak A. Hepatitis C as a cause of chronic liver disease in northern Pakistan. J Pak Med Assoc. 1992; 42(3): 67-8.                                           | 1992      |                      |
| Pakistan | Pakistan Demographic Survey 1993 as it appears in United Nations Statistics Division (UNSD). United Nations Demographic Yearbook. New York City, United States: United Nations Statistics Division (UNSD).                                                      | 1993      |                      |
| Pakistan | Luby SP, Qamruddin K, Shah AA, Omair A, Pahsa O, Khan AJ, McCormick JB, Hoodbhoy F, Fisher-Hoch S. The relationship between therapeutic injections and high prevalence of hepatitis C infection in Hafizabad, Pakistan. Epidemiol Infect. 1997; 119(3): 349-56. | 1993      |                      |
| Pakistan | Federal Bureau of Statistics (Pakistan). Pakistan Demographic Survey 1993-1994.                                                                                                                                                                                 | 1993-1994 |                      |
| Pakistan | Khan NR, Sadiq F. Prenatal screening for hepatitis B virus. Int J Gynaecol Obstet. 1996; 55(1): 79-80.                                                                                                                                                          | 1994      |                      |
| Pakistan | Khokhar N. Spectrum of chronic liver disease in a tertiary care hospital. J Pak Med Assoc. 2002; 52(2): 56-8.                                                                                                                                                   | 1994-2000 |                      |
| Pakistan | Makki K, Haikh I, Memon A, Qureshi A. Hepatitis C and chronic liver disease. Biomedica. 1995; 11(1): 33-5.                                                                                                                                                      | 1995      |                      |
| Pakistan | Malik I, Ahmad N, Butt S, Tariq W, Muzaffar M, Bakhtiar N. Role of HBV and HCV in etiology of HCC in northern Pakistan. J Coll Physicians Surg Pak. 1995; 5(1): 26-8.                                                                                           | 1995      |                      |
| Pakistan | Federal Bureau of Statistics (Pakistan). Pakistan Demographic Survey 1995-1996.                                                                                                                                                                                 | 1995-1996 | *                    |
| Pakistan | Parkin DM, International Agency for Research on Cancer, International Association of Cancer Registries. Cancer Incidence in Five Continents. Vol. I to VIII. Lyon, France, IARC Press, 2005.                                                                    | 1996      |                      |
| Pakistan | Tareen S, Eslick GD, Kam EPY, Byles JE, Durrani AB, Maree SM. High prevalence of hepatitis B virus (HBV) among male blood donors in a developing country: urgent need for systematic screening. Scand J Infect Dis. 2002; 34(9): 712-3.                         | 1996      |                      |
| Pakistan | Centre for Population Studies, London School of Hygiene and Tropical Medicine, National Institute of Population Studies (Pakistan). Pakistan Fertility and Family Planning Survey 1996-1997.                                                                    | 1996-1997 |                      |
| Pakistan | United Nations Office on Drugs and Crime (UNODC). United Nations Office on Drugs and Crime Global Study on Homicides 2011. Vienna, Austria: United Nations Office on Drugs and Crime (UNODC), 2011.                                                             | 1996-2009 |                      |
| Pakistan | Butt T, Ahmad RN, Salman M, Kazmi SY. Changing trends in drug resistance among typhoid salmonellae in Rawalpindi, Pakistan. East Mediterr Health J. 2005; 11(5-6): 1038-44.                                                                                     | 1996-2003 | *                    |



**Web Table 32 - Comprehensive citation list**

| Country  | Citation                                                                                                                                                                                                                                    | Year*            | New for GBD 2013 (*) |
|----------|---------------------------------------------------------------------------------------------------------------------------------------------------------------------------------------------------------------------------------------------|------------------|----------------------|
| Pakistan | Sultan F, Mehmood T, Mahmood MT. Infectious pathogens in volunteer and replacement blood donors in Pakistan: a ten-year experience. <i>Int J Infect Dis.</i> 2007; 11(5): 407-12.                                                           | 1996-2005        |                      |
| Pakistan | Pakistan Demographic Survey 1997 as it appears in United Nations Statistics Division (UNSD). <i>United Nations Demographic Yearbook.</i> New York City, United States: United Nations Statistics Division (UNSD).                           | 1997             | *                    |
| Pakistan | Federal Bureau of Statistics (Pakistan). <i>Pakistan Demographic Survey 1997.</i>                                                                                                                                                           | 1997             | *                    |
| Pakistan | Durrani AB, Rana AB, Siddiqi HS, Marwat BU. The Spectrum of Chronic Liver Disease in Balochistan. <i>J Coll Physicians Surg Pak.</i> 2001; 95-7.                                                                                            | 1997-2000        |                      |
| Pakistan | Department of Peace and Conflict Research, Uppsala University. <i>UCDP Nonstate Conflict Database Version 2.5, 2013.</i> Uppsala, Sweden: Department of Peace and Conflict Research, Uppsala University, 2013.                              | 1997-2012        | *                    |
| Pakistan | Qureshi H, Hafiz S. Exposure rate of hepatitis A and E (IgG) in children. <i>J Pak Med Assoc.</i> 2000; 50(8): 284-5.                                                                                                                       | 1997-1999        |                      |
| Pakistan | Federal Bureau of Statistics (Pakistan). <i>Pakistan Integrated Household Survey 1998-1999.</i> Islamabad, Pakistan: Federal Bureau of Statistics (Pakistan).                                                                               | 1998-1999        |                      |
| Pakistan | Department of Peace and Conflict Research, Uppsala University. <i>UCDP One-Sided Violence Database Version 1.4, 2013.</i> Uppsala, Sweden: Department of Peace and Conflict Research, Uppsala University, 2013.                             | 1998-2012        | *                    |
| Pakistan | Abdul Mujeeb S, Aamir K, Mehmood K. Seroprevalence of HBV, HCV and HIV infections among college going first time voluntary blood donors. <i>J Pak Med Assoc.</i> 2000; 50(8): 269-70.                                                       | 1998-1999        |                      |
| Pakistan | Akhtar S, Younus M, Adil S, Jafri SH, Hassan F. Hepatitis C virus infection in asymptomatic male volunteer blood donors in Karachi, Pakistan. <i>J Viral Hepat.</i> 2004; 11(6): 527-35.                                                    | 1998-2002        |                      |
| Pakistan | Bilwani F, Zaidi Y, Kakepoto GN, Adil SN, Khurshid M. Prevalence of hepatitis C virus in lymphoproliferative disorders. <i>J Pak Med Assoc.</i> 2004; 54(4): 202-6.                                                                         | 1998-2001        |                      |
| Pakistan | Farooqi JI, Farooqi RJ. Relative frequency of hepatitis "B" and "C" virus infections in cases of hepatocellular carcinoma in North-West Frontier Province, Pakistan. <i>J Coll Physicians Surg Pak.</i> 2000; 10(4): 128-30.                | 1998, 2002       |                      |
| Pakistan | Abu-Raddad LJ, Akala FA, Semini I, Riedner G, Wilson D, Tawil O, World Bank. <i>Characterizing the HIV/AIDS Epidemic in the Middle East and North Africa.</i> Washington DC, United States: World Bank, 2010.                               | 1998, 2005, 2007 |                      |
| Pakistan | Federal Bureau of Statistics (Pakistan). <i>Pakistan Demographic Survey 1999.</i>                                                                                                                                                           | 1999             | *                    |
| Pakistan | Umar M, Bushra H, Younis N, Bashir N. Clinical Spectrum of chronic liver disease due to HBV, HCV and dual infection – a comparative study. <i>Pak J Gastroenterol.</i> 1999; 13(1-2): 1-3.                                                  | 1999             |                      |
| Pakistan | Parker SP, Khan HI, Cubitt WD. Detection of antibodies to hepatitis C virus in dried blood spot samples from mothers and their offspring in Lahore, Pakistan. <i>J Clin Microbiol.</i> 1999; 37(6): 2061-3.                                 | 1999             |                      |
| Pakistan | Bukhtiar N, Hussain T, Iqbal M, Malik AM, Qureshi AH, Hussain A. Hepatitis B and C single and co-infection in chronic liver disease and their effect on the disease pattern. <i>J Pak Med Assoc.</i> 2003; 53(4): 136-40.                   | 1999-2000        |                      |
| Pakistan | Siddiqui FJ, Rabbani F, Hasan R, Nizami SQ, Bhutta ZA. Typhoid fever in children: some epidemiological considerations from Karachi, Pakistan. <i>Int J Infect Dis.</i> 2006; 10(3): 215-22.                                                 | 1999-2001        | *                    |
| Pakistan | Liaqat A, Humara M, Mashoor A. Hepatitis C in chronic liver disease. <i>Pak J Med Sci.</i> 2000; 16(3): 146-51.                                                                                                                             | 2000             |                      |
| Pakistan | Curado MP, Edwards B, Shin HR, Storm H, Ferlay J, Heanue M and Boyle P, eds (2007). <i>Cancer Incidence in Five Continents, Vol. IX Periodic Data (electronic version).</i> Lyon, IARC. <a href="http://ci5.iarc.fr">http://ci5.iarc.fr</a> | 2000             |                      |

**Web Table 32 - Comprehensive citation list**

| Country  | Citation                                                                                                                                                                                                                                                                                                                                                                                              | Year*     | New for GBD 2013 (*) |
|----------|-------------------------------------------------------------------------------------------------------------------------------------------------------------------------------------------------------------------------------------------------------------------------------------------------------------------------------------------------------------------------------------------------------|-----------|----------------------|
| Pakistan | Abdul Mujeeb S, Nanan D, Sabir S, Altaf A, Kadir M. Hepatitis B and C infection in first-time blood donors in Karachi--a possible subgroup for sentinel surveillance. <i>East Mediterr Health J.</i> 2006; 12(6): 735-41.                                                                                                                                                                             | 2000      |                      |
| Pakistan | National Institute of Population Studies (Pakistan). Pakistan Reproductive Health and Family Planning Survey 2000-2001.                                                                                                                                                                                                                                                                               | 2000-2001 |                      |
| Pakistan | Pakistan Demographic Survey 2001 as it appears in United Nations Statistics Division (UNSD). <i>United Nations Demographic Yearbook.</i> New York City, United States: United Nations Statistics Division (UNSD).                                                                                                                                                                                     | 2001      |                      |
| Pakistan | Federal Bureau of Statistics (Pakistan). Pakistan Integrated Household Survey 2001-2002. Islamabad, Pakistan: Federal Bureau of Statistics (Pakistan).                                                                                                                                                                                                                                                | 2001-2002 |                      |
| Pakistan | Hasan R, Zafar A, Abbas Z, Mahraj V, Malik F, Zaidi A. Antibiotic resistance among <i>Salmonella enterica</i> serovars Typhi and Paratyphi A in Pakistan (2001-2006). <i>J Infect Dev Ctries.</i> 2008; 2(04): 289-94.                                                                                                                                                                                | 2001-2006 | *                    |
| Pakistan | Iqbal RS. Liver cirrhosis in Northwest frontier province of Pakistan. <i>J Coll Physicians Surg Pak.</i> 2002; 12(5): 289-91.                                                                                                                                                                                                                                                                         | 2002      |                      |
| Pakistan | Shah F, Salih M, Malik I, Hussain I. Increasing prevalence of chronic hepatitis and associated risk factors. <i>Pak J Med Res.</i> 2002; 41(2): 46-50.                                                                                                                                                                                                                                                | 2002      |                      |
| Pakistan | Khan MI, Soofi SB, Ochiai RL, Khan MJ, Sahito SM, Habib MA, Puri MK, Von Seidlein L, Park JK, You YA, Ali M, Nizami SQ, Acosta CJ, Sack RB, Clemens JD, Bhutta ZA. Epidemiology, clinical presentation, and patterns of drug resistance of <i>Salmonella Typhi</i> in Karachi, Pakistan. <i>J Infect Dev Ctries.</i> 2012; 6(10): 704-14.                                                             | 2002-2004 | *                    |
| Pakistan | Ochiai RL, Wang X, von Seidlein L, Yang J, Bhutta ZA, Bhattacharya SK, Agtini M, Deen JL, Wain J, Kim DR, Ali M, Acosta CJ, Jodar L, Clemens JD. <i>Salmonella Paratyphi A</i> Rates, Asia. <i>Emerg Infect Dis.</i> 2005; 11(11): 1764-6.                                                                                                                                                            | 2002-2003 | *                    |
| Pakistan | Hakim S, Kazmi S, Bagasra O. Seroprevalence of Hepatitis B and C Genotypes Among Young Apparently Healthy Females of Karachi-Pakistan. <i>Libyan J Med.</i> 2008; 3(2): 66-70.                                                                                                                                                                                                                        | 2002-2006 |                      |
| Pakistan | Aziz S, Muzaffar R, Hafiz S, Abbas Z, Zafar MN, Naqvi SA, Rizvi SA. <i>Helicobacter Pylori</i> , Hepatitis Viruses A, C, E, Antibodies And HBsAg - Prevalence And Associated Risk Factors In Pediatric Communities Of Karachi. <i>J Coll Physicians Surg Pak.</i> 2007; 17(4): 195-8.                                                                                                                 | 2002-2004 |                      |
| Pakistan | Federal Bureau of Statistics (Pakistan). Pakistan Demographic Survey 2003. Karachi, Pakistan: Federal Bureau of Statistics (Pakistan).                                                                                                                                                                                                                                                                | 2003      |                      |
| Pakistan | Khokhar N, Asif N, Khokhar O. Hepatitis C virus Serotypes in chronic liver disease. <i>Pak J Med Sci.</i> 2002; 18(2): 156-9.                                                                                                                                                                                                                                                                         | 2003      |                      |
| Pakistan | World Health Organization (WHO). Pakistan World Health Survey 2003-2004. Geneva, Switzerland: World Health Organization (WHO), 2005.                                                                                                                                                                                                                                                                  | 2003-2004 |                      |
| Pakistan | Ali N, Anwar M, Ayyub M, Bhatti FA, Nadeem M, Nadeem A. Frequency of glucose-6-phosphate dehydrogenase deficiency in some ethnic groups of Pakistan. <i>J Coll Physicians Surg Pak.</i> 2005; 15(3): 137-41.                                                                                                                                                                                          | 2003-2004 |                      |
| Pakistan | Khan MI, Sahito SM, Khan MJ, Wassan SM, Shaikh AW, Maheshwari AK, Acosta CJ, Galindo CM, Ochiai RL, Rasool S, Peerwani S, Puri MK, Ali M, Zafar A, Hassan R, von Seidlein L, Clemens JD, Nizami SQ, Bhutta ZA. Enhanced disease surveillance through private health care sector cooperation in Karachi, Pakistan: experience from a vaccine trial. <i>Bull World Health Organ.</i> 2006; 84(1): 72-7. | 2003-2004 | *                    |
| Pakistan | Aurangzeb B, Nisar YB, Hazir T, Burki F, Hassan M. Clinical outcome in children hospitalized with complicated measles. <i>J Coll Physicians Surg Pak.</i> 2005; 15(9): 547-51.                                                                                                                                                                                                                        | 2003-2004 |                      |
| Pakistan | Mashud I, Khan H, Khattak AM. Relative frequency of hepatitis B and C viruses in patients with hepatic cirrhosis at DHQ Teaching Hospital D. I. Khan. <i>J Ayub Med Coll Abbottabad.</i> 2004; 16(1): 32-4.                                                                                                                                                                                           | 2004      |                      |



**Web Table 32 - Comprehensive citation list**

| Country  | Citation                                                                                                                                                                                                                                                                                                                                                                                              | Year*                      | New for GBD 2013 (*) |
|----------|-------------------------------------------------------------------------------------------------------------------------------------------------------------------------------------------------------------------------------------------------------------------------------------------------------------------------------------------------------------------------------------------------------|----------------------------|----------------------|
| Pakistan | Masood Z. Screening for Hepatitis B & C: A routine pre-operative investigation. Pak J Med Sci. 2005; 21(4): 455-9.                                                                                                                                                                                                                                                                                    | 2004                       |                      |
| Pakistan | Zaidi AKM, Khan H, Sherali AR, Lasi R, Sindh Meningitis Study Group. Burden of Haemophilus influenzae type b disease in Pakistani children. East Mediterr Health J. 2010; 16(6): 590-4.                                                                                                                                                                                                               | 2004-2005                  |                      |
| Pakistan | Federal Bureau of Statistics (Pakistan). Pakistan Demographic Survey 2005. Karachi, Pakistan: Federal Bureau of Statistics (Pakistan).                                                                                                                                                                                                                                                                | 2005                       | *                    |
| Pakistan | Aslam M, Aslam J, Mitchell BD, Munir KM. Association between smallpox vaccination and hepatitis C antibody positive serology in Pakistani volunteers. J Clin Gastroenterol. 2005; 39(3): 243-6.                                                                                                                                                                                                       | 2005                       |                      |
| Pakistan | Federal Bureau of Statistics (Pakistan). Pakistan Social and Living Standards Measurement Survey 2005-2006. Islamabad, Pakistan: Federal Bureau of Statistics (Pakistan).                                                                                                                                                                                                                             | 2005-2006                  |                      |
| Pakistan | Zaidi AKM, Khan H, Lasi R, Mahesar W. Surveillance of pneumococcal meningitis among children in Sindh, Southern Pakistan. Clin Infect Dis. 2009; 48 Suppl 2(Suppl 2): S129-S135.                                                                                                                                                                                                                      | 2005-2006                  |                      |
| Pakistan | Almani SA, Memon AS, Memon AI, Shah MI, Rahpoto MQ, Solangi R. Cirrhosis of liver: Etiological factors, complications and prognosis. J LUMHS. 2008; 61-6.                                                                                                                                                                                                                                             | 2005-2007                  |                      |
| Pakistan | Alam JM, Mahmood SR, Shaheen R, Asghar SS. Hepatitis "B" and "C" viral infections in patients with hepatocellular carcinoma. Pak J Pharmacol. 2009; 26(2): 25-32.                                                                                                                                                                                                                                     | 2005-2007                  |                      |
| Pakistan | World Health Organization (WHO). Retrospective Measles Data on Supplementary Immunization Activities. Geneva, Switzerland: World Health Organization (WHO).                                                                                                                                                                                                                                           | 2005, 2007-2008, 2010-2013 |                      |
| Pakistan | Federal Bureau of Statistics (Pakistan). Pakistan Demographic Survey 2006.                                                                                                                                                                                                                                                                                                                            | 2006                       |                      |
| Pakistan | Chaudhary I, Khan S, Majrooh M, Alvi A. Seroprevalence of hepatitis-B and C among the patients reporting in surgical OPD at Fauji Foundation Hospital, Rawalpindi: Review of 5 year literature. Pak J Med Sci. 2007; 514.                                                                                                                                                                             | 2006                       |                      |
| Pakistan | Macro International, Inc, National Institute of Population Studies (Pakistan). Pakistan Demographic and Health Survey 2006-2007. Calverton, United States: Macro International, Inc.                                                                                                                                                                                                                  | 2006-2007                  |                      |
| Pakistan | Moisi JC, Saha SK, Falade AG, Njanpop-Lafourcade B-M, Oundo J, Zaidi AKM, Afroj S, Bakare RA, Buss JK, Lasi R, Mueller J, Odekanmi AA, Sangare L, Scott JAG, Knoll MD, Levine OS, Gessner BD. Enhanced diagnosis of pneumococcal meningitis with use of the binax NOW immunochromatographic test of Streptococcus pneumoniae antigen: A multisite study. Clin Infect Dis. 2009; 48(Suppl 2): S49-S56. | 2006-2007                  |                      |
| Pakistan | Khan A, Tanaka Y, Azam Z, Abbas Z, Kurbanov F, Saleem U, Hamid S, Jafri W, Mizokami M. Epidemic spread of hepatitis C virus genotype 3a and relation to high incidence of hepatocellular carcinoma in Pakistan. J Med Virol. 2009; 81(7): 1189-97.                                                                                                                                                    | 2006-2007                  | *                    |
| Pakistan | Pakistan Demographic Survey 2007 as it appears in United Nations Statistics Division (UNSD). United Nations Demographic Yearbook. New York City, United States: United Nations Statistics Division (UNSD).                                                                                                                                                                                            | 2007                       |                      |
| Pakistan | Owais A, Tikmani SS, Sultana S, Zaman U, Ahmed I, Allana S, Zaidi AK. Incidence of pneumonia, bacteremia, and invasive pneumococcal disease in Pakistani children. Trop Med Int Health. 2010; 15(9): 1029-36.                                                                                                                                                                                         | 2007                       |                      |
| Pakistan | Nisar N, Sohoo NA. Maternal mortality in rural community: a challenge for achieving millennium development goal. J Pak Med Assoc. 2010; 60(1): 20-4.                                                                                                                                                                                                                                                  | 2007                       |                      |
| Pakistan | Federal Bureau of Statistics (Pakistan). Pakistan Social and Living Standards Measurement Survey 2007-2008. Islamabad, Pakistan: Federal Bureau of Statistics (Pakistan).                                                                                                                                                                                                                             | 2007-2008                  |                      |

**Web Table 32 - Comprehensive citation list**

| Country   | Citation                                                                                                                                                                                                                                                                                                                                                                                           | Year*                                 | New for GBD 2013 (*) |
|-----------|----------------------------------------------------------------------------------------------------------------------------------------------------------------------------------------------------------------------------------------------------------------------------------------------------------------------------------------------------------------------------------------------------|---------------------------------------|----------------------|
| Pakistan  | Owais A, Sultana S, Zaman U, Rizvi A, Zaidi AKM. Incidence of typhoid bacteremia in infants and young children in southern coastal Pakistan. <i>Pediatr Infect Dis J.</i> 2010; 29(11): 1035-9.                                                                                                                                                                                                    | 2007-2008                             | *                    |
| Pakistan  | Qureshi H, Bile KM, Jooma R, Alam SE, Afridi HUR. Prevalence of hepatitis B and C viral infections in Pakistan: findings of a national survey appealing for effective prevention and control measures. <i>East Mediterr Health J.</i> 2010; S15-23.                                                                                                                                                | 2007-2008                             |                      |
| Pakistan  | Joint United Nations Program on HIV/AIDS (UNAIDS), Ministry of Health (Pakistan). Pakistan UNGASS Report 2010. Geneva, Switzerland: Joint United Nations Program on HIV/AIDS (UNAIDS), 2010.                                                                                                                                                                                                       | 2008                                  |                      |
| Pakistan  | Ministry of Health (Pakistan), World Health Organization (WHO). Pakistan Report on Causes of Death: As Reflected by Hospital Records 2010.                                                                                                                                                                                                                                                         | 2009                                  |                      |
| Pakistan  | Ali A, Ahmad H, Ali I, Khan S, Zaidi G, Idrees M. Prevalence of active hepatitis c virus infection in district mansehra pakistan. <i>Virologia.</i> 2010; 7(1): 334.                                                                                                                                                                                                                               | 2009-2010                             |                      |
| Pakistan  | Abbas SM, Alam AY, Majid A. To determine the probable causes of death in an urban slum community of Pakistan among adults 18 years and above by verbal autopsy. <i>J Pak Med Assoc.</i> 2011; 61(3): 235-8.                                                                                                                                                                                        | 2010                                  |                      |
| Pakistan  | ICF International, National Institute of Population Studies (Pakistan), Pakistan Bureau of Statistics. Pakistan Demographic and Health Survey 2012-2013. Fairfax, United States: ICF International, 2014.                                                                                                                                                                                          | 2012-2013                             | *                    |
| Palau     | United Nations Children's Fund (UNICEF), World Health Organization (WHO). WHO and UNICEF Reported Disease Incidence Time Series - Pertussis. Geneva, Switzerland: World Health Organization (WHO).                                                                                                                                                                                                 | 1980-1992, 1994-2000, 2002, 2004-2013 |                      |
| Palau     | United Nations Children's Fund (UNICEF), World Health Organization (WHO). WHO and UNICEF Reported Disease Incidence Time Series - Measles. Geneva, Switzerland: World Health Organization (WHO).                                                                                                                                                                                                   | 1980-2000, 2002, 2004-2013            |                      |
| Palau     | World Health Organization (WHO). Retrospective Measles Data on Supplementary Immunization Activities. Geneva, Switzerland: World Health Organization (WHO).                                                                                                                                                                                                                                        | 2011                                  |                      |
| Palestine | Project Ploughshares: Research and Action for Peace [Internet]. Waterloo, Canada: Project Ploughshares; [updated 2014]. Israel and Palestine 1948 - First Combat Deaths; [updated 2013 Aug]. Available from: <a href="http://ploughshares.ca/pl_armedconflict/israel-palestine-1948-first-combat-deaths/">http://ploughshares.ca/pl_armedconflict/israel-palestine-1948-first-combat-deaths/</a> . | 1950-2012                             | *                    |
| Palestine | Jewish Virtual Library [Internet]. (USA): American-Israeli Cooperative Enterprise; [updated 2014]. Total Casualties - Arab-Israeli Conflict; [updated 2014]. Available from: <a href="https://www.jewishvirtuallibrary.org/jsource/History/casualtiestotal.html">https://www.jewishvirtuallibrary.org/jsource/History/casualtiestotal.html</a> .                                                   | 1950-2012                             | *                    |
| Palestine | Institute for Health Metrics and Evaluation (IHME), Joint United Nations Program on HIV/AIDS (UNAIDS). Institute for Health Metrics and Evaluation HIV Mortality Estimates Based on the UNAIDS Spectrum Model Framework.                                                                                                                                                                           | 1980-2013                             | *                    |
| Palestine | Procon.org: Pros and Cons of Controversial Issues [Internet]. Santa Monica (CA), United States: Procon.org; [updated 2014]. Deaths in the Conflict, 1987-2012 - Israeli-Palestinian Conflict. Available from: <a href="http://israelipalestinian.procon.org/view.resource.php?resourceID=000639">http://israelipalestinian.procon.org/view.resource.php?resourceID=000639</a> .                    | 1987-2012                             | *                    |
| Palestine | Tulchinsky TH, Belmaker I, Raabi S, Acker C, Arbeli Y, Lobel R, Abed Y, Toubassi N, Goldberg E, Slater PE. Measles during the Gulf War: a public health threat in Israel, the West Bank, and Gaza. <i>Public Health Rev.</i> 1993; 20(4-Mar): 285-96.                                                                                                                                              | 1990-1991                             |                      |
| Palestine | Centre for Health Informatics and Multiprofessional Education, University College London. Modell's Haemoglobinopathologist's Almanac. London, United Kingdom: Centre for Health Informatics and Multiprofessional Education, University College London, 2008.                                                                                                                                      | 1990-2003                             |                      |

**Web Table 32 - Comprehensive citation list**

| Country   | Citation                                                                                                                                                                                                                                                                                                                                                                                                                     | Year*     | New for GBD 2013 (*) |
|-----------|------------------------------------------------------------------------------------------------------------------------------------------------------------------------------------------------------------------------------------------------------------------------------------------------------------------------------------------------------------------------------------------------------------------------------|-----------|----------------------|
| Palestine | Palestinian Central Bureau of Statistics. Palestine Demographic Survey 1995.                                                                                                                                                                                                                                                                                                                                                 | 1995      |                      |
| Palestine | Palestinian Central Bureau of Statistics, Minnesota Population Center. Palestine Population, Housing, and Establishment Census 1997 from the Integrated Public Use Microdata Series, International. [Machine-readable database]. Minneapolis: University of Minnesota.                                                                                                                                                       | 1997      |                      |
| Palestine | Palestine - West Bank Vital Registration - Deaths 1997. [Unpublished].                                                                                                                                                                                                                                                                                                                                                       | 1997      | *                    |
| Palestine | United Nations Office on Drugs and Crime (UNODC). United Nations Office on Drugs and Crime Global Study on Homicides 2011. Vienna, Austria: United Nations Office on Drugs and Crime (UNODC), 2011.                                                                                                                                                                                                                          | 1997-2005 |                      |
| Palestine | Palestine - West Bank Vital Registration - Deaths 1998. [Unpublished].                                                                                                                                                                                                                                                                                                                                                       | 1998      | *                    |
| Palestine | Yassin K, Awad R, Tebi A, Queder A, Laaser U. The epidemiology of hepatitis A infection in Palestine: a universal vaccination programme is not yet needed. <i>Epidemiol Infect.</i> 2001; 127(2): 335-9.                                                                                                                                                                                                                     | 1998-2000 |                      |
| Palestine | Palestine - West Bank Vital Registration - Deaths 1999. [Unpublished].                                                                                                                                                                                                                                                                                                                                                       | 1999      | *                    |
| Palestine | Palestinian Central Bureau of Statistics. Palestine Health Survey 2000. Ramallah, Palestine: Palestinian Central Bureau of Statistics.                                                                                                                                                                                                                                                                                       | 2000      |                      |
| Palestine | Al-Adili N, Johansson A, Bergstrom S. Maternal mortality among Palestinian women in the West Bank. <i>Int J Gynaecol Obstet.</i> 2006; 93(2): 164-70.                                                                                                                                                                                                                                                                        | 2000      |                      |
| Palestine | Palestine - West Bank Vital Registration - Deaths 2000. [Unpublished].                                                                                                                                                                                                                                                                                                                                                       | 2000      | *                    |
| Palestine | Palestine Vital Registration Death Data 2000 as it appears in United Nations Statistics Division (UNSD). United Nations Demographic Yearbook. New York City, United States: United Nations Statistics Division (UNSD).                                                                                                                                                                                                       | 2000      |                      |
| Palestine | United Nations Information System on the Question of Palestine (UNISPAL): UNISPAL Documents Collection [Internet]. [New York, USA]: United Nations; [updated 2014]. Israeli-Palestinian Fatalities Since 2000 - Key Trends; [updated 2007 Aug 31]. Available from: <a href="http://unispal.un.org/UNISPAL.NSF/0/BE07C80CDA4579468525734800500272">http://unispal.un.org/UNISPAL.NSF/0/BE07C80CDA4579468525734800500272</a> . | 2000-2007 | *                    |
| Palestine | B'Tselem: The Israeli Information Center for Human Rights in the Occupied Territories [Internet]. Jerusalem (Israel): B'Tselem; [updated 2014 Mar 13]. Fatalities during Operation Cast Lead. Available from: <a href="http://www.btselem.org/statistics/fatalities/before-cast-lead/by-date-of-event">http://www.btselem.org/statistics/fatalities/before-cast-lead/by-date-of-event</a> .                                  | 2000-2008 | *                    |
| Palestine | Palestine - West Bank Vital Registration - Deaths 2001. [Unpublished].                                                                                                                                                                                                                                                                                                                                                       | 2001      | *                    |
| Palestine | Palestinian Human Rights Monitoring Group. Palestinian Human Rights Monitoring Group Annual Narrative Report 2007. Palestinian Human Rights Monitoring Group.                                                                                                                                                                                                                                                                | 2001-2007 | *                    |
| Palestine | Palestine - West Bank Vital Registration - Deaths 2002. [Unpublished].                                                                                                                                                                                                                                                                                                                                                       | 2002      | *                    |
| Palestine | Palestine Vital Registration Death Data 2002 as it appears in United Nations Statistics Division (UNSD). United Nations Demographic Yearbook. New York City, United States: United Nations Statistics Division (UNSD).                                                                                                                                                                                                       | 2002      |                      |
| Palestine | Palestinian Central Bureau of Statistics. Palestine - West Bank Vital Registration - Deaths 2003. [Unpublished].                                                                                                                                                                                                                                                                                                             | 2003      | *                    |
| Palestine | Palestine - West Bank Vital Registration - Deaths 2003. [Unpublished].                                                                                                                                                                                                                                                                                                                                                       | 2003      | *                    |
| Palestine | Palestine Vital Registration Death Data 2003 as it appears in United Nations Statistics Division (UNSD). United Nations Demographic Yearbook. New York City, United States: United Nations Statistics Division (UNSD).                                                                                                                                                                                                       | 2003      |                      |
| Palestine | Palestinian Central Bureau of Statistics. Palestine Demographic and Health Survey 2004.                                                                                                                                                                                                                                                                                                                                      | 2004      |                      |
| Palestine | Palestine - West Bank Vital Registration - Deaths 2004. [Unpublished].                                                                                                                                                                                                                                                                                                                                                       | 2004      | *                    |

**Web Table 32 - Comprehensive citation list**

| Country   | Citation                                                                                                                                                                                                                                                                                                                                                                                                                                                                                                                                                                                                                                                                                                                                                                                                                                                                                                               | Year*     | New for GBD 2013 (*) |
|-----------|------------------------------------------------------------------------------------------------------------------------------------------------------------------------------------------------------------------------------------------------------------------------------------------------------------------------------------------------------------------------------------------------------------------------------------------------------------------------------------------------------------------------------------------------------------------------------------------------------------------------------------------------------------------------------------------------------------------------------------------------------------------------------------------------------------------------------------------------------------------------------------------------------------------------|-----------|----------------------|
| Palestine | Palestine Vital Registration Death Data 2004 as it appears in United Nations Statistics Division (UNSD). United Nations Demographic Yearbook. New York City, United States: United Nations Statistics Division (UNSD).                                                                                                                                                                                                                                                                                                                                                                                                                                                                                                                                                                                                                                                                                                 | 2004      |                      |
| Palestine | Palestine - West Bank Vital Registration - Deaths 2005 [Unpublished].                                                                                                                                                                                                                                                                                                                                                                                                                                                                                                                                                                                                                                                                                                                                                                                                                                                  | 2005      | *                    |
| Palestine | Palestine Vital Registration Death Data 2006 as it appears in United Nations Statistics Division (UNSD). United Nations Demographic Yearbook. New York City, United States: United Nations Statistics Division (UNSD).                                                                                                                                                                                                                                                                                                                                                                                                                                                                                                                                                                                                                                                                                                 | 2006      |                      |
| Palestine | League of Arab States, Palestinian Central Bureau of Statistics, United Nations Children's Fund (UNICEF). Palestine Family Health Survey 2006-2007.                                                                                                                                                                                                                                                                                                                                                                                                                                                                                                                                                                                                                                                                                                                                                                    | 2006-2007 |                      |
| Palestine | Palestinian Central Bureau of Statistics. Palestine Population, Housing and Establishment Census 2007.                                                                                                                                                                                                                                                                                                                                                                                                                                                                                                                                                                                                                                                                                                                                                                                                                 | 2007      |                      |
| Palestine | Palestinian Central Bureau of Statistics, Minnesota Population Center. Palestine Population, Housing, and Establishment Census 2007 from the Integrated Public Use Microdata Series, International. [Machine-readable database]. Minneapolis: University of Minnesota, 2011.                                                                                                                                                                                                                                                                                                                                                                                                                                                                                                                                                                                                                                           | 2007      |                      |
| Palestine | Palestine - West Bank Vital Registration - Deaths 2007. [Unpublished].                                                                                                                                                                                                                                                                                                                                                                                                                                                                                                                                                                                                                                                                                                                                                                                                                                                 | 2007      | *                    |
| Palestine | Palestine Vital Registration Death Data 2007 as it appears in United Nations Statistics Division (UNSD). United Nations Demographic Yearbook. New York City, United States: United Nations Statistics Division (UNSD).                                                                                                                                                                                                                                                                                                                                                                                                                                                                                                                                                                                                                                                                                                 | 2007      |                      |
| Palestine | Palestine Vital Registration - Deaths 2008 ICD10 as it appears in World Health Organization (WHO). WHO Mortality Database Version February 2014. Geneva, Switzerland: World Health Organization (WHO), 2014.                                                                                                                                                                                                                                                                                                                                                                                                                                                                                                                                                                                                                                                                                                           | 2008      |                      |
| Palestine | Ministry of Health (Palestine). Palestine Report on Maternal Mortality 2008-2009. Nablus, Palestine: Ministry of Health (Palestine).                                                                                                                                                                                                                                                                                                                                                                                                                                                                                                                                                                                                                                                                                                                                                                                   | 2008-2009 | *                    |
| Palestine | B'Tselem: The Israeli Information Center for Human Rights in the Occupied Territories [Internet]. Jerusalem (Israel): B'Tselem; [updated 2014 Mar 13]. Fatalities during Operation Cast Lead. Available from: <a href="http://www.btselem.org/statistics/fatalities/during-cast-lead/by-date-of-event">http://www.btselem.org/statistics/fatalities/during-cast-lead/by-date-of-event</a> .                                                                                                                                                                                                                                                                                                                                                                                                                                                                                                                            | 2008-2009 | *                    |
| Palestine | Palestinian Human Rights Monitoring Group. Israel Palestine The War on Gaza 2008-2009. Palestinian Human Rights Monitoring Group.                                                                                                                                                                                                                                                                                                                                                                                                                                                                                                                                                                                                                                                                                                                                                                                      | 2008-2009 | *                    |
| Palestine | Institute for Middle East Understanding (IMEU) [Internet]. NY, USA: Institute for Middle East Understanding (IMEU); [updated 2013]. IMEU: Fact Sheet: Operation Cast Lead; [updated 2012 Jan 4]. Available from: <a href="http://imeu.net/news/article0021968.shtml">http://imeu.net/news/article0021968.shtml</a> .                                                                                                                                                                                                                                                                                                                                                                                                                                                                                                                                                                                                   | 2008-2009 | *                    |
| Palestine | Palestinian Centre for Human Rights [Internet]. Gaza City, Palestine: Palestinian Centre for Human Rights; [updated 2014]. Three Years After Operation Cast Lead Justice has been Comprehensively Denied; PCHR Release 23 Narratives Documenting the Experience of Victims; 2011 Dec 27; [about 1 screen]. Available from: <a href="http://www.pchrgaza.org/portal/en/index.php?option=com_content&amp;view=article&amp;id=7979:3-years-after-operation-cast-lead-justice-has-been-comprehensively-denied-pchr-release-23-narratives-documenting-the-experience-of-victims-&amp;catid=36:pchrpressreleases&amp;Itemid=194">http://www.pchrgaza.org/portal/en/index.php?option=com_content&amp;view=article&amp;id=7979:3-years-after-operation-cast-lead-justice-has-been-comprehensively-denied-pchr-release-23-narratives-documenting-the-experience-of-victims-&amp;catid=36:pchrpressreleases&amp;Itemid=194</a> . | 2008-2009 | *                    |
| Palestine | Palestine Vital Registration - Deaths 2009 ICD10 as it appears in World Health Organization (WHO). WHO Mortality Database Version February 2014. Geneva, Switzerland: World Health Organization (WHO), 2014.                                                                                                                                                                                                                                                                                                                                                                                                                                                                                                                                                                                                                                                                                                           | 2009      |                      |

**Web Table 32 - Comprehensive citation list**

| Country   | Citation                                                                                                                                                                                                                                                                                                                                                                                | Year* | New for GBD 2013 (*) |
|-----------|-----------------------------------------------------------------------------------------------------------------------------------------------------------------------------------------------------------------------------------------------------------------------------------------------------------------------------------------------------------------------------------------|-------|----------------------|
| Palestine | B'Tselem: The Israeli Information Center for Human Rights in the Occupied Territories [Internet]. Jerusalem, Israel: B'Tselem; [updated 2014 Mar 12]. Fatalities after Operation Cast Lead. Available from: <a href="http://www.btselem.org/statistics/fatalities/after-cast-lead/by-date-of-event">http://www.btselem.org/statistics/fatalities/after-cast-lead/by-date-of-event</a> . | 2009  | *                    |
| Palestine | Ministry of Health (Palestine), Palestinian Central Bureau of Statistics, United Nations Children's Fund (UNICEF), United Nations Population Fund (UNFPA). Palestine Multiple Indicator Cluster Survey 2010.                                                                                                                                                                            | 2010  | *                    |
| Palestine | Ministry of Health (Palestine). Palestine Health Status Annual Report 2010. Nablus, Palestine: Ministry of Health (Palestine), 2011.                                                                                                                                                                                                                                                    | 2010  |                      |
| Palestine | Ministry of Health (Palestine). Palestine Health Status Annual Report 2011. Nablus, Palestine: Ministry of Health (Palestine), 2012.                                                                                                                                                                                                                                                    | 2011  | *                    |
| Palestine | Office of the United Nations High Commissioner for Human Rights (OHCHR). Report of the United Nations High Commissioner for Human Rights on the implementation of Human Rights Council resolutions S-9/1 and S-12/1 - Addendum (A/HRC/22/35/Add.1). Geneva, Switzerland: Office of the United Nations High Commissioner for Human Rights (OHCHR), 2013.                                 | 2012  | *                    |
| Palestine | Human Rights Watch: Defending Human Rights Worldwide [Internet]. New York (NY, USA): Human Rights Watch; [updated 2014 Mar 15]. World Report 2013: Israel/Palestine; [cited 2014 Mar 17]. Available from: <a href="http://www.hrw.org/world-report/2013/country-chapters/israel-palestine?page=1">http://www.hrw.org/world-report/2013/country-chapters/israel-palestine?page=1</a> .   | 2012  | *                    |
| Palestine | Centre for Research on the Epidemiology of Disasters (CRED). EM-DAT: The OFDA/CRED International Disaster Database. Brussels, Belgium: Catholic University of Leuven.                                                                                                                                                                                                                   | 2013  |                      |
| Panama    | Panama Vital Registration Death Data 1950 as it appears in United Nations Statistics Division (UNSD). United Nations Demographic Yearbook. New York City, United States: United Nations Statistics Division (UNSD).                                                                                                                                                                     | 1950  |                      |
| Panama    | Panama Vital Registration Death Data 1952 as it appears in United Nations Statistics Division (UNSD). United Nations Demographic Yearbook. New York City, United States: United Nations Statistics Division (UNSD).                                                                                                                                                                     | 1952  |                      |
| Panama    | Panama Vital Registration Death Data 1953 as it appears in United Nations Statistics Division (UNSD). United Nations Demographic Yearbook. New York City, United States: United Nations Statistics Division (UNSD).                                                                                                                                                                     | 1953  |                      |
| Panama    | Panama Vital Registration - Deaths 1954 ICD7 as it appears in World Health Organization (WHO). WHO Mortality Database Version February 2014. Geneva, Switzerland: World Health Organization (WHO), 2014.                                                                                                                                                                                | 1954  |                      |
| Panama    | Panama Vital Registration - Deaths 1955 ICD7 as it appears in World Health Organization (WHO). WHO Mortality Database Version February 2014. Geneva, Switzerland: World Health Organization (WHO), 2014.                                                                                                                                                                                | 1955  |                      |
| Panama    | Panama Vital Registration - Deaths 1956 ICD7 as it appears in World Health Organization (WHO). WHO Mortality Database Version February 2014. Geneva, Switzerland: World Health Organization (WHO), 2014.                                                                                                                                                                                | 1956  |                      |
| Panama    | Panama Vital Registration - Deaths 1957 ICD7 as it appears in World Health Organization (WHO). WHO Mortality Database Version February 2014. Geneva, Switzerland: World Health Organization (WHO), 2014.                                                                                                                                                                                | 1957  |                      |
| Panama    | Panama Vital Registration - Deaths 1958 ICD7 as it appears in World Health Organization (WHO). WHO Mortality Database Version February 2014. Geneva, Switzerland: World Health Organization (WHO), 2014.                                                                                                                                                                                | 1958  |                      |

**Web Table 32 - Comprehensive citation list**

| Country | Citation                                                                                                                                                                                                                                                | Year*                                                                                             | New for GBD 2013 (*) |
|---------|---------------------------------------------------------------------------------------------------------------------------------------------------------------------------------------------------------------------------------------------------------|---------------------------------------------------------------------------------------------------|----------------------|
| Panama  | Panama Vital Registration - Deaths 1959 ICD7 as it appears in World Health Organization (WHO). WHO Mortality Database Version February 2014. Geneva, Switzerland: World Health Organization (WHO), 2014.                                                | 1959                                                                                              |                      |
| Panama  | Panama Vital Registration - Deaths 1960 ICD7 as it appears in World Health Organization (WHO). WHO Mortality Database Version February 2014. Geneva, Switzerland: World Health Organization (WHO), 2014.                                                | 1960                                                                                              |                      |
| Panama  | Department of Statistics and Census (Panama), Minnesota Population Center. Panama Population and Housing Census 1960 from the Integrated Public Use Microdata Series, International. [Machine-readable database]. Minneapolis: University of Minnesota. | 1960                                                                                              |                      |
| Panama  | Panama Vital Registration - Deaths 1961 ICD7 as it appears in World Health Organization (WHO). WHO Mortality Database Version February 2014. Geneva, Switzerland: World Health Organization (WHO), 2014.                                                | 1961                                                                                              |                      |
| Panama  | Panama Vital Registration - Deaths 1962 ICD7 as it appears in World Health Organization (WHO). WHO Mortality Database Version February 2014. Geneva, Switzerland: World Health Organization (WHO), 2014.                                                | 1962                                                                                              |                      |
| Panama  | Panama Vital Registration - Deaths 1963 ICD7 as it appears in World Health Organization (WHO). WHO Mortality Database Version February 2014. Geneva, Switzerland: World Health Organization (WHO), 2014.                                                | 1963                                                                                              |                      |
| Panama  | Panama Vital Registration - Deaths 1964 ICD7 as it appears in World Health Organization (WHO). WHO Mortality Database Version February 2014. Geneva, Switzerland: World Health Organization (WHO), 2014.                                                | 1964                                                                                              |                      |
| Panama  | Centre for Research on the Epidemiology of Disasters (CRED). EM-DAT: The OFDA/CRED International Disaster Database. Brussels, Belgium: Catholic University of Leuven.                                                                                   | 1964, 1966, 1970, 1973, 1978, 1984, 1986, 1988, 1991-1992, 1995, 1998-2000, 2002-2008, 2010, 2012 |                      |
| Panama  | Panama Vital Registration - Deaths 1965 ICD7 as it appears in World Health Organization (WHO). WHO Mortality Database Version February 2014. Geneva, Switzerland: World Health Organization (WHO), 2014.                                                | 1965                                                                                              |                      |
| Panama  | Panama Vital Registration - Deaths 1966 ICD7 as it appears in World Health Organization (WHO). WHO Mortality Database Version February 2014. Geneva, Switzerland: World Health Organization (WHO), 2014.                                                | 1966                                                                                              |                      |
| Panama  | Panama Vital Registration - Deaths 1967 ICD7 as it appears in World Health Organization (WHO). WHO Mortality Database Version February 2014. Geneva, Switzerland: World Health Organization (WHO), 2014.                                                | 1967                                                                                              |                      |
| Panama  | Panama Vital Registration - Deaths 1968 ICD8 as it appears in World Health Organization (WHO). WHO Mortality Database Version February 2014. Geneva, Switzerland: World Health Organization (WHO), 2014.                                                | 1968                                                                                              |                      |
| Panama  | Panama Vital Registration - Deaths 1969 ICD8 as it appears in World Health Organization (WHO). WHO Mortality Database Version February 2014. Geneva, Switzerland: World Health Organization (WHO), 2014.                                                | 1969                                                                                              |                      |
| Panama  | Panama Vital Registration - Deaths 1970 ICD8 as it appears in World Health Organization (WHO). WHO Mortality Database Version February 2014. Geneva, Switzerland: World Health Organization (WHO), 2014.                                                | 1970                                                                                              |                      |



**Web Table 32 - Comprehensive citation list**

| Country | Citation                                                                                                                                                                                                                                                | Year*     | New for GBD 2013 (*) |
|---------|---------------------------------------------------------------------------------------------------------------------------------------------------------------------------------------------------------------------------------------------------------|-----------|----------------------|
| Panama  | Panama Vital Registration - Deaths 1971 ICD8 as it appears in World Health Organization (WHO). WHO Mortality Database Version February 2014. Geneva, Switzerland: World Health Organization (WHO), 2014.                                                | 1971      |                      |
| Panama  | Panama Vital Registration - Deaths 1972 ICD8 as it appears in World Health Organization (WHO). WHO Mortality Database Version February 2014. Geneva, Switzerland: World Health Organization (WHO), 2014.                                                | 1972      |                      |
| Panama  | Panama Vital Registration - Deaths 1973 ICD8 as it appears in World Health Organization (WHO). WHO Mortality Database Version February 2014. Geneva, Switzerland: World Health Organization (WHO), 2014.                                                | 1973      |                      |
| Panama  | Panama Vital Registration - Deaths 1974 ICD8 as it appears in World Health Organization (WHO). WHO Mortality Database Version February 2014. Geneva, Switzerland: World Health Organization (WHO), 2014.                                                | 1974      |                      |
| Panama  | Panama Vital Registration - Deaths 1975 ICD8 as it appears in World Health Organization (WHO). WHO Mortality Database Version February 2014. Geneva, Switzerland: World Health Organization (WHO), 2014.                                                | 1975      |                      |
| Panama  | Directorate of Statistics and Census (Panama). Panama National Demographic Survey 1975-1977.                                                                                                                                                            | 1975-1977 |                      |
| Panama  | International Statistical Institute, Ministry of Health (Panama), Office of Population Studies. Panama World Fertility Survey 1975-1976. International Statistical Institute.                                                                           | 1975-1976 |                      |
| Panama  | Panama Vital Registration - Deaths 1976 ICD8 as it appears in World Health Organization (WHO). WHO Mortality Database Version February 2014. Geneva, Switzerland: World Health Organization (WHO), 2014.                                                | 1976      |                      |
| Panama  | United Nations Office on Drugs and Crime (UNODC). United Nations Surveys on Crime Trends and the Operations of Criminal Justice Systems 1970-2006 as provided by Kavi Bhalla. [Unpublished].                                                            | 1976-1980 |                      |
| Panama  | Panama Vital Registration - Deaths 1977 ICD8 as it appears in World Health Organization (WHO). WHO Mortality Database Version February 2014. Geneva, Switzerland: World Health Organization (WHO), 2014.                                                | 1977      |                      |
| Panama  | Panama Vital Registration - Deaths 1978 ICD8 as it appears in World Health Organization (WHO). WHO Mortality Database Version February 2014. Geneva, Switzerland: World Health Organization (WHO), 2014.                                                | 1978      |                      |
| Panama  | Panama Vital Registration - Deaths 1979 ICD9 as it appears in World Health Organization (WHO). WHO Mortality Database Version February 2014. Geneva, Switzerland: World Health Organization (WHO), 2014.                                                | 1979      |                      |
| Panama  | Panama Vital Registration - Deaths 1980 ICD9 as it appears in World Health Organization (WHO). WHO Mortality Database Version February 2014. Geneva, Switzerland: World Health Organization (WHO), 2014.                                                | 1980      |                      |
| Panama  | Department of Statistics and Census (Panama), Minnesota Population Center. Panama Population and Housing Census 1980 from the Integrated Public Use Microdata Series, International. [Machine-readable database]. Minneapolis: University of Minnesota. | 1980      |                      |
| Panama  | Institute for Health Metrics and Evaluation (IHME), Joint United Nations Program on HIV/AIDS (UNAIDS). Institute for Health Metrics and Evaluation HIV Mortality Estimates Based on the UNAIDS Spectrum Model Framework.                                | 1980-2013 | *                    |

**Web Table 32 - Comprehensive citation list**

| Country | Citation                                                                                                                                                                                                                                                      | Year*     | New for GBD 2013 (*) |
|---------|---------------------------------------------------------------------------------------------------------------------------------------------------------------------------------------------------------------------------------------------------------------|-----------|----------------------|
| Panama  | United Nations Children's Fund (UNICEF), World Health Organization (WHO). WHO and UNICEF Reported Disease Incidence Time Series - Pertussis. Geneva, Switzerland: World Health Organization (WHO).                                                            | 1980-2012 |                      |
| Panama  | United Nations Children's Fund (UNICEF), World Health Organization (WHO). WHO and UNICEF Reported Disease Incidence Time Series - Measles. Geneva, Switzerland: World Health Organization (WHO).                                                              | 1980-2012 |                      |
| Panama  | Panama Vital Registration - Deaths 1981 ICD9 as it appears in World Health Organization (WHO). WHO Mortality Database Version February 2014. Geneva, Switzerland: World Health Organization (WHO), 2014.                                                      | 1981      |                      |
| Panama  | Panama Vital Registration - Deaths 1982 ICD9 as it appears in World Health Organization (WHO). WHO Mortality Database Version February 2014. Geneva, Switzerland: World Health Organization (WHO), 2014.                                                      | 1982      |                      |
| Panama  | Panama Vital Registration - Deaths 1983 ICD9 as it appears in World Health Organization (WHO). WHO Mortality Database Version February 2014. Geneva, Switzerland: World Health Organization (WHO), 2014.                                                      | 1983      |                      |
| Panama  | Panama Vital Registration - Deaths 1984 ICD9 as it appears in World Health Organization (WHO). WHO Mortality Database Version February 2014. Geneva, Switzerland: World Health Organization (WHO), 2014.                                                      | 1984      |                      |
| Panama  | Panama Vital Registration - Deaths 1985 ICD9 as it appears in World Health Organization (WHO). WHO Mortality Database Version February 2014. Geneva, Switzerland: World Health Organization (WHO), 2014.                                                      | 1985      |                      |
| Panama  | Panama Vital Registration - Deaths 1986 ICD9 as it appears in World Health Organization (WHO). WHO Mortality Database Version February 2014. Geneva, Switzerland: World Health Organization (WHO), 2014.                                                      | 1986      |                      |
| Panama  | Panama Vital Registration - Deaths 1987 ICD9 as it appears in World Health Organization (WHO). WHO Mortality Database Version February 2014. Geneva, Switzerland: World Health Organization (WHO), 2014.                                                      | 1987      |                      |
| Panama  | Panama Vital Registration - Deaths 1988 ICD9 as it appears in World Health Organization (WHO). WHO Mortality Database Version February 2014. Geneva, Switzerland: World Health Organization (WHO), 2014.                                                      | 1988      |                      |
| Panama  | Panama Vital Registration - Deaths 1989 ICD9 as it appears in World Health Organization (WHO). WHO Mortality Database Version February 2014. Geneva, Switzerland: World Health Organization (WHO), 2014.                                                      | 1989      |                      |
| Panama  | Department of Statistics and Census (Panama), Minnesota Population Center. Panama Population and Housing Census 1990 from the Integrated Public Use Microdata Series, International. [Machine-readable database]. Minneapolis: University of Minnesota.       | 1990      |                      |
| Panama  | Panama Vital Registration Death Data 1990 as it appears in United Nations Statistics Division (UNSD). United Nations Demographic Yearbook. New York City, United States: United Nations Statistics Division (UNSD).                                           | 1990      |                      |
| Panama  | Centre for Health Informatics and Multiprofessional Education, University College London. Modell's Haemoglobinopathologist's Almanac. London, United Kingdom: Centre for Health Informatics and Multiprofessional Education, University College London, 2008. | 1990-2003 |                      |
| Panama  | Panama Vital Registration Death Data 1991 as it appears in United Nations Statistics Division (UNSD). United Nations Demographic Yearbook. New York City, United States: United Nations Statistics Division (UNSD).                                           | 1991      |                      |



**Web Table 32 - Comprehensive citation list**

| Country | Citation                                                                                                                                                                                                                                                | Year*                           | New for GBD 2013 (*) |
|---------|---------------------------------------------------------------------------------------------------------------------------------------------------------------------------------------------------------------------------------------------------------|---------------------------------|----------------------|
| Panama  | Panama Vital Registration Death Data 1992 as it appears in United Nations Statistics Division (UNSD). United Nations Demographic Yearbook. New York City, United States: United Nations Statistics Division (UNSD).                                     | 1992                            |                      |
| Panama  | Feigenbaum F, Fang C, Sandler SG. Human T-lymphotropic virus type II in Panamanian Guaymi Indians. Transfusion. 1994; 34(2): 158-61.                                                                                                                    | 1992                            |                      |
| Panama  | Panama Vital Registration Death Data 1993 as it appears in United Nations Statistics Division (UNSD). United Nations Demographic Yearbook. New York City, United States: United Nations Statistics Division (UNSD).                                     | 1993                            |                      |
| Panama  | Measles Supplementary Immunization Activity Data as provided by the World Health Organization. [Unpublished].                                                                                                                                           | 1993, 1996                      |                      |
| Panama  | Panama Vital Registration Death Data 1994 as it appears in United Nations Statistics Division (UNSD). United Nations Demographic Yearbook. New York City, United States: United Nations Statistics Division (UNSD).                                     | 1994                            |                      |
| Panama  | Panama Vital Registration Death Data 1995 as it appears in United Nations Statistics Division (UNSD). United Nations Demographic Yearbook. New York City, United States: United Nations Statistics Division (UNSD).                                     | 1995                            |                      |
| Panama  | United Nations Office on Drugs and Crime (UNODC). United Nations Office on Drugs and Crime Global Study on Homicides 2011. Vienna, Austria: United Nations Office on Drugs and Crime (UNODC), 2011.                                                     | 1995-2010                       |                      |
| Panama  | Panama Vital Registration - Deaths 1996 ICD9 as it appears in World Health Organization (WHO). WHO Mortality Database Version February 2014. Geneva, Switzerland: World Health Organization (WHO), 2014.                                                | 1996                            |                      |
| Panama  | Ministry of Planning and Economic Policy (Panama), World Bank. Panama Living Standards Measurement Survey 1997. Washington DC, United States: World Bank.                                                                                               | 1997                            |                      |
| Panama  | Panama Vital Registration - Deaths 1997 ICD9 as it appears in World Health Organization (WHO). WHO Mortality Database Version February 2014. Geneva, Switzerland: World Health Organization (WHO), 2014.                                                | 1997                            |                      |
| Panama  | World Health Organization (WHO). Yellow Fever Reported Cases, WHO Vaccine-Preventable Diseases: Monitoring System. Geneva, Switzerland: World Health Organization (WHO).                                                                                | 1997-1998, 2000-2001, 2003-2009 |                      |
| Panama  | Panama Vital Registration - Deaths 1998 ICD10 as it appears in World Health Organization (WHO). WHO Mortality Database Version February 2014. Geneva, Switzerland: World Health Organization (WHO), 2014.                                               | 1998                            |                      |
| Panama  | Panama Vital Registration - Deaths 1999 ICD10 as it appears in World Health Organization (WHO). WHO Mortality Database Version February 2014. Geneva, Switzerland: World Health Organization (WHO), 2014.                                               | 1999                            |                      |
| Panama  | Joint United Nations Program on HIV/AIDS (UNAIDS), Pan American Health Organization (PAHO), United Nations Children's Fund (UNICEF), World Health Organization (WHO). Panama Epidemiological Fact Sheet on HIV/AIDS and STIs 2004.                      | 1999-2002, 2004                 |                      |
| Panama  | Panama Vital Registration - Deaths 2000 ICD10 as it appears in World Health Organization (WHO). WHO Mortality Database Version February 2014. Geneva, Switzerland: World Health Organization (WHO), 2014.                                               | 2000                            |                      |
| Panama  | Department of Statistics and Census (Panama), Minnesota Population Center. Panama Population and Housing Census 2000 from the Integrated Public Use Microdata Series, International. [Machine-readable database]. Minneapolis: University of Minnesota. | 2000                            |                      |

**Web Table 32 - Comprehensive citation list**

| Country | Citation                                                                                                                                                                                                                                                                                                                                                                                                                        | Year*                  | New for GBD 2013 (*) |
|---------|---------------------------------------------------------------------------------------------------------------------------------------------------------------------------------------------------------------------------------------------------------------------------------------------------------------------------------------------------------------------------------------------------------------------------------|------------------------|----------------------|
| Panama  | Panama Vital Registration - Deaths 2001 ICD10 as it appears in World Health Organization (WHO). WHO Mortality Database Version February 2014. Geneva, Switzerland: World Health Organization (WHO), 2014.                                                                                                                                                                                                                       | 2001                   |                      |
| Panama  | Panama Vital Registration - Deaths 2002 ICD10 as it appears in World Health Organization (WHO). WHO Mortality Database Version February 2014. Geneva, Switzerland: World Health Organization (WHO), 2014.                                                                                                                                                                                                                       | 2002                   |                      |
| Panama  | Directorate of Statistics and Census (Panama), Ministry of Economy and Finance (Panama), World Bank. Panama Living Standard Measurement Survey 2003. Washington DC, United States: World Bank.                                                                                                                                                                                                                                  | 2003                   |                      |
| Panama  | Panama Vital Registration - Deaths 2003 ICD10 as it appears in World Health Organization (WHO). WHO Mortality Database Version February 2014. Geneva, Switzerland: World Health Organization (WHO), 2014.                                                                                                                                                                                                                       | 2003                   |                      |
| Panama  | World Health Organization (WHO). Retrospective Measles Data on Supplementary Immunization Activities. Geneva, Switzerland: World Health Organization (WHO).                                                                                                                                                                                                                                                                     | 2003, 2006, 2008, 2010 |                      |
| Panama  | Panama Vital Registration - Deaths 2004 ICD10 as it appears in World Health Organization (WHO). WHO Mortality Database Version February 2014. Geneva, Switzerland: World Health Organization (WHO), 2014.                                                                                                                                                                                                                       | 2004                   |                      |
| Panama  | Panama Vital Registration - Deaths 2005 ICD10 as it appears in World Health Organization (WHO). WHO Mortality Database Version February 2014. Geneva, Switzerland: World Health Organization (WHO), 2014.                                                                                                                                                                                                                       | 2005                   |                      |
| Panama  | Panama Vital Registration - Deaths 2006 ICD10 as it appears in World Health Organization (WHO). WHO Mortality Database Version February 2014. Geneva, Switzerland: World Health Organization (WHO), 2014.                                                                                                                                                                                                                       | 2006                   |                      |
| Panama  | Fassio E, Díaz S, Santa C, Reig ME, Martínez Artola Y, Alves de Mattos A, Míguez C, Galizzi J, Zapata R, Ridruejo E, de Souza FC, Hernández N, Pinchuk L, Multicenter Group for Study of Hepatocarcinoma in Latin America, Asociación Latinoamericana para el Estudio del Hígado (ALEH). Etiology of hepatocellular carcinoma in Latin America: a prospective, multicenter, international study. Ann Hepatol. 2010; 9(1): 63-9. | 2006-2008              | *                    |
| Panama  | Panama Vital Registration - Deaths 2007 ICD10 as it appears in World Health Organization (WHO). WHO Mortality Database Version February 2014. Geneva, Switzerland: World Health Organization (WHO), 2014.                                                                                                                                                                                                                       | 2007                   |                      |
| Panama  | Panama Vital Registration - Deaths 2008 ICD10 as it appears in World Health Organization (WHO). WHO Mortality Database Version February 2014. Geneva, Switzerland: World Health Organization (WHO), 2014.                                                                                                                                                                                                                       | 2008                   |                      |
| Panama  | Panama Vital Registration - Deaths 2009 ICD10 as it appears in World Health Organization (WHO). WHO Mortality Database Version February 2014. Geneva, Switzerland: World Health Organization (WHO), 2014.                                                                                                                                                                                                                       | 2009                   |                      |
| Panama  | Panama Vital Registration Death Data 2010 as it appears in United Nations Statistics Division (UNSD). United Nations Demographic Yearbook. New York City, United States: United Nations Statistics Division (UNSD).                                                                                                                                                                                                             | 2010                   |                      |

**Web Table 32 - Comprehensive citation list**

| Country          | Citation                                                                                                                                                                                                                                                                        | Year*                                                                                          | New for GBD 2013 (*) |
|------------------|---------------------------------------------------------------------------------------------------------------------------------------------------------------------------------------------------------------------------------------------------------------------------------|------------------------------------------------------------------------------------------------|----------------------|
| Papua New Guinea | Centre for Research on the Epidemiology of Disasters (CRED). EM-DAT: The OFDA/CRED International Disaster Database. Brussels, Belgium: Catholic University of Leuven.                                                                                                           | 1951, 1970-1971, 1979, 1983, 1987-1988, 1991, 1993-1994, 1996-2000, 2002-2003, 2005-2009, 2012 |                      |
| Papua New Guinea | Kidson C. Deficiency of glucose-6-phosphate dehydrogenase: some aspects of the trait in people of Papua-New Guinea. <i>Med J Aust.</i> 1961; 48(2): 506-9.                                                                                                                      | 1959-1961                                                                                      |                      |
| Papua New Guinea | Prins HK, Loos JA, Meuwissen JH. Glucose-6-phosphate dehydrogenase (G6PD) deficiency in West New Guinea. <i>Trop Geogr Med.</i> 1963; 361-70.                                                                                                                                   | 1962                                                                                           |                      |
| Papua New Guinea | Hawkes RA, Boughton CR, Ferguson V. The seroepidemiology of hepatitis in Papua New Guinea. I. A long-term study of hepatitis A. <i>Am J Epidemiol.</i> 1981; 114(4): 554-62.                                                                                                    | 1963-1964,1972                                                                                 |                      |
| Papua New Guinea | Hawkes RA, Boughton CR, Ferguson V, Vale TG. The Seroepidemiology of Hepatitis in Papua New Guinea II. a Long-Term Study of Hepatitis B. <i>Am J Epidemiol.</i> 1981; 114(4): 563-73.                                                                                           | 1963-1964,1972                                                                                 |                      |
| Papua New Guinea | Bureau of Statistics (Papua New Guinea). Papua New Guinea Population and Housing Census 1971.                                                                                                                                                                                   | 1971                                                                                           |                      |
| Papua New Guinea | Papua New Guinea Vital Registration - Deaths 1977 ICD8 as it appears in World Health Organization (WHO). WHO Mortality Database Version February 2014. Geneva, Switzerland: World Health Organization (WHO), 2014.                                                              | 1977                                                                                           |                      |
| Papua New Guinea | Papua New Guinea Population and Housing Census 1980 as it appears in United Nations Statistics Division (UNSD). United Nations Demographic Yearbook. New York City, United States: United Nations Statistics Division (UNSD).                                                   | 1980                                                                                           |                      |
| Papua New Guinea | Papua New Guinea Vital Registration - Deaths 1980 ICD9 as it appears in World Health Organization (WHO). WHO Mortality Database Version February 2014. Geneva, Switzerland: World Health Organization (WHO), 2014.                                                              | 1980                                                                                           | *                    |
| Papua New Guinea | Lehmann D. Mortality and morbidity from acute lower respiratory tract infections in Tari, Southern Highlands Province 1977-1983. <i>P N G Med J.</i> 1991; 34(3): 174-84.                                                                                                       | 1980                                                                                           |                      |
| Papua New Guinea | Lehmann D. Demography and causes of death among the Huli in the Tari Basin. <i>P N G Med J.</i> 2002; 45(1-2): 51-62.                                                                                                                                                           | 1980                                                                                           |                      |
| Papua New Guinea | Institute for Health Metrics and Evaluation (IHME), Joint United Nations Program on HIV/AIDS (UNAIDS). Institute for Health Metrics and Evaluation HIV Mortality Estimates Based on the UNAIDS Spectrum Model Framework.                                                        | 1980-2013                                                                                      | *                    |
| Papua New Guinea | United Nations Children's Fund (UNICEF), World Health Organization (WHO). WHO and UNICEF Reported Disease Incidence Time Series - Pertussis. Geneva, Switzerland: World Health Organization (WHO).                                                                              | 1980-2006, 2009-2013                                                                           |                      |
| Papua New Guinea | United Nations Children's Fund (UNICEF), World Health Organization (WHO). WHO and UNICEF Reported Disease Incidence Time Series - Measles. Geneva, Switzerland: World Health Organization (WHO).                                                                                | 1980-2013                                                                                      |                      |
| Papua New Guinea | Moir JS, Garner PA, Heywood PF, Alpers MP. Mortality in a rural area of Madang Province, Papua New Guinea. <i>Ann Trop Med Parasitol.</i> 1989; 83(3): 305-19.                                                                                                                  | 1983                                                                                           |                      |
| Papua New Guinea | Kakazo M, Lehmann D, Coakley K, Gratten H, Saleu G, Taime J, Riley ID, Alpers MP. Mortality rates and the utilization of health services during terminal illness in the Asaro Valley, Eastern Highlands Province, Papua New Guinea. <i>P N G Med J.</i> 1999; 42(2-Jan): 13-26. | 1985                                                                                           |                      |
| Papua New Guinea | Hill AV, Bowden DK, O'Shaughnessy DF, Weatherall DJ, Clegg JB. Beta thalassemia in Melanesia: association with malaria and characterization of a common variant (IVS-1 nt 5 G---C). <i>Blood.</i> 1988; 72(1): 9-14.                                                            | 1985-1987                                                                                      |                      |

**Web Table 32 - Comprehensive citation list**

| Country          | Citation                                                                                                                                                                                                                                                                                        | Year*     | New for GBD 2013 (*) |
|------------------|-------------------------------------------------------------------------------------------------------------------------------------------------------------------------------------------------------------------------------------------------------------------------------------------------|-----------|----------------------|
| Papua New Guinea | Brabin L, Brabin BJ, Dimitrakakis M, Gust I. Factors affecting the prevalence of infection with hepatitis B virus among non-pregnant women in the Alexishafen area of Papua New Guinea. <i>Ann Trop Med Parasitol.</i> 1989; 83(4): 365-74.                                                     | 1985-1987 |                      |
| Papua New Guinea | Brabin L, Brabin BJ. Malaria and glucose 6-phosphate dehydrogenase deficiency in populations with high and low spleen rates in Madang, Papua New Guinea. <i>Hum Hered.</i> 1990; 40(1): 15-21.                                                                                                  | 1987-1988 |                      |
| Papua New Guinea | Coakley KJ, Coakley CA, Spooner V, Smith TA, Javati A, Kajoi M. A review of measles admissions and deaths in the paediatric ward of Goroka Base Hospital during 1989. <i>P N G Med J.</i> 1991; 34(1): 41802.                                                                                   | 1989      |                      |
| Papua New Guinea | Yamaguchi K, Inaoka T, Ohtsuka R, Akimichi T, Hongo T, Kawabe T, Nakazawa M, Futatsuka M, Takatsuki K. HTLV-I, HIV-I, and hepatitis B and C viruses in Western Province, Papua New Guinea: a serological survey. <i>Jpn J Cancer Res.</i> 1993; 84(7): 715-9.                                   | 1989      |                      |
| Papua New Guinea | Sanders RC, Lewis D, Dyke T, Alpers MP. Markers of hepatitis B infection in Tari District, Southern Highlands Province, Papua New Guinea. <i>P N G Med J.</i> 1992; 35(3): 197-201.                                                                                                             | 1990      |                      |
| Papua New Guinea | Lavu EK, Oswyn G, Vince JD. Sickie-cell/beta+-thalassaemia in a Papua New Guinea: the first reported case of the sickie gene in Papua New Guinea. <i>Med J Aust.</i> 2002; 176(2): 70-1.                                                                                                        | 1990-2002 |                      |
| Papua New Guinea | Weatherall D. Sickie Cell and Thalassemias Prevalence Data, Personal Correspondence with David Weatherall. [Unpublished].                                                                                                                                                                       | 1990-2009 |                      |
| Papua New Guinea | Department of Peace and Conflict Research, Uppsala University. UCDP Battle-Related Deaths Database Version 5, 2013. Uppsala, Sweden: Department of Peace and Conflict Research, Uppsala University, 2013.                                                                                       | 1990-1996 | *                    |
| Papua New Guinea | Centre for Health Informatics and Multiprofessional Education, University College London. <i>Modell's Haemoglobinopathologist's Almanac.</i> London, United Kingdom: Centre for Health Informatics and Multiprofessional Education, University College London, 2008.                            | 1990-2003 |                      |
| Papua New Guinea | National Statistical Office (Papua New Guinea). <i>Papua New Guinea Demographic and Health Survey 1991.</i>                                                                                                                                                                                     | 1991      |                      |
| Papua New Guinea | Genton B, al-Yaman F, Beck HP, Hii J, Mellor S, Rare L, Ginny M, Smith T, Alpers MP. The epidemiology of malaria in the Wosera area, East Sepik Province, Papua New Guinea, in preparation for vaccine trials. II. Mortality and morbidity. <i>Ann Trop Med Parasitol.</i> 1995; 89(4): 377-90. | 1992      |                      |
| Papua New Guinea | Tiwara S, Passey M, Clegg A, Mgone C, Lupiwa S, Suve N, Lupiwa T. High prevalence of trichomonal vaginitis and chlamydial cervicitis among a rural population in the highlands of Papua New Guinea. <i>P N G Med J.</i> 1996; 39(3): 234-238.                                                   | 1994-1996 |                      |
| Papua New Guinea | Department of Peace and Conflict Research, Uppsala University. UCDP One-Sided Violence Database Version 1.4, 2013. Uppsala, Sweden: Department of Peace and Conflict Research, Uppsala University, 2013.                                                                                        | 1996      | *                    |
| Papua New Guinea | National Statistical Office (Papua New Guinea). <i>Papua New Guinea Demographic and Health Survey 1996-1997.</i>                                                                                                                                                                                | 1996-1997 |                      |
| Papua New Guinea | Measles Supplementary Immunization Activity Data as provided by the World Health Organization. [Unpublished].                                                                                                                                                                                   | 1997      |                      |
| Papua New Guinea | World Health Organization (WHO). <i>The Global Elimination of Congenital Syphilis: Rationale and Strategy for Action.</i> Geneva, Switzerland: World Health Organization (WHO), 2007.                                                                                                           | 1997-2003 |                      |
| Papua New Guinea | Joint United Nations Program on HIV/AIDS (UNAIDS), United Nations Children's Fund (UNICEF), World Health Organization (WHO). <i>Papua New Guinea Epidemiological Fact Sheet on HIV/AIDS and STIs 2004.</i>                                                                                      | 1997-1999 |                      |
| Papua New Guinea | Frank D, Duke T. Congenital syphilis at Goroka Base Hospital: incidence, clinical features and risk factors for mortality. <i>P N G Med J.</i> 2000; 43(2-Jan): 121-6.                                                                                                                          | 1998      |                      |

**Web Table 32 - Comprehensive citation list**

| Country          | Citation                                                                                                                                                                                                                         | Year*                      | New for GBD 2013 (*) |
|------------------|----------------------------------------------------------------------------------------------------------------------------------------------------------------------------------------------------------------------------------|----------------------------|----------------------|
| Papua New Guinea | World Health Organization (WHO). Global Prevalence and Incidence of Selected Curable Sexually Transmitted Infections: Overviews and Estimates 2001. Geneva, Switzerland: World Health Organization (WHO), 2001.                  | 1999                       |                      |
| Papua New Guinea | Rezza G, Danaya RT, Wagner TM, Sarmati L, Owen IL, Monini P, Andreoni M, Suligoi B, Ensoli B, Pozio E. Human herpesvirus-8 and other viral infections, Papua New Guinea. Emerg Infect Dis. 2001; 7(5): 893-5.                    | 1999                       |                      |
| Papua New Guinea | Fowkes FJI, Michon P, Pilling L, Ripley RM, Tavul L, Imrie HJ, Woods CM, Mgone CS, Luty AJF, Day KP. Host erythrocyte polymorphisms and exposure to Plasmodium falciparum in Papua New Guinea. Malar J. 2008; 1.                 | 1999-2000                  |                      |
| Papua New Guinea | Department of Peace and Conflict Research, Uppsala University. UCDP Nonstate Conflict Database Version 2.5, 2013. Uppsala, Sweden: Department of Peace and Conflict Research, Uppsala University, 2013.                          | 1999-2012                  | *                    |
| Papua New Guinea | National Statistical Office (Papua New Guinea). Papua New Guinea National Census 2000.                                                                                                                                           | 2000                       |                      |
| Papua New Guinea | World Health Organization (WHO). Retrospective Measles Data on Supplementary Immunization Activities. Geneva, Switzerland: World Health Organization (WHO).                                                                      | 2003-2005, 2009-2010, 2012 |                      |
| Papua New Guinea | National Statistical Office (Papua New Guinea), National Statistics Office (Philippines). Papua New Guinea Demographic and Health Survey 2006-2007.                                                                              | 2006-2007                  |                      |
| Papua New Guinea | United Nations Office on Drugs and Crime (UNODC). United Nations Office on Drugs and Crime Global Study on Homicides 2011. Vienna, Austria: United Nations Office on Drugs and Crime (UNODC), 2011.                              | 2006-2007                  |                      |
| Papua New Guinea | World Health Organization (WHO). Global Status Report on Road Safety 2009. Geneva, Switzerland: World Health Organization (WHO), 2009.                                                                                           | 2007                       |                      |
| Papua New Guinea | Joint United Nations Program on HIV/AIDS (UNAIDS), National AIDS Council (Papua New Guinea). Papua New Guinea UNGASS Country Progress Report 2010. Geneva, Switzerland: Joint United Nations Program on HIV/AIDS (UNAIDS), 2010. | 2009                       |                      |
| Papua New Guinea | National Statistical Office (Papua New Guinea). Papua New Guinea Census 2011.                                                                                                                                                    | 2011                       | *                    |
| Paraguay         | Paraguay Vital Registration Death Data 1950 as it appears in United Nations Statistics Division (UNSD). United Nations Demographic Yearbook. New York City, United States: United Nations Statistics Division (UNSD).            | 1950                       |                      |
| Paraguay         | Paraguay Vital Registration Death Data 1951 as it appears in United Nations Statistics Division (UNSD). United Nations Demographic Yearbook. New York City, United States: United Nations Statistics Division (UNSD).            | 1951                       |                      |
| Paraguay         | Paraguay Vital Registration Death Data 1952 as it appears in United Nations Statistics Division (UNSD). United Nations Demographic Yearbook. New York City, United States: United Nations Statistics Division (UNSD).            | 1952                       |                      |
| Paraguay         | Paraguay Vital Registration Death Data 1953 as it appears in United Nations Statistics Division (UNSD). United Nations Demographic Yearbook. New York City, United States: United Nations Statistics Division (UNSD).            | 1953                       |                      |
| Paraguay         | Peace Research Institute Oslo (PRIO). Battle Deaths Dataset Version 3, 2009. Oslo, Norway: Peace Research Institute Oslo (PRIO), 2009.                                                                                           | 1954                       |                      |
| Paraguay         | Paraguay Vital Registration Death Data 1954 as it appears in United Nations Statistics Division (UNSD). United Nations Demographic Yearbook. New York City, United States: United Nations Statistics Division (UNSD).            | 1954                       |                      |

**Web Table 32 - Comprehensive citation list**

| Country  | Citation                                                                                                                                                                                                              | Year*                                  | New for GBD 2013 (*) |
|----------|-----------------------------------------------------------------------------------------------------------------------------------------------------------------------------------------------------------------------|----------------------------------------|----------------------|
| Paraguay | Paraguay Vital Registration Death Data 1955 as it appears in United Nations Statistics Division (UNSD). United Nations Demographic Yearbook. New York City, United States: United Nations Statistics Division (UNSD). | 1955                                   |                      |
| Paraguay | Paraguay Vital Registration Death Data 1956 as it appears in United Nations Statistics Division (UNSD). United Nations Demographic Yearbook. New York City, United States: United Nations Statistics Division (UNSD). | 1956                                   |                      |
| Paraguay | Paraguay Vital Registration Death Data 1957 as it appears in United Nations Statistics Division (UNSD). United Nations Demographic Yearbook. New York City, United States: United Nations Statistics Division (UNSD). | 1957                                   |                      |
| Paraguay | Paraguay Vital Registration Death Data 1958 as it appears in United Nations Statistics Division (UNSD). United Nations Demographic Yearbook. New York City, United States: United Nations Statistics Division (UNSD). | 1958                                   |                      |
| Paraguay | Paraguay Vital Registration Death Data 1959 as it appears in United Nations Statistics Division (UNSD). United Nations Demographic Yearbook. New York City, United States: United Nations Statistics Division (UNSD). | 1959                                   |                      |
| Paraguay | Paraguay Vital Registration Death Data 1960 as it appears in United Nations Statistics Division (UNSD). United Nations Demographic Yearbook. New York City, United States: United Nations Statistics Division (UNSD). | 1960                                   |                      |
| Paraguay | Paraguay Vital Registration - Deaths 1961 ICD7 as it appears in World Health Organization (WHO). WHO Mortality Database Version February 2014. Geneva, Switzerland: World Health Organization (WHO), 2014.            | 1961                                   |                      |
| Paraguay | Paraguay Vital Registration - Deaths 1962 ICD7 as it appears in World Health Organization (WHO). WHO Mortality Database Version February 2014. Geneva, Switzerland: World Health Organization (WHO), 2014.            | 1962                                   |                      |
| Paraguay | Paraguay Vital Registration - Deaths 1963 ICD7 as it appears in World Health Organization (WHO). WHO Mortality Database Version February 2014. Geneva, Switzerland: World Health Organization (WHO), 2014.            | 1963                                   |                      |
| Paraguay | Paraguay Vital Registration Death Data 1964 as it appears in United Nations Statistics Division (UNSD). United Nations Demographic Yearbook. New York City, United States: United Nations Statistics Division (UNSD). | 1964                                   |                      |
| Paraguay | Paraguay Vital Registration - Deaths 1965 ICD7 as it appears in World Health Organization (WHO). WHO Mortality Database Version February 2014. Geneva, Switzerland: World Health Organization (WHO), 2014.            | 1965                                   |                      |
| Paraguay | Centre for Research on the Epidemiology of Disasters (CRED). EM-DAT: The OFDA/CRED International Disaster Database. Brussels, Belgium: Catholic University of Leuven.                                                 | 1965, 1983, 1997-2002, 2007-2008, 2012 |                      |
| Paraguay | Paraguay Vital Registration - Deaths 1966 ICD7 as it appears in World Health Organization (WHO). WHO Mortality Database Version February 2014. Geneva, Switzerland: World Health Organization (WHO), 2014.            | 1966                                   |                      |
| Paraguay | Paraguay Vital Registration - Deaths 1967 ICD7 as it appears in World Health Organization (WHO). WHO Mortality Database Version February 2014. Geneva, Switzerland: World Health Organization (WHO), 2014.            | 1967                                   |                      |



**Web Table 32 - Comprehensive citation list**

| Country  | Citation                                                                                                                                                                                                              | Year* | New for GBD 2013 (*) |
|----------|-----------------------------------------------------------------------------------------------------------------------------------------------------------------------------------------------------------------------|-------|----------------------|
| Paraguay | Paraguay Vital Registration - Deaths 1968 ICD8 as it appears in World Health Organization (WHO). WHO Mortality Database Version February 2014. Geneva, Switzerland: World Health Organization (WHO), 2014.            | 1968  |                      |
| Paraguay | Paraguay Vital Registration - Deaths 1969 ICD8 as it appears in World Health Organization (WHO). WHO Mortality Database Version February 2014. Geneva, Switzerland: World Health Organization (WHO), 2014.            | 1969  |                      |
| Paraguay | Paraguay Vital Registration - Deaths 1970 ICD8 as it appears in World Health Organization (WHO). WHO Mortality Database Version February 2014. Geneva, Switzerland: World Health Organization (WHO), 2014.            | 1970  |                      |
| Paraguay | Paraguay Vital Registration - Deaths 1971 ICD8 as it appears in World Health Organization (WHO). WHO Mortality Database Version February 2014. Geneva, Switzerland: World Health Organization (WHO), 2014.            | 1971  |                      |
| Paraguay | Paraguay Population and Housing Census 1972 as it appears in United Nations Statistics Division (UNSD). United Nations Demographic Yearbook. New York City, United States: United Nations Statistics Division (UNSD). | 1972  |                      |
| Paraguay | Paraguay Vital Registration - Deaths 1972 ICD8 as it appears in World Health Organization (WHO). WHO Mortality Database Version February 2014. Geneva, Switzerland: World Health Organization (WHO), 2014.            | 1972  |                      |
| Paraguay | Paraguay Vital Registration - Deaths 1973 ICD8 as it appears in World Health Organization (WHO). WHO Mortality Database Version February 2014. Geneva, Switzerland: World Health Organization (WHO), 2014.            | 1973  |                      |
| Paraguay | Paraguay Vital Registration - Deaths 1974 ICD8 as it appears in World Health Organization (WHO). WHO Mortality Database Version February 2014. Geneva, Switzerland: World Health Organization (WHO), 2014.            | 1974  |                      |
| Paraguay | Paraguay Vital Registration - Deaths 1975 ICD8 as it appears in World Health Organization (WHO). WHO Mortality Database Version February 2014. Geneva, Switzerland: World Health Organization (WHO), 2014.            | 1975  |                      |
| Paraguay | Paraguay Vital Registration - Deaths 1976 ICD8 as it appears in World Health Organization (WHO). WHO Mortality Database Version February 2014. Geneva, Switzerland: World Health Organization (WHO), 2014.            | 1976  |                      |
| Paraguay | Department of Statistics, Surveys and Censuses (Paraguay), Latin American and Caribbean Demographic Center (CELADE). Paraguay National Demographic Survey 1977.                                                       | 1977  |                      |
| Paraguay | Paraguay Vital Registration - Deaths 1977 ICD8 as it appears in World Health Organization (WHO). WHO Mortality Database Version February 2014. Geneva, Switzerland: World Health Organization (WHO), 2014.            | 1977  |                      |
| Paraguay | Paraguay Vital Registration - Deaths 1978 ICD8 as it appears in World Health Organization (WHO). WHO Mortality Database Version February 2014. Geneva, Switzerland: World Health Organization (WHO), 2014.            | 1978  |                      |
| Paraguay | Department of Statistics and Censuses (Paraguay), International Statistical Institute. Paraguay World Fertility Survey 1979. Voorburg, Netherlands: International Statistical Institute.                              | 1979  |                      |
| Paraguay | Paraguay Vital Registration - Deaths 1979 ICD9 as it appears in World Health Organization (WHO). WHO Mortality Database Version February 2014. Geneva, Switzerland: World Health Organization (WHO), 2014.            | 1979  |                      |

**Web Table 32 - Comprehensive citation list**

| Country  | Citation                                                                                                                                                                                                                 | Year*     | New for GBD 2013 (*) |
|----------|--------------------------------------------------------------------------------------------------------------------------------------------------------------------------------------------------------------------------|-----------|----------------------|
| Paraguay | Paraguay Vital Registration - Deaths 1980 ICD9 as it appears in World Health Organization (WHO). WHO Mortality Database Version February 2014. Geneva, Switzerland: World Health Organization (WHO), 2014.               | 1980      |                      |
| Paraguay | Institute for Health Metrics and Evaluation (IHME), Joint United Nations Program on HIV/AIDS (UNAIDS). Institute for Health Metrics and Evaluation HIV Mortality Estimates Based on the UNAIDS Spectrum Model Framework. | 1980-2013 | *                    |
| Paraguay | United Nations Children's Fund (UNICEF), World Health Organization (WHO). WHO and UNICEF Reported Disease Incidence Time Series - Pertussis. Geneva, Switzerland: World Health Organization (WHO).                       | 1980-2013 |                      |
| Paraguay | United Nations Children's Fund (UNICEF), World Health Organization (WHO). WHO and UNICEF Reported Disease Incidence Time Series - Measles. Geneva, Switzerland: World Health Organization (WHO).                         | 1980-2013 |                      |
| Paraguay | Paraguay Vital Registration - Deaths 1981 ICD9 as it appears in World Health Organization (WHO). WHO Mortality Database Version February 2014. Geneva, Switzerland: World Health Organization (WHO), 2014.               | 1981      |                      |
| Paraguay | Paraguay Population and Housing Census 1982 as it appears in United Nations Statistics Division (UNSD). United Nations Demographic Yearbook. New York City, United States: United Nations Statistics Division (UNSD).    | 1982      |                      |
| Paraguay | Paraguay Vital Registration - Deaths 1982 ICD9 as it appears in World Health Organization (WHO). WHO Mortality Database Version February 2014. Geneva, Switzerland: World Health Organization (WHO), 2014.               | 1982      |                      |
| Paraguay | Paraguay Vital Registration - Deaths 1983 ICD9 as it appears in World Health Organization (WHO). WHO Mortality Database Version February 2014. Geneva, Switzerland: World Health Organization (WHO), 2014.               | 1983      |                      |
| Paraguay | Paraguay Vital Registration - Deaths 1984 ICD9 as it appears in World Health Organization (WHO). WHO Mortality Database Version February 2014. Geneva, Switzerland: World Health Organization (WHO), 2014.               | 1984      |                      |
| Paraguay | Paraguay Vital Registration - Deaths 1985 ICD9 as it appears in World Health Organization (WHO). WHO Mortality Database Version February 2014. Geneva, Switzerland: World Health Organization (WHO), 2014.               | 1985      |                      |
| Paraguay | Paraguay Vital Registration - Deaths 1986 ICD9 as it appears in World Health Organization (WHO). WHO Mortality Database Version February 2014. Geneva, Switzerland: World Health Organization (WHO), 2014.               | 1986      |                      |
| Paraguay | Paraguay Vital Registration - Deaths 1987 ICD9 as it appears in World Health Organization (WHO). WHO Mortality Database Version February 2014. Geneva, Switzerland: World Health Organization (WHO), 2014.               | 1987      |                      |
| Paraguay | Paraguay Vital Registration - Deaths 1988 ICD9 as it appears in World Health Organization (WHO). WHO Mortality Database Version February 2014. Geneva, Switzerland: World Health Organization (WHO), 2014.               | 1988      |                      |
| Paraguay | Parkin DM, International Agency for Research on Cancer, International Association of Cancer Registries. Cancer Incidence in Five Continents. Vol. I to VIII. Lyon, France, IARC Press, 2005.                             | 1988      |                      |
| Paraguay | Paraguay Vital Registration - Deaths 1989 ICD9 as it appears in World Health Organization (WHO). WHO Mortality Database Version February 2014. Geneva, Switzerland: World Health Organization (WHO), 2014.               | 1989      |                      |



**Web Table 32 - Comprehensive citation list**

| Country  | Citation                                                                                                                                                                                                                                                      | Year*                | New for GBD 2013 (*) |
|----------|---------------------------------------------------------------------------------------------------------------------------------------------------------------------------------------------------------------------------------------------------------------|----------------------|----------------------|
| Paraguay | Paraguay Vital Registration - Deaths 1990 ICD9 as it appears in World Health Organization (WHO). WHO Mortality Database Version February 2014. Geneva, Switzerland: World Health Organization (WHO), 2014.                                                    | 1990                 |                      |
| Paraguay | Paraguayan Center for Population Studies (CEPEP), Macro Systems, Inc.; Institute for Resource Development. Paraguay Demographic and Health Survey 1990. Columbia, United States: Macro Systems, Inc.                                                          | 1990                 |                      |
| Paraguay | Centre for Health Informatics and Multiprofessional Education, University College London. Modell's Haemoglobinopathologist's Almanac. London, United Kingdom: Centre for Health Informatics and Multiprofessional Education, University College London, 2008. | 1990-2003            |                      |
| Paraguay | Paraguay Vital Registration - Deaths 1991 ICD9 as it appears in World Health Organization (WHO). WHO Mortality Database Version February 2014. Geneva, Switzerland: World Health Organization (WHO), 2014.                                                    | 1991                 |                      |
| Paraguay | Department of Statistics, Surveys and Censuses (Paraguay). Paraguay Population and Housing Census 1992.                                                                                                                                                       | 1992                 |                      |
| Paraguay | Paraguay Vital Registration Death Data 1992 as it appears in United Nations Statistics Division (UNSD). United Nations Demographic Yearbook. New York City, United States: United Nations Statistics Division (UNSD).                                         | 1992                 |                      |
| Paraguay | United Nations Office on Drugs and Crime (UNODC). United Nations Surveys on Crime Trends and the Operations of Criminal Justice Systems 1970-2006 as provided by Kavi Bhalla. [Unpublished].                                                                  | 1992-1993            |                      |
| Paraguay | Paraguay Vital Registration - Deaths 1994 ICD9 as it appears in World Health Organization (WHO). WHO Mortality Database Version February 2014. Geneva, Switzerland: World Health Organization (WHO), 2014.                                                    | 1994                 |                      |
| Paraguay | Paraguay Vital Registration - Deaths 1995 ICD9 as it appears in World Health Organization (WHO). WHO Mortality Database Version February 2014. Geneva, Switzerland: World Health Organization (WHO), 2014.                                                    | 1995                 |                      |
| Paraguay | Division of Reproductive Health-Centers for Disease Control and Prevention (CDC). Paraguay Reproductive Health Survey 1995-1996. Asunción, Paraguay, Paraguayan Center for Population Studies (CEPEP).                                                        | 1995-1996            |                      |
| Paraguay | United Nations Office on Drugs and Crime (UNODC). United Nations Office on Drugs and Crime Global Study on Homicides 2011. Vienna, Austria: United Nations Office on Drugs and Crime (UNODC), 2011.                                                           | 1995-2010            |                      |
| Paraguay | Measles Supplementary Immunization Activity Data as provided by the World Health Organization. [Unpublished].                                                                                                                                                 | 1995, 1998           |                      |
| Paraguay | Paraguay Vital Registration - Deaths 1996 ICD10 as it appears in World Health Organization (WHO). WHO Mortality Database Version February 2014. Geneva, Switzerland: World Health Organization (WHO), 2014.                                                   | 1996                 |                      |
| Paraguay | Paraguay Vital Registration - Deaths 1997 ICD10 as it appears in World Health Organization (WHO). WHO Mortality Database Version February 2014. Geneva, Switzerland: World Health Organization (WHO), 2014.                                                   | 1997                 |                      |
| Paraguay | Department of Statistics, Surveys and Censuses (Paraguay). Paraguay Integrated Household Survey 1997-1998. Asunción, Paraguay: Department of Statistics, Surveys and Censuses (Paraguay).                                                                     | 1997-1998            | *                    |
| Paraguay | World Health Organization (WHO). Yellow Fever Reported Cases, WHO Vaccine-Preventable Diseases: Monitoring System. Geneva, Switzerland: World Health Organization (WHO).                                                                                      | 1997-1998, 2000-2009 |                      |
| Paraguay | Division of Reproductive Health-Centers for Disease Control and Prevention (CDC). Paraguay Contraceptive Prevalence Survey 1998. Atlanta, United States: Centers for Disease Control and Prevention (CDC).                                                    | 1998                 |                      |

**Web Table 32 - Comprehensive citation list**

| Country  | Citation                                                                                                                                                                                                                             | Year*            | New for GBD 2013 (*) |
|----------|--------------------------------------------------------------------------------------------------------------------------------------------------------------------------------------------------------------------------------------|------------------|----------------------|
| Paraguay | Paraguay Vital Registration - Deaths 1998 ICD10 as it appears in World Health Organization (WHO). WHO Mortality Database Version February 2014. Geneva, Switzerland: World Health Organization (WHO), 2014.                          | 1998             |                      |
| Paraguay | Paraguay Vital Registration - Deaths 1999 ICD10 as it appears in World Health Organization (WHO). WHO Mortality Database Version February 2014. Geneva, Switzerland: World Health Organization (WHO), 2014.                          | 1999             |                      |
| Paraguay | Santa Cruz F, Cabrera W, Barreto S, Mayor MM, Báez D. Kidney disease in Paraguay. <i>Kidney Int Suppl.</i> 2005; 97: S120-5.                                                                                                         | 1999             |                      |
| Paraguay | Paraguay Vital Registration - Deaths 2000 ICD10 as it appears in World Health Organization (WHO). WHO Mortality Database Version February 2014. Geneva, Switzerland: World Health Organization (WHO), 2014.                          | 2000             |                      |
| Paraguay | Department of Statistics, Surveys and Censuses (Paraguay). Paraguay Integrated Household Survey 2000-2001. Asunción, Paraguay: Department of Statistics, Surveys and Censuses (Paraguay).                                            | 2000-2001        | *                    |
| Paraguay | World Health Organization (WHO). Paraguay WHO Leishmaniasis Country Profile.                                                                                                                                                         | 2000-2010        | *                    |
| Paraguay | Paraguay Vital Registration - Deaths 2001 ICD10 as it appears in World Health Organization (WHO). WHO Mortality Database Version February 2014. Geneva, Switzerland: World Health Organization (WHO), 2014.                          | 2001             |                      |
| Paraguay | Department of Statistics, Surveys and Censuses (Paraguay). Paraguay Population and Housing Census 2002.                                                                                                                              | 2002             |                      |
| Paraguay | Paraguay Vital Registration - Deaths 2002 ICD10 as it appears in World Health Organization (WHO). WHO Mortality Database Version February 2014. Geneva, Switzerland: World Health Organization (WHO), 2014.                          | 2002             |                      |
| Paraguay | World Health Organization (WHO). Paraguay World Health Survey 2002-2003. Geneva, Switzerland: World Health Organization (WHO), 2005.                                                                                                 | 2002-2003        |                      |
| Paraguay | Joint United Nations Program on HIV/AIDS (UNAIDS), Pan American Health Organization (PAHO), United Nations Children's Fund (UNICEF), World Health Organization (WHO). Paraguay Epidemiological Fact Sheet on HIV/AIDS and STIs 2004. | 2002-2004        |                      |
| Paraguay | Paraguay Vital Registration - Deaths 2003 ICD10 as it appears in World Health Organization (WHO). WHO Mortality Database Version February 2014. Geneva, Switzerland: World Health Organization (WHO), 2014.                          | 2003             |                      |
| Paraguay | World Health Organization (WHO). Retrospective Measles Data on Supplementary Immunization Activities. Geneva, Switzerland: World Health Organization (WHO).                                                                          | 2003, 2005, 2009 |                      |
| Paraguay | Division of Reproductive Health-Centers for Disease Control and Prevention (CDC). (2005): Paraguay Reproductive Health Survey 2004. Asunción, Paraguay, Paraguayan Center for Population Studies (CEPEP).                            | 2004             |                      |
| Paraguay | Paraguay Vital Registration - Deaths 2004 ICD10 as it appears in World Health Organization (WHO). WHO Mortality Database Version February 2014. Geneva, Switzerland: World Health Organization (WHO), 2014.                          | 2004             |                      |
| Paraguay | Paraguay Vital Registration - Deaths 2005 ICD10 as it appears in World Health Organization (WHO). WHO Mortality Database Version February 2014. Geneva, Switzerland: World Health Organization (WHO), 2014.                          | 2005             |                      |

**Web Table 32 - Comprehensive citation list**

| Country  | Citation                                                                                                                                                                                                                                                                                                                                                                                                                        | Year*                                                                    | New for GBD 2013 (*) |
|----------|---------------------------------------------------------------------------------------------------------------------------------------------------------------------------------------------------------------------------------------------------------------------------------------------------------------------------------------------------------------------------------------------------------------------------------|--------------------------------------------------------------------------|----------------------|
| Paraguay | Souza JP, Cecatti JG, Faundes A, Morais SS, Villar J, Carroli G, Gulmezoglu M, Wojdyla D, Zavaleta N, Donner A, Velazco A, Bataglia V, Valladares E, Kublickas M, Acosta A. Maternal near miss and maternal death in the World Health Organization's 2005 global survey on maternal and perinatal health. Bull World Health Organ. 2010; 88(2): 113-9.                                                                          | 2005                                                                     |                      |
| Paraguay | Paraguay Vital Registration - Deaths 2006 ICD10 as it appears in World Health Organization (WHO). WHO Mortality Database Version February 2014. Geneva, Switzerland: World Health Organization (WHO), 2014.                                                                                                                                                                                                                     | 2006                                                                     |                      |
| Paraguay | Fassio E, Díaz S, Santa C, Reig ME, Martínez Artola Y, Alves de Mattos A, Míguez C, Galizzi J, Zapata R, Ridruejo E, de Souza FC, Hernández N, Pinchuk L, Multicenter Group for Study of Hepatocarcinoma in Latin America, Asociación Latinoamericana para el Estudio del Hígado (ALEH). Etiology of hepatocellular carcinoma in Latin America: a prospective, multicenter, international study. Ann Hepatol. 2010; 9(1): 63-9. | 2006-2008                                                                | *                    |
| Paraguay | World Health Organization (WHO). Global Status Report on Road Safety 2009. Geneva, Switzerland: World Health Organization (WHO), 2009.                                                                                                                                                                                                                                                                                          | 2007                                                                     |                      |
| Paraguay | Paraguay Vital Registration - Deaths 2007 ICD10 as it appears in World Health Organization (WHO). WHO Mortality Database Version February 2014. Geneva, Switzerland: World Health Organization (WHO), 2014.                                                                                                                                                                                                                     | 2007                                                                     |                      |
| Paraguay | Paraguay Center for Population Studies (CEPEP). Paraguay Reproductive Health Survey 2008. Asunción, Paraguay: Paraguayan Center for Population Studies (CEPEP).                                                                                                                                                                                                                                                                 | 2008                                                                     |                      |
| Paraguay | Paraguay Vital Registration - Deaths 2008 ICD10 as it appears in World Health Organization (WHO). WHO Mortality Database Version February 2014. Geneva, Switzerland: World Health Organization (WHO), 2014.                                                                                                                                                                                                                     | 2008                                                                     |                      |
| Paraguay | World Health Organization (WHO). Yellow fever, Paraguay. Wkly Epidemiol Rec. 2008; 83(12): 105.                                                                                                                                                                                                                                                                                                                                 | 2008                                                                     |                      |
| Paraguay | Paraguay Vital Registration - Deaths 2009 ICD10 as it appears in World Health Organization (WHO). WHO Mortality Database Version February 2014. Geneva, Switzerland: World Health Organization (WHO), 2014.                                                                                                                                                                                                                     | 2009                                                                     |                      |
| Paraguay | Joint United Nations Program on HIV/AIDS (UNAIDS), Ministry of Health (Paraguay). Paraguay National Report on Progress in the Implementation of UNGASS 2010. Geneva, Switzerland: Joint United Nations Program on HIV/AIDS (UNAIDS), 2010.                                                                                                                                                                                      | 2009                                                                     |                      |
| Paraguay | Paraguay Vital Registration - Deaths 2010 ICD10 as it appears in World Health Organization (WHO). WHO Mortality Database Version February 2014. Geneva, Switzerland: World Health Organization (WHO), 2014.                                                                                                                                                                                                                     | 2010                                                                     |                      |
| Peru     | Peru Vital Registration Death Data 1950 as it appears in United Nations Statistics Division (UNSD). United Nations Demographic Yearbook. New York City, United States: United Nations Statistics Division (UNSD).                                                                                                                                                                                                               | 1950                                                                     |                      |
| Peru     | Centre for Research on the Epidemiology of Disasters (CRED). EM-DAT: The OFDA/CRED International Disaster Database. Brussels, Belgium: Catholic University of Leuven.                                                                                                                                                                                                                                                           | 1950, 1953, 1958, 1960, 1962, 1965-1974, 1977-1991, 1993-2005, 2007-2013 |                      |
| Peru     | Peru Vital Registration Death Data 1951 as it appears in United Nations Statistics Division (UNSD). United Nations Demographic Yearbook. New York City, United States: United Nations Statistics Division (UNSD).                                                                                                                                                                                                               | 1951                                                                     |                      |

**Web Table 32 - Comprehensive citation list**

| Country | Citation                                                                                                                                                                                                          | Year*     | New for GBD 2013 (*) |
|---------|-------------------------------------------------------------------------------------------------------------------------------------------------------------------------------------------------------------------|-----------|----------------------|
| Peru    | Peru Vital Registration Death Data 1952 as it appears in United Nations Statistics Division (UNSD). United Nations Demographic Yearbook. New York City, United States: United Nations Statistics Division (UNSD). | 1952      |                      |
| Peru    | Peru Vital Registration Death Data 1953 as it appears in United Nations Statistics Division (UNSD). United Nations Demographic Yearbook. New York City, United States: United Nations Statistics Division (UNSD). | 1953      |                      |
| Peru    | Peru Vital Registration Death Data 1954 as it appears in United Nations Statistics Division (UNSD). United Nations Demographic Yearbook. New York City, United States: United Nations Statistics Division (UNSD). | 1954      |                      |
| Peru    | Peru Vital Registration Death Data 1955 as it appears in United Nations Statistics Division (UNSD). United Nations Demographic Yearbook. New York City, United States: United Nations Statistics Division (UNSD). | 1955      |                      |
| Peru    | Peru Vital Registration Death Data 1956 as it appears in United Nations Statistics Division (UNSD). United Nations Demographic Yearbook. New York City, United States: United Nations Statistics Division (UNSD). | 1956      |                      |
| Peru    | Peru Vital Registration Death Data 1957 as it appears in United Nations Statistics Division (UNSD). United Nations Demographic Yearbook. New York City, United States: United Nations Statistics Division (UNSD). | 1957      |                      |
| Peru    | Peru Vital Registration Death Data 1958 as it appears in United Nations Statistics Division (UNSD). United Nations Demographic Yearbook. New York City, United States: United Nations Statistics Division (UNSD). | 1958      |                      |
| Peru    | Peru Vital Registration Death Data 1959 as it appears in United Nations Statistics Division (UNSD). United Nations Demographic Yearbook. New York City, United States: United Nations Statistics Division (UNSD). | 1959      |                      |
| Peru    | Peru Vital Registration Death Data 1960 as it appears in United Nations Statistics Division (UNSD). United Nations Demographic Yearbook. New York City, United States: United Nations Statistics Division (UNSD). | 1960      |                      |
| Peru    | Peru Vital Registration Death Data 1961 as it appears in United Nations Statistics Division (UNSD). United Nations Demographic Yearbook. New York City, United States: United Nations Statistics Division (UNSD). | 1961      |                      |
| Peru    | Peru Vital Registration Death Data 1962 as it appears in United Nations Statistics Division (UNSD). United Nations Demographic Yearbook. New York City, United States: United Nations Statistics Division (UNSD). | 1962      |                      |
| Peru    | Peru Vital Registration Death Data 1963 as it appears in United Nations Statistics Division (UNSD). United Nations Demographic Yearbook. New York City, United States: United Nations Statistics Division (UNSD). | 1963      |                      |
| Peru    | Peru Vital Registration Death Data 1964 as it appears in United Nations Statistics Division (UNSD). United Nations Demographic Yearbook. New York City, United States: United Nations Statistics Division (UNSD). | 1964      |                      |
| Peru    | Peace Research Institute Oslo (PRIO). Battle Deaths Dataset Version 3, 2009. Oslo, Norway: Peace Research Institute Oslo (PRIO), 2009.                                                                            | 1965-1988 |                      |
| Peru    | Peru Vital Registration - Deaths 1966 ICD7 as it appears in World Health Organization (WHO). WHO Mortality Database Version February 2014. Geneva, Switzerland: World Health Organization (WHO), 2014.            | 1966      |                      |

**Web Table 32 - Comprehensive citation list**

| Country | Citation                                                                                                                                                                                                          | Year*     | New for GBD 2013 (*) |
|---------|-------------------------------------------------------------------------------------------------------------------------------------------------------------------------------------------------------------------|-----------|----------------------|
| Peru    | Peru Vital Registration - Deaths 1967 ICD7 as it appears in World Health Organization (WHO). WHO Mortality Database Version February 2014. Geneva, Switzerland: World Health Organization (WHO), 2014.            | 1967      |                      |
| Peru    | Peru Vital Registration - Deaths 1968 ICD8 as it appears in World Health Organization (WHO). WHO Mortality Database Version February 2014. Geneva, Switzerland: World Health Organization (WHO), 2014.            | 1968      |                      |
| Peru    | Peru Vital Registration - Deaths 1969 ICD8 as it appears in World Health Organization (WHO). WHO Mortality Database Version February 2014. Geneva, Switzerland: World Health Organization (WHO), 2014.            | 1969      |                      |
| Peru    | Peru Vital Registration - Deaths 1970 ICD8 as it appears in World Health Organization (WHO). WHO Mortality Database Version February 2014. Geneva, Switzerland: World Health Organization (WHO), 2014.            | 1970      |                      |
| Peru    | United Nations Office on Drugs and Crime (UNODC). United Nations Surveys on Crime Trends and the Operations of Criminal Justice Systems 1970-2006 as provided by Kavi Bhalla. [Unpublished].                      | 1970-1985 |                      |
| Peru    | Peru Vital Registration - Deaths 1971 ICD8 as it appears in World Health Organization (WHO). WHO Mortality Database Version February 2014. Geneva, Switzerland: World Health Organization (WHO), 2014.            | 1971      |                      |
| Peru    | Peru Population and Housing Census 1972 as it appears in United Nations Statistics Division (UNSD). United Nations Demographic Yearbook. New York City, United States: United Nations Statistics Division (UNSD). | 1972      |                      |
| Peru    | Peru Vital Registration - Deaths 1972 ICD8 as it appears in World Health Organization (WHO). WHO Mortality Database Version February 2014. Geneva, Switzerland: World Health Organization (WHO), 2014.            | 1972      |                      |
| Peru    | Peru Vital Registration - Deaths 1973 ICD8 as it appears in World Health Organization (WHO). WHO Mortality Database Version February 2014. Geneva, Switzerland: World Health Organization (WHO), 2014.            | 1973      |                      |
| Peru    | National Bureau of Statistics and Censuses (Peru). Peru National Demographic Survey 1974-1976.                                                                                                                    | 1974-1976 |                      |
| Peru    | Peru Vital Registration Death Data 1975 as it appears in United Nations Statistics Division (UNSD). United Nations Demographic Yearbook. New York City, United States: United Nations Statistics Division (UNSD). | 1975      |                      |
| Peru    | Peru Vital Registration Death Data 1976 as it appears in United Nations Statistics Division (UNSD). United Nations Demographic Yearbook. New York City, United States: United Nations Statistics Division (UNSD). | 1976      |                      |
| Peru    | Peru Vital Registration - Deaths 1977 ICD8 as it appears in World Health Organization (WHO). WHO Mortality Database Version February 2014. Geneva, Switzerland: World Health Organization (WHO), 2014.            | 1977      |                      |
| Peru    | International Statistical Institute, National Institute of Statistics (Peru). Peru World Fertility Survey 1977-1978. International Statistical Institute.                                                         | 1977-1978 |                      |
| Peru    | Peru Vital Registration - Deaths 1978 ICD8 as it appears in World Health Organization (WHO). WHO Mortality Database Version February 2014. Geneva, Switzerland: World Health Organization (WHO), 2014.            | 1978      |                      |

**Web Table 32 - Comprehensive citation list**

| Country | Citation                                                                                                                                                                                                                 | Year*     | New for GBD 2013 (*) |
|---------|--------------------------------------------------------------------------------------------------------------------------------------------------------------------------------------------------------------------------|-----------|----------------------|
| Peru    | Peru Vital Registration Death Data 1979 as it appears in United Nations Statistics Division (UNSD). United Nations Demographic Yearbook. New York City, United States: United Nations Statistics Division (UNSD).        | 1979      |                      |
| Peru    | Méndez M, Arce M, Kruger H, Sánchez S. [Prevalence of serologic markers of viral hepatitis in various population groups in Peru]. Bol Oficina Sanit Panam. 1989; 106(2): 127-38.                                         | 1979-1984 |                      |
| Peru    | Peru Vital Registration - Deaths 1980 ICD9 as it appears in World Health Organization (WHO). WHO Mortality Database Version February 2014. Geneva, Switzerland: World Health Organization (WHO), 2014.                   | 1980      |                      |
| Peru    | WHO Department of Communicable Disease Surveillance and Response. WHO Report on Global Surveillance of Epidemic-prone Infectious Diseases 2000.                                                                          | 1980-1998 |                      |
| Peru    | Vasconcelos PF da C. Febre amarela. Rev Soc Bras Med Trop. 2003; 36(2): 275-93.                                                                                                                                          | 1980-2001 |                      |
| Peru    | Institute for Health Metrics and Evaluation (IHME), Joint United Nations Program on HIV/AIDS (UNAIDS). Institute for Health Metrics and Evaluation HIV Mortality Estimates Based on the UNAIDS Spectrum Model Framework. | 1980-2013 | *                    |
| Peru    | United Nations Children's Fund (UNICEF), World Health Organization (WHO). WHO and UNICEF Reported Disease Incidence Time Series - Pertussis. Geneva, Switzerland: World Health Organization (WHO).                       | 1980-2013 |                      |
| Peru    | United Nations Children's Fund (UNICEF), World Health Organization (WHO). WHO and UNICEF Reported Disease Incidence Time Series - Measles. Geneva, Switzerland: World Health Organization (WHO).                         | 1980-2013 |                      |
| Peru    | National Institute of Statistics (Peru), Westinghouse Health Systems, Inc. Peru National Survey of Contraceptive Prevalence 1981.                                                                                        | 1981      |                      |
| Peru    | Peru Population and Housing Census 1981 as it appears in United Nations Statistics Division (UNSD). United Nations Demographic Yearbook. New York City, United States: United Nations Statistics Division (UNSD).        | 1981      |                      |
| Peru    | Peru Vital Registration - Deaths 1981 ICD9 as it appears in World Health Organization (WHO). WHO Mortality Database Version February 2014. Geneva, Switzerland: World Health Organization (WHO), 2014.                   | 1981      |                      |
| Peru    | Peru Vital Registration - Deaths 1982 ICD9 as it appears in World Health Organization (WHO). WHO Mortality Database Version February 2014. Geneva, Switzerland: World Health Organization (WHO), 2014.                   | 1982      |                      |
| Peru    | Peru Vital Registration - Deaths 1983 ICD9 as it appears in World Health Organization (WHO). WHO Mortality Database Version February 2014. Geneva, Switzerland: World Health Organization (WHO), 2014.                   | 1983      |                      |
| Peru    | Kilpatrick ME, Escamilla J. Hepatitis A in Peru. The role of children. Am J Epidemiol. 1986; 124(1): 111-3.                                                                                                              | 1983-1984 |                      |
| Peru    | Peru Vital Registration Death Data 1984 as it appears in United Nations Statistics Division (UNSD). United Nations Demographic Yearbook. New York City, United States: United Nations Statistics Division (UNSD).        | 1984      |                      |
| Peru    | Peru Vital Registration Death Data 1985 as it appears in United Nations Statistics Division (UNSD). United Nations Demographic Yearbook. New York City, United States: United Nations Statistics Division (UNSD).        | 1985      |                      |
| Peru    | National Institute of Statistics and Informatics (INEI) (Peru), World Bank. Peru Living Standards Measurement Survey 1985-1986. Washington DC, United States: World Bank.                                                | 1985-1986 |                      |



**Web Table 32 - Comprehensive citation list**

| Country | Citation                                                                                                                                                                                                                                                      | Year*            | New for GBD 2013 (*) |
|---------|---------------------------------------------------------------------------------------------------------------------------------------------------------------------------------------------------------------------------------------------------------------|------------------|----------------------|
| Peru    | Pan American Health Organization (PAHO). Update on yellow fever in the Americas. Epidemiol Bull. 2000; 21(2):13.                                                                                                                                              | 1985, 1998-2000  |                      |
| Peru    | Parkin DM, International Agency for Research on Cancer, International Association of Cancer Registries. Cancer Incidence in Five Continents. Vol. I to VIII. Lyon, France, IARC Press, 2005.                                                                  | 1985, 1989-1990  |                      |
| Peru    | Peru Vital Registration - Deaths 1986 ICD9 as it appears in World Health Organization (WHO). WHO Mortality Database Version February 2014. Geneva, Switzerland: World Health Organization (WHO), 2014.                                                        | 1986             |                      |
| Peru    | National Institute of Statistics (Peru), Westinghouse; Institute for Resource Development. Peru Demographic and Health Survey 1986. Columbia, United States: Westinghouse; Institute for Resource Development.                                                | 1986             |                      |
| Peru    | Peru Vital Registration - Deaths 1987 ICD9 as it appears in World Health Organization (WHO). WHO Mortality Database Version February 2014. Geneva, Switzerland: World Health Organization (WHO), 2014.                                                        | 1987             |                      |
| Peru    | Peru Vital Registration - Deaths 1988 ICD9 as it appears in World Health Organization (WHO). WHO Mortality Database Version February 2014. Geneva, Switzerland: World Health Organization (WHO), 2014.                                                        | 1988             |                      |
| Peru    | Peru Vital Registration - Deaths 1989 ICD9 as it appears in World Health Organization (WHO). WHO Mortality Database Version February 2014. Geneva, Switzerland: World Health Organization (WHO), 2014.                                                        | 1989             |                      |
| Peru    | Department of Peace and Conflict Research, Uppsala University. UCDP Battle-Related Deaths Database Version 5, 2013. Uppsala, Sweden: Department of Peace and Conflict Research, Uppsala University, 2013.                                                     | 1989-2010        | *                    |
| Peru    | Department of Peace and Conflict Research, Uppsala University. UCDP One-Sided Violence Database Version 1.4, 2013. Uppsala, Sweden: Department of Peace and Conflict Research, Uppsala University, 2013.                                                      | 1989-1993        | *                    |
| Peru    | Peru Vital Registration - Deaths 1990 ICD9 as it appears in World Health Organization (WHO). WHO Mortality Database Version February 2014. Geneva, Switzerland: World Health Organization (WHO), 2014.                                                        | 1990             |                      |
| Peru    | Centre for Health Informatics and Multiprofessional Education, University College London. Modell's Haemoglobinopathologist's Almanac. London, United Kingdom: Centre for Health Informatics and Multiprofessional Education, University College London, 2008. | 1990-2003        |                      |
| Peru    | Peru Vital Registration - Deaths 1991 ICD9 as it appears in World Health Organization (WHO). WHO Mortality Database Version February 2014. Geneva, Switzerland: World Health Organization (WHO), 2014.                                                        | 1991             |                      |
| Peru    | Macro International, Inc, National Institute of Statistics (Peru), PRISMA (Peru). Peru Demographic and Health Survey 1991-1992. Calverton, United States: Macro International, Inc.                                                                           | 1991-1992        |                      |
| Peru    | Barham WB, Figueroa R, Phillips IA, Hyams KC. Chronic liver disease in Peru: role of viral hepatitis. J Med Virol. 1994; 42(2): 129-32.                                                                                                                       | 1991-1992        |                      |
| Peru    | Cabezas C, Gotuzzo E, Escamilla J, Phillips I. [Prevalence of serological markers of viral hepatitis A, B and delta in apparently healthy schoolchildren of Huanta, Peru]. Rev Gastroenterol Peru. 1994; 14(2): 123-34.                                       | 1991-1993        |                      |
| Peru    | Peru Vital Registration - Deaths 1992 ICD9 as it appears in World Health Organization (WHO). WHO Mortality Database Version February 2014. Geneva, Switzerland: World Health Organization (WHO), 2014.                                                        | 1992             |                      |
| Peru    | Measles Supplementary Immunization Activity Data as provided by the World Health Organization. [Unpublished].                                                                                                                                                 | 1992, 1995, 1997 |                      |

**Web Table 32 - Comprehensive citation list**

| Country | Citation                                                                                                                                                                                                                                                                         | Year*     | New for GBD 2013 (*) |
|---------|----------------------------------------------------------------------------------------------------------------------------------------------------------------------------------------------------------------------------------------------------------------------------------|-----------|----------------------|
| Peru    | National Institute of Statistics and Informatics (INEI) (Peru), Minnesota Population Center. Peru National Population and Housing Census 1993 from the Integrated Public Use Microdata Series, International. [Machine-readable database]. Minneapolis: University of Minnesota. | 1993      |                      |
| Peru    | Sniadack D, Moscoso B, Aguilar R, Heath J, Bellini W, Chiu MC. Measles epidemiology and outbreak response immunization in a rural community in Peru. Bull World Health Organ. 1999; 77(7).                                                                                       | 1993      |                      |
| Peru    | National Institute of Statistics and Informatics (Peru), World Bank (WB). Peru Living Standards Measurement Survey 1994.                                                                                                                                                         | 1994      | *                    |
| Peru    | Peru Vital Registration - Deaths 1994 ICD9 as it appears in World Health Organization (WHO). WHO Mortality Database Version February 2014. Geneva, Switzerland: World Health Organization (WHO), 2014.                                                                           | 1994      |                      |
| Peru    | Peru Vital Registration - Deaths 1995 ICD9 as it appears in World Health Organization (WHO). WHO Mortality Database Version February 2014. Geneva, Switzerland: World Health Organization (WHO), 2014.                                                                           | 1995      |                      |
| Peru    | Ruiz E, Almonte M M, Pizarro R, Celis J, Montalbelti JA, Urbano R. [Hepatitis B and C virus infection as risk factors for hepatocarcinoma in Peru: case and control study]. Rev Gastroenterol Peru. 1998; 18(3): 199-212.                                                        | 1995-1998 |                      |
| Peru    | Peru Vital Registration - Deaths 1996 ICD9 as it appears in World Health Organization (WHO). WHO Mortality Database Version February 2014. Geneva, Switzerland: World Health Organization (WHO), 2014.                                                                           | 1996      |                      |
| Peru    | Macro International, Inc, National Institute of Statistics (Peru). Peru Demographic and Health Survey 1996. Calverton, United States: Macro International, Inc.                                                                                                                  | 1996      |                      |
| Peru    | Joint United Nations Program on HIV/AIDS (UNAIDS), World Health Organization (WHO). Peru Epidemiological Fact Sheet on HIV/AIDS and STIs 2000.                                                                                                                                   | 1996-1998 |                      |
| Peru    | Peru Vital Registration - Deaths 1997 ICD9 as it appears in World Health Organization (WHO). WHO Mortality Database Version February 2014. Geneva, Switzerland: World Health Organization (WHO), 2014.                                                                           | 1997      |                      |
| Peru    | Peru Vital Registration - Deaths 1998 ICD9 as it appears in World Health Organization (WHO). WHO Mortality Database Version February 2014. Geneva, Switzerland: World Health Organization (WHO), 2014.                                                                           | 1998      |                      |
| Peru    | Peru Vital Registration - Deaths 1999 ICD10 as it appears in World Health Organization (WHO). WHO Mortality Database Version February 2014. Geneva, Switzerland: World Health Organization (WHO), 2014.                                                                          | 1999      |                      |
| Peru    | Vildósola H, Colichón A, Rubio Md M del P, Weil J. [ANTI-HAV IgG PREVALENCE IN A POPULATION BETWEEN 1 AND 39 YEARS OLD IN LIMA,PERU]. Rev Gastroenterol Peru. 2000; 20(2): 141-5.                                                                                                | 1999      |                      |
| Peru    | United Nations Office on Drugs and Crime (UNODC). United Nations Office on Drugs and Crime Global Study on Homicides 2011. Vienna, Austria: United Nations Office on Drugs and Crime (UNODC), 2011.                                                                              | 1999-2009 |                      |
| Peru    | Peru Vital Registration - Deaths 2000 ICD10 as it appears in World Health Organization (WHO). WHO Mortality Database Version February 2014. Geneva, Switzerland: World Health Organization (WHO), 2014.                                                                          | 2000      |                      |
| Peru    | Macro International, Inc, National Institute of Statistics (Peru). Peru Demographic and Health Survey 2000. Calverton, United States: Macro International, Inc.                                                                                                                  | 2000      |                      |



**Web Table 32 - Comprehensive citation list**

| Country | Citation                                                                                                                                                                                                                                                                                                                                                                                  | Year*                       | New for GBD 2013 (*) |
|---------|-------------------------------------------------------------------------------------------------------------------------------------------------------------------------------------------------------------------------------------------------------------------------------------------------------------------------------------------------------------------------------------------|-----------------------------|----------------------|
| Peru    | Curado MP, Edwards B, Shin HR, Storm H, Ferlay J, Heanue M and Boyle P, eds (2007). Cancer Incidence in Five Continents, Vol. IX Periodic Data (electronic version). Lyon, IARC. <a href="http://ci5.iarc.fr">http://ci5.iarc.fr</a>                                                                                                                                                      | 2000                        |                      |
| Peru    | Instituto Nacional de Salud (Peru) Grupo Multifuncional de Neumonias. Vigilancia epidemiologica centinela de Haemophilus influenzae y Streptococcus pneumoniae en menores de 5 años en el Peru. Rev Peru Med Exp Salud Publica. 2003; 20(3): 150-5.                                                                                                                                       | 2000-2001                   |                      |
| Peru    | Peru Vital Registration - Deaths 2001 ICD10 as it appears in World Health Organization (WHO). WHO Mortality Database Version February 2014. Geneva, Switzerland: World Health Organization (WHO), 2014.                                                                                                                                                                                   | 2001                        |                      |
| Peru    | World Health Organization (WHO). Retrospective Measles Data on Supplementary Immunization Activities. Geneva, Switzerland: World Health Organization (WHO).                                                                                                                                                                                                                               | 2001, 2003-2004, 2006, 2011 |                      |
| Peru    | Peru Vital Registration - Deaths 2002 ICD10 as it appears in World Health Organization (WHO). WHO Mortality Database Version February 2014. Geneva, Switzerland: World Health Organization (WHO), 2014.                                                                                                                                                                                   | 2002                        |                      |
| Peru    | World Health Organization (WHO). Yellow Fever Reported Cases, WHO Vaccine-Preventable Diseases: Monitoring System. Geneva, Switzerland: World Health Organization (WHO).                                                                                                                                                                                                                  | 2002, 2004-2005, 2007-2009  |                      |
| Peru    | Peru Vital Registration - Deaths 2003 ICD10 as it appears in World Health Organization (WHO). WHO Mortality Database Version February 2014. Geneva, Switzerland: World Health Organization (WHO), 2014.                                                                                                                                                                                   | 2003                        |                      |
| Peru    | Macro International, Inc, National Institute of Statistics and Informatics (INEI) (Peru). Peru Continuous Demographic and Health Survey. Calverton, United States: Macro International, Inc.                                                                                                                                                                                              | 2003-2012                   |                      |
| Peru    | Prince M, Acosta D, Ferri CP, Guerra M, Huang Y, Llibre Rodriguez JJ, Salas A, Sosa AL, Williams JD, Dewey ME, Acosta I, Jotheeswaran AT, Liu Z. Dementia incidence and mortality in middle-income countries, and associations with indicators of cognitive reserve: a 10/66 Dementia Research Group population-based cohort study. Lancet. 2012; 380(9836): 50-8.                        | 2003-2010                   |                      |
| Peru    | Sousa RM, Ferri CP, Acosta D, Albanese E, Guerra M, Huang Y, Jacob KS, Jotheeswaran AT, Rodriguez JLL, Pichardo GR, Rodriguez MC, Salas A, Sosa AL, Williams J, Zuniga T, Prince M. Contribution of chronic diseases to disability in elderly people in countries with low and middle incomes: a 10/66 Dementia Research Group population-based survey. Lancet. 2009; 374(9704): 1821-30. | 2003-2005                   |                      |
| Peru    | Peru Vital Registration - Deaths 2004 ICD10 as it appears in World Health Organization (WHO). WHO Mortality Database Version February 2014. Geneva, Switzerland: World Health Organization (WHO), 2014.                                                                                                                                                                                   | 2004                        |                      |
| Peru    | Joint United Nations Program on HIV/AIDS (UNAIDS), Pan American Health Organization (PAHO), United Nations Children's Fund (UNICEF), World Health Organization (WHO). Peru Epidemiological Fact Sheet on HIV/AIDS and STIs 2004.                                                                                                                                                          | 2004                        |                      |
| Peru    | Peru Vital Registration - Deaths 2005 ICD10 as it appears in World Health Organization (WHO). WHO Mortality Database Version February 2014. Geneva, Switzerland: World Health Organization (WHO), 2014.                                                                                                                                                                                   | 2005                        |                      |
| Peru    | Souza JP, Cecatti JG, Faundes A, Morais SS, Villar J, Carroli G, Gulmezoglu M, Wojdyla D, Zavaleta N, Donner A, Velazco A, Bataglia V, Valladares E, Kublickas M, Acosta A. Maternal near miss and maternal death in the World Health Organization's 2005 global survey on maternal and perinatal health. Bull World Health Organ. 2010; 88(2): 113-9.                                    | 2005                        |                      |

**Web Table 32 - Comprehensive citation list**

| Country     | Citation                                                                                                                                                                                                                                                                                                                                                                                                                                | Year*                                      | New for GBD 2013 (*) |
|-------------|-----------------------------------------------------------------------------------------------------------------------------------------------------------------------------------------------------------------------------------------------------------------------------------------------------------------------------------------------------------------------------------------------------------------------------------------|--------------------------------------------|----------------------|
| Peru        | Libre Rodriguez JJ, Ferri CP, Acosta D, Guerra M, Huang Y, Jacob KS, Krishnamoorthy ES, Salas A, Sosa AL, Acosta I, Dewey ME, Gaona C, Jotheeswaran AT, Li S, Rodriguez D, Rodriguez G, Kumar PS, Valhuerdi A, Prince M, 10/66 Dementia Research Group. Prevalence of dementia in Latin America, India, and China: a population-based cross-sectional survey. <i>Lancet</i> . 2008; 372(9637): 464-74.                                  | 2005-2006                                  |                      |
| Peru        | Peru Vital Registration - Deaths 2006 ICD10 as it appears in World Health Organization (WHO). WHO Mortality Database Version February 2014. Geneva, Switzerland: World Health Organization (WHO), 2014.                                                                                                                                                                                                                                 | 2006                                       |                      |
| Peru        | World Health Organization (WHO). Yellow fever in Africa and South America, 2006. <i>Wkly Epidemiol Rec</i> . 2008; 83(8): 60-76.                                                                                                                                                                                                                                                                                                        | 2006                                       |                      |
| Peru        | Fassio E, Díaz S, Santa C, Reig ME, Martínez Artola Y, Alves de Mattos A, Míguez C, Galizzi J, Zapata R, Ridruejo E, de Souza FC, Hernández N, Pinchuk L, Multicenter Group for Study of Hepatocarcinoma in Latin America, Asociación Latinoamericana para el Estudio del Hígado (ALEH). Etiology of hepatocellular carcinoma in Latin America: a prospective, multicenter, international study. <i>Ann Hepatol</i> . 2010; 9(1): 63-9. | 2006-2008                                  | *                    |
| Peru        | National Institute of Statistics and Informatics (INEI) (Peru), Minnesota Population Center. Peru National Population and Housing Census 2007 from the Integrated Public Use Microdata Series, International. [Machine-readable database]. Minneapolis: University of Minnesota.                                                                                                                                                        | 2007                                       |                      |
| Peru        | Peru Vital Registration - Deaths 2007 ICD10 as it appears in World Health Organization (WHO). WHO Mortality Database Version February 2014. Geneva, Switzerland: World Health Organization (WHO), 2014.                                                                                                                                                                                                                                 | 2007                                       |                      |
| Peru        | World Health Organization (WHO). Global Status Report on Road Safety 2009. Geneva, Switzerland: World Health Organization (WHO), 2009.                                                                                                                                                                                                                                                                                                  | 2007                                       |                      |
| Peru        | World Health Organization (WHO). Yellow fever in Africa and South America, 2007. <i>Wkly Epidemiol Rec</i> . 2009; 84(13): 97-104.                                                                                                                                                                                                                                                                                                      | 2007                                       |                      |
| Peru        | Joint United Nations Program on HIV/AIDS (UNAIDS), Ministry of Health (Peru). Peru National Report on Progress UNGASS 2010. Geneva, Switzerland: Joint United Nations Program on HIV/AIDS (UNAIDS), 2010.                                                                                                                                                                                                                               | 2007, 2009                                 |                      |
| Peru        | Peru Vital Registration - Deaths 2008 ICD10 as it appears in World Health Organization (WHO). WHO Mortality Database Version February 2014. Geneva, Switzerland: World Health Organization (WHO), 2014.                                                                                                                                                                                                                                 | 2008                                       |                      |
| Peru        | Peru Vital Registration - Deaths 2009 ICD10 as it appears in World Health Organization (WHO). WHO Mortality Database Version February 2014. Geneva, Switzerland: World Health Organization (WHO), 2014.                                                                                                                                                                                                                                 | 2009                                       |                      |
| Peru        | Peru Vital Registration - Deaths 2010 ICD10 as it appears in World Health Organization (WHO). WHO Mortality Database Version February 2014. Geneva, Switzerland: World Health Organization (WHO), 2014.                                                                                                                                                                                                                                 | 2010                                       |                      |
| Philippines | Philippines Vital Registration Death Data 1950 as it appears in United Nations Statistics Division (UNSD). United Nations Demographic Yearbook. New York City, United States: United Nations Statistics Division (UNSD).                                                                                                                                                                                                                | 1950                                       |                      |
| Philippines | Centre for Research on the Epidemiology of Disasters (CRED). EM-DAT: The OFDA/CRED International Disaster Database. Brussels, Belgium: Catholic University of Leuven.                                                                                                                                                                                                                                                                   | 1950-1952, 1954-1957, 1959-1960, 1962-2013 |                      |
| Philippines | Peace Research Institute Oslo (PRIO). Battle Deaths Dataset Version 3, 2009. Oslo, Norway: Peace Research Institute Oslo (PRIO), 2009.                                                                                                                                                                                                                                                                                                  | 1950-1988                                  |                      |
| Philippines | Asian Disaster Reduction Center. Data Book on Asian Natural Disasters 2012. Kobe, Japan: Asian Disaster Reduction Center, 2013.                                                                                                                                                                                                                                                                                                         | 1950-2012                                  | *                    |

**Web Table 32 - Comprehensive citation list**

| Country     | Citation                                                                                                                                                                                                                                                                                                                                                                                                                                                                                                         | Year*     | New for GBD 2013 (*) |
|-------------|------------------------------------------------------------------------------------------------------------------------------------------------------------------------------------------------------------------------------------------------------------------------------------------------------------------------------------------------------------------------------------------------------------------------------------------------------------------------------------------------------------------|-----------|----------------------|
| Philippines | The Daily Tribune. RP's Top 10 Deadliest Natural Disasters [Internet]. The Daily Tribune. 2013 Oct 16; Nation: [1 screen]. Available from: <a href="http://www.tribune.net.ph/nation/rp-s-top-10-deadliest-natural-disasters">http://www.tribune.net.ph/nation/rp-s-top-10-deadliest-natural-disasters</a> .                                                                                                                                                                                                     | 1950-2012 | *                    |
| Philippines | Casares, JB. Lest we forget: Filipinos in the Korean War. Pilipino Express News Magazine [Internet]. 2011 Jan 01: History and Culture; [about 2 screens]. Available from: <a href="http://www.pilipino-express.com/history-a-culture/special-features-history-a-culture/1102-filipinos-in-the-korean-war.htm">http://www.pilipino-express.com/history-a-culture/special-features-history-a-culture/1102-filipinos-in-the-korean-war.htm</a> .                                                                    | 1950-1952 | *                    |
| Philippines | University of Central Arkansas - UCA [Internet]. Conway (AR), United States: University of Central Arkansas; [updated 2014]. Philippines DADM Project Intrastate Dispute Narrative: Moro National Liberation Front 1946-Present. Available from: <a href="http://uca.edu/politicalscience/dadm-project/asiapacific-region/philippinesmoro-national-liberation-front-1968-present/">http://uca.edu/politicalscience/dadm-project/asiapacific-region/philippinesmoro-national-liberation-front-1968-present/</a> . | 1950-2012 | *                    |
| Philippines | Philippines Vital Registration Death Data 1951 as it appears in United Nations Statistics Division (UNSD). United Nations Demographic Yearbook. New York City, United States: United Nations Statistics Division (UNSD).                                                                                                                                                                                                                                                                                         | 1951      |                      |
| Philippines | Philippines Vital Registration Death Data 1952 as it appears in United Nations Statistics Division (UNSD). United Nations Demographic Yearbook. New York City, United States: United Nations Statistics Division (UNSD).                                                                                                                                                                                                                                                                                         | 1952      |                      |
| Philippines | Philippines Vital Registration Death Data 1953 as it appears in United Nations Statistics Division (UNSD). United Nations Demographic Yearbook. New York City, United States: United Nations Statistics Division (UNSD).                                                                                                                                                                                                                                                                                         | 1953      |                      |
| Philippines | Philippines Vital Registration Death Data 1956 as it appears in United Nations Statistics Division (UNSD). United Nations Demographic Yearbook. New York City, United States: United Nations Statistics Division (UNSD).                                                                                                                                                                                                                                                                                         | 1956      |                      |
| Philippines | Philippines Vital Registration Death Data 1957 as it appears in United Nations Statistics Division (UNSD). United Nations Demographic Yearbook. New York City, United States: United Nations Statistics Division (UNSD).                                                                                                                                                                                                                                                                                         | 1957      |                      |
| Philippines | Philippines Vital Registration Death Data 1958 as it appears in United Nations Statistics Division (UNSD). United Nations Demographic Yearbook. New York City, United States: United Nations Statistics Division (UNSD).                                                                                                                                                                                                                                                                                         | 1958      |                      |
| Philippines | Bureau of Census and Statistics (Philippines). Philippines Statistical Survey of Private Households 1958.                                                                                                                                                                                                                                                                                                                                                                                                        | 1958      |                      |
| Philippines | Philippines Vital Registration Death Data 1959 as it appears in United Nations Statistics Division (UNSD). United Nations Demographic Yearbook. New York City, United States: United Nations Statistics Division (UNSD).                                                                                                                                                                                                                                                                                         | 1959      |                      |
| Philippines | Philippines Vital Registration Death Data 1960 as it appears in United Nations Statistics Division (UNSD). United Nations Demographic Yearbook. New York City, United States: United Nations Statistics Division (UNSD).                                                                                                                                                                                                                                                                                         | 1960      |                      |
| Philippines | Philippines Vital Registration Death Data 1961 as it appears in United Nations Statistics Division (UNSD). United Nations Demographic Yearbook. New York City, United States: United Nations Statistics Division (UNSD).                                                                                                                                                                                                                                                                                         | 1961      |                      |
| Philippines | Philippines Vital Registration Death Data 1962 as it appears in United Nations Statistics Division (UNSD). United Nations Demographic Yearbook. New York City, United States: United Nations Statistics Division (UNSD).                                                                                                                                                                                                                                                                                         | 1962      |                      |

**Web Table 32 - Comprehensive citation list**

| Country     | Citation                                                                                                                                                                                                                                                                         | Year*     | New for GBD 2013 (*) |
|-------------|----------------------------------------------------------------------------------------------------------------------------------------------------------------------------------------------------------------------------------------------------------------------------------|-----------|----------------------|
| Philippines | Motulsky AG, Stransky E, Fraser GR. Glucose-6-phosphate dehydrogenase (G6PD) deficiency, thalassaemia, and abnormal haemoglobins in the Philippines. J Med Genet. 1964; 1(2): 102-6.                                                                                             | 1962-1964 |                      |
| Philippines | Philippines Vital Registration - Deaths 1963 ICD7 as it appears in World Health Organization (WHO). WHO Mortality Database Version February 2014. Geneva, Switzerland: World Health Organization (WHO), 2014.                                                                    | 1963      |                      |
| Philippines | Philippines Vital Registration - Deaths 1964 ICD7 as it appears in World Health Organization (WHO). WHO Mortality Database Version February 2014. Geneva, Switzerland: World Health Organization (WHO), 2014.                                                                    | 1964      |                      |
| Philippines | Larsen R, Collins JL. Allied Participation in Vietnam [Internet]. Washington, D.C., United States: U.S. Department of the Army; 1975. 175 p. Available from: <a href="http://www.history.army.mil/books/Vietnam/allied/">http://www.history.army.mil/books/Vietnam/allied/</a> . | 1964-1970 | *                    |
| Philippines | Philippines Vital Registration - Deaths 1965 ICD7 as it appears in World Health Organization (WHO). WHO Mortality Database Version February 2014. Geneva, Switzerland: World Health Organization (WHO), 2014.                                                                    | 1965      |                      |
| Philippines | Philippines Vital Registration - Deaths 1966 ICD7 as it appears in World Health Organization (WHO). WHO Mortality Database Version February 2014. Geneva, Switzerland: World Health Organization (WHO), 2014.                                                                    | 1966      |                      |
| Philippines | Philippines Vital Registration - Deaths 1967 ICD7 as it appears in World Health Organization (WHO). WHO Mortality Database Version February 2014. Geneva, Switzerland: World Health Organization (WHO), 2014.                                                                    | 1967      |                      |
| Philippines | Philippines Vital Registration - Deaths 1968 ICD7 as it appears in World Health Organization (WHO). WHO Mortality Database Version February 2014. Geneva, Switzerland: World Health Organization (WHO), 2014.                                                                    | 1968      |                      |
| Philippines | Philippines Vital Registration - Deaths 1969 ICD7 as it appears in World Health Organization (WHO). WHO Mortality Database Version February 2014. Geneva, Switzerland: World Health Organization (WHO), 2014.                                                                    | 1969      |                      |
| Philippines | Philippines Population and Housing Census 1970 as it appears in United Nations Statistics Division (UNSD). United Nations Demographic Yearbook. New York City, United States: United Nations Statistics Division (UNSD).                                                         | 1970      |                      |
| Philippines | Philippines Vital Registration - Deaths 1970 ICD7 as it appears in World Health Organization (WHO). WHO Mortality Database Version February 2014. Geneva, Switzerland: World Health Organization (WHO), 2014.                                                                    | 1970      |                      |
| Philippines | Philippines Vital Registration - Deaths 1971 ICD7 as it appears in World Health Organization (WHO). WHO Mortality Database Version February 2014. Geneva, Switzerland: World Health Organization (WHO), 2014.                                                                    | 1971      |                      |
| Philippines | Philippines Vital Registration - Deaths 1972 ICD7 as it appears in World Health Organization (WHO). WHO Mortality Database Version February 2014. Geneva, Switzerland: World Health Organization (WHO), 2014.                                                                    | 1972      |                      |
| Philippines | United Nations Office on Drugs and Crime (UNODC). United Nations Surveys on Crime Trends and the Operations of Criminal Justice Systems 1970-2006 as provided by Kavi Bhalla. [Unpublished].                                                                                     | 1972-1979 |                      |
| Philippines | Philippines Vital Registration - Deaths 1973 ICD8 as it appears in World Health Organization (WHO). WHO Mortality Database Version February 2014. Geneva, Switzerland: World Health Organization (WHO), 2014.                                                                    | 1973      |                      |

**Web Table 32 - Comprehensive citation list**

| Country     | Citation                                                                                                                                                                                                                 | Year*            | New for GBD 2013 (*) |
|-------------|--------------------------------------------------------------------------------------------------------------------------------------------------------------------------------------------------------------------------|------------------|----------------------|
| Philippines | Philippines Vital Registration - Deaths 1974 ICD8 as it appears in World Health Organization (WHO). WHO Mortality Database Version February 2014. Geneva, Switzerland: World Health Organization (WHO), 2014.            | 1974             |                      |
| Philippines | Philippines Vital Registration - Deaths 1975 ICD8 as it appears in World Health Organization (WHO). WHO Mortality Database Version February 2014. Geneva, Switzerland: World Health Organization (WHO), 2014.            | 1975             |                      |
| Philippines | Philippines Vital Registration - Deaths 1976 ICD8 as it appears in World Health Organization (WHO). WHO Mortality Database Version February 2014. Geneva, Switzerland: World Health Organization (WHO), 2014.            | 1976             |                      |
| Philippines | Philippines Vital Registration - Deaths 1977 ICD8 as it appears in World Health Organization (WHO). WHO Mortality Database Version February 2014. Geneva, Switzerland: World Health Organization (WHO), 2014.            | 1977             |                      |
| Philippines | National Statistics Office (Philippines), International Statistical Institute. Philippines World Fertility Survey 1978. Voorburg, Netherlands: International Statistical Institute.                                      | 1978             |                      |
| Philippines | Philippines Vital Registration - Deaths 1978 ICD8 as it appears in World Health Organization (WHO). WHO Mortality Database Version February 2014. Geneva, Switzerland: World Health Organization (WHO), 2014.            | 1978             |                      |
| Philippines | Philippines Vital Registration Death Data 1979 as it appears in United Nations Statistics Division (UNSD). United Nations Demographic Yearbook. New York City, United States: United Nations Statistics Division (UNSD). | 1979             |                      |
| Philippines | Department of Health (Philippines). Philippines Health Statistics 1979. Manila, Philippines: Department of Health (Philippines).                                                                                         | 1979             |                      |
| Philippines | Department of Health (Philippines). Philippines Vital Statistics - Deaths 1979-2000.                                                                                                                                     | 1979-2000        |                      |
| Philippines | Lingao AL, Domingo EO, West S, Reyes CM, Gasmen S, Viterbo G, Tiu E, Lansang MA. Seroprevalence of hepatitis B virus in the Philippines. Am J Epidemiol. 1986; 123(3): 473-80.                                           | 1979-1982        |                      |
| Philippines | Philippines Population and Housing Census 1980 as it appears in United Nations Statistics Division (UNSD). United Nations Demographic Yearbook. New York City, United States: United Nations Statistics Division (UNSD). | 1980             |                      |
| Philippines | Philippines Vital Registration Death Data 1980 as it appears in United Nations Statistics Division (UNSD). United Nations Demographic Yearbook. New York City, United States: United Nations Statistics Division (UNSD). | 1980             |                      |
| Philippines | Department of Health (Philippines). Philippines Health Statistics 1980. Manila, Philippines: Department of Health (Philippines).                                                                                         | 1980             |                      |
| Philippines | Institute for Health Metrics and Evaluation (IHME), Joint United Nations Program on HIV/AIDS (UNAIDS). Institute for Health Metrics and Evaluation HIV Mortality Estimates Based on the UNAIDS Spectrum Model Framework. | 1980-2013        | *                    |
| Philippines | Parkin DM, International Agency for Research on Cancer, International Association of Cancer Registries. Cancer Incidence in Five Continents. Vol. I to VIII. Lyon, France, IARC Press, 2005.                             | 1980, 1985, 1995 |                      |
| Philippines | Philippines Vital Registration - Deaths 1981 ICD8 as it appears in World Health Organization (WHO). WHO Mortality Database Version February 2014. Geneva, Switzerland: World Health Organization (WHO), 2014.            | 1981             |                      |
| Philippines | Department of Health (Philippines). Philippines Health Statistics 1981. Manila, Philippines: Department of Health (Philippines).                                                                                         | 1981             |                      |

**Web Table 32 - Comprehensive citation list**

| Country     | Citation                                                                                                                                                                                                                                                                                              | Year*     | New for GBD 2013 (*) |
|-------------|-------------------------------------------------------------------------------------------------------------------------------------------------------------------------------------------------------------------------------------------------------------------------------------------------------|-----------|----------------------|
| Philippines | Philippines Vital Registration Death Data 1982 as it appears in United Nations Statistics Division (UNSD). United Nations Demographic Yearbook. New York City, United States: United Nations Statistics Division (UNSD).                                                                              | 1982      |                      |
| Philippines | Department of Health (Philippines). Philippines Health Statistics 1982. Manila, Philippines: Department of Health (Philippines).                                                                                                                                                                      | 1982      |                      |
| Philippines | Philippines Vital Registration Death Data 1983 as it appears in United Nations Statistics Division (UNSD). United Nations Demographic Yearbook. New York City, United States: United Nations Statistics Division (UNSD).                                                                              | 1983      |                      |
| Philippines | Department of Health (Philippines). Philippines Health Statistics 1983. Manila, Philippines: Department of Health (Philippines).                                                                                                                                                                      | 1983      |                      |
| Philippines | Ferlay J, Parkin DM, Curado MP, Bray F, Edwards B, Shin HR and Forman D. Cancer Incidence in Five Continents, Volumes I to IX: IARC CancerBase No. 9 [Internet]. Lyon, France: International Agency for Research on Cancer; 2010. Available from: <a href="http://ci5.iarc.fr">http://ci5.iarc.fr</a> | 1983-2002 |                      |
| Philippines | Almoiradie-Javonillo I, Javonillo T. Profile of a measles epidemic in a remote Philippine barrio. J Philipp Med Assoc. 1984; 60(3): 103-8.                                                                                                                                                            | 1983-1984 |                      |
| Philippines | Philippines Vital Registration Death Data 1984 as it appears in United Nations Statistics Division (UNSD). United Nations Demographic Yearbook. New York City, United States: United Nations Statistics Division (UNSD).                                                                              | 1984      |                      |
| Philippines | Department of Health (Philippines). Philippines Health Statistics 1984. Manila, Philippines: Department of Health (Philippines).                                                                                                                                                                      | 1984      |                      |
| Philippines | Philippines Vital Registration Death Data 1985 as it appears in United Nations Statistics Division (UNSD). United Nations Demographic Yearbook. New York City, United States: United Nations Statistics Division (UNSD).                                                                              | 1985      |                      |
| Philippines | Lim DJ, Lingao A, Macasaet A, Morimoto M, Mochizuki H. Sero-epidemiological study on hepatitis A and B virus infection among dentists in the Philippines. Int Dent J. 1986; 36(4): 215-8.                                                                                                             | 1985      |                      |
| Philippines | Department of Health (Philippines). Philippines Health Statistics 1985. Manila, Philippines: Department of Health (Philippines).                                                                                                                                                                      | 1985      |                      |
| Philippines | Philippines Vital Registration Death Data 1986 as it appears in United Nations Statistics Division (UNSD). United Nations Demographic Yearbook. New York City, United States: United Nations Statistics Division (UNSD).                                                                              | 1986      |                      |
| Philippines | Department of Health (Philippines). Philippines Health Statistics 1986. Manila, Philippines: Department of Health (Philippines).                                                                                                                                                                      | 1986      |                      |
| Philippines | Philippines Vital Registration Death Data 1987 as it appears in United Nations Statistics Division (UNSD). United Nations Demographic Yearbook. New York City, United States: United Nations Statistics Division (UNSD).                                                                              | 1987      |                      |
| Philippines | Department of Health (Philippines). Philippines Health Statistics 1987. Manila, Philippines: Department of Health (Philippines).                                                                                                                                                                      | 1987      |                      |
| Philippines | Philippines Vital Registration Death Data 1988 as it appears in United Nations Statistics Division (UNSD). United Nations Demographic Yearbook. New York City, United States: United Nations Statistics Division (UNSD).                                                                              | 1988      |                      |
| Philippines | Department of Health (Philippines). Philippines Health Statistics 1988. Manila, Philippines: Department of Health (Philippines).                                                                                                                                                                      | 1988      |                      |
| Philippines | Yoon PW, Black RE, Moulton LH, Becker S. Effect of not breastfeeding on the risk of diarrheal and respiratory mortality in children under 2 years of age in Metro Cebu, The Philippines. Am J Epidemiol. 1996; 143(11): 1142-8.                                                                       | 1989      |                      |



**Web Table 32 - Comprehensive citation list**

| Country     | Citation                                                                                                                                                                                                                                                                                                        | Year*     | New for GBD 2013 (*) |
|-------------|-----------------------------------------------------------------------------------------------------------------------------------------------------------------------------------------------------------------------------------------------------------------------------------------------------------------|-----------|----------------------|
| Philippines | Philippines Vital Registration Death Data 1989 as it appears in United Nations Statistics Division (UNSD). United Nations Demographic Yearbook. New York City, United States: United Nations Statistics Division (UNSD).                                                                                        | 1989      |                      |
| Philippines | Department of Health (Philippines). Philippines Health Statistics 1989. Manila, Philippines: Department of Health (Philippines).                                                                                                                                                                                | 1989      |                      |
| Philippines | Department of Peace and Conflict Research, Uppsala University. UCDP Battle-Related Deaths Database Version 5, 2013. Uppsala, Sweden: Department of Peace and Conflict Research, Uppsala University, 2013.                                                                                                       | 1989-2012 | *                    |
| Philippines | National Statistics Office (Philippines), Minnesota Population Center. Philippines Population and Housing Census 1990 from the Integrated Public Use Microdata Series, International. [Machine-readable database]. Minneapolis: University of Minnesota.                                                        | 1990      |                      |
| Philippines | Philippines Vital Registration Death Data 1990 as it appears in United Nations Statistics Division (UNSD). United Nations Demographic Yearbook. New York City, United States: United Nations Statistics Division (UNSD).                                                                                        | 1990      |                      |
| Philippines | Arguillas MO, Domingo EO, Tsuda F, Mayumi M, Suzuki H. Seroepidemiology of hepatitis C virus infection in the Philippines: a preliminary study and comparison with hepatitis B virus infection among blood donors, medical personnel, and patient groups in Davao, Philippines. Gastroenterol Jpn. 1991; 170-5. | 1990      |                      |
| Philippines | Department of Health (Philippines). Philippines Health Statistics 1990. Manila, Philippines: Department of Health (Philippines).                                                                                                                                                                                | 1990      |                      |
| Philippines | Weatherall D. Sickle Cell and Thalassemias Prevalence Data, Personal Correspondence with David Weatherall. [Unpublished].                                                                                                                                                                                       | 1990-2009 |                      |
| Philippines | Centre for Health Informatics and Multiprofessional Education, University College London. Modell's Haemoglobinopathologist's Almanac. London, United Kingdom: Centre for Health Informatics and Multiprofessional Education, University College London, 2008.                                                   | 1990-2003 |                      |
| Philippines | Philippines Vital Registration Death Data 1991 as it appears in United Nations Statistics Division (UNSD). United Nations Demographic Yearbook. New York City, United States: United Nations Statistics Division (UNSD).                                                                                        | 1991      |                      |
| Philippines | Department of Health (Philippines). Philippines Health Statistics 1991. Manila, Philippines: Department of Health (Philippines).                                                                                                                                                                                | 1991      |                      |
| Philippines | Philippines Vital Registration - Deaths 1992 ICD9 as it appears in World Health Organization (WHO). WHO Mortality Database Version February 2014. Geneva, Switzerland: World Health Organization (WHO), 2014.                                                                                                   | 1992      |                      |
| Philippines | Philippines Vital Registration - Deaths 1993 ICD9 as it appears in World Health Organization (WHO). WHO Mortality Database Version February 2014. Geneva, Switzerland: World Health Organization (WHO), 2014.                                                                                                   | 1993      |                      |
| Philippines | Macro International, Inc, National Statistics Office (Philippines). Philippines Demographic and Health Survey 1993. Calverton, United States: Macro International, Inc.                                                                                                                                         | 1993      |                      |
| Philippines | National Epidemiology Center, Department of Health (Philippines). Philippines Field Health Service Information System Annual Report 1993. Manila, Philippines: National Epidemiology Center, Department of Health (Philippines).                                                                                | 1993      |                      |
| Philippines | Department of Peace and Conflict Research, Uppsala University. UCDP Nonstate Conflict Database Version 2.5, 2013. Uppsala, Sweden: Department of Peace and Conflict Research, Uppsala University, 2013.                                                                                                         | 1993-2011 | *                    |
| Philippines | Philippines Vital Registration - Deaths 1994 ICD9 as it appears in World Health Organization (WHO). WHO Mortality Database Version February 2014. Geneva, Switzerland: World Health Organization (WHO), 2014.                                                                                                   | 1994      |                      |

**Web Table 32 - Comprehensive citation list**

| Country     | Citation                                                                                                                                                                                                                                               | Year*     | New for GBD 2013 (*) |
|-------------|--------------------------------------------------------------------------------------------------------------------------------------------------------------------------------------------------------------------------------------------------------|-----------|----------------------|
| Philippines | National Epidemiology Center, Department of Health (Philippines). Philippines Field Health Service Information System Annual Report 1994. Manila, Philippines: National Epidemiology Center, Department of Health (Philippines).                       | 1994      |                      |
| Philippines | Stewart MK, Festin M. Validation study of women's reporting and recall of major obstetric complications treated at the Philippine General Hospital. Int J Gynaecol Obstet. 1995; 48(Suppl 1): S53-S66.                                                 | 1994      |                      |
| Philippines | Richards AL, Perrault JG, Caringal LT, Manaloto CR, Sie A, Graham R, Ramos RM, Leonardo JB, Hyams KC. A non-invasive assessment of hepatitis B virus carrier status using saliva samples. Southeast Asian J Trop Med Public Health. 1996; 27(1): 80-4. | 1994      |                      |
| Philippines | Philippines Vital Registration - Deaths 1995 ICD9 as it appears in World Health Organization (WHO). WHO Mortality Database Version February 2014. Geneva, Switzerland: World Health Organization (WHO), 2014.                                          | 1995      |                      |
| Philippines | Department of Peace and Conflict Research, Uppsala University. UCDP One-Sided Violence Database Version 1.4, 2013. Uppsala, Sweden: Department of Peace and Conflict Research, Uppsala University, 2013.                                               | 1995-2009 | *                    |
| Philippines | Philippines Vital Registration - Deaths 1996 ICD9 as it appears in World Health Organization (WHO). WHO Mortality Database Version February 2014. Geneva, Switzerland: World Health Organization (WHO), 2014.                                          | 1996      |                      |
| Philippines | National Epidemiology Center, Department of Health (Philippines). Philippines Field Health Service Information System Annual Report 1996. Manila, Philippines: National Epidemiology Center, Department of Health (Philippines).                       | 1996      |                      |
| Philippines | Philippines Vital Registration - Deaths 1997 ICD9 as it appears in World Health Organization (WHO). WHO Mortality Database Version February 2014. Geneva, Switzerland: World Health Organization (WHO), 2014.                                          | 1997      |                      |
| Philippines | National Epidemiology Center, Department of Health (Philippines). Philippines Field Health Service Information System Annual Report 1997. Manila, Philippines: National Epidemiology Center, Department of Health (Philippines).                       | 1997      |                      |
| Philippines | Kardorff R, Olveda RM, Acosta LP, Duebbelde UJ, Aligui GD, Alcorn NJ, Doehring E. Hepatosplenic morbidity in schistosomiasis japonica: evaluation with Doppler sonography. Am J Trop Med Hyg. 1999; 60(6): 954-9.                                      | 1997      |                      |
| Philippines | Subida RD, Zhang ZW, Agetano MC, Nakatsuka H, Watanabe T, Shimbo S, Higashikawa K, Ikeda M. Hepatitis B and C virus infection prevalence among women in Manila, the Philippines. Southeast Asian J Trop Med Public Health. 1997; 28(4): 683-8.         | 1997      |                      |
| Philippines | Philippines Vital Registration - Deaths 1998 ICD9 as it appears in World Health Organization (WHO). WHO Mortality Database Version February 2014. Geneva, Switzerland: World Health Organization (WHO), 2014.                                          | 1998      |                      |
| Philippines | Department of Health (Philippines), Macro International, Inc, National Statistics Office (Philippines). Philippines Demographic and Health Survey 1998. Calverton, United States: Macro International, Inc.                                            | 1998      |                      |
| Philippines | National Epidemiology Center, Department of Health (Philippines). Philippines Field Health Service Information System Annual Report 1998. Manila, Philippines: National Epidemiology Center, Department of Health (Philippines).                       | 1998      |                      |
| Philippines | Measles Supplementary Immunization Activity Data as provided by the World Health Organization. [Unpublished].                                                                                                                                          | 1998      |                      |



**Web Table 32 - Comprehensive citation list**

| Country     | Citation                                                                                                                                                                                                                                                                      | Year*                       | New for GBD 2013 (*) |
|-------------|-------------------------------------------------------------------------------------------------------------------------------------------------------------------------------------------------------------------------------------------------------------------------------|-----------------------------|----------------------|
| Philippines | Philippines Vital Registration - Deaths 1999 ICD10 as it appears in World Health Organization (WHO). WHO Mortality Database Version February 2014. Geneva, Switzerland: World Health Organization (WHO), 2014.                                                                | 1999                        |                      |
| Philippines | Department of Health (Philippines). Philippines Health Statistics 1999. Manila, Philippines: Department of Health (Philippines).                                                                                                                                              | 1999                        |                      |
| Philippines | World Health Organization (WHO). Yellow Fever Reported Cases, WHO Vaccine-Preventable Diseases: Monitoring System. Geneva, Switzerland: World Health Organization (WHO).                                                                                                      | 1999, 2005, 2008-2009       |                      |
| Philippines | Philippines Vital Registration - Deaths 2000 ICD10 as it appears in World Health Organization (WHO). WHO Mortality Database Version February 2014. Geneva, Switzerland: World Health Organization (WHO), 2014.                                                                | 2000                        |                      |
| Philippines | National Epidemiology Center, Department of Health (Philippines). Philippines Field Health Service Information System Annual Report 2000. Manila, Philippines: National Epidemiology Center, Department of Health (Philippines).                                              | 2000                        |                      |
| Philippines | Department of Health (Philippines). Philippines Health Statistics 2000. Manila, Philippines: Department of Health (Philippines).                                                                                                                                              | 2000                        |                      |
| Philippines | Philippines Vital Registration - Deaths 2001 ICD10 as it appears in World Health Organization (WHO). WHO Mortality Database Version February 2014. Geneva, Switzerland: World Health Organization (WHO), 2014.                                                                | 2001                        |                      |
| Philippines | National Epidemiology Center, Department of Health (Philippines). Philippines Field Health Service Information System Annual Report 2001. Manila, Philippines: National Epidemiology Center, Department of Health (Philippines).                                              | 2001                        |                      |
| Philippines | Padilla CD. Newborn screening in the Philippines. Southeast Asian J Trop Med Public Health. 2003; 87-8.                                                                                                                                                                       | 2001                        |                      |
| Philippines | Department of Health (Philippines). Philippines Health Statistics 2001. Manila, Philippines: Department of Health (Philippines).                                                                                                                                              | 2001                        |                      |
| Philippines | Philippines Vital Registration - Deaths 2002 ICD10 as it appears in World Health Organization (WHO). WHO Mortality Database Version February 2014. Geneva, Switzerland: World Health Organization (WHO), 2014.                                                                | 2002                        |                      |
| Philippines | National Epidemiology Center, Department of Health (Philippines). Philippines Field Health Service Information System Annual Report 2002. Manila, Philippines: National Epidemiology Center, Department of Health (Philippines).                                              | 2002                        |                      |
| Philippines | Agdamag DM, Kageyama S, Alesna ET, Solante RM, Leaño PS, Heredia AML, Abellanos-Tac-An IP, Vibal ET, Jereza LD, Ichimura H. Rapid spread of hepatitis C virus among injecting-drug users in the Philippines: Implications for HIV epidemics. J Med Virol. 2005; 77(2): 221-6. | 2002                        |                      |
| Philippines | Department of Health (Philippines). Philippines Health Statistics 2002. Manila, Philippines: Department of Health (Philippines).                                                                                                                                              | 2002                        |                      |
| Philippines | Yanase Y, Ohida T, Kaneita Y, Agdamag DMD, Leaño PSA, Gill CJ. The prevalence of HIV, HBV and HCV among Filipino blood donors and overseas work visa applicants. Bull World Health Organ. 2007; 85(2): 131-7.                                                                 | 2002-2004                   |                      |
| Philippines | World Health Organization (WHO). Retrospective Measles Data on Supplementary Immunization Activities. Geneva, Switzerland: World Health Organization (WHO).                                                                                                                   | 2002, 2004, 2007, 2009-2011 |                      |
| Philippines | Philippines Vital Registration - Deaths 2003 ICD10 as it appears in World Health Organization (WHO). WHO Mortality Database Version February 2014. Geneva, Switzerland: World Health Organization (WHO), 2014.                                                                | 2003                        |                      |

**Web Table 32 - Comprehensive citation list**

| Country     | Citation                                                                                                                                                                                                                                                                                                                                                                                               | Year*     | New for GBD 2013 (*) |
|-------------|--------------------------------------------------------------------------------------------------------------------------------------------------------------------------------------------------------------------------------------------------------------------------------------------------------------------------------------------------------------------------------------------------------|-----------|----------------------|
| Philippines | Macro International, Inc, National Statistics Office (Philippines). Philippines Demographic and Health Survey 2003. Calverton, United States: Macro International, Inc.                                                                                                                                                                                                                                | 2003      |                      |
| Philippines | World Health Organization (WHO). Philippines World Health Survey 2003. Geneva, Switzerland: World Health Organization (WHO), 2005.                                                                                                                                                                                                                                                                     | 2003      |                      |
| Philippines | Department of Health (Philippines), National Statistical Coordination Board (Philippines). Philippines Health Statistics 2003. Philippines: National Statistical Coordination Board (Philippines).                                                                                                                                                                                                     | 2003      |                      |
| Philippines | National Epidemiology Center, Department of Health (Philippines). Philippines Field Health Service Information System Annual Report 2003. Manila, Philippines: National Epidemiology Center, Department of Health (Philippines).                                                                                                                                                                       | 2003      |                      |
| Philippines | Department of Health (Philippines). Philippines Health Statistics 2004. Manila, Philippines: Department of Health (Philippines).                                                                                                                                                                                                                                                                       | 2004      |                      |
| Philippines | World Health Organization (WHO). Philippines Floods Situation Report December 2004. Geneva, Switzerland: World Health Organization (WHO), 2004.                                                                                                                                                                                                                                                        | 2004      | *                    |
| Philippines | WHO   World Health Organization [Internet]. Geneva: Switzerland: World Health Organization; [updated 2014]. Philippines Natural Disaster Situation Reports; [updated 2014 Mar 5]; [about 3 screens]. Available: <a href="http://www.who.int/hac/crises/phl/sitreps/en/">http://www.who.int/hac/crises/phl/sitreps/en/</a> .                                                                            | 2004      | *                    |
| Philippines | Philippines Vital Registration Death Data 2004 as it appears in United Nations Statistics Division (UNSD). United Nations Demographic Yearbook. New York City, United States: United Nations Statistics Division (UNSD).                                                                                                                                                                               | 2004      |                      |
| Philippines | Deutsche Welle. Philippines: A Country Prone to Natural Disasters [Internet]. Deutsche Welle. 2013 Nov 1; World: [about 6 screens]. Available from: <a href="http://www.dw.de/philippines-a-country-prone-to-natural-disasters/a-17217404">http://www.dw.de/philippines-a-country-prone-to-natural-disasters/a-17217404</a> .                                                                          | 2004-2013 | *                    |
| Philippines | Forman D, Bray F, Brewster DH, Gombe Mbalawa C, Kohler B, Piñeros M, Steliarova-Foucher E, Swaminathan R and Ferlay J, eds (2013). Cancer Incidence in Five Continents, Vol. X Summary Database (electronic version). Lyon, IARC. <a href="http://ci5.iarc.fr">http://ci5.iarc.fr</a>                                                                                                                  | 2005      |                      |
| Philippines | Department of Health (Philippines). Philippines Health Statistics 2005. Manila, Philippines: Department of Health (Philippines).                                                                                                                                                                                                                                                                       | 2005      |                      |
| Philippines | National Epidemiology Center, Department of Health (Philippines). Philippines Field Health Service Information System (FHSIS) Annual Report 2006. Manila, Philippines: National Epidemiology Center, Department of Health (Philippines), .                                                                                                                                                             | 2006      |                      |
| Philippines | National Epidemiology Center, Department of Health (Philippines). Philippines Field Health Service Information System (FHSIS) Annual Report 2007. Manila, Philippines: National Epidemiology Center, Department of Health (Philippines), .                                                                                                                                                             | 2007      |                      |
| Philippines | Lumbiganon P, Laopaiboon M, Gülmezoglu AM, Souza JP, Taneepanichskul S, Ruyan P, Attygalle DE, Shrestha N, Mori R, Hinh ND, Bang HT, Rathavy T, Chuyun K, Cheang K, Festin M, Udomprasertgul V, Germar MJV, Yanqiu G, Roy M, Carroli G, Ba-Thike K. Method of delivery and pregnancy outcomes in Asia: the WHO global survey on maternal and perinatal health 2007-08. Lancet. 2010; 375(9713): 490-9. | 2007-2008 |                      |
| Philippines | Macro International, Inc, National Statistics Office (Philippines). Philippines Demographic and Health Survey 2008. Calverton, United States: Macro International, Inc, 2010.                                                                                                                                                                                                                          | 2008      |                      |
| Philippines | Philippines Vital Registration - Deaths 2008 ICD10 as it appears in World Health Organization (WHO). WHO Mortality Database Version February 2014. Geneva, Switzerland: World Health Organization (WHO), 2014.                                                                                                                                                                                         | 2008      |                      |

**Web Table 32 - Comprehensive citation list**

| Country     | Citation                                                                                                                                                                                                                                                                                                                                                                                                                               | Year*                           | New for GBD 2013 (*) |
|-------------|----------------------------------------------------------------------------------------------------------------------------------------------------------------------------------------------------------------------------------------------------------------------------------------------------------------------------------------------------------------------------------------------------------------------------------------|---------------------------------|----------------------|
| Philippines | Garces RG, Sobel HL, Pabellon JA, Lopez JM Jr, de Quiroz Castro M, Nyunt-U S. A comparison of vital registration and reproductive-age mortality survey in Bukidnon, Philippines, 2008. <i>Int J Gynaecol Obstet.</i> 2012; 119(2): 121-4.                                                                                                                                                                                              | 2008                            |                      |
| Philippines | United Nations Office on Drugs and Crime (UNODC). United Nations Office on Drugs and Crime Global Study on Homicides 2011. Vienna, Austria: United Nations Office on Drugs and Crime (UNODC), 2011.                                                                                                                                                                                                                                    | 2009                            |                      |
| Philippines | Philippines Vital Registration Death Data 2009 as it appears in United Nations Statistics Division (UNSD). United Nations Demographic Yearbook. New York City, United States: United Nations Statistics Division (UNSD).                                                                                                                                                                                                               | 2009                            |                      |
| Philippines | Joint United Nations Program on HIV/AIDS (UNAIDS), Philippine National AIDS Council. Philippines Country Report 2010. Geneva, Switzerland: Joint United Nations Program on HIV/AIDS (UNAIDS), 2010.                                                                                                                                                                                                                                    | 2009                            |                      |
| Philippines | ICF International, National Statistics Office (Philippines). Philippines Demographic and Health Survey 2011.                                                                                                                                                                                                                                                                                                                           | 2011                            | *                    |
| Philippines | WPRO   WHO Western Pacific Region [Internet]. WHO Regional Office for the Western Pacific: Manila, The Philippines; [updated 2014 Mar 14]. Earthquake hits Negros Oriental, Philippines; [updated 2012 Mar 4]; [1 screen]. Available from: <a href="http://www.wpro.who.int/emergencies_disasters/disasters/negros_oriental_earthquake/en/">http://www.wpro.who.int/emergencies_disasters/disasters/negros_oriental_earthquake/en/</a> | 2012                            | *                    |
| Philippines | WPRO   WHO Western Pacific Region [Internet]. WHO Regional Office for the Western Pacific: Manila, Philippines; [updated 2014 Mar 14]. Addressing Health Challenges in the Aftermath of Typhoon Pablo; [updated 2012 Dec 28]; [about 3 screens]. Available from: <a href="http://www.wpro.who.int/emergencies_disasters/disasters/20121228/en/">http://www.wpro.who.int/emergencies_disasters/disasters/20121228/en/</a> .             | 2012                            | *                    |
| Philippines | United Nations Children's Fund (UNICEF), World Health Organization (WHO). WHO and UNICEF Reported Disease Incidence Time Series - Pertussis. Geneva, Switzerland: World Health Organization (WHO).                                                                                                                                                                                                                                     | 1980-1995, 1997-2010, 2012-2013 |                      |
| Philippines | United Nations Children's Fund (UNICEF), World Health Organization (WHO). WHO and UNICEF Reported Disease Incidence Time Series - Measles. Geneva, Switzerland: World Health Organization (WHO).                                                                                                                                                                                                                                       | 1980-1995, 1997-2013            |                      |
| Poland      | Poland Vital Registration Death Data 1950 as it appears in United Nations Statistics Division (UNSD). United Nations Demographic Yearbook. New York City, United States: United Nations Statistics Division (UNSD).                                                                                                                                                                                                                    | 1950                            |                      |
| Poland      | Poland Vital Registration Death Data 1951 as it appears in United Nations Statistics Division (UNSD). United Nations Demographic Yearbook. New York City, United States: United Nations Statistics Division (UNSD).                                                                                                                                                                                                                    | 1951                            |                      |
| Poland      | Poland Vital Registration Death Data 1952 as it appears in United Nations Statistics Division (UNSD). United Nations Demographic Yearbook. New York City, United States: United Nations Statistics Division (UNSD).                                                                                                                                                                                                                    | 1952                            |                      |
| Poland      | Poland Vital Registration Death Data 1953 as it appears in United Nations Statistics Division (UNSD). United Nations Demographic Yearbook. New York City, United States: United Nations Statistics Division (UNSD).                                                                                                                                                                                                                    | 1953                            |                      |
| Poland      | Poland Vital Registration Death Data 1954 as it appears in United Nations Statistics Division (UNSD). United Nations Demographic Yearbook. New York City, United States: United Nations Statistics Division (UNSD).                                                                                                                                                                                                                    | 1954                            |                      |
| Poland      | Poland Vital Registration Death Data 1955 as it appears in United Nations Statistics Division (UNSD). United Nations Demographic Yearbook. New York City, United States: United Nations Statistics Division (UNSD).                                                                                                                                                                                                                    | 1955                            |                      |

**Web Table 32 - Comprehensive citation list**

| Country | Citation                                                                                                                                                                                                                 | Year*     | New for GBD 2013 (*) |
|---------|--------------------------------------------------------------------------------------------------------------------------------------------------------------------------------------------------------------------------|-----------|----------------------|
| Poland  | Poland Vital Registration Death Data 1956 as it appears in United Nations Statistics Division (UNSD). United Nations Demographic Yearbook. New York City, United States: United Nations Statistics Division (UNSD).      | 1956      |                      |
| Poland  | Poland Vital Registration Death Data 1957 as it appears in United Nations Statistics Division (UNSD). United Nations Demographic Yearbook. New York City, United States: United Nations Statistics Division (UNSD).      | 1957      |                      |
| Poland  | Max Planck Institute for Demographic Research, University of California. Human Mortality Database. Berkeley, USA: University of California; Rostock, Germany: Max Planck Institute for Demographic Research.             | 1958-1998 |                      |
| Poland  | Poland Vital Registration - Deaths 1959 ICD7 as it appears in World Health Organization (WHO). WHO Mortality Database Version February 2014. Geneva, Switzerland: World Health Organization (WHO), 2014.                 | 1959      |                      |
| Poland  | Poland Vital Registration - Deaths 1960 ICD7 as it appears in World Health Organization (WHO). WHO Mortality Database Version February 2014. Geneva, Switzerland: World Health Organization (WHO), 2014.                 | 1960      |                      |
| Poland  | Poland Vital Registration - Deaths 1961 ICD7 as it appears in World Health Organization (WHO). WHO Mortality Database Version February 2014. Geneva, Switzerland: World Health Organization (WHO), 2014.                 | 1961      |                      |
| Poland  | Poland Vital Registration - Deaths 1962 ICD7 as it appears in World Health Organization (WHO). WHO Mortality Database Version February 2014. Geneva, Switzerland: World Health Organization (WHO), 2014.                 | 1962      |                      |
| Poland  | Fraser GR, Defaranas B, Kattamis CA, Race RR, Sanger R, Stamatoyannopoulos G. Glucose-6-phosphate dehydrogenase, colour vision and XG blood groups in Greece: linkage and population data. Ann Hum Genet. 1964; 395-403. | 1962      |                      |
| Poland  | Poland Vital Registration - Deaths 1963 ICD7 as it appears in World Health Organization (WHO). WHO Mortality Database Version February 2014. Geneva, Switzerland: World Health Organization (WHO), 2014.                 | 1963      |                      |
| Poland  | Poland Vital Registration - Deaths 1964 ICD7 as it appears in World Health Organization (WHO). WHO Mortality Database Version February 2014. Geneva, Switzerland: World Health Organization (WHO), 2014.                 | 1964      |                      |
| Poland  | Poland Vital Registration - Deaths 1965 ICD7 as it appears in World Health Organization (WHO). WHO Mortality Database Version February 2014. Geneva, Switzerland: World Health Organization (WHO), 2014.                 | 1965      |                      |
| Poland  | Poland Vital Registration - Deaths 1966 ICD7 as it appears in World Health Organization (WHO). WHO Mortality Database Version February 2014. Geneva, Switzerland: World Health Organization (WHO), 2014.                 | 1966      |                      |
| Poland  | Poland Vital Registration - Deaths 1967 ICD7 as it appears in World Health Organization (WHO). WHO Mortality Database Version February 2014. Geneva, Switzerland: World Health Organization (WHO), 2014.                 | 1967      |                      |
| Poland  | Poland Vital Registration - Deaths 1968 ICD7 as it appears in World Health Organization (WHO). WHO Mortality Database Version February 2014. Geneva, Switzerland: World Health Organization (WHO), 2014.                 | 1968      |                      |

**Web Table 32 - Comprehensive citation list**

| Country | Citation                                                                                                                                                                                                                 | Year*                                 | New for GBD 2013 (*) |
|---------|--------------------------------------------------------------------------------------------------------------------------------------------------------------------------------------------------------------------------|---------------------------------------|----------------------|
| Poland  | Poland Vital Registration - Deaths 1969 ICD8 as it appears in World Health Organization (WHO). WHO Mortality Database Version February 2014. Geneva, Switzerland: World Health Organization (WHO), 2014.                 | 1969                                  |                      |
| Poland  | Poland Vital Registration - Deaths 1970 ICD8 as it appears in World Health Organization (WHO). WHO Mortality Database Version February 2014. Geneva, Switzerland: World Health Organization (WHO), 2014.                 | 1970                                  |                      |
| Poland  | Poland Vital Registration - Deaths 1971 ICD8 as it appears in World Health Organization (WHO). WHO Mortality Database Version February 2014. Geneva, Switzerland: World Health Organization (WHO), 2014.                 | 1971                                  |                      |
| Poland  | Poland Vital Registration - Deaths 1972 ICD8 as it appears in World Health Organization (WHO). WHO Mortality Database Version February 2014. Geneva, Switzerland: World Health Organization (WHO), 2014.                 | 1972                                  |                      |
| Poland  | Poland Vital Registration - Deaths 1973 ICD8 as it appears in World Health Organization (WHO). WHO Mortality Database Version February 2014. Geneva, Switzerland: World Health Organization (WHO), 2014.                 | 1973                                  |                      |
| Poland  | Poland Vital Registration - Deaths 1974 ICD8 as it appears in World Health Organization (WHO). WHO Mortality Database Version February 2014. Geneva, Switzerland: World Health Organization (WHO), 2014.                 | 1974                                  |                      |
| Poland  | Poland Vital Registration - Deaths 1975 ICD8 as it appears in World Health Organization (WHO). WHO Mortality Database Version February 2014. Geneva, Switzerland: World Health Organization (WHO), 2014.                 | 1975                                  |                      |
| Poland  | Poland Vital Registration - Deaths 1976 ICD8 as it appears in World Health Organization (WHO). WHO Mortality Database Version February 2014. Geneva, Switzerland: World Health Organization (WHO), 2014.                 | 1976                                  |                      |
| Poland  | Poland Vital Registration - Deaths 1977 ICD8 as it appears in World Health Organization (WHO). WHO Mortality Database Version February 2014. Geneva, Switzerland: World Health Organization (WHO), 2014.                 | 1977                                  |                      |
| Poland  | Poland Vital Registration - Deaths 1978 ICD8 as it appears in World Health Organization (WHO). WHO Mortality Database Version February 2014. Geneva, Switzerland: World Health Organization (WHO), 2014.                 | 1978                                  |                      |
| Poland  | Poland Vital Registration - Deaths 1979 ICD8 as it appears in World Health Organization (WHO). WHO Mortality Database Version February 2014. Geneva, Switzerland: World Health Organization (WHO), 2014.                 | 1979                                  |                      |
| Poland  | Poland Vital Registration - Deaths 1980 ICD9 as it appears in World Health Organization (WHO). WHO Mortality Database Version February 2014. Geneva, Switzerland: World Health Organization (WHO), 2014.                 | 1980                                  |                      |
| Poland  | Institute for Health Metrics and Evaluation. Institute for Health Metrics and Evaluation Cancer Registry Database. [Unpublished].                                                                                        | 1980-2010                             |                      |
| Poland  | Parkin DM, International Agency for Research on Cancer, International Association of Cancer Registries. Cancer Incidence in Five Continents. Vol. I to VIII. Lyon, France, IARC Press, 2005.                             | 1980-1981, 1984-1986, 1990, 1994-1995 |                      |
| Poland  | Institute for Health Metrics and Evaluation (IHME), Joint United Nations Program on HIV/AIDS (UNAIDS). Institute for Health Metrics and Evaluation HIV Mortality Estimates Based on the UNAIDS Spectrum Model Framework. | 1980-2013                             | *                    |

**Web Table 32 - Comprehensive citation list**

| Country | Citation                                                                                                                                                                                                                                                                                              | Year*                      | New for GBD 2013 (*) |
|---------|-------------------------------------------------------------------------------------------------------------------------------------------------------------------------------------------------------------------------------------------------------------------------------------------------------|----------------------------|----------------------|
| Poland  | United Nations Children's Fund (UNICEF), World Health Organization (WHO). WHO and UNICEF Reported Disease Incidence Time Series - Pertussis. Geneva, Switzerland: World Health Organization (WHO).                                                                                                    | 1980-2007, 2009-2010, 2012 |                      |
| Poland  | United Nations Children's Fund (UNICEF), World Health Organization (WHO). WHO and UNICEF Reported Disease Incidence Time Series - Measles. Geneva, Switzerland: World Health Organization (WHO).                                                                                                      | 1980-2007, 2009-2010, 2012 |                      |
| Poland  | Poland Vital Registration - Deaths 1981 ICD9 as it appears in World Health Organization (WHO). WHO Mortality Database Version February 2014. Geneva, Switzerland: World Health Organization (WHO), 2014.                                                                                              | 1981                       |                      |
| Poland  | Poland Vital Registration - Deaths 1982 ICD9 as it appears in World Health Organization (WHO). WHO Mortality Database Version February 2014. Geneva, Switzerland: World Health Organization (WHO), 2014.                                                                                              | 1982                       |                      |
| Poland  | Ferlay J, Parkin DM, Curado MP, Bray F, Edwards B, Shin HR and Forman D. Cancer Incidence in Five Continents, Volumes I to IX: IARC CancerBase No. 9 [Internet]. Lyon, France: International Agency for Research on Cancer; 2010. Available from: <a href="http://ci5.iarc.fr">http://ci5.iarc.fr</a> | 1982-2002                  |                      |
| Poland  | Poland Vital Registration - Deaths 1983 ICD9 as it appears in World Health Organization (WHO). WHO Mortality Database Version February 2014. Geneva, Switzerland: World Health Organization (WHO), 2014.                                                                                              | 1983                       |                      |
| Poland  | Poland Vital Registration - Deaths 1984 ICD9 as it appears in World Health Organization (WHO). WHO Mortality Database Version February 2014. Geneva, Switzerland: World Health Organization (WHO), 2014.                                                                                              | 1984                       |                      |
| Poland  | Poland Vital Registration - Deaths 1985 ICD9 as it appears in World Health Organization (WHO). WHO Mortality Database Version February 2014. Geneva, Switzerland: World Health Organization (WHO), 2014.                                                                                              | 1985                       |                      |
| Poland  | Poland Vital Registration - Deaths 1986 ICD9 as it appears in World Health Organization (WHO). WHO Mortality Database Version February 2014. Geneva, Switzerland: World Health Organization (WHO), 2014.                                                                                              | 1986                       |                      |
| Poland  | Poland Vital Registration - Deaths 1987 ICD9 as it appears in World Health Organization (WHO). WHO Mortality Database Version February 2014. Geneva, Switzerland: World Health Organization (WHO), 2014.                                                                                              | 1987                       |                      |
| Poland  | Poland Vital Registration - Deaths 1988 ICD9 as it appears in World Health Organization (WHO). WHO Mortality Database Version February 2014. Geneva, Switzerland: World Health Organization (WHO), 2014.                                                                                              | 1988                       |                      |
| Poland  | Zalewska M, Gładysz A, Simon K. [Incidence of markers of HBV and HAV infections in workers of the departments and clinics of anesthesiology and intensive care at the medical academy in Wrocław]. Przegł Epidemiol. 1989; 43(4): 379-87.                                                             | 1988                       |                      |
| Poland  | Poland Vital Registration - Deaths 1989 ICD9 as it appears in World Health Organization (WHO). WHO Mortality Database Version February 2014. Geneva, Switzerland: World Health Organization (WHO), 2014.                                                                                              | 1989                       |                      |
| Poland  | Poland Vital Registration - Deaths 1990 ICD9 as it appears in World Health Organization (WHO). WHO Mortality Database Version February 2014. Geneva, Switzerland: World Health Organization (WHO), 2014.                                                                                              | 1990                       |                      |
| Poland  | Centre for Health Informatics and Multiprofessional Education, University College London. Modell's Haemoglobinopathologist's Almanac. London, United Kingdom: Centre for Health Informatics and Multiprofessional Education, University College London, 2008.                                         | 1990-2003                  |                      |



**Web Table 32 - Comprehensive citation list**

| Country | Citation                                                                                                                                                                                                                                                                                                                                             | Year*                                                   | New for GBD 2013 (*) |
|---------|------------------------------------------------------------------------------------------------------------------------------------------------------------------------------------------------------------------------------------------------------------------------------------------------------------------------------------------------------|---------------------------------------------------------|----------------------|
| Poland  | Polz-Dacewicz MA, Policzekiewicz P, Badach Z. Changing epidemiology of hepatitis A virus infection--a comparative study in central eastern Poland (1990-1999). <i>Med Sci Monit.</i> 2000; 6(5): 989-93.                                                                                                                                             | 1990,1998-1999                                          |                      |
| Poland  | Poland Vital Registration - Deaths 1991 ICD9 as it appears in World Health Organization (WHO). WHO Mortality Database Version February 2014. Geneva, Switzerland: World Health Organization (WHO), 2014.                                                                                                                                             | 1991                                                    |                      |
| Poland  | Gabryelewicz T. [The prevalence of dementia in the population of the Warsaw district of Mokotów from 65 to 84 years of age]. <i>Psychiatr Pol.</i> 1999; 33(3): 353-66.                                                                                                                                                                              | 1991-1994                                               |                      |
| Poland  | Poland Vital Registration - Deaths 1992 ICD9 as it appears in World Health Organization (WHO). WHO Mortality Database Version February 2014. Geneva, Switzerland: World Health Organization (WHO), 2014.                                                                                                                                             | 1992                                                    |                      |
| Poland  | Centre for Research on the Epidemiology of Disasters (CRED). EM-DAT: The OFDA/CRED International Disaster Database. Brussels, Belgium: Catholic University of Leuven.                                                                                                                                                                                | 1992, 1994, 1997-1999, 2001-2002, 2005, 2007-2010, 2012 |                      |
| Poland  | Poland Vital Registration - Deaths 1993 ICD9 as it appears in World Health Organization (WHO). WHO Mortality Database Version February 2014. Geneva, Switzerland: World Health Organization (WHO), 2014.                                                                                                                                             | 1993                                                    |                      |
| Poland  | Poland Vital Registration - Deaths 1994 ICD9 as it appears in World Health Organization (WHO). WHO Mortality Database Version February 2014. Geneva, Switzerland: World Health Organization (WHO), 2014.                                                                                                                                             | 1994                                                    |                      |
| Poland  | Poland Vital Registration - Deaths 1995 ICD9 as it appears in World Health Organization (WHO). WHO Mortality Database Version February 2014. Geneva, Switzerland: World Health Organization (WHO), 2014.                                                                                                                                             | 1995                                                    |                      |
| Poland  | Mircescu G, Capsa D, Covic M, Caprioara MG, Gluhovschi G, Golea O, Ursea N, Gârmeata L, Cepoi V, Constantinovici N, Covic A. Nephrology and renal replacement therapy in Romania – transition still continues (Cinderella story revisited). <i>Nephrol Dial Transplant.</i> 2004; 19(12): 2971-80.                                                   | 1995, 2003                                              |                      |
| Poland  | Poland Vital Registration - Deaths 1996 ICD9 as it appears in World Health Organization (WHO). WHO Mortality Database Version February 2014. Geneva, Switzerland: World Health Organization (WHO), 2014.                                                                                                                                             | 1996                                                    |                      |
| Poland  | Zabicka J. Zapalenia opon mózgowo-rdzeniowych i zapalenia mózgu w 1997 roku. <i>Przegl Epidemiol.</i> 1999; 53(1-2): 57-66.                                                                                                                                                                                                                          | 1997                                                    |                      |
| Poland  | Cianciara J. Hepatitis A shifting epidemiology in Poland and Eastern Europe. <i>Vaccine.</i> 2000; S68-70.                                                                                                                                                                                                                                           | 1997                                                    |                      |
| Poland  | Skoczynska A, Kriz P, Bossen Konradsen H, Hryniewicz W. Characteristics of the Major Etiologic Agents of Bacterial Meningitis Isolated in Poland in 1997-1998. <i>Microb Drug Resist.</i> 2000; 6(2): 147-53.                                                                                                                                        | 1997-1998                                               |                      |
| Poland  | Ryszkowska A, Gładysz A, Inglot M, Molin I. [Prevalence of anti-HAV antibodies in selected groups of children]. <i>Przegl Epidemiol.</i> 2000; 54(3-4): 375-83.                                                                                                                                                                                      | 1997-1999                                               |                      |
| Poland  | Zielinski A, Tomaszunas-Blaszczyk J, Kuklinska D. Epidemiology of Childhood Bacterial Meningitis in Poland: Incidence of Bacterial Meningitis with Special Reference to Haemophilus influenzae Type b among Children 0-59 Months Old in the Former Kielce and Bydgoszcz Districts in Poland in 1998-19. <i>Eur J Epidemiol.</i> 2001; 17(8): 779-82. | 1998-1999                                               |                      |
| Poland  | Chlabicz S, Bonifatiuk I, Radziwon P. Prevalence of hepatitis C virus antibodies among blood donors in north-eastern Poland. <i>Hepatol Res.</i> 2005; 33(3): 206-10.                                                                                                                                                                                | 1998-2003                                               |                      |

**Web Table 32 - Comprehensive citation list**

| Country | Citation                                                                                                                                                                                                                             | Year*           | New for GBD 2013 (*) |
|---------|--------------------------------------------------------------------------------------------------------------------------------------------------------------------------------------------------------------------------------------|-----------------|----------------------|
| Poland  | Poland Vital Registration - Deaths 1999 ICD10 as it appears in World Health Organization (WHO). WHO Mortality Database Version February 2014. Geneva, Switzerland: World Health Organization (WHO), 2014.                            | 1999            |                      |
| Poland  | Bielawski K, Wlasiuk M, Truskolawska M, Falkiewicz B. HCV Infection in Poland. Arch Med Res. 2000; 532-5.                                                                                                                            | 1999            |                      |
| Poland  | Grzeszczuk A, Sokolewicz-Bobrowska E, Chlabicz S. Occupational risk of hepatitis A infection among health care providers in northeastern Poland. Med Sci Monit. 2003; 9(7): PH11-14.                                                 | 1999-2000       |                      |
| Poland  | Poland Vital Registration - Deaths 2000 ICD10 as it appears in World Health Organization (WHO). WHO Mortality Database Version February 2014. Geneva, Switzerland: World Health Organization (WHO), 2014.                            | 2000            |                      |
| Poland  | Curado MP, Edwards B, Shin HR, Storm H, Ferlay J, Heanue M and Boyle P, eds (2007). Cancer Incidence in Five Continents, Vol. IX Periodic Data (electronic version). Lyon, IARC. <a href="http://ci5.iarc.fr">http://ci5.iarc.fr</a> | 2000            |                      |
| Poland  | World Health Organization (WHO). Yellow Fever Reported Cases, WHO Vaccine-Preventable Diseases: Monitoring System. Geneva, Switzerland: World Health Organization (WHO).                                                             | 2000-2007, 2009 |                      |
| Poland  | Poland Vital Registration - Deaths 2001 ICD10 as it appears in World Health Organization (WHO). WHO Mortality Database Version February 2014. Geneva, Switzerland: World Health Organization (WHO), 2014.                            | 2001            |                      |
| Poland  | Poland Vital Registration - Deaths 2002 ICD10 as it appears in World Health Organization (WHO). WHO Mortality Database Version February 2014. Geneva, Switzerland: World Health Organization (WHO), 2014.                            | 2002            |                      |
| Poland  | Rosinska M, Zielinski A. Zapalenia opon mózgowo-rdzeniowych i zapalenia mózgu w 2002 roku. Przegl Epidemiol. 2004; 58(1): 57-65.                                                                                                     | 2002            |                      |
| Poland  | Poland Vital Registration - Deaths 2003 ICD10 as it appears in World Health Organization (WHO). WHO Mortality Database Version February 2014. Geneva, Switzerland: World Health Organization (WHO), 2014.                            | 2003            |                      |
| Poland  | National Cancer Registry (Poland). Poland National Cancer Registry Incidence Tables by Site and Age Groups. Warsaw, Poland: Ministry of Health (Poland).                                                                             | 2003-2010       | *                    |
| Poland  | Poland Vital Registration - Deaths 2004 ICD10 as it appears in World Health Organization (WHO). WHO Mortality Database Version February 2014. Geneva, Switzerland: World Health Organization (WHO), 2014.                            | 2004            |                      |
| Poland  | Stefanoff P, Rosińska M. Meningitis and encephalitis in Poland in 2004. <i>Przegl Epidemiol.</i> 2006; 60(3): 419-28.                                                                                                                | 2004            |                      |
| Poland  | Janaszek-Seydlitz W, Bucholc B, Wiatrzyk A. [Prevalence of anti-HAV antibodies in Warsaw population]. <i>Przegl Epidemiol.</i> 2007; 61(4): 675-82.                                                                                  | 2004-2005       |                      |
| Poland  | Poland Vital Registration - Deaths 2005 ICD10 as it appears in World Health Organization (WHO). WHO Mortality Database Version February 2014. Geneva, Switzerland: World Health Organization (WHO), 2014.                            | 2005            |                      |
| Poland  | Poland Vital Registration - Deaths 2006 ICD10 as it appears in World Health Organization (WHO). WHO Mortality Database Version February 2014. Geneva, Switzerland: World Health Organization (WHO), 2014.                            | 2006            |                      |
| Poland  | Poland Vital Registration - Deaths 2007 ICD10 as it appears in World Health Organization (WHO). WHO Mortality Database Version February 2014. Geneva, Switzerland: World Health Organization (WHO), 2014.                            | 2007            |                      |



**Web Table 32 - Comprehensive citation list**

| Country  | Citation                                                                                                                                                                                                                                                                                         | Year*     | New for GBD 2013 (*) |
|----------|--------------------------------------------------------------------------------------------------------------------------------------------------------------------------------------------------------------------------------------------------------------------------------------------------|-----------|----------------------|
| Poland   | World Health Organization (WHO). Global Status Report on Road Safety 2009. Geneva, Switzerland: World Health Organization (WHO), 2009.                                                                                                                                                           | 2007      |                      |
| Poland   | Poland Vital Registration - Deaths 2008 ICD10 as it appears in World Health Organization (WHO). WHO Mortality Database Version February 2014. Geneva, Switzerland: World Health Organization (WHO), 2014.                                                                                        | 2008      |                      |
| Poland   | EUVAC-NET. EUVAC-NET Pertussis Surveillance Report 2008. Stockholm, Sweden: European Centre for Disease Prevention and Control, 2009.                                                                                                                                                            | 2008      |                      |
| Poland   | Poland Vital Registration - Deaths 2009 ICD10 as it appears in World Health Organization (WHO). WHO Mortality Database Version February 2014. Geneva, Switzerland: World Health Organization (WHO), 2014.                                                                                        | 2009      |                      |
| Poland   | EUVAC-NET. EUVAC-NET Pertussis Surveillance Report 2009. Stockholm, Sweden: European Centre for Disease Prevention and Control, 2010.                                                                                                                                                            | 2009      |                      |
| Poland   | Poland Vital Registration - Deaths 2010 ICD10 as it appears in World Health Organization (WHO). WHO Mortality Database Version February 2014. Geneva, Switzerland: World Health Organization (WHO), 2014.                                                                                        | 2010      |                      |
| Poland   | European Renal Association-European Dialysis and Transplant Association (ERA-EDTA). European Renal Association-European Dialysis and Transplant Association Registry Annual Report 2010. Parma, Italy: European Renal Association-European Dialysis and Transplant Association (ERA-EDTA), 2012. | 2010      | *                    |
| Poland   | EUVAC-NET. EUVAC-NET Measles Surveillance Report 2010. Stockholm, Sweden: European Centre for Disease Prevention and Control, 2011.                                                                                                                                                              | 2010      |                      |
| Poland   | Poland Vital Registration - Deaths 2011 ICD10 as it appears in World Health Organization (WHO). WHO Mortality Database Version February 2014. Geneva, Switzerland: World Health Organization (WHO), 2014.                                                                                        | 2011      | *                    |
| Poland   | Karasek E, Paradowska-Stankiewicz I. Measles in Poland in 2011. <i>Przegl Epidemiol</i> . 2012; 67(2): 181-4.                                                                                                                                                                                    | 2011      | *                    |
| Poland   | European Renal Association-European Dialysis and Transplant Association (ERA-EDTA). European Renal Association-European Dialysis and Transplant Association Registry Annual Report 2011. Parma, Italy: European Renal Association-European Dialysis and Transplant Association (ERA-EDTA), 2013. | 2011      | *                    |
| Portugal | Max Planck Institute for Demographic Research, University of California. Human Mortality Database. Berkeley, USA: University of California; Rostock, Germany: Max Planck Institute for Demographic Research.                                                                                     | 1950-2006 |                      |
| Portugal | Portugal Vital Registration - Deaths 1955 ICD7 as it appears in World Health Organization (WHO). WHO Mortality Database Version February 2014. Geneva, Switzerland: World Health Organization (WHO), 2014.                                                                                       | 1955      |                      |
| Portugal | Portugal Vital Registration - Deaths 1956 ICD7 as it appears in World Health Organization (WHO). WHO Mortality Database Version February 2014. Geneva, Switzerland: World Health Organization (WHO), 2014.                                                                                       | 1956      |                      |
| Portugal | Portugal Vital Registration - Deaths 1957 ICD7 as it appears in World Health Organization (WHO). WHO Mortality Database Version February 2014. Geneva, Switzerland: World Health Organization (WHO), 2014.                                                                                       | 1957      |                      |

**Web Table 32 - Comprehensive citation list**

| Country  | Citation                                                                                                                                                                                                   | Year*                                                                     | New for GBD 2013 (*) |
|----------|------------------------------------------------------------------------------------------------------------------------------------------------------------------------------------------------------------|---------------------------------------------------------------------------|----------------------|
| Portugal | Portugal Vital Registration - Deaths 1958 ICD7 as it appears in World Health Organization (WHO). WHO Mortality Database Version February 2014. Geneva, Switzerland: World Health Organization (WHO), 2014. | 1958                                                                      |                      |
| Portugal | Portugal Vital Registration - Deaths 1959 ICD7 as it appears in World Health Organization (WHO). WHO Mortality Database Version February 2014. Geneva, Switzerland: World Health Organization (WHO), 2014. | 1959                                                                      |                      |
| Portugal | Portugal Vital Registration - Deaths 1960 ICD7 as it appears in World Health Organization (WHO). WHO Mortality Database Version February 2014. Geneva, Switzerland: World Health Organization (WHO), 2014. | 1960                                                                      |                      |
| Portugal | Portugal Vital Registration - Deaths 1961 ICD7 as it appears in World Health Organization (WHO). WHO Mortality Database Version February 2014. Geneva, Switzerland: World Health Organization (WHO), 2014. | 1961                                                                      |                      |
| Portugal | Hailes AM, Roberts DF. Glucose-6-phosphate dehydrogenase deficiency screening in Madeira. Hum Biol. 1962; 206-13.                                                                                          | 1961                                                                      |                      |
| Portugal | Portugal Vital Registration - Deaths 1962 ICD7 as it appears in World Health Organization (WHO). WHO Mortality Database Version February 2014. Geneva, Switzerland: World Health Organization (WHO), 2014. | 1962                                                                      |                      |
| Portugal | Portugal Vital Registration - Deaths 1963 ICD7 as it appears in World Health Organization (WHO). WHO Mortality Database Version February 2014. Geneva, Switzerland: World Health Organization (WHO), 2014. | 1963                                                                      |                      |
| Portugal | Portugal Vital Registration - Deaths 1964 ICD7 as it appears in World Health Organization (WHO). WHO Mortality Database Version February 2014. Geneva, Switzerland: World Health Organization (WHO), 2014. | 1964                                                                      |                      |
| Portugal | Portugal Vital Registration - Deaths 1965 ICD7 as it appears in World Health Organization (WHO). WHO Mortality Database Version February 2014. Geneva, Switzerland: World Health Organization (WHO), 2014. | 1965                                                                      |                      |
| Portugal | Portugal Vital Registration - Deaths 1966 ICD7 as it appears in World Health Organization (WHO). WHO Mortality Database Version February 2014. Geneva, Switzerland: World Health Organization (WHO), 2014. | 1966                                                                      |                      |
| Portugal | Portugal Vital Registration - Deaths 1967 ICD7 as it appears in World Health Organization (WHO). WHO Mortality Database Version February 2014. Geneva, Switzerland: World Health Organization (WHO), 2014. | 1967                                                                      |                      |
| Portugal | Centre for Research on the Epidemiology of Disasters (CRED). EM-DAT: The OFDA/CRED International Disaster Database. Brussels, Belgium: Catholic University of Leuven.                                      | 1967, 1973, 1979, 1981, 1983, 1985-1986, 1996-1997, 2000-2005, 2008, 2010 |                      |
| Portugal | Portugal Vital Registration - Deaths 1968 ICD7 as it appears in World Health Organization (WHO). WHO Mortality Database Version February 2014. Geneva, Switzerland: World Health Organization (WHO), 2014. | 1968                                                                      |                      |
| Portugal | Portugal Vital Registration - Deaths 1969 ICD7 as it appears in World Health Organization (WHO). WHO Mortality Database Version February 2014. Geneva, Switzerland: World Health Organization (WHO), 2014. | 1969                                                                      |                      |

**Web Table 32 - Comprehensive citation list**

| Country  | Citation                                                                                                                                                                                                                 | Year*                | New for GBD 2013 (*) |
|----------|--------------------------------------------------------------------------------------------------------------------------------------------------------------------------------------------------------------------------|----------------------|----------------------|
| Portugal | Portugal Vital Registration - Deaths 1970 ICD7 as it appears in World Health Organization (WHO). WHO Mortality Database Version February 2014. Geneva, Switzerland: World Health Organization (WHO), 2014.               | 1970                 |                      |
| Portugal | Portugal Vital Registration - Deaths 1971 ICD8 as it appears in World Health Organization (WHO). WHO Mortality Database Version February 2014. Geneva, Switzerland: World Health Organization (WHO), 2014.               | 1971                 |                      |
| Portugal | Portugal Vital Registration - Deaths 1972 ICD8 as it appears in World Health Organization (WHO). WHO Mortality Database Version February 2014. Geneva, Switzerland: World Health Organization (WHO), 2014.               | 1972                 |                      |
| Portugal | Portugal Vital Registration - Deaths 1973 ICD8 as it appears in World Health Organization (WHO). WHO Mortality Database Version February 2014. Geneva, Switzerland: World Health Organization (WHO), 2014.               | 1973                 |                      |
| Portugal | Portugal Vital Registration - Deaths 1974 ICD8 as it appears in World Health Organization (WHO). WHO Mortality Database Version February 2014. Geneva, Switzerland: World Health Organization (WHO), 2014.               | 1974                 |                      |
| Portugal | Portugal Vital Registration - Deaths 1975 ICD8 as it appears in World Health Organization (WHO). WHO Mortality Database Version February 2014. Geneva, Switzerland: World Health Organization (WHO), 2014.               | 1975                 |                      |
| Portugal | Portugal Vital Registration - Deaths 1976 ICD8 as it appears in World Health Organization (WHO). WHO Mortality Database Version February 2014. Geneva, Switzerland: World Health Organization (WHO), 2014.               | 1976                 |                      |
| Portugal | Portugal Vital Registration - Deaths 1977 ICD8 as it appears in World Health Organization (WHO). WHO Mortality Database Version February 2014. Geneva, Switzerland: World Health Organization (WHO), 2014.               | 1977                 |                      |
| Portugal | Portugal Vital Registration - Deaths 1978 ICD8 as it appears in World Health Organization (WHO). WHO Mortality Database Version February 2014. Geneva, Switzerland: World Health Organization (WHO), 2014.               | 1978                 |                      |
| Portugal | Portugal Vital Registration - Deaths 1979 ICD8 as it appears in World Health Organization (WHO). WHO Mortality Database Version February 2014. Geneva, Switzerland: World Health Organization (WHO), 2014.               | 1979                 |                      |
| Portugal | National Institute of Statistics (Portugal), International Statistical Institute. Portugal World Fertility Survey 1979-1980. Voorburg, Netherlands: International Statistical Institute.                                 | 1979-1980            |                      |
| Portugal | Portugal Vital Registration - Deaths 1980 ICD9 as it appears in World Health Organization (WHO). WHO Mortality Database Version February 2014. Geneva, Switzerland: World Health Organization (WHO), 2014.               | 1980                 |                      |
| Portugal | Institute for Health Metrics and Evaluation (IHME), Joint United Nations Program on HIV/AIDS (UNAIDS). Institute for Health Metrics and Evaluation HIV Mortality Estimates Based on the UNAIDS Spectrum Model Framework. | 1980-2013            | *                    |
| Portugal | United Nations Children's Fund (UNICEF), World Health Organization (WHO). WHO and UNICEF Reported Disease Incidence Time Series - Pertussis. Geneva, Switzerland: World Health Organization (WHO).                       | 1980-2000, 2002-2013 |                      |
| Portugal | Portugal Vital Registration - Deaths 1981 ICD9 as it appears in World Health Organization (WHO). WHO Mortality Database Version February 2014. Geneva, Switzerland: World Health Organization (WHO), 2014.               | 1981                 |                      |

**Web Table 32 - Comprehensive citation list**

| Country  | Citation                                                                                                                                                                                                                                                      | Year*                | New for GBD 2013 (*) |
|----------|---------------------------------------------------------------------------------------------------------------------------------------------------------------------------------------------------------------------------------------------------------------|----------------------|----------------------|
| Portugal | Portugal Vital Registration - Deaths 1982 ICD9 as it appears in World Health Organization (WHO). WHO Mortality Database Version February 2014. Geneva, Switzerland: World Health Organization (WHO), 2014.                                                    | 1982                 |                      |
| Portugal | Portugal Vital Registration - Deaths 1983 ICD9 as it appears in World Health Organization (WHO). WHO Mortality Database Version February 2014. Geneva, Switzerland: World Health Organization (WHO), 2014.                                                    | 1983                 |                      |
| Portugal | Lecour H, Ribeiro AT, Amaral I, Rodrigues MA. Prevalence of viral hepatitis markers in the population of Portugal. Bull World Health Organ. 1984; 62(5): 743-7.                                                                                               | 1983                 |                      |
| Portugal | Portugal Vital Registration - Deaths 1984 ICD9 as it appears in World Health Organization (WHO). WHO Mortality Database Version February 2014. Geneva, Switzerland: World Health Organization (WHO), 2014.                                                    | 1984                 |                      |
| Portugal | Portugal Vital Registration - Deaths 1985 ICD9 as it appears in World Health Organization (WHO). WHO Mortality Database Version February 2014. Geneva, Switzerland: World Health Organization (WHO), 2014.                                                    | 1985                 |                      |
| Portugal | Parkin DM, International Agency for Research on Cancer, International Association of Cancer Registries. Cancer Incidence in Five Continents. Vol. I to VIII. Lyon, France, IARC Press, 2005.                                                                  | 1985, 1995           |                      |
| Portugal | Portugal Vital Registration - Deaths 1986 ICD9 as it appears in World Health Organization (WHO). WHO Mortality Database Version February 2014. Geneva, Switzerland: World Health Organization (WHO), 2014.                                                    | 1986                 |                      |
| Portugal | Portugal Vital Registration - Deaths 1987 ICD9 as it appears in World Health Organization (WHO). WHO Mortality Database Version February 2014. Geneva, Switzerland: World Health Organization (WHO), 2014.                                                    | 1987                 |                      |
| Portugal | United Nations Children's Fund (UNICEF), World Health Organization (WHO). WHO and UNICEF Reported Disease Incidence Time Series - Measles. Geneva, Switzerland: World Health Organization (WHO).                                                              | 1987-2000, 2002-2013 |                      |
| Portugal | Portugal Vital Registration - Deaths 1988 ICD9 as it appears in World Health Organization (WHO). WHO Mortality Database Version February 2014. Geneva, Switzerland: World Health Organization (WHO), 2014.                                                    | 1988                 |                      |
| Portugal | Modell B, Darlison M, Birgens H, Cario H, Faustino P, Giordano PC, Gulbis B, Hopmeier P, Lena-Russo D, Romao L, Theodorsson E. Epidemiology of haemoglobin disorders in Europe: an overview. Scand J Clin Lab Invest. 2007; 67(1): 39-69.                     | 1988, 2006           |                      |
| Portugal | Centre for Health Informatics and Multiprofessional Education, University College London. Modell's Haemoglobinopathologist's Almanac. London, United Kingdom: Centre for Health Informatics and Multiprofessional Education, University College London, 2008. | 1988, 2003, 2006     |                      |
| Portugal | Portugal Vital Registration - Deaths 1989 ICD9 as it appears in World Health Organization (WHO). WHO Mortality Database Version February 2014. Geneva, Switzerland: World Health Organization (WHO), 2014.                                                    | 1989                 |                      |
| Portugal | Portugal Vital Registration - Deaths 1990 ICD9 as it appears in World Health Organization (WHO). WHO Mortality Database Version February 2014. Geneva, Switzerland: World Health Organization (WHO), 2014.                                                    | 1990                 |                      |
| Portugal | Marinho RT, Valente AR, Ramalho FJ, de Moura MC. The changing epidemiological pattern of hepatitis A in Lisbon, Portugal. Eur J Gastroenterol Hepatol. 1997; 9(8): 795-7.                                                                                     | 1990-1992            |                      |

**Web Table 32 - Comprehensive citation list**

| Country  | Citation                                                                                                                                                                                                                                                                                                                                                                                                                                                                                                                                                                                                                                                                                                              | Year*     | New for GBD 2013 (*) |
|----------|-----------------------------------------------------------------------------------------------------------------------------------------------------------------------------------------------------------------------------------------------------------------------------------------------------------------------------------------------------------------------------------------------------------------------------------------------------------------------------------------------------------------------------------------------------------------------------------------------------------------------------------------------------------------------------------------------------------------------|-----------|----------------------|
| Portugal | Portugal Vital Registration - Deaths 1991 ICD9 as it appears in World Health Organization (WHO). WHO Mortality Database Version February 2014. Geneva, Switzerland: World Health Organization (WHO), 2014.                                                                                                                                                                                                                                                                                                                                                                                                                                                                                                            | 1991      |                      |
| Portugal | Santos A, Carvalho A, Bento D, Sá R, Tomás J, Rodrigues V, Pais L, Porto A. Epidemiology of hepatitis C in central Portugal. Prevalence of anti-HCV in the population of the Coimbra District. Acta Med Port. 1994; S3-8.                                                                                                                                                                                                                                                                                                                                                                                                                                                                                             | 1991-1993 |                      |
| Portugal | Portugal Vital Registration - Deaths 1992 ICD9 as it appears in World Health Organization (WHO). WHO Mortality Database Version February 2014. Geneva, Switzerland: World Health Organization (WHO), 2014.                                                                                                                                                                                                                                                                                                                                                                                                                                                                                                            | 1992      |                      |
| Portugal | Trichopoulos D, Bamia C, Lagiou P, Fedirko V, Trepo E, Jenab M, Pischon T, Nöthlings U, Overved K, Tjønneland A, Outzen M, Clavel-Chapelon F, Kaaks R, Lukanova A, Boeing H, Aleksandrova K, Benetou V, Zylis D, Palli D, Pala V, Panico S, Tumino R, Sacerdote C, Bueno-De-Mesquita HB, Van Kranen HJ, Peeters PHM, Lund E, Quirós JR, González CA, Sanchez Perez M-J, Navarro C, Dorronsoro M, Barricarte A, Lindkvist B, Regnér S, Werner M, Hallmans G, Khaw K-T, Wareham N, Key T, Romieu I, Chuang S-C, Murphy N, Boffetta P, Trichopoulou A, Riboli E. Hepatocellular carcinoma risk factors and disease burden in a European cohort: a nested case-control study. J Natl Cancer Inst. 2011; 103(22): 1686-95. | 1992-2006 | *                    |
| Portugal | Portugal Vital Registration - Deaths 1993 ICD9 as it appears in World Health Organization (WHO). WHO Mortality Database Version February 2014. Geneva, Switzerland: World Health Organization (WHO), 2014.                                                                                                                                                                                                                                                                                                                                                                                                                                                                                                            | 1993      |                      |
| Portugal | Macedo G, Ribeiro T. Hepatitis A: insights into new trends in epidemiology. Eur J Gastroenterol Hepatol. 1998; 10(2): 175.                                                                                                                                                                                                                                                                                                                                                                                                                                                                                                                                                                                            | 1993      |                      |
| Portugal | Portugal Vital Registration - Deaths 1994 ICD9 as it appears in World Health Organization (WHO). WHO Mortality Database Version February 2014. Geneva, Switzerland: World Health Organization (WHO), 2014.                                                                                                                                                                                                                                                                                                                                                                                                                                                                                                            | 1994      |                      |
| Portugal | Portugal Vital Registration - Deaths 1995 ICD9 as it appears in World Health Organization (WHO). WHO Mortality Database Version February 2014. Geneva, Switzerland: World Health Organization (WHO), 2014.                                                                                                                                                                                                                                                                                                                                                                                                                                                                                                            | 1995      |                      |
| Portugal | Macedo G, Pinto T, Sarmento JA, Vale AM, Ribeiro T. [The first assessment of hepatitis E virus seroprevalence in northern Portugal]. Acta Med Port. 1998; 11(12): 1065-8.                                                                                                                                                                                                                                                                                                                                                                                                                                                                                                                                             | 1995-1997 | *                    |
| Portugal | Portugal Vital Registration - Deaths 1996 ICD9 as it appears in World Health Organization (WHO). WHO Mortality Database Version February 2014. Geneva, Switzerland: World Health Organization (WHO), 2014.                                                                                                                                                                                                                                                                                                                                                                                                                                                                                                            | 1996      |                      |
| Portugal | Cunha I, Antunes H. [Prevalence of antibodies against hepatitis A virus in a population from northern Portugal]. Acta Med Port. 2001; 14(5-6): 479-82.                                                                                                                                                                                                                                                                                                                                                                                                                                                                                                                                                                | 1996      |                      |
| Portugal | World Health Organization (WHO). Portugal WHO Leishmaniasis Country Profile.                                                                                                                                                                                                                                                                                                                                                                                                                                                                                                                                                                                                                                          | 1996-2010 | *                    |
| Portugal | Portugal Vital Registration - Deaths 1997 ICD9 as it appears in World Health Organization (WHO). WHO Mortality Database Version February 2014. Geneva, Switzerland: World Health Organization (WHO), 2014.                                                                                                                                                                                                                                                                                                                                                                                                                                                                                                            | 1997      |                      |
| Portugal | Portugal Vital Registration - Deaths 1998 ICD9 as it appears in World Health Organization (WHO). WHO Mortality Database Version February 2014. Geneva, Switzerland: World Health Organization (WHO), 2014.                                                                                                                                                                                                                                                                                                                                                                                                                                                                                                            | 1998      |                      |

**Web Table 32 - Comprehensive citation list**

| Country  | Citation                                                                                                                                                                                                                                                                                     | Year*     | New for GBD 2013 (*) |
|----------|----------------------------------------------------------------------------------------------------------------------------------------------------------------------------------------------------------------------------------------------------------------------------------------------|-----------|----------------------|
| Portugal | Barros H, Oliveira F, Miranda H. A survey on hepatitis A in Portuguese children and adolescents. <i>J Viral Hepat.</i> 1999; 6(3): 249-53.                                                                                                                                                   | 1998      |                      |
| Portugal | EUVAC-NET. EUVAC-NET Pertussis Surveillance Report 1998-2002. Stockholm, Sweden: European Centre for Disease Prevention and Control.                                                                                                                                                         | 1998-2002 |                      |
| Portugal | Portugal Vital Registration - Deaths 1999 ICD9 as it appears in World Health Organization (WHO). WHO Mortality Database Version February 2014. Geneva, Switzerland: World Health Organization (WHO), 2014.                                                                                   | 1999      |                      |
| Portugal | Antunes H, Macedo M, Estrada A. [Hepatitis A virus prevalence: Portuguese first results of low endemicity]. <i>Acta Med Port.</i> 2004; 17(3): 219-24.                                                                                                                                       | 1999-2003 |                      |
| Portugal | Portugal Vital Registration - Deaths 2000 ICD9 as it appears in World Health Organization (WHO). WHO Mortality Database Version February 2014. Geneva, Switzerland: World Health Organization (WHO), 2014.                                                                                   | 2000      |                      |
| Portugal | Curado MP, Edwards B, Shin HR, Storm H, Ferlay J, Heanue M and Boyle P, eds (2007). <i>Cancer Incidence in Five Continents, Vol. IX Periodic Data</i> (electronic version). Lyon, IARC. <a href="http://ci5.iarc.fr">http://ci5.iarc.fr</a>                                                  | 2000      |                      |
| Portugal | Rodrigues M-O, Freire AP, Martins G, Pereira J, Martins M-C, Monteiro C. Glucose-6-phosphate dehydrogenase deficiency in Portugal: biochemical and mutational profiles, heterogeneity, and haplotype association. <i>Blood Cells Mol Dis.</i> 2002; 28(2): 249-59.                           | 2000-2002 |                      |
| Portugal | Vieira M, Dias JG, Queirós L, Correia AM. [Pertussis hospitalisations: Northern Region of Portugal, 2000-2006]. <i>Acta Med Port.</i> 2010; 23(4): 605-12.                                                                                                                                   | 2000-2006 |                      |
| Portugal | Portugal Vital Registration - Deaths 2001 ICD9 as it appears in World Health Organization (WHO). WHO Mortality Database Version February 2014. Geneva, Switzerland: World Health Organization (WHO), 2014.                                                                                   | 2001      |                      |
| Portugal | Portugal Vital Registration - Deaths 2002 ICD10 as it appears in World Health Organization (WHO). WHO Mortality Database Version February 2014. Geneva, Switzerland: World Health Organization (WHO), 2014.                                                                                  | 2002      |                      |
| Portugal | World Health Organization (WHO). <i>Yellow Fever Reported Cases, WHO Vaccine-Preventable Diseases: Monitoring System</i> . Geneva, Switzerland: World Health Organization (WHO).                                                                                                             | 2002-2007 |                      |
| Portugal | Portugal Vital Registration - Deaths 2003 ICD10 as it appears in World Health Organization (WHO). WHO Mortality Database Version February 2014. Geneva, Switzerland: World Health Organization (WHO), 2014.                                                                                  | 2003      |                      |
| Portugal | EUVAC-NET. EUVAC-NET Pertussis Surveillance Report 2003-2007. Stockholm, Sweden: European Centre for Disease Prevention and Control, 2009.                                                                                                                                                   | 2003-2007 |                      |
| Portugal | Thalassaemia International Federation, World Health Organization (WHO). <i>Management of Haemoglobin Disorders: Report of a Joint WHO-TIF Meeting, Nicosia, Cyprus, 16-18 November 2007</i> . Geneva, Switzerland: World Health Organization (WHO), 2008.                                    | 2004      |                      |
| Portugal | WHO Regional Office for Europe (EURO-WHO). <i>European Hospital Morbidity Database</i> . Copenhagen, Denmark: WHO Regional Office for Europe (EURO-WHO).                                                                                                                                     | 2004-2005 |                      |
| Portugal | Forman D, Bray F, Brewster DH, Gombe Mbalawa C, Kohler B, Piñeros M, Steliarova-Foucher E, Swaminathan R and Ferlay J, eds (2013). <i>Cancer Incidence in Five Continents, Vol. X Summary Database</i> (electronic version). Lyon, IARC. <a href="http://ci5.iarc.fr">http://ci5.iarc.fr</a> | 2005      |                      |



**Web Table 32 - Comprehensive citation list**

| Country  | Citation                                                                                                                                                                                                                                                                                         | Year*                                      | New for GBD 2013 (*) |
|----------|--------------------------------------------------------------------------------------------------------------------------------------------------------------------------------------------------------------------------------------------------------------------------------------------------|--------------------------------------------|----------------------|
| Portugal | Portugal Vital Registration - Deaths 2007 ICD10 as it appears in World Health Organization (WHO). WHO Mortality Database Version February 2014. Geneva, Switzerland: World Health Organization (WHO), 2014.                                                                                      | 2007                                       |                      |
| Portugal | Portugal Vital Registration - Deaths 2008 ICD10 as it appears in World Health Organization (WHO). WHO Mortality Database Version February 2014. Geneva, Switzerland: World Health Organization (WHO), 2014.                                                                                      | 2008                                       |                      |
| Portugal | EUVAC-NET. EUVAC-NET Pertussis Surveillance Report 2008. Stockholm, Sweden: European Centre for Disease Prevention and Control, 2009.                                                                                                                                                            | 2008                                       |                      |
| Portugal | Portugal Vital Registration - Deaths 2009 ICD10 as it appears in World Health Organization (WHO). WHO Mortality Database Version February 2014. Geneva, Switzerland: World Health Organization (WHO), 2014.                                                                                      | 2009                                       |                      |
| Portugal | Weatherall D. Sickle Cell and Thalassemias Prevalence Data, Personal Correspondence with David Weatherall. [Unpublished].                                                                                                                                                                        | 2009                                       |                      |
| Portugal | EUVAC-NET. EUVAC-NET Pertussis Surveillance Report 2009. Stockholm, Sweden: European Centre for Disease Prevention and Control, 2010.                                                                                                                                                            | 2009                                       |                      |
| Portugal | Portugal Vital Registration - Deaths 2010 ICD10 as it appears in World Health Organization (WHO). WHO Mortality Database Version February 2014. Geneva, Switzerland: World Health Organization (WHO), 2014.                                                                                      | 2010                                       |                      |
| Portugal | European Renal Association-European Dialysis and Transplant Association (ERA-EDTA). European Renal Association-European Dialysis and Transplant Association Registry Annual Report 2010. Parma, Italy: European Renal Association-European Dialysis and Transplant Association (ERA-EDTA), 2012. | 2010                                       | *                    |
| Portugal | EUVAC-NET. EUVAC-NET Measles Surveillance Report 2010. Stockholm, Sweden: European Centre for Disease Prevention and Control, 2011.                                                                                                                                                              | 2010                                       |                      |
| Portugal | Portugal Vital Registration - Deaths 2011 ICD10 as it appears in World Health Organization (WHO). WHO Mortality Database Version February 2014. Geneva, Switzerland: World Health Organization (WHO), 2014.                                                                                      | 2011                                       | *                    |
| Portugal | European Renal Association-European Dialysis and Transplant Association (ERA-EDTA). European Renal Association-European Dialysis and Transplant Association Registry Annual Report 2011. Parma, Italy: European Renal Association-European Dialysis and Transplant Association (ERA-EDTA), 2013. | 2011                                       | *                    |
| Qatar    | Central Statistical Organization (Qatar), Ministry of Public Health (Qatar). Qatar Vital Statistics Annual Bulletin 1984.                                                                                                                                                                        | 1970-1984                                  |                      |
| Qatar    | Central Statistical Organization (Qatar), Ministry of Public Health (Qatar). Qatar Vital Statistics Annual Bulletin 1985.                                                                                                                                                                        | 1970-1985                                  |                      |
| Qatar    | United Nations Office on Drugs and Crime (UNODC). United Nations Surveys on Crime Trends and the Operations of Criminal Justice Systems 1970-2006 as provided by Kavi Bhalla. [Unpublished].                                                                                                     | 1970-1994                                  |                      |
| Qatar    | Institute for Health Metrics and Evaluation (IHME), Joint United Nations Program on HIV/AIDS (UNAIDS). Institute for Health Metrics and Evaluation HIV Mortality Estimates Based on the UNAIDS Spectrum Model Framework.                                                                         | 1980-2013                                  | *                    |
| Qatar    | United Nations Children's Fund (UNICEF), World Health Organization (WHO). WHO and UNICEF Reported Disease Incidence Time Series - Pertussis. Geneva, Switzerland: World Health Organization (WHO).                                                                                               | 1980-1998, 2000-2003, 2005-2007, 2009-2013 |                      |
| Qatar    | United Nations Children's Fund (UNICEF), World Health Organization (WHO). WHO and UNICEF Reported Disease Incidence Time Series - Measles. Geneva, Switzerland: World Health Organization (WHO).                                                                                                 | 1980-1998, 2000-2007, 2009-2013            |                      |

**Web Table 32 - Comprehensive citation list**

| Country | Citation                                                                                                                                                                                                                                                      | Year*     | New for GBD 2013 (*) |
|---------|---------------------------------------------------------------------------------------------------------------------------------------------------------------------------------------------------------------------------------------------------------------|-----------|----------------------|
| Qatar   | Qatar Vital Registration Death Data 1981 as it appears in United Nations Statistics Division (UNSD). United Nations Demographic Yearbook. New York City, United States: United Nations Statistics Division (UNSD).                                            | 1981      |                      |
| Qatar   | Qatar Vital Registration Death Data 1982 as it appears in United Nations Statistics Division (UNSD). United Nations Demographic Yearbook. New York City, United States: United Nations Statistics Division (UNSD).                                            | 1982      |                      |
| Qatar   | Qatar Vital Registration Death Data 1983 as it appears in United Nations Statistics Division (UNSD). United Nations Demographic Yearbook. New York City, United States: United Nations Statistics Division (UNSD).                                            | 1983      |                      |
| Qatar   | Qatar Vital Registration Death Data 1985 as it appears in United Nations Statistics Division (UNSD). United Nations Demographic Yearbook. New York City, United States: United Nations Statistics Division (UNSD).                                            | 1985      |                      |
| Qatar   | Qatar Vital Registration Death Data 1986 as it appears in United Nations Statistics Division (UNSD). United Nations Demographic Yearbook. New York City, United States: United Nations Statistics Division (UNSD).                                            | 1986      |                      |
| Qatar   | Central Statistical Organization (Qatar), Council of Health Ministers of GCC States, Ministry of Public Health (Qatar). Qatar Child Health Survey 1987.                                                                                                       | 1987      |                      |
| Qatar   | Qatar Vital Registration Death Data 1987 as it appears in United Nations Statistics Division (UNSD). United Nations Demographic Yearbook. New York City, United States: United Nations Statistics Division (UNSD).                                            | 1987      |                      |
| Qatar   | Qatar Vital Registration Death Data 1988 as it appears in United Nations Statistics Division (UNSD). United Nations Demographic Yearbook. New York City, United States: United Nations Statistics Division (UNSD).                                            | 1988      |                      |
| Qatar   | Qatar Vital Registration Death Data 1989 as it appears in United Nations Statistics Division (UNSD). United Nations Demographic Yearbook. New York City, United States: United Nations Statistics Division (UNSD).                                            | 1989      |                      |
| Qatar   | Qatar Vital Registration Death Data 1990 as it appears in United Nations Statistics Division (UNSD). United Nations Demographic Yearbook. New York City, United States: United Nations Statistics Division (UNSD).                                            | 1990      |                      |
| Qatar   | Weatherall D. Sickle Cell and Thalassemias Prevalence Data, Personal Correspondence with David Weatherall. [Unpublished].                                                                                                                                     | 1990-2009 |                      |
| Qatar   | Centre for Health Informatics and Multiprofessional Education, University College London. Modell's Haemoglobinopathologist's Almanac. London, United Kingdom: Centre for Health Informatics and Multiprofessional Education, University College London, 2008. | 1990-2003 |                      |
| Qatar   | General Secretariat for Development Planning (Qatar), Ministry of Public Health (Qatar). Qatar Vital Statistics Annual Bulletin 2000. 2001.                                                                                                                   | 1991-2000 |                      |
| Qatar   | Qatar Vital Registration Death Data 1992 as it appears in United Nations Statistics Division (UNSD). United Nations Demographic Yearbook. New York City, United States: United Nations Statistics Division (UNSD).                                            | 1992      |                      |
| Qatar   | General Secretariat for Development Planning (Qatar), Ministry of Public Health (Qatar). Qatar Vital Statistics Annual Bulletin 2001. 2002.                                                                                                                   | 1992-2001 | *                    |
| Qatar   | Qatar Vital Registration Death Data 1993 as it appears in United Nations Statistics Division (UNSD). United Nations Demographic Yearbook. New York City, United States: United Nations Statistics Division (UNSD).                                            | 1993      |                      |



**Web Table 32 - Comprehensive citation list**

| Country | Citation                                                                                                                                                                                                                                                                                                                                                                                                                 | Year*                            | New for GBD 2013 (*) |
|---------|--------------------------------------------------------------------------------------------------------------------------------------------------------------------------------------------------------------------------------------------------------------------------------------------------------------------------------------------------------------------------------------------------------------------------|----------------------------------|----------------------|
| Qatar   | General Secretariat for Development Planning (Qatar), Ministry of Public Health (Qatar). Qatar Vital Statistics Annual Bulletin 2002. 2003.                                                                                                                                                                                                                                                                              | 1993-2002                        | *                    |
| Qatar   | Qatar Vital Registration Death Data 1994 as it appears in United Nations Statistics Division (UNSD). United Nations Demographic Yearbook. New York City, United States: United Nations Statistics Division (UNSD).                                                                                                                                                                                                       | 1994                             |                      |
| Qatar   | General Secretariat for Development Planning (Qatar), Ministry of Public Health (Qatar). Qatar Vital Statistics Annual Bulletin 2003. 2004.                                                                                                                                                                                                                                                                              | 1994-2003                        | *                    |
| Qatar   | Qatar Vital Registration - Deaths 1995 ICD10 as it appears in World Health Organization (WHO). WHO Mortality Database Version February 2014. Geneva, Switzerland: World Health Organization (WHO), 2014.                                                                                                                                                                                                                 | 1995                             |                      |
| Qatar   | Qatar Vital Registration Death Data 1996 as it appears in United Nations Statistics Division (UNSD). United Nations Demographic Yearbook. New York City, United States: United Nations Statistics Division (UNSD).                                                                                                                                                                                                       | 1996                             |                      |
| Qatar   | General Secretariat for Development Planning (Qatar), National Health Authority (Qatar). Qatar Vital Statistics Annual Bulletin 2005. 2006.                                                                                                                                                                                                                                                                              | 1996-2005                        | *                    |
| Qatar   | Qatar Vital Registration Death Data 1997 as it appears in United Nations Statistics Division (UNSD). United Nations Demographic Yearbook. New York City, United States: United Nations Statistics Division (UNSD).                                                                                                                                                                                                       | 1997                             |                      |
| Qatar   | World Health Organization (WHO). Global Prevalence and Incidence of Selected Curable Sexually Transmitted Infections: Overviews and Estimates 2001. Geneva, Switzerland: World Health Organization (WHO), 2001.                                                                                                                                                                                                          | 1997                             |                      |
| Qatar   | Joint United Nations Program on HIV/AIDS (UNAIDS), United Nations Children's Fund (UNICEF), World Health Organization (WHO). Qatar Epidemiological Fact Sheet on HIV/AIDS and STIs 2004.                                                                                                                                                                                                                                 | 1997                             |                      |
| Qatar   | National Health Authority (Qatar), Qatar Statistics Authority. Qatar Vital Statistics Annual Bulletin 2006.                                                                                                                                                                                                                                                                                                              | 1997-2006                        | *                    |
| Qatar   | Arab Fund for Economic and Social Development (AFESD), Arab Gulf Program for Development (AGFUND), Central Statistical Organization (Qatar), Council of Health Ministers of GCC States, Ministry of Public Health (Qatar), United Nations Children's Fund (UNICEF), United Nations Population Fund (UNFPA), United Nations Statistics Division (UNSD), World Health Organization (WHO). Qatar Family Health Survey 1998. | 1998                             |                      |
| Qatar   | Abu-Raddad LJ, Akala FA, Semini I, Riedner G, Wilson D, Tawil O, World Bank. Characterizing the HIV/AIDS Epidemic in the Middle East and North Africa. Washington DC, United States: World Bank, 2010.                                                                                                                                                                                                                   | 1998                             |                      |
| Qatar   | Joint United Nations Program on HIV/AIDS (UNAIDS), Supreme Council of Health (Qatar). Qatar UNGASS Country Progress Report 2010. Geneva, Switzerland: Joint United Nations Program on HIV/AIDS (UNAIDS), 2010.                                                                                                                                                                                                           | 1998                             |                      |
| Qatar   | United Nations Office on Drugs and Crime (UNODC). United Nations Office on Drugs and Crime Global Study on Homicides 2011. Vienna, Austria: United Nations Office on Drugs and Crime (UNODC), 2011.                                                                                                                                                                                                                      | 1998-2007                        |                      |
| Qatar   | World Health Organization (WHO). Yellow Fever Reported Cases, WHO Vaccine-Preventable Diseases: Monitoring System. Geneva, Switzerland: World Health Organization (WHO).                                                                                                                                                                                                                                                 | 1998, 2000-2003, 2005-2007, 2009 |                      |
| Qatar   | Qatar Vital Registration Death Data 1999 as it appears in United Nations Statistics Division (UNSD). United Nations Demographic Yearbook. New York City, United States: United Nations Statistics Division (UNSD).                                                                                                                                                                                                       | 1999                             |                      |
| Qatar   | National Health Authority (Qatar), Qatar Statistics Authority. Qatar Vital Statistics Annual Bulletin 2008.                                                                                                                                                                                                                                                                                                              | 1999-2008                        | *                    |

**Web Table 32 - Comprehensive citation list**

| Country | Citation                                                                                                                                                                                                                                                                              | Year*      | New for GBD 2013 (*) |
|---------|---------------------------------------------------------------------------------------------------------------------------------------------------------------------------------------------------------------------------------------------------------------------------------------|------------|----------------------|
| Qatar   | World Health Organization (WHO). Retrospective Measles Data on Supplementary Immunization Activities. Geneva, Switzerland: World Health Organization (WHO).                                                                                                                           | 2000, 2007 |                      |
| Qatar   | Qatar Vital Registration Death Data 2001 as it appears in United Nations Statistics Division (UNSD). United Nations Demographic Yearbook. New York City, United States: United Nations Statistics Division (UNSD).                                                                    | 2001       |                      |
| Qatar   | Qatar Vital Registration Death Data 2003 as it appears in United Nations Statistics Division (UNSD). United Nations Demographic Yearbook. New York City, United States: United Nations Statistics Division (UNSD).                                                                    | 2003       |                      |
| Qatar   | Qatar Vital Registration - Deaths 2004 ICD10 as it appears in World Health Organization (WHO). WHO Mortality Database Version February 2014. Geneva, Switzerland: World Health Organization (WHO), 2014.                                                                              | 2004       |                      |
| Qatar   | Qatar Vital Registration - Deaths 2005 ICD10 as it appears in World Health Organization (WHO). WHO Mortality Database Version February 2014. Geneva, Switzerland: World Health Organization (WHO), 2014.                                                                              | 2005       |                      |
| Qatar   | Forman D, Bray F, Brewster DH, Gombe Mbalawa C, Kohler B, Piñeros M, Steliarova-Foucher E, Swaminathan R and Ferlay J, eds (2013). Cancer Incidence in Five Continents, Vol. X Summary Database (electronic version). Lyon, IARC. <a href="http://ci5.iarc.fr">http://ci5.iarc.fr</a> | 2005       |                      |
| Qatar   | Qatar Vital Registration - Deaths 2006 ICD10 as it appears in World Health Organization (WHO). WHO Mortality Database Version February 2014. Geneva, Switzerland: World Health Organization (WHO), 2014.                                                                              | 2006       |                      |
| Qatar   | Qatar Vital Registration - Deaths 2007 ICD10 as it appears in World Health Organization (WHO). WHO Mortality Database Version February 2014. Geneva, Switzerland: World Health Organization (WHO), 2014.                                                                              | 2007       |                      |
| Qatar   | Qatar Vital Registration - Deaths 2008 ICD10 as it appears in World Health Organization (WHO). WHO Mortality Database Version February 2014. Geneva, Switzerland: World Health Organization (WHO), 2014.                                                                              | 2008       |                      |
| Qatar   | Qatar Vital Registration - Deaths 2009 ICD10 as it appears in World Health Organization (WHO). WHO Mortality Database Version February 2014. Geneva, Switzerland: World Health Organization (WHO), 2014.                                                                              | 2009       |                      |
| Qatar   | Qatar Vital Registration - Deaths 2010 ICD10 as it appears in World Health Organization (WHO). WHO Mortality Database Version February 2014. Geneva, Switzerland: World Health Organization (WHO), 2014.                                                                              | 2010       |                      |
| Qatar   | Qatar Vital Registration - Deaths 2011 ICD10 as it appears in World Health Organization (WHO). WHO Mortality Database Version February 2014. Geneva, Switzerland: World Health Organization (WHO), 2014.                                                                              | 2011       | *                    |
| Romania | Romania Vital Registration Death Data 1956 as it appears in United Nations Statistics Division (UNSD). United Nations Demographic Yearbook. New York City, United States: United Nations Statistics Division (UNSD).                                                                  | 1956       |                      |
| Romania | Romania Vital Registration Death Data 1957 as it appears in United Nations Statistics Division (UNSD). United Nations Demographic Yearbook. New York City, United States: United Nations Statistics Division (UNSD).                                                                  | 1957       |                      |

**Web Table 32 - Comprehensive citation list**

| Country | Citation                                                                                                                                                                                                                 | Year*     | New for GBD 2013 (*) |
|---------|--------------------------------------------------------------------------------------------------------------------------------------------------------------------------------------------------------------------------|-----------|----------------------|
| Romania | Romania Vital Registration Death Data 1958 as it appears in United Nations Statistics Division (UNSD). United Nations Demographic Yearbook. New York City, United States: United Nations Statistics Division (UNSD).     | 1958      |                      |
| Romania | Romania Vital Registration - Deaths 1959 ICD7 as it appears in World Health Organization (WHO). WHO Mortality Database Version February 2014. Geneva, Switzerland: World Health Organization (WHO), 2014.                | 1959      |                      |
| Romania | Romania Vital Registration - Deaths 1960 ICD7 as it appears in World Health Organization (WHO). WHO Mortality Database Version February 2014. Geneva, Switzerland: World Health Organization (WHO), 2014.                | 1960      |                      |
| Romania | Romania Vital Registration - Deaths 1961 ICD7 as it appears in World Health Organization (WHO). WHO Mortality Database Version February 2014. Geneva, Switzerland: World Health Organization (WHO), 2014.                | 1961      |                      |
| Romania | Romania Vital Registration - Deaths 1962 ICD7 as it appears in World Health Organization (WHO). WHO Mortality Database Version February 2014. Geneva, Switzerland: World Health Organization (WHO), 2014.                | 1962      |                      |
| Romania | Fraser GR, Defaranas B, Kattamis CA, Race RR, Sanger R, Stamatoyannopoulos G. Glucose-6-phosphate dehydrogenase, colour vision and XG blood groups in Greece: linkage and population data. Ann Hum Genet. 1964; 395-403. | 1962      |                      |
| Romania | Romania Vital Registration - Deaths 1963 ICD7 as it appears in World Health Organization (WHO). WHO Mortality Database Version February 2014. Geneva, Switzerland: World Health Organization (WHO), 2014.                | 1963      |                      |
| Romania | Romania Vital Registration - Deaths 1964 ICD7 as it appears in World Health Organization (WHO). WHO Mortality Database Version February 2014. Geneva, Switzerland: World Health Organization (WHO), 2014.                | 1964      |                      |
| Romania | Romania Vital Registration - Deaths 1965 ICD7 as it appears in World Health Organization (WHO). WHO Mortality Database Version February 2014. Geneva, Switzerland: World Health Organization (WHO), 2014.                | 1965      |                      |
| Romania | Romania Census 1966 as it appears in United Nations Statistics Division (UNSD). United Nations Demographic Yearbook. New York City, United States: United Nations Statistics Division (UNSD).                            | 1966      |                      |
| Romania | Romania Vital Registration - Deaths 1966 ICD7 as it appears in World Health Organization (WHO). WHO Mortality Database Version February 2014. Geneva, Switzerland: World Health Organization (WHO), 2014.                | 1966      |                      |
| Romania | Schneer JH. A survey for erythrocyte glucose-6-phosphate dehydrogenase deficiency in Rumania. Acta Haematol. 1968; 40(1): 44-7.                                                                                          | 1966-1968 |                      |
| Romania | Romania Vital Registration - Deaths 1967 ICD7 as it appears in World Health Organization (WHO). WHO Mortality Database Version February 2014. Geneva, Switzerland: World Health Organization (WHO), 2014.                | 1967      |                      |
| Romania | Romania Vital Registration - Deaths 1968 ICD7 as it appears in World Health Organization (WHO). WHO Mortality Database Version February 2014. Geneva, Switzerland: World Health Organization (WHO), 2014.                | 1968      |                      |
| Romania | Romania Vital Registration - Deaths 1969 ICD8 as it appears in World Health Organization (WHO). WHO Mortality Database Version February 2014. Geneva, Switzerland: World Health Organization (WHO), 2014.                | 1969      |                      |

**Web Table 32 - Comprehensive citation list**

| Country | Citation                                                                                                                                                                                                                                                        | Year*                                        | New for GBD 2013 (*) |
|---------|-----------------------------------------------------------------------------------------------------------------------------------------------------------------------------------------------------------------------------------------------------------------|----------------------------------------------|----------------------|
| Romania | Romania Vital Registration - Deaths 1970 ICD8 as it appears in World Health Organization (WHO). WHO Mortality Database Version February 2014. Geneva, Switzerland: World Health Organization (WHO), 2014.                                                       | 1970                                         |                      |
| Romania | Centre for Research on the Epidemiology of Disasters (CRED). EM-DAT: The OFDA/CRED International Disaster Database. Brussels, Belgium: Catholic University of Leuven.                                                                                           | 1970, 1975, 1977, 1990-1991, 1993-2010, 2013 |                      |
| Romania | Romania Vital Registration - Deaths 1971 ICD8 as it appears in World Health Organization (WHO). WHO Mortality Database Version February 2014. Geneva, Switzerland: World Health Organization (WHO), 2014.                                                       | 1971                                         |                      |
| Romania | Romania Vital Registration - Deaths 1972 ICD8 as it appears in World Health Organization (WHO). WHO Mortality Database Version February 2014. Geneva, Switzerland: World Health Organization (WHO), 2014.                                                       | 1972                                         |                      |
| Romania | Romania Vital Registration - Deaths 1973 ICD8 as it appears in World Health Organization (WHO). WHO Mortality Database Version February 2014. Geneva, Switzerland: World Health Organization (WHO), 2014.                                                       | 1973                                         |                      |
| Romania | Romania Vital Registration - Deaths 1974 ICD8 as it appears in World Health Organization (WHO). WHO Mortality Database Version February 2014. Geneva, Switzerland: World Health Organization (WHO), 2014.                                                       | 1974                                         |                      |
| Romania | Romania Vital Registration - Deaths 1975 ICD8 as it appears in World Health Organization (WHO). WHO Mortality Database Version February 2014. Geneva, Switzerland: World Health Organization (WHO), 2014.                                                       | 1975                                         |                      |
| Romania | Romania Vital Registration - Deaths 1976 ICD8 as it appears in World Health Organization (WHO). WHO Mortality Database Version February 2014. Geneva, Switzerland: World Health Organization (WHO), 2014.                                                       | 1976                                         |                      |
| Romania | Romania Census 1977 as it appears in United Nations Statistics Division (UNSD). United Nations Demographic Yearbook. New York City, United States: United Nations Statistics Division (UNSD).                                                                   | 1977                                         |                      |
| Romania | Romania Vital Registration - Deaths 1977 ICD8 as it appears in World Health Organization (WHO). WHO Mortality Database Version February 2014. Geneva, Switzerland: World Health Organization (WHO), 2014.                                                       | 1977                                         |                      |
| Romania | Romania Vital Registration - Deaths 1978 ICD8 as it appears in World Health Organization (WHO). WHO Mortality Database Version February 2014. Geneva, Switzerland: World Health Organization (WHO), 2014.                                                       | 1978                                         |                      |
| Romania | Onesciuc C, Szantay I, Gorgan V, Serban I, Onesciuc I, Gidaly M, Cirstina D. [Incidence of antibodies against hepatitis virus A (anti-HA) in a non-selected urban population]. Rev Ig Bacteriol Virusol Parazitol Epidemiol Pneumoftiziol. 1981; 26(3): 167-73. | 1978-1980                                    |                      |
| Romania | Romania Vital Registration Death Data 1979 as it appears in United Nations Statistics Division (UNSD). United Nations Demographic Yearbook. New York City, United States: United Nations Statistics Division (UNSD).                                            | 1979                                         |                      |
| Romania | Romania Vital Registration - Deaths 1980 ICD9 as it appears in World Health Organization (WHO). WHO Mortality Database Version February 2014. Geneva, Switzerland: World Health Organization (WHO), 2014.                                                       | 1980                                         |                      |
| Romania | Sabău M, Kiss E, Muntean I, Căpîlnă E. Serologic markers of hepatitis B and A infections in the healthy population. Virologie. 1983; 34(3): 197-201.                                                                                                            | 1980-1982                                    |                      |

**Web Table 32 - Comprehensive citation list**

| Country | Citation                                                                                                                                                                                                                 | Year*      | New for GBD 2013 (*) |
|---------|--------------------------------------------------------------------------------------------------------------------------------------------------------------------------------------------------------------------------|------------|----------------------|
| Romania | Institute for Health Metrics and Evaluation (IHME), Joint United Nations Program on HIV/AIDS (UNAIDS). Institute for Health Metrics and Evaluation HIV Mortality Estimates Based on the UNAIDS Spectrum Model Framework. | 1980-2013  | *                    |
| Romania | United Nations Children's Fund (UNICEF), World Health Organization (WHO). WHO and UNICEF Reported Disease Incidence Time Series - Pertussis. Geneva, Switzerland: World Health Organization (WHO).                       | 1980-2013  |                      |
| Romania | United Nations Children's Fund (UNICEF), World Health Organization (WHO). WHO and UNICEF Reported Disease Incidence Time Series - Measles. Geneva, Switzerland: World Health Organization (WHO).                         | 1980-2013  |                      |
| Romania | Parkin DM, International Agency for Research on Cancer, International Association of Cancer Registries. Cancer Incidence in Five Continents. Vol. I to VIII. Lyon, France, IARC Press, 2005.                             | 1980, 1985 |                      |
| Romania | Romania Vital Registration - Deaths 1981 ICD9 as it appears in World Health Organization (WHO). WHO Mortality Database Version February 2014. Geneva, Switzerland: World Health Organization (WHO), 2014.                | 1981       |                      |
| Romania | Romania Vital Registration - Deaths 1982 ICD9 as it appears in World Health Organization (WHO). WHO Mortality Database Version February 2014. Geneva, Switzerland: World Health Organization (WHO), 2014.                | 1982       |                      |
| Romania | Romania Vital Registration - Deaths 1983 ICD9 as it appears in World Health Organization (WHO). WHO Mortality Database Version February 2014. Geneva, Switzerland: World Health Organization (WHO), 2014.                | 1983       |                      |
| Romania | Romania Vital Registration - Deaths 1984 ICD9 as it appears in World Health Organization (WHO). WHO Mortality Database Version February 2014. Geneva, Switzerland: World Health Organization (WHO), 2014.                | 1984       |                      |
| Romania | Romania Vital Registration - Deaths 1985 ICD9 as it appears in World Health Organization (WHO). WHO Mortality Database Version February 2014. Geneva, Switzerland: World Health Organization (WHO), 2014.                | 1985       |                      |
| Romania | Romania Vital Registration - Deaths 1986 ICD9 as it appears in World Health Organization (WHO). WHO Mortality Database Version February 2014. Geneva, Switzerland: World Health Organization (WHO), 2014.                | 1986       |                      |
| Romania | Romania Vital Registration - Deaths 1987 ICD9 as it appears in World Health Organization (WHO). WHO Mortality Database Version February 2014. Geneva, Switzerland: World Health Organization (WHO), 2014.                | 1987       |                      |
| Romania | Romania Vital Registration - Deaths 1988 ICD9 as it appears in World Health Organization (WHO). WHO Mortality Database Version February 2014. Geneva, Switzerland: World Health Organization (WHO), 2014.                | 1988       |                      |
| Romania | Romania Vital Registration - Deaths 1989 ICD9 as it appears in World Health Organization (WHO). WHO Mortality Database Version February 2014. Geneva, Switzerland: World Health Organization (WHO), 2014.                | 1989       |                      |
| Romania | Department of Peace and Conflict Research, Uppsala University. UCDP One-Sided Violence Database Version 1.4, 2013. Uppsala, Sweden: Department of Peace and Conflict Research, Uppsala University, 2013.                 | 1989       | *                    |
| Romania | Romania Vital Registration - Deaths 1990 ICD9 as it appears in World Health Organization (WHO). WHO Mortality Database Version February 2014. Geneva, Switzerland: World Health Organization (WHO), 2014.                | 1990       |                      |
| Romania | Paquet C, Babes VT, Drucker J, Sénémaud B, Dobrescu A. Viral hepatitis in Bucharest. Bull World Health Organ. 1993; 71(6): 781-6.                                                                                        | 1990       |                      |

**Web Table 32 - Comprehensive citation list**

| Country | Citation                                                                                                                                                                                                                                                                                              | Year*                 | New for GBD 2013 (*) |
|---------|-------------------------------------------------------------------------------------------------------------------------------------------------------------------------------------------------------------------------------------------------------------------------------------------------------|-----------------------|----------------------|
| Romania | Modell B, Darlison M, Birgens H, Cario H, Faustino P, Giordano PC, Gulbis B, Hopmeier P, Lena-Russo D, Romao L, Theodorsson E. Epidemiology of haemoglobin disorders in Europe: an overview. <i>Scand J Clin Lab Invest.</i> 2007; 67(1): 39-69.                                                      | 1990-2006             |                      |
| Romania | Weatherall D. Sickle Cell and Thalassemias Prevalence Data, Personal Correspondence with David Weatherall. [Unpublished].                                                                                                                                                                             | 1990-2009             |                      |
| Romania | Centre for Health Informatics and Multiprofessional Education, University College London. Modell's Haemoglobinopathologist's Almanac. London, United Kingdom: Centre for Health Informatics and Multiprofessional Education, University College London, 2008.                                         | 1990-2006             |                      |
| Romania | Rudin C, Berger R, Tobler R, Nars PW, Just M, Pavic N. HIV-1, hepatitis (A,B, and C), and measles in Romanian children. <i>Lancet.</i> 1990; 336(8730): 1592-3.                                                                                                                                       | 1990, 1997            |                      |
| Romania | Romania Vital Registration - Deaths 1991 ICD9 as it appears in World Health Organization (WHO). WHO Mortality Database Version February 2014. Geneva, Switzerland: World Health Organization (WHO), 2014.                                                                                             | 1991                  |                      |
| Romania | Mircescu G, Capsa D, Covic M, Caprioara MG, Gluhovschi G, Golea O, Ursea N, Gârmeata L, Cepoi V, Constantinovici N, Covic A. Nephrology and renal replacement therapy in Romania – transition still continues (Cinderella story revisited). <i>Nephrol Dial Transplant.</i> 2004; 19(12): 2971-80.    | 1991, 1995-1996, 2003 |                      |
| Romania | Romania Vital Registration - Deaths 1992 ICD9 as it appears in World Health Organization (WHO). WHO Mortality Database Version February 2014. Geneva, Switzerland: World Health Organization (WHO), 2014.                                                                                             | 1992                  |                      |
| Romania | Romania Vital Registration - Deaths 1993 ICD9 as it appears in World Health Organization (WHO). WHO Mortality Database Version February 2014. Geneva, Switzerland: World Health Organization (WHO), 2014.                                                                                             | 1993                  |                      |
| Romania | Iacob E, Durnea C, Năstase A, Scripcaru L, Pisciă-Donose G. [Viral hepatitis A as an occupational disease in the city of Iași]. <i>Rev Med Chir Soc Med Nat Iasi.</i> 1999; 103(3-4): 161-6.                                                                                                          | 1993-1997             |                      |
| Romania | Romania Vital Registration - Deaths 1994 ICD9 as it appears in World Health Organization (WHO). WHO Mortality Database Version February 2014. Geneva, Switzerland: World Health Organization (WHO), 2014.                                                                                             | 1994                  |                      |
| Romania | Beldescu N, Bălan A, Popa R. [The prevalence of viral hepatitis markers in the general population]. <i>Bacteriol Virusol Parazitol Epidemiol.</i> 1995; 40(2): 101-8.                                                                                                                                 | 1994                  |                      |
| Romania | National Commission for Statistics (Romania), World Bank. Romania Living Standards Measurement Survey 1994-1995.                                                                                                                                                                                      | 1994-1995             |                      |
| Romania | Romania Vital Registration - Deaths 1995 ICD9 as it appears in World Health Organization (WHO). WHO Mortality Database Version February 2014. Geneva, Switzerland: World Health Organization (WHO), 2014.                                                                                             | 1995                  |                      |
| Romania | Constantinescu I, Diaconu C, Grancea C, Bleontu C, Ruță SM, Cernescu C. "Trial moves rapidly on, when the judge has determined the sentence beforehand" (W. Scott: <i>Ivanhoe</i> , 36) or pitfalls in serosurvey of anti-hepatitis C antibody in children. <i>Rom J Virol.</i> 1998; 49(1-4): 11-21. | 1995-1997             |                      |
| Romania | Nedelcu I, Crăciun D, Târdei G, Ruță SM, Grancea C, Cernescu C. Assessment of the anti-hepatitis B vaccination efficacy in high risk children. <i>Rom J Virol.</i> 1998; 49(1-4): 43-51.                                                                                                              | 1995-1996             |                      |
| Romania | Romania Vital Registration - Deaths 1996 ICD9 as it appears in World Health Organization (WHO). WHO Mortality Database Version February 2014. Geneva, Switzerland: World Health Organization (WHO), 2014.                                                                                             | 1996                  |                      |



**Web Table 32 - Comprehensive citation list**

| Country | Citation                                                                                                                                                                                                                                                                    | Year*      | New for GBD 2013 (*) |
|---------|-----------------------------------------------------------------------------------------------------------------------------------------------------------------------------------------------------------------------------------------------------------------------------|------------|----------------------|
| Romania | Centers for Disease Control and Prevention (CDC). Measles outbreak--Romania, 1997. MMWR Morb Mortal Wkly Rep. 1997; 46(49): 1159-63.                                                                                                                                        | 1996-1997  |                      |
| Romania | Romania Vital Registration - Deaths 1997 ICD9 as it appears in World Health Organization (WHO). WHO Mortality Database Version February 2014. Geneva, Switzerland: World Health Organization (WHO), 2014.                                                                   | 1997       |                      |
| Romania | Cernescu C, Ruță S, Diaconu C, Bleotu C, Grancea C, Truică C, Crăciun D, Nedelcu IN. Low rates of seroconversion after hepatitis B vaccination in orphanages with high prevalence of virus carriers. Rom J Virol. 1998; 49(1-4): 73-81.                                     | 1997       |                      |
| Romania | Romania Vital Registration - Deaths 1998 ICD9 as it appears in World Health Organization (WHO). WHO Mortality Database Version February 2014. Geneva, Switzerland: World Health Organization (WHO), 2014.                                                                   | 1998       |                      |
| Romania | Measles Supplementary Immunization Activity Data as provided by the World Health Organization. [Unpublished].                                                                                                                                                               | 1998       |                      |
| Romania | Division of Reproductive Health-Centers for Disease Control and Prevention (CDC) and Romanian Association of Public Health and Health Management. (2001) Romania Reproductive Health Survey 1999. Atlanta, United States: Centers for Disease Control and Prevention (CDC). | 1999       |                      |
| Romania | Romania Vital Registration - Deaths 1999 ICD10 as it appears in World Health Organization (WHO). WHO Mortality Database Version February 2014. Geneva, Switzerland: World Health Organization (WHO), 2014.                                                                  | 1999       |                      |
| Romania | World Health Organization (WHO). Yellow Fever Reported Cases, WHO Vaccine-Preventable Diseases: Monitoring System. Geneva, Switzerland: World Health Organization (WHO).                                                                                                    | 1999-2009  |                      |
| Romania | Romania Vital Registration - Deaths 2000 ICD10 as it appears in World Health Organization (WHO). WHO Mortality Database Version February 2014. Geneva, Switzerland: World Health Organization (WHO), 2014.                                                                  | 2000       |                      |
| Romania | Luca V, Gessner BD, Luca C, Turcu T, Rugina S, Rugina C, Ilie M, Novakova E, Vlasich C. Incidence and etiological agents of bacterial meningitis among children < 5 years of age in two districts of Romania. Eur J Clin Microbiol Infect Dis. 2004; 23(7): 523-8.          | 2000-2002  |                      |
| Romania | Romania Vital Registration - Deaths 2001 ICD10 as it appears in World Health Organization (WHO). WHO Mortality Database Version February 2014. Geneva, Switzerland: World Health Organization (WHO), 2014.                                                                  | 2001       |                      |
| Romania | Romania Vital Registration - Deaths 2002 ICD10 as it appears in World Health Organization (WHO). WHO Mortality Database Version February 2014. Geneva, Switzerland: World Health Organization (WHO), 2014.                                                                  | 2002       |                      |
| Romania | Romania Vital Registration - Deaths 2003 ICD10 as it appears in World Health Organization (WHO). WHO Mortality Database Version February 2014. Geneva, Switzerland: World Health Organization (WHO), 2014.                                                                  | 2003       |                      |
| Romania | EUVAC-NET. EUVAC-NET Pertussis Surveillance Report 2003-2007. Stockholm, Sweden: European Centre for Disease Prevention and Control, 2009.                                                                                                                                  | 2003-2007  |                      |
| Romania | Joint United Nations Program on HIV/AIDS (UNAIDS), Ministry of Health (Romania). Romania UNGASS Country Progress Report 2010. Geneva, Switzerland: Joint United Nations Program on HIV/AIDS (UNAIDS), 2010.                                                                 | 2003, 2009 |                      |

**Web Table 32 - Comprehensive citation list**

| Country | Citation                                                                                                                                                                                                                                                                                         | Year*     | New for GBD 2013 (*) |
|---------|--------------------------------------------------------------------------------------------------------------------------------------------------------------------------------------------------------------------------------------------------------------------------------------------------|-----------|----------------------|
| Romania | Romania Vital Registration - Deaths 2004 ICD10 as it appears in World Health Organization (WHO). WHO Mortality Database Version February 2014. Geneva, Switzerland: World Health Organization (WHO), 2014.                                                                                       | 2004      |                      |
| Romania | Romania Vital Registration - Deaths 2005 ICD10 as it appears in World Health Organization (WHO). WHO Mortality Database Version February 2014. Geneva, Switzerland: World Health Organization (WHO), 2014.                                                                                       | 2005      |                      |
| Romania | EUVAC-NET. EUVAC-NET Measles Surveillance Report 2005. Stockholm, Sweden: European Centre for Disease Prevention and Control, 2006.                                                                                                                                                              | 2005      |                      |
| Romania | Romania Vital Registration - Deaths 2006 ICD10 as it appears in World Health Organization (WHO). WHO Mortality Database Version February 2014. Geneva, Switzerland: World Health Organization (WHO), 2014.                                                                                       | 2006      |                      |
| Romania | EUVAC-NET. EUVAC-NET Measles Surveillance Report 2006. Stockholm, Sweden: European Centre for Disease Prevention and Control, 2007.                                                                                                                                                              | 2006      |                      |
| Romania | Gheorghe L, Csiki IE, Iacob S, Gheorghe C, Smira G, Regep L. The prevalence and risk factors of hepatitis C virus infection in adult population in Romania: a nationwide survey 2006 - 2008. J Gastrointest Liver Dis. 2010; 19(4): 373-9.                                                       | 2006-2008 |                      |
| Romania | Constantin CV, Streba CT, Rogoveanu I, Nita-Stefanescu L, Ionescu AG. Cirrhosis and Chronic Viral Hepatitis as Risk Factors for Hepatocellular Carcinoma: Romanian Single-clinic Experience. Maedica (Buchar). 2010; 5(4): 265-70.                                                               | 2006-2009 |                      |
| Romania | Liana Gheorghe SI. Prevalence of hepatitis C in Romania: different from European rates?. J Hepatol. 2008; 49(4): 661-3.                                                                                                                                                                          | 2006-2007 |                      |
| Romania | Romania Vital Registration - Deaths 2007 ICD10 as it appears in World Health Organization (WHO). WHO Mortality Database Version February 2014. Geneva, Switzerland: World Health Organization (WHO), 2014.                                                                                       | 2007      |                      |
| Romania | Romania Vital Registration - Deaths 2008 ICD10 as it appears in World Health Organization (WHO). WHO Mortality Database Version February 2014. Geneva, Switzerland: World Health Organization (WHO), 2014.                                                                                       | 2008      |                      |
| Romania | EUVAC-NET. EUVAC-NET Pertussis Surveillance Report 2009. Stockholm, Sweden: European Centre for Disease Prevention and Control, 2010.                                                                                                                                                            | 2008-2009 |                      |
| Romania | Romania Vital Registration - Deaths 2009 ICD10 as it appears in World Health Organization (WHO). WHO Mortality Database Version February 2014. Geneva, Switzerland: World Health Organization (WHO), 2014.                                                                                       | 2009      |                      |
| Romania | EUVAC-NET. EUVAC-NET Measles Surveillance Report 2009. Stockholm, Sweden: European Centre for Disease Prevention and Control, 2010.                                                                                                                                                              | 2009      |                      |
| Romania | Romania Vital Registration - Deaths 2010 ICD10 as it appears in World Health Organization (WHO). WHO Mortality Database Version February 2014. Geneva, Switzerland: World Health Organization (WHO), 2014.                                                                                       | 2010      |                      |
| Romania | European Renal Association-European Dialysis and Transplant Association (ERA-EDTA). European Renal Association-European Dialysis and Transplant Association Registry Annual Report 2010. Parma, Italy: European Renal Association-European Dialysis and Transplant Association (ERA-EDTA), 2012. | 2010      | *                    |
| Romania | EUVAC-NET. EUVAC-NET Measles Surveillance Report 2010. Stockholm, Sweden: European Centre for Disease Prevention and Control, 2011.                                                                                                                                                              | 2010      |                      |



**Web Table 32 - Comprehensive citation list**

| Country | Citation                                                                                                                                                                                                                                                                                         | Year*      | New for GBD 2013 (*) |
|---------|--------------------------------------------------------------------------------------------------------------------------------------------------------------------------------------------------------------------------------------------------------------------------------------------------|------------|----------------------|
| Romania | World Health Organization (WHO). Retrospective Measles Data on Supplementary Immunization Activities. Geneva, Switzerland: World Health Organization (WHO).                                                                                                                                      | 2010-2011  |                      |
| Romania | Romania Vital Registration - Deaths 2011 ICD10 as it appears in World Health Organization (WHO). WHO Mortality Database Version February 2014. Geneva, Switzerland: World Health Organization (WHO), 2014.                                                                                       | 2011       | *                    |
| Romania | European Renal Association-European Dialysis and Transplant Association (ERA-EDTA). European Renal Association-European Dialysis and Transplant Association Registry Annual Report 2011. Parma, Italy: European Renal Association-European Dialysis and Transplant Association (ERA-EDTA), 2013. | 2011       | *                    |
| Russia  | Peace Research Institute Oslo (PRIO). Battle Deaths Dataset Version 3, 2009. Oslo, Norway: Peace Research Institute Oslo (PRIO), 2009.                                                                                                                                                           | 1950-1988  |                      |
| Russia  | Max Planck Institute for Demographic Research, University of California. Human Mortality Database. Berkeley, USA: University of California; Rostock, Germany: Max Planck Institute for Demographic Research.                                                                                     | 1959-1979  |                      |
| Russia  | Savinskaia SS, Tol'skaia EA, Balaian MS. [Antibodies to the hepatitis A virus in the healthy population of Moscow]. Zh Mikrobiol Epidemiol Immunobiol. 1982; 34-7.                                                                                                                               | 1977-1981  |                      |
| Russia  | USSR, Former Vital Registration - Deaths 1980 ICD9 as it appears in World Health Organization (WHO). WHO Mortality Database Version February 2014. Geneva, Switzerland: World Health Organization (WHO), 2014.                                                                                   | 1980       |                      |
| Russia  | Institute for Health Metrics and Evaluation (IHME), Joint United Nations Program on HIV/AIDS (UNAIDS). Institute for Health Metrics and Evaluation HIV Mortality Estimates Based on the UNAIDS Spectrum Model Framework.                                                                         | 1980-2013  | *                    |
| Russia  | USSR, Former Vital Registration - Deaths 1981 ICD9 as it appears in World Health Organization (WHO). WHO Mortality Database Version February 2014. Geneva, Switzerland: World Health Organization (WHO), 2014.                                                                                   | 1981       |                      |
| Russia  | Kornachev AS, Mikhaïlova NB, Dubrovskaja LR, Sitkov VI. [The determination of hepatitis A antibodies in epidemiological practice]. Zh Mikrobiol Epidemiol Immunobiol. 1990; 59-60.                                                                                                               | 1981-1984  |                      |
| Russia  | USSR, Former Vital Registration - Deaths 1982 ICD9 as it appears in World Health Organization (WHO). WHO Mortality Database Version February 2014. Geneva, Switzerland: World Health Organization (WHO), 2014.                                                                                   | 1982       |                      |
| Russia  | USSR, Former Vital Registration - Deaths 1983 ICD9 as it appears in World Health Organization (WHO). WHO Mortality Database Version February 2014. Geneva, Switzerland: World Health Organization (WHO), 2014.                                                                                   | 1983       |                      |
| Russia  | USSR, Former Vital Registration - Deaths 1984 ICD9 as it appears in World Health Organization (WHO). WHO Mortality Database Version February 2014. Geneva, Switzerland: World Health Organization (WHO), 2014.                                                                                   | 1984       |                      |
| Russia  | USSR, Former Vital Registration - Deaths 1985 ICD9 as it appears in World Health Organization (WHO). WHO Mortality Database Version February 2014. Geneva, Switzerland: World Health Organization (WHO), 2014.                                                                                   | 1985       |                      |
| Russia  | Prikazchikov SA, Karetnyi IuV, Vakar EI, Balaian MS, Zenkov VA. [Characteristics of the development of humoral immunity to hepatitis A in children's day care centers]. Vopr Virusol. 1988; 33(2): 169-73.                                                                                       | 1985-1986  |                      |
| Russia  | Parkin DM, International Agency for Research on Cancer, International Association of Cancer Registries. Cancer Incidence in Five Continents. Vol. I to VIII. Lyon, France, IARC Press, 2005.                                                                                                     | 1985, 1995 |                      |

**Web Table 32 - Comprehensive citation list**

| Country | Citation                                                                                                                                                                                                                                                                                                                                                      | Year*           | New for GBD 2013 (*) |
|---------|---------------------------------------------------------------------------------------------------------------------------------------------------------------------------------------------------------------------------------------------------------------------------------------------------------------------------------------------------------------|-----------------|----------------------|
| Russia  | USSR, Former Vital Registration - Deaths 1986 ICD9 as it appears in World Health Organization (WHO). WHO Mortality Database Version February 2014. Geneva, Switzerland: World Health Organization (WHO), 2014.                                                                                                                                                | 1986            |                      |
| Russia  | Shliakhtenko LI, Kryga LN, Aleĭnik MD, Vasil'eva VI, Mukomolov SL, Rumovskii VI, Shargorodskaja EP, Asratian AA, Bystrova TN. [The morbidity and immunological structure of the population in viral hepatitis A at different phases in the development of multiyear epidemic cycles]. Zh Mikrobiol Epidemiol Immunobiol. 1994; 42-5.                          | 1986-1989       |                      |
| Russia  | Shliakhtenko L, Plotnikova V, Levakova I, Rubis L, Solovieva E, Mukomolov S. Modern epidemiology of hepatitis A in the north-western region of the Russian Federation. J Viral Hepat. 2008; 38-42.                                                                                                                                                            | 1986-1997       |                      |
| Russia  | USSR, Former Vital Registration - Deaths 1987 ICD9 as it appears in World Health Organization (WHO). WHO Mortality Database Version February 2014. Geneva, Switzerland: World Health Organization (WHO), 2014.                                                                                                                                                | 1987            |                      |
| Russia  | Karetnyi IuV, Vasil'eva ZN, Balaian MS, Zenkov VA, Sysoliatin VA, Sobina GV, Lysenko GV, Tsvetova GV, Tesheva SCh, Klimenko LA, et al. [The development of the epidemic process and the formation of humoral immunity to the hepatitis A virus in adolescent collectives]. Zh Mikrobiol Epidemiol Immunobiol. 1990; 71-6.                                     | 1987            |                      |
| Russia  | USSR, Former Vital Registration - Deaths 1988 ICD9 as it appears in World Health Organization (WHO). WHO Mortality Database Version February 2014. Geneva, Switzerland: World Health Organization (WHO), 2014.                                                                                                                                                | 1988            |                      |
| Russia  | USSR Census 1989 as it appears in United Nations Statistics Division (UNSD). United Nations Demographic Yearbook. New York City, United States: United Nations Statistics Division (UNSD).                                                                                                                                                                    | 1989            |                      |
| Russia  | Russia Vital Registration - Deaths 1989 ICD9 as it appears in World Health Organization (WHO). WHO Mortality Database Version February 2014. Geneva, Switzerland: World Health Organization (WHO), 2014.                                                                                                                                                      | 1989            |                      |
| Russia  | Department of Peace and Conflict Research, Uppsala University. UCDP Battle-Related Deaths Database Version 5, 2013. Uppsala, Sweden: Department of Peace and Conflict Research, Uppsala University, 2013.                                                                                                                                                     | 1989-2012       | *                    |
| Russia  | Center for Demographic Research, New Economic School (Russia). Russia Mortality Rates by Region, Age, Sex, and Cause of Death 1989-1998. Moscow, Russia: Center for Demographic Research, New Economic School (Russia), 2014-02-12. <a href="http://demogr.nes.ru/index.php/ru/demogr_indicat/data">http://demogr.nes.ru/index.php/ru/demogr_indicat/data</a> | 1989-1998       | *                    |
| Russia  | Department of Peace and Conflict Research, Uppsala University. UCDP Nonstate Conflict Database Version 2.5, 2013. Uppsala, Sweden: Department of Peace and Conflict Research, Uppsala University, 2013.                                                                                                                                                       | 1989-1994       | *                    |
| Russia  | Russia Vital Registration - Deaths 1990 ICD9 as it appears in World Health Organization (WHO). WHO Mortality Database Version February 2014. Geneva, Switzerland: World Health Organization (WHO), 2014.                                                                                                                                                      | 1990            |                      |
| Russia  | World Health Organization (WHO). Global Prevalence and Incidence of Selected Curable Sexually Transmitted Infections: Overviews and Estimates 2001. Geneva, Switzerland: World Health Organization (WHO), 2001.                                                                                                                                               | 1990-1994, 1996 |                      |
| Russia  | United Nations Children's Fund (UNICEF), World Health Organization (WHO). WHO and UNICEF Reported Disease Incidence Time Series - Pertussis. Geneva, Switzerland: World Health Organization (WHO).                                                                                                                                                            | 1990-2013       |                      |
| Russia  | United Nations Children's Fund (UNICEF), World Health Organization (WHO). WHO and UNICEF Reported Disease Incidence Time Series - Measles. Geneva, Switzerland: World Health Organization (WHO).                                                                                                                                                              | 1990-2013       |                      |

**Web Table 32 - Comprehensive citation list**

| Country | Citation                                                                                                                                                                                                                                                                                                      | Year*                           | New for GBD 2013 (*) |
|---------|---------------------------------------------------------------------------------------------------------------------------------------------------------------------------------------------------------------------------------------------------------------------------------------------------------------|---------------------------------|----------------------|
| Russia  | Centre for Health Informatics and Multiprofessional Education, University College London. Modell's Haemoglobinopathologist's Almanac. London, United Kingdom: Centre for Health Informatics and Multiprofessional Education, University College London, 2008.                                                 | 1990-2003                       |                      |
| Russia  | Russia Vital Registration - Deaths 1991 ICD9 as it appears in World Health Organization (WHO). WHO Mortality Database Version February 2014. Geneva, Switzerland: World Health Organization (WHO), 2014.                                                                                                      | 1991                            |                      |
| Russia  | Department of Peace and Conflict Research, Uppsala University. UCDP One-Sided Violence Database Version 1.4, 2013. Uppsala, Sweden: Department of Peace and Conflict Research, Uppsala University, 2013.                                                                                                      | 1991-2011                       | *                    |
| Russia  | Russia Vital Registration - Deaths 1992 ICD9 as it appears in World Health Organization (WHO). WHO Mortality Database Version February 2014. Geneva, Switzerland: World Health Organization (WHO), 2014.                                                                                                      | 1992                            |                      |
| Russia  | Centre for Research on the Epidemiology of Disasters (CRED). EM-DAT: The OFDA/CRED International Disaster Database. Brussels, Belgium: Catholic University of Leuven.                                                                                                                                         | 1992-2005, 2007-2008, 2010-2012 |                      |
| Russia  | Monitoring the AIDS Pandemic Network (MAP). The Determinants of the HIV/AIDS Epidemics in Eastern Europe. Harvard University School of Public Health, 1998.                                                                                                                                                   | 1992, 1996-1997                 |                      |
| Russia  | Russia Vital Registration - Deaths 1993 ICD9 as it appears in World Health Organization (WHO). WHO Mortality Database Version February 2014. Geneva, Switzerland: World Health Organization (WHO), 2014.                                                                                                      | 1993                            |                      |
| Russia  | Russia Vital Registration - Deaths 1994 ICD9 as it appears in World Health Organization (WHO). WHO Mortality Database Version February 2014. Geneva, Switzerland: World Health Organization (WHO), 2014.                                                                                                      | 1994                            |                      |
| Russia  | Balayan MS, Zamyatina NA, Mikhailov MI, Sychev AV, Usmanov RK, Dvoynikova OV, Nelga IV, Grishina GK, Ankhundinova LA. Serological survey on hepatitis E virus infection in an endemic area: diagnosis potential of enzyme immunoassay for detection of IgG antibody. Clin Diagn Virol. 1994; 2(4-5): 297-304. | 1994                            |                      |
| Russia  | Abdourakhmanov DT, Hasaev AS, Castro FJ, Guardia J. Epidemiological and clinical aspects of hepatitis C virus infection in the Russian Republic of Daghestan. Eur J Epidemiol. 1998; 14(6): 549-53.                                                                                                           | 1994-1996                       |                      |
| Russia  | Balayan MS, Fedorova OE, Mikhailov MI, Rytick PG, Eremin VF, Danilova TI, Shevelev BI, Gorbacheva EC, Pankova GY. Antibody to hepatitis E virus in HIV-infected individuals and AIDS patients. J Viral Hepat. 1997; 4(4): 279-83.                                                                             | 1994-1996                       | *                    |
| Russia  | Ohba K, Mizokami M, Kato T, Ueda R, Gurtsenvitch V, Senyuta N, Syrtsev A, Zoya K, Yamashita M, Hayami M. Seroprevalence of hepatitis B virus, hepatitis C virus and GB virus-C infections in Siberia. Epidemiol Infect. 1999; 122(1): 139-43.                                                                 | 1994-1995                       |                      |
| Russia  | Russia Vital Registration - Deaths 1995 ICD9 as it appears in World Health Organization (WHO). WHO Mortality Database Version February 2014. Geneva, Switzerland: World Health Organization (WHO), 2014.                                                                                                      | 1995                            |                      |
| Russia  | Reshetnikov OV, Khryanin AA, Teinina TR, Krivenchuk NA, Zimina IY. Hepatitis B and C seroprevalence in Novosibirsk, western Siberia. Sex Transm Infect. 2001; 77(6): 463.                                                                                                                                     | 1995-1999                       |                      |
| Russia  | Russia Vital Registration - Deaths 1996 ICD9 as it appears in World Health Organization (WHO). WHO Mortality Database Version February 2014. Geneva, Switzerland: World Health Organization (WHO), 2014.                                                                                                      | 1996                            |                      |
| Russia  | Khazanov AI. [Current problems of viral and alcohol diseases of the liver]. Klin Med (Mosk). 2002; 80(3): 14-9.                                                                                                                                                                                               | 1996-2000                       |                      |

**Web Table 32 - Comprehensive citation list**

| Country | Citation                                                                                                                                                                                                                                                                                 | Year*           | New for GBD 2013 (*) |
|---------|------------------------------------------------------------------------------------------------------------------------------------------------------------------------------------------------------------------------------------------------------------------------------------------|-----------------|----------------------|
| Russia  | Zakirov IG. [Liver cirrhosis and liver cancer associated with viral hepatitis B and C in republic of Tatarstan]. Zh Mikrobiol Epidemiol Immunobiol. 2003; 26-8.                                                                                                                          | 1996-2000       |                      |
| Russia  | Russia Vital Registration - Deaths 1997 ICD9 as it appears in World Health Organization (WHO). WHO Mortality Database Version February 2014. Geneva, Switzerland: World Health Organization (WHO), 2014.                                                                                 | 1997            |                      |
| Russia  | Von Hertzen LC, Laatikainen T, Mäkelä MJ, Jousilahti P, Kosunen TU, Petays T, Pussinen PJ, Haahtela T, Vartiainen E. Infectious burden as a determinant of atopy-- a comparison between adults in Finnish and Russian Karelia. Int Arch Allergy Immunol. 2006; 140(2): 89-95.            | 1997            |                      |
| Russia  | Russia Vital Registration - Deaths 1998 ICD9 as it appears in World Health Organization (WHO). WHO Mortality Database Version February 2014. Geneva, Switzerland: World Health Organization (WHO), 2014.                                                                                 | 1998            |                      |
| Russia  | Russia Vital Registration - Deaths 1999 ICD10 as it appears in World Health Organization (WHO). WHO Mortality Database Version February 2014. Geneva, Switzerland: World Health Organization (WHO), 2014.                                                                                | 1999            |                      |
| Russia  | Mukomolov SL, Shliakhtenko LI, Valle M, Plotnikova VA, Davidkin I, Levakova IA, Samokhina EV, Andreeva IA, Dmitrieva TG. [Characteristics of the manifest and latent components of the hepatitis A epidemic process in cities of Russia]. Zh Mikrobiol Epidemiol Immunobiol. 2001; 35-9. | 1999            |                      |
| Russia  | Russia Vital Registration - Deaths 2000 ICD10 as it appears in World Health Organization (WHO). WHO Mortality Database Version February 2014. Geneva, Switzerland: World Health Organization (WHO), 2014.                                                                                | 2000            |                      |
| Russia  | Curado MP, Edwards B, Shin HR, Storm H, Ferlay J, Heanue M and Boyle P, eds (2007). Cancer Incidence in Five Continents, Vol. IX Periodic Data (electronic version). Lyon, IARC. <a href="http://ci5.iarc.fr">http://ci5.iarc.fr</a>                                                     | 2000            |                      |
| Russia  | International Transport Forum. Russia Road Safety Performance 2010. Paris, France: International Transport Forum, 2011.                                                                                                                                                                  | 2000-2008       |                      |
| Russia  | Russia Vital Registration - Deaths 2001 ICD10 as it appears in World Health Organization (WHO). WHO Mortality Database Version February 2014. Geneva, Switzerland: World Health Organization (WHO), 2014.                                                                                | 2001            |                      |
| Russia  | World Health Organization (WHO). Yellow Fever Reported Cases, WHO Vaccine-Preventable Diseases: Monitoring System. Geneva, Switzerland: World Health Organization (WHO).                                                                                                                 | 2001-2002, 2008 |                      |
| Russia  | Shustov AV, Kochneva GV, Sivolobova GF, Grazhdantseva AA, Gavrilova IV, Akinfeeva LA, Rakova IG, Aleshina MV, Bukin VN, Orlovsky VG, Bepalov VS, Robertson BH, Netesov SV. Molecular epidemiology of the hepatitis C virus in Western Siberia. J Med Virol. 2005; 77(3): 382-9.          | 2001-2002       |                      |
| Russia  | Russia Vital Registration - Deaths 2002 ICD10 as it appears in World Health Organization (WHO). WHO Mortality Database Version February 2014. Geneva, Switzerland: World Health Organization (WHO), 2014.                                                                                | 2002            |                      |
| Russia  | Russia Vital Registration - Deaths 2003 ICD10 as it appears in World Health Organization (WHO). WHO Mortality Database Version February 2014. Geneva, Switzerland: World Health Organization (WHO), 2014.                                                                                | 2003            |                      |
| Russia  | Russia Vital Registration - Deaths 2004 ICD10 as it appears in World Health Organization (WHO). WHO Mortality Database Version February 2014. Geneva, Switzerland: World Health Organization (WHO), 2014.                                                                                | 2004            |                      |

**Web Table 32 - Comprehensive citation list**

| Country | Citation                                                                                                                                                                                                                                                                                                                            | Year*                 | New for GBD 2013 (*) |
|---------|-------------------------------------------------------------------------------------------------------------------------------------------------------------------------------------------------------------------------------------------------------------------------------------------------------------------------------------|-----------------------|----------------------|
| Russia  | Dobrodeeva LK, Kornienko EB, Petrenya NN, Lutfalievna GT, Schegoleva LS, Demeneva LV, Duberman BL, Tkachev AV, Chiba H, Senoo H, Ito K, Mizoguchi E, Yoshida S, Tajima K. A unique seroepidemiological pattern of HBV, HCV and HTLV-I in Nenets and Komi in northwestern Russia. <i>Asian Pac J Cancer Prev.</i> 2005; 6(3): 342-5. | 2004                  |                      |
| Russia  | World Health Organization (WHO). Retrospective Measles Data on Supplementary Immunization Activities. Geneva, Switzerland: World Health Organization (WHO).                                                                                                                                                                         | 2004-2005, 2008, 2010 |                      |
| Russia  | Russia Vital Registration - Deaths 2005 ICD10 as it appears in World Health Organization (WHO). WHO Mortality Database Version February 2014. Geneva, Switzerland: World Health Organization (WHO), 2014.                                                                                                                           | 2005                  |                      |
| Russia  | Forman D, Bray F, Brewster DH, Gombe Mbalawa C, Kohler B, Piñeros M, Steliarova-Foucher E, Swaminathan R and Ferlay J, eds (2013). <i>Cancer Incidence in Five Continents, Vol. X Summary Database</i> (electronic version). Lyon, IARC. <a href="http://ci5.iarc.fr">http://ci5.iarc.fr</a>                                        | 2005                  |                      |
| Russia  | Russia Dialysis and Transplant Registry data as it appears in the GBD 2010 Chronic Kidney Disease Expert Group dataset. Provided by Natalia Tomilina and Boris Bikbov. [Unpublished].                                                                                                                                               | 2005                  |                      |
| Russia  | Russia Vital Registration - Deaths 2006 ICD10 as it appears in World Health Organization (WHO). WHO Mortality Database Version February 2014. Geneva, Switzerland: World Health Organization (WHO), 2014.                                                                                                                           | 2006                  |                      |
| Russia  | Russia Vital Registration - Deaths 2007 ICD10 as it appears in World Health Organization (WHO). WHO Mortality Database Version February 2014. Geneva, Switzerland: World Health Organization (WHO), 2014.                                                                                                                           | 2007                  |                      |
| Russia  | Russia Vital Registration - Deaths 2008 ICD10 as it appears in World Health Organization (WHO). WHO Mortality Database Version February 2014. Geneva, Switzerland: World Health Organization (WHO), 2014.                                                                                                                           | 2008                  |                      |
| Russia  | Russia Vital Registration - Deaths 2009 ICD10 as it appears in World Health Organization (WHO). WHO Mortality Database Version February 2014. Geneva, Switzerland: World Health Organization (WHO), 2014.                                                                                                                           | 2009                  |                      |
| Russia  | Russia Vital Registration - Deaths 2010 ICD10 as it appears in World Health Organization (WHO). WHO Mortality Database Version February 2014. Geneva, Switzerland: World Health Organization (WHO), 2014.                                                                                                                           | 2010                  |                      |
| Russia  | European Renal Association-European Dialysis and Transplant Association (ERA-EDTA). <i>European Renal Association-European Dialysis and Transplant Association Registry Annual Report 2010</i> . Parma, Italy: European Renal Association-European Dialysis and Transplant Association (ERA-EDTA), 2012.                            | 2010                  | *                    |
| Russia  | Russia Vital Registration Death Data 2011 as it appears in United Nations Statistics Division (UNSD). <i>United Nations Demographic Yearbook</i> . New York City, United States: United Nations Statistics Division (UNSD).                                                                                                         | 2011                  | *                    |
| Russia  | European Renal Association-European Dialysis and Transplant Association (ERA-EDTA). <i>European Renal Association-European Dialysis and Transplant Association Registry Annual Report 2011</i> . Parma, Italy: European Renal Association-European Dialysis and Transplant Association (ERA-EDTA), 2013.                            | 2011                  | *                    |
| Rwanda  | Rwanda Demographic Survey 1970 as it appears in United Nations Statistics Division (UNSD). <i>United Nations Demographic Yearbook</i> . New York City, United States: United Nations Statistics Division (UNSD).                                                                                                                    | 1970                  |                      |

**Web Table 32 - Comprehensive citation list**

| Country | Citation                                                                                                                                                                                                                                                                 | Year*                                      | New for GBD 2013 (*) |
|---------|--------------------------------------------------------------------------------------------------------------------------------------------------------------------------------------------------------------------------------------------------------------------------|--------------------------------------------|----------------------|
| Rwanda  | Rwanda Population and Housing Census 1978 as it appears in United Nations Statistics Division (UNSD). United Nations Demographic Yearbook. New York City, United States: United Nations Statistics Division (UNSD).                                                      | 1978                                       |                      |
| Rwanda  | Institute for Health Metrics and Evaluation (IHME), Joint United Nations Program on HIV/AIDS (UNAIDS). Institute for Health Metrics and Evaluation HIV Mortality Estimates Based on the UNAIDS Spectrum Model Framework.                                                 | 1980-2013                                  | *                    |
| Rwanda  | United Nations Children's Fund (UNICEF), World Health Organization (WHO). WHO and UNICEF Reported Disease Incidence Time Series - Pertussis. Geneva, Switzerland: World Health Organization (WHO).                                                                       | 1980-1991, 1996, 1999-2005, 2010-2012      |                      |
| Rwanda  | United Nations Children's Fund (UNICEF), World Health Organization (WHO). WHO and UNICEF Reported Disease Incidence Time Series - Measles. Geneva, Switzerland: World Health Organization (WHO).                                                                         | 1980-1997, 1999-2013                       |                      |
| Rwanda  | De Clercq A. Problèmes en obstétrique et gynécologie [Problems in Obstetrics and Gynecology]. In: Meheus A et al, eds. Santé et maladies au Rwanda [Health and Disease in Rwanda]. Brussels, Belgium: General Administration for Development Cooperation; 1982. 627-656. | 1982                                       |                      |
| Rwanda  | National Office of Population (Rwanda), International Statistical Institute. Rwanda World Fertility Survey 1983. Voorburg, Netherlands: International Statistical Institute.                                                                                             | 1983                                       |                      |
| Rwanda  | United Nations Office on Drugs and Crime (UNODC). United Nations Surveys on Crime Trends and the Operations of Criminal Justice Systems 1970-2006 as provided by Kavi Bhalla. [Unpublished].                                                                             | 1986-1990                                  |                      |
| Rwanda  | Centre for Research on the Epidemiology of Disasters (CRED). EM-DAT: The OFDA/CRED International Disaster Database. Brussels, Belgium: Catholic University of Leuven.                                                                                                    | 1988-1989, 2001-2002, 2006-2008, 2010-2012 |                      |
| Rwanda  | Weatherall D. Sickle Cell and Thalassemias Prevalence Data, Personal Correspondence with David Weatherall. [Unpublished].                                                                                                                                                | 1990-2009                                  |                      |
| Rwanda  | Department of Peace and Conflict Research, Uppsala University. UCDP One-Sided Violence Database Version 1.4, 2013. Uppsala, Sweden: Department of Peace and Conflict Research, Uppsala University, 2013.                                                                 | 1990-2009                                  | *                    |
| Rwanda  | Department of Peace and Conflict Research, Uppsala University. UCDP Battle-Related Deaths Database Version 5, 2013. Uppsala, Sweden: Department of Peace and Conflict Research, Uppsala University, 2013.                                                                | 1990-2012                                  | *                    |
| Rwanda  | Centre for Health Informatics and Multiprofessional Education, University College London. Modell's Haemoglobinopathologist's Almanac. London, United Kingdom: Centre for Health Informatics and Multiprofessional Education, University College London, 2008.            | 1990-2003                                  |                      |
| Rwanda  | National Census Commission (Rwanda), Minnesota Population Center. Rwanda Population and Housing Census 1991 from the Integrated Public Use Microdata Series, International. [Machine-readable database]. Minneapolis: University of Minnesota.                           | 1991                                       |                      |
| Rwanda  | Macro International, Inc, National Office of Population (Rwanda). Rwanda Demographic and Health Survey 1992. Calverton, United States: Macro International, Inc.                                                                                                         | 1992                                       |                      |
| Rwanda  | National Office of Population (Rwanda), United Nations Population Fund (UNFPA). Rwanda Socio-Demographic Survey 1996. Rwanda: Ministry of Finance and Economic Planning (Rwanda).                                                                                        | 1996                                       |                      |
| Rwanda  | World Health Organization (WHO). Yellow Fever Reported Cases, WHO Vaccine-Preventable Diseases: Monitoring System. Geneva, Switzerland: World Health Organization (WHO).                                                                                                 | 1996-1997, 1999-2000, 2002-2003, 2005      |                      |
| Rwanda  | Measles Supplementary Immunization Activity Data as provided by the World Health Organization. [Unpublished].                                                                                                                                                            | 1999                                       |                      |
| Rwanda  | Macro International, Inc, National Office of Population (Rwanda). Rwanda Demographic and Health Survey 2000. Calverton, United States: Macro International, Inc.                                                                                                         | 2000                                       |                      |



**Web Table 32 - Comprehensive citation list**

| Country               | Citation                                                                                                                                                                                                                                                 | Year*                  | New for GBD 2013 (*) |
|-----------------------|----------------------------------------------------------------------------------------------------------------------------------------------------------------------------------------------------------------------------------------------------------|------------------------|----------------------|
| Rwanda                | National Census Commission (Rwanda), Minnesota Population Center. Rwanda Population and Housing Census 2002 from the Integrated Public Use Microdata Series, International. [Machine-readable database]. Minneapolis: University of Minnesota.           | 2002                   |                      |
| Rwanda                | United Nations Office on Drugs and Crime (UNODC). United Nations Office on Drugs and Crime Global Study on Homicides 2011. Vienna, Austria: United Nations Office on Drugs and Crime (UNODC), 2011.                                                      | 2003-2007              |                      |
| Rwanda                | World Health Organization (WHO). Retrospective Measles Data on Supplementary Immunization Activities. Geneva, Switzerland: World Health Organization (WHO).                                                                                              | 2003, 2006, 2009, 2013 |                      |
| Rwanda                | Macro International, Inc, National Institute of Statistics of Rwanda. Rwanda Demographic and Health Survey 2005. Calverton, United States: Macro International, Inc.                                                                                     | 2005                   |                      |
| Rwanda                | Munyanganizi R, Cotton F, Vertongen F, Gulbis B. Red blood cell disorders in Rwandese neonates: screening for sickle cell disease and glucose-6-phosphate dehydrogenase deficiency. J Med Screen. 2006; 13(3): 129-31.                                   | 2005                   |                      |
| Rwanda                | National Institute of Statistics of Rwanda (NISR), Oxford Policy Management. Rwanda Integrated Living Conditions Survey 2005-2006. Kigali, Rwanda: National Institute of Statistics of Rwanda (NISR).                                                    | 2005-2006              |                      |
| Rwanda                | World Health Organization (WHO). Global Status Report on Road Safety 2009. Geneva, Switzerland: World Health Organization (WHO), 2009.                                                                                                                   | 2007                   |                      |
| Rwanda                | Macro International, Inc, Ministry of Health (Rwanda), National Institute of Statistics of Rwanda. Rwanda Interim Demographic and Health Survey 2007-2008. Calverton, United States: Macro International, Inc.                                           | 2007-2008              |                      |
| Rwanda                | Joint United Nations Program on HIV/AIDS (UNAIDS), National AIDS Control Commission (Rwanda). Rwanda United Nations General Assembly Special Session on HIV and AIDS 2010. Geneva, Switzerland: Joint United Nations Program on HIV/AIDS (UNAIDS), 2010. | 2009                   |                      |
| Rwanda                | Gahutu J-B, Musemakweri A, Harms G, Mockenhaupt FP. Prevalence of classic erythrocyte polymorphisms among 749 children in southern highland Rwanda. Trans R Soc Trop Med Hyg. 2012; 106(1): 63-5.                                                        | 2010                   | *                    |
| Rwanda                | ICF Macro, Ministry of Health (Rwanda), National Institute of Statistics of Rwanda. Rwanda Demographic and Health Survey 2010-2011. Claverton, Maryland: ICF Macro.                                                                                      | 2010-2011              |                      |
| Saint Kitts and Nevis | United Nations Children's Fund (UNICEF), World Health Organization (WHO). WHO and UNICEF Reported Disease Incidence Time Series - Pertussis. Geneva, Switzerland: World Health Organization (WHO).                                                       | 1980-2013              |                      |
| Saint Kitts and Nevis | United Nations Children's Fund (UNICEF), World Health Organization (WHO). WHO and UNICEF Reported Disease Incidence Time Series - Measles. Geneva, Switzerland: World Health Organization (WHO).                                                         | 1980-2013              |                      |
| Saint Kitts and Nevis | Centre for Research on the Epidemiology of Disasters (CRED). EM-DAT: The OFDA/CRED International Disaster Database. Brussels, Belgium: Catholic University of Leuven.                                                                                    | 1989, 1998             |                      |
| Saint Kitts and Nevis | World Health Organization (WHO). Retrospective Measles Data on Supplementary Immunization Activities. Geneva, Switzerland: World Health Organization (WHO).                                                                                              | 2004                   |                      |
| Saint Lucia           | Saint Lucia Vital Registration Death Data 1950 as it appears in United Nations Statistics Division (UNSD). United Nations Demographic Yearbook. New York City, United States: United Nations Statistics Division (UNSD).                                 | 1950                   |                      |
| Saint Lucia           | Saint Lucia Vital Registration Death Data 1951 as it appears in United Nations Statistics Division (UNSD). United Nations Demographic Yearbook. New York City, United States: United Nations Statistics Division (UNSD).                                 | 1951                   |                      |

**Web Table 32 - Comprehensive citation list**

| Country     | Citation                                                                                                                                                                                                                 | Year*                              | New for GBD 2013 (*) |
|-------------|--------------------------------------------------------------------------------------------------------------------------------------------------------------------------------------------------------------------------|------------------------------------|----------------------|
| Saint Lucia | Saint Lucia Vital Registration Death Data 1952 as it appears in United Nations Statistics Division (UNSD). United Nations Demographic Yearbook. New York City, United States: United Nations Statistics Division (UNSD). | 1952                               |                      |
| Saint Lucia | Saint Lucia Vital Registration Death Data 1953 as it appears in United Nations Statistics Division (UNSD). United Nations Demographic Yearbook. New York City, United States: United Nations Statistics Division (UNSD). | 1953                               |                      |
| Saint Lucia | Saint Lucia Vital Registration Death Data 1954 as it appears in United Nations Statistics Division (UNSD). United Nations Demographic Yearbook. New York City, United States: United Nations Statistics Division (UNSD). | 1954                               |                      |
| Saint Lucia | Saint Lucia Vital Registration Death Data 1955 as it appears in United Nations Statistics Division (UNSD). United Nations Demographic Yearbook. New York City, United States: United Nations Statistics Division (UNSD). | 1955                               |                      |
| Saint Lucia | Saint Lucia Vital Registration Death Data 1956 as it appears in United Nations Statistics Division (UNSD). United Nations Demographic Yearbook. New York City, United States: United Nations Statistics Division (UNSD). | 1956                               |                      |
| Saint Lucia | Saint Lucia Vital Registration Death Data 1957 as it appears in United Nations Statistics Division (UNSD). United Nations Demographic Yearbook. New York City, United States: United Nations Statistics Division (UNSD). | 1957                               |                      |
| Saint Lucia | Saint Lucia Vital Registration Death Data 1958 as it appears in United Nations Statistics Division (UNSD). United Nations Demographic Yearbook. New York City, United States: United Nations Statistics Division (UNSD). | 1958                               |                      |
| Saint Lucia | Saint Lucia Vital Registration Death Data 1959 as it appears in United Nations Statistics Division (UNSD). United Nations Demographic Yearbook. New York City, United States: United Nations Statistics Division (UNSD). | 1959                               |                      |
| Saint Lucia | Saint Lucia Vital Registration Death Data 1960 as it appears in United Nations Statistics Division (UNSD). United Nations Demographic Yearbook. New York City, United States: United Nations Statistics Division (UNSD). | 1960                               |                      |
| Saint Lucia | Saint Lucia Vital Registration Death Data 1961 as it appears in United Nations Statistics Division (UNSD). United Nations Demographic Yearbook. New York City, United States: United Nations Statistics Division (UNSD). | 1961                               |                      |
| Saint Lucia | Saint Lucia Vital Registration Death Data 1963 as it appears in United Nations Statistics Division (UNSD). United Nations Demographic Yearbook. New York City, United States: United Nations Statistics Division (UNSD). | 1963                               |                      |
| Saint Lucia | Centre for Research on the Epidemiology of Disasters (CRED). EM-DAT: The OFDA/CRED International Disaster Database. Brussels, Belgium: Catholic University of Leuven.                                                    | 1963, 1980, 1988, 1994, 2007, 2010 |                      |
| Saint Lucia | Saint Lucia Vital Registration - Deaths 1968 ICD8 as it appears in World Health Organization (WHO). WHO Mortality Database Version February 2014. Geneva, Switzerland: World Health Organization (WHO), 2014.            | 1968                               |                      |
| Saint Lucia | Saint Lucia Vital Registration - Deaths 1972 ICD8 as it appears in World Health Organization (WHO). WHO Mortality Database Version February 2014. Geneva, Switzerland: World Health Organization (WHO), 2014.            | 1972                               |                      |



**Web Table 32 - Comprehensive citation list**

| Country     | Citation                                                                                                                                                                                                                 | Year*     | New for GBD 2013 (*) |
|-------------|--------------------------------------------------------------------------------------------------------------------------------------------------------------------------------------------------------------------------|-----------|----------------------|
| Saint Lucia | Saint Lucia Vital Registration - Deaths 1973 ICD8 as it appears in World Health Organization (WHO). WHO Mortality Database Version February 2014. Geneva, Switzerland: World Health Organization (WHO), 2014.            | 1973      |                      |
| Saint Lucia | Saint Lucia Vital Registration - Deaths 1974 ICD8 as it appears in World Health Organization (WHO). WHO Mortality Database Version February 2014. Geneva, Switzerland: World Health Organization (WHO), 2014.            | 1974      | *                    |
| Saint Lucia | Saint Lucia Vital Registration - Deaths 1975 ICD8 as it appears in World Health Organization (WHO). WHO Mortality Database Version February 2014. Geneva, Switzerland: World Health Organization (WHO), 2014.            | 1975      |                      |
| Saint Lucia | Saint Lucia Vital Registration - Deaths 1976 ICD8 as it appears in World Health Organization (WHO). WHO Mortality Database Version February 2014. Geneva, Switzerland: World Health Organization (WHO), 2014.            | 1976      |                      |
| Saint Lucia | Saint Lucia Vital Registration - Deaths 1977 ICD8 as it appears in World Health Organization (WHO). WHO Mortality Database Version February 2014. Geneva, Switzerland: World Health Organization (WHO), 2014.            | 1977      |                      |
| Saint Lucia | Saint Lucia Vital Registration - Deaths 1978 ICD8 as it appears in World Health Organization (WHO). WHO Mortality Database Version February 2014. Geneva, Switzerland: World Health Organization (WHO), 2014.            | 1978      | *                    |
| Saint Lucia | Saint Lucia Vital Registration - Deaths 1979 ICD9 as it appears in World Health Organization (WHO). WHO Mortality Database Version February 2014. Geneva, Switzerland: World Health Organization (WHO), 2014.            | 1979      |                      |
| Saint Lucia | Saint Lucia Vital Registration - Deaths 1980 ICD9 as it appears in World Health Organization (WHO). WHO Mortality Database Version February 2014. Geneva, Switzerland: World Health Organization (WHO), 2014.            | 1980      |                      |
| Saint Lucia | Institute for Health Metrics and Evaluation (IHME), Joint United Nations Program on HIV/AIDS (UNAIDS). Institute for Health Metrics and Evaluation HIV Mortality Estimates Based on the UNAIDS Spectrum Model Framework. | 1980-2013 | *                    |
| Saint Lucia | United Nations Children's Fund (UNICEF), World Health Organization (WHO). WHO and UNICEF Reported Disease Incidence Time Series - Pertussis. Geneva, Switzerland: World Health Organization (WHO).                       | 1980-2013 |                      |
| Saint Lucia | United Nations Children's Fund (UNICEF), World Health Organization (WHO). WHO and UNICEF Reported Disease Incidence Time Series - Measles. Geneva, Switzerland: World Health Organization (WHO).                         | 1980-2013 |                      |
| Saint Lucia | Saint Lucia Vital Registration - Deaths 1981 ICD9 as it appears in World Health Organization (WHO). WHO Mortality Database Version February 2014. Geneva, Switzerland: World Health Organization (WHO), 2014.            | 1981      |                      |
| Saint Lucia | Saint Lucia Vital Registration Death Data 1982 as it appears in United Nations Statistics Division (UNSD). United Nations Demographic Yearbook. New York City, United States: United Nations Statistics Division (UNSD). | 1982      |                      |
| Saint Lucia | Saint Lucia Vital Registration - Deaths 1983 ICD9 as it appears in World Health Organization (WHO). WHO Mortality Database Version February 2014. Geneva, Switzerland: World Health Organization (WHO), 2014.            | 1983      |                      |
| Saint Lucia | Saint Lucia Vital Registration Death Data 1984 as it appears in United Nations Statistics Division (UNSD). United Nations Demographic Yearbook. New York City, United States: United Nations Statistics Division (UNSD). | 1984      |                      |

**Web Table 32 - Comprehensive citation list**

| Country     | Citation                                                                                                                                                                                                                                                      | Year*      | New for GBD 2013 (*) |
|-------------|---------------------------------------------------------------------------------------------------------------------------------------------------------------------------------------------------------------------------------------------------------------|------------|----------------------|
| Saint Lucia | Saint Lucia Vital Registration Death Data 1985 as it appears in United Nations Statistics Division (UNSD). United Nations Demographic Yearbook. New York City, United States: United Nations Statistics Division (UNSD).                                      | 1985       |                      |
| Saint Lucia | Saint Lucia Vital Registration - Deaths 1986 ICD9 as it appears in World Health Organization (WHO). WHO Mortality Database Version February 2014. Geneva, Switzerland: World Health Organization (WHO), 2014.                                                 | 1986       |                      |
| Saint Lucia | Saint Lucia Vital Registration - Deaths 1987 ICD9 as it appears in World Health Organization (WHO). WHO Mortality Database Version February 2014. Geneva, Switzerland: World Health Organization (WHO), 2014.                                                 | 1987       |                      |
| Saint Lucia | Saint Lucia Vital Registration - Deaths 1988 ICD9 as it appears in World Health Organization (WHO). WHO Mortality Database Version February 2014. Geneva, Switzerland: World Health Organization (WHO), 2014.                                                 | 1988       |                      |
| Saint Lucia | Saint Lucia Vital Registration - Deaths 1989 ICD9 as it appears in World Health Organization (WHO). WHO Mortality Database Version February 2014. Geneva, Switzerland: World Health Organization (WHO), 2014.                                                 | 1989       |                      |
| Saint Lucia | Saint Lucia Vital Registration - Deaths 1990 ICD9 as it appears in World Health Organization (WHO). WHO Mortality Database Version February 2014. Geneva, Switzerland: World Health Organization (WHO), 2014.                                                 | 1990       |                      |
| Saint Lucia | Centre for Health Informatics and Multiprofessional Education, University College London. Modell's Haemoglobinopathologist's Almanac. London, United Kingdom: Centre for Health Informatics and Multiprofessional Education, University College London, 2008. | 1990-2003  |                      |
| Saint Lucia | Saint Lucia Vital Registration - Deaths 1991 ICD9 as it appears in World Health Organization (WHO). WHO Mortality Database Version February 2014. Geneva, Switzerland: World Health Organization (WHO), 2014.                                                 | 1991       |                      |
| Saint Lucia | Measles Supplementary Immunization Activity Data as provided by the World Health Organization. [Unpublished].                                                                                                                                                 | 1991, 1996 |                      |
| Saint Lucia | Saint Lucia Vital Registration - Deaths 1992 ICD9 as it appears in World Health Organization (WHO). WHO Mortality Database Version February 2014. Geneva, Switzerland: World Health Organization (WHO), 2014.                                                 | 1992       |                      |
| Saint Lucia | Saint Lucia Vital Registration - Deaths 1993 ICD9 as it appears in World Health Organization (WHO). WHO Mortality Database Version February 2014. Geneva, Switzerland: World Health Organization (WHO), 2014.                                                 | 1993       |                      |
| Saint Lucia | Saint Lucia Vital Registration - Deaths 1994 ICD9 as it appears in World Health Organization (WHO). WHO Mortality Database Version February 2014. Geneva, Switzerland: World Health Organization (WHO), 2014.                                                 | 1994       |                      |
| Saint Lucia | Saint Lucia Vital Registration - Deaths 1995 ICD9 as it appears in World Health Organization (WHO). WHO Mortality Database Version February 2014. Geneva, Switzerland: World Health Organization (WHO), 2014.                                                 | 1995       |                      |
| Saint Lucia | United Nations Office on Drugs and Crime (UNODC). United Nations Office on Drugs and Crime Global Study on Homicides 2011. Vienna, Austria: United Nations Office on Drugs and Crime (UNODC), 2011.                                                           | 1995-2010  |                      |
| Saint Lucia | Saint Lucia Vital Registration - Deaths 1996 ICD10 as it appears in World Health Organization (WHO). WHO Mortality Database Version February 2014. Geneva, Switzerland: World Health Organization (WHO), 2014.                                                | 1996       |                      |

**Web Table 32 - Comprehensive citation list**

| Country                          | Citation                                                                                                                                                                                                                                                                                                                                                                                                                        | Year*                | New for GBD 2013 (*) |
|----------------------------------|---------------------------------------------------------------------------------------------------------------------------------------------------------------------------------------------------------------------------------------------------------------------------------------------------------------------------------------------------------------------------------------------------------------------------------|----------------------|----------------------|
| Saint Lucia                      | Saint Lucia Vital Registration - Deaths 1997 ICD10 as it appears in World Health Organization (WHO). WHO Mortality Database Version February 2014. Geneva, Switzerland: World Health Organization (WHO), 2014.                                                                                                                                                                                                                  | 1997                 |                      |
| Saint Lucia                      | Saint Lucia Vital Registration - Deaths 1998 ICD10 as it appears in World Health Organization (WHO). WHO Mortality Database Version February 2014. Geneva, Switzerland: World Health Organization (WHO), 2014.                                                                                                                                                                                                                  | 1998                 |                      |
| Saint Lucia                      | Saint Lucia Vital Registration - Deaths 1999 ICD10 as it appears in World Health Organization (WHO). WHO Mortality Database Version February 2014. Geneva, Switzerland: World Health Organization (WHO), 2014.                                                                                                                                                                                                                  | 1999                 |                      |
| Saint Lucia                      | Saint Lucia Vital Registration - Deaths 2000 ICD10 as it appears in World Health Organization (WHO). WHO Mortality Database Version February 2014. Geneva, Switzerland: World Health Organization (WHO), 2014.                                                                                                                                                                                                                  | 2000                 |                      |
| Saint Lucia                      | World Health Organization (WHO). Yellow Fever Reported Cases, WHO Vaccine-Preventable Diseases: Monitoring System. Geneva, Switzerland: World Health Organization (WHO).                                                                                                                                                                                                                                                        | 2000-2004, 2006-2009 |                      |
| Saint Lucia                      | Saint Lucia Vital Registration - Deaths 2001 ICD10 as it appears in World Health Organization (WHO). WHO Mortality Database Version February 2014. Geneva, Switzerland: World Health Organization (WHO), 2014.                                                                                                                                                                                                                  | 2001                 |                      |
| Saint Lucia                      | Saint Lucia Vital Registration - Deaths 2002 ICD10 as it appears in World Health Organization (WHO). WHO Mortality Database Version February 2014. Geneva, Switzerland: World Health Organization (WHO), 2014.                                                                                                                                                                                                                  | 2002                 |                      |
| Saint Lucia                      | Saint Lucia Vital Registration - Deaths 2003 ICD10 as it appears in World Health Organization (WHO). WHO Mortality Database Version February 2014. Geneva, Switzerland: World Health Organization (WHO), 2014.                                                                                                                                                                                                                  | 2003                 |                      |
| Saint Lucia                      | Saint Lucia Vital Registration - Deaths 2004 ICD10 as it appears in World Health Organization (WHO). WHO Mortality Database Version February 2014. Geneva, Switzerland: World Health Organization (WHO), 2014.                                                                                                                                                                                                                  | 2004                 |                      |
| Saint Lucia                      | Saint Lucia Vital Registration - Deaths 2005 ICD10 as it appears in World Health Organization (WHO). WHO Mortality Database Version February 2014. Geneva, Switzerland: World Health Organization (WHO), 2014.                                                                                                                                                                                                                  | 2005                 |                      |
| Saint Lucia                      | Saint Lucia Vital Registration - Deaths 2006 ICD10 as it appears in World Health Organization (WHO). WHO Mortality Database Version February 2014. Geneva, Switzerland: World Health Organization (WHO), 2014.                                                                                                                                                                                                                  | 2006                 |                      |
| Saint Lucia                      | Fassio E, Díaz S, Santa C, Reig ME, Martínez Artola Y, Alves de Mattos A, Míguez C, Galizzi J, Zapata R, Ridruejo E, de Souza FC, Hernández N, Pinchuk L, Multicenter Group for Study of Hepatocarcinoma in Latin America, Asociación Latinoamericana para el Estudio del Hígado (ALEH). Etiology of hepatocellular carcinoma in Latin America: a prospective, multicenter, international study. Ann Hepatol. 2010; 9(1): 63-9. | 2006-2008            | *                    |
| Saint Lucia                      | Saint Lucia Vital Registration - Deaths 2008 ICD10 as it appears in World Health Organization (WHO). WHO Mortality Database Version February 2014. Geneva, Switzerland: World Health Organization (WHO), 2014.                                                                                                                                                                                                                  | 2008                 |                      |
| Saint Vincent and the Grenadines | Saint Vincent and the Grenadines Vital Registration Death Data 1950 as it appears in United Nations Statistics Division (UNSD). United Nations Demographic Yearbook. New York City, United States: United Nations Statistics Division (UNSD).                                                                                                                                                                                   | 1950                 |                      |

**Web Table 32 - Comprehensive citation list**

| Country                          | Citation                                                                                                                                                                                                                                      | Year*                        | New for GBD 2013 (*) |
|----------------------------------|-----------------------------------------------------------------------------------------------------------------------------------------------------------------------------------------------------------------------------------------------|------------------------------|----------------------|
| Saint Vincent and the Grenadines | Saint Vincent and the Grenadines Vital Registration Death Data 1951 as it appears in United Nations Statistics Division (UNSD). United Nations Demographic Yearbook. New York City, United States: United Nations Statistics Division (UNSD). | 1951                         |                      |
| Saint Vincent and the Grenadines | Saint Vincent and the Grenadines Vital Registration Death Data 1952 as it appears in United Nations Statistics Division (UNSD). United Nations Demographic Yearbook. New York City, United States: United Nations Statistics Division (UNSD). | 1952                         |                      |
| Saint Vincent and the Grenadines | Saint Vincent and the Grenadines Vital Registration Death Data 1953 as it appears in United Nations Statistics Division (UNSD). United Nations Demographic Yearbook. New York City, United States: United Nations Statistics Division (UNSD). | 1953                         |                      |
| Saint Vincent and the Grenadines | Saint Vincent and the Grenadines Vital Registration Death Data 1954 as it appears in United Nations Statistics Division (UNSD). United Nations Demographic Yearbook. New York City, United States: United Nations Statistics Division (UNSD). | 1954                         |                      |
| Saint Vincent and the Grenadines | Saint Vincent and the Grenadines Vital Registration Death Data 1955 as it appears in United Nations Statistics Division (UNSD). United Nations Demographic Yearbook. New York City, United States: United Nations Statistics Division (UNSD). | 1955                         |                      |
| Saint Vincent and the Grenadines | Centre for Research on the Epidemiology of Disasters (CRED). EM-DAT: The OFDA/CRED International Disaster Database. Brussels, Belgium: Catholic University of Leuven.                                                                         | 1955, 1967, 1979, 1992, 2002 |                      |
| Saint Vincent and the Grenadines | Saint Vincent and the Grenadines Vital Registration Death Data 1956 as it appears in United Nations Statistics Division (UNSD). United Nations Demographic Yearbook. New York City, United States: United Nations Statistics Division (UNSD). | 1956                         |                      |
| Saint Vincent and the Grenadines | Saint Vincent and the Grenadines Vital Registration Death Data 1960 as it appears in United Nations Statistics Division (UNSD). United Nations Demographic Yearbook. New York City, United States: United Nations Statistics Division (UNSD). | 1960                         |                      |
| Saint Vincent and the Grenadines | Saint Vincent and the Grenadines Vital Registration Death Data 1961 as it appears in United Nations Statistics Division (UNSD). United Nations Demographic Yearbook. New York City, United States: United Nations Statistics Division (UNSD). | 1961                         |                      |
| Saint Vincent and the Grenadines | Saint Vincent and the Grenadines Vital Registration Death Data 1962 as it appears in United Nations Statistics Division (UNSD). United Nations Demographic Yearbook. New York City, United States: United Nations Statistics Division (UNSD). | 1962                         |                      |
| Saint Vincent and the Grenadines | Saint Vincent and the Grenadines Vital Registration Death Data 1963 as it appears in United Nations Statistics Division (UNSD). United Nations Demographic Yearbook. New York City, United States: United Nations Statistics Division (UNSD). | 1963                         |                      |
| Saint Vincent and the Grenadines | Saint Vincent and the Grenadines Vital Registration Death Data 1964 as it appears in United Nations Statistics Division (UNSD). United Nations Demographic Yearbook. New York City, United States: United Nations Statistics Division (UNSD). | 1964                         |                      |
| Saint Vincent and the Grenadines | Saint Vincent and the Grenadines Vital Registration - Deaths 1970 ICD8 as it appears in World Health Organization (WHO). WHO Mortality Database Version February 2014. Geneva, Switzerland: World Health Organization (WHO), 2014.            | 1970                         |                      |
| Saint Vincent and the Grenadines | Saint Vincent and the Grenadines Vital Registration - Deaths 1971 ICD8 as it appears in World Health Organization (WHO). WHO Mortality Database Version February 2014. Geneva, Switzerland: World Health Organization (WHO), 2014.            | 1971                         |                      |

**Web Table 32 - Comprehensive citation list**

| Country                          | Citation                                                                                                                                                                                                                                      | Year*     | New for GBD 2013 (*) |
|----------------------------------|-----------------------------------------------------------------------------------------------------------------------------------------------------------------------------------------------------------------------------------------------|-----------|----------------------|
| Saint Vincent and the Grenadines | Saint Vincent and the Grenadines Vital Registration - Deaths 1972 ICD8 as it appears in World Health Organization (WHO). WHO Mortality Database Version February 2014. Geneva, Switzerland: World Health Organization (WHO), 2014.            | 1972      |                      |
| Saint Vincent and the Grenadines | Saint Vincent and the Grenadines Vital Registration - Deaths 1974 ICD8 as it appears in World Health Organization (WHO). WHO Mortality Database Version February 2014. Geneva, Switzerland: World Health Organization (WHO), 2014.            | 1974      |                      |
| Saint Vincent and the Grenadines | Saint Vincent and the Grenadines Vital Registration - Deaths 1977 ICD8 as it appears in World Health Organization (WHO). WHO Mortality Database Version February 2014. Geneva, Switzerland: World Health Organization (WHO), 2014.            | 1977      |                      |
| Saint Vincent and the Grenadines | Saint Vincent and the Grenadines Vital Registration - Deaths 1978 ICD8 as it appears in World Health Organization (WHO). WHO Mortality Database Version February 2014. Geneva, Switzerland: World Health Organization (WHO), 2014.            | 1978      |                      |
| Saint Vincent and the Grenadines | Saint Vincent and the Grenadines Vital Registration - Deaths 1979 ICD8 as it appears in World Health Organization (WHO). WHO Mortality Database Version February 2014. Geneva, Switzerland: World Health Organization (WHO), 2014.            | 1979      |                      |
| Saint Vincent and the Grenadines | Saint Vincent and the Grenadines Vital Registration Death Data 1980 as it appears in United Nations Statistics Division (UNSD). United Nations Demographic Yearbook. New York City, United States: United Nations Statistics Division (UNSD). | 1980      |                      |
| Saint Vincent and the Grenadines | Institute for Health Metrics and Evaluation (IHME), Joint United Nations Program on HIV/AIDS (UNAIDS). Institute for Health Metrics and Evaluation HIV Mortality Estimates Based on the UNAIDS Spectrum Model Framework.                      | 1980-2013 | *                    |
| Saint Vincent and the Grenadines | United Nations Children's Fund (UNICEF), World Health Organization (WHO). WHO and UNICEF Reported Disease Incidence Time Series - Pertussis. Geneva, Switzerland: World Health Organization (WHO).                                            | 1980-2013 |                      |
| Saint Vincent and the Grenadines | United Nations Children's Fund (UNICEF), World Health Organization (WHO). WHO and UNICEF Reported Disease Incidence Time Series - Measles. Geneva, Switzerland: World Health Organization (WHO).                                              | 1980-2013 |                      |
| Saint Vincent and the Grenadines | United Nations Office on Drugs and Crime (UNODC). United Nations Surveys on Crime Trends and the Operations of Criminal Justice Systems 1970-2006 as provided by Kavi Bhalla. [Unpublished].                                                  | 1981-1985 |                      |
| Saint Vincent and the Grenadines | Saint Vincent and the Grenadines Vital Registration - Deaths 1982 ICD9 as it appears in World Health Organization (WHO). WHO Mortality Database Version February 2014. Geneva, Switzerland: World Health Organization (WHO), 2014.            | 1982      |                      |
| Saint Vincent and the Grenadines | Saint Vincent and the Grenadines Vital Registration - Deaths 1983 ICD9 as it appears in World Health Organization (WHO). WHO Mortality Database Version February 2014. Geneva, Switzerland: World Health Organization (WHO), 2014.            | 1983      |                      |
| Saint Vincent and the Grenadines | Saint Vincent and the Grenadines Vital Registration - Deaths 1984 ICD9 as it appears in World Health Organization (WHO). WHO Mortality Database Version February 2014. Geneva, Switzerland: World Health Organization (WHO), 2014.            | 1984      |                      |
| Saint Vincent and the Grenadines | Saint Vincent and the Grenadines Vital Registration - Deaths 1985 ICD9 as it appears in World Health Organization (WHO). WHO Mortality Database Version February 2014. Geneva, Switzerland: World Health Organization (WHO), 2014.            | 1985      |                      |
| Saint Vincent and the Grenadines | Saint Vincent and the Grenadines Vital Registration - Deaths 1986 ICD9 as it appears in World Health Organization (WHO). WHO Mortality Database Version February 2014. Geneva, Switzerland: World Health Organization (WHO), 2014.            | 1986      |                      |

**Web Table 32 - Comprehensive citation list**

| Country                          | Citation                                                                                                                                                                                                                                                      | Year*                | New for GBD 2013 (*) |
|----------------------------------|---------------------------------------------------------------------------------------------------------------------------------------------------------------------------------------------------------------------------------------------------------------|----------------------|----------------------|
| Saint Vincent and the Grenadines | Saint Vincent and the Grenadines Vital Registration - Deaths 1987 ICD9 as it appears in World Health Organization (WHO). WHO Mortality Database Version February 2014. Geneva, Switzerland: World Health Organization (WHO), 2014.                            | 1987                 |                      |
| Saint Vincent and the Grenadines | Saint Vincent and the Grenadines Vital Registration Death Data 1988 as it appears in United Nations Statistics Division (UNSD). United Nations Demographic Yearbook. New York City, United States: United Nations Statistics Division (UNSD).                 | 1988                 |                      |
| Saint Vincent and the Grenadines | Saint Vincent and the Grenadines Vital Registration - Deaths 1990 ICD9 as it appears in World Health Organization (WHO). WHO Mortality Database Version February 2014. Geneva, Switzerland: World Health Organization (WHO), 2014.                            | 1990                 |                      |
| Saint Vincent and the Grenadines | Centre for Health Informatics and Multiprofessional Education, University College London. Modell's Haemoglobinopathologist's Almanac. London, United Kingdom: Centre for Health Informatics and Multiprofessional Education, University College London, 2008. | 1990-2003            |                      |
| Saint Vincent and the Grenadines | Measles Supplementary Immunization Activity Data as provided by the World Health Organization. [Unpublished].                                                                                                                                                 | 1991, 1995           |                      |
| Saint Vincent and the Grenadines | Saint Vincent and the Grenadines Vital Registration Death Data 1992 as it appears in United Nations Statistics Division (UNSD). United Nations Demographic Yearbook. New York City, United States: United Nations Statistics Division (UNSD).                 | 1992                 |                      |
| Saint Vincent and the Grenadines | Saint Vincent and the Grenadines Vital Registration - Deaths 1995 ICD9 as it appears in World Health Organization (WHO). WHO Mortality Database Version February 2014. Geneva, Switzerland: World Health Organization (WHO), 2014.                            | 1995                 |                      |
| Saint Vincent and the Grenadines | United Nations Office on Drugs and Crime (UNODC). United Nations Office on Drugs and Crime Global Study on Homicides 2011. Vienna, Austria: United Nations Office on Drugs and Crime (UNODC), 2011.                                                           | 1995-2010            |                      |
| Saint Vincent and the Grenadines | Saint Vincent and the Grenadines Vital Registration - Deaths 1996 ICD9 as it appears in World Health Organization (WHO). WHO Mortality Database Version February 2014. Geneva, Switzerland: World Health Organization (WHO), 2014.                            | 1996                 |                      |
| Saint Vincent and the Grenadines | Saint Vincent and the Grenadines Vital Registration - Deaths 1997 ICD9 as it appears in World Health Organization (WHO). WHO Mortality Database Version February 2014. Geneva, Switzerland: World Health Organization (WHO), 2014.                            | 1997                 |                      |
| Saint Vincent and the Grenadines | Saint Vincent and the Grenadines Vital Registration - Deaths 1998 ICD9 as it appears in World Health Organization (WHO). WHO Mortality Database Version February 2014. Geneva, Switzerland: World Health Organization (WHO), 2014.                            | 1998                 |                      |
| Saint Vincent and the Grenadines | Saint Vincent and the Grenadines Vital Registration - Deaths 1999 ICD9 as it appears in World Health Organization (WHO). WHO Mortality Database Version February 2014. Geneva, Switzerland: World Health Organization (WHO), 2014.                            | 1999                 |                      |
| Saint Vincent and the Grenadines | Saint Vincent and the Grenadines Vital Registration - Deaths 2000 ICD10 as it appears in World Health Organization (WHO). WHO Mortality Database Version February 2014. Geneva, Switzerland: World Health Organization (WHO), 2014.                           | 2000                 |                      |
| Saint Vincent and the Grenadines | World Health Organization (WHO). Yellow Fever Reported Cases, WHO Vaccine-Preventable Diseases: Monitoring System. Geneva, Switzerland: World Health Organization (WHO).                                                                                      | 2000-2002, 2004-2009 |                      |
| Saint Vincent and the Grenadines | Saint Vincent and the Grenadines Vital Registration - Deaths 2001 ICD10 as it appears in World Health Organization (WHO). WHO Mortality Database Version February 2014. Geneva, Switzerland: World Health Organization (WHO), 2014.                           | 2001                 |                      |



**Web Table 32 - Comprehensive citation list**

| Country                          | Citation                                                                                                                                                                                                                                                                                                                                                                                                                        | Year*     | New for GBD 2013 (*) |
|----------------------------------|---------------------------------------------------------------------------------------------------------------------------------------------------------------------------------------------------------------------------------------------------------------------------------------------------------------------------------------------------------------------------------------------------------------------------------|-----------|----------------------|
| Saint Vincent and the Grenadines | Saint Vincent and the Grenadines Vital Registration - Deaths 2002 ICD10 as it appears in World Health Organization (WHO). WHO Mortality Database Version February 2014. Geneva, Switzerland: World Health Organization (WHO), 2014.                                                                                                                                                                                             | 2002      |                      |
| Saint Vincent and the Grenadines | Saint Vincent and the Grenadines Vital Registration - Deaths 2003 ICD10 as it appears in World Health Organization (WHO). WHO Mortality Database Version February 2014. Geneva, Switzerland: World Health Organization (WHO), 2014.                                                                                                                                                                                             | 2003      |                      |
| Saint Vincent and the Grenadines | Saint Vincent and the Grenadines Vital Registration - Deaths 2004 ICD10 as it appears in World Health Organization (WHO). WHO Mortality Database Version February 2014. Geneva, Switzerland: World Health Organization (WHO), 2014.                                                                                                                                                                                             | 2004      |                      |
| Saint Vincent and the Grenadines | Saint Vincent and the Grenadines Vital Registration - Deaths 2005 ICD10 as it appears in World Health Organization (WHO). WHO Mortality Database Version February 2014. Geneva, Switzerland: World Health Organization (WHO), 2014.                                                                                                                                                                                             | 2005      |                      |
| Saint Vincent and the Grenadines | Saint Vincent and the Grenadines Vital Registration - Deaths 2006 ICD10 as it appears in World Health Organization (WHO). WHO Mortality Database Version February 2014. Geneva, Switzerland: World Health Organization (WHO), 2014.                                                                                                                                                                                             | 2006      |                      |
| Saint Vincent and the Grenadines | Fassio E, Díaz S, Santa C, Reig ME, Martínez Artola Y, Alves de Mattos A, Míguez C, Galizzi J, Zapata R, Ridruejo E, de Souza FC, Hernández N, Pinchuk L, Multicenter Group for Study of Hepatocarcinoma in Latin America, Asociación Latinoamericana para el Estudio del Hígado (ALEH). Etiology of hepatocellular carcinoma in Latin America: a prospective, multicenter, international study. Ann Hepatol. 2010; 9(1): 63-9. | 2006-2008 | *                    |
| Saint Vincent and the Grenadines | Saint Vincent and the Grenadines Vital Registration - Deaths 2007 ICD10 as it appears in World Health Organization (WHO). WHO Mortality Database Version February 2014. Geneva, Switzerland: World Health Organization (WHO), 2014.                                                                                                                                                                                             | 2007      |                      |
| Saint Vincent and the Grenadines | Saint Vincent and the Grenadines Vital Registration - Deaths 2008 ICD10 as it appears in World Health Organization (WHO). WHO Mortality Database Version February 2014. Geneva, Switzerland: World Health Organization (WHO), 2014.                                                                                                                                                                                             | 2008      |                      |
| Saint Vincent and the Grenadines | Saint Vincent and the Grenadines Vital Registration - Deaths 2009 ICD10 as it appears in World Health Organization (WHO). WHO Mortality Database Version February 2014. Geneva, Switzerland: World Health Organization (WHO), 2014.                                                                                                                                                                                             | 2009      |                      |
| Saint Vincent and the Grenadines | Saint Vincent and the Grenadines Vital Registration - Deaths 2010 ICD10 as it appears in World Health Organization (WHO). WHO Mortality Database Version February 2014. Geneva, Switzerland: World Health Organization (WHO), 2014.                                                                                                                                                                                             | 2010      |                      |
| Samoa                            | Samoa Vital Registration Death Data 1955 as it appears in United Nations Statistics Division (UNSD). United Nations Demographic Yearbook. New York City, United States: United Nations Statistics Division (UNSD).                                                                                                                                                                                                              | 1955      |                      |
| Samoa                            | Samoa Population Census 1956 as it appears in United Nations Statistics Division (UNSD). United Nations Demographic Yearbook. New York City, United States: United Nations Statistics Division (UNSD).                                                                                                                                                                                                                          | 1956      |                      |
| Samoa                            | Samoa Vital Registration Death Data 1956 as it appears in United Nations Statistics Division (UNSD). United Nations Demographic Yearbook. New York City, United States: United Nations Statistics Division (UNSD).                                                                                                                                                                                                              | 1956      |                      |
| Samoa                            | Samoa Vital Registration Death Data 1957 as it appears in United Nations Statistics Division (UNSD). United Nations Demographic Yearbook. New York City, United States: United Nations Statistics Division (UNSD).                                                                                                                                                                                                              | 1957      |                      |

**Web Table 32 - Comprehensive citation list**

| Country | Citation                                                                                                                                                                                                           | Year*                                        | New for GBD 2013 (*) |
|---------|--------------------------------------------------------------------------------------------------------------------------------------------------------------------------------------------------------------------|----------------------------------------------|----------------------|
| Samoa   | Samoa Vital Registration Death Data 1958 as it appears in United Nations Statistics Division (UNSD). United Nations Demographic Yearbook. New York City, United States: United Nations Statistics Division (UNSD). | 1958                                         |                      |
| Samoa   | Samoa Vital Registration Death Data 1959 as it appears in United Nations Statistics Division (UNSD). United Nations Demographic Yearbook. New York City, United States: United Nations Statistics Division (UNSD). | 1959                                         |                      |
| Samoa   | Samoa Vital Registration Death Data 1960 as it appears in United Nations Statistics Division (UNSD). United Nations Demographic Yearbook. New York City, United States: United Nations Statistics Division (UNSD). | 1960                                         |                      |
| Samoa   | Samoa Population and Housing Census 1961 as it appears in United Nations Statistics Division (UNSD). United Nations Demographic Yearbook. New York City, United States: United Nations Statistics Division (UNSD). | 1961                                         |                      |
| Samoa   | Samoa Vital Registration Death Data 1961 as it appears in United Nations Statistics Division (UNSD). United Nations Demographic Yearbook. New York City, United States: United Nations Statistics Division (UNSD). | 1961                                         |                      |
| Samoa   | Samoa Vital Registration Death Data 1962 as it appears in United Nations Statistics Division (UNSD). United Nations Demographic Yearbook. New York City, United States: United Nations Statistics Division (UNSD). | 1962                                         |                      |
| Samoa   | Samoa Vital Registration Death Data 1963 as it appears in United Nations Statistics Division (UNSD). United Nations Demographic Yearbook. New York City, United States: United Nations Statistics Division (UNSD). | 1963                                         |                      |
| Samoa   | Samoa Vital Registration Death Data 1964 as it appears in United Nations Statistics Division (UNSD). United Nations Demographic Yearbook. New York City, United States: United Nations Statistics Division (UNSD). | 1964                                         |                      |
| Samoa   | Centre for Research on the Epidemiology of Disasters (CRED). EM-DAT: The OFDA/CRED International Disaster Database. Brussels, Belgium: Catholic University of Leuven.                                              | 1964, 1966, 1990-1991, 2004-2005, 2009, 2012 |                      |
| Samoa   | Samoa Vital Registration Death Data 1965 as it appears in United Nations Statistics Division (UNSD). United Nations Demographic Yearbook. New York City, United States: United Nations Statistics Division (UNSD). | 1965                                         |                      |
| Samoa   | Samoa Population and Housing Census 1966 as it appears in United Nations Statistics Division (UNSD). United Nations Demographic Yearbook. New York City, United States: United Nations Statistics Division (UNSD). | 1966                                         |                      |
| Samoa   | Samoa Vital Registration Death Data 1966 as it appears in United Nations Statistics Division (UNSD). United Nations Demographic Yearbook. New York City, United States: United Nations Statistics Division (UNSD). | 1966                                         |                      |
| Samoa   | Samoa Vital Registration Death Data 1967 as it appears in United Nations Statistics Division (UNSD). United Nations Demographic Yearbook. New York City, United States: United Nations Statistics Division (UNSD). | 1967                                         |                      |
| Samoa   | Samoa Vital Registration Death Data 1968 as it appears in United Nations Statistics Division (UNSD). United Nations Demographic Yearbook. New York City, United States: United Nations Statistics Division (UNSD). | 1968                                         |                      |



**Web Table 32 - Comprehensive citation list**

| Country | Citation                                                                                                                                                                                                                                                      | Year*                           | New for GBD 2013 (*) |
|---------|---------------------------------------------------------------------------------------------------------------------------------------------------------------------------------------------------------------------------------------------------------------|---------------------------------|----------------------|
| Samoa   | Samoa Vital Registration Death Data 1969 as it appears in United Nations Statistics Division (UNSD). United Nations Demographic Yearbook. New York City, United States: United Nations Statistics Division (UNSD).                                            | 1969                            |                      |
| Samoa   | Samoa Vital Registration Death Data 1973 as it appears in United Nations Statistics Division (UNSD). United Nations Demographic Yearbook. New York City, United States: United Nations Statistics Division (UNSD).                                            | 1973                            |                      |
| Samoa   | Samoa Vital Registration Death Data 1974 as it appears in United Nations Statistics Division (UNSD). United Nations Demographic Yearbook. New York City, United States: United Nations Statistics Division (UNSD).                                            | 1974                            |                      |
| Samoa   | Samoa Vital Registration Death Data 1975 as it appears in United Nations Statistics Division (UNSD). United Nations Demographic Yearbook. New York City, United States: United Nations Statistics Division (UNSD).                                            | 1975                            |                      |
| Samoa   | Samoa Population and Housing Census 1976 as it appears in United Nations Statistics Division (UNSD). United Nations Demographic Yearbook. New York City, United States: United Nations Statistics Division (UNSD).                                            | 1976                            |                      |
| Samoa   | Samoa Vital Registration Death Data 1976 as it appears in United Nations Statistics Division (UNSD). United Nations Demographic Yearbook. New York City, United States: United Nations Statistics Division (UNSD).                                            | 1976                            |                      |
| Samoa   | Samoa Vital Registration Death Data 1978 as it appears in United Nations Statistics Division (UNSD). United Nations Demographic Yearbook. New York City, United States: United Nations Statistics Division (UNSD).                                            | 1978                            |                      |
| Samoa   | Samoa Vital Registration Death Data 1980 as it appears in United Nations Statistics Division (UNSD). United Nations Demographic Yearbook. New York City, United States: United Nations Statistics Division (UNSD).                                            | 1980                            |                      |
| Samoa   | Institute for Health Metrics and Evaluation (IHME), Joint United Nations Program on HIV/AIDS (UNAIDS). Institute for Health Metrics and Evaluation HIV Mortality Estimates Based on the UNAIDS Spectrum Model Framework.                                      | 1980-2013                       | *                    |
| Samoa   | United Nations Children's Fund (UNICEF), World Health Organization (WHO). WHO and UNICEF Reported Disease Incidence Time Series - Pertussis. Geneva, Switzerland: World Health Organization (WHO).                                                            | 1980-1998, 2003-2006, 2008-2012 |                      |
| Samoa   | United Nations Children's Fund (UNICEF), World Health Organization (WHO). WHO and UNICEF Reported Disease Incidence Time Series - Measles. Geneva, Switzerland: World Health Organization (WHO).                                                              | 1980-1998, 2003-2006, 2009-2012 |                      |
| Samoa   | Samoa Population and Housing Census 1981 as it appears in United Nations Statistics Division (UNSD). United Nations Demographic Yearbook. New York City, United States: United Nations Statistics Division (UNSD).                                            | 1981                            |                      |
| Samoa   | Paksoy N. Patterns of coroner's post mortems in western Samoa. N Z Med J. 1991; 104(923): 476-7.                                                                                                                                                              | 1984                            |                      |
| Samoa   | Paksoy N, Bouchardy C, Parkin DM. Cancer incidence in Western Samoa. Int J Epidemiol. 1991; 20(3): 634-41.                                                                                                                                                    | 1984                            |                      |
| Samoa   | Hill AV, Bowden DK, O'Shaughnessy DF, Weatherall DJ, Clegg JB. Beta thalassemia in Melanesia: association with malaria and characterization of a common variant (IVS-1 nt 5 G----C). Blood. 1988; 72(1): 9-14.                                                | 1985-1987                       |                      |
| Samoa   | Centre for Health Informatics and Multiprofessional Education, University College London. Modell's Haemoglobinopathologist's Almanac. London, United Kingdom: Centre for Health Informatics and Multiprofessional Education, University College London, 2008. | 1990-2003                       |                      |

**Web Table 32 - Comprehensive citation list**

| Country               | Citation                                                                                                                                                                                                                           | Year*                                                        | New for GBD 2013 (*) |
|-----------------------|------------------------------------------------------------------------------------------------------------------------------------------------------------------------------------------------------------------------------------|--------------------------------------------------------------|----------------------|
| Samoa                 | World Health Organization (WHO). The Global Elimination of Congenital Syphilis: Rationale and Strategy for Action. Geneva, Switzerland: World Health Organization (WHO), 2007.                                                     | 1997-2003                                                    |                      |
| Samoa                 | Measles Supplementary Immunization Activity Data as provided by the World Health Organization. [Unpublished].                                                                                                                      | 1998                                                         |                      |
| Samoa                 | World Health Organization (WHO). Yellow Fever Reported Cases, WHO Vaccine-Preventable Diseases: Monitoring System. Geneva, Switzerland: World Health Organization (WHO).                                                           | 1998, 2001, 2004, 2006, 2009                                 |                      |
| Samoa                 | Department of Statistics (Samoa), Secretariat of the Pacific Community (SPC). Samoa Demographic and Health Survey 1999.                                                                                                            | 1999                                                         |                      |
| Samoa                 | World Health Organization (WHO). Retrospective Measles Data on Supplementary Immunization Activities. Geneva, Switzerland: World Health Organization (WHO).                                                                        | 2003, 2008-2009                                              |                      |
| Samoa                 | Samoa Bureau of Statistics. Samoa Population and Housing Census 2006.                                                                                                                                                              | 2006                                                         |                      |
| Samoa                 | Ministry of Health (Samoa), ICF Macro, Samoa Bureau of Statistics. Samoa Demographic and Health Survey 2009. Calverton, United States: ICF Macro.                                                                                  | 2009                                                         | *                    |
| Samoa                 | Samoa Census 2011 as it appears in United Nations Statistics Division (UNSD). United Nations Demographic Yearbook 2012. New York City, United States: United Nations Statistics Division (UNSD), 2013.                             | 2011                                                         | *                    |
| San Marino            | United Nations Children's Fund (UNICEF), World Health Organization (WHO). WHO and UNICEF Reported Disease Incidence Time Series - Pertussis. Geneva, Switzerland: World Health Organization (WHO).                                 | 1980-1982, 1991, 1993, 1997, 1999-2000, 2003-2007, 2009-2012 |                      |
| San Marino            | United Nations Children's Fund (UNICEF), World Health Organization (WHO). WHO and UNICEF Reported Disease Incidence Time Series - Measles. Geneva, Switzerland: World Health Organization (WHO).                                   | 1990-1993, 1997, 1999-2000, 2003-2007, 2009-2012             |                      |
| Sao Tome and Principe | Sao Tome and Principe Vital Registration Death Data 1955 as it appears in United Nations Statistics Division (UNSD). United Nations Demographic Yearbook. New York City, United States: United Nations Statistics Division (UNSD). | 1955                                                         |                      |
| Sao Tome and Principe | Sao Tome and Principe Vital Registration Death Data 1956 as it appears in United Nations Statistics Division (UNSD). United Nations Demographic Yearbook. New York City, United States: United Nations Statistics Division (UNSD). | 1956                                                         |                      |
| Sao Tome and Principe | Sao Tome and Principe Vital Registration Death Data 1957 as it appears in United Nations Statistics Division (UNSD). United Nations Demographic Yearbook. New York City, United States: United Nations Statistics Division (UNSD). | 1957                                                         |                      |
| Sao Tome and Principe | Sao Tome and Principe Vital Registration Death Data 1958 as it appears in United Nations Statistics Division (UNSD). United Nations Demographic Yearbook. New York City, United States: United Nations Statistics Division (UNSD). | 1958                                                         |                      |
| Sao Tome and Principe | Sao Tome and Principe Vital Registration Death Data 1962 as it appears in United Nations Statistics Division (UNSD). United Nations Demographic Yearbook. New York City, United States: United Nations Statistics Division (UNSD). | 1962                                                         |                      |
| Sao Tome and Principe | Sao Tome and Principe Vital Registration Death Data 1963 as it appears in United Nations Statistics Division (UNSD). United Nations Demographic Yearbook. New York City, United States: United Nations Statistics Division (UNSD). | 1963                                                         |                      |
| Sao Tome and Principe | Sao Tome and Principe Vital Registration Death Data 1964 as it appears in United Nations Statistics Division (UNSD). United Nations Demographic Yearbook. New York City, United States: United Nations Statistics Division (UNSD). | 1964                                                         |                      |

**Web Table 32 - Comprehensive citation list**

| Country               | Citation                                                                                                                                                                                                                           | Year*                                 | New for GBD 2013 (*) |
|-----------------------|------------------------------------------------------------------------------------------------------------------------------------------------------------------------------------------------------------------------------------|---------------------------------------|----------------------|
| Sao Tome and Principe | Sao Tome and Principe Vital Registration Death Data 1965 as it appears in United Nations Statistics Division (UNSD). United Nations Demographic Yearbook. New York City, United States: United Nations Statistics Division (UNSD). | 1965                                  |                      |
| Sao Tome and Principe | Sao Tome and Principe Vital Registration Death Data 1966 as it appears in United Nations Statistics Division (UNSD). United Nations Demographic Yearbook. New York City, United States: United Nations Statistics Division (UNSD). | 1966                                  |                      |
| Sao Tome and Principe | Sao Tome and Principe Vital Registration Death Data 1967 as it appears in United Nations Statistics Division (UNSD). United Nations Demographic Yearbook. New York City, United States: United Nations Statistics Division (UNSD). | 1967                                  |                      |
| Sao Tome and Principe | Sao Tome and Principe Vital Registration Death Data 1968 as it appears in United Nations Statistics Division (UNSD). United Nations Demographic Yearbook. New York City, United States: United Nations Statistics Division (UNSD). | 1968                                  |                      |
| Sao Tome and Principe | Sao Tome and Principe Vital Registration Death Data 1969 as it appears in United Nations Statistics Division (UNSD). United Nations Demographic Yearbook. New York City, United States: United Nations Statistics Division (UNSD). | 1969                                  |                      |
| Sao Tome and Principe | Sao Tome and Principe Vital Registration Death Data 1970 as it appears in United Nations Statistics Division (UNSD). United Nations Demographic Yearbook. New York City, United States: United Nations Statistics Division (UNSD). | 1970                                  |                      |
| Sao Tome and Principe | Sao Tome and Principe Vital Registration Death Data 1971 as it appears in United Nations Statistics Division (UNSD). United Nations Demographic Yearbook. New York City, United States: United Nations Statistics Division (UNSD). | 1971                                  |                      |
| Sao Tome and Principe | Sao Tome and Principe Vital Registration Death Data 1977 as it appears in United Nations Statistics Division (UNSD). United Nations Demographic Yearbook. New York City, United States: United Nations Statistics Division (UNSD). | 1977                                  |                      |
| Sao Tome and Principe | Sao Tome and Principe Vital Registration Death Data 1978 as it appears in United Nations Statistics Division (UNSD). United Nations Demographic Yearbook. New York City, United States: United Nations Statistics Division (UNSD). | 1978                                  |                      |
| Sao Tome and Principe | Sao Tome and Principe Vital Registration Death Data 1979 as it appears in United Nations Statistics Division (UNSD). United Nations Demographic Yearbook. New York City, United States: United Nations Statistics Division (UNSD). | 1979                                  |                      |
| Sao Tome and Principe | Institute for Health Metrics and Evaluation (IHME), Joint United Nations Program on HIV/AIDS (UNAIDS). Institute for Health Metrics and Evaluation HIV Mortality Estimates Based on the UNAIDS Spectrum Model Framework.           | 1980-2013                             | *                    |
| Sao Tome and Principe | United Nations Children's Fund (UNICEF), World Health Organization (WHO). WHO and UNICEF Reported Disease Incidence Time Series - Pertussis. Geneva, Switzerland: World Health Organization (WHO).                                 | 1980-1998, 1991, 1996-1997, 2000-2013 |                      |
| Sao Tome and Principe | United Nations Children's Fund (UNICEF), World Health Organization (WHO). WHO and UNICEF Reported Disease Incidence Time Series - Measles. Geneva, Switzerland: World Health Organization (WHO).                                   | 1980-1988, 1990-1997, 2000-2013       |                      |
| Sao Tome and Principe | Sao Tome and Principe Population and Housing Census 1981 as it appears in United Nations Statistics Division (UNSD). United Nations Demographic Yearbook. New York City, United States: United Nations Statistics Division (UNSD). | 1981                                  |                      |
| Sao Tome and Principe | Sao Tome and Principe Vital Registration - Deaths 1984 ICD9 as it appears in World Health Organization (WHO). WHO Mortality Database Version February 2014. Geneva, Switzerland: World Health Organization (WHO), 2014.            | 1984                                  |                      |

**Web Table 32 - Comprehensive citation list**

| Country               | Citation                                                                                                                                                                                                                                                      | Year*                            | New for GBD 2013 (*) |
|-----------------------|---------------------------------------------------------------------------------------------------------------------------------------------------------------------------------------------------------------------------------------------------------------|----------------------------------|----------------------|
| Sao Tome and Principe | Sao Tome and Principe Vital Registration - Deaths 1985 ICD9 as it appears in World Health Organization (WHO). WHO Mortality Database Version February 2014. Geneva, Switzerland: World Health Organization (WHO), 2014.                                       | 1985                             |                      |
| Sao Tome and Principe | Sao Tome and Principe Vital Registration - Deaths 1987 ICD9 as it appears in World Health Organization (WHO). WHO Mortality Database Version February 2014. Geneva, Switzerland: World Health Organization (WHO), 2014.                                       | 1987                             |                      |
| Sao Tome and Principe | United Nations Office on Drugs and Crime (UNODC). United Nations Surveys on Crime Trends and the Operations of Criminal Justice Systems 1970-2006 as provided by Kavi Bhalla. [Unpublished]                                                                   | 1990-1994                        |                      |
| Sao Tome and Principe | Weatherall D. Sickle Cell and Thalassemias Prevalence Data, Personal Correspondence with David Weatherall. [Unpublished].                                                                                                                                     | 1990-2009                        |                      |
| Sao Tome and Principe | Centre for Health Informatics and Multiprofessional Education, University College London. Modell's Haemoglobinopathologist's Almanac. London, United Kingdom: Centre for Health Informatics and Multiprofessional Education, University College London, 2008. | 1990-2003                        |                      |
| Sao Tome and Principe | Sao Tome and Principe Population and Housing Census 1991 as it appears in United Nations Statistics Division (UNSD). United Nations Demographic Yearbook. New York City, United States: United Nations Statistics Division (UNSD).                            | 1991                             |                      |
| Sao Tome and Principe | World Health Organization (WHO). Yellow Fever Reported Cases, WHO Vaccine-Preventable Diseases: Monitoring System. Geneva, Switzerland: World Health Organization (WHO).                                                                                      | 1996-1997, 2000-2009             |                      |
| Sao Tome and Principe | National Institute of Statistics (São Tomé and Príncipe), United Nations Children's Fund (UNICEF). Sao Tome and Principe Multiple Indicator Cluster Survey 2000. New York, United States: United Nations Children's Fund (UNICEF).                            | 2000                             |                      |
| Sao Tome and Principe | National Institute of Statistics (São Tomé and Príncipe), United Nations Children's Fund (UNICEF). Sao Tome and Principe Multiple Indicator Cluster Survey 2006. New York, United States: United Nations Children's Fund (UNICEF).                            | 2006                             |                      |
| Sao Tome and Principe | World Health Organization (WHO). Retrospective Measles Data on Supplementary Immunization Activities. Geneva, Switzerland: World Health Organization (WHO).                                                                                                   | 2007, 2012                       |                      |
| Sao Tome and Principe | ICF Macro, Ministry of Health (São Tomé and Príncipe), National Institute of Statistics (São Tomé and Príncipe). Sao Tome and Principe Demographic and Health Survey 2008-2009. Claverton, Maryland: ICF Macro.                                               | 2008-2009                        |                      |
| Sao Tome and Principe | Joint United Nations Program on HIV/AIDS (UNAIDS), Ministry of Health (São Tomé and Príncipe). Sao Tome and Principe National Programme for the Fight Against AIDS Report 2010. Geneva, Switzerland: Joint United Nations Program on HIV/AIDS (UNAIDS), 2010. | 2009                             |                      |
| Saudi Arabia          | Gelpi AP. Glucose-6-phosphate dehydrogenase deficiency, the sickling trait, and malaria in Saudi Arab children. J Pediatr. 1967; 71(1): 138-46.                                                                                                               | 1950-1965,1975-1979              |                      |
| Saudi Arabia          | Centre for Research on the Epidemiology of Disasters (CRED). EM-DAT: The OFDA/CRED International Disaster Database. Brussels, Belgium: Catholic University of Leuven.                                                                                         | 1964, 1985, 2002-2005, 2009-2013 |                      |
| Saudi Arabia          | Perrine RP, Pembrey ME, John P, Perrine S, Shoup F. Natural history of sickle cell anemia in Saudi Arabs A study of 270 subjects. Ann Intern Med. 1978; 88(1): 1-6.                                                                                           | 1969-1979                        |                      |
| Saudi Arabia          | United Nations Office on Drugs and Crime (UNODC). United Nations Surveys on Crime Trends and the Operations of Criminal Justice Systems 1970-2006 as provided by Kavi Bhalla. [Unpublished]                                                                   | 1970-1974                        |                      |
| Saudi Arabia          | Ministry of Health (Saudi Arabia). Saudi Arabia Levels, Trends and Differentials of Infant and Child Mortality 1990. Riyadh, Saudi Arabia: Ministry of Health (Saudi Arabia), 1990.                                                                           | 1976-1990                        |                      |

**Web Table 32 - Comprehensive citation list**

| Country      | Citation                                                                                                                                                                                                                                                                                | Year*                | New for GBD 2013 (*) |
|--------------|-----------------------------------------------------------------------------------------------------------------------------------------------------------------------------------------------------------------------------------------------------------------------------------------|----------------------|----------------------|
| Saudi Arabia | Peace Research Institute Oslo (PRIO). Battle Deaths Dataset Version 3, 2009. Oslo, Norway: Peace Research Institute Oslo (PRIO), 2009.                                                                                                                                                  | 1979                 |                      |
| Saudi Arabia | Institute for Health Metrics and Evaluation (IHME), Joint United Nations Program on HIV/AIDS (UNAIDS). Institute for Health Metrics and Evaluation HIV Mortality Estimates Based on the UNAIDS Spectrum Model Framework.                                                                | 1980-2013            | *                    |
| Saudi Arabia | United Nations Children's Fund (UNICEF), World Health Organization (WHO). WHO and UNICEF Reported Disease Incidence Time Series - Pertussis. Geneva, Switzerland: World Health Organization (WHO).                                                                                      | 1980-1999, 2001-2012 |                      |
| Saudi Arabia | United Nations Children's Fund (UNICEF), World Health Organization (WHO). WHO and UNICEF Reported Disease Incidence Time Series - Measles. Geneva, Switzerland: World Health Organization (WHO).                                                                                        | 1980-1999, 2001-2012 |                      |
| Saudi Arabia | Talukder MAS, Waller DK, Nixon P, Al-Admawy AMO. Prevalence of Antibody to Hepatitis A Virus in a Saudi Arabian Hospital Population. <i>J Infect Dis.</i> 1983; 148(6): 1167.                                                                                                           | 1982                 |                      |
| Saudi Arabia | El-Hazmi MAF, Warsy AS. Appraisal of sickle-cell and thalassaemia genes in Saudi Arabia. <i>East Mediterr Health J.</i> 1999; 5(6): 1147-53.                                                                                                                                            | 1982-1992            |                      |
| Saudi Arabia | Fashir B, Sivasubramaniam V, Al Momen S, Assaf H. Pattern of liver disease in a Saudi patient population: a decade of experience at security forces hospital, Riyadh, KSA. <i>Saudi J Gastroenterol.</i> 1996; 2(1): 50-2.                                                              | 1983-1993            |                      |
| Saudi Arabia | Beutler E, Johnson C, Powars D, West C. Prevalence of Glucose-6-Phosphate Dehydrogenase Deficiency in Sickle-Cell Disease. <i>N Engl J Med.</i> 1974; 290(15): 826-8.                                                                                                                   | 1983-1985            |                      |
| Saudi Arabia | Almuneef M, Memish Z, Khan Y, Kagallwala A, Alshaalan M. Childhood bacterial meningitis in Saudi Arabia. <i>J Infect.</i> 1998; 36(2): 157-60.                                                                                                                                          | 1984-1995            |                      |
| Saudi Arabia | el-Hazmi MA, Al-Swailem AR, Al-Faleh FZ, Warsy AS. Frequency of glucose-6-phosphate dehydrogenase, pyruvate kinase and hexokinase deficiency in the Saudi population. <i>Hum Hered.</i> 1986; 36(1): 45-9.                                                                              | 1984-1986            |                      |
| Saudi Arabia | Samuel AP, Saha N. Distribution of red cell G6PD and 6PGD phenotypes in Saudi Arabia. <i>Trop Geogr Med.</i> 1986; 38(3): 287-91.                                                                                                                                                       | 1984-1986            |                      |
| Saudi Arabia | Ashraf SJ, Arya SC, Parande CM, Kristensen E. Hepatitis A virus among natives and expatriates in Saudi Arabia. <i>J Med Virol.</i> 1986; 19(2): 151-3.                                                                                                                                  | 1984-1985            |                      |
| Saudi Arabia | Ramia S. Antibody against hepatitis A in Saudi Arabians and in expatriates from various parts of the world working in Saudi Arabia. <i>J Infect.</i> 1986; 12(2): 153-5.                                                                                                                | 1985                 |                      |
| Saudi Arabia | Abanamy A, Shuja M, Khaleel M, Ghazal S, Cherian M, Salman H, Abdul Alim S. Childhood bacterial meningitis in Riyadh. <i>Ann Saudi Med.</i> 1991; 11(6): 628-32.                                                                                                                        | 1985-1990            |                      |
| Saudi Arabia | Saleem TH, Mendis BS, Osanyintuyi SO. Glucose-6-phosphate dehydrogenase deficiency in a rural Saudi population. <i>J Trop Med Hyg.</i> 1991; 94(5): 327-8.                                                                                                                              | 1986-1990            |                      |
| Saudi Arabia | el-Hazmi M. Hepatitis B virus in Saudi Arabia. <i>J Trop Med Hyg.</i> 1989; 92(1): 56-61.                                                                                                                                                                                               | 1987                 |                      |
| Saudi Arabia | Arab Gulf Program for Development (AGFUND), Council of Health Ministers of GCC States, Ministry of Health (Saudi Arabia), United Nations Children's Fund (UNICEF), United Nations Population Fund (UNFPA), World Health Organization (WHO). Saudi Arabia Child Health Survey 1987-1988. | 1987-1988            |                      |
| Saudi Arabia | el-Hazmi MA, Warsy AS. Frequency of glucose-6-phosphate dehydrogenase phenotypes and deficiency in Al-Baha. <i>Hum Hered.</i> 1989; 39(6): 313-7.                                                                                                                                       | 1987-1989            |                      |
| Saudi Arabia | Fathalla SE, Al-Jama AA, Al-Sheikh IH, Islam SI. Seroprevalence of hepatitis A virus markers in Eastern Saudi Arabia. <i>Saudi Med J.</i> 2000; 21(10): 945-9.                                                                                                                          | 1987-1999            |                      |
| Saudi Arabia | el-Hazmi MA. Hepatitis A antibodies: prevalence in Saudi Arabia. <i>J Trop Med Hyg.</i> 1989; 92(6): 427-30.                                                                                                                                                                            | 1988                 |                      |

**Web Table 32 - Comprehensive citation list**

| Country      | Citation                                                                                                                                                                                                                                                                                   | Year*      | New for GBD 2013 (*) |
|--------------|--------------------------------------------------------------------------------------------------------------------------------------------------------------------------------------------------------------------------------------------------------------------------------------------|------------|----------------------|
| Saudi Arabia | el-Hazmi MA, Jabbar FA, Al-Faleh FZ, Al-Swailem AR, Warsy AS. Patterns of sickle cell, thalassaemia and glucose-6-phosphate dehydrogenase deficiency genes in north-western Saudi Arabia. <i>Hum Hered.</i> 1991; 41(1): 26-34.                                                            | 1989-1991  |                      |
| Saudi Arabia | Al Rashed RS. Prevalence of hepatitis A virus among Saudi Arabian children: A community-based study. <i>Ann Saudi Med.</i> 1997; 17(2): 200-3.                                                                                                                                             | 1989-1990  |                      |
| Saudi Arabia | Weatherall D. Sickle Cell and Thalassemias Prevalence Data, Personal Correspondence with David Weatherall. [Unpublished].                                                                                                                                                                  | 1990-2009  |                      |
| Saudi Arabia | Jamjoom GA, Quli SK. Serodiagnosis of hepatitis C in acute and chronic liver disease in southwestern Saudi Arabia. <i>J Trop Med Hyg.</i> 1992; 95(6): 428-31.                                                                                                                             | 1990-1991  |                      |
| Saudi Arabia | Arif M, Qattan I, al-Faleh F, Ramia S. Epidemiology of hepatitis E virus (HEV) infection in Saudi Arabia. <i>Ann Trop Med Parasitol.</i> 1994; 88(2): 163-8.                                                                                                                               | 1990-1993  | *                    |
| Saudi Arabia | Centre for Health Informatics and Multiprofessional Education, University College London. <i>Modell's Haemoglobinopathologist's Almanac.</i> London, United Kingdom: Centre for Health Informatics and Multiprofessional Education, University College London, 2008.                       | 1990-2003  |                      |
| Saudi Arabia | el-Hazmi MA, Warsy AS, Bahakim HH, al-Swailem A. Glucose-6-phosphate dehydrogenase deficiency and the sickle cell gene in Makkah, Saudi Arabia. <i>J Trop Pediatr.</i> 1994; 40(1): 12-6.                                                                                                  | 1992-1994  |                      |
| Saudi Arabia | Tamimi WG, Altraif IM, Auamah A, Albuhanian BS, Alenzi FQB, Bernvil S, Sonbol RH, Cruse RJ. Impact of new AABB guidelines on hepatitis B and C testing among Saudi blood donors. <i>Br J Biomed Sci.</i> 2004; 61(4): 215-7.                                                               | 1992-2002  |                      |
| Saudi Arabia | Al-Tawfiq J, AbuKhamis A. Burden and etiology of community-acquired bacterial meningitis in a hospital in Eastern Saudi Arabia: 1993-2005. <i>Med Sci Monit.</i> 2009; 15(2): PI10-PI14.                                                                                                   | 1993-2005  |                      |
| Saudi Arabia | el-Hazmi MA, al-Swailem A, Warsy AS. Glucose-6-phosphate dehydrogenase deficiency and sickle cell genes in Bisha. <i>J Trop Pediatr.</i> 1995; 41(4): 225-9.                                                                                                                               | 1993-1995  |                      |
| Saudi Arabia | al-Faleh FZ, Ramia S, Arif M, Ayoola EA, al-Rashed RS, al-Jeffry M, Hossain A, el-Hazmi M. Profile of hepatitis C virus and the possible modes of transmission of the virus in the Gizan area of Saudi Arabia: a community-based study. <i>Ann Trop Med Parasitol.</i> 1995; 89(4): 431-7. | 1993, 1995 |                      |
| Saudi Arabia | Bakir TM, Kurbaan KM, al Fawaz I, Ramia S. Infection with hepatitis viruses (B and C) and human retroviruses (HTLV-1 and HIV) in Saudi children receiving cycled cancer chemotherapy. <i>J Trop Pediatr.</i> 1995; 41(4): 206-9.                                                           | 1993, 1995 |                      |
| Saudi Arabia | National Cancer Registry (Saudi Arabia). <i>Saudi Arabia Cancer Incidence Report 1994-1996.</i> Riyadh, Saudi Arabia: National Cancer Registry (Saudi Arabia), 1999.                                                                                                                       | 1994-1996  |                      |
| Saudi Arabia | al-Nuaim L, Talib ZA, el-Hazmi MA, Warsy AS. Sickle cell and G-6-PD deficiency gene in cord blood samples: experience at King Khalid University Hospital, Riyadh. <i>J Trop Pediatr.</i> 1997; 43(2): 71-4.                                                                                | 1994-1995  |                      |
| Saudi Arabia | Abdelaal M, Zawawi TH, Sobhi E al, Jeje O, Gilpin C, Kinsara A, Osoba A, Oni GA. Epidemiology of hepatitis E virus in male blood donors in Jeddah, Saudi Arabia. <i>Ir J Med Sci.</i> 1998; 167(2): 94-6.                                                                                  | 1995       | *                    |
| Saudi Arabia | Arif M. Enterically transmitted hepatitis in Saudi Arabia: an epidemiological study. <i>Ann Trop Med Parasitol.</i> 1996; 90(2): 197-201.                                                                                                                                                  | 1995       |                      |
| Saudi Arabia | Almuneef M, Alshaalan M, Memish Z, Alola SA. Bacterial Meningitis in Saudi Arabia: The Impact of Haemophilus influenzae Type B Vaccination. <i>J Chemother.</i> 2001; 13: 34-9.                                                                                                            | 1995-2000  |                      |
| Saudi Arabia | Ayoola EA, Gadour MOEH. Hepatocellular carcinoma in Saudi Arabia: role of hepatitis B and C infection. <i>J Gastroenterol Hepatol.</i> 2004; 19(6): 665-9.                                                                                                                                 | 1995-1996  |                      |



**Web Table 32 - Comprehensive citation list**

| Country      | Citation                                                                                                                                                                                                                                                                                                                                                                         | Year*                           | New for GBD 2013 (*) |
|--------------|----------------------------------------------------------------------------------------------------------------------------------------------------------------------------------------------------------------------------------------------------------------------------------------------------------------------------------------------------------------------------------|---------------------------------|----------------------|
| Saudi Arabia | Khalil M, Al-Mazrou Y, Al-Jeffri M, Al-Howasi M. Childhood epidemiology of hepatitis A virus in Riyadh, Saudi Arabia. <i>Ann Saudi Med.</i> 1998; 18(1): 18-21.                                                                                                                                                                                                                  | 1995-1996                       |                      |
| Saudi Arabia | Arab Fund for Economic and Social Development (AFESD), Arab Gulf Program for Development (AGFUND), Gulf-Co-operation Council (GCC), Ministry of Health (Saudi Arabia), United Nations Children's Fund (UNICEF), United Nations Population Fund (UNFPA), United Nations Statistics Division (UNSD), World Health Organization (WHO). Saudi Arabia Family Health Survey 1996-1997. | 1996-1997                       |                      |
| Saudi Arabia | Ministry of Health (Saudi Arabia). Saudi Arabia Vital Registration - Deaths 1996-2011. [Unpublished].                                                                                                                                                                                                                                                                            | 1996-2011                       |                      |
| Saudi Arabia | Muzaffer MA. Neonatal screening of glucose-6-phosphate dehydrogenase deficiency in Yanbu, Saudi Arabia. <i>J Med Screen.</i> 2005; 12(4): 170-1.                                                                                                                                                                                                                                 | 1996-1998                       |                      |
| Saudi Arabia | Al-Traif I, Ali A, Dafalla M, Al-Tamimi W, Qassem L. Prevalence of hepatitis delta antibody among HBsAG carriers in Saudi Arabia. <i>Ann Saudi Med.</i> 2004; 24(5): 343-4.                                                                                                                                                                                                      | 1996-1997                       |                      |
| Saudi Arabia | National Cancer Registry (Saudi Arabia). Saudi Arabia Cancer Incidence Report 1997-1998. Riyadh, Saudi Arabia: National Cancer Registry (Saudi Arabia), 2001.                                                                                                                                                                                                                    | 1997-1998                       |                      |
| Saudi Arabia | el-Hazmi MA. Genetic diseases in Arab populations. <i>East Mediterr Health J.</i> 1999; 5(6): 1102-3.                                                                                                                                                                                                                                                                            | 1997-1999                       |                      |
| Saudi Arabia | Memish ZA, Oni GA, Bannatyne RM, Qasem L. The cost-saving potential of prevaccination antibody tests when implementing a mass immunization program. <i>Mil Med.</i> 2001; 166(1): 11-3.                                                                                                                                                                                          | 1997-1998                       |                      |
| Saudi Arabia | Measles Supplementary Immunization Activity Data as provided by the World Health Organization. [Unpublished].                                                                                                                                                                                                                                                                    | 1998                            |                      |
| Saudi Arabia | World Health Organization (WHO). Yellow Fever Reported Cases, WHO Vaccine-Preventable Diseases: Monitoring System. Geneva, Switzerland: World Health Organization (WHO).                                                                                                                                                                                                         | 1998-1999, 2001-2003, 2005-2009 |                      |
| Saudi Arabia | Shobokshi OA, Serebour FE, Al-Drees AZ, Mitwalli AH, Qahtani A, Skakni LI. Hepatitis C virus seroprevalence rate among Saudis. <i>Saudi Med J.</i> 2003; S81-86.                                                                                                                                                                                                                 | 1998-2002                       |                      |
| Saudi Arabia | National Cancer Registry (Saudi Arabia). Saudi Arabia Cancer Incidence Report 1999-2000. Riyadh, Saudi Arabia: National Cancer Registry (Saudi Arabia), 2004.                                                                                                                                                                                                                    | 1999-2000                       |                      |
| Saudi Arabia | United Nations Office on Drugs and Crime (UNODC). United Nations Office on Drugs and Crime Global Study on Homicides 2011. Vienna, Austria: United Nations Office on Drugs and Crime (UNODC), 2011.                                                                                                                                                                              | 1999-2007                       |                      |
| Saudi Arabia | Al-Mazrou Y, Al-Jeffri M, Al-Haggar S, Musa E, Mohamed O, Abdalla M. Haemophilus Type B Meningitis in Saudi Children under 5 Years Old. <i>J Trop Pediatr.</i> 2004; 50(3): 131-6.                                                                                                                                                                                               | 1999-2001                       |                      |
| Saudi Arabia | Rouzi AA, Hawaswi AA, Aboalazm M, Hassanain F, Sindi O. Uterine rupture incidence, risk factors, and outcome. <i>Saudi Med J.</i> 2003; 24(1): 37-9.                                                                                                                                                                                                                             | 1999-2000                       |                      |
| Saudi Arabia | World Health Organization (WHO). Saudi Arabia WHO Leishmaniasis Country Profile.                                                                                                                                                                                                                                                                                                 | 1999-2009                       | *                    |
| Saudi Arabia | Zekri A-RN, Awlia AA, El Mahalawi H, Ismail EF, Mabrouk GM. Evaluation of blood units with isolated anti HBC for the presence of HBV DNA. <i>Dis Markers.</i> 2002; 18(3): 107-10.                                                                                                                                                                                               | 1999-2000                       |                      |
| Saudi Arabia | Al Jama FE, Gasem T, Burshaid S, Rahman J, Al Suleiman SA, Rahman MS. Pregnancy outcome in patients with homozygous sickle cell disease in a university hospital, Eastern Saudi Arabia. <i>Arch Gynecol Obstet.</i> 2009; 280(5): 793-7.                                                                                                                                         | 2000-2008                       | *                    |
| Saudi Arabia | El-Hazmi MM. Prevalence of HBV, HCV, HIV-1, 2 and HTLV-I/II infections among blood donors in a teaching hospital in the Central region of Saudi Arabia. <i>Saudi Med J.</i> 2004; 25(1): 26-33.                                                                                                                                                                                  | 2000-2002                       |                      |

**Web Table 32 - Comprehensive citation list**

| Country      | Citation                                                                                                                                                                                                                                                           | Year*                  | New for GBD 2013 (*) |
|--------------|--------------------------------------------------------------------------------------------------------------------------------------------------------------------------------------------------------------------------------------------------------------------|------------------------|----------------------|
| Saudi Arabia | Panhotra BR, Al-Bahrani A, Ul-Hassan Z. Epidemiology of antibody to hepatitis B core antigen screening among blood donors in Eastern Saudi Arabia. Need to replace the test by HBV DNA testing. Saudi Med J. 2005; 26(2): 270-3.                                   | 2000-2003              |                      |
| Saudi Arabia | World Health Organization (WHO). Retrospective Measles Data on Supplementary Immunization Activities. Geneva, Switzerland: World Health Organization (WHO).                                                                                                        | 2000, 2004, 2007, 2011 |                      |
| Saudi Arabia | National Cancer Registry (Saudi Arabia). Saudi Arabia Cancer Incidence Report 2001. Riyadh, Saudi Arabia: National Cancer Registry (Saudi Arabia), 2005.                                                                                                           | 2001                   |                      |
| Saudi Arabia | Al Kahtani MA, AlQahtani M, Alshebaily MM, Abd Elzaher M, Moawad A, Aljohani N. Morbidity and pregnancy outcomes associated with sickle cell anemia among Saudi women. Int J Gynaecol Obstet. 2012; 119(3): 224-6.                                                 | 2001-2010              | *                    |
| Saudi Arabia | Almuneef MA, Memish ZA, Balkhy HH, Otaibi B, Helmi M. Seroprevalence survey of varicella, measles, rubella, and hepatitis A and B viruses in a multinational healthcare workforce in Saudi Arabia. Infect Control Hosp Epidemiol. 2006; 27(11): 1178-83.           | 2001-2005              |                      |
| Saudi Arabia | National Cancer Registry (Saudi Arabia). Saudi Arabia Cancer Incidence Report 2002. Riyadh, Saudi Arabia: National Cancer Registry (Saudi Arabia).                                                                                                                 | 2002                   |                      |
| Saudi Arabia | Lumbiganon P, Piaggio G, Villar J, Pinol A, Bakketeig L, Bergsjö P, Al-Mazrou Y, Ba'aqeel H, Belizán JM, Farnot U, Carroli G, Berendes H, WHO Antenatal Care Trial Research Group. The epidemiology of syphilis in pregnancy. Int J STD AIDS. 2002; 13(7): 486-94. | 2002                   |                      |
| Saudi Arabia | National Cancer Registry (Saudi Arabia). Saudi Arabia Cancer Incidence Report 2003. Riyadh, Saudi Arabia: National Cancer Registry (Saudi Arabia).                                                                                                                 | 2003                   |                      |
| Saudi Arabia | Department of Peace and Conflict Research, Uppsala University. UCDP One-Sided Violence Database Version 1.4, 2013. Uppsala, Sweden: Department of Peace and Conflict Research, Uppsala University, 2013.                                                           | 2003-2004              | *                    |
| Saudi Arabia | Saudi Arabia Population and Housing Census 2004 as it appears in United Nations Statistics Division (UNSD). United Nations Demographic Yearbook. New York City, United States: United Nations Statistics Division (UNSD).                                          | 2004                   |                      |
| Saudi Arabia | Saudi Cancer Registry. Saudi Arabia Cancer Incidence Report 2004. Riyadh, Saudi Arabia: Saudi Cancer Registry (Saudi Arabia).                                                                                                                                      | 2004                   |                      |
| Saudi Arabia | Jaber SM. Prevalence of anti-hepatitis B and anti-hepatitis A antibodies among school aged children in Western Saudi Arabia. Saudi Med J. 2006; 27(10): 1515-22.                                                                                                   | 2004                   |                      |
| Saudi Arabia | Ministry of Health (Saudi Arabia). Saudi Arabia Health Statistical Yearbook 2005. Riyadh, Saudi Arabia: Ministry of Health (Saudi Arabia).                                                                                                                         | 2005                   |                      |
| Saudi Arabia | Saudi Cancer Registry. Saudi Arabia Cancer Incidence Report 2005. Riyadh, Saudi Arabia: Saudi Cancer Registry (Saudi Arabia).                                                                                                                                      | 2005                   |                      |
| Saudi Arabia | Almuneef MA, Memish ZA, Balkhy HH, Qahtani M, Alotaibi B, Hajeer A, Qasim L, Al Knawy B. Epidemiologic shift in the prevalence of Hepatitis A virus in Saudi Arabia: a case for routine Hepatitis A vaccination. Vaccine. 2006; 24(27-28): 5599-603.               | 2005                   |                      |
| Saudi Arabia | Central Department of Statistics and Information (Saudi Arabia). Saudi Arabia Demographic Research Bulletin 2007. Riyadh, Saudi Arabia: Central Department of Statistics and Information (Saudi Arabia).                                                           | 2007                   |                      |
| Saudi Arabia | Al Faleh FZ, Ali S, Aljebreen AM, Alhammad E, Abdo AA. Seroprevalence rates of Helicobacter pylori and viral hepatitis A among adolescents in three regions of the Kingdom of Saudi Arabia: is there any correlation?. Helicobacter. 2010; 15(6): 532-7.           | 2007-2008              |                      |



**Web Table 32 - Comprehensive citation list**

| Country      | Citation                                                                                                                                                                                                                                                                                                                                                                                                                       | Year*                                                        | New for GBD 2013 (*) |
|--------------|--------------------------------------------------------------------------------------------------------------------------------------------------------------------------------------------------------------------------------------------------------------------------------------------------------------------------------------------------------------------------------------------------------------------------------|--------------------------------------------------------------|----------------------|
| Saudi Arabia | Al Faleh F, Al Shehri S, Al Ansari S, Al Jeffri M, Al Mazrou Y, Shaffi A, Abdo A-A. Changing patterns of hepatitis A prevalence within the Saudi population over the last 18 years. <i>World J Gastroenterol</i> . 2008; 14(48): 7371-5.                                                                                                                                                                                       | 2007-2008                                                    |                      |
| Saudi Arabia | Postigo JAR. Leishmaniasis in the World Health Organization Eastern Mediterranean Region. <i>Int J Antimicrob Agents</i> . 2010; S62-65.                                                                                                                                                                                                                                                                                       | 2008                                                         |                      |
| Saudi Arabia | Ministry of Health (Saudi Arabia). Saudi Arabia Vital Registration - Deaths 2008-2011. [Unpublished].                                                                                                                                                                                                                                                                                                                          | 2008-2011                                                    | *                    |
| Saudi Arabia | Abdel-Moneim AS, Bamaga MS, Shehab GMG, Abu-Elsaad A-ASA, Farahat FM. HCV infection among Saudi population: high prevalence of genotype 4 and increased viral clearance rate. <i>PLoS One</i> . 2012; 7(1): e29781.                                                                                                                                                                                                            | 2008-2011                                                    |                      |
| Saudi Arabia | Joint United Nations Program on HIV/AIDS (UNAIDS), Ministry of Health (Saudi Arabia). Saudi Arabia UNGASS Country Progress Report 2010. Geneva, Switzerland: Joint United Nations Program on HIV/AIDS (UNAIDS), 2010.                                                                                                                                                                                                          | 2009                                                         |                      |
| Saudi Arabia | Ministry of Health (Saudi Arabia). Saudi Arabia Vital Registration - Deaths 2012. [Unpublished].                                                                                                                                                                                                                                                                                                                               | 2012                                                         | *                    |
| Senegal      | Linhard J, Baylet R, Malvoisin J. First results on glucose-6-phosphate dehydrogenase deficiencies in the Dakar region. Preliminary notes. <i>Bull Soc Med Afr Noire Lang Fr</i> . 1964; 269-70.                                                                                                                                                                                                                                | 1962-1964                                                    |                      |
| Senegal      | United Nations Office on Drugs and Crime (UNODC). United Nations Surveys on Crime Trends and the Operations of Criminal Justice Systems 1970-2006 as provided by Kavi Bhalla. [Unpublished]                                                                                                                                                                                                                                    | 1976-1980                                                    |                      |
| Senegal      | Department of Statistics (Senegal), International Statistical Institute. Senegal World Fertility Survey 1978. International Statistical Institute.                                                                                                                                                                                                                                                                             | 1978                                                         |                      |
| Senegal      | Barin F, Denis F, Chotard J, Paulin R, Diop Mar I, Chiron JP, Maupas P, Goudeau A, Coursaget P. [Sero-epidemiological study of hepatitis A infection in Senegalese children (author's transl)]. <i>Ann Pediatr (Paris)</i> . 1980; 27(8): 539-42.                                                                                                                                                                              | 1980                                                         |                      |
| Senegal      | Baylet R, Lemaire JM, Ridet J. [Sero-epidemiology of hepatitis A. Results obtained in Senegal (Fleuve and Casamance regions) (author's transl)]. <i>Pathol Biol</i> . 1981; 29(4): 217-21.                                                                                                                                                                                                                                     | 1980                                                         |                      |
| Senegal      | Institute for Health Metrics and Evaluation (IHME), Joint United Nations Program on HIV/AIDS (UNAIDS). Institute for Health Metrics and Evaluation HIV Mortality Estimates Based on the UNAIDS Spectrum Model Framework.                                                                                                                                                                                                       | 1980-2013                                                    | *                    |
| Senegal      | United Nations Children's Fund (UNICEF), World Health Organization (WHO). WHO and UNICEF Reported Disease Incidence Time Series - Pertussis. Geneva, Switzerland: World Health Organization (WHO).                                                                                                                                                                                                                             | 1980-1983, 1988-1994, 1997, 1999-2000, 2002, 2004, 2006-2009 |                      |
| Senegal      | United Nations Children's Fund (UNICEF), World Health Organization (WHO). WHO and UNICEF Reported Disease Incidence Time Series - Measles. Geneva, Switzerland: World Health Organization (WHO).                                                                                                                                                                                                                               | 1980-1983, 1986-1994, 1996-2013                              |                      |
| Senegal      | WHO Department of Communicable Disease Surveillance and Response. WHO Report on Global Surveillance of Epidemic-prone Infectious Diseases 2000.                                                                                                                                                                                                                                                                                | 1981, 1995-1996                                              |                      |
| Senegal      | Stephens, PW. Reliability of lay reporting of morbidity and cause-of-death data: an evaluation of reported cases and deaths from measles in rural Senegal. In: Vallin J, D'Souza S, Palloni A, eds. <i>Measurement and analysis of mortality: new approaches</i> . New York City, United States: Oxford University Press, 1990. 143-54.                                                                                        | 1983                                                         |                      |
| Senegal      | Garenne M, Maire B, Fontaine O, Dieng K, Briend A. Risques de deces associes a differents etats nutritionnels chez l'enfant d'age prescolaire: Etude realisee a Niakhar (Senegal), 1983-1986 [Risk of death associated with different nutritional states in children preschool age: A Study Conducted in Niakhar, Senegal 1983-1986]. Paris, France: Population and Development Research Center (CEPED) (France); 2000. 201 p. | 1983-1986                                                    |                      |

**Web Table 32 - Comprehensive citation list**

| Country | Citation                                                                                                                                                                                                                                                                                                   | Year*                                            | New for GBD 2013 (*) |
|---------|------------------------------------------------------------------------------------------------------------------------------------------------------------------------------------------------------------------------------------------------------------------------------------------------------------|--------------------------------------------------|----------------------|
| Senegal | Aaby P, Whittle H, Cisse B, Samb B, Jensen H, Simondon F. The frailty hypothesis revisited: mainly weak children die of measles. <i>Vaccine</i> . 2001; 20(6-May): 949-53.                                                                                                                                 | 1983-1994                                        |                      |
| Senegal | World Health Organization (WHO). Yellow fever virus surveillance in Western Africa. <i>Wkly Epidemiol Rec</i> . 1994; 69(13): 93-5.                                                                                                                                                                        | 1983, 1987, 1989-1990, 1992-1993                 |                      |
| Senegal | Garenne M, Willie D, Maire B, Fontaine O, Eeckels R, Briend A, Van den Broeck J. Incidence and duration of severe wasting in two African populations. <i>Public Health Nutr</i> . 2009; 12(11): 1974-82.                                                                                                   | 1984                                             |                      |
| Senegal | Pison G, Bonneuil N. Increased risk of measles mortality for children with siblings among the Fula Bande, Senegal. <i>Rev Infect Dis</i> . 1988; 10(2): 468-70.                                                                                                                                            | 1985                                             |                      |
| Senegal | Department of Statistics (Senegal), Westinghouse; Institute for Resource Development. Senegal Demographic and Health Survey 1986. Columbia, United States: Westinghouse; Institute for Resource Development.                                                                                               | 1986                                             |                      |
| Senegal | Victoria CG, Huttly SR, Fuchs SC, Barros FC, Garenne M, Leroy O, Fontaine O, Beau JP, Fauveau V, Chowdhury HR. International differences in clinical patterns of diarrhoeal deaths: a comparison of children from Brazil, Senegal, Bangladesh, and India. <i>J Diarrhoeal Dis Res</i> . 1993; 11(1): 25-9. | 1986                                             |                      |
| Senegal | Trape JF, Pison G, Preziosi MP, Enel C, Desgrées du Loû A, Delaunay V, Samb B, Lagarde E, Molez JF, Simondon F. Impact of chloroquine resistance on malaria mortality. <i>Comptes Rendus de l'Académie des Sciences - Series III - Sciences de la Vie</i> . 1998; 321(8): 689-97.                          | 1986-1992                                        |                      |
| Senegal | Préziosi MP, Yam A, Wassilak SG, Chabirand L, Simaga A, Ndiaye M, Dia M, Dabis F, Simondon F. Epidemiology of pertussis in a West African community before and after introduction of a widespread vaccination program. <i>Am J Epidemiol</i> . 2002; 155(10): 891-6.                                       | 1986, 1990, 1993                                 |                      |
| Senegal | Department of Peace and Conflict Research, Uppsala University. UCDP Nonstate Conflict Database Version 2.5, 2013. Uppsala, Sweden: Department of Peace and Conflict Research, Uppsala University, 2013.                                                                                                    | 1989-2006                                        | *                    |
| Senegal | Department of Peace and Conflict Research, Uppsala University. UCDP One-Sided Violence Database Version 1.4, 2013. Uppsala, Sweden: Department of Peace and Conflict Research, Uppsala University, 2013.                                                                                                   | 1989-2002                                        | *                    |
| Senegal | Weatherall D. Sickle Cell and Thalassemias Prevalence Data, Personal Correspondence with David Weatherall. [Unpublished].                                                                                                                                                                                  | 1990-2009                                        |                      |
| Senegal | Etard JF, Le Hesran JY, Diallo A, Diallo JP, Ndiaye JL, Delaunay V. Childhood mortality and probable causes of death using verbal autopsy in Niakhar, Senegal, 1989-2000. <i>Int J Epidemiol</i> . 2004; 33(6): 1286-92.                                                                                   | 1990-1999                                        |                      |
| Senegal | Department of Peace and Conflict Research, Uppsala University. UCDP Battle-Related Deaths Database Version 5, 2013. Uppsala, Sweden: Department of Peace and Conflict Research, Uppsala University, 2013.                                                                                                  | 1990-2011                                        | *                    |
| Senegal | Centre for Health Informatics and Multiprofessional Education, University College London. Modell's Haemoglobinopathologist's Almanac. London, United Kingdom: Centre for Health Informatics and Multiprofessional Education, University College London, 2008.                                              | 1990-2003                                        |                      |
| Senegal | World Health Organization (WHO). Yellow Fever Reported Cases, WHO Vaccine-Preventable Diseases: Monitoring System. Geneva, Switzerland: World Health Organization (WHO).                                                                                                                                   | 1991-1993, 1997, 1999-2001, 2003-2006, 2008-2009 |                      |
| Senegal | Sokhna CS, Rogier C, Dieye A, Trape JF. Host factors affecting the delay of reappearance of <i>Plasmodium falciparum</i> after radical treatment among a semi-immune population exposed to intense perennial transmission. <i>Am J Trop Med Hyg</i> . 2000; 62(2): 266-70.                                 | 1992                                             |                      |
| Senegal | Directorate of Forecasting and Statistics (Senegal), Macro International, Inc. Senegal Demographic and Health Survey 1992-1993. Calverton, United States: Macro International, Inc.                                                                                                                        | 1992-1993                                        |                      |
| Senegal | Duthe G, Pison G. Adult mortality in a rural area of Senegal: Non-communicable diseases have a large impact in Mlomp. <i>Demographic Research</i> . 2008; 19(37): 1419-48.                                                                                                                                 | 1994                                             |                      |

**Web Table 32 - Comprehensive citation list**

| Country | Citation                                                                                                                                                                                                                                                                | Year*                                 | New for GBD 2013 (*) |
|---------|-------------------------------------------------------------------------------------------------------------------------------------------------------------------------------------------------------------------------------------------------------------------------|---------------------------------------|----------------------|
| Senegal | De Bernis L, Dumont A, Bouillin D, Gueye A, Dompnier J-P, Bouvier-Colle M-H. Maternal morbidity and mortality in two different populations of Senegal: a prospective study (MOMA survey). <i>BJOG</i> . 2000; 107(1): 68-74.                                            | 1994-1996                             |                      |
| Senegal | Cisse B, Aaby P, Simondon F, Samb B, Soumaré M, Whittle H. Role of schools in the transmission of measles in rural Senegal: implications for measles control in developing countries. <i>Am J Epidemiol</i> . 1999; 149(4): 295-301.                                    | 1994-1995                             |                      |
| Senegal | Mbaye PS, Renaudineau Y, Diallo A, Haudrechy D, Sane M, Michel G, Raphenon G, Klotz F. [Hepatitis C virus and chronic hepatopathies in Dakar: case-control study]. <i>Med Trop (Mars)</i> . 2000; 60(1): 47-52.                                                         | 1995                                  |                      |
| Senegal | Thonnon J, Fontenille D, Tall A, Diallo M, Renaudineau Y, Baudez B, Raphenon G. Re-Emergence of Yellow Fever in Senegal in 1995. <i>Am J Trop Med Hyg</i> . 1998; 59(1): 108-14.                                                                                        | 1995                                  | *                    |
| Senegal | Government of Senegal, United Nations Children's Fund (UNICEF). Senegal Multiple Indicator Cluster Survey 1996.                                                                                                                                                         | 1996                                  | *                    |
| Senegal | Thonnon J, Spiegel A, Diallo M, Sylla R, Fall A, Mondo M, Fontenille D. Yellow fever outbreak in Kaffrine, Senegal 1996: epidemiological and entomological findings. <i>Trop Med Int Health</i> . 1998; 3(11): 872-7.                                                   | 1996                                  |                      |
| Senegal | Seydi M, Soumare M, Sow AI, Diop BM, Sow PS. Aspects actuels des bactériémies à Salmonella à la clinique des maladies infectieuses Ibrahima Diop Mar du centre hospitalier national de Fann (Sénégal). <i>Med Mal Infect</i> . 2005; 35(1): 23-7.                       | 1996-2003                             | *                    |
| Senegal | Directorate of Forecasting and Statistics (Senegal), Macro International, Inc. Senegal Demographic and Health Survey 1997. Calverton, United States: Macro International, Inc.                                                                                          | 1997                                  |                      |
| Senegal | World Health Organization (WHO). The Global Elimination of Congenital Syphilis: Rationale and Strategy for Action. Geneva, Switzerland: World Health Organization (WHO), 2007.                                                                                          | 1997-2003                             |                      |
| Senegal | Joint United Nations Program on HIV/AIDS (UNAIDS), United Nations Children's Fund (UNICEF), World Health Organization (WHO). Senegal Epidemiological Fact Sheet on HIV/AIDS and STIs 2004.                                                                              | 1997-2001                             |                      |
| Senegal | World Health Organization Regional Office for Africa. HIV/AIDS Epidemiological Surveillance Update for the WHO African Region. World Health Organization Regional Office for Africa, 2003.                                                                              | 1999-2002                             |                      |
| Senegal | Centre for Research on the Epidemiology of Disasters (CRED). EM-DAT: The OFDA/CRED International Disaster Database. Brussels, Belgium: Catholic University of Leuven.                                                                                                   | 1999, 2002-2004, 2007-2010, 2012-2013 |                      |
| Senegal | Directorate of Forecasting and Statistics (Senegal), Ministry of Economics and Finance (Senegal), United Nations Children's Fund (UNICEF). Senegal Multiple Indicator Cluster Survey 2000. New York, United States: United Nations Children's Fund (UNICEF).            | 2000                                  | *                    |
| Senegal | Directorate of Forecasting and Statistics (Senegal), Minnesota Population Center. Senegal General Population and Housing Census 2002 from the Integrated Public Use Microdata Series, International. [Machine-readable database]. Minneapolis: University of Minnesota. | 2002                                  |                      |
| Senegal | United Nations Office on Drugs and Crime (UNODC). United Nations Office on Drugs and Crime Global Study on Homicides 2011. Vienna, Austria: United Nations Office on Drugs and Crime (UNODC), 2011.                                                                     | 2003-2004                             |                      |
| Senegal | Cisse MF, Bg M, Breugelmans JG, Mueller JE, Gessner BD, Diop MB, Koffi D, Faye PC, Mhlanga B. The elimination of haemophilus influenzae type b meningitis following conjugate vaccine introduction in Senegal. <i>Pediatr Infect Dis J</i> . 2010; 29(6): 499-503.      | 2003-2007                             |                      |
| Senegal | World Health Organization (WHO). Retrospective Measles Data on Supplementary Immunization Activities. Geneva, Switzerland: World Health Organization (WHO).                                                                                                             | 2003, 2006, 2010, 2013                |                      |

**Web Table 32 - Comprehensive citation list**

| Country | Citation                                                                                                                                                                                                                                                       | Year*     | New for GBD 2013 (*) |
|---------|----------------------------------------------------------------------------------------------------------------------------------------------------------------------------------------------------------------------------------------------------------------|-----------|----------------------|
| Senegal | De Araujo C, Migot-Nabias F, Guitard J, Pelleau S, Vulliamy T, Ducrocq R. The role of the G6PD Aeth376G/968C allele in glucose-6-phosphate dehydrogenase deficiency in the seerer population of Senegal. <i>Haematologica</i> . 2006; 91(2): 262-3.            | 2004-2006 |                      |
| Senegal | Ministry of Health and Prevention (Senegal), Research Center for Human Development (Senegal). Senegal Demographic and Health Survey 2005. Calverton, United States: Macro International, Inc.                                                                  | 2005      |                      |
| Senegal | Macro International, Inc, Research Center for Human Development (Senegal). Senegal Malaria Indicator Survey 2006. Calverton, United States: Macro International, Inc.                                                                                          | 2006      |                      |
| Senegal | Helleringer S, Duthé G, Kanté AM, Andro A, Sokhna C, Trape J-F, Pison G. Misclassification of pregnancy-related deaths in adult mortality surveys: case study in Senegal. <i>Trop Med Int Health</i> . 2013; 18(1): 27-34.                                     | 2006      |                      |
| Senegal | World Health Organization (WHO). Yellow fever in Africa and South America, 2007. <i>Wkly Epidemiol Rec</i> . 2009; 84(13): 97-104.                                                                                                                             | 2007      |                      |
| Senegal | Macro International, Inc, Research Center for Human Development (Senegal). Senegal Malaria Indicator Survey 2008-2009. Calverton, United States: Macro International, Inc.                                                                                     | 2008-2009 |                      |
| Senegal | WHO Global Alert and Response (GAR). Yellow Fever in Senegal--1 December 2011. Geneva, Switzerland: World Health Organization (WHO), 2011.                                                                                                                     | 2010      |                      |
| Senegal | Center for Research in Human Development (CRDH), Cheikh Anta Diop University, Hospital Aristide Le Dantec, ICF Macro, National Agency of Statistics and Demography (Senegal). Senegal Demographic and Health Survey 2010-2011. Claverton, Maryland: ICF Macro. | 2010-2011 |                      |
| Senegal | ICF International, Ministry of Health and Social Action (Senegal), National Agency of Statistics and Demography (Senegal). Senegal Continuous Demographic and Health Survey 2012-2013. Calverton, United States: ICF International, 2014.                      | 2012-2013 | *                    |
| Serbia  | Yugoslavia - Slovenia Census 1953 as it appears in United Nations Statistics Division (UNSD). <i>UNSD Demographic Statistics - Deaths by Age, Sex, and Urban/Rural Residence</i> . New York City, United States: United Nations Statistics Division (UNSD).    | 1953      |                      |
| Serbia  | Yugoslavia - Serbia Census 1953 as it appears in United Nations Statistics Division (UNSD). <i>UNSD Demographic Statistics - Deaths by Age, Sex, and Urban/Rural Residence</i> . New York City, United States: United Nations Statistics Division (UNSD).      | 1953      |                      |
| Serbia  | Yugoslavia - Slovenia Census 1961 as it appears in United Nations Statistics Division (UNSD). <i>UNSD Demographic Statistics - Deaths by Age, Sex, and Urban/Rural Residence</i> . New York City, United States: United Nations Statistics Division (UNSD).    | 1961      |                      |
| Serbia  | Yugoslavia - Serbia Census 1961 as it appears in United Nations Statistics Division (UNSD). <i>UNSD Demographic Statistics - Deaths by Age, Sex, and Urban/Rural Residence</i> . New York City, United States: United Nations Statistics Division (UNSD).      | 1961      |                      |
| Serbia  | Fraser GR, Defaranas B, Kattamis CA, Race RR, Sanger R, Stamatoyannopoulos G. Glucose-6-phosphate dehydrogenase, colour vision and XG blood groups in Greece: linkage and population data. <i>Ann Hum Genet</i> . 1964; 395-403.                               | 1962      |                      |
| Serbia  | Yugoslavia - Slovenia Census 1971 as it appears in United Nations Statistics Division (UNSD). <i>United Nations Demographic Yearbook Database</i> . [Unpublished].                                                                                             | 1971      |                      |
| Serbia  | Yugoslavia - Serbia Census 1971 as it appears in United Nations Statistics Division (UNSD). <i>United Nations Demographic Yearbook Database</i> . [Unpublished].                                                                                               | 1971      |                      |

**Web Table 32 - Comprehensive citation list**

| Country | Citation                                                                                                                                                                                                                                                                                                                                                                                                                                                             | Year*                            | New for GBD 2013 (*) |
|---------|----------------------------------------------------------------------------------------------------------------------------------------------------------------------------------------------------------------------------------------------------------------------------------------------------------------------------------------------------------------------------------------------------------------------------------------------------------------------|----------------------------------|----------------------|
| Serbia  | Institute for Health Metrics and Evaluation (IHME), Joint United Nations Program on HIV/AIDS (UNAIDS). Institute for Health Metrics and Evaluation HIV Mortality Estimates Based on the UNAIDS Spectrum Model Framework.                                                                                                                                                                                                                                             | 1980-2013                        | *                    |
| Serbia  | United Nations Children's Fund (UNICEF), World Health Organization (WHO). WHO and UNICEF Reported Disease Incidence Time Series - Pertussis. Geneva, Switzerland: World Health Organization (WHO).                                                                                                                                                                                                                                                                   | 1980-2013                        |                      |
| Serbia  | United Nations Children's Fund (UNICEF), World Health Organization (WHO). WHO and UNICEF Reported Disease Incidence Time Series - Measles. Geneva, Switzerland: World Health Organization (WHO).                                                                                                                                                                                                                                                                     | 1980-2013                        |                      |
| Serbia  | Institute for Health Metrics and Evaluation. Institute for Health Metrics and Evaluation Cancer Registry Database. [Unpublished].                                                                                                                                                                                                                                                                                                                                    | 1990-2005                        |                      |
| Serbia  | Centre for Health Informatics and Multiprofessional Education, University College London. Modell's Haemoglobinopathologist's Almanac. London, United Kingdom: Centre for Health Informatics and Multiprofessional Education, University College London, 2008.                                                                                                                                                                                                        | 1990-2003                        |                      |
| Serbia  | Parkin DM, International Agency for Research on Cancer, International Association of Cancer Registries. Cancer Incidence in Five Continents. Vol. I to VIII. Lyon, France, IARC Press, 2005.                                                                                                                                                                                                                                                                         | 1990, 1995                       |                      |
| Serbia  | Yugoslavia, Federal Republic - Serbia Census 1991 as it appears in United Nations Statistics Division (UNSD). United Nations Demographic Yearbook. New York City, United States: United Nations Statistics Division (UNSD).                                                                                                                                                                                                                                          | 1991                             |                      |
| Serbia  | Department of Peace and Conflict Research, Uppsala University. UCDP Nonstate Conflict Database Version 2.5, 2013. Uppsala, Sweden: Department of Peace and Conflict Research, Uppsala University, 2013.                                                                                                                                                                                                                                                              | 1991-1992                        | *                    |
| Serbia  | Department of Peace and Conflict Research, Uppsala University. UCDP Battle-Related Deaths Database Version 5, 2013. Uppsala, Sweden: Department of Peace and Conflict Research, Uppsala University, 2013.                                                                                                                                                                                                                                                            | 1991-1999                        | *                    |
| Serbia  | World Health Organization (WHO). Country Mortality Data 1980-1999. [Unpublished].                                                                                                                                                                                                                                                                                                                                                                                    | 1995-1997                        |                      |
| Serbia  | Serbia Vital Registration Death Data 1997 as it appears in United Nations Statistics Division (UNSD). United Nations Demographic Yearbook. New York City, United States: United Nations Statistics Division (UNSD).                                                                                                                                                                                                                                                  | 1997                             |                      |
| Serbia  | Djukanović L, Radović M, Baković J, Budosan I, Bukvić D, Cveticanin A, Davinić S, Dragoljić B, Djordjević V, Djurić S, Haviza-Lilić B, Ilić M, Janos B, Jelčić R, Jelić S, Kostić N, Mandić M, Ostrić V, Pljesa S, Radisić M, Radojević M, Rakić N, Rangelov V, Ratković M, Stojanović M, Stojanović R, Tintor D, Vasić V. Epidemiology of end-stage renal disease and current status of hemodialysis in Yugoslavia. <i>Int J Artif Organs</i> . 2002; 25(9): 852-9. | 1997-1999                        |                      |
| Serbia  | Yugoslavia, Federal Republic - Serbia Vital Registration - Deaths 1998 ICD10 as it appears in World Health Organization (WHO). WHO Mortality Database Version February 2014. Geneva, Switzerland: World Health Organization (WHO), 2014.                                                                                                                                                                                                                             | 1998                             |                      |
| Serbia  | Department of Peace and Conflict Research, Uppsala University. UCDP One-Sided Violence Database Version 1.4, 2013. Uppsala, Sweden: Department of Peace and Conflict Research, Uppsala University, 2013.                                                                                                                                                                                                                                                             | 1998-1999                        | *                    |
| Serbia  | Yugoslavia, Federal Republic - Serbia Vital Registration - Deaths 1999 ICD10 as it appears in World Health Organization (WHO). WHO Mortality Database Version February 2014. Geneva, Switzerland: World Health Organization (WHO), 2014.                                                                                                                                                                                                                             | 1999                             |                      |
| Serbia  | World Health Organization (WHO). Yellow Fever Reported Cases, WHO Vaccine-Preventable Diseases: Monitoring System. Geneva, Switzerland: World Health Organization (WHO).                                                                                                                                                                                                                                                                                             | 1999-2000, 2002, 2004, 2006-2008 |                      |

**Web Table 32 - Comprehensive citation list**

| Country | Citation                                                                                                                                                                                                                                                                                            | Year*     | New for GBD 2013 (*) |
|---------|-----------------------------------------------------------------------------------------------------------------------------------------------------------------------------------------------------------------------------------------------------------------------------------------------------|-----------|----------------------|
| Serbia  | Yugoslavia, Federal Republic Vital Registration - Deaths 2000 ICD10 as it appears in World Health Organization (WHO). WHO Mortality Database Version February 2014. Geneva, Switzerland: World Health Organization (WHO), 2014.                                                                     | 2000      |                      |
| Serbia  | Yugoslavia, Federal Republic - Serbia Vital Registration - Deaths 2000 ICD10 as it appears in World Health Organization (WHO). WHO Mortality Database Version February 2014. Geneva, Switzerland: World Health Organization (WHO), 2014.                                                            | 2000      |                      |
| Serbia  | Curado MP, Edwards B, Shin HR, Storm H, Ferlay J, Heanue M and Boyle P, eds (2007). Cancer Incidence in Five Continents, Vol. IX Periodic Data (electronic version). Lyon, IARC. <a href="http://ci5.iarc.fr">http://ci5.iarc.fr</a>                                                                | 2000      |                      |
| Serbia  | Yugoslavia, Federal Republic - Serbia Vital Registration - Deaths 2001 ICD10 as it appears in World Health Organization (WHO). WHO Mortality Database Version February 2014. Geneva, Switzerland: World Health Organization (WHO), 2014.                                                            | 2001      |                      |
| Serbia  | Yugoslavia, Federal Republic - Serbia Vital Registration - Deaths 2002 ICD10 as it appears in World Health Organization (WHO). WHO Mortality Database Version February 2014. Geneva, Switzerland: World Health Organization (WHO), 2014.                                                            | 2002      |                      |
| Serbia  | Serbia and Montenegro - Serbia Vital Registration - Deaths 2003 ICD10 as it appears in World Health Organization (WHO). WHO Mortality Database Version February 2014. Geneva, Switzerland: World Health Organization (WHO), 2014.                                                                   | 2003      |                      |
| Serbia  | World Health Organization (WHO). Retrospective Measles Data on Supplementary Immunization Activities. Geneva, Switzerland: World Health Organization (WHO).                                                                                                                                         | 2003-2005 |                      |
| Serbia  | Serbia and Montenegro - Serbia Vital Registration - Deaths 2004 ICD10 as it appears in World Health Organization (WHO). WHO Mortality Database Version February 2014. Geneva, Switzerland: World Health Organization (WHO), 2014.                                                                   | 2004      |                      |
| Serbia  | Kanazir M, Boricic I, Delic D, Tepavcevic DK, Knezevic A, Jovanovic T, Pekmezovic T. Risk factors for hepatocellular carcinoma: a case-control study in Belgrade (Serbia). <i>Tumori</i> . 2010; 96(6): 911-7.                                                                                      | 2004-2007 | *                    |
| Serbia  | Serbia and Montenegro - Serbia Vital Registration - Deaths 2005 ICD10 as it appears in World Health Organization (WHO). WHO Mortality Database Version February 2014. Geneva, Switzerland: World Health Organization (WHO), 2014.                                                                   | 2005      |                      |
| Serbia  | Serbia and Montenegro - Montenegro Vital Registration - Deaths 2005 ICD10 as it appears in World Health Organization (WHO). WHO Mortality Database Version February 2014. Geneva, Switzerland: World Health Organization (WHO), 2014.                                                               | 2005      |                      |
| Serbia  | Forman D, Bray F, Brewster DH, Gombe Mbalawa C, Kohler B, Piñeros M, Steliarova-Foucher E, Swaminathan R and Ferlay J, eds (2013). Cancer Incidence in Five Continents, Vol. X Summary Database (electronic version). Lyon, IARC. <a href="http://ci5.iarc.fr">http://ci5.iarc.fr</a>               | 2005      |                      |
| Serbia  | Quaglio G, Ramadani N, Pattaro C, Cami A, Dentico P, Volpe A, Pellizzer G, Berisha A, Smacchia C, Figliomeni M, Schinaia N, Rezza G, Putoto G. Prevalence and risk factors for viral hepatitis in the Kosovar population: implications for health policy. <i>J Med Virol</i> . 2008; 80(5): 833-40. | 2005      |                      |
| Serbia  | United Nations Children's Fund (UNICEF), Statistical Office of the Republic of Serbia (SORS), Strategic Marketing Research Agency (SMMRI). Serbia Multiple Indicator Cluster Survey 2005-2006. New York, United States: United Nations Children's Fund (UNICEF).                                    | 2005-2006 |                      |
| Serbia  | Serbia and Montenegro - Serbia Vital Registration - Deaths 2006 ICD10 as it appears in World Health Organization (WHO). WHO Mortality Database Version February 2014. Geneva, Switzerland: World Health Organization (WHO), 2014.                                                                   | 2006      |                      |



**Web Table 32 - Comprehensive citation list**

| Country    | Citation                                                                                                                                                                                                                                                                                         | Year* | New for GBD 2013 (*) |
|------------|--------------------------------------------------------------------------------------------------------------------------------------------------------------------------------------------------------------------------------------------------------------------------------------------------|-------|----------------------|
| Serbia     | Serbia Vital Registration - Deaths 2007 ICD10 as it appears in World Health Organization (WHO). WHO Mortality Database Version February 2014. Geneva, Switzerland: World Health Organization (WHO), 2014.                                                                                        | 2007  |                      |
| Serbia     | World Health Organization (WHO). Global Status Report on Road Safety 2009. Geneva, Switzerland: World Health Organization (WHO), 2009.                                                                                                                                                           | 2007  |                      |
| Serbia     | Serbia Vital Registration - Deaths 2008 ICD10 as it appears in World Health Organization (WHO). WHO Mortality Database Version February 2014. Geneva, Switzerland: World Health Organization (WHO), 2014.                                                                                        | 2008  |                      |
| Serbia     | Serbia Vital Registration - Deaths 2009 ICD10 as it appears in World Health Organization (WHO). WHO Mortality Database Version February 2014. Geneva, Switzerland: World Health Organization (WHO), 2014.                                                                                        | 2009  |                      |
| Serbia     | Centre for Research on the Epidemiology of Disasters (CRED). EM-DAT: The OFDA/CRED International Disaster Database. Brussels, Belgium: Catholic University of Leuven.                                                                                                                            | 2010  |                      |
| Serbia     | Statistical Office of the Republic of Serbia, United Nations Children's Fund (UNICEF). Serbia Multiple Indicator Cluster Survey 2010. New York, United States: United Nations Children's Fund (UNICEF).                                                                                          | 2010  |                      |
| Serbia     | Serbia Vital Registration - Deaths 2010 ICD10 as it appears in World Health Organization (WHO). WHO Mortality Database Version February 2014. Geneva, Switzerland: World Health Organization (WHO), 2014.                                                                                        | 2010  |                      |
| Serbia     | European Renal Association-European Dialysis and Transplant Association (ERA-EDTA). European Renal Association-European Dialysis and Transplant Association Registry Annual Report 2010. Parma, Italy: European Renal Association-European Dialysis and Transplant Association (ERA-EDTA), 2012. | 2010  | *                    |
| Serbia     | Serbia Vital Registration - Deaths 2011 ICD10 as it appears in World Health Organization (WHO). WHO Mortality Database Version February 2014. Geneva, Switzerland: World Health Organization (WHO), 2014.                                                                                        | 2011  | *                    |
| Serbia     | European Renal Association-European Dialysis and Transplant Association (ERA-EDTA). European Renal Association-European Dialysis and Transplant Association Registry Annual Report 2011. Parma, Italy: European Renal Association-European Dialysis and Transplant Association (ERA-EDTA), 2013. | 2011  | *                    |
| Serbia     | Serbia Vital Registration - Deaths 2012 ICD10 as it appears in World Health Organization (WHO). WHO Mortality Database Version February 2014. Geneva, Switzerland: World Health Organization (WHO), 2014.                                                                                        | 2012  | *                    |
| Seychelles | Seychelles Vital Registration Death Data 1952 as it appears in United Nations Statistics Division (UNSD). United Nations Demographic Yearbook. New York City, United States: United Nations Statistics Division (UNSD).                                                                          | 1952  |                      |
| Seychelles | Seychelles Vital Registration Death Data 1953 as it appears in United Nations Statistics Division (UNSD). United Nations Demographic Yearbook. New York City, United States: United Nations Statistics Division (UNSD).                                                                          | 1953  |                      |
| Seychelles | Seychelles Vital Registration Death Data 1954 as it appears in United Nations Statistics Division (UNSD). United Nations Demographic Yearbook. New York City, United States: United Nations Statistics Division (UNSD).                                                                          | 1954  |                      |
| Seychelles | Seychelles Vital Registration Death Data 1955 as it appears in United Nations Statistics Division (UNSD). United Nations Demographic Yearbook. New York City, United States: United Nations Statistics Division (UNSD).                                                                          | 1955  |                      |

**Web Table 32 - Comprehensive citation list**

| Country    | Citation                                                                                                                                                                                                                | Year* | New for GBD 2013 (*) |
|------------|-------------------------------------------------------------------------------------------------------------------------------------------------------------------------------------------------------------------------|-------|----------------------|
| Seychelles | Seychelles Vital Registration Death Data 1956 as it appears in United Nations Statistics Division (UNSD). United Nations Demographic Yearbook. New York City, United States: United Nations Statistics Division (UNSD). | 1956  |                      |
| Seychelles | Seychelles Vital Registration Death Data 1957 as it appears in United Nations Statistics Division (UNSD). United Nations Demographic Yearbook. New York City, United States: United Nations Statistics Division (UNSD). | 1957  |                      |
| Seychelles | Seychelles Vital Registration Death Data 1959 as it appears in United Nations Statistics Division (UNSD). United Nations Demographic Yearbook. New York City, United States: United Nations Statistics Division (UNSD). | 1959  |                      |
| Seychelles | Seychelles Population and Housing Census 1960 as it appears in United Nations Statistics Division (UNSD). United Nations Demographic Yearbook. New York City, United States: United Nations Statistics Division (UNSD). | 1960  |                      |
| Seychelles | Seychelles Vital Registration Death Data 1961 as it appears in United Nations Statistics Division (UNSD). United Nations Demographic Yearbook. New York City, United States: United Nations Statistics Division (UNSD). | 1961  |                      |
| Seychelles | Seychelles Vital Registration Death Data 1962 as it appears in United Nations Statistics Division (UNSD). United Nations Demographic Yearbook. New York City, United States: United Nations Statistics Division (UNSD). | 1962  |                      |
| Seychelles | Seychelles Vital Registration Death Data 1963 as it appears in United Nations Statistics Division (UNSD). United Nations Demographic Yearbook. New York City, United States: United Nations Statistics Division (UNSD). | 1963  |                      |
| Seychelles | Seychelles Vital Registration Death Data 1964 as it appears in United Nations Statistics Division (UNSD). United Nations Demographic Yearbook. New York City, United States: United Nations Statistics Division (UNSD). | 1964  |                      |
| Seychelles | Seychelles Vital Registration Death Data 1965 as it appears in United Nations Statistics Division (UNSD). United Nations Demographic Yearbook. New York City, United States: United Nations Statistics Division (UNSD). | 1965  |                      |
| Seychelles | Seychelles Vital Registration Death Data 1966 as it appears in United Nations Statistics Division (UNSD). United Nations Demographic Yearbook. New York City, United States: United Nations Statistics Division (UNSD). | 1966  |                      |
| Seychelles | Seychelles Vital Registration Death Data 1967 as it appears in United Nations Statistics Division (UNSD). United Nations Demographic Yearbook. New York City, United States: United Nations Statistics Division (UNSD). | 1967  |                      |
| Seychelles | Seychelles Vital Registration Death Data 1968 as it appears in United Nations Statistics Division (UNSD). United Nations Demographic Yearbook. New York City, United States: United Nations Statistics Division (UNSD). | 1968  |                      |
| Seychelles | Seychelles Vital Registration Death Data 1969 as it appears in United Nations Statistics Division (UNSD). United Nations Demographic Yearbook. New York City, United States: United Nations Statistics Division (UNSD). | 1969  |                      |
| Seychelles | Seychelles Vital Registration Death Data 1970 as it appears in United Nations Statistics Division (UNSD). United Nations Demographic Yearbook. New York City, United States: United Nations Statistics Division (UNSD). | 1970  |                      |



**Web Table 32 - Comprehensive citation list**

| Country    | Citation                                                                                                                                                                                                                 | Year*                           | New for GBD 2013 (*) |
|------------|--------------------------------------------------------------------------------------------------------------------------------------------------------------------------------------------------------------------------|---------------------------------|----------------------|
| Seychelles | Seychelles Population and Housing Census 1971 as it appears in United Nations Statistics Division (UNSD). United Nations Demographic Yearbook. New York City, United States: United Nations Statistics Division (UNSD).  | 1971                            |                      |
| Seychelles | Seychelles Vital Registration Death Data 1971 as it appears in United Nations Statistics Division (UNSD). United Nations Demographic Yearbook. New York City, United States: United Nations Statistics Division (UNSD).  | 1971                            |                      |
| Seychelles | Seychelles Vital Registration Death Data 1972 as it appears in United Nations Statistics Division (UNSD). United Nations Demographic Yearbook. New York City, United States: United Nations Statistics Division (UNSD).  | 1972                            |                      |
| Seychelles | Seychelles Vital Registration Death Data 1973 as it appears in United Nations Statistics Division (UNSD). United Nations Demographic Yearbook. New York City, United States: United Nations Statistics Division (UNSD).  | 1973                            |                      |
| Seychelles | Seychelles Vital Registration Death Data 1974 as it appears in United Nations Statistics Division (UNSD). United Nations Demographic Yearbook. New York City, United States: United Nations Statistics Division (UNSD).  | 1974                            |                      |
| Seychelles | Seychelles Vital Registration Death Data 1975 as it appears in United Nations Statistics Division (UNSD). United Nations Demographic Yearbook. New York City, United States: United Nations Statistics Division (UNSD).  | 1975                            |                      |
| Seychelles | Seychelles Vital Registration Death Data 1976 as it appears in United Nations Statistics Division (UNSD). United Nations Demographic Yearbook. New York City, United States: United Nations Statistics Division (UNSD).  | 1976                            |                      |
| Seychelles | United Nations Office on Drugs and Crime (UNODC). United Nations Surveys on Crime Trends and the Operations of Criminal Justice Systems 1970-2006 as provided by Kavi Bhalla. [Unpublished]                              | 1976-1990                       |                      |
| Seychelles | Seychelles Vital Registration Death Data 1977 as it appears in United Nations Statistics Division (UNSD). United Nations Demographic Yearbook. New York City, United States: United Nations Statistics Division (UNSD).  | 1977                            |                      |
| Seychelles | Seychelles Vital Registration Death Data 1978 as it appears in United Nations Statistics Division (UNSD). United Nations Demographic Yearbook. New York City, United States: United Nations Statistics Division (UNSD).  | 1978                            |                      |
| Seychelles | Seychelles Vital Registration Death Data 1979 as it appears in United Nations Statistics Division (UNSD). United Nations Demographic Yearbook. New York City, United States: United Nations Statistics Division (UNSD).  | 1979                            |                      |
| Seychelles | Seychelles Vital Registration Death Data 1980 as it appears in United Nations Statistics Division (UNSD). United Nations Demographic Yearbook. New York City, United States: United Nations Statistics Division (UNSD).  | 1980                            |                      |
| Seychelles | Institute for Health Metrics and Evaluation (IHME), Joint United Nations Program on HIV/AIDS (UNAIDS). Institute for Health Metrics and Evaluation HIV Mortality Estimates Based on the UNAIDS Spectrum Model Framework. | 1980-2013                       | *                    |
| Seychelles | United Nations Children's Fund (UNICEF), World Health Organization (WHO). WHO and UNICEF Reported Disease Incidence Time Series - Pertussis. Geneva, Switzerland: World Health Organization (WHO).                       | 1980-1990, 1995-1999, 2001-2013 |                      |
| Seychelles | United Nations Children's Fund (UNICEF), World Health Organization (WHO). WHO and UNICEF Reported Disease Incidence Time Series - Measles. Geneva, Switzerland: World Health Organization (WHO).                         | 1980-1999, 2001-2013            |                      |

**Web Table 32 - Comprehensive citation list**

| Country    | Citation                                                                                                                                                                                                                | Year* | New for GBD 2013 (*) |
|------------|-------------------------------------------------------------------------------------------------------------------------------------------------------------------------------------------------------------------------|-------|----------------------|
| Seychelles | Seychelles Vital Registration - Deaths 1981 ICD9 as it appears in World Health Organization (WHO). WHO Mortality Database Version February 2014. Geneva, Switzerland: World Health Organization (WHO), 2014.            | 1981  | *                    |
| Seychelles | Seychelles Vital Registration - Deaths 1982 ICD9 as it appears in World Health Organization (WHO). WHO Mortality Database Version February 2014. Geneva, Switzerland: World Health Organization (WHO), 2014.            | 1982  | *                    |
| Seychelles | Seychelles Vital Registration Death Data 1983 as it appears in United Nations Statistics Division (UNSD). United Nations Demographic Yearbook. New York City, United States: United Nations Statistics Division (UNSD). | 1983  |                      |
| Seychelles | Seychelles Vital Registration Death Data 1984 as it appears in United Nations Statistics Division (UNSD). United Nations Demographic Yearbook. New York City, United States: United Nations Statistics Division (UNSD). | 1984  |                      |
| Seychelles | Seychelles Vital Registration - Deaths 1985 ICD9 as it appears in World Health Organization (WHO). WHO Mortality Database Version February 2014. Geneva, Switzerland: World Health Organization (WHO), 2014.            | 1985  |                      |
| Seychelles | Seychelles Vital Registration - Deaths 1986 ICD9 as it appears in World Health Organization (WHO). WHO Mortality Database Version February 2014. Geneva, Switzerland: World Health Organization (WHO), 2014.            | 1986  |                      |
| Seychelles | Seychelles Vital Registration - Deaths 1987 ICD9 as it appears in World Health Organization (WHO). WHO Mortality Database Version February 2014. Geneva, Switzerland: World Health Organization (WHO), 2014.            | 1987  |                      |
| Seychelles | Seychelles Vital Registration Death Data 1988 as it appears in United Nations Statistics Division (UNSD). United Nations Demographic Yearbook. New York City, United States: United Nations Statistics Division (UNSD). | 1988  |                      |
| Seychelles | Seychelles Vital Registration Death Data 1989 as it appears in United Nations Statistics Division (UNSD). United Nations Demographic Yearbook. New York City, United States: United Nations Statistics Division (UNSD). | 1989  |                      |
| Seychelles | Seychelles Vital Registration Death Data 1990 as it appears in United Nations Statistics Division (UNSD). United Nations Demographic Yearbook. New York City, United States: United Nations Statistics Division (UNSD). | 1990  |                      |
| Seychelles | Seychelles Vital Registration Death Data 1991 as it appears in United Nations Statistics Division (UNSD). United Nations Demographic Yearbook. New York City, United States: United Nations Statistics Division (UNSD). | 1991  |                      |
| Seychelles | Seychelles Vital Registration Death Data 1992 as it appears in United Nations Statistics Division (UNSD). United Nations Demographic Yearbook. New York City, United States: United Nations Statistics Division (UNSD). | 1992  |                      |
| Seychelles | Seychelles Vital Registration Death Data 1993 as it appears in United Nations Statistics Division (UNSD). United Nations Demographic Yearbook. New York City, United States: United Nations Statistics Division (UNSD). | 1993  |                      |
| Seychelles | Seychelles Vital Registration Death Data 1994 as it appears in United Nations Statistics Division (UNSD). United Nations Demographic Yearbook. New York City, United States: United Nations Statistics Division (UNSD). | 1994  |                      |

**Web Table 32 - Comprehensive citation list**

| Country    | Citation                                                                                                                                                                                                                | Year*                | New for GBD 2013 (*) |
|------------|-------------------------------------------------------------------------------------------------------------------------------------------------------------------------------------------------------------------------|----------------------|----------------------|
| Seychelles | Seychelles Vital Registration Death Data 1995 as it appears in United Nations Statistics Division (UNSD). United Nations Demographic Yearbook. New York City, United States: United Nations Statistics Division (UNSD). | 1995                 |                      |
| Seychelles | World Health Organization (WHO). Yellow Fever Reported Cases, WHO Vaccine-Preventable Diseases: Monitoring System. Geneva, Switzerland: World Health Organization (WHO).                                                | 1995-1999, 2001-2009 |                      |
| Seychelles | Seychelles Vital Registration Death Data 1996 as it appears in United Nations Statistics Division (UNSD). United Nations Demographic Yearbook. New York City, United States: United Nations Statistics Division (UNSD). | 1996                 |                      |
| Seychelles | Centre for Research on the Epidemiology of Disasters (CRED). EM-DAT: The OFDA/CRED International Disaster Database. Brussels, Belgium: Catholic University of Leuven.                                                   | 1997, 2004           |                      |
| Seychelles | Seychelles Vital Registration Death Data 1998 as it appears in United Nations Statistics Division (UNSD). United Nations Demographic Yearbook. New York City, United States: United Nations Statistics Division (UNSD). | 1998                 |                      |
| Seychelles | Seychelles Vital Registration Death Data 1999 as it appears in United Nations Statistics Division (UNSD). United Nations Demographic Yearbook. New York City, United States: United Nations Statistics Division (UNSD). | 1999                 |                      |
| Seychelles | Seychelles Vital Registration Death Data 2000 as it appears in United Nations Statistics Division (UNSD). United Nations Demographic Yearbook. New York City, United States: United Nations Statistics Division (UNSD). | 2000                 |                      |
| Seychelles | Seychelles Vital Registration - Deaths 2001 ICD10 as it appears in World Health Organization (WHO). WHO Mortality Database Version February 2014. Geneva, Switzerland: World Health Organization (WHO), 2014.           | 2001                 |                      |
| Seychelles | Seychelles Vital Registration - Deaths 2002 ICD10 as it appears in World Health Organization (WHO). WHO Mortality Database Version February 2014. Geneva, Switzerland: World Health Organization (WHO), 2014.           | 2002                 |                      |
| Seychelles | Seychelles Vital Registration - Deaths 2003 ICD10 as it appears in World Health Organization (WHO). WHO Mortality Database Version February 2014. Geneva, Switzerland: World Health Organization (WHO), 2014.           | 2003                 |                      |
| Seychelles | Seychelles Vital Registration - Deaths 2004 ICD10 as it appears in World Health Organization (WHO). WHO Mortality Database Version February 2014. Geneva, Switzerland: World Health Organization (WHO), 2014.           | 2004                 |                      |
| Seychelles | Seychelles Vital Registration - Deaths 2005 ICD10 as it appears in World Health Organization (WHO). WHO Mortality Database Version February 2014. Geneva, Switzerland: World Health Organization (WHO), 2014.           | 2005                 |                      |
| Seychelles | Seychelles Vital Registration - Deaths 2006 ICD10 as it appears in World Health Organization (WHO). WHO Mortality Database Version February 2014. Geneva, Switzerland: World Health Organization (WHO), 2014.           | 2006                 |                      |
| Seychelles | Seychelles Vital Registration - Deaths 2007 ICD10 as it appears in World Health Organization (WHO). WHO Mortality Database Version February 2014. Geneva, Switzerland: World Health Organization (WHO), 2014.           | 2007                 |                      |
| Seychelles | Seychelles Vital Registration - Deaths 2008 ICD10 as it appears in World Health Organization (WHO). WHO Mortality Database Version February 2014. Geneva, Switzerland: World Health Organization (WHO), 2014.           | 2008                 |                      |

**Web Table 32 - Comprehensive citation list**

| Country      | Citation                                                                                                                                                                                                                                                      | Year*                                        | New for GBD 2013 (*) |
|--------------|---------------------------------------------------------------------------------------------------------------------------------------------------------------------------------------------------------------------------------------------------------------|----------------------------------------------|----------------------|
| Seychelles   | Seychelles Vital Registration - Deaths 2009 ICD10 as it appears in World Health Organization (WHO). WHO Mortality Database Version February 2014. Geneva, Switzerland: World Health Organization (WHO), 2014.                                                 | 2009                                         |                      |
| Seychelles   | Seychelles Vital Registration Death Data 2010 as it appears in United Nations Statistics Division (UNSD). United Nations Demographic Yearbook. New York City, United States: United Nations Statistics Division (UNSD).                                       | 2010                                         |                      |
| Seychelles   | United Nations Statistics Division (UNSD). UNSD Demographic Statistics - Deaths by Age, Sex, and Urban/Rural Residence. New York City, United States: United Nations Statistics Division (UNSD).                                                              | 2011                                         | *                    |
| Seychelles   | Seychelles Vital Registration Death Data 2011 as it appears in United Nations Statistics Division (UNSD). United Nations Demographic Yearbook. New York City, United States: United Nations Statistics Division (UNSD).                                       | 2011                                         | *                    |
| Seychelles   | Seychelles Vital Registration - Deaths 2012 ICD10 as it appears in World Health Organization (WHO). WHO Mortality Database Version February 2014. Geneva, Switzerland: World Health Organization (WHO), 2014.                                                 | 2012                                         | *                    |
| Sierra Leone | Central Statistics Office (Sierra Leone). Sierra Leone Pilot Census 1973.                                                                                                                                                                                     | 1973                                         |                      |
| Sierra Leone | Central Statistics Office (Sierra Leone). Sierra Leone Population and Housing Census 1974.                                                                                                                                                                    | 1974                                         |                      |
| Sierra Leone | Centre for Research on the Epidemiology of Disasters (CRED). EM-DAT: The OFDA/CRED International Disaster Database. Brussels, Belgium: Catholic University of Leuven.                                                                                         | 1975, 1984, 1996, 1999, 2004-2005, 2009-2011 |                      |
| Sierra Leone | World Health Organization (WHO). Sierra Leone Yellow Fever Fact Sheet 2005. Geneva, Switzerland: World Health Organization (WHO), 2005.                                                                                                                       | 1980-2004                                    |                      |
| Sierra Leone | Hodges M, Sanders E, Aitken C. Seroprevalence of hepatitis markers; HAV, HBV, HCV and HEV amongst primary school children in Freetown, Sierra Leone. West Afr J Med. 1998; 17(1): 36-7.                                                                       | 1980-1997                                    |                      |
| Sierra Leone | Institute for Health Metrics and Evaluation (IHME), Joint United Nations Program on HIV/AIDS (UNAIDS). Institute for Health Metrics and Evaluation HIV Mortality Estimates Based on the UNAIDS Spectrum Model Framework.                                      | 1980-2013                                    | *                    |
| Sierra Leone | United Nations Children's Fund (UNICEF), World Health Organization (WHO). WHO and UNICEF Reported Disease Incidence Time Series - Pertussis. Geneva, Switzerland: World Health Organization (WHO).                                                            | 1980-1988, 1997, 2000, 2003, 2007, 2011      |                      |
| Sierra Leone | United Nations Children's Fund (UNICEF), World Health Organization (WHO). WHO and UNICEF Reported Disease Incidence Time Series - Measles. Geneva, Switzerland: World Health Organization (WHO).                                                              | 1980-1995, 1997, 2000-2013                   |                      |
| Sierra Leone | Central Statistics Office (Sierra Leone). Sierra Leone Population and Housing Census 1985.                                                                                                                                                                    | 1985                                         |                      |
| Sierra Leone | Barnish G, Maude GH, Bockarie MJ, Eggelte TA, Greenwood BM, Ceesay S. Malaria in a rural area of Sierra Leone. I. Initial results. Ann Trop Med Parasitol. 1993; 87(2): 125-36.                                                                               | 1990                                         |                      |
| Sierra Leone | Weatherall D. Sickle Cell and Thalassemias Prevalence Data, Personal Correspondence with David Weatherall. [Unpublished].                                                                                                                                     | 1990-2009                                    |                      |
| Sierra Leone | Centre for Health Informatics and Multiprofessional Education, University College London. Modell's Haemoglobinopathologist's Almanac. London, United Kingdom: Centre for Health Informatics and Multiprofessional Education, University College London, 2008. | 1990-2003                                    |                      |
| Sierra Leone | Department of Peace and Conflict Research, Uppsala University. UCDP One-Sided Violence Database Version 1.4, 2013. Uppsala, Sweden: Department of Peace and Conflict Research, Uppsala University, 2013.                                                      | 1991-2000                                    | *                    |
| Sierra Leone | Department of Peace and Conflict Research, Uppsala University. UCDP Battle-Related Deaths Database Version 5, 2013. Uppsala, Sweden: Department of Peace and Conflict Research, Uppsala University, 2013.                                                     | 1991-2001                                    | *                    |

**Web Table 32 - Comprehensive citation list**

| Country      | Citation                                                                                                                                                                                                                                          | Year*                  | New for GBD 2013 (*) |
|--------------|---------------------------------------------------------------------------------------------------------------------------------------------------------------------------------------------------------------------------------------------------|------------------------|----------------------|
| Sierra Leone | Amin R. Immunization coverage and child mortality in two rural districts of Sierra Leone. <i>Soc Sci Med.</i> 1996; 42(11): 1599-604.                                                                                                             | 1993                   |                      |
| Sierra Leone | WHO Department of Communicable Disease Surveillance and Response. WHO Report on Global Surveillance of Epidemic-prone Infectious Diseases 2000.                                                                                                   | 1995                   |                      |
| Sierra Leone | Department of Peace and Conflict Research, Uppsala University. UCDP Nonstate Conflict Database Version 2.5, 2013. Uppsala, Sweden: Department of Peace and Conflict Research, Uppsala University, 2013.                                           | 1995                   | *                    |
| Sierra Leone | Central Statistics Office (Sierra Leone), United Nations Children's Fund (UNICEF). Sierra Leone Multiple Indicator Cluster Survey 2000. New York, United States: United Nations Children's Fund (UNICEF).                                         | 2000                   |                      |
| Sierra Leone | World Health Organization (WHO). Yellow Fever Reported Cases, WHO Vaccine-Preventable Diseases: Monitoring System. Geneva, Switzerland: World Health Organization (WHO).                                                                          | 2000, 2003, 2005-2009  |                      |
| Sierra Leone | World Health Organization (WHO). Retrospective Measles Data on Supplementary Immunization Activities. Geneva, Switzerland: World Health Organization (WHO).                                                                                       | 2003, 2006, 2009, 2012 |                      |
| Sierra Leone | Statistics Sierra Leone and Minnesota Population Center. Sierra Leone Population and Housing Census 2004 from the Integrated Public Use Microdata Series, International. [Machine-readable database]. Minneapolis: University of Minnesota, 2011. | 2004                   |                      |
| Sierra Leone | Central Statistics Office (Sierra Leone). Sierra Leone Population and Housing Census 2004. [Unpublished].                                                                                                                                         | 2004                   |                      |
| Sierra Leone | United Nations Office on Drugs and Crime (UNODC). United Nations Office on Drugs and Crime Global Study on Homicides 2011. Vienna, Austria: United Nations Office on Drugs and Crime (UNODC), 2011.                                               | 2004-2007              |                      |
| Sierra Leone | United Nations Children's Fund (UNICEF), Statistics Sierra Leone. Sierra Leone Multiple Indicator Cluster Survey 2005. New York, United States: United Nations Children's Fund (UNICEF).                                                          | 2005                   |                      |
| Sierra Leone | World Health Organization (WHO). Global Status Report on Road Safety 2009. Geneva, Switzerland: World Health Organization (WHO), 2009.                                                                                                            | 2007                   |                      |
| Sierra Leone | Macro International, Inc. Statistics Sierra Leone. Sierra Leone Demographic and Health Survey 2008. Calverton, United States: Macro International, Inc.                                                                                           | 2008                   |                      |
| Sierra Leone | Joint United Nations Program on HIV/AIDS (UNAIDS), National HIV/AIDS Secretariat (NAS) (Sierra Leone). Sierra Leone UNGASS Progress Report 2010. Geneva, Switzerland: Joint United Nations Program on HIV/AIDS (UNAIDS), 2010.                    | 2009                   |                      |
| Sierra Leone | Sugerman DE, Fall A, Guigui M-T, N'dolie M, Balogun T, Wurie A, Goodson JL. Preplanned National Measles Vaccination Campaign at the Beginning of a Measles Outbreak-Sierra Leone, 2009-2010. <i>J Infect Dis.</i> 2011; 204(suppl 1): S260-S269.  | 2009-2010              | *                    |
| Sierra Leone | Statistics Sierra Leone, United Nations Children's Fund (UNICEF). Sierra Leone Multiple Indicator Cluster Survey 2010. New York, United States: United Nations Children's Fund (UNICEF).                                                          | 2010                   |                      |
| Sierra Leone | Groen RS, Solomon J, Samai MM, Kamara TB, Cassidy LDM, Blok L, Kushner AL, Dhanaraj M, Stekelenburg J. Female Health and Family Planning in Sierra Leone. <i>Obstet Gynecol.</i> 2013; 122(3): 525-31.                                            | 2012                   | *                    |
| Sierra Leone | ICF International, Ministry of Health and Sanitation (Sierra Leone), Statistics Sierra Leone. Sierra Leone Demographic and Health Survey 2013.                                                                                                    | 2013                   | *                    |
| Singapore    | Singapore Vital Registration Death Data 1950 as it appears in United Nations Statistics Division (UNSD). United Nations Demographic Yearbook. New York City, United States: United Nations Statistics Division (UNSD).                            | 1950                   |                      |

**Web Table 32 - Comprehensive citation list**

| Country   | Citation                                                                                                                                                                                                               | Year* | New for GBD 2013 (*) |
|-----------|------------------------------------------------------------------------------------------------------------------------------------------------------------------------------------------------------------------------|-------|----------------------|
| Singapore | Singapore Vital Registration Death Data 1951 as it appears in United Nations Statistics Division (UNSD). United Nations Demographic Yearbook. New York City, United States: United Nations Statistics Division (UNSD). | 1951  |                      |
| Singapore | Singapore Vital Registration Death Data 1952 as it appears in United Nations Statistics Division (UNSD). United Nations Demographic Yearbook. New York City, United States: United Nations Statistics Division (UNSD). | 1952  |                      |
| Singapore | Singapore Vital Registration Death Data 1953 as it appears in United Nations Statistics Division (UNSD). United Nations Demographic Yearbook. New York City, United States: United Nations Statistics Division (UNSD). | 1953  |                      |
| Singapore | Singapore Vital Registration Death Data 1954 as it appears in United Nations Statistics Division (UNSD). United Nations Demographic Yearbook. New York City, United States: United Nations Statistics Division (UNSD). | 1954  |                      |
| Singapore | Singapore Vital Registration - Deaths 1955 ICD7 as it appears in World Health Organization (WHO). WHO Mortality Database Version February 2014. Geneva, Switzerland: World Health Organization (WHO), 2014.            | 1955  |                      |
| Singapore | Singapore Vital Registration - Deaths 1956 ICD7 as it appears in World Health Organization (WHO). WHO Mortality Database Version February 2014. Geneva, Switzerland: World Health Organization (WHO), 2014.            | 1956  |                      |
| Singapore | Singapore Vital Registration - Deaths 1957 ICD7 as it appears in World Health Organization (WHO). WHO Mortality Database Version February 2014. Geneva, Switzerland: World Health Organization (WHO), 2014.            | 1957  |                      |
| Singapore | Singapore Vital Registration - Deaths 1958 ICD7 as it appears in World Health Organization (WHO). WHO Mortality Database Version February 2014. Geneva, Switzerland: World Health Organization (WHO), 2014.            | 1958  |                      |
| Singapore | Vella F. The incidence of erythrocyte glucose-6-phosphate dehydrogenase deficiency in Singapore. <i>Experientia</i> . 1961; 181-2.                                                                                     | 1959  |                      |
| Singapore | Singapore Vital Registration - Deaths 1959 ICD7 as it appears in World Health Organization (WHO). WHO Mortality Database Version February 2014. Geneva, Switzerland: World Health Organization (WHO), 2014.            | 1959  |                      |
| Singapore | Singapore Vital Registration - Deaths 1960 ICD7 as it appears in World Health Organization (WHO). WHO Mortality Database Version February 2014. Geneva, Switzerland: World Health Organization (WHO), 2014.            | 1960  |                      |
| Singapore | Singapore Vital Registration - Deaths 1961 ICD7 as it appears in World Health Organization (WHO). WHO Mortality Database Version February 2014. Geneva, Switzerland: World Health Organization (WHO), 2014.            | 1961  |                      |
| Singapore | Singapore Vital Registration - Deaths 1962 ICD7 as it appears in World Health Organization (WHO). WHO Mortality Database Version February 2014. Geneva, Switzerland: World Health Organization (WHO), 2014.            | 1962  |                      |
| Singapore | Singapore Vital Registration - Deaths 1963 ICD7 as it appears in World Health Organization (WHO). WHO Mortality Database Version February 2014. Geneva, Switzerland: World Health Organization (WHO), 2014.            | 1963  |                      |
| Singapore | Singapore Vital Registration - Deaths 1964 ICD7 as it appears in World Health Organization (WHO). WHO Mortality Database Version February 2014. Geneva, Switzerland: World Health Organization (WHO), 2014.            | 1964  |                      |



**Web Table 32 - Comprehensive citation list**

| Country   | Citation                                                                                                                                                                                                    | Year*     | New for GBD 2013 (*) |
|-----------|-------------------------------------------------------------------------------------------------------------------------------------------------------------------------------------------------------------|-----------|----------------------|
| Singapore | Singapore Vital Registration - Deaths 1965 ICD7 as it appears in World Health Organization (WHO). WHO Mortality Database Version February 2014. Geneva, Switzerland: World Health Organization (WHO), 2014. | 1965      |                      |
| Singapore | Singapore Vital Registration - Deaths 1966 ICD7 as it appears in World Health Organization (WHO). WHO Mortality Database Version February 2014. Geneva, Switzerland: World Health Organization (WHO), 2014. | 1966      |                      |
| Singapore | Singapore Vital Registration - Deaths 1967 ICD7 as it appears in World Health Organization (WHO). WHO Mortality Database Version February 2014. Geneva, Switzerland: World Health Organization (WHO), 2014. | 1967      |                      |
| Singapore | Singapore Vital Registration - Deaths 1968 ICD7 as it appears in World Health Organization (WHO). WHO Mortality Database Version February 2014. Geneva, Switzerland: World Health Organization (WHO), 2014. | 1968      |                      |
| Singapore | Singapore Vital Registration - Deaths 1969 ICD8 as it appears in World Health Organization (WHO). WHO Mortality Database Version February 2014. Geneva, Switzerland: World Health Organization (WHO), 2014. | 1969      |                      |
| Singapore | Saha N, Banerjee B. Erythrocyte G-6-PD deficiency among Chinese and Malays of Singapore. Trop Geogr Med. 1971; 23(2): 141-4.                                                                                | 1969-1971 |                      |
| Singapore | Singapore Vital Registration - Deaths 1970 ICD8 as it appears in World Health Organization (WHO). WHO Mortality Database Version February 2014. Geneva, Switzerland: World Health Organization (WHO), 2014. | 1970      |                      |
| Singapore | Singapore Vital Registration - Deaths 1971 ICD8 as it appears in World Health Organization (WHO). WHO Mortality Database Version February 2014. Geneva, Switzerland: World Health Organization (WHO), 2014. | 1971      |                      |
| Singapore | Singapore Vital Registration - Deaths 1972 ICD8 as it appears in World Health Organization (WHO). WHO Mortality Database Version February 2014. Geneva, Switzerland: World Health Organization (WHO), 2014. | 1972      |                      |
| Singapore | Singapore Vital Registration - Deaths 1973 ICD8 as it appears in World Health Organization (WHO). WHO Mortality Database Version February 2014. Geneva, Switzerland: World Health Organization (WHO), 2014. | 1973      |                      |
| Singapore | Singapore Vital Registration - Deaths 1974 ICD8 as it appears in World Health Organization (WHO). WHO Mortality Database Version February 2014. Geneva, Switzerland: World Health Organization (WHO), 2014. | 1974      |                      |
| Singapore | Singapore Vital Registration - Deaths 1975 ICD8 as it appears in World Health Organization (WHO). WHO Mortality Database Version February 2014. Geneva, Switzerland: World Health Organization (WHO), 2014. | 1975      |                      |
| Singapore | Singapore Vital Registration - Deaths 1976 ICD8 as it appears in World Health Organization (WHO). WHO Mortality Database Version February 2014. Geneva, Switzerland: World Health Organization (WHO), 2014. | 1976      |                      |
| Singapore | Singapore Vital Registration - Deaths 1977 ICD8 as it appears in World Health Organization (WHO). WHO Mortality Database Version February 2014. Geneva, Switzerland: World Health Organization (WHO), 2014. | 1977      |                      |
| Singapore | Singapore Vital Registration - Deaths 1978 ICD8 as it appears in World Health Organization (WHO). WHO Mortality Database Version February 2014. Geneva, Switzerland: World Health Organization (WHO), 2014. | 1978      |                      |

**Web Table 32 - Comprehensive citation list**

| Country   | Citation                                                                                                                                                                                                                 | Year*                  | New for GBD 2013 (*) |
|-----------|--------------------------------------------------------------------------------------------------------------------------------------------------------------------------------------------------------------------------|------------------------|----------------------|
| Singapore | Goh KT. Prevention and control of hepatitis B virus infection in Singapore. Ann Acad Med Singapore. 1997; 26(5): 671-81.                                                                                                 | 1978-1992              |                      |
| Singapore | Singapore Vital Registration - Deaths 1979 ICD9 as it appears in World Health Organization (WHO). WHO Mortality Database Version February 2014. Geneva, Switzerland: World Health Organization (WHO), 2014.              | 1979                   |                      |
| Singapore | Singapore Vital Registration - Deaths 1980 ICD9 as it appears in World Health Organization (WHO). WHO Mortality Database Version February 2014. Geneva, Switzerland: World Health Organization (WHO), 2014.              | 1980                   |                      |
| Singapore | Institute for Health Metrics and Evaluation. Institute for Health Metrics and Evaluation Cancer Registry Database. [Unpublished].                                                                                        | 1980-2008              |                      |
| Singapore | Institute for Health Metrics and Evaluation (IHME), Joint United Nations Program on HIV/AIDS (UNAIDS). Institute for Health Metrics and Evaluation HIV Mortality Estimates Based on the UNAIDS Spectrum Model Framework. | 1980-2013              | *                    |
| Singapore | United Nations Children's Fund (UNICEF), World Health Organization (WHO). WHO and UNICEF Reported Disease Incidence Time Series - Pertussis. Geneva, Switzerland: World Health Organization (WHO).                       | 1980-1995, 1997-2012   |                      |
| Singapore | Parkin DM, International Agency for Research on Cancer, International Association of Cancer Registries. Cancer Incidence in Five Continents. Vol. I to VIII. Lyon, France, IARC Press, 2005.                             | 1980, 1985, 1990, 1995 |                      |
| Singapore | Singapore Vital Registration - Deaths 1981 ICD9 as it appears in World Health Organization (WHO). WHO Mortality Database Version February 2014. Geneva, Switzerland: World Health Organization (WHO), 2014.              | 1981                   |                      |
| Singapore | United Nations Children's Fund (UNICEF), World Health Organization (WHO). WHO and UNICEF Reported Disease Incidence Time Series - Measles. Geneva, Switzerland: World Health Organization (WHO).                         | 1981-1995, 1997-2012   |                      |
| Singapore | Singapore Vital Registration - Deaths 1982 ICD9 as it appears in World Health Organization (WHO). WHO Mortality Database Version February 2014. Geneva, Switzerland: World Health Organization (WHO), 2014.              | 1982                   |                      |
| Singapore | Kua EH. Prevalence of mental disorders in the elderly in Singapore--a preliminary report. Ann Acad Med Singapore. 1987; 16(2): 264-6.                                                                                    | 1982-1985              |                      |
| Singapore | Singapore Vital Registration - Deaths 1983 ICD9 as it appears in World Health Organization (WHO). WHO Mortality Database Version February 2014. Geneva, Switzerland: World Health Organization (WHO), 2014.              | 1983                   |                      |
| Singapore | Singapore Vital Registration - Deaths 1984 ICD9 as it appears in World Health Organization (WHO). WHO Mortality Database Version February 2014. Geneva, Switzerland: World Health Organization (WHO), 2014.              | 1984                   |                      |
| Singapore | Goh KT, Wong LY, Oon CJ, Kumarapathy S. The prevalence of antibody to hepatitis A virus in Singapore. Asia Pac J Public Health. 1987; 1(2): 9-11.                                                                        | 1984-1985              |                      |
| Singapore | Singapore Vital Registration - Deaths 1985 ICD9 as it appears in World Health Organization (WHO). WHO Mortality Database Version February 2014. Geneva, Switzerland: World Health Organization (WHO), 2014.              | 1985                   |                      |
| Singapore | Singapore Vital Registration - Deaths 1986 ICD9 as it appears in World Health Organization (WHO). WHO Mortality Database Version February 2014. Geneva, Switzerland: World Health Organization (WHO), 2014.              | 1986                   |                      |
| Singapore | Goh KT, Chan YW, Wong LY, Kong KH, Oon CJ, Guan R. The prevalence of hepatitis B virus markers in dental personnel in Singapore. Trans R Soc Trop Med Hyg. 1988; 82(6): 908-10.                                          | 1986                   |                      |



**Web Table 32 - Comprehensive citation list**

| Country   | Citation                                                                                                                                                                                                                                                              | Year*     | New for GBD 2013 (*) |
|-----------|-----------------------------------------------------------------------------------------------------------------------------------------------------------------------------------------------------------------------------------------------------------------------|-----------|----------------------|
| Singapore | Lim MK, Tan EH, Wan A, Chao AK. Prevalence of G6PD deficiency among recruits in the Singapore Armed Forces. <i>Ann Acad Med Singapore</i> . 1995; 24(2): 322-4.                                                                                                       | 1986-1990 |                      |
| Singapore | Singapore Vital Registration - Deaths 1987 ICD9 as it appears in World Health Organization (WHO). WHO Mortality Database Version February 2014. Geneva, Switzerland: World Health Organization (WHO), 2014.                                                           | 1987      |                      |
| Singapore | Yap I, Guan R. Hepatitis A sero-epidemiology in Singapore: a changing pattern. <i>Trans R Soc Trop Med Hyg</i> . 1993; 87(1): 22-3.                                                                                                                                   | 1987-1991 |                      |
| Singapore | Singapore Vital Registration - Deaths 1988 ICD9 as it appears in World Health Organization (WHO). WHO Mortality Database Version February 2014. Geneva, Switzerland: World Health Organization (WHO), 2014.                                                           | 1988      |                      |
| Singapore | Singapore Vital Registration - Deaths 1989 ICD9 as it appears in World Health Organization (WHO). WHO Mortality Database Version February 2014. Geneva, Switzerland: World Health Organization (WHO), 2014.                                                           | 1989      |                      |
| Singapore | Singapore Vital Registration - Deaths 1990 ICD9 as it appears in World Health Organization (WHO). WHO Mortality Database Version February 2014. Geneva, Switzerland: World Health Organization (WHO), 2014.                                                           | 1990      |                      |
| Singapore | Kua EH, Ko SM. Prevalence of dementia among elderly Chinese and Malay residents of Singapore. <i>Int Psychogeriatr</i> . 1995; 7(3): 439-46.                                                                                                                          | 1990      |                      |
| Singapore | Khin LW, Teo CJ, Guan R. Seroprevalence of hepatitis B and C viral markers in patients with primary hepatocellular carcinoma in Singapore. <i>Singapore Med J</i> . 1996; 37(5): 492-6.                                                                               | 1990-1993 |                      |
| Singapore | Joseph R, Ho LY, Gomez JM, Rajdurai VS, Sivasankaran S, Yip YY. Mass newborn screening for glucose-6-phosphate dehydrogenase deficiency in Singapore. <i>Southeast Asian J Trop Med Public Health</i> . 1999; 70-1.                                                   | 1990-1997 |                      |
| Singapore | Ty AU, Ang GY, Ang LW, James L, Goh KT. Changing epidemiology of enteric fevers in Singapore. <i>Ann Acad Med Singapore</i> . 2010; 39(12): 889.                                                                                                                      | 1990-2009 | *                    |
| Singapore | Centre for Health Informatics and Multiprofessional Education, University College London. <i>Modell's Haemoglobinopathologist's Almanac</i> . London, United Kingdom: Centre for Health Informatics and Multiprofessional Education, University College London, 2008. | 1990-2003 |                      |
| Singapore | Singapore Vital Registration - Deaths 1991 ICD9 as it appears in World Health Organization (WHO). WHO Mortality Database Version February 2014. Geneva, Switzerland: World Health Organization (WHO), 2014.                                                           | 1991      |                      |
| Singapore | Fock KM, Tay HH, Phua KB, Guan R, Chia SC, Chong R, Chee AE, Chew CN. Seroprevalence of antibodies against hepatitis A (anti-HAV) in Singapore: the NFDD experience. <i>Singapore Med J</i> . 1995; 36(1): 26-7.                                                      | 1991      |                      |
| Singapore | Goh KT, Kong KH, Heng BH, Oon CJ. Seroepidemiology of hepatitis A and hepatitis B virus infection in a Gurkha community in Singapore. <i>J Med Virol</i> . 1993; 41(2): 146-9.                                                                                        | 1991      |                      |
| Singapore | Kuperan P, Choon AT, Ding SH, Lee G. Prevalence of antibodies to hepatitis C virus in relation to surrogate markers in a blood donor population of Singapore. <i>Southeast Asian J Trop Med Public Health</i> . 1993; 127-9.                                          | 1991      |                      |
| Singapore | Woo KT. The Singapore Renal Registry: an overview. <i>Singapore Med J</i> . 1993; 34(2): 157-63.                                                                                                                                                                      | 1991-1993 |                      |
| Singapore | Singapore Vital Registration - Deaths 1992 ICD9 as it appears in World Health Organization (WHO). WHO Mortality Database Version February 2014. Geneva, Switzerland: World Health Organization (WHO), 2014.                                                           | 1992      |                      |

**Web Table 32 - Comprehensive citation list**

| Country   | Citation                                                                                                                                                                                                                                                | Year*                | New for GBD 2013 (*) |
|-----------|---------------------------------------------------------------------------------------------------------------------------------------------------------------------------------------------------------------------------------------------------------|----------------------|----------------------|
| Singapore | Singapore Vital Registration - Deaths 1993 ICD9 as it appears in World Health Organization (WHO). WHO Mortality Database Version February 2014. Geneva, Switzerland: World Health Organization (WHO), 2014.                                             | 1993                 |                      |
| Singapore | Chow VT. Cancer and viruses. Ann Acad Med Singapore. 1993; 22(2): 163-9.                                                                                                                                                                                | 1993                 |                      |
| Singapore | Heng BH, Goh KT, Doraisingham S, Quek GH. Prevalence of hepatitis A virus infection among sewage workers in Singapore. Epidemiol Infect. 1994; 113(1): 121-8.                                                                                           | 1993                 |                      |
| Singapore | Singapore Vital Registration - Deaths 1994 ICD9 as it appears in World Health Organization (WHO). WHO Mortality Database Version February 2014. Geneva, Switzerland: World Health Organization (WHO), 2014.                                             | 1994                 |                      |
| Singapore | Singapore Vital Registration - Deaths 1995 ICD9 as it appears in World Health Organization (WHO). WHO Mortality Database Version February 2014. Geneva, Switzerland: World Health Organization (WHO), 2014.                                             | 1995                 |                      |
| Singapore | Singapore Vital Registration - Deaths 1996 ICD9 as it appears in World Health Organization (WHO). WHO Mortality Database Version February 2014. Geneva, Switzerland: World Health Organization (WHO), 2014.                                             | 1996                 |                      |
| Singapore | Singapore Vital Registration - Deaths 1997 ICD9 as it appears in World Health Organization (WHO). WHO Mortality Database Version February 2014. Geneva, Switzerland: World Health Organization (WHO), 2014.                                             | 1997                 |                      |
| Singapore | Singapore Vital Registration - Deaths 1998 ICD9 as it appears in World Health Organization (WHO). WHO Mortality Database Version February 2014. Geneva, Switzerland: World Health Organization (WHO), 2014.                                             | 1998                 |                      |
| Singapore | Health Promotion Board (Singapore), Singapore Renal Registry. Singapore Renal Registry Report 1998. Singapore, Singapore: Health Promotion Board (Singapore), 2005.                                                                                     | 1998                 |                      |
| Singapore | World Health Organization (WHO). Yellow Fever Reported Cases, WHO Vaccine-Preventable Diseases: Monitoring System. Geneva, Switzerland: World Health Organization (WHO).                                                                                | 1998-2000, 2002-2009 |                      |
| Singapore | Singapore Vital Registration - Deaths 1999 ICD9 as it appears in World Health Organization (WHO). WHO Mortality Database Version February 2014. Geneva, Switzerland: World Health Organization (WHO), 2014.                                             | 1999                 |                      |
| Singapore | James L, Fong CW, Foong BH, Wee MK, Chow A, Shum E, Chew SK. Hepatitis B Seroprevalence Study 1999. Singapore Med J. 2001; 42(9): 420-4.                                                                                                                | 1999                 |                      |
| Singapore | Singapore Vital Registration - Deaths 2000 ICD9 as it appears in World Health Organization (WHO). WHO Mortality Database Version February 2014. Geneva, Switzerland: World Health Organization (WHO), 2014.                                             | 2000                 |                      |
| Singapore | Curado MP, Edwards B, Shin HR, Storm H, Ferlay J, Heanue M and Boyle P, eds (2007). Cancer Incidence in Five Continents, Vol. IX Periodic Data (electronic version). Lyon, IARC. <a href="http://ci5.iarc.fr">http://ci5.iarc.fr</a>                    | 2000                 |                      |
| Singapore | Singapore Vital Registration - Deaths 2001 ICD9 as it appears in World Health Organization (WHO). WHO Mortality Database Version February 2014. Geneva, Switzerland: World Health Organization (WHO), 2014.                                             | 2001                 |                      |
| Singapore | Sahadevan S, Saw SM, Gao W, Tan LCS, Chin JJ, Hong CY, Venketasubramanian N. Ethnic differences in Singapore's dementia prevalence: the stroke, Parkinson's disease, epilepsy, and dementia in Singapore study. J Am Geriatr Soc. 2008; 56(11): 2061-8. | 2001-2003            |                      |

**Web Table 32 - Comprehensive citation list**

| Country   | Citation                                                                                                                                                                                                                                                                              | Year*           | New for GBD 2013 (*) |
|-----------|---------------------------------------------------------------------------------------------------------------------------------------------------------------------------------------------------------------------------------------------------------------------------------------|-----------------|----------------------|
| Singapore | Singapore Vital Registration - Deaths 2002 ICD9 as it appears in World Health Organization (WHO). WHO Mortality Database Version February 2014. Geneva, Switzerland: World Health Organization (WHO), 2014.                                                                           | 2002            |                      |
| Singapore | Singapore Vital Registration - Deaths 2003 ICD9 as it appears in World Health Organization (WHO). WHO Mortality Database Version February 2014. Geneva, Switzerland: World Health Organization (WHO), 2014.                                                                           | 2003            |                      |
| Singapore | Singapore Vital Registration - Deaths 2004 ICD9 as it appears in World Health Organization (WHO). WHO Mortality Database Version February 2014. Geneva, Switzerland: World Health Organization (WHO), 2014.                                                                           | 2004            |                      |
| Singapore | National Registry of Diseases Office (NRDO), Ministry of Health (Singapore). Singapore Cancer Registry Incidence 2004-2008. Singapore, Singapore: National Registry of Diseases Office (NRDO), Ministry of Health (Singapore).                                                        | 2004, 2006-2008 |                      |
| Singapore | Singapore Vital Registration - Deaths 2005 ICD9 as it appears in World Health Organization (WHO). WHO Mortality Database Version February 2014. Geneva, Switzerland: World Health Organization (WHO), 2014.                                                                           | 2005            |                      |
| Singapore | Forman D, Bray F, Brewster DH, Gombe Mbalawa C, Kohler B, Piñeros M, Steliarova-Foucher E, Swaminathan R and Ferlay J, eds (2013). Cancer Incidence in Five Continents, Vol. X Summary Database (electronic version). Lyon, IARC. <a href="http://ci5.iarc.fr">http://ci5.iarc.fr</a> | 2005            |                      |
| Singapore | Singapore Renal Registry. Singapore Renal Registry Report 2005-2006. Singapore, Singapore: Health Promotion Board (Singapore), 2009.                                                                                                                                                  | 2005            |                      |
| Singapore | Singapore Vital Registration - Deaths 2006 ICD9 as it appears in World Health Organization (WHO). WHO Mortality Database Version February 2014. Geneva, Switzerland: World Health Organization (WHO), 2014.                                                                           | 2006            |                      |
| Singapore | World Health Organization (WHO). Global Status Report on Road Safety 2009. Geneva, Switzerland: World Health Organization (WHO), 2009.                                                                                                                                                | 2007            |                      |
| Singapore | Singapore Vital Registration - Deaths 2007 ICD10 as it appears in World Health Organization (WHO). WHO Mortality Database Version February 2014. Geneva, Switzerland: World Health Organization (WHO), 2014.                                                                          | 2007            |                      |
| Singapore | Singapore Vital Registration - Deaths 2008 ICD10 as it appears in World Health Organization (WHO). WHO Mortality Database Version February 2014. Geneva, Switzerland: World Health Organization (WHO), 2014.                                                                          | 2008            |                      |
| Singapore | Ang LW, Tey SH, Cutter J, James L, Goh KT. Seroprevalence of hepatitis B virus infection among children and adolescents in Singapore, 2008-2010. J Med Virol. 2013; 85(4): 583-8.                                                                                                     | 2008-2010       |                      |
| Singapore | Singapore Vital Registration - Deaths 2009 ICD10 as it appears in World Health Organization (WHO). WHO Mortality Database Version February 2014. Geneva, Switzerland: World Health Organization (WHO), 2014.                                                                          | 2009            |                      |
| Singapore | Singapore Vital Registration - Deaths 2010 ICD10 as it appears in World Health Organization (WHO). WHO Mortality Database Version February 2014. Geneva, Switzerland: World Health Organization (WHO), 2014.                                                                          | 2010            |                      |
| Singapore | Singapore Vital Registration - Deaths 2011 ICD10 as it appears in World Health Organization (WHO). WHO Mortality Database Version February 2014. Geneva, Switzerland: World Health Organization (WHO), 2014.                                                                          | 2011            | *                    |

**Web Table 32 - Comprehensive citation list**

| Country  | Citation                                                                                                                                                                                                                                                                                                     | Year*     | New for GBD 2013 (*) |
|----------|--------------------------------------------------------------------------------------------------------------------------------------------------------------------------------------------------------------------------------------------------------------------------------------------------------------|-----------|----------------------|
| Slovakia | Max Planck Institute for Demographic Research, University of California. Human Mortality Database. Berkeley, USA: University of California; Rostock, Germany: Max Planck Institute for Demographic Research.                                                                                                 | 1950-1991 |                      |
| Slovakia | Fraser GR, Defaranas B, Kattamis CA, Race RR, Sanger R, Stamatoyannopoulos G. Glucose-6-phosphate dehydrogenase, colour vision and XG blood groups in Greece: linkage and population data. <i>Ann Hum Genet.</i> 1964; 395-403.                                                                              | 1962      |                      |
| Slovakia | Institute for Health Metrics and Evaluation. Institute for Health Metrics and Evaluation Cancer Registry Database. [Unpublished].                                                                                                                                                                            | 1980-2005 |                      |
| Slovakia | Ferlay J, Parkin DM, Curado MP, Bray F, Edwards B, Shin HR and Forman D. <i>Cancer Incidence in Five Continents, Volumes I to IX: IARC CancerBase No. 9</i> [Internet]. Lyon, France: International Agency for Research on Cancer; 2010. Available from: <a href="http://ci5.iarc.fr">http://ci5.iarc.fr</a> | 1980-2002 |                      |
| Slovakia | Institute for Health Metrics and Evaluation (IHME), Joint United Nations Program on HIV/AIDS (UNAIDS). Institute for Health Metrics and Evaluation HIV Mortality Estimates Based on the UNAIDS Spectrum Model Framework.                                                                                     | 1980-2013 | *                    |
| Slovakia | United Nations Children's Fund (UNICEF), World Health Organization (WHO). WHO and UNICEF Reported Disease Incidence Time Series - Pertussis. Geneva, Switzerland: World Health Organization (WHO).                                                                                                           | 1990-2013 |                      |
| Slovakia | United Nations Children's Fund (UNICEF), World Health Organization (WHO). WHO and UNICEF Reported Disease Incidence Time Series - Measles. Geneva, Switzerland: World Health Organization (WHO).                                                                                                             | 1990-2013 |                      |
| Slovakia | Centre for Health Informatics and Multiprofessional Education, University College London. <i>Modell's Haemoglobinopathologist's Almanac.</i> London, United Kingdom: Centre for Health Informatics and Multiprofessional Education, University College London, 2008.                                         | 1990-2003 |                      |
| Slovakia | Slovakia Vital Registration - Deaths 1992 ICD9 as it appears in World Health Organization (WHO). WHO Mortality Database Version February 2014. Geneva, Switzerland: World Health Organization (WHO), 2014.                                                                                                   | 1992      |                      |
| Slovakia | Slovakia Vital Registration - Deaths 1993 ICD9 as it appears in World Health Organization (WHO). WHO Mortality Database Version February 2014. Geneva, Switzerland: World Health Organization (WHO), 2014.                                                                                                   | 1993      |                      |
| Slovakia | Slovakia Vital Registration - Deaths 1994 ICD10 as it appears in World Health Organization (WHO). WHO Mortality Database Version February 2014. Geneva, Switzerland: World Health Organization (WHO), 2014.                                                                                                  | 1994      |                      |
| Slovakia | Slovakia Vital Registration - Deaths 1995 ICD10 as it appears in World Health Organization (WHO). WHO Mortality Database Version February 2014. Geneva, Switzerland: World Health Organization (WHO), 2014.                                                                                                  | 1995      |                      |
| Slovakia | Slovakia Vital Registration - Deaths 1996 ICD10 as it appears in World Health Organization (WHO). WHO Mortality Database Version February 2014. Geneva, Switzerland: World Health Organization (WHO), 2014.                                                                                                  | 1996      |                      |
| Slovakia | Slovakia Vital Registration - Deaths 1997 ICD10 as it appears in World Health Organization (WHO). WHO Mortality Database Version February 2014. Geneva, Switzerland: World Health Organization (WHO), 2014.                                                                                                  | 1997      |                      |
| Slovakia | Slovakia Vital Registration - Deaths 1998 ICD10 as it appears in World Health Organization (WHO). WHO Mortality Database Version February 2014. Geneva, Switzerland: World Health Organization (WHO), 2014.                                                                                                  | 1998      |                      |

**Web Table 32 - Comprehensive citation list**

| Country  | Citation                                                                                                                                                                                                                                                                              | Year*                            | New for GBD 2013 (*) |
|----------|---------------------------------------------------------------------------------------------------------------------------------------------------------------------------------------------------------------------------------------------------------------------------------------|----------------------------------|----------------------|
| Slovakia | Centre for Research on the Epidemiology of Disasters (CRED). EM-DAT: The OFDA/CRED International Disaster Database. Brussels, Belgium: Catholic University of Leuven.                                                                                                                 | 1998-2001, 2004-2006, 2010, 2013 |                      |
| Slovakia | Slovakia Vital Registration - Deaths 1999 ICD10 as it appears in World Health Organization (WHO). WHO Mortality Database Version February 2014. Geneva, Switzerland: World Health Organization (WHO), 2014.                                                                           | 1999                             |                      |
| Slovakia | Slovakia Vital Registration - Deaths 2000 ICD10 as it appears in World Health Organization (WHO). WHO Mortality Database Version February 2014. Geneva, Switzerland: World Health Organization (WHO), 2014.                                                                           | 2000                             |                      |
| Slovakia | Slovakia Vital Registration - Deaths 2001 ICD10 as it appears in World Health Organization (WHO). WHO Mortality Database Version February 2014. Geneva, Switzerland: World Health Organization (WHO), 2014.                                                                           | 2001                             |                      |
| Slovakia | World Health Organization (WHO). Yellow Fever Reported Cases, WHO Vaccine-Preventable Diseases: Monitoring System. Geneva, Switzerland: World Health Organization (WHO).                                                                                                              | 2001-2009                        |                      |
| Slovakia | Slovakia Vital Registration - Deaths 2002 ICD10 as it appears in World Health Organization (WHO). WHO Mortality Database Version February 2014. Geneva, Switzerland: World Health Organization (WHO), 2014.                                                                           | 2002                             |                      |
| Slovakia | WHO Regional Office for Europe (EURO-WHO). European Hospital Morbidity Database. Copenhagen, Denmark: WHO Regional Office for Europe (EURO-WHO).                                                                                                                                      | 2002-2006                        |                      |
| Slovakia | Slovakia Vital Registration - Deaths 2003 ICD10 as it appears in World Health Organization (WHO). WHO Mortality Database Version February 2014. Geneva, Switzerland: World Health Organization (WHO), 2014.                                                                           | 2003                             |                      |
| Slovakia | World Health Organization (WHO). Retrospective Measles Data on Supplementary Immunization Activities. Geneva, Switzerland: World Health Organization (WHO).                                                                                                                           | 2003                             |                      |
| Slovakia | EUVAC-NET. EUVAC-NET Pertussis Surveillance Report 2003-2007. Stockholm, Sweden: European Centre for Disease Prevention and Control, 2009.                                                                                                                                            | 2003-2007                        |                      |
| Slovakia | Slovakia Vital Registration - Deaths 2004 ICD10 as it appears in World Health Organization (WHO). WHO Mortality Database Version February 2014. Geneva, Switzerland: World Health Organization (WHO), 2014.                                                                           | 2004                             |                      |
| Slovakia | Slovakia Vital Registration - Deaths 2005 ICD10 as it appears in World Health Organization (WHO). WHO Mortality Database Version February 2014. Geneva, Switzerland: World Health Organization (WHO), 2014.                                                                           | 2005                             |                      |
| Slovakia | Forman D, Bray F, Brewster DH, Gombe Mbalawa C, Kohler B, Piñeros M, Steliarova-Foucher E, Swaminathan R and Ferlay J, eds (2013). Cancer Incidence in Five Continents, Vol. X Summary Database (electronic version). Lyon, IARC. <a href="http://ci5.iarc.fr">http://ci5.iarc.fr</a> | 2005                             |                      |
| Slovakia | Slovakia Vital Registration - Deaths 2006 ICD10 as it appears in World Health Organization (WHO). WHO Mortality Database Version February 2014. Geneva, Switzerland: World Health Organization (WHO), 2014.                                                                           | 2006                             |                      |
| Slovakia | World Health Organization (WHO). Global Status Report on Road Safety 2009. Geneva, Switzerland: World Health Organization (WHO), 2009.                                                                                                                                                | 2007                             |                      |
| Slovakia | Slovakia Vital Registration - Deaths 2007 ICD10 as it appears in World Health Organization (WHO). WHO Mortality Database Version February 2014. Geneva, Switzerland: World Health Organization (WHO), 2014.                                                                           | 2007                             |                      |

**Web Table 32 - Comprehensive citation list**

| Country  | Citation                                                                                                                                                                                                                                                                                              | Year*                  | New for GBD 2013 (*) |
|----------|-------------------------------------------------------------------------------------------------------------------------------------------------------------------------------------------------------------------------------------------------------------------------------------------------------|------------------------|----------------------|
| Slovakia | Slovakia Vital Registration - Deaths 2008 ICD10 as it appears in World Health Organization (WHO). WHO Mortality Database Version February 2014. Geneva, Switzerland: World Health Organization (WHO), 2014.                                                                                           | 2008                   |                      |
| Slovakia | EUVAC-NET. EUVAC-NET Pertussis Surveillance Report 2008. Stockholm, Sweden: European Centre for Disease Prevention and Control, 2009.                                                                                                                                                                 | 2008                   |                      |
| Slovakia | Slovakia Vital Registration - Deaths 2009 ICD10 as it appears in World Health Organization (WHO). WHO Mortality Database Version February 2014. Geneva, Switzerland: World Health Organization (WHO), 2014.                                                                                           | 2009                   |                      |
| Slovakia | EUVAC-NET. EUVAC-NET Pertussis Surveillance Report 2009. Stockholm, Sweden: European Centre for Disease Prevention and Control, 2010.                                                                                                                                                                 | 2009                   |                      |
| Slovakia | Slovakia Vital Registration - Deaths 2010 ICD10 as it appears in World Health Organization (WHO). WHO Mortality Database Version February 2014. Geneva, Switzerland: World Health Organization (WHO), 2014.                                                                                           | 2010                   |                      |
| Slovakia | European Renal Association-European Dialysis and Transplant Association (ERA-EDTA). European Renal Association-European Dialysis and Transplant Association Registry Annual Report 2010. Parma, Italy: European Renal Association-European Dialysis and Transplant Association (ERA-EDTA), 2012.      | 2010                   | *                    |
| Slovakia | Slovakia Vital Registration Death Data 2011 as it appears in United Nations Statistics Division (UNSD). United Nations Demographic Yearbook. New York City, United States: United Nations Statistics Division (UNSD).                                                                                 | 2011                   | *                    |
| Slovakia | European Renal Association-European Dialysis and Transplant Association (ERA-EDTA). European Renal Association-European Dialysis and Transplant Association Registry Annual Report 2011. Parma, Italy: European Renal Association-European Dialysis and Transplant Association (ERA-EDTA), 2013.      | 2011                   | *                    |
| Slovenia | Fraser GR, Defaranas B, Kattamis CA, Race RR, Sanger R, Stamatoyannopoulos G. Glucose-6-phosphate dehydrogenase, colour vision and XG blood groups in Greece: linkage and population data. Ann Hum Genet. 1964; 395-403.                                                                              | 1962                   |                      |
| Slovenia | Institute for Health Metrics and Evaluation. Institute for Health Metrics and Evaluation Cancer Registry Database. [Unpublished].                                                                                                                                                                     | 1980-2009              |                      |
| Slovenia | Ferlay J, Parkin DM, Curado MP, Bray F, Edwards B, Shin HR and Forman D. Cancer Incidence in Five Continents, Volumes I to IX: IARC CancerBase No. 9 [Internet]. Lyon, France: International Agency for Research on Cancer; 2010. Available from: <a href="http://ci5.iarc.fr">http://ci5.iarc.fr</a> | 1980-2002              |                      |
| Slovenia | Institute for Health Metrics and Evaluation (IHME), Joint United Nations Program on HIV/AIDS (UNAIDS). Institute for Health Metrics and Evaluation HIV Mortality Estimates Based on the UNAIDS Spectrum Model Framework.                                                                              | 1980-2013              | *                    |
| Slovenia | Parkin DM, International Agency for Research on Cancer, International Association of Cancer Registries. Cancer Incidence in Five Continents. Vol. I to VIII. Lyon, France, IARC Press, 2005.                                                                                                          | 1980, 1984, 1990, 1995 |                      |
| Slovenia | World Health Organization (WHO). Country Mortality Data 1980-1999. [Unpublished].                                                                                                                                                                                                                     | 1982                   |                      |
| Slovenia | Max Planck Institute for Demographic Research, University of California. Human Mortality Database. Berkeley, USA: University of California; Rostock, Germany: Max Planck Institute for Demographic Research.                                                                                          | 1983-1984              |                      |



**Web Table 32 - Comprehensive citation list**

| Country  | Citation                                                                                                                                                                                                                                                      | Year*                | New for GBD 2013 (*) |
|----------|---------------------------------------------------------------------------------------------------------------------------------------------------------------------------------------------------------------------------------------------------------------|----------------------|----------------------|
| Slovenia | Yugoslavia - Slovenia Vital Registration - Deaths 1985 ICD9 as it appears in World Health Organization (WHO). WHO Mortality Database Version February 2014. Geneva, Switzerland: World Health Organization (WHO), 2014.                                       | 1985                 |                      |
| Slovenia | Yugoslavia - Slovenia Vital Registration - Deaths 1986 ICD9 as it appears in World Health Organization (WHO). WHO Mortality Database Version February 2014. Geneva, Switzerland: World Health Organization (WHO), 2014.                                       | 1986                 |                      |
| Slovenia | Malovrh M, Kandus A, Ponikvar R, Premru V, Koselj M, Kveder R. The incidence and etiology of chronic renal failure in the Republic of Slovenia. Transplant Proc. 1992; 24(5): 1857-8.                                                                         | 1986-1990            |                      |
| Slovenia | Yugoslavia - Slovenia Vital Registration - Deaths 1987 ICD9 as it appears in World Health Organization (WHO). WHO Mortality Database Version February 2014. Geneva, Switzerland: World Health Organization (WHO), 2014.                                       | 1987                 |                      |
| Slovenia | Yugoslavia - Slovenia Vital Registration - Deaths 1988 ICD9 as it appears in World Health Organization (WHO). WHO Mortality Database Version February 2014. Geneva, Switzerland: World Health Organization (WHO), 2014.                                       | 1988                 |                      |
| Slovenia | Slovenia Vital Registration - Deaths 1989 ICD9 as it appears in World Health Organization (WHO). WHO Mortality Database Version February 2014. Geneva, Switzerland: World Health Organization (WHO), 2014.                                                    | 1989                 |                      |
| Slovenia | Yugoslavia - Slovenia Vital Registration - Deaths 1990 ICD9 as it appears in World Health Organization (WHO). WHO Mortality Database Version February 2014. Geneva, Switzerland: World Health Organization (WHO), 2014.                                       | 1990                 |                      |
| Slovenia | Centre for Health Informatics and Multiprofessional Education, University College London. Modell's Haemoglobinopathologist's Almanac. London, United Kingdom: Centre for Health Informatics and Multiprofessional Education, University College London, 2008. | 1990-2003            |                      |
| Slovenia | Slovenia Vital Registration - Deaths 1991 ICD9 as it appears in World Health Organization (WHO). WHO Mortality Database Version February 2014. Geneva, Switzerland: World Health Organization (WHO), 2014.                                                    | 1991                 |                      |
| Slovenia | United Nations Children's Fund (UNICEF), World Health Organization (WHO). WHO and UNICEF Reported Disease Incidence Time Series - Pertussis. Geneva, Switzerland: World Health Organization (WHO).                                                            | 1991-1999, 2001-2012 |                      |
| Slovenia | United Nations Children's Fund (UNICEF), World Health Organization (WHO). WHO and UNICEF Reported Disease Incidence Time Series - Measles. Geneva, Switzerland: World Health Organization (WHO).                                                              | 1991-1999, 2001-2012 |                      |
| Slovenia | Slovenia Vital Registration - Deaths 1992 ICD9 as it appears in World Health Organization (WHO). WHO Mortality Database Version February 2014. Geneva, Switzerland: World Health Organization (WHO), 2014.                                                    | 1992                 |                      |
| Slovenia | Slovenia Vital Registration - Deaths 1993 ICD9 as it appears in World Health Organization (WHO). WHO Mortality Database Version February 2014. Geneva, Switzerland: World Health Organization (WHO), 2014.                                                    | 1993                 |                      |
| Slovenia | Slovenia Vital Registration - Deaths 1994 ICD9 as it appears in World Health Organization (WHO). WHO Mortality Database Version February 2014. Geneva, Switzerland: World Health Organization (WHO), 2014.                                                    | 1994                 |                      |
| Slovenia | Slovenia Vital Registration - Deaths 1995 ICD9 as it appears in World Health Organization (WHO). WHO Mortality Database Version February 2014. Geneva, Switzerland: World Health Organization (WHO), 2014.                                                    | 1995                 |                      |

**Web Table 32 - Comprehensive citation list**

| Country  | Citation                                                                                                                                                                                                                                    | Year*      | New for GBD 2013 (*) |
|----------|---------------------------------------------------------------------------------------------------------------------------------------------------------------------------------------------------------------------------------------------|------------|----------------------|
| Slovenia | Slovenia Vital Registration - Deaths 1996 ICD9 as it appears in World Health Organization (WHO). WHO Mortality Database Version February 2014. Geneva, Switzerland: World Health Organization (WHO), 2014.                                  | 1996       |                      |
| Slovenia | Slovenia Vital Registration - Deaths 1997 ICD10 as it appears in World Health Organization (WHO). WHO Mortality Database Version February 2014. Geneva, Switzerland: World Health Organization (WHO), 2014.                                 | 1997       |                      |
| Slovenia | Slovenia Vital Registration - Deaths 1998 ICD10 as it appears in World Health Organization (WHO). WHO Mortality Database Version February 2014. Geneva, Switzerland: World Health Organization (WHO), 2014.                                 | 1998       |                      |
| Slovenia | Buturović-Ponikvar J, Republic of Slovenia Expert Group for Dialysis in Slovenia at the Ministry of Health. Renal replacement therapy in Slovenia: annual report 2001. <i>Nephrol Dial Transplant</i> . 2003; 18(Suppl 5): v53-5.           | 1998-2001  |                      |
| Slovenia | Slovenia Vital Registration - Deaths 1999 ICD10 as it appears in World Health Organization (WHO). WHO Mortality Database Version February 2014. Geneva, Switzerland: World Health Organization (WHO), 2014.                                 | 1999       |                      |
| Slovenia | Socan M, Kraigher A, Fiser-Marinic N. Hepatitis A seroprevalence in Slovene travellers. <i>Eur J Epidemiol</i> . 2001; 17(10): 925-6.                                                                                                       | 1999       |                      |
| Slovenia | Slovenia Vital Registration - Deaths 2000 ICD10 as it appears in World Health Organization (WHO). WHO Mortality Database Version February 2014. Geneva, Switzerland: World Health Organization (WHO), 2014.                                 | 2000       |                      |
| Slovenia | Curado MP, Edwards B, Shin HR, Storm H, Ferlay J, Heanue M and Boyle P, eds (2007). <i>Cancer Incidence in Five Continents, Vol. IX Periodic Data</i> (electronic version). Lyon, IARC. <a href="http://ci5.iarc.fr">http://ci5.iarc.fr</a> | 2000       |                      |
| Slovenia | Slovenia Vital Registration - Deaths 2001 ICD10 as it appears in World Health Organization (WHO). WHO Mortality Database Version February 2014. Geneva, Switzerland: World Health Organization (WHO), 2014.                                 | 2001       |                      |
| Slovenia | World Health Organization (WHO). <i>Yellow Fever Reported Cases, WHO Vaccine-Preventable Diseases: Monitoring System</i> . Geneva, Switzerland: World Health Organization (WHO).                                                            | 2001-2009  |                      |
| Slovenia | Slovenia Vital Registration - Deaths 2002 ICD10 as it appears in World Health Organization (WHO). WHO Mortality Database Version February 2014. Geneva, Switzerland: World Health Organization (WHO), 2014.                                 | 2002       |                      |
| Slovenia | Slovenia Vital Registration - Deaths 2003 ICD10 as it appears in World Health Organization (WHO). WHO Mortality Database Version February 2014. Geneva, Switzerland: World Health Organization (WHO), 2014.                                 | 2003       |                      |
| Slovenia | Cancer Registry of Republic of Slovenia. <i>Slovenia Cancer Incidence 2003</i> . Ljubljana, Slovenia: Cancer Registry of Republic of Slovenia, 2006.                                                                                        | 2003       |                      |
| Slovenia | Slovenia Vital Registration - Deaths 2004 ICD10 as it appears in World Health Organization (WHO). WHO Mortality Database Version February 2014. Geneva, Switzerland: World Health Organization (WHO), 2014.                                 | 2004       |                      |
| Slovenia | Cancer Registry of Republic of Slovenia. <i>Slovenia Cancer Incidence 2004</i> . Ljubljana, Slovenia: Cancer Registry of Republic of Slovenia, 2007.                                                                                        | 2004       |                      |
| Slovenia | WHO Regional Office for Europe (EURO-WHO). <i>European Hospital Morbidity Database</i> . Copenhagen, Denmark: WHO Regional Office for Europe (EURO-WHO).                                                                                    | 2004-2006  |                      |
| Slovenia | Centre for Research on the Epidemiology of Disasters (CRED). <i>EM-DAT: The OFDA/CRED International Disaster Database</i> . Brussels, Belgium: Catholic University of Leuven.                                                               | 2004, 2007 |                      |



**Web Table 32 - Comprehensive citation list**

| Country         | Citation                                                                                                                                                                                                                                                                                         | Year*                                                                      | New for GBD 2013 (*) |
|-----------------|--------------------------------------------------------------------------------------------------------------------------------------------------------------------------------------------------------------------------------------------------------------------------------------------------|----------------------------------------------------------------------------|----------------------|
| Slovenia        | Slovenia Vital Registration - Deaths 2005 ICD10 as it appears in World Health Organization (WHO). WHO Mortality Database Version February 2014. Geneva, Switzerland: World Health Organization (WHO), 2014.                                                                                      | 2005                                                                       |                      |
| Slovenia        | Forman D, Bray F, Brewster DH, Gombe Mbalawa C, Kohler B, Piñeros M, Steliarova-Foucher E, Swaminathan R and Ferlay J, eds (2013). Cancer Incidence in Five Continents, Vol. X Summary Database (electronic version). Lyon, IARC. <a href="http://ci5.iarc.fr">http://ci5.iarc.fr</a>            | 2005                                                                       |                      |
| Slovenia        | Slovenia Vital Registration - Deaths 2006 ICD10 as it appears in World Health Organization (WHO). WHO Mortality Database Version February 2014. Geneva, Switzerland: World Health Organization (WHO), 2014.                                                                                      | 2006                                                                       |                      |
| Slovenia        | Cancer Registry of Republic of Slovenia. Slovenia Cancer Incidence 2006. Ljubljana, Slovenia: Cancer Registry of Republic of Slovenia, 2009.                                                                                                                                                     | 2006                                                                       |                      |
| Slovenia        | Slovenia Vital Registration - Deaths 2007 ICD10 as it appears in World Health Organization (WHO). WHO Mortality Database Version February 2014. Geneva, Switzerland: World Health Organization (WHO), 2014.                                                                                      | 2007                                                                       |                      |
| Slovenia        | Cancer Registry of Republic of Slovenia. Slovenia Cancer 2007. Ljubljana, Slovenia: Cancer Registry of Republic of Slovenia, 2010.                                                                                                                                                               | 2007                                                                       |                      |
| Slovenia        | World Health Organization (WHO). Global Status Report on Road Safety 2009. Geneva, Switzerland: World Health Organization (WHO), 2009.                                                                                                                                                           | 2007                                                                       |                      |
| Slovenia        | Slovenia Vital Registration - Deaths 2008 ICD10 as it appears in World Health Organization (WHO). WHO Mortality Database Version February 2014. Geneva, Switzerland: World Health Organization (WHO), 2014.                                                                                      | 2008                                                                       |                      |
| Slovenia        | Cancer Registry of Republic of Slovenia. Slovenia Cancer 2008. Ljubljana, Slovenia: Cancer Registry of Republic of Slovenia, 2011.                                                                                                                                                               | 2008                                                                       |                      |
| Slovenia        | Slovenia Vital Registration - Deaths 2009 ICD10 as it appears in World Health Organization (WHO). WHO Mortality Database Version February 2014. Geneva, Switzerland: World Health Organization (WHO), 2014.                                                                                      | 2009                                                                       |                      |
| Slovenia        | Cancer Registry of Republic of Slovenia, Institute of Oncology Ljubljana (Slovenia). Slovenia Cancer 2009. Ljubljana, Slovenia: Cancer Registry of Republic of Slovenia, 2013.                                                                                                                   | 2009                                                                       | *                    |
| Slovenia        | Slovenia Vital Registration - Deaths 2010 ICD10 as it appears in World Health Organization (WHO). WHO Mortality Database Version February 2014. Geneva, Switzerland: World Health Organization (WHO), 2014.                                                                                      | 2010                                                                       |                      |
| Slovenia        | EUVAC-NET. EUVAC-NET Measles Surveillance Report 2010. Stockholm, Sweden: European Centre for Disease Prevention and Control, 2011.                                                                                                                                                              | 2010                                                                       |                      |
| Slovenia        | Slovenia Vital Registration Death Data 2011 as it appears in United Nations Statistics Division (UNSD). United Nations Demographic Yearbook. New York City, United States: United Nations Statistics Division (UNSD).                                                                            | 2011                                                                       | *                    |
| Slovenia        | European Renal Association-European Dialysis and Transplant Association (ERA-EDTA). European Renal Association-European Dialysis and Transplant Association Registry Annual Report 2011. Parma, Italy: European Renal Association-European Dialysis and Transplant Association (ERA-EDTA), 2013. | 2011                                                                       | *                    |
| Solomon Islands | Centre for Research on the Epidemiology of Disasters (CRED). EM-DAT: The OFDA/CRED International Disaster Database. Brussels, Belgium: Catholic University of Leuven.                                                                                                                            | 1956, 1966-1968, 1975, 1977, 1979, 1986, 1988, 1993, 2007, 2009-2010, 2013 |                      |

**Web Table 32 - Comprehensive citation list**

| Country         | Citation                                                                                                                                                                                                                                                                                                     | Year*                      | New for GBD 2013 (*) |
|-----------------|--------------------------------------------------------------------------------------------------------------------------------------------------------------------------------------------------------------------------------------------------------------------------------------------------------------|----------------------------|----------------------|
| Solomon Islands | Solomon Islands Population and Housing Census 1970 as it appears in United Nations Statistics Division (UNSD). United Nations Demographic Yearbook. New York City, United States: United Nations Statistics Division (UNSD).                                                                                 | 1970                       |                      |
| Solomon Islands | Solomon Islands Population and Housing Census 1976 as it appears in United Nations Statistics Division (UNSD). United Nations Demographic Yearbook. New York City, United States: United Nations Statistics Division (UNSD).                                                                                 | 1976                       |                      |
| Solomon Islands | Institute for Health Metrics and Evaluation (IHME), Joint United Nations Program on HIV/AIDS (UNAIDS). Institute for Health Metrics and Evaluation HIV Mortality Estimates Based on the UNAIDS Spectrum Model Framework.                                                                                     | 1980-2013                  | *                    |
| Solomon Islands | United Nations Children's Fund (UNICEF), World Health Organization (WHO). WHO and UNICEF Reported Disease Incidence Time Series - Pertussis. Geneva, Switzerland: World Health Organization (WHO).                                                                                                           | 1980-1998, 2001-2013       |                      |
| Solomon Islands | United Nations Children's Fund (UNICEF), World Health Organization (WHO). WHO and UNICEF Reported Disease Incidence Time Series - Measles. Geneva, Switzerland: World Health Organization (WHO).                                                                                                             | 1980-1998, 2001-2013       |                      |
| Solomon Islands | Hill AV, Bowden DK, O'Shaughnessy DF, Weatherall DJ, Clegg JB. Beta thalassemia in Melanesia: association with malaria and characterization of a common variant (IVS-1 nt 5 G----C). Blood. 1988; 72(1): 9-14.                                                                                               | 1985-1987                  |                      |
| Solomon Islands | Centre for Health Informatics and Multiprofessional Education, University College London. Modell's Haemoglobinopathologist's Almanac. London, United Kingdom: Centre for Health Informatics and Multiprofessional Education, University College London, 2008.                                                | 1990-2003                  |                      |
| Solomon Islands | Furusyo N, Hayashi J, Kakuda K, Sawayama Y, Ariyama I, Eddie R, Kashiwagi S. Markedly high seroprevalence of hepatitis B virus infection in comparison to hepatitis C virus and human T lymphotropic virus type-1 infections in selected Solomon Islands populations. Am J Trop Med Hyg. 1999; 61(1): 85-91. | 1994                       |                      |
| Solomon Islands | Lucas RE, Faoagali JL. The serological status of Solomon Island blood donors. Southeast Asian J Trop Med Public Health. 1999; 30(3): 542-5.                                                                                                                                                                  | 1994-1995                  |                      |
| Solomon Islands | Measles Supplementary Immunization Activity Data as provided by the World Health Organization. [Unpublished].                                                                                                                                                                                                | 1997-1998                  |                      |
| Solomon Islands | Solomon Islands National Statistics Office (SINSO). Solomon Islands Population and Housing Census 1999.                                                                                                                                                                                                      | 1999                       |                      |
| Solomon Islands | World Health Organization (WHO). Yellow Fever Reported Cases, WHO Vaccine-Preventable Diseases: Monitoring System. Geneva, Switzerland: World Health Organization (WHO).                                                                                                                                     | 2001-2002, 2004, 2006-2009 |                      |
| Solomon Islands | United Nations Office on Drugs and Crime (UNODC). United Nations Office on Drugs and Crime Global Study on Homicides 2011. Vienna, Austria: United Nations Office on Drugs and Crime (UNODC), 2011.                                                                                                          | 2004-2007                  |                      |
| Solomon Islands | Macro International, Inc, Ministry of Health (Solomon Islands), Secretariat of the Pacific Community (SPC), Solomon Islands National Statistics Office (SINSO). Solomon Islands Demographic and Health Survey 2006-2007.                                                                                     | 2006-2007                  |                      |
| Solomon Islands | World Health Organization (WHO). Retrospective Measles Data on Supplementary Immunization Activities. Geneva, Switzerland: World Health Organization (WHO).                                                                                                                                                  | 2006, 2009, 2012           |                      |
| Solomon Islands | Joint United Nations Program on HIV/AIDS (UNAIDS), Solomon Islands National AIDS Committee. Solomon Islands UNGASS Country Progress Report 2010. Geneva, Switzerland: Joint United Nations Program on HIV/AIDS (UNAIDS), 2010.                                                                               | 2008                       |                      |

**Web Table 32 - Comprehensive citation list**

| Country | Citation                                                                                                                                                                                                                                                      | Year*                                                                                     | New for GBD 2013 (*) |
|---------|---------------------------------------------------------------------------------------------------------------------------------------------------------------------------------------------------------------------------------------------------------------|-------------------------------------------------------------------------------------------|----------------------|
| Somalia | Centre for Research on the Epidemiology of Disasters (CRED). EM-DAT: The OFDA/CRED International Disaster Database. Brussels, Belgium: Catholic University of Leuven.                                                                                         | 1961, 1964, 1974-1976, 1981, 1987, 1989, 1994-1997, 2000-2001, 2003-2007, 2010, 2012-2013 |                      |
| Somalia | World Health Organization (WHO). Expanded programme on immunization. Epidemiology of Measles in a Rural Community. Wkly Epidemiol Rec. 1980; 55(12): 85-92.                                                                                                   | 1978                                                                                      |                      |
| Somalia | Peace Research Institute Oslo (PRIO). Battle Deaths Dataset Version 3, 2009. Oslo, Norway: Peace Research Institute Oslo (PRIO), 2009.                                                                                                                        | 1978-1988                                                                                 |                      |
| Somalia | Institute for Health Metrics and Evaluation (IHME), Joint United Nations Program on HIV/AIDS (UNAIDS). Institute for Health Metrics and Evaluation HIV Mortality Estimates Based on the UNAIDS Spectrum Model Framework.                                      | 1980-2013                                                                                 | *                    |
| Somalia | United Nations Children's Fund (UNICEF), World Health Organization (WHO). WHO and UNICEF Reported Disease Incidence Time Series - Pertussis. Geneva, Switzerland: World Health Organization (WHO).                                                            | 1983-1989, 1998-1999, 2007, 2009-2013                                                     |                      |
| Somalia | United Nations Children's Fund (UNICEF), World Health Organization (WHO). WHO and UNICEF Reported Disease Incidence Time Series - Measles. Geneva, Switzerland: World Health Organization (WHO).                                                              | 1983-1989, 1996, 1998-2004, 2006-2013                                                     |                      |
| Somalia | Ismail SO, Ahmed HJ, Grillner L, Hederstedt B, Issa A, Bygdeman SM. Sexually transmitted diseases in men in Mogadishu, Somalia. Int J STD AIDS. 1990; 1(2): 102-6.                                                                                            | 1986                                                                                      |                      |
| Somalia | Bile K, Mohamud O, Aden C, Isse A, Norder H, Nilsson L, Magnus L. The risk for hepatitis A, B, and C at two institutions for children in Somalia with different socioeconomic conditions. Am J Trop Med Hyg. 1992; 47(3): 357-64.                             | 1987                                                                                      |                      |
| Somalia | Aceti A, Taliani G, Bruni R, Sharif OS, Moallin KA, Celestino D, Quaranta G, Sebastiani A. Hepatitis C virus infection in chronic liver disease in Somalia. Am J Trop Med Hyg. 1993; 48(4): 581-4.                                                            | 1988-1990                                                                                 |                      |
| Somalia | Department of Peace and Conflict Research, Uppsala University. UCDP Battle-Related Deaths Database Version 5, 2013. Uppsala, Sweden: Department of Peace and Conflict Research, Uppsala University, 2013.                                                     | 1989-2012                                                                                 | *                    |
| Somalia | Department of Peace and Conflict Research, Uppsala University. UCDP One-Sided Violence Database Version 1.4, 2013. Uppsala, Sweden: Department of Peace and Conflict Research, Uppsala University, 2013.                                                      | 1989-2012                                                                                 | *                    |
| Somalia | Weatherall D. Sickle Cell and Thalassemias Prevalence Data, Personal Correspondence with David Weatherall. [Unpublished].                                                                                                                                     | 1990-2009                                                                                 |                      |
| Somalia | Department of Peace and Conflict Research, Uppsala University. UCDP Nonstate Conflict Database Version 2.5, 2013. Uppsala, Sweden: Department of Peace and Conflict Research, Uppsala University, 2013.                                                       | 1990-2012                                                                                 | *                    |
| Somalia | Abu-Raddad LJ, Akala FA, Semini I, Riedner G, Wilson D, Tawil O, World Bank. Characterizing the HIV/AIDS Epidemic in the Middle East and North Africa. Washington DC, United States: World Bank, 2010.                                                        | 1990-1991, 2006-2007                                                                      |                      |
| Somalia | Centre for Health Informatics and Multiprofessional Education, University College London. Modell's Haemoglobinopathologist's Almanac. London, United Kingdom: Centre for Health Informatics and Multiprofessional Education, University College London, 2008. | 1990-2003                                                                                 |                      |
| Somalia | Nur YA, Groen J, Elmi AM, Ott A, Osterhaus AD. Prevalence of serum antibodies against bloodborne and sexually transmitted agents in selected groups in Somalia. Epidemiol Infect. 2000; 124(1): 137-41.                                                       | 1995                                                                                      |                      |
| Somalia | World Health Organization (WHO). The Global Elimination of Congenital Syphilis: Rationale and Strategy for Action. Geneva, Switzerland: World Health Organization (WHO), 2007.                                                                                | 1997-2003                                                                                 |                      |
| Somalia | Joint United Nations Program on HIV/AIDS (UNAIDS), United Nations Children's Fund (UNICEF), World Health Organization (WHO). Somalia Epidemiological Fact Sheet on HIV/AIDS and STIs 2004.                                                                    | 1997-1999                                                                                 |                      |

**Web Table 32 - Comprehensive citation list**

| Country      | Citation                                                                                                                                                                                                                                 | Year*                                                                                    | New for GBD 2013 (*) |
|--------------|------------------------------------------------------------------------------------------------------------------------------------------------------------------------------------------------------------------------------------------|------------------------------------------------------------------------------------------|----------------------|
| Somalia      | United Nations Children's Fund (UNICEF). Somalia Multiple Indicator Cluster Survey 1999. New York, United States: United Nations Children's Fund (UNICEF).                                                                               | 1999                                                                                     |                      |
| Somalia      | World Health Organization (WHO). Somalia - Somaliland HIV/AIDS/STI Sentinel Surveillance Survey 2004.                                                                                                                                    | 2004                                                                                     |                      |
| Somalia      | Joint United Nations Program on HIV/AIDS (UNAIDS), Somaliland National AIDS Commission. Somalia Country Progress Report 2010. Geneva, Switzerland: Joint United Nations Program on HIV/AIDS (UNAIDS), 2010.                              | 2004, 2007                                                                               |                      |
| Somalia      | World Health Organization (WHO). Retrospective Measles Data on Supplementary Immunization Activities. Geneva, Switzerland: World Health Organization (WHO).                                                                              | 2005-2012                                                                                |                      |
| Somalia      | Pan Arab Project for Family Health (PAPFAM), United Nations Children's Fund (UNICEF). Somalia Multiple Indicator Cluster Survey 2006. New York, United States: United Nations Children's Fund (UNICEF).                                  | 2006                                                                                     |                      |
| Somalia      | Postigo JAR. Leishmaniasis in the World Health Organization Eastern Mediterranean Region. Int J Antimicrob Agents. 2010; S62-65.                                                                                                         | 2008                                                                                     |                      |
| Somalia      | World Health Organization (WHO). Somalia WHO Leishmaniasis Country Profile.                                                                                                                                                              | 2008                                                                                     | *                    |
| South Africa | Centre for Research on the Epidemiology of Disasters (CRED). EM-DAT: The OFDA/CRED International Disaster Database. Brussels, Belgium: Catholic University of Leuven.                                                                    | 1952, 1959, 1969, 1974, 1977-1978, 1981-1984, 1987-1988, 1990-1991, 1993-2003, 2005-2013 |                      |
| South Africa | Charlton RW, Bothwell TH. Primaquine-sensitivity of red cells in various races in Southern Africa. Br Med J. 1961; 1(5230): 941-4.                                                                                                       | 1959-1961                                                                                |                      |
| South Africa | Bernstein RE. Occurrence and clinical implications of red-cell glucose-6-phosphate dehydrogenase deficiency in South African racial groups. S Afr Med J. 1963; 447-51.                                                                   | 1961-1963                                                                                |                      |
| South Africa | Peace Research Institute Oslo (PRIO). Battle Deaths Dataset Version 3, 2009. Oslo, Norway: Peace Research Institute Oslo (PRIO), 2009.                                                                                                   | 1966-1988                                                                                |                      |
| South Africa | United Nations Office on Drugs and Crime (UNODC). United Nations Surveys on Crime Trends and the Operations of Criminal Justice Systems 1970-2006 as provided by Kavi Bhalla. [Unpublished]                                              | 1976-1980                                                                                |                      |
| South Africa | World Health Organization (WHO). Country Mortality Data 1980-1999. [Unpublished].                                                                                                                                                        | 1980-1982                                                                                |                      |
| South Africa | Ramkissoo A, Coovadia HM, Loening WE. Whooping cough--a neglected disease in southern Africa. S Afr Med J. 1989; 75(12): 560-1.                                                                                                          | 1980-1987                                                                                |                      |
| South Africa | Uzicanin A, Eggers R, Webb E, Harris B, Durrheim D, Ogunbanjo G, Isaacs V, Hawkrigde A, Biellik R, Strebel P. Impact of the 1996-1997 supplementary measles vaccination campaigns in South Africa. Int J Epidemiol. 2002; 31(5): 968-76. | 1980-1996                                                                                |                      |
| South Africa | Institute for Health Metrics and Evaluation (IHME), Joint United Nations Program on HIV/AIDS (UNAIDS). Institute for Health Metrics and Evaluation HIV Mortality Estimates Based on the UNAIDS Spectrum Model Framework.                 | 1980-2013                                                                                | *                    |
| South Africa | United Nations Children's Fund (UNICEF), World Health Organization (WHO). WHO and UNICEF Reported Disease Incidence Time Series - Measles. Geneva, Switzerland: World Health Organization (WHO).                                         | 1980-2013                                                                                |                      |
| South Africa | Bird AR, Ellis P, Wood K, Mathew C, Karabus C. Inherited haemoglobin variants in a South African population. J Med Genet. 1987; 4(24): 215-9.                                                                                            | 1981-1983                                                                                |                      |
| South Africa | Botha JF, Blackburn NK, Schoub BD, Kew MC. The prevalence of antibodies to the hepatitis A virus in Owambo children. Trop Gastroenterol. 1994; 15(1): 15-7.                                                                              | 1981-1983                                                                                |                      |

**Web Table 32 - Comprehensive citation list**

| Country      | Citation                                                                                                                                                                                                                                                      | Year*                                            | New for GBD 2013 (*) |
|--------------|---------------------------------------------------------------------------------------------------------------------------------------------------------------------------------------------------------------------------------------------------------------|--------------------------------------------------|----------------------|
| South Africa | Waner, Schoub, Baxter, French. A Study to Determine Susceptibility to Hepatitis A of Travelers from South Africa. <i>J Travel Med.</i> 1997; 4(4): 192-4.                                                                                                     | 1982-1983                                        |                      |
| South Africa | Dibisceglie AM, Kew MC, Dusheiko GM, Berger EL, Song E, Paterson AC, Hodkinson HJ. Prevalence of hepatitis B virus infection among black children in Soweto. <i>Br Med J (Clin Res Ed).</i> 1986; 292(6533): 1440-2.                                          | 1984-1985                                        |                      |
| South Africa | Abdool Karim SS, Coutsooudis A. Sero-epidemiology of hepatitis A in black South African children. <i>S Afr Med J.</i> 1993; 83(10): 748-50.                                                                                                                   | 1985                                             |                      |
| South Africa | Dusheiko GM, Brink BA, Conradie JD, Marimuthu T, Sher R. Regional Prevalence of Hepatitis B, Delta, and Human Immunodeficiency Virus Infection in Southern Africa: A Large Population Survey. <i>Am J Epidemiol.</i> 1989; 129(1): 138-45.                    | 1986                                             |                      |
| South Africa | Martin DJ, Blackburn NK, Johnson S, McAnerney JM. The current epidemiology of hepatitis A infection in South Africa: implications for vaccination. <i>Trans R Soc Trop Med Hyg.</i> 1994; 88(3): 288-91.                                                      | 1988-1991                                        |                      |
| South Africa | World Health Organization (WHO). Yellow Fever Reported Cases, WHO Vaccine-Preventable Diseases: Monitoring System. Geneva, Switzerland: World Health Organization (WHO).                                                                                      | 1989-1993, 1996-1998, 2000-2001, 2003-2006, 2009 |                      |
| South Africa | Department of Peace and Conflict Research, Uppsala University. UCDP Nonstate Conflict Database Version 2.5, 2013. Uppsala, Sweden: Department of Peace and Conflict Research, Uppsala University, 2013.                                                       | 1989-1998                                        | *                    |
| South Africa | Department of Peace and Conflict Research, Uppsala University. UCDP One-Sided Violence Database Version 1.4, 2013. Uppsala, Sweden: Department of Peace and Conflict Research, Uppsala University, 2013.                                                      | 1989-1994                                        | *                    |
| South Africa | Abdool Karim SS, Abdool Karim Q, Dilraj A, Chamane M. Unsustainability of a measles immunisation campaign--rise in measles incidence within 2 years of the campaign. <i>S Afr Med J.</i> 1993; 83(5): 322-3.                                                  | 1989-1992                                        |                      |
| South Africa | Pham-Kanter GB, Steinberg MH, Ballard RC. Sexually transmitted diseases in South Africa. <i>Genitourin Med.</i> 1996; 72(3): 160-71.                                                                                                                          | 1989-1990, 1992-1994                             |                      |
| South Africa | Dreyer A, Aspinall S, Jacobs F. Prevalence of markers for human immunodeficiency, hepatitis B and hepatitis C viruses in maxillofacial and oral surgery patients at Medunsa. <i>J Dent Assoc S Afr.</i> 1993; 48(7): 377-80.                                  | 1989-1992                                        |                      |
| South Africa | Schoub BD, Johnson S, McAnerney JM, Blackburn NK. The role of sexual transmission in the epidemiology of hepatitis C virus in black South Africans. <i>Trans R Soc Trop Med Hyg.</i> 1992; 86(4): 431-3.                                                      | 1989-1991                                        |                      |
| South Africa | Human Sciences Research Council. South Africa Human Sciences Research Council Child Mortality Estimates 1990.                                                                                                                                                 | 1990                                             |                      |
| South Africa | Bam RH, Cronjé HS, Muir A, Griessel DJ, Hoek BB. Syphilis in pregnant patients and their offspring. <i>Int J Gynaecol Obstet.</i> 1994; 44(2): 113-8.                                                                                                         | 1990                                             |                      |
| South Africa | Weatherall D. Sickle Cell and Thalassemias Prevalence Data, Personal Correspondence with David Weatherall. [Unpublished].                                                                                                                                     | 1990-2009                                        |                      |
| South Africa | World Health Organization (WHO). Global Prevalence and Incidence of Selected Curable Sexually Transmitted Infections: Overviews and Estimates 2001. Geneva, Switzerland: World Health Organization (WHO), 2001.                                               | 1990-1999                                        |                      |
| South Africa | Centre for Health Informatics and Multiprofessional Education, University College London. Modell's Haemoglobinopathologist's Almanac. London, United Kingdom: Centre for Health Informatics and Multiprofessional Education, University College London, 2008. | 1990-2003                                        |                      |
| South Africa | Lerer LB, Butchart A, Blanche MT. 'A bothersome death' -- narrative accounts of infant mortality in Cape Town, South Africa. <i>Soc Sci Med.</i> 1995; 40(7): 945-53.                                                                                         | 1991                                             |                      |
| South Africa | Hussey G, Schaaf H, Hanslo D, Hitchcock J, Coetzee G, Pitout J, Malan H, Donald P. Epidemiology of post-neonatal bacterial meningitis in Cape Town children. <i>S Afr Med J.</i> 1997; 87(1): 51-6.                                                           | 1991-1992                                        |                      |

**Web Table 32 - Comprehensive citation list**

| Country      | Citation                                                                                                                                                                                                             | Year*     | New for GBD 2013 (*) |
|--------------|----------------------------------------------------------------------------------------------------------------------------------------------------------------------------------------------------------------------|-----------|----------------------|
| South Africa | Soni PN, Tait DR, Gopaul W, Sathar MA, Simjee AE. Hepatitis C virus infection in chronic liver disease in Natal. S Afr Med J. 1996; 86(1): 80-3.                                                                     | 1991-1992 |                      |
| South Africa | Department of Health (South Africa), Eastern Cape Department of Health (South Africa). South Africa - Eastern Cape HIV and Syphilis Antenatal Sero-Surveillance Survey 2007.                                         | 1991-2007 |                      |
| South Africa | Sathar MA, Soni PN, Fernandes-Costa FJ, Wittenberg DF, Simjee AE. Racial differences in the seroprevalence of hepatitis A virus infection in Natal/KwaZulu, South Africa. J Med Virol. 1994; 44(1): 9-12.            | 1991-1993 |                      |
| South Africa | MRC/Wits Rural Public Health and Health Transitions Research Unit (Agincourt), INDEPTH. South Africa - Agincourt Health and Socio-Demographic Surveillance System. [Unpublished].                                    | 1992      |                      |
| South Africa | Taylor MB, Becker PJ, Van Rensburg EJ, Harris BN, Bailey IW, Grabow WO. A serosurvey of water-borne pathogens amongst canoeists in South Africa. Epidemiol Infect. 1995; 115(2): 299-307.                            | 1992      |                      |
| South Africa | Southern Africa Labour Development Research Unit (SALDRU), School of Economics, University of Cape Town, World Bank. South Africa Living Standards Measurement Study 1993. Washington DC, United States: World Bank. | 1993      |                      |
| South Africa | Central Statistical Service (South Africa). South Africa October Household Survey 1993.                                                                                                                              | 1993      | *                    |
| South Africa | South Africa Vital Registration - Deaths 1993 ICD9 as it appears in World Health Organization (WHO). WHO Mortality Database Version February 2014. Geneva, Switzerland: World Health Organization (WHO), 2014.       | 1993      |                      |
| South Africa | Kahn K, Tollman SM, Garenne M, Gear JS. Validation and application of verbal autopsies in a rural area of South Africa. Trop Med Int Health. 2000; 5(11): 824-31.                                                    | 1993      |                      |
| South Africa | Gaobepe M, Aspinall S, Bos P. Hepatitis B viral markers in bushmen at Schmidtsdrift, South Africa?: baseline studies for immunisation. East Afr Med J. 72(7): 421-3.                                                 | 1993      |                      |
| South Africa | Tucker TJ, Kirsch RE, Louw SJ, Isaacs S, Kannemeyer J, Robson SC. Hepatitis E in South Africa: evidence for sporadic spread and increased seroprevalence in rural areas. J Med Virol. 1996; 50(2): 117-9.            | 1993-1995 | *                    |
| South Africa | South Africa Vital Registration - Deaths 1994 ICD9 as it appears in World Health Organization (WHO). WHO Mortality Database Version February 2014. Geneva, Switzerland: World Health Organization (WHO), 2014.       | 1994      |                      |
| South Africa | Central Statistical Service (South Africa). South Africa October Household Survey 1994.                                                                                                                              | 1994      | *                    |
| South Africa | Rees H, Katzenellenbogen J, Shabodien R, Jewkes R, Fawcus S, McIntyre J, Lombard C, Truter H. The epidemiology of incomplete abortion in South Africa. S Afr Med J. 1997; 87(4): 432-7.                              | 1994      |                      |
| South Africa | Wilkinson D, Sach M, Connolly C. Epidemiology of syphilis in pregnancy in rural South Africa: opportunities for control. Trop Med Int Health. 1997; 2(1): 57-62.                                                     | 1994      |                      |
| South Africa | South Africa Vital Registration - Deaths 1995 ICD9 as it appears in World Health Organization (WHO). WHO Mortality Database Version February 2014. Geneva, Switzerland: World Health Organization (WHO), 2014.       | 1995      |                      |
| South Africa | Central Statistical Service (South Africa). South Africa October Household Survey 1995.                                                                                                                              | 1995      | *                    |
| South Africa | United Nations Office on Drugs and Crime (UNODC). United Nations Office on Drugs and Crime Global Study on Homicides 2011. Vienna, Austria: United Nations Office on Drugs and Crime (UNODC), 2011.                  | 1995-2009 |                      |



**Web Table 32 - Comprehensive citation list**

| Country      | Citation                                                                                                                                                                                                                                                                                                        | Year*                       | New for GBD 2013 (*) |
|--------------|-----------------------------------------------------------------------------------------------------------------------------------------------------------------------------------------------------------------------------------------------------------------------------------------------------------------|-----------------------------|----------------------|
| South Africa | Hino K, Katoh Y, Vardas E, Sim J, Okita K, Carman WF. The effect of introduction of universal childhood hepatitis B immunization in South Africa on the prevalence of serologically negative hepatitis B virus infection and the selection of immune escape variants. <i>Vaccine</i> . 2001; 19(28-29): 3912-8. | 1995-1997                   |                      |
| South Africa | Central Statistical Service (South Africa). South Africa October Household Survey 1996.                                                                                                                                                                                                                         | 1996                        | *                    |
| South Africa | South Africa Vital Registration - Deaths 1996 ICD10 as it appears in World Health Organization (WHO). WHO Mortality Database Version February 2014. Geneva, Switzerland: World Health Organization (WHO), 2014.                                                                                                 | 1996                        |                      |
| South Africa | Central Statistical Service (South Africa), Minnesota Population Center. South Africa Census 1996 from the Integrated Public Use Microdata Series, International. [Machine-readable database]. Minneapolis: University of Minnesota.                                                                            | 1996                        |                      |
| South Africa | Vardas E, Ross MH, Sharp G, McAnerney J, Sim J. Viral hepatitis in South African healthcare workers at increased risk of occupational exposure to blood-borne viruses. <i>J Hosp Infect</i> . 2002; 50(1): 6-12.                                                                                                | 1996                        |                      |
| South Africa | Du Plessis R, Webber L, Saayman G. Bloodborne viruses in forensic medical practice in South Africa. <i>Am J Forensic Med Pathol</i> . 1999; 20(4): 364-8.                                                                                                                                                       | 1996-1998                   |                      |
| South Africa | United Nations Children's Fund (UNICEF), World Health Organization (WHO). WHO and UNICEF Reported Disease Incidence Time Series - Pertussis. Geneva, Switzerland: World Health Organization (WHO).                                                                                                              | 1996-2003, 2009, 2011, 2013 |                      |
| South Africa | Measles Supplementary Immunization Activity Data as provided by the World Health Organization. [Unpublished].                                                                                                                                                                                                   | 1996-1997                   |                      |
| South Africa | South Africa Vital Registration - Deaths 1997 ICD10 as it appears in World Health Organization (WHO). WHO Mortality Database Version February 2014. Geneva, Switzerland: World Health Organization (WHO), 2014.                                                                                                 | 1997                        |                      |
| South Africa | Central Statistical Service (South Africa). South Africa October Household Survey 1997.                                                                                                                                                                                                                         | 1997                        | *                    |
| South Africa | Department of Health (South Africa), Department of Home Affairs (South Africa), Statistics South Africa. South Africa Mortality and Causes of Death 2010. Pretoria, South Africa: Statistics South Africa.                                                                                                      | 1997-2010                   |                      |
| South Africa | Department of Home Affairs (South Africa), Statistics South Africa. South Africa Mortality and Causes of Death 1997-2005. Pretoria, South Africa: Statistics South Africa.                                                                                                                                      | 1997-2005                   |                      |
| South Africa | World Health Organization Regional Office for Africa. HIV/AIDS Epidemiological Surveillance Update for the WHO African Region. World Health Organization Regional Office for Africa, 2003.                                                                                                                      | 1997-2002                   |                      |
| South Africa | World Health Organization (WHO). The Global Elimination of Congenital Syphilis: Rationale and Strategy for Action. Geneva, Switzerland: World Health Organization (WHO), 2007.                                                                                                                                  | 1997-2003                   |                      |
| South Africa | Department of Health (South Africa). South Africa National Antenatal Sentinel HIV and Syphilis Prevalence Survey 2009.                                                                                                                                                                                          | 1997-2009                   |                      |
| South Africa | Statistics South Africa. South Africa October Household Survey 1998.                                                                                                                                                                                                                                            | 1998                        | *                    |
| South Africa | South Africa Vital Registration - Deaths 1998 ICD10 as it appears in World Health Organization (WHO). WHO Mortality Database Version February 2014. Geneva, Switzerland: World Health Organization (WHO), 2014.                                                                                                 | 1998                        |                      |
| South Africa | Department of Health (South Africa), Macro International, Inc, South African Medical Research Council. South Africa Demographic and Health Survey 1998. Calverton, United States: Macro International, Inc.                                                                                                     | 1998                        |                      |
| South Africa | PROMECA Unit, South African Medical Research Council. South Africa PROMECA Cancer Registry Incidence 1998-2002. [Unpublished].                                                                                                                                                                                  | 1998-2002                   |                      |
| South Africa | Department of Health (South Africa). South Africa National Antenatal Sentinel HIV and Syphilis Prevalence Survey 2000.                                                                                                                                                                                          | 1998-2000                   |                      |

**Web Table 32 - Comprehensive citation list**

| Country      | Citation                                                                                                                                                                                                                                                                                                                                                                           | Year*                                  | New for GBD 2013 (*) |
|--------------|------------------------------------------------------------------------------------------------------------------------------------------------------------------------------------------------------------------------------------------------------------------------------------------------------------------------------------------------------------------------------------|----------------------------------------|----------------------|
| South Africa | South Africa Vital Registration - Deaths 1999 ICD10 as it appears in World Health Organization (WHO). WHO Mortality Database Version February 2014. Geneva, Switzerland: World Health Organization (WHO), 2014.                                                                                                                                                                    | 1999                                   |                      |
| South Africa | South Africa Vital Registration - Deaths 2000 ICD10 as it appears in World Health Organization (WHO). WHO Mortality Database Version February 2014. Geneva, Switzerland: World Health Organization (WHO), 2014.                                                                                                                                                                    | 2000                                   |                      |
| South Africa | PROMECA Unit, South African Medical Research Council. South Africa PROMECA Cancer Registry Incidence 1998-2002. [Unpublished].                                                                                                                                                                                                                                                     | 2000                                   |                      |
| South Africa | World Health Organization (WHO). Retrospective Measles Data on Supplementary Immunization Activities. Geneva, Switzerland: World Health Organization (WHO).                                                                                                                                                                                                                        | 2000, 2004-2005, 2007, 2009-2010, 2013 |                      |
| South Africa | Statistics South Africa. South Africa Census 2001. Pretoria, South Africa: Statistics South Africa.                                                                                                                                                                                                                                                                                | 2001                                   |                      |
| South Africa | South Africa Vital Registration - Deaths 2001 ICD10 as it appears in World Health Organization (WHO). WHO Mortality Database Version February 2014. Geneva, Switzerland: World Health Organization (WHO), 2014.                                                                                                                                                                    | 2001                                   |                      |
| South Africa | Statistics South Africa, Minnesota Population Center. South Africa Census 2001 from the Integrated Public Use Microdata Series, International. [Machine-readable database]. Minneapolis: University of Minnesota.                                                                                                                                                                  | 2001                                   |                      |
| South Africa | Garrib A, Jaffar S, Knight S, Bradshaw D, Bennish ML. Rates and causes of child mortality in an area of high HIV prevalence in rural South Africa. Trop Med Int Health. 2006; 11(12): 1841-8.                                                                                                                                                                                      | 2001                                   |                      |
| South Africa | Muhwava W. Contributions of the Africa Centre Demographic Surveillance to the Community. Umbiko. 2007; 12. 3-4.                                                                                                                                                                                                                                                                    | 2001                                   |                      |
| South Africa | Serwaa-Bonsu A, Herbst AJ, Reniers G, Ijaa W, Clark B, Kabudula C, Sankoh O. First experiences in the implementation of biometric technology to link data from Health and Demographic Surveillance Systems with health facility data. Glob Health Action. 2010; 3.                                                                                                                 | 2001                                   | *                    |
| South Africa | South Africa Vital Registration - Deaths 2002 ICD10 as it appears in World Health Organization (WHO). WHO Mortality Database Version February 2014. Geneva, Switzerland: World Health Organization (WHO), 2014.                                                                                                                                                                    | 2002                                   |                      |
| South Africa | Moyo S, Hawkrige T, Mahomed H, Workman L, Minnies D, Geiter LJ, Verver S, Kibel M, Hussey GD. Determining causes of mortality in children enrolled in a vaccine field trial in a rural area in the Western Cape Province of South Africa. J Paediatr Child Health. 2007; 43(3): 178-83.                                                                                            | 2002                                   |                      |
| South Africa | Bronzan RN, Mwesigwa-Kayongo DC, Narkunas D, Schmid GP, Neilsen GA, Ballard RC, Karuhije P, Ddamba J, Nombekela E, Hoyi G, Dlali P, Makwedini N, Fehler HG, Blandford JM, Ryan C. On-site rapid antenatal syphilis screening with an immunochromatographic strip improves case detection and treatment in rural South African clinics. Sex Transm Dis. 2007; 34(7 Suppl ): S55-60. | 2002, 2007                             |                      |
| South Africa | South Africa Vital Registration - Deaths 2003 ICD10 as it appears in World Health Organization (WHO). WHO Mortality Database Version February 2014. Geneva, Switzerland: World Health Organization (WHO), 2014.                                                                                                                                                                    | 2003                                   |                      |
| South Africa | Garrib A, Herbst AJ, Hosegood V, Newell M-L. Injury mortality in rural South Africa 2000 - 2007: rates and associated factors. Trop Med Int Health. 2011; 16(4): 439-46.                                                                                                                                                                                                           | 2003                                   |                      |
| South Africa | National Cancer Registry (South Africa). South Africa National Cancer Registry Incidence Tables 2003. Johannesburg, South Africa: National Institute for Occupational Health (South Africa).                                                                                                                                                                                       | 2003                                   |                      |



**Web Table 32 - Comprehensive citation list**

| Country      | Citation                                                                                                                                                                                                                                                                              | Year*     | New for GBD 2013 (*) |
|--------------|---------------------------------------------------------------------------------------------------------------------------------------------------------------------------------------------------------------------------------------------------------------------------------------|-----------|----------------------|
| South Africa | National Cancer Registry (South Africa). Cancer in South Africa Full Report 2003 . Johannesburg, South Africa: National Institute for Occupational Health (South Africa).                                                                                                             | 2003      |                      |
| South Africa | Department of Health (South Africa), Macro International, Inc, South African Medical Research Council. South Africa Demographic and Health Survey 2003-2004.                                                                                                                          | 2003-2004 |                      |
| South Africa | South Africa Vital Registration - Deaths 2004 ICD10 as it appears in World Health Organization (WHO). WHO Mortality Database Version February 2014. Geneva, Switzerland: World Health Organization (WHO), 2014.                                                                       | 2004      |                      |
| South Africa | National Cancer Registry (South Africa). South Africa National Cancer Registry Incidence Tables 2004. Johannesburg, South Africa: National Institute for Occupational Health (South Africa).                                                                                          | 2004      |                      |
| South Africa | National Cancer Registry (South Africa). Cancer in South Africa Full Report 2004. Johannesburg, South Africa: National Institute for Occupational Health (South Africa).                                                                                                              | 2004      |                      |
| South Africa | Myer L, Abdool Karim SS, Lombard C, Wilkinson D. Treatment of maternal syphilis in rural South Africa: effect of multiple doses of benzathine penicillin on pregnancy loss. Trop Med Int Health. 2004; 9(11): 1216-21.                                                                | 2004      |                      |
| South Africa | South Africa Vital Registration - Deaths 2005 ICD10 as it appears in World Health Organization (WHO). WHO Mortality Database Version February 2014. Geneva, Switzerland: World Health Organization (WHO), 2014.                                                                       | 2005      |                      |
| South Africa | National Cancer Registry (South Africa). South Africa National Cancer Registry Incidence Tables 2005. Johannesburg, South Africa: National Institute for Occupational Health (South Africa).                                                                                          | 2005      |                      |
| South Africa | National Cancer Registry (South Africa). South Africa National Cancer Registry Incidence 2005. Johannesburg, South Africa: National Institute for Occupational Health (South Africa).                                                                                                 | 2005      |                      |
| South Africa | Forman D, Bray F, Brewster DH, Gombe Mbalawa C, Kohler B, Piñeros M, Steliarova-Foucher E, Swaminathan R and Ferlay J, eds (2013). Cancer Incidence in Five Continents, Vol. X Summary Database (electronic version). Lyon, IARC. <a href="http://ci5.iarc.fr">http://ci5.iarc.fr</a> | 2005      |                      |
| South Africa | South Africa Vital Registration - Deaths 2006 ICD10 as it appears in World Health Organization (WHO). WHO Mortality Database Version February 2014. Geneva, Switzerland: World Health Organization (WHO), 2014.                                                                       | 2006      |                      |
| South Africa | South Africa Vital Registration - Deaths 2007 ICD10 as it appears in World Health Organization (WHO). WHO Mortality Database Version February 2014. Geneva, Switzerland: World Health Organization (WHO), 2014.                                                                       | 2007      |                      |
| South Africa | Statistics South Africa. South Africa Community Survey 2007. Pretoria, South Africa: Statistics South Africa.                                                                                                                                                                         | 2007      |                      |
| South Africa | Statistics South Africa, Minnesota Population Center. South Africa Community Survey 2007 from the Integrated Public Use Microdata Series, International. [Machine-readable database]. Minneapolis: University of Minnesota.                                                           | 2007      |                      |
| South Africa | South Africa Vital Registration - Deaths 2008 ICD10 as it appears in World Health Organization (WHO). WHO Mortality Database Version February 2014. Geneva, Switzerland: World Health Organization (WHO), 2014.                                                                       | 2008      |                      |
| South Africa | South Africa Vital Registration - Deaths 2009 ICD10 as it appears in World Health Organization (WHO). WHO Mortality Database Version February 2014. Geneva, Switzerland: World Health Organization (WHO), 2014.                                                                       | 2009      |                      |

**Web Table 32 - Comprehensive citation list**

| Country      | Citation                                                                                                                                                                                                                                                      | Year*                                                                  | New for GBD 2013 (*) |
|--------------|---------------------------------------------------------------------------------------------------------------------------------------------------------------------------------------------------------------------------------------------------------------|------------------------------------------------------------------------|----------------------|
| South Africa | Department of Health (South Africa), Joint United Nations Program on HIV/AIDS (UNAIDS). South Africa Country Progress Report on the Declaration of Commitment on HIV/AIDS 2010. Geneva, Switzerland: Joint United Nations Program on HIV/AIDS (UNAIDS), 2010. | 2009                                                                   |                      |
| South Africa | South African Medical Research Council. South Africa Rapid Mortality Surveillance Report 2011. Cape Town, South Africa: South African Medical Research Council, 2012.                                                                                         | 2009-2011                                                              | *                    |
| South Africa | Statistics South Africa. South Africa Population and Housing Census 2011.                                                                                                                                                                                     | 2011                                                                   | *                    |
| South Korea  | Centre for Research on the Epidemiology of Disasters (CRED). EM-DAT: The OFDA/CRED International Disaster Database. Brussels, Belgium: Catholic University of Leuven.                                                                                         | 1956-1957, 1959, 1961-1966, 1968-1972, 1976-1982, 1984-2008, 2010-2012 |                      |
| South Korea  | South Korea Vital Registration Death Data 1957 as it appears in United Nations Statistics Division (UNSD). United Nations Demographic Yearbook. New York City, United States: United Nations Statistics Division (UNSD).                                      | 1957                                                                   |                      |
| South Korea  | South Korea Vital Registration Death Data 1960 as it appears in United Nations Statistics Division (UNSD). United Nations Demographic Yearbook. New York City, United States: United Nations Statistics Division (UNSD).                                      | 1960                                                                   |                      |
| South Korea  | South Korea Vital Registration Death Data 1962 as it appears in United Nations Statistics Division (UNSD). United Nations Demographic Yearbook. New York City, United States: United Nations Statistics Division (UNSD).                                      | 1962                                                                   |                      |
| South Korea  | South Korea Vital Registration Death Data 1963 as it appears in United Nations Statistics Division (UNSD). United Nations Demographic Yearbook. New York City, United States: United Nations Statistics Division (UNSD).                                      | 1963                                                                   |                      |
| South Korea  | South Korea Vital Registration Death Data 1964 as it appears in United Nations Statistics Division (UNSD). United Nations Demographic Yearbook. New York City, United States: United Nations Statistics Division (UNSD).                                      | 1964                                                                   |                      |
| South Korea  | Catholic University of Leuven, Organization for Economic Co-operation and Development (OECD), United Nations Population Division. Mortality in Developing Countries: Tome I Data Bank. Organization for Economic Co-operation and Development (OECD), 1980.   | 1966                                                                   |                      |
| South Korea  | South Korea Vital Registration Death Data 1967 as it appears in United Nations Statistics Division (UNSD). United Nations Demographic Yearbook. New York City, United States: United Nations Statistics Division (UNSD).                                      | 1967                                                                   |                      |
| South Korea  | Korea, South Population and Housing Census 1970 as it appears in United Nations Statistics Division (UNSD). United Nations Demographic Yearbook. New York City, United States: United Nations Statistics Division (UNSD).                                     | 1970                                                                   |                      |
| South Korea  | National Bureau of Statistics (South Korea), Economic Planning Board, International Statistical Institute. Korea, Rep. World Fertility Survey 1974. Voorburg, Netherlands: International Statistical Institute.                                               | 1974                                                                   |                      |
| South Korea  | Korea, South Population and Housing Census 1975 as it appears in United Nations Statistics Division (UNSD). United Nations Demographic Yearbook. New York City, United States: United Nations Statistics Division (UNSD).                                     | 1975                                                                   |                      |
| South Korea  | South Korea Vital Registration Death Data 1977 as it appears in United Nations Statistics Division (UNSD). United Nations Demographic Yearbook. New York City, United States: United Nations Statistics Division (UNSD).                                      | 1977                                                                   |                      |

**Web Table 32 - Comprehensive citation list**

| Country     | Citation                                                                                                                                                                                                                  | Year*                           | New for GBD 2013 (*) |
|-------------|---------------------------------------------------------------------------------------------------------------------------------------------------------------------------------------------------------------------------|---------------------------------|----------------------|
| South Korea | South Korea Vital Registration Death Data 1978 as it appears in United Nations Statistics Division (UNSD). United Nations Demographic Yearbook. New York City, United States: United Nations Statistics Division (UNSD).  | 1978                            |                      |
| South Korea | South Korea Vital Registration Death Data 1979 as it appears in United Nations Statistics Division (UNSD). United Nations Demographic Yearbook. New York City, United States: United Nations Statistics Division (UNSD).  | 1979                            |                      |
| South Korea | Korea, South Population and Housing Census 1980 as it appears in United Nations Statistics Division (UNSD). United Nations Demographic Yearbook. New York City, United States: United Nations Statistics Division (UNSD). | 1980                            |                      |
| South Korea | South Korea Vital Registration Death Data 1980 as it appears in United Nations Statistics Division (UNSD). United Nations Demographic Yearbook. New York City, United States: United Nations Statistics Division (UNSD).  | 1980                            |                      |
| South Korea | Institute for Health Metrics and Evaluation (IHME), Joint United Nations Program on HIV/AIDS (UNAIDS). Institute for Health Metrics and Evaluation HIV Mortality Estimates Based on the UNAIDS Spectrum Model Framework.  | 1980-2013                       | *                    |
| South Korea | United Nations Children's Fund (UNICEF), World Health Organization (WHO). WHO and UNICEF Reported Disease Incidence Time Series - Pertussis. Geneva, Switzerland: World Health Organization (WHO).                        | 1980-1990, 1994-1998, 2000-2013 |                      |
| South Korea | United Nations Children's Fund (UNICEF), World Health Organization (WHO). WHO and UNICEF Reported Disease Incidence Time Series - Measles. Geneva, Switzerland: World Health Organization (WHO).                          | 1980-1990, 1994-1998, 2000-2013 |                      |
| South Korea | South Korea Vital Registration Death Data 1981 as it appears in United Nations Statistics Division (UNSD). United Nations Demographic Yearbook. New York City, United States: United Nations Statistics Division (UNSD).  | 1981                            |                      |
| South Korea | Cho YH, Kim HO, Lee JB, Lee MG. Syphilis prevalence has rapidly decreased in South Korea. Sex Transm Infect. 2003; 79(4): 323-4.                                                                                          | 1981, 1986, 1990, 1995, 2000    |                      |
| South Korea | South Korea Vital Registration Death Data 1982 as it appears in United Nations Statistics Division (UNSD). United Nations Demographic Yearbook. New York City, United States: United Nations Statistics Division (UNSD).  | 1982                            |                      |
| South Korea | South Korea Vital Registration Death Data 1983 as it appears in United Nations Statistics Division (UNSD). United Nations Demographic Yearbook. New York City, United States: United Nations Statistics Division (UNSD).  | 1983                            |                      |
| South Korea | South Korea Vital Registration Death Data 1984 as it appears in United Nations Statistics Division (UNSD). United Nations Demographic Yearbook. New York City, United States: United Nations Statistics Division (UNSD).  | 1984                            |                      |
| South Korea | Korea, South Population and Housing Census 1985 as it appears in United Nations Statistics Division (UNSD). United Nations Demographic Yearbook. New York City, United States: United Nations Statistics Division (UNSD). | 1985                            |                      |
| South Korea | Korea, South Vital Registration - Deaths 1985 ICD9 as it appears in World Health Organization (WHO). WHO Mortality Database Version February 2014. Geneva, Switzerland: World Health Organization (WHO), 2014.            | 1985                            |                      |
| South Korea | South Korea Vital Registration Death Data 1985 as it appears in United Nations Statistics Division (UNSD). United Nations Demographic Yearbook. New York City, United States: United Nations Statistics Division (UNSD).  | 1985                            |                      |

**Web Table 32 - Comprehensive citation list**

| Country     | Citation                                                                                                                                                                                                                                                                                                  | Year*           | New for GBD 2013 (*) |
|-------------|-----------------------------------------------------------------------------------------------------------------------------------------------------------------------------------------------------------------------------------------------------------------------------------------------------------|-----------------|----------------------|
| South Korea | Korea, South Vital Registration - Deaths 1986 ICD9 as it appears in World Health Organization (WHO). WHO Mortality Database Version February 2014. Geneva, Switzerland: World Health Organization (WHO), 2014.                                                                                            | 1986            |                      |
| South Korea | South Korea Vital Registration Death Data 1986 as it appears in United Nations Statistics Division (UNSD). United Nations Demographic Yearbook. New York City, United States: United Nations Statistics Division (UNSD).                                                                                  | 1986            |                      |
| South Korea | Korea, South Vital Registration - Deaths 1987 ICD9 as it appears in World Health Organization (WHO). WHO Mortality Database Version February 2014. Geneva, Switzerland: World Health Organization (WHO), 2014.                                                                                            | 1987            |                      |
| South Korea | South Korea Vital Registration Death Data 1987 as it appears in United Nations Statistics Division (UNSD). United Nations Demographic Yearbook. New York City, United States: United Nations Statistics Division (UNSD).                                                                                  | 1987            |                      |
| South Korea | Korea, South Vital Registration - Deaths 1988 ICD9 as it appears in World Health Organization (WHO). WHO Mortality Database Version February 2014. Geneva, Switzerland: World Health Organization (WHO), 2014.                                                                                            | 1988            |                      |
| South Korea | South Korea Vital Registration Death Data 1988 as it appears in United Nations Statistics Division (UNSD). United Nations Demographic Yearbook. New York City, United States: United Nations Statistics Division (UNSD).                                                                                  | 1988            |                      |
| South Korea | Park C-H, Cho Y-K, Park J-H, Jun J-S, Park E-S, Seo J-H, Lim J-Y, Woo H-O, Youn H-S, Ko G-H, Kang H-L, Baik S-C, Lee W-K, Cho M-J, Rhee K-H. Changes in the age-specific prevalence of hepatitis A virus antibodies: a 10-year cohort study in Jinju, South Korea. Clin Infect Dis. 2006; 42(8): 1148-50. | 1988-1997       |                      |
| South Korea | Shin HR, Kim JY, Kim JI, Lee DH, Yoo KY, Lee DS, Franceschi S. Hepatitis B and C virus prevalence in a rural area of South Korea: the role of acupuncture. Br J Cancer. 2002; 87(3): 314-8.                                                                                                               | 1988-1994       |                      |
| South Korea | Korea, South Vital Registration - Deaths 1989 ICD9 as it appears in World Health Organization (WHO). WHO Mortality Database Version February 2014. Geneva, Switzerland: World Health Organization (WHO), 2014.                                                                                            | 1989            |                      |
| South Korea | South Korea Vital Registration Death Data 1989 as it appears in United Nations Statistics Division (UNSD). United Nations Demographic Yearbook. New York City, United States: United Nations Statistics Division (UNSD).                                                                                  | 1989            |                      |
| South Korea | Institute for Health Metrics and Evaluation. Institute for Health Metrics and Evaluation Cancer Registry Database. [Unpublished].                                                                                                                                                                         | 1989-2010       |                      |
| South Korea | Parkin DM, International Agency for Research on Cancer, International Association of Cancer Registries. Cancer Incidence in Five Continents. Vol. I to VIII. Lyon, France, IARC Press, 2005.                                                                                                              | 1989, 1995-1997 |                      |
| South Korea | Korea, South Population and Housing Census 1990 as it appears in United Nations Statistics Division (UNSD). United Nations Demographic Yearbook. New York City, United States: United Nations Statistics Division (UNSD).                                                                                 | 1990            |                      |
| South Korea | Korea, South Vital Registration - Deaths 1990 ICD9 as it appears in World Health Organization (WHO). WHO Mortality Database Version February 2014. Geneva, Switzerland: World Health Organization (WHO), 2014.                                                                                            | 1990            |                      |
| South Korea | South Korea Vital Registration Death Data 1990 as it appears in United Nations Statistics Division (UNSD). United Nations Demographic Yearbook. New York City, United States: United Nations Statistics Division (UNSD).                                                                                  | 1990            |                      |

**Web Table 32 - Comprehensive citation list**

| Country     | Citation                                                                                                                                                                                                                                                      | Year*     | New for GBD 2013 (*) |
|-------------|---------------------------------------------------------------------------------------------------------------------------------------------------------------------------------------------------------------------------------------------------------------|-----------|----------------------|
| South Korea | Lee DY, Lee JH, Ju Y-S, Lee KU, Kim KW, Jhoo JH, Yoon JC, Ha J, Woo JI. The prevalence of dementia in older people in an urban population of Korea: the Seoul study. <i>J Am Geriatr Soc.</i> 2002; 50(7): 1233-9.                                            | 1990-2000 |                      |
| South Korea | Shin H-R, Hwang SY, Nam C-M. The Prevalence of Hepatitis C Virus Infection in Korea: Pooled Analysis. <i>J Korean Med Sci.</i> 2005; 20(6): 985-8.                                                                                                            | 1990-2001 |                      |
| South Korea | Centre for Health Informatics and Multiprofessional Education, University College London. Modell's Haemoglobinopathologist's Almanac. London, United Kingdom: Centre for Health Informatics and Multiprofessional Education, University College London, 2008. | 1990-2003 |                      |
| South Korea | Korea, South Vital Registration - Deaths 1991 ICD9 as it appears in World Health Organization (WHO). WHO Mortality Database Version February 2014. Geneva, Switzerland: World Health Organization (WHO), 2014.                                                | 1991      |                      |
| South Korea | South Korea Vital Registration Death Data 1991 as it appears in United Nations Statistics Division (UNSD). United Nations Demographic Yearbook. New York City, United States: United Nations Statistics Division (UNSD).                                      | 1991      |                      |
| South Korea | Han Y, Kim B, Baek I, Lee D, Kim K, Dong S, Kim H, Chang Y, Lee J, Chang R. [The change of the etiology, complications and cause of death of the liver cirrhosis in 1990s]. <i>Korean J Hepatol.</i> 2000; 6(3): 328-39.                                      | 1991-1998 |                      |
| South Korea | Kim YS, Um SH, Ryu HS, Lee JB, Lee JW, Park DK, Kim YS, Jin YT, Chun HJ, Lee HS, Lee SW, Choi JH, Kim CD, Hyun JH. The prognosis of liver cirrhosis in recent years in Korea. <i>J Korean Med Sci.</i> 2003; 18(6): 833-41.                                   | 1991-1999 |                      |
| South Korea | Korea, South Vital Registration - Deaths 1992 ICD9 as it appears in World Health Organization (WHO). WHO Mortality Database Version February 2014. Geneva, Switzerland: World Health Organization (WHO), 2014.                                                | 1992      |                      |
| South Korea | South Korea Vital Registration Death Data 1992 as it appears in United Nations Statistics Division (UNSD). United Nations Demographic Yearbook. New York City, United States: United Nations Statistics Division (UNSD).                                      | 1992      |                      |
| South Korea | Woo JI, Lee JH, Yoo KY, Kim CY, Kim YI, Shin YS. Prevalence estimation of dementia in a rural area of Korea. <i>J Am Geriatr Soc.</i> 1998; 46(8): 983-7.                                                                                                     | 1992      |                      |
| South Korea | Korea, South Vital Registration - Deaths 1993 ICD9 as it appears in World Health Organization (WHO). WHO Mortality Database Version February 2014. Geneva, Switzerland: World Health Organization (WHO), 2014.                                                | 1993      |                      |
| South Korea | South Korea Vital Registration Death Data 1993 as it appears in United Nations Statistics Division (UNSD). United Nations Demographic Yearbook. New York City, United States: United Nations Statistics Division (UNSD).                                      | 1993      |                      |
| South Korea | Korea, South Vital Registration - Deaths 1994 ICD9 as it appears in World Health Organization (WHO). WHO Mortality Database Version February 2014. Geneva, Switzerland: World Health Organization (WHO), 2014.                                                | 1994      |                      |
| South Korea | South Korea Vital Registration Death Data 1994 as it appears in United Nations Statistics Division (UNSD). United Nations Demographic Yearbook. New York City, United States: United Nations Statistics Division (UNSD).                                      | 1994      |                      |
| South Korea | Korea, South Vital Registration - Deaths 1995 ICD10 as it appears in World Health Organization (WHO). WHO Mortality Database Version February 2014. Geneva, Switzerland: World Health Organization (WHO), 2014.                                               | 1995      |                      |

**Web Table 32 - Comprehensive citation list**

| Country     | Citation                                                                                                                                                                                                                                                                                                                                         | Year*                 | New for GBD 2013 (*) |
|-------------|--------------------------------------------------------------------------------------------------------------------------------------------------------------------------------------------------------------------------------------------------------------------------------------------------------------------------------------------------|-----------------------|----------------------|
| South Korea | South Korea Vital Registration Death Data 1995 as it appears in United Nations Statistics Division (UNSD). United Nations Demographic Yearbook. New York City, United States: United Nations Statistics Division (UNSD).                                                                                                                         | 1995                  |                      |
| South Korea | Choi I-S, Kwon H-J, Shin N-R, Yoo HS. Identification of swine hepatitis E virus (HEV) and prevalence of anti-HEV antibodies in swine and human populations in Korea. J Clin Microbiol. 2003; 41(8): 3602-8.                                                                                                                                      | 1995                  | *                    |
| South Korea | United Nations Office on Drugs and Crime (UNODC). United Nations Office on Drugs and Crime Global Study on Homicides 2011. Vienna, Austria: United Nations Office on Drugs and Crime (UNODC), 2011.                                                                                                                                              | 1995-2009             |                      |
| South Korea | Shim J, Kim B-H, Kim NH, Dong SH, Kim HJ, Chang YW, Lee JI, Chang R. Clinical features of HBsAg-negative but anti-HBc-positive hepatocellular carcinoma in a hepatitis B virus endemic area. J Gastroenterol Hepatol. 2005; 20(5): 746-51.                                                                                                       | 1995-2000             |                      |
| South Korea | Jang MK, Lee JY, Lee JH, Kim YB, Kim HY, Lee MS, Park CK, Yoo JY. Seroepidemiology of HBV infection in South Korea, 1995 through 1999. Korean J Intern Med. 2001; 16(3): 153-9.                                                                                                                                                                  | 1995-1999             |                      |
| South Korea | Korea, South Vital Registration - Deaths 1996 ICD10 as it appears in World Health Organization (WHO). WHO Mortality Database Version February 2014. Geneva, Switzerland: World Health Organization (WHO), 2014.                                                                                                                                  | 1996                  |                      |
| South Korea | Cho HK, Lee H, Kim K-H, Kang JH, Kim J-H, Hur JK, Kim KN, Kim DS, Kim YK, Kim JS, Kim CH, Kim HM, Park S-E, Oh SH, Chung EH, Cha SH, Choi YY, Hong YJ, Lee HJ. The causative organisms of bacterial meningitis in Korean children in 1996-2005. J Korean Med Sci. 2010; 25(6): 895-9.                                                            | 1996-2005             |                      |
| South Korea | Suh G-H, Kim JK, Cho MJ. Community study of dementia in the older Korean rural population. Aust N Z J Psychiatry. 2003; 37(5): 606-12.                                                                                                                                                                                                           | 1996-1997             |                      |
| South Korea | Lee J-H, Cho HK, Kim K-H, Kim CH, Kim DS, Kim KN, Cha S-H, Oh SH, Hur JK, Kang JH, Kim JH, Kim Y-K, Hong YJ, Chung EH, Park S-E, Choi YY, Kim JS, Kim HM, Choi EH, Lee HJ. Etiology of invasive bacterial infections in immunocompetent children in Korea (1996-2005): a retrospective multicenter study. J Korean Med Sci. 2011; 26(2): 174-83. | 1996-2005             |                      |
| South Korea | Sohn YM, Rho HO, Park MS, Park JH, Choi BY, Ki M, Jang WI. The changing epidemiology of hepatitis A in children and the consideration of active immunization in Korea. Yonsei Med J. 2000; 41(1): 34-9.                                                                                                                                          | 1996-1997             |                      |
| South Korea | Korea, South Vital Registration - Deaths 1997 ICD10 as it appears in World Health Organization (WHO). WHO Mortality Database Version February 2014. Geneva, Switzerland: World Health Organization (WHO), 2014.                                                                                                                                  | 1997                  |                      |
| South Korea | World Health Organization (WHO). The Global Elimination of Congenital Syphilis: Rationale and Strategy for Action. Geneva, Switzerland: World Health Organization (WHO), 2007.                                                                                                                                                                   | 1997-2003             |                      |
| South Korea | Korea, South Vital Registration - Deaths 1998 ICD10 as it appears in World Health Organization (WHO). WHO Mortality Database Version February 2014. Geneva, Switzerland: World Health Organization (WHO), 2014.                                                                                                                                  | 1998                  |                      |
| South Korea | Lee D-H, Kim J-H, Nam J-J, Kim H-R, Shin H-R. Epidemiological findings of hepatitis B infection based on 1998 National Health and Nutrition Survey in Korea. J Korean Med Sci. 2002; 17(4): 457-62.                                                                                                                                              | 1998                  |                      |
| South Korea | World Health Organization (WHO). Yellow Fever Reported Cases, WHO Vaccine-Preventable Diseases: Monitoring System. Geneva, Switzerland: World Health Organization (WHO).                                                                                                                                                                         | 1998, 2001, 2003-2009 |                      |
| South Korea | Korea, South Vital Registration - Deaths 1999 ICD10 as it appears in World Health Organization (WHO). WHO Mortality Database Version February 2014. Geneva, Switzerland: World Health Organization (WHO), 2014.                                                                                                                                  | 1999                  |                      |



**Web Table 32 - Comprehensive citation list**

| Country     | Citation                                                                                                                                                                                                                                                                                                                     | Year*           | New for GBD 2013 (*) |
|-------------|------------------------------------------------------------------------------------------------------------------------------------------------------------------------------------------------------------------------------------------------------------------------------------------------------------------------------|-----------------|----------------------|
| South Korea | Kim JS, Jang YT, Kim JD, Park TH, Park JM, Kilgore PE, Kennedy WA, Park E, Nyambat B, Kim DR, Hwang PH, Kim SJ, Eun SH, Lee HS, Cho JH, Kim YS, Chang SJ, Huang HF, Clemens JD, Ward JI. Incidence of Haemophilus influenzae type b and other invasive diseases in South Korean children. Vaccine. 2004; 22(29-30): 3952-62. | 1999-2001       |                      |
| South Korea | Korea, South Vital Registration - Deaths 2000 ICD10 as it appears in World Health Organization (WHO). WHO Mortality Database Version February 2014. Geneva, Switzerland: World Health Organization (WHO), 2014.                                                                                                              | 2000            |                      |
| South Korea | Kim O, Kim S-S, Park M-S, Suh S-D, Lee M-W, Kim K-S, Yoon J-D, Lee J-S. Seroprevalence of sexually transmitted viruses in Korean populations including HIV-seropositive individuals. Int J STD AIDS. 2003; 14(1): 46-9.                                                                                                      | 2000            |                      |
| South Korea | Curado MP, Edwards B, Shin HR, Storm H, Ferlay J, Heanue M and Boyle P, eds (2007). Cancer Incidence in Five Continents, Vol. IX Periodic Data (electronic version). Lyon, IARC. <a href="http://ci5.iarc.fr">http://ci5.iarc.fr</a>                                                                                         | 2000-2001       |                      |
| South Korea | Korea, South Vital Registration - Deaths 2001 ICD10 as it appears in World Health Organization (WHO). WHO Mortality Database Version February 2014. Geneva, Switzerland: World Health Organization (WHO), 2014.                                                                                                              | 2001            |                      |
| South Korea | Kim J, Jeong I, Chun J-H, Lee S. The prevalence of dementia in a metropolitan city of South Korea. Int J Geriatr Psychiatry. 2003; 18(7): 617-22.                                                                                                                                                                            | 2001-2002       |                      |
| South Korea | World Health Organization (WHO). Retrospective Measles Data on Supplementary Immunization Activities. Geneva, Switzerland: World Health Organization (WHO).                                                                                                                                                                  | 2001, 2004-2009 |                      |
| South Korea | Korea, South Vital Registration - Deaths 2002 ICD10 as it appears in World Health Organization (WHO). WHO Mortality Database Version February 2014. Geneva, Switzerland: World Health Organization (WHO), 2014.                                                                                                              | 2002            |                      |
| South Korea | Kim TY, Sohn JH, Ahn SB, Son BK, Lee HL, Eun CS, Jeon CS, Han DS. Comparison of Recent IgG Anti-HAV Prevalence between Two Hospitals in Seoul and Gyeonggi area. Korean J Hepatol. 2007; 13(3): 363.                                                                                                                         | 2002-2006       |                      |
| South Korea | Korea, South Vital Registration - Deaths 2003 ICD10 as it appears in World Health Organization (WHO). WHO Mortality Database Version February 2014. Geneva, Switzerland: World Health Organization (WHO), 2014.                                                                                                              | 2003            |                      |
| South Korea | Korea Central Cancer Registry, Ministry of Health and Welfare (South Korea). Korea, South KOSIS Database - Incidence of 61 Cancers by Sex and 5-Year Age Groups - Korean Statistical Information Service . Seoul, South Korea: Statistics Korea (South Korea).                                                               | 2003-2007       |                      |
| South Korea | Lee SS, Jeong S-H, Byoun Y-S, Chung SM, Seong MH, Sohn HR, Min B-Y, Jang ES, Kim J-W, Park GJ, Lee YJ, Lee KH, Ahn S. Clinical features and outcome of cryptogenic hepatocellular carcinoma compared to those of viral and alcoholic hepatocellular carcinoma. BMC Cancer. 2013; 335.                                        | 2003-2012       | *                    |
| South Korea | Lee D, Cho Y-A, Park Y, Hwang J-H, Kim JW, Kim NY, Lee DH, Lee W, Jeong S-H. Hepatitis a in Korea: epidemiological shift and call for vaccine strategy. Intervirology. 2008; 51(2): 70-4.                                                                                                                                    | 2003-2006       |                      |
| South Korea | Ahn J-M, Kang S-G, Lee D-Y, Shin SJ, Yoo HS. Identification of novel human hepatitis E virus (HEV) isolates and determination of the seroprevalence of HEV in Korea. J Clin Microbiol. 2005; 43(7): 3042-8.                                                                                                                  | 2003-2004       |                      |
| South Korea | Korea, South Vital Registration - Deaths 2004 ICD10 as it appears in World Health Organization (WHO). WHO Mortality Database Version February 2014. Geneva, Switzerland: World Health Organization (WHO), 2014.                                                                                                              | 2004            |                      |

**Web Table 32 - Comprehensive citation list**

| Country     | Citation                                                                                                                                                                                                                                                                                                                            | Year*     | New for GBD 2013 (*) |
|-------------|-------------------------------------------------------------------------------------------------------------------------------------------------------------------------------------------------------------------------------------------------------------------------------------------------------------------------------------|-----------|----------------------|
| South Korea | Joint United Nations Program on HIV/AIDS (UNAIDS), United Nations Children's Fund (UNICEF), World Health Organization (WHO). Korea, South Epidemiological Fact Sheet on HIV/AIDS and STIs 2004.                                                                                                                                     | 2004      |                      |
| South Korea | Korea, South Vital Registration - Deaths 2005 ICD10 as it appears in World Health Organization (WHO). WHO Mortality Database Version February 2014. Geneva, Switzerland: World Health Organization (WHO), 2014.                                                                                                                     | 2005      |                      |
| South Korea | Forman D, Bray F, Brewster DH, Gombe Mbalawa C, Kohler B, Piñeros M, Steliarova-Foucher E, Swaminathan R and Ferlay J, eds (2013). Cancer Incidence in Five Continents, Vol. X Summary Database (electronic version). Lyon, IARC. <a href="http://ci5.iarc.fr">http://ci5.iarc.fr</a>                                               | 2005      |                      |
| South Korea | Lee SS, Byoun Y-S, Jeong S-H, Kim YM, Gil H, Min B-Y, Seong MH, Jang ES, Kim J-W. Type and cause of liver disease in Korea: single-center experience, 2005-2010. Clin Mol Hepatol. 2012; 18(3): 309-15.                                                                                                                             | 2005-2010 |                      |
| South Korea | Jhoo JH, Kim KW, Huh Y, Lee SB, Park JH, Lee JJ, Choi EA, Han C, Choo IH, Youn JC, Lee DY, Woo JI. Prevalence of dementia and its subtypes in an elderly urban Korean population: results from the Korean Longitudinal Study on Health And Aging (KLoSHA). Dement Geriatr Cogn Disord. 2008; 26(3): 270-6.                          | 2005-2006 |                      |
| South Korea | Kang C-I, Choi C-M, Park TS, Lee D-J, Oh M, Choe K-W. Incidence and seroprevalence of hepatitis A virus infections among young Korean soldiers. J Korean Med Sci. 2007; 22(3): 546-8.                                                                                                                                               | 2005-2006 |                      |
| South Korea | Taniguchi M, Kim SR, Mishiro S, Takahashi K, Shin MH, Yun H, Park MS, Li ZM, Kim MK, Fang J, Hayashi Y. Epidemiology of hepatitis E in Northeastern China, South Korea and Japan. J Infect. 2009; 58(3): 232-7.                                                                                                                     | 2005-2008 |                      |
| South Korea | Korea, South Vital Registration - Deaths 2006 ICD10 as it appears in World Health Organization (WHO). WHO Mortality Database Version February 2014. Geneva, Switzerland: World Health Organization (WHO), 2014.                                                                                                                     | 2006      |                      |
| South Korea | Song YB, Lee JH, Choi MS, Koh KC, Paik SW, Yoo BC, Choi Y-H, Sohn HJ, Lee KH, Rhee JC. [The age-specific seroprevalence of hepatitis A virus antibody in Korea]. Korean J Hepatol. 2007; 13(1): 27-33.                                                                                                                              | 2006      |                      |
| South Korea | Korea, South Vital Registration - Deaths 2007 ICD10 as it appears in World Health Organization (WHO). WHO Mortality Database Version February 2014. Geneva, Switzerland: World Health Organization (WHO), 2014.                                                                                                                     | 2007      |                      |
| South Korea | Korea, South Vital Registration - Deaths 2008 ICD10 as it appears in World Health Organization (WHO). WHO Mortality Database Version February 2014. Geneva, Switzerland: World Health Organization (WHO), 2014.                                                                                                                     | 2008      |                      |
| South Korea | Kim KW, Park JH, Kim M-H, Kim MD, Kim B-J, Kim S-K, Kim JL, Moon SW, Bae JN, Woo JI, Ryu S-H, Yoon JC, Lee N-J, Lee DY, Lee DW, Lee SB, Lee JJ, Lee J-Y, Lee C-U, Chang SM, Jhoo JH, Cho MJ. A nationwide survey on the prevalence of dementia and mild cognitive impairment in South Korea. J Alzheimers Dis. 2011; 23(2): 281-91. | 2008      |                      |
| South Korea | Korea Central Cancer Registry, Ministry of Health and Welfare (South Korea). Annual Report of Cancer Statistics in Korea in 2008. Goyang-si, South Korea: National Cancer Center (South Korea), 2010.                                                                                                                               | 2008      |                      |
| South Korea | Korea, South Vital Registration - Deaths 2009 ICD10 as it appears in World Health Organization (WHO). WHO Mortality Database Version February 2014. Geneva, Switzerland: World Health Organization (WHO), 2014.                                                                                                                     | 2009      |                      |
| South Korea | Korea Central Cancer Registry, Ministry of Health and Welfare (South Korea), National Cancer Center (South Korea). Annual Report of Cancer Statistics in Korea in 2010.                                                                                                                                                             | 2010      |                      |



**Web Table 32 - Comprehensive citation list**

| Country     | Citation                                                                                                                                                                                                                                                                                  | Year*           | New for GBD 2013 (*) |
|-------------|-------------------------------------------------------------------------------------------------------------------------------------------------------------------------------------------------------------------------------------------------------------------------------------------|-----------------|----------------------|
| South Korea | Korea, South Vital Registration - Deaths 2010 ICD10 as it appears in World Health Organization (WHO). WHO Mortality Database Version February 2014. Geneva, Switzerland: World Health Organization (WHO), 2014.                                                                           | 2010            |                      |
| South Korea | Korea, South Vital Registration - Deaths 2011 ICD10 as it appears in World Health Organization (WHO). WHO Mortality Database Version February 2014. Geneva, Switzerland: World Health Organization (WHO), 2014.                                                                           | 2011            | *                    |
| South Sudan | Institute for Health Metrics and Evaluation (IHME), Joint United Nations Program on HIV/AIDS (UNAIDS). Institute for Health Metrics and Evaluation HIV Mortality Estimates Based on the UNAIDS Spectrum Model Framework.                                                                  | 1980-2013       | *                    |
| South Sudan | Postigo JAR. Leishmaniasis in the World Health Organization Eastern Mediterranean Region. Int J Antimicrob Agents. 2010; S62-65.                                                                                                                                                          | 1989-2009       |                      |
| South Sudan | World Health Organization (WHO). South Sudan WHO Leishmaniasis Country Profile.                                                                                                                                                                                                           | 1989-2011       | *                    |
| South Sudan | Seaman J, Mercer AJ, Sondorp HE, Herwaldt BL. Epidemic visceral leishmaniasis in southern Sudan: treatment of severely debilitated patients under wartime conditions and with limited resources. Ann Intern Med. 1996; 124(7): 664-72.                                                    | 1990-1991       |                      |
| South Sudan | Southern Sudan Centre for Census, Statistics and Evaluation (SSCCSE) and National Population Census Council. Sudan Population and Housing Census 2008.                                                                                                                                    | 2008            | *                    |
| South Sudan | Sudan Population and Housing Census 2008 as it appears in United Nations Statistics Division (UNSD). United Nations Demographic Yearbook 2012. New York City, United States: United Nations Statistics Division (UNSD), 2013.                                                             | 2008            | *                    |
| South Sudan | Minnesota Population Center, Southern Sudan Centre for Census, Statistics and Evaluation. Sudan - South Sudan Population and Housing Census 2008 from the Integrated Public Use Microdata Series, International. [Machine-readable database]. Minneapolis: University of Minnesota, 2013. | 2008            | *                    |
| South Sudan | World Health Organization (WHO). Retrospective Measles Data on Supplementary Immunization Activities. Geneva, Switzerland: World Health Organization (WHO).                                                                                                                               | 2008, 2011-2012 |                      |
| South Sudan | Liverpool Associates in Tropical Health (LATH), Ministry of Health (South Sudan), Southern Sudan Centre for Census, Statistics and Evaluation, US Census Bureau, United Nations Children's Fund (UNICEF). Sudan - South Household Health Survey 2010.                                     | 2010            | *                    |
| South Sudan | Department of Peace and Conflict Research, Uppsala University. UCDP Battle-Related Deaths Database Version 5, 2013. Uppsala, Sweden: Department of Peace and Conflict Research, Uppsala University, 2013.                                                                                 | 2011-2012       | *                    |
| South Sudan | United Nations Children's Fund (UNICEF), World Health Organization (WHO). WHO and UNICEF Reported Disease Incidence Time Series - Measles. Geneva, Switzerland: World Health Organization (WHO).                                                                                          | 2011-2013       |                      |
| South Sudan | Centre for Research on the Epidemiology of Disasters (CRED). EM-DAT: The OFDA/CRED International Disaster Database. Brussels, Belgium: Catholic University of Leuven.                                                                                                                     | 2012            |                      |
| South Sudan | Department of Peace and Conflict Research, Uppsala University. UCDP Nonstate Conflict Database Version 2.5, 2013. Uppsala, Sweden: Department of Peace and Conflict Research, Uppsala University, 2013.                                                                                   | 2012            | *                    |
| South Sudan | Department of Peace and Conflict Research, Uppsala University. UCDP One-Sided Violence Database Version 1.4, 2013. Uppsala, Sweden: Department of Peace and Conflict Research, Uppsala University, 2013.                                                                                  | 2012            | *                    |
| Spain       | Max Planck Institute for Demographic Research, University of California. Human Mortality Database. Berkeley, USA: University of California; Rostock, Germany: Max Planck Institute for Demographic Research.                                                                              | 1950-2009       |                      |

**Web Table 32 - Comprehensive citation list**

| Country | Citation                                                                                                                                                                                                | Year*                                                                                                     | New for GBD 2013 (*) |
|---------|---------------------------------------------------------------------------------------------------------------------------------------------------------------------------------------------------------|-----------------------------------------------------------------------------------------------------------|----------------------|
| Spain   | Centre for Research on the Epidemiology of Disasters (CRED). EM-DAT: The OFDA/CRED International Disaster Database. Brussels, Belgium: Catholic University of Leuven.                                   | 1953, 1956-1957, 1962, 1973, 1978-1979, 1982-1984, 1987, 1989-1990, 1994, 1996-1997, 1999-2007, 2009-2012 |                      |
| Spain   | Flatz G, Düren R. Glucose-6-phosphate dehydrogenase deficiency in Spain. Hum Genet. 1967; 4(1): 81-3.                                                                                                   | 1965-1967                                                                                                 |                      |
| Spain   | Pellicer A, Casado A. Frequency of thalassemia and G6PD deficiency in five provinces of Spain. Am J Hum Genet. 1970; 22(3): 298-303.                                                                    | 1968-1970                                                                                                 |                      |
| Spain   | Spain Vital Registration - Deaths 1970 ICD8 as it appears in World Health Organization (WHO). WHO Mortality Database Version February 2014. Geneva, Switzerland: World Health Organization (WHO), 2014. | 1970                                                                                                      |                      |
| Spain   | Spain Vital Registration - Deaths 1971 ICD8 as it appears in World Health Organization (WHO). WHO Mortality Database Version February 2014. Geneva, Switzerland: World Health Organization (WHO), 2014. | 1971                                                                                                      |                      |
| Spain   | Spain Vital Registration - Deaths 1972 ICD8 as it appears in World Health Organization (WHO). WHO Mortality Database Version February 2014. Geneva, Switzerland: World Health Organization (WHO), 2014. | 1972                                                                                                      |                      |
| Spain   | Spain Vital Registration - Deaths 1973 ICD8 as it appears in World Health Organization (WHO). WHO Mortality Database Version February 2014. Geneva, Switzerland: World Health Organization (WHO), 2014. | 1973                                                                                                      |                      |
| Spain   | Spain Vital Registration - Deaths 1974 ICD8 as it appears in World Health Organization (WHO). WHO Mortality Database Version February 2014. Geneva, Switzerland: World Health Organization (WHO), 2014. | 1974                                                                                                      |                      |
| Spain   | Spain Vital Registration - Deaths 1975 ICD8 as it appears in World Health Organization (WHO). WHO Mortality Database Version February 2014. Geneva, Switzerland: World Health Organization (WHO), 2014. | 1975                                                                                                      |                      |
| Spain   | Spain Vital Registration - Deaths 1976 ICD8 as it appears in World Health Organization (WHO). WHO Mortality Database Version February 2014. Geneva, Switzerland: World Health Organization (WHO), 2014. | 1976                                                                                                      |                      |
| Spain   | Spain Vital Registration - Deaths 1977 ICD8 as it appears in World Health Organization (WHO). WHO Mortality Database Version February 2014. Geneva, Switzerland: World Health Organization (WHO), 2014. | 1977                                                                                                      |                      |
| Spain   | García SC, Moragón AC, López-Fernández ME. Frequency of glutathione reductase, pyruvate kinase and glucose-6-phosphate dehydrogenase deficiency in a Spanish population. Hum Hered. 1979; 29(5): 310-3. | 1977-1979                                                                                                 |                      |
| Spain   | Spain Vital Registration - Deaths 1978 ICD8 as it appears in World Health Organization (WHO). WHO Mortality Database Version February 2014. Geneva, Switzerland: World Health Organization (WHO), 2014. | 1978                                                                                                      |                      |
| Spain   | Spain Vital Registration - Deaths 1979 ICD8 as it appears in World Health Organization (WHO). WHO Mortality Database Version February 2014. Geneva, Switzerland: World Health Organization (WHO), 2014. | 1979                                                                                                      |                      |
| Spain   | Spain Vital Registration - Deaths 1980 ICD9 as it appears in World Health Organization (WHO). WHO Mortality Database Version February 2014. Geneva, Switzerland: World Health Organization (WHO), 2014. | 1980                                                                                                      |                      |

**Web Table 32 - Comprehensive citation list**

| Country | Citation                                                                                                                                                                                                                                                                                              | Year*                           | New for GBD 2013 (*) |
|---------|-------------------------------------------------------------------------------------------------------------------------------------------------------------------------------------------------------------------------------------------------------------------------------------------------------|---------------------------------|----------------------|
| Spain   | Institute for Health Metrics and Evaluation. Institute for Health Metrics and Evaluation Cancer Registry Database. [Unpublished].                                                                                                                                                                     | 1980-2005                       |                      |
| Spain   | Ferlay J, Parkin DM, Curado MP, Bray F, Edwards B, Shin HR and Forman D. Cancer Incidence in Five Continents, Volumes I to IX: IARC CancerBase No. 9 [Internet]. Lyon, France: International Agency for Research on Cancer; 2010. Available from: <a href="http://ci5.iarc.fr">http://ci5.iarc.fr</a> | 1980-2002                       |                      |
| Spain   | Peace Research Institute Oslo (PRIO). Battle Deaths Dataset Version 3, 2009. Oslo, Norway: Peace Research Institute Oslo (PRIO), 2009.                                                                                                                                                                | 1980-1988                       |                      |
| Spain   | Institute for Health Metrics and Evaluation (IHME), Joint United Nations Program on HIV/AIDS (UNAIDS). Institute for Health Metrics and Evaluation HIV Mortality Estimates Based on the UNAIDS Spectrum Model Framework.                                                                              | 1980-2013                       | *                    |
| Spain   | United Nations Children's Fund (UNICEF), World Health Organization (WHO). WHO and UNICEF Reported Disease Incidence Time Series - Measles. Geneva, Switzerland: World Health Organization (WHO).                                                                                                      | 1980-2000, 2002-2013            |                      |
| Spain   | Spain Vital Registration - Deaths 1981 ICD9 as it appears in World Health Organization (WHO). WHO Mortality Database Version February 2014. Geneva, Switzerland: World Health Organization (WHO), 2014.                                                                                               | 1981                            |                      |
| Spain   | Miguel A, Ramon M, Petitpierre E, Goos CM, Vermeesch-Markslag AM, Vermorken AJ. Population screening for glucose-6-phosphate dehydrogenase deficiency on the Balears. Hum Genet. 1983; 64(2): 176-9.                                                                                                  | 1981-1983                       |                      |
| Spain   | Parkin DM, International Agency for Research on Cancer, International Association of Cancer Registries. Cancer Incidence in Five Continents. Vol. I to VIII. Lyon, France, IARC Press, 2005.                                                                                                          | 1981, 1986, 1989-1996           |                      |
| Spain   | Rivera F, Ruiz J, García de Pesquera F. [Evolution of the prevalence of hepatitis A antibody in Seville]. Aten Primaria. 1998; 21(2): 97-100.                                                                                                                                                         | 1981, 1985                      |                      |
| Spain   | Spain Vital Registration - Deaths 1982 ICD9 as it appears in World Health Organization (WHO). WHO Mortality Database Version February 2014. Geneva, Switzerland: World Health Organization (WHO), 2014.                                                                                               | 1982                            |                      |
| Spain   | Carreño García V, González Alonso R, Porres Cubero JC, Ortiz Masllorens F, Martín Calderín F, Hernández Guío C. [Prevalence of anti-HAV in the Spanish population]. Rev Esp Enferm Apar Dig. 1983; 64(3): 187-90.                                                                                     | 1982                            |                      |
| Spain   | Grau A, Bertomeu F, Luna J, Llorente A, Vich JM, Anguiz A, Alberó J, Bofill D, Simo E. [Epidemiological study of hepatitis A using the measurement of anti-VHA antibody]. Rev Clin Esp. 1982; 165(1): 11-3.                                                                                           | 1982                            |                      |
| Spain   | United Nations Children's Fund (UNICEF), World Health Organization (WHO). WHO and UNICEF Reported Disease Incidence Time Series - Pertussis. Geneva, Switzerland: World Health Organization (WHO).                                                                                                    | 1982-2000, 2002-2003, 2005-2013 |                      |
| Spain   | Spain Vital Registration - Deaths 1983 ICD9 as it appears in World Health Organization (WHO). WHO Mortality Database Version February 2014. Geneva, Switzerland: World Health Organization (WHO), 2014.                                                                                               | 1983                            |                      |
| Spain   | Spain Vital Registration - Deaths 1984 ICD9 as it appears in World Health Organization (WHO). WHO Mortality Database Version February 2014. Geneva, Switzerland: World Health Organization (WHO), 2014.                                                                                               | 1984                            |                      |
| Spain   | González L, Roses A, Alomar P, del Valle JM, Garau A, Ferrer P, Maim- M, Llinares R, Blanco I, Lardinois R. The maternal-infant center in the control of hepatitis B. Acta Obstet Gynecol Scand. 1988; 67(5): 421-7.                                                                                  | 1984-1986                       |                      |
| Spain   | Spain Vital Registration - Deaths 1985 ICD9 as it appears in World Health Organization (WHO). WHO Mortality Database Version February 2014. Geneva, Switzerland: World Health Organization (WHO), 2014.                                                                                               | 1985                            |                      |

**Web Table 32 - Comprehensive citation list**

| Country | Citation                                                                                                                                                                                                                                                                                                                                                    | Year*          | New for GBD 2013 (*) |
|---------|-------------------------------------------------------------------------------------------------------------------------------------------------------------------------------------------------------------------------------------------------------------------------------------------------------------------------------------------------------------|----------------|----------------------|
| Spain   | Taberner JL, Bruguera M, Rodriguez MC, Mayor A, Batalla J. Seroepidemiological survey of hepatitis B infection in a cohort of military recruits in Barcelona, Spain. <i>Eur J Epidemiol.</i> 1992; 8(1): 117-9.                                                                                                                                             | 1985           |                      |
| Spain   | Salleras L, Bruguera M, Vidal J, Taberner JL, Plans P, Jiménez de Anta MT, Rodés J. [A change in the epidemiologic pattern of hepatitis A in Spain]. <i>Med Clin (Barc).</i> 1992; 99(3): 87-9.                                                                                                                                                             | 1985-1989      |                      |
| Spain   | Spain Vital Registration - Deaths 1986 ICD9 as it appears in World Health Organization (WHO). WHO Mortality Database Version February 2014. Geneva, Switzerland: World Health Organization (WHO), 2014.                                                                                                                                                     | 1986           |                      |
| Spain   | Perez Trallero E, Cilla Equiluz G, Urbietta Egaña M, Garcia Bengoechea M. Prevalence of hepatitis A virus infection in Spain. <i>Scand J Infect Dis.</i> 1988; 20(1): 113-4.                                                                                                                                                                                | 1986-1987      |                      |
| Spain   | Perez-Trallero E, Cilla G, Urbietta M, Dorronsoro M, Otero F, Marimon JM. Falling incidence and prevalence of hepatitis A in northern Spain. <i>Scand J Infect Dis.</i> 1994; 26(2): 133-6.                                                                                                                                                                 | 1986-1987,1992 |                      |
| Spain   | Soto B, Rodrigo L, Garcia-Bengoechea M, Sanchez-Quijano A, Riestra S, Arenas JI, Andreu J, Rodriguez M, Emparanza JI, Torres Y. Heterosexual transmission of hepatitis C virus and the possible role of coexistent human immunodeficiency virus infection in the index case. A multicentre study of 423 pairings. <i>J Intern Med.</i> 1994; 236(5): 515-9. | 1986-1991      |                      |
| Spain   | Spain Vital Registration - Deaths 1987 ICD9 as it appears in World Health Organization (WHO). WHO Mortality Database Version February 2014. Geneva, Switzerland: World Health Organization (WHO), 2014.                                                                                                                                                     | 1987           |                      |
| Spain   | Ruiz Moreno M, García Aguado J, Carreño García V, Alvarez Sala L, Rincón Víctor P, López-Linares del Prado M, Bas Pérez C. [Prevalence of hepatitis caused by A, B and D virus in children]. <i>An Esp Pediatr.</i> 1988; 29(5): 357-62.                                                                                                                    | 1987           |                      |
| Spain   | Saz P, Launer LJ, Dña JL, De-La-Cámara C, Marcos G, Lobo A. Mortality and mental disorders in a Spanish elderly population. <i>Int J Geriatr Psychiatry.</i> 1999; 14(12): 1031-8.                                                                                                                                                                          | 1987-1993      |                      |
| Spain   | Lobo A, Saz P, Marcos G, Dña JL, De-la -Cámara C. The prevalence of dementia and depression in the elderly community in a southern European population. The Zaragoza study. <i>Arch Gen Psychiatry.</i> 1995; 52(6): 497-506.                                                                                                                               | 1987-1992      |                      |
| Spain   | Spain Vital Registration - Deaths 1988 ICD9 as it appears in World Health Organization (WHO). WHO Mortality Database Version February 2014. Geneva, Switzerland: World Health Organization (WHO), 2014.                                                                                                                                                     | 1988           |                      |
| Spain   | Jiménez Rodríguez-Vila M, Hernández Gajate M, Pascual Martín ML, Martín Rojo M, Fernández Alonso MC, Gómez Arranz A, Hernández Pérez P, Martín Rodríguez JF, Orduña Domingo A, Caro-Patón Gómez A. [Antibody titers against the hepatitis A virus in a healthy population from an urban health area]. <i>Aten Primaria.</i> 1992; 9(1): 10-2.               | 1988           |                      |
| Spain   | Amela C, Pachon I, Bueno R, de Miguel C, Martinez-Navarro F. Trends in hepatitis A virus infection with reference to the process of urbanization in the greater Madrid area (Spain). <i>Eur J Epidemiol.</i> 1995; 11(5): 569-73.                                                                                                                           | 1988           |                      |
| Spain   | Martínez León M, García Martín FJ, Martínez Marín MI, Martínez Valverde A. Meningitis bacterianas Estudio clínico-epidemiológico Revisión de 8 años (1988-1995). <i>An Esp Pediatr.</i> 1998; 48(3): 277-82.                                                                                                                                                | 1988-1995      |                      |
| Spain   | Bolumar F, Giner-Duran R, Hernandez-Aguado I, Serra-Desfilis MA, Rebagliato M, Rodrigo JM. Epidemiology of hepatitis A in Valencia, Spain: public health implications. <i>J Viral Hepat.</i> 1995; 2(3): 145-9.                                                                                                                                             | 1988-1989      |                      |

**Web Table 32 - Comprehensive citation list**

| Country | Citation                                                                                                                                                                                                                                                                                            | Year*            | New for GBD 2013 (*) |
|---------|-----------------------------------------------------------------------------------------------------------------------------------------------------------------------------------------------------------------------------------------------------------------------------------------------------|------------------|----------------------|
| Spain   | Modell B, Darlison M, Birgens H, Cario H, Faustino P, Giordano PC, Gulbis B, Hopmeier P, Lena-Russo D, Romao L, Theodorsson E. Epidemiology of haemoglobin disorders in Europe: an overview. <i>Scand J Clin Lab Invest</i> . 2007; 67(1): 39-69.                                                   | 1988, 2006       |                      |
| Spain   | Centre for Health Informatics and Multiprofessional Education, University College London. Modell's Haemoglobinopathologist's Almanac. London, United Kingdom: Centre for Health Informatics and Multiprofessional Education, University College London, 2008.                                       | 1988, 2003, 2006 |                      |
| Spain   | Spain Vital Registration - Deaths 1989 ICD9 as it appears in World Health Organization (WHO). WHO Mortality Database Version February 2014. Geneva, Switzerland: World Health Organization (WHO), 2014.                                                                                             | 1989             |                      |
| Spain   | Dal-Ré R, Aguilar L, Coronel P. Current prevalence of hepatitis B, A and C in a healthy Spanish population. A seroepidemiological study. <i>Infection</i> . 1991; 19(6): 409-13.                                                                                                                    | 1989             |                      |
| Spain   | Department of Peace and Conflict Research, Uppsala University. UCDP Battle-Related Deaths Database Version 5, 2013. Uppsala, Sweden: Department of Peace and Conflict Research, Uppsala University, 2013.                                                                                           | 1989-1992        | *                    |
| Spain   | Esteban JI, López-Talavera JC, Genescà J, Madoz P, Viladomiu L, Muñoz E, Martín-Vega C, Rosell M, Allende H, Vidal X. High rate of infectivity and liver disease in blood donors with antibodies to hepatitis C virus. <i>Ann Intern Med</i> . 1991; 115(6): 443-9.                                 | 1989-1990        |                      |
| Spain   | Orduña A, Bratos MA, Gutierrez P, Almaraz A, Eiros JM, Martín JF, Gonzalez JM, Caro-Patón A, Rodríguez-Torres A. Infection by hepatitis B and C virus in non-intravenous drug using female prostitutes in Spain. <i>Eur J Epidemiol</i> . 1992; 8(5): 656-9.                                        | 1989-1990        |                      |
| Spain   | Spain Vital Registration - Deaths 1990 ICD9 as it appears in World Health Organization (WHO). WHO Mortality Database Version February 2014. Geneva, Switzerland: World Health Organization (WHO), 2014.                                                                                             | 1990             |                      |
| Spain   | Coria F, Gomez de Caso JA, Minguez L, Rodriguez-Artalejo F, Claveria LE. Prevalence of age-associated memory impairment and dementia in a rural community. <i>J Neurol Neurosurg Psychiatry</i> . 1993; 56(9): 973-6.                                                                               | 1990             |                      |
| Spain   | Morales JL, Huber L, Gallego S, Alvarez G, Diez-Delgado J, González A, Aguilar L, Dal-Ré R. A seroepidemiologic study of hepatitis A in Spanish children. Relationship of prevalence to age and socio-environmental factors. <i>Infection</i> . 1992; 20(4): 194-6.                                 | 1990             |                      |
| Spain   | Gil A, González A, Dal-Ré R, Aguilar L, Rey Calero J. [Seroprotection against hepatitis A, measles, rubella, and parotiditis in an urban school population]. <i>Med Clin (Barc)</i> . 1991; 96(18): 681-4.                                                                                          | 1990             |                      |
| Spain   | López-Pousa S, Vilalta-Franch J, Llinàs-Regla J, Garre-Olmo J, Román GC. Incidence of dementia in a rural community in Spain: the Girona cohort study. <i>Neuroepidemiology</i> . 2004; 23(4): 170-7.                                                                                               | 1990-1995        |                      |
| Spain   | Macías Rodríguez MA, Rendón Unceta P, Tejada Cabrera M, Infante Hernández JM, Correro Aguilar F, Díaz García F, Benítez Rodríguez E, Mangas Rojas A, Martín Herrera L. Risk factors for hepatocellular carcinoma in patients with liver cirrhosis. <i>Rev Esp Enferm Dig</i> . 2000; 92(7): 458-69. | 1990-1994        |                      |
| Spain   | Lasheras Lozano ML, Gil Miguel A, Santos Santos M, Rey Calero J. [The seroepidemiology of the hepatitis A virus in children and adolescents]. <i>Aten Primaria</i> . 1994; 13(1): 36-8.                                                                                                             | 1990-1991        |                      |
| Spain   | Spain Vital Registration - Deaths 1991 ICD9 as it appears in World Health Organization (WHO). WHO Mortality Database Version February 2014. Geneva, Switzerland: World Health Organization (WHO), 2014.                                                                                             | 1991             |                      |

**Web Table 32 - Comprehensive citation list**

| Country | Citation                                                                                                                                                                                                                                                                                                                                                                                                                                                                                                                                                                                                                                                                                                                      | Year*     | New for GBD 2013 (*) |
|---------|-------------------------------------------------------------------------------------------------------------------------------------------------------------------------------------------------------------------------------------------------------------------------------------------------------------------------------------------------------------------------------------------------------------------------------------------------------------------------------------------------------------------------------------------------------------------------------------------------------------------------------------------------------------------------------------------------------------------------------|-----------|----------------------|
| Spain   | Manubens JM, Martínez-Lage JM, Lacruz F, Muruzabal J, Larumbe R, Guarch C, Urrutia T, Sarrasqueta P, Martínez-Lage P, Rocca WA. Prevalence of Alzheimer's disease and other dementing disorders in Pamplona, Spain. <i>Neuroepidemiology</i> . 1995; 14(4): 155-64.                                                                                                                                                                                                                                                                                                                                                                                                                                                           | 1991      |                      |
| Spain   | Cilla G, Perez-Trallero E, Marimon JM, Erdozain S, Gutierrez C. Prevalence of hepatitis A antibody among disadvantaged gypsy children in northern Spain. <i>Epidemiol Infect</i> . 1995; 115(1): 157-61.                                                                                                                                                                                                                                                                                                                                                                                                                                                                                                                      | 1991-1993 |                      |
| Spain   | Spain Vital Registration - Deaths 1992 ICD9 as it appears in World Health Organization (WHO). WHO Mortality Database Version February 2014. Geneva, Switzerland: World Health Organization (WHO), 2014.                                                                                                                                                                                                                                                                                                                                                                                                                                                                                                                       | 1992      |                      |
| Spain   | González A, Bruguera M, Calbo Torrecillas F, Monge V, Dal-Ré R, Costa J. [Seroepidemiologic survey of hepatitis A antibodies in the young adult Spanish population. Spanish Study Group on hepatitis A (1)]. <i>Med Clin (Barc)</i> . 1994; 103(12): 445-8.                                                                                                                                                                                                                                                                                                                                                                                                                                                                   | 1992      |                      |
| Spain   | Pi J, Olivé JM, Roca J, Masana L. Prevalence of dementia in a semi-rural population of Catalunya, Spain. <i>Neuroepidemiology</i> . 1996; 15(1): 33-41.                                                                                                                                                                                                                                                                                                                                                                                                                                                                                                                                                                       | 1992-1993 |                      |
| Spain   | Trichopoulos D, Bamia C, Lagiou P, Fedirko V, Trepo E, Jenab M, Pischon T, Nöthlings U, Overved K, Tjønneland A, Outzen M, Clavel-Chapelon F, Kaaks R, Lukanova A, Boeing H, Aleksandrova K, Benetou V, Zylis D, Palli D, Pala V, Panico S, Tumino R, Sacerdote C, Bueno-De-Mesquita HB, Van Kranen HJ, Peeters PHM, Lund E, Quirós JR, González CA, Sanchez Perez M-J, Navarro C, Dorronsoro M, Barricarte A, Lindkvist B, Regnér S, Werner M, Hallmans G, Khaw K-T, Wareham N, Key T, Romieu I, Chuang S-C, Murphy N, Boffetta P, Trichopoulou A, Riboli E. Hepatocellular carcinoma risk factors and disease burden in a European cohort: a nested case-control study. <i>J Natl Cancer Inst</i> . 2011; 103(22): 1686-95. | 1992-2006 | *                    |
| Spain   | Bernal MC, Leyva A, Garcia F, Galan I, Piedrola G, Heyermann H, Maroto MC. Seroepidemiological study of hepatitis E virus in different population groups. <i>Eur J Clin Microbiol Infect Dis</i> . 1995; 14(11): 954-8.                                                                                                                                                                                                                                                                                                                                                                                                                                                                                                       | 1992-1994 | *                    |
| Spain   | Dal-Ré R, García-Corbeira P, García-de-Lomas J. A large percentage of the Spanish population under 30 years of age is not protected against hepatitis A. <i>J Med Virol</i> . 2000; 60(4): 363-6.                                                                                                                                                                                                                                                                                                                                                                                                                                                                                                                             | 1992-1993 |                      |
| Spain   | García-Fulgueiras A, Rodriguez T, Tormo MJ, Perez-Flores D, Chirlaque D, Navarro C. Prevalence of hepatitis A antibodies in southeastern Spain: a population-based study. <i>Eur J Epidemiol</i> . 1997; 13(4): 481-3.                                                                                                                                                                                                                                                                                                                                                                                                                                                                                                        | 1992-1993 |                      |
| Spain   | Bayas JM, Bruguera M, Vilella A, Carbó JM, Vidal J, Navarro G, Nebot X, Prat A, Salleras L. [Prevalence of hepatitis B and hepatitis A virus infection among health sciences students in Catalonia, Spain]. <i>Med Clin (Barc)</i> . 1996; 107(8): 281-4.                                                                                                                                                                                                                                                                                                                                                                                                                                                                     | 1992-1994 |                      |
| Spain   | Spain Vital Registration - Deaths 1993 ICD9 as it appears in World Health Organization (WHO). WHO Mortality Database Version February 2014. Geneva, Switzerland: World Health Organization (WHO), 2014.                                                                                                                                                                                                                                                                                                                                                                                                                                                                                                                       | 1993      |                      |
| Spain   | Gil A, González A, Dal-Ré R, Ortega P, Dominguez V. Prevalence of antibodies against varicella zoster, herpes simplex (types 1 and 2), hepatitis B and hepatitis A viruses among Spanish adolescents. <i>J Infect</i> . 1998; 36(1): 53-6.                                                                                                                                                                                                                                                                                                                                                                                                                                                                                    | 1993      |                      |
| Spain   | Montes Martínez I, Agulla Budiño A. [Prevalence of antibodies against hepatitis A, B, C and E viruses in the rural child population in Northern Extremadura]. <i>An Esp Pediatr</i> . 1996; 45(2): 133-6.                                                                                                                                                                                                                                                                                                                                                                                                                                                                                                                     | 1993-1995 |                      |
| Spain   | Santana Rodríguez OE, Malé Gil ML, HernándezSantana JF, Limiñana Cañal JM, Martín Sánchez AM. Prevalence of serologic markers of HBV, HDV, HCV and HIV in non-injection drug users compared to injection drug users in Gran Canaria, Spain. <i>Eur J Epidemiol</i> . 1998; 14(6): 555-61.                                                                                                                                                                                                                                                                                                                                                                                                                                     | 1993-1994 |                      |



**Web Table 32 - Comprehensive citation list**

| Country | Citation                                                                                                                                                                                                                                                                                                                                                                          | Year*     | New for GBD 2013 (*) |
|---------|-----------------------------------------------------------------------------------------------------------------------------------------------------------------------------------------------------------------------------------------------------------------------------------------------------------------------------------------------------------------------------------|-----------|----------------------|
| Spain   | Spain Vital Registration - Deaths 1994 ICD9 as it appears in World Health Organization (WHO). WHO Mortality Database Version February 2014. Geneva, Switzerland: World Health Organization (WHO), 2014.                                                                                                                                                                           | 1994      |                      |
| Spain   | Rodríguez-Iglesias MA, Pérez-Gracia MT, García-Valdivia MS, Pérez-Ramos S. Seroprevalence of hepatitis A virus antibodies in a pediatric population of southern Spain. <i>Infection</i> . 1995; 23(5): 309.                                                                                                                                                                       | 1994      |                      |
| Spain   | García García FJ, Sánchez Ayala MI, Pérez Martín A, Martín Correa E, Marsal Alonso C, Rodríguez Ferrer G, García Colmenero C, Romero Rizos L, Rodríguez Barqueroa MJ, Gutiérrez Avila G. [The prevalence of dementia and its main subtypes in subjects older than 65 years: impact of occupation and education. The Toledo Study]. <i>Med Clin (Barc)</i> . 2001; 116(11): 401-7. | 1994-1995 |                      |
| Spain   | Casado Flores J, García Teresa MA, Cambra F, Pilar Orive J, Teja JL, Rodríguez Núñez A, Quiroga E, Calvo C, Ruiz Extremera MA, Pérez Navero J, Melendo J, Soult JA. Multicenter prospective study on severe bacterial meningitis in children. <i>An Esp Pediatr</i> . 1997; 47(5): 466-72.                                                                                        | 1994-1995 |                      |
| Spain   | Rodríguez-Vidigal FF, Baz MJ, Romero J, del Puerto M. [Epidemiology of hepatocellular carcinoma in a rural area. Role of hepatotropic viruses on survival]. <i>An Med Interna</i> . 2005; 22(4): 162-6.                                                                                                                                                                           | 1994-2002 |                      |
| Spain   | World Health Organization (WHO). Spain WHO Leishmaniasis Country Profile.                                                                                                                                                                                                                                                                                                         | 1994-2008 | *                    |
| Spain   | Bermejo-Pareja F, Benito-León J, Vega S, Medrano MJ, Román GC, Neurological Disorders in Central Spain (NEDICES) Study Group. Incidence and subtypes of dementia in three elderly populations of central Spain. <i>J Neurol Sci</i> . 2008; 264(1-2): 63-72.                                                                                                                      | 1994-1998 |                      |
| Spain   | Menéndez MT, Cordero M, Viejo G, Miguel D, Malo de Molina A, Otero C. [The serum markers in the pregnant population of the basic health area of El Natahoyo (Gijón)]. <i>Aten Primaria</i> . 1996; 18(1): 17-21.                                                                                                                                                                  | 1994-1995 |                      |
| Spain   | Benito Ruesca R, Gil-Tomás J, Doiz Unzué O, López Cerero L. [The immune status against hepatitis A virus in medical residents]. <i>Med Clin (Barc)</i> . 1997; 109(6): 236-7.                                                                                                                                                                                                     | 1994-1996 |                      |
| Spain   | Spain Vital Registration - Deaths 1995 ICD9 as it appears in World Health Organization (WHO). WHO Mortality Database Version February 2014. Geneva, Switzerland: World Health Organization (WHO), 2014.                                                                                                                                                                           | 1995      |                      |
| Spain   | Suárez A, Navascués CA, García R, Peredo B, Miguel D, Menéndez MT, Saro C, Román F. [The prevalence of markers for the hepatitis A and B viruses in the population of Gijón between 6 and 25 years old]. <i>Med Clin (Barc)</i> . 1996; 106(13): 491-4.                                                                                                                           | 1995      |                      |
| Spain   | Gil Miguel A, González López A, Dal-r é R, Domínguez Rojas V. [A serial questionnaire on the prevalence of hepatitis A antibodies in adolescents in urban area: comparative study (1990-1995)]. <i>Aten Primaria</i> . 1996; 18(10): 584-586.                                                                                                                                     | 1995      |                      |
| Spain   | Buti M, Campins M, Jardí R, Navas E, Cotrina M, Llobet E, Vaqué J, Esteban R. [Seroepidemiology of hepatitis A virus infection in medical and nursing students. The role of vaccination]. <i>Gastroenterol Hepatol</i> . 1996; 19(4): 199-202.                                                                                                                                    | 1995      |                      |
| Spain   | Suárez A, Viejo G, Navascués CA, García R, Díaz G, Saro C, Román FJ. [The prevalence of hepatitis A, B and C viral markers in the population of Gijón between 26 and 65 years old]. <i>Gastroenterol Hepatol</i> . 1997; 20(7): 347-52.                                                                                                                                           | 1995      |                      |
| Spain   | Santana OE, Rivero LE, Limiñana JM, Hernández LA, Santana M, Martín AM. [Seroepidemiological study of hepatitis A in Gran Canaria (Spain)]. <i>Enferm Infecc Microbiol Clin</i> . 2000; 18(4): 170-3.                                                                                                                                                                             | 1995-1996 |                      |

**Web Table 32 - Comprehensive citation list**

| Country | Citation                                                                                                                                                                                                                                                                                                             | Year*     | New for GBD 2013 (*) |
|---------|----------------------------------------------------------------------------------------------------------------------------------------------------------------------------------------------------------------------------------------------------------------------------------------------------------------------|-----------|----------------------|
| Spain   | Bruguera M, Salleras L, Plans P, Vidal J, Navas E, Domínguez A, Batalla J, Taberner JL, Espuñes J. [Changes in seroepidemiology of hepatitis A virus infection in Catalonia in the period 1989-1996. Implications for new vaccination strategy]. <i>Med Clin (Barc)</i> . 1999; 112(11): 406-8.                      | 1995-1996 |                      |
| Spain   | Spain Vital Registration - Deaths 1996 ICD9 as it appears in World Health Organization (WHO). WHO Mortality Database Version February 2014. Geneva, Switzerland: World Health Organization (WHO), 2014.                                                                                                              | 1996      |                      |
| Spain   | Domínguez A, Bruguera M, Vidal J, Plans P, Salleras L. Changes in the seroepidemiology of hepatitis B infection in Catalonia 1989-1996. <i>Vaccine</i> . 2000; 18(22): 2345-50.                                                                                                                                      | 1996      |                      |
| Spain   | Gil A, González A, Dal-Ré R, Dominguez V, Astasio P, Aguilar L. Detection of antibodies against hepatitis A in blood spots dried on filter paper. Is this a reliable method for epidemiological studies? <i>Epidemiol Infect</i> . 1997; 118(2): 189-91.                                                             | 1996      |                      |
| Spain   | García Erce J, Solano Bernad VM, Ferrer Torres J, Gimeno Lozano JJ. [Seroprevalence of hepatitis A in Aragonese donors]. <i>Sangre (Barc)</i> . 1996; 41(6): 484-5.                                                                                                                                                  | 1996      |                      |
| Spain   | De Juanes JR, Arrazola MP, González A. Risk of hepatitis A among hospital personnel in an intermediate-endemicity area. <i>Infect Control Hosp Epidemiol</i> . 1999; 20(9): 590-1.                                                                                                                                   | 1996      |                      |
| Spain   | Domínguez A, Bruguera M, Vidal J, Plans P, Salleras L. Community-based seroepidemiological survey of HCV infection in Catalonia, Spain. <i>J Med Virol</i> . 2001; 65(4): 688-93.                                                                                                                                    | 1996      |                      |
| Spain   | Pereira A, Sanz C, Tàssies D, Ramírez B. Do patient-related blood donors represent a threat to the safety of the blood supply? <i>Haematologica</i> . 2002; 87(4): 427-33.                                                                                                                                           | 1996-2001 |                      |
| Spain   | Mateos ML, Camarero C, Lasa E, Teruel JL, Mir N, Baquero F. Hepatitis E virus: relevance in blood donors and risk groups. <i>Vox Sang</i> . 1999; 76(2): 78-80.                                                                                                                                                      | 1996-1997 | *                    |
| Spain   | Spain Vital Registration - Deaths 1997 ICD9 as it appears in World Health Organization (WHO). WHO Mortality Database Version February 2014. Geneva, Switzerland: World Health Organization (WHO), 2014.                                                                                                              | 1997      |                      |
| Spain   | Vilalta-Franch J, López-Pousa S, Llinàs-Reglà J. The prevalence of dementias in a rural area. A study in Girona. <i>Rev Neurol</i> . 2000; 30(11): 1026-32.                                                                                                                                                          | 1997-1999 |                      |
| Spain   | Lobo A, Lopez-Anton R, Santabàrbara J, de-la-Cámara C, Ventura T, Quintanilla MA, Roy JF, Campayo AJ, Lobo E, Palomo T, Rodriguez-Jimenez R, Saz P, Marcos G. Incidence and lifetime risk of dementia and Alzheimer's disease in a Southern European population. <i>Acta Psychiatr Scand</i> . 2011; 124(5): 372-83. | 1997-1999 |                      |
| Spain   | Gil R, Álvarez JL, Gómez C, Álvaro A, Gil Á. Epidemiology of typhoid and paratyphoid fever hospitalizations in Spain (1997-2005). <i>Hum Vaccin</i> . 2013; 5(6): 420-4.                                                                                                                                             | 1997-2005 | *                    |
| Spain   | Riestra S, Fernández E, Leiva P, García S, Ocio G, Rodrigo L. Prevalence of hepatitis C virus infection in the general population of northern Spain. <i>Eur J Gastroenterol Hepatol</i> . 2001; 13(5): 477-81.                                                                                                       | 1997-1998 |                      |
| Spain   | Spain Vital Registration - Deaths 1998 ICD9 as it appears in World Health Organization (WHO). WHO Mortality Database Version February 2014. Geneva, Switzerland: World Health Organization (WHO), 2014.                                                                                                              | 1998      |                      |
| Spain   | Gil Miguel A, González López A, San Martín Rodríguez M. [Prevalence of hepatitis A antibodies in 6-7 year-old children: follow-up study 1990-1998]. <i>An Esp Pediatr</i> . 1999; 51(5): 569-70.                                                                                                                     | 1998      |                      |
| Spain   | Curado MP, Edwards B, Shin HR, Storm H, Ferlay J, Heanue M and Boyle P, eds (2007). <i>Cancer Incidence in Five Continents, Vol. IX Periodic Data</i> (electronic version). Lyon, IARC. <a href="http://ci5.iarc.fr">http://ci5.iarc.fr</a>                                                                          | 1998-2000 |                      |



**Web Table 32 - Comprehensive citation list**

| Country | Citation                                                                                                                                                                                                                                                                  | Year*                 | New for GBD 2013 (*) |
|---------|---------------------------------------------------------------------------------------------------------------------------------------------------------------------------------------------------------------------------------------------------------------------------|-----------------------|----------------------|
| Spain   | Spain Dementia Data 1998-2001 from literature review, as provided by the Global Burden of Disease 2010 dementia expert group.                                                                                                                                             | 1998-2001             |                      |
| Spain   | Spain Vital Registration - Deaths 1999 ICD10 as it appears in World Health Organization (WHO). WHO Mortality Database Version February 2014. Geneva, Switzerland: World Health Organization (WHO), 2014.                                                                  | 1999                  |                      |
| Spain   | De Juanes JR, González A, Arrazola MP, San-Martín M. Cost analysis of two strategies for hepatitis A vaccination of hospital health-care personnel in an intermediate endemicity area. <i>Vaccine</i> . 2001; 19(30): 4130-4.                                             | 1999-2000             |                      |
| Spain   | Spain Vital Registration - Deaths 2000 ICD10 as it appears in World Health Organization (WHO). WHO Mortality Database Version February 2014. Geneva, Switzerland: World Health Organization (WHO), 2014.                                                                  | 2000                  |                      |
| Spain   | García-Torres ML, Zaragoza A, Giner R, Primo J, del Olmo JA. Incidence and epidemiological factors of hepatocellular carcinoma in Valencia during the year 2000. <i>Rev Esp Enferm Dig</i> . 2003; 95(6): 381-8.                                                          | 2000                  |                      |
| Spain   | González-Prætorius A, Rodríguez-Avial C, Fernández C, Teresa Pérez-Pomata Mf M, Gimeno C, Bisquert J. [The prevalence of hepatitis A in the Guadalajara province. Is Spain a country with low endemicity?]. <i>Enferm Infecc Microbiol Clin</i> . 2001; 19(9): 428-31.    | 2000                  |                      |
| Spain   | WHO Regional Office for Europe (EURO-WHO). European Hospital Morbidity Database. Copenhagen, Denmark: WHO Regional Office for Europe (EURO-WHO).                                                                                                                          | 2000-2005             |                      |
| Spain   | Llinàs-Regla J, López-Pousa S, Vilalta-Franch J, Garre-Olmo J, Román GC. Mortality after a diagnosis of dementia in a population aged 75 and over in Spain. <i>Neuroepidemiology</i> . 2008; 31(2): 80-8.                                                                 | 2000-2006             |                      |
| Spain   | Suárez González A, Solís Sánchez G, Otero Guerra L, Viejo De La Guerra G, Alvarez Navascués C, García López R. [Prevalence of immunity to hepatitis viruses in pregnant women from the health area of Gijón (Spain)]. <i>Gastroenterol Hepatol</i> . 2004; 27(6): 347-52. | 2000-2002             |                      |
| Spain   | World Health Organization (WHO). Yellow Fever Reported Cases, WHO Vaccine-Preventable Diseases: Monitoring System. Geneva, Switzerland: World Health Organization (WHO).                                                                                                  | 2000, 2002, 2004-2009 |                      |
| Spain   | Spain Vital Registration - Deaths 2001 ICD10 as it appears in World Health Organization (WHO). WHO Mortality Database Version February 2014. Geneva, Switzerland: World Health Organization (WHO), 2014.                                                                  | 2001                  |                      |
| Spain   | Domínguez A, Bruguera M, Plans P, Costa J, Salleras L. Prevalence of hepatitis A antibodies in schoolchildren in Catalonia (Spain) after the introduction of universal hepatitis A immunization. <i>J Med Virol</i> . 2004; 73(2): 172-6.                                 | 2001                  |                      |
| Spain   | EUVAC-NET. EUVAC-NET Measles Surveillance Report 2002. Stockholm, Sweden: European Centre for Disease Prevention and Control, 2003.                                                                                                                                       | 2001-2002             |                      |
| Spain   | Fernández M, Castro-Flores J, Perez-de las Heras S, Mandaluniz-Lekumberri A, Gordejuela M, Zarranz J. [Prevalence of dementia in the elderly aged above 65 in a district in the Basque Country]. <i>Rev Neurol</i> . 2008; 46(2): 89-96.                                  | 2001-2004             |                      |
| Spain   | Spain Vital Registration - Deaths 2002 ICD10 as it appears in World Health Organization (WHO). WHO Mortality Database Version February 2014. Geneva, Switzerland: World Health Organization (WHO), 2014.                                                                  | 2002                  |                      |
| Spain   | Junquera S, Mateos M, Lasa E, Chacón J, Baquero F. [Seroepidemiologic study of hepatitis A in the community of Madrid during the year 2002]. <i>Enferm Infecc Microbiol Clin</i> . 2004; 22(8): 448-51.                                                                   | 2002                  |                      |

**Web Table 32 - Comprehensive citation list**

| Country | Citation                                                                                                                                                                                                                                                                                                                              | Year*     | New for GBD 2013 (*) |
|---------|---------------------------------------------------------------------------------------------------------------------------------------------------------------------------------------------------------------------------------------------------------------------------------------------------------------------------------------|-----------|----------------------|
| Spain   | Domínguez A, Bruguera M, Plans P, Espuñes J, Costa J, Plasencia A, Salleras L. Declining hepatitis A seroprevalence in adults in Catalonia (Spain): a population-based study. <i>BMC Infect Dis.</i> 2007; 73.                                                                                                                        | 2002      |                      |
| Spain   | Buti M, Domínguez A, Plans P, Jardí R, Schaper M, Espuñes J, Cardeñosa N, Rodríguez-Frías F, Esteban R, Plasència A, Salleras L. Community-based seroepidemiological survey of hepatitis E virus infection in Catalonia, Spain. <i>Clin Vaccine Immunol.</i> 2006; 13(12): 1328-32.                                                   | 2002      |                      |
| Spain   | Salleras L, Domínguez A, Bruguera M, Plans P, Costa J, Cardeñosa N, Batalla J, Plasència A. Declining prevalence of hepatitis B virus infection in Catalonia (Spain) 12 years after the introduction of universal vaccination. <i>Vaccine.</i> 2007; 25(52): 8726-31.                                                                 | 2002      |                      |
| Spain   | Gascón-Bayarri J, Reñé R, Del Barrio JL, De Pedro-Cuesta J, Ramón JM, Manubens JM, Sánchez C, Hernández M, Estela J, Juncadella M, Rubio FR. Prevalence of dementia subtypes in El Prat de Llobregat, Catalonia, Spain: the PRATICON study. <i>Neuroepidemiology.</i> 2007; 28(4): 224-34.                                            | 2002-2004 |                      |
| Spain   | Spain Vital Registration - Deaths 2003 ICD10 as it appears in World Health Organization (WHO). WHO Mortality Database Version February 2014. Geneva, Switzerland: World Health Organization (WHO), 2014.                                                                                                                              | 2003      |                      |
| Spain   | Canary Islands Population-Based Cancer Registry. Spain - Canary Islands Population-Based Cancer Registry Report 2003-2004. Canarias: Canary Islands Population-Based Cancer Registry.                                                                                                                                                 | 2003      |                      |
| Spain   | López-Izquierdo R, Antonia Udaondo Ma, Zarzosa P, García-Ramón E, Garcinuño S, Ángel Bratos M, Orduña A, Rodríguez-Torres A, Almaraz A. Seroprevalencia de las hepatitis virales en población general representativa de una zona básica de salud urbana en Castilla y León. <i>Enferm Infecc Microbiol Clin.</i> 2007; 25(5): 317-23. | 2003      | *                    |
| Spain   | EUVAC-NET. EUVAC-NET Measles Surveillance Report 2003. Stockholm, Sweden: European Centre for Disease Prevention and Control, 2005.                                                                                                                                                                                                   | 2003      |                      |
| Spain   | Gavrila D, Antúnez C, Tormo MJ, Carles R, García Santos JM, Parrilla G, Fortuna L, Jiménez J, Salmérón D, Navarro C. Prevalence of dementia and cognitive impairment in Southeastern Spain: the Ariadna study. <i>Acta Neurol Scand.</i> 2009; 120(5): 300-7.                                                                         | 2003-2005 |                      |
| Spain   | EUVAC-NET. EUVAC-NET Pertussis Surveillance Report 2003-2007. Stockholm, Sweden: European Centre for Disease Prevention and Control, 2009.                                                                                                                                                                                            | 2003-2007 |                      |
| Spain   | Spain Vital Registration - Deaths 2004 ICD10 as it appears in World Health Organization (WHO). WHO Mortality Database Version February 2014. Geneva, Switzerland: World Health Organization (WHO), 2014.                                                                                                                              | 2004      |                      |
| Spain   | Fernández M C-FJ. Prevalencia de la demencia en mayores de 65 años en una comarca del País Vasco. <i>Rev Neurol.</i> 2008; 46(2): 16-31.                                                                                                                                                                                              | 2004      |                      |
| Spain   | Lorenzo V, Boronat M, Saavedra P, Rufino M, Maceira B, Novoa FJ, Torres A. Disproportionately high incidence of diabetes-related end-stage renal disease in the Canary Islands. An analysis based on estimated population at risk. <i>Nephrol Dial Transplant.</i> 2010; 25(7): 2283-8.                                               | 2004      |                      |
| Spain   | Department of Peace and Conflict Research, Uppsala University. UCDP One-Sided Violence Database Version 1.4, 2013. Uppsala, Sweden: Department of Peace and Conflict Research, Uppsala University, 2013.                                                                                                                              | 2004      | *                    |
| Spain   | Cilla G, Pérez-Trallero E, Artieda J, Serrano-Bengoechea E, Montes M, Vicente D. Marked decrease in the incidence and prevalence of hepatitis A in the Basque Country, Spain, 1986-2004. <i>Epidemiol Infect.</i> 2007; 135(3): 402-8.                                                                                                | 2004      |                      |
| Spain   | Gonzalez-Quintela A, Gude F, Boquete O, Aguilera A, Rey J, Meijide LM, Fernandez-Merino MC, Vidal C. Association of hepatitis A virus infection with allergic sensitization in a population with high prevalence of hepatitis A virus exposure. <i>Allergy.</i> 2005; 60(1): 98-103.                                                  | 2004      |                      |

**Web Table 32 - Comprehensive citation list**

| Country | Citation                                                                                                                                                                                                                                                                                         | Year*      | New for GBD 2013 (*) |
|---------|--------------------------------------------------------------------------------------------------------------------------------------------------------------------------------------------------------------------------------------------------------------------------------------------------|------------|----------------------|
| Spain   | Forman D, Bray F, Brewster DH, Gombe Mbalawa C, Kohler B, Piñeros M, Steliarova-Foucher E, Swaminathan R and Ferlay J, eds (2013). Cancer Incidence in Five Continents, Vol. X Summary Database (electronic version). Lyon, IARC. <a href="http://ci5.iarc.fr">http://ci5.iarc.fr</a>            | 2004-2005  |                      |
| Spain   | Thalassaemia International Federation, World Health Organization (WHO). Management of Haemoglobin Disorders: Report of a Joint WHO-TIF Meeting, Nicosia, Cyprus, 16-18 November 2007. Geneva, Switzerland: World Health Organization (WHO), 2008.                                                | 2004, 2006 |                      |
| Spain   | Spain Vital Registration - Deaths 2005 ICD10 as it appears in World Health Organization (WHO). WHO Mortality Database Version February 2014. Geneva, Switzerland: World Health Organization (WHO), 2014.                                                                                         | 2005       |                      |
| Spain   | de Francisco AL, Sanjuán F, Foraster A, Fabado S, Carretero D, Santamaría C, Aguilera J, Alcalá MI, Aljama P. Epidemiological study on chronic renal failure elderly patients on hemodialysis. <i>Nefrologia</i> . 2008; 28(1): 48-55.                                                           | 2005       |                      |
| Spain   | Fernández Martínez M, Castro Flores J, Pérez de Las Heras S, Mandaluniz Lekumberri A, Gordejuela Menocal M, Zarranz Imirizaldu JJ. Risk factors for dementia in the epidemiological study of Munguialde County (Basque Country-Spain). <i>BMC Neurol</i> . 2008; 39.                             | 2005-2007  |                      |
| Spain   | Spain Vital Registration - Deaths 2006 ICD10 as it appears in World Health Organization (WHO). WHO Mortality Database Version February 2014. Geneva, Switzerland: World Health Organization (WHO), 2014.                                                                                         | 2006       |                      |
| Spain   | Spain Vital Registration - Deaths 2007 ICD10 as it appears in World Health Organization (WHO). WHO Mortality Database Version February 2014. Geneva, Switzerland: World Health Organization (WHO), 2014.                                                                                         | 2007       |                      |
| Spain   | Spain Vital Registration - Deaths 2008 ICD10 as it appears in World Health Organization (WHO). WHO Mortality Database Version February 2014. Geneva, Switzerland: World Health Organization (WHO), 2014.                                                                                         | 2008       |                      |
| Spain   | Spain Vital Registration - Deaths 2009 ICD10 as it appears in World Health Organization (WHO). WHO Mortality Database Version February 2014. Geneva, Switzerland: World Health Organization (WHO), 2014.                                                                                         | 2009       |                      |
| Spain   | Weatherall D. Sickle Cell and Thalassemias Prevalence Data, Personal Correspondence with David Weatherall. [Unpublished].                                                                                                                                                                        | 2009       |                      |
| Spain   | Rodríguez-Sánchez E, Mora-Simón S, Patino-Alonso MC, García-García R, Escribano-Hernández A, García-Ortiz L, Perea-Bartolomé MV, Gómez-Marcos MA. Prevalence of cognitive impairment in individuals aged over 65 in an urban area: DERIVA study. <i>BMC Neurol</i> . 2011; 147.                  | 2009       |                      |
| Spain   | Spain Vital Registration - Deaths 2010 ICD10 as it appears in World Health Organization (WHO). WHO Mortality Database Version February 2014. Geneva, Switzerland: World Health Organization (WHO), 2014.                                                                                         | 2010       |                      |
| Spain   | European Renal Association-European Dialysis and Transplant Association (ERA-EDTA). European Renal Association-European Dialysis and Transplant Association Registry Annual Report 2010. Parma, Italy: European Renal Association-European Dialysis and Transplant Association (ERA-EDTA), 2012. | 2010       | *                    |
| Spain   | EUVAC-NET. EUVAC-NET Measles Surveillance Report 2010. Stockholm, Sweden: European Centre for Disease Prevention and Control, 2011.                                                                                                                                                              | 2010       |                      |
| Spain   | Spain Vital Registration - Deaths 2011 ICD10 as it appears in World Health Organization (WHO). WHO Mortality Database Version February 2014. Geneva, Switzerland: World Health Organization (WHO), 2014.                                                                                         | 2011       | *                    |

**Web Table 32 - Comprehensive citation list**

| Country   | Citation                                                                                                                                                                                                                                                                                         | Year*                                                                                                | New for GBD 2013 (*) |
|-----------|--------------------------------------------------------------------------------------------------------------------------------------------------------------------------------------------------------------------------------------------------------------------------------------------------|------------------------------------------------------------------------------------------------------|----------------------|
| Spain     | European Renal Association-European Dialysis and Transplant Association (ERA-EDTA). European Renal Association-European Dialysis and Transplant Association Registry Annual Report 2011. Parma, Italy: European Renal Association-European Dialysis and Transplant Association (ERA-EDTA), 2013. | 2011                                                                                                 | *                    |
| Sri Lanka | Sri Lanka Vital Registration - Deaths 1950 ICD7 as it appears in World Health Organization (WHO). WHO Mortality Database Version February 2014. Geneva, Switzerland: World Health Organization (WHO), 2014.                                                                                      | 1950                                                                                                 |                      |
| Sri Lanka | Sri Lanka Vital Registration - Deaths 1951 ICD7 as it appears in World Health Organization (WHO). WHO Mortality Database Version February 2014. Geneva, Switzerland: World Health Organization (WHO), 2014.                                                                                      | 1951                                                                                                 |                      |
| Sri Lanka | Sri Lanka Vital Registration - Deaths 1952 ICD7 as it appears in World Health Organization (WHO). WHO Mortality Database Version February 2014. Geneva, Switzerland: World Health Organization (WHO), 2014.                                                                                      | 1952                                                                                                 |                      |
| Sri Lanka | Sri Lanka Vital Registration - Deaths 1953 ICD7 as it appears in World Health Organization (WHO). WHO Mortality Database Version February 2014. Geneva, Switzerland: World Health Organization (WHO), 2014.                                                                                      | 1953                                                                                                 |                      |
| Sri Lanka | Sri Lanka Vital Registration - Deaths 1954 ICD7 as it appears in World Health Organization (WHO). WHO Mortality Database Version February 2014. Geneva, Switzerland: World Health Organization (WHO), 2014.                                                                                      | 1954                                                                                                 |                      |
| Sri Lanka | Sri Lanka Vital Registration - Deaths 1955 ICD7 as it appears in World Health Organization (WHO). WHO Mortality Database Version February 2014. Geneva, Switzerland: World Health Organization (WHO), 2014.                                                                                      | 1955                                                                                                 |                      |
| Sri Lanka | Sri Lanka Vital Registration - Deaths 1956 ICD7 as it appears in World Health Organization (WHO). WHO Mortality Database Version February 2014. Geneva, Switzerland: World Health Organization (WHO), 2014.                                                                                      | 1956                                                                                                 |                      |
| Sri Lanka | Sri Lanka Vital Registration - Deaths 1957 ICD7 as it appears in World Health Organization (WHO). WHO Mortality Database Version February 2014. Geneva, Switzerland: World Health Organization (WHO), 2014.                                                                                      | 1957                                                                                                 |                      |
| Sri Lanka | Centre for Research on the Epidemiology of Disasters (CRED). EM-DAT: The OFDA/CRED International Disaster Database. Brussels, Belgium: Catholic University of Leuven.                                                                                                                            | 1957, 1964, 1966-1967, 1969, 1974, 1977-1978, 1981-1984, 1986, 1989-1993, 1995, 1997-2000, 2002-2013 |                      |
| Sri Lanka | Sri Lanka Vital Registration - Deaths 1958 ICD7 as it appears in World Health Organization (WHO). WHO Mortality Database Version February 2014. Geneva, Switzerland: World Health Organization (WHO), 2014.                                                                                      | 1958                                                                                                 |                      |
| Sri Lanka | Sri Lanka Vital Registration - Deaths 1959 ICD7 as it appears in World Health Organization (WHO). WHO Mortality Database Version February 2014. Geneva, Switzerland: World Health Organization (WHO), 2014.                                                                                      | 1959                                                                                                 |                      |
| Sri Lanka | Sri Lanka Vital Registration - Deaths 1960 ICD7 as it appears in World Health Organization (WHO). WHO Mortality Database Version February 2014. Geneva, Switzerland: World Health Organization (WHO), 2014.                                                                                      | 1960                                                                                                 |                      |

**Web Table 32 - Comprehensive citation list**

| Country   | Citation                                                                                                                                                                                                                         | Year*     | New for GBD 2013 (*) |
|-----------|----------------------------------------------------------------------------------------------------------------------------------------------------------------------------------------------------------------------------------|-----------|----------------------|
| Sri Lanka | Sri Lanka Vital Registration - Deaths 1961 ICD7 as it appears in World Health Organization (WHO). WHO Mortality Database Version February 2014. Geneva, Switzerland: World Health Organization (WHO), 2014.                      | 1961      |                      |
| Sri Lanka | Sri Lanka Vital Registration - Deaths 1962 ICD7 as it appears in World Health Organization (WHO). WHO Mortality Database Version February 2014. Geneva, Switzerland: World Health Organization (WHO), 2014.                      | 1962      |                      |
| Sri Lanka | Sri Lanka Vital Registration - Deaths 1963 ICD7 as it appears in World Health Organization (WHO). WHO Mortality Database Version February 2014. Geneva, Switzerland: World Health Organization (WHO), 2014.                      | 1963      |                      |
| Sri Lanka | Sri Lanka Vital Registration - Deaths 1964 ICD7 as it appears in World Health Organization (WHO). WHO Mortality Database Version February 2014. Geneva, Switzerland: World Health Organization (WHO), 2014.                      | 1964      |                      |
| Sri Lanka | Sri Lanka Vital Registration - Deaths 1965 ICD7 as it appears in World Health Organization (WHO). WHO Mortality Database Version February 2014. Geneva, Switzerland: World Health Organization (WHO), 2014.                      | 1965      |                      |
| Sri Lanka | Sri Lanka Vital Registration - Deaths 1966 ICD7 as it appears in World Health Organization (WHO). WHO Mortality Database Version February 2014. Geneva, Switzerland: World Health Organization (WHO), 2014.                      | 1966      |                      |
| Sri Lanka | Sri Lanka Vital Registration - Deaths 1967 ICD7 as it appears in World Health Organization (WHO). WHO Mortality Database Version February 2014. Geneva, Switzerland: World Health Organization (WHO), 2014.                      | 1967      |                      |
| Sri Lanka | Sri Lanka Vital Registration - Deaths 1968 ICD7 as it appears in World Health Organization (WHO). WHO Mortality Database Version February 2014. Geneva, Switzerland: World Health Organization (WHO), 2014.                      | 1968      |                      |
| Sri Lanka | United Nations Office on Drugs and Crime (UNODC). United Nations Surveys on Crime Trends and the Operations of Criminal Justice Systems 1970-2006 as provided by Kavi Bhalla. [Unpublished]                                      | 1970-1990 |                      |
| Sri Lanka | Sri Lanka Vital Registration - Deaths 1970-1978. [Unpublished].                                                                                                                                                                  | 1970-1978 |                      |
| Sri Lanka | Sri Lanka Population and Housing Census 1971 as it appears in United Nations Statistics Division (UNSD). United Nations Demographic Yearbook. New York City, United States: United Nations Statistics Division (UNSD).           | 1971      |                      |
| Sri Lanka | Peace Research Institute Oslo (PRIO). Battle Deaths Dataset Version 3, 2009. Oslo, Norway: Peace Research Institute Oslo (PRIO), 2009.                                                                                           | 1972-1988 |                      |
| Sri Lanka | Abeyaratne KP, Premawansa S, Rajapakse L, Roberts DF, Pipiha SS. A survey of glucose-6-phosphate-dehydrogenase deficiency in the North Central Province of Sri Lanka (formerly Ceylon). Am J Phys Anthropol. 1976; 44(1): 135-8. | 1974-1976 |                      |
| Sri Lanka | Department of Census and Statistics (Sri Lanka), International Statistical Institute. Sri Lanka World Fertility Survey 1975. Voorburg, Netherlands: International Statistical Institute.                                         | 1975      |                      |
| Sri Lanka | Sri Lanka Vital Registration - Deaths 1977 ICD8 as it appears in World Health Organization (WHO). WHO Mortality Database Version February 2014. Geneva, Switzerland: World Health Organization (WHO), 2014.                      | 1977      |                      |
| Sri Lanka | Registrar General's Department (Sri Lanka). Sri Lanka Vital Statistics - Deaths 1979. [Unpublished].                                                                                                                             | 1979      |                      |
| Sri Lanka | Sivagnanasundram C, Sivarajah N, Wijyaratnam A. Infant deaths in a health unit area of Northern Sri Lanka. J Trop Med Hyg. 1985; 88(6): 401-6.                                                                                   | 1979      |                      |

**Web Table 32 - Comprehensive citation list**

| Country   | Citation                                                                                                                                                                                                                    | Year*     | New for GBD 2013 (*) |
|-----------|-----------------------------------------------------------------------------------------------------------------------------------------------------------------------------------------------------------------------------|-----------|----------------------|
| Sri Lanka | Sri Lanka Vital Registration - Deaths 1980 ICD9 as it appears in World Health Organization (WHO). WHO Mortality Database Version February 2014. Geneva, Switzerland: World Health Organization (WHO), 2014.                 | 1980      |                      |
| Sri Lanka | Institute for Health Metrics and Evaluation (IHME), Joint United Nations Program on HIV/AIDS (UNAIDS). Institute for Health Metrics and Evaluation HIV Mortality Estimates Based on the UNAIDS Spectrum Model Framework.    | 1980-2013 | *                    |
| Sri Lanka | United Nations Children's Fund (UNICEF), World Health Organization (WHO). WHO and UNICEF Reported Disease Incidence Time Series - Pertussis. Geneva, Switzerland: World Health Organization (WHO).                          | 1980-2013 |                      |
| Sri Lanka | United Nations Children's Fund (UNICEF), World Health Organization (WHO). WHO and UNICEF Reported Disease Incidence Time Series - Measles. Geneva, Switzerland: World Health Organization (WHO).                            | 1980-2013 |                      |
| Sri Lanka | Sri Lanka Vital Registration - Deaths 1981 ICD9 as it appears in World Health Organization (WHO). WHO Mortality Database Version February 2014. Geneva, Switzerland: World Health Organization (WHO), 2014.                 | 1981      |                      |
| Sri Lanka | Sri Lanka Vital Registration - Deaths 1982 ICD9 as it appears in World Health Organization (WHO). WHO Mortality Database Version February 2014. Geneva, Switzerland: World Health Organization (WHO), 2014.                 | 1982      |                      |
| Sri Lanka | Sri Lanka Vital Registration - Deaths 1983 ICD9 as it appears in World Health Organization (WHO). WHO Mortality Database Version February 2014. Geneva, Switzerland: World Health Organization (WHO), 2014.                 | 1983      |                      |
| Sri Lanka | World Health Organization (WHO). Expanded programme on immunization. Public health importance of measles: Sri Lanka. Wkly Epidemiol Rec. 1985; 60(13): 95-7.                                                                | 1983      |                      |
| Sri Lanka | Sri Lanka Vital Registration - Deaths 1984 ICD9 as it appears in World Health Organization (WHO). WHO Mortality Database Version February 2014. Geneva, Switzerland: World Health Organization (WHO), 2014.                 | 1984      |                      |
| Sri Lanka | Sri Lanka Vital Registration - Deaths 1985 ICD9 as it appears in World Health Organization (WHO). WHO Mortality Database Version February 2014. Geneva, Switzerland: World Health Organization (WHO), 2014.                 | 1985      |                      |
| Sri Lanka | Sri Lanka Vital Registration - Deaths 1986 ICD9 as it appears in World Health Organization (WHO). WHO Mortality Database Version February 2014. Geneva, Switzerland: World Health Organization (WHO), 2014.                 | 1986      |                      |
| Sri Lanka | Sri Lanka Vital Registration - Deaths 1987 ICD9 as it appears in World Health Organization (WHO). WHO Mortality Database Version February 2014. Geneva, Switzerland: World Health Organization (WHO), 2014.                 | 1987      | *                    |
| Sri Lanka | Department of Census and Statistics (Sri Lanka), Westinghouse; Institute for Resource Development. Sri Lanka Demographic and Health Survey 1987. Columbia, United States: Westinghouse; Institute for Resource Development. | 1987      |                      |
| Sri Lanka | Sri Lanka Vital Registration - Deaths 1988 ICD9 as it appears in World Health Organization (WHO). WHO Mortality Database Version February 2014. Geneva, Switzerland: World Health Organization (WHO), 2014.                 | 1988      | *                    |
| Sri Lanka | Sri Lanka Vital Registration - Deaths 1989 ICD9 as it appears in World Health Organization (WHO). WHO Mortality Database Version February 2014. Geneva, Switzerland: World Health Organization (WHO), 2014.                 | 1989      | *                    |



**Web Table 32 - Comprehensive citation list**

| Country   | Citation                                                                                                                                                                                                                                                      | Year*                            | New for GBD 2013 (*) |
|-----------|---------------------------------------------------------------------------------------------------------------------------------------------------------------------------------------------------------------------------------------------------------------|----------------------------------|----------------------|
| Sri Lanka | Department of Peace and Conflict Research, Uppsala University. UCDP Battle-Related Deaths Database Version 5, 2013. Uppsala, Sweden: Department of Peace and Conflict Research, Uppsala University, 2013.                                                     | 1989-2009                        | *                    |
| Sri Lanka | Department of Peace and Conflict Research, Uppsala University. UCDP Nonstate Conflict Database Version 2.5, 2013. Uppsala, Sweden: Department of Peace and Conflict Research, Uppsala University, 2013.                                                       | 1989-2006                        | *                    |
| Sri Lanka | Department of Peace and Conflict Research, Uppsala University. UCDP One-Sided Violence Database Version 1.4, 2013. Uppsala, Sweden: Department of Peace and Conflict Research, Uppsala University, 2013.                                                      | 1989-2009                        | *                    |
| Sri Lanka | Lamabadusuriya SP, Jayantha UK. An outbreak of measles in the Southern Province. Ceylon Med J. 1992; 37(2): 46-8.                                                                                                                                             | 1990                             |                      |
| Sri Lanka | Weatherall D. Sickle Cell and Thalassemias Prevalence Data, Personal Correspondence with David Weatherall. [Unpublished].                                                                                                                                     | 1990-2009                        |                      |
| Sri Lanka | Centre for Health Informatics and Multiprofessional Education, University College London. Modell's Haemoglobinopathologist's Almanac. London, United Kingdom: Centre for Health Informatics and Multiprofessional Education, University College London, 2008. | 1990-2003                        |                      |
| Sri Lanka | Sri Lanka Vital Registration - Deaths 1991 ICD9 as it appears in World Health Organization (WHO). WHO Mortality Database Version February 2014. Geneva, Switzerland: World Health Organization (WHO), 2014.                                                   | 1991                             | *                    |
| Sri Lanka | Sri Lanka Vital Registration - Deaths 1992 ICD9 as it appears in World Health Organization (WHO). WHO Mortality Database Version February 2014. Geneva, Switzerland: World Health Organization (WHO), 2014.                                                   | 1992                             | *                    |
| Sri Lanka | Department of Census and Statistics (Sri Lanka). Sri Lanka Demographic and Health Survey 1993.                                                                                                                                                                | 1993                             |                      |
| Sri Lanka | Padmasiri E, Rajapaksa L, Jayakuru WS, Withana N. The prevalence of hepatitis B surface antigen in the Gampaha district. Ceylon Med J. 1995; 40(1): 10-3.                                                                                                     | 1993                             |                      |
| Sri Lanka | Registrar General's Department (Sri Lanka). Sri Lanka Vital Statistics - Deaths 1993-1996. [Unpublished].                                                                                                                                                     | 1993-1996                        |                      |
| Sri Lanka | Ministry of Health (Sri Lanka). Sri Lanka Achievements in Maternal Health Report. Colombo, Sri Lanka: Ministry of Health (Sri Lanka).                                                                                                                         | 1995-2008                        |                      |
| Sri Lanka | United Nations Office on Drugs and Crime (UNODC). United Nations Office on Drugs and Crime Global Study on Homicides 2011. Vienna, Austria: United Nations Office on Drugs and Crime (UNODC), 2011.                                                           | 1997-2009                        |                      |
| Sri Lanka | Olivieri NF, Muraca GM, O'Donnell A, Premawardhena A, Fisher C, Weatherall DJ. Studies in haemoglobin E beta-thalassaemia. Br J Haematol. 2008; 141(3): 388-97.                                                                                               | 1997-2002                        | *                    |
| Sri Lanka | World Health Organization (WHO). Yellow Fever Reported Cases, WHO Vaccine-Preventable Diseases: Monitoring System. Geneva, Switzerland: World Health Organization (WHO).                                                                                      | 1998, 2000-2002, 2004-2005, 2009 |                      |
| Sri Lanka | Puvimanasinghe J, Arambepola CK, Abeyasinghe NMR, Rajapaksa LC, Kulatilaka TA. Measles outbreak in Sri Lanka, 1999-2000. J Infect Dis. 2003; 187(Suppl 1): S241-5.                                                                                            | 1999-2000                        |                      |
| Sri Lanka | Department of Census and Statistics (Sri Lanka), Ministry of Health, Nutrition and Welfare (Sri Lanka). Sri Lanka Demographic and Health Survey 2000. Colombo, Sri Lanka: Department of Census and Statistics (Sri Lanka), 2008.                              | 2000                             |                      |
| Sri Lanka | De Silva HA, Gunatilake SB, Smith AD. Prevalence of dementia in a semi-urban population in Sri Lanka: report from a regional survey. Int J Geriatr Psychiatry. 2003; 18(8): 711-5.                                                                            | 2000-2001                        |                      |
| Sri Lanka | Department of Census and Statistics (Sri Lanka). Sri Lanka Population and Housing Census 2001.                                                                                                                                                                | 2001                             |                      |
| Sri Lanka | National Cancer Control Programme, Ministry of Health (Sri Lanka). Sri Lanka Cancer Registry 2001-2005. Colombo, Sri Lanka: National Cancer Control Programme, Ministry of Health (Sri Lanka), 2009.                                                          | 2001-2005                        |                      |

**Web Table 32 - Comprehensive citation list**

| Country   | Citation                                                                                                                                                                                                                                                                                                                                                                                                      | Year*      | New for GBD 2013 (*) |
|-----------|---------------------------------------------------------------------------------------------------------------------------------------------------------------------------------------------------------------------------------------------------------------------------------------------------------------------------------------------------------------------------------------------------------------|------------|----------------------|
| Sri Lanka | Gunasekera HAKM, Sunil-Chandra NP, de Silva HJ. Low community seroprevalence of hepatitis C virus infection in the Gampaha district. <i>Ceylon Med J.</i> 2002; 47(4): 122.                                                                                                                                                                                                                                   | 2002       |                      |
| Sri Lanka | World Health Organization (WHO). Sri Lanka World Health Survey 2003. Geneva, Switzerland: World Health Organization (WHO), 2005.                                                                                                                                                                                                                                                                              | 2003       |                      |
| Sri Lanka | World Health Organization (WHO). Retrospective Measles Data on Supplementary Immunization Activities. Geneva, Switzerland: World Health Organization (WHO).                                                                                                                                                                                                                                                   | 2003-2004  |                      |
| Sri Lanka | National Cancer Control Programme, Ministry of Health (Sri Lanka). Sri Lanka - Cancer Incidence Data: Sri Lanka Year 2001-2005. Colombo, Sri Lanka: National Cancer Control Programme, Ministry of Health (Sri Lanka), 2009.                                                                                                                                                                                  | 2003, 2005 |                      |
| Sri Lanka | Batuwanthudawe R, Rajapakse L, Somaratne P, Dassanayake M, Abeysinghe N. Incidence of childhood Haemophilus influenzae type b meningitis in Sri Lanka. <i>Int J Infect Dis.</i> 2010; 14(5): e372-e376.                                                                                                                                                                                                       | 2004       |                      |
| Sri Lanka | Registrar General's Department (Sri Lanka). Sri Lanka Vital Statistics - Deaths 2004-2005. [Unpublished].                                                                                                                                                                                                                                                                                                     | 2004-2005  |                      |
| Sri Lanka | De Silva KSH, Weerasuriya DC, Peelawattage M, Fernando S. Seroprevalence of hepatitis A antibodies in relation to social factors--a preliminary study. <i>Ceylon Med J.</i> 2005; 50(2): 54-8.                                                                                                                                                                                                                | 2005-2006  |                      |
| Sri Lanka | Sri Lanka Vital Registration - Deaths 2006 ICD10 as it appears in World Health Organization (WHO). WHO Mortality Database Version February 2014. Geneva, Switzerland: World Health Organization (WHO), 2014.                                                                                                                                                                                                  | 2006       |                      |
| Sri Lanka | Sri Lanka Vital Registration Death Data 2006 as it appears in United Nations Statistics Division (UNSD). United Nations Demographic Yearbook. New York City, United States: United Nations Statistics Division (UNSD).                                                                                                                                                                                        | 2006       |                      |
| Sri Lanka | Department of Census and Statistics (Sri Lanka), Sri Lanka Demographic and Health Survey 2006-2007. Colombo, Sri Lanka: Department of Census and Statistics (Sri Lanka).                                                                                                                                                                                                                                      | 2006-2007  | *                    |
| Sri Lanka | Sri Lanka Vital Registration Death Data 2007 as it appears in United Nations Statistics Division (UNSD). United Nations Demographic Yearbook. New York City, United States: United Nations Statistics Division (UNSD).                                                                                                                                                                                        | 2007       |                      |
| Sri Lanka | Lumbiganon P, Laopaiboon M, Gülmezoglu AM, Souza JP, Taneepanichskul S, Ruyan P, Attygalle DE, Shrestha N, Mori R, Hinh ND, Bang HT, Rathavy T, Chuyun K, Cheang K, Festin M, Udomprasertgul V, Germar MJV, Yanqiu G, Roy M, Carroli G, Ba-Thike K. Method of delivery and pregnancy outcomes in Asia: the WHO global survey on maternal and perinatal health 2007-08. <i>Lancet.</i> 2010; 375(9713): 490-9. | 2007-2008  |                      |
| Sri Lanka | Joint United Nations Program on HIV/AIDS (UNAIDS). Sri Lanka Country Progress Report 2010-2011. Geneva, Switzerland: Joint United Nations Program on HIV/AIDS (UNAIDS), 2012.                                                                                                                                                                                                                                 | 2008-2009  |                      |
| Sri Lanka | Joint United Nations Program on HIV/AIDS (UNAIDS), Ministry of Healthcare and Nutrition (Sri Lanka). Sri Lanka UNGASS Report 2008-2009. Geneva, Switzerland: Joint United Nations Program on HIV/AIDS (UNAIDS), 2010.                                                                                                                                                                                         | 2009       |                      |
| Sudan     | Peace Research Institute Oslo (PRIO). Battle Deaths Dataset Version 3, 2009. Oslo, Norway: Peace Research Institute Oslo (PRIO), 2009.                                                                                                                                                                                                                                                                        | 1963-1988  |                      |
| Sudan     | United Nations Office on Drugs and Crime (UNODC). United Nations Surveys on Crime Trends and the Operations of Criminal Justice Systems 1970-2006 as provided by Kavi Bhalla. [Unpublished]                                                                                                                                                                                                                   | 1970-1994  |                      |
| Sudan     | Ministry of National Planning (Sudan). Sudan Census 1973.                                                                                                                                                                                                                                                                                                                                                     | 1973       |                      |
| Sudan     | Department of Statistics (Sudan), International Statistical Institute, Ministry of National Planning (North Sudan). Sudan World Fertility Survey 1978-1979. International Statistical Institute.                                                                                                                                                                                                              | 1978-1979  |                      |



**Web Table 32 - Comprehensive citation list**

| Country | Citation                                                                                                                                                                                                                                                      | Year*                                                             | New for GBD 2013 (*) |
|---------|---------------------------------------------------------------------------------------------------------------------------------------------------------------------------------------------------------------------------------------------------------------|-------------------------------------------------------------------|----------------------|
| Sudan   | Centre for Research on the Epidemiology of Disasters (CRED). EM-DAT: The OFDA/CRED International Disaster Database. Brussels, Belgium: Catholic University of Leuven.                                                                                         | 1978, 1983-1985, 1988, 1993-1994, 1996-1999, 2001-2003, 2005-2013 |                      |
| Sudan   | Institute for Health Metrics and Evaluation (IHME), Joint United Nations Program on HIV/AIDS (UNAIDS). Institute for Health Metrics and Evaluation HIV Mortality Estimates Based on the UNAIDS Spectrum Model Framework.                                      | 1980-2013                                                         | *                    |
| Sudan   | Saha N, Samuel AP, Omer A, Hoffbrand AV. The inter- and intra-tribal distribution of red cell G6PD phenotypes in Sudan. Hum Hered. 1983; 33(1): 39-43.                                                                                                        | 1981-1983                                                         |                      |
| Sudan   | Ministry of National Planning (Sudan). Sudan Population and Housing Census 1983.                                                                                                                                                                              | 1983                                                              |                      |
| Sudan   | Hyams KC, al-Arabi MA, al-Tagani AA, Messiter JF, al-Gaali AA, George JF. Epidemiology of hepatitis B in the Gezira region of Sudan. Am J Trop Med Hyg. 1989; 40(2): 200-6.                                                                                   | 1986                                                              |                      |
| Sudan   | Department of Peace and Conflict Research, Uppsala University. UCDP Battle-Related Deaths Database Version 5, 2013. Uppsala, Sweden: Department of Peace and Conflict Research, Uppsala University, 2013.                                                     | 1989-2012                                                         | *                    |
| Sudan   | Ministry of Finance and Economic Planning, Department of Statistics, Macro Systems, Inc.; Institute for Resource Development. Sudan Demographic and Health Survey 1989-1990. Columbia, United States: Macro Systems, Inc.                                     | 1989-1990                                                         |                      |
| Sudan   | Department of Peace and Conflict Research, Uppsala University. UCDP Nonstate Conflict Database Version 2.5, 2013. Uppsala, Sweden: Department of Peace and Conflict Research, Uppsala University, 2013.                                                       | 1989-2012                                                         | *                    |
| Sudan   | Department of Peace and Conflict Research, Uppsala University. UCDP One-Sided Violence Database Version 1.4, 2013. Uppsala, Sweden: Department of Peace and Conflict Research, Uppsala University, 2013.                                                      | 1989-2012                                                         | *                    |
| Sudan   | Weatherall D. Sickle Cell and Thalassemias Prevalence Data, Personal Correspondence with David Weatherall. [Unpublished].                                                                                                                                     | 1990-2009                                                         |                      |
| Sudan   | Centre for Health Informatics and Multiprofessional Education, University College London. Modell's Haemoglobinopathologist's Almanac. London, United Kingdom: Centre for Health Informatics and Multiprofessional Education, University College London, 2008. | 1990-2003                                                         |                      |
| Sudan   | Federal Ministry of Health (Sudan), League of Arab States. Sudan Maternal and Child Health Survey 1992-1993.                                                                                                                                                  | 1992-1993                                                         |                      |
| Sudan   | Sudan Population and Housing Census 1993 as it appears in United Nations Statistics Division (UNSD). United Nations Demographic Yearbook Special Census Topic, 2000 Round. New York City, United States: United Nations Statistics Division (UNSD).           | 1993                                                              |                      |
| Sudan   | Omer RE, Van't Veer P, Kadaru AM, Kampman E, el Khidir IM, Fedail SS, Kok FJ. The role of hepatitis B and hepatitis C viral infections in the incidence of hepatocellular carcinoma in Sudan. Trans R Soc Trop Med Hyg. 2001; 95(5): 487-91.                  | 1996-1998                                                         |                      |
| Sudan   | World Health Organization (WHO). Global Prevalence and Incidence of Selected Curable Sexually Transmitted Infections: Overviews and Estimates 2001. Geneva, Switzerland: World Health Organization (WHO), 2001.                                               | 1997                                                              |                      |
| Sudan   | World Health Organization (WHO). Sudan WHO Leishmaniasis Country Profile.                                                                                                                                                                                     | 1997-2010                                                         | *                    |
| Sudan   | Ibrahim SA, Mustafa OM, Mukhtar MM, Saleh EA, El Mubarak HS, Abdallah A, El-Hassan AM, Osterhaus AD, Groen J, De Swart RL, Zijlstra EE. Measles in suburban Khartoum: An epidemiological and clinical study. Trop Med Int Health. 2002; 7(5): 442-9.          | 1997-1999                                                         |                      |
| Sudan   | World Health Organization (WHO). The Global Elimination of Congenital Syphilis: Rationale and Strategy for Action. Geneva, Switzerland: World Health Organization (WHO), 2007.                                                                                | 1997-2003                                                         |                      |

**Web Table 32 - Comprehensive citation list**

| Country | Citation                                                                                                                                                                                                                                                                                                                                                               | Year*                       | New for GBD 2013 (*) |
|---------|------------------------------------------------------------------------------------------------------------------------------------------------------------------------------------------------------------------------------------------------------------------------------------------------------------------------------------------------------------------------|-----------------------------|----------------------|
| Sudan   | Measles Supplementary Immunization Activity Data as provided by the World Health Organization. [Unpublished].                                                                                                                                                                                                                                                          | 1998-1999                   |                      |
| Sudan   | Abu-Raddad LJ, Akala FA, Semini I, Riedner G, Wilson D, Tawil O, World Bank. Characterizing the HIV/AIDS Epidemic in the Middle East and North Africa. Washington DC, United States: World Bank, 2010.                                                                                                                                                                 | 1998, 2000, 2003, 2006-2008 |                      |
| Sudan   | Central Bureau of Statistics (Sudan), Federal Ministry of Health (Sudan). Sudan, Former Safe Motherhood Survey 1999. Khartoum, Sudan: Central Bureau of Statistics.                                                                                                                                                                                                    | 1999                        |                      |
| Sudan   | Federal Ministry of Health (Sudan), Central Bureau of Statistics (Sudan), United Nations Children's Fund (UNICEF). Sudan Multiple Indicator Cluster Survey, North Sudan 2000. New York, United States: United Nations Children's Fund (UNICEF).                                                                                                                        | 2000                        | *                    |
| Sudan   | World Health Organization (WHO). Yellow Fever Reported Cases, WHO Vaccine-Preventable Diseases: Monitoring System. Geneva, Switzerland: World Health Organization (WHO).                                                                                                                                                                                               | 2001-2002                   |                      |
| Sudan   | Onyango CO, Ofula VO, Sang RC, Konongoi SL, Sow A, De Cock KM, Tukei PM, Okoth FA, Swanepoel R, Burt FJ, Waters NC, Coldren RL. Yellow fever outbreak, Imatong, southern Sudan. Emerg Infect Dis. 2004; 10:63-8.                                                                                                                                                       | 2003                        |                      |
| Sudan   | Coronado F, Musa N, El Tayeb el SA, Haithami S, Dabbagh A, Mahoney F, Nandy R, Cairns L. Retrospective measles outbreak investigation: Sudan, 2004. J Trop Pediatr. 2006; 52(5): 329-34.                                                                                                                                                                               | 2003-2004                   |                      |
| Sudan   | World Health Organization (WHO). Retrospective Measles Data on Supplementary Immunization Activities. Geneva, Switzerland: World Health Organization (WHO).                                                                                                                                                                                                            | 2003-2008, 2010-2013        |                      |
| Sudan   | Centers for Disease Control and Prevention (CDC). Emergency measles control activities - Darfur, Sudan, 2004. Morb Mortal Wkly Rep. 2004; 53(38): 879-9.                                                                                                                                                                                                               | 2004                        |                      |
| Sudan   | Farnon EC, Gould LH, Griffith KS, Osman MS, Kholy AE, Brair M-E, Panella AJ, Kosoy O, Laven JJ, Godsey MS, Perea W, Hayes EB. Household-based sero-epidemiologic survey after a yellow fever epidemic, Sudan, 2005. Am J Trop Med Hyg. 2010; 82(6): 1146-52.                                                                                                           | 2005                        |                      |
| Sudan   | Gould LH, Osman MS, Farnon EC, Griffith KS, Godsey MS, Karch S, Mulenda B, El Kholy A, Grandesso F, De Radiguès X, Brair M-E, Briand S, El Tayeb ESM, Hayes EB, Zeller H, Perea W. An outbreak of yellow fever with concurrent chikungunya virus transmission in South Kordofan, Sudan, 2005. Trans R Soc Trop Med Hyg. 2005; 102(12): 1247-54.                        | 2005                        |                      |
| Sudan   | Ministry of Health (Southern Sudan), Federal Ministry of Health (Sudan), Southern Sudan Centre for Census, Statistics and Evaluation (SSCCSE), Central Bureau of Statistics (Sudan). Sudan Family Health Survey 2006.                                                                                                                                                  | 2006                        | *                    |
| Sudan   | World Health Organization (WHO). Global Status Report on Road Safety 2009. Geneva, Switzerland: World Health Organization (WHO), 2009.                                                                                                                                                                                                                                 | 2007                        |                      |
| Sudan   | United Nations Office on Drugs and Crime (UNODC). United Nations Office on Drugs and Crime Global Study on Homicides 2011. Vienna, Austria: United Nations Office on Drugs and Crime (UNODC), 2011.                                                                                                                                                                    | 2007                        |                      |
| Sudan   | Southern Sudan Centre for Census, Statistics and Evaluation (SSCCSE) and National Population Census Council. Sudan Population and Housing Census 2008.                                                                                                                                                                                                                 | 2008                        |                      |
| Sudan   | National Population Census Council (Sudan), Central Bureau of Statistics (Sudan), Southern Sudan Centre for Census, Statistics and Evaluation (SSCCSE), Minnesota Population Center. Sudan Population and Housing Census 2008 from the Integrated Public Use Microdata Series, International. [Machine-readable database]. Minneapolis: University of Minnesota, 2011. | 2008                        |                      |

**Web Table 32 - Comprehensive citation list**

| Country  | Citation                                                                                                                                                                                                                                                                                                                | Year*     | New for GBD 2013 (*) |
|----------|-------------------------------------------------------------------------------------------------------------------------------------------------------------------------------------------------------------------------------------------------------------------------------------------------------------------------|-----------|----------------------|
| Sudan    | Joint United Nations Program on HIV/AIDS (UNAIDS), Sudan National AIDS Control Program. North Sudan United Nations General Assembly Special Session on HIV/AIDS (UNGASS) Report 2008-2009. Geneva, Switzerland: Joint United Nations Program on HIV/AIDS (UNAIDS), 2010.                                                | 2009      |                      |
| Sudan    | Jervase A. HIV prevalence in South Sudan: data from the ANC sentinel surveillance 2009. <i>S Sudan Med J</i> . 2011; 4: 49-56.                                                                                                                                                                                          | 2009      |                      |
| Sudan    | Federal Ministry of Health and Central Bureau of Statistics, Sudan Household and Health Survey - 2, 2012, National report. Khartoum, Republic of Sudan: Federal Ministry of Health and Central Bureau of Statistics.                                                                                                    | 2010      | *                    |
| Sudan    | Ministry of Health (Southern Sudan), Federal Ministry of Health (Sudan), Southern Sudan Centre for Census, Statistics and Evaluation (SSCCSE), Central Bureau of Statistics (Sudan), United Nations Children's Fund (UNICEF). Sudan Multiple Indicator Cluster Survey 2010.                                             | 2010      |                      |
| Sudan    | Mueller YK, Nackers F, Ahmed KA, Boelaert M, Djoumessi J-C, Eltigani R, Gorashi HA, Hammam O, Ritmeijer K, Salih N, Worku D, Etard J-F, Chappuis F. Burden of visceral leishmaniasis in villages of eastern Gedaref State, Sudan: an exhaustive cross-sectional survey. <i>PLoS Negl Trop Dis</i> . 2012; 6(11): e1872. | 2011      | *                    |
| Sudan    | Soghaier MA, Hagar A, Abbas MA, Elmangory MM, Eltahir KM, Sall AA. Yellow Fever Outbreak in Darfur, Sudan in October 2012; the Initial Outbreak Investigation Report. <i>J Infect Public Health</i> . 2013; 6(5): 370-6.                                                                                                | 2012      | *                    |
| Sudan    | United Nations Children's Fund (UNICEF), World Health Organization (WHO). WHO and UNICEF Reported Disease Incidence Time Series - Pertussis. Geneva, Switzerland: World Health Organization (WHO).                                                                                                                      | 1980-2013 |                      |
| Sudan    | United Nations Children's Fund (UNICEF), World Health Organization (WHO). WHO and UNICEF Reported Disease Incidence Time Series - Measles. Geneva, Switzerland: World Health Organization (WHO).                                                                                                                        | 1980-2013 |                      |
| Suriname | Suriname Vital Registration Death Data 1950 as it appears in United Nations Statistics Division (UNSD). United Nations Demographic Yearbook. New York City, United States: United Nations Statistics Division (UNSD).                                                                                                   | 1950      |                      |
| Suriname | Suriname Vital Registration Death Data 1951 as it appears in United Nations Statistics Division (UNSD). United Nations Demographic Yearbook. New York City, United States: United Nations Statistics Division (UNSD).                                                                                                   | 1951      |                      |
| Suriname | Suriname Vital Registration Death Data 1952 as it appears in United Nations Statistics Division (UNSD). United Nations Demographic Yearbook. New York City, United States: United Nations Statistics Division (UNSD).                                                                                                   | 1952      |                      |
| Suriname | Suriname Vital Registration Death Data 1953 as it appears in United Nations Statistics Division (UNSD). United Nations Demographic Yearbook. New York City, United States: United Nations Statistics Division (UNSD).                                                                                                   | 1953      |                      |
| Suriname | Suriname Vital Registration Death Data 1954 as it appears in United Nations Statistics Division (UNSD). United Nations Demographic Yearbook. New York City, United States: United Nations Statistics Division (UNSD).                                                                                                   | 1954      |                      |
| Suriname | Suriname Vital Registration Death Data 1955 as it appears in United Nations Statistics Division (UNSD). United Nations Demographic Yearbook. New York City, United States: United Nations Statistics Division (UNSD).                                                                                                   | 1955      |                      |
| Suriname | Suriname Vital Registration Death Data 1956 as it appears in United Nations Statistics Division (UNSD). United Nations Demographic Yearbook. New York City, United States: United Nations Statistics Division (UNSD).                                                                                                   | 1956      |                      |

**Web Table 32 - Comprehensive citation list**

| Country  | Citation                                                                                                                                                                                                              | Year*     | New for GBD 2013 (*) |
|----------|-----------------------------------------------------------------------------------------------------------------------------------------------------------------------------------------------------------------------|-----------|----------------------|
| Suriname | Suriname Vital Registration Death Data 1957 as it appears in United Nations Statistics Division (UNSD). United Nations Demographic Yearbook. New York City, United States: United Nations Statistics Division (UNSD). | 1957      |                      |
| Suriname | Suriname Vital Registration Death Data 1961 as it appears in United Nations Statistics Division (UNSD). United Nations Demographic Yearbook. New York City, United States: United Nations Statistics Division (UNSD). | 1961      |                      |
| Suriname | Suriname Vital Registration Death Data 1962 as it appears in United Nations Statistics Division (UNSD). United Nations Demographic Yearbook. New York City, United States: United Nations Statistics Division (UNSD). | 1962      |                      |
| Suriname | Suriname Vital Registration - Deaths 1963 ICD7 as it appears in World Health Organization (WHO). WHO Mortality Database Version February 2014. Geneva, Switzerland: World Health Organization (WHO), 2014.            | 1963      |                      |
| Suriname | Smink DA, Prins HK. Hereditary and acquired blood factors in the negroid population of Surinam. V. Electrophoretic heterogeneity of glucose-6-phosphate dehydrogenase. Trop Geogr Med. 1965; 17(3): 236-42.           | 1963-1965 |                      |
| Suriname | Suriname Vital Registration - Deaths 1964 ICD7 as it appears in World Health Organization (WHO). WHO Mortality Database Version February 2014. Geneva, Switzerland: World Health Organization (WHO), 2014.            | 1964      |                      |
| Suriname | Suriname Vital Registration - Deaths 1965 ICD7 as it appears in World Health Organization (WHO). WHO Mortality Database Version February 2014. Geneva, Switzerland: World Health Organization (WHO), 2014.            | 1965      |                      |
| Suriname | Suriname Vital Registration - Deaths 1966 ICD7 as it appears in World Health Organization (WHO). WHO Mortality Database Version February 2014. Geneva, Switzerland: World Health Organization (WHO), 2014.            | 1966      |                      |
| Suriname | Suriname Vital Registration - Deaths 1971 ICD8 as it appears in World Health Organization (WHO). WHO Mortality Database Version February 2014. Geneva, Switzerland: World Health Organization (WHO), 2014.            | 1971      |                      |
| Suriname | Suriname Vital Registration - Deaths 1972 ICD8 as it appears in World Health Organization (WHO). WHO Mortality Database Version February 2014. Geneva, Switzerland: World Health Organization (WHO), 2014.            | 1972      |                      |
| Suriname | Suriname Vital Registration - Deaths 1973 ICD8 as it appears in World Health Organization (WHO). WHO Mortality Database Version February 2014. Geneva, Switzerland: World Health Organization (WHO), 2014.            | 1973      |                      |
| Suriname | Suriname Vital Registration - Deaths 1975 ICD8 as it appears in World Health Organization (WHO). WHO Mortality Database Version February 2014. Geneva, Switzerland: World Health Organization (WHO), 2014.            | 1975      |                      |
| Suriname | Suriname Vital Registration - Deaths 1976 ICD8 as it appears in World Health Organization (WHO). WHO Mortality Database Version February 2014. Geneva, Switzerland: World Health Organization (WHO), 2014.            | 1976      |                      |
| Suriname | United Nations Office on Drugs and Crime (UNODC). United Nations Surveys on Crime Trends and the Operations of Criminal Justice Systems 1970-2006 as provided by Kavi Bhalla. [Unpublished]                           | 1976-1986 |                      |

**Web Table 32 - Comprehensive citation list**

| Country  | Citation                                                                                                                                                                                                                 | Year*     | New for GBD 2013 (*) |
|----------|--------------------------------------------------------------------------------------------------------------------------------------------------------------------------------------------------------------------------|-----------|----------------------|
| Suriname | Suriname Vital Registration - Deaths 1977 ICD8 as it appears in World Health Organization (WHO). WHO Mortality Database Version February 2014. Geneva, Switzerland: World Health Organization (WHO), 2014.               | 1977      |                      |
| Suriname | Suriname Vital Registration - Deaths 1978 ICD8 as it appears in World Health Organization (WHO). WHO Mortality Database Version February 2014. Geneva, Switzerland: World Health Organization (WHO), 2014.               | 1978      |                      |
| Suriname | Suriname Vital Registration - Deaths 1979 ICD9 as it appears in World Health Organization (WHO). WHO Mortality Database Version February 2014. Geneva, Switzerland: World Health Organization (WHO), 2014.               | 1979      |                      |
| Suriname | Suriname Vital Registration - Deaths 1980 ICD9 as it appears in World Health Organization (WHO). WHO Mortality Database Version February 2014. Geneva, Switzerland: World Health Organization (WHO), 2014.               | 1980      |                      |
| Suriname | Institute for Health Metrics and Evaluation (IHME), Joint United Nations Program on HIV/AIDS (UNAIDS). Institute for Health Metrics and Evaluation HIV Mortality Estimates Based on the UNAIDS Spectrum Model Framework. | 1980-2013 | *                    |
| Suriname | United Nations Children's Fund (UNICEF), World Health Organization (WHO). WHO and UNICEF Reported Disease Incidence Time Series - Pertussis. Geneva, Switzerland: World Health Organization (WHO).                       | 1980-2013 |                      |
| Suriname | United Nations Children's Fund (UNICEF), World Health Organization (WHO). WHO and UNICEF Reported Disease Incidence Time Series - Measles. Geneva, Switzerland: World Health Organization (WHO).                         | 1980-2013 |                      |
| Suriname | Suriname Vital Registration - Deaths 1981 ICD9 as it appears in World Health Organization (WHO). WHO Mortality Database Version February 2014. Geneva, Switzerland: World Health Organization (WHO), 2014.               | 1981      |                      |
| Suriname | Suriname Vital Registration - Deaths 1982 ICD9 as it appears in World Health Organization (WHO). WHO Mortality Database Version February 2014. Geneva, Switzerland: World Health Organization (WHO), 2014.               | 1982      |                      |
| Suriname | Suriname Vital Registration - Deaths 1984 ICD9 as it appears in World Health Organization (WHO). WHO Mortality Database Version February 2014. Geneva, Switzerland: World Health Organization (WHO), 2014.               | 1984      |                      |
| Suriname | Suriname Vital Registration - Deaths 1985 ICD9 as it appears in World Health Organization (WHO). WHO Mortality Database Version February 2014. Geneva, Switzerland: World Health Organization (WHO), 2014.               | 1985      |                      |
| Suriname | Suriname Vital Registration - Deaths 1986 ICD9 as it appears in World Health Organization (WHO). WHO Mortality Database Version February 2014. Geneva, Switzerland: World Health Organization (WHO), 2014.               | 1986      |                      |
| Suriname | Peace Research Institute Oslo (PRIO). Battle Deaths Dataset Version 3, 2009. Oslo, Norway: Peace Research Institute Oslo (PRIO), 2009.                                                                                   | 1986-1988 |                      |
| Suriname | Suriname Vital Registration - Deaths 1987 ICD9 as it appears in World Health Organization (WHO). WHO Mortality Database Version February 2014. Geneva, Switzerland: World Health Organization (WHO), 2014.               | 1987      |                      |
| Suriname | Suriname Vital Registration - Deaths 1988 ICD9 as it appears in World Health Organization (WHO). WHO Mortality Database Version February 2014. Geneva, Switzerland: World Health Organization (WHO), 2014.               | 1988      |                      |

**Web Table 32 - Comprehensive citation list**

| Country  | Citation                                                                                                                                                                                                                                                                                        | Year*      | New for GBD 2013 (*) |
|----------|-------------------------------------------------------------------------------------------------------------------------------------------------------------------------------------------------------------------------------------------------------------------------------------------------|------------|----------------------|
| Suriname | Suriname Vital Registration - Deaths 1989 ICD9 as it appears in World Health Organization (WHO). WHO Mortality Database Version February 2014. Geneva, Switzerland: World Health Organization (WHO), 2014.                                                                                      | 1989       |                      |
| Suriname | Suriname Vital Registration - Deaths 1990 ICD9 as it appears in World Health Organization (WHO). WHO Mortality Database Version February 2014. Geneva, Switzerland: World Health Organization (WHO), 2014.                                                                                      | 1990       |                      |
| Suriname | Centre for Health Informatics and Multiprofessional Education, University College London. Modell's Haemoglobinopathologist's Almanac. London, United Kingdom: Centre for Health Informatics and Multiprofessional Education, University College London, 2008.                                   | 1990-2003  |                      |
| Suriname | Suriname Vital Registration - Deaths 1991 ICD9 as it appears in World Health Organization (WHO). WHO Mortality Database Version February 2014. Geneva, Switzerland: World Health Organization (WHO), 2014.                                                                                      | 1991       |                      |
| Suriname | Measles Supplementary Immunization Activity Data as provided by the World Health Organization. [Unpublished].                                                                                                                                                                                   | 1991, 1997 |                      |
| Suriname | Suriname Vital Registration - Deaths 1992 ICD9 as it appears in World Health Organization (WHO). WHO Mortality Database Version February 2014. Geneva, Switzerland: World Health Organization (WHO), 2014.                                                                                      | 1992       |                      |
| Suriname | Suriname Vital Registration Death Data 1993 as it appears in United Nations Statistics Division (UNSD). United Nations Demographic Yearbook. New York City, United States: United Nations Statistics Division (UNSD).                                                                           | 1993       |                      |
| Suriname | Suriname Vital Registration Death Data 1994 as it appears in United Nations Statistics Division (UNSD). United Nations Demographic Yearbook. New York City, United States: United Nations Statistics Division (UNSD).                                                                           | 1994       |                      |
| Suriname | Suriname Vital Registration - Deaths 1995 ICD10 as it appears in World Health Organization (WHO). WHO Mortality Database Version February 2014. Geneva, Switzerland: World Health Organization (WHO), 2014.                                                                                     | 1995       |                      |
| Suriname | Suriname Vital Registration - Deaths 1996 ICD10 as it appears in World Health Organization (WHO). WHO Mortality Database Version February 2014. Geneva, Switzerland: World Health Organization (WHO), 2014.                                                                                     | 1996       |                      |
| Suriname | Suriname Vital Registration - Deaths 1997 ICD10 as it appears in World Health Organization (WHO). WHO Mortality Database Version February 2014. Geneva, Switzerland: World Health Organization (WHO), 2014.                                                                                     | 1997       |                      |
| Suriname | Suriname Vital Registration - Deaths 1998 ICD10 as it appears in World Health Organization (WHO). WHO Mortality Database Version February 2014. Geneva, Switzerland: World Health Organization (WHO), 2014.                                                                                     | 1998       |                      |
| Suriname | Suriname Vital Registration - Deaths 1999 ICD10 as it appears in World Health Organization (WHO). WHO Mortality Database Version February 2014. Geneva, Switzerland: World Health Organization (WHO), 2014.                                                                                     | 1999       |                      |
| Suriname | General Bureau of Statistics (Suriname), Pan American Health Organization (PAHO), United Nations Children's Fund (UNICEF), United Nations Development Programme (UNDP). Suriname Multiple Indicator Cluster Survey 1999-2000. New York, United States: United Nations Children's Fund (UNICEF). | 1999-2000  |                      |



**Web Table 32 - Comprehensive citation list**

| Country  | Citation                                                                                                                                                                                                                                                                                                                                                                                                                        | Year*                | New for GBD 2013 (*) |
|----------|---------------------------------------------------------------------------------------------------------------------------------------------------------------------------------------------------------------------------------------------------------------------------------------------------------------------------------------------------------------------------------------------------------------------------------|----------------------|----------------------|
| Suriname | Suriname Vital Registration - Deaths 2000 ICD10 as it appears in World Health Organization (WHO). WHO Mortality Database Version February 2014. Geneva, Switzerland: World Health Organization (WHO), 2014.                                                                                                                                                                                                                     | 2000                 |                      |
| Suriname | World Health Organization (WHO). Yellow Fever Reported Cases, WHO Vaccine-Preventable Diseases: Monitoring System. Geneva, Switzerland: World Health Organization (WHO).                                                                                                                                                                                                                                                        | 2000-2002, 2004-2009 |                      |
| Suriname | Suriname Vital Registration - Deaths 2001 ICD10 as it appears in World Health Organization (WHO). WHO Mortality Database Version February 2014. Geneva, Switzerland: World Health Organization (WHO), 2014.                                                                                                                                                                                                                     | 2001                 |                      |
| Suriname | United Nations Office on Drugs and Crime (UNODC). United Nations Office on Drugs and Crime Global Study on Homicides 2011. Vienna, Austria: United Nations Office on Drugs and Crime (UNODC), 2011.                                                                                                                                                                                                                             | 2001-2007            |                      |
| Suriname | Suriname Vital Registration - Deaths 2002 ICD10 as it appears in World Health Organization (WHO). WHO Mortality Database Version February 2014. Geneva, Switzerland: World Health Organization (WHO), 2014.                                                                                                                                                                                                                     | 2002                 |                      |
| Suriname | Suriname Vital Registration - Deaths 2003 ICD10 as it appears in World Health Organization (WHO). WHO Mortality Database Version February 2014. Geneva, Switzerland: World Health Organization (WHO), 2014.                                                                                                                                                                                                                     | 2003                 |                      |
| Suriname | Suriname Vital Registration - Deaths 2004 ICD10 as it appears in World Health Organization (WHO). WHO Mortality Database Version February 2014. Geneva, Switzerland: World Health Organization (WHO), 2014.                                                                                                                                                                                                                     | 2004                 |                      |
| Suriname | Suriname Vital Registration - Deaths 2005 ICD10 as it appears in World Health Organization (WHO). WHO Mortality Database Version February 2014. Geneva, Switzerland: World Health Organization (WHO), 2014.                                                                                                                                                                                                                     | 2005                 |                      |
| Suriname | World Health Organization (WHO). Retrospective Measles Data on Supplementary Immunization Activities. Geneva, Switzerland: World Health Organization (WHO).                                                                                                                                                                                                                                                                     | 2005, 2007, 2010     |                      |
| Suriname | General Statistical Office (Suriname), United Nations Children's Fund (UNICEF). Suriname Multiple Indicator Cluster Survey 2006. New York, United States: United Nations Children's Fund (UNICEF).                                                                                                                                                                                                                              | 2006                 |                      |
| Suriname | Suriname Vital Registration - Deaths 2006 ICD10 as it appears in World Health Organization (WHO). WHO Mortality Database Version February 2014. Geneva, Switzerland: World Health Organization (WHO), 2014.                                                                                                                                                                                                                     | 2006                 |                      |
| Suriname | Fassio E, Díaz S, Santa C, Reig ME, Martínez Artola Y, Alves de Mattos A, Míguez C, Galizzi J, Zapata R, Ridruejo E, de Souza FC, Hernández N, Pinchuk L, Multicenter Group for Study of Hepatocarcinoma in Latin America, Asociación Latinoamericana para el Estudio del Hígado (ALEH). Etiology of hepatocellular carcinoma in Latin America: a prospective, multicenter, international study. Ann Hepatol. 2010; 9(1): 63-9. | 2006-2008            | *                    |
| Suriname | Centre for Research on the Epidemiology of Disasters (CRED). EM-DAT: The OFDA/CRED International Disaster Database. Brussels, Belgium: Catholic University of Leuven.                                                                                                                                                                                                                                                           | 2006, 2008           |                      |
| Suriname | Suriname Vital Registration - Deaths 2007 ICD10 as it appears in World Health Organization (WHO). WHO Mortality Database Version February 2014. Geneva, Switzerland: World Health Organization (WHO), 2014.                                                                                                                                                                                                                     | 2007                 |                      |
| Suriname | Suriname Vital Registration - Deaths 2008 ICD10 as it appears in World Health Organization (WHO). WHO Mortality Database Version February 2014. Geneva, Switzerland: World Health Organization (WHO), 2014.                                                                                                                                                                                                                     | 2008                 |                      |

**Web Table 32 - Comprehensive citation list**

| Country   | Citation                                                                                                                                                                                                                                                      | Year*                       | New for GBD 2013 (*) |
|-----------|---------------------------------------------------------------------------------------------------------------------------------------------------------------------------------------------------------------------------------------------------------------|-----------------------------|----------------------|
| Suriname  | Suriname Vital Registration - Deaths 2009 ICD10 as it appears in World Health Organization (WHO). WHO Mortality Database Version February 2014. Geneva, Switzerland: World Health Organization (WHO), 2014.                                                   | 2009                        |                      |
| Swaziland | Central Statistical Office (Swaziland). Swaziland Population and Housing Census 1966.                                                                                                                                                                         | 1966                        |                      |
| Swaziland | Central Statistical Office (Swaziland). Swaziland Population and Housing Census 1976.                                                                                                                                                                         | 1976                        |                      |
| Swaziland | Meheus A, Friedman F, Van Dyck E, Guyver T. Genital infections in prenatal and family planning attendants in Swaziland. East Afr Med J. 1980; 57(3): 212-7.                                                                                                   | 1980                        |                      |
| Swaziland | Institute for Health Metrics and Evaluation (IHME), Joint United Nations Program on HIV/AIDS (UNAIDS). Institute for Health Metrics and Evaluation HIV Mortality Estimates Based on the UNAIDS Spectrum Model Framework.                                      | 1980-2013                   | *                    |
| Swaziland | United Nations Children's Fund (UNICEF), World Health Organization (WHO). WHO and UNICEF Reported Disease Incidence Time Series - Measles. Geneva, Switzerland: World Health Organization (WHO).                                                              | 1981-2013                   |                      |
| Swaziland | United Nations Children's Fund (UNICEF), World Health Organization (WHO). WHO and UNICEF Reported Disease Incidence Time Series - Pertussis. Geneva, Switzerland: World Health Organization (WHO).                                                            | 1982-2013                   |                      |
| Swaziland | Centre for Research on the Epidemiology of Disasters (CRED). EM-DAT: The OFDA/CRED International Disaster Database. Brussels, Belgium: Catholic University of Leuven.                                                                                         | 1983-1984, 2006-2007        |                      |
| Swaziland | Central Statistical Office (Swaziland), United Nations Department for Technical Cooperation and Development (UNDTCD). Swaziland Population Census 1986.                                                                                                       | 1986                        |                      |
| Swaziland | Guinness LF, Sibandze S, McGrath E, Cornelis AL. Influence of antenatal screening on perinatal mortality caused by syphilis in Swaziland. Genitourin Med. 1988; 64(5): 294-7.                                                                                 | 1986                        |                      |
| Swaziland | United Nations Office on Drugs and Crime (UNODC). United Nations Surveys on Crime Trends and the Operations of Criminal Justice Systems 1970-2006 as provided by Kavi Bhalla. [Unpublished]                                                                   | 1986-1994                   |                      |
| Swaziland | Department of Peace and Conflict Research, Uppsala University. UCDP One-Sided Violence Database Version 1.4, 2013. Uppsala, Sweden: Department of Peace and Conflict Research, Uppsala University, 2013.                                                      | 1989                        | *                    |
| Swaziland | Centre for Health Informatics and Multiprofessional Education, University College London. Modell's Haemoglobinopathologist's Almanac. London, United Kingdom: Centre for Health Informatics and Multiprofessional Education, University College London, 2008. | 1990-2003                   |                      |
| Swaziland | World Health Organization Regional Office for Africa. HIV/AIDS Epidemiological Surveillance Update for the WHO African Region. World Health Organization Regional Office for Africa, 2003.                                                                    | 1994, 1996, 1998, 2000-2002 |                      |
| Swaziland | United Nations Office on Drugs and Crime (UNODC). United Nations Office on Drugs and Crime Global Study on Homicides 2011. Vienna, Austria: United Nations Office on Drugs and Crime (UNODC), 2011.                                                           | 1995-2004                   |                      |
| Swaziland | World Health Organization (WHO). Yellow Fever Reported Cases, WHO Vaccine-Preventable Diseases: Monitoring System. Geneva, Switzerland: World Health Organization (WHO).                                                                                      | 1995-1997, 1999, 2004-2009  |                      |
| Swaziland | Swaziland Population and Housing Census 1997 as it appears in United Nations Statistics Division (UNSD). United Nations Demographic Yearbook. New York City, United States: United Nations Statistics Division (UNSD).                                        | 1997                        |                      |
| Swaziland | Measles Supplementary Immunization Activity Data as provided by the World Health Organization. [Unpublished].                                                                                                                                                 | 1998-1999                   |                      |
| Swaziland | Central Statistical Office (Swaziland), United Nations Children's Fund (UNICEF). Swaziland Multiple Indicator Cluster Survey 2000. New York, United States: United Nations Children's Fund (UNICEF).                                                          | 2000                        |                      |



**Web Table 32 - Comprehensive citation list**

| Country   | Citation                                                                                                                                                                                                                                               | Year*                       | New for GBD 2013 (*) |
|-----------|--------------------------------------------------------------------------------------------------------------------------------------------------------------------------------------------------------------------------------------------------------|-----------------------------|----------------------|
| Swaziland | Joint United Nations Program on HIV/AIDS (UNAIDS), United Nations Children's Fund (UNICEF), World Health Organization (WHO). Swaziland Epidemiological Fact Sheet on HIV/AIDS and STIs 2004.                                                           | 2002                        |                      |
| Swaziland | World Health Organization (WHO). Retrospective Measles Data on Supplementary Immunization Activities. Geneva, Switzerland: World Health Organization (WHO).                                                                                            | 2002, 2006, 2009-2010, 2013 |                      |
| Swaziland | Central Statistical Office (Swaziland), Macro International, Inc. Swaziland Demographic and Health Survey 2006-2007. Calverton, United States: Macro International, Inc.                                                                               | 2006-2007                   |                      |
| Swaziland | Swaziland Population and Housing Census 2007 as it appears in United Nations Statistics Division (UNSD). United Nations Demographic Yearbook 2009-2010. New York City, United States: United Nations Statistics Division (UNSD), 2011.                 | 2007                        |                      |
| Swaziland | Joint United Nations Program on HIV/AIDS (UNAIDS), Ministry of Health (Swaziland). Swaziland Monitoring the Declaration of the Commitment on HIV and AIDS (UNGASS) 2012. Geneva, Switzerland: Joint United Nations Program on HIV/AIDS (UNAIDS), 2010. | 2009                        |                      |
| Swaziland | Central Statistical Office (Swaziland), United Nations Children's Fund (UNICEF). Swaziland Multiple Indicator Cluster Survey 2010. New York, United States: United Nations Children's Fund (UNICEF).                                                   | 2010                        |                      |
| Sweden    | Max Planck Institute for Demographic Research, University of California. Human Mortality Database. Berkeley, USA: University of California; Rostock, Germany: Max Planck Institute for Demographic Research.                                           | 1950-2011                   |                      |
| Sweden    | Sweden Vital Registration - Deaths 1951 ICD7 as it appears in World Health Organization (WHO). WHO Mortality Database Version February 2014. Geneva, Switzerland: World Health Organization (WHO), 2014.                                               | 1951                        |                      |
| Sweden    | Sweden Vital Registration - Deaths 1952 ICD7 as it appears in World Health Organization (WHO). WHO Mortality Database Version February 2014. Geneva, Switzerland: World Health Organization (WHO), 2014.                                               | 1952                        |                      |
| Sweden    | Sweden Vital Registration - Deaths 1953 ICD7 as it appears in World Health Organization (WHO). WHO Mortality Database Version February 2014. Geneva, Switzerland: World Health Organization (WHO), 2014.                                               | 1953                        |                      |
| Sweden    | Sweden Vital Registration - Deaths 1954 ICD7 as it appears in World Health Organization (WHO). WHO Mortality Database Version February 2014. Geneva, Switzerland: World Health Organization (WHO), 2014.                                               | 1954                        |                      |
| Sweden    | Sweden Vital Registration - Deaths 1955 ICD7 as it appears in World Health Organization (WHO). WHO Mortality Database Version February 2014. Geneva, Switzerland: World Health Organization (WHO), 2014.                                               | 1955                        |                      |
| Sweden    | Sweden Vital Registration - Deaths 1956 ICD7 as it appears in World Health Organization (WHO). WHO Mortality Database Version February 2014. Geneva, Switzerland: World Health Organization (WHO), 2014.                                               | 1956                        |                      |
| Sweden    | Sweden Vital Registration - Deaths 1957 ICD7 as it appears in World Health Organization (WHO). WHO Mortality Database Version February 2014. Geneva, Switzerland: World Health Organization (WHO), 2014.                                               | 1957                        |                      |
| Sweden    | Sweden Vital Registration - Deaths 1958 ICD7 as it appears in World Health Organization (WHO). WHO Mortality Database Version February 2014. Geneva, Switzerland: World Health Organization (WHO), 2014.                                               | 1958                        |                      |

**Web Table 32 - Comprehensive citation list**

| Country | Citation                                                                                                                                                                                                 | Year* | New for GBD 2013 (*) |
|---------|----------------------------------------------------------------------------------------------------------------------------------------------------------------------------------------------------------|-------|----------------------|
| Sweden  | Sweden Vital Registration - Deaths 1959 ICD7 as it appears in World Health Organization (WHO). WHO Mortality Database Version February 2014. Geneva, Switzerland: World Health Organization (WHO), 2014. | 1959  |                      |
| Sweden  | Sweden Vital Registration - Deaths 1960 ICD7 as it appears in World Health Organization (WHO). WHO Mortality Database Version February 2014. Geneva, Switzerland: World Health Organization (WHO), 2014. | 1960  |                      |
| Sweden  | Sweden Vital Registration - Deaths 1961 ICD7 as it appears in World Health Organization (WHO). WHO Mortality Database Version February 2014. Geneva, Switzerland: World Health Organization (WHO), 2014. | 1961  |                      |
| Sweden  | Sweden Vital Registration - Deaths 1962 ICD7 as it appears in World Health Organization (WHO). WHO Mortality Database Version February 2014. Geneva, Switzerland: World Health Organization (WHO), 2014. | 1962  |                      |
| Sweden  | Sweden Vital Registration - Deaths 1963 ICD7 as it appears in World Health Organization (WHO). WHO Mortality Database Version February 2014. Geneva, Switzerland: World Health Organization (WHO), 2014. | 1963  |                      |
| Sweden  | Sweden Vital Registration - Deaths 1964 ICD7 as it appears in World Health Organization (WHO). WHO Mortality Database Version February 2014. Geneva, Switzerland: World Health Organization (WHO), 2014. | 1964  |                      |
| Sweden  | Sweden Vital Registration - Deaths 1965 ICD7 as it appears in World Health Organization (WHO). WHO Mortality Database Version February 2014. Geneva, Switzerland: World Health Organization (WHO), 2014. | 1965  |                      |
| Sweden  | Sweden Vital Registration - Deaths 1966 ICD7 as it appears in World Health Organization (WHO). WHO Mortality Database Version February 2014. Geneva, Switzerland: World Health Organization (WHO), 2014. | 1966  |                      |
| Sweden  | Sweden Vital Registration - Deaths 1967 ICD7 as it appears in World Health Organization (WHO). WHO Mortality Database Version February 2014. Geneva, Switzerland: World Health Organization (WHO), 2014. | 1967  |                      |
| Sweden  | Sweden Vital Registration - Deaths 1968 ICD7 as it appears in World Health Organization (WHO). WHO Mortality Database Version February 2014. Geneva, Switzerland: World Health Organization (WHO), 2014. | 1968  |                      |
| Sweden  | Sweden Vital Registration - Deaths 1969 ICD8 as it appears in World Health Organization (WHO). WHO Mortality Database Version February 2014. Geneva, Switzerland: World Health Organization (WHO), 2014. | 1969  |                      |
| Sweden  | Sweden Vital Registration - Deaths 1970 ICD8 as it appears in World Health Organization (WHO). WHO Mortality Database Version February 2014. Geneva, Switzerland: World Health Organization (WHO), 2014. | 1970  |                      |
| Sweden  | Sweden Vital Registration - Deaths 1971 ICD8 as it appears in World Health Organization (WHO). WHO Mortality Database Version February 2014. Geneva, Switzerland: World Health Organization (WHO), 2014. | 1971  |                      |
| Sweden  | Sweden Vital Registration - Deaths 1972 ICD8 as it appears in World Health Organization (WHO). WHO Mortality Database Version February 2014. Geneva, Switzerland: World Health Organization (WHO), 2014. | 1972  |                      |

**Web Table 32 - Comprehensive citation list**

| Country | Citation                                                                                                                                                                                                                                                                                              | Year*                           | New for GBD 2013 (*) |
|---------|-------------------------------------------------------------------------------------------------------------------------------------------------------------------------------------------------------------------------------------------------------------------------------------------------------|---------------------------------|----------------------|
| Sweden  | Sweden Vital Registration - Deaths 1973 ICD8 as it appears in World Health Organization (WHO). WHO Mortality Database Version February 2014. Geneva, Switzerland: World Health Organization (WHO), 2014.                                                                                              | 1973                            |                      |
| Sweden  | Sweden Vital Registration - Deaths 1974 ICD8 as it appears in World Health Organization (WHO). WHO Mortality Database Version February 2014. Geneva, Switzerland: World Health Organization (WHO), 2014.                                                                                              | 1974                            |                      |
| Sweden  | Sweden Vital Registration - Deaths 1975 ICD8 as it appears in World Health Organization (WHO). WHO Mortality Database Version February 2014. Geneva, Switzerland: World Health Organization (WHO), 2014.                                                                                              | 1975                            |                      |
| Sweden  | Sweden Vital Registration - Deaths 1976 ICD8 as it appears in World Health Organization (WHO). WHO Mortality Database Version February 2014. Geneva, Switzerland: World Health Organization (WHO), 2014.                                                                                              | 1976                            |                      |
| Sweden  | Sweden Vital Registration - Deaths 1977 ICD8 as it appears in World Health Organization (WHO). WHO Mortality Database Version February 2014. Geneva, Switzerland: World Health Organization (WHO), 2014.                                                                                              | 1977                            |                      |
| Sweden  | Centre for Research on the Epidemiology of Disasters (CRED). EM-DAT: The OFDA/CRED International Disaster Database. Brussels, Belgium: Catholic University of Leuven.                                                                                                                                 | 1977, 1985, 1999, 2002, 2005    |                      |
| Sweden  | Sweden Vital Registration - Deaths 1978 ICD8 as it appears in World Health Organization (WHO). WHO Mortality Database Version February 2014. Geneva, Switzerland: World Health Organization (WHO), 2014.                                                                                              | 1978                            |                      |
| Sweden  | Sweden Vital Registration - Deaths 1979 ICD8 as it appears in World Health Organization (WHO). WHO Mortality Database Version February 2014. Geneva, Switzerland: World Health Organization (WHO), 2014.                                                                                              | 1979                            |                      |
| Sweden  | Sweden Vital Registration - Deaths 1980 ICD8 as it appears in World Health Organization (WHO). WHO Mortality Database Version February 2014. Geneva, Switzerland: World Health Organization (WHO), 2014.                                                                                              | 1980                            |                      |
| Sweden  | Institute for Health Metrics and Evaluation. Institute for Health Metrics and Evaluation Cancer Registry Database. [Unpublished].                                                                                                                                                                     | 1980-2010                       |                      |
| Sweden  | Ferlay J, Parkin DM, Curado MP, Bray F, Edwards B, Shin HR and Forman D. Cancer Incidence in Five Continents, Volumes I to IX: IARC CancerBase No. 9 [Internet]. Lyon, France: International Agency for Research on Cancer; 2010. Available from: <a href="http://ci5.iarc.fr">http://ci5.iarc.fr</a> | 1980-2002                       |                      |
| Sweden  | Institute for Health Metrics and Evaluation (IHME), Joint United Nations Program on HIV/AIDS (UNAIDS). Institute for Health Metrics and Evaluation HIV Mortality Estimates Based on the UNAIDS Spectrum Model Framework.                                                                              | 1980-2013                       | *                    |
| Sweden  | United Nations Children's Fund (UNICEF), World Health Organization (WHO). WHO and UNICEF Reported Disease Incidence Time Series - Pertussis. Geneva, Switzerland: World Health Organization (WHO).                                                                                                    | 1980-1997, 2000-2013            |                      |
| Sweden  | United Nations Children's Fund (UNICEF), World Health Organization (WHO). WHO and UNICEF Reported Disease Incidence Time Series - Measles. Geneva, Switzerland: World Health Organization (WHO).                                                                                                      | 1980-1986, 1988-1997, 2000-2013 |                      |
| Sweden  | Parkin DM, International Agency for Research on Cancer, International Association of Cancer Registries. Cancer Incidence in Five Continents. Vol. I to VIII. Lyon, France, IARC Press, 2005.                                                                                                          | 1980, 1985, 1990, 1995          |                      |
| Sweden  | Sweden Vital Registration - Deaths 1981 ICD8 as it appears in World Health Organization (WHO). WHO Mortality Database Version February 2014. Geneva, Switzerland: World Health Organization (WHO), 2014.                                                                                              | 1981                            |                      |

**Web Table 32 - Comprehensive citation list**

| Country | Citation                                                                                                                                                                                                                                                                                                                       | Year*     | New for GBD 2013 (*) |
|---------|--------------------------------------------------------------------------------------------------------------------------------------------------------------------------------------------------------------------------------------------------------------------------------------------------------------------------------|-----------|----------------------|
| Sweden  | Sweden Vital Registration - Deaths 1982 ICD8 as it appears in World Health Organization (WHO). WHO Mortality Database Version February 2014. Geneva, Switzerland: World Health Organization (WHO), 2014.                                                                                                                       | 1982      |                      |
| Sweden  | Sweden Vital Registration - Deaths 1983 ICD8 as it appears in World Health Organization (WHO). WHO Mortality Database Version February 2014. Geneva, Switzerland: World Health Organization (WHO), 2014.                                                                                                                       | 1983      |                      |
| Sweden  | Sylvan SP. The high rate of antibodies to hepatitis E virus in young, intravenous drug-abusers with acute hepatitis B-virus infection in a Swedish community: a study of hepatitis markers in individuals with intravenously or sexually acquired hepatitis B-virus infection. <i>Scand J Infect Dis.</i> 1998; 30(4): 429-30. | 1983-1986 |                      |
| Sweden  | Sweden Vital Registration - Deaths 1984 ICD8 as it appears in World Health Organization (WHO). WHO Mortality Database Version February 2014. Geneva, Switzerland: World Health Organization (WHO), 2014.                                                                                                                       | 1984      |                      |
| Sweden  | Sweden Vital Registration - Deaths 1985 ICD8 as it appears in World Health Organization (WHO). WHO Mortality Database Version February 2014. Geneva, Switzerland: World Health Organization (WHO), 2014.                                                                                                                       | 1985      |                      |
| Sweden  | Sweden Vital Registration - Deaths 1986 ICD8 as it appears in World Health Organization (WHO). WHO Mortality Database Version February 2014. Geneva, Switzerland: World Health Organization (WHO), 2014.                                                                                                                       | 1986      |                      |
| Sweden  | Skoog I, Nilsson L, Palmertz B, Andreasson LA, Svanborg A. A population-based study of dementia in 85-year-olds. <i>N Engl J Med.</i> 1993; 328(3): 153-8.                                                                                                                                                                     | 1986-1987 |                      |
| Sweden  | Skoog I, Andreasson LA, Landahl S, Lernfelt B. A population-based study on blood pressure and brain atrophy in 85-year-olds. <i>Hypertension.</i> 1998; 32(3): 404-9.                                                                                                                                                          | 1986-1989 |                      |
| Sweden  | Sweden Vital Registration - Deaths 1987 ICD9 as it appears in World Health Organization (WHO). WHO Mortality Database Version February 2014. Geneva, Switzerland: World Health Organization (WHO), 2014.                                                                                                                       | 1987      |                      |
| Sweden  | Fratiglioni L, Grut M, Forsell Y, Viitanen M, Grafström M, Holmén K, Ericsson K, Bäckman L, Ahlbom A, Winblad B. Prevalence of Alzheimer's disease and other dementias in an elderly urban population: relationship with age, sex, and education. <i>Neurology.</i> 1991; 41(12): 1886-92.                                     | 1987      |                      |
| Sweden  | Agüero-Torres H, Fratiglioni L, Guo Z, Viitanen M, Winblad B. Mortality from dementia in advanced age: a 5-year follow-up study of incident dementia cases. <i>J Clin Epidemiol.</i> 1999; 52(8): 737-43.                                                                                                                      | 1987-1992 |                      |
| Sweden  | Fratiglioni L, Viitanen M, von Strauss E, Tontodonati V, Herlitz A, Winblad B. Very old women at highest risk of dementia and Alzheimer's disease: incidence data from the Kungsholmen Project, Stockholm. <i>Neurology.</i> 1997; 48(1): 132-8.                                                                               | 1987-1992 |                      |
| Sweden  | Sweden Vital Registration - Deaths 1988 ICD9 as it appears in World Health Organization (WHO). WHO Mortality Database Version February 2014. Geneva, Switzerland: World Health Organization (WHO), 2014.                                                                                                                       | 1988      |                      |
| Sweden  | Schiano V, Laurenzano E, Brevetti G, De Maio JI, Lanero S, Scopacasa F, Chiariello M. Omega-3 polyunsaturated fatty acid in peripheral arterial disease: effect on lipid pattern, disease severity, inflammation profile, and endothelial function. <i>Clin Nutr.</i> 2008; 27(2): 241-7.                                      | 1988-2005 |                      |
| Sweden  | Hansson BG, Hansson HB, Ohlin AK, Nordenfelt E. Screening for anti-HIV and HBsAg in pooled sera from a clinical chemistry section as a tool for epidemiological survey. <i>Scand J Infect Dis.</i> 1993; 25(3): 297-303.                                                                                                       | 1988-1991 |                      |

**Web Table 32 - Comprehensive citation list**

| Country | Citation                                                                                                                                                                                                                                                                                                                                                                                                                                                                                                                                                                                                                                                                                                                     | Year*            | New for GBD 2013 (*) |
|---------|------------------------------------------------------------------------------------------------------------------------------------------------------------------------------------------------------------------------------------------------------------------------------------------------------------------------------------------------------------------------------------------------------------------------------------------------------------------------------------------------------------------------------------------------------------------------------------------------------------------------------------------------------------------------------------------------------------------------------|------------------|----------------------|
| Sweden  | Struve J, Giesecke J, Olcen P, von Sydow M, Weiland O. Prevalence of hepatitis B virus markers in Sweden: a community-based serosurvey of 4,000 young Swedish adults. <i>Am J Epidemiol.</i> 1992; 135(4): 409-17.                                                                                                                                                                                                                                                                                                                                                                                                                                                                                                           | 1988-1989        |                      |
| Sweden  | Modell B, Darlison M, Birgens H, Cario H, Faustino P, Giordano PC, Gulbis B, Hopmeier P, Lena-Russo D, Romao L, Theodorsson E. Epidemiology of haemoglobin disorders in Europe: an overview. <i>Scand J Clin Lab Invest.</i> 2007; 67(1): 39-69.                                                                                                                                                                                                                                                                                                                                                                                                                                                                             | 1988, 2006       |                      |
| Sweden  | Centre for Health Informatics and Multiprofessional Education, University College London. Modell's Haemoglobinopathologist's Almanac. London, United Kingdom: Centre for Health Informatics and Multiprofessional Education, University College London, 2008.                                                                                                                                                                                                                                                                                                                                                                                                                                                                | 1988, 2003, 2006 |                      |
| Sweden  | Sweden Vital Registration - Deaths 1989 ICD9 as it appears in World Health Organization (WHO). WHO Mortality Database Version February 2014. Geneva, Switzerland: World Health Organization (WHO), 2014.                                                                                                                                                                                                                                                                                                                                                                                                                                                                                                                     | 1989             |                      |
| Sweden  | Sweden Vital Registration - Deaths 1990 ICD9 as it appears in World Health Organization (WHO). WHO Mortality Database Version February 2014. Geneva, Switzerland: World Health Organization (WHO), 2014.                                                                                                                                                                                                                                                                                                                                                                                                                                                                                                                     | 1990             |                      |
| Sweden  | Böttiger M, Christenson B. [First study of hepatitis occurrence in Sweden: low immunity is associated with susceptibility to infection]. <i>Lakartidningen.</i> 1998; 95(16): 1801-4.                                                                                                                                                                                                                                                                                                                                                                                                                                                                                                                                        | 1990-1991        |                      |
| Sweden  | Sweden Vital Registration - Deaths 1991 ICD9 as it appears in World Health Organization (WHO). WHO Mortality Database Version February 2014. Geneva, Switzerland: World Health Organization (WHO), 2014.                                                                                                                                                                                                                                                                                                                                                                                                                                                                                                                     | 1991             |                      |
| Sweden  | Sweden Vital Registration - Deaths 1992 ICD9 as it appears in World Health Organization (WHO). WHO Mortality Database Version February 2014. Geneva, Switzerland: World Health Organization (WHO), 2014.                                                                                                                                                                                                                                                                                                                                                                                                                                                                                                                     | 1992             |                      |
| Sweden  | Von Strauss E, Viitanen M, De Ronchi D, Winblad B, Fratiglioni L. Aging and the occurrence of dementia: findings from a population-based cohort with a large sample of nonagenarians. <i>Arch Neurol.</i> 1999; 56(5): 587-92.                                                                                                                                                                                                                                                                                                                                                                                                                                                                                               | 1992             |                      |
| Sweden  | Trichopoulos D, Bamia C, Lagiou P, Fedirko V, Trepo E, Jenab M, Pischon T, Nöthlings U, Overved K, Tjønneland A, Outzen M, Clavel-Chapelon F, Kaaks R, Lukanova A, Boeing H, Aleksandrova K, Benetou V, Zylis D, Palli D, Pala V, Panico S, Tumino R, Sacerdote C, Bueno-De-Mesquita HB, Van Kranen HJ, Peeters PHM, Lund E, Quirós JR, González CA, Sanchez Perez M-J, Navarro C, Dorronsoro M, Barricarte A, Lindkvist B, Regnér S, Werner M, Hallmans G, Khaw K-T, Wareham N, Key T, Romieu I, Chuang S-C, Murphy N, Boffetta P, Trichopoulou A, Riboli E. Hepatocellular carcinoma risk factors and disease burden in a European cohort: a nested case-control study. <i>J Natl Cancer Inst.</i> 2011; 103(22): 1686-95. | 1992-2006        | *                    |
| Sweden  | Sweden Vital Registration - Deaths 1993 ICD9 as it appears in World Health Organization (WHO). WHO Mortality Database Version February 2014. Geneva, Switzerland: World Health Organization (WHO), 2014.                                                                                                                                                                                                                                                                                                                                                                                                                                                                                                                     | 1993             |                      |
| Sweden  | Sweden Vital Registration - Deaths 1994 ICD9 as it appears in World Health Organization (WHO). WHO Mortality Database Version February 2014. Geneva, Switzerland: World Health Organization (WHO), 2014.                                                                                                                                                                                                                                                                                                                                                                                                                                                                                                                     | 1994             |                      |
| Sweden  | Sweden Vital Registration - Deaths 1995 ICD9 as it appears in World Health Organization (WHO). WHO Mortality Database Version February 2014. Geneva, Switzerland: World Health Organization (WHO), 2014.                                                                                                                                                                                                                                                                                                                                                                                                                                                                                                                     | 1995             |                      |

**Web Table 32 - Comprehensive citation list**

| Country | Citation                                                                                                                                                                                                                                    | Year*               | New for GBD 2013 (*) |
|---------|---------------------------------------------------------------------------------------------------------------------------------------------------------------------------------------------------------------------------------------------|---------------------|----------------------|
| Sweden  | Börjesson-Hanson A, Gustafson D, Skoog I. Five-year mortality in relation to dementia and cognitive function in 95-year-olds. <i>Neurology</i> . 2007; 69(22): 2069-75.                                                                     | 1995-2000           |                      |
| Sweden  | Olsen B, Axelsson-Olsson D, Thelin A, Weiland O. Unexpected high prevalence of IgG-antibodies to hepatitis E virus in Swedish pig farmers and controls. <i>Scand J Infect Dis</i> . 2006; 38(1): 55-8.                                      | 1995-1997           | *                    |
| Sweden  | Sweden Vital Registration - Deaths 1996 ICD9 as it appears in World Health Organization (WHO). WHO Mortality Database Version February 2014. Geneva, Switzerland: World Health Organization (WHO), 2014.                                    | 1996                |                      |
| Sweden  | Börjesson-Hanson A, Waern M, Ostling S, Gustafson D, Skoog I. One-month prevalence of mental disorders in a population sample of 95-year olds. <i>Am J Geriatr Psychiatry</i> . 2011; 19(3): 284-91.                                        | 1996-1998           |                      |
| Sweden  | Sweden Vital Registration - Deaths 1997 ICD10 as it appears in World Health Organization (WHO). WHO Mortality Database Version February 2014. Geneva, Switzerland: World Health Organization (WHO), 2014.                                   | 1997                |                      |
| Sweden  | Sweden Vital Registration - Deaths 1998 ICD10 as it appears in World Health Organization (WHO). WHO Mortality Database Version February 2014. Geneva, Switzerland: World Health Organization (WHO), 2014.                                   | 1998                |                      |
| Sweden  | Andersson M, Guo X, Börjesson-Hanson A, Liebetrau M, Östling S, Skoog I. A population-based study on dementia and stroke in 97 year olds. <i>Age Ageing</i> . 2012; 41(4): 529-33.                                                          | 1998-2007           |                      |
| Sweden  | Börjesson-Hanson A, Edin E, Gislason T, Skoog I. The prevalence of dementia in 95 year olds. <i>Neurology</i> . 2004; 63(12): 2436-8.                                                                                                       | 1998-2001           |                      |
| Sweden  | Sweden Vital Registration - Deaths 1999 ICD10 as it appears in World Health Organization (WHO). WHO Mortality Database Version February 2014. Geneva, Switzerland: World Health Organization (WHO), 2014.                                   | 1999                |                      |
| Sweden  | Sweden Vital Registration - Deaths 2000 ICD10 as it appears in World Health Organization (WHO). WHO Mortality Database Version February 2014. Geneva, Switzerland: World Health Organization (WHO), 2014.                                   | 2000                |                      |
| Sweden  | Curado MP, Edwards B, Shin HR, Storm H, Ferlay J, Heanue M and Boyle P, eds (2007). <i>Cancer Incidence in Five Continents, Vol. IX Periodic Data</i> (electronic version). Lyon, IARC. <a href="http://ci5.iarc.fr">http://ci5.iarc.fr</a> | 2000                |                      |
| Sweden  | World Health Organization (WHO). <i>Yellow Fever Reported Cases, WHO Vaccine-Preventable Diseases: Monitoring System</i> . Geneva, Switzerland: World Health Organization (WHO).                                                            | 2000-2009           |                      |
| Sweden  | Mathillas J, Lövheim H, Gustafson Y. Increasing prevalence of dementia among very old people. <i>Age Ageing</i> . 2011; 40(2): 243-9.                                                                                                       | 2000-2002,2005-2007 |                      |
| Sweden  | Sacuiu S, Gustafson D, Sjögren M, Guo X, Ostling S, Johansson B, Skoog I. Secular changes in cognitive predictors of dementia and mortality in 70-year-olds. <i>Neurology</i> . 2010; 75(9): 779-85.                                        | 2000-2001           |                      |
| Sweden  | Sweden Vital Registration - Deaths 2001 ICD10 as it appears in World Health Organization (WHO). WHO Mortality Database Version February 2014. Geneva, Switzerland: World Health Organization (WHO), 2014.                                   | 2001                |                      |
| Sweden  | Sweden Vital Registration - Deaths 2002 ICD10 as it appears in World Health Organization (WHO). WHO Mortality Database Version February 2014. Geneva, Switzerland: World Health Organization (WHO), 2014.                                   | 2002                |                      |
| Sweden  | Sweden Vital Registration - Deaths 2003 ICD10 as it appears in World Health Organization (WHO). WHO Mortality Database Version February 2014. Geneva, Switzerland: World Health Organization (WHO), 2014.                                   | 2003                |                      |



**Web Table 32 - Comprehensive citation list**

| Country     | Citation                                                                                                                                                                                                                                                                                         | Year*     | New for GBD 2013 (*) |
|-------------|--------------------------------------------------------------------------------------------------------------------------------------------------------------------------------------------------------------------------------------------------------------------------------------------------|-----------|----------------------|
| Sweden      | Association of Nordic Cancer Registries (ANCR). Sweden NORDCAN Cancer Incidence Data Tables, Age-Specific by Countries. Copenhagen, Denmark: Association of Nordic Cancer Registries (ANCR).                                                                                                     | 2003-2010 | *                    |
| Sweden      | Sweden Vital Registration - Deaths 2004 ICD10 as it appears in World Health Organization (WHO). WHO Mortality Database Version February 2014. Geneva, Switzerland: World Health Organization (WHO), 2014.                                                                                        | 2004      |                      |
| Sweden      | Sweden Vital Registration - Deaths 2005 ICD10 as it appears in World Health Organization (WHO). WHO Mortality Database Version February 2014. Geneva, Switzerland: World Health Organization (WHO), 2014.                                                                                        | 2005      |                      |
| Sweden      | Forman D, Bray F, Brewster DH, Gombe Mbalawa C, Kohler B, Piñeros M, Steliarova-Foucher E, Swaminathan R and Ferlay J, eds (2013). Cancer Incidence in Five Continents, Vol. X Summary Database (electronic version). Lyon, IARC. <a href="http://ci5.iarc.fr">http://ci5.iarc.fr</a>            | 2005      |                      |
| Sweden      | Sweden Vital Registration - Deaths 2006 ICD10 as it appears in World Health Organization (WHO). WHO Mortality Database Version February 2014. Geneva, Switzerland: World Health Organization (WHO), 2014.                                                                                        | 2006      |                      |
| Sweden      | Sweden Vital Registration - Deaths 2007 ICD10 as it appears in World Health Organization (WHO). WHO Mortality Database Version February 2014. Geneva, Switzerland: World Health Organization (WHO), 2014.                                                                                        | 2007      |                      |
| Sweden      | Sweden Vital Registration - Deaths 2008 ICD10 as it appears in World Health Organization (WHO). WHO Mortality Database Version February 2014. Geneva, Switzerland: World Health Organization (WHO), 2014.                                                                                        | 2008      |                      |
| Sweden      | EUVAC-NET. EUVAC-NET Pertussis Surveillance Report 2008. Stockholm, Sweden: European Centre for Disease Prevention and Control, 2009.                                                                                                                                                            | 2008      |                      |
| Sweden      | Sweden Vital Registration - Deaths 2009 ICD10 as it appears in World Health Organization (WHO). WHO Mortality Database Version February 2014. Geneva, Switzerland: World Health Organization (WHO), 2014.                                                                                        | 2009      |                      |
| Sweden      | EUVAC-NET. EUVAC-NET Pertussis Surveillance Report 2009. Stockholm, Sweden: European Centre for Disease Prevention and Control, 2010.                                                                                                                                                            | 2009      |                      |
| Sweden      | Sweden Vital Registration - Deaths 2010 ICD10 as it appears in World Health Organization (WHO). WHO Mortality Database Version February 2014. Geneva, Switzerland: World Health Organization (WHO), 2014.                                                                                        | 2010      |                      |
| Sweden      | European Renal Association-European Dialysis and Transplant Association (ERA-EDTA). European Renal Association-European Dialysis and Transplant Association Registry Annual Report 2010. Parma, Italy: European Renal Association-European Dialysis and Transplant Association (ERA-EDTA), 2012. | 2010      | *                    |
| Sweden      | EUVAC-NET. EUVAC-NET Measles Surveillance Report 2010. Stockholm, Sweden: European Centre for Disease Prevention and Control, 2011.                                                                                                                                                              | 2010      |                      |
| Sweden      | European Renal Association-European Dialysis and Transplant Association (ERA-EDTA). European Renal Association-European Dialysis and Transplant Association Registry Annual Report 2011. Parma, Italy: European Renal Association-European Dialysis and Transplant Association (ERA-EDTA), 2013. | 2011      | *                    |
| Switzerland | Max Planck Institute for Demographic Research, University of California. Human Mortality Database. Berkeley, USA: University of California; Rostock, Germany: Max Planck Institute for Demographic Research.                                                                                     | 1950-2011 |                      |

**Web Table 32 - Comprehensive citation list**

| Country     | Citation                                                                                                                                                                                                      | Year*                                                                      | New for GBD 2013 (*) |
|-------------|---------------------------------------------------------------------------------------------------------------------------------------------------------------------------------------------------------------|----------------------------------------------------------------------------|----------------------|
| Switzerland | Switzerland Vital Registration - Deaths 1951 ICD7 as it appears in World Health Organization (WHO). WHO Mortality Database Version February 2014. Geneva, Switzerland: World Health Organization (WHO), 2014. | 1951                                                                       |                      |
| Switzerland | Centre for Research on the Epidemiology of Disasters (CRED). EM-DAT: The OFDA/CRED International Disaster Database. Brussels, Belgium: Catholic University of Leuven.                                         | 1951, 1965, 1968, 1970, 1975, 1987, 1990, 1993, 1999-2000, 2002, 2005-2007 |                      |
| Switzerland | Switzerland Vital Registration - Deaths 1952 ICD7 as it appears in World Health Organization (WHO). WHO Mortality Database Version February 2014. Geneva, Switzerland: World Health Organization (WHO), 2014. | 1952                                                                       |                      |
| Switzerland | Switzerland Vital Registration - Deaths 1953 ICD7 as it appears in World Health Organization (WHO). WHO Mortality Database Version February 2014. Geneva, Switzerland: World Health Organization (WHO), 2014. | 1953                                                                       |                      |
| Switzerland | Switzerland Vital Registration - Deaths 1954 ICD7 as it appears in World Health Organization (WHO). WHO Mortality Database Version February 2014. Geneva, Switzerland: World Health Organization (WHO), 2014. | 1954                                                                       |                      |
| Switzerland | Switzerland Vital Registration - Deaths 1955 ICD7 as it appears in World Health Organization (WHO). WHO Mortality Database Version February 2014. Geneva, Switzerland: World Health Organization (WHO), 2014. | 1955                                                                       |                      |
| Switzerland | Switzerland Vital Registration - Deaths 1956 ICD7 as it appears in World Health Organization (WHO). WHO Mortality Database Version February 2014. Geneva, Switzerland: World Health Organization (WHO), 2014. | 1956                                                                       |                      |
| Switzerland | Switzerland Vital Registration - Deaths 1957 ICD7 as it appears in World Health Organization (WHO). WHO Mortality Database Version February 2014. Geneva, Switzerland: World Health Organization (WHO), 2014. | 1957                                                                       |                      |
| Switzerland | Switzerland Vital Registration - Deaths 1958 ICD7 as it appears in World Health Organization (WHO). WHO Mortality Database Version February 2014. Geneva, Switzerland: World Health Organization (WHO), 2014. | 1958                                                                       |                      |
| Switzerland | Switzerland Vital Registration - Deaths 1959 ICD7 as it appears in World Health Organization (WHO). WHO Mortality Database Version February 2014. Geneva, Switzerland: World Health Organization (WHO), 2014. | 1959                                                                       |                      |
| Switzerland | Switzerland Census 1960 as it appears in United Nations Statistics Division (UNSD). United Nations Demographic Yearbook. New York City, United States: United Nations Statistics Division (UNSD).             | 1960                                                                       |                      |
| Switzerland | Switzerland Vital Registration - Deaths 1960 ICD7 as it appears in World Health Organization (WHO). WHO Mortality Database Version February 2014. Geneva, Switzerland: World Health Organization (WHO), 2014. | 1960                                                                       |                      |
| Switzerland | Switzerland Vital Registration - Deaths 1961 ICD7 as it appears in World Health Organization (WHO). WHO Mortality Database Version February 2014. Geneva, Switzerland: World Health Organization (WHO), 2014. | 1961                                                                       |                      |
| Switzerland | Switzerland Vital Registration - Deaths 1962 ICD7 as it appears in World Health Organization (WHO). WHO Mortality Database Version February 2014. Geneva, Switzerland: World Health Organization (WHO), 2014. | 1962                                                                       |                      |



**Web Table 32 - Comprehensive citation list**

| Country     | Citation                                                                                                                                                                                                      | Year* | New for GBD 2013 (*) |
|-------------|---------------------------------------------------------------------------------------------------------------------------------------------------------------------------------------------------------------|-------|----------------------|
| Switzerland | Switzerland Vital Registration - Deaths 1963 ICD7 as it appears in World Health Organization (WHO). WHO Mortality Database Version February 2014. Geneva, Switzerland: World Health Organization (WHO), 2014. | 1963  |                      |
| Switzerland | Switzerland Vital Registration - Deaths 1964 ICD7 as it appears in World Health Organization (WHO). WHO Mortality Database Version February 2014. Geneva, Switzerland: World Health Organization (WHO), 2014. | 1964  |                      |
| Switzerland | Switzerland Vital Registration - Deaths 1965 ICD7 as it appears in World Health Organization (WHO). WHO Mortality Database Version February 2014. Geneva, Switzerland: World Health Organization (WHO), 2014. | 1965  |                      |
| Switzerland | Switzerland Vital Registration - Deaths 1966 ICD7 as it appears in World Health Organization (WHO). WHO Mortality Database Version February 2014. Geneva, Switzerland: World Health Organization (WHO), 2014. | 1966  |                      |
| Switzerland | Switzerland Vital Registration - Deaths 1967 ICD7 as it appears in World Health Organization (WHO). WHO Mortality Database Version February 2014. Geneva, Switzerland: World Health Organization (WHO), 2014. | 1967  |                      |
| Switzerland | Switzerland Vital Registration - Deaths 1968 ICD7 as it appears in World Health Organization (WHO). WHO Mortality Database Version February 2014. Geneva, Switzerland: World Health Organization (WHO), 2014. | 1968  |                      |
| Switzerland | Switzerland Vital Registration - Deaths 1969 ICD8 as it appears in World Health Organization (WHO). WHO Mortality Database Version February 2014. Geneva, Switzerland: World Health Organization (WHO), 2014. | 1969  |                      |
| Switzerland | Switzerland Vital Registration - Deaths 1970 ICD8 as it appears in World Health Organization (WHO). WHO Mortality Database Version February 2014. Geneva, Switzerland: World Health Organization (WHO), 2014. | 1970  |                      |
| Switzerland | Switzerland Vital Registration - Deaths 1971 ICD8 as it appears in World Health Organization (WHO). WHO Mortality Database Version February 2014. Geneva, Switzerland: World Health Organization (WHO), 2014. | 1971  |                      |
| Switzerland | Switzerland Vital Registration - Deaths 1972 ICD8 as it appears in World Health Organization (WHO). WHO Mortality Database Version February 2014. Geneva, Switzerland: World Health Organization (WHO), 2014. | 1972  |                      |
| Switzerland | Switzerland Vital Registration - Deaths 1973 ICD8 as it appears in World Health Organization (WHO). WHO Mortality Database Version February 2014. Geneva, Switzerland: World Health Organization (WHO), 2014. | 1973  |                      |
| Switzerland | Switzerland Vital Registration - Deaths 1974 ICD8 as it appears in World Health Organization (WHO). WHO Mortality Database Version February 2014. Geneva, Switzerland: World Health Organization (WHO), 2014. | 1974  |                      |
| Switzerland | Switzerland Vital Registration - Deaths 1975 ICD8 as it appears in World Health Organization (WHO). WHO Mortality Database Version February 2014. Geneva, Switzerland: World Health Organization (WHO), 2014. | 1975  |                      |
| Switzerland | Switzerland Vital Registration - Deaths 1976 ICD8 as it appears in World Health Organization (WHO). WHO Mortality Database Version February 2014. Geneva, Switzerland: World Health Organization (WHO), 2014. | 1976  |                      |

**Web Table 32 - Comprehensive citation list**

| Country     | Citation                                                                                                                                                                                                                                                                                              | Year*                 | New for GBD 2013 (*) |
|-------------|-------------------------------------------------------------------------------------------------------------------------------------------------------------------------------------------------------------------------------------------------------------------------------------------------------|-----------------------|----------------------|
| Switzerland | Switzerland Vital Registration - Deaths 1977 ICD8 as it appears in World Health Organization (WHO). WHO Mortality Database Version February 2014. Geneva, Switzerland: World Health Organization (WHO), 2014.                                                                                         | 1977                  |                      |
| Switzerland | Switzerland Vital Registration - Deaths 1978 ICD8 as it appears in World Health Organization (WHO). WHO Mortality Database Version February 2014. Geneva, Switzerland: World Health Organization (WHO), 2014.                                                                                         | 1978                  |                      |
| Switzerland | Stadelmann W, Gasser M, Löffler H. [The incidence of antibodies against hepatitis A virus in various age groups in the Basle population 1978-79]. Schweiz Med Wochenschr. 1980; 110(25): 975-8.                                                                                                       | 1978-1979             |                      |
| Switzerland | Switzerland Vital Registration - Deaths 1979 ICD8 as it appears in World Health Organization (WHO). WHO Mortality Database Version February 2014. Geneva, Switzerland: World Health Organization (WHO), 2014.                                                                                         | 1979                  |                      |
| Switzerland | Holdener F, Grob PJ, Joller-Jemelka HI. Hepatitis virus infection in flying airline personnel. Aviat Space Environ Med. 1982; 53(6): 587-90.                                                                                                                                                          | 1979-1980             |                      |
| Switzerland | Switzerland Vital Registration - Deaths 1980 ICD8 as it appears in World Health Organization (WHO). WHO Mortality Database Version February 2014. Geneva, Switzerland: World Health Organization (WHO), 2014.                                                                                         | 1980                  |                      |
| Switzerland | Institute for Health Metrics and Evaluation. Institute for Health Metrics and Evaluation Cancer Registry Database. [Unpublished].                                                                                                                                                                     | 1980-2005             |                      |
| Switzerland | Ferlay J, Parkin DM, Curado MP, Bray F, Edwards B, Shin HR and Forman D. Cancer Incidence in Five Continents, Volumes I to IX: IARC CancerBase No. 9 [Internet]. Lyon, France: International Agency for Research on Cancer; 2010. Available from: <a href="http://ci5.iarc.fr">http://ci5.iarc.fr</a> | 1980-2002             |                      |
| Switzerland | Institute for Health Metrics and Evaluation (IHME), Joint United Nations Program on HIV/AIDS (UNAIDS). Institute for Health Metrics and Evaluation HIV Mortality Estimates Based on the UNAIDS Spectrum Model Framework.                                                                              | 1980-2013             | *                    |
| Switzerland | Switzerland Vital Registration - Deaths 1981 ICD8 as it appears in World Health Organization (WHO). WHO Mortality Database Version February 2014. Geneva, Switzerland: World Health Organization (WHO), 2014.                                                                                         | 1981                  |                      |
| Switzerland | Switzerland Vital Registration - Deaths 1982 ICD8 as it appears in World Health Organization (WHO). WHO Mortality Database Version February 2014. Geneva, Switzerland: World Health Organization (WHO), 2014.                                                                                         | 1982                  |                      |
| Switzerland | Switzerland Vital Registration - Deaths 1983 ICD8 as it appears in World Health Organization (WHO). WHO Mortality Database Version February 2014. Geneva, Switzerland: World Health Organization (WHO), 2014.                                                                                         | 1983                  |                      |
| Switzerland | Switzerland Vital Registration - Deaths 1984 ICD8 as it appears in World Health Organization (WHO). WHO Mortality Database Version February 2014. Geneva, Switzerland: World Health Organization (WHO), 2014.                                                                                         | 1984                  |                      |
| Switzerland | Switzerland Vital Registration - Deaths 1985 ICD8 as it appears in World Health Organization (WHO). WHO Mortality Database Version February 2014. Geneva, Switzerland: World Health Organization (WHO), 2014.                                                                                         | 1985                  |                      |
| Switzerland | Parkin DM, International Agency for Research on Cancer, International Association of Cancer Registries. Cancer Incidence in Five Continents. Vol. I to VIII. Lyon, France, IARC Press, 2005.                                                                                                          | 1985, 1990, 1980-1996 |                      |
| Switzerland | Switzerland Vital Registration - Deaths 1986 ICD8 as it appears in World Health Organization (WHO). WHO Mortality Database Version February 2014. Geneva, Switzerland: World Health Organization (WHO), 2014.                                                                                         | 1986                  |                      |

**Web Table 32 - Comprehensive citation list**

| Country     | Citation                                                                                                                                                                                                                                                                                                                                                                                                                                                                                                                                                                                                                                                                                                              | Year*                                 | New for GBD 2013 (*) |
|-------------|-----------------------------------------------------------------------------------------------------------------------------------------------------------------------------------------------------------------------------------------------------------------------------------------------------------------------------------------------------------------------------------------------------------------------------------------------------------------------------------------------------------------------------------------------------------------------------------------------------------------------------------------------------------------------------------------------------------------------|---------------------------------------|----------------------|
| Switzerland | Switzerland Vital Registration - Deaths 1987 ICD8 as it appears in World Health Organization (WHO). WHO Mortality Database Version February 2014. Geneva, Switzerland: World Health Organization (WHO), 2014.                                                                                                                                                                                                                                                                                                                                                                                                                                                                                                         | 1987                                  |                      |
| Switzerland | United Nations Children's Fund (UNICEF), World Health Organization (WHO). WHO and UNICEF Reported Disease Incidence Time Series - Measles. Geneva, Switzerland: World Health Organization (WHO).                                                                                                                                                                                                                                                                                                                                                                                                                                                                                                                      | 1987-1999, 2001, 2003-2005, 2007-2013 |                      |
| Switzerland | Switzerland Vital Registration - Deaths 1988 ICD8 as it appears in World Health Organization (WHO). WHO Mortality Database Version February 2014. Geneva, Switzerland: World Health Organization (WHO), 2014.                                                                                                                                                                                                                                                                                                                                                                                                                                                                                                         | 1988                                  |                      |
| Switzerland | Modell B, Darlison M, Birgens H, Cario H, Faustino P, Giordano PC, Gulbis B, Hopmeier P, Lena-Russo D, Romao L, Theodorsson E. Epidemiology of haemoglobin disorders in Europe: an overview. Scand J Clin Lab Invest. 2007; 67(1): 39-69.                                                                                                                                                                                                                                                                                                                                                                                                                                                                             | 1988, 2006                            |                      |
| Switzerland | Centre for Health Informatics and Multiprofessional Education, University College London. Modell's Haemoglobinopathologist's Almanac. London, United Kingdom: Centre for Health Informatics and Multiprofessional Education, University College London, 2008.                                                                                                                                                                                                                                                                                                                                                                                                                                                         | 1988, 2003, 2006                      |                      |
| Switzerland | Switzerland Vital Registration - Deaths 1989 ICD8 as it appears in World Health Organization (WHO). WHO Mortality Database Version February 2014. Geneva, Switzerland: World Health Organization (WHO), 2014.                                                                                                                                                                                                                                                                                                                                                                                                                                                                                                         | 1989                                  |                      |
| Switzerland | Switzerland Vital Registration - Deaths 1990 ICD8 as it appears in World Health Organization (WHO). WHO Mortality Database Version February 2014. Geneva, Switzerland: World Health Organization (WHO), 2014.                                                                                                                                                                                                                                                                                                                                                                                                                                                                                                         | 1990                                  |                      |
| Switzerland | Studer S, Joller-Jemelka HI, Steffen R, Grob PJ. Prevalence of hepatitis A antibodies in Swiss travellers. Eur J Epidemiol. 1993; 9(1): 50-4.                                                                                                                                                                                                                                                                                                                                                                                                                                                                                                                                                                         | 1990                                  |                      |
| Switzerland | Bart PA, Jacquier P, Zuber PL, Lavanchy D, Frei PC. Seroprevalence of HBV (anti-HBc, HBsAg and anti-HBs) and HDV infections among 9006 women at delivery. Liver. 1996; 16(2): 110-6.                                                                                                                                                                                                                                                                                                                                                                                                                                                                                                                                  | 1990-1991                             |                      |
| Switzerland | Switzerland Vital Registration - Deaths 1991 ICD8 as it appears in World Health Organization (WHO). WHO Mortality Database Version February 2014. Geneva, Switzerland: World Health Organization (WHO), 2014.                                                                                                                                                                                                                                                                                                                                                                                                                                                                                                         | 1991                                  |                      |
| Switzerland | Lavanchy D, Morel B, Frei PC. Seroprevalence of hepatitis E virus in Switzerland. Lancet. 1994; 344(8924): 747-8.                                                                                                                                                                                                                                                                                                                                                                                                                                                                                                                                                                                                     | 1991-1992                             | *                    |
| Switzerland | Switzerland Vital Registration - Deaths 1992 ICD8 as it appears in World Health Organization (WHO). WHO Mortality Database Version February 2014. Geneva, Switzerland: World Health Organization (WHO), 2014.                                                                                                                                                                                                                                                                                                                                                                                                                                                                                                         | 1992                                  |                      |
| Switzerland | Trichopoulos D, Bamia C, Lagiou P, Fedirko V, Trepo E, Jenab M, Pischon T, Nöthlings U, Overved K, Tjønneland A, Outzen M, Clavel-Chapelon F, Kaaks R, Lukanova A, Boeing H, Aleksandrova K, Benetou V, Zylis D, Palli D, Pala V, Panico S, Tumino R, Sacerdote C, Bueno-De-Mesquita HB, Van Kranen HJ, Peeters PHM, Lund E, Quirós JR, González CA, Sanchez Perez M-J, Navarro C, Dorronsoro M, Barricarte A, Lindkvist B, Regnér S, Werner M, Hallmans G, Khaw K-T, Wareham N, Key T, Romieu I, Chuang S-C, Murphy N, Boffetta P, Trichopoulou A, Riboli E. Hepatocellular carcinoma risk factors and disease burden in a European cohort: a nested case-control study. J Natl Cancer Inst. 2011; 103(22): 1686-95. | 1992-2006                             | *                    |
| Switzerland | United Nations Children's Fund (UNICEF), World Health Organization (WHO). WHO and UNICEF Reported Disease Incidence Time Series - Pertussis. Geneva, Switzerland: World Health Organization (WHO).                                                                                                                                                                                                                                                                                                                                                                                                                                                                                                                    | 1992-1999, 2001, 2009-2011            |                      |

**Web Table 32 - Comprehensive citation list**

| Country     | Citation                                                                                                                                                                                                                                    | Year*     | New for GBD 2013 (*) |
|-------------|---------------------------------------------------------------------------------------------------------------------------------------------------------------------------------------------------------------------------------------------|-----------|----------------------|
| Switzerland | Switzerland Vital Registration - Deaths 1993 ICD8 as it appears in World Health Organization (WHO). WHO Mortality Database Version February 2014. Geneva, Switzerland: World Health Organization (WHO), 2014.                               | 1993      |                      |
| Switzerland | Switzerland Vital Registration - Deaths 1994 ICD8 as it appears in World Health Organization (WHO). WHO Mortality Database Version February 2014. Geneva, Switzerland: World Health Organization (WHO), 2014.                               | 1994      |                      |
| Switzerland | Switzerland Vital Registration - Deaths 1995 ICD10 as it appears in World Health Organization (WHO). WHO Mortality Database Version February 2014. Geneva, Switzerland: World Health Organization (WHO), 2014.                              | 1995      |                      |
| Switzerland | Gostynski M, Ajdacic-Gross V, Gutzwiller F, Michel J-P, Herrmann F. Prevalence of dementia in the City of Zurich. <i>Soz Praventivmed.</i> 2002; 47(5): 330-5.                                                                              | 1995-1996 |                      |
| Switzerland | Switzerland Vital Registration - Deaths 1996 ICD10 as it appears in World Health Organization (WHO). WHO Mortality Database Version February 2014. Geneva, Switzerland: World Health Organization (WHO), 2014.                              | 1996      |                      |
| Switzerland | Switzerland Vital Registration - Deaths 1997 ICD10 as it appears in World Health Organization (WHO). WHO Mortality Database Version February 2014. Geneva, Switzerland: World Health Organization (WHO), 2014.                              | 1997      |                      |
| Switzerland | Switzerland Vital Registration - Deaths 1998 ICD10 as it appears in World Health Organization (WHO). WHO Mortality Database Version February 2014. Geneva, Switzerland: World Health Organization (WHO), 2014.                              | 1998      |                      |
| Switzerland | EUVAC-NET. EUVAC-NET Pertussis Surveillance Report 1998-2002. Stockholm, Sweden: European Centre for Disease Prevention and Control.                                                                                                        | 1998-2002 |                      |
| Switzerland | Switzerland Vital Registration - Deaths 1999 ICD10 as it appears in World Health Organization (WHO). WHO Mortality Database Version February 2014. Geneva, Switzerland: World Health Organization (WHO), 2014.                              | 1999      |                      |
| Switzerland | Switzerland Vital Registration - Deaths 2000 ICD10 as it appears in World Health Organization (WHO). WHO Mortality Database Version February 2014. Geneva, Switzerland: World Health Organization (WHO), 2014.                              | 2000      |                      |
| Switzerland | Curado MP, Edwards B, Shin HR, Storm H, Ferlay J, Heanue M and Boyle P, eds (2007). <i>Cancer Incidence in Five Continents, Vol. IX Periodic Data</i> (electronic version). Lyon, IARC. <a href="http://ci5.iarc.fr">http://ci5.iarc.fr</a> | 2000      |                      |
| Switzerland | Switzerland Vital Registration - Deaths 2001 ICD10 as it appears in World Health Organization (WHO). WHO Mortality Database Version February 2014. Geneva, Switzerland: World Health Organization (WHO), 2014.                              | 2001      |                      |
| Switzerland | Beckers K, Schaad UB, Heininger U. Compliance with antenatal screening for hepatitis B surface antigen carrier status in pregnant women and consecutive procedures in exposed newborns. <i>Eur J Pediatr.</i> 2004; 163(11): 654-7.         | 2001      |                      |
| Switzerland | World Health Organization (WHO). <i>Yellow Fever Reported Cases, WHO Vaccine-Preventable Diseases: Monitoring System.</i> Geneva, Switzerland: World Health Organization (WHO).                                                             | 2001-2009 |                      |
| Switzerland | Switzerland Vital Registration - Deaths 2002 ICD10 as it appears in World Health Organization (WHO). WHO Mortality Database Version February 2014. Geneva, Switzerland: World Health Organization (WHO), 2014.                              | 2002      |                      |

**Web Table 32 - Comprehensive citation list**

| Country     | Citation                                                                                                                                                                                                                                                                         | Year*     | New for GBD 2013 (*) |
|-------------|----------------------------------------------------------------------------------------------------------------------------------------------------------------------------------------------------------------------------------------------------------------------------------|-----------|----------------------|
| Switzerland | WHO Regional Office for Europe (EURO-WHO). European Hospital Morbidity Database. Copenhagen, Denmark: WHO Regional Office for Europe (EURO-WHO).                                                                                                                                 | 2002-2005 |                      |
| Switzerland | Switzerland Vital Registration - Deaths 2003 ICD10 as it appears in World Health Organization (WHO). WHO Mortality Database Version February 2014. Geneva, Switzerland: World Health Organization (WHO), 2014.                                                                   | 2003      |                      |
| Switzerland | Switzerland Vital Registration - Deaths 2004 ICD10 as it appears in World Health Organization (WHO). WHO Mortality Database Version February 2014. Geneva, Switzerland: World Health Organization (WHO), 2014.                                                                   | 2004      |                      |
| Switzerland | Switzerland Vital Registration - Deaths 2005 ICD10 as it appears in World Health Organization (WHO). WHO Mortality Database Version February 2014. Geneva, Switzerland: World Health Organization (WHO), 2014.                                                                   | 2005      |                      |
| Switzerland | Federal Statistical Office (Switzerland), National Institute for Cancer Epidemiology and Registration (Switzerland). Switzerland Statistics of Cancer Incidence 1983-2007. Zurich, Switzerland: National Institute for Cancer Epidemiology and Registration (Switzerland), 2010. | 2005      |                      |
| Switzerland | Switzerland Vital Registration - Deaths 2006 ICD10 as it appears in World Health Organization (WHO). WHO Mortality Database Version February 2014. Geneva, Switzerland: World Health Organization (WHO), 2014.                                                                   | 2006      |                      |
| Switzerland | Switzerland Vital Registration - Deaths 2007 ICD10 as it appears in World Health Organization (WHO). WHO Mortality Database Version February 2014. Geneva, Switzerland: World Health Organization (WHO), 2014.                                                                   | 2007      |                      |
| Switzerland | World Health Organization (WHO). Global Status Report on Road Safety 2009. Geneva, Switzerland: World Health Organization (WHO), 2009.                                                                                                                                           | 2007      |                      |
| Switzerland | Switzerland Vital Registration - Deaths 2008 ICD10 as it appears in World Health Organization (WHO). WHO Mortality Database Version February 2014. Geneva, Switzerland: World Health Organization (WHO), 2014.                                                                   | 2008      |                      |
| Switzerland | Switzerland Vital Registration - Deaths 2009 ICD10 as it appears in World Health Organization (WHO). WHO Mortality Database Version February 2014. Geneva, Switzerland: World Health Organization (WHO), 2014.                                                                   | 2009      |                      |
| Switzerland | Switzerland Vital Registration - Deaths 2010 ICD10 as it appears in World Health Organization (WHO). WHO Mortality Database Version February 2014. Geneva, Switzerland: World Health Organization (WHO), 2014.                                                                   | 2010      |                      |
| Switzerland | EUVAC-NET. EUVAC-NET Measles Surveillance Report 2010. Stockholm, Sweden: European Centre for Disease Prevention and Control, 2011.                                                                                                                                              | 2010      |                      |
| Syria       | Syria Vital Registration Death Data 1964 as it appears in United Nations Statistics Division (UNSD). United Nations Demographic Yearbook. New York City, United States: United Nations Statistics Division (UNSD).                                                               | 1964      |                      |
| Syria       | Syria Vital Registration Death Data 1965 as it appears in United Nations Statistics Division (UNSD). United Nations Demographic Yearbook. New York City, United States: United Nations Statistics Division (UNSD).                                                               | 1965      |                      |
| Syria       | Syria Vital Registration Death Data 1966 as it appears in United Nations Statistics Division (UNSD). United Nations Demographic Yearbook. New York City, United States: United Nations Statistics Division (UNSD).                                                               | 1966      |                      |
| Syria       | Peace Research Institute Oslo (PRIO). Battle Deaths Dataset Version 3, 2009. Oslo, Norway: Peace Research Institute Oslo (PRIO), 2009.                                                                                                                                           | 1966-1988 |                      |

**Web Table 32 - Comprehensive citation list**

| Country | Citation                                                                                                                                                                                                           | Year*     | New for GBD 2013 (*) |
|---------|--------------------------------------------------------------------------------------------------------------------------------------------------------------------------------------------------------------------|-----------|----------------------|
| Syria   | Syria Vital Registration Death Data 1967 as it appears in United Nations Statistics Division (UNSD). United Nations Demographic Yearbook. New York City, United States: United Nations Statistics Division (UNSD). | 1967      |                      |
| Syria   | Syria Vital Registration Death Data 1968 as it appears in United Nations Statistics Division (UNSD). United Nations Demographic Yearbook. New York City, United States: United Nations Statistics Division (UNSD). | 1968      |                      |
| Syria   | Syria Vital Registration Death Data 1969 as it appears in United Nations Statistics Division (UNSD). United Nations Demographic Yearbook. New York City, United States: United Nations Statistics Division (UNSD). | 1969      |                      |
| Syria   | Syria Census 1970 as it appears in United Nations Statistics Division (UNSD). United Nations Demographic Yearbook. New York City, United States: United Nations Statistics Division (UNSD).                        | 1970      |                      |
| Syria   | Syria Vital Registration Death Data 1970 as it appears in United Nations Statistics Division (UNSD). United Nations Demographic Yearbook. New York City, United States: United Nations Statistics Division (UNSD). | 1970      |                      |
| Syria   | United Nations Office on Drugs and Crime (UNODC). United Nations Surveys on Crime Trends and the Operations of Criminal Justice Systems 1970-2006 as provided by Kavi Bhalla. [Unpublished]                        | 1970-1994 |                      |
| Syria   | Syria Vital Registration Death Data 1971 as it appears in United Nations Statistics Division (UNSD). United Nations Demographic Yearbook. New York City, United States: United Nations Statistics Division (UNSD). | 1971      |                      |
| Syria   | Syria Vital Registration Death Data 1972 as it appears in United Nations Statistics Division (UNSD). United Nations Demographic Yearbook. New York City, United States: United Nations Statistics Division (UNSD). | 1972      |                      |
| Syria   | Syria Vital Registration - Deaths 1973 ICD8 as it appears in World Health Organization (WHO). WHO Mortality Database Version February 2014. Geneva, Switzerland: World Health Organization (WHO), 2014.            | 1973      |                      |
| Syria   | Syria Vital Registration - Deaths 1973 ICD8 as it appears in World Health Organization (WHO). WHO Mortality Database Version July 2012. Geneva, Switzerland: World Health Organization (WHO), 2012.                | 1973      |                      |
| Syria   | Syria Vital Registration - Deaths 1974 ICD8 as it appears in World Health Organization (WHO). WHO Mortality Database Version February 2014. Geneva, Switzerland: World Health Organization (WHO), 2014.            | 1974      |                      |
| Syria   | Syria Vital Registration - Deaths 1974 ICD8 as it appears in World Health Organization (WHO). WHO Mortality Database Version July 2012. Geneva, Switzerland: World Health Organization (WHO), 2012.                | 1974      |                      |
| Syria   | Syria Vital Registration - Deaths 1975 ICD8 as it appears in World Health Organization (WHO). WHO Mortality Database Version February 2014. Geneva, Switzerland: World Health Organization (WHO), 2014.            | 1975      |                      |
| Syria   | Syria Vital Registration - Deaths 1975 ICD8 as it appears in World Health Organization (WHO). WHO Mortality Database Version July 2012. Geneva, Switzerland: World Health Organization (WHO), 2012.                | 1975      |                      |
| Syria   | Syria Vital Registration - Deaths 1976 ICD8 as it appears in World Health Organization (WHO). WHO Mortality Database Version February 2014. Geneva, Switzerland: World Health Organization (WHO), 2014.            | 1976      |                      |
| Syria   | Syria Vital Registration - Deaths 1976 ICD8 as it appears in World Health Organization (WHO). WHO Mortality Database Version July 2012. Geneva, Switzerland: World Health Organization (WHO), 2012.                | 1976      |                      |



**Web Table 32 - Comprehensive citation list**

| Country | Citation                                                                                                                                                                                                                                                                                                                                                                                                                                                                                                                     | Year*                | New for GBD 2013 (*) |
|---------|------------------------------------------------------------------------------------------------------------------------------------------------------------------------------------------------------------------------------------------------------------------------------------------------------------------------------------------------------------------------------------------------------------------------------------------------------------------------------------------------------------------------------|----------------------|----------------------|
| Syria   | Central Bureau of Statistics (Syria). Syria Sample Population and Housing Census 1976.                                                                                                                                                                                                                                                                                                                                                                                                                                       | 1976                 |                      |
| Syria   | Syria Vital Registration - Deaths 1977 ICD8 as it appears in World Health Organization (WHO). WHO Mortality Database Version February 2014. Geneva, Switzerland: World Health Organization (WHO), 2014.                                                                                                                                                                                                                                                                                                                      | 1977                 |                      |
| Syria   | Syria Vital Registration - Deaths 1977 ICD8 as it appears in World Health Organization (WHO). WHO Mortality Database Version July 2012. Geneva, Switzerland: World Health Organization (WHO), 2012.                                                                                                                                                                                                                                                                                                                          | 1977                 |                      |
| Syria   | Central Bureau of Statistics (Syria), International Statistical Institute. Syria World Fertility Survey 1978. International Statistical Institute.                                                                                                                                                                                                                                                                                                                                                                           | 1978                 |                      |
| Syria   | Syria Vital Registration - Deaths 1978 ICD8 as it appears in World Health Organization (WHO). WHO Mortality Database Version February 2014. Geneva, Switzerland: World Health Organization (WHO), 2014.                                                                                                                                                                                                                                                                                                                      | 1978                 |                      |
| Syria   | Syria Vital Registration - Deaths 1978 ICD8 as it appears in World Health Organization (WHO). WHO Mortality Database Version July 2012. Geneva, Switzerland: World Health Organization (WHO), 2012.                                                                                                                                                                                                                                                                                                                          | 1978                 |                      |
| Syria   | Syria Vital Registration - Deaths 1980 ICD9 as it appears in World Health Organization (WHO). WHO Mortality Database Version February 2014. Geneva, Switzerland: World Health Organization (WHO), 2014.                                                                                                                                                                                                                                                                                                                      | 1980                 |                      |
| Syria   | Syrian Human Rights Committee [Internet]. London, United Kingdom: Syrian Human Rights Committee; 1997. Massacre of Hama (February 1982) Genocide and a Crime Against Humanity; 2006 Feb 14; [about 6 screens]. Available from: <a href="http://www.shrc.org/en/?p=20252">http://www.shrc.org/en/?p=20252</a> .                                                                                                                                                                                                               | 1980-1982            | *                    |
| Syria   | Institute for Health Metrics and Evaluation (IHME), Joint United Nations Program on HIV/AIDS (UNAIDS). Institute for Health Metrics and Evaluation HIV Mortality Estimates Based on the UNAIDS Spectrum Model Framework.                                                                                                                                                                                                                                                                                                     | 1980-2013            | *                    |
| Syria   | United Nations Children's Fund (UNICEF), World Health Organization (WHO). WHO and UNICEF Reported Disease Incidence Time Series - Pertussis. Geneva, Switzerland: World Health Organization (WHO).                                                                                                                                                                                                                                                                                                                           | 1980-2004, 2006-2013 |                      |
| Syria   | United Nations Children's Fund (UNICEF), World Health Organization (WHO). WHO and UNICEF Reported Disease Incidence Time Series - Measles. Geneva, Switzerland: World Health Organization (WHO).                                                                                                                                                                                                                                                                                                                             | 1980-2013            |                      |
| Syria   | Central Bureau of Statistics (Syria). Syria Census 1981.                                                                                                                                                                                                                                                                                                                                                                                                                                                                     | 1981                 |                      |
| Syria   | Khan A. On 30th Anniversary of Hama Massacre, Syrian Troops Lock Down City. Public Broadcasting System [Internet]. 2012 Feb 2; Frontline: Syria, Behind the Lines: [about 1 screen]. Available from: <a href="http://www.pbs.org/wgbh/pages/frontline/foreign-affairs-defense/syria-undercover/on-30th-anniversary-of-hama-massacre-syrian-troops-lock-down-city/">http://www.pbs.org/wgbh/pages/frontline/foreign-affairs-defense/syria-undercover/on-30th-anniversary-of-hama-massacre-syrian-troops-lock-down-city/</a> . | 1982                 | *                    |
| Syria   | Tharoor I. Hama: One City, Two Massacres. Time [Internet]. 2011 Aug 4; World: [about 1 screen]. Available from: <a href="http://world.time.com/2011/08/04/hama-one-city-two-massacres/">http://world.time.com/2011/08/04/hama-one-city-two-massacres/</a> .                                                                                                                                                                                                                                                                  | 1982                 | *                    |
| Syria   | Kenner D. Massacre City. Foreign Policy [Internet]. 2011 Aug 5; Argument: [about 5 screens]. Available from: <a href="http://www.foreignpolicy.com/articles/2011/08/05/massacre_city">http://www.foreignpolicy.com/articles/2011/08/05/massacre_city</a> .                                                                                                                                                                                                                                                                   | 1982                 | *                    |
| Syria   | Syria Vital Registration Death Data 1983 as it appears in United Nations Statistics Division (UNSD). United Nations Demographic Yearbook. New York City, United States: United Nations Statistics Division (UNSD).                                                                                                                                                                                                                                                                                                           | 1983                 |                      |
| Syria   | Syria Vital Registration - Deaths 1984 ICD9 as it appears in World Health Organization (WHO). WHO Mortality Database Version February 2014. Geneva, Switzerland: World Health Organization (WHO), 2014.                                                                                                                                                                                                                                                                                                                      | 1984                 |                      |

**Web Table 32 - Comprehensive citation list**

| Country | Citation                                                                                                                                                                                                                                                      | Year*                            | New for GBD 2013 (*) |
|---------|---------------------------------------------------------------------------------------------------------------------------------------------------------------------------------------------------------------------------------------------------------------|----------------------------------|----------------------|
| Syria   | Syria Vital Registration - Deaths 1985 ICD9 as it appears in World Health Organization (WHO). WHO Mortality Database Version February 2014. Geneva, Switzerland: World Health Organization (WHO), 2014.                                                       | 1985                             |                      |
| Syria   | Department of Peace and Conflict Research, Uppsala University. UCDP Battle-Related Deaths Database Version 5, 2013. Uppsala, Sweden: Department of Peace and Conflict Research, Uppsala University, 2013.                                                     | 1989-2012                        | *                    |
| Syria   | United Nations Children's Fund (UNICEF), World Health Organization (WHO). Syria EPI/CDD and Child Mortality Survey 1990.                                                                                                                                      | 1990                             |                      |
| Syria   | Weatherall D. Sickle Cell and Thalassemias Prevalence Data, Personal Correspondence with David Weatherall. [Unpublished].                                                                                                                                     | 1990-2009                        |                      |
| Syria   | Centre for Health Informatics and Multiprofessional Education, University College London. Modell's Haemoglobinopathologist's Almanac. London, United Kingdom: Centre for Health Informatics and Multiprofessional Education, University College London, 2008. | 1990-2003                        |                      |
| Syria   | Central Bureau of Statistics (Syria), League of Arab States. Syria Maternal and Child Health Survey 1993.                                                                                                                                                     | 1993                             |                      |
| Syria   | Syria Census 1994 as it appears in United Nations Statistics Division (UNSD). United Nations Demographic Yearbook. New York City, United States: United Nations Statistics Division (UNSD).                                                                   | 1994                             |                      |
| Syria   | World Health Organization (WHO). Syria WHO Leishmaniasis Country Profile.                                                                                                                                                                                     | 1994-2010                        | *                    |
| Syria   | Abu-Rashid N, Al-Jirf S, Bashour H. Causes of death among Syrian children using verbal autopsy. East Mediterr Health J. 1996; 2(3): 440-8.                                                                                                                    | 1995                             |                      |
| Syria   | Usanga EA, Ameen R. Glucose-6-phosphate dehydrogenase deficiency in Kuwait, Syria, Egypt, Iran, Jordan and Lebanon. Hum Hered. 2000; 50(3): 158-61.                                                                                                           | 1996-1997                        |                      |
| Syria   | Measles Supplementary Immunization Activity Data as provided by the World Health Organization. [Unpublished].                                                                                                                                                 | 1998                             |                      |
| Syria   | Antaki N, Kebbewar MK. Hepatitis A seroprevalence rate in Syria. Trop Doct. 2000; 30(2): 99-101.                                                                                                                                                              | 1999                             |                      |
| Syria   | Othman BM, Monem FS. Prevalence of hepatitis C virus antibodies among health care workers in Damascus, Syria. Saudi Med J. 2001; 22(7): 603-5.                                                                                                                | 1999                             |                      |
| Syria   | World Health Organization (WHO). Yellow Fever Reported Cases, WHO Vaccine-Preventable Diseases: Monitoring System. Geneva, Switzerland: World Health Organization (WHO).                                                                                      | 1999-2001, 2003, 2005, 2007-2009 |                      |
| Syria   | Central Bureau of Statistics (Syria), United Nations Children's Fund (UNICEF). Syria Multiple Indicator Cluster Survey 2000.                                                                                                                                  | 2000                             | *                    |
| Syria   | Central Bureau of Statistics (Syria), United Nations Children's Fund (UNICEF). Syria Multipurpose Survey 2000.                                                                                                                                                | 2000                             |                      |
| Syria   | Othman BM, Monem FS. Prevalence of hepatitis C virus antibodies among intravenous drug abusers and prostitutes in Damascus, Syria. Saudi Med J. 2002; 23(4): 393-5.                                                                                           | 2000                             |                      |
| Syria   | Central Bureau of Statistics (Syria), League of Arab States. Syria Family Health Survey 2001.                                                                                                                                                                 | 2001                             |                      |
| Syria   | Centre for Research on the Epidemiology of Disasters (CRED). EM-DAT: The OFDA/CRED International Disaster Database. Brussels, Belgium: Catholic University of Leuven.                                                                                         | 2001-2002, 2004, 2006            |                      |
| Syria   | Bashour H, Abdulsalam A, Jabr A, Cheikha S, Tabbaa M, Lahham M, Dihman R, Khadra M, Campbell OMR. Maternal mortality in Syria: causes, contributing factors and preventability. Trop Med Int Health. 2009; 14(9): 1122-7.                                     | 2003                             |                      |
| Syria   | World Health Organization (WHO). Retrospective Measles Data on Supplementary Immunization Activities. Geneva, Switzerland: World Health Organization (WHO).                                                                                                   | 2003-2005, 2007-2009, 2012-2013  |                      |
| Syria   | Ministry of Interior (Syria). Syria Vital Statistics - Deaths 2005-2007. [Unpublished].                                                                                                                                                                       | 2005-2007                        |                      |



**Web Table 32 - Comprehensive citation list**

| Country | Citation                                                                                                                                                                                                                                                                                                                                                                                                                                                                   | Year*     | New for GBD 2013 (*) |
|---------|----------------------------------------------------------------------------------------------------------------------------------------------------------------------------------------------------------------------------------------------------------------------------------------------------------------------------------------------------------------------------------------------------------------------------------------------------------------------------|-----------|----------------------|
| Syria   | United Nations Children's Fund (UNICEF), Central Bureau of Statistics (Syria), Ministry of Health (Syria), Pan Arab Project for Family Health (PAPFAM). Syria Multiple Indicator Cluster Survey 2006 . New York, United States: United Nations Children's Fund (UNICEF).                                                                                                                                                                                                   | 2006      |                      |
| Syria   | United Nations Office on Drugs and Crime (UNODC). United Nations Office on Drugs and Crime Global Study on Homicides 2011. Vienna, Austria: United Nations Office on Drugs and Crime (UNODC), 2011.                                                                                                                                                                                                                                                                        | 2007      |                      |
| Syria   | Postigo JAR. Leishmaniasis in the World Health Organization Eastern Mediterranean Region. <i>Int J Antimicrob Agents</i> . 2010; S62-65.                                                                                                                                                                                                                                                                                                                                   | 2008      |                      |
| Syria   | National Counterterrorism Center (United States), US Department of State. United States Country Reports on Terrorism 2010. Washington, D.C., United States: US Department of State, 2011.                                                                                                                                                                                                                                                                                  | 2009-2010 | *                    |
| Syria   | International Crisis Group. CrisisWatch Database - Syria. Brussels, Belgium: International Crisis Group.                                                                                                                                                                                                                                                                                                                                                                   | 2010      | *                    |
| Syria   | Syrian Revolution Martyr Database [Internet]. [place unknown: publisher unknown].[reviewed 2014 Apr 11]. Available from: <a href="http://syrianshuhada.com/?lang=en">http://syrianshuhada.com/?lang=en</a> .                                                                                                                                                                                                                                                               | 2011      | *                    |
| Syria   | Department of Peace and Conflict Research, Uppsala University. UCDP Nonstate Conflict Database Version 2.5, 2013. Uppsala, Sweden: Department of Peace and Conflict Research, Uppsala University, 2013.                                                                                                                                                                                                                                                                    | 2011-2012 | *                    |
| Syria   | Department of Peace and Conflict Research, Uppsala University. UCDP One-Sided Violence Database Version 1.4, 2013. Uppsala, Sweden: Department of Peace and Conflict Research, Uppsala University, 2013.                                                                                                                                                                                                                                                                   | 2011-2012 | *                    |
| Syria   | Amos D. 11,420 Children Dead In Syria's Civil War, So Far. National Public Radio (NPR) [Internet]. 2013 Dec 19. Number of the Year: [about 2 screens]. Available from: <a href="http://www.npr.org/2013/12/19/255406234/more-children-become-victims-of-syrias-civil-war">http://www.npr.org/2013/12/19/255406234/more-children-become-victims-of-syrias-civil-war</a> .                                                                                                   | 2011-2013 | *                    |
| Syria   | Kalin S, Ireland L. Anti-Assad monitoring group says Syrian death toll passes 130,000. Reuters [Internet]. 2013 Dec 31. [about 1 screen]. Available from: <a href="http://www.reuters.com/article/2013/12/31/us-syria-crisis-toll-idUSBRE9BU0FA20131231">http://www.reuters.com/article/2013/12/31/us-syria-crisis-toll-idUSBRE9BU0FA20131231</a> .                                                                                                                        | 2011-2013 | *                    |
| Syria   | CNN. By the numbers: Syria deaths. CNN [Internet]. 2013 April 2; World: [about 3 screens]. Available from: <a href="http://www.cnn.com/2013/01/08/world/meast/syria-civil-war-compare/">http://www.cnn.com/2013/01/08/world/meast/syria-civil-war-compare/</a> .                                                                                                                                                                                                           | 2011-2013 | *                    |
| Syria   | Violations Documentation Center in Syria. Syria Violations Documentation Center Revolution Martyrs and Regime Casualties. Syria: Violations Documentation Center in Syria.                                                                                                                                                                                                                                                                                                 | 2011-2014 | *                    |
| Syria   | Rogers S, Burn-Murdoch J. Syria Crisis: Deaths Recorded by UN and Syrian Revolution Martyr Database. The Guardian [Internet]. 2012 Jul 20; Datablog: [about 2 screens]. Available from: <a href="http://www.theguardian.com/news/datablog/2012/mar/02/syria-arab-and-middle-east-protests">http://www.theguardian.com/news/datablog/2012/mar/02/syria-arab-and-middle-east-protests</a> .                                                                                  | 2011-2012 | *                    |
| Syria   | The Associated Press. Syria Civil War Death Toll Reaches 60,000, UN Says. CBC News [Internet]. 2013 Jan 02; World: [about 3 screens]. Available from: <a href="http://www.cbc.ca/news/world/syria-civil-war-death-toll-reaches-60-000-un-says-1.1365760">http://www.cbc.ca/news/world/syria-civil-war-death-toll-reaches-60-000-un-says-1.1365760</a> .                                                                                                                    | 2011-2012 | *                    |
| Syria   | Syrian Observatory for Human Rights [Internet]. London, United Kingdom: Syrian Observatory for Human Rights; 2006. More Than 146,000 Have Died Since the Start of the Syrian Revolution; 2014 Mar 13; [about 6 screens]. Available from: <a href="http://syriahr.com/index.php?option=com_news&amp;nid=16470&amp;itemid=2&amp;task=displaynews#.U01fvldUif">http://syriahr.com/index.php?option=com_news&amp;nid=16470&amp;itemid=2&amp;task=displaynews#.U01fvldUif</a> . | 2011-2014 | *                    |
| Syria   | Syrian Network for Human Rights. Documenting the Killing of 101,513 Victims. Damascus, Syria: Syrian Network for Human Rights, 2013.                                                                                                                                                                                                                                                                                                                                       | 2011-2013 | *                    |

**Web Table 32 - Comprehensive citation list**

| Country                    | Citation                                                                                                                                                                                                                                                                                                                                                | Year*                                                                                                           | New for GBD 2013 (*) |
|----------------------------|---------------------------------------------------------------------------------------------------------------------------------------------------------------------------------------------------------------------------------------------------------------------------------------------------------------------------------------------------------|-----------------------------------------------------------------------------------------------------------------|----------------------|
| Syria                      | Washington Post. Syrian Civil War: A Rising Death Count. Washington Post [Internet]. [updated 2014 Apr 8]; World; [about 1 screen]. Available from: <a href="http://www.washingtonpost.com/wp-srv/special/world/syrian-uprising-one-year-of-bloodshed/">http://www.washingtonpost.com/wp-srv/special/world/syrian-uprising-one-year-of-bloodshed/</a> . | 2011-2014                                                                                                       | *                    |
| Taiwan (Province of China) | Centre for Research on the Epidemiology of Disasters (CRED). EM-DAT: The OFDA/CRED International Disaster Database. Brussels, Belgium: Catholic University of Leuven.                                                                                                                                                                                   | 1951, 1953, 1958-1962, 1964-1967, 1969, 1977, 1981, 1983-1984, 1986-1987, 1989-1992, 1994, 1996-2010, 2012-2013 |                      |
| Taiwan (Province of China) | Taiwan Vital Registration - Deaths 1955 ICD7 as it appears in World Health Organization (WHO). WHO Mortality Database Version February 2014. Geneva, Switzerland: World Health Organization (WHO), 2014.                                                                                                                                                | 1955                                                                                                            |                      |
| Taiwan (Province of China) | Taiwan Vital Registration - Deaths 1956 ICD7 as it appears in World Health Organization (WHO). WHO Mortality Database Version February 2014. Geneva, Switzerland: World Health Organization (WHO), 2014.                                                                                                                                                | 1956                                                                                                            |                      |
| Taiwan (Province of China) | Taiwan Vital Registration - Deaths 1957 ICD7 as it appears in World Health Organization (WHO). WHO Mortality Database Version February 2014. Geneva, Switzerland: World Health Organization (WHO), 2014.                                                                                                                                                | 1957                                                                                                            |                      |
| Taiwan (Province of China) | Taiwan Vital Registration - Deaths 1958 ICD7 as it appears in World Health Organization (WHO). WHO Mortality Database Version February 2014. Geneva, Switzerland: World Health Organization (WHO), 2014.                                                                                                                                                | 1958                                                                                                            |                      |
| Taiwan (Province of China) | Taiwan Vital Registration - Deaths 1959 ICD7 as it appears in World Health Organization (WHO). WHO Mortality Database Version February 2014. Geneva, Switzerland: World Health Organization (WHO), 2014.                                                                                                                                                | 1959                                                                                                            |                      |
| Taiwan (Province of China) | Taiwan Vital Registration - Deaths 1960 ICD7 as it appears in World Health Organization (WHO). WHO Mortality Database Version February 2014. Geneva, Switzerland: World Health Organization (WHO), 2014.                                                                                                                                                | 1960                                                                                                            |                      |
| Taiwan (Province of China) | Taiwan Vital Registration - Deaths 1961 ICD7 as it appears in World Health Organization (WHO). WHO Mortality Database Version February 2014. Geneva, Switzerland: World Health Organization (WHO), 2014.                                                                                                                                                | 1961                                                                                                            |                      |
| Taiwan (Province of China) | Lee T-C, Shih L-Y, Huang P-C, Lin C-C, Blackwell B-N, Blackwell RQ, Hsia DY-Y. Glucose-6-Phosphate Dehydrogenase Deficiency in Taiwan. <i>Am J Hum Genet.</i> 1963; 15(2): 126-32.                                                                                                                                                                      | 1961-1963                                                                                                       |                      |
| Taiwan (Province of China) | Taiwan Vital Registration - Deaths 1962 ICD7 as it appears in World Health Organization (WHO). WHO Mortality Database Version February 2014. Geneva, Switzerland: World Health Organization (WHO), 2014.                                                                                                                                                | 1962                                                                                                            |                      |
| Taiwan (Province of China) | Taiwan Vital Registration - Deaths 1963 ICD7 as it appears in World Health Organization (WHO). WHO Mortality Database Version February 2014. Geneva, Switzerland: World Health Organization (WHO), 2014.                                                                                                                                                | 1963                                                                                                            |                      |
| Taiwan (Province of China) | Motulsky AG, Lee TC, Fraser GR. Glucose-6-phosphate dehydrogenase (G6PD) deficiency, thalassaemia, and abnormal haemoglobins in Taiwan. <i>J Med Genet.</i> 1963; 2(1): 18-20.                                                                                                                                                                          | 1963-1965                                                                                                       |                      |
| Taiwan (Province of China) | Taiwan Vital Registration - Deaths 1964 ICD7 as it appears in World Health Organization (WHO). WHO Mortality Database Version February 2014. Geneva, Switzerland: World Health Organization (WHO), 2014.                                                                                                                                                | 1964                                                                                                            |                      |

**Web Table 32 - Comprehensive citation list**

| Country                    | Citation                                                                                                                                                                                                                                                                            | Year*     | New for GBD 2013 (*) |
|----------------------------|-------------------------------------------------------------------------------------------------------------------------------------------------------------------------------------------------------------------------------------------------------------------------------------|-----------|----------------------|
| Taiwan (Province of China) | Taiwan Vital Registration - Deaths 1965 ICD7 as it appears in World Health Organization (WHO). WHO Mortality Database Version February 2014. Geneva, Switzerland: World Health Organization (WHO), 2014.                                                                            | 1965      |                      |
| Taiwan (Province of China) | Taiwan Vital Registration - Deaths 1966 ICD7 as it appears in World Health Organization (WHO). WHO Mortality Database Version February 2014. Geneva, Switzerland: World Health Organization (WHO), 2014.                                                                            | 1966      |                      |
| Taiwan (Province of China) | Taiwan Vital Registration - Deaths 1967 ICD7 as it appears in World Health Organization (WHO). WHO Mortality Database Version February 2014. Geneva, Switzerland: World Health Organization (WHO), 2014.                                                                            | 1967      |                      |
| Taiwan (Province of China) | Taiwan Vital Registration - Deaths 1968 ICD7 as it appears in World Health Organization (WHO). WHO Mortality Database Version February 2014. Geneva, Switzerland: World Health Organization (WHO), 2014.                                                                            | 1968      |                      |
| Taiwan (Province of China) | Taiwan Vital Registration - Deaths 1969 ICD7 as it appears in World Health Organization (WHO). WHO Mortality Database Version February 2014. Geneva, Switzerland: World Health Organization (WHO), 2014.                                                                            | 1969      |                      |
| Taiwan (Province of China) | Max Planck Institute for Demographic Research, University of California. Human Mortality Database. Berkeley, USA: University of California; Rostock, Germany: Max Planck Institute for Demographic Research.                                                                        | 1970-2010 |                      |
| Taiwan (Province of China) | Taiwan Cancer Registry. Taiwan Cancer Incidence and Mortality 1980-2007.                                                                                                                                                                                                            | 1980-2007 |                      |
| Taiwan (Province of China) | Institute for Health Metrics and Evaluation (IHME), Joint United Nations Program on HIV/AIDS (UNAIDS). Institute for Health Metrics and Evaluation HIV Mortality Estimates Based on the UNAIDS Spectrum Model Framework.                                                            | 1980-2013 | *                    |
| Taiwan (Province of China) | Chiang SH, Wu SJ, Wu KF, Hsiao KJ. Neonatal screening for glucose-6-phosphate dehydrogenase deficiency in Taiwan. Southeast Asian J Trop Med Public Health. 1999; 72-4.                                                                                                             | 1987-1997 |                      |
| Taiwan (Province of China) | Chang YK, Chao SL, Huang LW. Gestational and congenital syphilis in Hualien. J Formos Med Assoc. 1992; 91(6): 620-3.                                                                                                                                                                | 1989      |                      |
| Taiwan (Province of China) | Centre for Health Informatics and Multiprofessional Education, University College London. Modell's Haemoglobinopathologist's Almanac. London, United Kingdom: Centre for Health Informatics and Multiprofessional Education, University College London, 2008.                       | 1990-2003 |                      |
| Taiwan (Province of China) | Lee M-H, Yang H-I, Jen C-L, Lu S-N, Yeh S-H, Liu C-J, You S-L, Sun C-A, Wang L-Y, Chen WJ, Chen C-J, R.E.V.E.A.L.-HCV Study Group. Community and personal risk factors for hepatitis C virus infection: a survey of 23,820 residents in Taiwan in 1991-2. Gut. 2011; 60(5): 688-94. | 1991-1992 |                      |
| Taiwan (Province of China) | Liu CK, Lin RT, Chen YF, Tai CT, Yen YY, Howng SL. Prevalence of dementia in an urban area in Taiwan. J Formos Med Assoc. 1996; 95(10): 762-8.                                                                                                                                      | 1992-1995 |                      |
| Taiwan (Province of China) | Liu HC, Lin KN, Teng EL, Wang SJ, Fuh JL, Guo NW, Chou P, Hu HH, Chiang BN. Prevalence and subtypes of dementia in Taiwan: a community survey of 5297 individuals. J Am Geriatr Soc. 1995; 43(2): 144-9.                                                                            | 1992-1994 |                      |
| Taiwan (Province of China) | Lin RT, Lai CL, Tai CT, Liu CK, Yen YY, Howng SL. Prevalence and subtypes of dementia in southern Taiwan: impact of age, sex, education, and urbanization. J Neurol Sci. 1998; 160(1): 67-75.                                                                                       | 1993      |                      |

**Web Table 32 - Comprehensive citation list**

| Country                    | Citation                                                                                                                                                                                                                                                                                       | Year*      | New for GBD 2013 (*) |
|----------------------------|------------------------------------------------------------------------------------------------------------------------------------------------------------------------------------------------------------------------------------------------------------------------------------------------|------------|----------------------|
| Taiwan (Province of China) | Liu HC, Fuh JL, Wang SJ, Liu CY, Larson EB, Lin KN, Wang HC, Chou P, Wu ZA, Lin CH, Wang PN, Teng EL. Prevalence and subtypes of dementia in a rural Chinese population. <i>Alzheimer Dis Assoc Disord.</i> 1998; 12(3): 127-34.                                                               | 1993-1994  |                      |
| Taiwan (Province of China) | Tang TK, Huang WY, Tang CJ, Hsu M, Cheng TA, Chen KH. Molecular basis of glucose-6-phosphate dehydrogenase (G6PD) deficiency in three Taiwan aboriginal tribes. <i>Hum Genet.</i> 1995; 95(6): 630-2.                                                                                          | 1993-1995  |                      |
| Taiwan (Province of China) | Peng CF, Lin MR, Chue PY, Tsai JF, Shih CH, Chen IL, He J, Carl M. Prevalence of antibody to hepatitis E virus among healthy individuals in southern Taiwan. <i>Microbiol Immunol.</i> 1995; 39(9): 733-6.                                                                                     | 1993-1994  | *                    |
| Taiwan (Province of China) | United Nations Office on Drugs and Crime (UNODC). United Nations Office on Drugs and Crime Global Study on Homicides 2011. Vienna, Austria: United Nations Office on Drugs and Crime (UNODC), 2011.                                                                                            | 1995-2009  |                      |
| Taiwan (Province of China) | Tsai J-F, Jeng J-E, Chuang L-Y, Ho M-S, Ko Y-C, Lin Z-Y, Hsieh M-Y, Chen S-C, Chuang W-L, Wang L-Y, Yu M-L, Dai C-Y, Ho C. Habitual betel quid chewing as a risk factor for cirrhosis: a case-control study. <i>Medicine (Baltimore).</i> 2003; 82(5): 365-72.                                 | 1996-1997  |                      |
| Taiwan (Province of China) | Lee CM, Lu SN, Changchien CS, Yeh CT, Hsu TT, Tang JH, Wang JH, Lin DY, Chen CL, Chen WJ. Age, gender, and local geographic variations of viral etiology of hepatocellular carcinoma in a hyperendemic area for hepatitis B virus infection. <i>Cancer.</i> 1999; 86(7): 1143-50.              | 1996-1997  |                      |
| Taiwan (Province of China) | Chen C-H, Yang P-M, Huang G-T, Lee H-S, Sung J-L, Sheu J-C. Estimation of seroprevalence of hepatitis B virus and hepatitis C virus in Taiwan from a large-scale survey of free hepatitis screening participants. <i>J Formos Med Assoc.</i> 2007; 106(2): 148-55.                             | 1996-2005  |                      |
| Taiwan (Province of China) | Liu CK, Lai CL, Tai CT, Lin RT, Yen YY, Howng SL. Incidence and subtypes of dementia in southern Taiwan: impact of socio-demographic factors. <i>Neurology.</i> 1998; 50(6): 1572-9.                                                                                                           | 1997       |                      |
| Taiwan (Province of China) | Shao PL, Chie WC, Wang CY, Yang CY, Lu CY, Chang LY, Huang LM, Lee CY. Epidemiology of Haemophilus influenzae type b meningitis in Taiwan, 1997 and 2000. <i>J Microbiol Immunol Infect.</i> 2004; 37(3): 164-8.                                                                               | 1997, 2000 |                      |
| Taiwan (Province of China) | Yang J-F, Lin C-I, Huang J-F, Dai C-Y, Lin W-Y, Ho C-K, Hsieh M-Y, Lee L-P, Ho N-J, Lin Z-Y, Chen S-C, Hsieh M-Y, Wang L-Y, Yu M-L, Chuang W-L, Chang W-Y. Viral hepatitis infections in southern Taiwan: a multicenter community-based study. <i>Kaohsiung J Med Sci.</i> 2010; 26(9): 461-9. | 1999-2005  |                      |
| Taiwan (Province of China) | Jiang J, Ma X, Song C, Lin B, Cao W, Wu S, Hsiao K-J. Using the fluorescence spot test for neonatal screening of G6PD deficiency. <i>Southeast Asian J Trop Med Public Health.</i> 2003; 140-2.                                                                                                | 2001-2005  |                      |
| Taiwan (Province of China) | Lin D-B, Lin J-B, Chen S-C, Yang C-C, Chen W-K, Chen C-J. Seroepidemiology of hepatitis E virus infection among preschool children in Taiwan. <i>J Med Virol.</i> 2004; 74(3): 414-8.                                                                                                          | 2001-2003  | *                    |
| Taiwan (Province of China) | Lee C-C, Shih Y-L, Laio C-S, Lin S-M, Huang M-M, Chen C-J, Chen C-P, Chang C-L, Chen L-R, Tschén S-Y, Wang C-H. Prevalence of antibody to hepatitis E virus among haemodialysis patients in Taiwan: possible infection by blood transfusion. <i>Nephron Clin Pract.</i> 2005; 99(4): c122-127. | 2002-2004  | *                    |
| Taiwan (Province of China) | Department of Health (Taiwan). Taiwan Vital Statistics - Deaths 2007. [Unpublished].                                                                                                                                                                                                           | 2007       |                      |
| Taiwan (Province of China) | Department of Health (Taiwan). Taiwan Statistics of Causes of Death 2008.                                                                                                                                                                                                                      | 2008       |                      |
| Taiwan (Province of China) | Tsai C-F, Lin D-B, Chen S-C, Chang Y-H, Chen C-Y, Lin J-B. Seroepidemiology of hepatitis A virus infection among schoolchildren in Taiwan. <i>J Med Virol.</i> 2011; 83(2): 196-200.                                                                                                           | 2008-2010  |                      |

**Web Table 32 - Comprehensive citation list**

| Country                    | Citation                                                                                                                                                                                                                 | Year*     | New for GBD 2013 (*) |
|----------------------------|--------------------------------------------------------------------------------------------------------------------------------------------------------------------------------------------------------------------------|-----------|----------------------|
| Taiwan (Province of China) | Department of Health (Taiwan). Taiwan Statistics of Causes of Death 2009.                                                                                                                                                | 2009      |                      |
| Taiwan (Province of China) | Department of Health (Taiwan). Taiwan Statistics of Causes of Death 2010.                                                                                                                                                | 2010      |                      |
| Taiwan (Province of China) | Department of Health (Taiwan). Taiwan Statistics of Causes of Death 2011.                                                                                                                                                | 2011      | *                    |
| Taiwan (Province of China) | Department of Health (Taiwan). Taiwan Statistics of Causes of Death 2012.                                                                                                                                                | 2012      | *                    |
| Tajikistan                 | Institute for Health Metrics and Evaluation (IHME), Joint United Nations Program on HIV/AIDS (UNAIDS). Institute for Health Metrics and Evaluation HIV Mortality Estimates Based on the UNAIDS Spectrum Model Framework. | 1980-2013 | *                    |
| Tajikistan                 | Tajikistan Vital Registration - Deaths 1981 ICD9 as it appears in World Health Organization (WHO). WHO Mortality Database Version February 2014. Geneva, Switzerland: World Health Organization (WHO), 2014.             | 1981      |                      |
| Tajikistan                 | Tajikistan Vital Registration - Deaths 1982 ICD9 as it appears in World Health Organization (WHO). WHO Mortality Database Version February 2014. Geneva, Switzerland: World Health Organization (WHO), 2014.             | 1982      |                      |
| Tajikistan                 | Tajikistan Vital Registration - Deaths 1985 ICD9 as it appears in World Health Organization (WHO). WHO Mortality Database Version February 2014. Geneva, Switzerland: World Health Organization (WHO), 2014.             | 1985      |                      |
| Tajikistan                 | Tajikistan Vital Registration - Deaths 1986 ICD9 as it appears in World Health Organization (WHO). WHO Mortality Database Version February 2014. Geneva, Switzerland: World Health Organization (WHO), 2014.             | 1986      |                      |
| Tajikistan                 | Tajikistan Vital Registration - Deaths 1987 ICD9 as it appears in World Health Organization (WHO). WHO Mortality Database Version February 2014. Geneva, Switzerland: World Health Organization (WHO), 2014.             | 1987      |                      |
| Tajikistan                 | Tajikistan Vital Registration - Deaths 1988 ICD9 as it appears in World Health Organization (WHO). WHO Mortality Database Version February 2014. Geneva, Switzerland: World Health Organization (WHO), 2014.             | 1988      |                      |
| Tajikistan                 | USSR Census 1989 as it appears in United Nations Statistics Division (UNSD). United Nations Demographic Yearbook. New York City, United States: United Nations Statistics Division (UNSD).                               | 1989      |                      |
| Tajikistan                 | Tajikistan Vital Registration - Deaths 1989 ICD9 as it appears in World Health Organization (WHO). WHO Mortality Database Version February 2014. Geneva, Switzerland: World Health Organization (WHO), 2014.             | 1989      |                      |
| Tajikistan                 | Tajikistan Vital Registration - Deaths 1990 ICD9 as it appears in World Health Organization (WHO). WHO Mortality Database Version February 2014. Geneva, Switzerland: World Health Organization (WHO), 2014.             | 1990      |                      |
| Tajikistan                 | Weatherall D. Sickle Cell and Thalassemias Prevalence Data, Personal Correspondence with David Weatherall. [Unpublished].                                                                                                | 1990-2009 |                      |
| Tajikistan                 | United Nations Children's Fund (UNICEF), World Health Organization (WHO). WHO and UNICEF Reported Disease Incidence Time Series - Pertussis. Geneva, Switzerland: World Health Organization (WHO).                       | 1990-2013 |                      |

**Web Table 32 - Comprehensive citation list**

| Country    | Citation                                                                                                                                                                                                                                                      | Year*                                                       | New for GBD 2013 (*) |
|------------|---------------------------------------------------------------------------------------------------------------------------------------------------------------------------------------------------------------------------------------------------------------|-------------------------------------------------------------|----------------------|
| Tajikistan | United Nations Children's Fund (UNICEF), World Health Organization (WHO). WHO and UNICEF Reported Disease Incidence Time Series - Measles. Geneva, Switzerland: World Health Organization (WHO).                                                              | 1990-2004, 2006-2013                                        |                      |
| Tajikistan | Centre for Health Informatics and Multiprofessional Education, University College London. Modell's Haemoglobinopathologist's Almanac. London, United Kingdom: Centre for Health Informatics and Multiprofessional Education, University College London, 2008. | 1990-2003                                                   |                      |
| Tajikistan | Tajikistan Vital Registration - Deaths 1991 ICD9 as it appears in World Health Organization (WHO). WHO Mortality Database Version February 2014. Geneva, Switzerland: World Health Organization (WHO), 2014.                                                  | 1991                                                        |                      |
| Tajikistan | Tajikistan Vital Registration - Deaths 1992 ICD9 as it appears in World Health Organization (WHO). WHO Mortality Database Version February 2014. Geneva, Switzerland: World Health Organization (WHO), 2014.                                                  | 1992                                                        |                      |
| Tajikistan | Department of Peace and Conflict Research, Uppsala University. UCDP Nonstate Conflict Database Version 2.5, 2013. Uppsala, Sweden: Department of Peace and Conflict Research, Uppsala University, 2013.                                                       | 1992                                                        | *                    |
| Tajikistan | Department of Peace and Conflict Research, Uppsala University. UCDP One-Sided Violence Database Version 1.4, 2013. Uppsala, Sweden: Department of Peace and Conflict Research, Uppsala University, 2013.                                                      | 1992                                                        | *                    |
| Tajikistan | Centre for Research on the Epidemiology of Disasters (CRED). EM-DAT: The OFDA/CRED International Disaster Database. Brussels, Belgium: Catholic University of Leuven.                                                                                         | 1992-1993, 1997-1999, 2001-2003, 2005-2007, 2009-2010, 2012 |                      |
| Tajikistan | Department of Peace and Conflict Research, Uppsala University. UCDP Battle-Related Deaths Database Version 5, 2013. Uppsala, Sweden: Department of Peace and Conflict Research, Uppsala University, 2013.                                                     | 1992-2011                                                   | *                    |
| Tajikistan | Tajikistan Vital Registration - Deaths 1993 ICD9 as it appears in World Health Organization (WHO). WHO Mortality Database Version February 2014. Geneva, Switzerland: World Health Organization (WHO), 2014.                                                  | 1993                                                        |                      |
| Tajikistan | Tajikistan Vital Registration - Deaths 1994 ICD9 as it appears in World Health Organization (WHO). WHO Mortality Database Version February 2014. Geneva, Switzerland: World Health Organization (WHO), 2014.                                                  | 1994                                                        |                      |
| Tajikistan | World Health Organization (WHO). Tajikistan WHO Leishmaniasis Country Profile.                                                                                                                                                                                | 1994-2008                                                   | *                    |
| Tajikistan | Tajikistan Vital Registration - Deaths 1995 ICD9 as it appears in World Health Organization (WHO). WHO Mortality Database Version February 2014. Geneva, Switzerland: World Health Organization (WHO), 2014.                                                  | 1995                                                        |                      |
| Tajikistan | Tajikistan Vital Registration - Deaths 1996 ICD9 as it appears in World Health Organization (WHO). WHO Mortality Database Version February 2014. Geneva, Switzerland: World Health Organization (WHO), 2014.                                                  | 1996                                                        |                      |
| Tajikistan | Tajikistan Vital Registration - Deaths 1997 ICD9 as it appears in World Health Organization (WHO). WHO Mortality Database Version February 2014. Geneva, Switzerland: World Health Organization (WHO), 2014.                                                  | 1997                                                        |                      |
| Tajikistan | Tajikistan Vital Registration - Deaths 1998 ICD9 as it appears in World Health Organization (WHO). WHO Mortality Database Version February 2014. Geneva, Switzerland: World Health Organization (WHO), 2014.                                                  | 1998                                                        |                      |
| Tajikistan | Rafiev KK. [Viral hepatitis E: its epidemiological characteristics in the Republic of Tajikistan]. Zh Mikrobiol Epidemiol Immunobiol. 1999; 26-9.                                                                                                             | 1998                                                        |                      |



**Web Table 32 - Comprehensive citation list**

| Country    | Citation                                                                                                                                                                                                                   | Year*                 | New for GBD 2013 (*) |
|------------|----------------------------------------------------------------------------------------------------------------------------------------------------------------------------------------------------------------------------|-----------------------|----------------------|
| Tajikistan | National State Statistical Agency (Tajikistan), World Bank. Tajikistan Living Standards Measurement Survey 1999.                                                                                                           | 1999                  |                      |
| Tajikistan | Tajikistan Vital Registration - Deaths 1999 ICD9 as it appears in World Health Organization (WHO). WHO Mortality Database Version February 2014. Geneva, Switzerland: World Health Organization (WHO), 2014.               | 1999                  |                      |
| Tajikistan | World Health Organization (WHO). Yellow Fever Reported Cases, WHO Vaccine-Preventable Diseases: Monitoring System. Geneva, Switzerland: World Health Organization (WHO).                                                   | 1999, 2001-2004, 2006 |                      |
| Tajikistan | National State Statistical Agency (Tajikistan), United Nations Children's Fund (UNICEF). Tajikistan Multiple Indicator Cluster Survey 2000 . New York, United States: United Nations Children's Fund (UNICEF).             | 2000                  |                      |
| Tajikistan | Tajikistan Vital Registration - Deaths 2000 ICD9 as it appears in World Health Organization (WHO). WHO Mortality Database Version February 2014. Geneva, Switzerland: World Health Organization (WHO), 2014.               | 2000                  |                      |
| Tajikistan | United Nations Office on Drugs and Crime (UNODC). United Nations Office on Drugs and Crime Global Study on Homicides 2011. Vienna, Austria: United Nations Office on Drugs and Crime (UNODC), 2011.                        | 2000-2009             |                      |
| Tajikistan | Tajikistan Vital Registration - Deaths 2001 ICD9 as it appears in World Health Organization (WHO). WHO Mortality Database Version February 2014. Geneva, Switzerland: World Health Organization (WHO), 2014.               | 2001                  |                      |
| Tajikistan | United Nations Children's Fund (UNICEF). Tajikistan Infant Mortality Report 2001-2003.                                                                                                                                     | 2001-2003             |                      |
| Tajikistan | Tajikistan Vital Registration - Deaths 2002 ICD9 as it appears in World Health Organization (WHO). WHO Mortality Database Version February 2014. Geneva, Switzerland: World Health Organization (WHO), 2014.               | 2002                  |                      |
| Tajikistan | United Nations Population Fund (UNFPA). Tajikistan Demographic Survey 2002.                                                                                                                                                | 2002                  |                      |
| Tajikistan | National State Statistical Agency (Tajikistan), World Bank. Tajikistan Living Standards Measurement Survey 2003.                                                                                                           | 2003                  |                      |
| Tajikistan | Tajikistan Vital Registration - Deaths 2003 ICD9 as it appears in World Health Organization (WHO). WHO Mortality Database Version February 2014. Geneva, Switzerland: World Health Organization (WHO), 2014.               | 2003                  |                      |
| Tajikistan | Tajikistan Vital Registration - Deaths 2004 ICD9 as it appears in World Health Organization (WHO). WHO Mortality Database Version February 2014. Geneva, Switzerland: World Health Organization (WHO), 2014.               | 2004                  |                      |
| Tajikistan | Rebholz CE, Michel AJ, Maselli DA, Saipphudin K, Wyss K. Frequency of malaria and glucose-6-phosphate dehydrogenase deficiency in Tajikistan. Malar J. 2006; 51.                                                           | 2004-2006             |                      |
| Tajikistan | World Health Organization (WHO). Retrospective Measles Data on Supplementary Immunization Activities. Geneva, Switzerland: World Health Organization (WHO).                                                                | 2004, 2009            |                      |
| Tajikistan | United Nations Children's Fund (UNICEF), State Committee on Statistics of the Republic of Tajikistan. Tajikistan Multiple Indicator Cluster Survey 2005. New York, United States: United Nations Children's Fund (UNICEF). | 2005                  |                      |
| Tajikistan | Tajikistan Vital Registration - Deaths 2005 ICD9 as it appears in World Health Organization (WHO). WHO Mortality Database Version February 2014. Geneva, Switzerland: World Health Organization (WHO), 2014.               | 2005                  |                      |

**Web Table 32 - Comprehensive citation list**

| Country    | Citation                                                                                                                                                                                                                                                                                                                                         | Year*                                                                              | New for GBD 2013 (*) |
|------------|--------------------------------------------------------------------------------------------------------------------------------------------------------------------------------------------------------------------------------------------------------------------------------------------------------------------------------------------------|------------------------------------------------------------------------------------|----------------------|
| Tajikistan | Joint United Nations Program on HIV/AIDS (UNAIDS), National Coordination Committee to combat HIV/AIDS, Tuberculosis and Malaria in the Republic of Tajikistan. Tajikistan National Report on the Implementation of the Declaration of Commitment on HIV/AIDS 2010. Geneva, Switzerland: Joint United Nations Program on HIV/AIDS (UNAIDS), 2010. | 2005-2008                                                                          |                      |
| Tajikistan | National State Statistical Agency (Tajikistan), World Bank. Tajikistan Living Standards Measurement Survey 2007.                                                                                                                                                                                                                                 | 2007                                                                               |                      |
| Tajikistan | Tajikistan Vital Registration Death Data 2007 as it appears in United Nations Statistics Division (UNSD). United Nations Demographic Yearbook. New York City, United States: United Nations Statistics Division (UNSD).                                                                                                                          | 2007                                                                               |                      |
| Tajikistan | Tajikistan Vital Registration Death Data 2008 as it appears in United Nations Statistics Division (UNSD). United Nations Demographic Yearbook. New York City, United States: United Nations Statistics Division (UNSD).                                                                                                                          | 2008                                                                               |                      |
| Tajikistan | Agency on Statistics Under the President of the Republic of Tajikistan, European Commission (EC), Federal Statistical Office (Germany), ICON-INSTITUTE Consulting Group. Tajikistan Survey on Infant, Child, and Maternal Mortality 2010.                                                                                                        | 2010                                                                               | *                    |
| Tajikistan | Tajikistan Vital Registration Death Data 2011 as it appears in United Nations Statistics Division (UNSD). United Nations Demographic Yearbook. New York City, United States: United Nations Statistics Division (UNSD).                                                                                                                          | 2011                                                                               | *                    |
| Tajikistan | ICF International, Ministry of Health (Tajikistan), Statistical Agency under the President of the Republic of Tajikistan. Tajikistan Demographic and Health Survey 2012. Fairfax, United States: ICF International, 2013.                                                                                                                        | 2012                                                                               | *                    |
| Tanzania   | Marti HR, Schoepf K, Gsell OR. Frequency of Haemoglobin S and Glucose-6-Phosphate Dehydrogenase Deficiency in Southern Tanzania. Br Med J. 1965; 1(5448): 1476-7.                                                                                                                                                                                | 1964                                                                               |                      |
| Tanzania   | Centre for Research on the Epidemiology of Disasters (CRED). EM-DAT: The OFDA/CRED International Disaster Database. Brussels, Belgium: Catholic University of Leuven.                                                                                                                                                                            | 1964, 1968, 1974, 1989-1990, 1993-1995, 1997-1998, 2000-2002, 2004-2005, 2008-2012 |                      |
| Tanzania   | Central Statistical Bureau (Tanzania), Ministry of Economic Affairs and Development Planning (Tanzania). Tanzania Population and Housing Census 1967.                                                                                                                                                                                            | 1967                                                                               |                      |
| Tanzania   | Bureau of Statistics (Tanzania). Tanzania National Demographic Survey 1973.                                                                                                                                                                                                                                                                      | 1973                                                                               |                      |
| Tanzania   | Bureau of Statistics (Tanzania). Tanzania Population Census 1978.                                                                                                                                                                                                                                                                                | 1978                                                                               |                      |
| Tanzania   | Acheson-Brown DG. The Tanzanian invasion of Uganda: A just war? Int Third World Stud J Rev. 2001; 12.                                                                                                                                                                                                                                            | 1978                                                                               | *                    |
| Tanzania   | Institute for Health Metrics and Evaluation (IHME), Joint United Nations Program on HIV/AIDS (UNAIDS). Institute for Health Metrics and Evaluation HIV Mortality Estimates Based on the UNAIDS Spectrum Model Framework.                                                                                                                         | 1980-2013                                                                          | *                    |
| Tanzania   | United Nations Children's Fund (UNICEF), World Health Organization (WHO). WHO and UNICEF Reported Disease Incidence Time Series - Pertussis. Geneva, Switzerland: World Health Organization (WHO).                                                                                                                                               | 1980-1991, 2001-2013                                                               |                      |
| Tanzania   | United Nations Children's Fund (UNICEF), World Health Organization (WHO). WHO and UNICEF Reported Disease Incidence Time Series - Measles. Geneva, Switzerland: World Health Organization (WHO).                                                                                                                                                 | 1980-2013                                                                          |                      |
| Tanzania   | Mtango FD, Neuvians D, Broome CV, Hightower AW, Pio A. Risk factors for deaths in children under 5 years old in Bagamoyo district, Tanzania. Trop Med Parasitol. 1992; 43(4): 229-33.                                                                                                                                                            | 1986                                                                               |                      |



**Web Table 32 - Comprehensive citation list**

| Country  | Citation                                                                                                                                                                                                                                                      | Year*                 | New for GBD 2013 (*) |
|----------|---------------------------------------------------------------------------------------------------------------------------------------------------------------------------------------------------------------------------------------------------------------|-----------------------|----------------------|
| Tanzania | Bureau of Statistics (Tanzania), Minnesota Population Center. Tanzania Population Census 1988 from the Integrated Public Use Microdata Series, International. [Machine-readable database]. Minneapolis: University of Minnesota.                              | 1988                  |                      |
| Tanzania | Weatherall D. Sickle Cell and Thalassemias Prevalence Data, Personal Correspondence with David Weatherall. [Unpublished].                                                                                                                                     | 1990-2009             |                      |
| Tanzania | Ministry of Health (Tanzania). Tanzania HIV/AIDS/STI Surveillance Report 2000. Tanzania: Ministry of Health (Tanzania), 2000.                                                                                                                                 | 1990-2000             |                      |
| Tanzania | Centre for Health Informatics and Multiprofessional Education, University College London. Modell's Haemoglobinopathologist's Almanac. London, United Kingdom: Centre for Health Informatics and Multiprofessional Education, University College London, 2008. | 1990-2003             |                      |
| Tanzania | Bureau of Statistics (Tanzania), Macro International, Inc, Ministry of Health (Tanzania). Tanzania Demographic and Health Survey 1991-1992. Calverton, United States: Macro International, Inc.                                                               | 1991-1992             |                      |
| Tanzania | Salum FM, Wilkes TJ, Kivumbi K, Curtis CF. Mortality of under-fives in a rural area of holoendemic malaria transmission. Acta Trop. 1994; 58(1): 29-34.                                                                                                       | 1992                  |                      |
| Tanzania | Miller WC, Shao JF, Weaver DJ, Shimokura GH, Paul DA, Lallinger GJ. Seroprevalence of viral hepatitis in Tanzanian adults. Trop Med Int Health. 1998; 3(9): 757-63.                                                                                           | 1992                  |                      |
| Tanzania | MacLeod J, Rhode R. Retrospective follow-up of maternal deaths and their associated risk factors in a rural district of Tanzania. Trop Med Int Health. 1998; 3(2): 130-7.                                                                                     | 1993                  |                      |
| Tanzania | Premji Z, Ndayanga P, Shiff C, Minjas J, Lubega P, MacLeod J. Community based studies on childhood mortality in a malaria holoendemic area on the Tanzanian coast. Acta Trop. 1997; 63(2-3): 101-9.                                                           | 1993                  |                      |
| Tanzania | Planning Commission (Tanzania), University of Dar es Salaam, World Bank. Tanzania Living Standards Measurement Study 1993-1994. Washington DC, United States: World Bank.                                                                                     | 1993-1994             |                      |
| Tanzania | World Health Organization Regional Office for Africa. HIV/AIDS Epidemiological Surveillance Update for the WHO African Region. World Health Organization Regional Office for Africa, 2003.                                                                    | 1994-2002             |                      |
| Tanzania | Hinderaker SG, Olsen BE, Bergsjø PB, Gasheka P, Lie RT, Havnen J, Kvåle G. Avoidable stillbirths and neonatal deaths in rural Tanzania. Br J Obstet Gynaecol. 2003; 110(6): 616-23.                                                                           | 1995                  |                      |
| Tanzania | Ministry of Health and Social Welfare (Tanzania), Newcastle University, UK Department for International Development (DFID). Tanzania Policy Implications of Mortality Burden 1995-2001.                                                                       | 1995-2001             |                      |
| Tanzania | Bureau of Statistics (Tanzania), Macro International, Inc, Planning Commission (Tanzania). Tanzania Demographic and Health Survey 1996. Calverton, United States: Macro International, Inc.                                                                   | 1996                  |                      |
| Tanzania | Iriya N, Manji KP, Mbise RL. Verbal autopsy in establishing cause of perinatal death. East Afr Med J. 2002; 79(2): 82-4.                                                                                                                                      | 1996                  |                      |
| Tanzania | Stark K, Poggensee G, Höhne M, Bienzle U, Kiwelu I, Schreier E. Seroepidemiology of TT virus, GBC-C/HGV, and hepatitis viruses B, C, and E among women in a rural area of Tanzania. J Med Virol. 2000; 62(4): 524-30.                                         | 1996                  |                      |
| Tanzania | Department of Peace and Conflict Research, Uppsala University. UCDP Nonstate Conflict Database Version 2.5, 2013. Uppsala, Sweden: Department of Peace and Conflict Research, Uppsala University, 2013.                                                       | 1997                  | *                    |
| Tanzania | World Health Organization (WHO). Yellow Fever Reported Cases, WHO Vaccine-Preventable Diseases: Monitoring System. Geneva, Switzerland: World Health Organization (WHO).                                                                                      | 1997, 2002, 2004-2007 |                      |

**Web Table 32 - Comprehensive citation list**

| Country  | Citation                                                                                                                                                                                                                                                             | Year*                            | New for GBD 2013 (*) |
|----------|----------------------------------------------------------------------------------------------------------------------------------------------------------------------------------------------------------------------------------------------------------------------|----------------------------------|----------------------|
| Tanzania | INDEPTH, National Institute for Medical Research (Tanzania), London School of Hygiene and Tropical Medicine. Tanzania - Magu Health and Demographic Surveillance System. Dar es Salaam, Tanzania: National Institute for Medical Research (Tanzania). [Unpublished]. | 1999                             |                      |
| Tanzania | Bureau of Statistics (Tanzania), Macro International, Inc. Tanzania Demographic and Health Survey 1999. Calverton, United States: Macro International, Inc.                                                                                                          | 1999                             |                      |
| Tanzania | Msuya SE, Mbizvo EM, Hussain A, Sam NE, Stray-Pedersen B. Seroprevalence of hepatitis B and C viruses among women of childbearing age in Moshi Urban, Tanzania. East Afr Med J. 2006; 83(2): 91-4.                                                                   | 1999                             |                      |
| Tanzania | Measles Supplementary Immunization Activity Data as provided by the World Health Organization. [Unpublished].                                                                                                                                                        | 1999                             |                      |
| Tanzania | INDEPTH, Ministry of Health and Social Welfare (Tanzania), School of Public Health, Columbia University. Tanzania - Rufiji Health and Demographic Surveillance System. [Unpublished].                                                                                | 2000                             |                      |
| Tanzania | Prytherch H, Massawe S, Kuelker R, Hunger C, Mtatifikolo F, Jahn A. The unmet need for Emergency Obstetric Care in Tanga Region, Tanzania. BMC Pregnancy Childbirth. 2007; 7(16).                                                                                    | 2000-2002                        |                      |
| Tanzania | World Health Organization (WHO). Retrospective Measles Data on Supplementary Immunization Activities. Geneva, Switzerland: World Health Organization (WHO).                                                                                                          | 2000-2002, 2005-2006, 2008, 2011 |                      |
| Tanzania | INDEPTH. Tanzania - Ifakara Health and Demographic Surveillance System. [Unpublished].                                                                                                                                                                               | 2001                             |                      |
| Tanzania | Kaatano GM, Mashauri FM, Kinung'hi SM, Mwanga JR, Malima RC, Kishamawe C, Nnko SE, Magesa SM, Mboera LE. Patterns of malaria related mortality based on verbal autopsy in Muleba District, north-western Tanzania. Tanzan J Health Res. 2009; 11(4): 210-8.          | 2001                             |                      |
| Tanzania | Department of Peace and Conflict Research, Uppsala University. UCDP One-Sided Violence Database Version 1.4, 2013. Uppsala, Sweden: Department of Peace and Conflict Research, Uppsala University, 2013.                                                             | 2001-2007                        | *                    |
| Tanzania | Joint United Nations Program on HIV/AIDS (UNAIDS), Tanzania Commission for AIDS (TACAIDS), World Bank. The HIV Epidemic in Tanzania Mainland: Where Have We Come From, Where Is It Going, and How Are We Responding? Washington DC, United States: World Bank, 2008. | 2001-2006                        |                      |
| Tanzania | Japan International Cooperation Agency, National Bureau of Statistics (Tanzania), US Census Bureau. Tanzania Population and Housing Census 2002. Dar es Salaam, Tanzania: National Bureau of Statistics (Tanzania).                                                  | 2002                             |                      |
| Tanzania | National Bureau of Statistics (Tanzania), Minnesota Population Center. Tanzania Population and Housing Census 2002 from the Integrated Public Use Microdata Series, International. [Machine-readable database]. Minneapolis: University of Minnesota.                | 2002                             |                      |
| Tanzania | Kamara MK. Clustering of mortality among children under five years due to malaria at the Ifakara Demographic Surveillance Site in Tanzania [Dissertation]. [Johannesburg]: University of the Witwatersrand; 2008.                                                    | 2003                             |                      |
| Tanzania | National Bureau of Statistics (Tanzania), ORC Macro, Tanzania Commission for AIDS (TACAIDS). Tanzania AIDS Indicator Survey 2003-2004. Calverton, United States: ORC Macro.                                                                                          | 2003-2004                        |                      |
| Tanzania | Narah-Bana, S. Risk Factors and Causes of Adult Deaths in the Ifakara Health and Demographic Surveillance System Population, 2003-2007 [dissertation]. [Johannesburg, South Africa]: University of the Witwatersrand; 2010. 174 p.                                   | 2003-2007                        |                      |
| Tanzania | United Nations Office on Drugs and Crime (UNODC). United Nations Office on Drugs and Crime Global Study on Homicides 2011. Vienna, Austria: United Nations Office on Drugs and Crime (UNODC), 2011.                                                                  | 2003-2004                        |                      |

**Web Table 32 - Comprehensive citation list**

| Country  | Citation                                                                                                                                                                                                                                                                                                                           | Year*           | New for GBD 2013 (*) |
|----------|------------------------------------------------------------------------------------------------------------------------------------------------------------------------------------------------------------------------------------------------------------------------------------------------------------------------------------|-----------------|----------------------|
| Tanzania | Yahya-Malima KI, Evjen-Olsen B, Matee MI, Fylkesnes K, Haarr L. HIV-1, HSV-2 and syphilis among pregnant women in a rural area of Tanzania: prevalence and risk factors. <i>BMC Infect Dis.</i> 2008; 8: 75.                                                                                                                       | 2003-2004       |                      |
| Tanzania | Swai RO, Somi G GR, Matee MI, Killewo J, Lyamuya EF, Kwesigabo G, Tulli T, Kabalimu TK, Ng'ang'a L, Isingo R, Ndayongeje J. Surveillance of HIV and syphilis infections among antenatal clinic attendees in Tanzania-2003/2004. <i>BMC Public Health.</i> 2006; 6: 91.                                                             | 2003-2004       |                      |
| Tanzania | Sazawal S, Black RE, Ramsan M, Chwaya HM, Dutta A, Dhingra U, Stoltzfus RJ, Othman MK, Kabole FM. Effect of zinc supplementation on mortality in children aged 1-48 months: a community-based randomised placebo-controlled trial. <i>Lancet.</i> 2007; 369(9565): 927-34.                                                         | 2004            |                      |
| Tanzania | Ae-Ngibise KA, Masanja H, Kellerman R, Owusu-Agyei S. Risk factors for injury mortality in rural Tanzania: a secondary data analysis. <i>BMJ Open.</i> 2012; 2(6): e001721.                                                                                                                                                        | 2004            |                      |
| Tanzania | Illah E, Mbaruku G, Masanja H, Kahn K. Causes and risk factors for maternal mortality in rural Tanzania--case of Rufiji Health and Demographic Surveillance Site (HDSS). <i>Afr J Reprod Health.</i> 2013; 17(3): 119-30.                                                                                                          | 2004            |                      |
| Tanzania | Macro International, Inc, National Bureau of Statistics (Tanzania). Tanzania Demographic and Health Survey 2004-2005. Calverton, United States: Macro International, Inc.                                                                                                                                                          | 2004-2005       |                      |
| Tanzania | Makani J, Cox SE, Soka D, Komba AN, Oruo J, Mwamtemi H, Magesa P, Rwezaula S, Meda E, Mgaya J, Lowe B, Muturi D, Roberts DJ, Williams TN, Pallangyo K, Kitundu J, Fegan G, Kirkham FJ, Marsh K, Newton CR. Mortality in sickle cell anemia in Africa: a prospective cohort study in Tanzania. <i>PLoS One.</i> 2011; 2(6): e14699. | 2004-2009       |                      |
| Tanzania | Cox SE, Makani J, Fulford AJ, Komba AN, Soka D, Williams TN, Newton CR, Marsh K, Prentice AM. Nutritional status, hospitalization and mortality among patients with sickle cell anemia in Tanzania. <i>Haematologica.</i> 2011; 96(7): 948-53.                                                                                     | 2004-2009       | *                    |
| Tanzania | Narh-Bana SA, Chirwa TF, Mwanyangala MA, Nathan R. Muertes de adultos y el futuro: Un análisis causa-especifico de las muertes de adultos de un estudio longitudinal en Tanzania rural 2003-2007. <i>Trop Med Int Health.</i> 2012; 17(11): 1396-404.                                                                              | 2005            |                      |
| Tanzania | Ministry of Health and Social Welfare (Tanzania). Tanzania Surveillance of HIV and Syphilis Infections Among Antenatal Attendees 2008. Dar es Salaam, Tanzania: Ministry of Health and Social Welfare (Tanzania), 2010.                                                                                                            | 2005-2006, 2008 |                      |
| Tanzania | Sangber-Dery MD. The Role of Birth Order in Infant Mortality in Ifakara DSS Area in Rural Tanzania [master's thesis]. [Johannesburg, South Africa]: University of the Witwatersrand; 2009.                                                                                                                                         | 2006            |                      |
| Tanzania | Kumogola Y, Slaymaker E, Zaba B, Mngara J, Isingo R, Chagalucha J, Mwidunda P, Kimaro D, Urassa M. Trends in HIV & syphilis prevalence and correlates of HIV infection: results from cross-sectional surveys among women attending ante-natal clinics in Northern Tanzania. <i>BMC Public Health.</i> 2010; 10: 553.               | 2006            |                      |
| Tanzania | Mrisho M, Schellenberg D, Manzi F, Tanner M, Mshinda H, Shirima K, Msambichaka B, Abdulla S, Schellenberg JA. Neonatal Deaths in Rural Southern Tanzania: Care-Seeking and Causes of Death. <i>ISRN Pediatr.</i> 2012; 2012: 953401.                                                                                               | 2007            |                      |
| Tanzania | Macro International, Inc, National Bureau of Statistics (Tanzania), Office of Chief Government Statistician (OCGS-Zanzibar), Tanzania Commission for AIDS (TACAIDS), Zanzibar AIDS Commission (ZAC). Tanzania HIV/AIDS and Malaria Indicator Survey 2007-2008. Calverton, United States: Macro International, Inc.                 | 2007-2008       |                      |

**Web Table 32 - Comprehensive citation list**

| Country  | Citation                                                                                                                                                                                                                                                         | Year*                                                         | New for GBD 2013 (*) |
|----------|------------------------------------------------------------------------------------------------------------------------------------------------------------------------------------------------------------------------------------------------------------------|---------------------------------------------------------------|----------------------|
| Tanzania | Joint United Nations Program on HIV/AIDS (UNAIDS), Tanzania Commission for AIDS (TACAIDS). Tanzania UNGASS Reporting for 2010. Geneva, Switzerland: Joint United Nations Program on HIV/AIDS (UNAIDS), 2010.                                                     | 2009                                                          |                      |
| Tanzania | ICF Macro, National Bureau of Statistics (Tanzania). Tanzania Demographic and Health Survey 2009-2010. Claverton, Maryland: ICF Macro.                                                                                                                           | 2009-2010                                                     |                      |
| Tanzania | Paddick S-M, Longdon AR, Kisoli A, Dotchin C, Gray WK, Dewhurst F, Chaote P, Kalaria R, Jusabani AM, Walker R. Dementia prevalence estimates in sub-Saharan Africa: comparison of two diagnostic criteria. Glob Health Action. 2013; 6: 19646.                   | 2009-2010                                                     |                      |
| Tanzania | Nelissen EJ, Mduma E, Ersdal HL, Evjen-Olsen B, van Roosmalen JJ, Stekelenburg J. Maternal near miss and mortality in a rural referral hospital in northern Tanzania: a cross-sectional study. BMC Pregnancy Childbirth. 2013; 13(1): 141.                       | 2010                                                          |                      |
| Tanzania | ICF International, National Bureau of Statistics (Tanzania), Office of Chief Government Statistician (OCGS-Zanzibar), Tanzania Commission for AIDS (TACAIDS), Zanzibar AIDS Commission (ZAC). Tanzania AIDS Indicator Survey 2011-2012. ICF International, 2013. | 2011-2012                                                     | *                    |
| Thailand | Thailand Vital Registration Death Data 1950 as it appears in United Nations Statistics Division (UNSD). United Nations Demographic Yearbook. New York City, United States: United Nations Statistics Division (UNSD).                                            | 1950                                                          |                      |
| Thailand | Thailand Vital Registration Death Data 1951 as it appears in United Nations Statistics Division (UNSD). United Nations Demographic Yearbook. New York City, United States: United Nations Statistics Division (UNSD).                                            | 1951                                                          |                      |
| Thailand | Peace Research Institute Oslo (PRIO). Battle Deaths Dataset Version 3, 2009. Oslo, Norway: Peace Research Institute Oslo (PRIO), 2009.                                                                                                                           | 1951-1988                                                     |                      |
| Thailand | Thailand Vital Registration Death Data 1952 as it appears in United Nations Statistics Division (UNSD). United Nations Demographic Yearbook. New York City, United States: United Nations Statistics Division (UNSD).                                            | 1952                                                          |                      |
| Thailand | Thailand Vital Registration Death Data 1953 as it appears in United Nations Statistics Division (UNSD). United Nations Demographic Yearbook. New York City, United States: United Nations Statistics Division (UNSD).                                            | 1953                                                          |                      |
| Thailand | Thailand Vital Registration Death Data 1954 as it appears in United Nations Statistics Division (UNSD). United Nations Demographic Yearbook. New York City, United States: United Nations Statistics Division (UNSD).                                            | 1954                                                          |                      |
| Thailand | Thailand Vital Registration - Deaths 1955 ICD7 as it appears in World Health Organization (WHO). WHO Mortality Database Version February 2014. Geneva, Switzerland: World Health Organization (WHO), 2014.                                                       | 1955                                                          |                      |
| Thailand | Centre for Research on the Epidemiology of Disasters (CRED). EM-DAT: The OFDA/CRED International Disaster Database. Brussels, Belgium: Catholic University of Leuven.                                                                                            | 1955, 1962, 1966, 1975, 1978, 1980-1981, 1983-1997, 1999-2012 |                      |
| Thailand | Thailand Vital Registration - Deaths 1956 ICD7 as it appears in World Health Organization (WHO). WHO Mortality Database Version February 2014. Geneva, Switzerland: World Health Organization (WHO), 2014.                                                       | 1956                                                          |                      |
| Thailand | Thailand Vital Registration - Deaths 1957 ICD7 as it appears in World Health Organization (WHO). WHO Mortality Database Version February 2014. Geneva, Switzerland: World Health Organization (WHO), 2014.                                                       | 1957                                                          |                      |

**Web Table 32 - Comprehensive citation list**

| Country  | Citation                                                                                                                                                                                                                                                         | Year*     | New for GBD 2013 (*) |
|----------|------------------------------------------------------------------------------------------------------------------------------------------------------------------------------------------------------------------------------------------------------------------|-----------|----------------------|
| Thailand | Thailand Vital Registration - Deaths 1958 ICD7 as it appears in World Health Organization (WHO). WHO Mortality Database Version February 2014. Geneva, Switzerland: World Health Organization (WHO), 2014.                                                       | 1958      |                      |
| Thailand | Thailand Vital Registration - Deaths 1959 ICD7 as it appears in World Health Organization (WHO). WHO Mortality Database Version February 2014. Geneva, Switzerland: World Health Organization (WHO), 2014.                                                       | 1959      |                      |
| Thailand | Thailand Vital Registration - Deaths 1960 ICD7 as it appears in World Health Organization (WHO). WHO Mortality Database Version February 2014. Geneva, Switzerland: World Health Organization (WHO), 2014.                                                       | 1960      |                      |
| Thailand | Kruatrachue M, Charoenlarp P, Chongsuphajsiddhi T, Harinasuta C. Erythrocyte glucose-6-phosphate dehydrogenase and malaria in Thailand. <i>Lancet</i> . 1962; 2(7267): 1183-6.                                                                                   | 1960-1962 |                      |
| Thailand | Thailand Vital Registration - Deaths 1961 ICD7 as it appears in World Health Organization (WHO). WHO Mortality Database Version February 2014. Geneva, Switzerland: World Health Organization (WHO), 2014.                                                       | 1961      |                      |
| Thailand | Thailand Vital Registration - Deaths 1962 ICD7 as it appears in World Health Organization (WHO). WHO Mortality Database Version February 2014. Geneva, Switzerland: World Health Organization (WHO), 2014.                                                       | 1962      |                      |
| Thailand | Flatz G, Sringam S. Glucose-6-phosphate dehydrogenase deficiency in different ethnic groups in Thailand. <i>Ann Hum Genet</i> . 1964; 315-8.                                                                                                                     | 1962-1964 |                      |
| Thailand | Flatz G, Thanangkul O, Simarak S, Manmontri M. Glucose-6-phosphate dehydrogenase deficiency and jaundice in newborn infants in northern Thailand. <i>Ann Paediatr</i> . 1964; 39-45.                                                                             | 1962-1964 |                      |
| Thailand | Thailand Vital Registration - Deaths 1963 ICD7 as it appears in World Health Organization (WHO). WHO Mortality Database Version February 2014. Geneva, Switzerland: World Health Organization (WHO), 2014.                                                       | 1963      |                      |
| Thailand | Wasi P, Na-Nakorn S, Suingdumrong A. Studies of the distribution of haemoglobin E, thalassaemias and glucose-6-phosphate dehydrogenase deficiency in north-eastern Thailand. <i>Nature</i> . 1967; 214(5087): 501-2.                                             | 1963      |                      |
| Thailand | Thailand Vital Registration - Deaths 1964 ICD7 as it appears in World Health Organization (WHO). WHO Mortality Database Version February 2014. Geneva, Switzerland: World Health Organization (WHO), 2014.                                                       | 1964      |                      |
| Thailand | Thailand Vital Registration - Deaths 1965 ICD7 as it appears in World Health Organization (WHO). WHO Mortality Database Version February 2014. Geneva, Switzerland: World Health Organization (WHO), 2014.                                                       | 1965      |                      |
| Thailand | Thailand Vital Registration - Deaths 1966 ICD7 as it appears in World Health Organization (WHO). WHO Mortality Database Version February 2014. Geneva, Switzerland: World Health Organization (WHO), 2014.                                                       | 1966      |                      |
| Thailand | Tuchinda S, Rucknagel DL, Na-Nakorn S, Wasi P. The Thai variant and the distribution of alleles of 6-phosphogluconate dehydrogenase and the distribution of glucose 6-phosphate dehydrogenase deficiency in Thailand. <i>Biochem Genet</i> . 1968; 2(3): 253-64. | 1966-1968 |                      |
| Thailand | Thailand Vital Registration - Deaths 1967 ICD7 as it appears in World Health Organization (WHO). WHO Mortality Database Version February 2014. Geneva, Switzerland: World Health Organization (WHO), 2014.                                                       | 1967      |                      |

**Web Table 32 - Comprehensive citation list**

| Country  | Citation                                                                                                                                                                                                                                            | Year*     | New for GBD 2013 (*) |
|----------|-----------------------------------------------------------------------------------------------------------------------------------------------------------------------------------------------------------------------------------------------------|-----------|----------------------|
| Thailand | Thailand Vital Registration - Deaths 1968 ICD7 as it appears in World Health Organization (WHO). WHO Mortality Database Version February 2014. Geneva, Switzerland: World Health Organization (WHO), 2014.                                          | 1968      |                      |
| Thailand | Thailand Vital Registration - Deaths 1969 ICD8 as it appears in World Health Organization (WHO). WHO Mortality Database Version February 2014. Geneva, Switzerland: World Health Organization (WHO), 2014.                                          | 1969      |                      |
| Thailand | Thailand Vital Registration - Deaths 1970 ICD8 as it appears in World Health Organization (WHO). WHO Mortality Database Version February 2014. Geneva, Switzerland: World Health Organization (WHO), 2014.                                          | 1970      |                      |
| Thailand | National Statistical Office (Thailand), Minnesota Population Center. Thailand Population and Housing Census 1970 from the Integrated Public Use Microdata Series, International. [Machine-readable database]. Minneapolis: University of Minnesota. | 1970      |                      |
| Thailand | Thailand Vital Registration - Deaths 1971 ICD8 as it appears in World Health Organization (WHO). WHO Mortality Database Version February 2014. Geneva, Switzerland: World Health Organization (WHO), 2014.                                          | 1971      |                      |
| Thailand | Burke DS, Snitbhan R, Johnson DE, Scott RM. Age-specific prevalence of hepatitis A virus antibody in Thailand. Am J Epidemiol. 1981; 113(3): 245-9.                                                                                                 | 1971-1977 |                      |
| Thailand | Thailand Vital Registration - Deaths 1972 ICD8 as it appears in World Health Organization (WHO). WHO Mortality Database Version February 2014. Geneva, Switzerland: World Health Organization (WHO), 2014.                                          | 1972      |                      |
| Thailand | Thailand Vital Registration - Deaths 1973 ICD8 as it appears in World Health Organization (WHO). WHO Mortality Database Version February 2014. Geneva, Switzerland: World Health Organization (WHO), 2014.                                          | 1973      |                      |
| Thailand | Thailand Vital Registration - Deaths 1974 ICD8 as it appears in World Health Organization (WHO). WHO Mortality Database Version February 2014. Geneva, Switzerland: World Health Organization (WHO), 2014.                                          | 1974      |                      |
| Thailand | United Nations Office on Drugs and Crime (UNODC). United Nations Surveys on Crime Trends and the Operations of Criminal Justice Systems 1970-2006 as provided by Kavi Bhalla. [Unpublished].                                                        | 1974-1979 |                      |
| Thailand | Institute of Population Studies (Thailand), Chulalongkorn University , International Statistical Institute. Thailand World Fertility Survey 1975. Voorburg, Netherlands: International Statistical Institute.                                       | 1975      |                      |
| Thailand | Thailand Vital Registration - Deaths 1975 ICD8 as it appears in World Health Organization (WHO). WHO Mortality Database Version February 2014. Geneva, Switzerland: World Health Organization (WHO), 2014.                                          | 1975      |                      |
| Thailand | Johnson DE, Snitbhan R, Scott RM, Pearlman EJ, Kennedy RS. Hepatitis B in the rural tropics. Int J Epidemiol. 1980; 9(2): 123-9.                                                                                                                    | 1975-1976 |                      |
| Thailand | Thailand Vital Registration - Deaths 1976 ICD8 as it appears in World Health Organization (WHO). WHO Mortality Database Version February 2014. Geneva, Switzerland: World Health Organization (WHO), 2014.                                          | 1976      |                      |
| Thailand | Thailand Vital Registration - Deaths 1977 ICD8 as it appears in World Health Organization (WHO). WHO Mortality Database Version February 2014. Geneva, Switzerland: World Health Organization (WHO), 2014.                                          | 1977      |                      |
| Thailand | World Health Orgn. Community control of hereditary anaemias: memorandum from a WHO meeting. Bull World Health Organ. 1983; 61(1): 63-80.                                                                                                            | 1977-1999 |                      |



**Web Table 32 - Comprehensive citation list**

| Country  | Citation                                                                                                                                                                                                                                                                                              | Year*                | New for GBD 2013 (*) |
|----------|-------------------------------------------------------------------------------------------------------------------------------------------------------------------------------------------------------------------------------------------------------------------------------------------------------|----------------------|----------------------|
| Thailand | World Health Organization (WHO). Thailand WHO Leishmaniasis Country Profile.                                                                                                                                                                                                                          | 1977-2010            | *                    |
| Thailand | Thailand Vital Registration - Deaths 1978 ICD8 as it appears in World Health Organization (WHO). WHO Mortality Database Version February 2014. Geneva, Switzerland: World Health Organization (WHO), 2014.                                                                                            | 1978                 |                      |
| Thailand | Khanjanasthiti P, Benchakarn V, Saksawad A, Khantanaphar S, Posayanond P. Perinatal problems in rural Thailand. J Trop Pediatr. 1984; 30(2): 72-8.                                                                                                                                                    | 1978                 |                      |
| Thailand | Thailand Vital Registration - Deaths 1979 ICD9 as it appears in World Health Organization (WHO). WHO Mortality Database Version February 2014. Geneva, Switzerland: World Health Organization (WHO), 2014.                                                                                            | 1979                 |                      |
| Thailand | Thailand Vital Registration - Deaths 1980 ICD9 as it appears in World Health Organization (WHO). WHO Mortality Database Version February 2014. Geneva, Switzerland: World Health Organization (WHO), 2014.                                                                                            | 1980                 |                      |
| Thailand | National Statistical Office (Thailand), Minnesota Population Center. Thailand Population and Housing Census 1980 from the Integrated Public Use Microdata Series, International. [Machine-readable database]. Minneapolis: University of Minnesota.                                                   | 1980                 |                      |
| Thailand | Chotpitayasunondh T. Bacterial meningitis in children: etiology and clinical features, an 11-year review of 618 cases. Southeast Asian J Trop Med Public Health. 1994; 25(1): 107-15.                                                                                                                 | 1980-1990            |                      |
| Thailand | Institute for Health Metrics and Evaluation (IHME), Joint United Nations Program on HIV/AIDS (UNAIDS). Institute for Health Metrics and Evaluation HIV Mortality Estimates Based on the UNAIDS Spectrum Model Framework.                                                                              | 1980-2013            | *                    |
| Thailand | United Nations Children's Fund (UNICEF), World Health Organization (WHO). WHO and UNICEF Reported Disease Incidence Time Series - Pertussis. Geneva, Switzerland: World Health Organization (WHO).                                                                                                    | 1980-1995, 1997-2013 |                      |
| Thailand | United Nations Children's Fund (UNICEF), World Health Organization (WHO). WHO and UNICEF Reported Disease Incidence Time Series - Measles. Geneva, Switzerland: World Health Organization (WHO).                                                                                                      | 1980-2013            |                      |
| Thailand | Thailand Vital Registration - Deaths 1981 ICD9 as it appears in World Health Organization (WHO). WHO Mortality Database Version February 2014. Geneva, Switzerland: World Health Organization (WHO), 2014.                                                                                            | 1981                 |                      |
| Thailand | Viranuvatti V, Hemindra P, Chainuvati T. Anti-HAV in Thai population. J Med Assoc Thai. 1982; 65(7): 379-82.                                                                                                                                                                                          | 1981                 |                      |
| Thailand | Thailand Vital Registration - Deaths 1982 ICD9 as it appears in World Health Organization (WHO). WHO Mortality Database Version February 2014. Geneva, Switzerland: World Health Organization (WHO), 2014.                                                                                            | 1982                 |                      |
| Thailand | Thailand Vital Registration - Deaths 1983 ICD9 as it appears in World Health Organization (WHO). WHO Mortality Database Version February 2014. Geneva, Switzerland: World Health Organization (WHO), 2014.                                                                                            | 1983                 |                      |
| Thailand | Ferlay J, Parkin DM, Curado MP, Bray F, Edwards B, Shin HR and Forman D. Cancer Incidence in Five Continents, Volumes I to IX: IARC CancerBase No. 9 [Internet]. Lyon, France: International Agency for Research on Cancer; 2010. Available from: <a href="http://ci5.iarc.fr">http://ci5.iarc.fr</a> | 1983-1999, 2001      |                      |
| Thailand | Thailand Vital Registration - Deaths 1984 ICD9 as it appears in World Health Organization (WHO). WHO Mortality Database Version February 2014. Geneva, Switzerland: World Health Organization (WHO), 2014.                                                                                            | 1984                 |                      |

**Web Table 32 - Comprehensive citation list**

| Country  | Citation                                                                                                                                                                                                                                                                           | Year*            | New for GBD 2013 (*) |
|----------|------------------------------------------------------------------------------------------------------------------------------------------------------------------------------------------------------------------------------------------------------------------------------------|------------------|----------------------|
| Thailand | Thailand Vital Registration - Deaths 1985 ICD9 as it appears in World Health Organization (WHO). WHO Mortality Database Version February 2014. Geneva, Switzerland: World Health Organization (WHO), 2014.                                                                         | 1985             |                      |
| Thailand | Thailand Vital Registration - Deaths 1986 ICD9 as it appears in World Health Organization (WHO). WHO Mortality Database Version February 2014. Geneva, Switzerland: World Health Organization (WHO), 2014.                                                                         | 1986             |                      |
| Thailand | Thailand Vital Registration - Deaths 1987 ICD9 as it appears in World Health Organization (WHO). WHO Mortality Database Version February 2014. Geneva, Switzerland: World Health Organization (WHO), 2014.                                                                         | 1987             |                      |
| Thailand | Institute of Population Studies (Thailand), Chulalongkorn University, Westinghouse; Institute for Resource Development. Thailand Demographic and Health Survey 1987. Columbia, United States: Westinghouse; Institute for Resource Development.                                    | 1987             |                      |
| Thailand | Poorawan Y, Vimalakij T, Chongsrisawat V, Theamboonlers A, Chumdermpadetsuk S. The declining pattern of seroepidemiology of hepatitis A virus infection among adolescents in Bangkok, Thailand. Southeast Asian J Trop Med Public Health. 1997; 28(1): 154-7.                      | 1987, 1993, 1996 |                      |
| Thailand | Thailand Vital Registration Death Data 1988 as it appears in United Nations Statistics Division (UNSD). United Nations Demographic Yearbook. New York City, United States: United Nations Statistics Division (UNSD).                                                              | 1988             |                      |
| Thailand | Parkin DM, International Agency for Research on Cancer, International Association of Cancer Registries. Cancer incidence in five continents. Volumes I to VIII. Lyon, France, IARC Press, 2005.                                                                                    | 1988, 1990-1996  |                      |
| Thailand | Parkin DM, International Agency for Research on Cancer, International Association of Cancer Registries. Cancer Incidence in Five Continents. Vol. I to VIII. Lyon, France, IARC Press, 2005.                                                                                       | 1988, 1990-1996  |                      |
| Thailand | Chunsumrit S, Biggs BA, Maynard J, Thamapalo S, Laoboripat S, Bovornsin S, Charanasri U, Pinyowiat W, Kunasol P. Integration of hepatitis B vaccination into the expanded programme on immunization in Chonburi and Chiangmai provinces, Thailand. Vaccine. 1997; 15(6-7): 769-74. | 1988, 1993       |                      |
| Thailand | National Statistical Office (Thailand). Thailand Survey of Population Change 1989.                                                                                                                                                                                                 | 1989             |                      |
| Thailand | Phanthumchinda K, Jitapunkul S, Sitthi-amron C, Bunnag SC, Ebrahim S. Prevalence of dementia in an urban slum population in Thailand: Validity of screening methods. Int J Geriatr Psychiatry. 1991; 6(9): 639-46.                                                                 | 1989             |                      |
| Thailand | Thailand Vital Registration Death Data 1989 as it appears in United Nations Statistics Division (UNSD). United Nations Demographic Yearbook. New York City, United States: United Nations Statistics Division (UNSD).                                                              | 1989             |                      |
| Thailand | Department of Peace and Conflict Research, Uppsala University. UCDP Battle-Related Deaths Database Version 5, 2013. Uppsala, Sweden: Department of Peace and Conflict Research, Uppsala University, 2013.                                                                          | 1989-2012        | *                    |
| Thailand | Poorawan Y, Theamboonlers A, Chumdermpadetsuk S. Seroepidemiology of antibody to hepatitis A in the rural eastern part of Thailand. Southeast Asian J Trop Med Public Health. 1993; 24(2): 250-4.                                                                                  | 1989-1992        |                      |
| Thailand | Issaragrisil S, Kaufman D, Thongput A, Chansung K, Thamprasit T, Piankijagum A, Anderson T, Shapiro S, Leaverton P, Young NS. Association of seropositivity for hepatitis viruses and aplastic anemia in Thailand. Hepatology. 1997; 25(5): 1255-7.                                | 1989-1994        |                      |



**Web Table 32 - Comprehensive citation list**

| Country  | Citation                                                                                                                                                                                                                                                                                                                                                           | Year*     | New for GBD 2013 (*) |
|----------|--------------------------------------------------------------------------------------------------------------------------------------------------------------------------------------------------------------------------------------------------------------------------------------------------------------------------------------------------------------------|-----------|----------------------|
| Thailand | Thailand Vital Registration - Deaths 1990 ICD9 as it appears in World Health Organization (WHO). WHO Mortality Database Version February 2014. Geneva, Switzerland: World Health Organization (WHO), 2014.                                                                                                                                                         | 1990      |                      |
| Thailand | National Statistical Office (Thailand), Minnesota Population Center. Thailand Population and Housing Census 1990 from the Integrated Public Use Microdata Series, International. [Machine-readable database]. Minneapolis: University of Minnesota.                                                                                                                | 1990      |                      |
| Thailand | Nelson KE, Suriyanon V, Taylor E, Wongchak T, Kingkeow C, Srirak N, Lertsrimongkol C, Cheewawat W, Celentano D. The incidence of HIV-1 infections in village populations of northern Thailand. AIDS. 1994; 8(7): 951-5.                                                                                                                                            | 1990      |                      |
| Thailand | Weatherall D. Sickle Cell and Thalassemias Prevalence Data, Personal Correspondence with David Weatherall. [Unpublished].                                                                                                                                                                                                                                          | 1990-2009 |                      |
| Thailand | Centre for Health Informatics and Multiprofessional Education, University College London. Modell's Haemoglobinopathologist's Almanac. London, United Kingdom: Centre for Health Informatics and Multiprofessional Education, University College London, 2008.                                                                                                      | 1990-2003 |                      |
| Thailand | Thailand Vital Registration - Deaths 1991 ICD9 as it appears in World Health Organization (WHO). WHO Mortality Database Version February 2014. Geneva, Switzerland: World Health Organization (WHO), 2014.                                                                                                                                                         | 1991      |                      |
| Thailand | Thailand Vital Registration - Deaths 1992 ICD9 as it appears in World Health Organization (WHO). WHO Mortality Database Version February 2014. Geneva, Switzerland: World Health Organization (WHO), 2014.                                                                                                                                                         | 1992      |                      |
| Thailand | Buchachart K, Krudsood S, Singhasivanon P, Treeprasertsuk S, Phophak N, Srivilairit S, Chalermrut K, Rattanapong Y, Supeeranuntha L, Wilairatana P, Brittenham G, Looareesuwan S. Effect of primaquine standard dose (15 mg/day for 14 days) in the treatment of vivax malaria patients in Thailand. Southeast Asian J Trop Med Public Health. 2001; 32(4): 720-6. | 1992-1997 |                      |
| Thailand | Thailand Vital Registration Death Data 1993 as it appears in United Nations Statistics Division (UNSD). United Nations Demographic Yearbook. New York City, United States: United Nations Statistics Division (UNSD).                                                                                                                                              | 1993      |                      |
| Thailand | Thailand Vital Registration - Deaths 1994 ICD10 as it appears in World Health Organization (WHO). WHO Mortality Database Version February 2014. Geneva, Switzerland: World Health Organization (WHO), 2014.                                                                                                                                                        | 1994      |                      |
| Thailand | Luengrojanakul P, Vareesangthip K, Chainuvati T, Murata K, Tsuda F, Tokita H, Okamoto H, Miyakawa Y, Mayumi M. Hepatitis C virus infection in patients with chronic liver disease or chronic renal failure and blood donors in Thailand. J Med Virol. 1994; 44(3): 287-92.                                                                                         | 1994      |                      |
| Thailand | Sawanpanyalert P, Boonmar S, Maeda T, Matsuura Y, Miyamura T. Risk factors for hepatitis C virus infection among blood donors in an HIV-epidemic area in Thailand. J Epidemiol Community Health. 1996; 50(2): 174-7.                                                                                                                                               | 1994      |                      |
| Thailand | Senanarong V, Harnphadungkit K, Pongvarin N, Thongtang O, Sukhatunga K, Vannasaeng S, International Stroke Society. Prevalence of Dementia, Including Vascular Dementia, in 1,070 Thai Elderly in Bangkok. J Stroke Cerebrovasc Dis. 2000; 9(2): 121-2.                                                                                                            | 1994-1997 |                      |
| Thailand | Thailand Vital Registration - Deaths 1995 ICD10 as it appears in World Health Organization (WHO). WHO Mortality Database Version February 2014. Geneva, Switzerland: World Health Organization (WHO), 2014.                                                                                                                                                        | 1995      |                      |

**Web Table 32 - Comprehensive citation list**

| Country  | Citation                                                                                                                                                                                                                                                                           | Year*                      | New for GBD 2013 (*) |
|----------|------------------------------------------------------------------------------------------------------------------------------------------------------------------------------------------------------------------------------------------------------------------------------------|----------------------------|----------------------|
| Thailand | Songsivilai S, Jinathongthai S, Wongsena W, Tiangpitayakorn C, Dharakul T. High prevalence of hepatitis C infection among blood donors in northeastern Thailand. <i>Am J Trop Med Hyg.</i> 1997; 57(1): 66-9.                                                                      | 1995                       |                      |
| Thailand | National Statistical Office (Thailand). Thailand Survey of Population Change 1995-1996. Bangkok, Thailand: National Statistical Office (Thailand).                                                                                                                                 | 1995-1996                  |                      |
| Thailand | Barusru S, Urwijitaroon Y, Puapairoj C, Romphruk A, Sriwanitchrak P. Association of HCV and Treponema pallidum infection in HIV infected northeastern Thai male blood donors. <i>J Med Assoc Thai.</i> 1997; S106-111.                                                             | 1995-1997                  |                      |
| Thailand | Thailand Vital Registration - Deaths 1996 ICD10 as it appears in World Health Organization (WHO). WHO Mortality Database Version February 2014. Geneva, Switzerland: World Health Organization (WHO), 2014.                                                                        | 1996                       |                      |
| Thailand | Kosuwan P, Sutra S, Kosalaraksa P, Poovorawan Y. Seroepidemiology of hepatitis A virus antibody in primary school children in Khon Kaen Province, northeastern Thailand. <i>Southeast Asian J Trop Med Public Health.</i> 1996; 27(4): 650-3.                                      | 1996                       |                      |
| Thailand | Tangkijvanich P, Hirsch P, Theamboonlers A, Nuchprayoon I, Poovorawan Y. Association of hepatitis viruses with hepatocellular carcinoma in Thailand. <i>J Gastroenterol.</i> 1999; 34(2): 227-33.                                                                                  | 1996-1998                  |                      |
| Thailand | Ratrisawadi V, Horpaopan S, Chotigeat U, Sangtawesin V, Kanjanapattanakul W, Ningsanond V, Sunthornthepvarakul T, Khoormompatana S, Charoensiriwatana W. Neonatal screening program in Rajavithi Hospital, Thailand. <i>Southeast Asian J Trop Med Public Health.</i> 1999; 28-32. | 1996-1998                  |                      |
| Thailand | Ishida T, Takao S, Settheetham-Ishida W, Tiwawech D. Prevalence of hepatitis B and C virus infection in rural ethnic populations of Northern Thailand. <i>J Clin Virol.</i> 2002; 24(1-2): 31-5.                                                                                   | 1996-1998                  |                      |
| Thailand | Chatchatee P, Chongsrisawat V, Theamboonlers A, Poovorawan Y. Declining hepatitis A seroprevalence among medical students in Bangkok, Thailand, 1981-2001. <i>Asian Pac J Allergy Immunol.</i> 2002; 20(1): 53-6.                                                                  | 1996, 2001                 |                      |
| Thailand | Thailand Vital Registration - Deaths 1997 ICD10 as it appears in World Health Organization (WHO). WHO Mortality Database Version February 2014. Geneva, Switzerland: World Health Organization (WHO), 2014.                                                                        | 1997                       |                      |
| Thailand | Tangkijvanich P, Theamboonlers A, Hirsch P, Thongngam D, Kullavanijaya P, Poovorawan Y. Hepatitis viruses and chronic liver disease. <i>Southeast Asian J Trop Med Public Health.</i> 1999; 30(3): 489-95.                                                                         | 1997-1998                  |                      |
| Thailand | Ministry of Public Health (Thailand). Thailand Burden of Disease and Injuries 1998-1999. [Unpublished].                                                                                                                                                                            | 1997-1998                  | *                    |
| Thailand | Department of Peace and Conflict Research, Uppsala University. UCDP One-Sided Violence Database Version 1.4, 2013. Uppsala, Sweden: Department of Peace and Conflict Research, Uppsala University, 2013.                                                                           | 1997-2012                  | *                    |
| Thailand | Thailand Vital Registration - Deaths 1998 ICD10 as it appears in World Health Organization (WHO). WHO Mortality Database Version February 2014. Geneva, Switzerland: World Health Organization (WHO), 2014.                                                                        | 1998                       |                      |
| Thailand | Samakoses R, Myint KSA, Rangsin R, Areekul W, Kerdpanich A, Watanaveeradej V, Mammen MP Jr. Seroprevalence of hepatitis A in Thai army medical cadets and nursing students: a reflection of regional risk differences. <i>Mil Med.</i> 2007; 172(12): 1275-8.                      | 1998                       |                      |
| Thailand | World Health Organization (WHO). Yellow Fever Reported Cases, WHO Vaccine-Preventable Diseases: Monitoring System. Geneva, Switzerland: World Health Organization (WHO).                                                                                                           | 1998-2001, 2003-2007, 2009 |                      |

**Web Table 32 - Comprehensive citation list**

| Country  | Citation                                                                                                                                                                                                                                                                                                                            | Year*     | New for GBD 2013 (*) |
|----------|-------------------------------------------------------------------------------------------------------------------------------------------------------------------------------------------------------------------------------------------------------------------------------------------------------------------------------------|-----------|----------------------|
| Thailand | Ministry of Public Health (Thailand). Thailand Burden of Disease and Injuries 1998-1999. [Unpublished].                                                                                                                                                                                                                             | 1998-1999 |                      |
| Thailand | Ariyasriwatana C, Kalayanarooj S. Severity of measles: a study at the Queen Sirikit National Institute of Child Health. J Med Assoc Thai. 2004; 87(6): 581-8.                                                                                                                                                                       | 1998-2002 |                      |
| Thailand | Beyrer C, Kawichai S, Hyder JA, Borwornsin S, Srirak N, Natpratan C, Celentano DD. Patterns of HIV and syphilis infection in Northern Thailand 1998-2001. Int J STD AIDS. 2007; 18(3): 179-83.                                                                                                                                      | 1998-2001 |                      |
| Thailand | Pancharoen C, Mekmullica J, Kasempimolporn S, Thisyakorn U, Wilde H. Seroprevalence of hepatitis A virus antibody among children and young adults in Bangkok. J Med Assoc Thai. 2001; 84(10): 1477-80.                                                                                                                              | 1998-1999 |                      |
| Thailand | Jutavijittum P, Jiviriyawat Y, Jiviriyawat W, Yousukh A, Hayashi S, Toriyama K. Present epidemiological pattern of antibody to hepatitis a virus among Chiang Mai children, Northern Thailand. Southeast Asian J Trop Med Public Health. 2002; 33(2): 268-71.                                                                       | 1998-2000 |                      |
| Thailand | Thailand Vital Registration - Deaths 1999 ICD10 as it appears in World Health Organization (WHO). WHO Mortality Database Version February 2014. Geneva, Switzerland: World Health Organization (WHO), 2014.                                                                                                                         | 1999      |                      |
| Thailand | Chub-uppakarn S, Panichart P, Theamboonlers A, Poovorawan Y. Impact of the hepatitis B mass vaccination program in the southern part of Thailand. Southeast Asian J Trop Med Public Health. 1998; 29(3): 464-8.                                                                                                                     | 1999      |                      |
| Thailand | Pramoolsinsap C, Attamasirul K, Busagorn N, Maneerat Y, Nuchprayoon C, Tanprasert S, Srivatanakul P, Theamboonlers A, Hirsch P, Poovorawan Y. Susceptibility to hepatitis A virus infection among chronic liver disease patients and healthy blood donors in Thailand. Southeast Asian J Trop Med Public Health. 1999; 30(1): 91-5. | 1999      |                      |
| Thailand | Pichainarong N, Chaveepojnkamjorn W, Luksamijarulkul P, Sujirarat D, Keereecamsuk T. Hepatitis B carrier among married hilltribe women in northern Thailand. Southeast Asian J Trop Med Public Health. 2003; 34(1): 114-9.                                                                                                          | 1999      |                      |
| Thailand | Silachamroon U, Krudsood S, Treeprasertsuk S, Wilairatana P, Chalearmrult K, Mint HY, Maneekan P, White NJ, Gourdeuk VR, Brittenham GM, Looareesuwan S. Clinical trial of oral artesunate with or without high-dose primaquine for the treatment of vivax malaria in Thailand. Am J Trop Med Hyg. 2003; 69(1): 14-8.                | 1999-2001 |                      |
| Thailand | Luksamijarulkul P, Tongpradit S, Vatanasomboon P, Utrarachkij F. Sero-epidemiological study of hepatitis A virus infection among hill-tribe youth and household environmental sanitation, a hill-tribe community in northern Thailand. Southeast Asian J Trop Med Public Health. 2003; 34(3): 569-76.                               | 1999-2000 |                      |
| Thailand | Luksamijarulkul P, Thammata N, Sujirarat D, Tiloklurs M. Hepatitis C virus infection among Thai blood donors: antibody prevalence, risk factors and development of risk screening form. Southeast Asian J Trop Med Public Health. 2004; 35(1): 147-54.                                                                              | 1999-2000 |                      |
| Thailand | Thailand Vital Registration - Deaths 2000 ICD10 as it appears in World Health Organization (WHO). WHO Mortality Database Version February 2014. Geneva, Switzerland: World Health Organization (WHO), 2014.                                                                                                                         | 2000      |                      |
| Thailand | National Statistical Office (Thailand), Minnesota Population Center. Thailand Population and Housing Census 2000 from the Integrated Public Use Microdata Series, International. [Machine-readable database]. Minneapolis: University of Minnesota.                                                                                 | 2000      |                      |
| Thailand | Tocharoenvanich P, Yipintsoi T, Choomalee K, Boonwanno P, Rodklai A. Risk factors for a five-year death in the interASIA-south cohort. J Med Assoc Thai. 2008; 91(4): 471-8.                                                                                                                                                        | 2000      |                      |

**Web Table 32 - Comprehensive citation list**

| Country  | Citation                                                                                                                                                                                                                                                                                                                                                                                                                                                                                                                           | Year*     | New for GBD 2013 (*) |
|----------|------------------------------------------------------------------------------------------------------------------------------------------------------------------------------------------------------------------------------------------------------------------------------------------------------------------------------------------------------------------------------------------------------------------------------------------------------------------------------------------------------------------------------------|-----------|----------------------|
| Thailand | Curado MP, Edwards B, Shin HR, Storm H, Ferlay J, Heanue M and Boyle P, eds (2007). Cancer Incidence in Five Continents, Vol. IX Periodic Data (electronic version). Lyon, IARC. <a href="http://ci5.iarc.fr">http://ci5.iarc.fr</a>                                                                                                                                                                                                                                                                                               | 2000      |                      |
| Thailand | Louisirirochanakul S, Myint KSA, Srimee B, Kanoksinsombat C, Khamboonruang C, Kunstadter P, Wasi C. The prevalence of viral hepatitis among the Hmong people of northern Thailand. Southeast Asian J Trop Med Public Health. 2002; 33(4): 837-44.                                                                                                                                                                                                                                                                                  | 2000      |                      |
| Thailand | Chanbancherd P, Paris RM, Torugsa K, de Souza M, Khin-Saw-Aye-Myint, Chitpong A, Brown AE. High frequency of HIV-1 and hepatitis C co-infection among young Thai men: evidence for a changing pattern of HIV transmission in Thailand. Southeast Asian J Trop Med Public Health. 2003; 34(3): 580-2.                                                                                                                                                                                                                               | 2000      |                      |
| Thailand | Reks-Ngarm S, Treleaven SC, Chunsuttiwat S, Muangchana C, Jolley D, Brooks A, Dejsirilert S, Warinrawat S, Guiver M, Kunasol P, Maynard JE, Biggs BA, Steinhoff M. Prospective population-based incidence of Haemophilus influenzae type b meningitis in Thailand. Vaccine. 2004; 22(8): 975-83.                                                                                                                                                                                                                                   | 2000-2001 |                      |
| Thailand | Nuchprayoon I, Sanpavat S, Nuchprayoon S. Glucose-6-phosphate dehydrogenase (G6PD) mutations in Thailand: G6PD Viangchan (871G>A) is the most common deficiency variant in the Thai population. Hum Mutat. 2002; 19(2): 185.                                                                                                                                                                                                                                                                                                       | 2000-2002 |                      |
| Thailand | Ratanasuwann W, Sonji A, Tiengrim S, Techasathit W, Suwanagool S. Serological survey of viral hepatitis A, B, and C at Thai Central Region and Bangkok: a population base study. Southeast Asian J Trop Med Public Health. 2004; 35(2): 416-20.                                                                                                                                                                                                                                                                                    | 2000-2002 |                      |
| Thailand | Mo-suwan L, Isaranurug S, Chanvitan P, Techasena W, Sutra S, Supakunpinyo C, Choprapawon C. Perinatal death pattern in the four districts of Thailand: findings from the Prospective Cohort Study of Thai Children (PCTC). Journal of The Medical Association of Thailand. 2009; 92(5): 660-6.                                                                                                                                                                                                                                     | 2001      |                      |
| Thailand | Chiang Mai University (Thailand), Chonburi Cancer Center (Thailand), Khon Kaen University (Thailand), Lampang Cancer Center (Thailand), Lopburi Cancer Center (Thailand), Ministry of Education (Thailand), National Cancer Institute (Thailand), Prince of Songkla University (Thailand), Surat Thani Cancer Center (Thailand), Ubon Ratchathani Cancer Center (Thailand), Udon Thani Cancer Center (Thailand). Thailand Cancer Registry Report 2001-2003. Bangkok, Thailand: National Cancer Institute (Thailand), 2010.         | 2001-2003 |                      |
| Thailand | Thailand Vital Registration - Deaths 2002 ICD10 as it appears in World Health Organization (WHO). WHO Mortality Database Version February 2014. Geneva, Switzerland: World Health Organization (WHO), 2014.                                                                                                                                                                                                                                                                                                                        | 2002      |                      |
| Thailand | Chiang Mai University (Thailand), Chonburi Cancer Center (Thailand), Khon Kaen University (Thailand), Lampang Cancer Center (Thailand), Lopburi Cancer Center (Thailand), Ministry of Education (Thailand), National Cancer Institute (Thailand), Prince of Songkla University (Thailand), Surat Thani Cancer Center (Thailand), Ubon Ratchathani Cancer Center (Thailand), Udon Thani Cancer Center (Thailand). Thailand - Cancer in Thailand Volume V, 2001-2003. Bangkok, Thailand: National Cancer Institute (Thailand), 2010. | 2002      |                      |
| Thailand | Lumbiganon P, Piaggio G, Villar J, Pinol A, Bakketeig L, Bergsjø P, Al-Mazrou Y, Ba'aqeel H, Belizán JM, Farnot U, Carroli G, Berendes H, WHO Antenatal Care Trial Research Group. The epidemiology of syphilis in pregnancy. Int J STD AIDS. 2002; 13(7): 486-94.                                                                                                                                                                                                                                                                 | 2002      |                      |
| Thailand | Thailand Vital Registration - Deaths 2003 ICD10 as it appears in World Health Organization (WHO). WHO Mortality Database Version February 2014. Geneva, Switzerland: World Health Organization (WHO), 2014.                                                                                                                                                                                                                                                                                                                        | 2003      |                      |

**Web Table 32 - Comprehensive citation list**

| Country  | Citation                                                                                                                                                                                                                                                                                                                                                                                                       | Year*     | New for GBD 2013 (*) |
|----------|----------------------------------------------------------------------------------------------------------------------------------------------------------------------------------------------------------------------------------------------------------------------------------------------------------------------------------------------------------------------------------------------------------------|-----------|----------------------|
| Thailand | Thailand Vital Registration - Deaths 2004 ICD10 as it appears in World Health Organization (WHO). WHO Mortality Database Version February 2014. Geneva, Switzerland: World Health Organization (WHO), 2014.                                                                                                                                                                                                    | 2004      |                      |
| Thailand | Chatproedprai S, Chongsrisawat V, Chatchatee P, Theamboonlers A, Yoocharoen P, Warinsathien P, Tharmaphornpilas P, Warinrawat S, Sinlaparatsamee S, Chaiear K, Khwanjaipanich S, Paupunwatana S, Poovorawan Y. Declining trend in the seroprevalence of infection with hepatitis A virus in Thailand. <i>Ann Trop Med Parasitol</i> . 2007; 101(1): 61-8.                                                      | 2004      |                      |
| Thailand | Chongsrisawat V, Thawornsuk N, Theamboonlers A, Louisirochanakul S, Poovorawan Y. Hepatitis B virus DNA in unusual serological profiles of hepatitis B surface antigen-positive sera. <i>Viral Immunol</i> . 2006; 19(4): 623-9.                                                                                                                                                                               | 2004      |                      |
| Thailand | Wangtongkum S, Sucharitkul P, Silprasert N, Intrachak R. Prevalence of dementia among population age over 45 years in Chiang Mai, Thailand. <i>J Med Assoc Thai</i> . 2008; 91(11): 1685-90.                                                                                                                                                                                                                   | 2004-2005 |                      |
| Thailand | Rueangchainikhom W, Srisuwan S, Prommas S, Sarapak S. Risk factors for primary postpartum hemorrhage in Bhumibol Adulyadej Hospital. <i>J Med Assoc Thai</i> . 2009; 92(12): 1586-90.                                                                                                                                                                                                                          | 2004-2007 |                      |
| Thailand | Ninokata A, Kimura R, Samakkarn U, Settheetham-Ishida W, Ishida T. Coexistence of five G6PD variants indicates ethnic complexity of Phuket islanders, Southern Thailand. <i>J Hum Genet</i> . 2006; 51(5): 424-8.                                                                                                                                                                                              | 2004-2006 |                      |
| Thailand | Thailand Vital Registration - Deaths 2005 ICD10 as it appears in World Health Organization (WHO). WHO Mortality Database Version February 2014. Geneva, Switzerland: World Health Organization (WHO), 2014.                                                                                                                                                                                                    | 2005      |                      |
| Thailand | Forman D, Bray F, Brewster DH, Gombe Mbalawa C, Kohler B, Piñeros M, Steliarova-Foucher E, Swaminathan R and Ferlay J, eds (2013). <i>Cancer Incidence in Five Continents, Vol. X Summary Database (electronic version)</i> . Lyon, IARC. <a href="http://ci5.iarc.fr">http://ci5.iarc.fr</a>                                                                                                                  | 2005      |                      |
| Thailand | Porapakkham Y, Rao C, Pattaraarchachai J, Polprasert W, Vos T, Adair T, Lopez AD. Estimated causes of death in Thailand, 2005: implications for health policy. <i>Popul Health Metr</i> . 2010; 8:14.                                                                                                                                                                                                          | 2005      | *                    |
| Thailand | National Statistical Office (Thailand), United Nations Children's Fund (UNICEF). Thailand Multiple Indicator Cluster Survey 2005-2006. New York, United States: United Nations Children's Fund (UNICEF).                                                                                                                                                                                                       | 2005-2006 |                      |
| Thailand | Thailand Vital Registration - Deaths 2006 ICD10 as it appears in World Health Organization (WHO). WHO Mortality Database Version February 2014. Geneva, Switzerland: World Health Organization (WHO), 2014.                                                                                                                                                                                                    | 2006      |                      |
| Thailand | World Health Organization (WHO). Global Status Report on Road Safety 2009. Geneva, Switzerland: World Health Organization (WHO), 2009.                                                                                                                                                                                                                                                                         | 2007      |                      |
| Thailand | Lumbiganon P, Laopaiboon M, Gülmezoglu AM, Souza JP, Taneepanichskul S, Ruyan P, Attygalle DE, Shrestha N, Mori R, Hinh ND, Bang HT, Rathavy T, Chuyun K, Cheang K, Festin M, Udomprasertgul V, Germar MJV, Yanqiu G, Roy M, Carroli G, Ba-Thike K. Method of delivery and pregnancy outcomes in Asia: the WHO global survey on maternal and perinatal health 2007-08. <i>Lancet</i> . 2010; 375(9713): 490-9. | 2007-2008 |                      |
| Thailand | Nephrology Society of Thailand. Thailand Renal Replacement Therapy Report 2008.                                                                                                                                                                                                                                                                                                                                | 2008      |                      |
| Thailand | Thailand Vital Registration Death Data 2008 as it appears in United Nations Statistics Division (UNSD). United Nations Demographic Yearbook. New York City, United States: United Nations Statistics Division (UNSD).                                                                                                                                                                                          | 2008      |                      |

**Web Table 32 - Comprehensive citation list**

| Country     | Citation                                                                                                                                                                                                                                      | Year*                                   | New for GBD 2013 (*) |
|-------------|-----------------------------------------------------------------------------------------------------------------------------------------------------------------------------------------------------------------------------------------------|-----------------------------------------|----------------------|
| Thailand    | Joint United Nations Program on HIV/AIDS (UNAIDS), National AIDS Prevention and Alleviation Committee (Thailand). Thailand UNGASS Country Progress Report 2010. Geneva, Switzerland: Joint United Nations Program on HIV/AIDS (UNAIDS), 2010. | 2008-2009                               |                      |
| Thailand    | Thailand Vital Registration Death Data 2009 as it appears in United Nations Statistics Division (UNSD). United Nations Demographic Yearbook. New York City, United States: United Nations Statistics Division (UNSD).                         | 2009                                    |                      |
| Thailand    | United Nations Office on Drugs and Crime (UNODC). United Nations Office on Drugs and Crime Global Study on Homicides 2011. Vienna, Austria: United Nations Office on Drugs and Crime (UNODC), 2011.                                           | 2009-2010                               |                      |
| Thailand    | Rianthavorn P, Fakthongyoo A, Yamsut S, Theamboonlers A, Poovorawan Y. Seroprevalence of hepatitis A among Thai population residing near Myanmar border. J Health Popul Nutr. 2011; 29(2): 174-7.                                             | 2009-2010                               |                      |
| The Bahamas | Bahamas Vital Registration Death Data 1965 as it appears in United Nations Statistics Division (UNSD). United Nations Demographic Yearbook. New York City, United States: United Nations Statistics Division (UNSD).                          | 1965                                    |                      |
| The Bahamas | Centre for Research on the Epidemiology of Disasters (CRED). EM-DAT: The OFDA/CRED International Disaster Database. Brussels, Belgium: Catholic University of Leuven.                                                                         | 1966, 1992, 1999, 2004-2005, 2007, 2012 |                      |
| The Bahamas | Bahamas Vital Registration Death Data 1967 as it appears in United Nations Statistics Division (UNSD). United Nations Demographic Yearbook. New York City, United States: United Nations Statistics Division (UNSD).                          | 1967                                    |                      |
| The Bahamas | Bahamas Vital Registration Death Data 1968 as it appears in United Nations Statistics Division (UNSD). United Nations Demographic Yearbook. New York City, United States: United Nations Statistics Division (UNSD).                          | 1968                                    |                      |
| The Bahamas | Bahamas Vital Registration Death Data 1969 as it appears in United Nations Statistics Division (UNSD). United Nations Demographic Yearbook. New York City, United States: United Nations Statistics Division (UNSD).                          | 1969                                    |                      |
| The Bahamas | United Nations Office on Drugs and Crime (UNODC). United Nations Surveys on Crime Trends and the Operations of Criminal Justice Systems 1970-2006 as provided by Kavi Bhalla. [Unpublished].                                                  | 1970-1994                               |                      |
| The Bahamas | Bahamas Vital Registration - Deaths 1971 ICD8 as it appears in World Health Organization (WHO). WHO Mortality Database Version February 2014. Geneva, Switzerland: World Health Organization (WHO), 2014.                                     | 1971                                    |                      |
| The Bahamas | Bahamas Vital Registration Death Data 1971 as it appears in United Nations Statistics Division (UNSD). United Nations Demographic Yearbook. New York City, United States: United Nations Statistics Division (UNSD).                          | 1971                                    |                      |
| The Bahamas | Bahamas Vital Registration - Deaths 1972 ICD8 as it appears in World Health Organization (WHO). WHO Mortality Database Version February 2014. Geneva, Switzerland: World Health Organization (WHO), 2014.                                     | 1972                                    |                      |
| The Bahamas | Bahamas Vital Registration Death Data 1973 as it appears in United Nations Statistics Division (UNSD). United Nations Demographic Yearbook. New York City, United States: United Nations Statistics Division (UNSD).                          | 1973                                    |                      |
| The Bahamas | Bahamas Vital Registration - Deaths 1974 ICD8 as it appears in World Health Organization (WHO). WHO Mortality Database Version February 2014. Geneva, Switzerland: World Health Organization (WHO), 2014.                                     | 1974                                    |                      |



**Web Table 32 - Comprehensive citation list**

| Country     | Citation                                                                                                                                                                                                                 | Year*     | New for GBD 2013 (*) |
|-------------|--------------------------------------------------------------------------------------------------------------------------------------------------------------------------------------------------------------------------|-----------|----------------------|
| The Bahamas | Bahamas Vital Registration - Deaths 1975 ICD8 as it appears in World Health Organization (WHO). WHO Mortality Database Version February 2014. Geneva, Switzerland: World Health Organization (WHO), 2014.                | 1975      |                      |
| The Bahamas | Bahamas Vital Registration - Deaths 1976 ICD8 as it appears in World Health Organization (WHO). WHO Mortality Database Version February 2014. Geneva, Switzerland: World Health Organization (WHO), 2014.                | 1976      |                      |
| The Bahamas | Bahamas Vital Registration - Deaths 1977 ICD8 as it appears in World Health Organization (WHO). WHO Mortality Database Version February 2014. Geneva, Switzerland: World Health Organization (WHO), 2014.                | 1977      |                      |
| The Bahamas | Bahamas Vital Registration Death Data 1978 as it appears in United Nations Statistics Division (UNSD). United Nations Demographic Yearbook. New York City, United States: United Nations Statistics Division (UNSD).     | 1978      |                      |
| The Bahamas | Bahamas Vital Registration - Deaths 1979 ICD8 as it appears in World Health Organization (WHO). WHO Mortality Database Version February 2014. Geneva, Switzerland: World Health Organization (WHO), 2014.                | 1979      |                      |
| The Bahamas | Bahamas Vital Registration - Deaths 1980 ICD9 as it appears in World Health Organization (WHO). WHO Mortality Database Version February 2014. Geneva, Switzerland: World Health Organization (WHO), 2014.                | 1980      |                      |
| The Bahamas | Institute for Health Metrics and Evaluation (IHME), Joint United Nations Program on HIV/AIDS (UNAIDS). Institute for Health Metrics and Evaluation HIV Mortality Estimates Based on the UNAIDS Spectrum Model Framework. | 1980-2013 | *                    |
| The Bahamas | United Nations Children's Fund (UNICEF), World Health Organization (WHO). WHO and UNICEF Reported Disease Incidence Time Series - Pertussis. Geneva, Switzerland: World Health Organization (WHO).                       | 1980-2013 |                      |
| The Bahamas | Bahamas Vital Registration - Deaths 1981 ICD9 as it appears in World Health Organization (WHO). WHO Mortality Database Version February 2014. Geneva, Switzerland: World Health Organization (WHO), 2014.                | 1981      |                      |
| The Bahamas | Bahamas Vital Registration Death Data 1982 as it appears in United Nations Statistics Division (UNSD). United Nations Demographic Yearbook. New York City, United States: United Nations Statistics Division (UNSD).     | 1982      |                      |
| The Bahamas | Bahamas Vital Registration - Deaths 1983 ICD9 as it appears in World Health Organization (WHO). WHO Mortality Database Version February 2014. Geneva, Switzerland: World Health Organization (WHO), 2014.                | 1983      |                      |
| The Bahamas | Bahamas Vital Registration - Deaths 1984 ICD9 as it appears in World Health Organization (WHO). WHO Mortality Database Version February 2014. Geneva, Switzerland: World Health Organization (WHO), 2014.                | 1984      |                      |
| The Bahamas | Bahamas Vital Registration - Deaths 1985 ICD9 as it appears in World Health Organization (WHO). WHO Mortality Database Version February 2014. Geneva, Switzerland: World Health Organization (WHO), 2014.                | 1985      |                      |
| The Bahamas | Bahamas Vital Registration Death Data 1986 as it appears in United Nations Statistics Division (UNSD). United Nations Demographic Yearbook. New York City, United States: United Nations Statistics Division (UNSD).     | 1986      |                      |

**Web Table 32 - Comprehensive citation list**

| Country     | Citation                                                                                                                                                                                                                                                      | Year*                            | New for GBD 2013 (*) |
|-------------|---------------------------------------------------------------------------------------------------------------------------------------------------------------------------------------------------------------------------------------------------------------|----------------------------------|----------------------|
| The Bahamas | Bahamas Vital Registration - Deaths 1987 ICD9 as it appears in World Health Organization (WHO). WHO Mortality Database Version February 2014. Geneva, Switzerland: World Health Organization (WHO), 2014.                                                     | 1987                             |                      |
| The Bahamas | Bahamas Vital Registration Death Data 1988 as it appears in United Nations Statistics Division (UNSD). United Nations Demographic Yearbook. New York City, United States: United Nations Statistics Division (UNSD).                                          | 1988                             |                      |
| The Bahamas | Bahamas Vital Registration Death Data 1989 as it appears in United Nations Statistics Division (UNSD). United Nations Demographic Yearbook. New York City, United States: United Nations Statistics Division (UNSD).                                          | 1989                             |                      |
| The Bahamas | Bahamas Vital Registration Death Data 1990 as it appears in United Nations Statistics Division (UNSD). United Nations Demographic Yearbook. New York City, United States: United Nations Statistics Division (UNSD).                                          | 1990                             |                      |
| The Bahamas | Weatherall D. Sickle Cell and Thalassemias Prevalence Data, Personal Correspondence with David Weatherall. [Unpublished].                                                                                                                                     | 1990-2009                        |                      |
| The Bahamas | Centre for Health Informatics and Multiprofessional Education, University College London. Modell's Haemoglobinopathologist's Almanac. London, United Kingdom: Centre for Health Informatics and Multiprofessional Education, University College London, 2008. | 1990-2003                        |                      |
| The Bahamas | Bahamas Vital Registration Death Data 1991 as it appears in United Nations Statistics Division (UNSD). United Nations Demographic Yearbook. New York City, United States: United Nations Statistics Division (UNSD).                                          | 1991                             |                      |
| The Bahamas | Measles Supplementary Immunization Activity Data as provided by the World Health Organization. [Unpublished].                                                                                                                                                 | 1991, 1997                       |                      |
| The Bahamas | Bahamas Vital Registration Death Data 1992 as it appears in United Nations Statistics Division (UNSD). United Nations Demographic Yearbook. New York City, United States: United Nations Statistics Division (UNSD).                                          | 1992                             |                      |
| The Bahamas | Bahamas Vital Registration - Deaths 1993 ICD9 as it appears in World Health Organization (WHO). WHO Mortality Database Version February 2014. Geneva, Switzerland: World Health Organization (WHO), 2014.                                                     | 1993                             |                      |
| The Bahamas | Bahamas Vital Registration - Deaths 1994 ICD9 as it appears in World Health Organization (WHO). WHO Mortality Database Version February 2014. Geneva, Switzerland: World Health Organization (WHO), 2014.                                                     | 1994                             |                      |
| The Bahamas | Bahamas Vital Registration - Deaths 1995 ICD9 as it appears in World Health Organization (WHO). WHO Mortality Database Version February 2014. Geneva, Switzerland: World Health Organization (WHO), 2014.                                                     | 1995                             |                      |
| The Bahamas | United Nations Office on Drugs and Crime (UNODC). United Nations Office on Drugs and Crime Global Study on Homicides 2011. Vienna, Austria: United Nations Office on Drugs and Crime (UNODC), 2011.                                                           | 1995-2010                        |                      |
| The Bahamas | Bahamas Vital Registration - Deaths 1996 ICD9 as it appears in World Health Organization (WHO). WHO Mortality Database Version February 2014. Geneva, Switzerland: World Health Organization (WHO), 2014.                                                     | 1996                             |                      |
| The Bahamas | Bahamas Vital Registration - Deaths 1997 ICD9 as it appears in World Health Organization (WHO). WHO Mortality Database Version February 2014. Geneva, Switzerland: World Health Organization (WHO), 2014.                                                     | 1997                             |                      |
| The Bahamas | World Health Organization (WHO). Yellow Fever Reported Cases, WHO Vaccine-Preventable Diseases: Monitoring System. Geneva, Switzerland: World Health Organization (WHO).                                                                                      | 1997-1998, 2001, 2004, 2006-2009 |                      |



**Web Table 32 - Comprehensive citation list**

| Country     | Citation                                                                                                                                                                                                                                                                                                                                                                                                                        | Year*           | New for GBD 2013 (*) |
|-------------|---------------------------------------------------------------------------------------------------------------------------------------------------------------------------------------------------------------------------------------------------------------------------------------------------------------------------------------------------------------------------------------------------------------------------------|-----------------|----------------------|
| The Bahamas | Bahamas Vital Registration - Deaths 1998 ICD9 as it appears in World Health Organization (WHO). WHO Mortality Database Version February 2014. Geneva, Switzerland: World Health Organization (WHO), 2014.                                                                                                                                                                                                                       | 1998            |                      |
| The Bahamas | Bahamas Vital Registration - Deaths 1999 ICD10 as it appears in World Health Organization (WHO). WHO Mortality Database Version February 2014. Geneva, Switzerland: World Health Organization (WHO), 2014.                                                                                                                                                                                                                      | 1999            |                      |
| The Bahamas | Bahamas Vital Registration - Deaths 2000 ICD10 as it appears in World Health Organization (WHO). WHO Mortality Database Version February 2014. Geneva, Switzerland: World Health Organization (WHO), 2014.                                                                                                                                                                                                                      | 2000            |                      |
| The Bahamas | Bahamas Vital Registration - Deaths 2001 ICD10 as it appears in World Health Organization (WHO). WHO Mortality Database Version February 2014. Geneva, Switzerland: World Health Organization (WHO), 2014.                                                                                                                                                                                                                      | 2001            |                      |
| The Bahamas | Bahamas Vital Registration - Deaths 2002 ICD10 as it appears in World Health Organization (WHO). WHO Mortality Database Version February 2014. Geneva, Switzerland: World Health Organization (WHO), 2014.                                                                                                                                                                                                                      | 2002            |                      |
| The Bahamas | Bahamas Vital Registration - Deaths 2003 ICD10 as it appears in World Health Organization (WHO). WHO Mortality Database Version February 2014. Geneva, Switzerland: World Health Organization (WHO), 2014.                                                                                                                                                                                                                      | 2003            |                      |
| The Bahamas | World Health Organization (WHO). Retrospective Measles Data on Supplementary Immunization Activities. Geneva, Switzerland: World Health Organization (WHO).                                                                                                                                                                                                                                                                     | 2003, 2006-2007 |                      |
| The Bahamas | Bahamas Vital Registration - Deaths 2004 ICD10 as it appears in World Health Organization (WHO). WHO Mortality Database Version February 2014. Geneva, Switzerland: World Health Organization (WHO), 2014.                                                                                                                                                                                                                      | 2004            |                      |
| The Bahamas | Bahamas Vital Registration - Deaths 2005 ICD10 as it appears in World Health Organization (WHO). WHO Mortality Database Version February 2014. Geneva, Switzerland: World Health Organization (WHO), 2014.                                                                                                                                                                                                                      | 2005            |                      |
| The Bahamas | Bahamas Vital Registration - Deaths 2006 ICD10 as it appears in World Health Organization (WHO). WHO Mortality Database Version February 2014. Geneva, Switzerland: World Health Organization (WHO), 2014.                                                                                                                                                                                                                      | 2006            |                      |
| The Bahamas | Soyibo AK, Barton EN. Report from the Caribbean renal registry, 2006. West Indian Med J. 2007; 56(4): 355-63.                                                                                                                                                                                                                                                                                                                   | 2006            |                      |
| The Bahamas | Fassio E, Díaz S, Santa C, Reig ME, Martínez Artola Y, Alves de Mattos A, Míguez C, Galizzi J, Zapata R, Ridruejo E, de Souza FC, Hernández N, Pinchuk L, Multicenter Group for Study of Hepatocarcinoma in Latin America, Asociación Latinoamericana para el Estudio del Hígado (ALEH). Etiology of hepatocellular carcinoma in Latin America: a prospective, multicenter, international study. Ann Hepatol. 2010; 9(1): 63-9. | 2006-2008       | *                    |
| The Bahamas | Bahamas Vital Registration - Deaths 2007 ICD10 as it appears in World Health Organization (WHO). WHO Mortality Database Version February 2014. Geneva, Switzerland: World Health Organization (WHO), 2014.                                                                                                                                                                                                                      | 2007            |                      |
| The Bahamas | Bahamas Vital Registration - Deaths 2008 ICD10 as it appears in World Health Organization (WHO). WHO Mortality Database Version February 2014. Geneva, Switzerland: World Health Organization (WHO), 2014.                                                                                                                                                                                                                      | 2008            |                      |

**Web Table 32 - Comprehensive citation list**

| Country     | Citation                                                                                                                                                                                                                                                            | Year*      | New for GBD 2013 (*) |
|-------------|---------------------------------------------------------------------------------------------------------------------------------------------------------------------------------------------------------------------------------------------------------------------|------------|----------------------|
| The Bahamas | United Nations Children's Fund (UNICEF), World Health Organization (WHO). WHO and UNICEF Reported Disease Incidence Time Series - Measles. Geneva, Switzerland: World Health Organization (WHO).                                                                    | 1980-2013  |                      |
| The Gambia  | Knox EG, McGregor IA. Glucose -6-phosphate dehydrogenase deficiency in a Gambian village. <i>Trans R Soc Trop Med Hyg.</i> 1965; 46-58.                                                                                                                             | 1958-1961  |                      |
| The Gambia  | Allison AC, Charles LJ, McGREGOR IA. Erythrocyte Glucose-6-Phosphate Dehydrogenase Deficiency in West Africa. <i>Nature.</i> 1961; 190(4782): 1198-9.                                                                                                               | 1959-1961  |                      |
| The Gambia  | Welch SG, Lee J, McGregor IA, Williams K. Red cell glucose 6 phosphate dehydrogenase genotypes of the population of two West African villages. <i>Hum Genet.</i> 1978; 43(3): 315-20.                                                                               | 1963-1965  |                      |
| The Gambia  | Central Statistics Division (Gambia). Gambia Population and Housing Census 1973.                                                                                                                                                                                    | 1973       |                      |
| The Gambia  | World Health Organization (WHO). Assessment of yellow fever epidemic risk – a decision-making tool for preventive immunization campaigns. <i>Wkly Epidemiol Rec.</i> 2007; 82(18): 153-60.                                                                          | 1979-2007  |                      |
| The Gambia  | Aaby P, Bukh J, Lisse IM, da Silva MC. Further community studies on the role of overcrowding and intensive exposure on measles mortality. <i>Rev Infect Dis.</i> 1988; 10(2): 474-7.                                                                                | 1980-1982  |                      |
| The Gambia  | Institute for Health Metrics and Evaluation (IHME), Joint United Nations Program on HIV/AIDS (UNAIDS). Institute for Health Metrics and Evaluation HIV Mortality Estimates Based on the UNAIDS Spectrum Model Framework.                                            | 1980-2013  | *                    |
| The Gambia  | Peace Research Institute Oslo (PRIO). Battle Deaths Dataset Version 3, 2009. Oslo, Norway: Peace Research Institute Oslo (PRIO), 2009.                                                                                                                              | 1981       |                      |
| The Gambia  | Hull HF. Increased measles mortality in households with multiple cases in the Gambia, 1981. <i>Rev Infect Dis.</i> 1988; 10(2): 463-7.                                                                                                                              | 1981       |                      |
| The Gambia  | Hull HF, Williams PJ, Oldfield F. Measles mortality and vaccine efficacy in rural West Africa. <i>Lancet.</i> 1983; 1(8331): 972-5.                                                                                                                                 | 1981       |                      |
| The Gambia  | Greenwood AM, Greenwood BM, Bradley AK, Williams K, Shenton FC, Tulloch S, Bypass P, Oldfield FS. A prospective survey of the outcome of pregnancy in a rural area of the Gambia. <i>Bull World Health Organ.</i> 1987; 65(5): 635-43.                              | 1982       |                      |
| The Gambia  | Greenwood BM, Greenwood AM, Bradley AK, Tulloch S, Hayes R, Oldfield FS. Deaths in infancy and early childhood in a well-vaccinated, rural, West African population. <i>Ann Trop Paediatr.</i> 1987; 7 (2): 91-9.                                                   | 1982       |                      |
| The Gambia  | Menon A, Snow RW, Byass P, Greenwood BM, Hayes RJ, N'Jie AB. Sustained protection against mortality and morbidity from malaria in rural Gambian children by chemoprophylaxis given by village health workers. <i>Trans R Soc Trop Med Hyg.</i> 1990; 84(6): 768-72. | 1982-1986  |                      |
| The Gambia  | Central Statistics Department (Gambia). Gambia Population and Housing Census 1983.                                                                                                                                                                                  | 1983       |                      |
| The Gambia  | Lamb WH. Epidemic Measles in a Highly Immunized Rural West African (Gambian) Village. <i>Rev Infect Dis.</i> 1988; 10(2): 457-62.                                                                                                                                   | 1984-1985  |                      |
| The Gambia  | Alonso PL, Lindsay SW, Armstrong JRM, de Francisco A, Shenton FC, Greenwood BM, Conteh M, Cham K, Hill AG, David PH, Fegan G, Hall AJ. The effect of insecticide-treated bed nets on mortality of Gambian children. <i>Lancet.</i> 1991; 337(8756): 1499-502.       | 1988-1989  |                      |
| The Gambia  | Parkin DM, International Agency for Research on Cancer, International Association of Cancer Registries. <i>Cancer Incidence in Five Continents. Vol. I to VIII.</i> Lyon, France, IARC Press, 2005.                                                                 | 1988, 1997 |                      |
| The Gambia  | de Francisco A, Morris J, Hall AJ, Armstrong Schellenberg JR, Greenwood BM. Risk factors for mortality from acute lower respiratory tract infections in young Gambian children. <i>Int J Epidemiol.</i> 1993; 22(6): 1174-82.                                       | 1989       |                      |

**Web Table 32 - Comprehensive citation list**

| Country    | Citation                                                                                                                                                                                                                                                                       | Year*                                  | New for GBD 2013 (*) |
|------------|--------------------------------------------------------------------------------------------------------------------------------------------------------------------------------------------------------------------------------------------------------------------------------|----------------------------------------|----------------------|
| The Gambia | Jaffar S, Leach A, Greenwood AM, Jepson A, Muller O, Ota MO, Bojang K, Obaro S, Greenwood BM. Changes in the pattern of infant and childhood mortality in upper river division, The Gambia, from 1989 to 1993. <i>Trop Med Int Health</i> . 1997; 2(1): 28-37.                 | 1989-1993                              |                      |
| The Gambia | Ministry of Labour, Health, and Social Welfare (Gambia). Gambia Contraceptive Prevalence and Fertility Determinants Survey 1990.                                                                                                                                               | 1990                                   |                      |
| The Gambia | Weatherall D. Sickle Cell and Thalassemias Prevalence Data, Personal Correspondence with David Weatherall. [Unpublished].                                                                                                                                                      | 1990-2009                              |                      |
| The Gambia | Centre for Health Informatics and Multiprofessional Education, University College London. Modell's Haemoglobinopathologist's Almanac. London, United Kingdom: Centre for Health Informatics and Multiprofessional Education, University College London, 2008.                  | 1990-2003                              |                      |
| The Gambia | D'Alessandro U, Olaleye BO, McGuire W, Langerock P, Bennett S, Aikins MK, Thomson MC, Cham MK, Cham BA, Greenwood BM. Mortality and morbidity from malaria in Gambian children after introduction of an impregnated bednet programme. <i>Lancet</i> . 1995; 345(8948): 479-83. | 1992                                   |                      |
| The Gambia | Bah E, Parkin DM, Hall AJ, Jack AD, Whittle H. Cancer in the Gambia: 1988-97. <i>Br J Cancer</i> . 2001; 84(9): 1207-14.                                                                                                                                                       | 1992                                   |                      |
| The Gambia | Bah E, Parkin DM, Hall AJ, Jack AD, Whittle H. Cancer in the Gambia: 1988-97. <i>Br J Cancer</i> . 2001; 84(9): 1207-14.                                                                                                                                                       | 1992                                   |                      |
| The Gambia | Central Statistics Department (Gambia). Gambia Population and Housing Census 1993.                                                                                                                                                                                             | 1993                                   |                      |
| The Gambia | Walraven G, Telfer M, Rowley J, Ronsmans C. Maternal mortality in rural Gambia: levels, causes and contributing factors. <i>Bull World Health Organ</i> . 2000; 78(5): 603-13.                                                                                                 | 1995                                   |                      |
| The Gambia | Kirk GD, Lesi OA, Mendy M, Akano AO, Sam O, Goedert JJ, Hainaut P, Hall AJ, Whittle H, Montesano R. The Gambia Liver Cancer Study: Infection with hepatitis B and C and the risk of hepatocellular carcinoma in West Africa. <i>Hepatology</i> . 2004; 39(1): 211-9.           | 1997-2001                              |                      |
| The Gambia | Umoh NJ, Lesi OA, Mendy M, Bah E, Akano A, Whittle H, Hainaut P, Kirk GD. Aetiological differences in demographical, clinical and pathological characteristics of hepatocellular carcinoma in The Gambia. <i>Liver Int</i> . 2011; 31(2): 215-21.                              | 1997-2001                              |                      |
| The Gambia | World Health Organization (WHO). Yellow Fever Reported Cases, WHO Vaccine-Preventable Diseases: Monitoring System. Geneva, Switzerland: World Health Organization (WHO).                                                                                                       | 1997, 1999, 2001-2009                  |                      |
| The Gambia | World Health Organization Regional Office for Africa. HIV/AIDS Epidemiological Surveillance Update for the WHO African Region. World Health Organization Regional Office for Africa, 2003.                                                                                     | 1998                                   |                      |
| The Gambia | Jasseh M, Webb EL, Jaffar S, Howie S, Townend J, Smith PG, Greenwood BM, Corrah T. Reaching millennium development goal 4 - the Gambia. <i>Trop Med Int Health</i> . 2011; 16(10): 1314-25.                                                                                    | 1999-2006                              |                      |
| The Gambia | Centre for Research on the Epidemiology of Disasters (CRED). EM-DAT: The OFDA/CRED International Disaster Database. Brussels, Belgium: Catholic University of Leuven.                                                                                                          | 1999, 2001, 2003-2004, 2009-2010, 2013 |                      |
| The Gambia | Central Statistics Department (Gambia), United Nations Children's Fund (UNICEF). Gambia Multiple Indicator Cluster Survey 2000. New York, United States: United Nations Children's Fund (UNICEF).                                                                              | 2000                                   |                      |
| The Gambia | Mboto CI, Davies-Russell A, Fielder M, Jewell AP. Hepatocellular Carcinoma in The Gambia and the role of Hepatitis B and Hepatitis C. <i>Int Semin Surg Oncol</i> . 2005; 20.                                                                                                  | 2002                                   |                      |
| The Gambia | Mboto CI, Davies-Russell A, Fielder M, Jewell AP. Hepatitis C antibodies in asymptomatic first-time blood donors in The Gambia: prevalence and risk factors. <i>Br J Biomed Sci</i> . 2005; 62(2): 89-91.                                                                      | 2002                                   |                      |
| The Gambia | World Health Organization (WHO). Retrospective Measles Data on Supplementary Immunization Activities. Geneva, Switzerland: World Health Organization (WHO).                                                                                                                    | 2003, 2007, 2011                       |                      |

**Web Table 32 - Comprehensive citation list**

| Country     | Citation                                                                                                                                                                                                                                                          | Year*                                      | New for GBD 2013 (*) |
|-------------|-------------------------------------------------------------------------------------------------------------------------------------------------------------------------------------------------------------------------------------------------------------------|--------------------------------------------|----------------------|
| The Gambia  | United Nations Office on Drugs and Crime (UNODC). United Nations Office on Drugs and Crime Global Study on Homicides 2011. Vienna, Austria: United Nations Office on Drugs and Crime (UNODC), 2011.                                                               | 2004                                       |                      |
| The Gambia  | Gambia Bureau of Statistics (GBOS), United Nations Children's Fund (UNICEF). Gambia Multiple Indicator Cluster Survey 2005-2006. New York, United States: United Nations Children's Fund (UNICEF).                                                                | 2005-2006                                  |                      |
| The Gambia  | Rutherford ME, Dockerty JD, Jasseh M, Howie SR, Herbison P, Jeffries DJ, Mulholland K, Adegbola RA, Hill PC. Preventive measures in infancy to reduce under-five mortality: a case-control study in The Gambia. <i>Trop Med Int Health</i> . 2009; 14(2): 149-55. | 2006                                       |                      |
| The Gambia  | Gambia Bureau of Statistics (GBOS), United Nations Children's Fund (UNICEF). Gambia Multiple Indicator Cluster Survey 2010.                                                                                                                                       | 2010                                       | *                    |
| The Gambia  | Gambia Bureau of Statistics (GBOS), ICF International, Ministry of Health and Social Welfare (Gambia). Gambia Demographic and Health Survey 2013.                                                                                                                 | 2013                                       | *                    |
| The Gambia  | United Nations Children's Fund (UNICEF), World Health Organization (WHO). WHO and UNICEF Reported Disease Incidence Time Series - Pertussis. Geneva, Switzerland: World Health Organization (WHO).                                                                | 1980-1981, 1985, 1997, 1999-2013           |                      |
| The Gambia  | United Nations Children's Fund (UNICEF), World Health Organization (WHO). WHO and UNICEF Reported Disease Incidence Time Series - Measles. Geneva, Switzerland: World Health Organization (WHO).                                                                  | 1980-1983, 1985-1986, 1991-1997, 1999-2013 |                      |
| Timor-Leste | Institute for Health Metrics and Evaluation (IHME), Joint United Nations Program on HIV/AIDS (UNAIDS). Institute for Health Metrics and Evaluation HIV Mortality Estimates Based on the UNAIDS Spectrum Model Framework.                                          | 1980-2013                                  | *                    |
| Timor-Leste | Centre for Health Informatics and Multiprofessional Education, University College London. Modell's Haemoglobinopathologist's Almanac. London, United Kingdom: Centre for Health Informatics and Multiprofessional Education, University College London, 2008.     | 1990-2003                                  |                      |
| Timor-Leste | Central Bureau of Statistics (Indonesia), Macro International, Inc, Ministry of Health (Indonesia), National Family Planning Coordinating Board (Indonesia). Indonesia Demographic and Health Survey 1991. Calverton, United States: Macro International, Inc.    | 1991                                       |                      |
| Timor-Leste | Central Bureau of Statistics (Indonesia), Macro International, Inc, Ministry of Health (Indonesia), National Family Planning Coordinating Board (Indonesia). Indonesia Demographic and Health Survey 1994. Calverton, United States: Macro International, Inc.    | 1994                                       |                      |
| Timor-Leste | Central Bureau of Statistics (Indonesia), Macro International, Inc, Ministry of Health (Indonesia), National Family Planning Coordinating Board (Indonesia). Indonesia Demographic and Health Survey 1997. Calverton, United States: Macro International, Inc.    | 1997                                       |                      |
| Timor-Leste | National Statistics Directorate (Timor-Leste), World Bank. Timor-Leste Living Standards and Measurement Survey 2001. Washington DC, United States: World Bank.                                                                                                    | 2001                                       | *                    |
| Timor-Leste | Centre for Research on the Epidemiology of Disasters (CRED). EM-DAT: The OFDA/CRED International Disaster Database. Brussels, Belgium: Catholic University of Leuven.                                                                                             | 2001, 2003, 2007                           |                      |
| Timor-Leste | World Health Organization (WHO). Yellow Fever Reported Cases, WHO Vaccine-Preventable Diseases: Monitoring System. Geneva, Switzerland: World Health Organization (WHO).                                                                                          | 2002-2005, 2007-2009                       |                      |
| Timor-Leste | United Nations Children's Fund (UNICEF), World Health Organization (WHO). WHO and UNICEF Reported Disease Incidence Time Series - Pertussis. Geneva, Switzerland: World Health Organization (WHO).                                                                | 2002-2013                                  |                      |
| Timor-Leste | United Nations Children's Fund (UNICEF), World Health Organization (WHO). WHO and UNICEF Reported Disease Incidence Time Series - Measles. Geneva, Switzerland: World Health Organization (WHO).                                                                  | 2002-2013                                  |                      |

**Web Table 32 - Comprehensive citation list**

| Country     | Citation                                                                                                                                                                                                                                                                                                                                                                                                                        | Year*                           | New for GBD 2013 (*) |
|-------------|---------------------------------------------------------------------------------------------------------------------------------------------------------------------------------------------------------------------------------------------------------------------------------------------------------------------------------------------------------------------------------------------------------------------------------|---------------------------------|----------------------|
| Timor-Leste | ACIL Australia Pty Ltd., Australian Agency for International Development (AusAID), Australian National University, European Union (EU), Ministry of Health (Timor-Leste), National Statistics Directorate (Timor-Leste), United Nations Children's Fund (UNICEF), United Nations Population Fund (UNFPA), University of Newcastle (Australia), World Health Organization (WHO). Timor-Leste Demographic and Health Survey 2003. | 2003                            |                      |
| Timor-Leste | World Health Organization (WHO). Retrospective Measles Data on Supplementary Immunization Activities. Geneva, Switzerland: World Health Organization (WHO).                                                                                                                                                                                                                                                                     | 2003, 2006, 2009, 2011          |                      |
| Timor-Leste | National Statistics Directorate (Timor-Leste). Timor-Leste Population and Housing Census 2004.                                                                                                                                                                                                                                                                                                                                  | 2004                            |                      |
| Timor-Leste | United Nations Office on Drugs and Crime (UNODC). United Nations Office on Drugs and Crime Global Study on Homicides 2011. Vienna, Austria: United Nations Office on Drugs and Crime (UNODC), 2011.                                                                                                                                                                                                                             | 2004-2010                       |                      |
| Timor-Leste | National Statistics Directorate (Timor-Leste), Ministry of Finance (Timor-Leste), ICF Macro. Timor-Leste Demographic and Health Survey 2009-2010. Calverton, United States: ICF Macro.                                                                                                                                                                                                                                          | 2009-2010                       |                      |
| Togo        | Togo Population and Housing Census 1958-1960 as it appears in United Nations Statistics Division (UNSD). United Nations Demographic Yearbook. New York City, United States: United Nations Statistics Division (UNSD).                                                                                                                                                                                                          | 1958-1960                       |                      |
| Togo        | Togo Demographic Survey 1961 as it appears in United Nations Statistics Division (UNSD). United Nations Demographic Yearbook. New York City, United States: United Nations Statistics Division (UNSD).                                                                                                                                                                                                                          | 1961                            |                      |
| Togo        | Department of Statistics (Togo). Togo Demographic Survey 1971.                                                                                                                                                                                                                                                                                                                                                                  | 1971                            |                      |
| Togo        | Institute for Health Metrics and Evaluation (IHME), Joint United Nations Program on HIV/AIDS (UNAIDS). Institute for Health Metrics and Evaluation HIV Mortality Estimates Based on the UNAIDS Spectrum Model Framework.                                                                                                                                                                                                        | 1980-2013                       | *                    |
| Togo        | United Nations Children's Fund (UNICEF), World Health Organization (WHO). WHO and UNICEF Reported Disease Incidence Time Series - Pertussis. Geneva, Switzerland: World Health Organization (WHO).                                                                                                                                                                                                                              | 1980-1991, 1993-2004, 2007-2013 |                      |
| Togo        | United Nations Children's Fund (UNICEF), World Health Organization (WHO). WHO and UNICEF Reported Disease Incidence Time Series - Measles. Geneva, Switzerland: World Health Organization (WHO).                                                                                                                                                                                                                                | 1980-2013                       |                      |
| Togo        | WHO Department of Communicable Disease Surveillance and Response. WHO Report on Global Surveillance of Epidemic-prone Infectious Diseases 2000.                                                                                                                                                                                                                                                                                 | 1984, 1987                      |                      |
| Togo        | Peace Research Institute Oslo (PRIO). Battle Deaths Dataset Version 3, 2009. Oslo, Norway: Peace Research Institute Oslo (PRIO), 2009.                                                                                                                                                                                                                                                                                          | 1986-1988                       |                      |
| Togo        | Demographic Research Unit (Togo), Ministry of Public Health, Social Affairs and the Status of Women (Togo), Department of Statistics (Togo), Macro Systems, Inc.; Institute for Resource Development. Togo Demographic and Health Survey 1988. Columbia, United States: Macro Systems, Inc.                                                                                                                                     | 1988                            |                      |
| Togo        | Department of Peace and Conflict Research, Uppsala University. UCDP Battle-Related Deaths Database Version 5, 2013. Uppsala, Sweden: Department of Peace and Conflict Research, Uppsala University, 2013.                                                                                                                                                                                                                       | 1989-1991                       | *                    |
| Togo        | Weatherall D. Sickle Cell and Thalassemias Prevalence Data, Personal Correspondence with David Weatherall. [Unpublished].                                                                                                                                                                                                                                                                                                       | 1990-2009                       |                      |
| Togo        | Centre for Health Informatics and Multiprofessional Education, University College London. Modell's Haemoglobinopathologist's Almanac. London, United Kingdom: Centre for Health Informatics and Multiprofessional Education, University College London, 2008.                                                                                                                                                                   | 1990-2003                       |                      |

**Web Table 32 - Comprehensive citation list**

| Country | Citation                                                                                                                                                                                                                                                                                           | Year*                        | New for GBD 2013 (*) |
|---------|----------------------------------------------------------------------------------------------------------------------------------------------------------------------------------------------------------------------------------------------------------------------------------------------------|------------------------------|----------------------|
| Togo    | Department of Peace and Conflict Research, Uppsala University. UCDP Nonstate Conflict Database Version 2.5, 2013. Uppsala, Sweden: Department of Peace and Conflict Research, Uppsala University, 2013.                                                                                            | 1991                         | *                    |
| Togo    | Department of Peace and Conflict Research, Uppsala University. UCDP One-Sided Violence Database Version 1.4, 2013. Uppsala, Sweden: Department of Peace and Conflict Research, Uppsala University, 2013.                                                                                           | 1991-2005                    | *                    |
| Togo    | Centre for Research on the Epidemiology of Disasters (CRED). EM-DAT: The OFDA/CRED International Disaster Database. Brussels, Belgium: Catholic University of Leuven.                                                                                                                              | 1995, 2007-2008, 2010        |                      |
| Togo    | World Health Organization (WHO). Yellow Fever Reported Cases, WHO Vaccine-Preventable Diseases: Monitoring System. Geneva, Switzerland: World Health Organization (WHO).                                                                                                                           | 1995, 1997-2009              |                      |
| Togo    | Department of Statistics (Togo), Macro International, Inc. Togo Demographic and Health Survey 1998. Calverton, United States: Macro International, Inc.                                                                                                                                            | 1998                         |                      |
| Togo    | World Health Organization Regional Office for Africa. HIV/AIDS Epidemiological Surveillance Update for the WHO African Region. World Health Organization Regional Office for Africa, 2003.                                                                                                         | 1998                         |                      |
| Togo    | World Health Organization (WHO). Retrospective Measles Data on Supplementary Immunization Activities. Geneva, Switzerland: World Health Organization (WHO).                                                                                                                                        | 2001, 2004, 2008, 2010, 2013 |                      |
| Togo    | World Health Organization (WHO). Measles mortality reduction in West Africa, 1996-2002. Wkly Epidemiol Rec. 2003; 78(45): 390-2.                                                                                                                                                                   | 2002                         |                      |
| Togo    | Directorate General of Statistics and National Accounting (Togo), United Nations Children's Fund (UNICEF). Togo Multiple Indicator Cluster Survey 2006. New York, United States: United Nations Children's Fund (UNICEF).                                                                          | 2006                         |                      |
| Togo    | World Health Organization (WHO). Global Status Report on Road Safety 2009. Geneva, Switzerland: World Health Organization (WHO), 2009.                                                                                                                                                             | 2007                         |                      |
| Togo    | World Health Organization (WHO). Yellow fever in Africa and South America, 2007. Wkly Epidemiol Rec. 2009; 84(13): 97-104.                                                                                                                                                                         | 2007                         |                      |
| Togo    | World Health Organization (WHO). Yellow fever, Togo. Wkly Epidemiol Rec. 2009; 82(5): 33-4.                                                                                                                                                                                                        | 2007                         |                      |
| Togo    | Delrieu I, Yaro S, Tamekloé TAS, Njanpop-Lafourcade B-M, Tall H, Jaillard P, Ouedraogo MS, Badziklou K, Sanou O, Drabo A, Gessner BD, Kambou JL, Mueller JE. Emergence of epidemic Neisseria meningitidis serogroup X meningitis in Togo and Burkina Faso. PLoS One. 2011; 6(5): e19513.           | 2007                         | *                    |
| Togo    | Joint United Nations Program on HIV/AIDS (UNAIDS), National Council for the Fight Against AIDS and Sexually Transmitted Diseases (Togo). Togo Monitoring the Declaration of Commitment on HIV and AIDS Report 2010. Geneva, Switzerland: Joint United Nations Program on HIV/AIDS (UNAIDS), 2010.  | 2009                         |                      |
| Togo    | Government of Togo, People's Republic of China, United Nations Children's Fund (UNICEF), United Nations Development Programme (UNDP), United Nations Population Fund (UNFPA). Togo Population and Housing Census 2010. Lomé, Togo: Directorate General of Statistics and National Accounts (Togo). | 2010                         | *                    |
| Togo    | Directorate General of Statistics and National Accounting (Togo), United Nations Children's Fund (UNICEF). Togo Multiple Indicator Cluster Survey 2010. New York, United States: United Nations Children's Fund (UNICEF).                                                                          | 2010                         |                      |
| Tonga   | Tonga Vital Registration Death Data 1957 as it appears in United Nations Statistics Division (UNSD). United Nations Demographic Yearbook. New York City, United States: United Nations Statistics Division (UNSD).                                                                                 | 1957                         |                      |



**Web Table 32 - Comprehensive citation list**

| Country | Citation                                                                                                                                                                                                                 | Year*                              | New for GBD 2013 (*) |
|---------|--------------------------------------------------------------------------------------------------------------------------------------------------------------------------------------------------------------------------|------------------------------------|----------------------|
| Tonga   | Tonga Vital Registration Death Data 1958 as it appears in United Nations Statistics Division (UNSD). United Nations Demographic Yearbook. New York City, United States: United Nations Statistics Division (UNSD).       | 1958                               |                      |
| Tonga   | Tonga Vital Registration Death Data 1959 as it appears in United Nations Statistics Division (UNSD). United Nations Demographic Yearbook. New York City, United States: United Nations Statistics Division (UNSD).       | 1959                               |                      |
| Tonga   | Tonga Vital Registration Death Data 1960 as it appears in United Nations Statistics Division (UNSD). United Nations Demographic Yearbook. New York City, United States: United Nations Statistics Division (UNSD).       | 1960                               |                      |
| Tonga   | Tonga Vital Registration Death Data 1961 as it appears in United Nations Statistics Division (UNSD). United Nations Demographic Yearbook. New York City, United States: United Nations Statistics Division (UNSD).       | 1961                               |                      |
| Tonga   | Centre for Research on the Epidemiology of Disasters (CRED). EM-DAT: The OFDA/CRED International Disaster Database. Brussels, Belgium: Catholic University of Leuven.                                                    | 1961, 1973, 1977, 1982, 1990, 2009 |                      |
| Tonga   | Tonga Vital Registration Death Data 1962 as it appears in United Nations Statistics Division (UNSD). United Nations Demographic Yearbook. New York City, United States: United Nations Statistics Division (UNSD).       | 1962                               |                      |
| Tonga   | Tonga Vital Registration Death Data 1963 as it appears in United Nations Statistics Division (UNSD). United Nations Demographic Yearbook. New York City, United States: United Nations Statistics Division (UNSD).       | 1963                               |                      |
| Tonga   | Tonga Vital Registration Death Data 1964 as it appears in United Nations Statistics Division (UNSD). United Nations Demographic Yearbook. New York City, United States: United Nations Statistics Division (UNSD).       | 1964                               |                      |
| Tonga   | Tonga Population and Housing Census 1966 as it appears in United Nations Statistics Division (UNSD). United Nations Demographic Yearbook. New York City, United States: United Nations Statistics Division (UNSD).       | 1966                               |                      |
| Tonga   | Tonga Vital Registration Death Data 1966 as it appears in United Nations Statistics Division (UNSD). United Nations Demographic Yearbook. New York City, United States: United Nations Statistics Division (UNSD).       | 1966                               |                      |
| Tonga   | Tonga Population and Housing Census 1976 as it appears in United Nations Statistics Division (UNSD). United Nations Demographic Yearbook. New York City, United States: United Nations Statistics Division (UNSD).       | 1976                               |                      |
| Tonga   | United Nations Office on Drugs and Crime (UNODC). United Nations Surveys on Crime Trends and the Operations of Criminal Justice Systems 1970-2006 as provided by Kavi Bhalla. [Unpublished].                             | 1976-1990                          |                      |
| Tonga   | Institute for Health Metrics and Evaluation (IHME), Joint United Nations Program on HIV/AIDS (UNAIDS). Institute for Health Metrics and Evaluation HIV Mortality Estimates Based on the UNAIDS Spectrum Model Framework. | 1980-2013                          | *                    |
| Tonga   | United Nations Children's Fund (UNICEF), World Health Organization (WHO). WHO and UNICEF Reported Disease Incidence Time Series - Pertussis. Geneva, Switzerland: World Health Organization (WHO).                       | 1980-1993, 1995-2013               |                      |
| Tonga   | United Nations Children's Fund (UNICEF), World Health Organization (WHO). WHO and UNICEF Reported Disease Incidence Time Series - Measles. Geneva, Switzerland: World Health Organization (WHO).                         | 1980-1993, 1995-2013               |                      |

**Web Table 32 - Comprehensive citation list**

| Country | Citation                                                                                                                                                                                                                                                      | Year*                            | New for GBD 2013 (*) |
|---------|---------------------------------------------------------------------------------------------------------------------------------------------------------------------------------------------------------------------------------------------------------------|----------------------------------|----------------------|
| Tonga   | Tonga Vital Registration Death Data 1982 as it appears in United Nations Statistics Division (UNSD). United Nations Demographic Yearbook. New York City, United States: United Nations Statistics Division (UNSD).                                            | 1982                             |                      |
| Tonga   | Tonga Vital Registration Death Data 1983 as it appears in United Nations Statistics Division (UNSD). United Nations Demographic Yearbook. New York City, United States: United Nations Statistics Division (UNSD).                                            | 1983                             |                      |
| Tonga   | Hill AV, Bowden DK, O'Shaughnessy DF, Weatherall DJ, Clegg JB. Beta thalassemia in Melanesia: association with malaria and characterization of a common variant (IVS-1 nt 5 G---C). Blood. 1988; 72(1): 9-14.                                                 | 1985-1987                        |                      |
| Tonga   | Tonga Population and Housing Census 1986 as it appears in United Nations Statistics Division (UNSD). United Nations Demographic Yearbook. New York City, United States: United Nations Statistics Division (UNSD).                                            | 1986                             |                      |
| Tonga   | Tonga Vital Registration Death Data 1990 as it appears in United Nations Statistics Division (UNSD). United Nations Demographic Yearbook. New York City, United States: United Nations Statistics Division (UNSD).                                            | 1990                             |                      |
| Tonga   | Centre for Health Informatics and Multiprofessional Education, University College London. Modell's Haemoglobinopathologist's Almanac. London, United Kingdom: Centre for Health Informatics and Multiprofessional Education, University College London, 2008. | 1990-2003                        |                      |
| Tonga   | Tonga Vital Registration Death Data 1996 as it appears in United Nations Statistics Division (UNSD). United Nations Demographic Yearbook. New York City, United States: United Nations Statistics Division (UNSD).                                            | 1996                             |                      |
| Tonga   | Tonga Vital Registration Death Data 1997 as it appears in United Nations Statistics Division (UNSD). United Nations Demographic Yearbook. New York City, United States: United Nations Statistics Division (UNSD).                                            | 1997                             |                      |
| Tonga   | Tonga Vital Registration Death Data 1998 as it appears in United Nations Statistics Division (UNSD). United Nations Demographic Yearbook. New York City, United States: United Nations Statistics Division (UNSD).                                            | 1998                             |                      |
| Tonga   | Measles Supplementary Immunization Activity Data as provided by the World Health Organization. [Unpublished].                                                                                                                                                 | 1998                             |                      |
| Tonga   | Tonga Vital Registration Death Data 1999 as it appears in United Nations Statistics Division (UNSD). United Nations Demographic Yearbook Database. [Unpublished].                                                                                             | 1999                             |                      |
| Tonga   | World Health Organization (WHO). Yellow Fever Reported Cases, WHO Vaccine-Preventable Diseases: Monitoring System. Geneva, Switzerland: World Health Organization (WHO).                                                                                      | 1999, 2001-2002, 2006, 2008-2009 |                      |
| Tonga   | Tonga Vital Registration Death Data 2000 as it appears in United Nations Statistics Division (UNSD). United Nations Demographic Yearbook. New York City, United States: United Nations Statistics Division (UNSD).                                            | 2000                             |                      |
| Tonga   | Tonga Vital Registration Death Data 2003 as it appears in United Nations Statistics Division (UNSD). United Nations Demographic Yearbook. New York City, United States: United Nations Statistics Division (UNSD).                                            | 2003                             |                      |
| Tonga   | Tonga Vital Registration Death Data 2004 as it appears in United Nations Statistics Division (UNSD). United Nations Demographic Yearbook. New York City, United States: United Nations Statistics Division (UNSD).                                            | 2004                             |                      |



**Web Table 32 - Comprehensive citation list**

| Country             | Citation                                                                                                                                                                                                                         | Year*     | New for GBD 2013 (*) |
|---------------------|----------------------------------------------------------------------------------------------------------------------------------------------------------------------------------------------------------------------------------|-----------|----------------------|
| Tonga               | Tonga Population and Housing Census 2006 as it appears in United Nations Statistics Division (UNSD). United Nations Demographic Yearbook. New York City, United States: United Nations Statistics Division (UNSD).               | 2006      |                      |
| Trinidad and Tobago | Trinidad and Tobago Vital Registration Death Data 1950 as it appears in United Nations Statistics Division (UNSD). United Nations Demographic Yearbook. New York City, United States: United Nations Statistics Division (UNSD). | 1950      |                      |
| Trinidad and Tobago | Trinidad and Tobago Vital Registration - Deaths 1951 ICD7 as it appears in World Health Organization (WHO). WHO Mortality Database Version February 2014. Geneva, Switzerland: World Health Organization (WHO), 2014.            | 1951      |                      |
| Trinidad and Tobago | Trinidad and Tobago Vital Registration - Deaths 1952 ICD7 as it appears in World Health Organization (WHO). WHO Mortality Database Version February 2014. Geneva, Switzerland: World Health Organization (WHO), 2014.            | 1952      |                      |
| Trinidad and Tobago | Trinidad and Tobago Vital Registration - Deaths 1953 ICD7 as it appears in World Health Organization (WHO). WHO Mortality Database Version February 2014. Geneva, Switzerland: World Health Organization (WHO), 2014.            | 1953      |                      |
| Trinidad and Tobago | Trinidad and Tobago Vital Registration - Deaths 1954 ICD7 as it appears in World Health Organization (WHO). WHO Mortality Database Version February 2014. Geneva, Switzerland: World Health Organization (WHO), 2014.            | 1954      |                      |
| Trinidad and Tobago | Trinidad and Tobago Vital Registration - Deaths 1955 ICD7 as it appears in World Health Organization (WHO). WHO Mortality Database Version February 2014. Geneva, Switzerland: World Health Organization (WHO), 2014.            | 1955      |                      |
| Trinidad and Tobago | Trinidad and Tobago Vital Registration - Deaths 1956 ICD7 as it appears in World Health Organization (WHO). WHO Mortality Database Version February 2014. Geneva, Switzerland: World Health Organization (WHO), 2014.            | 1956      |                      |
| Trinidad and Tobago | Trinidad and Tobago Vital Registration - Deaths 1957 ICD7 as it appears in World Health Organization (WHO). WHO Mortality Database Version February 2014. Geneva, Switzerland: World Health Organization (WHO), 2014.            | 1957      |                      |
| Trinidad and Tobago | Trinidad and Tobago Vital Registration - Deaths 1958 ICD7 as it appears in World Health Organization (WHO). WHO Mortality Database Version February 2014. Geneva, Switzerland: World Health Organization (WHO), 2014.            | 1958      |                      |
| Trinidad and Tobago | Trinidad and Tobago Vital Registration - Deaths 1959 ICD7 as it appears in World Health Organization (WHO). WHO Mortality Database Version February 2014. Geneva, Switzerland: World Health Organization (WHO), 2014.            | 1959      |                      |
| Trinidad and Tobago | Trinidad and Tobago Vital Registration - Deaths 1960 ICD7 as it appears in World Health Organization (WHO). WHO Mortality Database Version February 2014. Geneva, Switzerland: World Health Organization (WHO), 2014.            | 1960      |                      |
| Trinidad and Tobago | Trinidad and Tobago Vital Registration - Deaths 1961 ICD7 as it appears in World Health Organization (WHO). WHO Mortality Database Version February 2014. Geneva, Switzerland: World Health Organization (WHO), 2014.            | 1961      |                      |
| Trinidad and Tobago | Sutton RN. Erythrocyte glucose-6-phosphate-dehydrogenase deficiency in Trinidad. Lancet. 1963; 1(7286): 855.                                                                                                                     | 1961-1963 |                      |
| Trinidad and Tobago | Trinidad and Tobago Vital Registration - Deaths 1962 ICD7 as it appears in World Health Organization (WHO). WHO Mortality Database Version February 2014. Geneva, Switzerland: World Health Organization (WHO), 2014.            | 1962      |                      |

**Web Table 32 - Comprehensive citation list**

| Country             | Citation                                                                                                                                                                                                              | Year*                  | New for GBD 2013 (*) |
|---------------------|-----------------------------------------------------------------------------------------------------------------------------------------------------------------------------------------------------------------------|------------------------|----------------------|
| Trinidad and Tobago | Trinidad and Tobago Vital Registration - Deaths 1963 ICD7 as it appears in World Health Organization (WHO). WHO Mortality Database Version February 2014. Geneva, Switzerland: World Health Organization (WHO), 2014. | 1963                   |                      |
| Trinidad and Tobago | Centre for Research on the Epidemiology of Disasters (CRED). EM-DAT: The OFDA/CRED International Disaster Database. Brussels, Belgium: Catholic University of Leuven.                                                 | 1963, 1974, 1993, 2004 |                      |
| Trinidad and Tobago | Trinidad and Tobago Vital Registration - Deaths 1964 ICD7 as it appears in World Health Organization (WHO). WHO Mortality Database Version February 2014. Geneva, Switzerland: World Health Organization (WHO), 2014. | 1964                   |                      |
| Trinidad and Tobago | Trinidad and Tobago Vital Registration - Deaths 1965 ICD7 as it appears in World Health Organization (WHO). WHO Mortality Database Version February 2014. Geneva, Switzerland: World Health Organization (WHO), 2014. | 1965                   |                      |
| Trinidad and Tobago | Trinidad and Tobago Vital Registration - Deaths 1966 ICD7 as it appears in World Health Organization (WHO). WHO Mortality Database Version February 2014. Geneva, Switzerland: World Health Organization (WHO), 2014. | 1966                   |                      |
| Trinidad and Tobago | Trinidad and Tobago Vital Registration - Deaths 1967 ICD7 as it appears in World Health Organization (WHO). WHO Mortality Database Version February 2014. Geneva, Switzerland: World Health Organization (WHO), 2014. | 1967                   |                      |
| Trinidad and Tobago | Trinidad and Tobago Vital Registration - Deaths 1968 ICD7 as it appears in World Health Organization (WHO). WHO Mortality Database Version February 2014. Geneva, Switzerland: World Health Organization (WHO), 2014. | 1968                   |                      |
| Trinidad and Tobago | Trinidad and Tobago Vital Registration - Deaths 1969 ICD8 as it appears in World Health Organization (WHO). WHO Mortality Database Version February 2014. Geneva, Switzerland: World Health Organization (WHO), 2014. | 1969                   |                      |
| Trinidad and Tobago | Trinidad and Tobago Vital Registration - Deaths 1970 ICD8 as it appears in World Health Organization (WHO). WHO Mortality Database Version February 2014. Geneva, Switzerland: World Health Organization (WHO), 2014. | 1970                   |                      |
| Trinidad and Tobago | United Nations Office on Drugs and Crime (UNODC). United Nations Surveys on Crime Trends and the Operations of Criminal Justice Systems 1970-2006 as provided by Kavi Bhalla. [Unpublished].                          | 1970-1986              |                      |
| Trinidad and Tobago | Trinidad and Tobago Vital Registration - Deaths 1971 ICD8 as it appears in World Health Organization (WHO). WHO Mortality Database Version February 2014. Geneva, Switzerland: World Health Organization (WHO), 2014. | 1971                   |                      |
| Trinidad and Tobago | Trinidad and Tobago Vital Registration - Deaths 1972 ICD8 as it appears in World Health Organization (WHO). WHO Mortality Database Version February 2014. Geneva, Switzerland: World Health Organization (WHO), 2014. | 1972                   |                      |
| Trinidad and Tobago | Trinidad and Tobago Vital Registration - Deaths 1973 ICD8 as it appears in World Health Organization (WHO). WHO Mortality Database Version February 2014. Geneva, Switzerland: World Health Organization (WHO), 2014. | 1973                   |                      |
| Trinidad and Tobago | Trinidad and Tobago Vital Registration - Deaths 1974 ICD8 as it appears in World Health Organization (WHO). WHO Mortality Database Version February 2014. Geneva, Switzerland: World Health Organization (WHO), 2014. | 1974                   |                      |
| Trinidad and Tobago | Trinidad and Tobago Vital Registration - Deaths 1975 ICD8 as it appears in World Health Organization (WHO). WHO Mortality Database Version February 2014. Geneva, Switzerland: World Health Organization (WHO), 2014. | 1975                   |                      |

**Web Table 32 - Comprehensive citation list**

| Country             | Citation                                                                                                                                                                                                                         | Year*     | New for GBD 2013 (*) |
|---------------------|----------------------------------------------------------------------------------------------------------------------------------------------------------------------------------------------------------------------------------|-----------|----------------------|
| Trinidad and Tobago | Trinidad and Tobago Vital Registration - Deaths 1976 ICD8 as it appears in World Health Organization (WHO). WHO Mortality Database Version February 2014. Geneva, Switzerland: World Health Organization (WHO), 2014.            | 1976      |                      |
| Trinidad and Tobago | Central Statistical Office (Trinidad and Tobago), International Statistical Institute. Trinidad and Tobago World Fertility Survey 1977. Voorburg, Netherlands: International Statistical Institute.                              | 1977      |                      |
| Trinidad and Tobago | Trinidad and Tobago Vital Registration - Deaths 1977 ICD8 as it appears in World Health Organization (WHO). WHO Mortality Database Version February 2014. Geneva, Switzerland: World Health Organization (WHO), 2014.            | 1977      |                      |
| Trinidad and Tobago | Trinidad and Tobago Vital Registration - Deaths 1978 ICD8 as it appears in World Health Organization (WHO). WHO Mortality Database Version February 2014. Geneva, Switzerland: World Health Organization (WHO), 2014.            | 1978      |                      |
| Trinidad and Tobago | Trinidad and Tobago Vital Registration - Deaths 1979 ICD9 as it appears in World Health Organization (WHO). WHO Mortality Database Version February 2014. Geneva, Switzerland: World Health Organization (WHO), 2014.            | 1979      |                      |
| Trinidad and Tobago | Trinidad and Tobago Vital Registration - Deaths 1980 ICD9 as it appears in World Health Organization (WHO). WHO Mortality Database Version February 2014. Geneva, Switzerland: World Health Organization (WHO), 2014.            | 1980      |                      |
| Trinidad and Tobago | Institute for Health Metrics and Evaluation (IHME), Joint United Nations Program on HIV/AIDS (UNAIDS). Institute for Health Metrics and Evaluation HIV Mortality Estimates Based on the UNAIDS Spectrum Model Framework.         | 1980-2013 | *                    |
| Trinidad and Tobago | United Nations Children's Fund (UNICEF), World Health Organization (WHO). WHO and UNICEF Reported Disease Incidence Time Series - Pertussis. Geneva, Switzerland: World Health Organization (WHO).                               | 1980-2012 |                      |
| Trinidad and Tobago | United Nations Children's Fund (UNICEF), World Health Organization (WHO). WHO and UNICEF Reported Disease Incidence Time Series - Measles. Geneva, Switzerland: World Health Organization (WHO).                                 | 1980-2012 |                      |
| Trinidad and Tobago | Trinidad and Tobago Vital Registration - Deaths 1981 ICD9 as it appears in World Health Organization (WHO). WHO Mortality Database Version February 2014. Geneva, Switzerland: World Health Organization (WHO), 2014.            | 1981      |                      |
| Trinidad and Tobago | Trinidad and Tobago Vital Registration - Deaths 1982 ICD9 as it appears in World Health Organization (WHO). WHO Mortality Database Version February 2014. Geneva, Switzerland: World Health Organization (WHO), 2014.            | 1982      |                      |
| Trinidad and Tobago | Blattner WA, Saxinger C, Riedel D, Hull B, Taylor G, Cleghorn F, Gallo R, Blumberg B, Bartholomew C. A study of HTLV-I and its associated risk factors in Trinidad and Tobago. J Acquir Immune Defic Syndr. 1990; 3(11): 1102-8. | 1982-1984 |                      |
| Trinidad and Tobago | Trinidad and Tobago Vital Registration - Deaths 1983 ICD9 as it appears in World Health Organization (WHO). WHO Mortality Database Version February 2014. Geneva, Switzerland: World Health Organization (WHO), 2014.            | 1983      |                      |
| Trinidad and Tobago | Trinidad and Tobago Vital Registration - Deaths 1984 ICD9 as it appears in World Health Organization (WHO). WHO Mortality Database Version February 2014. Geneva, Switzerland: World Health Organization (WHO), 2014.            | 1984      |                      |
| Trinidad and Tobago | Trinidad and Tobago Vital Registration - Deaths 1985 ICD9 as it appears in World Health Organization (WHO). WHO Mortality Database Version February 2014. Geneva, Switzerland: World Health Organization (WHO), 2014.            | 1985      |                      |

**Web Table 32 - Comprehensive citation list**

| Country             | Citation                                                                                                                                                                                                                                                      | Year*     | New for GBD 2013 (*) |
|---------------------|---------------------------------------------------------------------------------------------------------------------------------------------------------------------------------------------------------------------------------------------------------------|-----------|----------------------|
| Trinidad and Tobago | Trinidad and Tobago Vital Registration - Deaths 1986 ICD9 as it appears in World Health Organization (WHO). WHO Mortality Database Version February 2014. Geneva, Switzerland: World Health Organization (WHO), 2014.                                         | 1986      |                      |
| Trinidad and Tobago | Trinidad and Tobago Vital Registration - Deaths 1987 ICD9 as it appears in World Health Organization (WHO). WHO Mortality Database Version February 2014. Geneva, Switzerland: World Health Organization (WHO), 2014.                                         | 1987      |                      |
| Trinidad and Tobago | Family Planning Association (Trinidad and Tobago), Westinghouse; Institute for Resource Development. Trinidad and Tobago Demographic and Health Survey 1987. Columbia, United States: Westinghouse; Institute for Resource Development.                       | 1987      |                      |
| Trinidad and Tobago | Trinidad and Tobago Vital Registration - Deaths 1988 ICD9 as it appears in World Health Organization (WHO). WHO Mortality Database Version February 2014. Geneva, Switzerland: World Health Organization (WHO), 2014.                                         | 1988      |                      |
| Trinidad and Tobago | Trinidad and Tobago Vital Registration - Deaths 1989 ICD9 as it appears in World Health Organization (WHO). WHO Mortality Database Version February 2014. Geneva, Switzerland: World Health Organization (WHO), 2014.                                         | 1989      |                      |
| Trinidad and Tobago | Trinidad and Tobago Vital Registration - Deaths 1990 ICD9 as it appears in World Health Organization (WHO). WHO Mortality Database Version February 2014. Geneva, Switzerland: World Health Organization (WHO), 2014.                                         | 1990      |                      |
| Trinidad and Tobago | Department of Peace and Conflict Research, Uppsala University. UCDP Battle-Related Deaths Database Version 5, 2013. Uppsala, Sweden: Department of Peace and Conflict Research, Uppsala University, 2013.                                                     | 1990      | *                    |
| Trinidad and Tobago | Centre for Health Informatics and Multiprofessional Education, University College London. Modell's Haemoglobinopathologist's Almanac. London, United Kingdom: Centre for Health Informatics and Multiprofessional Education, University College London, 2008. | 1990-2003 |                      |
| Trinidad and Tobago | Trinidad and Tobago Vital Registration - Deaths 1991 ICD9 as it appears in World Health Organization (WHO). WHO Mortality Database Version February 2014. Geneva, Switzerland: World Health Organization (WHO), 2014.                                         | 1991      |                      |
| Trinidad and Tobago | Trinidad and Tobago Vital Registration - Deaths 1992 ICD9 as it appears in World Health Organization (WHO). WHO Mortality Database Version February 2014. Geneva, Switzerland: World Health Organization (WHO), 2014.                                         | 1992      |                      |
| Trinidad and Tobago | Trinidad and Tobago Vital Registration - Deaths 1993 ICD9 as it appears in World Health Organization (WHO). WHO Mortality Database Version February 2014. Geneva, Switzerland: World Health Organization (WHO), 2014.                                         | 1993      |                      |
| Trinidad and Tobago | Trinidad and Tobago Vital Registration - Deaths 1994 ICD9 as it appears in World Health Organization (WHO). WHO Mortality Database Version February 2014. Geneva, Switzerland: World Health Organization (WHO), 2014.                                         | 1994      |                      |
| Trinidad and Tobago | Trinidad and Tobago Vital Registration - Deaths 1995 ICD9 as it appears in World Health Organization (WHO). WHO Mortality Database Version February 2014. Geneva, Switzerland: World Health Organization (WHO), 2014.                                         | 1995      |                      |
| Trinidad and Tobago | United Nations Office on Drugs and Crime (UNODC). United Nations Office on Drugs and Crime Global Study on Homicides 2011. Vienna, Austria: United Nations Office on Drugs and Crime (UNODC), 2011.                                                           | 1995-2010 |                      |
| Trinidad and Tobago | Dr. Elizabeth Quamina Cancer Registry, Ministry of Health (Trinidad and Tobago). Trinidad and Tobago Cancer Incidence 1995-2006.                                                                                                                              | 1995-2006 |                      |

**Web Table 32 - Comprehensive citation list**

| Country             | Citation                                                                                                                                                                                                                    | Year*                           | New for GBD 2013 (*) |
|---------------------|-----------------------------------------------------------------------------------------------------------------------------------------------------------------------------------------------------------------------------|---------------------------------|----------------------|
| Trinidad and Tobago | Trinidad and Tobago Vital Registration - Deaths 1996 ICD9 as it appears in World Health Organization (WHO). WHO Mortality Database Version February 2014. Geneva, Switzerland: World Health Organization (WHO), 2014.       | 1996                            |                      |
| Trinidad and Tobago | Trinidad and Tobago Vital Registration - Deaths 1997 ICD9 as it appears in World Health Organization (WHO). WHO Mortality Database Version February 2014. Geneva, Switzerland: World Health Organization (WHO), 2014.       | 1997                            |                      |
| Trinidad and Tobago | Measles Supplementary Immunization Activity Data as provided by the World Health Organization. [Unpublished].                                                                                                               | 1997                            |                      |
| Trinidad and Tobago | World Health Organization (WHO). Yellow Fever Reported Cases, WHO Vaccine-Preventable Diseases: Monitoring System. Geneva, Switzerland: World Health Organization (WHO).                                                    | 1997-1998, 2000-2002, 2004-2009 |                      |
| Trinidad and Tobago | Trinidad and Tobago Vital Registration - Deaths 1998 ICD9 as it appears in World Health Organization (WHO). WHO Mortality Database Version February 2014. Geneva, Switzerland: World Health Organization (WHO), 2014.       | 1998                            |                      |
| Trinidad and Tobago | Trinidad and Tobago Vital Registration - Deaths 1999 ICD10 as it appears in World Health Organization (WHO). WHO Mortality Database Version February 2014. Geneva, Switzerland: World Health Organization (WHO), 2014.      | 1999                            |                      |
| Trinidad and Tobago | Central Statistical Office (Trinidad and Tobago), United Nations Children's Fund (UNICEF). Trinidad and Tobago Multiple Indicator Cluster Survey 2000. New York, United States: United Nations Children's Fund (UNICEF).    | 2000                            |                      |
| Trinidad and Tobago | Trinidad and Tobago Vital Registration - Deaths 2000 ICD10 as it appears in World Health Organization (WHO). WHO Mortality Database Version February 2014. Geneva, Switzerland: World Health Organization (WHO), 2014.      | 2000                            |                      |
| Trinidad and Tobago | Trinidad and Tobago Vital Registration - Deaths 2001 ICD10 as it appears in World Health Organization (WHO). WHO Mortality Database Version February 2014. Geneva, Switzerland: World Health Organization (WHO), 2014.      | 2001                            |                      |
| Trinidad and Tobago | Trinidad and Tobago Vital Registration - Deaths 2002 ICD10 as it appears in World Health Organization (WHO). WHO Mortality Database Version February 2014. Geneva, Switzerland: World Health Organization (WHO), 2014.      | 2002                            |                      |
| Trinidad and Tobago | Trinidad and Tobago Vital Registration - Deaths 2004 ICD10 as it appears in World Health Organization (WHO). WHO Mortality Database Version February 2014. Geneva, Switzerland: World Health Organization (WHO), 2014.      | 2004                            |                      |
| Trinidad and Tobago | Trinidad and Tobago Vital Registration - Deaths 2005 ICD10 as it appears in World Health Organization (WHO). WHO Mortality Database Version February 2014. Geneva, Switzerland: World Health Organization (WHO), 2014.      | 2005                            |                      |
| Trinidad and Tobago | Central Statistical Office (Trinidad and Tobago) and United Nations Children's Fund (UNICEF). Trinidad and Tobago Multiple Indicator Cluster Survey 2006. New York, United States: United Nations Children's Fund (UNICEF). | 2006                            |                      |
| Trinidad and Tobago | Trinidad and Tobago Vital Registration - Deaths 2006 ICD10 as it appears in World Health Organization (WHO). WHO Mortality Database Version February 2014. Geneva, Switzerland: World Health Organization (WHO), 2014.      | 2006                            |                      |
| Trinidad and Tobago | Soyibo AK, Barton EN. Report from the Caribbean renal registry, 2006. West Indian Med J. 2007; 56(4): 355-63.                                                                                                               | 2006                            |                      |

**Web Table 32 - Comprehensive citation list**

| Country             | Citation                                                                                                                                                                                                                                                                                                                                                                                                                                | Year*                                                            | New for GBD 2013 (*) |
|---------------------|-----------------------------------------------------------------------------------------------------------------------------------------------------------------------------------------------------------------------------------------------------------------------------------------------------------------------------------------------------------------------------------------------------------------------------------------|------------------------------------------------------------------|----------------------|
| Trinidad and Tobago | Fassio E, Díaz S, Santa C, Reig ME, Martínez Artola Y, Alves de Mattos A, Míguez C, Galizzi J, Zapata R, Ridruejo E, de Souza FC, Hernández N, Pinchuk L, Multicenter Group for Study of Hepatocarcinoma in Latin America, Asociación Latinoamericana para el Estudio del Hígado (ALEH). Etiology of hepatocellular carcinoma in Latin America: a prospective, multicenter, international study. <i>Ann Hepatol</i> . 2010; 9(1): 63-9. | 2006-2008                                                        | *                    |
| Trinidad and Tobago | Trinidad and Tobago Vital Registration - Deaths 2007 ICD10 as it appears in World Health Organization (WHO). WHO Mortality Database Version February 2014. Geneva, Switzerland: World Health Organization (WHO), 2014.                                                                                                                                                                                                                  | 2007                                                             |                      |
| Trinidad and Tobago | Trinidad and Tobago Vital Registration - Deaths 2008 ICD10 as it appears in World Health Organization (WHO). WHO Mortality Database Version February 2014. Geneva, Switzerland: World Health Organization (WHO), 2014.                                                                                                                                                                                                                  | 2008                                                             |                      |
| Trinidad and Tobago | Joint United Nations Program on HIV/AIDS (UNAIDS), Trinidad and Tobago National AIDS Coordinating Committee. Trinidad and Tobago UNGASS Country Progress Report 2010. Geneva, Switzerland: Joint United Nations Program on HIV/AIDS (UNAIDS), 2010.                                                                                                                                                                                     | 2009                                                             |                      |
| Tunisia             | Peace Research Institute Oslo (PRIO). Battle Deaths Dataset Version 3, 2009. Oslo, Norway: Peace Research Institute Oslo (PRIO), 2009.                                                                                                                                                                                                                                                                                                  | 1953-1980                                                        |                      |
| Tunisia             | Centre for Research on the Epidemiology of Disasters (CRED). EM-DAT: The OFDA/CRED International Disaster Database. Brussels, Belgium: Catholic University of Leuven.                                                                                                                                                                                                                                                                   | 1957, 1962, 1964, 1969, 1973, 1982, 1986, 1990, 2003, 2007, 2009 |                      |
| Tunisia             | Tunisia Vital Registration Death Data 1960 as it appears in United Nations Statistics Division (UNSD). United Nations Demographic Yearbook. New York City, United States: United Nations Statistics Division (UNSD).                                                                                                                                                                                                                    | 1960                                                             |                      |
| Tunisia             | Tunisia Vital Registration Death Data 1968 as it appears in United Nations Statistics Division (UNSD). United Nations Demographic Yearbook. New York City, United States: United Nations Statistics Division (UNSD).                                                                                                                                                                                                                    | 1968                                                             |                      |
| Tunisia             | National Institute of Statistics (Tunisia). Tunisia National Demographic Survey 1968-1969.                                                                                                                                                                                                                                                                                                                                              | 1968-1969                                                        |                      |
| Tunisia             | Tunisia Vital Registration Death Data 1969 as it appears in United Nations Statistics Division (UNSD). United Nations Demographic Yearbook. New York City, United States: United Nations Statistics Division (UNSD).                                                                                                                                                                                                                    | 1969                                                             |                      |
| Tunisia             | Tunisia Vital Registration Death Data 1970 as it appears in United Nations Statistics Division (UNSD). United Nations Demographic Yearbook. New York City, United States: United Nations Statistics Division (UNSD).                                                                                                                                                                                                                    | 1970                                                             |                      |
| Tunisia             | Tunisia Vital Registration Death Data 1971 as it appears in United Nations Statistics Division (UNSD). United Nations Demographic Yearbook. New York City, United States: United Nations Statistics Division (UNSD).                                                                                                                                                                                                                    | 1971                                                             |                      |
| Tunisia             | Tunisia Vital Registration Death Data 1972 as it appears in United Nations Statistics Division (UNSD). United Nations Demographic Yearbook. New York City, United States: United Nations Statistics Division (UNSD).                                                                                                                                                                                                                    | 1972                                                             |                      |
| Tunisia             | Tunisia Vital Registration Death Data 1973 as it appears in United Nations Statistics Division (UNSD). United Nations Demographic Yearbook. New York City, United States: United Nations Statistics Division (UNSD).                                                                                                                                                                                                                    | 1973                                                             |                      |



**Web Table 32 - Comprehensive citation list**

| Country | Citation                                                                                                                                                                                                                 | Year*                | New for GBD 2013 (*) |
|---------|--------------------------------------------------------------------------------------------------------------------------------------------------------------------------------------------------------------------------|----------------------|----------------------|
| Tunisia | Tunisia Vital Registration Death Data 1974 as it appears in United Nations Statistics Division (UNSD). United Nations Demographic Yearbook. New York City, United States: United Nations Statistics Division (UNSD).     | 1974                 |                      |
| Tunisia | National Institute of Statistics (Tunisia). Tunisia Population and Housing Census 1975.                                                                                                                                  | 1975                 |                      |
| Tunisia | Tunisia Vital Registration Death Data 1976 as it appears in United Nations Statistics Division (UNSD). United Nations Demographic Yearbook. New York City, United States: United Nations Statistics Division (UNSD).     | 1976                 |                      |
| Tunisia | Tunisia Vital Registration Death Data 1977 as it appears in United Nations Statistics Division (UNSD). United Nations Demographic Yearbook. New York City, United States: United Nations Statistics Division (UNSD).     | 1977                 |                      |
| Tunisia | International Statistical Institute, National Office for Family and Population, Ministry of Public Health (Tunisia). Tunisia World Fertility Survey 1978. International Statistical Institute.                           | 1978                 |                      |
| Tunisia | Tunisia Vital Registration Death Data 1978 as it appears in United Nations Statistics Division (UNSD). United Nations Demographic Yearbook. New York City, United States: United Nations Statistics Division (UNSD).     | 1978                 |                      |
| Tunisia | Tunisia Vital Registration Death Data 1979 as it appears in United Nations Statistics Division (UNSD). United Nations Demographic Yearbook. New York City, United States: United Nations Statistics Division (UNSD).     | 1979                 |                      |
| Tunisia | Tunisia Vital Registration Death Data 1980 as it appears in United Nations Statistics Division (UNSD). United Nations Demographic Yearbook. New York City, United States: United Nations Statistics Division (UNSD).     | 1980                 |                      |
| Tunisia | Institute for Health Metrics and Evaluation (IHME), Joint United Nations Program on HIV/AIDS (UNAIDS). Institute for Health Metrics and Evaluation HIV Mortality Estimates Based on the UNAIDS Spectrum Model Framework. | 1980-2013            | *                    |
| Tunisia | United Nations Children's Fund (UNICEF), World Health Organization (WHO). WHO and UNICEF Reported Disease Incidence Time Series - Pertussis. Geneva, Switzerland: World Health Organization (WHO).                       | 1980-1982, 1985-2013 |                      |
| Tunisia | United Nations Children's Fund (UNICEF), World Health Organization (WHO). WHO and UNICEF Reported Disease Incidence Time Series - Measles. Geneva, Switzerland: World Health Organization (WHO).                         | 1980-2013            |                      |
| Tunisia | Fattoum S, Abbes S. Some data on the epidemiology of hemoglobinopathies in Tunisia. Hemoglobin. 1985; 4(9): 423-9.                                                                                                       | 1982-1985            |                      |
| Tunisia | National Office for Family and Population, Ministry of Public Health (Tunisia), Westinghouse Public Applied Systems. Tunisia Contraceptive Prevalence Survey 1983.                                                       | 1983                 |                      |
| Tunisia | Tunisia Population and Housing Census 1984 as it appears in United Nations Statistics Division (UNSD). United Nations Demographic Yearbook. New York City, United States: United Nations Statistics Division (UNSD).     | 1984                 |                      |
| Tunisia | Tunisia Vital Registration Death Data 1987 as it appears in United Nations Statistics Division (UNSD). United Nations Demographic Yearbook. New York City, United States: United Nations Statistics Division (UNSD).     | 1987                 |                      |
| Tunisia | National Office for Family and Population (Tunisia), Macro Systems, Inc.; Institute for Resource Development. Tunisia Demographic and Health Survey 1988. Columbia, United States: Macro Systems, Inc.                   | 1988                 |                      |

**Web Table 32 - Comprehensive citation list**

| Country | Citation                                                                                                                                                                                                                                                      | Year*     | New for GBD 2013 (*) |
|---------|---------------------------------------------------------------------------------------------------------------------------------------------------------------------------------------------------------------------------------------------------------------|-----------|----------------------|
| Tunisia | Tunisia Vital Registration Death Data 1988 as it appears in United Nations Statistics Division (UNSD). United Nations Demographic Yearbook. New York City, United States: United Nations Statistics Division (UNSD).                                          | 1988      |                      |
| Tunisia | Tunisia Vital Registration Death Data 1989 as it appears in United Nations Statistics Division (UNSD). United Nations Demographic Yearbook. New York City, United States: United Nations Statistics Division (UNSD).                                          | 1989      |                      |
| Tunisia | Weatherall D. Sickle Cell and Thalassemias Prevalence Data, Personal Correspondence with David Weatherall. [Unpublished].                                                                                                                                     | 1990-2009 |                      |
| Tunisia | Centre for Health Informatics and Multiprofessional Education, University College London. Modell's Haemoglobinopathologist's Almanac. London, United Kingdom: Centre for Health Informatics and Multiprofessional Education, University College London, 2008. | 1990-2003 |                      |
| Tunisia | Armed Conflict Location and Event Data Project (ACLED). Armed Conflict Location and Event Dataset, Realtime - Robert S. Strauss Center.                                                                                                                       | 1991-2013 | *                    |
| Tunisia | Coursaget P, Simpson B, el Goulli N, Ben Khelifa H, Kastally R. Hepatitis C core antibody detection in acute hepatitis and cirrhosis patients from Tunisia. Pathol Biol. 1992; 40(6): 646-8.                                                                  | 1992      |                      |
| Tunisia | Tunisia Vital Registration Death Data 1993 as it appears in United Nations Statistics Division (UNSD). United Nations Demographic Yearbook. New York City, United States: United Nations Statistics Division (UNSD).                                          | 1993      |                      |
| Tunisia | Triki H, Said N, Ben Salah A, Arrouji A, Ben Ahmed F, Bouguerra A, Hmida S, Dhahri R, Dellagi K. Seroepidemiology of hepatitis B, C and delta viruses in Tunisia. Trans R Soc Trop Med Hyg. 1997; 91(1): 11-4.                                                | 1993-1994 |                      |
| Tunisia | Triki H. [Epidemiology of hepatitis B virus, hepatitis C virus and Delta virus in the general population and in liver cirrhosis in Tunisia]. Arch Inst Pasteur Tunis. 1994; 71(3-4): 403-6.                                                                   | 1994      |                      |
| Tunisia | Tunisia Vital Registration Death Data 1994 as it appears in United Nations Statistics Division (UNSD). United Nations Demographic Yearbook. New York City, United States: United Nations Statistics Division (UNSD).                                          | 1994      |                      |
| Tunisia | Ministry of Public Health (Tunisia), National Office for Family and Population (Tunisia), League of Arab States. Tunisia Maternal and Child Health Survey 1994-1995.                                                                                          | 1994-1995 |                      |
| Tunisia | Tunisia Vital Registration Death Data 1995 as it appears in United Nations Statistics Division (UNSD). United Nations Demographic Yearbook. New York City, United States: United Nations Statistics Division (UNSD).                                          | 1995      |                      |
| Tunisia | World Health Organization (WHO). Tunisia WHO Leishmaniasis Country Profile.                                                                                                                                                                                   | 1996-2008 | *                    |
| Tunisia | Said Y, Debbeche R, Ben Ali Z, Bouzid K, Trabelsi S, Bouzaidi S, Salem M, Rajhi H, Kouni Chahed M, Najjar T. [Epidemiological, clinical and therapeutic features of hepatocellular carcinoma in cirrhotic patients]. Tunis Med. 2012; 90(6): 468-72.          | 1997-2009 | *                    |
| Tunisia | Tunisia Vital Registration Death Data 1998 as it appears in United Nations Statistics Division (UNSD). United Nations Demographic Yearbook. New York City, United States: United Nations Statistics Division (UNSD).                                          | 1998      |                      |
| Tunisia | Measles Supplementary Immunization Activity Data as provided by the World Health Organization. [Unpublished].                                                                                                                                                 | 1998      |                      |
| Tunisia | United Nations Office on Drugs and Crime (UNODC). United Nations Office on Drugs and Crime Global Study on Homicides 2011. Vienna, Austria: United Nations Office on Drugs and Crime (UNODC), 2011.                                                           | 1998-2002 |                      |



**Web Table 32 - Comprehensive citation list**

| Country | Citation                                                                                                                                                                                                                                                                                                                               | Year*           | New for GBD 2013 (*) |
|---------|----------------------------------------------------------------------------------------------------------------------------------------------------------------------------------------------------------------------------------------------------------------------------------------------------------------------------------------|-----------------|----------------------|
| Tunisia | Curado MP, Edwards B, Shin HR, Storm H, Ferlay J, Heanue M and Boyle P, eds (2007). Cancer Incidence in Five Continents, Vol. IX Periodic Data (electronic version). Lyon, IARC. <a href="http://ci5.iarc.fr">http://ci5.iarc.fr</a>                                                                                                   | 2000            |                      |
| Tunisia | Soltani MS, Bchir A, Amri F, Gueddiche N, Sfar T, Sahloul S, Garbouj M. Epidemiologie des meningites a Haemophilus influenzae en Tunisie. East Mediterr Health J. 2005; 11(1-2): 14-27.                                                                                                                                                | 2000-2001       |                      |
| Tunisia | League of Arab States, National Office for Family and Population, Ministry of Public Health (Tunisia), Pan Arab Project for Family Health (PAPFAM). Tunisia Family Health Survey 2001.                                                                                                                                                 | 2001            |                      |
| Tunisia | Letaief A, Kaabia N, Gaha R, Bousaadia A, Lazrag F, Trabelsi H, Ghannem H, Jemni L. Age-specific seroprevalence of hepatitis a among school children in central Tunisia. Am J Trop Med Hyg. 2005; 73(1): 40-3.                                                                                                                         | 2001-2002       |                      |
| Tunisia | World Health Organization (WHO). Retrospective Measles Data on Supplementary Immunization Activities. Geneva, Switzerland: World Health Organization (WHO).                                                                                                                                                                            | 2001-2002, 2005 |                      |
| Tunisia | World Health Organization (WHO). Tunisia World Health Survey 2003. Geneva, Switzerland: World Health Organization (WHO), 2005.                                                                                                                                                                                                         | 2002            |                      |
| Tunisia | Bahri O, Ezzikouri S, Alaya-Bouafif NB, Iguer F, Feydi AEE, Mestiri H, Benazzouz M, Khalfallah T, Afifi R, Elkihal L, Berkane S, Marchio A, Debzi N, Dejean A, Pineau P, Triki H, Benjelloun S. First multicenter study for risk factors for hepatocellular carcinoma development in North Africa. World J Hepatol. 2011; 3(1): 24-30. | 2002-2005       |                      |
| Tunisia | World Health Organization (WHO). Yellow Fever Reported Cases, WHO Vaccine-Preventable Diseases: Monitoring System. Geneva, Switzerland: World Health Organization (WHO).                                                                                                                                                               | 2003, 2006-2007 |                      |
| Tunisia | Forman D, Bray F, Brewster DH, Gombe Mbalawa C, Kohler B, Piñeros M, Steliarova-Foucher E, Swaminathan R and Ferlay J, eds (2013). Cancer Incidence in Five Continents, Vol. X Summary Database (electronic version). Lyon, IARC. <a href="http://ci5.iarc.fr">http://ci5.iarc.fr</a>                                                  | 2004            |                      |
| Tunisia | Joint United Nations Program on HIV/AIDS (UNAIDS), United Nations Children's Fund (UNICEF), World Health Organization (WHO). Tunisia Epidemiological Fact Sheet on HIV/AIDS and STIs 2004.                                                                                                                                             | 2004            |                      |
| Tunisia | Rezig D, Ouneissa R, Mhiri L, Mejri S, Haddad-Boubaker S, Ben Alaya N, Triki H. [Seroprevalences of hepatitis A and E infections in Tunisia]. Pathol Biol. 2008; 56(3): 148-53.                                                                                                                                                        | 2004-2006       |                      |
| Tunisia | World Health Organization (WHO). Global Status Report on Road Safety 2009. Geneva, Switzerland: World Health Organization (WHO), 2009.                                                                                                                                                                                                 | 2007            |                      |
| Tunisia | Houcine N, Jacques R, Salma F, Anne-Gaëlle D, Amin S, Mohsen H, Hamadi B, Christophe R, Patrice A, Mahjoub A, Caroline S. Seroprevalence of hepatitis E virus infection in rural and urban populations, Tunisia. Clin Microbiol Infect. 2012; 18(5): E119-121.                                                                         | 2007-2008       | *                    |
| Tunisia | Postigo JAR. Leishmaniasis in the World Health Organization Eastern Mediterranean Region. Int J Antimicrob Agents. 2010; S62-65.                                                                                                                                                                                                       | 2008            |                      |
| Tunisia | Hajer S, Neila T, Sondess HF, Fekria O, Nabila A, Mahbouba K, Melika D, Faïda O, Amina B, Raja B, Hedi R, Sadok M, Naima K, Slaheddine F, Taieb M. A lower-cost protocol for sickle cell disease neonatal screening in Tunisia. Ann Saudi Med. 2012; 32(1): 49-52.                                                                     | 2010-2011       | *                    |
| Tunisia | Ministry of Regional Development and Planning (Tunisia), National Institute of Statistics (Tunisia), United Nations Children's Fund (UNICEF). Tunisia Multiple Indicator Cluster Survey 2011-2012. New York, United States: United Nations Children's Fund (UNICEF), 2014.                                                             | 2011-2012       | *                    |

**Web Table 32 - Comprehensive citation list**

| Country | Citation                                                                                                                                                                                                                 | Year*                                                                                                    | New for GBD 2013 (*) |
|---------|--------------------------------------------------------------------------------------------------------------------------------------------------------------------------------------------------------------------------|----------------------------------------------------------------------------------------------------------|----------------------|
| Turkey  | Centre for Research on the Epidemiology of Disasters (CRED). EM-DAT: The OFDA/CRED International Disaster Database. Brussels, Belgium: Catholic University of Leuven.                                                    | 1951-1953, 1956-1957, 1962, 1964, 1966-1972, 1974-1977, 1980-1981, 1983-1986, 1988, 1990-1995, 1998-2012 |                      |
| Turkey  | Say B, Ozand P, Berkel I, Cevik N. Erythrocyte glucose-6-phosphate dehydrogenase deficiency in Turkey. Acta Paediatr Scand. 1965; 319-24.                                                                                | 1963                                                                                                     |                      |
| Turkey  | Turkey Demographic Survey 1966-1967 as it appears in United Nations Statistics Division (UNSD). United Nations Demographic Yearbook. New York City, United States: United Nations Statistics Division (UNSD).            | 1966-1967                                                                                                |                      |
| Turkey  | Turkey Population and Housing Census 1970 as it appears in United Nations Statistics Division (UNSD). United Nations Demographic Yearbook. New York City, United States: United Nations Statistics Division (UNSD).      | 1970                                                                                                     |                      |
| Turkey  | State Institute of Statistics (Turkey). Turkey Population and Housing Census 1975.                                                                                                                                       | 1975                                                                                                     |                      |
| Turkey  | Institute of Population Studies, Hacettepe University (Turkey), International Statistical Institute. Turkey World Fertility Survey 1978. Voorburg, Netherlands: International Statistical Institute.                     | 1978                                                                                                     |                      |
| Turkey  | Turkey Vital Registration - Deaths 1978 ICD8 as it appears in World Health Organization (WHO). WHO Mortality Database Version February 2014. Geneva, Switzerland: World Health Organization (WHO), 2014.                 | 1978                                                                                                     |                      |
| Turkey  | Turkey Vital Registration - Deaths 1979 ICD8 as it appears in World Health Organization (WHO). WHO Mortality Database Version February 2014. Geneva, Switzerland: World Health Organization (WHO), 2014.                 | 1979                                                                                                     |                      |
| Turkey  | Turkey Population and Housing Census 1980 as it appears in United Nations Statistics Division (UNSD). United Nations Demographic Yearbook. New York City, United States: United Nations Statistics Division (UNSD).      | 1980                                                                                                     |                      |
| Turkey  | Institute for Health Metrics and Evaluation (IHME), Joint United Nations Program on HIV/AIDS (UNAIDS). Institute for Health Metrics and Evaluation HIV Mortality Estimates Based on the UNAIDS Spectrum Model Framework. | 1980-2013                                                                                                | *                    |
| Turkey  | United Nations Children's Fund (UNICEF), World Health Organization (WHO). WHO and UNICEF Reported Disease Incidence Time Series - Pertussis. Geneva, Switzerland: World Health Organization (WHO).                       | 1980-2013                                                                                                |                      |
| Turkey  | United Nations Children's Fund (UNICEF), World Health Organization (WHO). WHO and UNICEF Reported Disease Incidence Time Series - Measles. Geneva, Switzerland: World Health Organization (WHO).                         | 1980-2013                                                                                                |                      |
| Turkey  | Turkey Vital Registration - Deaths 1981 ICD8 as it appears in World Health Organization (WHO). WHO Mortality Database Version February 2014. Geneva, Switzerland: World Health Organization (WHO), 2014.                 | 1981                                                                                                     |                      |
| Turkey  | Turkey Vital Registration - Deaths 1982 ICD8 as it appears in World Health Organization (WHO). WHO Mortality Database Version February 2014. Geneva, Switzerland: World Health Organization (WHO), 2014.                 | 1982                                                                                                     |                      |
| Turkey  | Turkey Vital Registration - Deaths 1983 ICD8 as it appears in World Health Organization (WHO). WHO Mortality Database Version February 2014. Geneva, Switzerland: World Health Organization (WHO), 2014.                 | 1983                                                                                                     |                      |
| Turkey  | Institute of Population Studies, Hacettepe University, Turkish Statistical Institute. Turkey Demographic and Health Survey 1983.                                                                                         | 1983                                                                                                     |                      |

**Web Table 32 - Comprehensive citation list**

| Country | Citation                                                                                                                                                                                                                                                    | Year*     | New for GBD 2013 (*) |
|---------|-------------------------------------------------------------------------------------------------------------------------------------------------------------------------------------------------------------------------------------------------------------|-----------|----------------------|
| Turkey  | Turkey Vital Registration - Deaths 1984 ICD8 as it appears in World Health Organization (WHO). WHO Mortality Database Version February 2014. Geneva, Switzerland: World Health Organization (WHO), 2014.                                                    | 1984      |                      |
| Turkey  | Peace Research Institute Oslo (PRIO). Battle Deaths Dataset Version 3, 2009. Oslo, Norway: Peace Research Institute Oslo (PRIO), 2009.                                                                                                                      | 1984-1988 |                      |
| Turkey  | Minnesota Population Center, State Institute of Statistics (Turkey). Turkey Population Census 1985 from the Integrated Public Use Microdata Series, International. [Machine-readable database]. Minneapolis: University of Minnesota, 2012.                 | 1985      |                      |
| Turkey  | Aksu TA, Esen F, Dolunay MS, Alicigüzel Y, Yücel G, Cali S, Baykal Y. Erythrocyte glucose-6-phosphate dehydrogenase (1.1.1.49) deficiency in Antalya province, Turkey: an epidemiologic and biochemical study. <i>Am J Epidemiol.</i> 1990; 131(6): 1094-7. | 1986-1988 |                      |
| Turkey  | Turkey Vital Registration - Deaths 1987 ICD8 as it appears in World Health Organization (WHO). WHO Mortality Database Version February 2014. Geneva, Switzerland: World Health Organization (WHO), 2014.                                                    | 1987      |                      |
| Turkey  | Hacettepe University and Division of Reproductive Health-Centers for Disease Control and Prevention (CDC). (1989) Turkey Family Planning/Maternal and Child Health Survey 1988. Ankara, Turkey, Hacettepe University.                                       | 1988      |                      |
| Turkey  | Turkey Vital Registration - Deaths 1988 ICD8 as it appears in World Health Organization (WHO). WHO Mortality Database Version February 2014. Geneva, Switzerland: World Health Organization (WHO), 2014.                                                    | 1988      |                      |
| Turkey  | Turkey Vital Registration - Deaths 1989 ICD8 as it appears in World Health Organization (WHO). WHO Mortality Database Version February 2014. Geneva, Switzerland: World Health Organization (WHO), 2014.                                                    | 1989      |                      |
| Turkey  | Istanbul University, State Institute of Statistics (Turkey). Turkey Demographic Survey 1989.                                                                                                                                                                | 1989      | *                    |
| Turkey  | Department of Peace and Conflict Research, Uppsala University. UCDP Battle-Related Deaths Database Version 5, 2013. Uppsala, Sweden: Department of Peace and Conflict Research, Uppsala University, 2013.                                                   | 1989-2012 | *                    |
| Turkey  | Department of Peace and Conflict Research, Uppsala University. UCDP One-Sided Violence Database Version 1.4, 2013. Uppsala, Sweden: Department of Peace and Conflict Research, Uppsala University, 2013.                                                    | 1989-1999 | *                    |
| Turkey  | Gürol E, Saban C, Oral O, Cigdem A, Armagan A. Trends in Hepatitis B and Hepatitis C Virus among Blood Donors over 16 Years in Turkey. <i>Eur J Epidemiol.</i> 2006; 21(4): 299-305.                                                                        | 1989-2004 |                      |
| Turkey  | Turkey Vital Registration - Deaths 1990 ICD8 as it appears in World Health Organization (WHO). WHO Mortality Database Version February 2014. Geneva, Switzerland: World Health Organization (WHO), 2014.                                                    | 1990      |                      |
| Turkey  | Minnesota Population Center, State Institute of Statistics (Turkey). Turkey Population Census 1990 from the Integrated Public Use Microdata Series, International. [Machine-readable database]. Minneapolis: University of Minnesota, 2012.                 | 1990      |                      |
| Turkey  | Modell B, Darlison M, Birgens H, Cario H, Faustino P, Giordano PC, Gulbis B, Hopmeier P, Lena-Russo D, Romao L, Theodorsson E. Epidemiology of haemoglobin disorders in Europe: an overview. <i>Scand J Clin Lab Invest.</i> 2007; 67(1): 39-69.            | 1990-2006 |                      |
| Turkey  | Weatherall D. Sickle Cell and Thalassemias Prevalence Data, Personal Correspondence with David Weatherall. [Unpublished].                                                                                                                                   | 1990-2009 |                      |
| Turkey  | Thomas DL, Mahley RW, Badur S, Palaoglu KE, Quinn TC. Epidemiology of hepatitis E virus infection in Turkey. <i>Lancet.</i> 1993; 341(8860): 1561-2.                                                                                                        | 1990-1992 | *                    |

**Web Table 32 - Comprehensive citation list**

| Country | Citation                                                                                                                                                                                                                                                              | Year*     | New for GBD 2013 (*) |
|---------|-----------------------------------------------------------------------------------------------------------------------------------------------------------------------------------------------------------------------------------------------------------------------|-----------|----------------------|
| Turkey  | Thomas DL, Mahley RW, Badur S, Palaoglu E, Quinn TC. The epidemiology of hepatitis C in Turkey. <i>Infection</i> . 1994; 22(6): 411-4.                                                                                                                                | 1990-1992 |                      |
| Turkey  | Centre for Health Informatics and Multiprofessional Education, University College London. <i>Modell's Haemoglobinopathologist's Almanac</i> . London, United Kingdom: Centre for Health Informatics and Multiprofessional Education, University College London, 2008. | 1990-2006 |                      |
| Turkey  | Turkey Vital Registration - Deaths 1991 ICD8 as it appears in World Health Organization (WHO). WHO Mortality Database Version February 2014. Geneva, Switzerland: World Health Organization (WHO), 2014.                                                              | 1991      |                      |
| Turkey  | Baki A, Aynaci M, Köksal I. Prevalence of antibody to hepatitis A virus among children in Trabzon, Turkey. <i>Infection</i> . 1993; 21(2): 132-3.                                                                                                                     | 1991      |                      |
| Turkey  | Turkey Vital Registration - Deaths 1992 ICD8 as it appears in World Health Organization (WHO). WHO Mortality Database Version February 2014. Geneva, Switzerland: World Health Organization (WHO), 2014.                                                              | 1992      |                      |
| Turkey  | Institute of Population Studies, Hacettepe University, Macro International, Inc, Ministry of Health (Turkey). <i>Turkey Demographic and Health Survey 1993</i> . Calverton, United States: Macro International, Inc.                                                  | 1993      |                      |
| Turkey  | Turkey Vital Registration - Deaths 1993 ICD8 as it appears in World Health Organization (WHO). WHO Mortality Database Version February 2014. Geneva, Switzerland: World Health Organization (WHO), 2014.                                                              | 1993      |                      |
| Turkey  | Cetinkaya F, Gürses N, Öztürk F. Hepatitis B seroprevalence among children in a Turkish hospital. <i>J Hosp Infect</i> . 1995; 29(3): 217-9.                                                                                                                          | 1993-1994 |                      |
| Turkey  | Turkey Vital Registration - Deaths 1994 ICD8 as it appears in World Health Organization (WHO). WHO Mortality Database Version February 2014. Geneva, Switzerland: World Health Organization (WHO), 2014.                                                              | 1994      |                      |
| Turkey  | Alacacioglu A, Somali I, Simsek I, Astarcioglu I, Ozkan M, Camci C, Alkis N, Karaoglu A, Tarhan O, Unek T, Yilmaz U. Epidemiology and survival of hepatocellular carcinoma in Turkey: outcome of multicenter study. <i>Jpn J Clin Oncol</i> . 2008; 38(10): 683-8.    | 1994-2007 |                      |
| Turkey  | Uzunaliimoğlu O, Yurdaydin C, Cetinkaya H, Bozkaya H, Sahin T, Colakoğlu S, Tankurt E, Sarioğlu M, Ozenirler S, Akkiz H, Tözün N, Değertekin H, Okten A. Risk factors for hepatocellular carcinoma in Turkey. <i>Dig Dis Sci</i> . 2001; 46(5): 1022-8.               | 1994-1997 |                      |
| Turkey  | Turkey Vital Registration - Deaths 1995 ICD8 as it appears in World Health Organization (WHO). WHO Mortality Database Version February 2014. Geneva, Switzerland: World Health Organization (WHO), 2014.                                                              | 1995      |                      |
| Turkey  | World Health Organization (WHO). <i>Turkey WHO Leishmaniasis Country Profile</i> .                                                                                                                                                                                    | 1995-2007 | *                    |
| Turkey  | Ersoy B, Aydoğan A, Dinçoğuz A, Sinan Meral M, Turul T. The seroprevalence of anti-HAV among 0-16-year-olds referred to pediatric outpatients clinics of a hospital. <i>J Trop Pediatr</i> . 1998; 44(1): 55-6.                                                       | 1995-1997 |                      |
| Turkey  | Berberoglu S. The seroprevalence of hepatitis B, hepatitis C and human immunodeficiency virus infections in paediatric oncology patients in Turkey. <i>Postgrad Med J</i> . 1996; 72(852): 609-11.                                                                    | 1995-1997 |                      |
| Turkey  | Dilek, Demir C, Bay A, Akdeniz H, Öner AF. Seropositivity rates of HBsAg, anti-HCV, anti-HIV and VDRL in blood donors in Eastern Turkey. <i>Turk J Haematol</i> . 2007; 24(1): 4-7.                                                                                   | 1995-2003 |                      |
| Turkey  | Karavelioğlu D, Koçtak ES, Bozkaya H, Uzunaliimoğlu O, Bozdayi AM, Yurdaydin C. Lichen planus and HCV infection in Turkish patients. <i>Turk J Gastroenterol</i> . 2004; 15(3): 133-6.                                                                                | 1995-1996 |                      |

**Web Table 32 - Comprehensive citation list**

| Country | Citation                                                                                                                                                                                                                  | Year*     | New for GBD 2013 (*) |
|---------|---------------------------------------------------------------------------------------------------------------------------------------------------------------------------------------------------------------------------|-----------|----------------------|
| Turkey  | Turkey Vital Registration - Deaths 1996 ICD8 as it appears in World Health Organization (WHO). WHO Mortality Database Version February 2014. Geneva, Switzerland: World Health Organization (WHO), 2014.                  | 1996      |                      |
| Turkey  | Koç A, Kösecik M, Vural H, Erel O, Atas A, Tatli MM. The frequency and etiology of anemia among children 6-16 years of age in the southeast region of Turkey. <i>Turk J Pediatr.</i> 2000; 42(2): 91-5.                   | 1996      |                      |
| Turkey  | Ozyilkan O, Arslan M, Ozyilkan E. Hepatitis B virus and hepatitis C virus infections in Turkish patients with hepatocellular carcinoma. <i>Am J Gastroenterol.</i> 1996; 91(7): 1479-80.                                  | 1996      |                      |
| Turkey  | Kuyucu N, Dökmen A, Yöney A, Teziç T. Seroprevalence of hepatitis B infection in Turkish children. <i>Infection.</i> 1998; 26(5): 317-8.                                                                                  | 1996      |                      |
| Turkey  | Colak D, Ogunc D, Gunseren F, Velipasaoglu S, Aktekin MR, Gültekin M. Seroprevalence of antibodies to hepatitis A and E viruses in pediatric age groups in Turkey. <i>Acta Microbiol Immunol Hung.</i> 2002; 49(1): 93-7. | 1996-1997 |                      |
| Turkey  | Turkey Vital Registration - Deaths 1997 ICD8 as it appears in World Health Organization (WHO). WHO Mortality Database Version February 2014. Geneva, Switzerland: World Health Organization (WHO), 2014.                  | 1997      |                      |
| Turkey  | Department of Peace and Conflict Research, Uppsala University. UCDP Nonstate Conflict Database Version 2.5, 2013. Uppsala, Sweden: Department of Peace and Conflict Research, Uppsala University, 2013.                   | 1997      | *                    |
| Turkey  | Kurçer M, Pehlivan E. Hepatitis B seroprevalence and risk factors in urban areas of Malatya. <i>Turk J Gastroenterol.</i> 2002; 13(1): 1-5.                                                                               | 1997      |                      |
| Turkey  | Nas T, Taner MZ, Yildiz A. Seroprevalence of syphilis, human immunodeficiency virus type-1, and hepatitis B virus infections among pregnant women in Turkey. <i>Int J Gynaecol Obstet.</i> 1999; 66(2): 171-2.            | 1997      |                      |
| Turkey  | Sidal M, Ünüvar E, Oğuz F, Cihan C, Onel D, Badur S. Age-specific seroepidemiology of hepatitis A, B, and E infections among children in Istanbul, Turkey. <i>Eur J Epidemiol.</i> 2001; 17(2): 141-4.                    | 1997-1998 |                      |
| Turkey  | Degertekin H, Tuzcu A, Yalçın K. Horizontal transmission of HBV infection among students in Turkey. <i>Public Health.</i> 2000; 114(5): 411-2.                                                                            | 1997-1999 |                      |
| Turkey  | Institute of Population Studies, Hacettepe University, Macro International, Inc. Turkey Demographic and Health Survey 1998. Calverton, United States: Macro International, Inc.                                           | 1998      |                      |
| Turkey  | Turkey Vital Registration - Deaths 1998 ICD8 as it appears in World Health Organization (WHO). WHO Mortality Database Version February 2014. Geneva, Switzerland: World Health Organization (WHO), 2014.                  | 1998      |                      |
| Turkey  | Kanra G, Tezcan S, Badur S, Turkish National Study Team. Hepatitis B and measles seroprevalence among Turkish children. <i>Turk J Pediatr.</i> 2005; 47(2): 105-10.                                                       | 1998      |                      |
| Turkey  | Doganci L, Haznedaroglu T. Prevalence of hepatitis A, B and C in Turkey. <i>Eur J Clin Microbiol Infect Dis.</i> 1992; 11(7): 661-2.                                                                                      | 1998      |                      |
| Turkey  | Kanra G, Tezcan S, Badur S. Hepatitis A seroprevalence in a random sample of the Turkish population by simultaneous EPI cluster and comparison with surveys in Turkey. <i>Turk J Pediatr.</i> 2002; 44(3): 204-10.        | 1998      |                      |
| Turkey  | Yapicioglu H, Alhan E, Yildizdas D, Yaman A, Bozdemir N. Prevalence of hepatitis A in children and adolescents in Adana, Turkey. <i>Indian Pediatr.</i> 2002; 39(10): 936-41.                                             | 1998      |                      |
| Turkey  | Ungan M, Yaman H, Taheri N. The seroprevalence of specific antibodies to hepatitis A virus in a Turkish population. <i>Eur J Gastroenterol Hepatol.</i> 2002; 14(9): 1033-4.                                              | 1998      |                      |
| Turkey  | Coskun O, Erdem H, Gul HC, Eyigun CP. Changes in hepatitis A prevalence rates between 1998 and 2007 in Eskisehir, Turkey. <i>Int J Infect Dis.</i> 2008; 12(6): e141.                                                     | 1998-2007 |                      |

**Web Table 32 - Comprehensive citation list**

| Country | Citation                                                                                                                                                                                                                                                    | Year*     | New for GBD 2013 (*) |
|---------|-------------------------------------------------------------------------------------------------------------------------------------------------------------------------------------------------------------------------------------------------------------|-----------|----------------------|
| Turkey  | Erden S, Büyükoztürk S, Calangu S, Yılmaz G, Palanduz S, Badur S. A study of serological markers of hepatitis B and C viruses in Istanbul, Turkey. <i>Med Princ Pract.</i> 2003; 12(3): 184-8.                                                              | 1998-2001 |                      |
| Turkey  | Ozsoy MF, Oncul O, Cavuslu S, Erdemoglu A, Emekdas G, Pahsa A. Seroprevalences of hepatitis B and C among health care workers in Turkey. <i>J Viral Hepat.</i> 2003; 10(2): 150-6.                                                                          | 1998-2000 |                      |
| Turkey  | Turkey Vital Registration - Deaths 1999 ICD8 as it appears in World Health Organization (WHO). WHO Mortality Database Version February 2014. Geneva, Switzerland: World Health Organization (WHO), 2014.                                                    | 1999      |                      |
| Turkey  | Sencan I, Sahin I, Kaya D, Oksuz S, Yildirim M. Assessment of HAV and HEV seroprevalence in children living in post-earthquake camps from Düzce, Turkey. <i>Eur J Epidemiol.</i> 2004; 19(5): 461-5.                                                        | 1999      |                      |
| Turkey  | Dikici B, Bosnak M, Haspolat K. The prevalence of anti-HCV seropositivity among children in Turkey. <i>J Clin Virol.</i> 2002; 24(1-2): 135-6.                                                                                                              | 1999      |                      |
| Turkey  | Ozer B, Serin E, Yılmaz U, Gümürdülü Y, Saygili OB, Kayaselçuk F, Boyacıoğlu S. Clinicopathologic features and risk factors for hepatocellular carcinoma: results from a single center in southern Turkey. <i>Turk J Gastroenterol.</i> 2003; 14(2): 85-90. | 1999-2002 |                      |
| Turkey  | Derya A, Necmi A, Emre A, Akgün Y. Decline of maternal hepatitis a antibodies during the first 2 years of life in infants born in Turkey. <i>Am J Trop Med Hyg.</i> 2005; 73(2): 457-9.                                                                     | 1999-2002 |                      |
| Turkey  | Ozdemir O, Arda K, Soylu M, Alyan O, Demir AD, Küçük E. Seroprevalence of hepatitis B and C in subjects admitted to a cardiology clinics in Turkey. <i>Eur J Epidemiol.</i> 2003; 18(3): 255-8.                                                             | 1999-2001 |                      |
| Turkey  | Turkey Vital Registration - Deaths 2000 ICD8 as it appears in World Health Organization (WHO). WHO Mortality Database Version February 2014. Geneva, Switzerland: World Health Organization (WHO), 2014.                                                    | 2000      |                      |
| Turkey  | Minnesota Population Center, State Institute of Statistics (Turkey). Turkey Population Census 2000 from the Integrated Public Use Microdata Series, International. [Machine-readable database]. Minneapolis: University of Minnesota, 2012.                 | 2000      |                      |
| Turkey  | Gunay T, Kilic B, Keskinoglu P, Kayser Konakci S, Pabuccuoğlu O. Infant Mortality Rates in Narlıdere District, Turkey (1999 to 2001): Trends in Rates and Risk Factors. <i>Turkish Journal of Public Health.</i> 2009; 6(1): 9-18.                          | 2000      |                      |
| Turkey  | Curado MP, Edwards B, Shin HR, Storm H, Ferlay J, Heanue M and Boyle P, eds (2007). <i>Cancer Incidence in Five Continents, Vol. IX Periodic Data (electronic version)</i> . Lyon, IARC. <a href="http://ci5.iarc.fr">http://ci5.iarc.fr</a>                | 2000      |                      |
| Turkey  | Eker A, Tansel O, Kunduracılar H, Tokuç B, Yuluğkural Z, Yüksel P. [Hepatitis E virus epidemiology in adult population in Edirne province, Turkey]. <i>Mikrobiyol Bul.</i> 2009; 43(2): 251-8.                                                              | 2000      |                      |
| Turkey  | Mert A, Altintas A, Ozaras R, Bilir M, Tabak F, Ozturk R, Siva A, Aktuglu Y, Senturk H. Prevalence of serum antibodies to hepatitis C virus in patients with multiple sclerosis. <i>Mult Scler.</i> 2000; 6(5): 364.                                        | 2000      |                      |
| Turkey  | Keskin N, Ozdes I, Keskin A, Acikbas I, Bagci H. Incidence and molecular analysis of glucose-6-phosphate dehydrogenase deficiency in the province of Denizli, Turkey. <i>Med Sci Monit.</i> 2002; 8(6): CR453-456.                                          | 2000-2002 |                      |
| Turkey  | Tosun S, Ertan P, Kasirga E, Atman U. Changes in seroprevalence of hepatitis A in children and adolescents in Manisa, Turkey. <i>Pediatr Int.</i> 2004; 46(6): 669-72.                                                                                      | 2000-2001 |                      |
| Turkey  | Cesur S, Akin K, Doğaroğlu I, Birengel S, Balık I. [Hepatitis A and hepatitis E seroprevalence in adults in the Ankara area]. <i>Mikrobiyol Bul.</i> 2002; 36(1): 79-83.                                                                                    | 2000-2001 |                      |



**Web Table 32 - Comprehensive citation list**

| Country | Citation                                                                                                                                                                                                                                                       | Year*      | New for GBD 2013 (*) |
|---------|----------------------------------------------------------------------------------------------------------------------------------------------------------------------------------------------------------------------------------------------------------------|------------|----------------------|
| Turkey  | Erdogan MS, Otkun M, Tatman-Otkun M, Akata F, Türe M. The epidemiology of hepatitis a virus infection in children, in Edirne, Turkey. <i>Eur J Epidemiol.</i> 2004; 19(3): 267-73.                                                                             | 2000-2002  |                      |
| Turkey  | Turkey Vital Registration - Deaths 2001 ICD8 as it appears in World Health Organization (WHO). WHO Mortality Database Version February 2014. Geneva, Switzerland: World Health Organization (WHO), 2014.                                                       | 2001       |                      |
| Turkey  | Demir A, Kalyoncu A, Selcuk T, Artvinli M, Sahin A. Prevalence of Asthma, Allergy, and Respiratory Symptoms in Hasacelebi/Hekimhan/Malatya in Eastern Turkey. <i>Turkish Respiratory Journal.</i> 2001; 2(2): 29-34.                                          | 2001       |                      |
| Turkey  | Ertekin V, Selimođlu MA, Altinkaynak S. Sero-epidemiology of hepatitis B infection in an urban paediatric population in Turkey. <i>Public Health.</i> 2003; 117(1): 49-53.                                                                                     | 2001       |                      |
| Turkey  | Turkish Statistical Institute. Turkey Road Traffic Accident Statistics 2010. Ankara, Turkey: Turkish Statistical Institute, 2011.                                                                                                                              | 2001-2010  |                      |
| Turkey  | Bayan K, Yilmaz S, Tuzun Y, Yildirim Y. Epidemiological and clinical aspects of liver cirrhosis in adult patients living in Southeastern Anatolia: leading role of HBV in 505 cases. <i>Hepatogastroenterology.</i> 2007; 54(80): 2198-202.                    | 2001-2006  |                      |
| Turkey  | Atay E, Bozaykut A, Ipek IO. Glucose-6-phosphate Dehydrogenase Deficiency in Neonatal Indirect Hyperbilirubinemia. <i>J Trop Pediatr.</i> 2006; 52(1): 56-8.                                                                                                   | 2001-2004  |                      |
| Turkey  | Caksen H, Odabas D, Kse D, Sar S, Tuncer O, Atas B. Measles is still a severe problem in Eastern Turkey. <i>J Med Assoc Thai.</i> 2004; 87(4): 386-8.                                                                                                         | 2001-2002  |                      |
| Turkey  | Atabek ME, Fyndyk D, Gulyuz A, Erkul I. Prevalence of anti-HAV and anti-HEV antibodies in Konya, Turkey. <i>Health Policy.</i> 2004; 67(3): 265-9.                                                                                                             | 2001-2002  |                      |
| Turkey  | Tosun SY, Kasirga E, Ertan P, Aksu S. Evidence against the fecal-oral route of transmission for <i>Helicobacter pylori</i> infection in childhood. <i>Med Sci Monit.</i> 2003; 9(11): CR489-492.                                                               | 2001-2002  |                      |
| Turkey  | Akbayir N, Gkdemir G, Mansur T, Skmen M, Gndüz S, Alkim C, Barutcuođlu B, Erdem L. Is there any relationship between hepatitis C virus and vitiligo?. <i>J Clin Gastroenterol.</i> 2004; 38(9): 815-7.                                                      | 2001-2003  |                      |
| Turkey  | Atabek ME, Kart H, Erkul I. Prevalence of hepatitis A, B, C and E virus in adolescents with type-1 diabetes mellitus. <i>Int J Adolesc Med Health.</i> 2003; 15(2): 133-7.                                                                                     | 2001, 2003 |                      |
| Turkey  | Turkey Vital Registration - Deaths 2002 ICD8 as it appears in World Health Organization (WHO). WHO Mortality Database Version February 2014. Geneva, Switzerland: World Health Organization (WHO), 2014.                                                       | 2002       |                      |
| Turkey  | Vancelik S, Guraksin A, Alp H. Hepatitis A seroepidemiology in Eastern Turkey. <i>East Afr Med J.</i> 2006; 83(2): 86-90.                                                                                                                                      | 2002       |                      |
| Turkey  | Demirel Y, Duran B, Toktamis A, Erden O, Cetin M. Seroprevalence of syphilis, hepatitis B and C, and human immunodeficiency virus infections among women. <i>Saudi Med J.</i> 2004; 25(12): 2037-8.                                                            | 2002       |                      |
| Turkey  | Arslantaş D, Ozbabalik D, Metintaş S, Ozkan S, Kalyoncu C, Ozdemir G, Arslantas A. Prevalence of dementia and associated risk factors in Middle Anatolia, Turkey. <i>J Clin Neurosci.</i> 2009; 16(11): 1455-9.                                                | 2002-2004  |                      |
| Turkey  | Demirtürk N, Demirdal T, Toprak D, Altindiş M, Aktepe OC. Hepatitis B and C virus in West-Central Turkey: seroprevalence in healthy individuals admitted to a university hospital for routine health checks. <i>Turk J Gastroenterol.</i> 2006; 17(4): 267-72. | 2002-2004  |                      |
| Turkey  | Baskent University, Ministry of Health (Turkey), State Institute of Statistics (Turkey). Turkey Verbal Autopsy Survey 2003. [Unpublished].                                                                                                                     | 2003       |                      |

**Web Table 32 - Comprehensive citation list**

| Country | Citation                                                                                                                                                                                                                                                  | Year*     | New for GBD 2013 (*) |
|---------|-----------------------------------------------------------------------------------------------------------------------------------------------------------------------------------------------------------------------------------------------------------|-----------|----------------------|
| Turkey  | Turkey Vital Registration - Deaths 2003 ICD8 as it appears in World Health Organization (WHO). WHO Mortality Database Version February 2014. Geneva, Switzerland: World Health Organization (WHO), 2014.                                                  | 2003      |                      |
| Turkey  | Akgün S, Çolak M, Bakar C. Identifying and verifying causes of death in Turkey: National verbal autopsy survey. Public Health. 2012; 126(2): 150-8.                                                                                                       | 2003      | *                    |
| Turkey  | Karabay O, Serin E, Tamer A, Gökdoğan F, Alpteker H, Özcan A, Gündüz H. Hepatitis B carriage and Brucella seroprevalence in urban and rural areas of Bolu province of Turkey: a prospective epidemiologic study. Turk J Gastroenterol. 2004; 15(1): 11-3. | 2003      |                      |
| Turkey  | Kaya AD, Öztürk CE, Yavuz T, Özaydın C, Bahcebasi T. Changing patterns of hepatitis A and E sero-prevalences in children after the 1999 earthquakes in Düzce, Turkey. J Paediatr Child Health. 2008; 44(4): 205-7.                                        | 2003      |                      |
| Turkey  | Soysal A, Gökçe I, Pehlivan T, Bakır M. Interchangeability of a hepatitis A vaccine second dose: Avaxim 80 following a first dose of Vaqta 25 or Havrix 720 in children in Turkey. Eur J Pediatr. 2007; 166(6): 533-9.                                    | 2003      |                      |
| Turkey  | Mehmet D, Meliksah E, Serif Y, Gunay S, Tuncer O, Zeynep S. Prevalence of hepatitis B infection in the southeastern region of Turkey: comparison of risk factors for HBV infection in rural and urban areas. Jpn J Infect Dis. 2005; 58(1): 15-9.         | 2003      |                      |
| Turkey  | Institute of Population Studies, Hacettepe University, Ministry of Health (Turkey). Turkey Demographic and Health Survey 2003-2004. Ankara, Turkey: Institute of Population Studies, Hacettepe University.                                                | 2003-2004 |                      |
| Turkey  | Oncu S, Oncu S, Sakarya S. Hepatitis A and B seropositivity among medical students. Health Policy. 2005; 74(1): 39-45.                                                                                                                                    | 2003-2004 |                      |
| Turkey  | Egemen A, Yılmaz O, Akil I, Altuğlu I. Evaluation of association between hepatitis A and Helicobacter pylori infections and routes of transmission. Turk J Pediatr. 2006; 48(2): 135-9.                                                                   | 2003-2005 |                      |
| Turkey  | World Health Organization (WHO). Retrospective Measles Data on Supplementary Immunization Activities. Geneva, Switzerland: World Health Organization (WHO).                                                                                               | 2003-2005 |                      |
| Turkey  | Turkey Vital Registration - Deaths 2004 ICD8 as it appears in World Health Organization (WHO). WHO Mortality Database Version February 2014. Geneva, Switzerland: World Health Organization (WHO), 2014.                                                  | 2004      |                      |
| Turkey  | Olmez S. Yoğun Bakım Yatırılan Sirozlu Olgularda Prognozu Belirleyen Risk Faktörleri [Prognostic Risk Factors in Cirrhotic Patients Admitted to Intensive Care] [dissertation]. Balçalı, Turkey: Çukurova University, 2008.                               | 2004-2006 |                      |
| Turkey  | Turan Y. Prevalence of erythrocyte glucose-6-phosphate dehydrogenase (G6PD) deficiency in the population of western Turkey. Arch Med Res. 2006; 37(7): 880-2.                                                                                             | 2004-2006 |                      |
| Turkey  | Turkey Vital Registration - Deaths 2005 ICD8 as it appears in World Health Organization (WHO). WHO Mortality Database Version February 2014. Geneva, Switzerland: World Health Organization (WHO), 2014.                                                  | 2005      |                      |
| Turkey  | Türkyılmaz AS, Koc I, Schumacher R, Campbell OMR. The Turkey national maternal mortality study. Eur J Contracept Reprod Health Care. 2009; 14(1): 75-82.                                                                                                  | 2005      |                      |
| Turkey  | EUVAC-NET. EUVAC-NET Measles Surveillance Report 2005. Stockholm, Sweden: European Centre for Disease Prevention and Control, 2006.                                                                                                                       | 2005      |                      |



**Web Table 32 - Comprehensive citation list**

| Country | Citation                                                                                                                                                                                                                                                                                                                                                                              | Year*           | New for GBD 2013 (*) |
|---------|---------------------------------------------------------------------------------------------------------------------------------------------------------------------------------------------------------------------------------------------------------------------------------------------------------------------------------------------------------------------------------------|-----------------|----------------------|
| Turkey  | Kaya D, Guler E, Ekerbicer HC, Dilber C, Karabiber H, Guler S, Davutoglu M, Ciragil P. Hepatitis A seroprevalence and its relationship with environmental factors in children of different age groups in Kahramanmaraş, Eastern Mediterranean region of Turkey. <i>J Viral Hepat.</i> 2007; 14(12): 830-4.                                                                            | 2005            |                      |
| Turkey  | Ceyhan M, Yildirim I, Secmeer G, Balmer P, Borrow R, Gray S, Dikici B, Turgut M, Kurt N, Aydogan A, Ecevit C, Anlar Y, Gulumser O, Tanir G, Salman N, Gurler N, Hatipoglu N, Camcioglu Y, Hacimustafaoglu M, Celebi S, Coskun Y, Alhan E, Celik U, G. A prospective study of etiology of childhood acute bacterial meningitis, Turkey. <i>Emerg Infect Dis.</i> 2008; 14(7): 1089-96. | 2005-2006       |                      |
| Turkey  | World Health Organization (WHO). Yellow Fever Reported Cases, WHO Vaccine-Preventable Diseases: Monitoring System. Geneva, Switzerland: World Health Organization (WHO).                                                                                                                                                                                                              | 2005-2006, 2009 |                      |
| Turkey  | Gurvit H, Emre M, Tinaz S, Bilgic B, Hanagasi H, Sahin H, Gurol E, Kvaloy JT, Harmanci H. The prevalence of dementia in an urban Turkish population. <i>Am J Alzheimers Dis Other Demen.</i> 2008; 23(1): 67-76.                                                                                                                                                                      | 2005-2007       |                      |
| Turkey  | Ministry of Health (Turkey). Turkey Infectious Disease Registration System 2005-2012. [Unpublished].                                                                                                                                                                                                                                                                                  | 2005-2011       | *                    |
| Turkey  | Kangin M, Turhanoglu M, Gulsun S, Cakabay B. Seroprevalence of Hepatitis B and C among Children in Endemic Areas of Turkey. <i>Hepat Mon.</i> 2010; 10(1): 36-41.                                                                                                                                                                                                                     | 2005-2008       |                      |
| Turkey  | Ceyhan M, Yildirim I, Kurt N, Uysal G, Dikici B, Ecevit C, Aydogan A, Koc A, Yasa O, Köseoğlu M, Onal K, Hacimustafaoglu M, Celebi S. Differences in hepatitis A seroprevalence among geographical regions in Turkey: a need for regional vaccination recommendations. <i>J Viral Hepat.</i> 2008; 69-72.                                                                             | 2005-2006       |                      |
| Turkey  | Turkey Vital Registration - Deaths 2006 ICD8 as it appears in World Health Organization (WHO). WHO Mortality Database Version February 2014. Geneva, Switzerland: World Health Organization (WHO), 2014.                                                                                                                                                                              | 2006            |                      |
| Turkey  | Forman D, Bray F, Brewster DH, Gombe Mbalawa C, Kohler B, Piñeros M, Steliarova-Foucher E, Swaminathan R and Ferlay J, eds (2013). Cancer Incidence in Five Continents, Vol. X Summary Database (electronic version). Lyon, IARC. <a href="http://ci5.iarc.fr">http://ci5.iarc.fr</a>                                                                                                 | 2006            |                      |
| Turkey  | Izmir Cancer Registry. Turkey - Izmir Cancer Registry Incidence 2006.                                                                                                                                                                                                                                                                                                                 | 2006            |                      |
| Turkey  | Izmir Cancer Registry (KIDEM). Turkey - Izmir Cancer Registry Incidence 2006.                                                                                                                                                                                                                                                                                                         | 2006            |                      |
| Turkey  | Akcam FZ, Uskun E, Avsar K, Songur Y. Hepatitis B virus and hepatitis C virus seroprevalence in rural areas of the southwestern region of Turkey. <i>Int J Infect Dis.</i> 2009; 13(2): 274-84.                                                                                                                                                                                       | 2006-2007       |                      |
| Turkey  | Yildirim B, Barut S, Bulut Y, Yenişehirli G, Ozdemir M, Cetin I, Etikan I, Akbaş A, Atiş O, Ozyurt H, Sahin S. Seroprevalence of hepatitis B and C viruses in the province of Tokat in the Black Sea region of Turkey: A population-based study. <i>Turk J Gastroenterol.</i> 2009; 20(1): 27-30.                                                                                     | 2006-2007       |                      |
| Turkey  | Turkey Vital Registration - Deaths 2007 ICD8 as it appears in World Health Organization (WHO). WHO Mortality Database Version February 2014. Geneva, Switzerland: World Health Organization (WHO), 2014.                                                                                                                                                                              | 2007            |                      |
| Turkey  | Cancer Control Department, Ministry of Health (Turkey). Turkey Active Cancer Registration System 8 Provinces 2007. Ankara, Turkey: Cancer Control Department, Ministry of Health (Turkey). [Unpublished].                                                                                                                                                                             | 2007            |                      |
| Turkey  | Cancer Control Department, Ministry of Health (Turkey). Turkey Active Cancer Registration System 8 Provinces Incidence 2007. [Unpublished].                                                                                                                                                                                                                                           | 2007            |                      |

**Web Table 32 - Comprehensive citation list**

| Country      | Citation                                                                                                                                                                                                                                                                                         | Year*     | New for GBD 2013 (*) |
|--------------|--------------------------------------------------------------------------------------------------------------------------------------------------------------------------------------------------------------------------------------------------------------------------------------------------|-----------|----------------------|
| Turkey       | Institute of Population Studies, Hacettepe University, Ministry of Health (Turkey), State Planning Organization (Turkey), Turkish Statistical Institute. Turkey Demographic and Health Survey 2008. Ankara, Turkey: Institute of Population Studies, Hacettepe University.                       | 2008      | *                    |
| Turkey       | Turkey Vital Registration - Deaths 2008 ICD8 as it appears in World Health Organization (WHO). WHO Mortality Database Version February 2014. Geneva, Switzerland: World Health Organization (WHO), 2014.                                                                                         | 2008      |                      |
| Turkey       | Cancer Control Department, Ministry of Health (Turkey). Turkey Active Cancer Registration System 9 Provinces 2008. Ankara, Turkey: Cancer Control Department, Ministry of Health (Turkey). [Unpublished].                                                                                        | 2008      |                      |
| Turkey       | Cancer Control Department, Ministry of Health (Turkey). Turkey Active Cancer Registration System 9 Provinces Incidence 2008. [Unpublished].                                                                                                                                                      | 2008      |                      |
| Turkey       | Kurugol Z, Aslan A, Turkoglu E, Koturoglu G. Changing epidemiology of hepatitis A infection in Izmir, Turkey. Vaccine. 2011; 29(37): 6259-61.                                                                                                                                                    | 2008      |                      |
| Turkey       | Abu-Raddad LJ, Akala FA, Semini I, Riedner G, Wilson D, Tawil O, World Bank. Characterizing the HIV/AIDS Epidemic in the Middle East and North Africa. Washington DC, United States: World Bank, 2010.                                                                                           | 2008-2009 |                      |
| Turkey       | Turkish Statistical Institute. Turkey Vital Registration - Deaths 2009-2010.                                                                                                                                                                                                                     | 2009-2010 |                      |
| Turkey       | Turkish Statistical Institute. Turkey Vital Registration - Deaths 2009-2011. [Unpublished].                                                                                                                                                                                                      | 2009-2011 | *                    |
| Turkey       | European Renal Association-European Dialysis and Transplant Association (ERA-EDTA). European Renal Association-European Dialysis and Transplant Association Registry Annual Report 2010. Parma, Italy: European Renal Association-European Dialysis and Transplant Association (ERA-EDTA), 2012. | 2010      | *                    |
| Turkey       | EUVAC-NET. EUVAC-NET Measles Surveillance Report 2010. Stockholm, Sweden: European Centre for Disease Prevention and Control, 2011.                                                                                                                                                              | 2010      |                      |
| Turkey       | Turkish Statistical Institute. Turkey Causes of Death Statistics 2010-2012. Ankara, Turkey: Turkish Statistical Institute.                                                                                                                                                                       | 2010-2012 | *                    |
| Turkey       | Cevahir N, Demir M, Bozkurt AI, Ergin A, Kaleli I. Seroprevalence of Hepatitis E virus among primary school children. Pak J Med Sci. 2013; 29(2): 629-32.                                                                                                                                        | 2010-2011 | *                    |
| Turkey       | Istanbul University, Ministry of Health (Turkey), Turkish Statistical Institute. Turkey Infant and Under-5 Mortality Survey 2011.                                                                                                                                                                | 2011      | *                    |
| Turkey       | Onat A, Aydın M, Köroğlu B, Örnek E, Altay S, Çelik E, Karagöz A, Pfizer, Turkish Society of Cardiology. TARS Survey 2011: mortality and performance in the long-term follow-up. Turk Kardiyol Dern Ars. 2012; 40(2): 117-121.                                                                   | 2011      | *                    |
| Turkey       | European Renal Association-European Dialysis and Transplant Association (ERA-EDTA). European Renal Association-European Dialysis and Transplant Association Registry Annual Report 2011. Parma, Italy: European Renal Association-European Dialysis and Transplant Association (ERA-EDTA), 2013. | 2011      | *                    |
| Turkmenistan | Institute for Health Metrics and Evaluation (IHME), Joint United Nations Program on HIV/AIDS (UNAIDS). Institute for Health Metrics and Evaluation HIV Mortality Estimates Based on the UNAIDS Spectrum Model Framework.                                                                         | 1980-2013 | *                    |
| Turkmenistan | Turkmenistan Vital Registration - Deaths 1981 ICD9 as it appears in World Health Organization (WHO). WHO Mortality Database Version February 2014. Geneva, Switzerland: World Health Organization (WHO), 2014.                                                                                   | 1981      |                      |

**Web Table 32 - Comprehensive citation list**

| Country      | Citation                                                                                                                                                                                                                                                      | Year*     | New for GBD 2013 (*) |
|--------------|---------------------------------------------------------------------------------------------------------------------------------------------------------------------------------------------------------------------------------------------------------------|-----------|----------------------|
| Turkmenistan | Turkmenistan Vital Registration - Deaths 1982 ICD9 as it appears in World Health Organization (WHO). WHO Mortality Database Version February 2014. Geneva, Switzerland: World Health Organization (WHO), 2014.                                                | 1982      |                      |
| Turkmenistan | Turkmenistan Vital Registration - Deaths 1985 ICD9 as it appears in World Health Organization (WHO). WHO Mortality Database Version February 2014. Geneva, Switzerland: World Health Organization (WHO), 2014.                                                | 1985      |                      |
| Turkmenistan | Turkmenistan Vital Registration - Deaths 1986 ICD9 as it appears in World Health Organization (WHO). WHO Mortality Database Version February 2014. Geneva, Switzerland: World Health Organization (WHO), 2014.                                                | 1986      |                      |
| Turkmenistan | Turkmenistan Vital Registration - Deaths 1987 ICD9 as it appears in World Health Organization (WHO). WHO Mortality Database Version February 2014. Geneva, Switzerland: World Health Organization (WHO), 2014.                                                | 1987      |                      |
| Turkmenistan | Turkmenistan Vital Registration - Deaths 1988 ICD9 as it appears in World Health Organization (WHO). WHO Mortality Database Version February 2014. Geneva, Switzerland: World Health Organization (WHO), 2014.                                                | 1988      |                      |
| Turkmenistan | Turkmenistan Vital Registration - Deaths 1989 ICD9 as it appears in World Health Organization (WHO). WHO Mortality Database Version February 2014. Geneva, Switzerland: World Health Organization (WHO), 2014.                                                | 1989      |                      |
| Turkmenistan | Turkmenistan Vital Registration - Deaths 1990 ICD9 as it appears in World Health Organization (WHO). WHO Mortality Database Version February 2014. Geneva, Switzerland: World Health Organization (WHO), 2014.                                                | 1990      |                      |
| Turkmenistan | United Nations Children's Fund (UNICEF), World Health Organization (WHO). WHO and UNICEF Reported Disease Incidence Time Series - Pertussis. Geneva, Switzerland: World Health Organization (WHO).                                                            | 1990-2013 |                      |
| Turkmenistan | United Nations Children's Fund (UNICEF), World Health Organization (WHO). WHO and UNICEF Reported Disease Incidence Time Series - Measles. Geneva, Switzerland: World Health Organization (WHO).                                                              | 1990-2013 |                      |
| Turkmenistan | Centre for Health Informatics and Multiprofessional Education, University College London. Modell's Haemoglobinopathologist's Almanac. London, United Kingdom: Centre for Health Informatics and Multiprofessional Education, University College London, 2008. | 1990-2003 |                      |
| Turkmenistan | Turkmenistan Vital Registration - Deaths 1991 ICD9 as it appears in World Health Organization (WHO). WHO Mortality Database Version February 2014. Geneva, Switzerland: World Health Organization (WHO), 2014.                                                | 1991      |                      |
| Turkmenistan | Turkmenistan Vital Registration - Deaths 1992 ICD9 as it appears in World Health Organization (WHO). WHO Mortality Database Version February 2014. Geneva, Switzerland: World Health Organization (WHO), 2014.                                                | 1992      |                      |
| Turkmenistan | Turkmenistan Vital Registration - Deaths 1993 ICD9 as it appears in World Health Organization (WHO). WHO Mortality Database Version February 2014. Geneva, Switzerland: World Health Organization (WHO), 2014.                                                | 1993      |                      |
| Turkmenistan | Turkmenistan Vital Registration - Deaths 1994 ICD9 as it appears in World Health Organization (WHO). WHO Mortality Database Version February 2014. Geneva, Switzerland: World Health Organization (WHO), 2014.                                                | 1994      |                      |
| Turkmenistan | Turkmenistan Vital Registration - Deaths 1995 ICD9 as it appears in World Health Organization (WHO). WHO Mortality Database Version February 2014. Geneva, Switzerland: World Health Organization (WHO), 2014.                                                | 1995      |                      |

**Web Table 32 - Comprehensive citation list**

| Country      | Citation                                                                                                                                                                                                                                                                   | Year*                                 | New for GBD 2013 (*) |
|--------------|----------------------------------------------------------------------------------------------------------------------------------------------------------------------------------------------------------------------------------------------------------------------------|---------------------------------------|----------------------|
| Turkmenistan | United Nations Office on Drugs and Crime (UNODC). United Nations Office on Drugs and Crime Global Study on Homicides 2011. Vienna, Austria: United Nations Office on Drugs and Crime (UNODC), 2011.                                                                        | 1995-2006                             |                      |
| Turkmenistan | Turkmenistan Vital Registration - Deaths 1996 ICD9 as it appears in World Health Organization (WHO). WHO Mortality Database Version February 2014. Geneva, Switzerland: World Health Organization (WHO), 2014.                                                             | 1996                                  |                      |
| Turkmenistan | Turkmenistan Vital Registration - Deaths 1997 ICD9 as it appears in World Health Organization (WHO). WHO Mortality Database Version February 2014. Geneva, Switzerland: World Health Organization (WHO), 2014.                                                             | 1997                                  |                      |
| Turkmenistan | Turkmenistan Vital Registration - Deaths 1998 ICD9 as it appears in World Health Organization (WHO). WHO Mortality Database Version February 2014. Geneva, Switzerland: World Health Organization (WHO), 2014.                                                             | 1998                                  |                      |
| Turkmenistan | Turkmenistan Vital Registration Death Data 1999 as it appears in TransMonEE 2013 Database, UNICEF Regional Office for CEE/CIS.                                                                                                                                             | 1999                                  |                      |
| Turkmenistan | World Health Organization (WHO). Yellow Fever Reported Cases, WHO Vaccine-Preventable Diseases: Monitoring System. Geneva, Switzerland: World Health Organization (WHO).                                                                                                   | 1999, 2001-2004, 2006                 |                      |
| Turkmenistan | Centre for Research on the Epidemiology of Disasters (CRED). EM-DAT: The OFDA/CRED International Disaster Database. Brussels, Belgium: Catholic University of Leuven.                                                                                                      | 2000                                  |                      |
| Turkmenistan | Gurbansoltan Eje Clinical Research Center for Maternal and Child Health (GECRCMCH), Macro International, Inc, Ministry of Health and Medical Industry (Turkmenistan). Turkmenistan Demographic and Health Survey 2000. Calverton, United States: Macro International, Inc. | 2000                                  |                      |
| Turkmenistan | Turkmenistan Vital Registration Death Data 2000 as it appears in TransMonEE 2013 Database, UNICEF Regional Office for CEE/CIS.                                                                                                                                             | 2000                                  |                      |
| Turkmenistan | Turkmenistan Vital Registration Death Data 2001 as it appears in TransMonEE 2013 Database, UNICEF Regional Office for CEE/CIS.                                                                                                                                             | 2001                                  |                      |
| Turkmenistan | Turkmenistan Vital Registration Death Data 2002 as it appears in TransMonEE 2013 Database, UNICEF Regional Office for CEE/CIS.                                                                                                                                             | 2002                                  |                      |
| Turkmenistan | Turkmenistan Vital Registration Death Data 2003 as it appears in TransMonEE 2013 Database, UNICEF Regional Office for CEE/CIS.                                                                                                                                             | 2003                                  |                      |
| Turkmenistan | Turkmenistan Vital Registration Death Data 2004 as it appears in TransMonEE 2013 Database, UNICEF Regional Office for CEE/CIS.                                                                                                                                             | 2004                                  |                      |
| Turkmenistan | Turkmenistan Vital Registration Death Data 2005 as it appears in TransMonEE 2013 Database, UNICEF Regional Office for CEE/CIS.                                                                                                                                             | 2005                                  |                      |
| Turkmenistan | Turkmenistan Vital Registration Death Data 2006 as it appears in TransMonEE 2013 Database, UNICEF Regional Office for CEE/CIS.                                                                                                                                             | 2006                                  |                      |
| Turkmenistan | World Health Organization (WHO). Retrospective Measles Data on Supplementary Immunization Activities. Geneva, Switzerland: World Health Organization (WHO).                                                                                                                | 2007                                  |                      |
| Tuvalu       | Centre for Research on the Epidemiology of Disasters (CRED). EM-DAT: The OFDA/CRED International Disaster Database. Brussels, Belgium: Catholic University of Leuven.                                                                                                      | 1972                                  |                      |
| Tuvalu       | United Nations Children's Fund (UNICEF), World Health Organization (WHO). WHO and UNICEF Reported Disease Incidence Time Series - Pertussis. Geneva, Switzerland: World Health Organization (WHO).                                                                         | 1980-1989, 1991-1997, 1999, 2001-2013 |                      |
| Tuvalu       | United Nations Children's Fund (UNICEF), World Health Organization (WHO). WHO and UNICEF Reported Disease Incidence Time Series - Measles. Geneva, Switzerland: World Health Organization (WHO).                                                                           | 1980-1989, 1991-1997, 1999, 2001-2013 |                      |
| Tuvalu       | Measles Supplementary Immunization Activity Data as provided by the World Health Organization. [Unpublished].                                                                                                                                                              | 1998                                  |                      |
| Tuvalu       | World Health Organization (WHO). Retrospective Measles Data on Supplementary Immunization Activities. Geneva, Switzerland: World Health Organization (WHO).                                                                                                                | 2005                                  |                      |

**Web Table 32 - Comprehensive citation list**

| Country | Citation                                                                                                                                                                                                                                                      | Year*                                             | New for GBD 2013 (*) |
|---------|---------------------------------------------------------------------------------------------------------------------------------------------------------------------------------------------------------------------------------------------------------------|---------------------------------------------------|----------------------|
| Uganda  | Williams EH, Hayes RJ, Smith PG. Admissions to a rural hospital in the West Nile District of Uganda over a 27 year period. <i>J Trop Med Hyg.</i> 1986; 89(4): 193-211.                                                                                       | 1951-1978                                         |                      |
| Uganda  | Luttrell V, Lea C. Glucose-6-phosphate dehydrogenase deficiency in East Africans. <i>East Afr Med J.</i> 1965; 313-5.                                                                                                                                         | 1963-1965                                         |                      |
| Uganda  | Lothe F. Erythrocyte glucose-6-phosphate dehydrogenase deficiency in Uganda. <i>Nature.</i> 1967; 215(5098): 299-300.                                                                                                                                         | 1965-1967                                         |                      |
| Uganda  | Centre for Research on the Epidemiology of Disasters (CRED). EM-DAT: The OFDA/CRED International Disaster Database. Brussels, Belgium: Catholic University of Leuven.                                                                                         | 1966, 1994, 1997, 1999-2003, 2006-2008, 2010-2013 |                      |
| Uganda  | Ministry of Planning and Economic Development (Uganda). Uganda Population and Housing Census 1969.                                                                                                                                                            | 1969                                              |                      |
| Uganda  | Peace Research Institute Oslo (PRIO). Battle Deaths Dataset Version 3, 2009. Oslo, Norway: Peace Research Institute Oslo (PRIO), 2009.                                                                                                                        | 1971-1988                                         |                      |
| Uganda  | Institute for Health Metrics and Evaluation (IHME), Joint United Nations Program on HIV/AIDS (UNAIDS). Institute for Health Metrics and Evaluation HIV Mortality Estimates Based on the UNAIDS Spectrum Model Framework.                                      | 1980-2013                                         | *                    |
| Uganda  | United Nations Children's Fund (UNICEF), World Health Organization (WHO). WHO and UNICEF Reported Disease Incidence Time Series - Pertussis. Geneva, Switzerland: World Health Organization (WHO).                                                            | 1980-1983, 1988-1990, 1998-1999, 2005             |                      |
| Uganda  | United Nations Children's Fund (UNICEF), World Health Organization (WHO). WHO and UNICEF Reported Disease Incidence Time Series - Measles. Geneva, Switzerland: World Health Organization (WHO).                                                              | 1980-1984, 1988-1990, 1992, 1994-2013             |                      |
| Uganda  | Ministry of Health (Uganda), Macro Systems, Inc.; Institute for Resource Development. Uganda Demographic and Health Survey 1988-1989. Columbia, United States: Macro Systems, Inc.                                                                            | 1988-1989                                         |                      |
| Uganda  | Department of Peace and Conflict Research, Uppsala University. UCDP Battle-Related Deaths Database Version 5, 2013. Uppsala, Sweden: Department of Peace and Conflict Research, Uppsala University, 2013.                                                     | 1989-2011                                         | *                    |
| Uganda  | Department of Peace and Conflict Research, Uppsala University. UCDP One-Sided Violence Database Version 1.4, 2013. Uppsala, Sweden: Department of Peace and Conflict Research, Uppsala University, 2013.                                                      | 1989-2011                                         | *                    |
| Uganda  | Weeks RM, Barenzi JF, Wayira JR. A low-cost, community-based measles outbreak investigation with follow-up action. <i>Bull World Health Organ.</i> 1992; 70(3): 317-21.                                                                                       | 1990                                              |                      |
| Uganda  | Weatherall D. Sickle Cell and Thalassemias Prevalence Data, Personal Correspondence with David Weatherall. [Unpublished].                                                                                                                                     | 1990-2009                                         |                      |
| Uganda  | Centre for Health Informatics and Multiprofessional Education, University College London. Modell's Haemoglobinopathologist's Almanac. London, United Kingdom: Centre for Health Informatics and Multiprofessional Education, University College London, 2008. | 1990-2003                                         |                      |
| Uganda  | Uganda Bureau of Statistics, Minnesota Population Center. Uganda Population and Housing Census 1991 from the Integrated Public Use Microdata Series, International. [Machine-readable database]. Minneapolis: University of Minnesota.                        | 1991                                              |                      |
| Uganda  | Ministry of Finance, Planning and Economic Development (Uganda), World Bank. Uganda Integrated Household Survey 1992.                                                                                                                                         | 1992                                              |                      |
| Uganda  | Parkin DM, International Agency for Research on Cancer, International Association of Cancer Registries. Cancer Incidence in Five Continents. Vol. I to VIII. Lyon, France, IARC Press, 2005.                                                                  | 1992, 1995                                        |                      |
| Uganda  | Macro International, Inc, Statistics Department (Uganda). Uganda Demographic and Health Survey 1995. Calverton, United States: Macro International, Inc.                                                                                                      | 1995                                              |                      |
| Uganda  | Institute of Statistics and Applied Economics, Makerere University, Macro International, Inc. Uganda In Depth Demographic and Health Survey 1995-1996. Calverton, United States: Macro International, Inc.                                                    | 1995-1996                                         |                      |

**Web Table 32 - Comprehensive citation list**

| Country | Citation                                                                                                                                                                                                                                                              | Year*                                  | New for GBD 2013 (*) |
|---------|-----------------------------------------------------------------------------------------------------------------------------------------------------------------------------------------------------------------------------------------------------------------------|----------------------------------------|----------------------|
| Uganda  | Mutyaba S, Mmiro F. Maternal morbidity during labor in Mulago hospital. <i>Int J Gynaecol Obstet.</i> 2001; 75(1): 79-80.                                                                                                                                             | 1997                                   |                      |
| Uganda  | Mayama S, Cuevas LE, Sheldon J, Omar OH, Smith DH, Okong P, Silvel B, Hart CA, Schulz TF. Prevalence and transmission of Kaposi's sarcoma-associated herpesvirus (human herpesvirus 8) in Ugandan children and adolescents. <i>Int J Cancer.</i> 1998; 77(6): 817-20. | 1997                                   |                      |
| Uganda  | Joint United Nations Program on HIV/AIDS (UNAIDS), World Health Organization (WHO). Uganda Epidemiological Fact Sheet on HIV/AIDS and STIs 2000.                                                                                                                      | 1997                                   |                      |
| Uganda  | World Health Organization (WHO). Yellow Fever Reported Cases, WHO Vaccine-Preventable Diseases: Monitoring System. Geneva, Switzerland: World Health Organization (WHO).                                                                                              | 1997-1998, 2000, 2003, 2005-2009       |                      |
| Uganda  | World Health Organization (WHO). The Global Elimination of Congenital Syphilis: Rationale and Strategy for Action. Geneva, Switzerland: World Health Organization (WHO), 2007.                                                                                        | 1997-2003                              |                      |
| Uganda  | Joint United Nations Program on HIV/AIDS (UNAIDS), United Nations Children's Fund (UNICEF), World Health Organization (WHO). Uganda Epidemiological Fact Sheet on HIV/AIDS and STIs 2004.                                                                             | 1997-1999                              |                      |
| Uganda  | Measles Supplementary Immunization Activity Data as provided by the World Health Organization. [Unpublished].                                                                                                                                                         | 1997-1999                              |                      |
| Uganda  | Stabinski L, Reynolds SJ, Ocama P, Laeyendecker O, Serwadda D, Gray RH, Wawer M, Thomas DL, Quinn TC, Kirk GD. Hepatitis B virus and sexual behavior in Rakai, Uganda. <i>J Med Virol.</i> 2011; 83(5): 796-800.                                                      | 1998                                   |                      |
| Uganda  | Department of Peace and Conflict Research, Uppsala University. UCDP Nonstate Conflict Database Version 2.5, 2013. Uppsala, Sweden: Department of Peace and Conflict Research, Uppsala University, 2013.                                                               | 1998-2009                              | *                    |
| Uganda  | Okong P, Byamughisha J, Mirembe F, Byaruhanga R, Bergstrom S. Audit of severe maternal morbidity in Uganda - implications for quality of obstetric care. <i>Acta Obstet Gynecol Scand.</i> 2006; 85(7): 797-804.                                                      | 1999-2000                              |                      |
| Uganda  | Curado MP, Edwards B, Shin HR, Storm H, Ferlay J, Heanue M and Boyle P, eds (2007). <i>Cancer Incidence in Five Continents, Vol. IX Periodic Data (electronic version)</i> . Lyon, IARC. <a href="http://ci5.iarc.fr">http://ci5.iarc.fr</a>                          | 2000                                   |                      |
| Uganda  | Macro International, Inc, Uganda Bureau of Statistics. Uganda Demographic and Health Survey 2000-2001. Calverton, United States: Macro International, Inc.                                                                                                            | 2000-2001                              |                      |
| Uganda  | Parikh S, Dorsey G, Rosenthal PJ. Host polymorphisms and the incidence of malaria in Ugandan children. <i>Am J Trop Med Hyg.</i> 2004; 71(6): 750-3.                                                                                                                  | 2000-2001                              |                      |
| Uganda  | World Health Organization (WHO). Uganda WHO Leishmaniasis Country Profile.                                                                                                                                                                                            | 2000-2008                              | *                    |
| Uganda  | World Health Organization (WHO). Retrospective Measles Data on Supplementary Immunization Activities. Geneva, Switzerland: World Health Organization (WHO).                                                                                                           | 2000-2001, 2003, 2005-2006, 2009, 2012 |                      |
| Uganda  | Uganda Bureau of Statistics, Minnesota Population Center. Uganda Population and Housing Census 2002 from the Integrated Public Use Microdata Series, International. [Machine-readable database]. Minneapolis: University of Minnesota.                                | 2002                                   |                      |
| Uganda  | United Nations Office on Drugs and Crime (UNODC). United Nations Office on Drugs and Crime Global Study on Homicides 2011. Vienna, Austria: United Nations Office on Drugs and Crime (UNODC), 2011.                                                                   | 2003-2004                              |                      |
| Uganda  | Division of Reproductive Health, Centers for Disease Control and Prevention (CDC), Ministry of Health (Uganda). Uganda AIDS Indicator Survey 2004-2005. Calverton, United States: Macro International, Inc.                                                           | 2004-2005                              |                      |
| Uganda  | Davis JC, Clark TD, Kemble SK, Talemwa N, Njama-Meya D, Staedke SG, Dorsey G. Longitudinal study of urban malaria in a cohort of Ugandan children: description of study site, census and recruitment. <i>Malar J.</i> 2006; 18.                                       | 2004-2005                              |                      |



**Web Table 32 - Comprehensive citation list**

| Country | Citation                                                                                                                                                                                                                                                                                                                                                                     | Year*     | New for GBD 2013 (*) |
|---------|------------------------------------------------------------------------------------------------------------------------------------------------------------------------------------------------------------------------------------------------------------------------------------------------------------------------------------------------------------------------------|-----------|----------------------|
| Uganda  | Forman D, Bray F, Brewster DH, Gombe Mbalawa C, Kohler B, Piñeros M, Steliarova-Foucher E, Swaminathan R and Ferlay J, eds (2013). Cancer Incidence in Five Continents, Vol. X Summary Database (electronic version). Lyon, IARC. <a href="http://ci5.iarc.fr">http://ci5.iarc.fr</a>                                                                                        | 2005      |                      |
| Uganda  | Macro International, Inc, Uganda Bureau of Statistics. Uganda Demographic and Health Survey 2006. Calverton, United States: Macro International, Inc.                                                                                                                                                                                                                        | 2006      |                      |
| Uganda  | Waiswa P, Kallander K, Peterson S, Tomson G, Pariyo GW. Using the three delays model to understand why newborn babies die in eastern Uganda. <i>Trop Med Int Health</i> . 2010; 15(8): 964-72.                                                                                                                                                                               | 2006      |                      |
| Uganda  | MEASURE Evaluation Project, Carolina Population Center, University of North Carolina, Macro International, Inc, Ministry of Health (Uganda), Uganda Bureau of Statistics. Uganda Child Verbal Autopsy Study 2007. Calverton, United States: Macro International, Inc.                                                                                                        | 2007      |                      |
| Uganda  | World Health Organization (WHO). Global Status Report on Road Safety 2009. Geneva, Switzerland: World Health Organization (WHO), 2009.                                                                                                                                                                                                                                       | 2007      |                      |
| Uganda  | Mayanja BN, Baisley K, Nalweyiso N, Kibengo FM, Mugisha JO, Van der Paal L, Maher D, Kaleebu P. Using verbal autopsy to assess the prevalence of HIV infection among deaths in the ART period in rural Uganda: a prospective cohort study, 2006-2008. <i>Popul Health Metr</i> . 2011; 9(36): 36.                                                                            | 2007      |                      |
| Uganda  | Uganda Bureau of Statistics, ICF Macro. Uganda Malaria Indicator Survey 2009-2010. Calverton, United States: ICF Macro.                                                                                                                                                                                                                                                      | 2009-2010 |                      |
| Uganda  | Wamala JF, Malimbo M, Okot CL, Atai-Omoruto AD, Tenywa E, Miller JR, Balinandi S, Shoemaker T, Oyoo C, Omony EO, Kagirita A, Musenero MM, Makumbi I, Nanyunja M, Lutwama JJ, Downing R, Mbonye AK. Epidemiological and Laboratory Characterization of a Yellow Fever Outbreak in Northern Uganda, October 2010–January 2011. <i>Int J Infect Dis</i> . 2012; 16(7): e536-42. | 2010-2011 | *                    |
| Uganda  | Centers for Disease Control and Prevention (CDC), ICF Macro, Ministry of Health (Uganda), Uganda Bureau of Statistics, Uganda Viral Research Institute. Uganda AIDS Indicator Survey 2011. ICF Macro.                                                                                                                                                                        | 2011      | *                    |
| Uganda  | ICF Macro, Uganda Bureau of Statistics. Uganda Demographic and Health Survey 2011. Claverton, Maryland: ICF Macro.                                                                                                                                                                                                                                                           | 2011      | *                    |
| Ukraine | Max Planck Institute for Demographic Research, University of California. Human Mortality Database. Berkeley, USA: University of California; Rostock, Germany: Max Planck Institute for Demographic Research.                                                                                                                                                                 | 1959-1984 |                      |
| Ukraine | Institute for Health Metrics and Evaluation (IHME), Joint United Nations Program on HIV/AIDS (UNAIDS). Institute for Health Metrics and Evaluation HIV Mortality Estimates Based on the UNAIDS Spectrum Model Framework.                                                                                                                                                     | 1980-2013 | *                    |
| Ukraine | Ukraine Vital Registration - Deaths 1981 ICD9 as it appears in World Health Organization (WHO). WHO Mortality Database Version February 2014. Geneva, Switzerland: World Health Organization (WHO), 2014.                                                                                                                                                                    | 1981      |                      |
| Ukraine | Ukraine Vital Registration - Deaths 1982 ICD9 as it appears in World Health Organization (WHO). WHO Mortality Database Version February 2014. Geneva, Switzerland: World Health Organization (WHO), 2014.                                                                                                                                                                    | 1982      |                      |
| Ukraine | Ukraine Vital Registration - Deaths 1985 ICD9 as it appears in World Health Organization (WHO). WHO Mortality Database Version February 2014. Geneva, Switzerland: World Health Organization (WHO), 2014.                                                                                                                                                                    | 1985      |                      |
| Ukraine | Ukraine Vital Registration - Deaths 1986 ICD9 as it appears in World Health Organization (WHO). WHO Mortality Database Version February 2014. Geneva, Switzerland: World Health Organization (WHO), 2014.                                                                                                                                                                    | 1986      |                      |

**Web Table 32 - Comprehensive citation list**

| Country | Citation                                                                                                                                                                                                  | Year*                                        | New for GBD 2013 (*) |
|---------|-----------------------------------------------------------------------------------------------------------------------------------------------------------------------------------------------------------|----------------------------------------------|----------------------|
| Ukraine | Ukraine Vital Registration - Deaths 1987 ICD9 as it appears in World Health Organization (WHO). WHO Mortality Database Version February 2014. Geneva, Switzerland: World Health Organization (WHO), 2014. | 1987                                         |                      |
| Ukraine | Ukraine Vital Registration - Deaths 1988 ICD9 as it appears in World Health Organization (WHO). WHO Mortality Database Version February 2014. Geneva, Switzerland: World Health Organization (WHO), 2014. | 1988                                         |                      |
| Ukraine | USSR Census 1989 as it appears in United Nations Statistics Division (UNSD). United Nations Demographic Yearbook. New York City, United States: United Nations Statistics Division (UNSD).                | 1989                                         |                      |
| Ukraine | Ukraine Vital Registration - Deaths 1989 ICD9 as it appears in World Health Organization (WHO). WHO Mortality Database Version February 2014. Geneva, Switzerland: World Health Organization (WHO), 2014. | 1989                                         |                      |
| Ukraine | Ukraine Vital Registration - Deaths 1990 ICD9 as it appears in World Health Organization (WHO). WHO Mortality Database Version February 2014. Geneva, Switzerland: World Health Organization (WHO), 2014. | 1990                                         |                      |
| Ukraine | United Nations Children's Fund (UNICEF), World Health Organization (WHO). WHO and UNICEF Reported Disease Incidence Time Series - Pertussis. Geneva, Switzerland: World Health Organization (WHO).        | 1990-2008, 2010-2012                         |                      |
| Ukraine | United Nations Children's Fund (UNICEF), World Health Organization (WHO). WHO and UNICEF Reported Disease Incidence Time Series - Measles. Geneva, Switzerland: World Health Organization (WHO).          | 1990-2008, 2010-2012                         |                      |
| Ukraine | Ukraine Vital Registration - Deaths 1991 ICD9 as it appears in World Health Organization (WHO). WHO Mortality Database Version February 2014. Geneva, Switzerland: World Health Organization (WHO), 2014. | 1991                                         |                      |
| Ukraine | Ukraine Vital Registration - Deaths 1992 ICD9 as it appears in World Health Organization (WHO). WHO Mortality Database Version February 2014. Geneva, Switzerland: World Health Organization (WHO), 2014. | 1992                                         |                      |
| Ukraine | Ukraine Vital Registration - Deaths 1993 ICD9 as it appears in World Health Organization (WHO). WHO Mortality Database Version February 2014. Geneva, Switzerland: World Health Organization (WHO), 2014. | 1993                                         |                      |
| Ukraine | Centre for Research on the Epidemiology of Disasters (CRED). EM-DAT: The OFDA/CRED International Disaster Database. Brussels, Belgium: Catholic University of Leuven.                                     | 1993, 1997-1998, 2000-2001, 2006, 2008, 2010 |                      |
| Ukraine | Ukraine Vital Registration - Deaths 1994 ICD9 as it appears in World Health Organization (WHO). WHO Mortality Database Version February 2014. Geneva, Switzerland: World Health Organization (WHO), 2014. | 1994                                         |                      |
| Ukraine | Ukraine Vital Registration - Deaths 1995 ICD9 as it appears in World Health Organization (WHO). WHO Mortality Database Version February 2014. Geneva, Switzerland: World Health Organization (WHO), 2014. | 1995                                         |                      |
| Ukraine | Ukraine Vital Registration - Deaths 1996 ICD9 as it appears in World Health Organization (WHO). WHO Mortality Database Version February 2014. Geneva, Switzerland: World Health Organization (WHO), 2014. | 1996                                         |                      |
| Ukraine | Ukraine Vital Registration - Deaths 1997 ICD9 as it appears in World Health Organization (WHO). WHO Mortality Database Version February 2014. Geneva, Switzerland: World Health Organization (WHO), 2014. | 1997                                         |                      |



**Web Table 32 - Comprehensive citation list**

| Country | Citation                                                                                                                                                                                                                                                  | Year*                | New for GBD 2013 (*) |
|---------|-----------------------------------------------------------------------------------------------------------------------------------------------------------------------------------------------------------------------------------------------------------|----------------------|----------------------|
| Ukraine | Moisseeva AV, Marichev IL, Biloschitchkay NA, Pavlenko KI, Novik LV, Kovinko LV, Lyabis OI, Houillon G, Rasuli AM. Hepatitis A seroprevalence in children and adults in Kiev City, Ukraine. J Viral Hepat. 2008; 43-6.                                    | 1997, 2007           |                      |
| Ukraine | Ukraine Vital Registration - Deaths 1998 ICD9 as it appears in World Health Organization (WHO). WHO Mortality Database Version February 2014. Geneva, Switzerland: World Health Organization (WHO), 2014.                                                 | 1998                 |                      |
| Ukraine | Division of Reproductive Health-Centers for Disease Control and Prevention (CDC) and Kiev International Institute of Sociology. (2001) Ukraine Reproductive Health Survey 1999. Atlanta, United States: Centers for Disease Control and Prevention (CDC). | 1999                 |                      |
| Ukraine | Ukraine Vital Registration - Deaths 1999 ICD9 as it appears in World Health Organization (WHO). WHO Mortality Database Version February 2014. Geneva, Switzerland: World Health Organization (WHO), 2014.                                                 | 1999                 |                      |
| Ukraine | Ukraine Vital Registration - Deaths 2000 ICD9 as it appears in World Health Organization (WHO). WHO Mortality Database Version February 2014. Geneva, Switzerland: World Health Organization (WHO), 2014.                                                 | 2000                 |                      |
| Ukraine | World Health Organization (WHO). Yellow Fever Reported Cases, WHO Vaccine-Preventable Diseases: Monitoring System. Geneva, Switzerland: World Health Organization (WHO).                                                                                  | 2000-2003, 2006-2008 |                      |
| Ukraine | Ukrainian National Cancer Registry. Ukraine Cancer 2000-2001. Ukraine: Ukrainian National Cancer Registry, 2002.                                                                                                                                          | 2000-2001            |                      |
| Ukraine | Ukraine Census 2001 as it appears in United Nations Statistics Division (UNSD). United Nations Demographic Yearbook. New York City, United States: United Nations Statistics Division (UNSD).                                                             | 2001                 |                      |
| Ukraine | Ukraine Vital Registration - Deaths 2001 ICD9 as it appears in World Health Organization (WHO). WHO Mortality Database Version February 2014. Geneva, Switzerland: World Health Organization (WHO), 2014.                                                 | 2001                 |                      |
| Ukraine | Ukraine Vital Registration - Deaths 2002 ICD9 as it appears in World Health Organization (WHO). WHO Mortality Database Version February 2014. Geneva, Switzerland: World Health Organization (WHO), 2014.                                                 | 2002                 |                      |
| Ukraine | Ukrainian National Cancer Registry. Ukraine Cancer 2002-2003. Ukraine: Ukrainian National Cancer Registry, 2004.                                                                                                                                          | 2002                 |                      |
| Ukraine | Ukraine Vital Registration - Deaths 2003 ICD9 as it appears in World Health Organization (WHO). WHO Mortality Database Version February 2014. Geneva, Switzerland: World Health Organization (WHO), 2014.                                                 | 2003                 |                      |
| Ukraine | Ukrainian National Cancer Registry. Ukraine Cancer 2003-2004. Ukraine: Ukrainian National Cancer Registry, 2005.                                                                                                                                          | 2003                 |                      |
| Ukraine | Ukraine Vital Registration - Deaths 2004 ICD9 as it appears in World Health Organization (WHO). WHO Mortality Database Version February 2014. Geneva, Switzerland: World Health Organization (WHO), 2014.                                                 | 2004                 |                      |
| Ukraine | Ukrainian National Cancer Registry. Ukraine Cancer 2004-2005. Ukraine: Ukrainian National Cancer Registry, 2006.                                                                                                                                          | 2004                 |                      |
| Ukraine | United Nations Children's Fund (UNICEF). Ukraine Multiple Indicator Cluster Survey 2005. New York, United States: United Nations Children's Fund (UNICEF).                                                                                                | 2005                 |                      |
| Ukraine | Ukraine Vital Registration - Deaths 2005 ICD10 as it appears in World Health Organization (WHO). WHO Mortality Database Version February 2014. Geneva, Switzerland: World Health Organization (WHO), 2014.                                                | 2005                 |                      |

**Web Table 32 - Comprehensive citation list**

| Country | Citation                                                                                                                                                                                                                                                                                         | Year*     | New for GBD 2013 (*) |
|---------|--------------------------------------------------------------------------------------------------------------------------------------------------------------------------------------------------------------------------------------------------------------------------------------------------|-----------|----------------------|
| Ukraine | Forman D, Bray F, Brewster DH, Gombe Mbalawa C, Kohler B, Piñeros M, Steliarova-Foucher E, Swaminathan R and Ferlay J, eds (2013). Cancer Incidence in Five Continents, Vol. X Summary Database (electronic version). Lyon, IARC. <a href="http://ci5.iarc.fr">http://ci5.iarc.fr</a>            | 2005      |                      |
| Ukraine | World Health Organization (WHO). Ukraine WHO Leishmaniasis Country Profile.                                                                                                                                                                                                                      | 2005-2008 | *                    |
| Ukraine | Ukraine Vital Registration - Deaths 2006 ICD10 as it appears in World Health Organization (WHO). WHO Mortality Database Version February 2014. Geneva, Switzerland: World Health Organization (WHO), 2014.                                                                                       | 2006      |                      |
| Ukraine | Ukrainian National Cancer Registry. Ukraine Cancer 2006-2007. Ukraine: Ukrainian National Cancer Registry, 2008.                                                                                                                                                                                 | 2006      |                      |
| Ukraine | Macro International, Inc, State Statistical Committee (Ukraine), Ukrainian Center for Social Reforms (UCSR). Ukraine Demographic and Health Survey 2007. Calverton, United States: Macro International, Inc.                                                                                     | 2007      |                      |
| Ukraine | Ukrainian National Cancer Registry. Ukraine Cancer 2007-2008. Ukraine: Ukrainian National Cancer Registry, 2009.                                                                                                                                                                                 | 2007      |                      |
| Ukraine | Ukraine Vital Registration - Deaths 2007 ICD10 as it appears in World Health Organization (WHO). WHO Mortality Database Version February 2014. Geneva, Switzerland: World Health Organization (WHO), 2014.                                                                                       | 2007      |                      |
| Ukraine | Ukraine Vital Registration - Deaths 2008 ICD10 as it appears in World Health Organization (WHO). WHO Mortality Database Version February 2014. Geneva, Switzerland: World Health Organization (WHO), 2014.                                                                                       | 2008      |                      |
| Ukraine | World Health Organization (WHO). Retrospective Measles Data on Supplementary Immunization Activities. Geneva, Switzerland: World Health Organization (WHO).                                                                                                                                      | 2008      |                      |
| Ukraine | Ukraine Vital Registration - Deaths 2009 ICD10 as it appears in World Health Organization (WHO). WHO Mortality Database Version February 2014. Geneva, Switzerland: World Health Organization (WHO), 2014.                                                                                       | 2009      |                      |
| Ukraine | Ukrainian National Cancer Registry. Ukraine Cancer 2009-2010. Ukraine: Ukrainian National Cancer Registry, 2011.                                                                                                                                                                                 | 2009      |                      |
| Ukraine | Ukraine Vital Registration - Deaths 2010 ICD10 as it appears in World Health Organization (WHO). WHO Mortality Database Version February 2014. Geneva, Switzerland: World Health Organization (WHO), 2014.                                                                                       | 2010      |                      |
| Ukraine | Ukrainian National Cancer Registry. Ukraine Cancer 2010-2011. Ukraine: Ukrainian National Cancer Registry, 2012.                                                                                                                                                                                 | 2010      |                      |
| Ukraine | European Renal Association-European Dialysis and Transplant Association (ERA-EDTA). European Renal Association-European Dialysis and Transplant Association Registry Annual Report 2010. Parma, Italy: European Renal Association-European Dialysis and Transplant Association (ERA-EDTA), 2012. | 2010      | *                    |
| Ukraine | Ukraine Vital Registration - Deaths 2011 ICD10 as it appears in World Health Organization (WHO). WHO Mortality Database Version February 2014. Geneva, Switzerland: World Health Organization (WHO), 2014.                                                                                       | 2011      | *                    |
| Ukraine | European Renal Association-European Dialysis and Transplant Association (ERA-EDTA). European Renal Association-European Dialysis and Transplant Association Registry Annual Report 2011. Parma, Italy: European Renal Association-European Dialysis and Transplant Association (ERA-EDTA), 2013. | 2011      | *                    |
| Ukraine | StatInform Consulting, State Statistics Service (Ukraine), Ukrainian Center for Social Reforms (UCSR), United Nations Children's Fund (UNICEF). Ukraine Multiple Indicator Cluster Survey 2012. New York, United States: United Nations Children's Fund (UNICEF), 2014.                          | 2012      | *                    |

**Web Table 32 - Comprehensive citation list**

| Country              | Citation                                                                                                                                                                                                                                                                                             | Year*           | New for GBD 2013 (*) |
|----------------------|------------------------------------------------------------------------------------------------------------------------------------------------------------------------------------------------------------------------------------------------------------------------------------------------------|-----------------|----------------------|
| Ukraine              | Ukraine Vital Registration - Deaths 2012 ICD10 as it appears in World Health Organization (WHO). WHO Mortality Database Version February 2014. Geneva, Switzerland: World Health Organization (WHO), 2014.                                                                                           | 2012            | *                    |
| United Arab Emirates | United Arab Emirates Census 1975 as it appears in United Nations Statistics Division (UNSD). United Nations Demographic Yearbook. New York City, United States: United Nations Statistics Division (UNSD).                                                                                           | 1975            |                      |
| United Arab Emirates | United Nations Office on Drugs and Crime (UNODC). United Nations Surveys on Crime Trends and the Operations of Criminal Justice Systems 1970-2006 as provided by Kavi Bhalla. [Unpublished].                                                                                                         | 1976-1980       |                      |
| United Arab Emirates | Ministry of Planning (United Arab Emirates). United Arab Emirates Census 1980.                                                                                                                                                                                                                       | 1980            |                      |
| United Arab Emirates | Institute for Health Metrics and Evaluation (IHME), Joint United Nations Program on HIV/AIDS (UNAIDS). Institute for Health Metrics and Evaluation HIV Mortality Estimates Based on the UNAIDS Spectrum Model Framework.                                                                             | 1980-2013       | *                    |
| United Arab Emirates | White JM, Byrne M, Richards R, Buchanan T, Katsoulis E, Weerasingh K. Red cell genetic abnormalities in Peninsular Arabs: sickle haemoglobin, G6PD deficiency, and alpha and beta thalassaemia. J Med Genet. 1986; 3(23): 245-51.                                                                    | 1984-1986       |                      |
| United Arab Emirates | Ministry of Health (United Arab Emirates). United Arab Emirates Child Health Survey 1987.                                                                                                                                                                                                            | 1987            |                      |
| United Arab Emirates | Al Hosani H, Salah M, Osman HM, Farag HM, Anvery SM. Incidence of haemoglobinopathies detected through neonatal screening in the United Arab Emirates. East Mediterr Health J. 2005; 11(3): 300-7.                                                                                                   | 1990-2002       |                      |
| United Arab Emirates | Weatherall D. Sickle Cell and Thalassemias Prevalence Data, Personal Correspondence with David Weatherall. [Unpublished].                                                                                                                                                                            | 1990-2009       |                      |
| United Arab Emirates | Federal Research Division, Library of Congress (United States). United Arab Emirates: A Country Study. Washington, D.C., United States: Library of Congress (United States), 1993.                                                                                                                   | 1990-1991       | *                    |
| United Arab Emirates | Centre for Health Informatics and Multiprofessional Education, University College London. Modell's Haemoglobinopathologist's Almanac. London, United Kingdom: Centre for Health Informatics and Multiprofessional Education, University College London, 2008.                                        | 1990-2003       |                      |
| United Arab Emirates | Bayoumi RA, Nur-E-Kamal MS, Tadayyon M, Mohamed KK, Mahboob BH, Qureshi MM, Lakhani MS, Awaad MO, Kaeda J, Vulliamy TJ, Luzzatto L. Molecular characterization of erythrocyte glucose-6-phosphate dehydrogenase deficiency in Al-Ain District, United Arab Emirates. Hum Hered. 1996; 46(3): 136-41. | 1994-1996       |                      |
| United Arab Emirates | Abdulrazzaq YM, Micallef R, Qureshi M, Dawodu A, Ahmed I, Khidr A, Bastaki SM, Al-Khayat A, Bayoumi RA. Diversity in expression of glucose-6-phosphate dehydrogenase deficiency in females. Clin Genet. 1999; 55(1): 13-9.                                                                           | 1994-1996       |                      |
| United Arab Emirates | Council of Health Ministers of GCC States, Ministry of Health (United Arab Emirates). United Arab Emirates Family Health Survey 1995.                                                                                                                                                                | 1995            |                      |
| United Arab Emirates | National Bureau of Statistics (United Arab Emirates). United Arab Emirates Vital Statistics - Deaths 1995-2005. [Unpublished].                                                                                                                                                                       | 1995-2005       |                      |
| United Arab Emirates | National Bureau of Statistics (United Arab Emirates). United Arab Emirates Statistical Abstract 1999.                                                                                                                                                                                                | 1998            |                      |
| United Arab Emirates | Measles Supplementary Immunization Activity Data as provided by the World Health Organization. [Unpublished].                                                                                                                                                                                        | 1998-1999       |                      |
| United Arab Emirates | World Health Organization (WHO). Yellow Fever Reported Cases, WHO Vaccine-Preventable Diseases: Monitoring System. Geneva, Switzerland: World Health Organization (WHO).                                                                                                                             | 1999-2005, 2008 |                      |
| United Arab Emirates | Dash N, Ameen A, Sheek-Hussein M, Smego R. Epidemiology of meningitis in Al-Ain, United Arab Emirates, 2000-2005. Int J Infect Dis. 2007; 11(4): 309-12.                                                                                                                                             | 2000-2005       |                      |

**Web Table 32 - Comprehensive citation list**

| Country              | Citation                                                                                                                                                                                                                                                         | Year*                       | New for GBD 2013 (*) |
|----------------------|------------------------------------------------------------------------------------------------------------------------------------------------------------------------------------------------------------------------------------------------------------------|-----------------------------|----------------------|
| United Arab Emirates | World Health Organization (WHO). Retrospective Measles Data on Supplementary Immunization Activities. Geneva, Switzerland: World Health Organization (WHO).                                                                                                      | 2001                        |                      |
| United Arab Emirates | United Nations Office on Drugs and Crime (UNODC). United Nations Office on Drugs and Crime Global Study on Homicides 2011. Vienna, Austria: United Nations Office on Drugs and Crime (UNODC), 2011.                                                              | 2003-2006                   |                      |
| United Arab Emirates | National Bureau of Statistics (United Arab Emirates). United Arab Emirates Statistical Abstract 2005.                                                                                                                                                            | 2004-2005                   |                      |
| United Arab Emirates | Sharar ZA, Rajah J, Parsons H. Childhood seroprevalence of hepatitis A in the United Arab Emirates. Trop Doct. 2008; 38(1): 65-6.                                                                                                                                | 2004-2005                   |                      |
| United Arab Emirates | National Bureau of Statistics (United Arab Emirates). United Arab Emirates Statistical Abstract 2007.                                                                                                                                                            | 2005-2006                   |                      |
| United Arab Emirates | Liveleak [Internet]. London, United Kingdom: Liveleak: [updated 2014]. 3 Die in Raging Flash Flood Waters; 2013 Nov 20. Video, 1:31. Available from: <a href="http://www.liveleak.com/view?i=033_1384990935">http://www.liveleak.com/view?i=033_1384990935</a> . | 2013                        | *                    |
| United Arab Emirates | Arab News. Torrential rains force closure of Dubai Airshow, UAE schools. Arab News [Internet]. 2013 Nov 22; News; [about 1 screen]. Available from: <a href="http://www.arabnews.com/news/481351">http://www.arabnews.com/news/481351</a> .                      | 2013                        | *                    |
| United Arab Emirates | United Nations Children's Fund (UNICEF), World Health Organization (WHO). WHO and UNICEF Reported Disease Incidence Time Series - Pertussis. Geneva, Switzerland: World Health Organization (WHO).                                                               | 1980-2005, 2008, 2010, 2012 |                      |
| United Arab Emirates | United Nations Children's Fund (UNICEF), World Health Organization (WHO). WHO and UNICEF Reported Disease Incidence Time Series - Measles. Geneva, Switzerland: World Health Organization (WHO).                                                                 | 1980-2005, 2008, 2010, 2012 |                      |
| United Kingdom       | United Kingdom Vital Registration - Deaths 1950 ICD7 as it appears in World Health Organization (WHO). WHO Mortality Database Version February 2014. Geneva, Switzerland: World Health Organization (WHO), 2014.                                                 | 1950                        |                      |
| United Kingdom       | United Kingdom - Bermuda Vital Registration Death Data 1950 as it appears in United Nations Statistics Division (UNSD). United Nations Demographic Yearbook. New York City, United States: United Nations Statistics Division (UNSD).                            | 1950                        |                      |
| United Kingdom       | Fine PE, Clarkson JA. Distribution of immunity to pertussis in the population of England and Wales. J Hyg (Lond). 1984; 92(1): 21-36.                                                                                                                            | 1950-1981                   |                      |
| United Kingdom       | Max Planck Institute for Demographic Research, University of California. Human Mortality Database. Berkeley, USA: University of California; Rostock, Germany: Max Planck Institute for Demographic Research.                                                     | 1950-2000                   |                      |
| United Kingdom       | Modell B, Khan M, Darlison M. Survival in beta-thalassaemia major in the UK. Lancet. 2000; 355(9220): 2051-2.                                                                                                                                                    | 1950-1998                   |                      |
| United Kingdom       | General Register Office for Scotland, Northern Ireland Statistics and Research Agency (NISRA), Office for National Statistics (United Kingdom). United Kingdom All-Cause Mortality Data 1950-2012. [Unpublished].                                                | 1950-2012                   | *                    |
| United Kingdom       | United Kingdom Vital Registration - Deaths 1951 ICD7 as it appears in World Health Organization (WHO). WHO Mortality Database Version February 2014. Geneva, Switzerland: World Health Organization (WHO), 2014.                                                 | 1951                        |                      |
| United Kingdom       | United Kingdom - Bermuda Vital Registration Death Data 1951 as it appears in United Nations Statistics Division (UNSD). United Nations Demographic Yearbook. New York City, United States: United Nations Statistics Division (UNSD).                            | 1951                        |                      |
| United Kingdom       | United Kingdom Vital Registration - Deaths 1952 ICD7 as it appears in World Health Organization (WHO). WHO Mortality Database Version February 2014. Geneva, Switzerland: World Health Organization (WHO), 2014.                                                 | 1952                        |                      |

**Web Table 32 - Comprehensive citation list**

| Country        | Citation                                                                                                                                                                                                                              | Year*                                                                                                       | New for GBD 2013 (*) |
|----------------|---------------------------------------------------------------------------------------------------------------------------------------------------------------------------------------------------------------------------------------|-------------------------------------------------------------------------------------------------------------|----------------------|
| United Kingdom | United Kingdom - Bermuda Vital Registration Death Data 1952 as it appears in United Nations Statistics Division (UNSD). United Nations Demographic Yearbook. New York City, United States: United Nations Statistics Division (UNSD). | 1952                                                                                                        |                      |
| United Kingdom | Centre for Research on the Epidemiology of Disasters (CRED). EM-DAT: The OFDA/CRED International Disaster Database. Brussels, Belgium: Catholic University of Leuven.                                                                 | 1952, 1960, 1966, 1968, 1977, 1981, 1983-1984, 1987, 1989-1991, 1993-2000, 2002, 2004-2005, 2007-2009, 2012 |                      |
| United Kingdom | United Kingdom Vital Registration - Deaths 1953 ICD7 as it appears in World Health Organization (WHO). WHO Mortality Database Version February 2014. Geneva, Switzerland: World Health Organization (WHO), 2014.                      | 1953                                                                                                        |                      |
| United Kingdom | United Kingdom - Bermuda Vital Registration Death Data 1953 as it appears in United Nations Statistics Division (UNSD). United Nations Demographic Yearbook. New York City, United States: United Nations Statistics Division (UNSD). | 1953                                                                                                        |                      |
| United Kingdom | United Kingdom Vital Registration - Deaths 1954 ICD7 as it appears in World Health Organization (WHO). WHO Mortality Database Version February 2014. Geneva, Switzerland: World Health Organization (WHO), 2014.                      | 1954                                                                                                        |                      |
| United Kingdom | United Kingdom - Bermuda Vital Registration Death Data 1954 as it appears in United Nations Statistics Division (UNSD). United Nations Demographic Yearbook. New York City, United States: United Nations Statistics Division (UNSD). | 1954                                                                                                        |                      |
| United Kingdom | United Kingdom Vital Registration - Deaths 1955 ICD7 as it appears in World Health Organization (WHO). WHO Mortality Database Version February 2014. Geneva, Switzerland: World Health Organization (WHO), 2014.                      | 1955                                                                                                        |                      |
| United Kingdom | United Kingdom - Bermuda Vital Registration Death Data 1955 as it appears in United Nations Statistics Division (UNSD). United Nations Demographic Yearbook. New York City, United States: United Nations Statistics Division (UNSD). | 1955                                                                                                        |                      |
| United Kingdom | United Kingdom Vital Registration - Deaths 1956 ICD7 as it appears in World Health Organization (WHO). WHO Mortality Database Version February 2014. Geneva, Switzerland: World Health Organization (WHO), 2014.                      | 1956                                                                                                        |                      |
| United Kingdom | United Kingdom - Bermuda Vital Registration Death Data 1956 as it appears in United Nations Statistics Division (UNSD). United Nations Demographic Yearbook. New York City, United States: United Nations Statistics Division (UNSD). | 1956                                                                                                        |                      |
| United Kingdom | United Kingdom Vital Registration - Deaths 1957 ICD7 as it appears in World Health Organization (WHO). WHO Mortality Database Version February 2014. Geneva, Switzerland: World Health Organization (WHO), 2014.                      | 1957                                                                                                        |                      |
| United Kingdom | United Kingdom - Bermuda Vital Registration Death Data 1957 as it appears in United Nations Statistics Division (UNSD). United Nations Demographic Yearbook. New York City, United States: United Nations Statistics Division (UNSD). | 1957                                                                                                        |                      |
| United Kingdom | United Kingdom Vital Registration - Deaths 1958 ICD7 as it appears in World Health Organization (WHO). WHO Mortality Database Version February 2014. Geneva, Switzerland: World Health Organization (WHO), 2014.                      | 1958                                                                                                        |                      |

**Web Table 32 - Comprehensive citation list**

| Country        | Citation                                                                                                                                                                                                                              | Year*     | New for GBD 2013 (*) |
|----------------|---------------------------------------------------------------------------------------------------------------------------------------------------------------------------------------------------------------------------------------|-----------|----------------------|
| United Kingdom | United Kingdom - Bermuda Vital Registration Death Data 1958 as it appears in United Nations Statistics Division (UNSD). United Nations Demographic Yearbook. New York City, United States: United Nations Statistics Division (UNSD). | 1958      |                      |
| United Kingdom | United Kingdom Vital Registration - Deaths 1959 ICD7 as it appears in World Health Organization (WHO). WHO Mortality Database Version February 2014. Geneva, Switzerland: World Health Organization (WHO), 2014.                      | 1959      |                      |
| United Kingdom | United Kingdom - Bermuda Vital Registration Death Data 1959 as it appears in United Nations Statistics Division (UNSD). United Nations Demographic Yearbook. New York City, United States: United Nations Statistics Division (UNSD). | 1959      |                      |
| United Kingdom | United Kingdom Vital Registration - Deaths 1960 ICD7 as it appears in World Health Organization (WHO). WHO Mortality Database Version February 2014. Geneva, Switzerland: World Health Organization (WHO), 2014.                      | 1960      |                      |
| United Kingdom | United Kingdom - Bermuda Vital Registration Death Data 1960 as it appears in United Nations Statistics Division (UNSD). United Nations Demographic Yearbook. New York City, United States: United Nations Statistics Division (UNSD). | 1960      |                      |
| United Kingdom | Modell B, Khan M, Darlison M, Westwood MA, Ingram D, Pennell DJ. Improved survival of thalassaemia major in the UK and relation to T2* cardiovascular magnetic resonance. J Cardiovasc Magn Reson. 2008; 10(1): 42.                   | 1960-2003 |                      |
| United Kingdom | Erdohazi M, Highman W. Glucose-6-phosphate-dehydrogenase deficiency in Britain. Lancet. 1962; 280(7268): 1274.                                                                                                                        | 1960-1962 |                      |
| United Kingdom | United Kingdom Vital Registration - Deaths 1961 ICD7 as it appears in World Health Organization (WHO). WHO Mortality Database Version February 2014. Geneva, Switzerland: World Health Organization (WHO), 2014.                      | 1961      |                      |
| United Kingdom | United Kingdom - Bermuda Vital Registration Death Data 1961 as it appears in United Nations Statistics Division (UNSD). United Nations Demographic Yearbook. New York City, United States: United Nations Statistics Division (UNSD). | 1961      |                      |
| United Kingdom | United Kingdom Vital Registration - Deaths 1962 ICD7 as it appears in World Health Organization (WHO). WHO Mortality Database Version February 2014. Geneva, Switzerland: World Health Organization (WHO), 2014.                      | 1962      |                      |
| United Kingdom | United Kingdom - Bermuda Vital Registration Death Data 1962 as it appears in United Nations Statistics Division (UNSD). United Nations Demographic Yearbook. New York City, United States: United Nations Statistics Division (UNSD). | 1962      |                      |
| United Kingdom | United Kingdom Vital Registration - Deaths 1963 ICD7 as it appears in World Health Organization (WHO). WHO Mortality Database Version February 2014. Geneva, Switzerland: World Health Organization (WHO), 2014.                      | 1963      |                      |
| United Kingdom | United Kingdom - Bermuda Vital Registration Death Data 1963 as it appears in United Nations Statistics Division (UNSD). United Nations Demographic Yearbook. New York City, United States: United Nations Statistics Division (UNSD). | 1963      |                      |
| United Kingdom | United Kingdom Vital Registration - Deaths 1964 ICD7 as it appears in World Health Organization (WHO). WHO Mortality Database Version February 2014. Geneva, Switzerland: World Health Organization (WHO), 2014.                      | 1964      |                      |
| United Kingdom | Bermuda Vital Registration - Deaths 1964 ICD7 as it appears in World Health Organization (WHO). WHO Mortality Database Version February 2014. Geneva, Switzerland: World Health Organization (WHO), 2014.                             | 1964      |                      |



**Web Table 32 - Comprehensive citation list**

| Country        | Citation                                                                                                                                                                                                                              | Year*     | New for GBD 2013 (*) |
|----------------|---------------------------------------------------------------------------------------------------------------------------------------------------------------------------------------------------------------------------------------|-----------|----------------------|
| United Kingdom | United Kingdom Vital Registration - Deaths 1965 ICD7 as it appears in World Health Organization (WHO). WHO Mortality Database Version February 2014. Geneva, Switzerland: World Health Organization (WHO), 2014.                      | 1965      |                      |
| United Kingdom | Bermuda Vital Registration - Deaths 1965 ICD7 as it appears in World Health Organization (WHO). WHO Mortality Database Version February 2014. Geneva, Switzerland: World Health Organization (WHO), 2014.                             | 1965      |                      |
| United Kingdom | United Kingdom Vital Registration - Deaths 1966 ICD7 as it appears in World Health Organization (WHO). WHO Mortality Database Version February 2014. Geneva, Switzerland: World Health Organization (WHO), 2014.                      | 1966      |                      |
| United Kingdom | United Kingdom - Bermuda Vital Registration Death Data 1966 as it appears in United Nations Statistics Division (UNSD). United Nations Demographic Yearbook. New York City, United States: United Nations Statistics Division (UNSD). | 1966      |                      |
| United Kingdom | United Kingdom Vital Registration - Deaths 1967 ICD7 as it appears in World Health Organization (WHO). WHO Mortality Database Version February 2014. Geneva, Switzerland: World Health Organization (WHO), 2014.                      | 1967      |                      |
| United Kingdom | Bermuda Vital Registration - Deaths 1967 ICD7 as it appears in World Health Organization (WHO). WHO Mortality Database Version February 2014. Geneva, Switzerland: World Health Organization (WHO), 2014.                             | 1967      |                      |
| United Kingdom | United Kingdom Vital Registration - Deaths 1968 ICD8 as it appears in World Health Organization (WHO). WHO Mortality Database Version February 2014. Geneva, Switzerland: World Health Organization (WHO), 2014.                      | 1968      |                      |
| United Kingdom | Bermuda Vital Registration - Deaths 1968 ICD8 as it appears in World Health Organization (WHO). WHO Mortality Database Version February 2014. Geneva, Switzerland: World Health Organization (WHO), 2014.                             | 1968      |                      |
| United Kingdom | United Kingdom Vital Registration - Deaths 1969 ICD8 as it appears in World Health Organization (WHO). WHO Mortality Database Version February 2014. Geneva, Switzerland: World Health Organization (WHO), 2014.                      | 1969      |                      |
| United Kingdom | Bermuda Vital Registration - Deaths 1969 ICD8 as it appears in World Health Organization (WHO). WHO Mortality Database Version February 2014. Geneva, Switzerland: World Health Organization (WHO), 2014.                             | 1969      |                      |
| United Kingdom | Mann JR. Sickle cell haemoglobinopathies in England. Arch Dis Child. 1981; 56(9): 676-83.                                                                                                                                             | 1969-1979 |                      |
| United Kingdom | United Kingdom Vital Registration - Deaths 1970 ICD8 as it appears in World Health Organization (WHO). WHO Mortality Database Version February 2014. Geneva, Switzerland: World Health Organization (WHO), 2014.                      | 1970      |                      |
| United Kingdom | Bermuda Vital Registration - Deaths 1970 ICD8 as it appears in World Health Organization (WHO). WHO Mortality Database Version February 2014. Geneva, Switzerland: World Health Organization (WHO), 2014.                             | 1970      |                      |
| United Kingdom | Castillo Taucher S. [Services for the care and prevention of birth defects. Reduced report of a World Health Organization and March of Dimes Foundation meeting]. Rev Med Chil. 2007; 135(6): 806-13.                                 | 1970-1974 |                      |
| United Kingdom | Office of Population Censuses and Surveys. Notification of Infectious Diseases in England and Wales.                                                                                                                                  | 1970-2008 |                      |

**Web Table 32 - Comprehensive citation list**

| Country        | Citation                                                                                                                                                                                                         | Year*     | New for GBD 2013 (*) |
|----------------|------------------------------------------------------------------------------------------------------------------------------------------------------------------------------------------------------------------|-----------|----------------------|
| United Kingdom | United Kingdom Vital Registration - Deaths 1971 ICD8 as it appears in World Health Organization (WHO). WHO Mortality Database Version February 2014. Geneva, Switzerland: World Health Organization (WHO), 2014. | 1971      |                      |
| United Kingdom | Bermuda Vital Registration - Deaths 1971 ICD8 as it appears in World Health Organization (WHO). WHO Mortality Database Version February 2014. Geneva, Switzerland: World Health Organization (WHO), 2014.        | 1971      |                      |
| United Kingdom | Peace Research Institute Oslo (PRIO). Battle Deaths Dataset Version 3, 2009. Oslo, Norway: Peace Research Institute Oslo (PRIO), 2009.                                                                           | 1971-1988 |                      |
| United Kingdom | United Kingdom Vital Registration - Deaths 1972 ICD8 as it appears in World Health Organization (WHO). WHO Mortality Database Version February 2014. Geneva, Switzerland: World Health Organization (WHO), 2014. | 1972      |                      |
| United Kingdom | Bermuda Vital Registration - Deaths 1972 ICD8 as it appears in World Health Organization (WHO). WHO Mortality Database Version February 2014. Geneva, Switzerland: World Health Organization (WHO), 2014.        | 1972      |                      |
| United Kingdom | United Kingdom Vital Registration - Deaths 1973 ICD8 as it appears in World Health Organization (WHO). WHO Mortality Database Version February 2014. Geneva, Switzerland: World Health Organization (WHO), 2014. | 1973      |                      |
| United Kingdom | Bermuda Vital Registration - Deaths 1973 ICD8 as it appears in World Health Organization (WHO). WHO Mortality Database Version February 2014. Geneva, Switzerland: World Health Organization (WHO), 2014.        | 1973      |                      |
| United Kingdom | United Kingdom Vital Registration - Deaths 1974 ICD8 as it appears in World Health Organization (WHO). WHO Mortality Database Version February 2014. Geneva, Switzerland: World Health Organization (WHO), 2014. | 1974      |                      |
| United Kingdom | Bermuda Vital Registration - Deaths 1974 ICD8 as it appears in World Health Organization (WHO). WHO Mortality Database Version February 2014. Geneva, Switzerland: World Health Organization (WHO), 2014.        | 1974      |                      |
| United Kingdom | United Kingdom Vital Registration - Deaths 1975 ICD8 as it appears in World Health Organization (WHO). WHO Mortality Database Version February 2014. Geneva, Switzerland: World Health Organization (WHO), 2014. | 1975      |                      |
| United Kingdom | Bermuda Vital Registration - Deaths 1975 ICD8 as it appears in World Health Organization (WHO). WHO Mortality Database Version February 2014. Geneva, Switzerland: World Health Organization (WHO), 2014.        | 1975      |                      |
| United Kingdom | United Kingdom Vital Registration - Deaths 1976 ICD8 as it appears in World Health Organization (WHO). WHO Mortality Database Version February 2014. Geneva, Switzerland: World Health Organization (WHO), 2014. | 1976      |                      |
| United Kingdom | Bermuda Vital Registration - Deaths 1976 ICD8 as it appears in World Health Organization (WHO). WHO Mortality Database Version February 2014. Geneva, Switzerland: World Health Organization (WHO), 2014.        | 1976      |                      |
| United Kingdom | United Kingdom Vital Registration - Deaths 1977 ICD8 as it appears in World Health Organization (WHO). WHO Mortality Database Version February 2014. Geneva, Switzerland: World Health Organization (WHO), 2014. | 1977      |                      |
| United Kingdom | Bermuda Vital Registration - Deaths 1977 ICD8 as it appears in World Health Organization (WHO). WHO Mortality Database Version February 2014. Geneva, Switzerland: World Health Organization (WHO), 2014.        | 1977      |                      |



**Web Table 32 - Comprehensive citation list**

| Country        | Citation                                                                                                                                                                                                                              | Year*                | New for GBD 2013 (*) |
|----------------|---------------------------------------------------------------------------------------------------------------------------------------------------------------------------------------------------------------------------------------|----------------------|----------------------|
| United Kingdom | United Kingdom Vital Registration - Deaths 1978 ICD8 as it appears in World Health Organization (WHO). WHO Mortality Database Version February 2014. Geneva, Switzerland: World Health Organization (WHO), 2014.                      | 1978                 |                      |
| United Kingdom | Bermuda Vital Registration - Deaths 1978 ICD8 as it appears in World Health Organization (WHO). WHO Mortality Database Version February 2014. Geneva, Switzerland: World Health Organization (WHO), 2014.                             | 1978                 |                      |
| United Kingdom | United Kingdom Vital Registration - Deaths 1979 ICD9 as it appears in World Health Organization (WHO). WHO Mortality Database Version February 2014. Geneva, Switzerland: World Health Organization (WHO), 2014.                      | 1979                 |                      |
| United Kingdom | United Kingdom - Bermuda Vital Registration Death Data 1979 as it appears in United Nations Statistics Division (UNSD). United Nations Demographic Yearbook. New York City, United States: United Nations Statistics Division (UNSD). | 1979                 |                      |
| United Kingdom | United Kingdom Vital Registration - Deaths 1980 ICD9 as it appears in World Health Organization (WHO). WHO Mortality Database Version February 2014. Geneva, Switzerland: World Health Organization (WHO), 2014.                      | 1980                 |                      |
| United Kingdom | Bermuda Vital Registration - Deaths 1980 ICD9 as it appears in World Health Organization (WHO). WHO Mortality Database Version February 2014. Geneva, Switzerland: World Health Organization (WHO), 2014.                             | 1980                 |                      |
| United Kingdom | United Nations Children's Fund (UNICEF), World Health Organization (WHO). WHO and UNICEF Reported Disease Incidence Time Series - Pertussis. Geneva, Switzerland: World Health Organization (WHO).                                    | 1980-1998, 2000-2010 |                      |
| United Kingdom | Institute for Health Metrics and Evaluation (IHME), Joint United Nations Program on HIV/AIDS (UNAIDS). Institute for Health Metrics and Evaluation HIV Mortality Estimates Based on the UNAIDS Spectrum Model Framework.              | 1980-2013            | *                    |
| United Kingdom | United Nations Children's Fund (UNICEF), World Health Organization (WHO). WHO and UNICEF Reported Disease Incidence Time Series - Pertussis. Geneva, Switzerland: World Health Organization (WHO).                                    | 1980-1998, 2000-2013 |                      |
| United Kingdom | United Nations Children's Fund (UNICEF), World Health Organization (WHO). WHO and UNICEF Reported Disease Incidence Time Series - Measles. Geneva, Switzerland: World Health Organization (WHO).                                      | 1980-1998, 2000-2013 |                      |
| United Kingdom | United Kingdom Vital Registration - Deaths 1981 ICD9 as it appears in World Health Organization (WHO). WHO Mortality Database Version February 2014. Geneva, Switzerland: World Health Organization (WHO), 2014.                      | 1981                 |                      |
| United Kingdom | United Kingdom - Bermuda Vital Registration Death Data 1981 as it appears in United Nations Statistics Division (UNSD). United Nations Demographic Yearbook. New York City, United States: United Nations Statistics Division (UNSD). | 1981                 |                      |
| United Kingdom | United Nations Office on Drugs and Crime (UNODC). United Nations Surveys on Crime Trends and the Operations of Criminal Justice Systems 1970-2006 as provided by Kavi Bhalla. [Unpublished].                                          | 1981-1994            |                      |
| United Kingdom | Office for National Statistics (United Kingdom). United Kingdom - England and Wales Mortality Data 1981-1994. Newport, United Kingdom: Office for National Statistics (United Kingdom). [Unpublished].                                | 1981-1994            | *                    |
| United Kingdom | Office for National Statistics (United Kingdom). United Kingdom - England and Wales Mortality Data 1981-1994. [Unpublished].                                                                                                          | 1981-1994            | *                    |
| United Kingdom | United Kingdom Vital Registration - Deaths 1982 ICD9 as it appears in World Health Organization (WHO). WHO Mortality Database Version February 2014. Geneva, Switzerland: World Health Organization (WHO), 2014.                      | 1982                 |                      |

**Web Table 32 - Comprehensive citation list**

| Country        | Citation                                                                                                                                                                                                                                                            | Year*     | New for GBD 2013 (*) |
|----------------|---------------------------------------------------------------------------------------------------------------------------------------------------------------------------------------------------------------------------------------------------------------------|-----------|----------------------|
| United Kingdom | United Kingdom - Bermuda Vital Registration Death Data 1982 as it appears in United Nations Statistics Division (UNSD). United Nations Demographic Yearbook. New York City, United States: United Nations Statistics Division (UNSD).                               | 1982      |                      |
| United Kingdom | Copeland JR, Dewey ME, Davidson IA, Saunders PA, Scott A. Geriatric Mental State-AGECAT: prevalence, incidence and long-term outcome of dementia and organic disorders in the Liverpool study of continuing health in the community. Neuroepidemiology. 1992; 84-7. | 1982-1985 |                      |
| United Kingdom | Muir MS, Brayne C. A longitudinal study in progress: a five-year follow-up of women aged 70-79 years living in a rural community. Neuroepidemiology. 1992; 11(Suppl 1): 67-70.                                                                                      | 1982-1985 |                      |
| United Kingdom | United Kingdom Vital Registration - Deaths 1983 ICD9 as it appears in World Health Organization (WHO). WHO Mortality Database Version February 2014. Geneva, Switzerland: World Health Organization (WHO), 2014.                                                    | 1983      |                      |
| United Kingdom | Bermuda Vital Registration - Deaths 1983 ICD9 as it appears in World Health Organization (WHO). WHO Mortality Database Version February 2014. Geneva, Switzerland: World Health Organization (WHO), 2014.                                                           | 1983      |                      |
| United Kingdom | Kyaw M, Christie P, Jones I, Campbell H. The Changing Epidemiology of Bacterial Meningitis and Invasive Non-meningitic Bacterial Disease in Scotland During the Period 1983-99. Scand J Infect Dis. 2002; 34(4): 289-98.                                            | 1983-1999 |                      |
| United Kingdom | Telfer P, Coen P, Chakravorty S, Wilkey O, Evans J, Newell H, Smalling B, Amos R, Stephens A, Rogers D, Kirkham F. Clinical outcomes in children with sickle cell disease living in England: a neonatal cohort in East London. Haematologica. 2007; 7(92): 905-12.  | 1983-2005 |                      |
| United Kingdom | O'Connor DW, Pollitt PA, Hyde JB, Fellows JL, Miller ND, Brook CP, Reiss BB, Roth M. The prevalence of dementia as measured by the Cambridge Mental Disorders of the Elderly Examination. Acta Psychiatr Scand. 1989; 79(2): 190-8.                                 | 1983-1986 |                      |
| United Kingdom | Gore SM, Brettle RP, Burns SM, Lewis SC. Pilot study to estimate survivors to 1995 of 1983-1984 prevalent hepatitis C infections in Lothian patients who tested positive or negative for hepatitis B surface antigen in 1983-1984. J Infect. 1998; 37(2): 159-65.   | 1983-1984 |                      |
| United Kingdom | United Kingdom Vital Registration - Deaths 1984 ICD9 as it appears in World Health Organization (WHO). WHO Mortality Database Version February 2014. Geneva, Switzerland: World Health Organization (WHO), 2014.                                                    | 1984      |                      |
| United Kingdom | Bermuda Vital Registration - Deaths 1984 ICD9 as it appears in World Health Organization (WHO). WHO Mortality Database Version February 2014. Geneva, Switzerland: World Health Organization (WHO), 2014.                                                           | 1984      |                      |
| United Kingdom | United Kingdom Vital Registration - Deaths 1985 ICD9 as it appears in World Health Organization (WHO). WHO Mortality Database Version February 2014. Geneva, Switzerland: World Health Organization (WHO), 2014.                                                    | 1985      |                      |
| United Kingdom | Bermuda Vital Registration - Deaths 1985 ICD9 as it appears in World Health Organization (WHO). WHO Mortality Database Version February 2014. Geneva, Switzerland: World Health Organization (WHO), 2014.                                                           | 1985      |                      |
| United Kingdom | Parkin DM, International Agency for Research on Cancer, International Association of Cancer Registries. Cancer incidence in five continents. Volumes I to VIII. Lyon, France, IARC Press, 2005.                                                                     | 1985      |                      |
| United Kingdom | Paykel ES, Brayne C, Huppert FA, Gill C, Barkley C, Gehlhaar E, Beardsall L, Girling DM, Pollitt P, O'Connor D. Incidence of dementia in a population older than 75 years in the United Kingdom. Arch Gen Psychiatry. 1994; 51(4): 325-32.                          | 1985-1990 |                      |

**Web Table 32 - Comprehensive citation list**

| Country        | Citation                                                                                                                                                                                                                  | Year*          | New for GBD 2013 (*) |
|----------------|---------------------------------------------------------------------------------------------------------------------------------------------------------------------------------------------------------------------------|----------------|----------------------|
| United Kingdom | United Kingdom Dementia Data 1985-1988 from literature review, as provided by the Global Burden of Disease 2010 dementia expert group.                                                                                    | 1985-1988      |                      |
| United Kingdom | United Kingdom Vital Registration - Deaths 1986 ICD9 as it appears in World Health Organization (WHO). WHO Mortality Database Version February 2014. Geneva, Switzerland: World Health Organization (WHO), 2014.          | 1986           |                      |
| United Kingdom | Bermuda Vital Registration - Deaths 1986 ICD9 as it appears in World Health Organization (WHO). WHO Mortality Database Version February 2014. Geneva, Switzerland: World Health Organization (WHO), 2014.                 | 1986           |                      |
| United Kingdom | Stones W, Lim W, Al-Azzawi F, Kelly M. An investigation of maternal morbidity with identification of life-threatening 'near miss' episodes. Health Trends. 1991; 23(1): 13-5.                                             | 1986           |                      |
| United Kingdom | Saunders PA, Copeland JR, Dewey ME, Gilmore C, Larkin BA, Phaterpekar H, Scott A. The prevalence of dementia, depression and neurosis in later life: the Liverpool MRC-ALPHA Study. Int J Epidemiol. 1993; 22(5): 838-47. | 1986-1989      |                      |
| United Kingdom | Gay NJ, Morgan-Capner P, Wright J, Farrington CP, Miller E. Age-specific antibody prevalence to hepatitis A in England: implications for disease control. Epidemiol Infect. 1994; 113(1): 113-20.                         | 1986-1987      |                      |
| United Kingdom | Cunningham R, Northwood JL, Kelly CD, Boxall EH, Andrews NJ. Routine antenatal screening for hepatitis B using pooled sera: validation and review of 10 years experience. J Clin Pathol. 1998; 51(5): 392-5.              | 1986-1996      |                      |
| United Kingdom | Balogun MA, Ramsay ME, Hesketh LM, Andrews N, Osborne KP, Gay NJ, Morgan-Capner P. The prevalence of hepatitis C in England and Wales. J Infect. 2002; 45(4): 219-26.                                                     | 1986,1991,1996 |                      |
| United Kingdom | United Kingdom Vital Registration - Deaths 1987 ICD9 as it appears in World Health Organization (WHO). WHO Mortality Database Version February 2014. Geneva, Switzerland: World Health Organization (WHO), 2014.          | 1987           |                      |
| United Kingdom | Bermuda Vital Registration - Deaths 1987 ICD9 as it appears in World Health Organization (WHO). WHO Mortality Database Version February 2014. Geneva, Switzerland: World Health Organization (WHO), 2014.                 | 1987           |                      |
| United Kingdom | Livingston G, Sax K, Willison J, Blizzard B, Mann A. The Gospel Oak Study stage II: the diagnosis of dementia in the community. Psychol Med. 1990; 20(4): 881-91.                                                         | 1987-1989      |                      |
| United Kingdom | Masterton RG, Strike PW, Tettmar RE. Hepatitis A immunity and travel history. J Infect. 1991; 23(3): 321-6.                                                                                                               | 1987-1988      |                      |
| United Kingdom | Abusheikha N, Akagbosu F, Marcus S, Lass A, Cousins C, Brinsden P. Viral screening and assisted conception treatment--the Bourn Hall experience. J Assist Reprod Genet. 1999; 16(6): 337-9.                               | 1987-1998      |                      |
| United Kingdom | United Kingdom Vital Registration - Deaths 1988 ICD9 as it appears in World Health Organization (WHO). WHO Mortality Database Version February 2014. Geneva, Switzerland: World Health Organization (WHO), 2014.          | 1988           |                      |
| United Kingdom | Bermuda Vital Registration - Deaths 1988 ICD9 as it appears in World Health Organization (WHO). WHO Mortality Database Version February 2014. Geneva, Switzerland: World Health Organization (WHO), 2014.                 | 1988           |                      |
| United Kingdom | World Health Organization (WHO). Expanded programme on immunization. Measles outbreak. Wkly Epidemiol Rec. 1990; 65(49): 379-81.                                                                                          | 1988           |                      |
| United Kingdom | Scott NJ, Harrison JF, Zuckerman AJ. Hepatitis A antibody in blood donors in North East Thames region: implications to prevention policies. Epidemiol Infect. 1989; 103(2): 377-82.                                       | 1988           |                      |
| United Kingdom | Bernal W, Smith H, Williams R. A Community Prevalence of Antibodies to Hepatitis A and E in Inner-City London. J Med Virol. 1996; 230-4.                                                                                  | 1988-1989      |                      |

**Web Table 32 - Comprehensive citation list**

| Country        | Citation                                                                                                                                                                                                                                                                                                                                      | Year*                | New for GBD 2013 (*) |
|----------------|-----------------------------------------------------------------------------------------------------------------------------------------------------------------------------------------------------------------------------------------------------------------------------------------------------------------------------------------------|----------------------|----------------------|
| United Kingdom | Chrystie I, Sumner D, Palmer S, Kenney A, Banatvala J. Screening of pregnant women for evidence of current hepatitis B infection: selective or universal?. Health Trends. 1992; 24(1): 13-5.                                                                                                                                                  | 1988-1990            |                      |
| United Kingdom | United Kingdom Dementia Data 1988-1991 from literature review, as provided by the Global Burden of Disease 2010 dementia expert group.                                                                                                                                                                                                        | 1988-1991            |                      |
| United Kingdom | Modell B, Darlison M, Birgens H, Cario H, Faustino P, Giordano PC, Gulbis B, Hopmeier P, Lena-Russo D, Romao L, Theodorsson E. Epidemiology of haemoglobin disorders in Europe: an overview. Scand J Clin Lab Invest. 2007; 67(1): 39-69.                                                                                                     | 1988, 2006           |                      |
| United Kingdom | Centre for Health Informatics and Multiprofessional Education, University College London. Modell's Haemoglobinopathologist's Almanac. London, United Kingdom: Centre for Health Informatics and Multiprofessional Education, University College London, 2008.                                                                                 | 1988, 2003, 2006     |                      |
| United Kingdom | United Kingdom Vital Registration - Deaths 1989 ICD9 as it appears in World Health Organization (WHO). WHO Mortality Database Version February 2014. Geneva, Switzerland: World Health Organization (WHO), 2014.                                                                                                                              | 1989                 |                      |
| United Kingdom | Bermuda Vital Registration - Deaths 1989 ICD9 as it appears in World Health Organization (WHO). WHO Mortality Database Version February 2014. Geneva, Switzerland: World Health Organization (WHO), 2014.                                                                                                                                     | 1989                 |                      |
| United Kingdom | World Health Organization (WHO). Measles surveillance in 1989. Wkly Epidemiol Rec. 1990; 65(15): 112-3.                                                                                                                                                                                                                                       | 1989                 |                      |
| United Kingdom | Department of Peace and Conflict Research, Uppsala University. UCDP Battle-Related Deaths Database Version 5, 2013. Uppsala, Sweden: Department of Peace and Conflict Research, Uppsala University, 2013.                                                                                                                                     | 1989-2003            | *                    |
| United Kingdom | Copeland JR, McCracken CF, Dewey ME, Wilson KC, Doran M, Gilmore C, Scott A, Larkin BA. Undifferentiated dementia, Alzheimer's disease and vascular dementia: age- and gender-related incidence in Liverpool. The MRC-ALPHA Study. Br J Psychiatry. 1999; 433-8.                                                                              | 1989-1998            |                      |
| United Kingdom | Sebire NJ, Jolly M, Harris JP, Wadsworth J, Joffe M, Beard RW, Regan L, Robinson S. Maternal obesity and pregnancy outcome: a study of 287213 pregnancies in London. Int J Obes Relat Metab Disord. 2001; 25(8): 1175-1182.                                                                                                                   | 1989-1997            |                      |
| United Kingdom | Cumberland NS, Masterton RG, Green AD, Sims MM. Prevalence of immunity to hepatitis A in recruits to the British Army and Royal Air Force. J R Army Med Corps. 1994; 140(2): 71-5.                                                                                                                                                            | 1989-1992            |                      |
| United Kingdom | United Kingdom Vital Registration - Deaths 1990 ICD9 as it appears in World Health Organization (WHO). WHO Mortality Database Version February 2014. Geneva, Switzerland: World Health Organization (WHO), 2014.                                                                                                                              | 1990                 |                      |
| United Kingdom | Bermuda Vital Registration - Deaths 1990 ICD9 as it appears in World Health Organization (WHO). WHO Mortality Database Version February 2014. Geneva, Switzerland: World Health Organization (WHO), 2014.                                                                                                                                     | 1990                 |                      |
| United Kingdom | Almeida AM, Henthorn JS, Davies SC. Neonatal screening for haemoglobinopathies: the results of a 10-year programme in an English Health Region. Br J Haematol. 2001; 112(1): 32-5.                                                                                                                                                            | 1990-2000            |                      |
| United Kingdom | Matthews FE, Arthur, Antony, Barnes, Linda E, Bond, John, Jagger, Carol, Robinson, Louise, Brayne, Carol. A two-decade comparison of prevalence of dementia in individuals aged 65 years and older from three geographical areas of England: results of the Cognitive Function and Ageing Study I and II. Lancet. 2013; 382(9902): 1405-1412. | 1990-1993, 2008-2011 |                      |
| United Kingdom | United Kingdom Cancer Information Service (UKCIS). United Kingdom - England Cancer Incidence Data 1990-2010. [Unpublished].                                                                                                                                                                                                                   | 1990-2010            |                      |

**Web Table 32 - Comprehensive citation list**

| Country        | Citation                                                                                                                                                                                                                                                                                                                                                                                                                                                                                                                                                                                                                                                                                                                     | Year*      | New for GBD 2013 (*) |
|----------------|------------------------------------------------------------------------------------------------------------------------------------------------------------------------------------------------------------------------------------------------------------------------------------------------------------------------------------------------------------------------------------------------------------------------------------------------------------------------------------------------------------------------------------------------------------------------------------------------------------------------------------------------------------------------------------------------------------------------------|------------|----------------------|
| United Kingdom | Matthews F, Brayne C, Medical Research Council Cognitive Function and Ageing Study Investigators. The incidence of dementia in England and Wales: findings from the five identical sites of the MRC CFA Study. <i>PLoS Med.</i> 2005; 2(8): e193.                                                                                                                                                                                                                                                                                                                                                                                                                                                                            | 1990-1996  |                      |
| United Kingdom | United Kingdom Vital Registration - Deaths 1991 ICD9 as it appears in World Health Organization (WHO). WHO Mortality Database Version February 2014. Geneva, Switzerland: World Health Organization (WHO), 2014.                                                                                                                                                                                                                                                                                                                                                                                                                                                                                                             | 1991       |                      |
| United Kingdom | Bermuda Vital Registration - Deaths 1991 ICD9 as it appears in World Health Organization (WHO). WHO Mortality Database Version February 2014. Geneva, Switzerland: World Health Organization (WHO), 2014.                                                                                                                                                                                                                                                                                                                                                                                                                                                                                                                    | 1991       |                      |
| United Kingdom | Jones IR, Urwin G, Feldman RA, Banatvala N. Social deprivation and bacterial meningitis in north east Thames region: three year study using small area statistics. <i>BMJ.</i> 1997; 314(7083): 794-5.                                                                                                                                                                                                                                                                                                                                                                                                                                                                                                                       | 1991-1993  |                      |
| United Kingdom | Zuckerman JN, Powell L. Hepatitis A antibodies in attenders of London travel clinics: Cost-benefit of screening prior to hepatitis A immunisation. <i>J Med Virol.</i> 1994; 44(4): 393-4.                                                                                                                                                                                                                                                                                                                                                                                                                                                                                                                                   | 1991-1993  |                      |
| United Kingdom | Ijaz S, Vyse AJ, Morgan D, Pebody RG, Tedder RS, Brown D. Indigenous hepatitis E virus infection in England: more common than it seems. <i>J Clin Virol.</i> 2009; 44(4): 272-6.                                                                                                                                                                                                                                                                                                                                                                                                                                                                                                                                             | 1991,2004  |                      |
| United Kingdom | MacLean AB, Cameron S, Follett EAC. Prevalence of hepatitis B and C viruses and human immunodeficiency virus infections in women of reproductive age. <i>Br J Obstet Gynaecol.</i> 1993; 100(7): 702-3.                                                                                                                                                                                                                                                                                                                                                                                                                                                                                                                      | 1991, 1993 |                      |
| United Kingdom | United Kingdom Vital Registration - Deaths 1992 ICD9 as it appears in World Health Organization (WHO). WHO Mortality Database Version February 2014. Geneva, Switzerland: World Health Organization (WHO), 2014.                                                                                                                                                                                                                                                                                                                                                                                                                                                                                                             | 1992       |                      |
| United Kingdom | Bermuda Vital Registration - Deaths 1992 ICD9 as it appears in World Health Organization (WHO). WHO Mortality Database Version February 2014. Geneva, Switzerland: World Health Organization (WHO), 2014.                                                                                                                                                                                                                                                                                                                                                                                                                                                                                                                    | 1992       |                      |
| United Kingdom | Douglas KA, Redman CWG. Eclampsia in the United Kingdom. <i>BMJ.</i> 1994; 309(6966): 1395-400.                                                                                                                                                                                                                                                                                                                                                                                                                                                                                                                                                                                                                              | 1992       |                      |
| United Kingdom | Fleming KM, Aithal GP, Solaymani-Dodaran M, Card TR, West J. Incidence and prevalence of cirrhosis in the United Kingdom, 1992-2001: a general population-based study. <i>J Hepatol.</i> 2008; 49(5): 732-8.                                                                                                                                                                                                                                                                                                                                                                                                                                                                                                                 | 1992-2001  |                      |
| United Kingdom | Trichopoulos D, Bamia C, Lagiou P, Fedirko V, Trepo E, Jenab M, Pischon T, Nöthlings U, Overved K, Tjønneland A, Outzen M, Clavel-Chapelon F, Kaaks R, Lukanova A, Boeing H, Aleksandrova K, Benetou V, Zylis D, Palli D, Pala V, Panico S, Tumino R, Sacerdote C, Bueno-De-Mesquita HB, Van Kranen HJ, Peeters PHM, Lund E, Quirós JR, González CA, Sanchez Perez M-J, Navarro C, Dorronsoro M, Barricarte A, Lindkvist B, Regnér S, Werner M, Hallmans G, Khaw K-T, Wareham N, Key T, Romieu I, Chuang S-C, Murphy N, Boffetta P, Trichopoulou A, Riboli E. Hepatocellular carcinoma risk factors and disease burden in a European cohort: a nested case-control study. <i>J Natl Cancer Inst.</i> 2011; 103(22): 1686-95. | 1992-2006  | *                    |
| United Kingdom | United Kingdom Vital Registration - Deaths 1993 ICD9 as it appears in World Health Organization (WHO). WHO Mortality Database Version February 2014. Geneva, Switzerland: World Health Organization (WHO), 2014.                                                                                                                                                                                                                                                                                                                                                                                                                                                                                                             | 1993       |                      |
| United Kingdom | Bermuda Vital Registration - Deaths 1993 ICD9 as it appears in World Health Organization (WHO). WHO Mortality Database Version February 2014. Geneva, Switzerland: World Health Organization (WHO), 2014.                                                                                                                                                                                                                                                                                                                                                                                                                                                                                                                    | 1993       |                      |

**Web Table 32 - Comprehensive citation list**

| Country        | Citation                                                                                                                                                                                                                             | Year*     | New for GBD 2013 (*) |
|----------------|--------------------------------------------------------------------------------------------------------------------------------------------------------------------------------------------------------------------------------------|-----------|----------------------|
| United Kingdom | Northern Ireland Cancer Registry. United Kingdom - Northern Ireland Cancer Registry Statistics. Belfast, Northern Ireland: Northern Ireland Cancer Registry.                                                                         | 1993-2011 |                      |
| United Kingdom | United Kingdom Vital Registration - Deaths 1994 ICD9 as it appears in World Health Organization (WHO). WHO Mortality Database Version February 2014. Geneva, Switzerland: World Health Organization (WHO), 2014.                     | 1994      |                      |
| United Kingdom | Bermuda Vital Registration - Deaths 1994 ICD9 as it appears in World Health Organization (WHO). WHO Mortality Database Version February 2014. Geneva, Switzerland: World Health Organization (WHO), 2014.                            | 1994      |                      |
| United Kingdom | Measles Supplementary Immunization Activity Data as provided by the World Health Organization. [Unpublished].                                                                                                                        | 1994      |                      |
| United Kingdom | Brayne C, Best N, Muir M, Richards SJ, Gill C. Five-year incidence and prediction of dementia and cognitive decline in a population sample of women aged 70-79 at baseline. <i>Int J Geriatr Psychiatry</i> . 1997; 12(11): 1107-18. | 1994-1996 |                      |
| United Kingdom | United Kingdom Vital Registration - Deaths 1995 ICD9 as it appears in World Health Organization (WHO). WHO Mortality Database Version February 2014. Geneva, Switzerland: World Health Organization (WHO), 2014.                     | 1995      |                      |
| United Kingdom | Bermuda Vital Registration - Deaths 1995 ICD9 as it appears in World Health Organization (WHO). WHO Mortality Database Version February 2014. Geneva, Switzerland: World Health Organization (WHO), 2014.                            | 1995      |                      |
| United Kingdom | Office for National Statistics (United Kingdom). United Kingdom - England and Wales Mortality Data 1995-2000. Newport, United Kingdom: Office for National Statistics (United Kingdom). [Unpublished].                               | 1995-2000 | *                    |
| United Kingdom | Office for National Statistics (United Kingdom). United Kingdom - England and Wales Mortality Data 1995-2000. [Unpublished].                                                                                                         | 1995-2000 | *                    |
| United Kingdom | United Kingdom Vital Registration - Deaths 1996 ICD9 as it appears in World Health Organization (WHO). WHO Mortality Database Version February 2014. Geneva, Switzerland: World Health Organization (WHO), 2014.                     | 1996      |                      |
| United Kingdom | Bermuda Vital Registration - Deaths 1996 ICD10 as it appears in World Health Organization (WHO). WHO Mortality Database Version February 2014. Geneva, Switzerland: World Health Organization (WHO), 2014.                           | 1996      |                      |
| United Kingdom | Morris MC, Gay NJ, Hesketh LM, Morgan-Capner P, Miller E. The changing epidemiological pattern of hepatitis A in England and Wales. <i>Epidemiol Infect</i> . 2002; 128(3): 457-63.                                                  | 1996      |                      |
| United Kingdom | Gay NJ, Hesketh LM, Osborne KP, Farrington CP, Morgan-Capner P, Miller E. The prevalence of hepatitis B infection in adults in England and Wales. <i>Epidemiol Infect</i> . 1999; 122(1): 133-8.                                     | 1996      |                      |
| United Kingdom | Bracebridge S, Irwin D, Millership S. Prevention of perinatal hepatitis B transmission in a health authority area: an audit. <i>Commun Dis Public Health</i> . 2004; 7(2): 138-41.                                                   | 1996-2002 |                      |
| United Kingdom | United Kingdom Vital Registration - Deaths 1997 ICD9 as it appears in World Health Organization (WHO). WHO Mortality Database Version February 2014. Geneva, Switzerland: World Health Organization (WHO), 2014.                     | 1997      |                      |
| United Kingdom | Bermuda Vital Registration - Deaths 1997 ICD10 as it appears in World Health Organization (WHO). WHO Mortality Database Version February 2014. Geneva, Switzerland: World Health Organization (WHO), 2014.                           | 1997      |                      |



**Web Table 32 - Comprehensive citation list**

| Country        | Citation                                                                                                                                                                                                                                            | Year*                | New for GBD 2013 (*) |
|----------------|-----------------------------------------------------------------------------------------------------------------------------------------------------------------------------------------------------------------------------------------------------|----------------------|----------------------|
| United Kingdom | Waterstone M, Bewley S, Wolfe C. Incidence and predictors of severe obstetrics morbidity: case-control study. <i>BMJ</i> . 2001; 322(7294): 1089-94.                                                                                                | 1997-1998            |                      |
| United Kingdom | United Kingdom Vital Registration - Deaths 1998 ICD9 as it appears in World Health Organization (WHO). WHO Mortality Database Version February 2014. Geneva, Switzerland: World Health Organization (WHO), 2014.                                    | 1998                 |                      |
| United Kingdom | Bermuda Vital Registration - Deaths 1998 ICD10 as it appears in World Health Organization (WHO). WHO Mortality Database Version February 2014. Geneva, Switzerland: World Health Organization (WHO), 2014.                                          | 1998                 |                      |
| United Kingdom | Davies SC, Cronin E, Gill M, Greengross P, Hickman M, Normand C. Screening for sickle cell disease and thalassaemia: a systematic review with supplementary research. <i>Health Technol Assess</i> . 2000; 4(3): 1-99.                              | 1998                 |                      |
| United Kingdom | United Nations Office on Drugs and Crime (UNODC). United Nations Office on Drugs and Crime Global Study on Homicides 2011. Vienna, Austria: United Nations Office on Drugs and Crime (UNODC), 2011.                                                 | 1998-2010            |                      |
| United Kingdom | United Kingdom Vital Registration - Deaths 1999 ICD9 as it appears in World Health Organization (WHO). WHO Mortality Database Version February 2014. Geneva, Switzerland: World Health Organization (WHO), 2014.                                    | 1999                 |                      |
| United Kingdom | Bermuda Vital Registration - Deaths 1999 ICD10 as it appears in World Health Organization (WHO). WHO Mortality Database Version February 2014. Geneva, Switzerland: World Health Organization (WHO), 2014.                                          | 1999                 |                      |
| United Kingdom | Bermuda Vital Registration - Deaths 2000 ICD10 as it appears in World Health Organization (WHO). WHO Mortality Database Version February 2014. Geneva, Switzerland: World Health Organization (WHO), 2014.                                          | 2000                 |                      |
| United Kingdom | Ross JDC, Ghanem M, Tariq A, Gilleran G, Winter AJ. Seroprevalence of hepatitis A immunity in male genitourinary medicine clinic attenders: a case control study of heterosexual and homosexual men. <i>Sex Transm Infect</i> . 2002; 78(3): 174-9. | 2000                 |                      |
| United Kingdom | Hutchinson SJ, Goldberg DJ, King M, Cameron SO, Shaw LE, Brown A, MacKenzie J, Wilson K, MacDonald L. Hepatitis C virus among childbearing women in Scotland: prevalence, deprivation, and diagnosis. <i>Gut</i> . 2004; 53(4): 593-8.              | 2000                 |                      |
| United Kingdom | WHO Regional Office for Europe (EURO-WHO). European Hospital Morbidity Database. Copenhagen, Denmark: WHO Regional Office for Europe (EURO-WHO).                                                                                                    | 2000-2005            |                      |
| United Kingdom | World Health Organization (WHO). Yellow Fever Reported Cases, WHO Vaccine-Preventable Diseases: Monitoring System. Geneva, Switzerland: World Health Organization (WHO).                                                                            | 2000-2003, 2005-2009 |                      |
| United Kingdom | Giraudon I, Forde J, Maguire H, Arnold J, Permalloo N. Antenatal screening and prevalence of infection: surveillance in London, 2000-2007. <i>Euro Surveill</i> . 2009; 14(9): 8-12.                                                                | 2000-2007            |                      |
| United Kingdom | United Kingdom Vital Registration - Deaths 2001 ICD10 as it appears in World Health Organization (WHO). WHO Mortality Database Version February 2014. Geneva, Switzerland: World Health Organization (WHO), 2014.                                   | 2001                 |                      |
| United Kingdom | Bermuda Vital Registration - Deaths 2001 ICD10 as it appears in World Health Organization (WHO). WHO Mortality Database Version February 2014. Geneva, Switzerland: World Health Organization (WHO), 2014.                                          | 2001                 |                      |
| United Kingdom | Brace V, Penney G, Hall M. Quantifying severe maternal morbidity: a Scottish population study. <i>BJOG</i> . 2004; 111(5): 481-4.                                                                                                                   | 2001                 |                      |

**Web Table 32 - Comprehensive citation list**

| Country        | Citation                                                                                                                                                                                                                                                                                                                                                               | Year*           | New for GBD 2013 (*) |
|----------------|------------------------------------------------------------------------------------------------------------------------------------------------------------------------------------------------------------------------------------------------------------------------------------------------------------------------------------------------------------------------|-----------------|----------------------|
| United Kingdom | Office for National Statistics (United Kingdom). United Kingdom - England and Wales Mortality Data 2001-2012. Newport, United Kingdom: Office for National Statistics (United Kingdom). [Unpublished].                                                                                                                                                                 | 2001-2012       | *                    |
| United Kingdom | Office for National Statistics (United Kingdom). United Kingdom - England and Wales Mortality Data 2001-2012. [Unpublished].                                                                                                                                                                                                                                           | 2001-2002       | *                    |
| United Kingdom | Morris-Cunnington MC, Edmunds WJ, Miller E, Brown DWG. A population-based seroprevalence study of hepatitis A virus using oral fluid in England and Wales. <i>Am J Epidemiol.</i> 2004; 159(8): 786-94.                                                                                                                                                                | 2001-2003       |                      |
| United Kingdom | United Kingdom Vital Registration - Deaths 2002 ICD10 as it appears in World Health Organization (WHO). WHO Mortality Database Version February 2014. Geneva, Switzerland: World Health Organization (WHO), 2014.                                                                                                                                                      | 2002            |                      |
| United Kingdom | Bermuda Vital Registration - Deaths 2002 ICD10 as it appears in World Health Organization (WHO). WHO Mortality Database Version February 2014. Geneva, Switzerland: World Health Organization (WHO), 2014.                                                                                                                                                             | 2002            |                      |
| United Kingdom | NHS England. United Kingdom - England Hospital Episode Statistics 2002-2003.                                                                                                                                                                                                                                                                                           | 2002            | *                    |
| United Kingdom | Anderson SR, Righarts A, Maguire H. Surveillance of antenatal infections--HIV, hepatitis B, syphilis and rubella susceptibility in London. <i>Commun Dis Public Health.</i> 2004; 7(4): 251-7.                                                                                                                                                                         | 2002            |                      |
| United Kingdom | Scottish Cancer Registry. United Kingdom - Scotland Cancer Incidence and Mortality 2002-2011. Edinburgh, Scotland: Information Services Division, NHS National Services Scotland, 2013.                                                                                                                                                                                | 2002-2009, 2011 | *                    |
| United Kingdom | Fish M, Bayer AJ, Gallacher JEJ, Bell T, Pickering J, Pedro S, Dunstan FD, Ben-Shlomo Y, Ebrahim S. Prevalence and pattern of cognitive impairment in a community cohort of men in South Wales: methodology and findings from the Caerphilly Prospective Study. <i>Neuroepidemiology.</i> 2008; 30(1): 25-33.                                                          | 2002-2004       |                      |
| United Kingdom | Brant LJ, Hurrelle M, Balogun MA, Klapper P, Ahmad F, Boxall E, Hale A, Hollyoak V, Ibrahim IB, Irving W, Meigh R, Mutton KJ, Patel BC, Paver WK, Pugh S, Taylor C, Turner AJ, Ramsay ME. Sentinel laboratory surveillance of hepatitis C antibody testing in England: understanding the epidemiology of HCV infection. <i>Epidemiol Infect.</i> 2007; 135(3): 417-26. | 2002-2003       |                      |
| United Kingdom | Sturrock CJ, Currie MJ, Vally H, O'Keefe EJ, Primrose R, Habel P, Schamburg K, Bowden FJ. Community-based sexual health care works: a review of the ACT outreach program. <i>Sex Health.</i> 2007; 4(3): 201-4.                                                                                                                                                        | 2002-2005       |                      |
| United Kingdom | United Kingdom Vital Registration - Deaths 2003 ICD10 as it appears in World Health Organization (WHO). WHO Mortality Database Version February 2014. Geneva, Switzerland: World Health Organization (WHO), 2014.                                                                                                                                                      | 2003            |                      |
| United Kingdom | Bermuda Vital Registration - Deaths 2003 ICD10 as it appears in World Health Organization (WHO). WHO Mortality Database Version February 2014. Geneva, Switzerland: World Health Organization (WHO), 2014.                                                                                                                                                             | 2003            |                      |
| United Kingdom | NHS England. United Kingdom - England Hospital Episode Statistics 2003-2004.                                                                                                                                                                                                                                                                                           | 2003            | *                    |
| United Kingdom | Jarvis D, Luczynska C, Chinn S, Burney P. The association of hepatitis A and <i>Helicobacter pylori</i> with sensitization to common allergens, asthma and hay fever in a population of young British adults. <i>Allergy.</i> 2004; 59(10): 1063-7.                                                                                                                    | 2003            |                      |
| United Kingdom | EUVAC-NET. EUVAC-NET Pertussis Surveillance Report 2003-2007. Stockholm, Sweden: European Centre for Disease Prevention and Control, 2009.                                                                                                                                                                                                                             | 2003-2007       |                      |



**Web Table 32 - Comprehensive citation list**

| Country        | Citation                                                                                                                                                                                                                                                      | Year*     | New for GBD 2013 (*) |
|----------------|---------------------------------------------------------------------------------------------------------------------------------------------------------------------------------------------------------------------------------------------------------------|-----------|----------------------|
| United Kingdom | United Kingdom Vital Registration - Deaths 2004 ICD10 as it appears in World Health Organization (WHO). WHO Mortality Database Version February 2014. Geneva, Switzerland: World Health Organization (WHO), 2014.                                             | 2004      |                      |
| United Kingdom | Bermuda Vital Registration - Deaths 2004 ICD10 as it appears in World Health Organization (WHO). WHO Mortality Database Version February 2014. Geneva, Switzerland: World Health Organization (WHO), 2014.                                                    | 2004      |                      |
| United Kingdom | NHS England. United Kingdom - England Hospital Episode Statistics 2004-2005.                                                                                                                                                                                  | 2004      | *                    |
| United Kingdom | Streety A, Clarke M, Downing M, Farrar L, Foo Y, Hall K, Kemp H, Newbold J, Walsh P, Yates J, Henthorn J. Implementation of the newborn screening programme for sickle cell disease in England: results for 2003-2005. J Med Screen. 2008; 15(1): 9-13.       | 2004-2007 |                      |
| United Kingdom | United Kingdom Vital Registration - Deaths 2005 ICD10 as it appears in World Health Organization (WHO). WHO Mortality Database Version February 2014. Geneva, Switzerland: World Health Organization (WHO), 2014.                                             | 2005      |                      |
| United Kingdom | Bermuda Vital Registration - Deaths 2005 ICD10 as it appears in World Health Organization (WHO). WHO Mortality Database Version February 2014. Geneva, Switzerland: World Health Organization (WHO), 2014.                                                    | 2005      |                      |
| United Kingdom | NHS England. United Kingdom - England Hospital Episode Statistics 2005-2006.                                                                                                                                                                                  | 2005      | *                    |
| United Kingdom | EUVAC-NET. EUVAC-NET Measles Surveillance Report 2005. Stockholm, Sweden: European Centre for Disease Prevention and Control, 2006.                                                                                                                           | 2005      |                      |
| United Kingdom | Streety A, Latinovic R, Hall K, Henthorn J. Implementation of universal newborn bloodspot screening for sickle cell disease and other clinically significant haemoglobinopathies in England: screening results for 2005-7. J Clin Pathol. 2009; 62(1): 26-30. | 2005-2007 |                      |
| United Kingdom | Dalton HR, Stableforth W, Hazeldine S, Thurairajah P, Ramnarace R, Warshow U, Ijaz S, Ellis V, Bendall R. Autochthonous hepatitis E in Southwest England: a comparison with hepatitis A. Eur J Clin Microbiol Infect Dis. 2008; 27(7): 579-85.                | 2005-2006 |                      |
| United Kingdom | United Kingdom Vital Registration - Deaths 2006 ICD10 as it appears in World Health Organization (WHO). WHO Mortality Database Version February 2014. Geneva, Switzerland: World Health Organization (WHO), 2014.                                             | 2006      |                      |
| United Kingdom | Bermuda Vital Registration - Deaths 2006 ICD10 as it appears in World Health Organization (WHO). WHO Mortality Database Version February 2014. Geneva, Switzerland: World Health Organization (WHO), 2014.                                                    | 2006      |                      |
| United Kingdom | Welsh Cancer Intelligence and Surveillance Unit. United Kingdom - Wales Cancer Incidence Report 2006-2010. Cardiff, Wales: Welsh Cancer Intelligence and Surveillance Unit, 2012.                                                                             | 2006      |                      |
| United Kingdom | NHS England. United Kingdom - England Hospital Episode Statistics 2006-2007.                                                                                                                                                                                  | 2006      | *                    |
| United Kingdom | EUVAC-NET. EUVAC-NET Measles Surveillance Report 2006. Stockholm, Sweden: European Centre for Disease Prevention and Control, 2007.                                                                                                                           | 2006      |                      |
| United Kingdom | United Kingdom Vital Registration - Deaths 2007 ICD10 as it appears in World Health Organization (WHO). WHO Mortality Database Version February 2014. Geneva, Switzerland: World Health Organization (WHO), 2014.                                             | 2007      |                      |

**Web Table 32 - Comprehensive citation list**

| Country        | Citation                                                                                                                                                                                                                                                               | Year*     | New for GBD 2013 (*) |
|----------------|------------------------------------------------------------------------------------------------------------------------------------------------------------------------------------------------------------------------------------------------------------------------|-----------|----------------------|
| United Kingdom | Bermuda Vital Registration - Deaths 2007 ICD10 as it appears in World Health Organization (WHO). WHO Mortality Database Version February 2014. Geneva, Switzerland: World Health Organization (WHO), 2014.                                                             | 2007      |                      |
| United Kingdom | World Health Organization (WHO). Global Status Report on Road Safety 2009. Geneva, Switzerland: World Health Organization (WHO), 2009.                                                                                                                                 | 2007      |                      |
| United Kingdom | NHS England. United Kingdom - England Hospital Episode Statistics 2007-2008.                                                                                                                                                                                           | 2007      | *                    |
| United Kingdom | EUVAC-NET. EUVAC-NET Measles Surveillance Report 2007. Stockholm, Sweden: European Centre for Disease Prevention and Control, 2008.                                                                                                                                    | 2007      |                      |
| United Kingdom | Welsh Cancer Intelligence and Surveillance Unit. United Kingdom - Wales Cancer Incidence Report 2007-2011. Cardiff, Wales: Welsh Cancer Intelligence and Surveillance Unit, 2013.                                                                                      | 2007-2011 | *                    |
| United Kingdom | United Kingdom Vital Registration - Deaths 2008 ICD10 as it appears in World Health Organization (WHO). WHO Mortality Database Version February 2014. Geneva, Switzerland: World Health Organization (WHO), 2014.                                                      | 2008      |                      |
| United Kingdom | Bermuda Vital Registration - Deaths 2008 ICD10 as it appears in World Health Organization (WHO). WHO Mortality Database Version February 2014. Geneva, Switzerland: World Health Organization (WHO), 2014.                                                             | 2008      |                      |
| United Kingdom | NHS England. United Kingdom - England Hospital Episode Statistics 2008-2009.                                                                                                                                                                                           | 2008      | *                    |
| United Kingdom | EUVAC-NET. EUVAC-NET Pertussis Surveillance Report 2008. Stockholm, Sweden: European Centre for Disease Prevention and Control, 2009.                                                                                                                                  | 2008      |                      |
| United Kingdom | EUVAC-NET. EUVAC-NET Measles Surveillance Report 2008. Stockholm, Sweden: European Centre for Disease Prevention and Control, 2009.                                                                                                                                    | 2008      |                      |
| United Kingdom | Day TG, Thein SL, Drasar E, Dick MC, Height SE, O'Driscoll S, Rees DC. Changing pattern of hospital admissions of children with sickle cell disease over the last 50 years. <i>J Pediatr Hematol Oncol</i> . 2011; 33(7): 491-5.                                       | 2008-2009 | *                    |
| United Kingdom | United Kingdom Vital Registration - Deaths 2009 ICD10 as it appears in World Health Organization (WHO). WHO Mortality Database Version February 2014. Geneva, Switzerland: World Health Organization (WHO), 2014.                                                      | 2009      |                      |
| United Kingdom | Weatherall D. Sickle Cell and Thalassemias Prevalence Data, Personal Correspondence with David Weatherall. [Unpublished].                                                                                                                                              | 2009      |                      |
| United Kingdom | NHS England. United Kingdom - England Hospital Episode Statistics 2009-2010.                                                                                                                                                                                           | 2009      | *                    |
| United Kingdom | United Kingdom - Bermuda Vital Registration Death Data 2009 as it appears in United Nations Statistics Division (UNSD). United Nations Demographic Yearbook. New York City, United States: United Nations Statistics Division (UNSD).                                  | 2009      |                      |
| United Kingdom | EUVAC-NET. EUVAC-NET Pertussis Surveillance Report 2009. Stockholm, Sweden: European Centre for Disease Prevention and Control, 2010.                                                                                                                                  | 2009      |                      |
| United Kingdom | Department of Health (United Kingdom), Health Protection Agency (United Kingdom), Joint United Nations Program on HIV/AIDS (UNAIDS). United Kingdom UNGASS Country Progress Report 2010. Geneva, Switzerland: Joint United Nations Program on HIV/AIDS (UNAIDS), 2010. | 2009      |                      |
| United Kingdom | United Kingdom Vital Registration - Deaths 2010 ICD10 as it appears in World Health Organization (WHO). WHO Mortality Database Version February 2014. Geneva, Switzerland: World Health Organization (WHO), 2014.                                                      | 2010      |                      |

**Web Table 32 - Comprehensive citation list**

| Country        | Citation                                                                                                                                                                                                                                                                                         | Year*     | New for GBD 2013 (*) |
|----------------|--------------------------------------------------------------------------------------------------------------------------------------------------------------------------------------------------------------------------------------------------------------------------------------------------|-----------|----------------------|
| United Kingdom | NHS England. United Kingdom - England Hospital Episode Statistics 2010-2011.                                                                                                                                                                                                                     | 2010      | *                    |
| United Kingdom | European Renal Association-European Dialysis and Transplant Association (ERA-EDTA). European Renal Association-European Dialysis and Transplant Association Registry Annual Report 2010. Parma, Italy: European Renal Association-European Dialysis and Transplant Association (ERA-EDTA), 2012. | 2010      | *                    |
| United Kingdom | EUVAC-NET. EUVAC-NET Measles Surveillance Report 2010. Stockholm, Sweden: European Centre for Disease Prevention and Control, 2011.                                                                                                                                                              | 2010      |                      |
| United Kingdom | Scottish Cancer Registry. United Kingdom - Scotland Cancer Incidence and Mortality 2001-2010. Edinburgh, Scotland: Information Services Division, NHS National Services Scotland, 2012.                                                                                                          | 2010      | *                    |
| United Kingdom | Northern Ireland Statistics and Research Agency (NISRA). United Kingdom - Northern Ireland Registrar General Annual Report 2011. Belfast, Northern Ireland: Northern Ireland Statistics and Research Agency (NISRA), 2012.                                                                       | 2011      | *                    |
| United Kingdom | National Records of Scotland. United Kingdom - Scotland Vital Events Reference Tables 2011. Edinburgh, Scotland: National Records of Scotland.                                                                                                                                                   | 2011      | *                    |
| United Kingdom | United Kingdom - England and Wales Vital Registration - Deaths 2011 ICD10 as it appears in World Health Organization (WHO). WHO Mortality Database Version February 2014. Geneva, Switzerland: World Health Organization (WHO), 2014.                                                            | 2011      | *                    |
| United Kingdom | United Kingdom - Bermuda Vital Registration Death Data 2011 as it appears in United Nations Statistics Division (UNSD). United Nations Demographic Yearbook. New York City, United States: United Nations Statistics Division (UNSD).                                                            | 2011      | *                    |
| United Kingdom | European Renal Association-European Dialysis and Transplant Association (ERA-EDTA). European Renal Association-European Dialysis and Transplant Association Registry Annual Report 2011. Parma, Italy: European Renal Association-European Dialysis and Transplant Association (ERA-EDTA), 2013. | 2011      | *                    |
| United Kingdom | NHS England. United Kingdom - England Hospital Episode Statistics 2011-2012.                                                                                                                                                                                                                     | 2011-2012 | *                    |
| United Kingdom | National Records of Scotland. United Kingdom - Scotland Vital Events Reference Tables 2012. Edinburgh, Scotland: National Records of Scotland.                                                                                                                                                   | 2012      | *                    |
| United States  | United States of America Vital Registration - Deaths 1950 ICD7 as it appears in World Health Organization (WHO). WHO Mortality Database Version February 2014. Geneva, Switzerland: World Health Organization (WHO), 2014.                                                                       | 1950      |                      |
| United States  | United States - Puerto Rico Vital Registration Death Data 1950 as it appears in United Nations Statistics Division (UNSD). United Nations Demographic Yearbook. New York City, United States: United Nations Statistics Division (UNSD).                                                         | 1950      |                      |
| United States  | Centre for Research on the Epidemiology of Disasters (CRED). EM-DAT: The OFDA/CRED International Disaster Database. Brussels, Belgium: Catholic University of Leuven.                                                                                                                            | 1950-2013 |                      |
| United States  | Peace Research Institute Oslo (PRIO). Battle Deaths Dataset Version 3, 2009. Oslo, Norway: Peace Research Institute Oslo (PRIO), 2009.                                                                                                                                                           | 1950-1988 |                      |
| United States  | United States of America Vital Registration - Deaths 1951 ICD7 as it appears in World Health Organization (WHO). WHO Mortality Database Version February 2014. Geneva, Switzerland: World Health Organization (WHO), 2014.                                                                       | 1951      |                      |

**Web Table 32 - Comprehensive citation list**

| Country       | Citation                                                                                                                                                                                                                                 | Year* | New for GBD 2013 (*) |
|---------------|------------------------------------------------------------------------------------------------------------------------------------------------------------------------------------------------------------------------------------------|-------|----------------------|
| United States | United States - Puerto Rico Vital Registration Death Data 1951 as it appears in United Nations Statistics Division (UNSD). United Nations Demographic Yearbook. New York City, United States: United Nations Statistics Division (UNSD). | 1951  |                      |
| United States | United States of America Vital Registration - Deaths 1952 ICD7 as it appears in World Health Organization (WHO). WHO Mortality Database Version February 2014. Geneva, Switzerland: World Health Organization (WHO), 2014.               | 1952  |                      |
| United States | United States - Puerto Rico Vital Registration Death Data 1952 as it appears in United Nations Statistics Division (UNSD). United Nations Demographic Yearbook. New York City, United States: United Nations Statistics Division (UNSD). | 1952  |                      |
| United States | United States of America Vital Registration - Deaths 1953 ICD7 as it appears in World Health Organization (WHO). WHO Mortality Database Version February 2014. Geneva, Switzerland: World Health Organization (WHO), 2014.               | 1953  |                      |
| United States | United States - Puerto Rico Vital Registration Death Data 1953 as it appears in United Nations Statistics Division (UNSD). United Nations Demographic Yearbook. New York City, United States: United Nations Statistics Division (UNSD). | 1953  |                      |
| United States | United States of America Vital Registration - Deaths 1954 ICD7 as it appears in World Health Organization (WHO). WHO Mortality Database Version February 2014. Geneva, Switzerland: World Health Organization (WHO), 2014.               | 1954  |                      |
| United States | United States - Puerto Rico Vital Registration Death Data 1954 as it appears in United Nations Statistics Division (UNSD). United Nations Demographic Yearbook. New York City, United States: United Nations Statistics Division (UNSD). | 1954  |                      |
| United States | United States of America Vital Registration - Deaths 1955 ICD7 as it appears in World Health Organization (WHO). WHO Mortality Database Version February 2014. Geneva, Switzerland: World Health Organization (WHO), 2014.               | 1955  |                      |
| United States | United States of America Vital Registration - Deaths 1956 ICD7 as it appears in World Health Organization (WHO). WHO Mortality Database Version February 2014. Geneva, Switzerland: World Health Organization (WHO), 2014.               | 1956  |                      |
| United States | United States of America Vital Registration - Deaths 1957 ICD7 as it appears in World Health Organization (WHO). WHO Mortality Database Version February 2014. Geneva, Switzerland: World Health Organization (WHO), 2014.               | 1957  |                      |
| United States | United States of America Vital Registration - Deaths 1958 ICD7 as it appears in World Health Organization (WHO). WHO Mortality Database Version February 2014. Geneva, Switzerland: World Health Organization (WHO), 2014.               | 1958  |                      |
| United States | United States of America Vital Registration - Deaths 1959 ICD7 as it appears in World Health Organization (WHO). WHO Mortality Database Version February 2014. Geneva, Switzerland: World Health Organization (WHO), 2014.               | 1959  |                      |
| United States | United States of America Vital Registration - Deaths 1960 ICD7 as it appears in World Health Organization (WHO). WHO Mortality Database Version February 2014. Geneva, Switzerland: World Health Organization (WHO), 2014.               | 1960  |                      |
| United States | Puerto Rico Vital Registration - Deaths 1961 ICD7 as it appears in World Health Organization (WHO). WHO Mortality Database Version February 2014. Geneva, Switzerland: World Health Organization (WHO), 2014.                            | 1961  |                      |

**Web Table 32 - Comprehensive citation list**

| Country       | Citation                                                                                                                                                                                                                                                                                | Year*     | New for GBD 2013 (*) |
|---------------|-----------------------------------------------------------------------------------------------------------------------------------------------------------------------------------------------------------------------------------------------------------------------------------------|-----------|----------------------|
| United States | United States of America Vital Registration - Deaths 1961 ICD7 as it appears in World Health Organization (WHO). WHO Mortality Database Version February 2014. Geneva, Switzerland: World Health Organization (WHO), 2014.                                                              | 1961      |                      |
| United States | Puerto Rico Vital Registration - Deaths 1962 ICD7 as it appears in World Health Organization (WHO). WHO Mortality Database Version February 2014. Geneva, Switzerland: World Health Organization (WHO), 2014.                                                                           | 1962      |                      |
| United States | United States of America Vital Registration - Deaths 1962 ICD7 as it appears in World Health Organization (WHO). WHO Mortality Database Version February 2014. Geneva, Switzerland: World Health Organization (WHO), 2014.                                                              | 1962      |                      |
| United States | Porter IH, Boyer SH. Variation of glucose-6-phosphate dehydrogenase in different populations. <i>Lancet</i> . 1964; 2(7367): 1016.                                                                                                                                                      | 1962-1964 |                      |
| United States | Puerto Rico Vital Registration - Deaths 1963 ICD7 as it appears in World Health Organization (WHO). WHO Mortality Database Version February 2014. Geneva, Switzerland: World Health Organization (WHO), 2014.                                                                           | 1963      |                      |
| United States | United States of America Vital Registration - Deaths 1963 ICD7 as it appears in World Health Organization (WHO). WHO Mortality Database Version February 2014. Geneva, Switzerland: World Health Organization (WHO), 2014.                                                              | 1963      |                      |
| United States | Puerto Rico Vital Registration - Deaths 1964 ICD7 as it appears in World Health Organization (WHO). WHO Mortality Database Version February 2014. Geneva, Switzerland: World Health Organization (WHO), 2014.                                                                           | 1964      |                      |
| United States | United States of America Vital Registration - Deaths 1964 ICD7 as it appears in World Health Organization (WHO). WHO Mortality Database Version February 2014. Geneva, Switzerland: World Health Organization (WHO), 2014.                                                              | 1964      |                      |
| United States | Puerto Rico Vital Registration - Deaths 1965 ICD7 as it appears in World Health Organization (WHO). WHO Mortality Database Version February 2014. Geneva, Switzerland: World Health Organization (WHO), 2014.                                                                           | 1965      |                      |
| United States | United States of America Vital Registration - Deaths 1965 ICD7 as it appears in World Health Organization (WHO). WHO Mortality Database Version February 2014. Geneva, Switzerland: World Health Organization (WHO), 2014.                                                              | 1965      |                      |
| United States | Jim RT. Survey for erythrocyte glucose-6-phosphate dehydrogenase deficiency in Hawaii. <i>Acta Haematol</i> . 1967; 37(2): 94-9.                                                                                                                                                        | 1965-1967 |                      |
| United States | Puerto Rico Vital Registration - Deaths 1966 ICD7 as it appears in World Health Organization (WHO). WHO Mortality Database Version February 2014. Geneva, Switzerland: World Health Organization (WHO), 2014.                                                                           | 1966      |                      |
| United States | United States of America Vital Registration - Deaths 1966 ICD7 as it appears in World Health Organization (WHO). WHO Mortality Database Version February 2014. Geneva, Switzerland: World Health Organization (WHO), 2014.                                                              | 1966      |                      |
| United States | Doebelin TD, Ingall GB, Pinkerton PH, Dronamraju KR, Bannerman RM. Genetic studies of the Seneca Indians: haptoglobins, transferrins, G-6-PD deficiency, hemoglobinopathy, color blindness, morphological traits and dermatoglyphics. <i>Acta Genet Stat Med</i> . 1968; 18(3): 251-60. | 1966-1968 |                      |
| United States | United States of America Vital Registration - Deaths 1967 ICD7 as it appears in World Health Organization (WHO). WHO Mortality Database Version February 2014. Geneva, Switzerland: World Health Organization (WHO), 2014.                                                              | 1967      |                      |

**Web Table 32 - Comprehensive citation list**

| Country       | Citation                                                                                                                                                                                                                                                                                                         | Year*                                                                            | New for GBD 2013 (*) |
|---------------|------------------------------------------------------------------------------------------------------------------------------------------------------------------------------------------------------------------------------------------------------------------------------------------------------------------|----------------------------------------------------------------------------------|----------------------|
| United States | United States - Puerto Rico Vital Registration Death Data 1967 as it appears in United Nations Statistics Division (UNSD). United Nations Demographic Yearbook. New York City, United States: United Nations Statistics Division (UNSD).                                                                         | 1967                                                                             |                      |
| United States | United States of America Vital Registration - Deaths 1968 ICD8 as it appears in World Health Organization (WHO). WHO Mortality Database Version February 2014. Geneva, Switzerland: World Health Organization (WHO), 2014.                                                                                       | 1968                                                                             |                      |
| United States | United States - Puerto Rico Vital Registration Death Data 1968 as it appears in United Nations Statistics Division (UNSD). United Nations Demographic Yearbook. New York City, United States: United Nations Statistics Division (UNSD).                                                                         | 1968                                                                             |                      |
| United States | Petrakis NL, Wiesenfeld SL, Sams BJ, Collen MF, Cutler JL, Siegel AB. Prevalence of sickle-cell trait and glucose-6-phosphate dehydrogenase deficiency. N Engl J Med. 1970; 282(14): 767-70.                                                                                                                     | 1968-1970                                                                        |                      |
| United States | Puerto Rico Vital Registration - Deaths 1969 ICD8 as it appears in World Health Organization (WHO). WHO Mortality Database Version February 2014. Geneva, Switzerland: World Health Organization (WHO), 2014.                                                                                                    | 1969                                                                             |                      |
| United States | United States of America Vital Registration - Deaths 1969 ICD8 as it appears in World Health Organization (WHO). WHO Mortality Database Version February 2014. Geneva, Switzerland: World Health Organization (WHO), 2014.                                                                                       | 1969                                                                             |                      |
| United States | Puerto Rico Vital Registration - Deaths 1970 ICD8 as it appears in World Health Organization (WHO). WHO Mortality Database Version February 2014. Geneva, Switzerland: World Health Organization (WHO), 2014.                                                                                                    | 1970                                                                             |                      |
| United States | United States of America Vital Registration - Deaths 1970 ICD8 as it appears in World Health Organization (WHO). WHO Mortality Database Version February 2014. Geneva, Switzerland: World Health Organization (WHO), 2014.                                                                                       | 1970                                                                             |                      |
| United States | Centre for Research on the Epidemiology of Disasters (CRED). EM-DAT: The OFDA/CRED International Disaster Database. Brussels, Belgium: Catholic University of Leuven.                                                                                                                                            | 1970, 1975, 1979, 1981, 1985, 1992, 1995-1996, 1999, 2001, 2003-2004, 2007, 2011 |                      |
| United States | Puerto Rico Vital Registration - Deaths 1971 ICD8 as it appears in World Health Organization (WHO). WHO Mortality Database Version February 2014. Geneva, Switzerland: World Health Organization (WHO), 2014.                                                                                                    | 1971                                                                             |                      |
| United States | United States of America Vital Registration - Deaths 1971 ICD8 as it appears in World Health Organization (WHO). WHO Mortality Database Version February 2014. Geneva, Switzerland: World Health Organization (WHO), 2014.                                                                                       | 1971                                                                             |                      |
| United States | Frischer H, Bowman JE, Carson PE, Rieckmann KH, Willerson D Jr, Colwell EJ. Erythrocytic glutathione reductase, glucose-6-phosphate dehydrogenase, and 6-phosphogluconic dehydrogenase deficiencies in populations of the United States, South Vietnam, Iran, and Ethiopia. J Lab Clin Med. 1973; 81(4): 603-12. | 1971-1973                                                                        |                      |
| United States | Puerto Rico Vital Registration - Deaths 1972 ICD8 as it appears in World Health Organization (WHO). WHO Mortality Database Version February 2014. Geneva, Switzerland: World Health Organization (WHO), 2014.                                                                                                    | 1972                                                                             |                      |
| United States | United States of America Vital Registration - Deaths 1972 ICD8 as it appears in World Health Organization (WHO). WHO Mortality Database Version February 2014. Geneva, Switzerland: World Health Organization (WHO), 2014.                                                                                       | 1972                                                                             |                      |



**Web Table 32 - Comprehensive citation list**

| Country       | Citation                                                                                                                                                                                                                                                       | Year*               | New for GBD 2013 (*) |
|---------------|----------------------------------------------------------------------------------------------------------------------------------------------------------------------------------------------------------------------------------------------------------------|---------------------|----------------------|
| United States | Uddin DE, Dickson LG, Brodine CE. Glucose-6-phosphate dehydrogenase deficiency in military recruits. JAMA. 1974; 227(12): 1408-9.                                                                                                                              | 1972                |                      |
| United States | Heller P, Best WR, Nelson RB, Becktel J. Clinical implications of sickle-cell trait and glucose-6-phosphate dehydrogenase deficiency in hospitalized black male patients. N Engl J Med. 1979; 300(18): 1001-5.                                                 | 1972-1975           |                      |
| United States | Puerto Rico Vital Registration - Deaths 1973 ICD8 as it appears in World Health Organization (WHO). WHO Mortality Database Version February 2014. Geneva, Switzerland: World Health Organization (WHO), 2014.                                                  | 1973                |                      |
| United States | United States of America Vital Registration - Deaths 1973 ICD8 as it appears in World Health Organization (WHO). WHO Mortality Database Version February 2014. Geneva, Switzerland: World Health Organization (WHO), 2014.                                     | 1973                |                      |
| United States | Puerto Rico Vital Registration - Deaths 1974 ICD8 as it appears in World Health Organization (WHO). WHO Mortality Database Version February 2014. Geneva, Switzerland: World Health Organization (WHO), 2014.                                                  | 1974                |                      |
| United States | United States of America Vital Registration - Deaths 1974 ICD8 as it appears in World Health Organization (WHO). WHO Mortality Database Version February 2014. Geneva, Switzerland: World Health Organization (WHO), 2014.                                     | 1974                |                      |
| United States | Puerto Rico Vital Registration - Deaths 1975 ICD8 as it appears in World Health Organization (WHO). WHO Mortality Database Version February 2014. Geneva, Switzerland: World Health Organization (WHO), 2014.                                                  | 1975                |                      |
| United States | United States of America Vital Registration - Deaths 1975 ICD8 as it appears in World Health Organization (WHO). WHO Mortality Database Version February 2014. Geneva, Switzerland: World Health Organization (WHO), 2014.                                     | 1975                |                      |
| United States | Puerto Rico Vital Registration - Deaths 1976 ICD8 as it appears in World Health Organization (WHO). WHO Mortality Database Version February 2014. Geneva, Switzerland: World Health Organization (WHO), 2014.                                                  | 1976                |                      |
| United States | United States of America Vital Registration - Deaths 1976 ICD8 as it appears in World Health Organization (WHO). WHO Mortality Database Version February 2014. Geneva, Switzerland: World Health Organization (WHO), 2014.                                     | 1976                |                      |
| United States | McQuillan GM, Coleman PJ, Kruszon-Moran D, Moyer LA, Lambert SB, Margolis HS. Prevalence of hepatitis B virus infection in the United States: the National Health and Nutrition Examination Surveys, 1976 through 1994. Am J Public Health. 1999; 89(1): 14-8. | 1976-1980           |                      |
| United States | Puerto Rico Vital Registration - Deaths 1977 ICD8 as it appears in World Health Organization (WHO). WHO Mortality Database Version February 2014. Geneva, Switzerland: World Health Organization (WHO), 2014.                                                  | 1977                |                      |
| United States | United States of America Vital Registration - Deaths 1977 ICD8 as it appears in World Health Organization (WHO). WHO Mortality Database Version February 2014. Geneva, Switzerland: World Health Organization (WHO), 2014.                                     | 1977                |                      |
| United States | Vichinsky EP, MacKlin EA, Waye JS, Lorey F, Olivieri NF. Changes in the Epidemiology of Thalassemia in North America: A New Minority Disease. Pediatrics. 2005; 116(6): 1536.                                                                                  | 1977-1985,1990-2002 |                      |
| United States | United States of America Vital Registration - Deaths 1978 ICD8 as it appears in World Health Organization (WHO). WHO Mortality Database Version February 2014. Geneva, Switzerland: World Health Organization (WHO), 2014.                                     | 1978                |                      |

**Web Table 32 - Comprehensive citation list**

| Country       | Citation                                                                                                                                                                                                                                                                                              | Year*     | New for GBD 2013 (*) |
|---------------|-------------------------------------------------------------------------------------------------------------------------------------------------------------------------------------------------------------------------------------------------------------------------------------------------------|-----------|----------------------|
| United States | United States - Puerto Rico Vital Registration Death Data 1978 as it appears in United Nations Statistics Division (UNSD). United Nations Demographic Yearbook. New York City, United States: United Nations Statistics Division (UNSD).                                                              | 1978      |                      |
| United States | Platt OS, Brambilla DJ, Rosse WF, Milner PF, Castro O, Steinberg MH, Klug PP. Mortality in sickle cell disease Life expectancy and risk factors for early death. N Engl J Med. 1994; 330(23): 1639-44.                                                                                                | 1978-1992 |                      |
| United States | Calvert AF, Trimble GE. Glucose-6-phosphate dehydrogenase in an Afro-American population. Hum Hered. 1980; 30(5): 271-7.                                                                                                                                                                              | 1978-1980 |                      |
| United States | United States Dementia Data 1978-1991 from literature review, as provided by the Global Burden of Disease 2010 dementia expert group.                                                                                                                                                                 | 1978-1991 |                      |
| United States | United States Dementia Data 1995-1998 from literature review, as provided by the Global Burden of Disease 2010 dementia expert group.                                                                                                                                                                 | 1978-1992 |                      |
| United States | Puerto Rico Vital Registration - Deaths 1979 ICD9 as it appears in World Health Organization (WHO). WHO Mortality Database Version February 2014. Geneva, Switzerland: World Health Organization (WHO), 2014.                                                                                         | 1979      |                      |
| United States | United States of America Vital Registration - Deaths 1979 ICD9 as it appears in World Health Organization (WHO). WHO Mortality Database Version February 2014. Geneva, Switzerland: World Health Organization (WHO), 2014.                                                                            | 1979      |                      |
| United States | National Center for Health Statistics (NCHS), Centers for Disease Control and Prevention (CDC), US Census Bureau. United States National Hospital Discharge Survey 1979. Hyattsville, United States: National Center for Health Statistics (NCHS), Centers for Disease Control and Prevention (CDC).  | 1979      |                      |
| United States | James JJ, Heath DG, Cowan DN, Polk AJ, Johnson WL, Stienmier RH. Serological markers for hepatitis types A and B among United States Army blood donors. Mil Med. 1981; 146(8): 562-7.                                                                                                                 | 1979      |                      |
| United States | Saftlas AF, Olson DR, Franks AL, Atrash HK, Pokras R. Epidemiology of preeclampsia and eclampsia in the United States, 1979-1986. Am J Obstet Gynecol. 1990; 163(2): 460-5.                                                                                                                           | 1979-1986 |                      |
| United States | Leikin SL, Gallagher D, Kinney TR, Sloane D, Klug P, Rida W. Mortality in children and adolescents with sickle cell disease. Pediatrics. 1989; 3(84): 500-8.                                                                                                                                          | 1979-1987 |                      |
| United States | Puerto Rico Vital Registration - Deaths 1980 ICD9 as it appears in World Health Organization (WHO). WHO Mortality Database Version February 2014. Geneva, Switzerland: World Health Organization (WHO), 2014.                                                                                         | 1980      |                      |
| United States | United States of America Vital Registration - Deaths 1980 ICD9 as it appears in World Health Organization (WHO). WHO Mortality Database Version February 2014. Geneva, Switzerland: World Health Organization (WHO), 2014.                                                                            | 1980      |                      |
| United States | National Center for Health Statistics (NCHS), Centers for Disease Control and Prevention (CDC). United States National Health and Nutrition Examination Survey 1976-1980. Hyattsville, United States: National Center for Health Statistics (NCHS), Centers for Disease Control and Prevention (CDC). | 1980      |                      |
| United States | National Center for Health Statistics (NCHS), Centers for Disease Control and Prevention (CDC), US Census Bureau. United States National Hospital Discharge Survey 1980. Hyattsville, United States: National Center for Health Statistics (NCHS), Centers for Disease Control and Prevention (CDC).  | 1980      |                      |
| United States | Institute for Health Metrics and Evaluation. Institute for Health Metrics and Evaluation Cancer Registry Database. [Unpublished].                                                                                                                                                                     | 1980-2008 |                      |
| United States | United Nations Children's Fund (UNICEF), World Health Organization (WHO). WHO and UNICEF Reported Disease Incidence Time Series - Pertussis. Geneva, Switzerland: World Health Organization (WHO).                                                                                                    | 1980-2009 |                      |



**Web Table 32 - Comprehensive citation list**

| Country       | Citation                                                                                                                                                                                                                                                                                                      | Year*     | New for GBD 2013 (*) |
|---------------|---------------------------------------------------------------------------------------------------------------------------------------------------------------------------------------------------------------------------------------------------------------------------------------------------------------|-----------|----------------------|
| United States | Lerner NB, Platania BL, LaBella S. Newborn sickle cell screening in a region of Western New York State. <i>J Pediatr.</i> 2009; 154(1): 121-5.                                                                                                                                                                | 1980-2006 | *                    |
| United States | Surveillance, Epidemiology, and End Results (SEER) Program ( <a href="http://www.seer.cancer.gov">www.seer.cancer.gov</a> ) Research Data (1973-2008), National Cancer Institute, DCCPS, Surveillance Research Program, Cancer Statistics Branch, released April 2011, based on the November 2010 submission. | 1980-2008 |                      |
| United States | Wasserheit JN. Effect of changes in human ecology and behavior on patterns of sexually transmitted diseases, including human immunodeficiency virus infection. <i>Proc Natl Acad Sci U S A.</i> 1994; 91(7): 2430-5.                                                                                          | 1980-1990 |                      |
| United States | Pfeffer RI, Afifi AA, Chance JM. Prevalence of Alzheimer's disease in a retirement community. <i>Am J Epidemiol.</i> 1987; 125(3): 420-36.                                                                                                                                                                    | 1980-1981 |                      |
| United States | Institute for Health Metrics and Evaluation (IHME), Joint United Nations Program on HIV/AIDS (UNAIDS). Institute for Health Metrics and Evaluation HIV Mortality Estimates Based on the UNAIDS Spectrum Model Framework.                                                                                      | 1980-2013 | *                    |
| United States | United Nations Children's Fund (UNICEF), World Health Organization (WHO). WHO and UNICEF Reported Disease Incidence Time Series - Pertussis. Geneva, Switzerland: World Health Organization (WHO).                                                                                                            | 1980-2013 |                      |
| United States | United Nations Children's Fund (UNICEF), World Health Organization (WHO). WHO and UNICEF Reported Disease Incidence Time Series - Measles. Geneva, Switzerland: World Health Organization (WHO).                                                                                                              | 1980-2013 |                      |
| United States | Puerto Rico Vital Registration - Deaths 1981 ICD9 as it appears in World Health Organization (WHO). WHO Mortality Database Version February 2014. Geneva, Switzerland: World Health Organization (WHO), 2014.                                                                                                 | 1981      |                      |
| United States | United States of America Vital Registration - Deaths 1981 ICD9 as it appears in World Health Organization (WHO). WHO Mortality Database Version February 2014. Geneva, Switzerland: World Health Organization (WHO), 2014.                                                                                    | 1981      |                      |
| United States | National Center for Health Statistics (NCHS), Centers for Disease Control and Prevention (CDC), US Census Bureau. United States National Hospital Discharge Survey 1981. Hyattsville, United States: National Center for Health Statistics (NCHS), Centers for Disease Control and Prevention (CDC).          | 1981      |                      |
| United States | Folstein MF, Bassett SS, Anthony JC, Romanoski AJ, Nestadt GR. Dementia: case ascertainment in a community survey. <i>J Gerontol.</i> 1991; 46(4): M132-138.                                                                                                                                                  | 1981-1982 |                      |
| United States | Puerto Rico Vital Registration - Deaths 1982 ICD9 as it appears in World Health Organization (WHO). WHO Mortality Database Version February 2014. Geneva, Switzerland: World Health Organization (WHO), 2014.                                                                                                 | 1982      |                      |
| United States | United States of America Vital Registration - Deaths 1982 ICD9 as it appears in World Health Organization (WHO). WHO Mortality Database Version February 2014. Geneva, Switzerland: World Health Organization (WHO), 2014.                                                                                    | 1982      |                      |
| United States | National Center for Health Statistics (NCHS), Centers for Disease Control and Prevention (CDC), US Census Bureau. United States National Hospital Discharge Survey 1982. Hyattsville, United States: National Center for Health Statistics (NCHS), Centers for Disease Control and Prevention (CDC).          | 1982      |                      |
| United States | Puerto Rico Vital Registration - Deaths 1983 ICD9 as it appears in World Health Organization (WHO). WHO Mortality Database Version February 2014. Geneva, Switzerland: World Health Organization (WHO), 2014.                                                                                                 | 1983      |                      |

**Web Table 32 - Comprehensive citation list**

| Country       | Citation                                                                                                                                                                                                                                                                                             | Year*            | New for GBD 2013 (*) |
|---------------|------------------------------------------------------------------------------------------------------------------------------------------------------------------------------------------------------------------------------------------------------------------------------------------------------|------------------|----------------------|
| United States | United States of America Vital Registration - Deaths 1983 ICD9 as it appears in World Health Organization (WHO). WHO Mortality Database Version February 2014. Geneva, Switzerland: World Health Organization (WHO), 2014.                                                                           | 1983             |                      |
| United States | National Center for Health Statistics (NCHS), Centers for Disease Control and Prevention (CDC), US Census Bureau. United States National Hospital Discharge Survey 1983. Hyattsville, United States: National Center for Health Statistics (NCHS), Centers for Disease Control and Prevention (CDC). | 1983             |                      |
| United States | Quinn CT, Rogers ZR, Buchanan GR. Survival of children with sickle cell disease. Blood. 2004; 103(11): 4023-7.                                                                                                                                                                                       | 1983-2002        |                      |
| United States | Puerto Rico Vital Registration - Deaths 1984 ICD9 as it appears in World Health Organization (WHO). WHO Mortality Database Version February 2014. Geneva, Switzerland: World Health Organization (WHO), 2014.                                                                                        | 1984             |                      |
| United States | United States of America Vital Registration - Deaths 1984 ICD9 as it appears in World Health Organization (WHO). WHO Mortality Database Version February 2014. Geneva, Switzerland: World Health Organization (WHO), 2014.                                                                           | 1984             |                      |
| United States | National Center for Health Statistics (NCHS), Centers for Disease Control and Prevention (CDC), US Census Bureau. United States National Hospital Discharge Survey 1984. Hyattsville, United States: National Center for Health Statistics (NCHS), Centers for Disease Control and Prevention (CDC). | 1984             |                      |
| United States | Pepe PE, Hollinger FB, Troisi CL, Heiberg D. Viral hepatitis risk in urban emergency medical services personnel. Ann Emerg Med. 1986; 15(4): 454-7.                                                                                                                                                  | 1984-1985        |                      |
| United States | Puerto Rico Vital Registration - Deaths 1985 ICD9 as it appears in World Health Organization (WHO). WHO Mortality Database Version February 2014. Geneva, Switzerland: World Health Organization (WHO), 2014.                                                                                        | 1985             |                      |
| United States | United States of America Vital Registration - Deaths 1985 ICD9 as it appears in World Health Organization (WHO). WHO Mortality Database Version February 2014. Geneva, Switzerland: World Health Organization (WHO), 2014.                                                                           | 1985             |                      |
| United States | National Center for Health Statistics (NCHS), Centers for Disease Control and Prevention (CDC), US Census Bureau. United States National Hospital Discharge Survey 1985. Hyattsville, United States: National Center for Health Statistics (NCHS), Centers for Disease Control and Prevention (CDC). | 1985             |                      |
| United States | Parkin DM, International Agency for Research on Cancer, International Association of Cancer Registries. Cancer Incidence in Five Continents. Vol. I to VIII. Lyon, France, IARC Press, 2005.                                                                                                         | 1985, 1989, 1992 |                      |
| United States | Puerto Rico Vital Registration - Deaths 1986 ICD9 as it appears in World Health Organization (WHO). WHO Mortality Database Version February 2014. Geneva, Switzerland: World Health Organization (WHO), 2014.                                                                                        | 1986             |                      |
| United States | United States of America Vital Registration - Deaths 1986 ICD9 as it appears in World Health Organization (WHO). WHO Mortality Database Version February 2014. Geneva, Switzerland: World Health Organization (WHO), 2014.                                                                           | 1986             |                      |
| United States | National Center for Health Statistics (NCHS), Centers for Disease Control and Prevention (CDC), US Census Bureau. United States National Hospital Discharge Survey 1986. Hyattsville, United States: National Center for Health Statistics (NCHS), Centers for Disease Control and Prevention (CDC). | 1986             |                      |

**Web Table 32 - Comprehensive citation list**

| Country       | Citation                                                                                                                                                                                                                                                                                              | Year*      | New for GBD 2013 (*) |
|---------------|-------------------------------------------------------------------------------------------------------------------------------------------------------------------------------------------------------------------------------------------------------------------------------------------------------|------------|----------------------|
| United States | Hsia YE, Miyakawa F, Baltazar J, Ching NS, Yuen J, Westwood B, Beutler E. Frequency of glucose-6-phosphate dehydrogenase (G6PD) mutations in Chinese, Filipinos, and Laotians from Hawaii. <i>Hum Genet.</i> 1993; 92(5): 470-6.                                                                      | 1986-1992  |                      |
| United States | Puerto Rico Vital Registration - Deaths 1987 ICD9 as it appears in World Health Organization (WHO). WHO Mortality Database Version February 2014. Geneva, Switzerland: World Health Organization (WHO), 2014.                                                                                         | 1987       |                      |
| United States | United States of America Vital Registration - Deaths 1987 ICD9 as it appears in World Health Organization (WHO). WHO Mortality Database Version February 2014. Geneva, Switzerland: World Health Organization (WHO), 2014.                                                                            | 1987       |                      |
| United States | National Center for Health Statistics (NCHS), Centers for Disease Control and Prevention (CDC), US Census Bureau. United States National Hospital Discharge Survey 1987. Hyattsville, United States: National Center for Health Statistics (NCHS), Centers for Disease Control and Prevention (CDC).  | 1987       |                      |
| United States | Hooper RR, Cunnion SO, Conwill DE, Merrell BR, Wallace JG, Batchelor RA. Hepatitis A and B in a naval population. <i>Mil Med.</i> 1988; 153(7): 350-5.                                                                                                                                                | 1987       |                      |
| United States | Lydon-Rochelle M, Holt VL, Easterling TR, Martin DP. Risk of uterine rupture during labor among women with a prior cesarean delivery. <i>N Engl J Med.</i> 2001; 345(1): 4-8.                                                                                                                         | 1987-1996  |                      |
| United States | Fillenbaum GG, Heyman A, Huber MS, Woodbury MA, Leiss J, Schmader KE, Bohannon A, Trapp-Moen B. The prevalence and 3-year incidence of dementia in older Black and White community residents. <i>J Clin Epidemiol.</i> 1998; 51(7): 587-95.                                                           | 1987-1989  |                      |
| United States | Andsell, Abou-Sayf. Prevalence of Hepatitis A Antibody in Travelers from Hawaii. <i>J Travel Med.</i> 1996; 3(1): 27-31.                                                                                                                                                                              | 1987-1990  |                      |
| United States | Puerto Rico Vital Registration - Deaths 1988 ICD9 as it appears in World Health Organization (WHO). WHO Mortality Database Version February 2014. Geneva, Switzerland: World Health Organization (WHO), 2014.                                                                                         | 1988       |                      |
| United States | United States of America Vital Registration - Deaths 1988 ICD9 as it appears in World Health Organization (WHO). WHO Mortality Database Version February 2014. Geneva, Switzerland: World Health Organization (WHO), 2014.                                                                            | 1988       |                      |
| United States | National Center for Health Statistics (NCHS), Centers for Disease Control and Prevention (CDC), US Census Bureau. United States National Hospital Discharge Survey 1988. Hyattsville, United States: National Center for Health Statistics (NCHS), Centers for Disease Control and Prevention (CDC).  | 1988       |                      |
| United States | National Center for Health Statistics (NCHS), Centers for Disease Control and Prevention (CDC). United States National Health and Nutrition Examination Survey 1988-1994. Hyattsville, United States: National Center for Health Statistics (NCHS), Centers for Disease Control and Prevention (CDC). | 1988-1994  |                      |
| United States | McQuillan GM, Kruszon-Moran D, Kottiri BJ, Curtin LR, Lucas JW, Kington RS. Racial and ethnic differences in the seroprevalence of 6 infectious diseases in the United States: data from NHANES III, 1988-1994. <i>Am J Public Health.</i> 2004; 94(11): 1952-8.                                      | 1988-1994  |                      |
| United States | Bell BP, Kruszon-Moran D, Shapiro CN, Lambert SB, McQuillan GM, Margolis HS. Hepatitis A virus infection in the United States: serologic results from the Third National Health and Nutrition Examination Survey. <i>Vaccine.</i> 2005; 23(50): 5798-806.                                             | 1988, 1994 |                      |

**Web Table 32 - Comprehensive citation list**

| Country       | Citation                                                                                                                                                                                                                                                                                             | Year*      | New for GBD 2013 (*) |
|---------------|------------------------------------------------------------------------------------------------------------------------------------------------------------------------------------------------------------------------------------------------------------------------------------------------------|------------|----------------------|
| United States | Puerto Rico Vital Registration - Deaths 1989 ICD9 as it appears in World Health Organization (WHO). WHO Mortality Database Version February 2014. Geneva, Switzerland: World Health Organization (WHO), 2014.                                                                                        | 1989       |                      |
| United States | United States of America Vital Registration - Deaths 1989 ICD9 as it appears in World Health Organization (WHO). WHO Mortality Database Version February 2014. Geneva, Switzerland: World Health Organization (WHO), 2014.                                                                           | 1989       |                      |
| United States | National Center for Health Statistics (NCHS), Centers for Disease Control and Prevention (CDC), US Census Bureau. United States National Hospital Discharge Survey 1989. Hyattsville, United States: National Center for Health Statistics (NCHS), Centers for Disease Control and Prevention (CDC). | 1989       |                      |
| United States | Hyams KC, Struewing JP, Gray GC. Seroprevalence of hepatitis A, B, and C in a United States military recruit population. Mil Med. 1992; 157(11): 579-82.                                                                                                                                             | 1989       |                      |
| United States | Levine EA, Alverdy JC, Agrawal A. Hepatitis prevalence in trauma patients. Am Surg. 1991; 57(6): 385-7.                                                                                                                                                                                              | 1989       |                      |
| United States | Department of Peace and Conflict Research, Uppsala University. UCDP Battle-Related Deaths Database Version 5, 2013. Uppsala, Sweden: Department of Peace and Conflict Research, Uppsala University, 2013.                                                                                            | 1989-2012  | *                    |
| United States | Sarbah SA, Gramlich T, Younoszai A, Osmack P, Goormastic M, Grosso L, Cooper JN, Di Bisceglie A, Seneca R, Younoszi ZM. Risk factors for hepatocellular carcinoma in patients with cirrhosis. Dig Dis Sci. 2004; 49(5): 850-3.                                                                       | 1989-2000  |                      |
| United States | Hawkins RE, Malone JD, Cloninger LA, Rozmajzl PJ, Lewis D, Butler J, Cross E, Gray S, Hyams KC. Risk of viral hepatitis among military personnel assigned to US Navy ships. J Infect Dis. 1992; 165(4): 716-9.                                                                                       | 1989-1990  |                      |
| United States | Karetnyi YV, Gilchrist MJ, Naides SJ. Hepatitis E virus infection prevalence among selected populations in Iowa. J Clin Virol. 1999; 14(1): 51-5.                                                                                                                                                    | 1989, 1998 | *                    |
| United States | Puerto Rico Vital Registration - Deaths 1990 ICD9 as it appears in World Health Organization (WHO). WHO Mortality Database Version February 2014. Geneva, Switzerland: World Health Organization (WHO), 2014.                                                                                        | 1990       |                      |
| United States | United States of America Vital Registration - Deaths 1990 ICD9 as it appears in World Health Organization (WHO). WHO Mortality Database Version February 2014. Geneva, Switzerland: World Health Organization (WHO), 2014.                                                                           | 1990       |                      |
| United States | National Center for Health Statistics (NCHS), Centers for Disease Control and Prevention (CDC), US Census Bureau. United States National Hospital Discharge Survey 1990. Hyattsville, United States: National Center for Health Statistics (NCHS), Centers for Disease Control and Prevention (CDC). | 1990       |                      |
| United States | Lu E, Kirby RS, Schutze GE. Pertussis in Arkansas. J Ark Med Soc. 1996; 92(12): 623-6.                                                                                                                                                                                                               | 1990-1994  |                      |
| United States | Puerto Rico Vital Registration - Deaths 1991 ICD9 as it appears in World Health Organization (WHO). WHO Mortality Database Version February 2014. Geneva, Switzerland: World Health Organization (WHO), 2014.                                                                                        | 1991       |                      |
| United States | United States of America Vital Registration - Deaths 1991 ICD9 as it appears in World Health Organization (WHO). WHO Mortality Database Version February 2014. Geneva, Switzerland: World Health Organization (WHO), 2014.                                                                           | 1991       |                      |

**Web Table 32 - Comprehensive citation list**

| Country       | Citation                                                                                                                                                                                                                                                                                                                             | Year*     | New for GBD 2013 (*) |
|---------------|--------------------------------------------------------------------------------------------------------------------------------------------------------------------------------------------------------------------------------------------------------------------------------------------------------------------------------------|-----------|----------------------|
| United States | National Center for Health Statistics (NCHS), Centers for Disease Control and Prevention (CDC), US Census Bureau. United States National Hospital Discharge Survey 1991. Hyattsville, United States: National Center for Health Statistics (NCHS), Centers for Disease Control and Prevention (CDC).                                 | 1991      |                      |
| United States | Yang JD, Kim B, Sanderson SO, St Sauver JL, Yawn BP, Pedersen RA, Larson JJ, Therneau TM, Roberts LR, Kim WR. Hepatocellular carcinoma in olmsted county, Minnesota, 1976-2008. <i>Mayo Clin Proc.</i> 2012; 87(1): 9-16.                                                                                                            | 1991-2008 |                      |
| United States | Puerto Rico Vital Registration - Deaths 1992 ICD9 as it appears in World Health Organization (WHO). WHO Mortality Database Version February 2014. Geneva, Switzerland: World Health Organization (WHO), 2014.                                                                                                                        | 1992      |                      |
| United States | United States of America Vital Registration - Deaths 1992 ICD9 as it appears in World Health Organization (WHO). WHO Mortality Database Version February 2014. Geneva, Switzerland: World Health Organization (WHO), 2014.                                                                                                           | 1992      |                      |
| United States | National Center for Health Statistics (NCHS), Centers for Disease Control and Prevention (CDC), US Census Bureau. United States National Hospital Discharge Survey 1992. Hyattsville, United States: National Center for Health Statistics (NCHS), Centers for Disease Control and Prevention (CDC).                                 | 1992      |                      |
| United States | Breitner JC, Wyse BW, Anthony JC, Welsh-Bohmer KA, Steffens DC, Norton MC, Tschanz JT, Plassman BL, Meyer MR, Skoog I, Khachaturian A. APOE-epsilon4 count predicts age when prevalence of AD increases, then declines: the Cache County Study. <i>Neurology</i> . 1999; 53(2): 321-31.                                              | 1992      |                      |
| United States | Magann EF, Chauhan SP, Bofill JA, Waddell D, Rust OA, Morrison JC. Maternal morbidity and mortality associated with intrauterine fetal demise: five-year experience in a tertiary referral hospital. <i>South Med J.</i> 2001; 94(5): 493-5.                                                                                         | 1992-1997 |                      |
| United States | Hendrie HC, Ogunniyi A, Hall KS, Baiyewu O, Unverzagt FW, Gureje O, Gao S, Evans RM, Ogunseyinde AO, Adeyinka AO, Musick B, Hui SL. Incidence of dementia and Alzheimer disease in 2 communities: Yoruba residing in Ibadan, Nigeria, and African Americans residing in Indianapolis, Indiana. <i>JAMA.</i> 2001; 285(6): 739-47.    | 1992-1995 |                      |
| United States | Puerto Rico Vital Registration - Deaths 1993 ICD9 as it appears in World Health Organization (WHO). WHO Mortality Database Version February 2014. Geneva, Switzerland: World Health Organization (WHO), 2014.                                                                                                                        | 1993      |                      |
| United States | United States of America Vital Registration - Deaths 1993 ICD9 as it appears in World Health Organization (WHO). WHO Mortality Database Version February 2014. Geneva, Switzerland: World Health Organization (WHO), 2014.                                                                                                           | 1993      |                      |
| United States | National Center for Health Statistics (NCHS), Centers for Disease Control and Prevention (CDC), US Census Bureau. United States National Hospital Discharge Survey 1993. Hyattsville, United States: National Center for Health Statistics (NCHS), Centers for Disease Control and Prevention (CDC).                                 | 1993      |                      |
| United States | Katz MJ, Lipton RB, Hall CB, Zimmerman ME, Sanders AE, Verghese J, Dickson DW, Derby CA. Age-specific and sex-specific prevalence and incidence of mild cognitive impairment, dementia, and Alzheimer dementia in blacks and whites: a report from the Einstein Aging Study. <i>Alzheimer Dis Assoc Disord.</i> 2012; 26(4): 335-43. | 1993-2006 |                      |
| United States | Davila JA, Morgan RO, Shaib Y, McGlynn KA, El-Serag HB. Hepatitis C infection and the increasing incidence of hepatocellular carcinoma: a population-based study. <i>Gastroenterology.</i> 2004; 127(5): 1372-80.                                                                                                                    | 1993-1999 |                      |

**Web Table 32 - Comprehensive citation list**

| Country       | Citation                                                                                                                                                                                                                                                                                             | Year*     | New for GBD 2013 (*) |
|---------------|------------------------------------------------------------------------------------------------------------------------------------------------------------------------------------------------------------------------------------------------------------------------------------------------------|-----------|----------------------|
| United States | Hassan MM, Frome A, Patt YZ, El-Serag HB. Rising prevalence of hepatitis C virus infection among patients recently diagnosed with hepatocellular carcinoma in the United States. <i>J Clin Gastroenterol.</i> 2002; 35(3): 266-9.                                                                    | 1993-1998 |                      |
| United States | Puerto Rico Vital Registration - Deaths 1994 ICD9 as it appears in World Health Organization (WHO). WHO Mortality Database Version February 2014. Geneva, Switzerland: World Health Organization (WHO), 2014.                                                                                        | 1994      |                      |
| United States | United States of America Vital Registration - Deaths 1994 ICD9 as it appears in World Health Organization (WHO). WHO Mortality Database Version February 2014. Geneva, Switzerland: World Health Organization (WHO), 2014.                                                                           | 1994      |                      |
| United States | National Center for Health Statistics (NCHS), Centers for Disease Control and Prevention (CDC), US Census Bureau. United States National Hospital Discharge Survey 1994. Hyattsville, United States: National Center for Health Statistics (NCHS), Centers for Disease Control and Prevention (CDC). | 1994      |                      |
| United States | Hyams KC. Chronic liver disease among U.S. military patients: the role of hepatitis C and G virus infection. <i>Mil Med.</i> 2000; 165(3): 178-9.                                                                                                                                                    | 1994-1996 |                      |
| United States | Chalasanani N, Horlander JC Sr, Said A, Hoen H, Kopecky KK, Stockberger SM Jr, Manam R, Kwo PY, Lumeng L. Screening for hepatocellular carcinoma in patients with advanced cirrhosis. <i>Am J Gastroenterol.</i> 1999; 94(10): 2988-93.                                                              | 1994-1997 |                      |
| United States | Arbor Research Collaborative for Health, University of Michigan Kidney Epidemiology and Cost Center (UM-KECC). United States Renal Data Extraction and Referencing System.                                                                                                                           | 1994-2000 |                      |
| United States | Welzel TM, Graubard BI, Quraishi S, Zeuzem S, Davila JA, El-Serag HB, McGlynn KA. Population-attributable fractions of risk factors for hepatocellular carcinoma in the United States. <i>Am J Gastroenterol.</i> 2013; 108(8): 1314-21.                                                             | 1994-2010 | *                    |
| United States | Puerto Rico Vital Registration - Deaths 1995 ICD9 as it appears in World Health Organization (WHO). WHO Mortality Database Version February 2014. Geneva, Switzerland: World Health Organization (WHO), 2014.                                                                                        | 1995      |                      |
| United States | United States of America Vital Registration - Deaths 1995 ICD9 as it appears in World Health Organization (WHO). WHO Mortality Database Version February 2014. Geneva, Switzerland: World Health Organization (WHO), 2014.                                                                           | 1995      |                      |
| United States | National Center for Health Statistics (NCHS), Centers for Disease Control and Prevention (CDC), US Census Bureau. United States National Hospital Discharge Survey 1995. Hyattsville, United States: National Center for Health Statistics (NCHS), Centers for Disease Control and Prevention (CDC). | 1995      |                      |
| United States | Redlinger T, O'Rourke K, Nickey L, Martinez G. Elevated hepatitis A and E seroprevalence rates in a Texas/Mexico border community. <i>Tex Med.</i> 1998; 94(5): 68-71.                                                                                                                               | 1995      |                      |
| United States | University of Puerto Rico. Puerto Rico Reproductive Health Survey 1995-1996. San Juan, Puerto Rico: University of Puerto Rico, 1998.                                                                                                                                                                 | 1995-1996 |                      |
| United States | United Nations Office on Drugs and Crime (UNODC). United Nations Office on Drugs and Crime Global Study on Homicides 2011. Vienna, Austria: United Nations Office on Drugs and Crime (UNODC), 2011.                                                                                                  | 1995-2007 |                      |
| United States | United Nations Office on Drugs and Crime (UNODC). United Nations Office on Drugs and Crime Global Study on Homicides 2011. Vienna, Austria: United Nations Office on Drugs and Crime (UNODC), 2011.                                                                                                  | 1995-2010 |                      |
| United States | Shankar SM, Arbogast PG, Mitchel E, Cooper WO, Wang WC, Griffin MR. Medical care utilization and mortality in sickle cell disease: A population-based study. <i>Am J Hematol.</i> 2005; 4(80): 262-70.                                                                                               | 1995-2002 |                      |



**Web Table 32 - Comprehensive citation list**

| Country       | Citation                                                                                                                                                                                                                                                                                                   | Year*     | New for GBD 2013 (*) |
|---------------|------------------------------------------------------------------------------------------------------------------------------------------------------------------------------------------------------------------------------------------------------------------------------------------------------------|-----------|----------------------|
| United States | Miech RA, Breitner JCS, Zandi PP, Khachaturian AS, Anthony JC, Mayer L. Incidence of AD may decline in the early 90s for men, later for women: The Cache County study. <i>Neurology</i> . 2002; 58(2): 209-18.                                                                                             | 1995-1999 |                      |
| United States | Puerto Rico Vital Registration - Deaths 1996 ICD9 as it appears in World Health Organization (WHO). WHO Mortality Database Version February 2014. Geneva, Switzerland: World Health Organization (WHO), 2014.                                                                                              | 1996      |                      |
| United States | United States of America Vital Registration - Deaths 1996 ICD9 as it appears in World Health Organization (WHO). WHO Mortality Database Version February 2014. Geneva, Switzerland: World Health Organization (WHO), 2014.                                                                                 | 1996      |                      |
| United States | National Center for Health Statistics (NCHS), Centers for Disease Control and Prevention (CDC), US Census Bureau. United States National Hospital Discharge Survey 1996. Hyattsville, United States: National Center for Health Statistics (NCHS), Centers for Disease Control and Prevention (CDC).       | 1996      |                      |
| United States | WHO Department of Communicable Disease Surveillance and Response. WHO Report on Global Surveillance of Epidemic-prone Infectious Diseases 2000.                                                                                                                                                            | 1996      |                      |
| United States | Redlinger T, O'Rourke K, VanDerslice J. Hepatitis A among schoolchildren in a US-Mexico border community. <i>Am J Public Health</i> . 1997; 87(10): 1715-7.                                                                                                                                                | 1996      |                      |
| United States | Villano SA, Nelson KE, Vlahov D, Purcell RH, Saah AJ, Thomas DL. Hepatitis A among homosexual men and injection drug users: more evidence for vaccination. <i>Clin Infect Dis</i> . 1997; 25(3): 726-8.                                                                                                    | 1996      |                      |
| United States | Tschanz JT, Corcoran C, Skoog I, Khachaturian AS, Herrick J, Hayden KM, Welsh-Bohmer KA, Calvert T, Norton MC, Zandi P, Breitner JCS, Cache County Study Group. Dementia: the leading predictor of death in a defined elderly population: the Cache County Study. <i>Neurology</i> . 2004; 62(7): 1156-62. | 1996-2001 |                      |
| United States | Mansouri A, Nandy I. NADH-methemoglobin reductase (cytochrome b5 reductase) levels in two groups of American blacks and whites. <i>J Investig Med</i> . 1998; 46(2): 82-6.                                                                                                                                 | 1996-1998 |                      |
| United States | O'Brien JA, Caro JJ. Hospitalization for pertussis: profiles and case costs by age. <i>BMC Infect Dis</i> . 2005; 5: 57.                                                                                                                                                                                   | 1996-1999 |                      |
| United States | Leach CT, Koo FC, Hilsenbeck SG, Jenson HB. The epidemiology of viral hepatitis in children in South Texas: increased prevalence of hepatitis A along the Texas-Mexico border. <i>J Infect Dis</i> . 1999; 180(2): 509-13.                                                                                 | 1996-1997 |                      |
| United States | Weldon M, VanEgdom MJ, Hendricks KA, Regner G, Bell BP, Schulster LM. Prevalence of antibody to hepatitis A virus in drinking water workers and wastewater workers in Texas from 1996 to 1997. <i>J Occup Environ Med</i> . 2000; 42(8): 821-6.                                                            | 1996-1997 |                      |
| United States | Chien NT, Dundoo G, Horani MH, Osmack P, Morley JH, Di Bisceglie AM. Seroprevalence of viral hepatitis in an older nursing home population. <i>J Am Geriatr Soc</i> . 1999; 47(9): 1110-3.                                                                                                                 | 1996-1997 |                      |
| United States | Puerto Rico Vital Registration - Deaths 1997 ICD9 as it appears in World Health Organization (WHO). WHO Mortality Database Version February 2014. Geneva, Switzerland: World Health Organization (WHO), 2014.                                                                                              | 1997      |                      |
| United States | United States of America Vital Registration - Deaths 1997 ICD9 as it appears in World Health Organization (WHO). WHO Mortality Database Version February 2014. Geneva, Switzerland: World Health Organization (WHO), 2014.                                                                                 | 1997      |                      |

**Web Table 32 - Comprehensive citation list**

| Country       | Citation                                                                                                                                                                                                                                                                                                                                                                   | Year*     | New for GBD 2013 (*) |
|---------------|----------------------------------------------------------------------------------------------------------------------------------------------------------------------------------------------------------------------------------------------------------------------------------------------------------------------------------------------------------------------------|-----------|----------------------|
| United States | National Center for Health Statistics (NCHS), Centers for Disease Control and Prevention (CDC), US Census Bureau. United States National Hospital Discharge Survey 1997. Hyattsville, United States: National Center for Health Statistics (NCHS), Centers for Disease Control and Prevention (CDC).                                                                       | 1997      |                      |
| United States | Healthcare Cost and Utilization Project (HCUP), Agency for Healthcare Research and Quality (AHRQ). United States State Inpatient Databases 1997. Rockville, United States: Healthcare Cost and Utilization Project (HCUP), Agency for Healthcare Research and Quality (AHRQ).                                                                                              | 1997      |                      |
| United States | Wiberg K, Birnbaum A, Gradon J. Causes and presentation of meningitis in a Baltimore community hospital 1997-2006. <i>South Med J.</i> 2008; 101(10): 1012-6.                                                                                                                                                                                                              | 1997-2006 |                      |
| United States | Di Bisceglie AM, Lyra AC, Schwartz M, Reddy RK, Martin P, Gores G, Lok ASF, Hussain KB, Gish R, Van Thiel DH, Younossi Z, Tong M, Hassanein T, Balart L, Fleckenstein J, Flamm S, Blei A, Befeler AS, Liver Cancer Network. Hepatitis C-related hepatocellular carcinoma in the United States: influence of ethnic status. <i>Am J Gastroenterol.</i> 2003; 98(9): 2060-3. | 1997-1999 |                      |
| United States | Tungsiripat M, Drechsler H, Sarlone C, Amyot K, Laffey E, Aberg J. Prevalence and significance of G6PD deficiency in patients of an urban HIV clinic. <i>J Int Assoc Physicians AIDS Care (Chic).</i> 2008; 7(2): 88-90.                                                                                                                                                   | 1997-2003 |                      |
| United States | Fishbain JT, Eckart RE, Harner KC, Hospenthal DR. Empiric immunization versus serologic screening: developing a cost-effective strategy for the use of hepatitis A immunization in travelers. <i>J Travel Med.</i> 2002; 9(2): 71-5.                                                                                                                                       | 1997-1998 |                      |
| United States | Puerto Rico Vital Registration - Deaths 1998 ICD9 as it appears in World Health Organization (WHO). WHO Mortality Database Version February 2014. Geneva, Switzerland: World Health Organization (WHO), 2014.                                                                                                                                                              | 1998      |                      |
| United States | United States of America Vital Registration - Deaths 1998 ICD9 as it appears in World Health Organization (WHO). WHO Mortality Database Version February 2014. Geneva, Switzerland: World Health Organization (WHO), 2014.                                                                                                                                                 | 1998      |                      |
| United States | National Center for Health Statistics (NCHS), Centers for Disease Control and Prevention (CDC), US Census Bureau. United States National Hospital Discharge Survey 1998. Hyattsville, United States: National Center for Health Statistics (NCHS), Centers for Disease Control and Prevention (CDC).                                                                       | 1998      |                      |
| United States | Dentinger CM, Heinrich NL, Bell BP, Fox LM, Katz DJ, Culver DH, Shapiro CN. A prevalence study of hepatitis A virus infection in a migrant community: Is hepatitis A vaccine indicated?. <i>J Pediatr.</i> 2001; 138(5): 705-9.                                                                                                                                            | 1998      |                      |
| United States | Michlitsch J, Azimi M, Hoppe C, Walters MC, Lubin B, Lorey F, Vichinsky E. Newborn screening for hemoglobinopathies in California. <i>Pediatr Blood Cancer.</i> 2009; 52(4): 486-90.                                                                                                                                                                                       | 1998-2006 | *                    |
| United States | Thigpen MC, Whitney CG, Messonnier NE, Zell ER, Lynfield R, Hadler JL, Harrison LH, Farley MM, Reingold A, Bennett NM, Craig AS, Schaffner W, Thomas A, Lewis MM, Scallan E, Schuchat A, Emerging Infections Programs Network. Bacterial meningitis in the United States, 1998-2007. <i>N Engl J Med.</i> 2011; 364(21): 2016-25.                                          | 1998-2007 | *                    |
| United States | Davila JA, Weston A, Smalley W, El-Serag HB. Utilization of screening for hepatocellular carcinoma in the United States. <i>J Clin Gastroenterol.</i> 2007; 41(8): 777-82.                                                                                                                                                                                                 | 1998-2003 |                      |
| United States | Alagappan K, Barnett B, Napolitano A, Gressin J, Auerbach C. Seroprevalence of hepatitis A among hospital dietary workers: implications for screening and immunization. <i>Am J Med Qual.</i> 2001; 16(4): 145-8.                                                                                                                                                          | 1998-1999 |                      |



**Web Table 32 - Comprehensive citation list**

| Country       | Citation                                                                                                                                                                                                                                                                                                                                                            | Year*                 | New for GBD 2013 (*) |
|---------------|---------------------------------------------------------------------------------------------------------------------------------------------------------------------------------------------------------------------------------------------------------------------------------------------------------------------------------------------------------------------|-----------------------|----------------------|
| United States | World Health Organization (WHO). Yellow Fever Reported Cases, WHO Vaccine-Preventable Diseases: Monitoring System. Geneva, Switzerland: World Health Organization (WHO).                                                                                                                                                                                            | 1998, 2000-2003, 2008 |                      |
| United States | Puerto Rico Vital Registration - Deaths 1999 ICD10 as it appears in World Health Organization (WHO). WHO Mortality Database Version February 2014. Geneva, Switzerland: World Health Organization (WHO), 2014.                                                                                                                                                      | 1999                  |                      |
| United States | United States of America Vital Registration - Deaths 1999 ICD10 as it appears in World Health Organization (WHO). WHO Mortality Database Version February 2014. Geneva, Switzerland: World Health Organization (WHO), 2014.                                                                                                                                         | 1999                  |                      |
| United States | National Center for Health Statistics (NCHS), Centers for Disease Control and Prevention (CDC), US Census Bureau. United States National Hospital Discharge Survey 1999. Hyattsville, United States: National Center for Health Statistics (NCHS), Centers for Disease Control and Prevention (CDC).                                                                | 1999                  |                      |
| United States | Hirota WK, Duncan MB, Hirota WK, Tsuchida A. The utility of prescreening for hepatitis A in military recruits prior to vaccination. <i>Mil Med.</i> 2002; 167(11): 907-10.                                                                                                                                                                                          | 1999                  |                      |
| United States | Bell BP, Manos MM, Zaman A, Terrault N, Thomas A, Navarro VJ, Dhotre KB, Murphy RC, Van Ness GR, Stabach N, Robert ME, Bower WA, Bialek SR, Sofair AN. The epidemiology of newly diagnosed chronic liver disease in gastroenterology practices in the United States: results from population-based surveillance. <i>Am J Gastroenterol.</i> 2008; 103(11): 2727-37. | 1999-2001             |                      |
| United States | Meng XJ, Wiseman B, Elvinger F, Guenette DK, Toth TE, Engle RE, Emerson SU, Purcell RH. Prevalence of antibodies to hepatitis E virus in veterinarians working with swine and in normal blood donors in the United States and other countries. <i>J Clin Microbiol.</i> 2002; 40(1): 117-22.                                                                        | 1999-2001             | *                    |
| United States | Armstrong GL, Wasley A, Simard EP, McQuillan GM, Kuhnert WL, Alter MJ. The prevalence of hepatitis C virus infection in the United States, 1999 through 2002. <i>Ann Intern Med.</i> 2006; 144(10): 705-14.                                                                                                                                                         | 1999-2002             |                      |
| United States | Wasley A, Kruszon-Moran D, Kuhnert W, Simard EP, Finelli L, McQuillan G, Bell B. The prevalence of hepatitis B virus infection in the United States in the era of vaccination. <i>J Infect Dis.</i> 2010; 202(2): 192-201.                                                                                                                                          | 1999-2006             |                      |
| United States | Lao XQ, Thompson A, McHutchison JG, McCarthy JJ. Sex and age differences in lipid response to chronic infection with the hepatitis C virus in the United States National Health and Nutrition Examination Surveys. <i>J Viral Hepat.</i> 2011; 18(8): 571-9.                                                                                                        | 1999-2006             |                      |
| United States | Puerto Rico Vital Registration - Deaths 2000 ICD10 as it appears in World Health Organization (WHO). WHO Mortality Database Version February 2014. Geneva, Switzerland: World Health Organization (WHO), 2014.                                                                                                                                                      | 2000                  |                      |
| United States | United States of America Vital Registration - Deaths 2000 ICD10 as it appears in World Health Organization (WHO). WHO Mortality Database Version February 2014. Geneva, Switzerland: World Health Organization (WHO), 2014.                                                                                                                                         | 2000                  |                      |
| United States | National Center for Health Statistics (NCHS), Centers for Disease Control and Prevention (CDC), US Census Bureau. United States National Hospital Discharge Survey 2000. Hyattsville, United States: National Center for Health Statistics (NCHS), Centers for Disease Control and Prevention (CDC).                                                                | 2000                  |                      |
| United States | Healthcare Cost and Utilization Project (HCUP), Agency for Healthcare Research and Quality (AHRQ). United States State Inpatient Databases 2000. Rockville, United States: Healthcare Cost and Utilization Project (HCUP), Agency for Healthcare Research and Quality (AHRQ).                                                                                       | 2000                  |                      |

**Web Table 32 - Comprehensive citation list**

| Country       | Citation                                                                                                                                                                                                                                                                                              | Year*     | New for GBD 2013 (*) |
|---------------|-------------------------------------------------------------------------------------------------------------------------------------------------------------------------------------------------------------------------------------------------------------------------------------------------------|-----------|----------------------|
| United States | Yu L, Sloane DA, Guo C, Howell CD. Risk factors for primary hepatocellular carcinoma in black and white Americans in 2000. Clin Gastroenterol Hepatol. 2006; 4(3): 355-60.                                                                                                                            | 2000      |                      |
| United States | Puerto Rico Vital Registration - Deaths 2001 ICD10 as it appears in World Health Organization (WHO). WHO Mortality Database Version February 2014. Geneva, Switzerland: World Health Organization (WHO), 2014.                                                                                        | 2001      |                      |
| United States | United States of America Vital Registration - Deaths 2001 ICD10 as it appears in World Health Organization (WHO). WHO Mortality Database Version February 2014. Geneva, Switzerland: World Health Organization (WHO), 2014.                                                                           | 2001      |                      |
| United States | National Center for Health Statistics (NCHS), Centers for Disease Control and Prevention (CDC), US Census Bureau. United States National Hospital Discharge Survey 2001. Hyattsville, United States: National Center for Health Statistics (NCHS), Centers for Disease Control and Prevention (CDC).  | 2001      | *                    |
| United States | United States Renal Data System Coordinating Center. USRDS 2001 Annual Data Report: Atlas of End-Stage Renal Disease in the United States. Bethesda, United States: National Institute of Diabetes and Digestive and Kidney Diseases (NIDDK), National Institutes of Health, 2001.                    | 2001      |                      |
| United States | Department of Peace and Conflict Research, Uppsala University. UCDP One-Sided Violence Database Version 1.4, 2013. Uppsala, Sweden: Department of Peace and Conflict Research, Uppsala University, 2013.                                                                                              | 2001      | *                    |
| United States | National Center for Health Statistics (NCHS), Centers for Disease Control and Prevention (CDC). United States National Health and Nutrition Examination Survey 2001-2002. Hyattsville, United States: National Center for Health Statistics (NCHS), Centers for Disease Control and Prevention (CDC). | 2001-2002 |                      |
| United States | Plassman BL, Langa KM, Fisher GG, Heeringa SG, Weir DR, Ofstedal MB, Burke JR, Hurd MD, Potter GG, Rodgers WL, Steffens DC, Willis RJ, Wallace RB. Prevalence of dementia in the United States: the aging, demographics, and memory study. Neuroepidemiology. 2007; 29(1-2): 125-32.                  | 2001-2003 |                      |
| United States | Gottlieb SL, Pope V, Sternberg MR, McQuillan GM, Beltrami JF, Berman SM, Markowitz LE. Prevalence of syphilis seroreactivity in the United States: data from the National Health and Nutrition Examination Surveys (NHANES) 2001-2004. Sex Transm Dis. 2008; 35(5): 507-11.                           | 2001-2002 |                      |
| United States | Puerto Rico Vital Registration - Deaths 2002 ICD10 as it appears in World Health Organization (WHO). WHO Mortality Database Version February 2014. Geneva, Switzerland: World Health Organization (WHO), 2014.                                                                                        | 2002      |                      |
| United States | United States of America Vital Registration - Deaths 2002 ICD10 as it appears in World Health Organization (WHO). WHO Mortality Database Version February 2014. Geneva, Switzerland: World Health Organization (WHO), 2014.                                                                           | 2002      |                      |
| United States | National Center for Health Statistics (NCHS), Centers for Disease Control and Prevention (CDC), US Census Bureau. United States National Hospital Discharge Survey 2002. Hyattsville, United States: National Center for Health Statistics (NCHS), Centers for Disease Control and Prevention (CDC).  | 2002      |                      |
| United States | United States Renal Data System Coordinating Center. USRDS 2002 Annual Data Report: Atlas of End-Stage Renal Disease in the United States. Bethesda, United States: National Institute of Diabetes and Digestive and Kidney Diseases (NIDDK), National Institutes of Health, 2002.                    | 2002      |                      |

**Web Table 32 - Comprehensive citation list**

| Country       | Citation                                                                                                                                                                                                                                                                                              | Year*     | New for GBD 2013 (*) |
|---------------|-------------------------------------------------------------------------------------------------------------------------------------------------------------------------------------------------------------------------------------------------------------------------------------------------------|-----------|----------------------|
| United States | Marrero JA, Fontana RJ, Fu S, Conjeevaram HS, Su GL, Lok AS. Alcohol, tobacco and obesity are synergistic risk factors for hepatocellular carcinoma. J Hepatol. 2005; 42(2): 218-24.                                                                                                                  | 2002-2003 |                      |
| United States | Puerto Rico Vital Registration - Deaths 2003 ICD10 as it appears in World Health Organization (WHO). WHO Mortality Database Version February 2014. Geneva, Switzerland: World Health Organization (WHO), 2014.                                                                                        | 2003      |                      |
| United States | United States of America Vital Registration - Deaths 2003 ICD10 as it appears in World Health Organization (WHO). WHO Mortality Database Version February 2014. Geneva, Switzerland: World Health Organization (WHO), 2014.                                                                           | 2003      |                      |
| United States | National Center for Health Statistics (NCHS), Centers for Disease Control and Prevention (CDC), US Census Bureau. United States National Hospital Discharge Survey 2003. Hyattsville, United States: National Center for Health Statistics (NCHS), Centers for Disease Control and Prevention (CDC).  | 2003      |                      |
| United States | Healthcare Cost and Utilization Project (HCUP), Agency for Healthcare Research and Quality (AHRQ). United States State Inpatient Databases 2003. Rockville, United States: Healthcare Cost and Utilization Project (HCUP), Agency for Healthcare Research and Quality (AHRQ).                         | 2003      |                      |
| United States | United States Renal Data System Coordinating Center. USRDS 2003 Annual Data Report: Atlas of End-Stage Renal Disease in the United States. Bethesda, United States: National Institute of Diabetes and Digestive and Kidney Diseases (NIDDK), National Institutes of Health, 2003.                    | 2003      |                      |
| United States | Centre for Health Informatics and Multiprofessional Education, University College London. Modell's Haemoglobinopathologist's Almanac. London, United Kingdom: Centre for Health Informatics and Multiprofessional Education, University College London, 2008.                                         | 2003      |                      |
| United States | National Center for Health Statistics (NCHS), Centers for Disease Control and Prevention (CDC). United States National Health and Nutrition Examination Survey 2003-2004. Hyattsville, United States: National Center for Health Statistics (NCHS), Centers for Disease Control and Prevention (CDC). | 2003-2004 |                      |
| United States | Hagar RW, Michlitsch JG, Gardner J, Vichinsky EP, Morris CR. Clinical differences between children and adults with pulmonary hypertension and sickle cell disease. Br J Haematol. 2008; 140(1): 104-12.                                                                                               | 2003-2007 | *                    |
| United States | United States of America Vital Registration - Deaths 2004 ICD10 as it appears in World Health Organization (WHO). WHO Mortality Database Version February 2014. Geneva, Switzerland: World Health Organization (WHO), 2014.                                                                           | 2004      |                      |
| United States | National Center for Health Statistics (NCHS), Centers for Disease Control and Prevention (CDC), US Census Bureau. United States National Hospital Discharge Survey 2004. Hyattsville, United States: National Center for Health Statistics (NCHS), Centers for Disease Control and Prevention (CDC).  | 2004      |                      |
| United States | Healthcare Cost and Utilization Project (HCUP), Agency for Healthcare Research and Quality (AHRQ). United States State Inpatient Databases 2004. Rockville, United States: Healthcare Cost and Utilization Project (HCUP), Agency for Healthcare Research and Quality (AHRQ).                         | 2004      |                      |
| United States | United States Renal Data System Coordinating Center. United States Renal Data System Annual Data Report 2004. Bethesda, United States: National Institute of Diabetes and Digestive and Kidney Diseases (NIDDK), National Institutes of Health, 2004.                                                 | 2004      |                      |
| United States | Nevin RL, Niebuhr DW. Rising hepatitis A immunity in U.S. military recruits. Mil Med. 2007; 172(7): 787-93.                                                                                                                                                                                           | 2004      |                      |

**Web Table 32 - Comprehensive citation list**

| Country       | Citation                                                                                                                                                                                                                                                                                                      | Year*     | New for GBD 2013 (*) |
|---------------|---------------------------------------------------------------------------------------------------------------------------------------------------------------------------------------------------------------------------------------------------------------------------------------------------------------|-----------|----------------------|
| United States | Chinevere TD, Murray CK, Grant E Jr, Johnson GA, Duelm F, Hospenthal DR. Prevalence of glucose-6-phosphate dehydrogenase deficiency in U.S. Army personnel. <i>Mil Med.</i> 2006; 171(9): 905-7.                                                                                                              | 2004-2005 |                      |
| United States | Puerto Rico Vital Registration - Deaths 2005 ICD10 as it appears in World Health Organization (WHO). WHO Mortality Database Version February 2014. Geneva, Switzerland: World Health Organization (WHO), 2014.                                                                                                | 2005      |                      |
| United States | United States of America Vital Registration - Deaths 2005 ICD10 as it appears in World Health Organization (WHO). WHO Mortality Database Version February 2014. Geneva, Switzerland: World Health Organization (WHO), 2014.                                                                                   | 2005      |                      |
| United States | National Center for Health Statistics (NCHS), Centers for Disease Control and Prevention (CDC), US Census Bureau. United States National Hospital Discharge Survey 2005. Hyattsville, United States: National Center for Health Statistics (NCHS), Centers for Disease Control and Prevention (CDC).          | 2005      |                      |
| United States | Healthcare Cost and Utilization Project (HCUP), Agency for Healthcare Research and Quality (AHRQ). United States State Inpatient Databases 2005. Rockville, United States: Healthcare Cost and Utilization Project (HCUP), Agency for Healthcare Research and Quality (AHRQ).                                 | 2005      |                      |
| United States | United States Renal Data System Coordinating Center. USRDS 2005 Annual Data Report: Atlas of End-Stage Renal Disease in the United States. Bethesda, United States: National Institute of Diabetes and Digestive and Kidney Diseases (NIDDK), National Institutes of Health, 2005.                            | 2005      |                      |
| United States | National Center for Health Statistics (NCHS), Centers for Disease Control and Prevention (CDC), US Census Bureau. United States National Hospital Discharge Survey 2006. Hyattsville, United States: National Center for Health Statistics (NCHS), Centers for Disease Control and Prevention (CDC).          | 2006      |                      |
| United States | Healthcare Cost and Utilization Project (HCUP), Agency for Healthcare Research and Quality (AHRQ). United States State Inpatient Databases 2006. Rockville, United States: Healthcare Cost and Utilization Project (HCUP), Agency for Healthcare Research and Quality (AHRQ).                                 | 2006      |                      |
| United States | Puerto Rico Vital Registration - Deaths 2006 ICD10 as it appears in World Health Organization (WHO). WHO Mortality Database Version February 2014. Geneva, Switzerland: World Health Organization (WHO), 2014.                                                                                                | 2006      |                      |
| United States | United States of America Vital Registration - Deaths 2006 ICD10 as it appears in World Health Organization (WHO). WHO Mortality Database Version February 2014. Geneva, Switzerland: World Health Organization (WHO), 2014.                                                                                   | 2006      |                      |
| United States | United States Renal Data System Coordinating Center. USRDS 2006 Annual Data Report: Atlas of Chronic Kidney Disease and End-Stage Renal Disease in the United States. Bethesda, United States: National Institute of Diabetes and Digestive and Kidney Diseases (NIDDK), National Institutes of Health, 2006. | 2006      |                      |
| United States | National Center for Health Statistics (NCHS), Centers for Disease Control and Prevention (CDC). United States National Health and Nutrition Examination Survey 2005-2006. Hyattsville, United States: National Center for Health Statistics (NCHS), Centers for Disease Control and Prevention (CDC), 2007.   | 2006-2007 |                      |
| United States | United States of America Vital Registration - Deaths 2007 ICD10 as it appears in World Health Organization (WHO). WHO Mortality Database Version February 2014. Geneva, Switzerland: World Health Organization (WHO), 2014.                                                                                   | 2007      |                      |
| United States | World Health Organization (WHO). Global Status Report on Road Safety 2009. Geneva, Switzerland: World Health Organization (WHO), 2009.                                                                                                                                                                        | 2007      |                      |

**Web Table 32 - Comprehensive citation list**

| Country       | Citation                                                                                                                                                                                                                                                                                                      | Year*     | New for GBD 2013 (*) |
|---------------|---------------------------------------------------------------------------------------------------------------------------------------------------------------------------------------------------------------------------------------------------------------------------------------------------------------|-----------|----------------------|
| United States | Puerto Rico Vital Registration - Deaths 2007 ICD10 as it appears in World Health Organization (WHO). WHO Mortality Database Version February 2014. Geneva, Switzerland: World Health Organization (WHO), 2014.                                                                                                | 2007      |                      |
| United States | United States Renal Data System Coordinating Center. USRDS 2007 Annual Data Report: Atlas of Chronic Kidney Disease and End-Stage Renal Disease in the United States. Bethesda, United States: National Institute of Diabetes and Digestive and Kidney Diseases (NIDDK), National Institutes of Health, 2007. | 2007      |                      |
| United States | Yang JD, Harmsen WS, Slettedahl SW, Chaiteerakij R, Enders FT, Therneau TM, Orsini L, Kim WR, Roberts LR. Factors that affect risk for hepatocellular carcinoma and effects of surveillance. Clin Gastroenterol Hepatol. 2011; 9(7): 617-623.                                                                 | 2007-2009 |                      |
| United States | National Center for Health Statistics (NCHS), Centers for Disease Control and Prevention (CDC). United States NVSS Mortality Data 2008. Atlanta, United States: Centers for Disease Control and Prevention (CDC).                                                                                             | 2008      |                      |
| United States | United States of America Vital Registration - Deaths 2008 ICD10 as it appears in World Health Organization (WHO). WHO Mortality Database Version February 2014. Geneva, Switzerland: World Health Organization (WHO), 2014.                                                                                   | 2008      |                      |
| United States | United States Renal Data System Coordinating Center. USRDS 2008 Annual Data Report: Atlas of Chronic Kidney Disease and End-Stage Renal Disease in the United States. Bethesda, United States: National Institute of Diabetes and Digestive and Kidney Diseases (NIDDK), National Institutes of Health, 2008. | 2008      |                      |
| United States | Puerto Rico Vital Registration - Deaths 2008 ICD10 as it appears in World Health Organization (WHO). WHO Mortality Database Version February 2014. Geneva, Switzerland: World Health Organization (WHO), 2014.                                                                                                | 2008      |                      |
| United States | Poon LW, Woodard JL, Stephen Miller L, Green R, Gearing M, Davey A, Arnold J, Martin P, Siegler IC, Nahapetyan L, Kim YS, Markesbery W. Understanding dementia prevalence among centenarians. J Gerontol A Biol Sci Med Sci. 2012; 67(4): 358-65.                                                             | 2008-2010 |                      |
| United States | National Center for Health Statistics (NCHS), Centers for Disease Control and Prevention (CDC). United States NVSS Mortality Data 2009. Atlanta, United States: Centers for Disease Control and Prevention (CDC).                                                                                             | 2009      |                      |
| United States | United States of America Vital Registration - Deaths 2009 ICD10 as it appears in World Health Organization (WHO). WHO Mortality Database Version February 2014. Geneva, Switzerland: World Health Organization (WHO), 2014.                                                                                   | 2009      |                      |
| United States | Weatherall D. Sickle Cell and Thalassemias Prevalence Data, Personal Correspondence with David Weatherall. [Unpublished].                                                                                                                                                                                     | 2009      |                      |
| United States | National Center for Health Statistics (NCHS), Centers for Disease Control and Prevention (CDC). United States NVSS Mortality Data 2010. Atlanta, United States: Centers for Disease Control and Prevention (CDC).                                                                                             | 2010      |                      |
| United States | United States of America Vital Registration - Deaths 2010 ICD10 as it appears in World Health Organization (WHO). WHO Mortality Database Version February 2014. Geneva, Switzerland: World Health Organization (WHO), 2014.                                                                                   | 2010      |                      |
| United States | National Center for Health Statistics (NCHS), Centers for Disease Control and Prevention (CDC). United States NVSS Mortality Data 2011.                                                                                                                                                                       | 2010      | *                    |

**Web Table 32 - Comprehensive citation list**

| Country       | Citation                                                                                                                                                                                                             | Year* | New for GBD 2013 (*) |
|---------------|----------------------------------------------------------------------------------------------------------------------------------------------------------------------------------------------------------------------|-------|----------------------|
| United States | Puerto Rico Vital Registration - Deaths 2010 ICD10 as it appears in World Health Organization (WHO). WHO Mortality Database Version February 2014. Geneva, Switzerland: World Health Organization (WHO), 2014.       | 2010  |                      |
| Uruguay       | Uruguay Vital Registration Death Data 1950 as it appears in United Nations Statistics Division (UNSD). United Nations Demographic Yearbook. New York City, United States: United Nations Statistics Division (UNSD). | 1950  |                      |
| Uruguay       | Uruguay Vital Registration Death Data 1951 as it appears in United Nations Statistics Division (UNSD). United Nations Demographic Yearbook. New York City, United States: United Nations Statistics Division (UNSD). | 1951  |                      |
| Uruguay       | Uruguay Vital Registration Death Data 1952 as it appears in United Nations Statistics Division (UNSD). United Nations Demographic Yearbook. New York City, United States: United Nations Statistics Division (UNSD). | 1952  |                      |
| Uruguay       | Uruguay Vital Registration Death Data 1953 as it appears in United Nations Statistics Division (UNSD). United Nations Demographic Yearbook. New York City, United States: United Nations Statistics Division (UNSD). | 1953  |                      |
| Uruguay       | Uruguay Vital Registration Death Data 1954 as it appears in United Nations Statistics Division (UNSD). United Nations Demographic Yearbook. New York City, United States: United Nations Statistics Division (UNSD). | 1954  |                      |
| Uruguay       | Uruguay Vital Registration - Deaths 1955 ICD7 as it appears in World Health Organization (WHO). WHO Mortality Database Version February 2014. Geneva, Switzerland: World Health Organization (WHO), 2014.            | 1955  |                      |
| Uruguay       | Uruguay Vital Registration - Deaths 1956 ICD7 as it appears in World Health Organization (WHO). WHO Mortality Database Version February 2014. Geneva, Switzerland: World Health Organization (WHO), 2014.            | 1956  |                      |
| Uruguay       | Uruguay Vital Registration - Deaths 1957 ICD7 as it appears in World Health Organization (WHO). WHO Mortality Database Version February 2014. Geneva, Switzerland: World Health Organization (WHO), 2014.            | 1957  |                      |
| Uruguay       | Uruguay Vital Registration - Deaths 1958 ICD7 as it appears in World Health Organization (WHO). WHO Mortality Database Version February 2014. Geneva, Switzerland: World Health Organization (WHO), 2014.            | 1958  |                      |
| Uruguay       | Uruguay Vital Registration - Deaths 1959 ICD7 as it appears in World Health Organization (WHO). WHO Mortality Database Version February 2014. Geneva, Switzerland: World Health Organization (WHO), 2014.            | 1959  |                      |
| Uruguay       | Uruguay Vital Registration - Deaths 1960 ICD7 as it appears in World Health Organization (WHO). WHO Mortality Database Version February 2014. Geneva, Switzerland: World Health Organization (WHO), 2014.            | 1960  |                      |
| Uruguay       | Uruguay Vital Registration Death Data 1961 as it appears in United Nations Statistics Division (UNSD). United Nations Demographic Yearbook. New York City, United States: United Nations Statistics Division (UNSD). | 1961  |                      |
| Uruguay       | Uruguay Vital Registration Death Data 1962 as it appears in United Nations Statistics Division (UNSD). United Nations Demographic Yearbook. New York City, United States: United Nations Statistics Division (UNSD). | 1962  |                      |



**Web Table 32 - Comprehensive citation list**

| Country | Citation                                                                                                                                                                                                  | Year*                                   | New for GBD 2013 (*) |
|---------|-----------------------------------------------------------------------------------------------------------------------------------------------------------------------------------------------------------|-----------------------------------------|----------------------|
| Uruguay | Uruguay Vital Registration - Deaths 1963 ICD7 as it appears in World Health Organization (WHO). WHO Mortality Database Version February 2014. Geneva, Switzerland: World Health Organization (WHO), 2014. | 1963                                    |                      |
| Uruguay | Uruguay Vital Registration - Deaths 1964 ICD7 as it appears in World Health Organization (WHO). WHO Mortality Database Version February 2014. Geneva, Switzerland: World Health Organization (WHO), 2014. | 1964                                    |                      |
| Uruguay | Uruguay Vital Registration - Deaths 1965 ICD7 as it appears in World Health Organization (WHO). WHO Mortality Database Version February 2014. Geneva, Switzerland: World Health Organization (WHO), 2014. | 1965                                    |                      |
| Uruguay | Uruguay Vital Registration - Deaths 1966 ICD7 as it appears in World Health Organization (WHO). WHO Mortality Database Version February 2014. Geneva, Switzerland: World Health Organization (WHO), 2014. | 1966                                    |                      |
| Uruguay | Uruguay Vital Registration - Deaths 1967 ICD7 as it appears in World Health Organization (WHO). WHO Mortality Database Version February 2014. Geneva, Switzerland: World Health Organization (WHO), 2014. | 1967                                    |                      |
| Uruguay | Centre for Research on the Epidemiology of Disasters (CRED). EM-DAT: The OFDA/CRED International Disaster Database. Brussels, Belgium: Catholic University of Leuven.                                     | 1967, 1997-1999, 2002, 2005, 2007, 2009 |                      |
| Uruguay | Uruguay Vital Registration - Deaths 1968 ICD8 as it appears in World Health Organization (WHO). WHO Mortality Database Version February 2014. Geneva, Switzerland: World Health Organization (WHO), 2014. | 1968                                    |                      |
| Uruguay | Uruguay Vital Registration - Deaths 1969 ICD8 as it appears in World Health Organization (WHO). WHO Mortality Database Version February 2014. Geneva, Switzerland: World Health Organization (WHO), 2014. | 1969                                    |                      |
| Uruguay | Uruguay Vital Registration - Deaths 1970 ICD8 as it appears in World Health Organization (WHO). WHO Mortality Database Version February 2014. Geneva, Switzerland: World Health Organization (WHO), 2014. | 1970                                    |                      |
| Uruguay | Uruguay Vital Registration - Deaths 1971 ICD8 as it appears in World Health Organization (WHO). WHO Mortality Database Version February 2014. Geneva, Switzerland: World Health Organization (WHO), 2014. | 1971                                    |                      |
| Uruguay | Uruguay Vital Registration - Deaths 1972 ICD8 as it appears in World Health Organization (WHO). WHO Mortality Database Version February 2014. Geneva, Switzerland: World Health Organization (WHO), 2014. | 1972                                    |                      |
| Uruguay | Peace Research Institute Oslo (PRIO). Battle Deaths Dataset Version 3, 2009. Oslo, Norway: Peace Research Institute Oslo (PRIO), 2009.                                                                    | 1972                                    |                      |
| Uruguay | Uruguay Vital Registration - Deaths 1973 ICD8 as it appears in World Health Organization (WHO). WHO Mortality Database Version February 2014. Geneva, Switzerland: World Health Organization (WHO), 2014. | 1973                                    |                      |
| Uruguay | Uruguay Vital Registration - Deaths 1974 ICD8 as it appears in World Health Organization (WHO). WHO Mortality Database Version February 2014. Geneva, Switzerland: World Health Organization (WHO), 2014. | 1974                                    |                      |
| Uruguay | Uruguay Vital Registration - Deaths 1975 ICD8 as it appears in World Health Organization (WHO). WHO Mortality Database Version February 2014. Geneva, Switzerland: World Health Organization (WHO), 2014. | 1975                                    |                      |

**Web Table 32 - Comprehensive citation list**

| Country | Citation                                                                                                                                                                                                                                                                   | Year*     | New for GBD 2013 (*) |
|---------|----------------------------------------------------------------------------------------------------------------------------------------------------------------------------------------------------------------------------------------------------------------------------|-----------|----------------------|
| Uruguay | Minnesota Population Center, General Directorate of Statistics and Censuses (Uruguay). Uruguay Population and Housing Census 1975 from the Integrated Public Use Microdata Series, International. [Machine-readable database]. Minneapolis: University of Minnesota, 2012. | 1975      |                      |
| Uruguay | Uruguay Vital Registration - Deaths 1976 ICD8 as it appears in World Health Organization (WHO). WHO Mortality Database Version February 2014. Geneva, Switzerland: World Health Organization (WHO), 2014.                                                                  | 1976      |                      |
| Uruguay | United Nations Office on Drugs and Crime (UNODC). United Nations Surveys on Crime Trends and the Operations of Criminal Justice Systems 1970-2006 as provided by Kavi Bhalla. [Unpublished].                                                                               | 1976-1986 |                      |
| Uruguay | Uruguay Vital Registration - Deaths 1977 ICD8 as it appears in World Health Organization (WHO). WHO Mortality Database Version February 2014. Geneva, Switzerland: World Health Organization (WHO), 2014.                                                                  | 1977      |                      |
| Uruguay | Uruguay Vital Registration - Deaths 1978 ICD8 as it appears in World Health Organization (WHO). WHO Mortality Database Version February 2014. Geneva, Switzerland: World Health Organization (WHO), 2014.                                                                  | 1978      |                      |
| Uruguay | Uruguay Vital Registration Death Data 1979 as it appears in United Nations Statistics Division (UNSD). United Nations Demographic Yearbook. New York City, United States: United Nations Statistics Division (UNSD).                                                       | 1979      |                      |
| Uruguay | Uruguay Vital Registration - Deaths 1980 ICD9 as it appears in World Health Organization (WHO). WHO Mortality Database Version February 2014. Geneva, Switzerland: World Health Organization (WHO), 2014.                                                                  | 1980      |                      |
| Uruguay | Institute for Health Metrics and Evaluation (IHME), Joint United Nations Program on HIV/AIDS (UNAIDS). Institute for Health Metrics and Evaluation HIV Mortality Estimates Based on the UNAIDS Spectrum Model Framework.                                                   | 1980-2013 | *                    |
| Uruguay | United Nations Children's Fund (UNICEF), World Health Organization (WHO). WHO and UNICEF Reported Disease Incidence Time Series - Pertussis. Geneva, Switzerland: World Health Organization (WHO).                                                                         | 1980-2013 |                      |
| Uruguay | United Nations Children's Fund (UNICEF), World Health Organization (WHO). WHO and UNICEF Reported Disease Incidence Time Series - Measles. Geneva, Switzerland: World Health Organization (WHO).                                                                           | 1980-2013 |                      |
| Uruguay | Uruguay Vital Registration - Deaths 1981 ICD9 as it appears in World Health Organization (WHO). WHO Mortality Database Version February 2014. Geneva, Switzerland: World Health Organization (WHO), 2014.                                                                  | 1981      |                      |
| Uruguay | González C, Fernández-Cean J, González-Martínez F, Schwedt E, Mazzuchi N. Chronic dialysis in Uruguay: mortality trends from 1981 to 1998. Nefrologia. 2001; 21(4): 342-8.                                                                                                 | 1981-1998 |                      |
| Uruguay | Uruguay Vital Registration - Deaths 1982 ICD9 as it appears in World Health Organization (WHO). WHO Mortality Database Version February 2014. Geneva, Switzerland: World Health Organization (WHO), 2014.                                                                  | 1982      |                      |
| Uruguay | Uruguay Vital Registration - Deaths 1983 ICD9 as it appears in World Health Organization (WHO). WHO Mortality Database Version February 2014. Geneva, Switzerland: World Health Organization (WHO), 2014.                                                                  | 1983      |                      |
| Uruguay | Uruguay Vital Registration - Deaths 1984 ICD9 as it appears in World Health Organization (WHO). WHO Mortality Database Version February 2014. Geneva, Switzerland: World Health Organization (WHO), 2014.                                                                  | 1984      |                      |



**Web Table 32 - Comprehensive citation list**

| Country | Citation                                                                                                                                                                                                                                                                   | Year*      | New for GBD 2013 (*) |
|---------|----------------------------------------------------------------------------------------------------------------------------------------------------------------------------------------------------------------------------------------------------------------------------|------------|----------------------|
| Uruguay | Uruguay Vital Registration - Deaths 1985 ICD9 as it appears in World Health Organization (WHO). WHO Mortality Database Version February 2014. Geneva, Switzerland: World Health Organization (WHO), 2014.                                                                  | 1985       |                      |
| Uruguay | Minnesota Population Center, General Directorate of Statistics and Censuses (Uruguay). Uruguay Population and Housing Census 1985 from the Integrated Public Use Microdata Series, International. [Machine-readable database]. Minneapolis: University of Minnesota, 2012. | 1985       |                      |
| Uruguay | Uruguay Vital Registration - Deaths 1986 ICD9 as it appears in World Health Organization (WHO). WHO Mortality Database Version February 2014. Geneva, Switzerland: World Health Organization (WHO), 2014.                                                                  | 1986       |                      |
| Uruguay | Uruguay Vital Registration - Deaths 1987 ICD9 as it appears in World Health Organization (WHO). WHO Mortality Database Version February 2014. Geneva, Switzerland: World Health Organization (WHO), 2014.                                                                  | 1987       |                      |
| Uruguay | Uruguay Vital Registration - Deaths 1988 ICD9 as it appears in World Health Organization (WHO). WHO Mortality Database Version February 2014. Geneva, Switzerland: World Health Organization (WHO), 2014.                                                                  | 1988       |                      |
| Uruguay | Uruguay Vital Registration - Deaths 1989 ICD9 as it appears in World Health Organization (WHO). WHO Mortality Database Version February 2014. Geneva, Switzerland: World Health Organization (WHO), 2014.                                                                  | 1989       |                      |
| Uruguay | Uruguay Vital Registration - Deaths 1990 ICD9 as it appears in World Health Organization (WHO). WHO Mortality Database Version February 2014. Geneva, Switzerland: World Health Organization (WHO), 2014.                                                                  | 1990       |                      |
| Uruguay | Centre for Health Informatics and Multiprofessional Education, University College London. Modell's Haemoglobinopathologist's Almanac. London, United Kingdom: Centre for Health Informatics and Multiprofessional Education, University College London, 2008.              | 1990-2003  |                      |
| Uruguay | Uruguay Vital Registration - Deaths 1991. [Unpublished].                                                                                                                                                                                                                   | 1991       |                      |
| Uruguay | Parkin DM, International Agency for Research on Cancer, International Association of Cancer Registries. Cancer Incidence in Five Continents. Vol. I to VIII. Lyon, France, IARC Press, 2005.                                                                               | 1991, 1994 |                      |
| Uruguay | Uruguay Vital Registration Death Data 1992 as it appears in United Nations Statistics Division (UNSD). United Nations Demographic Yearbook. New York City, United States: United Nations Statistics Division (UNSD).                                                       | 1992       |                      |
| Uruguay | Uruguay Vital Registration - Deaths 1993 ICD9 as it appears in World Health Organization (WHO). WHO Mortality Database Version February 2014. Geneva, Switzerland: World Health Organization (WHO), 2014.                                                                  | 1993       |                      |
| Uruguay | Uruguay Vital Registration - Deaths 1994 ICD9 as it appears in World Health Organization (WHO). WHO Mortality Database Version February 2014. Geneva, Switzerland: World Health Organization (WHO), 2014.                                                                  | 1994       |                      |
| Uruguay | Measles Supplementary Immunization Activity Data as provided by the World Health Organization. [Unpublished].                                                                                                                                                              | 1994, 1998 |                      |
| Uruguay | Uruguay Vital Registration - Deaths 1995 ICD9 as it appears in World Health Organization (WHO). WHO Mortality Database Version February 2014. Geneva, Switzerland: World Health Organization (WHO), 2014.                                                                  | 1995       |                      |
| Uruguay | Uruguay Dialysis and Transplant Registry data as it appears in the GBD 2010 Chronic Kidney Disease Expert Group dataset. Provided by Carlota Gonzalez-Bedat, Emma Schwedt, and Francisco Gonzalez-Martinez. [Unpublished].                                                 | 1995       |                      |

**Web Table 32 - Comprehensive citation list**

| Country | Citation                                                                                                                                                                                                                                                                 | Year*      | New for GBD 2013 (*) |
|---------|--------------------------------------------------------------------------------------------------------------------------------------------------------------------------------------------------------------------------------------------------------------------------|------------|----------------------|
| Uruguay | United Nations Office on Drugs and Crime (UNODC). United Nations Office on Drugs and Crime Global Study on Homicides 2011. Vienna, Austria: United Nations Office on Drugs and Crime (UNODC), 2011.                                                                      | 1995-2010  |                      |
| Uruguay | World Health Organization (WHO). Yellow Fever Reported Cases, WHO Vaccine-Preventable Diseases: Monitoring System. Geneva, Switzerland: World Health Organization (WHO).                                                                                                 | 1995-2009  |                      |
| Uruguay | Uruguay Vital Registration - Deaths 1996 ICD9 as it appears in World Health Organization (WHO). WHO Mortality Database Version February 2014. Geneva, Switzerland: World Health Organization (WHO), 2014.                                                                | 1996       |                      |
| Uruguay | Minnesota Population Center, National Institute of Statistics (Uruguay). Uruguay Population, Household, and Housing Census 1996 from the Integrated Public Use Microdata Series, International. [Machine-readable database]. Minneapolis: University of Minnesota, 2012. | 1996       |                      |
| Uruguay | Cruells MR, Mescia G, Gaibisso R, Ramírez M, Gutiérrez M, Kohen S, González M, Russi J, Chiparelli H, Ucar L, Pérez MT. [Epidemiological study of hepatitis A and E viruses in different populations in Uruguay]. Gastroenterol Hepatol. 1997; 20(6): 295-8.             | 1996-1997  |                      |
| Uruguay | Uruguay Vital Registration - Deaths 1997 ICD10 as it appears in World Health Organization (WHO). WHO Mortality Database Version February 2014. Geneva, Switzerland: World Health Organization (WHO), 2014.                                                               | 1997       |                      |
| Uruguay | Uruguay Vital Registration - Deaths 1998 ICD10 as it appears in World Health Organization (WHO). WHO Mortality Database Version February 2014. Geneva, Switzerland: World Health Organization (WHO), 2014.                                                               | 1998       |                      |
| Uruguay | Uruguay Vital Registration - Deaths 1999 ICD10 as it appears in World Health Organization (WHO). WHO Mortality Database Version February 2014. Geneva, Switzerland: World Health Organization (WHO), 2014.                                                               | 1999       |                      |
| Uruguay | Uruguay Vital Registration - Deaths 2000 ICD10 as it appears in World Health Organization (WHO). WHO Mortality Database Version February 2014. Geneva, Switzerland: World Health Organization (WHO), 2014.                                                               | 2000       |                      |
| Uruguay | Uruguay Vital Registration - Deaths 2001 ICD10 as it appears in World Health Organization (WHO). WHO Mortality Database Version February 2014. Geneva, Switzerland: World Health Organization (WHO), 2014.                                                               | 2001       |                      |
| Uruguay | Uruguay Vital Registration Death Data 2002 as it appears in United Nations Statistics Division (UNSD). United Nations Demographic Yearbook. New York City, United States: United Nations Statistics Division (UNSD).                                                     | 2002       |                      |
| Uruguay | Honorary Commission for the Fight Against Cancer (Uruguay), National Cancer Registry (Uruguay). Uruguay Cancer Incidence Atlas 2002-2006. Montevideo, Uruguay: Honorary Commission for the Fight Against Cancer (Uruguay), 2010.                                         | 2002-2006  |                      |
| Uruguay | Uruguay Vital Registration - Deaths 2003 ICD10 as it appears in World Health Organization (WHO). WHO Mortality Database Version February 2014. Geneva, Switzerland: World Health Organization (WHO), 2014.                                                               | 2003       |                      |
| Uruguay | World Health Organization (WHO). Retrospective Measles Data on Supplementary Immunization Activities. Geneva, Switzerland: World Health Organization (WHO).                                                                                                              | 2003, 2008 |                      |
| Uruguay | Uruguay Vital Registration - Deaths 2004 ICD10 as it appears in World Health Organization (WHO). WHO Mortality Database Version February 2014. Geneva, Switzerland: World Health Organization (WHO), 2014.                                                               | 2004       |                      |

**Web Table 32 - Comprehensive citation list**

| Country    | Citation                                                                                                                                                                                                                                                                                                                                                                                                                        | Year*     | New for GBD 2013 (*) |
|------------|---------------------------------------------------------------------------------------------------------------------------------------------------------------------------------------------------------------------------------------------------------------------------------------------------------------------------------------------------------------------------------------------------------------------------------|-----------|----------------------|
| Uruguay    | Honorary Commission for the Fight Against Cancer (Uruguay), National Cancer Registry (Uruguay). Uruguay Cancer Incidence Atlas 2002-2006. Montevideo, Uruguay: Honorary Commission for the Fight Against Cancer (Uruguay), 2010.                                                                                                                                                                                                | 2004      |                      |
| Uruguay    | United States Renal Data System Coordinating Center. USRDS 2010 Annual Data Report: Atlas of Chronic Kidney Disease and End-Stage Renal Disease in the United States. Bethesda, United States: National Institute of Diabetes and Digestive and Kidney Diseases (NIDDK), National Institutes of Health, 2010.                                                                                                                   | 2005      |                      |
| Uruguay    | Uruguay Society of Nephrology. Uruguay Dialysis Registry Report 2005. Montevideo, Uruguay: Uruguay Society of Nephrology.                                                                                                                                                                                                                                                                                                       | 2005      |                      |
| Uruguay    | Forman D, Bray F, Brewster DH, Gombe Mbalawa C, Kohler B, Piñeros M, Steliarova-Foucher E, Swaminathan R and Ferlay J, eds (2013). Cancer Incidence in Five Continents, Vol. X Summary Database (electronic version). Lyon, IARC. <a href="http://ci5.iarc.fr">http://ci5.iarc.fr</a>                                                                                                                                           | 2006      |                      |
| Uruguay    | Fassio E, Díaz S, Santa C, Reig ME, Martínez Artola Y, Alves de Mattos A, Míguez C, Galizzi J, Zapata R, Ridruejo E, de Souza FC, Hernández N, Pinchuk L, Multicenter Group for Study of Hepatocarcinoma in Latin America, Asociación Latinoamericana para el Estudio del Hígado (ALEH). Etiology of hepatocellular carcinoma in Latin America: a prospective, multicenter, international study. Ann Hepatol. 2010; 9(1): 63-9. | 2006-2008 | *                    |
| Uruguay    | Uruguay Vital Registration - Deaths 2007 ICD10 as it appears in World Health Organization (WHO). WHO Mortality Database Version February 2014. Geneva, Switzerland: World Health Organization (WHO), 2014.                                                                                                                                                                                                                      | 2007      |                      |
| Uruguay    | Uruguay Vital Registration - Deaths 2008 ICD10 as it appears in World Health Organization (WHO). WHO Mortality Database Version February 2014. Geneva, Switzerland: World Health Organization (WHO), 2014.                                                                                                                                                                                                                      | 2008      |                      |
| Uruguay    | Uruguay Vital Registration - Deaths 2009 ICD10 as it appears in World Health Organization (WHO). WHO Mortality Database Version February 2014. Geneva, Switzerland: World Health Organization (WHO), 2014.                                                                                                                                                                                                                      | 2009      |                      |
| Uruguay    | National Institute of Statistics (Uruguay). Uruguay Census 2011.                                                                                                                                                                                                                                                                                                                                                                | 2011      | *                    |
| Uzbekistan | Institute for Health Metrics and Evaluation (IHME), Joint United Nations Program on HIV/AIDS (UNAIDS). Institute for Health Metrics and Evaluation HIV Mortality Estimates Based on the UNAIDS Spectrum Model Framework.                                                                                                                                                                                                        | 1980-2013 | *                    |
| Uzbekistan | Uzbekistan Vital Registration - Deaths 1981 ICD9 as it appears in World Health Organization (WHO). WHO Mortality Database Version February 2014. Geneva, Switzerland: World Health Organization (WHO), 2014.                                                                                                                                                                                                                    | 1981      |                      |
| Uzbekistan | Uzbekistan Vital Registration - Deaths 1982 ICD9 as it appears in World Health Organization (WHO). WHO Mortality Database Version February 2014. Geneva, Switzerland: World Health Organization (WHO), 2014.                                                                                                                                                                                                                    | 1982      |                      |
| Uzbekistan | Uzbekistan Vital Registration - Deaths 1985 ICD9 as it appears in World Health Organization (WHO). WHO Mortality Database Version February 2014. Geneva, Switzerland: World Health Organization (WHO), 2014.                                                                                                                                                                                                                    | 1985      |                      |
| Uzbekistan | Uzbekistan Vital Registration - Deaths 1986 ICD9 as it appears in World Health Organization (WHO). WHO Mortality Database Version February 2014. Geneva, Switzerland: World Health Organization (WHO), 2014.                                                                                                                                                                                                                    | 1986      |                      |

**Web Table 32 - Comprehensive citation list**

| Country    | Citation                                                                                                                                                                                                                                                                                              | Year*            | New for GBD 2013 (*) |
|------------|-------------------------------------------------------------------------------------------------------------------------------------------------------------------------------------------------------------------------------------------------------------------------------------------------------|------------------|----------------------|
| Uzbekistan | Uzbekistan Vital Registration - Deaths 1987 ICD9 as it appears in World Health Organization (WHO). WHO Mortality Database Version February 2014. Geneva, Switzerland: World Health Organization (WHO), 2014.                                                                                          | 1987             |                      |
| Uzbekistan | Uzbekistan Vital Registration - Deaths 1988 ICD9 as it appears in World Health Organization (WHO). WHO Mortality Database Version February 2014. Geneva, Switzerland: World Health Organization (WHO), 2014.                                                                                          | 1988             |                      |
| Uzbekistan | Uzbekistan Vital Registration - Deaths 1989 ICD9 as it appears in World Health Organization (WHO). WHO Mortality Database Version February 2014. Geneva, Switzerland: World Health Organization (WHO), 2014.                                                                                          | 1989             |                      |
| Uzbekistan | Uzbekistan Vital Registration - Deaths 1990 ICD9 as it appears in World Health Organization (WHO). WHO Mortality Database Version February 2014. Geneva, Switzerland: World Health Organization (WHO), 2014.                                                                                          | 1990             |                      |
| Uzbekistan | Weatherall D. Sickle Cell and Thalassemias Prevalence Data, Personal Correspondence with David Weatherall. [Unpublished].                                                                                                                                                                             | 1990-2009        |                      |
| Uzbekistan | Ruzibakiev R, Kato H, Ueda R, Yuldasheva N, Hegay T, Avazova D, Kurbanov F, Zalaliev M, Tuichiev L, Achundjanov B, Mizokami M. Risk factors and seroprevalence of hepatitis B virus, hepatitis C virus, and human immunodeficiency virus infection in Uzbekistan. Intervirology. 2001; 44(6): 327-32. | 1990-2000        |                      |
| Uzbekistan | United Nations Children's Fund (UNICEF), World Health Organization (WHO). WHO and UNICEF Reported Disease Incidence Time Series - Pertussis. Geneva, Switzerland: World Health Organization (WHO).                                                                                                    | 1990-2013        |                      |
| Uzbekistan | United Nations Children's Fund (UNICEF), World Health Organization (WHO). WHO and UNICEF Reported Disease Incidence Time Series - Measles. Geneva, Switzerland: World Health Organization (WHO).                                                                                                      | 1990-2011, 2013  |                      |
| Uzbekistan | Centre for Health Informatics and Multiprofessional Education, University College London. Modell's Haemoglobinopathologist's Almanac. London, United Kingdom: Centre for Health Informatics and Multiprofessional Education, University College London, 2008.                                         | 1990-2003        |                      |
| Uzbekistan | Uzbekistan Vital Registration - Deaths 1991 ICD9 as it appears in World Health Organization (WHO). WHO Mortality Database Version February 2014. Geneva, Switzerland: World Health Organization (WHO), 2014.                                                                                          | 1991             |                      |
| Uzbekistan | Uzbekistan Vital Registration - Deaths 1992 ICD9 as it appears in World Health Organization (WHO). WHO Mortality Database Version February 2014. Geneva, Switzerland: World Health Organization (WHO), 2014.                                                                                          | 1992             |                      |
| Uzbekistan | Centre for Research on the Epidemiology of Disasters (CRED). EM-DAT: The OFDA/CRED International Disaster Database. Brussels, Belgium: Catholic University of Leuven.                                                                                                                                 | 1992, 1999, 2011 |                      |
| Uzbekistan | Uzbekistan Vital Registration - Deaths 1993 ICD9 as it appears in World Health Organization (WHO). WHO Mortality Database Version February 2014. Geneva, Switzerland: World Health Organization (WHO), 2014.                                                                                          | 1993             |                      |
| Uzbekistan | Uzbekistan Vital Registration - Deaths 1994 ICD9 as it appears in World Health Organization (WHO). WHO Mortality Database Version February 2014. Geneva, Switzerland: World Health Organization (WHO), 2014.                                                                                          | 1994             |                      |
| Uzbekistan | World Health Organization (WHO). Uzbekistan WHO Leishmaniasis Country Profile.                                                                                                                                                                                                                        | 1994-2010        | *                    |
| Uzbekistan | Uzbekistan Vital Registration - Deaths 1995 ICD9 as it appears in World Health Organization (WHO). WHO Mortality Database Version February 2014. Geneva, Switzerland: World Health Organization (WHO), 2014.                                                                                          | 1995             |                      |

**Web Table 32 - Comprehensive citation list**

| Country    | Citation                                                                                                                                                                                                                                                                | Year*                      | New for GBD 2013 (*) |
|------------|-------------------------------------------------------------------------------------------------------------------------------------------------------------------------------------------------------------------------------------------------------------------------|----------------------------|----------------------|
| Uzbekistan | United Nations Office on Drugs and Crime (UNODC). United Nations Office on Drugs and Crime Global Study on Homicides 2011. Vienna, Austria: United Nations Office on Drugs and Crime (UNODC), 2011.                                                                     | 1995-2007                  |                      |
| Uzbekistan | Uzbekistan Vital Registration - Deaths 1996 ICD9 as it appears in World Health Organization (WHO). WHO Mortality Database Version February 2014. Geneva, Switzerland: World Health Organization (WHO), 2014.                                                            | 1996                       |                      |
| Uzbekistan | Institute of Obstetrics and Gynecology, Ministry of Health (Uzbekistan), Macro International, Inc, Ministry of Health (Uzbekistan). Uzbekistan Demographic and Health Survey 1996. Calverton, United States: Macro International, Inc.                                  | 1996                       |                      |
| Uzbekistan | Uzbekistan Vital Registration - Deaths 1997 ICD9 as it appears in World Health Organization (WHO). WHO Mortality Database Version February 2014. Geneva, Switzerland: World Health Organization (WHO), 2014.                                                            | 1997                       |                      |
| Uzbekistan | Doroshenko NV, Schastnyĭ EI, Iagodovskii VV, Abdullaeva FA, Stakhanova VM. [Specific immunity in preschool children at high risk of infection with hepatitis A virus]. Vopr Virusol. 1990; 35(1): 26-9.                                                                 | 1997                       |                      |
| Uzbekistan | Uzbekistan Vital Registration - Deaths 1998 ICD9 as it appears in World Health Organization (WHO). WHO Mortality Database Version February 2014. Geneva, Switzerland: World Health Organization (WHO), 2014.                                                            | 1998                       |                      |
| Uzbekistan | Uzbekistan Vital Registration - Deaths 1999 ICD9 as it appears in World Health Organization (WHO). WHO Mortality Database Version February 2014. Geneva, Switzerland: World Health Organization (WHO), 2014.                                                            | 1999                       |                      |
| Uzbekistan | Department of Peace and Conflict Research, Uppsala University. UCDP Battle-Related Deaths Database Version 5, 2013. Uppsala, Sweden: Department of Peace and Conflict Research, Uppsala University, 2013.                                                               | 1999-2004                  | *                    |
| Uzbekistan | World Health Organization (WHO). Yellow Fever Reported Cases, WHO Vaccine-Preventable Diseases: Monitoring System. Geneva, Switzerland: World Health Organization (WHO).                                                                                                | 1999, 2001-2006, 2008-2009 |                      |
| Uzbekistan | United Nations Children's Fund (UNICEF), Ministry of Macroeconomics and Statistics (Uzbekistan). Uzbekistan Multiple Indicator Cluster Survey 2000. New York, United States: United Nations Children's Fund (UNICEF).                                                   | 2000                       |                      |
| Uzbekistan | Uzbekistan Vital Registration - Deaths 2000 ICD9 as it appears in World Health Organization (WHO). WHO Mortality Database Version February 2014. Geneva, Switzerland: World Health Organization (WHO), 2014.                                                            | 2000                       |                      |
| Uzbekistan | Uzbekistan Vital Registration - Deaths 2001 ICD9 as it appears in World Health Organization (WHO). WHO Mortality Database Version February 2014. Geneva, Switzerland: World Health Organization (WHO), 2014.                                                            | 2001                       |                      |
| Uzbekistan | Uzbekistan Vital Registration - Deaths 2002 ICD9 as it appears in World Health Organization (WHO). WHO Mortality Database Version February 2014. Geneva, Switzerland: World Health Organization (WHO), 2014.                                                            | 2002                       |                      |
| Uzbekistan | Analytical and Information Center of the Ministry of Health of Uzbekistan, Macro International, Inc, Ministry of Macroeconomics and Statistics (Uzbekistan). Uzbekistan Special Demographic and Health Survey 2002. Calverton, United States: Macro International, Inc. | 2002                       |                      |
| Uzbekistan | Uzbekistan Vital Registration - Deaths 2003 ICD9 as it appears in World Health Organization (WHO). WHO Mortality Database Version February 2014. Geneva, Switzerland: World Health Organization (WHO), 2014.                                                            | 2003                       |                      |

**Web Table 32 - Comprehensive citation list**

| Country    | Citation                                                                                                                                                                                                                                                                | Year*                                                          | New for GBD 2013 (*) |
|------------|-------------------------------------------------------------------------------------------------------------------------------------------------------------------------------------------------------------------------------------------------------------------------|----------------------------------------------------------------|----------------------|
| Uzbekistan | Uzbekistan Vital Registration - Deaths 2004 ICD10 as it appears in World Health Organization (WHO). WHO Mortality Database Version February 2014. Geneva, Switzerland: World Health Organization (WHO), 2014.                                                           | 2004                                                           |                      |
| Uzbekistan | Uzbekistan Vital Registration - Deaths 2005 ICD10 as it appears in World Health Organization (WHO). WHO Mortality Database Version February 2014. Geneva, Switzerland: World Health Organization (WHO), 2014.                                                           | 2005                                                           |                      |
| Uzbekistan | United Nations Children's Fund (UNICEF), State Committee of the Republic of Uzbekistan on Statistics. Uzbekistan Multiple Indicator Cluster Survey 2006. New York, United States: United Nations Children's Fund (UNICEF).                                              | 2006                                                           |                      |
| Uzbekistan | Uzbekistan Vital Statistics - Deaths 2006 as it appears in TransMonEE 2013 Database, UNICEF Regional Office for CEE/CIS.                                                                                                                                                | 2006                                                           |                      |
| Uzbekistan | World Health Organization (WHO). Retrospective Measles Data on Supplementary Immunization Activities. Geneva, Switzerland: World Health Organization (WHO).                                                                                                             | 2006-2007, 2011                                                |                      |
| Uzbekistan | Joint United Nations Program on HIV/AIDS (UNAIDS), Ministry of Health (Uzbekistan). Uzbekistan UNGASS Report 2010. Geneva, Switzerland: Joint United Nations Program on HIV/AIDS (UNAIDS), 2010.                                                                        | 2009                                                           |                      |
| Vanuatu    | Centre for Research on the Epidemiology of Disasters (CRED). EM-DAT: The OFDA/CRED International Disaster Database. Brussels, Belgium: Catholic University of Leuven.                                                                                                   | 1951, 1972, 1985, 1987-1988, 1992-1993, 1997, 1999, 2001, 2004 |                      |
| Vanuatu    | New Hebrides, Former Population and Housing Census 1967 as it appears in United Nations Statistics Division (UNSD). United Nations Demographic Yearbook. New York City, United States: United Nations Statistics Division (UNSD).                                       | 1967                                                           |                      |
| Vanuatu    | Institute for Health Metrics and Evaluation (IHME), Joint United Nations Program on HIV/AIDS (UNAIDS). Institute for Health Metrics and Evaluation HIV Mortality Estimates Based on the UNAIDS Spectrum Model Framework.                                                | 1980-2013                                                      | *                    |
| Vanuatu    | United Nations Children's Fund (UNICEF), World Health Organization (WHO). WHO and UNICEF Reported Disease Incidence Time Series - Pertussis. Geneva, Switzerland: World Health Organization (WHO).                                                                      | 1980-1997, 1999-2000, 2002, 2005-2011                          |                      |
| Vanuatu    | United Nations Children's Fund (UNICEF), World Health Organization (WHO). WHO and UNICEF Reported Disease Incidence Time Series - Measles. Geneva, Switzerland: World Health Organization (WHO).                                                                        | 1980-1997, 1999-2003, 2005-2013                                |                      |
| Vanuatu    | Hill AV, Bowden DK, O'Shaughnessy DF, Weatherall DJ, Clegg JB. Beta thalassemia in Melanesia: association with malaria and characterization of a common variant (IVS-1 nt 5 G----C). Blood. 1988; 72(1): 9-14.                                                          | 1985-1987                                                      |                      |
| Vanuatu    | Kaneko A, Taleo G, Kalkoa M, Yaviong J, Reeve PA, Ganczakowski M, Shirakawa C, Palmer K, Kobayakawa T, Björkman A. Malaria epidemiology, glucose 6-phosphate dehydrogenase deficiency and human settlement in the Vanuatu Archipelago. Acta Trop. 1998; 70(3): 285-302. | 1985-1992                                                      |                      |
| Vanuatu    | United Nations Office on Drugs and Crime (UNODC). United Nations Surveys on Crime Trends and the Operations of Criminal Justice Systems 1970-2006 as provided by Kavi Bhalla. [Unpublished].                                                                            | 1987-1990                                                      |                      |
| Vanuatu    | National Planning and Statistics Office (Vanuatu). Vanuatu Population and Housing Census 1989.                                                                                                                                                                          | 1989                                                           |                      |
| Vanuatu    | Maher CP, Harris MS, Milne A, Johnston A, Stewart A, Waldon JA. Seroepidemiology of hepatitis B infection in children in Vanuatu. Implications for vaccination strategy. Med J Aust. 154(4): 249-53.                                                                    | 1989                                                           |                      |



**Web Table 32 - Comprehensive citation list**

| Country   | Citation                                                                                                                                                                                                                                                                                       | Year*                                                                                     | New for GBD 2013 (*) |
|-----------|------------------------------------------------------------------------------------------------------------------------------------------------------------------------------------------------------------------------------------------------------------------------------------------------|-------------------------------------------------------------------------------------------|----------------------|
| Vanuatu   | Centre for Health Informatics and Multiprofessional Education, University College London. Modell's Haemoglobinopathologist's Almanac. London, United Kingdom: Centre for Health Informatics and Multiprofessional Education, University College London, 2008.                                  | 1990-2003                                                                                 |                      |
| Vanuatu   | Ganczakowski M, Town M, Bowden DK, Vulliamy TJ, Kaneko A, Clegg JB, Weatherall DJ, Luzzatto L. Multiple glucose 6-phosphate dehydrogenase-deficient variants correlate with malaria endemicity in the Vanuatu archipelago (southwestern Pacific). <i>Am J Hum Genet.</i> 1995; 56(1): 294-301. | 1993-1995                                                                                 |                      |
| Vanuatu   | World Health Organization (WHO). The Global Elimination of Congenital Syphilis: Rationale and Strategy for Action. Geneva, Switzerland: World Health Organization (WHO), 2007.                                                                                                                 | 1997-2003                                                                                 |                      |
| Vanuatu   | Measles Supplementary Immunization Activity Data as provided by the World Health Organization. [Unpublished].                                                                                                                                                                                  | 1998                                                                                      |                      |
| Vanuatu   | World Health Organization (WHO). Yellow Fever Reported Cases, WHO Vaccine-Preventable Diseases: Monitoring System. Geneva, Switzerland: World Health Organization (WHO).                                                                                                                       | 1998-1999, 2001                                                                           |                      |
| Vanuatu   | Vanuatu National Statistics Office. Vanuatu Population and Housing Census 1999.                                                                                                                                                                                                                | 1999                                                                                      |                      |
| Vanuatu   | World Health Organization (WHO). Retrospective Measles Data on Supplementary Immunization Activities. Geneva, Switzerland: World Health Organization (WHO).                                                                                                                                    | 2006, 2009                                                                                |                      |
| Vanuatu   | Ministry of Health (Vanuatu), United Nations Children's Fund (UNICEF). Vanuatu Multiple Indicator Cluster Survey 2007-2008. New York, United States: United Nations Children's Fund (UNICEF).                                                                                                  | 2007-2008                                                                                 |                      |
| Vanuatu   | Vanuatu National Statistics Office. Vanuatu Population and Housing Census 2009.                                                                                                                                                                                                                | 2009                                                                                      | *                    |
| Venezuela | Venezuela Vital Registration Death Data 1950 as it appears in United Nations Statistics Division (UNSD). United Nations Demographic Yearbook. New York City, United States: United Nations Statistics Division (UNSD).                                                                         | 1950                                                                                      |                      |
| Venezuela | Centre for Research on the Epidemiology of Disasters (CRED). EM-DAT: The OFDA/CRED International Disaster Database. Brussels, Belgium: Catholic University of Leuven.                                                                                                                          | 1950, 1962, 1967, 1981, 1985-1988, 1993-1994, 1997, 1999-2000, 2002-2005, 2008, 2010-2011 |                      |
| Venezuela | Venezuela Vital Registration Death Data 1951 as it appears in United Nations Statistics Division (UNSD). United Nations Demographic Yearbook. New York City, United States: United Nations Statistics Division (UNSD).                                                                         | 1951                                                                                      |                      |
| Venezuela | Venezuela Vital Registration Death Data 1952 as it appears in United Nations Statistics Division (UNSD). United Nations Demographic Yearbook. New York City, United States: United Nations Statistics Division (UNSD).                                                                         | 1952                                                                                      |                      |
| Venezuela | Venezuela Vital Registration Death Data 1953 as it appears in United Nations Statistics Division (UNSD). United Nations Demographic Yearbook. New York City, United States: United Nations Statistics Division (UNSD).                                                                         | 1953                                                                                      |                      |
| Venezuela | Venezuela Vital Registration Death Data 1954 as it appears in United Nations Statistics Division (UNSD). United Nations Demographic Yearbook. New York City, United States: United Nations Statistics Division (UNSD).                                                                         | 1954                                                                                      |                      |
| Venezuela | Venezuela Vital Registration - Deaths 1955 ICD7 as it appears in World Health Organization (WHO). WHO Mortality Database Version February 2014. Geneva, Switzerland: World Health Organization (WHO), 2014.                                                                                    | 1955                                                                                      |                      |

**Web Table 32 - Comprehensive citation list**

| Country   | Citation                                                                                                                                                                                                    | Year*     | New for GBD 2013 (*) |
|-----------|-------------------------------------------------------------------------------------------------------------------------------------------------------------------------------------------------------------|-----------|----------------------|
| Venezuela | Venezuela Vital Registration - Deaths 1956 ICD7 as it appears in World Health Organization (WHO). WHO Mortality Database Version February 2014. Geneva, Switzerland: World Health Organization (WHO), 2014. | 1956      |                      |
| Venezuela | Venezuela Vital Registration - Deaths 1957 ICD7 as it appears in World Health Organization (WHO). WHO Mortality Database Version February 2014. Geneva, Switzerland: World Health Organization (WHO), 2014. | 1957      |                      |
| Venezuela | Venezuela Vital Registration - Deaths 1958 ICD7 as it appears in World Health Organization (WHO). WHO Mortality Database Version February 2014. Geneva, Switzerland: World Health Organization (WHO), 2014. | 1958      |                      |
| Venezuela | Venezuela Vital Registration - Deaths 1959 ICD7 as it appears in World Health Organization (WHO). WHO Mortality Database Version February 2014. Geneva, Switzerland: World Health Organization (WHO), 2014. | 1959      |                      |
| Venezuela | Venezuela Vital Registration - Deaths 1960 ICD7 as it appears in World Health Organization (WHO). WHO Mortality Database Version February 2014. Geneva, Switzerland: World Health Organization (WHO), 2014. | 1960      |                      |
| Venezuela | Venezuela Vital Registration - Deaths 1961 ICD7 as it appears in World Health Organization (WHO). WHO Mortality Database Version February 2014. Geneva, Switzerland: World Health Organization (WHO), 2014. | 1961      |                      |
| Venezuela | Venezuela Vital Registration - Deaths 1962 ICD7 as it appears in World Health Organization (WHO). WHO Mortality Database Version February 2014. Geneva, Switzerland: World Health Organization (WHO), 2014. | 1962      |                      |
| Venezuela | Peace Research Institute Oslo (PRIO). Battle Deaths Dataset Version 3, 2009. Oslo, Norway: Peace Research Institute Oslo (PRIO), 2009.                                                                      | 1962-1988 |                      |
| Venezuela | Venezuela Vital Registration - Deaths 1963 ICD7 as it appears in World Health Organization (WHO). WHO Mortality Database Version February 2014. Geneva, Switzerland: World Health Organization (WHO), 2014. | 1963      |                      |
| Venezuela | Venezuela Vital Registration - Deaths 1964 ICD7 as it appears in World Health Organization (WHO). WHO Mortality Database Version February 2014. Geneva, Switzerland: World Health Organization (WHO), 2014. | 1964      |                      |
| Venezuela | Venezuela Vital Registration - Deaths 1965 ICD7 as it appears in World Health Organization (WHO). WHO Mortality Database Version February 2014. Geneva, Switzerland: World Health Organization (WHO), 2014. | 1965      |                      |
| Venezuela | Venezuela Vital Registration - Deaths 1966 ICD7 as it appears in World Health Organization (WHO). WHO Mortality Database Version February 2014. Geneva, Switzerland: World Health Organization (WHO), 2014. | 1966      |                      |
| Venezuela | Venezuela Vital Registration - Deaths 1967 ICD7 as it appears in World Health Organization (WHO). WHO Mortality Database Version February 2014. Geneva, Switzerland: World Health Organization (WHO), 2014. | 1967      |                      |
| Venezuela | Venezuela Vital Registration - Deaths 1968 ICD8 as it appears in World Health Organization (WHO). WHO Mortality Database Version February 2014. Geneva, Switzerland: World Health Organization (WHO), 2014. | 1968      |                      |
| Venezuela | Venezuela Vital Registration - Deaths 1969 ICD8 as it appears in World Health Organization (WHO). WHO Mortality Database Version February 2014. Geneva, Switzerland: World Health Organization (WHO), 2014. | 1969      |                      |



**Web Table 32 - Comprehensive citation list**

| Country   | Citation                                                                                                                                                                                                                 | Year*                | New for GBD 2013 (*) |
|-----------|--------------------------------------------------------------------------------------------------------------------------------------------------------------------------------------------------------------------------|----------------------|----------------------|
| Venezuela | Venezuela Vital Registration - Deaths 1970 ICD8 as it appears in World Health Organization (WHO). WHO Mortality Database Version February 2014. Geneva, Switzerland: World Health Organization (WHO), 2014.              | 1970                 |                      |
| Venezuela | Venezuela Vital Registration - Deaths 1971 ICD8 as it appears in World Health Organization (WHO). WHO Mortality Database Version February 2014. Geneva, Switzerland: World Health Organization (WHO), 2014.              | 1971                 |                      |
| Venezuela | Venezuela Vital Registration - Deaths 1972 ICD8 as it appears in World Health Organization (WHO). WHO Mortality Database Version February 2014. Geneva, Switzerland: World Health Organization (WHO), 2014.              | 1972                 |                      |
| Venezuela | Venezuela Vital Registration - Deaths 1973 ICD8 as it appears in World Health Organization (WHO). WHO Mortality Database Version February 2014. Geneva, Switzerland: World Health Organization (WHO), 2014.              | 1973                 |                      |
| Venezuela | Venezuela Vital Registration - Deaths 1974 ICD8 as it appears in World Health Organization (WHO). WHO Mortality Database Version February 2014. Geneva, Switzerland: World Health Organization (WHO), 2014.              | 1974                 |                      |
| Venezuela | Venezuela Vital Registration - Deaths 1975 ICD8 as it appears in World Health Organization (WHO). WHO Mortality Database Version February 2014. Geneva, Switzerland: World Health Organization (WHO), 2014.              | 1975                 |                      |
| Venezuela | Venezuela Vital Registration - Deaths 1976 ICD8 as it appears in World Health Organization (WHO). WHO Mortality Database Version February 2014. Geneva, Switzerland: World Health Organization (WHO), 2014.              | 1976                 |                      |
| Venezuela | Central Office of Statistics and Information (Venezuela), International Statistical Institute. Venezuela World Fertility Survey 1977. Voorburg, Netherlands: International Statistical Institute.                        | 1977                 |                      |
| Venezuela | Venezuela Vital Registration - Deaths 1977 ICD8 as it appears in World Health Organization (WHO). WHO Mortality Database Version February 2014. Geneva, Switzerland: World Health Organization (WHO), 2014.              | 1977                 |                      |
| Venezuela | Venezuela Vital Registration - Deaths 1978 ICD8 as it appears in World Health Organization (WHO). WHO Mortality Database Version February 2014. Geneva, Switzerland: World Health Organization (WHO), 2014.              | 1978                 |                      |
| Venezuela | Venezuela Vital Registration - Deaths 1979 ICD9 as it appears in World Health Organization (WHO). WHO Mortality Database Version February 2014. Geneva, Switzerland: World Health Organization (WHO), 2014.              | 1979                 |                      |
| Venezuela | Venezuela Vital Registration - Deaths 1980 ICD9 as it appears in World Health Organization (WHO). WHO Mortality Database Version February 2014. Geneva, Switzerland: World Health Organization (WHO), 2014.              | 1980                 |                      |
| Venezuela | Vasconcelos PF da C. Febre amarela. Rev Soc Bras Med Trop. 2003; 36(2): 275-93.                                                                                                                                          | 1980-2001            |                      |
| Venezuela | Institute for Health Metrics and Evaluation (IHME), Joint United Nations Program on HIV/AIDS (UNAIDS). Institute for Health Metrics and Evaluation HIV Mortality Estimates Based on the UNAIDS Spectrum Model Framework. | 1980-2013            | *                    |
| Venezuela | United Nations Children's Fund (UNICEF), World Health Organization (WHO). WHO and UNICEF Reported Disease Incidence Time Series - Pertussis. Geneva, Switzerland: World Health Organization (WHO).                       | 1980-2006, 2008-2013 |                      |

**Web Table 32 - Comprehensive citation list**

| Country   | Citation                                                                                                                                                                                                               | Year*           | New for GBD 2013 (*) |
|-----------|------------------------------------------------------------------------------------------------------------------------------------------------------------------------------------------------------------------------|-----------------|----------------------|
| Venezuela | United Nations Children's Fund (UNICEF), World Health Organization (WHO). WHO and UNICEF Reported Disease Incidence Time Series - Measles. Geneva, Switzerland: World Health Organization (WHO).                       | 1980-2013       |                      |
| Venezuela | WHO Department of Communicable Disease Surveillance and Response. WHO Report on Global Surveillance of Epidemic-prone Infectious Diseases 2000.                                                                        | 1980, 1998      |                      |
| Venezuela | Venezuela Population and Housing Census 1981 as it appears in United Nations Statistics Division (UNSD). United Nations Demographic Yearbook. New York City, United States: United Nations Statistics Division (UNSD). | 1981            |                      |
| Venezuela | Venezuela Vital Registration - Deaths 1981 ICD9 as it appears in World Health Organization (WHO). WHO Mortality Database Version February 2014. Geneva, Switzerland: World Health Organization (WHO), 2014.            | 1981            |                      |
| Venezuela | Venezuela Vital Registration - Deaths 1982 ICD9 as it appears in World Health Organization (WHO). WHO Mortality Database Version February 2014. Geneva, Switzerland: World Health Organization (WHO), 2014.            | 1982            |                      |
| Venezuela | Venezuela Vital Registration - Deaths 1983 ICD9 as it appears in World Health Organization (WHO). WHO Mortality Database Version February 2014. Geneva, Switzerland: World Health Organization (WHO), 2014.            | 1983            |                      |
| Venezuela | Venezuela Vital Registration Death Data 1984 as it appears in United Nations Statistics Division (UNSD). United Nations Demographic Yearbook. New York City, United States: United Nations Statistics Division (UNSD). | 1984            |                      |
| Venezuela | Amesty-Valbuena A, González-Pirela Y, Rivero M. [Seroepidemiologic study of hepatitis A virus among children of Maracaibo, Venezuela]. Invest Clin. 1989; 30(4): 215-28.                                               | 1984-1986       |                      |
| Venezuela | Venezuela Vital Registration - Deaths 1985 ICD9 as it appears in World Health Organization (WHO). WHO Mortality Database Version February 2014. Geneva, Switzerland: World Health Organization (WHO), 2014.            | 1985            |                      |
| Venezuela | Pan American Health Organization (PAHO). Update on yellow fever in the Americas. Epidemiol Bull. 2000; 21(2):13.                                                                                                       | 1985, 1998-1999 |                      |
| Venezuela | Venezuela Vital Registration - Deaths 1986 ICD9 as it appears in World Health Organization (WHO). WHO Mortality Database Version February 2014. Geneva, Switzerland: World Health Organization (WHO), 2014.            | 1986            |                      |
| Venezuela | Venezuela Vital Registration - Deaths 1987 ICD9 as it appears in World Health Organization (WHO). WHO Mortality Database Version February 2014. Geneva, Switzerland: World Health Organization (WHO), 2014.            | 1987            |                      |
| Venezuela | Venezuela Vital Registration - Deaths 1988 ICD9 as it appears in World Health Organization (WHO). WHO Mortality Database Version February 2014. Geneva, Switzerland: World Health Organization (WHO), 2014.            | 1988            |                      |
| Venezuela | Venezuela Vital Registration - Deaths 1989 ICD9 as it appears in World Health Organization (WHO). WHO Mortality Database Version February 2014. Geneva, Switzerland: World Health Organization (WHO), 2014.            | 1989            |                      |
| Venezuela | Department of Peace and Conflict Research, Uppsala University. UCDP One-Sided Violence Database Version 1.4, 2013. Uppsala, Sweden: Department of Peace and Conflict Research, Uppsala University, 2013.               | 1989            | *                    |
| Venezuela | Department of Peace and Conflict Research, Uppsala University. UCDP Battle-Related Deaths Database Version 5, 2013. Uppsala, Sweden: Department of Peace and Conflict Research, Uppsala University, 2013.              | 1989-1992       | *                    |

**Web Table 32 - Comprehensive citation list**

| Country   | Citation                                                                                                                                                                                                                                                               | Year*                 | New for GBD 2013 (*) |
|-----------|------------------------------------------------------------------------------------------------------------------------------------------------------------------------------------------------------------------------------------------------------------------------|-----------------------|----------------------|
| Venezuela | Central Office of Statistics and Information (Venezuela), Minnesota Population Center. Venezuela Population and Housing Census 1990 from the Integrated Public Use Microdata Series, International. [Machine-readable database]. Minneapolis: University of Minnesota. | 1990                  |                      |
| Venezuela | Venezuela Vital Registration - Deaths 1990 ICD9 as it appears in World Health Organization (WHO). WHO Mortality Database Version February 2014. Geneva, Switzerland: World Health Organization (WHO), 2014.                                                            | 1990                  |                      |
| Venezuela | Weatherall D. Sickle Cell and Thalassemias Prevalence Data, Personal Correspondence with David Weatherall. [Unpublished].                                                                                                                                              | 1990-2009             |                      |
| Venezuela | Centre for Health Informatics and Multiprofessional Education, University College London. Modell's Haemoglobinopathologist's Almanac. London, United Kingdom: Centre for Health Informatics and Multiprofessional Education, University College London, 2008.          | 1990-2003             |                      |
| Venezuela | Venezuela Vital Registration Death Data 1991 as it appears in United Nations Statistics Division (UNSD). United Nations Demographic Yearbook. New York City, United States: United Nations Statistics Division (UNSD).                                                 | 1991                  |                      |
| Venezuela | Pujol FH, Favorov MO, Marcano T, Esté JA, Magris M, Liprandi F, Khudyakov YE, Khudyakova NS, Fields HA. Prevalence of antibodies against hepatitis E virus among urban and rural populations in Venezuela. J Med Virol. 1994; 42(3): 234-6.                            | 1991-1992             |                      |
| Venezuela | Venezuela Vital Registration - Deaths 1992 ICD9 as it appears in World Health Organization (WHO). WHO Mortality Database Version February 2014. Geneva, Switzerland: World Health Organization (WHO), 2014.                                                            | 1992                  |                      |
| Venezuela | Albornoz Monque A, Presilla RC, Ascanio Mujica B. [Viral hepatitis type A. Who should be vaccinated?]. G E N. 1995; 49(4): 263-6.                                                                                                                                      | 1992-1994             |                      |
| Venezuela | Venezuela Vital Registration - Deaths 1993 ICD9 as it appears in World Health Organization (WHO). WHO Mortality Database Version February 2014. Geneva, Switzerland: World Health Organization (WHO), 2014.                                                            | 1993                  |                      |
| Venezuela | Venezuela Vital Registration - Deaths 1994 ICD9 as it appears in World Health Organization (WHO). WHO Mortality Database Version February 2014. Geneva, Switzerland: World Health Organization (WHO), 2014.                                                            | 1994                  |                      |
| Venezuela | Blitz-Dorfman L, Monsalve F, Atencio R, Porto L, Monzon M, Favorov MO, Fields HA, Pujol FH, Echevarria JM. Serological survey of markers of infection with viral hepatitis among the Yukpa Amerindians from Western Venezuela. Ann Trop Med Parasitol. 90(6): 655-7.   | 1994                  |                      |
| Venezuela | Measles Supplementary Immunization Activity Data as provided by the World Health Organization. [Unpublished].                                                                                                                                                          | 1994, 1998            |                      |
| Venezuela | United Nations Office on Drugs and Crime (UNODC). United Nations Office on Drugs and Crime Global Study on Homicides 2011. Vienna, Austria: United Nations Office on Drugs and Crime (UNODC), 2011.                                                                    | 1995-2009             |                      |
| Venezuela | World Health Organization (WHO). Venezuela WHO Leishmaniasis Country Profile.                                                                                                                                                                                          | 1995-2010             | *                    |
| Venezuela | World Health Organization (WHO). Yellow Fever Reported Cases, WHO Vaccine-Preventable Diseases: Monitoring System. Geneva, Switzerland: World Health Organization (WHO).                                                                                               | 1995, 1997, 2000-2009 |                      |
| Venezuela | Venezuela Vital Registration - Deaths 1996 ICD10 as it appears in World Health Organization (WHO). WHO Mortality Database Version February 2014. Geneva, Switzerland: World Health Organization (WHO), 2014.                                                           | 1996                  |                      |
| Venezuela | Tapia-Conyer R, Santos JI, Cavalcanti AM, Urdaneta E, Rivera L, Manterola A, Potin M, Ruttiman R, Tanaka Kido J. Hepatitis A in Latin America: A Changing Epidemiologic Pattern. Am J Trop Med Hyg. 1999; 61(5): 825-9.                                                | 1996-1997             |                      |

**Web Table 32 - Comprehensive citation list**

| Country   | Citation                                                                                                                                                                                                                                                                                                                                                                                  | Year*           | New for GBD 2013 (*) |
|-----------|-------------------------------------------------------------------------------------------------------------------------------------------------------------------------------------------------------------------------------------------------------------------------------------------------------------------------------------------------------------------------------------------|-----------------|----------------------|
| Venezuela | Venezuela Vital Registration - Deaths 1997 ICD10 as it appears in World Health Organization (WHO). WHO Mortality Database Version February 2014. Geneva, Switzerland: World Health Organization (WHO), 2014.                                                                                                                                                                              | 1997            |                      |
| Venezuela | United Nations Population Fund (UNFPA). Venezuela Population and Family Survey 1998.                                                                                                                                                                                                                                                                                                      | 1998            |                      |
| Venezuela | Venezuela Vital Registration - Deaths 1998 ICD10 as it appears in World Health Organization (WHO). WHO Mortality Database Version February 2014. Geneva, Switzerland: World Health Organization (WHO), 2014.                                                                                                                                                                              | 1998            |                      |
| Venezuela | Sylvatic yellow fever outbreak in Bolivia. EPI Newsl. 1999; 1(21): 1-3.                                                                                                                                                                                                                                                                                                                   | 1998            |                      |
| Venezuela | Molero AE, Pino-Ramírez G, Maestre GE. High prevalence of dementia in a Caribbean population. Neuroepidemiology. 2007; 29(1-2): 107-12.                                                                                                                                                                                                                                                   | 1998-2001       |                      |
| Venezuela | Venezuela Vital Registration - Deaths 1999 ICD10 as it appears in World Health Organization (WHO). WHO Mortality Database Version February 2014. Geneva, Switzerland: World Health Organization (WHO), 2014.                                                                                                                                                                              | 1999            |                      |
| Venezuela | Venezuela Vital Registration - Deaths 2000 ICD10 as it appears in World Health Organization (WHO). WHO Mortality Database Version February 2014. Geneva, Switzerland: World Health Organization (WHO), 2014.                                                                                                                                                                              | 2000            |                      |
| Venezuela | Bellorin-Font E, Milanés CL, Rodríguez-Iturbe B. End-stage renal disease and its treatment in Venezuela. Artif Organs. 2002; 26(9): 747-9.                                                                                                                                                                                                                                                | 2000            |                      |
| Venezuela | National Institute of Statistics (Venezuela). Venezuela Vital Registration - Deaths 2010.                                                                                                                                                                                                                                                                                                 | 2000-2010       | *                    |
| Venezuela | Venezuela Vital Registration - Deaths 2001 ICD10 as it appears in World Health Organization (WHO). WHO Mortality Database Version February 2014. Geneva, Switzerland: World Health Organization (WHO), 2014.                                                                                                                                                                              | 2001            |                      |
| Venezuela | National Institute of Statistics (Venezuela). Venezuela Vital Registration - Deaths 2011.                                                                                                                                                                                                                                                                                                 | 2001-2011       | *                    |
| Venezuela | World Health Organization (WHO). Retrospective Measles Data on Supplementary Immunization Activities. Geneva, Switzerland: World Health Organization (WHO).                                                                                                                                                                                                                               | 2001-2007, 2009 |                      |
| Venezuela | National Institute of Statistics (Venezuela), Minnesota Population Center. Venezuela Population and Housing Census 2002 from the Integrated Public Use Microdata Series, International: [Machine-readable database]. Minneapolis: University of Minnesota.                                                                                                                                | 2002            |                      |
| Venezuela | Venezuela Vital Registration - Deaths 2002 ICD10 as it appears in World Health Organization (WHO). WHO Mortality Database Version February 2014. Geneva, Switzerland: World Health Organization (WHO), 2014.                                                                                                                                                                              | 2002            |                      |
| Venezuela | Venezuela Vital Registration - Deaths 2003 ICD10 as it appears in World Health Organization (WHO). WHO Mortality Database Version February 2014. Geneva, Switzerland: World Health Organization (WHO), 2014.                                                                                                                                                                              | 2003            |                      |
| Venezuela | Prince M, Acosta D, Ferri CP, Guerra M, Huang Y, Llibre Rodriguez JJ, Salas A, Sosa AL, Williams JD, Dewey ME, Acosta I, Jotheeswaran AT, Liu Z. Dementia incidence and mortality in middle-income countries, and associations with indicators of cognitive reserve: a 10/66 Dementia Research Group population-based cohort study. Lancet. 2012; 380(9836): 50-8.                        | 2003-2010       |                      |
| Venezuela | Sousa RM, Ferri CP, Acosta D, Albanese E, Guerra M, Huang Y, Jacob KS, Jotheeswaran AT, Rodriguez JLL, Pichardo GR, Rodriguez MC, Salas A, Sosa AL, Williams J, Zuniga T, Prince M. Contribution of chronic diseases to disability in elderly people in countries with low and middle incomes: a 10/66 Dementia Research Group population-based survey. Lancet. 2009; 374(9704): 1821-30. | 2003-2005       |                      |

**Web Table 32 - Comprehensive citation list**

| Country   | Citation                                                                                                                                                                                                                                                                                                                                                                                                                                | Year*                                                          | New for GBD 2013 (*) |
|-----------|-----------------------------------------------------------------------------------------------------------------------------------------------------------------------------------------------------------------------------------------------------------------------------------------------------------------------------------------------------------------------------------------------------------------------------------------|----------------------------------------------------------------|----------------------|
| Venezuela | Venezuela Vital Registration - Deaths 2004 ICD10 as it appears in World Health Organization (WHO). WHO Mortality Database Version February 2014. Geneva, Switzerland: World Health Organization (WHO), 2014.                                                                                                                                                                                                                            | 2004                                                           |                      |
| Venezuela | Llibre Rodriguez JJ, Ferri CP, Acosta D, Guerra M, Huang Y, Jacob KS, Krishnamoorthy ES, Salas A, Sosa AL, Acosta I, Dewey ME, Gaona C, Jotheeswaran AT, Li S, Rodriguez D, Rodriguez G, Kumar PS, Valhuerdi A, Prince M, 10/66 Dementia Research Group. Prevalence of dementia in Latin America, India, and China: a population-based cross-sectional survey. <i>Lancet</i> . 2008; 372(9637): 464-74.                                 | 2004-2005                                                      |                      |
| Venezuela | Venezuela Vital Registration - Deaths 2005 ICD10 as it appears in World Health Organization (WHO). WHO Mortality Database Version February 2014. Geneva, Switzerland: World Health Organization (WHO), 2014.                                                                                                                                                                                                                            | 2005                                                           |                      |
| Venezuela | Venezuela Vital Registration - Deaths 2006 ICD10 as it appears in World Health Organization (WHO). WHO Mortality Database Version February 2014. Geneva, Switzerland: World Health Organization (WHO), 2014.                                                                                                                                                                                                                            | 2006                                                           |                      |
| Venezuela | Fassio E, Díaz S, Santa C, Reig ME, Martínez Artola Y, Alves de Mattos A, Míguez C, Galizzi J, Zapata R, Ridruejo E, de Souza FC, Hernández N, Pinchuk L, Multicenter Group for Study of Hepatocarcinoma in Latin America, Asociación Latinoamericana para el Estudio del Hígado (ALEH). Etiology of hepatocellular carcinoma in Latin America: a prospective, multicenter, international study. <i>Ann Hepatol</i> . 2010; 9(1): 63-9. | 2006-2008                                                      | *                    |
| Venezuela | Venezuela Vital Registration - Deaths 2007 ICD10 as it appears in World Health Organization (WHO). WHO Mortality Database Version February 2014. Geneva, Switzerland: World Health Organization (WHO), 2014.                                                                                                                                                                                                                            | 2007                                                           |                      |
| Venezuela | Giménez OG, Torrealba MC, Urquiola MB, Ortiz GG, Fonseca SM, Merzón R, de Donato M, Castillo O, Arends de Pérez A. Diagnosis of hemoglobinopathies in newborns in Venezuela hospitals. <i>An Pediatr (Barc)</i> . 2009; 71(4): 314-8.                                                                                                                                                                                                   | 2007-2008                                                      | *                    |
| Venezuela | Venezuela Vital Registration - Deaths 2008 ICD10 as it appears in World Health Organization (WHO). WHO Mortality Database Version February 2014. Geneva, Switzerland: World Health Organization (WHO), 2014.                                                                                                                                                                                                                            | 2008                                                           |                      |
| Venezuela | Venezuela Vital Registration - Deaths 2009 ICD10 as it appears in World Health Organization (WHO). WHO Mortality Database Version February 2014. Geneva, Switzerland: World Health Organization (WHO), 2014.                                                                                                                                                                                                                            | 2009                                                           |                      |
| Vietnam   | Peace Research Institute Oslo (PRIO). Battle Deaths Dataset Version 3, 2009. Oslo, Norway: Peace Research Institute Oslo (PRIO), 2009.                                                                                                                                                                                                                                                                                                  | 1950-1975                                                      |                      |
| Vietnam   | Centre for Research on the Epidemiology of Disasters (CRED). EM-DAT: The OFDA/CRED International Disaster Database. Brussels, Belgium: Catholic University of Leuven.                                                                                                                                                                                                                                                                   | 1953, 1956, 1964, 1966, 1970-1971, 1973, 1978, 1980, 1982-2013 |                      |
| Vietnam   | Le-Xuan-Chat, Le-Si-Quang, Humbert C, Chu-Quang-Giao. Glucose-6-phosphate dehydrogenase deficiency in Viet-nam. <i>Nouv Rev Fr Hematol</i> . 1968; 8(6): 878-84.                                                                                                                                                                                                                                                                        | 1966-1968                                                      |                      |
| Vietnam   | Youel DB, Strickland GT, Binh BA, Clarkson R, Blackwell RQ. Low incidence of erythrocyte G-6-P D deficiency in Vietnamese and Montagnards of South Vietnam. <i>Vox Sang</i> . 1971; 20(6): 555-8.                                                                                                                                                                                                                                       | 1969-1971                                                      |                      |
| Vietnam   | Frischer H, Bowman JE, Carson PE, Rieckmann KH, Willerson D Jr, Colwell EJ. Erythrocytic glutathione reductase, glucose-6-phosphate dehydrogenase, and 6-phosphogluconic dehydrogenase deficiencies in populations of the United States, South Vietnam, Iran, and Ethiopia. <i>J Lab Clin Med</i> . 1973; 81(4): 603-12.                                                                                                                | 1971-1973                                                      |                      |

**Web Table 32 - Comprehensive citation list**

| Country | Citation                                                                                                                                                                                                                                                                               | Year*           | New for GBD 2013 (*) |
|---------|----------------------------------------------------------------------------------------------------------------------------------------------------------------------------------------------------------------------------------------------------------------------------------------|-----------------|----------------------|
| Vietnam | Panich V, Bumrungtrakul P, Jitjai C, Kamolmatayakul S, Khoprasert B, Klaisuvan C, Kongmuang U, Maneechai P, Pornpatkul M, Ruengrairatanaroje P, Surapruk P, Viriyayudhakorn S. Glucose-6-phosphate dehydrogenase deficiency in South Vietnamese. <i>Hum Hered.</i> 1980; 30(6): 361-4. | 1978-1980       |                      |
| Vietnam | Institute for Health Metrics and Evaluation (IHME), Joint United Nations Program on HIV/AIDS (UNAIDS). Institute for Health Metrics and Evaluation HIV Mortality Estimates Based on the UNAIDS Spectrum Model Framework.                                                               | 1980-2013       | *                    |
| Vietnam | United Nations Children's Fund (UNICEF), World Health Organization (WHO). WHO and UNICEF Reported Disease Incidence Time Series - Pertussis. Geneva, Switzerland: World Health Organization (WHO).                                                                                     | 1980-2013       |                      |
| Vietnam | United Nations Children's Fund (UNICEF), World Health Organization (WHO). WHO and UNICEF Reported Disease Incidence Time Series - Measles. Geneva, Switzerland: World Health Organization (WHO).                                                                                       | 1980-2013       |                      |
| Vietnam | Hoa DP, Höjer B, Persson LA. Are there social inequities in child morbidity and mortality in rural Vietnam. <i>J Trop Pediatr.</i> 1997; 43(4): 226-31.                                                                                                                                | 1987            |                      |
| Vietnam | General Statistics Office (Viet Nam), Minnesota Population Center. Viet Nam Population Census 1989 from the Integrated Public Use Microdata Series, International: [Machine-readable database]. Minneapolis: University of Minnesota.                                                  | 1989            |                      |
| Vietnam | Weatherall D. Sickle Cell and Thalassemias Prevalence Data, Personal Correspondence with David Weatherall. [Unpublished].                                                                                                                                                              | 1990-2009       |                      |
| Vietnam | Centre for Health Informatics and Multiprofessional Education, University College London. Modell's Haemoglobinopathologist's Almanac. London, United Kingdom: Centre for Health Informatics and Multiprofessional Education, University College London, 2008.                          | 1990-2003       |                      |
| Vietnam | Song P, Duc DD, Hien B, Nakata S, Chosa T, Watanabe J, Tsuda F, Murata K, Okamoto H. Markers of hepatitis C and B virus infections among blood donors in Ho Chi Minh City and Hanoi, Vietnam. <i>Clin Diagn Lab Immunol.</i> 1994; 1(4): 413-8.                                        | 1992            |                      |
| Vietnam | Parkin DM, International Agency for Research on Cancer, International Association of Cancer Registries. <i>Cancer Incidence in Five Continents. Vol. I to VIII.</i> Lyon, France, IARC Press, 2005.                                                                                    | 1992, 1995-1996 |                      |
| Vietnam | Nakata S, Song P, Duc DD, Nguyen XQ, Murata K, Tsuda F, Okamoto H. Hepatitis C and B virus infections in populations at low or high risk in Ho Chi Minh and Hanoi, Vietnam. <i>J Gastroenterol Hepatol.</i> 1994; 9(4): 416-9.                                                         | 1993            |                      |
| Vietnam | Measles Supplementary Immunization Activity Data as provided by the World Health Organization. [Unpublished].                                                                                                                                                                          | 1993-1999       |                      |
| Vietnam | General Statistics Office (Viet Nam). Vietnam Intercensal Demographic Survey 1994.                                                                                                                                                                                                     | 1994            |                      |
| Vietnam | Hieu DT, Hanenberg R, Vach TH, Vinh DQ, Sokal D. Maternal mortality in Vietnam in 1994-95. <i>Stud Fam Plann.</i> 1999; 30(4): 329-38.                                                                                                                                                 | 1994            |                      |
| Vietnam | Hau CH, Hien TT, Tien NT, Khiem HB, Sac PK, Nhung VT, Larasati RP, Laras K, Putri MP, Doss R, Hyams KC, Corwin AL. Prevalence of Enteric Hepatitis A and E Viruses in the Mekong River Delta Region of Vietnam. <i>Am J Trop Med Hyg.</i> 1999; 60(2): 277-80.                         | 1994            |                      |
| Vietnam | Katellaris PH, Robertson G, Bradbury R, Tippett G, Hoa DQ, Ngu MC. Seroprevalence of hepatitis viruses in children in rural Viet Nam. <i>Trans R Soc Trop Med Hyg.</i> 1995; 89(5): 487.                                                                                               | 1994            |                      |
| Vietnam | Tran TT, Le QT, Tran TN, Nguyen NT, Pedersen FK, Schlumberger M. The etiology of bacterial pneumonia and meningitis in Vietnam. <i>Pediatr Infect Dis J.</i> 1998; 17 Suppl(9 Suppl): S192-S194.                                                                                       | 1995-1996       |                      |
| Vietnam | Verlé P, Nhan DH, Tinh TT, Uyen TT, Thuong ND, Kongs A, Stuyft P, Coosemans M. Glucose-6-phosphate dehydrogenase deficiency in northern Vietnam. <i>Trop Med Int Health.</i> 2000; 5(3): 203-6.                                                                                        | 1996-1997       |                      |



**Web Table 32 - Comprehensive citation list**

| Country | Citation                                                                                                                                                                                                                                                                    | Year*                      | New for GBD 2013 (*) |
|---------|-----------------------------------------------------------------------------------------------------------------------------------------------------------------------------------------------------------------------------------------------------------------------------|----------------------------|----------------------|
| Vietnam | Macro International, Inc. National Committee for Population and Family Planning. Vietnam Demographic and Health Survey 1997. Calverton, United States: Macro International, Inc.                                                                                            | 1997                       |                      |
| Vietnam | Matsuoka H, Thuan DTV, van Thien H, Kanbe T, Jalloh A, Hirai M, Arai M, Dung NT, Kawamoto F. Seven different glucose-6-phosphate dehydrogenase variants including a new variant distributed in Lam Dong Province in southern Vietnam. Acta Med Okayama. 2007; 61(4): 213-9. | 1997-2004                  |                      |
| Vietnam | Jutavijittum P, Jiviriyawat Y, Jiviriyamat W, Yousukh A, Hayashi S, Itakura H, Toriyama K. Seroprevalence of Antibody to Hepatitis E Virus in Voluntary Blood Donors in Northern Thailand. Tropical Medicine. 2000; 42(2): 135-9.                                           | 1998-1999                  | *                    |
| Vietnam | General Statistics Office (Viet Nam). Vietnam Population and Housing Census 1999.                                                                                                                                                                                           | 1999                       |                      |
| Vietnam | General Statistics Office (Viet Nam), Minnesota Population Center. Viet Nam Population and Housing Census 1999 from the Integrated Public Use Microdata Series, International: [Machine-readable database]. Minneapolis: University of Minnesota.                           | 1999                       |                      |
| Vietnam | Huong DL, Minh HV, Byass P. Applying verbal autopsy to determine cause of death in rural Vietnam. Scand J Public Health Suppl. 2003; 62: 19-25.                                                                                                                             | 1999                       |                      |
| Vietnam | World Health Organization (WHO). Yellow Fever Reported Cases, WHO Vaccine-Preventable Diseases: Monitoring System. Geneva, Switzerland: World Health Organization (WHO).                                                                                                    | 1999, 2001, 2003           |                      |
| Vietnam | General Statistics Office (Viet Nam), United Nations Children's Fund (UNICEF). Vietnam Multiple Indicator Cluster Survey 2000. New York, United States: United Nations Children's Fund (UNICEF).                                                                            | 2000                       |                      |
| Vietnam | Huong DL, Van Minh H, Janlert U, Van DD, Byass P. Socio-economic status inequality and major causes of death in adults: a 5-year follow-up study in rural Vietnam. Public Health. 2006; 120(6): 497-504.                                                                    | 2001                       |                      |
| Vietnam | World Health Organization (WHO). Retrospective Measles Data on Supplementary Immunization Activities. Geneva, Switzerland: World Health Organization (WHO).                                                                                                                 | 2001-2005, 2007-2008, 2010 |                      |
| Vietnam | General Statistics Office (Viet Nam), Macro International, Inc. Vietnam Demographic and Health Survey 2002. Calverton, United States: Macro International, Inc.                                                                                                             | 2002                       |                      |
| Vietnam | General Statistics Office (Viet Nam), Macro International, Inc, National Institute of Hygiene and Epidemiology (Viet Nam). Vietnam AIDS Indicator Survey 2005. Calverton, United States: Macro International, Inc.                                                          | 2005                       |                      |
| Vietnam | Tsu VD, Mai TTP, Nguyen YH, Luu HTT. Reducing postpartum hemorrhage in Vietnam: assessing the effectiveness of active management of third-stage labor. J Obstet Gynaecol Res. 2006; 32(5): 489-96.                                                                          | 2005                       |                      |
| Vietnam | United Nations Office on Drugs and Crime (UNODC). United Nations Office on Drugs and Crime Global Study on Homicides 2011. Vienna, Austria: United Nations Office on Drugs and Crime (UNODC), 2011.                                                                         | 2005-2006                  |                      |
| Vietnam | General Statistics Office (Viet Nam), United Nations Children's Fund (UNICEF). Vietnam Multiple Indicator Cluster Survey 2006. New York, United States: United Nations Children's Fund (UNICEF).                                                                            | 2006                       |                      |
| Vietnam | General Statistics Office (Viet Nam). Vietnam Population Change and Family Planning Survey 2006.                                                                                                                                                                            | 2006                       |                      |
| Vietnam | Ngo AD, Rao C, Hoa NP, Adair T, Chuc NTK. Mortality patterns in Vietnam, 2006: Findings from a national verbal autopsy survey. BMC Res Notes. 2010; 3: 78.                                                                                                                  | 2006                       |                      |
| Vietnam | Duong TH, Nguyen PH, Henley K, Peters M. Risk factors for hepatitis B infection in rural Vietnam. Asian Pac J Cancer Prev. 2009; 10(1): 97-102.                                                                                                                             | 2006                       |                      |

**Web Table 32 - Comprehensive citation list**

| Country | Citation                                                                                                                                                                                                                                                                                                                                                                                               | Year*                                                                      | New for GBD 2013 (*) |
|---------|--------------------------------------------------------------------------------------------------------------------------------------------------------------------------------------------------------------------------------------------------------------------------------------------------------------------------------------------------------------------------------------------------------|----------------------------------------------------------------------------|----------------------|
| Vietnam | General Statistics Office (Viet Nam). Population Change and Family Planning Survey 2007. Hanoi, Viet Nam: General Statistics Office (Viet Nam), 2008.                                                                                                                                                                                                                                                  | 2007                                                                       |                      |
| Vietnam | Lumbiganon P, Laopaiboon M, Gülmezoglu AM, Souza JP, Taneepanichskul S, Ruyan P, Attygalle DE, Shrestha N, Mori R, Hinh ND, Bang HT, Rathavy T, Chuyun K, Cheang K, Festin M, Udomprasertgul V, Germar MJV, Yanqiu G, Roy M, Carroli G, Ba-Thike K. Method of delivery and pregnancy outcomes in Asia: the WHO global survey on maternal and perinatal health 2007-08. Lancet. 2010; 375(9713): 490-9. | 2007-2008                                                                  |                      |
| Vietnam | General Statistics Office (Viet Nam). Viet Nam Population Change and Family Planning Survey 2008. Hanoi, Viet Nam: General Statistics Office (Viet Nam).                                                                                                                                                                                                                                               | 2008                                                                       |                      |
| Vietnam | Ministry of Health (Viet Nam). Vietnam Health Statistical Yearbook 2008. Hanoi, Vietnam: Ministry of Health (Viet Nam).                                                                                                                                                                                                                                                                                | 2008                                                                       | *                    |
| Vietnam | Hanoi School of Public Health, Ministry of Health (Viet Nam), School of Population Health, University of Queensland (Australia). Vietnam Burden of Disease and Injury Study 2008. Hanoi, Vietnam: Hanoi School of Public Health, 2011.                                                                                                                                                                 | 2008                                                                       |                      |
| Vietnam | Quyen BTT, Nhung NT, Cuong PV. The causes of deaths in Chililab between 2008-2010 based on verbal autopsy method. Vietnam Journal of Public Health. 2012; 1(1): 24-31.                                                                                                                                                                                                                                 | 2008-2010                                                                  |                      |
| Vietnam | General Statistics Office (Viet Nam), Minnesota Population Center. Viet Nam Population and Housing Census 2009 from the Integrated Public Use Microdata Series, International: [Machine-readable database]. Minneapolis: University of Minnesota.                                                                                                                                                      | 2009                                                                       |                      |
| Vietnam | Hoa NP, Rao C, Hoy DG, Hinh ND, Chuc NT, Ngo DA. Mortality measures from sample-based surveillance: evidence of the epidemiological transition in Viet Nam. Bull World Health Organ. 2012; 90(10): 764-72.                                                                                                                                                                                             | 2009                                                                       |                      |
| Vietnam | Nga NT, Hoa DTP, Målqvist M, Persson L-Å, Ewald U. Causes of neonatal death: results from NeoKIP community-based trial in Quang Ninh province, Vietnam. Acta Paediatr. 2012; 101(4): 368-73.                                                                                                                                                                                                           | 2009                                                                       |                      |
| Vietnam | Joint United Nations Program on HIV/AIDS (UNAIDS), Ministry of Health (Viet Nam). Vietnam UNGASS Report 2010. Geneva, Switzerland: Joint United Nations Program on HIV/AIDS (UNAIDS), 2010.                                                                                                                                                                                                            | 2009                                                                       |                      |
| Vietnam | General Statistics Office (Viet Nam), United Nations Population Fund (UNFPA). Vietnam Population Change and Family Planning Survey 2010. Hanoi, Vietnam: General Statistics Office (Viet Nam), 2011.                                                                                                                                                                                                   | 2010                                                                       | *                    |
| Vietnam | General Statistics Office (Viet Nam), United Nations Children's Fund (UNICEF). Vietnam Multiple Indicator Cluster Survey 2010-2011. New York, United States: United Nations Children's Fund (UNICEF).                                                                                                                                                                                                  | 2010-2011                                                                  | *                    |
| Vietnam | General Statistics Office (Viet Nam), United Nations Population Fund (UNFPA). Vietnam Population Change and Family Planning Survey 2011. Hanoi, Vietnam: General Statistics Office (Viet Nam), 2011.                                                                                                                                                                                                   | 2011                                                                       | *                    |
| Yemen   | Peace Research Institute Oslo (PRIO). Battle Deaths Dataset Version 3, 2009. Oslo, Norway: Peace Research Institute Oslo (PRIO), 2009.                                                                                                                                                                                                                                                                 | 1962-1988                                                                  |                      |
| Yemen   | Centre for Research on the Epidemiology of Disasters (CRED). EM-DAT: The OFDA/CRED International Disaster Database. Brussels, Belgium: Catholic University of Leuven.                                                                                                                                                                                                                                  | 1973, 1975, 1982, 1989, 1991, 1993, 1996, 1998, 2001-2003, 2005-2010, 2013 |                      |
| Yemen   | Central Planning Organization (Yemen), International Statistical Institute. Yemen World Fertility Survey 1979. Voorburg, Netherlands: International Statistical Institute.                                                                                                                                                                                                                             | 1979                                                                       |                      |



**Web Table 32 - Comprehensive citation list**

| Country | Citation                                                                                                                                                                                                                                                                                                                                                         | Year*                                      | New for GBD 2013 (*) |
|---------|------------------------------------------------------------------------------------------------------------------------------------------------------------------------------------------------------------------------------------------------------------------------------------------------------------------------------------------------------------------|--------------------------------------------|----------------------|
| Yemen   | Institute for Health Metrics and Evaluation (IHME), Joint United Nations Program on HIV/AIDS (UNAIDS). Institute for Health Metrics and Evaluation HIV Mortality Estimates Based on the UNAIDS Spectrum Model Framework.                                                                                                                                         | 1980-2013                                  | *                    |
| Yemen   | United Nations Children's Fund (UNICEF), World Health Organization (WHO). WHO and UNICEF Reported Disease Incidence Time Series - Pertussis. Geneva, Switzerland: World Health Organization (WHO).                                                                                                                                                               | 1980-1989, 1992, 1994-1995, 2004-2013      |                      |
| Yemen   | United Nations Children's Fund (UNICEF), World Health Organization (WHO). WHO and UNICEF Reported Disease Incidence Time Series - Measles. Geneva, Switzerland: World Health Organization (WHO).                                                                                                                                                                 | 1980-1989, 1991-1995, 1997-1999, 2001-2013 |                      |
| Yemen   | White JM, Byrne M, Richards R, Buchanan T, Katsoulis E, Weerasingh K. Red cell genetic abnormalities in Peninsular Arabs: sickle haemoglobin, G6PD deficiency, and alpha and beta thalassaemia. <i>J Med Genet.</i> 1986; 3(23): 245-51.                                                                                                                         | 1984-1986                                  |                      |
| Yemen   | Freudenheim M, Levine R. The World; 10,000 killed in South Yemen. <i>New York Times</i> [Internet]. 1986 Jan 26; Week in Review; [1 screen]. Available from: <a href="http://www.nytimes.com/1986/01/26/weekinreview/the-world-10000-killed-in-south-yemen.html">http://www.nytimes.com/1986/01/26/weekinreview/the-world-10000-killed-in-south-yemen.html</a> . | 1986                                       | *                    |
| Yemen   | Scott DA, Burans JP, al-Ouzeib HD, Arunkumar BK, al-Fadeel M, Nigad YR, al-Hadad A, Elyazeed RR, Hyams KC, Woody JN. A seroepidemiological survey of viral hepatitis in the Yemen Arab Republic. <i>Trans R Soc Trop Med Hyg.</i> 1990; 84(2): 288-91.                                                                                                           | 1988                                       |                      |
| Yemen   | Scott DA, Constantine NT, Callahan J, Burans JP, Olson JG, al-Fadeel M, al-Ozib H, Arunkumer H, Hyams KC. The epidemiology of hepatitis C virus antibody in Yemen. <i>Am J Trop Med Hyg.</i> 1992; 46(1): 63-8.                                                                                                                                                  | 1988                                       |                      |
| Yemen   | Department of Peace and Conflict Research, Uppsala University. UCDP Battle-Related Deaths Database Version 5, 2013. Uppsala, Sweden: Department of Peace and Conflict Research, Uppsala University, 2013.                                                                                                                                                        | 1989-2012                                  | *                    |
| Yemen   | Weatherall D. Sickle Cell and Thalassemias Prevalence Data, Personal Correspondence with David Weatherall. [Unpublished].                                                                                                                                                                                                                                        | 1990-2009                                  |                      |
| Yemen   | Centre for Health Informatics and Multiprofessional Education, University College London. Modell's Haemoglobinopathologist's Almanac. London, United Kingdom: Centre for Health Informatics and Multiprofessional Education, University College London, 2008.                                                                                                    | 1990-2003                                  |                      |
| Yemen   | Central Statistical Organization (Yemen), League of Arab States, Macro International, Inc. Yemen Demographic and Health Survey 1991-1992. Calverton, United States: Macro International, Inc.                                                                                                                                                                    | 1991-1992                                  |                      |
| Yemen   | Gray GC, Kassira EN, Rodier GR, Myers MC, Calamaio CA, Gregory M, Nagi MA, Kamal K, Botros BA, Soliman AK, Hassan NF, Gregory R, Arunkumar BK, Cope A, Hyams KC. Remote village survey for agents causing hepatosplenic disease in the Republic of Yemen. <i>Trop Doct.</i> 1999; 29(4): 212-9.                                                                  | 1992                                       |                      |
| Yemen   | Yemen Population and Housing Census 1994 as it appears in United Nations Statistics Division (UNSD). United Nations Demographic Yearbook 2006. New York City, United States: United Nations Statistics Division (UNSD), 2008.                                                                                                                                    | 1994                                       |                      |
| Yemen   | Central Statistical Organization (Yemen), Macro International, Inc. Yemen Demographic and Health Survey 1997. Calverton, United States: Macro International, Inc.                                                                                                                                                                                                | 1997                                       | *                    |
| Yemen   | Abu-Raddad LJ, Akala FA, Semini I, Riedner G, Wilson D, Tawil O, World Bank. Characterizing the HIV/AIDS Epidemic in the Middle East and North Africa. Washington DC, United States: World Bank, 2010.                                                                                                                                                           | 1998                                       |                      |
| Yemen   | Al-Nassiri K, Raja'a Y. Hepatitis B infection in Yemenis in Sana'a: pattern and risk factors. <i>East Mediterr Health J.</i> 2000; 7(1-2): 147-52.                                                                                                                                                                                                               | 1999                                       |                      |
| Yemen   | Diab AE. Uterine ruptures in Yemen. <i>Saudi Med J.</i> 2005; 26(2): 264-9.                                                                                                                                                                                                                                                                                      | 1999-2004                                  |                      |
| Yemen   | Sallam TA, Cuevas LE, Tong CYW. Increase in susceptibility of young adults to hepatitis B infection in the Republic of Yemen. <i>Trans R Soc Trop Med Hyg.</i> 2003; 97(3): 302-4.                                                                                                                                                                               | 1999-2000                                  |                      |

**Web Table 32 - Comprehensive citation list**

| Country | Citation                                                                                                                                                                                                                                                                                                                                                                    | Year*                      | New for GBD 2013 (*) |
|---------|-----------------------------------------------------------------------------------------------------------------------------------------------------------------------------------------------------------------------------------------------------------------------------------------------------------------------------------------------------------------------------|----------------------------|----------------------|
| Yemen   | Sallam TA, Tong CYW, Cuevas LE, Raja'a YA, Othman AM, Al-Kharsa KR. Prevalence of blood-borne viral hepatitis in different communities in Yemen. <i>Epidemiol Infect.</i> 2003; 131(1): 771-5.                                                                                                                                                                              | 2000-2002                  |                      |
| Yemen   | Al-Moslih MI, Al-Huraibi MA. Prevalence of hepatitis C virus among patients with liver disease in the Republic of Yemen. <i>East Mediterr Health J.</i> 2001; 7(4-5): 771-8.                                                                                                                                                                                                | 2001                       |                      |
| Yemen   | Salem AK, Abdulrab A, Alfakeh Y, Aown A. Hepatocellular carcinoma in Yemeni patients: a single centre experience over an 8-year period. <i>East Mediterr Health J.</i> 2012; 18(7): 693-9.                                                                                                                                                                                  | 2001-2008                  | *                    |
| Yemen   | World Health Organization (WHO). Retrospective Measles Data on Supplementary Immunization Activities. Geneva, Switzerland: World Health Organization (WHO).                                                                                                                                                                                                                 | 2001, 2004-2007, 2009-2012 |                      |
| Yemen   | Central Statistical Organization (Yemen), League of Arab States, Ministry of Public Health and Population (Yemen), Pan Arab Project for Family Health (PAPFAM). Yemen Family Health Survey 2003.                                                                                                                                                                            | 2003                       |                      |
| Yemen   | United Nations Office on Drugs and Crime (UNODC). United Nations Office on Drugs and Crime Global Study on Homicides 2011. Vienna, Austria: United Nations Office on Drugs and Crime (UNODC), 2011.                                                                                                                                                                         | 2003-2009                  |                      |
| Yemen   | International Crisis Group. CrisisWatch Database - Yemen. Brussels, Belgium: International Crisis Group.                                                                                                                                                                                                                                                                    | 2004                       | *                    |
| Yemen   | Project Ploughshares: Research and Action for Peace [Internet]. Waterloo, Canada: Project Ploughshares; [updated 2014]. Yemen 2004 - First Combat Deaths; [updated 2013 Aug]. Available from: <a href="http://ploughshares.ca/pl_armedconflict/yemen-2004-first-combat-deaths/#deaths">http://ploughshares.ca/pl_armedconflict/yemen-2004-first-combat-deaths/#deaths</a> . | 2004-2012                  | *                    |
| Yemen   | Bawazir AA, Hart CA, Sallam TA, Parry CM, Beeching NJ, Cuevas LE. Seroprevalence of hepatitis A and hepatitis E viruses in Aden, Yemen. <i>Trans R Soc Trop Med Hyg.</i> 2010; 104(12): 801-5.                                                                                                                                                                              | 2005                       |                      |
| Yemen   | Ministry of Health (Yemen) and United Nations Children's Fund (UNICEF). Yemen Multiple Indicator Cluster Survey 2006. New York, United States: United Nations Children's Fund (UNICEF).                                                                                                                                                                                     | 2006                       |                      |
| Yemen   | Ministry of Health and Population (Yemen). Yemen Annual Statistical Health Report 2006. Sana'a, Yemen: Ministry of Health and Population (Yemen).                                                                                                                                                                                                                           | 2006                       |                      |
| Yemen   | Ministry of Health and Population (Yemen). Yemen Annual Statistical Health Report 2007. Sana'a, Yemen: Ministry of Health and Population (Yemen), 2008.                                                                                                                                                                                                                     | 2007                       |                      |
| Yemen   | Selm SAB. Prevalence of hepatitis B and C viral markers in chronic liver disease patients: A single center experience from Yemen. <i>Arab J Gastroenterol.</i> 2010; 11(2): 105-7.                                                                                                                                                                                          | 2007                       |                      |
| Yemen   | The Age. Yemeni military battles Shi'ite rebels. <i>The Age</i> [Internet]. 2007 Mar 20; World; [1 screen]. Available from: <a href="http://www.theage.com.au/news/World/Yemeni-military-battles-Shiite-rebels/2007/03/20/1174153010354.html">http://www.theage.com.au/news/World/Yemeni-military-battles-Shiite-rebels/2007/03/20/1174153010354.html</a> .                 | 2007                       | *                    |
| Yemen   | Al-haj A. Clashes in Yemen kill more than 100. <i>Fox News</i> [Internet]. 2007 Feb 19; [about 1 screen]. Available from: <a href="http://www.foxnews.com/prINTER_friendly_wires/2007Feb19/0,4675,YemenRebels,00.html">http://www.foxnews.com/prINTER_friendly_wires/2007Feb19/0,4675,YemenRebels,00.html</a> .                                                             | 2007                       | *                    |
| Yemen   | World Health Organization (WHO). Yellow Fever Reported Cases, WHO Vaccine-Preventable Diseases: Monitoring System. Geneva, Switzerland: World Health Organization (WHO).                                                                                                                                                                                                    | 2008-2009                  |                      |
| Yemen   | Department of Peace and Conflict Research, Uppsala University. UCDP Nonstate Conflict Database Version 2.5, 2013. Uppsala, Sweden: Department of Peace and Conflict Research, Uppsala University, 2013.                                                                                                                                                                     | 2010                       | *                    |
| Yemen   | Gacche RN, Al-Mohani SK. Seroprevalence and Risk Factors for Hepatitis C Virus Infection among General Population in Central Region of Yemen. <i>Hepat Res Treat.</i> 2012.                                                                                                                                                                                                 | 2010-2011                  |                      |

**Web Table 32 - Comprehensive citation list**

| Country | Citation                                                                                                                                                                                                                                                                                                                                                                                                                | Year*                            | New for GBD 2013 (*) |
|---------|-------------------------------------------------------------------------------------------------------------------------------------------------------------------------------------------------------------------------------------------------------------------------------------------------------------------------------------------------------------------------------------------------------------------------|----------------------------------|----------------------|
| Yemen   | Department of Peace and Conflict Research, Uppsala University. UCDP One-Sided Violence Database Version 1.4, 2013. Uppsala, Sweden: Department of Peace and Conflict Research, Uppsala University, 2013.                                                                                                                                                                                                                | 2011                             | *                    |
| Yemen   | Al-haj A. Yemen says more than 2,000 killed in uprising. Washington Post [Internet]. 2012 Mar 18; World; [about 2 screens]. Available from: <a href="http://www.washingtonpost.com/world/middle_east/yemen-says-more-than-2000-killed-in-uprising/2012/03/18/gIQAG0tCLS_story.html">http://www.washingtonpost.com/world/middle_east/yemen-says-more-than-2000-killed-in-uprising/2012/03/18/gIQAG0tCLS_story.html</a> . | 2011-2012                        | *                    |
| Yemen   | National Counterterrorism Center (United States), US Department of State. United States Country Reports on Terrorism 2012. Washington, D.C., United States: US Department of State, 2013.                                                                                                                                                                                                                               | 2012                             | *                    |
| Zambia  | Central Statistical Office (Zambia). Zambia Census of Population and Housing 1969.                                                                                                                                                                                                                                                                                                                                      | 1969                             |                      |
| Zambia  | Central Statistical Office (Zambia). Zambia Sample Population Census 1974.                                                                                                                                                                                                                                                                                                                                              | 1974                             |                      |
| Zambia  | United Nations Office on Drugs and Crime (UNODC). United Nations Surveys on Crime Trends and the Operations of Criminal Justice Systems 1970-2006 as provided by Kavi Bhalla. [Unpublished].                                                                                                                                                                                                                            | 1976-1994                        |                      |
| Zambia  | Centre for Research on the Epidemiology of Disasters (CRED). EM-DAT: The OFDA/CRED International Disaster Database. Brussels, Belgium: Catholic University of Leuven.                                                                                                                                                                                                                                                   | 1978, 2001, 2003-2004, 2007-2010 |                      |
| Zambia  | Zambia Census of Population and Housing 1980 as it appears in United Nations Statistics Division (UNSD). United Nations Demographic Yearbook. New York City, United States: United Nations Statistics Division (UNSD).                                                                                                                                                                                                  | 1980                             |                      |
| Zambia  | Rolfe M. Measles immunization in the Zambian copperbelt: cause for concern. Trans R Soc Trop Med Hyg. 1982; 76(4): 529-30.                                                                                                                                                                                                                                                                                              | 1980-1981                        |                      |
| Zambia  | Institute for Health Metrics and Evaluation (IHME), Joint United Nations Program on HIV/AIDS (UNAIDS). Institute for Health Metrics and Evaluation HIV Mortality Estimates Based on the UNAIDS Spectrum Model Framework.                                                                                                                                                                                                | 1980-2013                        | *                    |
| Zambia  | United Nations Children's Fund (UNICEF), World Health Organization (WHO). WHO and UNICEF Reported Disease Incidence Time Series - Pertussis. Geneva, Switzerland: World Health Organization (WHO).                                                                                                                                                                                                                      | 1980-1990, 1997, 1999-2013       |                      |
| Zambia  | United Nations Children's Fund (UNICEF), World Health Organization (WHO). WHO and UNICEF Reported Disease Incidence Time Series - Measles. Geneva, Switzerland: World Health Organization (WHO).                                                                                                                                                                                                                        | 1980-1997, 1999-2013             |                      |
| Zambia  | Ratnam AV, Din SN, Hira SK, Bhat GJ, Wacha DS, Rukmini A, Mulenga RC. Syphilis in pregnant women in Zambia. Br J Vener Dis. 1982; 58(6): 355-8.                                                                                                                                                                                                                                                                         | 1980, 1982                       |                      |
| Zambia  | Hira SK, Bhat GJ, Patel JB, Din SN, Attili RV, Patel MI, Baskarnathan S, Hira RS, Andu NN. Early congenital syphilis: clinico-radiologic features in 202 patients. Sex Transm Dis. 1985; 12(4): 177-83.                                                                                                                                                                                                                 | 1984                             |                      |
| Zambia  | Hira SK, Bhat GJ, Chikamata DM, Nkowane B, Tembo G, Perine PL, Meheus A. Syphilis intervention in pregnancy: Zambian demonstration project. Genitourin Med. 1990; 66(3): 159-64.                                                                                                                                                                                                                                        | 1986                             |                      |
| Zambia  | Hira SK. Maternal and congenital syphilis in Zambia - some epidemiological aspects. Afr J Sex Transm Dis. 1987; 3: 6-Mar.                                                                                                                                                                                                                                                                                               | 1987                             |                      |
| Zambia  | Department of Peace and Conflict Research, Uppsala University. UCDP One-Sided Violence Database Version 1.4, 2013. Uppsala, Sweden: Department of Peace and Conflict Research, Uppsala University, 2013.                                                                                                                                                                                                                | 1989-2000                        | *                    |
| Zambia  | Zambia Census of Population, Housing and Agriculture 1990 as it appears in United Nations Statistics Division (UNSD). United Nations Demographic Yearbook. New York City, United States: United Nations Statistics Division (UNSD).                                                                                                                                                                                     | 1990                             |                      |
| Zambia  | Weatherall D. Sickle Cell and Thalassemias Prevalence Data, Personal Correspondence with David Weatherall. [Unpublished].                                                                                                                                                                                                                                                                                               | 1990-2009                        |                      |

**Web Table 32 - Comprehensive citation list**

| Country | Citation                                                                                                                                                                                                                                                                                                                                                                               | Year*                       | New for GBD 2013 (*) |
|---------|----------------------------------------------------------------------------------------------------------------------------------------------------------------------------------------------------------------------------------------------------------------------------------------------------------------------------------------------------------------------------------------|-----------------------------|----------------------|
| Zambia  | Centre for Health Informatics and Multiprofessional Education, University College London. Modell's Haemoglobinopathologist's Almanac. London, United Kingdom: Centre for Health Informatics and Multiprofessional Education, University College London, 2008.                                                                                                                          | 1990-2003                   |                      |
| Zambia  | Central Statistical Office (Zambia), Macro International, Inc, University of Zambia. Zambia Demographic and Health Survey 1992. Calverton, United States: Macro International, Inc.                                                                                                                                                                                                    | 1992                        |                      |
| Zambia  | Oshitani H, Mpabalwani M, Kasolo F, Mizuta K, Luo NP, Bhat GJ, Suzuki H, Numazaki Y. Measles infection in hospitalized children in Lusaka, Zambia. Ann Trop Paediatr. 1995; 15(2): 167-72.                                                                                                                                                                                             | 1992-1993                   |                      |
| Zambia  | Oshitani H, Kasolo F, Tembo C, Mpabalwani M, Mizuta K, Luo N, Suzuki H, Numazaki Y. Hepatitis B virus infection among pregnant women in Zambia. East Afr Med J. 72(12): 813-5.                                                                                                                                                                                                         | 1992-1993                   |                      |
| Zambia  | Central Statistical Office (Zambia), Macro International, Inc, Ministry of Health (Zambia). Zambia Demographic and Health Survey 1996-1997. Calverton, United States: Macro International, Inc.                                                                                                                                                                                        | 1996-1997                   |                      |
| Zambia  | World Health Organization Regional Office for Africa. HIV/AIDS Epidemiological Surveillance Update for the WHO African Region. World Health Organization Regional Office for Africa, 2003.                                                                                                                                                                                             | 1997-1998, 2001-2002        |                      |
| Zambia  | World Health Organization (WHO). Yellow Fever Reported Cases, WHO Vaccine-Preventable Diseases: Monitoring System. Geneva, Switzerland: World Health Organization (WHO).                                                                                                                                                                                                               | 1997, 1999-2001, 2003-2009  |                      |
| Zambia  | Central Statistical Office (Zambia), London School of Hygiene and Tropical Medicine. Zambia Living Conditions Monitoring Survey 1998. Lusaka, Zambia: Central Statistical Office (Zambia).                                                                                                                                                                                             | 1998                        | *                    |
| Zambia  | United Nations Office on Drugs and Crime (UNODC). United Nations Office on Drugs and Crime Global Study on Homicides 2011. Vienna, Austria: United Nations Office on Drugs and Crime (UNODC), 2011.                                                                                                                                                                                    | 1998-1999                   |                      |
| Zambia  | Centers for Disease Control and Prevention (CDC). Measles incidence before and after supplementary vaccination activities--Lusaka, Zambia, 1996-2000. MMWR Morb Mortal Wkly Rep. 2001; 50(24): 513-6.                                                                                                                                                                                  | 1998-1999                   |                      |
| Zambia  | Measles Supplementary Immunization Activity Data as provided by the World Health Organization. [Unpublished].                                                                                                                                                                                                                                                                          | 1999                        |                      |
| Zambia  | Central Statistical Office (Zambia). Zambia Census of Population and Housing 2000. Lusaka, Zambia: Central Statistical Office (Zambia).                                                                                                                                                                                                                                                | 2000                        |                      |
| Zambia  | Central Board of Health (Zambia), Central Statistical Office (Zambia), MEASURE Evaluation Project, Carolina Population Center, University of North Carolina, University of Zambia, Zambian National AIDS Council. Zambia Sexual Behavior Survey 2000. Lusaka, Zambia: Central Statistical Office (Zambia).                                                                             | 2000                        | *                    |
| Zambia  | Central Board of Health (Zambia), Central Statistical Office (Zambia), Macro International, Inc. Zambia Demographic and Health Survey 2001-2002. Calverton, United States: Macro International, Inc.                                                                                                                                                                                   | 2001-2002                   |                      |
| Zambia  | World Health Organization (WHO). Retrospective Measles Data on Supplementary Immunization Activities. Geneva, Switzerland: World Health Organization (WHO).                                                                                                                                                                                                                            | 2002-2003, 2007, 2010, 2012 |                      |
| Zambia  | Central Statistical Office (Zambia), Family Health International, MEASURE Evaluation Project, Carolina Population Center, University of North Carolina, Ministry of Health (Zambia), UK Department for International Development (DFID), University of Zambia, Zambian National AIDS Council. Zambia Sexual Behavior Survey 2005. Lusaka, Zambia: Central Statistical Office (Zambia). | 2005                        | *                    |
| Zambia  | Central Statistical Office (Zambia). Zambia Living Conditions Monitoring Survey 2006.                                                                                                                                                                                                                                                                                                  | 2006                        | *                    |
| Zambia  | Central Statistical Office (Zambia), Macro International, Inc. Zambia Demographic and Health Survey 2007. Calverton, United States: Macro International, Inc.                                                                                                                                                                                                                          | 2007                        |                      |

**Web Table 32 - Comprehensive citation list**

| Country  | Citation                                                                                                                                                                                                                                                                                                                                    | Year*                                        | New for GBD 2013 (*) |
|----------|---------------------------------------------------------------------------------------------------------------------------------------------------------------------------------------------------------------------------------------------------------------------------------------------------------------------------------------------|----------------------------------------------|----------------------|
| Zambia   | World Health Organization (WHO). Global Status Report on Road Safety 2009. Geneva, Switzerland: World Health Organization (WHO), 2009.                                                                                                                                                                                                      | 2007                                         |                      |
| Zambia   | Gill CJ, Phiri-Mazala G, Guerina NG, Kasimba J, Mulenga C, MacLeod WB, Waitolo N, Knapp AB, Mirochnick M, Mazimba A, Fox MP, Sabin L, Seidenberg P, Simon JL, Hamer DH. Effect of training traditional birth attendants on neonatal mortality (Lufwanyama Neonatal Survival Project): randomised controlled study. <i>BMJ</i> . 2011; d346. | 2007                                         |                      |
| Zambia   | Central Statistical Office (Zambia). Zambia Household Health Coverage Survey 2008. Lusaka, Zambia: Central Statistical Office (Zambia).                                                                                                                                                                                                     | 2008                                         | *                    |
| Zambia   | Turnbull E, Lembalemba MK, Brad Guffey M, Bolton-Moore C, Mubiana-Mbewe M, Chintu N, Giganti MJ, Nalubamba-Phiri M, Stringer EM, Stringer JS. Causes of stillbirth, neonatal death and early childhood death in rural Zambia by verbal autopsy assessments. <i>Trop Med Int Health</i> . 2011; 16(7): 894-901.                              | 2008                                         |                      |
| Zambia   | Central Statistical Office (Zambia), MEASURE Evaluation Project, Carolina Population Center, University of North Carolina, Ministry of Health (Zambia), University of Zambia, Zambian National AIDS Council. Zambia Sexual Behavior Survey 2009.                                                                                            | 2009                                         | *                    |
| Zambia   | Mudenda SS, Kamocha S, Mswia R, Conkling M, Sikanyiti P, Potter D, Mayaka WC, Marx MA. Feasibility of using a WHO-standard methodology for Sample Vital Registration with Verbal Autopsy (SAVVY) to report leading causes of death in Zambia: results of a pilot in four provinces, 2010. <i>Popul Health Metr</i> . 2011; 9: 40.           | 2009                                         |                      |
| Zambia   | Joint United Nations Program on HIV/AIDS (UNAIDS), National HIV/AIDS/STI/TB Council (Zambia). Zambia Country Report Monitoring the Declaration of Commitment on HIV and AIDS and the Universal Access 2010. Geneva, Switzerland: Joint United Nations Program on HIV/AIDS (UNAIDS), 2010.                                                   | 2009                                         |                      |
| Zambia   | Central Statistical Office (Zambia). Zambia Living Conditions Monitoring Survey 2010.                                                                                                                                                                                                                                                       | 2010                                         | *                    |
| Zambia   | Central Statistical Office (Zambia). Zambia Census of Population and Housing 2010.                                                                                                                                                                                                                                                          | 2010                                         |                      |
| Zambia   | Ministry of Health (Zambia), PATH MACEPA, President's Malaria Initiative (PMI), United Nations Children's Fund (UNICEF), World Bank, World Health Organization (WHO). Zambia Malaria Indicator Survey 2012.                                                                                                                                 | 2012                                         | *                    |
| Zimbabwe | Peace Research Institute Oslo (PRIO). Battle Deaths Dataset Version 3, 2009. Oslo, Norway: Peace Research Institute Oslo (PRIO), 2009.                                                                                                                                                                                                      | 1967-1983                                    |                      |
| Zimbabwe | Central Statistical Office (Zimbabwe). Zimbabwe Population and Housing Census 1969.                                                                                                                                                                                                                                                         | 1969                                         |                      |
| Zimbabwe | Centre for Research on the Epidemiology of Disasters (CRED). EM-DAT: The OFDA/CRED International Disaster Database. Brussels, Belgium: Catholic University of Leuven.                                                                                                                                                                       | 1975, 1998, 2000-2001, 2003, 2007-2008, 2013 |                      |
| Zimbabwe | United Nations Office on Drugs and Crime (UNODC). United Nations Surveys on Crime Trends and the Operations of Criminal Justice Systems 1970-2006 as provided by Kavi Bhalla. [Unpublished].                                                                                                                                                | 1976-1986                                    |                      |
| Zimbabwe | Marufu T, Siziya S, Tshimanga M, Murugasampillay S, Mason E, Manyame B. Factors associated with measles complications in Gweru, Zimbabwe. <i>East Afr Med J</i> . 2001; 78(3): 135-8.                                                                                                                                                       | 1980-1989                                    |                      |
| Zimbabwe | Institute for Health Metrics and Evaluation (IHME), Joint United Nations Program on HIV/AIDS (UNAIDS). Institute for Health Metrics and Evaluation HIV Mortality Estimates Based on the UNAIDS Spectrum Model Framework.                                                                                                                    | 1980-2013                                    | *                    |
| Zimbabwe | United Nations Children's Fund (UNICEF), World Health Organization (WHO). WHO and UNICEF Reported Disease Incidence Time Series - Pertussis. Geneva, Switzerland: World Health Organization (WHO).                                                                                                                                          | 1980-1991, 1993-2013                         |                      |

**Web Table 32 - Comprehensive citation list**

| Country  | Citation                                                                                                                                                                                                                                                      | Year*      | New for GBD 2013 (*) |
|----------|---------------------------------------------------------------------------------------------------------------------------------------------------------------------------------------------------------------------------------------------------------------|------------|----------------------|
| Zimbabwe | United Nations Children's Fund (UNICEF), World Health Organization (WHO). WHO and UNICEF Reported Disease Incidence Time Series - Measles. Geneva, Switzerland: World Health Organization (WHO).                                                              | 1980-2013  |                      |
| Zimbabwe | Central Statistical Office (Zimbabwe). Zimbabwe Population and Housing Census 1982.                                                                                                                                                                           | 1982       |                      |
| Zimbabwe | Central Statistical Office (Zimbabwe), Macro Systems, Inc.; Institute for Resource Development. Zimbabwe Demographic and Health Survey 1988-1989. Columbia, United States: Macro Systems, Inc.                                                                | 1988-1989  |                      |
| Zimbabwe | Department of Peace and Conflict Research, Uppsala University. UCDP One-Sided Violence Database Version 1.4, 2013. Uppsala, Sweden: Department of Peace and Conflict Research, Uppsala University, 2013.                                                      | 1989-2008  | *                    |
| Zimbabwe | Zimbabwe Vital Registration - Deaths 1990 ICD9 as it appears in World Health Organization (WHO). WHO Mortality Database Version February 2014. Geneva, Switzerland: World Health Organization (WHO), 2014.                                                    | 1990       |                      |
| Zimbabwe | Weatherall D. Sickle Cell and Thalassemias Prevalence Data, Personal Correspondence with David Weatherall. [Unpublished].                                                                                                                                     | 1990-2009  |                      |
| Zimbabwe | Registrar General's Department (Zimbabwe), Zimbabwe National Statistics Agency. Zimbabwe Mortality Report 2007.                                                                                                                                               | 1990-2007  |                      |
| Zimbabwe | Centre for Health Informatics and Multiprofessional Education, University College London. Modell's Haemoglobinopathologist's Almanac. London, United Kingdom: Centre for Health Informatics and Multiprofessional Education, University College London, 2008. | 1990-2003  |                      |
| Zimbabwe | Parkin DM, International Agency for Research on Cancer, International Association of Cancer Registries. Cancer Incidence in Five Continents. Vol. I to VIII. Lyon, France, IARC Press, 2005.                                                                  | 1991, 1995 |                      |
| Zimbabwe | Central Statistical Office (Zimbabwe). Zimbabwe Population and Housing Census 1992.                                                                                                                                                                           | 1992       |                      |
| Zimbabwe | Central Statistical Office (Zimbabwe), Macro International, Inc. Zimbabwe Demographic and Health Survey 1994. Calverton, United States: Macro International, Inc.                                                                                             | 1994       |                      |
| Zimbabwe | Nsungu M. Measles vaccination status, delay in recognizing measles outbreaks and outbreak outcome. Cent Afr J Med. 1995; 41(11): 336-9.                                                                                                                       | 1994       |                      |
| Zimbabwe | Gangaidzo IT, Moyo VM, Khumalo H, Saungweme T, Gomo Z, Rouault T, Gordeuk VR. Hepatitis C virus in Zimbabwe. Cent Afr J Med. 1997; 43(5): 122-5.                                                                                                              | 1994       |                      |
| Zimbabwe | World Health Organization (WHO). Country Mortality Data 1980-1999. [Unpublished].                                                                                                                                                                             | 1995       |                      |
| Zimbabwe | United Nations Office on Drugs and Crime (UNODC). United Nations Office on Drugs and Crime Global Study on Homicides 2011. Vienna, Austria: United Nations Office on Drugs and Crime (UNODC), 2011.                                                           | 1995-2007  |                      |
| Zimbabwe | Madzime S, Adem M, Mahomed K, Woelk GB, Mudzamiri S, Williams MA. Hepatitis B virus infection among pregnant women delivering at Harare Maternity Hospital, Harare Zimbabwe, 1996 to 1997. Cent Afr J Med. 1999; 45(8).                                       | 1996-1997  |                      |
| Zimbabwe | Madzime S, William MA, Mohamed K, October T, Adem M, Mudzamiri S, Woelk GB. Seroprevalence of hepatitis C virus infection among indigent urban pregnant women in Zimbabwe. Cent Afr J Med. 2000; 46(1): 1-4.                                                  | 1996-1997  |                      |
| Zimbabwe | Central Statistical Office (Zimbabwe). Zimbabwe Intercensal Demographic Survey 1997.                                                                                                                                                                          | 1997       |                      |
| Zimbabwe | Weinig M, Hakim JG, Gudza I, Tobaiwa O. Hepatitis C virus and HIV antibodies in patients with hepatocellular carcinoma in Zimbabwe: a pilot study. Trans R Soc Trop Med Hyg. 1997; 91(5): 570-2.                                                              | 1997       |                      |
| Zimbabwe | World Health Organization (WHO). The Global Elimination of Congenital Syphilis: Rationale and Strategy for Action. Geneva, Switzerland: World Health Organization (WHO), 2007.                                                                                | 1997-2003  |                      |



**Web Table 32 - Comprehensive citation list**

| Country  | Citation                                                                                                                                                                                                                                                                              | Year*                            | New for GBD 2013 (*) |
|----------|---------------------------------------------------------------------------------------------------------------------------------------------------------------------------------------------------------------------------------------------------------------------------------------|----------------------------------|----------------------|
| Zimbabwe | Measles Supplementary Immunization Activity Data as provided by the World Health Organization. [Unpublished].                                                                                                                                                                         | 1997-1998                        |                      |
| Zimbabwe | World Health Organization (WHO). Yellow Fever Reported Cases, WHO Vaccine-Preventable Diseases: Monitoring System. Geneva, Switzerland: World Health Organization (WHO).                                                                                                              | 1997, 2009                       |                      |
| Zimbabwe | Central Statistical Office (Zimbabwe), Macro International, Inc. Zimbabwe Demographic and Health Survey 1999. Calverton, United States: Macro International, Inc.                                                                                                                     | 1999                             |                      |
| Zimbabwe | Curado MP, Edwards B, Shin HR, Storm H, Ferlay J, Heanue M and Boyle P, eds (2007). Cancer Incidence in Five Continents, Vol. IX Periodic Data (electronic version). Lyon, IARC. <a href="http://ci5.iarc.fr">http://ci5.iarc.fr</a>                                                  | 2000                             |                      |
| Zimbabwe | Joint United Nations Program on HIV/AIDS (UNAIDS), United Nations Children's Fund (UNICEF), World Health Organization (WHO). Zimbabwe Epidemiological Fact Sheet on HIV/AIDS and STIs 2002.                                                                                           | 2000                             |                      |
| Zimbabwe | World Health Organization Regional Office for Africa. HIV/AIDS Epidemiological Surveillance Update for the WHO African Region. World Health Organization Regional Office for Africa, 2003.                                                                                            | 2000-2002                        |                      |
| Zimbabwe | Central Statistical Office (Zimbabwe). Zimbabwe Population and Housing Census 2002.                                                                                                                                                                                                   | 2002                             |                      |
| Zimbabwe | Zimbabwe Population and Housing Census 2002 as it appears in United Nations Statistics Division (UNSD). United Nations Demographic Yearbook 2009-2010. New York City, United States: United Nations Statistics Division (UNSD), 2011.                                                 | 2002                             |                      |
| Zimbabwe | World Health Organization (WHO). Retrospective Measles Data on Supplementary Immunization Activities. Geneva, Switzerland: World Health Organization (WHO).                                                                                                                           | 2002-2003, 2006, 2009-2010, 2012 |                      |
| Zimbabwe | World Health Organization (WHO). Zimbabwe World Health Survey 2003. Geneva, Switzerland: World Health Organization (WHO), 2005.                                                                                                                                                       | 2003                             |                      |
| Zimbabwe | Forman D, Bray F, Brewster DH, Gombe Mbalawa C, Kohler B, Piñeros M, Steliarova-Foucher E, Swaminathan R and Ferlay J, eds (2013). Cancer Incidence in Five Continents, Vol. X Summary Database (electronic version). Lyon, IARC. <a href="http://ci5.iarc.fr">http://ci5.iarc.fr</a> | 2004                             |                      |
| Zimbabwe | Zimbabwe National Cancer Registry. Zimbabwe National Cancer Registry Annual Report 2005. Harare, Zimbabwe: Zimbabwe National Cancer Registry, 2009.                                                                                                                                   | 2005                             |                      |
| Zimbabwe | Pham L, Woelk GB, Ning Y, Madzime S, Mudzamiri S, Mahomed K, Williams MA. Seroprevalence and risk factors of syphilis infection in pregnant women delivering at Harare Maternity Hospital, Zimbabwe. Cent Afr J Med. 2005; 51(4-Mar): 24-30.                                          | 2005                             |                      |
| Zimbabwe | Central Statistical Office (Zimbabwe), Macro International, Inc. Zimbabwe Demographic and Health Survey 2005-2006. Calverton, United States: Macro International, Inc.                                                                                                                | 2005-2006                        |                      |
| Zimbabwe | World Health Organization (WHO). Global Status Report on Road Safety 2009. Geneva, Switzerland: World Health Organization (WHO), 2009.                                                                                                                                                | 2006                             |                      |
| Zimbabwe | Zimbabwe National Cancer Registry. Zimbabwe National Cancer Registry Annual Report 2006. Harare, Zimbabwe: Zimbabwe National Cancer Registry, 2010.                                                                                                                                   | 2006                             |                      |
| Zimbabwe | Central Statistical Office (Zimbabwe). Zimbabwe Multiple Indicator Monitoring Survey 2009. New York, United States: United Nations Children's Fund (UNICEF).                                                                                                                          | 2009                             | *                    |
| Zimbabwe | Joint United Nations Program on HIV/AIDS (UNAIDS), National AIDS Council (Zimbabwe). Zimbabwe United Nations General Assembly Special Session Report on HIV and AIDS 2010. Geneva, Switzerland: Joint United Nations Program on HIV/AIDS (UNAIDS), 2010.                              | 2009                             |                      |
| Zimbabwe | ICF Macro, Zimbabwe National Statistics Agency. Zimbabwe Demographic and Health Survey 2010-2011. Claverton, Maryland: ICF Macro, 2012.                                                                                                                                               | 2010-2011                        |                      |

**Web Table 32 - Comprehensive citation list**

| Country  | Citation                                                                          | Year* | New for<br>GBD 2013<br>(* ) |
|----------|-----------------------------------------------------------------------------------|-------|-----------------------------|
| Zimbabwe | Zimbabwe National Statistics Agency. Zimbabwe Population and Housing Census 2012. | 2012  | *                           |

estimate year). For all other data types (surveys, vital registration, etc.), Year indicates the source year or year of data collection.



**Web Table 33: Data citation list by country for LRI and diarrhea etiologies**

**Web Table 33- Etiology citation list**

| Country   | Citation                                                                                                                                                                                                                                                                                                                                                                                                                                                                                                                                                                    | Year*     | New for GBD 2013 (*) |
|-----------|-----------------------------------------------------------------------------------------------------------------------------------------------------------------------------------------------------------------------------------------------------------------------------------------------------------------------------------------------------------------------------------------------------------------------------------------------------------------------------------------------------------------------------------------------------------------------------|-----------|----------------------|
| Argentina | Lombardi GH, Roseto AM, Stamboulian D, Oro JG. Letter: Virus of infantile gastroenteritis in Argentina. <i>Lancet</i> . 1975; 2(7948): 1311.                                                                                                                                                                                                                                                                                                                                                                                                                                | 1975      |                      |
| Argentina | Muchnik GR, Grinstein S, Plaza A. Rotavirus infection in children hospitalized for diarrhoea in Argentina. <i>Ann Trop Paediatr</i> . 1981; 1(3): 167-73.                                                                                                                                                                                                                                                                                                                                                                                                                   | 1978-1980 |                      |
| Argentina | Ginevskaya VA, Amitina NN, Eremeeva TP, Shirman GA, Priimägi LS, Drozdov SG. Electropherotypes and serotypes of human rotavirus in Estonia in 1989-1992. <i>Arch Virol</i> . 1994; 137(1-2): 199-207.                                                                                                                                                                                                                                                                                                                                                                       | 1979-1989 |                      |
| Argentina | Gómez J. Diarrea por rotavirus: estudio prospectivo de 49 familias del partido de Avellaneda, provincia de Buenos Aires. <i>Arch Argent Pediatr</i> . 1986; 85: 139.                                                                                                                                                                                                                                                                                                                                                                                                        | 1983-1986 |                      |
| Argentina | Gómez JA, Biscotti EL, Bercovich JA, Grinstein S. Epidemiology of human rotaviruses in Argentina as determined by RNA genome electrophoresis. <i>Intervirology</i> . 1987; 26(3): 174-80.                                                                                                                                                                                                                                                                                                                                                                                   | 1983-1985 |                      |
| Argentina | Komaid JA, de Caillou SL, Suárez AM, de Castagnaro NR. Electrophoretic types of rotavirus RNA during a 4-yr study of gastroenteritis in Tucumán. <i>Rev Argent Microbiol</i> . 1990; 22(3): 123-9.                                                                                                                                                                                                                                                                                                                                                                          | 1986-1989 |                      |
| Argentina | Espul C, Cuello H, Navarta LM, Mamani N, O'Ryan M, O'Ryan M. Characterization of antigenic types of circulating rotaviruses in Mendoza, Argentina based on typing of the external VP7 capsid protein. <i>Acta Gastroenterol Latinoam</i> . 1995; 23(4): 211-6.                                                                                                                                                                                                                                                                                                              | 1991-1992 |                      |
| Argentina | O'Ryan M, Pérez-Schael I, Mamani N, Peña A, Salinas B, González G, González F, Matson DO, Gómez J. Rotavirus-associated medical visits and hospitalizations in South America: a prospective study at three large sentinel hospitals. <i>Pediatr Infect Dis J</i> . 2001; 20(7): 685-93.                                                                                                                                                                                                                                                                                     | 1997-1999 |                      |
| Argentina | Castello AA, Argüelles MH, Rota RP, Humphrey CD, Olthoff A, Gentsch JR, Glass RI, Glikmann G, Jiang B. Detection and characterization of group C rotavirus in Buenos Aires, Argentina, 1997-2003. <i>J Med Virol</i> . 2009; 81(6): 1109-16.                                                                                                                                                                                                                                                                                                                                | 1997-2003 | *                    |
| Argentina | Tregnaigh MW, Sáez-Llorens X, López P, Abate H, Smith E, Póseman A, et al. Evaluating the efficacy of 10-valent pneumococcal non-typeable Haemophilus influenzae protein-D conjugate vaccine (PHiD-CV) against community-acquired pneumonia in Latin America [abstract]. In: Abstracts of the 29th Annual Meeting of the European Society for Paediatric Infectious Diseases (ESPID); 2011 June 7-11; The Hague, The Netherlands.                                                                                                                                           | 1997-2000 | *                    |
| Argentina | Moreno L, Krishnan JA, Duran P, Ferrero F. Development and validation of a clinical prediction rule to distinguish bacterial from viral pneumonia in children. <i>Pediatr Pulmonol</i> . 2006; 41(4): 331-7.                                                                                                                                                                                                                                                                                                                                                                | 2002-2003 | *                    |
| Argentina | Nyambat B, Meng CY, Vansith K, Vuthy U, Rin E, Kirkwood C, Bogdanovic-Sakran N, Kilgore PE. Hospital-based surveillance for rotavirus diarrhoea in Phnom Penh, Cambodia, March 2005 through February 2007. <i>Vaccine</i> . 2009; 27(Suppl 5): 81-84.                                                                                                                                                                                                                                                                                                                       | 2005-2007 |                      |
| Argentina | Degiuseppe JI, Giovacchini C, Stupka JA, Red Nacional de Vigilancia de Gastroenteritis Virales. [Rotavirus epidemiology and surveillance in Argentina: 2009-2011]. <i>Arch Argent Pediatr</i> . 2013; 111(2): 148-54.                                                                                                                                                                                                                                                                                                                                                       | 2009-2011 | *                    |
| Australia | Barnes GL, Uren E, Stevens KB, Bishop RF. Etiology of acute gastroenteritis in hospitalized children in Melbourne, Australia, from April 1980 to March 1993. <i>J Clin Microbiol</i> . 1998; 36(1): 133-8.                                                                                                                                                                                                                                                                                                                                                                  | 1980-1993 | *                    |
| Australia | Burke V, Gracey M, Robinson J, Peck D, Beaman J, Bundell C. The microbiology of childhood gastroenteritis: Aeromonas species and other infective agents. <i>J Infect Dis</i> . 1983; 148(1): 68-74.                                                                                                                                                                                                                                                                                                                                                                         | 1980      | *                    |
| Australia | Tzipori S, Smith M, Birch C, Barnes G, Bishop R. Cryptosporidiosis in hospital patients with gastroenteritis. <i>Am J Trop Med Hyg</i> . 1983; 32(5): 931-4.                                                                                                                                                                                                                                                                                                                                                                                                                | 1981-1982 | *                    |
| Australia | Biggs BA, Megna R, Wickremesinghe S, Dwyer B. Human infection with Cryptosporidium spp.: results of a 24-month survey. <i>Med J Aust</i> . 1987; 147(4): 175-7.                                                                                                                                                                                                                                                                                                                                                                                                             | 1984-1986 | *                    |
| Australia | O'Grady KF, Carlin JB, Chang AB, Torzillo PJ, Nolan TM, Ruben A, Andrews RM. Effectiveness of 7-valent pneumococcal conjugate vaccine against radiologically diagnosed pneumonia in indigenous infants in Australia. <i>Bull World Health Organ</i> . 2009; 88(2): 139-146.                                                                                                                                                                                                                                                                                                 | 1995-2005 | *                    |
| Australia | Sinclair MI, Hellard ME, Wolfe R, Mitakakis TZ, Leder K, Fairley CK. Pathogens causing community gastroenteritis in Australia. <i>J Gastroenterol Hepatol</i> . 2005; 20(11): 1685-90.                                                                                                                                                                                                                                                                                                                                                                                      | 1997-1999 | *                    |
| Australia | World Health Organization (WHO). WHO Global Health Observatory - Cholera: Number of Reported Cases by Country. Geneva, Switzerland: World Health Organization (WHO).                                                                                                                                                                                                                                                                                                                                                                                                        | 2000-2012 | *                    |
| Australia | Charles PGP, Grayson ML, Pierce RJP, Mayall BC, Fuller AJ, Stirling R, Hooy M, Korman TM, Holmes PW, Wright AA, Catton MG, Whitby M, Johnson B, Armstrong JG, Nimmo GR, Christiansen KJ, Waterer GW, Grayson L, Johnson P, Munckhof W, Looke D, Garske L, Playford G, Spelman D, Kotsimpos T, Holmes P, Korman T, Bardin P, Heath C, Birch C, Druce J, Ryan N, Irving L, Hart D. The etiology of community-acquired pneumonia in Australia: Why penicillin plus doxycycline or a macrolide is the most appropriate therapy. <i>Clin Infect Dis</i> . 2008; 46(10): 1513-21. | 2004-2005 | *                    |
| Australia | Jardine A, Menzies RI, McIntyre PB. Reduction in hospitalizations for pneumonia associated with the introduction of a pneumococcal conjugate vaccination schedule without a booster dose in Australia. <i>Pediatr Infect Dis J</i> . 2010; 29(7): 607-12.                                                                                                                                                                                                                                                                                                                   | 2005      | *                    |
| Austria   | Federal Ministry of Health (Austria), Statistics Austria. Austria Hospital Inpatient Discharges 1989. Vienna, Austria: Statistics Austria.                                                                                                                                                                                                                                                                                                                                                                                                                                  | 1989      | *                    |
| Austria   | Federal Ministry of Health (Austria), Statistics Austria. Austria Hospital Inpatient Discharges 1990. Vienna, Austria: Statistics Austria.                                                                                                                                                                                                                                                                                                                                                                                                                                  | 1990      | *                    |
| Austria   | Federal Ministry of Health (Austria), Statistics Austria. Austria Hospital Inpatient Discharges 1991. Vienna, Austria: Statistics Austria.                                                                                                                                                                                                                                                                                                                                                                                                                                  | 1991      | *                    |

**Web Table 33- Etiology citation list**

| Country    | Citation                                                                                                                                                                                                                                                     | Year*     | New for GBD 2013 (*) |
|------------|--------------------------------------------------------------------------------------------------------------------------------------------------------------------------------------------------------------------------------------------------------------|-----------|----------------------|
| Austria    | Federal Ministry of Health (Austria), Statistics Austria. Austria Hospital Inpatient Discharges 1992. Vienna, Austria: Statistics Austria.                                                                                                                   | 1992      | *                    |
| Austria    | Federal Ministry of Health (Austria), Statistics Austria. Austria Hospital Inpatient Discharges 1993. Vienna, Austria: Statistics Austria.                                                                                                                   | 1993      | *                    |
| Austria    | Federal Ministry of Health (Austria), Statistics Austria. Austria Hospital Inpatient Discharges 1994. Vienna, Austria: Statistics Austria.                                                                                                                   | 1994      | *                    |
| Austria    | Federal Ministry of Health (Austria), Statistics Austria. Austria Hospital Inpatient Discharges 1995. Vienna, Austria: Statistics Austria.                                                                                                                   | 1995      | *                    |
| Austria    | Federal Ministry of Health (Austria), Statistics Austria. Austria Hospital Inpatient Discharges 1996. Vienna, Austria: Statistics Austria.                                                                                                                   | 1996      | *                    |
| Austria    | Federal Ministry of Health (Austria), Statistics Austria. Austria Hospital Inpatient Discharges 1997. Vienna, Austria: Statistics Austria.                                                                                                                   | 1997      | *                    |
| Austria    | Federal Ministry of Health (Austria), Statistics Austria. Austria Hospital Inpatient Discharges 1998. Vienna, Austria: Statistics Austria.                                                                                                                   | 1998      | *                    |
| Austria    | Federal Ministry of Health (Austria), Statistics Austria. Austria Hospital Inpatient Discharges 1999. Vienna, Austria: Statistics Austria.                                                                                                                   | 1999      | *                    |
| Austria    | Federal Ministry of Health (Austria), Statistics Austria. Austria Hospital Inpatient Discharges 2000. Vienna, Austria: Statistics Austria.                                                                                                                   | 2000      | *                    |
| Austria    | World Health Organization (WHO). WHO Global Health Observatory - Cholera: Number of Reported Cases by Country. Geneva, Switzerland: World Health Organization (WHO).                                                                                         | 2001-2005 | *                    |
| Austria    | Federal Ministry of Health (Austria), Statistics Austria. Austria Hospital Inpatient Discharges 2001. Vienna, Austria: Statistics Austria.                                                                                                                   | 2001      | *                    |
| Austria    | Federal Ministry of Health (Austria), Statistics Austria. Austria Hospital Inpatient Discharges 2002. Vienna, Austria: Statistics Austria.                                                                                                                   | 2002      | *                    |
| Austria    | Federal Ministry of Health (Austria), Statistics Austria. Austria Hospital Inpatient Discharges 2003. Vienna, Austria: Statistics Austria.                                                                                                                   | 2003      | *                    |
| Austria    | Federal Ministry of Health (Austria), Statistics Austria. Austria Hospital Inpatient Discharges 2004. Vienna, Austria: Statistics Austria.                                                                                                                   | 2004      | *                    |
| Austria    | Federal Ministry of Health (Austria), Statistics Austria. Austria Hospital Inpatient Discharges 2005. Vienna, Austria: Statistics Austria.                                                                                                                   | 2005      | *                    |
| Austria    | Federal Ministry of Health (Austria), Statistics Austria. Austria Hospital Inpatient Discharges 2006. Vienna, Austria: Statistics Austria.                                                                                                                   | 2006      | *                    |
| Austria    | Huhulescu S, Kiss R, Brettlecker M, Cerny RJ, Hess C, Wewalka G, Allerberger F. Etiology of acute gastroenteritis in three sentinel general practices, Austria 2007. <i>Infection</i> . 2009; 37(2): 103-8.                                                  | 2007      | *                    |
| Austria    | Federal Ministry of Health (Austria), Statistics Austria. Austria Hospital Inpatient Discharges 2007. Vienna, Austria: Statistics Austria.                                                                                                                   | 2007      | *                    |
| Austria    | Federal Ministry of Health (Austria), Statistics Austria. Austria Hospital Inpatient Discharges 2008. Vienna, Austria: Statistics Austria.                                                                                                                   | 2008      | *                    |
| Austria    | Federal Ministry of Health (Austria), Statistics Austria. Austria Hospital Inpatient Discharges 2009. Vienna, Austria: Statistics Austria.                                                                                                                   | 2009      | *                    |
| Austria    | Federal Ministry of Health (Austria), Statistics Austria. Austria Hospital Inpatient Discharges 2010. Vienna, Austria: Statistics Austria.                                                                                                                   | 2010      | *                    |
| Bangladesh | Oberle MW, Merson MH, Islam MS, Rahman AS, Huber DH, Curlin G. Diarrhoeal disease in Bangladesh: epidemiology, mortality averted and costs at a rural treatment centre. <i>Int J Epidemiol</i> . 1980; 9(4): 341-8.                                          | 1975-1976 | *                    |
| Bangladesh | Hossain MA, Albert MJ, Hasan KZ. Epidemiology of shigellosis in Teknaf, a coastal area of Bangladesh: a 10-year survey. <i>Epidemiol Infect</i> . 1990; 105(1): 41-9.                                                                                        | 1975-1984 | *                    |
| Bangladesh | Black RE, Merson MH, Rahman AS, Yunus M, Alim AR, Huq I, Yolken RH, Curlin GT. A two-year study of bacterial, viral, and parasitic agents associated with diarrhea in rural Bangladesh. <i>J Infect Dis</i> . 1980; 142(5): 660-4.                           | 1977-1979 | *                    |
| Bangladesh | Black RE, Merson MH, Huq I, Alim AR, Yunus M. Incidence and severity of rotavirus and <i>Escherichia coli</i> diarrhoea in rural Bangladesh. Implications for vaccine development. <i>Lancet</i> . 1981; 1(8212): 141-3.                                     | 1977-1978 | *                    |
| Bangladesh | Black RE, Brown KH, Becker S, Alim AR, Huq I. Longitudinal studies of infectious diseases and physical growth of children in rural Bangladesh. II. Incidence of diarrhea and association with known pathogens. <i>Am J Epidemiol</i> . 1982; 115(3): 315-24. | 1978-1979 | *                    |
| Bangladesh | Stoll BJ, Glass RI, Huq MI, Khan MU, Holt JE, Banu H. Surveillance of patients attending a diarrhoeal disease hospital in Bangladesh. <i>Br Med J (Clin Res Ed)</i> . 1982; 285(6349): 1185-8.                                                               | 1979-1980 | *                    |
| Bangladesh | Islam SS, Shahid NS. Morbidity and mortality in a diarrhoeal diseases hospital in Bangladesh. <i>Trans R Soc Trop Med Hyg</i> . 1986; 80(5): 748-52.                                                                                                         | 1980-1981 | *                    |
| Bangladesh | Shahid NS, Greenough WB 3rd, Samadi AR, Huq MI, Rahman N. Hand washing with soap reduces diarrhoea and spread of bacterial pathogens in a Bangladesh village. <i>J Diarrhoeal Dis Res</i> . 1996; 14(2): 85-9.                                               | 1983      | *                    |

**Web Table 33- Etiology citation list**

| Country    | Citation                                                                                                                                                                                                                                                                                                                                                 | Year*     | New for GBD 2013 (*) |
|------------|----------------------------------------------------------------------------------------------------------------------------------------------------------------------------------------------------------------------------------------------------------------------------------------------------------------------------------------------------------|-----------|----------------------|
| Bangladesh | Mahalanabis D, Alam AN, Rahman N, Hasnat A. Prognostic indicators and risk factors for increased duration of acute diarrhoea and for persistent diarrhoea in children. <i>Int J Epidemiol.</i> 1991; 20(4): 1064-72.                                                                                                                                     | 1983-1985 |                      |
| Bangladesh | Baqui AH, Yunus MD, Zaman K, Mitra AK, Hossain KM. Surveillance of patients attending a rural diarrhoea treatment centre in Bangladesh. <i>Trop Geogr Med.</i> 1991; 43(1-2): 17-22.                                                                                                                                                                     | 1983-1984 | *                    |
| Bangladesh | Rahman M, Shahid NS, Rahman H, Sack DA, Rahman N, Hossain S. Cryptosporidiosis: a cause of diarrhea in Bangladesh. <i>Am J Trop Med Hyg.</i> 1990; 42(2): 127-30.                                                                                                                                                                                        | 1985      | *                    |
| Bangladesh | Rahman M, Huq F, Sack DA, Butler T, Azad AK, Alam A, Nahar N, Islam M. Acute lower respiratory tract infections in hospitalized patients with diarrhea in Dhaka, Bangladesh. <i>Rev Infect Dis.</i> 1990; 12(Suppl 8): S899-906.                                                                                                                         | 1986-1988 | *                    |
| Bangladesh | Ryan ET, Dhar U, Khan WA, Salam MA, Faruque AS, Fuchs GJ, Calderwood SB, Bennish ML. Mortality, morbidity, and microbiology of endemic cholera among hospitalized patients in Dhaka, Bangladesh. <i>Am J Trop Med Hyg.</i> 2000; 63(1-2): 12-20.                                                                                                         | 1986-1996 | *                    |
| Bangladesh | Henry FJ, Udoy AS, Wanke CA, Aziz KM. Epidemiology of persistent diarrhea and etiologic agents in Mirzapur, Bangladesh. <i>Acta Paediatr Suppl.</i> 1992; 381: 27-31.                                                                                                                                                                                    | 1987-1989 |                      |
| Bangladesh | Fun BN, Unicomb L, Rahim Z, Banu NN, Podder G, Clemens J, Van Loon FP, Rao MR, Malek A, Tzipori S. Rotavirus-associated diarrhea in rural Bangladesh: two-year study of incidence and serotype distribution. <i>J Clin Microbiol.</i> 1991; 29(7): 1359-63.                                                                                              | 1987-1989 | *                    |
| Bangladesh | Baqui AH, Sack RB, Black RE, Haider K, Hossain A, Alim AR, Yunus M, Chowdhury HR, Siddique AK. Enteropathogens associated with acute and persistent diarrhea in Bangladeshi children less than 5 years of age. <i>J Infect Dis.</i> 1992; 166(4): 792-6.                                                                                                 | 1988-1989 |                      |
| Bangladesh | Faruque AS, Mahalanabis D, Islam A, Hoque SS, Hasnat A. Common diarrhea pathogens and the risk of dehydration in young children with acute watery diarrhea: a case-control study. <i>Am J Trop Med Hyg.</i> 1993; 49(1): 93-100.                                                                                                                         | 1988-1989 | *                    |
| Bangladesh | Unicomb LE, Kilgore PE, Faruque SG, Hamadani JD, Fuchs GJ, Albert MJ, Glass RI. Anticipating rotavirus vaccines: hospital-based surveillance for rotavirus diarrhea and estimates of disease burden in Bangladesh. <i>Pediatr Infect Dis J.</i> 1997; 16(10): 947-51.                                                                                    | 1990-1993 | *                    |
| Bangladesh | Khan AM, Hossain MS, Khan AI, Chisti MJ, Chowdhury F, Faruque ASG, Salam MA. Bacterial enteropathogens of neonates admitted to an urban diarrhoeal hospital in Bangladesh. <i>J Trop Pediatr.</i> 2009; 55(2): 122-4.                                                                                                                                    | 1991-2004 | *                    |
| Bangladesh | Hasan K, Jolly P, Marquis G, Roy E, Podder G, Alam K, Huq F, Sack R. Viral etiology of pneumonia in a cohort of newborns till 24 months of age in Rural Mirzapur, Bangladesh. <i>Scand J Infect Dis.</i> 2006; 38(8): 690-5.                                                                                                                             | 1993-1994 | *                    |
| Bangladesh | Tanaka G, Faruque ASG, Luby SP, Malek MA, Glass RI, Parashar UD. Deaths from rotavirus disease in Bangladeshi children: estimates from hospital-based surveillance. <i>Pediatr Infect Dis J.</i> 2007; 26(11): 1014-8.                                                                                                                                   | 1993-2004 |                      |
| Bangladesh | Albert MJ, Faruque AS, Faruque SM, Sack RB, Mahalanabis D. Case-control study of enteropathogens associated with childhood diarrhea in Dhaka, Bangladesh. <i>J Clin Microbiol.</i> 1999; 37(11): 3458-64.                                                                                                                                                | 1993-1994 | *                    |
| Bangladesh | CHOICE Study Group. Multicenter, randomized, double-blind clinical trial to evaluate the efficacy and safety of a reduced osmolarity oral rehydration salts solution in children with acute watery diarrhea. <i>Pediatrics.</i> 2001; 107(4): 613-8.                                                                                                     | 1995-1997 | *                    |
| Bangladesh | Faruque ASG, Malek MA, Khan AI, Huq S, Salam MA, Sack DA. Diarrhoea in elderly people: aetiology, and clinical characteristics. <i>Scand J Infect Dis.</i> 2004; 36(3): 204-8.                                                                                                                                                                           | 1996-2001 | *                    |
| Bangladesh | Haque R, Mondal D, Kirkpatrick BD, Akhter S, Farr BM, Sack RB, Petri WA Jr. Epidemiologic and clinical characteristics of acute diarrhea with emphasis on Entamoeba histolytica infections in preschool children in an urban slum of Dhaka, Bangladesh. <i>Am J Trop Med Hyg.</i> 2003; 69(4): 398-405.                                                  | 1999-2002 |                      |
| Bangladesh | Wu J. Diarrheal diseases in rural Bangladesh: spatial-temporal patterns, risk factors and pathogen detection. <i>Diss Abstr Int.</i> 2011; 73(1).                                                                                                                                                                                                        | 2000-2006 | *                    |
| Bangladesh | Baqui AH, El Arifeen S, Saha SK, Persson L, Zaman K, Gessner BD, Moulton LH, Black RE, Santosham M. Effectiveness of Haemophilus influenzae type B conjugate vaccine on prevention of pneumonia and meningitis in Bangladeshi children: a case-control study. <i>Pediatr Infect Dis J.</i> 2007; 26(7): 565-71.                                          | 2000-2003 | *                    |
| Bangladesh | Qadri F, Saha A, Ahmed T, Al Tarique A, Begum YA, Svennerholm AM. Disease burden due to enterotoxigenic Escherichia coli in the first 2 years of life in an urban community in Bangladesh. <i>Infect Immun.</i> 2007; 75(8): 3961-8.                                                                                                                     | 2002-2004 |                      |
| Bangladesh | Von Seidlein L, Kim DR, Ali M, Lee H, Wang X, Thiem VD, Canh DG, Chaicumpa W, Agtini MD, Hossain A, Bhutta ZA, Mason C, Sethabutr O, Talukder K, Nair GB, Deen JL, Kotloff K, Clemens J. A Multicentre Study of Shigella Diarrhoea in Six Asian Countries: Disease Burden, Clinical Manifestations, and Microbiology. <i>PLoS Med.</i> 2006; 3(9): e353. | 2002-2004 | *                    |
| Bangladesh | Ahmed S, Hussain M, Akhter S, Islam T, Ahmed SU, Kabir ML. Genotypes of rotavirus diarrhoea in a children hospital of Bangladesh. <i>Mymensingh Med J.</i> 2012; 21(3): 497-502.                                                                                                                                                                         | 2006-2007 | *                    |

**Web Table 33- Etiology citation list**

| Country                | Citation                                                                                                                                                                                                                                                                                                                                              | Year*     | New for GBD 2013 (*) |
|------------------------|-------------------------------------------------------------------------------------------------------------------------------------------------------------------------------------------------------------------------------------------------------------------------------------------------------------------------------------------------------|-----------|----------------------|
| Bangladesh             | Chowdhury F, Rahman MA, Begum YA, Khan AI, Faruque ASG, Saha NC, Baby NI, Malek MA, Kumar AR, Svennerholm A-M, Pietroni M, Cravioto A, Qadri F. Impact of rapid urbanization on the rates of infection by <i>Vibrio cholerae</i> O1 and enterotoxigenic <i>Escherichia coli</i> in Dhaka, Bangladesh. <i>PLoS Negl Trop Dis</i> . 2011; 5(4): e999.   | 2008-2010 | *                    |
| Bangladesh             | Nasrin D, Wu Y, Blackwelder WC, Farag TH, Saha D, Sow SO, Alonso PL, Breiman RF, Sur D, Faruque ASG, Zaidi AKM, Biswas K, Van Eijk AM, Walker DG, Levine MM, Kotloff KL. Health care seeking for childhood diarrhea in developing countries: evidence from seven sites in Africa and Asia. <i>Am J Trop Med Hyg</i> . 2013; 89(1 Suppl): 3-12.        | 2010      | *                    |
| Belgium                | Van Damme P, Giaquinto C, Huet F, Gothefors L, Maxwell M, Van der Wielen M. Multicenter prospective study of the burden of rotavirus acute gastroenteritis in Europe, 2004-2005: the REVEAL study. <i>J Infect Dis</i> . 2007; 195 Suppl 1: 4-16.                                                                                                     | 2004-2005 |                      |
| Belgium                | Giaquinto C, van Damme P, REVEAL Study Group. Age distribution of paediatric rotavirus gastroenteritis cases in Europe: the REVEAL study. <i>Scand J Infect Dis</i> . 2010; 42(2): 142-7.                                                                                                                                                             | 2004-2005 | *                    |
| Belgium                | World Health Organization (WHO). WHO Global Health Observatory - Cholera: Number of Reported Cases by Country. Geneva, Switzerland: World Health Organization (WHO).                                                                                                                                                                                  | 2004-2005 | *                    |
| Belgium                | De Schutter I, De Wachter E, Malfroot A, Soetens O, Pierard D, Crokaert F, Verhaegen J. Microbiology of bronchoalveolar lavage fluid in children with acute nonresponding or recurrent community-acquired pneumonia: Identification of nontypeable <i>Haemophilus influenzae</i> as a major pathogen. <i>Clin Infect Dis</i> . 2011; 52(12): 1437-44. | 2005      | *                    |
| Bolivia                | Rodas C, Mamani R, Blanco J, Blanco JE, Wiklund G, Svennerholm A-M, Sjöling A, Iniguez V. Enterotoxins, colonization factors, serotypes and antimicrobial resistance of enterotoxigenic <i>Escherichia coli</i> (ETEC) strains isolated from hospitalized children with diarrhea in Bolivia. <i>Braz J Infect Dis</i> . 2011; 15(2): 132-7.           | 2002-2006 | *                    |
| Bolivia                | De Oliveira LH, Danovaro-Holliday MC, Andrus JK, de Fillipis AMB, Gentsch J, Matus CR, Widdowson M-A. Sentinel hospital surveillance for rotavirus in Latin American and Caribbean countries. <i>J Infect Dis</i> . 2009; 200 Suppl 1: 131-139.                                                                                                       | 2006-2007 |                      |
| Bolivia                | Gonzales L, Sanchez S, Zambrana S, Iniguez V, Wiklund G, Svennerholm A-M, Sjöling A. Molecular characterization of enterotoxigenic <i>Escherichia coli</i> isolates recovered from children with diarrhea during a 4-year period (2007 to 2010) in Bolivia. <i>J Clin Microbiol</i> . 2013; 51(4): 1219-25.                                           | 2007-2010 | *                    |
| Bosnia and Herzegovina | Zvizdi S, Telabasi S, Beslagi E, Cavaljuga S, Maglajli J, Zvizdi A, Hamzi S. Clinical characteristics of rotaviruses disease. <i>Bosn J Basic Med Sci</i> . 2004; 4(2): 22-4.                                                                                                                                                                         | 1988-1991 |                      |
| Bosnia and Herzegovina | Dedeić-Ljubović A, Hukić M, Bekić D, Zvizdić A. Frequency and distribution of diarrhoeagenic <i>Escherichia coli</i> strains isolated from pediatric patients with diarrhoea in Bosnia and Herzegovina. <i>Bosn J Basic Med Sci</i> . 2009; 9(2): 148-55.                                                                                             | 2007-2008 | *                    |
| Botswana               | Kasule M, Sebunya TK, Gashe BA, Armah G, Steele AD. Detection and characterization of human rotavirus among children with diarrhoea in Botswana. <i>Trop Med Int Health</i> . 2003; 8(12): 1137-42.                                                                                                                                                   | 1999-2001 | *                    |
| Botswana               | Basu G, Rossouw J, Sebunya TK, Gashe BA, de Beer M, Dewar JB, Steele AD. Prevalence of rotavirus, adenovirus and astrovirus infection in young children with gastroenteritis in Gaborone, Botswana. <i>East Afr Med J</i> . 2003; 80(12): 652-5.                                                                                                      | 2001-2002 | *                    |
| Botswana               | Kebaabetswe LP, Sebunya TK, Matsheka MI, Ndung'u T. Detection and molecular characterisation of group A rotavirus from children in northern Botswana. <i>East Afr Med J</i> . 2005; 82(4): 203-8.                                                                                                                                                     | 2003-2004 | *                    |
| Brazil                 | Guerrant RL, Kirchhoff LV, Shields DS, Nations MK, Leslie J, de Sousa MA, Araujo JG, Correia LL, Sauer KT, McClelland KE. Prospective study of diarrheal illnesses in northeastern Brazil: patterns of disease, nutritional impact, etiologies, and risk factors. <i>J Infect Dis</i> . 1983; 148(6): 986-97.                                         | 1978-1980 | *                    |
| Brazil                 | Linhares AC, Monção HC, Gabbay YB, de Araújo VL, Serruya AC, Loureiro EC. Acute diarrhoea associated with rotavirus among children living in Belém, Brazil. <i>Trans R Soc Trop Med Hyg</i> . 1983; 77(3): 384-90.                                                                                                                                    | 1979-1980 | *                    |
| Brazil                 | Coiro JR, Bendati MM, de Almeida Neto AJ, Heuser CF, Vasconcellos VL. Rotavirus infection in Brazilian children with acute enteritis: a seasonal variation study. <i>Am J Trop Med Hyg</i> . 1983; 32(5): 1186-8.                                                                                                                                     | 1982      | *                    |
| Brazil                 | Schorling JB, Wanke CA, Schorling SK, McAuliffe JF, De Souza MA, Guerrant RL. A prospective study of persistent diarrhea among children in an urban Brazilian slum. Patterns of occurrence and etiologic agents. <i>Am J Epidemiol</i> . 1990; 132(1): 144-56.                                                                                        | 1985-1986 |                      |
| Brazil                 | Cardoso D das D de P, Soares CMA, Dias e Souza MB de L, de Azevedo M da SP, Martins RMB, Queiróz DA de O, de Brito WMED, Munford V, Rác ML. Epidemiological features of rotavirus infection in Goiânia, Goiás, Brazil, from 1986 to 2000. <i>Mem Inst Oswaldo Cruz</i> . 2003; 98(1): 25-9.                                                           | 1986-2000 |                      |
| Brazil                 | Stewien KE, da Cunha LC, Alvim A de C, dos Reis Filho SA, Alvim MA, Brandão AA, Neiva MN. Rotavirus associated diarrhoea during infancy in the city of S. Luís (MA), Brazil: a two-year longitudinal study. <i>Rev Inst Med Trop Sao Paulo</i> . 1991; 33(6): 459-64.                                                                                 | 1986-1988 | *                    |
| Brazil                 | Rác ML, Candeias JA, Trábulsi JR, Murahowski J. Diarrheal diseases in Brazil: clinical features of rotavirus-associated gastroenteritis in children. <i>Eur J Epidemiol</i> . 1988; 4(3): 382-5.                                                                                                                                                      | 1986-1987 | *                    |
| Brazil                 | Sartori AMC, Valentim J, de Soárez PC, Novaes HMD. Rotavirus morbidity and mortality in children in Brazil. <i>Rev Panam Salud Publica</i> . 2008; 23(2): 92-100.                                                                                                                                                                                     | 1986-2006 | *                    |

**Web Table 33- Etiology citation list**

| Country | Citation                                                                                                                                                                                                                                                                                                                                                                     | Year*     | New for GBD 2013 (*) |
|---------|------------------------------------------------------------------------------------------------------------------------------------------------------------------------------------------------------------------------------------------------------------------------------------------------------------------------------------------------------------------------------|-----------|----------------------|
| Brazil  | Fang GD, Lima AA, Martins CV, Nataro JP, Guerrant RL. Etiology and epidemiology of persistent diarrhea in northeastern Brazil: a hospital-based, prospective, case-control study. <i>J Pediatr Gastroenterol Nutr.</i> 1995; 21(2): 137-44.                                                                                                                                  | 1988-1991 |                      |
| Brazil  | Lima AA, Moore SR, Barboza MS Jr, Soares AM, Schlepner MA, Newman RD, Sears CL, Nataro JP, Fedorko DP, Wuhib T, Schorling JB, Guerrant RL. Persistent diarrhea signals a critical period of increased diarrhea burdens and nutritional shortfalls: a prospective cohort study among children in northeastern Brazil. <i>J Infect Dis.</i> 2000; 181(5): 1643-51.             | 1989-1993 |                      |
| Brazil  | Newman RD, Sears CL, Moore SR, Nataro JP, Wuhib T, Agnew DA, Guerrant RL, Lima AA. Longitudinal study of Cryptosporidium infection in children in northeastern Brazil. <i>J Infect Dis.</i> 1999; 180(1): 167-75.                                                                                                                                                            | 1989-1993 | *                    |
| Brazil  | Lima AA, Guerrant RL. Persistent diarrhea in children: epidemiology, risk factors, pathophysiology, nutritional impact, and management. <i>Epidemiol Rev.</i> 1992; 14: 222-42.                                                                                                                                                                                              | 1989-1991 |                      |
| Brazil  | Sobel J, Gomes TAT, Ramos RTS, Hoekstra M, Rodrigue D, Rassi V, Griffin PM. Pathogen-specific risk factors and protective factors for acute diarrheal illness in children aged 12-59 months in São Paulo, Brazil. <i>Clin Infect Dis.</i> 2004; 38(11): 1545-51.                                                                                                             | 1989-1990 | *                    |
| Brazil  | Gusmão RH, Mascarenhas JD, Gabbay YB, Lins-Lainson Z, Ramos FL, Monteiro TA, Valente SA, Fagundes-Neto U, Linhares AC. Rotavirus subgroups, G serotypes, and electrophoretotypes in cases of nosocomial infantile diarrhoea in Belém, Brazil. <i>J Trop Pediatr.</i> 1999; 45(2): 81-6.                                                                                      | 1992-1994 |                      |
| Brazil  | Da Silva Domingues AL, da Silva Vaz MG, Moreno M, Câmara FP. Molecular epidemiology of group A rotavirus causing acute diarrhea in infants and young children hospitalized in Rio de Janeiro, Brazil, 1995-1996. <i>Braz J Infect Dis.</i> 2000; 4(3): 119-25.                                                                                                               | 1995-1996 |                      |
| Brazil  | CHOICE Study Group. Multicenter, randomized, double-blind clinical trial to evaluate the efficacy and safety of a reduced osmolarity oral rehydration salts solution in children with acute watery diarrhea. <i>Pediatrics.</i> 2001; 107(4): 613-8.                                                                                                                         | 1995-1997 | *                    |
| Brazil  | Araújo IT, Fialho AM, de Assis RMS, Rocha M, Galvão M, Cruz CM, Ferreira MSR, Leite JPG. Rotavirus strain diversity in Rio de Janeiro, Brazil: characterization of VP4 and VP7 genotypes in hospitalized children. <i>J Trop Pediatr.</i> 2002; 48(4): 214-8.                                                                                                                | 1996-1999 |                      |
| Brazil  | Bittencourt JA, Arbo E, Malysz AS, Oravec R, Dias C. Seasonal and age distribution of rotavirus infection in Porto Alegre--Brazil. <i>Braz J Infect Dis.</i> 2000; 4(6): 279-83.                                                                                                                                                                                             | 1996-1998 |                      |
| Brazil  | Fernandes JV, Fonseca SM, Azevedo JC, Maranhão H de S, Fonseca MH, Dantas MT, Meissner R de V. Rotavirus detection in feces of children with acute diarrhea. <i>J Pediatr (Rio J).</i> 2000; 76(4): 300-4.                                                                                                                                                                   | 1996-1998 |                      |
| Brazil  | Luz CRNE da, Mascarenhas JDP, Gabbay YB, Motta ARB, Lima TVR, Soares L da S, Linhares AC. Rotavirus serotypes and electropherotypes identified among hospitalised children in São Luís, Maranhão, Brazil. <i>Rev Inst Med Trop Sao Paulo.</i> 2005; 47(5): 287-93.                                                                                                           | 1997-1999 |                      |
| Brazil  | Rosa E Silva ML, Pires De Carvalho I, Gouvea V. 1998-1999 rotavirus seasons in Juiz de Fora, Minas Gerais, Brazil: detection of an unusual G3P4 epidemic strain. <i>J Clin Microbiol.</i> 2002; 40(8): 2837-42.                                                                                                                                                              | 1998-1999 |                      |
| Brazil  | Soares CC, Volotão EM, Albuquerque MCM, da Silva FM, de Carvalho TRB, Nozawa CM, Linhares RE, Santos N. Prevalence of enteric adenoviruses among children with diarrhea in four Brazilian cities. <i>J Clin Virol.</i> 2002; 23(3): 171-7.                                                                                                                                   | 1998-2000 |                      |
| Brazil  | Santos N, Volotão EM, Soares CC, Campos GS, Sardi SI, Hoshino Y. Predominance of rotavirus genotype G9 during the 1999, 2000, and 2002 seasons among hospitalized children in the city of Salvador, Bahia, Brazil: implications for future vaccine strategies. <i>J Clin Microbiol.</i> 2005; 43(8): 4064-9.                                                                 | 1999-2002 |                      |
| Brazil  | Volotão EM, Soares CC, Maranhão AG, Rocha LN, Hoshino Y, Santos N. Rotavirus surveillance in the city of Rio de Janeiro-Brazil during 2000-2004: detection of unusual strains with G8P4 or G10P9 specificities. <i>J Med Virol.</i> 2006; 78(2): 263-72.                                                                                                                     | 2000-2004 |                      |
| Brazil  | Nascimento-Carvalho CM, Ribeiro CT, Viriato D, Souza AL, Cardoso MRA, Barral A, Araujo-Neto CA, Oliveira JR, Sobral LS, Saukkoriipi A, Paldanius M, Leinonen M, Vainionpää R, Ruuskanen O. The role of respiratory viral infections among children hospitalized for community-acquired pneumonia in a developing country. <i>Pediatr Infect Dis J.</i> 2008; 27(10): 939-41. | 2003-2005 | *                    |
| Brazil  | Nunes MRCM, Magalhães PP, Penna FJ, Nunes JMM, Mendes EN. Diarrhea associated with Shigella in children and susceptibility to antimicrobials. <i>J Pediatr (Rio J).</i> 2012; 88(2): 125-8.                                                                                                                                                                                  | 2004-2007 | *                    |
| Brazil  | Sáfadi MAP, Berezin EN, Munford V, Almeida FJ, de Moraes JC, Pinheiro CF, Racz ML. Hospital-based surveillance to evaluate the impact of rotavirus vaccination in São Paulo, Brazil. <i>Pediatr Infect Dis J.</i> 2010; 29(11): 1019-22.                                                                                                                                     | 2004-2008 | *                    |
| Brazil  | Nyambat B, Meng CY, Vansith K, Vuthy U, Rin E, Kirkwood C, Bogdanovic-Sakran N, Kilgore PE. Hospital-based surveillance for rotavirus diarrhoea in Phnom Penh, Cambodia, March 2005 through February 2007. <i>Vaccine.</i> 2009; 27(Suppl 5): 81-84.                                                                                                                         | 2005-2007 |                      |
| Brazil  | Munford V, Gilio AE, de Souza EC, Cardoso DM, Cardoso D das D de P, Borges AMT, Costa PSS da, Melgaço IAM, Rosa H, Carvalho PRA, Goldani MZ, Moreira ED Jr, Santana C, El Khoury A, Ikedo F, Rácz ML. Rotavirus gastroenteritis in children in 4 regions in Brazil: a hospital-based surveillance study. <i>J Infect Dis.</i> 2009; 200(Suppl 1): S106-113.                  | 2005-2006 | *                    |
| Brazil  | Nunes AA, de Mello LM, Parode RN, Bittar JPM, Domingues AL da S. Prevalence of rotavirus in acute diarrhea and its association with clinical signs and symptoms. <i>J Trop Pediatr.</i> 2010; 56(3): 212-3.                                                                                                                                                                  | 2005-2007 | *                    |



**Web Table 33- Etiology citation list**

| Country      | Citation                                                                                                                                                                                                                                                                                                                                                                          | Year*     | New for GBD 2013 (*) |
|--------------|-----------------------------------------------------------------------------------------------------------------------------------------------------------------------------------------------------------------------------------------------------------------------------------------------------------------------------------------------------------------------------------|-----------|----------------------|
| Brazil       | Correia JB, Patel MM, Nakagomi O, Montenegro FMU, Germano EM, Correia NB, Cuevas LE, Parashar UD, Cunliffe NA, Nakagomi T. Effectiveness of monovalent rotavirus vaccine (Rotarix) against severe diarrhea caused by serotypically unrelated G2P[4] strains in Brazil. <i>J Infect Dis.</i> 2010; 201(3): 363-9.                                                                  | 2006-2008 | *                    |
| Brazil       | Gurgel RG, Bohland AK, Vieira SCF, Oliveira DMP, Fontes PB, Barros VF, Ramos MF, Dove W, Nakagomi T, Nakagomi O, Correia JB, Cunliffe N, Cuevas LE. Incidence of rotavirus and all-cause diarrhea in northeast Brazil following the introduction of a national vaccination program. <i>Gastroenterology.</i> 2009; 137(6): 1970-5.                                                | 2006-2008 | *                    |
| Brazil       | Lamarão LM, Ramos FL, Mello WA, Santos MC, Barbagelata LS, Justino MCA, da Silva AF, Quaresma AJPG, da Silva VB, Burbano RR, Linhares AC. Prevalence and clinical features of respiratory syncytial virus in children hospitalized for community-acquired pneumonia in northern Brazil. <i>BMC Infect Dis.</i> 2012; 119.                                                         | 2006-2007 | *                    |
| Brazil       | Ministry of Health (Brazil). Brazil Hospital Information System 2006. Rio de Janeiro, Brazil: Ministry of Health (Brazil).                                                                                                                                                                                                                                                        | 2006      | *                    |
| Brazil       | Ministry of Health (Brazil). Brazil Hospital Information System 2007. Rio de Janeiro, Brazil: Ministry of Health (Brazil).                                                                                                                                                                                                                                                        | 2007      | *                    |
| Brazil       | Ministry of Health (Brazil). Brazil Hospital Information System 2008. Rio de Janeiro, Brazil: Ministry of Health (Brazil).                                                                                                                                                                                                                                                        | 2008      | *                    |
| Brazil       | Ministry of Health (Brazil). Brazil Hospital Information System 2009. Rio de Janeiro, Brazil: Ministry of Health (Brazil).                                                                                                                                                                                                                                                        | 2009      | *                    |
| Brazil       | Afonso ET, Minamisava R, Bierrenbach AL, Escalante JJC, Alencar AP, Domingues CM, Morais-Neto OL, Toscano CM, Andrade AL. Effect of 10-Valent Pneumococcal Vaccine on Pneumonia among Children, Brazil. <i>Emerg Infect Dis.</i> 2013; 19(4): 589-97.                                                                                                                             | 2010-2011 | *                    |
| Brunei       | World Health Organization (WHO). WHO Global Health Observatory - Cholera: Number of Reported Cases by Country. Geneva, Switzerland: World Health Organization (WHO).                                                                                                                                                                                                              | 2011      | *                    |
| Bulgaria     | Mladenova Z, Korsun N, Geonova T, Ituriza-Gómara M, Rotavirus Study Group. Molecular epidemiology of rotaviruses in Bulgaria: annual shift of the predominant genotype. <i>Eur J Clin Microbiol Infect Dis.</i> 2010; 29(5): 555-62.                                                                                                                                              | 2005-2008 | *                    |
| Burkina Faso | Simpore J, Ouermi D, Ilboudo D, Kabre A, Zeba B, Pietra V, Pignatelli S, Nikiema JB, Kabre GB, Caligaris S, Schumacher F, Castelli F. Aetiology of acute gastro-enteritis in children at Saint Camille Medical Centre, Ouagadougou, Burkina Faso. <i>Pak J Biol Sci.</i> 2009; 12(3): 258-63.                                                                                     | 2006-2008 | *                    |
| Burkina Faso | Bonkougou IJO, Sanou I, Bon F, Benon B, Coulibaly SO, Haukka K, Traoré AS, Barro N. Epidemiology of rotavirus infection among young children with acute diarrhoea in Burkina Faso. <i>BMC Pediatr.</i> 2010; 94.                                                                                                                                                                  | 2008-2010 | *                    |
| Burkina Faso | Bonkougou IJO, Haukka K, Österblad M, Hakanen AJ, Traoré AS, Barro N, Siitonen A. Bacterial and viral etiology of childhood diarrhea in Ouagadougou, Burkina Faso. <i>BMC Pediatr.</i> 2013; 13: 36.                                                                                                                                                                              | 2009-2010 | *                    |
| Cambodia     | Meng CY, Smith BL, Bodhidatta L, Richard SA, Vansith K, Thy B, Srijan A, Serichantalergs O, Mason CJ. Etiology of diarrhea in young children and patterns of antibiotic resistance in Cambodia. <i>Pediatr Infect Dis J.</i> 2011; 30(4): 331-5.                                                                                                                                  | 2004-2006 | *                    |
| Cameroon     | Esona MD, Armah GE, Steele AD. Molecular epidemiology of rotavirus infection in Western Cameroon. <i>J Trop Pediatr.</i> 2003; 49(3): 160-3.                                                                                                                                                                                                                                      | 1999-2000 | *                    |
| Cameroon     | Mwenda JM, Ntoto KM, Abebe A, Enweronu-Laryea C, Amina I, Mchomvu J, Kisakyé A, Mpabalwani EM, Pazvakavambwa I, Armah GE, Seheri LM, Kiulia NM, Page N, Widdowson M-A, Steele AD. Burden and epidemiology of rotavirus diarrhea in selected African countries: preliminary results from the African Rotavirus Surveillance Network. <i>J Infect Dis.</i> 2010; 202(Suppl): S5-11. | 2007-2008 | *                    |
| Canada       | Gurwith M, Wenman W, Hinde D, Feltham S, Greenberg H. A prospective study of rotavirus infection in infants and young children. <i>J Infect Dis.</i> 1981; 144(3): 218-24.                                                                                                                                                                                                        | 1976-1977 | *                    |
| Canada       | Pépin J, Valiquette L, Alary M-E, Villemure P, Pelletier A, Forget K, Pépin K, Chouinard D. Clostridium difficile-associated diarrhea in a region of Quebec from 1991 to 2003: a changing pattern of disease severity. <i>CMAJ.</i> 2004; 171(5): 466-72.                                                                                                                         | 1991-2003 | *                    |
| Canada       | World Health Organization (WHO). WHO Global Health Observatory - Cholera: Number of Reported Cases by Country. Geneva, Switzerland: World Health Organization (WHO).                                                                                                                                                                                                              | 2000-2011 | *                    |
| Canada       | Canadian Institute for Health Information (CIHI). Canada Discharge Abstract Database 2002-2003. Ottawa, Canada: Canadian Institute for Health Information (CIHI).                                                                                                                                                                                                                 | 2002      | *                    |
| Canada       | Canadian Institute for Health Information (CIHI). Canada Discharge Abstract Database 2003-2004. Ottawa, Canada: Canadian Institute for Health Information (CIHI).                                                                                                                                                                                                                 | 2003      | *                    |
| Canada       | Canadian Institute for Health Information (CIHI). Canada Discharge Abstract Database 2004-2005. Ottawa, Canada: Canadian Institute for Health Information (CIHI).                                                                                                                                                                                                                 | 2004      | *                    |
| Canada       | Canadian Institute for Health Information (CIHI). Canada Discharge Abstract Database 2005-2006. Ottawa, Canada: Canadian Institute for Health Information (CIHI).                                                                                                                                                                                                                 | 2005      | *                    |
| Canada       | Lambert PJ, Dyck M, Thompson LH, Hammond GW. Population-Based Surveillance of Clostridium difficile Infection in Manitoba, Canada, by Using Interim Surveillance Definitions. <i>Infect Control Hosp Epidemiol.</i> 2009; 30(10): 945-51.                                                                                                                                         | 2005-2006 | *                    |
| Canada       | Canadian Institute for Health Information (CIHI). Canada Discharge Abstract Database 2006-2007. Ottawa, Canada: Canadian Institute for Health Information (CIHI).                                                                                                                                                                                                                 | 2006      | *                    |

**Web Table 33- Etiology citation list**

| Country                  | Citation                                                                                                                                                                                                                                                                                                                                                 | Year*     | New for GBD 2013 (*) |
|--------------------------|----------------------------------------------------------------------------------------------------------------------------------------------------------------------------------------------------------------------------------------------------------------------------------------------------------------------------------------------------------|-----------|----------------------|
| Canada                   | Canadian Institute for Health Information (CIHI). Canada Discharge Abstract Database 2007-2008. Ottawa, Canada: Canadian Institute for Health Information (CIHI).                                                                                                                                                                                        | 2007      | *                    |
| Canada                   | Canadian Institute for Health Information (CIHI). Canada Discharge Abstract Database 2008-2009. Ottawa, Canada: Canadian Institute for Health Information (CIHI).                                                                                                                                                                                        | 2008      | *                    |
| Canada                   | Canadian Institute for Health Information (CIHI). Canada Discharge Abstract Database 2009-2010. Ottawa, Canada: Canadian Institute for Health Information (CIHI).                                                                                                                                                                                        | 2009      | *                    |
| Central African Republic | Georges MC, Wachsmuth IK, Meunier DM, Nebout N, Didier F, Siopathis MR, Georges AJ. Parasitic, bacterial, and viral enteric pathogens associated with diarrhea in the Central African Republic. <i>J Clin Microbiol.</i> 1984; 19(5): 571-5.                                                                                                             | 1981-1982 | *                    |
| Central African Republic | Georges MC, Roure C, Tauxe RV, Meunier DM, Merlin M, Testa J, Baya C, Limbassa J, Georges AJ. Diarrheal morbidity and mortality in children in the Central African Republic. <i>Am J Trop Med Hyg.</i> 1987; 36(3): 598-602.                                                                                                                             | 1983      | *                    |
| Central African Republic | Georges-Courbot MC, Monges J, Beraud-Cassel AM, Gouandjika I, Georges AJ. Prospective longitudinal study of rotavirus infections in children from birth to two years of age in Central Africa. <i>Ann Inst Pasteur Virol.</i> 1988; 139(4): 421-8.                                                                                                       | 1983-1985 | *                    |
| Chile                    | Ferreccio C, Prado V, Ojeda A, Cayazo M, Abrego P, Guers L, Levine MM. Epidemiologic patterns of acute diarrhea and endemic Shigella infections in children in a poor periurban setting in Santiago, Chile. <i>Am J Epidemiol.</i> 1991; 134(6): 614-27.                                                                                                 | 1986-1989 |                      |
| Chile                    | Levine OS, Lagos R, Muñoz A, Villaroel J, Alvarez AM, Abrego P, Levine MM. Defining the burden of pneumonia in children preventable by vaccination against Haemophilus influenzae type b. <i>Pediatr Infect Dis J.</i> 1999; 18(12): 1060-4.                                                                                                             | 1992-1995 | *                    |
| Chile                    | O'Ryan M, Pérez-Schael I, Mamani N, Peña A, Salinas B, González G, González F, Matson DO, Gómez J. Rotavirus-associated medical visits and hospitalizations in South America: a prospective study at three large sentinel hospitals. <i>Pediatr Infect Dis J.</i> 2001; 20(7): 685-93.                                                                   | 1997-1999 |                      |
| Chile                    | Díaz A, Barria P, Niederman M, Restrepo MI, Dreyse J, Fuentes G, Couble B, Saldías F. Etiology of community-acquired pneumonia in hospitalized patients in Chile: the increasing prevalence of respiratory viruses among classic pathogens. <i>Chest.</i> 2007; 131(3): 779-87.                                                                          | 2003-2005 | *                    |
| Chile                    | Luchsinger V, Piedra PA, Ruiz M, Zunino E, Martínez MA, Machado C, Fasce R, Ulloa MT, Fink MC, Lara P, Avendaño LF. Role of neutralizing antibodies in adults with community-acquired pneumonia by respiratory syncytial virus. <i>Clin Infect Dis.</i> 2012; 54(7): 905-12.                                                                             | 2005-2007 | *                    |
| Chile                    | Luchsinger V, Ruiz M, Zunino E, Martínez MA, Machado C, Piedra PA, Fasce R, Ulloa MT, Fink MC, Lara P, Gebauer M, Chávez F, Avendaño LF. Community-acquired pneumonia in Chile: the clinical relevance in the detection of viruses and atypical bacteria. <i>Thorax.</i> 2013; 68(11): 1000-6.                                                           | 2005-2007 | *                    |
| Chile                    | O'Ryan ML, Peña A, Vergara R, Díaz J, Mamani N, Cortés H, Lucero Y, Vidal R, Osorio G, Santolaya ME, Hermosilla G, Prado VJ. Prospective characterization of norovirus compared with rotavirus acute diarrhea episodes in Chilean children. <i>Pediatr Infect Dis J.</i> 2010; 29(9): 855-9.                                                             | 2006-2008 | *                    |
| Chile                    | De Oliveira LH, Danovaro-Holliday MC, Andrus JK, de Fillipsis AMB, Gentsch J, Matus CR, Widdowson M-A. Sentinel hospital surveillance for rotavirus in Latin American and Caribbean countries. <i>J Infect Dis.</i> 2009; 200 Suppl 1: 131-139.                                                                                                          | 2007      |                      |
| Chile                    | World Health Organization (WHO). WHO Global Health Observatory - Cholera: Number of Reported Cases by Country. Geneva, Switzerland: World Health Organization (WHO).                                                                                                                                                                                     | 2011      | *                    |
| China                    | Huilan S, Zhen LG, Mathan MM, Mathew MM, Olarte J, Espejo R, Khin Maung U, Ghafoor MA, Khan MA, Sami Z. Etiology of acute diarrhoea among children in developing countries: a multicentre study in five countries. <i>Bull World Health Organ.</i> 1991; 69(5): 549-55.                                                                                  | 1982-1984 | *                    |
| China                    | Tam JS, Kum WW, Lam B, Yeung CY, Ng MH. Molecular epidemiology of human rotavirus infection in children in Hong Kong. <i>J Clin Microbiol.</i> 1986; 23(3): 660-4.                                                                                                                                                                                       | 1983-1984 | *                    |
| China                    | Sung RYT, Cheng AFB, Chan RCK, Tam JS, Oppenheimer SJ. Epidemiology and Etiology of Pneumonia in Children in Hong Kong. <i>Clin Infect Dis.</i> 1993; 17(5): 894-6.                                                                                                                                                                                      | 1986-1988 | *                    |
| China                    | Wu H, Taniguchi K, Urasawa T, Urasawa S. Serological and genomic characterization of human rotaviruses detected in China. <i>J Med Virol.</i> 1998; 55(2): 168-76.                                                                                                                                                                                       | 1994-1995 | *                    |
| China                    | Xu J, Yang Y, Sun J, Ding Y, Su L, Fang Z, Glass RI. Molecular epidemiology of rotavirus infections among children hospitalized for acute gastroenteritis in Shanghai, China, 2001 through 2005. <i>J Clin Virol.</i> 2009; 44(1): 58-61.                                                                                                                | 2001-2005 |                      |
| China                    | Jin Y, Ye X-H, Fang Z-Y, Li Y-N, Yang X-M, Dong Q-L, Huang X. Molecular epidemic features and variation of rotavirus among children with diarrhea in Lanzhou, China, 2001-2006. <i>World J Pediatr.</i> 2008; 4(3): 197-201.                                                                                                                             | 2001-2006 |                      |
| China                    | Lau C-S, Wong DA, Tong LKL, Lo JYC, Ma AMC, Cheng PKC, Lim WWL. High rate and changing molecular epidemiology pattern of norovirus infections in sporadic cases and outbreaks of gastroenteritis in Hong Kong. <i>J Med Virol.</i> 2004; 73(1): 113-7.                                                                                                   | 2001-2002 | *                    |
| China                    | Von Seidlein L, Kim DR, Ali M, Lee H, Wang X, Thiem VD, Canh DG, Chaicumpa W, Agtini MD, Hossain A, Bhutta ZA, Mason C, Sethabutr O, Talukder K, Nair GB, Deen JL, Kotloff K, Clemens J. A Multicentre Study of Shigella Diarrhoea in Six Asian Countries: Disease Burden, Clinical Manifestations, and Microbiology. <i>PLoS Med.</i> 2006; 3(9): e353. | 2002      | *                    |



**Web Table 33- Etiology citation list**

| Country       | Citation                                                                                                                                                                                                                                                                                                                          | Year*     | New for GBD 2013 (*) |
|---------------|-----------------------------------------------------------------------------------------------------------------------------------------------------------------------------------------------------------------------------------------------------------------------------------------------------------------------------------|-----------|----------------------|
| China         | Duan Z-J, Liu N, Yang S-H, Zhang J, Sun L-W, Tang J-Y, Jin Y, Du Z-Q, Xu J, Wu Q-B, Tong Z-L, Gong S-T, Qian Y, Ma J-M, Liao X-C, Widdowson M-A, Jiang B, Fang Z-Y. Hospital-Based Surveillance of Rotavirus Diarrhea in the People's Republic of China, August 2003-July 2007. <i>J Infect Dis.</i> 2009; 200(Supp 1): S167-173. | 2003-2007 | *                    |
| China         | Zhang Q, MacDonald NE, Guo Z. Vaccine preventable community-acquired pneumonia in hospitalized children in Northwest China. <i>Pediatr Infect Dis J.</i> 2011; 30(1): 7-10.                                                                                                                                                       | 2004-2005 | *                    |
| China         | Guo L, Song J, Xu X, Ren L, Li J, Zhou H, Wang M, Qu J, Wang J, Hung T. Genetic analysis of norovirus in children affected with acute gastroenteritis in Beijing, 2004-2007. <i>J Clin Virol.</i> 2009; 44(1): 94-8.                                                                                                              | 2004-2007 | *                    |
| China         | Hon KL, Leung E, Hung E, Tang J, Chow CM, Leung TF, Cheung KL, Ng PC. Premorbid factors and outcome associated with respiratory virus infections in a pediatric intensive care unit. <i>Pediatr Pulmonol.</i> 2008; 43(3): 275-80.                                                                                                | 2004-2007 | *                    |
| China         | Jin Y, Cheng W, Yang X, Jin M, Zhang Q, Xu Z, Yu J, Zhu L, Yang S, Liu N, Cui S, Fang Z, Duan Z. Viral agents associated with acute gastroenteritis in children hospitalized with diarrhea in Lanzhou, China. <i>J Clin Virol.</i> 2009; 44(3): 238-41.                                                                           | 2005-2007 | *                    |
| China         | Sung RYT, Chan PKS, Tsen T, Li AM, Lam WY, Yeung ACM, Nelson EAS. Identification of viral and atypical bacterial pathogens in children hospitalized with acute respiratory infections in Hong Kong by multiplex PCR assays. <i>J Med Virol.</i> 2009; 81(1): 153-9.                                                               | 2005-2006 | *                    |
| China         | Gao Y, Jin M, Cong X, Duan Z, Li H-Y, Guo X, Zuo Y, Zhang Y, Zhang Y, Wei L. Clinical and molecular epidemiologic analyses of norovirus-associated sporadic gastroenteritis in adults from Beijing, China. <i>J Med Virol.</i> 2011; 83(6): 1078-85.                                                                              | 2007-2008 | *                    |
| China         | Lou J-T, Xu X-J, Wu Y-D, Tao R, Tong M-Q. Epidemiology and burden of rotavirus infection among children in Hangzhou, China. <i>J Clin Virol.</i> 2011; 50(1): 84-7.                                                                                                                                                               | 2007-2008 | *                    |
| China         | Cao B, Song S-F, Bai L, Yin YD, Zhang Y-Y, Liu Y-M, Guo P, Wang C, Ren L-L, Wang J-W, Zhao F, Zhang J-Z, Gonzalez R. Viral and Mycoplasma pneumoniae community-acquired pneumonia and novel clinical outcome evaluation in ambulatory adult patients in China. <i>Eur J Clin Microbiol Infect Dis.</i> 2010; 29(11): 1443-8.      | 2008-2009 | *                    |
| China         | Ouyang Y, Ma H, Jin M, Wang X, Wang J, Xu L, Lin S, Shen Z, Chen Z, Qiu Z, Gao Z, Peng L, Li J. Etiology and epidemiology of viral diarrhea in children under the age of five hospitalized in Tianjin, China. <i>Arch Virol.</i> 2012; 157(5): 881-7.                                                                             | 2008-2009 | *                    |
| China         | Lu G, Li J, Xie Z, Liu C, Guo L, Vernet G, Shen K, Wang J. Human metapneumovirus associated with community-acquired pneumonia in children in Beijing, China. <i>J Med Virol.</i> 2013; 85(1): 138-43.                                                                                                                             | 2008-2010 | *                    |
| China         | Qu M, Deng Y, Zhang X, Liu G, Huang Y, Lin C, Li J, Yan H, Li X, Jia L, Kan B, Huang F, Wang Q. Etiology of acute diarrhea due to enteropathogenic bacteria in Beijing, China. <i>J Infect.</i> 2012; 65(3): 214-22.                                                                                                              | 2010-2011 | *                    |
| Cote d'Ivoire | Akran V, Peenze I, Akoua-Koffi C, Kette H, de Beer MC, Dosso M, Steele AD. Molecular characterization and genotyping of human rotavirus strains in Abidjan, Cote d'Ivoire. <i>J Infect Dis.</i> 2010; S220-224.                                                                                                                   | 2000-2004 | *                    |
| Croatia       | WHO Regional Office for Europe (EURO-WHO). European Hospital Morbidity Database. Copenhagen, Denmark: WHO Regional Office for Europe (EURO-WHO).                                                                                                                                                                                  | 2010-2011 | *                    |
| Denmark       | World Health Organization (WHO). WHO Global Health Observatory - Cholera: Number of Reported Cases by Country. Geneva, Switzerland: World Health Organization (WHO).                                                                                                                                                              | 2004-2008 | *                    |
| Denmark       | Hoffmann T, Iturriza M, Faaborg-Andersen J, Kraer C, Nielsen CP, Gray J, Hogh B. Prospective study of the burden of rotavirus gastroenteritis in Danish children and their families. <i>Eur J Pediatr.</i> 2011; 170(12): 1535-9.                                                                                                 | 2008-2009 | *                    |
| Ecuador       | Suzuki H, Sato T, Kitaoka S, Tazawa F, Konno T, Amano Y, Alava Alprecht A, Gutiérrez Vera E, Lopez Villalta J, Numazaki Y. Epidemiology of rotavirus in Guayaquil, Ecuador. <i>Am J Trop Med Hyg.</i> 1986; 35(2): 372-5.                                                                                                         | 1978-1981 | *                    |
| Ecuador       | National Institute of Statistics and Censuses (Ecuador). Ecuador Hospital Inpatient Discharges 1999. Quito, Ecuador: National Institute of Statistics and Censuses (Ecuador).                                                                                                                                                     | 1999      | *                    |
| Ecuador       | National Institute of Statistics and Censuses (Ecuador). Ecuador Hospital Inpatient Discharges 2000. Quito, Ecuador: National Institute of Statistics and Censuses (Ecuador).                                                                                                                                                     | 2000      | *                    |
| Ecuador       | National Institute of Statistics and Censuses (Ecuador). Ecuador Hospital Inpatient Discharges 2001. Quito, Ecuador: National Institute of Statistics and Censuses (Ecuador).                                                                                                                                                     | 2001      | *                    |
| Ecuador       | National Institute of Statistics and Censuses (Ecuador). Ecuador Hospital Inpatient Discharges 2002. Quito, Ecuador: National Institute of Statistics and Censuses (Ecuador).                                                                                                                                                     | 2002      | *                    |
| Ecuador       | National Institute of Statistics and Censuses (Ecuador). Ecuador Hospital Inpatient Discharges 2003. Quito, Ecuador: National Institute of Statistics and Censuses (Ecuador).                                                                                                                                                     | 2003      | *                    |
| Ecuador       | National Institute of Statistics and Censuses (Ecuador). Ecuador Hospital Inpatient Discharges 2004. Quito, Ecuador: National Institute of Statistics and Censuses (Ecuador).                                                                                                                                                     | 2004      | *                    |
| Ecuador       | National Institute of Statistics and Censuses (Ecuador). Ecuador Hospital Inpatient Discharges 2005. Quito, Ecuador: National Institute of Statistics and Censuses (Ecuador).                                                                                                                                                     | 2005      | *                    |
| Ecuador       | National Institute of Statistics and Censuses (Ecuador). Ecuador Hospital Inpatient Discharges 2006. Quito, Ecuador: National Institute of Statistics and Censuses (Ecuador).                                                                                                                                                     | 2006      | *                    |

**Web Table 33- Etiology citation list**

| Country     | Citation                                                                                                                                                                                                                                                                                                                                                                        | Year*     | New for GBD 2013 (*) |
|-------------|---------------------------------------------------------------------------------------------------------------------------------------------------------------------------------------------------------------------------------------------------------------------------------------------------------------------------------------------------------------------------------|-----------|----------------------|
| Ecuador     | National Institute of Statistics and Censuses (Ecuador). Ecuador Hospital Inpatient Discharges 2007. Quito, Ecuador: National Institute of Statistics and Censuses (Ecuador).                                                                                                                                                                                                   | 2007      | *                    |
| Ecuador     | National Institute of Statistics and Censuses (Ecuador). Ecuador Hospital Inpatient Discharges 2008. Quito, Ecuador: National Institute of Statistics and Censuses (Ecuador).                                                                                                                                                                                                   | 2008      | *                    |
| Ecuador     | National Institute of Statistics and Censuses (Ecuador). Ecuador Hospital Inpatient Discharges 2009. Quito, Ecuador: National Institute of Statistics and Censuses (Ecuador).                                                                                                                                                                                                   | 2009      | *                    |
| Ecuador     | National Institute of Statistics and Censuses (Ecuador). Ecuador Hospital Inpatient Discharges 2010. Quito, Ecuador: National Institute of Statistics and Censuses (Ecuador).                                                                                                                                                                                                   | 2010      | *                    |
| Ecuador     | National Institute of Statistics and Censuses (Ecuador). Ecuador Hospital Inpatient Discharges 2011. Quito, Ecuador: National Institute of Statistics and Censuses (Ecuador).                                                                                                                                                                                                   | 2011      | *                    |
| Egypt       | Zaki AM, DuPont HL, el Alamy MA, Arafat RR, Amin K, Awad MM, Bassiouni L, Imam IZ, el Malih GS, el Marsafie A. The detection of enteropathogens in acute diarrhea in a family cohort population in rural Egypt. <i>Am J Trop Med Hyg.</i> 1986; 35(5): 1013-22.                                                                                                                 | 1981-1983 | *                    |
| Egypt       | Shukry S, Zaki AM, DuPont HL, Shoukry I, el Tagi M, Hamed Z. Detection of enteropathogens in fatal and potentially fatal diarrhea in Cairo, Egypt. <i>J Clin Microbiol.</i> 1986; 24(6): 959-62.                                                                                                                                                                                | 1982-1983 | *                    |
| Egypt       | Pazzaglia G, Bourgeois AL, Araby I, Mikhail I, Podgore JK, Mourad A, Riad S, Gaffar T, Ramadan AM. Campylobacter-associated diarrhoea in Egyptian infants: epidemiology and clinical manifestations of disease and high frequency of concomitant infections. <i>J Diarrhoeal Dis Res.</i> 1993; 11(1): 6-13.                                                                    | 1983-1984 | *                    |
| Egypt       | Wasfy MO, Oyoyo BA, David JC, Ismail TF, el-Gendy AM, Mohran ZS, Sultan Y, Peruski LF Jr. Isolation and antibiotic susceptibility of Salmonella, Shigella, and Campylobacter from acute enteric infections in Egypt. <i>J Health Popul Nutr.</i> 2000; 18(1): 33-8.                                                                                                             | 1986-1993 | *                    |
| Egypt       | el-Mougi M, Amer A, el-Abhar A, Hughes J, el-Shafie A. Epidemiological and clinical features of rotavirus associated acute infantile diarrhoea in Cairo, Egypt. <i>J Trop Pediatr.</i> 1989; 35(5): 230-3.                                                                                                                                                                      | 1986      | *                    |
| Egypt       | Naficy AB, Rao MR, Holmes JL, Abu-Elyazeed R, Savarino SJ, Wierzba TF, Frenck RW, Monroe SS, Glass RI, Clemens JD. Astrovirus diarrhea in Egyptian children. <i>J Infect Dis.</i> 2000; 182(3): 685-90.                                                                                                                                                                         | 1995-1998 | *                    |
| Egypt       | Matson DO, Abdel-Messih IA, Schlett CD, Bok K, Wienkopff T, Wierzba TF, Sanders JW, Frenck RW Jr. Rotavirus genotypes among hospitalized children in Egypt, 2000-2002. <i>J Infect Dis.</i> 2010; 202 Suppl: 263-265.                                                                                                                                                           | 2000-2002 |                      |
| Egypt       | Wierzba TF, Abdel-Messih IA, Abu-Elyazeed R, Putnam SD, Kamal KA, Rozmajzl P, Ahmed SF, Fatah A, Zabedy K, Shaheen HI, Sanders J, Frenck R. Clinic-based surveillance for bacterial- and rotavirus-associated diarrhea in Egyptian children. <i>Am J Trop Med Hyg.</i> 2006; 74(1): 148-53.                                                                                     | 2000-2002 | *                    |
| Egypt       | El-Mohammady H, Mansour A, Shaheen HI, Henien NH, Motawea MS, Raafat I, Moustafa M, Adib-Messih IA, Sebeny PJ, Young SYN, Klana JD. Increase in the detection rate of viral and parasitic enteric pathogens among Egyptian children with acute diarrhea. <i>J Infect Dev Ctries.</i> 2012; 6(11): 774-81.                                                                       | 2005-2007 | *                    |
| Egypt       | Al Jarousha AMK, El Jarou MA, El Qouqa IA. Bacterial enteropathogens and risk factors associated with childhood diarrhea. <i>Indian J Pediatr.</i> 2011; 78(2): 165-70.                                                                                                                                                                                                         | 2006-2007 | *                    |
| Egypt       | Behiry IK, Abada EA, Ahmed EA, Labeeb RS. Enteropathogenic Escherichia coli associated with diarrhea in children in Cairo, Egypt. <i>ScientificWorldJournal.</i> 2011; 2613-9.                                                                                                                                                                                                  | 2009      | *                    |
| El Salvador | Spencer HC, Wells JG, Gary GW, SONDY J, Puhf ND, Feldman RA. Diarrhea in a non-hospitalized rural Salvadoran population: the role of enterotoxigenic Escherichia coli and rotavirus. <i>Am J Trop Med Hyg.</i> 1980; 29(2): 246-53.                                                                                                                                             | 1977      | *                    |
| El Salvador | Yen C, Armero Guardado JA, Alberto P, Rodriguez Araujo DS, Mena C, Cuellar E, Nolasco JB, De Oliveira LH, Pastor D, Tate JE, Parashar UD, Patel MM. Decline in rotavirus hospitalizations and health care visits for childhood diarrhea following rotavirus vaccination in El Salvador. <i>Pediatr Infect Dis J.</i> 2011; 30(1 Suppl): S6-S10.                                 | 2005-2006 | *                    |
| El Salvador | De Oliveira LH, Danovaro-Holliday MC, Andrus JK, de Phillipis AMB, Gentsch J, Matus CR, Widdowson M-A. Sentinel hospital surveillance for rotavirus in Latin American and Caribbean countries. <i>J Infect Dis.</i> 2009; 200 Suppl 1: 131-139.                                                                                                                                 | 2006-2007 |                      |
| Estonia     | Ginevskaya VA, Amitina NN, Ereemeeva TP, Shirman GA, Priimägi LS, Drozdov SG. Electropherotypes and serotypes of human rotavirus in Estonia in 1989-1992. <i>Arch Virol.</i> 1994; 137(1-2): 199-207.                                                                                                                                                                           | 1989-1992 |                      |
| Ethiopia    | Stintzing G, Bäck E, Tufvesson B, Johnsson T, Wadström T, Habte D. Seasonal fluctuations in the occurrence of enterotoxigenic bacteria and rotavirus in paediatric diarrhoea in Addis Ababa. <i>Bull World Health Organ.</i> 1981; 59(1): 67-73.                                                                                                                                | 1977-1978 | *                    |
| Ethiopia    | Muhe L, Fredrikzon B, Habte D. Clinical profile of rotavirus enteritis in Ethiopian children. <i>Ethiop Med J.</i> 1986; 24(1): 1-6.                                                                                                                                                                                                                                            | 1983-1984 | *                    |
| Ethiopia    | Bartels SA, Greenough PG, Tamar M, VanRooyen MJ. Investigation of a cholera outbreak in Ethiopia's Oromiya Region. <i>Disaster Med Public Health Prep.</i> 2010; 4(4): 312-7.                                                                                                                                                                                                   | 2006      | *                    |
| Ethiopia    | Mwenda JM, Ntoto KM, Abebe A, Enweronu-Laryea C, Amina I, Mchomvu J, Kisakye A, Mpabalwani EM, Pazvakambwa I, Armah GE, Seheri LM, Kiulia NM, Page N, Widdowson M-A, Steele AD. Burden and epidemiology of rotavirus diarrhea in selected African countries: preliminary results from the African Rotavirus Surveillance Network. <i>J Infect Dis.</i> 2010; 202(Suppl): S5-11. | 2007-2008 |                      |

**Web Table 33- Etiology citation list**

| Country  | Citation                                                                                                                                                                                                                                                                                                                                            | Year*     | New for GBD 2013 (*) |
|----------|-----------------------------------------------------------------------------------------------------------------------------------------------------------------------------------------------------------------------------------------------------------------------------------------------------------------------------------------------------|-----------|----------------------|
| Ethiopia | Adamu H, Petros B, Hailu A, Petry F. Molecular characterization of Cryptosporidium isolates from humans in Ethiopia. <i>Acta Trop.</i> 2010; 115(1-2): 77-83.                                                                                                                                                                                       | 2007-2008 | *                    |
| Ethiopia | Zhao Y-F, Guo X-J, Zhang Z-S, Ma X-Q, Wang R, Yan X-Y, He J. Epidemiology of functional diarrhea and comparison with diarrhea-predominant irritable bowel syndrome: a population-based survey in China. <i>PLoS One.</i> 2012; 7(8): e43749.                                                                                                        | 2007-2012 | *                    |
| Fiji     | Jenney A, Tikoduadua L, Buadromo E, Barnes G, Kirkwood CD, Boniface K, Bines J, Mulholland K, Russell F. The burden of hospitalised rotavirus infections in Fiji. <i>Vaccine.</i> 2009; 27 Suppl 5: 108-11.                                                                                                                                         | 2006-2007 |                      |
| Fiji     | Mermond S, Berlioz-Arthaud A, Estivals M, Baumann F, Levenes H, Martin PMV. Aetiology of community-acquired pneumonia in hospitalized adult patients in New Caledonia. <i>Trop Med Int Health.</i> 2010; 15(12): 1517-24.                                                                                                                           | 2006-2007 | *                    |
| Finland  | World Health Organization (WHO). WHO Global Health Observatory - Cholera: Number of Reported Cases by Country. Geneva, Switzerland: World Health Organization (WHO).                                                                                                                                                                                | 2005-2008 | *                    |
| Finland  | Lahti E, Peltola V, Waris M, Virkki R, Rantakokko-Jalava K, Jalava J, Eerola E, Ruuskanen O. Induced sputum in the diagnosis of childhood community-acquired pneumonia. <i>Thorax.</i> 2009; 64(3): 252-7.                                                                                                                                          | 2006-2007 | *                    |
| Finland  | Honkinen M, Lahti E, Österback R, Ruuskanen O, Waris M. Viruses and bacteria in sputum samples of children with community-acquired pneumonia. <i>Clin Microbiol Infect.</i> 2012; 18(3): 300-7.                                                                                                                                                     | 2006-2007 | *                    |
| Finland  | Kotila SM, Virolainen A, Snellman M, Ibrahim S, Jalava J, Lyytikäinen O. Incidence, case fatality and genotypes causing <i>Clostridium difficile</i> infections, Finland, 2008. <i>Clin Microbiol Infect.</i> 2011; 17(6): 888-93.                                                                                                                  | 2008      | *                    |
| Finland  | Puustinen L, Blazevic V, Salminen M, Hämäläinen M, Räsänen S, Vesikari T. Noroviruses as a major cause of acute gastroenteritis in children in Finland, 2009-2010. <i>Scand J Infect Dis.</i> 2011; 43(10): 804-8.                                                                                                                                  | 2009-2010 | *                    |
| France   | World Health Organization (WHO). WHO Global Health Observatory - Cholera: Number of Reported Cases by Country. Geneva, Switzerland: World Health Organization (WHO).                                                                                                                                                                                | 2000-2011 | *                    |
| France   | Lorrot M, Bon F, El Hajje MJ, Aho S, Wolfer M, Giraudon H, Kaplon J, Marc E, Raymond J, Lebon P, Pothier P, Gendrel D. Epidemiology and clinical features of gastroenteritis in hospitalised children: prospective survey during a 2-year period in a Parisian hospital, France. <i>Eur J Clin Microbiol Infect Dis.</i> 2011; 30(3): 361-8.        | 2001-2004 | *                    |
| France   | Giaquinto C, van Damme P, REVEAL Study Group. Age distribution of paediatric rotavirus gastroenteritis cases in Europe: the REVEAL study. <i>Scand J Infect Dis.</i> 2010; 42(2): 142-7.                                                                                                                                                            | 2004-2005 | *                    |
| France   | Forster J, Guarino A, Parez N, Moraga F, Román E, Mory O, Tozzi AE, de Aguilera AL, Wahn U, Graham C, Berner R, Ninan T, Barberousse C, Meyer N, Soriano-Gabarró M. Hospital-based surveillance to estimate the burden of rotavirus gastroenteritis among European children younger than 5 years of age. <i>Pediatrics.</i> 2009; 123(3): e393-400. | 2005-2006 |                      |
| Gabon    | Sitbon M, Lecerf A, Garin Y, Ivanoff B. Rotavirus prevalence and relationships with climatological factors in Gabon, Africa. <i>J Med Virol.</i> 1985; 16(2): 177-82.                                                                                                                                                                               | 1980-1981 | *                    |
| Georgia  | Ginevskaya VA, Ereemeeva TP, Zangaladze ED, Shirman GA, Kazantseva VA, Sakvarelidze LA, Drozdov SG. Analysis of rotaviral gastroenteritis in Tbilisi. <i>Acta Virol.</i> 1991; 35(3): 232-7.                                                                                                                                                        | 1984-1986 |                      |
| Germany  | World Health Organization (WHO). WHO Global Health Observatory - Cholera: Number of Reported Cases by Country. Geneva, Switzerland: World Health Organization (WHO).                                                                                                                                                                                | 2000-2011 | *                    |
| Germany  | Adam D, Fehnle K. Safety and effectiveness against respiratory tract infections for pneumococcal conjugate vaccine co-administered with routine vaccine combinations. <i>Vaccine.</i> 2008; 26(47): 5944-51                                                                                                                                         | 2001-2004 | *                    |
| Germany  | Karsten C, Baumgarte S, Friedrich AW, von Eiff C, Becker K, Wosniok W, Ammon A, Bockemühl J, Karch H, Huppertz H-I. Incidence and risk factors for community-acquired acute gastroenteritis in north-west Germany in 2004. <i>Eur J Clin Microbiol Infect Dis.</i> 2009; 28(8): 935-43.                                                             | 2004      | *                    |
| Germany  | Giaquinto C, van Damme P, REVEAL Study Group. Age distribution of paediatric rotavirus gastroenteritis cases in Europe: the REVEAL study. <i>Scand J Infect Dis.</i> 2010; 42(2): 142-7.                                                                                                                                                            | 2004-2005 | *                    |
| Germany  | Forster J, Guarino A, Parez N, Moraga F, Román E, Mory O, Tozzi AE, de Aguilera AL, Wahn U, Graham C, Berner R, Ninan T, Barberousse C, Meyer N, Soriano-Gabarró M. Hospital-based surveillance to estimate the burden of rotavirus gastroenteritis among European children younger than 5 years of age. <i>Pediatrics.</i> 2009; 123(3): e393-400. | 2005-2006 |                      |
| Germany  | Jansen A, Stark K, Kunkel J, Schreier E, Ignatius R, Liesenfeld O, Werber D, Göbel UB, Zeitz M, Schneider T. Aetiology of community-acquired, acute gastroenteritis in hospitalised adults: a prospective cohort study. <i>BMC Infect Dis.</i> 2008; 8: 143.                                                                                        | 2005-2007 | *                    |
| Ghana    | Nakano T, Binka FN, Afari EA, Agbodaze D, Aryeetey ME, Mingle JA, Kamiya H, Sakurai M. Survey of enteropathogenic agents in children with and without diarrhoea in Ghana. <i>J Trop Med Hyg.</i> 1990; 93(6): 408-12.                                                                                                                               | 1987-1988 | *                    |
| Ghana    | Armah GE, Mingle JA, Dodoo AK, Anyanful A, Antwi R, Commey J, Nkrumah FK. Seasonality of rotavirus infection in Ghana. <i>Ann Trop Paediatr.</i> 1994; 14(3): 223-9.                                                                                                                                                                                | 1991-1992 | *                    |
| Ghana    | Binka FN, Anto FK, Oduro AR, Awini EA, Nazzar AK, Armah GE, Asmah RH, Hall AJ, Cutts F, Alexander N, Brown D, Green J, Gray J, Iturriza-Gómara M, Navrongo Rotavirus Research Group. Incidence and risk factors of paediatric rotavirus diarrhoea in northern Ghana. <i>Trop Med Int Health.</i> 2003; 8(9): 840-6.                                 | 1998-1999 | *                    |

**Web Table 33- Etiology citation list**

| Country       | Citation                                                                                                                                                                                                                                                                                                                                                                                                                                                                                 | Year*     | New for GBD 2013 (*) |
|---------------|------------------------------------------------------------------------------------------------------------------------------------------------------------------------------------------------------------------------------------------------------------------------------------------------------------------------------------------------------------------------------------------------------------------------------------------------------------------------------------------|-----------|----------------------|
| Ghana         | Armah GE, Steele AD, Binka FN, Esona MD, Asmah RH, Anto F, Brown D, Green J, Cutts F, Hall A. Changing patterns of rotavirus genotypes in Ghana: emergence of human rotavirus G9 as a major cause of diarrhea in children. <i>J Clin Microbiol.</i> 2003; 41(6): 2317-22.                                                                                                                                                                                                                | 1998-2000 | *                    |
| Ghana         | Reither K, Ignatius R, Weitzel T, Seidu-Korkor A, Anyidoho L, Saad E, Djie-Maletz A, Ziniel P, Amoo-Sakyi F, Danikuu F, Danour S, Otchwemah RN, Schreier E, Bienzie U, Stark K, Mockenhaupt FP. Acute childhood diarrhoea in northern Ghana: epidemiological, clinical and microbiological characteristics. <i>BMC Infect Dis.</i> 2007; 7: 104.                                                                                                                                         | 2005-2006 | *                    |
| Ghana         | Mwenda JM, Ntoto KM, Abebe A, Enweronu-Laryea C, Amina I, Mchomvu J, Kisakye A, Mpabalwani EM, Pazvakavambwa I, Armah GE, Seheri LM, Kiulia NM, Page N, Widdowson M-A, Steele AD. Burden and epidemiology of rotavirus diarrhea in selected African countries: preliminary results from the African Rotavirus Surveillance Network. <i>J Infect Dis.</i> 2010; 202(Suppl): S5-11.                                                                                                        | 2006-2008 |                      |
| Ghana         | Armah GE, Sow SO, Breiman RF, Dallas MJ, Tapia MD, Feikin DR, Binka FN, Steele AD, Laserson KF, Ansah NA, Levine MM, Lewis K, Coia ML, Attah-Poku M, Ojwando J, Rivers SB, Victor JC, Nyambane G, Hodgson A, Schödel F, Ciarlet M, Neuzil KM. Efficacy of pentavalent rotavirus vaccine against severe rotavirus gastroenteritis in infants in developing countries in sub-Saharan Africa: a randomised, double-blind, placebo-controlled trial. <i>Lancet.</i> 2010; 376(9741): 606-14. | 2007-2009 | *                    |
| Greece        | Samonis G, Maraki S, Christidou A, Georgiladakis A, Tselentis Y. Bacterial pathogens associated with diarrhoea on the island of Crete. <i>Eur J Epidemiol.</i> 1997; 13(7): 831-6.                                                                                                                                                                                                                                                                                                       | 1992-1994 | *                    |
| Greece        | Levidiotou S, Gartzonika C, Papaventsis D, Christaki C, Priavali E, Zotos N, Kapsali E, Vrioni G. Viral agents of acute gastroenteritis in hospitalized children in Greece. <i>Clin Microbiol Infect.</i> 2009; 15(6): 596-8.                                                                                                                                                                                                                                                            | 2000-2006 | *                    |
| Greece        | Koukou D, Grivea I, Roma E, Tsioni H, Trimis G, Galanakis E, Farmaki E, Iosifidis E, Michos A, Siamopoulou-Mavridou A, Kalmanti M, Papadopoulou H, Roilides E, Theodoridou M, Syrogiannopoulos GA, Syriopoulou V, Greek Rotascore Extension Study Group. Frequency, clinical characteristics, and genotype distribution of rotavirus gastroenteritis in Greece (2007-2008). <i>J Med Virol.</i> 2011; 83(1): 165-9.                                                                      | 2007-2008 | *                    |
| Guatemala     | Cruz JR, Cáceres P, Cano F, Flores J, Bartlett A, Torún B. Adenovirus types 40 and 41 and rotaviruses associated with diarrhea in children from Guatemala. <i>J Clin Microbiol.</i> 1990; 28(8): 1780-4.                                                                                                                                                                                                                                                                                 | 1986-1988 | *                    |
| Guatemala     | Bartlett AV, Torun B, Morales C, Cano F, Cruz JR. Oral gentamicin is not effective treatment for persistent diarrhea. <i>Acta Paediatr Suppl.</i> 1992; 381: 149-54.                                                                                                                                                                                                                                                                                                                     | 1988-1990 |                      |
| Guatemala     | Bern C, Hernandez B, Lopez MB, Arrowood MJ, De Merida AM, Klein RE. The contrasting epidemiology of Cyclospora and Cryptosporidium among outpatients in Guatemala. <i>Am J Trop Med Hyg.</i> 2000; 63(5-6): 231-5.                                                                                                                                                                                                                                                                       | 1997-1998 | *                    |
| Guatemala     | De Oliveira LH, Danovaro-Holliday MC, Andrus JK, de Fillipis AMB, Gentsch J, Matus CR, Widdowson M-A. Sentinel hospital surveillance for rotavirus in Latin American and Caribbean countries. <i>J Infect Dis.</i> 2009; 200 Suppl 1: 131-139.                                                                                                                                                                                                                                           | 2006-2007 |                      |
| Guatemala     | Cortes J, Arvelo W, Lopez B, Reyes L, Kerin T, Gautam R, Patel M, Parashar U, Lindblade KA. Rotavirus disease burden among children <5 years of age--Santa Rosa, Guatemala, 2007-2009. <i>Trop Med Int Health.</i> 2012; 17(2): 254-9.                                                                                                                                                                                                                                                   | 2007-2009 | *                    |
| Guatemala     | Lindblade KA, Arvelo W, Gray J, Estevez A, Frenkel G, Reyes L, Moscoso F, Moir JC, Fry AM, Olsen SJ. A comparison of the epidemiology and clinical presentation of seasonal influenza A and 2009 pandemic influenza A (H1N1) in Guatemala. <i>PLoS One.</i> 2010; 5(12): e15826.                                                                                                                                                                                                         | 2008-2009 | *                    |
| Guinea-Bissau | Mølbak K, Wested N, Højlyng N, Scheutz F, Gottschau A, Aaby P, da Silva AP. The etiology of early childhood diarrhea: a community study from Guinea-Bissau. <i>J Infect Dis.</i> 1994; 169(3): 581-7.                                                                                                                                                                                                                                                                                    | 1987-1988 | *                    |
| Guyana        | De Oliveira LH, Danovaro-Holliday MC, Andrus JK, de Fillipis AMB, Gentsch J, Matus CR, Widdowson M-A. Sentinel hospital surveillance for rotavirus in Latin American and Caribbean countries. <i>J Infect Dis.</i> 2009; 200 Suppl 1: 131-139.                                                                                                                                                                                                                                           | 2007      |                      |
| Haiti         | Jackson BR, Fouche B, Lafosse E, Nygren B, Roddly AW, Dahourou G, Copeland J, Mahon B, O'Reilly C, Boney J, Mintz E. Evaluation of cholera severity in a highly affected Haitian population. <i>Am J Trop Med Hyg.</i> 2011; 85(6 Suppl): 288.                                                                                                                                                                                                                                           | 2011      | *                    |
| Honduras      | Kaminsky RG. Parasitism and diarrhoea in children from two rural communities and marginal barrio in Honduras. <i>Trans R Soc Trop Med Hyg.</i> 1991; 85(1): 70-3.                                                                                                                                                                                                                                                                                                                        | 1990      | *                    |
| Honduras      | De Oliveira LH, Danovaro-Holliday MC, Andrus JK, de Fillipis AMB, Gentsch J, Matus CR, Widdowson M-A. Sentinel hospital surveillance for rotavirus in Latin American and Caribbean countries. <i>J Infect Dis.</i> 2009; 200 Suppl 1: 131-139.                                                                                                                                                                                                                                           | 2006-2007 |                      |
| Hungary       | Szűcs G, Uj M, Mihály I, Deák J. Burden of human rotavirus-associated hospitalizations in three geographic regions of Hungary. <i>Acta Paediatr Suppl.</i> 1999; 88(426): 61-5.                                                                                                                                                                                                                                                                                                          | 1993-1996 | *                    |
| Iceland       | Hilmarsdóttir I, Baldvinsdóttir GE, Harðardóttir H, Briem H, Sigurðsson SI. Enteropathogens in acute diarrhea: a general practice-based study in a Nordic country. <i>Eur J Clin Microbiol Infect Dis.</i> 2012; 31(7): 1501-9.                                                                                                                                                                                                                                                          | 2003-2007 | *                    |
| India         | Paniker CK, Mathew S, Mathan M. Rotavirus and acute diarrhoeal disease in children in a southern Indian coastal town. <i>Bull World Health Organ.</i> 1982; 60(1): 123-7.                                                                                                                                                                                                                                                                                                                | 1976-1978 | *                    |
| India         | Saha MR, Sen D, Datta P, Datta D, Pal SC. Role of rotavirus as the cause of acute paediatric diarrhoea in Calcutta. <i>Trans R Soc Trop Med Hyg.</i> 1984; 78(6): 818-20.                                                                                                                                                                                                                                                                                                                | 1979-1981 | *                    |

**Web Table 33- Etiology citation list**

| Country   | Citation                                                                                                                                                                                                                                                                                                                                                                                                                             | Year*     | New for GBD 2013 (*) |
|-----------|--------------------------------------------------------------------------------------------------------------------------------------------------------------------------------------------------------------------------------------------------------------------------------------------------------------------------------------------------------------------------------------------------------------------------------------|-----------|----------------------|
| India     | Huilan S, Zhen LG, Mathan MM, Mathew MM, Olarte J, Espejo R, Khin Maung U, Ghafoor MA, Khan MA, Sami Z. Etiology of acute diarrhoea among children in developing countries: a multicentre study in five countries. <i>Bull World Health Organ.</i> 1991; 69(5): 549-55.                                                                                                                                                              | 1982-1984 | *                    |
| India     | Panigrahi D, Agarwal KC, Kaur T, Ayyagari A, Walia BN. A study of rotavirus diarrhoea in children in a north Indian community. <i>J Diarrhoeal Dis Res.</i> 1985; 3(1): 20-3.                                                                                                                                                                                                                                                        | 1982-1983 | *                    |
| India     | Vethanayagam RR, Ananda Babu M, Nagalaxmi KS, Maiya PP, Venkatesh HA, Purohit S, Behl R, Bhan MK, Ward RL, Greenberg HB, Durga Rao C. Possible role of neonatal infection with the asymptomatic reassortant rotavirus (RV) strain I321 in the decrease in hospital admissions for RV diarrhea, Bangalore, India, 1988-1999. <i>J Infect Dis.</i> 2004; 189(12): 2282-9.                                                              | 1988-1999 | *                    |
| India     | Kelkar SD, Purohit SG, Boralkar AN, Verma SP. Prevalence of rotavirus diarrhea among outpatients and hospitalized patients: a comparison. <i>Southeast Asian J Trop Med Public Health.</i> 2001; 32(3): 494-9.                                                                                                                                                                                                                       | 1993-1996 | *                    |
| India     | Nath G, Choudhury A, Shukla BN, Singh TB, Reddy DC. Significance of <i>Cryptosporidium</i> in acute diarrhoea in North-Eastern India. <i>J Med Microbiol.</i> 1999; 48(6): 523-6.                                                                                                                                                                                                                                                    | 1994-1996 | *                    |
| India     | CHOICE Study Group. Multicenter, randomized, double-blind clinical trial to evaluate the efficacy and safety of a reduced osmolarity oral rehydration salts solution in children with acute watery diarrhea. <i>Pediatrics.</i> 2001; 107(4): 613-8.                                                                                                                                                                                 | 1995-1997 | *                    |
| India     | Gambhir IS, Jaiswal JP, Nath G. Significance of <i>Cryptosporidium</i> as an aetiology of acute infectious diarrhoea in elderly Indians. <i>Trop Med Int Health.</i> 2003; 8(5): 415-9.                                                                                                                                                                                                                                              | 1997-2000 | *                    |
| India     | Mishra OP, Dhawan T, Singla PN, Dixit VK, Arya NC, Nath G. Endoscopic and histopathological evaluation of preschool children with chronic diarrhoea. <i>J Trop Pediatr.</i> 2001; 47(2): 77-80.                                                                                                                                                                                                                                      | 1998-1999 |                      |
| India     | Bahl R, Ray P, Subodh S, Shambharkar P, Saxena M, Parashar U, Gentsch J, Glass R, Bhan MK, Delhi Rotavirus Study Group. Incidence of severe rotavirus diarrhea in New Delhi, India, and G and P types of the infecting rotavirus strains. <i>J Infect Dis.</i> 2005; S114-119.                                                                                                                                                       | 2000-2001 | *                    |
| India     | Sugunan AP, Ghosh AR, Roy S, Gupte MD, Sehgal SC. A cholera epidemic among the Nicobarese tribe of Nancowry, Andaman, and Nicobar, India. <i>Am J Trop Med Hyg.</i> 2004; 71(6): 822-7.                                                                                                                                                                                                                                              | 2002      | *                    |
| India     | Nagamani K, Pavuluri PRR, Gyaneshwari M, Prasanthi K, Rao MIS, Saxena NK. Molecular characterisation of <i>Cryptosporidium</i> : an emerging parasite. <i>Indian J Med Microbiol.</i> 2007; 25(2): 133-6.                                                                                                                                                                                                                            | 2003-2006 |                      |
| India     | Samal SK, Khuntia HK, Nanda PK, Satapathy CS, Nayak SR, Sarangi AK, Sahoo N, Pattnaik SK, Chhotray GP, Pal BB. Incidence of bacterial enteropathogens among hospitalized diarrhea patients from Orissa, India. <i>Jpn J Infect Dis.</i> 2008; 61(5): 350-5.                                                                                                                                                                          | 2004-2006 | *                    |
| India     | Kang G, Arora R, Chitambar SD, Deshpande J, Gupte MD, Kulkarni M, Naik TN, Mukherji D, Venkatasubramanian S, Gentsch JR, Glass RI, Parashar UD. Multicenter, hospital-based surveillance of rotavirus disease and strains among Indian children aged <5 years. <i>J Infect Dis.</i> 2009; 200 Suppl 1: 147-153.                                                                                                                      | 2005-2007 |                      |
| India     | Ajjampur SSR, Liakath FB, Kannan A, Rajendran P, Sarkar R, Moses PD, Simon A, Agarwal I, Mathew A, O'Connor R, Ward H, Kang G. Multisite study of cryptosporidiosis in children with diarrhea in India. <i>J Clin Microbiol.</i> 2010; 48(6): 2075-81.                                                                                                                                                                               | 2005-2008 | *                    |
| India     | Nair GB, Ramamurthy T, Bhattacharya MK, Krishnan T, Ganguly S, Saha DR, Rajendran K, Manna B, Ghosh M, Okamoto K, Takeda Y. Emerging trends in the etiology of enteric pathogens as evidenced from an active surveillance of hospitalized diarrhoeal patients in Kolkata, India. <i>Gut Pathog.</i> 2010; 2(1): 4.                                                                                                                   | 2007-2009 | *                    |
| India     | Babji S, Arumugam R, Peters A, Ramani S, Kang G. Detection and characterisation of rotaviruses from children less than 5 years hospitalised with acute gastroenteritis in Nagercoil. <i>Indian J Med Microbiol.</i> 2013; 31(1): 69-71.                                                                                                                                                                                              | 2007-2010 | *                    |
| India     | Nasrin D, Wu Y, Blackwelder WC, Farag TH, Saha D, Sow SO, Alonso PL, Breiman RF, Sur D, Faruque ASG, Zaidi AKM, Biswas K, Van Eijk AM, Walker DG, Levine MM, Kotloff KL. Health care seeking for childhood diarrhea in developing countries: evidence from seven sites in Africa and Asia. <i>Am J Trop Med Hyg.</i> 2013; 89(1 Suppl): 3-12.                                                                                        | 2010      | *                    |
| Indonesia | Soenarto Y, Sebodo T, Ridho R, Alrasjid H, Rohde JE, Bugg HC, Barnes GL, Bishop RF. Acute diarrhea and rotavirus infection in newborn babies and children in Yogyakarta, Indonesia, from June 1978 to June 1979. <i>J Clin Microbiol.</i> 1981; 14(2): 123-9.                                                                                                                                                                        | 1978-1979 | *                    |
| Indonesia | Katsumata T, Hosea D, Wasito EB, Kohno S, Hara K, Soeparto P, Ranuh IG. Cryptosporidiosis in Indonesia: a hospital-based study and a community-based survey. <i>Am J Trop Med Hyg.</i> 1998; 59(4): 628-32.                                                                                                                                                                                                                          | 1992-1993 | *                    |
| Indonesia | Simadibrata M, Tytgat GNJ, Yuwono V, Daldiyono, Lesmana LA, Syam AF, Ariawan I, Rani A. Microorganisms and parasites in chronic infective diarrhea. <i>Acta Med Indones.</i> 2004; 36(4): 211-4.                                                                                                                                                                                                                                     | 1995-2000 | *                    |
| Indonesia | Gessner BD, Sutanto A, Linehan M, Djelantik IG, Fletcher T, Gerudug IK, Ingerani, Mercer D, Moniaga V, Moulton LH, Moulton LH, Mulholland K, Nelson C, Soemohardjo S, Steinhoff M, Widjaya A, Stoeckel P, Maynard J, Arjoso S. Incidences of vaccine-preventable <i>Haemophilus influenzae</i> type b pneumonia and meningitis in Indonesian children: hamlet-randomised vaccine-probe trial. <i>Lancet.</i> 2005; 365(9453): 43-52. | 1998-2002 | *                    |



**Web Table 33- Etiology citation list**

| Country   | Citation                                                                                                                                                                                                                                                                                                                                                 | Year*     | New for GBD 2013 (*) |
|-----------|----------------------------------------------------------------------------------------------------------------------------------------------------------------------------------------------------------------------------------------------------------------------------------------------------------------------------------------------------------|-----------|----------------------|
| Indonesia | Robertson SE, Roca A, Alonso P, Simoes EAF, Kartasasmita CB, Olaleye DO, Odaibo GN, Collinson M, Venter M, Zhu Y, Wright PF. Respiratory syncytial virus infection: denominator-based studies in Indonesia, Mozambique, Nigeria and South Africa. <i>Bull World Health Organ.</i> 2004; 82(12): 914-22.                                                  | 1999-2001 | *                    |
| Indonesia | Djelantik IG, Gessner BD, Soewignjo S, Steinhoff M, Sutanto A, Widjaya A, Linehan M, Moniaga V, Ingerani. Incidence and clinical features of hospitalization because of respiratory syncytial virus lower respiratory illness among children less than two years of age in a rural Asian setting. <i>Pediatr Infect Dis J.</i> 2003; 22(2): 150-7.       | 2000-2001 | *                    |
| Indonesia | Von Seidlein L, Kim DR, Ali M, Lee H, Wang X, Thiem VD, Canh DG, Chaicumpa W, Agtini MD, Hossain A, Bhutta ZA, Mason C, Sethabutr O, Talukder K, Nair GB, Deen JL, Kotloff K, Clemens J. A Multicentre Study of Shigella Diarrhoea in Six Asian Countries: Disease Burden, Clinical Manifestations, and Microbiology. <i>PLoS Med.</i> 2006; 3(9): e353. | 2001-2003 | *                    |
| Indonesia | Putnam SD, Sedyaningsih ER, Listyaningsih E, Pulungsih SP, Komalarini, Soenarto Y, Salim OC, Subekti D, Riddle MS, Burgess TH, Blair PJ. Group A rotavirus-associated diarrhea in children seeking treatment in Indonesia. <i>J Clin Virol.</i> 2007; 40(4): 289-94.                                                                                     | 2004-2005 |                      |
| Indonesia | Soenarto Y, Aman AT, Bakri A, Waluya H, Firmansyah A, Kadim M, Martiza I, Prasetyo D, Mulyani NS, Widowati T, Soetjningsih, Karyana IPG, Sukardi W, Bresee J, Widdowson M-A. Burden of severe rotavirus diarrhea in Indonesia. <i>J Infect Dis.</i> 2009; 200 Suppl 1: 188-194.                                                                          | 2006      |                      |
| Iran      | MoezArdalan K, Zali MR, Dallal MMS, Hemami MR, Salmanzadeh-Ahrabi S. Prevalence and pattern of antimicrobial resistance of Shigella species among patients with acute diarrhoea in Karaj, Tehran, Iran. <i>J Health Popul Nutr.</i> 2003; 21(2): 96-102.                                                                                                 | 2001-2002 | *                    |
| Iran      | Hamed Y, Safa O, Haidari M. Cryptosporidium infection in diarrheic children in southeastern Iran. <i>Pediatr Infect Dis J.</i> 2005; 24(1): 86-8.                                                                                                                                                                                                        | 2003      | *                    |
| Iran      | Jafari F, Garcia-Gil LJ, Salmanzadeh-Ahrabi S, Shokrzadeh L, Aslani MM, Pourhoseingholi MA, Derakhshan F, Zali MR. Diagnosis and prevalence of enteropathogenic bacteria in children less than 5 years of age with acute diarrhea in Tehran children's hospitals. <i>J Infect.</i> 2009; 58(1): 21-7.                                                    | 2003-2005 | *                    |
| Iran      | Modaress S, Rahbarimanesh AA, Edalat R, Sohrabi A, Modarres S, Gomari H, Motamedirad M, Sayari AA. Human rotavirus genotypes detection among hospitalized children, a study in Tehran, Iran. <i>Arch Iran Med.</i> 2011; 14(1): 39-45.                                                                                                                   | 2004-2008 |                      |
| Iran      | Eesteghamati A, Gouya M, Keshtkar A, Najafi L, Zali MR, Sanaei M, Yaghini F, El Mohamady H, Patel M, Klena JD, Tebb N. Sentinel hospital-based surveillance of rotavirus diarrhea in Iran. <i>J Infect Dis.</i> 2009; 200 Suppl 1: 244-247.                                                                                                              | 2006-2007 |                      |
| Iran      | Ranjbar M, Rahmani E, Nooriamiri A, Gholami H, Golmohamadi A, Barati H, Rajabifar D, Barati S, Sabet MS, Zamiri A, Haghighi S, Taifehashemi P, Nojomi M. High prevalence of multidrug-resistant strains of Vibrio cholerae, in a cholera outbreak in Tehran-Iran, during June-September 2008. <i>Trop Doct.</i> 2010; 40(4): 214-6.                      | 2008      | *                    |
| Iran      | Ranjbar M, Rahmani E, Nooriamiri A, Gholami H, Golmohamadi A, Barati H, Rajabifar D, Barati S, Sabet MS, Zamiri A, Haghighi S, Taifehashemi P, Nojomi M. High prevalence of multidrug-resistant strains of Vibrio cholerae, in a cholera outbreak in Tehran-Iran, during June-September 2008. <i>Trop Doct.</i> 2010; 40(4): 214-6.                      | 2008      | *                    |
| Iraq      | Al-Abbassi AM, Ahmed S, Al-Hadithi T. Cholera epidemic in Baghdad during 1999: clinical and bacteriological profile of hospitalized cases. <i>East Mediterr Health J.</i> 2005; 11(1-2): 6-13.                                                                                                                                                           | 1999      | *                    |
| Iraq      | Khwaif JM, Hayyawi AH, Yousif TI. Cholera outbreak in Baghdad in 2007: an epidemiological study. <i>East Mediterr Health J.</i> 2010; 16(6): 584-9.                                                                                                                                                                                                      | 2007      | *                    |
| Ireland   | World Health Organization (WHO). WHO Global Health Observatory - Cholera: Number of Reported Cases by Country. Geneva, Switzerland: World Health Organization (WHO).                                                                                                                                                                                     | 2001      | *                    |
| Israel    | Dagan R, Bar-David Y, Sarov B, Katz M, Kassisi I, Greenberg D, Glass RI, Margolis CZ, Sarov I. Rotavirus diarrhea in Jewish and Bedouin children in the Negev region of Israel: epidemiology, clinical aspects and possible role of malnutrition in severity of illness. <i>Pediatr Infect Dis J.</i> 1990; 9(5): 314-21.                                | 1986-1987 | *                    |
| Israel    | Wolf DG, Greenberg D, Shemer-Avni Y, Givon-Lavi N, Bar-Ziv J, Dagan R. Association of human metapneumovirus with radiologically diagnosed community-acquired alveolar pneumonia in young children. <i>J Pediatr.</i> 2010; 156(1): 115-20.                                                                                                               | 2001-2005 | *                    |
| Israel    | Perl S, Goldman M, Berkovitch M, Kozer E. Characteristics of rotavirus gastroenteritis in hospitalized children in Israel. <i>Isr Med Assoc J.</i> 2011; 13(5): 274-7.                                                                                                                                                                                   | 2004-2006 | *                    |
| Israel    | Lieberman D, Shimoni A, Shemer-Avni Y, Keren-Naos A, Shtainberg R, Lieberman D. Respiratory viruses in adults with community-acquired pneumonia. <i>Chest.</i> 2010; 138(4): 811-6.                                                                                                                                                                      | 2004-2006 | *                    |
| Israel    | Shibli F, Flatau E, Nitzan O, Chazan B, Edelstein H, Raz R, Colodner R, Blondheim O. Etiology of community-acquired pneumonia in hospitalized patients in Northern Israel. <i>Isr Med Assoc J.</i> 2010; 12(8): 477-82.                                                                                                                                  | 2006-2007 | *                    |
| Israel    | Muhsen K, Shulman L, Rubinstein U, Kasem E, Kremer A, Goren S, Zilberstein I, Chodick G, Ephros M, Cohen D. Incidence, characteristics, and economic burden of rotavirus gastroenteritis associated with hospitalization of Israeli children <5 years of age, 2007-2008. <i>J Infect Dis.</i> 2009; 200(Suppl 1): S254-263.                              | 2007-2008 |                      |

**Web Table 33- Etiology citation list**

| Country | Citation                                                                                                                                                                                                                                                                                                                                                                                | Year*     | New for GBD 2013 (*) |
|---------|-----------------------------------------------------------------------------------------------------------------------------------------------------------------------------------------------------------------------------------------------------------------------------------------------------------------------------------------------------------------------------------------|-----------|----------------------|
| Italy   | Donelli G, Ruggeri FM, Tinari A, Marziano ML, Menichella D, Caione D, Concato C, Rocchi G, Vella S. A three-year diagnostic and epidemiological study on viral infantile diarrhoea in Rome. <i>Epidemiol Infect.</i> 1988; 100(2): 311-20.                                                                                                                                              | 1982-1984 | *                    |
| Italy   | Brandonisio O, Marangi A, Panaro MA, Marzio R, Natalicchio ML, Zizzadoro P, De Santis U. Prevalence of <i>Cryptosporidium</i> in children with enteritis in southern Italy. <i>Eur J Epidemiol.</i> 1996; 12(2): 187-90.                                                                                                                                                                | 1987-1994 | *                    |
| Italy   | Caprioli A, Pezzella C, Morelli R, Giammanco A, Arista S, Crotti D, Facchini M, Guglielmetti P, Piersimoni C, Luzzi I. Enteropathogens associated with childhood diarrhea in Italy. The Italian Study Group on Gastrointestinal Infections. <i>Pediatr Infect Dis J.</i> 1996; 15(10): 876-83.                                                                                          | 1992      | *                    |
| Italy   | Gabutti G, Marsella M, Lazzara C, Fiumana E, Cavallaro A, Borgna-Pignatti C. Epidemiology and burden of rotavirus-associated hospitalizations in Ferrara, Italy. <i>J Prev Med Hyg.</i> 2007; 48(1): 5-9.                                                                                                                                                                               | 2001-2005 |                      |
| Italy   | Don M, Valerio G, Korppi M, Canciani M. Hyper- and hypoglycemia in children with community-acquired pneumonia. <i>J Pediatr Endocrinol Metab.</i> 2008; 21(7): 657-64.                                                                                                                                                                                                                  | 2001-2002 | *                    |
| Italy   | Esposito S, Lizioli A, Lastrico A, Begliatti E, Rognoni A, Tagliabue C, Cesati L, Carreri V, Principi N. Impact on respiratory tract infections of heptavalent pneumococcal conjugate vaccine administered at 3, 5 and 11 months of age. <i>Respir Res.</i> 2007; 8(1): 12.                                                                                                             | 2002-2004 | *                    |
| Italy   | Palumbo E, Branchi M, Malorgio C, Siani A, Bonora G. Diarrhea in children: etiology and clinical aspects. <i>Minerva Pediatr.</i> 2010; 62(4): 347-51.                                                                                                                                                                                                                                  | 2003-2006 | *                    |
| Italy   | Ansaldi F, Sticchi L, Durando P, Carloni R, Oreste P, Vercelli M, Crovari P, Icardi G. Decline in pneumonia and acute otitis media after the introduction of childhood pneumococcal vaccination in Liguria, Italy. <i>J Int Med Res.</i> 2008; 36(6): 1255-60.                                                                                                                          | 2003-2005 | *                    |
| Italy   | Grassi T, De Donno A, Guido M, Gabutti G. The epidemiology and disease burden of rotavirus infection in the Salento peninsula, Italy. <i>Turk J Pediatr.</i> 2008; 50(2): 132-6.                                                                                                                                                                                                        | 2004      |                      |
| Italy   | Giaquinto C, van Damme P, REVEAL Study Group. Age distribution of paediatric rotavirus gastroenteritis cases in Europe: the REVEAL study. <i>Scand J Infect Dis.</i> 2010; 42(2): 142-7.                                                                                                                                                                                                | 2004-2005 | *                    |
| Italy   | Forster J, Guarino A, Perez N, Moraga F, Román E, Mory O, Tozzi AE, de Aguieta AL, Wahn U, Graham C, Berner R, Ninan T, Barberousse C, Meyer N, Soriano-Gabarró M. Hospital-based surveillance to estimate the burden of rotavirus gastroenteritis among European children younger than 5 years of age. <i>Pediatrics.</i> 2009; 123(3): e393-400.                                      | 2005-2006 |                      |
| Italy   | World Health Organization (WHO). WHO Global Health Observatory - Cholera: Number of Reported Cases by Country. Geneva, Switzerland: World Health Organization (WHO).                                                                                                                                                                                                                    | 2006-2007 | *                    |
| Italy   | Finamore E, Vitiello M, Kampanaraki A, Rao M, Galdiero M, Galdiero E, Bevilacqua P, Gallo MA, Galdiero M. G2 as an emerging rotavirus strain in pediatric gastroenteritis in southern Italy. <i>Infection.</i> 2011; 39(2): 113-9.                                                                                                                                                      | 2007-2008 | *                    |
| Italy   | Amisano G, Fornasero S, Migliaretti G, Caramello S, Tarasco V, Savino F. Diarrheagenic <i>Escherichia coli</i> in acute gastroenteritis in infants in North-West Italy. <i>New Microbiol.</i> 2011; 34(1): 45-51.                                                                                                                                                                       | 2008-2009 | *                    |
| Italy   | Medici MC, Tummolo F, Albonetti V, Abelli LA, Chezzi C, Calderaro A. Molecular detection and epidemiology of astrovirus, bocavirus, and sapovirus in Italian children admitted to hospital with acute gastroenteritis, 2008-2009. <i>J Med Virol.</i> 2012; 84(4): 643-50.                                                                                                              | 2008-2009 | *                    |
| Jamaica | Dowe G, King SD, Maitland PB, Swaby-Ellis DE. Laboratory investigations on rotavirus in infantile gastroenteritis in Jamaica. <i>Trans R Soc Trop Med Hyg.</i> 1988; 82(1): 155-9.                                                                                                                                                                                                      | 1982-1983 | *                    |
| Japan   | World Health Organization (WHO). WHO Global Health Observatory - Cholera: Number of Reported Cases by Country. Geneva, Switzerland: World Health Organization (WHO).                                                                                                                                                                                                                    | 2000-2012 | *                    |
| Japan   | Tajima T, Nakayama E, Kondo Y, Hirai F, Ito H, Iitsuka T, Momomura M, Kutsuma H, Kodaka Y, Funaki N, Yanagawa Y, Ubukata K. Etiology and clinical study of community-acquired pneumonia in 157 hospitalized children. <i>J Infect Chemother.</i> 2006; 12(6): 372-9.                                                                                                                    | 2001-2002 | *                    |
| Japan   | Maruyama T, Gabazza EC, Morser J, Takagi T, D'Alessandro-Gabazza C, Hirohata S, Nakayama S, Ramirez AY, Fujiwara A, Naito M, Nishikubo K, Yuda H, Yoshida M, Takei Y, Taguchi O. Community-acquired pneumonia and nursing home-acquired pneumonia in the very elderly patients. <i>Respir Med.</i> 2010; 104(4): 584-92.                                                                | 2004-2005 | *                    |
| Japan   | Maruyama T, Niederman MS, Kobayashi T, Kobayashi H, Takagi T, D'Alessandro-Gabazza CN, Fujimoto H, Gil Bernabe P, Hirohata S, Nakayama S, Nishikubo K, Yuda H, Yamaguchi A, Gabazza EC, Noguchi T, Takei Y, Taguchi O. A prospective comparison of nursing home-acquired pneumonia with hospital-acquired pneumonia in non-intubated elderly. <i>Respir Med.</i> 2008; 102(9): 1287-95. | 2004-2005 | *                    |
| Japan   | Hamano-Hasegawa K, Morozumi M, Nakayama E, Chiba N, Murayama S, Takayanagi R, Iwata S, Sunakawa K, Ubukata K. Comprehensive detection of causative pathogens using real-time PCR to diagnose pediatric community-acquired pneumonia. <i>J Infect Chemother.</i> 2008; 14(6): 424-32.                                                                                                    | 2005-2006 | *                    |
| Japan   | Dey SK, Thongprachum A, Ota Y, Phan TG, Nishimura S, Mizuguchi M, Okitsu S, Ushijima H. Molecular and epidemiological trend of rotavirus infection among infants and children in Japan. <i>Infect Genet Evol.</i> 2009; 9(5): 955-61.                                                                                                                                                   | 2006-2007 | *                    |
| Japan   | Chan-it W, Thongprachum A, Dey SK, Phan TG, Khamrin P, Okitsu S, Nishimura S, Kobayashi M, Kikuta H, Baba T, Yamamoto A, Sugita K, Hashira S, Tajima T, Ishida S, Mizuguchi M, Ushijima H. Detection and genetic characterization of rotavirus infections in non-hospitalized children with acute gastroenteritis in Japan, 2007-2009. <i>Infect Genet Evol.</i> 2011; 11(2): 415-22.   | 2007-2009 | *                    |

**Web Table 33- Etiology citation list**

| Country    | Citation                                                                                                                                                                                                                                                                                                                                                                                                                                                                                 | Year*     | New for GBD 2013 (*) |
|------------|------------------------------------------------------------------------------------------------------------------------------------------------------------------------------------------------------------------------------------------------------------------------------------------------------------------------------------------------------------------------------------------------------------------------------------------------------------------------------------------|-----------|----------------------|
| Japan      | Thongprachum A, Chan-it W, Khamrin P, Okitsu S, Nishimura S, Kikuta H, Yamamoto A, Sugita K, Baba T, Mizuguchi M, Maneekarn N, Hayakawa S, Ushijima H. Reemergence of new variant G3 rotavirus in Japanese pediatric patients, 2009-2011. <i>Infect Genet Evol.</i> 2013; 13: 168-74.                                                                                                                                                                                                    | 2009-2011 | *                    |
| Jordan     | Battikhi MNG. Epidemiological study on Jordanian patients suffering from diarrhoea. <i>New Microbiol.</i> 2002; 25(4): 405-12.                                                                                                                                                                                                                                                                                                                                                           | 1997-2000 |                      |
| Kazakhstan | Tamendarova NC, Kumisbaeva ZN, Abenova UA. Use of the passive hemagglutination reaction for diagnosing rotavirus infections. <i>Vopr Virusol.</i> 1989; 34(4): 501-3.                                                                                                                                                                                                                                                                                                                    | 1985-1986 |                      |
| Kazakhstan | Latipov R, Utegenova E, Kuatbayeva A, Kasymbekova K, Abdykarimov S, Juraev R, Ismailov U, Flem E. Epidemiology and burden of rotavirus disease in Central Asia. <i>Int J Infect Dis.</i> 2011; 15(7): e464-469.                                                                                                                                                                                                                                                                          | 2005-2009 | *                    |
| Kenya      | Mutanda LN. Epidemiology of acute gastroenteritis in early childhood in Kenya. III. Distribution of the aetiological agents. <i>East Afr Med J.</i> 1980; 57(5): 317-26.                                                                                                                                                                                                                                                                                                                 | 1975-1977 | *                    |
| Kenya      | Mutanda LN. Epidemiology of acute gastroenteritis in early childhood in Kenya: aetiological agents. <i>Trop Geogr Med.</i> 1980; 32(2): 138-44.                                                                                                                                                                                                                                                                                                                                          | 1975      | *                    |
| Kenya      | Mutanda LN, Kinoti SN, Gemert W, Lichenga EO. Age distribution and seasonal pattern of rotavirus infection in children in Kenya. <i>J Diarrhoeal Dis Res.</i> 1984; 2(3): 147-50.                                                                                                                                                                                                                                                                                                        | 1981-1983 | *                    |
| Kenya      | Makino Y, Matsumoto I, Chiba Y, Mohammed OA, Ogaja PO, Kibue AM, Muli JM, Nakitare GW. Virological survey of children in Nyeri and Mombasa. Monthly survey of rotavirus in faeces. <i>East Afr Med J.</i> 1983; 60(8): 536-41.                                                                                                                                                                                                                                                           | 1981-1982 | *                    |
| Kenya      | Mutanda LN, Kangethe SK, Juma R, Lichenga EO, Gathecha C. Aetiology of diarrhoea in malnourished children at Kenyatta National Hospital. <i>East Afr Med J.</i> 1985; 62(12): 835-41.                                                                                                                                                                                                                                                                                                    | 1982-1984 | *                    |
| Kenya      | Saidi SM, Iijima Y, Sang WK, Mwangudza AK, Oundo JO, Taga K, Aihara M, Nagayama K, Yamamoto H, Waiyaki PG, Honda T. Epidemiological study on infectious diarrheal diseases in children in a coastal rural area of Kenya. <i>Microbiol Immunol.</i> 1997; 41(10): 773-8.                                                                                                                                                                                                                  | 1991-1993 | *                    |
| Kenya      | Nakata S, Gatheru Z, Ukae S, Adachi N, Kobayashi N, Honma S, Muli J, Ogaja P, Nyangao J, Kiplagat E, Tukey PM, Chiba S. Epidemiological study of the G serotype distribution of group A rotaviruses in Kenya from 1991 to 1994. <i>J Med Virol.</i> 1999; 58(3): 296-303.                                                                                                                                                                                                                | 1991-1994 | *                    |
| Kenya      | Kakai R, Wamola IA, Bwayo JJ. Association of human rotavirus infection and intestinal rotavirus-specific immunoglobulin A in children with diarrhoea. <i>East Afr Med J.</i> 1995; 72(4): 217-9.                                                                                                                                                                                                                                                                                         | 1992-1994 | *                    |
| Kenya      | Kakai R, Wamola IA, Bwayo JJ, Ndinya-Achola JO. Enteric pathogens in malnourished children with diarrhoea. <i>East Afr Med J.</i> 1995; 72(5): 288-9.                                                                                                                                                                                                                                                                                                                                    | 1992-1994 | *                    |
| Kenya      | Beatty ME, Ochieng JB, Chege W, Kumar L, Okoth G, Shapiro RL, Wells JG, Parsons MB, Bopp C, Chiller T, Vulule J, Mintz E, Slutsker L, Brooks JT. Sporadic paediatric diarrhoeal illness in urban and rural sites in Nyanza Province, Kenya. <i>East Afr Med J.</i> 2009; 86(8): 387-98.                                                                                                                                                                                                  | 1997-2003 | *                    |
| Kenya      | Kiulia NM, Peenze I, Dewar J, Nyachio A, Galo M, Omolo E, Steele AD, Mwenda JM. Molecular characterisation of the rotavirus strains prevalent in Maua, Meru North, Kenya. <i>East Afr Med J.</i> 2006; 83(7): 360-5.                                                                                                                                                                                                                                                                     | 2004-2005 | *                    |
| Kenya      | O'Reilly CE, Jaron P, Ochieng B, Nyaguara A, Tate JE, Parsons MB, Bopp CA, Williams KA, Vinjé J, Blanton E, Wannemuehler KA, Vulule J, Laserson KF, Breiman RF, Feikin DR, Widdowson M-A, Mintz E. Risk factors for death among children less than 5 years old hospitalized with diarrhea in rural western Kenya, 2005-2007: a cohort study. <i>PLoS Med.</i> 2012; 9(7): e1001256.                                                                                                      | 2005-2007 | *                    |
| Kenya      | Mwenda JM, Ntoto KM, Abebe A, Enweronu-Laryea C, Amina I, Mchomvu J, Kisakye A, Mpabalwani EM, Pazvakavambwa I, Armah GE, Seheri LM, Kiulia NM, Page N, Widdowson M-A, Steele AD. Burden and epidemiology of rotavirus diarrhea in selected African countries: preliminary results from the African Rotavirus Surveillance Network. <i>J Infect Dis.</i> 2010; 202(Suppl): S5-11.                                                                                                        | 2006-2008 |                      |
| Kenya      | Armah GE, Sow SO, Breiman RF, Dallas MJ, Tapia MD, Feikin DR, Binka FN, Steele AD, Laserson KF, Ansah NA, Levine MM, Lewis K, Coia ML, Attah-Poku M, Ojwando J, Rivers SB, Victor JC, Nyambane G, Hodgson A, Schödel F, Ciarlet M, Neuzil KM. Efficacy of pentavalent rotavirus vaccine against severe rotavirus gastroenteritis in infants in developing countries in sub-Saharan Africa: a randomised, double-blind, placebo-controlled trial. <i>Lancet.</i> 2010; 376(9741): 606-14. | 2007-2009 | *                    |
| Kenya      | Berkley JA, Munywoki P, Ngama M, Kazungu S, Abwao J, Bett A, Lassaunière R, Kresfelder T, Cane PA, Venter M, Scott JAG, Nokes DJ. Viral etiology of severe pneumonia among Kenyan infants and children. <i>JAMA.</i> 2010; 303(20): 2051-7.                                                                                                                                                                                                                                              | 2007      | *                    |
| Kenya      | Onyango CO, Njeru R, Kazungu S, Achilla R, Bulimo W, Welch SR, Cane PA, Gunson RN, Hammit LL, Scott JAG, Berkley JA, Nokes DJ. Influenza surveillance among children with pneumonia admitted to a district hospital in coastal Kenya, 2007-2010. <i>J Infect Dis.</i> 2012; S61-67.                                                                                                                                                                                                      | 2007-2010 | *                    |
| Kenya      | Nasrin D, Wu Y, Blackwelder WC, Farag TH, Saha D, Sow SO, Alonso PL, Breiman RF, Sur D, Faruque ASG, Zaidi AKM, Biswas K, Van Eijk AM, Walker DG, Levine MM, Kotloff KL. Health care seeking for childhood diarrhea in developing countries: evidence from seven sites in Africa and Asia. <i>Am J Trop Med Hyg.</i> 2013; 89(1 Suppl): 3-12.                                                                                                                                            | 2010      | *                    |
| Kenya      | Hammit LL, Kazungu S, Morpeth SC, Gibson DG, Mvera B, Brent AJ, Mwarumba S, Onyango CO, Bett A, Akech DO, Murdoch DR, Nokes DJ, Scott JAG. A preliminary study of pneumonia etiology among hospitalized children in Kenya. <i>Clin Infect Dis.</i> 2012; S190-199.                                                                                                                                                                                                                       | 2010-2011 | *                    |
| Kuwait     | Hijazi Z, Pacsas A, El-Gharbawy F, Chugh TD, Essa S, El Shazli A, Abd El-Salam R. Acute lower respiratory tract infections in children in Kuwait. <i>Ann Trop Paediatr.</i> 1997; 17(2): 127-34.                                                                                                                                                                                                                                                                                         | 1993-1994 | *                    |



**Web Table 33- Etiology citation list**

| Country    | Citation                                                                                                                                                                                                                                                                                                                                                                                                                                                                          | Year*     | New for GBD 2013 (*) |
|------------|-----------------------------------------------------------------------------------------------------------------------------------------------------------------------------------------------------------------------------------------------------------------------------------------------------------------------------------------------------------------------------------------------------------------------------------------------------------------------------------|-----------|----------------------|
| Kuwait     | Albert MJ, Rotimi VO, Dhar R, Silpikurian S, Pacsa AS, Molla AM, Szucs G. Diarrhoeagenic Escherichia coli are not a significant cause of diarrhoea in hospitalised children in Kuwait. BMC Microbiol. 2009; 62.                                                                                                                                                                                                                                                                   | 2005-2007 | *                    |
| Kyrgyzstan | Flem ET, Kasymbekova KT, Vainio K, Gentsch J, Abdikarimov ST, Glass RI, Bresee JS. Rotavirus infection in hospitalized children and estimates of disease burden in Kyrgyzstan, 2005-2007. Vaccine. 2009; 27 Suppl 5: 35-39.                                                                                                                                                                                                                                                       | 2005-2007 |                      |
| Kyrgyzstan | Latipov R, Utegenova E, Kuatbayeva A, Kasymbekova K, Abdykarimov S, Juraev R, Ismailov U, Flem E. Epidemiology and burden of rotavirus disease in Central Asia. Int J Infect Dis. 2011; 15(7): e464-469.                                                                                                                                                                                                                                                                          | 2005-2009 | *                    |
| Laos       | Phetsouvanh R, Midorikawa Y, Nakamura S. The seasonal variation in the microbial agents implicated in the etiology of diarrheal diseases among children in Lao People's Democratic Republic. Southeast Asian J Trop Med Public Health. 1999; 30(2): 319-23.                                                                                                                                                                                                                       | 1994-1995 | *                    |
| Laos       | Aloun DS, Nyambat B, Phetsouvanh R, Douangboupha V, Keonakhone P, Xoumphongphakdy B, Vongsouvath M, Kirkwood C, Bogdanovic-Sakran N, Kilgore PE. Rotavirus diarrhoea among children aged less than 5 years at Mahosot Hospital, Vientiane, Lao PDR. Vaccine. 2009; 27 Suppl 5: 85-88.                                                                                                                                                                                             | 2005-2007 |                      |
| Libya      | Ali MMM, Mohamed ZK, Klena JD, Ahmed SF, Moussa TAA, Ghenghesh KS. Molecular characterization of diarrheagenic Escherichia coli from Libya. Am J Trop Med Hyg. 2012; 86(5): 866-71.                                                                                                                                                                                                                                                                                               | 2000-2001 | *                    |
| Madagascar | Cassel-Beraud AM, Michel P, Garbarg-Chenon A. Epidemiological study of infantile rotavirus diarrhoea in Tananarive (Madagascar). J Diarrhoeal Dis Res. 1993; 11(2): 82-7.                                                                                                                                                                                                                                                                                                         | 1988-1990 | *                    |
| Madagascar | Jaureguiberry S, Hentgen V, Raholiniana N, Rasolomahefa D, Belec M. Cholera at Tamatave (Madagascar) from February to July 2000: Epidemic characteristics. Sante. 2001; 11(2): 73-8.                                                                                                                                                                                                                                                                                              | 2000      | *                    |
| Madagascar | Adiku TK, Dove W, Grosjean P, Combe P, Nakagomi T, Nakagomi O, Hart CA, Cunliffe NA. Molecular characterization of rotavirus strains circulating among children with acute gastroenteritis in Madagascar during 2004-2005. J Infect Dis. 2010; S175-179.                                                                                                                                                                                                                          | 2004-2005 | *                    |
| Malawi     | Cunliffe NA, Ngwira BM, Dove W, Thindwa BDM, Turner AM, Broadhead RL, Molyneux ME, Hart CA. Epidemiology of rotavirus infection in children in Blantyre, Malawi, 1997-2007. J Infect Dis. 2010; 202(Suppl): 168-174.                                                                                                                                                                                                                                                              | 1997-2007 | *                    |
| Malawi     | Turner A, Ngwira B, Witte D, Mwapasa M, Dove W, Cunliffe N. Surveillance of rotavirus gastro-enteritis in children in Blantyre, Malawi. Paediatr Int Child Health. 2013; 33(1): 42-5.                                                                                                                                                                                                                                                                                             | 2008-2009 | *                    |
| Malaysia   | Yap KL, Yasmin AM, Wong YH, Ooi YE, Tan SC, Jegathesan M, Khor CM, Low MC. A one year community-based study on the incidence of diarrhoea and rotavirus infection in urban and suburban Malaysian children. Med J Malaysia. 1992; 47(4): 303-8.                                                                                                                                                                                                                                   | 1988-1989 | *                    |
| Malaysia   | Ngeow YF, Weil AF, Khairullah NS, Yusof MY, Luam L, Gaydos C, Quinn TC. Young Malaysian children with lower respiratory tract infections show low incidence of chlamydial infection. J Paediatr Child Health. 1997; 33(5): 422-5.                                                                                                                                                                                                                                                 | 1992-1993 | *                    |
| Malaysia   | Izzuddin Poo M, Lee WS. Admission to hospital with childhood acute gastroenteritis in Kuala Lumpur, Malaysia. Med J Malaysia. 2007; 62(3): 189-93.                                                                                                                                                                                                                                                                                                                                | 2002      |                      |
| Mali       | Armah GE, Sow SO, Breiman RF, Dallas MJ, Tapia MD, Feikin DR, Binka FN, Steele AD, Laserson KF, Ansah NA, Levine MM, Lewis K, Coia ML, Attah-Poku M, Ojwando J, Rivers SB, Victor JC, Nyambane G, Hodgson A, Schödel F, Ciarlet M, Neuzil KM. Efficacy of pentavalent rotavirus vaccine against severe rotavirus gastroenteritis in infants in developing countries in sub-Saharan Africa: a randomised, double-blind, placebo-controlled trial. Lancet. 2010; 376(9741): 606-14. | 2007-2009 | *                    |
| Mali       | Nasrin D, Wu Y, Blackwelder WC, Farag TH, Saha D, Sow SO, Alonso PL, Breiman RF, Sur D, Faruque ASG, Zaidi AKM, Biswas K, Van Eijk AM, Walker DG, Levine MM, Kotloff KL. Health care seeking for childhood diarrhea in developing countries: evidence from seven sites in Africa and Asia. Am J Trop Med Hyg. 2013; 89(1 Suppl): 3-12.                                                                                                                                            | 2010      | *                    |
| Mexico     | Cravioto A, Reyes RE, Ortega R, Fernández G, Hernández R, López D. Prospective study of diarrhoeal disease in a cohort of rural Mexican children: incidence and isolated pathogens during the first two years of life. Epidemiol Infect. 1988; 101(1): 123-34.                                                                                                                                                                                                                    | 1982-1983 | *                    |
| Mexico     | Huilan S, Zhen LG, Mathan MM, Mathew MM, Olarte J, Espejo R, Khin Maung U, Ghafoor MA, Khan MA, Sami Z. Etiology of acute diarrhoea among children in developing countries: a multicentre study in five countries. Bull World Health Organ. 1991; 69(5): 549-55.                                                                                                                                                                                                                  | 1982-1984 | *                    |
| Mexico     | Puerto FI, Polanco GG, González MR, Zavala JE Jr, Ortega G. Role of rotavirus and enteric adenovirus in acute paediatric diarrhoea at an urban hospital in Mexico. Trans R Soc Trop Med Hyg. 1989; 83(3): 396-8.                                                                                                                                                                                                                                                                  | 1986      | *                    |
| Mexico     | Guerra-Godínez JC, Larrosa-Haro A, Coello-Ramírez P, Tostado HRA, Rivera-Chávez E, Castillo de León YA, Bojórquez-Ramos M del C, Aguilar-Benavides S. Changing trends in prevalence, morbidity, and lethality in persistent diarrhea of infancy during the last decade in Mexico. Arch Med Res. 2003; 34(3): 209-13.                                                                                                                                                              | 1988-1999 | *                    |
| Mexico     | Ministry of Health (Mexico). Mexico Ministry of Health Hospital Discharges 2000. Mexico City, Mexico: Ministry of Health (Mexico).                                                                                                                                                                                                                                                                                                                                                | 2000      | *                    |
| Mexico     | Ministry of Health (Mexico). Mexico Ministry of Health Hospital Discharges 2001. Mexico City, Mexico: Ministry of Health (Mexico).                                                                                                                                                                                                                                                                                                                                                | 2001      | *                    |

**Web Table 33- Etiology citation list**

| Country    | Citation                                                                                                                                                                                                                                                                                                                                                      | Year*     | New for GBD 2013 (*) |
|------------|---------------------------------------------------------------------------------------------------------------------------------------------------------------------------------------------------------------------------------------------------------------------------------------------------------------------------------------------------------------|-----------|----------------------|
| Mexico     | Ministry of Health (Mexico). Mexico Ministry of Health Hospital Discharges 2002. Mexico City, Mexico: Ministry of Health (Mexico).                                                                                                                                                                                                                            | 2002      | *                    |
| Mexico     | Ministry of Health (Mexico). Mexico Ministry of Health Hospital Discharges 2003. Mexico City, Mexico: Ministry of Health (Mexico).                                                                                                                                                                                                                            | 2003      | *                    |
| Mexico     | Ministry of Health (Mexico). Mexico Ministry of Health Hospital Discharges 2004. Mexico City, Mexico: Ministry of Health (Mexico).                                                                                                                                                                                                                            | 2004      | *                    |
| Mexico     | Ministry of Health (Mexico). Mexico Ministry of Health Hospital Discharges 2005. Mexico City, Mexico: Ministry of Health (Mexico).                                                                                                                                                                                                                            | 2005      | *                    |
| Mexico     | Ministry of Health (Mexico). Mexico Ministry of Health Hospital Discharges 2006. Mexico City, Mexico: Ministry of Health (Mexico).                                                                                                                                                                                                                            | 2006      | *                    |
| Mexico     | Ministry of Health (Mexico). Mexico Ministry of Health Hospital Discharges 2007. Mexico City, Mexico: Ministry of Health (Mexico).                                                                                                                                                                                                                            | 2007      | *                    |
| Mexico     | Ministry of Health (Mexico). Mexico Ministry of Health Hospital Discharges 2008. Mexico City, Mexico: Ministry of Health (Mexico).                                                                                                                                                                                                                            | 2008      | *                    |
| Mexico     | Ministry of Health (Mexico). Mexico Ministry of Health Hospital Discharges 2009. Mexico City, Mexico: Ministry of Health (Mexico).                                                                                                                                                                                                                            | 2009      | *                    |
| Mexico     | Ministry of Health (Mexico). Mexico Ministry of Health Hospital Discharges 2010. Mexico City, Mexico: Ministry of Health (Mexico).                                                                                                                                                                                                                            | 2010      | *                    |
| Mexico     | Ministry of Health (Mexico). Mexico Ministry of Health Hospital Discharges 2011. Mexico City, Mexico: Ministry of Health (Mexico).                                                                                                                                                                                                                            | 2011      | *                    |
| Morocco    | Tazi-Lakhsassi L, Garbarg-Chenon A, Nicolas JC, Soubhi H, Benbachir M, el Mdaghri N, Tazi M, Bricout F, Huraux JM. Epidemiological and clinical study and electrophoretotyping survey of rotavirus acute diarrhoea in a children's infectious disease unit in Casablanca, Morocco. <i>Ann Inst Pasteur Virol.</i> 1988; 139(2): 205-15.                       | 1982-1983 | *                    |
| Morocco    | Benhafid M, Youbi M, Klena JD, Gentsch JR, Teleb N, Widdowson M-A, Elaouad R. Epidemiology of rotavirus gastroenteritis among children <5 years of age in Morocco during 1 year of sentinel hospital surveillance, June 2006-May 2007. <i>J Infect Dis.</i> 2009; 200 (Suppl 1): 70-75.                                                                       | 2006-2007 |                      |
| Morocco    | Benhafid M, Rguig A, Trivedi T, Elqazoui M, Teleb N, Mouane N, Maltouf AF, Parashar U, Patel M, Aouad RE. Monitoring of rotavirus vaccination in Morocco: establishing the baseline burden of rotavirus disease. <i>Vaccine.</i> 2012; 30(46): 6515-20.                                                                                                       | 2006-2010 | *                    |
| Mozambique | Cliff JL, Zinkin P, Martelli A. A hospital outbreak of cholera in Maputo, Mozambique. <i>Trans R Soc Trop Med Hyg.</i> 1986; 80(3): 473-6.                                                                                                                                                                                                                    | 1981      | *                    |
| Mozambique | Robertson SE, Roca A, Alonso P, Simoes EAF, Kartasasmita CB, Olaleye DO, Odaibo GN, Collinson M, Venter M, Zhu Y, Wright PF. Respiratory syncytial virus infection: denominator-based studies in Indonesia, Mozambique, Nigeria and South Africa. <i>Bull World Health Organ.</i> 2004; 82(12): 914-22.                                                       | 1999-2000 | *                    |
| Mozambique | O'Callaghan-Gordo C, Bassat Q, Morais L, Díez-Padriza N, Machevo S, Nhampossa T, Nhalungo D, Sanz S, Quintó L, Alonso PL, Roca A. Etiology and epidemiology of viral pneumonia among hospitalized children in rural Mozambique: a malaria endemic area with high prevalence of human immunodeficiency virus. <i>Pediatr Infect Dis J.</i> 2011; 30(1): 39-44. | 2006-2007 | *                    |
| Mozambique | Nasrin D, Wu Y, Blackwelder WC, Farag TH, Saha D, Sow SO, Alonso PL, Breiman RF, Sur D, Faruque ASG, Zaidi AKM, Biswas K, Van Eijk AM, Walker DG, Levine MM, Kotloff KL. Health care seeking for childhood diarrhoea in developing countries: evidence from seven sites in Africa and Asia. <i>Am J Trop Med Hyg.</i> 2013; 89(1 Suppl): 3-12.                | 2010      | *                    |
| Myanmar    | Huilan S, Zhen LG, Mathan MM, Mathew MM, Olarte J, Espejo R, Khin Maung U, Ghafoor MA, Khan MA, Sami Z. Etiology of acute diarrhoea among children in developing countries: a multicentre study in five countries. <i>Bull World Health Organ.</i> 1991; 69(5): 549-55.                                                                                       | 1982-1984 | *                    |
| Nepal      | M Shariff, M Deb, R Singh. A study of diarrhoea among children in eastern Nepal with special reference to rotavirus. <i>Indian J Med Microbiol.</i> 2003; 21(2): 87.                                                                                                                                                                                          | 1999-2000 | *                    |
| Nepal      | Haruki K, Sherchand JB. Rotavirus Diarrhoea in Children and Animals of Urban and Rural Nepal. <i>J Nepal Health Res Counc.</i> 2008.                                                                                                                                                                                                                          | 2001-2002 | *                    |
| Nepal      | Williams JV, Edwards KM, Weinberg GA, Griffin MR, Hall CB, Zhu Y, Szilagyi PG, Wang CK, Yang C-F, Silva D, Ye D, Spaete RR, Crowe JE Jr. Population-based incidence of human metapneumovirus infection among hospitalized children. <i>J Infect Dis.</i> 2010; 201(12): 1890-8.                                                                               | 2001-2003 | *                    |
| Nepal      | Uchida R, Pandey BD, Sherchand JB, Ahmed K, Yokoo M, Nakagomi T, Cuevas LE, Cunliffe NA, Hart CA, Nakagomi O. Molecular epidemiology of rotavirus diarrhea among children and adults in Nepal: detection of G12 strains with P6 or P8 and a G11P25 strain. <i>J Clin Microbiol.</i> 2006; 44(10): 3499-505.                                                   | 2003-2004 | *                    |
| Nepal      | Pun SB, Nakagomi T, Sherchand JB, Pandey BD, Cuevas LE, Cunliffe NA, Hart CA, Nakagomi O. Detection of G12 human rotaviruses in Nepal. <i>Emerg Infect Dis.</i> 2007; 13(3): 482-4.                                                                                                                                                                           | 2004-2005 | *                    |
| Nepal      | Mathisen M, Strand TA, Sharma BN, Chandyo RK, Valentiner-Branth P, Basnet S, Adhikari RK, Hvidsten D, Shrestha PS, Sommerfelt H. RNA viruses in community-acquired childhood pneumonia in semi-urban Nepal; a cross-sectional study. <i>BMC Med.</i> 2009; 35.                                                                                                | 2004-2007 | *                    |
| Nepal      | Sherchand JB, Nakagomi O, Dove W, Nakagomi T, Yokoo M, Pandey BD, Cuevas LE, Hart CA, Cunliffe NA. Molecular epidemiology of rotavirus diarrhea among children aged <5 years in Nepal: predominance of emergent G12 strains during 2 years. <i>J Infect Dis.</i> 2009; 200 Suppl 1: 182-187.                                                                  | 2005-2007 | *                    |

**Web Table 33- Etiology citation list**

| Country     | Citation                                                                                                                                                                                                                                                                                                | Year*     | New for GBD 2013 (*) |
|-------------|---------------------------------------------------------------------------------------------------------------------------------------------------------------------------------------------------------------------------------------------------------------------------------------------------------|-----------|----------------------|
| Nepal       | Mathisen M, Strand TA, Valentiner-Branth P, Chandyo RK, Basnet S, Sharma BN, Adhikari RK, Hvidsten D, Shrestha PS, Sommerfelt H. Respiratory viruses in nepalese children with and without pneumonia: a case-control study. <i>Pediatr Infect Dis J.</i> 2010; 29(8): 731-5.                            | 2006-2007 | *                    |
| Nepal       | Mathisen M, Basnet S, Sharma A, Shrestha PS, Sharma BN, Valentiner-Branth P, Sommerfelt H, Strand TA. RNA viruses in young Nepalese children hospitalized with severe pneumonia. <i>Pediatr Infect Dis J.</i> 2011; 30(12): 1032-6.                                                                     | 2006-2008 | *                    |
| Nepal       | Amatya R, Poudyal N, Gurung R, Khanal B. Prevalence of cryptosporidium species in paediatric patients in Eastern Nepal. <i>Trop Doct.</i> 2011; 41(1): 36-7.                                                                                                                                            | 2007-2008 | *                    |
| Nepal       | Sherchand JB, Tandukar S, Sherchan JB, Rayamajhi A, Gurung B, Shrestha L, Rijal B, Pokhrel BM. Hospital-based study in children with rotavirus gastroenteritis and other enteropathogens. <i>J Nepal Health Res Counc.</i> 2012; 10(21): 130-5.                                                         | 2009-2010 | *                    |
| Netherlands | World Health Organization (WHO). WHO Global Health Observatory - Cholera: Number of Reported Cases by Country. Geneva, Switzerland: World Health Organization (WHO).                                                                                                                                    | 2000-2008 | *                    |
| New Zealand | World Health Organization (WHO). WHO Global Health Observatory - Cholera: Number of Reported Cases by Country. Geneva, Switzerland: World Health Organization (WHO).                                                                                                                                    | 2001-2005 | *                    |
| Nicaragua   | Espinoza F, Paniagua M, Hallander H, Svensson L, Strannegård O. Rotavirus infections in young Nicaraguan children. <i>Pediatr Infect Dis J.</i> 1997; 16(6): 564-71.                                                                                                                                    | 1991-1994 | *                    |
| Nicaragua   | Vilchez S, Reyes D, Paniagua M, Bucardo F, Möllby R, Weintraub A. Prevalence of diarrhoeagenic <i>Escherichia coli</i> in children from León, Nicaragua. <i>J Med Microbiol.</i> 2009; 58(Pt 5): 630-7.                                                                                                 | 2005-2006 | *                    |
| Nicaragua   | Becker-Dreps S, Paniagua M, Zambrana LE, Bucardo F, Hudgens MG, Weber DJ, Morgan DR, Espinoza F. Rotavirus prevalence in the primary care setting in Nicaragua after universal infant rotavirus immunization. <i>Am J Trop Med Hyg.</i> 2011; 85(5): 957-60.                                            | 2008-2009 | *                    |
| Nigeria     | Paul MO, Paul BD. Rotavirus infection among children in hospital in Nigeria. <i>J Infect.</i> 1986; 12(1): 39-47.                                                                                                                                                                                       | 1980-1982 | *                    |
| Nigeria     | Umoh JU, Adesiyun AA, Adekeye JO, Nadarajah M. Epidemiological features of an outbreak of gastroenteritis/cholera in Katsina, Northern Nigeria. <i>J Hyg (Lond).</i> 1983; 91(1): 101-11.                                                                                                               | 1982      | *                    |
| Nigeria     | Coker AO, Dosunmu-Ogunbi O, Odugbemi T, Alabi SA, Macaulay SA. A study on the prevalence of rotavirus diarrhoeas in Ohaozara local government area, Imo State, Nigeria and the Lagos University Teaching Hospital, Lagos, Nigeria. <i>East Afr Med J.</i> 1987; 64(9): 586-9.                           | 1983-1986 | *                    |
| Nigeria     | Gomwalk NE, Gosham LT, Umoh UJ. Rotavirus gastroenteritis in pediatric diarrhoea in Jos, Nigeria. <i>J Trop Pediatr.</i> 1990; 36(2): 52-5.                                                                                                                                                             | 1986-1987 | *                    |
| Nigeria     | Gomwalk NE, Umoh UJ, Gosham LT, Ahmad AA. Influence of climatic factors on rotavirus infection among children with acute gastroenteritis in Zaria, northern Nigeria. <i>J Trop Pediatr.</i> 1993; 39(5): 293-7.                                                                                         | 1986-1987 | *                    |
| Nigeria     | Adah MI, Rohwedder A, Olaleye OD, Durojaiye OA, Werchau H. Serotype of Nigerian rotavirus strains. <i>Trop Med Int Health.</i> 1997; 2(4): 363-70.                                                                                                                                                      | 1993-1995 | *                    |
| Nigeria     | Akinyemi KO, Oyefolu AO, Opere B, Otunba-Payne VA, Oworu AO. <i>Escherichia coli</i> in patients with acute gastroenteritis in Lagos, Nigeria. <i>East Afr Med J.</i> 1998; 75(9): 512-5.                                                                                                               | 1995-1996 | *                    |
| Nigeria     | Audu R, Omilabu SA, de Beer M, Peenze I, Steele AD. Diversity of human rotavirus VP6, VP7, and VP4 in Lagos State, Nigeria. <i>J Health Popul Nutr.</i> 2002; 20(1): 59-64.                                                                                                                             | 1996-1997 | *                    |
| Nigeria     | Lawoyin TO, Ogunbodode NA, Olumide EA, Onadeko MO. Outbreak of cholera in Ibadan, Nigeria. <i>Eur J Epidemiol.</i> 1999; 15(4): 367-70.                                                                                                                                                                 | 1996      | *                    |
| Nigeria     | Pennap G, Peenze, De Beer M, Pager CT, Kwaga JKP, Ogalla WN, Umoh JU, Steele AD. VP6 subgroup and VP7 serotype of human rotavirus in Zaria, northern Nigeria. <i>J Trop Pediatr.</i> 2000; 46(6): 344-7.                                                                                                | 1997-1998 | *                    |
| Nigeria     | Robertson SE, Roca A, Alonso P, Simoes EAF, Kartasasmita CB, Olaleye DO, Odaibo GN, Collinson M, Venter M, Zhu Y, Wright PF. Respiratory syncytial virus infection: denominator-based studies in Indonesia, Mozambique, Nigeria and South Africa. <i>Bull World Health Organ.</i> 2004; 82(12): 914-22. | 1999-2001 | *                    |
| Nigeria     | Odimayo MS, Olanrewaju WI, Omilabu SA, Adegboro B. Prevalence of rotavirus-induced diarrhea among children under 5 years in Ilorin, Nigeria. <i>J Trop Pediatr.</i> 2008; 54(5): 343-6.                                                                                                                 | 2003-2004 | *                    |
| Nigeria     | Junaid SA, Umeh C, Olabode AO, Banda JM. Incidence of rotavirus infection in children with gastroenteritis attending Jos university teaching hospital, Nigeria. <i>Virology.</i> 2011; 233.                                                                                                             | 2008-2010 | *                    |
| Nigeria     | Kolo PM, Jibrin YB, Sanya EO, Alkali M, Salami AK, Omotoso AB, Tahir A. Outcome of cholera admissions in Bauchi, Nigeria. <i>South Afr J Epidemiol Infect.</i> 2013; 28(3): 143-6.                                                                                                                      | 2010-2011 | *                    |
| Nigeria     | Getso KI, Kaita IM, Nguku PM, Sabitu K, Idris SH, Nigeria Field Epidemiology and Laboratory Training Program, Abuja, Nigeria, Ahmadu Bello University, Zaria, Nigeria. Cholera Outbreak in Tofa and Samawa Wards - Zamfara State, Nigeria 2011. <i>Am J Trop Med Hyg.</i> 2012; 87(5 Suppl 1): 320.     | 2011      | *                    |
| Norway      | World Health Organization (WHO). WHO Global Health Observatory - Cholera: Number of Reported Cases by Country. Geneva, Switzerland: World Health Organization (WHO).                                                                                                                                    | 2005-2007 | *                    |
| Oman        | Aithala G, Al Dhahry SH, Saha A, Elbualy MS. Epidemiological and clinical features of rotavirus gastroenteritis in Oman. <i>J Trop Pediatr.</i> 1996; 42(1): 54-7.                                                                                                                                      | 1990-1992 | *                    |

**Web Table 33- Etiology citation list**

| Country          | Citation                                                                                                                                                                                                                                                                                                                                                             | Year*     | New for GBD 2013 (*) |
|------------------|----------------------------------------------------------------------------------------------------------------------------------------------------------------------------------------------------------------------------------------------------------------------------------------------------------------------------------------------------------------------|-----------|----------------------|
| Oman             | Al Awaidy SA, Bawikar S, Al Busaidy S, Baqiani S, Al Abedani I, Varghese R, Abdoan HS, Al Abdoon H, Bhatnagar S, Al Hasini KS, Mohan P, Shah S, Elamir E, Klena J, Ahmed SF, Teleb N, Parashar U, Patel MM. Considerations for introduction of a rotavirus vaccine in Oman: rotavirus disease and economic burden. <i>J Infect Dis.</i> 2009; 200(Suppl 1): 248-253. | 2006-2008 |                      |
| Pakistan         | Huilan S, Zhen LG, Mathan MM, Mathew MM, Olarte J, Espejo R, Khin Maung U, Ghafoor MA, Khan MA, Sami Z. Etiology of acute diarrhoea among children in developing countries: a multicentre study in five countries. <i>Bull World Health Organ.</i> 1991; 69(5): 549-55.                                                                                              | 1983-1985 | *                    |
| Pakistan         | Nishio O, Matsui K, Oka T, Ushijima H, Mubina A, Dure-Samin A, Isomura S. Rotavirus infection among infants with diarrhea in Pakistan. <i>Pediatr Int.</i> 2000; 42(4): 425-7.                                                                                                                                                                                       | 1990-1997 | *                    |
| Pakistan         | Von Seidlein L, Kim DR, Ali M, Lee H, Wang X, Thiem VD, Canh DG, Chaicumpa W, Agtini MD, Hossain A, Bhutta ZA, Mason C, Sethabutr O, Talukder K, Nair GB, Deen JL, Kotloff K, Clemens J. A Multicentre Study of Shigella Diarrhoea in Six Asian Countries: Disease Burden, Clinical Manifestations, and Microbiology. <i>PLoS Med.</i> 2006; 3(9): e353.             | 2002-2003 | *                    |
| Pakistan         | Nasrin D, Wu Y, Blackwelder WC, Farag TH, Saha D, Sow SO, Alonso PL, Breiman RF, Sur D, Faruque ASG, Zaidi AKM, Biswas K, Van Eijk AM, Walker DG, Levine MM, Kotloff KL. Health care seeking for childhood diarrhea in developing countries: evidence from seven sites in Africa and Asia. <i>Am J Trop Med Hyg.</i> 2013; 89(1 Suppl): 3-12.                        | 2010      | *                    |
| Papua New Guinea | Howard P, Alexander ND, Atkinson A, Clegg AO, Gerega G, Javati A, Kajoi M, Lupiwa S, Lupiwa T, Mens M, Saleu G, Sanders RC, West B, Alpers MP. Bacterial, viral and parasitic aetiology of paediatric diarrhoea in the highlands of Papua New Guinea. <i>J Trop Pediatr.</i> 2000; 46(1): 10-4.                                                                      | 1985-1990 | *                    |
| Papua New Guinea | Richmond P, Phuanukoonnon S, Jacoby P, et al. Effect of neonatal and early immunisation with heptavalent pneumococcal conjugate vaccine on morbidity and pneumonia in Papua New Guinea [abstract]. 6th International Symposium on Pneumococci and Pneumococcal Disease; 2008 Jun 8–12; Reykjavik, Iceland.                                                           | 2003-2005 | *                    |
| Papua New Guinea | Soli KW, Maure T, Kas MP, Bande G, Bebes S, Luang-Suarkia D, Siba PM, Morita A, Umezaki M, Greenhill AR, Horwood PF. Detection of enteric viral and bacterial pathogens associated with paediatric diarrhoea in Goroka, Papua New Guinea. <i>Int J Infect Dis.</i>                                                                                                   | 2009-2010 | *                    |
| Paraguay         | Amarilla A, Espínola EE, Galeano ME, Fariña N, Russomando G, Parra GI. Rotavirus infection in the Paraguayan population from 2004 to 2005: high incidence of rotavirus strains with short electropherotype in children and adults. <i>Med Sci Monit.</i> 2007; 13(7): CR333-337.                                                                                     | 2004-2005 | *                    |
| Paraguay         | De Oliveira LH, Danovaro-Holliday MC, Andrus JK, de Fillipsis AMB, Gentsch J, Matus CR, Widdowson M-A. Sentinel hospital surveillance for rotavirus in Latin American and Caribbean countries. <i>J Infect Dis.</i> 2009; 200 Suppl 1: 131-139.                                                                                                                      | 2006-2007 |                      |
| Peru             | Black RE, Lopez de Romaña G, Brown KH, Bravo N, Bazalar OG, Kanashiro HC. Incidence and etiology of infantile diarrhea and major routes of transmission in Huascar, Peru. <i>Am J Epidemiol.</i> 1989; 129(4): 785-99.                                                                                                                                               | 1982-1984 | *                    |
| Peru             | Greenberg BL, Sack RB, Salazar-Lindo E, Budge E, Gutierrez M, Campos M, Visberg A, Leon-Barua R, Yi A, Maurutia D. Measles-associated diarrhea in hospitalized children in Lima, Peru: pathogenic agents and impact on growth. <i>J Infect Dis.</i> 1991; 163(3): 495-502.                                                                                           | 1985-1987 |                      |
| Peru             | Lanata CF, Black RE, Maúrtua D, Gil A, Gabilondo A, Yi A, Miranda E, Gilman RH, León-Barúa R, Sack RB. Etiologic agents in acute vs persistent diarrhea in children under three years of age in peri-urban Lima, Per. <i>Acta Paediatr Suppl.</i> 1992; 32-8.                                                                                                        | 1985-1987 | *                    |
| Peru             | Penny ME, Paredes P, Brown KH, Laughan B, Smith H. Lack of a role of the duodenal microflora in pathogenesis of persistent diarrhea and diarrhea-related malabsorption in Peruvian children. <i>Pediatr Infect Dis J.</i> 1990; 9(7): 479-87.                                                                                                                        | 1987-1989 | *                    |
| Peru             | Pazzaglia G, Sack RB, Salazar E, Yi A, Chea E, Leon-Barua R, Guerrero CE, Palomino J. High frequency of coinfecting enteropathogens in Aeromonas-associated diarrhea of hospitalized Peruvian infants. <i>J Clin Microbiol.</i> 1991; 29(6): 1151-6.                                                                                                                 | 1988-1989 |                      |
| Peru             | Figuroa-Quintanilla D, Salazar-Lindo E, Sack RB, León-Barúa R, Sarabia-Arce S, Campos-Sánchez M, Eyzaguirre-Maccan E. A controlled trial of bismuth subsalicylate in infants with acute watery diarrheal disease. <i>N Engl J Med.</i> 1993; 328(23): 1653-8.                                                                                                        | 1990-1991 | *                    |
| Peru             | Quick RE, Vargas R, Moreno D, Mujica O, Beingolea L, Palacios AM, Seminario L, Tauxe RV. Epidemic cholera in the Amazon: the challenge of preventing death. <i>Am J Trop Med Hyg.</i> 1993; 48(5): 597-602.                                                                                                                                                          | 1991      | *                    |
| Peru             | Oberhelman RA, Gilman RH, Sheen P, Taylor DN, Black RE, Cabrera L, Lescano AG, Meza R, Madico G. A placebo-controlled trial of Lactobacillus GG to prevent diarrhea in undernourished Peruvian children. <i>J Pediatr.</i> 1999; 134(1): 15-20.                                                                                                                      | 1995-1996 |                      |
| Peru             | Cama RI, Parashar UD, Taylor DN, Hickey T, Figuroa D, Ortega YR, Romero S, Perez J, Sterling CR, Gentsch JR, Gilman RH, Glass RI. Enteropathogens and other factors associated with severe disease in children with acute watery diarrhea in Lima, Peru. <i>J Infect Dis.</i> 1999; 179(5): 1139-44.                                                                 | 1995-1997 |                      |
| Peru             | CHOICE Study Group. Multicenter, randomized, double-blind clinical trial to evaluate the efficacy and safety of a reduced osmolarity oral rehydration salts solution in children with acute watery diarrhea. <i>Pediatrics.</i> 2001; 107(4): 613-8.                                                                                                                 | 1995-1997 | *                    |

**Web Table 33- Etiology citation list**

| Country                          | Citation                                                                                                                                                                                                                                                                                                                                                                                                                                                                                              | Year*     | New for GBD 2013 (*) |
|----------------------------------|-------------------------------------------------------------------------------------------------------------------------------------------------------------------------------------------------------------------------------------------------------------------------------------------------------------------------------------------------------------------------------------------------------------------------------------------------------------------------------------------------------|-----------|----------------------|
| Peru                             | Yori PP, Schwab K, Gilman RH, Nappier S, Portocarrero DV, Black RE, Olortegui MP, Hall ER, Moe C, Leon J, Cama VA, Kosek M. Norovirus highly prevalent cause of endemic acute diarrhea in children in the peruvian Amazon. <i>Pediatr Infect Dis J</i> . 2009; 28(9): 844-7.                                                                                                                                                                                                                          | 2003-2006 | *                    |
| Peru                             | Ochoa TJ, Ecker L, Barletta F, Mispireta ML, Gil AI, Contreras C, Molina M, Amemiya I, Verastegui H, Hall ER, Cleary TG, Lanata CF. Age-related susceptibility to infection with diarrheagenic <i>Escherichia coli</i> among infants from Periurban areas in Lima, Peru. <i>Clin Infect Dis</i> . 2009; 49(11): 1694-702.                                                                                                                                                                             | 2006-2007 | *                    |
| Peru                             | Rivera FP, Ochoa TJ, Maves RC, Bernal M, Medina AM, Meza R, Barletta F, Mercado E, Ecker L, Gil AI, Hall ER, Huicho L, Lanata CF. Genotypic and phenotypic characterization of enterotoxigenic <i>Escherichia coli</i> strains isolated from Peruvian children. <i>J Clin Microbiol</i> . 2010; 48(9): 3198-203.                                                                                                                                                                                      | 2006-2008 | *                    |
| Philippines                      | Singh PB, Sreenivasan MA, Pavri KM. Viruses in acute gastroenteritis in children in Pune, India. <i>Epidemiol Infect</i> . 1989; 102(2): 345-53.                                                                                                                                                                                                                                                                                                                                                      | 1981-1982 | *                    |
| Philippines                      | Adkins HJ, Escamilla J, Santiago LT, Rañona C, Echeverria P, Cross JH. Two-year survey of etiologic agents of diarrheal disease at San Lazaro Hospital, Manila, Republic of the Philippines. <i>J Clin Microbiol</i> . 1987; 25(7): 1143-7.                                                                                                                                                                                                                                                           | 1983-1984 | *                    |
| Philippines                      | Lucero MG, Tallo V, Lupisan S, Sanvictores D, Ugpo J, Lechago M, Abucejo-Ladesma E, Sombrero L, Nohynek H, Puumalainen T, Nissinen A, Soininen A, Ruutu P, Makela HP, Williams G, Forsyth S, De Campo M, Riley I, Simoes EAF. Efficacy of an 11-valent pneumococcal conjugate vaccine against radiologically confirmed pneumonia among children less than 2 years of age in the Philippines: A randomized, double-blind, placebo-controlled trial. <i>Pediatr Infect Dis J</i> . 2009; 28(6): 455-62. | 2000-2004 | *                    |
| Philippines                      | Suzuki A, Lupisan S, Furuse Y, Fuji N, Saito M, Tamaki R, Galang H, Sombrero L, Mondoy M, Aniceto R, Olveda R, Oshitani H. Respiratory viruses from hospitalized children with severe pneumonia in the Philippines. <i>BMC Infect Dis</i> . 2012; 267.                                                                                                                                                                                                                                                | 2008-2009 | *                    |
| Philippines                      | Manzon LVLA, King SVB, Garcia RDJ. Haemophilus Influenzae Type B Conjugate Vaccine (HiBCV) And Heptavalent Pneumococcal Conjugate Vaccine (PCV7) Immunization Status Of Patients 5 Years And Below Hospitalized For Pneumonia. <i>PIDSP J</i> . 2012; 13(2): 30-36.                                                                                                                                                                                                                                   | 2009-2010 | *                    |
| Poland                           | Mrukowicz JZ, Krobicka B, Duplaga M, Kowalska-Duplaga K, Domański J, Szajewska H, Kantecki M, Iwańczak F, Pyrus T. Epidemiology and impact of rotavirus diarrhoea in Poland. <i>Acta Paediatr Suppl</i> . 1999; 88(426): 53-60.                                                                                                                                                                                                                                                                       | 1994-1996 | *                    |
| Poland                           | Patrzałek M, Albrecht P, Sobczynski M. Significant decline in pneumonia admission rate after the introduction of routine 2+1 dose schedule heptavalent pneumococcal conjugate vaccine (PCV7) in children under 5 years of age in Kielce, Poland. <i>Eur J Clin Microbiol Infect Dis</i> . 2010; 29(7): 787-92.                                                                                                                                                                                        | 2007-2008 | *                    |
| Poland                           | Oldak E, Sulik A, Rozkiewicz D, Liwoch-Nienartowicz N. Norovirus infections in children under 5 years of age hospitalized due to the acute viral gastroenteritis in northeastern Poland. <i>Eur J Clin Microbiol Infect Dis</i> . 2012; 31(4): 417-22.                                                                                                                                                                                                                                                | 2009-2010 | *                    |
| Portugal                         | Cabrita J, Pires I, Vlaes L, Coignau H, Levy J, Goossens H, Goncalves AP, De Mol P, Butzler JP. <i>Campylobacter</i> enteritis in Portugal: epidemiological features and biological markers. <i>Eur J Epidemiol</i> . 1992; 8(1): 22-6.                                                                                                                                                                                                                                                               | 1984-1989 | *                    |
| Russia                           | Podkolzin AT, Fenske EB, Abramycheva NY, Shipulin GA, Sagalova OI, Mazepa VN, Ivanova GN, Semena AV, Tagirova ZG, Alekseeva MN, Molochny VP, Parashar UD, Vinjé J, Maleev VV, Glass RI, Pokrovsky VI. Hospital-based surveillance of rotavirus and other viral agents of diarrhea in children and adults in Russia, 2005-2007. <i>J Infect Dis</i> . 2009; 200(Suppl 1): 228-233.                                                                                                                     | 2005-2007 |                      |
| Saint Vincent and the Grenadines | De Oliveira LH, Danovaro-Holliday MC, Andrus JK, de Phillipis AMB, Gentsch J, Matus CR, Widdowson M-A. Sentinel hospital surveillance for rotavirus in Latin American and Caribbean countries. <i>J Infect Dis</i> . 2009; 200 Suppl 1: 131-139.                                                                                                                                                                                                                                                      | 2006-2007 |                      |
| Saudi Arabia                     | Zaman R. <i>Campylobacter</i> enteritis in Saudi Arabia. <i>Epidemiol Infect</i> . 1992; 108(1): 51-8.                                                                                                                                                                                                                                                                                                                                                                                                | 1989-1990 | *                    |
| Saudi Arabia                     | Kheyami AM, Nakagomi T, Nakagomi O, Dove W, Hart CA, Cunliffe NA. Molecular epidemiology of rotavirus diarrhea among children in Saudi Arabia: first detection of G9 and G12 strains. <i>J Clin Microbiol</i> . 2008; 46(4): 1185-9.                                                                                                                                                                                                                                                                  | 2004-2005 |                      |
| Senegal                          | Gassama A, Sow PS, Fall F, Camara P, Guèye-N'diaye A, Seng R, Samb B, M'Boup S, Aïdara-Kane A. Ordinary and opportunistic enteropathogens associated with diarrhea in Senegalese adults in relation to human immunodeficiency virus serostatus. <i>Int J Infect Dis</i> . 2001; 5(4): 192-8.                                                                                                                                                                                                          | 1997-2000 |                      |
| Singapore                        | Lim YS, Tay L. A one-year study of enteric <i>Campylobacter</i> infections in Singapore. <i>J Trop Med Hyg</i> . 1992; 95(2): 119-23.                                                                                                                                                                                                                                                                                                                                                                 | 1989-1990 | *                    |
| Singapore                        | World Health Organization (WHO). WHO Global Health Observatory - Cholera: Number of Reported Cases by Country. Geneva, Switzerland: World Health Organization (WHO).                                                                                                                                                                                                                                                                                                                                  | 2000-2012 | *                    |
| Somalia                          | Casalino M, Yusuf MW, Nicoletti M, Bazzicalupo P, Coppo A, Colonna B, Cappelli C, Bianchini C, Falbo V, Ahmed HJ. A two-year study of enteric infections associated with diarrhoeal diseases in children in urban Somalia. <i>Trans R Soc Trop Med Hyg</i> . 1988; 82(4): 637-41.                                                                                                                                                                                                                     | 1983-1984 | *                    |
| Somalia                          | Coppo A, Colombo M, Pazzani C, Bruni R, Mohamud KA, Omar KH, Mastrandrea S, Salvia AM, Rotigliano G, Maimone F. <i>Vibrio cholerae</i> in the horn of Africa: epidemiology, plasmids, tetracycline resistance gene amplification, and comparison between O1 and non-O1 strains. <i>Am J Trop Med Hyg</i> . 1995; 53(4): 351-9.                                                                                                                                                                        | 1983-1985 | *                    |



**Web Table 33- Etiology citation list**

| Country      | Citation                                                                                                                                                                                                                                                                                                               | Year*     | New for GBD 2013 (*) |
|--------------|------------------------------------------------------------------------------------------------------------------------------------------------------------------------------------------------------------------------------------------------------------------------------------------------------------------------|-----------|----------------------|
| South Africa | Küstner HG, Du Plessis G. The cholera epidemic in South Africa, 1980-1987. Epidemiological features. S Afr Med J. 1991; 79(9): 539-44.                                                                                                                                                                                 | 1980-1987 | *                    |
| South Africa | Househam KC, Mann MD, Bowie MD. Enteropathogens associated with acute infantile diarrhoea in Cape Town. S Afr Med J. 1988; 73(2): 83-7.                                                                                                                                                                                | 1981-1982 | *                    |
| South Africa | Steele AD, Alexander JJ, Hay IT. Rotavirus-associated gastro-enteritis at Ga-Rankuwa Hospital. A pilot study. S Afr Med J. 1986; 69(1): 21-2.                                                                                                                                                                          | 1982      | *                    |
| South Africa | Loening WE, Coovadia YM, Van den Ende J. Aetiological factors of infantile diarrhoea: a community-based study. Ann Trop Paediatr. 1989; 9(4): 248-55.                                                                                                                                                                  | 1985-1986 |                      |
| South Africa | Haffejee IE, Windsor I, Moosa A. Asymptomatic rotavirus infections among normal Indian children in Chatsworth, Durban. S Afr Med J. 1989; 76(11): 599-601.                                                                                                                                                             | 1985-1987 | *                    |
| South Africa | Tiemessen CT, Wegerhoff FO, Erasmus MJ, Kidd AH. Infection by enteric adenoviruses, rotaviruses, and other agents in a rural African environment. J Med Virol. 1989; 28(3): 176-82.                                                                                                                                    | 1985-1986 | *                    |
| South Africa | Jeena PM, Wesley AG, Coovadia HM. Infectious diseases at the paediatric isolation units of Clairwood and King Edward VIII Hospitals, Durban. Trends in admission and mortality rates (1985-1996) and the early impact of HIV (1994-1996). S Afr Med J. 1998; 88(7): 867-72.                                            | 1985-1988 | *                    |
| South Africa | Griffiths FH, Steele AD, Alexander JJ. The molecular epidemiology of rotavirus-associated gastro-enteritis in the Transkei, southern Africa. Ann Trop Paediatr. 1992; 12(3): 259-64.                                                                                                                                   | 1988-1989 | *                    |
| South Africa | Steele AD, Mnisi YN, Williams MM, Bos P, Aspinall S. Electrophoretic typing of nosocomial rotavirus infection in a general paediatric unit showing the continual introduction of community strains. J Med Virol. 1993; 40(2): 126-32.                                                                                  | 1989      | *                    |
| South Africa | Sebata T, Steele AD. Atypical rotavirus identified from young children with diarrhoea in South Africa. J Health Popul Nutr. 2001; 19(3): 199-203.                                                                                                                                                                      | 1996-1997 | *                    |
| South Africa | Madhi SA, Kuwanda L, Cutland C, Klugman KP. The Impact of a 9-Valent Pneumococcal Conjugate Vaccine on the Public Health Burden of Pneumonia in HIV-Infected and -Uninfected Children. Clin Infect Dis. 2005; 40(10): 1511-8.                                                                                          | 1998-2001 | *                    |
| South Africa | Mapaseka SL, Dewar JB, van der Merwe L, Geyer A, Tumbo J, Zwegarth M, Bos P, Esona MD, Steele AD, Sommerfelt H. Prospective hospital-based surveillance to estimate rotavirus disease burden in the Gauteng and North West Province of South Africa during 2003-2005. J Infect Dis. 2010; 202 Suppl: 131-138.          | 2003-2005 |                      |
| South Africa | Samie A, Guerrant RL, Barrett L, Bessong PO, Igumbor EO, Obi CL. Prevalence of intestinal parasitic and bacterial pathogens in diarrhoeal and non-diarrhoeal human stools from Vhembe district, South Africa. J Health Popul Nutr. 2009; 27(6): 739-45.                                                                | 2003-2005 | *                    |
| South Korea  | Chang K, Kim C, Oh S, Lee H, Lee K. A clinical and epidemiological study on rotavirus gastroenteritis in children. J Korean Pediatr Soc. 1988; 961-76.                                                                                                                                                                 | 1983-1987 | *                    |
| South Korea  | Rhee E, Hwang N, Choi Y, Seo S. Clinical studies of human rotavirus gastroenteritis. J Korean Pediatr Soc. 1989; 369-79.                                                                                                                                                                                               | 1986-1987 | *                    |
| South Korea  | Han S, Seo S, Min K, Kim J, Kim K, Ryoo K. Clinical observations on human rotavirus (HRV) gastroenteritis. J Korean Pediatr Soc. 1992; 226-33.                                                                                                                                                                         | 1987-1989 | *                    |
| South Korea  | Bae GY, Oh ET, Jung WS, Kim SS. A Study of Serum Transaminase Level and It's Correlation with Several Symptoms in Children with HRV Gastroenteritis. J Korean Pediatr Soc. 1993; 36(8): 1146-55.                                                                                                                       | 1991      | *                    |
| South Korea  | Hong G, Jeon H, Choi W, Namgoong M, Kim J. A study of relation between serum aminotransferase elevation and clinical symptoms from human rotavirus gastroenteritis. J Korean Pediatr Soc. 1995; 54-60.                                                                                                                 | 1991-1993 | *                    |
| South Korea  | Kim D, Park B, Jung D, Ahn J, Kim C, Kang S. Prevalence and identification of rotaviruses in stool specimens of patients with acute diarrhea from several regions of Korea. J Korean Pediatr Soc. 1999; 501-9.                                                                                                         | 1991-1992 | *                    |
| South Korea  | Song M-O, Kim K-J, Chung S-I, Lim I, Kang S-Y, An C-N, Kim W. Distribution of human group A rotavirus VP7 and VP4 types circulating in Seoul, Korea between 1998 and 2000. J Med Virol. 2003; 70(2): 324-8.                                                                                                            | 1998-2000 | *                    |
| South Korea  | Moon S-S, Green YS, Song J-W, Ahn CN, Kim H, Park KS, Song K-J, Lee JH, Baik LJ. Genetic distribution of group A human rotavirus types isolated in Gyunggi province of Korea, 1999-2002. J Clin Virol. 2007; 38(1): 57-63.                                                                                             | 1999-2002 | *                    |
| South Korea  | Huh J-W, Kim W-H, Moon S-G, Lee J-B, Lim Y-H. Viral etiology and incidence associated with acute gastroenteritis in a 5-year survey in Gyeonggi province, South Korea. J Clin Virol. 2009; 44(2): 152-6.                                                                                                               | 2001-2005 | *                    |
| South Korea  | World Health Organization (WHO). WHO Global Health Observatory - Cholera: Number of Reported Cases by Country. Geneva, Switzerland: World Health Organization (WHO).                                                                                                                                                   | 2001-2011 | *                    |
| South Korea  | Kang JO, Kim CR, Kilgore PE, Choi TY. G and P genotyping of human rotavirus isolated in a university hospital in Korea: implications for nosocomial infections. J Korean Med Sci. 2006; 21(6): 983-8.                                                                                                                  | 2001-2003 | *                    |
| South Korea  | Kim JS, Kang JO, Cho SC, Jang YT, Min SA, Park TH, Nyambat B, Jo DS, Gentsch J, Bresee JS, Mast TC, Kilgore PE. Epidemiological profile of rotavirus infection in the Republic of Korea: results from prospective surveillance in the Jeongeub District, 1 July 2002 through 30 June 2004. J Infect Dis. 2005; S49-56. | 2002-2004 | *                    |

**Web Table 33- Etiology citation list**

| Country     | Citation                                                                                                                                                                                                                                                                                                                                                                         | Year*     | New for GBD 2013 (*) |
|-------------|----------------------------------------------------------------------------------------------------------------------------------------------------------------------------------------------------------------------------------------------------------------------------------------------------------------------------------------------------------------------------------|-----------|----------------------|
| South Korea | Huh J-W, Kim W-H, Yoon M-H, Lim Y-H. Genotypic distribution of rotavirus strains causing severe gastroenteritis in Gyeonggi province, South Korea, from 2003 to 2005. <i>Arch Virol.</i> 2009; 154(1): 167-70.                                                                                                                                                                   | 2003-2005 | *                    |
| South Korea | Cheun H-I, Cho S-H, Lee J-H, Lim Y-Y, Jeon J-H, Yu J-R, Kim T-S, Lee W-J, Cho S-H, Lee D-Y, Park M-S, Jeong H-S, Chen D-S, Ji Y-M, Kwon M-H. Infection status of hospitalized diarrheal patients with gastrointestinal protozoa, bacteria, and viruses in the Republic of Korea. <i>Korean J Parasitol.</i> 2010; 48(2): 113-20.                                                 | 2004-2006 |                      |
| South Korea | Lee JI, Lee G-C, Chung JY, Han TH, Lee YK, Kim MS, Lee CH. Detection and molecular characterization of adenoviruses in Korean children hospitalized with acute gastroenteritis. <i>Microbiol Immunol.</i> 2012; 56(8): 523-8.                                                                                                                                                    | 2004-2006 | *                    |
| South Korea | Park SH, Kim EJ, Oh SA, Kim CK, Choi SS, Cho SJ, Han KY, Lee JI, Kim MY, Jung HS, Chun DS, Kim HS. Viral agents associated with acute gastroenteritis in Seoul, Korea. <i>Clin Lab.</i> 2011; 57(1-2): 59-65.                                                                                                                                                                    | 2004-2008 | *                    |
| South Korea | Le VP, Kim J-Y, Cho S-L, Nam S-W, Lim I, Lee H-J, Kim K, Chung S-I, Song W, Lee KM, Rhee M-S, Lee J-S, Kim W. Detection of unusual rotavirus genotypes G8P[8] and G12P[6] in South Korea. <i>J Med Virol.</i> 2008; 80(1): 175-82.                                                                                                                                               | 2004-2006 | *                    |
| South Korea | Lee SY, Hong SK, Lee SG, Suh CI, Park SW, Lee JH, Kim JH, Kim DS, Kim HM, Jang YT, Ma SH, Kim SY, Sohn YS, Kang JH, Paik SY. Human rotavirus genotypes in hospitalized children, South Korea, April 2005 to March 2007. <i>Vaccine.</i> 2009; 27(Suppl 5): 97-101.                                                                                                               | 2005-2007 |                      |
| South Korea | Park S, Oh S, Lee J, Park G, Choi S, Chae Y, Kim H. Genotypes of rotavirus associated with acute gastroenteritis in Seoul, Korea. <i>Microbiol Immunol.</i> 2011; 55(9): 641-4.                                                                                                                                                                                                  | 2009      | *                    |
| South Korea | Choi S-H, Hong S-B, Ko G-B, Lee Y, Park HJ, Park S-Y, Moon SM, Cho O-H, Park K-H, Chong YP, Kim S-H, Huh JW, Sung H, Do K-H, Lee S-O, Kim M-N, Jeong J-Y, Lim C-M, Kim YS, Woo JH, Koh Y. Viral infection in patients with severe pneumonia requiring intensive care unit admission. <i>Am J Respir Crit Care Med.</i> 2012; 186(4): 325-32.                                     | 2010-2011 | *                    |
| Spain       | Cilla G, Gomariz M, Montes M, Mendiburu MI, Pérez-Yarza EG, Pérez-Trallero E. Incidence of hospitalization due to community-acquired rotavirus infection: a 12-year study (1996-2008). <i>Epidemiol Infect.</i> 2010; 138(9): 1235-4.                                                                                                                                            | 1996-2008 |                      |
| Spain       | Briones ML, Blanquer J, Ferrando D, Blasco ML, Gimeno C, Marín J. Assessment of analysis of urinary pneumococcal antigen by immunochromatography for etiologic diagnosis of community-acquired pneumonia in adults. <i>Clin Vaccine Immunol.</i> 2006; 13(10): 1092-7.                                                                                                           | 2000-2004 | *                    |
| Spain       | World Health Organization (WHO). WHO Global Health Observatory - Cholera: Number of Reported Cases by Country. Geneva, Switzerland: World Health Organization (WHO).                                                                                                                                                                                                             | 2001-2008 | *                    |
| Spain       | Martínón-Torres F, Martínón-Torres N, Bouzón Alejandro M, Redondo Collazo L, Pérttega-Díaz S, Seoane-Pillado MT, Aboal Viñas J, San-Martín M. Acute gastroenteritis hospitalizations among children aged < 5 years before and after introduction of rotavirus vaccines: a hospital-based surveillance study in Galicia, Spain. <i>Hum Vaccin Immunother.</i> 2012; 8(7): 946-52. | 2003-2007 | *                    |
| Spain       | Giaquinto C, van Damme P, REVEAL Study Group. Age distribution of paediatric rotavirus gastroenteritis cases in Europe: the REVEAL study. <i>Scand J Infect Dis.</i> 2010; 42(2): 142-7.                                                                                                                                                                                         | 2004-2005 | *                    |
| Spain       | Cilla G, Oñate E, Perez-Yarza EG, Montes M, Vicente D, Perez-Trallero E. Viruses in community-acquired pneumonia in children aged less than 3 years old: High rate of viral coinfection. <i>J Med Virol.</i> 2008; 80(10): 1843-9.                                                                                                                                               | 2004-2006 | *                    |
| Spain       | Forster J, Guarino A, Parez N, Moraga F, Román E, Mory O, Tozzi AE, de Aguilera AL, Wahn U, Graham C, Berner R, Ninan T, Barberousse C, Meyer N, Soriano-Gabarró M. Hospital-based surveillance to estimate the burden of rotavirus gastroenteritis among European children younger than 5 years of age. <i>Pediatrics.</i> 2009; 123(3): e393-400.                              | 2005-2006 |                      |
| Spain       | Junquera CG, de Baranda CS, Mialdea OG, Serrano EB, Sánchez-Fauquier A. Prevalence and clinical characteristics of norovirus gastroenteritis among hospitalized children in Spain. <i>Pediatr Infect Dis J.</i> 2009; 28(7): 604-7.                                                                                                                                              | 2005-2008 | *                    |
| Spain       | Gonzalez-Galan V, Sánchez-Fauquier A, Obando I, Montero V, Fernandez M, Torres MJ, Neth O, Aznar-Martin J. High prevalence of community-acquired norovirus gastroenteritis among hospitalized children: a prospective study. <i>Clin Microbiol Infect.</i> 2011; 17(12): 1895-9.                                                                                                 | 2006-2007 | *                    |
| Spain       | Sánchez-Fauquier A, Montero V, Colomina J, González-Galán V, Aznar J, Aisa ML, Gutierrez C, Sainz de Baranda C, Wilhelmi I. Global study of viral diarrhea in hospitalized children in Spain: results of structural surveillance of viral gastroenteritis net work (VIGESS-net) 2006-2008. <i>J Clin Virol.</i> 2011; 52(4): 353-8.                                              | 2006-2008 | *                    |
| Suriname    | De Oliveira LH, Danovaro-Holliday MC, Andrus JK, de Fillipis AMB, Gentsch J, Matus CR, Widdowson M-A. Sentinel hospital surveillance for rotavirus in Latin American and Caribbean countries. <i>J Infect Dis.</i> 2009; 200 Suppl 1: 131-139.                                                                                                                                   | 2006-2007 |                      |
| Sweden      | Uhnöo I, Wadell G, Svensson L, Olding-Stenkvist E, Ekwall E, Mölby R. Aetiology and epidemiology of acute gastro-enteritis in Swedish children. <i>J Infect.</i> 1986; 13(1): 73-89.                                                                                                                                                                                             | 1981      | *                    |
| Sweden      | Svanteson B, Thorén A, Castor B, Barkenius G, Bergdahl U, Tufvesson B, Hansson HB, Möllby R, Juhlin I. Acute diarrhoea in adults: aetiology, clinical appearance and therapeutic aspects. <i>Scand J Infect Dis.</i> 1988; 20(3): 303-14.                                                                                                                                        | 1981-1982 | *                    |

**Web Table 33- Etiology citation list**

| Country                    | Citation                                                                                                                                                                                                                                                                                                                                                                 | Year*     | New for GBD 2013 (*) |
|----------------------------|--------------------------------------------------------------------------------------------------------------------------------------------------------------------------------------------------------------------------------------------------------------------------------------------------------------------------------------------------------------------------|-----------|----------------------|
| Sweden                     | Karlström O, Fryklund B, Tullus K, Burman LG. A prospective nationwide study of Clostridium difficile-associated diarrhea in Sweden. The Swedish C. difficile Study Group. Clin Infect Dis. 1998; 26(1): 141-5.                                                                                                                                                          | 1995      | *                    |
| Sweden                     | Norén T, Akerlund T, Bäck E, Sjöberg L, Persson I, Alriksson I, Burman LG. Molecular epidemiology of hospital-associated and community-acquired Clostridium difficile infection in a Swedish county. J Clin Microbiol. 2004; 42(8): 3635-43.                                                                                                                             | 1999-2000 | *                    |
| Sweden                     | World Health Organization (WHO). WHO Global Health Observatory - Cholera: Number of Reported Cases by Country. Geneva, Switzerland: World Health Organization (WHO).                                                                                                                                                                                                     | 2003-2011 | *                    |
| Sweden                     | Johansson N, Kalin M, Tiveljung-Lindell A, Giske CG, Hedlund J. Etiology of Community-Acquired pneumonia: Increased microbiological yield with new diagnostic methods. Clin Infect Dis. 2010; 50(2): 202-9.                                                                                                                                                              | 2004-2005 | *                    |
| Sweden                     | Giaquinto C, van Damme P, REVEAL Study Group. Age distribution of paediatric rotavirus gastroenteritis cases in Europe: the REVEAL study. Scand J Infect Dis. 2010; 42(2): 142-7.                                                                                                                                                                                        | 2004-2005 | *                    |
| Switzerland                | Cevey-Macherel M, Galetto-Lacour A, Gervaix A, Siegrist C-A, Bille J, Bescher-Ninet B, Kaiser L, Krahenbuhl J-D, Gehri M. Etiology of community-acquired pneumonia in hospitalized children based on WHO clinical guidelines. Eur J Pediatr. 2009; 168(12): 1429-36.                                                                                                     | 2003-2005 | *                    |
| Switzerland                | World Health Organization (WHO). WHO Global Health Observatory - Cholera: Number of Reported Cases by Country. Geneva, Switzerland: World Health Organization (WHO).                                                                                                                                                                                                     | 2006      | *                    |
| Taiwan (Province of China) | Wu FT, Liang SY, Tsao KC, Huang CG, Lin CY, Lin JS, Su CY, Eng HL, Yang JY, Chen PJ, Yang CF. Hospital-based surveillance and molecular epidemiology of rotavirus infection in Taiwan, 2005-2007. Vaccine. 2009; 27(Suppl 5): 50-54.                                                                                                                                     | 2005-2007 |                      |
| Tanzania                   | Mwenda JM, Ntoto KM, Abebe A, Enweronu-Laryea C, Amina I, Mchomvu J, Kisakye A, Mpabalwani EM, Pazvakambwa I, Armah GE, Seheri LM, Kiulia NM, Page N, Widdowson M-A, Steele AD. Burden and epidemiology of rotavirus diarrhea in selected African countries: preliminary results from the African Rotavirus Surveillance Network. J Infect Dis. 2010; 202(Suppl): S5-11. | 2007-2008 |                      |
| Thailand                   | Echeverria P, Blacklow NR, Cukor GG, Vibulbandhitkit S, Changchawalit S, Boonthai P. Rotavirus as a cause of severe gastroenteritis in adults. J Clin Microbiol. 1983; 18(3): 663-7.                                                                                                                                                                                     | 1980-1981 | *                    |
| Thailand                   | Echeverria P, Seriwatana J, Taylor DN, Yanggratoke S, Tirapat C. A comparative study of enterotoxigenic Escherichia coli, Shigella, Aeromonas, and Vibrio as etiologies of diarrhea in northeastern Thailand. Am J Trop Med Hyg. 1985; 34(3): 547-54.                                                                                                                    | 1982-1983 | *                    |
| Thailand                   | Wasi C, Louisirirothanakul S, Thakerngpol K, Satrasook S, Surakhala M, Varavithya W, Thongcharoen P. The epidemiological study on viral diarrhoea in Thailand. J Med Assoc Thai. 1984; 67(7): 369-75.                                                                                                                                                                    | 1982-1983 | *                    |
| Thailand                   | Poocharoen L, Bruin CW. Campylobacter jejuni in hospitalized children with diarrhoea in Chiang Mai, Thailand. Southeast Asian J Trop Med Public Health. 1986; 17(1): 53-8.                                                                                                                                                                                               | 1983-1984 | *                    |
| Thailand                   | Poocharoen L, Bruin CW, Sirisanthana V, Vannareumol P, Leechanachai P, Sukhavat K. The relative importance of various enteropathogens as a cause of diarrhoea in hospitalized children in Chiang Mai, Thailand. J Diarrhoeal Dis Res. 1986; 4(1): 10-5.                                                                                                                  | 1983-1984 | *                    |
| Thailand                   | Pipittajan P, Kasempimolporn S, Ikegami N, Akatani K, Wasi C, Sinarachatanant P. Molecular epidemiology of rotaviruses associated with pediatric diarrhea in Bangkok, Thailand. J Clin Microbiol. 1991; 29(3): 617-24.                                                                                                                                                   | 1985-1987 | *                    |
| Thailand                   | Coiro JR, Bendati MM, de Almeida Neto AJ, Heuser CF, Vasconcellos VL. Rotavirus infection in Brazilian children with acute enteritis: a seasonal variation study. Am J Trop Med Hyg. 1983; 32(5): 1186-8.                                                                                                                                                                | 1985-1986 | *                    |
| Thailand                   | Echeverria P, Taylor DN, Leksomboon U, Bhaibulaya M, Blacklow NR, Tamura K, Sakazaki R. Case-control study of endemic diarrheal disease in Thai children. J Infect Dis. 1989; 159(3): 543-8.                                                                                                                                                                             | 1985-1986 | *                    |
| Thailand                   | Herrmann JE, Blacklow NR, Perron-Henry DM, Clements E, Taylor DN, Echeverria P. Incidence of enteric adenoviruses among children in Thailand and the significance of these viruses in gastroenteritis. J Clin Microbiol. 1988; 26(9): 1783-6.                                                                                                                            | 1985-1987 | *                    |
| Thailand                   | Sunakorn P, Chunchit L, Niltawat S, Wangweerawong M, Jacobs RF. Epidemiology of acute respiratory infections in young children from Thailand. Pediatr Infect Dis J. 1990; 9(12): 873-7.                                                                                                                                                                                  | 1988-1989 | *                    |
| Thailand                   | Punyaratabandhu P, Vathanophas K, Varavithya W, Sangchai R, Athipanyakom S, Echeverria P, Wasi C. Childhood diarrhoea in a low-income urban community in Bangkok: incidence, clinical features, and child caretaker's behaviours. J Diarrhoeal Dis Res. 1991; 9(3): 244-9.                                                                                               | 1988-1989 | *                    |
| Thailand                   | Varavithya W, Vathanophas K, Bodhidatta L, Punyaratabandhu P, Sangchai R, Athipanyakom S, Wasi C, Echeverria P. Importance of salmonellae and Campylobacter jejuni in the etiology of diarrheal disease among children less than 5 years of age in a community in Bangkok, Thailand. J Clin Microbiol. 1990; 28(11): 2507-10.                                            | 1988-1989 | *                    |
| Thailand                   | Echeverria P, Hoge CW, Bodhidatta L, Tungtaem C, Herrmann J, Imlarp S, Tamura K. Etiology of diarrhea in a rural community in western Thailand: importance of enteric viruses and enterovirulent Escherichia coli. J Infect Dis. 1994; 169(4): 916-9.                                                                                                                    | 1991      | *                    |
| Thailand                   | Von Seidlein L, Kim DR, Ali M, Lee H, Wang X, Thiem VD, Canh DG, Chaicumpa W, Agtini MD, Hossain A, Bhutta ZA, Mason C, Sethabutr O, Talukder K, Nair GB, Deen JL, Kotloff K, Clemens J. A Multicentre Study of Shigella Diarrhoea in Six Asian Countries: Disease Burden, Clinical Manifestations, and Microbiology. PLoS Med. 2006; 3(9): e353.                        | 2000-2003 | *                    |



**Web Table 33- Etiology citation list**

| Country    | Citation                                                                                                                                                                                                                                                                                                                                                                                                                   | Year*     | New for GBD 2013 (*) |
|------------|----------------------------------------------------------------------------------------------------------------------------------------------------------------------------------------------------------------------------------------------------------------------------------------------------------------------------------------------------------------------------------------------------------------------------|-----------|----------------------|
| Thailand   | Jiraphongsa C, Bresee JS, Pongsuwanna Y, Kluabwang P, Poonawagul U, Arpornit P, Kanoksil M, Prensri N, Intusoma U. Epidemiology and burden of rotavirus diarrhea in Thailand: results of sentinel surveillance. <i>J Infect Dis.</i> 2005; 192(Suppl 1): S87-93.                                                                                                                                                           | 2001-2003 |                      |
| Thailand   | Bodhidatta L, McDaniel P, Sornsakrin S, Srijan A, Serichantalergs O, Mason CJ. Case-control study of diarrheal disease etiology in a remote rural area in Western Thailand. <i>Am J Trop Med Hyg.</i> 2010; 83(5): 1106-9.                                                                                                                                                                                                 | 2001-2002 | *                    |
| Thailand   | Khamrin P, Peerakome S, Tonusin S, Malasao R, Okitsu S, Mizuguchi M, Ushijima H, Maneekarn N. Changing pattern of rotavirus G genotype distribution in Chiang Mai, Thailand from 2002 to 2004: decline of G9 and reemergence of G1 and G2. <i>J Med Virol.</i> 2007; 79(11): 1775-82.                                                                                                                                      | 2002-2004 |                      |
| Thailand   | Olsen SJ, Thamthitwat S, Baggett HC, Maloney S, Peruski LF, Chantra S, Chittaganpitch M, Sawanpanyalert P, Fry AM, Simmerman JM, Peret TCT, Erdman D, Benson R, Thacker L, Tondella ML, Winchell J, Fields B, Talkington D, Nicholson WL, Ungchusak K, Dowell SF. Incidence of respiratory pathogens in persons hospitalized with pneumonia in two provinces in Thailand. <i>Epidemiol Infect.</i> 2010; 138(12): 1811-22. | 2003-2005 | *                    |
| Thailand   | Khamrin P, Maneekarn N, Malasao R, Nguyen TA, Ishida S, Okitsu S, Ushijima H. Genotypic linkages of VP4, VP6, VP7, NSP4, NSP5 genes of rotaviruses circulating among children with acute gastroenteritis in Thailand. <i>Infect Genet Evol.</i> 2010; 10(4): 467-72.                                                                                                                                                       | 2005      |                      |
| Thailand   | Kittigul L, Pombubpa K, Taweekate Y, Yeephoo T, Khamrin P, Ushijima H. Molecular characterization of rotaviruses, noroviruses, sapovirus, and adenoviruses in patients with acute gastroenteritis in Thailand. <i>J Med Virol.</i> 2009; 81(2): 345-53.                                                                                                                                                                    | 2006-2007 | *                    |
| Thailand   | Thongprachum A, Khamrin P, Chan-It W, Malasao R, Chaimongkol N, Okitsu S, Mizuguchi M, Maneekarn N, Hayakawa S, Ushijima H. Emergence of norovirus GII/4 2006a and 2006b variants in hospitalized children with acute gastroenteritis in Thailand. <i>Clin Lab.</i> 2013; 59(3-4): 271-6.                                                                                                                                  | 2006      | *                    |
| Thailand   | Samransamruajkit R, Hiranrat T, Chieochansin T, Sritippayawan S, Deerojanawong J, Prapphal N, Poovorawan Y. Prevalence, clinical presentations and complications among hospitalized children with influenza pneumonia. <i>Jpn J Infect Dis.</i> 2008; 61(6): 446-9.                                                                                                                                                        | 2006-2007 | *                    |
| Thailand   | Hara K, Yahara K, Gotoh K, Nakazono Y, Kashiwagi T, Imamura Y, Hamada N, Khositsakulchai W, Sanchai T, Khantawa B, Tharavichitkul P, Maneekarn N, Sirisanthana T, Watanabe H. Clinical study concerning the relationship between community-acquired pneumonia and viral infection in northern Thailand. <i>Intern Med.</i> 2011; 50(9): 991-8.                                                                             | 2006-2008 | *                    |
| Thailand   | Maiklang O, Vutithanachot V, Vutithanachot C, Hacharoen P, Chieochansin T, Poovorawan Y. Prevalence of group A genotype human rotavirus among children with diarrhea in Thailand, 2009-2011. <i>Southeast Asian J Trop Med Public Health.</i> 2012; 43(4): 904-16.                                                                                                                                                         | 2009-2011 | *                    |
| The Gambia | Forgie IM, O'Neill KP, Lloyd-Evans N, Leinonen M, Campbell H, Whittle HC, Greenwood BM. Etiology of acute lower respiratory tract infections in Gambian children: II Acute lower respiratory tract infection in children ages one to nine years presenting at the hospital. <i>Pediatr Infect Dis J.</i> 1991; 10(1): 42-7.                                                                                                | 1986-1988 | *                    |
| The Gambia | Forgie IM, O'Neill KP, Lloyd-Evans N, Leinonen M, Campbell H, Whittle HC, Greenwood BM. Etiology of acute lower respiratory tract infections in Gambian children: I Acute lower respiratory tract infections in infants presenting at the hospital. <i>Pediatr Infect Dis J.</i> 1991; 10(1): 33-41.                                                                                                                       | 1987-1988 | *                    |
| The Gambia | Adegbola RA, Falade AG, Sam BE, Aidoo M, Baldeh I, Hazlett D, Whittle H, Greenwood BM, Mulholland EK. The etiology of pneumonia in malnourished and well-nourished Gambian children. <i>Pediatr Infect Dis J.</i> 1994; 13(11): 975-82.                                                                                                                                                                                    | 1990-1992 | *                    |
| The Gambia | Mulholland K, Hilton S, Adegbola R, Usen S, Oparaugo A, Omosigho C, Weber M, Palmer A, Schneider G, Jobe K, Lahai G, Jaffar S, Secka O, Lin K, Ethevenaux C, Greenwood B. Randomised trial of Haemophilus influenzae type-b tetanus protein conjugate vaccine corrected for prevention of pneumonia and meningitis in Gambian infants. <i>Lancet.</i> 1997; 349(9060): 1191-7.                                             | 1993-1995 | *                    |
| The Gambia | Cutts F, Zaman SM, Enwere G, Jaffar S, Levine O, Okoko J, Oluwalana C, Vaughan A, Obaro S, Leach A, McAdam K, Biney E, Saaka M, Onwuchekwa U, Yallop F, Pierce N, Greenwood B, Adegbola R. Efficacy of nine-valent pneumococcal conjugate vaccine against pneumonia and invasive pneumococcal disease in The Gambia: randomised, double-blind, placebo-controlled trial. <i>Lancet.</i> 2005; 365(9465): 1139-46.          | 2000-2004 | *                    |
| The Gambia | Nasrin D, Wu Y, Blackwelder WC, Farag TH, Saha D, Sow SO, Alonso PL, Breiman RF, Sur D, Faruque ASG, Zaidi AKM, Biswas K, Van Eijk AM, Walker DG, Levine MM, Kotloff KL. Health care seeking for childhood diarrhea in developing countries: evidence from seven sites in Africa and Asia. <i>Am J Trop Med Hyg.</i> 2013; 89(1 Suppl): 3-12.                                                                              | 2010      | *                    |
| Tunisia    | Trabelsi A, Peenze I, Pager C, Jeddi M, Steele D. Distribution of rotavirus VP7 serotypes and VP4 genotypes circulating in Sousse, Tunisia, from 1995 to 1999: emergence of natural human reassortants. <i>J Clin Microbiol.</i> 2000; 38(9): 3415-9.                                                                                                                                                                      | 1995-1999 | *                    |
| Tunisia    | Al-Gallas N, Bahri O, Bouratbeen A, Ben Haasen A, Ben Aissa R. Etiology of acute diarrhea in children and adults in Tunis, Tunisia, with emphasis on diarrheagenic Escherichia coli: prevalence, phenotyping, and molecular epidemiology. <i>Am J Trop Med Hyg.</i> 2007; 77(3): 571-82.                                                                                                                                   | 2001-2004 |                      |
| Tunisia    | Fodha I, Chouikha A, Peenze I, De Beer M, Dewar J, Geyer A, Messaadi F, Trabelsi A, Boujaafar N, Taylor MB, Steele D. Identification of viral agents causing diarrhea among children in the Eastern Center of Tunisia. <i>J Med Virol.</i> 2006; 78(9): 1198-203.                                                                                                                                                          | 2003-2005 | *                    |

**Web Table 33- Etiology citation list**

| Country        | Citation                                                                                                                                                                                                                                                                                                                                                                                 | Year*     | New for GBD 2013 (*) |
|----------------|------------------------------------------------------------------------------------------------------------------------------------------------------------------------------------------------------------------------------------------------------------------------------------------------------------------------------------------------------------------------------------------|-----------|----------------------|
| Tunisia        | Soltani M, Bouanene I, Trabelsi A, Harbi A, Hachicha M, Amri F, Boussnina S, Gueddiche MN, Sfar MT, Teleb N, Ben Ghorbel M, Ben Hamida E. [Epidemiology of rotavirus gastroenteritis among children under 5 years of age in Tunisia - results of sentinel hospital surveillance 2009 to 2011]. Rev Epidemiol Sante Publique. 2012; 60(6): 473-80.                                        | 2009-2011 | *                    |
| Turkey         | Koksal I, Bayraktar O, Yilmaz G, Caylan R, Aydin K, Sucu N, Ozlu T, Bulbul Y, Oztuna F, Ozcan DI, Ogu S C, Tekeli E, Kaya A, Ayaz C, Dagli CE, Yildiz O, Oymak FS, Kalkan A, Muz MH, Turgut H, Fisekci F, Heper Y, Uzaslan E. Etiological agents of community-acquired pneumonia in adult patients in Turkey; a multicentric, cross-sectional study. Tuberk Toraks. 2010; 58(2): 119-27. | 2003-2008 | *                    |
| Turkey         | Ceyhan M, Alhan E, Salman N, Kurugol Z, Yildirim I, Celik U, Keser M, Koturoglu G, Tezer H, Bulbul EK, Karabocuoğlu M, Halicioğlu O, Anis S, Pawinski R. Multicenter prospective study on the burden of rotavirus gastroenteritis in Turkey, 2005-2006: a hospital-based study. J Infect Dis. 2009; 200 Suppl 1: 234-238.                                                                | 2005-2006 |                      |
| Turkey         | Ozdemir S, Delialiolu N, Emekda G. Investigation of rotavirus, adenovirus and astrovirus frequencies in children with acute gastroenteritis and evaluation of epidemiological features. Mikrobiyol Bul. 2010; 44(4): 571-8.                                                                                                                                                              | 2008      |                      |
| Turkey         | Hacimustafaoglu M, Celebi S, Agin M, Ozkaya G. Rotavirus epidemiology of children in Bursa, Turkey: a multi-centered hospital-based descriptive study. Turk J Pediatr. 2011; 53(6): 604-13.                                                                                                                                                                                              | 2010      | *                    |
| Uganda         | Tumwine JK, Kekitiinwa A, Bakeera-Kitaka S, Ndeezi G, Downing R, Feng X, Akiyoshi DE, Tzipori S. Cryptosporidiosis and microsporidiosis in ugandan children with persistent diarrhea with and without concurrent infection with the human immunodeficiency virus. Am J Trop Med Hyg. 2005; 73(5): 921-5.                                                                                 | 2002-2003 | *                    |
| Uganda         | Mwenda JM, Ntoto KM, Abebe A, Enweronu-Laryea C, Amina I, Mchomvu J, Kisakye A, Mpabalwani EM, Pazvakavambwa I, Armah GE, Seheri LM, Kiulia NM, Page N, Widdowson M-A, Steele AD. Burden and epidemiology of rotavirus diarrhea in selected African countries: preliminary results from the African Rotavirus Surveillance Network. J Infect Dis. 2010; 202(Suppl): S5-11.               | 2006-2008 |                      |
| Ukraine        | Clark CG, Kravetz AN, Alekseenko VV, Krendelev YuD, Johnson WM. Microbiological and epidemiological investigation of cholera epidemic in Ukraine during 1994 and 1995. Epidemiol Infect. 1998; 121(1): 1-13.                                                                                                                                                                             | 1994-1995 | *                    |
| United Kingdom | Watson B, Ellis M, Mandal B, Dunbar E, Whale K, Brennan J. A comparison of the clinico-pathological features with stool pathogens in patients hospitalised with the symptom of diarrhoea. J Infect Dis. 1986; 18(6): 553-9.                                                                                                                                                              | 1981-1982 | *                    |
| United Kingdom | World Health Organization (WHO). WHO Global Health Observatory - Cholera: Number of Reported Cases by Country. Geneva, Switzerland: World Health Organization (WHO).                                                                                                                                                                                                                     | 2000-2012 | *                    |
| United Kingdom | NHS England. United Kingdom - England Hospital Episode Statistics 2002-2003.                                                                                                                                                                                                                                                                                                             | 2002      | *                    |
| United Kingdom | NHS England. United Kingdom - England Hospital Episode Statistics 2003-2004.                                                                                                                                                                                                                                                                                                             | 2003      | *                    |
| United Kingdom | Giaquinto C, van Damme P, REVEAL Study Group. Age distribution of paediatric rotavirus gastroenteritis cases in Europe: the REVEAL study. Scand J Infect Dis. 2010; 42(2): 142-7.                                                                                                                                                                                                        | 2004-2005 | *                    |
| United Kingdom | NHS England. United Kingdom - England Hospital Episode Statistics 2004-2005.                                                                                                                                                                                                                                                                                                             | 2004      | *                    |
| United Kingdom | Forster J, Guarino A, Parez N, Moraga F, Román E, Mory O, Tozzi AE, de Aguilera AL, Wahn U, Graham C, Berner R, Ninan T, Barberousse C, Meyer N, Soriano-Gabarró M. Hospital-based surveillance to estimate the burden of rotavirus gastroenteritis among European children younger than 5 years of age. Pediatrics. 2009; 123(3): e393-400.                                             | 2005-2006 |                      |
| United Kingdom | NHS England. United Kingdom - England Hospital Episode Statistics 2005-2006.                                                                                                                                                                                                                                                                                                             | 2005      | *                    |
| United Kingdom | NHS England. United Kingdom - England Hospital Episode Statistics 2006-2007.                                                                                                                                                                                                                                                                                                             | 2006      | *                    |
| United Kingdom | NHS England. United Kingdom - England Hospital Episode Statistics 2007-2008.                                                                                                                                                                                                                                                                                                             | 2007      | *                    |
| United Kingdom | NHS England. United Kingdom - England Hospital Episode Statistics 2008-2009.                                                                                                                                                                                                                                                                                                             | 2008      | *                    |
| United Kingdom | NHS England. United Kingdom - England Hospital Episode Statistics 2009-2010.                                                                                                                                                                                                                                                                                                             | 2009      | *                    |
| United Kingdom | NHS England. United Kingdom - England Hospital Episode Statistics 2010-2011.                                                                                                                                                                                                                                                                                                             | 2010      | *                    |
| United Kingdom | NHS England. United Kingdom - England Hospital Episode Statistics 2011-2012.                                                                                                                                                                                                                                                                                                             | 2011-2012 | *                    |
| United States  | Austrian R. Prevention of pneumococcal infection by immunization with capsular polysaccharides of Streptococcus pneumoniae: current status of polyvalent vaccines. J Infect Dis. 1977; 136(Suppl): S 38-42.                                                                                                                                                                              | 1975-1976 | *                    |
| United States  | Rodriguez WJ, Kim HW, Brandt CD, Schwartz RH, Gardner MK, Jeffries B, Parrott RH, Kaslow RA, Smith JI, Kapikian AZ. Longitudinal study of rotavirus infection and gastroenteritis in families served by a pediatric medical practice: clinical and epidemiologic observations. Pediatr Infect Dis J. 1987; 6(2): 170-6.                                                                  | 1977-1980 | *                    |
| United States  | Santosham M, Sack RB, Reid R, Black R, Croll J, Yolken R, Aurelian L, Wolff M, Chan E, Garrett S. Diarrhoeal diseases in the White Mountain Apaches: epidemiologic studies. J Diarrhoeal Dis Res. 1995; 13(1): 18-28.                                                                                                                                                                    | 1981-1985 |                      |

**Web Table 33- Etiology citation list**

| Country       | Citation                                                                                                                                                                                                                                                                                                                                                                      | Year*     | New for GBD 2013 (*) |
|---------------|-------------------------------------------------------------------------------------------------------------------------------------------------------------------------------------------------------------------------------------------------------------------------------------------------------------------------------------------------------------------------------|-----------|----------------------|
| United States | Healthcare Cost and Utilization Project (HCUP), Agency for Healthcare Research and Quality (AHRQ). United States Nationwide Inpatient Sample 1988. Rockville, United States: Healthcare Cost and Utilization Project (HCUP), Agency for Healthcare Research and Quality (AHRQ).                                                                                               | 1988      | *                    |
| United States | Healthcare Cost and Utilization Project (HCUP), Agency for Healthcare Research and Quality (AHRQ). United States Nationwide Inpatient Sample 1989. Rockville, United States: Healthcare Cost and Utilization Project (HCUP), Agency for Healthcare Research and Quality (AHRQ).                                                                                               | 1989      | *                    |
| United States | Parashar UD, Holman RC, Clarke MJ, Bresee JS, Glass RI. Hospitalizations associated with rotavirus diarrhea in the United States, 1993 through 1995: surveillance based on the new ICD-9-CM rotavirus-specific diagnostic code. <i>J Infect Dis.</i> 1998; 177(1): 13-7.                                                                                                      | 1990-1995 | *                    |
| United States | Healthcare Cost and Utilization Project (HCUP), Agency for Healthcare Research and Quality (AHRQ). United States Nationwide Inpatient Sample 1990. Rockville, United States: Healthcare Cost and Utilization Project (HCUP), Agency for Healthcare Research and Quality (AHRQ).                                                                                               | 1990      | *                    |
| United States | Khanna S, Pardi DS, Aronson SL, Kammer PP, Orenstein R, St Sauver JL, Harmsen WS, Zinsmeister AR. The epidemiology of community-acquired Clostridium difficile infection: a population-based study. <i>Am J Gastroenterol.</i> 2012; 107(1): 89-95.                                                                                                                           | 1991-2005 | *                    |
| United States | Healthcare Cost and Utilization Project (HCUP), Agency for Healthcare Research and Quality (AHRQ). United States Nationwide Inpatient Sample 1991. Rockville, United States: Healthcare Cost and Utilization Project (HCUP), Agency for Healthcare Research and Quality (AHRQ).                                                                                               | 1991      | *                    |
| United States | Healthcare Cost and Utilization Project (HCUP), Agency for Healthcare Research and Quality (AHRQ). United States Nationwide Inpatient Sample 1992. Rockville, United States: Healthcare Cost and Utilization Project (HCUP), Agency for Healthcare Research and Quality (AHRQ).                                                                                               | 1992      | *                    |
| United States | National Center for Health Statistics (NCHS), Centers for Disease Control and Prevention (CDC), US Census Bureau. United States National Hospital Discharge Survey 1993. Hyattsville, United States: National Center for Health Statistics (NCHS), Centers for Disease Control and Prevention (CDC).                                                                          | 1993      | *                    |
| United States | Healthcare Cost and Utilization Project (HCUP), Agency for Healthcare Research and Quality (AHRQ). United States Nationwide Inpatient Sample 1993. Rockville, United States: Healthcare Cost and Utilization Project (HCUP), Agency for Healthcare Research and Quality (AHRQ).                                                                                               | 1993      | *                    |
| United States | National Center for Health Statistics (NCHS), Centers for Disease Control and Prevention (CDC), US Census Bureau. United States National Hospital Discharge Survey 1994. Hyattsville, United States: National Center for Health Statistics (NCHS), Centers for Disease Control and Prevention (CDC).                                                                          | 1994      | *                    |
| United States | Healthcare Cost and Utilization Project (HCUP), Agency for Healthcare Research and Quality (AHRQ). United States Nationwide Inpatient Sample 1994. Rockville, United States: Healthcare Cost and Utilization Project (HCUP), Agency for Healthcare Research and Quality (AHRQ).                                                                                               | 1994      | *                    |
| United States | National Center for Health Statistics (NCHS), Centers for Disease Control and Prevention (CDC), US Census Bureau. United States National Hospital Discharge Survey 1995. Hyattsville, United States: National Center for Health Statistics (NCHS), Centers for Disease Control and Prevention (CDC).                                                                          | 1995      | *                    |
| United States | Healthcare Cost and Utilization Project (HCUP), Agency for Healthcare Research and Quality (AHRQ). United States Nationwide Inpatient Sample 1995. Rockville, United States: Healthcare Cost and Utilization Project (HCUP), Agency for Healthcare Research and Quality (AHRQ).                                                                                               | 1995      | *                    |
| United States | Hansen J, Black S, Shinefield H, Cherian T, Benson J, Fireman B, Lewis E, Ray P, Lee J. Effectiveness of Heptavalent Pneumococcal Conjugate Vaccine in Children Younger Than 5 Years of Age for Prevention of Pneumonia: Updated Analysis Using World Health Organization Standardized Interpretation of Chest Radiographs. <i>Pediatr Infect Dis J.</i> 2006; 25(9): 779-81. | 1995-1998 | *                    |
| United States | National Center for Health Statistics (NCHS), Centers for Disease Control and Prevention (CDC), US Census Bureau. United States National Hospital Discharge Survey 1996. Hyattsville, United States: National Center for Health Statistics (NCHS), Centers for Disease Control and Prevention (CDC).                                                                          | 1996      | *                    |
| United States | Healthcare Cost and Utilization Project (HCUP), Agency for Healthcare Research and Quality (AHRQ). United States Nationwide Inpatient Sample 1996. Rockville, United States: Healthcare Cost and Utilization Project (HCUP), Agency for Healthcare Research and Quality (AHRQ).                                                                                               | 1996      | *                    |
| United States | National Center for Health Statistics (NCHS), Centers for Disease Control and Prevention (CDC), US Census Bureau. United States National Hospital Discharge Survey 1997. Hyattsville, United States: National Center for Health Statistics (NCHS), Centers for Disease Control and Prevention (CDC).                                                                          | 1997      | *                    |
| United States | Healthcare Cost and Utilization Project (HCUP), Agency for Healthcare Research and Quality (AHRQ). United States Nationwide Inpatient Sample 1997. Rockville, United States: Healthcare Cost and Utilization Project (HCUP), Agency for Healthcare Research and Quality (AHRQ).                                                                                               | 1997      | *                    |
| United States | O'Brien KL, Millar EV, Zell ER, Bronsdon M, Weatherholtz R, Reid R, Becenti J, Kvamme S, Whitney CG, Santosham M. Effect of pneumococcal conjugate vaccine on nasopharyngeal colonization among immunized and unimmunized children in a community-randomized trial. <i>J Infect Dis.</i> 2007; 196(8): 1211-20.                                                               | 1997-2000 | *                    |
| United States | National Center for Health Statistics (NCHS), Centers for Disease Control and Prevention (CDC), US Census Bureau. United States National Hospital Discharge Survey 1998. Hyattsville, United States: National Center for Health Statistics (NCHS), Centers for Disease Control and Prevention (CDC).                                                                          | 1998      | *                    |
| United States | Healthcare Cost and Utilization Project (HCUP), Agency for Healthcare Research and Quality (AHRQ). United States Nationwide Inpatient Sample 1998. Rockville, United States: Healthcare Cost and Utilization Project (HCUP), Agency for Healthcare Research and Quality (AHRQ).                                                                                               | 1998      | *                    |

**Web Table 33- Etiology citation list**

| Country       | Citation                                                                                                                                                                                                                                                                                                                                                                                   | Year*     | New for GBD 2013 (*) |
|---------------|--------------------------------------------------------------------------------------------------------------------------------------------------------------------------------------------------------------------------------------------------------------------------------------------------------------------------------------------------------------------------------------------|-----------|----------------------|
| United States | Nelson JC, Jackson M, Yu O, Whitney CG, Bounds L, Bittner R, Zavitkovsky A, Jackson LA. Impact of the introduction of pneumococcal conjugate vaccine on rates of community acquired pneumonia in children and adults. <i>Vaccine</i> . 2008; 26(38): 4947-54.                                                                                                                              | 1998-2004 | *                    |
| United States | National Center for Health Statistics (NCHS), Centers for Disease Control and Prevention (CDC), US Census Bureau. United States National Hospital Discharge Survey 1999. Hyattsville, United States: National Center for Health Statistics (NCHS), Centers for Disease Control and Prevention (CDC).                                                                                       | 1999      | *                    |
| United States | Bresee JS, Marcus R, Venezia RA, Keene WE, Morse D, Thanassi M, Brunett P, Bulens S, Beard RS, Dauphin LA, Slutsker L, Bopp C, Eberhard M, Hall A, Vinje J, Monroe SS, Glass RI, US Acute Gastroenteritis Etiology Study Team. The etiology of severe acute gastroenteritis among adults visiting emergency departments in the United States. <i>J Infect Dis</i> . 2012; 205(9): 1374-81. | 1999-2001 | *                    |
| United States | Healthcare Cost and Utilization Project (HCUP), Agency for Healthcare Research and Quality (AHRQ). United States Nationwide Inpatient Sample 1999. Rockville, United States: Healthcare Cost and Utilization Project (HCUP), Agency for Healthcare Research and Quality (AHRQ).                                                                                                            | 1999      | *                    |
| United States | National Center for Health Statistics (NCHS), Centers for Disease Control and Prevention (CDC), US Census Bureau. United States National Hospital Discharge Survey 2000. Hyattsville, United States: National Center for Health Statistics (NCHS), Centers for Disease Control and Prevention (CDC).                                                                                       | 2000      | *                    |
| United States | World Health Organization (WHO). WHO Global Health Observatory - Cholera: Number of Reported Cases by Country. Geneva, Switzerland: World Health Organization (WHO).                                                                                                                                                                                                                       | 2000-2012 | *                    |
| United States | Healthcare Cost and Utilization Project (HCUP), Agency for Healthcare Research and Quality (AHRQ). United States Nationwide Inpatient Sample 2000. Rockville, United States: Healthcare Cost and Utilization Project (HCUP), Agency for Healthcare Research and Quality (AHRQ).                                                                                                            | 2000      | *                    |
| United States | National Center for Health Statistics (NCHS), Centers for Disease Control and Prevention (CDC), US Census Bureau. United States National Hospital Discharge Survey 2001. Hyattsville, United States: National Center for Health Statistics (NCHS), Centers for Disease Control and Prevention (CDC).                                                                                       | 2001      | *                    |
| United States | Healthcare Cost and Utilization Project (HCUP), Agency for Healthcare Research and Quality (AHRQ). United States Nationwide Inpatient Sample 2001. Rockville, United States: Healthcare Cost and Utilization Project (HCUP), Agency for Healthcare Research and Quality (AHRQ).                                                                                                            | 2001      | *                    |
| United States | Grijalva CG, Nuorti JP, Arbogast PG, Martin SW, Edwards KM, Griffin MR. Decline in pneumonia admissions after routine childhood immunisation with pneumococcal conjugate vaccine in the USA: a time-series analysis. <i>Lancet</i> . 2007; 369(9568): 1179-86.                                                                                                                             | 2001-2004 | *                    |
| United States | Grijalva CG, Nuorti JP, Zhu Y, Griffin MR. Increasing Incidence of Empyema Complicating Childhood Community-Acquired Pneumonia in the United States. <i>Clin Infect Dis</i> . 2010; 50(6): 805-13.                                                                                                                                                                                         | 2001-2007 | *                    |
| United States | National Center for Health Statistics (NCHS), Centers for Disease Control and Prevention (CDC), US Census Bureau. United States National Hospital Discharge Survey 2002. Hyattsville, United States: National Center for Health Statistics (NCHS), Centers for Disease Control and Prevention (CDC).                                                                                       | 2002      | *                    |
| United States | Healthcare Cost and Utilization Project (HCUP), Agency for Healthcare Research and Quality (AHRQ). United States Nationwide Inpatient Sample 2002. Rockville, United States: Healthcare Cost and Utilization Project (HCUP), Agency for Healthcare Research and Quality (AHRQ).                                                                                                            | 2002      | *                    |
| United States | National Center for Health Statistics (NCHS), Centers for Disease Control and Prevention (CDC), US Census Bureau. United States National Hospital Discharge Survey 2003. Hyattsville, United States: National Center for Health Statistics (NCHS), Centers for Disease Control and Prevention (CDC).                                                                                       | 2003      | *                    |
| United States | Denno DM, Shaikh N, Stapp JR, Qin X, Hutter CM, Hoffman V, Mooney JC, Wood KM, Stevens HJ, Jones R, Tarr PI, Klein EJ. Diarrhea etiology in a pediatric emergency department: a case control study. <i>Clin Infect Dis</i> . 2012; 55(7): 897-904.                                                                                                                                         | 2003-2005 | *                    |
| United States | Sandora TJ, Desai R, Miko BA, Harper MB. Assessing quality indicators for pediatric community-acquired pneumonia. <i>Am J Med Qual</i> . 2009; 24(5): 419-27.                                                                                                                                                                                                                              | 2003-2004 | *                    |
| United States | Healthcare Cost and Utilization Project (HCUP), Agency for Healthcare Research and Quality (AHRQ). United States Nationwide Inpatient Sample 2003. Rockville, United States: Healthcare Cost and Utilization Project (HCUP), Agency for Healthcare Research and Quality (AHRQ).                                                                                                            | 2003      | *                    |
| United States | National Center for Health Statistics (NCHS), Centers for Disease Control and Prevention (CDC), US Census Bureau. United States National Hospital Discharge Survey 2004. Hyattsville, United States: National Center for Health Statistics (NCHS), Centers for Disease Control and Prevention (CDC).                                                                                       | 2004      | *                    |
| United States | Hall AJ, Rosenthal M, Gregoricus N, Greene SA, Ferguson J, Henao OL, Vinjé J, Lopman BA, Parashar UD, Widdowson M-A. Incidence of acute gastroenteritis and role of norovirus, Georgia, USA, 2004-2005. <i>Emerg Infect Dis</i> . 2011; 17(8): 1381-8.                                                                                                                                     | 2004-2005 | *                    |
| United States | Kuntz JL, Chrischilles EA, Pendergast JF, Herwaldt LA, Polgreen PM. Incidence of and risk factors for community-associated <i>Clostridium difficile</i> infection: a nested case-control study. <i>BMC Infect Dis</i> . 2011; 11: 194.                                                                                                                                                     | 2004-2007 | *                    |
| United States | Healthcare Cost and Utilization Project (HCUP), Agency for Healthcare Research and Quality (AHRQ). United States Nationwide Inpatient Sample 2004. Rockville, United States: Healthcare Cost and Utilization Project (HCUP), Agency for Healthcare Research and Quality (AHRQ).                                                                                                            | 2004      | *                    |
| United States | Zhou F, Kyaw MH, Shefer A, Winston CA, Nuorti J. Health care utilization for pneumonia in young children after routine pneumococcal conjugate vaccine use in the United States. <i>Arch Pediatr Adolesc Med</i> . 2007; 161(12): 1162-8.                                                                                                                                                   | 2004      | *                    |



**Web Table 33- Etiology citation list**

| Country       | Citation                                                                                                                                                                                                                                                                                             | Year*     | New for GBD 2013 (*) |
|---------------|------------------------------------------------------------------------------------------------------------------------------------------------------------------------------------------------------------------------------------------------------------------------------------------------------|-----------|----------------------|
| United States | National Center for Health Statistics (NCHS), Centers for Disease Control and Prevention (CDC), US Census Bureau. United States National Hospital Discharge Survey 2005. Hyattsville, United States: National Center for Health Statistics (NCHS), Centers for Disease Control and Prevention (CDC). | 2005      | *                    |
| United States | Anderson EJ, Katz BZ, Polin JA, Reddy S, Weinrobe MH, Noskin GA. Rotavirus in adults requiring hospitalization. <i>J Infect.</i> 2012; 64(1): 89-95.                                                                                                                                                 | 2005-2006 | *                    |
| United States | Singleton RJ, Bulkow LR, Miernyk K, DeByle C, Pruitt L, Hummel KB, Bruden D, Englund JA, Anderson LJ, Lucher L, Holman RC, Hennessy TW. Viral respiratory infections in hospitalized and community control children in Alaska. <i>J Med Virol.</i> 2010; 82(7): 1282-90.                             | 2005-2007 | *                    |
| United States | Healthcare Cost and Utilization Project (HCUP), Agency for Healthcare Research and Quality (AHRQ). United States Nationwide Inpatient Sample 2005. Rockville, United States: Healthcare Cost and Utilization Project (HCUP), Agency for Healthcare Research and Quality (AHRQ).                      | 2005      | *                    |
| United States | Simonsen L, Taylor RJ, Young-Xu Y, Haber M, May L, Klugman KP. Impact of Pneumococcal Conjugate Vaccination of Infants on Pneumonia and Influenza Hospitalization and Mortality in All Age Groups in the United States. <i>MBio.</i> 2011; 2(1): e00309-10.                                          | 2005-2006 | *                    |
| United States | National Center for Health Statistics (NCHS), Centers for Disease Control and Prevention (CDC), US Census Bureau. United States National Hospital Discharge Survey 2006. Hyattsville, United States: National Center for Health Statistics (NCHS), Centers for Disease Control and Prevention (CDC). | 2006      | *                    |
| United States | Healthcare Cost and Utilization Project (HCUP), Agency for Healthcare Research and Quality (AHRQ). United States Nationwide Inpatient Sample 2006. Rockville, United States: Healthcare Cost and Utilization Project (HCUP), Agency for Healthcare Research and Quality (AHRQ).                      | 2006      | *                    |
| United States | National Center for Health Statistics (NCHS), Centers for Disease Control and Prevention (CDC), US Census Bureau. United States National Hospital Discharge Survey 2007. Hyattsville, United States: National Center for Health Statistics (NCHS), Centers for Disease Control and Prevention (CDC). | 2007      | *                    |
| United States | Wilhelm CM, Hanna SL, Welch CA, Shahid H, Minnich LL, Daly SB, Udall JN Jr. Viral gastroenteritis in Charleston, West Virginia, in 2007: from birth to 99 years of age. <i>Infect Control Hosp Epidemiol.</i> 2010; 31(8): 816-21.                                                                   | 2007      | *                    |
| United States | Healthcare Cost and Utilization Project (HCUP), Agency for Healthcare Research and Quality (AHRQ). United States Nationwide Inpatient Sample 2007. Rockville, United States: Healthcare Cost and Utilization Project (HCUP), Agency for Healthcare Research and Quality (AHRQ).                      | 2007      | *                    |
| United States | Griffin MR, Zhu Y, Moore MR, Whitney CG, Grijalva CG. U.S. hospitalizations for pneumonia after a decade of pneumococcal vaccination. <i>N Engl J Med.</i> 2013; 369(2): 155-63.                                                                                                                     | 2007-2009 | *                    |
| United States | National Center for Health Statistics (NCHS), Centers for Disease Control and Prevention (CDC), US Census Bureau. United States National Hospital Discharge Survey 2008. Hyattsville, United States: National Center for Health Statistics (NCHS), Centers for Disease Control and Prevention (CDC). | 2008      | *                    |
| United States | Payne DC, Vinjé J, Szilagyi PG, Edwards KM, Staat MA, Weinberg GA, Hall CB, Chappell J, Bernstein DI, Curms AT, Wikswo M, Shirley SH, Hall AJ, Lopman B, Parashar UD. Norovirus and medically attended gastroenteritis in U.S. children. <i>N Engl J Med.</i> 2013; 368(12): 1121-30.                | 2008-2010 | *                    |
| United States | Healthcare Cost and Utilization Project (HCUP), Agency for Healthcare Research and Quality (AHRQ). United States Nationwide Inpatient Sample 2008. Rockville, United States: Healthcare Cost and Utilization Project (HCUP), Agency for Healthcare Research and Quality (AHRQ).                      | 2008      | *                    |
| United States | National Center for Health Statistics (NCHS), Centers for Disease Control and Prevention (CDC), US Census Bureau. United States National Hospital Discharge Survey 2009. Hyattsville, United States: National Center for Health Statistics (NCHS), Centers for Disease Control and Prevention (CDC). | 2009      | *                    |
| United States | Healthcare Cost and Utilization Project (HCUP), Agency for Healthcare Research and Quality (AHRQ). United States Nationwide Inpatient Sample 2009. Rockville, United States: Healthcare Cost and Utilization Project (HCUP), Agency for Healthcare Research and Quality (AHRQ).                      | 2009      | *                    |
| United States | National Center for Health Statistics (NCHS), Centers for Disease Control and Prevention (CDC), US Census Bureau. United States National Hospital Discharge Survey 2010. Hyattsville, United States: National Center for Health Statistics (NCHS), Centers for Disease Control and Prevention (CDC). | 2010      | *                    |
| United States | Healthcare Cost and Utilization Project (HCUP), Agency for Healthcare Research and Quality (AHRQ). United States Nationwide Inpatient Sample 2010. Rockville, United States: Healthcare Cost and Utilization Project (HCUP), Agency for Healthcare Research and Quality (AHRQ).                      | 2010      | *                    |
| United States | Healthcare Cost and Utilization Project (HCUP), Agency for Healthcare Research and Quality (AHRQ). United States Nationwide Inpatient Sample 2011. Rockville, United States: Healthcare Cost and Utilization Project (HCUP), Agency for Healthcare Research and Quality (AHRQ).                      | 2011      | *                    |
| Uzbekistan    | Isakbaeva ET, Musabaev E, Antil L, Rheingans R, Juraev R, Glass RI, Bresee JS. Rotavirus disease in Uzbekistan: cost-effectiveness of a new vaccine. <i>Vaccine.</i> 2007; 25(2): 373-80.                                                                                                            | 2004      |                      |
| Uzbekistan    | Flem ET, Musabaev E, Juraev R, Kerin T, Gentsch J, Glass RI, Bresee JS. Rotavirus gastroenteritis in Uzbekistan: implications for vaccine policy in central Asia. <i>J Infect Dis.</i> 2009; 200 Suppl 1: 154-159.                                                                                   | 2005-2006 |                      |
| Uzbekistan    | Latipov R, Utegenova E, Kuatbayeva A, Kasymbekova K, Abdykarimov S, Juraev R, Ismailov U, Flem E. Epidemiology and burden of rotavirus disease in Central Asia. <i>Int J Infect Dis.</i> 2011; 15(7): e464-469.                                                                                      | 2005-2009 | *                    |
| Venezuela     | Pérez-Schael I, González R, Fernández R, Alfonzo E, Inaty D, Boher Y, Sarmiento L. Epidemiological features of rotavirus infection in Caracas, Venezuela: implications for rotavirus immunization programs. <i>J Med Virol.</i> 1999; 59(4): 520-6.                                                  | 1992-1993 | *                    |

**Web Table 33- Etiology citation list**

| Country   | Citation                                                                                                                                                                                                                                                                                                                                                                          | Year*     | New for GBD 2013 (*) |
|-----------|-----------------------------------------------------------------------------------------------------------------------------------------------------------------------------------------------------------------------------------------------------------------------------------------------------------------------------------------------------------------------------------|-----------|----------------------|
| Venezuela | O’Ryan M, Pérez-Schael I, Mamani N, Peña A, Salinas B, González G, González F, Matson DO, Gómez J. Rotavirus-associated medical visits and hospitalizations in South America: a prospective study at three large sentinel hospitals. <i>Pediatr Infect Dis J.</i> 2001; 20(7): 685-93.                                                                                            | 1997-1999 |                      |
| Venezuela | Salinas B, González G, González R, Escalona M, Materán M, Schael IP. Epidemiologic and clinical characteristics of rotavirus disease during five years of surveillance in Venezuela. <i>Pediatr Infect Dis J.</i> 2004; 23(10 Suppl): 161-167.                                                                                                                                    | 1998-2002 |                      |
| Venezuela | González GG, Liprandi F, Ludert JE. Molecular epidemiology of enteric viruses in children with sporadic gastroenteritis in Valencia, Venezuela. <i>J Med Virol.</i> 2011; 83(11): 1972-82.                                                                                                                                                                                        | 2003      | *                    |
| Venezuela | Araque M. Nontyphoid Salmonella gastroenteritis in pediatric patients from urban areas in the city of Mérida, Venezuela. <i>J Infect Dev Ctries.</i> 2009; 3(1): 28-34.                                                                                                                                                                                                           | 2004-2005 | *                    |
| Vietnam   | Ngan PK, Khanh NG, Tuong CV, Quy PP, Anh DN, Thuy HT. Persistent diarrhea in Vietnamese children: a preliminary report. <i>Acta Paediatr.</i> 1992; 81 Suppl 381: 124-6.                                                                                                                                                                                                          | 1988-1989 |                      |
| Vietnam   | Trach DD, Clemens JD, Ke NT, Thuy HT, Son ND, Canh DG, Hang PV, Rao MR. Field trial of a locally produced, killed, oral cholera vaccine in Vietnam. <i>Lancet.</i> 1997; 349(9047): 231-5.                                                                                                                                                                                        | 1993      | *                    |
| Vietnam   | CHOICE Study Group. Multicenter, randomized, double-blind clinical trial to evaluate the efficacy and safety of a reduced osmolarity oral rehydration salts solution in children with acute watery diarrhea. <i>Pediatrics.</i> 2001; 107(4): 613-8.                                                                                                                              | 1995-1997 | *                    |
| Vietnam   | Van Man N, Luan LT, Trach DD, Thanh NTH, Van Tu P, Long NT, Anh DD, Fischer TK, Ivanoff B, Gentsch JR, Glass RI. Epidemiological profile and burden of rotavirus diarrhea in Vietnam: 5 years of sentinel hospital surveillance, 1998-2003. <i>J Infect Dis.</i> 2005; 192(Suppl 1): 127-132.                                                                                     | 1998-2003 |                      |
| Vietnam   | Nguyen VM, Nguyen VT, Huynh PL, Dang DT, Nguyen TH, Phan VT, Nguyen TL, Le TL, Ivanoff B, Gentsch JR, Glass RI, Vietnam Rotavirus Surveillance Network. The epidemiology and disease burden of rotavirus in Vietnam: sentinel surveillance at 6 hospitals. <i>J Infect Dis.</i> 2001; 183(12): 1707-12.                                                                           | 1998-2000 | *                    |
| Vietnam   | Von Seidlein L, Kim DR, Ali M, Lee H, Wang X, Thiem VD, Canh DG, Chaicumpa W, Agtini MD, Hossain A, Bhatta ZA, Mason C, Sethabutr O, Talukder K, Nair GB, Deen JL, Kotloff K, Clemens J. A Multicentre Study of Shigella Diarrhoea in Six Asian Countries: Disease Burden, Clinical Manifestations, and Microbiology. <i>PLoS Med.</i> 2006; 3(9): e353.                          | 2001-2003 | *                    |
| Vietnam   | Do TT, Bui TTH, Mølbak K, Phung DC, Dalsgaard A. Epidemiology and aetiology of diarrhoeal diseases in adults engaged in wastewater-fed agriculture and aquaculture in Hanoi, Vietnam. <i>Trop Med Int Health.</i> 2007; 12(Suppl 2): 23-33.                                                                                                                                       | 2002-2004 |                      |
| Vietnam   | Trang NV, Luan LT, Kim-Anh LT, Hau VT, Nhung LTH, Phasuk P, Setrabutr O, Shirley H, Vinjé J, Anh DD, Mason CJ. Detection and molecular characterization of noroviruses and sapoviruses in children admitted to hospital with acute gastroenteritis in Vietnam. <i>J Med Virol.</i> 2012; 84(2): 290-7.                                                                            | 2007-2008 | *                    |
| Vietnam   | Thompson CN, Phan VTM, Le TPT, Pham TNT, Hoang LP, Ha V, Nguyen VMH, Pham VM, Nguyen TV, Cao TT, Tran TTN, Nguyen TTH, Dao MT, Campbell JI, Nguyen TC, Tang CT, Ha MT, Farrar J, Baker S. Epidemiological features and risk factors of Salmonella gastroenteritis in children resident in Ho Chi Minh City, Vietnam. <i>Epidemiol Infect.</i> 2013; 141(8): 1604-13.              | 2009-2010 | *                    |
| Zambia    | Chintu C, Luo C, Baboo S, Khumalo-Ngwenya B, Mathewson J, DuPont HL, Zumla A. Intestinal parasites in HIV-seropositive Zambian children with diarrhoea. <i>J Trop Pediatr.</i> 1995; 41(3): 149-52.                                                                                                                                                                               | 1993-1994 | *                    |
| Zambia    | Amadi B, Kelly P, Mwiya M, Mulwazi E, Sianongo S, Changwe F, Thomson M, Hachungula J, Watuka A, Walker-Smith J, Chintu C. Intestinal and systemic infection, HIV, and mortality in Zambian children with persistent diarrhea and malnutrition. <i>J Pediatr Gastroenterol Nutr.</i> 2001; 32(5): 550-4.                                                                           | 1998-2000 | *                    |
| Zambia    | Mwenda JM, Ntoto KM, Abebe A, Enweronu-Laryea C, Amina I, Mchomvu J, Kisakye A, Mpabalwani EM, Pazvakavambwa I, Armah GE, Seheri LM, Kiulia NM, Page N, Widdowson M-A, Steele AD. Burden and epidemiology of rotavirus diarrhea in selected African countries: preliminary results from the African Rotavirus Surveillance Network. <i>J Infect Dis.</i> 2010; 202(Suppl): S5-11. | 2006-2008 |                      |
| Zimbabwe  | Tswana SA, Jorgensen PH, Halliwell RW, Kapaata R, Moyo SR. The incidence of rotavirus infection in children from two selected study areas in Zimbabwe. <i>Cent Afr J Med.</i> 1990; 36(10): 241-6.                                                                                                                                                                                | 1987-1988 | *                    |
| Zimbabwe  | Mwenda JM, Ntoto KM, Abebe A, Enweronu-Laryea C, Amina I, Mchomvu J, Kisakye A, Mpabalwani EM, Pazvakavambwa I, Armah GE, Seheri LM, Kiulia NM, Page N, Widdowson M-A, Steele AD. Burden and epidemiology of rotavirus diarrhea in selected African countries: preliminary results from the African Rotavirus Surveillance Network. <i>J Infect Dis.</i> 2010; 202(Suppl): S5-11. | 2007-2008 |                      |

\*For databases, multinational reports, hospital data and scientific literature, the Year column represents the year that the data were used for (the estimate year). For all other data types (surveys, vital registration, etc.), year indicates the source year or year of data collection.

## **Section 11. GBD 2013 covariates list**

### **Web Table 34: Data citation list for covariates**

Web Table 34 – GBD 2013 Covariates List

| #  | Topic       | Covariate                                                                                                    | Primary Data Source                         | Estimation Approach                     |
|----|-------------|--------------------------------------------------------------------------------------------------------------|---------------------------------------------|-----------------------------------------|
| 1  | Alcohol     | Alcohol (liters per capita)                                                                                  | FAO Food Balance Sheets, World Drink Trends | Space-time/GPR                          |
| 1  | Alcohol     | Patterns of drinking on a scale of 1 (least risky pattern of drinking) to 5 (most risky pattern of drinking) | WHO Global Health Observatory               | WHO estimates                           |
| 2  | ANC         | Antenatal Care (1 visit) Coverage (% of pregnant women with 1 visit)                                         | Systematic analysis of survey data          | Described in Lim S, et al. <sup>1</sup> |
| 2  | ANC         | Antenatal Care (4 visits) Coverage Smooth (% of pregnant women with 4 visits)                                | Systematic analysis of survey data          | Described in Lim S, et al. <sup>1</sup> |
| 3  | Animal Fat  | Animal Fats (kcal per capita)                                                                                | FAO Food Balance Sheets                     | Space-time/GPR                          |
| 3  | Animal Fat  | ln-Animal Fats (kcal per capita)                                                                             | FAO Food Balance Sheets                     | Space-time/GPR                          |
| 3  | Animal Fat  | ln-Percent of total calories consumed as animal fat (% calories)                                             | FAO Food Balance Sheets                     | Space-time/GPR                          |
| 4  | Asbestos    | Asbestos production (kg per capita)                                                                          | USGS                                        | Raw variable                            |
| 4  | Asbestos    | Asbestos production (binary)                                                                                 | USGS                                        | Raw variable                            |
| 4  | Asbestos    | ln-Asbestos production (kg per capita)                                                                       | USGS                                        | Raw variable                            |
| 5  | Births      | Fertility (15-19 year olds) (births per woman)                                                               | World Population Prospect 2012              | UNPD estimates                          |
| 5  | Births      | Live Births 40+ (Proportion of live births from women age 40+)                                               | World Population Prospect 2012              | UNPD estimates                          |
| 5  | Births      | Live Births 35+ (Proportion of live births from women age 35+)                                               | World Population Prospect 2012              | UNPD estimates                          |
| 6  | BMI         | Mean BMI                                                                                                     | Systematic analysis                         | Space-time/GPR                          |
| 6  | BMI         | ln-Mean BMI                                                                                                  | Systematic analysis                         | Space-time/GPR                          |
| 7  | Calories    | Total Calories (kcal per capita)                                                                             | FAO Food Balance Sheets                     | Space-time/GPR                          |
| 8  | Chagas      | Chagas Endemic (binary)                                                                                      | Systematic literature review                | Raw variable                            |
| 8  | Chagas      | Chagas Population-at-Risk 2 (% of population)                                                                | Systematic literature review                | Lowess smoothing                        |
| 9  | Cholera     | Country had cholera (binary)                                                                                 | WHO cholera surveillance                    | Raw variable                            |
| 10 | Cholesterol | Cholesterol (total, mean per capita)                                                                         | Systematic analysis                         | Space-time/GPR                          |



|    |                                  |                                                                      |                                                                                                      |                                                                                                                                                            |
|----|----------------------------------|----------------------------------------------------------------------|------------------------------------------------------------------------------------------------------|------------------------------------------------------------------------------------------------------------------------------------------------------------|
| 11 | <b>Cigarettes</b>                | Cumulative number of cigarettes smoked in past 15 Years (per capita) | Systematic analysis                                                                                  | Described in Ng M., et al. <sup>2</sup>                                                                                                                    |
| 11 | <b>Cigarettes</b>                | Cumulative number of cigarettes smoked in past 20 Years (per capita) | Systematic analysis                                                                                  | Described in Ng M., et al. <sup>2</sup>                                                                                                                    |
| 11 | <b>Cigarettes</b>                | Tobacco (cigarettes per capita)                                      | Systematic analysis                                                                                  | Described in Ng M., et al. <sup>2</sup>                                                                                                                    |
| 11 | <b>Cigarettes</b>                | Tobacco (cigarettes per capita, 20 year lag)                         | Systematic analysis                                                                                  | Described in Ng M., et al. <sup>2</sup>                                                                                                                    |
| 11 | <b>Cigarettes</b>                | Cumulative number of cigarettes smoked in past 5 Years (per capita)  | Systematic analysis                                                                                  | Described in Ng M., et al. <sup>2</sup>                                                                                                                    |
| 11 | <b>Cigarettes</b>                | Cumulative number of cigarettes smoked in past 10 Years (per capita) | Systematic analysis                                                                                  | Described in Ng M., et al. <sup>2</sup>                                                                                                                    |
| 12 | <b>Coal</b>                      | Coal Reserves (binary)                                               | World Energy Council Survey of Energy Resources                                                      | Raw variable                                                                                                                                               |
| 12 | <b>Coal</b>                      | Coal Reserves (teragrams per capita)                                 | World Energy Council Survey of Energy Resources                                                      | Raw variable                                                                                                                                               |
| 13 | <b>Coastal</b>                   | Coastal Population within 10km (% of population)                     | Coastlines shapefile (ESRI), Gridded Population of the World 3 (Columbia University)                 | Raw variable                                                                                                                                               |
| 14 | <b>Completeness</b>              | Completeness of Vital Registration (% of deaths captured)            | Census and Vital Registration data                                                                   | Synthesis of three death distribution methods                                                                                                              |
| 15 | <b>Composite Dietary Factors</b> | FAO Composite Factor #1                                              | FAO Food Balance Sheets                                                                              | Factor analysis using 15 FAO covariates                                                                                                                    |
| 15 | <b>Composite Dietary Factors</b> | FAO Composite Factor #2                                              | FAO Food Balance Sheets                                                                              | Factor analysis using 15 FAO covariates                                                                                                                    |
| 15 | <b>Composite Dietary Factors</b> | FAO Composite Factor #3                                              | FAO Food Balance Sheets                                                                              | Factor analysis using 15 FAO covariates                                                                                                                    |
| 15 | <b>Composite Dietary Factors</b> | FAO Composite Factor #4                                              | FAO Food Balance Sheets                                                                              | Factor analysis using 15 FAO covariates                                                                                                                    |
| 16 | <b>Conflict</b>                  | War Mortality Rate Greater than 1 per 100,000 (binary)               | Uppsala Conflict Data Program-Armed Conflict Database, International Institute for Strategic Studies | Transformed crude death rate from the conflict to adjusted 45q15 and 5q0. 45q15 and 5q0 are then used to generate age-specific mortality rate with shocks. |
| 16 | <b>Conflict</b>                  | War Mortality Rate Greater than 1 per 10,000 (binary)                | Uppsala Conflict Data Program-Armed Conflict Database, International Institute for Strategic Studies | Transformed crude death rate from the conflict to adjusted 45q15 and 5q0. 45q15 and 5q0 are then used to generate age-specific mortality rate with shocks. |
| 16 | <b>Conflict</b>                  | War Mortality Rate Greater than 1 per 1,000 (binary)                 | Uppsala Conflict Data Program-Armed Conflict Database, International Institute for Strategic Studies | Transformed crude death rate from the conflict to adjusted 45q15 and 5q0. 45q15 and 5q0 are then used                                                      |

|    |                                             |                                                                     |                                                                                                                      |                                                      |
|----|---------------------------------------------|---------------------------------------------------------------------|----------------------------------------------------------------------------------------------------------------------|------------------------------------------------------|
|    |                                             |                                                                     |                                                                                                                      | to generate age-specific mortality rate with shocks. |
| 17 | <b>Congenital Chromosomal Abnormalities</b> | Rate of congenital chromosomal abnormalities (per 1000 live births) | Systematic literature review                                                                                         | Linear regression                                    |
| 18 | <b>Congenital CVD</b>                       | Rate of congenital heart disease (per 1000 live births)             | Systematic literature review                                                                                         | Linear regression                                    |
| 19 | <b>Congenital NTDs</b>                      | Rate of congenital neural tube defects (per 1000 live births)       | Systematic literature review                                                                                         | Linear regression                                    |
| 20 | <b>Contraception</b>                        | Contraception (Total) Prevalence (% of women 15-49 years)           | Systematic analysis of survey data                                                                                   | Space-time/GPR                                       |
| 20 | <b>Contraception</b>                        | Contraception (Modern) Prevalence (% of women 15-49 years)          | Systematic analysis of survey data                                                                                   | Space-time/GPR                                       |
| 21 | <b>Dengue</b>                               | Dengue Incidence (per 1000)                                         | Case notifications                                                                                                   | Raw variable                                         |
| 21 | <b>Dengue</b>                               | Population weighted probability of dengue transmission              | Systematic analysis <sup>3</sup>                                                                                     | Raw variable                                         |
| 22 | <b>Diabetes</b>                             | Diabetes Age-Standardized Prevalence (% of population)              | Systematic analysis <sup>4</sup>                                                                                     | Bayesian hierarchical model                          |
| 22 | <b>Diabetes</b>                             | Diabetes Fasting Plasma Glucose (mmol/L)                            | Systematic analysis                                                                                                  | Space-time/GPR                                       |
| 22 | <b>Diabetes</b>                             | Diabetes Age-Specific Prevalence (% of population)                  | Systematic analysis <sup>4</sup>                                                                                     | Bayesian hierarchical model                          |
| 23 | <b>Disasters</b>                            | Disaster Deaths (rate per 1000)                                     | International Disaster Database, Centre for Research on the Epidemiology of Disasters                                | Raw variable                                         |
| 24 | <b>DTP3</b>                                 | DTP3 Coverage Smooth (% of population)                              | Systematic analysis of survey data <sup>5</sup>                                                                      | GPR                                                  |
| 24 | <b>DTP3</b>                                 | DTP3 Coverage (% of population)                                     | Systematic analysis of survey data <sup>5</sup>                                                                      | GPR                                                  |
| 25 | <b>Education</b>                            | Education (years per capita)                                        | Censuses and nationally representative surveys <sup>5</sup>                                                          | Space-time/GPR                                       |
| 26 | <b>Elevation</b>                            | Elevation Under 100m (% of population)                              | USGS, Earth Resources Observation and Science (EROS) Center, Gridded Population of the World 3 (Columbia University) | Raw variable                                         |
| 26 | <b>Elevation</b>                            | Elevation 100 to 500m (% of population)                             | USGS, Earth Resources Observation and Science (EROS) Center, Gridded Population of the World 3 (Columbia University) | Raw variable                                         |
| 26 | <b>Elevation</b>                            | Elevation 500 to 1500m (% of population)                            | USGS, Earth Resources Observation and Science (EROS) Center, Gridded Population of the World 3 (Columbia University) | Raw variable                                         |

|    |                           |                                                                           |                                                                                     |                                                                                                                                       |
|----|---------------------------|---------------------------------------------------------------------------|-------------------------------------------------------------------------------------|---------------------------------------------------------------------------------------------------------------------------------------|
| 27 | <b>Fats/oils</b>          | In-Total packaged foods sold via retail (tonnes per capita)               | Euromonitor Market Sizes                                                            | Raw variable                                                                                                                          |
| 28 | <b>Fertility Rate</b>     | Age-Specific Fertility Rate (births per 1,000 women)                      | World Population Prospects 2012 and Statistics Office of Republic of China (Taiwan) | Raw variable from WPP 2012, for Taiwan only, log-log model was applied to get age specific fertility rates from total fertility rate. |
| 28 | <b>Fertility Rate</b>     | Total Fertility Rate (births per woman)                                   | World Population Prospects 2012 and Statistics Office of Republic of China (Taiwan) | Raw variable                                                                                                                          |
| 29 | <b>Fruit</b>              | Fruits (kcal per capita)                                                  | FAO Food Balance Sheets                                                             | Space-time/GPR                                                                                                                        |
| 29 | <b>Fruit</b>              | ln-Fruits (kcal per capita)                                               | FAO Food Balance Sheets                                                             | Space-time/GPR                                                                                                                        |
| 29 | <b>Fruit</b>              | ln-Percent of total calories consumed as fruits (% calories)              | FAO Food Balance Sheets                                                             | Space-time/GPR                                                                                                                        |
| 30 | <b>Gold</b>               | Gold production (kg per capita)                                           | British Geological Survey                                                           | Raw variable                                                                                                                          |
| 30 | <b>Gold</b>               | Gold production (binary)                                                  | British Geological Survey                                                           | Raw variable                                                                                                                          |
| 31 | <b>Grains</b>             | Whole Grains (kcal per capita)                                            | FAO Food Balance Sheets                                                             | Space-time/GPR                                                                                                                        |
| 31 | <b>Grains</b>             | ln-Non-Wheat Whole Grains (kcal per capita)                               | FAO Food Balance Sheets                                                             | Space-time/GPR                                                                                                                        |
| 31 | <b>Grains</b>             | Percent of total calories consumed as non-wheat whole grains (% calories) | FAO Food Balance Sheets                                                             | Space-time/GPR                                                                                                                        |
| 32 | <b>Health System</b>      | Health System Access (unitless)                                           | Composite of [Hospital beds, ANC1/4, SBA and IFD, Tetanus, DTP3, Measles]           | Principal component analysis                                                                                                          |
| 32 | <b>Health System</b>      | Health System Access 2 (unitless)                                         | Composite of [ANC1/4, SBA and IFD, Tetanus, DTP3, Measles]                          | Principal component analysis                                                                                                          |
| 33 | <b>Hemoglobinopathies</b> | Hemoglobinopathies Prevalence x Excess Mortality (age-standardized)       | Systematic literature review                                                        | Meta-regression using DisMod 3                                                                                                        |
| 34 | <b>Hep A</b>              | Hepatitis A Prevalence (% of population)                                  | Systematic literature review                                                        | Meta-regression using DisMod 3                                                                                                        |
| 35 | <b>Hep B</b>              | Hepatitis B Prevalence (% of population)                                  | Systematic literature review                                                        | Meta-regression using DisMod 3                                                                                                        |
| 36 | <b>Hep C</b>              | Hepatitis C Prevalence (% of population)                                  | Systematic literature review                                                        | Meta-regression using DisMod 3                                                                                                        |
| 37 | <b>Hep E</b>              | Hepatitis E Prevalence (% of population)                                  | Systematic literature review                                                        | Meta-regression using DisMod 3                                                                                                        |
| 38 | <b>Hib3</b>               | Hib3 Vaccine Coverage (% of population)                                   | WHO compilation of national reporting                                               | Lowess smoothing using DTP3                                                                                                           |
| 39 | <b>HIV PREV</b>           | HIV Prevalence, ARV-Adjusted (Custom Lag, % of population)                | UNAIDS Estimates of Prevalence                                                      | ARV adjustment back calculated from UNAIDS estimates of HIV                                                                           |

|    |                             |                                                                         |                                                                                                                                            |                                         |
|----|-----------------------------|-------------------------------------------------------------------------|--------------------------------------------------------------------------------------------------------------------------------------------|-----------------------------------------|
|    |                             |                                                                         |                                                                                                                                            | death rate                              |
| 40 | <b>Hospital beds</b>        | Hospital Beds (per 1000)                                                | World Health Statistics                                                                                                                    | Space-time/GPR                          |
| 41 | <b>Hydrog Oil</b>           | In-Ratio of Hydrogenated Oils Exports to Total Oilcrops Exports         | FAO Food Balance Sheets                                                                                                                    | Space-time/GPR                          |
| 41 | <b>Hydrog Oil</b>           | In-Percent of total calories that are hydrogenated oils (% of calories) | FAO Food Balance Sheets                                                                                                                    | Space-time/GPR                          |
| 42 | <b>In Facility Birth</b>    | In-Facility Delivery Smooth (% of population)                           | Systematic analysis of survey data                                                                                                         | Lowess smoothing                        |
| 42 | <b>In Facility Birth</b>    | In-Facility Delivery (% of population)                                  | Systematic analysis of survey data                                                                                                         | Described in Lim S, et al. <sup>1</sup> |
| 43 | <b>Indoor Air Pollution</b> | Indoor Air Pollution (Coal Cooking) (% of households)                   | IPUMS, WHO database on solid fuel, survey reports                                                                                          | Space-time/GPR                          |
| 43 | <b>Indoor Air Pollution</b> | Indoor Air Pollution (Biomass Cooking) (% of households)                | Census and survey data                                                                                                                     | Space-time/GPR                          |
| 43 | <b>Indoor Air Pollution</b> | Indoor Air Pollution (All Cooking Fuels) (% of households)              | Census and survey data                                                                                                                     | Space-time/GPR                          |
| 44 | <b>ITN</b>                  | ITN Coverage (% of population)                                          | Survey data, national program data, manufacturer data <sup>6</sup>                                                                         | Bayesian stock and flow model           |
| 45 | <b>Landlocked</b>           | Landlocked Nation (binary)                                              | ARCMap world shapefile (ESRI)                                                                                                              | Raw variable                            |
| 46 | <b>Latitude</b>             | Absolute value of average latitude (degree)                             | ARCMap world shapefile (ESRI)                                                                                                              | Raw variable                            |
| 47 | <b>LDI</b>                  | Lag Distributed Income (per Capita) (\$I)                               | Penn World Tables, World Development Indicators, Statistics on World Population, World Economic Outlook, National Accounts Main Aggregates | Cross imputed growth rates <sup>7</sup> |
| 47 | <b>LDI</b>                  | Log Lag Distributed Income (per Capita) (\$I) Squared                   | Penn World Tables, World Development Indicators, Statistics on World Population, World Economic Outlook, National Accounts Main Aggregates | Cross imputed growth rates <sup>7</sup> |
| 47 | <b>LDI</b>                  | Log Lag Distributed Income (per Capita) (\$I)                           | Penn World Tables, World Development Indicators, Statistics on World Population, World Economic Outlook, National Accounts Main Aggregates | Cross imputed growth rates <sup>7</sup> |
| 48 | <b>Lead Gas</b>             | Year of Lead Gas Phase Out (year)                                       | Review of national legislation and policies                                                                                                | Raw variable                            |
| 49 | <b>Legumes and Pulses</b>   | Pulses & Legumes (kcal per capita)                                      | FAO Food Balance Sheets                                                                                                                    | Space-time/GPR                          |
| 49 | <b>Legumes and Pulses</b>   | In-Pulses & Legumes (kcal per capita)                                   | FAO Food Balance Sheets                                                                                                                    | Space-time/GPR                          |
| 49 | <b>Legumes and Pulses</b>   | In-Percent of total calories consumed as legumes (% calories)           | FAO Food Balance Sheets                                                                                                                    | Space-time/GPR                          |
| 50 | <b>Liver Fluke</b>          | Liver Fluke Endemicity (binary)                                         | WHO Expert Assessment <sup>8</sup>                                                                                                         | Raw variable                            |

|    |                             |                                                                                   |                                                                                                |                                               |
|----|-----------------------------|-----------------------------------------------------------------------------------|------------------------------------------------------------------------------------------------|-----------------------------------------------|
| 51 | <b>Lymphatic Filariasis</b> | Population at risk for LF Infection                                               | WHO PCT databank                                                                               | Raw variable                                  |
| 51 | <b>Lymphatic Filariasis</b> | PC treatments per person at risk for LF Infection                                 | WHO PCT databank                                                                               | Raw variable                                  |
| 51 | <b>Lymphatic Filariasis</b> | Total PC treatments per person at risk for LF Infection (1999-2012)               | WHO PCT databank                                                                               | Raw variable                                  |
| 51 | <b>Lymphatic Filariasis</b> | Cumulative (to-date) PC treatment per person at risk for LF Infection (1999-2012) | WHO PCT databank                                                                               | Raw variable                                  |
| 52 | <b>Malaria</b>              | Malaria PfPR (% of population aged 2-10 years)                                    | Malaria Atlas Project gridded data and Gridded Population of the World 3 (Columbia University) | Raw variable                                  |
| 52 | <b>Malaria</b>              | Presence of malaria vivax transmission (binary)                                   | World Malaria Report                                                                           | Raw variable                                  |
| 52 | <b>Malaria</b>              | Malaria Endemicity (PfPR 40-100%) (binary)                                        | Malaria Atlas Project gridded data                                                             | Raw variable                                  |
| 52 | <b>Malaria</b>              | Malaria Endemicity (PfPR 5-100%) (binary)                                         | Malaria Atlas Project gridded data                                                             | Raw variable                                  |
| 52 | <b>Malaria</b>              | Malaria Population-At-Risk (% of population)                                      | World Malaria Report                                                                           | Raw variable                                  |
| 52 | <b>Malaria</b>              | Malaria Lysenko PFPR 1 (Holoendemic) (% of population)                            | Systematic analysis <sup>9</sup>                                                               | Raw variable                                  |
| 52 | <b>Malaria</b>              | Malaria Lysenko PFPR (2 Highest Endemicity) (% of population)                     | Systematic analysis <sup>9</sup>                                                               | Raw variable                                  |
| 52 | <b>Malaria</b>              | Malaria Lysenko PFPR (3 Highest Endemicity) (% of population)                     | Systematic analysis <sup>9</sup>                                                               | Raw variable                                  |
| 52 | <b>Malaria</b>              | Malaria Lysenko PFPR (4 Highest Endemicity) (% of population)                     | Systematic analysis <sup>9</sup>                                                               | Raw variable                                  |
| 52 | <b>Malaria</b>              | Malaria Indoor Residual Spraying Coverage (% of population)                       | Systematic literature review                                                                   | Described in Murray CJL, et al. <sup>10</sup> |
| 52 | <b>Malaria</b>              | Malaria Prevalence-Weighted Resistance (% of malaria cases)                       | Systematic literature review                                                                   | Described in Murray CJL, et al. <sup>10</sup> |
| 53 | <b>Malnutrition</b>         | Malnutrition (proportion <2SD weight for age)                                     | Systematic analysis of survey data                                                             | Space-time/GPR                                |
| 53 | <b>Malnutrition</b>         | In-Malnutrition (proportion <2SD weight for age)                                  | Systematic analysis of survey data                                                             | Space-time/GPR                                |
| 53 | <b>Malnutrition</b>         | Malnutrition Shock (binary)                                                       | Published reports of famines                                                                   | Raw variable                                  |
| 54 | <b>Measles</b>              | Measles Vaccine Coverage (% of population)                                        | Systematic analysis of survey data                                                             | BDDR                                          |
| 55 | <b>Meningitis</b>           | Meningitis Belt (binary)                                                          | Meningitis Vaccine Project                                                                     | Raw variable                                  |

|    |                              |                                                                                          |                                                                                         |                                          |
|----|------------------------------|------------------------------------------------------------------------------------------|-----------------------------------------------------------------------------------------|------------------------------------------|
| 56 | <b>Milk</b>                  | In-Milk (kcal per capita)                                                                | FAO Food Balance Sheets                                                                 | Space-time/GPR                           |
| 56 | <b>Milk</b>                  | Milk (kcal per capita)                                                                   | FAO Food Balance Sheets                                                                 | Space-time/GPR                           |
| 56 | <b>Milk</b>                  | In-Percent of total calories consumed as milk (% of calories)                            | FAO Food Balance Sheets                                                                 | Space-time/GPR                           |
| 57 | <b>Monsoon</b>               | Proportion of the population living in the classic monsoon region                        | Gridded Population of the World 3 (Columbia University)                                 | Raw variable                             |
| 57 | <b>Monsoon</b>               | Proportion of the population living in the classic monsoon region (low-income countries) | Gridded Population of the World 3 (Columbia University)                                 | Raw variable                             |
| 58 | <b>Neonatal mortality</b>    | Neonatal Death Rate Modeled 2 (per 1000)                                                 | Systematic analysis of survey data, census and vital registration data <sup>11-13</sup> | Hierarchical mixed-effects model         |
| 59 | <b>Nuts and Seeds</b>        | Nuts & Seeds (kcal per capita)                                                           | FAO Food Balance Sheets                                                                 | Space-time/GPR                           |
| 59 | <b>Nuts and Seeds</b>        | In-Nuts & Seeds (kcal per capita)                                                        | FAO Food Balance Sheets                                                                 | Space-time/GPR                           |
| 59 | <b>Nuts and Seeds</b>        | In-Percent of total calories consumed as nuts and seeds (% of calories)                  | FAO Food Balance Sheets                                                                 | Space-time/GPR                           |
| 60 | <b>Obesity</b>               | Prevalence of obesity                                                                    | Systematic analysis of survey and census data                                           | Described in Ng M., et al. <sup>14</sup> |
| 60 | <b>Obesity</b>               | Prevalence of obesity and overweight                                                     | Systematic analysis of survey and census data                                           | Described in Ng M., et al. <sup>14</sup> |
| 61 | <b>Opium</b>                 | Opium Cultivation (binary)                                                               | UN surveillance (World Drug Report 2010)                                                | Raw variable                             |
| 62 | <b>Outdoor Air Pollution</b> | Outdoor Air Pollution (PM2.5) (mcg/m3)                                                   | Ground sensors, satellite data <sup>15</sup>                                            | Linear regression                        |
| 63 | <b>Pig Meat</b>              | Pig Meat (kg per capita)                                                                 | FAO Food Balance Sheets                                                                 | Space-time/GPR                           |
| 63 | <b>Pig Meat</b>              | In-Pig Meat (kg per capita)                                                              | FAO Food Balance Sheets                                                                 | Space-time/GPR                           |
| 63 | <b>Pig Meat</b>              | In-Percent of total calories consumed as pig meat (% of calories)                        | FAO Food Balance Sheets                                                                 | Space-time/GPR                           |
| 64 | <b>Population</b>            | Population Over 65 (% of population)                                                     | World Population Prospects 2012, Human Mortality Database                               | Raw variable                             |
| 64 | <b>Population</b>            | Population Under 30 (% of population)                                                    | World Population Prospects 2012, Human Mortality Database                               | Raw variable                             |
| 64 | <b>Population</b>            | Population 15 to 30 (% of population)                                                    | World Population Prospects 2012, Human Mortality Database                               | Raw variable                             |
| 65 | <b>Population Density</b>    | Population Density (under 150 ppl/sqkm, % of population)                                 | Gridded Population of the World 3 (Columbia University)                                 | Raw variable                             |
| 65 | <b>Population Density</b>    | Population Density (150-300 ppl/sqkm, % of population)                                   | Gridded Population of the World 3 (Columbia University)                                 | Raw variable                             |
| 65 | <b>Population Density</b>    | Population Density (300-500 ppl/sqkm, % of population)                                   | Gridded Population of the World 3 (Columbia University)                                 | Raw variable                             |

|    |                             |                                                                |                                                                                                                                  |                |
|----|-----------------------------|----------------------------------------------------------------|----------------------------------------------------------------------------------------------------------------------------------|----------------|
| 65 | <b>Population Density</b>   | Population Density (500-1000 ppl/sqkm, % of population)        | Gridded Population of the World 3 (Columbia University)                                                                          | Raw variable   |
| 65 | <b>Population Density</b>   | Population Density (over 1000 ppl/sqkm, % of population)       | Gridded Population of the World 3 (Columbia University)                                                                          | Raw variable   |
| 66 | <b>Population Elevation</b> | Elevation Over 1500m (% of population)                         | USGS, Earth Resources Observation and Science (EROS) Center, Gridded Population of the World 3 (Columbia University)             | Raw variable   |
| 67 | <b>Population Latitude</b>  | Latitude Under 15 (% of population)                            | Gridded Population of the World 3 (Columbia University)                                                                          | Raw variable   |
| 67 | <b>Population Latitude</b>  | Latitude 15 to 30 (% of population)                            | Gridded Population of the World 3 (Columbia University)                                                                          | Raw variable   |
| 67 | <b>Population Latitude</b>  | Latitude 30 to 45 (% of population)                            | Gridded Population of the World 3 (Columbia University)                                                                          | Raw variable   |
| 67 | <b>Population Latitude</b>  | Latitude Over 45 (% of population)                             | Gridded Population of the World 3 (Columbia University)                                                                          | Raw variable   |
| 67 | <b>Population Latitude</b>  | Latitude Under 45 (binary)                                     | Gridded Population of the World 3 (Columbia University)                                                                          | Raw variable   |
| 68 | <b>PUFA</b>                 | In-PUFA (kcal per capita)                                      | FAO Food Balance Sheets                                                                                                          | Space-time/GPR |
| 68 | <b>PUFA</b>                 | PUFA Omega 3 - Seafood (kcal per capita)                       | FAO Food Balance Sheets                                                                                                          | Space-time/GPR |
| 68 | <b>PUFA</b>                 | In-PUFA Omega 3 - Seafood (kcal per capita)                    | FAO Food Balance Sheets                                                                                                          | Space-time/GPR |
| 68 | <b>PUFA</b>                 | PUFA Omega 6 - Vegetable Oils (kcal per capita)                | FAO Food Balance Sheets                                                                                                          | Space-time/GPR |
| 68 | <b>PUFA</b>                 | In-Percent of total calories consumed as PUFA3 (% of calories) | FAO Food Balance Sheets                                                                                                          | Space-time/GPR |
| 68 | <b>PUFA</b>                 | Percent of total calories consumed as PUFA3 (% of calories)    | FAO Food Balance Sheets                                                                                                          | Space-time/GPR |
| 69 | <b>Rainfall</b>             | Rainfall (Quintiles 4-5) (% of population in quintile)         | Global Historical Climatology Network (GHCN) and Information Service and Gridded Population of the World 3 (Columbia University) | Raw variable   |
| 69 | <b>Rainfall</b>             | Rainfall (Quintiles 3-5) (% of population in quintile)         | Global Historical Climatology Network (GHCN) and Information Service and Gridded Population of the World 3 (Columbia University) | Raw variable   |
| 69 | <b>Rainfall</b>             | Rainfall (Quintiles 2-5) (% of population in quintile)         | Global Historical Climatology Network (GHCN) and Information Service and Gridded Population of the World 3 (Columbia University) | Raw variable   |
| 69 | <b>Rainfall</b>             | Rainfall Quintile 1 (% of population in quintile)              | Global Historical Climatology Network (GHCN) and Information Service and Gridded Population of                                   | Raw variable   |



|    |                                 |                                                                          |                                                                                                                                                                                                     |                                                                                                                                                                                 |
|----|---------------------------------|--------------------------------------------------------------------------|-----------------------------------------------------------------------------------------------------------------------------------------------------------------------------------------------------|---------------------------------------------------------------------------------------------------------------------------------------------------------------------------------|
|    |                                 |                                                                          | the World 3 (Columbia University)                                                                                                                                                                   |                                                                                                                                                                                 |
| 69 | <b>Rainfall</b>                 | Rainfall Quintile 2 (% of population in quintile)                        | Global Historical Climatology Network (GHCN) and Information Service and Gridded Population of the World 3 (Columbia University)                                                                    | Raw variable                                                                                                                                                                    |
| 69 | <b>Rainfall</b>                 | Rainfall Quintile 3 (% of population in quintile)                        | Global Historical Climatology Network (GHCN) and Information Service and Gridded Population of the World 3 (Columbia University)                                                                    | Raw variable                                                                                                                                                                    |
| 69 | <b>Rainfall</b>                 | Rainfall Quintile 4 (% of population in quintile)                        | Global Historical Climatology Network (GHCN) and Information Service and Gridded Population of the World 3 (Columbia University)                                                                    | Raw variable                                                                                                                                                                    |
| 69 | <b>Rainfall</b>                 | Rainfall Quintile 5 (% of population in quintile)                        | Global Historical Climatology Network (GHCN) and Information Service and Gridded Population of the World 3 (Columbia University)                                                                    | Raw variable                                                                                                                                                                    |
| 70 | <b>Red Meat</b>                 | Red Meat (kcal per capita)                                               | FAO Food Balance Sheets                                                                                                                                                                             | Space-time/GPR                                                                                                                                                                  |
| 70 | <b>Red Meat</b>                 | ln-Red Meat (kcal per capita)                                            | FAO Food Balance Sheets                                                                                                                                                                             | Space-time/GPR                                                                                                                                                                  |
| 70 | <b>Red Meat</b>                 | ln-Percent of total calories consumed as red meat (% of calories)        | FAO Food Balance Sheets                                                                                                                                                                             | Space-time/GPR                                                                                                                                                                  |
| 71 | <b>Religion</b>                 | Religion (binary, >50% Muslim)                                           | CIA World Factbook                                                                                                                                                                                  | Raw variable                                                                                                                                                                    |
| 72 | <b>Rotavirus</b>                | Rotavirus Vaccine Introduced (binary)                                    | Vaccine Information Management System (VIMS)                                                                                                                                                        | Raw variable                                                                                                                                                                    |
| 73 | <b>Sanitation</b>               | Sanitation (% of population with access)                                 | Systematic analysis of survey and census data                                                                                                                                                       | Space-time/GPR                                                                                                                                                                  |
| 74 | <b>Saturated fats</b>           | ln-Saturated Fats (kcal per capita)                                      | FAO Food Balance Sheets                                                                                                                                                                             | Space-time/GPR                                                                                                                                                                  |
| 74 | <b>Saturated fats</b>           | ln-Percent of total calories consumed as saturated fat (% of calories)   | FAO Food Balance Sheets                                                                                                                                                                             | Space-time/GPR                                                                                                                                                                  |
| 75 | <b>SBP</b>                      | Systolic Blood Pressure (mmHg)                                           | Systematic analysis of survey data                                                                                                                                                                  | Space-time/GPR                                                                                                                                                                  |
| 76 | <b>Schistosomiasis</b>          | Schistosomiasis Prevalence (% of population)                             | Compilations of local surveys <sup>16-21</sup>                                                                                                                                                      | Geospatial models                                                                                                                                                               |
| 77 | <b>Shocks</b>                   | Shock Mortality Rate in Past 10 Years Greater than 1 per 10,000 (binary) | Uppsala Conflict Data Program-Armed Conflict Database, International Institute for Strategic Studies, International Disaster Database from the Centre for Research on the Epidemiology of Disasters | Transformed crude death rate from the conflict and natural disaster to adjusted 45q15 and 5q0. 45q15 and 5q0 are then used to generate age-specific mortality rate with shocks. |
| 78 | <b>Skilled Birth Attendance</b> | Skilled Birth Attendance (% of births)                                   | Systematic analysis of survey data                                                                                                                                                                  | Space-time/GPR                                                                                                                                                                  |



|    |                                 |                                                                          |                                                                                                      |                                                                                                                                                            |
|----|---------------------------------|--------------------------------------------------------------------------|------------------------------------------------------------------------------------------------------|------------------------------------------------------------------------------------------------------------------------------------------------------------|
| 78 | <b>Skilled Birth Attendance</b> | Skilled Birth Attendance Smooth (% of births)                            | Systematic analysis of survey data                                                                   | Lowess smoothing                                                                                                                                           |
| 79 | <b>Smoking</b>                  | Smoking Prevalence (% of population)                                     | Systematic analysis of survey and census data                                                        | Described in Ng M., et al. <sup>2</sup>                                                                                                                    |
| 79 | <b>Smoking</b>                  | Smoking Prevalence (20 year lag) (% of population)                       | Systematic analysis of survey and census data                                                        | Described in Ng M., et al. <sup>2</sup>                                                                                                                    |
| 79 | <b>Smoking</b>                  | Smoking Prevalence (Reproductive Age Standardized) (% of population)     | Systematic analysis of survey and census data                                                        | Described in Ng M., et al. <sup>2</sup>                                                                                                                    |
| 80 | <b>Sugar</b>                    | ln-Sugar (kcal per capita)                                               | FAO Food Balance Sheets                                                                              | Space-time/GPR                                                                                                                                             |
| 80 | <b>Sugar</b>                    | ln-Percent of total calories consumed as sugar (% of calories)           | FAO Food Balance Sheets                                                                              | Space-time/GPR                                                                                                                                             |
| 81 | <b>Syphilis</b>                 | Syphilis prevalence lagged 10 years (% of population)                    | Systematic literature review and surveillance data                                                   | Mixed effects linear model                                                                                                                                 |
| 82 | <b>Temperature</b>              | 90th percentile climatic temperature in the given country-year (Celsius) | British Atmospheric Data Center and Gridded Population of the World 3 (Columbia University)          | Direct calculation                                                                                                                                         |
| 82 | <b>Temperature</b>              | Population-weighted mean temperature (Celsius)                           | British Atmospheric Data Center                                                                      | Raw variable                                                                                                                                               |
| 83 | <b>Tetanus</b>                  | Tetanus Toxoid Coverage Smooth (% of population)                         | WHO-UNICEF                                                                                           | GPR                                                                                                                                                        |
| 84 | <b>Varicella</b>                | Varicella seroprevalence                                                 | Systematic literature review                                                                         | Meta-regression using DisMod 3                                                                                                                             |
| 85 | <b>Vegetables</b>               | Vegetables (kcal per capita)                                             | FAO Food Balance Sheets                                                                              | Space-time/GPR                                                                                                                                             |
| 85 | <b>Vegetables</b>               | ln-Vegetables (kcal per capita)                                          | FAO Food Balance Sheets                                                                              | Space-time/GPR                                                                                                                                             |
| 85 | <b>Vegetables</b>               | ln-Percent of total calories consumed as vegetables (% of calories)      | FAO Food Balance Sheets                                                                              | Space-time/GPR                                                                                                                                             |
| 86 | <b>Vehicles</b>                 | Vehicles - 2 wheels (per capita)                                         | World Road Statistics, International Road Federation                                                 | Space-time/GPR                                                                                                                                             |
| 86 | <b>Vehicles</b>                 | Vehicles - 4 wheels (per capita)                                         | World Road Statistics, International Road Federation                                                 | Space-time/GPR                                                                                                                                             |
| 86 | <b>Vehicles</b>                 | Vehicles - 2+4 wheels (per capita)                                       | World Road Statistics, International Road Federation                                                 | Space-time/GPR                                                                                                                                             |
| 86 | <b>Vehicles</b>                 | Vehicles - 2 wheels fraction (% of population)                           | World Road Statistics, International Road Federation                                                 | Space-time/GPR                                                                                                                                             |
| 87 | <b>War</b>                      | War Deaths (rate per 1000)                                               | Uppsala Conflict Data Program-Armed Conflict Database, International Institute for Strategic Studies | Transformed crude death rate from the conflict to adjusted 45q15 and 5q0. 45q15 and 5q0 are then used to generate age-specific mortality rate with shocks. |
| 88 | <b>Water</b>                    | Improved Water Source (% of population with access)                      | Systematic analysis of survey and census data                                                        | Space-time/GPR                                                                                                                                             |

|    |           |                                    |                              |                                |
|----|-----------|------------------------------------|------------------------------|--------------------------------|
| 89 | Vitamin A | Vitamin A supplementation coverage | Systematic literature review | Meta-regression using DisMod 3 |
|----|-----------|------------------------------------|------------------------------|--------------------------------|

- 1 Lim S, Myerson R, Rosenfeld L, Murray CJ. Safe pregnancy and delivery: A systematic analysis of trends in the coverage of antenatal and intrapartum care. (in submission).
- 2 Ng M, Freeman MK, Fleming TD, Et al. Smoking prevalence and cigarette consumption in 187 countries, 1980-2012. *JAMA* 2014; **311**: 183–92.
- 3 Bhatt S, Gething PW, Brady OJ, *et al.* The global distribution and burden of dengue. *Nature* 2013; **496**: 504–7.
- 4 Danaei G, Finucane MM, Lu Y, *et al.* National, regional, and global trends in fasting plasma glucose and diabetes prevalence since 1980: systematic analysis of health examination surveys and epidemiological studies with 370 country-years and 2.7 million participants. *Lancet* 2011; **378**: 31–40.
- 5 Gakidou E, Cowling K, Lozano R, Murray CJL. Increased educational attainment and its effect on child mortality in 175 countries between 1970 and 2009: a systematic analysis. *Lancet* 2010; **376**: 959–74.
- 6 Flaxman AD, Fullman N, Otten MW Jr, *et al.* Rapid scaling up of insecticide-treated bed net coverage in Africa and its relationship with development assistance for health: a systematic synthesis of supply, distribution, and household survey data. *PLoS Med* 2010; **7**: e1000328.
- 7 James SL, Gubbins P, Murray CJ, Gakidou E. Developing a comprehensive time series of GDP per capita for 210 countries from 1950 to 2015. *Population Health Metrics* In Press.
- 8 Control of foodborne trematode infections. Report of a WHO Study Group. *World Health Organ Tech Rep Ser* 1995; **849**: 1–157.
- 9 Lysenko A, Semashko I. Geography of malaria. A medico-geographic profile of an ancient disease. In: *Itogi Nauki: Medicinskaja Geografija*. Moscow, USSR, Academy of Sciences, 1968: 25–146.
- 10 Murray CJL. Global, regional and national incidence and death for HIV, tuberculosis and malaria during 1990-2013: a systematic analysis for the Global Burden of Disease Study 2013. In press.
- 11 Rajaratnam JK, Marcus JR, Flaxman AD, *et al.* Neonatal, postneonatal, childhood, and under-5 mortality for 187 countries, 1970-2010: a systematic analysis of progress towards Millennium Development Goal 4. *Lancet* 2010; **375**: 1988–2008.
- 12 Lozano R, Wang H, Foreman KJ, *et al.* Progress towards Millennium Development Goals 4 and 5 on maternal and child mortality: an updated systematic analysis. *Lancet* 2011; **378**: 1139–65.
- 13 Wang H, Dwyer-Lindgren L, Lofgren KT, *et al.* Age-specific and sex-specific mortality in 187 countries, 1970-2010: a systematic analysis for the Global Burden of Disease Study 2010. *Lancet* (in submission).

- 14 Ng M, Fleming T, Robinson M, *et al.* Global, regional, and national prevalence of overweight and obesity in children and adults during 1980–2013: a systematic analysis for the Global Burden of Disease Study 2013. *The Lancet* doi:10.1016/S0140-6736(14)60460-8.
- 15 Brauer M, Amann M, Burnett RT, *et al.* Exposure assessment for estimation of the global burden of disease attributable to outdoor air pollution. *Environ Sci Technol* 2012; **46**: 652–60.
- 16 Chitsulo L, Engels D, Montresor A, Savioli L. The global status of schistosomiasis and its control. *Acta Trop* 2000; **77**: 41–51.
- 17 Clements ACA, Garba A, Sacko M, *et al.* Mapping the probability of schistosomiasis and associated uncertainty, West Africa. *Emerging Infect Dis* 2008; **14**: 1629–32.
- 18 Clements ACA, Moyeed R, Brooker S. Bayesian geostatistical prediction of the intensity of infection with *Schistosoma mansoni* in East Africa. *Parasitology* 2006; **133**: 711–9.
- 19 Schur N, Hürlimann E, Garba A, *et al.* Geostatistical model-based estimates of Schistosomiasis prevalence among individuals aged  $\leq 20$  years in West Africa. *PLoS Negl Trop Dis* 2011; **5**: e1194.
- 20 Schur N, Hürlimann E, Stensgaard A-S, *et al.* Spatially explicit *Schistosoma* infection risk in eastern Africa using Bayesian geostatistical modelling. *Acta Trop* 2011. doi:10.1016/j.actatropica.2011.10.006.
- 21 Steinmann P, Keiser J, Bos R, Tanner M, Utzinger J. Schistosomiasis and water resources development: systematic review, meta-analysis, and estimates of people at risk. *Lancet Infect Dis* 2006; **6**: 411–25.

## Section 12. References

- 1 Murray CJL, Rajaratnam JK, Marcus J, Laakso T, Lopez AD. What can we conclude from death registration? Improved methods for evaluating completeness. *PLoS Med* 2010; **7**: e1000262.
- 2 Obermeyer Z, Rajaratnam JK, Park CH, *et al.* Measuring adult mortality using sibling survival: a new analytical method and new results for 44 countries, 1974–2006. *PLoS Med* 2010; **7**: e1000260.
- 3 Rajaratnam JK, Tran LN, Lopez AD, Murray CJL. Measuring Under-Five Mortality: Validation of New Low-Cost Methods. *PLoS Med* 2010; **7**: e1000253.
- 4 Wang H, Dwyer-Lindgren L, Lofgren KT, *et al.* Age-specific and sex-specific mortality in 187 countries, 1970–2010: a systematic analysis for the Global Burden of Disease Study 2010. *The Lancet* 2012; **380**: 2071–94.
- 5 Hill K. Estimating census and death registration completeness. *Asian Pac Popul Forum East-West Popul Inst East-West Cent* 1987; **1**: 8–13, 23–4.
- 6 Bennett NG, Horiuchi S. Estimating the completeness of death registration in a closed population. *Popul Index* 1981; **47**: 207–21.
- 7 Brass W, Coale AJ. Methods of Analysis and Estimation. In: Brass W, ed. *The Demography of Tropical Africa*. Princeton: Princeton University Press, 1968.
- 8 Preston S, Coale AJ, Trussell J, Weinstein M. Estimating the completeness of reporting of adult deaths in populations that are approximately stable. *Popul Index* 1980; **46**: 179–202.
- 9 Preston S, Hill K. Estimating the completeness of death registration. *Popul Stud* 1980; **34**: 349–66.
- 10 Lozano R, Wang H, Foreman KJ, *et al.* Progress towards Millennium Development Goals 4 and 5 on maternal and child mortality: an updated systematic analysis. *The Lancet* 2011; **378**: 1139–65.
- 11 Wang H, Liddell CA, Coates MM, *et al.* Global, regional, and national levels of neonatal, infant, and under-5 mortality during 1990–2013: a systematic analysis for the Global Burden of Disease Study 2013. *The Lancet* DOI:10.1016/S0140-6736(14)60497-9.
- 12 Murray CJ, Ezzati M, Flaxman AD, *et al.* GBD 2010: design, definitions, and metrics. *The Lancet* 2012; **380**: 2063–6.
- 13 Brass W. On the Scale of Mortality. In: Brass W, ed. *Biological Aspects of Demography*. London, UK: Taylor and Francis, 1971.
- 14 Murray CJL, Ferguson BD, Lopez AD, Guillot M, Salomon JA, Ahmad O. Modified logit life table system: Principles, empirical validation, and application. *Popul Stud* 2003; **57**: 165–82.
- 15 Wang H, Lopez AD, Murray CJ. Estimating Age Specific Mortality Rates: Application of new model life table system. In: Murray CJ, Lopez AD, Wang H, eds. *Mortality Estimation for National Populations: Methods and Applications*. Seattle, WA: University of Washington Press, (in preparation).
- 16 Human Mortality Database. Berkeley, USA: University of California; Rostock, Germany: Max Planck Institute for Demographic Research. <http://www.mortality.org/> (accessed April 11, 2011).

- 17 Dhaka, Bangladesh: International Centre for Diarrhoeal Disease Research, Bangladesh (ICDDR,B), INDEPTH. Bangladesh - Matlab Health and Demographic Surveillance System. [http://www.indepth-network.org/dss\\_site\\_profiles/matlab.pdf](http://www.indepth-network.org/dss_site_profiles/matlab.pdf) (accessed July 18, 2012).
- 18 Gompertz B. On one uniform law of mortality from birth to extreme old age, and on the law of sickness. *J Inst Actuar Assur Mag* 1871; **16**: 329–44.
- 19 Thatcher AR. The long-term pattern of adult mortality and the highest attained age. *J R Stat Soc Ser A Stat Soc* 1999; **162**: 5–43.
- 20 Preston SH, Heuveline P, Guillot M. Demography: Measuring and modeling population processes. Oxford, UK: Blackwell Publishers, 2001.
- 21 King G, Tomz M, Wittenberg J. Making the most of statistical analyses: improving interpretation and presentation. *Am J Polit Sci* 2000; **44**: 347–61.
- 22 Lozano R, Naghavi M, Foreman K, *et al*. Global and regional mortality from 235 causes of death for 20 age groups in 1990 and 2010: a systematic analysis for the Global Burden of Disease Study 2010. *The Lancet* 2012; **380**: 2095–128.
- 23 Ahern RM, Lozano R, Naghavi M, Foreman K, Gakidou E, Murray CJ. Improving the public health utility of global cardiovascular mortality data: the rise of ischemic heart disease. *Popul Health Metr* 2011; **9**: 8.
- 24 Foreman KJ, Lozano R, Lopez AD, Murray CJ. Modeling causes of death: an integrated approach using CODEm. *Popul Health Metr* 2012; **10**: 1.
- 25 Murray CJL. Global, regional and national incidence and death for HIV, tuberculosis and malaria during 1990–2013: a systematic analysis for the Global Burden of Disease Study 2013. In press.
- 26 Conway B, Webster A, Ramsay G, *et al*. Predicting mortality and uptake of renal replacement therapy in patients with stage 4 chronic kidney disease. *Nephrol Dial Transplant Off Publ Eur Dial Transpl Assoc - Eur Ren Assoc* 2009; **24**: 1930–7.
- 27 Schnuelle P, Lorenz D, Trede M, Van Der Woude FJ. Impact of renal cadaveric transplantation on survival in end-stage renal failure: evidence for reduced mortality risk compared with hemodialysis during long-term follow-up. *J Am Soc Nephrol JASN* 1998; **9**: 2135–41.
- 28 Metcalfe W, Khan IH, Prescott GJ, Simpson K, Macleod AM, Scottish Renal Registry. End-stage renal disease in Scotland: outcomes and standards of care. *Kidney Int* 2003; **64**: 1808–16.
- 29 Moser K, Shkolnikov V, Leon DA. World mortality 1950–2000: divergence replaces convergence from the late 1980s. *Bull World Health Organ* 2005; **83**: 202–9.
